# Supplementary material
Source: PubMed Central journal article supplement (PMC4821692)
Supplement: NIHMS741634-supplement-supplement_1.pdf [file NIHMS741634-supplement-supplement_1.pdf]

***Supplemental Table 1***

| <b>Gene Product</b> | <b>Rhesus Macaque NCBI Gene ID#</b> | <b>TaqMan® Gene Expression Assay#*</b> |
|---------------------|-------------------------------------|----------------------------------------|
| CYP17A1             | 678693                              | Hs01124136_m1                          |
| DLL1                | 714731                              | Hs00194509_m1                          |
| LHCGR               | 715999                              | Hs00896336_m1                          |
| HSD3B2              | 712686                              | Hs00605123_m1                          |
| PGR                 | 613024                              | Hs01556702_m1                          |

\*Assays based on human mRNA sequences with areas of perfect match to rhesus macaque mRNA sequences

**Supplemental Table 2: Ultrasound Evaluation for Polycystic Ovary Morphology (PCOM)**

|                                        | <b># macaques with one ovary showing PCOM/ total (%)</b> | <b># macaques with both ovaries showing PCOM/ total (%)</b> |
|----------------------------------------|----------------------------------------------------------|-------------------------------------------------------------|
| <b>5.0 years old (Before WSD)</b>      |                                                          |                                                             |
| Cholesterol                            | 2/6 (33)                                                 | 0/6 (0)                                                     |
| Testosterone                           | 3/6 (50)                                                 | 1/6 (17)                                                    |
| <b>5.8 years old (+WSD)</b>            |                                                          |                                                             |
| Cholesterol                            | 3/6 (50)                                                 | 0/6 (0)                                                     |
| Testosterone                           | 6/6 (100)                                                | 4/6 (67)                                                    |
| <b>6.7 years old (+WSD)</b>            |                                                          |                                                             |
| Cholesterol                            | 5/6 (83)                                                 | 3/6 (50)                                                    |
| Testosterone                           | 6/6 (100)                                                | 2/6 (33)*                                                   |
|                                        |                                                          |                                                             |
| <b>Standard Diet (7.0±2 years old)</b> | 4/13 (30)                                                | 2/13 (15)                                                   |

\*Lower number at this time point possibly due to two females at 5.8 years displaying PCOM morphology in both ovaries, who now (6.7 years) had 1 ovary each in which center stroma was not clearly visualized due to large number of antral follicles.

***Supplemental Table 3: KEGG Pathway Analysis of SAF Genes Whose mRNA Levels Were Altered by WSD and WSD+T Compared to Control***

| <i>KEGG Pathway<sup>1</sup></i>                            | <i>#Significant mRNAs</i> | <i>#mRNAs in Pathway<sup>*2</sup></i> | <i>z-score<sup>**</sup></i> |
|------------------------------------------------------------|---------------------------|---------------------------------------|-----------------------------|
| <i>DNA replication</i>                                     | 11                        | 31                                    | 6.52                        |
| <i>Cell cycle</i>                                          | 23                        | 118                                   | 5.74                        |
| <i>Mismatch repair</i>                                     | 7                         | 21                                    | 4.96                        |
| <i>Pancreatic cancer</i>                                   | 14                        | 67                                    | 4.77                        |
| <i>Osteoclast differentiation</i>                          | 17                        | 113                                   | 3.68                        |
| <i>Pathways in cancer</i>                                  | 35                        | 306                                   | 3.56                        |
| <i>Dorso-ventral axis formation</i>                        | 5                         | 19                                    | 3.48                        |
| <i>Valine, leucine and isoleucine degradation</i>          | 8                         | 41                                    | 3.36                        |
| <i>Jak-STAT signaling pathway</i>                          | 18                        | 132                                   | 3.33                        |
| <i>Apoptosis</i>                                           | 13                        | 84                                    | 3.33                        |
| <i>Glycosaminoglycan biosynthesis - heparan sulfate</i>    | 5                         | 21                                    | 3.2                         |
| <i>MAPK signaling pathway</i>                              | 27                        | 235                                   | 3.13                        |
| <i>Autoimmune thyroid disease</i>                          | 8                         | 45                                    | 3.05                        |
| <i>GnRH signaling pathway</i>                              | 12                        | 82                                    | 2.98                        |
| <i>Toxoplasmosis</i>                                       | 15                        | 117                                   | 2.77                        |
| <i>Colorectal cancer</i>                                   | 9                         | 59                                    | 2.71                        |
| <i>Progesterone-mediated oocyte maturation</i>             | 10                        | 75                                    | 2.39                        |
| <i>Ubiquinone and other terpenoid-quinone biosynthesis</i> | 2                         | 7                                     | 2.35                        |
| <i>Allograft rejection</i>                                 | 6                         | 38                                    | 2.31                        |
| <i>Steroid hormone biosynthesis</i>                        | 6                         | 38                                    | 2.31                        |
| <i>Pathogenic Escherichia coli infection</i>               | 6                         | 40                                    | 2.16                        |
| <i>Viral myocarditis</i>                                   | 9                         | 72                                    | 2.05                        |
| <i>Homologous recombination</i>                            | 4                         | 24                                    | 2.0                         |

\*Due to differences in probeset annotation some mRNAs within the KEGG pathway, while significantly affected by treatments, do not appear in this listing.

\*\*z-score  $\geq 2.0$

1. Italics denote KEGG pathways analyzed further in Table 3

2. Total Number Present on Affymetrix™ Rhesus Macaque Gene Chip

**Supplemental Table 4: Genes products in Selected KEGG Pathways from Table 2**

| <b>KEGG Pathway*</b>                           | <b>Gene Products (mRNAs)**</b>                                                                                                                                                                 |
|------------------------------------------------|------------------------------------------------------------------------------------------------------------------------------------------------------------------------------------------------|
| <i>DNA replication</i>                         | MCM4 LIG1 RPA2 RFC3 MCM7 RFC5 RNASEH2A<br>FEN1 MCM3 POLE DNA2L                                                                                                                                 |
| <i>Cell cycle</i>                              | CDC14B TGFB1 RAD21 ORC5L MCM4 MCM7<br>ABL1 SKP2 MCM7 CDC25A MAD2L1 E2F1 SKP2<br>CCNB2 CCNB1 CDC25C CDC45L MCM3 ESPL1<br>BUB1 BUB1B CCNA1 CHEK1 E2F2 CDC6                                       |
| <i>Mismatch repair</i>                         | LIG1 RPA2RFC3 RFC5 MLH1 MSH6 EXO1                                                                                                                                                              |
| <i>Pathways in cancer</i>                      | ITGA3 RUNX1 STAT3 ETS1 CDC42 IKBKB FZD7<br>CUL2 RALGDS WNT9A TGFB1 RALB APC PIK3R3<br>MLH1 ABL1 PTCH2 LAMA3 SKP2 BIRC5 E2F1<br>MSH6 BRCA2 EGFR FOS RAD51 JUN FZD4<br>CCNA1 E2F2 AR LAMA1 FGF14 |
| <i>Apoptosis</i>                               | PRKACB IL1R1 TNFRSF10B CFLAR IKBKB RIPK1<br>TNFRSF1A NGFB MYD88 DFFB PDCD8 PIK3R3                                                                                                              |
| <i>Autoimmune thyroid disease</i>              | HLA-DQA1 HLA-A HLA-E TPO CD40 HLA-F TG<br>IL5                                                                                                                                                  |
| <i>GnRH signaling pathway</i>                  | PRKACB CAMK2D PRKCD CDC42 MAP3K2 GNRH1<br>MAP2K6 PLA2G12A EGFR JUN                                                                                                                             |
| <i>Progesterone-mediated oocyte maturation</i> | PRKACB RPS6KA3 PIK3R3 CDC25A MAD2L1<br>CCNB2 CCNB1 CDC25C BUB1 CCNA1                                                                                                                           |
| <i>Steroid hormone biosynthesis</i>            | CYP3A5 CYP3A43 CYP1B1 CYP19A1 HSD3B2                                                                                                                                                           |

\*Due to differences in probeset annotation some gene products (mRNAs) within the KEGG pathway, while significantly affected by treatments, do not appear in this listing, such as CYP17A1 (Figure 6).

\*\*Some genes have several mRNA probesets, so multiple listings are removed

Supplemental Table 5: Pairwise Comparisons of Selected Gene Products

|                                                                                              |             |                                        | Pairwise Comparisons <sup>A</sup> |                         |                  |                         |                 |                         |
|----------------------------------------------------------------------------------------------|-------------|----------------------------------------|-----------------------------------|-------------------------|------------------|-------------------------|-----------------|-------------------------|
|                                                                                              |             |                                        | Control vs WSD                    |                         | Control vs WSD+T |                         | WSD vs WSD+T    |                         |
| Function                                                                                     | Gene        | One-way ANOVA all conditions (P-value) | Fold change\$ *                   | One-way ANOVA (P-value) | Fold change\$ *  | One-way ANOVA (P-value) | Fold change\$ * | One-way ANOVA (P-value) |
| Ovarian Processes                                                                            | AMH         | 0.07                                   | -1.39                             | 0.15                    | <b>-2.82</b>     | <b>0.01</b>             | -2.02           | 0.52                    |
|                                                                                              | ANGPT1      | 0.20                                   | -1.10                             | 0.90                    | 1.69             | 0.22                    | 1.86            | <b>0.03</b>             |
|                                                                                              | ANGPT2      | 0.34                                   | 1.17                              | 0.79                    | 3.36             | 0.38                    | <b>2.88</b>     | <b>0.004</b>            |
|                                                                                              | AR          | <b>0.007</b>                           | <b>-3.16</b>                      | <b>0.01</b>             | <b>-3.13</b>     | <b>0.004</b>            | 1.01            | 0.57                    |
|                                                                                              | CDKN1A      | <b>0.008</b>                           | <b>2.91</b>                       | <b>0.009</b>            | 1.61             | 0.15                    | -1.81           | <b>0.02</b>             |
|                                                                                              | CYP11A1     | <b>0.04</b>                            | <b>-2.58</b>                      | <b>0.05</b>             | -1.33            | 0.14                    | 1.94            | 0.12                    |
|                                                                                              | CYP17A1     | <b>0.003</b>                           | <b>-2.99</b>                      | <b>0.01</b>             | -1.67            | <b>0.01</b>             | 1.79            | 0.07                    |
|                                                                                              | CYP19A1     | <b>0.01</b>                            | -3.26                             | 0.11                    | <b>-4.90</b>     | <b>0.003</b>            | -1.50           | 0.12                    |
|                                                                                              | DENND1A     | 0.6                                    | 1.04                              | 0.47                    | 1.04             | 0.4                     | 1.00            | 0.9                     |
|                                                                                              | ESR1        | <b>0.005</b>                           | -1.42                             | 0.43                    | <b>-2.59</b>     | <b>0.01</b>             | -1.82           | <b>0.01</b>             |
|                                                                                              | ESR2        | 0.19                                   | -1.32                             | 0.27                    | -1.23            | <b>0.02</b>             | 1.07            | 0.72                    |
|                                                                                              | FSHR        | 0.07                                   | -3.25                             | 0.08                    | <b>-3.33</b>     | <b>0.003</b>            | -1.03           | 0.61                    |
|                                                                                              | HSD3B2      | <b>0.00002</b>                         | <b>-2.10</b>                      | <b>0.01</b>             | <b>-5.35</b>     | <b>0.0001</b>           | <b>-2.55</b>    | <b>0.0004</b>           |
|                                                                                              | LHCGR       | <b>0.002</b>                           | <b>-3.87</b>                      | <b>0.01</b>             | 1.15             | 0.79                    | <b>4.44</b>     | <b>0.003</b>            |
|                                                                                              | PGR         | 0.98                                   | -1.24                             | 0.94                    | -1.02            | 0.54                    | 1.22            | 0.92                    |
|                                                                                              | PGRMC1      | 0.13                                   | 1.17                              | 0.88                    | -1.19            | 0.13                    | -1.39           | <b>0.01</b>             |
| VEGF                                                                                         | <b>0.04</b> | -1.12                                  | 0.72                              | -1.58                   | <b>0.03</b>      | -1.41                   | <b>0.03</b>     |                         |
| Metabolism and Insulin Signaling                                                             | IGF1        | 0.15                                   | 2.39                              | 0.15                    | 1.84             | 0.12                    | -1.3            | 0.58                    |
|                                                                                              | IGF2        | 0.59                                   | -1.47                             | 0.67                    | -1.51            | 0.13                    | -1.02           | 0.67                    |
|                                                                                              | IGFR        | 0.41                                   | -1.1                              | 0.49                    | -1.63            | <b>0.04</b>             | -1.49           | 0.69                    |
|                                                                                              | INSLR       | <b>0.001</b>                           | 1.48                              | <b>0.03</b>             | -1.35            | <b>0.01</b>             | <b>-2</b>       | <b>0.002</b>            |
|                                                                                              | LDLR        | <b>0.003</b>                           | -1.61                             | <b>0.01</b>             | <b>-2.27</b>     | <b>0.004</b>            | -1.41           | 0.32                    |
|                                                                                              | PAPPA       | <b>0.017</b>                           | <b>-3.41</b>                      | <b>0.05</b>             | <b>-3.94</b>     | <b>0.02</b>             | 1.16            | 0.69                    |
| Endoplasmic Reticulum Stress-Associated with Oocyte Fatty Acid Exposure <sup>1</sup>         | ATF4        | <b>0.03</b>                            | 1.25                              | <b>0.04</b>             | 1.02             | 0.49                    | -1.22           | <b>0.01</b>             |
|                                                                                              | ATF6        | <b>0.04</b>                            | 1.55                              | <b>0.05</b>             | 1.46             | <b>0.04</b>             | -1.06           | 0.39                    |
|                                                                                              | DDIT3       | 0.07                                   | 1.92                              | 0.16                    | -1.24            | 0.47                    | <b>-2.38</b>    | <b>0.03</b>             |
|                                                                                              | EIF2AK3     | 0.69                                   | 1.2                               | 0.61                    | -1               | 0.77                    | -1.21           | 0.46                    |
|                                                                                              | HSPA4       | <b>0.03</b>                            | 1.3                               | <b>0.02</b>             | 1.19             | 0.17                    | -1.09           | 0.16                    |
|                                                                                              | HSPA5       | <b>0.02</b>                            | <b>4.24</b>                       | <b>0.05</b>             | -1.39            | 0.35                    | <b>-5.88</b>    | <b>0.02</b>             |
|                                                                                              | XBP1        | <b>0.006</b>                           | 1.47                              | <b>0.006</b>            | 1.1              | 0.22                    | -1.34           | <b>0.01</b>             |
| Fatty Acid Biosynthesis (PCOS Microarray Databases Granulosa and Cumulus Cells) <sup>2</sup> | ELOVL7      | 0.13                                   | 1.64                              | 0.31                    | -1.74            | 0.29                    | -2.85           | 0.07                    |
|                                                                                              | FADS1       | <b>0.0001</b>                          | <b>-2.42</b>                      | <b>0.001</b>            | <b>-2.23</b>     | <b>0.001</b>            | 1.09            | 0.52                    |
|                                                                                              | PRKAA2      | <b>0.03</b>                            | -1.02                             | 0.45                    | 1.57             | <b>0.01</b>             | 1.61            | <b>0.04</b>             |
|                                                                                              | PTPLA       | <b>0.02</b>                            | <b>2.57</b>                       | <b>0.03</b>             | 2.09             | 0.06                    | -1.23           | 0.06                    |

|  |               |             |              |             |              |              |       |      |
|--|---------------|-------------|--------------|-------------|--------------|--------------|-------|------|
|  | <b>SC4MOL</b> | <b>0.01</b> | <b>-2.49</b> | <b>0.03</b> | <b>-3.02</b> | <b>0.002</b> | -1.21 | 0.57 |
|  | SCD5          | 0.31        | -1.75        | 0.23        | -1.76        | 0.18         | -1.01 | 0.95 |

**Bold text** denotes statistical significance for gene products and if significant Fold change >2 or <-2

A. Comparisons were performed with Affymetrix Transcriptome Analysis Console (TAC) 2.0 to determine statistical significance and fold change of all mRNAs after RMA transformation (Supplemental Files 7-9)

\$Fold change: Positive fold change denotes an increase in expression compared to Control conditions, while Negative fold changes indicate decreased expression by Treatment (Modified from TAC Control:Treatment ratio).

\*When multiple probesets are present for a given gene, preference will be given to probesets with "A" grade annotations and 100% identity to genome and/or target sequence. If more than 1 probeset meets this conditions, the one with the lowest P-value is reported.

1. Yang X et al. Fertil Steril 2012;97:1438-1443

2. GEO datasets Series GSE34526 and GSE10946

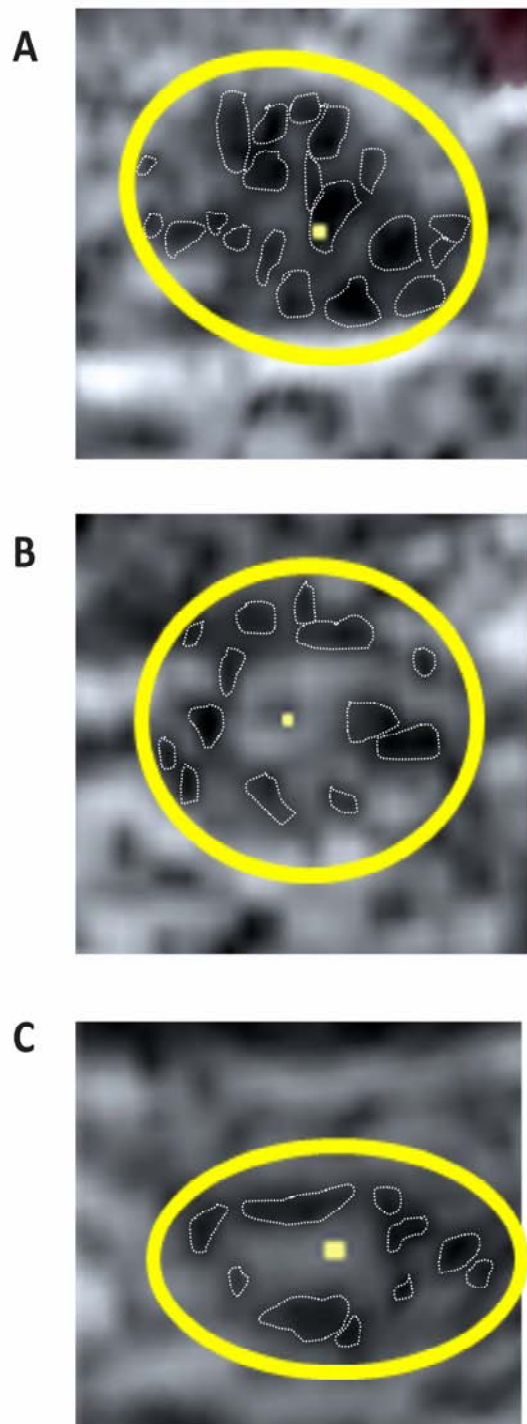

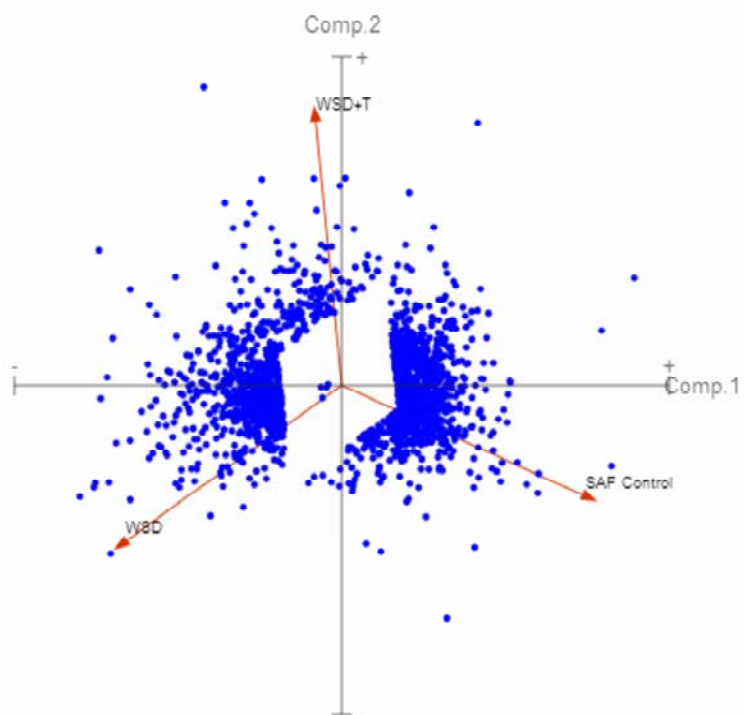

Supplemental Figure 2

A



A

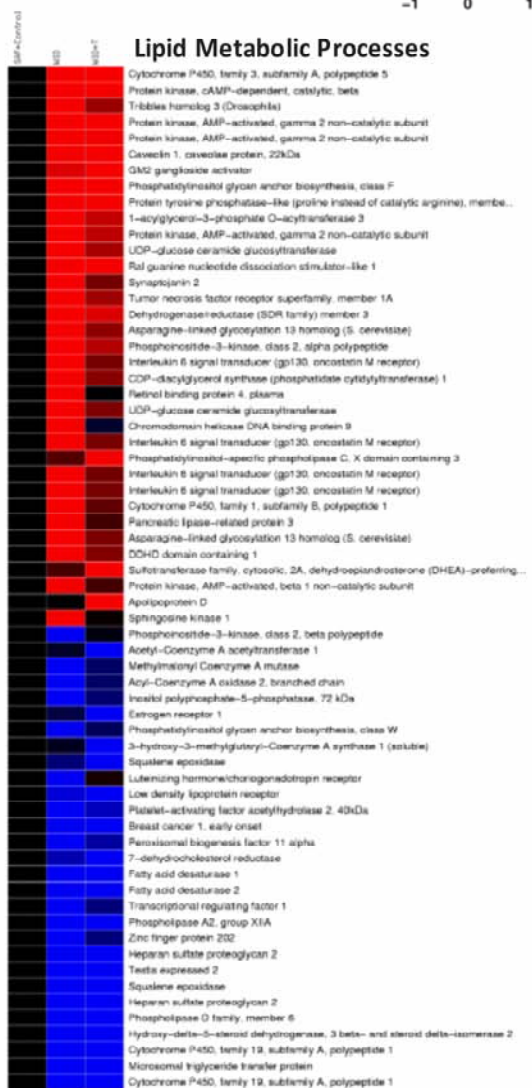

B

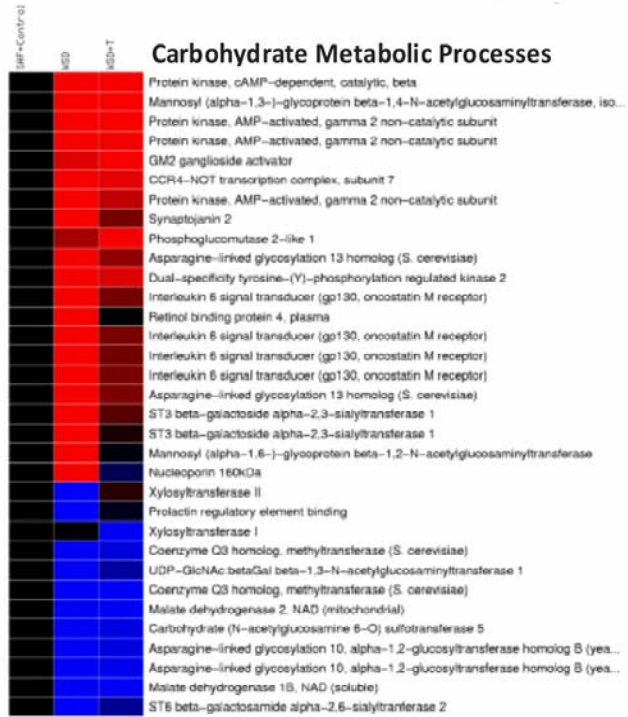

C

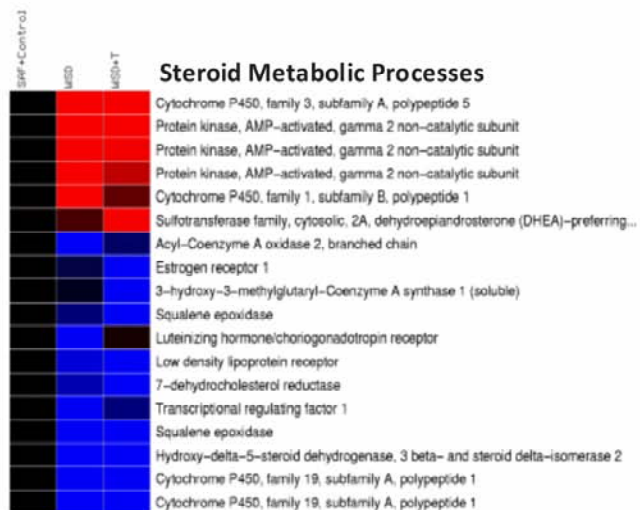

Supplemental Figure 3

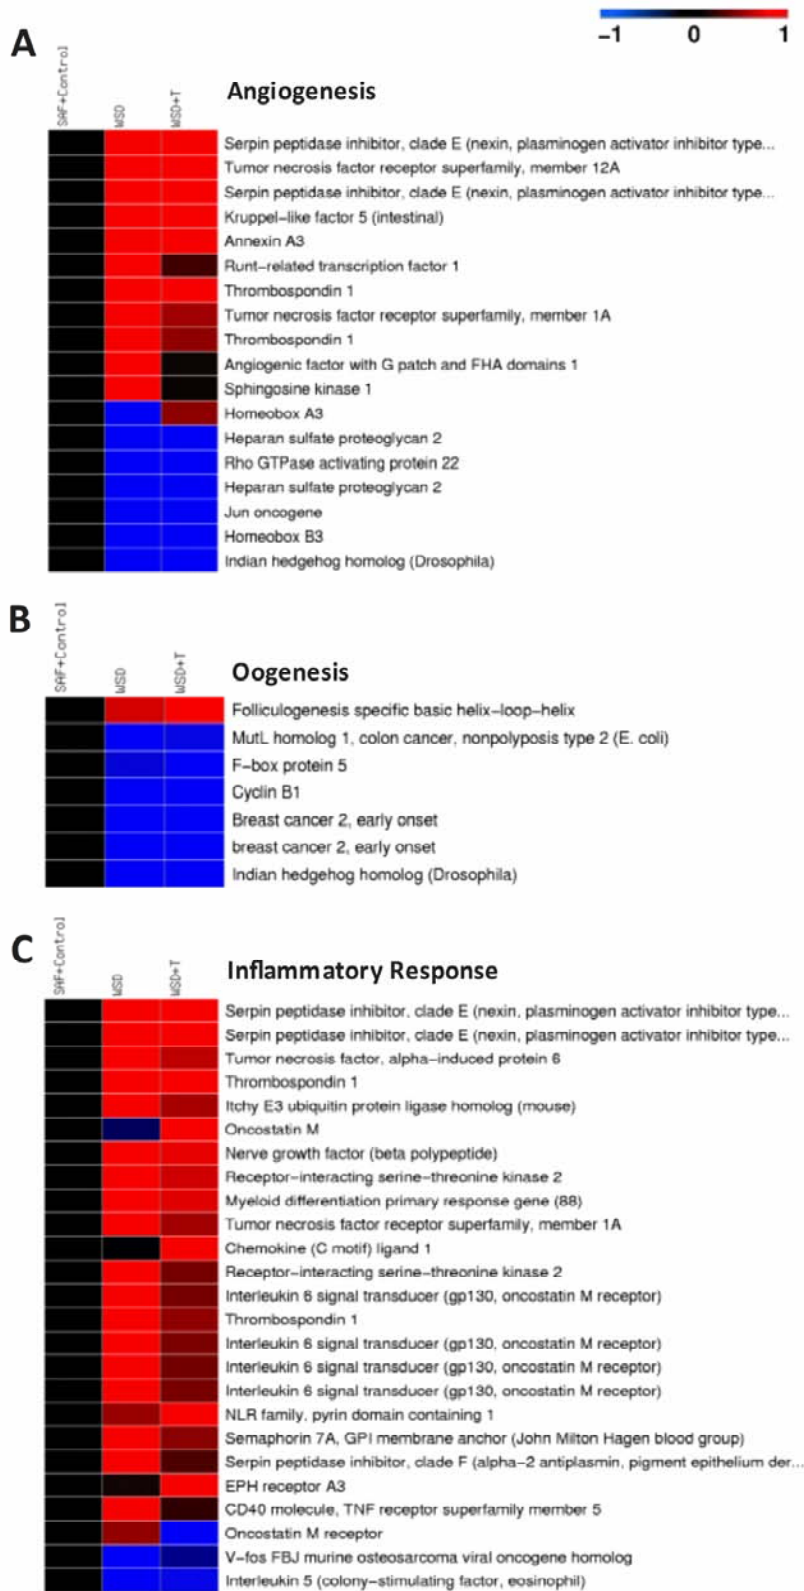









*Ontologies identified by number present on Array data  $\geq 5$ , Gene sets of  $\geq 10$ , but  $\leq 100$ , and z-score  $\geq 2.0$*

| Ontology                                                                                     | List | Gene Set | z-score |
|----------------------------------------------------------------------------------------------|------|----------|---------|
| chromosome segregation                                                                       | 33   | 98       | 10.0    |
| mitotic prometaphase                                                                         | 27   | 75       | 10.0    |
| sister chromatid segregation                                                                 | 14   | 36       | 7.0     |
| spindle organization                                                                         | 16   | 47       | 7.0     |
| mitotic sister chromatid segregation                                                         | 13   | 34       | 7.0     |
| chromosome condensation                                                                      | 10   | 23       | 7.0     |
| DNA strand elongation                                                                        | 11   | 29       | 6.0     |
| mitotic spindle organization                                                                 | 8    | 17       | 6.0     |
| chromatin remodeling at centromere                                                           | 9    | 21       | 6.0     |
| DNA strand elongation involved in DNA replication                                            | 10   | 26       | 6.0     |
| regulation of chromosome segregation                                                         | 7    | 14       | 6.0     |
| mitotic chromosome condensation                                                              | 6    | 11       | 6.0     |
| CenH3-containing nucleosome assembly at centromere                                           | 8    | 19       | 6.0     |
| DNA replication-independent nucleosome assembly                                              | 8    | 19       | 6.0     |
| DNA replication-independent nucleosome organization                                          | 8    | 19       | 6.0     |
| mitotic recombination                                                                        | 10   | 28       | 6.0     |
| histone exchange                                                                             | 8    | 21       | 5.0     |
| DNA packaging                                                                                | 19   | 89       | 5.0     |
| attachment of spindle microtubules to chromosome                                             | 5    | 10       | 5.0     |
| chromosome localization                                                                      | 6    | 14       | 5.0     |
| establishment of chromosome localization                                                     | 6    | 14       | 5.0     |
| regulation of transcription involved in G1/S phase of mitotic cell cycle                     | 6    | 14       | 5.0     |
| ATP-dependent chromatin remodeling                                                           | 8    | 23       | 5.0     |
| DNA-dependent DNA replication                                                                | 17   | 79       | 5.0     |
| metaphase plate congression                                                                  | 5    | 11       | 5.0     |
| microtubule polymerization or depolymerization                                               | 10   | 36       | 5.0     |
| DNA damage response, signal transduction resulting in induction of apoptosis                 | 9    | 31       | 4.0     |
| branched chain family amino acid catabolic process                                           | 6    | 16       | 4.0     |
| regulation of mitosis                                                                        | 14   | 66       | 4.0     |
| regulation of nuclear division                                                               | 14   | 66       | 4.0     |
| M phase of meiotic cell cycle                                                                | 17   | 90       | 4.0     |
| meiosis                                                                                      | 17   | 90       | 4.0     |
| reciprocal meiotic recombination                                                             | 8    | 28       | 4.0     |
| meiotic cell cycle                                                                           | 17   | 91       | 4.0     |
| male meiosis                                                                                 | 5    | 13       | 4.0     |
| response to mechanical stimulus                                                              | 15   | 76       | 4.0     |
| branched chain family amino acid metabolic process                                           | 6    | 18       | 4.0     |
| regulation of microtubule-based process                                                      | 11   | 51       | 4.0     |
| inositol lipid-mediated signaling                                                            | 12   | 59       | 4.0     |
| phosphatidylinositol-mediated signaling                                                      | 12   | 59       | 4.0     |
| regulation of microtubule cytoskeleton organization                                          | 10   | 45       | 4.0     |
| immunoglobulin production involved in immunoglobulin mediated immune response                | 6    | 20       | 4.0     |
| isotype switching                                                                            | 6    | 20       | 4.0     |
| microtubule anchoring                                                                        | 6    | 20       | 4.0     |
| somatic diversification of immunoglobulins involved in immune response                       | 6    | 20       | 4.0     |
| somatic recombination of immunoglobulin genes involved in immune response                    | 6    | 20       | 4.0     |
| telomere maintenance via recombination                                                       | 6    | 20       | 4.0     |
| meiosis I                                                                                    | 9    | 39       | 4.0     |
| spindle checkpoint                                                                           | 8    | 33       | 4.0     |
| telomere maintenance via semi-conservative replication                                       | 6    | 21       | 4.0     |
| DNA-dependent DNA replication initiation                                                     | 7    | 28       | 3.0     |
| organelle localization                                                                       | 16   | 98       | 3.0     |
| B cell activation involved in immune response                                                | 6    | 23       | 3.0     |
| negative regulation of gene expression, epigenetic                                           | 6    | 23       | 3.0     |
| cellular response to mechanical stimulus                                                     | 7    | 30       | 3.0     |
| somatic cell DNA recombination                                                               | 7    | 30       | 3.0     |
| somatic diversification of immune receptors via germline recombination within a single locus | 7    | 30       | 3.0     |
| G2/M transition checkpoint                                                                   | 6    | 24       | 3.0     |
| lymphocyte activation involved in immune response                                            | 9    | 45       | 3.0     |

|                                                                          |    |    |     |
|--------------------------------------------------------------------------|----|----|-----|
| maintenance of location in cell                                          | 13 | 78 | 3.1 |
| double-strand break repair                                               | 11 | 62 | 3.4 |
| chromatin assembly or disassembly                                        | 15 | 97 | 3.4 |
| positive regulation of JNK cascade                                       | 6  | 25 | 3.4 |
| pyrimidine base metabolic process                                        | 6  | 25 | 3.4 |
| somatic recombination of immunoglobulin gene segments                    | 6  | 25 | 3.4 |
| telomere maintenance via telomere lengthening                            | 7  | 32 | 3.4 |
| mitotic metaphase/anaphase transition                                    | 9  | 47 | 3.4 |
| G2/M transition DNA damage checkpoint                                    | 5  | 19 | 3.4 |
| microtubule depolymerization                                             | 5  | 19 | 3.4 |
| spindle assembly                                                         | 5  | 19 | 3.4 |
| lymphocyte proliferation                                                 | 15 | 99 | 3.3 |
| cell aging                                                               | 8  | 40 | 3.3 |
| establishment or maintenance of cell polarity                            | 10 | 56 | 3.3 |
| cytokinesis                                                              | 10 | 57 | 3.3 |
| pyrimidine nucleotide biosynthetic process                               | 5  | 20 | 3.3 |
| regulation of DNA recombination                                          | 5  | 20 | 3.3 |
| regulation of cyclin-dependent protein kinase activity                   | 9  | 49 | 3.3 |
| somatic diversification of immune receptors                              | 7  | 34 | 3.3 |
| maintenance of protein location                                          | 12 | 75 | 3.3 |
| establishment of organelle localization                                  | 11 | 67 | 3.3 |
| regulation of S phase                                                    | 5  | 21 | 3.3 |
| pyrimidine-containing compound metabolic process                         | 9  | 51 | 3.3 |
| double-strand break repair via homologous recombination                  | 6  | 28 | 3.3 |
| recombinational repair                                                   | 6  | 28 | 3.3 |
| regulation of gene expression, epigenetic                                | 13 | 87 | 3.0 |
| cellular response to abiotic stimulus                                    | 9  | 52 | 3.0 |
| 'de novo' protein folding                                                | 8  | 44 | 3.0 |
| negative regulation of cell cycle process                                | 10 | 61 | 3.0 |
| induction of apoptosis by intracellular signals                          | 11 | 70 | 3.0 |
| positive regulation of stress-activated protein kinase signaling cascade | 6  | 29 | 3.0 |
| somatic diversification of immunoglobulins                               | 6  | 29 | 3.0 |
| mismatch repair                                                          | 5  | 22 |     |
| maintenance of protein location in cell                                  | 11 | 71 | 2.9 |
| regulation of lymphocyte proliferation                                   | 12 | 81 | 2.9 |
| mitotic cell cycle spindle checkpoint                                    | 6  | 30 | 2.9 |
| negative regulation of MAPKKK cascade                                    | 6  | 30 | 2.9 |
| regulation of microtubule polymerization or depolymerization             | 6  | 30 | 2.9 |
| spindle assembly checkpoint                                              | 6  | 30 | 2.9 |
| telomere maintenance                                                     | 8  | 46 | 2.8 |
| immunoglobulin production                                                | 7  | 38 | 2.8 |
| <b>positive regulation of angiogenesis</b>                               | 7  | 38 | 2.8 |
| regulation of mitotic metaphase/anaphase transition                      | 7  | 38 | 2.8 |
| regulation of mononuclear cell proliferation                             | 12 | 82 | 2.8 |
| telomere organization                                                    | 8  | 47 | 2.8 |
| pyrimidine-containing compound biosynthetic process                      | 6  | 31 | 2.8 |
| production of molecular mediator of immune response                      | 9  | 57 | 2.7 |
| regulation of leukocyte proliferation                                    | 12 | 85 | 2.7 |
| regulation of stress-activated protein kinase signaling cascade          | 12 | 85 | 2.7 |
| cell projection assembly                                                 | 13 | 95 | 2.7 |
| positive regulation of MAPKKK cascade                                    | 11 | 76 | 2.7 |
| cell activation involved in immune response                              | 10 | 67 | 2.6 |
| leukocyte activation involved in immune response                         | 10 | 67 | 2.6 |
| myeloid leukocyte differentiation                                        | 10 | 67 | 2.6 |
| centrosome cycle                                                         | 5  | 25 | 2.6 |
| nucleoside biosynthetic process                                          | 5  | 25 | 2.6 |
| MyD88-dependent toll-like receptor signaling pathway                     | 9  | 60 | 2.5 |
| regulation of JNK cascade                                                | 11 | 79 | 2.5 |
| immunoglobulin mediated immune response                                  | 8  | 51 | 2.5 |
| nucleobase metabolic process                                             | 8  | 51 | 2.5 |
| G1 phase                                                                 | 6  | 34 | 2.5 |



|                                                                                                      |    |     |     |
|------------------------------------------------------------------------------------------------------|----|-----|-----|
| positive regulation of calcium ion transport                                                         | 6  | 34  | 2.1 |
| positive regulation of adaptive immune response                                                      | 5  | 26  | 2.1 |
| adaptive immune response                                                                             | 13 | 100 | 2.1 |
| smoothened signaling pathway                                                                         | 7  | 43  | 2.1 |
| chromatin assembly                                                                                   | 9  | 62  | 2.1 |
| chromatin remodeling                                                                                 | 9  | 62  | 2.1 |
| B cell mediated immunity                                                                             | 8  | 53  | 2.1 |
| organelle assembly                                                                                   | 8  | 53  | 2.1 |
| response to UV                                                                                       | 8  | 53  | 2.1 |
| cellular response to extracellular stimulus                                                          | 12 | 92  | 2.1 |
| Toll signaling pathway                                                                               | 9  | 63  | 2   |
| response to interferon-gamma                                                                         | 10 | 73  | 2.1 |
| microtubule organizing center organization                                                           | 7  | 45  | 2.1 |
| regulation of myeloid leukocyte differentiation                                                      | 7  | 45  | 2.1 |
| regulation of smoothened signaling pathway                                                           | 5  | 28  | 2.1 |
| protein-DNA complex subunit organization                                                             | 11 | 84  | 2.1 |
| cellular response to nutrient levels                                                                 | 10 | 74  | 2.1 |
| toll-like receptor signaling pathway                                                                 | 10 | 74  | 2.1 |
| regulation of oxidoreductase activity                                                                | 6  | 37  | 2.1 |
| toll-like receptor 4 signaling pathway                                                               | 9  | 65  | 2   |
| female gamete generation                                                                             | 8  | 56  | 2.1 |
| negative regulation of protein serine/threonine kinase activity                                      | 8  | 56  | 2.1 |
| toll-like receptor 1 signaling pathway                                                               | 8  | 56  | 2.1 |
| mitotic cell cycle spindle assembly checkpoint                                                       | 5  | 29  | 2.1 |
| negative regulation of lymphocyte proliferation                                                      | 5  | 29  | 2.1 |
| negative regulation of mitotic metaphase/anaphase transition                                         | 5  | 29  | 2.1 |
| negative regulation of mononuclear cell proliferation                                                | 5  | 29  | 2.1 |
| M/G1 transition of mitotic cell cycle                                                                | 9  | 66  | 2.1 |
| nucleosome organization                                                                              | 9  | 66  | 2.1 |
| adaptive immune response based on somatic recombination of immune receptors built from immunoglobuli | 12 | 97  | 2.1 |
| positive regulation of cytokine production                                                           | 12 | 97  | 2.1 |
| <b>oogenesis</b>                                                                                     | 6  | 38  | 2.1 |
| pyrimidine nucleoside metabolic process                                                              | 6  | 38  | 2.1 |
| toll-like receptor 2 signaling pathway                                                               | 8  | 57  | 2.1 |
| pattern recognition receptor signaling pathway                                                       | 10 | 77  | 2   |
| regulation of adaptive immune response                                                               | 7  | 48  | 2.1 |
| innate immune response-activating signal transduction                                                | 10 | 78  | 2.1 |
| positive regulation of cell cycle                                                                    | 8  | 58  | 2.1 |
| protein heterooligomerization                                                                        | 7  | 49  | 2.1 |
| protein-DNA complex assembly                                                                         | 10 | 79  | 2.1 |
| interferon-gamma-mediated signaling pathway                                                          | 8  | 59  | 2   |
| nucleosome assembly                                                                                  | 8  | 59  | 2   |
| protein polymerization                                                                               | 11 | 90  | 2.1 |
| 'de novo' posttranslational protein folding                                                          | 6  | 40  | 2.1 |
| base-excision repair                                                                                 | 5  | 31  | 2.1 |
| G1 phase of mitotic cell cycle                                                                       | 5  | 31  | 2.1 |
| negative regulation of leukocyte proliferation                                                       | 5  | 31  | 2.1 |
| negative regulation of mitosis                                                                       | 5  | 31  | 2.1 |
| negative regulation of nuclear division                                                              | 5  | 31  | 2.1 |
| <b>positive regulation of inflammatory response</b>                                                  | 5  | 31  | 2.1 |
| activation of innate immune response                                                                 | 10 | 80  | 2.1 |
| male gonad development                                                                               | 7  | 50  | 2.1 |
| cellular response to starvation                                                                      | 6  | 41  | 2.1 |
| response to tumor necrosis factor                                                                    | 6  | 41  | 2.1 |
| protein maturation                                                                                   | 9  | 71  | 2.1 |
| positive regulation of muscle cell differentiation                                                   | 5  | 32  | 2.1 |
| pyrimidine nucleotide metabolic process                                                              | 5  | 32  | 2.1 |
| response to toxin                                                                                    | 8  | 61  |     |

| Transcript Cluster ID | Transcript ID(Array Design) | SAF Control                 | WSD Bi-                  | SAF Control        | WSD                | Fold Change                    | ANOVA p-value         | ANOVA p-               | FDR p-value           | FDR p-value      |
|-----------------------|-----------------------------|-----------------------------|--------------------------|--------------------|--------------------|--------------------------------|-----------------------|------------------------|-----------------------|------------------|
|                       |                             | Bi-weight Avg Signal (log2) | weight Avg Signal (log2) | Standard Deviation | Standard Deviation | (linear) (SAF Control vs. WSD) | (SAF Control vs. WSD) | value (All Conditions) | (SAF Control vs. WSD) | (All Conditions) |
| AFFX-BioB-5_at        | AFFX-BioB-5                 | 10.47                       | 10.54                    | 0.18               | 0.19               | -1.05                          | 0.751186              | 0.895706               | 0.893648              | 0.940372         |
| AFFX-BioB-M_at        | AFFX-BioB-M                 | 11.13                       | 11.22                    | 0.19               | 0.16               | -1.07                          | 0.815418              | 0.886674               | 0.924995              | 0.935519         |
| AFFX-BioB-3_at        | AFFX-BioB-3                 | 10.98                       | 11.08                    | 0.21               | 0.14               | -1.07                          | 0.802974              | 0.910341               | 0.918874              | 0.949414         |
| AFFX-BioC-5_at        | AFFX-BioC-5                 | 11.72                       | 11.74                    | 0.19               | 0.14               | -1.01                          | 0.960539              | 0.959002               | 0.9849                | 0.976777         |
| AFFX-BioC-3_at        | AFFX-BioC-3                 | 11.87                       | 11.92                    | 0.18               | 0.12               | -1.04                          | 0.972854              | 0.938204               | 0.989532              | 0.964949         |
| AFFX-BioDn-5_at       | AFFX-BioDn-5                | 12.96                       | 12.93                    | 0.14               | 0.12               | 1.03                           | 0.755969              | 0.924374               | 0.896282              | 0.957351         |
| AFFX-BioDn-3_at       | AFFX-BioDn-3                | 13.75                       | 13.71                    | 0.07               | 0.09               | 1.03                           | 0.579123              | 0.67327                | 0.804078              | 0.809084         |
| AFFX-CreX-5_at        | AFFX-CreX-5                 | 14.49                       | 14.45                    | 0.04               | 0.05               | 1.02                           | 0.385846              | 0.440588               | 0.690905              | 0.659029         |
| AFFX-CreX-3_at        | AFFX-CreX-3                 | 14.71                       | 14.65                    | 0.03               | 0.06               | 1.04                           | 0.194694              | 0.167944               | 0.558163              | 0.444517         |
| AFFX-DapX-5_at        | AFFX-DapX-5                 | 4.01                        | 3.97                     | 0.09               | 0.27               | 1.03                           | 0.356444              | 0.441131               | 0.671568              | 0.659375         |
| AFFX-DapX-M_at        | AFFX-DapX-M                 | 3.47                        | 3.6                      | 0.04               | 0.07               | -1.1                           | 0.095584              | 0.299868               | 0.453501              | 0.558148         |
| AFFX-DapX-3_at        | AFFX-DapX-3                 | 3.98                        | 4.05                     | 0.01               | 0.14               | -1.05                          | 0.413242              | 0.465035               | 0.70838               | 0.675534         |
| AFFX-LysX-5_at        | AFFX-LysX-5                 | 3                           | 3.32                     | 0.07               | 0.13               | -1.24                          | 0.071419              | 0.067931               | 0.415264              | 0.306839         |
| AFFX-LysX-M_at        | AFFX-LysX-M                 | 3.69                        | 3.76                     | 0.06               | 0.1                | -1.05                          | 0.378942              | 0.57511                | 0.686586              | 0.746329         |
| AFFX-LysX-3_at        | AFFX-LysX-3                 | 3.18                        | 3.4                      | 0.07               | 0.13               | -1.16                          | 0.056945              | 0.054681               | 0.387418              | 0.27934          |
| AFFX-PheX-5_at        | AFFX-PheX-5                 | 3.83                        | 3.84                     | 0.16               | 0.07               | -1.01                          | 0.722519              | 0.901615               | 0.878757              | 0.944007         |
| AFFX-PheX-M_at        | AFFX-PheX-M                 | 3.75                        | 3.74                     | 0.14               | 0.09               | 1.01                           | 0.950145              | 0.620651               | 0.981177              | 0.775525         |
| AFFX-PheX-3_at        | AFFX-PheX-3                 | 4.9                         | 5.14                     | 0.22               | 0.15               | -1.18                          | 0.279414              | 0.29563                | 0.621094              | 0.555108         |
| AFFX-ThrX-5_at        | AFFX-ThrX-5                 | 4.67                        | 4.74                     | 0.05               | 0.05               | -1.05                          | 0.090716              | 0.250276               | 0.446279              | 0.519282         |
| AFFX-ThrX-M_at        | AFFX-ThrX-M                 | 4.03                        | 4.04                     | 0.04               | 0.09               | -1.01                          | 0.80286               | 0.679699               | 0.918811              | 0.812998         |
| AFFX-ThrX-3_at        | AFFX-ThrX-3                 | 6.17                        | 6.29                     | 0.11               | 0.21               | -1.09                          | 0.32421               | 0.291408               | 0.651856              | 0.551823         |
| AFFX-TrpnX-5_at       | AFFX-TrpnX-5                | 3.43                        | 3.54                     | 0.03               | 0.05               | -1.08                          | 0.053536              | 0.138164               | 0.380288              | 0.411086         |
| AFFX-TrpnX-M_at       | AFFX-TrpnX-M                | 4.48                        | 4.52                     | 0.02               | 0.04               | -1.03                          | 0.111477              | 0.089969               | 0.473695              | 0.34423          |
| AFFX-TrpnX-3_at       | AFFX-TrpnX-3                | 3.35                        | 3.58                     | 0.06               | 0.06               | -1.17                          | 0.014681              | 0.007857               | 0.254707              | 0.118059         |
| AFFX-r2-Ec-bioB-5_at  | AFFX-r2-Ec-bioB-5           | 11.05                       | 11.2                     | 0.18               | 0.18               | -1.11                          | 0.701678              | 0.890195               | 0.868127              | 0.937473         |
| AFFX-r2-Ec-bioB-M_at  | AFFX-r2-Ec-bioB-M           | 11.2                        | 11.29                    | 0.21               | 0.15               | -1.07                          | 0.793883              | 0.90393                | 0.914508              | 0.945472         |
| AFFX-r2-Ec-bioB-3_at  | AFFX-r2-Ec-bioB-3           | 11.19                       | 11.28                    | 0.22               | 0.12               | -1.07                          | 0.771226              | 0.896628               | 0.903674              | 0.940929         |
| AFFX-r2-Ec-bioC-5_at  | AFFX-r2-Ec-bioC-5           | 12.43                       | 12.42                    | 0.15               | 0.1                | 1                              | 0.795602              | 0.929291               | 0.915216              | 0.959661         |
| AFFX-r2-Ec-bioC-3_at  | AFFX-r2-Ec-bioC-3           | 12.55                       | 12.55                    | 0.15               | 0.1                | 1                              | 0.847696              | 0.960131               | 0.939033              | 0.977408         |
| AFFX-r2-Ec-bioD-5_at  | AFFX-r2-Ec-bioD-5           | 13.76                       | 13.7                     | 0.06               | 0.06               | 1.04                           | 0.509906              | 0.576551               | 0.764585              | 0.747267         |
| AFFX-r2-Ec-bioD-3_at  | AFFX-r2-Ec-bioD-3           | 14.05                       | 14.05                    | 0.03               | 0.06               | 1                              | 0.563407              | 0.408622               | 0.79597               | 0.635777         |
| AFFX-r2-P1-cre-5_at   | AFFX-r2-P1-cre-5            | 14.81                       | 14.78                    | 0.02               | 0.06               | 1.02                           | 0.315887              | 0.285154               | 0.64672               | 0.547098         |
| AFFX-r2-P1-cre-3_at   | AFFX-r2-P1-cre-3            | 14.87                       | 14.85                    | 0.02               | 0.03               | 1.01                           | 0.287231              | 0.425534               | 0.625853              | 0.647884         |
| AFFX-r2-Bs-dap-5_at   | AFFX-r2-Bs-dap-5            | 3.64                        | 3.85                     | 0.05               | 0.11               | -1.15                          | 0.013805              | 0.007783               | 0.249758              | 0.117732         |
| AFFX-r2-Bs-dap-M_at   | AFFX-r2-Bs-dap-M            | 3.02                        | 3.01                     | 0.08               | 0.09               | 1                              | 0.585377              | 0.342394               | 0.807548              | 0.588448         |
| AFFX-r2-Bs-dap-3_at   | AFFX-r2-Bs-dap-3            | 2.93                        | 2.91                     | 0.11               | 0.31               | 1.02                           | 0.781144              | 0.935387               | 0.908721              | 0.963529         |
| AFFX-r2-Bs-lys-5_at   | AFFX-r2-Bs-lys-5            | 3.14                        | 3.26                     | 0.03               | 0.19               | -1.08                          | 0.286856              | 0.266814               | 0.625572              | 0.53241          |

|                          |                  |       |       |      |      |       |          |          |          |          |
|--------------------------|------------------|-------|-------|------|------|-------|----------|----------|----------|----------|
| AFFX-r2-Bs-lys-M_at      | AFFX-r2-Bs-lys-M | 3.2   | 3.2   | 0.09 | 0.19 | 1     | 0.266932 | 0.307542 | 0.612291 | 0.563781 |
| AFFX-r2-Bs-lys-3_at      | AFFX-r2-Bs-lys-3 | 3.46  | 3.53  | 0.08 | 0.14 | -1.05 | 0.20684  | 0.388134 | 0.568858 | 0.622607 |
| AFFX-r2-Bs-phe-5_at      | AFFX-r2-Bs-phe-5 | 3.17  | 3.16  | 0.16 | 0.13 | 1     | 0.767253 | 0.624769 | 0.902194 | 0.77888  |
| AFFX-r2-Bs-phe-M_at      | AFFX-r2-Bs-phe-M | 2.96  | 2.98  | 0.06 | 0.17 | -1.01 | 0.862608 | 0.933377 | 0.944723 | 0.96217  |
| AFFX-r2-Bs-phe-3_at      | AFFX-r2-Bs-phe-3 | 3.22  | 3.38  | 0.05 | 0.33 | -1.12 | 0.347516 | 0.454286 | 0.666496 | 0.66849  |
| AFFX-r2-Bs-thr-5_s_at    | AFFX-r2-Bs-thr-5 | 3.53  | 3.83  | 0.12 | 0.09 | -1.23 | 0.049398 | 0.038833 | 0.37138  | 0.242002 |
| AFFX-r2-Bs-thr-M_s_at    | AFFX-r2-Bs-thr-M | 4.72  | 5.17  | 0.18 | 0.18 | -1.37 | 0.053924 | 0.056822 | 0.381209 | 0.284531 |
| AFFX-r2-Bs-thr-3_s_at    | AFFX-r2-Bs-thr-3 | 4.98  | 5.11  | 0.05 | 0.07 | -1.1  | 0.046574 | 0.045947 | 0.363306 | 0.258786 |
| AFFX-r2-TagA_at          | AFFX-TagA        | 3.39  | 3.41  | 0.04 | 0.06 | -1.02 | 0.620354 | 0.088425 | 0.826026 | 0.341877 |
| AFFX-r2-TagB_at          | AFFX-TagB        | 3.91  | 3.9   | 0.05 | 0.24 | 1.01  | 0.533709 | 0.299018 | 0.778431 | 0.557628 |
| AFFX-r2-TagC_at          | AFFX-TagC        | 3.17  | 3.42  | 0.1  | 0.07 | -1.19 | 0.068729 | 0.121659 | 0.410593 | 0.39084  |
| AFFX-r2-TagD_at          | AFFX-TagD        | 3.6   | 3.86  | 0.11 | 0.12 | -1.2  | 0.03824  | 0.014386 | 0.34376  | 0.153115 |
| AFFX-r2-TagE_at          | AFFX-TagE        | 3.37  | 3.59  | 0.13 | 0.18 | -1.17 | 0.160789 | 0.212888 | 0.525884 | 0.486799 |
| AFFX-r2-TagF_at          | AFFX-TagF        | 3.75  | 3.97  | 0.07 | 0.25 | -1.17 | 0.275128 | 0.434679 | 0.617694 | 0.654756 |
| AFFX-r2-TagG_at          | AFFX-TagG        | 4.1   | 4.1   | 0.05 | 0.08 | 1     | 0.730574 | 0.919071 | 0.883214 | 0.954533 |
| AFFX-r2-TagH_at          | AFFX-TagH        | 4.37  | 4.5   | 0.07 | 0.16 | -1.1  | 0.30316  | 0.354535 | 0.637386 | 0.59726  |
| AFFX-r2-TagJ-3_at        | AFFX-TagJ        | 4.57  | 4.55  | 0.13 | 0.25 | 1.01  | 0.295116 | 0.369381 | 0.631503 | 0.608783 |
| AFFX-r2-TagJ-5_at        | AFFX-TagJ        | 3.4   | 3.4   | 0.16 | 0.1  | -1    | 0.542879 | 0.341099 | 0.783702 | 0.587233 |
| AFFX-r2-TagO-3_at        | AFFX-TagO        | 3.97  | 4.02  | 0.18 | 0.07 | -1.04 | 0.194546 | 0.231802 | 0.558002 | 0.503592 |
| AFFX-r2-TagO-5_at        | AFFX-TagO        | 4.4   | 4.66  | 0.05 | 0.17 | -1.19 | 0.142994 | 0.455704 | 0.509942 | 0.669654 |
| AFFX-r2-TagQ-3_at        | AFFX-TagQ        | 4.22  | 4.22  | 0    | 0.04 | 1     | 0.373901 | 0.132046 | 0.683245 | 0.404043 |
| AFFX-r2-TagQ-5_at        | AFFX-TagQ        | 3.58  | 3.72  | 0.1  | 0.08 | -1.11 | 0.097835 | 0.101043 | 0.457014 | 0.3607   |
| AFFX-r2-TagIN-3_at       | AFFX-TagIN       | 4.93  | 5.09  | 0.07 | 0.13 | -1.12 | 0.240046 | 0.417368 | 0.592883 | 0.642165 |
| AFFX-r2-TagIN-M_at       | AFFX-TagIN       | 4.08  | 4.13  | 0.06 | 0.18 | -1.04 | 0.30936  | 0.448893 | 0.641455 | 0.664672 |
| AFFX-r2-TagIN-5_at       | AFFX-TagIN       | 3.33  | 3.32  | 0.07 | 0.39 | 1.01  | 0.408411 | 0.483755 | 0.705161 | 0.688112 |
| AFFX-Mmu-r2-Bs-dap-3_at  | AFFX-Bs-dap      | 3.46  | 3.69  | 0.05 | 0.14 | -1.17 | 0.066472 | 0.075554 | 0.406564 | 0.319982 |
| AFFX-Mmu-r2-Bs-dap-5_at  | AFFX-Bs-dap      | 3.61  | 3.73  | 0.2  | 0.08 | -1.09 | 0.080965 | 0.074092 | 0.431646 | 0.317745 |
| AFFX-Mmu-r2-Bs-dap-M_at  | AFFX-Bs-dap      | 3.46  | 3.57  | 0.11 | 0.12 | -1.08 | 0.266007 | 0.189171 | 0.611558 | 0.464997 |
| AFFX-Mmu-r2-Bs-lys-3_at  | AFFX-Bs-lys      | 3.83  | 3.98  | 0.06 | 0.13 | -1.11 | 0.095544 | 0.063983 | 0.453501 | 0.299066 |
| AFFX-Mmu-r2-Bs-lys-5_at  | AFFX-Bs-lys      | 3.56  | 3.6   | 0    | 0.13 | -1.03 | 0.647174 | 0.466185 | 0.841246 | 0.676147 |
| AFFX-Mmu-r2-Bs-lys-M_at  | AFFX-Bs-lys      | 3.82  | 3.82  | 0.05 | 0.18 | 1     | 0.526223 | 0.401601 | 0.774004 | 0.631068 |
| AFFX-Mmu-r2-Bs-phe-3_at  | AFFX-Bs-phe      | 4.36  | 4.37  | 0.2  | 0.15 | -1.01 | 0.36673  | 0.509191 | 0.679209 | 0.704028 |
| AFFX-Mmu-r2-Bs-phe-5_at  | AFFX-Bs-phe      | 4.48  | 4.41  | 0.24 | 0.13 | 1.05  | 0.92483  | 0.995025 | 0.970896 | 0.996929 |
| AFFX-Mmu-r2-Bs-phe-M_at  | AFFX-Bs-phe      | 3.24  | 3.5   | 0.16 | 0.26 | -1.21 | 0.295115 | 0.405236 | 0.631503 | 0.633604 |
| AFFX-Mmu-TrpnX-3_at      | AFFX-Bs-trp      | 3.72  | 3.49  | 0.06 | 0.29 | 1.17  | 0.619932 | 0.772168 | 0.82586  | 0.867565 |
| AFFX-Mmu-TrpnX-5_at      | AFFX-Bs-trp      | 4.29  | 4.37  | 0.05 | 0.12 | -1.05 | 0.680832 | 0.926457 | 0.857325 | 0.958307 |
| AFFX-Mmu-TrpnX-M_at      | AFFX-Bs-trp      | 4.18  | 4.21  | 0.1  | 0.24 | -1.02 | 0.687772 | 0.879465 | 0.860691 | 0.931144 |
| AFFX-Mmu-r2-Ec-bioB-3_at | AFFX-Ec-bioB     | 11.38 | 11.43 | 0.18 | 0.1  | -1.03 | 0.778762 | 0.945118 | 0.907692 | 0.968852 |
| AFFX-Mmu-r2-Ec-bioB-5_at | AFFX-Ec-bioB     | 10.68 | 10.79 | 0.23 | 0.15 | -1.08 | 0.780381 | 0.917226 | 0.908495 | 0.953758 |
| AFFX-Mmu-r2-Ec-bioB-M_at | AFFX-Ec-bioB     | 11.12 | 11.25 | 0.17 | 0.11 | -1.1  | 0.758862 | 0.89801  | 0.898097 | 0.941931 |
| AFFX-Mmu-r2-Ec-bioC-3_at | AFFX-Ec-bioC     | 12.43 | 12.43 | 0.17 | 0.08 | -1    | 0.895291 | 0.983251 | 0.958083 | 0.990726 |

|                           |                |       |       |      |      |       |          |          |          |          |
|---------------------------|----------------|-------|-------|------|------|-------|----------|----------|----------|----------|
| AFFX-Mmu-r2-Ec-bioC-5_at  | AFFX-Ec-bioC   | 12.22 | 12.2  | 0.18 | 0.1  | 1.02  | 0.992852 | 0.951636 | 0.997561 | 0.972522 |
| AFFX-Mmu-r2-Ec-bioD-3_at  | AFFX-Ec-bioD   | 14.28 | 14.28 | 0.04 | 0.07 | 1     | 0.68219  | 0.405519 | 0.857808 | 0.633803 |
| AFFX-Mmu-r2-Ec-bioD-5_at  | AFFX-Ec-bioD   | 13.5  | 13.45 | 0.08 | 0.07 | 1.04  | 0.639791 | 0.655944 | 0.837375 | 0.798758 |
| AFFX-Mmu-r2-P1-cre-3_s_at | AFFX-P1-cre    | 14.85 | 14.83 | 0.01 | 0.02 | 1.01  | 0.138439 | 0.171954 | 0.505745 | 0.448352 |
| AFFX-Mmu-r2-P1-cre-5_s_at | AFFX-P1-cre    | 14.79 | 14.75 | 0    | 0.03 | 1.03  | 0.083204 | 0.106843 | 0.435674 | 0.369467 |
| AFFX-Mmu-r2-Bs-thr-3_s_at | AFFX-Bs-thr-r2 | 6.18  | 6.36  | 0.05 | 0.04 | -1.13 | 0.010695 | 0.015603 | 0.23109  | 0.158262 |
| AFFX-Mmu-r2-Bs-thr-5_s_at | AFFX-Bs-thr-r2 | 4.03  | 4.29  | 0.07 | 0.06 | -1.19 | 0.03438  | 0.053988 | 0.33285  | 0.27777  |
| AFFX-Mmu-r2-Bs-thr-M_s_at | AFFX-Bs-thr-r2 | 4.24  | 4.26  | 0.07 | 0.06 | -1.02 | 0.463272 | 0.794461 | 0.738678 | 0.881455 |
| RPTR-Mmu-AY342347_at      | AY342347       | 5.01  | 5.26  | 0.05 | 0.01 | -1.19 | 0.001083 | 0.014192 | 0.144025 | 0.152173 |
| RPTR-Mmu-U43284-1_s_at    | U43284-1       | 7.31  | 7.5   | 0.09 | 0.11 | -1.14 | 0.123188 | 0.086308 | 0.488769 | 0.338771 |
| RPTR-Mmu-AJ002682-1_s_at  | AJ002682-1     | 3.88  | 4.05  | 0.16 | 0.16 | -1.13 | 0.100371 | 0.114245 | 0.460881 | 0.380761 |
| RPTR-Mmu-AJ002682-2_s_at  | AJ002682-2     | 4.54  | 4.62  | 0.07 | 0.42 | -1.06 | 0.377754 | 0.526704 | 0.686056 | 0.715627 |
| RPTR-Mmu-X58791-1_s_at    | X58791-1       | 3.19  | 3.26  | 0.07 | 0.25 | -1.05 | 0.223776 | 0.285532 | 0.582123 | 0.547395 |
| RPTR-Mmu-X58791-2_s_at    | X58791-2       | 4.43  | 4.43  | 0.17 | 0.05 | 1     | 0.494032 | 0.668207 | 0.756411 | 0.805834 |
| RPTR-Mmu-M10961-1_at      | M10961-1       | 3.58  | 3.65  | 0.17 | 0.07 | -1.05 | 0.454849 | 0.437505 | 0.733478 | 0.656769 |
| RPTR-Mmu-M10961-2_at      | M10961-2       | 2.54  | 2.67  | 0.04 | 0.08 | -1.09 | 0.174045 | 0.22081  | 0.537585 | 0.494262 |
| RPTR-Mmu-M10961-4_at      | M10961-4       | 3.39  | 3.48  | 0.09 | 0.2  | -1.06 | 0.736502 | 0.53757  | 0.886692 | 0.722606 |
| RPTR-Mmu-A00196-1_s_at    | A00196-1       | 5.39  | 5.49  | 0    | 0.1  | -1.07 | 0.050858 | 0.074374 | 0.37568  | 0.318053 |
| RPTR-Mmu-M15077-1_at      | M15077-1       | 3.35  | 3.45  | 0.02 | 0.06 | -1.07 | 0.094685 | 0.017217 | 0.452166 | 0.166245 |
| RPTR-Mmu-M15077-1_s_at    | M15077-1       | 3.96  | 4.26  | 0.1  | 0.14 | -1.23 | 0.039312 | 0.035905 | 0.346898 | 0.234002 |
| RPTR-Mmu-M62653-1_at      | M62653-1       | 2.95  | 2.9   | 0.14 | 0.1  | 1.04  | 0.769422 | 0.336646 | 0.903012 | 0.583999 |
| RPTR-Mmu-M62653-1_s_at    | M62653-1       | 3.36  | 3.33  | 0.16 | 0.07 | 1.02  | 0.873353 | 0.795561 | 0.94924  | 0.882205 |
| RPTR-Mmu-U47295-1_at      | U47295-1       | 5.18  | 5.17  | 0.03 | 0.24 | 1.01  | 0.640325 | 0.346156 | 0.837613 | 0.591195 |
| RPTR-Mmu-AJ132968-1_at    | AJ132968-1     | 4.54  | 4.68  | 0.03 | 0.23 | -1.1  | 0.29717  | 0.25074  | 0.633004 | 0.519419 |
| RPTR-Mmu-NM_131175-1_at   | NM_131175-1    | 4.68  | 4.71  | 0.21 | 0.09 | -1.02 | 0.383147 | 0.525581 | 0.689068 | 0.715132 |
| RPTR-Mmu-J01636-1_at      | J01636-1       | 6.2   | 6.46  | 0.08 | 0.13 | -1.19 | 0.191226 | 0.185567 | 0.554194 | 0.461566 |
| RPTR-Mmu-E00696-1_s_at    | E00696-1       | 5.23  | 5.27  | 0.09 | 0.14 | -1.03 | 0.891851 | 0.339237 | 0.956942 | 0.585918 |
| RPTR-Mmu-J01636-3_at      | J01636-3       | 3.49  | 3.63  | 0.07 | 0.04 | -1.11 | 0.076503 | 0.1328   | 0.425086 | 0.404544 |
| RPTR-Mmu-J01636-4_at      | J01636-4       | 3.49  | 3.92  | 0.16 | 0.23 | -1.35 | 0.05901  | 0.185155 | 0.390921 | 0.461034 |
| RPTR-Mmu-ECOLOXB_at       | ECOLOXB        | 2.57  | 2.56  | 0    | 0.06 | 1.01  | 0.469845 | 0.68758  | 0.741958 | 0.81762  |
| RPTR-Mmu-K01486-1_at      | K01486-1       | 3.52  | 3.48  | 0.05 | 0.3  | 1.02  | 0.465821 | 0.693786 | 0.740131 | 0.821912 |
| RPTR-Mmu-X03453-1_at      | X03453-1       | 3.84  | 3.93  | 0.03 | 0.11 | -1.06 | 0.082945 | 0.137782 | 0.434751 | 0.410757 |
| RPTR-Mmu-AY056050-1_at    | AY056050-1     | 5.86  | 5.92  | 0.15 | 0.11 | -1.04 | 0.648538 | 0.277938 | 0.841989 | 0.541664 |
| RPTR-Mmu-AF298789-1_at    | AF298789-1     | 3.56  | 3.53  | 0.11 | 0.1  | 1.03  | 0.756017 | 0.866966 | 0.896298 | 0.924408 |
| RPTR-Mmu-J01347-1_s_at    | J01347-1       | 3.08  | 3.33  | 0.02 | 0.24 | -1.19 | 0.44218  | 0.557396 | 0.725394 | 0.735031 |
| RPTR-Mmu-J01347-2_at      | J01347-2       | 3.14  | 3.27  | 0.07 | 0.05 | -1.09 | 0.031306 | 0.02052  | 0.321349 | 0.179779 |
| RPTR-Mmu-J01347-3_at      | J01347-3       | 3.48  | 3.61  | 0.09 | 0.06 | -1.1  | 0.07178  | 0.140774 | 0.415886 | 0.414137 |
| RPTR-Mmu-J01347-4_at      | J01347-4       | 3.73  | 3.84  | 0.08 | 0.2  | -1.08 | 0.140085 | 0.257046 | 0.508065 | 0.524781 |
| RPTR-Mmu-U46493-1_s_at    | U46493-1       | 3.15  | 3.19  | 0    | 0.07 | -1.03 | 0.393352 | 0.381197 | 0.695146 | 0.617534 |
| RPTR-Mmu-U57609-2_s_at    | U57609-2       | 4.01  | 3.94  | 0.13 | 0.14 | 1.05  | 0.305784 | 0.649956 | 0.639223 | 0.795295 |
| RPTR-Mmu-AB076373-1_at    | AB076373-1     | 5.29  | 5.41  | 0.1  | 0.15 | -1.09 | 0.306568 | 0.208199 | 0.639593 | 0.482086 |

|                           |                 |       |       |      |      |        |          |          |          |          |
|---------------------------|-----------------|-------|-------|------|------|--------|----------|----------|----------|----------|
| RPTR-Mmu-AF323980-1_at    | AF323980-1      | 3.03  | 3.05  | 0.02 | 0.22 | -1.02  | 0.767964 | 0.787193 | 0.902473 | 0.876889 |
| RPTR-Mmu-AF292559-1_at    | AF292559-1      | 3.01  | 2.92  | 0.12 | 0.02 | 1.06   | 0.958402 | 0.941114 | 0.984324 | 0.96664  |
| RPTR-Mmu-AF292559-2_s_at  | AF292559-2      | 2.91  | 2.92  | 0    | 0.1  | -1.01  | 0.271741 | 0.449362 | 0.615789 | 0.665021 |
| RPTR-Mmu-AF292559-3_s_at  | AF292559-3      | 3.52  | 3.75  | 0.02 | 0.02 | -1.18  | 0.000223 | 0.006944 | 0.120316 | 0.112568 |
| RPTR-Mmu-AF292559-4_s_at  | AF292559-4      | 5.43  | 5.51  | 0.06 | 0.05 | -1.06  | 0.189881 | 0.483028 | 0.552746 | 0.687687 |
| RPTR-Mmu-AF292560-1_s_at  | AF292560-1      | 3.11  | 3.27  | 0.08 | 0.25 | -1.12  | 0.352436 | 0.485112 | 0.669616 | 0.688913 |
| RPTR-Mmu-U89963-1_at      | U89963-1        | 4.07  | 4.15  | 0.14 | 0.14 | -1.06  | 0.883981 | 0.462202 | 0.953474 | 0.673601 |
| RPTR-Mmu-U89963-1_s_at    | U89963-1        | 4.53  | 4.92  | 0    | 0.26 | -1.31  | 0.171545 | 0.171847 | 0.53519  | 0.44825  |
| RPTR-Mmu-U89963-1_x_at    | U89963-1        | 3.51  | 3.66  | 0.03 | 0.09 | -1.11  | 0.091723 | 0.066064 | 0.447969 | 0.302431 |
| RPTR-Mmu-U55943-1_at      | U55943-1        | 4.06  | 4.15  | 0.1  | 0.18 | -1.07  | 0.449269 | 0.615278 | 0.730188 | 0.771908 |
| RPTR-Mmu-U55943-1_x_at    | U55943-1        | 3.69  | 3.75  | 0.05 | 0.03 | -1.04  | 0.894664 | 0.622257 | 0.957917 | 0.776775 |
| NC-001798.CDS51.S1_s_at   | NC-001798.CDS51 | 4.72  | 5.11  | 0.19 | 0.13 | -1.3   | 0.089655 | 0.20874  | 0.445334 | 0.482608 |
| RPTR-Mmu-NC_001669-1_s_at | NC_001669-1     | 4.16  | 4.18  | 0.06 | 0.29 | -1.02  | 0.699116 | 0.823591 | 0.866628 | 0.898664 |
| RPTR-Mmu-NC_001669-2_s_at | NC_001669-2     | 3.77  | 3.64  | 0.09 | 0.18 | 1.09   | 0.979545 | 0.170465 | 0.99244  | 0.447103 |
| RPTR-Mmu-AF403737-1_at    | AF403737-1      | 3.35  | 3.34  | 0.22 | 0.06 | 1.01   | 0.735653 | 0.854209 | 0.886382 | 0.916964 |
| RPTR-Mmu-L36849-1_at      | L36849-1        | 6.54  | 6.59  | 0.17 | 0.14 | -1.04  | 0.299435 | 0.391911 | 0.634938 | 0.625419 |
| RPTR-Mmu-AF062997-1_at    | AF062997-1      | 5.76  | 5.81  | 0.22 | 0.05 | -1.04  | 0.379544 | 0.51218  | 0.687061 | 0.706087 |
| NC-001345.CDS50.S1_s_at   | NC-001345.CDS50 | 4.36  | 4.57  | 0.15 | 0.11 | -1.16  | 0.128666 | 0.16561  | 0.494664 | 0.441901 |
| RPTR-Mmu-X17220-1_at      | X17220-1        | 6.05  | 6.16  | 0.31 | 0.1  | -1.08  | 0.608217 | 0.585743 | 0.819872 | 0.753011 |
| RPTR-Mmu-K01193-1_at      | K01193-1        | 4.15  | 4.65  | 0.07 | 0.23 | -1.41  | 0.06519  | 0.053948 | 0.404063 | 0.277769 |
| RPTR-Mmu-XXU09476-1_at    | XXU09476-1      | 3.47  | 3.48  | 0.11 | 0.12 | -1.01  | 0.705495 | 0.542873 | 0.870099 | 0.725834 |
| RPTR-Mmu-NC_002086-1_at   | NC_002086-1     | 6.47  | 6.59  | 0.08 | 0.12 | -1.09  | 0.099507 | 0.183664 | 0.459387 | 0.459681 |
| RPTR-Mmu-J03196-1_at      | J03196-1        | 5.69  | 5.94  | 0.05 | 0.16 | -1.19  | 0.205902 | 0.047443 | 0.568383 | 0.262486 |
| RPTR-Mmu-A12338-1_at      | A12338-1        | 5.79  | 6.15  | 0.04 | 0.12 | -1.29  | 0.008778 | 0.0366   | 0.221033 | 0.235884 |
| RPTR-Mmu-A06498-1_at      | A06498-1        | 3.9   | 4.07  | 0.18 | 0.26 | -1.12  | 0.490106 | 0.502195 | 0.754288 | 0.70006  |
| RPTR-Mmu-CVE247372-1_at   | CVE247372-1     | 4.96  | 5.27  | 0.16 | 0.09 | -1.24  | 0.055289 | 0.038114 | 0.383689 | 0.239867 |
| RPTR-Mmu-AE009032-1_at    | AE009032-1      | 5.26  | 5.41  | 0.11 | 0.06 | -1.1   | 0.042529 | 0.348497 | 0.355128 | 0.592599 |
| RPTR-Mmu-AY125353_at      | AY125353        | 5.03  | 5.16  | 0.06 | 0.14 | -1.1   | 0.37447  | 0.506894 | 0.683647 | 0.702649 |
| MmurRNA.1.1.S1_at         | MmurRNA.1.1     | 8.73  | 9.91  | 0.31 | 1.92 | -2.25  | 0.446725 | 0.555175 | 0.728511 | 0.733715 |
| MmurRNA.2.1.S1_at         | MmurRNA.2.1     | 6.56  | 11.12 | 0.62 | 2.82 | -23.58 | 0.141854 | 0.116645 | 0.509205 | 0.383843 |
| MmurRNA.2.1.S1_s_at       | MmurRNA.2.1     | 11    | 13.66 | 0.89 | 2.34 | -6.34  | 0.269434 | 0.252277 | 0.614156 | 0.520953 |
| MmurRNA.3.1.S1_at         | MmurRNA.3.1     | 8.72  | 11.61 | 0.1  | 1.96 | -7.42  | 0.177623 | 0.203655 | 0.541743 | 0.477904 |
| AFFX-Mmu-actin-5_at       | Mmu.4662.1      | 13.14 | 13.32 | 0.15 | 0.22 | -1.14  | 0.272547 | 0.339189 | 0.616155 | 0.585918 |
| AFFX-Mmu-actin-M_at       | Mmu.4662.1      | 13.88 | 14.08 | 0.12 | 0.17 | -1.15  | 0.313304 | 0.384077 | 0.645086 | 0.619926 |
| AFFX-Mmu-actin-M_x_at     | Mmu.4662.1      | 13.69 | 13.91 | 0.12 | 0.19 | -1.16  | 0.305054 | 0.359207 | 0.639014 | 0.600533 |
| AFFX-Mmu-actin-3_s_at     | Mmu.4662.1      | 14.34 | 14.32 | 0.05 | 0.02 | 1.01   | 0.509433 | 0.146659 | 0.764331 | 0.420683 |
| MmugDNA.28776.1.S1_s_at   | MmugDNA.28776.1 | 14.58 | 14.53 | 0.04 | 0.05 | 1.04   | 0.504815 | 0.257423 | 0.761465 | 0.52521  |
| AFFX-Mmu-ef1a-5_s_at      | Mmu.12098.2     | 14.41 | 14.39 | 0.02 | 0.05 | 1.01   | 0.330649 | 0.535323 | 0.65595  | 0.720887 |
| AFFX-Mmu-ef1a-M_s_at      | Mmu.12098.2     | 14.6  | 14.59 | 0.02 | 0.01 | 1      | 0.670661 | 0.086239 | 0.852442 | 0.338635 |
| AFFX-Mmu-ef1a-M_x_at      | Mmu.12098.2     | 14.51 | 14.49 | 0.01 | 0.03 | 1.01   | 0.985707 | 0.698444 | 0.994806 | 0.82482  |
| AFFX-Mmu-ef1a-3_x_at      | Mmu.12098.2     | 14.33 | 14.32 | 0.02 | 0.03 | 1      | 0.488211 | 0.647342 | 0.752793 | 0.793415 |

|                       |             |       |       |      |      |        |          |          |          |          |
|-----------------------|-------------|-------|-------|------|------|--------|----------|----------|----------|----------|
| AFFX-Mmu-gapdh-5_at   | Mmu.6661.1  | 13.42 | 13.24 | 0.05 | 0.23 | 1.13   | 0.38824  | 0.081089 | 0.69236  | 0.32927  |
| AFFX-Mmu-gapdh-M_s_at | Mmu.6661.1  | 13.51 | 13.4  | 0.05 | 0.22 | 1.08   | 0.509312 | 0.076696 | 0.764323 | 0.322093 |
| AFFX-Mmu-gapdh-M_x_at | Mmu.6661.1  | 13.27 | 13.14 | 0.06 | 0.19 | 1.1    | 0.579708 | 0.086875 | 0.804451 | 0.339667 |
| AFFX-Mmu-gapdh-3_at   | Mmu.6661.1  | 14.31 | 14.22 | 0.05 | 0.13 | 1.06   | 0.426943 | 0.182158 | 0.716003 | 0.45867  |
| AFFX-Mmu-gapdh-3_x_at | Mmu.6661.1  | 14.19 | 14.15 | 0.03 | 0.1  | 1.03   | 0.348055 | 0.296103 | 0.666977 | 0.555339 |
| Mmu.10002.1.S1_at     | Mmu.10002.1 | 10.5  | 11.67 | 0.32 | 0.46 | -2.24  | 0.034824 | 0.015305 | 0.333964 | 0.157071 |
| Mmu.10002.1.S1_s_at   | Mmu.10002.1 | 11.41 | 12.47 | 0.29 | 0.35 | -2.09  | 0.024782 | 0.010391 | 0.296399 | 0.133359 |
| Mmu.10014.1.S1_at     | Mmu.10014.1 | 10.42 | 10.47 | 0.31 | 0.19 | -1.04  | 0.497271 | 0.534643 | 0.757913 | 0.720477 |
| Mmu.10025.1.S1_at     | Mmu.10025.1 | 7.99  | 10.01 | 0.62 | 1.84 | -4.06  | 0.219759 | 0.182838 | 0.579133 | 0.459354 |
| Mmu.10030.1.S1_at     | Mmu.10030.1 | 11.15 | 12.01 | 0.44 | 0.59 | -1.82  | 0.113035 | 0.106558 | 0.475614 | 0.369099 |
| Mmu.10039.1.S1_at     | Mmu.10039.1 | 9.93  | 9.9   | 0.29 | 0.08 | 1.02   | 0.442663 | 0.204789 | 0.725706 | 0.479203 |
| Mmu.10045.2.S1_at     | Mmu.10045.2 | 8.25  | 10.38 | 0.79 | 1.41 | -4.37  | 0.218379 | 0.02172  | 0.577884 | 0.184333 |
| Mmu.10045.2.S1_x_at   | Mmu.10045.2 | 7.99  | 10.13 | 0.87 | 1.19 | -4.39  | 0.14412  | 0.011063 | 0.510652 | 0.136934 |
| Mmu.10062.1.S1_s_at   | Mmu.10062.1 | 13.67 | 13.68 | 0.05 | 0.05 | -1     | 0.521988 | 0.40588  | 0.771756 | 0.634037 |
| Mmu.10083.1.A1_at     | Mmu.10083.1 | 7.67  | 9.25  | 1.05 | 1.06 | -3     | 0.198229 | 0.19041  | 0.561234 | 0.465906 |
| Mmu.10083.1.S1_s_at   | Mmu.10083.1 | 7.14  | 8.71  | 1    | 1.11 | -2.98  | 0.222286 | 0.219849 | 0.58082  | 0.493388 |
| Mmu.10088.2.S1_at     | Mmu.10088.2 | 5.63  | 7.73  | 1.18 | 1.47 | -4.29  | 0.275276 | 0.229849 | 0.617789 | 0.501802 |
| Mmu.101.1.S1_at       | Mmu.101.1   | 9.79  | 9.93  | 0.13 | 0.15 | -1.1   | 0.149413 | 0.004468 | 0.514001 | 0.093294 |
| Mmu.10114.1.S1_at     | Mmu.10114.1 | 9.49  | 8.8   | 0.14 | 0.21 | 1.61   | 0.011069 | 0.005823 | 0.233784 | 0.104661 |
| Mmu.10116.1.S1_at     | Mmu.10116.1 | 11.05 | 11.72 | 0.17 | 0.13 | -1.6   | 0.006079 | 0.003799 | 0.195337 | 0.087835 |
| Mmu.10122.1.S1_at     | Mmu.10122.1 | 7.52  | 11.48 | 1.36 | 2.67 | -15.57 | 0.230921 | 0.17808  | 0.587369 | 0.454462 |
| Mmu.10126.1.S1_at     | Mmu.10126.1 | 9.8   | 10.07 | 0.07 | 0.25 | -1.2   | 0.178196 | 0.156564 | 0.542428 | 0.43196  |
| Mmu.10134.1.S1_at     | Mmu.10134.1 | 10.2  | 10.33 | 0.26 | 0.3  | -1.1   | 0.319333 | 0.442076 | 0.648832 | 0.660148 |
| Mmu.10135.1.S1_at     | Mmu.10135.1 | 11.05 | 11.64 | 0.16 | 0.08 | -1.51  | 0.002332 | 0.001238 | 0.161798 | 0.05478  |
| Mmu.10139.2.S1_at     | Mmu.10139.2 | 12.37 | 12.47 | 0.05 | 0.16 | -1.07  | 0.712387 | 0.34771  | 0.874013 | 0.592082 |
| Mmu.1015.1.S1_s_at    | Mmu.1015.1  | 14.3  | 14.26 | 0.05 | 0.05 | 1.02   | 0.427343 | 0.299821 | 0.716187 | 0.5581   |
| Mmu.10150.1.S1_at     | Mmu.10150.1 | 9.21  | 9.37  | 0.02 | 0.05 | -1.12  | 0.005823 | 0.000911 | 0.193191 | 0.048322 |
| Mmu.10158.1.S1_at     | Mmu.10158.1 | 8.85  | 9.09  | 0.18 | 0.13 | -1.18  | 0.344061 | 0.41455  | 0.664205 | 0.64042  |
| Mmu.10176.1.S1_at     | Mmu.10176.1 | 5.33  | 5.31  | 0.11 | 0.1  | 1.01   | 0.233801 | 0.31699  | 0.588317 | 0.570298 |
| Mmu.10185.1.S1_at     | Mmu.10185.1 | 6.19  | 6.36  | 0.25 | 0.2  | -1.12  | 0.743313 | 0.921565 | 0.89014  | 0.955761 |
| Mmu.10185.1.S1_s_at   | Mmu.10185.1 | 4.16  | 4.28  | 0.1  | 0.15 | -1.09  | 0.359296 | 0.221109 | 0.673869 | 0.494497 |
| Mmu.10186.1.S1_at     | Mmu.10186.1 | 4.8   | 5.34  | 0.12 | 0.55 | -1.45  | 0.175133 | 0.158436 | 0.538831 | 0.434313 |
| Mmu.10187.1.S1_at     | Mmu.10187.1 | 5.93  | 6.05  | 0.03 | 0.04 | -1.08  | 0.024866 | 0.017596 | 0.296866 | 0.167721 |
| Mmu.10195.2.S1_x_at   | Mmu.10195.2 | 12.47 | 12.86 | 0.29 | 0.37 | -1.3   | 0.266735 | 0.261778 | 0.612234 | 0.528227 |
| Mmu.2177.1.S1_x_at    | Mmu.2177.1  | 10.92 | 11.59 | 0.29 | 0.81 | -1.6   | 0.220238 | 0.161672 | 0.579311 | 0.437771 |
| Mmu.10197.1.S1_at     | Mmu.10197.1 | 12.05 | 12.38 | 0.15 | 0.15 | -1.26  | 0.046941 | 0.041712 | 0.364343 | 0.248886 |
| Mmu.2935.3.S1_s_at    | Mmu.2935.3  | 7.15  | 7.43  | 0.21 | 0.07 | -1.21  | 0.0797   | 0.084243 | 0.430147 | 0.335371 |
| Mmu.1020.1.S1_s_at    | Mmu.1020.1  | 9.52  | 9.66  | 0.1  | 0.12 | -1.1   | 0.470484 | 0.82489  | 0.742448 | 0.899427 |
| Mmu.10202.1.S1_at     | Mmu.10202.1 | 9.74  | 10.23 | 0.04 | 0.33 | -1.41  | 0.059776 | 0.041061 | 0.392799 | 0.247375 |
| Mmu.10209.1.S1_s_at   | Mmu.10209.1 | 13.7  | 14.46 | 1.08 | 0.01 | -1.69  | 0.245282 | 0.220435 | 0.596967 | 0.493818 |
| Mmu.10209.2.S1_at     | Mmu.10209.2 | 7.24  | 11.93 | 4.02 | 0.28 | -25.87 | 0.164774 | 0.124996 | 0.528663 | 0.395386 |

|                        |                |       |       |      |      |       |          |          |          |          |
|------------------------|----------------|-------|-------|------|------|-------|----------|----------|----------|----------|
| MmugDNA.6969.1.S1_at   | MmugDNA.6969.1 | 10.29 | 10.44 | 0.03 | 0.56 | -1.11 | 0.618487 | 0.764112 | 0.825248 | 0.862852 |
| MmugDNA.6969.1.S1_s_at | MmugDNA.6969.1 | 9.59  | 9.71  | 0.07 | 0.66 | -1.09 | 0.591931 | 0.779729 | 0.810706 | 0.872303 |
| Mmu.10212.1.S1_at      | Mmu.10212.1    | 6.96  | 7.26  | 2.18 | 0.3  | -1.23 | 0.882291 | 0.669206 | 0.952793 | 0.806492 |
| Mmu.10214.1.S1_at      | Mmu.10214.1    | 8.9   | 9.4   | 0.2  | 0.21 | -1.41 | 0.029641 | 0.044669 | 0.314985 | 0.255759 |
| Mmu.10221.1.S1_at      | Mmu.10221.1    | 10.18 | 10.32 | 0.19 | 0.24 | -1.11 | 0.389566 | 0.3817   | 0.693064 | 0.617895 |
| Mmu.10229.1.S1_at      | Mmu.10229.1    | 7.99  | 9.69  | 0.57 | 0.46 | -3.26 | 0.017093 | 0.008431 | 0.266719 | 0.121874 |
| Mmu.10237.1.S1_at      | Mmu.10237.1    | 2.84  | 2.86  | 0.15 | 0.23 | -1.02 | 0.308107 | 0.406085 | 0.640531 | 0.634197 |
| Mmu.10239.1.S1_at      | Mmu.10239.1    | 8.36  | 7.86  | 0.14 | 0.22 | 1.42  | 0.064931 | 0.042391 | 0.403744 | 0.250533 |
| Mmu.10240.1.S1_at      | Mmu.10240.1    | 10.78 | 10.43 | 0.12 | 0.31 | 1.28  | 0.337043 | 0.435527 | 0.659858 | 0.655267 |
| Mmu.10246.2.A1_x_at    | Mmu.10246.2    | 7.39  | 8.15  | 1.3  | 1.24 | -1.69 | 0.893667 | 0.683144 | 0.957703 | 0.815168 |
| Mmu.10246.2.S1_x_at    | Mmu.10246.2    | 8.91  | 10.62 | 1.38 | 1.71 | -3.26 | 0.810642 | 0.590187 | 0.922872 | 0.756117 |
| Mmu.10266.1.A1_at      | Mmu.10266.1    | 11.03 | 11.19 | 0.14 | 0.09 | -1.12 | 0.068464 | 0.061672 | 0.410144 | 0.295135 |
| Mmu.1028.1.S1_at       | Mmu.1028.1     | 7.73  | 9.02  | 0.19 | 0.96 | -2.44 | 0.107515 | 0.110313 | 0.468045 | 0.374403 |
| Mmu.10293.1.S1_s_at    | Mmu.10293.1    | 13.02 | 12.82 | 0.03 | 0.09 | 1.15  | 0.036689 | 0.033325 | 0.340048 | 0.226207 |
| Mmu.10300.2.S1_at      | Mmu.10300.2    | 11.83 | 11.83 | 0.08 | 0.22 | 1     | 0.982642 | 0.22385  | 0.993543 | 0.496802 |
| Mmu.10318.1.S1_at      | Mmu.10318.1    | 8.71  | 8.68  | 0.05 | 0.21 | 1.03  | 0.743176 | 0.289751 | 0.890118 | 0.550776 |
| Mmu.10318.1.S1_s_at    | Mmu.10318.1    | 12.95 | 12.88 | 0.02 | 0.08 | 1.06  | 0.197406 | 0.024714 | 0.560419 | 0.19685  |
| Mmu.1032.1.S1_at       | Mmu.1032.1     | 7.24  | 7.66  | 0.33 | 0.21 | -1.34 | 0.046455 | 0.026247 | 0.363009 | 0.202991 |
| Mmu.10327.1.S1_at      | Mmu.10327.1    | 8.61  | 8.03  | 0.3  | 0.18 | 1.5   | 0.117984 | 0.134507 | 0.482063 | 0.406629 |
| Mmu.10346.1.S1_at      | Mmu.10346.1    | 10.99 | 11.16 | 0.09 | 0.21 | -1.13 | 0.102724 | 0.046158 | 0.46254  | 0.259257 |
| Mmu.1036.1.S1_at       | Mmu.1036.1     | 11.93 | 12.95 | 0.34 | 0.21 | -2.03 | 0.006082 | 0.002811 | 0.195337 | 0.078181 |
| Mmu.10362.1.S1_at      | Mmu.10362.1    | 9.17  | 9.88  | 0.07 | 0.46 | -1.64 | 0.052909 | 0.032311 | 0.378593 | 0.22253  |
| Mmu.10377.1.S1_x_at    | Mmu.10377.1    | 8.42  | 8.7   | 0.3  | 0.06 | -1.21 | 0.275263 | 0.356152 | 0.617789 | 0.59815  |
| MmugDNA.7415.1.S1_s_at | MmugDNA.7415.1 | 12.23 | 12.77 | 0.12 | 0.16 | -1.45 | 0.022604 | 0.016176 | 0.287448 | 0.161214 |
| Mmu.10380.1.S1_at      | Mmu.10380.1    | 12.08 | 12.34 | 0.23 | 0.56 | -1.2  | 0.497094 | 0.458803 | 0.75785  | 0.671427 |
| Mmu.10380.2.S1_s_at    | Mmu.10380.2    | 10.53 | 10.84 | 0.14 | 0.61 | -1.24 | 0.515046 | 0.605645 | 0.767272 | 0.765377 |
| Mmu.10383.1.S1_at      | Mmu.10383.1    | 6.36  | 5.77  | 0.42 | 0.44 | 1.5   | 0.1478   | 0.107199 | 0.51336  | 0.36989  |
| Mmu.10390.1.S1_at      | Mmu.10390.1    | 5.46  | 6.99  | 1.28 | 0.97 | -2.9  | 0.201681 | 0.227343 | 0.563988 | 0.499659 |
| Mmu.10393.1.S1_x_at    | Mmu.10393.1    | 14.44 | 14.39 | 0.03 | 0.06 | 1.03  | 0.117451 | 0.122793 | 0.481525 | 0.392777 |
| Mmu.10420.1.S1_at      | Mmu.10420.1    | 8.58  | 8.61  | 0.06 | 0.21 | -1.02 | 0.544105 | 0.494131 | 0.784268 | 0.694703 |
| Mmu.10433.1.S1_at      | Mmu.10433.1    | 12.32 | 11.99 | 0.28 | 0.57 | 1.25  | 0.358168 | 0.437118 | 0.673071 | 0.656547 |
| Mmu.10436.1.S1_at      | Mmu.10436.1    | 10.29 | 10.7  | 0.17 | 0.01 | -1.33 | 0.014801 | 0.004499 | 0.255423 | 0.093593 |
| Mmu.10443.1.S1_at      | Mmu.10443.1    | 10.57 | 10.46 | 0.2  | 0.18 | 1.07  | 0.506755 | 0.004425 | 0.762448 | 0.092904 |
| Mmu.10451.1.S1_at      | Mmu.10451.1    | 7.31  | 7.12  | 0.52 | 0.85 | 1.14  | 0.578715 | 0.613269 | 0.803945 | 0.770491 |
| Mmu.10452.1.A1_at      | Mmu.10452.1    | 5.4   | 5.55  | 0.07 | 0.04 | -1.12 | 0.083926 | 0.222391 | 0.436311 | 0.495456 |
| Mmu.10452.1.S1_at      | Mmu.10452.1    | 5.52  | 5.8   | 0.2  | 0.29 | -1.22 | 0.613244 | 0.610125 | 0.822591 | 0.768398 |
| Mmu.10472.1.S1_at      | Mmu.10472.1    | 7.61  | 9.58  | 0.74 | 1.22 | -3.91 | 0.080464 | 0.078469 | 0.430491 | 0.325226 |
| Mmu.10481.1.S1_at      | Mmu.10481.1    | 2.69  | 2.66  | 0.12 | 0.03 | 1.01  | 0.904627 | 0.77506  | 0.961834 | 0.869035 |
| Mmu.10483.1.S1_x_at    | Mmu.10483.1    | 7.22  | 7.26  | 0.12 | 0.1  | -1.03 | 0.677308 | 0.217361 | 0.855438 | 0.490978 |
| Mmu.10484.1.A1_at      | Mmu.10484.1    | 4.09  | 4.24  | 0.08 | 0.15 | -1.11 | 0.350828 | 0.400878 | 0.668785 | 0.630658 |
| Mmu.10484.1.S1_at      | Mmu.10484.1    | 3.63  | 3.74  | 0.06 | 0.16 | -1.07 | 0.238666 | 0.230209 | 0.591963 | 0.502084 |

|                         |                 |       |       |      |      |       |          |          |          |          |
|-------------------------|-----------------|-------|-------|------|------|-------|----------|----------|----------|----------|
| Mmu.10484.2.A1_at       | Mmu.10484.2     | 3.06  | 3.07  | 0.12 | 0.05 | -1.01 | 0.215964 | 0.258028 | 0.575954 | 0.52557  |
| Mmu.10484.2.S1_x_at     | Mmu.10484.2     | 6.22  | 6.18  | 0.11 | 0.06 | 1.02  | 0.448953 | 0.593549 | 0.729982 | 0.758329 |
| Mmu.10488.1.S1_at       | Mmu.10488.1     | 4.1   | 4.13  | 0.05 | 0.07 | -1.02 | 0.8362   | 0.244398 | 0.933665 | 0.514233 |
| Mmu.105.1.S1_at         | Mmu.105.1       | 10.44 | 10.63 | 0.15 | 0.06 | -1.14 | 0.311652 | 0.211031 | 0.64356  | 0.485047 |
| Mmu.105.1.S1_s_at       | Mmu.105.1       | 9.88  | 10.05 | 0.23 | 0.14 | -1.12 | 0.730612 | 0.773389 | 0.883214 | 0.868269 |
| Mmu.105.1.S1_x_at       | Mmu.105.1       | 10.49 | 10.61 | 0.19 | 0.07 | -1.09 | 0.660613 | 0.286448 | 0.847783 | 0.547829 |
| Mmu.10506.1.S1_at       | Mmu.10506.1     | 11.46 | 11.15 | 0.26 | 0.18 | 1.24  | 0.160622 | 0.308899 | 0.525711 | 0.564656 |
| Mmu.10506.1.S1_s_at     | Mmu.10506.1     | 12.58 | 12.21 | 0.28 | 0.16 | 1.29  | 0.144687 | 0.272299 | 0.511058 | 0.53761  |
| Mmu.10507.1.S1_at       | Mmu.10507.1     | 12.94 | 13.13 | 0.16 | 0.08 | -1.14 | 0.415951 | 0.484455 | 0.709583 | 0.688478 |
| Mmu.1051.1.S1_at        | Mmu.1051.1      | 4.6   | 4.6   | 0.18 | 0.11 | 1     | 0.677215 | 0.875861 | 0.855398 | 0.929487 |
| Mmu.6048.1.S1_s_at      | Mmu.6048.1      | 13.42 | 13.84 | 0.33 | 0.08 | -1.33 | 0.330194 | 0.208541 | 0.655613 | 0.482453 |
| Mmu.10533.2.S1_s_at     | Mmu.10533.2     | 13.93 | 13.88 | 0.1  | 0.04 | 1.04  | 0.379269 | 0.544527 | 0.68682  | 0.726929 |
| Mmu.10543.1.S1_at       | Mmu.10543.1     | 11.96 | 11.49 | 0.12 | 0.15 | 1.38  | 0.034652 | 0.0141   | 0.333385 | 0.15195  |
| Mmu.10543.1.S1_x_at     | Mmu.10543.1     | 12.06 | 11.63 | 0.11 | 0.13 | 1.35  | 0.023643 | 0.014358 | 0.292354 | 0.15294  |
| Mmu.10544.1.S1_at       | Mmu.10544.1     | 9.84  | 9.19  | 0.2  | 0.2  | 1.56  | 0.042614 | 0.006653 | 0.355272 | 0.110505 |
| Mmu.10545.1.S1_at       | Mmu.10545.1     | 9.79  | 10.34 | 0.1  | 0.41 | -1.46 | 0.083911 | 0.086402 | 0.436311 | 0.33887  |
| Mmu.10556.1.S1_at       | Mmu.10556.1     | 2.98  | 3.18  | 0.79 | 0.69 | -1.15 | 0.83368  | 0.235449 | 0.932356 | 0.506491 |
| Mmu.10556.1.S1_s_at     | Mmu.10556.1     | 7.21  | 9.08  | 1.07 | 2.34 | -3.66 | 0.403658 | 0.141559 | 0.702185 | 0.415063 |
| Mmu.10570.1.S1_at       | Mmu.10570.1     | 7.34  | 7.5   | 0.12 | 0.11 | -1.12 | 0.089143 | 0.084886 | 0.444661 | 0.336468 |
| Mmu.10576.1.S1_at       | Mmu.10576.1     | 11.16 | 11.22 | 0.26 | 0.15 | -1.04 | 0.169588 | 0.203144 | 0.533686 | 0.477415 |
| Mmu.10576.1.S1_s_at     | Mmu.10576.1     | 10.17 | 10.22 | 0.29 | 0.16 | -1.03 | 0.27688  | 0.292468 | 0.619043 | 0.552545 |
| Mmu.10581.1.S2_at       | Mmu.10581.1     | 5.31  | 5.28  | 0.35 | 0.48 | 1.02  | 0.431621 | 0.457209 | 0.718606 | 0.670746 |
| Mmu.10602.2.S1_at       | Mmu.10602.2     | 10.11 | 10.04 | 0.04 | 0.25 | 1.05  | 0.61476  | 0.344422 | 0.823258 | 0.589813 |
| MmugDNA.37553.1.S1_at   | MmugDNA.37553.1 | 12.36 | 12.32 | 0.05 | 0.24 | 1.03  | 0.822628 | 0.692194 | 0.927793 | 0.82091  |
| MmugDNA.37553.1.S1_s_at | MmugDNA.37553.1 | 9.89  | 9.91  | 0.09 | 0.41 | -1.01 | 0.551667 | 0.137051 | 0.788895 | 0.409836 |
| MmugDNA.37553.1.S1_x_at | MmugDNA.37553.1 | 11.65 | 11.59 | 0.09 | 0.31 | 1.04  | 0.76177  | 0.393153 | 0.899718 | 0.626102 |
| Mmu.10608.1.S1_s_at     | Mmu.10608.1     | 3.42  | 3.43  | 0.19 | 0.17 | -1.01 | 0.895219 | 0.8149   | 0.958083 | 0.893213 |
| Mmu.10608.1.S1_x_at     | Mmu.10608.1     | 3.15  | 3.27  | 0.1  | 0.2  | -1.09 | 0.141878 | 0.202506 | 0.509205 | 0.476819 |
| Mmu.10626.1.S1_at       | Mmu.10626.1     | 10.29 | 10.29 | 0.16 | 0.24 | 1     | 0.605124 | 0.72564  | 0.818114 | 0.84112  |
| Mmu.10627.1.S1_at       | Mmu.10627.1     | 10.22 | 12.21 | 0.2  | 0.49 | -3.99 | 0.006383 | 0.004077 | 0.198947 | 0.090418 |
| Mmu.1063.2.S1_at        | Mmu.1063.2      | 7.19  | 7.03  | 0.1  | 0.06 | 1.12  | 0.061359 | 0.050689 | 0.395579 | 0.270317 |
| Mmu.10646.1.S1_at       | Mmu.10646.1     | 7.54  | 7.6   | 0.12 | 0.07 | -1.04 | 0.38486  | 0.433355 | 0.690118 | 0.653656 |
| Mmu.10665.1.S1_at       | Mmu.10665.1     | 9.76  | 9.38  | 0.03 | 0.29 | 1.3   | 0.06279  | 0.026004 | 0.399303 | 0.202179 |
| Mmu.10677.1.S1_at       | Mmu.10677.1     | 3.66  | 3.91  | 1.03 | 1.16 | -1.19 | 0.744001 | 0.807122 | 0.890339 | 0.888946 |
| Mmu.10706.1.S1_at       | Mmu.10706.1     | 5.37  | 5.34  | 0.21 | 0.57 | 1.02  | 0.298438 | 0.408271 | 0.633969 | 0.635568 |
| Mmu.1071.1.S1_at        | Mmu.1071.1      | 10.27 | 9.97  | 0.2  | 0.54 | 1.23  | 0.435971 | 0.103672 | 0.721547 | 0.364465 |
| Mmu.4786.2.S1_at        | Mmu.4786.2      | 11.7  | 11.64 | 0.38 | 0.36 | 1.04  | 0.528954 | 0.458491 | 0.775764 | 0.671192 |
| Mmu.4786.2.S1_s_at      | Mmu.4786.2      | 12.92 | 12.86 | 0.24 | 0.27 | 1.04  | 0.422591 | 0.323976 | 0.713606 | 0.574672 |
| Mmu.10769.1.S1_at       | Mmu.10769.1     | 9.81  | 9.72  | 0.17 | 0.42 | 1.07  | 0.48338  | 0.621364 | 0.749882 | 0.775982 |
| Mmu.10771.1.S1_at       | Mmu.10771.1     | 10.31 | 9.43  | 0.17 | 1.06 | 1.84  | 0.188847 | 0.221624 | 0.551869 | 0.494901 |
| Mmu.10780.1.S1_at       | Mmu.10780.1     | 8.9   | 8.73  | 0.35 | 1.03 | 1.13  | 0.410504 | 0.408815 | 0.706382 | 0.6359   |



|                        |                |       |       |      |      |       |          |          |          |          |
|------------------------|----------------|-------|-------|------|------|-------|----------|----------|----------|----------|
| MmugDNA.6439.1.S1_s_at | MmugDNA.6439.1 | 5.44  | 4.64  | 0.05 | 0.28 | 1.74  | 0.017639 | 0.011322 | 0.267454 | 0.138076 |
| Mmu.10797.1.S1_at      | Mmu.10797.1    | 11.6  | 11.75 | 0.13 | 0.08 | -1.11 | 0.110554 | 0.02207  | 0.472278 | 0.185927 |
| Mmu.10798.1.S1_at      | Mmu.10798.1    | 3.39  | 3.46  | 0.12 | 0.02 | -1.04 | 0.963546 | 0.959197 | 0.985967 | 0.976862 |
| Mmu.10798.1.S1_s_at    | Mmu.10798.1    | 11.88 | 12.11 | 0.13 | 0.06 | -1.17 | 0.052287 | 0.019795 | 0.377309 | 0.176951 |
| Mmu.1081.1.S1_at       | Mmu.1081.1     | 7.87  | 8.38  | 0.58 | 0.22 | -1.42 | 0.574457 | 0.72906  | 0.801702 | 0.843401 |
| Mmu.10820.1.S1_at      | Mmu.10820.1    | 8.77  | 8.46  | 0.11 | 0.42 | 1.24  | 0.89645  | 0.157646 | 0.958707 | 0.433137 |
| Mmu.10820.1.S1_s_at    | Mmu.10820.1    | 12.08 | 11.96 | 0.14 | 0.47 | 1.09  | 0.926233 | 0.229869 | 0.971707 | 0.501802 |
| Mmu.10830.1.S1_at      | Mmu.10830.1    | 6.72  | 7.14  | 0.11 | 0.12 | -1.34 | 0.01095  | 0.00581  | 0.233218 | 0.104646 |
| Mmu.10843.1.S1_at      | Mmu.10843.1    | 9.24  | 8.29  | 0.4  | 0.38 | 1.92  | 0.023252 | 0.012706 | 0.290458 | 0.145332 |
| Mmu.10853.1.S1_at      | Mmu.10853.1    | 6.97  | 7.03  | 0.45 | 0.24 | -1.05 | 0.992398 | 0.853299 | 0.997401 | 0.916546 |
| Mmu.10858.1.S1_s_at    | Mmu.10858.1    | 12.2  | 12.45 | 0.19 | 0.34 | -1.2  | 0.186497 | 0.279323 | 0.550106 | 0.542962 |
| Mmu.10874.1.S1_at      | Mmu.10874.1    | 8.33  | 8.87  | 0.47 | 0.49 | -1.46 | 0.140138 | 0.202921 | 0.508065 | 0.477343 |
| Mmu.10885.1.S1_at      | Mmu.10885.1    | 12.54 | 12.47 | 0.11 | 0.09 | 1.05  | 0.082367 | 0.037796 | 0.433785 | 0.238765 |
| Mmu.10886.1.S1_at      | Mmu.10886.1    | 8.47  | 9.29  | 0.08 | 0.07 | -1.77 | 0.000208 | 0.000641 | 0.120316 | 0.042928 |
| Mmu.10905.1.S1_at      | Mmu.10905.1    | 6.83  | 6.83  | 0.06 | 0.02 | 1     | 0.456413 | 0.592144 | 0.734498 | 0.757536 |
| Mmu.10913.1.S1_at      | Mmu.10913.1    | 6.63  | 6.66  | 0.47 | 0.16 | -1.02 | 0.882709 | 0.593184 | 0.952889 | 0.758097 |
| Mmu.10924.1.S1_a_at    | Mmu.10924.1    | 4.34  | 4.37  | 0.1  | 0.29 | -1.02 | 0.731771 | 0.652475 | 0.884008 | 0.796793 |
| Mmu.10938.1.S1_at      | Mmu.10938.1    | 7.39  | 8.45  | 0.93 | 0.86 | -2.08 | 0.603305 | 0.333076 | 0.817111 | 0.581374 |
| Mmu.10939.1.S1_at      | Mmu.10939.1    | 11.06 | 10.89 | 0.18 | 0.11 | 1.13  | 0.272872 | 0.051937 | 0.616391 | 0.273337 |
| Mmu.10941.2.S1_at      | Mmu.10941.2    | 7.08  | 9.36  | 0.93 | 2.08 | -4.84 | 0.238299 | 0.191935 | 0.591578 | 0.467295 |
| Mmu.10947.1.A1_at      | Mmu.10947.1    | 9.49  | 10.68 | 0.35 | 0.44 | -2.28 | 0.024287 | 0.016629 | 0.294535 | 0.163189 |
| Mmu.10973.1.S1_at      | Mmu.10973.1    | 10.71 | 10.94 | 0.34 | 0.47 | -1.18 | 0.694013 | 0.875488 | 0.864359 | 0.929259 |
| Mmu.10979.1.S1_at      | Mmu.10979.1    | 6.68  | 6.56  | 0.07 | 0.01 | 1.09  | 0.147158 | 0.154071 | 0.51306  | 0.428867 |
| Mmu.1098.1.A1_at       | Mmu.1098.1     | 3.94  | 3.99  | 0.47 | 0.09 | -1.04 | 0.458616 | 0.580591 | 0.7356   | 0.749782 |
| Mmu.10988.1.S1_at      | Mmu.10988.1    | 4.14  | 4.16  | 0.22 | 0.19 | -1.01 | 0.265282 | 0.263179 | 0.610859 | 0.529492 |
| Mmu.10994.1.S1_at      | Mmu.10994.1    | 8.38  | 9.97  | 0.32 | 0.09 | -3    | 0.001164 | 0.000613 | 0.145267 | 0.042275 |
| Mmu.11000.1.S1_at      | Mmu.11000.1    | 10.36 | 11.3  | 0.52 | 0.5  | -1.93 | 0.092871 | 0.066023 | 0.449928 | 0.302361 |
| Mmu.6085.1.S1_x_at     | Mmu.6085.1     | 12.75 | 13.3  | 0.37 | 0.34 | -1.46 | 0.293891 | 0.109759 | 0.631033 | 0.373701 |
| Mmu.11032.1.A1_at      | Mmu.11032.1    | 6.77  | 6.13  | 0.36 | 0.88 | 1.56  | 0.921846 | 0.296611 | 0.969631 | 0.555606 |
| Mmu.11047.2.S1_s_at    | Mmu.11047.2    | 6.09  | 5.91  | 0.16 | 0.11 | 1.13  | 0.212191 | 0.000168 | 0.572526 | 0.030511 |
| Mmu.11049.1.S1_s_at    | Mmu.11049.1    | 14.25 | 14.26 | 0.07 | 0.13 | -1    | 0.923627 | 0.984843 | 0.97036  | 0.991445 |
| Mmu.11053.1.S1_s_at    | Mmu.11053.1    | 10.18 | 11.12 | 0.45 | 0.68 | -1.92 | 0.1064   | 0.122255 | 0.466831 | 0.39196  |
| Mmu.11074.1.S1_at      | Mmu.11074.1    | 12.13 | 11.97 | 0.22 | 0.1  | 1.11  | 0.871303 | 0.078819 | 0.948463 | 0.325757 |
| Mmu.11077.2.S1_at      | Mmu.11077.2    | 12.2  | 12.26 | 0.18 | 0.17 | -1.04 | 0.929391 | 0.037211 | 0.972716 | 0.237285 |
| Mmu.11093.1.S1_at      | Mmu.11093.1    | 11.46 | 11.61 | 0.15 | 0.18 | -1.11 | 0.125435 | 0.091026 | 0.491333 | 0.345819 |
| Mmu.11097.1.S1_at      | Mmu.11097.1    | 10.54 | 10.25 | 0.09 | 0.19 | 1.23  | 0.050768 | 0.058607 | 0.375333 | 0.288819 |
| Mmu.11135.1.S1_at      | Mmu.11135.1    | 11.11 | 10.78 | 0.05 | 0.32 | 1.26  | 0.05205  | 0.015797 | 0.376952 | 0.15934  |
| Mmu.11137.1.S1_x_at    | Mmu.11137.1    | 4.61  | 4.51  | 0.71 | 0.06 | 1.07  | 0.558432 | 0.62467  | 0.793205 | 0.778812 |
| Mmu.11137.2.S1_at      | Mmu.11137.2    | 3.5   | 3.52  | 0.17 | 0.08 | -1.02 | 0.718994 | 0.815776 | 0.876808 | 0.893766 |
| Mmu.11141.1.S1_at      | Mmu.11141.1    | 10.25 | 10.46 | 0.06 | 0.16 | -1.16 | 0.033063 | 0.036747 | 0.327027 | 0.236287 |
| Mmu.11151.1.S1_at      | Mmu.11151.1    | 11.85 | 11.35 | 0.22 | 0.1  | 1.41  | 0.023516 | 0.014044 | 0.291638 | 0.15177  |

|                        |                |       |       |      |      |       |          |          |          |          |
|------------------------|----------------|-------|-------|------|------|-------|----------|----------|----------|----------|
| Mmu.11151.1.S1_s_at    | Mmu.11151.1    | 12.09 | 11.7  | 0.15 | 0.09 | 1.31  | 0.016436 | 0.010589 | 0.264023 | 0.134213 |
| Mmu.11154.1.A1_at      | Mmu.11154.1    | 5.15  | 6.75  | 1.97 | 1.64 | -3.03 | 0.448614 | 0.450187 | 0.729722 | 0.665542 |
| Mmu.11154.2.S1_at      | Mmu.11154.2    | 6.04  | 6.66  | 0.9  | 0.72 | -1.53 | 0.515954 | 0.638262 | 0.767717 | 0.787493 |
| Mmu.11164.1.S1_at      | Mmu.11164.1    | 5.92  | 5.94  | 0.08 | 0.13 | -1.01 | 0.383741 | 0.541101 | 0.689519 | 0.72475  |
| Mmu.11165.2.S1_at      | Mmu.11165.2    | 4.74  | 4.93  | 0.12 | 0.05 | -1.14 | 0.071844 | 0.184655 | 0.415886 | 0.460645 |
| Mmu.11167.1.A1_at      | Mmu.11167.1    | 6.88  | 7.38  | 0.18 | 0.18 | -1.41 | 0.022722 | 0.013625 | 0.288168 | 0.149406 |
| Mmu.1117.1.S1_at       | Mmu.1117.1     | 5.26  | 4.62  | 0.37 | 0.03 | 1.56  | 0.036282 | 0.009645 | 0.339201 | 0.129267 |
| Mmu.11179.1.S1_at      | Mmu.11179.1    | 8.36  | 9.05  | 0.14 | 0.77 | -1.61 | 0.199851 | 0.085502 | 0.562928 | 0.337495 |
| Mmu.11185.2.S1_at      | Mmu.11185.2    | 5.06  | 4.64  | 0.44 | 0.19 | 1.34  | 0.839612 | 0.574235 | 0.935251 | 0.745688 |
| Mmu.11188.1.S1_at      | Mmu.11188.1    | 11.52 | 11.58 | 0.03 | 0.17 | -1.04 | 0.698654 | 0.016487 | 0.866271 | 0.162562 |
| Mmu.11192.1.S1_at      | Mmu.11192.1    | 6.63  | 6.62  | 0.15 | 0.14 | 1.01  | 0.257077 | 0.11344  | 0.60448  | 0.379509 |
| Mmu.11195.1.S1_at      | Mmu.11195.1    | 11.61 | 11.32 | 0.12 | 1.04 | 1.22  | 0.227504 | 0.05157  | 0.585103 | 0.272544 |
| Mmu.11197.1.S1_at      | Mmu.11197.1    | 3.56  | 3.67  | 0.17 | 0.32 | -1.08 | 0.800142 | 0.933344 | 0.917386 | 0.962162 |
| Mmu.11201.1.S1_at      | Mmu.11201.1    | 4.36  | 4.53  | 0.62 | 0.17 | -1.12 | 0.583288 | 0.775993 | 0.806347 | 0.869682 |
| Mmu.11204.1.S1_s_at    | Mmu.11204.1    | 13.34 | 13.16 | 0.05 | 0.25 | 1.13  | 0.148999 | 0.008453 | 0.513987 | 0.121922 |
| Mmu.11208.1.S1_at      | Mmu.11208.1    | 6.99  | 9     | 0.82 | 1.09 | -4.04 | 0.15006  | 0.177981 | 0.514662 | 0.454339 |
| Mmu.11220.1.S1_at      | Mmu.11220.1    | 10.1  | 10.22 | 0.18 | 0.09 | -1.09 | 0.54768  | 0.073188 | 0.786269 | 0.316064 |
| Mmu.11224.1.S1_at      | Mmu.11224.1    | 7.92  | 9.07  | 0.24 | 0.4  | -2.22 | 0.013466 | 0.004823 | 0.24708  | 0.096904 |
| Mmu.11229.1.S1_at      | Mmu.11229.1    | 11.08 | 11.38 | 0.06 | 0.21 | -1.23 | 0.071204 | 0.04075  | 0.414877 | 0.246735 |
| Mmu.11231.1.A1_at      | Mmu.11231.1    | 7.39  | 7.41  | 0.21 | 0.1  | -1.02 | 0.912693 | 0.877671 | 0.965435 | 0.930219 |
| Mmu.11231.1.S1_at      | Mmu.11231.1    | 8.25  | 8.31  | 0.14 | 0.16 | -1.05 | 0.818839 | 0.958854 | 0.926498 | 0.976695 |
| Mmu.11243.2.S1_at      | Mmu.11243.2    | 10.12 | 9.79  | 0.06 | 0.61 | 1.25  | 0.357566 | 0.254129 | 0.672471 | 0.522439 |
| Mmu.11250.2.S1_at      | Mmu.11250.2    | 6.42  | 6.58  | 0.15 | 0.02 | -1.12 | 0.058027 | 0.077352 | 0.389637 | 0.323153 |
| Mmu.11268.1.S1_at      | Mmu.11268.1    | 9.63  | 9.82  | 0.51 | 0.59 | -1.15 | 0.224606 | 0.311281 | 0.58277  | 0.566351 |
| Mmu.11289.1.S1_at      | Mmu.11289.1    | 5.13  | 6.23  | 0.66 | 0.72 | -2.14 | 0.262591 | 0.402731 | 0.609039 | 0.631543 |
| Mmu.11306.1.S1_at      | Mmu.11306.1    | 7.3   | 7.38  | 0.48 | 0.32 | -1.05 | 0.869245 | 0.295479 | 0.947917 | 0.554921 |
| Mmu.11314.1.S1_x_at    | Mmu.11314.1    | 14.05 | 14.1  | 0.89 | 0.05 | -1.03 | 0.530249 | 0.563931 | 0.776693 | 0.738913 |
| MmunewRS.816.1.S1_s_at | MmunewRS.816.1 | 4.86  | 6.53  | 1.28 | 1.47 | -3.2  | 0.46891  | 0.11331  | 0.741317 | 0.379388 |
| Mmu.11342.1.S1_at      | Mmu.11342.1    | 7.29  | 6.8   | 0.23 | 0.9  | 1.4   | 0.121227 | 0.142036 | 0.48598  | 0.415633 |
| Mmu.11343.1.S1_at      | Mmu.11343.1    | 10.39 | 10.08 | 0.07 | 0.03 | 1.24  | 0.001721 | 0.007288 | 0.154452 | 0.114596 |
| Mmu.11358.1.S1_at      | Mmu.11358.1    | 4.04  | 4.05  | 0.11 | 0.11 | -1.01 | 0.458007 | 0.196189 | 0.735139 | 0.471236 |
| Mmu.11363.1.S1_at      | Mmu.11363.1    | 5.16  | 6.83  | 1.28 | 1.53 | -3.18 | 0.292234 | 0.410077 | 0.629464 | 0.637065 |
| Mmu.11366.1.S1_at      | Mmu.11366.1    | 3.4   | 4.26  | 0.08 | 0.54 | -1.81 | 0.050384 | 0.042982 | 0.374295 | 0.251882 |
| Mmu.11367.1.S1_at      | Mmu.11367.1    | 11.36 | 11.11 | 0.22 | 0.35 | 1.19  | 0.346727 | 0.183082 | 0.666013 | 0.459493 |
| Mmu.11369.1.S1_at      | Mmu.11369.1    | 10.64 | 10.22 | 0.12 | 0.33 | 1.33  | 0.069798 | 0.069133 | 0.412907 | 0.30917  |
| Mmu.1137.1.S1_at       | Mmu.1137.1     | 3.6   | 3.64  | 0.27 | 0.71 | -1.03 | 0.552725 | 0.650122 | 0.789681 | 0.795406 |
| Mmu.1137.1.S1_s_at     | Mmu.1137.1     | 4.88  | 5.92  | 0.5  | 1.37 | -2.07 | 0.365566 | 0.468587 | 0.678307 | 0.677755 |
| Mmu.11373.1.S1_at      | Mmu.11373.1    | 9.76  | 10.11 | 0.29 | 0.07 | -1.27 | 0.040683 | 0.054806 | 0.350025 | 0.279635 |
| Mmu.1138.1.S1_at       | Mmu.1138.1     | 3.36  | 3.34  | 0.28 | 0.15 | 1.02  | 0.79671  | 0.939876 | 0.91569  | 0.96581  |
| Mmu.11384.1.S1_at      | Mmu.11384.1    | 10.64 | 10.83 | 0.08 | 0.17 | -1.14 | 0.431128 | 0.146856 | 0.718464 | 0.42088  |
| Mmu.3044.12.S1_s_at    | Mmu.3044.12    | 12.87 | 14.26 | 0.84 | 0.03 | -2.63 | 0.136637 | 0.091507 | 0.503755 | 0.346552 |

|                     |             |       |       |      |      |       |          |          |          |          |
|---------------------|-------------|-------|-------|------|------|-------|----------|----------|----------|----------|
| Mmu.11403.1.S1_at   | Mmu.11403.1 | 8.13  | 8.68  | 0.44 | 0.2  | -1.47 | 0.030061 | 0.02     | 0.316741 | 0.177634 |
| Mmu.11403.1.S1_x_at | Mmu.11403.1 | 8.54  | 9.32  | 0.42 | 0.2  | -1.71 | 0.018277 | 0.01077  | 0.269791 | 0.135471 |
| Mmu.11412.1.S1_at   | Mmu.11412.1 | 10.07 | 10.53 | 0.07 | 0.31 | -1.37 | 0.189173 | 0.017409 | 0.552337 | 0.166995 |
| Mmu.11413.1.S1_at   | Mmu.11413.1 | 7.12  | 7.34  | 0.15 | 0.14 | -1.17 | 0.153366 | 0.227421 | 0.517785 | 0.499693 |
| Mmu.11414.1.S1_a_at | Mmu.11414.1 | 4.54  | 4.55  | 0.1  | 0.54 | -1.01 | 0.490644 | 0.613858 | 0.754497 | 0.770884 |
| Mmu.11416.1.A1_at   | Mmu.11416.1 | 3.4   | 3.55  | 0.11 | 0.15 | -1.11 | 0.11584  | 0.439778 | 0.479325 | 0.658439 |
| Mmu.11416.1.S1_at   | Mmu.11416.1 | 4.01  | 4.24  | 0.18 | 0.11 | -1.18 | 0.059682 | 0.223097 | 0.39273  | 0.49588  |
| Mmu.11417.1.S1_at   | Mmu.11417.1 | 6.49  | 6.52  | 0.21 | 0.04 | -1.02 | 0.233323 | 0.250521 | 0.588108 | 0.519391 |
| Mmu.11419.1.S1_at   | Mmu.11419.1 | 5.82  | 5.99  | 0.13 | 0.05 | -1.12 | 0.057949 | 0.054498 | 0.38951  | 0.278959 |
| Mmu.11420.1.S1_at   | Mmu.11420.1 | 5     | 5.18  | 0.14 | 0.29 | -1.13 | 0.147054 | 0.189792 | 0.51306  | 0.465403 |
| Mmu.11421.1.S1_a_at | Mmu.11421.1 | 4.49  | 4.74  | 0.07 | 0.16 | -1.19 | 0.194235 | 0.289632 | 0.557805 | 0.5507   |
| Mmu.11423.1.S1_a_at | Mmu.11423.1 | 4.57  | 4.79  | 0.17 | 0.36 | -1.17 | 0.422029 | 0.620057 | 0.713322 | 0.775218 |
| Mmu.11429.1.A1_at   | Mmu.11429.1 | 4.27  | 4.36  | 0.87 | 0.64 | -1.07 | 0.590125 | 0.14557  | 0.809764 | 0.419456 |
| Mmu.11473.1.S1_at   | Mmu.11473.1 | 2.86  | 2.94  | 0.1  | 0.14 | -1.06 | 0.242719 | 0.241321 | 0.594529 | 0.511952 |
| Mmu.11473.1.S1_s_at | Mmu.11473.1 | 11.79 | 12.17 | 0.06 | 0.21 | -1.3  | 0.044255 | 0.032858 | 0.358277 | 0.224478 |
| Mmu.11492.1.S1_x_at | Mmu.11492.1 | 8     | 7.68  | 0.46 | 0.25 | 1.25  | 0.17918  | 0.218124 | 0.543481 | 0.491711 |
| Mmu.11516.1.S1_at   | Mmu.11516.1 | 12.14 | 12.14 | 0.16 | 0.12 | -1.01 | 0.667324 | 0.802766 | 0.850936 | 0.886441 |
| Mmu.11526.1.S1_at   | Mmu.11526.1 | 5.66  | 5.86  | 0.58 | 0.26 | -1.15 | 0.489802 | 0.668038 | 0.754118 | 0.805709 |
| Mmu.11557.1.S1_at   | Mmu.11557.1 | 8.63  | 8.44  | 0.32 | 0.1  | 1.14  | 0.17584  | 0.193623 | 0.539441 | 0.468785 |
| Mmu.11562.1.S1_at   | Mmu.11562.1 | 7.77  | 7.12  | 0.23 | 0.64 | 1.57  | 0.054369 | 0.04017  | 0.381851 | 0.245709 |
| Mmu.11565.1.S1_at   | Mmu.11565.1 | 9.94  | 10.35 | 0.15 | 0.1  | -1.33 | 0.012098 | 0.011938 | 0.239983 | 0.141357 |
| Mmu.11584.1.S1_at   | Mmu.11584.1 | 10.96 | 11.11 | 0.32 | 0.32 | -1.11 | 0.567661 | 0.746068 | 0.798266 | 0.852688 |
| Mmu.116.1.S1_s_at   | Mmu.116.1   | 12.46 | 12.76 | 0.28 | 0.06 | -1.23 | 0.138099 | 0.171651 | 0.505616 | 0.448044 |
| Mmu.11607.1.S1_at   | Mmu.11607.1 | 9.44  | 8.69  | 0.11 | 0.44 | 1.69  | 0.124517 | 0.120016 | 0.490468 | 0.388672 |
| Mmu.1161.1.S1_at    | Mmu.1161.1  | 5.83  | 7.03  | 0.63 | 1.63 | -2.3  | 0.304776 | 0.355174 | 0.638784 | 0.597552 |
| Mmu.1162.1.S1_at    | Mmu.1162.1  | 10.58 | 10.8  | 0.14 | 0.69 | -1.17 | 0.569636 | 0.545074 | 0.799134 | 0.727313 |
| Mmu.11635.1.S1_at   | Mmu.11635.1 | 9.03  | 9.05  | 0.13 | 0.21 | -1.01 | 0.908975 | 0.117574 | 0.963951 | 0.38531  |
| Mmu.11636.1.S1_at   | Mmu.11636.1 | 6.13  | 6.08  | 0.05 | 0.13 | 1.03  | 0.969509 | 0.772928 | 0.988405 | 0.867957 |
| Mmu.11638.2.S1_at   | Mmu.11638.2 | 9.5   | 10.38 | 0.78 | 0.44 | -1.84 | 0.062858 | 0.058825 | 0.399468 | 0.289228 |
| Mmu.11640.1.S1_at   | Mmu.11640.1 | 12.86 | 12.93 | 0.11 | 0.08 | -1.06 | 0.396274 | 0.523787 | 0.69693  | 0.714028 |
| Mmu.11645.2.S1_at   | Mmu.11645.2 | 3.71  | 3.52  | 0.16 | 0.12 | 1.14  | 0.178484 | 0.138931 | 0.542847 | 0.412037 |
| Mmu.11646.1.S1_at   | Mmu.11646.1 | 4.99  | 4.9   | 0.1  | 0.15 | 1.07  | 0.311597 | 0.390147 | 0.64356  | 0.624002 |
| Mmu.11647.1.A1_at   | Mmu.11647.1 | 9.52  | 8     | 0.34 | 0.57 | 2.86  | 0.009675 | 0.006132 | 0.226235 | 0.106665 |
| Mmu.11662.1.S1_at   | Mmu.11662.1 | 10.9  | 11.23 | 0.14 | 0.21 | -1.26 | 0.171165 | 0.019939 | 0.535105 | 0.177457 |
| Mmu.11663.1.S1_at   | Mmu.11663.1 | 9.55  | 10.03 | 0.09 | 0.41 | -1.39 | 0.117696 | 0.14755  | 0.48184  | 0.421872 |
| Mmu.11667.1.S1_at   | Mmu.11667.1 | 11.95 | 11.99 | 0.13 | 0.1  | -1.03 | 0.351608 | 0.379275 | 0.669126 | 0.616251 |
| Mmu.11667.1.S1_x_at | Mmu.11667.1 | 11.92 | 11.97 | 0.15 | 0.13 | -1.04 | 0.337788 | 0.411952 | 0.660277 | 0.638434 |
| Mmu.11668.1.S1_at   | Mmu.11668.1 | 4.52  | 6.96  | 0.91 | 0.52 | -5.43 | 0.046462 | 0.04391  | 0.363009 | 0.254098 |
| Mmu.1167.1.S1_at    | Mmu.1167.1  | 5.3   | 5.71  | 0.01 | 0.43 | -1.33 | 0.112453 | 0.174393 | 0.474902 | 0.450842 |
| Mmu.11672.1.S1_at   | Mmu.11672.1 | 11.98 | 11.98 | 0.13 | 0.12 | -1    | 0.642006 | 0.073038 | 0.838658 | 0.316017 |
| Mmu.11693.1.S1_at   | Mmu.11693.1 | 8.29  | 8.56  | 0.59 | 0.58 | -1.21 | 0.385219 | 0.326951 | 0.690372 | 0.576911 |

|                         |                 |       |       |      |      |        |          |          |          |          |
|-------------------------|-----------------|-------|-------|------|------|--------|----------|----------|----------|----------|
| Mmu.11695.1.S1_at       | Mmu.11695.1     | 7.85  | 7.43  | 0.64 | 0.61 | 1.33   | 0.189768 | 0.233946 | 0.552667 | 0.505211 |
| Mmu.11700.1.S1_at       | Mmu.11700.1     | 5.54  | 5.88  | 0.2  | 0.37 | -1.27  | 0.173008 | 0.197398 | 0.536666 | 0.472311 |
| Mmu.11707.1.S1_at       | Mmu.11707.1     | 9.1   | 8.32  | 0.19 | 0.95 | 1.72   | 0.067714 | 0.058372 | 0.408357 | 0.288369 |
| Mmu.11727.1.S1_at       | Mmu.11727.1     | 6.88  | 8.52  | 0.44 | 0.45 | -3.1   | 0.010649 | 0.006675 | 0.230991 | 0.110612 |
| Mmu.11729.1.S1_s_at     | Mmu.11729.1     | 12.82 | 12.87 | 0.19 | 0.09 | -1.04  | 0.634941 | 0.471657 | 0.834793 | 0.679552 |
| MmugDNA.28319.1.S1_s_at | MmugDNA.28319.1 | 14.41 | 14.39 | 0.06 | 0.03 | 1.01   | 0.63649  | 0.785224 | 0.835582 | 0.875672 |
| Mmu.11739.1.S1_at       | Mmu.11739.1     | 11.71 | 11.81 | 0.43 | 0.44 | -1.07  | 0.782984 | 0.028171 | 0.909384 | 0.209433 |
| Mmu.11741.1.S1_at       | Mmu.11741.1     | 8.39  | 7.77  | 0.37 | 0.81 | 1.54   | 0.54292  | 0.378657 | 0.783702 | 0.615681 |
| Mmu.11741.2.S1_a_at     | Mmu.11741.2     | 3.36  | 3.4   | 0.25 | 0.12 | -1.03  | 0.749849 | 0.914135 | 0.892776 | 0.951725 |
| Mmu.11745.1.A1_at       | Mmu.11745.1     | 8.56  | 8.28  | 0.04 | 0.49 | 1.21   | 0.326453 | 0.353819 | 0.653184 | 0.596829 |
| Mmu.11775.1.S1_at       | Mmu.11775.1     | 11.33 | 11.58 | 0.09 | 0.27 | -1.19  | 0.166064 | 0.227792 | 0.529901 | 0.500072 |
| Mmu.11792.1.S1_at       | Mmu.11792.1     | 9.18  | 9.62  | 0.12 | 0.42 | -1.36  | 0.066687 | 0.089372 | 0.406981 | 0.343635 |
| Mmu.11804.2.S1_at       | Mmu.11804.2     | 12.73 | 12.58 | 0.06 | 0.12 | 1.11   | 0.376624 | 0.230523 | 0.685249 | 0.502251 |
| Mmu.1181.1.S1_at        | Mmu.1181.1      | 5.35  | 5.34  | 0.13 | 0.05 | 1      | 0.509265 | 0.34059  | 0.764295 | 0.586789 |
| Mmu.11815.1.S1_s_at     | Mmu.11815.1     | 10.41 | 10.37 | 0.28 | 0.16 | 1.02   | 0.708182 | 0.130328 | 0.871588 | 0.402172 |
| Mmu.11819.2.S1_at       | Mmu.11819.2     | 9.91  | 10.12 | 0.79 | 0.08 | -1.16  | 0.603755 | 0.390882 | 0.817308 | 0.624592 |
| Mmu.11820.13.S1_a_at    | Mmu.11820.13    | 13.66 | 13.25 | 0.18 | 0.95 | 1.33   | 0.198548 | 0.222239 | 0.561652 | 0.495265 |
| Mmu.11826.1.S1_at       | Mmu.11826.1     | 12.68 | 12.75 | 0.25 | 0.13 | -1.05  | 0.413089 | 0.515063 | 0.708313 | 0.70805  |
| Mmu.11827.1.A1_at       | Mmu.11827.1     | 4.52  | 4.66  | 0.07 | 0.17 | -1.1   | 0.141455 | 0.193607 | 0.509067 | 0.468785 |
| Mmu.11827.1.S1_at       | Mmu.11827.1     | 3.95  | 3.95  | 0.1  | 0.02 | 1      | 0.49179  | 0.047072 | 0.755302 | 0.261469 |
| Mmu.11828.1.S1_at       | Mmu.11828.1     | 4.05  | 4     | 0.15 | 0.32 | 1.03   | 0.558817 | 0.514694 | 0.793517 | 0.707841 |
| Mmu.1183.2.S1_at        | Mmu.1183.2      | 9.7   | 11.57 | 1.23 | 1.86 | -3.66  | 0.407862 | 0.282828 | 0.704899 | 0.545524 |
| Mmu.1183.4.A1_at        | Mmu.1183.4      | 3.26  | 3.39  | 0.23 | 0.11 | -1.1   | 0.123454 | 0.156859 | 0.489161 | 0.432372 |
| Mmu.1183.4.S1_at        | Mmu.1183.4      | 3.19  | 3.3   | 0.17 | 0.14 | -1.08  | 0.272534 | 0.210829 | 0.616155 | 0.484902 |
| Mmu.11837.1.S1_at       | Mmu.11837.1     | 8.28  | 8.11  | 0.17 | 0.17 | 1.13   | 0.096876 | 0.106009 | 0.455899 | 0.36838  |
| Mmu.11839.1.S1_at       | Mmu.11839.1     | 8.91  | 8.77  | 0.11 | 0.23 | 1.1    | 0.114761 | 0.131825 | 0.478025 | 0.403891 |
| Mmu.1184.1.S1_at        | Mmu.1184.1      | 8.96  | 9.44  | 0.04 | 0.19 | -1.39  | 0.017581 | 0.008228 | 0.267454 | 0.120459 |
| Mmu.11841.1.S1_s_at     | Mmu.11841.1     | 10.87 | 10.53 | 0.16 | 0.35 | 1.26   | 0.54175  | 0.323249 | 0.78291  | 0.574408 |
| Mmu.11859.1.S1_at       | Mmu.11859.1     | 6.79  | 8.04  | 0.67 | 2.56 | -2.38  | 0.516418 | 0.603516 | 0.768067 | 0.764189 |
| Mmu.11863.1.S1_at       | Mmu.11863.1     | 9.49  | 9.79  | 0.06 | 0.14 | -1.23  | 0.035438 | 0.016375 | 0.336406 | 0.16199  |
| Mmu.11884.1.S1_at       | Mmu.11884.1     | 3.78  | 4.11  | 0.11 | 0.19 | -1.26  | 0.207678 | 0.323754 | 0.569822 | 0.574607 |
| Mmu.11885.2.S1_at       | Mmu.11885.2     | 8.74  | 8.09  | 0.18 | 0.36 | 1.57   | 0.060716 | 0.068808 | 0.394321 | 0.308711 |
| Mmu.1189.5.S1_x_at      | Mmu.1189.5      | 11.21 | 11.54 | 0.63 | 0.28 | -1.26  | 0.453888 | 0.360411 | 0.733001 | 0.601462 |
| Mmu.11893.1.S1_at       | Mmu.11893.1     | 3.6   | 3.36  | 0.02 | 0.33 | 1.18   | 0.722292 | 0.864604 | 0.878644 | 0.923249 |
| Mmu.11899.1.S1_at       | Mmu.11899.1     | 4.94  | 8.39  | 1.51 | 3.04 | -10.98 | 0.303614 | 0.221686 | 0.637813 | 0.494901 |
| Mmu.11912.1.S1_at       | Mmu.11912.1     | 6.07  | 6.82  | 1.19 | 1.11 | -1.68  | 0.617696 | 0.25244  | 0.824859 | 0.521061 |
| Mmu.11914.1.S1_at       | Mmu.11914.1     | 6.11  | 6.61  | 0.08 | 0.24 | -1.41  | 0.068748 | 0.0555   | 0.410653 | 0.281404 |
| MmugDNA.27313.1.S1_at   | MmugDNA.27313.1 | 6.32  | 6.32  | 0.09 | 0.07 | -1     | 0.473045 | 0.104554 | 0.744128 | 0.365805 |
| MmugDNA.27313.1.S1_s_at | MmugDNA.27313.1 | 7.07  | 7.13  | 0.12 | 0.2  | -1.04  | 0.452922 | 0.40663  | 0.732217 | 0.634468 |
| Mmu.11943.1.S1_at       | Mmu.11943.1     | 7.91  | 8.83  | 0.19 | 0.28 | -1.9   | 0.010216 | 0.007747 | 0.228247 | 0.117619 |
| Mmu.11959.1.A1_at       | Mmu.11959.1     | 3.74  | 3.74  | 0.13 | 0.16 | -1     | 0.245778 | 0.353324 | 0.597234 | 0.596477 |

|                         |                 |       |       |      |      |       |          |          |          |          |
|-------------------------|-----------------|-------|-------|------|------|-------|----------|----------|----------|----------|
| Mmu.11960.1.S1_at       | Mmu.11960.1     | 7.64  | 8.9   | 0.31 | 0.51 | -2.41 | 0.020488 | 0.018968 | 0.278215 | 0.173308 |
| Mmu.11960.1.S1_x_at     | Mmu.11960.1     | 7.55  | 8.83  | 0.3  | 0.41 | -2.43 | 0.013974 | 0.012865 | 0.250102 | 0.146025 |
| Mmu.11961.1.S1_at       | Mmu.11961.1     | 5.4   | 6.92  | 0.49 | 0.54 | -2.87 | 0.023873 | 0.02346  | 0.293078 | 0.191956 |
| Mmu.11961.1.S1_x_at     | Mmu.11961.1     | 6.8   | 8.21  | 0.42 | 0.55 | -2.66 | 0.024442 | 0.023741 | 0.294575 | 0.192893 |
| Mmu.11962.1.S1_at       | Mmu.11962.1     | 10.43 | 10.59 | 0.19 | 0.21 | -1.12 | 0.997202 | 0.845179 | 0.99892  | 0.9119   |
| Mmu.1198.1.S1_at        | Mmu.1198.1      | 7.49  | 7.69  | 0.17 | 0.23 | -1.14 | 0.153273 | 0.324669 | 0.517764 | 0.575208 |
| Mmu.11980.1.S1_at       | Mmu.11980.1     | 7.53  | 9.33  | 0.24 | 0.45 | -3.49 | 0.003761 | 0.001808 | 0.179914 | 0.063723 |
| Mmu.11986.2.S1_at       | Mmu.11986.2     | 6.85  | 7.8   | 0.63 | 1.35 | -1.94 | 0.377761 | 0.518333 | 0.686056 | 0.71038  |
| Mmu.11987.1.S1_at       | Mmu.11987.1     | 4.7   | 4.63  | 0.03 | 0.11 | 1.05  | 0.435914 | 0.313235 | 0.721542 | 0.567753 |
| Mmu.11995.1.S1_at       | Mmu.11995.1     | 4.92  | 4.72  | 0.21 | 0.62 | 1.15  | 0.906834 | 0.986243 | 0.963023 | 0.992174 |
| Mmu.11997.1.S1_at       | Mmu.11997.1     | 12    | 12.46 | 0.19 | 0.69 | -1.37 | 0.383293 | 0.529663 | 0.689211 | 0.717463 |
| Mmu.12.1.S1_at          | Mmu.12.1        | 9.99  | 10.74 | 0.13 | 0.33 | -1.69 | 0.022613 | 0.006803 | 0.287448 | 0.111444 |
| Mmu.12003.1.S1_s_at     | Mmu.12003.1     | 14.53 | 14.47 | 0.04 | 0.03 | 1.04  | 0.036903 | 0.019311 | 0.34048  | 0.174723 |
| Mmu.12005.1.S1_at       | Mmu.12005.1     | 3.15  | 3.3   | 0.1  | 0.08 | -1.1  | 0.156015 | 0.225971 | 0.520741 | 0.498391 |
| Mmu.12007.1.S1_s_at     | Mmu.12007.1     | 7.64  | 7.66  | 0.16 | 0.25 | -1.01 | 0.211628 | 0.357154 | 0.572347 | 0.598825 |
| Mmu.12009.1.S1_at       | Mmu.12009.1     | 4.39  | 4.43  | 0.13 | 0.26 | -1.03 | 0.280787 | 0.392357 | 0.621843 | 0.625756 |
| Mmu.12027.2.S1_at       | Mmu.12027.2     | 5.55  | 5.77  | 0.07 | 0.18 | -1.16 | 0.565655 | 0.504258 | 0.797274 | 0.701474 |
| Mmu.12027.3.S1_at       | Mmu.12027.3     | 12    | 11.85 | 0.11 | 0.15 | 1.11  | 0.260587 | 0.039597 | 0.607303 | 0.244002 |
| Mmu.12045.1.S1_at       | Mmu.12045.1     | 9.79  | 9.28  | 0.16 | 0.22 | 1.42  | 0.071526 | 0.01034  | 0.415505 | 0.133123 |
| Mmu.12046.1.S1_at       | Mmu.12046.1     | 4.99  | 5.13  | 0.12 | 0.3  | -1.1  | 0.175311 | 0.178487 | 0.539047 | 0.454778 |
| Mmu.12059.1.S1_at       | Mmu.12059.1     | 11.62 | 11.43 | 0.1  | 0.11 | 1.14  | 0.136955 | 0.055935 | 0.504163 | 0.282317 |
| MmugDNA.29332.1.S1_at   | MmugDNA.29332.1 | 7.35  | 7.24  | 0.2  | 0.33 | 1.08  | 0.841933 | 0.895302 | 0.936278 | 0.940185 |
| MmugDNA.29332.1.S1_s_at | MmugDNA.29332.1 | 10.28 | 10.13 | 0.21 | 0.24 | 1.11  | 0.982459 | 0.994256 | 0.993452 | 0.996461 |
| MmugDNA.30012.1.S1_s_at | MmugDNA.30012.1 | 9.9   | 10.49 | 0.1  | 0.48 | -1.5  | 0.104391 | 0.150746 | 0.464351 | 0.4253   |
| Mmu.12077.1.S1_at       | Mmu.12077.1     | 8.6   | 8.51  | 0.15 | 0.06 | 1.07  | 0.305691 | 0.295976 | 0.639223 | 0.555264 |
| Mmu.12078.1.S1_at       | Mmu.12078.1     | 10.19 | 9.83  | 0.23 | 0.04 | 1.28  | 0.032448 | 0.007711 | 0.324971 | 0.117372 |
| Mmu.12079.1.A1_at       | Mmu.12079.1     | 6.89  | 6.85  | 0.09 | 0.32 | 1.03  | 0.526509 | 0.704089 | 0.774143 | 0.828326 |
| Mmu.12087.1.S1_x_at     | Mmu.12087.1     | 6.14  | 6.14  | 0.18 | 0.12 | 1     | 0.930017 | 0.94507  | 0.972958 | 0.968834 |
| Mmu.12088.1.S1_at       | Mmu.12088.1     | 4.27  | 4.9   | 0.66 | 0.62 | -1.54 | 0.576725 | 0.752739 | 0.803224 | 0.855968 |
| Mmu.12088.1.S1_x_at     | Mmu.12088.1     | 5.02  | 5.05  | 0.24 | 0.13 | -1.02 | 0.798945 | 0.581982 | 0.916772 | 0.750784 |
| Mmu.12088.2.A1_s_at     | Mmu.12088.2     | 3.93  | 4.02  | 1.12 | 0.09 | -1.06 | 0.454688 | 0.564413 | 0.733343 | 0.739252 |
| Mmu.12088.2.S1_s_at     | Mmu.12088.2     | 3.83  | 3.96  | 0.52 | 0.29 | -1.1  | 0.720566 | 0.903189 | 0.877612 | 0.944982 |
| Mmu.12088.3.A1_at       | Mmu.12088.3     | 3.25  | 3.57  | 0.21 | 0.24 | -1.24 | 0.141852 | 0.15782  | 0.509205 | 0.433475 |
| Mmu.12088.3.A1_x_at     | Mmu.12088.3     | 3.72  | 4.06  | 0.23 | 0.24 | -1.27 | 0.225486 | 0.284793 | 0.583587 | 0.546966 |
| Mmu.12088.3.S1_at       | Mmu.12088.3     | 3.47  | 3.51  | 0.1  | 0.12 | -1.03 | 0.931295 | 0.229392 | 0.973425 | 0.501527 |
| Mmu.12088.3.S1_x_at     | Mmu.12088.3     | 4.2   | 4.27  | 0.08 | 0.06 | -1.05 | 0.796371 | 0.117599 | 0.91548  | 0.38531  |
| Mmu.12088.4.A1_at       | Mmu.12088.4     | 3.58  | 3.71  | 0.07 | 0.12 | -1.09 | 0.305914 | 0.371764 | 0.639227 | 0.610541 |
| Mmu.12088.4.A1_x_at     | Mmu.12088.4     | 4.22  | 4.25  | 0.16 | 0.14 | -1.02 | 0.325101 | 0.457243 | 0.652361 | 0.670746 |
| Mmu.12088.4.S1_at       | Mmu.12088.4     | 3.7   | 3.93  | 0.19 | 0.16 | -1.17 | 0.384716 | 0.453209 | 0.690114 | 0.66762  |
| Mmu.12088.4.S1_x_at     | Mmu.12088.4     | 3.48  | 3.26  | 0.15 | 0.03 | 1.16  | 0.057081 | 0.02427  | 0.387418 | 0.194957 |
| Mmu.12089.1.S1_at       | Mmu.12089.1     | 2.74  | 2.72  | 0.06 | 0.12 | 1.01  | 0.325896 | 0.423389 | 0.653063 | 0.646277 |

|                         |                 |       |       |      |      |        |          |          |          |          |
|-------------------------|-----------------|-------|-------|------|------|--------|----------|----------|----------|----------|
| Mmu.12089.1.S1_x_at     | Mmu.12089.1     | 3.16  | 3.11  | 0.16 | 0.14 | 1.04   | 0.471981 | 0.640061 | 0.743454 | 0.788682 |
| Mmu.1209.5.S1_x_at      | Mmu.1209.5      | 3.34  | 3.55  | 0.17 | 0.1  | -1.16  | 0.140692 | 0.177592 | 0.508421 | 0.453962 |
| Mmu.12090.1.S1_at       | Mmu.12090.1     | 8.91  | 9.06  | 0.18 | 0.63 | -1.11  | 0.660683 | 0.200381 | 0.847842 | 0.47478  |
| Mmu.12096.1.S1_at       | Mmu.12096.1     | 4.63  | 10.45 | 2.3  | 4.04 | -56.55 | 0.450232 | 0.437824 | 0.73087  | 0.656977 |
| Mmu.12098.1.S1_x_at     | Mmu.12098.1     | 14.62 | 14.61 | 0.01 | 0.04 | 1.01   | 0.652229 | 0.807706 | 0.843581 | 0.889292 |
| Mmu.12098.2.S1_x_at     | Mmu.12098.2     | 14.47 | 14.47 | 0.01 | 0.05 | -1     | 0.706583 | 0.878146 | 0.870731 | 0.930474 |
| Mmu.12104.1.A1_at       | Mmu.12104.1     | 4.85  | 4.57  | 0.52 | 0.06 | 1.22   | 0.401042 | 0.42335  | 0.700559 | 0.646277 |
| Mmu.12104.1.S1_at       | Mmu.12104.1     | 6.47  | 5.82  | 0.59 | 0.08 | 1.56   | 0.485466 | 0.373422 | 0.750946 | 0.612236 |
| Mmu.12105.1.S1_a_at     | Mmu.12105.1     | 4.59  | 4.98  | 0.09 | 0.21 | -1.31  | 0.042342 | 0.043497 | 0.354659 | 0.25316  |
| Mmu.12110.1.S1_at       | Mmu.12110.1     | 7.8   | 8.62  | 0.62 | 0.85 | -1.77  | 0.31203  | 0.11157  | 0.643775 | 0.376407 |
| Mmu.12129.1.S1_at       | Mmu.12129.1     | 3.79  | 3.86  | 0.29 | 0.24 | -1.04  | 0.326361 | 0.512977 | 0.653184 | 0.706653 |
| Mmu.12135.1.S1_at       | Mmu.12135.1     | 9.74  | 9.93  | 0.04 | 0.18 | -1.14  | 0.115863 | 0.055193 | 0.479325 | 0.280555 |
| Mmu.12136.2.S1_at       | Mmu.12136.2     | 10.5  | 10.96 | 0.3  | 0.24 | -1.38  | 0.079582 | 0.045196 | 0.429909 | 0.256979 |
| Mmu.12145.1.S1_at       | Mmu.12145.1     | 6.23  | 6.26  | 0.14 | 0.15 | -1.03  | 0.838127 | 0.548539 | 0.934582 | 0.729266 |
| Mmu.12145.1.S1_s_at     | Mmu.12145.1     | 14.41 | 14.44 | 0.04 | 0.05 | -1.02  | 0.663954 | 0.559669 | 0.849245 | 0.736365 |
| Mmu.1215.1.S1_at        | Mmu.1215.1      | 7.74  | 7.21  | 0.39 | 0.05 | 1.44   | 0.29561  | 0.321837 | 0.631948 | 0.573496 |
| Mmu.12174.1.S1_at       | Mmu.12174.1     | 4.91  | 4.38  | 0.09 | 0.09 | 1.44   | 0.001587 | 0.000443 | 0.15196  | 0.038359 |
| Mmu.1218.1.S1_at        | Mmu.1218.1      | 6.59  | 6.75  | 0.15 | 0.04 | -1.12  | 0.482351 | 0.407426 | 0.749404 | 0.63502  |
| Mmu.12187.1.S1_at       | Mmu.12187.1     | 10.85 | 10.79 | 0.54 | 0.47 | 1.04   | 0.988624 | 0.599406 | 0.995952 | 0.76144  |
| Mmu.12196.1.S1_at       | Mmu.12196.1     | 9.9   | 9.75  | 0.25 | 0.33 | 1.11   | 0.483603 | 0.697109 | 0.749945 | 0.824045 |
| Mmu.12206.2.S1_at       | Mmu.12206.2     | 12.34 | 12.35 | 0.16 | 0.2  | -1.01  | 0.852324 | 0.044875 | 0.940647 | 0.256424 |
| Mmu.12206.3.S1_at       | Mmu.12206.3     | 5.99  | 5.88  | 0.18 | 0.2  | 1.08   | 0.937666 | 0.041879 | 0.975994 | 0.249202 |
| Mmu.12206.3.S1_x_at     | Mmu.12206.3     | 11.52 | 11.57 | 0.13 | 0.25 | -1.04  | 0.93737  | 0.039902 | 0.975858 | 0.244852 |
| Mmu.12211.1.A1_at       | Mmu.12211.1     | 8.81  | 6.62  | 0.16 | 0.51 | 4.56   | 0.003464 | 0.000356 | 0.178436 | 0.037229 |
| Mmu.12211.1.S1_at       | Mmu.12211.1     | 7.68  | 5.56  | 0.16 | 0.5  | 4.32   | 0.004372 | 0.000442 | 0.183061 | 0.038359 |
| Mmu.12227.1.S1_at       | Mmu.12227.1     | 3.4   | 3.55  | 0.09 | 0.09 | -1.11  | 0.105702 | 0.114195 | 0.466526 | 0.380758 |
| Mmu.12235.2.S1_at       | Mmu.12235.2     | 5.21  | 6.46  | 0.21 | 0.37 | -2.38  | 0.006804 | 0.002622 | 0.201708 | 0.075772 |
| Mmu.12240.1.S1_at       | Mmu.12240.1     | 5.69  | 5.89  | 1.21 | 0.72 | -1.15  | 0.835256 | 0.857071 | 0.933181 | 0.91834  |
| Mmu.12241.1.S1_at       | Mmu.12241.1     | 4.18  | 4.11  | 0.07 | 0.26 | 1.05   | 0.630361 | 0.525152 | 0.832004 | 0.714766 |
| Mmu.12242.1.S1_at       | Mmu.12242.1     | 6.3   | 6.24  | 0.22 | 0.02 | 1.04   | 0.587763 | 0.590743 | 0.808706 | 0.756437 |
| Mmu.12242.1.S1_x_at     | Mmu.12242.1     | 5.87  | 5.99  | 0.14 | 0.08 | -1.09  | 0.248634 | 0.166374 | 0.599428 | 0.442884 |
| Mmu.12243.1.A1_at       | Mmu.12243.1     | 4.93  | 4.94  | 0.14 | 0.16 | -1     | 0.869479 | 0.973419 | 0.947917 | 0.985537 |
| Mmu.12243.1.S1_at       | Mmu.12243.1     | 5.71  | 5.9   | 0.21 | 0.16 | -1.14  | 0.430028 | 0.556833 | 0.717891 | 0.734831 |
| Mmu.12249.1.S1_at       | Mmu.12249.1     | 13.89 | 13.87 | 0.3  | 0.37 | 1.02   | 0.954499 | 0.990535 | 0.983073 | 0.994656 |
| MmugDNA.41518.1.S1_s_at | MmugDNA.41518.1 | 13.83 | 13.8  | 0.5  | 0.59 | 1.02   | 0.821738 | 0.958057 | 0.927464 | 0.976273 |
| Mmu.12251.1.S1_s_at     | Mmu.12251.1     | 13.42 | 13.38 | 0.13 | 0.48 | 1.02   | 0.294425 | 0.366048 | 0.631227 | 0.605891 |
| Mmu.12263.1.S1_at       | Mmu.12263.1     | 11.25 | 10.9  | 0.17 | 0.3  | 1.27   | 0.074372 | 0.072684 | 0.419963 | 0.31561  |
| Mmu.12264.1.S1_at       | Mmu.12264.1     | 12.14 | 12.03 | 0.13 | 0.07 | 1.07   | 0.14028  | 0.130711 | 0.508065 | 0.402799 |
| Mmu.12266.1.S1_at       | Mmu.12266.1     | 11.56 | 11.69 | 0.21 | 0.16 | -1.09  | 0.357264 | 0.459734 | 0.672175 | 0.671948 |
| Mmu.12268.1.S1_at       | Mmu.12268.1     | 10.11 | 10.33 | 0.28 | 0.58 | -1.16  | 0.216299 | 0.255469 | 0.575963 | 0.523505 |
| Mmu.12272.2.A1_at       | Mmu.12272.2     | 4.79  | 4.87  | 0.11 | 0.15 | -1.06  | 0.512058 | 0.560868 | 0.765453 | 0.736993 |

|                         |                 |       |       |      |      |       |          |          |          |          |
|-------------------------|-----------------|-------|-------|------|------|-------|----------|----------|----------|----------|
| Mmu.12272.2.S1_at       | Mmu.12272.2     | 3.78  | 3.88  | 0.17 | 0.24 | -1.07 | 0.228657 | 0.393513 | 0.586121 | 0.626447 |
| Mmu.12281.1.S1_at       | Mmu.12281.1     | 11.49 | 11.36 | 0.08 | 0.04 | 1.1   | 0.099814 | 0.362283 | 0.459718 | 0.602931 |
| Mmu.12285.1.S1_at       | Mmu.12285.1     | 7.38  | 9.07  | 0.6  | 1.78 | -3.24 | 0.313989 | 0.287079 | 0.645488 | 0.548379 |
| Mmu.12305.1.S1_at       | Mmu.12305.1     | 8.2   | 8.23  | 0.11 | 0.27 | -1.02 | 0.417769 | 0.426611 | 0.710734 | 0.648739 |
| Mmu.12307.1.S1_at       | Mmu.12307.1     | 7.42  | 7.89  | 0.56 | 0.41 | -1.39 | 0.308381 | 0.349774 | 0.640749 | 0.593578 |
| Mmu.12320.1.S1_at       | Mmu.12320.1     | 10.46 | 10.4  | 0.35 | 0.07 | 1.04  | 0.7191   | 0.789618 | 0.876813 | 0.87847  |
| Mmu.12324.1.S1_at       | Mmu.12324.1     | 8.77  | 8.03  | 0.2  | 0.11 | 1.67  | 0.004592 | 0.001327 | 0.1844   | 0.056164 |
| Mmu.12330.1.S1_at       | Mmu.12330.1     | 13.46 | 13.36 | 0.02 | 0.06 | 1.07  | 0.015812 | 0.00413  | 0.261297 | 0.090891 |
| Mmu.12345.2.S1_at       | Mmu.12345.2     | 10.67 | 10.41 | 0.18 | 0.15 | 1.19  | 0.11143  | 0.094195 | 0.473646 | 0.350889 |
| Mmu.12356.1.S1_at       | Mmu.12356.1     | 5.62  | 5.07  | 0.91 | 1.06 | 1.46  | 0.621182 | 0.447889 | 0.826445 | 0.663881 |
| Mmu.12356.1.S1_s_at     | Mmu.12356.1     | 5.28  | 5.54  | 0.54 | 0.48 | -1.19 | 0.590597 | 0.640857 | 0.809886 | 0.789221 |
| Mmu.12364.1.S1_at       | Mmu.12364.1     | 7.17  | 7.39  | 0.17 | 0.35 | -1.17 | 0.764879 | 0.646124 | 0.900986 | 0.792676 |
| Mmu.12364.1.S1_x_at     | Mmu.12364.1     | 6.95  | 7.05  | 0.19 | 0.26 | -1.07 | 0.990264 | 0.867484 | 0.996541 | 0.924699 |
| Mmu.12381.1.S1_at       | Mmu.12381.1     | 9.66  | 10.53 | 0.06 | 0.54 | -1.82 | 0.041858 | 0.039907 | 0.353088 | 0.244852 |
| Mmu.12382.1.S1_s_at     | Mmu.12382.1     | 11.4  | 11.27 | 0.24 | 0.16 | 1.09  | 0.393378 | 0.654876 | 0.695168 | 0.798179 |
| Mmu.12383.1.S1_at       | Mmu.12383.1     | 11.59 | 11.69 | 0.21 | 0.04 | -1.08 | 0.341692 | 0.043754 | 0.662761 | 0.25387  |
| Mmu.12385.2.S1_x_at     | Mmu.12385.2     | 12.2  | 12.71 | 0.67 | 0.54 | -1.42 | 0.353339 | 0.257049 | 0.670121 | 0.524781 |
| Mmu.12385.4.S1_x_at     | Mmu.12385.4     | 12.07 | 12.59 | 0.62 | 0.53 | -1.44 | 0.328852 | 0.237003 | 0.654694 | 0.507675 |
| Mmu.12385.5.S1_x_at     | Mmu.12385.5     | 8.85  | 9.08  | 0.23 | 0.18 | -1.17 | 0.27372  | 0.138334 | 0.617179 | 0.411244 |
| Mmu.12391.1.S1_at       | Mmu.12391.1     | 7.62  | 7.37  | 0.2  | 0.42 | 1.2   | 0.701393 | 0.875314 | 0.868043 | 0.929211 |
| Mmu.12394.1.S1_at       | Mmu.12394.1     | 5.96  | 5.71  | 0.06 | 0.1  | 1.19  | 0.078783 | 0.026601 | 0.428609 | 0.204008 |
| Mmu.12401.1.S1_at       | Mmu.12401.1     | 10.21 | 9.6   | 0.09 | 0.34 | 1.53  | 0.110186 | 0.134583 | 0.471834 | 0.406629 |
| Mmu.12401.1.S1_s_at     | Mmu.12401.1     | 10.23 | 9.63  | 0.12 | 0.38 | 1.51  | 0.125333 | 0.13183  | 0.49131  | 0.403891 |
| Mmu.12405.1.S1_at       | Mmu.12405.1     | 6.95  | 6.34  | 0.45 | 0.42 | 1.52  | 0.221729 | 0.159956 | 0.580397 | 0.436061 |
| Mmu.12407.1.S1_at       | Mmu.12407.1     | 6.67  | 6.97  | 0.17 | 0.14 | -1.23 | 0.170281 | 0.140067 | 0.534249 | 0.413394 |
| Mmu.12414.1.S1_at       | Mmu.12414.1     | 7.55  | 7.55  | 0.01 | 0.04 | 1     | 0.299601 | 0.885605 | 0.634993 | 0.934982 |
| Mmu.12423.1.S1_at       | Mmu.12423.1     | 6.54  | 6.08  | 0.14 | 0.07 | 1.37  | 0.022776 | 0.005871 | 0.288168 | 0.104856 |
| Mmu.12425.1.S1_at       | Mmu.12425.1     | 5.78  | 6.3   | 0.13 | 0.47 | -1.43 | 0.299546 | 0.393359 | 0.634993 | 0.626258 |
| Mmu.12426.1.S1_at       | Mmu.12426.1     | 3.72  | 4     | 0.15 | 0.16 | -1.21 | 0.087557 | 0.259057 | 0.441949 | 0.526246 |
| Mmu.12439.1.S1_s_at     | Mmu.12439.1     | 12.77 | 12.52 | 0.17 | 0.13 | 1.19  | 0.057133 | 0.080039 | 0.387418 | 0.327429 |
| Mmu.12441.1.S1_at       | Mmu.12441.1     | 13.79 | 13.63 | 0.06 | 0.18 | 1.12  | 0.087661 | 0.045761 | 0.442009 | 0.258277 |
| MmugDNA.31343.1.S1_at   | MmugDNA.31343.1 | 13.93 | 13.65 | 0.04 | 0.16 | 1.21  | 0.043321 | 0.037039 | 0.3567   | 0.236886 |
| MmugDNA.31343.1.S1_s_at | MmugDNA.31343.1 | 13.48 | 13.19 | 0.04 | 0.21 | 1.22  | 0.071063 | 0.072488 | 0.414673 | 0.315339 |
| Mmu.12449.1.S1_at       | Mmu.12449.1     | 6.77  | 6.95  | 0.2  | 0.21 | -1.13 | 0.131911 | 0.159687 | 0.498114 | 0.435785 |
| Mmu.12457.1.S1_at       | Mmu.12457.1     | 11.76 | 11.75 | 0.02 | 0.21 | 1.01  | 0.446369 | 0.620995 | 0.728244 | 0.775745 |
| Mmu.12457.1.S1_s_at     | Mmu.12457.1     | 12.82 | 12.74 | 0.03 | 0.14 | 1.05  | 0.259243 | 0.297353 | 0.606358 | 0.556071 |
| Mmu.12458.2.S1_at       | Mmu.12458.2     | 12.11 | 12.2  | 0.18 | 0.17 | -1.07 | 0.670071 | 0.02002  | 0.852318 | 0.177698 |
| Mmu.12458.2.S1_x_at     | Mmu.12458.2     | 12.56 | 12.65 | 0.18 | 0.18 | -1.06 | 0.732597 | 0.022647 | 0.884502 | 0.188488 |
| Mmu.12467.1.S1_at       | Mmu.12467.1     | 9.53  | 8.21  | 0.34 | 0.6  | 2.49  | 0.028097 | 0.006218 | 0.309743 | 0.106916 |
| Mmu.12468.1.S1_at       | Mmu.12468.1     | 7.21  | 7.75  | 0.66 | 0.43 | -1.45 | 0.094646 | 0.119393 | 0.452166 | 0.387887 |
| Mmu.12476.2.S1_a_at     | Mmu.12476.2     | 4.93  | 4.71  | 0.4  | 0.21 | 1.17  | 0.154546 | 0.18257  | 0.519131 | 0.459065 |

|                     |             |       |       |      |      |       |          |          |          |          |
|---------------------|-------------|-------|-------|------|------|-------|----------|----------|----------|----------|
| Mmu.1249.1.S1_at    | Mmu.1249.1  | 8.47  | 7.95  | 0.07 | 1    | 1.43  | 0.339176 | 0.309596 | 0.661179 | 0.564987 |
| Mmu.12497.1.S1_at   | Mmu.12497.1 | 11.91 | 11.88 | 0.13 | 0.19 | 1.02  | 0.567376 | 0.763462 | 0.798083 | 0.862471 |
| Mmu.125.1.S1_at     | Mmu.125.1   | 4.42  | 4.71  | 0.23 | 0.15 | -1.22 | 0.144072 | 0.178522 | 0.510652 | 0.454778 |
| Mmu.12516.1.A1_at   | Mmu.12516.1 | 3.83  | 3.81  | 0.08 | 0.28 | 1.01  | 0.954844 | 0.554085 | 0.983073 | 0.732953 |
| Mmu.12516.1.S1_at   | Mmu.12516.1 | 4.16  | 4.06  | 0.28 | 0.33 | 1.07  | 0.34629  | 0.485464 | 0.665754 | 0.68914  |
| Mmu.12522.1.S1_at   | Mmu.12522.1 | 12.39 | 12.48 | 0.06 | 0.16 | -1.06 | 0.969174 | 0.429945 | 0.988261 | 0.65111  |
| Mmu.12522.1.S1_x_at | Mmu.12522.1 | 12.31 | 12.36 | 0.02 | 0.2  | -1.04 | 0.926788 | 0.70329  | 0.971827 | 0.827958 |
| Mmu.12524.1.S1_at   | Mmu.12524.1 | 8.48  | 8.32  | 0.18 | 0.44 | 1.12  | 0.992897 | 0.524467 | 0.997577 | 0.714384 |
| Mmu.1257.1.S1_at    | Mmu.1257.1  | 3.92  | 4.21  | 0.14 | 0.32 | -1.23 | 0.083548 | 0.036676 | 0.43582  | 0.235973 |
| Mmu.12585.1.S1_at   | Mmu.12585.1 | 9.12  | 9.44  | 0.23 | 0.3  | -1.25 | 0.126867 | 0.148441 | 0.493029 | 0.423007 |
| Mmu.12596.1.S1_at   | Mmu.12596.1 | 7.93  | 7.81  | 0.13 | 0.24 | 1.09  | 0.890585 | 0.129554 | 0.956235 | 0.401081 |
| Mmu.126.1.S1_a_at   | Mmu.126.1   | 4.09  | 4.11  | 0.04 | 0.21 | -1.01 | 0.262752 | 0.336783 | 0.609039 | 0.584093 |
| Mmu.126.2.A1_at     | Mmu.126.2   | 4     | 4.1   | 0.06 | 0.35 | -1.08 | 0.25435  | 0.340044 | 0.602363 | 0.586516 |
| Mmu.12603.1.S1_a_at | Mmu.12603.1 | 11.09 | 10.11 | 0.45 | 0.17 | 1.97  | 0.026058 | 0.037618 | 0.30146  | 0.238384 |
| Mmu.12603.1.S1_at   | Mmu.12603.1 | 11.08 | 10.21 | 0.38 | 0.21 | 1.82  | 0.019777 | 0.020663 | 0.275549 | 0.180392 |
| Mmu.12603.2.S1_at   | Mmu.12603.2 | 2.92  | 3.01  | 0.06 | 0.02 | -1.06 | 0.035167 | 0.013322 | 0.335333 | 0.148042 |
| Mmu.1261.1.S1_at    | Mmu.1261.1  | 3.61  | 3.58  | 0    | 0.07 | 1.02  | 0.576188 | 0.942371 | 0.80281  | 0.967292 |
| Mmu.2120.1.S1_s_at  | Mmu.2120.1  | 14.18 | 14.72 | 0.36 | 0.01 | -1.45 | 0.192054 | 0.149626 | 0.555109 | 0.424172 |
| Mmu.12611.1.S1_at   | Mmu.12611.1 | 9.49  | 9.51  | 0.21 | 0.18 | -1.01 | 0.306536 | 0.378812 | 0.639593 | 0.615795 |
| Mmu.1262.1.A1_at    | Mmu.1262.1  | 12.14 | 11.93 | 0.12 | 0.13 | 1.16  | 0.231247 | 0.34797  | 0.587369 | 0.592215 |
| Mmu.12628.1.S1_at   | Mmu.12628.1 | 10.38 | 8.86  | 0.14 | 0.64 | 2.87  | 0.034601 | 0.029915 | 0.333297 | 0.214643 |
| Mmu.12633.1.S1_at   | Mmu.12633.1 | 9.01  | 10.05 | 0.09 | 0.23 | -2.04 | 0.00127  | 0.001551 | 0.145267 | 0.059602 |
| Mmu.12638.1.S1_at   | Mmu.12638.1 | 9.96  | 9.85  | 0.05 | 0.15 | 1.08  | 0.80254  | 0.005271 | 0.918577 | 0.100589 |
| Mmu.12642.1.S1_at   | Mmu.12642.1 | 6.52  | 6.1   | 0.12 | 0.38 | 1.34  | 0.107373 | 0.141012 | 0.468045 | 0.414507 |
| Mmu.12644.1.S1_at   | Mmu.12644.1 | 6.4   | 7.19  | 0.38 | 0.83 | -1.73 | 0.355177 | 0.208066 | 0.670851 | 0.482049 |
| Mmu.12647.1.S1_at   | Mmu.12647.1 | 8.52  | 8.36  | 0.06 | 0.27 | 1.11  | 0.932274 | 0.902436 | 0.973784 | 0.944564 |
| Mmu.1265.1.S1_at    | Mmu.1265.1  | 9.89  | 9.41  | 0.19 | 0.5  | 1.4   | 0.240607 | 0.123116 | 0.593462 | 0.393123 |
| Mmu.12651.3.S1_at   | Mmu.12651.3 | 7.58  | 10.08 | 0.54 | 0.29 | -5.64 | 0.001995 | 0.000626 | 0.155636 | 0.042692 |
| Mmu.12653.1.S1_at   | Mmu.12653.1 | 10.6  | 10.98 | 0.21 | 0.21 | -1.31 | 0.189578 | 0.109755 | 0.552483 | 0.373701 |
| Mmu.12672.1.S1_at   | Mmu.12672.1 | 3     | 3.04  | 0.07 | 0.14 | -1.03 | 0.427227 | 0.612043 | 0.716187 | 0.76972  |
| Mmu.12672.1.S1_s_at | Mmu.12672.1 | 10.75 | 11.14 | 0.07 | 0.3  | -1.3  | 0.233175 | 0.33902  | 0.587994 | 0.585891 |
| Mmu.7460.2.S1_x_at  | Mmu.7460.2  | 4.18  | 5.94  | 0.18 | 1.37 | -3.39 | 0.079222 | 0.062476 | 0.429096 | 0.296745 |
| Mmu.127.1.A1_at     | Mmu.127.1   | 2.9   | 2.98  | 0.08 | 0.26 | -1.06 | 0.33433  | 0.325122 | 0.658336 | 0.575547 |
| Mmu.127.1.S1_at     | Mmu.127.1   | 3.34  | 3.32  | 0.17 | 0.17 | 1.01  | 0.583868 | 0.76878  | 0.806781 | 0.865653 |
| Mmu.12708.1.S1_at   | Mmu.12708.1 | 5.22  | 5.47  | 0.04 | 0.46 | -1.19 | 0.281121 | 0.223988 | 0.622118 | 0.497025 |
| Mmu.12740.1.S1_at   | Mmu.12740.1 | 10.38 | 10.17 | 0.22 | 0.2  | 1.15  | 0.236377 | 0.419699 | 0.590419 | 0.643616 |
| Mmu.12743.1.S1_at   | Mmu.12743.1 | 9.3   | 9.01  | 0.04 | 0.24 | 1.22  | 0.101507 | 0.008926 | 0.461313 | 0.124951 |
| Mmu.12751.1.S1_at   | Mmu.12751.1 | 9.02  | 9.84  | 0.12 | 0.1  | -1.76 | 0.000782 | 0.00101  | 0.136818 | 0.050657 |
| Mmu.12759.1.S1_at   | Mmu.12759.1 | 6.84  | 6.51  | 0.28 | 0.21 | 1.26  | 0.386027 | 0.436442 | 0.690975 | 0.65599  |
| Mmu.1276.1.S1_at    | Mmu.1276.1  | 10.56 | 10.76 | 0.37 | 0.9  | -1.14 | 0.940479 | 0.788244 | 0.97745  | 0.877514 |
| Mmu.1278.1.S1_s_at  | Mmu.1278.1  | 14.84 | 14.82 | 0.01 | 0.01 | 1.01  | 0.719281 | 0.26336  | 0.876813 | 0.529635 |



|                         |                 |       |       |      |      |       |          |          |          |          |
|-------------------------|-----------------|-------|-------|------|------|-------|----------|----------|----------|----------|
| Mmu.12784.1.S1_at       | Mmu.12784.1     | 10.84 | 11.79 | 0.13 | 0.11 | -1.94 | 0.000724 | 0.000428 | 0.136818 | 0.038359 |
| Mmu.128.1.S1_at         | Mmu.128.1       | 14.16 | 14.03 | 0.09 | 0.16 | 1.09  | 0.172278 | 0.053796 | 0.535678 | 0.277457 |
| MmugDNA.2157.1.S1_s_at  | MmugDNA.2157.1  | 13.2  | 12.76 | 0.2  | 0.22 | 1.35  | 0.122434 | 0.034627 | 0.487622 | 0.230247 |
| Mmu.12802.1.S1_at       | Mmu.12802.1     | 12.84 | 12.84 | 0.05 | 0.25 | 1     | 0.958626 | 0.996932 | 0.984337 | 0.99822  |
| Mmu.12802.2.S1_a_at     | Mmu.12802.2     | 11.91 | 12.01 | 0.14 | 0.29 | -1.07 | 0.784742 | 0.900504 | 0.910286 | 0.943447 |
| Mmu.12802.2.S1_at       | Mmu.12802.2     | 4.98  | 5.78  | 0.37 | 0.35 | -1.74 | 0.058353 | 0.047167 | 0.39029  | 0.261755 |
| Mmu.12806.1.S1_at       | Mmu.12806.1     | 10.11 | 10.33 | 0.37 | 0.04 | -1.17 | 0.249053 | 0.219654 | 0.599743 | 0.493246 |
| Mmu.12819.1.S1_at       | Mmu.12819.1     | 7.27  | 7.31  | 0.14 | 0.04 | -1.03 | 0.71547  | 0.863729 | 0.875098 | 0.922638 |
| Mmu.12819.1.S1_s_at     | Mmu.12819.1     | 5.29  | 5.44  | 0.04 | 0.12 | -1.11 | 0.079366 | 0.070938 | 0.429376 | 0.312444 |
| Mmu.12831.2.S1_at       | Mmu.12831.2     | 10.58 | 10.48 | 0.21 | 0.2  | 1.07  | 0.646237 | 0.205902 | 0.840778 | 0.480109 |
| Mmu.12852.1.S1_at       | Mmu.12852.1     | 11.64 | 11.4  | 0.14 | 0.5  | 1.18  | 0.339696 | 0.105418 | 0.661347 | 0.367279 |
| Mmu.12860.1.S1_at       | Mmu.12860.1     | 9.94  | 9.72  | 0.53 | 0.14 | 1.17  | 0.669535 | 0.546558 | 0.852167 | 0.728079 |
| Mmu.12861.1.S1_at       | Mmu.12861.1     | 12.54 | 12.51 | 0.05 | 0.29 | 1.02  | 0.258413 | 0.32261  | 0.60566  | 0.574023 |
| Mmu.12861.2.S1_at       | Mmu.12861.2     | 10.96 | 10.89 | 0.03 | 0.25 | 1.05  | 0.605734 | 0.515849 | 0.818499 | 0.708504 |
| MmugDNA.41416.1.S1_s_at | MmugDNA.41416.1 | 10.83 | 10.88 | 0.12 | 0.31 | -1.04 | 0.736923 | 0.558025 | 0.886925 | 0.735346 |
| Mmu.12863.1.S1_at       | Mmu.12863.1     | 10.86 | 11.31 | 0.19 | 0.16 | -1.37 | 0.022069 | 0.016014 | 0.28446  | 0.160458 |
| Mmu.12864.1.S1_at       | Mmu.12864.1     | 10.31 | 10.39 | 0.04 | 0.12 | -1.06 | 0.304109 | 0.009448 | 0.638294 | 0.128022 |
| Mmu.12865.1.S1_s_at     | Mmu.12865.1     | 8.94  | 9.19  | 0.08 | 0.31 | -1.19 | 0.224024 | 0.183531 | 0.582482 | 0.459681 |
| Mmu.12870.1.S1_at       | Mmu.12870.1     | 11.98 | 12.21 | 0.21 | 0.23 | -1.17 | 0.127434 | 0.117328 | 0.493834 | 0.384947 |
| Mmu.12873.1.S1_at       | Mmu.12873.1     | 7.33  | 7.36  | 0.32 | 0.4  | -1.02 | 0.626854 | 0.780193 | 0.82981  | 0.872539 |
| Mmu.12875.1.S1_at       | Mmu.12875.1     | 8.92  | 9.52  | 0.65 | 0.46 | -1.51 | 0.154433 | 0.138705 | 0.51902  | 0.411807 |
| Mmu.12880.1.S1_at       | Mmu.12880.1     | 10.47 | 10.25 | 0.13 | 0.38 | 1.17  | 0.442475 | 0.128534 | 0.72561  | 0.39989  |
| Mmu.12897.1.A1_at       | Mmu.12897.1     | 11.85 | 12.23 | 0.03 | 0.25 | -1.3  | 0.062349 | 0.079217 | 0.397836 | 0.326399 |
| Mmu.12897.1.S1_at       | Mmu.12897.1     | 11.35 | 11.76 | 0.05 | 0.25 | -1.33 | 0.020155 | 0.026212 | 0.276895 | 0.202891 |
| Mmu.12899.1.S1_at       | Mmu.12899.1     | 12.81 | 12.15 | 0.03 | 0.84 | 1.58  | 0.165035 | 0.197594 | 0.528987 | 0.472564 |
| Mmu.12915.1.A1_at       | Mmu.12915.1     | 3.37  | 3.37  | 0.13 | 0.02 | 1     | 0.318429 | 0.419347 | 0.648425 | 0.643449 |
| Mmu.12915.1.S1_at       | Mmu.12915.1     | 4     | 4.39  | 0.05 | 0.2  | -1.31 | 0.079952 | 0.050283 | 0.430176 | 0.269566 |
| Mmu.12921.1.S1_at       | Mmu.12921.1     | 7.68  | 7.58  | 0.21 | 0.68 | 1.07  | 0.855225 | 0.946001 | 0.941454 | 0.969324 |
| Mmu.12925.2.S1_at       | Mmu.12925.2     | 3.43  | 3.8   | 0.09 | 0.12 | -1.3  | 0.01057  | 0.008764 | 0.230404 | 0.124009 |
| Mmu.12935.1.S1_at       | Mmu.12935.1     | 5.16  | 5.16  | 0.27 | 0.1  | 1     | 0.91816  | 0.977407 | 0.968215 | 0.987721 |
| Mmu.12948.1.S1_at       | Mmu.12948.1     | 10.15 | 9.8   | 0.22 | 0.22 | 1.27  | 0.322075 | 0.029649 | 0.650801 | 0.213852 |
| Mmu.12952.1.S1_at       | Mmu.12952.1     | 9.32  | 10.97 | 0.97 | 2.26 | -3.13 | 0.471611 | 0.458422 | 0.743311 | 0.671165 |
| Mmu.12953.1.A1_at       | Mmu.12953.1     | 11.12 | 10.94 | 0.16 | 0.14 | 1.13  | 0.218208 | 0.416818 | 0.57777  | 0.641749 |
| Mmu.12959.1.S1_at       | Mmu.12959.1     | 12.78 | 12.7  | 0.08 | 0.14 | 1.06  | 0.669884 | 0.16151  | 0.852318 | 0.437651 |
| Mmu.12966.1.S1_at       | Mmu.12966.1     | 8.49  | 7.77  | 0.33 | 0.36 | 1.65  | 0.101081 | 0.1331   | 0.461009 | 0.404734 |
| Mmu.12981.1.S1_at       | Mmu.12981.1     | 11.99 | 12.39 | 0.3  | 0.31 | -1.32 | 0.455251 | 0.204197 | 0.733701 | 0.478507 |
| Mmu.12981.1.S1_s_at     | Mmu.12981.1     | 12.71 | 12.87 | 0.2  | 0.2  | -1.12 | 0.550443 | 0.137645 | 0.787912 | 0.410618 |
| Mmu.12987.1.S1_at       | Mmu.12987.1     | 9.57  | 9.94  | 0.11 | 0.08 | -1.29 | 0.008342 | 0.005904 | 0.217705 | 0.105118 |
| Mmu.12990.1.S1_x_at     | Mmu.12990.1     | 8.62  | 8.29  | 0.3  | 0.31 | 1.26  | 0.093677 | 0.052059 | 0.450966 | 0.273754 |
| Mmu.12999.1.S1_at       | Mmu.12999.1     | 7.12  | 7.39  | 0.36 | 0.57 | -1.21 | 0.860129 | 0.264126 | 0.943524 | 0.530214 |
| Mmu.1300.1.S1_at        | Mmu.1300.1      | 5.82  | 6.37  | 0.23 | 0.36 | -1.46 | 0.044525 | 0.028927 | 0.358786 | 0.211953 |

|                      |              |       |       |      |      |       |          |          |          |          |
|----------------------|--------------|-------|-------|------|------|-------|----------|----------|----------|----------|
| Mmu.15247.37.S1_s_at | Mmu.15247.37 | 2.84  | 3.07  | 0.19 | 0.16 | -1.17 | 0.813412 | 0.914319 | 0.924267 | 0.951823 |
| Mmu.15247.37.S1_x_at | Mmu.15247.37 | 2.93  | 2.94  | 0.02 | 0.02 | -1    | 0.831411 | 0.877599 | 0.931711 | 0.930173 |
| Mmu.13011.1.S1_at    | Mmu.13011.1  | 7.77  | 6.75  | 0.01 | 0.28 | 2.03  | 0.005177 | 0.005071 | 0.190313 | 0.09907  |
| Mmu.13012.1.S1_at    | Mmu.13012.1  | 4.79  | 4.29  | 1.1  | 0.26 | 1.42  | 0.266036 | 0.230294 | 0.611558 | 0.502102 |
| Mmu.13013.1.S1_at    | Mmu.13013.1  | 7.94  | 7.96  | 0.13 | 0.24 | -1.02 | 0.226939 | 0.268165 | 0.584827 | 0.533876 |
| Mmu.13013.1.S1_x_at  | Mmu.13013.1  | 7.37  | 7.45  | 0.1  | 0.18 | -1.06 | 0.240393 | 0.246433 | 0.593208 | 0.515899 |
| Mmu.13018.1.S1_at    | Mmu.13018.1  | 7.39  | 7.89  | 0.28 | 0.59 | -1.41 | 0.317028 | 0.296371 | 0.647775 | 0.555492 |
| Mmu.13018.2.S1_a_at  | Mmu.13018.2  | 8.6   | 8.99  | 0.24 | 0.22 | -1.31 | 0.21614  | 0.154835 | 0.575954 | 0.429849 |
| Mmu.13021.1.S1_at    | Mmu.13021.1  | 6.3   | 7.58  | 0.37 | 0.19 | -2.43 | 0.006742 | 0.002828 | 0.20158  | 0.078363 |
| Mmu.1303.1.A1_at     | Mmu.1303.1   | 6.18  | 6.3   | 0.06 | 0.16 | -1.08 | 0.169544 | 0.289448 | 0.533686 | 0.55046  |
| Mmu.1303.1.S1_at     | Mmu.1303.1   | 6.19  | 6.25  | 0.1  | 0.35 | -1.04 | 0.964378 | 0.940908 | 0.986213 | 0.966553 |
| Mmu.13051.1.S1_at    | Mmu.13051.1  | 5.08  | 4.99  | 0.07 | 0.25 | 1.07  | 0.770521 | 0.722162 | 0.90333  | 0.839044 |
| Mmu.13059.1.S1_at    | Mmu.13059.1  | 10.35 | 10.74 | 0.14 | 0.12 | -1.3  | 0.04062  | 0.007952 | 0.34998  | 0.118702 |
| Mmu.13079.1.S1_at    | Mmu.13079.1  | 3.38  | 3.39  | 0.12 | 0.17 | -1.01 | 0.686948 | 0.863632 | 0.860053 | 0.922638 |
| Mmu.13079.1.S1_s_at  | Mmu.13079.1  | 13.27 | 12.24 | 0.01 | 0.17 | 2.05  | 0.000441 | 0.000062 | 0.133116 | 0.025666 |
| Mmu.13084.1.S1_x_at  | Mmu.13084.1  | 3.48  | 3.43  | 0.16 | 0.66 | 1.04  | 0.381976 | 0.506292 | 0.688341 | 0.702368 |
| Mmu.1309.1.S1_at     | Mmu.1309.1   | 12.15 | 11.91 | 0.11 | 0.26 | 1.18  | 0.348293 | 0.343018 | 0.66711  | 0.58885  |
| Mmu.13092.1.S1_s_at  | Mmu.13092.1  | 12.85 | 13.07 | 0.16 | 0.08 | -1.17 | 0.278079 | 0.106252 | 0.620201 | 0.368669 |
| Mmu.13096.1.S1_at    | Mmu.13096.1  | 9.77  | 10.24 | 0.29 | 0.27 | -1.39 | 0.125456 | 0.169718 | 0.491333 | 0.446287 |
| Mmu.1310.2.S1_at     | Mmu.1310.2   | 10.9  | 10.78 | 0.15 | 0.22 | 1.09  | 0.623001 | 0.008534 | 0.82774  | 0.122563 |
| Mmu.13104.1.S1_at    | Mmu.13104.1  | 11.75 | 11.63 | 0.11 | 0.16 | 1.09  | 0.189854 | 0.114301 | 0.552746 | 0.380835 |
| Mmu.13105.1.S1_at    | Mmu.13105.1  | 13.28 | 13.06 | 0.06 | 0.06 | 1.16  | 0.016295 | 0.007192 | 0.263592 | 0.114057 |
| Mmu.13110.1.S1_at    | Mmu.13110.1  | 10.38 | 9.91  | 0.08 | 0.17 | 1.38  | 0.02347  | 0.030501 | 0.291591 | 0.216644 |
| Mmu.13110.1.S1_s_at  | Mmu.13110.1  | 9.61  | 9.01  | 0.12 | 0.18 | 1.52  | 0.01392  | 0.021693 | 0.250029 | 0.184333 |
| Mmu.13111.1.S1_at    | Mmu.13111.1  | 7.04  | 7.33  | 0.09 | 0.31 | -1.23 | 0.136487 | 0.114244 | 0.503566 | 0.380761 |
| Mmu.1314.2.S1_a_at   | Mmu.1314.2   | 6.75  | 9.79  | 0.96 | 1.25 | -8.22 | 0.05183  | 0.035687 | 0.376487 | 0.233314 |
| Mmu.13156.2.A1_x_at  | Mmu.13156.2  | 7.46  | 7.21  | 2.21 | 1.26 | 1.19  | 0.74312  | 0.429979 | 0.89009  | 0.65111  |
| Mmu.13156.2.S1_x_at  | Mmu.13156.2  | 7.69  | 7.97  | 1.67 | 0.96 | -1.22 | 0.681121 | 0.487523 | 0.85748  | 0.690559 |
| Mmu.13156.3.A1_at    | Mmu.13156.3  | 3.86  | 3.75  | 0.61 | 0.21 | 1.08  | 0.754925 | 0.330269 | 0.895807 | 0.579044 |
| Mmu.13156.3.S1_at    | Mmu.13156.3  | 5.73  | 5.98  | 0.38 | 0.05 | -1.19 | 0.479935 | 0.332305 | 0.747922 | 0.580738 |
| Mmu.13156.4.S1_x_at  | Mmu.13156.4  | 8.62  | 10.15 | 0.34 | 1.38 | -2.9  | 0.187564 | 0.090491 | 0.550528 | 0.345002 |
| Mmu.13156.5.A1_x_at  | Mmu.13156.5  | 8.03  | 8.7   | 0.93 | 1.28 | -1.6  | 0.50378  | 0.251606 | 0.761    | 0.520349 |
| Mmu.13156.5.S1_x_at  | Mmu.13156.5  | 8.25  | 9.64  | 1.35 | 1.54 | -2.63 | 0.51082  | 0.149338 | 0.765151 | 0.423811 |
| Mmu.13168.1.S1_at    | Mmu.13168.1  | 11    | 9.92  | 0.26 | 0.12 | 2.11  | 0.004711 | 0.001731 | 0.184492 | 0.062895 |
| Mmu.13168.2.S1_at    | Mmu.13168.2  | 9.26  | 7.96  | 0.3  | 0.19 | 2.46  | 0.008106 | 0.00253  | 0.216416 | 0.074291 |
| Mmu.13181.1.S1_at    | Mmu.13181.1  | 8.32  | 8.6   | 0.28 | 0.16 | -1.22 | 0.197263 | 0.273973 | 0.56024  | 0.538503 |
| Mmu.13184.1.S1_x_at  | Mmu.13184.1  | 10    | 9.92  | 0.06 | 0.06 | 1.06  | 0.089774 | 0.243265 | 0.445334 | 0.513356 |
| Mmu.13185.1.S1_s_at  | Mmu.13185.1  | 13.29 | 13.27 | 0.14 | 0.14 | 1.01  | 0.372814 | 0.508587 | 0.683054 | 0.703719 |
| Mmu.132.1.S1_at      | Mmu.132.1    | 8.03  | 9.14  | 0.45 | 0.45 | -2.16 | 0.062302 | 0.024553 | 0.397683 | 0.196073 |
| Mmu.13251.1.A1_at    | Mmu.13251.1  | 5.27  | 5.72  | 0.15 | 0.07 | -1.36 | 0.026362 | 0.009115 | 0.302842 | 0.125994 |
| Mmu.13254.1.S1_at    | Mmu.13254.1  | 7.66  | 8.26  | 0.09 | 0.23 | -1.51 | 0.014896 | 0.004329 | 0.256179 | 0.092251 |

|                         |                 |       |       |      |      |       |          |          |          |          |
|-------------------------|-----------------|-------|-------|------|------|-------|----------|----------|----------|----------|
| Mmu.13271.1.S1_s_at     | Mmu.13271.1     | 6.44  | 6.51  | 0.12 | 0.07 | -1.05 | 0.476109 | 0.376117 | 0.746139 | 0.613952 |
| Mmu.13281.1.S1_at       | Mmu.13281.1     | 9.49  | 9.59  | 0.12 | 0.31 | -1.07 | 0.640764 | 0.762804 | 0.83776  | 0.862045 |
| Mmu.13282.1.A1_at       | Mmu.13282.1     | 4.92  | 4.99  | 0.09 | 0.07 | -1.05 | 0.267313 | 0.173583 | 0.612416 | 0.449956 |
| Mmu.13282.1.S1_at       | Mmu.13282.1     | 3.39  | 3.74  | 0.02 | 0.2  | -1.28 | 0.103548 | 0.037662 | 0.463273 | 0.23853  |
| Mmu.13291.1.S1_at       | Mmu.13291.1     | 11.44 | 11.38 | 0.15 | 0.5  | 1.05  | 0.423769 | 0.030222 | 0.714199 | 0.21576  |
| Mmu.13294.1.S1_at       | Mmu.13294.1     | 9.47  | 9.51  | 0.22 | 0.13 | -1.03 | 0.504037 | 0.53089  | 0.761108 | 0.718247 |
| Mmu.13324.1.S1_at       | Mmu.13324.1     | 9.35  | 9.15  | 0.15 | 0.1  | 1.15  | 0.285651 | 0.140671 | 0.625066 | 0.41397  |
| Mmu.13335.1.S1_at       | Mmu.13335.1     | 8.81  | 7.98  | 0.23 | 0.26 | 1.78  | 0.015688 | 0.011325 | 0.260208 | 0.138076 |
| Mmu.13339.1.S1_at       | Mmu.13339.1     | 7.48  | 7.52  | 0.11 | 0.12 | -1.03 | 0.260354 | 0.478653 | 0.607157 | 0.684657 |
| Mmu.13340.1.S1_at       | Mmu.13340.1     | 7.71  | 7.59  | 0.11 | 0.45 | 1.09  | 0.606699 | 0.209607 | 0.818965 | 0.483271 |
| Mmu.13354.1.A1_at       | Mmu.13354.1     | 9.3   | 9.16  | 0.23 | 0.12 | 1.1   | 0.099557 | 0.046361 | 0.459552 | 0.259844 |
| Mmu.13354.1.S1_at       | Mmu.13354.1     | 9.98  | 9.85  | 0.18 | 0.11 | 1.1   | 0.089534 | 0.054811 | 0.445161 | 0.279637 |
| Mmu.13356.1.S1_at       | Mmu.13356.1     | 10.38 | 10.23 | 0.12 | 0.32 | 1.11  | 0.501954 | 0.439133 | 0.760244 | 0.657885 |
| Mmu.13360.1.S1_at       | Mmu.13360.1     | 5.82  | 5.76  | 0.37 | 0.23 | 1.05  | 0.698251 | 0.82409  | 0.866049 | 0.898903 |
| Mmu.13368.1.S1_at       | Mmu.13368.1     | 11.4  | 11.55 | 0.05 | 0.24 | -1.11 | 0.902008 | 0.077662 | 0.960872 | 0.323709 |
| Mmu.13380.2.S1_at       | Mmu.13380.2     | 3.8   | 3.88  | 0.17 | 0.2  | -1.06 | 0.540849 | 0.572064 | 0.782193 | 0.744208 |
| Mmu.13384.1.S1_at       | Mmu.13384.1     | 7.93  | 7.95  | 0.24 | 0.16 | -1.01 | 0.568461 | 0.783439 | 0.798666 | 0.874577 |
| Mmu.13405.1.S1_at       | Mmu.13405.1     | 6.77  | 6.92  | 0.13 | 0.03 | -1.11 | 0.038164 | 0.041501 | 0.343587 | 0.248606 |
| MmugDNA.19759.1.S1_s_at | MmugDNA.19759.1 | 12.57 | 13.08 | 0.03 | 0.3  | -1.42 | 0.123551 | 0.046442 | 0.489327 | 0.260042 |
| Mmu.13435.1.S1_at       | Mmu.13435.1     | 13.89 | 13.94 | 0.27 | 0.13 | -1.03 | 0.708118 | 0.796818 | 0.871567 | 0.882803 |
| Mmu.13445.1.S1_at       | Mmu.13445.1     | 13.18 | 13.18 | 0.13 | 0.1  | 1     | 0.837087 | 0.581369 | 0.934152 | 0.750417 |
| Mmu.13450.1.S1_s_at     | Mmu.13450.1     | 14.51 | 14.49 | 0.03 | 0.02 | 1.02  | 0.121534 | 0.140916 | 0.486438 | 0.414394 |
| Mmu.13463.1.S1_at       | Mmu.13463.1     | 3.09  | 3.09  | 0.04 | 0.08 | 1     | 0.412289 | 0.370897 | 0.70788  | 0.609874 |
| Mmu.13476.1.A1_at       | Mmu.13476.1     | 5.52  | 5.19  | 0.28 | 0.03 | 1.25  | 0.094713 | 0.034148 | 0.452166 | 0.228692 |
| Mmu.13476.1.S1_at       | Mmu.13476.1     | 6.45  | 6.08  | 0.11 | 0.03 | 1.29  | 0.004405 | 0.002909 | 0.183071 | 0.079157 |
| Mmu.13482.1.S1_at       | Mmu.13482.1     | 7.56  | 8.23  | 0.11 | 0.83 | -1.59 | 0.247765 | 0.305257 | 0.599045 | 0.562255 |
| Mmu.13488.1.S1_at       | Mmu.13488.1     | 3.87  | 3.88  | 0.22 | 0.09 | -1.01 | 0.883192 | 0.904288 | 0.952984 | 0.945683 |
| Mmu.13493.1.S1_at       | Mmu.13493.1     | 7.24  | 6.87  | 0.13 | 0.19 | 1.29  | 0.058454 | 0.263825 | 0.390399 | 0.530086 |
| Mmu.1351.1.S1_at        | Mmu.1351.1      | 6.2   | 6.78  | 0.76 | 0.25 | -1.49 | 0.192991 | 0.152251 | 0.556235 | 0.427045 |
| Mmu.13511.1.S1_at       | Mmu.13511.1     | 7.73  | 7.78  | 0.27 | 0.07 | -1.04 | 0.35391  | 0.454774 | 0.670266 | 0.668859 |
| Mmu.13514.1.S1_s_at     | Mmu.13514.1     | 10.71 | 11.42 | 0.29 | 0.07 | -1.63 | 0.013085 | 0.007403 | 0.245262 | 0.115643 |
| Mmu.13516.1.S1_at       | Mmu.13516.1     | 7.63  | 8.87  | 0.53 | 1.04 | -2.36 | 0.223723 | 0.279602 | 0.582123 | 0.543186 |
| Mmu.1995.1.S1_s_at      | Mmu.1995.1      | 13.92 | 13.05 | 0.06 | 0.13 | 1.83  | 0.000574 | 0.000084 | 0.136818 | 0.027016 |
| Mmu.13540.1.A1_at       | Mmu.13540.1     | 6.88  | 6.97  | 0.19 | 0.05 | -1.07 | 0.355196 | 0.375093 | 0.670863 | 0.613186 |
| Mmu.13540.1.S1_at       | Mmu.13540.1     | 6.44  | 6.5   | 0.05 | 0.1  | -1.04 | 0.443203 | 0.615945 | 0.725992 | 0.772359 |
| Mmu.1356.2.S1_at        | Mmu.1356.2      | 7.58  | 7.92  | 0.23 | 0.04 | -1.27 | 0.170289 | 0.033395 | 0.534249 | 0.226396 |
| Mmu.13562.1.S1_at       | Mmu.13562.1     | 11.5  | 11.66 | 0.24 | 0.1  | -1.12 | 0.475164 | 0.216    | 0.745579 | 0.48965  |
| Mmu.13562.1.S1_x_at     | Mmu.13562.1     | 11.58 | 11.77 | 0.22 | 0.07 | -1.14 | 0.407551 | 0.151394 | 0.704692 | 0.426104 |
| Mmu.13564.1.S1_at       | Mmu.13564.1     | 4.93  | 5.41  | 0.3  | 0.2  | -1.39 | 0.102706 | 0.039385 | 0.46254  | 0.243406 |
| Mmu.13566.1.A1_at       | Mmu.13566.1     | 6.15  | 6.27  | 0.06 | 0.04 | -1.09 | 0.062286 | 0.157281 | 0.397683 | 0.432782 |
| Mmu.13566.1.S1_at       | Mmu.13566.1     | 5.6   | 5.74  | 0.16 | 0.34 | -1.1  | 0.888678 | 0.551248 | 0.955362 | 0.730863 |

|                     |             |       |       |      |      |       |          |          |          |          |
|---------------------|-------------|-------|-------|------|------|-------|----------|----------|----------|----------|
| Mmu.13573.1.S1_at   | Mmu.13573.1 | 11.89 | 12.01 | 0.22 | 0.06 | -1.09 | 0.378451 | 0.359556 | 0.686482 | 0.600813 |
| Mmu.1358.2.S1_at    | Mmu.1358.2  | 13.26 | 13.3  | 0.05 | 0.18 | -1.02 | 0.60251  | 0.794192 | 0.816564 | 0.881296 |
| Mmu.13595.1.S1_at   | Mmu.13595.1 | 10.02 | 9.06  | 0.28 | 0.78 | 1.94  | 0.495506 | 0.66167  | 0.757268 | 0.801903 |
| Mmu.13611.1.S1_at   | Mmu.13611.1 | 8.47  | 8.46  | 0.07 | 0.28 | 1.01  | 0.785298 | 0.2001   | 0.910651 | 0.474603 |
| Mmu.13628.1.S1_s_at | Mmu.13628.1 | 9.74  | 9.61  | 0.25 | 0.52 | 1.09  | 0.852659 | 0.130508 | 0.940647 | 0.402373 |
| Mmu.13628.1.S1_x_at | Mmu.13628.1 | 7.29  | 6.96  | 0.42 | 1.02 | 1.25  | 0.476373 | 0.453617 | 0.746223 | 0.668054 |
| Mmu.13644.1.A1_at   | Mmu.13644.1 | 5.19  | 4.37  | 0.88 | 0.18 | 1.77  | 0.16113  | 0.041065 | 0.5262   | 0.247375 |
| Mmu.13644.1.S1_at   | Mmu.13644.1 | 4.79  | 4     | 0.92 | 0.45 | 1.73  | 0.114844 | 0.03686  | 0.478048 | 0.23648  |
| Mmu.13651.1.S1_s_at | Mmu.13651.1 | 9.21  | 9.07  | 0.12 | 0.19 | 1.11  | 0.96418  | 0.027607 | 0.986154 | 0.207455 |
| Mmu.13667.1.S1_s_at | Mmu.13667.1 | 13.2  | 13.31 | 0.07 | 0.14 | -1.08 | 0.292187 | 0.084802 | 0.629464 | 0.336325 |
| Mmu.1367.1.S1_at    | Mmu.1367.1  | 3.73  | 3.96  | 0.04 | 0.11 | -1.17 | 0.030564 | 0.157173 | 0.319073 | 0.432623 |
| Mmu.1367.1.S1_x_at  | Mmu.1367.1  | 4.21  | 4.22  | 0.03 | 0.11 | -1    | 0.252998 | 0.270577 | 0.60168  | 0.535837 |
| Mmu.13672.1.S1_s_at | Mmu.13672.1 | 13.53 | 13.76 | 0.14 | 0.35 | -1.18 | 0.836178 | 0.085585 | 0.933665 | 0.33757  |
| Mmu.13676.1.S1_at   | Mmu.13676.1 | 9.55  | 7.62  | 0.17 | 0.57 | 3.79  | 0.005098 | 0.0016   | 0.189099 | 0.060468 |
| Mmu.13676.1.S1_s_at | Mmu.13676.1 | 11.33 | 9.24  | 0.13 | 0.63 | 4.24  | 0.006534 | 0.002037 | 0.199625 | 0.066885 |
| Mmu.13692.1.S1_at   | Mmu.13692.1 | 11.14 | 10.99 | 0.24 | 0.17 | 1.11  | 0.902307 | 0.393594 | 0.961025 | 0.626497 |
| Mmu.13696.1.S1_at   | Mmu.13696.1 | 10.28 | 10.18 | 0.43 | 0.1  | 1.06  | 0.793346 | 0.583584 | 0.914348 | 0.751826 |
| Mmu.13707.1.S1_at   | Mmu.13707.1 | 10.21 | 10.25 | 0.06 | 0.24 | -1.03 | 0.602931 | 0.814987 | 0.81682  | 0.893221 |
| Mmu.13713.1.S1_s_at | Mmu.13713.1 | 12.9  | 12.67 | 0.09 | 0.3  | 1.17  | 0.73834  | 0.706267 | 0.887643 | 0.829634 |
| Mmu.13716.1.S1_at   | Mmu.13716.1 | 9.55  | 9.73  | 0.06 | 0.37 | -1.13 | 0.13954  | 0.271969 | 0.506996 | 0.53674  |
| Mmu.13728.1.S1_a_at | Mmu.13728.1 | 6.42  | 6.51  | 0.19 | 0.27 | -1.06 | 0.871199 | 0.958589 | 0.948463 | 0.976525 |
| Mmu.13729.1.S1_at   | Mmu.13729.1 | 3.1   | 3.34  | 0.06 | 0.59 | -1.19 | 0.504001 | 0.45038  | 0.761105 | 0.665643 |
| Mmu.13736.1.S1_at   | Mmu.13736.1 | 9.99  | 9.44  | 0.4  | 0.36 | 1.46  | 0.166983 | 0.063575 | 0.531023 | 0.298666 |
| Mmu.13746.1.S1_at   | Mmu.13746.1 | 7.44  | 7.04  | 0.14 | 0.15 | 1.32  | 0.019802 | 0.025006 | 0.275549 | 0.198121 |
| Mmu.13750.1.S1_at   | Mmu.13750.1 | 9.23  | 9.39  | 0.04 | 0.19 | -1.12 | 0.821006 | 0.368925 | 0.92718  | 0.608449 |
| Mmu.13764.1.S1_s_at | Mmu.13764.1 | 7.92  | 8.12  | 0.11 | 0.43 | -1.15 | 0.495986 | 0.360116 | 0.757394 | 0.601254 |
| Mmu.13773.1.S1_at   | Mmu.13773.1 | 9.97  | 9.27  | 0.15 | 0.23 | 1.63  | 0.011704 | 0.007213 | 0.23742  | 0.11412  |
| Mmu.13782.1.S1_at   | Mmu.13782.1 | 11.51 | 11.9  | 0.1  | 0.12 | -1.31 | 0.007736 | 0.002713 | 0.211795 | 0.076643 |
| Mmu.13787.1.S1_at   | Mmu.13787.1 | 11.84 | 11.91 | 0.23 | 0.36 | -1.06 | 0.597009 | 0.482546 | 0.813377 | 0.68734  |
| Mmu.1379.1.S1_at    | Mmu.1379.1  | 3.35  | 3.25  | 0.07 | 0.26 | 1.07  | 0.586958 | 0.776016 | 0.808376 | 0.869689 |
| Mmu.13791.1.S1_at   | Mmu.13791.1 | 12.13 | 12.65 | 0.27 | 0.35 | -1.43 | 0.14431  | 0.163712 | 0.510808 | 0.439902 |
| Mmu.13792.1.S1_at   | Mmu.13792.1 | 12.37 | 12.54 | 0.19 | 0.39 | -1.12 | 0.390633 | 0.51921  | 0.693739 | 0.710878 |
| Mmu.13799.1.S1_at   | Mmu.13799.1 | 10.13 | 9.88  | 0.24 | 0.06 | 1.19  | 0.107266 | 0.218267 | 0.467913 | 0.491804 |
| Mmu.13800.1.S1_at   | Mmu.13800.1 | 10.69 | 10.36 | 0.28 | 0.18 | 1.25  | 0.275537 | 0.374421 | 0.617878 | 0.612886 |
| Mmu.13804.1.S1_s_at | Mmu.13804.1 | 13.52 | 13.54 | 0.04 | 0.09 | -1.01 | 0.86781  | 0.872431 | 0.947272 | 0.927467 |
| Mmu.1384.2.S1_at    | Mmu.1384.2  | 3.74  | 3.69  | 0.03 | 0    | 1.03  | 0.128037 | 0.536078 | 0.494243 | 0.721462 |
| Mmu.13843.2.S1_s_at | Mmu.13843.2 | 3.15  | 2.66  | 0.39 | 0.03 | 1.41  | 0.037022 | 0.011093 | 0.340567 | 0.137051 |
| Mmu.13854.1.S1_at   | Mmu.13854.1 | 6.35  | 6.38  | 0.16 | 0.05 | -1.02 | 0.382607 | 0.11231  | 0.688839 | 0.377592 |
| Mmu.13858.1.S1_at   | Mmu.13858.1 | 6.56  | 7.26  | 0.41 | 0.03 | -1.63 | 0.106445 | 0.186511 | 0.466881 | 0.462364 |
| Mmu.13865.1.S1_s_at | Mmu.13865.1 | 13.46 | 13.66 | 2.52 | 0.09 | -1.15 | 0.332397 | 0.344647 | 0.656831 | 0.590018 |
| Mmu.13868.1.S1_at   | Mmu.13868.1 | 7.76  | 8.23  | 0.24 | 0.3  | -1.39 | 0.104572 | 0.049968 | 0.464751 | 0.268752 |

|                       |               |       |       |      |      |       |          |          |          |          |
|-----------------------|---------------|-------|-------|------|------|-------|----------|----------|----------|----------|
| Mmu.1387.1.A1_at      | Mmu.1387.1    | 9.09  | 9.4   | 0.3  | 0.21 | -1.25 | 0.284472 | 0.09908  | 0.624317 | 0.357215 |
| Mmu.13876.1.S1_at     | Mmu.13876.1   | 8.3   | 8.16  | 0.39 | 0.99 | 1.1   | 0.712928 | 0.78588  | 0.874274 | 0.875989 |
| Mmu.13883.1.S1_s_at   | Mmu.13883.1   | 9.22  | 8.82  | 0.19 | 0.87 | 1.32  | 0.870153 | 0.887215 | 0.948096 | 0.935788 |
| Mmu.13908.1.S1_at     | Mmu.13908.1   | 4.84  | 4.81  | 0.28 | 0.16 | 1.02  | 0.911274 | 0.787222 | 0.965013 | 0.876889 |
| Mmu.13908.2.A1_at     | Mmu.13908.2   | 2.63  | 2.78  | 0.08 | 0.05 | -1.11 | 0.059044 | 0.053054 | 0.390921 | 0.276025 |
| Mmu.13917.1.S1_at     | Mmu.13917.1   | 8.9   | 8.52  | 0.35 | 0.56 | 1.3   | 0.718218 | 0.20331  | 0.876373 | 0.477517 |
| Mmu.13923.1.S1_at     | Mmu.13923.1   | 6.64  | 6.79  | 0.03 | 0.12 | -1.11 | 0.049715 | 0.001039 | 0.371923 | 0.051426 |
| Mmu.1393.1.S1_s_at    | Mmu.1393.1    | 13.46 | 13.54 | 0.2  | 0.11 | -1.06 | 0.889469 | 0.965376 | 0.955727 | 0.980661 |
| Mmu.13937.1.S1_s_at   | Mmu.13937.1   | 14.17 | 14.16 | 0.1  | 0.15 | 1     | 0.604931 | 0.089447 | 0.818041 | 0.343748 |
| Mmu.1394.1.S1_s_at    | Mmu.1394.1    | 11.78 | 11.87 | 0.03 | 0.08 | -1.06 | 0.162417 | 0.050647 | 0.526706 | 0.270317 |
| Mmu.13944.1.A1_at     | Mmu.13944.1   | 9.96  | 11.17 | 0.4  | 0.3  | -2.31 | 0.00719  | 0.003841 | 0.205355 | 0.088205 |
| Mmu.13944.1.S1_at     | Mmu.13944.1   | 6.01  | 5.78  | 0.42 | 0.3  | 1.17  | 0.345778 | 0.466342 | 0.665315 | 0.67624  |
| MmuSTS.1922.1.S1_at   | MmuSTS.1922.1 | 12.28 | 12.72 | 0.14 | 0.16 | -1.36 | 0.011829 | 0.006523 | 0.237777 | 0.10961  |
| MmuSTS.1922.1.S1_s_at | MmuSTS.1922.1 | 10.2  | 11.18 | 0.33 | 0.27 | -1.97 | 0.007241 | 0.003689 | 0.205925 | 0.086591 |
| Mmu.13947.1.S1_at     | Mmu.13947.1   | 7.38  | 7.4   | 0.14 | 0.14 | -1.01 | 0.628676 | 0.261139 | 0.830911 | 0.527538 |
| Mmu.13948.1.S1_at     | Mmu.13948.1   | 4.7   | 4.75  | 0.02 | 0.32 | -1.04 | 0.406623 | 0.405502 | 0.703786 | 0.633795 |
| Mmu.13956.1.S1_at     | Mmu.13956.1   | 9.79  | 9.99  | 0.25 | 0.67 | -1.15 | 0.763114 | 0.911453 | 0.90009  | 0.950093 |
| Mmu.13959.1.S1_at     | Mmu.13959.1   | 7.88  | 7.79  | 0.21 | 0.12 | 1.06  | 0.270287 | 0.02386  | 0.614663 | 0.193489 |
| Mmu.1396.1.S1_at      | Mmu.1396.1    | 10.88 | 10.74 | 0.05 | 0.05 | 1.1   | 0.021107 | 0.02256  | 0.282266 | 0.187982 |
| Mmu.13961.1.S1_at     | Mmu.13961.1   | 10.3  | 9.66  | 0.36 | 0.12 | 1.55  | 0.056546 | 0.045232 | 0.386649 | 0.257005 |
| Mmu.13982.2.S1_at     | Mmu.13982.2   | 7.55  | 7.17  | 0.41 | 0.61 | 1.3   | 0.639577 | 0.452028 | 0.837243 | 0.666754 |
| Mmu.13989.1.S1_at     | Mmu.13989.1   | 9.27  | 10.27 | 0.18 | 0.77 | -2    | 0.116956 | 0.146066 | 0.480867 | 0.420074 |
| Mmu.13993.1.S1_at     | Mmu.13993.1   | 3.93  | 3.89  | 0.27 | 0.2  | 1.03  | 0.922628 | 0.87435  | 0.970024 | 0.928629 |
| Mmu.13995.1.A1_at     | Mmu.13995.1   | 9.96  | 9.17  | 0.12 | 0.23 | 1.73  | 0.007326 | 0.002692 | 0.207019 | 0.076455 |
| Mmu.14024.1.S1_at     | Mmu.14024.1   | 8.39  | 7.71  | 0.14 | 0.43 | 1.61  | 0.084318 | 0.133206 | 0.436922 | 0.404941 |
| Mmu.14035.1.S1_at     | Mmu.14035.1   | 9.22  | 9.53  | 0.44 | 0.55 | -1.24 | 0.987017 | 0.90359  | 0.995377 | 0.945251 |
| Mmu.14041.1.S1_at     | Mmu.14041.1   | 8.78  | 9.4   | 0.25 | 0.49 | -1.53 | 0.241493 | 0.302414 | 0.593941 | 0.560109 |
| Mmu.14057.1.S1_at     | Mmu.14057.1   | 5.17  | 5.19  | 0.04 | 0.27 | -1.02 | 0.699136 | 0.661887 | 0.866628 | 0.802004 |
| Mmu.14060.1.A1_at     | Mmu.14060.1   | 12.06 | 11.95 | 0.24 | 0.71 | 1.08  | 0.691187 | 0.566986 | 0.862582 | 0.740935 |
| Mmu.14063.1.S1_at     | Mmu.14063.1   | 8.43  | 7.3   | 0.42 | 0.79 | 2.19  | 0.058766 | 0.040026 | 0.390921 | 0.245244 |
| Mmu.14068.1.S1_at     | Mmu.14068.1   | 5.82  | 7.49  | 0.6  | 1.27 | -3.19 | 0.174645 | 0.174132 | 0.538249 | 0.45044  |
| Mmu.14068.2.A1_at     | Mmu.14068.2   | 7.55  | 9.15  | 1.84 | 1.79 | -3.03 | 0.352565 | 0.218161 | 0.669669 | 0.491731 |
| Mmu.14082.1.S1_at     | Mmu.14082.1   | 10.53 | 10.48 | 0.1  | 0.13 | 1.03  | 0.293428 | 0.10387  | 0.630496 | 0.364519 |
| Mmu.14100.1.S1_at     | Mmu.14100.1   | 10.5  | 9.51  | 0.09 | 0.31 | 1.98  | 0.004206 | 0.001295 | 0.181739 | 0.055585 |
| Mmu.1412.1.S1_at      | Mmu.1412.1    | 9.7   | 9.57  | 0.13 | 0.18 | 1.1   | 0.774779 | 0.101248 | 0.905445 | 0.360971 |
| Mmu.14121.1.S1_at     | Mmu.14121.1   | 7.33  | 6.79  | 0.13 | 0.14 | 1.45  | 0.005519 | 0.006637 | 0.191603 | 0.110446 |
| Mmu.14152.1.S1_at     | Mmu.14152.1   | 5.1   | 7.42  | 1.77 | 1.94 | -4.98 | 0.223116 | 0.155808 | 0.581722 | 0.431211 |
| Mmu.14166.1.S1_at     | Mmu.14166.1   | 7.11  | 7.25  | 0.14 | 0.12 | -1.1  | 0.573041 | 0.045616 | 0.801055 | 0.257766 |
| Mmu.14167.1.S1_at     | Mmu.14167.1   | 9.7   | 9.92  | 0.05 | 0.15 | -1.16 | 0.114201 | 0.002073 | 0.47744  | 0.067389 |
| Mmu.14173.1.S1_at     | Mmu.14173.1   | 11.35 | 11.25 | 0.05 | 0.19 | 1.07  | 0.433582 | 0.531612 | 0.720116 | 0.718783 |
| Mmu.14174.1.S1_at     | Mmu.14174.1   | 9.61  | 9.57  | 0.33 | 0.24 | 1.03  | 0.516597 | 0.489029 | 0.768145 | 0.691559 |

|                         |                 |       |       |      |      |       |          |          |          |          |
|-------------------------|-----------------|-------|-------|------|------|-------|----------|----------|----------|----------|
| Mmu.14177.1.S1_at       | Mmu.14177.1     | 9.28  | 9.58  | 0.29 | 0.19 | -1.23 | 0.17209  | 0.204189 | 0.535422 | 0.478507 |
| Mmu.14179.2.S1_at       | Mmu.14179.2     | 9.99  | 9.86  | 0.13 | 0.29 | 1.09  | 0.553177 | 0.607935 | 0.789894 | 0.76668  |
| Mmu.14179.2.S1_x_at     | Mmu.14179.2     | 10.15 | 10.15 | 0.02 | 0.07 | 1     | 0.755882 | 0.562688 | 0.896248 | 0.7381   |
| Mmu.14180.1.S1_at       | Mmu.14180.1     | 8.1   | 8.38  | 0.05 | 0.22 | -1.22 | 0.139122 | 0.246508 | 0.50659  | 0.515917 |
| Mmu.14181.1.S1_at       | Mmu.14181.1     | 10.56 | 9.64  | 0.14 | 0.41 | 1.88  | 0.030902 | 0.019534 | 0.320207 | 0.175505 |
| Mmu.14202.1.S1_at       | Mmu.14202.1     | 12.29 | 12.99 | 0.09 | 0.21 | -1.62 | 0.010496 | 0.004451 | 0.229964 | 0.092997 |
| Mmu.14209.1.A1_at       | Mmu.14209.1     | 4.12  | 4.19  | 0.12 | 0.25 | -1.05 | 0.790577 | 0.872492 | 0.91308  | 0.927494 |
| Mmu.14209.1.S1_at       | Mmu.14209.1     | 3.18  | 3.19  | 0.14 | 0.01 | -1.01 | 0.434557 | 0.70263  | 0.720596 | 0.827641 |
| Mmu.14221.2.S1_at       | Mmu.14221.2     | 7.88  | 7.71  | 0.75 | 0.46 | 1.13  | 0.630853 | 0.243801 | 0.832393 | 0.513949 |
| Mmu.14247.1.S1_at       | Mmu.14247.1     | 3.62  | 4.4   | 0.21 | 0.83 | -1.72 | 0.193386 | 0.263881 | 0.556856 | 0.530118 |
| Mmu.14249.1.S1_at       | Mmu.14249.1     | 4.19  | 6.28  | 1.37 | 1.77 | -4.26 | 0.420246 | 0.118447 | 0.712267 | 0.386431 |
| Mmu.1425.1.S1_at        | Mmu.1425.1      | 9.88  | 9.63  | 0.77 | 0.91 | 1.19  | 0.774138 | 0.008842 | 0.905037 | 0.124493 |
| Mmu.1426.1.S1_at        | Mmu.1426.1      | 10.91 | 9.28  | 0.76 | 0.86 | 3.11  | 0.123553 | 0.008277 | 0.489327 | 0.12078  |
| Mmu.14263.2.S1_at       | Mmu.14263.2     | 8.14  | 9.28  | 0.12 | 0.32 | -2.2  | 0.007284 | 0.002341 | 0.206649 | 0.071588 |
| MmugDNA.26809.1.S1_s_at | MmugDNA.26809.1 | 13.73 | 13.67 | 0.08 | 0.12 | 1.04  | 0.247391 | 0.282192 | 0.598469 | 0.544949 |
| Mmu.14275.1.S1_at       | Mmu.14275.1     | 10.97 | 11.26 | 0.18 | 0.4  | -1.22 | 0.825582 | 0.094417 | 0.929243 | 0.351036 |
| Mmu.14298.1.S1_at       | Mmu.14298.1     | 5.21  | 5.49  | 0.17 | 0.16 | -1.22 | 0.100171 | 0.086424 | 0.460763 | 0.338882 |
| Mmu.14306.1.S1_s_at     | Mmu.14306.1     | 11.24 | 11.42 | 0.11 | 0.13 | -1.14 | 0.029337 | 0.144537 | 0.313768 | 0.418408 |
| Mmu.14311.1.S1_at       | Mmu.14311.1     | 6.07  | 8.02  | 0.44 | 1.51 | -3.87 | 0.158835 | 0.167842 | 0.524047 | 0.444426 |
| Mmu.14315.1.S1_at       | Mmu.14315.1     | 7.42  | 7.25  | 0.27 | 0.17 | 1.13  | 0.769004 | 0.735426 | 0.902867 | 0.846919 |
| Mmu.14317.2.S1_at       | Mmu.14317.2     | 9.89  | 9.96  | 0.25 | 0.01 | -1.05 | 0.670791 | 0.62185  | 0.852478 | 0.776413 |
| Mmu.14327.1.S1_at       | Mmu.14327.1     | 11.77 | 11.31 | 0.09 | 0.23 | 1.37  | 0.016493 | 0.004406 | 0.264215 | 0.092846 |
| Mmu.14341.1.S1_at       | Mmu.14341.1     | 7.2   | 7.09  | 0.36 | 0.18 | 1.08  | 0.722787 | 0.822113 | 0.878819 | 0.897658 |
| Mmu.14369.1.S1_at       | Mmu.14369.1     | 4.64  | 4.94  | 0.16 | 0.07 | -1.23 | 0.048538 | 0.10346  | 0.369003 | 0.364346 |
| Mmu.14389.1.S1_at       | Mmu.14389.1     | 7.52  | 7.65  | 0.16 | 0.26 | -1.09 | 0.104711 | 0.121029 | 0.465093 | 0.390038 |
| Mmu.14395.1.S1_at       | Mmu.14395.1     | 11.62 | 11.14 | 0.33 | 0.42 | 1.4   | 0.10363  | 0.081629 | 0.463383 | 0.329824 |
| Mmu.14396.1.S1_at       | Mmu.14396.1     | 11.1  | 10.69 | 0.18 | 0.13 | 1.32  | 0.103389 | 0.087606 | 0.462888 | 0.340846 |
| Mmu.1440.1.S1_at        | Mmu.1440.1      | 9.17  | 9.24  | 0.1  | 0.7  | -1.05 | 0.954467 | 0.993824 | 0.983073 | 0.996274 |
| Mmu.14402.2.A1_at       | Mmu.14402.2     | 5.07  | 6.32  | 0.16 | 0.66 | -2.37 | 0.027807 | 0.01058  | 0.309061 | 0.134213 |
| Mmu.14402.2.S1_at       | Mmu.14402.2     | 5.52  | 5.61  | 0.12 | 0.06 | -1.06 | 0.451514 | 0.417727 | 0.731625 | 0.642382 |
| Mmu.14426.1.S1_at       | Mmu.14426.1     | 4.07  | 4.26  | 0.27 | 0.19 | -1.14 | 0.485881 | 0.681316 | 0.751144 | 0.813957 |
| Mmu.14429.1.A1_at       | Mmu.14429.1     | 5.6   | 5.86  | 0.18 | 0.26 | -1.2  | 0.344164 | 0.50329  | 0.664241 | 0.700767 |
| Mmu.14429.1.S1_at       | Mmu.14429.1     | 3.95  | 4.16  | 0.17 | 0.18 | -1.16 | 0.260559 | 0.145852 | 0.607303 | 0.419888 |
| Mmu.14431.1.S1_at       | Mmu.14431.1     | 4.37  | 4.39  | 0    | 0.25 | -1.02 | 0.65768  | 0.792911 | 0.846091 | 0.880392 |
| Mmu.14436.1.S1_at       | Mmu.14436.1     | 6.12  | 11.7  | 2.15 | 3.48 | -47.7 | 0.369929 | 0.269616 | 0.681073 | 0.534868 |
| Mmu.14440.1.S1_at       | Mmu.14440.1     | 7.5   | 7.83  | 0.32 | 0.35 | -1.26 | 0.252013 | 0.352246 | 0.601234 | 0.595568 |
| Mmu.14441.1.S1_at       | Mmu.14441.1     | 10.26 | 9.62  | 0.14 | 0.22 | 1.56  | 0.02761  | 0.024472 | 0.308386 | 0.195777 |
| Mmu.14442.2.S1_at       | Mmu.14442.2     | 5.9   | 6     | 0.17 | 0.32 | -1.07 | 0.242447 | 0.304533 | 0.594425 | 0.561803 |
| Mmu.14456.1.S1_at       | Mmu.14456.1     | 10.43 | 9.95  | 0.11 | 0.19 | 1.39  | 0.019726 | 0.020305 | 0.275549 | 0.178871 |
| Mmu.14457.1.S1_at       | Mmu.14457.1     | 8.49  | 8.08  | 0.36 | 0.06 | 1.33  | 0.072856 | 0.085574 | 0.418008 | 0.337567 |
| Mmu.1447.1.A1_at        | Mmu.1447.1      | 5.78  | 6     | 0.03 | 0.08 | -1.16 | 0.009779 | 0.014014 | 0.22634  | 0.151595 |

|                         |                 |       |       |      |      |       |          |          |          |          |
|-------------------------|-----------------|-------|-------|------|------|-------|----------|----------|----------|----------|
| Mmu.1447.1.S1_at        | Mmu.1447.1      | 6.58  | 6.72  | 0.2  | 0.02 | -1.1  | 0.248411 | 0.124132 | 0.599265 | 0.394389 |
| Mmu.14488.1.S1_x_at     | Mmu.14488.1     | 5.77  | 5.24  | 0.09 | 0.36 | 1.45  | 0.135207 | 0.282174 | 0.501995 | 0.544937 |
| Mmu.14495.1.S1_at       | Mmu.14495.1     | 11.41 | 11.39 | 0.09 | 0.02 | 1.01  | 0.733452 | 0.001677 | 0.885068 | 0.061994 |
| Mmu.14509.2.S1_at       | Mmu.14509.2     | 11.55 | 11    | 0.26 | 0.22 | 1.46  | 0.082746 | 0.015816 | 0.434437 | 0.159476 |
| Mmu.1451.1.S1_at        | Mmu.1451.1      | 13.1  | 12.75 | 0.07 | 0.12 | 1.28  | 0.015071 | 0.006601 | 0.257266 | 0.110088 |
| Mmu.14510.1.S2_at       | Mmu.14510.1     | 2.62  | 2.76  | 0.12 | 0.15 | -1.1  | 0.22421  | 0.288843 | 0.582619 | 0.549981 |
| MmuSTS.4665.1.S1_at     | MmuSTS.4665.1   | 6.12  | 6.12  | 0.31 | 0.51 | -1    | 0.783653 | 0.93371  | 0.909657 | 0.962289 |
| MmuSTS.4665.1.S1_s_at   | MmuSTS.4665.1   | 8.5   | 8.53  | 0.19 | 0.71 | -1.02 | 0.904234 | 0.980106 | 0.961669 | 0.989236 |
| Mmu.14519.1.S1_at       | Mmu.14519.1     | 9.64  | 11.28 | 0.22 | 0.43 | -3.11 | 0.004874 | 0.001442 | 0.185363 | 0.057912 |
| Mmu.14534.1.S1_at       | Mmu.14534.1     | 5.48  | 5.63  | 0.42 | 0.4  | -1.11 | 0.439472 | 0.156686 | 0.723617 | 0.432182 |
| Mmu.14535.1.S1_at       | Mmu.14535.1     | 12.05 | 12.68 | 0.1  | 0.22 | -1.55 | 0.015356 | 0.00357  | 0.258258 | 0.085525 |
| MmugDNA.29503.1.S1_s_at | MmugDNA.29503.1 | 11.26 | 12.05 | 0.11 | 0.26 | -1.73 | 0.016722 | 0.004041 | 0.265094 | 0.090281 |
| Mmu.14551.1.S1_at       | Mmu.14551.1     | 5.17  | 4.93  | 0.15 | 0.12 | 1.19  | 0.466439 | 0.743538 | 0.740215 | 0.851395 |
| Mmu.14552.1.S1_a_at     | Mmu.14552.1     | 3.11  | 3.27  | 0.09 | 0.17 | -1.12 | 0.590293 | 0.483878 | 0.809851 | 0.688227 |
| Mmu.15973.50.S1_x_at    | Mmu.15973.50    | 5.88  | 6.13  | 0.35 | 0.1  | -1.19 | 0.424331 | 0.541913 | 0.714453 | 0.725146 |
| Mmu.14560.3.S1_at       | Mmu.14560.3     | 5.83  | 5.85  | 0.1  | 0.05 | -1.01 | 0.566698 | 0.820544 | 0.797703 | 0.896648 |
| Mmu.14562.1.S1_at       | Mmu.14562.1     | 9.71  | 8.65  | 0.66 | 0.29 | 2.08  | 0.059245 | 0.021243 | 0.391544 | 0.182465 |
| Mmu.1457.1.S1_at        | Mmu.1457.1      | 5.11  | 5.29  | 0.27 | 0.07 | -1.13 | 0.476865 | 0.736608 | 0.746306 | 0.847627 |
| Mmu.1457.1.S1_x_at      | Mmu.1457.1      | 5.11  | 5.11  | 0.1  | 0    | -1    | 0.856565 | 0.975955 | 0.942047 | 0.986856 |
| Mmu.14571.1.S1_at       | Mmu.14571.1     | 3.1   | 3.07  | 0.13 | 0.05 | 1.02  | 0.951286 | 0.754861 | 0.981684 | 0.857323 |
| Mmu.14583.1.S1_at       | Mmu.14583.1     | 10.12 | 10.49 | 0.17 | 0.27 | -1.3  | 0.090323 | 0.019028 | 0.445788 | 0.173644 |
| Mmu.14589.1.A1_at       | Mmu.14589.1     | 10.33 | 10.52 | 0.06 | 0.12 | -1.14 | 0.052987 | 0.058548 | 0.378925 | 0.288669 |
| Mmu.14593.1.S1_at       | Mmu.14593.1     | 9.81  | 10.71 | 0.14 | 0.66 | -1.86 | 0.088152 | 0.074434 | 0.442584 | 0.318062 |
| Mmu.6867.1.S1_at        | Mmu.6867.1      | 2.8   | 2.96  | 0.2  | 0.07 | -1.12 | 0.525021 | 0.721604 | 0.773363 | 0.838759 |
| Mmu.6867.1.S1_s_at      | Mmu.6867.1      | 14.02 | 13.94 | 0.96 | 0.06 | 1.06  | 0.482054 | 0.53423  | 0.749398 | 0.720204 |
| Mmu.14635.1.S1_s_at     | Mmu.14635.1     | 5.28  | 5.3   | 0.65 | 0.19 | -1.01 | 0.646423 | 0.609219 | 0.840895 | 0.767677 |
| Mmu.14640.1.S1_x_at     | Mmu.14640.1     | 8.66  | 8.53  | 0.21 | 0.17 | 1.1   | 0.914949 | 0.592555 | 0.966361 | 0.757844 |
| Mmu.14669.1.S1_at       | Mmu.14669.1     | 8.16  | 8.14  | 0.11 | 0.33 | 1.01  | 0.623537 | 0.255895 | 0.827977 | 0.523862 |
| Mmu.14676.1.S1_at       | Mmu.14676.1     | 5.43  | 5.41  | 0.27 | 0.19 | 1.01  | 0.653749 | 0.644368 | 0.844319 | 0.791566 |
| Mmu.14695.1.A1_at       | Mmu.14695.1     | 7.36  | 6.95  | 0.08 | 0.37 | 1.33  | 0.530565 | 0.650539 | 0.776893 | 0.795663 |
| Mmu.14710.1.S1_at       | Mmu.14710.1     | 4.71  | 4.85  | 0.09 | 0.02 | -1.1  | 0.042006 | 0.031283 | 0.353803 | 0.218752 |
| Mmu.14712.1.S1_at       | Mmu.14712.1     | 12.65 | 12.77 | 0.08 | 1.14 | -1.08 | 0.423871 | 0.515395 | 0.714199 | 0.708274 |
| Mmu.14715.2.S1_at       | Mmu.14715.2     | 3.54  | 3.83  | 0.14 | 0.06 | -1.22 | 0.085603 | 0.095485 | 0.439573 | 0.352525 |
| Mmu.14728.1.S1_at       | Mmu.14728.1     | 9.32  | 9.88  | 0.31 | 0.73 | -1.48 | 0.51493  | 0.468288 | 0.767243 | 0.6777   |
| Mmu.14737.1.S1_s_at     | Mmu.14737.1     | 13.93 | 13.89 | 0.05 | 0.2  | 1.03  | 0.832092 | 0.934986 | 0.931955 | 0.96319  |
| Mmu.14749.1.S1_s_at     | Mmu.14749.1     | 8.13  | 7.66  | 0.13 | 0.37 | 1.38  | 0.216119 | 0.041354 | 0.575954 | 0.247995 |
| Mmu.1477.1.S1_at        | Mmu.1477.1      | 9.42  | 9.96  | 0.58 | 0.49 | -1.46 | 0.79571  | 0.740046 | 0.915229 | 0.849396 |
| Mmu.14771.1.S1_at       | Mmu.14771.1     | 8.89  | 10.72 | 0.61 | 0.19 | -3.55 | 0.010763 | 0.014157 | 0.231196 | 0.152107 |
| Mmu.14774.1.S1_at       | Mmu.14774.1     | 10.57 | 10.41 | 0.37 | 0.37 | 1.11  | 0.823818 | 0.633017 | 0.928378 | 0.783894 |
| Mmu.14785.1.S1_at       | Mmu.14785.1     | 7.99  | 8.23  | 0.14 | 0.19 | -1.18 | 0.177423 | 0.078552 | 0.541483 | 0.325285 |
| Mmu.14786.1.S1_at       | Mmu.14786.1     | 10.14 | 10.12 | 0.15 | 0.27 | 1.01  | 0.879242 | 0.068103 | 0.951507 | 0.307142 |

|                         |                 |       |       |      |      |        |          |          |          |          |
|-------------------------|-----------------|-------|-------|------|------|--------|----------|----------|----------|----------|
| Mmu.14787.1.S1_at       | Mmu.14787.1     | 8.53  | 8.6   | 0.09 | 0.3  | -1.05  | 0.560215 | 0.224656 | 0.794209 | 0.497613 |
| Mmu.14792.1.S1_at       | Mmu.14792.1     | 9.68  | 10.48 | 0.4  | 0.96 | -1.74  | 0.382605 | 0.140105 | 0.688839 | 0.413394 |
| Mmu.14795.1.S1_at       | Mmu.14795.1     | 11.51 | 11.21 | 0.13 | 0.27 | 1.23   | 0.144996 | 0.141148 | 0.511188 | 0.414665 |
| Mmu.14798.1.S1_s_at     | Mmu.14798.1     | 8.95  | 9.08  | 0.19 | 0.85 | -1.09  | 0.739648 | 0.914541 | 0.888213 | 0.95196  |
| Mmu.14801.1.S1_at       | Mmu.14801.1     | 12.3  | 12.38 | 0.14 | 0.19 | -1.06  | 0.523427 | 0.417721 | 0.77253  | 0.642382 |
| MmugDNA.37414.1.S1_s_at | MmugDNA.37414.1 | 12.25 | 12.47 | 0.16 | 0.14 | -1.16  | 0.323116 | 0.301298 | 0.651295 | 0.559356 |
| Mmu.14807.1.S1_s_at     | Mmu.14807.1     | 12.46 | 12.5  | 0.09 | 0.11 | -1.03  | 0.446328 | 0.006609 | 0.728244 | 0.110149 |
| Mmu.14809.1.S1_at       | Mmu.14809.1     | 6.57  | 6.78  | 0.09 | 0.24 | -1.16  | 0.246222 | 0.368052 | 0.597663 | 0.607669 |
| Mmu.1481.2.S1_at        | Mmu.1481.2      | 5.42  | 6.41  | 0.15 | 1.04 | -1.99  | 0.11762  | 0.056446 | 0.48184  | 0.283516 |
| Mmu.1481.2.S1_s_at      | Mmu.1481.2      | 8.85  | 11.13 | 0.41 | 0.05 | -4.85  | 0.000771 | 0.000096 | 0.136818 | 0.027665 |
| Mmu.14814.1.S1_at       | Mmu.14814.1     | 9.12  | 10.36 | 0.34 | 0.63 | -2.36  | 0.051908 | 0.042628 | 0.376668 | 0.251037 |
| Mmu.14836.1.S1_at       | Mmu.14836.1     | 10.91 | 10.85 | 0.1  | 0.32 | 1.05   | 0.63155  | 0.452472 | 0.83275  | 0.667111 |
| Mmu.14838.1.S1_at       | Mmu.14838.1     | 12.05 | 12.31 | 0.18 | 0.12 | -1.2   | 0.198947 | 0.104443 | 0.562029 | 0.365719 |
| Mmu.1485.1.S1_at        | Mmu.1485.1      | 8.15  | 12.26 | 1.7  | 2.7  | -17.26 | 0.378757 | 0.294046 | 0.68656  | 0.553912 |
| Mmu.14856.1.A1_at       | Mmu.14856.1     | 11.27 | 12.31 | 0.24 | 0.63 | -2.05  | 0.061493 | 0.057151 | 0.39612  | 0.284972 |
| Mmu.14866.1.S1_at       | Mmu.14866.1     | 10.93 | 12.2  | 0.39 | 0.4  | -2.42  | 0.017086 | 0.008784 | 0.266719 | 0.124066 |
| Mmu.14874.1.S1_at       | Mmu.14874.1     | 6.57  | 6.85  | 0.36 | 0.7  | -1.22  | 0.719064 | 0.84206  | 0.876813 | 0.910022 |
| MmugDNA.40586.1.S1_s_at | MmugDNA.40586.1 | 6.74  | 7.95  | 0.65 | 0.65 | -2.31  | 0.021296 | 0.008914 | 0.282524 | 0.12491  |
| Mmu.14893.1.S1_x_at     | Mmu.14893.1     | 3.21  | 3.88  | 0.82 | 0.75 | -1.6   | 0.523419 | 0.722074 | 0.77253  | 0.838998 |
| Mmu.14901.1.S1_at       | Mmu.14901.1     | 7.06  | 7.15  | 0.37 | 0.18 | -1.07  | 0.48309  | 0.240197 | 0.749775 | 0.51084  |
| Mmu.14917.1.S1_s_at     | Mmu.14917.1     | 4.27  | 4.41  | 0.38 | 0.1  | -1.1   | 0.571776 | 0.001497 | 0.800374 | 0.058967 |
| Mmu.14917.2.S1_at       | Mmu.14917.2     | 2.99  | 3.21  | 0.09 | 0.04 | -1.16  | 0.020628 | 0.012966 | 0.279122 | 0.146523 |
| Mmu.14931.1.A1_at       | Mmu.14931.1     | 13.3  | 12.37 | 0.01 | 0.09 | 1.9    | 0.000061 | 0.000009 | 0.112653 | 0.016421 |
| Mmu.14932.1.S1_at       | Mmu.14932.1     | 8.45  | 8.5   | 0.09 | 0.38 | -1.03  | 0.29119  | 0.46882  | 0.628725 | 0.677906 |
| Mmu.14942.1.S1_at       | Mmu.14942.1     | 3.91  | 4.24  | 0.1  | 0.12 | -1.26  | 0.023835 | 0.052597 | 0.292829 | 0.274853 |
| Mmu.7847.1.S1_s_at      | Mmu.7847.1      | 10.06 | 10.34 | 0.22 | 0.31 | -1.21  | 0.234651 | 0.329903 | 0.588808 | 0.578874 |
| Mmu.14945.2.S1_at       | Mmu.14945.2     | 9.3   | 9.99  | 0.13 | 0.43 | -1.61  | 0.083006 | 0.096701 | 0.4349   | 0.35417  |
| Mmu.14958.1.S1_at       | Mmu.14958.1     | 9.44  | 10.12 | 0.08 | 0.49 | -1.6   | 0.032398 | 0.010506 | 0.324872 | 0.133936 |
| Mmu.14962.1.S1_at       | Mmu.14962.1     | 9.7   | 9.31  | 0.04 | 0.04 | 1.31   | 0.000167 | 0.000037 | 0.118376 | 0.023051 |
| Mmu.14966.1.S1_at       | Mmu.14966.1     | 9.17  | 9.84  | 0.3  | 0.49 | -1.6   | 0.446469 | 0.141183 | 0.728339 | 0.414709 |
| Mmu.1499.1.S1_at        | Mmu.1499.1      | 6.69  | 7.73  | 0.29 | 0.78 | -2.06  | 0.118594 | 0.13349  | 0.48294  | 0.405385 |
| Mmu.14994.1.S1_at       | Mmu.14994.1     | 4.47  | 4.74  | 0.23 | 0.11 | -1.2   | 0.265652 | 0.355793 | 0.611314 | 0.597864 |
| Mmu.150.1.S1_at         | Mmu.150.1       | 10.85 | 11.06 | 0.3  | 0.23 | -1.16  | 0.40556  | 0.412361 | 0.70327  | 0.638793 |
| Mmu.15003.1.S1_at       | Mmu.15003.1     | 10.45 | 10.24 | 0.08 | 0.23 | 1.16   | 0.204098 | 0.127296 | 0.566605 | 0.398032 |
| Mmu.15003.1.S1_s_at     | Mmu.15003.1     | 11.07 | 10.87 | 0.07 | 0.23 | 1.15   | 0.26574  | 0.165715 | 0.611356 | 0.441982 |
| Mmu.15003.1.S1_x_at     | Mmu.15003.1     | 10.56 | 10.34 | 0.09 | 0.3  | 1.17   | 0.314291 | 0.357797 | 0.645738 | 0.599418 |
| Mmu.15008.1.S1_at       | Mmu.15008.1     | 10.35 | 11.53 | 0.59 | 0.25 | -2.27  | 0.01384  | 0.006509 | 0.249758 | 0.109521 |
| Mmu.15009.1.S1_at       | Mmu.15009.1     | 6.94  | 7.54  | 0.14 | 0.23 | -1.52  | 0.019796 | 0.010545 | 0.275549 | 0.134072 |
| Mmu.15028.1.S1_at       | Mmu.15028.1     | 4.98  | 5.18  | 0.41 | 0.05 | -1.15  | 0.878326 | 0.981069 | 0.951178 | 0.989567 |
| Mmu.15029.1.A1_at       | Mmu.15029.1     | 3.36  | 3.38  | 0.2  | 0.22 | -1.01  | 0.968689 | 0.906217 | 0.988176 | 0.94693  |
| Mmu.15029.1.S1_at       | Mmu.15029.1     | 3.22  | 3.43  | 0.22 | 0.42 | -1.16  | 0.450111 | 0.541349 | 0.730786 | 0.724874 |



|                         |                 |       |       |      |      |       |          |          |          |          |
|-------------------------|-----------------|-------|-------|------|------|-------|----------|----------|----------|----------|
| Mmu.15032.1.S1_at       | Mmu.15032.1     | 11.97 | 11.96 | 0.1  | 0.51 | 1     | 0.794289 | 0.389299 | 0.914561 | 0.623403 |
| Mmu.15035.1.S1_at       | Mmu.15035.1     | 5.41  | 6.39  | 0.52 | 1.33 | -1.98 | 0.28149  | 0.200402 | 0.622236 | 0.474782 |
| Mmu.15041.1.S1_at       | Mmu.15041.1     | 9.35  | 10.17 | 0.76 | 0.41 | -1.77 | 0.085155 | 0.0857   | 0.438423 | 0.337761 |
| Mmu.15054.1.S1_at       | Mmu.15054.1     | 11.26 | 11.16 | 0.15 | 0.49 | 1.07  | 0.262736 | 0.062656 | 0.609039 | 0.297022 |
| Mmu.15056.1.S2_at       | Mmu.15056.1     | 4.31  | 4.69  | 0.26 | 0.32 | -1.3  | 0.873543 | 0.205753 | 0.94929  | 0.48007  |
| Mmu.15059.1.S1_at       | Mmu.15059.1     | 8.49  | 8.55  | 0.07 | 0.22 | -1.05 | 0.700037 | 0.1679   | 0.867253 | 0.444485 |
| Mmu.15062.1.S1_at       | Mmu.15062.1     | 9.12  | 9.05  | 0.02 | 0.28 | 1.04  | 0.380331 | 0.277141 | 0.68725  | 0.541154 |
| Mmu.15077.1.S1_at       | Mmu.15077.1     | 11.65 | 11.85 | 0.07 | 0.13 | -1.14 | 0.403641 | 0.018069 | 0.702178 | 0.169379 |
| Mmu.15102.1.S1_at       | Mmu.15102.1     | 9.32  | 9.59  | 0.09 | 0.13 | -1.21 | 0.065675 | 0.046473 | 0.404886 | 0.260113 |
| Mmu.15103.2.A1_at       | Mmu.15103.2     | 4.03  | 4.11  | 0.07 | 0.11 | -1.06 | 0.24611  | 0.183288 | 0.597474 | 0.459553 |
| Mmu.15103.2.S1_at       | Mmu.15103.2     | 5.37  | 5.55  | 0.1  | 0.12 | -1.13 | 0.326371 | 0.204653 | 0.653184 | 0.479012 |
| MmugDNA.13086.1.S1_s_at | MmugDNA.13086.1 | 10.34 | 10.4  | 0.51 | 0.43 | -1.04 | 0.935166 | 0.171133 | 0.974926 | 0.447694 |
| Mmu.15115.1.S1_at       | Mmu.15115.1     | 10.94 | 10.45 | 0.03 | 0.2  | 1.4   | 0.030679 | 0.017283 | 0.319646 | 0.166461 |
| MmugDNA.35753.1.S1_at   | MmugDNA.35753.1 | 4.5   | 4.44  | 0.38 | 0.15 | 1.04  | 0.463305 | 0.322168 | 0.738686 | 0.573758 |
| MmugDNA.35753.1.S1_s_at | MmugDNA.35753.1 | 10.66 | 10.19 | 0.22 | 0.19 | 1.38  | 0.056662 | 0.069071 | 0.386838 | 0.30905  |
| Mmu.15125.1.S1_at       | Mmu.15125.1     | 7.55  | 7.43  | 0.1  | 0.6  | 1.09  | 0.212435 | 0.096121 | 0.572716 | 0.353345 |
| Mmu.15143.1.S1_at       | Mmu.15143.1     | 8.78  | 9     | 0.25 | 0.45 | -1.16 | 0.546493 | 0.67728  | 0.785565 | 0.811578 |
| Mmu.15145.1.A1_at       | Mmu.15145.1     | 6.07  | 6.12  | 0.11 | 0.26 | -1.04 | 0.723559 | 0.755511 | 0.879211 | 0.857658 |
| Mmu.15145.1.A1_x_at     | Mmu.15145.1     | 6.08  | 6.07  | 0.05 | 0.29 | 1.01  | 0.903822 | 0.481326 | 0.961578 | 0.686365 |
| Mmu.15162.1.S1_at       | Mmu.15162.1     | 6.37  | 6.41  | 0.19 | 0.09 | -1.03 | 0.539857 | 0.364683 | 0.781349 | 0.605001 |
| Mmu.1520.2.S1_at        | Mmu.1520.2      | 11.39 | 11.49 | 0.11 | 0.15 | -1.07 | 0.353935 | 0.092372 | 0.670266 | 0.348294 |
| Mmu.15219.1.S1_at       | Mmu.15219.1     | 6.72  | 8.86  | 1.55 | 2.26 | -4.39 | 0.979581 | 0.982359 | 0.99244  | 0.990358 |
| Mmu.15231.1.S1_at       | Mmu.15231.1     | 9.39  | 9.68  | 0.03 | 0.06 | -1.22 | 0.002882 | 0.002898 | 0.169151 | 0.079107 |
| Mmu.15242.1.S1_at       | Mmu.15242.1     | 9.98  | 9.61  | 0.04 | 0.45 | 1.29  | 0.38436  | 0.062238 | 0.689908 | 0.296307 |
| Mmu.15247.1.S1_s_at     | Mmu.15247.1     | 4.87  | 5.11  | 0.26 | 0.23 | -1.18 | 0.410197 | 0.099044 | 0.706234 | 0.357183 |
| Mmu.15247.26.S1_x_at    | Mmu.15247.26    | 3.7   | 3.8   | 0.14 | 1.03 | -1.07 | 0.327525 | 0.501993 | 0.653899 | 0.699986 |
| Mmu.15247.11.S1_s_at    | Mmu.15247.11    | 2.95  | 2.84  | 0.13 | 0.08 | 1.08  | 0.59227  | 0.50903  | 0.810875 | 0.703967 |
| Mmu.15247.13.S1_at      | Mmu.15247.13    | 3.28  | 3.53  | 0.05 | 0.13 | -1.19 | 0.102897 | 0.103728 | 0.46254  | 0.364519 |
| Mmu.15247.13.S1_x_at    | Mmu.15247.13    | 3.19  | 3.36  | 0.22 | 0.43 | -1.12 | 0.882885 | 0.805912 | 0.952961 | 0.888395 |
| Mmu.15247.15.S1_x_at    | Mmu.15247.15    | 3.72  | 4.04  | 0.2  | 0.19 | -1.24 | 0.056982 | 0.196984 | 0.387418 | 0.472099 |
| Mmu.15247.16.S1_x_at    | Mmu.15247.16    | 5.55  | 5.58  | 0    | 0.06 | -1.02 | 0.732945 | 0.489497 | 0.884739 | 0.691824 |
| Mmu.15247.18.S1_at      | Mmu.15247.18    | 3.64  | 3.64  | 0.2  | 0.17 | 1     | 0.989365 | 0.864312 | 0.996263 | 0.923012 |
| Mmu.15247.23.S1_x_at    | Mmu.15247.23    | 4.3   | 4.39  | 0.11 | 0    | -1.06 | 0.25693  | 0.463805 | 0.604434 | 0.674656 |
| Mmu.9242.6.S1_x_at      | Mmu.9242.6      | 6.05  | 6.35  | 0.08 | 0.18 | -1.23 | 0.069144 | 0.144723 | 0.411264 | 0.418549 |
| Mmu.15247.21.S1_x_at    | Mmu.15247.21    | 4.42  | 3.51  | 0.93 | 0.2  | 1.88  | 0.183067 | 0.234032 | 0.547141 | 0.505312 |
| Mmu.15247.25.S1_x_at    | Mmu.15247.25    | 6.33  | 6.34  | 0.54 | 0.37 | -1    | 0.441759 | 0.599181 | 0.725144 | 0.761359 |
| Mmu.15247.3.S1_x_at     | Mmu.15247.3     | 6.06  | 6.09  | 0.64 | 0.82 | -1.02 | 0.776252 | 0.919867 | 0.906244 | 0.954947 |
| Mmu.15247.33.S1_at      | Mmu.15247.33    | 5.14  | 5.43  | 0.14 | 0.33 | -1.23 | 0.080745 | 0.080871 | 0.431255 | 0.328841 |
| Mmu.15247.40.S1_at      | Mmu.15247.40    | 7.82  | 7.65  | 0.72 | 0.24 | 1.12  | 0.249631 | 0.368217 | 0.600196 | 0.607811 |
| Mmu.15247.8.S1_x_at     | Mmu.15247.8     | 2.56  | 2.66  | 0.05 | 0.1  | -1.06 | 0.594182 | 0.770264 | 0.811686 | 0.866566 |
| Mmu.15247.42.S1_s_at    | Mmu.15247.42    | 2.73  | 2.75  | 0.16 | 0.08 | -1.02 | 0.672471 | 0.483619 | 0.853095 | 0.688067 |

|                         |                 |       |       |      |      |       |          |          |          |          |
|-------------------------|-----------------|-------|-------|------|------|-------|----------|----------|----------|----------|
| Mmu.15247.43.S1_at      | Mmu.15247.43    | 2.84  | 2.88  | 0.1  | 0.16 | -1.02 | 0.517782 | 0.731087 | 0.769043 | 0.844197 |
| Mmu.15247.44.S1_x_at    | Mmu.15247.44    | 3.27  | 3.17  | 0.13 | 0.07 | 1.07  | 0.190559 | 0.220732 | 0.553097 | 0.494199 |
| Mmu.15247.45.S1_x_at    | Mmu.15247.45    | 7.76  | 7.29  | 0.07 | 0.28 | 1.38  | 0.019787 | 0.013907 | 0.275549 | 0.151286 |
| Mmu.15247.7.S1_s_at     | Mmu.15247.7     | 3.18  | 3.18  | 0.07 | 0.15 | 1     | 0.884948 | 0.250416 | 0.953894 | 0.519391 |
| Mmu.15249.2.S1_at       | Mmu.15249.2     | 12.42 | 12.44 | 0.12 | 0.09 | -1.01 | 0.834391 | 0.009247 | 0.932737 | 0.126966 |
| MmugDNA.41786.1.S1_s_at | MmugDNA.41786.1 | 13.71 | 13.69 | 0.11 | 0.04 | 1.02  | 0.442486 | 0.079091 | 0.72561  | 0.326184 |
| Mmu.1526.1.S1_a_at      | Mmu.1526.1      | 5.43  | 6.35  | 0.13 | 0.78 | -1.88 | 0.119349 | 0.134299 | 0.484049 | 0.406573 |
| Mmu.1527.1.S1_at        | Mmu.1527.1      | 7.68  | 7.11  | 0.16 | 0.67 | 1.48  | 0.06916  | 0.064934 | 0.411264 | 0.300855 |
| Mmu.15276.1.S1_s_at     | Mmu.15276.1     | 12.31 | 11.87 | 0.47 | 0.62 | 1.36  | 0.249516 | 0.008105 | 0.600196 | 0.119551 |
| Mmu.15280.1.S1_at       | Mmu.15280.1     | 8.29  | 7.01  | 0.4  | 0.23 | 2.42  | 0.010206 | 0.000281 | 0.228247 | 0.03453  |
| Mmu.15281.1.S1_at       | Mmu.15281.1     | 10.66 | 11.08 | 0.23 | 0.11 | -1.33 | 0.050898 | 0.025078 | 0.37568  | 0.198405 |
| Mmu.15288.1.S1_at       | Mmu.15288.1     | 6.46  | 6.5   | 0.06 | 0.23 | -1.03 | 0.263407 | 0.290285 | 0.609348 | 0.551169 |
| Mmu.15288.1.S1_s_at     | Mmu.15288.1     | 14.03 | 13.98 | 0.06 | 0.14 | 1.04  | 0.660618 | 0.853548 | 0.847783 | 0.916683 |
| Mmu.1530.1.S1_at        | Mmu.1530.1      | 9.07  | 10.22 | 0.51 | 0.3  | -2.21 | 0.046515 | 0.012996 | 0.363221 | 0.146803 |
| MmugDNA.31308.1.S1_s_at | MmugDNA.31308.1 | 13    | 13.02 | 0.1  | 0.2  | -1.01 | 0.876957 | 0.449603 | 0.950709 | 0.665143 |
| Mmu.15331.1.S1_at       | Mmu.15331.1     | 7.13  | 7.35  | 0.05 | 0.25 | -1.16 | 0.175372 | 0.294015 | 0.539136 | 0.553909 |
| Mmu.15347.1.S1_s_at     | Mmu.15347.1     | 12.55 | 12.08 | 0.11 | 0.4  | 1.39  | 0.169003 | 0.191679 | 0.533243 | 0.466942 |
| Mmu.15352.1.S1_at       | Mmu.15352.1     | 9.67  | 9.8   | 0.34 | 0.14 | -1.09 | 0.381453 | 0.52778  | 0.687891 | 0.716271 |
| Mmu.15359.1.S1_s_at     | Mmu.15359.1     | 6.21  | 6.52  | 0.32 | 0.62 | -1.24 | 0.653837 | 0.124535 | 0.84439  | 0.394987 |
| MmugDNA.3842.1.S1_at    | MmugDNA.3842.1  | 7.78  | 8.01  | 0.21 | 0.13 | -1.18 | 0.261804 | 0.35225  | 0.608392 | 0.595568 |
| MmugDNA.3842.1.S1_s_at  | MmugDNA.3842.1  | 14.63 | 14.61 | 0.05 | 0.04 | 1.01  | 0.846464 | 0.95195  | 0.93835  | 0.972743 |
| Mmu.1538.1.S1_at        | Mmu.1538.1      | 9.18  | 9.18  | 0.25 | 0.13 | -1    | 0.806177 | 0.64572  | 0.920526 | 0.792516 |
| Mmu.15402.1.A1_at       | Mmu.15402.1     | 13.91 | 14.62 | 0.44 | 0.01 | -1.64 | 0.146446 | 0.093591 | 0.512605 | 0.349952 |
| Mmu.15402.10.S1_s_at    | Mmu.15402.10    | 14.82 | 14.79 | 0.2  | 0.02 | 1.02  | 0.555176 | 0.466048 | 0.79128  | 0.676096 |
| Mmu.15402.11.S1_at      | Mmu.15402.11    | 2.98  | 2.96  | 0.03 | 0.06 | 1.02  | 0.513033 | 0.768439 | 0.765949 | 0.865527 |
| Mmu.15433.1.S1_at       | Mmu.15433.1     | 5.55  | 5.67  | 0.05 | 0.08 | -1.09 | 0.082318 | 0.073578 | 0.433725 | 0.316905 |
| Mmu.15440.1.S1_at       | Mmu.15440.1     | 9.26  | 9.54  | 0.3  | 0.23 | -1.22 | 0.643264 | 0.270921 | 0.839279 | 0.536033 |
| Mmu.15443.1.S1_x_at     | Mmu.15443.1     | 6.1   | 6.66  | 0.2  | 0.7  | -1.47 | 0.238771 | 0.027001 | 0.592015 | 0.2055   |
| Mmu.15490.1.A1_at       | Mmu.15490.1     | 6.46  | 6.72  | 0.65 | 0.75 | -1.2  | 0.311105 | 0.364487 | 0.643066 | 0.604846 |
| Mmu.15491.1.S1_s_at     | Mmu.15491.1     | 7.6   | 7.66  | 0.16 | 0.03 | -1.04 | 0.705316 | 0.184934 | 0.870004 | 0.460776 |
| Mmu.15494.1.S1_at       | Mmu.15494.1     | 11.51 | 11.53 | 0.14 | 0.11 | -1.01 | 0.701476 | 0.879389 | 0.868043 | 0.931144 |
| Mmu.15499.1.S1_s_at     | Mmu.15499.1     | 10.94 | 11.98 | 0.11 | 0.1  | -2.05 | 0.000323 | 0.000145 | 0.12562  | 0.029509 |
| Mmu.15501.1.S1_s_at     | Mmu.15501.1     | 11.54 | 12.08 | 0.08 | 0.54 | -1.45 | 0.058939 | 0.022765 | 0.390921 | 0.188931 |
| Mmu.15507.1.A1_at       | Mmu.15507.1     | 4.36  | 4.7   | 0.24 | 0.35 | -1.27 | 0.119613 | 0.02842  | 0.484145 | 0.210385 |
| Mmu.15507.1.S1_x_at     | Mmu.15507.1     | 5.48  | 5.88  | 0.43 | 0.18 | -1.32 | 0.248304 | 0.01266  | 0.599164 | 0.145089 |
| Mmu.15516.1.S1_at       | Mmu.15516.1     | 5.63  | 5.45  | 0.23 | 0.25 | 1.13  | 0.190209 | 0.23371  | 0.553    | 0.505032 |
| Mmu.15516.1.S1_x_at     | Mmu.15516.1     | 7.17  | 6.69  | 0.07 | 0.06 | 1.4   | 0.000762 | 0.000324 | 0.136818 | 0.035587 |
| Mmu.3361.2.S1_s_at      | Mmu.3361.2      | 13.91 | 13.92 | 0.06 | 0.06 | -1.01 | 0.600035 | 0.325759 | 0.815049 | 0.57602  |
| Mmu.15555.1.S1_at       | Mmu.15555.1     | 10.74 | 10.48 | 0.36 | 0.75 | 1.2   | 0.184603 | 0.044373 | 0.548202 | 0.255144 |
| Mmu.15572.1.S1_at       | Mmu.15572.1     | 9.47  | 9.59  | 0.21 | 0.13 | -1.09 | 0.268441 | 0.235436 | 0.613168 | 0.506489 |
| Mmu.15592.2.S1_at       | Mmu.15592.2     | 10.87 | 10.46 | 0.21 | 0.27 | 1.33  | 0.064718 | 0.056467 | 0.403239 | 0.283516 |

|                     |             |       |       |      |      |       |          |          |          |          |
|---------------------|-------------|-------|-------|------|------|-------|----------|----------|----------|----------|
| Mmu.8286.1.S1_s_at  | Mmu.8286.1  | 13.84 | 13.69 | 0.06 | 0.03 | 1.11  | 0.015454 | 0.005185 | 0.258779 | 0.099739 |
| Mmu.156.2.S1_at     | Mmu.156.2   | 13.33 | 13.22 | 0.1  | 0.05 | 1.08  | 0.062938 | 0.108619 | 0.399633 | 0.372171 |
| Mmu.156.2.S1_x_at   | Mmu.156.2   | 13.14 | 12.99 | 0.08 | 0.07 | 1.11  | 0.071088 | 0.127434 | 0.414673 | 0.398274 |
| Mmu.15601.1.S2_at   | Mmu.15601.1 | 2.77  | 2.76  | 0.09 | 0.01 | 1.01  | 0.869566 | 0.634608 | 0.947917 | 0.784946 |
| Mmu.15601.1.S2_s_at | Mmu.15601.1 | 3.94  | 3.79  | 0.11 | 0.09 | 1.11  | 0.225172 | 0.126141 | 0.58306  | 0.396734 |
| Mmu.15609.1.S1_at   | Mmu.15609.1 | 11.65 | 11.78 | 0.07 | 0.21 | -1.09 | 0.334113 | 0.031854 | 0.658035 | 0.220909 |
| Mmu.15616.1.S1_at   | Mmu.15616.1 | 3.8   | 3.74  | 0.39 | 0.21 | 1.05  | 0.575687 | 0.851424 | 0.802449 | 0.915468 |
| Mmu.15616.1.S1_x_at | Mmu.15616.1 | 3.08  | 3.15  | 0.45 | 0.06 | -1.05 | 0.717257 | 0.914967 | 0.87574  | 0.952272 |
| Mmu.15620.1.S1_at   | Mmu.15620.1 | 6.91  | 7.75  | 0.41 | 1    | -1.79 | 0.360353 | 0.494961 | 0.67441  | 0.695223 |
| Mmu.1563.1.S1_at    | Mmu.1563.1  | 9.62  | 9.73  | 0.08 | 0.09 | -1.08 | 0.173153 | 0.292098 | 0.536812 | 0.552261 |
| Mmu.15662.1.S1_at   | Mmu.15662.1 | 9.35  | 9.6   | 0.34 | 0.13 | -1.19 | 0.146924 | 0.250744 | 0.512985 | 0.519419 |
| Mmu.15690.2.S1_at   | Mmu.15690.2 | 8.37  | 10.08 | 0.58 | 0.38 | -3.27 | 0.044246 | 0.029992 | 0.358277 | 0.214956 |
| Mmu.15700.2.S1_at   | Mmu.15700.2 | 9.68  | 11.25 | 0.83 | 1.4  | -2.98 | 0.249862 | 0.242163 | 0.600389 | 0.512652 |
| Mmu.15708.2.S1_at   | Mmu.15708.2 | 13.57 | 13.63 | 0.06 | 0.07 | -1.05 | 0.117104 | 0.153055 | 0.481132 | 0.427928 |
| Mmu.15723.1.S1_s_at | Mmu.15723.1 | 11.54 | 12.16 | 0.05 | 0.23 | -1.54 | 0.005012 | 0.001605 | 0.187653 | 0.060501 |
| Mmu.15723.2.S1_at   | Mmu.15723.2 | 8.45  | 8.96  | 0.1  | 0.44 | -1.42 | 0.04491  | 0.03416  | 0.359175 | 0.228708 |
| Mmu.15730.2.S1_at   | Mmu.15730.2 | 7.61  | 7.67  | 0.02 | 0.09 | -1.04 | 0.429315 | 0.188878 | 0.717448 | 0.464789 |
| Mmu.15738.1.S1_at   | Mmu.15738.1 | 4.76  | 7.96  | 1.4  | 2.49 | -9.21 | 0.23786  | 0.180667 | 0.591294 | 0.457245 |
| Mmu.15748.1.S1_s_at | Mmu.15748.1 | 4.17  | 4.16  | 0.24 | 0.05 | 1.01  | 0.734488 | 0.921    | 0.88571  | 0.955491 |
| Mmu.15752.2.S1_at   | Mmu.15752.2 | 7.59  | 7.6   | 0.03 | 0.04 | -1.01 | 0.181127 | 0.303851 | 0.545694 | 0.561225 |
| Mmu.15755.1.S1_at   | Mmu.15755.1 | 9.47  | 9.75  | 0.09 | 0.2  | -1.22 | 0.049015 | 0.027839 | 0.370485 | 0.208365 |
| Mmu.15770.1.S1_at   | Mmu.15770.1 | 5.82  | 5.89  | 0.21 | 0.21 | -1.05 | 0.875295 | 0.367534 | 0.949951 | 0.607197 |
| Mmu.15774.1.S1_at   | Mmu.15774.1 | 8.33  | 8.32  | 0.17 | 0.23 | 1.01  | 0.826224 | 0.919697 | 0.929365 | 0.954878 |
| Mmu.15814.5.S1_at   | Mmu.15814.5 | 4.17  | 4.43  | 0.13 | 0.02 | -1.19 | 0.039503 | 0.038786 | 0.347288 | 0.241916 |
| Mmu.15827.1.S1_at   | Mmu.15827.1 | 7.15  | 6.98  | 0.03 | 0.25 | 1.12  | 0.296105 | 0.414836 | 0.632176 | 0.640469 |
| Mmu.15835.1.S1_at   | Mmu.15835.1 | 7.84  | 8.25  | 0.32 | 0.45 | -1.33 | 0.335451 | 0.47497  | 0.659165 | 0.681837 |
| Mmu.15843.1.S1_at   | Mmu.15843.1 | 10.43 | 10.57 | 0.16 | 0.43 | -1.1  | 0.716372 | 0.356217 | 0.875428 | 0.598166 |
| Mmu.15848.1.S1_at   | Mmu.15848.1 | 10.21 | 10.03 | 0.39 | 0.33 | 1.13  | 0.515261 | 0.18594  | 0.767346 | 0.461772 |
| Mmu.15849.1.S1_a_at | Mmu.15849.1 | 10.35 | 10.29 | 0.53 | 0.41 | 1.04  | 0.755895 | 0.241499 | 0.896248 | 0.512152 |
| Mmu.15849.1.S1_at   | Mmu.15849.1 | 9.39  | 9.26  | 0.49 | 0.41 | 1.09  | 0.636937 | 0.11392  | 0.83591  | 0.38018  |
| Mmu.15849.2.S1_at   | Mmu.15849.2 | 6.25  | 6.18  | 1.06 | 0.55 | 1.05  | 0.589911 | 0.472577 | 0.809673 | 0.68007  |
| Mmu.15852.1.S1_s_at | Mmu.15852.1 | 11.94 | 11.93 | 0.03 | 0.18 | 1.01  | 0.426572 | 0.315503 | 0.715846 | 0.569004 |
| Mmu.15853.1.S1_s_at | Mmu.15853.1 | 11.71 | 11.74 | 0.23 | 0.22 | -1.02 | 0.889258 | 0.719412 | 0.955714 | 0.837629 |
| Mmu.15853.1.S1_x_at | Mmu.15853.1 | 12.12 | 12.01 | 0.16 | 0.25 | 1.08  | 0.514894 | 0.503492 | 0.767211 | 0.700892 |
| Mmu.15859.1.S1_at   | Mmu.15859.1 | 9.14  | 9.47  | 0.26 | 0.21 | -1.26 | 0.187452 | 0.208887 | 0.550505 | 0.482717 |
| Mmu.1586.1.S1_at    | Mmu.1586.1  | 8.73  | 9.04  | 0.27 | 0.07 | -1.24 | 0.236116 | 0.054399 | 0.590122 | 0.278799 |
| Mmu.15886.1.S1_s_at | Mmu.15886.1 | 13.42 | 13.15 | 0.12 | 0.36 | 1.21  | 0.152639 | 0.041999 | 0.517325 | 0.249463 |
| Mmu.15890.1.S1_s_at | Mmu.15890.1 | 8     | 7.41  | 0.71 | 0.37 | 1.5   | 0.160265 | 0.065427 | 0.525269 | 0.301415 |
| Mmu.15894.3.S1_at   | Mmu.15894.3 | 10.92 | 10.96 | 0.3  | 0.16 | -1.03 | 0.99348  | 0.903025 | 0.997754 | 0.944941 |
| Mmu.15897.1.S1_at   | Mmu.15897.1 | 11.49 | 11.75 | 0.09 | 0.28 | -1.2  | 0.680427 | 0.041339 | 0.857162 | 0.247995 |
| Mmu.15902.2.S1_at   | Mmu.15902.2 | 5.48  | 5.61  | 0.15 | 0.01 | -1.09 | 0.215542 | 0.300493 | 0.575924 | 0.55882  |

|                         |                 |       |       |      |      |       |          |          |          |          |
|-------------------------|-----------------|-------|-------|------|------|-------|----------|----------|----------|----------|
| Mmu.15921.1.S1_at       | Mmu.15921.1     | 11.42 | 11.65 | 0.1  | 0.12 | -1.17 | 0.029577 | 0.086767 | 0.314766 | 0.339521 |
| Mmu.15931.1.S1_at       | Mmu.15931.1     | 8.43  | 9.2   | 0.12 | 0.36 | -1.7  | 0.010932 | 0.00332  | 0.233129 | 0.082861 |
| Mmu.15937.1.S1_at       | Mmu.15937.1     | 10.24 | 10.23 | 0.11 | 0.13 | 1.01  | 0.664267 | 0.823358 | 0.84947  | 0.898479 |
| Mmu.15939.2.S1_at       | Mmu.15939.2     | 4.52  | 3.96  | 0.13 | 0.04 | 1.48  | 0.003433 | 0.099193 | 0.17833  | 0.357379 |
| Mmu.1595.1.S1_at        | Mmu.1595.1      | 5.12  | 5.22  | 0.22 | 0.09 | -1.07 | 0.120473 | 0.076353 | 0.4855   | 0.321368 |
| Mmu.15951.1.A1_at       | Mmu.15951.1     | 4.05  | 4.15  | 0.04 | 0.06 | -1.07 | 0.173336 | 0.125914 | 0.537006 | 0.396452 |
| Mmu.15951.1.S1_at       | Mmu.15951.1     | 3.65  | 3.73  | 0.18 | 0.15 | -1.06 | 0.778352 | 0.957058 | 0.907414 | 0.975699 |
| Mmu.15952.1.A1_at       | Mmu.15952.1     | 3.78  | 3.82  | 0.06 | 0.11 | -1.03 | 0.126257 | 0.08894  | 0.49248  | 0.342771 |
| Mmu.15952.1.S1_at       | Mmu.15952.1     | 3.62  | 3.87  | 0.09 | 0.06 | -1.2  | 0.027602 | 0.019333 | 0.308386 | 0.174785 |
| Mmu.15953.1.A1_at       | Mmu.15953.1     | 4.82  | 4.87  | 0.03 | 0.01 | -1.03 | 0.171371 | 0.85964  | 0.535166 | 0.92003  |
| Mmu.15953.1.S1_at       | Mmu.15953.1     | 6.15  | 6.56  | 0.23 | 0.12 | -1.33 | 0.095458 | 0.137345 | 0.453484 | 0.41029  |
| Mmu.15956.1.A1_at       | Mmu.15956.1     | 3.77  | 3.85  | 0.07 | 0.09 | -1.06 | 0.366785 | 0.460806 | 0.679209 | 0.672749 |
| Mmu.15956.1.S1_at       | Mmu.15956.1     | 3.37  | 3.81  | 0.16 | 0.21 | -1.36 | 0.073053 | 0.104175 | 0.418338 | 0.365297 |
| Mmu.15966.1.S1_at       | Mmu.15966.1     | 9.47  | 9.23  | 0.3  | 0.8  | 1.18  | 0.732263 | 0.463295 | 0.884299 | 0.674323 |
| MmugDNA.11221.1.S1_s_at | MmugDNA.11221.1 | 8.41  | 7.34  | 0.46 | 0.96 | 2.09  | 0.290047 | 0.393012 | 0.628003 | 0.625971 |
| Mmu.15973.1.S1_a_at     | Mmu.15973.1     | 3.56  | 3.54  | 0.07 | 0.16 | 1.01  | 0.80385  | 0.770832 | 0.919339 | 0.866807 |
| Mmu.15973.17.S1_x_at    | Mmu.15973.17    | 4.72  | 4.93  | 0.14 | 0.08 | -1.15 | 0.190429 | 0.254626 | 0.553071 | 0.522912 |
| Mmu.15973.14.S1_at      | Mmu.15973.14    | 5.44  | 5.59  | 0.2  | 0.04 | -1.11 | 0.25927  | 0.302841 | 0.606366 | 0.560356 |
| Mmu.15973.16.S1_at      | Mmu.15973.16    | 4.96  | 5.1   | 0.22 | 0.07 | -1.1  | 0.756389 | 0.537475 | 0.896478 | 0.722606 |
| Mmu.15973.16.S1_x_at    | Mmu.15973.16    | 4.85  | 4.87  | 0.09 | 0.11 | -1.01 | 0.418168 | 0.657434 | 0.711168 | 0.799704 |
| Mmu.15973.19.S1_at      | Mmu.15973.19    | 5.21  | 5.29  | 0.11 | 0.09 | -1.06 | 0.538946 | 0.247884 | 0.780889 | 0.517326 |
| Mmu.15973.19.S1_x_at    | Mmu.15973.19    | 5.58  | 5.54  | 0.15 | 0.07 | 1.03  | 0.296451 | 0.461664 | 0.632465 | 0.673228 |
| Mmu.15973.2.S1_x_at     | Mmu.15973.2     | 4.85  | 4.85  | 0.15 | 0.15 | -1    | 0.830521 | 0.946077 | 0.931464 | 0.969369 |
| Mmu.15976.1.S1_at       | Mmu.15976.1     | 8.17  | 7.87  | 0.11 | 0.25 | 1.23  | 0.232917 | 0.32167  | 0.587927 | 0.573346 |
| Mmu.15983.1.S1_at       | Mmu.15983.1     | 7.45  | 7.46  | 0.22 | 0.03 | -1.01 | 0.328713 | 0.612872 | 0.654467 | 0.770261 |
| Mmu.15987.2.S1_at       | Mmu.15987.2     | 8.79  | 8.97  | 0.24 | 0.35 | -1.13 | 0.547421 | 0.38798  | 0.786218 | 0.62253  |
| Mmu.15993.1.S1_s_at     | Mmu.15993.1     | 13.43 | 13.44 | 0.25 | 0.14 | -1    | 0.899058 | 0.658887 | 0.959684 | 0.800473 |
| MmugDNA.11151.1.S1_s_at | MmugDNA.11151.1 | 9.11  | 9.08  | 0.06 | 0.01 | 1.02  | 0.116489 | 0.000768 | 0.48032  | 0.04544  |
| Mmu.15999.1.S1_at       | Mmu.15999.1     | 10.29 | 10.57 | 0.17 | 0.16 | -1.21 | 0.038158 | 0.044544 | 0.343587 | 0.255417 |
| Mmu.16001.1.S1_at       | Mmu.16001.1     | 6.68  | 6.3   | 0.42 | 0.6  | 1.3   | 0.822328 | 0.615111 | 0.927682 | 0.771754 |
| Mmu.16022.1.S1_at       | Mmu.16022.1     | 4.48  | 5     | 0.14 | 0.06 | -1.43 | 0.00493  | 0.002774 | 0.185837 | 0.077892 |
| Mmu.16023.1.S1_at       | Mmu.16023.1     | 9.04  | 9.15  | 0.24 | 0.17 | -1.08 | 0.283949 | 0.183377 | 0.623838 | 0.459553 |
| Mmu.16024.1.S1_at       | Mmu.16024.1     | 9.44  | 9.37  | 0.14 | 0.15 | 1.05  | 0.432063 | 0.587265 | 0.718823 | 0.754106 |
| Mmu.16030.2.S1_a_at     | Mmu.16030.2     | 9.43  | 8.73  | 0.82 | 0.69 | 1.63  | 0.326378 | 0.251962 | 0.653184 | 0.520646 |
| Mmu.16043.1.S1_at       | Mmu.16043.1     | 5.2   | 5.26  | 0.11 | 0.11 | -1.04 | 0.203811 | 0.258676 | 0.566303 | 0.525937 |
| Mmu.1605.1.S1_at        | Mmu.1605.1      | 6.68  | 8.46  | 2.16 | 2.81 | -3.45 | 0.631052 | 0.4175   | 0.832437 | 0.642252 |
| Mmu.16061.1.S1_at       | Mmu.16061.1     | 7.6   | 9.62  | 1.02 | 1.32 | -4.06 | 0.161584 | 0.116411 | 0.526481 | 0.383671 |
| MmugDNA.33134.1.S1_at   | MmugDNA.33134.1 | 6.55  | 6.53  | 0.08 | 0.13 | 1.02  | 0.989513 | 0.296014 | 0.996281 | 0.555295 |
| MmugDNA.33134.1.S1_s_at | MmugDNA.33134.1 | 11.03 | 10.74 | 0.13 | 0.15 | 1.22  | 0.079487 | 0.06114  | 0.429617 | 0.293981 |
| Mmu.16078.1.S1_at       | Mmu.16078.1     | 7.3   | 7.29  | 0.39 | 0.26 | 1.01  | 0.832807 | 0.711678 | 0.932268 | 0.832794 |
| Mmu.16091.1.A1_at       | Mmu.16091.1     | 9.04  | 9.45  | 0.09 | 0.16 | -1.33 | 0.019694 | 0.006058 | 0.275549 | 0.106152 |

|                         |                 |       |       |      |      |        |          |          |          |          |
|-------------------------|-----------------|-------|-------|------|------|--------|----------|----------|----------|----------|
| Mmu.16091.1.S1_at       | Mmu.16091.1     | 12.82 | 12.99 | 0.04 | 0.15 | -1.13  | 0.198949 | 0.16166  | 0.562029 | 0.437771 |
| Mmu.16093.1.S1_at       | Mmu.16093.1     | 5.93  | 5.94  | 0.1  | 0.25 | -1.01  | 0.556977 | 0.299798 | 0.792245 | 0.558081 |
| Mmu.16103.1.S1_s_at     | Mmu.16103.1     | 13.72 | 14.04 | 0.12 | 0.11 | -1.25  | 0.129953 | 0.175753 | 0.496028 | 0.452344 |
| Mmu.16106.1.S1_at       | Mmu.16106.1     | 10.94 | 11.05 | 0.04 | 0.34 | -1.08  | 0.233371 | 0.306955 | 0.588128 | 0.563427 |
| Mmu.16109.1.S1_at       | Mmu.16109.1     | 11.62 | 11.24 | 0.27 | 0.21 | 1.3    | 0.170173 | 0.003504 | 0.534249 | 0.08503  |
| Mmu.16110.1.S1_s_at     | Mmu.16110.1     | 12    | 11.64 | 0.12 | 0.27 | 1.29   | 0.141238 | 0.063386 | 0.508853 | 0.298439 |
| Mmu.16117.1.S1_at       | Mmu.16117.1     | 4.37  | 4.99  | 0.41 | 0.25 | -1.53  | 0.234175 | 0.098919 | 0.588621 | 0.357049 |
| Mmu.1612.1.S1_at        | Mmu.1612.1      | 9.36  | 9.69  | 0.28 | 0.09 | -1.26  | 0.122077 | 0.135973 | 0.487099 | 0.408258 |
| Mmu.16121.1.S1_at       | Mmu.16121.1     | 3.95  | 3.85  | 0.12 | 0.21 | 1.07   | 0.182557 | 0.278059 | 0.546812 | 0.541754 |
| Mmu.16121.1.S1_s_at     | Mmu.16121.1     | 9.6   | 9.57  | 0.04 | 0.26 | 1.02   | 0.31024  | 0.30964  | 0.642233 | 0.564991 |
| Mmu.16123.2.S1_at       | Mmu.16123.2     | 9.87  | 10.6  | 0.18 | 0.23 | -1.66  | 0.01151  | 0.014393 | 0.23613  | 0.153146 |
| Mmu.16124.1.S1_at       | Mmu.16124.1     | 4.27  | 6.75  | 0.99 | 1.84 | -5.6   | 0.184219 | 0.198242 | 0.54806  | 0.473234 |
| Mmu.16174.1.S1_at       | Mmu.16174.1     | 9.51  | 9.76  | 0.14 | 0.19 | -1.19  | 0.384787 | 0.060114 | 0.690114 | 0.291847 |
| Mmu.16174.1.S1_x_at     | Mmu.16174.1     | 9.73  | 9.95  | 0.17 | 0.17 | -1.17  | 0.476086 | 0.134637 | 0.746125 | 0.406629 |
| Mmu.16175.1.S1_at       | Mmu.16175.1     | 6.6   | 10.8  | 1.95 | 3.02 | -18.41 | 0.400198 | 0.329401 | 0.699735 | 0.578733 |
| Mmu.16205.1.S1_at       | Mmu.16205.1     | 10.46 | 10.41 | 0.75 | 0.29 | 1.04   | 0.921469 | 0.745075 | 0.969398 | 0.852267 |
| Mmu.16211.1.S1_at       | Mmu.16211.1     | 10.39 | 10.57 | 0.29 | 0.2  | -1.14  | 0.317909 | 0.170786 | 0.64802  | 0.447359 |
| Mmu.16215.1.S1_at       | Mmu.16215.1     | 8.71  | 9.49  | 0.82 | 0.87 | -1.71  | 0.263631 | 0.146727 | 0.609554 | 0.42078  |
| Mmu.16226.1.S1_at       | Mmu.16226.1     | 5.65  | 5.39  | 0.15 | 0.03 | 1.2    | 0.111628 | 0.106044 | 0.473915 | 0.368427 |
| Mmu.16226.1.S1_x_at     | Mmu.16226.1     | 5.87  | 5.81  | 0.09 | 0.15 | 1.04   | 0.248781 | 0.431591 | 0.599636 | 0.652439 |
| Mmu.16227.2.S1_at       | Mmu.16227.2     | 2.86  | 2.94  | 0.09 | 0.14 | -1.06  | 0.568561 | 0.393785 | 0.798666 | 0.626565 |
| Mmu.16227.3.S1_at       | Mmu.16227.3     | 4.98  | 5.19  | 0.09 | 0.11 | -1.15  | 0.078563 | 0.081069 | 0.428609 | 0.329249 |
| Mmu.16235.1.S1_at       | Mmu.16235.1     | 12.21 | 12.51 | 0.14 | 0.04 | -1.23  | 0.015214 | 0.006806 | 0.257698 | 0.111444 |
| Mmu.16242.1.S1_at       | Mmu.16242.1     | 7.42  | 9.08  | 0.41 | 0.23 | -3.15  | 0.003813 | 0.001743 | 0.179914 | 0.062895 |
| Mmu.16242.1.S1_s_at     | Mmu.16242.1     | 7.52  | 8.59  | 0.2  | 0.49 | -2.11  | 0.043491 | 0.038799 | 0.356765 | 0.241916 |
| Mmu.16247.1.S1_at       | Mmu.16247.1     | 10.61 | 10.7  | 0.2  | 0.14 | -1.06  | 0.145601 | 0.012856 | 0.51146  | 0.145997 |
| Mmu.1625.1.S1_at        | Mmu.1625.1      | 9.19  | 10.29 | 0.15 | 0.41 | -2.15  | 0.012236 | 0.013185 | 0.240418 | 0.14735  |
| Mmu.16255.1.S1_at       | Mmu.16255.1     | 9.02  | 8.86  | 0.16 | 0.29 | 1.12   | 0.892377 | 0.624153 | 0.957146 | 0.778457 |
| Mmu.16260.1.S1_at       | Mmu.16260.1     | 10.02 | 9.95  | 0.37 | 0.32 | 1.06   | 0.869223 | 0.250695 | 0.947917 | 0.51941  |
| Mmu.16261.1.S1_at       | Mmu.16261.1     | 10.21 | 9.74  | 0.02 | 0.42 | 1.39   | 0.395917 | 0.543453 | 0.696652 | 0.726138 |
| Mmu.16278.1.S1_at       | Mmu.16278.1     | 12.54 | 12.32 | 0.44 | 0.23 | 1.17   | 0.984411 | 0.469376 | 0.994476 | 0.678207 |
| Mmu.16285.1.A1_at       | Mmu.16285.1     | 13.11 | 12.85 | 0.03 | 0.1  | 1.2    | 0.008555 | 0.002707 | 0.21941  | 0.07652  |
| Mmu.16290.1.S1_at       | Mmu.16290.1     | 12.21 | 12.11 | 0.35 | 0.74 | 1.08   | 0.445512 | 0.363471 | 0.727744 | 0.6039   |
| Mmu.16292.1.S1_at       | Mmu.16292.1     | 9.28  | 9.09  | 0.14 | 0.7  | 1.15   | 0.219762 | 0.282627 | 0.579133 | 0.545355 |
| Mmu.16297.1.S1_s_at     | Mmu.16297.1     | 9.54  | 8.76  | 0.4  | 0.69 | 1.72   | 0.253605 | 0.2448   | 0.60216  | 0.514644 |
| Mmu.16299.1.S1_at       | Mmu.16299.1     | 13.01 | 13.17 | 0.06 | 0.15 | -1.12  | 0.257999 | 0.28194  | 0.605348 | 0.544868 |
| MmugDNA.10121.1.S1_s_at | MmugDNA.10121.1 | 12.67 | 12.93 | 0.13 | 0.13 | -1.2   | 0.151888 | 0.048258 | 0.516547 | 0.264727 |
| Mmu.16305.1.S1_at       | Mmu.16305.1     | 6.99  | 7.11  | 0.16 | 0.14 | -1.09  | 0.406248 | 0.593245 | 0.703645 | 0.758138 |
| Mmu.16311.1.S1_at       | Mmu.16311.1     | 8.99  | 9.37  | 0.07 | 0.04 | -1.3   | 0.001172 | 0.001477 | 0.145267 | 0.058628 |
| Mmu.16317.1.S1_at       | Mmu.16317.1     | 9.97  | 9.64  | 0.09 | 0.28 | 1.26   | 0.149264 | 0.00808  | 0.514001 | 0.119476 |
| Mmu.16324.1.S1_at       | Mmu.16324.1     | 12.03 | 11.87 | 0.22 | 0.15 | 1.12   | 0.204626 | 0.099752 | 0.567166 | 0.358296 |

|                         |                 |       |       |      |      |       |          |          |          |          |
|-------------------------|-----------------|-------|-------|------|------|-------|----------|----------|----------|----------|
| Mmu.16330.1.S1_at       | Mmu.16330.1     | 8.81  | 7.77  | 0.19 | 0.53 | 2.05  | 0.019269 | 0.009718 | 0.273608 | 0.129718 |
| Mmu.16335.1.S1_at       | Mmu.16335.1     | 7.98  | 8.09  | 0.27 | 0.05 | -1.08 | 0.639093 | 0.831951 | 0.836983 | 0.90356  |
| Mmu.16349.1.S1_at       | Mmu.16349.1     | 8.89  | 9.21  | 0.39 | 0.56 | -1.25 | 0.194578 | 0.222537 | 0.558002 | 0.495594 |
| Mmu.16352.2.S1_at       | Mmu.16352.2     | 2.79  | 2.89  | 0.03 | 0.12 | -1.07 | 0.715895 | 0.781152 | 0.875256 | 0.873038 |
| Mmu.16352.3.S1_at       | Mmu.16352.3     | 4.07  | 4.29  | 0.25 | 0.17 | -1.16 | 0.380734 | 0.551366 | 0.687579 | 0.730922 |
| Mmu.16358.1.S1_at       | Mmu.16358.1     | 9.98  | 9.84  | 0.11 | 0.38 | 1.1   | 0.773243 | 0.836326 | 0.904749 | 0.906363 |
| Mmu.16365.1.S1_at       | Mmu.16365.1     | 8.69  | 8.77  | 0.05 | 0.06 | -1.05 | 0.091431 | 0.191004 | 0.447175 | 0.46629  |
| Mmu.16379.1.S1_at       | Mmu.16379.1     | 12.68 | 12.78 | 0.24 | 0.09 | -1.08 | 0.602144 | 0.42596  | 0.816339 | 0.648141 |
| Mmu.16380.2.S1_at       | Mmu.16380.2     | 9.59  | 10.08 | 0.61 | 0.16 | -1.41 | 0.194124 | 0.158864 | 0.557718 | 0.434967 |
| Mmu.16385.1.S1_a_at     | Mmu.16385.1     | 7.94  | 8.06  | 0.04 | 0.14 | -1.08 | 0.200254 | 0.392221 | 0.563139 | 0.625652 |
| Mmu.16385.1.S1_at       | Mmu.16385.1     | 7.42  | 7.52  | 0.21 | 0.2  | -1.08 | 0.294172 | 0.475292 | 0.631154 | 0.682031 |
| Mmu.16385.2.S1_at       | Mmu.16385.2     | 2.98  | 3     | 0.01 | 0    | -1.01 | 0.036184 | 0.240498 | 0.339036 | 0.511123 |
| Mmu.1639.1.S1_at        | Mmu.1639.1      | 4.68  | 4.3   | 0.53 | 0.34 | 1.3   | 0.251358 | 0.09007  | 0.600793 | 0.344402 |
| Mmu.16390.2.S1_at       | Mmu.16390.2     | 9.47  | 8.96  | 0.08 | 0.46 | 1.42  | 0.175247 | 0.174846 | 0.538943 | 0.451505 |
| Mmu.16391.1.S1_at       | Mmu.16391.1     | 10.3  | 10.53 | 0.17 | 0.28 | -1.18 | 0.235405 | 0.18528  | 0.589352 | 0.461194 |
| Mmu.16393.1.S1_at       | Mmu.16393.1     | 7.13  | 8.47  | 0.58 | 0.99 | -2.53 | 0.140643 | 0.059171 | 0.508385 | 0.290203 |
| Mmu.16400.1.S1_at       | Mmu.16400.1     | 9.57  | 9.91  | 0.22 | 0.35 | -1.26 | 0.239337 | 0.315641 | 0.592443 | 0.569053 |
| Mmu.16411.1.S1_at       | Mmu.16411.1     | 3.85  | 3.86  | 0.14 | 0.12 | -1.01 | 0.375658 | 0.461109 | 0.684803 | 0.672855 |
| Mmu.16415.2.S1_at       | Mmu.16415.2     | 8.26  | 8.31  | 0.28 | 0.21 | -1.03 | 0.96288  | 0.506382 | 0.985683 | 0.702371 |
| Mmu.16418.1.A1_at       | Mmu.16418.1     | 12.05 | 12.07 | 0.1  | 0.04 | -1.02 | 0.334512 | 0.661408 | 0.658444 | 0.801755 |
| Mmu.16421.1.S1_at       | Mmu.16421.1     | 6.78  | 6.73  | 0.19 | 0.32 | 1.03  | 0.831784 | 0.413464 | 0.931835 | 0.639648 |
| Mmu.16432.1.S1_at       | Mmu.16432.1     | 7.04  | 7     | 0.2  | 0.25 | 1.03  | 0.934706 | 0.826431 | 0.974755 | 0.900309 |
| Mmu.16433.2.S1_at       | Mmu.16433.2     | 12.89 | 12.76 | 0.19 | 0.37 | 1.09  | 0.396999 | 0.260782 | 0.697462 | 0.52721  |
| Mmu.16444.1.S1_at       | Mmu.16444.1     | 3.68  | 3.75  | 0.27 | 0.11 | -1.05 | 0.659739 | 0.664884 | 0.847313 | 0.803709 |
| Mmu.16444.2.S1_a_at     | Mmu.16444.2     | 3.35  | 3.26  | 0.09 | 0.27 | 1.07  | 0.722624 | 0.43603  | 0.878815 | 0.655726 |
| Mmu.16445.1.S1_at       | Mmu.16445.1     | 3.07  | 3.55  | 1.4  | 0.17 | -1.39 | 0.680621 | 0.421594 | 0.857242 | 0.645173 |
| Mmu.16454.1.S1_at       | Mmu.16454.1     | 8.74  | 8.55  | 0.17 | 0.72 | 1.14  | 0.51501  | 0.659592 | 0.767272 | 0.800802 |
| Mmu.16454.1.S2_at       | Mmu.16454.1     | 10.87 | 11.06 | 0.22 | 0.76 | -1.14 | 0.609901 | 0.806197 | 0.820731 | 0.888575 |
| MmugDNA.34165.1.S1_at   | MmugDNA.34165.1 | 10.44 | 10.64 | 0.22 | 0.73 | -1.15 | 0.620476 | 0.817784 | 0.826026 | 0.894834 |
| MmugDNA.34165.1.S1_s_at | MmugDNA.34165.1 | 9.1   | 9.41  | 0.14 | 0.76 | -1.24 | 0.553917 | 0.701494 | 0.790503 | 0.826875 |
| Mmu.16465.1.S1_at       | Mmu.16465.1     | 10.31 | 10.04 | 0.12 | 0.36 | 1.21  | 0.567128 | 0.178334 | 0.797989 | 0.454672 |
| Mmu.16468.1.S1_at       | Mmu.16468.1     | 11.04 | 10.2  | 0.11 | 0.3  | 1.79  | 0.021025 | 0.012197 | 0.281947 | 0.142872 |
| Mmu.16475.1.S1_at       | Mmu.16475.1     | 9.77  | 9.67  | 0.11 | 0.37 | 1.08  | 0.714157 | 0.889895 | 0.874661 | 0.937287 |
| Mmu.16489.1.S1_at       | Mmu.16489.1     | 3.61  | 3.43  | 0.11 | 0.05 | 1.13  | 0.161375 | 0.203004 | 0.526364 | 0.477343 |
| Mmu.16497.1.S1_at       | Mmu.16497.1     | 5.27  | 5.43  | 0.16 | 0.08 | -1.11 | 0.133096 | 0.272407 | 0.499475 | 0.537122 |
| Mmu.16501.1.S1_at       | Mmu.16501.1     | 8.44  | 8.19  | 0.28 | 0.63 | 1.19  | 0.831899 | 0.945896 | 0.931902 | 0.969245 |
| Mmu.16504.1.S1_at       | Mmu.16504.1     | 10.34 | 10.84 | 0.37 | 0.04 | -1.41 | 0.288563 | 0.061041 | 0.626714 | 0.29389  |
| Mmu.1653.1.S1_at        | Mmu.1653.1      | 11.23 | 11.12 | 0.23 | 0.14 | 1.08  | 0.899032 | 0.419217 | 0.959684 | 0.643398 |
| Mmu.16530.1.S1_at       | Mmu.16530.1     | 8.29  | 8.16  | 0.18 | 0.33 | 1.1   | 0.464766 | 0.729413 | 0.73952  | 0.843541 |
| Mmu.16536.10.S1_at      | Mmu.16536.10    | 10.91 | 11.25 | 0.27 | 0.26 | -1.27 | 0.855322 | 0.970399 | 0.941503 | 0.983873 |
| Mmu.16547.1.S1_at       | Mmu.16547.1     | 3.83  | 3.95  | 0.17 | 0.24 | -1.09 | 0.189854 | 0.220637 | 0.552746 | 0.494069 |

|                         |                 |       |       |      |      |       |          |          |          |          |
|-------------------------|-----------------|-------|-------|------|------|-------|----------|----------|----------|----------|
| MmugDNA.19689.1.S1_s_at | MmugDNA.19689.1 | 4.7   | 4.67  | 0.15 | 0.16 | 1.02  | 0.842992 | 0.41348  | 0.936766 | 0.639648 |
| Mmu.16551.1.S1_at       | Mmu.16551.1     | 11.64 | 11.69 | 0.29 | 0.25 | -1.04 | 0.898636 | 0.787343 | 0.959492 | 0.876973 |
| Mmu.16556.1.S1_at       | Mmu.16556.1     | 5.62  | 5.47  | 0.08 | 0.12 | 1.11  | 0.117114 | 0.49691  | 0.481132 | 0.696273 |
| Mmu.1671.1.S1_at        | Mmu.1671.1      | 9.94  | 9.67  | 0.1  | 0.21 | 1.2   | 0.166029 | 0.021806 | 0.529882 | 0.184765 |
| Mmu.1700.1.S1_x_at      | Mmu.1700.1      | 11.77 | 12.88 | 1.31 | 0.38 | -2.16 | 0.291373 | 0.247089 | 0.628798 | 0.516259 |
| Mmu.1716.2.S1_at        | Mmu.1716.2      | 5.24  | 5.21  | 0.13 | 0.16 | 1.02  | 0.17197  | 0.254506 | 0.535422 | 0.522829 |
| Mmu.1719.1.S1_at        | Mmu.1719.1      | 5.64  | 5.64  | 0.24 | 0.35 | -1    | 0.869815 | 0.505117 | 0.947917 | 0.70197  |
| Mmu.1726.1.S1_at        | Mmu.1726.1      | 10.63 | 10.91 | 0.17 | 0.74 | -1.21 | 0.734633 | 0.433212 | 0.885725 | 0.653533 |
| Mmu.1730.1.S1_at        | Mmu.1730.1      | 11.37 | 11.94 | 0.44 | 0.22 | -1.49 | 0.229127 | 0.297133 | 0.586439 | 0.555996 |
| Mmu.1734.1.S1_at        | Mmu.1734.1      | 11.08 | 10.19 | 0.82 | 1.03 | 1.86  | 0.270352 | 0.252274 | 0.614698 | 0.520953 |
| Mmu.1738.2.S1_at        | Mmu.1738.2      | 5.71  | 5.28  | 0.35 | 0.34 | 1.35  | 0.190362 | 0.185585 | 0.553031 | 0.461566 |
| Mmu.1748.1.A1_at        | Mmu.1748.1      | 3.04  | 3.08  | 0.07 | 0.08 | -1.03 | 0.167783 | 0.298457 | 0.532027 | 0.557143 |
| Mmu.1748.1.S1_at        | Mmu.1748.1      | 2.91  | 2.9   | 0.07 | 0.09 | 1.01  | 0.826744 | 0.974029 | 0.9296   | 0.985833 |
| Mmu.175.1.A1_at         | Mmu.175.1       | 2.74  | 2.73  | 0.07 | 0.01 | 1.01  | 0.470941 | 0.171293 | 0.742796 | 0.447809 |
| Mmu.175.1.A1_x_at       | Mmu.175.1       | 3.16  | 3.12  | 0.1  | 0.09 | 1.03  | 0.909479 | 0.948174 | 0.964176 | 0.97046  |
| Mmu.175.1.S1_at         | Mmu.175.1       | 6.48  | 6.32  | 0.11 | 0.06 | 1.11  | 0.282261 | 0.318951 | 0.622707 | 0.571532 |
| Mmu.1757.2.S1_at        | Mmu.1757.2      | 11.45 | 11.76 | 0.05 | 0.03 | -1.24 | 0.000996 | 0.003293 | 0.139813 | 0.082571 |
| Mmu.1773.1.S1_at        | Mmu.1773.1      | 5.87  | 6.02  | 0.12 | 0.14 | -1.11 | 0.460128 | 0.291088 | 0.736725 | 0.551574 |
| Mmu.1775.1.S1_at        | Mmu.1775.1      | 10.49 | 10.64 | 0.33 | 0.42 | -1.11 | 0.206385 | 0.089269 | 0.56868  | 0.343391 |
| Mmu.181.1.S1_at         | Mmu.181.1       | 11.71 | 11.67 | 0.14 | 0.17 | 1.03  | 0.546387 | 0.03975  | 0.785466 | 0.244402 |
| Mmu.1815.1.S1_at        | Mmu.1815.1      | 13.62 | 13.66 | 0.09 | 0.07 | -1.03 | 0.53133  | 0.745118 | 0.777134 | 0.852267 |
| Mmu.1817.1.S1_at        | Mmu.1817.1      | 8.96  | 9.18  | 0.28 | 0.41 | -1.16 | 0.567441 | 0.426813 | 0.798131 | 0.648894 |
| Mmu.1818.1.S1_at        | Mmu.1818.1      | 4.6   | 4.89  | 0.24 | 0.37 | -1.22 | 0.825834 | 0.48899  | 0.929311 | 0.691529 |
| Mmu.1819.1.S1_at        | Mmu.1819.1      | 8.47  | 9.6   | 0.77 | 1.23 | -2.19 | 0.233146 | 0.155331 | 0.587994 | 0.430693 |
| Mmu.1836.1.S1_at        | Mmu.1836.1      | 6.22  | 6.73  | 0.25 | 0.26 | -1.43 | 0.148519 | 0.068425 | 0.513907 | 0.308011 |
| Mmu.1837.2.S1_at        | Mmu.1837.2      | 8.32  | 8.12  | 0.13 | 0.39 | 1.15  | 0.29901  | 0.17053  | 0.634566 | 0.447177 |
| Mmu.1854.1.S1_at        | Mmu.1854.1      | 7.98  | 7.77  | 0.44 | 0.85 | 1.15  | 0.911443 | 0.989646 | 0.965013 | 0.994102 |
| Mmu.1855.1.S1_at        | Mmu.1855.1      | 10.57 | 10.4  | 0.07 | 0.18 | 1.12  | 0.182077 | 0.208217 | 0.546458 | 0.482104 |
| Mmu.1884.1.S1_at        | Mmu.1884.1      | 6.6   | 6.91  | 0.04 | 0.05 | -1.24 | 0.000719 | 0.000013 | 0.136818 | 0.017532 |
| Mmu.19.1.S1_at          | Mmu.19.1        | 8.94  | 7.98  | 0.22 | 0.13 | 1.94  | 0.0027   | 0.000471 | 0.164621 | 0.038572 |
| Mmu.190.1.S1_at         | Mmu.190.1       | 9.41  | 10.26 | 0.09 | 0.14 | -1.81 | 0.001284 | 0.000217 | 0.145565 | 0.032385 |
| Mmu.190.2.S1_at         | Mmu.190.2       | 7.79  | 8.42  | 0.09 | 0.2  | -1.55 | 0.006494 | 0.002241 | 0.199625 | 0.069683 |
| Mmu.1900.1.S1_s_at      | Mmu.1900.1      | 12.64 | 12.69 | 0.21 | 0.17 | -1.03 | 0.797145 | 0.946771 | 0.915871 | 0.96978  |
| Mmu.1903.1.S1_at        | Mmu.1903.1      | 12.99 | 13.01 | 0.14 | 0.06 | -1.01 | 0.499915 | 0.679934 | 0.759402 | 0.8131   |
| Mmu.1906.10.S1_a_at     | Mmu.1906.10     | 3.21  | 3.71  | 0.26 | 0.4  | -1.41 | 0.28029  | 0.043501 | 0.621522 | 0.25316  |
| Mmu.1906.10.S1_s_at     | Mmu.1906.10     | 3.95  | 4.03  | 0.18 | 0.29 | -1.06 | 0.472496 | 0.455694 | 0.743763 | 0.669654 |
| Mmu.1906.11.S1_a_at     | Mmu.1906.11     | 3.62  | 4.29  | 0.11 | 0.61 | -1.6  | 0.337331 | 0.008888 | 0.659871 | 0.124698 |
| Mmu.1906.11.S1_x_at     | Mmu.1906.11     | 3.97  | 4.4   | 0.17 | 0.22 | -1.34 | 0.146419 | 0.015447 | 0.512545 | 0.157803 |
| Mmu.1906.13.S1_at       | Mmu.1906.13     | 3.51  | 3.45  | 0.13 | 0.14 | 1.05  | 0.477201 | 0.541806 | 0.746544 | 0.725074 |
| Mmu.1906.3.S1_x_at      | Mmu.1906.3      | 2.75  | 2.78  | 0.07 | 0.04 | -1.02 | 0.300485 | 0.374526 | 0.635914 | 0.6129   |
| Mmu.1906.5.S1_s_at      | Mmu.1906.5      | 3.5   | 3.52  | 0.04 | 0.07 | -1.02 | 0.245292 | 0.527239 | 0.596967 | 0.715896 |

|                    |            |       |       |      |      |       |          |          |          |          |
|--------------------|------------|-------|-------|------|------|-------|----------|----------|----------|----------|
| Mmu.1906.7.S1_at   | Mmu.1906.7 | 5.14  | 5.61  | 0.26 | 0.13 | -1.38 | 0.09358  | 0.000214 | 0.450966 | 0.032361 |
| Mmu.1906.9.S1_s_at | Mmu.1906.9 | 3.49  | 3.6   | 0.21 | 0.11 | -1.07 | 0.751686 | 0.883493 | 0.893893 | 0.933594 |
| Mmu.1907.1.S1_at   | Mmu.1907.1 | 4.03  | 3.97  | 0.35 | 0.28 | 1.04  | 0.88946  | 0.982082 | 0.955727 | 0.990211 |
| Mmu.1914.1.S1_s_at | Mmu.1914.1 | 11.64 | 11.85 | 0.4  | 0.02 | -1.16 | 0.466269 | 0.613368 | 0.740215 | 0.770518 |
| Mmu.1942.1.S1_at   | Mmu.1942.1 | 14.18 | 14.19 | 0.18 | 0.07 | -1    | 0.85125  | 0.769894 | 0.940204 | 0.866376 |
| Mmu.1942.1.S1_x_at | Mmu.1942.1 | 14.16 | 14.17 | 0.18 | 0.08 | -1    | 0.993858 | 0.645047 | 0.997879 | 0.791993 |
| Mmu.1943.1.S1_at   | Mmu.1943.1 | 11.35 | 11.75 | 0.02 | 0.04 | -1.32 | 0.000106 | 0.008022 | 0.112653 | 0.119047 |
| Mmu.1946.1.S1_at   | Mmu.1946.1 | 9.35  | 9.57  | 0.12 | 0.21 | -1.17 | 0.150711 | 0.069973 | 0.515411 | 0.31072  |
| Mmu.1956.1.S1_at   | Mmu.1956.1 | 11.9  | 11.7  | 0.08 | 0.18 | 1.15  | 0.056196 | 0.040232 | 0.386006 | 0.245805 |
| Mmu.1976.1.A1_at   | Mmu.1976.1 | 10.58 | 10.45 | 0.15 | 0.18 | 1.09  | 0.847654 | 0.491316 | 0.939025 | 0.692931 |
| Mmu.1976.1.S1_at   | Mmu.1976.1 | 10.13 | 9.88  | 0.07 | 0.26 | 1.19  | 0.083806 | 0.064672 | 0.43619  | 0.300314 |
| Mmu.2010.1.S1_s_at | Mmu.2010.1 | 4.79  | 4.63  | 0.29 | 0.01 | 1.12  | 0.286543 | 0.229286 | 0.625572 | 0.501527 |
| Mmu.2013.1.S1_at   | Mmu.2013.1 | 9.11  | 9.76  | 0.06 | 0.52 | -1.57 | 0.039599 | 0.02873  | 0.347684 | 0.211301 |
| Mmu.2018.1.S1_at   | Mmu.2018.1 | 7.85  | 10.37 | 0.7  | 2.15 | -5.74 | 0.249597 | 0.204967 | 0.600196 | 0.479296 |
| Mmu.2031.1.S1_at   | Mmu.2031.1 | 10.41 | 9.71  | 0.38 | 1.23 | 1.62  | 0.406907 | 0.558937 | 0.704025 | 0.735944 |
| Mmu.2033.2.S1_at   | Mmu.2033.2 | 5.06  | 5.22  | 0.21 | 0.1  | -1.12 | 0.497779 | 0.470215 | 0.758068 | 0.678572 |
| Mmu.2043.1.S1_at   | Mmu.2043.1 | 6.61  | 6.87  | 0.01 | 0.13 | -1.2  | 0.078691 | 0.007955 | 0.428609 | 0.118702 |
| Mmu.2046.1.S1_at   | Mmu.2046.1 | 10.62 | 10.94 | 0.05 | 0.13 | -1.25 | 0.01574  | 0.003473 | 0.260601 | 0.084834 |
| Mmu.2048.1.S1_at   | Mmu.2048.1 | 6.49  | 6.2   | 0.25 | 0.11 | 1.22  | 0.068652 | 0.052192 | 0.410319 | 0.274036 |
| Mmu.2050.1.S1_s_at | Mmu.2050.1 | 9.56  | 10.98 | 0.13 | 0.47 | -2.66 | 0.008568 | 0.00434  | 0.219449 | 0.092354 |
| Mmu.2053.1.S1_s_at | Mmu.2053.1 | 8.1   | 7.95  | 1.95 | 1.59 | 1.11  | 0.909857 | 0.543556 | 0.964287 | 0.726202 |
| Mmu.2056.1.S1_at   | Mmu.2056.1 | 3.03  | 3.1   | 0.07 | 0.08 | -1.05 | 0.312    | 0.212144 | 0.643774 | 0.486036 |
| Mmu.2057.1.S1_at   | Mmu.2057.1 | 3.19  | 3.29  | 0.05 | 0.18 | -1.07 | 0.260014 | 0.13272  | 0.606878 | 0.404544 |
| Mmu.2057.1.S1_s_at | Mmu.2057.1 | 10.08 | 10.03 | 0.15 | 0.09 | 1.04  | 0.873341 | 0.959227 | 0.94924  | 0.976875 |
| Mmu.2059.1.S1_at   | Mmu.2059.1 | 7.77  | 7.41  | 0.23 | 0.26 | 1.28  | 0.086479 | 0.090198 | 0.440232 | 0.344588 |
| Mmu.2066.1.A1_at   | Mmu.2066.1 | 13.42 | 13.43 | 0.21 | 0.24 | -1.01 | 0.98632  | 0.999568 | 0.995151 | 0.999859 |
| Mmu.2074.1.S1_at   | Mmu.2074.1 | 7.68  | 7.66  | 0.07 | 0.18 | 1.02  | 0.35169  | 0.440485 | 0.669126 | 0.658967 |
| Mmu.2083.1.S1_at   | Mmu.2083.1 | 3.35  | 3.36  | 0.06 | 0.25 | -1.01 | 0.51766  | 0.736836 | 0.768927 | 0.847693 |
| Mmu.2088.1.S1_at   | Mmu.2088.1 | 8.08  | 6.49  | 0.47 | 0.57 | 3.01  | 0.014243 | 0.006636 | 0.251724 | 0.110446 |
| Mmu.2091.1.S1_x_at | Mmu.2091.1 | 13.22 | 13.49 | 0.63 | 0.22 | -1.2  | 0.196137 | 0.185749 | 0.559235 | 0.461631 |
| Mmu.2091.3.S1_at   | Mmu.2091.3 | 7.05  | 8.14  | 0.65 | 0.13 | -2.12 | 0.024745 | 0.012054 | 0.296308 | 0.142044 |
| Mmu.2091.3.S1_x_at | Mmu.2091.3 | 7.18  | 8.18  | 0.61 | 0.15 | -2.01 | 0.053046 | 0.035439 | 0.379207 | 0.232561 |
| Mmu.2091.5.S1_a_at | Mmu.2091.5 | 5.29  | 6.15  | 0.11 | 0.26 | -1.81 | 0.003397 | 0.000821 | 0.177724 | 0.046565 |
| Mmu.2091.5.S1_x_at | Mmu.2091.5 | 6.6   | 6.78  | 0.15 | 0.09 | -1.13 | 0.037156 | 0.026349 | 0.340777 | 0.203321 |
| Mmu.2104.1.S1_at   | Mmu.2104.1 | 6.89  | 7.1   | 0.15 | 0.05 | -1.15 | 0.11903  | 0.098964 | 0.483719 | 0.357049 |
| Mmu.2107.1.S1_at   | Mmu.2107.1 | 7.61  | 7.9   | 0.13 | 0.07 | -1.22 | 0.020645 | 0.01619  | 0.279122 | 0.161274 |
| Mmu.211.1.S1_at    | Mmu.211.1  | 13.4  | 13.4  | 0.06 | 0.22 | 1     | 0.698311 | 0.636032 | 0.866049 | 0.78583  |
| Mmu.2114.1.A1_at   | Mmu.2114.1 | 4.99  | 5.19  | 0.12 | 0.25 | -1.15 | 0.276294 | 0.128644 | 0.61836  | 0.400083 |
| Mmu.2114.1.S1_at   | Mmu.2114.1 | 5.52  | 5.74  | 0.22 | 0.03 | -1.16 | 0.137998 | 0.020396 | 0.505467 | 0.179286 |
| Mmu.2120.1.A1_at   | Mmu.2120.1 | 14.17 | 14.38 | 0.2  | 0.04 | -1.16 | 0.265554 | 0.121788 | 0.611167 | 0.391074 |
| Mmu.2126.1.S1_at   | Mmu.2126.1 | 13.1  | 12.84 | 0.04 | 0.05 | 1.19  | 0.00336  | 0.001358 | 0.177484 | 0.056687 |



|                    |            |       |       |      |      |       |          |          |          |          |
|--------------------|------------|-------|-------|------|------|-------|----------|----------|----------|----------|
| Mmu.2126.1.S1_s_at | Mmu.2126.1 | 13.38 | 13.14 | 0.03 | 0.02 | 1.18  | 0.000372 | 0.001301 | 0.12925  | 0.055613 |
| Mmu.2128.1.S1_x_at | Mmu.2128.1 | 6.98  | 6.8   | 0.36 | 0.29 | 1.14  | 0.218643 | 0.384982 | 0.578242 | 0.620583 |
| Mmu.2136.1.S1_at   | Mmu.2136.1 | 7.84  | 8.16  | 0.3  | 0.35 | -1.25 | 0.18952  | 0.223118 | 0.552479 | 0.49588  |
| Mmu.2142.1.S1_at   | Mmu.2142.1 | 7.8   | 8.67  | 0.45 | 0.69 | -1.83 | 0.078018 | 0.019861 | 0.428012 | 0.177189 |
| Mmu.2143.1.S1_x_at | Mmu.2143.1 | 7.24  | 7.02  | 0.28 | 0.39 | 1.16  | 0.303944 | 0.584661 | 0.638126 | 0.752482 |
| Mmu.2174.1.S1_at   | Mmu.2174.1 | 7.95  | 8.56  | 0.28 | 0.57 | -1.53 | 0.232437 | 0.279152 | 0.587814 | 0.542814 |
| Mmu.2196.1.A1_at   | Mmu.2196.1 | 9.57  | 9.88  | 0.16 | 0.19 | -1.24 | 0.207318 | 0.013023 | 0.569475 | 0.146821 |
| Mmu.2196.1.S1_at   | Mmu.2196.1 | 9.77  | 10    | 0.18 | 0.17 | -1.17 | 0.112665 | 0.010891 | 0.4751   | 0.135939 |
| Mmu.22.2.S1_at     | Mmu.22.2   | 11.67 | 11.5  | 0.16 | 0.13 | 1.12  | 0.493267 | 0.051692 | 0.756084 | 0.272892 |
| Mmu.2224.1.A1_at   | Mmu.2224.1 | 11.35 | 11.01 | 0.11 | 0.4  | 1.27  | 0.212187 | 0.004247 | 0.572526 | 0.091685 |
| Mmu.2226.2.S1_at   | Mmu.2226.2 | 10.61 | 10.91 | 0.13 | 0.09 | -1.23 | 0.017435 | 0.004696 | 0.267445 | 0.095363 |
| Mmu.2231.1.S1_at   | Mmu.2231.1 | 8.68  | 8.24  | 1.18 | 0.39 | 1.36  | 0.984044 | 0.303174 | 0.99433  | 0.56067  |
| Mmu.2238.1.S1_at   | Mmu.2238.1 | 12.61 | 12.57 | 0.04 | 0.05 | 1.03  | 0.346864 | 0.411228 | 0.666049 | 0.637954 |
| Mmu.2240.1.A1_at   | Mmu.2240.1 | 2.77  | 2.84  | 0.06 | 0.03 | -1.05 | 0.21506  | 0.354424 | 0.575507 | 0.59721  |
| Mmu.2243.1.S1_at   | Mmu.2243.1 | 12.72 | 12.62 | 0.12 | 0.02 | 1.07  | 0.322195 | 0.173422 | 0.650882 | 0.449918 |
| Mmu.225.1.S1_at    | Mmu.225.1  | 10.39 | 10.34 | 0.06 | 0.34 | 1.03  | 0.838402 | 0.766985 | 0.934652 | 0.864663 |
| Mmu.2250.1.S1_at   | Mmu.2250.1 | 4.05  | 4.06  | 0.15 | 0.09 | -1    | 0.594169 | 0.30521  | 0.811686 | 0.562255 |
| Mmu.2252.1.S1_at   | Mmu.2252.1 | 8.75  | 8.8   | 0.04 | 0.12 | -1.03 | 0.535964 | 0.118494 | 0.779351 | 0.386469 |
| Mmu.2256.2.S1_at   | Mmu.2256.2 | 5.91  | 5.94  | 0.31 | 0.26 | -1.03 | 0.389279 | 0.755186 | 0.692956 | 0.857488 |
| Mmu.2276.1.S1_at   | Mmu.2276.1 | 5.07  | 5.76  | 0.51 | 1.11 | -1.62 | 0.390261 | 0.193314 | 0.69348  | 0.468656 |
| Mmu.2277.1.S1_at   | Mmu.2277.1 | 10.91 | 10.99 | 0.56 | 0.34 | -1.05 | 0.391982 | 0.339342 | 0.694373 | 0.585984 |
| Mmu.2297.1.S1_at   | Mmu.2297.1 | 8.37  | 7.88  | 0.14 | 0.53 | 1.41  | 0.143489 | 0.002344 | 0.510312 | 0.07161  |
| Mmu.2302.1.S1_at   | Mmu.2302.1 | 6.3   | 6.96  | 0.19 | 0.56 | -1.58 | 0.046128 | 0.045686 | 0.362501 | 0.258049 |
| Mmu.2304.1.S1_at   | Mmu.2304.1 | 6.69  | 8     | 0.9  | 2.11 | -2.47 | 0.454505 | 0.369424 | 0.733213 | 0.608816 |
| Mmu.2305.1.S1_at   | Mmu.2305.1 | 8.85  | 9.87  | 1.08 | 1.77 | -2.02 | 0.495462 | 0.274087 | 0.757254 | 0.538565 |
| Mmu.2313.1.S1_at   | Mmu.2313.1 | 10.06 | 10.55 | 0.26 | 0.03 | -1.4  | 0.027544 | 0.005381 | 0.308386 | 0.101199 |
| Mmu.2323.2.S1_at   | Mmu.2323.2 | 7.3   | 6.95  | 0.11 | 0.05 | 1.27  | 0.013319 | 0.012158 | 0.246471 | 0.142648 |
| Mmu.2333.1.S1_at   | Mmu.2333.1 | 9.23  | 8.51  | 0.18 | 0.35 | 1.65  | 0.027661 | 0.014135 | 0.308507 | 0.15208  |
| Mmu.234.1.A1_at    | Mmu.234.1  | 7.55  | 7.72  | 1.09 | 1.04 | -1.12 | 0.605808 | 0.792023 | 0.818557 | 0.879813 |
| Mmu.2342.1.S1_at   | Mmu.2342.1 | 6.97  | 5.23  | 0.37 | 0.38 | 3.36  | 0.007232 | 0.004115 | 0.205916 | 0.090887 |
| Mmu.2344.1.A1_at   | Mmu.2344.1 | 5.77  | 5.81  | 0.15 | 0.18 | -1.03 | 0.90372  | 0.538231 | 0.961578 | 0.72298  |
| Mmu.2344.1.S1_at   | Mmu.2344.1 | 4.49  | 4.49  | 0.05 | 0.06 | 1     | 0.866386 | 0.957425 | 0.946723 | 0.975899 |
| Mmu.235.1.S1_at    | Mmu.235.1  | 5.04  | 5.17  | 0.08 | 0.21 | -1.09 | 0.574704 | 0.29867  | 0.801827 | 0.557252 |
| Mmu.2375.1.S1_at   | Mmu.2375.1 | 6.5   | 6.29  | 0.21 | 0.12 | 1.16  | 0.080825 | 0.056729 | 0.431352 | 0.284291 |
| Mmu.2391.1.S1_at   | Mmu.2391.1 | 5.54  | 5.61  | 0.04 | 0.05 | -1.05 | 0.100441 | 0.111912 | 0.461009 | 0.377006 |
| Mmu.2392.1.S1_at   | Mmu.2392.1 | 5.71  | 5.8   | 0.14 | 0.69 | -1.07 | 0.948403 | 0.991757 | 0.980183 | 0.995392 |
| Mmu.2411.1.S1_at   | Mmu.2411.1 | 11.36 | 11.34 | 0.26 | 0.1  | 1.01  | 0.856772 | 0.869175 | 0.942171 | 0.925755 |
| Mmu.2416.1.S1_at   | Mmu.2416.1 | 9.64  | 9.87  | 0.22 | 0.16 | -1.18 | 0.116521 | 0.056558 | 0.48034  | 0.283838 |
| Mmu.2442.1.S1_at   | Mmu.2442.1 | 8.27  | 10.39 | 0.64 | 0.89 | -4.35 | 0.04904  | 0.026667 | 0.370523 | 0.20423  |
| Mmu.245.1.S1_x_at  | Mmu.245.1  | 13.17 | 13.19 | 0.01 | 0.16 | -1.02 | 0.511364 | 0.684001 | 0.765295 | 0.81565  |
| Mmu.2452.1.S1_at   | Mmu.2452.1 | 9.78  | 11.65 | 0.36 | 0.04 | -3.64 | 0.001267 | 0.000484 | 0.145267 | 0.038753 |

|                         |                 |       |       |      |      |        |          |          |          |          |
|-------------------------|-----------------|-------|-------|------|------|--------|----------|----------|----------|----------|
| Mmu.2461.3.S1_at        | Mmu.2461.3      | 3.94  | 3.96  | 0.17 | 0.13 | -1.01  | 0.698295 | 0.618868 | 0.866049 | 0.774212 |
| Mmu.2484.1.S1_at        | Mmu.2484.1      | 5.76  | 5.76  | 0.12 | 0    | 1      | 0.373901 | 0.293897 | 0.683245 | 0.553878 |
| Mmu.249.1.S1_at         | Mmu.249.1       | 9.67  | 10.09 | 0.45 | 0.89 | -1.33  | 0.522959 | 0.708937 | 0.772257 | 0.831181 |
| MmugDNA.7350.1.S1_s_at  | MmugDNA.7350.1  | 10.96 | 11.3  | 0.22 | 0.82 | -1.27  | 0.466118 | 0.638382 | 0.740195 | 0.787623 |
| Mmu.2499.1.S1_at        | Mmu.2499.1      | 13.7  | 13.69 | 0.09 | 0.02 | 1.01   | 0.701874 | 0.883799 | 0.868197 | 0.933691 |
| Mmu.2514.1.S1_at        | Mmu.2514.1      | 9.24  | 9.31  | 0.04 | 0.25 | -1.05  | 0.506181 | 0.727013 | 0.762112 | 0.842084 |
| Mmu.2523.1.S1_at        | Mmu.2523.1      | 9.04  | 12.71 | 1.44 | 2.31 | -12.74 | 0.290444 | 0.239095 | 0.628091 | 0.509827 |
| Mmu.2524.1.S1_at        | Mmu.2524.1      | 6.43  | 6.68  | 0.31 | 0.21 | -1.19  | 0.063338 | 0.038486 | 0.400486 | 0.241138 |
| Mmu.2541.1.S1_at        | Mmu.2541.1      | 11.52 | 11.36 | 0.13 | 0.29 | 1.12   | 0.412743 | 0.56584  | 0.708019 | 0.740112 |
| Mmu.2554.1.A1_at        | Mmu.2554.1      | 5.82  | 6.16  | 0.09 | 0.37 | -1.27  | 0.472667 | 0.676397 | 0.74392  | 0.810935 |
| Mmu.2556.1.S1_at        | Mmu.2556.1      | 11.28 | 11.39 | 0.18 | 0.43 | -1.08  | 0.630777 | 0.742884 | 0.832339 | 0.851074 |
| Mmu.2571.1.S1_at        | Mmu.2571.1      | 3.35  | 3.33  | 0.13 | 0.03 | 1.01   | 0.858831 | 0.585258 | 0.943028 | 0.752837 |
| Mmu.2576.1.S1_at        | Mmu.2576.1      | 10.33 | 10.73 | 0.14 | 0.03 | -1.32  | 0.021332 | 0.004856 | 0.282524 | 0.09727  |
| Mmu.258.1.S1_s_at       | Mmu.258.1       | 11.79 | 11.45 | 0.04 | 0.13 | 1.26   | 0.013841 | 0.035472 | 0.249758 | 0.232564 |
| Mmu.2594.1.S1_at        | Mmu.2594.1      | 14    | 14    | 0.06 | 0.1  | 1      | 0.770494 | 0.675334 | 0.90333  | 0.81026  |
| Mmu.2601.1.S1_at        | Mmu.2601.1      | 11.97 | 11.57 | 0.05 | 0.02 | 1.32   | 0.000323 | 0.002378 | 0.12562  | 0.072042 |
| Mmu.2604.1.S1_s_at      | Mmu.2604.1      | 12.38 | 12.44 | 0.18 | 0.16 | -1.04  | 0.711553 | 0.775244 | 0.873642 | 0.869162 |
| Mmu.2612.1.S1_at        | Mmu.2612.1      | 5.14  | 4.67  | 0.15 | 0.36 | 1.38   | 0.066934 | 0.070063 | 0.406999 | 0.310966 |
| Mmu.2615.1.S1_at        | Mmu.2615.1      | 6.25  | 6.31  | 0.21 | 0.19 | -1.04  | 0.293009 | 0.363517 | 0.630264 | 0.603941 |
| Mmu.2633.1.S1_at        | Mmu.2633.1      | 4.64  | 4.51  | 0.16 | 0.31 | 1.1    | 0.927027 | 0.603109 | 0.971962 | 0.763947 |
| Mmu.2659.1.S1_at        | Mmu.2659.1      | 5.84  | 5.7   | 0.15 | 0.03 | 1.1    | 0.456942 | 0.654861 | 0.734612 | 0.798179 |
| Mmu.2665.1.S1_at        | Mmu.2665.1      | 5.44  | 5.5   | 0.09 | 0.07 | -1.04  | 0.469193 | 0.062342 | 0.741519 | 0.296503 |
| Mmu.2673.1.S1_at        | Mmu.2673.1      | 5.67  | 5.89  | 0.23 | 0.15 | -1.16  | 0.161089 | 0.186311 | 0.526189 | 0.462172 |
| Mmu.2694.1.S1_at        | Mmu.2694.1      | 12.29 | 12.05 | 0.02 | 0.2  | 1.18   | 0.081546 | 0.03797  | 0.432522 | 0.239302 |
| Mmu.2694.1.S1_s_at      | Mmu.2694.1      | 10.65 | 10.43 | 0.08 | 0.22 | 1.17   | 0.137337 | 0.134418 | 0.504506 | 0.406603 |
| Mmu.2695.1.S1_at        | Mmu.2695.1      | 8.16  | 8.09  | 0.24 | 0.21 | 1.05   | 0.45177  | 0.513691 | 0.73168  | 0.707212 |
| Mmu.2704.1.S1_at        | Mmu.2704.1      | 9.26  | 8.81  | 0.35 | 0.55 | 1.36   | 0.147639 | 0.11725  | 0.513287 | 0.384781 |
| Mmu.2718.1.S1_at        | Mmu.2718.1      | 12.02 | 11.57 | 0.18 | 0.17 | 1.37   | 0.058698 | 0.019671 | 0.390921 | 0.176276 |
| MmugDNA.1323.1.S1_s_at  | MmugDNA.1323.1  | 12.6  | 12.71 | 0.2  | 0.26 | -1.08  | 0.553506 | 0.752508 | 0.790178 | 0.855912 |
| Mmu.2721.1.S1_at        | Mmu.2721.1      | 6.69  | 6.79  | 0.3  | 0.06 | -1.07  | 0.874268 | 0.634062 | 0.949565 | 0.784619 |
| Mmu.2724.1.S1_at        | Mmu.2724.1      | 9.25  | 9.73  | 0.55 | 0.1  | -1.39  | 0.179853 | 0.234636 | 0.544019 | 0.505853 |
| Mmu.2746.2.S1_at        | Mmu.2746.2      | 5.35  | 5.38  | 0.17 | 0.1  | -1.02  | 0.18066  | 0.084829 | 0.545044 | 0.336352 |
| Mmu.2749.1.S1_at        | Mmu.2749.1      | 9.76  | 9.97  | 0.25 | 0.17 | -1.15  | 0.101631 | 0.0501   | 0.461313 | 0.268916 |
| Mmu.2756.1.S1_at        | Mmu.2756.1      | 7.94  | 8.37  | 0.13 | 0.25 | -1.34  | 0.038862 | 0.009047 | 0.345902 | 0.1257   |
| MmugDNA.23929.1.S1_at   | MmugDNA.23929.1 | 12.12 | 12.56 | 0.17 | 0.41 | -1.36  | 0.164658 | 0.149221 | 0.528638 | 0.423728 |
| MmugDNA.23929.1.S1_s_at | MmugDNA.23929.1 | 11.75 | 12.3  | 0.21 | 0.42 | -1.46  | 0.181285 | 0.177515 | 0.545766 | 0.453888 |
| Mmu.2761.1.S1_at        | Mmu.2761.1      | 4.68  | 4.7   | 0.18 | 0.01 | -1.02  | 0.490676 | 0.676994 | 0.754497 | 0.811292 |
| Mmu.2763.1.S1_at        | Mmu.2763.1      | 3.87  | 3.97  | 0.23 | 0.35 | -1.08  | 0.589007 | 0.669046 | 0.809183 | 0.806427 |
| Mmu.2776.1.S1_at        | Mmu.2776.1      | 11.72 | 10.77 | 0.17 | 0.29 | 1.93   | 0.005267 | 0.002928 | 0.191107 | 0.079497 |
| Mmu.2787.1.S1_at        | Mmu.2787.1      | 11.46 | 11.86 | 0.38 | 0.06 | -1.31  | 0.09229  | 0.054229 | 0.448803 | 0.278278 |
| Mmu.2787.1.S1_x_at      | Mmu.2787.1      | 11.64 | 11.9  | 0.33 | 0.08 | -1.2   | 0.088358 | 0.04856  | 0.443133 | 0.265572 |

|                          |                  |       |       |      |      |       |          |          |          |          |
|--------------------------|------------------|-------|-------|------|------|-------|----------|----------|----------|----------|
| Mmu.2788.1.S1_at         | Mmu.2788.1       | 5.88  | 5.91  | 0.34 | 0.11 | -1.02 | 0.821356 | 0.32993  | 0.927303 | 0.578874 |
| Mmu.2788.1.S1_s_at       | Mmu.2788.1       | 9.38  | 8.94  | 0.26 | 0.25 | 1.36  | 0.292619 | 0.062482 | 0.629959 | 0.296749 |
| Mmu.2800.1.S1_at         | Mmu.2800.1       | 9.08  | 9.06  | 0.31 | 0.35 | 1.01  | 0.971038 | 0.66671  | 0.988846 | 0.804734 |
| Mmu.2804.1.S1_at         | Mmu.2804.1       | 7.66  | 7.84  | 0.16 | 0.13 | -1.13 | 0.263643 | 0.220478 | 0.609555 | 0.493818 |
| Mmu.2810.1.S1_at         | Mmu.2810.1       | 8.13  | 7.67  | 0.08 | 0.31 | 1.38  | 0.055284 | 0.067657 | 0.383689 | 0.306199 |
| Mmu.2851.1.S1_at         | Mmu.2851.1       | 5.55  | 5.93  | 0.25 | 0.47 | -1.3  | 0.163685 | 0.159151 | 0.527992 | 0.435217 |
| Mmu.2852.1.S1_at         | Mmu.2852.1       | 3.27  | 3.26  | 0.04 | 0.1  | 1.01  | 0.869281 | 0.932567 | 0.947917 | 0.961739 |
| Mmu.2852.1.S1_x_at       | Mmu.2852.1       | 3.39  | 3.39  | 0.03 | 0.07 | -1    | 0.509311 | 0.232026 | 0.764323 | 0.503761 |
| Mmu.2856.1.S1_at         | Mmu.2856.1       | 7.65  | 7.21  | 0.48 | 0.04 | 1.35  | 0.069213 | 0.056973 | 0.411431 | 0.284811 |
| Mmu.2860.1.S1_at         | Mmu.2860.1       | 4.78  | 4.75  | 0.09 | 0.17 | 1.02  | 0.576649 | 0.755687 | 0.803217 | 0.85776  |
| Mmu.2868.1.S1_at         | Mmu.2868.1       | 3.39  | 3.44  | 0.11 | 0.04 | -1.04 | 0.480334 | 0.731049 | 0.748257 | 0.844197 |
| Mmu.2883.1.S1_at         | Mmu.2883.1       | 8.16  | 9.8   | 1.44 | 0.83 | -3.11 | 0.376696 | 0.035363 | 0.685249 | 0.232348 |
| Mmu.2887.1.S1_at         | Mmu.2887.1       | 12.04 | 12.15 | 0.25 | 0.11 | -1.07 | 0.377301 | 0.105102 | 0.685736 | 0.366755 |
| Mmu.289.1.S1_at          | Mmu.289.1        | 7.94  | 7.44  | 0.14 | 0.27 | 1.41  | 0.059706 | 0.001503 | 0.39273  | 0.059065 |
| MmugDNA.15562.1.S1_s_at  | MmugDNA.15562.1  | 14.29 | 14.3  | 0.03 | 0.01 | -1.01 | 0.604073 | 0.244213 | 0.81746  | 0.514167 |
| Mmu.2918.1.S1_at         | Mmu.2918.1       | 9.43  | 9.64  | 0.27 | 0.11 | -1.16 | 0.100619 | 0.104735 | 0.461009 | 0.366144 |
| Mmu.2925.1.S1_at         | Mmu.2925.1       | 9.9   | 10.44 | 0.14 | 0.34 | -1.45 | 0.057143 | 0.056919 | 0.387418 | 0.284712 |
| Mmu.2935.3.A1_a_at       | Mmu.2935.3       | 8.28  | 8.84  | 0.18 | 0.45 | -1.47 | 0.082552 | 0.050073 | 0.434069 | 0.268916 |
| Mmu.2935.1.S1_at         | Mmu.2935.1       | 5.71  | 5.78  | 0.15 | 0.3  | -1.05 | 0.784102 | 0.866655 | 0.909937 | 0.924203 |
| Mmu.2935.2.S1_at         | Mmu.2935.2       | 6.51  | 7.52  | 0.2  | 0.33 | -2.01 | 0.024743 | 0.016928 | 0.296308 | 0.164991 |
| Mmu.2935.4.S1_x_at       | Mmu.2935.4       | 12.21 | 12.47 | 0.36 | 0.63 | -1.19 | 0.784563 | 0.1692   | 0.910258 | 0.445812 |
| MmunewRS.781.1.S1_s_at   | MmunewRS.781.1   | 13.48 | 13.42 | 0.09 | 0.22 | 1.04  | 0.46399  | 0.017816 | 0.738998 | 0.168612 |
| Mmu.2975.1.S1_at         | Mmu.2975.1       | 8.36  | 8.51  | 0.33 | 0.6  | -1.1  | 0.64986  | 0.642861 | 0.842533 | 0.790529 |
| Mmu.2976.1.S1_at         | Mmu.2976.1       | 8.15  | 10.16 | 1.06 | 0.61 | -4.03 | 0.038545 | 0.030353 | 0.344633 | 0.216116 |
| Mmu.2984.1.S1_at         | Mmu.2984.1       | 10.95 | 10.52 | 0.32 | 0.31 | 1.34  | 0.367071 | 0.505044 | 0.679287 | 0.70197  |
| Mmu.2985.1.S1_at         | Mmu.2985.1       | 13.3  | 13.32 | 0.07 | 0.04 | -1.01 | 0.468369 | 0.542434 | 0.741049 | 0.725516 |
| Mmu.2989.1.S1_s_at       | Mmu.2989.1       | 13.89 | 13.92 | 0.07 | 0.13 | -1.02 | 0.669842 | 0.66654  | 0.852318 | 0.804636 |
| Mmu.3027.1.S1_at         | Mmu.3027.1       | 11.47 | 11.55 | 0.12 | 0.03 | -1.06 | 0.713424 | 0.895412 | 0.874494 | 0.940218 |
| Mmu.303.1.S1_at          | Mmu.303.1        | 8.31  | 7.46  | 0.2  | 0.14 | 1.81  | 0.003551 | 0.000696 | 0.179515 | 0.044237 |
| Mmu.3035.1.S1_x_at       | Mmu.3035.1       | 3.34  | 3.47  | 0.44 | 0.14 | -1.1  | 0.624154 | 0.751835 | 0.828178 | 0.855698 |
| Mmu.3041.1.S1_at         | Mmu.3041.1       | 3.64  | 3.61  | 0.22 | 0.16 | 1.02  | 0.638106 | 0.70118  | 0.836489 | 0.826707 |
| Mmu.3044.1.S1_x_at       | Mmu.3044.1       | 13.26 | 14.44 | 1.27 | 0.04 | -2.27 | 0.182068 | 0.143463 | 0.546458 | 0.417442 |
| Mmu.3044.13.S1_x_at      | Mmu.3044.13      | 11.93 | 14.43 | 3.67 | 0.02 | -5.63 | 0.223432 | 0.203008 | 0.581912 | 0.477343 |
| Mmu.3044.15.S1_at        | Mmu.3044.15      | 7.39  | 7.48  | 0.25 | 0.07 | -1.07 | 0.246264 | 0.177786 | 0.597666 | 0.454111 |
| Mmu.3044.17.S1_x_at      | Mmu.3044.17      | 14.59 | 14.56 | 1.37 | 0    | 1.02  | 0.389075 | 0.434456 | 0.692937 | 0.654569 |
| Mmu.3044.6.S1_at         | Mmu.3044.6       | 3.01  | 3.08  | 0.09 | 0.1  | -1.04 | 0.874619 | 0.950128 | 0.949712 | 0.971594 |
| Mmu.3053.1.S1_at         | Mmu.3053.1       | 5.27  | 5.27  | 0.04 | 0.06 | 1     | 0.292485 | 0.204135 | 0.629851 | 0.478458 |
| Mmu.3054.2.S1_at         | Mmu.3054.2       | 11.25 | 11.39 | 0.06 | 0.05 | -1.1  | 0.033058 | 0.011924 | 0.327027 | 0.141304 |
| MmuMitochon.12.1.S1_s_at | MmuMitochon.12.1 | 13.76 | 13.67 | 0.14 | 0.08 | 1.06  | 0.962379 | 0.890041 | 0.985546 | 0.937384 |
| Mmu.3058.1.S1_at         | Mmu.3058.1       | 6.81  | 8.44  | 0.26 | 0.19 | -3.1  | 0.001006 | 0.000657 | 0.140289 | 0.043559 |
| Mmu.3064.1.S1_s_at       | Mmu.3064.1       | 13.97 | 14.51 | 0.77 | 0.03 | -1.45 | 0.260284 | 0.231193 | 0.607093 | 0.5029   |

|                    |             |       |       |      |      |        |          |          |          |          |
|--------------------|-------------|-------|-------|------|------|--------|----------|----------|----------|----------|
| Mmu.3064.4.S1_s_at | Mmu.3064.4  | 8.41  | 14.36 | 3.53 | 0.03 | -61.75 | 0.126902 | 0.086904 | 0.49303  | 0.339713 |
| Mmu.3073.1.A1_s_at | Mmu.3073.1  | 5.98  | 6.59  | 0.39 | 0.73 | -1.53  | 0.171135 | 0.207847 | 0.535105 | 0.482049 |
| Mmu.3073.1.S1_x_at | Mmu.3073.1  | 5.46  | 5.75  | 0.15 | 0.41 | -1.22  | 0.157322 | 0.180005 | 0.522148 | 0.456552 |
| Mmu.3075.1.S1_at   | Mmu.3075.1  | 3.2   | 3.31  | 0.02 | 0.12 | -1.08  | 0.143818 | 0.246925 | 0.510427 | 0.516238 |
| Mmu.3079.1.S1_at   | Mmu.3079.1  | 10.49 | 10.33 | 0.11 | 0.31 | 1.12   | 0.730199 | 0.011247 | 0.882997 | 0.138014 |
| Mmu.309.1.S1_s_at  | Mmu.309.1   | 6.88  | 7.18  | 0.19 | 0.15 | -1.23  | 0.056024 | 0.121167 | 0.385491 | 0.390223 |
| Mmu.3094.1.S1_at   | Mmu.3094.1  | 13.89 | 14.25 | 0.53 | 0.07 | -1.28  | 0.233188 | 0.175541 | 0.587994 | 0.452174 |
| Mmu.3117.1.S1_at   | Mmu.3117.1  | 8.3   | 13.76 | 4.37 | 0.02 | -43.87 | 0.125535 | 0.084859 | 0.491368 | 0.336411 |
| Mmu.312.1.S1_at    | Mmu.312.1   | 11.3  | 11.32 | 0.27 | 0.26 | -1.02  | 0.627793 | 0.78546  | 0.83033  | 0.875798 |
| Mmu.3126.6.S1_x_at | Mmu.3126.6  | 14.31 | 14.29 | 0.49 | 0.03 | 1.02   | 0.464238 | 0.429297 | 0.739156 | 0.650754 |
| Mmu.3126.23.S1_at  | Mmu.3126.23 | 3.67  | 3.75  | 0.05 | 0.13 | -1.06  | 0.938326 | 0.768598 | 0.976373 | 0.865637 |
| Mmu.3126.28.S1_at  | Mmu.3126.28 | 3.71  | 3.65  | 0.07 | 0.16 | 1.04   | 0.482434 | 0.678452 | 0.749408 | 0.812209 |
| Mmu.3126.4.S1_at   | Mmu.3126.4  | 3.38  | 3.37  | 0    | 0.02 | 1.01   | 0.208093 | 0.736344 | 0.570011 | 0.847451 |
| Mmu.3127.1.S1_at   | Mmu.3127.1  | 2.85  | 2.9   | 0.07 | 0.15 | -1.03  | 0.750098 | 0.683736 | 0.89292  | 0.815491 |
| Mmu.313.1.S1_at    | Mmu.313.1   | 10.9  | 10.23 | 0.07 | 0.25 | 1.59   | 0.01039  | 0.006178 | 0.229439 | 0.106774 |
| Mmu.3131.1.S1_at   | Mmu.3131.1  | 6.17  | 6.21  | 0.11 | 0.22 | -1.03  | 0.681742 | 0.608467 | 0.857635 | 0.767077 |
| Mmu.3131.1.S1_x_at | Mmu.3131.1  | 6.2   | 6.21  | 0.18 | 0.05 | -1.01  | 0.717941 | 0.792279 | 0.87621  | 0.879986 |
| Mmu.3132.1.S1_at   | Mmu.3132.1  | 4.76  | 4.94  | 0.04 | 0.19 | -1.14  | 0.203023 | 0.247581 | 0.565659 | 0.516939 |
| Mmu.3140.1.A1_at   | Mmu.3140.1  | 2.93  | 2.95  | 0.03 | 0.03 | -1.02  | 0.922415 | 0.692567 | 0.969928 | 0.821061 |
| Mmu.3140.1.S1_at   | Mmu.3140.1  | 3.29  | 2.98  | 0.15 | 0.1  | 1.24   | 0.105808 | 0.030697 | 0.466616 | 0.217148 |
| Mmu.3149.1.S1_at   | Mmu.3149.1  | 12.66 | 12.79 | 0.31 | 0.26 | -1.1   | 0.524637 | 0.681115 | 0.773218 | 0.813791 |
| Mmu.3173.1.S1_at   | Mmu.3173.1  | 8.24  | 7.93  | 0.12 | 0.7  | 1.24   | 0.911862 | 0.977268 | 0.965151 | 0.987637 |
| Mmu.3176.1.S1_at   | Mmu.3176.1  | 3.26  | 3.48  | 0.1  | 0.17 | -1.16  | 0.083488 | 0.02737  | 0.43582  | 0.206695 |
| Mmu.3186.1.S1_s_at | Mmu.3186.1  | 14.34 | 14.51 | 0.19 | 0.02 | -1.12  | 0.34506  | 0.279047 | 0.664951 | 0.542782 |
| Mmu.3186.3.S1_at   | Mmu.3186.3  | 3.27  | 3.67  | 0.29 | 0.1  | -1.32  | 0.088267 | 0.071986 | 0.44292  | 0.314305 |
| Mmu.3186.4.S1_at   | Mmu.3186.4  | 3.27  | 3.28  | 0    | 0.12 | -1.01  | 0.831947 | 0.954172 | 0.931926 | 0.973959 |
| Mmu.3186.4.S1_x_at | Mmu.3186.4  | 2.84  | 2.93  | 0.26 | 0.03 | -1.06  | 0.818737 | 0.929974 | 0.926444 | 0.960154 |
| Mmu.3187.1.S1_at   | Mmu.3187.1  | 6.16  | 5.11  | 0.94 | 0.81 | 2.07   | 0.219928 | 0.286401 | 0.579133 | 0.547817 |
| Mmu.3193.1.S1_at   | Mmu.3193.1  | 8.33  | 8.64  | 0.71 | 0.61 | -1.24  | 0.638198 | 0.825405 | 0.836511 | 0.899709 |
| Mmu.3203.2.S1_at   | Mmu.3203.2  | 10.79 | 11.06 | 0.23 | 0.22 | -1.2   | 0.955872 | 0.15739  | 0.983384 | 0.432859 |
| Mmu.3223.1.S1_at   | Mmu.3223.1  | 9.49  | 10.13 | 0.28 | 0.25 | -1.56  | 0.026206 | 0.013984 | 0.301828 | 0.151585 |
| Mmu.3224.1.S1_at   | Mmu.3224.1  | 10.31 | 9.07  | 0.66 | 0.49 | 2.37   | 0.145015 | 0.022237 | 0.511188 | 0.18659  |
| Mmu.3235.1.S1_at   | Mmu.3235.1  | 5.86  | 5.19  | 0.36 | 0.51 | 1.58   | 0.284234 | 0.331347 | 0.62409  | 0.58006  |
| Mmu.3243.1.S1_at   | Mmu.3243.1  | 7.56  | 7.27  | 0.11 | 0.27 | 1.23   | 0.042768 | 0.024123 | 0.355382 | 0.1945   |
| Mmu.3265.1.S1_at   | Mmu.3265.1  | 11.17 | 11.25 | 0.12 | 0.15 | -1.06  | 0.80923  | 0.275219 | 0.922223 | 0.539628 |
| Mmu.3265.1.S1_s_at | Mmu.3265.1  | 12.32 | 12.35 | 0.11 | 0.14 | -1.02  | 0.939485 | 0.051266 | 0.976986 | 0.271825 |
| Mmu.3271.1.A1_at   | Mmu.3271.1  | 8.41  | 8.53  | 0.03 | 0.07 | -1.08  | 0.109171 | 0.028268 | 0.470811 | 0.209859 |
| Mmu.3271.1.S1_at   | Mmu.3271.1  | 7.14  | 7.05  | 0.24 | 0.8  | 1.06   | 0.963768 | 0.997916 | 0.985982 | 0.998971 |
| Mmu.3274.1.S1_at   | Mmu.3274.1  | 11.99 | 12.28 | 0.29 | 0.05 | -1.23  | 0.413791 | 0.571091 | 0.708642 | 0.743541 |
| Mmu.3276.1.S1_at   | Mmu.3276.1  | 2.78  | 2.89  | 0.01 | 0.15 | -1.09  | 0.082897 | 0.092901 | 0.43467  | 0.349024 |
| Mmu.328.1.S1_at    | Mmu.328.1   | 9.22  | 9.22  | 0.08 | 0.13 | 1      | 0.460977 | 0.349579 | 0.737309 | 0.593539 |

|                       |                 |       |       |      |      |        |          |          |          |          |
|-----------------------|-----------------|-------|-------|------|------|--------|----------|----------|----------|----------|
| Mmu.3280.1.S1_at      | Mmu.3280.1      | 8.89  | 8.69  | 0.17 | 0.36 | 1.15   | 0.88122  | 0.288967 | 0.952244 | 0.550098 |
| Mmu.3285.1.S1_s_at    | Mmu.3285.1      | 9.92  | 9.31  | 0.18 | 0.43 | 1.52   | 0.079515 | 0.032365 | 0.429636 | 0.222725 |
| Mmu.3298.1.S1_at      | Mmu.3298.1      | 12.38 | 12.29 | 0.18 | 0.13 | 1.06   | 0.557263 | 0.145984 | 0.792388 | 0.419998 |
| Mmu.3308.1.S1_at      | Mmu.3308.1      | 4.72  | 4.84  | 0.14 | 0.31 | -1.09  | 0.59435  | 0.738017 | 0.81181  | 0.848158 |
| Mmu.3320.1.S1_at      | Mmu.3320.1      | 5.96  | 5.83  | 0.31 | 0.21 | 1.1    | 0.281956 | 0.035249 | 0.622505 | 0.231974 |
| Mmu.3343.2.S1_at      | Mmu.3343.2      | 10.41 | 10.46 | 0.11 | 0.12 | -1.04  | 0.270783 | 0.004561 | 0.615052 | 0.094371 |
| Mmu.3346.2.S1_at      | Mmu.3346.2      | 3.68  | 3.48  | 0.09 | 0.06 | 1.14   | 0.05648  | 0.04706  | 0.386516 | 0.261469 |
| Mmu.335.1.S1_at       | Mmu.335.1       | 6.42  | 6.86  | 0.53 | 1.2  | -1.36  | 0.215054 | 0.244588 | 0.575507 | 0.514387 |
| Mmu.3350.1.S1_at      | Mmu.3350.1      | 7.49  | 7.48  | 0.09 | 0.11 | 1      | 0.657777 | 0.068756 | 0.846129 | 0.308711 |
| Mmu.3375.1.S1_at      | Mmu.3375.1      | 8.39  | 8.4   | 0.36 | 0.62 | -1.01  | 0.240988 | 0.283403 | 0.593738 | 0.545936 |
| Mmu.3378.1.S1_at      | Mmu.3378.1      | 5.28  | 5.56  | 0.07 | 0.06 | -1.22  | 0.003818 | 0.005093 | 0.179914 | 0.099108 |
| Mmu.3384.1.S1_at      | Mmu.3384.1      | 10.8  | 10.8  | 0.13 | 0.02 | 1      | 0.31245  | 0.071281 | 0.644204 | 0.313318 |
| Mmu.3395.1.S1_at      | Mmu.3395.1      | 13.02 | 13.15 | 0.22 | 0.2  | -1.1   | 0.223741 | 0.282123 | 0.582123 | 0.544937 |
| Mmu.3395.1.S1_s_at    | Mmu.3395.1      | 13.48 | 13.63 | 0.13 | 0.13 | -1.11  | 0.305886 | 0.405862 | 0.639227 | 0.634037 |
| Mmu.3404.1.S1_at      | Mmu.3404.1      | 8.59  | 9.01  | 0.31 | 1.32 | -1.33  | 0.696193 | 0.507018 | 0.865148 | 0.702701 |
| Mmu.3412.1.A1_at      | Mmu.3412.1      | 9.79  | 9.79  | 0.11 | 0.8  | 1      | 0.992525 | 0.999855 | 0.997431 | 0.999954 |
| Mmu.3418.2.S1_at      | Mmu.3418.2      | 10.08 | 11.55 | 0.47 | 0.33 | -2.77  | 0.010718 | 0.003847 | 0.23109  | 0.088232 |
| Mmu.3422.1.A1_at      | Mmu.3422.1      | 5.62  | 9.4   | 1.13 | 2.84 | -13.79 | 0.271542 | 0.232871 | 0.615716 | 0.50445  |
| Mmu.3422.1.S1_at      | Mmu.3422.1      | 6.52  | 9.31  | 0.66 | 2.49 | -6.91  | 0.248054 | 0.22046  | 0.599076 | 0.493818 |
| Mmu.3435.1.S1_at      | Mmu.3435.1      | 8.17  | 7.71  | 0.31 | 0.15 | 1.37   | 0.139383 | 0.148842 | 0.506801 | 0.423218 |
| Mmu.3463.1.S1_at      | Mmu.3463.1      | 8.91  | 9.2   | 0.41 | 0.24 | -1.22  | 0.200682 | 0.06908  | 0.5634   | 0.309061 |
| Mmu.3466.1.S1_at      | Mmu.3466.1      | 3.76  | 3.83  | 0.23 | 0.49 | -1.05  | 0.613679 | 0.148464 | 0.822845 | 0.423011 |
| Mmu.3474.1.S1_at      | Mmu.3474.1      | 8.47  | 8.93  | 0.28 | 0.85 | -1.38  | 0.4631   | 0.314398 | 0.738603 | 0.56831  |
| Mmu.3483.1.S1_at      | Mmu.3483.1      | 6.12  | 6.29  | 0.13 | 0.33 | -1.13  | 0.577997 | 0.414419 | 0.803619 | 0.640293 |
| Mmu.3486.1.S1_at      | Mmu.3486.1      | 7.89  | 7.46  | 0.94 | 0.6  | 1.35   | 0.383496 | 0.517209 | 0.689416 | 0.709435 |
| Mmu.3486.2.S1_at      | Mmu.3486.2      | 8.93  | 9.02  | 0.71 | 0.44 | -1.07  | 0.806384 | 0.94946  | 0.920614 | 0.971102 |
| Mmu.3500.1.S1_at      | Mmu.3500.1      | 8.33  | 7.97  | 0.25 | 0.53 | 1.28   | 0.625917 | 0.282302 | 0.829239 | 0.545046 |
| Mmu.3505.2.S1_s_at    | Mmu.3505.2      | 12.4  | 12.76 | 0.09 | 0.03 | -1.28  | 0.001695 | 0.000748 | 0.15365  | 0.045119 |
| Mmu.3513.1.S1_at      | Mmu.3513.1      | 10.21 | 9.96  | 0.23 | 0.78 | 1.19   | 0.155377 | 0.139104 | 0.520164 | 0.412205 |
| Mmu.3521.1.A1_at      | Mmu.3521.1      | 9.6   | 9.15  | 0.17 | 1.18 | 1.37   | 0.183614 | 0.205404 | 0.54773  | 0.479751 |
| Mmu.3521.1.S1_at      | Mmu.3521.1      | 9.86  | 9.29  | 0.15 | 1.13 | 1.48   | 0.144588 | 0.152789 | 0.511015 | 0.427601 |
| Mmu.3524.1.S1_at      | Mmu.3524.1      | 6.51  | 7.18  | 0.32 | 0.07 | -1.59  | 0.020107 | 0.018845 | 0.27674  | 0.172686 |
| Mmu.3529.1.S1_at      | Mmu.3529.1      | 11.2  | 11.29 | 0.24 | 0.09 | -1.07  | 0.314498 | 0.074179 | 0.645869 | 0.317916 |
| Mmu.3531.1.A1_at      | Mmu.3531.1      | 5.34  | 5.35  | 0.05 | 0.18 | -1.01  | 0.255895 | 0.363372 | 0.603662 | 0.603755 |
| Mmu.3531.1.S1_at      | Mmu.3531.1      | 4.57  | 4.75  | 0.13 | 0.05 | -1.14  | 0.160866 | 0.162797 | 0.525925 | 0.438915 |
| Mmu.3541.1.S1_at      | Mmu.3541.1      | 11.25 | 11.34 | 0.24 | 0.14 | -1.06  | 0.925944 | 0.256425 | 0.971539 | 0.524183 |
| Mmu.3553.1.A1_at      | Mmu.3553.1      | 10.72 | 11.43 | 0.12 | 0.12 | -1.64  | 0.002207 | 0.002185 | 0.159615 | 0.069035 |
| Mmu.3554.1.S1_at      | Mmu.3554.1      | 9.89  | 10.52 | 0.07 | 0.14 | -1.55  | 0.002245 | 0.00195  | 0.160628 | 0.065813 |
| Mmu.3556.1.S1_s_at    | Mmu.3556.1      | 11.95 | 11.64 | 0.12 | 0.12 | 1.24   | 0.0802   | 0.079453 | 0.430341 | 0.326766 |
| Mmu.3567.1.S1_at      | Mmu.3567.1      | 9.39  | 9.67  | 0.19 | 0.32 | -1.21  | 0.330945 | 0.295917 | 0.656063 | 0.555241 |
| MmugDNA.19826.1.S1_at | MmugDNA.19826.1 | 9.26  | 8.58  | 0.18 | 0.92 | 1.6    | 0.287113 | 0.284729 | 0.625773 | 0.546934 |

|                         |                 |       |       |      |      |        |          |          |          |          |
|-------------------------|-----------------|-------|-------|------|------|--------|----------|----------|----------|----------|
| MmugDNA.19826.1.S1_s_at | MmugDNA.19826.1 | 9.29  | 8.55  | 0.16 | 1    | 1.67   | 0.257264 | 0.233746 | 0.60459  | 0.50505  |
| Mmu.357.1.S1_at         | Mmu.357.1       | 5.24  | 5.57  | 0.47 | 0.52 | -1.26  | 0.492003 | 0.501333 | 0.755423 | 0.69951  |
| Mmu.357.1.S1_x_at       | Mmu.357.1       | 8.09  | 7.93  | 0.49 | 0.16 | 1.12   | 0.638918 | 0.783222 | 0.836878 | 0.874547 |
| Mmu.3573.1.S1_at        | Mmu.3573.1      | 9.66  | 9.67  | 0.11 | 0.28 | -1     | 0.643838 | 0.38464  | 0.839681 | 0.620255 |
| Mmu.359.1.S1_at         | Mmu.359.1       | 7.22  | 7.18  | 0.45 | 0.57 | 1.03   | 0.418547 | 0.549401 | 0.711383 | 0.729841 |
| Mmu.3604.1.S1_s_at      | Mmu.3604.1      | 9.44  | 13.18 | 1.34 | 1.46 | -13.35 | 0.135295 | 0.103023 | 0.502087 | 0.363839 |
| Mmu.3605.1.S1_at        | Mmu.3605.1      | 10.66 | 11.12 | 0.09 | 0.1  | -1.37  | 0.003876 | 0.00058  | 0.180184 | 0.041447 |
| Mmu.3605.1.S1_s_at      | Mmu.3605.1      | 10.27 | 10.73 | 0.13 | 0.11 | -1.38  | 0.009571 | 0.002029 | 0.226235 | 0.066885 |
| MmunewRS.789.1.S1_s_at  | MmunewRS.789.1  | 3.52  | 3.6   | 0.09 | 0.08 | -1.05  | 0.122317 | 0.269614 | 0.48746  | 0.534868 |
| Mmu.3611.1.S1_at        | Mmu.3611.1      | 7.01  | 7.19  | 0.13 | 0.09 | -1.13  | 0.106826 | 0.13043  | 0.467551 | 0.402262 |
| Mmu.3625.1.S1_at        | Mmu.3625.1      | 5.15  | 5.09  | 0.24 | 0.06 | 1.04   | 0.310716 | 0.234447 | 0.642654 | 0.505674 |
| Mmu.3626.1.S1_at        | Mmu.3626.1      | 6.35  | 6.32  | 0.27 | 0.04 | 1.02   | 0.798335 | 0.772745 | 0.916444 | 0.867844 |
| Mmu.3634.1.S1_at        | Mmu.3634.1      | 8.35  | 8.43  | 0.2  | 0.23 | -1.06  | 0.749561 | 0.061013 | 0.89273  | 0.293811 |
| Mmu.364.1.S1_at         | Mmu.364.1       | 9.11  | 10.33 | 0.27 | 0.3  | -2.33  | 0.012182 | 0.006491 | 0.240358 | 0.109489 |
| Mmu.367.1.S1_at         | Mmu.367.1       | 12.14 | 12.48 | 0.19 | 0.48 | -1.27  | 0.240056 | 0.180406 | 0.592883 | 0.457077 |
| Mmu.3675.1.S1_at        | Mmu.3675.1      | 8.59  | 8.04  | 0.35 | 0.69 | 1.47   | 0.666587 | 0.594591 | 0.85048  | 0.758623 |
| Mmu.3690.1.S1_x_at      | Mmu.3690.1      | 6.35  | 6.49  | 0.19 | 0.3  | -1.11  | 0.45916  | 0.415769 | 0.735945 | 0.641104 |
| Mmu.3691.1.A1_at        | Mmu.3691.1      | 5.84  | 5.82  | 0.2  | 0.1  | 1.01   | 0.316053 | 0.272232 | 0.646849 | 0.536977 |
| Mmu.3691.1.S1_at        | Mmu.3691.1      | 4.74  | 4.72  | 0.04 | 0.15 | 1.02   | 0.373282 | 0.505795 | 0.683245 | 0.702218 |
| Mmu.3692.1.S1_at        | Mmu.3692.1      | 5.83  | 6.05  | 0.25 | 0.16 | -1.17  | 0.303316 | 0.216037 | 0.63754  | 0.48965  |
| Mmu.3693.1.A1_at        | Mmu.3693.1      | 10.26 | 10.13 | 0.44 | 0.17 | 1.09   | 0.595596 | 0.159504 | 0.812393 | 0.43566  |
| Mmu.3693.1.S1_at        | Mmu.3693.1      | 9.2   | 8.24  | 0.24 | 0.46 | 1.95   | 0.130223 | 0.079157 | 0.496613 | 0.326338 |
| Mmu.3695.1.S1_s_at      | Mmu.3695.1      | 12.88 | 12.72 | 0.04 | 0.21 | 1.11   | 0.236694 | 0.153614 | 0.590504 | 0.428341 |
| Mmu.3696.1.S1_at        | Mmu.3696.1      | 4.49  | 4.28  | 0.09 | 0.13 | 1.16   | 0.070287 | 0.388331 | 0.413911 | 0.62274  |
| Mmu.3708.1.S1_at        | Mmu.3708.1      | 9.73  | 10.15 | 0.16 | 0.34 | -1.34  | 0.151823 | 0.044019 | 0.516514 | 0.254195 |
| Mmu.3718.1.S1_at        | Mmu.3718.1      | 10.82 | 10.68 | 0.09 | 0.04 | 1.11   | 0.289915 | 0.051877 | 0.627873 | 0.273151 |
| Mmu.3719.1.S1_at        | Mmu.3719.1      | 9.48  | 9.34  | 0.16 | 0.14 | 1.1    | 0.085853 | 0.091928 | 0.439933 | 0.347267 |
| Mmu.374.1.S1_at         | Mmu.374.1       | 8.67  | 8.01  | 0.22 | 0.19 | 1.58   | 0.029667 | 0.043691 | 0.315023 | 0.253732 |
| Mmu.3743.1.S1_s_at      | Mmu.3743.1      | 11.95 | 11.83 | 0.11 | 0.06 | 1.09   | 0.115415 | 0.022901 | 0.478773 | 0.189371 |
| Mmu.3745.1.S1_at        | Mmu.3745.1      | 3.49  | 3.68  | 0.16 | 0.16 | -1.14  | 0.181877 | 0.290653 | 0.546458 | 0.551363 |
| MmugDNA.23135.1.S1_s_at | MmugDNA.23135.1 | 11.27 | 11.72 | 0.29 | 0.74 | -1.37  | 0.367508 | 0.312723 | 0.679502 | 0.567299 |
| Mmu.3750.1.S1_at        | Mmu.3750.1      | 7.02  | 7.72  | 0.11 | 0.08 | -1.62  | 0.000976 | 0.000237 | 0.139813 | 0.03241  |
| Mmu.3756.1.S1_at        | Mmu.3756.1      | 6.12  | 6.1   | 0.18 | 0.01 | 1.01   | 0.999906 | 0.726949 | 0.999967 | 0.84203  |
| Mmu.3779.1.S1_at        | Mmu.3779.1      | 9.31  | 10.1  | 0.23 | 0.34 | -1.73  | 0.112643 | 0.166859 | 0.475099 | 0.443311 |
| Mmu.3782.2.S1_a_at      | Mmu.3782.2      | 6.22  | 7.96  | 0.55 | 0.69 | -3.34  | 0.023764 | 0.015812 | 0.292771 | 0.159466 |
| Mmu.3793.1.S1_at        | Mmu.3793.1      | 11.18 | 11.53 | 0.24 | 0.19 | -1.28  | 0.14883  | 0.166525 | 0.51391  | 0.442958 |
| Mmu.3794.1.S1_at        | Mmu.3794.1      | 7.87  | 10.22 | 0.69 | 0.73 | -5.12  | 0.020966 | 0.007808 | 0.281673 | 0.117858 |
| Mmu.3795.1.S1_at        | Mmu.3795.1      | 8.8   | 10.67 | 0.26 | 1.9  | -3.66  | 0.21233  | 0.27161  | 0.57259  | 0.536577 |
| Mmu.3798.1.S1_at        | Mmu.3798.1      | 9.32  | 9.58  | 0.14 | 0.06 | -1.2   | 0.090437 | 0.023527 | 0.445834 | 0.192231 |
| Mmu.380.1.S1_at         | Mmu.380.1       | 9.5   | 8.96  | 0.03 | 0.36 | 1.45   | 0.16598  | 0.011452 | 0.529863 | 0.13846  |
| Mmu.3806.2.S1_at        | Mmu.3806.2      | 4.21  | 4.29  | 0.11 | 0.08 | -1.06  | 0.25785  | 0.266839 | 0.605259 | 0.53241  |

|                         |                 |       |       |      |      |       |          |          |          |          |
|-------------------------|-----------------|-------|-------|------|------|-------|----------|----------|----------|----------|
| Mmu.3811.1.S1_at        | Mmu.3811.1      | 10.4  | 10.43 | 0.09 | 0.41 | -1.02 | 0.999457 | 0.743941 | 0.999874 | 0.851597 |
| Mmu.3814.1.S1_at        | Mmu.3814.1      | 11.24 | 11.57 | 0.21 | 0.09 | -1.26 | 0.060397 | 0.050931 | 0.393524 | 0.270955 |
| Mmu.3820.1.S1_at        | Mmu.3820.1      | 5.99  | 6.31  | 0.18 | 0.03 | -1.25 | 0.13237  | 0.282984 | 0.498572 | 0.545692 |
| Mmu.3845.1.S1_at        | Mmu.3845.1      | 5.99  | 5.63  | 0.31 | 0.1  | 1.28  | 0.129881 | 0.064339 | 0.495954 | 0.29983  |
| Mmu.3845.1.S1_x_at      | Mmu.3845.1      | 6.01  | 5.4   | 0.51 | 0.28 | 1.54  | 0.146866 | 0.099077 | 0.512886 | 0.357215 |
| Mmu.3847.1.S1_at        | Mmu.3847.1      | 9.47  | 8.49  | 0.19 | 0.22 | 1.97  | 0.00393  | 0.000417 | 0.180953 | 0.038093 |
| Mmu.3853.1.S1_at        | Mmu.3853.1      | 7.13  | 7.59  | 0.17 | 0.52 | -1.37 | 0.269002 | 0.292343 | 0.613705 | 0.552408 |
| Mmu.3865.1.A1_at        | Mmu.3865.1      | 9.59  | 9.91  | 0.2  | 0.29 | -1.25 | 0.177231 | 0.053164 | 0.541297 | 0.276383 |
| Mmu.3886.1.S1_at        | Mmu.3886.1      | 6.09  | 6.09  | 0.1  | 0.09 | -1    | 0.232689 | 0.410113 | 0.587814 | 0.637065 |
| Mmu.3898.1.A1_at        | Mmu.3898.1      | 8.64  | 8.23  | 0.19 | 0.38 | 1.33  | 0.094039 | 0.049148 | 0.451612 | 0.266534 |
| Mmu.3902.1.S1_at        | Mmu.3902.1      | 13.57 | 13.37 | 0.02 | 0.03 | 1.15  | 0.000261 | 0.000183 | 0.12562  | 0.030511 |
| Mmu.3906.1.S1_at        | Mmu.3906.1      | 11.97 | 11.52 | 0.15 | 0.4  | 1.36  | 0.166536 | 0.199505 | 0.530253 | 0.4741   |
| Mmu.3907.1.S1_at        | Mmu.3907.1      | 10.42 | 10.08 | 0.22 | 0.01 | 1.26  | 0.055498 | 0.035402 | 0.384068 | 0.232488 |
| Mmu.3908.1.S1_s_at      | Mmu.3908.1      | 10.69 | 10.77 | 0.16 | 0.15 | -1.06 | 0.495775 | 0.601443 | 0.757324 | 0.762787 |
| Mmu.3911.1.S1_at        | Mmu.3911.1      | 12.58 | 12.01 | 0.26 | 0.87 | 1.48  | 0.287797 | 0.373689 | 0.626235 | 0.612403 |
| Mmu.3918.1.S1_at        | Mmu.3918.1      | 5.91  | 6.07  | 0.04 | 0.17 | -1.11 | 0.232163 | 0.178792 | 0.587814 | 0.455095 |
| Mmu.3931.1.S1_at        | Mmu.3931.1      | 7.54  | 8.22  | 0.36 | 0.09 | -1.6  | 0.044277 | 0.008771 | 0.358336 | 0.124009 |
| Mmu.3936.1.S1_at        | Mmu.3936.1      | 8.54  | 8.35  | 0.13 | 0.07 | 1.14  | 0.053875 | 0.031885 | 0.381017 | 0.220977 |
| Mmu.3937.1.S1_at        | Mmu.3937.1      | 2.97  | 3.02  | 0.07 | 0.05 | -1.04 | 0.165259 | 0.313042 | 0.52932  | 0.567601 |
| MmugDNA.15042.1.S1_s_at | MmugDNA.15042.1 | 10.86 | 10.85 | 0.13 | 0.07 | 1.01  | 0.618291 | 0.550414 | 0.825111 | 0.730421 |
| Mmu.394.1.S1_at         | Mmu.394.1       | 10.79 | 11.69 | 0.26 | 0.38 | -1.87 | 0.032031 | 0.027885 | 0.323873 | 0.208455 |
| Mmu.3952.1.A1_at        | Mmu.3952.1      | 5.62  | 6.25  | 0.67 | 0.43 | -1.55 | 0.745604 | 0.327511 | 0.891168 | 0.577321 |
| Mmu.3952.1.S1_at        | Mmu.3952.1      | 2.9   | 2.66  | 0.13 | 0.06 | 1.18  | 0.10962  | 0.191924 | 0.470811 | 0.467295 |
| Mmu.3978.1.S1_at        | Mmu.3978.1      | 5.54  | 5.59  | 0.11 | 0.31 | -1.04 | 0.639467 | 0.899316 | 0.837212 | 0.942758 |
| Mmu.4005.1.S1_s_at      | Mmu.4005.1      | 13.43 | 13.46 | 0.08 | 0.13 | -1.02 | 0.531226 | 0.086993 | 0.777112 | 0.339851 |
| Mmu.4013.1.S1_at        | Mmu.4013.1      | 7.06  | 7.57  | 0.59 | 0.58 | -1.43 | 0.071236 | 0.062767 | 0.414927 | 0.297193 |
| Mmu.4026.1.S1_at        | Mmu.4026.1      | 9.24  | 8.97  | 0.15 | 0.52 | 1.2   | 0.326589 | 0.213058 | 0.653184 | 0.48702  |
| Mmu.4039.1.S1_at        | Mmu.4039.1      | 9.62  | 10.26 | 0.35 | 0.15 | -1.56 | 0.076642 | 0.09896  | 0.42524  | 0.357049 |
| Mmu.4060.1.S1_at        | Mmu.4060.1      | 6.73  | 7.07  | 0.26 | 0.68 | -1.26 | 0.196802 | 0.238808 | 0.559808 | 0.509485 |
| Mmu.408.1.S1_at         | Mmu.408.1       | 2.66  | 2.76  | 0.06 | 0.08 | -1.07 | 0.158908 | 0.013076 | 0.524147 | 0.147079 |
| Mmu.4085.1.A1_x_at      | Mmu.4085.1      | 3.66  | 3.84  | 0.1  | 0.04 | -1.13 | 0.1488   | 0.110717 | 0.51391  | 0.374854 |
| Mmu.4088.1.S1_at        | Mmu.4088.1      | 10.32 | 11.2  | 0.12 | 0.19 | -1.84 | 0.002606 | 0.001847 | 0.164386 | 0.064494 |
| Mmu.4098.1.S1_at        | Mmu.4098.1      | 7.69  | 9.95  | 1.28 | 1.39 | -4.81 | 0.14389  | 0.173591 | 0.510456 | 0.449956 |
| Mmu.4110.1.S1_s_at      | Mmu.4110.1      | 14.38 | 14.38 | 0.03 | 0.05 | 1     | 0.415908 | 0.33407  | 0.70957  | 0.582104 |
| Mmu.4117.1.S1_at        | Mmu.4117.1      | 3.46  | 3.55  | 0.11 | 0.3  | -1.07 | 0.64576  | 0.734128 | 0.840447 | 0.845896 |
| Mmu.4119.2.S1_a_at      | Mmu.4119.2      | 3.04  | 2.9   | 0.13 | 0.08 | 1.11  | 0.787424 | 0.209129 | 0.91159  | 0.482939 |
| Mmu.4119.2.S1_s_at      | Mmu.4119.2      | 6.04  | 6.04  | 0.03 | 0.06 | -1    | 0.446843 | 0.50424  | 0.72864  | 0.701473 |
| Mmu.4118.1.S1_s_at      | Mmu.4118.1      | 3.25  | 3.72  | 0.1  | 0.22 | -1.38 | 0.097948 | 0.095432 | 0.457244 | 0.352453 |
| Mmu.4118.1.S1_x_at      | Mmu.4118.1      | 5.35  | 5.4   | 0.04 | 0.15 | -1.03 | 0.218807 | 0.161854 | 0.578251 | 0.437937 |
| Mmu.4119.1.S1_x_at      | Mmu.4119.1      | 2.93  | 3.05  | 0.15 | 0.12 | -1.09 | 0.848468 | 0.340394 | 0.939211 | 0.586725 |
| Mmu.4119.3.S1_a_at      | Mmu.4119.3      | 2.61  | 2.75  | 0.26 | 0.04 | -1.1  | 0.925677 | 0.992777 | 0.971452 | 0.995715 |

|                        |                |       |       |      |      |       |          |          |          |          |
|------------------------|----------------|-------|-------|------|------|-------|----------|----------|----------|----------|
| Mmu.4119.3.S1_at       | Mmu.4119.3     | 3.16  | 3.16  | 0.02 | 0.14 | 1     | 0.968173 | 0.975874 | 0.98805  | 0.986856 |
| Mmu.4119.3.S1_x_at     | Mmu.4119.3     | 2.89  | 2.97  | 0.2  | 0.05 | -1.05 | 0.81696  | 0.948053 | 0.9258   | 0.970446 |
| Mmu.4120.1.S1_x_at     | Mmu.4120.1     | 4.79  | 4.87  | 0.08 | 0.1  | -1.06 | 0.133542 | 0.098088 | 0.5002   | 0.356166 |
| Mmu.4122.1.A1_at       | Mmu.4122.1     | 3.52  | 3.59  | 0.14 | 0.16 | -1.05 | 0.204303 | 0.2546   | 0.566752 | 0.522879 |
| Mmu.4122.1.S1_x_at     | Mmu.4122.1     | 3.28  | 3.33  | 0.1  | 0.17 | -1.04 | 0.322846 | 0.487539 | 0.651245 | 0.690559 |
| Mmu.4123.1.S1_x_at     | Mmu.4123.1     | 3.36  | 3.55  | 0.07 | 0.12 | -1.14 | 0.107312 | 0.100218 | 0.467976 | 0.359205 |
| Mmu.4124.1.S1_a_at     | Mmu.4124.1     | 4.62  | 4.81  | 0.09 | 0.17 | -1.14 | 0.06832  | 0.031413 | 0.410012 | 0.219107 |
| Mmu.4125.1.A1_at       | Mmu.4125.1     | 7.21  | 7.46  | 0.17 | 0.16 | -1.19 | 0.076146 | 0.073962 | 0.424738 | 0.317472 |
| Mmu.4125.1.S1_at       | Mmu.4125.1     | 6.87  | 6.75  | 0.16 | 0.07 | 1.09  | 0.743683 | 0.238432 | 0.890194 | 0.50907  |
| Mmu.4125.1.S1_x_at     | Mmu.4125.1     | 6.95  | 6.9   | 0.2  | 0.05 | 1.04  | 0.583423 | 0.481058 | 0.806492 | 0.686122 |
| Mmu.4129.1.S1_at       | Mmu.4129.1     | 9.28  | 9.57  | 0.07 | 0.03 | -1.23 | 0.001854 | 0.000815 | 0.155636 | 0.046302 |
| Mmu.414.1.S1_at        | Mmu.414.1      | 8.79  | 9.92  | 1.03 | 1.05 | -2.18 | 0.265783 | 0.20375  | 0.611392 | 0.478011 |
| Mmu.4140.1.S1_at       | Mmu.4140.1     | 9.76  | 9.99  | 0.29 | 0.47 | -1.18 | 0.970536 | 0.824315 | 0.988658 | 0.899073 |
| Mmu.4152.2.S1_at       | Mmu.4152.2     | 12.78 | 12.38 | 0.06 | 0.12 | 1.32  | 0.00946  | 0.006781 | 0.225313 | 0.111388 |
| Mmu.4154.1.S1_at       | Mmu.4154.1     | 3.2   | 3.26  | 0.07 | 0.23 | -1.04 | 0.532774 | 0.575919 | 0.777862 | 0.746847 |
| Mmu.4184.1.A1_at       | Mmu.4184.1     | 3.74  | 3.82  | 0.25 | 0.13 | -1.06 | 0.734625 | 0.882087 | 0.885725 | 0.932794 |
| Mmu.4184.1.S1_at       | Mmu.4184.1     | 3.3   | 3.44  | 0.35 | 0.16 | -1.1  | 0.705675 | 0.820189 | 0.870245 | 0.896372 |
| Mmu.4189.1.S1_at       | Mmu.4189.1     | 3.18  | 3.21  | 0.16 | 0.42 | -1.02 | 0.545125 | 0.751088 | 0.784779 | 0.855314 |
| Mmu.4194.1.S1_at       | Mmu.4194.1     | 3.98  | 4.18  | 0.17 | 0.13 | -1.15 | 0.401332 | 0.681729 | 0.700776 | 0.814123 |
| Mmu.4204.1.S1_at       | Mmu.4204.1     | 8.74  | 9.78  | 0.22 | 0.46 | -2.06 | 0.033962 | 0.031047 | 0.330623 | 0.218115 |
| Mmu.421.1.S1_at        | Mmu.421.1      | 12.1  | 11.89 | 0.03 | 0.2  | 1.15  | 0.100514 | 0.016044 | 0.461009 | 0.160532 |
| Mmu.4246.1.S1_at       | Mmu.4246.1     | 5.18  | 5.16  | 0.17 | 0.05 | 1.01  | 0.864641 | 0.71895  | 0.945589 | 0.83732  |
| Mmu.4246.1.S1_s_at     | Mmu.4246.1     | 10.18 | 9.98  | 0.21 | 0.26 | 1.15  | 0.445831 | 0.753193 | 0.728005 | 0.856365 |
| Mmu.4266.1.S1_at       | Mmu.4266.1     | 11.15 | 11.08 | 0.22 | 0.22 | 1.05  | 0.716308 | 0.272975 | 0.875374 | 0.53761  |
| Mmu.4269.1.S1_at       | Mmu.4269.1     | 8.01  | 7.68  | 0.22 | 0.33 | 1.26  | 0.613002 | 0.015363 | 0.822517 | 0.157392 |
| Mmu.4271.1.S1_at       | Mmu.4271.1     | 10.1  | 9.99  | 0.09 | 0.11 | 1.08  | 0.78913  | 0.093717 | 0.912451 | 0.350192 |
| Mmu.4290.1.S1_at       | Mmu.4290.1     | 5.05  | 5.09  | 0.11 | 0.67 | -1.03 | 0.869474 | 0.9781   | 0.947917 | 0.988066 |
| Mmu.4305.1.S1_at       | Mmu.4305.1     | 5.78  | 5.73  | 0.2  | 0.08 | 1.03  | 0.862259 | 0.280877 | 0.944609 | 0.544054 |
| Mmu.4317.1.S1_at       | Mmu.4317.1     | 5.92  | 5.88  | 0.06 | 0.03 | 1.03  | 0.686202 | 0.009019 | 0.859694 | 0.125502 |
| Mmu.4317.2.S1_s_at     | Mmu.4317.2     | 12.01 | 11.94 | 0.03 | 0.1  | 1.05  | 0.187018 | 0.049471 | 0.550118 | 0.267334 |
| Mmu.4328.1.S1_at       | Mmu.4328.1     | 5.61  | 5.65  | 0.03 | 0.06 | -1.03 | 0.15439  | 0.588635 | 0.518969 | 0.755131 |
| Mmu.4331.1.S1_s_at     | Mmu.4331.1     | 11.97 | 12.05 | 0.09 | 0.09 | -1.05 | 0.764102 | 0.260192 | 0.900673 | 0.526807 |
| Mmu.4348.1.S1_at       | Mmu.4348.1     | 11.29 | 11.15 | 0.04 | 0.3  | 1.1   | 0.294362 | 0.342172 | 0.631216 | 0.588334 |
| Mmu.436.1.S1_at        | Mmu.436.1      | 10.88 | 10.82 | 0.15 | 0.06 | 1.04  | 0.18777  | 0.145808 | 0.550802 | 0.419833 |
| MmugDNA.5037.1.S1_s_at | MmugDNA.5037.1 | 5.89  | 6.32  | 0.09 | 0.31 | -1.35 | 0.053152 | 0.062944 | 0.379463 | 0.297579 |
| Mmu.4374.2.S1_s_at     | Mmu.4374.2     | 11.95 | 11.22 | 0.29 | 0.94 | 1.66  | 0.39755  | 0.448361 | 0.697979 | 0.664212 |
| Mmu.4374.2.S1_x_at     | Mmu.4374.2     | 11.37 | 10.86 | 0.27 | 0.74 | 1.42  | 0.425902 | 0.519956 | 0.715385 | 0.71141  |
| Mmu.4376.1.A1_at       | Mmu.4376.1     | 6.92  | 6.69  | 0.15 | 0.2  | 1.17  | 0.677528 | 0.138885 | 0.855526 | 0.412037 |
| Mmu.4376.1.S1_at       | Mmu.4376.1     | 7.07  | 7.17  | 0.07 | 0.12 | -1.07 | 0.449394 | 0.050685 | 0.73019  | 0.270317 |
| Mmu.4380.1.S1_at       | Mmu.4380.1     | 2.91  | 2.93  | 0.13 | 0.18 | -1.02 | 0.246213 | 0.189696 | 0.597663 | 0.465328 |
| Mmu.4380.1.S1_s_at     | Mmu.4380.1     | 12.1  | 12.11 | 0.16 | 0.46 | -1.01 | 0.946829 | 0.860198 | 0.979482 | 0.920292 |



|                       |               |       |       |      |      |       |          |          |          |          |
|-----------------------|---------------|-------|-------|------|------|-------|----------|----------|----------|----------|
| Mmu.4385.1.S1_at      | Mmu.4385.1    | 5.7   | 5.83  | 0.17 | 0.26 | -1.1  | 0.740278 | 0.230729 | 0.888498 | 0.50243  |
| Mmu.439.1.S1_x_at     | Mmu.439.1     | 6.24  | 5.95  | 0.05 | 0.16 | 1.22  | 0.060174 | 0.178164 | 0.393081 | 0.454527 |
| Mmu.4390.1.S1_at      | Mmu.4390.1    | 5.27  | 5.31  | 0.41 | 0.14 | -1.02 | 0.50228  | 0.293815 | 0.760275 | 0.553823 |
| Mmu.4398.1.S1_s_at    | Mmu.4398.1    | 11.41 | 12.1  | 0.11 | 0.19 | -1.61 | 0.007195 | 0.0034   | 0.205379 | 0.083992 |
| Mmu.4403.1.S1_at      | Mmu.4403.1    | 10.13 | 10.32 | 0.21 | 0.41 | -1.15 | 0.829103 | 0.95226  | 0.930604 | 0.972946 |
| Mmu.4413.1.S1_at      | Mmu.4413.1    | 7.1   | 6.79  | 0.14 | 0.28 | 1.24  | 0.263311 | 0.274346 | 0.609348 | 0.538779 |
| Mmu.4422.1.S1_s_at    | Mmu.4422.1    | 11.76 | 11.25 | 0.14 | 0.51 | 1.43  | 0.170371 | 0.07778  | 0.534249 | 0.323933 |
| Mmu.4423.1.S1_at      | Mmu.4423.1    | 8.64  | 8.42  | 0.46 | 0.29 | 1.17  | 0.424554 | 0.618691 | 0.714559 | 0.774185 |
| Mmu.4425.1.S1_at      | Mmu.4425.1    | 5.77  | 5.52  | 0.13 | 0.07 | 1.19  | 0.029376 | 0.025938 | 0.313903 | 0.201919 |
| Mmu.443.1.S1_at       | Mmu.443.1     | 8     | 7.4   | 0.15 | 0.29 | 1.51  | 0.051576 | 0.026864 | 0.376072 | 0.205049 |
| Mmu.4434.1.S1_at      | Mmu.4434.1    | 10.92 | 10.91 | 0.09 | 0.35 | 1.01  | 0.871488 | 0.962109 | 0.948534 | 0.978697 |
| Mmu.4437.1.S1_at      | Mmu.4437.1    | 5.95  | 5.92  | 0.24 | 0.34 | 1.02  | 0.723481 | 0.520039 | 0.879197 | 0.711472 |
| Mmu.4440.1.S1_at      | Mmu.4440.1    | 4.74  | 4.5   | 0.19 | 0.34 | 1.18  | 0.385589 | 0.173763 | 0.690707 | 0.450128 |
| Mmu.4442.1.S1_at      | Mmu.4442.1    | 11.46 | 11.02 | 0.91 | 0.33 | 1.36  | 0.378709 | 0.083075 | 0.68656  | 0.332911 |
| Mmu.4442.1.S1_s_at    | Mmu.4442.1    | 12.28 | 11.98 | 0.77 | 0.18 | 1.23  | 0.353091 | 0.138513 | 0.669964 | 0.411492 |
| MmuAffx.23.16.S1_s_at | MmuAffx.23.16 | 13.99 | 13.97 | 0.85 | 0.07 | 1.02  | 0.423174 | 0.402364 | 0.713909 | 0.631393 |
| Mmu.4443.6.S1_at      | Mmu.4443.6    | 5.04  | 5.08  | 0.04 | 0.04 | -1.03 | 0.118136 | 0.338315 | 0.482221 | 0.585417 |
| Mmu.4443.8.S1_at      | Mmu.4443.8    | 2.59  | 2.5   | 0.12 | 0.09 | 1.06  | 0.687352 | 0.644094 | 0.86037  | 0.791328 |
| Mmu.4443.9.S1_at      | Mmu.4443.9    | 4.14  | 4.1   | 0.16 | 0.1  | 1.03  | 0.80809  | 0.771156 | 0.921609 | 0.866992 |
| Mmu.4443.9.S1_x_at    | Mmu.4443.9    | 4.93  | 5.01  | 0.07 | 0.09 | -1.05 | 0.322734 | 0.404913 | 0.651245 | 0.633399 |
| Mmu.4444.2.S1_at      | Mmu.4444.2    | 4.15  | 4.23  | 0.03 | 0.17 | -1.06 | 0.417024 | 0.590204 | 0.710321 | 0.756117 |
| Mmu.4448.1.S1_at      | Mmu.4448.1    | 5.38  | 5.97  | 0.1  | 0.71 | -1.5  | 0.197567 | 0.269281 | 0.560592 | 0.534534 |
| Mmu.4450.1.S1_x_at    | Mmu.4450.1    | 3.03  | 3.03  | 0.02 | 0.09 | -1    | 0.887619 | 0.799704 | 0.954863 | 0.884812 |
| Mmu.4459.1.S1_at      | Mmu.4459.1    | 11.37 | 11.29 | 0.04 | 0.09 | 1.06  | 0.277931 | 0.244583 | 0.620054 | 0.514387 |
| Mmu.4460.1.S1_at      | Mmu.4460.1    | 8.14  | 7.55  | 0.5  | 0.19 | 1.51  | 0.143553 | 0.191893 | 0.510312 | 0.46727  |
| Mmu.4465.1.S1_s_at    | Mmu.4465.1    | 10.82 | 10.32 | 0.14 | 0.49 | 1.41  | 0.494824 | 0.61752  | 0.756977 | 0.773477 |
| Mmu.4493.1.S1_at      | Mmu.4493.1    | 8.31  | 7.67  | 0.44 | 0.09 | 1.56  | 0.258647 | 0.419528 | 0.605847 | 0.643507 |
| Mmu.4504.1.S1_at      | Mmu.4504.1    | 12.17 | 11.82 | 0.03 | 0.31 | 1.28  | 0.365181 | 0.484363 | 0.678069 | 0.688478 |
| Mmu.4512.2.S1_at      | Mmu.4512.2    | 11.11 | 10.71 | 0.13 | 0.13 | 1.32  | 0.084563 | 0.09416  | 0.437266 | 0.350859 |
| Mmu.4519.1.S1_x_at    | Mmu.4519.1    | 6.63  | 6.63  | 0.12 | 0.05 | 1.01  | 0.686129 | 0.891023 | 0.859632 | 0.937877 |
| Mmu.452.1.S1_at       | Mmu.452.1     | 7.6   | 8.51  | 1.27 | 1.27 | -1.88 | 0.410521 | 0.132234 | 0.706382 | 0.404274 |
| Mmu.4523.1.S1_at      | Mmu.4523.1    | 6.34  | 6.11  | 0.18 | 0.41 | 1.17  | 0.264575 | 0.340229 | 0.610296 | 0.586637 |
| Mmu.4529.1.S1_at      | Mmu.4529.1    | 6.24  | 6.19  | 1.02 | 0.62 | 1.04  | 0.623841 | 0.82429  | 0.828086 | 0.899073 |
| Mmu.4533.1.S1_at      | Mmu.4533.1    | 6.7   | 9.46  | 1    | 2.1  | -6.75 | 0.285531 | 0.20145  | 0.625034 | 0.475963 |
| Mmu.4535.1.S1_at      | Mmu.4535.1    | 3.93  | 3.9   | 0.35 | 0.03 | 1.03  | 0.673394 | 0.853253 | 0.853546 | 0.916534 |
| Mmu.4542.1.A1_at      | Mmu.4542.1    | 3.14  | 3.38  | 0.12 | 0.11 | -1.18 | 0.135623 | 0.266911 | 0.502462 | 0.532461 |
| Mmu.4542.1.S1_at      | Mmu.4542.1    | 3.71  | 3.91  | 0.04 | 0.19 | -1.15 | 0.124876 | 0.146092 | 0.490786 | 0.420092 |
| Mmu.4542.2.A1_s_at    | Mmu.4542.2    | 3.13  | 3.19  | 0.14 | 0.05 | -1.05 | 0.164931 | 0.102863 | 0.528821 | 0.363492 |
| Mmu.4542.2.A1_x_at    | Mmu.4542.2    | 6.36  | 6.57  | 0.15 | 0.06 | -1.16 | 0.151328 | 0.280098 | 0.516063 | 0.543369 |
| Mmu.4542.2.S1_s_at    | Mmu.4542.2    | 3.64  | 3.97  | 0.06 | 0.14 | -1.25 | 0.041842 | 0.054694 | 0.353013 | 0.279343 |
| Mmu.4542.2.S1_x_at    | Mmu.4542.2    | 5.95  | 5.92  | 0.2  | 0.08 | 1.02  | 0.695743 | 0.80637  | 0.865007 | 0.888642 |

|                         |                 |       |       |      |      |       |          |          |          |          |
|-------------------------|-----------------|-------|-------|------|------|-------|----------|----------|----------|----------|
| Mmu.4580.1.S1_at        | Mmu.4580.1      | 12.86 | 12.88 | 0.16 | 0.08 | -1.01 | 0.657431 | 0.151692 | 0.845993 | 0.426383 |
| Mmu.4582.1.S1_at        | Mmu.4582.1      | 3.21  | 3.15  | 0.08 | 0.04 | 1.04  | 0.168243 | 0.493658 | 0.53256  | 0.694288 |
| Mmu.4582.2.S1_x_at      | Mmu.4582.2      | 7.17  | 7.08  | 0.19 | 0.1  | 1.06  | 0.616573 | 0.104446 | 0.824231 | 0.365719 |
| Mmu.4582.3.S1_s_at      | Mmu.4582.3      | 4.06  | 3.84  | 0.46 | 0.33 | 1.16  | 0.684006 | 0.842949 | 0.858543 | 0.910554 |
| Mmu.4582.4.S1_at        | Mmu.4582.4      | 3.58  | 3.62  | 0    | 0.25 | -1.03 | 0.517283 | 0.50662  | 0.768711 | 0.702509 |
| Mmu.4594.1.S1_s_at      | Mmu.4594.1      | 14.74 | 14.77 | 0.04 | 0.01 | -1.02 | 0.278944 | 0.350788 | 0.620884 | 0.594515 |
| Mmu.460.1.S1_s_at       | Mmu.460.1       | 13.52 | 13.52 | 0.1  | 0.11 | -1.01 | 0.901009 | 0.544196 | 0.960391 | 0.726643 |
| Mmu.4602.1.S1_at        | Mmu.4602.1      | 11.08 | 10.75 | 0.11 | 0.08 | 1.25  | 0.014637 | 0.027078 | 0.254381 | 0.20576  |
| Mmu.4615.1.S1_s_at      | Mmu.4615.1      | 9.79  | 9.25  | 0.78 | 0.3  | 1.45  | 0.102853 | 0.065988 | 0.46254  | 0.302293 |
| MmugDNA.8926.1.S1_s_at  | MmugDNA.8926.1  | 10.58 | 10.22 | 0.6  | 0.42 | 1.28  | 0.193482 | 0.14082  | 0.557043 | 0.414202 |
| Mmu.4627.1.S1_at        | Mmu.4627.1      | 5.87  | 5.74  | 1.01 | 0.33 | 1.1   | 0.382302 | 0.468834 | 0.688612 | 0.677906 |
| MmugDNA.22652.1.S1_s_at | MmugDNA.22652.1 | 7.96  | 8.07  | 0.12 | 0.08 | -1.07 | 0.399985 | 0.188966 | 0.699692 | 0.464854 |
| Mmu.4647.4.S1_s_at      | Mmu.4647.4      | 3.74  | 3.74  | 0.4  | 0.35 | -1    | 0.497761 | 0.650441 | 0.758068 | 0.79565  |
| Mmu.4660.1.A1_at        | Mmu.4660.1      | 4.08  | 4.09  | 0.08 | 0.06 | -1    | 0.509368 | 0.907416 | 0.764331 | 0.947622 |
| Mmu.4662.5.S1_at        | Mmu.4662.5      | 10.73 | 10.54 | 0.16 | 0.73 | 1.15  | 0.56795  | 0.274865 | 0.798337 | 0.539335 |
| Mmu.4677.1.S1_s_at      | Mmu.4677.1      | 9.4   | 9.17  | 0.11 | 0.76 | 1.17  | 0.533221 | 0.63284  | 0.777978 | 0.783788 |
| Mmu.4682.1.S1_at        | Mmu.4682.1      | 9.29  | 9.69  | 0.02 | 0.52 | -1.32 | 0.268755 | 0.346349 | 0.613433 | 0.59124  |
| Mmu.4689.1.S1_at        | Mmu.4689.1      | 9.93  | 10.1  | 0.08 | 0.21 | -1.13 | 0.202388 | 0.147239 | 0.564694 | 0.421464 |
| Mmu.4690.1.S1_at        | Mmu.4690.1      | 8.43  | 8.24  | 0.04 | 0.32 | 1.14  | 0.37226  | 0.326051 | 0.682724 | 0.576285 |
| Mmu.4697.1.S1_at        | Mmu.4697.1      | 7.96  | 8     | 0.36 | 0.21 | -1.03 | 0.635659 | 0.682435 | 0.835072 | 0.814526 |
| Mmu.4703.1.S1_at        | Mmu.4703.1      | 10.51 | 10.2  | 0.46 | 0.27 | 1.24  | 0.516244 | 0.418052 | 0.767924 | 0.642569 |
| Mmu.4705.1.S1_at        | Mmu.4705.1      | 12.31 | 12.48 | 0.04 | 0.17 | -1.13 | 0.148739 | 0.140564 | 0.51391  | 0.413822 |
| Mmu.4707.1.S1_at        | Mmu.4707.1      | 6.47  | 6.3   | 0.8  | 0.98 | 1.13  | 0.829353 | 0.853206 | 0.930749 | 0.916521 |
| Mmu.4717.1.S1_at        | Mmu.4717.1      | 5.37  | 5.64  | 0.22 | 0.36 | -1.21 | 0.332187 | 0.121312 | 0.656683 | 0.390351 |
| Mmu.4722.1.S1_at        | Mmu.4722.1      | 9.26  | 7.93  | 0.23 | 0.43 | 2.52  | 0.02658  | 0.032621 | 0.303505 | 0.223644 |
| Mmu.4737.1.S1_at        | Mmu.4737.1      | 8.31  | 8.44  | 0.36 | 0.21 | -1.09 | 0.435012 | 0.123562 | 0.72094  | 0.393637 |
| Mmu.4754.1.S1_at        | Mmu.4754.1      | 10.35 | 10.74 | 0.09 | 0.33 | -1.31 | 0.050695 | 0.044546 | 0.37519  | 0.255417 |
| Mmu.4761.1.S1_at        | Mmu.4761.1      | 9.48  | 10.25 | 0.13 | 0.17 | -1.7  | 0.002953 | 0.000716 | 0.170703 | 0.044419 |
| Mmu.4778.1.S1_at        | Mmu.4778.1      | 9.17  | 9.7   | 0.06 | 0.15 | -1.44 | 0.003926 | 0.004186 | 0.180953 | 0.091107 |
| Mmu.4813.1.S1_at        | Mmu.4813.1      | 5.18  | 5.28  | 0.44 | 0.25 | -1.08 | 0.608624 | 0.640483 | 0.820119 | 0.788963 |
| Mmu.4815.2.S1_at        | Mmu.4815.2      | 2.67  | 2.84  | 0.17 | 0.08 | -1.13 | 0.357112 | 0.283592 | 0.672128 | 0.546021 |
| Mmu.483.1.S1_at         | Mmu.483.1       | 4.1   | 3.86  | 0.23 | 0.28 | 1.18  | 0.648196 | 0.853748 | 0.84178  | 0.916773 |
| Mmu.4846.1.S1_at        | Mmu.4846.1      | 9.71  | 8.75  | 0.11 | 0.71 | 1.95  | 0.242796 | 0.198995 | 0.59459  | 0.473569 |
| Mmu.4846.2.S1_at        | Mmu.4846.2      | 10.63 | 9.69  | 0.14 | 0.56 | 1.91  | 0.130731 | 0.104555 | 0.497065 | 0.365805 |
| Mmu.4853.1.S1_at        | Mmu.4853.1      | 11.51 | 11.48 | 0.16 | 0.22 | 1.02  | 0.777184 | 0.934649 | 0.906837 | 0.962994 |
| Mmu.488.1.S1_at         | Mmu.488.1       | 9.65  | 9.37  | 0.22 | 0.2  | 1.22  | 0.140651 | 0.028257 | 0.508385 | 0.209854 |
| Mmu.4882.1.S1_at        | Mmu.4882.1      | 10.52 | 10.06 | 0.16 | 0.07 | 1.38  | 0.007241 | 0.003484 | 0.205925 | 0.084834 |
| Mmu.4888.1.S1_at        | Mmu.4888.1      | 11.41 | 10.16 | 0.37 | 0.15 | 2.38  | 0.009991 | 0.00306  | 0.226899 | 0.080641 |
| Mmu.4889.1.S1_at        | Mmu.4889.1      | 5.17  | 5.13  | 0.02 | 0.08 | 1.03  | 0.216487 | 0.671096 | 0.576119 | 0.80765  |
| Mmu.4898.1.S1_at        | Mmu.4898.1      | 10.83 | 11.07 | 0.06 | 0.3  | -1.18 | 0.18406  | 0.073191 | 0.547972 | 0.316064 |
| Mmu.4904.1.S1_at        | Mmu.4904.1      | 10.42 | 10.24 | 0.16 | 0.33 | 1.13  | 0.428929 | 0.37421  | 0.717166 | 0.612711 |

|                         |                 |       |       |      |      |       |          |          |          |          |
|-------------------------|-----------------|-------|-------|------|------|-------|----------|----------|----------|----------|
| Mmu.4923.1.S1_at        | Mmu.4923.1      | 3.77  | 3.64  | 0.06 | 0.19 | 1.1   | 0.354417 | 0.367823 | 0.670585 | 0.607466 |
| Mmu.4926.1.S1_at        | Mmu.4926.1      | 8.59  | 8.26  | 0.16 | 0.36 | 1.25  | 0.2734   | 0.370816 | 0.616843 | 0.609797 |
| Mmu.4940.1.S1_at        | Mmu.4940.1      | 8.9   | 8.75  | 0.17 | 0.3  | 1.11  | 0.531079 | 0.745126 | 0.777048 | 0.852267 |
| Mmu.4943.1.S1_at        | Mmu.4943.1      | 10.04 | 10.98 | 0.38 | 0.4  | -1.92 | 0.064881 | 0.065904 | 0.403744 | 0.302129 |
| Mmu.4946.1.S1_at        | Mmu.4946.1      | 9.89  | 10.32 | 0.38 | 0.19 | -1.34 | 0.460073 | 0.190514 | 0.736688 | 0.465906 |
| Mmu.4947.1.S1_at        | Mmu.4947.1      | 7.06  | 7.01  | 0.05 | 0.12 | 1.03  | 0.216328 | 0.415645 | 0.575985 | 0.641007 |
| Mmu.4949.1.A1_at        | Mmu.4949.1      | 6.2   | 6.24  | 0.32 | 0.65 | -1.03 | 0.60595  | 0.365252 | 0.818647 | 0.605412 |
| Mmu.4957.1.S1_at        | Mmu.4957.1      | 4.28  | 4.29  | 0.11 | 0.04 | -1    | 0.557293 | 0.488022 | 0.792388 | 0.690855 |
| Mmu.4958.1.S1_at        | Mmu.4958.1      | 4.03  | 4.05  | 0.07 | 0.03 | -1.01 | 0.875822 | 0.975643 | 0.950257 | 0.98673  |
| Mmu.4959.1.S1_at        | Mmu.4959.1      | 7.53  | 7.14  | 0.14 | 0.4  | 1.31  | 0.598421 | 0.791371 | 0.813939 | 0.879472 |
| Mmu.497.1.A1_at         | Mmu.497.1       | 3.12  | 3.26  | 0.15 | 0.06 | -1.1  | 0.240017 | 0.310637 | 0.592883 | 0.565787 |
| MmugDNA.19865.1.S1_s_at | MmugDNA.19865.1 | 13.71 | 13.88 | 0.09 | 0.32 | -1.12 | 0.745876 | 0.730792 | 0.891243 | 0.844057 |
| MmugDNA.19865.1.S1_x_at | MmugDNA.19865.1 | 13.06 | 13.24 | 0.1  | 0.42 | -1.13 | 0.569152 | 0.672776 | 0.798992 | 0.808768 |
| Mmu.4984.1.S1_at        | Mmu.4984.1      | 7.5   | 7.36  | 0.18 | 0.23 | 1.1   | 0.601011 | 0.26049  | 0.815637 | 0.527026 |
| Mmu.4985.1.S1_at        | Mmu.4985.1      | 8.3   | 8     | 0.42 | 0.58 | 1.23  | 0.788681 | 0.882556 | 0.912194 | 0.933072 |
| Mmu.4997.1.S1_at        | Mmu.4997.1      | 6.74  | 7.69  | 0.03 | 0.37 | -1.93 | 0.01407  | 0.012658 | 0.250974 | 0.145088 |
| Mmu.5019.1.S1_s_at      | Mmu.5019.1      | 8.87  | 9.04  | 0.19 | 0.65 | -1.13 | 0.184028 | 0.256965 | 0.547964 | 0.524779 |
| Mmu.5026.1.S1_at        | Mmu.5026.1      | 4.67  | 5.04  | 0.11 | 0.15 | -1.29 | 0.030867 | 0.01553  | 0.32011  | 0.158053 |
| MmugDNA.33122.1.S1_at   | MmugDNA.33122.1 | 11.23 | 11.68 | 0.13 | 0.44 | -1.37 | 0.140639 | 0.127249 | 0.508385 | 0.397935 |
| MmugDNA.33122.1.S1_s_at | MmugDNA.33122.1 | 11.74 | 12.35 | 0.18 | 0.54 | -1.53 | 0.295068 | 0.252143 | 0.631503 | 0.520828 |
| Mmu.5028.1.S1_at        | Mmu.5028.1      | 4.07  | 4.18  | 0.16 | 0.27 | -1.08 | 0.95586  | 0.707314 | 0.983384 | 0.830236 |
| Mmu.5034.1.A1_at        | Mmu.5034.1      | 7.26  | 6.79  | 0.49 | 0.44 | 1.38  | 0.974085 | 0.963117 | 0.989794 | 0.97942  |
| Mmu.5034.1.S1_s_at      | Mmu.5034.1      | 10.98 | 10.73 | 0.31 | 0.46 | 1.19  | 0.824457 | 0.774003 | 0.92884  | 0.868608 |
| Mmu.5034.1.S1_x_at      | Mmu.5034.1      | 11.38 | 11.26 | 0.23 | 0.44 | 1.08  | 0.804704 | 0.748865 | 0.919718 | 0.853944 |
| Mmu.506.1.A1_at         | Mmu.506.1       | 6.51  | 8.79  | 0.9  | 1.69 | -4.87 | 0.198527 | 0.147242 | 0.561629 | 0.421464 |
| Mmu.506.1.S1_at         | Mmu.506.1       | 4.69  | 7.79  | 1.44 | 2.25 | -8.56 | 0.249341 | 0.177794 | 0.60017  | 0.454111 |
| Mmu.5060.1.S1_at        | Mmu.5060.1      | 8.8   | 8.96  | 0.53 | 0.15 | -1.12 | 0.684714 | 0.153854 | 0.858795 | 0.428506 |
| MmugDNA.19825.1.S1_at   | MmugDNA.19825.1 | 4.96  | 5.13  | 0.11 | 0.09 | -1.13 | 0.04143  | 0.034496 | 0.351726 | 0.229879 |
| MmugDNA.19825.1.S1_s_at | MmugDNA.19825.1 | 9.31  | 9.4   | 0.5  | 0.11 | -1.06 | 0.538487 | 0.043449 | 0.780615 | 0.253079 |
| Mmu.5062.1.S1_at        | Mmu.5062.1      | 4.59  | 4.62  | 0.06 | 0.2  | -1.02 | 0.736385 | 0.75346  | 0.886656 | 0.856527 |
| Mmu.5066.1.S1_at        | Mmu.5066.1      | 9.66  | 9.41  | 0.08 | 0.37 | 1.19  | 0.578066 | 0.219567 | 0.803619 | 0.493192 |
| Mmu.5073.1.S1_at        | Mmu.5073.1      | 8.68  | 8.61  | 0.21 | 0.32 | 1.05  | 0.358912 | 0.48957  | 0.673592 | 0.691824 |
| Mmu.5090.1.S1_at        | Mmu.5090.1      | 9.26  | 8.5   | 0.11 | 0.2  | 1.69  | 0.006195 | 0.002984 | 0.196818 | 0.079958 |
| Mmu.5094.1.S1_at        | Mmu.5094.1      | 6.66  | 5.89  | 0.41 | 0.2  | 1.7   | 0.054096 | 0.04179  | 0.381457 | 0.248986 |
| Mmu.511.1.S1_at         | Mmu.511.1       | 4.36  | 4.6   | 0.06 | 0.08 | -1.18 | 0.011784 | 0.004169 | 0.237691 | 0.091036 |
| Mmu.512.1.S1_at         | Mmu.512.1       | 12.74 | 12.09 | 0.03 | 0.68 | 1.57  | 0.123491 | 0.134578 | 0.489234 | 0.406629 |
| Mmu.5124.1.S1_at        | Mmu.5124.1      | 12.5  | 12.6  | 0.05 | 0.06 | -1.07 | 0.043252 | 0.081172 | 0.3567   | 0.329351 |
| Mmu.5133.1.S1_at        | Mmu.5133.1      | 6.98  | 6.99  | 0.23 | 0.33 | -1.01 | 0.644964 | 0.718392 | 0.840031 | 0.837031 |
| Mmu.5150.1.A1_at        | Mmu.5150.1      | 6.27  | 6.09  | 0.13 | 0.12 | 1.13  | 0.782073 | 0.623211 | 0.909105 | 0.777635 |
| Mmu.5150.1.S1_at        | Mmu.5150.1      | 6.15  | 6.19  | 0.08 | 0.12 | -1.03 | 0.79201  | 0.794984 | 0.913645 | 0.881864 |
| Mmu.5151.1.S1_s_at      | Mmu.5151.1      | 6.63  | 5.88  | 0.92 | 0.27 | 1.69  | 0.229173 | 0.319519 | 0.586439 | 0.571872 |

|                         |                 |       |       |      |      |       |          |          |          |          |
|-------------------------|-----------------|-------|-------|------|------|-------|----------|----------|----------|----------|
| Mmu.5152.1.S1_at        | Mmu.5152.1      | 3.24  | 3.25  | 0.17 | 0.26 | -1    | 0.326668 | 0.445251 | 0.653184 | 0.662338 |
| Mmu.5152.1.S1_x_at      | Mmu.5152.1      | 4.98  | 4.61  | 0.15 | 0.17 | 1.29  | 0.053683 | 0.054024 | 0.38074  | 0.277914 |
| Mmu.5155.1.S1_s_at      | Mmu.5155.1      | 8.31  | 9.11  | 0.22 | 0.46 | -1.74 | 0.051551 | 0.027515 | 0.376072 | 0.207161 |
| Mmu.5166.1.S1_at        | Mmu.5166.1      | 10.14 | 9.92  | 0.24 | 0.14 | 1.17  | 0.094553 | 0.047411 | 0.452166 | 0.262476 |
| Mmu.518.1.S1_at         | Mmu.518.1       | 3.61  | 3.5   | 0.09 | 0.11 | 1.08  | 0.433654 | 0.559111 | 0.720156 | 0.736046 |
| Mmu.5186.1.S1_at        | Mmu.5186.1      | 3.82  | 5.48  | 0.1  | 1.13 | -3.16 | 0.05982  | 0.019512 | 0.392923 | 0.175439 |
| Mmu.5207.1.S1_at        | Mmu.5207.1      | 6.68  | 6.98  | 0.15 | 0.03 | -1.24 | 0.079805 | 0.04221  | 0.430147 | 0.24989  |
| Mmu.5234.1.S1_at        | Mmu.5234.1      | 8.33  | 7.62  | 0.11 | 0.55 | 1.63  | 0.066413 | 0.098729 | 0.406564 | 0.356811 |
| Mmu.524.1.S1_at         | Mmu.524.1       | 3.56  | 3.81  | 0.04 | 0.28 | -1.19 | 0.684683 | 0.652905 | 0.858795 | 0.797125 |
| Mmu.5240.1.S1_at        | Mmu.5240.1      | 6.44  | 6.93  | 0.16 | 0.44 | -1.4  | 0.088494 | 0.086325 | 0.44331  | 0.338771 |
| Mmu.5247.1.A1_at        | Mmu.5247.1      | 8.29  | 9.38  | 0.12 | 0.61 | -2.13 | 0.03896  | 0.044254 | 0.345975 | 0.25493  |
| Mmu.5251.1.S1_at        | Mmu.5251.1      | 7.53  | 8.16  | 0.47 | 0.96 | -1.55 | 0.428728 | 0.480098 | 0.71704  | 0.685659 |
| Mmu.5257.1.S1_at        | Mmu.5257.1      | 12.78 | 12.83 | 0.08 | 0.11 | -1.04 | 0.309427 | 0.267196 | 0.641535 | 0.532809 |
| Mmu.5288.1.S1_at        | Mmu.5288.1      | 11.54 | 11.76 | 0.51 | 0.23 | -1.16 | 0.990186 | 0.145704 | 0.99652  | 0.419653 |
| Mmu.53.1.S1_at          | Mmu.53.1        | 11.21 | 11.22 | 0.04 | 0.08 | -1.01 | 0.339276 | 0.504903 | 0.661232 | 0.701947 |
| Mmu.5300.1.S1_at        | Mmu.5300.1      | 5.55  | 5.46  | 0.23 | 0.06 | 1.06  | 0.74455  | 0.22242  | 0.890653 | 0.495479 |
| Mmu.5303.1.S1_at        | Mmu.5303.1      | 11.13 | 13.65 | 0.53 | 4.69 | -5.76 | 0.897925 | 0.069717 | 0.959199 | 0.310183 |
| MmugDNA.15798.1.S1_s_at | MmugDNA.15798.1 | 9.12  | 11.76 | 1.44 | 2.01 | -6.22 | 0.267151 | 0.325716 | 0.612309 | 0.57602  |
| Mmu.5321.1.S1_at        | Mmu.5321.1      | 7.59  | 7.3   | 0.17 | 0.12 | 1.22  | 0.041676 | 0.013206 | 0.352383 | 0.147409 |
| Mmu.5328.1.S1_x_at      | Mmu.5328.1      | 13.8  | 13.82 | 0.06 | 0.01 | -1.01 | 0.818255 | 0.955745 | 0.926289 | 0.974924 |
| Mmu.5329.1.S1_at        | Mmu.5329.1      | 10.99 | 11.06 | 0.54 | 0.31 | -1.05 | 0.354533 | 0.471785 | 0.670592 | 0.679681 |
| Mmu.5333.1.S1_at        | Mmu.5333.1      | 9.15  | 8.99  | 0.17 | 0.08 | 1.12  | 0.205033 | 0.304107 | 0.567483 | 0.561453 |
| Mmu.5339.1.S1_at        | Mmu.5339.1      | 10.94 | 11.41 | 0.09 | 0.1  | -1.38 | 0.004522 | 0.001539 | 0.183876 | 0.05949  |
| Mmu.534.1.S1_at         | Mmu.534.1       | 8.17  | 9.71  | 0.29 | 0.41 | -2.91 | 0.005554 | 0.001894 | 0.191807 | 0.065004 |
| Mmu.535.1.S1_at         | Mmu.535.1       | 9.8   | 9.92  | 0.11 | 0.28 | -1.09 | 0.480105 | 0.044032 | 0.748121 | 0.254195 |
| Mmu.5354.1.S1_at        | Mmu.5354.1      | 10.48 | 10.69 | 0.11 | 0.23 | -1.16 | 0.330446 | 0.450318 | 0.655696 | 0.665643 |
| Mmu.5356.1.S1_at        | Mmu.5356.1      | 12.15 | 12.24 | 0.13 | 0.29 | -1.06 | 0.739505 | 0.890297 | 0.888157 | 0.937505 |
| Mmu.5357.1.S1_at        | Mmu.5357.1      | 8.95  | 8.97  | 0.09 | 0.04 | -1.01 | 0.985229 | 0.413145 | 0.99475  | 0.639461 |
| Mmu.5363.1.S1_at        | Mmu.5363.1      | 10.1  | 10.5  | 0.3  | 1.06 | -1.32 | 0.673424 | 0.835075 | 0.853546 | 0.905549 |
| Mmu.5373.1.S1_s_at      | Mmu.5373.1      | 12.54 | 12.45 | 0.07 | 0.12 | 1.07  | 0.14764  | 0.01124  | 0.513287 | 0.138014 |
| Mmu.5386.1.S1_at        | Mmu.5386.1      | 7.84  | 7.71  | 0.46 | 0.19 | 1.1   | 0.929485 | 0.128785 | 0.972735 | 0.400248 |
| Mmu.5392.1.S1_at        | Mmu.5392.1      | 4.08  | 4.11  | 0.09 | 0.26 | -1.02 | 0.644697 | 0.832653 | 0.839787 | 0.904017 |
| Mmu.5406.1.S1_at        | Mmu.5406.1      | 5.48  | 5.73  | 0.23 | 0.14 | -1.18 | 0.116827 | 0.125143 | 0.48074  | 0.395577 |
| Mmu.5409.1.S1_at        | Mmu.5409.1      | 7.57  | 7.31  | 0.23 | 0.4  | 1.2   | 0.559264 | 0.75715  | 0.793748 | 0.858648 |
| Mmu.5423.1.S1_at        | Mmu.5423.1      | 12.07 | 11.58 | 0.2  | 0.05 | 1.4   | 0.015063 | 0.009777 | 0.257205 | 0.130028 |
| Mmu.5427.1.S1_at        | Mmu.5427.1      | 4.94  | 4.81  | 0.12 | 0.22 | 1.1   | 0.234349 | 0.39902  | 0.588656 | 0.62969  |
| Mmu.5431.1.S1_at        | Mmu.5431.1      | 9.01  | 9.07  | 0.03 | 0.19 | -1.04 | 0.711479 | 0.472916 | 0.873642 | 0.680236 |
| Mmu.5435.1.S1_at        | Mmu.5435.1      | 7.22  | 7.9   | 0.42 | 0.57 | -1.6  | 0.111737 | 0.014939 | 0.474019 | 0.155342 |
| Mmu.5448.1.S1_at        | Mmu.5448.1      | 8.11  | 7.63  | 0.23 | 0.07 | 1.4   | 0.029694 | 0.046883 | 0.31509  | 0.261276 |
| Mmu.5468.1.S1_at        | Mmu.5468.1      | 9.03  | 9.17  | 0.24 | 0.02 | -1.1  | 0.344444 | 0.426285 | 0.664563 | 0.648468 |
| Mmu.5484.1.S1_s_at      | Mmu.5484.1      | 12.12 | 11.6  | 0.12 | 0.5  | 1.43  | 0.156105 | 0.162254 | 0.520741 | 0.438447 |

|                         |                 |       |       |      |      |       |          |          |          |          |
|-------------------------|-----------------|-------|-------|------|------|-------|----------|----------|----------|----------|
| Mmu.549.1.S1_x_at       | Mmu.549.1       | 3.15  | 3.21  | 0.43 | 0.11 | -1.04 | 0.662506 | 0.56016  | 0.848652 | 0.736517 |
| Mmu.5491.1.S1_at        | Mmu.5491.1      | 9.34  | 10.28 | 0.45 | 1.16 | -1.92 | 0.248288 | 0.336694 | 0.599157 | 0.584037 |
| Mmu.5499.1.S1_at        | Mmu.5499.1      | 12.88 | 12.76 | 0.11 | 0.1  | 1.09  | 0.381765 | 0.402207 | 0.688164 | 0.631247 |
| Mmu.5502.1.S1_at        | Mmu.5502.1      | 5.88  | 5.92  | 0.11 | 0.17 | -1.03 | 0.768564 | 0.906789 | 0.902719 | 0.947229 |
| Mmu.5514.1.S1_at        | Mmu.5514.1      | 5.22  | 5.24  | 0.21 | 0.14 | -1.02 | 0.418953 | 0.3808   | 0.711627 | 0.617426 |
| Mmu.5523.1.S1_at        | Mmu.5523.1      | 9.05  | 8.99  | 0.2  | 0.24 | 1.04  | 0.700972 | 0.221836 | 0.867793 | 0.49495  |
| Mmu.5524.1.S1_at        | Mmu.5524.1      | 9.51  | 9.54  | 0.08 | 0.21 | -1.02 | 0.283056 | 0.231342 | 0.623159 | 0.503029 |
| Mmu.5534.1.S1_at        | Mmu.5534.1      | 5.59  | 5.96  | 0.09 | 0.17 | -1.29 | 0.062824 | 0.111494 | 0.399328 | 0.376205 |
| Mmu.5541.2.S1_at        | Mmu.5541.2      | 3.69  | 3.77  | 0.15 | 0.68 | -1.06 | 0.304481 | 0.454458 | 0.638542 | 0.668603 |
| Mmu.5569.1.S1_at        | Mmu.5569.1      | 4.93  | 5     | 0.08 | 0.45 | -1.05 | 0.353051 | 0.49772  | 0.669964 | 0.697025 |
| Mmu.5587.1.S1_at        | Mmu.5587.1      | 8.83  | 8.92  | 0.19 | 0.03 | -1.06 | 0.402392 | 0.68447  | 0.701398 | 0.815959 |
| Mmu.5593.1.S1_at        | Mmu.5593.1      | 9.94  | 9.88  | 0.23 | 0.08 | 1.04  | 0.849423 | 0.377093 | 0.939567 | 0.614795 |
| Mmu.5631.1.A1_at        | Mmu.5631.1      | 6.82  | 6.82  | 0.18 | 0.58 | -1    | 0.868774 | 0.944091 | 0.947725 | 0.968306 |
| Mmu.5646.1.A1_at        | Mmu.5646.1      | 3.19  | 3.37  | 0.09 | 0.08 | -1.13 | 0.138548 | 0.139606 | 0.505769 | 0.41286  |
| Mmu.5654.1.S1_at        | Mmu.5654.1      | 7.74  | 7.5   | 0.44 | 0.2  | 1.18  | 0.291089 | 0.371343 | 0.628725 | 0.610172 |
| Mmu.5655.1.S1_s_at      | Mmu.5655.1      | 13.3  | 13.18 | 0.08 | 0.1  | 1.09  | 0.157357 | 0.082721 | 0.522148 | 0.332171 |
| Mmu.5673.1.S1_at        | Mmu.5673.1      | 7.49  | 8.68  | 0.21 | 1.08 | -2.29 | 0.126216 | 0.134385 | 0.4924   | 0.406603 |
| Mmu.5674.1.A1_at        | Mmu.5674.1      | 3.85  | 3.87  | 0.15 | 0.18 | -1.02 | 0.426109 | 0.210821 | 0.715524 | 0.484902 |
| Mmu.5674.1.S1_at        | Mmu.5674.1      | 4.14  | 4.21  | 0.18 | 0.09 | -1.05 | 0.84362  | 0.085996 | 0.937089 | 0.338156 |
| Mmu.5677.4.S1_at        | Mmu.5677.4      | 7.74  | 6.98  | 0.38 | 0.68 | 1.7   | 0.74202  | 0.473146 | 0.88958  | 0.68048  |
| Mmu.5680.1.S1_at        | Mmu.5680.1      | 8.05  | 8.87  | 0.66 | 0.41 | -1.77 | 0.131444 | 0.146249 | 0.498041 | 0.420241 |
| Mmu.5689.1.S1_at        | Mmu.5689.1      | 11.72 | 11.62 | 0.28 | 0.73 | 1.07  | 0.473813 | 0.457852 | 0.744593 | 0.670983 |
| Mmu.5691.1.S1_at        | Mmu.5691.1      | 7.05  | 7.42  | 0.13 | 0.23 | -1.29 | 0.266909 | 0.051187 | 0.612291 | 0.271771 |
| Mmu.5692.1.S1_at        | Mmu.5692.1      | 12.39 | 12.24 | 0.11 | 0.07 | 1.11  | 0.247533 | 0.188169 | 0.598731 | 0.464251 |
| MmugDNA.25237.1.S1_s_at | MmugDNA.25237.1 | 12.02 | 11.86 | 0.12 | 0.06 | 1.12  | 0.138813 | 0.055795 | 0.505917 | 0.282044 |
| Mmu.5693.1.S1_at        | Mmu.5693.1      | 4.71  | 5.05  | 0.06 | 0.01 | -1.27 | 0.000661 | 0.000395 | 0.136818 | 0.037471 |
| Mmu.5696.1.S1_at        | Mmu.5696.1      | 5.93  | 5.93  | 0.15 | 0.14 | -1    | 0.796333 | 0.46174  | 0.91548  | 0.673302 |
| Mmu.5709.1.S1_x_at      | Mmu.5709.1      | 14.23 | 14.23 | 0.03 | 0.03 | 1     | 0.518751 | 0.828984 | 0.769592 | 0.901691 |
| Mmu.5709.2.S1_s_at      | Mmu.5709.2      | 12.03 | 12.58 | 0.2  | 0.25 | -1.46 | 0.092179 | 0.093315 | 0.448698 | 0.349412 |
| Mmu.5714.1.S1_at        | Mmu.5714.1      | 5.87  | 5.91  | 0.07 | 0.09 | -1.03 | 0.485852 | 0.703837 | 0.751144 | 0.828251 |
| Mmu.5725.1.S1_at        | Mmu.5725.1      | 3.9   | 4.54  | 0.34 | 0.38 | -1.55 | 0.080134 | 0.083206 | 0.430315 | 0.333184 |
| Mmu.5727.1.S1_at        | Mmu.5727.1      | 11.55 | 11.89 | 0.4  | 1.01 | -1.27 | 0.500894 | 0.229078 | 0.759735 | 0.501396 |
| Mmu.5757.1.S1_at        | Mmu.5757.1      | 7.49  | 8.21  | 0.45 | 0.67 | -1.65 | 0.259963 | 0.147592 | 0.606878 | 0.421901 |
| Mmu.5766.1.S1_at        | Mmu.5766.1      | 9.76  | 10.05 | 0.1  | 0.43 | -1.22 | 0.328527 | 0.538871 | 0.654375 | 0.723368 |
| Mmu.5767.1.A1_at        | Mmu.5767.1      | 4.67  | 4.65  | 0.23 | 0.05 | 1.02  | 0.47669  | 0.558978 | 0.746273 | 0.735963 |
| Mmu.577.1.S1_at         | Mmu.577.1       | 7.59  | 8.39  | 0.54 | 0.42 | -1.74 | 0.195061 | 0.309781 | 0.558557 | 0.565044 |
| Mmu.5782.1.S1_at        | Mmu.5782.1      | 11.19 | 11.18 | 0.24 | 0.03 | 1.01  | 0.88636  | 0.768706 | 0.95456  | 0.865653 |
| Mmu.5802.2.S1_at        | Mmu.5802.2      | 11.68 | 11.56 | 0.15 | 0.18 | 1.09  | 0.165455 | 0.177692 | 0.529433 | 0.454073 |
| Mmu.5808.1.S1_at        | Mmu.5808.1      | 8.22  | 8.8   | 0.28 | 1.43 | -1.49 | 0.544532 | 0.70827  | 0.784442 | 0.830841 |
| Mmu.5811.1.A1_at        | Mmu.5811.1      | 7.31  | 7.6   | 0.24 | 0.25 | -1.22 | 0.315102 | 0.065527 | 0.646356 | 0.301415 |
| Mmu.5814.1.S1_at        | Mmu.5814.1      | 4.73  | 4.84  | 0.16 | 0.09 | -1.08 | 0.207458 | 0.489871 | 0.569624 | 0.691972 |

|                       |               |       |       |      |      |        |          |          |          |          |
|-----------------------|---------------|-------|-------|------|------|--------|----------|----------|----------|----------|
| Mmu.5825.1.S1_s_at    | Mmu.5825.1    | 12.54 | 12.44 | 0.19 | 0.21 | 1.07   | 0.841621 | 0.323393 | 0.936215 | 0.574453 |
| Mmu.5849.1.S1_at      | Mmu.5849.1    | 4.01  | 3.81  | 0.18 | 0.2  | 1.15   | 0.127636 | 0.232753 | 0.493916 | 0.504385 |
| Mmu.586.1.S1_at       | Mmu.586.1     | 8.5   | 9.16  | 0.03 | 0.45 | -1.58  | 0.057778 | 0.062911 | 0.388999 | 0.297501 |
| Mmu.586.2.S1_at       | Mmu.586.2     | 9.19  | 10.19 | 0.22 | 0.74 | -1.99  | 0.144674 | 0.145393 | 0.511058 | 0.419421 |
| Mmu.5870.1.S1_at      | Mmu.5870.1    | 6.16  | 6.14  | 0.28 | 0.12 | 1.01   | 0.471654 | 0.489145 | 0.743322 | 0.691629 |
| Mmu.5871.1.S1_x_at    | Mmu.5871.1    | 14.38 | 14.31 | 0.03 | 0.07 | 1.04   | 0.13243  | 0.144537 | 0.498641 | 0.418408 |
| Mmu.5875.1.S1_at      | Mmu.5875.1    | 3.11  | 3.2   | 0.3  | 0.05 | -1.06  | 0.667644 | 0.80221  | 0.851241 | 0.886112 |
| Mmu.5879.1.S1_at      | Mmu.5879.1    | 12.54 | 12.57 | 0.16 | 0.34 | -1.02  | 0.843728 | 0.80541  | 0.937151 | 0.888152 |
| Mmu.5899.1.S1_at      | Mmu.5899.1    | 12.4  | 12.52 | 0.03 | 0.1  | -1.08  | 0.089479 | 0.171625 | 0.445142 | 0.448044 |
| Mmu.5967.1.S1_s_at    | Mmu.5967.1    | 11.53 | 11.69 | 0.11 | 0.09 | -1.11  | 0.114108 | 0.174515 | 0.47744  | 0.450998 |
| Mmu.5901.1.S1_at      | Mmu.5901.1    | 7.49  | 7.73  | 0.25 | 0.12 | -1.18  | 0.176499 | 0.09789  | 0.540136 | 0.355679 |
| Mmu.5908.1.S1_at      | Mmu.5908.1    | 10.24 | 9.98  | 0.21 | 0.15 | 1.2    | 0.20971  | 0.482894 | 0.571042 | 0.68765  |
| Mmu.5912.1.S1_at      | Mmu.5912.1    | 5.46  | 5.81  | 0.14 | 0.26 | -1.28  | 0.097397 | 0.08227  | 0.45638  | 0.331165 |
| Mmu.5921.1.S1_at      | Mmu.5921.1    | 11.79 | 11.97 | 0.16 | 0.13 | -1.14  | 0.902668 | 0.635223 | 0.961177 | 0.785279 |
| Mmu.5974.1.S1_at      | Mmu.5974.1    | 7.15  | 7.13  | 0.09 | 0.29 | 1.01   | 0.878656 | 0.853748 | 0.95133  | 0.916773 |
| Mmu.5978.1.S1_at      | Mmu.5978.1    | 9.26  | 9.16  | 0.27 | 0.29 | 1.07   | 0.411431 | 0.471861 | 0.707304 | 0.679772 |
| Mmu.5991.1.S1_at      | Mmu.5991.1    | 5.97  | 6.05  | 0.05 | 0.2  | -1.06  | 0.474954 | 0.581438 | 0.745455 | 0.750451 |
| Mmu.5996.1.S1_s_at    | Mmu.5996.1    | 3.59  | 3.44  | 0.19 | 0.17 | 1.11   | 0.84502  | 0.42404  | 0.937778 | 0.646666 |
| Mmu.5996.1.S1_x_at    | Mmu.5996.1    | 4.41  | 4.42  | 0.13 | 0.21 | -1.01  | 0.787642 | 0.330018 | 0.911639 | 0.578915 |
| Mmu.5996.2.S1_at      | Mmu.5996.2    | 4.13  | 4.33  | 0.02 | 0.07 | -1.14  | 0.009189 | 0.160626 | 0.222541 | 0.436745 |
| Mmu.5996.2.S1_x_at    | Mmu.5996.2    | 4.64  | 4.82  | 0.03 | 0.1  | -1.13  | 0.162013 | 0.063491 | 0.526638 | 0.298444 |
| Mmu.6007.1.S1_at      | Mmu.6007.1    | 7.26  | 7.36  | 0.28 | 0.08 | -1.07  | 0.878653 | 0.951643 | 0.95133  | 0.972522 |
| Mmu.6016.1.S1_at      | Mmu.6016.1    | 12.25 | 12.47 | 0.34 | 0.28 | -1.16  | 0.414513 | 0.459507 | 0.709338 | 0.671805 |
| Mmu.6025.1.S1_at      | Mmu.6025.1    | 6.86  | 11.74 | 2.7  | 0.13 | -29.37 | 0.100124 | 0.06171  | 0.460668 | 0.295166 |
| MmuAffx.23.18.S1_s_at | MmuAffx.23.18 | 14.12 | 14.15 | 0.07 | 0.01 | -1.02  | 0.483566 | 0.576143 | 0.749933 | 0.747028 |
| Mmu.6027.1.S1_at      | Mmu.6027.1    | 8.35  | 8.62  | 0.69 | 0.68 | -1.2   | 0.203399 | 0.254842 | 0.566041 | 0.523051 |
| Mmu.6042.1.S1_at      | Mmu.6042.1    | 4.74  | 4.64  | 0.21 | 0.08 | 1.07   | 0.467511 | 0.216959 | 0.740702 | 0.490571 |
| Mmu.6048.2.S1_at      | Mmu.6048.2    | 6.61  | 8.16  | 1.17 | 0.1  | -2.93  | 0.137543 | 0.092902 | 0.504666 | 0.349024 |
| Mmu.6050.1.S1_at      | Mmu.6050.1    | 10.59 | 10.12 | 0.16 | 0.38 | 1.39   | 0.030618 | 0.019142 | 0.31944  | 0.174115 |
| Mmu.6053.1.S1_at      | Mmu.6053.1    | 7.34  | 8.45  | 0.44 | 0.33 | -2.17  | 0.065178 | 0.067762 | 0.404039 | 0.306425 |
| Mmu.6061.1.A1_at      | Mmu.6061.1    | 3.32  | 3.4   | 0.07 | 0.08 | -1.06  | 0.241971 | 0.511371 | 0.594166 | 0.705534 |
| Mmu.6061.1.S1_at      | Mmu.6061.1    | 3.29  | 3.28  | 0.14 | 0.19 | 1.01   | 0.644078 | 0.826209 | 0.839719 | 0.900203 |
| Mmu.6083.1.S1_at      | Mmu.6083.1    | 12.46 | 12.95 | 0.13 | 0.1  | -1.41  | 0.00892  | 0.006222 | 0.221598 | 0.106937 |
| Mmu.6085.2.S1_x_at    | Mmu.6085.2    | 11.75 | 11.83 | 0.26 | 0.31 | -1.06  | 0.373917 | 0.357868 | 0.683251 | 0.599493 |
| Mmu.6118.1.S1_at      | Mmu.6118.1    | 8.83  | 9.68  | 0.24 | 1.25 | -1.79  | 0.286778 | 0.359485 | 0.625572 | 0.600754 |
| Mmu.6125.1.A1_at      | Mmu.6125.1    | 5.58  | 5.69  | 0.05 | 0.21 | -1.08  | 0.141614 | 0.072369 | 0.509159 | 0.315164 |
| Mmu.6125.1.S1_at      | Mmu.6125.1    | 5.76  | 5.66  | 0    | 0.24 | 1.07   | 0.782211 | 0.931661 | 0.909138 | 0.961188 |
| Mmu.6135.1.S1_at      | Mmu.6135.1    | 11.36 | 11.85 | 0.12 | 0.15 | -1.4   | 0.02759  | 0.018364 | 0.308386 | 0.170406 |
| Mmu.6139.1.S1_s_at    | Mmu.6139.1    | 9.81  | 9.95  | 0.31 | 0.1  | -1.1   | 0.532824 | 0.299129 | 0.777862 | 0.557663 |
| Mmu.6141.1.A1_at      | Mmu.6141.1    | 9.47  | 8.45  | 0.14 | 0.45 | 2.02   | 0.023814 | 0.01256  | 0.292771 | 0.144501 |
| Mmu.6141.1.S1_at      | Mmu.6141.1    | 9.6   | 8.58  | 0.17 | 0.4  | 2.02   | 0.01941  | 0.008848 | 0.274042 | 0.124493 |

|                         |                 |       |       |      |      |        |          |          |          |          |
|-------------------------|-----------------|-------|-------|------|------|--------|----------|----------|----------|----------|
| Mmu.616.1.S1_at         | Mmu.616.1       | 9.74  | 9.96  | 0.09 | 0.15 | -1.16  | 0.070106 | 0.037767 | 0.413586 | 0.238746 |
| Mmu.6177.1.A1_at        | Mmu.6177.1      | 8.06  | 11.69 | 1.56 | 1.31 | -12.33 | 0.086777 | 0.067865 | 0.440475 | 0.306744 |
| Mmu.6180.1.S1_s_at      | Mmu.6180.1      | 12.6  | 12.96 | 0.07 | 0.09 | -1.28  | 0.01152  | 0.034941 | 0.23613  | 0.231062 |
| Mmu.6187.1.S1_at        | Mmu.6187.1      | 9.36  | 7.57  | 0.65 | 0.58 | 3.46   | 0.019371 | 0.008466 | 0.273874 | 0.122057 |
| Mmu.6201.1.S1_at        | Mmu.6201.1      | 12.16 | 11.81 | 0.09 | 1.05 | 1.28   | 0.507259 | 0.645274 | 0.762788 | 0.792151 |
| Mmu.6263.1.S1_s_at      | Mmu.6263.1      | 14.08 | 14.11 | 0.07 | 0.09 | -1.02  | 0.413309 | 0.566889 | 0.70838  | 0.740843 |
| Mmu.6269.1.S1_at        | Mmu.6269.1      | 4.83  | 4.64  | 0.34 | 0.17 | 1.14   | 0.611375 | 0.618784 | 0.821648 | 0.774185 |
| Mmu.6271.1.S1_at        | Mmu.6271.1      | 5.76  | 10.03 | 1.36 | 3.31 | -19.41 | 0.411934 | 0.300844 | 0.707648 | 0.55906  |
| Mmu.6271.2.S1_a_at      | Mmu.6271.2      | 6.91  | 10.32 | 0.96 | 3.2  | -10.64 | 0.413076 | 0.362329 | 0.708313 | 0.60295  |
| Mmu.6272.2.S1_at        | Mmu.6272.2      | 6.89  | 10.55 | 1.27 | 2.7  | -12.65 | 0.268162 | 0.175321 | 0.613047 | 0.45207  |
| Mmu.6282.1.S1_at        | Mmu.6282.1      | 5.1   | 7.2   | 1.19 | 1.18 | -4.28  | 0.218035 | 0.275266 | 0.577569 | 0.539641 |
| Mmu.629.1.S1_s_at       | Mmu.629.1       | 10.76 | 12.53 | 0.52 | 1.21 | -3.41  | 0.283547 | 0.123958 | 0.623624 | 0.394261 |
| Mmu.629.2.S1_a_at       | Mmu.629.2       | 8.95  | 11.47 | 0.78 | 1.81 | -5.72  | 0.196834 | 0.128502 | 0.559865 | 0.399838 |
| Mmu.629.2.S1_at         | Mmu.629.2       | 8.41  | 10.78 | 0.58 | 1.87 | -5.16  | 0.184418 | 0.128903 | 0.548138 | 0.400331 |
| Mmu.6308.1.S1_at        | Mmu.6308.1      | 10.84 | 10.93 | 0.03 | 0.12 | -1.06  | 0.765048 | 0.214197 | 0.901084 | 0.487851 |
| Mmu.6310.1.S1_at        | Mmu.6310.1      | 11.52 | 11.75 | 0.11 | 0.19 | -1.17  | 0.036076 | 0.024238 | 0.338781 | 0.194936 |
| Mmu.6311.1.S1_at        | Mmu.6311.1      | 7.99  | 9.78  | 0.27 | 0.82 | -3.46  | 0.032804 | 0.021537 | 0.326124 | 0.183818 |
| Mmu.6318.1.S1_at        | Mmu.6318.1      | 9.13  | 9.12  | 0.19 | 0.21 | 1      | 0.941288 | 0.99066  | 0.977671 | 0.994725 |
| Mmu.6342.1.S1_at        | Mmu.6342.1      | 10.61 | 9.99  | 0.07 | 0.05 | 1.53   | 0.000305 | 0.00004  | 0.12562  | 0.02409  |
| Mmu.6352.1.S1_at        | Mmu.6352.1      | 8.34  | 8.15  | 0.18 | 0.16 | 1.14   | 0.253092 | 0.533962 | 0.601794 | 0.720008 |
| Mmu.6387.1.S1_s_at      | Mmu.6387.1      | 11.29 | 11.16 | 0.13 | 0.12 | 1.1    | 0.217981 | 0.157477 | 0.577569 | 0.432985 |
| Mmu.6397.2.S1_at        | Mmu.6397.2      | 9.73  | 9.94  | 0.18 | 0.26 | -1.16  | 0.201195 | 0.232692 | 0.563821 | 0.504359 |
| Mmu.6399.1.S1_at        | Mmu.6399.1      | 10.18 | 9.88  | 0.24 | 0.11 | 1.24   | 0.53352  | 0.248142 | 0.77827  | 0.517567 |
| Mmu.6412.1.S1_at        | Mmu.6412.1      | 11.51 | 11.11 | 0.14 | 0.39 | 1.33   | 0.192701 | 0.202096 | 0.556004 | 0.476545 |
| Mmu.6416.1.S1_at        | Mmu.6416.1      | 9.29  | 9.04  | 0.22 | 0.33 | 1.19   | 0.628689 | 0.822681 | 0.830911 | 0.898006 |
| Mmu.6423.1.S1_at        | Mmu.6423.1      | 9.07  | 9.28  | 0.15 | 0.14 | -1.16  | 0.161864 | 0.251487 | 0.526573 | 0.520246 |
| Mmu.6425.1.S1_at        | Mmu.6425.1      | 7.1   | 6.71  | 0.41 | 0.21 | 1.31   | 0.316723 | 0.229279 | 0.647644 | 0.501527 |
| Mmu.6430.2.S1_at        | Mmu.6430.2      | 7.1   | 7.17  | 0.21 | 0.1  | -1.05  | 0.4223   | 0.386881 | 0.71345  | 0.621935 |
| Mmu.6446.1.S1_at        | Mmu.6446.1      | 10.87 | 11.03 | 0.11 | 0.08 | -1.11  | 0.137686 | 0.017517 | 0.504937 | 0.167516 |
| Mmu.6446.1.S1_x_at      | Mmu.6446.1      | 10.81 | 11    | 0.15 | 0.09 | -1.14  | 0.234714 | 0.049223 | 0.588818 | 0.266697 |
| Mmu.6455.1.S1_at        | Mmu.6455.1      | 6.57  | 6.63  | 0.23 | 0.56 | -1.04  | 0.517191 | 0.480815 | 0.76864  | 0.686    |
| Mmu.6457.1.A1_at        | Mmu.6457.1      | 7.7   | 7.71  | 0.21 | 0.45 | -1     | 0.900822 | 0.382684 | 0.960386 | 0.618843 |
| Mmu.6457.1.S1_at        | Mmu.6457.1      | 7.67  | 7.83  | 0.13 | 0.35 | -1.12  | 0.480655 | 0.444836 | 0.748536 | 0.662072 |
| Mmu.6469.1.S1_at        | Mmu.6469.1      | 5.87  | 5.38  | 1.13 | 1.05 | 1.41   | 0.442089 | 0.575667 | 0.725371 | 0.746703 |
| Mmu.6470.1.S1_at        | Mmu.6470.1      | 6.7   | 12.67 | 3.18 | 4    | -62.58 | 0.471417 | 0.260422 | 0.743126 | 0.526995 |
| Mmu.6471.1.S1_at        | Mmu.6471.1      | 8.4   | 7.5   | 1.04 | 0.94 | 1.87   | 0.574823 | 0.494789 | 0.801864 | 0.695092 |
| Mmu.6471.1.S1_x_at      | Mmu.6471.1      | 8.85  | 8.42  | 1.3  | 1.11 | 1.35   | 0.740061 | 0.585451 | 0.88842  | 0.752852 |
| Mmu.6481.1.S1_at        | Mmu.6481.1      | 3.87  | 3.99  | 0.17 | 0.24 | -1.09  | 0.585989 | 0.455023 | 0.807817 | 0.66903  |
| MmugDNA.22710.1.S1_at   | MmugDNA.22710.1 | 5.61  | 5.74  | 0.06 | 0.03 | -1.1   | 0.014147 | 0.042089 | 0.251402 | 0.249638 |
| MmugDNA.22710.1.S1_s_at | MmugDNA.22710.1 | 8.64  | 8.13  | 0.16 | 0.24 | 1.42   | 0.04805  | 0.045591 | 0.367582 | 0.257674 |
| Mmu.6504.1.S1_at        | Mmu.6504.1      | 10.47 | 10.78 | 0.19 | 0.2  | -1.24  | 0.05454  | 0.064009 | 0.381851 | 0.299139 |

|                        |                |       |       |      |      |        |          |          |          |          |
|------------------------|----------------|-------|-------|------|------|--------|----------|----------|----------|----------|
| Mmu.6513.1.S1_at       | Mmu.6513.1     | 8.3   | 7.23  | 0.17 | 0.52 | 2.09   | 0.052737 | 0.017629 | 0.378449 | 0.167839 |
| Mmu.6514.1.S1_at       | Mmu.6514.1     | 8.38  | 8.3   | 0.32 | 0.06 | 1.06   | 0.494984 | 0.230511 | 0.756991 | 0.502251 |
| Mmu.6522.1.S1_at       | Mmu.6522.1     | 9.74  | 10.12 | 0.17 | 0.15 | -1.3   | 0.197443 | 0.045498 | 0.560419 | 0.2575   |
| Mmu.6550.1.S1_at       | Mmu.6550.1     | 3.19  | 3.2   | 0.19 | 0    | -1     | 0.942426 | 0.990812 | 0.977977 | 0.99482  |
| Mmu.6551.1.S1_at       | Mmu.6551.1     | 10.86 | 10.64 | 0.2  | 0.33 | 1.17   | 0.214734 | 0.263969 | 0.575346 | 0.530153 |
| Mmu.6554.1.S1_at       | Mmu.6554.1     | 10.94 | 11.09 | 0.03 | 0.16 | -1.11  | 0.070087 | 0.152211 | 0.413521 | 0.427012 |
| Mmu.6556.1.S1_at       | Mmu.6556.1     | 7.62  | 10.15 | 0.92 | 1.72 | -5.78  | 0.182505 | 0.11963  | 0.546767 | 0.388275 |
| Mmu.6559.1.S1_s_at     | Mmu.6559.1     | 9.46  | 11.62 | 1.6  | 0.68 | -4.47  | 0.06985  | 0.06523  | 0.412907 | 0.301239 |
| Mmu.656.1.S1_at        | Mmu.656.1      | 10.18 | 10.55 | 0.14 | 0.08 | -1.29  | 0.035668 | 0.019431 | 0.3373   | 0.175133 |
| Mmu.6573.1.S1_at       | Mmu.6573.1     | 8.93  | 9.87  | 0.07 | 0.16 | -1.92  | 0.000739 | 0.000211 | 0.136818 | 0.032262 |
| Mmu.6593.2.S1_x_at     | Mmu.6593.2     | 6.13  | 6.39  | 0.08 | 0.37 | -1.19  | 0.997412 | 0.863724 | 0.998942 | 0.922638 |
| Mmu.6609.1.S1_at       | Mmu.6609.1     | 5.77  | 5.71  | 0.9  | 0.63 | 1.04   | 0.794581 | 0.113027 | 0.914727 | 0.378888 |
| Mmu.6623.1.S1_at       | Mmu.6623.1     | 6.6   | 6.71  | 0.1  | 0.46 | -1.09  | 0.228756 | 0.233898 | 0.586121 | 0.505169 |
| MmugDNA.1902.1.S1_s_at | MmugDNA.1902.1 | 12.94 | 13.08 | 0.12 | 0.03 | -1.11  | 0.062657 | 0.054979 | 0.398794 | 0.279898 |
| Mmu.6637.1.S1_at       | Mmu.6637.1     | 3.27  | 3.31  | 0.11 | 0.14 | -1.03  | 0.617287 | 0.34913  | 0.824662 | 0.593178 |
| Mmu.6642.1.S1_at       | Mmu.6642.1     | 5.6   | 5.3   | 0.31 | 0.09 | 1.23   | 0.189363 | 0.082575 | 0.552479 | 0.331761 |
| Mmu.6646.1.S1_at       | Mmu.6646.1     | 8.07  | 8.3   | 0.26 | 0.33 | -1.17  | 0.763908 | 0.13921  | 0.900502 | 0.412358 |
| Mmu.666.1.S1_at        | Mmu.666.1      | 4.18  | 5.36  | 0.2  | 0.32 | -2.27  | 0.009876 | 0.002796 | 0.226668 | 0.077966 |
| Mmu.6678.1.S1_at       | Mmu.6678.1     | 6.86  | 9.77  | 0.27 | 2.39 | -7.51  | 0.142118 | 0.07169  | 0.509437 | 0.313904 |
| Mmu.6678.1.S1_x_at     | Mmu.6678.1     | 8.7   | 10.67 | 0.21 | 1.26 | -3.9   | 0.073652 | 0.039713 | 0.419075 | 0.244271 |
| Mmu.6687.1.S1_at       | Mmu.6687.1     | 12.78 | 13.12 | 0.06 | 0.1  | -1.27  | 0.010297 | 0.005676 | 0.228805 | 0.103959 |
| Mmu.6716.1.S1_at       | Mmu.6716.1     | 9.09  | 13.31 | 1.5  | 2.39 | -18.61 | 0.224006 | 0.159202 | 0.582464 | 0.435217 |
| Mmu.6730.1.S1_at       | Mmu.6730.1     | 7.54  | 11.56 | 2    | 3.6  | -16.25 | 0.50906  | 0.193342 | 0.764172 | 0.46866  |
| Mmu.6738.1.S1_at       | Mmu.6738.1     | 8.66  | 9.58  | 0.19 | 0.75 | -1.89  | 0.063667 | 0.030322 | 0.401303 | 0.216032 |
| Mmu.6738.1.S1_s_at     | Mmu.6738.1     | 8.68  | 9.41  | 0.19 | 0.71 | -1.66  | 0.073218 | 0.034132 | 0.418452 | 0.228692 |
| Mmu.6739.1.S1_at       | Mmu.6739.1     | 5.28  | 5.76  | 0.07 | 0.5  | -1.39  | 0.546178 | 0.740369 | 0.785337 | 0.849623 |
| Mmu.6744.2.S1_at       | Mmu.6744.2     | 12.68 | 12.57 | 0.13 | 0.15 | 1.07   | 0.168692 | 0.094536 | 0.532986 | 0.351296 |
| Mmu.6763.1.S1_at       | Mmu.6763.1     | 8.57  | 9     | 0.37 | 1.29 | -1.35  | 0.642729 | 0.673055 | 0.838858 | 0.808955 |
| Mmu.6769.1.S1_at       | Mmu.6769.1     | 3.25  | 3.01  | 0.09 | 0.11 | 1.18   | 0.080112 | 0.042885 | 0.430315 | 0.251731 |
| Mmu.6773.1.S1_at       | Mmu.6773.1     | 7.94  | 7.89  | 0.24 | 0.3  | 1.03   | 0.302348 | 0.270865 | 0.63692  | 0.536026 |
| Mmu.6776.1.A1_at       | Mmu.6776.1     | 6.78  | 7.45  | 0.28 | 0.21 | -1.59  | 0.017623 | 0.010236 | 0.267454 | 0.1326   |
| Mmu.6776.1.S1_at       | Mmu.6776.1     | 5.62  | 6.77  | 0.45 | 0.23 | -2.22  | 0.020956 | 0.018077 | 0.28167  | 0.169379 |
| Mmu.6784.1.S1_at       | Mmu.6784.1     | 9.97  | 9.53  | 0.09 | 0.23 | 1.35   | 0.103385 | 0.05815  | 0.462888 | 0.287812 |
| Mmu.6788.1.S1_at       | Mmu.6788.1     | 12    | 12.21 | 0.21 | 0.19 | -1.16  | 0.436808 | 0.432014 | 0.722049 | 0.652738 |
| Mmu.6796.1.S1_at       | Mmu.6796.1     | 6.21  | 6.14  | 0.33 | 0.1  | 1.05   | 0.894394 | 0.976842 | 0.957917 | 0.987413 |
| Mmu.6800.1.S1_at       | Mmu.6800.1     | 11.91 | 11.92 | 0.2  | 0.19 | -1.01  | 0.818761 | 0.110375 | 0.926451 | 0.374541 |
| Mmu.6832.1.S1_at       | Mmu.6832.1     | 12.77 | 12.34 | 0.09 | 0.31 | 1.35   | 0.036838 | 0.023285 | 0.34044  | 0.191274 |
| Mmu.6835.1.S1_at       | Mmu.6835.1     | 5.35  | 5.6   | 0.08 | 0.04 | -1.19  | 0.009918 | 0.041485 | 0.226899 | 0.24854  |
| Mmu.6867.1.A1_at       | Mmu.6867.1     | 12.01 | 14.05 | 1.91 | 0.07 | -4.1   | 0.174901 | 0.129816 | 0.538538 | 0.40147  |
| Mmu.6867.2.S1_at       | Mmu.6867.2     | 2.99  | 3     | 0.1  | 0.05 | -1.01  | 0.552272 | 0.31956  | 0.789376 | 0.571875 |
| Mmu.6867.3.S1_s_at     | Mmu.6867.3     | 14.15 | 14.33 | 0.23 | 0.05 | -1.14  | 0.35988  | 0.207858 | 0.674027 | 0.482049 |



|                       |                 |       |       |      |      |       |          |          |          |          |
|-----------------------|-----------------|-------|-------|------|------|-------|----------|----------|----------|----------|
| Mmu.6887.1.S1_at      | Mmu.6887.1      | 11.26 | 11.62 | 0.12 | 0.33 | -1.29 | 0.171721 | 0.219801 | 0.535284 | 0.493388 |
| Mmu.6892.1.S1_at      | Mmu.6892.1      | 5.89  | 6.18  | 0.19 | 0.52 | -1.23 | 0.149199 | 0.172836 | 0.514001 | 0.449424 |
| Mmu.6898.1.S1_at      | Mmu.6898.1      | 4.15  | 4.39  | 0.15 | 0.12 | -1.18 | 0.039002 | 0.022143 | 0.346181 | 0.186249 |
| Mmu.6922.1.A1_at      | Mmu.6922.1      | 6.52  | 6.53  | 0.1  | 0.1  | -1.01 | 0.294845 | 0.347914 | 0.631442 | 0.592196 |
| Mmu.6922.1.S1_at      | Mmu.6922.1      | 3.64  | 3.97  | 0.04 | 0.22 | -1.26 | 0.071616 | 0.142556 | 0.415587 | 0.416206 |
| Mmu.6936.1.S1_at      | Mmu.6936.1      | 4.72  | 5.07  | 0.14 | 0.07 | -1.28 | 0.039659 | 0.007832 | 0.347812 | 0.117929 |
| Mmu.6961.1.S1_at      | Mmu.6961.1      | 9.35  | 8.87  | 0.13 | 0.43 | 1.4   | 0.411605 | 0.518881 | 0.707473 | 0.710789 |
| Mmu.6961.1.S1_s_at    | Mmu.6961.1      | 9.03  | 8.7   | 0.14 | 0.46 | 1.26  | 0.593521 | 0.530576 | 0.811496 | 0.718042 |
| Mmu.6977.1.S1_at      | Mmu.6977.1      | 7.87  | 7.17  | 0.24 | 0.08 | 1.62  | 0.021678 | 0.012731 | 0.283263 | 0.145429 |
| Mmu.6979.1.S1_at      | Mmu.6979.1      | 10.85 | 10.86 | 0.19 | 0.19 | -1.01 | 0.641113 | 0.000597 | 0.838009 | 0.041941 |
| Mmu.6994.1.S1_at      | Mmu.6994.1      | 8.74  | 8.52  | 0.25 | 0.61 | 1.17  | 0.687515 | 0.173178 | 0.860493 | 0.44977  |
| Mmu.7027.1.S1_at      | Mmu.7027.1      | 10.97 | 11.04 | 0.09 | 0.17 | -1.05 | 0.133066 | 0.010352 | 0.499412 | 0.133191 |
| Mmu.7028.1.S1_at      | Mmu.7028.1      | 12.92 | 12.88 | 0.03 | 0.15 | 1.02  | 0.644289 | 0.697405 | 0.839719 | 0.824183 |
| Mmu.7032.1.S1_s_at    | Mmu.7032.1      | 13.78 | 13.7  | 0.07 | 0.08 | 1.06  | 0.061285 | 0.006982 | 0.395362 | 0.112771 |
| Mmu.7046.1.S1_at      | Mmu.7046.1      | 4.55  | 6.23  | 0.59 | 0.17 | -3.2  | 0.012344 | 0.007    | 0.240921 | 0.112958 |
| Mmu.7053.1.S1_at      | Mmu.7053.1      | 8.14  | 8.58  | 1.01 | 0.89 | -1.36 | 0.662116 | 0.309955 | 0.848422 | 0.565222 |
| Mmu.7057.1.S1_at      | Mmu.7057.1      | 8.41  | 9.03  | 0.61 | 0.15 | -1.53 | 0.187726 | 0.134446 | 0.550758 | 0.406605 |
| Mmu.7075.1.S1_at      | Mmu.7075.1      | 4.76  | 4.59  | 0.17 | 0.07 | 1.13  | 0.526808 | 0.264719 | 0.774374 | 0.530753 |
| Mmu.7075.1.S2_s_at    | Mmu.7075.1      | 2.83  | 2.85  | 0.08 | 0.14 | -1.01 | 0.942182 | 0.248276 | 0.977916 | 0.517596 |
| Mmu.7078.1.S1_s_at    | Mmu.7078.1      | 13.5  | 13.52 | 0.11 | 0.13 | -1.01 | 0.930836 | 0.565153 | 0.973349 | 0.739748 |
| Mmu.7081.1.S1_at      | Mmu.7081.1      | 10.97 | 11.22 | 0.07 | 0.47 | -1.19 | 0.401868 | 0.166283 | 0.7011   | 0.442825 |
| Mmu.7083.1.S1_at      | Mmu.7083.1      | 6.93  | 7.36  | 0.49 | 1.71 | -1.35 | 0.891125 | 0.404821 | 0.956554 | 0.63333  |
| Mmu.7088.1.S1_at      | Mmu.7088.1      | 10.02 | 9.82  | 0.18 | 0.23 | 1.15  | 0.116199 | 0.107181 | 0.479802 | 0.36989  |
| Mmu.7098.1.S1_at      | Mmu.7098.1      | 5.37  | 5.56  | 0.23 | 0.27 | -1.14 | 0.167145 | 0.267687 | 0.531295 | 0.533467 |
| Mmu.7120.1.S1_at      | Mmu.7120.1      | 10.1  | 10    | 0.3  | 0.29 | 1.07  | 0.808721 | 0.649477 | 0.922032 | 0.794911 |
| Mmu.7135.1.S1_at      | Mmu.7135.1      | 9.77  | 9.09  | 0.16 | 0.22 | 1.6   | 0.008915 | 0.002975 | 0.221598 | 0.079958 |
| Mmu.7150.1.S1_at      | Mmu.7150.1      | 12.52 | 12.51 | 0.1  | 0.11 | 1.01  | 0.511829 | 0.001094 | 0.765318 | 0.052283 |
| Mmu.7164.1.S1_at      | Mmu.7164.1      | 10.76 | 10.49 | 0.23 | 0.25 | 1.21  | 0.60893  | 0.029495 | 0.820226 | 0.213423 |
| Mmu.7173.1.S1_at      | Mmu.7173.1      | 3.74  | 4.24  | 0.14 | 0.25 | -1.41 | 0.054904 | 0.038532 | 0.382765 | 0.241292 |
| Mmu.7179.1.S1_at      | Mmu.7179.1      | 7.54  | 7.84  | 0.21 | 0.12 | -1.23 | 0.178228 | 0.153669 | 0.542493 | 0.428413 |
| Mmu.7190.1.A1_at      | Mmu.7190.1      | 9.68  | 10.87 | 0.15 | 0.35 | -2.27 | 0.005833 | 0.003318 | 0.193198 | 0.082861 |
| Mmu.7191.1.S1_at      | Mmu.7191.1      | 7.68  | 7.63  | 0.39 | 0.57 | 1.03  | 0.573186 | 0.315002 | 0.801055 | 0.568759 |
| Mmu.7193.1.S1_at      | Mmu.7193.1      | 3.59  | 3.43  | 0.26 | 0.26 | 1.12  | 0.95624  | 0.770794 | 0.983483 | 0.866807 |
| Mmu.7205.1.A1_at      | Mmu.7205.1      | 6.42  | 5.99  | 0.39 | 0.39 | 1.35  | 0.069339 | 0.060154 | 0.411959 | 0.291882 |
| Mmu.7207.1.S1_at      | Mmu.7207.1      | 10.43 | 10.52 | 0.46 | 0.13 | -1.06 | 0.595276 | 0.040575 | 0.81235  | 0.246296 |
| Mmu.7208.1.S1_at      | Mmu.7208.1      | 10.69 | 10.81 | 0.06 | 0.18 | -1.09 | 0.143995 | 0.038426 | 0.510652 | 0.240918 |
| Mmu.722.1.S1_at       | Mmu.722.1       | 3.13  | 3.08  | 0.04 | 0.24 | 1.03  | 0.650728 | 0.833674 | 0.842847 | 0.90462  |
| Mmu.7225.1.S1_at      | Mmu.7225.1      | 10.42 | 10.87 | 0.07 | 0.16 | -1.36 | 0.006086 | 0.001776 | 0.195337 | 0.0634   |
| Mmu.7236.1.S1_at      | Mmu.7236.1      | 6.01  | 6.97  | 0.57 | 0.79 | -1.93 | 0.319806 | 0.250116 | 0.649178 | 0.519168 |
| Mmu.7236.1.S1_s_at    | Mmu.7236.1      | 11.46 | 12.4  | 0.49 | 0.8  | -1.93 | 0.151069 | 0.097681 | 0.51581  | 0.355554 |
| MmugDNA.14187.1.S1_at | MmugDNA.14187.1 | 5.34  | 5.46  | 0.17 | 0.27 | -1.09 | 0.959122 | 0.460045 | 0.984486 | 0.671989 |

|                         |                 |       |       |      |      |        |          |          |          |          |
|-------------------------|-----------------|-------|-------|------|------|--------|----------|----------|----------|----------|
| MmugDNA.14187.1.S1_s_at | MmugDNA.14187.1 | 13.07 | 13.06 | 0.25 | 0.35 | 1.01   | 0.564232 | 0.727454 | 0.796457 | 0.842336 |
| Mmu.7267.1.S1_at        | Mmu.7267.1      | 8.15  | 7.68  | 0.48 | 1.76 | 1.38   | 0.632366 | 0.480743 | 0.833214 | 0.686    |
| Mmu.7278.1.A1_at        | Mmu.7278.1      | 5.67  | 5.94  | 0.2  | 0.13 | -1.2   | 0.156472 | 0.16614  | 0.521229 | 0.442694 |
| Mmu.7278.1.S1_at        | Mmu.7278.1      | 5.13  | 5.35  | 0.29 | 0.14 | -1.17  | 0.39406  | 0.49184  | 0.695652 | 0.693275 |
| Mmu.7280.1.S1_at        | Mmu.7280.1      | 9.96  | 10.25 | 0.12 | 0.12 | -1.23  | 0.078099 | 0.008233 | 0.4282   | 0.120504 |
| Mmu.7281.1.S1_s_at      | Mmu.7281.1      | 9.79  | 10.14 | 0.42 | 0.26 | -1.27  | 0.269443 | 0.320457 | 0.614156 | 0.572648 |
| Mmu.7287.1.S1_at        | Mmu.7287.1      | 6.22  | 7.74  | 0.61 | 1.11 | -2.88  | 0.113941 | 0.132225 | 0.47735  | 0.404274 |
| Mmu.729.1.S1_at         | Mmu.729.1       | 4.79  | 4.98  | 0.04 | 0.17 | -1.14  | 0.126305 | 0.104307 | 0.492593 | 0.365518 |
| Mmu.7319.1.S1_at        | Mmu.7319.1      | 10.39 | 10.51 | 0.14 | 0.39 | -1.08  | 0.219292 | 0.240826 | 0.57872  | 0.511521 |
| Mmu.7346.1.S1_at        | Mmu.7346.1      | 4.93  | 5.38  | 0.11 | 0.18 | -1.36  | 0.054715 | 0.115105 | 0.382151 | 0.381985 |
| Mmu.7348.2.S1_a_at      | Mmu.7348.2      | 11.31 | 10.98 | 0.42 | 0.52 | 1.26   | 0.848888 | 0.682272 | 0.939232 | 0.814486 |
| Mmu.7348.2.S1_at        | Mmu.7348.2      | 11.45 | 11.02 | 0.56 | 0.59 | 1.34   | 0.819594 | 0.809277 | 0.926561 | 0.890102 |
| Mmu.737.1.S1_s_at       | Mmu.737.1       | 13.51 | 13.56 | 0.06 | 0.06 | -1.04  | 0.737253 | 0.691247 | 0.887042 | 0.820338 |
| Mmu.7379.1.A1_at        | Mmu.7379.1      | 6.32  | 6.37  | 0.06 | 0.07 | -1.04  | 0.772682 | 0.61912  | 0.904334 | 0.774377 |
| Mmu.7380.1.S1_at        | Mmu.7380.1      | 8.03  | 8.24  | 0.12 | 0.28 | -1.16  | 0.229458 | 0.35226  | 0.586579 | 0.595568 |
| Mmu.7385.1.S1_at        | Mmu.7385.1      | 12.66 | 12.69 | 0.05 | 0.15 | -1.02  | 0.8656   | 0.047081 | 0.946163 | 0.261469 |
| Mmu.7390.1.S1_at        | Mmu.7390.1      | 9.21  | 8.95  | 0.13 | 0.08 | 1.2    | 0.060087 | 0.138449 | 0.393081 | 0.411392 |
| Mmu.7394.1.A1_at        | Mmu.7394.1      | 8.05  | 9.99  | 0.53 | 0.39 | -3.84  | 0.011732 | 0.00564  | 0.237595 | 0.103751 |
| Mmu.7399.1.S1_at        | Mmu.7399.1      | 13.55 | 13.45 | 0.08 | 0.03 | 1.07   | 0.28778  | 0.161094 | 0.626223 | 0.437279 |
| Mmu.7434.1.S1_at        | Mmu.7434.1      | 9.28  | 9.45  | 0.12 | 0.32 | -1.12  | 0.584695 | 0.528085 | 0.807089 | 0.716432 |
| Mmu.7445.1.S1_at        | Mmu.7445.1      | 13.62 | 13.79 | 0.13 | 0.17 | -1.12  | 0.572298 | 0.715953 | 0.800678 | 0.835339 |
| MmugDNA.5580.1.S1_at    | MmugDNA.5580.1  | 13.52 | 13.52 | 0.03 | 0.19 | -1     | 0.920235 | 0.35651  | 0.968895 | 0.598459 |
| MmugDNA.5580.1.S1_s_at  | MmugDNA.5580.1  | 13.29 | 13.47 | 0.15 | 0.17 | -1.14  | 0.519333 | 0.564759 | 0.770156 | 0.739427 |
| Mmu.7448.1.S1_at        | Mmu.7448.1      | 12.88 | 12.54 | 0.08 | 0.54 | 1.27   | 0.314002 | 0.308109 | 0.645488 | 0.564219 |
| Mmu.7453.1.S1_at        | Mmu.7453.1      | 10.4  | 10.68 | 0.08 | 0.23 | -1.21  | 0.118257 | 0.083874 | 0.482489 | 0.334771 |
| Mmu.7454.1.S1_at        | Mmu.7454.1      | 9.45  | 9.18  | 0.16 | 0.09 | 1.21   | 0.016736 | 0.012325 | 0.265215 | 0.143659 |
| Mmu.7458.1.S1_at        | Mmu.7458.1      | 12.16 | 12.24 | 0.07 | 0.13 | -1.06  | 0.626103 | 0.826503 | 0.829387 | 0.90035  |
| Mmu.7460.1.S1_x_at      | Mmu.7460.1      | 6.58  | 11.09 | 2.02 | 3.8  | -22.74 | 0.410696 | 0.512152 | 0.706555 | 0.706087 |
| Mmu.7460.10.S1_x_at     | Mmu.7460.10     | 4.8   | 5.41  | 0.15 | 0.36 | -1.52  | 0.078836 | 0.041352 | 0.428609 | 0.247995 |
| Mmu.7460.12.S1_at       | Mmu.7460.12     | 4.77  | 5.2   | 0.17 | 0.33 | -1.35  | 0.148053 | 0.117094 | 0.513451 | 0.384548 |
| Mmu.7460.12.S1_x_at     | Mmu.7460.12     | 4.06  | 4.73  | 0.16 | 0.64 | -1.59  | 0.11014  | 0.078987 | 0.471802 | 0.325995 |
| Mmu.7460.14.S1_s_at     | Mmu.7460.14     | 6.41  | 10.35 | 2.12 | 3.63 | -15.39 | 0.434413 | 0.524654 | 0.720416 | 0.714472 |
| Mmu.7460.14.S1_x_at     | Mmu.7460.14     | 6.78  | 9.41  | 0.86 | 2.23 | -6.21  | 0.248227 | 0.32485  | 0.599152 | 0.575375 |
| Mmu.7460.15.S1_x_at     | Mmu.7460.15     | 4.41  | 6.19  | 0.06 | 1.51 | -3.43  | 0.119438 | 0.092072 | 0.484134 | 0.34762  |
| Mmu.7460.17.S1_s_at     | Mmu.7460.17     | 2.86  | 2.87  | 0.1  | 0.05 | -1     | 0.968295 | 0.338415 | 0.988076 | 0.585432 |
| Mmu.7460.17.S1_x_at     | Mmu.7460.17     | 3.56  | 3.73  | 0.11 | 0.26 | -1.12  | 0.165421 | 0.161933 | 0.529362 | 0.438029 |
| Mmu.7460.18.S1_x_at     | Mmu.7460.18     | 4.21  | 4.22  | 0.09 | 0.12 | -1.01  | 0.791102 | 0.193412 | 0.913239 | 0.468711 |
| Mmu.7460.4.S1_a_at      | Mmu.7460.4      | 2.89  | 2.99  | 0.16 | 0.2  | -1.07  | 0.260529 | 0.333633 | 0.607303 | 0.581808 |
| Mmu.7460.4.S1_x_at      | Mmu.7460.4      | 3.26  | 3.94  | 0.15 | 0.8  | -1.61  | 0.129397 | 0.126349 | 0.495588 | 0.396852 |
| Mmu.7460.6.S1_x_at      | Mmu.7460.6      | 3.92  | 6.03  | 0.11 | 1.39 | -4.32  | 0.089222 | 0.067358 | 0.44489  | 0.305525 |
| Mmu.7460.7.S1_x_at      | Mmu.7460.7      | 4.14  | 6.08  | 0.21 | 1.56 | -3.83  | 0.139609 | 0.094948 | 0.507122 | 0.352054 |

|                    |            |       |       |      |      |       |          |          |          |          |
|--------------------|------------|-------|-------|------|------|-------|----------|----------|----------|----------|
| Mmu.7469.1.S1_at   | Mmu.7469.1 | 13.26 | 13.4  | 0.05 | 0.16 | -1.1  | 0.216271 | 0.217361 | 0.575963 | 0.490978 |
| Mmu.7474.1.S1_at   | Mmu.7474.1 | 12.22 | 12.28 | 0.1  | 0.22 | -1.04 | 0.729191 | 0.270728 | 0.882443 | 0.53602  |
| Mmu.7474.1.S1_x_at | Mmu.7474.1 | 11.99 | 12.09 | 0.09 | 0.27 | -1.07 | 0.455586 | 0.218888 | 0.733847 | 0.492656 |
| Mmu.7476.1.S1_s_at | Mmu.7476.1 | 14.56 | 14.54 | 0.08 | 0.09 | 1.01  | 0.737771 | 0.523398 | 0.887343 | 0.713713 |
| Mmu.7481.1.A1_at   | Mmu.7481.1 | 8.99  | 8.74  | 0.09 | 0.47 | 1.19  | 0.381321 | 0.551402 | 0.68784  | 0.730925 |
| Mmu.749.1.S1_at    | Mmu.749.1  | 10.81 | 10.72 | 0.09 | 0.29 | 1.06  | 0.506653 | 0.371602 | 0.762432 | 0.610389 |
| Mmu.7507.2.S1_at   | Mmu.7507.2 | 11.27 | 11.45 | 0.31 | 0.52 | -1.13 | 0.793788 | 0.063319 | 0.914508 | 0.298315 |
| Mmu.7520.1.S1_x_at | Mmu.7520.1 | 5.7   | 5.16  | 0.44 | 0.15 | 1.45  | 0.485835 | 0.335744 | 0.751144 | 0.583489 |
| Mmu.7528.1.S1_at   | Mmu.7528.1 | 9.88  | 9.76  | 0.03 | 0.3  | 1.08  | 0.499621 | 0.529345 | 0.759272 | 0.717257 |
| Mmu.7531.1.S1_at   | Mmu.7531.1 | 8.12  | 7.56  | 0.72 | 0.15 | 1.48  | 0.194311 | 0.146336 | 0.557805 | 0.420368 |
| Mmu.7535.1.S1_at   | Mmu.7535.1 | 5.06  | 5.13  | 0.09 | 0.08 | -1.05 | 0.153101 | 0.204103 | 0.517499 | 0.478418 |
| Mmu.7543.1.S1_at   | Mmu.7543.1 | 9.84  | 9.87  | 0.28 | 0.14 | -1.02 | 0.39709  | 0.570944 | 0.697506 | 0.743422 |
| Mmu.7546.1.S1_at   | Mmu.7546.1 | 9.03  | 8.84  | 0.08 | 0.36 | 1.14  | 0.210261 | 0.110404 | 0.571459 | 0.374614 |
| Mmu.7561.1.S1_at   | Mmu.7561.1 | 8.09  | 9.18  | 0.42 | 0.29 | -2.13 | 0.013206 | 0.00449  | 0.245924 | 0.093558 |
| Mmu.7599.1.S1_at   | Mmu.7599.1 | 10.82 | 9.9   | 0.3  | 0.39 | 1.88  | 0.04387  | 0.023658 | 0.357149 | 0.192574 |
| Mmu.7601.1.S1_at   | Mmu.7601.1 | 3.21  | 3.32  | 0.16 | 0.13 | -1.08 | 0.223771 | 0.484281 | 0.582123 | 0.688434 |
| Mmu.7605.1.S1_at   | Mmu.7605.1 | 12.86 | 12.37 | 0.18 | 0.09 | 1.41  | 0.008857 | 0.002477 | 0.221584 | 0.073576 |
| Mmu.7638.1.S1_at   | Mmu.7638.1 | 8.5   | 8.05  | 0.05 | 0.92 | 1.37  | 0.333457 | 0.345478 | 0.657597 | 0.590746 |
| Mmu.7639.1.S1_at   | Mmu.7639.1 | 10.68 | 10.88 | 0.15 | 0.37 | -1.15 | 0.151449 | 0.190396 | 0.516105 | 0.465906 |
| Mmu.7643.1.S1_at   | Mmu.7643.1 | 3.15  | 3.37  | 0.11 | 0.08 | -1.16 | 0.168221 | 0.236456 | 0.53256  | 0.507314 |
| Mmu.7649.1.S1_at   | Mmu.7649.1 | 4.93  | 5.8   | 0.35 | 0.64 | -1.83 | 0.109594 | 0.054617 | 0.470811 | 0.279211 |
| Mmu.7660.1.S1_at   | Mmu.7660.1 | 8.47  | 9.28  | 0.06 | 0.27 | -1.76 | 0.016115 | 0.010438 | 0.262742 | 0.133573 |
| Mmu.7663.1.S1_at   | Mmu.7663.1 | 10.08 | 10.69 | 0.1  | 0.24 | -1.52 | 0.011735 | 0.006089 | 0.237595 | 0.106327 |
| Mmu.7667.1.S1_at   | Mmu.7667.1 | 4.35  | 4.35  | 0.2  | 0.06 | -1    | 0.941289 | 0.529935 | 0.977671 | 0.71758  |
| Mmu.7673.1.S1_at   | Mmu.7673.1 | 11.24 | 11.29 | 0.27 | 0.43 | -1.04 | 0.733551 | 0.783341 | 0.885148 | 0.874571 |
| Mmu.7683.1.S1_at   | Mmu.7683.1 | 12.45 | 12.58 | 0.38 | 0.27 | -1.1  | 0.943419 | 0.729921 | 0.978516 | 0.843733 |
| Mmu.7710.1.S1_at   | Mmu.7710.1 | 8.33  | 9.3   | 0.1  | 0.18 | -1.96 | 0.001239 | 0.003255 | 0.145267 | 0.082277 |
| Mmu.7716.1.S1_at   | Mmu.7716.1 | 9.42  | 9.15  | 0.46 | 0.56 | 1.2   | 0.305918 | 0.35453  | 0.639227 | 0.59726  |
| Mmu.7717.1.S1_at   | Mmu.7717.1 | 9.03  | 9.34  | 0.15 | 0.14 | -1.24 | 0.143233 | 0.033582 | 0.510106 | 0.226848 |
| Mmu.7730.1.S1_at   | Mmu.7730.1 | 7.14  | 8.24  | 0.57 | 0.42 | -2.15 | 0.069014 | 0.055792 | 0.411078 | 0.282044 |
| Mmu.7746.1.S1_at   | Mmu.7746.1 | 9.11  | 9.49  | 0.22 | 0.32 | -1.3  | 0.105058 | 0.021232 | 0.4655   | 0.182449 |
| Mmu.7752.1.S1_at   | Mmu.7752.1 | 10.02 | 10.91 | 0.51 | 0.38 | -1.86 | 0.058783 | 0.049148 | 0.390921 | 0.266534 |
| Mmu.7758.1.S1_at   | Mmu.7758.1 | 12.07 | 12.1  | 0.04 | 0.07 | -1.02 | 0.651513 | 0.080349 | 0.843201 | 0.327965 |
| Mmu.7792.1.S1_at   | Mmu.7792.1 | 11.58 | 11.81 | 0.07 | 0.34 | -1.17 | 0.585993 | 0.570571 | 0.807817 | 0.743175 |
| Mmu.7801.1.S1_at   | Mmu.7801.1 | 11.1  | 11.02 | 0.35 | 0.41 | 1.06  | 0.243709 | 0.212969 | 0.595523 | 0.4869   |
| Mmu.7805.1.S1_at   | Mmu.7805.1 | 10.96 | 10.35 | 0.22 | 0.39 | 1.53  | 0.078901 | 0.045507 | 0.428609 | 0.2575   |
| Mmu.7831.2.S1_at   | Mmu.7831.2 | 8.86  | 9.05  | 0.11 | 0.09 | -1.14 | 0.105756 | 0.003012 | 0.466526 | 0.08009  |
| Mmu.7836.1.S1_at   | Mmu.7836.1 | 7.89  | 9.15  | 0.18 | 0.34 | -2.4  | 0.00603  | 0.003909 | 0.195046 | 0.088806 |
| Mmu.7836.1.S1_x_at | Mmu.7836.1 | 7.45  | 8.94  | 0.33 | 0.35 | -2.82 | 0.009655 | 0.006113 | 0.226235 | 0.10649  |
| Mmu.7841.1.S1_at   | Mmu.7841.1 | 6.42  | 6.58  | 0.22 | 0.16 | -1.12 | 0.428627 | 0.569413 | 0.717023 | 0.742382 |
| Mmu.7842.1.S1_at   | Mmu.7842.1 | 11.85 | 12.2  | 0.18 | 0.14 | -1.27 | 0.074577 | 0.083638 | 0.420533 | 0.334255 |

|                        |                |       |       |      |      |       |          |          |          |          |
|------------------------|----------------|-------|-------|------|------|-------|----------|----------|----------|----------|
| Mmu.7855.1.S1_at       | Mmu.7855.1     | 9.3   | 9.41  | 0.08 | 0.13 | -1.08 | 0.697498 | 0.121127 | 0.865682 | 0.390187 |
| Mmu.7856.1.S1_at       | Mmu.7856.1     | 6.78  | 6.94  | 0.13 | 0.25 | -1.12 | 0.236535 | 0.289963 | 0.590504 | 0.550984 |
| Mmu.7863.1.S1_at       | Mmu.7863.1     | 2.53  | 2.65  | 0.08 | 0.03 | -1.09 | 0.123808 | 0.341123 | 0.489539 | 0.587233 |
| Mmu.7865.1.S1_at       | Mmu.7865.1     | 5.48  | 5.85  | 0.19 | 0.67 | -1.29 | 0.372745 | 0.464776 | 0.683021 | 0.675419 |
| Mmu.7878.1.S1_at       | Mmu.7878.1     | 11.69 | 11.68 | 0.3  | 0.46 | 1.01  | 0.799023 | 0.751577 | 0.916813 | 0.855508 |
| Mmu.7883.1.S1_x_at     | Mmu.7883.1     | 14.68 | 14.68 | 0.02 | 0.01 | -1    | 0.330247 | 0.15094  | 0.655613 | 0.425525 |
| Mmu.7886.1.S1_at       | Mmu.7886.1     | 9.43  | 10.28 | 0.26 | 0.33 | -1.8  | 0.045184 | 0.031117 | 0.360276 | 0.218175 |
| Mmu.7889.1.S1_at       | Mmu.7889.1     | 4.66  | 4.65  | 0.11 | 0.15 | 1.01  | 0.569865 | 0.616099 | 0.79921  | 0.772461 |
| Mmu.789.1.S1_at        | Mmu.789.1      | 8.15  | 8.26  | 0.12 | 0.18 | -1.07 | 0.180154 | 0.167016 | 0.544371 | 0.443466 |
| Mmu.7914.1.S1_at       | Mmu.7914.1     | 8.14  | 7.71  | 0.14 | 0.47 | 1.35  | 0.46581  | 0.661884 | 0.740131 | 0.802004 |
| Mmu.792.1.S1_at        | Mmu.792.1      | 6.7   | 7.19  | 0.07 | 0.49 | -1.4  | 0.116547 | 0.135234 | 0.48034  | 0.407303 |
| Mmu.7922.1.S1_at       | Mmu.7922.1     | 4.03  | 4.11  | 0.07 | 0.13 | -1.06 | 0.639851 | 0.926743 | 0.837395 | 0.958404 |
| Mmu.7922.1.S1_x_at     | Mmu.7922.1     | 4.28  | 4.36  | 0.01 | 0.1  | -1.06 | 0.176236 | 0.093495 | 0.53985  | 0.349846 |
| Mmu.7935.1.S1_at       | Mmu.7935.1     | 10.41 | 10.57 | 0.25 | 0.49 | -1.12 | 0.596695 | 0.402539 | 0.813157 | 0.631481 |
| Mmu.7940.1.A1_at       | Mmu.7940.1     | 4.19  | 4.19  | 0.02 | 0.25 | 1     | 0.382309 | 0.618957 | 0.688612 | 0.774229 |
| Mmu.7944.1.S1_at       | Mmu.7944.1     | 9.95  | 10.4  | 0.28 | 0.17 | -1.36 | 0.122592 | 0.096158 | 0.487859 | 0.353432 |
| Mmu.7947.1.S1_at       | Mmu.7947.1     | 7.14  | 6.55  | 0.13 | 1.23 | 1.5   | 0.81694  | 0.878305 | 0.925797 | 0.93053  |
| Mmu.7958.1.S1_at       | Mmu.7958.1     | 8.89  | 9.14  | 0.56 | 0.44 | -1.19 | 0.601616 | 0.79878  | 0.816001 | 0.884072 |
| Mmu.7958.1.S1_s_at     | Mmu.7958.1     | 9.84  | 10.16 | 0.13 | 0.26 | -1.25 | 0.331462 | 0.49785  | 0.656405 | 0.697071 |
| Mmu.7978.1.S1_at       | Mmu.7978.1     | 3.31  | 3.43  | 0.05 | 0.13 | -1.08 | 0.178961 | 0.134227 | 0.543331 | 0.406456 |
| MmugDNA.7764.1.S1_at   | MmugDNA.7764.1 | 7.66  | 7.53  | 0.15 | 0.07 | 1.09  | 0.301204 | 0.016461 | 0.636299 | 0.162471 |
| MmugDNA.7764.1.S1_s_at | MmugDNA.7764.1 | 11.87 | 12.08 | 0.19 | 0.14 | -1.15 | 0.494389 | 0.005861 | 0.756771 | 0.104856 |
| Mmu.799.1.S1_at        | Mmu.799.1      | 12.48 | 12.5  | 0.22 | 0.37 | -1.01 | 0.805983 | 0.398524 | 0.920419 | 0.629458 |
| Mmu.800.1.S1_at        | Mmu.800.1      | 11.69 | 11.87 | 0.16 | 0.33 | -1.13 | 0.268519 | 0.351145 | 0.61324  | 0.594844 |
| Mmu.8008.1.S1_at       | Mmu.8008.1     | 9     | 9.43  | 0.22 | 0.24 | -1.34 | 0.078496 | 0.077226 | 0.4286   | 0.322852 |
| Mmu.8044.1.S1_at       | Mmu.8044.1     | 5.74  | 5.66  | 0.14 | 0.15 | 1.05  | 0.961855 | 0.316563 | 0.985387 | 0.569938 |
| Mmu.8046.1.S1_at       | Mmu.8046.1     | 6.75  | 7.06  | 0.14 | 0.59 | -1.25 | 0.388839 | 0.470449 | 0.692804 | 0.678756 |
| Mmu.8048.1.S1_at       | Mmu.8048.1     | 9.76  | 10.14 | 0.18 | 0.49 | -1.3  | 0.452898 | 0.522349 | 0.732217 | 0.713115 |
| Mmu.8051.1.S1_at       | Mmu.8051.1     | 10.25 | 11.2  | 0.25 | 0.54 | -1.93 | 0.175538 | 0.029014 | 0.539306 | 0.212267 |
| Mmu.8060.2.S1_at       | Mmu.8060.2     | 12.42 | 13.3  | 0.66 | 0.2  | -1.84 | 0.080837 | 0.059986 | 0.431352 | 0.291599 |
| Mmu.8061.1.S1_at       | Mmu.8061.1     | 10.8  | 12    | 0.91 | 0.28 | -2.29 | 0.081046 | 0.063981 | 0.431775 | 0.299066 |
| Mmu.8065.1.S1_at       | Mmu.8065.1     | 6.71  | 6.74  | 0.18 | 0.17 | -1.02 | 0.467037 | 0.521472 | 0.740527 | 0.71247  |
| Mmu.8073.1.S1_at       | Mmu.8073.1     | 8.9   | 8.1   | 0.22 | 0.29 | 1.74  | 0.07106  | 0.098122 | 0.414673 | 0.356218 |
| Mmu.8078.2.S1_at       | Mmu.8078.2     | 12.46 | 12.38 | 0.23 | 0.45 | 1.06  | 0.972329 | 0.992076 | 0.989473 | 0.995515 |
| Mmu.8081.1.S1_at       | Mmu.8081.1     | 12.38 | 12.22 | 0.49 | 0.66 | 1.12  | 0.321156 | 0.014056 | 0.649887 | 0.151841 |
| Mmu.8081.1.S1_x_at     | Mmu.8081.1     | 12.44 | 12.23 | 0.51 | 0.63 | 1.15  | 0.294985 | 0.014994 | 0.631503 | 0.155662 |
| Mmu.8084.1.S1_at       | Mmu.8084.1     | 4.94  | 4.42  | 0.28 | 0.54 | 1.43  | 0.104949 | 0.01657  | 0.465329 | 0.163004 |
| Mmu.8090.1.S1_at       | Mmu.8090.1     | 11.74 | 11.41 | 0.27 | 1.12 | 1.25  | 0.476925 | 0.648988 | 0.746355 | 0.794525 |
| MmuSTS.2072.1.S1_s_at  | MmuSTS.2072.1  | 12.14 | 11.88 | 0.21 | 1.15 | 1.2   | 0.496994 | 0.663143 | 0.757731 | 0.80284  |
| Mmu.8100.1.S1_at       | Mmu.8100.1     | 5.06  | 5.75  | 0.27 | 0.21 | -1.61 | 0.022042 | 0.013174 | 0.28446  | 0.14735  |
| Mmu.8117.1.S1_at       | Mmu.8117.1     | 6.16  | 6.34  | 0.12 | 0.18 | -1.13 | 0.085006 | 0.08144  | 0.438076 | 0.329632 |

|                    |            |       |       |      |      |       |          |          |          |          |
|--------------------|------------|-------|-------|------|------|-------|----------|----------|----------|----------|
| Mmu.8122.1.A1_at   | Mmu.8122.1 | 11.2  | 11.28 | 0.11 | 0.36 | -1.06 | 0.780599 | 0.276034 | 0.90855  | 0.540071 |
| Mmu.8122.1.S1_at   | Mmu.8122.1 | 11.21 | 11.24 | 0.17 | 0.34 | -1.03 | 0.902623 | 0.31667  | 0.961167 | 0.569995 |
| Mmu.8123.1.S1_at   | Mmu.8123.1 | 6.3   | 6.23  | 0.15 | 0.22 | 1.05  | 0.4758   | 0.262288 | 0.745964 | 0.528605 |
| Mmu.8137.1.S1_at   | Mmu.8137.1 | 6.88  | 6.87  | 0.21 | 0.45 | 1.01  | 0.589058 | 0.239108 | 0.809191 | 0.509827 |
| Mmu.8143.1.S1_at   | Mmu.8143.1 | 4.27  | 5.21  | 0.17 | 0.87 | -1.92 | 0.046196 | 0.019451 | 0.362604 | 0.175136 |
| Mmu.8145.1.S1_at   | Mmu.8145.1 | 9.48  | 8.25  | 0.38 | 0.36 | 2.36  | 0.025854 | 0.002789 | 0.300915 | 0.077966 |
| Mmu.8147.1.A1_at   | Mmu.8147.1 | 5.43  | 5.18  | 0.23 | 0.04 | 1.19  | 0.049711 | 0.029084 | 0.371923 | 0.212721 |
| Mmu.8149.1.S1_s_at | Mmu.8149.1 | 9.91  | 9.96  | 0.11 | 0.17 | -1.04 | 0.441126 | 0.470628 | 0.724743 | 0.67894  |
| Mmu.8156.1.S1_at   | Mmu.8156.1 | 8.72  | 8.81  | 0.22 | 0.69 | -1.06 | 0.611225 | 0.320131 | 0.821551 | 0.572472 |
| Mmu.8163.1.S1_at   | Mmu.8163.1 | 10    | 9.55  | 0.02 | 0.17 | 1.37  | 0.009933 | 0.001075 | 0.226899 | 0.051908 |
| Mmu.8192.1.S1_at   | Mmu.8192.1 | 6.94  | 7.14  | 0.28 | 0.5  | -1.15 | 0.388161 | 0.549572 | 0.692266 | 0.729956 |
| Mmu.8197.1.S1_at   | Mmu.8197.1 | 8.57  | 8.65  | 0.34 | 0.14 | -1.06 | 0.265724 | 0.365268 | 0.611346 | 0.605413 |
| Mmu.8209.1.S1_at   | Mmu.8209.1 | 10.08 | 10.1  | 0.26 | 0.34 | -1.02 | 0.520882 | 0.154369 | 0.771047 | 0.429245 |
| Mmu.8218.1.S1_at   | Mmu.8218.1 | 7.52  | 6.19  | 0.3  | 0.7  | 2.51  | 0.057486 | 0.046996 | 0.388505 | 0.261469 |
| Mmu.8222.1.S1_at   | Mmu.8222.1 | 11.95 | 11.96 | 0.29 | 0.71 | -1.01 | 0.342308 | 0.183374 | 0.663129 | 0.459553 |
| Mmu.8245.1.S1_at   | Mmu.8245.1 | 4.95  | 4.94  | 0.12 | 0.44 | 1.01  | 0.37229  | 0.484652 | 0.68274  | 0.688591 |
| Mmu.826.1.S1_at    | Mmu.826.1  | 8.11  | 8.45  | 0.13 | 0.34 | -1.26 | 0.52451  | 0.315252 | 0.773192 | 0.568939 |
| Mmu.8262.1.S1_at   | Mmu.8262.1 | 8.91  | 9.59  | 0.06 | 0.48 | -1.6  | 0.192175 | 0.16163  | 0.555276 | 0.437771 |
| Mmu.8265.1.S1_at   | Mmu.8265.1 | 9.91  | 10.43 | 0.02 | 0.25 | -1.44 | 0.024957 | 0.01394  | 0.297287 | 0.151391 |
| Mmu.8273.1.S1_at   | Mmu.8273.1 | 4.16  | 4.16  | 0.11 | 0.13 | 1     | 0.231367 | 0.570399 | 0.587372 | 0.743103 |
| Mmu.8277.1.S1_at   | Mmu.8277.1 | 8.45  | 7.8   | 0.3  | 0.11 | 1.57  | 0.059649 | 0.130803 | 0.39273  | 0.40299  |
| Mmu.8277.2.S1_at   | Mmu.8277.2 | 8.08  | 8     | 0.26 | 0.15 | 1.05  | 0.97298  | 0.867089 | 0.989561 | 0.924465 |
| Mmu.828.1.S1_at    | Mmu.828.1  | 8.44  | 8.46  | 0.28 | 0.22 | -1.01 | 0.690348 | 0.721717 | 0.862058 | 0.838808 |
| Mmu.8299.1.S1_at   | Mmu.8299.1 | 8.49  | 9.18  | 0.35 | 0.2  | -1.61 | 0.109891 | 0.122473 | 0.47102  | 0.392348 |
| Mmu.8299.1.S1_s_at | Mmu.8299.1 | 9.74  | 10    | 0.26 | 0.13 | -1.2  | 0.435364 | 0.37267  | 0.721218 | 0.611617 |
| Mmu.8323.1.S1_at   | Mmu.8323.1 | 8.81  | 8.31  | 0.44 | 0.38 | 1.42  | 0.501867 | 0.532001 | 0.760163 | 0.718995 |
| Mmu.8324.2.S1_at   | Mmu.8324.2 | 8.15  | 9.26  | 0.35 | 0.27 | -2.15 | 0.025258 | 0.018154 | 0.298384 | 0.169673 |
| Mmu.8324.2.S1_s_at | Mmu.8324.2 | 10.01 | 10.55 | 0.21 | 0.17 | -1.46 | 0.04578  | 0.051364 | 0.361816 | 0.272082 |
| Mmu.8335.1.S1_s_at | Mmu.8335.1 | 11.37 | 11.35 | 0.21 | 0.5  | 1.01  | 0.248171 | 0.285474 | 0.599121 | 0.547351 |
| Mmu.8339.1.S1_at   | Mmu.8339.1 | 3.05  | 3.06  | 0.14 | 0.22 | -1.01 | 0.39632  | 0.568231 | 0.696939 | 0.741866 |
| Mmu.8361.1.S1_at   | Mmu.8361.1 | 6.08  | 6.55  | 0.22 | 0.21 | -1.39 | 0.074005 | 0.088624 | 0.419667 | 0.342167 |
| Mmu.8365.1.S1_at   | Mmu.8365.1 | 12.49 | 12    | 0.13 | 0.24 | 1.4   | 0.03375  | 0.01396  | 0.330119 | 0.151509 |
| Mmu.8365.1.S1_s_at | Mmu.8365.1 | 12.37 | 11.94 | 0.09 | 0.23 | 1.35  | 0.038712 | 0.019556 | 0.345106 | 0.175563 |
| Mmu.8378.1.S1_at   | Mmu.8378.1 | 5     | 4.98  | 0.04 | 0.18 | 1.02  | 0.409167 | 0.550749 | 0.705781 | 0.730611 |
| Mmu.8380.1.S1_at   | Mmu.8380.1 | 3.27  | 3.36  | 0.06 | 0.03 | -1.06 | 0.092924 | 0.222978 | 0.450064 | 0.495821 |
| Mmu.8395.1.S1_at   | Mmu.8395.1 | 3.37  | 3.17  | 0.16 | 0.08 | 1.15  | 0.259468 | 0.260613 | 0.606562 | 0.527118 |
| Mmu.8402.1.S1_at   | Mmu.8402.1 | 11.16 | 10.98 | 0.16 | 0.06 | 1.13  | 0.38698  | 0.019624 | 0.691724 | 0.176044 |
| Mmu.8410.1.S1_at   | Mmu.8410.1 | 9.51  | 10.24 | 0.05 | 0.16 | -1.66 | 0.001789 | 0.000319 | 0.154452 | 0.035423 |
| Mmu.8428.1.S1_at   | Mmu.8428.1 | 9.72  | 9.28  | 0.31 | 0.5  | 1.36  | 0.307081 | 0.137042 | 0.639861 | 0.409836 |
| Mmu.8473.1.A1_at   | Mmu.8473.1 | 3.06  | 3.24  | 0.16 | 0.49 | -1.13 | 0.280845 | 0.388162 | 0.621889 | 0.622617 |
| Mmu.8473.1.S1_x_at | Mmu.8473.1 | 3.37  | 3.74  | 0.11 | 0.09 | -1.29 | 0.005776 | 0.00514  | 0.193003 | 0.099496 |

|                    |            |       |       |      |      |       |          |          |          |          |
|--------------------|------------|-------|-------|------|------|-------|----------|----------|----------|----------|
| Mmu.8487.1.S1_at   | Mmu.8487.1 | 11.21 | 11.18 | 0.05 | 0.06 | 1.02  | 0.979093 | 0.021948 | 0.992315 | 0.185352 |
| Mmu.849.1.S1_at    | Mmu.849.1  | 4.71  | 4.82  | 0.21 | 0.06 | -1.09 | 0.629716 | 0.487429 | 0.831685 | 0.690508 |
| Mmu.85.1.S1_at     | Mmu.85.1   | 5.72  | 5.91  | 0.06 | 0.04 | -1.14 | 0.023446 | 0.487935 | 0.291512 | 0.690787 |
| Mmu.8527.2.A1_at   | Mmu.8527.2 | 6.09  | 8.93  | 1.18 | 2.26 | -7.18 | 0.258578 | 0.155946 | 0.605793 | 0.431357 |
| Mmu.8527.2.A1_s_at | Mmu.8527.2 | 8.41  | 10.1  | 0.93 | 2.21 | -3.21 | 0.45442  | 0.339411 | 0.733188 | 0.586066 |
| Mmu.8548.1.S1_at   | Mmu.8548.1 | 8.9   | 9.38  | 0.18 | 0.41 | -1.39 | 0.110742 | 0.071383 | 0.472623 | 0.313478 |
| Mmu.8566.2.S1_at   | Mmu.8566.2 | 10.68 | 10.3  | 0.31 | 0.16 | 1.3   | 0.227296 | 0.289341 | 0.585089 | 0.550378 |
| Mmu.8574.2.S1_at   | Mmu.8574.2 | 8.29  | 8     | 0.5  | 0.25 | 1.22  | 0.291201 | 0.379515 | 0.628725 | 0.616433 |
| Mmu.8581.1.A1_at   | Mmu.8581.1 | 12.91 | 12.68 | 0.25 | 0.11 | 1.18  | 0.142429 | 0.119363 | 0.509648 | 0.387887 |
| Mmu.8587.1.S1_at   | Mmu.8587.1 | 11.41 | 11.47 | 0.12 | 0.26 | -1.04 | 0.430617 | 0.296515 | 0.718201 | 0.555528 |
| Mmu.8604.1.A1_at   | Mmu.8604.1 | 9.49  | 9.83  | 0.23 | 0.18 | -1.27 | 0.259559 | 0.329369 | 0.606665 | 0.578733 |
| Mmu.8608.1.S2_at   | Mmu.8608.1 | 6.4   | 7.08  | 0.3  | 0.72 | -1.61 | 0.190843 | 0.109277 | 0.553627 | 0.37308  |
| Mmu.8637.1.S1_at   | Mmu.8637.1 | 11.35 | 11.31 | 0.47 | 0.36 | 1.02  | 0.977909 | 0.006506 | 0.991716 | 0.109521 |
| Mmu.865.1.S1_at    | Mmu.865.1  | 6.26  | 6.45  | 0.35 | 0.35 | -1.14 | 0.392417 | 0.474399 | 0.694657 | 0.681423 |
| Mmu.8677.1.S1_at   | Mmu.8677.1 | 3.91  | 3.89  | 0.11 | 0.01 | 1.01  | 0.498527 | 0.128849 | 0.758473 | 0.400277 |
| Mmu.8707.1.S1_s_at | Mmu.8707.1 | 9.72  | 9.72  | 0.18 | 0.22 | -1    | 0.745969 | 0.059641 | 0.891243 | 0.290838 |
| Mmu.8713.1.S1_at   | Mmu.8713.1 | 7.47  | 8.23  | 0.28 | 0.06 | -1.7  | 0.010869 | 0.044759 | 0.232241 | 0.256009 |
| Mmu.8713.1.S1_s_at | Mmu.8713.1 | 9.22  | 10.01 | 0.28 | 0.07 | -1.72 | 0.014767 | 0.013191 | 0.255038 | 0.147352 |
| Mmu.8716.1.S1_at   | Mmu.8716.1 | 7.79  | 8.34  | 0.37 | 0.29 | -1.47 | 0.053654 | 0.044449 | 0.38074  | 0.25521  |
| Mmu.8731.1.S1_at   | Mmu.8731.1 | 11.04 | 11.27 | 0.29 | 0.09 | -1.17 | 0.242219 | 0.24407  | 0.594305 | 0.514116 |
| Mmu.8731.1.S1_x_at | Mmu.8731.1 | 11.19 | 11.46 | 0.26 | 0.05 | -1.21 | 0.180743 | 0.15208  | 0.545222 | 0.426827 |
| Mmu.8739.1.S1_at   | Mmu.8739.1 | 10.73 | 12.03 | 0.38 | 0.81 | -2.47 | 0.08997  | 0.061442 | 0.445437 | 0.294704 |
| Mmu.874.1.S1_at    | Mmu.874.1  | 7.12  | 6.22  | 0.45 | 0.51 | 1.87  | 0.174297 | 0.146598 | 0.537961 | 0.420619 |
| Mmu.8747.1.S1_at   | Mmu.8747.1 | 3.31  | 3.58  | 0.13 | 0.15 | -1.21 | 0.159168 | 0.005269 | 0.52416  | 0.100589 |
| Mmu.8757.1.S1_at   | Mmu.8757.1 | 9.82  | 9.52  | 0.13 | 0.27 | 1.23  | 0.483363 | 0.04202  | 0.749882 | 0.249463 |
| Mmu.8766.1.S1_at   | Mmu.8766.1 | 8.4   | 8.61  | 0.07 | 0.18 | -1.15 | 0.051481 | 0.111797 | 0.376072 | 0.376856 |
| Mmu.8769.1.S1_s_at | Mmu.8769.1 | 9.98  | 11.02 | 0.19 | 0.19 | -2.07 | 0.001384 | 0.000874 | 0.146228 | 0.047471 |
| Mmu.8777.1.S1_s_at | Mmu.8777.1 | 14.55 | 14.53 | 0.04 | 0.03 | 1.01  | 0.63873  | 0.204211 | 0.836715 | 0.478507 |
| Mmu.8778.1.S1_at   | Mmu.8778.1 | 2.63  | 2.64  | 0.17 | 0.18 | -1    | 0.858181 | 0.800646 | 0.942698 | 0.885317 |
| Mmu.8787.1.S1_at   | Mmu.8787.1 | 9.99  | 10.82 | 0.15 | 0.66 | -1.78 | 0.401673 | 0.328232 | 0.700992 | 0.577956 |
| Mmu.8794.2.S1_s_at | Mmu.8794.2 | 13.1  | 13.18 | 0.08 | 0.06 | -1.06 | 0.226439 | 0.044884 | 0.584429 | 0.256424 |
| Mmu.8798.1.S1_at   | Mmu.8798.1 | 10.56 | 10.04 | 0.05 | 0.54 | 1.43  | 0.24071  | 0.017233 | 0.593526 | 0.166331 |
| Mmu.8798.1.S1_s_at | Mmu.8798.1 | 11.07 | 10.49 | 0.21 | 0.52 | 1.49  | 0.233037 | 0.034184 | 0.587988 | 0.228728 |
| Mmu.8810.2.S1_at   | Mmu.8810.2 | 9.87  | 9.77  | 0.05 | 0.19 | 1.07  | 0.421939 | 0.088486 | 0.713215 | 0.341946 |
| Mmu.8849.1.S1_at   | Mmu.8849.1 | 10.98 | 11.48 | 0.22 | 0.03 | -1.41 | 0.014234 | 0.003569 | 0.251724 | 0.085525 |
| Mmu.8855.1.S1_at   | Mmu.8855.1 | 7.97  | 7.06  | 0.1  | 0.29 | 1.88  | 0.010587 | 0.003508 | 0.230522 | 0.08503  |
| Mmu.8859.1.S1_at   | Mmu.8859.1 | 6.13  | 6.3   | 0.19 | 0.7  | -1.13 | 0.278499 | 0.14558  | 0.620536 | 0.419456 |
| Mmu.886.1.S1_at    | Mmu.886.1  | 4.86  | 4.86  | 0.1  | 0.1  | 1     | 0.696057 | 0.96856  | 0.865113 | 0.982645 |
| Mmu.8876.1.S1_at   | Mmu.8876.1 | 8.5   | 8.25  | 0.1  | 0.09 | 1.19  | 0.151437 | 0.101938 | 0.516099 | 0.361967 |
| Mmu.8887.1.S1_at   | Mmu.8887.1 | 4.25  | 4.68  | 0.15 | 0.24 | -1.34 | 0.044238 | 0.100272 | 0.358277 | 0.359318 |
| Mmu.8893.1.S1_s_at | Mmu.8893.1 | 12.1  | 12.33 | 0.1  | 0.14 | -1.17 | 0.119546 | 0.141904 | 0.484145 | 0.415427 |

|                    |            |       |       |      |      |       |          |          |          |          |
|--------------------|------------|-------|-------|------|------|-------|----------|----------|----------|----------|
| Mmu.8901.1.S1_at   | Mmu.8901.1 | 7.15  | 7.05  | 0.21 | 0.2  | 1.08  | 0.247122 | 0.408166 | 0.598177 | 0.635498 |
| Mmu.8905.1.S1_at   | Mmu.8905.1 | 6.7   | 6.82  | 0.15 | 0.04 | -1.08 | 0.313585 | 0.153127 | 0.645195 | 0.428011 |
| Mmu.891.1.S1_at    | Mmu.891.1  | 4.43  | 4.36  | 0.13 | 0.08 | 1.05  | 0.533989 | 0.689811 | 0.778483 | 0.819112 |
| Mmu.8925.1.S1_at   | Mmu.8925.1 | 4.82  | 6.05  | 1.01 | 0.24 | -2.35 | 0.270679 | 0.173999 | 0.614969 | 0.450247 |
| Mmu.8934.1.S1_at   | Mmu.8934.1 | 10    | 10.42 | 0.26 | 0.34 | -1.34 | 0.406631 | 0.124725 | 0.703786 | 0.39513  |
| Mmu.8939.2.S1_at   | Mmu.8939.2 | 10.16 | 10.18 | 0.1  | 0.25 | -1.02 | 0.681626 | 0.398066 | 0.857635 | 0.629148 |
| Mmu.8945.1.S1_at   | Mmu.8945.1 | 10.17 | 9.68  | 0.23 | 0.59 | 1.4   | 0.243659 | 0.012544 | 0.595516 | 0.144478 |
| Mmu.8948.1.S1_at   | Mmu.8948.1 | 13.35 | 13.36 | 0.14 | 0.13 | -1.01 | 0.957682 | 0.155146 | 0.983925 | 0.430291 |
| Mmu.8970.1.S1_at   | Mmu.8970.1 | 8.44  | 8.47  | 0.05 | 0.19 | -1.02 | 0.801294 | 0.053541 | 0.918065 | 0.277021 |
| Mmu.8971.1.S1_at   | Mmu.8971.1 | 12.75 | 12.97 | 0.16 | 0.56 | -1.17 | 0.760719 | 0.885634 | 0.899135 | 0.934982 |
| Mmu.8980.1.S1_at   | Mmu.8980.1 | 14.34 | 14.31 | 0.04 | 0.04 | 1.02  | 0.494441 | 0.521334 | 0.756791 | 0.712346 |
| Mmu.8980.1.S1_s_at | Mmu.8980.1 | 14.01 | 14.01 | 0.05 | 0.04 | 1.01  | 0.477678 | 0.656564 | 0.746893 | 0.799163 |
| Mmu.8984.1.S1_at   | Mmu.8984.1 | 7.11  | 7.29  | 0.38 | 0.12 | -1.13 | 0.887481 | 0.183239 | 0.954863 | 0.459553 |
| Mmu.8988.1.S1_at   | Mmu.8988.1 | 4.31  | 4.3   | 0.15 | 0.25 | 1.01  | 0.984353 | 0.558823 | 0.994473 | 0.735887 |
| Mmu.8999.1.S1_at   | Mmu.8999.1 | 11.25 | 11.49 | 0.16 | 0.25 | -1.18 | 0.467067 | 0.524427 | 0.740553 | 0.714366 |
| Mmu.90.1.S1_at     | Mmu.90.1   | 11.99 | 11.94 | 0.08 | 0.12 | 1.04  | 0.723753 | 0.552073 | 0.879238 | 0.73147  |
| Mmu.9008.1.S1_at   | Mmu.9008.1 | 7.9   | 7.6   | 0.54 | 0.48 | 1.23  | 0.264209 | 0.294016 | 0.609984 | 0.553909 |
| Mmu.9015.1.S1_at   | Mmu.9015.1 | 7.64  | 7.47  | 0.33 | 0.34 | 1.13  | 0.813947 | 0.020464 | 0.924472 | 0.179619 |
| Mmu.9017.1.S1_at   | Mmu.9017.1 | 5.34  | 5.4   | 0.18 | 0.25 | -1.05 | 0.894804 | 0.835833 | 0.957917 | 0.90607  |
| Mmu.9020.1.S1_at   | Mmu.9020.1 | 6.29  | 7.2   | 0.18 | 0.16 | -1.88 | 0.00179  | 0.000464 | 0.154452 | 0.038572 |
| Mmu.9040.1.S1_at   | Mmu.9040.1 | 8.69  | 10.02 | 0.25 | 0.17 | -2.52 | 0.001525 | 0.000884 | 0.151506 | 0.047602 |
| Mmu.9070.1.S1_at   | Mmu.9070.1 | 3.01  | 3.01  | 0.13 | 0.16 | 1     | 0.791615 | 0.736196 | 0.913459 | 0.847336 |
| Mmu.9097.1.S1_at   | Mmu.9097.1 | 6.78  | 7.21  | 0.39 | 0.13 | -1.35 | 0.182928 | 0.126692 | 0.547134 | 0.397363 |
| Mmu.9109.1.A1_at   | Mmu.9109.1 | 4.91  | 4.81  | 0.33 | 0.07 | 1.07  | 0.367984 | 0.295909 | 0.679739 | 0.555241 |
| Mmu.9109.1.A1_x_at | Mmu.9109.1 | 5.48  | 5.14  | 0.62 | 0.3  | 1.27  | 0.13751  | 0.170996 | 0.504619 | 0.447561 |
| Mmu.9109.1.S1_at   | Mmu.9109.1 | 7.47  | 7.16  | 0.71 | 0.45 | 1.24  | 0.231853 | 0.332129 | 0.587568 | 0.580584 |
| Mmu.9118.1.S1_at   | Mmu.9118.1 | 10.37 | 10.14 | 0.17 | 0.1  | 1.18  | 0.116264 | 0.190982 | 0.479808 | 0.46629  |
| Mmu.912.1.S1_at    | Mmu.912.1  | 7.52  | 3.2   | 0.53 | 0.02 | 20.07 | 0.000112 | 0.00013  | 0.112653 | 0.029087 |
| Mmu.9127.1.S1_a_at | Mmu.9127.1 | 5.38  | 5.54  | 0.33 | 0.11 | -1.12 | 0.926561 | 0.235238 | 0.971724 | 0.50629  |
| Mmu.915.1.S1_at    | Mmu.915.1  | 10.3  | 10.22 | 0.17 | 0.26 | 1.06  | 0.712695 | 0.250276 | 0.874192 | 0.519282 |
| Mmu.9154.1.S1_at   | Mmu.9154.1 | 8.72  | 8.91  | 0.15 | 0.21 | -1.14 | 0.8846   | 0.969146 | 0.953771 | 0.983055 |
| Mmu.9155.1.S1_at   | Mmu.9155.1 | 9.05  | 8.72  | 0.07 | 0.04 | 1.25  | 0.002624 | 0.000135 | 0.164386 | 0.029087 |
| Mmu.919.1.S1_at    | Mmu.919.1  | 7.04  | 8.01  | 0.35 | 0.87 | -1.95 | 0.122002 | 0.068522 | 0.486982 | 0.308267 |
| Mmu.9198.1.S1_at   | Mmu.9198.1 | 9.08  | 8.74  | 0.2  | 0.27 | 1.26  | 0.301018 | 0.380065 | 0.636126 | 0.61674  |
| Mmu.92.1.S1_at     | Mmu.92.1   | 8.14  | 8.76  | 0.27 | 0.33 | -1.53 | 0.146617 | 0.18108  | 0.512668 | 0.457577 |
| Mmu.923.1.S1_at    | Mmu.923.1  | 9.51  | 9.29  | 0.24 | 0.29 | 1.17  | 0.157092 | 0.010887 | 0.521912 | 0.135939 |
| Mmu.9230.1.S1_at   | Mmu.9230.1 | 7.88  | 8.16  | 0.32 | 0.29 | -1.21 | 0.724363 | 0.02354  | 0.879601 | 0.192231 |
| Mmu.9231.1.S1_s_at | Mmu.9231.1 | 10.95 | 11.06 | 0.1  | 0.16 | -1.08 | 0.307081 | 0.386608 | 0.639861 | 0.621765 |
| Mmu.9239.1.S1_at   | Mmu.9239.1 | 4.55  | 4.84  | 0.06 | 0.34 | -1.22 | 0.640557 | 0.790256 | 0.837676 | 0.878754 |
| Mmu.924.1.S1_at    | Mmu.924.1  | 11.26 | 10.91 | 0.07 | 0.2  | 1.28  | 0.069286 | 0.062205 | 0.411737 | 0.296296 |
| Mmu.9241.2.S1_at   | Mmu.9241.2 | 10.88 | 13.69 | 1.27 | 1.63 | -7.04 | 0.379133 | 0.226531 | 0.686752 | 0.499001 |

|                        |                |       |       |      |      |        |          |          |          |          |
|------------------------|----------------|-------|-------|------|------|--------|----------|----------|----------|----------|
| Mmu.9242.1.S1_x_at     | Mmu.9242.1     | 4.14  | 4.2   | 0.04 | 0.17 | -1.04  | 0.834529 | 0.793747 | 0.932871 | 0.881039 |
| Mmu.9242.10.S1_x_at    | Mmu.9242.10    | 2.95  | 2.95  | 0.01 | 0.05 | 1      | 0.305646 | 0.702683 | 0.639223 | 0.827658 |
| Mmu.9242.11.S1_x_at    | Mmu.9242.11    | 3.15  | 3.19  | 0.1  | 0.36 | -1.03  | 0.429694 | 0.488451 | 0.71769  | 0.691147 |
| Mmu.9242.12.S1_at      | Mmu.9242.12    | 3.19  | 3.32  | 0.11 | 0.07 | -1.09  | 0.231459 | 0.097431 | 0.587406 | 0.355097 |
| Mmu.9242.12.S1_x_at    | Mmu.9242.12    | 3.18  | 3.14  | 0.06 | 0.06 | 1.02   | 0.841295 | 0.186363 | 0.936191 | 0.46221  |
| Mmu.9242.2.S1_at       | Mmu.9242.2     | 2.8   | 2.81  | 0.09 | 0.07 | -1     | 0.693137 | 0.13375  | 0.863807 | 0.405732 |
| Mmu.9242.2.S1_x_at     | Mmu.9242.2     | 3.02  | 3.03  | 0.11 | 0.06 | -1     | 0.684524 | 0.252638 | 0.858788 | 0.521174 |
| Mmu.9242.8.S1_at       | Mmu.9242.8     | 3.12  | 3.24  | 0.18 | 0.12 | -1.08  | 0.847515 | 0.832691 | 0.938931 | 0.904017 |
| Mmu.9244.1.S1_at       | Mmu.9244.1     | 11.6  | 11.55 | 0.08 | 0.22 | 1.03   | 0.723976 | 0.12378  | 0.879313 | 0.393908 |
| Mmu.926.1.S1_at        | Mmu.926.1      | 12.14 | 11.84 | 0.11 | 0.18 | 1.23   | 0.128553 | 0.14979  | 0.494653 | 0.424394 |
| Mmu.9266.1.S1_x_at     | Mmu.9266.1     | 4.8   | 4.28  | 0.3  | 0.12 | 1.43   | 0.178193 | 0.029406 | 0.542428 | 0.213363 |
| Mmu.9306.1.S1_at       | Mmu.9306.1     | 10.05 | 10.42 | 0.91 | 1.21 | -1.29  | 0.674504 | 0.862599 | 0.854194 | 0.92189  |
| Mmu.9308.1.S1_at       | Mmu.9308.1     | 9.48  | 9.65  | 0.35 | 0.36 | -1.12  | 0.671248 | 0.504057 | 0.852602 | 0.701301 |
| Mmu.9309.1.S1_at       | Mmu.9309.1     | 12    | 11.95 | 0.06 | 0.02 | 1.03   | 0.993516 | 0.011912 | 0.997754 | 0.141283 |
| Mmu.9314.1.S1_at       | Mmu.9314.1     | 9.97  | 9.54  | 0.26 | 0.46 | 1.35   | 0.452006 | 0.267114 | 0.731815 | 0.532727 |
| Mmu.9316.1.S1_at       | Mmu.9316.1     | 11.5  | 11.44 | 0.36 | 0.12 | 1.04   | 0.590658 | 0.590431 | 0.809946 | 0.756223 |
| Mmu.9324.1.S1_at       | Mmu.9324.1     | 11.68 | 11.59 | 0.14 | 0.13 | 1.07   | 0.153503 | 0.035174 | 0.517898 | 0.231708 |
| Mmu.9324.2.S1_a_at     | Mmu.9324.2     | 11.86 | 11.65 | 0.2  | 0.23 | 1.16   | 0.119379 | 0.018355 | 0.484088 | 0.170357 |
| Mmu.9324.2.S1_at       | Mmu.9324.2     | 10.98 | 10.78 | 0.18 | 0.21 | 1.15   | 0.117909 | 0.003906 | 0.482063 | 0.088806 |
| Mmu.9329.1.S1_at       | Mmu.9329.1     | 5.26  | 4.97  | 0.25 | 0.23 | 1.22   | 0.456262 | 0.319531 | 0.734378 | 0.571873 |
| Mmu.9335.1.S1_at       | Mmu.9335.1     | 10.73 | 10.65 | 0.29 | 0.57 | 1.06   | 0.359962 | 0.518095 | 0.674108 | 0.710138 |
| Mmu.9362.1.S1_at       | Mmu.9362.1     | 5.89  | 6.01  | 0.11 | 0.27 | -1.09  | 0.568756 | 0.492806 | 0.798875 | 0.6938   |
| Mmu.937.1.S1_at        | Mmu.937.1      | 9.21  | 9.13  | 0.22 | 0.24 | 1.05   | 0.859022 | 0.042129 | 0.943112 | 0.249753 |
| Mmu.9375.1.S1_at       | Mmu.9375.1     | 4.76  | 5.25  | 0.92 | 0.66 | -1.4   | 0.194913 | 0.193233 | 0.558503 | 0.468578 |
| Mmu.9409.1.S1_at       | Mmu.9409.1     | 9.2   | 9.61  | 0.23 | 0.82 | -1.33  | 0.419687 | 0.436538 | 0.71205  | 0.656048 |
| Mmu.9420.1.S1_at       | Mmu.9420.1     | 11.51 | 11.22 | 0.03 | 0.1  | 1.22   | 0.01333  | 0.007839 | 0.246471 | 0.118    |
| Mmu.9425.2.S1_at       | Mmu.9425.2     | 5.42  | 5.73  | 0.08 | 0.25 | -1.24  | 0.160492 | 0.234267 | 0.525449 | 0.505511 |
| Mmu.9437.1.S1_at       | Mmu.9437.1     | 10.95 | 10.78 | 0.17 | 0.21 | 1.13   | 0.189495 | 0.072062 | 0.552479 | 0.314519 |
| Mmu.9444.1.S1_at       | Mmu.9444.1     | 8.75  | 8.63  | 0.2  | 0.03 | 1.09   | 0.270456 | 0.102492 | 0.614788 | 0.362765 |
| Mmu.9460.1.S1_s_at     | Mmu.9460.1     | 12.33 | 12.6  | 0.04 | 0.32 | -1.21  | 0.584243 | 0.718123 | 0.806949 | 0.836865 |
| Mmu.9470.1.A1_x_at     | Mmu.9470.1     | 8.48  | 10.62 | 1.13 | 1.81 | -4.41  | 0.102868 | 0.106403 | 0.46254  | 0.36895  |
| Mmu.9470.1.S1_x_at     | Mmu.9470.1     | 6.87  | 11.23 | 0.99 | 3.03 | -20.52 | 0.156136 | 0.137538 | 0.520797 | 0.410509 |
| Mmu.9470.2.A1_at       | Mmu.9470.2     | 3.89  | 4.09  | 0.07 | 0.03 | -1.15  | 0.006098 | 0.006141 | 0.195495 | 0.10676  |
| Mmu.9470.2.S1_at       | Mmu.9470.2     | 4.81  | 5.01  | 0.37 | 0.1  | -1.15  | 0.468259 | 0.098193 | 0.741049 | 0.356253 |
| Mmu.9470.4.A1_x_at     | Mmu.9470.4     | 7.17  | 9.19  | 0.24 | 1.9  | -4.06  | 0.292151 | 0.392642 | 0.629464 | 0.625813 |
| Mmu.9470.4.S1_x_at     | Mmu.9470.4     | 8.36  | 9.65  | 0.07 | 1.81 | -2.45  | 0.382121 | 0.50778  | 0.688507 | 0.703325 |
| Mmu.9481.2.S1_a_at     | Mmu.9481.2     | 7.4   | 8.04  | 0.53 | 1.43 | -1.55  | 0.901762 | 0.906282 | 0.960796 | 0.946953 |
| Mmu.9497.1.S1_at       | Mmu.9497.1     | 11.51 | 11.42 | 0.42 | 0.14 | 1.06   | 0.96736  | 0.987743 | 0.987802 | 0.993169 |
| Mmu.9501.1.S1_at       | Mmu.9501.1     | 10.82 | 11.72 | 0.31 | 0.91 | -1.86  | 0.271128 | 0.283022 | 0.615322 | 0.545692 |
| MmugDNA.7045.1.S1_s_at | MmugDNA.7045.1 | 10.75 | 10.74 | 0.08 | 0.11 | 1.01   | 0.198727 | 0.010059 | 0.561773 | 0.13156  |
| Mmu.952.1.S1_at        | Mmu.952.1      | 7.84  | 7.89  | 0.23 | 0.21 | -1.04  | 0.732782 | 0.62833  | 0.884623 | 0.781112 |



|                         |                 |       |       |      |      |       |          |          |          |          |
|-------------------------|-----------------|-------|-------|------|------|-------|----------|----------|----------|----------|
| Mmu.9527.1.S1_s_at      | Mmu.9527.1      | 7.45  | 6.99  | 1.11 | 0.54 | 1.38  | 0.943274 | 0.740201 | 0.97844  | 0.849504 |
| Mmu.954.1.S1_at         | Mmu.954.1       | 9.83  | 9.85  | 0.23 | 0.17 | -1.01 | 0.95395  | 0.588961 | 0.982918 | 0.755275 |
| Mmu.9543.1.S1_at        | Mmu.9543.1      | 7.62  | 9.7   | 0.46 | 0.6  | -4.22 | 0.013086 | 0.008257 | 0.245262 | 0.12078  |
| Mmu.9549.1.S1_at        | Mmu.9549.1      | 7.56  | 9.01  | 0.35 | 0.22 | -2.74 | 0.003657 | 0.001257 | 0.179515 | 0.055042 |
| Mmu.9550.1.S1_at        | Mmu.9550.1      | 6.65  | 6.08  | 0.36 | 0.28 | 1.48  | 0.16417  | 0.199568 | 0.528211 | 0.474208 |
| Mmu.9550.2.S1_at        | Mmu.9550.2      | 9.47  | 9.8   | 0.13 | 0.22 | -1.26 | 0.083559 | 0.011903 | 0.43582  | 0.141251 |
| Mmu.9557.1.S1_at        | Mmu.9557.1      | 11.47 | 11.92 | 0.38 | 0.28 | -1.37 | 0.144554 | 0.137208 | 0.511015 | 0.410063 |
| Mmu.9567.1.S1_at        | Mmu.9567.1      | 12.1  | 12.37 | 0.02 | 0.09 | -1.2  | 0.005639 | 0.002433 | 0.191943 | 0.073093 |
| Mmu.9589.1.S1_at        | Mmu.9589.1      | 3.89  | 3.18  | 0.41 | 0.26 | 1.63  | 0.109384 | 0.108558 | 0.470811 | 0.372125 |
| Mmu.9596.1.S1_at        | Mmu.9596.1      | 7.38  | 8.67  | 0.42 | 0.49 | -2.44 | 0.045331 | 0.044045 | 0.360702 | 0.254195 |
| Mmu.9614.1.A1_at        | Mmu.9614.1      | 4.59  | 4.6   | 0.13 | 0.1  | -1    | 0.644953 | 0.288763 | 0.840031 | 0.549927 |
| Mmu.9614.1.S1_at        | Mmu.9614.1      | 2.81  | 2.84  | 0.01 | 0.16 | -1.02 | 0.253065 | 0.381072 | 0.601785 | 0.617478 |
| Mmu.9632.1.A1_at        | Mmu.9632.1      | 10.35 | 10.08 | 0.32 | 0.84 | 1.2   | 0.486413 | 0.652333 | 0.751591 | 0.796688 |
| Mmu.964.1.S1_at         | Mmu.964.1       | 13.21 | 12.93 | 0.08 | 0.24 | 1.21  | 0.120802 | 0.118683 | 0.48574  | 0.38672  |
| MmugDNA.4836.1.S1_s_at  | MmugDNA.4836.1  | 10.69 | 10.45 | 0.16 | 0.27 | 1.18  | 0.144557 | 0.18849  | 0.511015 | 0.464458 |
| Mmu.9654.1.S1_at        | Mmu.9654.1      | 7.65  | 8.14  | 0.24 | 0.44 | -1.4  | 0.094486 | 0.096583 | 0.452119 | 0.354126 |
| Mmu.9655.1.S1_at        | Mmu.9655.1      | 12.08 | 12.56 | 0.1  | 0.17 | -1.4  | 0.019325 | 0.030933 | 0.273655 | 0.217705 |
| Mmu.967.1.S1_s_at       | Mmu.967.1       | 10.05 | 10.43 | 0.15 | 0.09 | -1.29 | 0.019641 | 0.046511 | 0.275549 | 0.260216 |
| Mmu.9670.2.S1_at        | Mmu.9670.2      | 11.76 | 12.29 | 0.18 | 0.15 | -1.44 | 0.010039 | 0.000809 | 0.226901 | 0.046123 |
| Mmu.9670.2.S1_x_at      | Mmu.9670.2      | 10.95 | 11.63 | 0.17 | 0.14 | -1.61 | 0.005915 | 0.000471 | 0.193611 | 0.038572 |
| Mmu.9683.1.S1_at        | Mmu.9683.1      | 8.59  | 8.47  | 0    | 0.15 | 1.09  | 0.121694 | 0.516511 | 0.486508 | 0.709034 |
| Mmu.9686.1.S1_at        | Mmu.9686.1      | 7.52  | 7.97  | 0.31 | 0.94 | -1.37 | 0.329789 | 0.442298 | 0.655349 | 0.660336 |
| Mmu.9689.2.S1_at        | Mmu.9689.2      | 3.72  | 3.87  | 0.06 | 0.09 | -1.11 | 0.035438 | 0.028742 | 0.336406 | 0.211357 |
| MmugDNA.34564.1.S1_s_at | MmugDNA.34564.1 | 12.88 | 13.03 | 0.16 | 0.03 | -1.1  | 0.185511 | 0.248374 | 0.548921 | 0.517634 |
| Mmu.971.2.S1_at         | Mmu.971.2       | 8.3   | 8.2   | 0.31 | 0.9  | 1.07  | 0.876394 | 0.975645 | 0.950507 | 0.98673  |
| Mmu.9711.1.S1_at        | Mmu.9711.1      | 9.08  | 8.9   | 0.15 | 0.11 | 1.14  | 0.101984 | 0.160187 | 0.461388 | 0.436308 |
| Mmu.9720.1.S1_at        | Mmu.9720.1      | 11.97 | 12.24 | 0.13 | 0.08 | -1.21 | 0.076584 | 0.095136 | 0.425098 | 0.352151 |
| Mmu.9731.1.S1_at        | Mmu.9731.1      | 5.91  | 6.17  | 0.21 | 0.48 | -1.2  | 0.149879 | 0.17453  | 0.514437 | 0.450998 |
| Mmu.9738.1.S1_at        | Mmu.9738.1      | 3.68  | 3.85  | 0.26 | 0.13 | -1.12 | 0.926733 | 0.871764 | 0.971811 | 0.927056 |
| Mmu.9738.1.S1_s_at      | Mmu.9738.1      | 4.04  | 4.07  | 0.01 | 0.09 | -1.02 | 0.210904 | 0.453124 | 0.571977 | 0.667551 |
| Mmu.9769.1.S1_s_at      | Mmu.9769.1      | 12.73 | 12.68 | 0.08 | 0.08 | 1.03  | 0.949665 | 0.299077 | 0.980873 | 0.557663 |
| Mmu.9771.1.S1_at        | Mmu.9771.1      | 6.95  | 7.98  | 0.12 | 0.47 | -2.06 | 0.043472 | 0.005216 | 0.356741 | 0.100105 |
| Mmu.9773.1.S1_at        | Mmu.9773.1      | 9.33  | 9.83  | 0.17 | 0.7  | -1.41 | 0.095641 | 0.060175 | 0.453501 | 0.291882 |
| Mmu.9777.1.S1_a_at      | Mmu.9777.1      | 4.27  | 3.84  | 0.29 | 0.16 | 1.34  | 0.15188  | 0.370222 | 0.516547 | 0.609392 |
| Mmu.9792.1.S1_at        | Mmu.9792.1      | 11.51 | 12.04 | 0.06 | 0.47 | -1.45 | 0.124605 | 0.144005 | 0.490671 | 0.417912 |
| Mmu.9793.1.S1_at        | Mmu.9793.1      | 6.7   | 8.15  | 0.69 | 0.98 | -2.73 | 0.192067 | 0.105668 | 0.555115 | 0.367776 |
| Mmu.9798.1.S1_at        | Mmu.9798.1      | 10.02 | 10.04 | 0.16 | 0.39 | -1.02 | 0.359268 | 0.006094 | 0.673869 | 0.106327 |
| Mmu.9802.1.S1_at        | Mmu.9802.1      | 6.86  | 7.62  | 0.16 | 0.95 | -1.7  | 0.33019  | 0.400404 | 0.655613 | 0.630187 |
| Mmu.9805.1.S1_at        | Mmu.9805.1      | 7.03  | 8.41  | 0.57 | 0.63 | -2.59 | 0.05208  | 0.064723 | 0.376989 | 0.300314 |
| Mmu.9808.1.S1_s_at      | Mmu.9808.1      | 10.98 | 11.01 | 0.03 | 0.1  | -1.02 | 0.473236 | 0.146362 | 0.744128 | 0.420368 |
| Mmu.9831.1.S1_at        | Mmu.9831.1      | 7.04  | 7.59  | 0.19 | 1.34 | -1.46 | 0.545766 | 0.669774 | 0.785214 | 0.806882 |

|                         |                 |       |       |      |      |       |          |          |          |          |
|-------------------------|-----------------|-------|-------|------|------|-------|----------|----------|----------|----------|
| Mmu.9837.1.S1_at        | Mmu.9837.1      | 8.85  | 8.35  | 0.11 | 0.35 | 1.41  | 0.083024 | 0.041888 | 0.434921 | 0.249206 |
| Mmu.9862.2.S1_at        | Mmu.9862.2      | 8.97  | 8.81  | 0.33 | 0.68 | 1.11  | 0.910939 | 0.059356 | 0.964833 | 0.29054  |
| Mmu.9866.1.S1_s_at      | Mmu.9866.1      | 10.89 | 11.46 | 0.23 | 0.61 | -1.48 | 0.179443 | 0.226946 | 0.543593 | 0.499276 |
| MmugDNA.19922.1.S1_at   | MmugDNA.19922.1 | 11.02 | 11.23 | 0.26 | 0.21 | -1.15 | 0.29387  | 0.340383 | 0.631033 | 0.586725 |
| MmugDNA.19922.1.S1_s_at | MmugDNA.19922.1 | 10.74 | 11.07 | 0.2  | 0.26 | -1.26 | 0.268883 | 0.339811 | 0.613528 | 0.586394 |
| Mmu.9876.2.S1_at        | Mmu.9876.2      | 7.35  | 7.77  | 0.65 | 0.72 | -1.34 | 0.960519 | 0.493848 | 0.9849   | 0.694433 |
| Mmu.9888.1.S1_at        | Mmu.9888.1      | 11.25 | 11.75 | 0.26 | 0.37 | -1.41 | 0.123146 | 0.117388 | 0.488745 | 0.38505  |
| Mmu.9888.1.S1_s_at      | Mmu.9888.1      | 12.09 | 12.5  | 0.21 | 0.35 | -1.34 | 0.145365 | 0.164829 | 0.511407 | 0.441152 |
| Mmu.9951.1.S1_at        | Mmu.9951.1      | 12.25 | 12.15 | 0.12 | 0.1  | 1.08  | 0.124137 | 0.046897 | 0.489863 | 0.261281 |
| Mmu.9961.1.S1_at        | Mmu.9961.1      | 5.66  | 7.88  | 0.92 | 1.4  | -4.64 | 0.158338 | 0.156565 | 0.523176 | 0.43196  |
| Mmu.9964.1.S1_at        | Mmu.9964.1      | 4.31  | 4.54  | 0.86 | 1.28 | -1.17 | 0.941644 | 0.361155 | 0.977784 | 0.60207  |
| Mmu.9975.10.S1_x_at     | Mmu.9975.10     | 3.74  | 3.72  | 0.17 | 0.03 | 1.02  | 0.630043 | 0.805739 | 0.831865 | 0.888331 |
| Mmu.9975.17.S1_at       | Mmu.9975.17     | 2.62  | 2.62  | 0.12 | 0.14 | 1     | 0.724108 | 0.894942 | 0.879393 | 0.940055 |
| Mmu.9989.1.S1_s_at      | Mmu.9989.1      | 10.38 | 10.49 | 0.1  | 0.11 | -1.08 | 0.391288 | 0.460672 | 0.693992 | 0.672598 |
| MmuAffx.1.1.S1_at       | MmuAffx.1.1     | 4.14  | 4.13  | 0.1  | 0.17 | 1.01  | 0.519785 | 0.707706 | 0.770351 | 0.830472 |
| MmuAffx.10.1.A1_x_at    | MmuAffx.10.1    | 8.37  | 7.74  | 0.31 | 0.19 | 1.55  | 0.105549 | 0.149645 | 0.46647  | 0.424181 |
| MmuAffx.1008.1.S1_at    | MmuAffx.1008.1  | 6.83  | 7.14  | 0.36 | 0.74 | -1.24 | 0.573054 | 0.744562 | 0.801055 | 0.852091 |
| MmuAffx.11.1.A1_at      | MmuAffx.11.1    | 2.59  | 2.66  | 0.07 | 0.06 | -1.05 | 0.883669 | 0.463828 | 0.953293 | 0.674663 |
| MmuAffx.11.1.S1_x_at    | MmuAffx.11.1    | 2.56  | 2.58  | 0    | 0.12 | -1.02 | 0.881358 | 0.791888 | 0.95231  | 0.87976  |
| MmuAffx.1125.1.S1_at    | MmuAffx.1125.1  | 3.84  | 3.93  | 0.11 | 0.09 | -1.06 | 0.302553 | 0.395001 | 0.636951 | 0.627229 |
| MmuAffx.1186.1.S1_at    | MmuAffx.1186.1  | 3.11  | 3.1   | 0.01 | 0.16 | 1.01  | 0.999235 | 0.998605 | 0.999765 | 0.999247 |
| MmuAffx.12.1.A1_at      | MmuAffx.12.1    | 6.8   | 7.05  | 0.09 | 0.56 | -1.19 | 0.374824 | 0.011868 | 0.684033 | 0.141016 |
| MmuAffx.12.1.S1_x_at    | MmuAffx.12.1    | 7.44  | 7.52  | 0.29 | 0.51 | -1.06 | 0.504396 | 0.290391 | 0.761231 | 0.551169 |
| MmuAffx.1252.1.A1_at    | MmuAffx.1252.1  | 5.66  | 5.54  | 0.88 | 1.21 | 1.09  | 0.656354 | 0.419874 | 0.845384 | 0.643733 |
| MmuAffx.1533.1.S1_at    | MmuAffx.1533.1  | 8.62  | 8.68  | 0.29 | 0.45 | -1.04 | 0.914234 | 0.980468 | 0.966155 | 0.989333 |
| MmuAffx.161.1.S1_at     | MmuAffx.161.1   | 11.82 | 12.25 | 0.26 | 0.67 | -1.35 | 0.260241 | 0.281258 | 0.607086 | 0.544385 |
| MmuAffx.18.1.A1_at      | MmuAffx.18.1    | 6     | 6.34  | 0.15 | 0.02 | -1.27 | 0.040461 | 0.033798 | 0.349277 | 0.227489 |
| MmuAffx.18.1.S1_x_at    | MmuAffx.18.1    | 6.19  | 6.27  | 0.04 | 0.17 | -1.06 | 0.151954 | 0.147298 | 0.516573 | 0.421493 |
| MmuAffx.19.1.A1_at      | MmuAffx.19.1    | 6.32  | 6.48  | 0.19 | 0.76 | -1.12 | 0.333497 | 0.459074 | 0.657597 | 0.671544 |
| MmuAffx.19.1.S1_s_at    | MmuAffx.19.1    | 7.6   | 7.87  | 0.12 | 0.41 | -1.2  | 0.152654 | 0.208287 | 0.517325 | 0.48217  |
| MmuAffx.2.1.S1_at       | MmuAffx.2.1     | 4.6   | 4.53  | 0.14 | 0.1  | 1.05  | 0.536142 | 0.733084 | 0.779378 | 0.845503 |
| MmuAffx.204.1.A1_at     | MmuAffx.204.1   | 4.45  | 4.11  | 0.28 | 0.34 | 1.26  | 0.284205 | 0.411027 | 0.62409  | 0.637874 |
| MmuAffx.204.1.S1_at     | MmuAffx.204.1   | 4.67  | 4.41  | 0.4  | 0.04 | 1.19  | 0.264992 | 0.119749 | 0.61074  | 0.388496 |
| MmuAffx.2095.1.S1_at    | MmuAffx.2095.1  | 4.36  | 4.43  | 0.11 | 0.08 | -1.05 | 0.808941 | 0.658256 | 0.922109 | 0.800244 |
| MmuAffx.21.1.A1_at      | MmuAffx.21.1    | 5.43  | 5.4   | 0.19 | 0.09 | 1.02  | 0.889234 | 0.420722 | 0.955708 | 0.644381 |
| MmuAffx.21.1.S1_at      | MmuAffx.21.1    | 5     | 5.26  | 0.17 | 0.07 | -1.2  | 0.096424 | 0.103587 | 0.454966 | 0.364346 |
| MmuAffx.2165.1.A1_at    | MmuAffx.2165.1  | 3.75  | 3.84  | 0.06 | 0.08 | -1.07 | 0.091532 | 0.000091 | 0.447485 | 0.027225 |
| MmuAffx.2165.1.S1_at    | MmuAffx.2165.1  | 3.88  | 3.9   | 0.29 | 0.2  | -1.02 | 0.636309 | 0.001712 | 0.835468 | 0.062657 |
| MmuAffx.2166.1.A1_a_at  | MmuAffx.2166.1  | 3.58  | 3.58  | 0.07 | 0.02 | 1     | 0.712768 | 0.783333 | 0.874217 | 0.874571 |
| MmuAffx.2166.1.S1_at    | MmuAffx.2166.1  | 5.92  | 5.97  | 0.08 | 0.11 | -1.04 | 0.168365 | 0.335097 | 0.532644 | 0.582853 |
| MmugDNA.38587.1.S1_at   | MmugDNA.38587.1 | 2.6   | 2.64  | 0.07 | 0.04 | -1.03 | 0.455245 | 0.285722 | 0.733701 | 0.54744  |

|                         |                 |       |       |      |      |        |          |          |          |          |
|-------------------------|-----------------|-------|-------|------|------|--------|----------|----------|----------|----------|
| MmugDNA.38587.1.S1_s_at | MmugDNA.38587.1 | 3.58  | 3.64  | 0    | 0.06 | -1.04  | 0.163359 | 0.395995 | 0.527696 | 0.627823 |
| MmuAffx.2166.1.S1_x_at  | MmuAffx.2166.1  | 4.01  | 4.02  | 0.08 | 0.03 | -1     | 0.223541 | 0.699633 | 0.582017 | 0.825545 |
| MmuAffx.2166.2.S1_at    | MmuAffx.2166.2  | 3.96  | 4.17  | 0.03 | 0.14 | -1.15  | 0.183014 | 0.152651 | 0.547134 | 0.427483 |
| MmuAffx.2166.2.S1_x_at  | MmuAffx.2166.2  | 3.52  | 3.59  | 0.08 | 0.01 | -1.05  | 0.183721 | 0.152318 | 0.547827 | 0.427072 |
| MmuAffx.2168.1.A1_at    | MmuAffx.2168.1  | 4.7   | 4.75  | 0.14 | 0.06 | -1.04  | 0.506425 | 0.550914 | 0.762349 | 0.730659 |
| MmuAffx.2168.1.S1_at    | MmuAffx.2168.1  | 5.92  | 5.74  | 0.21 | 0.16 | 1.13   | 0.227812 | 0.165289 | 0.585266 | 0.441488 |
| MmuAffx.2168.1.S1_x_at  | MmuAffx.2168.1  | 5.85  | 5.69  | 0.35 | 0.02 | 1.12   | 0.349056 | 0.350448 | 0.667394 | 0.594161 |
| MmuAffx.2169.1.S1_at    | MmuAffx.2169.1  | 2.69  | 2.87  | 0.22 | 0.11 | -1.13  | 0.922888 | 0.828777 | 0.970066 | 0.901565 |
| MmuAffx.2170.1.A1_at    | MmuAffx.2170.1  | 3.29  | 3.39  | 0.08 | 0.06 | -1.08  | 0.075945 | 0.372731 | 0.42407  | 0.611661 |
| MmuAffx.2170.1.S1_at    | MmuAffx.2170.1  | 3.74  | 3.85  | 0.06 | 0.06 | -1.08  | 0.043214 | 0.082386 | 0.356669 | 0.331354 |
| MmuAffx.2181.1.S1_s_at  | MmuAffx.2181.1  | 7.84  | 8.5   | 0.13 | 0.07 | -1.58  | 0.001891 | 0.000023 | 0.155636 | 0.019635 |
| MmuAffx.22.1.S1_at      | MmuAffx.22.1    | 5.85  | 6.24  | 0.17 | 0.08 | -1.31  | 0.036292 | 0.041132 | 0.339201 | 0.247659 |
| MmuAffx.225.1.A1_x_at   | MmuAffx.225.1   | 3.27  | 3.27  | 0    | 0.17 | -1     | 0.713    | 0.876295 | 0.874274 | 0.929668 |
| MmuAffx.225.1.S1_at     | MmuAffx.225.1   | 3.07  | 3.25  | 0.17 | 0.05 | -1.14  | 0.291543 | 0.357934 | 0.628857 | 0.599532 |
| MmuAffx.228.1.A1_at     | MmuAffx.228.1   | 4.61  | 4.92  | 0.24 | 0.17 | -1.24  | 0.301037 | 0.270326 | 0.63614  | 0.535676 |
| MmuAffx.228.1.S1_x_at   | MmuAffx.228.1   | 4.45  | 4.83  | 0.16 | 0.22 | -1.3   | 0.068646 | 0.15262  | 0.410319 | 0.427435 |
| MmuAffx.23.12.S1_at     | MmuAffx.23.12   | 11.6  | 11.19 | 0.19 | 0.74 | 1.33   | 0.391309 | 0.423705 | 0.693994 | 0.646515 |
| MmuAffx.23.12.S1_x_at   | MmuAffx.23.12   | 12.02 | 11.65 | 0.15 | 0.71 | 1.29   | 0.409597 | 0.457761 | 0.70588  | 0.670897 |
| MmuAffx.23.13.S1_s_at   | MmuAffx.23.13   | 13.98 | 13.5  | 0.25 | 0.29 | 1.4    | 0.101107 | 0.099965 | 0.461009 | 0.358768 |
| MmuAffx.23.14.S1_at     | MmuAffx.23.14   | 3.14  | 3.3   | 0.08 | 0.13 | -1.12  | 0.179084 | 0.271689 | 0.543382 | 0.536577 |
| MmuAffx.23.14.S1_s_at   | MmuAffx.23.14   | 14.06 | 14.64 | 0.38 | 0.01 | -1.5   | 0.170605 | 0.12057  | 0.534399 | 0.389378 |
| MmuAffx.23.21.S1_s_at   | MmuAffx.23.21   | 13.23 | 12.95 | 0.12 | 0.55 | 1.21   | 0.356899 | 0.446282 | 0.671919 | 0.662743 |
| MmuAffx.23.22.S1_at     | MmuAffx.23.22   | 3.09  | 3.15  | 0.04 | 0.15 | -1.04  | 0.222441 | 0.302437 | 0.580951 | 0.560109 |
| MmuAffx.23.23.S1_s_at   | MmuAffx.23.23   | 4.67  | 9.48  | 2    | 3.58 | -28.09 | 0.41554  | 0.217757 | 0.709528 | 0.491309 |
| MmuAffx.23.3.S1_s_at    | MmuAffx.23.3    | 13.41 | 14.33 | 0.84 | 0.02 | -1.89  | 0.148255 | 0.110598 | 0.513702 | 0.374854 |
| MmuAffx.23.30.S1_at     | MmuAffx.23.30   | 2.74  | 2.95  | 0.03 | 0.11 | -1.15  | 0.036443 | 0.048225 | 0.339246 | 0.264682 |
| MmuAffx.23.31.S1_at     | MmuAffx.23.31   | 2.81  | 2.81  | 0.02 | 0.03 | 1      | 0.890757 | 0.299268 | 0.956312 | 0.557769 |
| MmuAffx.23.32.S1_at     | MmuAffx.23.32   | 7.84  | 7.71  | 0.2  | 0.25 | 1.1    | 0.797326 | 0.637656 | 0.916012 | 0.787067 |
| MmuAffx.23.33.S1_at     | MmuAffx.23.33   | 4.38  | 4.7   | 0.15 | 0.13 | -1.25  | 0.070193 | 0.063617 | 0.413758 | 0.298759 |
| MmuAffx.23.35.S1_at     | MmuAffx.23.35   | 3.27  | 3.33  | 0.2  | 0.23 | -1.05  | 0.481843 | 0.54154  | 0.749333 | 0.725015 |
| MmuAffx.23.8.S1_s_at    | MmuAffx.23.8    | 14.35 | 14.21 | 0.06 | 0.39 | 1.1    | 0.224627 | 0.282706 | 0.58277  | 0.545448 |
| MmuAffx.259.1.A1_at     | MmuAffx.259.1   | 6.38  | 6.53  | 0.28 | 0.25 | -1.11  | 0.214775 | 0.307059 | 0.575346 | 0.563427 |
| MmuAffx.259.1.S1_x_at   | MmuAffx.259.1   | 6.51  | 6.65  | 0.29 | 0.12 | -1.1   | 0.471948 | 0.156329 | 0.743454 | 0.43161  |
| MmuAffx.396.1.A1_at     | MmuAffx.396.1   | 4.19  | 3.95  | 0.18 | 0.12 | 1.18   | 0.149699 | 0.219081 | 0.514291 | 0.49285  |
| MmuAffx.52.1.A1_at      | MmuAffx.52.1    | 9.3   | 9.43  | 0.79 | 0.61 | -1.09  | 0.75229  | 0.842761 | 0.894293 | 0.910388 |
| MmuAffx.52.1.S1_s_at    | MmuAffx.52.1    | 8.54  | 8.86  | 0.68 | 0.61 | -1.25  | 0.611332 | 0.794816 | 0.821632 | 0.881767 |
| MmuAffx.730.1.A1_at     | MmuAffx.730.1   | 3.19  | 3.2   | 0.05 | 0.07 | -1.01  | 0.199831 | 0.148733 | 0.562906 | 0.423201 |
| MmuAffx.738.1.S1_at     | MmuAffx.738.1   | 2.6   | 2.78  | 0.05 | 0.09 | -1.13  | 0.11238  | 0.092285 | 0.474902 | 0.348128 |
| MmuAffx.78.1.S1_s_at    | MmuAffx.78.1    | 11.46 | 13.32 | 2.03 | 0.17 | -3.62  | 0.187874 | 0.14095  | 0.550964 | 0.414469 |
| MmuAffx.8.1.A1_at       | MmuAffx.8.1     | 4.83  | 4.82  | 0.26 | 0.13 | 1.01   | 0.736026 | 0.707293 | 0.886439 | 0.83023  |
| MmuAffx.8.1.S1_at       | MmuAffx.8.1     | 3.81  | 4     | 0.2  | 0.06 | -1.14  | 0.188465 | 0.096718 | 0.551451 | 0.354171 |

|                         |                 |       |       |      |      |        |          |          |          |          |
|-------------------------|-----------------|-------|-------|------|------|--------|----------|----------|----------|----------|
| MmuAffx.84.1.S1_at      | MmuAffx.84.1    | 8.04  | 9.52  | 0.23 | 2.13 | -2.79  | 0.61033  | 0.597803 | 0.821014 | 0.760411 |
| MmuAffx.873.1.A1_at     | MmuAffx.873.1   | 8.11  | 8.15  | 0.17 | 0.1  | -1.03  | 0.798243 | 0.088634 | 0.916416 | 0.342167 |
| MmuAffx.873.1.S1_at     | MmuAffx.873.1   | 8.64  | 8.74  | 0.12 | 0.19 | -1.07  | 0.671882 | 0.258175 | 0.852716 | 0.525574 |
| MmuAffx.885.1.S1_at     | MmuAffx.885.1   | 8.41  | 9.31  | 0.02 | 0.16 | -1.87  | 0.000608 | 0.000067 | 0.136818 | 0.025805 |
| MmuAffx.888.1.A1_at     | MmuAffx.888.1   | 6.11  | 6.44  | 0.2  | 0.14 | -1.26  | 0.07603  | 0.040348 | 0.424338 | 0.245984 |
| MmuAffx.888.1.S1_at     | MmuAffx.888.1   | 6.09  | 6.29  | 0.08 | 0.14 | -1.14  | 0.323731 | 0.381076 | 0.651695 | 0.617478 |
| MmuAffx.914.1.S1_at     | MmuAffx.914.1   | 14.05 | 13.09 | 1.93 | 0.44 | 1.94   | 0.896413 | 0.948947 | 0.958707 | 0.97078  |
| MmuAffx.949.1.A1_at     | MmuAffx.949.1   | 10.91 | 10.75 | 0.3  | 0.1  | 1.12   | 0.400651 | 0.000882 | 0.700264 | 0.047602 |
| MmuAffx.949.1.S1_x_at   | MmuAffx.949.1   | 10.32 | 10.17 | 0.32 | 0.09 | 1.11   | 0.661157 | 0.001547 | 0.848043 | 0.05949  |
| MmuAffx.951.1.S1_at     | MmuAffx.951.1   | 2.8   | 3.02  | 0.02 | 0.14 | -1.16  | 0.040648 | 0.022353 | 0.34998  | 0.187159 |
| MmuAffx.951.1.S1_x_at   | MmuAffx.951.1   | 2.8   | 2.95  | 0.05 | 0.19 | -1.11  | 0.12846  | 0.154341 | 0.494541 | 0.429208 |
| MmuAffx.956.1.S1_at     | MmuAffx.956.1   | 13.14 | 13.19 | 0.09 | 0.08 | -1.04  | 0.553761 | 0.532203 | 0.790372 | 0.718995 |
| MmugDNA.1.1.S1_at       | MmugDNA.1.1     | 6.18  | 6.11  | 0.35 | 1.14 | 1.05   | 0.431049 | 0.577795 | 0.718438 | 0.748124 |
| MmugDNA.1000.1.S1_at    | MmugDNA.1000.1  | 2.9   | 2.9   | 0    | 0.14 | 1      | 0.350157 | 0.569332 | 0.668409 | 0.742375 |
| MmugDNA.10002.1.S1_at   | MmugDNA.10002.1 | 4.03  | 4     | 0.57 | 0.64 | 1.03   | 0.880677 | 0.563835 | 0.952025 | 0.73888  |
| MmugDNA.10003.1.S1_at   | MmugDNA.10003.1 | 4.65  | 5.6   | 0.37 | 0.49 | -1.93  | 0.134187 | 0.092567 | 0.500726 | 0.348519 |
| MmugDNA.10005.1.S1_at   | MmugDNA.10005.1 | 7.29  | 7.39  | 0.06 | 0.19 | -1.07  | 0.149226 | 0.206006 | 0.514001 | 0.480243 |
| MmugDNA.10007.1.S1_at   | MmugDNA.10007.1 | 4.63  | 4.57  | 0.18 | 0.06 | 1.04   | 0.599272 | 0.274307 | 0.814555 | 0.538751 |
| MmugDNA.10009.1.S1_at   | MmugDNA.10009.1 | 8.06  | 8.29  | 0.19 | 0.32 | -1.17  | 0.424915 | 0.562357 | 0.714908 | 0.738004 |
| MmugDNA.1001.1.S1_s_at  | MmugDNA.1001.1  | 5.36  | 6.11  | 0.29 | 1.1  | -1.69  | 0.305333 | 0.434914 | 0.639126 | 0.654901 |
| MmugDNA.10010.1.S1_at   | MmugDNA.10010.1 | 3.3   | 3.38  | 0.19 | 0.13 | -1.05  | 0.543278 | 0.707792 | 0.783788 | 0.830472 |
| MmugDNA.10013.1.S1_s_at | MmugDNA.10013.1 | 5.74  | 5.48  | 0.18 | 0.26 | 1.2    | 0.300605 | 0.50252  | 0.635955 | 0.700192 |
| MmugDNA.10015.1.S1_at   | MmugDNA.10015.1 | 8.43  | 8.19  | 0.42 | 0.09 | 1.18   | 0.457119 | 0.368342 | 0.734718 | 0.607917 |
| MmugDNA.10016.1.S1_at   | MmugDNA.10016.1 | 7.47  | 7.61  | 0.16 | 0.06 | -1.1   | 0.439559 | 0.082909 | 0.723655 | 0.332446 |
| MmugDNA.10017.1.S1_at   | MmugDNA.10017.1 | 9.42  | 8.99  | 0.23 | 0.46 | 1.35   | 0.215216 | 0.163851 | 0.575623 | 0.440054 |
| MmugDNA.10019.1.S1_at   | MmugDNA.10019.1 | 11.86 | 12.09 | 0.07 | 0.2  | -1.17  | 0.097078 | 0.02733  | 0.456113 | 0.206625 |
| MmugDNA.1002.1.S1_at    | MmugDNA.1002.1  | 7.51  | 6.93  | 0.34 | 0.16 | 1.49   | 0.069625 | 0.059771 | 0.412649 | 0.291114 |
| MmugDNA.10020.1.S1_at   | MmugDNA.10020.1 | 3.92  | 3.55  | 0.22 | 0.12 | 1.29   | 0.090797 | 0.01011  | 0.446383 | 0.131859 |
| MmugDNA.10021.1.S1_at   | MmugDNA.10021.1 | 3.53  | 3.6   | 0.07 | 0.15 | -1.05  | 0.799827 | 0.864952 | 0.917271 | 0.923415 |
| MmugDNA.10022.1.S1_at   | MmugDNA.10022.1 | 3.46  | 3.56  | 0.01 | 0.13 | -1.08  | 0.646493 | 0.444517 | 0.840925 | 0.662072 |
| MmugDNA.10023.1.S1_at   | MmugDNA.10023.1 | 3.51  | 3.53  | 0.1  | 0.1  | -1.01  | 0.419179 | 0.359833 | 0.711691 | 0.601086 |
| MmugDNA.10024.1.S1_at   | MmugDNA.10024.1 | 5.09  | 5.08  | 0.03 | 0.45 | 1.01   | 0.902559 | 0.137652 | 0.961142 | 0.410618 |
| MmugDNA.10026.1.S1_at   | MmugDNA.10026.1 | 3.89  | 4.04  | 0.31 | 0.09 | -1.11  | 0.353973 | 0.50459  | 0.670266 | 0.701719 |
| MmugDNA.10027.1.S1_at   | MmugDNA.10027.1 | 3.69  | 3.15  | 0.52 | 0.09 | 1.46   | 0.108222 | 0.105442 | 0.469293 | 0.367279 |
| MmugDNA.10028.1.S1_s_at | MmugDNA.10028.1 | 8.24  | 8.31  | 0.22 | 0.02 | -1.05  | 0.694818 | 0.291476 | 0.864678 | 0.551848 |
| MmugDNA.10029.1.S1_at   | MmugDNA.10029.1 | 7.39  | 7.2   | 0.39 | 0.24 | 1.14   | 0.90588  | 0.962195 | 0.962542 | 0.978747 |
| MmugDNA.1003.1.S1_at    | MmugDNA.1003.1  | 9.38  | 9.27  | 0.45 | 0.41 | 1.08   | 0.735453 | 0.862244 | 0.886267 | 0.921663 |
| MmugDNA.10030.1.S1_at   | MmugDNA.10030.1 | 3.45  | 3.6   | 0.07 | 0.08 | -1.12  | 0.031433 | 0.087238 | 0.321864 | 0.340233 |
| MmugDNA.10034.1.S1_at   | MmugDNA.10034.1 | 4.13  | 4.18  | 0.18 | 0.2  | -1.03  | 0.468135 | 0.311045 | 0.741008 | 0.566076 |
| MmugDNA.10035.1.S1_at   | MmugDNA.10035.1 | 3.21  | 9.58  | 2.61 | 3.57 | -82.24 | 0.26066  | 0.240877 | 0.607375 | 0.511584 |
| MmugDNA.10035.1.S1_s_at | MmugDNA.10035.1 | 5.38  | 7.9   | 0.88 | 2.02 | -5.74  | 0.188053 | 0.22116  | 0.551056 | 0.494506 |

|                         |                 |       |       |      |      |       |          |          |          |          |
|-------------------------|-----------------|-------|-------|------|------|-------|----------|----------|----------|----------|
| MmugDNA.10036.1.S1_at   | MmugDNA.10036.1 | 6.78  | 6.45  | 0.14 | 0.3  | 1.26  | 0.432265 | 0.649254 | 0.718878 | 0.794724 |
| MmugDNA.10037.1.S1_at   | MmugDNA.10037.1 | 3.2   | 3.24  | 0.22 | 0.07 | -1.03 | 0.422323 | 0.376146 | 0.71345  | 0.613978 |
| MmugDNA.10038.1.S1_at   | MmugDNA.10038.1 | 6.45  | 5.49  | 1.6  | 0.87 | 1.95  | 0.564719 | 0.755348 | 0.796798 | 0.857558 |
| MmugDNA.1004.1.S1_at    | MmugDNA.1004.1  | 3.81  | 3.6   | 0.05 | 0.16 | 1.16  | 0.086759 | 0.08665  | 0.440475 | 0.339212 |
| MmugDNA.10041.1.S1_at   | MmugDNA.10041.1 | 5.39  | 5.22  | 0.48 | 0.07 | 1.13  | 0.390006 | 0.276158 | 0.693398 | 0.540169 |
| MmugDNA.10042.1.S1_at   | MmugDNA.10042.1 | 3.61  | 3.45  | 0.2  | 0.17 | 1.12  | 0.505324 | 0.128725 | 0.761594 | 0.400135 |
| MmugDNA.10043.1.S1_at   | MmugDNA.10043.1 | 3.93  | 3.93  | 0.13 | 0.11 | -1    | 0.359135 | 0.444474 | 0.673869 | 0.662072 |
| MmugDNA.10045.1.S1_at   | MmugDNA.10045.1 | 3.52  | 3.85  | 0.31 | 0.23 | -1.26 | 0.703741 | 0.379211 | 0.869215 | 0.616197 |
| MmugDNA.10046.1.S1_s_at | MmugDNA.10046.1 | 8.24  | 8.23  | 0.29 | 0.35 | 1.01  | 0.593676 | 0.154376 | 0.811568 | 0.429245 |
| MmugDNA.10047.1.S1_at   | MmugDNA.10047.1 | 8.12  | 8.06  | 0.09 | 0.09 | 1.04  | 0.466237 | 0.31453  | 0.740215 | 0.568372 |
| MmugDNA.10048.1.S1_at   | MmugDNA.10048.1 | 5.35  | 5.93  | 0.21 | 0.27 | -1.49 | 0.021599 | 0.04643  | 0.282979 | 0.260036 |
| MmugDNA.10049.1.S1_at   | MmugDNA.10049.1 | 3.58  | 3.08  | 0.45 | 0.06 | 1.42  | 0.213706 | 0.122716 | 0.573938 | 0.392719 |
| MmugDNA.1005.1.S1_at    | MmugDNA.1005.1  | 3.51  | 3.35  | 0.05 | 0.52 | 1.12  | 0.825615 | 0.966053 | 0.929243 | 0.980991 |
| MmugDNA.10050.1.S1_at   | MmugDNA.10050.1 | 5.39  | 5.5   | 0.23 | 0.34 | -1.08 | 0.857106 | 0.764759 | 0.942171 | 0.863203 |
| MmugDNA.10051.1.S1_at   | MmugDNA.10051.1 | 3.86  | 3.86  | 0.18 | 0.16 | 1     | 0.553322 | 0.824102 | 0.790065 | 0.898903 |
| MmugDNA.10052.1.S1_at   | MmugDNA.10052.1 | 10.13 | 9.75  | 0.21 | 0.09 | 1.31  | 0.026529 | 0.013093 | 0.303499 | 0.14718  |
| MmugDNA.10053.1.S1_at   | MmugDNA.10053.1 | 3.95  | 4.07  | 0.09 | 0.17 | -1.09 | 0.226403 | 0.266736 | 0.584429 | 0.53241  |
| MmugDNA.10054.1.S1_at   | MmugDNA.10054.1 | 7.76  | 7.25  | 0.13 | 0.32 | 1.43  | 0.064781 | 0.052817 | 0.403383 | 0.275444 |
| MmugDNA.10055.1.S1_at   | MmugDNA.10055.1 | 3.41  | 3.35  | 0.18 | 0.07 | 1.04  | 0.29156  | 0.103776 | 0.628857 | 0.364519 |
| MmugDNA.10056.1.S1_at   | MmugDNA.10056.1 | 5.98  | 5.25  | 0.58 | 0.55 | 1.65  | 0.212345 | 0.233941 | 0.57259  | 0.505211 |
| MmugDNA.10057.1.S1_at   | MmugDNA.10057.1 | 10.23 | 10.23 | 0.22 | 0.15 | -1    | 0.545024 | 0.416497 | 0.784702 | 0.641647 |
| MmugDNA.10058.1.S1_at   | MmugDNA.10058.1 | 9.77  | 9.82  | 0.24 | 0.23 | -1.04 | 0.618251 | 0.698364 | 0.825111 | 0.82478  |
| MmugDNA.1006.1.S1_at    | MmugDNA.1006.1  | 5.92  | 6.07  | 0.22 | 0.14 | -1.12 | 0.656971 | 0.183035 | 0.845682 | 0.459493 |
| MmugDNA.10060.1.S1_at   | MmugDNA.10060.1 | 10.71 | 10.73 | 0.19 | 0.16 | -1.01 | 0.802803 | 0.656493 | 0.918778 | 0.799097 |
| MmugDNA.10060.1.S1_s_at | MmugDNA.10060.1 | 11.2  | 11.11 | 0.19 | 0.15 | 1.06  | 0.890723 | 0.575397 | 0.956312 | 0.746486 |
| MmugDNA.10061.1.S1_s_at | MmugDNA.10061.1 | 8.02  | 7.54  | 0.28 | 0.69 | 1.4   | 0.425345 | 0.156327 | 0.715047 | 0.43161  |
| MmugDNA.10062.1.S1_at   | MmugDNA.10062.1 | 7.54  | 7.6   | 0.3  | 0.17 | -1.04 | 0.458296 | 0.651372 | 0.735376 | 0.796212 |
| MmugDNA.10063.1.S1_at   | MmugDNA.10063.1 | 6.43  | 6.54  | 0.19 | 0.09 | -1.08 | 0.327318 | 0.110464 | 0.653682 | 0.374684 |
| MmugDNA.10065.1.S1_at   | MmugDNA.10065.1 | 4.21  | 4.17  | 0.06 | 0.2  | 1.03  | 0.714942 | 0.908397 | 0.875005 | 0.948141 |
| MmugDNA.10066.1.S1_at   | MmugDNA.10066.1 | 10.58 | 9.91  | 0.08 | 0.28 | 1.59  | 0.023675 | 0.010712 | 0.292613 | 0.135227 |
| MmugDNA.10067.1.S1_at   | MmugDNA.10067.1 | 4.64  | 4.3   | 0.35 | 0.05 | 1.27  | 0.164859 | 0.29639  | 0.528805 | 0.555508 |
| MmugDNA.10068.1.S1_at   | MmugDNA.10068.1 | 3.22  | 3.06  | 0.11 | 0.18 | 1.11  | 0.270382 | 0.218972 | 0.614698 | 0.492722 |
| MmugDNA.1007.1.S1_at    | MmugDNA.1007.1  | 5.56  | 5.57  | 0.21 | 0.05 | -1.01 | 0.838289 | 0.742061 | 0.934646 | 0.850608 |
| MmugDNA.10070.1.S1_at   | MmugDNA.10070.1 | 8.68  | 9.66  | 0.26 | 0.32 | -1.97 | 0.008562 | 0.007145 | 0.21941  | 0.113735 |
| MmugDNA.10071.1.S1_at   | MmugDNA.10071.1 | 5.58  | 5.99  | 0.28 | 0.13 | -1.33 | 0.071086 | 0.082316 | 0.414673 | 0.331257 |
| MmugDNA.10072.1.S1_at   | MmugDNA.10072.1 | 3.43  | 3.36  | 0.15 | 0.66 | 1.05  | 0.546647 | 0.563469 | 0.785646 | 0.738692 |
| MmugDNA.10074.1.S1_at   | MmugDNA.10074.1 | 6.27  | 6.13  | 0.04 | 0.04 | 1.1   | 0.039569 | 0.091606 | 0.347539 | 0.346715 |
| MmugDNA.10075.1.S1_at   | MmugDNA.10075.1 | 10.02 | 9.57  | 0.22 | 0.17 | 1.37  | 0.164449 | 0.201992 | 0.528313 | 0.476444 |
| MmugDNA.10076.1.S1_at   | MmugDNA.10076.1 | 9.89  | 9.47  | 0.1  | 0.07 | 1.33  | 0.013642 | 0.001783 | 0.248684 | 0.063434 |
| MmugDNA.10077.1.S1_at   | MmugDNA.10077.1 | 6.41  | 5.68  | 0.45 | 0.28 | 1.65  | 0.192663 | 0.149808 | 0.555988 | 0.424394 |
| MmugDNA.10079.1.S1_at   | MmugDNA.10079.1 | 3.12  | 3.06  | 0.41 | 0.19 | 1.04  | 0.350261 | 0.365136 | 0.668443 | 0.605316 |

|                         |                 |       |       |      |      |       |          |          |          |          |
|-------------------------|-----------------|-------|-------|------|------|-------|----------|----------|----------|----------|
| MmugDNA.1008.1.S1_at    | MmugDNA.1008.1  | 3.88  | 3.84  | 0.38 | 0.14 | 1.03  | 0.47312  | 0.652027 | 0.744128 | 0.796529 |
| MmugDNA.10080.1.S1_at   | MmugDNA.10080.1 | 6.1   | 6.37  | 0.61 | 0.39 | -1.2  | 0.503595 | 0.639247 | 0.760979 | 0.788125 |
| MmugDNA.10081.1.S1_at   | MmugDNA.10081.1 | 8.08  | 7.53  | 0.05 | 0.29 | 1.46  | 0.050598 | 0.045391 | 0.374816 | 0.257395 |
| MmugDNA.10082.1.S1_s_at | MmugDNA.10082.1 | 9.53  | 9.7   | 0.3  | 0.38 | -1.13 | 0.572668 | 0.739972 | 0.800881 | 0.849334 |
| MmugDNA.10083.1.S1_at   | MmugDNA.10083.1 | 3.61  | 3.64  | 0.1  | 0.06 | -1.02 | 0.463359 | 0.56396  | 0.738706 | 0.738913 |
| MmugDNA.10085.1.S1_at   | MmugDNA.10085.1 | 9.06  | 9.07  | 1.01 | 0.48 | -1.01 | 0.366066 | 0.380843 | 0.678877 | 0.617426 |
| MmugDNA.10086.1.S1_at   | MmugDNA.10086.1 | 8.34  | 8.41  | 0.24 | 0.11 | -1.05 | 0.255889 | 0.091773 | 0.603662 | 0.346977 |
| MmugDNA.10087.1.S1_at   | MmugDNA.10087.1 | 4.28  | 4.19  | 0.49 | 0.06 | 1.06  | 0.303184 | 0.426594 | 0.637386 | 0.648739 |
| MmugDNA.10088.1.S1_at   | MmugDNA.10088.1 | 8.71  | 8.89  | 0.3  | 0.44 | -1.13 | 0.376061 | 0.457417 | 0.68492  | 0.670829 |
| MmugDNA.10089.1.S1_at   | MmugDNA.10089.1 | 8.98  | 8.54  | 0.13 | 0.53 | 1.36  | 0.830709 | 0.796962 | 0.93155  | 0.882822 |
| MmugDNA.1009.1.S1_at    | MmugDNA.1009.1  | 7.58  | 7.45  | 0.13 | 0.15 | 1.09  | 0.346481 | 0.067971 | 0.665892 | 0.306909 |
| MmugDNA.10090.1.S1_at   | MmugDNA.10090.1 | 6.18  | 6.15  | 0.64 | 0.35 | 1.02  | 0.40127  | 0.575401 | 0.700768 | 0.746486 |
| MmugDNA.10091.1.S1_at   | MmugDNA.10091.1 | 3.3   | 3.32  | 0.13 | 0.16 | -1.02 | 0.636978 | 0.718082 | 0.83591  | 0.836855 |
| MmugDNA.10092.1.S1_at   | MmugDNA.10092.1 | 4     | 4.13  | 0.1  | 0.12 | -1.1  | 0.245389 | 0.380372 | 0.597013 | 0.61703  |
| MmugDNA.10093.1.S1_at   | MmugDNA.10093.1 | 6.02  | 5.32  | 0.74 | 1.33 | 1.62  | 0.721383 | 0.413637 | 0.878074 | 0.639688 |
| MmugDNA.10094.1.S1_at   | MmugDNA.10094.1 | 5.15  | 4.66  | 0.08 | 0.29 | 1.4   | 0.05306  | 0.077403 | 0.379207 | 0.323204 |
| MmugDNA.10095.1.S1_at   | MmugDNA.10095.1 | 4.67  | 4.75  | 0.04 | 0.28 | -1.06 | 0.719437 | 0.677493 | 0.876883 | 0.81167  |
| MmugDNA.10097.1.S1_at   | MmugDNA.10097.1 | 4.05  | 4.01  | 0.35 | 0.12 | 1.03  | 0.791666 | 0.71338  | 0.913459 | 0.833698 |
| MmugDNA.10098.1.S1_at   | MmugDNA.10098.1 | 5.11  | 5.12  | 0.1  | 0.08 | -1    | 0.401983 | 0.666765 | 0.701106 | 0.804779 |
| MmugDNA.10099.1.S1_at   | MmugDNA.10099.1 | 4.6   | 4.85  | 0.06 | 0.25 | -1.19 | 0.182044 | 0.002685 | 0.546458 | 0.076408 |
| MmugDNA.101.1.S1_at     | MmugDNA.101.1   | 6.67  | 6.7   | 0.06 | 0.15 | -1.02 | 0.991561 | 0.784409 | 0.99695  | 0.87518  |
| MmugDNA.1010.1.S1_at    | MmugDNA.1010.1  | 3.76  | 3.67  | 0.16 | 0.16 | 1.06  | 0.666827 | 0.54709  | 0.85063  | 0.728283 |
| MmugDNA.10100.1.S1_at   | MmugDNA.10100.1 | 6.97  | 6.67  | 0.1  | 0.26 | 1.23  | 0.097418 | 0.079395 | 0.45638  | 0.32676  |
| MmugDNA.10102.1.S1_s_at | MmugDNA.10102.1 | 14.2  | 13.74 | 0.06 | 0.05 | 1.37  | 0.000651 | 0.000077 | 0.136818 | 0.027016 |
| MmugDNA.10103.1.S1_at   | MmugDNA.10103.1 | 11.23 | 11.37 | 0.12 | 0.17 | -1.11 | 0.170277 | 0.198939 | 0.534249 | 0.473521 |
| MmugDNA.10104.1.S1_at   | MmugDNA.10104.1 | 2.89  | 2.84  | 0.03 | 0.07 | 1.04  | 0.136601 | 0.044003 | 0.503755 | 0.254195 |
| MmugDNA.10105.1.S1_at   | MmugDNA.10105.1 | 4.5   | 4.51  | 0.05 | 0.07 | -1.01 | 0.190279 | 0.392668 | 0.553031 | 0.625813 |
| MmugDNA.10106.1.S1_at   | MmugDNA.10106.1 | 3.12  | 3.1   | 0.33 | 0.12 | 1.01  | 0.377369 | 0.473301 | 0.685813 | 0.680586 |
| MmugDNA.10107.1.S1_at   | MmugDNA.10107.1 | 4.57  | 4.71  | 0.01 | 0.17 | -1.1  | 0.576031 | 0.768345 | 0.802692 | 0.865493 |
| MmugDNA.10108.1.S1_at   | MmugDNA.10108.1 | 5.98  | 6.08  | 0.12 | 0.09 | -1.07 | 0.080045 | 0.06464  | 0.430204 | 0.300314 |
| MmugDNA.10109.1.S1_at   | MmugDNA.10109.1 | 7.99  | 7.67  | 0.04 | 0.09 | 1.25  | 0.007435 | 0.002856 | 0.208197 | 0.078756 |
| MmugDNA.1011.1.S1_at    | MmugDNA.1011.1  | 7.24  | 8.21  | 0.58 | 0.44 | -1.96 | 0.180948 | 0.2441   | 0.54536  | 0.514121 |
| MmugDNA.10111.1.S1_at   | MmugDNA.10111.1 | 10.56 | 10.1  | 0.18 | 0.22 | 1.38  | 0.04836  | 0.050092 | 0.368327 | 0.268916 |
| MmugDNA.10112.1.S1_at   | MmugDNA.10112.1 | 9.19  | 9.4   | 0.28 | 0.27 | -1.16 | 0.26855  | 0.367747 | 0.613283 | 0.607416 |
| MmugDNA.10112.1.S1_s_at | MmugDNA.10112.1 | 10.15 | 10.59 | 0.16 | 0.19 | -1.36 | 0.065478 | 0.070564 | 0.404571 | 0.311781 |
| MmugDNA.10113.1.S1_at   | MmugDNA.10113.1 | 5.08  | 5.05  | 0.42 | 0    | 1.03  | 0.311343 | 0.186866 | 0.643352 | 0.462707 |
| MmugDNA.10115.1.S1_at   | MmugDNA.10115.1 | 10.68 | 9.91  | 0.26 | 1.05 | 1.71  | 0.405125 | 0.379461 | 0.703082 | 0.616406 |
| MmugDNA.10117.1.S1_s_at | MmugDNA.10117.1 | 7.92  | 6.51  | 0.16 | 0.55 | 2.64  | 0.018574 | 0.008312 | 0.270581 | 0.120929 |
| MmugDNA.10118.1.S1_at   | MmugDNA.10118.1 | 5.57  | 5.53  | 0.08 | 0.08 | 1.03  | 0.954024 | 0.575871 | 0.982956 | 0.746841 |
| MmugDNA.10120.1.S1_at   | MmugDNA.10120.1 | 6.73  | 7.26  | 0.96 | 0.39 | -1.44 | 0.711642 | 0.515257 | 0.873646 | 0.708226 |
| MmugDNA.10123.1.S1_at   | MmugDNA.10123.1 | 3.65  | 3.67  | 0.17 | 0.3  | -1.01 | 0.444449 | 0.306266 | 0.726992 | 0.562907 |

|                         |                 |       |       |      |      |       |          |          |          |          |
|-------------------------|-----------------|-------|-------|------|------|-------|----------|----------|----------|----------|
| MmugDNA.10124.1.S1_at   | MmugDNA.10124.1 | 4.88  | 4.89  | 0.08 | 0.14 | -1.01 | 0.934046 | 0.477121 | 0.97447  | 0.683217 |
| MmugDNA.10125.1.S1_at   | MmugDNA.10125.1 | 4.93  | 4.54  | 0.28 | 0.38 | 1.31  | 0.939777 | 0.263921 | 0.977013 | 0.530153 |
| MmugDNA.10126.1.S1_s_at | MmugDNA.10126.1 | 4.38  | 4.33  | 0.5  | 0.19 | 1.03  | 0.51453  | 0.450432 | 0.76693  | 0.665643 |
| MmugDNA.10127.1.S1_at   | MmugDNA.10127.1 | 8.92  | 10.08 | 0.59 | 0.75 | -2.23 | 0.085248 | 0.092757 | 0.438687 | 0.34896  |
| MmugDNA.10128.1.S1_at   | MmugDNA.10128.1 | 10.28 | 11.93 | 0.37 | 0.32 | -3.15 | 0.004141 | 0.004445 | 0.181739 | 0.092958 |
| MmugDNA.10129.1.S1_at   | MmugDNA.10129.1 | 5.57  | 5.55  | 0.16 | 0.19 | 1.01  | 0.681466 | 0.533297 | 0.857635 | 0.719552 |
| MmugDNA.1013.1.S1_at    | MmugDNA.1013.1  | 7.05  | 6.89  | 0.67 | 0.39 | 1.12  | 0.689188 | 0.846201 | 0.861403 | 0.912444 |
| MmugDNA.10131.1.S1_at   | MmugDNA.10131.1 | 6.8   | 6.91  | 0.12 | 0.04 | -1.07 | 0.140903 | 0.127471 | 0.508448 | 0.398349 |
| MmugDNA.10132.1.S1_at   | MmugDNA.10132.1 | 4.74  | 4.71  | 0.16 | 0.15 | 1.03  | 0.89169  | 0.42819  | 0.956867 | 0.64972  |
| MmugDNA.10133.1.S1_at   | MmugDNA.10133.1 | 4.14  | 4.12  | 0.42 | 0.19 | 1.01  | 0.419963 | 0.390281 | 0.712178 | 0.624128 |
| MmugDNA.10135.1.S1_at   | MmugDNA.10135.1 | 7.8   | 7.62  | 0.15 | 0.21 | 1.13  | 0.272364 | 0.132876 | 0.616016 | 0.404544 |
| MmugDNA.10136.1.S1_at   | MmugDNA.10136.1 | 8.76  | 7.41  | 0.18 | 0.65 | 2.56  | 0.025631 | 0.015189 | 0.300161 | 0.15662  |
| MmugDNA.10139.1.S1_at   | MmugDNA.10139.1 | 10.22 | 10.55 | 0.24 | 0.68 | -1.25 | 0.560364 | 0.054306 | 0.794218 | 0.278539 |
| MmugDNA.1014.1.S1_at    | MmugDNA.1014.1  | 5.95  | 5.98  | 0.09 | 0.16 | -1.02 | 0.386912 | 0.735901 | 0.691718 | 0.847202 |
| MmugDNA.10140.1.S1_at   | MmugDNA.10140.1 | 9.9   | 11.83 | 0.26 | 0.51 | -3.81 | 0.005646 | 0.00188  | 0.191943 | 0.064979 |
| MmugDNA.10141.1.S1_at   | MmugDNA.10141.1 | 3.29  | 3.78  | 0.04 | 0.22 | -1.41 | 0.01734  | 0.007816 | 0.267196 | 0.117908 |
| MmugDNA.10142.1.S1_s_at | MmugDNA.10142.1 | 9.56  | 9.27  | 0.29 | 0.42 | 1.23  | 0.365407 | 0.313018 | 0.678257 | 0.567594 |
| MmugDNA.10143.1.S1_at   | MmugDNA.10143.1 | 5.65  | 5.35  | 0.12 | 0.44 | 1.23  | 0.359556 | 0.128547 | 0.673945 | 0.399908 |
| MmugDNA.10144.1.S1_at   | MmugDNA.10144.1 | 6.51  | 6.53  | 0.34 | 0.51 | -1.02 | 0.842948 | 0.967937 | 0.936737 | 0.982248 |
| MmugDNA.10145.1.S1_at   | MmugDNA.10145.1 | 3.14  | 3.14  | 0.04 | 0.15 | 1     | 0.29006  | 0.400325 | 0.628003 | 0.630169 |
| MmugDNA.10146.1.S1_at   | MmugDNA.10146.1 | 10.86 | 11.26 | 0.42 | 0.03 | -1.32 | 0.584947 | 0.747079 | 0.807261 | 0.853124 |
| MmugDNA.10147.1.S1_at   | MmugDNA.10147.1 | 8.04  | 8.14  | 0.23 | 0.15 | -1.07 | 0.487233 | 0.648413 | 0.752002 | 0.794235 |
| MmugDNA.10148.1.S1_at   | MmugDNA.10148.1 | 11.56 | 11.24 | 0.23 | 0.66 | 1.24  | 0.531027 | 0.719462 | 0.777    | 0.837651 |
| MmugDNA.10149.1.S1_at   | MmugDNA.10149.1 | 6.53  | 6.46  | 0.27 | 0.07 | 1.05  | 0.635245 | 0.735437 | 0.83494  | 0.846919 |
| MmugDNA.1015.1.S1_at    | MmugDNA.1015.1  | 3.66  | 3.73  | 0.08 | 0.35 | -1.05 | 0.496337 | 0.643741 | 0.757473 | 0.791112 |
| MmugDNA.10151.1.S1_at   | MmugDNA.10151.1 | 4.84  | 4.54  | 0.56 | 0.43 | 1.23  | 0.487046 | 0.400551 | 0.751872 | 0.630361 |
| MmugDNA.10152.1.S1_at   | MmugDNA.10152.1 | 6.96  | 5.69  | 2.27 | 0.63 | 2.42  | 0.274113 | 0.35101  | 0.617262 | 0.594736 |
| MmugDNA.10154.1.S1_at   | MmugDNA.10154.1 | 4.32  | 4.53  | 0.18 | 0.34 | -1.16 | 0.438279 | 0.246317 | 0.722942 | 0.515889 |
| MmugDNA.10155.1.S1_at   | MmugDNA.10155.1 | 3.31  | 3.44  | 0.15 | 0.06 | -1.09 | 0.290196 | 0.317867 | 0.628043 | 0.571042 |
| MmugDNA.10157.1.S1_at   | MmugDNA.10157.1 | 3.7   | 3.77  | 0.49 | 0.27 | -1.05 | 0.516927 | 0.444732 | 0.768355 | 0.662072 |
| MmugDNA.10159.1.S1_at   | MmugDNA.10159.1 | 8.79  | 8.92  | 0.04 | 0.41 | -1.1  | 0.537411 | 0.191672 | 0.780008 | 0.466942 |
| MmugDNA.1016.1.S1_at    | MmugDNA.1016.1  | 5.46  | 4.95  | 1.05 | 0.47 | 1.43  | 0.203466 | 0.275969 | 0.566041 | 0.540057 |
| MmugDNA.10160.1.S1_at   | MmugDNA.10160.1 | 8.18  | 9.73  | 0.53 | 0.55 | -2.94 | 0.046194 | 0.037336 | 0.362604 | 0.237659 |
| MmugDNA.10161.1.S1_s_at | MmugDNA.10161.1 | 11.06 | 10.87 | 0.13 | 0.22 | 1.13  | 0.198977 | 0.37819  | 0.562029 | 0.615438 |
| MmugDNA.10161.1.S1_x_at | MmugDNA.10161.1 | 10.91 | 10.7  | 0.13 | 0.23 | 1.16  | 0.213164 | 0.237844 | 0.573477 | 0.508341 |
| MmugDNA.10163.1.S1_at   | MmugDNA.10163.1 | 6.27  | 6.42  | 0.21 | 0.56 | -1.11 | 0.454064 | 0.432203 | 0.733133 | 0.652775 |
| MmugDNA.10164.1.S1_at   | MmugDNA.10164.1 | 3.75  | 4.01  | 0.17 | 0.8  | -1.2  | 0.438185 | 0.654077 | 0.722864 | 0.797844 |
| MmugDNA.10165.1.S1_at   | MmugDNA.10165.1 | 6.85  | 6.63  | 0.4  | 0.55 | 1.16  | 0.38936  | 0.318743 | 0.692994 | 0.571373 |
| MmugDNA.10166.1.S1_at   | MmugDNA.10166.1 | 4.77  | 4.12  | 0.69 | 0.27 | 1.57  | 0.241486 | 0.440456 | 0.593941 | 0.658967 |
| MmugDNA.10167.1.S1_at   | MmugDNA.10167.1 | 7.19  | 7.76  | 0.29 | 0.49 | -1.49 | 0.419559 | 0.064798 | 0.711969 | 0.300493 |
| MmugDNA.10168.1.S1_at   | MmugDNA.10168.1 | 7.61  | 7.07  | 0.22 | 0.2  | 1.45  | 0.056551 | 0.024399 | 0.386649 | 0.19551  |

|                         |                 |       |       |      |      |        |          |          |          |          |
|-------------------------|-----------------|-------|-------|------|------|--------|----------|----------|----------|----------|
| MmugDNA.10169.1.S1_at   | MmugDNA.10169.1 | 3.14  | 3.15  | 0.05 | 0.12 | -1.01  | 0.830126 | 0.82702  | 0.931298 | 0.900672 |
| MmugDNA.1017.1.S1_at    | MmugDNA.1017.1  | 5.4   | 9.25  | 0.45 | 1.14 | -14.43 | 0.005007 | 0.002545 | 0.187602 | 0.07453  |
| MmugDNA.10170.1.S1_at   | MmugDNA.10170.1 | 5.83  | 5.9   | 0.08 | 0.02 | -1.05  | 0.606152 | 0.047189 | 0.818749 | 0.261793 |
| MmugDNA.10171.1.S1_at   | MmugDNA.10171.1 | 9.35  | 9.09  | 0.39 | 0.32 | 1.2    | 0.516613 | 0.476442 | 0.768145 | 0.682725 |
| MmugDNA.10172.1.S1_at   | MmugDNA.10172.1 | 9.06  | 9.54  | 0.36 | 0.87 | -1.4   | 0.40085  | 0.039916 | 0.700437 | 0.244857 |
| MmugDNA.10173.1.S1_at   | MmugDNA.10173.1 | 5.06  | 4.74  | 0.21 | 0.5  | 1.25   | 0.814508 | 0.824982 | 0.924758 | 0.899487 |
| MmugDNA.10174.1.S1_at   | MmugDNA.10174.1 | 4.66  | 4.79  | 0.14 | 0.21 | -1.1   | 0.705967 | 0.695544 | 0.870378 | 0.823054 |
| MmugDNA.10175.1.S1_at   | MmugDNA.10175.1 | 5.83  | 5.72  | 0.41 | 0.19 | 1.08   | 0.63093  | 0.346328 | 0.832396 | 0.59124  |
| MmugDNA.10176.1.S1_at   | MmugDNA.10176.1 | 3.41  | 3.33  | 0.3  | 0.01 | 1.06   | 0.620882 | 0.711213 | 0.826212 | 0.832484 |
| MmugDNA.10178.1.S1_at   | MmugDNA.10178.1 | 7.92  | 7.56  | 0.21 | 0.36 | 1.29   | 0.360231 | 0.167926 | 0.674277 | 0.444493 |
| MmugDNA.10179.1.S1_at   | MmugDNA.10179.1 | 3.4   | 3.32  | 0.29 | 0.06 | 1.06   | 0.626621 | 0.788894 | 0.829734 | 0.878011 |
| MmugDNA.1018.1.S1_at    | MmugDNA.1018.1  | 3.76  | 3.37  | 0.41 | 0.22 | 1.3    | 0.133787 | 0.124351 | 0.500334 | 0.394826 |
| MmugDNA.10180.1.S1_at   | MmugDNA.10180.1 | 5.12  | 4.82  | 0.14 | 0.03 | 1.23   | 0.074669 | 0.054386 | 0.420607 | 0.278784 |
| MmugDNA.10181.1.S1_at   | MmugDNA.10181.1 | 6.92  | 7     | 0.05 | 0.14 | -1.05  | 0.406494 | 0.199667 | 0.703713 | 0.474335 |
| MmugDNA.10183.1.S1_at   | MmugDNA.10183.1 | 3.42  | 3.41  | 0.21 | 0.24 | 1.01   | 0.965796 | 0.863254 | 0.987062 | 0.922329 |
| MmugDNA.10184.1.S1_at   | MmugDNA.10184.1 | 3.9   | 3.94  | 0.17 | 0.12 | -1.03  | 0.689494 | 0.78048  | 0.861555 | 0.872614 |
| MmugDNA.10185.1.S1_at   | MmugDNA.10185.1 | 4.18  | 4.09  | 0.06 | 0.12 | 1.06   | 0.725247 | 0.269421 | 0.880109 | 0.534742 |
| MmugDNA.10187.1.S1_at   | MmugDNA.10187.1 | 8.04  | 7.32  | 0.13 | 0.69 | 1.64   | 0.195426 | 0.087188 | 0.558901 | 0.340135 |
| MmugDNA.10188.1.S1_at   | MmugDNA.10188.1 | 3.3   | 3.39  | 0.08 | 0.04 | -1.07  | 0.316921 | 0.171524 | 0.647775 | 0.447895 |
| MmugDNA.10189.1.S1_at   | MmugDNA.10189.1 | 4.75  | 4.84  | 0.18 | 0.11 | -1.07  | 0.598611 | 0.110942 | 0.814014 | 0.375376 |
| MmugDNA.1019.1.S1_at    | MmugDNA.1019.1  | 6.04  | 6.04  | 0.04 | 0.06 | 1      | 0.64437  | 0.26788  | 0.839734 | 0.533607 |
| MmugDNA.10190.1.S1_at   | MmugDNA.10190.1 | 4.73  | 5.31  | 0.53 | 1.11 | -1.49  | 0.468693 | 0.466424 | 0.741184 | 0.676289 |
| MmugDNA.10191.1.S1_at   | MmugDNA.10191.1 | 3.73  | 3.78  | 0.66 | 0.12 | -1.03  | 0.432219 | 0.63465  | 0.718847 | 0.784964 |
| MmugDNA.10192.1.S1_at   | MmugDNA.10192.1 | 4.05  | 4.17  | 0.17 | 0.12 | -1.09  | 0.813567 | 0.323647 | 0.924333 | 0.574525 |
| MmugDNA.10193.1.S1_at   | MmugDNA.10193.1 | 10.67 | 10.75 | 0.26 | 0.58 | -1.06  | 0.89035  | 0.981443 | 0.956149 | 0.989775 |
| MmugDNA.10194.1.S1_at   | MmugDNA.10194.1 | 8.71  | 8.78  | 0.44 | 0.23 | -1.05  | 0.709872 | 0.306945 | 0.872725 | 0.563427 |
| MmugDNA.10198.1.S1_at   | MmugDNA.10198.1 | 7.39  | 7.67  | 0.11 | 0.12 | -1.21  | 0.060577 | 0.065279 | 0.393743 | 0.301239 |
| MmugDNA.10199.1.S1_at   | MmugDNA.10199.1 | 4.12  | 4.2   | 0    | 0.13 | -1.06  | 0.399102 | 0.164795 | 0.699102 | 0.441106 |
| MmugDNA.102.1.S1_at     | MmugDNA.102.1   | 9.81  | 9.76  | 0.08 | 0.37 | 1.03   | 0.517969 | 0.439162 | 0.76914  | 0.657909 |
| MmugDNA.1020.1.S1_at    | MmugDNA.1020.1  | 8.95  | 9.08  | 0.28 | 1.01 | -1.09  | 0.419975 | 0.380833 | 0.712178 | 0.617426 |
| MmugDNA.10201.1.S1_at   | MmugDNA.10201.1 | 4.81  | 4.99  | 0.18 | 0.15 | -1.13  | 0.909073 | 0.330742 | 0.963975 | 0.57952  |
| MmugDNA.10202.1.S1_at   | MmugDNA.10202.1 | 5.37  | 5.71  | 0.04 | 0.16 | -1.27  | 0.063893 | 0.031216 | 0.401767 | 0.218485 |
| MmugDNA.10203.1.S1_at   | MmugDNA.10203.1 | 6.78  | 6.38  | 0.35 | 0.21 | 1.32   | 0.746109 | 0.338425 | 0.891268 | 0.585432 |
| MmugDNA.10204.1.S1_at   | MmugDNA.10204.1 | 6.14  | 5.29  | 0.83 | 0.64 | 1.81   | 0.373314 | 0.392666 | 0.683245 | 0.625813 |
| MmugDNA.10205.1.S1_at   | MmugDNA.10205.1 | 2.92  | 2.92  | 0.03 | 0.19 | -1     | 0.606982 | 0.802432 | 0.819156 | 0.886217 |
| MmugDNA.10206.1.S1_at   | MmugDNA.10206.1 | 3.87  | 3.84  | 0.43 | 0.09 | 1.02   | 0.430299 | 0.556212 | 0.717986 | 0.734449 |
| MmugDNA.10207.1.S1_at   | MmugDNA.10207.1 | 5.97  | 5.99  | 0.23 | 0.15 | -1.01  | 0.491449 | 0.456853 | 0.755082 | 0.670521 |
| MmugDNA.10208.1.S1_s_at | MmugDNA.10208.1 | 7.38  | 7.07  | 0.24 | 0.11 | 1.24   | 0.072982 | 0.104694 | 0.418323 | 0.366073 |
| MmugDNA.1021.1.S1_at    | MmugDNA.1021.1  | 3.54  | 3.47  | 0.07 | 0.11 | 1.05   | 0.507381 | 0.288237 | 0.762788 | 0.5495   |
| MmugDNA.10210.1.S1_at   | MmugDNA.10210.1 | 3.71  | 3.72  | 0.08 | 0.03 | -1.01  | 0.356968 | 0.480705 | 0.672024 | 0.68597  |
| MmugDNA.10211.1.S1_at   | MmugDNA.10211.1 | 6.21  | 6.31  | 0.06 | 0.06 | -1.07  | 0.136864 | 0.053657 | 0.504029 | 0.277225 |



|                         |                 |       |       |      |      |        |          |          |          |          |
|-------------------------|-----------------|-------|-------|------|------|--------|----------|----------|----------|----------|
| MmugDNA.10213.1.S1_at   | MmugDNA.10213.1 | 5.94  | 6.62  | 1.09 | 1.32 | -1.6   | 0.755604 | 0.277966 | 0.896094 | 0.541664 |
| MmugDNA.10215.1.S1_at   | MmugDNA.10215.1 | 8.59  | 8.32  | 0.11 | 0.08 | 1.21   | 0.009103 | 0.004051 | 0.222023 | 0.090281 |
| MmugDNA.10217.1.S1_at   | MmugDNA.10217.1 | 6.69  | 6.77  | 0.14 | 0.13 | -1.06  | 0.960627 | 0.151598 | 0.9849   | 0.426333 |
| MmugDNA.10219.1.S1_at   | MmugDNA.10219.1 | 5.36  | 5.44  | 0.18 | 0.11 | -1.05  | 0.670124 | 0.702419 | 0.852347 | 0.827522 |
| MmugDNA.1022.1.S1_s_at  | MmugDNA.1022.1  | 3.6   | 7.02  | 0.41 | 2.3  | -10.73 | 0.19966  | 0.077607 | 0.562726 | 0.323558 |
| MmugDNA.10221.1.S1_at   | MmugDNA.10221.1 | 5.82  | 5.62  | 0.13 | 0.13 | 1.16   | 0.512763 | 0.417133 | 0.765738 | 0.642029 |
| MmugDNA.10224.1.S1_at   | MmugDNA.10224.1 | 5.79  | 6.23  | 0.46 | 0.21 | -1.35  | 0.20064  | 0.214232 | 0.5634   | 0.487856 |
| MmugDNA.10225.1.S1_at   | MmugDNA.10225.1 | 6.18  | 5.86  | 0.76 | 0.51 | 1.24   | 0.428319 | 0.383786 | 0.716796 | 0.619734 |
| MmugDNA.10226.1.S1_at   | MmugDNA.10226.1 | 8.34  | 7.74  | 0.34 | 0.83 | 1.52   | 0.45913  | 0.654267 | 0.735945 | 0.797979 |
| MmugDNA.10228.1.S1_at   | MmugDNA.10228.1 | 5.74  | 5.76  | 0.04 | 0.14 | -1.02  | 0.423337 | 0.544452 | 0.714016 | 0.726849 |
| MmugDNA.10229.1.S1_at   | MmugDNA.10229.1 | 5.66  | 4.37  | 1.26 | 0.36 | 2.45   | 0.123414 | 0.14597  | 0.489112 | 0.419981 |
| MmugDNA.1023.1.S1_at    | MmugDNA.1023.1  | 7.26  | 7.06  | 0.69 | 0.36 | 1.15   | 0.246522 | 0.342833 | 0.597782 | 0.588712 |
| MmugDNA.10230.1.S1_at   | MmugDNA.10230.1 | 4.87  | 4.58  | 0.24 | 0.2  | 1.22   | 0.160667 | 0.166098 | 0.525746 | 0.442669 |
| MmugDNA.10231.1.S1_at   | MmugDNA.10231.1 | 6.35  | 6.58  | 0.22 | 0.38 | -1.18  | 0.364405 | 0.324965 | 0.677318 | 0.575512 |
| MmugDNA.10232.1.S1_at   | MmugDNA.10232.1 | 5.73  | 4.43  | 0.34 | 0.64 | 2.45   | 0.129109 | 0.060309 | 0.495114 | 0.292254 |
| MmugDNA.10233.1.S1_s_at | MmugDNA.10233.1 | 6.76  | 7.05  | 0.1  | 0.17 | -1.23  | 0.30057  | 0.091109 | 0.635955 | 0.345945 |
| MmugDNA.10234.1.S1_at   | MmugDNA.10234.1 | 6.32  | 6.91  | 0.29 | 0.42 | -1.51  | 0.060828 | 0.039694 | 0.394325 | 0.244271 |
| MmugDNA.10235.1.S1_at   | MmugDNA.10235.1 | 11.02 | 10.8  | 0.19 | 0.18 | 1.16   | 0.319036 | 0.248201 | 0.648688 | 0.517574 |
| MmugDNA.10237.1.S1_at   | MmugDNA.10237.1 | 7.32  | 7.11  | 0.14 | 0.19 | 1.16   | 0.058758 | 0.089524 | 0.390921 | 0.343811 |
| MmugDNA.10238.1.S1_at   | MmugDNA.10238.1 | 7.87  | 7.56  | 0.21 | 0.59 | 1.24   | 0.338836 | 0.49664  | 0.660988 | 0.696119 |
| MmugDNA.10239.1.S1_at   | MmugDNA.10239.1 | 5.08  | 4.86  | 0.31 | 0.33 | 1.16   | 0.637744 | 0.749989 | 0.836256 | 0.854652 |
| MmugDNA.1024.1.S1_s_at  | MmugDNA.1024.1  | 7.25  | 8.84  | 0.02 | 1.41 | -3     | 0.128361 | 0.124052 | 0.494376 | 0.394349 |
| MmugDNA.10241.1.S1_at   | MmugDNA.10241.1 | 3.75  | 3.62  | 0.14 | 0.09 | 1.1    | 0.586048 | 0.721713 | 0.80786  | 0.838808 |
| MmugDNA.10244.1.S1_at   | MmugDNA.10244.1 | 3.72  | 3.76  | 0.02 | 0.1  | -1.02  | 0.73337  | 0.823839 | 0.884989 | 0.898803 |
| MmugDNA.10245.1.S1_at   | MmugDNA.10245.1 | 6.06  | 5.74  | 0.09 | 0.23 | 1.25   | 0.10443  | 0.762578 | 0.464351 | 0.861882 |
| MmugDNA.10246.1.S1_at   | MmugDNA.10246.1 | 9.53  | 9.72  | 0.14 | 0.24 | -1.14  | 0.102419 | 0.140309 | 0.462321 | 0.413498 |
| MmugDNA.10247.1.S1_at   | MmugDNA.10247.1 | 4.15  | 3.95  | 0.28 | 0.32 | 1.15   | 0.191466 | 0.339205 | 0.554471 | 0.585918 |
| MmugDNA.10248.1.S1_at   | MmugDNA.10248.1 | 7.52  | 6.67  | 0.93 | 0.41 | 1.8    | 0.306707 | 0.386889 | 0.639659 | 0.621935 |
| MmugDNA.1025.1.S1_at    | MmugDNA.1025.1  | 6.37  | 6.01  | 0.18 | 0.43 | 1.29   | 0.130466 | 0.195778 | 0.496851 | 0.470637 |
| MmugDNA.10250.1.S1_at   | MmugDNA.10250.1 | 3.1   | 3.1   | 0.12 | 0.24 | -1     | 0.935992 | 0.886712 | 0.975172 | 0.935519 |
| MmugDNA.10251.1.S1_at   | MmugDNA.10251.1 | 9.87  | 11.13 | 0.57 | 1.18 | -2.39  | 0.744425 | 0.889474 | 0.890646 | 0.937014 |
| MmugDNA.10252.1.S1_at   | MmugDNA.10252.1 | 3.6   | 3.58  | 0.11 | 0.26 | 1.02   | 0.569837 | 0.849422 | 0.79921  | 0.914533 |
| MmugDNA.10254.1.S1_at   | MmugDNA.10254.1 | 4.86  | 5.04  | 0.15 | 0.2  | -1.13  | 0.126402 | 0.238475 | 0.492753 | 0.509084 |
| MmugDNA.10255.1.S1_at   | MmugDNA.10255.1 | 6.13  | 6.03  | 0.26 | 0.05 | 1.07   | 0.901    | 0.292601 | 0.960391 | 0.552659 |
| MmugDNA.10256.1.S1_at   | MmugDNA.10256.1 | 7.52  | 7.16  | 0.04 | 0.13 | 1.29   | 0.018356 | 0.044606 | 0.270007 | 0.255589 |
| MmugDNA.10258.1.S1_at   | MmugDNA.10258.1 | 7.51  | 7.53  | 0.19 | 0.07 | -1.01  | 0.904223 | 0.283642 | 0.961669 | 0.546058 |
| MmugDNA.1026.1.S1_at    | MmugDNA.1026.1  | 3.39  | 3.39  | 0.15 | 0.03 | 1      | 0.295182 | 0.329379 | 0.631561 | 0.578733 |
| MmugDNA.10263.1.S1_at   | MmugDNA.10263.1 | 4.86  | 4.51  | 0.27 | 0.07 | 1.28   | 0.301362 | 0.219955 | 0.636366 | 0.49344  |
| MmugDNA.10264.1.S1_at   | MmugDNA.10264.1 | 6.6   | 6.62  | 0.24 | 0.15 | -1.01  | 0.652761 | 0.635173 | 0.843845 | 0.785258 |
| MmugDNA.10265.1.S1_at   | MmugDNA.10265.1 | 7.51  | 5.73  | 0.25 | 0.3  | 3.42   | 0.001416 | 0.000316 | 0.147682 | 0.035358 |
| MmugDNA.10266.1.S1_at   | MmugDNA.10266.1 | 3.53  | 3.45  | 0.12 | 0.05 | 1.05   | 0.540487 | 0.571318 | 0.781935 | 0.743642 |

|                         |                 |       |       |      |      |       |          |          |          |          |
|-------------------------|-----------------|-------|-------|------|------|-------|----------|----------|----------|----------|
| MmugDNA.10270.1.S1_at   | MmugDNA.10270.1 | 5.74  | 5.85  | 0.22 | 0    | -1.08 | 0.923131 | 0.452691 | 0.970128 | 0.667253 |
| MmugDNA.10273.1.S1_at   | MmugDNA.10273.1 | 11.1  | 11.4  | 0.11 | 0.07 | -1.23 | 0.013073 | 0.000477 | 0.245262 | 0.038572 |
| MmugDNA.10275.1.S1_x_at | MmugDNA.10275.1 | 7.7   | 7.3   | 0.88 | 0.2  | 1.32  | 0.166515 | 0.172922 | 0.530253 | 0.449546 |
| MmugDNA.10276.1.S1_at   | MmugDNA.10276.1 | 7.85  | 9.05  | 0.32 | 0.53 | -2.3  | 0.021342 | 0.014552 | 0.282524 | 0.153907 |
| MmugDNA.10277.1.S1_at   | MmugDNA.10277.1 | 5.88  | 5.76  | 0.06 | 0.3  | 1.09  | 0.1737   | 0.251687 | 0.537255 | 0.520444 |
| MmugDNA.10279.1.S1_at   | MmugDNA.10279.1 | 4.44  | 4.37  | 0.12 | 0.08 | 1.05  | 0.713129 | 0.885834 | 0.874301 | 0.93508  |
| MmugDNA.10280.1.S1_at   | MmugDNA.10280.1 | 4.96  | 5.29  | 0.31 | 0.26 | -1.26 | 0.490947 | 0.467511 | 0.754698 | 0.677091 |
| MmugDNA.10281.1.S1_s_at | MmugDNA.10281.1 | 3.29  | 3.14  | 0.69 | 0.1  | 1.11  | 0.25853  | 0.304624 | 0.605762 | 0.561838 |
| MmugDNA.10282.1.S1_at   | MmugDNA.10282.1 | 4.48  | 5.16  | 0.24 | 0.48 | -1.6  | 0.085536 | 0.114782 | 0.43944  | 0.381311 |
| MmugDNA.10285.1.S1_at   | MmugDNA.10285.1 | 3.58  | 3.63  | 1.52 | 0.39 | -1.04 | 0.543231 | 0.467631 | 0.783788 | 0.677203 |
| MmugDNA.10289.1.S1_at   | MmugDNA.10289.1 | 9.38  | 9.05  | 0.02 | 0.09 | 1.26  | 0.00309  | 0.003645 | 0.172102 | 0.086526 |
| MmugDNA.1029.1.S1_at    | MmugDNA.1029.1  | 4.05  | 4.08  | 0.19 | 0.14 | -1.02 | 0.623161 | 0.577691 | 0.827836 | 0.748038 |
| MmugDNA.10290.1.S1_at   | MmugDNA.10290.1 | 8.51  | 8.64  | 0.17 | 0.22 | -1.09 | 0.570404 | 0.249585 | 0.799483 | 0.518645 |
| MmugDNA.10291.1.S1_at   | MmugDNA.10291.1 | 3.32  | 3.2   | 0.16 | 0.15 | 1.08  | 0.547551 | 0.751846 | 0.786269 | 0.855698 |
| MmugDNA.10292.1.S1_at   | MmugDNA.10292.1 | 4.09  | 3.67  | 0.16 | 0.43 | 1.34  | 0.122405 | 0.103407 | 0.487622 | 0.3643   |
| MmugDNA.10293.1.S1_at   | MmugDNA.10293.1 | 4.92  | 4.54  | 0.34 | 0.69 | 1.29  | 0.915956 | 0.50274  | 0.966921 | 0.700289 |
| MmugDNA.10294.1.S1_at   | MmugDNA.10294.1 | 5.76  | 5.76  | 0.35 | 0.2  | 1     | 0.658856 | 0.838729 | 0.846726 | 0.908041 |
| MmugDNA.10295.1.S1_at   | MmugDNA.10295.1 | 4.1   | 4.23  | 0.16 | 0.07 | -1.1  | 0.352566 | 0.044275 | 0.669669 | 0.254941 |
| MmugDNA.10296.1.S1_at   | MmugDNA.10296.1 | 4.5   | 4.26  | 0.04 | 0.27 | 1.18  | 0.071309 | 0.47235  | 0.415079 | 0.679977 |
| MmugDNA.10297.1.S1_at   | MmugDNA.10297.1 | 9.83  | 9.46  | 0.2  | 0.88 | 1.29  | 0.218359 | 0.280723 | 0.577884 | 0.543924 |
| MmugDNA.10298.1.S1_at   | MmugDNA.10298.1 | 3.84  | 3.52  | 0.28 | 0.05 | 1.25  | 0.463919 | 0.336555 | 0.738998 | 0.58391  |
| MmugDNA.10299.1.S1_at   | MmugDNA.10299.1 | 3.61  | 3.59  | 0.27 | 0.14 | 1.01  | 0.652029 | 0.142856 | 0.843476 | 0.416786 |
| MmugDNA.103.1.S1_at     | MmugDNA.103.1   | 9.3   | 9.36  | 0.18 | 0.54 | -1.04 | 0.990549 | 0.959175 | 0.996696 | 0.976862 |
| MmugDNA.1030.1.S1_at    | MmugDNA.1030.1  | 10.23 | 10.27 | 0.31 | 0.26 | -1.03 | 0.742934 | 0.841483 | 0.890085 | 0.909663 |
| MmugDNA.10300.1.S1_at   | MmugDNA.10300.1 | 4.8   | 4.77  | 0.14 | 0.03 | 1.03  | 0.83133  | 0.794349 | 0.931682 | 0.881371 |
| MmugDNA.10301.1.S1_at   | MmugDNA.10301.1 | 7.31  | 6.32  | 0.24 | 0.35 | 1.99  | 0.015473 | 0.010572 | 0.258858 | 0.134182 |
| MmugDNA.10303.1.S1_at   | MmugDNA.10303.1 | 4.51  | 6.2   | 1.16 | 2.31 | -3.25 | 0.417531 | 0.21336  | 0.710571 | 0.487226 |
| MmugDNA.10304.1.S1_at   | MmugDNA.10304.1 | 7.47  | 7.48  | 0.23 | 0.06 | -1.01 | 0.700531 | 0.504172 | 0.867502 | 0.701433 |
| MmugDNA.10304.1.S1_s_at | MmugDNA.10304.1 | 6.34  | 6.6   | 0.07 | 0.05 | -1.19 | 0.010475 | 0.00489  | 0.229964 | 0.097632 |
| MmugDNA.10305.1.S1_at   | MmugDNA.10305.1 | 10.65 | 10.84 | 0.09 | 0.17 | -1.14 | 0.206587 | 0.259489 | 0.568816 | 0.526418 |
| MmugDNA.10308.1.S1_at   | MmugDNA.10308.1 | 4.28  | 4.36  | 0.11 | 0.05 | -1.06 | 0.109682 | 0.044    | 0.470963 | 0.254195 |
| MmugDNA.10309.1.S1_at   | MmugDNA.10309.1 | 5.68  | 5.83  | 0.04 | 0.1  | -1.11 | 0.054647 | 0.006373 | 0.382059 | 0.108546 |
| MmugDNA.1031.1.S1_at    | MmugDNA.1031.1  | 5.76  | 5.45  | 1.08 | 0.18 | 1.24  | 0.203919 | 0.323275 | 0.566394 | 0.574408 |
| MmugDNA.10310.1.S1_at   | MmugDNA.10310.1 | 7.4   | 7.31  | 0.5  | 0.37 | 1.06  | 0.320534 | 0.289596 | 0.649472 | 0.550661 |
| MmugDNA.10312.1.S1_at   | MmugDNA.10312.1 | 10.63 | 9.92  | 0.34 | 0.3  | 1.64  | 0.04564  | 0.05694  | 0.361322 | 0.284726 |
| MmugDNA.10313.1.S1_at   | MmugDNA.10313.1 | 3.26  | 3.34  | 0.18 | 0.22 | -1.06 | 0.646731 | 0.772329 | 0.841047 | 0.867672 |
| MmugDNA.10314.1.S1_at   | MmugDNA.10314.1 | 7.67  | 7.73  | 0.14 | 0.16 | -1.04 | 0.69117  | 0.279721 | 0.862582 | 0.543228 |
| MmugDNA.10315.1.S1_at   | MmugDNA.10315.1 | 3.68  | 3.85  | 0.19 | 0.15 | -1.12 | 0.875083 | 0.676322 | 0.949887 | 0.810904 |
| MmugDNA.10316.1.S1_s_at | MmugDNA.10316.1 | 8.59  | 8.57  | 0.17 | 0.15 | 1.02  | 0.983919 | 0.159749 | 0.994301 | 0.435871 |
| MmugDNA.10317.1.S1_at   | MmugDNA.10317.1 | 8.98  | 9.41  | 0.02 | 0.1  | -1.35 | 0.001797 | 0.000427 | 0.154452 | 0.038359 |
| MmugDNA.10318.1.S1_at   | MmugDNA.10318.1 | 10.86 | 10.66 | 0.06 | 0.24 | 1.15  | 0.423464 | 0.168903 | 0.714127 | 0.445458 |

|                         |                 |       |       |      |      |       |          |          |          |          |
|-------------------------|-----------------|-------|-------|------|------|-------|----------|----------|----------|----------|
| MmugDNA.10319.1.S1_at   | MmugDNA.10319.1 | 3.33  | 3.32  | 0.14 | 0.08 | 1.01  | 0.730888 | 0.913811 | 0.88338  | 0.951523 |
| MmugDNA.1032.1.S1_at    | MmugDNA.1032.1  | 5.87  | 6.11  | 0.08 | 0.17 | -1.18 | 0.159081 | 0.232622 | 0.52416  | 0.504359 |
| MmugDNA.10321.1.S1_at   | MmugDNA.10321.1 | 12.61 | 12.74 | 0.11 | 0.11 | -1.1  | 0.210018 | 0.154411 | 0.571234 | 0.429288 |
| MmugDNA.10323.1.S1_s_at | MmugDNA.10323.1 | 12.24 | 12.26 | 0.13 | 0.19 | -1.01 | 0.914988 | 0.021106 | 0.966361 | 0.181869 |
| MmugDNA.10325.1.S1_at   | MmugDNA.10325.1 | 12.01 | 12.21 | 0.36 | 0.04 | -1.15 | 0.410836 | 0.00706  | 0.70666  | 0.113278 |
| MmugDNA.10326.1.S1_at   | MmugDNA.10326.1 | 10.77 | 10.26 | 0.32 | 0.34 | 1.42  | 0.136715 | 0.076102 | 0.503852 | 0.320848 |
| MmugDNA.10329.1.S1_at   | MmugDNA.10329.1 | 8.42  | 7.58  | 0.91 | 0.85 | 1.78  | 0.450471 | 0.588738 | 0.73096  | 0.755137 |
| MmugDNA.1033.1.S1_at    | MmugDNA.1033.1  | 5.27  | 4.74  | 0.13 | 0.21 | 1.44  | 0.078189 | 0.175519 | 0.428221 | 0.452161 |
| MmugDNA.10330.1.S1_at   | MmugDNA.10330.1 | 5.3   | 5.35  | 0.16 | 0.19 | -1.03 | 0.251511 | 0.318679 | 0.600873 | 0.571315 |
| MmugDNA.10332.1.S1_at   | MmugDNA.10332.1 | 4.93  | 4.53  | 0.05 | 0.22 | 1.32  | 0.038418 | 0.01946  | 0.344318 | 0.175136 |
| MmugDNA.10336.1.S1_at   | MmugDNA.10336.1 | 6.19  | 5.88  | 0.18 | 0.13 | 1.24  | 0.19261  | 0.040837 | 0.555864 | 0.246981 |
| MmugDNA.10337.1.S1_at   | MmugDNA.10337.1 | 7.63  | 7.76  | 0.43 | 0.71 | -1.1  | 0.590566 | 0.777811 | 0.809865 | 0.870888 |
| MmugDNA.10339.1.S1_at   | MmugDNA.10339.1 | 4.47  | 4.47  | 0.05 | 0.15 | 1     | 0.272711 | 0.318172 | 0.616379 | 0.571046 |
| MmugDNA.1034.1.S1_at    | MmugDNA.1034.1  | 7.36  | 7.28  | 0.49 | 0.57 | 1.06  | 0.93569  | 0.970636 | 0.975127 | 0.984019 |
| MmugDNA.10340.1.S1_at   | MmugDNA.10340.1 | 8.8   | 8.94  | 0.32 | 0.13 | -1.11 | 0.862549 | 0.57129  | 0.944717 | 0.743642 |
| MmugDNA.10341.1.S1_at   | MmugDNA.10341.1 | 5.57  | 5.24  | 0.31 | 0.18 | 1.25  | 0.084804 | 0.100839 | 0.437699 | 0.360364 |
| MmugDNA.10342.1.S1_at   | MmugDNA.10342.1 | 7.9   | 9.58  | 0.18 | 0.6  | -3.19 | 0.012142 | 0.016946 | 0.240358 | 0.165073 |
| MmugDNA.10343.1.S1_at   | MmugDNA.10343.1 | 6.03  | 6.21  | 0.19 | 0.26 | -1.14 | 0.339895 | 0.468487 | 0.661533 | 0.677738 |
| MmugDNA.10344.1.S1_at   | MmugDNA.10344.1 | 3.91  | 3.52  | 0.35 | 0.07 | 1.31  | 0.154526 | 0.058411 | 0.519097 | 0.288454 |
| MmugDNA.10346.1.S1_at   | MmugDNA.10346.1 | 5.4   | 5.53  | 0.2  | 0.13 | -1.1  | 0.27986  | 0.366259 | 0.621287 | 0.606019 |
| MmugDNA.10348.1.S1_s_at | MmugDNA.10348.1 | 11.96 | 12.64 | 0.26 | 0.17 | -1.6  | 0.009644 | 0.008422 | 0.226235 | 0.121844 |
| MmugDNA.1035.1.S1_at    | MmugDNA.1035.1  | 3.14  | 3.13  | 0.02 | 0.08 | 1.01  | 0.938425 | 0.91578  | 0.976437 | 0.952836 |
| MmugDNA.15783.1.S1_s_at | MmugDNA.15783.1 | 3.89  | 4.02  | 0.12 | 0.19 | -1.09 | 0.282143 | 0.335104 | 0.622569 | 0.582853 |
| MmugDNA.10351.1.S1_at   | MmugDNA.10351.1 | 4.95  | 4.69  | 0.24 | 0.25 | 1.2   | 0.212154 | 0.366088 | 0.572526 | 0.605906 |
| MmugDNA.10352.1.S1_at   | MmugDNA.10352.1 | 13.99 | 13.86 | 0.03 | 0.06 | 1.1   | 0.03296  | 0.012211 | 0.326786 | 0.142932 |
| MmugDNA.10353.1.S1_at   | MmugDNA.10353.1 | 5.99  | 6.14  | 0.04 | 0.1  | -1.11 | 0.078946 | 0.258502 | 0.428609 | 0.525786 |
| MmugDNA.10354.1.S1_at   | MmugDNA.10354.1 | 11.6  | 11.57 | 0.11 | 0.28 | 1.02  | 0.870966 | 0.168506 | 0.948399 | 0.445136 |
| MmugDNA.10355.1.S1_at   | MmugDNA.10355.1 | 8.3   | 8.44  | 0.2  | 0.15 | -1.1  | 0.150752 | 0.331822 | 0.515411 | 0.580397 |
| MmugDNA.10358.1.S1_at   | MmugDNA.10358.1 | 6.85  | 6.88  | 0.3  | 0.04 | -1.02 | 0.451151 | 0.39004  | 0.731475 | 0.624002 |
| MmugDNA.10359.1.S1_at   | MmugDNA.10359.1 | 9.97  | 9.72  | 0.06 | 0.31 | 1.2   | 0.237916 | 0.188309 | 0.591296 | 0.46433  |
| MmugDNA.10359.1.S1_s_at | MmugDNA.10359.1 | 9.71  | 9.35  | 0.07 | 0.31 | 1.29  | 0.128457 | 0.131902 | 0.494541 | 0.403927 |
| MmugDNA.1036.1.S1_at    | MmugDNA.1036.1  | 5.43  | 5.49  | 0.16 | 0.04 | -1.04 | 0.789546 | 0.225003 | 0.912615 | 0.49773  |
| MmugDNA.10360.1.S1_at   | MmugDNA.10360.1 | 7.45  | 7.77  | 0.35 | 0.17 | -1.25 | 0.554437 | 0.593806 | 0.790738 | 0.758418 |
| MmugDNA.10361.1.S1_at   | MmugDNA.10361.1 | 3.89  | 3.89  | 0.08 | 0.18 | -1    | 0.822044 | 0.283636 | 0.927526 | 0.546058 |
| MmugDNA.10362.1.S1_at   | MmugDNA.10362.1 | 7.69  | 5.63  | 0.49 | 0.73 | 4.18  | 0.006792 | 0.00139  | 0.201708 | 0.057005 |
| MmugDNA.20020.1.S1_s_at | MmugDNA.20020.1 | 7.7   | 6.78  | 1.01 | 0.99 | 1.89  | 0.39515  | 0.500949 | 0.696396 | 0.69936  |
| MmugDNA.10365.1.S1_at   | MmugDNA.10365.1 | 5.29  | 6.37  | 0.38 | 0.29 | -2.12 | 0.057669 | 0.053434 | 0.388861 | 0.276777 |
| MmugDNA.10366.1.S1_at   | MmugDNA.10366.1 | 6.96  | 6.61  | 0.59 | 0.36 | 1.28  | 0.276114 | 0.169377 | 0.618148 | 0.445989 |
| MmugDNA.10367.1.S1_at   | MmugDNA.10367.1 | 4.72  | 4.64  | 0.36 | 0.14 | 1.06  | 0.26269  | 0.433168 | 0.609039 | 0.653513 |
| MmugDNA.10368.1.S1_at   | MmugDNA.10368.1 | 4.86  | 4.95  | 0.07 | 0.46 | -1.06 | 0.91274  | 0.995292 | 0.965456 | 0.997046 |
| MmugDNA.10372.1.S1_at   | MmugDNA.10372.1 | 10.12 | 10.07 | 0.16 | 0.51 | 1.04  | 0.848397 | 0.87883  | 0.939211 | 0.930872 |

|                         |                 |       |       |      |      |       |          |          |          |          |
|-------------------------|-----------------|-------|-------|------|------|-------|----------|----------|----------|----------|
| MmugDNA.10373.1.S1_at   | MmugDNA.10373.1 | 12.13 | 11.77 | 0.17 | 0.07 | 1.28  | 0.07558  | 0.07454  | 0.422896 | 0.318173 |
| MmugDNA.10374.1.S1_at   | MmugDNA.10374.1 | 6.82  | 6.79  | 0.35 | 0.71 | 1.02  | 0.911035 | 0.561843 | 0.964858 | 0.737659 |
| MmugDNA.29281.1.S1_s_at | MmugDNA.29281.1 | 13.78 | 13.55 | 0.16 | 0.29 | 1.17  | 0.16342  | 0.130962 | 0.527779 | 0.403037 |
| MmugDNA.10376.1.S1_at   | MmugDNA.10376.1 | 5.68  | 6.2   | 0.12 | 0.45 | -1.44 | 0.135006 | 0.144945 | 0.501995 | 0.418862 |
| MmugDNA.10377.1.S1_at   | MmugDNA.10377.1 | 7.26  | 7.52  | 0.56 | 1.04 | -1.19 | 0.827876 | 0.718762 | 0.930155 | 0.837241 |
| MmugDNA.10378.1.S1_at   | MmugDNA.10378.1 | 3.25  | 3.12  | 0.09 | 0.07 | 1.09  | 0.178644 | 0.120435 | 0.542945 | 0.38925  |
| MmugDNA.10379.1.S1_at   | MmugDNA.10379.1 | 12.42 | 12.18 | 0.17 | 0.42 | 1.18  | 0.094839 | 0.070645 | 0.452335 | 0.311975 |
| MmugDNA.1038.1.S1_at    | MmugDNA.1038.1  | 6.42  | 6.41  | 0.31 | 0.17 | 1     | 0.785612 | 0.83968  | 0.910856 | 0.908582 |
| MmugDNA.10380.1.S1_at   | MmugDNA.10380.1 | 10.25 | 9.64  | 0.5  | 0.36 | 1.53  | 0.115048 | 0.16503  | 0.478372 | 0.44123  |
| MmugDNA.10381.1.S1_at   | MmugDNA.10381.1 | 5.1   | 5.3   | 0.53 | 0.18 | -1.15 | 0.212266 | 0.266465 | 0.572552 | 0.532234 |
| MmugDNA.10382.1.S1_at   | MmugDNA.10382.1 | 3.72  | 3.39  | 0.37 | 0.47 | 1.25  | 0.482541 | 0.438189 | 0.749408 | 0.657196 |
| MmugDNA.10384.1.S1_at   | MmugDNA.10384.1 | 8.29  | 7.61  | 0.12 | 0.51 | 1.61  | 0.025811 | 0.044327 | 0.300687 | 0.255035 |
| MmugDNA.10388.1.S1_at   | MmugDNA.10388.1 | 3.58  | 3.57  | 0.01 | 0.01 | 1     | 0.274679 | 0.409474 | 0.617596 | 0.636521 |
| MmugDNA.1039.1.S1_at    | MmugDNA.1039.1  | 3.17  | 3.46  | 0.28 | 0.1  | -1.23 | 0.678998 | 0.845432 | 0.856302 | 0.912071 |
| MmugDNA.10391.1.S1_at   | MmugDNA.10391.1 | 3.11  | 3.27  | 0.35 | 0.06 | -1.12 | 0.961347 | 0.998296 | 0.985087 | 0.999091 |
| MmugDNA.10393.1.S1_at   | MmugDNA.10393.1 | 5.94  | 5.95  | 0.06 | 0.07 | -1    | 0.486488 | 0.5387   | 0.751654 | 0.723315 |
| MmugDNA.10396.1.S1_at   | MmugDNA.10396.1 | 9.16  | 8.54  | 0.42 | 0.4  | 1.54  | 0.270179 | 0.357074 | 0.614663 | 0.59875  |
| MmugDNA.104.1.S1_at     | MmugDNA.104.1   | 7.34  | 6.47  | 0.53 | 0.04 | 1.83  | 0.071571 | 0.064548 | 0.415505 | 0.300255 |
| MmugDNA.10400.1.S1_at   | MmugDNA.10400.1 | 6.96  | 7.22  | 0.91 | 0.77 | -1.19 | 0.532531 | 0.638502 | 0.777757 | 0.78765  |
| MmugDNA.10401.1.S1_at   | MmugDNA.10401.1 | 10.24 | 9.88  | 0.07 | 0.34 | 1.29  | 0.053269 | 0.008803 | 0.379848 | 0.124117 |
| MmugDNA.10402.1.S1_at   | MmugDNA.10402.1 | 5.18  | 5.23  | 0.52 | 0.14 | -1.04 | 0.680508 | 0.769608 | 0.857223 | 0.866216 |
| MmugDNA.10404.1.S1_at   | MmugDNA.10404.1 | 10.17 | 9.47  | 0.16 | 0.18 | 1.63  | 0.003609 | 0.000904 | 0.179515 | 0.048084 |
| MmugDNA.10406.1.S1_at   | MmugDNA.10406.1 | 8.27  | 6.82  | 0.33 | 0.44 | 2.73  | 0.019966 | 0.01138  | 0.276365 | 0.138214 |
| MmugDNA.10407.1.S1_at   | MmugDNA.10407.1 | 5.03  | 5.09  | 0.2  | 0.31 | -1.04 | 0.551539 | 0.739568 | 0.788807 | 0.849084 |
| MmugDNA.10408.1.S1_at   | MmugDNA.10408.1 | 10.76 | 9.68  | 0.21 | 0.82 | 2.12  | 0.068285 | 0.052668 | 0.409933 | 0.27502  |
| MmugDNA.10409.1.S1_at   | MmugDNA.10409.1 | 3.7   | 3.7   | 0.06 | 0.09 | -1    | 0.838146 | 0.73786  | 0.934583 | 0.848106 |
| MmugDNA.1041.1.S1_s_at  | MmugDNA.1041.1  | 9.97  | 10.59 | 0.06 | 0.19 | -1.54 | 0.005188 | 0.007375 | 0.190333 | 0.115315 |
| MmugDNA.10412.1.S1_at   | MmugDNA.10412.1 | 4.64  | 4.81  | 0.27 | 0.12 | -1.13 | 0.393887 | 0.558778 | 0.695522 | 0.735887 |
| MmugDNA.10412.1.S1_x_at | MmugDNA.10412.1 | 4.76  | 4.94  | 0.35 | 0.03 | -1.13 | 0.968178 | 0.800375 | 0.98805  | 0.885129 |
| MmugDNA.10413.1.S1_at   | MmugDNA.10413.1 | 5.26  | 5.56  | 0.39 | 0.39 | -1.23 | 0.406131 | 0.52301  | 0.703569 | 0.713429 |
| MmugDNA.10414.1.S1_at   | MmugDNA.10414.1 | 7.65  | 8.01  | 0.24 | 0.65 | -1.28 | 0.388906 | 0.530452 | 0.692804 | 0.717991 |
| MmugDNA.10416.1.S1_at   | MmugDNA.10416.1 | 4.37  | 4.43  | 0.07 | 0.06 | -1.05 | 0.103028 | 0.267276 | 0.46254  | 0.532909 |
| MmugDNA.10418.1.S1_at   | MmugDNA.10418.1 | 3.8   | 3.87  | 0.2  | 0.05 | -1.05 | 0.501336 | 0.926338 | 0.759966 | 0.958277 |
| MmugDNA.10419.1.S1_at   | MmugDNA.10419.1 | 7.43  | 9.47  | 0.88 | 1.07 | -4.11 | 0.060473 | 0.047205 | 0.393715 | 0.26183  |
| MmugDNA.10420.1.S1_at   | MmugDNA.10420.1 | 3.54  | 3.51  | 0.26 | 0.17 | 1.03  | 0.189306 | 0.184995 | 0.552435 | 0.460814 |
| MmugDNA.10427.1.S1_at   | MmugDNA.10427.1 | 9.3   | 8.86  | 0.24 | 0.33 | 1.36  | 0.073214 | 0.077717 | 0.418452 | 0.323851 |
| MmugDNA.10428.1.S1_at   | MmugDNA.10428.1 | 6.22  | 6.07  | 0.14 | 0.07 | 1.11  | 0.751793 | 0.785722 | 0.893937 | 0.875928 |
| MmugDNA.10430.1.S1_at   | MmugDNA.10430.1 | 8.32  | 8.5   | 0.23 | 0.41 | -1.13 | 0.412562 | 0.577689 | 0.707935 | 0.748038 |
| MmugDNA.10431.1.S1_at   | MmugDNA.10431.1 | 8.23  | 7.96  | 0.17 | 0.45 | 1.21  | 0.245111 | 0.370187 | 0.596803 | 0.609371 |
| MmugDNA.10433.1.S1_at   | MmugDNA.10433.1 | 3.32  | 3.51  | 0.1  | 0.1  | -1.14 | 0.12662  | 0.091337 | 0.492802 | 0.346281 |
| MmugDNA.10434.1.S1_at   | MmugDNA.10434.1 | 10.41 | 11.65 | 0.21 | 0.42 | -2.37 | 0.007921 | 0.013384 | 0.214294 | 0.14827  |

|                         |                 |       |       |      |      |       |          |          |          |          |
|-------------------------|-----------------|-------|-------|------|------|-------|----------|----------|----------|----------|
| MmugDNA.10436.1.S1_at   | MmugDNA.10436.1 | 3.61  | 3.83  | 0.03 | 0.2  | -1.17 | 0.497937 | 0.432661 | 0.758109 | 0.653054 |
| MmugDNA.10437.1.S1_at   | MmugDNA.10437.1 | 8.34  | 7.8   | 0.1  | 0.1  | 1.46  | 0.005603 | 0.001425 | 0.191807 | 0.057604 |
| MmugDNA.10438.1.S1_at   | MmugDNA.10438.1 | 4.83  | 5.09  | 0.08 | 0.06 | -1.2  | 0.009585 | 0.015471 | 0.226235 | 0.157908 |
| MmugDNA.10439.1.S1_at   | MmugDNA.10439.1 | 6.24  | 6.46  | 0.12 | 0.23 | -1.16 | 0.16839  | 0.189345 | 0.532644 | 0.465092 |
| MmugDNA.1044.1.S1_at    | MmugDNA.1044.1  | 9.59  | 9.25  | 0.01 | 0.49 | 1.27  | 0.554058 | 0.612809 | 0.790657 | 0.770218 |
| MmugDNA.10440.1.S1_at   | MmugDNA.10440.1 | 8.38  | 8.26  | 0.12 | 0.38 | 1.09  | 0.716262 | 0.32254  | 0.875374 | 0.573991 |
| MmugDNA.10441.1.S1_at   | MmugDNA.10441.1 | 8.99  | 9.27  | 0.2  | 0.21 | -1.21 | 0.106484 | 0.042142 | 0.466966 | 0.249753 |
| MmugDNA.10442.1.S1_s_at | MmugDNA.10442.1 | 7.51  | 8.33  | 0.41 | 1.53 | -1.76 | 0.489831 | 0.55164  | 0.754118 | 0.731126 |
| MmugDNA.10447.1.S1_at   | MmugDNA.10447.1 | 4.17  | 4.26  | 0.15 | 0.24 | -1.07 | 0.448722 | 0.692525 | 0.729784 | 0.821061 |
| MmugDNA.10449.1.S1_at   | MmugDNA.10449.1 | 11.54 | 11.43 | 0.27 | 0.28 | 1.08  | 0.683182 | 0.618926 | 0.858347 | 0.774229 |
| MmugDNA.1045.1.S1_at    | MmugDNA.1045.1  | 6.67  | 6.76  | 0.04 | 0.15 | -1.06 | 0.468836 | 0.307734 | 0.741287 | 0.563932 |
| MmugDNA.10451.1.S1_at   | MmugDNA.10451.1 | 7.61  | 9.47  | 2.16 | 1.8  | -3.62 | 0.355035 | 0.383337 | 0.670716 | 0.619368 |
| MmugDNA.10454.1.S1_at   | MmugDNA.10454.1 | 3.96  | 4.34  | 0.14 | 0.55 | -1.3  | 0.328962 | 0.319718 | 0.654754 | 0.572054 |
| MmugDNA.10455.1.S1_at   | MmugDNA.10455.1 | 6.25  | 6.25  | 0.06 | 0.15 | 1     | 0.94523  | 0.80098  | 0.979067 | 0.885538 |
| MmugDNA.10456.1.S1_at   | MmugDNA.10456.1 | 6.59  | 6.56  | 0.1  | 0.55 | 1.02  | 0.874829 | 0.533027 | 0.949799 | 0.71937  |
| MmugDNA.10457.1.S1_at   | MmugDNA.10457.1 | 5.01  | 5.04  | 0.11 | 0.09 | -1.02 | 0.302887 | 0.663442 | 0.637146 | 0.803016 |
| MmugDNA.1046.1.S1_at    | MmugDNA.1046.1  | 11.57 | 13.81 | 1.03 | 1.15 | -4.72 | 0.32894  | 0.151152 | 0.654754 | 0.425805 |
| MmugDNA.1046.1.S1_s_at  | MmugDNA.1046.1  | 11.56 | 13.99 | 1.11 | 1.23 | -5.38 | 0.293599 | 0.150378 | 0.630734 | 0.424934 |
| MmugDNA.10460.1.S1_at   | MmugDNA.10460.1 | 5.71  | 5.13  | 0.09 | 0.35 | 1.49  | 0.025137 | 0.008338 | 0.297733 | 0.121147 |
| MmugDNA.10461.1.S1_at   | MmugDNA.10461.1 | 5.83  | 5.96  | 0.08 | 0.09 | -1.09 | 0.145474 | 0.107474 | 0.51146  | 0.370311 |
| MmugDNA.10462.1.S1_at   | MmugDNA.10462.1 | 8.53  | 6.87  | 0.69 | 2    | 3.15  | 0.357927 | 0.307894 | 0.672895 | 0.563992 |
| MmugDNA.10465.1.S1_at   | MmugDNA.10465.1 | 7.74  | 8.33  | 0.46 | 0.56 | -1.51 | 0.162124 | 0.065462 | 0.526638 | 0.301415 |
| MmugDNA.10466.1.S1_at   | MmugDNA.10466.1 | 13.18 | 12.93 | 0.12 | 0.02 | 1.19  | 0.010777 | 0.006306 | 0.231399 | 0.107813 |
| MmugDNA.10469.1.S1_at   | MmugDNA.10469.1 | 4.17  | 3.87  | 1.16 | 1.01 | 1.23  | 0.694347 | 0.712961 | 0.864407 | 0.83357  |
| MmugDNA.1047.1.S1_at    | MmugDNA.1047.1  | 4.66  | 4.73  | 0.35 | 0.26 | -1.05 | 0.653003 | 0.798198 | 0.843896 | 0.883849 |
| MmugDNA.10470.1.S1_at   | MmugDNA.10470.1 | 3.78  | 3.64  | 0.32 | 0.23 | 1.1   | 0.913585 | 0.020574 | 0.965794 | 0.179964 |
| MmugDNA.10471.1.S1_at   | MmugDNA.10471.1 | 4.01  | 4.29  | 0.23 | 0.07 | -1.21 | 0.231683 | 0.270308 | 0.587487 | 0.535676 |
| MmugDNA.10472.1.S1_at   | MmugDNA.10472.1 | 6.14  | 5.4   | 0.4  | 0.45 | 1.67  | 0.503138 | 0.687099 | 0.760689 | 0.817434 |
| MmugDNA.10473.1.S1_at   | MmugDNA.10473.1 | 5.61  | 5.85  | 0.29 | 0.15 | -1.19 | 0.45396  | 0.635817 | 0.733035 | 0.785669 |
| MmugDNA.11511.1.S1_s_at | MmugDNA.11511.1 | 9.35  | 8.87  | 0.4  | 0.76 | 1.4   | 0.297784 | 0.431964 | 0.63352  | 0.652723 |
| MmugDNA.10476.1.S1_at   | MmugDNA.10476.1 | 5.21  | 5.94  | 0.18 | 0.68 | -1.66 | 0.082933 | 0.092841 | 0.434729 | 0.349024 |
| MmugDNA.10478.1.S1_at   | MmugDNA.10478.1 | 5.17  | 5.24  | 0.21 | 0.03 | -1.05 | 0.56408  | 0.283283 | 0.796391 | 0.545836 |
| MmugDNA.10479.1.S1_at   | MmugDNA.10479.1 | 6.21  | 6.35  | 0.15 | 0.2  | -1.1  | 0.363155 | 0.700854 | 0.676565 | 0.826525 |
| MmugDNA.1048.1.S1_at    | MmugDNA.1048.1  | 4.17  | 4.16  | 0.07 | 0.06 | 1     | 0.578223 | 0.808066 | 0.803737 | 0.889504 |
| MmugDNA.10480.1.S1_at   | MmugDNA.10480.1 | 9.58  | 9.39  | 0.26 | 0.35 | 1.14  | 0.786175 | 0.926809 | 0.911069 | 0.958404 |
| MmugDNA.10483.1.S1_at   | MmugDNA.10483.1 | 7.08  | 6.25  | 0.91 | 0.11 | 1.79  | 0.161207 | 0.146306 | 0.526258 | 0.420306 |
| MmugDNA.10484.1.S1_at   | MmugDNA.10484.1 | 4.12  | 3.96  | 0.08 | 0.12 | 1.12  | 0.148288 | 0.330541 | 0.513713 | 0.579302 |
| MmugDNA.10485.1.S1_at   | MmugDNA.10485.1 | 4.1   | 4.06  | 0.12 | 0.15 | 1.03  | 0.824759 | 0.80194  | 0.928991 | 0.885989 |
| MmugDNA.10486.1.S1_at   | MmugDNA.10486.1 | 7.3   | 7.24  | 0.07 | 0.17 | 1.04  | 0.697938 | 0.874655 | 0.865851 | 0.928837 |
| MmugDNA.10487.1.S1_at   | MmugDNA.10487.1 | 6.9   | 6.9   | 0.2  | 0.07 | -1    | 0.841571 | 0.205522 | 0.936215 | 0.479794 |
| MmugDNA.10488.1.S1_at   | MmugDNA.10488.1 | 5.84  | 5.87  | 0.08 | 0.29 | -1.02 | 0.834963 | 0.798512 | 0.933081 | 0.884012 |

|                         |                 |       |       |      |      |       |          |          |          |          |
|-------------------------|-----------------|-------|-------|------|------|-------|----------|----------|----------|----------|
| MmugDNA.10489.1.S1_at   | MmugDNA.10489.1 | 5.85  | 5.89  | 0.17 | 0.04 | -1.03 | 0.672106 | 0.038693 | 0.852837 | 0.24169  |
| MmugDNA.10489.1.S1_s_at | MmugDNA.10489.1 | 6.51  | 6.77  | 0.33 | 0.09 | -1.19 | 0.906947 | 0.611073 | 0.963023 | 0.769031 |
| MmugDNA.1049.1.S1_at    | MmugDNA.1049.1  | 4.59  | 4.5   | 0.19 | 0.24 | 1.07  | 0.853227 | 0.316844 | 0.940741 | 0.570212 |
| MmugDNA.10490.1.S1_at   | MmugDNA.10490.1 | 3.39  | 3.54  | 0.17 | 0.1  | -1.11 | 0.165022 | 0.191981 | 0.528978 | 0.467377 |
| MmugDNA.10492.1.S1_at   | MmugDNA.10492.1 | 3.51  | 4.11  | 0.1  | 1.12 | -1.51 | 0.137098 | 0.16697  | 0.504356 | 0.44345  |
| MmugDNA.10493.1.S1_at   | MmugDNA.10493.1 | 4.01  | 4.01  | 0.1  | 0.01 | 1     | 0.403488 | 0.321856 | 0.702073 | 0.57351  |
| MmugDNA.10495.1.S1_at   | MmugDNA.10495.1 | 9.13  | 8.35  | 0.3  | 0.57 | 1.71  | 0.15717  | 0.165715 | 0.521923 | 0.441982 |
| MmugDNA.10496.1.S1_at   | MmugDNA.10496.1 | 11.1  | 10.26 | 0.15 | 0.51 | 1.8   | 0.066941 | 0.058806 | 0.406999 | 0.289228 |
| MmugDNA.10497.1.S1_at   | MmugDNA.10497.1 | 5.85  | 5.87  | 0.13 | 0.06 | -1.01 | 0.52258  | 0.684848 | 0.772135 | 0.816189 |
| MmugDNA.10498.1.S1_at   | MmugDNA.10498.1 | 4.38  | 4.19  | 0.21 | 0.36 | 1.14  | 0.991913 | 0.985535 | 0.997194 | 0.991808 |
| MmugDNA.10499.1.S1_at   | MmugDNA.10499.1 | 5.28  | 5.15  | 0.16 | 0.28 | 1.09  | 0.783205 | 0.38798  | 0.909454 | 0.62253  |
| MmugDNA.105.1.S1_at     | MmugDNA.105.1   | 5.36  | 5.46  | 0.27 | 0.35 | -1.08 | 0.418904 | 0.418673 | 0.711627 | 0.643036 |
| MmugDNA.10500.1.S1_at   | MmugDNA.10500.1 | 8.04  | 8.93  | 0.02 | 0.87 | -1.86 | 0.141783 | 0.129933 | 0.509159 | 0.401515 |
| MmugDNA.10501.1.S1_at   | MmugDNA.10501.1 | 4.01  | 3.97  | 0.07 | 0.11 | 1.02  | 0.422137 | 0.200849 | 0.713412 | 0.475369 |
| MmugDNA.10502.1.S1_at   | MmugDNA.10502.1 | 6.21  | 6.41  | 0.49 | 0.43 | -1.15 | 0.813167 | 0.492106 | 0.924156 | 0.693442 |
| MmugDNA.10503.1.S1_at   | MmugDNA.10503.1 | 5.24  | 4.98  | 0.16 | 0.53 | 1.2   | 0.243937 | 0.44483  | 0.595699 | 0.662072 |
| MmugDNA.10504.1.S1_at   | MmugDNA.10504.1 | 11.49 | 12.22 | 0.71 | 0.18 | -1.66 | 0.056379 | 0.028544 | 0.386471 | 0.210754 |
| MmugDNA.10505.1.S1_at   | MmugDNA.10505.1 | 8.88  | 8.36  | 0.35 | 0.36 | 1.43  | 0.212094 | 0.264435 | 0.572526 | 0.530385 |
| MmugDNA.10505.1.S1_s_at | MmugDNA.10505.1 | 8.16  | 7.21  | 0.32 | 0.37 | 1.94  | 0.056645 | 0.0501   | 0.386838 | 0.268916 |
| MmugDNA.10507.1.S1_at   | MmugDNA.10507.1 | 5.23  | 5.34  | 0.2  | 0.1  | -1.08 | 0.433616 | 0.50802  | 0.720128 | 0.703358 |
| MmugDNA.10508.1.S1_at   | MmugDNA.10508.1 | 3.29  | 3.42  | 0.03 | 0.09 | -1.1  | 0.024848 | 0.014776 | 0.296788 | 0.154617 |
| MmugDNA.10509.1.S1_s_at | MmugDNA.10509.1 | 3.01  | 3.27  | 0.11 | 0.21 | -1.2  | 0.246605 | 0.110422 | 0.597806 | 0.374651 |
| MmugDNA.10510.1.S1_at   | MmugDNA.10510.1 | 5.61  | 5.72  | 0.12 | 0.27 | -1.08 | 0.670648 | 0.233914 | 0.852442 | 0.505183 |
| MmugDNA.10511.1.S1_at   | MmugDNA.10511.1 | 4.32  | 4.14  | 0.16 | 0.22 | 1.13  | 0.302172 | 0.145476 | 0.636884 | 0.419424 |
| MmugDNA.10513.1.S1_at   | MmugDNA.10513.1 | 5.13  | 4.3   | 0.65 | 0.43 | 1.77  | 0.132374 | 0.149459 | 0.498572 | 0.423928 |
| MmugDNA.10514.1.S1_at   | MmugDNA.10514.1 | 3.06  | 3.06  | 0.04 | 0.18 | -1    | 0.965477 | 0.483254 | 0.986828 | 0.687881 |
| MmugDNA.10515.1.S1_at   | MmugDNA.10515.1 | 4.02  | 4.18  | 0.04 | 0.16 | -1.12 | 0.172019 | 0.053777 | 0.535422 | 0.27744  |
| MmugDNA.10516.1.S1_at   | MmugDNA.10516.1 | 7.45  | 7.18  | 0.25 | 0.25 | 1.2   | 0.380701 | 0.000944 | 0.687566 | 0.049054 |
| MmugDNA.10517.1.S1_at   | MmugDNA.10517.1 | 8.7   | 8.66  | 0.41 | 0.61 | 1.02  | 0.796618 | 0.94652  | 0.915624 | 0.969668 |
| MmugDNA.10518.1.S1_at   | MmugDNA.10518.1 | 3.28  | 3.11  | 0.16 | 0.14 | 1.12  | 0.282036 | 0.206872 | 0.622553 | 0.481034 |
| MmugDNA.10519.1.S1_at   | MmugDNA.10519.1 | 4.75  | 4.69  | 0.14 | 0.14 | 1.05  | 0.245723 | 0.33634  | 0.597221 | 0.583813 |
| MmugDNA.1052.1.S1_at    | MmugDNA.1052.1  | 3.71  | 3.84  | 0.14 | 0.16 | -1.1  | 0.784658 | 0.69853  | 0.910286 | 0.824852 |
| MmugDNA.10520.1.S1_at   | MmugDNA.10520.1 | 9.02  | 9.19  | 0.38 | 0.51 | -1.12 | 0.139858 | 0.198247 | 0.507556 | 0.473234 |
| MmugDNA.10521.1.S1_at   | MmugDNA.10521.1 | 3.06  | 3.27  | 0.13 | 0.17 | -1.16 | 0.357055 | 0.529256 | 0.672045 | 0.717233 |
| MmugDNA.10522.1.S1_at   | MmugDNA.10522.1 | 4.01  | 4.24  | 0.23 | 0.35 | -1.17 | 0.664769 | 0.579732 | 0.849707 | 0.74927  |
| MmugDNA.10523.1.S1_at   | MmugDNA.10523.1 | 8.51  | 8.13  | 0.05 | 0.2  | 1.31  | 0.038664 | 0.029528 | 0.345054 | 0.213512 |
| MmugDNA.10524.1.S1_at   | MmugDNA.10524.1 | 6.64  | 5.99  | 0.65 | 0.12 | 1.57  | 0.175408 | 0.175619 | 0.539155 | 0.45218  |
| MmugDNA.10527.1.S1_at   | MmugDNA.10527.1 | 5.57  | 5.16  | 0.93 | 0.29 | 1.33  | 0.359814 | 0.452481 | 0.673991 | 0.667111 |
| MmugDNA.10529.1.S1_at   | MmugDNA.10529.1 | 3.71  | 3.95  | 0.1  | 0.22 | -1.18 | 0.185826 | 0.094839 | 0.549363 | 0.35185  |
| MmugDNA.1053.1.S1_at    | MmugDNA.1053.1  | 10.79 | 11.12 | 0.28 | 0.3  | -1.25 | 0.10752  | 0.048594 | 0.468045 | 0.265572 |
| MmugDNA.10532.1.S1_s_at | MmugDNA.10532.1 | 10.32 | 10.64 | 0.38 | 0.52 | -1.25 | 0.794702 | 0.944304 | 0.914794 | 0.968468 |

|                         |                 |       |       |      |      |       |          |          |          |          |
|-------------------------|-----------------|-------|-------|------|------|-------|----------|----------|----------|----------|
| MmugDNA.10533.1.S1_at   | MmugDNA.10533.1 | 4.29  | 4.27  | 0.34 | 0.05 | 1.02  | 0.286439 | 0.377187 | 0.625572 | 0.614825 |
| MmugDNA.10534.1.S1_at   | MmugDNA.10534.1 | 7.63  | 8.4   | 0.37 | 0.66 | -1.7  | 0.383538 | 0.522762 | 0.689416 | 0.713367 |
| MmugDNA.11916.1.S1_s_at | MmugDNA.11916.1 | 13.99 | 13.77 | 0.01 | 0.02 | 1.16  | 0.000032 | 0.000303 | 0.112653 | 0.034907 |
| MmugDNA.10536.1.S1_at   | MmugDNA.10536.1 | 8.74  | 8.82  | 0.23 | 0.34 | -1.06 | 0.839244 | 0.568817 | 0.935078 | 0.74211  |
| MmugDNA.10537.1.S1_at   | MmugDNA.10537.1 | 7.23  | 6.71  | 0.37 | 0.19 | 1.43  | 0.100391 | 0.098588 | 0.46093  | 0.356709 |
| MmugDNA.10538.1.S1_at   | MmugDNA.10538.1 | 8.01  | 8.18  | 0.08 | 0.05 | -1.13 | 0.102044 | 0.013044 | 0.46143  | 0.14696  |
| MmugDNA.10538.1.S1_s_at | MmugDNA.10538.1 | 6.82  | 6.81  | 0.07 | 0.16 | 1     | 0.901013 | 0.207113 | 0.960391 | 0.481191 |
| MmugDNA.1054.1.S1_at    | MmugDNA.1054.1  | 3.51  | 3.36  | 0.06 | 0.06 | 1.11  | 0.066771 | 0.093183 | 0.406981 | 0.34931  |
| MmugDNA.10540.1.S1_at   | MmugDNA.10540.1 | 4.11  | 4.15  | 0.03 | 0.04 | -1.03 | 0.124675 | 0.459074 | 0.49075  | 0.671544 |
| MmugDNA.10541.1.S1_at   | MmugDNA.10541.1 | 3.34  | 3.04  | 0.26 | 0.05 | 1.23  | 0.402275 | 0.6273   | 0.701365 | 0.780361 |
| MmugDNA.10543.1.S1_at   | MmugDNA.10543.1 | 4.83  | 4.65  | 0.31 | 0.21 | 1.13  | 0.400498 | 0.844107 | 0.700074 | 0.911246 |
| MmugDNA.10544.1.S1_at   | MmugDNA.10544.1 | 3.41  | 3.48  | 0.39 | 0.22 | -1.05 | 0.936521 | 0.737072 | 0.975429 | 0.847791 |
| MmugDNA.10545.1.S1_at   | MmugDNA.10545.1 | 4.21  | 4.4   | 0.6  | 0.26 | -1.14 | 0.74682  | 0.806482 | 0.89155  | 0.888651 |
| MmugDNA.10546.1.S1_at   | MmugDNA.10546.1 | 6.93  | 6.08  | 0.3  | 0.88 | 1.81  | 0.04963  | 0.035841 | 0.371625 | 0.233777 |
| MmugDNA.10547.1.S1_at   | MmugDNA.10547.1 | 6.91  | 7.14  | 0.2  | 0.28 | -1.17 | 0.328275 | 0.53993  | 0.654312 | 0.723995 |
| MmugDNA.1055.1.S1_at    | MmugDNA.1055.1  | 5.55  | 5.19  | 0.38 | 0.04 | 1.29  | 0.118878 | 0.112566 | 0.483423 | 0.377995 |
| MmugDNA.10550.1.S1_at   | MmugDNA.10550.1 | 5.37  | 4.39  | 1.17 | 0.71 | 1.98  | 0.211614 | 0.222999 | 0.572347 | 0.495821 |
| MmugDNA.10551.1.S1_at   | MmugDNA.10551.1 | 9.53  | 10.57 | 0.15 | 0.08 | -2.05 | 0.000303 | 0.000028 | 0.12562  | 0.021152 |
| MmugDNA.10552.1.S1_at   | MmugDNA.10552.1 | 3.43  | 3.52  | 0.04 | 0.16 | -1.07 | 0.455542 | 0.313894 | 0.733844 | 0.568094 |
| MmugDNA.10553.1.S1_at   | MmugDNA.10553.1 | 4.8   | 4.95  | 0.16 | 0.14 | -1.1  | 0.208582 | 0.217286 | 0.570384 | 0.490911 |
| MmugDNA.10554.1.S1_at   | MmugDNA.10554.1 | 4.61  | 4.6   | 0.18 | 0.04 | 1.01  | 0.946125 | 0.225766 | 0.979359 | 0.498159 |
| MmugDNA.10555.1.S1_at   | MmugDNA.10555.1 | 7.26  | 7.42  | 0.51 | 0.09 | -1.12 | 0.592938 | 0.420771 | 0.811221 | 0.64442  |
| MmugDNA.10556.1.S1_at   | MmugDNA.10556.1 | 3.74  | 3.76  | 0.13 | 0.1  | -1.02 | 0.463768 | 0.149635 | 0.738963 | 0.424175 |
| MmugDNA.10557.1.S1_at   | MmugDNA.10557.1 | 6.54  | 6.54  | 0    | 0.01 | 1     | 0.373901 | 0.862226 | 0.683245 | 0.921663 |
| MmugDNA.10558.1.S1_at   | MmugDNA.10558.1 | 10.4  | 10.63 | 0.05 | 0.26 | -1.17 | 0.221998 | 0.077044 | 0.580625 | 0.322481 |
| MmugDNA.10559.1.S1_at   | MmugDNA.10559.1 | 3.92  | 4.2   | 0.26 | 0.38 | -1.21 | 0.757589 | 0.288008 | 0.897216 | 0.549277 |
| MmugDNA.10560.1.S1_at   | MmugDNA.10560.1 | 10.85 | 11.61 | 0.11 | 0.1  | -1.69 | 0.001045 | 0.00116  | 0.142738 | 0.053615 |
| MmugDNA.10561.1.S1_at   | MmugDNA.10561.1 | 5.54  | 5.48  | 0.13 | 0.13 | 1.05  | 0.503097 | 0.234823 | 0.760671 | 0.506125 |
| MmugDNA.10562.1.S1_at   | MmugDNA.10562.1 | 9.83  | 10.16 | 0.38 | 0.64 | -1.26 | 0.491737 | 0.576533 | 0.755257 | 0.747267 |
| MmugDNA.10564.1.S1_at   | MmugDNA.10564.1 | 12.55 | 11.06 | 0.29 | 0.31 | 2.81  | 0.002751 | 0.00061  | 0.165355 | 0.042176 |
| MmugDNA.10565.1.S1_at   | MmugDNA.10565.1 | 4.67  | 4.86  | 0.11 | 0.28 | -1.14 | 0.912526 | 0.988381 | 0.965306 | 0.993461 |
| MmugDNA.10566.1.S1_at   | MmugDNA.10566.1 | 2.95  | 2.91  | 0.12 | 0.15 | 1.03  | 0.651563 | 0.462908 | 0.843245 | 0.674149 |
| MmugDNA.10567.1.S1_at   | MmugDNA.10567.1 | 7.66  | 6.79  | 0.24 | 0.16 | 1.84  | 0.011961 | 0.015745 | 0.239065 | 0.158972 |
| MmugDNA.10568.1.S1_at   | MmugDNA.10568.1 | 6.62  | 6.73  | 0.35 | 1.18 | -1.07 | 0.459091 | 0.260157 | 0.735918 | 0.5268   |
| MmugDNA.10569.1.S1_at   | MmugDNA.10569.1 | 8.77  | 8.6   | 0.27 | 0.35 | 1.12  | 0.138241 | 0.182257 | 0.505671 | 0.458766 |
| MmugDNA.1057.1.S1_at    | MmugDNA.1057.1  | 12.09 | 11.04 | 0.38 | 0.41 | 2.07  | 0.038619 | 0.019555 | 0.344862 | 0.175563 |
| MmugDNA.10571.1.S1_at   | MmugDNA.10571.1 | 5.14  | 6.08  | 0.4  | 0.82 | -1.92 | 0.054181 | 0.035408 | 0.381696 | 0.232497 |
| MmugDNA.10572.1.S1_at   | MmugDNA.10572.1 | 11.11 | 9.83  | 0.44 | 0.55 | 2.44  | 0.041585 | 0.019828 | 0.352305 | 0.177124 |
| MmugDNA.10573.1.S1_at   | MmugDNA.10573.1 | 8.29  | 8     | 0.18 | 0.2  | 1.22  | 0.305125 | 0.394762 | 0.639014 | 0.627208 |
| MmugDNA.10576.1.S1_at   | MmugDNA.10576.1 | 6.22  | 6.32  | 0.15 | 0.25 | -1.07 | 0.991146 | 0.986887 | 0.996899 | 0.992589 |
| MmugDNA.10577.1.S1_at   | MmugDNA.10577.1 | 5.61  | 5.93  | 0.71 | 0.32 | -1.25 | 0.839296 | 0.942682 | 0.935098 | 0.967498 |

|                         |                 |       |       |      |      |       |          |          |          |          |
|-------------------------|-----------------|-------|-------|------|------|-------|----------|----------|----------|----------|
| MmugDNA.10579.1.S1_at   | MmugDNA.10579.1 | 8.6   | 10.04 | 0.6  | 1.36 | -2.7  | 0.727619 | 0.37536  | 0.881457 | 0.613359 |
| MmugDNA.1058.1.S1_at    | MmugDNA.1058.1  | 5.14  | 5.01  | 1.42 | 0.24 | 1.1   | 0.303237 | 0.255121 | 0.6374   | 0.52317  |
| MmugDNA.10580.1.S1_at   | MmugDNA.10580.1 | 9.8   | 9.64  | 0.18 | 0.2  | 1.12  | 0.670514 | 0.202304 | 0.852391 | 0.476691 |
| MmugDNA.10581.1.S1_s_at | MmugDNA.10581.1 | 6.31  | 6.57  | 0.15 | 0.1  | -1.2  | 0.313793 | 0.279269 | 0.645387 | 0.542937 |
| MmugDNA.10582.1.S1_at   | MmugDNA.10582.1 | 5.67  | 5.68  | 0.13 | 0.19 | -1.01 | 0.518885 | 0.743384 | 0.769708 | 0.851291 |
| MmugDNA.10583.1.S1_at   | MmugDNA.10583.1 | 4.75  | 4.62  | 0.22 | 0.23 | 1.09  | 0.525954 | 0.692195 | 0.773971 | 0.82091  |
| MmugDNA.10584.1.S1_s_at | MmugDNA.10584.1 | 11.34 | 11.44 | 0.23 | 0.25 | -1.07 | 0.155695 | 0.136429 | 0.520357 | 0.408839 |
| MmugDNA.10585.1.S1_at   | MmugDNA.10585.1 | 10.44 | 9.93  | 0.11 | 0.51 | 1.43  | 0.404543 | 0.54155  | 0.702799 | 0.725015 |
| MmugDNA.10586.1.S1_at   | MmugDNA.10586.1 | 5.87  | 6.04  | 0.04 | 0.1  | -1.13 | 0.068984 | 0.065747 | 0.411002 | 0.301766 |
| MmugDNA.1059.1.S1_at    | MmugDNA.1059.1  | 7.81  | 6.95  | 0.18 | 0.91 | 1.81  | 0.355279 | 0.029703 | 0.6709   | 0.214029 |
| MmugDNA.10590.1.S1_at   | MmugDNA.10590.1 | 7.51  | 8.15  | 0.4  | 0.52 | -1.56 | 0.771103 | 0.139156 | 0.903645 | 0.412266 |
| MmugDNA.10591.1.S1_at   | MmugDNA.10591.1 | 2.94  | 3.12  | 0.04 | 0.03 | -1.13 | 0.003814 | 0.005431 | 0.179914 | 0.101706 |
| MmugDNA.10592.1.S1_at   | MmugDNA.10592.1 | 6.43  | 6.33  | 0.97 | 0.66 | 1.07  | 0.416996 | 0.203718 | 0.710321 | 0.477966 |
| MmugDNA.10593.1.S1_at   | MmugDNA.10593.1 | 9.26  | 8.81  | 0.14 | 0.14 | 1.36  | 0.010482 | 0.006529 | 0.229964 | 0.109613 |
| MmugDNA.10595.1.S1_at   | MmugDNA.10595.1 | 9.9   | 9.86  | 0.17 | 0.36 | 1.03  | 0.775535 | 0.704876 | 0.905841 | 0.828846 |
| MmugDNA.10596.1.S1_s_at | MmugDNA.10596.1 | 12.47 | 12.79 | 0.23 | 0.29 | -1.24 | 0.086976 | 0.067774 | 0.44076  | 0.30644  |
| MmugDNA.10597.1.S1_at   | MmugDNA.10597.1 | 6.25  | 6.42  | 1.44 | 0.36 | -1.12 | 0.784085 | 0.750706 | 0.909937 | 0.855009 |
| MmugDNA.10598.1.S1_s_at | MmugDNA.10598.1 | 6.09  | 5.99  | 0.22 | 0.11 | 1.07  | 0.723283 | 0.881316 | 0.879114 | 0.932281 |
| MmugDNA.106.1.S1_at     | MmugDNA.106.1   | 4.71  | 4.78  | 0.24 | 0.69 | -1.05 | 0.748542 | 0.831195 | 0.892494 | 0.903172 |
| MmugDNA.1060.1.S1_at    | MmugDNA.1060.1  | 6.8   | 5.92  | 0.22 | 0.62 | 1.84  | 0.033721 | 0.031183 | 0.330119 | 0.21838  |
| MmugDNA.10600.1.S1_at   | MmugDNA.10600.1 | 5.68  | 5.99  | 0.33 | 0.21 | -1.23 | 0.355885 | 0.323327 | 0.671276 | 0.57443  |
| MmugDNA.10601.1.S1_at   | MmugDNA.10601.1 | 10.34 | 10.6  | 0.16 | 0.12 | -1.2  | 0.148748 | 0.353114 | 0.51391  | 0.596383 |
| MmugDNA.10601.1.S1_s_at | MmugDNA.10601.1 | 10.19 | 10.49 | 0.24 | 0.16 | -1.23 | 0.26709  | 0.163293 | 0.612309 | 0.439468 |
| MmugDNA.10602.1.S1_at   | MmugDNA.10602.1 | 8.92  | 9.54  | 0.26 | 0.21 | -1.54 | 0.039631 | 0.034851 | 0.347789 | 0.230897 |
| MmugDNA.10603.1.S1_at   | MmugDNA.10603.1 | 5.11  | 5.21  | 0.1  | 0.15 | -1.07 | 0.142095 | 0.05184  | 0.509437 | 0.273151 |
| MmugDNA.10604.1.S1_at   | MmugDNA.10604.1 | 3.73  | 3.77  | 0.46 | 0.03 | -1.03 | 0.428608 | 0.586973 | 0.717023 | 0.753932 |
| MmugDNA.35526.1.S1_s_at | MmugDNA.35526.1 | 11.04 | 11.26 | 0.16 | 0.14 | -1.16 | 0.135002 | 0.036134 | 0.501995 | 0.234582 |
| MmugDNA.10606.1.S1_at   | MmugDNA.10606.1 | 9.58  | 10.02 | 0.41 | 0.34 | -1.36 | 0.245203 | 0.174155 | 0.596918 | 0.450451 |
| MmugDNA.10607.1.S1_s_at | MmugDNA.10607.1 | 11.11 | 11.53 | 0.07 | 0.24 | -1.34 | 0.039999 | 0.023753 | 0.348591 | 0.192931 |
| MmugDNA.10608.1.S1_s_at | MmugDNA.10608.1 | 10.59 | 10.52 | 0.28 | 0.1  | 1.05  | 0.296031 | 0.297331 | 0.632176 | 0.556071 |
| MmugDNA.10609.1.S1_at   | MmugDNA.10609.1 | 3.24  | 3.21  | 0.23 | 0.08 | 1.02  | 0.44599  | 0.599727 | 0.728075 | 0.761544 |
| MmugDNA.1061.1.S1_at    | MmugDNA.1061.1  | 6.1   | 5.97  | 0.21 | 0.04 | 1.1   | 0.231346 | 0.138726 | 0.587372 | 0.411807 |
| MmugDNA.10612.1.S1_at   | MmugDNA.10612.1 | 3.41  | 3.67  | 0.23 | 0.15 | -1.19 | 0.223477 | 0.167983 | 0.581963 | 0.444576 |
| MmugDNA.10613.1.S1_at   | MmugDNA.10613.1 | 4.23  | 4.12  | 0.04 | 0.09 | 1.08  | 0.25168  | 0.054637 | 0.601007 | 0.279266 |
| MmugDNA.10615.1.S1_at   | MmugDNA.10615.1 | 6.49  | 6.46  | 0.13 | 0.18 | 1.02  | 0.987482 | 0.580564 | 0.995561 | 0.749782 |
| MmugDNA.10616.1.S1_at   | MmugDNA.10616.1 | 5.41  | 5.21  | 0.46 | 0.85 | 1.14  | 0.383706 | 0.365841 | 0.689519 | 0.605763 |
| MmugDNA.10617.1.S1_s_at | MmugDNA.10617.1 | 3.86  | 3.82  | 0.22 | 0.23 | 1.03  | 0.727073 | 0.884813 | 0.88121  | 0.934373 |
| MmugDNA.10618.1.S1_at   | MmugDNA.10618.1 | 10.54 | 11.33 | 0.25 | 0.36 | -1.73 | 0.025291 | 0.016619 | 0.298643 | 0.163117 |
| MmugDNA.10619.1.S1_at   | MmugDNA.10619.1 | 4.15  | 4.15  | 0.22 | 0.02 | 1     | 0.856549 | 0.90781  | 0.942047 | 0.947847 |
| MmugDNA.1062.1.S1_at    | MmugDNA.1062.1  | 3.77  | 3.74  | 0.03 | 0.21 | 1.02  | 0.59162  | 0.560144 | 0.810512 | 0.736517 |
| MmugDNA.10620.1.S1_at   | MmugDNA.10620.1 | 7.94  | 9.03  | 0.37 | 0.7  | -2.13 | 0.047963 | 0.045434 | 0.367582 | 0.2575   |



|                         |                 |       |       |      |      |       |          |          |          |          |
|-------------------------|-----------------|-------|-------|------|------|-------|----------|----------|----------|----------|
| MmugDNA.10621.1.S1_at   | MmugDNA.10621.1 | 10.71 | 11.21 | 0.13 | 0.39 | -1.41 | 0.052689 | 0.028845 | 0.378395 | 0.211661 |
| MmugDNA.10622.1.S1_at   | MmugDNA.10622.1 | 5.56  | 5.69  | 0.23 | 0.2  | -1.1  | 0.514234 | 0.712805 | 0.766816 | 0.833516 |
| MmugDNA.10623.1.S1_at   | MmugDNA.10623.1 | 4.5   | 4.7   | 0.09 | 0.06 | -1.15 | 0.059433 | 0.084909 | 0.392153 | 0.336511 |
| MmugDNA.10624.1.S1_at   | MmugDNA.10624.1 | 6.46  | 6.35  | 0.72 | 0.38 | 1.07  | 0.894407 | 0.74607  | 0.957917 | 0.852688 |
| MmugDNA.10625.1.S1_at   | MmugDNA.10625.1 | 5.98  | 5.49  | 0.36 | 0.26 | 1.4   | 0.065916 | 0.073672 | 0.405425 | 0.317014 |
| MmugDNA.10626.1.S1_at   | MmugDNA.10626.1 | 6.2   | 4.41  | 0.95 | 0.31 | 3.47  | 0.035886 | 0.053906 | 0.338042 | 0.277699 |
| MmugDNA.10627.1.S1_at   | MmugDNA.10627.1 | 10.12 | 10.65 | 0.32 | 0.58 | -1.45 | 0.175646 | 0.227104 | 0.539405 | 0.499432 |
| MmugDNA.10629.1.S1_at   | MmugDNA.10629.1 | 11.15 | 11.27 | 0.11 | 0.47 | -1.09 | 0.223265 | 0.155417 | 0.581734 | 0.430802 |
| MmugDNA.1063.1.S1_at    | MmugDNA.1063.1  | 7.95  | 6.54  | 0.26 | 0.48 | 2.65  | 0.021951 | 0.023639 | 0.28441  | 0.192555 |
| MmugDNA.10630.1.S1_s_at | MmugDNA.10630.1 | 11.66 | 11.1  | 0.14 | 0.68 | 1.47  | 0.184006 | 0.12649  | 0.547964 | 0.397038 |
| MmugDNA.10631.1.S1_at   | MmugDNA.10631.1 | 10.52 | 9.63  | 0.18 | 0.65 | 1.85  | 0.060276 | 0.036193 | 0.393081 | 0.234827 |
| MmugDNA.10632.1.S1_at   | MmugDNA.10632.1 | 5.11  | 6.21  | 0.58 | 1.53 | -2.14 | 0.282534 | 0.352429 | 0.622911 | 0.595722 |
| MmugDNA.10633.1.S1_s_at | MmugDNA.10633.1 | 5.68  | 4.76  | 0.31 | 0.26 | 1.89  | 0.023749 | 0.014933 | 0.292771 | 0.155342 |
| MmugDNA.10634.1.S1_at   | MmugDNA.10634.1 | 7.11  | 7.44  | 0.07 | 0.99 | -1.26 | 0.658048 | 0.83748  | 0.846303 | 0.907127 |
| MmugDNA.10635.1.S1_at   | MmugDNA.10635.1 | 9.67  | 10.04 | 0.27 | 0.13 | -1.3  | 0.060949 | 0.030242 | 0.394705 | 0.215784 |
| MmugDNA.10639.1.S1_at   | MmugDNA.10639.1 | 9.38  | 9.24  | 0.27 | 0.12 | 1.1   | 0.336376 | 0.121009 | 0.659444 | 0.389997 |
| MmugDNA.10641.1.S1_at   | MmugDNA.10641.1 | 9.38  | 9.23  | 1.41 | 0.44 | 1.11  | 0.824274 | 0.906497 | 0.928728 | 0.947112 |
| MmugDNA.10642.1.S1_at   | MmugDNA.10642.1 | 3.47  | 3.66  | 0.04 | 0.08 | -1.14 | 0.016924 | 0.014467 | 0.266211 | 0.153478 |
| MmugDNA.10644.1.S1_at   | MmugDNA.10644.1 | 8.01  | 8.23  | 0.69 | 0.33 | -1.17 | 0.792723 | 0.564733 | 0.914029 | 0.739425 |
| MmugDNA.10645.1.S1_at   | MmugDNA.10645.1 | 6.46  | 6.53  | 0.16 | 0.08 | -1.05 | 0.936145 | 0.128558 | 0.975264 | 0.399918 |
| MmugDNA.10646.1.S1_at   | MmugDNA.10646.1 | 3.55  | 3.33  | 0.18 | 0.12 | 1.17  | 0.275856 | 0.05646  | 0.61793  | 0.283516 |
| MmugDNA.10648.1.S1_at   | MmugDNA.10648.1 | 5.59  | 5.92  | 0.31 | 0.07 | -1.26 | 0.425049 | 0.624456 | 0.714956 | 0.778655 |
| MmugDNA.1065.1.S1_at    | MmugDNA.1065.1  | 5.11  | 4.56  | 0.72 | 0.17 | 1.47  | 0.187152 | 0.168306 | 0.550236 | 0.444942 |
| MmugDNA.10650.1.S1_at   | MmugDNA.10650.1 | 5.36  | 5.04  | 0.84 | 0.16 | 1.24  | 0.189567 | 0.35592  | 0.552481 | 0.597894 |
| MmugDNA.10651.1.S1_at   | MmugDNA.10651.1 | 2.9   | 3.43  | 0.02 | 0.32 | -1.45 | 0.118032 | 0.153512 | 0.482095 | 0.42827  |
| MmugDNA.10652.1.S1_at   | MmugDNA.10652.1 | 4.05  | 3.92  | 0.22 | 0.11 | 1.1   | 0.784965 | 0.696951 | 0.910465 | 0.824002 |
| MmugDNA.10653.1.S1_at   | MmugDNA.10653.1 | 3.68  | 3.59  | 0.25 | 0.14 | 1.07  | 0.157054 | 0.281732 | 0.521852 | 0.544807 |
| MmugDNA.10654.1.S1_at   | MmugDNA.10654.1 | 6     | 6.17  | 0.65 | 0.2  | -1.13 | 0.850704 | 0.525722 | 0.940027 | 0.715217 |
| MmugDNA.10655.1.S1_at   | MmugDNA.10655.1 | 3.7   | 3.86  | 0.64 | 0.19 | -1.12 | 0.459163 | 0.662933 | 0.735945 | 0.802665 |
| MmugDNA.10656.1.S1_at   | MmugDNA.10656.1 | 9.66  | 9.33  | 0.47 | 0.81 | 1.26  | 0.896171 | 0.910855 | 0.958603 | 0.949709 |
| MmugDNA.10657.1.S1_at   | MmugDNA.10657.1 | 5.18  | 5.11  | 0.06 | 0.18 | 1.05  | 0.167444 | 0.218743 | 0.531631 | 0.492438 |
| MmugDNA.10658.1.S1_at   | MmugDNA.10658.1 | 4.72  | 4.55  | 0.17 | 0.14 | 1.12  | 0.939743 | 0.436621 | 0.977013 | 0.656124 |
| MmugDNA.10659.1.S1_at   | MmugDNA.10659.1 | 7.77  | 11.08 | 2.2  | 1.37 | -9.94 | 0.253708 | 0.113679 | 0.602177 | 0.379818 |
| MmugDNA.1066.1.S1_at    | MmugDNA.1066.1  | 8.66  | 7.66  | 0.06 | 0.39 | 2     | 0.009734 | 0.002159 | 0.226235 | 0.068763 |
| MmugDNA.10660.1.S1_at   | MmugDNA.10660.1 | 11.26 | 11.55 | 0.22 | 0.07 | -1.22 | 0.105652 | 0.036769 | 0.466487 | 0.236291 |
| MmugDNA.10661.1.S1_at   | MmugDNA.10661.1 | 5.65  | 5.73  | 0.35 | 0.14 | -1.06 | 0.654759 | 0.248446 | 0.844752 | 0.517727 |
| MmugDNA.10662.1.S1_at   | MmugDNA.10662.1 | 5.26  | 5.47  | 0.18 | 0.19 | -1.16 | 0.349142 | 0.364985 | 0.667453 | 0.605199 |
| MmugDNA.10664.1.S1_at   | MmugDNA.10664.1 | 7.2   | 7.16  | 0.67 | 0.74 | 1.03  | 0.898084 | 0.644377 | 0.959278 | 0.791566 |
| MmugDNA.10665.1.S1_at   | MmugDNA.10665.1 | 12.5  | 11.96 | 0.2  | 0.17 | 1.45  | 0.019317 | 0.006161 | 0.273655 | 0.106774 |
| MmugDNA.10667.1.S1_at   | MmugDNA.10667.1 | 12.63 | 12.32 | 0.11 | 0.24 | 1.24  | 0.445642 | 0.304208 | 0.727844 | 0.561558 |
| MmugDNA.10670.1.S1_at   | MmugDNA.10670.1 | 4.94  | 4.7   | 0.21 | 0.2  | 1.18  | 0.110404 | 0.284228 | 0.471885 | 0.546461 |

|                         |                 |       |       |      |      |       |          |          |          |          |
|-------------------------|-----------------|-------|-------|------|------|-------|----------|----------|----------|----------|
| MmugDNA.10671.1.S1_at   | MmugDNA.10671.1 | 5.32  | 6.4   | 1.52 | 0.05 | -2.11 | 0.824558 | 0.682954 | 0.928895 | 0.815033 |
| MmugDNA.10672.1.S1_at   | MmugDNA.10672.1 | 7.16  | 5.92  | 0.38 | 0.1  | 2.37  | 0.009468 | 0.004357 | 0.225357 | 0.092421 |
| MmugDNA.10673.1.S1_at   | MmugDNA.10673.1 | 5.52  | 5.84  | 0.07 | 0.04 | -1.25 | 0.001356 | 0.045076 | 0.146228 | 0.256789 |
| MmugDNA.10674.1.S1_at   | MmugDNA.10674.1 | 11.23 | 10.95 | 0.13 | 0.46 | 1.21  | 0.537636 | 0.751903 | 0.780064 | 0.855714 |
| MmugDNA.10677.1.S1_at   | MmugDNA.10677.1 | 9.73  | 9.54  | 0.12 | 0.56 | 1.14  | 0.545551 | 0.704081 | 0.785008 | 0.828326 |
| MmugDNA.10678.1.S1_at   | MmugDNA.10678.1 | 6.53  | 5.98  | 0.36 | 0.16 | 1.47  | 0.091168 | 0.098942 | 0.447111 | 0.357049 |
| MmugDNA.10681.1.S1_at   | MmugDNA.10681.1 | 5.79  | 5.9   | 0.29 | 0.16 | -1.08 | 0.528071 | 0.328581 | 0.775351 | 0.578148 |
| MmugDNA.10683.1.S1_at   | MmugDNA.10683.1 | 7.86  | 8.51  | 0.15 | 0.34 | -1.58 | 0.024442 | 0.020747 | 0.294575 | 0.180721 |
| MmugDNA.10686.1.S1_at   | MmugDNA.10686.1 | 6     | 5.85  | 0.74 | 0.13 | 1.11  | 0.27366  | 0.239122 | 0.617179 | 0.509827 |
| MmugDNA.10689.1.S1_at   | MmugDNA.10689.1 | 3.27  | 3.53  | 0.19 | 0.18 | -1.2  | 0.217018 | 0.016392 | 0.576574 | 0.162128 |
| MmugDNA.1069.1.S1_at    | MmugDNA.1069.1  | 8.4   | 8.37  | 0.44 | 0.35 | 1.02  | 0.567121 | 0.538819 | 0.797989 | 0.723368 |
| MmugDNA.10690.1.S1_at   | MmugDNA.10690.1 | 4.55  | 4.46  | 0.07 | 0.22 | 1.06  | 0.584733 | 0.596483 | 0.80712  | 0.759596 |
| MmugDNA.10691.1.S1_at   | MmugDNA.10691.1 | 7.45  | 8.36  | 1.31 | 1.02 | -1.88 | 0.354008 | 0.16013  | 0.670282 | 0.436296 |
| MmugDNA.10693.1.S1_at   | MmugDNA.10693.1 | 6.11  | 6.38  | 0.21 | 0.07 | -1.21 | 0.314055 | 0.427293 | 0.645522 | 0.649175 |
| MmugDNA.10694.1.S1_at   | MmugDNA.10694.1 | 3.49  | 3.07  | 0.6  | 0.04 | 1.34  | 0.311646 | 0.429758 | 0.64356  | 0.651032 |
| MmugDNA.10696.1.S1_at   | MmugDNA.10696.1 | 6.63  | 6.9   | 0.13 | 0.1  | -1.21 | 0.074012 | 0.046336 | 0.419667 | 0.25979  |
| MmugDNA.10697.1.S1_at   | MmugDNA.10697.1 | 3.9   | 3.89  | 0.1  | 0.04 | 1.01  | 0.416155 | 0.532817 | 0.709692 | 0.719235 |
| MmugDNA.1070.1.S1_at    | MmugDNA.1070.1  | 6.99  | 8.68  | 0.94 | 0.35 | -3.22 | 0.114739 | 0.045188 | 0.478025 | 0.256979 |
| MmugDNA.1070.1.S1_s_at  | MmugDNA.1070.1  | 10.78 | 10.53 | 0.02 | 0.61 | 1.19  | 0.618916 | 0.552935 | 0.825395 | 0.732201 |
| MmugDNA.10700.1.S1_at   | MmugDNA.10700.1 | 8.75  | 9.92  | 0.23 | 0.38 | -2.25 | 0.010005 | 0.0038   | 0.226899 | 0.087835 |
| MmugDNA.10701.1.S1_at   | MmugDNA.10701.1 | 5.33  | 5.48  | 0.32 | 0.11 | -1.11 | 0.887937 | 0.318031 | 0.954955 | 0.571046 |
| MmugDNA.10702.1.S1_at   | MmugDNA.10702.1 | 6.82  | 6.41  | 0.4  | 0.59 | 1.33  | 0.186684 | 0.251249 | 0.550106 | 0.519984 |
| MmugDNA.10703.1.S1_at   | MmugDNA.10703.1 | 6.6   | 6.6   | 0.11 | 0.04 | 1     | 0.628548 | 0.112205 | 0.83087  | 0.377537 |
| MmugDNA.10704.1.S1_at   | MmugDNA.10704.1 | 4.66  | 4.64  | 0.2  | 0.05 | 1.02  | 0.915002 | 0.478802 | 0.966361 | 0.684733 |
| MmugDNA.10705.1.S1_at   | MmugDNA.10705.1 | 7.96  | 8.21  | 0.03 | 0.35 | -1.18 | 0.774563 | 0.880245 | 0.905293 | 0.931571 |
| MmugDNA.10706.1.S1_at   | MmugDNA.10706.1 | 7.29  | 7.91  | 0.66 | 0.31 | -1.53 | 0.5703   | 0.702113 | 0.799452 | 0.827304 |
| MmugDNA.10709.1.S1_at   | MmugDNA.10709.1 | 5.7   | 6     | 0    | 0.3  | -1.23 | 0.228981 | 0.174919 | 0.586303 | 0.451595 |
| MmugDNA.1071.1.S1_s_at  | MmugDNA.1071.1  | 13.18 | 13.35 | 0.11 | 0.15 | -1.12 | 0.39166  | 0.058324 | 0.694174 | 0.288292 |
| MmugDNA.10711.1.S1_s_at | MmugDNA.10711.1 | 11.89 | 11.69 | 0.03 | 0.25 | 1.15  | 0.487229 | 0.662108 | 0.752002 | 0.802107 |
| MmugDNA.10713.1.S1_at   | MmugDNA.10713.1 | 4.79  | 5.47  | 0.61 | 0.27 | -1.6  | 0.276459 | 0.33867  | 0.618572 | 0.585703 |
| MmugDNA.10714.1.S1_at   | MmugDNA.10714.1 | 4.32  | 4.27  | 0.24 | 0.39 | 1.04  | 0.763923 | 0.771744 | 0.900502 | 0.867344 |
| MmugDNA.10715.1.S1_at   | MmugDNA.10715.1 | 3.34  | 3.51  | 0.1  | 0.21 | -1.13 | 0.955838 | 0.94365  | 0.983384 | 0.967966 |
| MmugDNA.10716.1.S1_at   | MmugDNA.10716.1 | 10.6  | 10.37 | 0.18 | 0.25 | 1.17  | 0.322628 | 0.196592 | 0.651245 | 0.471608 |
| MmugDNA.10717.1.S1_at   | MmugDNA.10717.1 | 5.92  | 6.05  | 0.06 | 0.11 | -1.09 | 0.447706 | 0.812128 | 0.729195 | 0.89155  |
| MmugDNA.10718.1.S1_at   | MmugDNA.10718.1 | 11.45 | 11.48 | 0.31 | 0.3  | -1.02 | 0.727013 | 0.096666 | 0.88121  | 0.35417  |
| MmugDNA.10718.1.S1_s_at | MmugDNA.10718.1 | 9.46  | 9.54  | 0.21 | 0.22 | -1.06 | 0.675535 | 0.637561 | 0.854583 | 0.787033 |
| MmugDNA.10719.1.S1_at   | MmugDNA.10719.1 | 5.99  | 6.56  | 0.53 | 0.19 | -1.48 | 0.654525 | 0.461319 | 0.844601 | 0.672984 |
| MmugDNA.1072.1.S1_at    | MmugDNA.1072.1  | 6.5   | 6.9   | 0.22 | 0.12 | -1.31 | 0.093515 | 0.094689 | 0.45086  | 0.351481 |
| MmugDNA.10720.1.S1_at   | MmugDNA.10720.1 | 7.26  | 6.89  | 0.3  | 0.27 | 1.29  | 0.14587  | 0.108284 | 0.511704 | 0.371557 |
| MmugDNA.10721.1.S1_at   | MmugDNA.10721.1 | 5.16  | 5     | 0.13 | 0.57 | 1.12  | 0.254381 | 0.34565  | 0.602363 | 0.590854 |
| MmugDNA.10722.1.S1_at   | MmugDNA.10722.1 | 3.44  | 3.36  | 0.21 | 0.28 | 1.05  | 0.7994   | 0.982314 | 0.916962 | 0.990348 |

|                         |                 |       |       |      |      |       |          |          |          |          |
|-------------------------|-----------------|-------|-------|------|------|-------|----------|----------|----------|----------|
| MmugDNA.10723.1.S1_at   | MmugDNA.10723.1 | 5.32  | 5.17  | 0.59 | 0.21 | 1.11  | 0.715658 | 0.34611  | 0.875243 | 0.591182 |
| MmugDNA.10724.1.S1_at   | MmugDNA.10724.1 | 3.86  | 3.73  | 0.94 | 0.19 | 1.1   | 0.26588  | 0.323943 | 0.611545 | 0.57466  |
| MmugDNA.2695.1.S1_x_at  | MmugDNA.2695.1  | 12.49 | 12.22 | 0.28 | 0.11 | 1.2   | 0.172944 | 0.256305 | 0.536607 | 0.524079 |
| MmugDNA.10726.1.S1_at   | MmugDNA.10726.1 | 8.07  | 7.51  | 0.17 | 0.64 | 1.47  | 0.287707 | 0.39858  | 0.626103 | 0.629458 |
| MmugDNA.10729.1.S1_at   | MmugDNA.10729.1 | 3.91  | 3.77  | 0.16 | 0.06 | 1.11  | 0.101067 | 0.049854 | 0.461009 | 0.268412 |
| MmugDNA.1073.1.S1_at    | MmugDNA.1073.1  | 11.23 | 11.24 | 0.1  | 0.12 | -1    | 0.557747 | 0.738258 | 0.792743 | 0.84825  |
| MmugDNA.10730.1.S1_at   | MmugDNA.10730.1 | 9.53  | 9.81  | 0.4  | 0.12 | -1.21 | 0.076196 | 0.076369 | 0.424738 | 0.321368 |
| MmugDNA.10731.1.S1_at   | MmugDNA.10731.1 | 2.73  | 2.78  | 0.07 | 0.14 | -1.03 | 0.475943 | 0.70357  | 0.746034 | 0.828139 |
| MmugDNA.10732.1.S1_at   | MmugDNA.10732.1 | 3.46  | 3.53  | 0.13 | 0.24 | -1.04 | 0.68997  | 0.890128 | 0.861872 | 0.937438 |
| MmugDNA.10733.1.S1_s_at | MmugDNA.10733.1 | 10.2  | 10.13 | 0.21 | 0.15 | 1.05  | 0.872174 | 0.759225 | 0.948957 | 0.860036 |
| MmugDNA.10735.1.S1_at   | MmugDNA.10735.1 | 10.19 | 10.07 | 0.45 | 0.61 | 1.09  | 0.59597  | 0.17755  | 0.812742 | 0.453943 |
| MmugDNA.10737.1.S1_at   | MmugDNA.10737.1 | 10.09 | 10.07 | 0.22 | 0.46 | 1.01  | 0.900489 | 0.698391 | 0.960326 | 0.82478  |
| MmugDNA.10738.1.S1_s_at | MmugDNA.10738.1 | 8.96  | 8.85  | 0.88 | 0.48 | 1.08  | 0.78008  | 0.491415 | 0.908464 | 0.693004 |
| MmugDNA.10739.1.S1_at   | MmugDNA.10739.1 | 4.67  | 4.4   | 0.03 | 0.22 | 1.2   | 0.41507  | 0.309101 | 0.709338 | 0.564787 |
| MmugDNA.1074.1.S1_at    | MmugDNA.1074.1  | 4.41  | 4.59  | 0.11 | 0.09 | -1.14 | 0.436247 | 0.103281 | 0.721644 | 0.364143 |
| MmugDNA.10740.1.S1_at   | MmugDNA.10740.1 | 4.34  | 4.45  | 0.28 | 0.32 | -1.08 | 0.819269 | 0.667339 | 0.926528 | 0.805297 |
| MmugDNA.10742.1.S1_at   | MmugDNA.10742.1 | 10.84 | 10.36 | 0.44 | 0.54 | 1.4   | 0.325856 | 0.046373 | 0.653063 | 0.259844 |
| MmugDNA.10746.1.S1_at   | MmugDNA.10746.1 | 8.72  | 8.33  | 0.21 | 0.37 | 1.31  | 0.092624 | 0.036425 | 0.449245 | 0.235375 |
| MmugDNA.10747.1.S1_at   | MmugDNA.10747.1 | 6.08  | 6.17  | 0.03 | 0.17 | -1.06 | 0.941449 | 0.742593 | 0.977713 | 0.850976 |
| MmugDNA.10748.1.S1_at   | MmugDNA.10748.1 | 4.52  | 4.63  | 0.04 | 0.16 | -1.08 | 0.168933 | 0.347181 | 0.53321  | 0.591815 |
| MmugDNA.10749.1.S1_at   | MmugDNA.10749.1 | 4.65  | 4.94  | 0.1  | 0.06 | -1.21 | 0.016246 | 0.030023 | 0.263592 | 0.215056 |
| MmugDNA.1075.1.S1_at    | MmugDNA.1075.1  | 5.7   | 5.66  | 0    | 0.22 | 1.03  | 0.579933 | 0.65274  | 0.804451 | 0.796986 |
| MmugDNA.10750.1.S1_at   | MmugDNA.10750.1 | 8.65  | 9.55  | 0.33 | 0.33 | -1.87 | 0.02152  | 0.012453 | 0.282524 | 0.14417  |
| MmugDNA.10750.1.S1_s_at | MmugDNA.10750.1 | 8.71  | 9.42  | 0.48 | 0.43 | -1.64 | 0.059915 | 0.044983 | 0.392991 | 0.256531 |
| MmugDNA.10751.1.S1_at   | MmugDNA.10751.1 | 5.12  | 4.97  | 0.39 | 0.44 | 1.11  | 0.787766 | 0.246083 | 0.911673 | 0.515827 |
| MmugDNA.10752.1.S1_at   | MmugDNA.10752.1 | 4.73  | 6.63  | 0.9  | 1.65 | -3.73 | 0.20205  | 0.156206 | 0.56434  | 0.43161  |
| MmugDNA.10753.1.S1_at   | MmugDNA.10753.1 | 4.86  | 5.2   | 0.57 | 0.14 | -1.27 | 0.964696 | 0.964854 | 0.986359 | 0.980489 |
| MmugDNA.10755.1.S1_at   | MmugDNA.10755.1 | 3.22  | 3.22  | 0.13 | 0.1  | 1     | 0.872941 | 0.138056 | 0.94924  | 0.410919 |
| MmugDNA.10756.1.S1_at   | MmugDNA.10756.1 | 2.89  | 2.89  | 0.06 | 0.05 | 1     | 0.727241 | 0.130642 | 0.881213 | 0.402634 |
| MmugDNA.10757.1.S1_at   | MmugDNA.10757.1 | 4.56  | 3.7   | 0.64 | 0.56 | 1.82  | 0.269284 | 0.631842 | 0.613979 | 0.782971 |
| MmugDNA.10758.1.S1_at   | MmugDNA.10758.1 | 6.11  | 5.83  | 0.32 | 0.26 | 1.21  | 0.582607 | 0.752736 | 0.805828 | 0.855968 |
| MmugDNA.10759.1.S1_at   | MmugDNA.10759.1 | 5.95  | 6.22  | 0.19 | 0.32 | -1.2  | 0.508696 | 0.671895 | 0.763905 | 0.808166 |
| MmugDNA.10760.1.S1_at   | MmugDNA.10760.1 | 4.32  | 3.88  | 0.38 | 0.08 | 1.35  | 0.209106 | 0.162507 | 0.570667 | 0.438649 |
| MmugDNA.10761.1.S1_at   | MmugDNA.10761.1 | 7.34  | 7.37  | 0.03 | 0.21 | -1.02 | 0.476814 | 0.761246 | 0.746293 | 0.861279 |
| MmugDNA.10762.1.S1_at   | MmugDNA.10762.1 | 6.19  | 6.41  | 0.04 | 0.31 | -1.16 | 0.816929 | 0.959251 | 0.925797 | 0.97688  |
| MmugDNA.10765.1.S1_at   | MmugDNA.10765.1 | 5.83  | 5.93  | 0.04 | 0.01 | -1.07 | 0.007092 | 0.183792 | 0.20405  | 0.459871 |
| MmugDNA.10766.1.S1_at   | MmugDNA.10766.1 | 3.52  | 3.57  | 0.04 | 0.04 | -1.03 | 0.131274 | 0.140135 | 0.497869 | 0.413394 |
| MmugDNA.10767.1.S1_at   | MmugDNA.10767.1 | 9.6   | 9.53  | 0.29 | 0.86 | 1.05  | 0.960677 | 0.943279 | 0.9849   | 0.967814 |
| MmugDNA.10768.1.S1_at   | MmugDNA.10768.1 | 3.54  | 3.46  | 0.04 | 0.36 | 1.06  | 0.820966 | 0.785867 | 0.92718  | 0.875989 |
| MmugDNA.10770.1.S1_at   | MmugDNA.10770.1 | 3.85  | 3.84  | 0.14 | 0.06 | 1.01  | 0.832383 | 0.590282 | 0.932116 | 0.756124 |
| MmugDNA.10772.1.S1_at   | MmugDNA.10772.1 | 7.62  | 7.5   | 0.6  | 0.43 | 1.09  | 0.94193  | 0.164001 | 0.977822 | 0.440128 |

|                         |                 |       |       |      |      |       |          |          |          |          |
|-------------------------|-----------------|-------|-------|------|------|-------|----------|----------|----------|----------|
| MmugDNA.10774.1.S1_at   | MmugDNA.10774.1 | 4.79  | 4.95  | 0.08 | 0.11 | -1.12 | 0.047063 | 0.027107 | 0.364969 | 0.205797 |
| MmugDNA.10775.1.S1_at   | MmugDNA.10775.1 | 7.04  | 8.03  | 0.31 | 0.34 | -1.99 | 0.027714 | 0.041541 | 0.308669 | 0.248704 |
| MmugDNA.10775.1.S1_s_at | MmugDNA.10775.1 | 7.17  | 8     | 0.16 | 0.32 | -1.77 | 0.023924 | 0.028594 | 0.29338  | 0.210901 |
| MmugDNA.10779.1.S1_at   | MmugDNA.10779.1 | 13.89 | 13.93 | 0.15 | 0.06 | -1.02 | 0.670357 | 0.724309 | 0.852386 | 0.840433 |
| MmugDNA.1078.1.S1_at    | MmugDNA.1078.1  | 4.22  | 4.27  | 0.07 | 0.05 | -1.03 | 0.475311 | 0.04444  | 0.745706 | 0.25521  |
| MmugDNA.10780.1.S1_at   | MmugDNA.10780.1 | 5.71  | 5.72  | 0.12 | 0.15 | -1.01 | 0.417744 | 0.05062  | 0.710734 | 0.270317 |
| MmugDNA.10781.1.S1_at   | MmugDNA.10781.1 | 10.19 | 9.53  | 0.2  | 0.94 | 1.58  | 0.344499 | 0.283434 | 0.664605 | 0.545955 |
| MmugDNA.10782.1.S1_at   | MmugDNA.10782.1 | 6.17  | 5.83  | 0.69 | 0.43 | 1.26  | 0.456491 | 0.61055  | 0.734509 | 0.768734 |
| MmugDNA.10784.1.S1_at   | MmugDNA.10784.1 | 4.18  | 4.69  | 0.06 | 0.23 | -1.42 | 0.050381 | 0.057    | 0.374295 | 0.284868 |
| MmugDNA.10785.1.S1_at   | MmugDNA.10785.1 | 4.51  | 3.88  | 0.76 | 0.75 | 1.54  | 0.60345  | 0.437541 | 0.817154 | 0.656769 |
| MmugDNA.10786.1.S1_at   | MmugDNA.10786.1 | 10.83 | 10.07 | 0.18 | 0.75 | 1.69  | 0.06618  | 0.080482 | 0.40632  | 0.328159 |
| MmugDNA.10787.1.S1_at   | MmugDNA.10787.1 | 8.44  | 8.12  | 0.16 | 0.35 | 1.25  | 0.156697 | 0.189733 | 0.521541 | 0.465396 |
| MmugDNA.10788.1.S1_at   | MmugDNA.10788.1 | 5.69  | 5.76  | 0.21 | 0.22 | -1.05 | 0.28056  | 0.286872 | 0.621702 | 0.548182 |
| MmugDNA.10789.1.S1_at   | MmugDNA.10789.1 | 4.37  | 4.64  | 0.61 | 1.58 | -1.2  | 0.702928 | 0.856348 | 0.868924 | 0.917938 |
| MmugDNA.1079.1.S1_at    | MmugDNA.1079.1  | 4.93  | 4.75  | 0.2  | 0.23 | 1.13  | 0.172026 | 0.170007 | 0.535422 | 0.446736 |
| MmugDNA.10792.1.S1_at   | MmugDNA.10792.1 | 11.16 | 9.97  | 0.09 | 0.19 | 2.3   | 0.000924 | 0.000105 | 0.139813 | 0.028099 |
| MmugDNA.10793.1.S1_at   | MmugDNA.10793.1 | 7.66  | 7.41  | 0.29 | 0.11 | 1.19  | 0.114688 | 0.127537 | 0.478025 | 0.398407 |
| MmugDNA.10794.1.S1_at   | MmugDNA.10794.1 | 4.86  | 5.06  | 0.12 | 0.12 | -1.15 | 0.313147 | 0.380998 | 0.644972 | 0.617476 |
| MmugDNA.10795.1.S1_at   | MmugDNA.10795.1 | 9.86  | 9.49  | 0.43 | 0.23 | 1.29  | 0.09553  | 0.08956  | 0.453501 | 0.343811 |
| MmugDNA.10797.1.S1_at   | MmugDNA.10797.1 | 11.64 | 11.17 | 0.12 | 0.16 | 1.38  | 0.021125 | 0.001459 | 0.282335 | 0.058204 |
| MmugDNA.10798.1.S1_at   | MmugDNA.10798.1 | 3.31  | 3.17  | 0.23 | 0.06 | 1.1   | 0.810924 | 0.940989 | 0.922893 | 0.966568 |
| MmugDNA.10799.1.S1_at   | MmugDNA.10799.1 | 3.79  | 3.76  | 0.2  | 0.12 | 1.02  | 0.569141 | 0.509395 | 0.798992 | 0.704159 |
| MmugDNA.108.1.S1_at     | MmugDNA.108.1   | 5.66  | 5.3   | 0.52 | 0.4  | 1.28  | 0.316431 | 0.354311 | 0.647373 | 0.597164 |
| MmugDNA.1080.1.S1_at    | MmugDNA.1080.1  | 5.9   | 5.81  | 0.72 | 0.22 | 1.06  | 0.812462 | 0.951343 | 0.923656 | 0.972417 |
| MmugDNA.10800.1.S1_at   | MmugDNA.10800.1 | 4.21  | 4.01  | 0.21 | 0.16 | 1.15  | 0.474051 | 0.389986 | 0.744812 | 0.624002 |
| MmugDNA.10801.1.S1_s_at | MmugDNA.10801.1 | 3.09  | 3.3   | 0.13 | 0.12 | -1.16 | 0.256803 | 0.106769 | 0.604419 | 0.369349 |
| MmugDNA.10802.1.S1_at   | MmugDNA.10802.1 | 4.44  | 4.7   | 0.21 | 0.21 | -1.19 | 0.937444 | 0.864499 | 0.975858 | 0.923174 |
| MmugDNA.10803.1.S1_s_at | MmugDNA.10803.1 | 9.1   | 9.69  | 0.3  | 1.51 | -1.5  | 0.543515 | 0.544693 | 0.78381  | 0.727041 |
| MmugDNA.10804.1.S1_at   | MmugDNA.10804.1 | 3.17  | 3.51  | 0.09 | 0.07 | -1.27 | 0.006097 | 0.12532  | 0.195495 | 0.395949 |
| MmugDNA.10805.1.S1_at   | MmugDNA.10805.1 | 7.3   | 6.72  | 0.23 | 0.27 | 1.5   | 0.061587 | 0.07612  | 0.396368 | 0.320899 |
| MmugDNA.10805.1.S1_s_at | MmugDNA.10805.1 | 7.92  | 7.59  | 0.14 | 0.19 | 1.25  | 0.036773 | 0.044474 | 0.340337 | 0.255242 |
| MmugDNA.10806.1.S1_at   | MmugDNA.10806.1 | 5.46  | 5.63  | 0    | 0.1  | -1.12 | 0.125311 | 0.09981  | 0.49131  | 0.358431 |
| MmugDNA.10808.1.S1_at   | MmugDNA.10808.1 | 4.09  | 4.1   | 0.08 | 0.08 | -1.01 | 0.621015 | 0.226812 | 0.826295 | 0.499232 |
| MmugDNA.10809.1.S1_at   | MmugDNA.10809.1 | 5.22  | 5.34  | 0.32 | 0.11 | -1.09 | 0.679267 | 0.153461 | 0.856516 | 0.42827  |
| MmugDNA.10810.1.S1_at   | MmugDNA.10810.1 | 5.55  | 5.57  | 0.07 | 0.06 | -1.01 | 0.655245 | 0.578675 | 0.844826 | 0.748603 |
| MmugDNA.10813.1.S1_at   | MmugDNA.10813.1 | 8.8   | 7.82  | 0.23 | 0.76 | 1.96  | 0.072263 | 0.072751 | 0.416651 | 0.315651 |
| MmugDNA.10814.1.S1_at   | MmugDNA.10814.1 | 3.28  | 3.1   | 0.15 | 0.15 | 1.13  | 0.273676 | 0.275926 | 0.617179 | 0.540035 |
| MmugDNA.10815.1.S1_at   | MmugDNA.10815.1 | 9.14  | 7.59  | 1.22 | 0.95 | 2.94  | 0.160883 | 0.165828 | 0.525946 | 0.442152 |
| MmugDNA.10816.1.S1_at   | MmugDNA.10816.1 | 6.17  | 5.64  | 0.6  | 0.09 | 1.45  | 0.067267 | 0.07351  | 0.407291 | 0.316778 |
| MmugDNA.10817.1.S1_at   | MmugDNA.10817.1 | 5.79  | 5.46  | 0.13 | 0.09 | 1.26  | 0.010474 | 0.053636 | 0.229964 | 0.277224 |
| MmugDNA.10818.1.S1_at   | MmugDNA.10818.1 | 5.73  | 5.43  | 0.12 | 0.31 | 1.23  | 0.596815 | 0.601801 | 0.813202 | 0.763113 |

|                         |                 |       |       |      |      |        |          |          |          |          |
|-------------------------|-----------------|-------|-------|------|------|--------|----------|----------|----------|----------|
| MmugDNA.1082.1.S1_at    | MmugDNA.1082.1  | 3.81  | 3.44  | 0.36 | 0.14 | 1.29   | 0.273077 | 0.115359 | 0.616536 | 0.382394 |
| MmugDNA.10820.1.S1_at   | MmugDNA.10820.1 | 5.77  | 6.51  | 0.92 | 1.14 | -1.67  | 0.472685 | 0.051643 | 0.743927 | 0.272698 |
| MmugDNA.10821.1.S1_at   | MmugDNA.10821.1 | 3.13  | 3.15  | 0.35 | 0.27 | -1.01  | 0.715192 | 0.913372 | 0.875005 | 0.95123  |
| MmugDNA.10822.1.S1_at   | MmugDNA.10822.1 | 5.47  | 4.57  | 1.27 | 0.51 | 1.86   | 0.304316 | 0.43974  | 0.638475 | 0.65842  |
| MmugDNA.10824.1.S1_at   | MmugDNA.10824.1 | 4.57  | 5.1   | 0.15 | 0.67 | -1.44  | 0.622953 | 0.513584 | 0.82774  | 0.707103 |
| MmugDNA.10825.1.S1_at   | MmugDNA.10825.1 | 3.21  | 3.1   | 0.11 | 0.06 | 1.08   | 0.224284 | 0.403651 | 0.582637 | 0.632266 |
| MmugDNA.10826.1.S1_at   | MmugDNA.10826.1 | 3.66  | 4.02  | 0.14 | 0.09 | -1.28  | 0.072707 | 0.060584 | 0.417651 | 0.292769 |
| MmugDNA.10827.1.S1_at   | MmugDNA.10827.1 | 8.87  | 9.72  | 0.64 | 0.25 | -1.8   | 0.111459 | 0.119089 | 0.473657 | 0.387386 |
| MmugDNA.10828.1.S1_at   | MmugDNA.10828.1 | 9.85  | 10.11 | 0.16 | 0.34 | -1.2   | 0.143017 | 0.156677 | 0.509977 | 0.432179 |
| MmugDNA.1083.1.S1_at    | MmugDNA.1083.1  | 5.58  | 6.81  | 1.04 | 1.82 | -2.35  | 0.408172 | 0.560967 | 0.70497  | 0.737076 |
| MmugDNA.10830.1.S1_at   | MmugDNA.10830.1 | 4.23  | 4.65  | 0.18 | 0.17 | -1.34  | 0.082512 | 0.077743 | 0.434069 | 0.323869 |
| MmugDNA.10831.1.S1_at   | MmugDNA.10831.1 | 9.24  | 9.2   | 0.21 | 0.46 | 1.03   | 0.709749 | 0.113252 | 0.872658 | 0.379287 |
| MmugDNA.10832.1.S1_at   | MmugDNA.10832.1 | 7.23  | 6.91  | 0.15 | 0.23 | 1.25   | 0.040224 | 0.014716 | 0.349219 | 0.154415 |
| MmugDNA.10833.1.S1_at   | MmugDNA.10833.1 | 7.59  | 7.63  | 0.09 | 0.4  | -1.03  | 0.844904 | 0.812973 | 0.937773 | 0.891895 |
| MmugDNA.10834.1.S1_at   | MmugDNA.10834.1 | 9.86  | 13.27 | 1.41 | 2.61 | -10.62 | 0.465959 | 0.224819 | 0.740195 | 0.497617 |
| MmugDNA.10835.1.S1_at   | MmugDNA.10835.1 | 3.22  | 3.19  | 0.18 | 0.18 | 1.02   | 0.491667 | 0.660871 | 0.755185 | 0.801618 |
| MmugDNA.10836.1.S1_at   | MmugDNA.10836.1 | 4.87  | 4.85  | 0.07 | 0.19 | 1.02   | 0.503079 | 0.484255 | 0.760671 | 0.688416 |
| MmugDNA.10837.1.S1_at   | MmugDNA.10837.1 | 7.63  | 7.49  | 0.34 | 0.77 | 1.11   | 0.571125 | 0.532279 | 0.7999   | 0.719017 |
| MmugDNA.10838.1.S1_at   | MmugDNA.10838.1 | 4.86  | 3.78  | 0.79 | 0.23 | 2.11   | 0.261587 | 0.17229  | 0.608234 | 0.448666 |
| MmugDNA.10839.1.S1_at   | MmugDNA.10839.1 | 10.96 | 12.04 | 0.06 | 0.92 | -2.11  | 0.144865 | 0.134606 | 0.511188 | 0.406629 |
| MmugDNA.1084.1.S1_at    | MmugDNA.1084.1  | 6.58  | 6.62  | 0.12 | 0.16 | -1.03  | 0.878393 | 0.137178 | 0.951188 | 0.410045 |
| MmugDNA.10841.1.S1_at   | MmugDNA.10841.1 | 4.95  | 4.94  | 0.22 | 0.37 | 1.01   | 0.721665 | 0.269224 | 0.878248 | 0.534534 |
| MmugDNA.10842.1.S1_at   | MmugDNA.10842.1 | 6.8   | 6.7   | 0.07 | 0.06 | 1.07   | 0.373403 | 0.141847 | 0.683245 | 0.41535  |
| MmugDNA.10843.1.S1_at   | MmugDNA.10843.1 | 4.24  | 4.61  | 0.22 | 0.04 | -1.29  | 0.153439 | 0.01073  | 0.517815 | 0.135287 |
| MmugDNA.10845.1.S1_at   | MmugDNA.10845.1 | 6.77  | 6.83  | 0.18 | 0.07 | -1.04  | 0.384444 | 0.257451 | 0.689949 | 0.52521  |
| MmugDNA.10846.1.S1_at   | MmugDNA.10846.1 | 5.68  | 5.78  | 0.11 | 1    | -1.08  | 0.955442 | 0.95322  | 0.983289 | 0.973457 |
| MmugDNA.10847.1.S1_at   | MmugDNA.10847.1 | 7.57  | 7.65  | 0.22 | 0.14 | -1.06  | 0.568815 | 0.394948 | 0.798884 | 0.627216 |
| MmugDNA.10848.1.S1_at   | MmugDNA.10848.1 | 5.59  | 5.65  | 0.09 | 0.08 | -1.04  | 0.869846 | 0.135906 | 0.947917 | 0.408103 |
| MmugDNA.10849.1.S1_at   | MmugDNA.10849.1 | 5.89  | 6.03  | 0.01 | 0.22 | -1.1   | 0.97771  | 0.868743 | 0.991591 | 0.925426 |
| MmugDNA.1085.1.S1_at    | MmugDNA.1085.1  | 3.4   | 3.5   | 0.07 | 0.12 | -1.07  | 0.644043 | 0.153184 | 0.839719 | 0.428017 |
| MmugDNA.10851.1.S1_at   | MmugDNA.10851.1 | 3.01  | 2.96  | 0.41 | 0.09 | 1.04   | 0.389375 | 0.577788 | 0.692994 | 0.748124 |
| MmugDNA.10852.1.S1_at   | MmugDNA.10852.1 | 5.29  | 5.29  | 0.06 | 0.08 | 1      | 0.351785 | 0.45919  | 0.669177 | 0.67164  |
| MmugDNA.10853.1.S1_at   | MmugDNA.10853.1 | 8.24  | 7.82  | 0.19 | 0.27 | 1.33   | 0.103248 | 0.094217 | 0.462888 | 0.350889 |
| MmugDNA.10854.1.S1_at   | MmugDNA.10854.1 | 5.03  | 4.51  | 0.59 | 0.23 | 1.43   | 0.661903 | 0.61593  | 0.848299 | 0.772359 |
| MmugDNA.10856.1.S1_at   | MmugDNA.10856.1 | 6.33  | 6.44  | 0.12 | 0.02 | -1.08  | 0.558572 | 0.3412   | 0.793302 | 0.587312 |
| MmugDNA.10857.1.S1_at   | MmugDNA.10857.1 | 6.21  | 5.79  | 0.16 | 0.2  | 1.34   | 0.029068 | 0.020347 | 0.312634 | 0.179112 |
| MmugDNA.10858.1.S1_at   | MmugDNA.10858.1 | 4.5   | 4.61  | 0.05 | 0.24 | -1.08  | 0.442979 | 0.554407 | 0.725962 | 0.733195 |
| MmugDNA.10859.1.S1_at   | MmugDNA.10859.1 | 3.15  | 3.16  | 0.03 | 0.05 | -1.01  | 0.861945 | 0.318476 | 0.944477 | 0.571239 |
| MmugDNA.1086.1.S1_at    | MmugDNA.1086.1  | 7.97  | 7.86  | 0.66 | 0.03 | 1.08   | 0.424588 | 0.5281   | 0.714559 | 0.716435 |
| MmugDNA.10860.1.S1_s_at | MmugDNA.10860.1 | 8.55  | 8.23  | 0.15 | 0.35 | 1.25   | 0.642511 | 0.122535 | 0.838763 | 0.392427 |
| MmugDNA.10861.1.S1_at   | MmugDNA.10861.1 | 3.87  | 3.96  | 0.11 | 0.09 | -1.07  | 0.228064 | 0.490859 | 0.58544  | 0.692666 |

|                         |                 |       |       |      |      |       |          |          |          |          |
|-------------------------|-----------------|-------|-------|------|------|-------|----------|----------|----------|----------|
| MmugDNA.10862.1.S1_at   | MmugDNA.10862.1 | 3.8   | 3.83  | 0.11 | 0.13 | -1.02 | 0.902536 | 0.303287 | 0.961142 | 0.560748 |
| MmugDNA.10864.1.S1_at   | MmugDNA.10864.1 | 7.03  | 7.09  | 0.1  | 0.23 | -1.04 | 0.728895 | 0.826273 | 0.882277 | 0.900217 |
| MmugDNA.10864.1.S1_s_at | MmugDNA.10864.1 | 7.29  | 7.58  | 0.23 | 0.27 | -1.23 | 0.106104 | 0.104981 | 0.466831 | 0.36659  |
| MmugDNA.10865.1.S1_at   | MmugDNA.10865.1 | 11.64 | 11.79 | 0.2  | 0.21 | -1.1  | 0.324453 | 0.454382 | 0.651941 | 0.668576 |
| MmugDNA.10866.1.S1_at   | MmugDNA.10866.1 | 3.67  | 4.38  | 0.11 | 0.17 | -1.64 | 0.005306 | 0.001381 | 0.191107 | 0.056947 |
| MmugDNA.10867.1.S1_at   | MmugDNA.10867.1 | 4.16  | 3.96  | 0.51 | 0.11 | 1.15  | 0.448853 | 0.614186 | 0.729864 | 0.771143 |
| MmugDNA.10868.1.S1_at   | MmugDNA.10868.1 | 4.1   | 4.36  | 0.16 | 0.17 | -1.19 | 0.128067 | 0.154534 | 0.49425  | 0.429405 |
| MmugDNA.1087.1.S1_at    | MmugDNA.1087.1  | 9.54  | 9.37  | 0.17 | 0.36 | 1.12  | 0.376446 | 0.508008 | 0.685219 | 0.703358 |
| MmugDNA.10870.1.S1_at   | MmugDNA.10870.1 | 5.13  | 4.91  | 0.14 | 0.09 | 1.17  | 0.145036 | 0.570496 | 0.511188 | 0.743151 |
| MmugDNA.10871.1.S1_at   | MmugDNA.10871.1 | 4.83  | 4.78  | 0.28 | 0.2  | 1.04  | 0.902469 | 0.37731  | 0.961119 | 0.614891 |
| MmugDNA.10873.1.S1_at   | MmugDNA.10873.1 | 5.13  | 5.25  | 0.1  | 0.08 | -1.09 | 0.10075  | 0.112782 | 0.461009 | 0.37844  |
| MmugDNA.10877.1.S1_at   | MmugDNA.10877.1 | 10.24 | 8.57  | 0.22 | 1.46 | 3.18  | 0.114135 | 0.034638 | 0.47744  | 0.230247 |
| MmugDNA.10879.1.S1_at   | MmugDNA.10879.1 | 5.29  | 5.3   | 0.19 | 0.26 | -1.01 | 0.873011 | 0.892634 | 0.94924  | 0.938769 |
| MmugDNA.1088.1.S1_at    | MmugDNA.1088.1  | 5.29  | 5.55  | 0.16 | 0.09 | -1.2  | 0.0902   | 0.109236 | 0.445655 | 0.37308  |
| MmugDNA.10880.1.S1_at   | MmugDNA.10880.1 | 10.21 | 10.83 | 0.19 | 0.24 | -1.54 | 0.033692 | 0.01774  | 0.330119 | 0.168367 |
| MmugDNA.10881.1.S1_at   | MmugDNA.10881.1 | 11.14 | 11.72 | 0.31 | 0.43 | -1.5  | 0.170603 | 0.084554 | 0.534399 | 0.335953 |
| MmugDNA.10882.1.S1_at   | MmugDNA.10882.1 | 11.87 | 11.85 | 0.43 | 1.18 | 1.01  | 0.402094 | 0.568185 | 0.70117  | 0.741859 |
| MmugDNA.10885.1.S1_at   | MmugDNA.10885.1 | 9.7   | 8.97  | 0.06 | 0.28 | 1.66  | 0.011805 | 0.005818 | 0.237691 | 0.104661 |
| MmugDNA.10886.1.S1_at   | MmugDNA.10886.1 | 5.56  | 5.67  | 0.18 | 0    | -1.08 | 0.969619 | 0.208712 | 0.98841  | 0.482595 |
| MmugDNA.10887.1.S1_at   | MmugDNA.10887.1 | 5.58  | 5.51  | 0.14 | 0.07 | 1.05  | 0.66247  | 0.775846 | 0.848638 | 0.869553 |
| MmugDNA.10888.1.S1_at   | MmugDNA.10888.1 | 6.73  | 7.36  | 0.67 | 0.22 | -1.55 | 0.05023  | 0.047487 | 0.373841 | 0.262539 |
| MmugDNA.1089.1.S1_at    | MmugDNA.1089.1  | 10.03 | 9.37  | 0.27 | 0.27 | 1.58  | 0.034534 | 0.022422 | 0.333289 | 0.187403 |
| MmugDNA.1089.1.S1_s_at  | MmugDNA.1089.1  | 9.51  | 8.94  | 0.3  | 0.26 | 1.49  | 0.048092 | 0.038136 | 0.367772 | 0.239923 |
| MmugDNA.10890.1.S1_at   | MmugDNA.10890.1 | 5.58  | 6.1   | 0.36 | 0.31 | -1.44 | 0.643361 | 0.300737 | 0.839349 | 0.558959 |
| MmugDNA.10891.1.S1_at   | MmugDNA.10891.1 | 3.42  | 3.31  | 0.25 | 0.15 | 1.08  | 0.384327 | 0.162294 | 0.689908 | 0.438447 |
| MmugDNA.10892.1.S1_at   | MmugDNA.10892.1 | 5.64  | 5.92  | 1.52 | 0.45 | -1.22 | 0.973414 | 0.895786 | 0.9896   | 0.940438 |
| MmugDNA.10894.1.S1_at   | MmugDNA.10894.1 | 5.26  | 5.06  | 0.05 | 0.22 | 1.15  | 0.233419 | 0.183444 | 0.588137 | 0.459574 |
| MmugDNA.10895.1.S1_at   | MmugDNA.10895.1 | 2.87  | 2.82  | 0.01 | 0.2  | 1.03  | 0.611321 | 0.869743 | 0.821632 | 0.926118 |
| MmugDNA.10897.1.S1_at   | MmugDNA.10897.1 | 8.66  | 8.6   | 0.19 | 0.13 | 1.04  | 0.405778 | 0.541061 | 0.703348 | 0.724737 |
| MmugDNA.10897.1.S1_s_at | MmugDNA.10897.1 | 9.53  | 9.5   | 0.04 | 0.07 | 1.02  | 0.221572 | 0.089129 | 0.580303 | 0.343152 |
| MmugDNA.10898.1.S1_at   | MmugDNA.10898.1 | 7.5   | 7.23  | 0.31 | 0.6  | 1.2   | 0.737301 | 0.359483 | 0.887061 | 0.600754 |
| MmugDNA.109.1.S1_at     | MmugDNA.109.1   | 3.3   | 3.29  | 0.64 | 0.04 | 1     | 0.392657 | 0.302899 | 0.694706 | 0.560356 |
| MmugDNA.1090.1.S1_at    | MmugDNA.1090.1  | 9.94  | 10.3  | 0.17 | 0.29 | -1.28 | 0.225929 | 0.283086 | 0.583922 | 0.545692 |
| MmugDNA.10901.1.S1_at   | MmugDNA.10901.1 | 3.95  | 3.98  | 0.09 | 0.38 | -1.02 | 0.971903 | 0.932719 | 0.989291 | 0.961786 |
| MmugDNA.10902.1.S1_at   | MmugDNA.10902.1 | 4.81  | 4.2   | 0.13 | 0.32 | 1.53  | 0.057319 | 0.080136 | 0.387873 | 0.327639 |
| MmugDNA.10903.1.S1_at   | MmugDNA.10903.1 | 8.07  | 8.14  | 0.67 | 0.26 | -1.05 | 0.697195 | 0.37414  | 0.865585 | 0.612678 |
| MmugDNA.10905.1.S1_at   | MmugDNA.10905.1 | 9.25  | 8.89  | 0.21 | 0.49 | 1.28  | 0.437409 | 0.599443 | 0.722414 | 0.761455 |
| MmugDNA.10909.1.S1_at   | MmugDNA.10909.1 | 8.96  | 7.75  | 0.98 | 0.16 | 2.32  | 0.259709 | 0.317351 | 0.606733 | 0.570599 |
| MmugDNA.10910.1.S1_at   | MmugDNA.10910.1 | 2.94  | 2.96  | 0.13 | 0.11 | -1.02 | 0.741876 | 0.780992 | 0.889478 | 0.872934 |
| MmugDNA.10913.1.S1_at   | MmugDNA.10913.1 | 6.14  | 6.19  | 0.29 | 0.13 | -1.03 | 0.997531 | 0.161475 | 0.998986 | 0.437616 |
| MmugDNA.10914.1.S1_at   | MmugDNA.10914.1 | 3.02  | 3.05  | 0.08 | 0.05 | -1.02 | 0.404852 | 0.685185 | 0.703075 | 0.816369 |

|                         |                 |       |       |      |      |       |          |          |          |          |
|-------------------------|-----------------|-------|-------|------|------|-------|----------|----------|----------|----------|
| MmugDNA.10915.1.S1_at   | MmugDNA.10915.1 | 5.08  | 4.96  | 1.28 | 0.11 | 1.08  | 0.346713 | 0.49828  | 0.666013 | 0.697403 |
| MmugDNA.10916.1.S1_at   | MmugDNA.10916.1 | 6.14  | 5.65  | 0.34 | 0.46 | 1.4   | 0.341106 | 0.435131 | 0.662256 | 0.655026 |
| MmugDNA.10917.1.S1_at   | MmugDNA.10917.1 | 4.58  | 4.59  | 0.12 | 0.13 | -1.01 | 0.855763 | 0.518688 | 0.941689 | 0.710613 |
| MmugDNA.10918.1.S1_at   | MmugDNA.10918.1 | 3     | 2.99  | 0.11 | 0.01 | 1     | 0.512467 | 0.902658 | 0.765612 | 0.944707 |
| MmugDNA.10919.1.S1_at   | MmugDNA.10919.1 | 5.6   | 5.61  | 0.16 | 0.08 | -1.01 | 0.49378  | 0.702022 | 0.756364 | 0.827276 |
| MmugDNA.10920.1.S1_at   | MmugDNA.10920.1 | 3.08  | 2.97  | 0.12 | 0.11 | 1.08  | 0.709755 | 0.886055 | 0.872658 | 0.935136 |
| MmugDNA.10924.1.S1_at   | MmugDNA.10924.1 | 5.28  | 6.02  | 0.07 | 0.28 | -1.67 | 0.031062 | 0.022712 | 0.32048  | 0.188723 |
| MmugDNA.10927.1.S1_at   | MmugDNA.10927.1 | 4.53  | 4.9   | 0.47 | 0.33 | -1.29 | 0.434997 | 0.602414 | 0.72094  | 0.763396 |
| MmugDNA.10929.1.S1_at   | MmugDNA.10929.1 | 8.51  | 9.04  | 0.3  | 0.29 | -1.45 | 0.039666 | 0.022687 | 0.347812 | 0.188685 |
| MmugDNA.10930.1.S1_s_at | MmugDNA.10930.1 | 6.8   | 7.09  | 0.19 | 0.41 | -1.22 | 0.390662 | 0.449914 | 0.693739 | 0.665343 |
| MmugDNA.10932.1.S1_at   | MmugDNA.10932.1 | 3.15  | 3.27  | 0.1  | 0.24 | -1.08 | 0.302119 | 0.511132 | 0.636873 | 0.705399 |
| MmugDNA.10933.1.S1_at   | MmugDNA.10933.1 | 11.42 | 10.36 | 0.13 | 0.4  | 2.09  | 0.01495  | 0.004641 | 0.256514 | 0.095    |
| MmugDNA.10934.1.S1_at   | MmugDNA.10934.1 | 5.11  | 5.29  | 1.54 | 0.2  | -1.14 | 0.485465 | 0.452396 | 0.750946 | 0.667073 |
| MmugDNA.10935.1.S1_at   | MmugDNA.10935.1 | 4.34  | 4.59  | 0.56 | 0.54 | -1.19 | 0.856784 | 0.893923 | 0.942171 | 0.939452 |
| MmugDNA.10936.1.S1_at   | MmugDNA.10936.1 | 3.67  | 3.65  | 0.09 | 0.09 | 1.01  | 0.818168 | 0.576381 | 0.926284 | 0.747202 |
| MmugDNA.10938.1.S1_at   | MmugDNA.10938.1 | 4.93  | 5.02  | 0.16 | 0.08 | -1.06 | 0.76878  | 0.188366 | 0.902765 | 0.46435  |
| MmugDNA.10939.1.S1_at   | MmugDNA.10939.1 | 5.62  | 5.82  | 0.07 | 0.19 | -1.16 | 0.437304 | 0.134371 | 0.72235  | 0.406603 |
| MmugDNA.10941.1.S1_at   | MmugDNA.10941.1 | 4.63  | 4.33  | 0.72 | 0.54 | 1.23  | 0.20789  | 0.288038 | 0.569854 | 0.54928  |
| MmugDNA.10944.1.S1_at   | MmugDNA.10944.1 | 10.59 | 10.18 | 0.21 | 0.36 | 1.33  | 0.149339 | 0.097259 | 0.514001 | 0.354912 |
| MmugDNA.35889.1.S1_at   | MmugDNA.35889.1 | 8.38  | 8     | 0.25 | 0.06 | 1.29  | 0.220151 | 0.055607 | 0.579297 | 0.281649 |
| MmugDNA.35889.1.S1_s_at | MmugDNA.35889.1 | 8.11  | 7.13  | 0.53 | 0.34 | 1.98  | 0.116633 | 0.090558 | 0.48034  | 0.345026 |
| MmugDNA.10947.1.S1_at   | MmugDNA.10947.1 | 3.6   | 3.71  | 0.33 | 0.09 | -1.08 | 0.456661 | 0.565471 | 0.734529 | 0.739886 |
| MmugDNA.10948.1.S1_at   | MmugDNA.10948.1 | 7.34  | 6.52  | 0.29 | 0.52 | 1.76  | 0.201579 | 0.235313 | 0.563988 | 0.506346 |
| MmugDNA.10949.1.S1_at   | MmugDNA.10949.1 | 11.41 | 11.08 | 0.37 | 1.23 | 1.26  | 0.50593  | 0.626354 | 0.761907 | 0.779698 |
| MmugDNA.1095.1.S1_at    | MmugDNA.1095.1  | 7.92  | 8.54  | 0.08 | 0.17 | -1.54 | 0.002634 | 0.00138  | 0.164386 | 0.056947 |
| MmugDNA.10950.1.S1_at   | MmugDNA.10950.1 | 9.25  | 9.65  | 0.38 | 0.44 | -1.32 | 0.650981 | 0.809047 | 0.84297  | 0.889981 |
| MmugDNA.10951.1.S1_at   | MmugDNA.10951.1 | 4.62  | 4.49  | 0.3  | 0.17 | 1.09  | 0.212352 | 0.27974  | 0.57259  | 0.543232 |
| MmugDNA.10952.1.S1_at   | MmugDNA.10952.1 | 5.67  | 5.96  | 0.08 | 0.08 | -1.22 | 0.032463 | 0.01077  | 0.324971 | 0.135471 |
| MmugDNA.10953.1.S1_at   | MmugDNA.10953.1 | 10.46 | 9.34  | 0.18 | 0.6  | 2.16  | 0.14199  | 0.105793 | 0.509281 | 0.368018 |
| MmugDNA.10954.1.S1_at   | MmugDNA.10954.1 | 9.17  | 9.25  | 0.19 | 0.2  | -1.06 | 0.969589 | 0.328654 | 0.98841  | 0.578213 |
| MmugDNA.10955.1.S1_at   | MmugDNA.10955.1 | 9.54  | 9.46  | 0.38 | 0.15 | 1.05  | 0.459475 | 0.050976 | 0.73622  | 0.271055 |
| MmugDNA.10956.1.S1_at   | MmugDNA.10956.1 | 9.03  | 9.5   | 0.95 | 1.33 | -1.38 | 0.671151 | 0.840568 | 0.852602 | 0.909134 |
| MmugDNA.10958.1.S1_at   | MmugDNA.10958.1 | 8.74  | 8.55  | 0.29 | 0.48 | 1.15  | 0.654454 | 0.851211 | 0.844586 | 0.915364 |
| MmugDNA.10959.1.S1_at   | MmugDNA.10959.1 | 3.19  | 3.38  | 0.28 | 0.27 | -1.14 | 0.853117 | 0.709591 | 0.940708 | 0.831691 |
| MmugDNA.10960.1.S1_at   | MmugDNA.10960.1 | 7.68  | 7.65  | 0.15 | 0.5  | 1.02  | 0.848421 | 0.87368  | 0.939211 | 0.928169 |
| MmugDNA.10961.1.S1_at   | MmugDNA.10961.1 | 4.57  | 4.62  | 0.16 | 0.05 | -1.04 | 0.727127 | 0.375782 | 0.88121  | 0.613689 |
| MmugDNA.10962.1.S1_at   | MmugDNA.10962.1 | 5.65  | 5.74  | 0.29 | 0    | -1.07 | 0.200476 | 0.210865 | 0.563327 | 0.484934 |
| MmugDNA.10963.1.S1_at   | MmugDNA.10963.1 | 4.04  | 4.04  | 0.04 | 0.13 | -1    | 0.509604 | 0.564732 | 0.764465 | 0.739425 |
| MmugDNA.10964.1.S1_at   | MmugDNA.10964.1 | 6.34  | 6.34  | 0.09 | 0.11 | 1     | 0.935073 | 0.084157 | 0.974907 | 0.335181 |
| MmugDNA.10965.1.S1_at   | MmugDNA.10965.1 | 5.94  | 5.65  | 0.24 | 0.05 | 1.22  | 0.090111 | 0.07091  | 0.445578 | 0.312439 |
| MmugDNA.10966.1.S1_at   | MmugDNA.10966.1 | 5.41  | 6.01  | 0.21 | 0.36 | -1.51 | 0.105283 | 0.145505 | 0.465874 | 0.419441 |

|                       |                 |       |       |      |      |       |          |          |          |          |
|-----------------------|-----------------|-------|-------|------|------|-------|----------|----------|----------|----------|
| MmugDNA.10967.1.S1_at | MmugDNA.10967.1 | 6.18  | 6.27  | 0.02 | 0.06 | -1.07 | 0.020211 | 0.03761  | 0.277311 | 0.238384 |
| MmugDNA.10968.1.S1_at | MmugDNA.10968.1 | 5.4   | 5.48  | 0.03 | 0.12 | -1.06 | 0.367375 | 0.502649 | 0.67949  | 0.700236 |
| MmugDNA.10969.1.S1_at | MmugDNA.10969.1 | 3.49  | 3.52  | 0.29 | 0.5  | -1.02 | 0.457494 | 0.626353 | 0.734941 | 0.779698 |
| MmugDNA.1097.1.S1_at  | MmugDNA.1097.1  | 8.41  | 8.37  | 1.34 | 0.12 | 1.03  | 0.324827 | 0.392097 | 0.652158 | 0.625588 |
| MmugDNA.10970.1.S1_at | MmugDNA.10970.1 | 11.83 | 12.78 | 0.29 | 0.27 | -1.93 | 0.014071 | 0.00914  | 0.250974 | 0.126119 |
| MmugDNA.10971.1.S1_at | MmugDNA.10971.1 | 11.76 | 11.39 | 0.26 | 0.08 | 1.29  | 0.23167  | 0.101385 | 0.587487 | 0.36112  |
| MmugDNA.10972.1.S1_at | MmugDNA.10972.1 | 5.08  | 5.02  | 0.08 | 0.16 | 1.04  | 0.475419 | 0.504433 | 0.745766 | 0.701557 |
| MmugDNA.10973.1.S1_at | MmugDNA.10973.1 | 5.09  | 4.86  | 0.14 | 0.26 | 1.17  | 0.239526 | 0.227889 | 0.592545 | 0.500201 |
| MmugDNA.10974.1.S1_at | MmugDNA.10974.1 | 4.92  | 4.93  | 0.08 | 0.12 | -1.01 | 0.428728 | 0.500611 | 0.71704  | 0.699165 |
| MmugDNA.10978.1.S1_at | MmugDNA.10978.1 | 3.87  | 4.01  | 0.27 | 0.21 | -1.1  | 0.612876 | 0.670398 | 0.822443 | 0.807285 |
| MmugDNA.1098.1.S1_at  | MmugDNA.1098.1  | 5.04  | 5.21  | 0.16 | 0.17 | -1.13 | 0.121407 | 0.159714 | 0.486115 | 0.435828 |
| MmugDNA.10980.1.S1_at | MmugDNA.10980.1 | 9.63  | 9.88  | 0.33 | 0.25 | -1.19 | 0.721811 | 0.132306 | 0.878319 | 0.404294 |
| MmugDNA.10982.1.S1_at | MmugDNA.10982.1 | 7.75  | 7.54  | 0.33 | 1.3  | 1.15  | 0.945215 | 0.840133 | 0.979067 | 0.908905 |
| MmugDNA.10983.1.S1_at | MmugDNA.10983.1 | 10.95 | 11.17 | 0.07 | 0.7  | -1.16 | 0.985456 | 0.290198 | 0.99475  | 0.551169 |
| MmugDNA.10984.1.S1_at | MmugDNA.10984.1 | 3.81  | 3.67  | 0.23 | 0.27 | 1.11  | 0.258409 | 0.308558 | 0.60566  | 0.564575 |
| MmugDNA.10985.1.S1_at | MmugDNA.10985.1 | 5.68  | 5.09  | 0.6  | 0.26 | 1.51  | 0.161846 | 0.191268 | 0.526573 | 0.466553 |
| MmugDNA.10987.1.S1_at | MmugDNA.10987.1 | 5.74  | 5.75  | 0.05 | 0.28 | -1    | 0.834018 | 0.87502  | 0.932552 | 0.929098 |
| MmugDNA.10988.1.S1_at | MmugDNA.10988.1 | 4.32  | 5.41  | 0.04 | 0.48 | -2.14 | 0.018018 | 0.020394 | 0.268422 | 0.179286 |
| MmugDNA.10989.1.S1_at | MmugDNA.10989.1 | 3.71  | 3.74  | 0.08 | 0.28 | -1.02 | 0.482838 | 0.52898  | 0.749617 | 0.71703  |
| MmugDNA.10991.1.S1_at | MmugDNA.10991.1 | 3.32  | 3.39  | 0.27 | 0.14 | -1.05 | 0.925086 | 0.696791 | 0.970985 | 0.823939 |
| MmugDNA.10992.1.S1_at | MmugDNA.10992.1 | 3.81  | 3.76  | 0.4  | 0.12 | 1.04  | 0.288564 | 0.437965 | 0.626714 | 0.657057 |
| MmugDNA.10993.1.S1_at | MmugDNA.10993.1 | 7.79  | 7.03  | 0.61 | 0.14 | 1.69  | 0.283613 | 0.23667  | 0.623677 | 0.507459 |
| MmugDNA.10994.1.S1_at | MmugDNA.10994.1 | 6.12  | 5.75  | 0.91 | 0.52 | 1.29  | 0.895307 | 0.983097 | 0.958083 | 0.990726 |
| MmugDNA.10996.1.S1_at | MmugDNA.10996.1 | 2.95  | 2.95  | 0.09 | 0.06 | -1    | 0.610204 | 0.513368 | 0.820972 | 0.706881 |
| MmugDNA.10997.1.S1_at | MmugDNA.10997.1 | 11.08 | 10.91 | 0.04 | 0.25 | 1.12  | 0.749803 | 0.162386 | 0.892776 | 0.438575 |
| MmugDNA.10999.1.S1_at | MmugDNA.10999.1 | 8     | 7.56  | 0.72 | 1.08 | 1.36  | 0.755625 | 0.424231 | 0.896094 | 0.646833 |
| MmugDNA.11.1.S1_at    | MmugDNA.11.1    | 5.41  | 5.64  | 0.01 | 0.18 | -1.17 | 0.275753 | 0.138322 | 0.617878 | 0.411244 |
| MmugDNA.110.1.S1_at   | MmugDNA.110.1   | 5.12  | 4.95  | 0.08 | 0.14 | 1.13  | 0.157644 | 0.167259 | 0.522514 | 0.443684 |
| MmugDNA.1100.1.S1_at  | MmugDNA.1100.1  | 6.57  | 6.12  | 0.35 | 0.32 | 1.36  | 0.229185 | 0.383524 | 0.586442 | 0.619481 |
| MmugDNA.11000.1.S1_at | MmugDNA.11000.1 | 4.56  | 4.6   | 0.11 | 0.08 | -1.03 | 0.172211 | 0.251276 | 0.535575 | 0.519984 |
| MmugDNA.11005.1.S1_at | MmugDNA.11005.1 | 5.4   | 5.53  | 0.12 | 0.2  | -1.1  | 0.287645 | 0.23512  | 0.626102 | 0.50629  |
| MmugDNA.11006.1.S1_at | MmugDNA.11006.1 | 8.61  | 8.57  | 0.26 | 0.27 | 1.03  | 0.905064 | 0.959075 | 0.962071 | 0.976813 |
| MmugDNA.11007.1.S1_at | MmugDNA.11007.1 | 8.2   | 8.05  | 0.38 | 0.65 | 1.11  | 0.848879 | 0.159228 | 0.939232 | 0.435217 |
| MmugDNA.11008.1.S1_at | MmugDNA.11008.1 | 4.09  | 4.15  | 0.19 | 0.05 | -1.04 | 0.573976 | 0.5736   | 0.801437 | 0.745228 |
| MmugDNA.1101.1.S1_at  | MmugDNA.1101.1  | 5.67  | 6.7   | 1.56 | 0.97 | -2.04 | 0.833001 | 0.921573 | 0.93227  | 0.955761 |
| MmugDNA.11010.1.S1_at | MmugDNA.11010.1 | 3.63  | 3.74  | 0.65 | 0.14 | -1.08 | 0.421129 | 0.590914 | 0.712872 | 0.756512 |
| MmugDNA.11011.1.S1_at | MmugDNA.11011.1 | 3.95  | 4.06  | 0.2  | 0.2  | -1.08 | 0.489798 | 0.640102 | 0.754118 | 0.788696 |
| MmugDNA.11012.1.S1_at | MmugDNA.11012.1 | 3.42  | 3.33  | 0.2  | 0.08 | 1.06  | 0.857317 | 0.876112 | 0.942256 | 0.92958  |
| MmugDNA.11013.1.S1_at | MmugDNA.11013.1 | 8.6   | 8.94  | 0.13 | 0.31 | -1.27 | 0.187075 | 0.148318 | 0.550144 | 0.422869 |
| MmugDNA.11014.1.S1_at | MmugDNA.11014.1 | 7.02  | 8.6   | 0.35 | 0.61 | -3    | 0.023883 | 0.012508 | 0.293078 | 0.144302 |
| MmugDNA.11015.1.S1_at | MmugDNA.11015.1 | 5.43  | 5.81  | 0.24 | 0.15 | -1.3  | 0.067773 | 0.114035 | 0.408485 | 0.380416 |



|                         |                 |       |       |      |      |       |          |          |          |          |
|-------------------------|-----------------|-------|-------|------|------|-------|----------|----------|----------|----------|
| MmugDNA.11016.1.S1_at   | MmugDNA.11016.1 | 4.64  | 4.75  | 0.61 | 0.27 | -1.08 | 0.737291 | 0.790397 | 0.887061 | 0.878857 |
| MmugDNA.11017.1.S1_at   | MmugDNA.11017.1 | 4.27  | 4.22  | 0.54 | 0.06 | 1.04  | 0.347839 | 0.420652 | 0.666733 | 0.644323 |
| MmugDNA.11018.1.S1_at   | MmugDNA.11018.1 | 4.23  | 4.18  | 0.5  | 0.11 | 1.04  | 0.321335 | 0.474429 | 0.650037 | 0.68143  |
| MmugDNA.1102.1.S1_at    | MmugDNA.1102.1  | 6.3   | 6.48  | 0.06 | 0.04 | -1.14 | 0.007251 | 0.002627 | 0.206075 | 0.075772 |
| MmugDNA.11021.1.S1_at   | MmugDNA.11021.1 | 4.17  | 4.15  | 1.56 | 0.39 | 1.02  | 0.495834 | 0.622719 | 0.757324 | 0.777232 |
| MmugDNA.11022.1.S1_at   | MmugDNA.11022.1 | 10.11 | 10.52 | 0.46 | 0.98 | -1.32 | 0.962526 | 0.544285 | 0.985588 | 0.726717 |
| MmugDNA.11023.1.S1_at   | MmugDNA.11023.1 | 10.21 | 11.1  | 0.13 | 0.35 | -1.85 | 0.013023 | 0.008953 | 0.245262 | 0.125082 |
| MmugDNA.11024.1.S1_at   | MmugDNA.11024.1 | 8.52  | 7.93  | 0.53 | 0.63 | 1.51  | 0.553593 | 0.430882 | 0.790258 | 0.651894 |
| MmugDNA.11025.1.S1_at   | MmugDNA.11025.1 | 11.87 | 11.33 | 0.14 | 0.13 | 1.46  | 0.008319 | 0.00379  | 0.217489 | 0.087708 |
| MmugDNA.11028.1.S1_at   | MmugDNA.11028.1 | 7.5   | 7.42  | 0.18 | 0.14 | 1.05  | 0.764476 | 0.048289 | 0.900789 | 0.264814 |
| MmugDNA.11029.1.S1_at   | MmugDNA.11029.1 | 6.2   | 6.44  | 0.68 | 0.49 | -1.18 | 0.756071 | 0.487099 | 0.896323 | 0.69025  |
| MmugDNA.1103.1.S1_at    | MmugDNA.1103.1  | 9.42  | 9.46  | 0.23 | 0.11 | -1.03 | 0.482154 | 0.46443  | 0.749398 | 0.675068 |
| MmugDNA.11030.1.S1_s_at | MmugDNA.11030.1 | 6.36  | 7.06  | 0.68 | 0.82 | -1.63 | 0.548424 | 0.746298 | 0.786665 | 0.85272  |
| MmugDNA.11031.1.S1_at   | MmugDNA.11031.1 | 5.23  | 5.21  | 0.13 | 0.14 | 1.01  | 0.622732 | 0.154986 | 0.827633 | 0.429984 |
| MmugDNA.11033.1.S1_at   | MmugDNA.11033.1 | 8.07  | 7.61  | 0.14 | 0.71 | 1.38  | 0.760561 | 0.262844 | 0.899044 | 0.529182 |
| MmugDNA.11034.1.S1_at   | MmugDNA.11034.1 | 4.58  | 6.95  | 0.41 | 0.69 | -5.14 | 0.01993  | 0.011713 | 0.276356 | 0.140206 |
| MmugDNA.11037.1.S1_at   | MmugDNA.11037.1 | 6.33  | 6.57  | 0.26 | 0.23 | -1.18 | 0.692735 | 0.151403 | 0.863611 | 0.426104 |
| MmugDNA.11037.1.S1_s_at | MmugDNA.11037.1 | 3.01  | 3.01  | 0.13 | 0.08 | 1     | 0.622206 | 0.612646 | 0.827307 | 0.770123 |
| MmugDNA.11038.1.S1_at   | MmugDNA.11038.1 | 7.68  | 7.91  | 0.08 | 0.16 | -1.18 | 0.075951 | 0.070126 | 0.42407  | 0.311029 |
| MmugDNA.11038.1.S1_s_at | MmugDNA.11038.1 | 7.16  | 7.51  | 0.16 | 0.09 | -1.28 | 0.055646 | 0.043384 | 0.384291 | 0.25294  |
| MmugDNA.11039.1.S1_at   | MmugDNA.11039.1 | 5.24  | 5.09  | 0.17 | 0.21 | 1.11  | 0.70004  | 0.901442 | 0.867253 | 0.943931 |
| MmugDNA.1104.1.S1_at    | MmugDNA.1104.1  | 4.87  | 5.14  | 0    | 0.42 | -1.21 | 0.282277 | 0.24809  | 0.622707 | 0.517567 |
| MmugDNA.11041.1.S1_at   | MmugDNA.11041.1 | 2.9   | 3.01  | 0.07 | 0.12 | -1.07 | 0.562065 | 0.597326 | 0.795109 | 0.760137 |
| MmugDNA.11042.1.S1_at   | MmugDNA.11042.1 | 6.2   | 6.83  | 0.33 | 0.45 | -1.54 | 0.530863 | 0.093728 | 0.776921 | 0.350198 |
| MmugDNA.11043.1.S1_at   | MmugDNA.11043.1 | 3.28  | 4.82  | 0.2  | 1.25 | -2.91 | 0.107633 | 0.087962 | 0.46812  | 0.341368 |
| MmugDNA.11043.1.S1_s_at | MmugDNA.11043.1 | 4.83  | 4.99  | 0.2  | 0.09 | -1.12 | 0.087846 | 0.04549  | 0.442159 | 0.2575   |
| MmugDNA.1105.1.S1_at    | MmugDNA.1105.1  | 5.02  | 5.25  | 0.08 | 0.16 | -1.17 | 0.093965 | 0.132253 | 0.451548 | 0.404294 |
| MmugDNA.11050.1.S1_at   | MmugDNA.11050.1 | 6.89  | 7.57  | 1.2  | 0.45 | -1.61 | 0.755067 | 0.873662 | 0.895855 | 0.928169 |
| MmugDNA.11053.1.S1_at   | MmugDNA.11053.1 | 5.18  | 5.66  | 0.15 | 0.33 | -1.4  | 0.056696 | 0.073815 | 0.386838 | 0.317146 |
| MmugDNA.11054.1.S1_at   | MmugDNA.11054.1 | 7.42  | 7.61  | 0.22 | 0.56 | -1.14 | 0.452904 | 0.501677 | 0.732217 | 0.6998   |
| MmugDNA.11055.1.S1_at   | MmugDNA.11055.1 | 9.61  | 9.8   | 0.4  | 0.91 | -1.15 | 0.633703 | 0.1877   | 0.833932 | 0.46368  |
| MmugDNA.11056.1.S1_at   | MmugDNA.11056.1 | 4.06  | 4.39  | 0.13 | 0.33 | -1.25 | 0.164679 | 0.236759 | 0.528638 | 0.507512 |
| MmugDNA.11057.1.S1_at   | MmugDNA.11057.1 | 5.86  | 5.82  | 0.16 | 0.26 | 1.03  | 0.364332 | 0.302982 | 0.677295 | 0.560452 |
| MmugDNA.11059.1.S1_at   | MmugDNA.11059.1 | 4.68  | 4.73  | 0.1  | 0.39 | -1.04 | 0.786271 | 0.846115 | 0.911108 | 0.912389 |
| MmugDNA.11060.1.S1_at   | MmugDNA.11060.1 | 8.21  | 8.13  | 0.37 | 0.39 | 1.06  | 0.653524 | 0.61342  | 0.84417  | 0.770528 |
| MmugDNA.11061.1.S1_at   | MmugDNA.11061.1 | 6.09  | 6.36  | 0.6  | 0.07 | -1.21 | 0.952287 | 0.79316  | 0.982156 | 0.880576 |
| MmugDNA.11062.1.S1_at   | MmugDNA.11062.1 | 8.34  | 8.13  | 0.23 | 0.12 | 1.15  | 0.12643  | 0.175536 | 0.492774 | 0.452174 |
| MmugDNA.11063.1.S1_at   | MmugDNA.11063.1 | 10.84 | 11.63 | 0.19 | 0.29 | -1.73 | 0.009055 | 0.005341 | 0.222023 | 0.101089 |
| MmugDNA.11065.1.S1_at   | MmugDNA.11065.1 | 3.33  | 3.29  | 0.12 | 0.23 | 1.02  | 0.566611 | 0.784845 | 0.797643 | 0.875432 |
| MmugDNA.11067.1.S1_at   | MmugDNA.11067.1 | 6.71  | 6.55  | 0.8  | 0.82 | 1.12  | 0.606346 | 0.859883 | 0.818806 | 0.92016  |
| MmugDNA.11068.1.S1_at   | MmugDNA.11068.1 | 5.39  | 5.39  | 0.17 | 0.17 | -1    | 0.320447 | 0.430277 | 0.649472 | 0.651316 |

|                         |                 |       |       |      |      |       |          |          |          |          |
|-------------------------|-----------------|-------|-------|------|------|-------|----------|----------|----------|----------|
| MmugDNA.11069.1.S1_at   | MmugDNA.11069.1 | 5.2   | 5.49  | 0.09 | 0.07 | -1.23 | 0.046029 | 0.070545 | 0.362198 | 0.311777 |
| MmugDNA.1107.1.S1_at    | MmugDNA.1107.1  | 3.84  | 4.32  | 0.3  | 0.36 | -1.39 | 0.381629 | 0.126806 | 0.688065 | 0.397446 |
| MmugDNA.11070.1.S1_at   | MmugDNA.11070.1 | 3.17  | 3.15  | 1.15 | 0.06 | 1.01  | 0.343222 | 0.439456 | 0.663514 | 0.6582   |
| MmugDNA.11071.1.S1_at   | MmugDNA.11071.1 | 7.38  | 6.84  | 0.68 | 1.03 | 1.46  | 0.533176 | 0.715839 | 0.777978 | 0.83529  |
| MmugDNA.11074.1.S1_at   | MmugDNA.11074.1 | 10.63 | 9.89  | 0.13 | 0.15 | 1.67  | 0.00208  | 0.000212 | 0.155636 | 0.032262 |
| MmugDNA.11076.1.S1_at   | MmugDNA.11076.1 | 9.22  | 8.1   | 0.42 | 0.16 | 2.18  | 0.009805 | 0.004206 | 0.226444 | 0.091368 |
| MmugDNA.11077.1.S1_at   | MmugDNA.11077.1 | 5.72  | 5.76  | 0.24 | 0.14 | -1.03 | 0.509429 | 0.496775 | 0.764331 | 0.696198 |
| MmugDNA.1108.1.S1_at    | MmugDNA.1108.1  | 10.05 | 10.23 | 0.14 | 0.3  | -1.13 | 0.756515 | 0.334727 | 0.896546 | 0.582615 |
| MmugDNA.11080.1.S1_at   | MmugDNA.11080.1 | 5.68  | 5.76  | 0.4  | 0.26 | -1.06 | 0.353096 | 0.530305 | 0.669964 | 0.71787  |
| MmugDNA.11081.1.S1_at   | MmugDNA.11081.1 | 7.05  | 7.42  | 0.19 | 0.2  | -1.29 | 0.216079 | 0.256078 | 0.575954 | 0.524052 |
| MmugDNA.11081.1.S1_x_at | MmugDNA.11081.1 | 6.99  | 7.19  | 0.25 | 0.17 | -1.15 | 0.307599 | 0.460895 | 0.64008  | 0.672763 |
| MmugDNA.11082.1.S1_at   | MmugDNA.11082.1 | 9.16  | 9.47  | 0.11 | 0.1  | -1.25 | 0.025092 | 0.009611 | 0.297733 | 0.129157 |
| MmugDNA.11083.1.S1_at   | MmugDNA.11083.1 | 6.39  | 6.86  | 1.86 | 1.09 | -1.39 | 0.924318 | 0.991412 | 0.970608 | 0.995196 |
| MmugDNA.11085.1.S1_at   | MmugDNA.11085.1 | 4.24  | 4.34  | 0.08 | 0.14 | -1.07 | 0.182142 | 0.585361 | 0.546458 | 0.752844 |
| MmugDNA.11086.1.S1_at   | MmugDNA.11086.1 | 6.72  | 6.83  | 0.22 | 0.05 | -1.08 | 0.931961 | 0.9627   | 0.973717 | 0.979091 |
| MmugDNA.11087.1.S1_s_at | MmugDNA.11087.1 | 11.98 | 11.56 | 0.17 | 0.3  | 1.34  | 0.130394 | 0.131153 | 0.496851 | 0.403153 |
| MmugDNA.11089.1.S1_s_at | MmugDNA.11089.1 | 7.55  | 7.55  | 0.03 | 0.13 | -1    | 0.290157 | 0.223054 | 0.628012 | 0.49588  |
| MmugDNA.1109.1.S1_at    | MmugDNA.1109.1  | 8.32  | 8.63  | 0.12 | 0.2  | -1.24 | 0.148057 | 0.31433  | 0.513451 | 0.568273 |
| MmugDNA.11090.1.S1_at   | MmugDNA.11090.1 | 5.47  | 5.47  | 0.06 | 0.33 | 1     | 0.783443 | 0.941292 | 0.909533 | 0.966729 |
| MmugDNA.11091.1.S1_at   | MmugDNA.11091.1 | 4.79  | 4.79  | 0.47 | 0.23 | -1    | 0.931301 | 0.129935 | 0.973425 | 0.401515 |
| MmugDNA.11093.1.S1_at   | MmugDNA.11093.1 | 3.94  | 4.21  | 0.16 | 0.1  | -1.2  | 0.050619 | 0.061355 | 0.374816 | 0.29448  |
| MmugDNA.11094.1.S1_at   | MmugDNA.11094.1 | 4.1   | 4.61  | 0.29 | 0.71 | -1.43 | 0.841657 | 0.855612 | 0.936215 | 0.917679 |
| MmugDNA.11096.1.S1_at   | MmugDNA.11096.1 | 7.68  | 7.57  | 0.4  | 0.57 | 1.08  | 0.355578 | 0.208864 | 0.671128 | 0.482717 |
| MmugDNA.11097.1.S1_at   | MmugDNA.11097.1 | 8.31  | 8.54  | 0.43 | 0.93 | -1.17 | 0.66001  | 0.634316 | 0.847435 | 0.78475  |
| MmugDNA.11098.1.S1_at   | MmugDNA.11098.1 | 6.82  | 6.86  | 0.17 | 0.11 | -1.03 | 0.289669 | 0.207209 | 0.627563 | 0.48136  |
| MmugDNA.11099.1.S1_at   | MmugDNA.11099.1 | 6.27  | 6.34  | 1.29 | 0.25 | -1.05 | 0.866162 | 0.973932 | 0.946582 | 0.985754 |
| MmugDNA.1110.1.S1_at    | MmugDNA.1110.1  | 4.39  | 4.4   | 0.37 | 0.23 | -1.01 | 0.632884 | 0.507918 | 0.833393 | 0.703358 |
| MmugDNA.11100.1.S1_at   | MmugDNA.11100.1 | 4.55  | 4.15  | 0.28 | 0.24 | 1.32  | 0.055354 | 0.025328 | 0.383689 | 0.199522 |
| MmugDNA.11102.1.S1_at   | MmugDNA.11102.1 | 8.09  | 7.13  | 0.37 | 0.47 | 1.95  | 0.037691 | 0.03664  | 0.342537 | 0.235943 |
| MmugDNA.11103.1.S1_at   | MmugDNA.11103.1 | 4.26  | 4.77  | 0.13 | 0.26 | -1.42 | 0.108746 | 0.13197  | 0.470244 | 0.404024 |
| MmugDNA.11104.1.S1_at   | MmugDNA.11104.1 | 7.02  | 6.86  | 0.15 | 0.26 | 1.12  | 0.904148 | 0.59753  | 0.961669 | 0.760237 |
| MmugDNA.11106.1.S1_at   | MmugDNA.11106.1 | 6.53  | 6.05  | 0.46 | 0.38 | 1.4   | 0.427306 | 0.495795 | 0.716187 | 0.695734 |
| MmugDNA.11107.1.S1_at   | MmugDNA.11107.1 | 8.97  | 8.49  | 0.39 | 0.52 | 1.4   | 0.580476 | 0.48126  | 0.804649 | 0.686318 |
| MmugDNA.11109.1.S1_at   | MmugDNA.11109.1 | 4.03  | 4.26  | 0.11 | 0.25 | -1.17 | 0.120155 | 0.124126 | 0.48496  | 0.394389 |
| MmugDNA.1111.1.S1_at    | MmugDNA.1111.1  | 5.98  | 6.1   | 0.11 | 0.09 | -1.09 | 0.21994  | 0.280938 | 0.579133 | 0.544102 |
| MmugDNA.11110.1.S1_at   | MmugDNA.11110.1 | 10.87 | 11.22 | 0.11 | 0.26 | -1.28 | 0.039294 | 0.050971 | 0.346898 | 0.271055 |
| MmugDNA.11111.1.S1_at   | MmugDNA.11111.1 | 8.94  | 8.79  | 0.05 | 0.11 | 1.12  | 0.073013 | 0.017904 | 0.418323 | 0.168922 |
| MmugDNA.11113.1.S1_at   | MmugDNA.11113.1 | 9.77  | 9.44  | 0.24 | 0.45 | 1.25  | 0.57278  | 0.304714 | 0.800974 | 0.561921 |
| MmugDNA.11114.1.S1_s_at | MmugDNA.11114.1 | 10.05 | 9.74  | 0.24 | 0.05 | 1.24  | 0.333445 | 0.28727  | 0.657597 | 0.548526 |
| MmugDNA.11116.1.S1_at   | MmugDNA.11116.1 | 5.57  | 6.04  | 0.1  | 0.37 | -1.38 | 0.09044  | 0.075806 | 0.445834 | 0.320402 |
| MmugDNA.11118.1.S1_at   | MmugDNA.11118.1 | 4.03  | 4.39  | 0.16 | 0.18 | -1.29 | 0.06635  | 0.059463 | 0.406394 | 0.290548 |

|                         |                 |       |      |      |      |       |          |          |          |          |
|-------------------------|-----------------|-------|------|------|------|-------|----------|----------|----------|----------|
| MmugDNA.11119.1.S1_at   | MmugDNA.11119.1 | 3.47  | 3.47 | 0.05 | 0.02 | 1     | 0.747499 | 0.036549 | 0.8919   | 0.235649 |
| MmugDNA.1112.1.S1_at    | MmugDNA.1112.1  | 5.17  | 5.19 | 0.13 | 0.12 | -1.01 | 0.409083 | 0.336081 | 0.705737 | 0.583652 |
| MmugDNA.11120.1.S1_at   | MmugDNA.11120.1 | 6.33  | 6.37 | 0.18 | 0.17 | -1.03 | 0.763038 | 0.921556 | 0.900081 | 0.955761 |
| MmugDNA.11121.1.S1_at   | MmugDNA.11121.1 | 3.93  | 4.01 | 0.23 | 0.08 | -1.06 | 0.98999  | 0.58658  | 0.996447 | 0.753592 |
| MmugDNA.11122.1.S1_at   | MmugDNA.11122.1 | 3.94  | 3.97 | 1    | 0.19 | -1.02 | 0.509683 | 0.586794 | 0.764485 | 0.753819 |
| MmugDNA.11123.1.S1_at   | MmugDNA.11123.1 | 5.14  | 5.22 | 0.06 | 0.05 | -1.05 | 0.056452 | 0.063005 | 0.386477 | 0.297656 |
| MmugDNA.11124.1.S1_at   | MmugDNA.11124.1 | 4.61  | 4.6  | 0.2  | 0.08 | 1     | 0.598386 | 0.346368 | 0.813939 | 0.59124  |
| MmugDNA.11125.1.S1_at   | MmugDNA.11125.1 | 4.33  | 4.17 | 0.11 | 0.07 | 1.12  | 0.095612 | 0.250176 | 0.453501 | 0.519199 |
| MmugDNA.11126.1.S1_at   | MmugDNA.11126.1 | 5.24  | 5.27 | 0.43 | 0.55 | -1.02 | 0.697919 | 0.239205 | 0.865847 | 0.509902 |
| MmugDNA.11127.1.S1_at   | MmugDNA.11127.1 | 5.19  | 5.27 | 0.17 | 0.1  | -1.05 | 0.322841 | 0.347072 | 0.651245 | 0.591815 |
| MmugDNA.11128.1.S1_at   | MmugDNA.11128.1 | 5.83  | 5.98 | 0.11 | 0.37 | -1.11 | 0.418464 | 0.392658 | 0.711356 | 0.625813 |
| MmugDNA.11129.1.S1_at   | MmugDNA.11129.1 | 7.92  | 7.52 | 0.31 | 0.5  | 1.32  | 0.567597 | 0.706344 | 0.798202 | 0.829634 |
| MmugDNA.1113.1.S1_at    | MmugDNA.1113.1  | 4.12  | 4.08 | 0.02 | 0.13 | 1.03  | 0.745887 | 0.359021 | 0.891243 | 0.600412 |
| MmugDNA.11130.1.S1_at   | MmugDNA.11130.1 | 6.95  | 7    | 0.24 | 0.61 | -1.04 | 0.634096 | 0.594437 | 0.834241 | 0.758623 |
| MmugDNA.11131.1.S1_at   | MmugDNA.11131.1 | 4.45  | 4.49 | 0.17 | 0.08 | -1.03 | 0.415777 | 0.457545 | 0.709528 | 0.670864 |
| MmugDNA.11133.1.S1_at   | MmugDNA.11133.1 | 3.2   | 3.1  | 0.44 | 0.06 | 1.07  | 0.531132 | 0.678151 | 0.777081 | 0.812015 |
| MmugDNA.11135.1.S1_at   | MmugDNA.11135.1 | 10.56 | 9.2  | 0.27 | 0.31 | 2.57  | 0.012628 | 0.004343 | 0.242681 | 0.092354 |
| MmugDNA.11136.1.S1_at   | MmugDNA.11136.1 | 6.53  | 6.3  | 0.02 | 0.23 | 1.17  | 0.157768 | 0.150484 | 0.522564 | 0.42501  |
| MmugDNA.11137.1.S1_at   | MmugDNA.11137.1 | 5.02  | 5.28 | 0.04 | 0.22 | -1.2  | 0.040775 | 0.034409 | 0.350343 | 0.229473 |
| MmugDNA.11138.1.S1_at   | MmugDNA.11138.1 | 4.69  | 5.01 | 0.11 | 0.16 | -1.25 | 0.153786 | 0.212305 | 0.518459 | 0.486202 |
| MmugDNA.11139.1.S1_at   | MmugDNA.11139.1 | 3.11  | 2.98 | 0.47 | 0.08 | 1.1   | 0.218787 | 0.291392 | 0.578251 | 0.551823 |
| MmugDNA.11140.1.S1_at   | MmugDNA.11140.1 | 3.12  | 3.27 | 0.21 | 0.13 | -1.12 | 0.587126 | 0.574981 | 0.808418 | 0.746216 |
| MmugDNA.11141.1.S1_at   | MmugDNA.11141.1 | 9.01  | 8.81 | 0.54 | 0.88 | 1.15  | 0.980183 | 0.395171 | 0.992802 | 0.627379 |
| MmugDNA.11142.1.S1_at   | MmugDNA.11142.1 | 4.68  | 4.75 | 0.06 | 0.21 | -1.05 | 0.198897 | 0.241044 | 0.561953 | 0.511657 |
| MmugDNA.11144.1.S1_s_at | MmugDNA.11144.1 | 6.85  | 7    | 0.3  | 0.11 | -1.11 | 0.480712 | 0.631008 | 0.748582 | 0.782599 |
| MmugDNA.11145.1.S1_at   | MmugDNA.11145.1 | 4.01  | 4.09 | 0.18 | 0.13 | -1.06 | 0.873711 | 0.298034 | 0.949369 | 0.556695 |
| MmugDNA.11146.1.S1_at   | MmugDNA.11146.1 | 6.32  | 6.28 | 0.11 | 0.17 | 1.03  | 0.824321 | 0.533589 | 0.928728 | 0.719808 |
| MmugDNA.11146.1.S1_s_at | MmugDNA.11146.1 | 6.5   | 6.62 | 1.09 | 0.62 | -1.09 | 0.436307 | 0.519004 | 0.721646 | 0.710813 |
| MmugDNA.11147.1.S1_at   | MmugDNA.11147.1 | 3.38  | 3.4  | 0.09 | 0.06 | -1.01 | 0.610089 | 0.779354 | 0.8209   | 0.872061 |
| MmugDNA.11148.1.S1_at   | MmugDNA.11148.1 | 4.46  | 4.54 | 0.05 | 0.54 | -1.06 | 0.24924  | 0.243886 | 0.6001   | 0.514055 |
| MmugDNA.11149.1.S1_at   | MmugDNA.11149.1 | 5.03  | 4.94 | 0.2  | 0.09 | 1.06  | 0.336516 | 0.468761 | 0.659517 | 0.677885 |
| MmugDNA.1115.1.S1_at    | MmugDNA.1115.1  | 3.4   | 3.58 | 0.07 | 0.3  | -1.14 | 0.380194 | 0.495091 | 0.68724  | 0.695319 |
| MmugDNA.11150.1.S1_at   | MmugDNA.11150.1 | 3.63  | 3.6  | 0.24 | 0.22 | 1.02  | 0.653908 | 0.595896 | 0.844436 | 0.759258 |
| MmugDNA.11152.1.S1_at   | MmugDNA.11152.1 | 4.82  | 4.78 | 0.14 | 0.15 | 1.02  | 0.84648  | 0.424701 | 0.93835  | 0.647232 |
| MmugDNA.11153.1.S1_at   | MmugDNA.11153.1 | 5.78  | 4.75 | 0.29 | 0.44 | 2.05  | 0.016954 | 0.002349 | 0.266211 | 0.07161  |
| MmugDNA.11154.1.S1_at   | MmugDNA.11154.1 | 3.15  | 3.19 | 0.23 | 0.16 | -1.02 | 0.876595 | 0.955216 | 0.950613 | 0.97461  |
| MmugDNA.11155.1.S1_at   | MmugDNA.11155.1 | 5.29  | 4.86 | 0.35 | 0.12 | 1.35  | 0.098361 | 0.092876 | 0.458095 | 0.349024 |
| MmugDNA.11156.1.S1_at   | MmugDNA.11156.1 | 3.98  | 4    | 0.36 | 0.41 | -1.01 | 0.515086 | 0.70013  | 0.767272 | 0.825967 |
| MmugDNA.11158.1.S1_at   | MmugDNA.11158.1 | 4.01  | 4.18 | 0.03 | 0.16 | -1.13 | 0.189192 | 0.050005 | 0.552363 | 0.268843 |
| MmugDNA.11159.1.S1_at   | MmugDNA.11159.1 | 5.5   | 5.59 | 0.37 | 0.34 | -1.06 | 0.310771 | 0.291659 | 0.642709 | 0.552042 |
| MmugDNA.1116.1.S1_at    | MmugDNA.1116.1  | 6.57  | 6.18 | 0.64 | 0.42 | 1.31  | 0.474719 | 0.733975 | 0.74537  | 0.845896 |

|                         |                 |       |       |      |      |       |          |          |          |          |
|-------------------------|-----------------|-------|-------|------|------|-------|----------|----------|----------|----------|
| MmugDNA.11160.1.S1_at   | MmugDNA.11160.1 | 4.73  | 7.29  | 0.18 | 0.37 | -5.87 | 0.000349 | 0.000447 | 0.128842 | 0.038539 |
| MmugDNA.11161.1.S1_at   | MmugDNA.11161.1 | 3.66  | 3.67  | 0.24 | 0    | -1    | 0.390193 | 0.413998 | 0.693438 | 0.639979 |
| MmugDNA.11162.1.S1_at   | MmugDNA.11162.1 | 5.22  | 5.27  | 0.04 | 0.05 | -1.04 | 0.237188 | 0.033753 | 0.590811 | 0.227395 |
| MmugDNA.11164.1.S1_at   | MmugDNA.11164.1 | 5.56  | 5.63  | 0.22 | 0.21 | -1.05 | 0.724846 | 0.744307 | 0.879885 | 0.851942 |
| MmugDNA.11167.1.S1_at   | MmugDNA.11167.1 | 7.18  | 7.69  | 0.03 | 0.48 | -1.43 | 0.120982 | 0.184863 | 0.48574  | 0.460776 |
| MmugDNA.11169.1.S1_at   | MmugDNA.11169.1 | 8.63  | 6.72  | 0.22 | 0.27 | 3.78  | 0.001248 | 0.000186 | 0.145267 | 0.030511 |
| MmugDNA.1117.1.S1_at    | MmugDNA.1117.1  | 4.52  | 4.68  | 0.56 | 0.08 | -1.11 | 0.656876 | 0.81806  | 0.845614 | 0.895063 |
| MmugDNA.11170.1.S1_at   | MmugDNA.11170.1 | 4.96  | 5.14  | 1.15 | 0.53 | -1.13 | 0.780114 | 0.943892 | 0.908466 | 0.968158 |
| MmugDNA.11173.1.S1_at   | MmugDNA.11173.1 | 5.98  | 6.15  | 0.48 | 0.35 | -1.13 | 0.758792 | 0.557434 | 0.898078 | 0.735031 |
| MmugDNA.11174.1.S1_at   | MmugDNA.11174.1 | 4.42  | 4.47  | 0.44 | 0.28 | -1.03 | 0.482791 | 0.678761 | 0.749589 | 0.812378 |
| MmugDNA.11175.1.S1_at   | MmugDNA.11175.1 | 3.89  | 3.83  | 0.94 | 0.58 | 1.04  | 0.825268 | 0.409078 | 0.929153 | 0.63613  |
| MmugDNA.11177.1.S1_at   | MmugDNA.11177.1 | 3.08  | 3.02  | 0.11 | 0.13 | 1.04  | 0.974736 | 0.747508 | 0.990134 | 0.853149 |
| MmugDNA.11178.1.S1_at   | MmugDNA.11178.1 | 5.66  | 5.55  | 0.3  | 0.33 | 1.08  | 0.581549 | 0.751994 | 0.805227 | 0.855739 |
| MmugDNA.11179.1.S1_at   | MmugDNA.11179.1 | 10.84 | 10.55 | 0.29 | 0.28 | 1.23  | 0.449216 | 0.618939 | 0.730162 | 0.774229 |
| MmugDNA.1118.1.S1_at    | MmugDNA.1118.1  | 5.22  | 5.3   | 0.21 | 0.13 | -1.06 | 0.42766  | 0.555268 | 0.716368 | 0.733767 |
| MmugDNA.11180.1.S1_at   | MmugDNA.11180.1 | 5.98  | 5.75  | 0.35 | 0.05 | 1.17  | 0.250696 | 0.370611 | 0.600389 | 0.609664 |
| MmugDNA.11181.1.S1_at   | MmugDNA.11181.1 | 5.99  | 5.17  | 1.06 | 0.4  | 1.77  | 0.476312 | 0.329841 | 0.746214 | 0.578874 |
| MmugDNA.11182.1.S1_at   | MmugDNA.11182.1 | 3.87  | 3.39  | 0.21 | 0.05 | 1.4   | 0.038899 | 0.030774 | 0.345909 | 0.217323 |
| MmugDNA.11183.1.S1_at   | MmugDNA.11183.1 | 6.5   | 6.19  | 1.17 | 0.28 | 1.24  | 0.231669 | 0.255243 | 0.587487 | 0.523284 |
| MmugDNA.11184.1.S1_at   | MmugDNA.11184.1 | 4.97  | 4.97  | 0.07 | 0.11 | 1     | 0.801425 | 0.746931 | 0.918115 | 0.853062 |
| MmugDNA.11185.1.S1_at   | MmugDNA.11185.1 | 8.77  | 7.88  | 0.24 | 0.64 | 1.86  | 0.169285 | 0.104899 | 0.533619 | 0.366451 |
| MmugDNA.11186.1.S1_at   | MmugDNA.11186.1 | 5.29  | 6.37  | 0.28 | 0.99 | -2.11 | 0.140195 | 0.166738 | 0.508065 | 0.443215 |
| MmugDNA.11186.1.S1_s_at | MmugDNA.11186.1 | 6.19  | 6.81  | 0.1  | 0.66 | -1.54 | 0.202626 | 0.260458 | 0.56509  | 0.527006 |
| MmugDNA.11187.1.S1_at   | MmugDNA.11187.1 | 4.72  | 4.78  | 0.14 | 0.24 | -1.05 | 0.357638 | 0.49092  | 0.672471 | 0.692666 |
| MmugDNA.11188.1.S1_at   | MmugDNA.11188.1 | 8.01  | 7.69  | 0.17 | 0.5  | 1.25  | 0.554085 | 0.381486 | 0.790657 | 0.617691 |
| MmugDNA.11189.1.S1_at   | MmugDNA.11189.1 | 8.01  | 7.96  | 0.17 | 0.79 | 1.03  | 0.884729 | 0.444655 | 0.95382  | 0.662072 |
| MmugDNA.1119.1.S1_at    | MmugDNA.1119.1  | 4.79  | 5.29  | 0.4  | 1.19 | -1.41 | 0.529661 | 0.563277 | 0.77625  | 0.738514 |
| MmugDNA.11190.1.S1_at   | MmugDNA.11190.1 | 4.49  | 4.76  | 0.06 | 0.24 | -1.2  | 0.065339 | 0.043252 | 0.404414 | 0.252708 |
| MmugDNA.11191.1.S1_at   | MmugDNA.11191.1 | 5.47  | 5.48  | 0.05 | 0.05 | -1    | 0.287217 | 0.466804 | 0.625848 | 0.676543 |
| MmugDNA.11193.1.S1_s_at | MmugDNA.11193.1 | 7.79  | 8.89  | 0.47 | 0.39 | -2.15 | 0.018743 | 0.011126 | 0.2715   | 0.137286 |
| MmugDNA.11194.1.S1_at   | MmugDNA.11194.1 | 5.83  | 6.02  | 0.06 | 0.24 | -1.14 | 0.214009 | 0.169635 | 0.574381 | 0.446221 |
| MmugDNA.11195.1.S1_at   | MmugDNA.11195.1 | 5.56  | 6.13  | 0.32 | 0.35 | -1.48 | 0.070501 | 0.001593 | 0.414379 | 0.06044  |
| MmugDNA.11196.1.S1_at   | MmugDNA.11196.1 | 6.92  | 6.46  | 0.22 | 0.77 | 1.37  | 0.42127  | 0.407265 | 0.712907 | 0.634862 |
| MmugDNA.11198.1.S1_at   | MmugDNA.11198.1 | 6.09  | 6.03  | 0.4  | 0.32 | 1.04  | 0.959956 | 0.290869 | 0.984847 | 0.551436 |
| MmugDNA.11199.1.S1_at   | MmugDNA.11199.1 | 5.17  | 5.17  | 0.14 | 0.07 | -1    | 0.900791 | 0.654308 | 0.960386 | 0.797979 |
| MmugDNA.112.1.S1_at     | MmugDNA.112.1   | 7.76  | 8.09  | 0.17 | 0.55 | -1.26 | 0.328568 | 0.125842 | 0.654375 | 0.396315 |
| MmugDNA.11200.1.S1_at   | MmugDNA.11200.1 | 6.61  | 6.81  | 0.25 | 0.12 | -1.15 | 0.378995 | 0.51851  | 0.686586 | 0.710477 |
| MmugDNA.11201.1.S1_at   | MmugDNA.11201.1 | 3.74  | 3.76  | 0.05 | 0.15 | -1.01 | 0.9488   | 0.262153 | 0.98044  | 0.528414 |
| MmugDNA.11202.1.S1_at   | MmugDNA.11202.1 | 4.29  | 4.29  | 0.12 | 0.05 | -1    | 0.650598 | 0.57719  | 0.842789 | 0.747688 |
| MmugDNA.39039.1.S1_s_at | MmugDNA.39039.1 | 14.34 | 14.34 | 0.1  | 0.06 | -1    | 0.84794  | 0.947487 | 0.939068 | 0.970206 |
| MmugDNA.11205.1.S1_at   | MmugDNA.11205.1 | 3.98  | 3.78  | 0.38 | 0.06 | 1.16  | 0.353715 | 0.724878 | 0.670266 | 0.840716 |

|                         |                 |       |       |      |      |       |          |          |          |          |
|-------------------------|-----------------|-------|-------|------|------|-------|----------|----------|----------|----------|
| MmugDNA.11208.1.S1_at   | MmugDNA.11208.1 | 10.91 | 10.58 | 0.14 | 0.1  | 1.25  | 0.123898 | 0.003153 | 0.489589 | 0.081739 |
| MmugDNA.11208.1.S1_s_at | MmugDNA.11208.1 | 12.28 | 12.23 | 0.09 | 0.05 | 1.04  | 0.090733 | 0.005648 | 0.446279 | 0.103804 |
| MmugDNA.11209.1.S1_at   | MmugDNA.11209.1 | 4.35  | 4.33  | 0.12 | 0.36 | 1.01  | 0.437583 | 0.686127 | 0.72256  | 0.81681  |
| MmugDNA.1121.1.S1_at    | MmugDNA.1121.1  | 3.88  | 4.08  | 0.83 | 0.44 | -1.15 | 0.792392 | 0.475785 | 0.913837 | 0.682376 |
| MmugDNA.11211.1.S1_at   | MmugDNA.11211.1 | 10.6  | 10.19 | 0.2  | 0.41 | 1.33  | 0.231497 | 0.308461 | 0.587406 | 0.564504 |
| MmugDNA.11212.1.S1_s_at | MmugDNA.11212.1 | 10.18 | 10.18 | 0.21 | 0.12 | -1    | 0.701028 | 0.503106 | 0.867793 | 0.700595 |
| MmugDNA.11213.1.S1_at   | MmugDNA.11213.1 | 5.05  | 5.1   | 0.63 | 0.09 | -1.04 | 0.376414 | 0.320507 | 0.685219 | 0.572648 |
| MmugDNA.11214.1.S1_at   | MmugDNA.11214.1 | 9.88  | 10.28 | 0.22 | 0.5  | -1.31 | 0.395199 | 0.344512 | 0.696396 | 0.589905 |
| MmugDNA.11215.1.S1_at   | MmugDNA.11215.1 | 5.64  | 4.75  | 1.75 | 0.57 | 1.85  | 0.419037 | 0.595807 | 0.711691 | 0.759258 |
| MmugDNA.11217.1.S1_at   | MmugDNA.11217.1 | 11.61 | 11.75 | 0.19 | 0.14 | -1.11 | 0.199536 | 0.138769 | 0.562556 | 0.411885 |
| MmugDNA.11218.1.S1_at   | MmugDNA.11218.1 | 9.82  | 8.62  | 0.33 | 0.45 | 2.29  | 0.04487  | 0.016214 | 0.359128 | 0.161389 |
| MmugDNA.1122.1.S1_at    | MmugDNA.1122.1  | 5.96  | 6.07  | 0.11 | 0.15 | -1.08 | 0.419118 | 0.032745 | 0.711691 | 0.224042 |
| MmugDNA.1122.1.S1_s_at  | MmugDNA.1122.1  | 7.09  | 7.39  | 0.14 | 0.11 | -1.23 | 0.040351 | 0.029399 | 0.349277 | 0.213352 |
| MmugDNA.11220.1.S1_at   | MmugDNA.11220.1 | 6.48  | 6.8   | 0.64 | 1.11 | -1.24 | 0.154658 | 0.172007 | 0.519274 | 0.448404 |
| MmugDNA.11222.1.S1_at   | MmugDNA.11222.1 | 4.93  | 4.82  | 0.19 | 0.08 | 1.08  | 0.76835  | 0.083094 | 0.902701 | 0.332962 |
| MmugDNA.11224.1.S1_at   | MmugDNA.11224.1 | 9.02  | 8.12  | 0.1  | 0.45 | 1.86  | 0.032119 | 0.021727 | 0.324347 | 0.184348 |
| MmugDNA.11225.1.S1_s_at | MmugDNA.11225.1 | 11.93 | 11.77 | 0.24 | 0.97 | 1.11  | 0.55157  | 0.619984 | 0.78882  | 0.775163 |
| MmugDNA.11226.1.S1_at   | MmugDNA.11226.1 | 3.73  | 3.73  | 0.03 | 0.08 | 1     | 0.592295 | 0.598257 | 0.810875 | 0.760715 |
| MmugDNA.11227.1.S1_at   | MmugDNA.11227.1 | 3.9   | 3.4   | 0.4  | 0.05 | 1.42  | 0.3007   | 0.327499 | 0.635955 | 0.57732  |
| MmugDNA.11228.1.S1_at   | MmugDNA.11228.1 | 10.35 | 10.25 | 0.12 | 0.22 | 1.07  | 0.434982 | 0.523651 | 0.72094  | 0.713879 |
| MmugDNA.11229.1.S1_at   | MmugDNA.11229.1 | 4.1   | 4.55  | 0.32 | 0.29 | -1.37 | 0.237621 | 0.405116 | 0.591146 | 0.633482 |
| MmugDNA.1123.1.S1_at    | MmugDNA.1123.1  | 5.79  | 5.79  | 0.13 | 0.01 | 1     | 0.963202 | 0.983243 | 0.985784 | 0.990726 |
| MmugDNA.11230.1.S1_at   | MmugDNA.11230.1 | 5.36  | 5.4   | 0.31 | 0.14 | -1.02 | 0.845788 | 0.53181  | 0.93814  | 0.718955 |
| MmugDNA.11231.1.S1_at   | MmugDNA.11231.1 | 3.37  | 3.45  | 0.19 | 0.12 | -1.05 | 0.815639 | 0.198185 | 0.925109 | 0.473153 |
| MmugDNA.11232.1.S1_at   | MmugDNA.11232.1 | 4.52  | 4.69  | 0.05 | 0.16 | -1.12 | 0.220363 | 0.185351 | 0.579323 | 0.461323 |
| MmugDNA.11233.1.S1_at   | MmugDNA.11233.1 | 5.23  | 5.31  | 0.07 | 0.17 | -1.06 | 0.106259 | 0.127277 | 0.466831 | 0.397996 |
| MmugDNA.11234.1.S1_at   | MmugDNA.11234.1 | 3.07  | 3.27  | 0.04 | 0.11 | -1.15 | 0.040879 | 0.059391 | 0.350506 | 0.290548 |
| MmugDNA.11236.1.S1_at   | MmugDNA.11236.1 | 3.35  | 3.29  | 0.16 | 0.1  | 1.04  | 0.539504 | 0.512567 | 0.78115  | 0.706419 |
| MmugDNA.11239.1.S1_at   | MmugDNA.11239.1 | 3.93  | 4.11  | 0.36 | 0.02 | -1.14 | 0.898206 | 0.162351 | 0.959278 | 0.438518 |
| MmugDNA.1124.1.S1_at    | MmugDNA.1124.1  | 3.32  | 3.52  | 0.11 | 0.07 | -1.15 | 0.164655 | 0.247261 | 0.528638 | 0.516473 |
| MmugDNA.11240.1.S1_at   | MmugDNA.11240.1 | 4.42  | 4.43  | 0.35 | 0.03 | -1.01 | 0.895487 | 0.922891 | 0.958162 | 0.956603 |
| MmugDNA.11241.1.S1_at   | MmugDNA.11241.1 | 5.55  | 5.56  | 0.16 | 0.23 | -1    | 0.64425  | 0.768389 | 0.839719 | 0.865508 |
| MmugDNA.11242.1.S1_at   | MmugDNA.11242.1 | 6.26  | 6.71  | 0.3  | 0.27 | -1.37 | 0.045014 | 0.03518  | 0.359653 | 0.231723 |
| MmugDNA.11244.1.S1_at   | MmugDNA.11244.1 | 3.26  | 3.61  | 0.16 | 0.16 | -1.27 | 0.067956 | 0.072695 | 0.409028 | 0.31561  |
| MmugDNA.11245.1.S1_at   | MmugDNA.11245.1 | 4.9   | 4.8   | 0.37 | 0.43 | 1.07  | 0.528155 | 0.313726 | 0.775373 | 0.568083 |
| MmugDNA.11246.1.S1_at   | MmugDNA.11246.1 | 3.95  | 3.81  | 0.26 | 0.11 | 1.1   | 0.183806 | 0.301367 | 0.547947 | 0.559391 |
| MmugDNA.11247.1.S1_at   | MmugDNA.11247.1 | 2.85  | 2.86  | 0.06 | 0.1  | -1.01 | 0.960309 | 0.993173 | 0.98486  | 0.995946 |
| MmugDNA.11248.1.S1_s_at | MmugDNA.11248.1 | 7.46  | 8.98  | 1.35 | 2.44 | -2.88 | 0.573697 | 0.586349 | 0.801332 | 0.753442 |
| MmugDNA.11249.1.S1_at   | MmugDNA.11249.1 | 8.44  | 10.07 | 0.81 | 0.74 | -3.09 | 0.066223 | 0.046463 | 0.406371 | 0.260089 |
| MmugDNA.1125.1.S1_at    | MmugDNA.1125.1  | 6.58  | 7.6   | 0.37 | 0.42 | -2.03 | 0.016661 | 0.016783 | 0.26475  | 0.164091 |
| MmugDNA.11250.1.S1_at   | MmugDNA.11250.1 | 4.42  | 4.31  | 0.27 | 0.24 | 1.08  | 0.671007 | 0.937629 | 0.852532 | 0.964687 |

|                         |                 |       |       |      |      |       |          |          |          |          |
|-------------------------|-----------------|-------|-------|------|------|-------|----------|----------|----------|----------|
| MmugDNA.11252.1.S1_at   | MmugDNA.11252.1 | 8.29  | 8.33  | 0.05 | 0.24 | -1.02 | 0.814716 | 0.374123 | 0.924758 | 0.612678 |
| MmugDNA.11252.1.S1_s_at | MmugDNA.11252.1 | 8.25  | 8.08  | 0.11 | 0.25 | 1.13  | 0.576675 | 0.467428 | 0.803217 | 0.677085 |
| MmugDNA.11253.1.S1_at   | MmugDNA.11253.1 | 5.96  | 6.21  | 0.26 | 0.2  | -1.19 | 0.291225 | 0.279712 | 0.628725 | 0.543228 |
| MmugDNA.11255.1.S1_at   | MmugDNA.11255.1 | 8.23  | 9.24  | 0.3  | 0.15 | -2.01 | 0.004077 | 0.002105 | 0.181739 | 0.067867 |
| MmugDNA.11258.1.S1_at   | MmugDNA.11258.1 | 3.04  | 4.12  | 0.58 | 0.29 | -2.11 | 0.135418 | 0.160661 | 0.502243 | 0.436745 |
| MmugDNA.1126.1.S1_at    | MmugDNA.1126.1  | 5.84  | 4.25  | 0.24 | 0.71 | 3.01  | 0.038242 | 0.026831 | 0.34376  | 0.204912 |
| MmugDNA.11260.1.S1_at   | MmugDNA.11260.1 | 4.25  | 4.29  | 0.15 | 0.17 | -1.03 | 0.667166 | 0.182454 | 0.850837 | 0.459043 |
| MmugDNA.11261.1.S1_at   | MmugDNA.11261.1 | 4.9   | 5.12  | 0.9  | 0.31 | -1.16 | 0.332468 | 0.393989 | 0.65685  | 0.626733 |
| MmugDNA.11262.1.S1_at   | MmugDNA.11262.1 | 9.74  | 9.91  | 0.04 | 0.08 | -1.12 | 0.027912 | 0.005536 | 0.309162 | 0.102661 |
| MmugDNA.11264.1.S1_at   | MmugDNA.11264.1 | 5.23  | 5.25  | 0.12 | 0.16 | -1.02 | 0.701905 | 0.759972 | 0.868197 | 0.860514 |
| MmugDNA.11265.1.S1_at   | MmugDNA.11265.1 | 6.77  | 6.35  | 0.02 | 0.28 | 1.34  | 0.052655 | 0.079468 | 0.378392 | 0.326781 |
| MmugDNA.11266.1.S1_s_at | MmugDNA.11266.1 | 10.46 | 10.52 | 0.06 | 0.18 | -1.05 | 0.295006 | 0.279571 | 0.631503 | 0.543146 |
| MmugDNA.11267.1.S1_at   | MmugDNA.11267.1 | 5.38  | 5.33  | 0.21 | 0.22 | 1.04  | 0.352543 | 0.497812 | 0.669669 | 0.697071 |
| MmugDNA.11268.1.S1_at   | MmugDNA.11268.1 | 5.67  | 5.68  | 0.1  | 0    | -1    | 0.337032 | 0.215896 | 0.659858 | 0.489536 |
| MmugDNA.11269.1.S1_at   | MmugDNA.11269.1 | 7.66  | 7.98  | 0.14 | 0.31 | -1.25 | 0.10403  | 0.135832 | 0.464135 | 0.408019 |
| MmugDNA.1127.1.S1_at    | MmugDNA.1127.1  | 5.19  | 5.12  | 0.1  | 0.26 | 1.05  | 0.957139 | 0.854406 | 0.983802 | 0.91705  |
| MmugDNA.11270.1.S1_at   | MmugDNA.11270.1 | 8.3   | 8.33  | 0.13 | 0.52 | -1.02 | 0.878046 | 0.784652 | 0.951038 | 0.875304 |
| MmugDNA.11271.1.S1_at   | MmugDNA.11271.1 | 10.91 | 10.66 | 0.29 | 0.53 | 1.19  | 0.540848 | 0.704564 | 0.782193 | 0.828608 |
| MmugDNA.11272.1.S1_at   | MmugDNA.11272.1 | 3.33  | 3.4   | 0.03 | 0.15 | -1.05 | 0.159513 | 0.175778 | 0.524352 | 0.452344 |
| MmugDNA.11274.1.S1_at   | MmugDNA.11274.1 | 6.8   | 6.95  | 0.01 | 0.04 | -1.11 | 0.004578 | 0.000722 | 0.1844   | 0.044531 |
| MmugDNA.11275.1.S1_at   | MmugDNA.11275.1 | 6.8   | 6.65  | 0.07 | 0.17 | 1.11  | 0.4364   | 0.227873 | 0.721713 | 0.500201 |
| MmugDNA.11276.1.S1_at   | MmugDNA.11276.1 | 8.89  | 9.13  | 0.12 | 0.15 | -1.18 | 0.272214 | 0.016003 | 0.616016 | 0.160458 |
| MmugDNA.11277.1.S1_at   | MmugDNA.11277.1 | 6.93  | 7.01  | 0.08 | 0.26 | -1.05 | 0.255568 | 0.235235 | 0.603395 | 0.50629  |
| MmugDNA.11278.1.S1_at   | MmugDNA.11278.1 | 4.76  | 5.36  | 0.55 | 0.16 | -1.51 | 0.196741 | 0.21427  | 0.559808 | 0.487891 |
| MmugDNA.1128.1.S1_at    | MmugDNA.1128.1  | 10.91 | 10.35 | 0.32 | 0.5  | 1.47  | 0.185871 | 0.051047 | 0.549376 | 0.271214 |
| MmugDNA.11280.1.S1_at   | MmugDNA.11280.1 | 4.76  | 4.71  | 0.06 | 0.16 | 1.03  | 0.462067 | 0.758381 | 0.738159 | 0.859454 |
| MmugDNA.11282.1.S1_at   | MmugDNA.11282.1 | 8.04  | 6.8   | 0.57 | 0.28 | 2.37  | 0.024003 | 0.003034 | 0.293798 | 0.080386 |
| MmugDNA.11283.1.S1_at   | MmugDNA.11283.1 | 4.76  | 5.08  | 0.05 | 0.08 | -1.25 | 0.00384  | 0.053247 | 0.179914 | 0.276449 |
| MmugDNA.11284.1.S1_s_at | MmugDNA.11284.1 | 13.03 | 12.94 | 0.04 | 0.05 | 1.07  | 0.133807 | 0.196228 | 0.500334 | 0.471236 |
| MmugDNA.11285.1.S1_at   | MmugDNA.11285.1 | 3.35  | 3.22  | 0.03 | 0.29 | 1.09  | 0.899808 | 0.964743 | 0.960025 | 0.980422 |
| MmugDNA.11288.1.S1_s_at | MmugDNA.11288.1 | 7.12  | 7.32  | 0.21 | 0.12 | -1.15 | 0.39104  | 0.401558 | 0.693889 | 0.631068 |
| MmugDNA.11289.1.S1_at   | MmugDNA.11289.1 | 5.31  | 5.32  | 0.25 | 0.09 | -1.01 | 0.92067  | 0.95948  | 0.969077 | 0.977017 |
| MmugDNA.1129.1.S1_at    | MmugDNA.1129.1  | 4.53  | 4.55  | 0.14 | 0.03 | -1.01 | 0.774294 | 0.976084 | 0.905118 | 0.98693  |
| MmugDNA.11290.1.S1_at   | MmugDNA.11290.1 | 11.41 | 11.41 | 0.18 | 0.26 | -1    | 0.71363  | 0.083803 | 0.874503 | 0.334647 |
| MmugDNA.11291.1.S1_s_at | MmugDNA.11291.1 | 11.66 | 11.68 | 0.04 | 0.16 | -1.02 | 0.362054 | 0.163473 | 0.675653 | 0.439707 |
| MmugDNA.11291.1.S1_x_at | MmugDNA.11291.1 | 3.36  | 3.25  | 0.13 | 0.17 | 1.08  | 0.947687 | 0.592341 | 0.979946 | 0.757716 |
| MmugDNA.6252.1.S1_s_at  | MmugDNA.6252.1  | 7.53  | 7.53  | 0.12 | 0.09 | 1     | 0.826457 | 0.004824 | 0.929529 | 0.096904 |
| MmugDNA.11293.1.S1_at   | MmugDNA.11293.1 | 10.27 | 9.85  | 0.29 | 0.5  | 1.33  | 0.701499 | 0.034581 | 0.868043 | 0.230061 |
| MmugDNA.11295.1.S1_at   | MmugDNA.11295.1 | 5.16  | 5.28  | 0.01 | 0.15 | -1.08 | 0.20779  | 0.243219 | 0.569822 | 0.513356 |
| MmugDNA.11296.1.S1_at   | MmugDNA.11296.1 | 11.84 | 11.75 | 0.19 | 0.69 | 1.06  | 0.908504 | 0.841586 | 0.963781 | 0.909677 |
| MmugDNA.11297.1.S1_at   | MmugDNA.11297.1 | 6.43  | 6.74  | 0.24 | 0.26 | -1.24 | 0.917186 | 0.305505 | 0.967709 | 0.562461 |

|                         |                 |       |       |      |      |       |          |          |          |          |
|-------------------------|-----------------|-------|-------|------|------|-------|----------|----------|----------|----------|
| MmugDNA.11299.1.S1_at   | MmugDNA.11299.1 | 11.23 | 10.98 | 0.18 | 1.16 | 1.19  | 0.538722 | 0.502366 | 0.780754 | 0.700134 |
| MmugDNA.1130.1.S1_at    | MmugDNA.1130.1  | 6.03  | 6.31  | 0.19 | 0.2  | -1.22 | 0.488537 | 0.715553 | 0.753113 | 0.835123 |
| MmugDNA.11302.1.S1_at   | MmugDNA.11302.1 | 5.62  | 6.25  | 0.28 | 0.54 | -1.55 | 0.054536 | 0.062127 | 0.381851 | 0.296182 |
| MmugDNA.11304.1.S1_at   | MmugDNA.11304.1 | 7.09  | 7.07  | 0.17 | 0.08 | 1.02  | 0.788167 | 0.715445 | 0.911878 | 0.835033 |
| MmugDNA.11305.1.S1_at   | MmugDNA.11305.1 | 2.9   | 2.97  | 0.14 | 0.03 | -1.05 | 0.35413  | 0.519047 | 0.67034  | 0.710813 |
| MmugDNA.11306.1.S1_at   | MmugDNA.11306.1 | 2.89  | 2.99  | 0.08 | 0.01 | -1.07 | 0.33916  | 0.261558 | 0.661173 | 0.52802  |
| MmugDNA.11307.1.S1_at   | MmugDNA.11307.1 | 11.79 | 11.11 | 0.14 | 0.11 | 1.6   | 0.002756 | 0.00058  | 0.165355 | 0.041447 |
| MmugDNA.11308.1.S1_at   | MmugDNA.11308.1 | 3.82  | 4.07  | 0.04 | 0.26 | -1.19 | 0.104213 | 0.252108 | 0.464208 | 0.520787 |
| MmugDNA.1131.1.S1_at    | MmugDNA.1131.1  | 4.77  | 6.43  | 0.54 | 0.52 | -3.16 | 0.065433 | 0.039376 | 0.404567 | 0.243406 |
| MmugDNA.11312.1.S1_at   | MmugDNA.11312.1 | 4.03  | 3.53  | 0.25 | 0.07 | 1.42  | 0.077216 | 0.411982 | 0.426701 | 0.638434 |
| MmugDNA.11313.1.S1_at   | MmugDNA.11313.1 | 7.66  | 7.64  | 0.29 | 0.09 | 1.01  | 0.972922 | 0.730615 | 0.989561 | 0.844055 |
| MmugDNA.11317.1.S1_at   | MmugDNA.11317.1 | 5.42  | 5.47  | 0.08 | 0.08 | -1.03 | 0.156052 | 0.193131 | 0.520741 | 0.468554 |
| MmugDNA.11318.1.S1_at   | MmugDNA.11318.1 | 8.84  | 8.23  | 0.2  | 0.53 | 1.53  | 0.277487 | 0.40055  | 0.619693 | 0.630361 |
| MmugDNA.11319.1.S1_at   | MmugDNA.11319.1 | 11.25 | 10.62 | 0.07 | 0.19 | 1.55  | 0.003616 | 0.00019  | 0.179515 | 0.030754 |
| MmugDNA.1132.1.S1_at    | MmugDNA.1132.1  | 4.62  | 4.74  | 0.07 | 0.19 | -1.09 | 0.137805 | 0.098829 | 0.50524  | 0.357002 |
| MmugDNA.26114.1.S1_s_at | MmugDNA.26114.1 | 4.2   | 4.2   | 0.01 | 0.29 | 1     | 0.383916 | 0.434231 | 0.689646 | 0.654422 |
| MmugDNA.11322.1.S1_at   | MmugDNA.11322.1 | 4.76  | 4.75  | 0.15 | 0.36 | 1.01  | 0.298236 | 0.38449  | 0.633823 | 0.620142 |
| MmugDNA.11323.1.S1_at   | MmugDNA.11323.1 | 3.23  | 3.38  | 0.05 | 0.06 | -1.11 | 0.034864 | 0.034852 | 0.333988 | 0.230897 |
| MmugDNA.11324.1.S1_at   | MmugDNA.11324.1 | 11.1  | 10.57 | 0.05 | 0.4  | 1.44  | 0.08743  | 0.041944 | 0.441776 | 0.249397 |
| MmugDNA.11325.1.S1_at   | MmugDNA.11325.1 | 4.28  | 4.28  | 0.01 | 0.12 | 1     | 0.342733 | 0.083955 | 0.663407 | 0.334877 |
| MmugDNA.11326.1.S1_at   | MmugDNA.11326.1 | 6.59  | 7.52  | 0.12 | 0.23 | -1.9  | 0.00332  | 0.000459 | 0.177442 | 0.038572 |
| MmugDNA.11329.1.S1_at   | MmugDNA.11329.1 | 4.6   | 4.65  | 0.37 | 0.39 | -1.04 | 0.635409 | 0.148215 | 0.83497  | 0.422745 |
| MmugDNA.1133.1.S1_at    | MmugDNA.1133.1  | 4.51  | 4.9   | 0.72 | 0.27 | -1.3  | 0.991381 | 0.816946 | 0.99695  | 0.894418 |
| MmugDNA.11330.1.S1_at   | MmugDNA.11330.1 | 5.56  | 5.58  | 0.12 | 0.18 | -1.01 | 0.487498 | 0.67075  | 0.75211  | 0.807469 |
| MmugDNA.11331.1.S1_at   | MmugDNA.11331.1 | 3.66  | 3.64  | 0.39 | 0.1  | 1.01  | 0.570589 | 0.613308 | 0.799614 | 0.770498 |
| MmugDNA.11333.1.S1_at   | MmugDNA.11333.1 | 4.38  | 4.42  | 0.21 | 0.28 | -1.03 | 0.928524 | 0.713205 | 0.972527 | 0.833655 |
| MmugDNA.11334.1.S1_at   | MmugDNA.11334.1 | 3.13  | 3.21  | 0.05 | 0.36 | -1.06 | 0.703381 | 0.704285 | 0.868993 | 0.828392 |
| MmugDNA.11335.1.S1_at   | MmugDNA.11335.1 | 3.87  | 3.88  | 0.28 | 0.12 | -1.01 | 0.681153 | 0.326255 | 0.85748  | 0.576452 |
| MmugDNA.11337.1.S1_at   | MmugDNA.11337.1 | 4.38  | 4.53  | 0.15 | 0.11 | -1.11 | 0.193901 | 0.198733 | 0.557547 | 0.473391 |
| MmugDNA.11339.1.S1_at   | MmugDNA.11339.1 | 11.3  | 10.59 | 0.18 | 0.53 | 1.63  | 0.124501 | 0.138019 | 0.490468 | 0.410919 |
| MmugDNA.1134.1.S1_at    | MmugDNA.1134.1  | 4.75  | 4.91  | 0.28 | 0.1  | -1.12 | 0.569304 | 0.367163 | 0.79903  | 0.606832 |
| MmugDNA.11340.1.S1_at   | MmugDNA.11340.1 | 6.06  | 5.94  | 0.07 | 0.05 | 1.09  | 0.135094 | 0.731602 | 0.501995 | 0.844457 |
| MmugDNA.11343.1.S1_s_at | MmugDNA.11343.1 | 8.5   | 8.66  | 0.09 | 0.09 | -1.12 | 0.19671  | 0.137063 | 0.559808 | 0.409836 |
| MmugDNA.11344.1.S1_at   | MmugDNA.11344.1 | 4.38  | 4.39  | 0.11 | 0.21 | -1.01 | 0.251053 | 0.270846 | 0.600545 | 0.536026 |
| MmugDNA.11345.1.S1_at   | MmugDNA.11345.1 | 5.64  | 5.38  | 0.38 | 0.27 | 1.2   | 0.349633 | 0.246197 | 0.667907 | 0.515883 |
| MmugDNA.11348.1.S1_at   | MmugDNA.11348.1 | 5.37  | 4.94  | 0.69 | 0.32 | 1.34  | 0.35715  | 0.408472 | 0.672128 | 0.635694 |
| MmugDNA.1135.1.S1_at    | MmugDNA.1135.1  | 9.23  | 7.91  | 0.13 | 0.14 | 2.49  | 0.000293 | 0.000017 | 0.12562  | 0.019635 |
| MmugDNA.11354.1.S1_at   | MmugDNA.11354.1 | 3.1   | 2.9   | 0.21 | 0.21 | 1.14  | 0.665063 | 0.636839 | 0.849774 | 0.786404 |
| MmugDNA.11356.1.S1_at   | MmugDNA.11356.1 | 9.85  | 9.09  | 0.29 | 0.68 | 1.69  | 0.650369 | 0.836117 | 0.842789 | 0.906284 |
| MmugDNA.11357.1.S1_at   | MmugDNA.11357.1 | 3.81  | 4.14  | 0.26 | 0.18 | -1.25 | 0.730947 | 0.506401 | 0.883416 | 0.702371 |
| MmugDNA.11359.1.S1_at   | MmugDNA.11359.1 | 3.24  | 3.36  | 0.23 | 0.01 | -1.09 | 0.968036 | 0.89494  | 0.987964 | 0.940055 |

|                         |                 |       |       |      |      |       |          |          |          |          |
|-------------------------|-----------------|-------|-------|------|------|-------|----------|----------|----------|----------|
| MmugDNA.11361.1.S1_at   | MmugDNA.11361.1 | 3.76  | 3.56  | 0.12 | 0.2  | 1.15  | 0.722718 | 0.089815 | 0.878819 | 0.34404  |
| MmugDNA.11363.1.S1_at   | MmugDNA.11363.1 | 3.04  | 3.11  | 0.06 | 0.12 | -1.05 | 0.582993 | 0.620109 | 0.806097 | 0.775227 |
| MmugDNA.11367.1.S1_at   | MmugDNA.11367.1 | 5.07  | 5.09  | 0.55 | 0.13 | -1.01 | 0.972042 | 0.998329 | 0.989315 | 0.999091 |
| MmugDNA.1137.1.S1_at    | MmugDNA.1137.1  | 5.63  | 5.64  | 0.05 | 0.05 | -1.01 | 0.464576 | 0.622868 | 0.739374 | 0.77739  |
| MmugDNA.11370.1.S1_at   | MmugDNA.11370.1 | 5.55  | 5.97  | 0.19 | 0.24 | -1.34 | 0.092639 | 0.08712  | 0.449257 | 0.340073 |
| MmugDNA.11371.1.S1_at   | MmugDNA.11371.1 | 4.54  | 4.61  | 0.19 | 0.13 | -1.05 | 0.95108  | 0.996699 | 0.981606 | 0.998097 |
| MmugDNA.11372.1.S1_at   | MmugDNA.11372.1 | 5.89  | 4.76  | 0.23 | 0.14 | 2.2   | 0.001873 | 0.001699 | 0.155636 | 0.062399 |
| MmugDNA.11373.1.S1_at   | MmugDNA.11373.1 | 4.43  | 4.51  | 0.34 | 0.22 | -1.06 | 0.739047 | 0.796899 | 0.888088 | 0.882822 |
| MmugDNA.11374.1.S1_at   | MmugDNA.11374.1 | 4.39  | 4.67  | 0.07 | 0.66 | -1.22 | 0.399912 | 0.503893 | 0.699692 | 0.701193 |
| MmugDNA.11374.1.S1_s_at | MmugDNA.11374.1 | 7.31  | 8     | 0.3  | 1.14 | -1.61 | 0.359068 | 0.288565 | 0.673818 | 0.549827 |
| MmugDNA.11376.1.S1_at   | MmugDNA.11376.1 | 5.82  | 5.54  | 0.03 | 0.54 | 1.21  | 0.473332 | 0.38895  | 0.744169 | 0.623255 |
| MmugDNA.11377.1.S1_s_at | MmugDNA.11377.1 | 4.65  | 6.51  | 0.27 | 1.61 | -3.62 | 0.175729 | 0.196611 | 0.539441 | 0.471632 |
| MmugDNA.1138.1.S1_at    | MmugDNA.1138.1  | 4.29  | 4     | 0.42 | 0.11 | 1.22  | 0.292462 | 0.274769 | 0.629851 | 0.539225 |
| MmugDNA.11381.1.S1_at   | MmugDNA.11381.1 | 4.27  | 3.85  | 0.27 | 0.29 | 1.34  | 0.366519 | 0.389957 | 0.679082 | 0.624002 |
| MmugDNA.11383.1.S1_at   | MmugDNA.11383.1 | 7     | 7.06  | 0.15 | 0.56 | -1.04 | 0.786839 | 0.460336 | 0.911324 | 0.672182 |
| MmugDNA.11384.1.S1_at   | MmugDNA.11384.1 | 5.47  | 5.01  | 0.59 | 0.34 | 1.37  | 0.148372 | 0.246594 | 0.513766 | 0.515917 |
| MmugDNA.11385.1.S1_at   | MmugDNA.11385.1 | 3.78  | 3.77  | 0.04 | 0.05 | 1     | 0.871372 | 0.96904  | 0.948485 | 0.982966 |
| MmugDNA.11388.1.S1_at   | MmugDNA.11388.1 | 10.75 | 10.87 | 0.12 | 0.15 | -1.09 | 0.988705 | 0.219137 | 0.995952 | 0.492868 |
| MmugDNA.1139.1.S1_at    | MmugDNA.1139.1  | 9.06  | 8.33  | 0.2  | 0.74 | 1.66  | 0.68932  | 0.087443 | 0.861507 | 0.340617 |
| MmugDNA.11390.1.S1_at   | MmugDNA.11390.1 | 4.48  | 4.39  | 0.13 | 0.09 | 1.06  | 0.432125 | 0.257667 | 0.718823 | 0.525332 |
| MmugDNA.11391.1.S1_at   | MmugDNA.11391.1 | 7.69  | 7.43  | 0.08 | 0.38 | 1.2   | 0.210989 | 0.4101   | 0.571977 | 0.637065 |
| MmugDNA.11392.1.S1_at   | MmugDNA.11392.1 | 6.7   | 6.78  | 0.26 | 0.47 | -1.05 | 0.750928 | 0.661085 | 0.893491 | 0.801683 |
| MmugDNA.11393.1.S1_at   | MmugDNA.11393.1 | 6.86  | 7.32  | 0.85 | 0.92 | -1.38 | 0.624159 | 0.805238 | 0.828178 | 0.888036 |
| MmugDNA.11394.1.S1_at   | MmugDNA.11394.1 | 3.27  | 3.42  | 0.18 | 0.16 | -1.11 | 0.358387 | 0.091425 | 0.673196 | 0.34639  |
| MmugDNA.11395.1.S1_at   | MmugDNA.11395.1 | 7.87  | 7.43  | 1.55 | 0.86 | 1.35  | 0.420927 | 0.611043 | 0.712792 | 0.769023 |
| MmugDNA.11396.1.S1_s_at | MmugDNA.11396.1 | 7.16  | 7.05  | 0.47 | 0.37 | 1.08  | 0.746737 | 0.89084  | 0.891546 | 0.937722 |
| MmugDNA.11397.1.S1_at   | MmugDNA.11397.1 | 3.75  | 3.54  | 0.38 | 0.63 | 1.15  | 0.894918 | 0.518535 | 0.957988 | 0.710477 |
| MmugDNA.11399.1.S1_at   | MmugDNA.11399.1 | 8.04  | 8.13  | 0.1  | 0.34 | -1.06 | 0.957604 | 0.591919 | 0.983922 | 0.757386 |
| MmugDNA.114.1.S1_at     | MmugDNA.114.1   | 2.81  | 2.92  | 0.06 | 0.09 | -1.08 | 0.634338 | 0.406256 | 0.834477 | 0.634225 |
| MmugDNA.1140.1.S1_at    | MmugDNA.1140.1  | 4.62  | 4.42  | 0.2  | 0.44 | 1.15  | 0.90174  | 0.060273 | 0.960796 | 0.292164 |
| MmugDNA.11400.1.S1_at   | MmugDNA.11400.1 | 7.3   | 6.62  | 0.88 | 0.77 | 1.6   | 0.334664 | 0.365022 | 0.658454 | 0.605222 |
| MmugDNA.11401.1.S1_at   | MmugDNA.11401.1 | 6.98  | 7.1   | 0.1  | 0.27 | -1.09 | 0.542873 | 0.727928 | 0.783702 | 0.842707 |
| MmugDNA.11402.1.S1_at   | MmugDNA.11402.1 | 7.42  | 7.47  | 0.12 | 0.1  | -1.04 | 0.57241  | 0.33422  | 0.80071  | 0.582266 |
| MmugDNA.11403.1.S1_at   | MmugDNA.11403.1 | 5.02  | 4.75  | 0.27 | 0.36 | 1.21  | 0.446549 | 0.61343  | 0.728373 | 0.770528 |
| MmugDNA.11404.1.S1_at   | MmugDNA.11404.1 | 5.03  | 4.99  | 0.17 | 0.03 | 1.03  | 0.870699 | 0.092919 | 0.948338 | 0.349024 |
| MmugDNA.11405.1.S1_s_at | MmugDNA.11405.1 | 8.9   | 9.21  | 0.22 | 0.2  | -1.24 | 0.072044 | 0.006204 | 0.416191 | 0.106825 |
| MmugDNA.11407.1.S1_at   | MmugDNA.11407.1 | 5.2   | 4.77  | 0.03 | 0.36 | 1.35  | 0.083718 | 0.05713  | 0.43598  | 0.284945 |
| MmugDNA.11408.1.S1_at   | MmugDNA.11408.1 | 3.96  | 3.96  | 0.07 | 0.1  | 1     | 0.667802 | 0.61753  | 0.851339 | 0.773477 |
| MmugDNA.11409.1.S1_at   | MmugDNA.11409.1 | 3.18  | 2.92  | 0.29 | 0.06 | 1.19  | 0.106261 | 0.202847 | 0.466831 | 0.477312 |
| MmugDNA.1141.1.S1_at    | MmugDNA.1141.1  | 5.39  | 5.67  | 0.3  | 0.1  | -1.22 | 0.784553 | 0.625624 | 0.910258 | 0.779265 |
| MmugDNA.11410.1.S1_at   | MmugDNA.11410.1 | 10.31 | 10.3  | 0.07 | 0.12 | 1     | 0.245635 | 0.353349 | 0.597182 | 0.596477 |



|                         |                 |       |       |      |      |       |          |          |          |          |
|-------------------------|-----------------|-------|-------|------|------|-------|----------|----------|----------|----------|
| MmugDNA.11411.1.S1_at   | MmugDNA.11411.1 | 12.53 | 12.48 | 0.03 | 0.18 | 1.04  | 0.590459 | 0.015866 | 0.809851 | 0.159789 |
| MmugDNA.11412.1.S1_at   | MmugDNA.11412.1 | 12.44 | 12.43 | 0.09 | 0.13 | 1.01  | 0.213175 | 0.274514 | 0.573477 | 0.538987 |
| MmugDNA.11413.1.S1_at   | MmugDNA.11413.1 | 4.28  | 4.07  | 0.24 | 0.2  | 1.16  | 0.233696 | 0.476563 | 0.588317 | 0.682787 |
| MmugDNA.11413.1.S1_s_at | MmugDNA.11413.1 | 6.37  | 6.5   | 0.04 | 0.09 | -1.09 | 0.23876  | 0.239951 | 0.592015 | 0.510627 |
| MmugDNA.11414.1.S1_at   | MmugDNA.11414.1 | 3.86  | 5.53  | 0.19 | 1.2  | -3.19 | 0.100284 | 0.106982 | 0.460878 | 0.369557 |
| MmugDNA.11415.1.S1_at   | MmugDNA.11415.1 | 4.85  | 5.09  | 0.24 | 0.03 | -1.18 | 0.425551 | 0.604672 | 0.715135 | 0.764769 |
| MmugDNA.11415.1.S1_s_at | MmugDNA.11415.1 | 6.17  | 6.18  | 0.29 | 0.22 | -1.01 | 0.642071 | 0.475967 | 0.83868  | 0.682397 |
| MmugDNA.11416.1.S1_at   | MmugDNA.11416.1 | 9.27  | 8.89  | 0.58 | 0.45 | 1.31  | 0.482223 | 0.122771 | 0.749398 | 0.392755 |
| MmugDNA.11417.1.S1_at   | MmugDNA.11417.1 | 8.8   | 8.16  | 0.45 | 0.46 | 1.55  | 0.079801 | 0.052428 | 0.430147 | 0.274496 |
| MmugDNA.11418.1.S1_at   | MmugDNA.11418.1 | 3.32  | 3.27  | 0.05 | 0.42 | 1.04  | 0.82838  | 0.91413  | 0.930326 | 0.951725 |
| MmugDNA.1142.1.S1_at    | MmugDNA.1142.1  | 6.89  | 8.66  | 0.8  | 0.73 | -3.41 | 0.075078 | 0.071263 | 0.421831 | 0.313318 |
| MmugDNA.11420.1.S1_at   | MmugDNA.11420.1 | 5.61  | 5.71  | 0.47 | 0.35 | -1.07 | 0.530773 | 0.651286 | 0.776921 | 0.796167 |
| MmugDNA.11421.1.S1_at   | MmugDNA.11421.1 | 5.84  | 6.05  | 0.15 | 0.04 | -1.16 | 0.055713 | 0.05833  | 0.384603 | 0.288296 |
| MmugDNA.11422.1.S1_at   | MmugDNA.11422.1 | 6.83  | 6.97  | 0.47 | 0.16 | -1.1  | 0.479272 | 0.081851 | 0.747639 | 0.330284 |
| MmugDNA.11423.1.S1_at   | MmugDNA.11423.1 | 3.46  | 3.29  | 0.13 | 0.08 | 1.13  | 0.072948 | 0.065542 | 0.418323 | 0.301415 |
| MmugDNA.11425.1.S1_at   | MmugDNA.11425.1 | 4.52  | 6.1   | 0.24 | 1.43 | -2.99 | 0.12589  | 0.082318 | 0.491955 | 0.331257 |
| MmugDNA.11428.1.S1_at   | MmugDNA.11428.1 | 8.37  | 8.02  | 0.66 | 0.19 | 1.28  | 0.963006 | 0.993151 | 0.985684 | 0.995946 |
| MmugDNA.11429.1.S1_at   | MmugDNA.11429.1 | 6.66  | 6.53  | 0.5  | 1.2  | 1.09  | 0.584451 | 0.460815 | 0.807026 | 0.672749 |
| MmugDNA.1143.1.S1_at    | MmugDNA.1143.1  | 8.76  | 8.96  | 0.1  | 0.06 | -1.15 | 0.041178 | 0.265832 | 0.350996 | 0.531695 |
| MmugDNA.11431.1.S1_at   | MmugDNA.11431.1 | 4.55  | 4.44  | 0.25 | 0.12 | 1.08  | 0.73442  | 0.282212 | 0.885649 | 0.544952 |
| MmugDNA.11432.1.S1_at   | MmugDNA.11432.1 | 12.71 | 12.04 | 0.03 | 0.54 | 1.59  | 0.070416 | 0.061162 | 0.414212 | 0.293981 |
| MmugDNA.11433.1.S1_at   | MmugDNA.11433.1 | 3.34  | 3.13  | 0.1  | 0.27 | 1.16  | 0.522108 | 0.664126 | 0.771804 | 0.803247 |
| MmugDNA.11434.1.S1_at   | MmugDNA.11434.1 | 9.85  | 9.7   | 0.18 | 0.28 | 1.11  | 0.350396 | 0.454424 | 0.668486 | 0.66859  |
| MmugDNA.11435.1.S1_at   | MmugDNA.11435.1 | 6.23  | 6.36  | 0.15 | 0.05 | -1.1  | 0.174796 | 0.050687 | 0.53837  | 0.270317 |
| MmugDNA.11436.1.S1_at   | MmugDNA.11436.1 | 11.65 | 11.75 | 0.08 | 0.18 | -1.08 | 0.974612 | 0.033025 | 0.990048 | 0.224983 |
| MmugDNA.11437.1.S1_at   | MmugDNA.11437.1 | 3.59  | 3.63  | 0.06 | 0.12 | -1.03 | 0.639118 | 0.379819 | 0.836996 | 0.616587 |
| MmugDNA.11439.1.S1_at   | MmugDNA.11439.1 | 5.24  | 4.87  | 0.16 | 0.13 | 1.3   | 0.027857 | 0.01009  | 0.309107 | 0.131767 |
| MmugDNA.1144.1.S1_at    | MmugDNA.1144.1  | 5.17  | 4.66  | 0.59 | 0.77 | 1.42  | 0.806055 | 0.457544 | 0.920447 | 0.670864 |
| MmugDNA.11440.1.S1_at   | MmugDNA.11440.1 | 5.61  | 5.32  | 0.07 | 0.2  | 1.22  | 0.089805 | 0.138049 | 0.445351 | 0.410919 |
| MmugDNA.11441.1.S1_at   | MmugDNA.11441.1 | 9.61  | 8.13  | 0.74 | 0.42 | 2.81  | 0.025636 | 0.012822 | 0.300161 | 0.145864 |
| MmugDNA.11442.1.S1_at   | MmugDNA.11442.1 | 4.76  | 5.01  | 0.49 | 0.15 | -1.19 | 0.970257 | 0.688533 | 0.988606 | 0.818201 |
| MmugDNA.11443.1.S1_at   | MmugDNA.11443.1 | 6.49  | 6     | 0.43 | 0.14 | 1.4   | 0.198658 | 0.361759 | 0.561698 | 0.602476 |
| MmugDNA.11444.1.S1_at   | MmugDNA.11444.1 | 3.63  | 3.87  | 0.09 | 0.11 | -1.18 | 0.059069 | 0.093201 | 0.390921 | 0.34931  |
| MmugDNA.11445.1.S1_at   | MmugDNA.11445.1 | 11.99 | 12.04 | 0.08 | 0.22 | -1.04 | 0.328118 | 0.419567 | 0.654292 | 0.643528 |
| MmugDNA.11446.1.S1_at   | MmugDNA.11446.1 | 4.51  | 4.96  | 0.54 | 0.33 | -1.36 | 0.131934 | 0.039786 | 0.498114 | 0.244453 |
| MmugDNA.11447.1.S1_at   | MmugDNA.11447.1 | 8.37  | 7.9   | 0.54 | 0.2  | 1.39  | 0.87684  | 0.275446 | 0.950675 | 0.539693 |
| MmugDNA.11448.1.S1_at   | MmugDNA.11448.1 | 6.19  | 6.2   | 0.21 | 0.17 | -1    | 0.332992 | 0.31472  | 0.657222 | 0.568449 |
| MmugDNA.11449.1.S1_at   | MmugDNA.11449.1 | 9.22  | 10.04 | 0.48 | 1.38 | -1.76 | 0.423831 | 0.05441  | 0.714199 | 0.278799 |
| MmugDNA.1145.1.S1_at    | MmugDNA.1145.1  | 3.15  | 3.16  | 0.06 | 0.1  | -1.01 | 0.882907 | 0.938417 | 0.952961 | 0.965059 |
| MmugDNA.1145.1.S1_x_at  | MmugDNA.1145.1  | 4.85  | 4.82  | 0.04 | 0.1  | 1.02  | 0.341582 | 0.060433 | 0.662652 | 0.292482 |
| MmugDNA.11450.1.S1_at   | MmugDNA.11450.1 | 11.63 | 11.79 | 0.25 | 0.37 | -1.12 | 0.472415 | 0.506256 | 0.743746 | 0.702368 |

|                         |                 |       |       |      |      |       |          |          |          |          |
|-------------------------|-----------------|-------|-------|------|------|-------|----------|----------|----------|----------|
| MmugDNA.11451.1.S1_at   | MmugDNA.11451.1 | 4.89  | 4.74  | 0.22 | 0.33 | 1.11  | 0.614751 | 0.759335 | 0.823258 | 0.860037 |
| MmugDNA.11452.1.S1_at   | MmugDNA.11452.1 | 3.93  | 3.9   | 0.26 | 0    | 1.02  | 0.770406 | 0.948565 | 0.90333  | 0.970655 |
| MmugDNA.11453.1.S1_at   | MmugDNA.11453.1 | 4.82  | 4.42  | 0.5  | 0.36 | 1.33  | 0.296887 | 0.318614 | 0.632758 | 0.571258 |
| MmugDNA.11454.1.S1_at   | MmugDNA.11454.1 | 6.25  | 6.27  | 0.49 | 0.51 | -1.01 | 0.850232 | 0.362892 | 0.939872 | 0.603393 |
| MmugDNA.11455.1.S1_s_at | MmugDNA.11455.1 | 3.47  | 3.2   | 0.18 | 0.03 | 1.21  | 0.023829 | 0.013204 | 0.292816 | 0.147409 |
| MmugDNA.11457.1.S1_at   | MmugDNA.11457.1 | 9.8   | 10.08 | 0.25 | 0.24 | -1.21 | 0.191504 | 0.229239 | 0.554528 | 0.501527 |
| MmugDNA.11458.1.S1_at   | MmugDNA.11458.1 | 11.65 | 11.64 | 0.04 | 1.42 | 1     | 0.371594 | 0.493368 | 0.682332 | 0.694092 |
| MmugDNA.11459.1.S1_at   | MmugDNA.11459.1 | 2.99  | 3.06  | 0.18 | 0.18 | -1.05 | 0.409573 | 0.35421  | 0.70588  | 0.597105 |
| MmugDNA.11460.1.S1_at   | MmugDNA.11460.1 | 5.67  | 5.52  | 0.85 | 0.44 | 1.11  | 0.372654 | 0.449633 | 0.682946 | 0.665152 |
| MmugDNA.11464.1.S1_at   | MmugDNA.11464.1 | 4.53  | 5.16  | 0.26 | 0.12 | -1.55 | 0.023999 | 0.014182 | 0.293798 | 0.152173 |
| MmugDNA.11467.1.S1_at   | MmugDNA.11467.1 | 3.27  | 3.07  | 0.12 | 0.06 | 1.16  | 0.091309 | 0.037019 | 0.447137 | 0.236867 |
| MmugDNA.11469.1.S1_at   | MmugDNA.11469.1 | 5.42  | 5.29  | 0.28 | 0.04 | 1.09  | 0.147614 | 0.035151 | 0.513287 | 0.231645 |
| MmugDNA.1147.1.S1_at    | MmugDNA.1147.1  | 5.98  | 5.77  | 0.18 | 0.16 | 1.16  | 0.085194 | 0.204044 | 0.438539 | 0.478372 |
| MmugDNA.11470.1.S1_at   | MmugDNA.11470.1 | 12.41 | 12.59 | 0.16 | 0.16 | -1.14 | 0.095918 | 0.053234 | 0.453957 | 0.276445 |
| MmugDNA.11470.1.S1_s_at | MmugDNA.11470.1 | 13.8  | 13.83 | 0.02 | 0.13 | -1.02 | 0.667264 | 0.648058 | 0.850921 | 0.793977 |
| MmugDNA.11471.1.S1_at   | MmugDNA.11471.1 | 9.24  | 8.19  | 0.14 | 0.85 | 2.07  | 0.319675 | 0.429656 | 0.649068 | 0.650973 |
| MmugDNA.11472.1.S1_at   | MmugDNA.11472.1 | 10.21 | 10.03 | 0.15 | 0.06 | 1.13  | 0.056793 | 0.045325 | 0.387092 | 0.257202 |
| MmugDNA.11473.1.S1_at   | MmugDNA.11473.1 | 4.09  | 4.21  | 0.04 | 0.07 | -1.08 | 0.091554 | 0.082137 | 0.447485 | 0.330937 |
| MmugDNA.11474.1.S1_at   | MmugDNA.11474.1 | 3.49  | 3.51  | 0.14 | 0.09 | -1.01 | 0.323994 | 0.397741 | 0.651822 | 0.629105 |
| MmugDNA.11475.1.S1_at   | MmugDNA.11475.1 | 10.81 | 10.87 | 0.06 | 0.33 | -1.04 | 0.64963  | 0.489212 | 0.842495 | 0.691706 |
| MmugDNA.11476.1.S1_at   | MmugDNA.11476.1 | 4.33  | 4.37  | 0.07 | 0.2  | -1.02 | 0.65068  | 0.203883 | 0.842825 | 0.478102 |
| MmugDNA.11477.1.S1_at   | MmugDNA.11477.1 | 7.44  | 7.52  | 0.38 | 0.07 | -1.06 | 0.58034  | 0.258727 | 0.804567 | 0.525949 |
| MmugDNA.11478.1.S1_at   | MmugDNA.11478.1 | 7.26  | 6.35  | 0.18 | 0.39 | 1.88  | 0.018522 | 0.013003 | 0.270581 | 0.146803 |
| MmugDNA.11479.1.S1_at   | MmugDNA.11479.1 | 5.68  | 5.69  | 0.39 | 0.33 | -1.01 | 0.319302 | 0.375313 | 0.648803 | 0.613336 |
| MmugDNA.1148.1.S1_at    | MmugDNA.1148.1  | 9.86  | 9.5   | 0.08 | 0.31 | 1.28  | 0.367736 | 0.578661 | 0.679566 | 0.748603 |
| MmugDNA.11480.1.S1_at   | MmugDNA.11480.1 | 4.47  | 4.65  | 0.01 | 0.18 | -1.13 | 0.17929  | 0.074326 | 0.543593 | 0.318046 |
| MmugDNA.11481.1.S1_at   | MmugDNA.11481.1 | 7.18  | 7.06  | 0.47 | 0.36 | 1.08  | 0.398866 | 0.47004  | 0.698954 | 0.678572 |
| MmugDNA.11482.1.S1_at   | MmugDNA.11482.1 | 8.18  | 6.26  | 0.64 | 0.76 | 3.79  | 0.059061 | 0.03155  | 0.390921 | 0.219708 |
| MmugDNA.11483.1.S1_at   | MmugDNA.11483.1 | 7.59  | 8.8   | 0.8  | 1.87 | -2.33 | 0.416953 | 0.435273 | 0.710282 | 0.655127 |
| MmugDNA.11484.1.S1_at   | MmugDNA.11484.1 | 5.42  | 5.39  | 0.07 | 0.27 | 1.02  | 0.354614 | 0.193785 | 0.670604 | 0.468847 |
| MmugDNA.11485.1.S1_at   | MmugDNA.11485.1 | 6.94  | 7.39  | 0.52 | 0.11 | -1.36 | 0.653372 | 0.492873 | 0.844077 | 0.693817 |
| MmugDNA.11487.1.S1_at   | MmugDNA.11487.1 | 7.23  | 6.59  | 0.17 | 0.62 | 1.55  | 0.04601  | 0.040608 | 0.362169 | 0.246364 |
| MmugDNA.11488.1.S1_at   | MmugDNA.11488.1 | 5.34  | 5.07  | 0.36 | 0.21 | 1.2   | 0.236157 | 0.495898 | 0.590172 | 0.695781 |
| MmugDNA.11489.1.S1_at   | MmugDNA.11489.1 | 6.01  | 6.01  | 0.66 | 0.56 | -1    | 0.233972 | 0.130088 | 0.588492 | 0.401724 |
| MmugDNA.1149.1.S1_at    | MmugDNA.1149.1  | 6.3   | 6.75  | 0.17 | 0.14 | -1.36 | 0.022325 | 0.07197  | 0.285701 | 0.314305 |
| MmugDNA.11490.1.S1_at   | MmugDNA.11490.1 | 6.78  | 7.91  | 0.5  | 1.43 | -2.18 | 0.322857 | 0.380314 | 0.651245 | 0.616984 |
| MmugDNA.11491.1.S1_at   | MmugDNA.11491.1 | 6.55  | 6.31  | 0.33 | 0.04 | 1.18  | 0.815988 | 0.24831  | 0.925276 | 0.5176   |
| MmugDNA.11492.1.S1_at   | MmugDNA.11492.1 | 5.51  | 4.97  | 0.4  | 0.34 | 1.46  | 0.146394 | 0.054877 | 0.512525 | 0.279748 |
| MmugDNA.11493.1.S1_at   | MmugDNA.11493.1 | 4.84  | 4.69  | 0.28 | 0.16 | 1.11  | 0.317769 | 0.39623  | 0.64802  | 0.628068 |
| MmugDNA.11495.1.S1_at   | MmugDNA.11495.1 | 3.79  | 3.59  | 0.29 | 0.04 | 1.15  | 0.586619 | 0.73119  | 0.808193 | 0.84424  |
| MmugDNA.11496.1.S1_at   | MmugDNA.11496.1 | 9.31  | 9.92  | 0.15 | 1.82 | -1.53 | 0.708664 | 0.689405 | 0.871964 | 0.818813 |

|                         |                 |       |       |      |      |       |          |          |          |          |
|-------------------------|-----------------|-------|-------|------|------|-------|----------|----------|----------|----------|
| MmugDNA.11497.1.S1_at   | MmugDNA.11497.1 | 4.86  | 3.41  | 0.82 | 0.35 | 2.73  | 0.203387 | 0.240801 | 0.566041 | 0.511521 |
| MmugDNA.11498.1.S1_at   | MmugDNA.11498.1 | 9.61  | 10.31 | 0.52 | 0.53 | -1.62 | 0.426065 | 0.213598 | 0.715521 | 0.487432 |
| MmugDNA.11499.1.S1_at   | MmugDNA.11499.1 | 3.83  | 3.48  | 0.26 | 0.14 | 1.27  | 0.12225  | 0.132179 | 0.487436 | 0.404274 |
| MmugDNA.115.1.S1_at     | MmugDNA.115.1   | 4.84  | 4.69  | 0.17 | 0.11 | 1.11  | 0.115752 | 0.195389 | 0.479264 | 0.470253 |
| MmugDNA.38313.1.S1_at   | MmugDNA.38313.1 | 6.75  | 6.68  | 0.1  | 0.08 | 1.05  | 0.694535 | 0.028788 | 0.86449  | 0.211521 |
| MmugDNA.38313.1.S1_s_at | MmugDNA.38313.1 | 6.84  | 6.74  | 0.12 | 0.06 | 1.07  | 0.398624 | 0.181082 | 0.698762 | 0.457577 |
| MmugDNA.11500.1.S1_at   | MmugDNA.11500.1 | 6.54  | 5.92  | 0.38 | 0.65 | 1.54  | 0.084314 | 0.117808 | 0.436922 | 0.385702 |
| MmugDNA.11501.1.S1_at   | MmugDNA.11501.1 | 5.13  | 4.69  | 0.27 | 0.11 | 1.36  | 0.164742 | 0.261844 | 0.528656 | 0.528265 |
| MmugDNA.11502.1.S1_at   | MmugDNA.11502.1 | 4.58  | 4.68  | 0.34 | 0.11 | -1.07 | 0.820012 | 0.955859 | 0.926819 | 0.975006 |
| MmugDNA.11503.1.S1_at   | MmugDNA.11503.1 | 5.11  | 5.21  | 0.14 | 0.05 | -1.08 | 0.114867 | 0.108247 | 0.478107 | 0.371557 |
| MmugDNA.11504.1.S1_at   | MmugDNA.11504.1 | 2.92  | 2.76  | 0.12 | 0.1  | 1.12  | 0.329303 | 0.443293 | 0.654927 | 0.661138 |
| MmugDNA.11505.1.S1_at   | MmugDNA.11505.1 | 8.86  | 6.8   | 0.1  | 0.91 | 4.17  | 0.044454 | 0.023658 | 0.358591 | 0.192574 |
| MmugDNA.11506.1.S1_at   | MmugDNA.11506.1 | 7.97  | 7.93  | 0.3  | 0.17 | 1.03  | 0.860767 | 0.911224 | 0.94382  | 0.949929 |
| MmugDNA.11507.1.S1_at   | MmugDNA.11507.1 | 7.01  | 5.94  | 0.36 | 0.96 | 2.1   | 0.052003 | 0.041751 | 0.376949 | 0.248933 |
| MmugDNA.1151.1.S1_at    | MmugDNA.1151.1  | 7.22  | 7.32  | 0.03 | 0.06 | -1.07 | 0.078217 | 0.076482 | 0.428221 | 0.32158  |
| MmugDNA.11510.1.S1_at   | MmugDNA.11510.1 | 8.08  | 8.91  | 0.46 | 0.55 | -1.77 | 0.139631 | 0.120663 | 0.507125 | 0.389476 |
| MmugDNA.11512.1.S1_at   | MmugDNA.11512.1 | 6.69  | 7.56  | 1.48 | 0.61 | -1.83 | 0.491742 | 0.679533 | 0.755257 | 0.812884 |
| MmugDNA.11513.1.S1_at   | MmugDNA.11513.1 | 8.9   | 9.01  | 0.32 | 1.1  | -1.08 | 0.910881 | 0.972734 | 0.964792 | 0.985334 |
| MmugDNA.11514.1.S1_at   | MmugDNA.11514.1 | 7.42  | 7.15  | 1.04 | 1.08 | 1.21  | 0.347863 | 0.492234 | 0.666754 | 0.693477 |
| MmugDNA.11515.1.S1_at   | MmugDNA.11515.1 | 10.36 | 10.14 | 0.16 | 0.14 | 1.16  | 0.068565 | 0.12181  | 0.410201 | 0.3911   |
| MmugDNA.11517.1.S1_at   | MmugDNA.11517.1 | 3.95  | 3.66  | 0.27 | 0.1  | 1.22  | 0.149448 | 0.226061 | 0.514026 | 0.498529 |
| MmugDNA.11518.1.S1_at   | MmugDNA.11518.1 | 7.78  | 5.22  | 1.54 | 1.26 | 5.9   | 0.157384 | 0.044357 | 0.522164 | 0.255109 |
| MmugDNA.11518.1.S1_s_at | MmugDNA.11518.1 | 7.34  | 5.01  | 1.56 | 1.27 | 5.03  | 0.140673 | 0.050472 | 0.508385 | 0.26998  |
| MmugDNA.1152.1.S1_at    | MmugDNA.1152.1  | 5.67  | 5.84  | 0.1  | 0.04 | -1.13 | 0.141693 | 0.079095 | 0.509159 | 0.326184 |
| MmugDNA.11520.1.S1_at   | MmugDNA.11520.1 | 5.1   | 5.39  | 0.35 | 0.11 | -1.23 | 0.242847 | 0.370304 | 0.594632 | 0.609407 |
| MmugDNA.11521.1.S1_at   | MmugDNA.11521.1 | 8.21  | 7.36  | 0.34 | 0.53 | 1.8   | 0.064497 | 0.057314 | 0.402975 | 0.285275 |
| MmugDNA.11522.1.S1_at   | MmugDNA.11522.1 | 5.39  | 5.26  | 0.14 | 0.05 | 1.09  | 0.135611 | 0.132889 | 0.502462 | 0.404544 |
| MmugDNA.11523.1.S1_at   | MmugDNA.11523.1 | 6.3   | 6.31  | 0.14 | 0.14 | -1.01 | 0.586913 | 0.499038 | 0.808357 | 0.697964 |
| MmugDNA.11524.1.S1_at   | MmugDNA.11524.1 | 7.67  | 7.38  | 0.05 | 0.1  | 1.22  | 0.011293 | 0.007565 | 0.235353 | 0.116437 |
| MmugDNA.11525.1.S1_at   | MmugDNA.11525.1 | 7.74  | 8.95  | 0.41 | 0.3  | -2.33 | 0.0164   | 0.007953 | 0.263876 | 0.118702 |
| MmugDNA.11526.1.S1_at   | MmugDNA.11526.1 | 5.38  | 5.35  | 0.14 | 0.05 | 1.02  | 0.579433 | 0.840872 | 0.804265 | 0.909295 |
| MmugDNA.11528.1.S1_at   | MmugDNA.11528.1 | 8.29  | 7.37  | 0.16 | 0.6  | 1.89  | 0.086736 | 0.074423 | 0.440475 | 0.318058 |
| MmugDNA.11529.1.S1_at   | MmugDNA.11529.1 | 6.56  | 6.63  | 0.23 | 0.82 | -1.05 | 0.880224 | 0.763762 | 0.951822 | 0.862648 |
| MmugDNA.1153.1.S1_at    | MmugDNA.1153.1  | 9.6   | 9.74  | 0.19 | 0.24 | -1.1  | 0.15277  | 0.142129 | 0.517325 | 0.415728 |
| MmugDNA.11530.1.S1_at   | MmugDNA.11530.1 | 5.07  | 5.09  | 0.1  | 0.16 | -1.02 | 0.314288 | 0.30286  | 0.645738 | 0.560356 |
| MmugDNA.11531.1.S1_at   | MmugDNA.11531.1 | 9.24  | 10.2  | 0.12 | 0.44 | -1.94 | 0.025104 | 0.009339 | 0.297733 | 0.127598 |
| MmugDNA.11534.1.S1_at   | MmugDNA.11534.1 | 10.06 | 9.71  | 0.15 | 0.75 | 1.28  | 0.485336 | 0.362501 | 0.750894 | 0.603066 |
| MmugDNA.11536.1.S1_at   | MmugDNA.11536.1 | 9.21  | 8.3   | 0.18 | 0.22 | 1.88  | 0.006355 | 0.001371 | 0.198801 | 0.05691  |
| MmugDNA.11537.1.S1_at   | MmugDNA.11537.1 | 5.91  | 6.07  | 0.14 | 0.1  | -1.11 | 0.09809  | 0.10606  | 0.457356 | 0.368438 |
| MmugDNA.11538.1.S1_at   | MmugDNA.11538.1 | 6.19  | 6.19  | 0.13 | 0.07 | 1     | 0.351785 | 0.494341 | 0.669177 | 0.694829 |
| MmugDNA.11542.1.S1_at   | MmugDNA.11542.1 | 7.42  | 7.54  | 0.24 | 0.31 | -1.09 | 0.248438 | 0.229923 | 0.59929  | 0.501802 |

|                         |                 |       |       |      |      |        |          |          |          |          |
|-------------------------|-----------------|-------|-------|------|------|--------|----------|----------|----------|----------|
| MmugDNA.11543.1.S1_at   | MmugDNA.11543.1 | 3.19  | 3.16  | 0.1  | 0.11 | 1.02   | 0.859685 | 0.945274 | 0.943379 | 0.968942 |
| MmugDNA.11544.1.S1_at   | MmugDNA.11544.1 | 4.49  | 4.19  | 0.16 | 0.23 | 1.23   | 0.225649 | 0.189823 | 0.583746 | 0.465403 |
| MmugDNA.11545.1.S1_at   | MmugDNA.11545.1 | 8.67  | 8.43  | 0.36 | 0.31 | 1.17   | 0.385423 | 0.007661 | 0.690574 | 0.117089 |
| MmugDNA.11546.1.S1_at   | MmugDNA.11546.1 | 7.32  | 7.43  | 0.28 | 0.07 | -1.08  | 0.941884 | 0.740752 | 0.977821 | 0.849915 |
| MmugDNA.11547.1.S1_at   | MmugDNA.11547.1 | 10.11 | 10.28 | 0.08 | 0.6  | -1.12  | 0.768185 | 0.563682 | 0.902594 | 0.7388   |
| MmugDNA.11548.1.S1_at   | MmugDNA.11548.1 | 3.91  | 4.02  | 0.15 | 0.08 | -1.08  | 0.304025 | 0.086913 | 0.638244 | 0.339715 |
| MmugDNA.1155.1.S1_at    | MmugDNA.1155.1  | 7.01  | 7.15  | 0.09 | 0.07 | -1.11  | 0.200345 | 0.205385 | 0.563198 | 0.479751 |
| MmugDNA.11550.1.S1_at   | MmugDNA.11550.1 | 4.9   | 5.11  | 0.11 | 0.22 | -1.16  | 0.438403 | 0.138916 | 0.723035 | 0.412037 |
| MmugDNA.11551.1.S1_at   | MmugDNA.11551.1 | 9.29  | 8.64  | 0.96 | 1.06 | 1.57   | 0.786811 | 0.192492 | 0.911324 | 0.467952 |
| MmugDNA.11552.1.S1_at   | MmugDNA.11552.1 | 5.33  | 4.7   | 1.12 | 0.21 | 1.54   | 0.510783 | 0.396255 | 0.765151 | 0.628074 |
| MmugDNA.11553.1.S1_at   | MmugDNA.11553.1 | 3.45  | 3.53  | 0.07 | 0.27 | -1.06  | 0.214089 | 0.221528 | 0.57448  | 0.494849 |
| MmugDNA.11554.1.S1_at   | MmugDNA.11554.1 | 7.94  | 7.58  | 0.11 | 0.84 | 1.28   | 0.492363 | 0.545587 | 0.755683 | 0.727579 |
| MmugDNA.11556.1.S1_at   | MmugDNA.11556.1 | 4.05  | 3.61  | 0.24 | 0.13 | 1.36   | 0.06686  | 0.056779 | 0.406981 | 0.284379 |
| MmugDNA.11558.1.S1_at   | MmugDNA.11558.1 | 3.99  | 4.02  | 0.08 | 0.18 | -1.02  | 0.751739 | 0.177154 | 0.893913 | 0.453611 |
| MmugDNA.11559.1.S1_at   | MmugDNA.11559.1 | 3.34  | 3.46  | 0.12 | 0.05 | -1.08  | 0.138277 | 0.152249 | 0.505674 | 0.427045 |
| MmugDNA.11560.1.S1_at   | MmugDNA.11560.1 | 8.78  | 8.27  | 0.33 | 0.29 | 1.43   | 0.048468 | 0.039175 | 0.368878 | 0.243072 |
| MmugDNA.11561.1.S1_at   | MmugDNA.11561.1 | 4.06  | 3.83  | 0.45 | 0.11 | 1.17   | 0.50367  | 0.495147 | 0.760979 | 0.695319 |
| MmugDNA.11562.1.S1_at   | MmugDNA.11562.1 | 6.74  | 6.28  | 0.12 | 0.37 | 1.38   | 0.029154 | 0.036885 | 0.313305 | 0.236506 |
| MmugDNA.11563.1.S1_at   | MmugDNA.11563.1 | 4.18  | 5.54  | 0.26 | 1.7  | -2.56  | 0.251967 | 0.068299 | 0.601195 | 0.307706 |
| MmugDNA.11565.1.S1_at   | MmugDNA.11565.1 | 4.28  | 4.29  | 0.06 | 0.35 | -1.01  | 0.733791 | 0.631345 | 0.885206 | 0.78278  |
| MmugDNA.11566.1.S1_at   | MmugDNA.11566.1 | 3.52  | 3.59  | 0.17 | 0.1  | -1.05  | 0.990001 | 0.175904 | 0.996447 | 0.452486 |
| MmugDNA.11567.1.S1_s_at | MmugDNA.11567.1 | 9.6   | 9.41  | 0.3  | 0.47 | 1.14   | 0.956537 | 0.117267 | 0.98359  | 0.384813 |
| MmugDNA.11568.1.S1_at   | MmugDNA.11568.1 | 5.21  | 5.18  | 0.05 | 0.16 | 1.02   | 0.790222 | 0.868093 | 0.912958 | 0.925106 |
| MmugDNA.11569.1.S1_at   | MmugDNA.11569.1 | 7.1   | 7.06  | 0.12 | 0.18 | 1.03   | 0.628023 | 0.576934 | 0.830492 | 0.747521 |
| MmugDNA.1157.1.S1_at    | MmugDNA.1157.1  | 5.27  | 5.5   | 0.26 | 0.09 | -1.17  | 0.279007 | 0.09533  | 0.620884 | 0.35236  |
| MmugDNA.11571.1.S1_at   | MmugDNA.11571.1 | 8.73  | 8.8   | 0.2  | 1.23 | -1.05  | 0.937754 | 0.989524 | 0.976046 | 0.994037 |
| MmugDNA.11572.1.S1_at   | MmugDNA.11572.1 | 10.42 | 10.73 | 0.53 | 0.55 | -1.24  | 0.670313 | 0.129071 | 0.852382 | 0.400548 |
| MmugDNA.11573.1.S1_at   | MmugDNA.11573.1 | 6.29  | 6.51  | 0.15 | 0.47 | -1.17  | 0.660696 | 0.869722 | 0.847842 | 0.926114 |
| MmugDNA.11574.1.S1_at   | MmugDNA.11574.1 | 3.4   | 3.08  | 0.24 | 0.26 | 1.25   | 0.327242 | 0.034148 | 0.653682 | 0.228692 |
| MmugDNA.11576.1.S1_at   | MmugDNA.11576.1 | 7.97  | 8.78  | 0.59 | 0.97 | -1.75  | 0.417392 | 0.500006 | 0.710512 | 0.698744 |
| MmugDNA.11577.1.S1_at   | MmugDNA.11577.1 | 4.54  | 4.22  | 1.15 | 0.14 | 1.24   | 0.669996 | 0.704378 | 0.852318 | 0.828445 |
| MmugDNA.11578.1.S1_at   | MmugDNA.11578.1 | 5.39  | 5.29  | 0.2  | 0.22 | 1.07   | 0.24002  | 0.358279 | 0.592883 | 0.599779 |
| MmugDNA.11579.1.S1_at   | MmugDNA.11579.1 | 5.46  | 5.51  | 0.14 | 0.08 | -1.04  | 0.603879 | 0.859169 | 0.817352 | 0.919754 |
| MmugDNA.1158.1.S1_at    | MmugDNA.1158.1  | 5.65  | 10.18 | 2.25 | 2.83 | -23.08 | 0.343337 | 0.35162  | 0.663541 | 0.595114 |
| MmugDNA.11581.1.S1_at   | MmugDNA.11581.1 | 7.33  | 7.04  | 0.09 | 0.32 | 1.22   | 0.572293 | 0.024638 | 0.800678 | 0.196442 |
| MmugDNA.11584.1.S1_at   | MmugDNA.11584.1 | 8.28  | 7.08  | 0.15 | 0.31 | 2.3    | 0.004321 | 0.003462 | 0.182631 | 0.084734 |
| MmugDNA.11586.1.S1_at   | MmugDNA.11586.1 | 3.25  | 3.74  | 0.6  | 0.61 | -1.41  | 0.532266 | 0.161602 | 0.777626 | 0.43777  |
| MmugDNA.11587.1.S1_at   | MmugDNA.11587.1 | 4.34  | 4.55  | 0.46 | 0.11 | -1.16  | 0.491567 | 0.494083 | 0.7551   | 0.694663 |
| MmugDNA.11588.1.S1_at   | MmugDNA.11588.1 | 9.24  | 8.92  | 0.08 | 0.25 | 1.25   | 0.277439 | 0.422606 | 0.619611 | 0.64577  |
| MmugDNA.1159.1.S1_at    | MmugDNA.1159.1  | 6.01  | 6.39  | 0.18 | 0.08 | -1.3   | 0.087203 | 0.111907 | 0.441182 | 0.377006 |
| MmugDNA.11590.1.S1_at   | MmugDNA.11590.1 | 8.6   | 8.56  | 0.29 | 0.99 | 1.03   | 0.982025 | 0.978154 | 0.993449 | 0.988066 |

|                         |                 |       |       |      |      |       |          |          |          |          |
|-------------------------|-----------------|-------|-------|------|------|-------|----------|----------|----------|----------|
| MmugDNA.11592.1.S1_at   | MmugDNA.11592.1 | 2.7   | 2.71  | 0.03 | 0.09 | -1.01 | 0.921067 | 0.43067  | 0.969211 | 0.651688 |
| MmugDNA.11592.1.S1_s_at | MmugDNA.11592.1 | 3.2   | 3.08  | 0.12 | 0.22 | 1.09  | 0.891694 | 0.67094  | 0.956867 | 0.807629 |
| MmugDNA.11593.1.S1_at   | MmugDNA.11593.1 | 11.24 | 11.52 | 0.07 | 0.18 | -1.22 | 0.210493 | 0.013513 | 0.571783 | 0.148824 |
| MmugDNA.11596.1.S1_at   | MmugDNA.11596.1 | 7.64  | 6.87  | 0.36 | 0.68 | 1.71  | 0.323871 | 0.028748 | 0.651789 | 0.211372 |
| MmugDNA.11597.1.S1_at   | MmugDNA.11597.1 | 4.99  | 4.92  | 0.07 | 0.37 | 1.05  | 0.918846 | 0.333975 | 0.968436 | 0.582063 |
| MmugDNA.11598.1.S1_at   | MmugDNA.11598.1 | 3.45  | 3.57  | 0.06 | 0.09 | -1.08 | 0.056262 | 0.11555  | 0.386221 | 0.38267  |
| MmugDNA.11599.1.S1_at   | MmugDNA.11599.1 | 4.49  | 4.39  | 1.49 | 0.6  | 1.07  | 0.788126 | 0.670197 | 0.91185  | 0.807153 |
| MmugDNA.116.1.S1_at     | MmugDNA.116.1   | 8.56  | 8.87  | 0.24 | 0.22 | -1.24 | 0.165289 | 0.020473 | 0.529353 | 0.179641 |
| MmugDNA.11600.1.S1_at   | MmugDNA.11600.1 | 6.08  | 6.22  | 0.31 | 0.11 | -1.1  | 0.812236 | 0.251017 | 0.923605 | 0.519638 |
| MmugDNA.11602.1.S1_at   | MmugDNA.11602.1 | 8.26  | 7.99  | 0.18 | 0.29 | 1.21  | 0.050445 | 0.032993 | 0.374335 | 0.224886 |
| MmugDNA.11603.1.S1_at   | MmugDNA.11603.1 | 6.73  | 6.74  | 0.04 | 0.07 | -1    | 0.402428 | 0.396823 | 0.701407 | 0.628452 |
| MmugDNA.11603.1.S1_s_at | MmugDNA.11603.1 | 10.81 | 10.67 | 0.47 | 0.48 | 1.1   | 0.996063 | 0.404219 | 0.998451 | 0.632691 |
| MmugDNA.11604.1.S1_at   | MmugDNA.11604.1 | 7.46  | 7.18  | 0.28 | 0.42 | 1.21  | 0.350533 | 0.377408 | 0.668568 | 0.6149   |
| MmugDNA.11606.1.S1_at   | MmugDNA.11606.1 | 6.1   | 5.89  | 0.11 | 0.26 | 1.15  | 0.188624 | 0.026956 | 0.551613 | 0.205395 |
| MmugDNA.11607.1.S1_at   | MmugDNA.11607.1 | 4.23  | 4.18  | 0.08 | 0.19 | 1.04  | 0.725774 | 0.810977 | 0.880526 | 0.890949 |
| MmugDNA.11608.1.S1_at   | MmugDNA.11608.1 | 3.44  | 3.46  | 0.54 | 0.07 | -1.01 | 0.466821 | 0.412575 | 0.740411 | 0.638941 |
| MmugDNA.11609.1.S1_at   | MmugDNA.11609.1 | 3.24  | 3.2   | 0.05 | 0.13 | 1.03  | 0.426974 | 0.574766 | 0.716003 | 0.746142 |
| MmugDNA.1161.1.S1_at    | MmugDNA.1161.1  | 3.66  | 3.71  | 0.1  | 0.13 | -1.04 | 0.263811 | 0.364957 | 0.609674 | 0.60517  |
| MmugDNA.11611.1.S1_at   | MmugDNA.11611.1 | 4.46  | 4.64  | 0.27 | 0.19 | -1.14 | 0.39471  | 0.193425 | 0.69601  | 0.468711 |
| MmugDNA.11612.1.S1_at   | MmugDNA.11612.1 | 3.5   | 3.54  | 0.12 | 0.44 | -1.03 | 0.887509 | 0.615866 | 0.954863 | 0.772353 |
| MmugDNA.11613.1.S1_at   | MmugDNA.11613.1 | 2.94  | 2.84  | 0.38 | 0.1  | 1.07  | 0.423939 | 0.511163 | 0.714199 | 0.705422 |
| MmugDNA.11615.1.S1_at   | MmugDNA.11615.1 | 3.59  | 3.81  | 1.34 | 0.22 | -1.17 | 0.622949 | 0.556423 | 0.82774  | 0.734507 |
| MmugDNA.11616.1.S1_at   | MmugDNA.11616.1 | 8.89  | 8.08  | 0.41 | 0.15 | 1.76  | 0.053663 | 0.045818 | 0.38074  | 0.258337 |
| MmugDNA.11617.1.S1_at   | MmugDNA.11617.1 | 10.5  | 10.56 | 0.07 | 0.05 | -1.05 | 0.250586 | 0.521379 | 0.600389 | 0.712376 |
| MmugDNA.11619.1.S1_at   | MmugDNA.11619.1 | 4.41  | 4.18  | 0.23 | 0.05 | 1.18  | 0.102782 | 0.03355  | 0.46254  | 0.226764 |
| MmugDNA.11620.1.S1_at   | MmugDNA.11620.1 | 6.16  | 6.41  | 0.09 | 0.19 | -1.19 | 0.065504 | 0.072407 | 0.404593 | 0.31528  |
| MmugDNA.11621.1.S1_at   | MmugDNA.11621.1 | 4.11  | 4.13  | 0.1  | 0.21 | -1.01 | 0.900698 | 0.825651 | 0.960386 | 0.899784 |
| MmugDNA.11628.1.S1_at   | MmugDNA.11628.1 | 7.39  | 7.58  | 0.08 | 0.09 | -1.14 | 0.027259 | 0.017504 | 0.307135 | 0.167516 |
| MmugDNA.11629.1.S1_at   | MmugDNA.11629.1 | 4.55  | 4.91  | 0.38 | 0.16 | -1.28 | 0.831081 | 0.527912 | 0.931637 | 0.716345 |
| MmugDNA.1163.1.S1_a_at  | MmugDNA.1163.1  | 8.73  | 8.57  | 0.31 | 0.04 | 1.12  | 0.982621 | 0.985806 | 0.99354  | 0.991942 |
| MmugDNA.1163.1.S1_at    | MmugDNA.1163.1  | 5.11  | 5.15  | 0.2  | 0.25 | -1.03 | 0.637661 | 0.829746 | 0.836256 | 0.902191 |
| MmugDNA.11632.1.S1_at   | MmugDNA.11632.1 | 6.97  | 7.02  | 0.65 | 0.82 | -1.03 | 0.967219 | 0.851876 | 0.987781 | 0.915799 |
| MmugDNA.11633.1.S1_at   | MmugDNA.11633.1 | 3.87  | 3.86  | 0.23 | 0.15 | 1     | 0.857106 | 0.774726 | 0.942171 | 0.868833 |
| MmugDNA.11634.1.S1_at   | MmugDNA.11634.1 | 9.15  | 8.73  | 0.21 | 0.32 | 1.34  | 0.097225 | 0.133825 | 0.456142 | 0.405819 |
| MmugDNA.11636.1.S1_at   | MmugDNA.11636.1 | 3.42  | 3.26  | 0.23 | 0.1  | 1.12  | 0.136713 | 0.185715 | 0.503852 | 0.46163  |
| MmugDNA.11638.1.S1_at   | MmugDNA.11638.1 | 5.1   | 4.58  | 0.26 | 0.33 | 1.43  | 0.318068 | 0.355751 | 0.64802  | 0.597864 |
| MmugDNA.1164.1.S1_at    | MmugDNA.1164.1  | 9.33  | 8.43  | 0.36 | 0.63 | 1.88  | 0.215482 | 0.291639 | 0.575924 | 0.552025 |
| MmugDNA.11640.1.S1_at   | MmugDNA.11640.1 | 5.79  | 5.57  | 0.29 | 0.13 | 1.17  | 0.194573 | 0.186762 | 0.558002 | 0.46257  |
| MmugDNA.11641.1.S1_s_at | MmugDNA.11641.1 | 8.66  | 8.7   | 0.22 | 0.23 | -1.03 | 0.174212 | 0.144144 | 0.537888 | 0.418024 |
| MmugDNA.11642.1.S1_at   | MmugDNA.11642.1 | 6.05  | 5.79  | 0.43 | 0.32 | 1.2   | 0.673017 | 0.3684   | 0.853341 | 0.607932 |
| MmugDNA.11643.1.S1_at   | MmugDNA.11643.1 | 12.42 | 12.38 | 0.08 | 0.45 | 1.03  | 0.762856 | 0.482021 | 0.900046 | 0.686939 |

|                         |                 |       |       |      |      |        |          |          |          |          |
|-------------------------|-----------------|-------|-------|------|------|--------|----------|----------|----------|----------|
| MmugDNA.11644.1.S1_at   | MmugDNA.11644.1 | 8.57  | 8.83  | 0.09 | 0.87 | -1.19  | 0.634172 | 0.2856   | 0.8343   | 0.547395 |
| MmugDNA.11645.1.S1_at   | MmugDNA.11645.1 | 7.45  | 6.81  | 0.34 | 0.21 | 1.56   | 0.207688 | 0.026505 | 0.569822 | 0.203897 |
| MmugDNA.11646.1.S1_at   | MmugDNA.11646.1 | 3.88  | 3.76  | 0.1  | 0.06 | 1.09   | 0.051581 | 0.125903 | 0.376072 | 0.396452 |
| MmugDNA.1165.1.S1_at    | MmugDNA.1165.1  | 6.34  | 6.55  | 0.12 | 0.41 | -1.16  | 0.360118 | 0.641506 | 0.674232 | 0.789578 |
| MmugDNA.11651.1.S1_at   | MmugDNA.11651.1 | 4.56  | 4.54  | 0.15 | 0.04 | 1.01   | 0.854132 | 0.705533 | 0.941079 | 0.829287 |
| MmugDNA.11656.1.S1_at   | MmugDNA.11656.1 | 8.78  | 8.66  | 0.66 | 0.22 | 1.09   | 0.342377 | 0.413645 | 0.663141 | 0.639688 |
| MmugDNA.11657.1.S1_at   | MmugDNA.11657.1 | 3.78  | 3.75  | 0.23 | 0.06 | 1.02   | 0.57803  | 0.673516 | 0.803619 | 0.809257 |
| MmugDNA.11658.1.S1_at   | MmugDNA.11658.1 | 11.17 | 11.15 | 0.03 | 0.23 | 1.02   | 0.579454 | 0.612448 | 0.804265 | 0.770057 |
| MmugDNA.11659.1.S1_s_at | MmugDNA.11659.1 | 12.27 | 11.48 | 0.04 | 0.71 | 1.72   | 0.113756 | 0.11534  | 0.477015 | 0.382394 |
| MmugDNA.1166.1.S1_at    | MmugDNA.1166.1  | 6.5   | 6.21  | 0.24 | 0.22 | 1.23   | 0.188608 | 0.27001  | 0.551601 | 0.535312 |
| MmugDNA.11663.1.S1_at   | MmugDNA.11663.1 | 3.33  | 3.22  | 0.19 | 0.2  | 1.08   | 0.586626 | 0.765249 | 0.808193 | 0.863535 |
| MmugDNA.11664.1.S1_at   | MmugDNA.11664.1 | 8.09  | 8.99  | 0.13 | 0.89 | -1.86  | 0.130932 | 0.050921 | 0.497248 | 0.270955 |
| MmugDNA.11665.1.S1_at   | MmugDNA.11665.1 | 9.19  | 9.59  | 0.14 | 0.22 | -1.33  | 0.048009 | 0.060162 | 0.367582 | 0.291882 |
| MmugDNA.11666.1.S1_at   | MmugDNA.11666.1 | 3.71  | 3.86  | 0.1  | 0.13 | -1.11  | 0.846404 | 0.936839 | 0.93835  | 0.964385 |
| MmugDNA.11667.1.S1_at   | MmugDNA.11667.1 | 6.49  | 6.52  | 0.29 | 0.3  | -1.02  | 0.779111 | 0.463469 | 0.907898 | 0.674446 |
| MmugDNA.11668.1.S1_at   | MmugDNA.11668.1 | 4.62  | 4.72  | 0.11 | 0.11 | -1.08  | 0.228903 | 0.297287 | 0.586256 | 0.556071 |
| MmugDNA.11669.1.S1_at   | MmugDNA.11669.1 | 4.47  | 4.62  | 0.43 | 0.2  | -1.11  | 0.65347  | 0.188938 | 0.844142 | 0.464854 |
| MmugDNA.11670.1.S1_at   | MmugDNA.11670.1 | 5.89  | 6.12  | 0.06 | 0.12 | -1.17  | 0.02726  | 0.01473  | 0.307135 | 0.154415 |
| MmugDNA.11671.1.S1_at   | MmugDNA.11671.1 | 4.74  | 5     | 0.03 | 0.13 | -1.2   | 0.026027 | 0.288573 | 0.30146  | 0.549827 |
| MmugDNA.11674.1.S1_at   | MmugDNA.11674.1 | 5.52  | 5     | 0.39 | 0.32 | 1.43   | 0.2417   | 0.211582 | 0.593941 | 0.485681 |
| MmugDNA.11675.1.S1_at   | MmugDNA.11675.1 | 3.99  | 4.98  | 0.28 | 0.91 | -1.98  | 0.184843 | 0.188657 | 0.548357 | 0.464569 |
| MmugDNA.11676.1.S1_at   | MmugDNA.11676.1 | 4.75  | 4.85  | 0.23 | 0.08 | -1.07  | 0.908618 | 0.770274 | 0.963816 | 0.866566 |
| MmugDNA.11677.1.S1_at   | MmugDNA.11677.1 | 5.24  | 5.36  | 0.21 | 0.45 | -1.09  | 0.242394 | 0.311822 | 0.594377 | 0.566807 |
| MmugDNA.11678.1.S1_at   | MmugDNA.11678.1 | 8.18  | 12.21 | 0.66 | 2.66 | -16.41 | 0.186131 | 0.090217 | 0.549657 | 0.344604 |
| MmugDNA.11679.1.S1_at   | MmugDNA.11679.1 | 3.87  | 3.78  | 0.24 | 0.16 | 1.07   | 0.166218 | 0.13762  | 0.529929 | 0.410568 |
| MmugDNA.1168.1.S1_at    | MmugDNA.1168.1  | 7.09  | 6.55  | 0.41 | 0.12 | 1.45   | 0.278251 | 0.193609 | 0.620425 | 0.468785 |
| MmugDNA.1168.1.S1_s_at  | MmugDNA.1168.1  | 6.24  | 6.21  | 0.81 | 0.09 | 1.02   | 0.79505  | 0.73727  | 0.914955 | 0.847869 |
| MmugDNA.11682.1.S1_at   | MmugDNA.11682.1 | 3.08  | 3.16  | 0.12 | 0.06 | -1.06  | 0.213387 | 0.022404 | 0.573596 | 0.187311 |
| MmugDNA.11683.1.S1_at   | MmugDNA.11683.1 | 5.46  | 5.66  | 0.26 | 0.43 | -1.15  | 0.203906 | 0.373999 | 0.566394 | 0.612612 |
| MmugDNA.11686.1.S1_at   | MmugDNA.11686.1 | 10.52 | 10.19 | 0.24 | 0.26 | 1.26   | 0.047304 | 0.022542 | 0.36587  | 0.187965 |
| MmugDNA.15822.1.S1_s_at | MmugDNA.15822.1 | 9.88  | 9.12  | 0.21 | 0.31 | 1.68   | 0.026399 | 0.01016  | 0.303006 | 0.1321   |
| MmugDNA.11687.1.S1_at   | MmugDNA.11687.1 | 3.92  | 3.9   | 0.25 | 0.15 | 1.02   | 0.6702   | 0.373195 | 0.852382 | 0.612036 |
| MmugDNA.11688.1.S1_at   | MmugDNA.11688.1 | 7.76  | 7.77  | 0.14 | 0.37 | -1.01  | 0.668978 | 0.001254 | 0.851986 | 0.055001 |
| MmugDNA.11689.1.S1_at   | MmugDNA.11689.1 | 4.25  | 4.27  | 0.56 | 0.32 | -1.02  | 0.545397 | 0.315929 | 0.784919 | 0.569358 |
| MmugDNA.1169.1.S1_at    | MmugDNA.1169.1  | 4.97  | 4.99  | 0.19 | 0.11 | -1.02  | 0.78156  | 0.259023 | 0.908868 | 0.526218 |
| MmugDNA.11690.1.S1_at   | MmugDNA.11690.1 | 3.56  | 3.66  | 0.13 | 0.12 | -1.07  | 0.500548 | 0.143538 | 0.759592 | 0.41747  |
| MmugDNA.11695.1.S1_at   | MmugDNA.11695.1 | 5.09  | 5.23  | 0.1  | 0.16 | -1.1   | 0.24126  | 0.259492 | 0.593801 | 0.526418 |
| MmugDNA.11696.1.S1_at   | MmugDNA.11696.1 | 5.11  | 5.42  | 0.16 | 0.34 | -1.24  | 0.131529 | 0.214033 | 0.498041 | 0.487633 |
| MmugDNA.11697.1.S1_at   | MmugDNA.11697.1 | 5.31  | 5.42  | 0.42 | 0.37 | -1.08  | 0.679315 | 0.693357 | 0.856536 | 0.821643 |
| MmugDNA.11698.1.S1_at   | MmugDNA.11698.1 | 6.88  | 6.91  | 0.03 | 0.04 | -1.02  | 0.755568 | 0.224718 | 0.896094 | 0.497614 |
| MmugDNA.117.1.S1_at     | MmugDNA.117.1   | 9.8   | 9.25  | 0.17 | 0.31 | 1.47   | 0.060087 | 0.078128 | 0.393081 | 0.324578 |

|                         |                 |       |       |      |      |       |          |          |          |          |
|-------------------------|-----------------|-------|-------|------|------|-------|----------|----------|----------|----------|
| MmugDNA.11700.1.S1_at   | MmugDNA.11700.1 | 10.59 | 10.64 | 0.08 | 0.28 | -1.03 | 0.897717 | 0.301003 | 0.95917  | 0.559198 |
| MmugDNA.11703.1.S1_at   | MmugDNA.11703.1 | 5.67  | 5.78  | 0.12 | 0.55 | -1.08 | 0.250511 | 0.300757 | 0.600389 | 0.558976 |
| MmugDNA.11704.1.S1_at   | MmugDNA.11704.1 | 4.31  | 5.42  | 1.15 | 0.32 | -2.16 | 0.533507 | 0.664154 | 0.77827  | 0.803247 |
| MmugDNA.11705.1.S1_at   | MmugDNA.11705.1 | 5.31  | 4.91  | 0.29 | 0.25 | 1.32  | 0.088165 | 0.305187 | 0.442584 | 0.562255 |
| MmugDNA.11706.1.S1_at   | MmugDNA.11706.1 | 4     | 4.1   | 0.23 | 0.1  | -1.07 | 0.562055 | 0.68147  | 0.795109 | 0.81409  |
| MmugDNA.11707.1.S1_at   | MmugDNA.11707.1 | 3.03  | 3.15  | 0.12 | 0.17 | -1.09 | 0.239906 | 0.235106 | 0.592837 | 0.50629  |
| MmugDNA.11709.1.S1_at   | MmugDNA.11709.1 | 3.58  | 3.45  | 0.47 | 0.51 | 1.1   | 0.723347 | 0.743287 | 0.879114 | 0.851281 |
| MmugDNA.1171.1.S1_at    | MmugDNA.1171.1  | 6.56  | 6.52  | 0.24 | 0.14 | 1.03  | 0.900357 | 0.106777 | 0.960269 | 0.369349 |
| MmugDNA.11710.1.S1_at   | MmugDNA.11710.1 | 7.1   | 8.33  | 0.5  | 0.86 | -2.34 | 0.313577 | 0.348482 | 0.645195 | 0.592593 |
| MmugDNA.11713.1.S1_at   | MmugDNA.11713.1 | 4.24  | 4.15  | 0.1  | 0.02 | 1.06  | 0.383373 | 0.095535 | 0.689296 | 0.352627 |
| MmugDNA.11714.1.S1_at   | MmugDNA.11714.1 | 9.02  | 10.06 | 0.3  | 0.55 | -2.05 | 0.036591 | 0.015988 | 0.340031 | 0.160458 |
| MmugDNA.11715.1.S1_at   | MmugDNA.11715.1 | 5.12  | 5.1   | 0.1  | 0.06 | 1.01  | 0.507264 | 0.70759  | 0.762788 | 0.830424 |
| MmugDNA.11717.1.S1_at   | MmugDNA.11717.1 | 3.19  | 3.25  | 0.03 | 0.15 | -1.04 | 0.753701 | 0.896073 | 0.894978 | 0.940608 |
| MmugDNA.11718.1.S1_at   | MmugDNA.11718.1 | 6.09  | 6.44  | 1.08 | 0.21 | -1.28 | 0.969846 | 0.577111 | 0.98846  | 0.74764  |
| MmugDNA.11719.1.S1_at   | MmugDNA.11719.1 | 4.58  | 4.65  | 0.12 | 0    | -1.05 | 0.964061 | 0.998275 | 0.986071 | 0.999091 |
| MmugDNA.1172.1.S1_at    | MmugDNA.1172.1  | 4.73  | 4.61  | 0.25 | 0.09 | 1.09  | 0.759525 | 0.935706 | 0.898442 | 0.963725 |
| MmugDNA.11721.1.S1_a_at | MmugDNA.11721.1 | 2.49  | 2.62  | 0.04 | 0.12 | -1.09 | 0.177098 | 0.298484 | 0.541073 | 0.557161 |
| MmugDNA.11722.1.S1_at   | MmugDNA.11722.1 | 11.11 | 10.23 | 0.11 | 0.37 | 1.84  | 0.007188 | 0.002084 | 0.205355 | 0.067486 |
| MmugDNA.11723.1.S1_at   | MmugDNA.11723.1 | 5.18  | 4.99  | 0.12 | 0.25 | 1.15  | 0.752473 | 0.930265 | 0.894361 | 0.960382 |
| MmugDNA.11724.1.S1_at   | MmugDNA.11724.1 | 8.18  | 7.76  | 0.21 | 0.42 | 1.34  | 0.151348 | 0.077789 | 0.516063 | 0.323933 |
| MmugDNA.11725.1.S1_at   | MmugDNA.11725.1 | 5.42  | 5     | 0.07 | 0.69 | 1.34  | 0.861197 | 0.958    | 0.944018 | 0.976273 |
| MmugDNA.11726.1.S1_at   | MmugDNA.11726.1 | 10.39 | 10.31 | 0.21 | 0.46 | 1.06  | 0.935324 | 0.948585 | 0.975003 | 0.970655 |
| MmugDNA.11727.1.S1_at   | MmugDNA.11727.1 | 3.59  | 3.32  | 0.23 | 0.08 | 1.2   | 0.151925 | 0.131973 | 0.516573 | 0.404024 |
| MmugDNA.1173.1.S1_at    | MmugDNA.1173.1  | 4.37  | 4.42  | 0.12 | 0.2  | -1.04 | 0.670284 | 0.720907 | 0.852382 | 0.838368 |
| MmugDNA.11730.1.S1_at   | MmugDNA.11730.1 | 7.08  | 6.6   | 1.63 | 1.95 | 1.39  | 0.78902  | 0.53881  | 0.912366 | 0.723368 |
| MmugDNA.11731.1.S1_at   | MmugDNA.11731.1 | 5.43  | 5.43  | 0.25 | 0.1  | 1     | 0.931311 | 0.990909 | 0.973425 | 0.994898 |
| MmugDNA.11732.1.S1_at   | MmugDNA.11732.1 | 5     | 4.26  | 0.43 | 0.14 | 1.68  | 0.024271 | 0.008743 | 0.294535 | 0.123975 |
| MmugDNA.11733.1.S1_at   | MmugDNA.11733.1 | 3.79  | 3.71  | 0.24 | 0.18 | 1.05  | 0.917738 | 0.178076 | 0.968032 | 0.454462 |
| MmugDNA.11734.1.S1_at   | MmugDNA.11734.1 | 3.71  | 3.89  | 0.12 | 0.45 | -1.14 | 0.22253  | 0.277664 | 0.580951 | 0.541636 |
| MmugDNA.11736.1.S1_at   | MmugDNA.11736.1 | 6.16  | 5.7   | 0.3  | 0.31 | 1.37  | 0.143971 | 0.073021 | 0.510636 | 0.316017 |
| MmugDNA.11737.1.S1_at   | MmugDNA.11737.1 | 5.04  | 4.27  | 0.8  | 0.46 | 1.7   | 0.12508  | 0.120301 | 0.491138 | 0.38925  |
| MmugDNA.11738.1.S1_at   | MmugDNA.11738.1 | 13.96 | 13.85 | 0.06 | 0.15 | 1.08  | 0.109763 | 0.094985 | 0.470963 | 0.352071 |
| MmugDNA.11739.1.S1_s_at | MmugDNA.11739.1 | 13.51 | 13.48 | 0.03 | 0.01 | 1.02  | 0.073572 | 0.199136 | 0.419023 | 0.473735 |
| MmugDNA.1174.1.S1_at    | MmugDNA.1174.1  | 6.18  | 6.14  | 0.04 | 0.04 | 1.03  | 0.113847 | 0.531124 | 0.477183 | 0.718416 |
| MmugDNA.11740.1.S1_at   | MmugDNA.11740.1 | 8.17  | 7.85  | 0.31 | 0.16 | 1.25  | 0.229353 | 0.137812 | 0.5865   | 0.41077  |
| MmugDNA.11742.1.S1_at   | MmugDNA.11742.1 | 4.53  | 3.57  | 0.48 | 0.09 | 1.95  | 0.065468 | 0.055264 | 0.404567 | 0.280809 |
| MmugDNA.11743.1.S1_at   | MmugDNA.11743.1 | 6.4   | 5.69  | 0.07 | 0.9  | 1.63  | 0.66708  | 0.86243  | 0.850778 | 0.921766 |
| MmugDNA.11744.1.S1_at   | MmugDNA.11744.1 | 4.99  | 4.55  | 0.37 | 0.29 | 1.36  | 0.171295 | 0.173216 | 0.535166 | 0.449779 |
| MmugDNA.11745.1.S1_at   | MmugDNA.11745.1 | 9.02  | 8.43  | 0.31 | 0.37 | 1.5   | 0.110345 | 0.079681 | 0.471863 | 0.326981 |
| MmugDNA.11747.1.S1_at   | MmugDNA.11747.1 | 11.41 | 10.4  | 0.22 | 0.27 | 2.01  | 0.005331 | 0.001123 | 0.191107 | 0.052924 |
| MmugDNA.11749.1.S1_at   | MmugDNA.11749.1 | 8.08  | 6.5   | 0.38 | 0.34 | 2.99  | 0.008019 | 0.0033   | 0.215137 | 0.082611 |

|                         |                 |       |       |      |      |       |          |          |          |          |
|-------------------------|-----------------|-------|-------|------|------|-------|----------|----------|----------|----------|
| MmugDNA.11750.1.S1_at   | MmugDNA.11750.1 | 4.71  | 4.88  | 0.08 | 0.17 | -1.13 | 0.442566 | 0.667484 | 0.72569  | 0.805333 |
| MmugDNA.11751.1.S1_at   | MmugDNA.11751.1 | 4.5   | 4.25  | 0.28 | 0.09 | 1.18  | 0.319855 | 0.351552 | 0.649205 | 0.595094 |
| MmugDNA.11752.1.S1_at   | MmugDNA.11752.1 | 10.05 | 9.05  | 0.08 | 0.39 | 1.99  | 0.006534 | 0.002997 | 0.199625 | 0.079958 |
| MmugDNA.11753.1.S1_at   | MmugDNA.11753.1 | 3.57  | 3.8   | 0.12 | 0.15 | -1.18 | 0.101358 | 0.12863  | 0.461313 | 0.400072 |
| MmugDNA.11757.1.S1_at   | MmugDNA.11757.1 | 3.09  | 2.99  | 0.2  | 0.05 | 1.07  | 0.149952 | 0.323328 | 0.514522 | 0.57443  |
| MmugDNA.1176.1.S1_at    | MmugDNA.1176.1  | 8.44  | 8.42  | 0.58 | 0.74 | 1.01  | 0.665628 | 0.812485 | 0.850023 | 0.891676 |
| MmugDNA.11760.1.S1_at   | MmugDNA.11760.1 | 5.41  | 5.41  | 0.02 | 0.11 | 1     | 0.87566  | 0.8501   | 0.950218 | 0.914709 |
| MmugDNA.11761.1.S1_at   | MmugDNA.11761.1 | 12.37 | 10.71 | 0.69 | 1.17 | 3.15  | 0.197464 | 0.137695 | 0.560449 | 0.410701 |
| MmugDNA.11762.1.S1_at   | MmugDNA.11762.1 | 5.35  | 5.53  | 0.27 | 0.15 | -1.13 | 0.787498 | 0.346232 | 0.911623 | 0.591201 |
| MmugDNA.11764.1.S1_at   | MmugDNA.11764.1 | 4.83  | 4.38  | 0.67 | 0.49 | 1.37  | 0.401801 | 0.361988 | 0.70103  | 0.602725 |
| MmugDNA.11766.1.S1_at   | MmugDNA.11766.1 | 6.32  | 6.06  | 0.03 | 0.08 | 1.2   | 0.004387 | 0.004212 | 0.183061 | 0.091368 |
| MmugDNA.11767.1.S1_at   | MmugDNA.11767.1 | 12.38 | 12.57 | 0.34 | 0.08 | -1.14 | 0.32628  | 0.09682  | 0.653184 | 0.354213 |
| MmugDNA.11768.1.S1_at   | MmugDNA.11768.1 | 4.28  | 4.4   | 0.14 | 0.22 | -1.09 | 0.626163 | 0.107112 | 0.829408 | 0.369808 |
| MmugDNA.11769.1.S1_at   | MmugDNA.11769.1 | 6.46  | 6.53  | 0.24 | 0.45 | -1.05 | 0.580391 | 0.09241  | 0.804571 | 0.348296 |
| MmugDNA.1177.1.S1_at    | MmugDNA.1177.1  | 5.59  | 5.62  | 0.2  | 0.06 | -1.02 | 0.807181 | 0.918509 | 0.920996 | 0.954287 |
| MmugDNA.11771.1.S1_at   | MmugDNA.11771.1 | 4.26  | 4.6   | 0.21 | 0.13 | -1.26 | 0.194063 | 0.286417 | 0.557718 | 0.547829 |
| MmugDNA.11772.1.S1_at   | MmugDNA.11772.1 | 5.88  | 5.97  | 0.58 | 0.51 | -1.06 | 0.934626 | 0.993608 | 0.974715 | 0.996218 |
| MmugDNA.11774.1.S1_at   | MmugDNA.11774.1 | 3.55  | 3.69  | 0.08 | 0.17 | -1.11 | 0.306904 | 0.248909 | 0.639788 | 0.517972 |
| MmugDNA.11775.1.S1_at   | MmugDNA.11775.1 | 7.26  | 6.47  | 0.57 | 0.32 | 1.73  | 0.32462  | 0.156005 | 0.65199  | 0.431431 |
| MmugDNA.11776.1.S1_at   | MmugDNA.11776.1 | 7.99  | 7.55  | 0.74 | 0.06 | 1.35  | 0.159438 | 0.106128 | 0.524333 | 0.368499 |
| MmugDNA.11776.1.S1_x_at | MmugDNA.11776.1 | 7.68  | 7.64  | 0.8  | 0.03 | 1.03  | 0.324412 | 0.339128 | 0.651941 | 0.585891 |
| MmugDNA.11777.1.S1_at   | MmugDNA.11777.1 | 9.58  | 9.05  | 0.41 | 0.41 | 1.44  | 0.184996 | 0.159863 | 0.548443 | 0.435986 |
| MmugDNA.11778.1.S1_at   | MmugDNA.11778.1 | 7.76  | 7.85  | 0.46 | 1.02 | -1.07 | 0.932106 | 0.373567 | 0.973733 | 0.612361 |
| MmugDNA.1178.1.S1_at    | MmugDNA.1178.1  | 4.81  | 5.17  | 0.14 | 0.86 | -1.29 | 0.171507 | 0.146935 | 0.535166 | 0.421008 |
| MmugDNA.11782.1.S1_s_at | MmugDNA.11782.1 | 4.42  | 4.27  | 0.1  | 0.13 | 1.11  | 0.115818 | 0.65892  | 0.479325 | 0.800473 |
| MmugDNA.11785.1.S1_at   | MmugDNA.11785.1 | 4.21  | 5.7   | 0.22 | 1.74 | -2.82 | 0.194919 | 0.194267 | 0.558503 | 0.469384 |
| MmugDNA.11786.1.S1_at   | MmugDNA.11786.1 | 8.34  | 9.13  | 1.41 | 0.37 | -1.72 | 0.468289 | 0.308286 | 0.741049 | 0.564425 |
| MmugDNA.11789.1.S1_at   | MmugDNA.11789.1 | 8.37  | 7.83  | 0.11 | 0.35 | 1.46  | 0.092839 | 0.096331 | 0.449857 | 0.35382  |
| MmugDNA.11790.1.S1_at   | MmugDNA.11790.1 | 4.9   | 4.94  | 0.08 | 0.24 | -1.03 | 0.535574 | 0.589555 | 0.77916  | 0.755724 |
| MmugDNA.11792.1.S1_at   | MmugDNA.11792.1 | 7.53  | 7.59  | 0.12 | 0.16 | -1.05 | 0.244598 | 0.355766 | 0.596278 | 0.597864 |
| MmugDNA.11794.1.S1_at   | MmugDNA.11794.1 | 4.58  | 4.77  | 0.12 | 0.3  | -1.14 | 0.282953 | 0.24909  | 0.623159 | 0.51821  |
| MmugDNA.11796.1.S1_at   | MmugDNA.11796.1 | 6.56  | 6.59  | 0.17 | 0.22 | -1.02 | 0.585567 | 0.289761 | 0.807608 | 0.550776 |
| MmugDNA.11798.1.S1_at   | MmugDNA.11798.1 | 5.34  | 5.18  | 0.08 | 0.15 | 1.12  | 0.204722 | 0.013021 | 0.567258 | 0.146821 |
| MmugDNA.118.1.S1_at     | MmugDNA.118.1   | 3.65  | 3.64  | 0.22 | 0.14 | 1.01  | 0.996497 | 0.589491 | 0.998565 | 0.755691 |
| MmugDNA.1180.1.S1_at    | MmugDNA.1180.1  | 5.18  | 4.68  | 0.32 | 0.28 | 1.41  | 0.057143 | 0.038546 | 0.387418 | 0.241322 |
| MmugDNA.11800.1.S1_at   | MmugDNA.11800.1 | 4.72  | 4.11  | 0.58 | 0.28 | 1.53  | 0.291783 | 0.387974 | 0.629048 | 0.62253  |
| MmugDNA.11802.1.S1_at   | MmugDNA.11802.1 | 5.15  | 4.67  | 0.55 | 0.23 | 1.39  | 0.267608 | 0.320955 | 0.612666 | 0.572948 |
| MmugDNA.11803.1.S1_at   | MmugDNA.11803.1 | 4.72  | 4.7   | 0.03 | 0.22 | 1.01  | 0.853814 | 0.636753 | 0.940936 | 0.78635  |
| MmugDNA.11804.1.S1_at   | MmugDNA.11804.1 | 10.95 | 10.93 | 0.05 | 0.38 | 1.01  | 0.990747 | 0.77525  | 0.996791 | 0.869162 |
| MmugDNA.11805.1.S1_at   | MmugDNA.11805.1 | 3.86  | 3.84  | 0.05 | 0    | 1.01  | 0.715201 | 0.817686 | 0.875005 | 0.894805 |
| MmugDNA.11806.1.S1_at   | MmugDNA.11806.1 | 3.57  | 3.41  | 0.23 | 0.02 | 1.12  | 0.286849 | 0.458393 | 0.625572 | 0.671165 |



|                         |                 |       |       |      |      |       |          |          |          |          |
|-------------------------|-----------------|-------|-------|------|------|-------|----------|----------|----------|----------|
| MmugDNA.11807.1.S1_at   | MmugDNA.11807.1 | 11.12 | 11.11 | 0.1  | 0.33 | 1.01  | 0.796293 | 0.377592 | 0.91548  | 0.61503  |
| MmugDNA.11807.1.S1_s_at | MmugDNA.11807.1 | 12.38 | 12.49 | 0.14 | 0.4  | -1.08 | 0.666597 | 0.142961 | 0.85048  | 0.416854 |
| MmugDNA.11808.1.S1_at   | MmugDNA.11808.1 | 8.99  | 9.04  | 0.28 | 0.29 | -1.03 | 0.50394  | 0.696907 | 0.761056 | 0.824002 |
| MmugDNA.1181.1.S1_at    | MmugDNA.1181.1  | 8.36  | 8.63  | 0.66 | 0.44 | -1.21 | 0.66384  | 0.782955 | 0.849156 | 0.87441  |
| MmugDNA.11810.1.S1_at   | MmugDNA.11810.1 | 10.13 | 9.57  | 0.28 | 0.23 | 1.48  | 0.283386 | 0.134068 | 0.623411 | 0.406276 |
| MmugDNA.11812.1.S1_x_at | MmugDNA.11812.1 | 12.65 | 12.34 | 0.41 | 0.2  | 1.24  | 0.143509 | 0.185569 | 0.510312 | 0.461566 |
| MmugDNA.11813.1.S1_at   | MmugDNA.11813.1 | 3.53  | 3.38  | 0.13 | 0.1  | 1.1   | 0.271631 | 0.347375 | 0.615767 | 0.591967 |
| MmugDNA.11815.1.S1_at   | MmugDNA.11815.1 | 4.71  | 4.76  | 0.15 | 0.15 | -1.03 | 0.631542 | 0.684917 | 0.83275  | 0.816234 |
| MmugDNA.11816.1.S1_at   | MmugDNA.11816.1 | 4.34  | 4.14  | 0.12 | 0.34 | 1.14  | 0.756309 | 0.282158 | 0.896424 | 0.544937 |
| MmugDNA.11819.1.S1_at   | MmugDNA.11819.1 | 10.96 | 10.68 | 0.21 | 0.63 | 1.22  | 0.426268 | 0.539019 | 0.715682 | 0.723468 |
| MmugDNA.1182.1.S1_at    | MmugDNA.1182.1  | 7.39  | 7.61  | 0.16 | 0.49 | -1.16 | 0.13644  | 0.117062 | 0.503566 | 0.384494 |
| MmugDNA.11821.1.S1_at   | MmugDNA.11821.1 | 7.03  | 7.11  | 0.41 | 0.95 | -1.06 | 0.582639 | 0.751795 | 0.80583  | 0.855696 |
| MmugDNA.11822.1.S1_at   | MmugDNA.11822.1 | 3.9   | 4.12  | 0.26 | 0.13 | -1.17 | 0.41309  | 0.552234 | 0.708313 | 0.731602 |
| MmugDNA.11823.1.S1_at   | MmugDNA.11823.1 | 4.13  | 4.15  | 0.22 | 0.12 | -1.01 | 0.51095  | 0.638711 | 0.765151 | 0.787808 |
| MmugDNA.11826.1.S1_at   | MmugDNA.11826.1 | 5.16  | 4.86  | 0.5  | 2.42 | 1.22  | 0.385764 | 0.600934 | 0.690905 | 0.762424 |
| MmugDNA.11827.1.S1_at   | MmugDNA.11827.1 | 4.46  | 4.64  | 0.11 | 0.2  | -1.14 | 0.3817   | 0.256751 | 0.688101 | 0.524607 |
| MmugDNA.11829.1.S1_at   | MmugDNA.11829.1 | 7.11  | 6.8   | 0.03 | 0.26 | 1.24  | 0.241178 | 0.295491 | 0.593763 | 0.554925 |
| MmugDNA.11830.1.S1_at   | MmugDNA.11830.1 | 8.15  | 7.64  | 0.25 | 0.24 | 1.42  | 0.066582 | 0.060475 | 0.406564 | 0.292553 |
| MmugDNA.11831.1.S1_at   | MmugDNA.11831.1 | 5.58  | 5.38  | 0.51 | 0.98 | 1.15  | 0.676702 | 0.236986 | 0.8552   | 0.507675 |
| MmugDNA.11832.1.S1_at   | MmugDNA.11832.1 | 6.26  | 5.67  | 1.07 | 0.25 | 1.5   | 0.437213 | 0.599456 | 0.722285 | 0.761455 |
| MmugDNA.11833.1.S1_at   | MmugDNA.11833.1 | 5.54  | 5.91  | 0.37 | 0.12 | -1.29 | 0.53308  | 0.640955 | 0.777969 | 0.789319 |
| MmugDNA.11834.1.S1_at   | MmugDNA.11834.1 | 8.86  | 8.15  | 0.12 | 0.29 | 1.63  | 0.045643 | 0.031058 | 0.361322 | 0.218115 |
| MmugDNA.11835.1.S1_at   | MmugDNA.11835.1 | 5.58  | 5.37  | 0    | 0.23 | 1.15  | 0.619747 | 0.844236 | 0.825762 | 0.911327 |
| MmugDNA.11836.1.S1_at   | MmugDNA.11836.1 | 7.3   | 7.31  | 0.18 | 0.01 | -1.01 | 0.723319 | 0.765435 | 0.879114 | 0.863671 |
| MmugDNA.11838.1.S1_at   | MmugDNA.11838.1 | 4.76  | 4.83  | 0.36 | 0.39 | -1.05 | 0.871265 | 0.947286 | 0.948463 | 0.970103 |
| MmugDNA.11839.1.S1_at   | MmugDNA.11839.1 | 3.58  | 3.14  | 0.19 | 0.27 | 1.36  | 0.249246 | 0.290797 | 0.6001   | 0.551399 |
| MmugDNA.11840.1.S1_at   | MmugDNA.11840.1 | 6.47  | 5.9   | 0.91 | 0.27 | 1.49  | 0.387666 | 0.441933 | 0.692111 | 0.66004  |
| MmugDNA.11841.1.S1_at   | MmugDNA.11841.1 | 4.35  | 3.75  | 0.22 | 0.13 | 1.52  | 0.025205 | 0.016354 | 0.298141 | 0.161943 |
| MmugDNA.11842.1.S1_at   | MmugDNA.11842.1 | 7.64  | 7.95  | 0.06 | 0.21 | -1.24 | 0.044221 | 0.180186 | 0.358276 | 0.456751 |
| MmugDNA.11844.1.S1_at   | MmugDNA.11844.1 | 6.39  | 5.59  | 0.32 | 0.07 | 1.74  | 0.006077 | 0.016276 | 0.195337 | 0.161661 |
| MmugDNA.11845.1.S1_at   | MmugDNA.11845.1 | 3.75  | 3.96  | 1.22 | 0.21 | -1.16 | 0.536505 | 0.557951 | 0.77949  | 0.735306 |
| MmugDNA.11847.1.S1_at   | MmugDNA.11847.1 | 3.43  | 3.25  | 0.29 | 0.1  | 1.14  | 0.236172 | 0.151467 | 0.590172 | 0.426214 |
| MmugDNA.11849.1.S1_at   | MmugDNA.11849.1 | 7.69  | 7.68  | 0.18 | 0.05 | 1.01  | 0.509096 | 0.643324 | 0.764172 | 0.79084  |
| MmugDNA.1185.1.S1_at    | MmugDNA.1185.1  | 5.6   | 6.08  | 0.14 | 0.2  | -1.39 | 0.034857 | 0.028448 | 0.333988 | 0.210466 |
| MmugDNA.11850.1.S1_at   | MmugDNA.11850.1 | 6.42  | 5.75  | 1.19 | 0.95 | 1.59  | 0.812876 | 0.947911 | 0.923949 | 0.970378 |
| MmugDNA.11851.1.S1_at   | MmugDNA.11851.1 | 5.78  | 5.38  | 0.8  | 0.38 | 1.32  | 0.235132 | 0.302768 | 0.589342 | 0.560307 |
| MmugDNA.11851.1.S1_x_at | MmugDNA.11851.1 | 6.06  | 5.88  | 0.78 | 0.32 | 1.13  | 0.175788 | 0.219526 | 0.539441 | 0.493168 |
| MmugDNA.11852.1.S1_at   | MmugDNA.11852.1 | 10.89 | 10.34 | 0.26 | 0.53 | 1.46  | 0.258499 | 0.27089  | 0.605715 | 0.536026 |
| MmugDNA.11854.1.S1_at   | MmugDNA.11854.1 | 3.14  | 3.14  | 0.1  | 0.2  | 1     | 0.876462 | 0.949936 | 0.950553 | 0.971436 |
| MmugDNA.11855.1.S1_at   | MmugDNA.11855.1 | 6.97  | 6.27  | 0.21 | 0.27 | 1.62  | 0.074298 | 0.083137 | 0.419963 | 0.332999 |
| MmugDNA.11856.1.S1_at   | MmugDNA.11856.1 | 3.34  | 3.75  | 0.7  | 0.93 | -1.32 | 0.634856 | 0.472394 | 0.834784 | 0.679986 |

|                         |                 |       |       |      |      |       |          |          |          |          |
|-------------------------|-----------------|-------|-------|------|------|-------|----------|----------|----------|----------|
| MmugDNA.11857.1.S1_at   | MmugDNA.11857.1 | 5.19  | 4.96  | 0.41 | 0.04 | 1.17  | 0.281765 | 0.203416 | 0.62238  | 0.477634 |
| MmugDNA.11859.1.S1_at   | MmugDNA.11859.1 | 10.25 | 10.26 | 0.24 | 0.13 | -1    | 0.748417 | 0.074747 | 0.892452 | 0.318471 |
| MmugDNA.1186.1.S1_at    | MmugDNA.1186.1  | 4.54  | 4.35  | 0.14 | 0.27 | 1.15  | 0.281191 | 0.366037 | 0.622129 | 0.605891 |
| MmugDNA.11860.1.S1_at   | MmugDNA.11860.1 | 4.01  | 4.08  | 0.07 | 0.12 | -1.05 | 0.50161  | 0.452337 | 0.760109 | 0.667046 |
| MmugDNA.11861.1.S1_at   | MmugDNA.11861.1 | 11.41 | 11.16 | 0.17 | 0.06 | 1.19  | 0.029192 | 0.030695 | 0.313575 | 0.217148 |
| MmugDNA.11862.1.S1_at   | MmugDNA.11862.1 | 7.22  | 7.47  | 0.23 | 0.52 | -1.19 | 0.737049 | 0.447548 | 0.886925 | 0.663579 |
| MmugDNA.11865.1.S1_at   | MmugDNA.11865.1 | 5.92  | 5.92  | 0.01 | 0.06 | 1     | 0.426019 | 0.297158 | 0.715482 | 0.556022 |
| MmugDNA.11866.1.S1_at   | MmugDNA.11866.1 | 5.67  | 5.66  | 0.21 | 0.28 | 1.01  | 0.963998 | 0.893218 | 0.986041 | 0.939141 |
| MmugDNA.11867.1.S1_at   | MmugDNA.11867.1 | 5.73  | 5.8   | 0.01 | 0.15 | -1.05 | 0.848535 | 0.78947  | 0.939211 | 0.87838  |
| MmugDNA.11869.1.S1_at   | MmugDNA.11869.1 | 10.58 | 11.32 | 0.14 | 0.53 | -1.67 | 0.145283 | 0.058822 | 0.511345 | 0.289228 |
| MmugDNA.1187.1.S1_at    | MmugDNA.1187.1  | 7.87  | 5.98  | 0.65 | 0.57 | 3.71  | 0.039946 | 0.0679   | 0.3483   | 0.306745 |
| MmugDNA.11870.1.S1_at   | MmugDNA.11870.1 | 4.21  | 3.73  | 0.41 | 0.53 | 1.4   | 0.327309 | 0.12769  | 0.653682 | 0.398581 |
| MmugDNA.11871.1.S1_at   | MmugDNA.11871.1 | 10.65 | 11.35 | 0.1  | 0.68 | -1.64 | 0.463652 | 0.462831 | 0.738895 | 0.674149 |
| MmugDNA.11872.1.S1_at   | MmugDNA.11872.1 | 7.33  | 7.87  | 0.7  | 0.64 | -1.45 | 0.406914 | 0.530497 | 0.704025 | 0.718028 |
| MmugDNA.11874.1.S1_at   | MmugDNA.11874.1 | 4.76  | 4.69  | 0.2  | 0.71 | 1.05  | 0.880988 | 0.511961 | 0.952105 | 0.705897 |
| MmugDNA.11875.1.S1_at   | MmugDNA.11875.1 | 4.94  | 4.84  | 0.2  | 0.06 | 1.07  | 0.425229 | 0.609436 | 0.715027 | 0.767768 |
| MmugDNA.11876.1.S1_at   | MmugDNA.11876.1 | 7.18  | 6.48  | 0.42 | 0.27 | 1.63  | 0.358503 | 0.436815 | 0.673252 | 0.65629  |
| MmugDNA.11877.1.S1_at   | MmugDNA.11877.1 | 7.9   | 7.62  | 0.23 | 0.06 | 1.22  | 0.105378 | 0.066531 | 0.46602  | 0.303705 |
| MmugDNA.11878.1.S1_at   | MmugDNA.11878.1 | 6.87  | 6.69  | 0.3  | 0.24 | 1.14  | 0.226903 | 0.1571   | 0.584827 | 0.432579 |
| MmugDNA.1188.1.S1_at    | MmugDNA.1188.1  | 5.93  | 5.89  | 1.74 | 0.59 | 1.03  | 0.294458 | 0.443338 | 0.631245 | 0.661168 |
| MmugDNA.11880.1.S1_at   | MmugDNA.11880.1 | 4.9   | 5.48  | 0.24 | 0.39 | -1.5  | 0.275667 | 0.313551 | 0.617878 | 0.56796  |
| MmugDNA.11881.1.S1_at   | MmugDNA.11881.1 | 6.95  | 7.23  | 0.03 | 0.08 | -1.21 | 0.006566 | 0.012321 | 0.199625 | 0.143659 |
| MmugDNA.11882.1.S1_at   | MmugDNA.11882.1 | 7.08  | 7.34  | 0.21 | 0.07 | -1.2  | 0.151521 | 0.180119 | 0.516168 | 0.456712 |
| MmugDNA.11883.1.S1_at   | MmugDNA.11883.1 | 5.94  | 5.9   | 0.05 | 0.04 | 1.02  | 0.647099 | 0.001425 | 0.841216 | 0.057604 |
| MmugDNA.11885.1.S1_at   | MmugDNA.11885.1 | 8.79  | 9.55  | 0.6  | 1.02 | -1.69 | 0.318168 | 0.384805 | 0.648093 | 0.620432 |
| MmugDNA.11887.1.S1_at   | MmugDNA.11887.1 | 5.88  | 6.14  | 0.47 | 0.16 | -1.2  | 0.619019 | 0.594645 | 0.825395 | 0.758623 |
| MmugDNA.11888.1.S1_at   | MmugDNA.11888.1 | 6.89  | 6.42  | 0.54 | 0.14 | 1.39  | 0.152083 | 0.158508 | 0.516832 | 0.434442 |
| MmugDNA.1189.1.S1_at    | MmugDNA.1189.1  | 7.29  | 6.63  | 0.78 | 1.45 | 1.58  | 0.990539 | 0.747387 | 0.996696 | 0.853149 |
| MmugDNA.11892.1.S1_at   | MmugDNA.11892.1 | 7.33  | 7.23  | 0.5  | 0.1  | 1.07  | 0.425878 | 0.502127 | 0.715367 | 0.70006  |
| MmugDNA.11894.1.S1_at   | MmugDNA.11894.1 | 3.38  | 3.14  | 0.27 | 0.05 | 1.18  | 0.132408 | 0.21666  | 0.498629 | 0.490307 |
| MmugDNA.11897.1.S1_at   | MmugDNA.11897.1 | 4.38  | 5.32  | 0.28 | 0.26 | -1.91 | 0.013356 | 0.006118 | 0.246471 | 0.106503 |
| MmugDNA.11899.1.S1_at   | MmugDNA.11899.1 | 10.17 | 10.6  | 0.03 | 0.51 | -1.35 | 0.466451 | 0.069565 | 0.740215 | 0.309848 |
| MmugDNA.1190.1.S1_at    | MmugDNA.1190.1  | 5.09  | 4.76  | 0.58 | 0.12 | 1.26  | 0.35925  | 0.513373 | 0.673869 | 0.706881 |
| MmugDNA.11900.1.S1_at   | MmugDNA.11900.1 | 7.7   | 6.39  | 0.48 | 1.15 | 2.47  | 0.12811  | 0.134913 | 0.494307 | 0.406878 |
| MmugDNA.11901.1.S1_at   | MmugDNA.11901.1 | 12.45 | 12.07 | 0.12 | 0.18 | 1.31  | 0.092559 | 0.047279 | 0.449243 | 0.262158 |
| MmugDNA.11902.1.S1_at   | MmugDNA.11902.1 | 6.57  | 6.74  | 0.15 | 0.09 | -1.13 | 0.295343 | 0.059462 | 0.631605 | 0.290548 |
| MmugDNA.11903.1.S1_at   | MmugDNA.11903.1 | 9.65  | 9.56  | 0.43 | 1.54 | 1.07  | 0.255317 | 0.341856 | 0.603158 | 0.587944 |
| MmugDNA.11904.1.S1_at   | MmugDNA.11904.1 | 4.76  | 4.76  | 0.23 | 0.1  | 1     | 0.731726 | 0.835078 | 0.884008 | 0.905549 |
| MmugDNA.11905.1.S1_at   | MmugDNA.11905.1 | 5.21  | 5.44  | 0.91 | 0.22 | -1.17 | 0.479679 | 0.630457 | 0.747778 | 0.782237 |
| MmugDNA.11906.1.S1_at   | MmugDNA.11906.1 | 6.02  | 5.84  | 0.13 | 0.03 | 1.13  | 0.336317 | 0.630814 | 0.659402 | 0.78245  |
| MmugDNA.11907.1.S1_s_at | MmugDNA.11907.1 | 9.12  | 8.16  | 1.06 | 1.06 | 1.94  | 0.333498 | 0.33615  | 0.657597 | 0.583675 |

|                         |                 |       |       |      |      |       |          |          |          |          |
|-------------------------|-----------------|-------|-------|------|------|-------|----------|----------|----------|----------|
| MmugDNA.11908.1.S1_s_at | MmugDNA.11908.1 | 12.51 | 12.59 | 0.1  | 0.01 | -1.06 | 0.068077 | 0.13097  | 0.409262 | 0.403037 |
| MmugDNA.11909.1.S1_s_at | MmugDNA.11909.1 | 9.17  | 9.95  | 0.11 | 0.23 | -1.71 | 0.004278 | 0.001341 | 0.18216  | 0.056396 |
| MmugDNA.1191.1.S1_at    | MmugDNA.1191.1  | 4.56  | 4.64  | 0.12 | 0.45 | -1.06 | 0.787937 | 0.295958 | 0.911712 | 0.555249 |
| MmugDNA.11912.1.S1_at   | MmugDNA.11912.1 | 6.06  | 6.17  | 0.09 | 0.07 | -1.08 | 0.114532 | 0.375112 | 0.477887 | 0.613186 |
| MmugDNA.11914.1.S1_at   | MmugDNA.11914.1 | 10.68 | 10.88 | 0.18 | 0.16 | -1.15 | 0.215785 | 0.252437 | 0.575954 | 0.521061 |
| MmugDNA.11919.1.S1_at   | MmugDNA.11919.1 | 5.37  | 5.36  | 0.24 | 0.14 | 1.01  | 0.983247 | 0.268268 | 0.993951 | 0.533981 |
| MmugDNA.1192.1.S1_at    | MmugDNA.1192.1  | 4.16  | 4.12  | 0.08 | 0.04 | 1.03  | 0.158621 | 0.656962 | 0.523699 | 0.799401 |
| MmugDNA.11920.1.S1_at   | MmugDNA.11920.1 | 5.95  | 5.94  | 0.28 | 0.14 | 1.01  | 0.276539 | 0.524371 | 0.618718 | 0.714309 |
| MmugDNA.11921.1.S1_at   | MmugDNA.11921.1 | 9.02  | 8.51  | 0.2  | 0.26 | 1.43  | 0.036656 | 0.031739 | 0.340048 | 0.22057  |
| MmugDNA.11922.1.S1_at   | MmugDNA.11922.1 | 3.17  | 4.91  | 0.09 | 0.33 | -3.35 | 0.000822 | 0.00007  | 0.136958 | 0.025812 |
| MmugDNA.11923.1.S1_at   | MmugDNA.11923.1 | 9.89  | 9.43  | 0.05 | 0.28 | 1.38  | 0.043099 | 0.021259 | 0.356342 | 0.182504 |
| MmugDNA.11924.1.S1_at   | MmugDNA.11924.1 | 3.28  | 3.13  | 0.3  | 0.04 | 1.1   | 0.58206  | 0.311174 | 0.805513 | 0.566215 |
| MmugDNA.11925.1.S1_at   | MmugDNA.11925.1 | 13.62 | 13.51 | 0.08 | 0.13 | 1.08  | 0.060498 | 0.067932 | 0.393715 | 0.306839 |
| MmugDNA.11926.1.S1_at   | MmugDNA.11926.1 | 5.63  | 6.57  | 0.21 | 0.16 | -1.92 | 0.003778 | 0.000332 | 0.179914 | 0.036036 |
| MmugDNA.11927.1.S1_at   | MmugDNA.11927.1 | 6     | 5.79  | 0.35 | 0.06 | 1.16  | 0.153082 | 0.122723 | 0.517474 | 0.392719 |
| MmugDNA.11928.1.S1_at   | MmugDNA.11928.1 | 3.78  | 3.98  | 0.23 | 0.18 | -1.15 | 0.66346  | 0.663357 | 0.84899  | 0.802976 |
| MmugDNA.11929.1.S1_at   | MmugDNA.11929.1 | 4.79  | 6.27  | 0.58 | 0.83 | -2.79 | 0.10952  | 0.123319 | 0.470811 | 0.393386 |
| MmugDNA.1193.1.S1_at    | MmugDNA.1193.1  | 6.17  | 6.06  | 0.05 | 0.12 | 1.08  | 0.166046 | 0.691857 | 0.529882 | 0.820749 |
| MmugDNA.11930.1.S1_at   | MmugDNA.11930.1 | 5.17  | 3.86  | 1.1  | 0.4  | 2.47  | 0.152157 | 0.162989 | 0.51689  | 0.439145 |
| MmugDNA.11931.1.S1_at   | MmugDNA.11931.1 | 4.7   | 5.12  | 0.13 | 0.49 | -1.33 | 0.131669 | 0.176959 | 0.498041 | 0.453374 |
| MmugDNA.11932.1.S1_at   | MmugDNA.11932.1 | 5.77  | 5.18  | 0.62 | 0.46 | 1.51  | 0.3754   | 0.398727 | 0.684712 | 0.629464 |
| MmugDNA.11933.1.S1_at   | MmugDNA.11933.1 | 6.72  | 6.8   | 0.31 | 0.16 | -1.05 | 0.624406 | 0.563691 | 0.828251 | 0.7388   |
| MmugDNA.11935.1.S1_x_at | MmugDNA.11935.1 | 7.03  | 6.67  | 0.32 | 0.24 | 1.28  | 0.155748 | 0.247054 | 0.520384 | 0.516247 |
| MmugDNA.11936.1.S1_at   | MmugDNA.11936.1 | 6.91  | 7.94  | 0.88 | 0.34 | -2.05 | 0.158103 | 0.142841 | 0.522944 | 0.416786 |
| MmugDNA.11938.1.S1_at   | MmugDNA.11938.1 | 5.82  | 5.92  | 0.05 | 0.03 | -1.07 | 0.07273  | 0.298853 | 0.41769  | 0.557455 |
| MmugDNA.11939.1.S1_at   | MmugDNA.11939.1 | 5.38  | 5     | 0.49 | 0.36 | 1.3   | 0.270639 | 0.245769 | 0.614969 | 0.515519 |
| MmugDNA.1194.1.S1_at    | MmugDNA.1194.1  | 3.33  | 3.32  | 0.06 | 0.2  | 1.01  | 0.250728 | 0.501622 | 0.600389 | 0.699764 |
| MmugDNA.11940.1.S1_at   | MmugDNA.11940.1 | 10.33 | 9.92  | 0.15 | 0.28 | 1.33  | 0.042581 | 0.032866 | 0.355272 | 0.224478 |
| MmugDNA.11941.1.S1_at   | MmugDNA.11941.1 | 7.28  | 7.32  | 0.12 | 0.16 | -1.02 | 0.935355 | 0.870608 | 0.975008 | 0.926446 |
| MmugDNA.11942.1.S1_at   | MmugDNA.11942.1 | 5.68  | 5.86  | 0.11 | 0.13 | -1.14 | 0.067423 | 0.038498 | 0.407723 | 0.241139 |
| MmugDNA.11943.1.S1_at   | MmugDNA.11943.1 | 5.94  | 5.79  | 0.24 | 0.13 | 1.11  | 0.320448 | 0.277269 | 0.649472 | 0.541239 |
| MmugDNA.11944.1.S1_at   | MmugDNA.11944.1 | 10.23 | 11.14 | 0.18 | 0.1  | -1.89 | 0.001613 | 0.000845 | 0.152612 | 0.047038 |
| MmugDNA.11946.1.S1_at   | MmugDNA.11946.1 | 4.31  | 4.26  | 0.16 | 0.05 | 1.03  | 0.219151 | 0.293977 | 0.578562 | 0.553909 |
| MmugDNA.11947.1.S1_at   | MmugDNA.11947.1 | 5.44  | 5.62  | 0.2  | 0.02 | -1.13 | 0.660164 | 0.811407 | 0.847439 | 0.891158 |
| MmugDNA.11948.1.S1_at   | MmugDNA.11948.1 | 4.45  | 4.44  | 0.16 | 0.23 | 1.01  | 0.615215 | 0.826042 | 0.823342 | 0.900052 |
| MmugDNA.11949.1.S1_at   | MmugDNA.11949.1 | 3.16  | 3.15  | 0.11 | 0.2  | 1.01  | 0.391934 | 0.653269 | 0.694373 | 0.797337 |
| MmugDNA.1195.1.S1_at    | MmugDNA.1195.1  | 6.56  | 6.1   | 0.34 | 0    | 1.38  | 0.230903 | 0.244224 | 0.587369 | 0.514167 |
| MmugDNA.11950.1.S1_at   | MmugDNA.11950.1 | 6.45  | 6.54  | 0.18 | 0.08 | -1.07 | 0.878686 | 0.106738 | 0.95133  | 0.369337 |
| MmugDNA.11951.1.S1_at   | MmugDNA.11951.1 | 5.65  | 5.76  | 0.06 | 0.19 | -1.08 | 0.548821 | 0.132198 | 0.786975 | 0.404274 |
| MmugDNA.11952.1.S1_at   | MmugDNA.11952.1 | 10.14 | 10.23 | 0.28 | 0.69 | -1.07 | 0.909089 | 0.878788 | 0.963975 | 0.930855 |
| MmugDNA.11953.1.S1_at   | MmugDNA.11953.1 | 12    | 12.79 | 0.18 | 0.22 | -1.72 | 0.015526 | 0.012655 | 0.259093 | 0.145088 |

|                         |                 |       |       |      |      |       |          |          |          |          |
|-------------------------|-----------------|-------|-------|------|------|-------|----------|----------|----------|----------|
| MmugDNA.11954.1.S1_at   | MmugDNA.11954.1 | 4.09  | 4.42  | 0.32 | 0.1  | -1.26 | 0.462528 | 0.675256 | 0.738252 | 0.81026  |
| MmugDNA.11955.1.S1_at   | MmugDNA.11955.1 | 7.61  | 7.75  | 0.11 | 0.05 | -1.1  | 0.165943 | 0.166499 | 0.529851 | 0.442933 |
| MmugDNA.11956.1.S1_at   | MmugDNA.11956.1 | 3.5   | 3.49  | 0.3  | 0.13 | 1.01  | 0.665507 | 0.845699 | 0.850023 | 0.912219 |
| MmugDNA.11957.1.S1_at   | MmugDNA.11957.1 | 9.5   | 10.2  | 0.3  | 0.09 | -1.63 | 0.019116 | 0.01349  | 0.273018 | 0.148728 |
| MmugDNA.11958.1.S1_at   | MmugDNA.11958.1 | 7.65  | 7.81  | 0.08 | 0.06 | -1.12 | 0.088052 | 0.111062 | 0.442394 | 0.375588 |
| MmugDNA.11959.1.S1_at   | MmugDNA.11959.1 | 6.28  | 6.36  | 0.3  | 0.13 | -1.06 | 0.616634 | 0.787101 | 0.824231 | 0.876832 |
| MmugDNA.1196.1.S1_s_at  | MmugDNA.1196.1  | 13.35 | 13.41 | 0.13 | 0.11 | -1.04 | 0.81343  | 0.685742 | 0.924267 | 0.816612 |
| MmugDNA.11960.1.S1_at   | MmugDNA.11960.1 | 5.41  | 5.09  | 0.51 | 0.59 | 1.25  | 0.334047 | 0.454083 | 0.658024 | 0.668398 |
| MmugDNA.11961.1.S1_at   | MmugDNA.11961.1 | 3.32  | 3.42  | 0.5  | 0.25 | -1.07 | 0.673774 | 0.7979   | 0.853765 | 0.88363  |
| MmugDNA.11962.1.S1_at   | MmugDNA.11962.1 | 4.04  | 3.95  | 0.2  | 0.12 | 1.06  | 0.619658 | 0.805701 | 0.825711 | 0.888324 |
| MmugDNA.11964.1.S1_at   | MmugDNA.11964.1 | 4.53  | 4.34  | 0.09 | 0.34 | 1.14  | 0.214791 | 0.445308 | 0.575346 | 0.662338 |
| MmugDNA.11965.1.S1_x_at | MmugDNA.11965.1 | 10.63 | 10.43 | 0.42 | 0.27 | 1.15  | 0.247919 | 0.346314 | 0.599052 | 0.59124  |
| MmugDNA.11967.1.S1_at   | MmugDNA.11967.1 | 7.88  | 7.69  | 0.75 | 0.3  | 1.14  | 0.456028 | 0.623935 | 0.734235 | 0.77828  |
| MmugDNA.11968.1.S1_at   | MmugDNA.11968.1 | 5.45  | 5.08  | 0.49 | 0.5  | 1.3   | 0.749146 | 0.610302 | 0.892627 | 0.768529 |
| MmugDNA.11969.1.S1_at   | MmugDNA.11969.1 | 7.23  | 7.24  | 0.17 | 0.24 | -1.01 | 0.216124 | 0.308185 | 0.575954 | 0.564324 |
| MmugDNA.1197.1.S1_at    | MmugDNA.1197.1  | 7.65  | 9.51  | 0.3  | 0.76 | -3.64 | 0.015981 | 0.009091 | 0.262097 | 0.125944 |
| MmugDNA.11971.1.S1_at   | MmugDNA.11971.1 | 3.49  | 3.58  | 0.31 | 0.14 | -1.06 | 0.695178 | 0.760785 | 0.864821 | 0.861028 |
| MmugDNA.11972.1.S1_at   | MmugDNA.11972.1 | 7.57  | 7.67  | 0.22 | 0.04 | -1.08 | 0.357571 | 0.462893 | 0.672471 | 0.674149 |
| MmugDNA.11973.1.S1_at   | MmugDNA.11973.1 | 3.96  | 4.02  | 0.28 | 0.11 | -1.04 | 0.674814 | 0.855564 | 0.854234 | 0.917669 |
| MmugDNA.11975.1.S1_at   | MmugDNA.11975.1 | 9.43  | 7.81  | 0.05 | 0.34 | 3.07  | 0.001188 | 0.000433 | 0.145267 | 0.038359 |
| MmugDNA.11976.1.S1_s_at | MmugDNA.11976.1 | 6.81  | 7.5   | 0.22 | 0.53 | -1.62 | 0.19566  | 0.220988 | 0.558901 | 0.494389 |
| MmugDNA.11977.1.S1_at   | MmugDNA.11977.1 | 5.41  | 5.38  | 0.13 | 0.05 | 1.02  | 0.487789 | 0.021245 | 0.752378 | 0.182465 |
| MmugDNA.11980.1.S1_at   | MmugDNA.11980.1 | 5.66  | 5.71  | 0.77 | 0.51 | -1.03 | 0.911981 | 0.91848  | 0.965176 | 0.954275 |
| MmugDNA.11981.1.S1_x_at | MmugDNA.11981.1 | 10.74 | 10.54 | 0.91 | 0.14 | 1.15  | 0.296135 | 0.394899 | 0.632176 | 0.627216 |
| MmugDNA.11982.1.S1_at   | MmugDNA.11982.1 | 3.39  | 3.46  | 0.02 | 0.02 | -1.05 | 0.030312 | 0.000472 | 0.317878 | 0.038572 |
| MmugDNA.11983.1.S1_s_at | MmugDNA.11983.1 | 6.05  | 7.02  | 0.66 | 1.27 | -1.96 | 0.391468 | 0.42703  | 0.694099 | 0.649087 |
| MmugDNA.11984.1.S1_at   | MmugDNA.11984.1 | 3.69  | 3.53  | 0.09 | 0.2  | 1.12  | 0.662609 | 0.44304  | 0.84873  | 0.660947 |
| MmugDNA.11986.1.S1_at   | MmugDNA.11986.1 | 4.53  | 4.4   | 0.11 | 0.31 | 1.1   | 0.881171 | 0.97816  | 0.952244 | 0.988066 |
| MmugDNA.11987.1.S1_at   | MmugDNA.11987.1 | 8.78  | 8.93  | 1.38 | 0.57 | -1.11 | 0.924269 | 0.752265 | 0.970608 | 0.855787 |
| MmugDNA.11988.1.S1_at   | MmugDNA.11988.1 | 5.09  | 5.23  | 0.07 | 0.08 | -1.11 | 0.161874 | 0.349634 | 0.526573 | 0.593541 |
| MmugDNA.1199.1.S1_at    | MmugDNA.1199.1  | 5.63  | 5.64  | 0.13 | 0.1  | -1    | 0.558575 | 0.754274 | 0.793302 | 0.857004 |
| MmugDNA.11990.1.S1_at   | MmugDNA.11990.1 | 9.93  | 9.67  | 0.33 | 1.28 | 1.19  | 0.241387 | 0.300392 | 0.593941 | 0.55871  |
| MmugDNA.11991.1.S1_at   | MmugDNA.11991.1 | 6.69  | 8.15  | 0.5  | 0.21 | -2.76 | 0.016208 | 0.011447 | 0.263449 | 0.13846  |
| MmugDNA.11992.1.S1_at   | MmugDNA.11992.1 | 11.11 | 11.1  | 0.28 | 0.08 | 1.01  | 0.371637 | 0.356834 | 0.682352 | 0.59863  |
| MmugDNA.11994.1.S1_at   | MmugDNA.11994.1 | 3.08  | 3.25  | 0.36 | 0.17 | -1.13 | 0.790534 | 0.706093 | 0.913071 | 0.829633 |
| MmugDNA.11995.1.S1_at   | MmugDNA.11995.1 | 3.36  | 3.45  | 0.15 | 0.16 | -1.06 | 0.374421 | 0.575289 | 0.683641 | 0.74643  |
| MmugDNA.11996.1.S1_at   | MmugDNA.11996.1 | 6.42  | 7     | 0.14 | 0.2  | -1.5  | 0.049499 | 0.04784  | 0.371515 | 0.263679 |
| MmugDNA.11996.1.S1_s_at | MmugDNA.11996.1 | 5.08  | 5.23  | 0.11 | 0.2  | -1.11 | 0.0842   | 0.085118 | 0.43691  | 0.336936 |
| MmugDNA.11997.1.S1_at   | MmugDNA.11997.1 | 9.07  | 8.64  | 0.6  | 0.55 | 1.35  | 0.6879   | 0.855979 | 0.860812 | 0.917783 |
| MmugDNA.11999.1.S1_at   | MmugDNA.11999.1 | 3.84  | 4.04  | 0.05 | 0.12 | -1.15 | 0.060791 | 0.094172 | 0.394325 | 0.350865 |
| MmugDNA.12.1.S1_at      | MmugDNA.12.1    | 4.32  | 4.34  | 0.1  | 0.21 | -1.01 | 0.437863 | 0.647072 | 0.722586 | 0.793279 |

|                         |                 |       |       |      |      |        |          |          |          |          |
|-------------------------|-----------------|-------|-------|------|------|--------|----------|----------|----------|----------|
| MmugDNA.120.1.S1_at     | MmugDNA.120.1   | 7.19  | 7.38  | 0.27 | 0.14 | -1.14  | 0.564476 | 0.843302 | 0.796568 | 0.910767 |
| MmugDNA.1200.1.S1_at    | MmugDNA.1200.1  | 3.33  | 3.3   | 0.06 | 0.13 | 1.02   | 0.654643 | 0.539435 | 0.844665 | 0.723763 |
| MmugDNA.12000.1.S1_at   | MmugDNA.12000.1 | 5.58  | 5.89  | 0.22 | 0.17 | -1.24  | 0.622328 | 0.118358 | 0.827345 | 0.386398 |
| MmugDNA.12001.1.S1_at   | MmugDNA.12001.1 | 4.22  | 4.9   | 0.86 | 0.25 | -1.6   | 0.731902 | 0.84104  | 0.884095 | 0.909421 |
| MmugDNA.12002.1.S1_at   | MmugDNA.12002.1 | 9.07  | 9.44  | 0.3  | 0.93 | -1.29  | 0.813696 | 0.565985 | 0.924368 | 0.740174 |
| MmugDNA.12004.1.S1_at   | MmugDNA.12004.1 | 5.46  | 5.44  | 0.25 | 0.16 | 1.01   | 0.579982 | 0.606922 | 0.804451 | 0.766134 |
| MmugDNA.12005.1.S1_at   | MmugDNA.12005.1 | 3.97  | 3.8   | 0.23 | 0.04 | 1.12   | 0.810781 | 0.85033  | 0.922872 | 0.914874 |
| MmugDNA.12006.1.S1_at   | MmugDNA.12006.1 | 7.98  | 7.55  | 0.07 | 0.23 | 1.34   | 0.105125 | 0.1083   | 0.46558  | 0.371557 |
| MmugDNA.12009.1.S1_at   | MmugDNA.12009.1 | 3.01  | 3.2   | 0.15 | 0.1  | -1.14  | 0.142206 | 0.279813 | 0.509437 | 0.543276 |
| MmugDNA.12010.1.S1_at   | MmugDNA.12010.1 | 4.74  | 4.77  | 0.28 | 0.05 | -1.02  | 0.861586 | 0.988921 | 0.94421  | 0.993666 |
| MmugDNA.25123.1.S1_s_at | MmugDNA.25123.1 | 4.12  | 8.01  | 1.43 | 2.57 | -14.86 | 0.222601 | 0.273253 | 0.581039 | 0.537788 |
| MmugDNA.12012.1.S1_at   | MmugDNA.12012.1 | 3.33  | 3.29  | 0.03 | 0.04 | 1.03   | 0.11872  | 0.387157 | 0.483051 | 0.621935 |
| MmugDNA.12014.1.S1_at   | MmugDNA.12014.1 | 4.41  | 4.44  | 0    | 0.03 | -1.02  | 0.14953  | 0.807854 | 0.514055 | 0.8894   |
| MmugDNA.12015.1.S1_at   | MmugDNA.12015.1 | 4.03  | 3.93  | 0.31 | 0.2  | 1.07   | 0.697405 | 0.795362 | 0.865678 | 0.882132 |
| MmugDNA.12017.1.S1_at   | MmugDNA.12017.1 | 8.06  | 7.9   | 0.35 | 1.08 | 1.12   | 0.614562 | 0.806366 | 0.823236 | 0.888642 |
| MmugDNA.12018.1.S1_at   | MmugDNA.12018.1 | 4.46  | 4.9   | 0.19 | 0.19 | -1.36  | 0.086777 | 0.059045 | 0.440475 | 0.289904 |
| MmugDNA.1202.1.S1_at    | MmugDNA.1202.1  | 4.72  | 4.56  | 0.11 | 0.24 | 1.12   | 0.985248 | 0.407403 | 0.99475  | 0.635002 |
| MmugDNA.12020.1.S1_at   | MmugDNA.12020.1 | 7.59  | 8.67  | 0.17 | 0.47 | -2.11  | 0.046008 | 0.053023 | 0.362169 | 0.27592  |
| MmugDNA.12022.1.S1_at   | MmugDNA.12022.1 | 7.25  | 8.08  | 0.15 | 0.61 | -1.77  | 0.067867 | 0.044624 | 0.408606 | 0.255589 |
| MmugDNA.12023.1.S1_at   | MmugDNA.12023.1 | 6.34  | 6.44  | 0.14 | 0.22 | -1.08  | 0.757818 | 0.820604 | 0.897367 | 0.896677 |
| MmugDNA.12023.1.S1_s_at | MmugDNA.12023.1 | 6.91  | 6.83  | 0.18 | 0.07 | 1.06   | 0.703322 | 0.870581 | 0.868993 | 0.926446 |
| MmugDNA.12024.1.S1_s_at | MmugDNA.12024.1 | 3.97  | 4.48  | 0.17 | 0.27 | -1.43  | 0.165801 | 0.234015 | 0.529848 | 0.505312 |
| MmugDNA.12025.1.S1_at   | MmugDNA.12025.1 | 12.28 | 12.09 | 0.03 | 0.12 | 1.14   | 0.059914 | 0.023299 | 0.392991 | 0.191315 |
| MmugDNA.12027.1.S1_at   | MmugDNA.12027.1 | 4.89  | 4.86  | 0.31 | 0.08 | 1.02   | 0.803256 | 0.507912 | 0.919051 | 0.703358 |
| MmugDNA.12028.1.S1_at   | MmugDNA.12028.1 | 4.93  | 6.46  | 0.53 | 0.47 | -2.89  | 0.02518  | 0.014674 | 0.297994 | 0.15428  |
| MmugDNA.12029.1.S1_at   | MmugDNA.12029.1 | 7.49  | 7.55  | 0.11 | 0.22 | -1.04  | 0.379378 | 0.203173 | 0.686918 | 0.477415 |
| MmugDNA.1203.1.S1_s_at  | MmugDNA.1203.1  | 4.51  | 4.34  | 0.78 | 0.33 | 1.12   | 0.276629 | 0.281654 | 0.618796 | 0.54471  |
| MmugDNA.12030.1.S1_at   | MmugDNA.12030.1 | 8.08  | 7.9   | 0.59 | 0.53 | 1.14   | 0.694137 | 0.839282 | 0.864407 | 0.908393 |
| MmugDNA.12031.1.S1_at   | MmugDNA.12031.1 | 6.35  | 6.14  | 0.12 | 0.09 | 1.16   | 0.106826 | 0.175579 | 0.467551 | 0.45218  |
| MmugDNA.36977.1.S1_at   | MmugDNA.36977.1 | 6.59  | 6.65  | 0.14 | 0.41 | -1.04  | 0.737028 | 0.44482  | 0.886925 | 0.662072 |
| MmugDNA.36977.1.S1_s_at | MmugDNA.36977.1 | 11.13 | 11.1  | 0.28 | 0.74 | 1.02   | 0.943062 | 0.250351 | 0.978387 | 0.519362 |
| MmugDNA.12034.1.S1_at   | MmugDNA.12034.1 | 3.36  | 3.53  | 0.05 | 0.02 | -1.12  | 0.014284 | 0.047533 | 0.251885 | 0.262712 |
| MmugDNA.12035.1.S1_at   | MmugDNA.12035.1 | 9.62  | 8.87  | 0.06 | 0.9  | 1.69   | 0.096472 | 0.076993 | 0.455149 | 0.322421 |
| MmugDNA.12036.1.S1_at   | MmugDNA.12036.1 | 4.24  | 5.53  | 0.86 | 1.12 | -2.44  | 0.201778 | 0.17033  | 0.564031 | 0.447103 |
| MmugDNA.12037.1.S1_at   | MmugDNA.12037.1 | 6.96  | 6.13  | 0.3  | 0.23 | 1.78   | 0.031074 | 0.047366 | 0.32048  | 0.262362 |
| MmugDNA.12038.1.S1_at   | MmugDNA.12038.1 | 5.61  | 5.63  | 0.06 | 0.23 | -1.01  | 0.473223 | 0.584425 | 0.744128 | 0.752435 |
| MmugDNA.12038.1.S1_x_at | MmugDNA.12038.1 | 5.68  | 5.64  | 0.51 | 0.2  | 1.03   | 0.377184 | 0.513835 | 0.685642 | 0.707281 |
| MmugDNA.12039.1.S1_at   | MmugDNA.12039.1 | 4.01  | 4.55  | 0.25 | 0.99 | -1.46  | 0.510579 | 0.693929 | 0.765138 | 0.821989 |
| MmugDNA.1204.1.S1_at    | MmugDNA.1204.1  | 4.19  | 4.07  | 0.52 | 0.31 | 1.08   | 0.743001 | 0.14783  | 0.890085 | 0.42217  |
| MmugDNA.12040.1.S1_at   | MmugDNA.12040.1 | 3.58  | 3.61  | 0.09 | 0.17 | -1.03  | 0.892217 | 0.396267 | 0.957096 | 0.628074 |
| MmugDNA.12041.1.S1_at   | MmugDNA.12041.1 | 7.68  | 7.25  | 0.76 | 0.34 | 1.34   | 0.349789 | 0.401089 | 0.668001 | 0.630684 |

|                         |                 |       |       |      |      |       |          |          |          |          |
|-------------------------|-----------------|-------|-------|------|------|-------|----------|----------|----------|----------|
| MmugDNA.12042.1.S1_at   | MmugDNA.12042.1 | 4.28  | 4.39  | 0.04 | 0.12 | -1.08 | 0.13047  | 0.470215 | 0.496851 | 0.678572 |
| MmugDNA.12043.1.S1_at   | MmugDNA.12043.1 | 7.39  | 7.83  | 0.27 | 1.09 | -1.35 | 0.704478 | 0.446478 | 0.869658 | 0.662842 |
| MmugDNA.12044.1.S1_at   | MmugDNA.12044.1 | 5.13  | 5.28  | 0.06 | 0.24 | -1.11 | 0.316412 | 0.558226 | 0.647373 | 0.735467 |
| MmugDNA.12045.1.S1_at   | MmugDNA.12045.1 | 7.45  | 8.47  | 0.25 | 0.51 | -2.03 | 0.013322 | 0.008104 | 0.246471 | 0.119551 |
| MmugDNA.12047.1.S1_at   | MmugDNA.12047.1 | 5.91  | 7.6   | 1.39 | 1.27 | -3.22 | 0.295848 | 0.321273 | 0.632176 | 0.573168 |
| MmugDNA.12048.1.S1_at   | MmugDNA.12048.1 | 4.07  | 4.1   | 0.41 | 0.09 | -1.02 | 0.439527 | 0.551006 | 0.723648 | 0.730751 |
| MmugDNA.12049.1.S1_at   | MmugDNA.12049.1 | 4.66  | 4.47  | 0.35 | 0.34 | 1.14  | 0.570758 | 0.135764 | 0.799645 | 0.407932 |
| MmugDNA.1205.1.S1_at    | MmugDNA.1205.1  | 9.61  | 9.21  | 1.01 | 0.28 | 1.32  | 0.392074 | 0.546294 | 0.694439 | 0.727896 |
| MmugDNA.12050.1.S1_at   | MmugDNA.12050.1 | 12.13 | 12.17 | 0.01 | 0.09 | -1.03 | 0.221215 | 0.288652 | 0.580161 | 0.549827 |
| MmugDNA.12051.1.S1_at   | MmugDNA.12051.1 | 4.98  | 4.6   | 0.41 | 0.23 | 1.3   | 0.279906 | 0.284832 | 0.621287 | 0.546966 |
| MmugDNA.12052.1.S1_at   | MmugDNA.12052.1 | 8.14  | 8     | 0.2  | 0.51 | 1.11  | 0.743745 | 0.764637 | 0.890194 | 0.863158 |
| MmugDNA.12053.1.S1_at   | MmugDNA.12053.1 | 4.71  | 4.42  | 0.25 | 0.08 | 1.22  | 0.109557 | 0.253832 | 0.470811 | 0.522173 |
| MmugDNA.12054.1.S1_at   | MmugDNA.12054.1 | 4.42  | 4.69  | 0.2  | 0.19 | -1.21 | 0.437136 | 0.622443 | 0.722208 | 0.776933 |
| MmugDNA.12055.1.S1_at   | MmugDNA.12055.1 | 7.07  | 6.87  | 0.1  | 0.64 | 1.15  | 0.782256 | 0.811437 | 0.909138 | 0.891158 |
| MmugDNA.12056.1.S1_at   | MmugDNA.12056.1 | 5.61  | 5.69  | 0.1  | 0.05 | -1.06 | 0.165866 | 0.025052 | 0.529848 | 0.198316 |
| MmugDNA.12057.1.S1_at   | MmugDNA.12057.1 | 5.71  | 4.98  | 0.3  | 0.23 | 1.66  | 0.04947  | 0.020388 | 0.371515 | 0.179281 |
| MmugDNA.12058.1.S1_at   | MmugDNA.12058.1 | 6.53  | 6.72  | 0.05 | 0.1  | -1.14 | 0.018081 | 0.017187 | 0.268759 | 0.166089 |
| MmugDNA.12059.1.S1_at   | MmugDNA.12059.1 | 5.53  | 5.53  | 0.43 | 0.1  | 1     | 0.297074 | 0.290402 | 0.632927 | 0.551169 |
| MmugDNA.12061.1.S1_at   | MmugDNA.12061.1 | 6.44  | 6.48  | 0.24 | 0.43 | -1.03 | 0.436013 | 0.478102 | 0.721547 | 0.684103 |
| MmugDNA.12062.1.S1_at   | MmugDNA.12062.1 | 4.02  | 4.29  | 0.18 | 0.22 | -1.21 | 0.355538 | 0.186453 | 0.671128 | 0.462306 |
| MmugDNA.12063.1.S1_at   | MmugDNA.12063.1 | 3.31  | 3.41  | 0.13 | 0.15 | -1.07 | 0.135887 | 0.186499 | 0.502782 | 0.462364 |
| MmugDNA.12064.1.S1_at   | MmugDNA.12064.1 | 6.11  | 6.07  | 0.07 | 0.25 | 1.02  | 0.695223 | 0.881402 | 0.864856 | 0.932335 |
| MmugDNA.12064.1.S1_s_at | MmugDNA.12064.1 | 6.31  | 6.58  | 0.09 | 0.04 | -1.2  | 0.013842 | 0.047618 | 0.249758 | 0.262996 |
| MmugDNA.12066.1.S1_at   | MmugDNA.12066.1 | 4.35  | 4.39  | 0.15 | 0.13 | -1.03 | 0.839402 | 0.972971 | 0.935102 | 0.985389 |
| MmugDNA.12068.1.S1_at   | MmugDNA.12068.1 | 4.37  | 4.01  | 0.24 | 0.26 | 1.29  | 0.314432 | 0.274106 | 0.645757 | 0.538565 |
| MmugDNA.1207.1.S1_at    | MmugDNA.1207.1  | 7.34  | 7.05  | 0.6  | 0.55 | 1.23  | 0.94936  | 0.923791 | 0.980726 | 0.957119 |
| MmugDNA.12072.1.S1_at   | MmugDNA.12072.1 | 3.34  | 3.41  | 0.04 | 0.08 | -1.05 | 0.121179 | 0.052528 | 0.48598  | 0.274771 |
| MmugDNA.12074.1.S1_at   | MmugDNA.12074.1 | 3.2   | 3     | 0.1  | 0.05 | 1.15  | 0.176318 | 0.242888 | 0.539927 | 0.513274 |
| MmugDNA.12076.1.S1_at   | MmugDNA.12076.1 | 4.92  | 5.07  | 0.21 | 0    | -1.12 | 0.272392 | 0.290434 | 0.616016 | 0.551169 |
| MmugDNA.12077.1.S1_at   | MmugDNA.12077.1 | 6.65  | 6.97  | 0.63 | 1.2  | -1.25 | 0.273185 | 0.259078 | 0.616648 | 0.526263 |
| MmugDNA.12077.1.S1_s_at | MmugDNA.12077.1 | 5.41  | 6.63  | 1.39 | 1.93 | -2.32 | 0.384696 | 0.485419 | 0.690114 | 0.68914  |
| MmugDNA.12078.1.S1_at   | MmugDNA.12078.1 | 3.73  | 4.27  | 1.05 | 0.55 | -1.45 | 0.559209 | 0.708885 | 0.793691 | 0.831167 |
| MmugDNA.12079.1.S1_at   | MmugDNA.12079.1 | 5.47  | 5.46  | 0.18 | 0.16 | 1.01  | 0.864875 | 0.215532 | 0.945737 | 0.489269 |
| MmugDNA.1208.1.S1_at    | MmugDNA.1208.1  | 10.36 | 10.71 | 0.12 | 0.34 | -1.27 | 0.389494 | 0.444784 | 0.692994 | 0.662072 |
| MmugDNA.12080.1.S1_at   | MmugDNA.12080.1 | 5.14  | 5.15  | 0.2  | 0.23 | -1.01 | 0.421969 | 0.595145 | 0.713243 | 0.758988 |
| MmugDNA.12081.1.S1_at   | MmugDNA.12081.1 | 8.26  | 8.12  | 0.37 | 0.12 | 1.1   | 0.15705  | 0.2401   | 0.521852 | 0.5108   |
| MmugDNA.12083.1.S1_at   | MmugDNA.12083.1 | 2.96  | 2.84  | 0.07 | 0.19 | 1.09  | 0.992364 | 0.538219 | 0.997401 | 0.72298  |
| MmugDNA.12084.1.S1_at   | MmugDNA.12084.1 | 5.72  | 5.51  | 0.11 | 0.35 | 1.15  | 0.968722 | 0.508196 | 0.988176 | 0.703422 |
| MmugDNA.12085.1.S1_at   | MmugDNA.12085.1 | 4.86  | 4.98  | 0.15 | 0.09 | -1.09 | 0.361181 | 0.322554 | 0.675116 | 0.573991 |
| MmugDNA.12086.1.S1_at   | MmugDNA.12086.1 | 3.24  | 2.9   | 0.23 | 0.15 | 1.27  | 0.464666 | 0.509642 | 0.739429 | 0.704273 |
| MmugDNA.12088.1.S1_at   | MmugDNA.12088.1 | 4.4   | 4.33  | 0.11 | 0.22 | 1.05  | 0.740663 | 0.312096 | 0.888738 | 0.566904 |

|                         |                 |       |       |      |      |       |          |          |          |          |
|-------------------------|-----------------|-------|-------|------|------|-------|----------|----------|----------|----------|
| MmugDNA.12089.1.S1_at   | MmugDNA.12089.1 | 7.22  | 7.13  | 0.08 | 0.32 | 1.06  | 0.652361 | 0.071688 | 0.843658 | 0.313904 |
| MmugDNA.1209.1.S1_at    | MmugDNA.1209.1  | 5.48  | 5.9   | 0.22 | 0.35 | -1.34 | 0.363421 | 0.300724 | 0.676679 | 0.558959 |
| MmugDNA.12092.1.S1_at   | MmugDNA.12092.1 | 11.15 | 11.19 | 0.19 | 0.11 | -1.02 | 0.956169 | 0.314161 | 0.983483 | 0.568185 |
| MmugDNA.12093.1.S1_s_at | MmugDNA.12093.1 | 7.78  | 7.05  | 0.13 | 0.16 | 1.66  | 0.002707 | 0.001396 | 0.164826 | 0.057005 |
| MmugDNA.12095.1.S1_at   | MmugDNA.12095.1 | 4.59  | 4.5   | 0.07 | 0.04 | 1.06  | 0.323905 | 0.029992 | 0.651789 | 0.214956 |
| MmugDNA.12096.1.S1_at   | MmugDNA.12096.1 | 5.46  | 5.34  | 0.54 | 0.1  | 1.09  | 0.23817  | 0.311985 | 0.591555 | 0.566838 |
| MmugDNA.12097.1.S1_at   | MmugDNA.12097.1 | 5.62  | 5.35  | 0.15 | 0.14 | 1.21  | 0.378559 | 0.415789 | 0.686535 | 0.641116 |
| MmugDNA.12098.1.S1_at   | MmugDNA.12098.1 | 3.08  | 3.12  | 0.16 | 0.27 | -1.03 | 0.727173 | 0.900364 | 0.88121  | 0.94344  |
| MmugDNA.12099.1.S1_at   | MmugDNA.12099.1 | 9.2   | 9.25  | 0.36 | 0.73 | -1.03 | 0.463977 | 0.658118 | 0.738998 | 0.800181 |
| MmugDNA.121.1.S1_at     | MmugDNA.121.1   | 9.46  | 8.66  | 0.4  | 0.43 | 1.74  | 0.362735 | 0.509349 | 0.676211 | 0.704113 |
| MmugDNA.121.1.S1_s_at   | MmugDNA.121.1   | 9.8   | 9.14  | 0.35 | 0.36 | 1.57  | 0.351261 | 0.492203 | 0.669117 | 0.693477 |
| MmugDNA.1210.1.S1_at    | MmugDNA.1210.1  | 3.64  | 3.59  | 0.09 | 0.13 | 1.04  | 0.733087 | 0.805952 | 0.88483  | 0.888397 |
| MmugDNA.12100.1.S1_at   | MmugDNA.12100.1 | 3.97  | 3.87  | 0.29 | 0.1  | 1.08  | 0.816055 | 0.544353 | 0.925294 | 0.726752 |
| MmugDNA.12101.1.S1_at   | MmugDNA.12101.1 | 5.16  | 4.89  | 0.38 | 0.1  | 1.21  | 0.096139 | 0.081099 | 0.454327 | 0.329276 |
| MmugDNA.12102.1.S1_at   | MmugDNA.12102.1 | 5.64  | 4.8   | 0.47 | 0.4  | 1.79  | 0.07473  | 0.242747 | 0.420734 | 0.5131   |
| MmugDNA.12103.1.S1_at   | MmugDNA.12103.1 | 3.85  | 3.92  | 0.25 | 0.18 | -1.05 | 0.633023 | 0.590264 | 0.833487 | 0.756124 |
| MmugDNA.17454.1.S1_s_at | MmugDNA.17454.1 | 4.43  | 4.6   | 0.09 | 0.1  | -1.12 | 0.09102  | 0.056039 | 0.446857 | 0.2826   |
| MmugDNA.12104.1.S1_at   | MmugDNA.12104.1 | 10.05 | 10.92 | 0.21 | 0.19 | -1.82 | 0.010122 | 0.001799 | 0.228232 | 0.063652 |
| MmugDNA.12104.1.S1_s_at | MmugDNA.12104.1 | 10.54 | 11.34 | 0.25 | 0.16 | -1.75 | 0.019386 | 0.008712 | 0.273874 | 0.123746 |
| MmugDNA.12105.1.S1_at   | MmugDNA.12105.1 | 7.21  | 8.43  | 0.11 | 1.12 | -2.34 | 0.272376 | 0.134888 | 0.616016 | 0.406878 |
| MmugDNA.12106.1.S1_at   | MmugDNA.12106.1 | 9.28  | 9.44  | 0.29 | 0.25 | -1.12 | 0.724833 | 0.770208 | 0.879885 | 0.86656  |
| MmugDNA.12107.1.S1_at   | MmugDNA.12107.1 | 5.16  | 5.2   | 0.07 | 0.05 | -1.03 | 0.471979 | 0.348936 | 0.743454 | 0.592945 |
| MmugDNA.12108.1.S1_at   | MmugDNA.12108.1 | 4.45  | 4.31  | 0.36 | 0.17 | 1.11  | 0.640904 | 0.05796  | 0.837842 | 0.287221 |
| MmugDNA.1211.1.S1_s_at  | MmugDNA.1211.1  | 12.84 | 12.59 | 0.13 | 0.19 | 1.2   | 0.261041 | 0.062647 | 0.607554 | 0.297022 |
| MmugDNA.1211.1.S1_x_at  | MmugDNA.1211.1  | 12.74 | 12.53 | 0.18 | 0.14 | 1.16  | 0.351405 | 0.051457 | 0.669126 | 0.272242 |
| MmugDNA.12111.1.S1_at   | MmugDNA.12111.1 | 5.19  | 5.1   | 0.11 | 0.49 | 1.07  | 0.283484 | 0.404931 | 0.623549 | 0.633408 |
| MmugDNA.12112.1.S1_at   | MmugDNA.12112.1 | 5.6   | 5.7   | 0.07 | 0.23 | -1.07 | 0.396758 | 0.267598 | 0.697224 | 0.53333  |
| MmugDNA.12113.1.S1_s_at | MmugDNA.12113.1 | 9.23  | 8.46  | 0.36 | 0.17 | 1.71  | 0.06684  | 0.059447 | 0.406981 | 0.290548 |
| MmugDNA.12115.1.S1_at   | MmugDNA.12115.1 | 3.27  | 3.28  | 0.16 | 0.19 | -1.01 | 0.713234 | 0.819494 | 0.874362 | 0.89602  |
| MmugDNA.12116.1.S1_at   | MmugDNA.12116.1 | 5.76  | 6.04  | 0    | 0.09 | -1.22 | 0.00904  | 0.014112 | 0.222023 | 0.15195  |
| MmugDNA.12117.1.S1_at   | MmugDNA.12117.1 | 4.11  | 3.97  | 0.26 | 0.14 | 1.1   | 0.625014 | 0.843816 | 0.828582 | 0.911025 |
| MmugDNA.12118.1.S1_at   | MmugDNA.12118.1 | 7.72  | 8.15  | 0.86 | 0.67 | -1.35 | 0.362512 | 0.219422 | 0.676081 | 0.493156 |
| MmugDNA.12119.1.S1_s_at | MmugDNA.12119.1 | 11.84 | 11.55 | 0.11 | 0.24 | 1.23  | 0.073021 | 0.044027 | 0.418323 | 0.254195 |
| MmugDNA.1212.1.S1_at    | MmugDNA.1212.1  | 2.81  | 2.86  | 0.25 | 0.21 | -1.04 | 0.767024 | 0.930016 | 0.902065 | 0.960166 |
| MmugDNA.12120.1.S1_at   | MmugDNA.12120.1 | 2.72  | 2.7   | 0.05 | 0.13 | 1.01  | 0.555247 | 0.419469 | 0.791316 | 0.643488 |
| MmugDNA.12121.1.S1_at   | MmugDNA.12121.1 | 6     | 7.02  | 0.82 | 0.48 | -2.02 | 0.221712 | 0.287377 | 0.580397 | 0.548636 |
| MmugDNA.12122.1.S1_s_at | MmugDNA.12122.1 | 10.46 | 9.9   | 0.04 | 0.3  | 1.47  | 0.034898 | 0.025347 | 0.334018 | 0.199552 |
| MmugDNA.12123.1.S1_at   | MmugDNA.12123.1 | 10.77 | 10.52 | 0.29 | 0.22 | 1.19  | 0.220701 | 0.065784 | 0.579701 | 0.301802 |
| MmugDNA.12125.1.S1_at   | MmugDNA.12125.1 | 3.86  | 3.63  | 0.23 | 0.09 | 1.17  | 0.270089 | 0.58321  | 0.614648 | 0.751637 |
| MmugDNA.12126.1.S1_at   | MmugDNA.12126.1 | 4.83  | 4.66  | 0.16 | 0.05 | 1.13  | 0.24449  | 0.040099 | 0.596252 | 0.245388 |
| MmugDNA.12127.1.S1_at   | MmugDNA.12127.1 | 4.95  | 4.96  | 0.33 | 0.24 | -1.01 | 0.575925 | 0.0761   | 0.802615 | 0.320848 |

|                         |                 |       |       |      |      |       |          |          |          |          |
|-------------------------|-----------------|-------|-------|------|------|-------|----------|----------|----------|----------|
| MmugDNA.12129.1.S1_at   | MmugDNA.12129.1 | 5.56  | 5.82  | 0.17 | 0.14 | -1.2  | 0.325274 | 0.402209 | 0.652582 | 0.631247 |
| MmugDNA.1213.1.S1_at    | MmugDNA.1213.1  | 4.42  | 4.01  | 0.67 | 0.06 | 1.33  | 0.427769 | 0.296713 | 0.716428 | 0.555718 |
| MmugDNA.12130.1.S1_at   | MmugDNA.12130.1 | 5.74  | 5.89  | 0.14 | 0.42 | -1.11 | 0.399799 | 0.563524 | 0.699692 | 0.738718 |
| MmugDNA.12131.1.S1_at   | MmugDNA.12131.1 | 6.26  | 6.24  | 0.18 | 0.16 | 1.01  | 0.365094 | 0.390942 | 0.677975 | 0.624649 |
| MmugDNA.12132.1.S1_at   | MmugDNA.12132.1 | 9.91  | 9.96  | 0.43 | 0.21 | -1.03 | 0.853284 | 0.021704 | 0.940767 | 0.184333 |
| MmugDNA.12133.1.S1_at   | MmugDNA.12133.1 | 5.96  | 6.79  | 0.09 | 0.84 | -1.78 | 0.166411 | 0.218066 | 0.530062 | 0.491683 |
| MmugDNA.12133.1.S1_s_at | MmugDNA.12133.1 | 7.38  | 7.57  | 0.11 | 0.33 | -1.15 | 0.129886 | 0.162147 | 0.495954 | 0.438282 |
| MmugDNA.12135.1.S1_at   | MmugDNA.12135.1 | 11.54 | 10.87 | 0.12 | 0.52 | 1.59  | 0.099343 | 0.084972 | 0.459226 | 0.336607 |
| MmugDNA.12137.1.S1_at   | MmugDNA.12137.1 | 3.5   | 3.45  | 0.27 | 0.09 | 1.03  | 0.702765 | 0.586283 | 0.868924 | 0.753427 |
| MmugDNA.12138.1.S1_at   | MmugDNA.12138.1 | 9.02  | 8.79  | 0.14 | 0.46 | 1.18  | 0.504885 | 0.688768 | 0.761527 | 0.818332 |
| MmugDNA.1214.1.S1_at    | MmugDNA.1214.1  | 2.9   | 2.9   | 0.03 | 0.04 | 1     | 0.232343 | 0.362227 | 0.587814 | 0.602875 |
| MmugDNA.12142.1.S1_s_at | MmugDNA.12142.1 | 7.31  | 7.79  | 0.23 | 0.22 | -1.39 | 0.059736 | 0.023464 | 0.39273  | 0.191956 |
| MmugDNA.12143.1.S1_at   | MmugDNA.12143.1 | 4.64  | 4.61  | 0.5  | 0.12 | 1.02  | 0.3074   | 0.533775 | 0.639999 | 0.719866 |
| MmugDNA.12144.1.S1_at   | MmugDNA.12144.1 | 3.59  | 3.46  | 0.1  | 0.11 | 1.1   | 0.476256 | 0.056101 | 0.746149 | 0.282723 |
| MmugDNA.12145.1.S1_at   | MmugDNA.12145.1 | 3.68  | 3.52  | 0.17 | 0.15 | 1.12  | 0.620246 | 0.285715 | 0.826026 | 0.54744  |
| MmugDNA.12146.1.S1_at   | MmugDNA.12146.1 | 8.42  | 8.98  | 0.46 | 0.23 | -1.48 | 0.10851  | 0.033706 | 0.469866 | 0.227194 |
| MmugDNA.12147.1.S1_at   | MmugDNA.12147.1 | 5.94  | 6.05  | 0.16 | 0.44 | -1.08 | 0.83425  | 0.646173 | 0.932619 | 0.792676 |
| MmugDNA.12149.1.S1_at   | MmugDNA.12149.1 | 6.79  | 6.39  | 0.45 | 0.53 | 1.32  | 0.38946  | 0.550761 | 0.692994 | 0.730611 |
| MmugDNA.1215.1.S1_at    | MmugDNA.1215.1  | 7.32  | 6.9   | 0.64 | 0.52 | 1.34  | 0.719955 | 0.468988 | 0.87721  | 0.67798  |
| MmugDNA.12152.1.S1_at   | MmugDNA.12152.1 | 3.4   | 3.24  | 0.11 | 0.14 | 1.11  | 0.301976 | 0.213963 | 0.6368   | 0.487596 |
| MmugDNA.12154.1.S1_at   | MmugDNA.12154.1 | 7.13  | 7.11  | 0.55 | 0.34 | 1.02  | 0.259943 | 0.362575 | 0.606878 | 0.603132 |
| MmugDNA.12155.1.S1_at   | MmugDNA.12155.1 | 4.95  | 5.07  | 0.01 | 0.29 | -1.08 | 0.503763 | 0.610163 | 0.761    | 0.768419 |
| MmugDNA.12157.1.S1_at   | MmugDNA.12157.1 | 5.5   | 5.58  | 0.05 | 0.17 | -1.06 | 0.195107 | 0.243761 | 0.558557 | 0.513899 |
| MmugDNA.12158.1.S1_at   | MmugDNA.12158.1 | 5.92  | 6.03  | 0.55 | 0.18 | -1.08 | 0.416387 | 0.554195 | 0.709936 | 0.73306  |
| MmugDNA.12159.1.S1_at   | MmugDNA.12159.1 | 6.11  | 6.18  | 0.12 | 0.14 | -1.05 | 0.590879 | 0.788052 | 0.810127 | 0.877426 |
| MmugDNA.1216.1.S1_at    | MmugDNA.1216.1  | 3.83  | 3.85  | 0.07 | 0.2  | -1.02 | 0.554602 | 0.355795 | 0.790867 | 0.597864 |
| MmugDNA.12160.1.S1_at   | MmugDNA.12160.1 | 6.37  | 6.76  | 1.1  | 0.22 | -1.31 | 0.642207 | 0.857421 | 0.838696 | 0.918603 |
| MmugDNA.12162.1.S1_s_at | MmugDNA.12162.1 | 7.15  | 8.83  | 0.96 | 0.67 | -3.21 | 0.168498 | 0.180943 | 0.532724 | 0.457418 |
| MmugDNA.12163.1.S1_at   | MmugDNA.12163.1 | 4.23  | 4.25  | 0.29 | 0.26 | -1.01 | 0.584283 | 0.307634 | 0.806956 | 0.563799 |
| MmugDNA.12164.1.S1_at   | MmugDNA.12164.1 | 4.71  | 4.79  | 0.13 | 0.08 | -1.06 | 0.150643 | 0.176412 | 0.515411 | 0.45282  |
| MmugDNA.12164.1.S1_s_at | MmugDNA.12164.1 | 7.78  | 8.28  | 0.31 | 0.46 | -1.42 | 0.076616 | 0.087658 | 0.425141 | 0.340938 |
| MmugDNA.12167.1.S1_at   | MmugDNA.12167.1 | 4.95  | 4.48  | 0.15 | 0.12 | 1.39  | 0.019292 | 0.011276 | 0.273655 | 0.138076 |
| MmugDNA.12168.1.S1_at   | MmugDNA.12168.1 | 7.63  | 8.39  | 0.18 | 0.67 | -1.69 | 0.116858 | 0.025632 | 0.480756 | 0.200834 |
| MmugDNA.12169.1.S1_at   | MmugDNA.12169.1 | 6.24  | 6.02  | 0.04 | 0.49 | 1.17  | 0.512299 | 0.178413 | 0.765523 | 0.454778 |
| MmugDNA.12170.1.S1_at   | MmugDNA.12170.1 | 3.51  | 3.43  | 0.04 | 0.13 | 1.06  | 0.219913 | 0.064319 | 0.579133 | 0.299804 |
| MmugDNA.12171.1.S1_at   | MmugDNA.12171.1 | 3.55  | 3.97  | 0.19 | 0.83 | -1.34 | 0.502189 | 0.325441 | 0.760244 | 0.575807 |
| MmugDNA.12172.1.S1_at   | MmugDNA.12172.1 | 8.2   | 8.74  | 0.35 | 0.61 | -1.46 | 0.112956 | 0.087295 | 0.475579 | 0.340327 |
| MmugDNA.12173.1.S1_at   | MmugDNA.12173.1 | 8.81  | 9.56  | 0.64 | 0.44 | -1.68 | 0.413175 | 0.024242 | 0.70838  | 0.194936 |
| MmugDNA.12174.1.S1_at   | MmugDNA.12174.1 | 4.68  | 4.69  | 0.18 | 0.13 | -1.01 | 0.47971  | 0.665033 | 0.747791 | 0.803733 |
| MmugDNA.12176.1.S1_at   | MmugDNA.12176.1 | 4.98  | 4.89  | 0.08 | 0.26 | 1.07  | 0.419636 | 0.042641 | 0.712008 | 0.251037 |
| MmugDNA.12177.1.S1_at   | MmugDNA.12177.1 | 5.8   | 5.88  | 0.09 | 0.07 | -1.05 | 0.31389  | 0.696953 | 0.645397 | 0.824002 |



|                         |                 |       |       |      |      |       |          |          |          |          |
|-------------------------|-----------------|-------|-------|------|------|-------|----------|----------|----------|----------|
| MmugDNA.12178.1.S1_s_at | MmugDNA.12178.1 | 8.46  | 8.48  | 0.43 | 0.11 | -1.01 | 0.566333 | 0.51838  | 0.797591 | 0.71038  |
| MmugDNA.12179.1.S1_at   | MmugDNA.12179.1 | 9.03  | 8.61  | 0.07 | 0.68 | 1.34  | 0.364644 | 0.234859 | 0.6775   | 0.506125 |
| MmugDNA.1218.1.S1_at    | MmugDNA.1218.1  | 5.27  | 5.28  | 0.11 | 0.06 | -1.01 | 0.637564 | 0.83247  | 0.836245 | 0.903893 |
| MmugDNA.12180.1.S1_at   | MmugDNA.12180.1 | 7.99  | 7.8   | 0.39 | 0.93 | 1.14  | 0.918066 | 0.499751 | 0.968173 | 0.698494 |
| MmugDNA.12181.1.S1_at   | MmugDNA.12181.1 | 11.85 | 11.7  | 0.13 | 0.35 | 1.1   | 0.339132 | 0.364136 | 0.661168 | 0.604488 |
| MmugDNA.12182.1.S1_at   | MmugDNA.12182.1 | 2.7   | 2.72  | 0.04 | 0.03 | -1.01 | 0.177871 | 0.713557 | 0.542092 | 0.83382  |
| MmugDNA.12183.1.S1_at   | MmugDNA.12183.1 | 5.1   | 5.56  | 0.19 | 0.53 | -1.38 | 0.355736 | 0.451034 | 0.671194 | 0.665993 |
| MmugDNA.12185.1.S1_at   | MmugDNA.12185.1 | 5.37  | 4.98  | 0.21 | 0.36 | 1.3   | 0.105732 | 0.305875 | 0.466526 | 0.562731 |
| MmugDNA.12186.1.S1_at   | MmugDNA.12186.1 | 8.8   | 9.65  | 0.24 | 0.39 | -1.81 | 0.096881 | 0.010984 | 0.455899 | 0.136546 |
| MmugDNA.12187.1.S1_at   | MmugDNA.12187.1 | 4.78  | 5.02  | 0.19 | 0.23 | -1.18 | 0.243442 | 0.265494 | 0.595206 | 0.531381 |
| MmugDNA.12188.1.S1_at   | MmugDNA.12188.1 | 9.4   | 9.42  | 0.51 | 1.46 | -1.01 | 0.924042 | 0.596071 | 0.970594 | 0.759339 |
| MmugDNA.12189.1.S1_at   | MmugDNA.12189.1 | 10.09 | 9.96  | 0.12 | 0.19 | 1.09  | 0.853832 | 0.919783 | 0.940936 | 0.954906 |
| MmugDNA.1219.1.S1_at    | MmugDNA.1219.1  | 5.2   | 5.02  | 0.73 | 0.52 | 1.13  | 0.600246 | 0.656857 | 0.815188 | 0.799401 |
| MmugDNA.12191.1.S1_at   | MmugDNA.12191.1 | 3.46  | 3.46  | 0.1  | 0    | 1     | 0.373901 | 0.690513 | 0.683245 | 0.819604 |
| MmugDNA.12192.1.S1_at   | MmugDNA.12192.1 | 6.47  | 6.67  | 0.19 | 0.12 | -1.15 | 0.430549 | 0.354133 | 0.718125 | 0.597059 |
| MmugDNA.12195.1.S1_at   | MmugDNA.12195.1 | 5.14  | 7.35  | 0.4  | 0.66 | -4.63 | 0.016888 | 0.004407 | 0.266107 | 0.092846 |
| MmugDNA.12196.1.S1_at   | MmugDNA.12196.1 | 2.79  | 2.8   | 0.29 | 0.05 | -1    | 0.468268 | 0.47431  | 0.741049 | 0.68135  |
| MmugDNA.12197.1.S1_at   | MmugDNA.12197.1 | 5.89  | 5.84  | 0.18 | 0.09 | 1.04  | 0.937103 | 0.553778 | 0.975769 | 0.732802 |
| MmugDNA.12198.1.S1_at   | MmugDNA.12198.1 | 5.14  | 5.03  | 0.12 | 0.04 | 1.08  | 0.336245 | 0.333181 | 0.659402 | 0.581467 |
| MmugDNA.12199.1.S1_at   | MmugDNA.12199.1 | 7.32  | 7.31  | 0.13 | 0.11 | 1.01  | 0.385413 | 0.185621 | 0.690574 | 0.461586 |
| MmugDNA.122.1.S1_at     | MmugDNA.122.1   | 3.97  | 4.17  | 0.34 | 0.98 | -1.15 | 0.233635 | 0.290797 | 0.588317 | 0.551399 |
| MmugDNA.1220.1.S1_at    | MmugDNA.1220.1  | 5.43  | 5.35  | 1.13 | 0.09 | 1.06  | 0.323248 | 0.368275 | 0.651461 | 0.60787  |
| MmugDNA.12201.1.S1_at   | MmugDNA.12201.1 | 6.76  | 7.62  | 0.23 | 0.46 | -1.81 | 0.050137 | 0.044527 | 0.373452 | 0.255364 |
| MmugDNA.12203.1.S1_at   | MmugDNA.12203.1 | 9.18  | 10.1  | 0.06 | 0.49 | -1.9  | 0.033034 | 0.00961  | 0.32696  | 0.129157 |
| MmugDNA.12204.1.S1_x_at | MmugDNA.12204.1 | 8.37  | 8.04  | 0.84 | 0.45 | 1.26  | 0.225787 | 0.289406 | 0.583854 | 0.550439 |
| MmugDNA.12205.1.S1_at   | MmugDNA.12205.1 | 4.81  | 4.26  | 0.59 | 0.69 | 1.46  | 0.501852 | 0.642891 | 0.760163 | 0.790529 |
| MmugDNA.12207.1.S1_at   | MmugDNA.12207.1 | 7     | 6.64  | 0.11 | 0.3  | 1.28  | 0.0433   | 0.037138 | 0.3567   | 0.2372   |
| MmugDNA.12208.1.S1_at   | MmugDNA.12208.1 | 3.16  | 3.31  | 0.05 | 0.18 | -1.11 | 0.690622 | 0.873636 | 0.862319 | 0.928169 |
| MmugDNA.12209.1.S1_at   | MmugDNA.12209.1 | 3.83  | 3.98  | 0.11 | 0.1  | -1.11 | 0.090997 | 0.106394 | 0.446856 | 0.36895  |
| MmugDNA.1221.1.S1_at    | MmugDNA.1221.1  | 12.08 | 11.91 | 0.12 | 0.11 | 1.12  | 0.352288 | 0.022499 | 0.669556 | 0.187696 |
| MmugDNA.1221.1.S1_s_at  | MmugDNA.1221.1  | 12.65 | 12.43 | 0.11 | 0.09 | 1.17  | 0.116532 | 0.010721 | 0.48034  | 0.135271 |
| MmugDNA.12210.1.S1_at   | MmugDNA.12210.1 | 8.75  | 8.25  | 0.35 | 0.91 | 1.41  | 0.495453 | 0.636538 | 0.757254 | 0.786247 |
| MmugDNA.12211.1.S1_at   | MmugDNA.12211.1 | 5.35  | 4.78  | 0.46 | 0.24 | 1.48  | 0.598437 | 0.463275 | 0.813939 | 0.674323 |
| MmugDNA.12212.1.S1_at   | MmugDNA.12212.1 | 8.76  | 8.61  | 0.14 | 0.25 | 1.11  | 0.120578 | 0.092366 | 0.485724 | 0.348294 |
| MmugDNA.12213.1.S1_at   | MmugDNA.12213.1 | 6.45  | 6.42  | 0.37 | 0.13 | 1.02  | 0.933028 | 0.943583 | 0.973979 | 0.967955 |
| MmugDNA.12214.1.S1_at   | MmugDNA.12214.1 | 4.31  | 4.79  | 0.94 | 0.72 | -1.39 | 0.935027 | 0.349483 | 0.974886 | 0.593473 |
| MmugDNA.12216.1.S1_at   | MmugDNA.12216.1 | 5.73  | 5.64  | 0.31 | 0.05 | 1.07  | 0.503787 | 0.605089 | 0.761    | 0.764917 |
| MmugDNA.12217.1.S1_at   | MmugDNA.12217.1 | 10.78 | 10.67 | 0.11 | 0.36 | 1.07  | 0.57781  | 0.70535  | 0.803587 | 0.829145 |
| MmugDNA.12220.1.S1_at   | MmugDNA.12220.1 | 10.17 | 9.7   | 0.07 | 0.45 | 1.38  | 0.223221 | 0.168032 | 0.581723 | 0.444641 |
| MmugDNA.12221.1.S1_at   | MmugDNA.12221.1 | 5.88  | 5.99  | 0.12 | 0.16 | -1.08 | 0.386425 | 0.452497 | 0.691361 | 0.667111 |
| MmugDNA.12223.1.S1_at   | MmugDNA.12223.1 | 10.92 | 11.61 | 0.29 | 0.15 | -1.62 | 0.013876 | 0.010912 | 0.249758 | 0.136002 |

|                         |                 |       |       |      |      |       |          |          |          |          |
|-------------------------|-----------------|-------|-------|------|------|-------|----------|----------|----------|----------|
| MmugDNA.12224.1.S1_at   | MmugDNA.12224.1 | 5.94  | 4.02  | 0.62 | 0.37 | 3.78  | 0.016224 | 0.00787  | 0.26354  | 0.118132 |
| MmugDNA.12225.1.S1_at   | MmugDNA.12225.1 | 7.33  | 6.78  | 0.31 | 0.48 | 1.46  | 0.1809   | 0.230778 | 0.54536  | 0.502452 |
| MmugDNA.12227.1.S1_at   | MmugDNA.12227.1 | 9.91  | 8.98  | 0.56 | 0.31 | 1.9   | 0.314363 | 0.422028 | 0.645738 | 0.645422 |
| MmugDNA.12230.1.S1_at   | MmugDNA.12230.1 | 3.58  | 3.49  | 0.51 | 0.07 | 1.06  | 0.464661 | 0.472782 | 0.739429 | 0.680117 |
| MmugDNA.12230.1.S1_x_at | MmugDNA.12230.1 | 3.25  | 3.17  | 0.49 | 0.22 | 1.06  | 0.189566 | 0.302247 | 0.552481 | 0.560092 |
| MmugDNA.12231.1.S1_at   | MmugDNA.12231.1 | 6.67  | 6.67  | 0.26 | 0.16 | -1    | 0.96573  | 0.78399  | 0.987014 | 0.874963 |
| MmugDNA.12231.1.S1_s_at | MmugDNA.12231.1 | 10.14 | 10.61 | 0.12 | 0.11 | -1.38 | 0.006432 | 0.004277 | 0.199625 | 0.091847 |
| MmugDNA.12232.1.S1_at   | MmugDNA.12232.1 | 10.97 | 11.34 | 0.11 | 0.11 | -1.29 | 0.013319 | 0.008155 | 0.246471 | 0.119759 |
| MmugDNA.12233.1.S1_at   | MmugDNA.12233.1 | 4.28  | 4.29  | 0.07 | 0.08 | -1    | 0.224939 | 0.359545 | 0.582943 | 0.600813 |
| MmugDNA.12235.1.S1_at   | MmugDNA.12235.1 | 3.07  | 3.15  | 0.04 | 0.17 | -1.05 | 0.244636 | 0.333871 | 0.596278 | 0.582011 |
| MmugDNA.12236.1.S1_at   | MmugDNA.12236.1 | 3.66  | 3.68  | 0.08 | 0.18 | -1.01 | 0.593777 | 0.842241 | 0.811569 | 0.910143 |
| MmugDNA.12237.1.S1_at   | MmugDNA.12237.1 | 4.33  | 4.17  | 0.43 | 0.61 | 1.12  | 0.519501 | 0.595568 | 0.770186 | 0.759091 |
| MmugDNA.12238.1.S1_at   | MmugDNA.12238.1 | 4.41  | 4.28  | 0.12 | 0.33 | 1.09  | 0.819726 | 0.932883 | 0.926651 | 0.961886 |
| MmugDNA.1224.1.S1_s_at  | MmugDNA.1224.1  | 6.45  | 6.69  | 0.45 | 0.29 | -1.19 | 0.794145 | 0.64784  | 0.914561 | 0.793789 |
| MmugDNA.12240.1.S1_at   | MmugDNA.12240.1 | 7.63  | 7.49  | 0.78 | 1.31 | 1.1   | 0.370179 | 0.290971 | 0.681113 | 0.551525 |
| MmugDNA.12241.1.S1_at   | MmugDNA.12241.1 | 4.38  | 4.41  | 0.02 | 0.07 | -1.02 | 0.114147 | 0.679933 | 0.47744  | 0.8131   |
| MmugDNA.12242.1.S1_at   | MmugDNA.12242.1 | 6.82  | 7.04  | 0.13 | 0.12 | -1.17 | 0.124684 | 0.097237 | 0.49075  | 0.3549   |
| MmugDNA.12243.1.S1_at   | MmugDNA.12243.1 | 11.35 | 11.35 | 0.09 | 0.25 | -1    | 0.892496 | 0.391736 | 0.957228 | 0.625301 |
| MmugDNA.12244.1.S1_at   | MmugDNA.12244.1 | 3.52  | 3.76  | 0.11 | 0.11 | -1.18 | 0.314706 | 0.302604 | 0.64608  | 0.560201 |
| MmugDNA.12245.1.S1_at   | MmugDNA.12245.1 | 11.33 | 10.88 | 0.13 | 0.04 | 1.37  | 0.003968 | 0.00109  | 0.181455 | 0.052283 |
| MmugDNA.12246.1.S1_at   | MmugDNA.12246.1 | 7.17  | 7.13  | 0.09 | 0.33 | 1.02  | 0.455462 | 0.677494 | 0.733811 | 0.81167  |
| MmugDNA.12247.1.S1_at   | MmugDNA.12247.1 | 12.26 | 12.07 | 0.13 | 0.31 | 1.14  | 0.825672 | 0.536016 | 0.929258 | 0.721454 |
| MmugDNA.12248.1.S1_at   | MmugDNA.12248.1 | 3.37  | 3.5   | 0.23 | 0.27 | -1.1  | 0.378069 | 0.394915 | 0.686315 | 0.627216 |
| MmugDNA.12249.1.S1_at   | MmugDNA.12249.1 | 7.76  | 7.75  | 0.89 | 0.89 | 1.01  | 0.494164 | 0.669683 | 0.756533 | 0.806827 |
| MmugDNA.12249.1.S1_s_at | MmugDNA.12249.1 | 9.75  | 9.62  | 0.29 | 0.75 | 1.09  | 0.98893  | 0.917891 | 0.996052 | 0.954027 |
| MmugDNA.12250.1.S1_at   | MmugDNA.12250.1 | 7.79  | 6.08  | 0.1  | 1.11 | 3.28  | 0.18345  | 0.098285 | 0.547606 | 0.356337 |
| MmugDNA.12252.1.S1_at   | MmugDNA.12252.1 | 5.43  | 5.51  | 0.16 | 0.02 | -1.06 | 0.568655 | 0.284009 | 0.798776 | 0.546246 |
| MmugDNA.12253.1.S1_at   | MmugDNA.12253.1 | 12.17 | 12.18 | 0.08 | 0.32 | -1.01 | 0.353418 | 0.163167 | 0.67013  | 0.439303 |
| MmugDNA.12254.1.S1_at   | MmugDNA.12254.1 | 4.93  | 4.93  | 0.1  | 0.03 | 1     | 0.279    | 0.876799 | 0.620884 | 0.929829 |
| MmugDNA.12255.1.S1_at   | MmugDNA.12255.1 | 10.6  | 9.96  | 0.16 | 0.19 | 1.55  | 0.00575  | 0.001513 | 0.192626 | 0.059188 |
| MmugDNA.12256.1.S1_at   | MmugDNA.12256.1 | 6.62  | 6.63  | 0.05 | 0.27 | -1    | 0.980773 | 0.998984 | 0.993045 | 0.999494 |
| MmugDNA.12256.1.S1_s_at | MmugDNA.12256.1 | 7.39  | 6.88  | 0.09 | 0.47 | 1.42  | 0.160328 | 0.182506 | 0.525289 | 0.459065 |
| MmugDNA.12257.1.S1_at   | MmugDNA.12257.1 | 8.1   | 7.9   | 0.19 | 0.24 | 1.15  | 0.207882 | 0.234855 | 0.569854 | 0.506125 |
| MmugDNA.12259.1.S1_at   | MmugDNA.12259.1 | 4.33  | 4.3   | 0.04 | 0.2  | 1.02  | 0.653766 | 0.586572 | 0.844319 | 0.753592 |
| MmugDNA.1226.1.S1_at    | MmugDNA.1226.1  | 3.92  | 3.9   | 0.23 | 0.09 | 1.01  | 0.536181 | 0.717556 | 0.779378 | 0.836463 |
| MmugDNA.12260.1.S1_at   | MmugDNA.12260.1 | 5.89  | 7.93  | 0.61 | 1.36 | -4.12 | 0.114524 | 0.115169 | 0.477887 | 0.382079 |
| MmugDNA.12261.1.S1_at   | MmugDNA.12261.1 | 4.08  | 4.07  | 0.1  | 0.18 | 1.01  | 0.999675 | 0.932464 | 0.999967 | 0.961716 |
| MmugDNA.12263.1.S1_at   | MmugDNA.12263.1 | 3.08  | 3.1   | 0.1  | 0.26 | -1.01 | 0.875608 | 0.9802   | 0.950181 | 0.989257 |
| MmugDNA.12265.1.S1_at   | MmugDNA.12265.1 | 5.61  | 5.52  | 0.05 | 0.06 | 1.06  | 0.212541 | 0.094675 | 0.572826 | 0.351481 |
| MmugDNA.12266.1.S1_at   | MmugDNA.12266.1 | 3.75  | 3.53  | 0.35 | 0.11 | 1.16  | 0.442198 | 0.532371 | 0.725402 | 0.719017 |
| MmugDNA.12267.1.S1_at   | MmugDNA.12267.1 | 3.34  | 3.27  | 0.05 | 0.17 | 1.05  | 0.734681 | 0.460948 | 0.885762 | 0.672778 |

|                         |                 |       |       |      |      |       |          |          |          |          |
|-------------------------|-----------------|-------|-------|------|------|-------|----------|----------|----------|----------|
| MmugDNA.12268.1.S1_at   | MmugDNA.12268.1 | 4.75  | 4.7   | 0.21 | 0.1  | 1.03  | 0.939149 | 0.500756 | 0.976863 | 0.699257 |
| MmugDNA.12269.1.S1_s_at | MmugDNA.12269.1 | 4.73  | 4.74  | 0.09 | 0.22 | -1    | 0.973149 | 0.804626 | 0.989572 | 0.88762  |
| MmugDNA.12270.1.S1_at   | MmugDNA.12270.1 | 4.45  | 4.36  | 0.08 | 0.07 | 1.06  | 0.488178 | 0.063166 | 0.752792 | 0.298071 |
| MmugDNA.12271.1.S1_at   | MmugDNA.12271.1 | 6.89  | 6.9   | 0.25 | 0.07 | -1    | 0.699991 | 0.394595 | 0.867253 | 0.627112 |
| MmugDNA.12272.1.S1_at   | MmugDNA.12272.1 | 4.37  | 4.37  | 0.22 | 0.02 | 1     | 0.875898 | 0.812919 | 0.950267 | 0.891875 |
| MmugDNA.12273.1.S1_at   | MmugDNA.12273.1 | 12.8  | 11.89 | 0.14 | 0.35 | 1.88  | 0.009044 | 0.002337 | 0.222023 | 0.071533 |
| MmugDNA.12274.1.S1_at   | MmugDNA.12274.1 | 6.04  | 6.44  | 0.68 | 1.73 | -1.32 | 0.739528 | 0.78419  | 0.888163 | 0.875049 |
| MmugDNA.12275.1.S1_at   | MmugDNA.12275.1 | 4.98  | 5.08  | 0.31 | 0.13 | -1.07 | 0.540128 | 0.608658 | 0.781591 | 0.767185 |
| MmugDNA.12276.1.S1_at   | MmugDNA.12276.1 | 7.81  | 7.61  | 0.69 | 0.33 | 1.15  | 0.994727 | 0.118095 | 0.998151 | 0.385973 |
| MmugDNA.12278.1.S1_at   | MmugDNA.12278.1 | 3.7   | 3.46  | 0.25 | 0.34 | 1.18  | 0.523063 | 0.485471 | 0.77227  | 0.68914  |
| MmugDNA.12279.1.S1_at   | MmugDNA.12279.1 | 5.9   | 5.76  | 0.18 | 0.16 | 1.1   | 0.676766 | 0.34891  | 0.855219 | 0.592939 |
| MmugDNA.1228.1.S1_at    | MmugDNA.1228.1  | 3.63  | 3.4   | 0.32 | 0.1  | 1.17  | 0.645192 | 0.772377 | 0.840224 | 0.867685 |
| MmugDNA.12280.1.S1_at   | MmugDNA.12280.1 | 8.75  | 8.5   | 0.11 | 0.35 | 1.19  | 0.240845 | 0.100275 | 0.593606 | 0.359318 |
| MmugDNA.12281.1.S1_at   | MmugDNA.12281.1 | 5.96  | 6.07  | 0.4  | 0.07 | -1.07 | 0.798415 | 0.731227 | 0.916444 | 0.84425  |
| MmugDNA.12281.1.S1_x_at | MmugDNA.12281.1 | 6.45  | 6.24  | 0.31 | 0.16 | 1.15  | 0.871252 | 0.407806 | 0.948463 | 0.63521  |
| MmugDNA.12282.1.S1_at   | MmugDNA.12282.1 | 5.93  | 5.97  | 0.19 | 0.14 | -1.03 | 0.997823 | 0.058822 | 0.999146 | 0.289228 |
| MmugDNA.12283.1.S1_at   | MmugDNA.12283.1 | 3.78  | 3.57  | 1.22 | 0.1  | 1.16  | 0.292221 | 0.417551 | 0.629464 | 0.642252 |
| MmugDNA.12284.1.S1_at   | MmugDNA.12284.1 | 6.83  | 6.55  | 0.04 | 0.1  | 1.21  | 0.03604  | 0.002584 | 0.338744 | 0.075213 |
| MmugDNA.12285.1.S1_at   | MmugDNA.12285.1 | 3.4   | 3.4   | 0.07 | 0.17 | -1    | 0.734342 | 0.889757 | 0.885576 | 0.937198 |
| MmugDNA.12286.1.S1_at   | MmugDNA.12286.1 | 3.51  | 3.5   | 0.36 | 0.47 | 1.01  | 0.643969 | 0.51243  | 0.839708 | 0.706299 |
| MmugDNA.12287.1.S1_at   | MmugDNA.12287.1 | 8.46  | 8.5   | 0.17 | 0.42 | -1.03 | 0.484266 | 0.720582 | 0.750248 | 0.838346 |
| MmugDNA.12288.1.S1_at   | MmugDNA.12288.1 | 10.14 | 9.95  | 0.27 | 0.3  | 1.14  | 0.089566 | 0.077657 | 0.44526  | 0.323709 |
| MmugDNA.12289.1.S1_at   | MmugDNA.12289.1 | 4.93  | 4.14  | 0.64 | 0.23 | 1.72  | 0.052613 | 0.037795 | 0.378269 | 0.238765 |
| MmugDNA.1229.1.S1_s_at  | MmugDNA.1229.1  | 12.74 | 13.18 | 0.18 | 0.74 | -1.35 | 0.464199 | 0.52184  | 0.739153 | 0.712654 |
| MmugDNA.12291.1.S1_at   | MmugDNA.12291.1 | 7.86  | 7.74  | 0.15 | 0.1  | 1.09  | 0.116913 | 0.031084 | 0.480867 | 0.218117 |
| MmugDNA.12292.1.S1_at   | MmugDNA.12292.1 | 6.9   | 6.07  | 0.68 | 0.57 | 1.77  | 0.218375 | 0.071937 | 0.577884 | 0.314293 |
| MmugDNA.12294.1.S1_at   | MmugDNA.12294.1 | 5.41  | 5.39  | 0.14 | 0.24 | 1.02  | 0.313621 | 0.404954 | 0.645195 | 0.633415 |
| MmugDNA.12295.1.S1_at   | MmugDNA.12295.1 | 5.32  | 5.26  | 0.06 | 0.35 | 1.05  | 0.365356 | 0.579644 | 0.678238 | 0.749254 |
| MmugDNA.12297.1.S1_at   | MmugDNA.12297.1 | 5.41  | 5.54  | 0.68 | 0.37 | -1.09 | 0.328183 | 0.356407 | 0.654312 | 0.598396 |
| MmugDNA.12298.1.S1_x_at | MmugDNA.12298.1 | 3.49  | 3.84  | 0.14 | 0.08 | -1.27 | 0.056589 | 0.048368 | 0.386709 | 0.265081 |
| MmugDNA.12299.1.S1_at   | MmugDNA.12299.1 | 6.05  | 5.97  | 0.12 | 0.94 | 1.06  | 0.835136 | 0.278612 | 0.93317  | 0.542329 |
| MmugDNA.123.1.S1_at     | MmugDNA.123.1   | 7.12  | 8.21  | 0.48 | 1.04 | -2.13 | 0.173773 | 0.206207 | 0.537255 | 0.480377 |
| MmugDNA.1230.1.S1_at    | MmugDNA.1230.1  | 4.54  | 4.27  | 0.17 | 0.1  | 1.2   | 0.111341 | 0.075309 | 0.473544 | 0.319475 |
| MmugDNA.12300.1.S1_at   | MmugDNA.12300.1 | 4.68  | 4.16  | 1.55 | 0.81 | 1.43  | 0.45769  | 0.616632 | 0.735025 | 0.772837 |
| MmugDNA.12301.1.S1_at   | MmugDNA.12301.1 | 3.57  | 3.79  | 0.28 | 0.28 | -1.17 | 0.593956 | 0.501984 | 0.811676 | 0.699986 |
| MmugDNA.12303.1.S1_at   | MmugDNA.12303.1 | 5.42  | 6.11  | 1.33 | 0.51 | -1.61 | 0.826895 | 0.865444 | 0.929656 | 0.923596 |
| MmugDNA.12304.1.S1_at   | MmugDNA.12304.1 | 6.78  | 8.19  | 0.52 | 0.72 | -2.65 | 0.097497 | 0.148542 | 0.456527 | 0.423074 |
| MmugDNA.12306.1.S1_at   | MmugDNA.12306.1 | 5.85  | 5.57  | 0.63 | 0.7  | 1.22  | 0.534465 | 0.73047  | 0.77876  | 0.844017 |
| MmugDNA.9265.1.S1_s_at  | MmugDNA.9265.1  | 11.86 | 11.22 | 0.22 | 0.75 | 1.56  | 0.162927 | 0.164269 | 0.52737  | 0.440539 |
| MmugDNA.12308.1.S1_at   | MmugDNA.12308.1 | 6.66  | 8.34  | 0.67 | 0.62 | -3.22 | 0.06877  | 0.036969 | 0.410653 | 0.236733 |
| MmugDNA.12309.1.S1_at   | MmugDNA.12309.1 | 3.53  | 3.64  | 0.42 | 0.16 | -1.08 | 0.656201 | 0.588016 | 0.845317 | 0.754703 |

|                         |                 |       |       |      |      |       |          |          |          |          |
|-------------------------|-----------------|-------|-------|------|------|-------|----------|----------|----------|----------|
| MmugDNA.1231.1.S1_at    | MmugDNA.1231.1  | 6.85  | 6.43  | 0.68 | 0.43 | 1.33  | 0.580151 | 0.714968 | 0.804451 | 0.834753 |
| MmugDNA.12310.1.S1_at   | MmugDNA.12310.1 | 12.25 | 11.96 | 0.08 | 0.37 | 1.22  | 0.891724 | 0.006793 | 0.956867 | 0.111388 |
| MmugDNA.12311.1.S1_at   | MmugDNA.12311.1 | 5.56  | 5.15  | 1.05 | 0.65 | 1.32  | 0.803477 | 0.611013 | 0.919138 | 0.769004 |
| MmugDNA.12312.1.S1_at   | MmugDNA.12312.1 | 7.65  | 7.63  | 0.34 | 0.27 | 1.02  | 0.422561 | 0.563429 | 0.713604 | 0.738659 |
| MmugDNA.12313.1.S1_at   | MmugDNA.12313.1 | 6.86  | 6.52  | 0.37 | 0.54 | 1.27  | 0.585782 | 0.567862 | 0.807699 | 0.741693 |
| MmugDNA.12316.1.S1_at   | MmugDNA.12316.1 | 5.53  | 6.82  | 0.21 | 0.81 | -2.46 | 0.06324  | 0.058526 | 0.400486 | 0.288646 |
| MmugDNA.12317.1.S1_at   | MmugDNA.12317.1 | 4.85  | 4.94  | 0.15 | 0.16 | -1.06 | 0.489248 | 0.718925 | 0.753638 | 0.83732  |
| MmugDNA.12318.1.S1_at   | MmugDNA.12318.1 | 10.39 | 12.44 | 0.9  | 0.5  | -4.14 | 0.029661 | 0.01222  | 0.315023 | 0.142932 |
| MmugDNA.12319.1.S1_at   | MmugDNA.12319.1 | 5.42  | 5.4   | 0.11 | 0.19 | 1.02  | 0.697484 | 0.787571 | 0.865682 | 0.877098 |
| MmugDNA.1232.1.S1_at    | MmugDNA.1232.1  | 5.78  | 6.66  | 0.22 | 0.51 | -1.83 | 0.056442 | 0.049301 | 0.386477 | 0.266927 |
| MmugDNA.12320.1.S1_at   | MmugDNA.12320.1 | 2.93  | 2.98  | 0.16 | 0.08 | -1.04 | 0.753868 | 0.537193 | 0.895075 | 0.72233  |
| MmugDNA.12322.1.S1_at   | MmugDNA.12322.1 | 4.86  | 5.06  | 0.36 | 0.07 | -1.15 | 0.590324 | 0.626325 | 0.809851 | 0.779698 |
| MmugDNA.12323.1.S1_at   | MmugDNA.12323.1 | 13.17 | 13.27 | 0.12 | 0.08 | -1.07 | 0.109464 | 0.045828 | 0.470811 | 0.258354 |
| MmugDNA.12324.1.S1_at   | MmugDNA.12324.1 | 5.25  | 5.27  | 0.06 | 0.3  | -1.01 | 0.453621 | 0.186124 | 0.732794 | 0.461946 |
| MmugDNA.12325.1.S1_at   | MmugDNA.12325.1 | 5.91  | 5.87  | 0.26 | 0.2  | 1.03  | 0.671796 | 0.810823 | 0.852716 | 0.890845 |
| MmugDNA.12326.1.S1_at   | MmugDNA.12326.1 | 3.77  | 3.86  | 0.08 | 0.18 | -1.06 | 0.869299 | 0.764417 | 0.947917 | 0.863093 |
| MmugDNA.12327.1.S1_at   | MmugDNA.12327.1 | 9.28  | 9.3   | 0.29 | 0.16 | -1.01 | 0.791999 | 0.715347 | 0.913645 | 0.834994 |
| MmugDNA.12329.1.S1_at   | MmugDNA.12329.1 | 11.48 | 12.15 | 0.13 | 0.82 | -1.59 | 0.231748 | 0.290135 | 0.587568 | 0.551134 |
| MmugDNA.1233.1.S1_at    | MmugDNA.1233.1  | 11.45 | 10.73 | 0.09 | 0.23 | 1.64  | 0.00523  | 0.001442 | 0.190821 | 0.057912 |
| MmugDNA.12330.1.S1_at   | MmugDNA.12330.1 | 5.26  | 5.14  | 0.26 | 0.2  | 1.08  | 0.484537 | 0.295815 | 0.750493 | 0.555199 |
| MmugDNA.12331.1.S1_x_at | MmugDNA.12331.1 | 10.64 | 10.09 | 0.35 | 0.35 | 1.47  | 0.177263 | 0.255646 | 0.541333 | 0.523619 |
| MmugDNA.12332.1.S1_at   | MmugDNA.12332.1 | 10.04 | 9.41  | 0.18 | 1.99 | 1.54  | 0.201145 | 0.250861 | 0.563821 | 0.51956  |
| MmugDNA.12333.1.S1_at   | MmugDNA.12333.1 | 8.09  | 8.11  | 0.15 | 0.28 | -1.01 | 0.368053 | 0.088955 | 0.679753 | 0.342807 |
| MmugDNA.12335.1.S1_at   | MmugDNA.12335.1 | 6.19  | 6.68  | 0.4  | 0.34 | -1.41 | 0.819398 | 0.08414  | 0.926528 | 0.335181 |
| MmugDNA.12336.1.S1_at   | MmugDNA.12336.1 | 4.54  | 4.55  | 0.2  | 0.1  | -1.01 | 0.521223 | 0.599676 | 0.771142 | 0.761533 |
| MmugDNA.12337.1.S1_at   | MmugDNA.12337.1 | 5.16  | 3.67  | 0.77 | 0.34 | 2.81  | 0.038658 | 0.012382 | 0.345054 | 0.143958 |
| MmugDNA.12338.1.S1_at   | MmugDNA.12338.1 | 10.58 | 10.03 | 0.18 | 0.16 | 1.46  | 0.011783 | 0.025338 | 0.237691 | 0.199522 |
| MmugDNA.12339.1.S1_at   | MmugDNA.12339.1 | 5.9   | 5.43  | 0.5  | 0.18 | 1.38  | 0.153484 | 0.127712 | 0.517898 | 0.398581 |
| MmugDNA.1234.1.S1_at    | MmugDNA.1234.1  | 5.55  | 5.83  | 0.67 | 0.34 | -1.21 | 0.549323 | 0.256269 | 0.787247 | 0.524079 |
| MmugDNA.12340.1.S1_at   | MmugDNA.12340.1 | 4.67  | 4.53  | 0.58 | 0.21 | 1.1   | 0.492856 | 0.6016   | 0.755888 | 0.762951 |
| MmugDNA.12341.1.S1_at   | MmugDNA.12341.1 | 6.22  | 5.83  | 0.39 | 0.45 | 1.32  | 0.20211  | 0.131713 | 0.564394 | 0.403854 |
| MmugDNA.12343.1.S1_at   | MmugDNA.12343.1 | 6.09  | 5.99  | 0.12 | 0.06 | 1.07  | 0.271131 | 0.11765  | 0.615322 | 0.385352 |
| MmugDNA.12344.1.S1_at   | MmugDNA.12344.1 | 5.8   | 5.79  | 0.07 | 0.06 | 1     | 0.859593 | 0.662345 | 0.943317 | 0.802265 |
| MmugDNA.12345.1.S1_at   | MmugDNA.12345.1 | 10.73 | 11.7  | 0.25 | 0.38 | -1.95 | 0.036253 | 0.022911 | 0.339201 | 0.189395 |
| MmugDNA.12346.1.S1_at   | MmugDNA.12346.1 | 3.97  | 4.19  | 0.43 | 0.62 | -1.16 | 0.498795 | 0.720823 | 0.758705 | 0.838368 |
| MmugDNA.12347.1.S1_at   | MmugDNA.12347.1 | 4.73  | 4.63  | 0.09 | 0.17 | 1.07  | 0.850144 | 0.065501 | 0.939853 | 0.301415 |
| MmugDNA.12348.1.S1_at   | MmugDNA.12348.1 | 6.74  | 6.78  | 0.8  | 0.13 | -1.02 | 0.84984  | 0.964126 | 0.939733 | 0.980052 |
| MmugDNA.1235.1.S1_at    | MmugDNA.1235.1  | 4.07  | 4.08  | 0    | 0.11 | -1.01 | 0.90159  | 0.80566  | 0.960707 | 0.888316 |
| MmugDNA.12351.1.S1_at   | MmugDNA.12351.1 | 5.28  | 5.82  | 0.48 | 0.01 | -1.45 | 0.405381 | 0.495126 | 0.703122 | 0.695319 |
| MmugDNA.12355.1.S1_at   | MmugDNA.12355.1 | 4.05  | 4.32  | 0.17 | 1.04 | -1.21 | 0.446189 | 0.512816 | 0.728175 | 0.70653  |
| MmugDNA.12356.1.S1_at   | MmugDNA.12356.1 | 7.96  | 7.89  | 0.35 | 0.42 | 1.05  | 0.834638 | 0.942747 | 0.932931 | 0.967499 |

|                         |                 |       |       |      |      |       |          |          |          |          |
|-------------------------|-----------------|-------|-------|------|------|-------|----------|----------|----------|----------|
| MmugDNA.12357.1.S1_at   | MmugDNA.12357.1 | 3.62  | 3.59  | 0.11 | 0.09 | 1.02  | 0.969231 | 0.261879 | 0.988281 | 0.528284 |
| MmugDNA.12358.1.S1_at   | MmugDNA.12358.1 | 3.4   | 3.37  | 0.11 | 0.48 | 1.02  | 0.442655 | 0.565763 | 0.725706 | 0.740112 |
| MmugDNA.12359.1.S1_at   | MmugDNA.12359.1 | 6.63  | 6.7   | 0.04 | 0.09 | -1.05 | 0.227088 | 0.385352 | 0.584952 | 0.620818 |
| MmugDNA.1236.1.S1_at    | MmugDNA.1236.1  | 10.95 | 9.79  | 0.06 | 0.35 | 2.23  | 0.009632 | 0.003387 | 0.226235 | 0.083858 |
| MmugDNA.12360.1.S1_at   | MmugDNA.12360.1 | 4.15  | 4.26  | 0.04 | 0.05 | -1.08 | 0.024155 | 0.096864 | 0.294535 | 0.354275 |
| MmugDNA.12362.1.S1_at   | MmugDNA.12362.1 | 5.98  | 6.36  | 0.71 | 0.1  | -1.3  | 0.949268 | 0.989762 | 0.980674 | 0.994108 |
| MmugDNA.12363.1.S1_at   | MmugDNA.12363.1 | 12.29 | 12.25 | 0.2  | 0.29 | 1.03  | 0.709896 | 0.869903 | 0.872725 | 0.926177 |
| MmugDNA.12364.1.S1_at   | MmugDNA.12364.1 | 11.16 | 10.55 | 0.15 | 0.32 | 1.53  | 0.053791 | 0.030603 | 0.380879 | 0.216887 |
| MmugDNA.12366.1.S1_at   | MmugDNA.12366.1 | 3.63  | 3.61  | 0.29 | 0.21 | 1.01  | 0.65275  | 0.75804  | 0.843845 | 0.859249 |
| MmugDNA.12367.1.S1_at   | MmugDNA.12367.1 | 7.09  | 6.55  | 0.28 | 0.76 | 1.46  | 0.334035 | 0.118551 | 0.658024 | 0.38654  |
| MmugDNA.12368.1.S1_at   | MmugDNA.12368.1 | 4.81  | 4.28  | 0.36 | 0.17 | 1.45  | 0.081658 | 0.067247 | 0.432665 | 0.30531  |
| MmugDNA.12369.1.S1_at   | MmugDNA.12369.1 | 3.39  | 3.48  | 0.16 | 0.16 | -1.06 | 0.965046 | 0.162444 | 0.986601 | 0.438575 |
| MmugDNA.1237.1.S1_at    | MmugDNA.1237.1  | 5.82  | 5.32  | 0.66 | 0.22 | 1.41  | 0.217632 | 0.262097 | 0.577214 | 0.528382 |
| MmugDNA.12370.1.S1_at   | MmugDNA.12370.1 | 3.74  | 3.57  | 0.05 | 0.22 | 1.12  | 0.440551 | 0.509889 | 0.724395 | 0.704492 |
| MmugDNA.12372.1.S1_at   | MmugDNA.12372.1 | 4.63  | 4.73  | 0.08 | 0.13 | -1.07 | 0.211877 | 0.658756 | 0.572347 | 0.800473 |
| MmugDNA.12375.1.S1_at   | MmugDNA.12375.1 | 11.85 | 11.44 | 0.14 | 0.15 | 1.33  | 0.024001 | 0.014139 | 0.293798 | 0.15208  |
| MmugDNA.12377.1.S1_at   | MmugDNA.12377.1 | 6.23  | 6.43  | 0.14 | 0.28 | -1.15 | 0.197425 | 0.1833   | 0.560419 | 0.459553 |
| MmugDNA.12378.1.S1_at   | MmugDNA.12378.1 | 6.4   | 6     | 0.21 | 1.01 | 1.32  | 0.222407 | 0.1831   | 0.580951 | 0.459493 |
| MmugDNA.12379.1.S1_at   | MmugDNA.12379.1 | 5.04  | 5.13  | 0.09 | 0.15 | -1.06 | 0.972506 | 0.93878  | 0.989473 | 0.965181 |
| MmugDNA.1238.1.S1_at    | MmugDNA.1238.1  | 3.53  | 3.54  | 0.44 | 0.17 | -1    | 0.882369 | 0.982187 | 0.952793 | 0.990279 |
| MmugDNA.12380.1.S1_at   | MmugDNA.12380.1 | 5.13  | 5.2   | 0.15 | 0.3  | -1.05 | 0.958082 | 0.980943 | 0.984122 | 0.989478 |
| MmugDNA.12381.1.S1_s_at | MmugDNA.12381.1 | 6.8   | 6.46  | 0.43 | 0.65 | 1.27  | 0.94373  | 0.928207 | 0.978535 | 0.959209 |
| MmugDNA.12384.1.S1_at   | MmugDNA.12384.1 | 7.01  | 8.21  | 0.28 | 0.53 | -2.3  | 0.030719 | 0.019773 | 0.319646 | 0.176901 |
| MmugDNA.12385.1.S1_at   | MmugDNA.12385.1 | 12.05 | 11.82 | 0.17 | 0.14 | 1.17  | 0.142201 | 0.094491 | 0.509437 | 0.35125  |
| MmugDNA.12387.1.S1_at   | MmugDNA.12387.1 | 10.66 | 11.09 | 0.2  | 0.1  | -1.35 | 0.056143 | 0.027827 | 0.385905 | 0.208337 |
| MmugDNA.12388.1.S1_at   | MmugDNA.12388.1 | 11    | 11.7  | 0.1  | 0.17 | -1.63 | 0.006286 | 0.002027 | 0.1975   | 0.066885 |
| MmugDNA.12389.1.S1_at   | MmugDNA.12389.1 | 5.24  | 5.62  | 0.14 | 0.07 | -1.31 | 0.012958 | 0.013686 | 0.24501  | 0.149772 |
| MmugDNA.1239.1.S1_at    | MmugDNA.1239.1  | 4.44  | 4.48  | 0.08 | 0.14 | -1.03 | 0.747289 | 0.017853 | 0.891773 | 0.168774 |
| MmugDNA.12392.1.S1_at   | MmugDNA.12392.1 | 3.6   | 3.54  | 0.15 | 0.04 | 1.05  | 0.444061 | 0.513715 | 0.726677 | 0.707217 |
| MmugDNA.12394.1.S1_at   | MmugDNA.12394.1 | 11.13 | 11.16 | 0.12 | 0.08 | -1.02 | 0.996129 | 0.858233 | 0.998461 | 0.919151 |
| MmugDNA.12395.1.S1_s_at | MmugDNA.12395.1 | 10.67 | 10.65 | 0.08 | 0.09 | 1.02  | 0.486982 | 0.010946 | 0.751857 | 0.13621  |
| MmugDNA.12396.1.S1_at   | MmugDNA.12396.1 | 8.33  | 8.84  | 3.25 | 0.78 | -1.43 | 0.719114 | 0.892085 | 0.876813 | 0.938526 |
| MmugDNA.12397.1.S1_at   | MmugDNA.12397.1 | 3.52  | 3.49  | 0.12 | 0.2  | 1.02  | 0.585605 | 0.637878 | 0.807608 | 0.787216 |
| MmugDNA.12398.1.S1_at   | MmugDNA.12398.1 | 10.66 | 9.91  | 0.17 | 0.38 | 1.69  | 0.058169 | 0.038491 | 0.390093 | 0.241138 |
| MmugDNA.124.1.S1_at     | MmugDNA.124.1   | 8.82  | 8.06  | 0.3  | 0.42 | 1.69  | 0.052894 | 0.04578  | 0.378593 | 0.258303 |
| MmugDNA.1240.1.S1_at    | MmugDNA.1240.1  | 10.89 | 10.35 | 0.21 | 0.35 | 1.45  | 0.100598 | 0.103839 | 0.461009 | 0.364519 |
| MmugDNA.12400.1.S1_at   | MmugDNA.12400.1 | 5.96  | 6.12  | 0.1  | 0.17 | -1.12 | 0.123033 | 0.121642 | 0.488452 | 0.39083  |
| MmugDNA.12401.1.S1_at   | MmugDNA.12401.1 | 6.13  | 6.14  | 0.12 | 0.13 | -1.01 | 0.789486 | 0.192488 | 0.912587 | 0.467952 |
| MmugDNA.12402.1.S1_at   | MmugDNA.12402.1 | 3.08  | 2.99  | 0.05 | 0.12 | 1.06  | 0.154604 | 0.161013 | 0.519189 | 0.437161 |
| MmugDNA.12403.1.S1_at   | MmugDNA.12403.1 | 9.48  | 10.03 | 0.39 | 0.38 | -1.46 | 0.06972  | 0.057882 | 0.412879 | 0.28702  |
| MmugDNA.12404.1.S1_at   | MmugDNA.12404.1 | 3.94  | 3.71  | 0.98 | 0.03 | 1.17  | 0.246619 | 0.181257 | 0.597806 | 0.457798 |

|                         |                 |       |       |      |      |       |          |          |          |          |
|-------------------------|-----------------|-------|-------|------|------|-------|----------|----------|----------|----------|
| MmugDNA.12405.1.S1_at   | MmugDNA.12405.1 | 11.9  | 12.03 | 0.12 | 0.11 | -1.1  | 0.208044 | 0.206834 | 0.569945 | 0.481008 |
| MmugDNA.12405.1.S1_s_at | MmugDNA.12405.1 | 11.36 | 11.58 | 0.15 | 0.1  | -1.16 | 0.197505 | 0.201501 | 0.560513 | 0.476036 |
| MmugDNA.12406.1.S1_s_at | MmugDNA.12406.1 | 6.79  | 6.68  | 0.07 | 0.26 | 1.08  | 0.73314  | 0.912994 | 0.884853 | 0.951043 |
| MmugDNA.12407.1.S1_at   | MmugDNA.12407.1 | 4.22  | 4.35  | 0.02 | 0.16 | -1.1  | 0.218663 | 0.100136 | 0.578242 | 0.359064 |
| MmugDNA.12409.1.S1_at   | MmugDNA.12409.1 | 5.58  | 5.58  | 0.07 | 0.05 | -1    | 0.725434 | 0.401457 | 0.880256 | 0.631018 |
| MmugDNA.1241.1.S1_at    | MmugDNA.1241.1  | 4.89  | 4.89  | 0.21 | 0.25 | -1    | 0.502612 | 0.716921 | 0.760484 | 0.836147 |
| MmugDNA.12410.1.S1_at   | MmugDNA.12410.1 | 3.99  | 4.25  | 0.16 | 0.26 | -1.2  | 0.695912 | 0.528026 | 0.865073 | 0.716426 |
| MmugDNA.12411.1.S1_at   | MmugDNA.12411.1 | 4.42  | 4.4   | 0    | 0.19 | 1.01  | 0.454672 | 0.274283 | 0.733343 | 0.538751 |
| MmugDNA.12412.1.S1_s_at | MmugDNA.12412.1 | 10.94 | 10.35 | 0.09 | 0.46 | 1.5   | 0.10414  | 0.080343 | 0.464201 | 0.327965 |
| MmugDNA.12413.1.S1_at   | MmugDNA.12413.1 | 6.07  | 6.58  | 0.42 | 1.06 | -1.43 | 0.544265 | 0.709509 | 0.784293 | 0.831686 |
| MmugDNA.12414.1.S1_at   | MmugDNA.12414.1 | 4.75  | 4.89  | 0.28 | 0.27 | -1.11 | 0.571817 | 0.688278 | 0.800389 | 0.818009 |
| MmugDNA.12415.1.S1_at   | MmugDNA.12415.1 | 7.38  | 8.36  | 0.35 | 1.02 | -1.97 | 0.184225 | 0.198735 | 0.54806  | 0.473391 |
| MmugDNA.12416.1.S1_at   | MmugDNA.12416.1 | 8.6   | 7.89  | 0.13 | 0.35 | 1.63  | 0.01209  | 0.005375 | 0.239963 | 0.101199 |
| MmugDNA.12417.1.S1_at   | MmugDNA.12417.1 | 9.14  | 9.02  | 0.05 | 0.07 | 1.08  | 0.083252 | 0.458186 | 0.435702 | 0.671077 |
| MmugDNA.12418.1.S1_at   | MmugDNA.12418.1 | 8.33  | 8.02  | 0.13 | 0.38 | 1.24  | 0.190769 | 0.02348  | 0.553513 | 0.192031 |
| MmugDNA.12419.1.S1_at   | MmugDNA.12419.1 | 9.07  | 9.94  | 0.08 | 0.23 | -1.83 | 0.002296 | 0.000609 | 0.161798 | 0.042176 |
| MmugDNA.1242.1.S1_at    | MmugDNA.1242.1  | 6.24  | 6.45  | 0.13 | 0.26 | -1.16 | 0.326773 | 0.313897 | 0.653212 | 0.568094 |
| MmugDNA.12420.1.S1_at   | MmugDNA.12420.1 | 10.53 | 9.84  | 0.14 | 0.46 | 1.62  | 0.230671 | 0.100027 | 0.587222 | 0.3589   |
| MmugDNA.12421.1.S1_at   | MmugDNA.12421.1 | 6.21  | 6.3   | 0.03 | 0.22 | -1.06 | 0.774764 | 0.585266 | 0.905445 | 0.752837 |
| MmugDNA.12422.1.S1_at   | MmugDNA.12422.1 | 11.95 | 11.58 | 0.12 | 0.25 | 1.29  | 0.222325 | 0.041284 | 0.580835 | 0.247995 |
| MmugDNA.12422.1.S1_s_at | MmugDNA.12422.1 | 12.11 | 11.77 | 0.14 | 0.24 | 1.26  | 0.290413 | 0.05416  | 0.628091 | 0.278084 |
| MmugDNA.12423.1.S1_at   | MmugDNA.12423.1 | 4.29  | 4.31  | 0.36 | 0.47 | -1.01 | 0.659852 | 0.5198   | 0.847376 | 0.71135  |
| MmugDNA.12424.1.S1_at   | MmugDNA.12424.1 | 5.8   | 6.01  | 0.16 | 0.1  | -1.16 | 0.619931 | 0.546297 | 0.82586  | 0.727896 |
| MmugDNA.12425.1.S1_at   | MmugDNA.12425.1 | 3.3   | 3.67  | 0.04 | 0.33 | -1.29 | 0.042281 | 0.05776  | 0.354563 | 0.286677 |
| MmugDNA.12427.1.S1_at   | MmugDNA.12427.1 | 4.78  | 4.58  | 0.18 | 0.3  | 1.15  | 0.23328  | 0.219964 | 0.588091 | 0.49344  |
| MmugDNA.12428.1.S1_at   | MmugDNA.12428.1 | 4.25  | 4.63  | 0.78 | 0.65 | -1.3  | 0.874245 | 0.952539 | 0.949565 | 0.973066 |
| MmugDNA.12429.1.S1_at   | MmugDNA.12429.1 | 3.32  | 3.45  | 0.19 | 0.21 | -1.1  | 0.425537 | 0.629764 | 0.715135 | 0.781989 |
| MmugDNA.1243.1.S1_at    | MmugDNA.1243.1  | 3.53  | 3.47  | 0.07 | 0.1  | 1.04  | 0.608968 | 0.164427 | 0.820226 | 0.440678 |
| MmugDNA.12430.1.S1_at   | MmugDNA.12430.1 | 9.88  | 8.91  | 0.45 | 0.81 | 1.95  | 0.162338 | 0.186338 | 0.526658 | 0.46218  |
| MmugDNA.12431.1.S1_at   | MmugDNA.12431.1 | 10.61 | 10.9  | 0.17 | 0.05 | -1.22 | 0.041358 | 0.012524 | 0.351624 | 0.144385 |
| MmugDNA.12432.1.S1_at   | MmugDNA.12432.1 | 3.49  | 3.84  | 0.26 | 0.28 | -1.28 | 0.444554 | 0.04527  | 0.727044 | 0.257084 |
| MmugDNA.12433.1.S1_s_at | MmugDNA.12433.1 | 7.07  | 6.32  | 0.32 | 0.28 | 1.68  | 0.055755 | 0.047173 | 0.384612 | 0.261761 |
| MmugDNA.12434.1.S1_at   | MmugDNA.12434.1 | 3.76  | 4.43  | 0.11 | 0.36 | -1.59 | 0.072976 | 0.055785 | 0.418323 | 0.282044 |
| MmugDNA.12435.1.S1_at   | MmugDNA.12435.1 | 2.76  | 3.2   | 0.16 | 0.2  | -1.36 | 0.070015 | 0.02284  | 0.413492 | 0.189246 |
| MmugDNA.12437.1.S1_at   | MmugDNA.12437.1 | 6.06  | 6.14  | 0.73 | 0.79 | -1.05 | 0.712958 | 0.192955 | 0.874274 | 0.468455 |
| MmugDNA.12438.1.S1_at   | MmugDNA.12438.1 | 10.85 | 10.37 | 0.16 | 0.21 | 1.39  | 0.056358 | 0.022055 | 0.386404 | 0.185927 |
| MmugDNA.12439.1.S1_at   | MmugDNA.12439.1 | 10.58 | 11    | 0.21 | 0.31 | -1.34 | 0.369333 | 0.152048 | 0.680609 | 0.42682  |
| MmugDNA.12440.1.S1_s_at | MmugDNA.12440.1 | 4.07  | 4.26  | 0.27 | 0.17 | -1.14 | 0.3895   | 0.619582 | 0.692994 | 0.774788 |
| MmugDNA.12441.1.S1_at   | MmugDNA.12441.1 | 4.7   | 4.85  | 0.13 | 0.25 | -1.11 | 0.581513 | 0.635496 | 0.80522  | 0.785405 |
| MmugDNA.12442.1.S1_at   | MmugDNA.12442.1 | 6.97  | 6.49  | 1.01 | 0.12 | 1.39  | 0.370185 | 0.080586 | 0.681113 | 0.328361 |
| MmugDNA.12444.1.S1_at   | MmugDNA.12444.1 | 5.8   | 5.64  | 0.2  | 0.33 | 1.12  | 0.521522 | 0.553826 | 0.771406 | 0.732843 |

|                         |                 |       |       |      |      |       |          |          |          |          |
|-------------------------|-----------------|-------|-------|------|------|-------|----------|----------|----------|----------|
| MmugDNA.12445.1.S1_at   | MmugDNA.12445.1 | 3.52  | 3.47  | 0.2  | 0.03 | 1.04  | 0.55908  | 0.697143 | 0.793647 | 0.824045 |
| MmugDNA.12447.1.S1_at   | MmugDNA.12447.1 | 4.12  | 3.61  | 0.46 | 0.1  | 1.42  | 0.101582 | 0.056642 | 0.461313 | 0.284094 |
| MmugDNA.12448.1.S1_at   | MmugDNA.12448.1 | 3.67  | 3.21  | 0.31 | 0.11 | 1.38  | 0.199082 | 0.301219 | 0.562104 | 0.559356 |
| MmugDNA.12449.1.S1_at   | MmugDNA.12449.1 | 4.4   | 4.62  | 0.06 | 0.06 | -1.17 | 0.008718 | 0.007443 | 0.22051  | 0.115858 |
| MmugDNA.1245.1.S1_at    | MmugDNA.1245.1  | 11.04 | 10.75 | 0.09 | 0.49 | 1.23  | 0.89425  | 0.968352 | 0.957854 | 0.982571 |
| MmugDNA.12451.1.S1_at   | MmugDNA.12451.1 | 4.37  | 4.33  | 0.22 | 0.45 | 1.03  | 0.953786 | 0.998025 | 0.982872 | 0.999008 |
| MmugDNA.12452.1.S1_at   | MmugDNA.12452.1 | 10.99 | 11.19 | 0.02 | 0.27 | -1.14 | 0.340008 | 0.465671 | 0.661611 | 0.675863 |
| MmugDNA.12453.1.S1_at   | MmugDNA.12453.1 | 10.42 | 10.22 | 0.05 | 0.23 | 1.15  | 0.160774 | 0.21533  | 0.525884 | 0.489062 |
| MmugDNA.12454.1.S1_at   | MmugDNA.12454.1 | 7.87  | 7.75  | 0.68 | 0.31 | 1.09  | 0.859518 | 0.119951 | 0.943274 | 0.388671 |
| MmugDNA.12455.1.S1_at   | MmugDNA.12455.1 | 3.17  | 3.21  | 0.09 | 0.12 | -1.03 | 0.326004 | 0.253079 | 0.653176 | 0.521415 |
| MmugDNA.12456.1.S1_at   | MmugDNA.12456.1 | 11.42 | 10.31 | 0.27 | 0.11 | 2.16  | 0.002795 | 0.000851 | 0.16633  | 0.047111 |
| MmugDNA.12457.1.S1_at   | MmugDNA.12457.1 | 5.13  | 5.74  | 0.72 | 0.63 | -1.53 | 0.367567 | 0.156265 | 0.679502 | 0.43161  |
| MmugDNA.12458.1.S1_at   | MmugDNA.12458.1 | 6.27  | 6.28  | 0.09 | 0.01 | -1.01 | 0.748108 | 0.881434 | 0.892265 | 0.93235  |
| MmugDNA.1246.1.S1_at    | MmugDNA.1246.1  | 8.77  | 8.08  | 0.12 | 0.11 | 1.62  | 0.002306 | 0.000584 | 0.161798 | 0.041486 |
| MmugDNA.12462.1.S1_at   | MmugDNA.12462.1 | 5.02  | 4.87  | 0.1  | 0.07 | 1.11  | 0.227856 | 0.251171 | 0.585266 | 0.519897 |
| MmugDNA.12463.1.S1_at   | MmugDNA.12463.1 | 6.12  | 5.43  | 0.76 | 0.47 | 1.62  | 0.219172 | 0.079969 | 0.578574 | 0.327352 |
| MmugDNA.12464.1.S1_at   | MmugDNA.12464.1 | 5.52  | 5.49  | 0.09 | 0.11 | 1.02  | 0.838278 | 0.449823 | 0.934646 | 0.665284 |
| MmugDNA.12466.1.S1_at   | MmugDNA.12466.1 | 6.52  | 6.51  | 0.02 | 0.17 | 1.01  | 0.493634 | 0.445047 | 0.756295 | 0.66224  |
| MmugDNA.12467.1.S1_at   | MmugDNA.12467.1 | 11.03 | 10    | 0.06 | 0.29 | 2.04  | 0.006786 | 0.001355 | 0.201708 | 0.056687 |
| MmugDNA.12468.1.S1_s_at | MmugDNA.12468.1 | 11.56 | 11.07 | 0.2  | 0.22 | 1.4   | 0.023732 | 0.002951 | 0.292771 | 0.079945 |
| MmugDNA.1247.1.S1_s_at  | MmugDNA.1247.1  | 6.43  | 5.97  | 1.03 | 0.27 | 1.38  | 0.417188 | 0.438746 | 0.710385 | 0.657658 |
| MmugDNA.12470.1.S1_at   | MmugDNA.12470.1 | 11.87 | 10.76 | 0.18 | 0.18 | 2.16  | 0.001791 | 0.000279 | 0.154452 | 0.03453  |
| MmugDNA.12471.1.S1_at   | MmugDNA.12471.1 | 5.68  | 5.4   | 0.85 | 0.43 | 1.21  | 0.598273 | 0.789745 | 0.813939 | 0.878519 |
| MmugDNA.12472.1.S1_at   | MmugDNA.12472.1 | 4.42  | 4.42  | 0.1  | 0.07 | 1     | 0.233776 | 0.316629 | 0.588317 | 0.569963 |
| MmugDNA.12473.1.S1_at   | MmugDNA.12473.1 | 7.21  | 8.29  | 0.45 | 0.54 | -2.11 | 0.04641  | 0.014504 | 0.363009 | 0.153682 |
| MmugDNA.12474.1.S1_at   | MmugDNA.12474.1 | 7.41  | 6.59  | 0.65 | 0.64 | 1.76  | 0.431647 | 0.574491 | 0.718606 | 0.745928 |
| MmugDNA.12475.1.S1_s_at | MmugDNA.12475.1 | 9.89  | 8.98  | 0.15 | 0.31 | 1.87  | 0.009249 | 0.001475 | 0.223361 | 0.058588 |
| MmugDNA.12476.1.S1_at   | MmugDNA.12476.1 | 3.47  | 3.33  | 0.21 | 0.09 | 1.1   | 0.999344 | 0.504794 | 0.999798 | 0.701855 |
| MmugDNA.12477.1.S1_at   | MmugDNA.12477.1 | 2.95  | 2.98  | 0.24 | 0.11 | -1.02 | 0.948073 | 0.930701 | 0.980091 | 0.960648 |
| MmugDNA.12479.1.S1_at   | MmugDNA.12479.1 | 6.55  | 7.93  | 0.69 | 0.68 | -2.61 | 0.033734 | 0.012234 | 0.330119 | 0.142996 |
| MmugDNA.12481.1.S1_at   | MmugDNA.12481.1 | 4.47  | 4.8   | 0.41 | 0.63 | -1.26 | 0.534928 | 0.100198 | 0.778906 | 0.359195 |
| MmugDNA.12482.1.S1_at   | MmugDNA.12482.1 | 4.16  | 4.16  | 0.09 | 0.11 | 1     | 0.85121  | 0.900738 | 0.940204 | 0.943538 |
| MmugDNA.12485.1.S1_at   | MmugDNA.12485.1 | 10.97 | 10.13 | 0.16 | 0.55 | 1.79  | 0.070298 | 0.048503 | 0.413911 | 0.265472 |
| MmugDNA.12486.1.S1_at   | MmugDNA.12486.1 | 4.16  | 4.11  | 0.72 | 0.14 | 1.04  | 0.34503  | 0.557436 | 0.66494  | 0.735031 |
| MmugDNA.12488.1.S1_at   | MmugDNA.12488.1 | 12.12 | 12.25 | 0.26 | 0.26 | -1.1  | 0.239025 | 0.151103 | 0.59213  | 0.425782 |
| MmugDNA.12489.1.S1_at   | MmugDNA.12489.1 | 10.51 | 9.52  | 0.23 | 0.13 | 1.99  | 0.003001 | 0.000831 | 0.171022 | 0.046851 |
| MmugDNA.1249.1.S1_at    | MmugDNA.1249.1  | 4.06  | 4.36  | 0.17 | 0.16 | -1.24 | 0.143187 | 0.145864 | 0.510106 | 0.419888 |
| MmugDNA.12491.1.S1_at   | MmugDNA.12491.1 | 9.74  | 9.6   | 0.46 | 0.27 | 1.1   | 0.923659 | 0.614613 | 0.970375 | 0.771367 |
| MmugDNA.12492.1.S1_at   | MmugDNA.12492.1 | 5.57  | 6.12  | 0.36 | 0.29 | -1.47 | 0.209592 | 0.211422 | 0.570957 | 0.485559 |
| MmugDNA.12493.1.S1_at   | MmugDNA.12493.1 | 6.66  | 6.7   | 0.36 | 0.24 | -1.03 | 0.386626 | 0.215847 | 0.691563 | 0.489536 |
| MmugDNA.12494.1.S1_at   | MmugDNA.12494.1 | 6.4   | 6.39  | 0.14 | 0.13 | 1.01  | 0.564265 | 0.576042 | 0.796461 | 0.746951 |

|                         |                 |       |       |      |      |       |          |          |          |          |
|-------------------------|-----------------|-------|-------|------|------|-------|----------|----------|----------|----------|
| MmugDNA.12495.1.S1_at   | MmugDNA.12495.1 | 7.39  | 7.41  | 0.04 | 0.01 | -1.01 | 0.62524  | 0.280431 | 0.82872  | 0.543648 |
| MmugDNA.12496.1.S1_at   | MmugDNA.12496.1 | 7.12  | 6.76  | 0.18 | 0.19 | 1.29  | 0.072834 | 0.148964 | 0.417993 | 0.423294 |
| MmugDNA.12497.1.S1_at   | MmugDNA.12497.1 | 6.64  | 6.72  | 0.16 | 0.06 | -1.05 | 0.5176   | 0.663676 | 0.768927 | 0.803086 |
| MmugDNA.12498.1.S1_at   | MmugDNA.12498.1 | 4.21  | 4.09  | 0.3  | 0.05 | 1.09  | 0.58935  | 0.685022 | 0.80924  | 0.816304 |
| MmugDNA.24190.1.S1_s_at | MmugDNA.24190.1 | 10.75 | 10.58 | 0.61 | 0.57 | 1.12  | 0.270027 | 0.39611  | 0.614612 | 0.627916 |
| MmugDNA.1250.1.S1_at    | MmugDNA.1250.1  | 5.61  | 5.74  | 0.1  | 0.11 | -1.09 | 0.230307 | 0.339439 | 0.587222 | 0.586093 |
| MmugDNA.12500.1.S1_at   | MmugDNA.12500.1 | 3.25  | 3.14  | 0.11 | 0.07 | 1.08  | 0.341069 | 0.196718 | 0.662243 | 0.471783 |
| MmugDNA.12502.1.S1_at   | MmugDNA.12502.1 | 3.55  | 3.64  | 0.12 | 0.24 | -1.06 | 0.158604 | 0.272922 | 0.52369  | 0.53761  |
| MmugDNA.12504.1.S1_at   | MmugDNA.12504.1 | 11.14 | 10.21 | 0.12 | 0.25 | 1.9   | 0.00648  | 0.005087 | 0.199625 | 0.099108 |
| MmugDNA.12506.1.S1_at   | MmugDNA.12506.1 | 4.9   | 4.95  | 0.01 | 0.07 | -1.03 | 0.76896  | 0.482401 | 0.902867 | 0.687259 |
| MmugDNA.12507.1.S1_at   | MmugDNA.12507.1 | 10.36 | 9.45  | 0.07 | 0.53 | 1.87  | 0.037368 | 0.013045 | 0.341309 | 0.14696  |
| MmugDNA.12508.1.S1_at   | MmugDNA.12508.1 | 5.51  | 5.72  | 0.16 | 0.13 | -1.16 | 0.144251 | 0.328119 | 0.510664 | 0.577873 |
| MmugDNA.12509.1.S1_at   | MmugDNA.12509.1 | 5.76  | 5.44  | 0.27 | 0.17 | 1.25  | 0.161791 | 0.324782 | 0.526573 | 0.575311 |
| MmugDNA.12510.1.S1_at   | MmugDNA.12510.1 | 7.85  | 8.1   | 0.24 | 0.37 | -1.19 | 0.19196  | 0.298426 | 0.554963 | 0.557131 |
| MmugDNA.12512.1.S1_at   | MmugDNA.12512.1 | 2.97  | 2.95  | 0.04 | 0.21 | 1.02  | 0.982391 | 0.563214 | 0.993449 | 0.738468 |
| MmugDNA.12513.1.S1_at   | MmugDNA.12513.1 | 6.52  | 6.72  | 0.05 | 0.11 | -1.15 | 0.069349 | 0.061345 | 0.411972 | 0.29448  |
| MmugDNA.12514.1.S1_at   | MmugDNA.12514.1 | 3.99  | 4.1   | 0.08 | 0.12 | -1.08 | 0.748618 | 0.522953 | 0.89251  | 0.713429 |
| MmugDNA.12517.1.S1_at   | MmugDNA.12517.1 | 3.8   | 3.7   | 0.48 | 0.19 | 1.08  | 0.390511 | 0.402454 | 0.693724 | 0.631481 |
| MmugDNA.12518.1.S1_at   | MmugDNA.12518.1 | 4.7   | 5.56  | 0.44 | 0.49 | -1.82 | 0.161898 | 0.3587   | 0.526573 | 0.600178 |
| MmugDNA.12519.1.S1_at   | MmugDNA.12519.1 | 5.31  | 5.41  | 0.07 | 0.25 | -1.07 | 0.914577 | 0.855894 | 0.966289 | 0.917744 |
| MmugDNA.1252.1.S1_at    | MmugDNA.1252.1  | 4.37  | 5.06  | 0.26 | 1.36 | -1.62 | 0.472623 | 0.582684 | 0.743886 | 0.751307 |
| MmugDNA.1252.1.S1_s_at  | MmugDNA.1252.1  | 3.7   | 4.02  | 0.3  | 1.33 | -1.25 | 0.335748 | 0.429468 | 0.659165 | 0.650931 |
| MmugDNA.12520.1.S1_at   | MmugDNA.12520.1 | 6.71  | 8.38  | 0.56 | 1.08 | -3.18 | 0.095614 | 0.087893 | 0.453501 | 0.341301 |
| MmugDNA.12521.1.S1_at   | MmugDNA.12521.1 | 8.88  | 9.09  | 0.38 | 0.28 | -1.15 | 0.799162 | 0.44509  | 0.916874 | 0.662281 |
| MmugDNA.12522.1.S1_at   | MmugDNA.12522.1 | 7.69  | 7.49  | 0.11 | 0.13 | 1.16  | 0.070587 | 0.051223 | 0.414439 | 0.271799 |
| MmugDNA.12523.1.S1_at   | MmugDNA.12523.1 | 4.5   | 4.17  | 0.57 | 0.16 | 1.25  | 0.430462 | 0.528987 | 0.718048 | 0.71703  |
| MmugDNA.12525.1.S1_at   | MmugDNA.12525.1 | 5.43  | 6.25  | 0.01 | 0.62 | -1.76 | 0.031218 | 0.022327 | 0.32089  | 0.187022 |
| MmugDNA.12526.1.S1_at   | MmugDNA.12526.1 | 5.04  | 4.96  | 0.25 | 0.4  | 1.06  | 0.910106 | 0.871146 | 0.964415 | 0.92679  |
| MmugDNA.12527.1.S1_at   | MmugDNA.12527.1 | 5.87  | 6.02  | 0.14 | 0.21 | -1.11 | 0.174252 | 0.175282 | 0.537904 | 0.452061 |
| MmugDNA.12528.1.S1_at   | MmugDNA.12528.1 | 12.24 | 12.19 | 0.11 | 0.09 | 1.03  | 0.296062 | 0.321531 | 0.632176 | 0.573226 |
| MmugDNA.1253.1.S1_at    | MmugDNA.1253.1  | 10.52 | 9.45  | 0.17 | 0.42 | 2.1   | 0.020327 | 0.010235 | 0.277448 | 0.1326   |
| MmugDNA.12531.1.S1_at   | MmugDNA.12531.1 | 3.81  | 3.79  | 0.04 | 0.16 | 1.02  | 0.931549 | 0.821194 | 0.973537 | 0.8971   |
| MmugDNA.12532.1.S1_at   | MmugDNA.12532.1 | 4.36  | 4.57  | 0.11 | 0.26 | -1.16 | 0.618184 | 0.348261 | 0.825111 | 0.592446 |
| MmugDNA.12534.1.S1_at   | MmugDNA.12534.1 | 5.7   | 5.74  | 0.14 | 0.22 | -1.03 | 0.841734 | 0.280017 | 0.936215 | 0.543369 |
| MmugDNA.12536.1.S1_at   | MmugDNA.12536.1 | 5.29  | 6.09  | 0.41 | 0.54 | -1.74 | 0.104305 | 0.070566 | 0.464351 | 0.311781 |
| MmugDNA.12537.1.S1_at   | MmugDNA.12537.1 | 3.18  | 3.22  | 0.09 | 0.17 | -1.03 | 0.952406 | 0.968015 | 0.982188 | 0.982304 |
| MmugDNA.12538.1.S1_at   | MmugDNA.12538.1 | 4.51  | 4.88  | 0.01 | 0.19 | -1.29 | 0.073145 | 0.029507 | 0.418452 | 0.213475 |
| MmugDNA.1254.1.S1_at    | MmugDNA.1254.1  | 7.36  | 6.82  | 0.01 | 0.02 | 1.45  | 0.000001 | 0.000382 | 0.047602 | 0.037273 |
| MmugDNA.12541.1.S1_at   | MmugDNA.12541.1 | 3.07  | 3.24  | 0.01 | 0.1  | -1.12 | 0.048242 | 0.054274 | 0.368148 | 0.278456 |
| MmugDNA.12542.1.S1_at   | MmugDNA.12542.1 | 6.39  | 7.11  | 0.34 | 0.18 | -1.64 | 0.033681 | 0.022238 | 0.330119 | 0.18659  |
| MmugDNA.12545.1.S1_at   | MmugDNA.12545.1 | 3.9   | 3.85  | 0.03 | 0.49 | 1.04  | 0.502127 | 0.650416 | 0.760244 | 0.795636 |



|                         |                 |       |       |      |      |       |          |          |          |          |
|-------------------------|-----------------|-------|-------|------|------|-------|----------|----------|----------|----------|
| MmugDNA.12547.1.S1_at   | MmugDNA.12547.1 | 4.74  | 4.02  | 1.3  | 0.2  | 1.64  | 0.338612 | 0.46191  | 0.660988 | 0.673419 |
| MmugDNA.1255.1.S1_at    | MmugDNA.1255.1  | 6.99  | 7.15  | 0.15 | 0.1  | -1.12 | 0.484211 | 0.176315 | 0.750235 | 0.452752 |
| MmugDNA.12552.1.S1_at   | MmugDNA.12552.1 | 5.11  | 4.94  | 0.18 | 0.21 | 1.12  | 0.726529 | 0.091591 | 0.881058 | 0.346713 |
| MmugDNA.12553.1.S1_at   | MmugDNA.12553.1 | 3.58  | 3.66  | 0.16 | 0.25 | -1.06 | 0.343079 | 0.537068 | 0.663407 | 0.722261 |
| MmugDNA.12553.1.S1_s_at | MmugDNA.12553.1 | 5     | 4.95  | 0.18 | 0.28 | 1.04  | 0.417607 | 0.522682 | 0.710641 | 0.713295 |
| MmugDNA.12554.1.S1_at   | MmugDNA.12554.1 | 4.66  | 4.55  | 0.14 | 0.09 | 1.08  | 0.50315  | 0.173113 | 0.760689 | 0.449765 |
| MmugDNA.12558.1.S1_at   | MmugDNA.12558.1 | 6.38  | 7.76  | 0.45 | 0.04 | -2.61 | 0.003116 | 0.00145  | 0.172335 | 0.057999 |
| MmugDNA.1256.1.S1_at    | MmugDNA.1256.1  | 5.16  | 5.15  | 0.25 | 0.11 | 1     | 0.612953 | 0.734967 | 0.822493 | 0.846604 |
| MmugDNA.12561.1.S1_at   | MmugDNA.12561.1 | 5.95  | 6.23  | 0.26 | 0.14 | -1.21 | 0.306253 | 0.124188 | 0.639466 | 0.394496 |
| MmugDNA.12562.1.S1_at   | MmugDNA.12562.1 | 6     | 5.99  | 0.22 | 0.27 | 1.01  | 0.87868  | 0.983288 | 0.95133  | 0.990726 |
| MmugDNA.12565.1.S1_at   | MmugDNA.12565.1 | 4.74  | 4.96  | 0.16 | 0.18 | -1.16 | 0.230559 | 0.26616  | 0.587222 | 0.531988 |
| MmugDNA.12566.1.S1_at   | MmugDNA.12566.1 | 5.98  | 6.09  | 0.27 | 0.14 | -1.08 | 0.906693 | 0.612551 | 0.96296  | 0.770077 |
| MmugDNA.12569.1.S1_at   | MmugDNA.12569.1 | 6.28  | 4.77  | 0.88 | 0.54 | 2.85  | 0.07689  | 0.08549  | 0.425728 | 0.337495 |
| MmugDNA.12572.1.S1_at   | MmugDNA.12572.1 | 5.21  | 4.95  | 0.43 | 0.15 | 1.2   | 0.275671 | 0.393564 | 0.617878 | 0.626497 |
| MmugDNA.12575.1.S1_at   | MmugDNA.12575.1 | 9.32  | 9.17  | 0.08 | 0.13 | 1.11  | 0.294962 | 0.213131 | 0.631503 | 0.487054 |
| MmugDNA.17018.1.S1_s_at | MmugDNA.17018.1 | 9.55  | 9.49  | 0.12 | 0.07 | 1.04  | 0.194987 | 0.131999 | 0.558557 | 0.404036 |
| MmugDNA.12576.1.S1_at   | MmugDNA.12576.1 | 3.97  | 3.61  | 0.69 | 0.11 | 1.28  | 0.148476 | 0.127615 | 0.513907 | 0.398557 |
| MmugDNA.12578.1.S1_at   | MmugDNA.12578.1 | 3.28  | 3.1   | 0.19 | 0.12 | 1.13  | 0.096949 | 0.056816 | 0.455899 | 0.284531 |
| MmugDNA.12579.1.S1_at   | MmugDNA.12579.1 | 11.27 | 10.86 | 0.07 | 0.82 | 1.33  | 0.138381 | 0.056037 | 0.505745 | 0.2826   |
| MmugDNA.1258.1.S1_at    | MmugDNA.1258.1  | 7.69  | 7.55  | 0.28 | 0.43 | 1.1   | 0.386036 | 0.496105 | 0.690975 | 0.695877 |
| MmugDNA.12580.1.S1_at   | MmugDNA.12580.1 | 3.74  | 3.88  | 0.23 | 0.17 | -1.1  | 0.462328 | 0.428227 | 0.738226 | 0.649721 |
| MmugDNA.12581.1.S1_at   | MmugDNA.12581.1 | 7.13  | 7.27  | 0.08 | 0.1  | -1.1  | 0.113475 | 0.052716 | 0.47686  | 0.275218 |
| MmugDNA.12581.1.S1_s_at | MmugDNA.12581.1 | 5.89  | 5.87  | 0.09 | 0.15 | 1.01  | 0.844153 | 0.132071 | 0.937436 | 0.404046 |
| MmugDNA.12582.1.S1_at   | MmugDNA.12582.1 | 3.9   | 4.1   | 0.1  | 0.14 | -1.15 | 0.083422 | 0.081043 | 0.43582  | 0.329189 |
| MmugDNA.12583.1.S1_at   | MmugDNA.12583.1 | 10.75 | 10.6  | 0.21 | 0.19 | 1.1   | 0.673144 | 0.867463 | 0.853359 | 0.924699 |
| MmugDNA.12584.1.S1_at   | MmugDNA.12584.1 | 10.26 | 10.11 | 0.25 | 0.38 | 1.11  | 0.610911 | 0.164454 | 0.821394 | 0.440678 |
| MmugDNA.12585.1.S1_at   | MmugDNA.12585.1 | 3.31  | 3.37  | 0.1  | 0.07 | -1.05 | 0.630819 | 0.773539 | 0.832374 | 0.868348 |
| MmugDNA.12586.1.S1_at   | MmugDNA.12586.1 | 11.3  | 11.27 | 0.27 | 0.26 | 1.02  | 0.61356  | 0.743555 | 0.822835 | 0.851395 |
| MmugDNA.12588.1.S1_at   | MmugDNA.12588.1 | 9.57  | 8.26  | 0.23 | 0.5  | 2.47  | 0.012482 | 0.003461 | 0.241976 | 0.084734 |
| MmugDNA.12589.1.S1_at   | MmugDNA.12589.1 | 9.25  | 7.51  | 0.51 | 1.27 | 3.34  | 0.245888 | 0.239552 | 0.597293 | 0.510209 |
| MmugDNA.1259.1.S1_at    | MmugDNA.1259.1  | 12.29 | 12.52 | 0.16 | 0.13 | -1.17 | 0.139728 | 0.001122 | 0.507376 | 0.052924 |
| MmugDNA.1259.1.S1_s_at  | MmugDNA.1259.1  | 12.54 | 12.64 | 0.06 | 0.1  | -1.07 | 0.078449 | 0.000455 | 0.428503 | 0.038572 |
| MmugDNA.12590.1.S1_at   | MmugDNA.12590.1 | 7.34  | 6.99  | 0.9  | 0.36 | 1.28  | 0.206318 | 0.28443  | 0.568606 | 0.546637 |
| MmugDNA.12591.1.S1_s_at | MmugDNA.12591.1 | 11.27 | 11.34 | 0.05 | 0.29 | -1.05 | 0.675514 | 0.823674 | 0.854576 | 0.898726 |
| MmugDNA.12594.1.S1_at   | MmugDNA.12594.1 | 5.45  | 5.16  | 0.07 | 0.68 | 1.23  | 0.502609 | 0.46842  | 0.760484 | 0.677714 |
| MmugDNA.12597.1.S1_at   | MmugDNA.12597.1 | 4.63  | 4.77  | 0.05 | 0.03 | -1.1  | 0.018644 | 0.004899 | 0.270832 | 0.097632 |
| MmugDNA.12600.1.S1_at   | MmugDNA.12600.1 | 4.46  | 5.26  | 0.6  | 0.13 | -1.74 | 0.209034 | 0.256174 | 0.570648 | 0.524069 |
| MmugDNA.12601.1.S1_at   | MmugDNA.12601.1 | 9.78  | 9.34  | 0.02 | 0.38 | 1.36  | 0.130514 | 0.106661 | 0.496888 | 0.369213 |
| MmugDNA.12603.1.S1_at   | MmugDNA.12603.1 | 3.99  | 3.99  | 1.4  | 0.31 | 1.01  | 0.390886 | 0.342347 | 0.693845 | 0.588413 |
| MmugDNA.12605.1.S1_at   | MmugDNA.12605.1 | 7.06  | 7.09  | 0.22 | 0.14 | -1.02 | 0.255814 | 0.251641 | 0.603657 | 0.520387 |
| MmugDNA.12606.1.S1_at   | MmugDNA.12606.1 | 3.79  | 3.71  | 0.11 | 0.11 | 1.06  | 0.613222 | 0.285777 | 0.822591 | 0.547484 |

|                         |                 |       |       |      |      |       |          |          |          |          |
|-------------------------|-----------------|-------|-------|------|------|-------|----------|----------|----------|----------|
| MmugDNA.12607.1.S1_at   | MmugDNA.12607.1 | 7.58  | 7.73  | 0.25 | 0.08 | -1.11 | 0.456229 | 0.232826 | 0.734359 | 0.504441 |
| MmugDNA.12607.1.S1_x_at | MmugDNA.12607.1 | 7.67  | 7.69  | 0.18 | 0.09 | -1.02 | 0.733235 | 0.578555 | 0.884906 | 0.748589 |
| MmugDNA.12608.1.S1_at   | MmugDNA.12608.1 | 4.37  | 4.38  | 0.19 | 0.19 | -1.01 | 0.551316 | 0.738313 | 0.788586 | 0.848258 |
| MmugDNA.12609.1.S1_at   | MmugDNA.12609.1 | 8.72  | 9.21  | 0.35 | 0.85 | -1.4  | 0.271671 | 0.359793 | 0.615767 | 0.601077 |
| MmugDNA.1261.1.S1_at    | MmugDNA.1261.1  | 7.26  | 7.09  | 0.39 | 0.49 | 1.12  | 0.74638  | 0.478643 | 0.891402 | 0.684657 |
| MmugDNA.12612.1.S1_s_at | MmugDNA.12612.1 | 7.34  | 7.26  | 0.46 | 0.72 | 1.06  | 0.497122 | 0.692382 | 0.757861 | 0.820984 |
| MmugDNA.12613.1.S1_at   | MmugDNA.12613.1 | 7.21  | 7.19  | 0.35 | 0.14 | 1.01  | 0.658446 | 0.850482 | 0.846599 | 0.91497  |
| MmugDNA.12614.1.S1_at   | MmugDNA.12614.1 | 11.89 | 12.81 | 0.61 | 0.31 | -1.89 | 0.032936 | 0.020092 | 0.326734 | 0.178033 |
| MmugDNA.12615.1.S1_at   | MmugDNA.12615.1 | 5.3   | 6.53  | 0.24 | 0.38 | -2.34 | 0.005898 | 0.014019 | 0.19355  | 0.151595 |
| MmugDNA.12616.1.S1_at   | MmugDNA.12616.1 | 8.39  | 8.35  | 0.2  | 0.38 | 1.03  | 0.771974 | 0.917329 | 0.903991 | 0.953807 |
| MmugDNA.12618.1.S1_at   | MmugDNA.12618.1 | 3     | 3.17  | 0.08 | 0.1  | -1.13 | 0.077644 | 0.308078 | 0.427619 | 0.564219 |
| MmugDNA.12619.1.S1_at   | MmugDNA.12619.1 | 3.6   | 3.89  | 0.07 | 0.15 | -1.23 | 0.036276 | 0.032169 | 0.339201 | 0.222069 |
| MmugDNA.12620.1.S1_at   | MmugDNA.12620.1 | 2.59  | 2.73  | 0.05 | 0.16 | -1.1  | 0.855408 | 0.973041 | 0.941542 | 0.985401 |
| MmugDNA.12621.1.S1_at   | MmugDNA.12621.1 | 4.69  | 4.06  | 0.21 | 0.33 | 1.55  | 0.114172 | 0.355801 | 0.47744  | 0.597864 |
| MmugDNA.12626.1.S1_s_at | MmugDNA.12626.1 | 9.33  | 9.3   | 0.26 | 0.2  | 1.02  | 0.388589 | 0.540237 | 0.692653 | 0.724221 |
| MmugDNA.12629.1.S1_at   | MmugDNA.12629.1 | 4.07  | 4.22  | 0.13 | 0.17 | -1.11 | 0.133491 | 0.114549 | 0.50015  | 0.381098 |
| MmugDNA.1263.1.S1_at    | MmugDNA.1263.1  | 7.75  | 7.13  | 0.12 | 0.41 | 1.54  | 0.135229 | 0.092951 | 0.501995 | 0.349044 |
| MmugDNA.12630.1.S1_at   | MmugDNA.12630.1 | 3.1   | 3.04  | 0.43 | 0.19 | 1.04  | 0.516667 | 0.306697 | 0.768185 | 0.563264 |
| MmugDNA.12631.1.S1_at   | MmugDNA.12631.1 | 4.42  | 4.59  | 0.14 | 0.1  | -1.12 | 0.321892 | 0.377629 | 0.65054  | 0.615071 |
| MmugDNA.12632.1.S1_at   | MmugDNA.12632.1 | 5.26  | 5.52  | 0.09 | 0.1  | -1.2  | 0.04684  | 0.057463 | 0.364195 | 0.285751 |
| MmugDNA.12633.1.S1_at   | MmugDNA.12633.1 | 7.47  | 7.04  | 0.14 | 0.32 | 1.35  | 0.257993 | 0.285279 | 0.605348 | 0.547192 |
| MmugDNA.12635.1.S1_at   | MmugDNA.12635.1 | 4.42  | 4.42  | 0.25 | 0.14 | 1     | 0.466496 | 0.617175 | 0.740215 | 0.773242 |
| MmugDNA.12636.1.S1_at   | MmugDNA.12636.1 | 7.28  | 7.07  | 0.32 | 0.21 | 1.15  | 0.149588 | 0.053309 | 0.514118 | 0.276463 |
| MmugDNA.12637.1.S1_at   | MmugDNA.12637.1 | 8.23  | 7.33  | 0.13 | 0.15 | 1.87  | 0.001991 | 0.000593 | 0.155636 | 0.041912 |
| MmugDNA.12638.1.S1_at   | MmugDNA.12638.1 | 5.43  | 5.19  | 0.06 | 0.6  | 1.18  | 0.494568 | 0.604271 | 0.756791 | 0.764558 |
| MmugDNA.12639.1.S1_at   | MmugDNA.12639.1 | 6.14  | 5.99  | 0.17 | 0.19 | 1.11  | 0.966456 | 0.212113 | 0.987299 | 0.486036 |
| MmugDNA.1264.1.S1_at    | MmugDNA.1264.1  | 3.53  | 3.89  | 0.3  | 0.19 | -1.28 | 0.718673 | 0.318351 | 0.876537 | 0.571192 |
| MmugDNA.12641.1.S1_at   | MmugDNA.12641.1 | 6     | 5.84  | 0.56 | 0.43 | 1.11  | 0.798533 | 0.935725 | 0.91649  | 0.963726 |
| MmugDNA.12642.1.S1_at   | MmugDNA.12642.1 | 2.9   | 2.98  | 0.02 | 0.22 | -1.06 | 0.874798 | 0.907728 | 0.949796 | 0.94778  |
| MmugDNA.12643.1.S1_at   | MmugDNA.12643.1 | 5.74  | 4.98  | 0.56 | 0.26 | 1.69  | 0.103755 | 0.067544 | 0.46354  | 0.305949 |
| MmugDNA.12644.1.S1_at   | MmugDNA.12644.1 | 11.18 | 11.64 | 0.12 | 0.22 | -1.38 | 0.047962 | 0.04507  | 0.367582 | 0.256789 |
| MmugDNA.12645.1.S1_at   | MmugDNA.12645.1 | 8.4   | 9.02  | 0.3  | 0.15 | -1.53 | 0.010703 | 0.012074 | 0.23109  | 0.142158 |
| MmugDNA.12646.1.S1_at   | MmugDNA.12646.1 | 9.65  | 9.45  | 0.1  | 0.05 | 1.15  | 0.021197 | 0.020208 | 0.282524 | 0.178561 |
| MmugDNA.12647.1.S1_at   | MmugDNA.12647.1 | 10.11 | 8.99  | 0.43 | 0.48 | 2.18  | 0.052822 | 0.046205 | 0.378449 | 0.259359 |
| MmugDNA.12649.1.S1_at   | MmugDNA.12649.1 | 3.18  | 2.99  | 0.11 | 0.13 | 1.14  | 0.160864 | 0.162871 | 0.525925 | 0.438966 |
| MmugDNA.12650.1.S1_at   | MmugDNA.12650.1 | 7.62  | 7.51  | 0.07 | 0.66 | 1.08  | 0.981838 | 0.956219 | 0.993423 | 0.975088 |
| MmugDNA.12651.1.S1_at   | MmugDNA.12651.1 | 6.72  | 6.85  | 0.29 | 0.85 | -1.09 | 0.236716 | 0.260595 | 0.590504 | 0.527103 |
| MmugDNA.12652.1.S1_at   | MmugDNA.12652.1 | 3.57  | 3.61  | 0.13 | 0.29 | -1.03 | 0.700316 | 0.884507 | 0.867396 | 0.934199 |
| MmugDNA.12654.1.S1_at   | MmugDNA.12654.1 | 3.69  | 3.51  | 0.15 | 0.07 | 1.13  | 0.098717 | 0.149573 | 0.458569 | 0.424095 |
| MmugDNA.12655.1.S1_at   | MmugDNA.12655.1 | 3.97  | 4.04  | 0.22 | 0.08 | -1.05 | 0.663244 | 0.209427 | 0.848941 | 0.483069 |
| MmugDNA.12656.1.S1_at   | MmugDNA.12656.1 | 8.82  | 8.81  | 0.48 | 1.35 | 1     | 0.902036 | 0.816413 | 0.960872 | 0.89413  |

|                         |                 |      |      |      |      |       |          |          |          |          |
|-------------------------|-----------------|------|------|------|------|-------|----------|----------|----------|----------|
| MmugDNA.12658.1.S1_at   | MmugDNA.12658.1 | 2.89 | 2.94 | 0.02 | 0.26 | -1.03 | 0.56531  | 0.401763 | 0.796979 | 0.631068 |
| MmugDNA.1266.1.S1_at    | MmugDNA.1266.1  | 5.02 | 5.01 | 0.17 | 0.21 | 1     | 0.545391 | 0.773963 | 0.784919 | 0.868585 |
| MmugDNA.12660.1.S1_at   | MmugDNA.12660.1 | 9.08 | 9.96 | 0.35 | 0.4  | -1.83 | 0.049007 | 0.026968 | 0.370479 | 0.205423 |
| MmugDNA.12661.1.S1_at   | MmugDNA.12661.1 | 5.54 | 5.43 | 0.23 | 0.05 | 1.07  | 0.796458 | 0.470592 | 0.91552  | 0.678925 |
| MmugDNA.12662.1.S1_at   | MmugDNA.12662.1 | 7.69 | 6.79 | 0.31 | 0.85 | 1.87  | 0.507739 | 0.64746  | 0.763087 | 0.793487 |
| MmugDNA.12663.1.S1_at   | MmugDNA.12663.1 | 7.34 | 7.22 | 0.29 | 0.26 | 1.09  | 0.905249 | 0.163059 | 0.962162 | 0.439224 |
| MmugDNA.12664.1.S1_at   | MmugDNA.12664.1 | 8.55 | 9.64 | 0.41 | 0.2  | -2.12 | 0.012092 | 0.019038 | 0.239963 | 0.173644 |
| MmugDNA.12665.1.S1_at   | MmugDNA.12665.1 | 5.25 | 5.25 | 0.04 | 0    | -1    | 0.830672 | 0.994605 | 0.93155  | 0.99666  |
| MmugDNA.12667.1.S1_at   | MmugDNA.12667.1 | 4.48 | 4.63 | 0.28 | 0.08 | -1.11 | 0.564889 | 0.729365 | 0.796834 | 0.843541 |
| MmugDNA.12668.1.S1_at   | MmugDNA.12668.1 | 5.13 | 5.35 | 0.33 | 0.6  | -1.17 | 0.645985 | 0.328577 | 0.840597 | 0.578148 |
| MmugDNA.12668.1.S1_s_at | MmugDNA.12668.1 | 5.75 | 6.02 | 0.28 | 0.58 | -1.21 | 0.421612 | 0.315579 | 0.713163 | 0.569053 |
| MmugDNA.12669.1.S1_at   | MmugDNA.12669.1 | 5.86 | 5.93 | 0.11 | 0.33 | -1.05 | 0.218146 | 0.343964 | 0.577744 | 0.58962  |
| MmugDNA.1267.1.S1_s_at  | MmugDNA.1267.1  | 4.7  | 5.96 | 0.48 | 0.34 | -2.4  | 0.043969 | 0.033836 | 0.357596 | 0.227575 |
| MmugDNA.12670.1.S1_at   | MmugDNA.12670.1 | 3.84 | 3.79 | 0.32 | 0.09 | 1.03  | 0.483462 | 0.367876 | 0.749882 | 0.607469 |
| MmugDNA.12671.1.S1_at   | MmugDNA.12671.1 | 6.49 | 7.04 | 0.47 | 0.69 | -1.46 | 0.834307 | 0.536836 | 0.932663 | 0.722119 |
| MmugDNA.12672.1.S1_s_at | MmugDNA.12672.1 | 4.87 | 4.76 | 0.13 | 0.07 | 1.07  | 0.733996 | 0.351954 | 0.885333 | 0.595336 |
| MmugDNA.12673.1.S1_at   | MmugDNA.12673.1 | 4.7  | 4.72 | 0.2  | 0.04 | -1.01 | 0.443643 | 0.558944 | 0.726292 | 0.735944 |
| MmugDNA.12674.1.S1_at   | MmugDNA.12674.1 | 4.64 | 4.67 | 0.09 | 0.18 | -1.02 | 0.200609 | 0.283139 | 0.5634   | 0.545694 |
| MmugDNA.12675.1.S1_at   | MmugDNA.12675.1 | 4.64 | 4.59 | 0.06 | 0.06 | 1.04  | 0.686568 | 0.888413 | 0.85983  | 0.93636  |
| MmugDNA.12676.1.S1_at   | MmugDNA.12676.1 | 4.67 | 4.66 | 0.04 | 0.05 | 1     | 0.367932 | 0.522392 | 0.679739 | 0.713139 |
| MmugDNA.12677.1.S1_at   | MmugDNA.12677.1 | 4.26 | 4.34 | 0.25 | 0.24 | -1.06 | 0.485668 | 0.59844  | 0.751099 | 0.760839 |
| MmugDNA.12678.1.S1_at   | MmugDNA.12678.1 | 4.69 | 4.67 | 0.14 | 0.06 | 1.01  | 0.479918 | 0.678269 | 0.747918 | 0.812064 |
| MmugDNA.12679.1.S1_at   | MmugDNA.12679.1 | 3.8  | 3.65 | 0.21 | 0.08 | 1.11  | 0.200962 | 0.439726 | 0.563821 | 0.65842  |
| MmugDNA.1268.1.S1_at    | MmugDNA.1268.1  | 6.01 | 5.2  | 0.52 | 0.63 | 1.75  | 0.162283 | 0.065427 | 0.526638 | 0.301415 |
| MmugDNA.12680.1.S1_at   | MmugDNA.12680.1 | 4.08 | 4.02 | 0.01 | 0.15 | 1.04  | 0.587672 | 0.344226 | 0.808643 | 0.589762 |
| MmugDNA.12681.1.S1_at   | MmugDNA.12681.1 | 4.47 | 4.16 | 0.9  | 0.31 | 1.24  | 0.195086 | 0.230228 | 0.558557 | 0.502084 |
| MmugDNA.12682.1.S1_at   | MmugDNA.12682.1 | 7.23 | 7.33 | 0.06 | 0.15 | -1.07 | 0.248129 | 0.325065 | 0.599076 | 0.575545 |
| MmugDNA.12683.1.S1_at   | MmugDNA.12683.1 | 4.97 | 5.29 | 0.14 | 0.05 | -1.25 | 0.064714 | 0.169858 | 0.403239 | 0.446544 |
| MmugDNA.12684.1.S1_at   | MmugDNA.12684.1 | 4.35 | 4.33 | 0.28 | 0.18 | 1.02  | 0.88911  | 0.649006 | 0.955613 | 0.794525 |
| MmugDNA.12685.1.S1_at   | MmugDNA.12685.1 | 8.41 | 8.31 | 0.3  | 0.12 | 1.07  | 0.738864 | 0.564648 | 0.888031 | 0.739414 |
| MmugDNA.12686.1.S1_at   | MmugDNA.12686.1 | 3.37 | 3.32 | 0.16 | 0.18 | 1.04  | 0.686795 | 0.868665 | 0.859938 | 0.925405 |
| MmugDNA.12687.1.S1_at   | MmugDNA.12687.1 | 7.57 | 7.4  | 0.11 | 0.17 | 1.13  | 0.446131 | 0.252512 | 0.728161 | 0.521079 |
| MmugDNA.12689.1.S1_at   | MmugDNA.12689.1 | 3.44 | 3.29 | 0.14 | 0.18 | 1.11  | 0.349586 | 0.330854 | 0.667902 | 0.57958  |
| MmugDNA.12690.1.S1_at   | MmugDNA.12690.1 | 6.93 | 6.66 | 0.21 | 0.16 | 1.21  | 0.14885  | 0.122467 | 0.51391  | 0.392348 |
| MmugDNA.12692.1.S1_at   | MmugDNA.12692.1 | 8.86 | 8.39 | 0.5  | 0.53 | 1.39  | 0.345566 | 0.380644 | 0.665245 | 0.6173   |
| MmugDNA.12693.1.S1_at   | MmugDNA.12693.1 | 7.67 | 7.17 | 0.31 | 0.79 | 1.42  | 0.99873  | 0.943355 | 0.999529 | 0.967832 |
| MmugDNA.12694.1.S1_at   | MmugDNA.12694.1 | 5.14 | 5.09 | 0.49 | 0.14 | 1.04  | 0.790005 | 0.102345 | 0.912878 | 0.362527 |
| MmugDNA.12696.1.S1_at   | MmugDNA.12696.1 | 5.38 | 5.29 | 0.2  | 0.09 | 1.06  | 0.556819 | 0.516133 | 0.792106 | 0.70873  |
| MmugDNA.12697.1.S1_at   | MmugDNA.12697.1 | 5.21 | 4.93 | 0.32 | 0.15 | 1.22  | 0.134037 | 0.182136 | 0.500624 | 0.458636 |
| MmugDNA.12698.1.S1_at   | MmugDNA.12698.1 | 4.19 | 4.04 | 0.11 | 0.09 | 1.11  | 0.115242 | 0.372125 | 0.478726 | 0.610981 |
| MmugDNA.12699.1.S1_at   | MmugDNA.12699.1 | 3.84 | 3.56 | 0.02 | 0.16 | 1.21  | 0.10183  | 0.197295 | 0.461313 | 0.472213 |

|                         |                 |       |       |      |      |       |          |          |          |          |
|-------------------------|-----------------|-------|-------|------|------|-------|----------|----------|----------|----------|
| MmugDNA.127.1.S1_at     | MmugDNA.127.1   | 6.35  | 6.41  | 0.57 | 0.24 | -1.04 | 0.73609  | 0.555688 | 0.88645  | 0.734    |
| MmugDNA.127.1.S1_x_at   | MmugDNA.127.1   | 9.03  | 9.23  | 0.18 | 0.04 | -1.15 | 0.103414 | 0.001995 | 0.462896 | 0.066264 |
| MmugDNA.12700.1.S1_at   | MmugDNA.12700.1 | 4.12  | 4.19  | 0.04 | 0.08 | -1.05 | 0.244687 | 0.276159 | 0.596321 | 0.540169 |
| MmugDNA.12701.1.S1_at   | MmugDNA.12701.1 | 4.88  | 4.49  | 1.04 | 0.2  | 1.31  | 0.195158 | 0.209293 | 0.558582 | 0.48303  |
| MmugDNA.12702.1.S1_at   | MmugDNA.12702.1 | 4.05  | 3.92  | 0.11 | 0.05 | 1.1   | 0.081789 | 0.05955  | 0.432853 | 0.290548 |
| MmugDNA.12704.1.S1_s_at | MmugDNA.12704.1 | 7.54  | 7.75  | 0.11 | 0.13 | -1.16 | 0.219373 | 0.047146 | 0.578759 | 0.261745 |
| MmugDNA.12705.1.S1_at   | MmugDNA.12705.1 | 5.21  | 5.43  | 0.11 | 0.15 | -1.17 | 0.090169 | 0.094725 | 0.445655 | 0.351535 |
| MmugDNA.12706.1.S1_at   | MmugDNA.12706.1 | 9.21  | 9.96  | 0.21 | 0.47 | -1.68 | 0.101412 | 0.156923 | 0.461313 | 0.432372 |
| MmugDNA.12707.1.S1_at   | MmugDNA.12707.1 | 5.58  | 6.27  | 0.41 | 0.59 | -1.62 | 0.085638 | 0.037136 | 0.43967  | 0.2372   |
| MmugDNA.12708.1.S1_at   | MmugDNA.12708.1 | 8.88  | 7.45  | 0.08 | 0.42 | 2.7   | 0.0041   | 0.011826 | 0.181739 | 0.140866 |
| MmugDNA.12709.1.S1_at   | MmugDNA.12709.1 | 6.85  | 6.92  | 0.41 | 0.33 | -1.05 | 0.567878 | 0.702558 | 0.798321 | 0.827615 |
| MmugDNA.1271.1.S1_at    | MmugDNA.1271.1  | 4.91  | 5.25  | 0.29 | 0.2  | -1.26 | 0.434918 | 0.489954 | 0.72094  | 0.692051 |
| MmugDNA.12710.1.S1_at   | MmugDNA.12710.1 | 4.29  | 4.25  | 0.16 | 0.15 | 1.03  | 0.372189 | 0.236554 | 0.682724 | 0.507364 |
| MmugDNA.12712.1.S1_s_at | MmugDNA.12712.1 | 10.62 | 10.26 | 0.35 | 0.69 | 1.28  | 0.658811 | 0.840308 | 0.846726 | 0.909001 |
| MmugDNA.12713.1.S1_at   | MmugDNA.12713.1 | 5.89  | 5.89  | 0.3  | 0    | 1     | 0.364285 | 0.228881 | 0.677295 | 0.501124 |
| MmugDNA.12714.1.S1_at   | MmugDNA.12714.1 | 9.43  | 9.01  | 0.11 | 0.34 | 1.33  | 0.041305 | 0.019976 | 0.35151  | 0.177532 |
| MmugDNA.12715.1.S1_s_at | MmugDNA.12715.1 | 10.88 | 10.8  | 0.24 | 0.2  | 1.05  | 0.463949 | 0.198993 | 0.738998 | 0.473569 |
| MmugDNA.12716.1.S1_at   | MmugDNA.12716.1 | 7.68  | 7.76  | 0.06 | 0.09 | -1.06 | 0.200063 | 0.102156 | 0.563056 | 0.362212 |
| MmugDNA.12717.1.S1_at   | MmugDNA.12717.1 | 5.79  | 6.16  | 0.17 | 0.06 | -1.29 | 0.024865 | 0.011004 | 0.296866 | 0.136623 |
| MmugDNA.12718.1.S1_at   | MmugDNA.12718.1 | 7.72  | 7.82  | 0.13 | 0.11 | -1.07 | 0.345421 | 0.542282 | 0.665175 | 0.725385 |
| MmugDNA.12719.1.S1_at   | MmugDNA.12719.1 | 3.82  | 3.81  | 0.21 | 0.14 | 1.01  | 0.692393 | 0.843493 | 0.863378 | 0.910881 |
| MmugDNA.1272.1.S1_at    | MmugDNA.1272.1  | 6.69  | 6.73  | 0.21 | 0.1  | -1.03 | 0.556676 | 0.709882 | 0.79203  | 0.831863 |
| MmugDNA.17946.1.S1_s_at | MmugDNA.17946.1 | 8.35  | 8.1   | 0.24 | 0.58 | 1.19  | 0.287307 | 0.332232 | 0.625926 | 0.580686 |
| MmugDNA.12721.1.S1_at   | MmugDNA.12721.1 | 4.46  | 4.43  | 0.22 | 0.11 | 1.03  | 0.31967  | 0.256278 | 0.649068 | 0.524079 |
| MmugDNA.12722.1.S1_at   | MmugDNA.12722.1 | 3.23  | 3.03  | 0.2  | 0.22 | 1.15  | 0.694141 | 0.865163 | 0.864407 | 0.923491 |
| MmugDNA.12723.1.S1_at   | MmugDNA.12723.1 | 5.41  | 5.54  | 0.15 | 0.15 | -1.1  | 0.29502  | 0.073811 | 0.631503 | 0.317146 |
| MmugDNA.12724.1.S1_at   | MmugDNA.12724.1 | 5     | 5.2   | 0.05 | 0.09 | -1.15 | 0.033979 | 0.101835 | 0.330689 | 0.361805 |
| MmugDNA.12726.1.S1_at   | MmugDNA.12726.1 | 5.88  | 6.02  | 0.39 | 0.06 | -1.11 | 0.613998 | 0.783692 | 0.823039 | 0.87473  |
| MmugDNA.12727.1.S1_at   | MmugDNA.12727.1 | 10.54 | 8.76  | 0.44 | 0.32 | 3.43  | 0.005638 | 0.002021 | 0.191943 | 0.066833 |
| MmugDNA.12729.1.S1_at   | MmugDNA.12729.1 | 3.7   | 3.69  | 0.13 | 0.08 | 1.01  | 0.396586 | 0.5517   | 0.697108 | 0.731155 |
| MmugDNA.1273.1.S1_at    | MmugDNA.1273.1  | 4.39  | 4.48  | 0.13 | 0.2  | -1.06 | 0.585594 | 0.638491 | 0.807608 | 0.78765  |
| MmugDNA.12730.1.S1_at   | MmugDNA.12730.1 | 6.76  | 6.9   | 0.06 | 0.02 | -1.1  | 0.021643 | 0.018705 | 0.283201 | 0.171763 |
| MmugDNA.12731.1.S1_at   | MmugDNA.12731.1 | 4.43  | 4.54  | 0.06 | 0.04 | -1.08 | 0.068764 | 0.135254 | 0.410653 | 0.407325 |
| MmugDNA.12732.1.S1_at   | MmugDNA.12732.1 | 4.28  | 4.11  | 0.12 | 0.18 | 1.12  | 0.616552 | 0.1621   | 0.824231 | 0.438244 |
| MmugDNA.12733.1.S1_at   | MmugDNA.12733.1 | 4.44  | 4.51  | 0.02 | 0.08 | -1.05 | 0.62218  | 0.684574 | 0.827294 | 0.816019 |
| MmugDNA.12734.1.S1_at   | MmugDNA.12734.1 | 6.42  | 6.2   | 0.25 | 1.35 | 1.17  | 0.818901 | 0.796469 | 0.92651  | 0.882693 |
| MmugDNA.12735.1.S1_at   | MmugDNA.12735.1 | 6.99  | 7.08  | 0.24 | 0.16 | -1.06 | 0.778278 | 0.929986 | 0.907408 | 0.960154 |
| MmugDNA.12739.1.S1_at   | MmugDNA.12739.1 | 10.86 | 10.62 | 0.34 | 0.36 | 1.18  | 0.192969 | 0.2447   | 0.556235 | 0.514521 |
| MmugDNA.1274.1.S1_at    | MmugDNA.1274.1  | 5.55  | 5.63  | 0.31 | 0.22 | -1.06 | 0.743335 | 0.289115 | 0.890141 | 0.55027  |
| MmugDNA.31816.1.S1_s_at | MmugDNA.31816.1 | 12.39 | 12.95 | 0.1  | 0.23 | -1.48 | 0.041036 | 0.02833  | 0.350537 | 0.210111 |
| MmugDNA.12742.1.S1_at   | MmugDNA.12742.1 | 3.47  | 3.44  | 0.1  | 0.23 | 1.02  | 0.555121 | 0.774715 | 0.791244 | 0.868833 |

|                         |                 |       |       |      |      |       |          |          |          |          |
|-------------------------|-----------------|-------|-------|------|------|-------|----------|----------|----------|----------|
| MmugDNA.12744.1.S1_at   | MmugDNA.12744.1 | 3.33  | 3.36  | 0.02 | 0.23 | -1.02 | 0.640473 | 0.810821 | 0.837628 | 0.890845 |
| MmugDNA.12746.1.S1_at   | MmugDNA.12746.1 | 11.67 | 12.15 | 0.07 | 0.09 | -1.39 | 0.001696 | 0.000644 | 0.15365  | 0.042928 |
| MmugDNA.27345.1.S1_at   | MmugDNA.27345.1 | 12.38 | 12.5  | 0.09 | 0.18 | -1.08 | 0.310845 | 0.123452 | 0.642785 | 0.393482 |
| MmugDNA.27345.1.S1_s_at | MmugDNA.27345.1 | 12.86 | 12.91 | 0.11 | 0.17 | -1.03 | 0.235089 | 0.107318 | 0.589325 | 0.370219 |
| MmugDNA.12747.1.S1_at   | MmugDNA.12747.1 | 3.83  | 3.94  | 0.24 | 0.14 | -1.08 | 0.647629 | 0.60686  | 0.841554 | 0.766111 |
| MmugDNA.1275.1.S1_at    | MmugDNA.1275.1  | 7.97  | 7.35  | 0.34 | 0.3  | 1.54  | 0.044331 | 0.015997 | 0.358414 | 0.160458 |
| MmugDNA.1275.1.S1_x_at  | MmugDNA.1275.1  | 7.84  | 7.34  | 0.25 | 0.16 | 1.41  | 0.032496 | 0.007075 | 0.325032 | 0.113284 |
| MmugDNA.12750.1.S1_at   | MmugDNA.12750.1 | 4.84  | 5.1   | 0.37 | 0.17 | -1.2  | 0.176676 | 0.187414 | 0.540348 | 0.46345  |
| MmugDNA.12752.1.S1_s_at | MmugDNA.12752.1 | 12.27 | 11.66 | 0.09 | 0.47 | 1.53  | 0.054767 | 0.044892 | 0.382361 | 0.256424 |
| MmugDNA.12753.1.S1_at   | MmugDNA.12753.1 | 6.23  | 6     | 0.15 | 0.27 | 1.18  | 0.104242 | 0.152478 | 0.464257 | 0.427287 |
| MmugDNA.12754.1.S1_s_at | MmugDNA.12754.1 | 4.39  | 3.95  | 0.27 | 0.1  | 1.35  | 0.06324  | 0.048758 | 0.400486 | 0.265764 |
| MmugDNA.12755.1.S1_s_at | MmugDNA.12755.1 | 7.77  | 8.13  | 0.17 | 0.22 | -1.28 | 0.197234 | 0.260993 | 0.560187 | 0.527363 |
| MmugDNA.12756.1.S1_at   | MmugDNA.12756.1 | 5.67  | 5.73  | 0.13 | 0.07 | -1.04 | 0.852696 | 0.877461 | 0.940647 | 0.930158 |
| MmugDNA.12758.1.S1_at   | MmugDNA.12758.1 | 6.9   | 7.11  | 0.27 | 0.21 | -1.16 | 0.2539   | 0.249473 | 0.602339 | 0.518532 |
| MmugDNA.1276.1.S1_at    | MmugDNA.1276.1  | 4.67  | 3.48  | 0.74 | 0.14 | 2.28  | 0.087665 | 0.165903 | 0.442009 | 0.442326 |
| MmugDNA.12760.1.S1_at   | MmugDNA.12760.1 | 7.77  | 5.72  | 0.95 | 0.73 | 4.13  | 0.035189 | 0.020105 | 0.335371 | 0.178091 |
| MmugDNA.12761.1.S1_at   | MmugDNA.12761.1 | 6.71  | 6.23  | 0.3  | 0.24 | 1.4   | 0.056062 | 0.368259 | 0.38562  | 0.607863 |
| MmugDNA.12762.1.S1_s_at | MmugDNA.12762.1 | 10.65 | 9.73  | 0.18 | 0.16 | 1.88  | 0.002645 | 0.000497 | 0.164386 | 0.038955 |
| MmugDNA.12763.1.S1_at   | MmugDNA.12763.1 | 10.83 | 10.66 | 0.28 | 0.35 | 1.13  | 0.754342 | 0.242216 | 0.895356 | 0.51267  |
| MmugDNA.12764.1.S1_at   | MmugDNA.12764.1 | 4.21  | 4.3   | 0.09 | 0.07 | -1.07 | 0.543929 | 0.325443 | 0.784183 | 0.575807 |
| MmugDNA.12765.1.S1_at   | MmugDNA.12765.1 | 8.05  | 7.35  | 0.09 | 0.62 | 1.63  | 0.129088 | 0.126678 | 0.495114 | 0.397363 |
| MmugDNA.12766.1.S1_at   | MmugDNA.12766.1 | 4.54  | 5     | 0.11 | 0.74 | -1.38 | 0.200102 | 0.12632  | 0.563056 | 0.396787 |
| MmugDNA.12766.1.S1_s_at | MmugDNA.12766.1 | 5.92  | 6.25  | 0.07 | 0.57 | -1.26 | 0.37364  | 0.520217 | 0.683245 | 0.711546 |
| MmugDNA.12767.1.S1_at   | MmugDNA.12767.1 | 6.2   | 4.91  | 0.46 | 0.48 | 2.45  | 0.042436 | 0.0418   | 0.355019 | 0.249015 |
| MmugDNA.12768.1.S1_at   | MmugDNA.12768.1 | 6.92  | 6.93  | 0.08 | 0.23 | -1.01 | 0.892273 | 0.843279 | 0.957126 | 0.910767 |
| MmugDNA.12769.1.S1_at   | MmugDNA.12769.1 | 7.17  | 7.65  | 0.41 | 0.18 | -1.39 | 0.617521 | 0.615244 | 0.824768 | 0.771884 |
| MmugDNA.1277.1.S1_at    | MmugDNA.1277.1  | 4.14  | 4.02  | 0.45 | 0.05 | 1.09  | 0.722756 | 0.67074  | 0.878819 | 0.807469 |
| MmugDNA.12770.1.S1_at   | MmugDNA.12770.1 | 4.69  | 4.7   | 0.12 | 0.1  | -1.01 | 0.286894 | 0.419899 | 0.625576 | 0.643737 |
| MmugDNA.12771.1.S1_at   | MmugDNA.12771.1 | 4.28  | 4.28  | 0.09 | 0.13 | 1     | 0.6012   | 0.481496 | 0.815685 | 0.686469 |
| MmugDNA.12772.1.S1_at   | MmugDNA.12772.1 | 9.94  | 9.25  | 0.18 | 1.23 | 1.62  | 0.908761 | 0.575989 | 0.963816 | 0.746919 |
| MmugDNA.12773.1.S1_at   | MmugDNA.12773.1 | 5.76  | 5.61  | 0.12 | 1.02 | 1.11  | 0.515549 | 0.366155 | 0.767625 | 0.605941 |
| MmugDNA.12774.1.S1_at   | MmugDNA.12774.1 | 10.52 | 10.11 | 0.25 | 0.27 | 1.33  | 0.132709 | 0.166989 | 0.49874  | 0.443466 |
| MmugDNA.12775.1.S1_at   | MmugDNA.12775.1 | 13.64 | 13.19 | 0.05 | 0.09 | 1.37  | 0.001688 | 0.003587 | 0.15365  | 0.085687 |
| MmugDNA.12775.1.S1_x_at | MmugDNA.12775.1 | 13.56 | 13.1  | 0.08 | 0.07 | 1.37  | 0.00281  | 0.005568 | 0.166724 | 0.103069 |
| MmugDNA.12776.1.S1_at   | MmugDNA.12776.1 | 9.26  | 9.39  | 0.22 | 0.43 | -1.1  | 0.937661 | 0.28296  | 0.975994 | 0.545692 |
| MmugDNA.12777.1.S1_at   | MmugDNA.12777.1 | 3.86  | 3.88  | 0.42 | 0.28 | -1.02 | 0.904596 | 0.952225 | 0.961834 | 0.972929 |
| MmugDNA.12778.1.S1_at   | MmugDNA.12778.1 | 10.04 | 11.31 | 0.47 | 0.69 | -2.42 | 0.05677  | 0.040609 | 0.386993 | 0.246364 |
| MmugDNA.12779.1.S1_at   | MmugDNA.12779.1 | 9.63  | 9.68  | 0.03 | 0.33 | -1.04 | 0.79027  | 0.031711 | 0.912972 | 0.220493 |
| MmugDNA.1278.1.S1_at    | MmugDNA.1278.1  | 8.15  | 8.96  | 0.44 | 0.83 | -1.76 | 0.138117 | 0.146958 | 0.505616 | 0.421011 |
| MmugDNA.12781.1.S1_at   | MmugDNA.12781.1 | 3.52  | 3.51  | 0.24 | 0.04 | 1     | 0.971472 | 0.992211 | 0.9891   | 0.995563 |
| MmugDNA.12782.1.S1_at   | MmugDNA.12782.1 | 8.54  | 7.91  | 0.21 | 0.17 | 1.55  | 0.016082 | 0.014741 | 0.262631 | 0.15446  |

|                         |                 |       |       |      |      |       |          |          |          |          |
|-------------------------|-----------------|-------|-------|------|------|-------|----------|----------|----------|----------|
| MmugDNA.12783.1.S1_at   | MmugDNA.12783.1 | 8.32  | 8.28  | 0.29 | 0.27 | 1.02  | 0.577747 | 0.044448 | 0.803559 | 0.25521  |
| MmugDNA.12784.1.S1_at   | MmugDNA.12784.1 | 6.41  | 6.68  | 0.15 | 0.39 | -1.2  | 0.61561  | 0.790735 | 0.823612 | 0.878973 |
| MmugDNA.12785.1.S1_at   | MmugDNA.12785.1 | 3.99  | 4.12  | 0.04 | 0.08 | -1.09 | 0.143548 | 0.360901 | 0.510312 | 0.60194  |
| MmugDNA.12787.1.S1_at   | MmugDNA.12787.1 | 11    | 11.46 | 0.15 | 0.37 | -1.38 | 0.080008 | 0.026636 | 0.430184 | 0.204075 |
| MmugDNA.12788.1.S1_at   | MmugDNA.12788.1 | 8.89  | 9.23  | 0.14 | 0.32 | -1.26 | 0.208885 | 0.329678 | 0.570476 | 0.578874 |
| MmugDNA.1279.1.S1_at    | MmugDNA.1279.1  | 6.01  | 6.26  | 0.2  | 0.39 | -1.19 | 0.130666 | 0.289175 | 0.49705  | 0.550293 |
| MmugDNA.12790.1.S1_at   | MmugDNA.12790.1 | 7.39  | 8.35  | 0.11 | 0.46 | -1.94 | 0.030719 | 0.004651 | 0.319646 | 0.095108 |
| MmugDNA.12793.1.S1_at   | MmugDNA.12793.1 | 6.54  | 6.77  | 0.07 | 0.14 | -1.17 | 0.150127 | 0.208521 | 0.514719 | 0.482453 |
| MmugDNA.12796.1.S1_at   | MmugDNA.12796.1 | 4.04  | 4.23  | 0.23 | 0.26 | -1.14 | 0.238189 | 0.284976 | 0.591555 | 0.547071 |
| MmugDNA.12798.1.S1_at   | MmugDNA.12798.1 | 5.88  | 6.52  | 1.41 | 0.32 | -1.56 | 0.620499 | 0.793893 | 0.826026 | 0.881131 |
| MmugDNA.12799.1.S1_at   | MmugDNA.12799.1 | 5.02  | 5.09  | 0.04 | 0.01 | -1.05 | 0.105778 | 0.102581 | 0.466579 | 0.362933 |
| MmugDNA.1280.1.S1_at    | MmugDNA.1280.1  | 5.21  | 4.24  | 0.62 | 0.56 | 1.96  | 0.252796 | 0.160003 | 0.601605 | 0.436167 |
| MmugDNA.12800.1.S1_at   | MmugDNA.12800.1 | 5.05  | 4.77  | 0.37 | 0.09 | 1.22  | 0.13818  | 0.139964 | 0.505618 | 0.413309 |
| MmugDNA.12802.1.S1_at   | MmugDNA.12802.1 | 6.23  | 6.59  | 0.06 | 0.09 | -1.28 | 0.00543  | 0.001617 | 0.191107 | 0.06074  |
| MmugDNA.12804.1.S1_at   | MmugDNA.12804.1 | 2.89  | 2.99  | 0.56 | 0.04 | -1.07 | 0.543663 | 0.767105 | 0.783939 | 0.864712 |
| MmugDNA.12805.1.S1_at   | MmugDNA.12805.1 | 3.87  | 3.93  | 0.09 | 0.21 | -1.04 | 0.426604 | 0.163139 | 0.715846 | 0.4393   |
| MmugDNA.12806.1.S1_at   | MmugDNA.12806.1 | 6.37  | 6.36  | 0.07 | 0.28 | 1.01  | 0.782562 | 0.749322 | 0.909254 | 0.854352 |
| MmugDNA.12807.1.S1_at   | MmugDNA.12807.1 | 3.42  | 3.65  | 0.21 | 0.27 | -1.17 | 0.594516 | 0.796355 | 0.811974 | 0.882625 |
| MmugDNA.12808.1.S1_at   | MmugDNA.12808.1 | 7.97  | 8.71  | 0.97 | 0.53 | -1.66 | 0.143645 | 0.10938  | 0.510312 | 0.373156 |
| MmugDNA.12809.1.S1_at   | MmugDNA.12809.1 | 5.27  | 5.32  | 0.1  | 0.14 | -1.04 | 0.753564 | 0.592262 | 0.894902 | 0.757652 |
| MmugDNA.1281.1.S1_at    | MmugDNA.1281.1  | 5     | 5.05  | 0.05 | 0.32 | -1.03 | 0.887861 | 0.952677 | 0.954933 | 0.973147 |
| MmugDNA.12812.1.S1_at   | MmugDNA.12812.1 | 12.04 | 11.68 | 0.04 | 0.32 | 1.28  | 0.121029 | 0.139409 | 0.48574  | 0.412691 |
| MmugDNA.12813.1.S1_at   | MmugDNA.12813.1 | 3.16  | 3.21  | 0.16 | 0.05 | -1.03 | 0.708626 | 0.589246 | 0.871949 | 0.755509 |
| MmugDNA.12814.1.S1_at   | MmugDNA.12814.1 | 4.59  | 4.72  | 0.06 | 0.24 | -1.09 | 0.264436 | 0.365924 | 0.61016  | 0.605798 |
| MmugDNA.12815.1.S1_at   | MmugDNA.12815.1 | 3.74  | 3.56  | 0.05 | 0.12 | 1.14  | 0.210403 | 0.492273 | 0.571697 | 0.693485 |
| MmugDNA.12816.1.S1_at   | MmugDNA.12816.1 | 7.69  | 7     | 0.2  | 0.2  | 1.6   | 0.008211 | 0.017883 | 0.216841 | 0.168819 |
| MmugDNA.12817.1.S1_at   | MmugDNA.12817.1 | 10.78 | 9.7   | 0.09 | 0.43 | 2.12  | 0.00558  | 0.00096  | 0.191807 | 0.049342 |
| MmugDNA.12818.1.S1_at   | MmugDNA.12818.1 | 5.13  | 5.13  | 0.3  | 0.54 | 1     | 0.812914 | 0.92914  | 0.923968 | 0.959637 |
| MmugDNA.12819.1.S1_at   | MmugDNA.12819.1 | 3.73  | 3.66  | 0.24 | 0.04 | 1.05  | 0.559965 | 0.7834   | 0.79419  | 0.874571 |
| MmugDNA.1282.1.S1_at    | MmugDNA.1282.1  | 4.54  | 4.57  | 0.08 | 0.07 | -1.02 | 0.610348 | 0.766403 | 0.821014 | 0.864265 |
| MmugDNA.12820.1.S1_at   | MmugDNA.12820.1 | 3.95  | 3.82  | 0.34 | 0.16 | 1.1   | 0.200496 | 0.238702 | 0.563327 | 0.509385 |
| MmugDNA.12821.1.S1_at   | MmugDNA.12821.1 | 10.76 | 10.39 | 0.41 | 0.28 | 1.29  | 0.670442 | 0.014292 | 0.852391 | 0.152639 |
| MmugDNA.12822.1.S1_at   | MmugDNA.12822.1 | 4.39  | 4.49  | 0.15 | 0.15 | -1.07 | 0.830959 | 0.148387 | 0.931586 | 0.422996 |
| MmugDNA.12824.1.S1_at   | MmugDNA.12824.1 | 6.34  | 6.83  | 0.27 | 0.34 | -1.41 | 0.066958 | 0.060334 | 0.407016 | 0.292254 |
| MmugDNA.12825.1.S1_at   | MmugDNA.12825.1 | 3.33  | 3.26  | 0.05 | 0.16 | 1.05  | 0.874768 | 0.823001 | 0.949796 | 0.898312 |
| MmugDNA.12826.1.S1_x_at | MmugDNA.12826.1 | 9.6   | 9.87  | 0.21 | 0.23 | -1.21 | 0.272489 | 0.247813 | 0.616131 | 0.517219 |
| MmugDNA.12827.1.S1_at   | MmugDNA.12827.1 | 5.01  | 5.22  | 0.18 | 0.05 | -1.16 | 0.518743 | 0.686964 | 0.769592 | 0.817365 |
| MmugDNA.12829.1.S1_at   | MmugDNA.12829.1 | 4.99  | 6.08  | 0.13 | 0.22 | -2.14 | 0.002078 | 0.000234 | 0.155636 | 0.03241  |
| MmugDNA.1283.1.S1_at    | MmugDNA.1283.1  | 4.18  | 3.83  | 0.92 | 0.37 | 1.28  | 0.302514 | 0.260236 | 0.63692  | 0.526807 |
| MmugDNA.12830.1.S1_at   | MmugDNA.12830.1 | 6.38  | 6.39  | 0.16 | 0.07 | -1.01 | 0.862152 | 0.425615 | 0.944557 | 0.647989 |
| MmugDNA.24441.1.S1_s_at | MmugDNA.24441.1 | 10.78 | 10.42 | 0.72 | 0.4  | 1.28  | 0.707017 | 0.298001 | 0.8709   | 0.556695 |

|                         |                 |       |       |      |      |       |          |          |          |          |
|-------------------------|-----------------|-------|-------|------|------|-------|----------|----------|----------|----------|
| MmugDNA.12832.1.S1_at   | MmugDNA.12832.1 | 5.03  | 5.18  | 0.2  | 0.1  | -1.12 | 0.098955 | 0.162235 | 0.458711 | 0.438447 |
| MmugDNA.12833.1.S1_at   | MmugDNA.12833.1 | 7.52  | 7.49  | 0.25 | 0.6  | 1.02  | 0.503703 | 0.584431 | 0.760979 | 0.752435 |
| MmugDNA.12834.1.S1_at   | MmugDNA.12834.1 | 5.82  | 6.61  | 1.12 | 1.13 | -1.73 | 0.650508 | 0.832877 | 0.842789 | 0.904108 |
| MmugDNA.12837.1.S1_at   | MmugDNA.12837.1 | 3.84  | 4.17  | 0.17 | 0.15 | -1.25 | 0.069753 | 0.187076 | 0.412907 | 0.462997 |
| MmugDNA.12838.1.S1_at   | MmugDNA.12838.1 | 7.49  | 7.38  | 1.47 | 0.35 | 1.08  | 0.81954  | 0.758164 | 0.926529 | 0.8593   |
| MmugDNA.12839.1.S1_at   | MmugDNA.12839.1 | 6.92  | 6.85  | 0.61 | 0.49 | 1.05  | 0.493897 | 0.259691 | 0.756383 | 0.526583 |
| MmugDNA.1284.1.S1_s_at  | MmugDNA.1284.1  | 8.03  | 8.03  | 0.15 | 0.18 | -1.01 | 0.943362 | 0.360149 | 0.978492 | 0.601268 |
| MmugDNA.12840.1.S1_at   | MmugDNA.12840.1 | 3.58  | 3.71  | 0.46 | 0.2  | -1.1  | 0.825214 | 0.822381 | 0.929153 | 0.897821 |
| MmugDNA.12840.1.S1_s_at | MmugDNA.12840.1 | 4.36  | 4.02  | 1.11 | 0.33 | 1.26  | 0.294285 | 0.255786 | 0.631216 | 0.523727 |
| MmugDNA.12842.1.S1_at   | MmugDNA.12842.1 | 7.94  | 6.04  | 0.36 | 0.06 | 3.73  | 0.001398 | 0.000263 | 0.146354 | 0.033786 |
| MmugDNA.12843.1.S1_at   | MmugDNA.12843.1 | 5.2   | 4.69  | 0.34 | 0.14 | 1.42  | 0.188504 | 0.183575 | 0.551451 | 0.459681 |
| MmugDNA.12844.1.S1_at   | MmugDNA.12844.1 | 6.02  | 6.16  | 0.42 | 1.06 | -1.1  | 0.855038 | 0.619175 | 0.941406 | 0.774408 |
| MmugDNA.12845.1.S1_at   | MmugDNA.12845.1 | 3.45  | 3.67  | 0.13 | 0.1  | -1.16 | 0.09652  | 0.224215 | 0.455258 | 0.497164 |
| MmugDNA.12846.1.S1_s_at | MmugDNA.12846.1 | 9.64  | 9.75  | 0.29 | 0.14 | -1.08 | 0.901765 | 0.381494 | 0.960796 | 0.617691 |
| MmugDNA.12848.1.S1_at   | MmugDNA.12848.1 | 7.39  | 6.94  | 0.62 | 0.45 | 1.37  | 0.639819 | 0.38749  | 0.837375 | 0.622163 |
| MmugDNA.12849.1.S1_at   | MmugDNA.12849.1 | 8.72  | 9.27  | 0.21 | 0.19 | -1.46 | 0.016227 | 0.008807 | 0.26354  | 0.124117 |
| MmugDNA.1285.1.S1_at    | MmugDNA.1285.1  | 7.82  | 7.82  | 0.23 | 0.11 | -1    | 0.284082 | 0.375805 | 0.623949 | 0.613697 |
| MmugDNA.12850.1.S1_at   | MmugDNA.12850.1 | 6.58  | 6.24  | 0.34 | 0.07 | 1.26  | 0.226971 | 0.166059 | 0.58486  | 0.442653 |
| MmugDNA.12852.1.S1_at   | MmugDNA.12852.1 | 3.92  | 3.68  | 0.18 | 0.02 | 1.18  | 0.104438 | 0.065101 | 0.464351 | 0.301119 |
| MmugDNA.12853.1.S1_at   | MmugDNA.12853.1 | 5.25  | 5.86  | 0.4  | 0.74 | -1.53 | 0.373556 | 0.097363 | 0.683245 | 0.35507  |
| MmugDNA.12856.1.S1_at   | MmugDNA.12856.1 | 5.7   | 4.81  | 1.47 | 0.84 | 1.85  | 0.39415  | 0.529536 | 0.695705 | 0.717341 |
| MmugDNA.12858.1.S1_at   | MmugDNA.12858.1 | 4.89  | 4.83  | 0.13 | 0.19 | 1.05  | 0.573128 | 0.890353 | 0.801055 | 0.937508 |
| MmugDNA.12859.1.S1_at   | MmugDNA.12859.1 | 5.53  | 5.6   | 0.14 | 0.1  | -1.05 | 0.595167 | 0.655453 | 0.812315 | 0.798546 |
| MmugDNA.12860.1.S1_at   | MmugDNA.12860.1 | 7.84  | 7.89  | 0.17 | 0.41 | -1.04 | 0.27509  | 0.114581 | 0.617694 | 0.381131 |
| MmugDNA.12861.1.S1_at   | MmugDNA.12861.1 | 6.47  | 6.74  | 0.14 | 0.18 | -1.21 | 0.110244 | 0.116039 | 0.471863 | 0.383257 |
| MmugDNA.12862.1.S1_at   | MmugDNA.12862.1 | 10.59 | 9.88  | 0.26 | 0.56 | 1.63  | 0.091876 | 0.04976  | 0.448335 | 0.268151 |
| MmugDNA.12864.1.S1_x_at | MmugDNA.12864.1 | 8.74  | 9.11  | 0.56 | 0.29 | -1.29 | 0.593059 | 0.67526  | 0.811221 | 0.81026  |
| MmugDNA.12867.1.S1_at   | MmugDNA.12867.1 | 12.28 | 11.81 | 0.12 | 0.31 | 1.38  | 0.105578 | 0.108877 | 0.46647  | 0.372496 |
| MmugDNA.12868.1.S1_at   | MmugDNA.12868.1 | 10.19 | 9.89  | 0.13 | 0.25 | 1.23  | 0.07058  | 0.053882 | 0.414439 | 0.277682 |
| MmugDNA.12869.1.S1_at   | MmugDNA.12869.1 | 11.26 | 11.27 | 0.22 | 0.11 | -1.01 | 0.329484 | 0.524529 | 0.655089 | 0.714395 |
| MmugDNA.1287.1.S1_s_at  | MmugDNA.1287.1  | 7.14  | 8.46  | 0.42 | 1.39 | -2.51 | 0.267036 | 0.327382 | 0.612309 | 0.577284 |
| MmugDNA.12870.1.S1_at   | MmugDNA.12870.1 | 3.53  | 3.62  | 0.14 | 0.19 | -1.06 | 0.21357  | 0.270061 | 0.573727 | 0.535338 |
| MmugDNA.12871.1.S1_at   | MmugDNA.12871.1 | 5.14  | 4.84  | 0.21 | 0.14 | 1.23  | 0.083451 | 0.054085 | 0.43582  | 0.277914 |
| MmugDNA.12872.1.S1_at   | MmugDNA.12872.1 | 7.69  | 6.75  | 0.04 | 0.29 | 1.92  | 0.004817 | 0.001381 | 0.184674 | 0.056947 |
| MmugDNA.12874.1.S1_at   | MmugDNA.12874.1 | 6.71  | 6.31  | 0.45 | 0.85 | 1.32  | 0.664094 | 0.848502 | 0.849316 | 0.914012 |
| MmugDNA.12876.1.S1_at   | MmugDNA.12876.1 | 5.73  | 5.34  | 0.3  | 0.26 | 1.31  | 0.231371 | 0.200159 | 0.587372 | 0.474603 |
| MmugDNA.12877.1.S1_at   | MmugDNA.12877.1 | 2.81  | 2.81  | 0.09 | 0.08 | -1    | 0.60257  | 0.535206 | 0.816617 | 0.720821 |
| MmugDNA.12879.1.S1_at   | MmugDNA.12879.1 | 5.21  | 4.48  | 0.56 | 0.26 | 1.66  | 0.054944 | 0.042463 | 0.382788 | 0.250702 |
| MmugDNA.1288.1.S1_at    | MmugDNA.1288.1  | 8.05  | 9.49  | 0.97 | 1.63 | -2.72 | 0.276718 | 0.257682 | 0.618907 | 0.525332 |
| MmugDNA.12882.1.S1_at   | MmugDNA.12882.1 | 5.94  | 6     | 0.06 | 0.11 | -1.04 | 0.279519 | 0.354371 | 0.621135 | 0.597166 |
| MmugDNA.12883.1.S1_at   | MmugDNA.12883.1 | 4.66  | 4.88  | 0.09 | 0.08 | -1.17 | 0.020049 | 0.027897 | 0.276484 | 0.208505 |

|                         |                 |       |       |      |      |       |          |          |          |          |
|-------------------------|-----------------|-------|-------|------|------|-------|----------|----------|----------|----------|
| MmugDNA.12884.1.S1_at   | MmugDNA.12884.1 | 4.54  | 4.66  | 0.05 | 0.1  | -1.09 | 0.095444 | 0.084961 | 0.453459 | 0.336592 |
| MmugDNA.12886.1.S1_at   | MmugDNA.12886.1 | 3     | 3.15  | 0.03 | 0.03 | -1.11 | 0.005287 | 0.026493 | 0.191107 | 0.203897 |
| MmugDNA.12887.1.S1_at   | MmugDNA.12887.1 | 5.51  | 5.73  | 0.12 | 0.13 | -1.16 | 0.08686  | 0.09249  | 0.440524 | 0.348429 |
| MmugDNA.12888.1.S1_at   | MmugDNA.12888.1 | 8.84  | 8.34  | 0.91 | 0.26 | 1.42  | 0.329813 | 0.398191 | 0.655349 | 0.629257 |
| MmugDNA.1289.1.S1_at    | MmugDNA.1289.1  | 4.94  | 5.2   | 0.37 | 0.09 | -1.2  | 0.669536 | 0.796945 | 0.852167 | 0.882822 |
| MmugDNA.12890.1.S1_at   | MmugDNA.12890.1 | 6.72  | 7.37  | 0.81 | 0.95 | -1.58 | 0.42793  | 0.236485 | 0.716519 | 0.507336 |
| MmugDNA.12891.1.S1_at   | MmugDNA.12891.1 | 5.78  | 5.55  | 0.14 | 0.11 | 1.17  | 0.177425 | 0.236741 | 0.541483 | 0.507512 |
| MmugDNA.12892.1.S1_at   | MmugDNA.12892.1 | 10.38 | 10.12 | 0.44 | 0.25 | 1.2   | 0.715105 | 0.713274 | 0.875005 | 0.833666 |
| MmugDNA.12893.1.S1_at   | MmugDNA.12893.1 | 5.47  | 5.37  | 0.25 | 0.45 | 1.07  | 0.614452 | 0.432018 | 0.823199 | 0.652738 |
| MmugDNA.12894.1.S1_at   | MmugDNA.12894.1 | 9.84  | 10.45 | 0.35 | 1.18 | -1.52 | 0.646908 | 0.280057 | 0.84111  | 0.543369 |
| MmugDNA.12897.1.S1_at   | MmugDNA.12897.1 | 10.28 | 9.66  | 0.14 | 0.15 | 1.53  | 0.006737 | 0.001905 | 0.20158  | 0.065139 |
| MmugDNA.12898.1.S1_at   | MmugDNA.12898.1 | 3.23  | 3.4   | 0.2  | 0.15 | -1.12 | 0.409335 | 0.451965 | 0.705878 | 0.666717 |
| MmugDNA.12899.1.S1_at   | MmugDNA.12899.1 | 8.61  | 8.74  | 0.43 | 0.36 | -1.1  | 0.909596 | 0.984379 | 0.964222 | 0.991287 |
| MmugDNA.129.1.S1_s_at   | MmugDNA.129.1   | 5.87  | 5.18  | 0.81 | 0.28 | 1.62  | 0.212247 | 0.24329  | 0.572552 | 0.513356 |
| MmugDNA.12901.1.S1_at   | MmugDNA.12901.1 | 3.29  | 3.04  | 0.33 | 0.01 | 1.19  | 0.260566 | 0.200072 | 0.607303 | 0.474603 |
| MmugDNA.12902.1.S1_at   | MmugDNA.12902.1 | 6.04  | 6.79  | 0.6  | 0.8  | -1.68 | 0.30148  | 0.232001 | 0.636394 | 0.503726 |
| MmugDNA.12903.1.S1_at   | MmugDNA.12903.1 | 3.78  | 3.71  | 0.27 | 0.22 | 1.05  | 0.710516 | 0.313429 | 0.873061 | 0.567879 |
| MmugDNA.12903.1.S1_s_at | MmugDNA.12903.1 | 6.04  | 5.6   | 0.45 | 0.46 | 1.36  | 0.905799 | 0.171948 | 0.962495 | 0.448352 |
| MmugDNA.12905.1.S1_at   | MmugDNA.12905.1 | 3.69  | 3.1   | 0.49 | 0.25 | 1.51  | 0.163694 | 0.188344 | 0.527992 | 0.46433  |
| MmugDNA.12906.1.S1_at   | MmugDNA.12906.1 | 8.09  | 7.27  | 0.62 | 0.5  | 1.76  | 0.185207 | 0.270882 | 0.54869  | 0.536026 |
| MmugDNA.12907.1.S1_at   | MmugDNA.12907.1 | 4.8   | 4.4   | 0.01 | 0.61 | 1.32  | 0.50915  | 0.354565 | 0.764209 | 0.597269 |
| MmugDNA.12909.1.S1_at   | MmugDNA.12909.1 | 4.09  | 4.09  | 0.06 | 0.06 | 1     | 0.230204 | 0.45821  | 0.587112 | 0.671077 |
| MmugDNA.1291.1.S1_at    | MmugDNA.1291.1  | 6.02  | 7.12  | 1.48 | 0.54 | -2.14 | 0.6615   | 0.578986 | 0.848148 | 0.748791 |
| MmugDNA.12910.1.S1_at   | MmugDNA.12910.1 | 6.74  | 6.95  | 0.14 | 0.07 | -1.15 | 0.146141 | 0.149002 | 0.512187 | 0.423337 |
| MmugDNA.12911.1.S1_at   | MmugDNA.12911.1 | 8.22  | 8.35  | 0.22 | 0.04 | -1.1  | 0.97223  | 0.07481  | 0.989434 | 0.318603 |
| MmugDNA.12912.1.S1_at   | MmugDNA.12912.1 | 11.08 | 10.7  | 0.15 | 1.55 | 1.3   | 0.519518 | 0.689727 | 0.770186 | 0.819049 |
| MmugDNA.12913.1.S1_at   | MmugDNA.12913.1 | 6.39  | 6.16  | 0.16 | 0.19 | 1.17  | 0.24996  | 0.194739 | 0.600389 | 0.469774 |
| MmugDNA.12915.1.S1_at   | MmugDNA.12915.1 | 3.41  | 3.4   | 0.04 | 0.4  | 1     | 0.367085 | 0.436487 | 0.679287 | 0.656022 |
| MmugDNA.12916.1.S1_at   | MmugDNA.12916.1 | 9.95  | 9.44  | 0.23 | 0.17 | 1.42  | 0.062804 | 0.028788 | 0.399328 | 0.211521 |
| MmugDNA.12917.1.S1_at   | MmugDNA.12917.1 | 10.65 | 11.11 | 0.19 | 0.09 | -1.38 | 0.040427 | 0.036459 | 0.349277 | 0.235423 |
| MmugDNA.25653.1.S1_s_at | MmugDNA.25653.1 | 9.48  | 9.26  | 0.11 | 0.18 | 1.16  | 0.274982 | 0.28376  | 0.617642 | 0.546185 |
| MmugDNA.12919.1.S1_s_at | MmugDNA.12919.1 | 10.16 | 10.03 | 0.24 | 0.18 | 1.09  | 0.473457 | 0.295885 | 0.744256 | 0.555241 |
| MmugDNA.1292.1.S1_at    | MmugDNA.1292.1  | 3.87  | 4.02  | 0.02 | 0.08 | -1.11 | 0.015531 | 0.013181 | 0.259093 | 0.14735  |
| MmugDNA.12920.1.S1_at   | MmugDNA.12920.1 | 5.76  | 6.29  | 0.35 | 0.83 | -1.44 | 0.935979 | 0.134543 | 0.975172 | 0.406629 |
| MmugDNA.12921.1.S1_at   | MmugDNA.12921.1 | 5.19  | 5.13  | 0.53 | 0.3  | 1.04  | 0.798918 | 0.329508 | 0.916772 | 0.578781 |
| MmugDNA.12922.1.S1_at   | MmugDNA.12922.1 | 3.08  | 3.03  | 0.13 | 0.05 | 1.04  | 0.544066 | 0.54043  | 0.784262 | 0.724383 |
| MmugDNA.12925.1.S1_at   | MmugDNA.12925.1 | 4.49  | 4.33  | 0.09 | 0.12 | 1.12  | 0.132496 | 0.275352 | 0.498643 | 0.539663 |
| MmugDNA.12926.1.S1_at   | MmugDNA.12926.1 | 7.58  | 7.58  | 0.19 | 0.15 | -1.01 | 0.483804 | 0.683006 | 0.749945 | 0.815061 |
| MmugDNA.12927.1.S1_at   | MmugDNA.12927.1 | 6.92  | 6.23  | 0.3  | 0.1  | 1.61  | 0.046222 | 0.024521 | 0.362622 | 0.196001 |
| MmugDNA.12928.1.S1_at   | MmugDNA.12928.1 | 5.54  | 5.56  | 0.06 | 0.21 | -1.01 | 0.34333  | 0.483031 | 0.663541 | 0.687687 |
| MmugDNA.12929.1.S1_at   | MmugDNA.12929.1 | 7.22  | 7.32  | 0.07 | 0.13 | -1.07 | 0.908421 | 0.23912  | 0.963748 | 0.509827 |



|                         |                 |       |       |      |      |       |          |          |          |          |
|-------------------------|-----------------|-------|-------|------|------|-------|----------|----------|----------|----------|
| MmugDNA.9943.1.S1_at    | MmugDNA.9943.1  | 8.74  | 8.07  | 0.16 | 0.25 | 1.59  | 0.016773 | 0.010489 | 0.265326 | 0.133872 |
| MmugDNA.9943.1.S1_s_at  | MmugDNA.9943.1  | 9.93  | 9.25  | 0.18 | 0.51 | 1.61  | 0.055945 | 0.053747 | 0.385245 | 0.277384 |
| MmugDNA.12930.1.S1_at   | MmugDNA.12930.1 | 6     | 5.96  | 0.39 | 0.07 | 1.02  | 0.744476 | 0.807899 | 0.890646 | 0.889413 |
| MmugDNA.12931.1.S1_at   | MmugDNA.12931.1 | 5.27  | 5.53  | 0.02 | 0.1  | -1.19 | 0.010542 | 0.01032  | 0.230404 | 0.132962 |
| MmugDNA.12932.1.S1_at   | MmugDNA.12932.1 | 3.95  | 4.14  | 0.24 | 0.04 | -1.14 | 0.629983 | 0.819395 | 0.831842 | 0.895966 |
| MmugDNA.12933.1.S1_at   | MmugDNA.12933.1 | 3.37  | 3.27  | 0.32 | 0.15 | 1.07  | 0.953618 | 0.323395 | 0.982865 | 0.574453 |
| MmugDNA.12934.1.S1_at   | MmugDNA.12934.1 | 6.32  | 6.15  | 0.16 | 1.14 | 1.12  | 0.848765 | 0.369973 | 0.939211 | 0.609208 |
| MmugDNA.12935.1.S1_at   | MmugDNA.12935.1 | 4.77  | 4.65  | 0.16 | 0.03 | 1.09  | 0.199114 | 0.196264 | 0.562104 | 0.471236 |
| MmugDNA.12936.1.S1_at   | MmugDNA.12936.1 | 3.86  | 3.58  | 0.1  | 0.23 | 1.21  | 0.388082 | 0.48085  | 0.692266 | 0.686    |
| MmugDNA.12937.1.S1_at   | MmugDNA.12937.1 | 4.4   | 4.41  | 0.35 | 0.11 | -1.01 | 0.953705 | 0.948609 | 0.982865 | 0.970661 |
| MmugDNA.12938.1.S1_at   | MmugDNA.12938.1 | 4.99  | 5.01  | 0.12 | 0.06 | -1.01 | 0.780575 | 0.893621 | 0.90855  | 0.939284 |
| MmugDNA.12939.1.S1_at   | MmugDNA.12939.1 | 10.33 | 10.2  | 0.02 | 0.3  | 1.09  | 0.541499 | 0.31223  | 0.782715 | 0.566963 |
| MmugDNA.12940.1.S1_at   | MmugDNA.12940.1 | 10.14 | 9.62  | 0.01 | 0.97 | 1.43  | 0.249634 | 0.272371 | 0.600196 | 0.537122 |
| MmugDNA.12941.1.S1_at   | MmugDNA.12941.1 | 10.12 | 9.88  | 0.07 | 1.18 | 1.18  | 0.448144 | 0.451206 | 0.729452 | 0.666085 |
| MmugDNA.12942.1.S1_at   | MmugDNA.12942.1 | 4.18  | 3.93  | 0.18 | 0.09 | 1.19  | 0.024064 | 0.015566 | 0.294141 | 0.15814  |
| MmugDNA.12945.1.S1_at   | MmugDNA.12945.1 | 7.5   | 7.47  | 0.66 | 0.08 | 1.02  | 0.962989 | 0.479647 | 0.985684 | 0.685331 |
| MmugDNA.12946.1.S1_at   | MmugDNA.12946.1 | 6.92  | 7.43  | 0.11 | 0.42 | -1.42 | 0.176251 | 0.10659  | 0.539864 | 0.369136 |
| MmugDNA.12947.1.S1_at   | MmugDNA.12947.1 | 5.96  | 5.97  | 0.04 | 0.65 | -1.01 | 0.464665 | 0.537835 | 0.739429 | 0.722758 |
| MmugDNA.12948.1.S1_at   | MmugDNA.12948.1 | 9.9   | 9.95  | 0.2  | 0.18 | -1.04 | 0.153304 | 0.126807 | 0.517764 | 0.397446 |
| MmugDNA.12949.1.S1_at   | MmugDNA.12949.1 | 10.97 | 10.09 | 0.11 | 1.07 | 1.83  | 0.446112 | 0.54913  | 0.728161 | 0.729611 |
| MmugDNA.12950.1.S1_at   | MmugDNA.12950.1 | 7.27  | 6.83  | 0.2  | 0.45 | 1.35  | 0.269599 | 0.086824 | 0.614187 | 0.339594 |
| MmugDNA.12953.1.S1_at   | MmugDNA.12953.1 | 8.46  | 7.23  | 0.15 | 0.49 | 2.34  | 0.011485 | 0.004896 | 0.23613  | 0.097632 |
| MmugDNA.12956.1.S1_at   | MmugDNA.12956.1 | 4.07  | 4.4   | 0.23 | 0.14 | -1.26 | 0.087512 | 0.049098 | 0.441877 | 0.266518 |
| MmugDNA.12957.1.S1_at   | MmugDNA.12957.1 | 4.06  | 4.31  | 0.17 | 0.09 | -1.19 | 0.051139 | 0.039895 | 0.375935 | 0.244852 |
| MmugDNA.12959.1.S1_at   | MmugDNA.12959.1 | 4.9   | 5.02  | 0.06 | 0.13 | -1.09 | 0.326149 | 0.125939 | 0.653184 | 0.396461 |
| MmugDNA.12960.1.S1_at   | MmugDNA.12960.1 | 5.09  | 4.5   | 0.29 | 0.35 | 1.51  | 0.071958 | 0.103388 | 0.41606  | 0.3643   |
| MmugDNA.12961.1.S1_at   | MmugDNA.12961.1 | 3.45  | 3.49  | 0.18 | 0.13 | -1.03 | 0.168469 | 0.189652 | 0.532662 | 0.465297 |
| MmugDNA.12962.1.S1_at   | MmugDNA.12962.1 | 6.04  | 6.16  | 0.07 | 0.05 | -1.08 | 0.080035 | 0.095061 | 0.430204 | 0.352124 |
| MmugDNA.12962.1.S1_s_at | MmugDNA.12962.1 | 8.84  | 8.96  | 0.13 | 0.15 | -1.09 | 0.396214 | 0.634849 | 0.696871 | 0.785041 |
| MmugDNA.12963.1.S1_at   | MmugDNA.12963.1 | 3.68  | 3.7   | 0.44 | 0.14 | -1.02 | 0.573143 | 0.349599 | 0.801055 | 0.593539 |
| MmugDNA.12964.1.S1_at   | MmugDNA.12964.1 | 6.3   | 6.21  | 0.05 | 0.14 | 1.06  | 0.39277  | 0.075985 | 0.694783 | 0.320676 |
| MmugDNA.12965.1.S1_at   | MmugDNA.12965.1 | 10.65 | 10.3  | 0.03 | 0.45 | 1.28  | 0.14357  | 0.068065 | 0.510312 | 0.307142 |
| MmugDNA.12966.1.S1_at   | MmugDNA.12966.1 | 4.12  | 3.74  | 0.13 | 0.11 | 1.31  | 0.050162 | 0.090232 | 0.373452 | 0.344636 |
| MmugDNA.12967.1.S1_at   | MmugDNA.12967.1 | 4.3   | 4.4   | 0.05 | 0.06 | -1.08 | 0.405226 | 0.061521 | 0.703082 | 0.294835 |
| MmugDNA.12970.1.S1_at   | MmugDNA.12970.1 | 4.82  | 5.24  | 0.55 | 0.36 | -1.34 | 0.814614 | 0.814947 | 0.924758 | 0.893221 |
| MmugDNA.12972.1.S1_at   | MmugDNA.12972.1 | 3.42  | 5.91  | 1.18 | 1.8  | -5.63 | 0.25746  | 0.172715 | 0.604863 | 0.449206 |
| MmugDNA.12974.1.S1_at   | MmugDNA.12974.1 | 3.8   | 3.91  | 0.06 | 0.05 | -1.07 | 0.080279 | 0.625938 | 0.430342 | 0.7794   |
| MmugDNA.12976.1.S1_at   | MmugDNA.12976.1 | 4.72  | 4.76  | 0.19 | 0.04 | -1.03 | 0.888549 | 0.701672 | 0.955321 | 0.826974 |
| MmugDNA.12978.1.S1_at   | MmugDNA.12978.1 | 6.88  | 8.07  | 0.46 | 0.18 | -2.28 | 0.013803 | 0.012119 | 0.249758 | 0.142442 |
| MmugDNA.12979.1.S1_s_at | MmugDNA.12979.1 | 10.9  | 10.71 | 0.01 | 0.1  | 1.14  | 0.111126 | 0.108849 | 0.473191 | 0.37247  |
| MmugDNA.1298.1.S1_at    | MmugDNA.1298.1  | 11.92 | 12.03 | 0.07 | 0.22 | -1.08 | 0.422274 | 0.438005 | 0.71345  | 0.657058 |

|                         |                 |       |       |      |      |       |          |          |          |          |
|-------------------------|-----------------|-------|-------|------|------|-------|----------|----------|----------|----------|
| MmugDNA.12981.1.S1_at   | MmugDNA.12981.1 | 4.98  | 5.43  | 0.17 | 0.74 | -1.36 | 0.343327 | 0.293066 | 0.663541 | 0.552978 |
| MmugDNA.12982.1.S1_at   | MmugDNA.12982.1 | 8.87  | 8.37  | 0.11 | 0.37 | 1.41  | 0.238036 | 0.144454 | 0.591399 | 0.418323 |
| MmugDNA.12983.1.S1_at   | MmugDNA.12983.1 | 8.58  | 8.14  | 0.24 | 0.32 | 1.35  | 0.147633 | 0.278897 | 0.513287 | 0.542633 |
| MmugDNA.12984.1.S1_at   | MmugDNA.12984.1 | 13.09 | 13.25 | 0.05 | 1.07 | -1.12 | 0.517005 | 0.480624 | 0.76845  | 0.685926 |
| MmugDNA.12985.1.S1_at   | MmugDNA.12985.1 | 5.51  | 5.22  | 0.27 | 0.11 | 1.22  | 0.346858 | 0.454949 | 0.666049 | 0.669021 |
| MmugDNA.12986.1.S1_at   | MmugDNA.12986.1 | 5.75  | 5.86  | 0.35 | 0.31 | -1.08 | 0.771645 | 0.580167 | 0.90393  | 0.749524 |
| MmugDNA.12987.1.S1_at   | MmugDNA.12987.1 | 10.62 | 10.46 | 0.2  | 0.25 | 1.12  | 0.700198 | 0.530641 | 0.867372 | 0.718094 |
| MmugDNA.12988.1.S1_s_at | MmugDNA.12988.1 | 10.73 | 10.6  | 0.2  | 0.56 | 1.09  | 0.556898 | 0.747815 | 0.792175 | 0.853252 |
| MmugDNA.1299.1.S1_at    | MmugDNA.1299.1  | 9.65  | 10    | 0.1  | 0.13 | -1.27 | 0.062256 | 0.0429   | 0.397675 | 0.251759 |
| MmugDNA.12990.1.S1_at   | MmugDNA.12990.1 | 4.17  | 4.39  | 0.26 | 0.43 | -1.17 | 0.216715 | 0.237764 | 0.576318 | 0.50826  |
| MmugDNA.12991.1.S1_at   | MmugDNA.12991.1 | 4.25  | 4.14  | 0.12 | 0.16 | 1.08  | 0.272836 | 0.234377 | 0.616391 | 0.505646 |
| MmugDNA.12992.1.S1_at   | MmugDNA.12992.1 | 4.05  | 4.14  | 0.64 | 0.25 | -1.06 | 0.352164 | 0.443683 | 0.669466 | 0.661384 |
| MmugDNA.12993.1.S1_at   | MmugDNA.12993.1 | 8.25  | 6.93  | 0.44 | 0.3  | 2.5   | 0.018237 | 0.01934  | 0.269591 | 0.174785 |
| MmugDNA.12995.1.S1_at   | MmugDNA.12995.1 | 6.22  | 6.1   | 0.26 | 0.2  | 1.09  | 0.551246 | 0.533638 | 0.78857  | 0.719846 |
| MmugDNA.12998.1.S1_at   | MmugDNA.12998.1 | 8.67  | 8.64  | 0.86 | 0.32 | 1.02  | 0.857511 | 0.076083 | 0.942274 | 0.320848 |
| MmugDNA.13.1.S1_at      | MmugDNA.13.1    | 4.5   | 4.6   | 0.09 | 0.06 | -1.08 | 0.066881 | 0.217872 | 0.406981 | 0.491408 |
| MmugDNA.1300.1.S1_at    | MmugDNA.1300.1  | 5.96  | 5.37  | 0.38 | 0.28 | 1.5   | 0.153937 | 0.131065 | 0.518553 | 0.403084 |
| MmugDNA.13000.1.S1_at   | MmugDNA.13000.1 | 6.68  | 6.22  | 0.11 | 0.16 | 1.38  | 0.051063 | 0.091058 | 0.375812 | 0.345842 |
| MmugDNA.13002.1.S1_at   | MmugDNA.13002.1 | 8.82  | 8.59  | 0.45 | 0.88 | 1.17  | 0.453499 | 0.265491 | 0.732663 | 0.531381 |
| MmugDNA.13003.1.S1_at   | MmugDNA.13003.1 | 3.15  | 3.03  | 0.01 | 0.15 | 1.08  | 0.462811 | 0.225128 | 0.738389 | 0.497779 |
| MmugDNA.13004.1.S1_at   | MmugDNA.13004.1 | 9.27  | 7.9   | 0.02 | 0.75 | 2.6   | 0.042789 | 0.025859 | 0.355382 | 0.201654 |
| MmugDNA.13005.1.S1_at   | MmugDNA.13005.1 | 6.51  | 6.57  | 1    | 0.42 | -1.04 | 0.712048 | 0.885679 | 0.873815 | 0.934982 |
| MmugDNA.13006.1.S1_at   | MmugDNA.13006.1 | 3.2   | 3.31  | 0.01 | 0.31 | -1.08 | 0.608223 | 0.563568 | 0.819872 | 0.738718 |
| MmugDNA.13007.1.S1_at   | MmugDNA.13007.1 | 5.88  | 5.91  | 0.07 | 0.07 | -1.03 | 0.897808 | 0.883902 | 0.95918  | 0.933747 |
| MmugDNA.13008.1.S1_at   | MmugDNA.13008.1 | 4.91  | 4.66  | 0.53 | 0.2  | 1.19  | 0.174083 | 0.313291 | 0.537645 | 0.567753 |
| MmugDNA.6104.1.S1_s_at  | MmugDNA.6104.1  | 9.89  | 9.44  | 0.11 | 0.18 | 1.37  | 0.03453  | 0.027999 | 0.333289 | 0.208898 |
| MmugDNA.13012.1.S1_at   | MmugDNA.13012.1 | 5.92  | 5.75  | 0.15 | 0.11 | 1.12  | 0.167532 | 0.105561 | 0.531702 | 0.367526 |
| MmugDNA.13013.1.S1_at   | MmugDNA.13013.1 | 9.21  | 9.14  | 0.13 | 0.64 | 1.05  | 0.494055 | 0.594438 | 0.756414 | 0.758623 |
| MmugDNA.13014.1.S1_at   | MmugDNA.13014.1 | 5.74  | 5.85  | 0.16 | 0.2  | -1.08 | 0.548669 | 0.671518 | 0.786843 | 0.807948 |
| MmugDNA.13015.1.S1_at   | MmugDNA.13015.1 | 9.3   | 9.71  | 0.14 | 0.13 | -1.33 | 0.012776 | 0.005327 | 0.243715 | 0.100928 |
| MmugDNA.13015.1.S1_s_at | MmugDNA.13015.1 | 8.53  | 9.06  | 0.12 | 0.07 | -1.44 | 0.002523 | 0.005479 | 0.164386 | 0.102081 |
| MmugDNA.13016.1.S1_at   | MmugDNA.13016.1 | 4.3   | 4.23  | 0.19 | 0.23 | 1.05  | 0.750661 | 0.921526 | 0.893314 | 0.955761 |
| MmugDNA.13017.1.S1_at   | MmugDNA.13017.1 | 5.77  | 5.73  | 0.08 | 0.07 | 1.03  | 0.277993 | 0.049486 | 0.620089 | 0.267375 |
| MmugDNA.13018.1.S1_at   | MmugDNA.13018.1 | 4.88  | 4.94  | 0.32 | 0.3  | -1.04 | 0.498432 | 0.263873 | 0.758399 | 0.530118 |
| MmugDNA.1302.1.S1_at    | MmugDNA.1302.1  | 10.75 | 10.5  | 0.12 | 0.23 | 1.19  | 0.231628 | 0.298378 | 0.587487 | 0.557061 |
| MmugDNA.13020.1.S1_at   | MmugDNA.13020.1 | 8.54  | 8.47  | 0.35 | 0.5  | 1.05  | 0.852475 | 0.971648 | 0.940647 | 0.984608 |
| MmugDNA.13021.1.S1_at   | MmugDNA.13021.1 | 3.29  | 3.46  | 0.27 | 0.09 | -1.12 | 0.803282 | 0.280643 | 0.919051 | 0.543828 |
| MmugDNA.13022.1.S1_at   | MmugDNA.13022.1 | 3.91  | 4.37  | 0.3  | 0.15 | -1.37 | 0.350205 | 0.436015 | 0.668409 | 0.655722 |
| MmugDNA.13024.1.S1_at   | MmugDNA.13024.1 | 3.34  | 3.12  | 0.82 | 0.2  | 1.17  | 0.218831 | 0.291065 | 0.578251 | 0.551574 |
| MmugDNA.13026.1.S1_at   | MmugDNA.13026.1 | 3.54  | 3.52  | 0.08 | 0.33 | 1.02  | 0.839575 | 0.757096 | 0.93523  | 0.858642 |
| MmugDNA.13027.1.S1_at   | MmugDNA.13027.1 | 4.45  | 4.56  | 0.05 | 0.21 | -1.08 | 0.318633 | 0.281234 | 0.648593 | 0.544374 |

|                         |                 |       |       |      |      |       |          |          |          |          |
|-------------------------|-----------------|-------|-------|------|------|-------|----------|----------|----------|----------|
| MmugDNA.13028.1.S1_at   | MmugDNA.13028.1 | 6.03  | 6.6   | 0.33 | 0.55 | -1.48 | 0.081808 | 0.076784 | 0.432853 | 0.322252 |
| MmugDNA.13029.1.S1_at   | MmugDNA.13029.1 | 6.92  | 6.84  | 0.32 | 0.55 | 1.05  | 0.478636 | 0.184339 | 0.747332 | 0.460458 |
| MmugDNA.13031.1.S1_at   | MmugDNA.13031.1 | 4.34  | 4.25  | 0.26 | 0.32 | 1.06  | 0.931314 | 0.788844 | 0.973425 | 0.877997 |
| MmugDNA.13033.1.S1_at   | MmugDNA.13033.1 | 9.47  | 9.96  | 0.43 | 0.2  | -1.41 | 0.137253 | 0.127769 | 0.504356 | 0.398627 |
| MmugDNA.13038.1.S1_at   | MmugDNA.13038.1 | 4.42  | 4.55  | 0.67 | 0.09 | -1.1  | 0.592018 | 0.293907 | 0.810758 | 0.553878 |
| MmugDNA.1304.1.S1_at    | MmugDNA.1304.1  | 12.88 | 12.57 | 0.08 | 0.08 | 1.25  | 0.014378 | 0.014421 | 0.251885 | 0.153273 |
| MmugDNA.13041.1.S1_s_at | MmugDNA.13041.1 | 5.24  | 5.25  | 0.08 | 0.13 | -1.01 | 0.482762 | 0.230319 | 0.749566 | 0.502102 |
| MmugDNA.13042.1.S1_at   | MmugDNA.13042.1 | 6.83  | 6.61  | 0.24 | 0.13 | 1.17  | 0.162954 | 0.052529 | 0.527373 | 0.274771 |
| MmugDNA.13043.1.S1_at   | MmugDNA.13043.1 | 10.3  | 10.29 | 0.2  | 0.59 | 1.01  | 0.432556 | 0.055631 | 0.719094 | 0.281649 |
| MmugDNA.13045.1.S1_at   | MmugDNA.13045.1 | 5.82  | 5.87  | 0.1  | 0.15 | -1.04 | 0.373387 | 0.285441 | 0.683245 | 0.547307 |
| MmugDNA.13047.1.S1_at   | MmugDNA.13047.1 | 6.06  | 6.38  | 0.44 | 0.81 | -1.24 | 0.495316 | 0.678094 | 0.75718  | 0.811973 |
| MmugDNA.13048.1.S1_at   | MmugDNA.13048.1 | 5.52  | 5.54  | 0.75 | 0.05 | -1.02 | 0.378115 | 0.226213 | 0.686315 | 0.498692 |
| MmugDNA.13049.1.S1_at   | MmugDNA.13049.1 | 6.65  | 6.84  | 0.07 | 0.25 | -1.14 | 0.089372 | 0.182757 | 0.445032 | 0.459215 |
| MmugDNA.1305.1.S1_x_at  | MmugDNA.1305.1  | 5.66  | 5.7   | 0.51 | 0.01 | -1.03 | 0.454744 | 0.522966 | 0.733358 | 0.713429 |
| MmugDNA.13050.1.S1_at   | MmugDNA.13050.1 | 4.97  | 5.01  | 0.11 | 0.22 | -1.03 | 0.820841 | 0.55862  | 0.927175 | 0.735766 |
| MmugDNA.13051.1.S1_at   | MmugDNA.13051.1 | 4.88  | 4.9   | 0.23 | 0.91 | -1.02 | 0.544573 | 0.699731 | 0.784452 | 0.825643 |
| MmugDNA.13054.1.S1_at   | MmugDNA.13054.1 | 5.68  | 5.63  | 0.04 | 0.35 | 1.04  | 0.90019  | 0.902585 | 0.960239 | 0.944668 |
| MmugDNA.13055.1.S1_at   | MmugDNA.13055.1 | 3.33  | 3.22  | 0.06 | 0.1  | 1.08  | 0.111385 | 0.131826 | 0.473544 | 0.403891 |
| MmugDNA.13056.1.S1_at   | MmugDNA.13056.1 | 8.73  | 8.25  | 0.2  | 0.51 | 1.4   | 0.247965 | 0.192725 | 0.599052 | 0.468231 |
| MmugDNA.13059.1.S1_at   | MmugDNA.13059.1 | 3.96  | 4.2   | 0.21 | 0.05 | -1.18 | 0.296393 | 0.43545  | 0.632368 | 0.655208 |
| MmugDNA.13060.1.S1_at   | MmugDNA.13060.1 | 5     | 5.56  | 0.18 | 0.22 | -1.48 | 0.027938 | 0.02344  | 0.309162 | 0.191956 |
| MmugDNA.13062.1.S1_at   | MmugDNA.13062.1 | 5.69  | 5.71  | 0.25 | 0.19 | -1.01 | 0.591189 | 0.098325 | 0.810276 | 0.356397 |
| MmugDNA.13063.1.S1_at   | MmugDNA.13063.1 | 4.37  | 4.36  | 0.47 | 0.22 | 1.01  | 0.491861 | 0.45036  | 0.75533  | 0.665643 |
| MmugDNA.13065.1.S1_at   | MmugDNA.13065.1 | 5.82  | 6.85  | 0.17 | 0.74 | -2.05 | 0.029519 | 0.008846 | 0.31466  | 0.124493 |
| MmugDNA.13066.1.S1_at   | MmugDNA.13066.1 | 4.44  | 4.24  | 0.36 | 0.61 | 1.15  | 0.889823 | 0.746074 | 0.955913 | 0.852688 |
| MmugDNA.13067.1.S1_at   | MmugDNA.13067.1 | 6.16  | 5.78  | 0.74 | 0.27 | 1.3   | 0.535864 | 0.744631 | 0.779351 | 0.852121 |
| MmugDNA.13068.1.S1_at   | MmugDNA.13068.1 | 6.53  | 6.35  | 0.24 | 0.11 | 1.13  | 0.151188 | 0.154498 | 0.515947 | 0.429395 |
| MmugDNA.13069.1.S1_at   | MmugDNA.13069.1 | 3.27  | 3.21  | 0.28 | 0.05 | 1.05  | 0.244392 | 0.279908 | 0.596151 | 0.543342 |
| MmugDNA.2307.1.S1_at    | MmugDNA.2307.1  | 4     | 4.02  | 0.06 | 0.06 | -1.02 | 0.31043  | 0.744964 | 0.642429 | 0.852232 |
| MmugDNA.2307.1.S1_s_at  | MmugDNA.2307.1  | 7.32  | 7.38  | 0.12 | 0.01 | -1.04 | 0.416011 | 0.416148 | 0.709616 | 0.641371 |
| MmugDNA.13070.1.S1_s_at | MmugDNA.13070.1 | 9.42  | 8.78  | 0.1  | 0.17 | 1.56  | 0.004682 | 0.001495 | 0.184492 | 0.058967 |
| MmugDNA.13071.1.S1_at   | MmugDNA.13071.1 | 4.06  | 3.95  | 0.21 | 0.33 | 1.08  | 0.326547 | 0.51731  | 0.653184 | 0.709435 |
| MmugDNA.13072.1.S1_at   | MmugDNA.13072.1 | 4.31  | 4.3   | 0.16 | 0.1  | 1.01  | 0.789861 | 0.779511 | 0.912819 | 0.872163 |
| MmugDNA.13073.1.S1_at   | MmugDNA.13073.1 | 6.58  | 6.66  | 0.07 | 0.05 | -1.06 | 0.423679 | 0.184113 | 0.714199 | 0.460323 |
| MmugDNA.13075.1.S1_at   | MmugDNA.13075.1 | 7.34  | 6.59  | 0.57 | 0.25 | 1.68  | 0.142319 | 0.225281 | 0.509631 | 0.497892 |
| MmugDNA.13078.1.S1_at   | MmugDNA.13078.1 | 5.72  | 5.41  | 0.91 | 0.56 | 1.24  | 0.252073 | 0.466564 | 0.601234 | 0.676398 |
| MmugDNA.8372.1.S1_s_at  | MmugDNA.8372.1  | 10.77 | 10.99 | 0.17 | 0.25 | -1.16 | 0.154925 | 0.141521 | 0.519574 | 0.415063 |
| MmugDNA.1308.1.S1_at    | MmugDNA.1308.1  | 4.93  | 4.75  | 0.17 | 0.01 | 1.14  | 0.148647 | 0.049869 | 0.51391  | 0.268436 |
| MmugDNA.13080.1.S1_at   | MmugDNA.13080.1 | 5.53  | 5.23  | 0.27 | 0.29 | 1.23  | 0.106365 | 0.347923 | 0.466831 | 0.592196 |
| MmugDNA.13081.1.S1_at   | MmugDNA.13081.1 | 3.6   | 3.59  | 0.03 | 0.09 | 1     | 0.961017 | 0.706187 | 0.984976 | 0.829634 |
| MmugDNA.13082.1.S1_at   | MmugDNA.13082.1 | 5.77  | 5.77  | 0.23 | 0.11 | 1     | 0.827725 | 0.537521 | 0.930084 | 0.722606 |

|                         |                 |       |       |      |      |       |          |          |          |          |
|-------------------------|-----------------|-------|-------|------|------|-------|----------|----------|----------|----------|
| MmugDNA.13083.1.S1_at   | MmugDNA.13083.1 | 6.64  | 6.08  | 0.31 | 0.12 | 1.47  | 0.02459  | 0.030024 | 0.295214 | 0.215056 |
| MmugDNA.13084.1.S1_at   | MmugDNA.13084.1 | 4.21  | 4.28  | 0.12 | 0.08 | -1.05 | 0.742547 | 0.725664 | 0.889888 | 0.841129 |
| MmugDNA.13087.1.S1_at   | MmugDNA.13087.1 | 7.41  | 5.46  | 0.39 | 1.02 | 3.88  | 0.036199 | 0.101211 | 0.339036 | 0.360863 |
| MmugDNA.13088.1.S1_at   | MmugDNA.13088.1 | 4.49  | 3.7   | 0.95 | 0.94 | 1.73  | 0.355872 | 0.440789 | 0.671276 | 0.659136 |
| MmugDNA.13089.1.S1_at   | MmugDNA.13089.1 | 6.91  | 7.07  | 0.18 | 0.07 | -1.11 | 0.422152 | 0.026087 | 0.713415 | 0.202477 |
| MmugDNA.13089.1.S1_x_at | MmugDNA.13089.1 | 7.01  | 7.08  | 0.1  | 0.09 | -1.06 | 0.340731 | 0.035167 | 0.662185 | 0.231696 |
| MmugDNA.1309.1.S1_at    | MmugDNA.1309.1  | 4.25  | 4.39  | 0.32 | 0.6  | -1.1  | 0.485602 | 0.625815 | 0.751041 | 0.779339 |
| MmugDNA.13090.1.S1_at   | MmugDNA.13090.1 | 6.99  | 6.42  | 0.29 | 0.44 | 1.48  | 0.116608 | 0.069537 | 0.48034  | 0.309848 |
| MmugDNA.13091.1.S1_at   | MmugDNA.13091.1 | 5.79  | 5.88  | 0.06 | 0.15 | -1.07 | 0.557316 | 0.053716 | 0.792388 | 0.277384 |
| MmugDNA.13092.1.S1_at   | MmugDNA.13092.1 | 9.6   | 8.55  | 0.11 | 0.6  | 2.06  | 0.1158   | 0.039529 | 0.479325 | 0.243753 |
| MmugDNA.13093.1.S1_at   | MmugDNA.13093.1 | 4.82  | 4.7   | 0.21 | 0.21 | 1.09  | 0.341328 | 0.536925 | 0.66254  | 0.722124 |
| MmugDNA.13094.1.S1_at   | MmugDNA.13094.1 | 7.08  | 6.11  | 1.09 | 0.98 | 1.96  | 0.406721 | 0.566786 | 0.703854 | 0.740763 |
| MmugDNA.13095.1.S1_at   | MmugDNA.13095.1 | 4.51  | 4.62  | 0.1  | 0.25 | -1.08 | 0.844716 | 0.840607 | 0.937622 | 0.909157 |
| MmugDNA.13098.1.S1_at   | MmugDNA.13098.1 | 3.8   | 3.91  | 0.08 | 0.2  | -1.08 | 0.255243 | 0.392284 | 0.603111 | 0.625694 |
| MmugDNA.13100.1.S1_at   | MmugDNA.13100.1 | 10.27 | 10.05 | 0.16 | 0.35 | 1.16  | 0.685152 | 0.123542 | 0.858887 | 0.393629 |
| MmugDNA.13101.1.S1_at   | MmugDNA.13101.1 | 3.19  | 3.21  | 0.23 | 0.09 | -1.02 | 0.573052 | 0.40157  | 0.801055 | 0.631068 |
| MmugDNA.13103.1.S1_at   | MmugDNA.13103.1 | 5.23  | 5.49  | 0.18 | 1.15 | -1.2  | 0.559692 | 0.573069 | 0.793999 | 0.744941 |
| MmugDNA.13105.1.S1_at   | MmugDNA.13105.1 | 2.97  | 2.98  | 0.33 | 0.19 | -1.01 | 0.790042 | 0.671877 | 0.912878 | 0.808164 |
| MmugDNA.13106.1.S1_at   | MmugDNA.13106.1 | 6.51  | 6.42  | 0.23 | 0.2  | 1.07  | 0.854547 | 0.766095 | 0.941244 | 0.864102 |
| MmugDNA.13107.1.S1_at   | MmugDNA.13107.1 | 6.73  | 7.07  | 0.13 | 0.18 | -1.27 | 0.148944 | 0.138412 | 0.513964 | 0.41133  |
| MmugDNA.13108.1.S1_at   | MmugDNA.13108.1 | 10.21 | 9.7   | 0.08 | 0.35 | 1.43  | 0.048305 | 0.048657 | 0.368148 | 0.265613 |
| MmugDNA.13109.1.S1_at   | MmugDNA.13109.1 | 8.76  | 7.84  | 0.38 | 0.8  | 1.9   | 0.413999 | 0.526725 | 0.708765 | 0.715627 |
| MmugDNA.1311.1.S1_at    | MmugDNA.1311.1  | 5.81  | 5.48  | 0.31 | 0.08 | 1.25  | 0.347057 | 0.50602  | 0.666207 | 0.702337 |
| MmugDNA.13110.1.S1_at   | MmugDNA.13110.1 | 3.43  | 3.29  | 0.26 | 0    | 1.11  | 0.584307 | 0.492522 | 0.806956 | 0.693604 |
| MmugDNA.13111.1.S1_at   | MmugDNA.13111.1 | 3.51  | 3.58  | 0.08 | 0.11 | -1.04 | 0.935748 | 0.253471 | 0.975129 | 0.521768 |
| MmugDNA.13112.1.S1_at   | MmugDNA.13112.1 | 4.55  | 4.94  | 0.22 | 0.44 | -1.31 | 0.110967 | 0.118259 | 0.47278  | 0.386244 |
| MmugDNA.13113.1.S1_at   | MmugDNA.13113.1 | 3.14  | 3.41  | 0.2  | 0.24 | -1.21 | 0.198592 | 0.2907   | 0.56166  | 0.551382 |
| MmugDNA.13114.1.S1_at   | MmugDNA.13114.1 | 4.05  | 4.05  | 0.06 | 0    | 1     | 0.373901 | 0.500224 | 0.683245 | 0.698951 |
| MmugDNA.13115.1.S1_at   | MmugDNA.13115.1 | 9.09  | 9.05  | 0.38 | 0.42 | 1.03  | 0.610484 | 0.706856 | 0.821046 | 0.829968 |
| MmugDNA.13116.1.S1_at   | MmugDNA.13116.1 | 7.03  | 6.85  | 0.66 | 0.21 | 1.14  | 0.86682  | 0.82632  | 0.946844 | 0.900243 |
| MmugDNA.13117.1.S1_at   | MmugDNA.13117.1 | 9.12  | 9.33  | 0.33 | 0.88 | -1.15 | 0.616738 | 0.784384 | 0.824287 | 0.87518  |
| MmugDNA.13118.1.S1_at   | MmugDNA.13118.1 | 7.87  | 7.57  | 0.28 | 0.14 | 1.23  | 0.081902 | 0.148232 | 0.433147 | 0.422745 |
| MmugDNA.13119.1.S1_at   | MmugDNA.13119.1 | 5.98  | 6.11  | 0.22 | 0.1  | -1.1  | 0.611634 | 0.292525 | 0.821755 | 0.55258  |
| MmugDNA.1312.1.S1_at    | MmugDNA.1312.1  | 6.13  | 6.21  | 0.1  | 0.04 | -1.06 | 0.052186 | 0.074419 | 0.377155 | 0.318058 |
| MmugDNA.13123.1.S1_at   | MmugDNA.13123.1 | 4.98  | 4.43  | 0.71 | 0.18 | 1.47  | 0.917847 | 0.784756 | 0.968032 | 0.875383 |
| MmugDNA.13124.1.S1_at   | MmugDNA.13124.1 | 6.1   | 5.98  | 0.79 | 0.4  | 1.09  | 0.725848 | 0.850921 | 0.880575 | 0.91522  |
| MmugDNA.13125.1.S1_at   | MmugDNA.13125.1 | 5.73  | 5.86  | 0.24 | 0.53 | -1.09 | 0.43743  | 0.676831 | 0.722423 | 0.811172 |
| MmugDNA.13126.1.S1_at   | MmugDNA.13126.1 | 6     | 6     | 0.05 | 0.03 | 1     | 0.241785 | 0.506382 | 0.593977 | 0.702371 |
| MmugDNA.13128.1.S1_at   | MmugDNA.13128.1 | 12.29 | 12.04 | 0.09 | 0.57 | 1.19  | 0.156833 | 0.173981 | 0.521577 | 0.450247 |
| MmugDNA.13129.1.S1_at   | MmugDNA.13129.1 | 4.09  | 4.31  | 0.05 | 0.11 | -1.16 | 0.044042 | 0.011265 | 0.357647 | 0.138076 |
| MmugDNA.1313.1.S1_at    | MmugDNA.1313.1  | 11.26 | 12.17 | 0.23 | 0.38 | -1.88 | 0.028859 | 0.017698 | 0.312166 | 0.168304 |

|                         |                 |       |       |      |      |       |          |          |          |          |
|-------------------------|-----------------|-------|-------|------|------|-------|----------|----------|----------|----------|
| MmugDNA.13130.1.S1_s_at | MmugDNA.13130.1 | 5.64  | 5.65  | 0.5  | 0.03 | -1.01 | 0.530687 | 0.634967 | 0.776893 | 0.785108 |
| MmugDNA.13131.1.S1_at   | MmugDNA.13131.1 | 7.54  | 6.79  | 0.77 | 0.7  | 1.68  | 0.225885 | 0.349909 | 0.583922 | 0.593668 |
| MmugDNA.13132.1.S1_at   | MmugDNA.13132.1 | 9.8   | 10.14 | 0.27 | 0.04 | -1.26 | 0.072462 | 0.081327 | 0.416971 | 0.329427 |
| MmugDNA.13133.1.S1_at   | MmugDNA.13133.1 | 9.55  | 9.44  | 0.17 | 0.33 | 1.08  | 0.752652 | 0.894494 | 0.894426 | 0.939772 |
| MmugDNA.13134.1.S1_at   | MmugDNA.13134.1 | 7.98  | 7.84  | 0.37 | 0.25 | 1.1   | 0.34403  | 0.367891 | 0.6642   | 0.607469 |
| MmugDNA.13135.1.S1_at   | MmugDNA.13135.1 | 9.49  | 9.09  | 0.14 | 0.24 | 1.32  | 0.037677 | 0.006181 | 0.342468 | 0.106774 |
| MmugDNA.13136.1.S1_at   | MmugDNA.13136.1 | 3.95  | 3.95  | 0.23 | 0.09 | 1     | 0.321127 | 0.525816 | 0.649862 | 0.715217 |
| MmugDNA.13137.1.S1_at   | MmugDNA.13137.1 | 7.38  | 6.43  | 0.15 | 0.17 | 1.93  | 0.004579 | 0.003355 | 0.1844   | 0.083359 |
| MmugDNA.13138.1.S1_at   | MmugDNA.13138.1 | 4.46  | 4.49  | 0.05 | 0.31 | -1.02 | 0.713914 | 0.900462 | 0.874591 | 0.943447 |
| MmugDNA.13139.1.S1_at   | MmugDNA.13139.1 | 3.53  | 3.87  | 0.18 | 0.15 | -1.26 | 0.070717 | 0.078915 | 0.414661 | 0.325912 |
| MmugDNA.1314.1.S1_at    | MmugDNA.1314.1  | 4.17  | 4.36  | 0.25 | 0.17 | -1.14 | 0.874263 | 0.515697 | 0.949565 | 0.708451 |
| MmugDNA.13141.1.S1_at   | MmugDNA.13141.1 | 2.95  | 2.9   | 0.3  | 0.13 | 1.03  | 0.851374 | 0.906234 | 0.940204 | 0.94693  |
| MmugDNA.13141.1.S1_x_at | MmugDNA.13141.1 | 3.51  | 3.53  | 0.06 | 0.02 | -1.01 | 0.518464 | 0.56879  | 0.769471 | 0.74211  |
| MmugDNA.13142.1.S1_at   | MmugDNA.13142.1 | 3.23  | 3.29  | 0.05 | 0.21 | -1.04 | 0.295591 | 0.474756 | 0.631933 | 0.681695 |
| MmugDNA.13143.1.S1_at   | MmugDNA.13143.1 | 5.28  | 5.37  | 0.03 | 0.09 | -1.06 | 0.13054  | 0.062453 | 0.496902 | 0.296717 |
| MmugDNA.13144.1.S1_at   | MmugDNA.13144.1 | 7.07  | 7.78  | 0.24 | 0.08 | -1.63 | 0.010039 | 0.009456 | 0.226901 | 0.12804  |
| MmugDNA.13145.1.S1_at   | MmugDNA.13145.1 | 3.61  | 3.43  | 0.04 | 0.22 | 1.13  | 0.347332 | 0.220011 | 0.666414 | 0.49344  |
| MmugDNA.13146.1.S1_at   | MmugDNA.13146.1 | 5.26  | 5.24  | 0.15 | 0.24 | 1.01  | 0.210499 | 0.351715 | 0.571783 | 0.595164 |
| MmugDNA.13147.1.S1_at   | MmugDNA.13147.1 | 5.24  | 4.86  | 0.15 | 0.11 | 1.3   | 0.062565 | 0.026525 | 0.398492 | 0.203899 |
| MmugDNA.13148.1.S1_at   | MmugDNA.13148.1 | 4.51  | 4.71  | 0.71 | 0.21 | -1.15 | 0.87097  | 0.93344  | 0.948399 | 0.962195 |
| MmugDNA.13149.1.S1_at   | MmugDNA.13149.1 | 3.51  | 3.65  | 0.22 | 0.13 | -1.1  | 0.550757 | 0.771526 | 0.788084 | 0.867249 |
| MmugDNA.1315.1.S1_at    | MmugDNA.1315.1  | 4.43  | 5.09  | 0.72 | 0.68 | -1.58 | 0.709192 | 0.876145 | 0.872343 | 0.929583 |
| MmugDNA.13150.1.S1_at   | MmugDNA.13150.1 | 6.22  | 7.33  | 0.1  | 0.39 | -2.16 | 0.014809 | 0.007961 | 0.255426 | 0.118702 |
| MmugDNA.13152.1.S1_at   | MmugDNA.13152.1 | 7.89  | 7.02  | 0.14 | 0.63 | 1.83  | 0.029546 | 0.011108 | 0.314766 | 0.137198 |
| MmugDNA.13153.1.S1_at   | MmugDNA.13153.1 | 8.16  | 7.79  | 0.11 | 1.03 | 1.3   | 0.740203 | 0.816002 | 0.888448 | 0.893865 |
| MmugDNA.13154.1.S1_at   | MmugDNA.13154.1 | 7.05  | 5.61  | 0.34 | 0.79 | 2.72  | 0.043057 | 0.026622 | 0.356103 | 0.204028 |
| MmugDNA.13155.1.S1_at   | MmugDNA.13155.1 | 13.3  | 12.94 | 0.06 | 0.27 | 1.28  | 0.031645 | 0.018465 | 0.32249  | 0.170923 |
| MmugDNA.13157.1.S1_s_at | MmugDNA.13157.1 | 3.6   | 3.51  | 0.17 | 0.08 | 1.06  | 0.471814 | 0.098986 | 0.743397 | 0.357049 |
| MmugDNA.13158.1.S1_at   | MmugDNA.13158.1 | 2.99  | 2.99  | 0.13 | 0.2  | -1    | 0.837822 | 0.940246 | 0.934478 | 0.966105 |
| MmugDNA.13159.1.S1_at   | MmugDNA.13159.1 | 5.99  | 4.66  | 0.18 | 1.29 | 2.52  | 0.554196 | 0.525079 | 0.790667 | 0.714766 |
| MmugDNA.1316.1.S1_at    | MmugDNA.1316.1  | 3.04  | 3.18  | 0.14 | 0.12 | -1.1  | 0.537372 | 0.189498 | 0.780008 | 0.465237 |
| MmugDNA.13160.1.S1_at   | MmugDNA.13160.1 | 3.33  | 3.27  | 0.12 | 0.03 | 1.04  | 0.195446 | 0.355544 | 0.558901 | 0.597801 |
| MmugDNA.13164.1.S1_at   | MmugDNA.13164.1 | 5.26  | 5.48  | 0.16 | 0.22 | -1.17 | 0.368132 | 0.284458 | 0.679753 | 0.546637 |
| MmugDNA.13166.1.S1_at   | MmugDNA.13166.1 | 3.48  | 3.45  | 0.12 | 0.12 | 1.02  | 0.931477 | 0.673268 | 0.973509 | 0.809084 |
| MmugDNA.13167.1.S1_at   | MmugDNA.13167.1 | 4.17  | 4.28  | 0.32 | 0.04 | -1.09 | 0.741609 | 0.764726 | 0.889293 | 0.863203 |
| MmugDNA.13168.1.S1_at   | MmugDNA.13168.1 | 7.78  | 7.79  | 0.07 | 0.12 | -1    | 0.527145 | 0.140222 | 0.774581 | 0.413405 |
| MmugDNA.13169.1.S1_at   | MmugDNA.13169.1 | 6.63  | 6.34  | 0.19 | 0.28 | 1.23  | 0.240378 | 0.177362 | 0.593203 | 0.453742 |
| MmugDNA.1317.1.S1_at    | MmugDNA.1317.1  | 3.93  | 3.89  | 0.06 | 0.07 | 1.02  | 0.749314 | 0.346007 | 0.892656 | 0.59115  |
| MmugDNA.13170.1.S1_at   | MmugDNA.13170.1 | 3.63  | 3.55  | 0.16 | 0.1  | 1.06  | 0.852702 | 0.978055 | 0.940647 | 0.988066 |
| MmugDNA.13171.1.S1_at   | MmugDNA.13171.1 | 4.55  | 4.67  | 0.26 | 0.3  | -1.09 | 0.160405 | 0.202336 | 0.525374 | 0.476691 |
| MmugDNA.13174.1.S1_at   | MmugDNA.13174.1 | 10.61 | 10.37 | 0.18 | 0.07 | 1.18  | 0.108753 | 0.049265 | 0.470244 | 0.266828 |

|                         |                 |       |       |      |      |        |          |          |          |          |
|-------------------------|-----------------|-------|-------|------|------|--------|----------|----------|----------|----------|
| MmugDNA.13175.1.S1_at   | MmugDNA.13175.1 | 4.57  | 4.29  | 1.25 | 0.34 | 1.21   | 0.348772 | 0.49068  | 0.66724  | 0.692652 |
| MmugDNA.13176.1.S1_at   | MmugDNA.13176.1 | 4.19  | 4.25  | 0.03 | 0.06 | -1.04  | 0.300937 | 0.160626 | 0.636012 | 0.436745 |
| MmugDNA.1318.1.S1_at    | MmugDNA.1318.1  | 6.33  | 6.3   | 0.31 | 0.08 | 1.02   | 0.953681 | 0.85034  | 0.982865 | 0.914874 |
| MmugDNA.13180.1.S1_at   | MmugDNA.13180.1 | 6.05  | 6.11  | 0.12 | 0.05 | -1.04  | 0.238563 | 0.216281 | 0.591896 | 0.489844 |
| MmugDNA.13181.1.S1_at   | MmugDNA.13181.1 | 6.07  | 6.13  | 0.09 | 0.06 | -1.05  | 0.170207 | 0.151262 | 0.534249 | 0.426    |
| MmugDNA.13182.1.S1_at   | MmugDNA.13182.1 | 6.8   | 10.33 | 1.54 | 3.12 | -11.59 | 0.454198 | 0.331515 | 0.733184 | 0.580163 |
| MmugDNA.13183.1.S1_at   | MmugDNA.13183.1 | 6.21  | 6.15  | 0.24 | 0.09 | 1.04   | 0.923592 | 0.537933 | 0.970342 | 0.722799 |
| MmugDNA.30742.1.S1_s_at | MmugDNA.30742.1 | 7.83  | 7.9   | 0.09 | 0.1  | -1.05  | 0.870659 | 0.664182 | 0.948314 | 0.803247 |
| MmugDNA.13187.1.S1_at   | MmugDNA.13187.1 | 4.73  | 4.52  | 0.25 | 0.2  | 1.16   | 0.143891 | 0.34624  | 0.510456 | 0.591201 |
| MmugDNA.1319.1.S1_at    | MmugDNA.1319.1  | 6.81  | 6.84  | 0.18 | 0.51 | -1.03  | 0.524541 | 0.72026  | 0.773192 | 0.838202 |
| MmugDNA.13190.1.S1_at   | MmugDNA.13190.1 | 4.32  | 3.66  | 0.39 | 0.42 | 1.58   | 0.190393 | 0.400278 | 0.553059 | 0.630158 |
| MmugDNA.13191.1.S1_at   | MmugDNA.13191.1 | 6.17  | 6.19  | 0.15 | 0.08 | -1.01  | 0.483798 | 0.095225 | 0.749945 | 0.35218  |
| MmugDNA.13192.1.S1_s_at | MmugDNA.13192.1 | 10.12 | 10.1  | 0.35 | 0.1  | 1.01   | 0.302388 | 0.30554  | 0.63692  | 0.562486 |
| MmugDNA.13193.1.S1_at   | MmugDNA.13193.1 | 7.39  | 7.28  | 0.15 | 0.12 | 1.08   | 0.110314 | 0.067485 | 0.471863 | 0.305811 |
| MmugDNA.13194.1.S1_at   | MmugDNA.13194.1 | 4.94  | 5.12  | 0.09 | 0.17 | -1.14  | 0.102573 | 0.233347 | 0.462417 | 0.504701 |
| MmugDNA.13194.1.S1_s_at | MmugDNA.13194.1 | 6.3   | 6.19  | 0.12 | 0.07 | 1.08   | 0.320329 | 0.783659 | 0.649463 | 0.874712 |
| MmugDNA.13195.1.S1_at   | MmugDNA.13195.1 | 5.28  | 4.74  | 0.56 | 0.79 | 1.45   | 0.176539 | 0.145243 | 0.540178 | 0.419256 |
| MmugDNA.13196.1.S1_at   | MmugDNA.13196.1 | 4.37  | 4.61  | 0.37 | 0.36 | -1.18  | 0.146407 | 0.188772 | 0.512537 | 0.464761 |
| MmugDNA.13198.1.S1_at   | MmugDNA.13198.1 | 2.67  | 2.71  | 0.03 | 0.08 | -1.03  | 0.593014 | 0.363639 | 0.811221 | 0.604046 |
| MmugDNA.13199.1.S1_at   | MmugDNA.13199.1 | 3.18  | 3.21  | 0.1  | 0.1  | -1.03  | 0.830662 | 0.038655 | 0.93155  | 0.24169  |
| MmugDNA.1320.1.S1_at    | MmugDNA.1320.1  | 4.7   | 4.7   | 0.01 | 0.09 | 1      | 0.430297 | 0.048556 | 0.717986 | 0.265572 |
| MmugDNA.13200.1.S1_at   | MmugDNA.13200.1 | 4.82  | 4.23  | 0.87 | 1.38 | 1.51   | 0.739507 | 0.475545 | 0.888157 | 0.682235 |
| MmugDNA.13202.1.S1_at   | MmugDNA.13202.1 | 5.55  | 5.14  | 0.17 | 0.2  | 1.33   | 0.115362 | 0.383169 | 0.478773 | 0.619153 |
| MmugDNA.13203.1.S1_at   | MmugDNA.13203.1 | 8.97  | 8.83  | 0.28 | 0.31 | 1.1    | 0.416767 | 0.464163 | 0.710179 | 0.674918 |
| MmugDNA.13204.1.S1_at   | MmugDNA.13204.1 | 8.05  | 7.1   | 0.35 | 0.47 | 1.94   | 0.061083 | 0.035825 | 0.394935 | 0.233727 |
| MmugDNA.13205.1.S1_at   | MmugDNA.13205.1 | 4.23  | 3.68  | 0.53 | 0.12 | 1.46   | 0.128698 | 0.176793 | 0.494664 | 0.45321  |
| MmugDNA.13206.1.S1_at   | MmugDNA.13206.1 | 3.66  | 3.82  | 0.16 | 0.21 | -1.11  | 0.178542 | 0.315185 | 0.54288  | 0.568899 |
| MmugDNA.13207.1.S1_at   | MmugDNA.13207.1 | 7.81  | 7.45  | 0.45 | 0.39 | 1.29   | 0.070721 | 0.025484 | 0.414661 | 0.200302 |
| MmugDNA.13208.1.S1_at   | MmugDNA.13208.1 | 3.98  | 4.08  | 0.56 | 0.16 | -1.07  | 0.4428   | 0.594133 | 0.725848 | 0.758517 |
| MmugDNA.13209.1.S1_at   | MmugDNA.13209.1 | 4.12  | 3.87  | 0.32 | 0.09 | 1.19   | 0.178063 | 0.215847 | 0.542335 | 0.489536 |
| MmugDNA.1321.1.S1_at    | MmugDNA.1321.1  | 3.67  | 3.75  | 0.52 | 0.04 | -1.06  | 0.519376 | 0.471614 | 0.770186 | 0.679537 |
| MmugDNA.13210.1.S1_at   | MmugDNA.13210.1 | 3.88  | 3.45  | 0.14 | 0.25 | 1.35   | 0.170534 | 0.240317 | 0.534302 | 0.510874 |
| MmugDNA.13211.1.S1_at   | MmugDNA.13211.1 | 4.8   | 5.67  | 0.53 | 0.21 | -1.83  | 0.035203 | 0.037656 | 0.335371 | 0.23852  |
| MmugDNA.13212.1.S1_at   | MmugDNA.13212.1 | 3.69  | 3.48  | 0.24 | 0.19 | 1.16   | 0.288867 | 0.237746 | 0.626809 | 0.50826  |
| MmugDNA.13213.1.S1_at   | MmugDNA.13213.1 | 2.87  | 3.04  | 0.05 | 0.14 | -1.12  | 0.140314 | 0.343468 | 0.508095 | 0.58924  |
| MmugDNA.13214.1.S1_at   | MmugDNA.13214.1 | 3.94  | 3.95  | 0.16 | 0.09 | -1.01  | 0.523182 | 0.627663 | 0.772377 | 0.780629 |
| MmugDNA.13215.1.S1_at   | MmugDNA.13215.1 | 6.13  | 5.37  | 0.19 | 0.79 | 1.69   | 0.136488 | 0.00869  | 0.503566 | 0.123663 |
| MmugDNA.13216.1.S1_at   | MmugDNA.13216.1 | 5.28  | 5.3   | 0.11 | 0.03 | -1.02  | 0.479052 | 0.597134 | 0.747575 | 0.760094 |
| MmugDNA.13217.1.S1_at   | MmugDNA.13217.1 | 10.84 | 10.45 | 0.27 | 0.32 | 1.31   | 0.233571 | 0.289261 | 0.588317 | 0.550293 |
| MmugDNA.13219.1.S1_at   | MmugDNA.13219.1 | 7.15  | 7.02  | 0.18 | 0.09 | 1.09   | 0.544974 | 0.617594 | 0.784702 | 0.773511 |
| MmugDNA.1322.1.S1_at    | MmugDNA.1322.1  | 6.42  | 6.46  | 0.03 | 0.11 | -1.03  | 0.203771 | 0.194713 | 0.5663   | 0.469765 |

|                         |                 |       |       |      |      |       |          |          |          |          |
|-------------------------|-----------------|-------|-------|------|------|-------|----------|----------|----------|----------|
| MmugDNA.1322.1.S1_s_at  | MmugDNA.1322.1  | 7.89  | 8.61  | 0.02 | 0.15 | -1.65 | 0.001964 | 0.000699 | 0.155636 | 0.04424  |
| MmugDNA.13220.1.S1_at   | MmugDNA.13220.1 | 2.86  | 2.99  | 0.18 | 0.16 | -1.09 | 0.788487 | 0.656712 | 0.912168 | 0.79927  |
| MmugDNA.13221.1.S1_at   | MmugDNA.13221.1 | 10.82 | 11.66 | 0.25 | 0.71 | -1.8  | 0.343927 | 0.451404 | 0.664147 | 0.666186 |
| MmugDNA.13222.1.S1_s_at | MmugDNA.13222.1 | 5.29  | 5.52  | 0.32 | 0.33 | -1.18 | 0.262194 | 0.250948 | 0.608894 | 0.519618 |
| MmugDNA.13223.1.S1_at   | MmugDNA.13223.1 | 4.1   | 4.77  | 0.07 | 0.06 | -1.59 | 0.000206 | 0.000162 | 0.120316 | 0.030478 |
| MmugDNA.13225.1.S1_at   | MmugDNA.13225.1 | 8.64  | 8.24  | 0.27 | 0.76 | 1.32  | 0.598032 | 0.358859 | 0.813917 | 0.600291 |
| MmugDNA.13226.1.S1_at   | MmugDNA.13226.1 | 6.99  | 6.4   | 0.21 | 0.09 | 1.51  | 0.023547 | 0.113862 | 0.291638 | 0.380084 |
| MmugDNA.13228.1.S1_at   | MmugDNA.13228.1 | 6.26  | 5.45  | 1.35 | 0.65 | 1.76  | 0.582471 | 0.774101 | 0.805787 | 0.868685 |
| MmugDNA.13229.1.S1_at   | MmugDNA.13229.1 | 4.7   | 4.56  | 0.19 | 0.13 | 1.1   | 0.126316 | 0.081878 | 0.492599 | 0.330339 |
| MmugDNA.13232.1.S1_at   | MmugDNA.13232.1 | 6.81  | 6.79  | 0.06 | 0.14 | 1.01  | 0.620384 | 0.673909 | 0.826026 | 0.809483 |
| MmugDNA.13232.1.S1_s_at | MmugDNA.13232.1 | 7.85  | 7.89  | 0.06 | 0.14 | -1.03 | 0.222223 | 0.183067 | 0.580714 | 0.459493 |
| MmugDNA.41625.1.S1_s_at | MmugDNA.41625.1 | 5.63  | 5.54  | 0.2  | 0.15 | 1.06  | 0.838641 | 0.333356 | 0.934745 | 0.581668 |
| MmugDNA.13235.1.S1_at   | MmugDNA.13235.1 | 8.82  | 7.68  | 0.24 | 0.02 | 2.21  | 0.001493 | 0.000189 | 0.150888 | 0.030754 |
| MmugDNA.13236.1.S1_at   | MmugDNA.13236.1 | 6.24  | 7.67  | 0.27 | 0.28 | -2.68 | 0.003886 | 0.001125 | 0.180184 | 0.052924 |
| MmugDNA.13237.1.S1_s_at | MmugDNA.13237.1 | 11.37 | 11.97 | 0.11 | 0.22 | -1.52 | 0.012989 | 0.005107 | 0.245238 | 0.099116 |
| MmugDNA.13238.1.S1_at   | MmugDNA.13238.1 | 6.61  | 6.41  | 0.28 | 0.16 | 1.15  | 0.723618 | 0.485627 | 0.879213 | 0.68924  |
| MmugDNA.13239.1.S1_at   | MmugDNA.13239.1 | 7.67  | 8.86  | 0.37 | 0.57 | -2.28 | 0.065122 | 0.013966 | 0.40393  | 0.151509 |
| MmugDNA.1324.1.S1_s_at  | MmugDNA.1324.1  | 6.51  | 6.68  | 0.54 | 0.68 | -1.12 | 0.470853 | 0.711589 | 0.74274  | 0.832761 |
| MmugDNA.13240.1.S1_at   | MmugDNA.13240.1 | 4     | 4.01  | 0.1  | 0.07 | -1.01 | 0.664505 | 0.558475 | 0.849598 | 0.735631 |
| MmugDNA.13241.1.S1_at   | MmugDNA.13241.1 | 6.37  | 6.29  | 0.17 | 0.43 | 1.06  | 0.868042 | 0.751248 | 0.947279 | 0.855385 |
| MmugDNA.13243.1.S1_at   | MmugDNA.13243.1 | 4.9   | 4.44  | 1.52 | 0.11 | 1.38  | 0.189862 | 0.235184 | 0.552746 | 0.50629  |
| MmugDNA.13244.1.S1_at   | MmugDNA.13244.1 | 3.37  | 3.21  | 0.38 | 0.1  | 1.12  | 0.468646 | 0.629714 | 0.741167 | 0.781989 |
| MmugDNA.13245.1.S1_at   | MmugDNA.13245.1 | 5.19  | 4.93  | 0.58 | 0.06 | 1.2   | 0.336876 | 0.356978 | 0.659663 | 0.598736 |
| MmugDNA.13246.1.S1_at   | MmugDNA.13246.1 | 4.53  | 4.52  | 0.61 | 0.22 | 1.01  | 0.381123 | 0.280686 | 0.687695 | 0.543874 |
| MmugDNA.13247.1.S1_at   | MmugDNA.13247.1 | 4.67  | 4.39  | 0.12 | 0.11 | 1.22  | 0.056975 | 0.100314 | 0.387418 | 0.359386 |
| MmugDNA.13248.1.S1_at   | MmugDNA.13248.1 | 4.91  | 4.94  | 0.1  | 0.05 | -1.03 | 0.555243 | 0.298777 | 0.791316 | 0.557392 |
| MmugDNA.13249.1.S1_at   | MmugDNA.13249.1 | 7.15  | 7.14  | 0.58 | 0.85 | 1     | 0.804241 | 0.946081 | 0.919488 | 0.969369 |
| MmugDNA.1325.1.S1_at    | MmugDNA.1325.1  | 4.37  | 4.54  | 0.14 | 0.04 | -1.12 | 0.129335 | 0.089592 | 0.495453 | 0.343811 |
| MmugDNA.13250.1.S1_at   | MmugDNA.13250.1 | 9.44  | 9.61  | 0.17 | 0.32 | -1.12 | 0.937119 | 0.550417 | 0.975769 | 0.730421 |
| MmugDNA.13251.1.S1_at   | MmugDNA.13251.1 | 5.53  | 5.55  | 0.24 | 0.25 | -1.02 | 0.650844 | 0.725414 | 0.842955 | 0.841043 |
| MmugDNA.13253.1.S1_at   | MmugDNA.13253.1 | 4.4   | 4.31  | 0.75 | 0.63 | 1.07  | 0.474978 | 0.446271 | 0.745472 | 0.662743 |
| MmugDNA.13253.1.S1_x_at | MmugDNA.13253.1 | 5.04  | 5.05  | 0.55 | 0.36 | -1    | 0.561863 | 0.671118 | 0.795002 | 0.807655 |
| MmugDNA.13254.1.S1_at   | MmugDNA.13254.1 | 4.01  | 3.83  | 0.8  | 0.21 | 1.13  | 0.254233 | 0.336468 | 0.602339 | 0.583831 |
| MmugDNA.13255.1.S1_at   | MmugDNA.13255.1 | 5.29  | 5.41  | 0.04 | 0.22 | -1.09 | 0.319703 | 0.592642 | 0.649068 | 0.757854 |
| MmugDNA.13256.1.S1_at   | MmugDNA.13256.1 | 7.74  | 8.84  | 0.73 | 1.25 | -2.15 | 0.974579 | 0.425497 | 0.990048 | 0.647866 |
| MmugDNA.13257.1.S1_at   | MmugDNA.13257.1 | 4.72  | 4.65  | 0.07 | 0    | 1.05  | 0.544598 | 0.159678 | 0.784452 | 0.435785 |
| MmugDNA.13258.1.S1_at   | MmugDNA.13258.1 | 5.69  | 4.57  | 1.08 | 1.22 | 2.18  | 0.677717 | 0.345289 | 0.855562 | 0.590593 |
| MmugDNA.13259.1.S1_at   | MmugDNA.13259.1 | 12.34 | 12.06 | 0.03 | 0.12 | 1.21  | 0.019933 | 0.008241 | 0.276356 | 0.12058  |
| MmugDNA.1326.1.S1_at    | MmugDNA.1326.1  | 4.04  | 4.51  | 0.96 | 0.17 | -1.39 | 0.768604 | 0.542311 | 0.902719 | 0.725385 |
| MmugDNA.13260.1.S1_at   | MmugDNA.13260.1 | 3.96  | 4     | 0.07 | 0.11 | -1.03 | 0.847294 | 0.898329 | 0.938764 | 0.942152 |
| MmugDNA.13261.1.S1_at   | MmugDNA.13261.1 | 6.12  | 6.27  | 0.22 | 0.08 | -1.11 | 0.234146 | 0.402131 | 0.588621 | 0.631232 |

|                         |                 |       |       |      |      |       |          |          |          |          |
|-------------------------|-----------------|-------|-------|------|------|-------|----------|----------|----------|----------|
| MmugDNA.13262.1.S1_at   | MmugDNA.13262.1 | 5.66  | 5.8   | 0.04 | 0.24 | -1.1  | 0.213544 | 0.232608 | 0.573715 | 0.504359 |
| MmugDNA.13263.1.S1_at   | MmugDNA.13263.1 | 3.25  | 3.28  | 0.27 | 0.26 | -1.02 | 0.928975 | 0.493357 | 0.972607 | 0.694092 |
| MmugDNA.13264.1.S1_at   | MmugDNA.13264.1 | 5.8   | 6.07  | 0.04 | 0.13 | -1.2  | 0.030014 | 0.118477 | 0.316643 | 0.386457 |
| MmugDNA.13265.1.S1_at   | MmugDNA.13265.1 | 4.94  | 5.09  | 0.11 | 0.22 | -1.11 | 0.572348 | 0.218057 | 0.800678 | 0.491683 |
| MmugDNA.13267.1.S1_at   | MmugDNA.13267.1 | 9.61  | 9.23  | 0.25 | 0.53 | 1.3   | 0.469309 | 0.626709 | 0.741612 | 0.779962 |
| MmugDNA.13268.1.S1_at   | MmugDNA.13268.1 | 10.52 | 11.59 | 0.19 | 0.41 | -2.1  | 0.015388 | 0.006738 | 0.258258 | 0.110984 |
| MmugDNA.13271.1.S1_at   | MmugDNA.13271.1 | 5.19  | 5.19  | 0.05 | 0.14 | 1.01  | 0.837342 | 0.457712 | 0.93428  | 0.670897 |
| MmugDNA.13272.1.S1_at   | MmugDNA.13272.1 | 4.24  | 3.52  | 0.41 | 0.15 | 1.65  | 0.037936 | 0.022099 | 0.343341 | 0.185973 |
| MmugDNA.13274.1.S1_at   | MmugDNA.13274.1 | 5.36  | 5.33  | 0.13 | 0.34 | 1.02  | 0.833074 | 0.948079 | 0.93227  | 0.970446 |
| MmugDNA.13275.1.S1_at   | MmugDNA.13275.1 | 4.87  | 4.92  | 0.49 | 0.92 | -1.04 | 0.810256 | 0.778356 | 0.922654 | 0.871276 |
| MmugDNA.13276.1.S1_at   | MmugDNA.13276.1 | 2.94  | 2.93  | 0.11 | 0.19 | 1     | 0.990739 | 0.242466 | 0.996791 | 0.512835 |
| MmugDNA.13278.1.S1_at   | MmugDNA.13278.1 | 10.65 | 10.23 | 0.13 | 0.43 | 1.34  | 0.217385 | 0.259926 | 0.57694  | 0.52675  |
| MmugDNA.13279.1.S1_at   | MmugDNA.13279.1 | 10.02 | 9.93  | 0.01 | 0.31 | 1.06  | 0.650469 | 0.138288 | 0.842789 | 0.411198 |
| MmugDNA.1328.1.S1_at    | MmugDNA.1328.1  | 8.1   | 7.62  | 0.09 | 0.35 | 1.4   | 0.201996 | 0.094082 | 0.564284 | 0.350727 |
| MmugDNA.13280.1.S1_at   | MmugDNA.13280.1 | 5.45  | 5.58  | 0.28 | 0.03 | -1.1  | 0.92122  | 0.970482 | 0.969237 | 0.983936 |
| MmugDNA.13281.1.S1_at   | MmugDNA.13281.1 | 6.16  | 5.94  | 0.23 | 0.15 | 1.17  | 0.293376 | 0.098534 | 0.630419 | 0.356636 |
| MmugDNA.13282.1.S1_at   | MmugDNA.13282.1 | 6.32  | 6.2   | 0.07 | 0.21 | 1.09  | 0.331866 | 0.439869 | 0.656523 | 0.658468 |
| MmugDNA.13283.1.S1_at   | MmugDNA.13283.1 | 3.81  | 3.93  | 0.13 | 0.18 | -1.08 | 0.49879  | 0.690052 | 0.758705 | 0.819235 |
| MmugDNA.13286.1.S1_at   | MmugDNA.13286.1 | 8.13  | 10.99 | 1.02 | 2.59 | -7.23 | 0.442434 | 0.366792 | 0.725608 | 0.606502 |
| MmugDNA.22482.1.S1_s_at | MmugDNA.22482.1 | 10.03 | 9.48  | 0.14 | 0.24 | 1.47  | 0.036078 | 0.022371 | 0.338781 | 0.187176 |
| MmugDNA.13288.1.S1_s_at | MmugDNA.13288.1 | 13.45 | 13.62 | 0.11 | 0.16 | -1.12 | 0.423613 | 0.538447 | 0.714199 | 0.723141 |
| MmugDNA.13289.1.S1_at   | MmugDNA.13289.1 | 8     | 8.28  | 0.2  | 0.71 | -1.21 | 0.909253 | 0.930762 | 0.964052 | 0.960673 |
| MmugDNA.1329.1.S1_at    | MmugDNA.1329.1  | 5.01  | 4.84  | 0.09 | 0.1  | 1.12  | 0.048648 | 0.085267 | 0.369138 | 0.337096 |
| MmugDNA.13291.1.S1_at   | MmugDNA.13291.1 | 3.87  | 3.98  | 0.39 | 0.3  | -1.08 | 0.86954  | 0.661322 | 0.947917 | 0.801687 |
| MmugDNA.13292.1.S1_at   | MmugDNA.13292.1 | 3.03  | 3.2   | 0.07 | 0.12 | -1.12 | 0.429252 | 0.27736  | 0.717422 | 0.541302 |
| MmugDNA.13294.1.S1_at   | MmugDNA.13294.1 | 3.95  | 3.95  | 0.08 | 0.06 | 1     | 0.890289 | 0.07723  | 0.956122 | 0.322852 |
| MmugDNA.13295.1.S1_at   | MmugDNA.13295.1 | 4.04  | 4.17  | 0.18 | 0.18 | -1.09 | 0.420495 | 0.412383 | 0.712506 | 0.6388   |
| MmugDNA.13296.1.S1_at   | MmugDNA.13296.1 | 5.63  | 5.73  | 0.2  | 0.05 | -1.07 | 0.511999 | 0.692366 | 0.765422 | 0.820984 |
| MmugDNA.13297.1.S1_at   | MmugDNA.13297.1 | 4.86  | 4.83  | 0.93 | 0.42 | 1.02  | 0.833016 | 0.932638 | 0.93227  | 0.961739 |
| MmugDNA.13298.1.S1_at   | MmugDNA.13298.1 | 8.18  | 7.14  | 0.27 | 0.45 | 2.04  | 0.050333 | 0.043036 | 0.374136 | 0.252089 |
| MmugDNA.1330.1.S1_at    | MmugDNA.1330.1  | 4.39  | 4.49  | 0.48 | 0.21 | -1.07 | 0.600699 | 0.831594 | 0.815426 | 0.903439 |
| MmugDNA.13301.1.S1_at   | MmugDNA.13301.1 | 12.41 | 12.75 | 0.02 | 0.11 | -1.27 | 0.004032 | 0.003021 | 0.181739 | 0.080204 |
| MmugDNA.13305.1.S1_at   | MmugDNA.13305.1 | 4.92  | 4.91  | 0.09 | 0.09 | 1     | 0.252592 | 0.556854 | 0.60139  | 0.734831 |
| MmugDNA.13307.1.S1_at   | MmugDNA.13307.1 | 3.95  | 3.94  | 0.11 | 0.12 | 1.01  | 0.83714  | 0.554974 | 0.93416  | 0.733559 |
| MmugDNA.13309.1.S1_at   | MmugDNA.13309.1 | 6.3   | 6.59  | 0.06 | 0.18 | -1.23 | 0.104109 | 0.081125 | 0.464201 | 0.32931  |
| MmugDNA.1331.1.S1_at    | MmugDNA.1331.1  | 5.34  | 5.58  | 0.06 | 0.11 | -1.18 | 0.036498 | 0.074634 | 0.33952  | 0.318314 |
| MmugDNA.13310.1.S1_at   | MmugDNA.13310.1 | 4.29  | 4.32  | 0.11 | 0.2  | -1.02 | 0.735576 | 0.741405 | 0.886336 | 0.850285 |
| MmugDNA.13311.1.S1_at   | MmugDNA.13311.1 | 3.62  | 3.63  | 0.07 | 0.08 | -1    | 0.848534 | 0.776248 | 0.939211 | 0.86982  |
| MmugDNA.13313.1.S1_at   | MmugDNA.13313.1 | 6.51  | 6.33  | 0.19 | 0.09 | 1.13  | 0.882557 | 0.682279 | 0.952793 | 0.814486 |
| MmugDNA.13314.1.S1_at   | MmugDNA.13314.1 | 4     | 4.16  | 0.25 | 0.19 | -1.12 | 0.804982 | 0.588071 | 0.919917 | 0.754719 |
| MmugDNA.13315.1.S1_at   | MmugDNA.13315.1 | 5.76  | 6.04  | 0.23 | 0.2  | -1.22 | 0.205851 | 0.306471 | 0.568383 | 0.563029 |



|                         |                 |       |       |      |      |       |          |          |          |          |
|-------------------------|-----------------|-------|-------|------|------|-------|----------|----------|----------|----------|
| MmugDNA.13316.1.S1_at   | MmugDNA.13316.1 | 4.6   | 4.77  | 0.18 | 0.04 | -1.12 | 0.148104 | 0.654879 | 0.513463 | 0.798179 |
| MmugDNA.13317.1.S1_at   | MmugDNA.13317.1 | 3.66  | 3.78  | 0.11 | 0.21 | -1.08 | 0.347428 | 0.483937 | 0.66643  | 0.688243 |
| MmugDNA.13318.1.S1_at   | MmugDNA.13318.1 | 3.08  | 2.97  | 0.09 | 0.13 | 1.08  | 0.115644 | 0.317748 | 0.479022 | 0.570922 |
| MmugDNA.13319.1.S1_at   | MmugDNA.13319.1 | 3.61  | 3.56  | 0.09 | 0.12 | 1.03  | 0.669451 | 0.107533 | 0.852167 | 0.370389 |
| MmugDNA.1332.1.S1_at    | MmugDNA.1332.1  | 3.53  | 3.62  | 0.31 | 0.11 | -1.06 | 0.467912 | 0.70349  | 0.740847 | 0.828101 |
| MmugDNA.13321.1.S1_at   | MmugDNA.13321.1 | 11.62 | 11.67 | 0.13 | 0.15 | -1.04 | 0.729257 | 0.388661 | 0.882472 | 0.622949 |
| MmugDNA.13322.1.S1_at   | MmugDNA.13322.1 | 8.69  | 8.49  | 0.11 | 0.44 | 1.15  | 0.358532 | 0.007058 | 0.673267 | 0.113278 |
| MmugDNA.13323.1.S1_at   | MmugDNA.13323.1 | 4.04  | 4.08  | 0.05 | 0.36 | -1.03 | 0.482868 | 0.189694 | 0.749643 | 0.465328 |
| MmugDNA.13324.1.S1_at   | MmugDNA.13324.1 | 12.11 | 12.13 | 0.07 | 0.11 | -1.01 | 0.443177 | 0.015793 | 0.725992 | 0.159334 |
| MmugDNA.13326.1.S1_at   | MmugDNA.13326.1 | 6.03  | 6.08  | 0.02 | 0.13 | -1.04 | 0.530065 | 0.296291 | 0.77653  | 0.555423 |
| MmugDNA.13328.1.S1_at   | MmugDNA.13328.1 | 9.75  | 10.53 | 0.23 | 0.41 | -1.73 | 0.107219 | 0.017701 | 0.467913 | 0.168304 |
| MmugDNA.1333.1.S1_at    | MmugDNA.1333.1  | 6.88  | 6.87  | 0.15 | 0.01 | 1.01  | 0.934512 | 0.648857 | 0.974687 | 0.794491 |
| MmugDNA.13330.1.S1_at   | MmugDNA.13330.1 | 3.86  | 3.9   | 0.17 | 0.08 | -1.03 | 0.939462 | 0.000961 | 0.976986 | 0.049342 |
| MmugDNA.13331.1.S1_at   | MmugDNA.13331.1 | 5.01  | 4.74  | 0.11 | 0.15 | 1.21  | 0.05243  | 0.0655   | 0.377579 | 0.301415 |
| MmugDNA.13333.1.S1_at   | MmugDNA.13333.1 | 3.65  | 3.67  | 0.04 | 0.1  | -1.01 | 0.483741 | 0.569822 | 0.749945 | 0.742694 |
| MmugDNA.13334.1.S1_at   | MmugDNA.13334.1 | 4.47  | 4.42  | 0.17 | 0.17 | 1.04  | 0.744527 | 0.893856 | 0.890646 | 0.939437 |
| MmugDNA.13335.1.S1_at   | MmugDNA.13335.1 | 9.85  | 10.33 | 0.35 | 0.55 | -1.39 | 0.142429 | 0.069689 | 0.509648 | 0.310164 |
| MmugDNA.13336.1.S1_at   | MmugDNA.13336.1 | 7.53  | 5.63  | 0.98 | 0.81 | 3.73  | 0.04733  | 0.047896 | 0.365873 | 0.263751 |
| MmugDNA.13337.1.S1_at   | MmugDNA.13337.1 | 6.42  | 6.02  | 0.1  | 0.08 | 1.32  | 0.005029 | 0.002125 | 0.187868 | 0.06817  |
| MmugDNA.1334.1.S1_at    | MmugDNA.1334.1  | 5.99  | 6.15  | 0.09 | 0.25 | -1.12 | 0.582673 | 0.212017 | 0.805834 | 0.486006 |
| MmugDNA.13340.1.S1_at   | MmugDNA.13340.1 | 3.88  | 3.83  | 0.17 | 0.17 | 1.03  | 0.375833 | 0.381495 | 0.684803 | 0.617691 |
| MmugDNA.13341.1.S1_at   | MmugDNA.13341.1 | 3.14  | 3.25  | 0.13 | 0.13 | -1.08 | 0.196566 | 0.132013 | 0.559808 | 0.404043 |
| MmugDNA.13342.1.S1_s_at | MmugDNA.13342.1 | 11.64 | 11.3  | 0.25 | 0.09 | 1.27  | 0.040027 | 0.089164 | 0.348657 | 0.343188 |
| MmugDNA.13343.1.S1_at   | MmugDNA.13343.1 | 10.56 | 10.47 | 0.09 | 0.42 | 1.07  | 0.817849 | 0.639958 | 0.926073 | 0.788592 |
| MmugDNA.13344.1.S1_at   | MmugDNA.13344.1 | 5.16  | 5.4   | 0.46 | 0.48 | -1.18 | 0.886291 | 0.980725 | 0.954504 | 0.989447 |
| MmugDNA.13345.1.S1_at   | MmugDNA.13345.1 | 6.11  | 6.23  | 0.23 | 0.07 | -1.09 | 0.273386 | 0.376996 | 0.616839 | 0.614702 |
| MmugDNA.13347.1.S1_at   | MmugDNA.13347.1 | 4.84  | 4.43  | 0.97 | 1.13 | 1.33  | 0.365562 | 0.443567 | 0.678307 | 0.661336 |
| MmugDNA.13348.1.S1_at   | MmugDNA.13348.1 | 4.63  | 4.62  | 0.12 | 0.14 | 1.01  | 0.253298 | 0.404498 | 0.601905 | 0.633004 |
| MmugDNA.13350.1.S1_at   | MmugDNA.13350.1 | 4.74  | 4.73  | 0.12 | 0.23 | 1.01  | 0.386854 | 0.554824 | 0.691684 | 0.733508 |
| MmugDNA.13351.1.S1_at   | MmugDNA.13351.1 | 3.39  | 3.42  | 0.24 | 0.1  | -1.02 | 0.914609 | 0.7547   | 0.966289 | 0.85732  |
| MmugDNA.13353.1.S1_at   | MmugDNA.13353.1 | 7.36  | 7.56  | 0.14 | 0.49 | -1.15 | 0.526781 | 0.418754 | 0.774374 | 0.643101 |
| MmugDNA.13354.1.S1_at   | MmugDNA.13354.1 | 3.12  | 8.07  | 1.51 | 3.44 | -31   | 0.278494 | 0.174037 | 0.620536 | 0.450275 |
| MmugDNA.13357.1.S1_at   | MmugDNA.13357.1 | 10.35 | 10.23 | 0.29 | 0.04 | 1.09  | 0.757808 | 0.216322 | 0.897367 | 0.489884 |
| MmugDNA.13358.1.S1_at   | MmugDNA.13358.1 | 4.8   | 5.03  | 0.24 | 0.35 | -1.17 | 0.344439 | 0.28117  | 0.664563 | 0.544312 |
| MmugDNA.13359.1.S1_at   | MmugDNA.13359.1 | 7.12  | 6.93  | 0.24 | 0.12 | 1.14  | 0.918327 | 0.371271 | 0.96831  | 0.610135 |
| MmugDNA.1336.1.S1_at    | MmugDNA.1336.1  | 7.96  | 8.44  | 0.33 | 1.5  | -1.39 | 0.763089 | 0.772546 | 0.900082 | 0.867784 |
| MmugDNA.13360.1.S1_at   | MmugDNA.13360.1 | 10.22 | 10.02 | 0.26 | 0.22 | 1.15  | 0.798475 | 0.305087 | 0.916476 | 0.562255 |
| MmugDNA.13361.1.S1_at   | MmugDNA.13361.1 | 7.75  | 7.81  | 0.29 | 0.18 | -1.05 | 0.312187 | 0.345502 | 0.643949 | 0.590747 |
| MmugDNA.13363.1.S1_at   | MmugDNA.13363.1 | 4.06  | 3.94  | 0.26 | 0.19 | 1.09  | 0.345661 | 0.446112 | 0.665264 | 0.662706 |
| MmugDNA.13364.1.S1_at   | MmugDNA.13364.1 | 3.54  | 3.9   | 0.47 | 0.2  | -1.28 | 0.779549 | 0.824859 | 0.90816  | 0.899427 |
| MmugDNA.13365.1.S1_at   | MmugDNA.13365.1 | 4.07  | 4.14  | 0.45 | 0.22 | -1.05 | 0.841966 | 0.770227 | 0.936295 | 0.866562 |

|                         |                 |       |       |      |      |       |          |          |          |          |
|-------------------------|-----------------|-------|-------|------|------|-------|----------|----------|----------|----------|
| MmugDNA.13368.1.S1_at   | MmugDNA.13368.1 | 6.84  | 7     | 0.13 | 0.05 | -1.12 | 0.261388 | 0.315346 | 0.607983 | 0.568939 |
| MmugDNA.13369.1.S1_at   | MmugDNA.13369.1 | 3.85  | 3.62  | 0.26 | 0.18 | 1.17  | 0.145423 | 0.192704 | 0.511449 | 0.468219 |
| MmugDNA.1337.1.S1_at    | MmugDNA.1337.1  | 12.26 | 11.84 | 0.12 | 0.32 | 1.34  | 0.033364 | 0.021969 | 0.328518 | 0.185463 |
| MmugDNA.13370.1.S1_at   | MmugDNA.13370.1 | 3.44  | 3.44  | 0.21 | 0.2  | -1    | 0.987604 | 0.715573 | 0.995588 | 0.835127 |
| MmugDNA.13371.1.S1_at   | MmugDNA.13371.1 | 3.07  | 2.84  | 0.22 | 0.06 | 1.17  | 0.116289 | 0.339881 | 0.479834 | 0.586417 |
| MmugDNA.13372.1.S1_at   | MmugDNA.13372.1 | 5.81  | 6.04  | 0.07 | 0.2  | -1.17 | 0.286174 | 0.224888 | 0.625434 | 0.497657 |
| MmugDNA.13373.1.S1_at   | MmugDNA.13373.1 | 5.74  | 4.81  | 0.18 | 0.61 | 1.91  | 0.132469 | 0.210422 | 0.498643 | 0.484303 |
| MmugDNA.13374.1.S1_at   | MmugDNA.13374.1 | 4.44  | 4.46  | 0.24 | 0.08 | -1.01 | 0.633571 | 0.679303 | 0.833841 | 0.81275  |
| MmugDNA.13375.1.S1_at   | MmugDNA.13375.1 | 10.43 | 11.38 | 0.18 | 0.39 | -1.93 | 0.025989 | 0.019962 | 0.301367 | 0.17752  |
| MmugDNA.13376.1.S1_at   | MmugDNA.13376.1 | 4.53  | 4.47  | 0.13 | 0.16 | 1.04  | 0.431228 | 0.28023  | 0.718513 | 0.543487 |
| MmugDNA.13377.1.S1_at   | MmugDNA.13377.1 | 4.02  | 3.59  | 1.21 | 0.42 | 1.35  | 0.331865 | 0.23282  | 0.656523 | 0.504441 |
| MmugDNA.13378.1.S1_at   | MmugDNA.13378.1 | 4.24  | 4.23  | 0.21 | 0.07 | 1.01  | 0.906006 | 0.733067 | 0.962579 | 0.845503 |
| MmugDNA.13379.1.S1_at   | MmugDNA.13379.1 | 7.19  | 7.03  | 0.09 | 0.11 | 1.12  | 0.095154 | 0.100582 | 0.452979 | 0.359845 |
| MmugDNA.1338.1.S1_at    | MmugDNA.1338.1  | 5.7   | 5.65  | 0.05 | 0    | 1.03  | 0.172533 | 0.132699 | 0.536116 | 0.404544 |
| MmugDNA.13383.1.S1_at   | MmugDNA.13383.1 | 2.93  | 2.76  | 0.28 | 0.18 | 1.13  | 0.66256  | 0.685971 | 0.848689 | 0.816691 |
| MmugDNA.13384.1.S1_at   | MmugDNA.13384.1 | 8.01  | 7.12  | 0.26 | 0.13 | 1.86  | 0.00332  | 0.001084 | 0.177442 | 0.05215  |
| MmugDNA.13385.1.S1_at   | MmugDNA.13385.1 | 5.34  | 5     | 0.86 | 0.56 | 1.27  | 0.384398 | 0.534733 | 0.68993  | 0.720524 |
| MmugDNA.13387.1.S1_at   | MmugDNA.13387.1 | 6.21  | 6.61  | 0.18 | 0.44 | -1.32 | 0.100294 | 0.013384 | 0.460878 | 0.14827  |
| MmugDNA.13388.1.S1_at   | MmugDNA.13388.1 | 6.22  | 6.37  | 0.24 | 0.25 | -1.11 | 0.903119 | 0.69712  | 0.961412 | 0.824045 |
| MmugDNA.13389.1.S1_s_at | MmugDNA.13389.1 | 7.23  | 7     | 0.2  | 0.47 | 1.17  | 0.377097 | 0.418593 | 0.685542 | 0.642999 |
| MmugDNA.1339.1.S1_at    | MmugDNA.1339.1  | 11.79 | 11.44 | 0.27 | 0.11 | 1.27  | 0.045416 | 0.024159 | 0.361012 | 0.194601 |
| MmugDNA.13390.1.S1_at   | MmugDNA.13390.1 | 3.33  | 3.5   | 0.17 | 0.37 | -1.13 | 0.416141 | 0.667329 | 0.709692 | 0.805297 |
| MmugDNA.13392.1.S1_at   | MmugDNA.13392.1 | 10.88 | 10.22 | 0.7  | 0.72 | 1.58  | 0.271524 | 0.42334  | 0.615716 | 0.646277 |
| MmugDNA.13393.1.S1_at   | MmugDNA.13393.1 | 8.55  | 9.23  | 0.39 | 0.52 | -1.6  | 0.036593 | 0.030693 | 0.340031 | 0.217148 |
| MmugDNA.13395.1.S1_at   | MmugDNA.13395.1 | 9.72  | 10.64 | 0.54 | 0.73 | -1.9  | 0.149514 | 0.09585  | 0.514055 | 0.352962 |
| MmugDNA.13396.1.S1_at   | MmugDNA.13396.1 | 5.18  | 5.21  | 0.19 | 0.1  | -1.02 | 0.578449 | 0.504655 | 0.803828 | 0.701754 |
| MmugDNA.13399.1.S1_at   | MmugDNA.13399.1 | 11.16 | 11.82 | 0.29 | 0.31 | -1.58 | 0.20035  | 0.113532 | 0.563198 | 0.379632 |
| MmugDNA.1340.1.S1_at    | MmugDNA.1340.1  | 10.98 | 11.36 | 0.4  | 0.05 | -1.3  | 0.059327 | 0.036356 | 0.391935 | 0.235105 |
| MmugDNA.13401.1.S1_s_at | MmugDNA.13401.1 | 9.7   | 10.1  | 0.25 | 0.41 | -1.32 | 0.375499 | 0.449315 | 0.684785 | 0.665015 |
| MmugDNA.13404.1.S1_at   | MmugDNA.13404.1 | 4.15  | 4.25  | 0.06 | 0.27 | -1.08 | 0.637702 | 0.732351 | 0.836256 | 0.844986 |
| MmugDNA.13405.1.S1_at   | MmugDNA.13405.1 | 7.77  | 7.84  | 0.47 | 1    | -1.05 | 0.484798 | 0.590161 | 0.750677 | 0.756117 |
| MmugDNA.13409.1.S1_at   | MmugDNA.13409.1 | 5.3   | 5.59  | 0.09 | 0.24 | -1.22 | 0.225046 | 0.293679 | 0.583047 | 0.553665 |
| MmugDNA.13410.1.S1_at   | MmugDNA.13410.1 | 3.46  | 3.41  | 0.06 | 0.03 | 1.03  | 0.855189 | 0.144296 | 0.941454 | 0.418196 |
| MmugDNA.13411.1.S1_at   | MmugDNA.13411.1 | 4.61  | 4.43  | 0.31 | 0.02 | 1.13  | 0.404312 | 0.667346 | 0.702606 | 0.805297 |
| MmugDNA.13412.1.S1_at   | MmugDNA.13412.1 | 6.06  | 5.58  | 0.03 | 0.07 | 1.39  | 0.00033  | 0.000171 | 0.12562  | 0.030511 |
| MmugDNA.13413.1.S1_at   | MmugDNA.13413.1 | 7.35  | 4.78  | 1.19 | 0.89 | 5.95  | 0.042654 | 0.026336 | 0.355272 | 0.203321 |
| MmugDNA.13414.1.S1_at   | MmugDNA.13414.1 | 3     | 2.93  | 0.29 | 0.02 | 1.05  | 0.237418 | 0.252923 | 0.590941 | 0.521258 |
| MmugDNA.13415.1.S1_at   | MmugDNA.13415.1 | 5.15  | 4.87  | 0.26 | 0.02 | 1.21  | 0.160672 | 0.159571 | 0.525746 | 0.435774 |
| MmugDNA.13415.1.S1_s_at | MmugDNA.13415.1 | 7.16  | 7.08  | 0.08 | 0.19 | 1.06  | 0.667724 | 0.729988 | 0.851281 | 0.843736 |
| MmugDNA.13416.1.S1_at   | MmugDNA.13416.1 | 3.21  | 2.99  | 0.77 | 0.65 | 1.16  | 0.767228 | 0.446513 | 0.902184 | 0.662842 |
| MmugDNA.13419.1.S1_at   | MmugDNA.13419.1 | 7.07  | 6.59  | 0.14 | 0.44 | 1.4   | 0.054087 | 0.069446 | 0.381447 | 0.309778 |

|                         |                 |       |       |      |      |       |          |          |          |          |
|-------------------------|-----------------|-------|-------|------|------|-------|----------|----------|----------|----------|
| MmugDNA.1342.1.S1_at    | MmugDNA.1342.1  | 4.93  | 5.16  | 0.16 | 0.1  | -1.17 | 0.110451 | 0.186632 | 0.471953 | 0.462425 |
| MmugDNA.13420.1.S1_at   | MmugDNA.13420.1 | 11.1  | 10.37 | 0.09 | 0.07 | 1.66  | 0.000459 | 0.000228 | 0.13362  | 0.032385 |
| MmugDNA.13421.1.S1_at   | MmugDNA.13421.1 | 8.38  | 8.91  | 0.13 | 0.64 | -1.44 | 0.156208 | 0.055136 | 0.520907 | 0.280429 |
| MmugDNA.13423.1.S1_at   | MmugDNA.13423.1 | 10.93 | 11.42 | 0.16 | 0.17 | -1.4  | 0.03265  | 0.021936 | 0.32573  | 0.185351 |
| MmugDNA.13425.1.S1_at   | MmugDNA.13425.1 | 5.6   | 5.64  | 0.24 | 0.11 | -1.02 | 0.613953 | 0.583001 | 0.823    | 0.751495 |
| MmugDNA.13427.1.S1_at   | MmugDNA.13427.1 | 6.55  | 6.51  | 0.28 | 0.38 | 1.03  | 0.384495 | 0.409922 | 0.689987 | 0.636956 |
| MmugDNA.13429.1.S1_at   | MmugDNA.13429.1 | 3.33  | 3.33  | 0.07 | 0.23 | 1     | 0.406455 | 0.334281 | 0.703713 | 0.582323 |
| MmugDNA.1343.1.S1_at    | MmugDNA.1343.1  | 4.58  | 4.55  | 0.22 | 0.16 | 1.02  | 0.718951 | 0.679032 | 0.876792 | 0.812591 |
| MmugDNA.13430.1.S1_at   | MmugDNA.13430.1 | 4.56  | 4.49  | 0.2  | 0.17 | 1.05  | 0.873199 | 0.129707 | 0.94924  | 0.401344 |
| MmugDNA.13431.1.S1_at   | MmugDNA.13431.1 | 5.3   | 5.26  | 0.07 | 0.18 | 1.03  | 0.975171 | 0.340503 | 0.990346 | 0.586776 |
| MmugDNA.13433.1.S1_at   | MmugDNA.13433.1 | 4.37  | 4.37  | 0.05 | 0    | 1     | 0.340997 | 0.335997 | 0.662232 | 0.583601 |
| MmugDNA.13434.1.S1_at   | MmugDNA.13434.1 | 6.85  | 7.78  | 0.43 | 0.73 | -1.9  | 0.215894 | 0.282749 | 0.575954 | 0.545473 |
| MmugDNA.13435.1.S1_at   | MmugDNA.13435.1 | 5.97  | 6.03  | 0.09 | 0.15 | -1.04 | 0.530498 | 0.705283 | 0.776893 | 0.829122 |
| MmugDNA.13437.1.S1_at   | MmugDNA.13437.1 | 10    | 9.86  | 0.21 | 1.21 | 1.1   | 0.47121  | 0.584613 | 0.742951 | 0.752482 |
| MmugDNA.13438.1.S1_at   | MmugDNA.13438.1 | 9.93  | 9.45  | 0.2  | 0.66 | 1.4   | 0.070603 | 0.07373  | 0.414443 | 0.317071 |
| MmugDNA.13440.1.S1_at   | MmugDNA.13440.1 | 10.05 | 8.5   | 0.1  | 0.39 | 2.93  | 0.003964 | 0.003331 | 0.181455 | 0.083001 |
| MmugDNA.13441.1.S1_at   | MmugDNA.13441.1 | 3.88  | 3.53  | 0.2  | 0.45 | 1.27  | 0.863016 | 0.973332 | 0.944982 | 0.985515 |
| MmugDNA.13442.1.S1_at   | MmugDNA.13442.1 | 10.74 | 10.77 | 0.3  | 0.42 | -1.03 | 0.566352 | 0.610235 | 0.797591 | 0.768481 |
| MmugDNA.13443.1.S1_at   | MmugDNA.13443.1 | 6.38  | 6.61  | 0.06 | 0.14 | -1.18 | 0.078481 | 0.122511 | 0.428561 | 0.392423 |
| MmugDNA.13446.1.S1_at   | MmugDNA.13446.1 | 5.53  | 5.79  | 0.06 | 0.07 | -1.2  | 0.005813 | 0.109689 | 0.193191 | 0.373675 |
| MmugDNA.13447.1.S1_at   | MmugDNA.13447.1 | 5.22  | 5.34  | 0.36 | 0.22 | -1.09 | 0.746505 | 0.923534 | 0.891499 | 0.956997 |
| MmugDNA.13448.1.S1_at   | MmugDNA.13448.1 | 10.02 | 9.51  | 0.4  | 0.32 | 1.43  | 0.370965 | 0.106324 | 0.681748 | 0.368819 |
| MmugDNA.13449.1.S1_at   | MmugDNA.13449.1 | 3.46  | 3.33  | 0.12 | 0.02 | 1.1   | 0.168436 | 0.133781 | 0.532652 | 0.405778 |
| MmugDNA.1345.1.S1_at    | MmugDNA.1345.1  | 4.05  | 4.2   | 0.11 | 0.33 | -1.11 | 0.955431 | 0.631759 | 0.983289 | 0.782957 |
| MmugDNA.1345.1.S1_s_at  | MmugDNA.1345.1  | 5.18  | 5.16  | 0.27 | 0.08 | 1.02  | 0.616818 | 0.818845 | 0.824331 | 0.895606 |
| MmugDNA.13450.1.S1_at   | MmugDNA.13450.1 | 12.4  | 12.42 | 0.28 | 1.26 | -1.01 | 0.439438 | 0.475521 | 0.723601 | 0.682219 |
| MmugDNA.13451.1.S1_at   | MmugDNA.13451.1 | 6.75  | 6.69  | 0.37 | 0.15 | 1.04  | 0.220729 | 0.278521 | 0.579701 | 0.542311 |
| MmugDNA.13452.1.S1_at   | MmugDNA.13452.1 | 6.53  | 6.81  | 0.03 | 0.37 | -1.21 | 0.091491 | 0.053303 | 0.447382 | 0.276463 |
| MmugDNA.13453.1.S1_at   | MmugDNA.13453.1 | 6.82  | 6.95  | 0.07 | 0.06 | -1.1  | 0.033088 | 0.060907 | 0.327101 | 0.293514 |
| MmugDNA.13454.1.S1_at   | MmugDNA.13454.1 | 6.48  | 6.79  | 0.35 | 0.01 | -1.24 | 0.211641 | 0.243136 | 0.572347 | 0.513356 |
| MmugDNA.13456.1.S1_at   | MmugDNA.13456.1 | 3.52  | 3.09  | 0.91 | 0.24 | 1.36  | 0.280317 | 0.271435 | 0.621522 | 0.536512 |
| MmugDNA.13457.1.S1_at   | MmugDNA.13457.1 | 4.67  | 4.67  | 0.85 | 0.12 | -1    | 0.33088  | 0.358939 | 0.656063 | 0.600333 |
| MmugDNA.13458.1.S1_at   | MmugDNA.13458.1 | 10.78 | 10.79 | 0.01 | 0.44 | -1.01 | 0.356138 | 0.471711 | 0.671384 | 0.679612 |
| MmugDNA.13458.1.S1_s_at | MmugDNA.13458.1 | 11.22 | 11.43 | 0.08 | 0.37 | -1.16 | 0.272387 | 0.261893 | 0.616016 | 0.528287 |
| MmugDNA.13459.1.S1_at   | MmugDNA.13459.1 | 2.77  | 2.9   | 0.33 | 0.07 | -1.09 | 0.936034 | 0.954561 | 0.975178 | 0.974203 |
| MmugDNA.1346.1.S1_at    | MmugDNA.1346.1  | 4.1   | 4.16  | 0.07 | 0.07 | -1.04 | 0.156613 | 0.210049 | 0.521515 | 0.483835 |
| MmugDNA.13460.1.S1_at   | MmugDNA.13460.1 | 13.21 | 12.75 | 0.12 | 0.12 | 1.37  | 0.008459 | 0.003412 | 0.218339 | 0.084071 |
| MmugDNA.13460.1.S1_s_at | MmugDNA.13460.1 | 12.95 | 12.58 | 0.09 | 0.29 | 1.29  | 0.041462 | 0.035065 | 0.351747 | 0.231425 |
| MmugDNA.13462.1.S1_at   | MmugDNA.13462.1 | 12.53 | 12.48 | 0.09 | 0.14 | 1.04  | 0.75352  | 0.297612 | 0.894902 | 0.55624  |
| MmugDNA.13463.1.S1_at   | MmugDNA.13463.1 | 12.62 | 12.46 | 0.15 | 0.05 | 1.11  | 0.045817 | 0.011251 | 0.361834 | 0.138039 |
| MmugDNA.13465.1.S1_s_at | MmugDNA.13465.1 | 7.76  | 6.76  | 0.65 | 0.65 | 2     | 0.124511 | 0.070425 | 0.490468 | 0.311729 |

|                         |                 |       |       |      |      |       |          |          |          |          |
|-------------------------|-----------------|-------|-------|------|------|-------|----------|----------|----------|----------|
| MmugDNA.13466.1.S1_at   | MmugDNA.13466.1 | 10.03 | 10.26 | 0.14 | 0.58 | -1.17 | 0.479125 | 0.651987 | 0.747575 | 0.796529 |
| MmugDNA.13468.1.S1_at   | MmugDNA.13468.1 | 8.71  | 8.97  | 0.16 | 0.48 | -1.19 | 0.300929 | 0.059366 | 0.636012 | 0.29054  |
| MmugDNA.13469.1.S1_at   | MmugDNA.13469.1 | 6.6   | 6.75  | 0.07 | 0.09 | -1.11 | 0.378501 | 0.682017 | 0.686501 | 0.814299 |
| MmugDNA.1347.1.S1_at    | MmugDNA.1347.1  | 6     | 5.96  | 0.26 | 0.08 | 1.03  | 0.43249  | 0.331077 | 0.719052 | 0.5798   |
| MmugDNA.13470.1.S1_at   | MmugDNA.13470.1 | 5.71  | 4.7   | 0.61 | 0.4  | 2.01  | 0.045749 | 0.171397 | 0.361679 | 0.447862 |
| MmugDNA.13471.1.S1_at   | MmugDNA.13471.1 | 7.29  | 6.67  | 0.04 | 0.58 | 1.54  | 0.072088 | 0.044442 | 0.416191 | 0.25521  |
| MmugDNA.13473.1.S1_at   | MmugDNA.13473.1 | 3.18  | 3.28  | 0.13 | 0.13 | -1.07 | 0.360156 | 0.390723 | 0.674235 | 0.624501 |
| MmugDNA.13474.1.S1_at   | MmugDNA.13474.1 | 3.17  | 3.24  | 0.12 | 0.09 | -1.05 | 0.996241 | 0.432672 | 0.99849  | 0.653054 |
| MmugDNA.13475.1.S1_at   | MmugDNA.13475.1 | 5.14  | 5     | 0.28 | 0.02 | 1.11  | 0.382148 | 0.478848 | 0.688532 | 0.684745 |
| MmugDNA.13476.1.S1_at   | MmugDNA.13476.1 | 3.76  | 3.84  | 0.26 | 0.03 | -1.06 | 0.728387 | 0.914235 | 0.881936 | 0.951773 |
| MmugDNA.13477.1.S1_at   | MmugDNA.13477.1 | 3.61  | 3.39  | 0.63 | 0.33 | 1.17  | 0.997922 | 0.727876 | 0.999207 | 0.842703 |
| MmugDNA.13478.1.S1_at   | MmugDNA.13478.1 | 10.6  | 10.6  | 0.1  | 0.52 | -1    | 0.84806  | 0.681642 | 0.939121 | 0.814092 |
| MmugDNA.13479.1.S1_at   | MmugDNA.13479.1 | 4.03  | 3.66  | 0.48 | 0.13 | 1.29  | 0.121995 | 0.173976 | 0.486982 | 0.450247 |
| MmugDNA.1348.1.S1_at    | MmugDNA.1348.1  | 6.26  | 6.12  | 0.8  | 0.22 | 1.09  | 0.598152 | 0.811333 | 0.813939 | 0.891133 |
| MmugDNA.13480.1.S1_at   | MmugDNA.13480.1 | 5.62  | 5.53  | 0.2  | 0.12 | 1.07  | 0.48549  | 0.279993 | 0.750946 | 0.543369 |
| MmugDNA.13483.1.S1_at   | MmugDNA.13483.1 | 8.49  | 8.03  | 0.19 | 0.34 | 1.38  | 0.320313 | 0.153146 | 0.649463 | 0.428011 |
| MmugDNA.13484.1.S1_at   | MmugDNA.13484.1 | 9.81  | 10.01 | 0.17 | 0.1  | -1.15 | 0.678971 | 0.50295  | 0.856302 | 0.700471 |
| MmugDNA.13485.1.S1_s_at | MmugDNA.13485.1 | 8.63  | 8.78  | 0.22 | 0.2  | -1.11 | 0.432814 | 0.605025 | 0.719294 | 0.764917 |
| MmugDNA.13487.1.S1_at   | MmugDNA.13487.1 | 3.33  | 3.3   | 0.06 | 0.26 | 1.02  | 0.39285  | 0.47658  | 0.694841 | 0.682787 |
| MmugDNA.13489.1.S1_at   | MmugDNA.13489.1 | 9.62  | 9.57  | 0.14 | 0.15 | 1.03  | 0.771199 | 0.084148 | 0.903674 | 0.335181 |
| MmugDNA.1349.1.S1_at    | MmugDNA.1349.1  | 6.01  | 6.03  | 0.03 | 0.16 | -1.02 | 0.340002 | 0.653882 | 0.661611 | 0.797692 |
| MmugDNA.13491.1.S1_at   | MmugDNA.13491.1 | 9.08  | 9.23  | 0.12 | 0.24 | -1.12 | 0.080814 | 0.048743 | 0.431352 | 0.265744 |
| MmugDNA.13492.1.S1_at   | MmugDNA.13492.1 | 5.77  | 5.86  | 0.36 | 0.12 | -1.07 | 0.869539 | 0.542609 | 0.947917 | 0.725615 |
| MmugDNA.13494.1.S1_at   | MmugDNA.13494.1 | 4.5   | 4.4   | 0.3  | 0.1  | 1.07  | 0.688064 | 0.324611 | 0.860854 | 0.575163 |
| MmugDNA.13495.1.S1_at   | MmugDNA.13495.1 | 6.05  | 5.72  | 0.84 | 0.16 | 1.26  | 0.145414 | 0.146146 | 0.511449 | 0.420099 |
| MmugDNA.13496.1.S1_at   | MmugDNA.13496.1 | 3.97  | 3.93  | 0.09 | 0.09 | 1.03  | 0.879331 | 0.509155 | 0.951526 | 0.704028 |
| MmugDNA.13497.1.S1_at   | MmugDNA.13497.1 | 6.55  | 7.77  | 0.41 | 1.62 | -2.33 | 0.205148 | 0.242208 | 0.567639 | 0.51267  |
| MmugDNA.13499.1.S1_at   | MmugDNA.13499.1 | 9.08  | 9.21  | 0.21 | 0.32 | -1.09 | 0.234908 | 0.178739 | 0.589108 | 0.455039 |
| MmugDNA.135.1.S1_at     | MmugDNA.135.1   | 7.61  | 4.88  | 0.74 | 0.27 | 6.61  | 0.002971 | 0.000522 | 0.170703 | 0.039743 |
| MmugDNA.13500.1.S1_at   | MmugDNA.13500.1 | 3.21  | 3.23  | 0.26 | 0.12 | -1.02 | 0.629219 | 0.749166 | 0.831363 | 0.854211 |
| MmugDNA.13501.1.S1_at   | MmugDNA.13501.1 | 6.3   | 6.42  | 0.09 | 0.07 | -1.09 | 0.144523 | 0.30522  | 0.511015 | 0.562255 |
| MmugDNA.13502.1.S1_at   | MmugDNA.13502.1 | 10.8  | 11.01 | 0.07 | 0.79 | -1.15 | 0.787702 | 0.713178 | 0.911639 | 0.833655 |
| MmugDNA.13503.1.S1_at   | MmugDNA.13503.1 | 3.16  | 3.21  | 0.16 | 0.05 | -1.03 | 0.729422 | 0.73566  | 0.882541 | 0.847033 |
| MmugDNA.13504.1.S1_at   | MmugDNA.13504.1 | 6.43  | 6.75  | 0.76 | 0.29 | -1.25 | 0.57399  | 0.572635 | 0.801437 | 0.744597 |
| MmugDNA.13504.1.S1_x_at | MmugDNA.13504.1 | 7.47  | 7.78  | 0.69 | 0.32 | -1.24 | 0.571717 | 0.532442 | 0.800374 | 0.719059 |
| MmugDNA.13505.1.S1_at   | MmugDNA.13505.1 | 3.59  | 3.61  | 0.15 | 0.09 | -1.02 | 0.51442  | 0.833648 | 0.76693  | 0.904613 |
| MmugDNA.13506.1.S1_at   | MmugDNA.13506.1 | 10.88 | 10.58 | 0.09 | 0.36 | 1.23  | 0.180109 | 0.120729 | 0.544307 | 0.389579 |
| MmugDNA.13507.1.S1_at   | MmugDNA.13507.1 | 12.61 | 12.47 | 0.04 | 0.07 | 1.1   | 0.040305 | 0.030257 | 0.349277 | 0.215828 |
| MmugDNA.13508.1.S1_at   | MmugDNA.13508.1 | 2.81  | 2.81  | 0.03 | 0.04 | 1     | 0.232514 | 0.313749 | 0.587814 | 0.568083 |
| MmugDNA.13509.1.S1_at   | MmugDNA.13509.1 | 11.43 | 11.55 | 0.11 | 0.11 | -1.09 | 0.239409 | 0.051505 | 0.592443 | 0.272373 |
| MmugDNA.1351.1.S1_at    | MmugDNA.1351.1  | 4.92  | 5.31  | 0.15 | 0.06 | -1.31 | 0.032247 | 0.047215 | 0.3244   | 0.261855 |

|                         |                 |       |       |      |      |       |          |          |          |          |
|-------------------------|-----------------|-------|-------|------|------|-------|----------|----------|----------|----------|
| MmugDNA.13511.1.S1_at   | MmugDNA.13511.1 | 4.09  | 4.07  | 0.11 | 0.12 | 1.01  | 0.399949 | 0.38454  | 0.699692 | 0.620194 |
| MmugDNA.13512.1.S1_at   | MmugDNA.13512.1 | 3.15  | 3.23  | 0.16 | 0.25 | -1.06 | 0.527466 | 0.461955 | 0.774849 | 0.673467 |
| MmugDNA.13514.1.S1_at   | MmugDNA.13514.1 | 6.38  | 5.93  | 0.28 | 0.11 | 1.36  | 0.05646  | 0.043803 | 0.386477 | 0.25387  |
| MmugDNA.13515.1.S1_at   | MmugDNA.13515.1 | 8.14  | 8.34  | 0.12 | 0.53 | -1.15 | 0.722905 | 0.257728 | 0.878924 | 0.525344 |
| MmugDNA.13516.1.S1_at   | MmugDNA.13516.1 | 4     | 4.02  | 0.16 | 0.04 | -1.01 | 0.727573 | 0.481828 | 0.88145  | 0.686795 |
| MmugDNA.13517.1.S1_at   | MmugDNA.13517.1 | 10.93 | 10.25 | 0.42 | 0.51 | 1.61  | 0.323452 | 0.288226 | 0.651635 | 0.5495   |
| MmugDNA.13518.1.S1_at   | MmugDNA.13518.1 | 3.12  | 3.26  | 0.06 | 0.2  | -1.1  | 0.1824   | 0.428552 | 0.546756 | 0.650098 |
| MmugDNA.13519.1.S1_at   | MmugDNA.13519.1 | 11.76 | 11.63 | 0.12 | 0.07 | 1.09  | 0.125451 | 0.132792 | 0.491333 | 0.404544 |
| MmugDNA.13521.1.S1_at   | MmugDNA.13521.1 | 4.95  | 4.38  | 0.44 | 0.1  | 1.49  | 0.137934 | 0.023812 | 0.505364 | 0.193276 |
| MmugDNA.13522.1.S1_at   | MmugDNA.13522.1 | 4.38  | 4.28  | 0.17 | 0.04 | 1.08  | 0.467319 | 0.206459 | 0.74068  | 0.480571 |
| MmugDNA.13523.1.S1_at   | MmugDNA.13523.1 | 9.88  | 10.51 | 0.31 | 1.03 | -1.54 | 0.919616 | 0.942873 | 0.968755 | 0.967564 |
| MmugDNA.13525.1.S1_at   | MmugDNA.13525.1 | 3.51  | 3.5   | 0.15 | 0.08 | 1     | 0.450939 | 0.513844 | 0.731464 | 0.707281 |
| MmugDNA.13526.1.S1_at   | MmugDNA.13526.1 | 4.47  | 4.77  | 0.26 | 0.66 | -1.24 | 0.354098 | 0.52667  | 0.67034  | 0.715627 |
| MmugDNA.13527.1.S1_at   | MmugDNA.13527.1 | 7.81  | 7.47  | 0.21 | 0.13 | 1.27  | 0.072088 | 0.090311 | 0.416191 | 0.3447   |
| MmugDNA.13529.1.S1_at   | MmugDNA.13529.1 | 8.79  | 5.58  | 2.34 | 0.62 | 9.25  | 0.334088 | 0.278457 | 0.658035 | 0.542235 |
| MmugDNA.13530.1.S1_at   | MmugDNA.13530.1 | 3.22  | 3.19  | 0.18 | 0.22 | 1.02  | 0.952877 | 0.934748 | 0.982406 | 0.963039 |
| MmugDNA.13533.1.S1_at   | MmugDNA.13533.1 | 7.2   | 7.08  | 0.17 | 0.15 | 1.08  | 0.852546 | 0.845812 | 0.940647 | 0.912246 |
| MmugDNA.13534.1.S1_at   | MmugDNA.13534.1 | 8.81  | 8.59  | 0.56 | 0.57 | 1.17  | 0.768652 | 0.137782 | 0.902722 | 0.410757 |
| MmugDNA.13535.1.S1_at   | MmugDNA.13535.1 | 11.97 | 11.87 | 0.34 | 0.14 | 1.08  | 0.349818 | 0.01886  | 0.668032 | 0.172765 |
| MmugDNA.13539.1.S1_at   | MmugDNA.13539.1 | 6.08  | 5.54  | 0.86 | 0.68 | 1.45  | 0.757648 | 0.692367 | 0.897246 | 0.820984 |
| MmugDNA.1354.1.S1_at    | MmugDNA.1354.1  | 4.08  | 3.78  | 0.34 | 0.06 | 1.23  | 0.113874 | 0.494809 | 0.477206 | 0.695103 |
| MmugDNA.13540.1.S1_at   | MmugDNA.13540.1 | 9.06  | 7.97  | 0.25 | 0.12 | 2.13  | 0.002974 | 0.000649 | 0.170703 | 0.04316  |
| MmugDNA.13541.1.S1_at   | MmugDNA.13541.1 | 3.87  | 3.84  | 0.26 | 0.49 | 1.02  | 0.48384  | 0.662912 | 0.749945 | 0.802665 |
| MmugDNA.13542.1.S1_at   | MmugDNA.13542.1 | 4.8   | 4.72  | 0.12 | 0.41 | 1.05  | 0.418264 | 0.605188 | 0.711206 | 0.764968 |
| MmugDNA.13543.1.S1_at   | MmugDNA.13543.1 | 7.63  | 8.71  | 0.22 | 0.83 | -2.11 | 0.167766 | 0.149349 | 0.532027 | 0.423811 |
| MmugDNA.13545.1.S1_at   | MmugDNA.13545.1 | 7.92  | 8.01  | 0.08 | 0.25 | -1.06 | 0.570958 | 0.703399 | 0.799822 | 0.828011 |
| MmugDNA.13546.1.S1_at   | MmugDNA.13546.1 | 4.13  | 3.73  | 0.38 | 0.39 | 1.33  | 0.366373 | 0.292046 | 0.67904  | 0.552201 |
| MmugDNA.13547.1.S1_at   | MmugDNA.13547.1 | 5.83  | 6.54  | 0.04 | 0.37 | -1.64 | 0.068619 | 0.03233  | 0.410308 | 0.222602 |
| MmugDNA.13548.1.S1_at   | MmugDNA.13548.1 | 8.23  | 8.22  | 0.14 | 0.24 | 1.01  | 0.637014 | 0.123738 | 0.83591  | 0.393883 |
| MmugDNA.13549.1.S1_at   | MmugDNA.13549.1 | 4.13  | 4.06  | 0.45 | 0.57 | 1.04  | 0.536646 | 0.69402  | 0.779531 | 0.82206  |
| MmugDNA.1355.1.S1_at    | MmugDNA.1355.1  | 4.65  | 4.36  | 1.24 | 0.13 | 1.22  | 0.549905 | 0.444636 | 0.787505 | 0.662072 |
| MmugDNA.13550.1.S1_at   | MmugDNA.13550.1 | 8.65  | 9.2   | 0.4  | 1.04 | -1.46 | 0.436188 | 0.551011 | 0.721644 | 0.730751 |
| MmugDNA.13551.1.S1_at   | MmugDNA.13551.1 | 5.87  | 5.71  | 0.24 | 0.42 | 1.11  | 0.675496 | 0.547994 | 0.854574 | 0.72884  |
| MmugDNA.13552.1.S1_at   | MmugDNA.13552.1 | 5.63  | 4.85  | 0.58 | 1.24 | 1.72  | 0.974064 | 0.308295 | 0.989791 | 0.564425 |
| MmugDNA.13553.1.S1_at   | MmugDNA.13553.1 | 4.88  | 4.9   | 0.47 | 0.17 | -1.01 | 0.395181 | 0.540917 | 0.696396 | 0.724649 |
| MmugDNA.13554.1.S1_at   | MmugDNA.13554.1 | 3.35  | 3.49  | 0.25 | 0.09 | -1.1  | 0.702953 | 0.647093 | 0.868924 | 0.793279 |
| MmugDNA.13555.1.S1_at   | MmugDNA.13555.1 | 3.68  | 3.74  | 0.28 | 0.15 | -1.04 | 0.329587 | 0.345455 | 0.655218 | 0.590746 |
| MmugDNA.13556.1.S1_at   | MmugDNA.13556.1 | 6.71  | 6.93  | 0.19 | 0.11 | -1.16 | 0.184723 | 0.223203 | 0.548341 | 0.496011 |
| MmugDNA.13556.1.S1_s_at | MmugDNA.13556.1 | 7.36  | 7.19  | 0.29 | 0.07 | 1.12  | 0.535271 | 0.577681 | 0.778933 | 0.748038 |
| MmugDNA.13557.1.S1_at   | MmugDNA.13557.1 | 5.53  | 5.31  | 0.49 | 0.2  | 1.16  | 0.251164 | 0.273062 | 0.600641 | 0.537644 |
| MmugDNA.13558.1.S1_at   | MmugDNA.13558.1 | 4.94  | 4.99  | 0.17 | 0.1  | -1.04 | 0.737043 | 0.509022 | 0.886925 | 0.703967 |

|                         |                 |       |       |      |      |       |          |          |          |          |
|-------------------------|-----------------|-------|-------|------|------|-------|----------|----------|----------|----------|
| MmugDNA.1356.1.S1_at    | MmugDNA.1356.1  | 6.85  | 6.85  | 0.17 | 0.09 | 1     | 0.412255 | 0.547217 | 0.707873 | 0.728342 |
| MmugDNA.27184.1.S1_s_at | MmugDNA.27184.1 | 14.3  | 14.3  | 0.04 | 0.04 | -1    | 0.722155 | 0.747999 | 0.878615 | 0.853341 |
| MmugDNA.13562.1.S1_at   | MmugDNA.13562.1 | 6.71  | 6.53  | 0.19 | 0.41 | 1.13  | 0.537408 | 0.31193  | 0.780008 | 0.566833 |
| MmugDNA.13563.1.S1_at   | MmugDNA.13563.1 | 4.8   | 4.66  | 0.55 | 0.19 | 1.1   | 0.729381 | 0.682415 | 0.882512 | 0.814526 |
| MmugDNA.13564.1.S1_at   | MmugDNA.13564.1 | 6.19  | 6.19  | 0.04 | 0.09 | 1     | 0.65228  | 0.069531 | 0.843594 | 0.309848 |
| MmugDNA.13566.1.S1_at   | MmugDNA.13566.1 | 6.85  | 5.89  | 0.88 | 1.29 | 1.96  | 0.364433 | 0.249799 | 0.677322 | 0.518876 |
| MmugDNA.13567.1.S1_at   | MmugDNA.13567.1 | 7.21  | 7.21  | 0.07 | 0.26 | -1    | 0.281871 | 0.321089 | 0.62238  | 0.57307  |
| MmugDNA.1357.1.S1_at    | MmugDNA.1357.1  | 5.57  | 5.14  | 0.16 | 0.35 | 1.35  | 0.12234  | 0.134026 | 0.48746  | 0.406234 |
| MmugDNA.13570.1.S1_at   | MmugDNA.13570.1 | 4.93  | 5.05  | 0.36 | 0.1  | -1.09 | 0.571137 | 0.753649 | 0.7999   | 0.856589 |
| MmugDNA.13572.1.S1_at   | MmugDNA.13572.1 | 9.51  | 8     | 0.18 | 0.57 | 2.85  | 0.004888 | 0.001048 | 0.185504 | 0.051466 |
| MmugDNA.13573.1.S1_at   | MmugDNA.13573.1 | 3.49  | 3.03  | 0.32 | 0.07 | 1.37  | 0.087971 | 0.060328 | 0.442256 | 0.292254 |
| MmugDNA.13574.1.S1_at   | MmugDNA.13574.1 | 3.87  | 3.95  | 0.06 | 0.24 | -1.05 | 0.214458 | 0.316964 | 0.57498  | 0.570275 |
| MmugDNA.13575.1.S1_at   | MmugDNA.13575.1 | 4.09  | 4.38  | 0.1  | 0.2  | -1.23 | 0.083645 | 0.082102 | 0.435945 | 0.330917 |
| MmugDNA.13576.1.S1_at   | MmugDNA.13576.1 | 10.76 | 10.25 | 0.19 | 0.69 | 1.42  | 0.166578 | 0.194169 | 0.530266 | 0.469266 |
| MmugDNA.13577.1.S1_at   | MmugDNA.13577.1 | 6.86  | 6.68  | 0.19 | 0.19 | 1.13  | 0.826168 | 0.163566 | 0.929365 | 0.439765 |
| MmugDNA.13578.1.S1_at   | MmugDNA.13578.1 | 4.82  | 5.39  | 0.51 | 0.38 | -1.48 | 0.189589 | 0.228656 | 0.552486 | 0.500887 |
| MmugDNA.13579.1.S1_at   | MmugDNA.13579.1 | 6.16  | 5.69  | 0.84 | 0.01 | 1.38  | 0.96691  | 0.756919 | 0.987571 | 0.858495 |
| MmugDNA.13579.1.S1_s_at | MmugDNA.13579.1 | 6.81  | 6.17  | 0.46 | 0.05 | 1.55  | 0.209746 | 0.263138 | 0.571042 | 0.529465 |
| MmugDNA.1358.1.S1_at    | MmugDNA.1358.1  | 5.34  | 6.1   | 0.46 | 0.64 | -1.69 | 0.574442 | 0.398123 | 0.801702 | 0.6292   |
| MmugDNA.13580.1.S1_at   | MmugDNA.13580.1 | 4.39  | 3.88  | 0.68 | 0.73 | 1.43  | 0.771743 | 0.920972 | 0.903954 | 0.955491 |
| MmugDNA.13581.1.S1_at   | MmugDNA.13581.1 | 3.66  | 3.62  | 0.23 | 0.05 | 1.03  | 0.367815 | 0.756497 | 0.679618 | 0.858223 |
| MmugDNA.13582.1.S1_at   | MmugDNA.13582.1 | 4.53  | 4.19  | 0.54 | 0.31 | 1.26  | 0.75273  | 0.87429  | 0.894468 | 0.928616 |
| MmugDNA.13583.1.S1_at   | MmugDNA.13583.1 | 3.51  | 3.52  | 0.01 | 0    | -1.01 | 0.127858 | 0.310649 | 0.494071 | 0.565787 |
| MmugDNA.13585.1.S1_at   | MmugDNA.13585.1 | 6.77  | 6.76  | 0.75 | 0.84 | 1.01  | 0.753814 | 0.721519 | 0.89507  | 0.838734 |
| MmugDNA.13586.1.S1_at   | MmugDNA.13586.1 | 8.08  | 8.06  | 2.35 | 2.15 | 1.01  | 0.961236 | 0.380108 | 0.985015 | 0.616791 |
| MmugDNA.13587.1.S1_at   | MmugDNA.13587.1 | 3.75  | 3.84  | 0.15 | 0.05 | -1.07 | 0.455397 | 0.246115 | 0.733761 | 0.51585  |
| MmugDNA.13588.1.S1_at   | MmugDNA.13588.1 | 5.16  | 5.18  | 0.15 | 0.18 | -1.02 | 0.770844 | 0.314805 | 0.903442 | 0.568554 |
| MmugDNA.13589.1.S1_at   | MmugDNA.13589.1 | 5.35  | 5.38  | 0.31 | 0.05 | -1.03 | 0.479082 | 0.432753 | 0.747575 | 0.653101 |
| MmugDNA.1359.1.S1_at    | MmugDNA.1359.1  | 7.3   | 7.91  | 0.11 | 0.53 | -1.52 | 0.051218 | 0.024444 | 0.376001 | 0.195642 |
| MmugDNA.13591.1.S1_at   | MmugDNA.13591.1 | 11.66 | 11.28 | 0.19 | 0.49 | 1.29  | 0.262357 | 0.282003 | 0.608902 | 0.544886 |
| MmugDNA.13592.1.S1_at   | MmugDNA.13592.1 | 5.85  | 5.31  | 0.26 | 0.15 | 1.45  | 0.041041 | 0.018875 | 0.350537 | 0.172814 |
| MmugDNA.13594.1.S1_at   | MmugDNA.13594.1 | 5.14  | 8.01  | 1.45 | 1.4  | -7.34 | 0.342361 | 0.169227 | 0.663141 | 0.445815 |
| MmugDNA.13595.1.S1_at   | MmugDNA.13595.1 | 6.66  | 7.83  | 0.81 | 0.17 | -2.26 | 0.048581 | 0.022959 | 0.369003 | 0.189548 |
| MmugDNA.13595.1.S1_s_at | MmugDNA.13595.1 | 9.21  | 9.89  | 0.84 | 0.2  | -1.6  | 0.08043  | 0.063417 | 0.430491 | 0.298441 |
| MmugDNA.13597.1.S1_at   | MmugDNA.13597.1 | 3.1   | 3.27  | 0.17 | 0.17 | -1.13 | 0.273384 | 0.234847 | 0.616839 | 0.506125 |
| MmugDNA.13598.1.S1_at   | MmugDNA.13598.1 | 8     | 8.59  | 0.25 | 0.29 | -1.51 | 0.051343 | 0.012497 | 0.376001 | 0.144302 |
| MmugDNA.13599.1.S1_at   | MmugDNA.13599.1 | 6.3   | 5.71  | 0.18 | 0.22 | 1.5   | 0.022487 | 0.012926 | 0.287215 | 0.146343 |
| MmugDNA.136.1.S1_at     | MmugDNA.136.1   | 5.37  | 3.76  | 0.81 | 0.65 | 3.04  | 0.035382 | 0.009726 | 0.336277 | 0.129723 |
| MmugDNA.136.1.S1_s_at   | MmugDNA.136.1   | 8.3   | 5.43  | 0.45 | 1.29 | 7.34  | 0.028777 | 0.007648 | 0.312166 | 0.117015 |
| MmugDNA.1360.1.S1_at    | MmugDNA.1360.1  | 4.55  | 4.79  | 0.14 | 0.14 | -1.18 | 0.109621 | 0.188315 | 0.470811 | 0.46433  |
| MmugDNA.13600.1.S1_at   | MmugDNA.13600.1 | 5.3   | 5.42  | 0.05 | 0.29 | -1.09 | 0.565568 | 0.258829 | 0.797194 | 0.525985 |

|                         |                 |       |       |      |      |       |          |          |          |          |
|-------------------------|-----------------|-------|-------|------|------|-------|----------|----------|----------|----------|
| MmugDNA.13601.1.S1_at   | MmugDNA.13601.1 | 9.78  | 10.51 | 0.18 | 0.5  | -1.66 | 0.261642 | 0.363985 | 0.608304 | 0.60434  |
| MmugDNA.5372.1.S1_at    | MmugDNA.5372.1  | 10.34 | 10.8  | 0.1  | 0.5  | -1.37 | 0.621521 | 0.814568 | 0.82675  | 0.892959 |
| MmugDNA.5372.1.S1_s_at  | MmugDNA.5372.1  | 10.84 | 11.3  | 0.09 | 0.46 | -1.38 | 0.328442 | 0.455496 | 0.654375 | 0.669479 |
| MmugDNA.13602.1.S1_at   | MmugDNA.13602.1 | 4.41  | 3.64  | 1.22 | 0.14 | 1.71  | 0.239834 | 0.276045 | 0.592786 | 0.540071 |
| MmugDNA.13604.1.S1_s_at | MmugDNA.13604.1 | 6.37  | 7.28  | 0.21 | 0.05 | -1.88 | 0.001797 | 0.000462 | 0.154452 | 0.038572 |
| MmugDNA.13606.1.S1_at   | MmugDNA.13606.1 | 2.77  | 2.89  | 0.15 | 0.07 | -1.09 | 0.171307 | 0.273156 | 0.535166 | 0.537776 |
| MmugDNA.13607.1.S1_at   | MmugDNA.13607.1 | 4.02  | 3.94  | 0.27 | 0.27 | 1.06  | 0.368073 | 0.515771 | 0.679753 | 0.708485 |
| MmugDNA.13609.1.S1_at   | MmugDNA.13609.1 | 5.3   | 5.96  | 0.1  | 0.63 | -1.58 | 0.361434 | 0.306744 | 0.67519  | 0.5633   |
| MmugDNA.1361.1.S1_at    | MmugDNA.1361.1  | 3.37  | 3.51  | 0.06 | 0.08 | -1.11 | 0.128291 | 0.02608  | 0.49431  | 0.202453 |
| MmugDNA.13610.1.S1_at   | MmugDNA.13610.1 | 10.7  | 11.09 | 0.25 | 0.24 | -1.31 | 0.06554  | 0.029541 | 0.404624 | 0.213535 |
| MmugDNA.13611.1.S1_at   | MmugDNA.13611.1 | 4.33  | 4.35  | 0.05 | 0.13 | -1.02 | 0.305573 | 0.273424 | 0.639223 | 0.537863 |
| MmugDNA.13614.1.S1_s_at | MmugDNA.13614.1 | 10.13 | 9.95  | 0.04 | 0.25 | 1.13  | 0.275324 | 0.291437 | 0.617789 | 0.551823 |
| MmugDNA.13615.1.S1_at   | MmugDNA.13615.1 | 6.17  | 6.1   | 0.09 | 0.1  | 1.05  | 0.166095 | 0.1896   | 0.529918 | 0.465297 |
| MmugDNA.13616.1.S1_at   | MmugDNA.13616.1 | 5.05  | 5.1   | 0.2  | 0.07 | -1.03 | 0.769122 | 0.88406  | 0.902946 | 0.933894 |
| MmugDNA.13618.1.S1_at   | MmugDNA.13618.1 | 6.61  | 6.83  | 0.28 | 0.1  | -1.17 | 0.275823 | 0.368194 | 0.61793  | 0.607793 |
| MmugDNA.1362.1.S1_at    | MmugDNA.1362.1  | 2.94  | 3.11  | 0.14 | 0.21 | -1.12 | 0.751316 | 0.796188 | 0.893728 | 0.88253  |
| MmugDNA.13621.1.S1_at   | MmugDNA.13621.1 | 11.79 | 11.19 | 0.09 | 0.32 | 1.52  | 0.051013 | 0.02734  | 0.375705 | 0.206637 |
| MmugDNA.13623.1.S1_at   | MmugDNA.13623.1 | 4.1   | 4.06  | 0.06 | 0.2  | 1.02  | 0.505819 | 0.673537 | 0.761826 | 0.809257 |
| MmugDNA.13624.1.S1_at   | MmugDNA.13624.1 | 7.35  | 7.48  | 0.69 | 0.58 | -1.09 | 0.46975  | 0.491461 | 0.741936 | 0.693004 |
| MmugDNA.1363.1.S1_at    | MmugDNA.1363.1  | 2.84  | 2.95  | 0.02 | 0.08 | -1.07 | 0.103123 | 0.066943 | 0.462758 | 0.304713 |
| MmugDNA.13632.1.S1_at   | MmugDNA.13632.1 | 7.24  | 7.09  | 1.05 | 0.65 | 1.11  | 0.708891 | 0.185682 | 0.872172 | 0.46163  |
| MmugDNA.13633.1.S1_at   | MmugDNA.13633.1 | 11.04 | 10.86 | 0.09 | 0.11 | 1.14  | 0.115382 | 0.00506  | 0.478773 | 0.09907  |
| MmugDNA.13636.1.S1_at   | MmugDNA.13636.1 | 12.13 | 12.06 | 0.14 | 0.28 | 1.05  | 0.243032 | 0.329612 | 0.594744 | 0.578813 |
| MmugDNA.13637.1.S1_at   | MmugDNA.13637.1 | 9.17  | 9.02  | 0.19 | 1.4  | 1.11  | 0.605298 | 0.634213 | 0.81824  | 0.78472  |
| MmugDNA.13639.1.S1_at   | MmugDNA.13639.1 | 6.56  | 6.84  | 0.28 | 0.51 | -1.21 | 0.196938 | 0.217314 | 0.55995  | 0.490953 |
| MmugDNA.1364.1.S1_at    | MmugDNA.1364.1  | 10.45 | 10.23 | 0.14 | 0.11 | 1.16  | 0.16336  | 0.181858 | 0.527696 | 0.458395 |
| MmugDNA.13641.1.S1_at   | MmugDNA.13641.1 | 6.78  | 6.84  | 0    | 0.13 | -1.04 | 0.149396 | 0.166069 | 0.514001 | 0.442658 |
| MmugDNA.13642.1.S1_at   | MmugDNA.13642.1 | 12.55 | 13.08 | 0.18 | 0.25 | -1.45 | 0.134004 | 0.105898 | 0.50054  | 0.368187 |
| MmugDNA.13643.1.S1_at   | MmugDNA.13643.1 | 3.2   | 3.2   | 0.11 | 0.28 | -1    | 0.52987  | 0.29858  | 0.776331 | 0.557183 |
| MmugDNA.13645.1.S1_at   | MmugDNA.13645.1 | 4.3   | 4.43  | 0.12 | 0.16 | -1.1  | 0.070511 | 0.055793 | 0.414379 | 0.282044 |
| MmugDNA.13646.1.S1_at   | MmugDNA.13646.1 | 3.38  | 3.39  | 0.12 | 0.09 | -1    | 0.968208 | 0.5591   | 0.988057 | 0.736046 |
| MmugDNA.13647.1.S1_at   | MmugDNA.13647.1 | 5.92  | 5.9   | 0.26 | 0.17 | 1.01  | 0.907658 | 0.819652 | 0.963338 | 0.896119 |
| MmugDNA.13649.1.S1_at   | MmugDNA.13649.1 | 3.15  | 3.12  | 0.07 | 0.24 | 1.02  | 0.689134 | 0.607316 | 0.861357 | 0.766358 |
| MmugDNA.1365.1.S1_at    | MmugDNA.1365.1  | 4.91  | 4.66  | 0.52 | 0.71 | 1.19  | 0.442056 | 0.407756 | 0.725349 | 0.635158 |
| MmugDNA.13650.1.S1_at   | MmugDNA.13650.1 | 7.3   | 7.77  | 0.48 | 0.28 | -1.38 | 0.049085 | 0.049495 | 0.370644 | 0.267375 |
| MmugDNA.13651.1.S1_at   | MmugDNA.13651.1 | 5.92  | 6.09  | 0.11 | 0.12 | -1.12 | 0.138168 | 0.060093 | 0.505618 | 0.291828 |
| MmugDNA.13652.1.S1_at   | MmugDNA.13652.1 | 9.34  | 10.76 | 0.84 | 0.25 | -2.66 | 0.109705 | 0.10923  | 0.470963 | 0.37308  |
| MmugDNA.13653.1.S1_at   | MmugDNA.13653.1 | 4.34  | 3.6   | 0.76 | 0.79 | 1.67  | 0.397058 | 0.688958 | 0.697474 | 0.818449 |
| MmugDNA.13656.1.S1_at   | MmugDNA.13656.1 | 5.34  | 5.38  | 0.14 | 0.45 | -1.03 | 0.940557 | 0.563966 | 0.97745  | 0.738913 |
| MmugDNA.13657.1.S1_at   | MmugDNA.13657.1 | 3.99  | 4.58  | 0.37 | 0.14 | -1.5  | 0.049105 | 0.048148 | 0.370743 | 0.264422 |
| MmugDNA.13658.1.S1_at   | MmugDNA.13658.1 | 7.02  | 7.15  | 0.48 | 0.25 | -1.09 | 0.445061 | 0.114467 | 0.727399 | 0.381021 |

|                         |                 |       |       |      |      |       |          |          |          |          |
|-------------------------|-----------------|-------|-------|------|------|-------|----------|----------|----------|----------|
| MmugDNA.13659.1.S1_at   | MmugDNA.13659.1 | 3.86  | 3.83  | 0.11 | 0.18 | 1.02  | 0.655207 | 0.61594  | 0.844826 | 0.772359 |
| MmugDNA.1366.1.S1_at    | MmugDNA.1366.1  | 5.45  | 5.51  | 0.09 | 0.08 | -1.04 | 0.889952 | 0.508757 | 0.955994 | 0.703811 |
| MmugDNA.13660.1.S1_at   | MmugDNA.13660.1 | 5     | 4.98  | 0.06 | 0.04 | 1.01  | 0.719913 | 0.048592 | 0.87718  | 0.265572 |
| MmugDNA.13661.1.S1_at   | MmugDNA.13661.1 | 5.99  | 6.65  | 0.38 | 0.96 | -1.58 | 0.341537 | 0.45541  | 0.66263  | 0.66939  |
| MmugDNA.13665.1.S1_at   | MmugDNA.13665.1 | 4.72  | 4.81  | 0.04 | 0.05 | -1.06 | 0.04551  | 0.032678 | 0.361188 | 0.223827 |
| MmugDNA.13665.1.S1_s_at | MmugDNA.13665.1 | 9.93  | 10.19 | 0.18 | 0.3  | -1.19 | 0.131508 | 0.15903  | 0.498041 | 0.435217 |
| MmugDNA.13669.1.S1_at   | MmugDNA.13669.1 | 4.09  | 4.22  | 0.21 | 0.11 | -1.09 | 0.693612 | 0.324222 | 0.864154 | 0.57488  |
| MmugDNA.1367.1.S1_at    | MmugDNA.1367.1  | 5.83  | 5.79  | 0.37 | 0.13 | 1.03  | 0.333265 | 0.398294 | 0.657525 | 0.629324 |
| MmugDNA.13671.1.S1_s_at | MmugDNA.13671.1 | 9.02  | 9.96  | 0.51 | 0.69 | -1.92 | 0.264775 | 0.110802 | 0.610545 | 0.375076 |
| MmugDNA.13672.1.S1_at   | MmugDNA.13672.1 | 3.58  | 3.53  | 0    | 0.03 | 1.04  | 0.119804 | 0.487592 | 0.484387 | 0.690565 |
| MmugDNA.13673.1.S1_s_at | MmugDNA.13673.1 | 6.71  | 6.78  | 0.12 | 0.12 | -1.05 | 0.967868 | 0.993628 | 0.987919 | 0.996218 |
| MmugDNA.13675.1.S1_at   | MmugDNA.13675.1 | 4.57  | 4.69  | 0.01 | 0.13 | -1.08 | 0.213555 | 0.116699 | 0.573715 | 0.383878 |
| MmugDNA.13676.1.S1_at   | MmugDNA.13676.1 | 5.58  | 4.56  | 0.55 | 0.74 | 2.03  | 0.192226 | 0.136428 | 0.555316 | 0.408839 |
| MmugDNA.13677.1.S1_at   | MmugDNA.13677.1 | 3.41  | 3.29  | 0.12 | 0.28 | 1.09  | 0.586459 | 0.645243 | 0.808146 | 0.792131 |
| MmugDNA.13678.1.S1_at   | MmugDNA.13678.1 | 5.83  | 5.91  | 0.07 | 0.07 | -1.05 | 0.128251 | 0.167198 | 0.494307 | 0.443675 |
| MmugDNA.1368.1.S1_at    | MmugDNA.1368.1  | 3.42  | 3.58  | 0.28 | 0.16 | -1.12 | 0.998038 | 0.431153 | 0.999237 | 0.652158 |
| MmugDNA.13680.1.S1_at   | MmugDNA.13680.1 | 5.47  | 5.14  | 0.29 | 0.14 | 1.26  | 0.342507 | 0.421893 | 0.663271 | 0.645369 |
| MmugDNA.13681.1.S1_at   | MmugDNA.13681.1 | 4.54  | 4.69  | 0.38 | 0.55 | -1.1  | 0.902392 | 0.616307 | 0.961084 | 0.772571 |
| MmugDNA.13682.1.S1_at   | MmugDNA.13682.1 | 5.57  | 5.7   | 0.25 | 0.04 | -1.09 | 0.492869 | 0.412192 | 0.755888 | 0.638588 |
| MmugDNA.13683.1.S1_at   | MmugDNA.13683.1 | 5.62  | 5.65  | 0.26 | 0.04 | -1.02 | 0.890274 | 0.780725 | 0.956122 | 0.872765 |
| MmugDNA.13684.1.S1_at   | MmugDNA.13684.1 | 3.32  | 3.34  | 0.38 | 0.16 | -1.01 | 0.54989  | 0.665803 | 0.787505 | 0.804188 |
| MmugDNA.13685.1.S1_at   | MmugDNA.13685.1 | 4.8   | 4.6   | 0.12 | 0.2  | 1.15  | 0.894337 | 0.137584 | 0.957901 | 0.410555 |
| MmugDNA.13686.1.S1_at   | MmugDNA.13686.1 | 8.43  | 8.52  | 0.23 | 0.21 | -1.06 | 0.143843 | 0.071735 | 0.510427 | 0.313981 |
| MmugDNA.13687.1.S1_at   | MmugDNA.13687.1 | 5.08  | 4.97  | 0.26 | 0.09 | 1.08  | 0.650635 | 0.808796 | 0.842789 | 0.889895 |
| MmugDNA.13688.1.S1_at   | MmugDNA.13688.1 | 6.62  | 6.31  | 0.21 | 0.18 | 1.24  | 0.153416 | 0.031786 | 0.517785 | 0.220723 |
| MmugDNA.13689.1.S1_at   | MmugDNA.13689.1 | 7.77  | 7.84  | 0.13 | 0.2  | -1.04 | 0.977245 | 0.67405  | 0.991309 | 0.809506 |
| MmugDNA.1369.1.S1_at    | MmugDNA.1369.1  | 5.31  | 5.31  | 0.21 | 0.16 | -1    | 0.604659 | 0.391117 | 0.817904 | 0.624833 |
| MmugDNA.13691.1.S1_at   | MmugDNA.13691.1 | 4.64  | 4.7   | 0.74 | 0.27 | -1.04 | 0.903136 | 0.980297 | 0.961412 | 0.989317 |
| MmugDNA.13692.1.S1_at   | MmugDNA.13692.1 | 6.41  | 6.52  | 0.11 | 0.08 | -1.08 | 0.548217 | 0.240195 | 0.786664 | 0.51084  |
| MmugDNA.13695.1.S1_at   | MmugDNA.13695.1 | 5.63  | 5.62  | 0.6  | 0.4  | 1.01  | 0.580778 | 0.764906 | 0.804812 | 0.863324 |
| MmugDNA.13697.1.S1_at   | MmugDNA.13697.1 | 13.33 | 13.34 | 0.08 | 0.04 | -1.01 | 0.45154  | 0.309088 | 0.731625 | 0.564787 |
| MmugDNA.13698.1.S1_at   | MmugDNA.13698.1 | 6.47  | 6.19  | 0.12 | 0.12 | 1.21  | 0.075012 | 0.065528 | 0.421728 | 0.301415 |
| MmugDNA.1370.1.S1_at    | MmugDNA.1370.1  | 5.62  | 5.52  | 0.16 | 0.12 | 1.07  | 0.930759 | 0.360303 | 0.973288 | 0.601339 |
| MmugDNA.13700.1.S1_at   | MmugDNA.13700.1 | 3.46  | 3.38  | 0.07 | 0.14 | 1.06  | 0.448346 | 0.334927 | 0.729578 | 0.58275  |
| MmugDNA.13703.1.S1_at   | MmugDNA.13703.1 | 6.63  | 6.33  | 0.11 | 0.14 | 1.23  | 0.09882  | 0.101388 | 0.458711 | 0.36112  |
| MmugDNA.13704.1.S1_at   | MmugDNA.13704.1 | 6.87  | 6.89  | 0.29 | 0.43 | -1.02 | 0.491461 | 0.493214 | 0.755082 | 0.694005 |
| MmugDNA.13705.1.S1_at   | MmugDNA.13705.1 | 12.68 | 12.63 | 0.66 | 0.74 | 1.03  | 0.889313 | 0.03599  | 0.955714 | 0.234165 |
| MmugDNA.18778.1.S1_at   | MmugDNA.18778.1 | 11.54 | 11.43 | 0.55 | 0.83 | 1.08  | 0.752417 | 0.041684 | 0.894361 | 0.24887  |
| MmugDNA.18778.1.S1_s_at | MmugDNA.18778.1 | 12.47 | 12.49 | 0.65 | 0.72 | -1.01 | 0.962114 | 0.025685 | 0.985456 | 0.200834 |
| MmugDNA.13706.1.S1_at   | MmugDNA.13706.1 | 4.99  | 5.15  | 0.22 | 0.22 | -1.11 | 0.286538 | 0.249858 | 0.625572 | 0.518876 |
| MmugDNA.13707.1.S1_at   | MmugDNA.13707.1 | 3.2   | 3.19  | 0.01 | 0.23 | 1     | 0.952199 | 0.799964 | 0.982156 | 0.884989 |



|                         |                 |       |       |      |      |       |          |          |          |          |
|-------------------------|-----------------|-------|-------|------|------|-------|----------|----------|----------|----------|
| MmugDNA.13709.1.S1_at   | MmugDNA.13709.1 | 5.22  | 5.08  | 0.11 | 0.12 | 1.1   | 0.19778  | 0.127736 | 0.560816 | 0.398581 |
| MmugDNA.13710.1.S1_at   | MmugDNA.13710.1 | 7.03  | 7.39  | 0.37 | 0.14 | -1.28 | 0.376047 | 0.517205 | 0.684918 | 0.709435 |
| MmugDNA.13711.1.S1_at   | MmugDNA.13711.1 | 3.9   | 3.44  | 0.44 | 0.07 | 1.38  | 0.226471 | 0.166954 | 0.584429 | 0.443429 |
| MmugDNA.13712.1.S1_at   | MmugDNA.13712.1 | 3.71  | 3.71  | 0.04 | 0.01 | 1     | 0.689795 | 0.604698 | 0.861775 | 0.764769 |
| MmugDNA.13714.1.S1_at   | MmugDNA.13714.1 | 10.03 | 12.09 | 0.74 | 1    | -4.17 | 0.064933 | 0.042025 | 0.403744 | 0.249463 |
| MmugDNA.13715.1.S1_at   | MmugDNA.13715.1 | 3.61  | 3.38  | 0.35 | 0.22 | 1.17  | 0.200108 | 0.239901 | 0.563056 | 0.510627 |
| MmugDNA.13717.1.S1_at   | MmugDNA.13717.1 | 9.54  | 9.27  | 0.21 | 0.38 | 1.21  | 0.906263 | 0.16201  | 0.9627   | 0.438108 |
| MmugDNA.1372.1.S1_at    | MmugDNA.1372.1  | 5.36  | 4.87  | 0.25 | 0.06 | 1.4   | 0.01595  | 0.037559 | 0.262019 | 0.238211 |
| MmugDNA.13720.1.S1_at   | MmugDNA.13720.1 | 3.59  | 3.51  | 0.04 | 0.05 | 1.05  | 0.117231 | 0.137666 | 0.481278 | 0.410637 |
| MmugDNA.13721.1.S1_at   | MmugDNA.13721.1 | 4.89  | 4.79  | 0.89 | 0.32 | 1.07  | 0.71969  | 0.693761 | 0.877054 | 0.8219   |
| MmugDNA.13722.1.S1_at   | MmugDNA.13722.1 | 8.02  | 8.1   | 0.25 | 0.45 | -1.05 | 0.766758 | 0.176322 | 0.901912 | 0.452752 |
| MmugDNA.13724.1.S1_at   | MmugDNA.13724.1 | 8.89  | 9.94  | 0.13 | 0.29 | -2.07 | 0.011371 | 0.004214 | 0.235384 | 0.091368 |
| MmugDNA.13725.1.S1_at   | MmugDNA.13725.1 | 9.2   | 8.02  | 0.35 | 0.26 | 2.27  | 0.006286 | 0.001092 | 0.1975   | 0.052283 |
| MmugDNA.13726.1.S1_at   | MmugDNA.13726.1 | 3.59  | 3.59  | 0.2  | 0.68 | -1    | 0.888715 | 0.001342 | 0.955383 | 0.056396 |
| MmugDNA.13728.1.S1_at   | MmugDNA.13728.1 | 5.25  | 5.21  | 0.23 | 0.25 | 1.02  | 0.60612  | 0.727666 | 0.818728 | 0.842508 |
| MmugDNA.1373.1.S1_at    | MmugDNA.1373.1  | 4.47  | 4.54  | 0.07 | 0.08 | -1.05 | 0.563312 | 0.17848  | 0.795945 | 0.454778 |
| MmugDNA.13730.1.S1_at   | MmugDNA.13730.1 | 4.09  | 4.42  | 0.22 | 0.06 | -1.26 | 0.086153 | 0.531783 | 0.44011  | 0.718951 |
| MmugDNA.13731.1.S1_at   | MmugDNA.13731.1 | 7.86  | 10.02 | 0.12 | 0.3  | -4.47 | 0.000326 | 0.000225 | 0.12562  | 0.032385 |
| MmugDNA.13732.1.S1_at   | MmugDNA.13732.1 | 8.71  | 9.21  | 0.12 | 1.27 | -1.41 | 0.556861 | 0.234402 | 0.792144 | 0.505674 |
| MmugDNA.13733.1.S1_at   | MmugDNA.13733.1 | 9.06  | 8.93  | 0.17 | 0.44 | 1.1   | 0.817238 | 0.73367  | 0.925917 | 0.845792 |
| MmugDNA.13735.1.S1_at   | MmugDNA.13735.1 | 3.7   | 3.67  | 0.22 | 0.23 | 1.02  | 0.51352  | 0.617311 | 0.766403 | 0.773333 |
| MmugDNA.13736.1.S1_at   | MmugDNA.13736.1 | 4.91  | 4.44  | 0.36 | 0.06 | 1.38  | 0.168413 | 0.200875 | 0.532644 | 0.475369 |
| MmugDNA.13737.1.S1_at   | MmugDNA.13737.1 | 5.71  | 6.52  | 0.15 | 0.26 | -1.75 | 0.018278 | 0.005408 | 0.269791 | 0.10146  |
| MmugDNA.13738.1.S1_at   | MmugDNA.13738.1 | 6.1   | 6.13  | 0.47 | 0.05 | -1.02 | 0.475093 | 0.344563 | 0.745579 | 0.589932 |
| MmugDNA.1374.1.S1_at    | MmugDNA.1374.1  | 4.77  | 4.95  | 0.49 | 0.35 | -1.13 | 0.56886  | 0.290269 | 0.798894 | 0.551169 |
| MmugDNA.13741.1.S1_at   | MmugDNA.13741.1 | 3.46  | 3.32  | 0    | 0.12 | 1.1   | 0.138001 | 0.031029 | 0.505467 | 0.218074 |
| MmugDNA.13743.1.S1_at   | MmugDNA.13743.1 | 8.05  | 7.79  | 0.09 | 0.2  | 1.2   | 0.210545 | 0.263534 | 0.5718   | 0.529826 |
| MmugDNA.13745.1.S1_at   | MmugDNA.13745.1 | 3.81  | 3.87  | 0.17 | 0.02 | -1.04 | 0.695924 | 0.452809 | 0.865073 | 0.667356 |
| MmugDNA.13746.1.S1_s_at | MmugDNA.13746.1 | 5.24  | 5.11  | 0.19 | 0.14 | 1.09  | 0.409642 | 0.143466 | 0.705904 | 0.417442 |
| MmugDNA.13747.1.S1_at   | MmugDNA.13747.1 | 12.39 | 12.77 | 0.15 | 0.33 | -1.3  | 0.471564 | 0.641292 | 0.743268 | 0.789506 |
| MmugDNA.13748.1.S1_at   | MmugDNA.13748.1 | 5.68  | 5.84  | 0.41 | 0.15 | -1.12 | 0.539123 | 0.66987  | 0.780929 | 0.806933 |
| MmugDNA.13749.1.S1_s_at | MmugDNA.13749.1 | 8.78  | 8.82  | 0.19 | 0.04 | -1.03 | 0.821401 | 0.012927 | 0.927315 | 0.146343 |
| MmugDNA.1375.1.S1_at    | MmugDNA.1375.1  | 6.23  | 6.41  | 0.26 | 0.17 | -1.13 | 0.236304 | 0.150574 | 0.590342 | 0.425106 |
| MmugDNA.13751.1.S1_at   | MmugDNA.13751.1 | 8.44  | 9.34  | 0.4  | 0.78 | -1.87 | 0.59002  | 0.490634 | 0.809704 | 0.692642 |
| MmugDNA.13755.1.S1_at   | MmugDNA.13755.1 | 5.86  | 6.03  | 0.08 | 0.04 | -1.13 | 0.035624 | 0.300374 | 0.337224 | 0.558696 |
| MmugDNA.13756.1.S1_at   | MmugDNA.13756.1 | 12.16 | 11.72 | 0.04 | 0.18 | 1.36  | 0.013414 | 0.003775 | 0.246639 | 0.08749  |
| MmugDNA.13759.1.S1_at   | MmugDNA.13759.1 | 6.43  | 6.49  | 0.11 | 0.24 | -1.04 | 0.27235  | 0.466361 | 0.616016 | 0.67624  |
| MmugDNA.1376.1.S1_at    | MmugDNA.1376.1  | 3.03  | 2.79  | 0.22 | 0.03 | 1.18  | 0.183602 | 0.162767 | 0.54773  | 0.438913 |
| MmugDNA.13761.1.S1_at   | MmugDNA.13761.1 | 4.21  | 4.08  | 0.02 | 0.16 | 1.1   | 0.690685 | 0.870612 | 0.862357 | 0.926446 |
| MmugDNA.13763.1.S1_at   | MmugDNA.13763.1 | 7.04  | 7.08  | 0.13 | 0.09 | -1.02 | 0.386039 | 0.353582 | 0.690975 | 0.59664  |
| MmugDNA.13764.1.S1_at   | MmugDNA.13764.1 | 5.83  | 5.8   | 0.08 | 0.22 | 1.02  | 0.926543 | 0.038374 | 0.971724 | 0.240795 |

|                         |                 |       |       |      |      |       |          |          |          |          |
|-------------------------|-----------------|-------|-------|------|------|-------|----------|----------|----------|----------|
| MmugDNA.13765.1.S1_at   | MmugDNA.13765.1 | 7.09  | 6.72  | 0.31 | 0.23 | 1.3   | 0.129344 | 0.149264 | 0.495453 | 0.42373  |
| MmugDNA.13766.1.S1_at   | MmugDNA.13766.1 | 8.16  | 8.23  | 0.13 | 0.21 | -1.05 | 0.747199 | 0.110277 | 0.89177  | 0.374403 |
| MmugDNA.13768.1.S1_at   | MmugDNA.13768.1 | 7.82  | 7.28  | 0.8  | 0.18 | 1.46  | 0.089748 | 0.083569 | 0.445334 | 0.334152 |
| MmugDNA.13769.1.S1_at   | MmugDNA.13769.1 | 8.12  | 8.73  | 0.09 | 0.36 | -1.53 | 0.180054 | 0.161352 | 0.544225 | 0.437519 |
| MmugDNA.1377.1.S1_at    | MmugDNA.1377.1  | 4.66  | 4.53  | 0.69 | 0.34 | 1.1   | 0.302944 | 0.336483 | 0.637233 | 0.583831 |
| MmugDNA.13770.1.S1_at   | MmugDNA.13770.1 | 8.23  | 6.64  | 0.34 | 0.87 | 3.02  | 0.037112 | 0.014809 | 0.340777 | 0.154838 |
| MmugDNA.13771.1.S1_at   | MmugDNA.13771.1 | 3.63  | 3.34  | 0.23 | 0.11 | 1.22  | 0.13307  | 0.030804 | 0.499412 | 0.217376 |
| MmugDNA.13772.1.S1_at   | MmugDNA.13772.1 | 3.94  | 4.02  | 0.06 | 0.02 | -1.05 | 0.095872 | 0.23565  | 0.453861 | 0.506737 |
| MmugDNA.13773.1.S1_at   | MmugDNA.13773.1 | 5.14  | 4.29  | 0.3  | 0.33 | 1.81  | 0.032861 | 0.067049 | 0.326361 | 0.304872 |
| MmugDNA.13775.1.S1_at   | MmugDNA.13775.1 | 4.2   | 3.75  | 0.93 | 0.48 | 1.37  | 0.293305 | 0.014905 | 0.630358 | 0.155167 |
| MmugDNA.13778.1.S1_at   | MmugDNA.13778.1 | 4.33  | 4.77  | 0.11 | 0.15 | -1.36 | 0.035492 | 0.016364 | 0.336631 | 0.161973 |
| MmugDNA.13778.1.S1_s_at | MmugDNA.13778.1 | 3.62  | 3.62  | 0.18 | 0.26 | 1     | 0.740053 | 0.746106 | 0.88842  | 0.852688 |
| MmugDNA.13779.1.S1_at   | MmugDNA.13779.1 | 5.76  | 5.84  | 0.12 | 0.13 | -1.06 | 0.157393 | 0.191472 | 0.522164 | 0.466821 |
| MmugDNA.13780.1.S1_at   | MmugDNA.13780.1 | 3.53  | 3.3   | 0.29 | 0.37 | 1.17  | 0.6413   | 0.610388 | 0.838155 | 0.768582 |
| MmugDNA.13781.1.S1_at   | MmugDNA.13781.1 | 12.97 | 12.87 | 0.18 | 0.08 | 1.07  | 0.094725 | 0.067311 | 0.452166 | 0.305414 |
| MmugDNA.13782.1.S1_at   | MmugDNA.13782.1 | 5.77  | 5.94  | 0.36 | 0.13 | -1.13 | 0.813914 | 0.562715 | 0.924469 | 0.738107 |
| MmugDNA.13784.1.S1_at   | MmugDNA.13784.1 | 5.94  | 7.57  | 0.7  | 0.39 | -3.09 | 0.059024 | 0.062016 | 0.390921 | 0.295892 |
| MmugDNA.13785.1.S1_at   | MmugDNA.13785.1 | 9.79  | 9.11  | 0.22 | 0.12 | 1.6   | 0.007521 | 0.006312 | 0.209134 | 0.107847 |
| MmugDNA.13786.1.S1_at   | MmugDNA.13786.1 | 3.21  | 2.96  | 0.25 | 0    | 1.19  | 0.503603 | 0.562249 | 0.760979 | 0.737898 |
| MmugDNA.13787.1.S1_at   | MmugDNA.13787.1 | 10.32 | 10.21 | 0.34 | 0.31 | 1.08  | 0.808395 | 0.163323 | 0.921904 | 0.43947  |
| MmugDNA.13788.1.S1_s_at | MmugDNA.13788.1 | 5.54  | 5.45  | 0.44 | 0.03 | 1.06  | 0.735359 | 0.693312 | 0.886196 | 0.821612 |
| MmugDNA.13789.1.S1_at   | MmugDNA.13789.1 | 11.03 | 11.06 | 0.07 | 0.37 | -1.02 | 0.990776 | 0.958029 | 0.996791 | 0.976273 |
| MmugDNA.1379.1.S1_at    | MmugDNA.1379.1  | 10.01 | 9.34  | 0.37 | 0.23 | 1.58  | 0.123849 | 0.13999  | 0.489589 | 0.413309 |
| MmugDNA.13793.1.S1_at   | MmugDNA.13793.1 | 5.84  | 6.1   | 0.26 | 0.83 | -1.2  | 0.156093 | 0.141519 | 0.520741 | 0.415063 |
| MmugDNA.13794.1.S1_at   | MmugDNA.13794.1 | 3.1   | 3.04  | 0.05 | 0    | 1.04  | 0.113602 | 0.224351 | 0.476938 | 0.497266 |
| MmugDNA.13795.1.S1_at   | MmugDNA.13795.1 | 11.35 | 11.13 | 0.15 | 0.29 | 1.17  | 0.197443 | 0.205467 | 0.560419 | 0.479764 |
| MmugDNA.13796.1.S1_at   | MmugDNA.13796.1 | 5.48  | 5.38  | 0.2  | 0.08 | 1.08  | 0.374117 | 0.237269 | 0.683335 | 0.508008 |
| MmugDNA.13797.1.S1_at   | MmugDNA.13797.1 | 7.43  | 8.03  | 0.27 | 0.1  | -1.52 | 0.033166 | 0.02814  | 0.327353 | 0.209306 |
| MmugDNA.13797.1.S1_s_at | MmugDNA.13797.1 | 7.07  | 7.55  | 0.32 | 0.12 | -1.39 | 0.201037 | 0.249226 | 0.563821 | 0.518313 |
| MmugDNA.13798.1.S1_at   | MmugDNA.13798.1 | 11.35 | 11.51 | 0.19 | 0.1  | -1.12 | 0.102884 | 0.246757 | 0.46254  | 0.516094 |
| MmugDNA.13798.1.S1_s_at | MmugDNA.13798.1 | 11.04 | 11.29 | 0.12 | 0.16 | -1.19 | 0.097784 | 0.200649 | 0.45698  | 0.475195 |
| MmugDNA.13799.1.S1_at   | MmugDNA.13799.1 | 5.95  | 5.69  | 0.5  | 1.22 | 1.2   | 0.530797 | 0.70325  | 0.776921 | 0.827928 |
| MmugDNA.138.1.S1_at     | MmugDNA.138.1   | 4.46  | 4.23  | 0.03 | 0.14 | 1.18  | 0.140842 | 0.05197  | 0.508448 | 0.273453 |
| MmugDNA.1380.1.S1_at    | MmugDNA.1380.1  | 3.04  | 3.16  | 0.17 | 0.17 | -1.09 | 0.329871 | 0.500237 | 0.655349 | 0.698951 |
| MmugDNA.13800.1.S1_at   | MmugDNA.13800.1 | 10.08 | 10.78 | 0.07 | 0.78 | -1.62 | 0.233307 | 0.299391 | 0.588107 | 0.557857 |
| MmugDNA.13801.1.S1_at   | MmugDNA.13801.1 | 5.8   | 5.8   | 0.27 | 0.18 | 1     | 0.847775 | 0.876889 | 0.939063 | 0.929855 |
| MmugDNA.13803.1.S1_at   | MmugDNA.13803.1 | 7.67  | 6.1   | 1.06 | 0.75 | 2.97  | 0.028755 | 0.036019 | 0.312166 | 0.234255 |
| MmugDNA.13804.1.S1_at   | MmugDNA.13804.1 | 7.45  | 8.06  | 0.05 | 0.79 | -1.53 | 0.261738 | 0.230884 | 0.608373 | 0.502546 |
| MmugDNA.13805.1.S1_at   | MmugDNA.13805.1 | 6.66  | 8.06  | 0.55 | 0.47 | -2.64 | 0.073114 | 0.058562 | 0.418452 | 0.288686 |
| MmugDNA.13807.1.S1_at   | MmugDNA.13807.1 | 7.26  | 7.39  | 0.16 | 0.25 | -1.09 | 0.254675 | 0.258614 | 0.60255  | 0.52584  |
| MmugDNA.13808.1.S1_at   | MmugDNA.13808.1 | 4.51  | 5.11  | 1.2  | 0.55 | -1.52 | 0.489376 | 0.559739 | 0.753748 | 0.736365 |

|                         |                 |       |       |      |      |       |          |          |          |          |
|-------------------------|-----------------|-------|-------|------|------|-------|----------|----------|----------|----------|
| MmugDNA.13809.1.S1_at   | MmugDNA.13809.1 | 4.08  | 3.82  | 0.53 | 0.46 | 1.2   | 0.832266 | 0.958551 | 0.932037 | 0.976506 |
| MmugDNA.1381.1.S1_at    | MmugDNA.1381.1  | 5.08  | 4.39  | 0.29 | 0.29 | 1.61  | 0.081628 | 0.114366 | 0.432665 | 0.380871 |
| MmugDNA.13811.1.S1_at   | MmugDNA.13811.1 | 5.15  | 5.28  | 0.28 | 0.06 | -1.1  | 0.751691 | 0.89234  | 0.893893 | 0.938624 |
| MmugDNA.13812.1.S1_at   | MmugDNA.13812.1 | 8.78  | 8.84  | 0.44 | 0.69 | -1.05 | 0.478092 | 0.606545 | 0.747099 | 0.765811 |
| MmugDNA.13813.1.S1_at   | MmugDNA.13813.1 | 4.07  | 4.05  | 0.27 | 0.15 | 1.02  | 0.762304 | 0.66577  | 0.899996 | 0.804165 |
| MmugDNA.13814.1.S1_at   | MmugDNA.13814.1 | 6.9   | 6.94  | 0.48 | 0.27 | -1.03 | 0.437211 | 0.514468 | 0.722285 | 0.707693 |
| MmugDNA.13816.1.S1_at   | MmugDNA.13816.1 | 9.56  | 10.1  | 0.32 | 0.39 | -1.46 | 0.073669 | 0.018182 | 0.419083 | 0.169673 |
| MmugDNA.13817.1.S1_at   | MmugDNA.13817.1 | 9.61  | 10.09 | 0.23 | 0.08 | -1.39 | 0.035777 | 0.039382 | 0.33757  | 0.243406 |
| MmugDNA.13818.1.S1_at   | MmugDNA.13818.1 | 6.01  | 6.38  | 0.1  | 0.37 | -1.29 | 0.15148  | 0.149964 | 0.51615  | 0.424608 |
| MmugDNA.13819.1.S1_at   | MmugDNA.13819.1 | 3.45  | 3.54  | 0.06 | 0.13 | -1.06 | 0.228669 | 0.399413 | 0.586121 | 0.629798 |
| MmugDNA.1382.1.S1_at    | MmugDNA.1382.1  | 4.31  | 4.31  | 0.57 | 0.31 | 1     | 0.429886 | 0.598165 | 0.717788 | 0.760674 |
| MmugDNA.13820.1.S1_at   | MmugDNA.13820.1 | 4.52  | 4.46  | 0.27 | 0.4  | 1.05  | 0.8513   | 0.808223 | 0.940204 | 0.889636 |
| MmugDNA.13821.1.S1_s_at | MmugDNA.13821.1 | 12.56 | 10.76 | 1.72 | 0.98 | 3.49  | 0.359823 | 0.526055 | 0.673991 | 0.715374 |
| MmugDNA.13821.1.S1_x_at | MmugDNA.13821.1 | 7.37  | 5.78  | 1.58 | 0.83 | 3.01  | 0.352395 | 0.506147 | 0.66959  | 0.702359 |
| MmugDNA.30269.1.S1_s_at | MmugDNA.30269.1 | 10.4  | 10.31 | 0.13 | 0.58 | 1.07  | 0.288072 | 0.375065 | 0.626381 | 0.613186 |
| MmugDNA.13823.1.S1_at   | MmugDNA.13823.1 | 3.72  | 3.69  | 0.08 | 0.07 | 1.03  | 0.63821  | 0.681939 | 0.836511 | 0.81424  |
| MmugDNA.13824.1.S1_at   | MmugDNA.13824.1 | 9.31  | 9.13  | 0.11 | 0.04 | 1.13  | 0.10755  | 0.217537 | 0.468045 | 0.491121 |
| MmugDNA.13825.1.S1_at   | MmugDNA.13825.1 | 5.62  | 5.41  | 0.8  | 0.19 | 1.16  | 0.529794 | 0.11793  | 0.776323 | 0.385837 |
| MmugDNA.13826.1.S1_at   | MmugDNA.13826.1 | 3.39  | 3.45  | 0.17 | 0.06 | -1.04 | 0.313704 | 0.330247 | 0.645316 | 0.579044 |
| MmugDNA.13827.1.S1_at   | MmugDNA.13827.1 | 5.89  | 5.5   | 0.31 | 0.35 | 1.31  | 0.080857 | 0.159859 | 0.431371 | 0.435986 |
| MmugDNA.13829.1.S1_s_at | MmugDNA.13829.1 | 7.75  | 7.69  | 0.19 | 0.42 | 1.04  | 0.816895 | 0.955252 | 0.925786 | 0.974611 |
| MmugDNA.1383.1.S1_at    | MmugDNA.1383.1  | 4.97  | 5.16  | 0.13 | 0.15 | -1.14 | 0.411984 | 0.157999 | 0.707679 | 0.433744 |
| MmugDNA.13830.1.S1_at   | MmugDNA.13830.1 | 10.32 | 10.16 | 0.01 | 0.76 | 1.12  | 0.744517 | 0.809591 | 0.890646 | 0.890236 |
| MmugDNA.13831.1.S1_at   | MmugDNA.13831.1 | 10.31 | 9.77  | 0.05 | 0.24 | 1.46  | 0.018807 | 0.008529 | 0.2715   | 0.122563 |
| MmugDNA.13834.1.S1_at   | MmugDNA.13834.1 | 7.83  | 7.94  | 0.15 | 0.08 | -1.08 | 0.119879 | 0.131825 | 0.484448 | 0.403891 |
| MmugDNA.13835.1.S1_at   | MmugDNA.13835.1 | 7.93  | 7.45  | 0.22 | 0.3  | 1.39  | 0.165977 | 0.188302 | 0.529863 | 0.46433  |
| MmugDNA.13837.1.S1_at   | MmugDNA.13837.1 | 8.88  | 7.69  | 0.13 | 0.15 | 2.29  | 0.000475 | 0.000111 | 0.13422  | 0.028099 |
| MmugDNA.13839.1.S1_at   | MmugDNA.13839.1 | 5.16  | 5.28  | 0.03 | 0.11 | -1.08 | 0.128765 | 0.140244 | 0.494664 | 0.413405 |
| MmugDNA.1384.1.S1_at    | MmugDNA.1384.1  | 4.81  | 5.1   | 1.22 | 0.48 | -1.22 | 0.723893 | 0.6012   | 0.879238 | 0.762571 |
| MmugDNA.13840.1.S1_at   | MmugDNA.13840.1 | 4.8   | 4.84  | 1.01 | 0.18 | -1.02 | 0.340099 | 0.358995 | 0.661621 | 0.600389 |
| MmugDNA.13841.1.S1_at   | MmugDNA.13841.1 | 3.03  | 3.09  | 0.09 | 0.06 | -1.05 | 0.737655 | 0.228072 | 0.887266 | 0.500249 |
| MmugDNA.13843.1.S1_at   | MmugDNA.13843.1 | 3.89  | 3.59  | 0.1  | 0.28 | 1.23  | 0.565255 | 0.724036 | 0.796922 | 0.840274 |
| MmugDNA.13844.1.S1_at   | MmugDNA.13844.1 | 3.38  | 3.4   | 0.22 | 0.08 | -1.01 | 0.886525 | 0.976626 | 0.954601 | 0.987237 |
| MmugDNA.13845.1.S1_at   | MmugDNA.13845.1 | 5.67  | 4.86  | 0.63 | 0.04 | 1.75  | 0.241122 | 0.358875 | 0.593741 | 0.600291 |
| MmugDNA.13846.1.S1_at   | MmugDNA.13846.1 | 9.72  | 12.24 | 0.88 | 0.19 | -5.73 | 0.008628 | 0.003657 | 0.219657 | 0.086526 |
| MmugDNA.13847.1.S1_at   | MmugDNA.13847.1 | 3.03  | 3.21  | 0.08 | 0.04 | -1.13 | 0.011073 | 0.004337 | 0.233784 | 0.092354 |
| MmugDNA.13849.1.S1_at   | MmugDNA.13849.1 | 4.18  | 4.89  | 0.58 | 0.95 | -1.63 | 0.502454 | 0.669202 | 0.760355 | 0.806492 |
| MmugDNA.1385.1.S1_at    | MmugDNA.1385.1  | 7.73  | 7.44  | 0.08 | 0.36 | 1.22  | 0.319584 | 0.238955 | 0.649068 | 0.509678 |
| MmugDNA.13850.1.S1_at   | MmugDNA.13850.1 | 5.19  | 5.18  | 0.32 | 0.33 | 1     | 0.928021 | 0.965353 | 0.972249 | 0.980657 |
| MmugDNA.13851.1.S1_at   | MmugDNA.13851.1 | 4.55  | 4.66  | 0.25 | 0.09 | -1.08 | 0.624048 | 0.70954  | 0.828178 | 0.831686 |
| MmugDNA.13853.1.S1_at   | MmugDNA.13853.1 | 5.39  | 4.99  | 0.38 | 0.21 | 1.31  | 0.295337 | 0.198414 | 0.631605 | 0.473302 |

|                         |                 |       |       |      |      |       |          |          |          |          |
|-------------------------|-----------------|-------|-------|------|------|-------|----------|----------|----------|----------|
| MmugDNA.13854.1.S1_at   | MmugDNA.13854.1 | 6.04  | 6.05  | 0.05 | 0.12 | -1.01 | 0.548395 | 0.831791 | 0.786665 | 0.903503 |
| MmugDNA.13855.1.S1_at   | MmugDNA.13855.1 | 3.03  | 3.02  | 0.14 | 0.08 | 1.01  | 0.832485 | 0.896984 | 0.932134 | 0.941205 |
| MmugDNA.13856.1.S1_at   | MmugDNA.13856.1 | 6.18  | 6.15  | 0.15 | 0.11 | 1.02  | 0.93461  | 0.586246 | 0.974715 | 0.7534   |
| MmugDNA.13857.1.S1_at   | MmugDNA.13857.1 | 3.82  | 3.87  | 0.09 | 0.05 | -1.04 | 0.1948   | 0.150671 | 0.558334 | 0.42522  |
| MmugDNA.13858.1.S1_at   | MmugDNA.13858.1 | 8.44  | 7.58  | 0.44 | 0.46 | 1.81  | 0.187258 | 0.17316  | 0.550364 | 0.449765 |
| MmugDNA.13859.1.S1_at   | MmugDNA.13859.1 | 3.68  | 3.89  | 0.58 | 0.27 | -1.16 | 0.765629 | 0.814657 | 0.901387 | 0.893021 |
| MmugDNA.1386.1.S1_at    | MmugDNA.1386.1  | 5.79  | 5.51  | 0.56 | 0.2  | 1.22  | 0.284694 | 0.140585 | 0.62439  | 0.413822 |
| MmugDNA.13860.1.S1_at   | MmugDNA.13860.1 | 10.24 | 10.69 | 0.79 | 0.56 | -1.37 | 0.511532 | 0.623968 | 0.765318 | 0.778285 |
| MmugDNA.13862.1.S1_at   | MmugDNA.13862.1 | 10.9  | 10.62 | 0.04 | 0.04 | 1.22  | 0.001136 | 0.011683 | 0.144733 | 0.140078 |
| MmugDNA.13863.1.S1_at   | MmugDNA.13863.1 | 7.48  | 7.72  | 0.1  | 0.13 | -1.18 | 0.030728 | 0.014189 | 0.319646 | 0.152173 |
| MmugDNA.13864.1.S1_at   | MmugDNA.13864.1 | 6.74  | 6.43  | 0.19 | 0.08 | 1.24  | 0.067467 | 0.320954 | 0.407944 | 0.572948 |
| MmugDNA.13865.1.S1_at   | MmugDNA.13865.1 | 8.13  | 8.51  | 0.64 | 1.37 | -1.3  | 0.624373 | 0.387097 | 0.828251 | 0.621935 |
| MmugDNA.13866.1.S1_at   | MmugDNA.13866.1 | 7.15  | 7.33  | 0.32 | 0.09 | -1.13 | 0.5073   | 0.42605  | 0.762788 | 0.648241 |
| MmugDNA.13867.1.S1_at   | MmugDNA.13867.1 | 4.18  | 4.21  | 0.13 | 0.17 | -1.01 | 0.285971 | 0.371032 | 0.625381 | 0.609964 |
| MmugDNA.13868.1.S1_at   | MmugDNA.13868.1 | 3.68  | 3.67  | 0.15 | 0.04 | 1.01  | 0.588215 | 0.901935 | 0.808927 | 0.944174 |
| MmugDNA.1387.1.S1_at    | MmugDNA.1387.1  | 4.07  | 4.04  | 0.29 | 0.15 | 1.02  | 0.561424 | 0.510699 | 0.794887 | 0.705114 |
| MmugDNA.13870.1.S1_at   | MmugDNA.13870.1 | 3.72  | 3.72  | 0.15 | 0.05 | 1     | 0.80577  | 0.876485 | 0.920349 | 0.929683 |
| MmugDNA.13871.1.S1_at   | MmugDNA.13871.1 | 6.84  | 6.38  | 0.66 | 0.24 | 1.37  | 0.194128 | 0.195595 | 0.557718 | 0.470441 |
| MmugDNA.13876.1.S1_at   | MmugDNA.13876.1 | 5.19  | 5.11  | 0.31 | 0.23 | 1.06  | 0.457583 | 0.128778 | 0.735016 | 0.400248 |
| MmugDNA.13877.1.S1_at   | MmugDNA.13877.1 | 3.02  | 2.95  | 0.25 | 0.07 | 1.05  | 0.164431 | 0.129897 | 0.528313 | 0.401509 |
| MmugDNA.13878.1.S1_at   | MmugDNA.13878.1 | 3.6   | 3.61  | 0.32 | 0    | -1.01 | 0.864111 | 0.865901 | 0.945449 | 0.923757 |
| MmugDNA.13879.1.S1_at   | MmugDNA.13879.1 | 9.73  | 9.33  | 0.13 | 0.28 | 1.32  | 0.252627 | 0.039463 | 0.601447 | 0.243642 |
| MmugDNA.1388.1.S1_at    | MmugDNA.1388.1  | 4.21  | 4.08  | 0.15 | 0.32 | 1.1   | 0.961132 | 0.653295 | 0.984976 | 0.79735  |
| MmugDNA.13880.1.S1_at   | MmugDNA.13880.1 | 3.08  | 2.98  | 0.13 | 0.07 | 1.07  | 0.320704 | 0.224138 | 0.64956  | 0.497129 |
| MmugDNA.13884.1.S1_at   | MmugDNA.13884.1 | 9.4   | 9.64  | 0.19 | 0.23 | -1.19 | 0.083676 | 0.074709 | 0.435945 | 0.318465 |
| MmugDNA.13885.1.S1_at   | MmugDNA.13885.1 | 5.24  | 4.66  | 0.63 | 0.48 | 1.5   | 0.253621 | 0.332397 | 0.60216  | 0.580841 |
| MmugDNA.13885.1.S1_x_at | MmugDNA.13885.1 | 4.74  | 4.79  | 0.74 | 0.24 | -1.03 | 0.428827 | 0.520624 | 0.71704  | 0.711831 |
| MmugDNA.13887.1.S1_s_at | MmugDNA.13887.1 | 5.74  | 5.73  | 0.11 | 0.49 | 1.01  | 0.394222 | 0.468866 | 0.695705 | 0.677906 |
| MmugDNA.13887.1.S1_x_at | MmugDNA.13887.1 | 5.36  | 5.39  | 0.19 | 0.34 | -1.02 | 0.213446 | 0.329839 | 0.573627 | 0.578874 |
| MmugDNA.13888.1.S1_at   | MmugDNA.13888.1 | 8.95  | 8.66  | 0.19 | 0.71 | 1.22  | 0.424561 | 0.457376 | 0.714559 | 0.670806 |
| MmugDNA.13889.1.S1_at   | MmugDNA.13889.1 | 4.3   | 4.37  | 0.22 | 0.19 | -1.05 | 0.569592 | 0.451555 | 0.799095 | 0.666372 |
| MmugDNA.1389.1.S1_at    | MmugDNA.1389.1  | 9.21  | 9.97  | 0.22 | 0.13 | -1.7  | 0.00885  | 0.01925  | 0.221512 | 0.174522 |
| MmugDNA.13890.1.S1_at   | MmugDNA.13890.1 | 4.56  | 4.37  | 0.23 | 0.02 | 1.14  | 0.248313 | 0.427072 | 0.599164 | 0.649087 |
| MmugDNA.13891.1.S1_at   | MmugDNA.13891.1 | 4.49  | 4.61  | 0.41 | 0.17 | -1.09 | 0.542063 | 0.59856  | 0.783075 | 0.760958 |
| MmugDNA.13892.1.S1_at   | MmugDNA.13892.1 | 5.36  | 5.51  | 0.2  | 0.53 | -1.11 | 0.696802 | 0.838151 | 0.865498 | 0.907587 |
| MmugDNA.13894.1.S1_at   | MmugDNA.13894.1 | 4.65  | 4.89  | 0.18 | 0.16 | -1.18 | 0.567333 | 0.355548 | 0.798078 | 0.597801 |
| MmugDNA.13895.1.S1_at   | MmugDNA.13895.1 | 6.56  | 6.44  | 0.07 | 0.48 | 1.09  | 0.721386 | 0.379039 | 0.878074 | 0.616011 |
| MmugDNA.13896.1.S1_at   | MmugDNA.13896.1 | 5.14  | 4.19  | 0.47 | 0.18 | 1.94  | 0.033022 | 0.028012 | 0.326925 | 0.208903 |
| MmugDNA.13897.1.S1_s_at | MmugDNA.13897.1 | 8.49  | 8.77  | 0.95 | 0.6  | -1.22 | 0.145758 | 0.14827  | 0.511603 | 0.422777 |
| MmugDNA.13898.1.S1_at   | MmugDNA.13898.1 | 8.9   | 9.09  | 0.79 | 0.76 | -1.14 | 0.263431 | 0.242272 | 0.609348 | 0.512697 |
| MmugDNA.13899.1.S1_at   | MmugDNA.13899.1 | 5.94  | 6.06  | 0.11 | 0.32 | -1.09 | 0.979511 | 0.260673 | 0.99244  | 0.527199 |

|                         |                 |       |       |      |      |       |          |          |          |          |
|-------------------------|-----------------|-------|-------|------|------|-------|----------|----------|----------|----------|
| MmugDNA.1390.1.S1_at    | MmugDNA.1390.1  | 3.7   | 4.51  | 0.59 | 0.58 | -1.75 | 0.757051 | 0.834524 | 0.89696  | 0.905227 |
| MmugDNA.13901.1.S1_at   | MmugDNA.13901.1 | 8.08  | 8.52  | 0.06 | 0.48 | -1.35 | 0.419734 | 0.37738  | 0.712083 | 0.6149   |
| MmugDNA.13902.1.S1_at   | MmugDNA.13902.1 | 6.99  | 7.22  | 0.09 | 0.25 | -1.17 | 0.263705 | 0.194672 | 0.609629 | 0.469765 |
| MmugDNA.13903.1.S1_at   | MmugDNA.13903.1 | 3.91  | 4.05  | 0.6  | 0.14 | -1.1  | 0.888502 | 0.274205 | 0.95529  | 0.538698 |
| MmugDNA.13904.1.S1_at   | MmugDNA.13904.1 | 5.25  | 6.06  | 0.51 | 0.6  | -1.76 | 0.15161  | 0.239491 | 0.516223 | 0.510162 |
| MmugDNA.13905.1.S1_at   | MmugDNA.13905.1 | 8.14  | 7.51  | 0.37 | 0.44 | 1.55  | 0.114193 | 0.101437 | 0.47744  | 0.361205 |
| MmugDNA.13906.1.S1_at   | MmugDNA.13906.1 | 4.82  | 4.77  | 0.26 | 0.11 | 1.04  | 0.272053 | 0.42196  | 0.615959 | 0.645406 |
| MmugDNA.13907.1.S1_at   | MmugDNA.13907.1 | 9.04  | 9.71  | 0.3  | 0.11 | -1.6  | 0.022005 | 0.007309 | 0.28446  | 0.114792 |
| MmugDNA.13908.1.S1_at   | MmugDNA.13908.1 | 7.84  | 8.13  | 0.39 | 0.15 | -1.23 | 0.661699 | 0.163173 | 0.848161 | 0.439303 |
| MmugDNA.13909.1.S1_at   | MmugDNA.13909.1 | 10.33 | 10.13 | 0.25 | 1    | 1.14  | 0.494607 | 0.589645 | 0.756791 | 0.755803 |
| MmugDNA.13910.1.S1_at   | MmugDNA.13910.1 | 4.94  | 4.89  | 0.18 | 0.09 | 1.03  | 0.720861 | 0.845754 | 0.877828 | 0.912241 |
| MmugDNA.13912.1.S1_at   | MmugDNA.13912.1 | 3.42  | 3.4   | 0.03 | 0.13 | 1.01  | 0.40628  | 0.714433 | 0.703645 | 0.834313 |
| MmugDNA.13915.1.S1_at   | MmugDNA.13915.1 | 3.31  | 3.35  | 0.08 | 0.22 | -1.03 | 0.71828  | 0.562999 | 0.876382 | 0.738314 |
| MmugDNA.13918.1.S1_at   | MmugDNA.13918.1 | 6.16  | 5.83  | 0.12 | 0.8  | 1.25  | 0.997624 | 0.844997 | 0.999041 | 0.911799 |
| MmugDNA.13919.1.S1_at   | MmugDNA.13919.1 | 5.06  | 4.95  | 0.12 | 0.22 | 1.08  | 0.769272 | 0.719212 | 0.902994 | 0.837526 |
| MmugDNA.1392.1.S1_at    | MmugDNA.1392.1  | 9.42  | 9.35  | 0.46 | 0.25 | 1.05  | 0.852003 | 0.10715  | 0.940437 | 0.369817 |
| MmugDNA.13920.1.S1_at   | MmugDNA.13920.1 | 6.31  | 6.45  | 0.21 | 0.11 | -1.11 | 0.387933 | 0.581867 | 0.692145 | 0.750784 |
| MmugDNA.13921.1.S1_at   | MmugDNA.13921.1 | 5.3   | 4.62  | 1.31 | 0.48 | 1.61  | 0.319196 | 0.505027 | 0.648688 | 0.70197  |
| MmugDNA.13922.1.S1_at   | MmugDNA.13922.1 | 5.27  | 4.94  | 0.28 | 0.06 | 1.26  | 0.289393 | 0.236424 | 0.62741  | 0.507314 |
| MmugDNA.13924.1.S1_at   | MmugDNA.13924.1 | 11.52 | 12.85 | 0.41 | 0.52 | -2.52 | 0.044948 | 0.01492  | 0.359318 | 0.155285 |
| MmugDNA.13925.1.S1_at   | MmugDNA.13925.1 | 11.58 | 11.39 | 0.11 | 0.59 | 1.14  | 0.53809  | 0.357873 | 0.780393 | 0.599493 |
| MmugDNA.13926.1.S1_at   | MmugDNA.13926.1 | 12.08 | 11.78 | 0.05 | 0.71 | 1.24  | 0.384813 | 0.321485 | 0.690114 | 0.573226 |
| MmugDNA.13927.1.S1_at   | MmugDNA.13927.1 | 7.77  | 7.54  | 0.16 | 0.1  | 1.17  | 0.026058 | 0.03645  | 0.30146  | 0.235423 |
| MmugDNA.13927.1.S1_x_at | MmugDNA.13927.1 | 7.79  | 7.33  | 0.14 | 0.18 | 1.38  | 0.053375 | 0.089649 | 0.380257 | 0.343842 |
| MmugDNA.13928.1.S1_at   | MmugDNA.13928.1 | 4.93  | 5.15  | 0.11 | 0.12 | -1.16 | 0.086299 | 0.088856 | 0.440224 | 0.342698 |
| MmugDNA.13929.1.S1_at   | MmugDNA.13929.1 | 3.46  | 3.46  | 0.06 | 0.14 | -1    | 0.628617 | 0.697249 | 0.830903 | 0.824057 |
| MmugDNA.1393.1.S1_at    | MmugDNA.1393.1  | 7.94  | 8.12  | 0.68 | 0.16 | -1.13 | 0.695047 | 0.722382 | 0.864725 | 0.839202 |
| MmugDNA.13930.1.S1_at   | MmugDNA.13930.1 | 3.91  | 3.86  | 0.19 | 0.12 | 1.03  | 0.285016 | 0.301434 | 0.624632 | 0.559467 |
| MmugDNA.13931.1.S1_at   | MmugDNA.13931.1 | 11.04 | 10.98 | 0.14 | 0.05 | 1.04  | 0.259973 | 0.407079 | 0.606878 | 0.634722 |
| MmugDNA.13934.1.S1_at   | MmugDNA.13934.1 | 6.14  | 6.61  | 0.18 | 0.22 | -1.39 | 0.150958 | 0.169399 | 0.515667 | 0.446024 |
| MmugDNA.13935.1.S1_at   | MmugDNA.13935.1 | 6.36  | 6.51  | 0.25 | 0.11 | -1.11 | 0.357029 | 0.472599 | 0.672044 | 0.68007  |
| MmugDNA.13936.1.S1_at   | MmugDNA.13936.1 | 4.6   | 4.54  | 0.22 | 0.13 | 1.04  | 0.796367 | 0.819067 | 0.91548  | 0.895738 |
| MmugDNA.13937.1.S1_at   | MmugDNA.13937.1 | 6     | 5.12  | 0.17 | 0.14 | 1.83  | 0.001371 | 0.000211 | 0.146228 | 0.032262 |
| MmugDNA.13938.1.S1_at   | MmugDNA.13938.1 | 11.87 | 12.16 | 0.62 | 0.61 | -1.22 | 0.436985 | 0.603491 | 0.722145 | 0.764189 |
| MmugDNA.13939.1.S1_s_at | MmugDNA.13939.1 | 10.7  | 11.11 | 0.11 | 0.01 | -1.33 | 0.001625 | 0.000119 | 0.152812 | 0.028664 |
| MmugDNA.13940.1.S1_at   | MmugDNA.13940.1 | 4.04  | 3.77  | 0.44 | 0.26 | 1.21  | 0.182512 | 0.218536 | 0.546767 | 0.492142 |
| MmugDNA.13941.1.S1_at   | MmugDNA.13941.1 | 4.4   | 4.47  | 0.05 | 0.16 | -1.05 | 0.238707 | 0.363925 | 0.592009 | 0.604293 |
| MmugDNA.13942.1.S1_at   | MmugDNA.13942.1 | 6.21  | 5.46  | 0.05 | 0.23 | 1.68  | 0.007831 | 0.000838 | 0.213391 | 0.046968 |
| MmugDNA.13943.1.S1_at   | MmugDNA.13943.1 | 5.19  | 5.13  | 0.37 | 0.25 | 1.04  | 0.437971 | 0.447031 | 0.722687 | 0.663235 |
| MmugDNA.13944.1.S1_at   | MmugDNA.13944.1 | 3.31  | 3.14  | 0.16 | 0.11 | 1.12  | 0.395481 | 0.516168 | 0.696508 | 0.708757 |
| MmugDNA.13947.1.S1_at   | MmugDNA.13947.1 | 3.85  | 3.88  | 0.19 | 0.04 | -1.02 | 0.231255 | 0.308331 | 0.587369 | 0.564425 |

|                         |                 |       |       |      |      |       |          |          |          |          |
|-------------------------|-----------------|-------|-------|------|------|-------|----------|----------|----------|----------|
| MmugDNA.13948.1.S1_at   | MmugDNA.13948.1 | 3.2   | 3.19  | 0.18 | 0.22 | 1     | 0.624144 | 0.41953  | 0.828178 | 0.643507 |
| MmugDNA.13949.1.S1_at   | MmugDNA.13949.1 | 6.55  | 6.74  | 0.21 | 0.06 | -1.14 | 0.147844 | 0.062892 | 0.513385 | 0.297494 |
| MmugDNA.13950.1.S1_at   | MmugDNA.13950.1 | 4.15  | 4.34  | 0.06 | 0.12 | -1.14 | 0.28493  | 0.010879 | 0.624573 | 0.135926 |
| MmugDNA.13951.1.S1_at   | MmugDNA.13951.1 | 4.53  | 4.36  | 0.49 | 0.22 | 1.13  | 0.462933 | 0.229418 | 0.738484 | 0.501527 |
| MmugDNA.13952.1.S1_at   | MmugDNA.13952.1 | 5.98  | 5.76  | 0.24 | 0.58 | 1.16  | 0.203156 | 0.22498  | 0.565831 | 0.49773  |
| MmugDNA.13956.1.S1_at   | MmugDNA.13956.1 | 4.92  | 4.95  | 0.08 | 0.07 | -1.02 | 0.250562 | 0.27632  | 0.600389 | 0.540303 |
| MmugDNA.13959.1.S1_at   | MmugDNA.13959.1 | 5.25  | 5.26  | 0.1  | 0.1  | -1.01 | 0.44197  | 0.489653 | 0.725321 | 0.691862 |
| MmugDNA.1396.1.S1_at    | MmugDNA.1396.1  | 5.92  | 5.99  | 0.09 | 0.09 | -1.05 | 0.636387 | 0.785995 | 0.835488 | 0.876026 |
| MmugDNA.13960.1.S1_at   | MmugDNA.13960.1 | 5.66  | 7.04  | 0.91 | 0.85 | -2.6  | 0.272392 | 0.086309 | 0.616016 | 0.338771 |
| MmugDNA.13961.1.S1_at   | MmugDNA.13961.1 | 4.87  | 4.87  | 0.04 | 0.1  | 1     | 0.293086 | 0.299782 | 0.630264 | 0.558081 |
| MmugDNA.13962.1.S1_at   | MmugDNA.13962.1 | 8.61  | 8.05  | 0.14 | 0.43 | 1.48  | 0.418537 | 0.655696 | 0.711383 | 0.7987   |
| MmugDNA.13963.1.S1_at   | MmugDNA.13963.1 | 5.65  | 6.69  | 0.53 | 0.49 | -2.07 | 0.162572 | 0.095515 | 0.526874 | 0.352588 |
| MmugDNA.13964.1.S1_at   | MmugDNA.13964.1 | 5.77  | 6.02  | 0.39 | 0.67 | -1.19 | 0.320618 | 0.030975 | 0.649505 | 0.217853 |
| MmugDNA.13965.1.S1_at   | MmugDNA.13965.1 | 7.08  | 7     | 0.34 | 0.37 | 1.06  | 0.850196 | 0.76454  | 0.939853 | 0.863128 |
| MmugDNA.13966.1.S1_s_at | MmugDNA.13966.1 | 8.14  | 7.05  | 1    | 0.26 | 2.12  | 0.053955 | 0.04823  | 0.381209 | 0.264684 |
| MmugDNA.13967.1.S1_at   | MmugDNA.13967.1 | 5.64  | 7     | 1.61 | 1.03 | -2.57 | 0.339544 | 0.248895 | 0.661307 | 0.517964 |
| MmugDNA.13968.1.S1_at   | MmugDNA.13968.1 | 13.36 | 13.35 | 0.03 | 0.84 | 1.01  | 0.356799 | 0.283989 | 0.671778 | 0.546237 |
| MmugDNA.13969.1.S1_at   | MmugDNA.13969.1 | 4.7   | 4.74  | 0.17 | 0.43 | -1.02 | 0.853397 | 0.556681 | 0.940833 | 0.734714 |
| MmugDNA.1397.1.S1_at    | MmugDNA.1397.1  | 5.47  | 5.37  | 0.1  | 0.07 | 1.07  | 0.506605 | 0.152735 | 0.762432 | 0.427571 |
| MmugDNA.13970.1.S1_at   | MmugDNA.13970.1 | 9.36  | 8.49  | 0.26 | 0.21 | 1.82  | 0.019031 | 0.01091  | 0.272726 | 0.136002 |
| MmugDNA.13971.1.S1_at   | MmugDNA.13971.1 | 5.97  | 6.02  | 0.12 | 0.13 | -1.04 | 0.598549 | 0.170049 | 0.81395  | 0.446789 |
| MmugDNA.13972.1.S1_at   | MmugDNA.13972.1 | 3.96  | 4.44  | 0.18 | 0.7  | -1.4  | 0.269631 | 0.294533 | 0.614187 | 0.554265 |
| MmugDNA.32487.1.S1_s_at | MmugDNA.32487.1 | 5.58  | 5.61  | 0.06 | 0.26 | -1.02 | 0.319148 | 0.411364 | 0.648688 | 0.638108 |
| MmugDNA.13975.1.S1_at   | MmugDNA.13975.1 | 3.91  | 3.84  | 0.12 | 0.21 | 1.05  | 0.841465 | 0.842108 | 0.936191 | 0.910036 |
| MmugDNA.13977.1.S1_at   | MmugDNA.13977.1 | 4.9   | 5.06  | 0.01 | 0.22 | -1.12 | 0.202271 | 0.220108 | 0.564606 | 0.493552 |
| MmugDNA.13978.1.S1_at   | MmugDNA.13978.1 | 10.88 | 10.23 | 0.3  | 0.66 | 1.57  | 0.522984 | 0.711608 | 0.772257 | 0.832761 |
| MmugDNA.1398.1.S1_at    | MmugDNA.1398.1  | 10.19 | 8.02  | 0.11 | 0.72 | 4.5   | 0.00666  | 0.007006 | 0.201191 | 0.112986 |
| MmugDNA.13980.1.S1_at   | MmugDNA.13980.1 | 11.14 | 11.76 | 0.62 | 0.35 | -1.54 | 0.064679 | 0.059559 | 0.403239 | 0.290568 |
| MmugDNA.13981.1.S1_at   | MmugDNA.13981.1 | 5.12  | 5.4   | 0.08 | 0.13 | -1.22 | 0.025403 | 0.016552 | 0.299142 | 0.162881 |
| MmugDNA.13985.1.S1_s_at | MmugDNA.13985.1 | 9.25  | 9.71  | 0.31 | 0.14 | -1.38 | 0.230529 | 0.03222  | 0.587222 | 0.222159 |
| MmugDNA.26902.1.S1_at   | MmugDNA.26902.1 | 4.04  | 4.1   | 0.07 | 0.03 | -1.04 | 0.597868 | 0.186241 | 0.813757 | 0.462127 |
| MmugDNA.26902.1.S1_s_at | MmugDNA.26902.1 | 9.79  | 9.91  | 0.16 | 0.79 | -1.08 | 0.913625 | 0.972244 | 0.965802 | 0.985011 |
| MmugDNA.13987.1.S1_at   | MmugDNA.13987.1 | 5.89  | 5.35  | 0.42 | 0.04 | 1.45  | 0.076276 | 0.094863 | 0.424738 | 0.351901 |
| MmugDNA.13988.1.S1_at   | MmugDNA.13988.1 | 3.18  | 3.19  | 0.24 | 0.05 | -1.01 | 0.792773 | 0.722656 | 0.914046 | 0.839355 |
| MmugDNA.13989.1.S1_at   | MmugDNA.13989.1 | 3.93  | 3.9   | 0.19 | 0.03 | 1.02  | 0.272716 | 0.27979  | 0.616379 | 0.543251 |
| MmugDNA.1399.1.S1_at    | MmugDNA.1399.1  | 3.87  | 3.88  | 0.83 | 0.16 | -1.01 | 0.321707 | 0.300592 | 0.650341 | 0.558885 |
| MmugDNA.13990.1.S1_at   | MmugDNA.13990.1 | 4.55  | 4.64  | 0.25 | 0.2  | -1.06 | 0.977318 | 0.524949 | 0.991326 | 0.714672 |
| MmugDNA.13991.1.S1_at   | MmugDNA.13991.1 | 6.48  | 7.25  | 0.77 | 0.09 | -1.71 | 0.132636 | 0.203001 | 0.49874  | 0.477343 |
| MmugDNA.13993.1.S1_at   | MmugDNA.13993.1 | 9.23  | 8.76  | 0.2  | 0.12 | 1.38  | 0.017523 | 0.012221 | 0.267445 | 0.142932 |
| MmugDNA.13994.1.S1_at   | MmugDNA.13994.1 | 4.06  | 4.08  | 0.24 | 0.03 | -1.01 | 0.515803 | 0.284483 | 0.767629 | 0.546642 |
| MmugDNA.13995.1.S1_at   | MmugDNA.13995.1 | 4.59  | 4.5   | 0.18 | 0.13 | 1.06  | 0.414445 | 0.545646 | 0.709279 | 0.727579 |

|                         |                 |       |       |      |      |       |          |          |          |          |
|-------------------------|-----------------|-------|-------|------|------|-------|----------|----------|----------|----------|
| MmugDNA.13996.1.S1_at   | MmugDNA.13996.1 | 6.94  | 6.59  | 0.66 | 0.14 | 1.27  | 0.228706 | 0.315371 | 0.586121 | 0.568939 |
| MmugDNA.13997.1.S1_at   | MmugDNA.13997.1 | 7.29  | 7.01  | 0.23 | 0.06 | 1.22  | 0.073639 | 0.039373 | 0.419075 | 0.243406 |
| MmugDNA.13997.1.S1_s_at | MmugDNA.13997.1 | 6.37  | 6.15  | 0.18 | 0.09 | 1.16  | 0.077851 | 0.111366 | 0.427855 | 0.376087 |
| MmugDNA.13998.1.S1_at   | MmugDNA.13998.1 | 6.72  | 7.75  | 0.55 | 0.66 | -2.03 | 0.54043  | 0.728016 | 0.781897 | 0.842711 |
| MmugDNA.14.1.S1_at      | MmugDNA.14.1    | 3.72  | 3.73  | 0.06 | 0.12 | -1.01 | 0.206047 | 0.124394 | 0.568453 | 0.394857 |
| MmugDNA.140.1.S1_at     | MmugDNA.140.1   | 5.68  | 5.69  | 0.15 | 0.2  | -1.01 | 0.975945 | 0.99833  | 0.990702 | 0.999091 |
| MmugDNA.1400.1.S1_at    | MmugDNA.1400.1  | 4.87  | 3.44  | 1.56 | 0.96 | 2.69  | 0.274812 | 0.355393 | 0.617628 | 0.597738 |
| MmugDNA.14000.1.S1_at   | MmugDNA.14000.1 | 4.81  | 4.72  | 0.23 | 0.06 | 1.06  | 0.257175 | 0.059379 | 0.604541 | 0.290548 |
| MmugDNA.14001.1.S1_at   | MmugDNA.14001.1 | 10.11 | 10.54 | 0.01 | 0.8  | -1.35 | 0.391388 | 0.47194  | 0.69404  | 0.679793 |
| MmugDNA.14002.1.S1_at   | MmugDNA.14002.1 | 7.62  | 7.91  | 0.09 | 0.29 | -1.22 | 0.246439 | 0.039966 | 0.597777 | 0.245076 |
| MmugDNA.14003.1.S1_at   | MmugDNA.14003.1 | 9.47  | 8.83  | 0.13 | 0.08 | 1.57  | 0.001482 | 0.000078 | 0.150888 | 0.027016 |
| MmugDNA.14004.1.S1_at   | MmugDNA.14004.1 | 10.33 | 11.2  | 0.12 | 0.99 | -1.83 | 0.235643 | 0.246455 | 0.589497 | 0.515899 |
| MmugDNA.14005.1.S1_at   | MmugDNA.14005.1 | 3.02  | 2.97  | 0.12 | 0.13 | 1.04  | 0.271572 | 0.492675 | 0.615716 | 0.693708 |
| MmugDNA.14007.1.S1_at   | MmugDNA.14007.1 | 3.75  | 3.69  | 0.37 | 0.29 | 1.04  | 0.837799 | 0.826343 | 0.934478 | 0.900249 |
| MmugDNA.14008.1.S1_s_at | MmugDNA.14008.1 | 8.1   | 7.63  | 0.13 | 0.13 | 1.38  | 0.004752 | 0.004289 | 0.184674 | 0.091951 |
| MmugDNA.1401.1.S1_at    | MmugDNA.1401.1  | 3.44  | 3.53  | 0.07 | 0.1  | -1.06 | 0.247814 | 0.266832 | 0.599052 | 0.53241  |
| MmugDNA.14010.1.S1_at   | MmugDNA.14010.1 | 3.04  | 2.94  | 0.11 | 0.1  | 1.08  | 0.274497 | 0.528386 | 0.617491 | 0.716583 |
| MmugDNA.14012.1.S1_at   | MmugDNA.14012.1 | 3.23  | 3.24  | 0.34 | 0.22 | -1.01 | 0.851269 | 0.570297 | 0.940204 | 0.743056 |
| MmugDNA.14013.1.S1_at   | MmugDNA.14013.1 | 5.72  | 6.2   | 0.48 | 0.79 | -1.39 | 0.955517 | 0.126013 | 0.983289 | 0.396648 |
| MmugDNA.14014.1.S1_at   | MmugDNA.14014.1 | 3.42  | 3.29  | 0.55 | 0.13 | 1.09  | 0.248973 | 0.302538 | 0.599715 | 0.560201 |
| MmugDNA.14015.1.S1_at   | MmugDNA.14015.1 | 7.72  | 7.97  | 0.17 | 0.56 | -1.19 | 0.915417 | 0.232324 | 0.966542 | 0.504054 |
| MmugDNA.14016.1.S1_at   | MmugDNA.14016.1 | 4.42  | 4.52  | 0.07 | 0.2  | -1.07 | 0.256784 | 0.18113  | 0.604419 | 0.457582 |
| MmugDNA.14017.1.S1_at   | MmugDNA.14017.1 | 6.34  | 6.53  | 0.34 | 0.24 | -1.14 | 0.502184 | 0.328521 | 0.760244 | 0.578137 |
| MmugDNA.14018.1.S1_at   | MmugDNA.14018.1 | 5.09  | 4.88  | 0.31 | 0.14 | 1.16  | 0.903753 | 0.242222 | 0.961578 | 0.51267  |
| MmugDNA.14019.1.S1_at   | MmugDNA.14019.1 | 7     | 5.51  | 1.18 | 0.14 | 2.81  | 0.094213 | 0.025051 | 0.451714 | 0.198316 |
| MmugDNA.1402.1.S1_at    | MmugDNA.1402.1  | 4.83  | 4.54  | 1.15 | 0.6  | 1.22  | 0.271041 | 0.345089 | 0.615322 | 0.590354 |
| MmugDNA.14021.1.S1_at   | MmugDNA.14021.1 | 4.77  | 4.93  | 0.49 | 0.07 | -1.12 | 0.773216 | 0.812663 | 0.904749 | 0.891778 |
| MmugDNA.14023.1.S1_at   | MmugDNA.14023.1 | 12.77 | 12.67 | 0.08 | 0.1  | 1.07  | 0.234024 | 0.363729 | 0.588542 | 0.604138 |
| MmugDNA.14024.1.S1_at   | MmugDNA.14024.1 | 3.88  | 3.67  | 0.13 | 0.17 | 1.16  | 0.197018 | 0.047848 | 0.560025 | 0.263679 |
| MmugDNA.14025.1.S1_at   | MmugDNA.14025.1 | 4.7   | 4.69  | 0.04 | 0.1  | 1.01  | 0.767527 | 0.393264 | 0.902376 | 0.626183 |
| MmugDNA.14026.1.S1_at   | MmugDNA.14026.1 | 5.19  | 5.41  | 0.33 | 0.09 | -1.17 | 0.094614 | 0.074527 | 0.452166 | 0.318173 |
| MmugDNA.14027.1.S1_at   | MmugDNA.14027.1 | 3.69  | 3.65  | 0.41 | 0.33 | 1.03  | 0.98727  | 0.496544 | 0.995537 | 0.696119 |
| MmugDNA.14028.1.S1_at   | MmugDNA.14028.1 | 3.68  | 3.69  | 0.02 | 0.07 | -1    | 0.648265 | 0.745419 | 0.8418   | 0.852384 |
| MmugDNA.14029.1.S1_at   | MmugDNA.14029.1 | 4.42  | 4.4   | 0.09 | 0.06 | 1.01  | 0.600428 | 0.594634 | 0.815205 | 0.758623 |
| MmugDNA.1403.1.S1_at    | MmugDNA.1403.1  | 7.17  | 7.57  | 0.02 | 0.57 | -1.32 | 0.263831 | 0.270897 | 0.609674 | 0.536026 |
| MmugDNA.14030.1.S1_at   | MmugDNA.14030.1 | 5.09  | 5.14  | 0.36 | 0.12 | -1.03 | 0.579782 | 0.757844 | 0.804451 | 0.859085 |
| MmugDNA.14032.1.S1_at   | MmugDNA.14032.1 | 5.37  | 5.45  | 0.8  | 0.5  | -1.06 | 0.298254 | 0.340905 | 0.633823 | 0.587035 |
| MmugDNA.14034.1.S1_at   | MmugDNA.14034.1 | 3.62  | 3.74  | 0.62 | 0.12 | -1.09 | 0.555291 | 0.595887 | 0.791316 | 0.759258 |
| MmugDNA.14035.1.S1_at   | MmugDNA.14035.1 | 4.31  | 4.51  | 0.12 | 0.05 | -1.15 | 0.038436 | 0.038796 | 0.344376 | 0.241916 |
| MmugDNA.14036.1.S1_at   | MmugDNA.14036.1 | 4.3   | 4.2   | 0.11 | 0.16 | 1.08  | 0.650488 | 0.631541 | 0.842789 | 0.782845 |
| MmugDNA.14038.1.S1_at   | MmugDNA.14038.1 | 5.64  | 5.37  | 0.21 | 0.1  | 1.21  | 0.062042 | 0.068684 | 0.396982 | 0.308653 |

|                         |                 |       |       |      |      |       |          |          |          |          |
|-------------------------|-----------------|-------|-------|------|------|-------|----------|----------|----------|----------|
| MmugDNA.14039.1.S1_at   | MmugDNA.14039.1 | 5.68  | 5.27  | 0.55 | 0.23 | 1.32  | 0.111095 | 0.271547 | 0.473136 | 0.536547 |
| MmugDNA.1404.1.S1_at    | MmugDNA.1404.1  | 8.25  | 8.53  | 0.03 | 0.7  | -1.22 | 0.509902 | 0.61783  | 0.764585 | 0.773715 |
| MmugDNA.14040.1.S1_at   | MmugDNA.14040.1 | 3.64  | 3.67  | 0.03 | 0.17 | -1.02 | 0.216917 | 0.271806 | 0.57648  | 0.536577 |
| MmugDNA.14041.1.S1_at   | MmugDNA.14041.1 | 4.51  | 4.47  | 0.03 | 0.15 | 1.03  | 0.178594 | 0.093648 | 0.542922 | 0.350047 |
| MmugDNA.14042.1.S1_at   | MmugDNA.14042.1 | 7.75  | 8.81  | 0.5  | 0.8  | -2.09 | 0.136752 | 0.170911 | 0.503852 | 0.447561 |
| MmugDNA.14043.1.S1_at   | MmugDNA.14043.1 | 10.97 | 10.99 | 0.69 | 0.76 | -1.01 | 0.663399 | 0.847    | 0.84899  | 0.913045 |
| MmugDNA.14044.1.S1_at   | MmugDNA.14044.1 | 5.64  | 5.59  | 0.33 | 0.23 | 1.04  | 0.973506 | 0.975517 | 0.989603 | 0.986659 |
| MmugDNA.14047.1.S1_at   | MmugDNA.14047.1 | 4.57  | 4.28  | 0.24 | 0.15 | 1.23  | 0.103376 | 0.107851 | 0.462888 | 0.370945 |
| MmugDNA.14049.1.S1_at   | MmugDNA.14049.1 | 3.89  | 3.86  | 0.72 | 0.08 | 1.02  | 0.625306 | 0.615369 | 0.828732 | 0.771962 |
| MmugDNA.1405.1.S1_at    | MmugDNA.1405.1  | 6.72  | 6.5   | 1.21 | 0.52 | 1.16  | 0.653089 | 0.833556 | 0.843939 | 0.904566 |
| MmugDNA.14050.1.S1_at   | MmugDNA.14050.1 | 5.23  | 5.38  | 0.06 | 0.08 | -1.11 | 0.333259 | 0.107367 | 0.657525 | 0.370219 |
| MmugDNA.14051.1.S1_at   | MmugDNA.14051.1 | 5.92  | 6.13  | 0.24 | 0.36 | -1.15 | 0.470978 | 0.357961 | 0.742816 | 0.59955  |
| MmugDNA.14053.1.S1_at   | MmugDNA.14053.1 | 6.67  | 6.52  | 0.86 | 0.47 | 1.11  | 0.691192 | 0.725464 | 0.862582 | 0.841043 |
| MmugDNA.14055.1.S1_at   | MmugDNA.14055.1 | 7.69  | 7.31  | 0.17 | 0.48 | 1.3   | 0.248363 | 0.241917 | 0.599239 | 0.512489 |
| MmugDNA.14056.1.S1_at   | MmugDNA.14056.1 | 6.52  | 6.35  | 0.1  | 0.48 | 1.12  | 0.772248 | 0.887411 | 0.904121 | 0.935867 |
| MmugDNA.14057.1.S1_at   | MmugDNA.14057.1 | 4.04  | 4.12  | 0.17 | 0.17 | -1.06 | 0.265255 | 0.321374 | 0.610859 | 0.573207 |
| MmugDNA.14058.1.S1_at   | MmugDNA.14058.1 | 7.4   | 8.19  | 0.02 | 0.64 | -1.73 | 0.036802 | 0.02118  | 0.34044  | 0.182297 |
| MmugDNA.14059.1.S1_at   | MmugDNA.14059.1 | 10.27 | 10.27 | 0.03 | 0.43 | -1    | 0.404869 | 0.114785 | 0.703075 | 0.381311 |
| MmugDNA.1406.1.S1_at    | MmugDNA.1406.1  | 8.57  | 7.5   | 0.23 | 0.35 | 2.1   | 0.034197 | 0.021891 | 0.331951 | 0.185194 |
| MmugDNA.14060.1.S1_at   | MmugDNA.14060.1 | 6.89  | 6.29  | 0.27 | 0.28 | 1.51  | 0.135826 | 0.052743 | 0.502782 | 0.275315 |
| MmugDNA.22926.1.S1_s_at | MmugDNA.22926.1 | 11.28 | 11.57 | 0.11 | 0.22 | -1.22 | 0.093716 | 0.104622 | 0.45102  | 0.365941 |
| MmugDNA.14063.1.S1_at   | MmugDNA.14063.1 | 3.63  | 3.29  | 0.11 | 0.35 | 1.26  | 0.684601 | 0.649442 | 0.858795 | 0.794887 |
| MmugDNA.14064.1.S1_at   | MmugDNA.14064.1 | 5.2   | 5.3   | 0.05 | 0.25 | -1.07 | 0.248128 | 0.29178  | 0.599076 | 0.552054 |
| MmugDNA.14065.1.S1_at   | MmugDNA.14065.1 | 6.95  | 6.47  | 0.66 | 0.39 | 1.4   | 0.21896  | 0.245577 | 0.578361 | 0.515348 |
| MmugDNA.14066.1.S1_at   | MmugDNA.14066.1 | 5.34  | 5.45  | 0.21 | 0.03 | -1.08 | 0.937291 | 0.996936 | 0.975853 | 0.99822  |
| MmugDNA.14069.1.S1_at   | MmugDNA.14069.1 | 4.62  | 4.5   | 0.19 | 0.09 | 1.09  | 0.487493 | 0.421732 | 0.75211  | 0.645254 |
| MmugDNA.1407.1.S1_at    | MmugDNA.1407.1  | 4.48  | 3.98  | 0.38 | 0.2  | 1.42  | 0.295731 | 0.347581 | 0.632091 | 0.592019 |
| MmugDNA.14070.1.S1_at   | MmugDNA.14070.1 | 4.19  | 4.32  | 0.2  | 0.14 | -1.09 | 0.241174 | 0.156321 | 0.593763 | 0.43161  |
| MmugDNA.14071.1.S1_at   | MmugDNA.14071.1 | 5.23  | 5.41  | 0.66 | 0.12 | -1.13 | 0.752618 | 0.910836 | 0.894415 | 0.949709 |
| MmugDNA.14072.1.S1_at   | MmugDNA.14072.1 | 3.33  | 3.51  | 0.11 | 0.05 | -1.13 | 0.067376 | 0.084649 | 0.407578 | 0.33618  |
| MmugDNA.14073.1.S1_at   | MmugDNA.14073.1 | 6.2   | 6.83  | 0.58 | 0.55 | -1.55 | 0.484232 | 0.280311 | 0.750235 | 0.543544 |
| MmugDNA.14074.1.S1_at   | MmugDNA.14074.1 | 4.29  | 4.59  | 0.51 | 0.23 | -1.24 | 0.821863 | 0.725951 | 0.927464 | 0.841316 |
| MmugDNA.14077.1.S1_at   | MmugDNA.14077.1 | 4.56  | 4.52  | 0.15 | 0.38 | 1.02  | 0.622992 | 0.736044 | 0.82774  | 0.847309 |
| MmugDNA.14079.1.S1_at   | MmugDNA.14079.1 | 6.44  | 6.56  | 0.11 | 0.36 | -1.09 | 0.185569 | 0.233737 | 0.548924 | 0.50505  |
| MmugDNA.1408.1.S1_at    | MmugDNA.1408.1  | 9.17  | 9.3   | 0.19 | 0.47 | -1.09 | 0.619774 | 0.35085  | 0.825777 | 0.594572 |
| MmugDNA.14082.1.S1_at   | MmugDNA.14082.1 | 6.91  | 6.96  | 0    | 0.06 | -1.03 | 0.218364 | 0.063657 | 0.577884 | 0.298815 |
| MmugDNA.33264.1.S1_at   | MmugDNA.33264.1 | 5.32  | 5.2   | 0.64 | 0.95 | 1.09  | 0.409337 | 0.583056 | 0.705878 | 0.75153  |
| MmugDNA.33264.1.S1_s_at | MmugDNA.33264.1 | 12.5  | 12.27 | 0.2  | 0.12 | 1.17  | 0.772348 | 0.331234 | 0.90415  | 0.579978 |
| MmugDNA.14084.1.S1_at   | MmugDNA.14084.1 | 2.96  | 3.18  | 0.36 | 0.62 | -1.17 | 0.414787 | 0.34926  | 0.709338 | 0.593267 |
| MmugDNA.14085.1.S1_at   | MmugDNA.14085.1 | 10.26 | 9.79  | 0.17 | 0.44 | 1.38  | 0.117933 | 0.120744 | 0.482063 | 0.389579 |
| MmugDNA.14086.1.S1_at   | MmugDNA.14086.1 | 5.46  | 6.57  | 1.17 | 1.89 | -2.15 | 0.562103 | 0.251918 | 0.795129 | 0.520632 |



|                         |                 |       |       |      |      |       |          |          |          |          |
|-------------------------|-----------------|-------|-------|------|------|-------|----------|----------|----------|----------|
| MmugDNA.14087.1.S1_at   | MmugDNA.14087.1 | 7.73  | 7.8   | 0.17 | 0.09 | -1.05 | 0.835662 | 0.86972  | 0.933468 | 0.926114 |
| MmugDNA.1409.1.S1_at    | MmugDNA.1409.1  | 6.27  | 5.99  | 0.56 | 0.57 | 1.22  | 0.471277 | 0.641583 | 0.742955 | 0.789618 |
| MmugDNA.37584.1.S1_s_at | MmugDNA.37584.1 | 9.13  | 9.09  | 0.13 | 0.37 | 1.03  | 0.736559 | 0.900202 | 0.886692 | 0.943313 |
| MmugDNA.14092.1.S1_s_at | MmugDNA.14092.1 | 9.05  | 9.09  | 0.56 | 0.86 | -1.02 | 0.520761 | 0.703038 | 0.771038 | 0.827866 |
| MmugDNA.14094.1.S1_at   | MmugDNA.14094.1 | 5.34  | 5.25  | 0.11 | 0.06 | 1.06  | 0.711869 | 0.237758 | 0.873742 | 0.50826  |
| MmugDNA.14095.1.S1_at   | MmugDNA.14095.1 | 3.5   | 3.54  | 0.01 | 0.06 | -1.03 | 0.331903 | 0.465011 | 0.656541 | 0.675534 |
| MmugDNA.14097.1.S1_at   | MmugDNA.14097.1 | 5.31  | 5.31  | 0.02 | 0.02 | 1     | 0.840008 | 0.99174  | 0.935495 | 0.995392 |
| MmugDNA.14098.1.S1_at   | MmugDNA.14098.1 | 10.95 | 11.48 | 0.2  | 0.43 | -1.44 | 0.051324 | 0.056112 | 0.376001 | 0.282751 |
| MmugDNA.141.1.S1_at     | MmugDNA.141.1   | 3.77  | 3.77  | 0.26 | 0.07 | 1     | 0.780334 | 0.807234 | 0.908495 | 0.889014 |
| MmugDNA.14100.1.S1_at   | MmugDNA.14100.1 | 9.75  | 8     | 0.62 | 1.75 | 3.37  | 0.169835 | 0.200448 | 0.534043 | 0.474826 |
| MmugDNA.14101.1.S1_at   | MmugDNA.14101.1 | 11.02 | 11.07 | 0.08 | 0.2  | -1.04 | 0.16997  | 0.048955 | 0.534161 | 0.266062 |
| MmugDNA.14102.1.S1_at   | MmugDNA.14102.1 | 3.67  | 3.25  | 0.2  | 0.04 | 1.34  | 0.033071 | 0.046802 | 0.327027 | 0.261073 |
| MmugDNA.14103.1.S1_at   | MmugDNA.14103.1 | 3.39  | 3.44  | 0.19 | 0.28 | -1.03 | 0.643947 | 0.342845 | 0.8397   | 0.588712 |
| MmugDNA.14104.1.S1_at   | MmugDNA.14104.1 | 10.69 | 10.83 | 0.41 | 0.7  | -1.1  | 0.537315 | 0.726181 | 0.779997 | 0.84147  |
| MmugDNA.14105.1.S1_at   | MmugDNA.14105.1 | 3.35  | 3.57  | 0.04 | 0.14 | -1.17 | 0.084685 | 0.076383 | 0.43753  | 0.321368 |
| MmugDNA.14106.1.S1_at   | MmugDNA.14106.1 | 4.75  | 5.13  | 0.39 | 0.59 | -1.3  | 0.680373 | 0.861078 | 0.857147 | 0.920972 |
| MmugDNA.14107.1.S1_at   | MmugDNA.14107.1 | 4.66  | 4.71  | 0.13 | 0.09 | -1.04 | 0.992207 | 0.160988 | 0.997355 | 0.437116 |
| MmugDNA.14108.1.S1_at   | MmugDNA.14108.1 | 3.84  | 3.91  | 0.09 | 0.06 | -1.05 | 0.25159  | 0.329159 | 0.600981 | 0.578548 |
| MmugDNA.1411.1.S1_at    | MmugDNA.1411.1  | 3.7   | 3.67  | 0.13 | 0.11 | 1.02  | 0.747368 | 0.666665 | 0.89179  | 0.804716 |
| MmugDNA.14111.1.S1_at   | MmugDNA.14111.1 | 5.98  | 5.73  | 0.53 | 0.11 | 1.19  | 0.14758  | 0.132853 | 0.513287 | 0.404544 |
| MmugDNA.14112.1.S1_at   | MmugDNA.14112.1 | 10.88 | 9.97  | 0.43 | 0.32 | 1.87  | 0.197508 | 0.153615 | 0.560513 | 0.428341 |
| MmugDNA.14113.1.S1_at   | MmugDNA.14113.1 | 4.83  | 4.78  | 0.21 | 0.31 | 1.04  | 0.592493 | 0.759936 | 0.810972 | 0.860511 |
| MmugDNA.14114.1.S1_at   | MmugDNA.14114.1 | 5.29  | 4.46  | 1    | 0.72 | 1.78  | 0.2346   | 0.255072 | 0.588808 | 0.52317  |
| MmugDNA.14115.1.S1_at   | MmugDNA.14115.1 | 5.03  | 5.01  | 0.19 | 0.16 | 1.01  | 0.388738 | 0.40981  | 0.692804 | 0.636825 |
| MmugDNA.14116.1.S1_at   | MmugDNA.14116.1 | 6.2   | 6.18  | 0.02 | 0.48 | 1.01  | 0.411752 | 0.318786 | 0.707557 | 0.571379 |
| MmugDNA.14117.1.S1_at   | MmugDNA.14117.1 | 5.13  | 4.95  | 0.06 | 0.2  | 1.13  | 0.57348  | 0.379783 | 0.801233 | 0.616576 |
| MmugDNA.14119.1.S1_at   | MmugDNA.14119.1 | 3.49  | 3.32  | 0.11 | 0.1  | 1.12  | 0.142468 | 0.237521 | 0.509652 | 0.508178 |
| MmugDNA.14120.1.S1_at   | MmugDNA.14120.1 | 10.66 | 10.54 | 0.51 | 0.19 | 1.09  | 0.749203 | 0.696843 | 0.892627 | 0.823975 |
| MmugDNA.14122.1.S1_at   | MmugDNA.14122.1 | 5.63  | 5.4   | 0.12 | 0.13 | 1.18  | 0.155292 | 0.099384 | 0.520164 | 0.357673 |
| MmugDNA.14125.1.S1_at   | MmugDNA.14125.1 | 5.38  | 7.1   | 0.17 | 0.65 | -3.3  | 0.008629 | 0.004692 | 0.219657 | 0.095363 |
| MmugDNA.14126.1.S1_at   | MmugDNA.14126.1 | 8.12  | 7.12  | 0.4  | 0.29 | 2     | 0.028685 | 0.017423 | 0.312031 | 0.167044 |
| MmugDNA.14127.1.S1_at   | MmugDNA.14127.1 | 6.45  | 6.48  | 0.1  | 0.14 | -1.02 | 0.71059  | 0.892498 | 0.873085 | 0.938696 |
| MmugDNA.14129.1.S1_at   | MmugDNA.14129.1 | 11.75 | 11.66 | 0.28 | 0.2  | 1.06  | 0.663532 | 0.807463 | 0.849018 | 0.889121 |
| MmugDNA.14129.1.S1_x_at | MmugDNA.14129.1 | 12.04 | 11.97 | 0.27 | 0.18 | 1.06  | 0.716292 | 0.880274 | 0.875374 | 0.931571 |
| MmugDNA.1413.1.S1_at    | MmugDNA.1413.1  | 6.53  | 6.3   | 0.92 | 0.21 | 1.17  | 0.242156 | 0.297216 | 0.594305 | 0.556067 |
| MmugDNA.14130.1.S1_at   | MmugDNA.14130.1 | 11.26 | 11.95 | 0.29 | 0.35 | -1.61 | 0.051393 | 0.041287 | 0.376003 | 0.247995 |
| MmugDNA.14131.1.S1_at   | MmugDNA.14131.1 | 7.46  | 7.45  | 0.16 | 0.12 | 1.01  | 0.483912 | 0.526089 | 0.749945 | 0.715376 |
| MmugDNA.14133.1.S1_at   | MmugDNA.14133.1 | 6.89  | 7.47  | 0.01 | 0.13 | -1.49 | 0.001808 | 0.001232 | 0.155166 | 0.05478  |
| MmugDNA.14134.1.S1_at   | MmugDNA.14134.1 | 6.98  | 7.2   | 0.11 | 0.13 | -1.17 | 0.448328 | 0.135728 | 0.729572 | 0.407917 |
| MmugDNA.14135.1.S1_at   | MmugDNA.14135.1 | 6.55  | 5.99  | 1.05 | 0.03 | 1.47  | 0.338578 | 0.427328 | 0.660988 | 0.649175 |
| MmugDNA.14136.1.S1_at   | MmugDNA.14136.1 | 3.95  | 3.52  | 0.5  | 0.32 | 1.35  | 0.306589 | 0.039214 | 0.639593 | 0.243173 |

|                         |                 |       |       |      |      |       |          |          |          |          |
|-------------------------|-----------------|-------|-------|------|------|-------|----------|----------|----------|----------|
| MmugDNA.14138.1.S1_at   | MmugDNA.14138.1 | 5     | 4.83  | 0.24 | 0.34 | 1.12  | 0.106252 | 0.103613 | 0.466831 | 0.36439  |
| MmugDNA.14140.1.S1_at   | MmugDNA.14140.1 | 4.65  | 4.68  | 0.21 | 0.02 | -1.02 | 0.448062 | 0.198617 | 0.729431 | 0.473391 |
| MmugDNA.14141.1.S1_at   | MmugDNA.14141.1 | 3.81  | 3.86  | 0.15 | 0.14 | -1.04 | 0.319185 | 0.462092 | 0.648688 | 0.673537 |
| MmugDNA.14142.1.S1_at   | MmugDNA.14142.1 | 5.22  | 5.22  | 0.28 | 0.18 | 1     | 0.64242  | 0.452216 | 0.838763 | 0.666957 |
| MmugDNA.14143.1.S1_at   | MmugDNA.14143.1 | 5.42  | 4.93  | 0.34 | 0.15 | 1.41  | 0.152672 | 0.116467 | 0.517325 | 0.383671 |
| MmugDNA.14144.1.S1_s_at | MmugDNA.14144.1 | 6.36  | 6.52  | 0.13 | 0.06 | -1.12 | 0.190882 | 0.051229 | 0.553627 | 0.271799 |
| MmugDNA.14148.1.S1_at   | MmugDNA.14148.1 | 3.97  | 4.08  | 0.22 | 0.04 | -1.08 | 0.170022 | 0.166454 | 0.534161 | 0.442903 |
| MmugDNA.14149.1.S1_at   | MmugDNA.14149.1 | 6.56  | 6.27  | 0.08 | 0.23 | 1.22  | 0.094029 | 0.067424 | 0.451612 | 0.305664 |
| MmugDNA.1415.1.S1_at    | MmugDNA.1415.1  | 4.43  | 4.48  | 0.4  | 0.06 | -1.03 | 0.402572 | 0.4955   | 0.701496 | 0.695527 |
| MmugDNA.14150.1.S1_at   | MmugDNA.14150.1 | 6.91  | 7.24  | 0.14 | 0.18 | -1.25 | 0.039917 | 0.031908 | 0.34828  | 0.221018 |
| MmugDNA.14150.1.S1_s_at | MmugDNA.14150.1 | 7.5   | 7.57  | 0.1  | 0.46 | -1.05 | 0.996002 | 0.583107 | 0.998451 | 0.751559 |
| MmugDNA.14152.1.S1_at   | MmugDNA.14152.1 | 7.92  | 6.76  | 0.69 | 1.31 | 2.23  | 0.497716 | 0.440905 | 0.758068 | 0.659138 |
| MmugDNA.14153.1.S1_at   | MmugDNA.14153.1 | 10.75 | 10.69 | 0.33 | 0.25 | 1.04  | 0.768604 | 0.92851  | 0.902719 | 0.95936  |
| MmugDNA.14156.1.S1_at   | MmugDNA.14156.1 | 6.29  | 6.2   | 0.11 | 0.03 | 1.06  | 0.24676  | 0.644596 | 0.59791  | 0.791686 |
| MmugDNA.14157.1.S1_at   | MmugDNA.14157.1 | 5.59  | 5.37  | 0.29 | 0.21 | 1.17  | 0.175835 | 0.148684 | 0.539441 | 0.423201 |
| MmugDNA.14158.1.S1_at   | MmugDNA.14158.1 | 11.63 | 11.94 | 0.13 | 0.05 | -1.23 | 0.020228 | 0.005763 | 0.277311 | 0.104378 |
| MmugDNA.14158.1.S1_s_at | MmugDNA.14158.1 | 11.86 | 12.23 | 0.09 | 0.03 | -1.29 | 0.003439 | 0.000426 | 0.17833  | 0.038359 |
| MmugDNA.14159.1.S1_at   | MmugDNA.14159.1 | 5.23  | 5.33  | 0.72 | 0.26 | -1.08 | 0.565906 | 0.664898 | 0.797414 | 0.803709 |
| MmugDNA.14160.1.S1_at   | MmugDNA.14160.1 | 10.87 | 10.99 | 0.11 | 0.23 | -1.09 | 0.14199  | 0.211911 | 0.509281 | 0.485931 |
| MmugDNA.14161.1.S1_at   | MmugDNA.14161.1 | 3.55  | 3.53  | 0.09 | 0.18 | 1.02  | 0.885473 | 0.522566 | 0.954118 | 0.713227 |
| MmugDNA.14162.1.S1_at   | MmugDNA.14162.1 | 10.26 | 10.2  | 0.1  | 0.22 | 1.04  | 0.476021 | 0.642878 | 0.746101 | 0.790529 |
| MmugDNA.14162.1.S1_s_at | MmugDNA.14162.1 | 12.06 | 11.94 | 0.08 | 0.16 | 1.09  | 0.237033 | 0.21773  | 0.590795 | 0.491309 |
| MmugDNA.14163.1.S1_at   | MmugDNA.14163.1 | 9.32  | 9.18  | 0.13 | 0.58 | 1.1   | 0.915091 | 0.309448 | 0.9664   | 0.564979 |
| MmugDNA.14164.1.S1_at   | MmugDNA.14164.1 | 8.41  | 8.22  | 0.51 | 0.52 | 1.14  | 0.504352 | 0.481491 | 0.761223 | 0.686469 |
| MmugDNA.14165.1.S1_at   | MmugDNA.14165.1 | 6.1   | 6.61  | 0.44 | 0.5  | -1.42 | 0.428987 | 0.307274 | 0.717207 | 0.56352  |
| MmugDNA.14166.1.S1_at   | MmugDNA.14166.1 | 4.2   | 4     | 0.26 | 0.1  | 1.15  | 0.146747 | 0.16727  | 0.512699 | 0.443684 |
| MmugDNA.14167.1.S1_at   | MmugDNA.14167.1 | 6.37  | 6.37  | 0.36 | 0.18 | -1    | 0.689389 | 0.803711 | 0.861525 | 0.887094 |
| MmugDNA.14169.1.S1_at   | MmugDNA.14169.1 | 7.63  | 9.18  | 0.3  | 1.02 | -2.92 | 0.065452 | 0.0728   | 0.404567 | 0.315651 |
| MmugDNA.1417.1.S1_at    | MmugDNA.1417.1  | 9.74  | 10.64 | 0.29 | 0.31 | -1.86 | 0.017262 | 0.005689 | 0.266981 | 0.104021 |
| MmugDNA.14170.1.S1_at   | MmugDNA.14170.1 | 8.76  | 8.97  | 0.51 | 0.79 | -1.15 | 0.661668 | 0.385021 | 0.848161 | 0.620609 |
| MmugDNA.14173.1.S1_at   | MmugDNA.14173.1 | 4.34  | 4.47  | 0.31 | 0.06 | -1.09 | 0.941875 | 0.912392 | 0.977821 | 0.950641 |
| MmugDNA.14175.1.S1_at   | MmugDNA.14175.1 | 4.87  | 4.97  | 0.15 | 0.19 | -1.07 | 0.609291 | 0.189033 | 0.820433 | 0.464897 |
| MmugDNA.14176.1.S1_s_at | MmugDNA.14176.1 | 4.96  | 4.04  | 0.4  | 0.65 | 1.89  | 0.259605 | 0.420683 | 0.60672  | 0.64434  |
| MmugDNA.14179.1.S1_at   | MmugDNA.14179.1 | 5.35  | 5.22  | 0.12 | 0.13 | 1.09  | 0.657886 | 0.243291 | 0.846208 | 0.513356 |
| MmugDNA.1418.1.S1_at    | MmugDNA.1418.1  | 5.35  | 5.21  | 0.35 | 0.1  | 1.1   | 0.238065 | 0.19414  | 0.591414 | 0.469266 |
| MmugDNA.14180.1.S1_at   | MmugDNA.14180.1 | 3.76  | 4.75  | 0.16 | 0.53 | -1.99 | 0.026142 | 0.013322 | 0.301461 | 0.148042 |
| MmugDNA.14181.1.S1_at   | MmugDNA.14181.1 | 11.54 | 11.39 | 0.69 | 0.26 | 1.11  | 0.826547 | 0.391737 | 0.929552 | 0.625301 |
| MmugDNA.14182.1.S1_at   | MmugDNA.14182.1 | 5.14  | 5.07  | 0.3  | 0.2  | 1.05  | 0.717531 | 0.866579 | 0.8759   | 0.924174 |
| MmugDNA.14183.1.S1_at   | MmugDNA.14183.1 | 6.88  | 7.12  | 0.59 | 0.32 | -1.18 | 0.724556 | 0.906984 | 0.879724 | 0.947344 |
| MmugDNA.14184.1.S1_x_at | MmugDNA.14184.1 | 14.43 | 14.44 | 0.03 | 0.1  | -1.01 | 0.598719 | 0.724577 | 0.814076 | 0.840552 |
| MmugDNA.14186.1.S1_at   | MmugDNA.14186.1 | 5.18  | 4.78  | 0.52 | 0.23 | 1.32  | 0.295046 | 0.282334 | 0.631503 | 0.545076 |

|                         |                 |       |       |      |      |       |          |          |          |          |
|-------------------------|-----------------|-------|-------|------|------|-------|----------|----------|----------|----------|
| MmugDNA.14189.1.S1_at   | MmugDNA.14189.1 | 5.53  | 5.59  | 0.09 | 0.1  | -1.04 | 0.371547 | 0.521815 | 0.682292 | 0.712654 |
| MmugDNA.1419.1.S1_at    | MmugDNA.1419.1  | 6.86  | 6.74  | 0.17 | 0.47 | 1.08  | 0.588205 | 0.235858 | 0.808927 | 0.50704  |
| MmugDNA.14190.1.S1_at   | MmugDNA.14190.1 | 7.69  | 6.78  | 0.43 | 0.39 | 1.87  | 0.055441 | 0.023011 | 0.383777 | 0.189778 |
| MmugDNA.14191.1.S1_at   | MmugDNA.14191.1 | 10.32 | 11.43 | 0.29 | 1.19 | -2.16 | 0.27709  | 0.203809 | 0.619225 | 0.478081 |
| MmugDNA.14195.1.S1_at   | MmugDNA.14195.1 | 3.61  | 3.59  | 0.22 | 0.04 | 1.02  | 0.546112 | 0.768811 | 0.785337 | 0.86567  |
| MmugDNA.14196.1.S1_at   | MmugDNA.14196.1 | 3.64  | 3.82  | 0.06 | 0.05 | -1.14 | 0.016337 | 0.002083 | 0.263616 | 0.067486 |
| MmugDNA.14197.1.S1_at   | MmugDNA.14197.1 | 8.01  | 8.22  | 0.62 | 0.27 | -1.16 | 0.431388 | 0.503766 | 0.71858  | 0.701126 |
| MmugDNA.14198.1.S1_at   | MmugDNA.14198.1 | 6.36  | 6.31  | 0.32 | 0.28 | 1.04  | 0.970474 | 0.324978 | 0.988651 | 0.575512 |
| MmugDNA.14199.1.S1_at   | MmugDNA.14199.1 | 3.55  | 3.11  | 0.4  | 0.14 | 1.36  | 0.09006  | 0.070929 | 0.445455 | 0.312444 |
| MmugDNA.142.1.S1_at     | MmugDNA.142.1   | 4.84  | 4.89  | 0.25 | 0.33 | -1.03 | 0.954231 | 0.9926   | 0.983062 | 0.995715 |
| MmugDNA.1420.1.S1_s_at  | MmugDNA.1420.1  | 5.7   | 5.15  | 0.25 | 0.28 | 1.46  | 0.026316 | 0.020665 | 0.302632 | 0.180392 |
| MmugDNA.14200.1.S1_at   | MmugDNA.14200.1 | 2.96  | 3.12  | 0.09 | 0.08 | -1.12 | 0.362404 | 0.172741 | 0.675977 | 0.449252 |
| MmugDNA.14201.1.S1_at   | MmugDNA.14201.1 | 5.59  | 5.61  | 0.14 | 0.16 | -1.02 | 0.365212 | 0.422322 | 0.678084 | 0.645653 |
| MmugDNA.14202.1.S1_at   | MmugDNA.14202.1 | 6.61  | 6.52  | 0.3  | 0.09 | 1.06  | 0.227862 | 0.349836 | 0.585266 | 0.593595 |
| MmugDNA.14205.1.S1_at   | MmugDNA.14205.1 | 5.98  | 6.21  | 0.25 | 0.13 | -1.17 | 0.937414 | 0.3308   | 0.975858 | 0.579563 |
| MmugDNA.14207.1.S1_at   | MmugDNA.14207.1 | 5.17  | 4.92  | 0.44 | 0.21 | 1.19  | 0.315818 | 0.499348 | 0.646695 | 0.698217 |
| MmugDNA.14208.1.S1_at   | MmugDNA.14208.1 | 4.34  | 4.62  | 0.25 | 0.14 | -1.22 | 0.104512 | 0.104863 | 0.4646   | 0.366397 |
| MmugDNA.14212.1.S1_at   | MmugDNA.14212.1 | 6.06  | 6.14  | 0.25 | 0.15 | -1.06 | 0.172724 | 0.17891  | 0.536331 | 0.455241 |
| MmugDNA.14214.1.S1_at   | MmugDNA.14214.1 | 4.5   | 4.19  | 0.28 | 0.18 | 1.24  | 0.090194 | 0.164296 | 0.445655 | 0.440539 |
| MmugDNA.14215.1.S1_at   | MmugDNA.14215.1 | 7.89  | 8.74  | 0.17 | 0.29 | -1.8  | 0.017978 | 0.006725 | 0.268362 | 0.110963 |
| MmugDNA.14216.1.S1_at   | MmugDNA.14216.1 | 3.17  | 3.63  | 0.19 | 0.1  | -1.37 | 0.017126 | 0.031647 | 0.266906 | 0.220165 |
| MmugDNA.14217.1.S1_at   | MmugDNA.14217.1 | 5.79  | 5.66  | 0.1  | 0.27 | 1.09  | 0.885136 | 0.50392  | 0.95398  | 0.701193 |
| MmugDNA.14219.1.S1_at   | MmugDNA.14219.1 | 4.91  | 4.92  | 0.33 | 0.06 | -1.01 | 0.33195  | 0.37647  | 0.65656  | 0.614293 |
| MmugDNA.1422.1.S1_at    | MmugDNA.1422.1  | 3.1   | 2.97  | 0.09 | 0.08 | 1.1   | 0.135997 | 0.20579  | 0.502862 | 0.480072 |
| MmugDNA.14220.1.S1_s_at | MmugDNA.14220.1 | 5.28  | 5.38  | 0.11 | 0.15 | -1.07 | 0.534111 | 0.378857 | 0.778574 | 0.615818 |
| MmugDNA.14221.1.S1_at   | MmugDNA.14221.1 | 3.48  | 3.49  | 0.86 | 0.18 | -1    | 0.404584 | 0.305774 | 0.702825 | 0.562731 |
| MmugDNA.14222.1.S1_at   | MmugDNA.14222.1 | 3.55  | 3.74  | 0.13 | 0.18 | -1.14 | 0.105042 | 0.147721 | 0.465471 | 0.422007 |
| MmugDNA.14224.1.S1_at   | MmugDNA.14224.1 | 10.2  | 10.12 | 0.04 | 0.28 | 1.06  | 0.765247 | 0.517314 | 0.901238 | 0.709435 |
| MmugDNA.14225.1.S1_at   | MmugDNA.14225.1 | 3.33  | 3.42  | 0.06 | 0.13 | -1.07 | 0.38413  | 0.033738 | 0.689715 | 0.227376 |
| MmugDNA.14226.1.S1_at   | MmugDNA.14226.1 | 12.24 | 11.84 | 0.11 | 0.2  | 1.33  | 0.037894 | 0.027405 | 0.343205 | 0.206752 |
| MmugDNA.14228.1.S1_at   | MmugDNA.14228.1 | 5.24  | 5.27  | 0.19 | 0.12 | -1.02 | 0.380386 | 0.526829 | 0.687269 | 0.715627 |
| MmugDNA.14229.1.S1_at   | MmugDNA.14229.1 | 6.71  | 6.76  | 0.16 | 0.34 | -1.03 | 0.520379 | 0.181627 | 0.770745 | 0.458228 |
| MmugDNA.1423.1.S1_at    | MmugDNA.1423.1  | 4.96  | 4.9   | 0.26 | 0.2  | 1.04  | 0.93981  | 0.220971 | 0.977013 | 0.494389 |
| MmugDNA.14232.1.S1_at   | MmugDNA.14232.1 | 4.28  | 4.31  | 0.13 | 0.08 | -1.02 | 0.482255 | 0.656641 | 0.749398 | 0.799221 |
| MmugDNA.14235.1.S1_at   | MmugDNA.14235.1 | 9.08  | 9.31  | 0.59 | 0.72 | -1.17 | 0.348589 | 0.477049 | 0.667173 | 0.683188 |
| MmugDNA.14236.1.S1_at   | MmugDNA.14236.1 | 3.9   | 4.12  | 0    | 0.17 | -1.17 | 0.264868 | 0.158127 | 0.610599 | 0.433959 |
| MmugDNA.14237.1.S1_at   | MmugDNA.14237.1 | 6.36  | 6.35  | 0.1  | 0.13 | 1.01  | 0.852469 | 0.905406 | 0.940647 | 0.946384 |
| MmugDNA.14238.1.S1_at   | MmugDNA.14238.1 | 6.12  | 6.13  | 0.06 | 0.23 | -1.01 | 0.430707 | 0.432187 | 0.718237 | 0.652775 |
| MmugDNA.14239.1.S1_at   | MmugDNA.14239.1 | 6.27  | 6.49  | 0.04 | 0.11 | -1.17 | 0.018463 | 0.008445 | 0.270581 | 0.121922 |
| MmugDNA.14240.1.S1_at   | MmugDNA.14240.1 | 7.5   | 8.5   | 0.41 | 0.79 | -2    | 0.20316  | 0.205235 | 0.565831 | 0.479596 |
| MmugDNA.14241.1.S1_at   | MmugDNA.14241.1 | 5.21  | 5.04  | 0.08 | 0.12 | 1.13  | 0.299425 | 0.28647  | 0.634938 | 0.54785  |

|                         |                 |       |       |      |      |        |          |          |          |          |
|-------------------------|-----------------|-------|-------|------|------|--------|----------|----------|----------|----------|
| MmugDNA.14242.1.S1_at   | MmugDNA.14242.1 | 4.15  | 4.15  | 0.1  | 0.09 | 1      | 0.85612  | 0.178422 | 0.941848 | 0.454778 |
| MmugDNA.14244.1.S1_at   | MmugDNA.14244.1 | 11.36 | 11.39 | 0.1  | 0.16 | -1.02  | 0.391553 | 0.523323 | 0.694126 | 0.713653 |
| MmugDNA.4378.1.S1_s_at  | MmugDNA.4378.1  | 8.48  | 8.21  | 0.28 | 0.28 | 1.2    | 0.135108 | 0.161782 | 0.501995 | 0.437876 |
| MmugDNA.14247.1.S1_at   | MmugDNA.14247.1 | 8.18  | 8.23  | 0.18 | 0.13 | -1.03  | 0.566699 | 0.313362 | 0.797703 | 0.567811 |
| MmugDNA.14248.1.S1_at   | MmugDNA.14248.1 | 5.91  | 5.88  | 0.29 | 0.09 | 1.02   | 0.94949  | 0.84818  | 0.980798 | 0.913817 |
| MmugDNA.1425.1.S1_at    | MmugDNA.1425.1  | 11.77 | 11.68 | 0.25 | 1.7  | 1.06   | 0.407806 | 0.440056 | 0.704863 | 0.658651 |
| MmugDNA.14250.1.S1_at   | MmugDNA.14250.1 | 10.34 | 9.92  | 0.05 | 0.16 | 1.34   | 0.005705 | 0.001698 | 0.191956 | 0.062399 |
| MmugDNA.14251.1.S1_at   | MmugDNA.14251.1 | 3.57  | 3.45  | 0.06 | 0.15 | 1.09   | 0.375162 | 0.357729 | 0.684418 | 0.599352 |
| MmugDNA.14252.1.S1_at   | MmugDNA.14252.1 | 6.52  | 6.82  | 0.24 | 0.19 | -1.22  | 0.400712 | 0.135111 | 0.700264 | 0.407128 |
| MmugDNA.14254.1.S1_at   | MmugDNA.14254.1 | 7.24  | 7.27  | 0.07 | 0.16 | -1.02  | 0.701795 | 0.889026 | 0.868197 | 0.936779 |
| MmugDNA.14259.1.S1_at   | MmugDNA.14259.1 | 9.91  | 9.75  | 0.27 | 0.61 | 1.12   | 0.599604 | 0.199124 | 0.81465  | 0.473727 |
| MmugDNA.14262.1.S1_at   | MmugDNA.14262.1 | 4.82  | 4.89  | 0.11 | 0.08 | -1.05  | 0.444993 | 0.233574 | 0.72736  | 0.50492  |
| MmugDNA.14263.1.S1_at   | MmugDNA.14263.1 | 12.06 | 12.47 | 0.02 | 0.08 | -1.33  | 0.001195 | 0.001294 | 0.145267 | 0.055585 |
| MmugDNA.14264.1.S1_at   | MmugDNA.14264.1 | 3.05  | 3.08  | 0.15 | 0.04 | -1.02  | 0.90539  | 0.988691 | 0.962254 | 0.993595 |
| MmugDNA.14265.1.S1_at   | MmugDNA.14265.1 | 4.54  | 4.63  | 0.48 | 0.27 | -1.07  | 0.535103 | 0.594977 | 0.778933 | 0.758829 |
| MmugDNA.14266.1.S1_at   | MmugDNA.14266.1 | 9.35  | 9.65  | 0.13 | 0.38 | -1.24  | 0.523706 | 0.085959 | 0.77271  | 0.338116 |
| MmugDNA.14267.1.S1_at   | MmugDNA.14267.1 | 4.24  | 6.51  | 0.88 | 1.86 | -4.83  | 0.213206 | 0.249758 | 0.573477 | 0.518876 |
| MmugDNA.14269.1.S1_at   | MmugDNA.14269.1 | 3.77  | 3.42  | 0.06 | 0.27 | 1.28   | 0.250692 | 0.368551 | 0.600389 | 0.608079 |
| MmugDNA.1427.1.S1_at    | MmugDNA.1427.1  | 4.52  | 4.6   | 0.53 | 0.22 | -1.06  | 0.780203 | 0.7876   | 0.908487 | 0.877111 |
| MmugDNA.14270.1.S1_at   | MmugDNA.14270.1 | 3.11  | 2.94  | 0.47 | 0.13 | 1.13   | 0.192493 | 0.21693  | 0.555708 | 0.490566 |
| MmugDNA.14271.1.S1_at   | MmugDNA.14271.1 | 3.81  | 3.68  | 0.22 | 0.17 | 1.1    | 0.177287 | 0.221349 | 0.541344 | 0.494644 |
| MmugDNA.14273.1.S1_at   | MmugDNA.14273.1 | 4.95  | 4.93  | 0.14 | 0.06 | 1.01   | 0.888001 | 0.366891 | 0.955004 | 0.606566 |
| MmugDNA.14274.1.S1_at   | MmugDNA.14274.1 | 4.38  | 3.99  | 0.56 | 0.93 | 1.31   | 0.942984 | 0.768771 | 0.978331 | 0.865653 |
| MmugDNA.14275.1.S1_at   | MmugDNA.14275.1 | 3.41  | 3.27  | 0.43 | 0.07 | 1.11   | 0.226925 | 0.702074 | 0.584827 | 0.827304 |
| MmugDNA.14276.1.S1_at   | MmugDNA.14276.1 | 4.45  | 4.28  | 0.14 | 0.13 | 1.13   | 0.398505 | 0.275474 | 0.698752 | 0.539697 |
| MmugDNA.14277.1.S1_at   | MmugDNA.14277.1 | 4.55  | 6.66  | 0.75 | 1.92 | -4.29  | 0.248785 | 0.31088  | 0.599636 | 0.565881 |
| MmugDNA.14278.1.S1_at   | MmugDNA.14278.1 | 5.29  | 5.59  | 0.2  | 0.08 | -1.22  | 0.100212 | 0.079981 | 0.460868 | 0.327352 |
| MmugDNA.14279.1.S1_at   | MmugDNA.14279.1 | 5.02  | 5.33  | 0.42 | 0.65 | -1.24  | 0.25782  | 0.370391 | 0.605259 | 0.609478 |
| MmugDNA.1428.1.S1_at    | MmugDNA.1428.1  | 11.85 | 12.36 | 0.15 | 0.29 | -1.42  | 0.048029 | 0.054535 | 0.367582 | 0.279042 |
| MmugDNA.14280.1.S1_at   | MmugDNA.14280.1 | 12.42 | 10.91 | 0.38 | 0.82 | 2.86   | 0.036302 | 0.017826 | 0.339201 | 0.168645 |
| MmugDNA.14281.1.S1_at   | MmugDNA.14281.1 | 5.18  | 5.51  | 0.14 | 0.1  | -1.26  | 0.054132 | 0.0722   | 0.381661 | 0.31474  |
| MmugDNA.14281.1.S1_s_at | MmugDNA.14281.1 | 10.6  | 10.71 | 0.18 | 0.1  | -1.08  | 0.154141 | 0.196585 | 0.518659 | 0.471608 |
| MmugDNA.14283.1.S1_at   | MmugDNA.14283.1 | 4.76  | 9.34  | 1.93 | 3.1  | -23.91 | 0.352325 | 0.304646 | 0.669556 | 0.561859 |
| MmugDNA.14284.1.S1_at   | MmugDNA.14284.1 | 8.3   | 8.7   | 0.53 | 0.31 | -1.33  | 0.135018 | 0.01219  | 0.501995 | 0.14287  |
| MmugDNA.14286.1.S1_at   | MmugDNA.14286.1 | 11.9  | 12.29 | 0.21 | 0.35 | -1.31  | 0.135043 | 0.147267 | 0.501995 | 0.421464 |
| MmugDNA.14288.1.S1_at   | MmugDNA.14288.1 | 9.97  | 8.69  | 0.13 | 0.37 | 2.42   | 0.003446 | 0.000934 | 0.17833  | 0.048962 |
| MmugDNA.1429.1.S1_at    | MmugDNA.1429.1  | 11.18 | 11.42 | 0.15 | 0.24 | -1.18  | 0.128454 | 0.116467 | 0.494541 | 0.383671 |
| MmugDNA.14291.1.S1_at   | MmugDNA.14291.1 | 7.02  | 6.75  | 0.16 | 0.04 | 1.21   | 0.024966 | 0.015519 | 0.297322 | 0.158053 |
| MmugDNA.14292.1.S1_at   | MmugDNA.14292.1 | 7.7   | 7.17  | 0.29 | 0.42 | 1.45   | 0.132319 | 0.106007 | 0.498572 | 0.36838  |
| MmugDNA.14294.1.S1_at   | MmugDNA.14294.1 | 5.14  | 5.19  | 0.22 | 0.16 | -1.03  | 0.958879 | 0.960193 | 0.984371 | 0.977425 |
| MmugDNA.14295.1.S1_at   | MmugDNA.14295.1 | 5.81  | 5.59  | 0.42 | 0.18 | 1.16   | 0.908865 | 0.965603 | 0.963873 | 0.980751 |

|                         |                 |       |       |      |      |        |          |          |          |          |
|-------------------------|-----------------|-------|-------|------|------|--------|----------|----------|----------|----------|
| MmugDNA.14296.1.S1_at   | MmugDNA.14296.1 | 8.83  | 7.39  | 0.46 | 0.8  | 2.73   | 0.041022 | 0.026893 | 0.35051  | 0.205149 |
| MmugDNA.14299.1.S1_at   | MmugDNA.14299.1 | 10    | 10.08 | 0.17 | 0.11 | -1.06  | 0.201046 | 0.302126 | 0.563821 | 0.560071 |
| MmugDNA.143.1.S1_at     | MmugDNA.143.1   | 5.17  | 4.34  | 0.29 | 0.25 | 1.77   | 0.038014 | 0.026922 | 0.34335  | 0.205227 |
| MmugDNA.1430.1.S1_at    | MmugDNA.1430.1  | 5.07  | 5.11  | 0.12 | 0.07 | -1.02  | 0.192564 | 0.240463 | 0.555823 | 0.51108  |
| MmugDNA.14301.1.S1_at   | MmugDNA.14301.1 | 12.12 | 12.06 | 0.13 | 0.09 | 1.04   | 0.373327 | 0.467395 | 0.683245 | 0.677085 |
| MmugDNA.14302.1.S1_at   | MmugDNA.14302.1 | 9.81  | 10.16 | 0.07 | 0.34 | -1.27  | 0.180215 | 0.229237 | 0.544371 | 0.501527 |
| MmugDNA.14304.1.S1_x_at | MmugDNA.14304.1 | 3.02  | 3.17  | 0.04 | 0.03 | -1.11  | 0.008253 | 0.002038 | 0.216948 | 0.066885 |
| MmugDNA.14305.1.S1_at   | MmugDNA.14305.1 | 6.73  | 6.28  | 0.16 | 0.11 | 1.37   | 0.009301 | 0.004054 | 0.223832 | 0.090288 |
| MmugDNA.14309.1.S1_at   | MmugDNA.14309.1 | 9.51  | 10.17 | 0.48 | 0.39 | -1.58  | 0.109545 | 0.157162 | 0.470811 | 0.432616 |
| MmugDNA.1431.1.S1_at    | MmugDNA.1431.1  | 3.84  | 3.82  | 0.43 | 0.18 | 1.01   | 0.810993 | 0.94107  | 0.922916 | 0.966632 |
| MmugDNA.33663.1.S1_s_at | MmugDNA.33663.1 | 4.59  | 4.61  | 0.01 | 0.21 | -1.01  | 0.794292 | 0.561413 | 0.914561 | 0.737397 |
| MmugDNA.14311.1.S1_at   | MmugDNA.14311.1 | 5.44  | 5.42  | 0.09 | 0.14 | 1.01   | 0.977612 | 0.621315 | 0.991534 | 0.775946 |
| MmugDNA.14312.1.S1_at   | MmugDNA.14312.1 | 4.95  | 5.12  | 0.07 | 0.18 | -1.12  | 0.615267 | 0.836161 | 0.823342 | 0.9063   |
| MmugDNA.14313.1.S1_at   | MmugDNA.14313.1 | 7.37  | 7.51  | 0.74 | 0.88 | -1.1   | 0.613167 | 0.783186 | 0.822571 | 0.874547 |
| MmugDNA.14315.1.S1_at   | MmugDNA.14315.1 | 4.54  | 4.67  | 0.29 | 0.58 | -1.1   | 0.169096 | 0.190906 | 0.533399 | 0.466269 |
| MmugDNA.14316.1.S1_at   | MmugDNA.14316.1 | 5.13  | 5.28  | 0.07 | 0.17 | -1.11  | 0.143371 | 0.207666 | 0.510289 | 0.481906 |
| MmugDNA.14317.1.S1_at   | MmugDNA.14317.1 | 3.45  | 3.48  | 0.08 | 0.25 | -1.02  | 0.774139 | 0.901886 | 0.905037 | 0.944161 |
| MmugDNA.1432.1.S1_at    | MmugDNA.1432.1  | 5.54  | 6.72  | 1.57 | 1.05 | -2.26  | 0.934085 | 0.923623 | 0.974481 | 0.957057 |
| MmugDNA.14320.1.S1_at   | MmugDNA.14320.1 | 4.38  | 4.2   | 0.78 | 0.44 | 1.13   | 0.164989 | 0.274279 | 0.528905 | 0.538751 |
| MmugDNA.14321.1.S1_at   | MmugDNA.14321.1 | 7.87  | 7.87  | 0.15 | 0.75 | -1     | 0.384352 | 0.062717 | 0.689908 | 0.297117 |
| MmugDNA.14322.1.S1_at   | MmugDNA.14322.1 | 8.49  | 9.64  | 0.3  | 0.21 | -2.21  | 0.015247 | 0.015446 | 0.257698 | 0.157803 |
| MmugDNA.14323.1.S1_at   | MmugDNA.14323.1 | 3.19  | 3.21  | 0.16 | 0.07 | -1.02  | 0.838396 | 0.597005 | 0.934652 | 0.759993 |
| MmugDNA.14323.1.S1_s_at | MmugDNA.14323.1 | 3.8   | 3.84  | 0.31 | 0.04 | -1.03  | 0.356399 | 0.115745 | 0.671551 | 0.382814 |
| MmugDNA.14324.1.S1_at   | MmugDNA.14324.1 | 6.74  | 6.97  | 0.19 | 0.14 | -1.17  | 0.404391 | 0.10677  | 0.702662 | 0.369349 |
| MmugDNA.14325.1.S1_at   | MmugDNA.14325.1 | 5.22  | 5.18  | 0.7  | 0.48 | 1.02   | 0.933861 | 0.893542 | 0.974412 | 0.939277 |
| MmugDNA.14325.1.S1_x_at | MmugDNA.14325.1 | 6     | 6.14  | 0.91 | 0.61 | -1.1   | 0.605788 | 0.867898 | 0.818551 | 0.924973 |
| MmugDNA.14328.1.S1_at   | MmugDNA.14328.1 | 6.96  | 6.9   | 0.2  | 0.22 | 1.05   | 0.805088 | 0.70723  | 0.91994  | 0.830225 |
| MmugDNA.14330.1.S1_at   | MmugDNA.14330.1 | 8.05  | 7.86  | 0.33 | 0.27 | 1.14   | 0.161252 | 0.054475 | 0.526306 | 0.278959 |
| MmugDNA.14331.1.S1_at   | MmugDNA.14331.1 | 9.54  | 9.51  | 0.04 | 0.29 | 1.02   | 0.926462 | 0.445757 | 0.971724 | 0.662505 |
| MmugDNA.14332.1.S1_at   | MmugDNA.14332.1 | 4.73  | 4.59  | 0.25 | 0.1  | 1.1    | 0.540538 | 0.53207  | 0.781948 | 0.718995 |
| MmugDNA.14334.1.S1_at   | MmugDNA.14334.1 | 3.27  | 3.41  | 0.04 | 0.15 | -1.1   | 0.74373  | 0.209241 | 0.890194 | 0.48303  |
| MmugDNA.14336.1.S1_at   | MmugDNA.14336.1 | 5.44  | 11.11 | 2.27 | 3.41 | -50.83 | 0.358512 | 0.250485 | 0.673252 | 0.519391 |
| MmugDNA.14337.1.S1_at   | MmugDNA.14337.1 | 5.11  | 5.23  | 0.79 | 0.26 | -1.08  | 0.478075 | 0.532035 | 0.747094 | 0.718995 |
| MmugDNA.14339.1.S1_at   | MmugDNA.14339.1 | 8.08  | 8.69  | 0.69 | 0.97 | -1.52  | 0.922755 | 0.84247  | 0.970061 | 0.910315 |
| MmugDNA.1434.1.S1_at    | MmugDNA.1434.1  | 6.01  | 5.85  | 0.13 | 0.13 | 1.12   | 0.34227  | 0.669306 | 0.663129 | 0.806539 |
| MmugDNA.14340.1.S1_at   | MmugDNA.14340.1 | 10.09 | 10.35 | 0.1  | 0.12 | -1.2   | 0.021964 | 0.018661 | 0.28441  | 0.171716 |
| MmugDNA.14340.1.S1_s_at | MmugDNA.14340.1 | 8.96  | 9.45  | 0.07 | 0.11 | -1.41  | 0.001956 | 0.000216 | 0.155636 | 0.032385 |
| MmugDNA.14343.1.S1_at   | MmugDNA.14343.1 | 4.77  | 4.87  | 0.3  | 0.03 | -1.07  | 0.617076 | 0.393291 | 0.824489 | 0.626189 |
| MmugDNA.14344.1.S1_at   | MmugDNA.14344.1 | 5.93  | 5.93  | 0.26 | 0.21 | 1      | 0.646357 | 0.79913  | 0.840888 | 0.884363 |
| MmugDNA.14345.1.S1_at   | MmugDNA.14345.1 | 10.92 | 11.31 | 0.12 | 0.24 | -1.31  | 0.072548 | 0.067046 | 0.417185 | 0.304872 |
| MmugDNA.14345.1.S1_s_at | MmugDNA.14345.1 | 10.18 | 10.8  | 0.15 | 0.42 | -1.54  | 0.106819 | 0.106732 | 0.467551 | 0.369337 |

|                         |                 |       |       |      |      |       |          |          |          |          |
|-------------------------|-----------------|-------|-------|------|------|-------|----------|----------|----------|----------|
| MmugDNA.14346.1.S1_at   | MmugDNA.14346.1 | 6.67  | 6.23  | 1.22 | 0.22 | 1.36  | 0.396917 | 0.53629  | 0.697407 | 0.721629 |
| MmugDNA.14348.1.S1_at   | MmugDNA.14348.1 | 11.51 | 11.76 | 0.08 | 0.4  | -1.19 | 0.314321 | 0.408508 | 0.645738 | 0.635694 |
| MmugDNA.14349.1.S1_at   | MmugDNA.14349.1 | 7.9   | 7.94  | 0.19 | 0.78 | -1.03 | 0.906672 | 0.802809 | 0.962958 | 0.886441 |
| MmugDNA.1435.1.S1_at    | MmugDNA.1435.1  | 6.83  | 6.96  | 0.07 | 0.19 | -1.1  | 0.248456 | 0.25809  | 0.59929  | 0.525574 |
| MmugDNA.15990.1.S1_s_at | MmugDNA.15990.1 | 2.94  | 2.93  | 0.07 | 0.27 | 1.01  | 0.392497 | 0.554215 | 0.694657 | 0.733069 |
| MmugDNA.14354.1.S1_at   | MmugDNA.14354.1 | 2.89  | 2.9   | 0    | 0.11 | -1.01 | 0.795582 | 0.692017 | 0.915216 | 0.82091  |
| MmugDNA.14357.1.S1_at   | MmugDNA.14357.1 | 4.42  | 4.5   | 0.07 | 0.24 | -1.06 | 0.570783 | 0.238933 | 0.799645 | 0.509678 |
| MmugDNA.14358.1.S1_at   | MmugDNA.14358.1 | 4.66  | 4.6   | 0.27 | 0.05 | 1.04  | 0.532765 | 0.525232 | 0.777862 | 0.714809 |
| MmugDNA.1436.1.S1_at    | MmugDNA.1436.1  | 10.43 | 10.45 | 0.14 | 0.17 | -1.01 | 0.890531 | 0.97991  | 0.956227 | 0.989228 |
| MmugDNA.14360.1.S1_at   | MmugDNA.14360.1 | 11.56 | 11.38 | 0.17 | 0.25 | 1.13  | 0.180938 | 0.034103 | 0.54536  | 0.2286   |
| MmugDNA.14362.1.S1_at   | MmugDNA.14362.1 | 3.71  | 3.81  | 0.57 | 0.2  | -1.07 | 0.976341 | 0.895277 | 0.990829 | 0.940185 |
| MmugDNA.14363.1.S1_at   | MmugDNA.14363.1 | 6.23  | 6.53  | 0.16 | 0.44 | -1.23 | 0.39997  | 0.217058 | 0.699692 | 0.490668 |
| MmugDNA.14364.1.S1_at   | MmugDNA.14364.1 | 3.24  | 3.13  | 0.08 | 0.2  | 1.08  | 0.963746 | 0.117772 | 0.985982 | 0.385631 |
| MmugDNA.14365.1.S1_at   | MmugDNA.14365.1 | 8.94  | 9.22  | 0.17 | 0.1  | -1.22 | 0.114907 | 0.072365 | 0.478201 | 0.315164 |
| MmugDNA.14366.1.S1_at   | MmugDNA.14366.1 | 8.43  | 8.58  | 0.13 | 0.2  | -1.11 | 0.738417 | 0.256643 | 0.887676 | 0.524447 |
| MmugDNA.14367.1.S1_at   | MmugDNA.14367.1 | 8.61  | 6.1   | 0.31 | 1.14 | 5.7   | 0.025571 | 0.01504  | 0.299731 | 0.155766 |
| MmugDNA.14368.1.S1_at   | MmugDNA.14368.1 | 8.11  | 8.78  | 0.36 | 0.37 | -1.59 | 0.086794 | 0.060338 | 0.440475 | 0.292254 |
| MmugDNA.14369.1.S1_at   | MmugDNA.14369.1 | 3.46  | 3.54  | 0.23 | 0.08 | -1.06 | 0.777149 | 0.91446  | 0.906831 | 0.951914 |
| MmugDNA.1437.1.S1_at    | MmugDNA.1437.1  | 3.4   | 3.41  | 0.11 | 0.04 | -1.01 | 0.281881 | 0.494171 | 0.62238  | 0.694704 |
| MmugDNA.14371.1.S1_at   | MmugDNA.14371.1 | 10.73 | 10.11 | 0.25 | 0.57 | 1.53  | 0.10476  | 0.034149 | 0.465114 | 0.228692 |
| MmugDNA.14374.1.S1_at   | MmugDNA.14374.1 | 6.26  | 6.45  | 0.68 | 0.55 | -1.14 | 0.689294 | 0.568202 | 0.861496 | 0.741862 |
| MmugDNA.14376.1.S1_at   | MmugDNA.14376.1 | 6.58  | 7.28  | 0.18 | 0.27 | -1.62 | 0.04631  | 0.101984 | 0.363009 | 0.362058 |
| MmugDNA.14378.1.S1_at   | MmugDNA.14378.1 | 3.46  | 3.46  | 0.12 | 0.04 | -1    | 0.525537 | 0.731966 | 0.773765 | 0.844751 |
| MmugDNA.14379.1.S1_at   | MmugDNA.14379.1 | 3.58  | 3.57  | 0.07 | 0.09 | 1.01  | 0.491338 | 0.242336 | 0.755009 | 0.512793 |
| MmugDNA.14381.1.S1_at   | MmugDNA.14381.1 | 6.5   | 6.68  | 0.09 | 0.05 | -1.13 | 0.02769  | 0.020284 | 0.308669 | 0.178761 |
| MmugDNA.14381.1.S1_x_at | MmugDNA.14381.1 | 6.7   | 6.81  | 0    | 0.2  | -1.08 | 0.122546 | 0.05006  | 0.487757 | 0.268916 |
| MmugDNA.14383.1.S1_at   | MmugDNA.14383.1 | 2.66  | 2.63  | 0.32 | 0.07 | 1.02  | 0.420691 | 0.808086 | 0.712654 | 0.889507 |
| MmugDNA.14384.1.S1_at   | MmugDNA.14384.1 | 4.02  | 4.09  | 0.15 | 0.32 | -1.04 | 0.577314 | 0.779036 | 0.803468 | 0.871798 |
| MmugDNA.14386.1.S1_s_at | MmugDNA.14386.1 | 10.86 | 11.08 | 0.28 | 0.76 | -1.17 | 0.68836  | 0.693731 | 0.860959 | 0.8219   |
| MmugDNA.14389.1.S1_at   | MmugDNA.14389.1 | 11.38 | 11.27 | 0.06 | 0.15 | 1.08  | 0.332949 | 0.042203 | 0.657205 | 0.24989  |
| MmugDNA.1439.1.S1_at    | MmugDNA.1439.1  | 7.93  | 7.98  | 0.34 | 0.49 | -1.04 | 0.728654 | 0.904767 | 0.88208  | 0.946059 |
| MmugDNA.14390.1.S1_at   | MmugDNA.14390.1 | 3.59  | 4.03  | 0.3  | 0.19 | -1.36 | 0.482642 | 0.385647 | 0.749437 | 0.621079 |
| MmugDNA.14391.1.S1_at   | MmugDNA.14391.1 | 4.58  | 4.66  | 0.22 | 0.09 | -1.06 | 0.771449 | 0.96634  | 0.903845 | 0.981226 |
| MmugDNA.14392.1.S1_at   | MmugDNA.14392.1 | 11.87 | 11.93 | 0.46 | 0.17 | -1.04 | 0.723774 | 0.529306 | 0.879238 | 0.717233 |
| MmugDNA.14393.1.S1_at   | MmugDNA.14393.1 | 10.17 | 10.45 | 0.01 | 0.19 | -1.21 | 0.052127 | 0.039093 | 0.376989 | 0.242995 |
| MmugDNA.14395.1.S1_at   | MmugDNA.14395.1 | 6.04  | 5.99  | 0.1  | 0.01 | 1.03  | 0.873278 | 0.277733 | 0.94924  | 0.541648 |
| MmugDNA.14397.1.S1_at   | MmugDNA.14397.1 | 3.66  | 3.88  | 0.24 | 0.16 | -1.16 | 0.693728 | 0.310782 | 0.864197 | 0.565832 |
| MmugDNA.11784.1.S1_s_at | MmugDNA.11784.1 | 5.28  | 5     | 0.16 | 0.28 | 1.21  | 0.11471  | 0.180516 | 0.478025 | 0.457128 |
| MmugDNA.14399.1.S1_at   | MmugDNA.14399.1 | 6.16  | 6.06  | 0.06 | 0.06 | 1.08  | 0.082506 | 0.186375 | 0.434069 | 0.46221  |
| MmugDNA.1440.1.S1_at    | MmugDNA.1440.1  | 4.98  | 4.94  | 0.33 | 0.12 | 1.03  | 0.464272 | 0.29415  | 0.739156 | 0.553962 |
| MmugDNA.14402.1.S1_at   | MmugDNA.14402.1 | 6.77  | 6.71  | 0.08 | 0.62 | 1.05  | 0.70765  | 0.89003  | 0.871175 | 0.937384 |

|                         |                 |       |       |      |      |        |          |          |          |          |
|-------------------------|-----------------|-------|-------|------|------|--------|----------|----------|----------|----------|
| MmugDNA.14403.1.S1_at   | MmugDNA.14403.1 | 5.32  | 5.34  | 0.42 | 0.22 | -1.01  | 0.827408 | 0.611192 | 0.92997  | 0.769136 |
| MmugDNA.14405.1.S1_at   | MmugDNA.14405.1 | 2.99  | 3.02  | 0.04 | 0.11 | -1.02  | 0.231943 | 0.465996 | 0.587671 | 0.676077 |
| MmugDNA.14406.1.S1_at   | MmugDNA.14406.1 | 3.37  | 3.42  | 0.25 | 0.23 | -1.03  | 0.494527 | 0.638046 | 0.756791 | 0.787332 |
| MmugDNA.14409.1.S1_at   | MmugDNA.14409.1 | 7.07  | 7.19  | 0.46 | 0.88 | -1.08  | 0.832996 | 0.273213 | 0.93227  | 0.537788 |
| MmugDNA.1441.1.S1_at    | MmugDNA.1441.1  | 11.92 | 11.99 | 0.18 | 0.09 | -1.06  | 0.46648  | 0.38053  | 0.740215 | 0.617172 |
| MmugDNA.14411.1.S1_at   | MmugDNA.14411.1 | 4.02  | 4.43  | 0.25 | 0.15 | -1.32  | 0.212928 | 0.236965 | 0.573342 | 0.507675 |
| MmugDNA.14413.1.S1_at   | MmugDNA.14413.1 | 5.85  | 5.82  | 0.04 | 0.07 | 1.02   | 0.240341 | 0.293759 | 0.593146 | 0.553758 |
| MmugDNA.14414.1.S1_at   | MmugDNA.14414.1 | 4.55  | 4.38  | 0    | 0.18 | 1.12   | 0.593034 | 0.718956 | 0.811221 | 0.83732  |
| MmugDNA.14415.1.S1_at   | MmugDNA.14415.1 | 3.4   | 3.51  | 0.14 | 0.24 | -1.08  | 0.339645 | 0.478894 | 0.661347 | 0.684774 |
| MmugDNA.14417.1.S1_at   | MmugDNA.14417.1 | 3.57  | 3.62  | 0.02 | 0.04 | -1.03  | 0.329757 | 0.012417 | 0.655349 | 0.144079 |
| MmugDNA.14418.1.S1_at   | MmugDNA.14418.1 | 5.99  | 6.56  | 0.16 | 0.38 | -1.48  | 0.258928 | 0.354105 | 0.606156 | 0.597048 |
| MmugDNA.14419.1.S1_at   | MmugDNA.14419.1 | 3.57  | 3.44  | 0.09 | 0.07 | 1.1    | 0.098181 | 0.138654 | 0.457619 | 0.411705 |
| MmugDNA.1442.1.S1_at    | MmugDNA.1442.1  | 3.87  | 3.49  | 0.21 | 0.17 | 1.31   | 0.211801 | 0.016897 | 0.572347 | 0.164869 |
| MmugDNA.14420.1.S1_at   | MmugDNA.14420.1 | 6.35  | 5.87  | 0.5  | 0.79 | 1.39   | 0.961931 | 0.039345 | 0.985417 | 0.243406 |
| MmugDNA.14421.1.S1_at   | MmugDNA.14421.1 | 7.34  | 6.61  | 0.05 | 0.78 | 1.66   | 0.569557 | 0.749853 | 0.799087 | 0.854631 |
| MmugDNA.14422.1.S1_at   | MmugDNA.14422.1 | 3.69  | 3.77  | 0.09 | 0.15 | -1.06  | 0.564053 | 0.321982 | 0.796391 | 0.57358  |
| MmugDNA.14423.1.S1_at   | MmugDNA.14423.1 | 8.12  | 8.05  | 0.1  | 0.6  | 1.05   | 0.457958 | 0.625008 | 0.735139 | 0.778973 |
| MmugDNA.14424.1.S1_at   | MmugDNA.14424.1 | 3.93  | 3.9   | 0.27 | 0.18 | 1.02   | 0.686796 | 0.869778 | 0.859938 | 0.926118 |
| MmugDNA.14425.1.S1_at   | MmugDNA.14425.1 | 5.07  | 4.56  | 0.58 | 0.15 | 1.42   | 0.21836  | 0.335869 | 0.577884 | 0.583533 |
| MmugDNA.14426.1.S1_at   | MmugDNA.14426.1 | 5.49  | 5.08  | 0.41 | 0.48 | 1.33   | 0.340241 | 0.30123  | 0.661654 | 0.559356 |
| MmugDNA.14427.1.S1_at   | MmugDNA.14427.1 | 5.16  | 5.21  | 0.1  | 0.12 | -1.03  | 0.331629 | 0.440901 | 0.656441 | 0.659138 |
| MmugDNA.14428.1.S1_s_at | MmugDNA.14428.1 | 8.2   | 9.69  | 0.25 | 0.26 | -2.8   | 0.001484 | 0.000237 | 0.150888 | 0.03241  |
| MmugDNA.14429.1.S1_at   | MmugDNA.14429.1 | 5.11  | 5     | 0.08 | 0.3  | 1.08   | 0.185042 | 0.397215 | 0.548475 | 0.628763 |
| MmugDNA.1443.1.S1_at    | MmugDNA.1443.1  | 4.8   | 4.53  | 0.23 | 0.1  | 1.21   | 0.252733 | 0.054034 | 0.60151  | 0.277914 |
| MmugDNA.14430.1.S1_at   | MmugDNA.14430.1 | 5.42  | 4.97  | 0.91 | 0.95 | 1.37   | 0.41328  | 0.557057 | 0.70838  | 0.73493  |
| MmugDNA.14431.1.S1_at   | MmugDNA.14431.1 | 6.69  | 7.01  | 0.05 | 0.12 | -1.24  | 0.01911  | 0.011121 | 0.273018 | 0.137271 |
| MmugDNA.14432.1.S1_at   | MmugDNA.14432.1 | 3.7   | 3.68  | 0.13 | 0.1  | 1.02   | 0.6656   | 0.031848 | 0.850023 | 0.220909 |
| MmugDNA.14433.1.S1_at   | MmugDNA.14433.1 | 6.78  | 6.57  | 1.04 | 0.47 | 1.15   | 0.178192 | 0.215554 | 0.542428 | 0.489297 |
| MmugDNA.14434.1.S1_at   | MmugDNA.14434.1 | 11.81 | 12.05 | 0.07 | 0.13 | -1.18  | 0.043756 | 0.026857 | 0.357051 | 0.205049 |
| MmugDNA.14435.1.S1_at   | MmugDNA.14435.1 | 6.04  | 5.69  | 0.29 | 0.13 | 1.27   | 0.044311 | 0.002352 | 0.358414 | 0.07161  |
| MmugDNA.14436.1.S1_at   | MmugDNA.14436.1 | 6.04  | 4.99  | 0.87 | 0.54 | 2.08   | 0.429463 | 0.289847 | 0.717559 | 0.550831 |
| MmugDNA.14437.1.S1_at   | MmugDNA.14437.1 | 12.84 | 12.79 | 0.09 | 0.11 | 1.03   | 0.278324 | 0.179792 | 0.6205   | 0.456321 |
| MmugDNA.14439.1.S1_at   | MmugDNA.14439.1 | 4.67  | 4.94  | 0.25 | 0.04 | -1.21  | 0.042781 | 0.044677 | 0.355382 | 0.255776 |
| MmugDNA.1444.1.S1_s_at  | MmugDNA.1444.1  | 9.97  | 10.08 | 0.1  | 0.47 | -1.08  | 0.313582 | 0.333954 | 0.645195 | 0.582063 |
| MmugDNA.14441.1.S1_at   | MmugDNA.14441.1 | 5.01  | 4.69  | 0.69 | 0.12 | 1.25   | 0.153685 | 0.232212 | 0.518246 | 0.503916 |
| MmugDNA.14442.1.S1_at   | MmugDNA.14442.1 | 5.25  | 4.83  | 0.43 | 0.15 | 1.34   | 0.248544 | 0.340893 | 0.59931  | 0.587035 |
| MmugDNA.14444.1.S1_at   | MmugDNA.14444.1 | 5.03  | 4.78  | 0.2  | 0.03 | 1.19   | 0.11099  | 0.130914 | 0.472842 | 0.403037 |
| MmugDNA.14445.1.S1_at   | MmugDNA.14445.1 | 7.02  | 11.77 | 2.29 | 2.94 | -26.91 | 0.369193 | 0.319564 | 0.680594 | 0.571875 |
| MmugDNA.14446.1.S1_at   | MmugDNA.14446.1 | 4.43  | 4.42  | 0.12 | 0.06 | 1      | 0.441532 | 0.673385 | 0.724962 | 0.809168 |
| MmugDNA.14447.1.S1_at   | MmugDNA.14447.1 | 4.64  | 4.38  | 0.23 | 0.6  | 1.19   | 0.719635 | 0.664369 | 0.877044 | 0.803354 |
| MmugDNA.14448.1.S1_at   | MmugDNA.14448.1 | 4.65  | 3.49  | 0.64 | 0.19 | 2.23   | 0.14949  | 0.073168 | 0.514055 | 0.316064 |

|                         |                 |       |       |      |      |       |          |          |          |          |
|-------------------------|-----------------|-------|-------|------|------|-------|----------|----------|----------|----------|
| MmugDNA.14449.1.S1_at   | MmugDNA.14449.1 | 5.82  | 5.61  | 0.24 | 0.07 | 1.15  | 0.492038 | 0.683821 | 0.755423 | 0.815571 |
| MmugDNA.1445.1.S1_at    | MmugDNA.1445.1  | 3.33  | 2.92  | 0.93 | 0.14 | 1.32  | 0.224054 | 0.239332 | 0.582526 | 0.510029 |
| MmugDNA.14450.1.S1_at   | MmugDNA.14450.1 | 5.35  | 5.32  | 0.38 | 0.07 | 1.02  | 0.833588 | 0.635361 | 0.932352 | 0.785362 |
| MmugDNA.14451.1.S1_at   | MmugDNA.14451.1 | 4.21  | 4.23  | 0.18 | 0.07 | -1.01 | 0.890445 | 0.982494 | 0.956183 | 0.99036  |
| MmugDNA.14452.1.S1_at   | MmugDNA.14452.1 | 7.65  | 5.76  | 0.36 | 0.3  | 3.72  | 0.00344  | 0.001306 | 0.17833  | 0.055656 |
| MmugDNA.14454.1.S1_at   | MmugDNA.14454.1 | 4.9   | 4.98  | 0.09 | 0.26 | -1.06 | 0.517933 | 0.348028 | 0.76914  | 0.59222  |
| MmugDNA.14457.1.S1_at   | MmugDNA.14457.1 | 5.97  | 5.97  | 0.36 | 0.54 | 1.01  | 0.238872 | 0.216597 | 0.59202  | 0.490237 |
| MmugDNA.1446.1.S1_at    | MmugDNA.1446.1  | 4.15  | 4.47  | 0.07 | 0.24 | -1.24 | 0.182616 | 0.193659 | 0.546814 | 0.468785 |
| MmugDNA.14460.1.S1_at   | MmugDNA.14460.1 | 12.34 | 12.18 | 0.06 | 0.25 | 1.12  | 0.421751 | 0.091475 | 0.713215 | 0.346505 |
| MmugDNA.14462.1.S1_at   | MmugDNA.14462.1 | 12.73 | 12.45 | 0.31 | 0.67 | 1.22  | 0.82738  | 0.277959 | 0.92997  | 0.541664 |
| MmugDNA.14466.1.S1_at   | MmugDNA.14466.1 | 4.45  | 4.53  | 0.08 | 0.19 | -1.05 | 0.795708 | 0.310036 | 0.915229 | 0.565253 |
| MmugDNA.14467.1.S1_at   | MmugDNA.14467.1 | 4.16  | 4.09  | 0.52 | 0.06 | 1.05  | 0.253173 | 0.280859 | 0.60185  | 0.544047 |
| MmugDNA.14468.1.S1_at   | MmugDNA.14468.1 | 5.82  | 5.88  | 0.14 | 0.09 | -1.04 | 0.564923 | 0.353839 | 0.796834 | 0.596845 |
| MmugDNA.14469.1.S1_at   | MmugDNA.14469.1 | 5.53  | 5.4   | 0.2  | 0.13 | 1.09  | 0.283011 | 0.333817 | 0.623159 | 0.581974 |
| MmugDNA.1447.1.S1_at    | MmugDNA.1447.1  | 7.83  | 8.18  | 0.14 | 0.16 | -1.27 | 0.158852 | 0.186605 | 0.524071 | 0.462401 |
| MmugDNA.14470.1.S1_at   | MmugDNA.14470.1 | 5.96  | 6.26  | 0.17 | 0.2  | -1.23 | 0.152649 | 0.202612 | 0.517325 | 0.477003 |
| MmugDNA.14471.1.S1_at   | MmugDNA.14471.1 | 3.56  | 3.9   | 0.11 | 0.05 | -1.27 | 0.013864 | 0.006416 | 0.249758 | 0.108813 |
| MmugDNA.14472.1.S1_at   | MmugDNA.14472.1 | 5.21  | 5.3   | 0.25 | 0.04 | -1.06 | 0.903943 | 0.983323 | 0.961585 | 0.990726 |
| MmugDNA.14473.1.S1_at   | MmugDNA.14473.1 | 5.57  | 5.52  | 0.02 | 0.24 | 1.03  | 0.649846 | 0.817653 | 0.842533 | 0.894802 |
| MmugDNA.14474.1.S1_s_at | MmugDNA.14474.1 | 6.71  | 6.73  | 0.22 | 0.15 | -1.02 | 0.933897 | 0.625411 | 0.974429 | 0.779175 |
| MmugDNA.14475.1.S1_at   | MmugDNA.14475.1 | 5.38  | 5.33  | 0.15 | 0.19 | 1.04  | 0.999138 | 0.977153 | 0.99976  | 0.987577 |
| MmugDNA.14476.1.S1_s_at | MmugDNA.14476.1 | 5.88  | 6.04  | 0.23 | 0.07 | -1.12 | 0.597245 | 0.772294 | 0.813431 | 0.867651 |
| MmugDNA.14477.1.S1_at   | MmugDNA.14477.1 | 4.61  | 3.48  | 0.6  | 0.13 | 2.18  | 0.048069 | 0.02671  | 0.367642 | 0.204348 |
| MmugDNA.14478.1.S1_at   | MmugDNA.14478.1 | 9.15  | 7.13  | 0.23 | 0.39 | 4.07  | 0.001671 | 0.001238 | 0.15365  | 0.05478  |
| MmugDNA.14479.1.S1_at   | MmugDNA.14479.1 | 8.88  | 8.72  | 0.43 | 0.62 | 1.12  | 0.777354 | 0.017964 | 0.906952 | 0.169043 |
| MmugDNA.1448.1.S1_s_at  | MmugDNA.1448.1  | 8.12  | 7.71  | 0.12 | 0.05 | 1.33  | 0.005269 | 0.008066 | 0.191107 | 0.119402 |
| MmugDNA.14481.1.S1_at   | MmugDNA.14481.1 | 4.72  | 4.85  | 0.15 | 0.14 | -1.09 | 0.327973 | 0.359067 | 0.654202 | 0.600433 |
| MmugDNA.14482.1.S1_at   | MmugDNA.14482.1 | 11.61 | 11.76 | 0.06 | 0.03 | -1.12 | 0.013276 | 0.000454 | 0.246471 | 0.038572 |
| MmugDNA.14485.1.S1_at   | MmugDNA.14485.1 | 8.09  | 7.91  | 0.66 | 0.83 | 1.13  | 0.91308  | 0.687778 | 0.965594 | 0.817671 |
| MmugDNA.14486.1.S1_at   | MmugDNA.14486.1 | 11.92 | 12.81 | 0.35 | 0.15 | -1.86 | 0.00981  | 0.004707 | 0.226445 | 0.095489 |
| MmugDNA.14487.1.S1_at   | MmugDNA.14487.1 | 9.86  | 9.96  | 0.08 | 0.12 | -1.07 | 0.515743 | 0.005795 | 0.767629 | 0.104597 |
| MmugDNA.14488.1.S1_at   | MmugDNA.14488.1 | 10.59 | 8.58  | 0.21 | 0.26 | 4.03  | 0.000391 | 0.000056 | 0.12978  | 0.025666 |
| MmugDNA.14489.1.S1_at   | MmugDNA.14489.1 | 8.16  | 8.29  | 0.41 | 0.49 | -1.09 | 0.994737 | 0.954932 | 0.998151 | 0.974471 |
| MmugDNA.1449.1.S1_at    | MmugDNA.1449.1  | 8.1   | 8.31  | 0.21 | 0.09 | -1.15 | 0.21581  | 0.164691 | 0.575954 | 0.441008 |
| MmugDNA.14490.1.S1_at   | MmugDNA.14490.1 | 3.38  | 3.46  | 0.05 | 0.16 | -1.06 | 0.357674 | 0.207024 | 0.672516 | 0.481115 |
| MmugDNA.14491.1.S1_at   | MmugDNA.14491.1 | 5.56  | 5.69  | 0.01 | 0.12 | -1.09 | 0.183868 | 0.279847 | 0.547947 | 0.543321 |
| MmugDNA.14492.1.S1_at   | MmugDNA.14492.1 | 6.8   | 6.96  | 0.21 | 0.16 | -1.12 | 0.182105 | 0.288619 | 0.546458 | 0.549827 |
| MmugDNA.14493.1.S1_at   | MmugDNA.14493.1 | 8.73  | 8.13  | 1.44 | 1.2  | 1.51  | 0.529841 | 0.619506 | 0.776323 | 0.774712 |
| MmugDNA.14494.1.S1_at   | MmugDNA.14494.1 | 4.02  | 3.63  | 0.97 | 0.35 | 1.31  | 0.200501 | 0.180908 | 0.563327 | 0.457397 |
| MmugDNA.14495.1.S1_at   | MmugDNA.14495.1 | 4.32  | 4.37  | 0.14 | 0.08 | -1.03 | 0.178711 | 0.56252  | 0.543002 | 0.738055 |
| MmugDNA.14496.1.S1_at   | MmugDNA.14496.1 | 4     | 4.09  | 0.2  | 0.09 | -1.06 | 0.82105  | 0.86211  | 0.92718  | 0.921635 |



|                         |                 |       |       |      |      |       |          |          |          |          |
|-------------------------|-----------------|-------|-------|------|------|-------|----------|----------|----------|----------|
| MmugDNA.14497.1.S1_at   | MmugDNA.14497.1 | 4.14  | 4.13  | 0.05 | 0.28 | 1.01  | 0.368669 | 0.459414 | 0.680126 | 0.671741 |
| MmugDNA.14498.1.S1_at   | MmugDNA.14498.1 | 7.03  | 7.12  | 0.1  | 0.31 | -1.06 | 0.46764  | 0.676627 | 0.740772 | 0.811009 |
| MmugDNA.145.1.S1_at     | MmugDNA.145.1   | 5.99  | 6.05  | 0.14 | 0.05 | -1.04 | 0.206939 | 0.208893 | 0.56893  | 0.482717 |
| MmugDNA.14500.1.S1_at   | MmugDNA.14500.1 | 5.69  | 5.69  | 0.06 | 0.09 | -1    | 0.989567 | 0.985392 | 0.996281 | 0.991752 |
| MmugDNA.14504.1.S1_at   | MmugDNA.14504.1 | 7.86  | 8     | 0.58 | 0.32 | -1.11 | 0.16041  | 0.187975 | 0.525374 | 0.464078 |
| MmugDNA.14509.1.S1_at   | MmugDNA.14509.1 | 3.68  | 3.66  | 0.08 | 0.14 | 1.02  | 0.924712 | 0.401756 | 0.970882 | 0.631068 |
| MmugDNA.1451.1.S1_at    | MmugDNA.1451.1  | 10.58 | 10.64 | 0.21 | 0.37 | -1.05 | 0.768727 | 0.892935 | 0.902722 | 0.938954 |
| MmugDNA.14510.1.S1_at   | MmugDNA.14510.1 | 6.74  | 6.55  | 0.29 | 0.15 | 1.14  | 0.61587  | 0.074121 | 0.823818 | 0.317794 |
| MmugDNA.14534.1.S1_s_at | MmugDNA.14534.1 | 6.02  | 6.1   | 0.24 | 0.31 | -1.06 | 0.616369 | 0.661106 | 0.824152 | 0.801683 |
| MmugDNA.14512.1.S1_at   | MmugDNA.14512.1 | 3.44  | 3.63  | 0.18 | 0.21 | -1.14 | 0.32067  | 0.091223 | 0.64956  | 0.346173 |
| MmugDNA.14513.1.S1_at   | MmugDNA.14513.1 | 6.98  | 6.98  | 0.06 | 0.07 | 1     | 0.580141 | 0.818899 | 0.804451 | 0.895647 |
| MmugDNA.14514.1.S1_at   | MmugDNA.14514.1 | 4.36  | 4.35  | 0.21 | 0.09 | 1.01  | 0.704356 | 0.313863 | 0.869588 | 0.568094 |
| MmugDNA.14515.1.S1_at   | MmugDNA.14515.1 | 2.95  | 2.97  | 0.35 | 0.11 | -1.01 | 0.850785 | 0.860906 | 0.940051 | 0.920825 |
| MmugDNA.14517.1.S1_at   | MmugDNA.14517.1 | 9.85  | 10.28 | 0.32 | 0.08 | -1.34 | 0.252654 | 0.183294 | 0.60145  | 0.459553 |
| MmugDNA.14518.1.S1_at   | MmugDNA.14518.1 | 7.28  | 6.89  | 0.64 | 0.38 | 1.3   | 0.659066 | 0.835962 | 0.846922 | 0.906135 |
| MmugDNA.14519.1.S1_s_at | MmugDNA.14519.1 | 5.83  | 6.06  | 0.41 | 0.74 | -1.18 | 0.685043 | 0.454332 | 0.858887 | 0.66853  |
| MmugDNA.1452.1.S1_at    | MmugDNA.1452.1  | 5.42  | 5.46  | 0.01 | 0.03 | -1.03 | 0.099778 | 0.119588 | 0.459718 | 0.388247 |
| MmugDNA.14522.1.S1_at   | MmugDNA.14522.1 | 3.5   | 3.44  | 0.24 | 0.15 | 1.04  | 0.800484 | 0.441616 | 0.917654 | 0.659754 |
| MmugDNA.14523.1.S1_at   | MmugDNA.14523.1 | 8.2   | 9.18  | 0.26 | 0.56 | -1.98 | 0.155779 | 0.188779 | 0.520384 | 0.464761 |
| MmugDNA.14524.1.S1_at   | MmugDNA.14524.1 | 10.33 | 9.09  | 0.29 | 1.3  | 2.36  | 0.315058 | 0.44283  | 0.646316 | 0.660759 |
| MmugDNA.14524.1.S1_x_at | MmugDNA.14524.1 | 9.91  | 8.35  | 0.23 | 1.32 | 2.96  | 0.288271 | 0.407845 | 0.626514 | 0.635242 |
| MmugDNA.14525.1.S1_at   | MmugDNA.14525.1 | 10.81 | 10.09 | 0.27 | 0.26 | 1.65  | 0.029338 | 0.005812 | 0.313768 | 0.104646 |
| MmugDNA.14526.1.S1_at   | MmugDNA.14526.1 | 3.64  | 3.63  | 0.04 | 0.12 | 1.01  | 0.62241  | 0.14132  | 0.827386 | 0.414874 |
| MmugDNA.14528.1.S1_s_at | MmugDNA.14528.1 | 13.17 | 12.98 | 0.11 | 0.31 | 1.14  | 0.59926  | 0.197784 | 0.814555 | 0.472721 |
| MmugDNA.14529.1.S1_at   | MmugDNA.14529.1 | 6.25  | 6.25  | 0.2  | 0.12 | 1     | 0.419174 | 0.411699 | 0.711691 | 0.638422 |
| MmugDNA.14533.1.S1_at   | MmugDNA.14533.1 | 3.21  | 3.34  | 0.39 | 0.17 | -1.09 | 0.888883 | 0.755361 | 0.955505 | 0.857558 |
| MmugDNA.14535.1.S1_s_at | MmugDNA.14535.1 | 5.98  | 5.97  | 0.15 | 0.11 | 1     | 0.966045 | 0.927803 | 0.987096 | 0.959005 |
| MmugDNA.14536.1.S1_at   | MmugDNA.14536.1 | 5.5   | 4.92  | 0.5  | 0.31 | 1.49  | 0.187552 | 0.224722 | 0.550528 | 0.497614 |
| MmugDNA.14537.1.S1_s_at | MmugDNA.14537.1 | 8.25  | 6.43  | 0.84 | 0.22 | 3.53  | 0.020092 | 0.009836 | 0.27674  | 0.130274 |
| MmugDNA.14538.1.S1_at   | MmugDNA.14538.1 | 5.32  | 5.46  | 0.26 | 0.06 | -1.1  | 0.317607 | 0.135448 | 0.648004 | 0.407535 |
| MmugDNA.14539.1.S1_at   | MmugDNA.14539.1 | 10.43 | 11.42 | 0.24 | 0.43 | -2    | 0.01432  | 0.008153 | 0.251885 | 0.119754 |
| MmugDNA.14540.1.S1_s_at | MmugDNA.14540.1 | 11.86 | 11.98 | 0.08 | 0.23 | -1.09 | 0.337297 | 0.431594 | 0.659871 | 0.652439 |
| MmugDNA.14541.1.S1_at   | MmugDNA.14541.1 | 10.93 | 11.49 | 0.07 | 0.37 | -1.48 | 0.024162 | 0.018953 | 0.294535 | 0.173197 |
| MmugDNA.14542.1.S1_at   | MmugDNA.14542.1 | 5.37  | 5.2   | 0.39 | 0.47 | 1.12  | 0.774995 | 0.630892 | 0.905462 | 0.782527 |
| MmugDNA.14545.1.S1_at   | MmugDNA.14545.1 | 5.86  | 5.42  | 0.36 | 0.09 | 1.35  | 0.146538 | 0.123924 | 0.512668 | 0.394201 |
| MmugDNA.14547.1.S1_at   | MmugDNA.14547.1 | 4.9   | 4.04  | 0.87 | 0.79 | 1.81  | 0.135153 | 0.167332 | 0.501995 | 0.443785 |
| MmugDNA.14548.1.S1_at   | MmugDNA.14548.1 | 5.44  | 5.29  | 0.6  | 0.25 | 1.11  | 0.408096 | 0.468075 | 0.70497  | 0.677568 |
| MmugDNA.14549.1.S1_at   | MmugDNA.14549.1 | 3.48  | 3.46  | 0.17 | 0.11 | 1.01  | 0.300202 | 0.620769 | 0.635545 | 0.775593 |
| MmugDNA.1455.1.S1_at    | MmugDNA.1455.1  | 4.83  | 4.74  | 0.01 | 0.33 | 1.07  | 0.616256 | 0.775456 | 0.824102 | 0.869338 |
| MmugDNA.14550.1.S1_at   | MmugDNA.14550.1 | 5.55  | 5.58  | 0.19 | 0.44 | -1.02 | 0.614437 | 0.802515 | 0.823199 | 0.88629  |
| MmugDNA.14552.1.S1_at   | MmugDNA.14552.1 | 6.04  | 6.06  | 0.1  | 0.11 | -1.02 | 0.956248 | 0.259903 | 0.983483 | 0.52675  |

|                         |                 |       |       |      |      |       |          |          |          |          |
|-------------------------|-----------------|-------|-------|------|------|-------|----------|----------|----------|----------|
| MmugDNA.14553.1.S1_at   | MmugDNA.14553.1 | 4.24  | 4.12  | 0.2  | 0.03 | 1.09  | 0.937045 | 0.679726 | 0.975769 | 0.812998 |
| MmugDNA.14554.1.S1_at   | MmugDNA.14554.1 | 6.25  | 6.87  | 0.07 | 0.19 | -1.54 | 0.003661 | 0.089543 | 0.179515 | 0.343811 |
| MmugDNA.14556.1.S1_at   | MmugDNA.14556.1 | 3.63  | 3.53  | 0.07 | 0.38 | 1.07  | 0.689403 | 0.867017 | 0.861525 | 0.924444 |
| MmugDNA.14557.1.S1_at   | MmugDNA.14557.1 | 10.17 | 10.14 | 0.24 | 0.34 | 1.02  | 0.496353 | 0.08254  | 0.757473 | 0.331672 |
| MmugDNA.14559.1.S1_at   | MmugDNA.14559.1 | 3.58  | 3.58  | 0.18 | 0.11 | 1     | 0.241664 | 0.662739 | 0.593941 | 0.802558 |
| MmugDNA.14560.1.S1_at   | MmugDNA.14560.1 | 7.4   | 6.41  | 0.27 | 0.28 | 1.98  | 0.009563 | 0.012502 | 0.226235 | 0.144302 |
| MmugDNA.14561.1.S1_at   | MmugDNA.14561.1 | 5.88  | 5.72  | 0.07 | 0.59 | 1.12  | 0.636375 | 0.657445 | 0.835488 | 0.799704 |
| MmugDNA.14564.1.S1_at   | MmugDNA.14564.1 | 8.63  | 7.96  | 0.11 | 0.32 | 1.6   | 0.017844 | 0.00725  | 0.26813  | 0.114309 |
| MmugDNA.14565.1.S1_at   | MmugDNA.14565.1 | 6.25  | 6.62  | 0.31 | 0.28 | -1.29 | 0.257009 | 0.338983 | 0.60447  | 0.585891 |
| MmugDNA.14566.1.S1_at   | MmugDNA.14566.1 | 3.28  | 3.18  | 0.28 | 0.19 | 1.07  | 0.979318 | 0.618544 | 0.992384 | 0.77415  |
| MmugDNA.14567.1.S1_at   | MmugDNA.14567.1 | 6.91  | 6.74  | 0.27 | 0.23 | 1.13  | 0.757293 | 0.906221 | 0.897006 | 0.94693  |
| MmugDNA.14568.1.S1_at   | MmugDNA.14568.1 | 4.8   | 4.78  | 0    | 0.15 | 1.01  | 0.79141  | 0.917464 | 0.913371 | 0.953838 |
| MmugDNA.14569.1.S1_at   | MmugDNA.14569.1 | 3.64  | 3.68  | 0.35 | 0.35 | -1.03 | 0.640181 | 0.565773 | 0.837608 | 0.740112 |
| MmugDNA.1457.1.S1_at    | MmugDNA.1457.1  | 5.91  | 6.59  | 0.25 | 0.85 | -1.6  | 0.257365 | 0.266015 | 0.60472  | 0.531815 |
| MmugDNA.14570.1.S1_at   | MmugDNA.14570.1 | 7.31  | 6.87  | 0.17 | 0.14 | 1.35  | 0.05601  | 0.028062 | 0.385473 | 0.209031 |
| MmugDNA.14574.1.S1_at   | MmugDNA.14574.1 | 11.2  | 10.35 | 0.24 | 0.42 | 1.8   | 0.026575 | 0.014699 | 0.303505 | 0.154371 |
| MmugDNA.14575.1.S1_at   | MmugDNA.14575.1 | 10.21 | 10.25 | 0.61 | 0.38 | -1.03 | 0.877069 | 0.121396 | 0.950716 | 0.390485 |
| MmugDNA.14576.1.S1_at   | MmugDNA.14576.1 | 5.18  | 5.5   | 0.23 | 0.17 | -1.24 | 0.134549 | 0.258183 | 0.5013   | 0.525574 |
| MmugDNA.14578.1.S1_at   | MmugDNA.14578.1 | 5.63  | 5.63  | 0.01 | 0.34 | -1    | 0.986558 | 0.688871 | 0.995237 | 0.818363 |
| MmugDNA.14579.1.S1_at   | MmugDNA.14579.1 | 4.11  | 3.8   | 0.37 | 0.17 | 1.24  | 0.35779  | 0.408574 | 0.672709 | 0.635757 |
| MmugDNA.1458.1.S1_at    | MmugDNA.1458.1  | 8.84  | 8.97  | 0.36 | 0.19 | -1.1  | 0.891525 | 0.906833 | 0.956781 | 0.947238 |
| MmugDNA.14580.1.S1_at   | MmugDNA.14580.1 | 3.26  | 3.43  | 0.25 | 0.09 | -1.13 | 0.459343 | 0.283519 | 0.736077 | 0.545959 |
| MmugDNA.14581.1.S1_at   | MmugDNA.14581.1 | 7.15  | 7.28  | 0.03 | 0.13 | -1.1  | 0.211592 | 0.089813 | 0.572347 | 0.34404  |
| MmugDNA.14582.1.S1_x_at | MmugDNA.14582.1 | 6     | 5.95  | 0.08 | 0.23 | 1.04  | 0.528861 | 0.730211 | 0.775764 | 0.843882 |
| MmugDNA.14584.1.S1_at   | MmugDNA.14584.1 | 7.92  | 7.88  | 0.03 | 0.07 | 1.02  | 0.388381 | 0.230905 | 0.692437 | 0.502548 |
| MmugDNA.14585.1.S1_s_at | MmugDNA.14585.1 | 6.05  | 5.82  | 0.13 | 0.42 | 1.17  | 0.443051 | 0.525998 | 0.725992 | 0.715326 |
| MmugDNA.14586.1.S1_s_at | MmugDNA.14586.1 | 7.3   | 8.23  | 0.06 | 0.25 | -1.91 | 0.003759 | 0.000618 | 0.179914 | 0.042444 |
| MmugDNA.5639.1.S1_s_at  | MmugDNA.5639.1  | 5.77  | 6.27  | 0.63 | 0.59 | -1.42 | 0.174642 | 0.160946 | 0.538249 | 0.437116 |
| MmugDNA.14589.1.S1_at   | MmugDNA.14589.1 | 6.7   | 8.55  | 0.35 | 0.94 | -3.6  | 0.030132 | 0.021906 | 0.317059 | 0.185235 |
| MmugDNA.14589.1.S1_s_at | MmugDNA.14589.1 | 6.47  | 7.8   | 0.05 | 0.7  | -2.51 | 0.024388 | 0.015013 | 0.294535 | 0.155736 |
| MmugDNA.1459.1.S1_s_at  | MmugDNA.1459.1  | 10.53 | 10.55 | 0.22 | 0.32 | -1.01 | 0.636375 | 0.393649 | 0.835488 | 0.626522 |
| MmugDNA.14590.1.S1_at   | MmugDNA.14590.1 | 3.82  | 3.83  | 0.31 | 0.21 | -1.01 | 0.760859 | 0.11582  | 0.899135 | 0.382867 |
| MmugDNA.14591.1.S1_at   | MmugDNA.14591.1 | 6.2   | 6.08  | 0.08 | 0.11 | 1.09  | 0.116624 | 0.287155 | 0.48034  | 0.548447 |
| MmugDNA.14594.1.S1_at   | MmugDNA.14594.1 | 4.47  | 4.32  | 0.12 | 0.15 | 1.11  | 0.464404 | 0.221095 | 0.739221 | 0.494487 |
| MmugDNA.14595.1.S1_at   | MmugDNA.14595.1 | 6.58  | 6.51  | 0.45 | 0.21 | 1.05  | 0.288047 | 0.469341 | 0.626381 | 0.678197 |
| MmugDNA.14596.1.S1_at   | MmugDNA.14596.1 | 5.31  | 5.34  | 0.17 | 0.14 | -1.02 | 0.351054 | 0.312685 | 0.668943 | 0.567299 |
| MmugDNA.14597.1.S1_at   | MmugDNA.14597.1 | 10.74 | 10.16 | 0.19 | 0.32 | 1.5   | 0.135418 | 0.160377 | 0.502243 | 0.436528 |
| MmugDNA.22825.1.S1_s_at | MmugDNA.22825.1 | 11.24 | 10.75 | 0.16 | 0.13 | 1.4   | 0.023789 | 0.013539 | 0.292771 | 0.148928 |
| MmugDNA.14598.1.S1_s_at | MmugDNA.14598.1 | 9.65  | 9.7   | 0.99 | 1.04 | -1.04 | 0.600955 | 0.697556 | 0.815606 | 0.824244 |
| MmugDNA.14599.1.S1_at   | MmugDNA.14599.1 | 5.09  | 5.13  | 0.03 | 0.08 | -1.02 | 0.119289 | 0.448017 | 0.484049 | 0.663986 |
| MmugDNA.14600.1.S1_at   | MmugDNA.14600.1 | 3.05  | 3.32  | 0.17 | 0.1  | -1.21 | 0.040244 | 0.086977 | 0.349251 | 0.33984  |

|                         |                 |       |       |      |      |       |          |          |          |          |
|-------------------------|-----------------|-------|-------|------|------|-------|----------|----------|----------|----------|
| MmugDNA.14602.1.S1_at   | MmugDNA.14602.1 | 7.46  | 8.6   | 0.64 | 0.55 | -2.2  | 0.052257 | 0.044623 | 0.377296 | 0.255589 |
| MmugDNA.14603.1.S1_at   | MmugDNA.14603.1 | 8.58  | 8.53  | 0.28 | 0.95 | 1.03  | 0.931586 | 0.908793 | 0.973537 | 0.948367 |
| MmugDNA.14604.1.S1_s_at | MmugDNA.14604.1 | 7.09  | 7.19  | 0.04 | 0.06 | -1.08 | 0.076482 | 0.515114 | 0.425064 | 0.708103 |
| MmugDNA.14605.1.S1_at   | MmugDNA.14605.1 | 12.96 | 12.58 | 0.12 | 0.21 | 1.3   | 0.048905 | 0.031759 | 0.369995 | 0.220651 |
| MmugDNA.14606.1.S1_at   | MmugDNA.14606.1 | 12.19 | 12.13 | 0.28 | 0.12 | 1.04  | 0.436485 | 0.573111 | 0.721751 | 0.744941 |
| MmugDNA.14606.1.S1_s_at | MmugDNA.14606.1 | 12.09 | 12.02 | 0.3  | 0.13 | 1.06  | 0.399875 | 0.535797 | 0.699692 | 0.721304 |
| MmugDNA.14607.1.S1_at   | MmugDNA.14607.1 | 12.04 | 12.59 | 0.13 | 0.36 | -1.46 | 0.258014 | 0.062634 | 0.605357 | 0.297022 |
| MmugDNA.14608.1.S1_at   | MmugDNA.14608.1 | 12.28 | 12.78 | 0.3  | 0.75 | -1.41 | 0.696307 | 0.268088 | 0.86516  | 0.533862 |
| MmugDNA.1461.1.S1_at    | MmugDNA.1461.1  | 3.46  | 3.45  | 0.09 | 0.07 | 1.01  | 0.29476  | 0.39272  | 0.631442 | 0.62583  |
| MmugDNA.14610.1.S1_at   | MmugDNA.14610.1 | 4.1   | 3.74  | 0.12 | 0.16 | 1.28  | 0.017144 | 0.048575 | 0.266906 | 0.265572 |
| MmugDNA.14611.1.S1_at   | MmugDNA.14611.1 | 7.32  | 7.05  | 0.96 | 0.54 | 1.21  | 0.593787 | 0.777769 | 0.811569 | 0.87086  |
| MmugDNA.14612.1.S1_at   | MmugDNA.14612.1 | 11.02 | 9.88  | 0.23 | 0.36 | 2.21  | 0.008207 | 0.003534 | 0.216841 | 0.085312 |
| MmugDNA.14613.1.S1_at   | MmugDNA.14613.1 | 10.2  | 9.16  | 0.04 | 0.19 | 2.05  | 0.001151 | 0.000166 | 0.145267 | 0.030511 |
| MmugDNA.14614.1.S1_at   | MmugDNA.14614.1 | 5.01  | 5.37  | 0.39 | 0.38 | -1.28 | 0.544203 | 0.658607 | 0.784268 | 0.800452 |
| MmugDNA.14615.1.S1_s_at | MmugDNA.14615.1 | 8.38  | 7.17  | 0.22 | 0.59 | 2.31  | 0.087798 | 0.093502 | 0.442117 | 0.349846 |
| MmugDNA.14616.1.S1_at   | MmugDNA.14616.1 | 4.53  | 4.5   | 0.04 | 0    | 1.02  | 0.313012 | 0.269058 | 0.644895 | 0.534425 |
| MmugDNA.14618.1.S1_at   | MmugDNA.14618.1 | 9.22  | 9.41  | 0.05 | 0.34 | -1.14 | 0.531749 | 0.124682 | 0.777404 | 0.39513  |
| MmugDNA.14619.1.S1_at   | MmugDNA.14619.1 | 8.12  | 8.36  | 0.13 | 0.33 | -1.19 | 0.616756 | 0.074677 | 0.82429  | 0.318424 |
| MmugDNA.1462.1.S1_at    | MmugDNA.1462.1  | 5.16  | 4.06  | 0.71 | 0.08 | 2.16  | 0.089054 | 0.070489 | 0.444469 | 0.311777 |
| MmugDNA.15219.1.S1_at   | MmugDNA.15219.1 | 6.28  | 6.2   | 0.42 | 0.26 | 1.06  | 0.209387 | 0.292803 | 0.570957 | 0.552823 |
| MmugDNA.15219.1.S1_s_at | MmugDNA.15219.1 | 11.64 | 11.59 | 0.17 | 0.05 | 1.04  | 0.868831 | 0.156707 | 0.947765 | 0.432216 |
| MmugDNA.14622.1.S1_at   | MmugDNA.14622.1 | 4.15  | 5.69  | 0.74 | 1.31 | -2.91 | 0.266981 | 0.224035 | 0.612291 | 0.497046 |
| MmugDNA.14624.1.S1_at   | MmugDNA.14624.1 | 8.29  | 8.58  | 0.16 | 0.43 | -1.22 | 0.239645 | 0.101335 | 0.592634 | 0.361111 |
| MmugDNA.14625.1.S1_at   | MmugDNA.14625.1 | 9.7   | 9.95  | 0.28 | 0.41 | -1.19 | 0.320929 | 0.170966 | 0.649662 | 0.447561 |
| MmugDNA.14627.1.S1_at   | MmugDNA.14627.1 | 10.22 | 10.19 | 0.18 | 0.08 | 1.02  | 0.201675 | 0.3088   | 0.563988 | 0.56463  |
| MmugDNA.14628.1.S1_at   | MmugDNA.14628.1 | 12.7  | 13.1  | 0.15 | 0.38 | -1.32 | 0.199113 | 0.158088 | 0.562104 | 0.433875 |
| MmugDNA.14629.1.S1_at   | MmugDNA.14629.1 | 7.2   | 6.83  | 0.02 | 0.06 | 1.3   | 0.00078  | 0.026483 | 0.136818 | 0.203897 |
| MmugDNA.1463.1.S1_s_at  | MmugDNA.1463.1  | 7.92  | 7.7   | 0.15 | 0.29 | 1.16  | 0.297987 | 0.244245 | 0.633647 | 0.514176 |
| MmugDNA.14630.1.S1_at   | MmugDNA.14630.1 | 4.76  | 4.45  | 0.06 | 0.34 | 1.24  | 0.682819 | 0.183281 | 0.858151 | 0.459553 |
| MmugDNA.4900.1.S1_at    | MmugDNA.4900.1  | 5.75  | 5.73  | 0.5  | 0.21 | 1.01  | 0.670688 | 0.262074 | 0.852442 | 0.528374 |
| MmugDNA.4900.1.S1_s_at  | MmugDNA.4900.1  | 6.45  | 6.22  | 0.36 | 0.43 | 1.17  | 0.419811 | 0.235798 | 0.712083 | 0.506953 |
| MmugDNA.14633.1.S1_at   | MmugDNA.14633.1 | 3.81  | 3.52  | 0.21 | 0.18 | 1.22  | 0.137363 | 0.675089 | 0.504518 | 0.810146 |
| MmugDNA.8966.1.S1_s_at  | MmugDNA.8966.1  | 6.8   | 5.49  | 0.42 | 0.7  | 2.48  | 0.099598 | 0.055158 | 0.459597 | 0.280487 |
| MmugDNA.8966.1.S1_x_at  | MmugDNA.8966.1  | 6.52  | 5.79  | 0.43 | 0.29 | 1.66  | 0.069008 | 0.027745 | 0.411078 | 0.208003 |
| MmugDNA.14634.1.S1_at   | MmugDNA.14634.1 | 3.9   | 4.08  | 0.11 | 0.25 | -1.13 | 0.565167 | 0.68754  | 0.796922 | 0.817614 |
| MmugDNA.14635.1.S1_at   | MmugDNA.14635.1 | 3.27  | 3.27  | 0.07 | 0.15 | 1     | 0.86995  | 0.959495 | 0.947952 | 0.977017 |
| MmugDNA.14636.1.S1_at   | MmugDNA.14636.1 | 5.54  | 5.56  | 0.32 | 0.12 | -1.02 | 0.55869  | 0.354866 | 0.793379 | 0.597466 |
| MmugDNA.14638.1.S1_at   | MmugDNA.14638.1 | 6.22  | 6.55  | 0.16 | 0.16 | -1.25 | 0.348658 | 0.182876 | 0.667173 | 0.459362 |
| MmugDNA.31136.1.S1_s_at | MmugDNA.31136.1 | 12.26 | 11.43 | 0.42 | 0.31 | 1.79  | 0.14698  | 0.171765 | 0.51306  | 0.448191 |
| MmugDNA.1464.1.S1_at    | MmugDNA.1464.1  | 10.62 | 10.66 | 0.16 | 0.19 | -1.03 | 0.613513 | 0.903961 | 0.822806 | 0.945472 |
| MmugDNA.14640.1.S1_at   | MmugDNA.14640.1 | 6.26  | 6.32  | 0.31 | 0.11 | -1.04 | 0.775363 | 0.69345  | 0.905707 | 0.821713 |

|                         |                 |       |       |      |      |       |          |          |          |          |
|-------------------------|-----------------|-------|-------|------|------|-------|----------|----------|----------|----------|
| MmugDNA.14641.1.S1_at   | MmugDNA.14641.1 | 4.52  | 4.76  | 0.08 | 0.14 | -1.19 | 0.133542 | 0.183589 | 0.5002   | 0.459681 |
| MmugDNA.14642.1.S1_at   | MmugDNA.14642.1 | 7.01  | 7.46  | 0.33 | 0.21 | -1.37 | 0.146244 | 0.165592 | 0.512339 | 0.44189  |
| MmugDNA.14643.1.S1_at   | MmugDNA.14643.1 | 4.12  | 3.35  | 0.54 | 0.07 | 1.7   | 0.030114 | 0.026795 | 0.316939 | 0.204733 |
| MmugDNA.14645.1.S1_at   | MmugDNA.14645.1 | 6.42  | 6.62  | 0.11 | 0.36 | -1.15 | 0.155109 | 0.160043 | 0.519871 | 0.436208 |
| MmugDNA.14645.1.S1_s_at | MmugDNA.14645.1 | 5.68  | 5.79  | 0.09 | 0.39 | -1.09 | 0.162807 | 0.089156 | 0.527211 | 0.343188 |
| MmugDNA.14646.1.S1_at   | MmugDNA.14646.1 | 7.52  | 7.45  | 0.14 | 0.38 | 1.04  | 0.511816 | 0.259535 | 0.765318 | 0.526448 |
| MmugDNA.14647.1.S1_at   | MmugDNA.14647.1 | 4.51  | 4.15  | 0.39 | 0.18 | 1.28  | 0.48258  | 0.584789 | 0.749415 | 0.752534 |
| MmugDNA.14648.1.S1_at   | MmugDNA.14648.1 | 6.16  | 6.39  | 0.04 | 0.19 | -1.17 | 0.34006  | 0.213384 | 0.661611 | 0.48726  |
| MmugDNA.14649.1.S1_at   | MmugDNA.14649.1 | 7.13  | 7.33  | 0.16 | 0.07 | -1.15 | 0.09166  | 0.111675 | 0.447754 | 0.376631 |
| MmugDNA.14650.1.S1_at   | MmugDNA.14650.1 | 3.85  | 5.1   | 0.34 | 0.87 | -2.38 | 0.049539 | 0.041351 | 0.371515 | 0.247995 |
| MmugDNA.14652.1.S1_at   | MmugDNA.14652.1 | 5.17  | 5.04  | 0.04 | 0.1  | 1.1   | 0.240257 | 0.564563 | 0.593098 | 0.739366 |
| MmugDNA.14653.1.S1_at   | MmugDNA.14653.1 | 5.41  | 4.7   | 0.42 | 0.12 | 1.64  | 0.045976 | 0.058655 | 0.362069 | 0.288901 |
| MmugDNA.14654.1.S1_at   | MmugDNA.14654.1 | 3.84  | 3.78  | 0.06 | 0.11 | 1.04  | 0.706976 | 0.841539 | 0.870899 | 0.909663 |
| MmugDNA.14655.1.S1_at   | MmugDNA.14655.1 | 3.97  | 4.11  | 0.02 | 0.09 | -1.1  | 0.089247 | 0.314855 | 0.444908 | 0.568619 |
| MmugDNA.14657.1.S1_at   | MmugDNA.14657.1 | 3     | 3.25  | 0.29 | 0.12 | -1.19 | 0.460469 | 0.680496 | 0.736944 | 0.813477 |
| MmugDNA.1466.1.S1_at    | MmugDNA.1466.1  | 9.21  | 8.9   | 0.25 | 0.62 | 1.24  | 0.458139 | 0.546743 | 0.73524  | 0.728159 |
| MmugDNA.14661.1.S1_at   | MmugDNA.14661.1 | 6.06  | 5.83  | 0.19 | 0.37 | 1.17  | 0.536467 | 0.640609 | 0.77949  | 0.789026 |
| MmugDNA.14662.1.S1_at   | MmugDNA.14662.1 | 4.38  | 4.73  | 0.67 | 0.23 | -1.28 | 0.981526 | 0.983227 | 0.993316 | 0.990726 |
| MmugDNA.14663.1.S1_at   | MmugDNA.14663.1 | 3.59  | 3.55  | 0.08 | 0.03 | 1.03  | 0.721011 | 0.184705 | 0.87787  | 0.460645 |
| MmugDNA.14664.1.S1_at   | MmugDNA.14664.1 | 11.08 | 11.03 | 0.06 | 0.23 | 1.03  | 0.482257 | 0.337352 | 0.749398 | 0.584572 |
| MmugDNA.14665.1.S1_at   | MmugDNA.14665.1 | 3.27  | 3.16  | 0.16 | 0.03 | 1.08  | 0.258678 | 0.437601 | 0.605879 | 0.656798 |
| MmugDNA.14666.1.S1_at   | MmugDNA.14666.1 | 5.23  | 5.15  | 0.19 | 0.1  | 1.06  | 0.823592 | 0.603318 | 0.928234 | 0.764049 |
| MmugDNA.14667.1.S1_at   | MmugDNA.14667.1 | 3.5   | 3.44  | 0.22 | 0.1  | 1.04  | 0.865065 | 0.977573 | 0.945844 | 0.987812 |
| MmugDNA.15185.1.S1_s_at | MmugDNA.15185.1 | 12.24 | 11.9  | 0.08 | 0.14 | 1.27  | 0.027171 | 0.013455 | 0.306629 | 0.148623 |
| MmugDNA.14669.1.S1_at   | MmugDNA.14669.1 | 3.86  | 3.47  | 0.7  | 0.28 | 1.3   | 0.494875 | 0.349612 | 0.756991 | 0.593539 |
| MmugDNA.1467.1.S1_at    | MmugDNA.1467.1  | 6.53  | 5.77  | 0.7  | 0.61 | 1.69  | 0.111973 | 0.07756  | 0.474392 | 0.323421 |
| MmugDNA.14672.1.S1_at   | MmugDNA.14672.1 | 5.35  | 5.8   | 0.24 | 0.17 | -1.36 | 0.103217 | 0.098403 | 0.462888 | 0.356531 |
| MmugDNA.14674.1.S1_at   | MmugDNA.14674.1 | 3.99  | 4.05  | 0.12 | 0.16 | -1.04 | 0.125105 | 0.197365 | 0.491138 | 0.472304 |
| MmugDNA.14674.1.S1_s_at | MmugDNA.14674.1 | 6.12  | 6.17  | 0.02 | 0.14 | -1.04 | 0.765208 | 0.928712 | 0.901213 | 0.959449 |
| MmugDNA.14676.1.S1_at   | MmugDNA.14676.1 | 3.11  | 3.17  | 0.15 | 0.04 | -1.05 | 0.960087 | 0.763708 | 0.98486  | 0.862607 |
| MmugDNA.14677.1.S1_at   | MmugDNA.14677.1 | 7.75  | 7.96  | 0.14 | 0.07 | -1.16 | 0.135302 | 0.097604 | 0.502087 | 0.355473 |
| MmugDNA.7699.1.S1_s_at  | MmugDNA.7699.1  | 7.38  | 7.62  | 0.17 | 0.05 | -1.17 | 0.085051 | 0.086133 | 0.438104 | 0.338467 |
| MmugDNA.14679.1.S1_at   | MmugDNA.14679.1 | 10.33 | 10.32 | 0.23 | 0.26 | 1     | 0.885563 | 0.897113 | 0.954118 | 0.941305 |
| MmugDNA.1468.1.S1_at    | MmugDNA.1468.1  | 7.56  | 8.99  | 0.38 | 0.9  | -2.69 | 0.050358 | 0.026218 | 0.374269 | 0.202901 |
| MmugDNA.14680.1.S1_at   | MmugDNA.14680.1 | 6.22  | 6.4   | 0.12 | 0.11 | -1.13 | 0.362683 | 0.202102 | 0.676176 | 0.476545 |
| MmugDNA.14681.1.S1_at   | MmugDNA.14681.1 | 5.99  | 5.48  | 0.37 | 0.2  | 1.42  | 0.077492 | 0.009091 | 0.427267 | 0.125944 |
| MmugDNA.14682.1.S1_at   | MmugDNA.14682.1 | 8.81  | 7.5   | 0.48 | 0.65 | 2.48  | 0.208517 | 0.247775 | 0.570355 | 0.517199 |
| MmugDNA.14683.1.S1_at   | MmugDNA.14683.1 | 4.16  | 4.16  | 0.69 | 0.21 | 1     | 0.415662 | 0.483028 | 0.709528 | 0.687687 |
| MmugDNA.14685.1.S1_at   | MmugDNA.14685.1 | 5.75  | 6.54  | 0.1  | 0.13 | -1.72 | 0.001698 | 0.002949 | 0.15365  | 0.079945 |
| MmugDNA.14687.1.S1_at   | MmugDNA.14687.1 | 7.12  | 7.09  | 1.15 | 0.05 | 1.02  | 0.360061 | 0.437202 | 0.674197 | 0.656591 |
| MmugDNA.14688.1.S1_at   | MmugDNA.14688.1 | 5.82  | 5.69  | 0.22 | 0.05 | 1.09  | 0.800071 | 0.934951 | 0.917379 | 0.963177 |

|                         |                 |       |       |      |      |       |          |          |          |          |
|-------------------------|-----------------|-------|-------|------|------|-------|----------|----------|----------|----------|
| MmugDNA.14689.1.S1_at   | MmugDNA.14689.1 | 4.69  | 4.86  | 0.22 | 0.11 | -1.12 | 0.270772 | 0.343251 | 0.615052 | 0.589001 |
| MmugDNA.1469.1.S1_at    | MmugDNA.1469.1  | 3.32  | 3.29  | 0.11 | 0.32 | 1.02  | 0.898781 | 0.984599 | 0.959589 | 0.991331 |
| MmugDNA.14690.1.S1_at   | MmugDNA.14690.1 | 7.83  | 9.18  | 1.09 | 0.64 | -2.55 | 0.103283 | 0.076922 | 0.462888 | 0.322421 |
| MmugDNA.14690.1.S1_s_at | MmugDNA.14690.1 | 7.45  | 8.57  | 1.16 | 0.61 | -2.17 | 0.12834  | 0.091785 | 0.494376 | 0.346977 |
| MmugDNA.14692.1.S1_at   | MmugDNA.14692.1 | 9.09  | 8.98  | 0.15 | 0.36 | 1.07  | 0.825127 | 0.807551 | 0.92912  | 0.889177 |
| MmugDNA.14692.1.S1_s_at | MmugDNA.14692.1 | 8.74  | 8.55  | 0.11 | 0.31 | 1.14  | 0.391367 | 0.571424 | 0.69404  | 0.743737 |
| MmugDNA.14693.1.S1_at   | MmugDNA.14693.1 | 6.16  | 7.23  | 0.34 | 0.68 | -2.1  | 0.332273 | 0.330143 | 0.656683 | 0.578987 |
| MmugDNA.33837.1.S1_s_at | MmugDNA.33837.1 | 9.06  | 8.66  | 0.13 | 0.42 | 1.32  | 0.145425 | 0.172944 | 0.511449 | 0.449582 |
| MmugDNA.14695.1.S1_at   | MmugDNA.14695.1 | 5.97  | 5.94  | 0.16 | 0.04 | 1.03  | 0.853065 | 0.776323 | 0.940695 | 0.869885 |
| MmugDNA.14696.1.S1_at   | MmugDNA.14696.1 | 8.63  | 8.54  | 0.24 | 0.73 | 1.07  | 0.839193 | 0.22709  | 0.935078 | 0.499423 |
| MmugDNA.14697.1.S1_at   | MmugDNA.14697.1 | 9.61  | 10    | 0.22 | 0.61 | -1.3  | 0.28749  | 0.188329 | 0.625987 | 0.46433  |
| MmugDNA.14698.1.S1_at   | MmugDNA.14698.1 | 10.27 | 10.53 | 0.15 | 0.47 | -1.2  | 0.215351 | 0.165829 | 0.575838 | 0.442152 |
| MmugDNA.14699.1.S1_at   | MmugDNA.14699.1 | 3.43  | 3.77  | 0.11 | 0.16 | -1.27 | 0.114726 | 0.084355 | 0.478025 | 0.335672 |
| MmugDNA.1470.1.S1_at    | MmugDNA.1470.1  | 6.86  | 6.97  | 0.04 | 0.03 | -1.08 | 0.010726 | 0.077428 | 0.23109  | 0.323236 |
| MmugDNA.14701.1.S1_at   | MmugDNA.14701.1 | 8.82  | 9.59  | 0.24 | 0.33 | -1.7  | 0.012052 | 0.015101 | 0.239875 | 0.156008 |
| MmugDNA.14703.1.S1_at   | MmugDNA.14703.1 | 8.31  | 8.27  | 0.46 | 0.3  | 1.03  | 0.549826 | 0.292164 | 0.787481 | 0.552327 |
| MmugDNA.14705.1.S1_at   | MmugDNA.14705.1 | 3.78  | 3.38  | 0.3  | 0.09 | 1.32  | 0.190509 | 0.127735 | 0.55308  | 0.398581 |
| MmugDNA.14706.1.S1_at   | MmugDNA.14706.1 | 8.08  | 7.78  | 0.21 | 0.45 | 1.23  | 0.144982 | 0.162783 | 0.511188 | 0.438915 |
| MmugDNA.14707.1.S1_at   | MmugDNA.14707.1 | 5.88  | 5.88  | 0.13 | 0.01 | -1    | 0.994595 | 0.974563 | 0.998128 | 0.986197 |
| MmugDNA.14708.1.S1_at   | MmugDNA.14708.1 | 6     | 6.01  | 0    | 0.09 | -1.01 | 0.767853 | 0.680843 | 0.902473 | 0.813597 |
| MmugDNA.14709.1.S1_at   | MmugDNA.14709.1 | 4.77  | 5.17  | 0.99 | 0.15 | -1.32 | 0.779072 | 0.805618 | 0.907881 | 0.888307 |
| MmugDNA.1471.1.S1_at    | MmugDNA.1471.1  | 5.71  | 5.72  | 0.2  | 0.07 | -1.01 | 0.383765 | 0.46907  | 0.689519 | 0.67808  |
| MmugDNA.14710.1.S1_at   | MmugDNA.14710.1 | 7.59  | 7.64  | 0.41 | 0.4  | -1.04 | 0.850194 | 0.948875 | 0.939853 | 0.97078  |
| MmugDNA.8169.1.S1_at    | MmugDNA.8169.1  | 12.37 | 12.41 | 0.21 | 0.12 | -1.03 | 0.698275 | 0.873033 | 0.866049 | 0.927822 |
| MmugDNA.8169.1.S1_s_at  | MmugDNA.8169.1  | 13    | 13.04 | 0.12 | 0.13 | -1.03 | 0.689954 | 0.865326 | 0.861872 | 0.923554 |
| MmugDNA.14714.1.S1_at   | MmugDNA.14714.1 | 5.04  | 5.24  | 0.11 | 0.74 | -1.14 | 0.266992 | 0.300916 | 0.612291 | 0.559173 |
| MmugDNA.14715.1.S1_s_at | MmugDNA.14715.1 | 7.63  | 7.6   | 0.19 | 0.18 | 1.02  | 0.901878 | 0.719227 | 0.960821 | 0.837526 |
| MmugDNA.14716.1.S1_at   | MmugDNA.14716.1 | 7.47  | 7.68  | 0.27 | 0.11 | -1.15 | 0.416442 | 0.550114 | 0.709947 | 0.730241 |
| MmugDNA.14717.1.S1_at   | MmugDNA.14717.1 | 12.69 | 13.05 | 0.21 | 0.04 | -1.28 | 0.014715 | 0.007649 | 0.254893 | 0.117015 |
| MmugDNA.14718.1.S1_at   | MmugDNA.14718.1 | 5.94  | 6     | 0.13 | 0.07 | -1.04 | 0.911834 | 0.178634 | 0.965151 | 0.454847 |
| MmugDNA.14719.1.S1_at   | MmugDNA.14719.1 | 3.69  | 3.5   | 0.36 | 0.02 | 1.14  | 0.391889 | 0.390807 | 0.694346 | 0.624547 |
| MmugDNA.14723.1.S1_at   | MmugDNA.14723.1 | 6.39  | 7.4   | 0.22 | 0.4  | -2.02 | 0.018527 | 0.005413 | 0.270581 | 0.101507 |
| MmugDNA.14724.1.S1_at   | MmugDNA.14724.1 | 7.28  | 7.11  | 0.02 | 0.08 | 1.12  | 0.040211 | 0.184887 | 0.349219 | 0.460776 |
| MmugDNA.14727.1.S1_at   | MmugDNA.14727.1 | 5.01  | 5.03  | 0.13 | 0.18 | -1.01 | 0.661562 | 0.02864  | 0.848148 | 0.210901 |
| MmugDNA.14728.1.S1_at   | MmugDNA.14728.1 | 5.83  | 5.84  | 0.21 | 0.15 | -1.01 | 0.707177 | 0.926809 | 0.870977 | 0.958404 |
| MmugDNA.14731.1.S1_at   | MmugDNA.14731.1 | 7.23  | 7.04  | 0.1  | 0.11 | 1.14  | 0.054517 | 0.055052 | 0.381851 | 0.280138 |
| MmugDNA.14732.1.S1_at   | MmugDNA.14732.1 | 4.45  | 4.54  | 0.6  | 0.07 | -1.06 | 0.528393 | 0.660141 | 0.775543 | 0.801083 |
| MmugDNA.14734.1.S1_at   | MmugDNA.14734.1 | 10.96 | 11.17 | 0.09 | 0.36 | -1.16 | 0.367116 | 0.38798  | 0.679287 | 0.62253  |
| MmugDNA.14735.1.S1_at   | MmugDNA.14735.1 | 12.51 | 12.55 | 0.16 | 0.11 | -1.03 | 0.156955 | 0.38099  | 0.521736 | 0.617476 |
| MmugDNA.14736.1.S1_at   | MmugDNA.14736.1 | 6.14  | 6.61  | 0.62 | 0.96 | -1.39 | 0.976267 | 0.441138 | 0.990792 | 0.659375 |
| MmugDNA.14738.1.S1_at   | MmugDNA.14738.1 | 10.26 | 9.33  | 0.46 | 0.71 | 1.91  | 0.426581 | 0.541908 | 0.715846 | 0.725146 |

|                         |                 |       |       |      |      |       |          |          |          |          |
|-------------------------|-----------------|-------|-------|------|------|-------|----------|----------|----------|----------|
| MmugDNA.14739.1.S1_at   | MmugDNA.14739.1 | 12.12 | 11.79 | 0.24 | 0.13 | 1.26  | 0.075252 | 0.077008 | 0.422133 | 0.322457 |
| MmugDNA.1474.1.S1_at    | MmugDNA.1474.1  | 5.29  | 5.58  | 1.28 | 0.22 | -1.22 | 0.505273 | 0.650603 | 0.761548 | 0.795663 |
| MmugDNA.14740.1.S1_at   | MmugDNA.14740.1 | 3.66  | 4.05  | 0.01 | 0.29 | -1.31 | 0.244494 | 0.218174 | 0.596252 | 0.49174  |
| MmugDNA.14741.1.S1_at   | MmugDNA.14741.1 | 3.8   | 3.85  | 0.51 | 0.15 | -1.03 | 0.916571 | 0.890349 | 0.967349 | 0.937508 |
| MmugDNA.14742.1.S1_at   | MmugDNA.14742.1 | 5.19  | 5.19  | 0.1  | 0.05 | 1     | 0.692345 | 0.172628 | 0.863369 | 0.449068 |
| MmugDNA.14744.1.S1_at   | MmugDNA.14744.1 | 5.1   | 5.11  | 0.12 | 0.1  | -1.01 | 0.972989 | 0.872795 | 0.989561 | 0.927686 |
| MmugDNA.14745.1.S1_at   | MmugDNA.14745.1 | 12.9  | 13.16 | 0.14 | 0.04 | -1.2  | 0.01248  | 0.003191 | 0.241976 | 0.08199  |
| MmugDNA.14746.1.S1_at   | MmugDNA.14746.1 | 6.17  | 6.33  | 0.42 | 0.16 | -1.12 | 0.846919 | 0.714104 | 0.938526 | 0.834149 |
| MmugDNA.14747.1.S1_at   | MmugDNA.14747.1 | 6.19  | 6.17  | 0.46 | 0.14 | 1.02  | 0.253537 | 0.285155 | 0.602121 | 0.547098 |
| MmugDNA.14748.1.S1_at   | MmugDNA.14748.1 | 7.05  | 6.99  | 0.68 | 0.43 | 1.05  | 0.566499 | 0.354904 | 0.797591 | 0.597466 |
| MmugDNA.14749.1.S1_at   | MmugDNA.14749.1 | 7.49  | 6.97  | 0.67 | 0.21 | 1.44  | 0.306311 | 0.188206 | 0.639467 | 0.464251 |
| MmugDNA.14750.1.S1_at   | MmugDNA.14750.1 | 3.9   | 4.03  | 0.12 | 0.13 | -1.09 | 0.400153 | 0.378045 | 0.699704 | 0.615351 |
| MmugDNA.14751.1.S1_at   | MmugDNA.14751.1 | 6.54  | 7.94  | 0.82 | 1.2  | -2.64 | 0.659536 | 0.68424  | 0.847196 | 0.815842 |
| MmugDNA.14752.1.S1_at   | MmugDNA.14752.1 | 4.57  | 4.67  | 0.11 | 0.12 | -1.07 | 0.950467 | 0.429495 | 0.981318 | 0.650934 |
| MmugDNA.14754.1.S1_at   | MmugDNA.14754.1 | 10.96 | 11.2  | 0.05 | 0.1  | -1.18 | 0.031145 | 0.038627 | 0.32069  | 0.241627 |
| MmugDNA.14755.1.S1_at   | MmugDNA.14755.1 | 4.6   | 4.6   | 0.07 | 0.04 | 1     | 0.585689 | 0.325916 | 0.807612 | 0.576181 |
| MmugDNA.14756.1.S1_at   | MmugDNA.14756.1 | 9.39  | 8.8   | 0.15 | 0.53 | 1.5   | 0.232509 | 0.294519 | 0.587814 | 0.554265 |
| MmugDNA.14757.1.S1_at   | MmugDNA.14757.1 | 4.75  | 4.68  | 0.82 | 0.24 | 1.05  | 0.809022 | 0.68185  | 0.922142 | 0.814175 |
| MmugDNA.14758.1.S1_at   | MmugDNA.14758.1 | 7.45  | 7.13  | 0.36 | 0.11 | 1.25  | 0.188904 | 0.205552 | 0.551906 | 0.47981  |
| MmugDNA.14759.1.S1_at   | MmugDNA.14759.1 | 11.78 | 11.74 | 0.21 | 0.22 | 1.03  | 0.831543 | 0.339658 | 0.931771 | 0.586242 |
| MmugDNA.14759.1.S1_s_at | MmugDNA.14759.1 | 10.54 | 10.61 | 0.04 | 0.14 | -1.06 | 0.413299 | 0.595201 | 0.70838  | 0.759023 |
| MmugDNA.1476.1.S1_at    | MmugDNA.1476.1  | 4.47  | 4.52  | 0.05 | 0.07 | -1.04 | 0.819104 | 0.52134  | 0.926528 | 0.712346 |
| MmugDNA.14760.1.S1_at   | MmugDNA.14760.1 | 5.1   | 4.86  | 0.19 | 0.13 | 1.17  | 0.074585 | 0.032874 | 0.420533 | 0.224478 |
| MmugDNA.14761.1.S1_at   | MmugDNA.14761.1 | 6.65  | 5.83  | 0.41 | 0.44 | 1.77  | 0.055614 | 0.059346 | 0.384246 | 0.29054  |
| MmugDNA.14763.1.S1_at   | MmugDNA.14763.1 | 3.44  | 3.63  | 0.13 | 0.1  | -1.14 | 0.283454 | 0.534888 | 0.623508 | 0.720595 |
| MmugDNA.14764.1.S1_at   | MmugDNA.14764.1 | 3.46  | 3.17  | 0.57 | 0.12 | 1.22  | 0.256883 | 0.314518 | 0.60443  | 0.568372 |
| MmugDNA.14766.1.S1_at   | MmugDNA.14766.1 | 5     | 6.37  | 0.9  | 1.94 | -2.59 | 0.439649 | 0.045032 | 0.723713 | 0.256697 |
| MmugDNA.14768.1.S1_at   | MmugDNA.14768.1 | 3.7   | 3.83  | 0.1  | 0.14 | -1.1  | 0.947974 | 0.99212  | 0.980065 | 0.995515 |
| MmugDNA.1477.1.S1_at    | MmugDNA.1477.1  | 6.14  | 5.77  | 0.2  | 0.14 | 1.3   | 0.061291 | 0.032129 | 0.395362 | 0.221941 |
| MmugDNA.1477.1.S1_s_at  | MmugDNA.1477.1  | 7.82  | 7.45  | 0.28 | 0.14 | 1.29  | 0.093262 | 0.037144 | 0.450461 | 0.237211 |
| MmugDNA.14771.1.S1_s_at | MmugDNA.14771.1 | 5.83  | 6.95  | 0.79 | 0.53 | -2.19 | 0.28359  | 0.094285 | 0.623677 | 0.350889 |
| MmugDNA.14774.1.S1_at   | MmugDNA.14774.1 | 4.93  | 4.49  | 0.1  | 0.09 | 1.36  | 0.011068 | 0.008041 | 0.233784 | 0.119166 |
| MmugDNA.14775.1.S1_at   | MmugDNA.14775.1 | 5.42  | 5.07  | 1.46 | 0.12 | 1.27  | 0.655399 | 0.748134 | 0.844941 | 0.853384 |
| MmugDNA.14776.1.S1_at   | MmugDNA.14776.1 | 10.71 | 11.08 | 0.25 | 0.21 | -1.3  | 0.126489 | 0.075698 | 0.492798 | 0.320271 |
| MmugDNA.14777.1.S1_at   | MmugDNA.14777.1 | 6.55  | 6.04  | 0.66 | 0.07 | 1.42  | 0.080504 | 0.029475 | 0.430579 | 0.213368 |
| MmugDNA.14779.1.S1_at   | MmugDNA.14779.1 | 3.84  | 3.94  | 0.06 | 0.09 | -1.07 | 0.427502 | 0.051936 | 0.716263 | 0.273337 |
| MmugDNA.1478.1.S1_at    | MmugDNA.1478.1  | 6.67  | 6.35  | 0.14 | 0.41 | 1.25  | 0.660476 | 0.108947 | 0.847722 | 0.372637 |
| MmugDNA.14780.1.S1_at   | MmugDNA.14780.1 | 7.23  | 6.46  | 0.17 | 0.66 | 1.7   | 0.125346 | 0.023297 | 0.49131  | 0.191315 |
| MmugDNA.14781.1.S1_at   | MmugDNA.14781.1 | 3.38  | 3.32  | 0.07 | 0.16 | 1.04  | 0.299231 | 0.176992 | 0.634789 | 0.453416 |
| MmugDNA.14782.1.S1_at   | MmugDNA.14782.1 | 9.44  | 9.21  | 0.06 | 0.17 | 1.18  | 0.053512 | 0.004198 | 0.380283 | 0.091319 |
| MmugDNA.14783.1.S1_s_at | MmugDNA.14783.1 | 3.95  | 3.92  | 0.05 | 0.18 | 1.03  | 0.89664  | 0.297455 | 0.958814 | 0.556105 |

|                         |                 |       |       |      |      |       |          |          |          |          |
|-------------------------|-----------------|-------|-------|------|------|-------|----------|----------|----------|----------|
| MmugDNA.14784.1.S1_at   | MmugDNA.14784.1 | 5.83  | 5.42  | 0.6  | 0.22 | 1.32  | 0.781307 | 0.924479 | 0.908722 | 0.957385 |
| MmugDNA.14785.1.S1_at   | MmugDNA.14785.1 | 3.69  | 3.62  | 0.33 | 0.23 | 1.05  | 0.458563 | 0.614172 | 0.735566 | 0.771143 |
| MmugDNA.14786.1.S1_at   | MmugDNA.14786.1 | 6.13  | 6.05  | 0.1  | 0.33 | 1.06  | 0.689082 | 0.496921 | 0.861312 | 0.696273 |
| MmugDNA.14787.1.S1_at   | MmugDNA.14787.1 | 8.4   | 9.02  | 0.37 | 0.53 | -1.53 | 0.161724 | 0.077795 | 0.526573 | 0.323933 |
| MmugDNA.14788.1.S1_at   | MmugDNA.14788.1 | 8.02  | 8.06  | 0.29 | 0.81 | -1.02 | 0.498688 | 0.679274 | 0.758605 | 0.81275  |
| MmugDNA.14789.1.S1_at   | MmugDNA.14789.1 | 5.13  | 5.13  | 0.17 | 0.07 | 1     | 0.77775  | 0.576672 | 0.907092 | 0.74731  |
| MmugDNA.1479.1.S1_s_at  | MmugDNA.1479.1  | 9.25  | 10.32 | 0.15 | 0.28 | -2.1  | 0.002475 | 0.000532 | 0.163555 | 0.0402   |
| MmugDNA.14790.1.S1_at   | MmugDNA.14790.1 | 5.29  | 5.48  | 0.11 | 0.13 | -1.14 | 0.116875 | 0.093594 | 0.480788 | 0.349952 |
| MmugDNA.14792.1.S1_at   | MmugDNA.14792.1 | 3.42  | 3.57  | 0.2  | 0.24 | -1.11 | 0.302877 | 0.351339 | 0.637146 | 0.59502  |
| MmugDNA.14793.1.S1_at   | MmugDNA.14793.1 | 5.04  | 5.46  | 0.89 | 0.05 | -1.34 | 0.869373 | 0.872398 | 0.947917 | 0.92745  |
| MmugDNA.14794.1.S1_at   | MmugDNA.14794.1 | 4.82  | 5     | 0.25 | 0.39 | -1.14 | 0.302629 | 0.460271 | 0.637008 | 0.672148 |
| MmugDNA.14795.1.S1_at   | MmugDNA.14795.1 | 5.85  | 5.86  | 0.63 | 0.16 | -1    | 0.422629 | 0.345486 | 0.713606 | 0.590746 |
| MmugDNA.14796.1.S1_at   | MmugDNA.14796.1 | 3.34  | 3.34  | 0.05 | 0.08 | -1    | 0.382803 | 0.105855 | 0.688989 | 0.368111 |
| MmugDNA.14797.1.S1_at   | MmugDNA.14797.1 | 4.67  | 4.65  | 0.31 | 0.03 | 1.01  | 0.378828 | 0.309602 | 0.68656  | 0.564987 |
| MmugDNA.14798.1.S1_at   | MmugDNA.14798.1 | 4.26  | 4.15  | 0.07 | 0.21 | 1.08  | 0.579886 | 0.813412 | 0.804451 | 0.892156 |
| MmugDNA.14799.1.S1_at   | MmugDNA.14799.1 | 4.21  | 4.4   | 0.14 | 0.12 | -1.14 | 0.677587 | 0.388137 | 0.855561 | 0.622607 |
| MmugDNA.148.1.S1_at     | MmugDNA.148.1   | 6.61  | 6.52  | 0.13 | 0.1  | 1.06  | 0.415572 | 0.042324 | 0.709528 | 0.250324 |
| MmugDNA.1480.1.S1_at    | MmugDNA.1480.1  | 4.75  | 4.46  | 0.51 | 0.26 | 1.22  | 0.508372 | 0.70021  | 0.763692 | 0.825987 |
| MmugDNA.14801.1.S1_at   | MmugDNA.14801.1 | 5.74  | 6.45  | 0.24 | 0.77 | -1.64 | 0.785388 | 0.895329 | 0.910715 | 0.940185 |
| MmugDNA.14802.1.S1_at   | MmugDNA.14802.1 | 4.6   | 4.57  | 0.14 | 0.11 | 1.02  | 0.686939 | 0.889476 | 0.860053 | 0.937014 |
| MmugDNA.14804.1.S1_at   | MmugDNA.14804.1 | 8.85  | 8.87  | 0.02 | 0.18 | -1.01 | 0.669873 | 0.330862 | 0.852318 | 0.57958  |
| MmugDNA.14805.1.S1_at   | MmugDNA.14805.1 | 5.17  | 5.23  | 0.43 | 0.2  | -1.04 | 0.79585  | 0.930823 | 0.915319 | 0.960718 |
| MmugDNA.14806.1.S1_at   | MmugDNA.14806.1 | 4.16  | 3.81  | 0.15 | 0.16 | 1.28  | 0.084876 | 0.255988 | 0.437796 | 0.523919 |
| MmugDNA.14807.1.S1_at   | MmugDNA.14807.1 | 4.16  | 4.27  | 0.17 | 0.1  | -1.08 | 0.929394 | 0.749605 | 0.972716 | 0.854505 |
| MmugDNA.14808.1.S1_at   | MmugDNA.14808.1 | 4.47  | 4.69  | 0.14 | 0.23 | -1.17 | 0.64891  | 0.113215 | 0.842266 | 0.379229 |
| MmugDNA.14809.1.S1_at   | MmugDNA.14809.1 | 3.67  | 3.89  | 0.22 | 0.09 | -1.16 | 0.64027  | 0.335995 | 0.837612 | 0.583601 |
| MmugDNA.14811.1.S1_at   | MmugDNA.14811.1 | 5.86  | 6.02  | 0.9  | 0.06 | -1.12 | 0.491171 | 0.629551 | 0.754863 | 0.781928 |
| MmugDNA.14812.1.S1_at   | MmugDNA.14812.1 | 7.82  | 7.95  | 0.27 | 0.77 | -1.1  | 0.665877 | 0.720782 | 0.850144 | 0.838368 |
| MmugDNA.14813.1.S1_at   | MmugDNA.14813.1 | 4.32  | 4.37  | 0.22 | 0.02 | -1.03 | 0.980896 | 0.993809 | 0.993107 | 0.996274 |
| MmugDNA.14814.1.S1_at   | MmugDNA.14814.1 | 5.37  | 5.34  | 0.12 | 0.19 | 1.02  | 0.687752 | 0.85274  | 0.860688 | 0.916281 |
| MmugDNA.14816.1.S1_at   | MmugDNA.14816.1 | 11.96 | 12.01 | 0.08 | 0.28 | -1.04 | 0.817699 | 0.5868   | 0.926022 | 0.753819 |
| MmugDNA.14816.1.S1_x_at | MmugDNA.14816.1 | 11.78 | 11.82 | 0.11 | 0.28 | -1.02 | 0.862357 | 0.667457 | 0.944681 | 0.805333 |
| MmugDNA.14818.1.S1_at   | MmugDNA.14818.1 | 5.05  | 5.02  | 0.21 | 0.18 | 1.02  | 0.811654 | 0.640833 | 0.923289 | 0.78921  |
| MmugDNA.1482.1.S1_at    | MmugDNA.1482.1  | 4.74  | 5.02  | 0.16 | 0.12 | -1.21 | 0.125291 | 0.086859 | 0.49131  | 0.339651 |
| MmugDNA.14820.1.S1_at   | MmugDNA.14820.1 | 2.84  | 2.92  | 0.33 | 0.19 | -1.05 | 0.83684  | 0.875656 | 0.934027 | 0.929374 |
| MmugDNA.14823.1.S1_at   | MmugDNA.14823.1 | 9.56  | 8.39  | 0.32 | 0.21 | 2.25  | 0.006701 | 0.002266 | 0.20158  | 0.07013  |
| MmugDNA.14827.1.S1_at   | MmugDNA.14827.1 | 4.56  | 6.08  | 0.44 | 1.05 | -2.87 | 0.140253 | 0.190484 | 0.508065 | 0.465906 |
| MmugDNA.14828.1.S1_at   | MmugDNA.14828.1 | 12.95 | 12.75 | 0.07 | 0.06 | 1.15  | 0.011805 | 0.000151 | 0.237691 | 0.029832 |
| MmugDNA.14829.1.S1_at   | MmugDNA.14829.1 | 10.46 | 10.78 | 0.06 | 1.11 | -1.25 | 0.653065 | 0.767879 | 0.843928 | 0.865256 |
| MmugDNA.14833.1.S1_at   | MmugDNA.14833.1 | 11.2  | 10.77 | 0.2  | 0.1  | 1.34  | 0.128748 | 0.098203 | 0.494664 | 0.356253 |
| MmugDNA.15123.1.S1_s_at | MmugDNA.15123.1 | 9.82  | 9.53  | 0.27 | 0.1  | 1.23  | 0.536513 | 0.643754 | 0.77949  | 0.791112 |

|                         |                 |       |       |      |      |       |          |          |          |          |
|-------------------------|-----------------|-------|-------|------|------|-------|----------|----------|----------|----------|
| MmugDNA.14834.1.S1_at   | MmugDNA.14834.1 | 11.67 | 11.89 | 0.67 | 1.04 | -1.16 | 0.716043 | 0.361409 | 0.87529  | 0.602196 |
| MmugDNA.14836.1.S1_at   | MmugDNA.14836.1 | 3.33  | 3.28  | 0.13 | 0.04 | 1.04  | 0.128561 | 0.090268 | 0.494653 | 0.344674 |
| MmugDNA.14837.1.S1_at   | MmugDNA.14837.1 | 4.15  | 4.2   | 0.03 | 0.08 | -1.03 | 0.251201 | 0.389011 | 0.600697 | 0.623288 |
| MmugDNA.1484.1.S1_at    | MmugDNA.1484.1  | 6.39  | 6.1   | 0.94 | 0.23 | 1.22  | 0.276763 | 0.287773 | 0.618938 | 0.549052 |
| MmugDNA.14840.1.S1_at   | MmugDNA.14840.1 | 3.69  | 3.64  | 0    | 0.3  | 1.04  | 0.805895 | 0.952542 | 0.92039  | 0.973066 |
| MmugDNA.14841.1.S1_at   | MmugDNA.14841.1 | 5.17  | 5.06  | 0.24 | 0.06 | 1.08  | 0.981999 | 0.901504 | 0.993449 | 0.943947 |
| MmugDNA.14843.1.S1_at   | MmugDNA.14843.1 | 9.03  | 11.23 | 0.33 | 0.65 | -4.6  | 0.013519 | 0.00607  | 0.247378 | 0.106175 |
| MmugDNA.14845.1.S1_at   | MmugDNA.14845.1 | 2.59  | 2.63  | 0.09 | 0.02 | -1.03 | 0.432702 | 0.721442 | 0.719197 | 0.838713 |
| MmugDNA.14845.1.S1_s_at | MmugDNA.14845.1 | 2.51  | 2.51  | 0.11 | 0.02 | 1     | 0.579113 | 0.718807 | 0.804078 | 0.837257 |
| MmugDNA.14846.1.S1_at   | MmugDNA.14846.1 | 8.93  | 9.16  | 0.25 | 0.58 | -1.17 | 0.47985  | 0.66396  | 0.747914 | 0.803246 |
| MmugDNA.14847.1.S1_at   | MmugDNA.14847.1 | 5.24  | 5.17  | 0.14 | 0.14 | 1.05  | 0.928428 | 0.399704 | 0.972486 | 0.629951 |
| MmugDNA.14848.1.S1_at   | MmugDNA.14848.1 | 5.79  | 5.75  | 0.53 | 0.3  | 1.03  | 0.523856 | 0.699354 | 0.772853 | 0.825344 |
| MmugDNA.14850.1.S1_at   | MmugDNA.14850.1 | 6.57  | 7.52  | 1.24 | 0.87 | -1.93 | 0.384766 | 0.419294 | 0.690114 | 0.643445 |
| MmugDNA.14851.1.S1_at   | MmugDNA.14851.1 | 4.1   | 4.18  | 0.03 | 0.13 | -1.06 | 0.790921 | 0.87645  | 0.913202 | 0.929683 |
| MmugDNA.14854.1.S1_at   | MmugDNA.14854.1 | 10.2  | 11.08 | 0.1  | 0.2  | -1.84 | 0.003914 | 0.001006 | 0.180728 | 0.050657 |
| MmugDNA.14855.1.S1_at   | MmugDNA.14855.1 | 11.53 | 11.65 | 0.26 | 0.46 | -1.08 | 0.632408 | 0.820339 | 0.833214 | 0.89648  |
| MmugDNA.14856.1.S1_at   | MmugDNA.14856.1 | 10.4  | 10.18 | 0.07 | 0.38 | 1.16  | 0.307672 | 0.273529 | 0.640082 | 0.53793  |
| MmugDNA.14859.1.S1_at   | MmugDNA.14859.1 | 6.3   | 6.16  | 0.12 | 0.16 | 1.1   | 0.705003 | 0.119606 | 0.869884 | 0.388247 |
| MmugDNA.1486.1.S1_at    | MmugDNA.1486.1  | 3.33  | 3.39  | 0.07 | 0.06 | -1.05 | 0.628042 | 0.8606   | 0.830492 | 0.920573 |
| MmugDNA.14863.1.S1_at   | MmugDNA.14863.1 | 3.76  | 3.78  | 0    | 0.19 | -1.02 | 0.521126 | 0.279679 | 0.771131 | 0.543228 |
| MmugDNA.14864.1.S1_s_at | MmugDNA.14864.1 | 9.94  | 10.25 | 0.22 | 0.52 | -1.25 | 0.819315 | 0.872854 | 0.926528 | 0.927711 |
| MmugDNA.14865.1.S1_at   | MmugDNA.14865.1 | 10.44 | 10.56 | 0.17 | 0.51 | -1.09 | 0.886437 | 0.597842 | 0.954596 | 0.760428 |
| MmugDNA.14867.1.S1_at   | MmugDNA.14867.1 | 6.75  | 6.85  | 0.9  | 0.12 | -1.07 | 0.921089 | 0.738237 | 0.969215 | 0.848245 |
| MmugDNA.14868.1.S1_at   | MmugDNA.14868.1 | 6.13  | 6.03  | 0.05 | 0.15 | 1.07  | 0.091313 | 0.141772 | 0.447137 | 0.415331 |
| MmugDNA.14869.1.S1_at   | MmugDNA.14869.1 | 3.03  | 3.24  | 0.05 | 0.04 | -1.15 | 0.019324 | 0.211636 | 0.273655 | 0.485681 |
| MmugDNA.1487.1.S1_at    | MmugDNA.1487.1  | 3.69  | 3.89  | 0.31 | 0.1  | -1.15 | 0.67978  | 0.876928 | 0.856816 | 0.929868 |
| MmugDNA.14870.1.S1_at   | MmugDNA.14870.1 | 5.41  | 5.43  | 0.06 | 0.14 | -1.01 | 0.76422  | 0.796622 | 0.900711 | 0.882754 |
| MmugDNA.14871.1.S1_at   | MmugDNA.14871.1 | 4.39  | 3.99  | 0.53 | 0.24 | 1.32  | 0.176969 | 0.213765 | 0.54084  | 0.487564 |
| MmugDNA.14873.1.S1_at   | MmugDNA.14873.1 | 7.71  | 5.44  | 0.1  | 0.29 | 4.83  | 0.000261 | 0.000152 | 0.12562  | 0.029832 |
| MmugDNA.34050.1.S1_s_at | MmugDNA.34050.1 | 6.12  | 6.85  | 0.15 | 0.66 | -1.66 | 0.112079 | 0.110215 | 0.474575 | 0.374349 |
| MmugDNA.14875.1.S1_at   | MmugDNA.14875.1 | 3.6   | 3.64  | 0.2  | 0.02 | -1.03 | 0.586555 | 0.872964 | 0.808193 | 0.927791 |
| MmugDNA.14877.1.S1_at   | MmugDNA.14877.1 | 6.03  | 5.94  | 0.26 | 0.08 | 1.06  | 0.213699 | 0.31638  | 0.573938 | 0.569809 |
| MmugDNA.14878.1.S1_at   | MmugDNA.14878.1 | 6.71  | 5.84  | 0.87 | 0.17 | 1.83  | 0.106128 | 0.095765 | 0.466831 | 0.352753 |
| MmugDNA.14879.1.S1_at   | MmugDNA.14879.1 | 5.55  | 5.53  | 0.97 | 0.39 | 1.01  | 0.421601 | 0.337146 | 0.713163 | 0.584348 |
| MmugDNA.1488.1.S1_at    | MmugDNA.1488.1  | 4.42  | 4.53  | 0.01 | 0.07 | -1.08 | 0.04945  | 0.082878 | 0.371434 | 0.332423 |
| MmugDNA.14880.1.S1_at   | MmugDNA.14880.1 | 3.94  | 3.84  | 0.05 | 0.18 | 1.07  | 0.389252 | 0.52337  | 0.692956 | 0.713698 |
| MmugDNA.14881.1.S1_at   | MmugDNA.14881.1 | 6.22  | 6.55  | 0.17 | 0.21 | -1.26 | 0.025369 | 0.015376 | 0.299142 | 0.157432 |
| MmugDNA.14882.1.S1_s_at | MmugDNA.14882.1 | 12.79 | 12.69 | 0.09 | 0.13 | 1.07  | 0.184423 | 0.046115 | 0.548138 | 0.259152 |
| MmugDNA.14883.1.S1_at   | MmugDNA.14883.1 | 4.41  | 4.29  | 0.04 | 0.13 | 1.09  | 0.388148 | 0.029227 | 0.692266 | 0.212898 |
| MmugDNA.14883.1.S1_s_at | MmugDNA.14883.1 | 10.63 | 10.76 | 0.27 | 0.25 | -1.09 | 0.951832 | 0.980022 | 0.981968 | 0.989229 |
| MmugDNA.14884.1.S1_at   | MmugDNA.14884.1 | 4.03  | 4.5   | 0.04 | 0.74 | -1.39 | 0.216016 | 0.318491 | 0.575954 | 0.571239 |



|                         |                 |       |       |      |      |       |          |          |          |          |
|-------------------------|-----------------|-------|-------|------|------|-------|----------|----------|----------|----------|
| MmugDNA.14885.1.S1_at   | MmugDNA.14885.1 | 12.15 | 12.04 | 0.09 | 0.56 | 1.08  | 0.21774  | 0.217997 | 0.577354 | 0.491614 |
| MmugDNA.14887.1.S1_at   | MmugDNA.14887.1 | 9.55  | 8.79  | 0.12 | 0.79 | 1.69  | 0.126651 | 0.132683 | 0.492802 | 0.404544 |
| MmugDNA.14888.1.S1_at   | MmugDNA.14888.1 | 7.52  | 6.43  | 0.4  | 0.16 | 2.12  | 0.01452  | 0.031734 | 0.253413 | 0.220562 |
| MmugDNA.14889.1.S1_at   | MmugDNA.14889.1 | 6.03  | 6.13  | 0.13 | 0.15 | -1.07 | 0.553572 | 0.152289 | 0.790251 | 0.427072 |
| MmugDNA.1489.1.S1_s_at  | MmugDNA.1489.1  | 7.77  | 7.73  | 0.24 | 0.25 | 1.03  | 0.985625 | 0.708475 | 0.994806 | 0.830919 |
| MmugDNA.14890.1.S1_at   | MmugDNA.14890.1 | 8.62  | 9.23  | 0.36 | 0.22 | -1.53 | 0.11802  | 0.078719 | 0.482085 | 0.325673 |
| MmugDNA.14891.1.S1_at   | MmugDNA.14891.1 | 6.06  | 5.83  | 0.92 | 0.59 | 1.17  | 0.692621 | 0.626757 | 0.86351  | 0.779979 |
| MmugDNA.14892.1.S1_at   | MmugDNA.14892.1 | 7.63  | 8.46  | 0.15 | 0.46 | -1.78 | 0.040035 | 0.018667 | 0.348657 | 0.171716 |
| MmugDNA.14894.1.S1_at   | MmugDNA.14894.1 | 3.14  | 3.13  | 0.07 | 0    | 1     | 0.541855 | 0.445268 | 0.783014 | 0.662338 |
| MmugDNA.14895.1.S1_at   | MmugDNA.14895.1 | 6.24  | 6.24  | 0.44 | 0.18 | -1    | 0.870138 | 0.96394  | 0.948096 | 0.979994 |
| MmugDNA.14896.1.S1_at   | MmugDNA.14896.1 | 12.35 | 12.15 | 0.15 | 0.1  | 1.15  | 0.372259 | 0.066419 | 0.682724 | 0.303385 |
| MmugDNA.14898.1.S1_at   | MmugDNA.14898.1 | 5.61  | 5.53  | 0.95 | 0.07 | 1.06  | 0.349537 | 0.355015 | 0.667857 | 0.597466 |
| MmugDNA.149.1.S1_at     | MmugDNA.149.1   | 7     | 6.82  | 0.15 | 0.13 | 1.14  | 0.2481   | 0.487033 | 0.599076 | 0.690176 |
| MmugDNA.1490.1.S1_at    | MmugDNA.1490.1  | 6.09  | 6.13  | 0.22 | 0.13 | -1.03 | 0.819631 | 0.872816 | 0.926583 | 0.92769  |
| MmugDNA.14900.1.S1_at   | MmugDNA.14900.1 | 2.89  | 2.94  | 0.04 | 0.04 | -1.03 | 0.115959 | 0.405563 | 0.479444 | 0.633804 |
| MmugDNA.14901.1.S1_at   | MmugDNA.14901.1 | 5.62  | 4.31  | 0.44 | 0.38 | 2.49  | 0.036598 | 0.212561 | 0.340031 | 0.486502 |
| MmugDNA.14902.1.S1_at   | MmugDNA.14902.1 | 6.46  | 6.52  | 0.15 | 0.23 | -1.04 | 0.858543 | 0.284556 | 0.942856 | 0.546721 |
| MmugDNA.14903.1.S1_at   | MmugDNA.14903.1 | 12.91 | 12.81 | 0.13 | 0.05 | 1.07  | 0.540353 | 0.717977 | 0.781809 | 0.836769 |
| MmugDNA.14904.1.S1_at   | MmugDNA.14904.1 | 10.57 | 11.48 | 0.31 | 0.11 | -1.88 | 0.007333 | 0.0028   | 0.207019 | 0.078022 |
| MmugDNA.14905.1.S1_at   | MmugDNA.14905.1 | 3.87  | 3.46  | 0.34 | 0.06 | 1.33  | 0.402969 | 0.283046 | 0.701716 | 0.545692 |
| MmugDNA.14906.1.S1_s_at | MmugDNA.14906.1 | 5.65  | 5.67  | 0.17 | 0.21 | -1.02 | 0.787737 | 0.271777 | 0.91166  | 0.536577 |
| MmugDNA.14907.1.S1_at   | MmugDNA.14907.1 | 5.24  | 5.16  | 0.28 | 0.26 | 1.06  | 0.665425 | 0.665732 | 0.850011 | 0.804156 |
| MmugDNA.1491.1.S1_at    | MmugDNA.1491.1  | 3.34  | 3.41  | 0.06 | 0.14 | -1.05 | 0.833112 | 0.733342 | 0.932274 | 0.845598 |
| MmugDNA.14910.1.S1_at   | MmugDNA.14910.1 | 6.68  | 8.23  | 0.3  | 1.3  | -2.93 | 0.112559 | 0.129165 | 0.475084 | 0.400611 |
| MmugDNA.14911.1.S1_at   | MmugDNA.14911.1 | 7.29  | 6.16  | 0.17 | 0.41 | 2.19  | 0.01756  | 0.003183 | 0.267454 | 0.081924 |
| MmugDNA.14914.1.S1_at   | MmugDNA.14914.1 | 3.89  | 4.01  | 0.06 | 0.19 | -1.09 | 0.543863 | 0.751383 | 0.784162 | 0.855447 |
| MmugDNA.14915.1.S1_at   | MmugDNA.14915.1 | 3.19  | 3.2   | 0.08 | 0.07 | -1    | 0.572958 | 0.933455 | 0.801055 | 0.962195 |
| MmugDNA.14916.1.S1_at   | MmugDNA.14916.1 | 3.72  | 3.71  | 0.1  | 0.09 | 1.01  | 0.856964 | 0.148783 | 0.942171 | 0.423201 |
| MmugDNA.14917.1.S1_at   | MmugDNA.14917.1 | 5.09  | 5.22  | 0.22 | 0.17 | -1.09 | 0.430764 | 0.581871 | 0.718266 | 0.750784 |
| MmugDNA.14918.1.S1_at   | MmugDNA.14918.1 | 11.6  | 9.85  | 0.67 | 0.53 | 3.37  | 0.02664  | 0.016157 | 0.303736 | 0.161102 |
| MmugDNA.14919.1.S1_at   | MmugDNA.14919.1 | 5.43  | 5.37  | 0.28 | 0.17 | 1.04  | 0.735358 | 0.607642 | 0.886196 | 0.766457 |
| MmugDNA.1492.1.S1_at    | MmugDNA.1492.1  | 8.58  | 9.02  | 0.06 | 0.37 | -1.36 | 0.091834 | 0.11518  | 0.448315 | 0.38209  |
| MmugDNA.14921.1.S1_at   | MmugDNA.14921.1 | 9.2   | 9.03  | 0.24 | 0.85 | 1.12  | 0.459844 | 0.582136 | 0.736566 | 0.750784 |
| MmugDNA.14922.1.S1_at   | MmugDNA.14922.1 | 4.75  | 5.01  | 0.14 | 0.27 | -1.2  | 0.618647 | 0.720327 | 0.825259 | 0.838252 |
| MmugDNA.14923.1.S1_at   | MmugDNA.14923.1 | 6.22  | 6.32  | 0.43 | 0.33 | -1.07 | 0.32765  | 0.233034 | 0.654051 | 0.50445  |
| MmugDNA.14924.1.S1_at   | MmugDNA.14924.1 | 4.53  | 3.94  | 0.97 | 0.31 | 1.51  | 0.390058 | 0.652206 | 0.693398 | 0.796592 |
| MmugDNA.14926.1.S1_at   | MmugDNA.14926.1 | 4.06  | 4     | 0.57 | 0.18 | 1.04  | 0.671704 | 0.809516 | 0.852716 | 0.890191 |
| MmugDNA.14927.1.S1_at   | MmugDNA.14927.1 | 5.06  | 5.28  | 0.13 | 0.12 | -1.17 | 0.079096 | 0.114254 | 0.428688 | 0.380761 |
| MmugDNA.14928.1.S1_at   | MmugDNA.14928.1 | 3.25  | 3.23  | 0.73 | 0.03 | 1.02  | 0.33456  | 0.350258 | 0.658444 | 0.594012 |
| MmugDNA.14930.1.S1_at   | MmugDNA.14930.1 | 8.46  | 9.18  | 0.53 | 0.53 | -1.65 | 0.287135 | 0.001729 | 0.625773 | 0.062895 |
| MmugDNA.14931.1.S1_at   | MmugDNA.14931.1 | 6.27  | 6.32  | 0.15 | 0.06 | -1.04 | 0.674749 | 0.49957  | 0.854234 | 0.698394 |

|                         |                 |       |       |      |      |       |          |          |          |          |
|-------------------------|-----------------|-------|-------|------|------|-------|----------|----------|----------|----------|
| MmugDNA.14932.1.S1_at   | MmugDNA.14932.1 | 5.04  | 4.94  | 0.17 | 0.57 | 1.07  | 0.480226 | 0.661699 | 0.748155 | 0.801903 |
| MmugDNA.14933.1.S1_at   | MmugDNA.14933.1 | 10.64 | 10.6  | 0.14 | 0.13 | 1.02  | 0.9159   | 0.3558   | 0.966911 | 0.597864 |
| MmugDNA.22780.1.S1_s_at | MmugDNA.22780.1 | 11.98 | 12.05 | 0.08 | 0.06 | -1.04 | 0.802097 | 0.067032 | 0.918358 | 0.304872 |
| MmugDNA.14934.1.S1_at   | MmugDNA.14934.1 | 6.2   | 6.75  | 0.26 | 0.42 | -1.46 | 0.059209 | 0.019421 | 0.391406 | 0.175117 |
| MmugDNA.14935.1.S1_at   | MmugDNA.14935.1 | 4.27  | 4.15  | 0.1  | 0.43 | 1.09  | 0.603834 | 0.802366 | 0.817352 | 0.886163 |
| MmugDNA.14937.1.S1_at   | MmugDNA.14937.1 | 7.76  | 7.46  | 0.53 | 0.27 | 1.23  | 0.895322 | 0.959497 | 0.958083 | 0.977017 |
| MmugDNA.14938.1.S1_at   | MmugDNA.14938.1 | 4.33  | 3.77  | 1.19 | 0.87 | 1.48  | 0.431835 | 0.459552 | 0.718638 | 0.671854 |
| MmugDNA.14939.1.S1_at   | MmugDNA.14939.1 | 5.4   | 5.36  | 0.44 | 0.99 | 1.03  | 0.634872 | 0.526416 | 0.834784 | 0.715557 |
| MmugDNA.14940.1.S1_at   | MmugDNA.14940.1 | 6.03  | 6.22  | 0.12 | 0.75 | -1.14 | 0.69221  | 0.786444 | 0.86333  | 0.87634  |
| MmugDNA.14941.1.S1_at   | MmugDNA.14941.1 | 3.64  | 3.64  | 0.15 | 0    | 1     | 0.373901 | 0.609428 | 0.683245 | 0.767768 |
| MmugDNA.14942.1.S1_at   | MmugDNA.14942.1 | 8.77  | 9     | 0.08 | 0.3  | -1.17 | 0.161513 | 0.168987 | 0.526444 | 0.445561 |
| MmugDNA.14943.1.S1_at   | MmugDNA.14943.1 | 3.57  | 3.45  | 0.25 | 0.1  | 1.09  | 0.324113 | 0.480626 | 0.651854 | 0.685926 |
| MmugDNA.14948.1.S1_at   | MmugDNA.14948.1 | 3.68  | 3.82  | 0.15 | 0.13 | -1.1  | 0.142374 | 0.208646 | 0.509648 | 0.482544 |
| MmugDNA.1495.1.S1_at    | MmugDNA.1495.1  | 6.13  | 6.32  | 0.11 | 0.14 | -1.14 | 0.155022 | 0.111133 | 0.519707 | 0.375714 |
| MmugDNA.14952.1.S1_at   | MmugDNA.14952.1 | 10.5  | 10.01 | 0.33 | 0.06 | 1.4   | 0.238087 | 0.31499  | 0.591443 | 0.568759 |
| MmugDNA.14952.1.S1_s_at | MmugDNA.14952.1 | 10.28 | 9.82  | 0.29 | 0.03 | 1.38  | 0.146987 | 0.173487 | 0.51306  | 0.449938 |
| MmugDNA.14953.1.S1_at   | MmugDNA.14953.1 | 3.01  | 3.09  | 0.15 | 0.35 | -1.06 | 0.761512 | 0.888085 | 0.899581 | 0.936183 |
| MmugDNA.14956.1.S1_at   | MmugDNA.14956.1 | 8.6   | 6.54  | 0.24 | 0.35 | 4.18  | 0.001118 | 0.000175 | 0.144533 | 0.030511 |
| MmugDNA.14957.1.S1_at   | MmugDNA.14957.1 | 4.42  | 4.55  | 0.27 | 0.27 | -1.1  | 0.900909 | 0.191041 | 0.960387 | 0.466313 |
| MmugDNA.14958.1.S1_at   | MmugDNA.14958.1 | 7.77  | 7.2   | 0.05 | 0.24 | 1.48  | 0.048247 | 0.020579 | 0.368148 | 0.179964 |
| MmugDNA.1496.1.S1_at    | MmugDNA.1496.1  | 6.86  | 7.38  | 0.25 | 0.38 | -1.44 | 0.047691 | 0.029576 | 0.367037 | 0.213628 |
| MmugDNA.1496.1.S1_s_at  | MmugDNA.1496.1  | 7.5   | 8.16  | 0.25 | 0.54 | -1.57 | 0.042838 | 0.021075 | 0.355382 | 0.181869 |
| MmugDNA.14960.1.S1_at   | MmugDNA.14960.1 | 3.27  | 3.39  | 0.1  | 0.25 | -1.09 | 0.160851 | 0.159644 | 0.525925 | 0.435785 |
| MmugDNA.14961.1.S1_at   | MmugDNA.14961.1 | 4.99  | 5.11  | 0.15 | 0.17 | -1.08 | 0.993194 | 0.489536 | 0.997679 | 0.691824 |
| MmugDNA.14963.1.S1_at   | MmugDNA.14963.1 | 6.95  | 7.14  | 0.11 | 0.04 | -1.14 | 0.047952 | 0.05792  | 0.367582 | 0.287131 |
| MmugDNA.14965.1.S1_at   | MmugDNA.14965.1 | 10.12 | 10.28 | 0.25 | 0.39 | -1.12 | 0.207712 | 0.121095 | 0.569822 | 0.390109 |
| MmugDNA.14966.1.S1_at   | MmugDNA.14966.1 | 8.53  | 8.63  | 0.1  | 0.12 | -1.07 | 0.166348 | 0.618137 | 0.529966 | 0.773929 |
| MmugDNA.14968.1.S1_at   | MmugDNA.14968.1 | 5.09  | 5.01  | 0.19 | 0.14 | 1.05  | 0.267965 | 0.822239 | 0.612874 | 0.897741 |
| MmugDNA.14969.1.S1_at   | MmugDNA.14969.1 | 6.76  | 6.94  | 0.17 | 0.15 | -1.14 | 0.089394 | 0.088527 | 0.445032 | 0.341947 |
| MmugDNA.1497.1.S1_at    | MmugDNA.1497.1  | 8.52  | 7.92  | 0.13 | 0.09 | 1.51  | 0.001986 | 0.002557 | 0.155636 | 0.074768 |
| MmugDNA.14971.1.S1_at   | MmugDNA.14971.1 | 7.95  | 6.68  | 0.75 | 0.64 | 2.42  | 0.084722 | 0.049454 | 0.437555 | 0.267334 |
| MmugDNA.14972.1.S1_at   | MmugDNA.14972.1 | 7.85  | 8.46  | 0.36 | 0.47 | -1.53 | 0.104836 | 0.061654 | 0.46526  | 0.295098 |
| MmugDNA.14974.1.S1_at   | MmugDNA.14974.1 | 10.77 | 11    | 0.13 | 0.12 | -1.17 | 0.13977  | 0.048759 | 0.507376 | 0.265764 |
| MmugDNA.14975.1.S1_at   | MmugDNA.14975.1 | 4.15  | 4.04  | 0.19 | 0.16 | 1.08  | 0.750909 | 0.429586 | 0.893489 | 0.650961 |
| MmugDNA.14976.1.S1_at   | MmugDNA.14976.1 | 10.2  | 10.27 | 0.54 | 0.63 | -1.05 | 0.972327 | 0.795244 | 0.989473 | 0.882019 |
| MmugDNA.14977.1.S1_at   | MmugDNA.14977.1 | 6.7   | 6.93  | 0.24 | 0.35 | -1.17 | 0.323573 | 0.226679 | 0.65165  | 0.49914  |
| MmugDNA.2806.1.S1_s_at  | MmugDNA.2806.1  | 6.84  | 7.63  | 0.41 | 0.74 | -1.72 | 0.326025 | 0.252283 | 0.653176 | 0.520953 |
| MmugDNA.14979.1.S1_at   | MmugDNA.14979.1 | 6.27  | 6.47  | 0.13 | 0.1  | -1.15 | 0.242145 | 0.380641 | 0.594305 | 0.6173   |
| MmugDNA.14980.1.S1_at   | MmugDNA.14980.1 | 4.74  | 4.85  | 0.15 | 0.03 | -1.08 | 0.786147 | 0.471553 | 0.911069 | 0.679515 |
| MmugDNA.14981.1.S1_at   | MmugDNA.14981.1 | 2.99  | 3.01  | 0.05 | 0.02 | -1.02 | 0.767588 | 0.952402 | 0.902428 | 0.973038 |
| MmugDNA.14983.1.S1_at   | MmugDNA.14983.1 | 4.86  | 4.61  | 1.21 | 0.6  | 1.19  | 0.751462 | 0.640661 | 0.893762 | 0.789053 |

|                         |                 |       |       |      |      |       |          |          |          |          |
|-------------------------|-----------------|-------|-------|------|------|-------|----------|----------|----------|----------|
| MmugDNA.14984.1.S1_s_at | MmugDNA.14984.1 | 7.8   | 7.95  | 0.07 | 0.1  | -1.1  | 0.378373 | 0.029119 | 0.686437 | 0.212733 |
| MmugDNA.14986.1.S1_at   | MmugDNA.14986.1 | 3.15  | 3.19  | 0.14 | 0.07 | -1.02 | 0.60537  | 0.420322 | 0.81824  | 0.644086 |
| MmugDNA.14987.1.S1_at   | MmugDNA.14987.1 | 10.58 | 10.13 | 0.29 | 0.63 | 1.37  | 0.639459 | 0.235365 | 0.837212 | 0.506412 |
| MmugDNA.14988.1.S1_at   | MmugDNA.14988.1 | 8.52  | 8     | 0.63 | 0.26 | 1.43  | 0.172572 | 0.229455 | 0.536174 | 0.501527 |
| MmugDNA.14990.1.S1_at   | MmugDNA.14990.1 | 5.27  | 5.44  | 1.43 | 1    | -1.13 | 0.987885 | 0.697023 | 0.995701 | 0.824045 |
| MmugDNA.14991.1.S1_at   | MmugDNA.14991.1 | 3.65  | 3.61  | 0.42 | 0.15 | 1.03  | 0.924959 | 0.329407 | 0.97091  | 0.578733 |
| MmugDNA.14993.1.S1_at   | MmugDNA.14993.1 | 3.46  | 3.57  | 0.16 | 0.24 | -1.08 | 0.743394 | 0.200866 | 0.890141 | 0.475369 |
| MmugDNA.14994.1.S1_at   | MmugDNA.14994.1 | 5.68  | 5.55  | 0.26 | 0.21 | 1.1   | 0.495201 | 0.674164 | 0.757115 | 0.809624 |
| MmugDNA.14996.1.S1_at   | MmugDNA.14996.1 | 12.39 | 12.53 | 0.16 | 0.2  | -1.1  | 0.187079 | 0.143351 | 0.550144 | 0.417349 |
| MmugDNA.14997.1.S1_at   | MmugDNA.14997.1 | 12.02 | 11.81 | 0.15 | 0.33 | 1.15  | 0.566473 | 0.362977 | 0.797591 | 0.603471 |
| MmugDNA.14998.1.S1_at   | MmugDNA.14998.1 | 5.38  | 5.24  | 0.37 | 0.01 | 1.1   | 0.513283 | 0.480233 | 0.766192 | 0.68574  |
| MmugDNA.15.1.S1_at      | MmugDNA.15.1    | 7.99  | 7.76  | 0.59 | 0.13 | 1.17  | 0.186639 | 0.24934  | 0.550106 | 0.518461 |
| MmugDNA.1500.1.S1_at    | MmugDNA.1500.1  | 4.05  | 4.13  | 0.35 | 0.23 | -1.05 | 0.483914 | 0.574331 | 0.749945 | 0.745794 |
| MmugDNA.15000.1.S1_at   | MmugDNA.15000.1 | 4.54  | 4.01  | 0.36 | 0.48 | 1.44  | 0.264326 | 0.405271 | 0.61012  | 0.63364  |
| MmugDNA.15001.1.S1_at   | MmugDNA.15001.1 | 3.77  | 3.85  | 0.09 | 0.1  | -1.06 | 0.202849 | 0.281965 | 0.565472 | 0.544868 |
| MmugDNA.15003.1.S1_at   | MmugDNA.15003.1 | 8.71  | 9.79  | 0.53 | 1.02 | -2.12 | 0.151012 | 0.068618 | 0.515728 | 0.308486 |
| MmugDNA.15005.1.S1_at   | MmugDNA.15005.1 | 8.6   | 9.16  | 0.14 | 0.86 | -1.47 | 0.568282 | 0.758876 | 0.79855  | 0.859892 |
| MmugDNA.15006.1.S1_at   | MmugDNA.15006.1 | 9.39  | 8.92  | 0.33 | 0.29 | 1.39  | 0.458583 | 0.648599 | 0.735573 | 0.794369 |
| MmugDNA.15007.1.S1_at   | MmugDNA.15007.1 | 5.6   | 5.78  | 0.94 | 0.66 | -1.13 | 0.410826 | 0.570524 | 0.70666  | 0.743151 |
| MmugDNA.15008.1.S1_at   | MmugDNA.15008.1 | 5.09  | 5.09  | 0.11 | 0.35 | -1    | 0.738329 | 0.8708   | 0.887643 | 0.926571 |
| MmugDNA.15009.1.S1_at   | MmugDNA.15009.1 | 6.11  | 6.06  | 0.06 | 0.09 | 1.04  | 0.919715 | 0.13997  | 0.968755 | 0.413309 |
| MmugDNA.15011.1.S1_at   | MmugDNA.15011.1 | 4.66  | 5     | 0.27 | 0.37 | -1.26 | 0.323725 | 0.032051 | 0.651695 | 0.221603 |
| MmugDNA.15012.1.S1_at   | MmugDNA.15012.1 | 7.47  | 6.43  | 0.63 | 0.26 | 2.06  | 0.056494 | 0.047468 | 0.386557 | 0.262486 |
| MmugDNA.15013.1.S1_at   | MmugDNA.15013.1 | 4.15  | 4.11  | 0.15 | 0.06 | 1.03  | 0.423938 | 0.55838  | 0.714199 | 0.735578 |
| MmugDNA.15015.1.S1_at   | MmugDNA.15015.1 | 3.07  | 2.88  | 0.28 | 0.18 | 1.14  | 0.269463 | 0.355067 | 0.614156 | 0.59749  |
| MmugDNA.15016.1.S1_at   | MmugDNA.15016.1 | 6.19  | 6.43  | 0.1  | 0.11 | -1.18 | 0.065977 | 0.050021 | 0.405613 | 0.268897 |
| MmugDNA.15017.1.S1_s_at | MmugDNA.15017.1 | 3.09  | 2.82  | 0.27 | 0.23 | 1.2   | 0.696558 | 0.192708 | 0.865337 | 0.468219 |
| MmugDNA.15018.1.S1_at   | MmugDNA.15018.1 | 4.27  | 3.97  | 0.21 | 0.01 | 1.23  | 0.061205 | 0.006495 | 0.395311 | 0.109521 |
| MmugDNA.15019.1.S1_at   | MmugDNA.15019.1 | 4.5   | 4.57  | 0.16 | 0.12 | -1.05 | 0.687228 | 0.33648  | 0.860236 | 0.583831 |
| MmugDNA.1502.1.S1_at    | MmugDNA.1502.1  | 3.51  | 3.49  | 0.08 | 0.27 | 1.01  | 0.712064 | 0.261503 | 0.873815 | 0.527999 |
| MmugDNA.15021.1.S1_at   | MmugDNA.15021.1 | 8.04  | 7.94  | 0.52 | 0.38 | 1.07  | 0.657091 | 0.71879  | 0.84573  | 0.837255 |
| MmugDNA.15021.1.S1_s_at | MmugDNA.15021.1 | 6.95  | 6.89  | 0.17 | 0.22 | 1.04  | 0.355677 | 0.514118 | 0.671185 | 0.707434 |
| MmugDNA.15023.1.S1_at   | MmugDNA.15023.1 | 8.39  | 8.1   | 1.39 | 0.96 | 1.22  | 0.609468 | 0.575273 | 0.820503 | 0.74643  |
| MmugDNA.15024.1.S1_at   | MmugDNA.15024.1 | 2.84  | 2.99  | 0.25 | 0.25 | -1.11 | 0.916555 | 0.981723 | 0.967349 | 0.989984 |
| MmugDNA.15025.1.S1_at   | MmugDNA.15025.1 | 3.98  | 4.05  | 0.24 | 0.3  | -1.05 | 0.759472 | 0.754863 | 0.898419 | 0.857323 |
| MmugDNA.15026.1.S1_at   | MmugDNA.15026.1 | 11.8  | 11.97 | 0.06 | 0.23 | -1.12 | 0.602022 | 0.731122 | 0.816272 | 0.844198 |
| MmugDNA.15027.1.S1_s_at | MmugDNA.15027.1 | 5.8   | 5.86  | 0.35 | 0.4  | -1.04 | 0.681939 | 0.745139 | 0.857635 | 0.852267 |
| MmugDNA.15028.1.S1_at   | MmugDNA.15028.1 | 3.06  | 2.9   | 0.15 | 0.08 | 1.12  | 0.774479 | 0.133764 | 0.905235 | 0.405752 |
| MmugDNA.15029.1.S1_at   | MmugDNA.15029.1 | 7.2   | 6.79  | 0.22 | 0.54 | 1.33  | 0.528159 | 0.592741 | 0.775373 | 0.75786  |
| MmugDNA.1503.1.S1_at    | MmugDNA.1503.1  | 4.84  | 4.8   | 0.32 | 0.07 | 1.03  | 0.745394 | 0.798769 | 0.891065 | 0.884072 |
| MmugDNA.15030.1.S1_at   | MmugDNA.15030.1 | 7.2   | 7.29  | 0.11 | 0.07 | -1.06 | 0.297985 | 0.209196 | 0.633647 | 0.483016 |

|                         |                 |       |       |      |      |       |          |          |          |          |
|-------------------------|-----------------|-------|-------|------|------|-------|----------|----------|----------|----------|
| MmugDNA.15031.1.S1_s_at | MmugDNA.15031.1 | 4.6   | 4.84  | 0.14 | 0.1  | -1.18 | 0.07587  | 0.413528 | 0.423804 | 0.639648 |
| MmugDNA.15032.1.S1_at   | MmugDNA.15032.1 | 10.91 | 10.36 | 0.38 | 1.15 | 1.46  | 0.330704 | 0.359957 | 0.65601  | 0.601195 |
| MmugDNA.33540.1.S1_s_at | MmugDNA.33540.1 | 3.44  | 3.35  | 0.12 | 0.13 | 1.06  | 0.341422 | 0.59446  | 0.662564 | 0.758623 |
| MmugDNA.15034.1.S1_at   | MmugDNA.15034.1 | 4.26  | 4.59  | 0.09 | 0.28 | -1.26 | 0.106288 | 0.186254 | 0.466831 | 0.462138 |
| MmugDNA.15035.1.S1_at   | MmugDNA.15035.1 | 3.92  | 3.82  | 0.25 | 0.23 | 1.07  | 0.860037 | 0.83961  | 0.943524 | 0.908582 |
| MmugDNA.15036.1.S1_at   | MmugDNA.15036.1 | 7.76  | 7.55  | 0.06 | 0.58 | 1.16  | 0.534768 | 0.259849 | 0.778804 | 0.526735 |
| MmugDNA.15038.1.S1_at   | MmugDNA.15038.1 | 3.64  | 3.65  | 1.03 | 0.1  | -1.01 | 0.369303 | 0.579366 | 0.680609 | 0.749058 |
| MmugDNA.15039.1.S1_at   | MmugDNA.15039.1 | 6.75  | 6.97  | 0.32 | 0.16 | -1.17 | 0.093797 | 0.093198 | 0.451215 | 0.34931  |
| MmugDNA.1504.1.S1_at    | MmugDNA.1504.1  | 7.06  | 6.83  | 0.32 | 0.23 | 1.17  | 0.525365 | 0.436917 | 0.773633 | 0.656357 |
| MmugDNA.15040.1.S1_at   | MmugDNA.15040.1 | 12.62 | 13.23 | 0.17 | 0.05 | -1.52 | 0.00524  | 0.004909 | 0.19102  | 0.097662 |
| MmugDNA.15041.1.S1_at   | MmugDNA.15041.1 | 5.81  | 5.9   | 0.31 | 0.11 | -1.06 | 0.356666 | 0.493711 | 0.671685 | 0.694316 |
| MmugDNA.15043.1.S1_at   | MmugDNA.15043.1 | 8.7   | 10.19 | 0.88 | 2.14 | -2.8  | 0.599673 | 0.327404 | 0.814724 | 0.577284 |
| MmugDNA.15047.1.S1_s_at | MmugDNA.15047.1 | 12.87 | 12.35 | 0.09 | 0.43 | 1.43  | 0.112191 | 0.118012 | 0.474694 | 0.385881 |
| MmugDNA.15048.1.S1_at   | MmugDNA.15048.1 | 9.34  | 9.08  | 0.14 | 0.37 | 1.2   | 0.205341 | 0.201514 | 0.567837 | 0.476036 |
| MmugDNA.15049.1.S1_at   | MmugDNA.15049.1 | 11.74 | 11.48 | 0.23 | 0.15 | 1.19  | 0.134992 | 0.101319 | 0.501995 | 0.361094 |
| MmugDNA.15050.1.S1_at   | MmugDNA.15050.1 | 9.62  | 8.83  | 0.18 | 0.23 | 1.73  | 0.023458 | 0.007559 | 0.291512 | 0.116437 |
| MmugDNA.15050.1.S1_x_at | MmugDNA.15050.1 | 9.8   | 9.08  | 0.15 | 0.23 | 1.65  | 0.023084 | 0.010264 | 0.290074 | 0.132661 |
| MmugDNA.15051.1.S1_at   | MmugDNA.15051.1 | 9.85  | 10.11 | 0.1  | 0.55 | -1.2  | 0.544753 | 0.685925 | 0.78459  | 0.81668  |
| MmugDNA.15053.1.S1_at   | MmugDNA.15053.1 | 3.51  | 3.43  | 0.3  | 0.13 | 1.06  | 0.253667 | 0.323913 | 0.602177 | 0.574658 |
| MmugDNA.15056.1.S1_at   | MmugDNA.15056.1 | 5.87  | 5.86  | 0.18 | 0.08 | 1.01  | 0.843478 | 0.887464 | 0.937058 | 0.935867 |
| MmugDNA.15057.1.S1_at   | MmugDNA.15057.1 | 4.08  | 3.65  | 0.17 | 0.07 | 1.34  | 0.041131 | 0.005205 | 0.350767 | 0.100027 |
| MmugDNA.15059.1.S1_at   | MmugDNA.15059.1 | 7.3   | 5.73  | 0.28 | 0.38 | 2.97  | 0.0044   | 0.000946 | 0.183061 | 0.049071 |
| MmugDNA.1506.1.S1_at    | MmugDNA.1506.1  | 8.46  | 9.28  | 0.5  | 1.05 | -1.77 | 0.178029 | 0.2079   | 0.542263 | 0.482049 |
| MmugDNA.15060.1.S1_at   | MmugDNA.15060.1 | 7.08  | 7.22  | 0.39 | 0.45 | -1.1  | 0.345986 | 0.323542 | 0.665474 | 0.574497 |
| MmugDNA.15061.1.S1_at   | MmugDNA.15061.1 | 5.87  | 7.93  | 0.49 | 0.94 | -4.17 | 0.026962 | 0.016313 | 0.305478 | 0.161818 |
| MmugDNA.15065.1.S1_at   | MmugDNA.15065.1 | 3.54  | 3.38  | 0.24 | 0.34 | 1.12  | 0.944981 | 0.294283 | 0.97903  | 0.55407  |
| MmugDNA.15066.1.S1_at   | MmugDNA.15066.1 | 6.3   | 6.24  | 0.2  | 0.17 | 1.04  | 0.797765 | 0.885969 | 0.916116 | 0.935119 |
| MmugDNA.15067.1.S1_at   | MmugDNA.15067.1 | 5.44  | 5.04  | 0.17 | 0.03 | 1.32  | 0.011376 | 0.022358 | 0.235384 | 0.187169 |
| MmugDNA.15068.1.S1_at   | MmugDNA.15068.1 | 4.8   | 4.42  | 0.24 | 0.21 | 1.3   | 0.103836 | 0.469709 | 0.463817 | 0.678355 |
| MmugDNA.15069.1.S1_at   | MmugDNA.15069.1 | 6.75  | 7.17  | 0.34 | 0.91 | -1.34 | 0.312389 | 0.152982 | 0.644141 | 0.427792 |
| MmugDNA.1507.1.S1_at    | MmugDNA.1507.1  | 3.16  | 3.38  | 0.84 | 0.51 | -1.16 | 0.87577  | 0.901928 | 0.950257 | 0.944174 |
| MmugDNA.15070.1.S1_at   | MmugDNA.15070.1 | 4.52  | 4.49  | 0.37 | 0.37 | 1.02  | 0.56724  | 0.420144 | 0.798061 | 0.643963 |
| MmugDNA.15071.1.S1_at   | MmugDNA.15071.1 | 4.45  | 4.51  | 0.16 | 0.34 | -1.05 | 0.765782 | 0.800996 | 0.901467 | 0.885538 |
| MmugDNA.15072.1.S1_at   | MmugDNA.15072.1 | 5.6   | 5.51  | 0.26 | 0.22 | 1.06  | 0.821054 | 0.554904 | 0.92718  | 0.733553 |
| MmugDNA.15073.1.S1_at   | MmugDNA.15073.1 | 7.86  | 7.78  | 0.11 | 0.66 | 1.05  | 0.973769 | 0.956128 | 0.989685 | 0.975053 |
| MmugDNA.15074.1.S1_at   | MmugDNA.15074.1 | 6.17  | 6.51  | 0.18 | 0.05 | -1.27 | 0.095701 | 0.058553 | 0.453501 | 0.288669 |
| MmugDNA.15077.1.S1_at   | MmugDNA.15077.1 | 3.89  | 4.07  | 0.04 | 0.14 | -1.13 | 0.098978 | 0.205693 | 0.458711 | 0.480043 |
| MmugDNA.15078.1.S1_at   | MmugDNA.15078.1 | 8.61  | 7.26  | 0.31 | 1.21 | 2.54  | 0.430094 | 0.4107   | 0.717933 | 0.637509 |
| MmugDNA.1508.1.S1_at    | MmugDNA.1508.1  | 5.94  | 5.88  | 0.2  | 0.08 | 1.04  | 0.62648  | 0.800845 | 0.82961  | 0.885464 |
| MmugDNA.15080.1.S1_at   | MmugDNA.15080.1 | 7.31  | 6.22  | 0.27 | 0.68 | 2.12  | 0.06503  | 0.046408 | 0.403791 | 0.259974 |
| MmugDNA.15081.1.S1_at   | MmugDNA.15081.1 | 5.83  | 5.84  | 0.21 | 0.24 | -1    | 0.522757 | 0.634744 | 0.772248 | 0.785012 |

|                         |                 |       |       |      |      |       |          |          |          |          |
|-------------------------|-----------------|-------|-------|------|------|-------|----------|----------|----------|----------|
| MmugDNA.15082.1.S1_at   | MmugDNA.15082.1 | 5.22  | 6.57  | 0.67 | 0.43 | -2.55 | 0.057769 | 0.050353 | 0.388999 | 0.269642 |
| MmugDNA.15083.1.S1_at   | MmugDNA.15083.1 | 5.17  | 6.78  | 0.48 | 0.58 | -3.05 | 0.05112  | 0.005835 | 0.375935 | 0.104669 |
| MmugDNA.15085.1.S1_at   | MmugDNA.15085.1 | 4.64  | 4.52  | 0.29 | 0.14 | 1.09  | 0.196324 | 0.357337 | 0.559558 | 0.598949 |
| MmugDNA.15087.1.S1_at   | MmugDNA.15087.1 | 3.5   | 3.63  | 0.08 | 0.06 | -1.09 | 0.109736 | 0.129758 | 0.470963 | 0.401362 |
| MmugDNA.15088.1.S1_at   | MmugDNA.15088.1 | 3.46  | 3.4   | 0.06 | 0.05 | 1.04  | 0.277787 | 0.759222 | 0.619916 | 0.860036 |
| MmugDNA.15090.1.S1_at   | MmugDNA.15090.1 | 3.59  | 3.65  | 0.34 | 0.15 | -1.04 | 0.903779 | 0.471633 | 0.961578 | 0.679537 |
| MmugDNA.15091.1.S1_at   | MmugDNA.15091.1 | 3.46  | 3.5   | 0.16 | 0.18 | -1.02 | 0.423803 | 0.482334 | 0.714199 | 0.687201 |
| MmugDNA.15093.1.S1_at   | MmugDNA.15093.1 | 5.22  | 4.69  | 0.36 | 0.6  | 1.45  | 0.208225 | 0.164004 | 0.570088 | 0.440128 |
| MmugDNA.15094.1.S1_at   | MmugDNA.15094.1 | 10.98 | 10.23 | 0.08 | 0.54 | 1.67  | 0.202341 | 0.221604 | 0.564621 | 0.494901 |
| MmugDNA.15094.1.S1_s_at | MmugDNA.15094.1 | 10.24 | 9.28  | 0.14 | 0.55 | 1.94  | 0.108918 | 0.112535 | 0.470653 | 0.377928 |
| MmugDNA.15095.1.S1_at   | MmugDNA.15095.1 | 6.66  | 6.42  | 0.26 | 0.88 | 1.18  | 0.905549 | 0.910509 | 0.962349 | 0.949465 |
| MmugDNA.15096.1.S1_at   | MmugDNA.15096.1 | 7.99  | 7.56  | 0.27 | 0.08 | 1.35  | 0.160278 | 0.01861  | 0.525269 | 0.171539 |
| MmugDNA.15097.1.S1_at   | MmugDNA.15097.1 | 6.01  | 6.86  | 0.22 | 0.29 | -1.8  | 0.026001 | 0.01539  | 0.301367 | 0.15752  |
| MmugDNA.15099.1.S1_at   | MmugDNA.15099.1 | 5.65  | 5.88  | 0.11 | 0.22 | -1.17 | 0.162107 | 0.201965 | 0.526638 | 0.476412 |
| MmugDNA.151.1.S1_at     | MmugDNA.151.1   | 11.48 | 12.02 | 0.15 | 0.38 | -1.45 | 0.07024  | 0.061542 | 0.413849 | 0.294865 |
| MmugDNA.36776.1.S1_at   | MmugDNA.36776.1 | 6.02  | 6.16  | 0.22 | 0.1  | -1.1  | 0.403146 | 0.326892 | 0.701894 | 0.576848 |
| MmugDNA.36776.1.S1_s_at | MmugDNA.36776.1 | 6.6   | 6.64  | 0.21 | 0.17 | -1.03 | 0.759419 | 0.825421 | 0.898381 | 0.899709 |
| MmugDNA.15100.1.S1_at   | MmugDNA.15100.1 | 9.46  | 7.94  | 0.9  | 0.67 | 2.86  | 0.080451 | 0.07694  | 0.430491 | 0.322421 |
| MmugDNA.15102.1.S1_at   | MmugDNA.15102.1 | 7.56  | 7.21  | 0.05 | 0.37 | 1.28  | 0.125349 | 0.055119 | 0.49131  | 0.280367 |
| MmugDNA.15103.1.S1_at   | MmugDNA.15103.1 | 3.79  | 3.58  | 0.61 | 0.52 | 1.16  | 0.324875 | 0.422761 | 0.65223  | 0.645932 |
| MmugDNA.15104.1.S1_at   | MmugDNA.15104.1 | 3.33  | 3.19  | 0.05 | 0.07 | 1.1   | 0.254511 | 0.008816 | 0.602433 | 0.124217 |
| MmugDNA.15105.1.S1_at   | MmugDNA.15105.1 | 3.94  | 3.93  | 0.32 | 0.15 | 1.01  | 0.814297 | 0.394729 | 0.924745 | 0.627208 |
| MmugDNA.15106.1.S1_at   | MmugDNA.15106.1 | 5.11  | 4.88  | 0.91 | 0.55 | 1.17  | 0.427743 | 0.64314  | 0.716428 | 0.79068  |
| MmugDNA.15107.1.S1_at   | MmugDNA.15107.1 | 9.96  | 10.4  | 0.45 | 0.38 | -1.36 | 0.231212 | 0.152069 | 0.587369 | 0.42682  |
| MmugDNA.15108.1.S1_at   | MmugDNA.15108.1 | 3.19  | 3.19  | 0.08 | 0.08 | -1    | 0.977031 | 0.859075 | 0.99123  | 0.919754 |
| MmugDNA.1511.1.S1_at    | MmugDNA.1511.1  | 7.08  | 6.05  | 1.04 | 0.3  | 2.05  | 0.183532 | 0.290934 | 0.547696 | 0.551499 |
| MmugDNA.15110.1.S1_at   | MmugDNA.15110.1 | 11.25 | 10.57 | 0.07 | 0.07 | 1.61  | 0.000318 | 0.000164 | 0.12562  | 0.030506 |
| MmugDNA.15111.1.S1_at   | MmugDNA.15111.1 | 5.74  | 5.9   | 0.25 | 0.2  | -1.12 | 0.592036 | 0.183461 | 0.810758 | 0.459586 |
| MmugDNA.15112.1.S1_at   | MmugDNA.15112.1 | 3.63  | 3.67  | 0.06 | 0.22 | -1.03 | 0.295761 | 0.273985 | 0.632111 | 0.538507 |
| MmugDNA.15115.1.S1_at   | MmugDNA.15115.1 | 7.99  | 7.68  | 0.35 | 0.71 | 1.24  | 0.674549 | 0.480853 | 0.854194 | 0.686    |
| MmugDNA.15115.1.S1_s_at | MmugDNA.15115.1 | 10.04 | 9.82  | 0.43 | 0.79 | 1.16  | 0.652694 | 0.58642  | 0.843828 | 0.753459 |
| MmugDNA.15116.1.S1_at   | MmugDNA.15116.1 | 4.07  | 4.38  | 0.09 | 0.25 | -1.24 | 0.154245 | 0.053612 | 0.518796 | 0.277182 |
| MmugDNA.15117.1.S1_at   | MmugDNA.15117.1 | 10.36 | 9.83  | 0.09 | 0.21 | 1.44  | 0.018114 | 0.009251 | 0.268849 | 0.126966 |
| MmugDNA.15118.1.S1_at   | MmugDNA.15118.1 | 10.44 | 9.74  | 0.02 | 0.25 | 1.62  | 0.009093 | 0.002576 | 0.222023 | 0.075148 |
| MmugDNA.15119.1.S1_at   | MmugDNA.15119.1 | 4.79  | 4.67  | 0.22 | 0.41 | 1.09  | 0.290551 | 0.415507 | 0.628298 | 0.64091  |
| MmugDNA.1512.1.S1_at    | MmugDNA.1512.1  | 6.66  | 6.94  | 0.07 | 0.12 | -1.21 | 0.035523 | 0.021081 | 0.336769 | 0.181869 |
| MmugDNA.15121.1.S1_s_at | MmugDNA.15121.1 | 5.07  | 5.18  | 0.26 | 0.15 | -1.08 | 0.834653 | 0.599758 | 0.932931 | 0.761564 |
| MmugDNA.15098.1.S1_s_at | MmugDNA.15098.1 | 9.37  | 8.36  | 0.14 | 0.47 | 2     | 0.066642 | 0.078178 | 0.406722 | 0.324684 |
| MmugDNA.15128.1.S1_at   | MmugDNA.15128.1 | 12.17 | 12    | 0.15 | 0.12 | 1.13  | 0.404711 | 0.15394  | 0.702952 | 0.428633 |
| MmugDNA.15129.1.S1_at   | MmugDNA.15129.1 | 4.74  | 4.37  | 0.12 | 0.38 | 1.29  | 0.549648 | 0.733728 | 0.787435 | 0.845822 |
| MmugDNA.1513.1.S1_at    | MmugDNA.1513.1  | 6.2   | 5.85  | 0.34 | 0.4  | 1.27  | 0.467882 | 0.457757 | 0.740845 | 0.670897 |

|                         |                 |       |       |      |      |       |          |          |          |          |
|-------------------------|-----------------|-------|-------|------|------|-------|----------|----------|----------|----------|
| MmugDNA.15130.1.S1_at   | MmugDNA.15130.1 | 4.62  | 4.82  | 0.09 | 0.22 | -1.15 | 0.249709 | 0.459426 | 0.600229 | 0.671741 |
| MmugDNA.15131.1.S1_at   | MmugDNA.15131.1 | 8.86  | 8.97  | 0.21 | 0.52 | -1.08 | 0.584349 | 0.140323 | 0.80696  | 0.413498 |
| MmugDNA.15133.1.S1_at   | MmugDNA.15133.1 | 3.88  | 3.65  | 0.25 | 0.24 | 1.18  | 0.729883 | 0.158194 | 0.882784 | 0.433986 |
| MmugDNA.15134.1.S1_at   | MmugDNA.15134.1 | 6.68  | 7.25  | 0.36 | 0.47 | -1.49 | 0.222069 | 0.142096 | 0.58065  | 0.415685 |
| MmugDNA.15136.1.S1_at   | MmugDNA.15136.1 | 9.34  | 9.03  | 0.13 | 0.75 | 1.24  | 0.526344 | 0.524578 | 0.77404  | 0.714424 |
| MmugDNA.15137.1.S1_at   | MmugDNA.15137.1 | 9.21  | 9.85  | 0.4  | 0.71 | -1.55 | 0.272883 | 0.123577 | 0.616391 | 0.393637 |
| MmugDNA.15138.1.S1_at   | MmugDNA.15138.1 | 4.59  | 4.52  | 0.22 | 0.18 | 1.05  | 0.386659 | 0.38388  | 0.691563 | 0.61978  |
| MmugDNA.15139.1.S1_at   | MmugDNA.15139.1 | 7.64  | 7.68  | 0.14 | 0.39 | -1.03 | 0.315758 | 0.431925 | 0.646695 | 0.652709 |
| MmugDNA.1514.1.S1_at    | MmugDNA.1514.1  | 5.14  | 5.36  | 0.35 | 0.09 | -1.16 | 0.370606 | 0.516556 | 0.681582 | 0.709034 |
| MmugDNA.15140.1.S1_at   | MmugDNA.15140.1 | 4.55  | 4.45  | 0.2  | 0.06 | 1.07  | 0.440234 | 0.385514 | 0.724158 | 0.621007 |
| MmugDNA.15142.1.S1_at   | MmugDNA.15142.1 | 5.79  | 5.97  | 0.09 | 0.14 | -1.13 | 0.370485 | 0.14358  | 0.681501 | 0.41751  |
| MmugDNA.15144.1.S1_at   | MmugDNA.15144.1 | 5.12  | 4.92  | 0.27 | 0.11 | 1.15  | 0.695451 | 0.664054 | 0.864936 | 0.803247 |
| MmugDNA.15145.1.S1_at   | MmugDNA.15145.1 | 4.69  | 4.77  | 0.14 | 0.18 | -1.05 | 0.637638 | 0.790654 | 0.836256 | 0.878957 |
| MmugDNA.15146.1.S1_at   | MmugDNA.15146.1 | 8.46  | 8.67  | 0.36 | 0.44 | -1.16 | 0.95312  | 0.620782 | 0.982522 | 0.775593 |
| MmugDNA.15147.1.S1_at   | MmugDNA.15147.1 | 4.07  | 4.1   | 0.18 | 0.14 | -1.02 | 0.65425  | 0.478461 | 0.844551 | 0.684481 |
| MmugDNA.15149.1.S1_at   | MmugDNA.15149.1 | 4.48  | 5.33  | 0.33 | 1.59 | -1.8  | 0.355244 | 0.416948 | 0.670893 | 0.641855 |
| MmugDNA.15173.1.S1_s_at | MmugDNA.15173.1 | 5.98  | 6.07  | 0.18 | 0.4  | -1.06 | 0.240828 | 0.315102 | 0.593592 | 0.568838 |
| MmugDNA.15154.1.S1_at   | MmugDNA.15154.1 | 8.43  | 8.11  | 0.14 | 0.46 | 1.25  | 0.428176 | 0.606422 | 0.716678 | 0.765747 |
| MmugDNA.15156.1.S1_at   | MmugDNA.15156.1 | 10.16 | 10.85 | 0.92 | 1.25 | -1.61 | 0.306213 | 0.137784 | 0.639466 | 0.410757 |
| MmugDNA.15157.1.S1_at   | MmugDNA.15157.1 | 4.19  | 3.99  | 0.56 | 0.12 | 1.14  | 0.256628 | 0.229531 | 0.604384 | 0.501534 |
| MmugDNA.15158.1.S1_at   | MmugDNA.15158.1 | 10.58 | 9.05  | 0.3  | 0.52 | 2.89  | 0.005659 | 0.00173  | 0.191943 | 0.062895 |
| MmugDNA.15159.1.S1_at   | MmugDNA.15159.1 | 3.77  | 3.22  | 0.54 | 0.12 | 1.46  | 0.159258 | 0.204888 | 0.524168 | 0.479227 |
| MmugDNA.1516.1.S1_at    | MmugDNA.1516.1  | 8.2   | 7.46  | 0.17 | 0.4  | 1.67  | 0.038208 | 0.006216 | 0.343724 | 0.106916 |
| MmugDNA.15160.1.S1_at   | MmugDNA.15160.1 | 4.08  | 4.28  | 0.48 | 0.32 | -1.15 | 0.796776 | 0.051528 | 0.915703 | 0.27241  |
| MmugDNA.15160.1.S1_s_at | MmugDNA.15160.1 | 4.69  | 4.53  | 0.38 | 0.41 | 1.12  | 0.740352 | 0.20364  | 0.888567 | 0.47789  |
| MmugDNA.15161.1.S1_at   | MmugDNA.15161.1 | 12.22 | 11.87 | 0.15 | 0.08 | 1.27  | 0.051287 | 0.041649 | 0.376001 | 0.24887  |
| MmugDNA.15163.1.S1_at   | MmugDNA.15163.1 | 3.72  | 3.65  | 0.17 | 0.17 | 1.05  | 0.343201 | 0.148127 | 0.663497 | 0.422667 |
| MmugDNA.15164.1.S1_s_at | MmugDNA.15164.1 | 10.46 | 10.12 | 0.19 | 0.22 | 1.27  | 0.233654 | 0.163832 | 0.588317 | 0.440054 |
| MmugDNA.15165.1.S1_at   | MmugDNA.15165.1 | 4.2   | 4.22  | 0.3  | 0.18 | -1.01 | 0.94959  | 0.953753 | 0.980834 | 0.973663 |
| MmugDNA.15166.1.S1_at   | MmugDNA.15166.1 | 7.36  | 7.05  | 0.23 | 0.31 | 1.24  | 0.064197 | 0.071513 | 0.402491 | 0.313706 |
| MmugDNA.15168.1.S1_at   | MmugDNA.15168.1 | 4.18  | 4.28  | 0.16 | 0.17 | -1.07 | 0.396561 | 0.712209 | 0.697088 | 0.833243 |
| MmugDNA.15169.1.S1_at   | MmugDNA.15169.1 | 3.49  | 3.66  | 0.08 | 0.09 | -1.13 | 0.142485 | 0.161326 | 0.509652 | 0.437494 |
| MmugDNA.1517.1.S1_at    | MmugDNA.1517.1  | 12.68 | 12.05 | 0.08 | 0.09 | 1.56  | 0.000981 | 0.000119 | 0.139813 | 0.028664 |
| MmugDNA.15171.1.S1_at   | MmugDNA.15171.1 | 3.75  | 3.81  | 0.36 | 0.23 | -1.04 | 0.972926 | 0.822073 | 0.989561 | 0.897651 |
| MmugDNA.15172.1.S1_at   | MmugDNA.15172.1 | 4.8   | 5.08  | 0.22 | 0.22 | -1.21 | 0.290233 | 0.387391 | 0.628072 | 0.622065 |
| MmugDNA.15174.1.S1_at   | MmugDNA.15174.1 | 6.7   | 6.91  | 0.09 | 0.25 | -1.16 | 0.078399 | 0.107716 | 0.428471 | 0.370779 |
| MmugDNA.15177.1.S1_at   | MmugDNA.15177.1 | 7.84  | 7.63  | 0.77 | 0.87 | 1.16  | 0.760154 | 0.740869 | 0.898845 | 0.849975 |
| MmugDNA.15179.1.S1_at   | MmugDNA.15179.1 | 9.62  | 9.46  | 0.24 | 0.21 | 1.11  | 0.614251 | 0.17174  | 0.823186 | 0.448148 |
| MmugDNA.1518.1.S1_at    | MmugDNA.1518.1  | 12.49 | 11.94 | 0.06 | 0.23 | 1.46  | 0.020539 | 0.011357 | 0.278552 | 0.138214 |
| MmugDNA.15180.1.S1_at   | MmugDNA.15180.1 | 3.31  | 3.28  | 0.07 | 0.18 | 1.02  | 0.851564 | 0.674931 | 0.940264 | 0.810089 |
| MmugDNA.15181.1.S1_at   | MmugDNA.15181.1 | 11.9  | 11.48 | 0.09 | 0.36 | 1.34  | 0.05219  | 0.00536  | 0.377155 | 0.101092 |

|                         |                 |       |       |      |      |       |          |          |          |          |
|-------------------------|-----------------|-------|-------|------|------|-------|----------|----------|----------|----------|
| MmugDNA.15182.1.S1_at   | MmugDNA.15182.1 | 6.01  | 5.48  | 0.29 | 0.57 | 1.45  | 0.238599 | 0.461457 | 0.591896 | 0.673131 |
| MmugDNA.15183.1.S1_at   | MmugDNA.15183.1 | 6.52  | 6.37  | 0.74 | 0.43 | 1.11  | 0.353086 | 0.456593 | 0.669964 | 0.670289 |
| MmugDNA.15184.1.S1_at   | MmugDNA.15184.1 | 6.1   | 6.21  | 0.1  | 0.36 | -1.08 | 0.612709 | 0.919017 | 0.822333 | 0.954495 |
| MmugDNA.15186.1.S1_at   | MmugDNA.15186.1 | 5.82  | 6.02  | 0.41 | 0.57 | -1.15 | 0.423359 | 0.5886   | 0.714017 | 0.755104 |
| MmugDNA.15187.1.S1_at   | MmugDNA.15187.1 | 3.93  | 3.92  | 0.25 | 0.14 | 1.01  | 0.521155 | 0.807098 | 0.771131 | 0.888946 |
| MmugDNA.15188.1.S1_at   | MmugDNA.15188.1 | 7.8   | 7.71  | 0.73 | 0.68 | 1.06  | 0.879832 | 0.950378 | 0.951698 | 0.971738 |
| MmugDNA.15189.1.S1_at   | MmugDNA.15189.1 | 5.65  | 5.61  | 0.92 | 0.5  | 1.03  | 0.402766 | 0.570705 | 0.701615 | 0.743295 |
| MmugDNA.1519.1.S1_at    | MmugDNA.1519.1  | 4.24  | 4.41  | 0.13 | 0.19 | -1.12 | 0.163709 | 0.184401 | 0.528002 | 0.460458 |
| MmugDNA.15190.1.S1_at   | MmugDNA.15190.1 | 7.97  | 7.17  | 0.29 | 0.91 | 1.74  | 0.185822 | 0.227935 | 0.549363 | 0.500211 |
| MmugDNA.15191.1.S1_at   | MmugDNA.15191.1 | 5.69  | 5.35  | 0.91 | 0.42 | 1.27  | 0.199725 | 0.31809  | 0.562817 | 0.571046 |
| MmugDNA.15192.1.S1_at   | MmugDNA.15192.1 | 6.73  | 7.38  | 0.53 | 0.54 | -1.57 | 0.198976 | 0.254349 | 0.562029 | 0.522647 |
| MmugDNA.15196.1.S1_at   | MmugDNA.15196.1 | 4.82  | 4.74  | 0.08 | 0.08 | 1.06  | 0.118551 | 0.123368 | 0.48294  | 0.393391 |
| MmugDNA.15197.1.S1_at   | MmugDNA.15197.1 | 5.16  | 5.34  | 0.1  | 0.15 | -1.14 | 0.102793 | 0.178384 | 0.46254  | 0.454755 |
| MmugDNA.15198.1.S1_at   | MmugDNA.15198.1 | 2.95  | 3.16  | 0.16 | 0.03 | -1.15 | 0.091385 | 0.07642  | 0.447175 | 0.321419 |
| MmugDNA.15199.1.S1_at   | MmugDNA.15199.1 | 6.07  | 5.07  | 0.95 | 0.81 | 1.99  | 0.18556  | 0.258245 | 0.548924 | 0.52558  |
| MmugDNA.152.1.S1_at     | MmugDNA.152.1   | 11.73 | 12.09 | 0.08 | 0.21 | -1.28 | 0.032909 | 0.018164 | 0.326584 | 0.169673 |
| MmugDNA.1520.1.S1_at    | MmugDNA.1520.1  | 7.01  | 7.71  | 0.21 | 0.16 | -1.62 | 0.012883 | 0.00229  | 0.244544 | 0.07045  |
| MmugDNA.15200.1.S1_at   | MmugDNA.15200.1 | 3.87  | 4.12  | 0.27 | 0.15 | -1.19 | 0.622028 | 0.315633 | 0.827196 | 0.569053 |
| MmugDNA.15201.1.S1_at   | MmugDNA.15201.1 | 5.77  | 6.24  | 0.59 | 0.11 | -1.39 | 0.326119 | 0.554805 | 0.653184 | 0.733501 |
| MmugDNA.15202.1.S1_at   | MmugDNA.15202.1 | 8.22  | 8.96  | 0.37 | 0.3  | -1.67 | 0.027483 | 0.030847 | 0.308211 | 0.217427 |
| MmugDNA.15203.1.S1_at   | MmugDNA.15203.1 | 4.77  | 4.49  | 0.52 | 0.38 | 1.21  | 0.534256 | 0.24194  | 0.77862  | 0.512489 |
| MmugDNA.15204.1.S1_at   | MmugDNA.15204.1 | 3.8   | 3.78  | 0.34 | 0.27 | 1.01  | 0.376871 | 0.540661 | 0.685427 | 0.724476 |
| MmugDNA.15206.1.S1_at   | MmugDNA.15206.1 | 5.48  | 5.58  | 0.04 | 0.02 | -1.07 | 0.015838 | 0.010208 | 0.261425 | 0.132467 |
| MmugDNA.15207.1.S1_at   | MmugDNA.15207.1 | 6.06  | 6.13  | 0.8  | 0.8  | -1.05 | 0.98301  | 0.853293 | 0.993768 | 0.916546 |
| MmugDNA.1521.1.S1_s_at  | MmugDNA.1521.1  | 6.91  | 7.72  | 0.22 | 0.63 | -1.75 | 0.135654 | 0.028911 | 0.502513 | 0.211894 |
| MmugDNA.15210.1.S1_at   | MmugDNA.15210.1 | 4.81  | 5     | 0.13 | 0.14 | -1.14 | 0.155524 | 0.191136 | 0.520256 | 0.4664   |
| MmugDNA.15211.1.S1_at   | MmugDNA.15211.1 | 3.74  | 3.45  | 0.11 | 0.33 | 1.22  | 0.237025 | 0.168869 | 0.590795 | 0.445458 |
| MmugDNA.15213.1.S1_at   | MmugDNA.15213.1 | 13.21 | 13.02 | 0.15 | 0.14 | 1.14  | 0.123164 | 0.135421 | 0.488745 | 0.407515 |
| MmugDNA.15214.1.S1_s_at | MmugDNA.15214.1 | 7.09  | 7.1   | 0.36 | 0.1  | -1    | 0.794043 | 0.861804 | 0.914561 | 0.92146  |
| MmugDNA.15215.1.S1_s_at | MmugDNA.15215.1 | 10.18 | 9.76  | 0.35 | 0.52 | 1.33  | 0.830843 | 0.911914 | 0.93155  | 0.950311 |
| MmugDNA.15216.1.S1_at   | MmugDNA.15216.1 | 6.06  | 6.27  | 1.45 | 0.39 | -1.16 | 0.904214 | 0.920455 | 0.961669 | 0.955182 |
| MmugDNA.15217.1.S1_at   | MmugDNA.15217.1 | 4.87  | 4.92  | 0.07 | 0.06 | -1.03 | 0.46539  | 0.150523 | 0.739873 | 0.425074 |
| MmugDNA.1522.1.S1_at    | MmugDNA.1522.1  | 4.33  | 4.78  | 0.15 | 0.33 | -1.37 | 0.067124 | 0.05428  | 0.407071 | 0.278459 |
| MmugDNA.15220.1.S1_s_at | MmugDNA.15220.1 | 8.98  | 8.53  | 0.14 | 0.31 | 1.37  | 0.101084 | 0.035759 | 0.461009 | 0.233437 |
| MmugDNA.15221.1.S1_at   | MmugDNA.15221.1 | 7.69  | 8.98  | 0.36 | 1.54 | -2.44 | 0.23044  | 0.175368 | 0.587222 | 0.452114 |
| MmugDNA.15223.1.S1_at   | MmugDNA.15223.1 | 5.12  | 5.2   | 0.08 | 0.29 | -1.06 | 0.494645 | 0.710011 | 0.756791 | 0.831887 |
| MmugDNA.15224.1.S1_at   | MmugDNA.15224.1 | 4.15  | 4.16  | 0.31 | 0.03 | -1    | 0.350404 | 0.475736 | 0.668486 | 0.682332 |
| MmugDNA.15226.1.S1_at   | MmugDNA.15226.1 | 4.49  | 4.37  | 0.17 | 0.37 | 1.09  | 0.935555 | 0.955898 | 0.975112 | 0.975006 |
| MmugDNA.15228.1.S1_at   | MmugDNA.15228.1 | 4.46  | 4.37  | 0.12 | 0.04 | 1.07  | 0.302091 | 0.081926 | 0.636849 | 0.330487 |
| MmugDNA.1523.1.S1_at    | MmugDNA.1523.1  | 4.8   | 4.43  | 0.59 | 0.23 | 1.3   | 0.32667  | 0.252312 | 0.653184 | 0.52096  |
| MmugDNA.15230.1.S1_at   | MmugDNA.15230.1 | 7.27  | 7.05  | 0.07 | 0.12 | 1.16  | 0.036816 | 0.00086  | 0.34044  | 0.047371 |

|                         |                 |       |       |      |      |        |          |          |          |          |
|-------------------------|-----------------|-------|-------|------|------|--------|----------|----------|----------|----------|
| MmugDNA.15231.1.S1_at   | MmugDNA.15231.1 | 7.18  | 7.16  | 0.16 | 0.4  | 1.01   | 0.926473 | 0.727619 | 0.971724 | 0.842488 |
| MmugDNA.15232.1.S1_at   | MmugDNA.15232.1 | 11.78 | 10.85 | 0.05 | 0.48 | 1.9    | 0.021525 | 0.006845 | 0.282524 | 0.111782 |
| MmugDNA.15235.1.S1_at   | MmugDNA.15235.1 | 3     | 3.04  | 0.11 | 0.01 | -1.03  | 0.400558 | 0.669397 | 0.70015  | 0.806626 |
| MmugDNA.15237.1.S1_at   | MmugDNA.15237.1 | 5.96  | 6.22  | 1.04 | 1.33 | -1.2   | 0.366416 | 0.470902 | 0.67904  | 0.679128 |
| MmugDNA.1524.1.S1_at    | MmugDNA.1524.1  | 7.82  | 7.99  | 0.15 | 0.15 | -1.12  | 0.576044 | 0.546605 | 0.802692 | 0.728105 |
| MmugDNA.15242.1.S1_at   | MmugDNA.15242.1 | 4.84  | 4.88  | 0.14 | 0.08 | -1.02  | 0.163344 | 0.464893 | 0.527696 | 0.675496 |
| MmugDNA.15243.1.S1_at   | MmugDNA.15243.1 | 6.54  | 7.62  | 0.14 | 0.18 | -2.12  | 0.001779 | 0.000861 | 0.154452 | 0.047371 |
| MmugDNA.15246.1.S1_at   | MmugDNA.15246.1 | 4.22  | 4.31  | 0.25 | 0.15 | -1.06  | 0.571759 | 0.736122 | 0.800374 | 0.84733  |
| MmugDNA.15247.1.S1_at   | MmugDNA.15247.1 | 4.73  | 4.73  | 0.09 | 0.13 | -1     | 0.252135 | 0.379668 | 0.601255 | 0.616523 |
| MmugDNA.32984.1.S1_at   | MmugDNA.32984.1 | 10.59 | 9.59  | 0.18 | 0.1  | 2      | 0.000923 | 0.000632 | 0.139813 | 0.042882 |
| MmugDNA.32984.1.S1_s_at | MmugDNA.32984.1 | 11.1  | 10.17 | 0.2  | 0.09 | 1.91   | 0.001191 | 0.002447 | 0.145267 | 0.073228 |
| MmugDNA.1525.1.S1_at    | MmugDNA.1525.1  | 5     | 4.73  | 0.43 | 0.08 | 1.2    | 0.092363 | 0.045114 | 0.448992 | 0.256956 |
| MmugDNA.1525.1.S1_x_at  | MmugDNA.1525.1  | 5.66  | 5.22  | 0.33 | 0.03 | 1.36   | 0.053149 | 0.010305 | 0.379463 | 0.132897 |
| MmugDNA.15252.1.S1_at   | MmugDNA.15252.1 | 3.76  | 3.33  | 0.43 | 0.07 | 1.35   | 0.195915 | 0.159611 | 0.558998 | 0.435785 |
| MmugDNA.15253.1.S1_at   | MmugDNA.15253.1 | 6.98  | 6.35  | 0.54 | 0.76 | 1.54   | 0.515942 | 0.294333 | 0.767717 | 0.55407  |
| MmugDNA.15254.1.S1_at   | MmugDNA.15254.1 | 5.72  | 6.48  | 0.65 | 1.47 | -1.7   | 0.529739 | 0.533708 | 0.776285 | 0.719849 |
| MmugDNA.15255.1.S1_at   | MmugDNA.15255.1 | 3.17  | 3.23  | 0.07 | 0.23 | -1.04  | 0.843757 | 0.923543 | 0.937163 | 0.956997 |
| MmugDNA.15256.1.S1_at   | MmugDNA.15256.1 | 5.33  | 5.37  | 0.13 | 0.04 | -1.03  | 0.888126 | 0.046933 | 0.955059 | 0.261301 |
| MmugDNA.15257.1.S1_at   | MmugDNA.15257.1 | 4.93  | 4.74  | 0.17 | 0.27 | 1.15   | 0.253359 | 0.352217 | 0.601996 | 0.595568 |
| MmugDNA.15262.1.S1_at   | MmugDNA.15262.1 | 9.85  | 10.22 | 0.18 | 1    | -1.29  | 0.341158 | 0.289072 | 0.662308 | 0.550238 |
| MmugDNA.15264.1.S1_at   | MmugDNA.15264.1 | 6.7   | 7.99  | 0.53 | 0.64 | -2.45  | 0.109023 | 0.12763  | 0.470796 | 0.398571 |
| MmugDNA.15265.1.S1_at   | MmugDNA.15265.1 | 3.66  | 8.58  | 1.92 | 2.91 | -30.26 | 0.209879 | 0.12159  | 0.571144 | 0.390723 |
| MmugDNA.15266.1.S1_at   | MmugDNA.15266.1 | 6.9   | 7.38  | 0.27 | 0.4  | -1.4   | 0.160483 | 0.190923 | 0.525449 | 0.466269 |
| MmugDNA.15268.1.S1_s_at | MmugDNA.15268.1 | 5.46  | 10.05 | 1.85 | 3.65 | -23.95 | 0.353457 | 0.208965 | 0.67013  | 0.482756 |
| MmugDNA.15269.1.S1_at   | MmugDNA.15269.1 | 8.59  | 9.43  | 0.5  | 0.49 | -1.79  | 0.154606 | 0.195312 | 0.519189 | 0.470253 |
| MmugDNA.1527.1.S1_at    | MmugDNA.1527.1  | 7.44  | 7.51  | 0.19 | 0.13 | -1.05  | 0.164562 | 0.16419  | 0.528529 | 0.440466 |
| MmugDNA.15270.1.S1_at   | MmugDNA.15270.1 | 3.11  | 3.2   | 0.08 | 0.13 | -1.06  | 0.341442 | 0.345604 | 0.662564 | 0.590833 |
| MmugDNA.15272.1.S1_at   | MmugDNA.15272.1 | 7.77  | 7.64  | 0.43 | 0.26 | 1.1    | 0.259771 | 0.232992 | 0.606733 | 0.50445  |
| MmugDNA.15273.1.S1_at   | MmugDNA.15273.1 | 4.35  | 4.42  | 0.07 | 0.22 | -1.05  | 0.766161 | 0.180211 | 0.901712 | 0.456777 |
| MmugDNA.15274.1.S1_at   | MmugDNA.15274.1 | 5.35  | 4.88  | 0.27 | 0.21 | 1.39   | 0.187358 | 0.311879 | 0.550428 | 0.566833 |
| MmugDNA.15275.1.S1_at   | MmugDNA.15275.1 | 8.72  | 9.13  | 0.26 | 0.24 | -1.33  | 0.075383 | 0.062257 | 0.422289 | 0.296325 |
| MmugDNA.15276.1.S1_at   | MmugDNA.15276.1 | 7.31  | 6.31  | 0.24 | 0.58 | 1.99   | 0.082876 | 0.033544 | 0.434645 | 0.226764 |
| MmugDNA.15277.1.S1_at   | MmugDNA.15277.1 | 5.84  | 6.41  | 0.39 | 0.43 | -1.48  | 0.160074 | 0.176653 | 0.524858 | 0.453138 |
| MmugDNA.15278.1.S1_at   | MmugDNA.15278.1 | 3.9   | 3.97  | 0    | 0.1  | -1.05  | 0.211746 | 0.616562 | 0.572347 | 0.772767 |
| MmugDNA.15280.1.S1_at   | MmugDNA.15280.1 | 5.83  | 6.1   | 0.11 | 0.04 | -1.21  | 0.01587  | 0.019928 | 0.261608 | 0.177443 |
| MmugDNA.15282.1.S1_at   | MmugDNA.15282.1 | 11.21 | 11.16 | 0.4  | 0.53 | 1.04   | 0.309574 | 0.415375 | 0.641613 | 0.640852 |
| MmugDNA.15283.1.S1_at   | MmugDNA.15283.1 | 5.88  | 6.57  | 0.25 | 0.45 | -1.62  | 0.119747 | 0.130465 | 0.484384 | 0.4023   |
| MmugDNA.15284.1.S1_at   | MmugDNA.15284.1 | 8.32  | 7.99  | 0.09 | 0.4  | 1.26   | 0.136084 | 0.199615 | 0.502941 | 0.474255 |
| MmugDNA.15287.1.S1_at   | MmugDNA.15287.1 | 9.92  | 9.18  | 0.09 | 0.21 | 1.67   | 0.008797 | 0.003579 | 0.221033 | 0.085582 |
| MmugDNA.15289.1.S1_at   | MmugDNA.15289.1 | 13.34 | 13.26 | 0.04 | 0.03 | 1.06   | 0.099697 | 0.024703 | 0.459668 | 0.196795 |
| MmugDNA.1529.1.S1_at    | MmugDNA.1529.1  | 6.26  | 5.47  | 0.35 | 0.08 | 1.72   | 0.027834 | 0.022302 | 0.309107 | 0.186842 |



|                         |                 |       |       |      |      |       |          |          |          |          |
|-------------------------|-----------------|-------|-------|------|------|-------|----------|----------|----------|----------|
| MmugDNA.15290.1.S1_at   | MmugDNA.15290.1 | 4.07  | 4.24  | 0.1  | 0.19 | -1.13 | 0.210436 | 0.263625 | 0.57172  | 0.529913 |
| MmugDNA.15291.1.S1_at   | MmugDNA.15291.1 | 6.45  | 6.37  | 0.24 | 0.15 | 1.06  | 0.886911 | 0.778286 | 0.954734 | 0.871272 |
| MmugDNA.15294.1.S1_at   | MmugDNA.15294.1 | 5.22  | 5.82  | 0.27 | 0.97 | -1.52 | 0.219604 | 0.159074 | 0.579028 | 0.435217 |
| MmugDNA.15295.1.S1_at   | MmugDNA.15295.1 | 6.15  | 6.47  | 0.09 | 0.62 | -1.25 | 0.131785 | 0.142382 | 0.498041 | 0.415965 |
| MmugDNA.15297.1.S1_at   | MmugDNA.15297.1 | 4.59  | 4.71  | 0    | 0.1  | -1.08 | 0.157089 | 0.205559 | 0.521912 | 0.47981  |
| MmugDNA.153.1.S1_at     | MmugDNA.153.1   | 9.94  | 9.27  | 0.13 | 0.28 | 1.59  | 0.044034 | 0.02565  | 0.357647 | 0.200834 |
| MmugDNA.153.1.S1_s_at   | MmugDNA.153.1   | 10.2  | 9.61  | 0.12 | 0.33 | 1.5   | 0.121324 | 0.072198 | 0.48598  | 0.31474  |
| MmugDNA.1530.1.S1_at    | MmugDNA.1530.1  | 4.91  | 4.88  | 0.22 | 0.09 | 1.03  | 0.908338 | 0.439659 | 0.96372  | 0.658393 |
| MmugDNA.15300.1.S1_at   | MmugDNA.15300.1 | 7.79  | 7.04  | 0.24 | 0.35 | 1.68  | 0.037975 | 0.017941 | 0.343341 | 0.168998 |
| MmugDNA.15301.1.S1_at   | MmugDNA.15301.1 | 4.47  | 4.37  | 0.17 | 0.12 | 1.07  | 0.14714  | 0.305982 | 0.51306  | 0.562732 |
| MmugDNA.15303.1.S1_at   | MmugDNA.15303.1 | 5.87  | 7.16  | 0.79 | 0.71 | -2.44 | 0.080374 | 0.0744   | 0.430491 | 0.318058 |
| MmugDNA.15303.1.S1_s_at | MmugDNA.15303.1 | 7.72  | 8.74  | 0.6  | 1.11 | -2.03 | 0.231854 | 0.285165 | 0.587568 | 0.547098 |
| MmugDNA.15306.1.S1_at   | MmugDNA.15306.1 | 4.04  | 4.16  | 0.36 | 0.36 | -1.09 | 0.955657 | 0.599622 | 0.983316 | 0.761524 |
| MmugDNA.15308.1.S1_at   | MmugDNA.15308.1 | 8.16  | 8.31  | 0.09 | 0.44 | -1.11 | 0.209533 | 0.280278 | 0.570957 | 0.543528 |
| MmugDNA.15308.1.S1_s_at | MmugDNA.15308.1 | 10.43 | 10.67 | 0.06 | 0.4  | -1.18 | 0.368555 | 0.314192 | 0.679986 | 0.568185 |
| MmugDNA.1531.1.S1_at    | MmugDNA.1531.1  | 6     | 5.77  | 0.73 | 0.08 | 1.17  | 0.215692 | 0.26656  | 0.575945 | 0.532301 |
| MmugDNA.15312.1.S1_at   | MmugDNA.15312.1 | 5.97  | 5.95  | 0.22 | 0    | 1.02  | 0.811703 | 0.941417 | 0.923289 | 0.966801 |
| MmugDNA.15313.1.S1_at   | MmugDNA.15313.1 | 6.09  | 6.03  | 0.73 | 0.25 | 1.04  | 0.883883 | 0.946378 | 0.953435 | 0.969598 |
| MmugDNA.15316.1.S1_at   | MmugDNA.15316.1 | 10.66 | 10.89 | 0.1  | 0.43 | -1.17 | 0.506651 | 0.168724 | 0.762432 | 0.445379 |
| MmugDNA.15318.1.S1_at   | MmugDNA.15318.1 | 7.18  | 6.98  | 0.18 | 0.4  | 1.14  | 0.900399 | 0.934955 | 0.960269 | 0.963177 |
| MmugDNA.1532.1.S1_at    | MmugDNA.1532.1  | 7.69  | 6.92  | 0.66 | 0.43 | 1.7   | 0.118723 | 0.12935  | 0.483051 | 0.400748 |
| MmugDNA.15320.1.S1_at   | MmugDNA.15320.1 | 7.1   | 7     | 0.34 | 0.35 | 1.07  | 0.992152 | 0.512655 | 0.997321 | 0.706448 |
| MmugDNA.15321.1.S1_at   | MmugDNA.15321.1 | 8.43  | 9.41  | 0.35 | 0.61 | -1.97 | 0.049937 | 0.041365 | 0.372556 | 0.247995 |
| MmugDNA.15322.1.S1_at   | MmugDNA.15322.1 | 4.67  | 4.97  | 0.78 | 1.25 | -1.23 | 0.2979   | 0.22504  | 0.633563 | 0.49773  |
| MmugDNA.15324.1.S1_at   | MmugDNA.15324.1 | 6.98  | 7.22  | 0.14 | 0.16 | -1.18 | 0.062344 | 0.046364 | 0.397836 | 0.259844 |
| MmugDNA.15325.1.S1_at   | MmugDNA.15325.1 | 7.81  | 8.26  | 0.11 | 0.54 | -1.37 | 0.075261 | 0.060583 | 0.422143 | 0.292769 |
| MmugDNA.15326.1.S1_at   | MmugDNA.15326.1 | 2.67  | 2.66  | 0.05 | 0.08 | 1.01  | 0.81366  | 0.395619 | 0.924368 | 0.627583 |
| MmugDNA.15327.1.S1_at   | MmugDNA.15327.1 | 4.09  | 4.19  | 0.06 | 0.13 | -1.07 | 0.153175 | 0.14955  | 0.517618 | 0.424095 |
| MmugDNA.15330.1.S1_at   | MmugDNA.15330.1 | 6.21  | 6.44  | 0.24 | 0.31 | -1.17 | 0.704052 | 0.706152 | 0.869416 | 0.829634 |
| MmugDNA.42233.1.S1_s_at | MmugDNA.42233.1 | 8.17  | 7.34  | 0.28 | 0.71 | 1.77  | 0.196082 | 0.249683 | 0.559231 | 0.518765 |
| MmugDNA.15335.1.S1_at   | MmugDNA.15335.1 | 3.82  | 3.82  | 0.24 | 0.17 | -1    | 0.883251 | 0.616405 | 0.953017 | 0.772626 |
| MmugDNA.15338.1.S1_at   | MmugDNA.15338.1 | 5.9   | 5.79  | 0.11 | 0    | 1.08  | 0.236437 | 0.317955 | 0.590463 | 0.571046 |
| MmugDNA.15339.1.S1_at   | MmugDNA.15339.1 | 10.59 | 10.12 | 0.21 | 0.54 | 1.38  | 0.348309 | 0.157247 | 0.66711  | 0.432729 |
| MmugDNA.1534.1.S1_at    | MmugDNA.1534.1  | 9.79  | 10.04 | 0.2  | 0.34 | -1.19 | 0.800828 | 0.871495 | 0.917868 | 0.926844 |
| MmugDNA.15340.1.S1_at   | MmugDNA.15340.1 | 4.03  | 4.16  | 0.31 | 0.33 | -1.09 | 0.999541 | 0.172122 | 0.999907 | 0.448529 |
| MmugDNA.15341.1.S1_at   | MmugDNA.15341.1 | 3.33  | 3.67  | 0.09 | 0.18 | -1.27 | 0.019973 | 0.016075 | 0.276365 | 0.160672 |
| MmugDNA.15342.1.S1_at   | MmugDNA.15342.1 | 10.92 | 7.59  | 1.43 | 0.36 | 10.1  | 0.041254 | 0.071608 | 0.351447 | 0.313717 |
| MmugDNA.15344.1.S1_at   | MmugDNA.15344.1 | 11.62 | 11.3  | 0.18 | 0.03 | 1.25  | 0.064979 | 0.073419 | 0.403744 | 0.316609 |
| MmugDNA.15346.1.S1_at   | MmugDNA.15346.1 | 6.76  | 6.21  | 0.42 | 0.15 | 1.47  | 0.290734 | 0.3022   | 0.628456 | 0.560092 |
| MmugDNA.15347.1.S1_at   | MmugDNA.15347.1 | 4.23  | 4.22  | 0.11 | 0.23 | 1     | 0.67202  | 0.839756 | 0.852789 | 0.908633 |
| MmugDNA.15349.1.S1_s_at | MmugDNA.15349.1 | 6.35  | 6.19  | 0.07 | 0.89 | 1.12  | 0.857004 | 0.500802 | 0.942171 | 0.699278 |

|                         |                 |       |       |      |      |        |          |          |          |          |
|-------------------------|-----------------|-------|-------|------|------|--------|----------|----------|----------|----------|
| MmugDNA.1535.1.S1_at    | MmugDNA.1535.1  | 4.37  | 7.5   | 0.74 | 0.52 | -8.76  | 0.003747 | 0.004902 | 0.179914 | 0.097649 |
| MmugDNA.15350.1.S1_at   | MmugDNA.15350.1 | 7.18  | 7.21  | 0.12 | 0.18 | -1.02  | 0.66628  | 0.759406 | 0.850305 | 0.860081 |
| MmugDNA.15351.1.S1_at   | MmugDNA.15351.1 | 4.98  | 5.45  | 0.45 | 0.82 | -1.39  | 0.574842 | 0.736858 | 0.801864 | 0.847693 |
| MmugDNA.15353.1.S1_at   | MmugDNA.15353.1 | 10.31 | 10.95 | 0.19 | 0.93 | -1.55  | 0.876268 | 0.882012 | 0.950429 | 0.932738 |
| MmugDNA.15355.1.S1_at   | MmugDNA.15355.1 | 10.39 | 11.11 | 0.17 | 0.27 | -1.64  | 0.028856 | 0.027446 | 0.312166 | 0.206953 |
| MmugDNA.15355.1.S1_s_at | MmugDNA.15355.1 | 12.09 | 12.34 | 0.08 | 0.22 | -1.19  | 0.172404 | 0.153044 | 0.535905 | 0.42792  |
| MmugDNA.15356.1.S1_at   | MmugDNA.15356.1 | 4.58  | 4.66  | 0.11 | 0.41 | -1.05  | 0.806697 | 0.959865 | 0.920801 | 0.977279 |
| MmugDNA.1536.1.S1_at    | MmugDNA.1536.1  | 4.92  | 4.47  | 0.25 | 0.32 | 1.36   | 0.13542  | 0.3526   | 0.502243 | 0.595856 |
| MmugDNA.15360.1.S1_at   | MmugDNA.15360.1 | 6.02  | 6.38  | 0.24 | 0.59 | -1.28  | 0.518706 | 0.300081 | 0.769592 | 0.558262 |
| MmugDNA.15360.1.S1_s_at | MmugDNA.15360.1 | 6.62  | 7.6   | 0.17 | 0.68 | -1.97  | 0.291921 | 0.157029 | 0.629224 | 0.432496 |
| MmugDNA.15362.1.S1_at   | MmugDNA.15362.1 | 12.94 | 12.94 | 0.1  | 0.16 | -1     | 0.568155 | 0.304464 | 0.798451 | 0.561738 |
| MmugDNA.25729.1.S1_s_at | MmugDNA.25729.1 | 5.2   | 8.92  | 1.62 | 2.53 | -13.21 | 0.262358 | 0.224078 | 0.608902 | 0.497059 |
| MmugDNA.15365.1.S1_at   | MmugDNA.15365.1 | 4.47  | 4.43  | 0.08 | 0.09 | 1.03   | 0.608479 | 0.252002 | 0.819999 | 0.520646 |
| MmugDNA.15366.1.S1_s_at | MmugDNA.15366.1 | 13.11 | 13.02 | 0.08 | 0.18 | 1.07   | 0.189252 | 0.072276 | 0.552386 | 0.314934 |
| MmugDNA.42295.1.S1_s_at | MmugDNA.42295.1 | 4.24  | 4.22  | 0.04 | 0.02 | 1.01   | 0.170738 | 0.745389 | 0.534594 | 0.852384 |
| MmugDNA.15368.1.S1_at   | MmugDNA.15368.1 | 3.63  | 3.65  | 0.42 | 0.09 | -1.02  | 0.673729 | 0.479969 | 0.853751 | 0.685569 |
| MmugDNA.15369.1.S1_at   | MmugDNA.15369.1 | 7.47  | 7.58  | 0.04 | 0.03 | -1.08  | 0.042325 | 0.049358 | 0.354652 | 0.267081 |
| MmugDNA.1537.1.S1_at    | MmugDNA.1537.1  | 7.21  | 6.99  | 0.33 | 0.19 | 1.17   | 0.762597 | 0.358498 | 0.900002 | 0.600012 |
| MmugDNA.15371.1.S1_at   | MmugDNA.15371.1 | 8.82  | 9.02  | 0.15 | 0.53 | -1.15  | 0.787678 | 0.189827 | 0.911639 | 0.465403 |
| MmugDNA.15372.1.S1_at   | MmugDNA.15372.1 | 3.88  | 3.98  | 0.35 | 0.15 | -1.08  | 0.706027 | 0.698873 | 0.870392 | 0.825026 |
| MmugDNA.15373.1.S1_at   | MmugDNA.15373.1 | 5.18  | 5.36  | 0.55 | 0.11 | -1.14  | 0.522825 | 0.783398 | 0.772248 | 0.874571 |
| MmugDNA.15375.1.S1_at   | MmugDNA.15375.1 | 5.6   | 5.47  | 0.15 | 0.24 | 1.09   | 0.464688 | 0.25444  | 0.739442 | 0.522732 |
| MmugDNA.15376.1.S1_at   | MmugDNA.15376.1 | 5.01  | 5.05  | 0.22 | 0.1  | -1.03  | 0.764226 | 0.347872 | 0.900711 | 0.592196 |
| MmugDNA.15377.1.S1_at   | MmugDNA.15377.1 | 6.04  | 6.03  | 0.16 | 0.02 | 1.01   | 0.631882 | 0.46339  | 0.832895 | 0.674383 |
| MmugDNA.15378.1.S1_at   | MmugDNA.15378.1 | 4.65  | 4.73  | 1.47 | 0.14 | -1.06  | 0.423617 | 0.505997 | 0.714199 | 0.702337 |
| MmugDNA.1538.1.S1_at    | MmugDNA.1538.1  | 10.16 | 9.67  | 0.12 | 0.31 | 1.4    | 0.069072 | 0.07258  | 0.411205 | 0.315511 |
| MmugDNA.15381.1.S1_at   | MmugDNA.15381.1 | 6.16  | 5.82  | 0.26 | 0.37 | 1.26   | 0.236502 | 0.107944 | 0.590476 | 0.371008 |
| MmugDNA.15382.1.S1_at   | MmugDNA.15382.1 | 3.9   | 4.04  | 0.26 | 0.1  | -1.11  | 0.407527 | 0.27241  | 0.704692 | 0.537122 |
| MmugDNA.15383.1.S1_at   | MmugDNA.15383.1 | 7.95  | 8.11  | 0.13 | 0.09 | -1.11  | 0.233341 | 0.192311 | 0.588108 | 0.467813 |
| MmugDNA.15383.1.S1_s_at | MmugDNA.15383.1 | 11.17 | 10.96 | 0.04 | 0.09 | 1.16   | 0.020319 | 0.013717 | 0.277448 | 0.150008 |
| MmugDNA.15384.1.S1_at   | MmugDNA.15384.1 | 6.6   | 6.92  | 0.18 | 0.05 | -1.24  | 0.148163 | 0.141352 | 0.513515 | 0.414874 |
| MmugDNA.15385.1.S1_at   | MmugDNA.15385.1 | 5.83  | 5.89  | 0.31 | 0.03 | -1.04  | 0.611542 | 0.831698 | 0.821726 | 0.903453 |
| MmugDNA.15386.1.S1_s_at | MmugDNA.15386.1 | 11.17 | 10.51 | 0.43 | 0.28 | 1.58   | 0.084161 | 0.119586 | 0.436855 | 0.388247 |
| MmugDNA.15387.1.S1_at   | MmugDNA.15387.1 | 6.48  | 6.41  | 0.66 | 0.1  | 1.05   | 0.369514 | 0.204089 | 0.680763 | 0.478413 |
| MmugDNA.15388.1.S1_at   | MmugDNA.15388.1 | 6.81  | 6.8   | 0.23 | 0.18 | 1.01   | 0.909795 | 0.871898 | 0.964279 | 0.927098 |
| MmugDNA.15389.1.S1_at   | MmugDNA.15389.1 | 13.06 | 13.37 | 0.04 | 0.17 | -1.24  | 0.039866 | 0.033005 | 0.34828  | 0.224908 |
| MmugDNA.1539.1.S1_at    | MmugDNA.1539.1  | 3.77  | 4.13  | 0.86 | 0.35 | -1.29  | 0.812356 | 0.565461 | 0.923648 | 0.739886 |
| MmugDNA.15390.1.S1_s_at | MmugDNA.15390.1 | 10.06 | 10.56 | 0.29 | 0.14 | -1.42  | 0.051058 | 0.012054 | 0.375812 | 0.142044 |
| MmugDNA.15391.1.S1_at   | MmugDNA.15391.1 | 4.26  | 4.52  | 0.14 | 0.22 | -1.2   | 0.065516 | 0.073504 | 0.404593 | 0.316778 |
| MmugDNA.15392.1.S1_at   | MmugDNA.15392.1 | 3.15  | 3.14  | 0.13 | 0.08 | 1.01   | 0.666189 | 0.496343 | 0.850305 | 0.695995 |
| MmugDNA.15393.1.S1_at   | MmugDNA.15393.1 | 4.91  | 4.98  | 0.05 | 0.07 | -1.05  | 0.620271 | 0.384363 | 0.826026 | 0.620041 |

|                         |                 |       |       |      |      |       |          |          |          |          |
|-------------------------|-----------------|-------|-------|------|------|-------|----------|----------|----------|----------|
| MmugDNA.15394.1.S1_at   | MmugDNA.15394.1 | 4.16  | 4.17  | 0.27 | 0.3  | -1    | 0.440638 | 0.728459 | 0.724412 | 0.843019 |
| MmugDNA.15395.1.S1_s_at | MmugDNA.15395.1 | 6.28  | 6.28  | 0.19 | 0.44 | -1    | 0.927119 | 0.351427 | 0.971962 | 0.595054 |
| MmugDNA.15396.1.S1_at   | MmugDNA.15396.1 | 7.4   | 7.69  | 0    | 0.17 | -1.22 | 0.052648 | 0.023566 | 0.378392 | 0.192289 |
| MmugDNA.15400.1.S1_at   | MmugDNA.15400.1 | 3.25  | 3.56  | 0.22 | 0.17 | -1.24 | 0.245658 | 0.26262  | 0.597182 | 0.528973 |
| MmugDNA.15401.1.S1_at   | MmugDNA.15401.1 | 7.55  | 7.51  | 0.08 | 0.43 | 1.03  | 0.760986 | 0.873785 | 0.899213 | 0.928234 |
| MmugDNA.15402.1.S1_at   | MmugDNA.15402.1 | 7.58  | 6.66  | 0.86 | 0.51 | 1.88  | 0.284717 | 0.206497 | 0.62439  | 0.480571 |
| MmugDNA.15403.1.S1_at   | MmugDNA.15403.1 | 4.3   | 4.1   | 0.16 | 0.28 | 1.15  | 0.281876 | 0.476054 | 0.62238  | 0.682475 |
| MmugDNA.15404.1.S1_at   | MmugDNA.15404.1 | 8.14  | 8.29  | 0.11 | 0.18 | -1.11 | 0.671904 | 0.192618 | 0.852716 | 0.468116 |
| MmugDNA.15404.1.S1_s_at | MmugDNA.15404.1 | 7.28  | 7.57  | 0.19 | 0.13 | -1.22 | 0.469135 | 0.086023 | 0.741474 | 0.33824  |
| MmugDNA.15406.1.S1_at   | MmugDNA.15406.1 | 5.82  | 6.83  | 0.72 | 1.1  | -2.02 | 0.392075 | 0.516036 | 0.694439 | 0.708688 |
| MmugDNA.15407.1.S1_at   | MmugDNA.15407.1 | 5.71  | 6.12  | 1.41 | 0.55 | -1.33 | 0.496459 | 0.697701 | 0.757501 | 0.824333 |
| MmugDNA.15407.1.S1_x_at | MmugDNA.15407.1 | 5.63  | 6.49  | 1.02 | 0.27 | -1.81 | 0.324697 | 0.477402 | 0.652046 | 0.683463 |
| MmugDNA.15408.1.S1_at   | MmugDNA.15408.1 | 5.31  | 5.43  | 0.14 | 0.09 | -1.08 | 0.55985  | 0.661264 | 0.794172 | 0.801687 |
| MmugDNA.1541.1.S1_at    | MmugDNA.1541.1  | 3.93  | 3.92  | 0.11 | 0.16 | 1.01  | 0.813776 | 0.281316 | 0.924404 | 0.544391 |
| MmugDNA.15410.1.S1_at   | MmugDNA.15410.1 | 10.09 | 9.96  | 0.35 | 0.04 | 1.09  | 0.703801 | 0.606109 | 0.869262 | 0.765674 |
| MmugDNA.15411.1.S1_at   | MmugDNA.15411.1 | 3.6   | 3.32  | 0.2  | 0.1  | 1.21  | 0.079263 | 0.228619 | 0.429178 | 0.500826 |
| MmugDNA.15412.1.S1_at   | MmugDNA.15412.1 | 5.02  | 5.04  | 0.05 | 0.09 | -1.02 | 0.366306 | 0.587373 | 0.679033 | 0.754171 |
| MmugDNA.15413.1.S1_s_at | MmugDNA.15413.1 | 7.49  | 7.31  | 0.17 | 0.37 | 1.14  | 0.772004 | 0.882774 | 0.903991 | 0.93317  |
| MmugDNA.15414.1.S1_at   | MmugDNA.15414.1 | 9.01  | 8.28  | 0.14 | 0.75 | 1.66  | 0.519027 | 0.568827 | 0.769832 | 0.74211  |
| MmugDNA.15415.1.S1_at   | MmugDNA.15415.1 | 8.65  | 9.02  | 0.51 | 0.45 | -1.29 | 0.960192 | 0.437985 | 0.98486  | 0.657058 |
| MmugDNA.15416.1.S1_at   | MmugDNA.15416.1 | 3.92  | 3.89  | 0.2  | 0.11 | 1.02  | 0.660371 | 0.029562 | 0.84761  | 0.213612 |
| MmugDNA.15417.1.S1_at   | MmugDNA.15417.1 | 9.79  | 9.1   | 0.1  | 0.64 | 1.61  | 0.440649 | 0.542282 | 0.724412 | 0.725385 |
| MmugDNA.15417.1.S1_s_at | MmugDNA.15417.1 | 12.3  | 11.74 | 0.09 | 0.45 | 1.48  | 0.38727  | 0.532807 | 0.691895 | 0.719235 |
| MmugDNA.1542.1.S1_at    | MmugDNA.1542.1  | 6.46  | 6.63  | 1.27 | 0.47 | -1.12 | 0.525353 | 0.607634 | 0.773633 | 0.766457 |
| MmugDNA.15420.1.S1_at   | MmugDNA.15420.1 | 5.35  | 5.34  | 0.11 | 0.06 | 1.01  | 0.339238 | 0.301229 | 0.661228 | 0.559356 |
| MmugDNA.15421.1.S1_at   | MmugDNA.15421.1 | 5.84  | 5.84  | 0.21 | 0.02 | -1    | 0.882087 | 0.257319 | 0.952656 | 0.525115 |
| MmugDNA.15423.1.S1_at   | MmugDNA.15423.1 | 8.21  | 8.02  | 0.37 | 0.62 | 1.14  | 0.605709 | 0.510891 | 0.818486 | 0.70525  |
| MmugDNA.15425.1.S1_at   | MmugDNA.15425.1 | 6.06  | 6.1   | 0.28 | 0.17 | -1.03 | 0.799414 | 0.54329  | 0.916962 | 0.726012 |
| MmugDNA.15426.1.S1_at   | MmugDNA.15426.1 | 10.5  | 10.31 | 0.04 | 0.4  | 1.14  | 0.430889 | 0.598027 | 0.718362 | 0.760536 |
| MmugDNA.15427.1.S1_at   | MmugDNA.15427.1 | 11.16 | 11.44 | 0.4  | 0.36 | -1.21 | 0.869022 | 0.947769 | 0.947856 | 0.970346 |
| MmugDNA.15429.1.S1_at   | MmugDNA.15429.1 | 4.26  | 4.09  | 0.37 | 0.26 | 1.12  | 0.867284 | 0.456743 | 0.947077 | 0.67043  |
| MmugDNA.15430.1.S1_at   | MmugDNA.15430.1 | 9.68  | 9.5   | 0.31 | 0.05 | 1.13  | 0.574825 | 0.007919 | 0.801864 | 0.11857  |
| MmugDNA.15431.1.S1_at   | MmugDNA.15431.1 | 5.75  | 6.13  | 0.27 | 0.08 | -1.3  | 0.092146 | 0.164961 | 0.448698 | 0.44123  |
| MmugDNA.15432.1.S1_at   | MmugDNA.15432.1 | 5.74  | 5.76  | 0.05 | 0.19 | -1.02 | 0.22194  | 0.293869 | 0.580625 | 0.553865 |
| MmugDNA.15433.1.S1_s_at | MmugDNA.15433.1 | 11.79 | 12.04 | 0.24 | 0.38 | -1.18 | 0.429459 | 0.036827 | 0.717559 | 0.236413 |
| MmugDNA.15434.1.S1_at   | MmugDNA.15434.1 | 6.26  | 6.26  | 0.65 | 0.17 | 1     | 0.990302 | 0.749894 | 0.996541 | 0.854631 |
| MmugDNA.15435.1.S1_at   | MmugDNA.15435.1 | 5.67  | 5.6   | 0.37 | 0.09 | 1.05  | 0.854058 | 0.923637 | 0.941051 | 0.957057 |
| MmugDNA.15436.1.S1_at   | MmugDNA.15436.1 | 8.48  | 8.42  | 0.26 | 0.45 | 1.04  | 0.830415 | 0.924305 | 0.931462 | 0.957351 |
| MmugDNA.15437.1.S1_at   | MmugDNA.15437.1 | 6.68  | 6.96  | 1.04 | 0.38 | -1.22 | 0.779652 | 0.931915 | 0.908204 | 0.9613   |
| MmugDNA.15438.1.S1_at   | MmugDNA.15438.1 | 3.25  | 3.23  | 0.08 | 0.2  | 1.02  | 0.799479 | 0.812015 | 0.916979 | 0.891493 |
| MmugDNA.15439.1.S1_at   | MmugDNA.15439.1 | 5.45  | 6.28  | 0.46 | 0.17 | -1.78 | 0.037497 | 0.038136 | 0.3415   | 0.239923 |

|                         |                 |       |       |      |      |       |          |          |          |          |
|-------------------------|-----------------|-------|-------|------|------|-------|----------|----------|----------|----------|
| MmugDNA.15440.1.S1_at   | MmugDNA.15440.1 | 5.15  | 5.36  | 0.82 | 0.82 | -1.16 | 0.781741 | 0.566631 | 0.908921 | 0.740707 |
| MmugDNA.15441.1.S1_at   | MmugDNA.15441.1 | 4.95  | 4.76  | 0.34 | 0.11 | 1.14  | 0.109519 | 0.036813 | 0.470811 | 0.236386 |
| MmugDNA.15442.1.S1_at   | MmugDNA.15442.1 | 4.1   | 4.25  | 0.15 | 0.17 | -1.11 | 0.599536 | 0.203216 | 0.814615 | 0.477415 |
| MmugDNA.15443.1.S1_at   | MmugDNA.15443.1 | 8.27  | 8.93  | 0.25 | 0.25 | -1.59 | 0.028623 | 0.008437 | 0.312031 | 0.121922 |
| MmugDNA.15447.1.S1_at   | MmugDNA.15447.1 | 5.66  | 5.69  | 0.17 | 0.1  | -1.02 | 0.903696 | 0.650382 | 0.961578 | 0.795614 |
| MmugDNA.15448.1.S1_at   | MmugDNA.15448.1 | 4.81  | 4.32  | 0.6  | 0.76 | 1.4   | 0.516297 | 0.48399  | 0.767981 | 0.688262 |
| MmugDNA.15449.1.S1_at   | MmugDNA.15449.1 | 10.4  | 9.83  | 0.11 | 0.73 | 1.48  | 0.234065 | 0.239531 | 0.588587 | 0.510206 |
| MmugDNA.1545.1.S1_at    | MmugDNA.1545.1  | 6.52  | 5.82  | 0.5  | 0.52 | 1.63  | 0.385558 | 0.251709 | 0.690683 | 0.520444 |
| MmugDNA.15450.1.S1_at   | MmugDNA.15450.1 | 3.08  | 3.03  | 0.03 | 0.06 | 1.03  | 0.220814 | 0.203198 | 0.579701 | 0.477415 |
| MmugDNA.15451.1.S1_at   | MmugDNA.15451.1 | 4.53  | 4.42  | 0.21 | 0.36 | 1.08  | 0.584636 | 0.906676 | 0.807089 | 0.947216 |
| MmugDNA.15452.1.S1_at   | MmugDNA.15452.1 | 6.16  | 6.24  | 0.05 | 0.09 | -1.06 | 0.140633 | 0.322543 | 0.508385 | 0.573991 |
| MmugDNA.15454.1.S1_at   | MmugDNA.15454.1 | 5.32  | 5.34  | 0.36 | 0.12 | -1.01 | 0.469978 | 0.827651 | 0.742052 | 0.901081 |
| MmugDNA.15456.1.S1_at   | MmugDNA.15456.1 | 4.08  | 4.08  | 0    | 0.04 | 1     | 0.373901 | 0.754921 | 0.683245 | 0.857334 |
| MmugDNA.15457.1.S1_at   | MmugDNA.15457.1 | 4.07  | 3.99  | 0.17 | 0.03 | 1.06  | 0.195342 | 0.485016 | 0.558899 | 0.688893 |
| MmugDNA.15458.1.S1_at   | MmugDNA.15458.1 | 10.24 | 10.32 | 0.11 | 0.44 | -1.05 | 0.805919 | 0.302162 | 0.920391 | 0.560092 |
| MmugDNA.15460.1.S1_at   | MmugDNA.15460.1 | 6.83  | 6.9   | 0.17 | 0.04 | -1.05 | 0.794275 | 0.730523 | 0.914561 | 0.844042 |
| MmugDNA.34659.1.S1_s_at | MmugDNA.34659.1 | 5.83  | 5.73  | 0.08 | 0.1  | 1.07  | 0.482505 | 0.625284 | 0.749408 | 0.779099 |
| MmugDNA.15462.1.S1_at   | MmugDNA.15462.1 | 8.45  | 8.24  | 0.28 | 0.35 | 1.16  | 0.224653 | 0.04993  | 0.58277  | 0.268603 |
| MmugDNA.15463.1.S1_at   | MmugDNA.15463.1 | 5.25  | 5.26  | 0.35 | 0.58 | -1.01 | 0.758223 | 0.380332 | 0.897645 | 0.616984 |
| MmugDNA.15464.1.S1_at   | MmugDNA.15464.1 | 4.7   | 4.73  | 0.2  | 0.2  | -1.02 | 0.662295 | 0.573153 | 0.848507 | 0.744941 |
| MmugDNA.15465.1.S1_at   | MmugDNA.15465.1 | 5.7   | 5.35  | 1.45 | 1.25 | 1.27  | 0.587645 | 0.584512 | 0.808643 | 0.752435 |
| MmugDNA.15466.1.S1_at   | MmugDNA.15466.1 | 8.12  | 7.14  | 0.29 | 0.15 | 1.97  | 0.005842 | 0.001972 | 0.193392 | 0.065871 |
| MmugDNA.15467.1.S1_at   | MmugDNA.15467.1 | 4.25  | 4     | 0.25 | 0.18 | 1.19  | 0.28574  | 0.402535 | 0.625149 | 0.631481 |
| MmugDNA.15468.1.S1_at   | MmugDNA.15468.1 | 6.91  | 6.59  | 0.37 | 0.41 | 1.25  | 0.380399 | 0.467697 | 0.687269 | 0.677207 |
| MmugDNA.1547.1.S1_at    | MmugDNA.1547.1  | 6.99  | 6.95  | 0.19 | 0.32 | 1.02  | 0.852833 | 0.967795 | 0.940682 | 0.982192 |
| MmugDNA.1547.1.S1_s_at  | MmugDNA.1547.1  | 11.32 | 9.54  | 0.2  | 0.28 | 3.45  | 0.000946 | 0.000741 | 0.139813 | 0.044929 |
| MmugDNA.15470.1.S1_at   | MmugDNA.15470.1 | 3.58  | 3.41  | 0.17 | 0.16 | 1.13  | 0.353459 | 0.40849  | 0.67013  | 0.635694 |
| MmugDNA.15471.1.S1_at   | MmugDNA.15471.1 | 4.24  | 4.43  | 0.09 | 0.78 | -1.14 | 0.51971  | 0.698951 | 0.770306 | 0.825058 |
| MmugDNA.15473.1.S1_at   | MmugDNA.15473.1 | 5.03  | 7.84  | 1.54 | 1.58 | -6.99 | 0.215609 | 0.296142 | 0.575924 | 0.555339 |
| MmugDNA.15474.1.S1_at   | MmugDNA.15474.1 | 11.2  | 10.84 | 0.13 | 0.56 | 1.28  | 0.195699 | 0.193306 | 0.558901 | 0.468656 |
| MmugDNA.15475.1.S1_at   | MmugDNA.15475.1 | 4.77  | 5.72  | 0.73 | 0.51 | -1.93 | 0.326668 | 0.417949 | 0.653184 | 0.642499 |
| MmugDNA.15477.1.S1_at   | MmugDNA.15477.1 | 5.66  | 4.94  | 0.57 | 0.49 | 1.65  | 0.085856 | 0.122993 | 0.439933 | 0.392923 |
| MmugDNA.15478.1.S1_at   | MmugDNA.15478.1 | 6.82  | 8.72  | 0.53 | 0.64 | -3.74 | 0.030298 | 0.020954 | 0.31783  | 0.181537 |
| MmugDNA.15479.1.S1_at   | MmugDNA.15479.1 | 5.24  | 5.19  | 0.16 | 0.35 | 1.03  | 0.854674 | 0.925346 | 0.941248 | 0.957778 |
| MmugDNA.1548.1.S1_at    | MmugDNA.1548.1  | 3.49  | 3.52  | 0.3  | 0.07 | -1.02 | 0.604734 | 0.599246 | 0.817951 | 0.761382 |
| MmugDNA.15480.1.S1_at   | MmugDNA.15480.1 | 10.23 | 10.29 | 0.32 | 0.64 | -1.04 | 0.911034 | 0.939448 | 0.964858 | 0.965611 |
| MmugDNA.15483.1.S1_at   | MmugDNA.15483.1 | 3.18  | 2.66  | 0.25 | 0.03 | 1.44  | 0.033829 | 0.205803 | 0.330248 | 0.480072 |
| MmugDNA.15484.1.S1_at   | MmugDNA.15484.1 | 5.69  | 5.88  | 0.38 | 0.28 | -1.14 | 0.891762 | 0.960097 | 0.956869 | 0.977408 |
| MmugDNA.15486.1.S1_at   | MmugDNA.15486.1 | 7.29  | 6.97  | 0.08 | 0.42 | 1.25  | 0.28185  | 0.357535 | 0.62238  | 0.599179 |
| MmugDNA.15487.1.S1_at   | MmugDNA.15487.1 | 9.68  | 9.51  | 0.12 | 0.22 | 1.12  | 0.190362 | 0.05506  | 0.553031 | 0.280147 |
| MmugDNA.15488.1.S1_at   | MmugDNA.15488.1 | 10.93 | 10.31 | 0.26 | 0.31 | 1.54  | 0.225927 | 0.294592 | 0.583922 | 0.554282 |

|                         |                 |       |       |      |      |       |          |          |          |          |
|-------------------------|-----------------|-------|-------|------|------|-------|----------|----------|----------|----------|
| MmugDNA.15489.1.S1_at   | MmugDNA.15489.1 | 4.87  | 4.87  | 0.02 | 0.08 | 1     | 0.535697 | 0.283303 | 0.779283 | 0.545836 |
| MmugDNA.15489.1.S1_s_at | MmugDNA.15489.1 | 5.71  | 5.71  | 0.14 | 0.02 | 1     | 0.320278 | 0.32294  | 0.649463 | 0.574261 |
| MmugDNA.1549.1.S1_at    | MmugDNA.1549.1  | 7.4   | 7.64  | 0.1  | 0.04 | -1.18 | 0.021674 | 0.046415 | 0.283263 | 0.259982 |
| MmugDNA.15491.1.S1_at   | MmugDNA.15491.1 | 7.13  | 7.55  | 0.81 | 0.7  | -1.34 | 0.639003 | 0.050551 | 0.836932 | 0.270222 |
| MmugDNA.15493.1.S1_at   | MmugDNA.15493.1 | 6.13  | 6.34  | 1.07 | 0.21 | -1.16 | 0.451086 | 0.429585 | 0.731471 | 0.650961 |
| MmugDNA.15494.1.S1_at   | MmugDNA.15494.1 | 4.57  | 4.7   | 0.14 | 0.12 | -1.1  | 0.215894 | 0.294918 | 0.575954 | 0.554462 |
| MmugDNA.15495.1.S1_at   | MmugDNA.15495.1 | 5.3   | 5.14  | 0.15 | 0.07 | 1.12  | 0.550266 | 0.245025 | 0.787781 | 0.514813 |
| MmugDNA.15496.1.S1_at   | MmugDNA.15496.1 | 7.87  | 7.44  | 0.17 | 0.47 | 1.34  | 0.294129 | 0.033077 | 0.631154 | 0.225105 |
| MmugDNA.15497.1.S1_at   | MmugDNA.15497.1 | 8.67  | 8.58  | 0.23 | 0.33 | 1.07  | 0.879897 | 0.921503 | 0.951729 | 0.955761 |
| MmugDNA.15498.1.S1_at   | MmugDNA.15498.1 | 3.99  | 4.03  | 0.19 | 0.23 | -1.03 | 0.331926 | 0.449151 | 0.656554 | 0.664892 |
| MmugDNA.15499.1.S1_at   | MmugDNA.15499.1 | 4.63  | 4.75  | 0.37 | 0.11 | -1.08 | 0.772591 | 0.92645  | 0.904267 | 0.958307 |
| MmugDNA.155.1.S1_at     | MmugDNA.155.1   | 12.07 | 12.31 | 0.09 | 0.09 | -1.18 | 0.028712 | 0.023407 | 0.312166 | 0.191786 |
| MmugDNA.1550.1.S1_at    | MmugDNA.1550.1  | 4.29  | 4.42  | 0.37 | 0.17 | -1.1  | 0.655004 | 0.581159 | 0.84477  | 0.750237 |
| MmugDNA.15502.1.S1_at   | MmugDNA.15502.1 | 7.55  | 6.75  | 0.4  | 0.09 | 1.74  | 0.068821 | 0.002301 | 0.410654 | 0.070694 |
| MmugDNA.15503.1.S1_at   | MmugDNA.15503.1 | 6.18  | 6.68  | 0.21 | 0.13 | -1.41 | 0.013544 | 0.033037 | 0.247672 | 0.225008 |
| MmugDNA.15507.1.S1_at   | MmugDNA.15507.1 | 6.9   | 7.26  | 0.09 | 0.11 | -1.28 | 0.011273 | 0.004986 | 0.235343 | 0.09844  |
| MmugDNA.15508.1.S1_at   | MmugDNA.15508.1 | 4.09  | 3.95  | 0.09 | 0.19 | 1.1   | 0.10924  | 0.211788 | 0.470811 | 0.485777 |
| MmugDNA.1551.1.S1_at    | MmugDNA.1551.1  | 8.99  | 8.95  | 0.17 | 0.22 | 1.03  | 0.667711 | 0.564067 | 0.851281 | 0.738956 |
| MmugDNA.1551.1.S1_s_at  | MmugDNA.1551.1  | 9.59  | 9.56  | 0.15 | 0.25 | 1.02  | 0.484707 | 0.458072 | 0.750645 | 0.671038 |
| MmugDNA.15510.1.S1_s_at | MmugDNA.15510.1 | 11.72 | 11.86 | 0.12 | 0.07 | -1.1  | 0.0492   | 0.022922 | 0.370907 | 0.189403 |
| MmugDNA.15511.1.S1_s_at | MmugDNA.15511.1 | 11.19 | 11.33 | 0.13 | 0.29 | -1.11 | 0.100885 | 0.103302 | 0.461009 | 0.364143 |
| MmugDNA.15513.1.S1_at   | MmugDNA.15513.1 | 3.32  | 3.5   | 0.09 | 0.13 | -1.13 | 0.092433 | 0.203158 | 0.449152 | 0.477415 |
| MmugDNA.15514.1.S1_at   | MmugDNA.15514.1 | 4.75  | 4.44  | 0.91 | 0.13 | 1.23  | 0.604166 | 0.805872 | 0.817551 | 0.888395 |
| MmugDNA.15516.1.S1_at   | MmugDNA.15516.1 | 3.89  | 3.76  | 0.23 | 0.22 | 1.09  | 0.236771 | 0.249778 | 0.590504 | 0.518876 |
| MmugDNA.15517.1.S1_at   | MmugDNA.15517.1 | 9.52  | 11.16 | 0.76 | 1.56 | -3.1  | 0.278551 | 0.136282 | 0.620599 | 0.4087   |
| MmugDNA.15519.1.S1_at   | MmugDNA.15519.1 | 4.69  | 4.87  | 0.16 | 0.18 | -1.13 | 0.232327 | 0.309598 | 0.587814 | 0.564987 |
| MmugDNA.1552.1.S1_at    | MmugDNA.1552.1  | 12.87 | 12.88 | 0.07 | 0.04 | -1.01 | 0.749554 | 0.834085 | 0.89273  | 0.904936 |
| MmugDNA.15520.1.S1_at   | MmugDNA.15520.1 | 7.71  | 8.36  | 1.39 | 2.15 | -1.56 | 0.502326 | 0.346064 | 0.760275 | 0.591154 |
| MmugDNA.15520.1.S1_s_at | MmugDNA.15520.1 | 10.13 | 10.7  | 0.99 | 1.99 | -1.48 | 0.578903 | 0.329505 | 0.804059 | 0.578781 |
| MmugDNA.15521.1.S1_at   | MmugDNA.15521.1 | 3.53  | 3.46  | 0.09 | 0.13 | 1.05  | 0.948273 | 0.161999 | 0.980164 | 0.438108 |
| MmugDNA.15522.1.S1_at   | MmugDNA.15522.1 | 5.7   | 5.03  | 0.94 | 0.65 | 1.59  | 0.390706 | 0.409381 | 0.693761 | 0.636452 |
| MmugDNA.15524.1.S1_at   | MmugDNA.15524.1 | 4.92  | 4.24  | 0.37 | 0.15 | 1.59  | 0.081368 | 0.049659 | 0.432224 | 0.267882 |
| MmugDNA.15526.1.S1_at   | MmugDNA.15526.1 | 4.78  | 4.66  | 0.06 | 0.06 | 1.08  | 0.169748 | 0.285826 | 0.533943 | 0.547484 |
| MmugDNA.15527.1.S1_at   | MmugDNA.15527.1 | 5.49  | 5.3   | 0.97 | 0.39 | 1.14  | 0.432492 | 0.4019   | 0.719052 | 0.63109  |
| MmugDNA.15529.1.S1_at   | MmugDNA.15529.1 | 7.68  | 6.27  | 0.12 | 0.43 | 2.66  | 0.0042   | 0.001205 | 0.181739 | 0.054389 |
| MmugDNA.1553.1.S1_at    | MmugDNA.1553.1  | 5.24  | 6.31  | 0.36 | 0.46 | -2.1  | 0.077427 | 0.118474 | 0.427131 | 0.386457 |
| MmugDNA.15531.1.S1_at   | MmugDNA.15531.1 | 5.8   | 7.11  | 0.51 | 0.54 | -2.48 | 0.033671 | 0.024805 | 0.330119 | 0.197344 |
| MmugDNA.15532.1.S1_at   | MmugDNA.15532.1 | 5.95  | 6.27  | 1.36 | 0.3  | -1.25 | 0.975993 | 0.996445 | 0.990704 | 0.997918 |
| MmugDNA.15533.1.S1_at   | MmugDNA.15533.1 | 4.87  | 4.65  | 0.08 | 0.08 | 1.17  | 0.011947 | 0.00568  | 0.239065 | 0.103959 |
| MmugDNA.15534.1.S1_at   | MmugDNA.15534.1 | 2.9   | 3.03  | 0.11 | 0.13 | -1.09 | 0.279933 | 0.263031 | 0.621296 | 0.529397 |
| MmugDNA.15535.1.S1_at   | MmugDNA.15535.1 | 3.71  | 3.7   | 0.03 | 0.11 | 1.01  | 0.568795 | 0.700059 | 0.798884 | 0.825946 |

|                         |                 |       |       |      |      |       |          |          |          |          |
|-------------------------|-----------------|-------|-------|------|------|-------|----------|----------|----------|----------|
| MmugDNA.8824.1.S1_at    | MmugDNA.8824.1  | 10.67 | 11.46 | 0.14 | 0.42 | -1.73 | 0.012294 | 0.002977 | 0.240706 | 0.079958 |
| MmugDNA.8824.1.S1_s_at  | MmugDNA.8824.1  | 10.63 | 11.43 | 0.21 | 0.39 | -1.75 | 0.011018 | 0.002788 | 0.233671 | 0.077966 |
| MmugDNA.15539.1.S1_at   | MmugDNA.15539.1 | 10.74 | 11.73 | 0.32 | 0.21 | -1.99 | 0.032408 | 0.022231 | 0.324908 | 0.18659  |
| MmugDNA.15541.1.S1_at   | MmugDNA.15541.1 | 4.91  | 6.95  | 0.52 | 2    | -4.12 | 0.215769 | 0.24702  | 0.575954 | 0.516238 |
| MmugDNA.12653.1.S1_at   | MmugDNA.12653.1 | 9.81  | 9.5   | 0.02 | 0.25 | 1.24  | 0.099173 | 0.120325 | 0.458925 | 0.38925  |
| MmugDNA.12653.1.S1_s_at | MmugDNA.12653.1 | 12    | 12.28 | 0.16 | 0.37 | -1.21 | 0.327782 | 0.420475 | 0.654129 | 0.644171 |
| MmugDNA.15543.1.S1_at   | MmugDNA.15543.1 | 3.47  | 3.42  | 0.14 | 0.03 | 1.03  | 0.413766 | 0.325036 | 0.708642 | 0.575545 |
| MmugDNA.15545.1.S1_at   | MmugDNA.15545.1 | 4.13  | 4.27  | 0.25 | 0.07 | -1.11 | 0.618735 | 0.814505 | 0.825288 | 0.892948 |
| MmugDNA.15546.1.S1_at   | MmugDNA.15546.1 | 3.81  | 3.98  | 0.32 | 0.28 | -1.13 | 0.539201 | 0.515837 | 0.780933 | 0.708504 |
| MmugDNA.15547.1.S1_at   | MmugDNA.15547.1 | 5.38  | 5.42  | 0.19 | 0.07 | -1.03 | 0.383142 | 0.506996 | 0.689068 | 0.702699 |
| MmugDNA.15549.1.S1_s_at | MmugDNA.15549.1 | 8.19  | 8.17  | 0.19 | 0.05 | 1.02  | 0.754892 | 0.271405 | 0.895788 | 0.536507 |
| MmugDNA.15550.1.S1_at   | MmugDNA.15550.1 | 3.34  | 3.31  | 0.17 | 0.12 | 1.02  | 0.592779 | 0.731245 | 0.811174 | 0.84425  |
| MmugDNA.15551.1.S1_at   | MmugDNA.15551.1 | 5.42  | 5.44  | 0.11 | 0.2  | -1.01 | 0.962449 | 0.160396 | 0.985577 | 0.436528 |
| MmugDNA.15552.1.S1_at   | MmugDNA.15552.1 | 4.37  | 4.41  | 0.07 | 0.23 | -1.03 | 0.576679 | 0.901754 | 0.803217 | 0.944082 |
| MmugDNA.15553.1.S1_at   | MmugDNA.15553.1 | 7.77  | 7.76  | 0.23 | 0.06 | 1.01  | 0.935598 | 0.778338 | 0.975112 | 0.871276 |
| MmugDNA.15555.1.S1_at   | MmugDNA.15555.1 | 6.76  | 6.57  | 0.15 | 0.08 | 1.14  | 0.345533 | 0.521898 | 0.665245 | 0.712684 |
| MmugDNA.15557.1.S1_at   | MmugDNA.15557.1 | 6.45  | 6.42  | 0.1  | 0.06 | 1.02  | 0.74547  | 0.009556 | 0.891108 | 0.12881  |
| MmugDNA.15558.1.S1_at   | MmugDNA.15558.1 | 7.27  | 7.05  | 0.17 | 0.38 | 1.17  | 0.382368 | 0.519845 | 0.688648 | 0.71135  |
| MmugDNA.1556.1.S1_at    | MmugDNA.1556.1  | 12.02 | 11.19 | 0.03 | 0.72 | 1.77  | 0.102022 | 0.10622  | 0.461412 | 0.368604 |
| MmugDNA.15561.1.S1_at   | MmugDNA.15561.1 | 7.09  | 6.75  | 0.55 | 0.52 | 1.27  | 0.897714 | 0.097834 | 0.95917  | 0.355639 |
| MmugDNA.15564.1.S1_x_at | MmugDNA.15564.1 | 5.76  | 5.38  | 0.85 | 0.15 | 1.3   | 0.193147 | 0.188175 | 0.556562 | 0.464251 |
| MmugDNA.15569.1.S1_at   | MmugDNA.15569.1 | 4.23  | 4.21  | 0.27 | 0.15 | 1.02  | 0.723152 | 0.856502 | 0.878999 | 0.918027 |
| MmugDNA.1557.1.S1_at    | MmugDNA.1557.1  | 3.34  | 3.48  | 0.12 | 0.2  | -1.1  | 0.396916 | 0.04044  | 0.697407 | 0.24621  |
| MmugDNA.15570.1.S1_at   | MmugDNA.15570.1 | 4.28  | 4.28  | 0.07 | 0.17 | 1     | 0.52735  | 0.707279 | 0.774786 | 0.83023  |
| MmugDNA.15571.1.S1_at   | MmugDNA.15571.1 | 9.52  | 9.72  | 0.25 | 0.27 | -1.16 | 0.77749  | 0.855044 | 0.907006 | 0.917395 |
| MmugDNA.15572.1.S1_at   | MmugDNA.15572.1 | 5.04  | 5.05  | 0.05 | 0.07 | -1.01 | 0.414412 | 0.375219 | 0.709245 | 0.613261 |
| MmugDNA.15577.1.S1_s_at | MmugDNA.15577.1 | 8.73  | 7.62  | 0.16 | 0.34 | 2.15  | 0.007157 | 0.002779 | 0.205071 | 0.077966 |
| MmugDNA.15578.1.S1_at   | MmugDNA.15578.1 | 4.93  | 5.61  | 0.37 | 0.67 | -1.6  | 0.185437 | 0.192965 | 0.548882 | 0.468455 |
| MmugDNA.15579.1.S1_at   | MmugDNA.15579.1 | 6.24  | 6.41  | 0.21 | 0.11 | -1.13 | 0.277291 | 0.308572 | 0.619436 | 0.564575 |
| MmugDNA.1558.1.S1_at    | MmugDNA.1558.1  | 5.1   | 5.1   | 0.06 | 0.09 | -1    | 0.813456 | 0.803979 | 0.924267 | 0.887203 |
| MmugDNA.15580.1.S1_at   | MmugDNA.15580.1 | 6.5   | 6.38  | 0.27 | 0.33 | 1.09  | 0.709427 | 0.72966  | 0.872518 | 0.843634 |
| MmugDNA.15581.1.S1_at   | MmugDNA.15581.1 | 4.57  | 4.31  | 1.54 | 0.64 | 1.2   | 0.296757 | 0.408845 | 0.632686 | 0.6359   |
| MmugDNA.15582.1.S1_s_at | MmugDNA.15582.1 | 12.2  | 12.48 | 0.04 | 0.09 | -1.21 | 0.011267 | 0.000295 | 0.235343 | 0.034892 |
| MmugDNA.15584.1.S1_at   | MmugDNA.15584.1 | 7.18  | 7.29  | 0.07 | 0.14 | -1.09 | 0.109532 | 0.148727 | 0.470811 | 0.423201 |
| MmugDNA.15588.1.S1_at   | MmugDNA.15588.1 | 7.79  | 8.01  | 0.39 | 0.31 | -1.17 | 0.573329 | 0.816291 | 0.801148 | 0.894034 |
| MmugDNA.1559.1.S1_at    | MmugDNA.1559.1  | 5.1   | 5.06  | 0.12 | 0.17 | 1.03  | 0.930979 | 0.677846 | 0.97337  | 0.811833 |
| MmugDNA.36629.1.S1_at   | MmugDNA.36629.1 | 8.25  | 8.53  | 0.24 | 0.02 | -1.22 | 0.340204 | 0.414754 | 0.661654 | 0.640456 |
| MmugDNA.36629.1.S1_s_at | MmugDNA.36629.1 | 4.84  | 4.65  | 0.39 | 0.43 | 1.14  | 0.647826 | 0.26437  | 0.841727 | 0.530385 |
| MmugDNA.36629.1.S1_x_at | MmugDNA.36629.1 | 8.03  | 8.1   | 0.18 | 0.16 | -1.05 | 0.720397 | 0.876358 | 0.877526 | 0.929679 |
| MmugDNA.15590.1.S1_at   | MmugDNA.15590.1 | 5.4   | 5     | 0.19 | 0.32 | 1.32  | 0.101844 | 0.043945 | 0.461313 | 0.254098 |
| MmugDNA.15591.1.S1_at   | MmugDNA.15591.1 | 3.68  | 3.99  | 0.05 | 0.29 | -1.24 | 0.119882 | 0.118349 | 0.484448 | 0.386395 |

|                         |                 |       |       |      |      |       |          |          |          |          |
|-------------------------|-----------------|-------|-------|------|------|-------|----------|----------|----------|----------|
| MmugDNA.15595.1.S1_at   | MmugDNA.15595.1 | 8.59  | 10.12 | 1.53 | 2.28 | -2.88 | 0.588184 | 0.371355 | 0.808927 | 0.610172 |
| MmugDNA.15597.1.S1_s_at | MmugDNA.15597.1 | 6.4   | 5.69  | 0.26 | 0.86 | 1.64  | 0.174703 | 0.07258  | 0.538288 | 0.315511 |
| MmugDNA.15598.1.S1_at   | MmugDNA.15598.1 | 3.27  | 3     | 0.08 | 0.1  | 1.2   | 0.030847 | 0.069702 | 0.32011  | 0.310164 |
| MmugDNA.15599.1.S1_s_at | MmugDNA.15599.1 | 7.04  | 7.21  | 0.04 | 0.29 | -1.13 | 0.282421 | 0.169914 | 0.622852 | 0.446569 |
| MmugDNA.1560.1.S1_at    | MmugDNA.1560.1  | 10.63 | 10.29 | 0.27 | 0.06 | 1.27  | 0.357883 | 0.038473 | 0.672837 | 0.241096 |
| MmugDNA.15600.1.S1_at   | MmugDNA.15600.1 | 12.66 | 12.66 | 0.08 | 0.17 | 1     | 0.924943 | 0.92845  | 0.97091  | 0.959353 |
| MmugDNA.15601.1.S1_at   | MmugDNA.15601.1 | 8.61  | 8.35  | 0.38 | 0.65 | 1.2   | 0.72363  | 0.231947 | 0.879213 | 0.503631 |
| MmugDNA.15602.1.S1_at   | MmugDNA.15602.1 | 5.87  | 5.69  | 0.19 | 0.05 | 1.13  | 0.069587 | 0.034201 | 0.412599 | 0.228775 |
| MmugDNA.15606.1.S1_at   | MmugDNA.15606.1 | 3.99  | 3.75  | 0.1  | 0.05 | 1.18  | 0.020073 | 0.089518 | 0.276627 | 0.343811 |
| MmugDNA.15607.1.S1_at   | MmugDNA.15607.1 | 5.66  | 5.7   | 0.41 | 0.38 | -1.03 | 0.920411 | 0.304561 | 0.968984 | 0.561819 |
| MmugDNA.15609.1.S1_at   | MmugDNA.15609.1 | 11.88 | 11.28 | 0.18 | 0.44 | 1.52  | 0.352352 | 0.439028 | 0.669556 | 0.657802 |
| MmugDNA.1561.1.S1_at    | MmugDNA.1561.1  | 3.53  | 3.82  | 0.19 | 0.22 | -1.23 | 0.391209 | 0.618187 | 0.69398  | 0.77393  |
| MmugDNA.15612.1.S1_at   | MmugDNA.15612.1 | 3.54  | 3.25  | 0.19 | 0.1  | 1.23  | 0.187948 | 0.17128  | 0.550984 | 0.447809 |
| MmugDNA.15613.1.S1_at   | MmugDNA.15613.1 | 9.59  | 10.3  | 0.16 | 0.31 | -1.63 | 0.01962  | 0.03956  | 0.275549 | 0.243891 |
| MmugDNA.15614.1.S1_at   | MmugDNA.15614.1 | 8.63  | 8.58  | 0.28 | 0.2  | 1.03  | 0.667946 | 0.04269  | 0.851379 | 0.251049 |
| MmugDNA.15618.1.S1_s_at | MmugDNA.15618.1 | 3.14  | 4.57  | 0.04 | 0.93 | -2.69 | 0.089291 | 0.099215 | 0.444981 | 0.357394 |
| MmugDNA.15619.1.S1_at   | MmugDNA.15619.1 | 6.3   | 6.31  | 0.23 | 0.18 | -1.01 | 0.891114 | 0.938747 | 0.956554 | 0.965165 |
| MmugDNA.15619.1.S1_s_at | MmugDNA.15619.1 | 6.19  | 6.35  | 0.08 | 0.27 | -1.12 | 0.19604  | 0.23247  | 0.559231 | 0.504244 |
| MmugDNA.1562.1.S1_at    | MmugDNA.1562.1  | 5.39  | 5.36  | 0.09 | 0.29 | 1.02  | 0.999199 | 0.953003 | 0.999761 | 0.973367 |
| MmugDNA.15622.1.S1_at   | MmugDNA.15622.1 | 4.01  | 4.02  | 0.53 | 0.22 | -1.01 | 0.424875 | 0.511711 | 0.714864 | 0.705797 |
| MmugDNA.15623.1.S1_at   | MmugDNA.15623.1 | 4.3   | 4.3   | 0.1  | 0.06 | 1     | 0.737196 | 0.14249  | 0.887008 | 0.416082 |
| MmugDNA.15624.1.S1_at   | MmugDNA.15624.1 | 4.69  | 4.69  | 0.03 | 0.11 | 1     | 0.291118 | 0.129339 | 0.628725 | 0.400748 |
| MmugDNA.15627.1.S1_at   | MmugDNA.15627.1 | 4.49  | 4.51  | 0.28 | 0.1  | -1.01 | 0.766726 | 0.888936 | 0.901912 | 0.936725 |
| MmugDNA.15628.1.S1_at   | MmugDNA.15628.1 | 3.15  | 3.14  | 0.11 | 0.24 | 1     | 0.809808 | 0.796009 | 0.922372 | 0.882479 |
| MmugDNA.15629.1.S1_at   | MmugDNA.15629.1 | 6.46  | 6.41  | 0.26 | 0.19 | 1.03  | 0.554484 | 0.49474  | 0.790763 | 0.695061 |
| MmugDNA.15630.1.S1_at   | MmugDNA.15630.1 | 5.03  | 5.38  | 0.26 | 0.06 | -1.28 | 0.248808 | 0.450861 | 0.599636 | 0.665869 |
| MmugDNA.15632.1.S1_at   | MmugDNA.15632.1 | 4.55  | 4.7   | 0.19 | 0.06 | -1.12 | 0.484526 | 0.659963 | 0.750493 | 0.801008 |
| MmugDNA.15635.1.S1_at   | MmugDNA.15635.1 | 6.03  | 5.72  | 0.2  | 0.17 | 1.24  | 0.119177 | 0.114634 | 0.48378  | 0.381156 |
| MmugDNA.15636.1.S1_at   | MmugDNA.15636.1 | 4.15  | 4.08  | 0.95 | 0.37 | 1.05  | 0.286741 | 0.338318 | 0.625572 | 0.585417 |
| MmugDNA.15640.1.S1_at   | MmugDNA.15640.1 | 3.24  | 3.39  | 0.13 | 0.11 | -1.11 | 0.374101 | 0.182564 | 0.683335 | 0.459065 |
| MmugDNA.15643.1.S1_at   | MmugDNA.15643.1 | 7.57  | 7.35  | 0.76 | 0.27 | 1.17  | 0.226516 | 0.285343 | 0.584429 | 0.547198 |
| MmugDNA.15644.1.S1_at   | MmugDNA.15644.1 | 4.97  | 5.03  | 0.35 | 0.11 | -1.04 | 0.675611 | 0.57732  | 0.854658 | 0.747838 |
| MmugDNA.15645.1.S1_at   | MmugDNA.15645.1 | 5.27  | 5.18  | 0.25 | 0.17 | 1.06  | 0.342855 | 0.464245 | 0.663407 | 0.674983 |
| MmugDNA.15648.1.S1_at   | MmugDNA.15648.1 | 8.25  | 8.69  | 0.1  | 0.63 | -1.35 | 0.950977 | 0.665597 | 0.981558 | 0.804075 |
| MmugDNA.15649.1.S1_at   | MmugDNA.15649.1 | 9.03  | 8.29  | 0.27 | 0.88 | 1.67  | 0.226208 | 0.065261 | 0.584285 | 0.301239 |
| MmugDNA.1565.1.S1_at    | MmugDNA.1565.1  | 3.46  | 3.44  | 0.02 | 0.15 | 1.01  | 0.745017 | 0.345085 | 0.890933 | 0.590354 |
| MmugDNA.15650.1.S1_s_at | MmugDNA.15650.1 | 7.46  | 9.14  | 0.31 | 0.51 | -3.2  | 0.005936 | 0.00204  | 0.193916 | 0.066887 |
| MmugDNA.15651.1.S1_at   | MmugDNA.15651.1 | 8.98  | 7.73  | 0.54 | 1    | 2.38  | 0.240223 | 0.063231 | 0.593068 | 0.298187 |
| MmugDNA.15652.1.S1_at   | MmugDNA.15652.1 | 12.61 | 13.08 | 0.03 | 0.13 | -1.38 | 0.003419 | 0.000734 | 0.178256 | 0.04476  |
| MmugDNA.15653.1.S1_at   | MmugDNA.15653.1 | 3.56  | 3.63  | 0.11 | 0.9  | -1.05 | 0.324305 | 0.29231  | 0.651927 | 0.552389 |
| MmugDNA.15654.1.S1_at   | MmugDNA.15654.1 | 11.55 | 12.17 | 0.08 | 0.25 | -1.53 | 0.03277  | 0.021125 | 0.326108 | 0.181957 |

|                         |                 |       |       |      |      |       |          |          |          |          |
|-------------------------|-----------------|-------|-------|------|------|-------|----------|----------|----------|----------|
| MmugDNA.15655.1.S1_at   | MmugDNA.15655.1 | 6.4   | 6.88  | 0.26 | 0.47 | -1.4  | 0.301282 | 0.209143 | 0.636303 | 0.482939 |
| MmugDNA.15657.1.S1_at   | MmugDNA.15657.1 | 6.28  | 6.74  | 0.26 | 0.38 | -1.37 | 0.219513 | 0.20439  | 0.578953 | 0.478736 |
| MmugDNA.24833.1.S1_s_at | MmugDNA.24833.1 | 14.15 | 13.98 | 0    | 0.12 | 1.12  | 0.057182 | 0.024939 | 0.387542 | 0.197799 |
| MmugDNA.15659.1.S1_at   | MmugDNA.15659.1 | 3.84  | 3.91  | 0.56 | 0.25 | -1.05 | 0.65     | 0.641737 | 0.842575 | 0.789698 |
| MmugDNA.15663.1.S1_at   | MmugDNA.15663.1 | 7.82  | 8.18  | 0.15 | 0.18 | -1.29 | 0.048328 | 0.015581 | 0.368238 | 0.158192 |
| MmugDNA.15668.1.S1_at   | MmugDNA.15668.1 | 4.27  | 4.36  | 0.09 | 0.07 | -1.07 | 0.138145 | 0.178837 | 0.505618 | 0.455141 |
| MmugDNA.15669.1.S1_at   | MmugDNA.15669.1 | 5.37  | 5.47  | 0.24 | 0.22 | -1.07 | 0.287521 | 0.39756  | 0.625987 | 0.628973 |
| MmugDNA.15670.1.S1_s_at | MmugDNA.15670.1 | 9.58  | 9.73  | 0.32 | 0.25 | -1.11 | 0.548329 | 0.406425 | 0.786665 | 0.634319 |
| MmugDNA.15672.1.S1_at   | MmugDNA.15672.1 | 6.39  | 6.52  | 0.18 | 0.17 | -1.09 | 0.637731 | 0.868711 | 0.836256 | 0.92541  |
| MmugDNA.15673.1.S1_at   | MmugDNA.15673.1 | 7.64  | 7.8   | 0.16 | 0.05 | -1.12 | 0.156447 | 0.203292 | 0.521176 | 0.477517 |
| MmugDNA.15674.1.S1_at   | MmugDNA.15674.1 | 2.97  | 3.04  | 0.03 | 0.22 | -1.05 | 0.218025 | 0.20781  | 0.577569 | 0.482031 |
| MmugDNA.15675.1.S1_at   | MmugDNA.15675.1 | 3.48  | 3.52  | 0.1  | 0.04 | -1.03 | 0.607343 | 0.1004   | 0.819317 | 0.359541 |
| MmugDNA.15676.1.S1_at   | MmugDNA.15676.1 | 4     | 4.56  | 0.22 | 0.34 | -1.48 | 0.077363 | 0.067176 | 0.427094 | 0.305198 |
| MmugDNA.15677.1.S1_at   | MmugDNA.15677.1 | 3.76  | 3.72  | 0.38 | 0.03 | 1.03  | 0.707928 | 0.83352  | 0.871454 | 0.904546 |
| MmugDNA.15678.1.S1_at   | MmugDNA.15678.1 | 4.76  | 4.8   | 0.08 | 0.24 | -1.03 | 0.37224  | 0.474022 | 0.682724 | 0.681177 |
| MmugDNA.15680.1.S1_at   | MmugDNA.15680.1 | 3.8   | 3.37  | 0.51 | 0.43 | 1.35  | 0.6623   | 0.462202 | 0.848507 | 0.673601 |
| MmugDNA.15681.1.S1_at   | MmugDNA.15681.1 | 8.55  | 7.95  | 0.29 | 0.2  | 1.52  | 0.037206 | 0.013062 | 0.341    | 0.147014 |
| MmugDNA.15683.1.S1_at   | MmugDNA.15683.1 | 3.47  | 3.51  | 0.13 | 0.1  | -1.03 | 0.939613 | 0.33582  | 0.977013 | 0.583533 |
| MmugDNA.15684.1.S1_at   | MmugDNA.15684.1 | 6.49  | 5.7   | 0.75 | 0.92 | 1.73  | 0.197811 | 0.297238 | 0.560816 | 0.556067 |
| MmugDNA.15685.1.S1_at   | MmugDNA.15685.1 | 4.24  | 4.16  | 0.28 | 0.25 | 1.06  | 0.50172  | 0.69437  | 0.760131 | 0.822254 |
| MmugDNA.15686.1.S1_at   | MmugDNA.15686.1 | 10.96 | 10.88 | 0.11 | 0.42 | 1.06  | 0.617693 | 0.802219 | 0.824859 | 0.886112 |
| MmugDNA.15688.1.S1_at   | MmugDNA.15688.1 | 5.57  | 5.53  | 0.43 | 0.3  | 1.03  | 0.382383 | 0.581608 | 0.688652 | 0.750589 |
| MmugDNA.15689.1.S1_at   | MmugDNA.15689.1 | 9.69  | 10.04 | 0.3  | 0.39 | -1.27 | 0.629424 | 0.363    | 0.831446 | 0.603478 |
| MmugDNA.21048.1.S1_s_at | MmugDNA.21048.1 | 13.27 | 13.38 | 0.09 | 0.13 | -1.08 | 0.165933 | 0.185769 | 0.529851 | 0.461631 |
| MmugDNA.15690.1.S1_at   | MmugDNA.15690.1 | 3.33  | 3.57  | 0.54 | 0.54 | -1.18 | 0.701908 | 0.576454 | 0.868197 | 0.747241 |
| MmugDNA.15692.1.S1_at   | MmugDNA.15692.1 | 9.21  | 9.43  | 0.31 | 0.22 | -1.17 | 0.820048 | 0.102671 | 0.926819 | 0.363058 |
| MmugDNA.15694.1.S1_at   | MmugDNA.15694.1 | 9.95  | 8.46  | 0.03 | 0.51 | 2.81  | 0.015272 | 0.001938 | 0.257698 | 0.065795 |
| MmugDNA.15695.1.S1_at   | MmugDNA.15695.1 | 3.01  | 3.1   | 0.1  | 0.1  | -1.07 | 0.669566 | 0.074609 | 0.852167 | 0.318299 |
| MmugDNA.15695.1.S1_s_at | MmugDNA.15695.1 | 11.95 | 12.54 | 0.28 | 0.31 | -1.5  | 0.094858 | 0.063325 | 0.452343 | 0.298315 |
| MmugDNA.15697.1.S1_at   | MmugDNA.15697.1 | 5.39  | 5.38  | 0.1  | 0.17 | 1     | 0.878058 | 0.246443 | 0.951038 | 0.515899 |
| MmugDNA.15698.1.S1_at   | MmugDNA.15698.1 | 6.41  | 6.62  | 0.11 | 0.1  | -1.15 | 0.060815 | 0.037172 | 0.394325 | 0.237285 |
| MmugDNA.15699.1.S1_at   | MmugDNA.15699.1 | 11.85 | 11.98 | 0.2  | 0.03 | -1.09 | 0.330119 | 0.514395 | 0.655612 | 0.707675 |
| MmugDNA.157.1.S1_at     | MmugDNA.157.1   | 5.76  | 6.65  | 0.39 | 0.3  | -1.85 | 0.023198 | 0.013291 | 0.290295 | 0.147978 |
| MmugDNA.1570.1.S1_at    | MmugDNA.1570.1  | 3.33  | 3.35  | 0.05 | 0.15 | -1.01 | 0.535259 | 0.731992 | 0.778933 | 0.844751 |
| MmugDNA.15701.1.S1_s_at | MmugDNA.15701.1 | 3.14  | 3.27  | 0.06 | 0.1  | -1.1  | 0.097526 | 0.083411 | 0.456541 | 0.333699 |
| MmugDNA.15702.1.S1_at   | MmugDNA.15702.1 | 6.7   | 7.46  | 0.11 | 0.63 | -1.69 | 0.095002 | 0.118553 | 0.452582 | 0.38654  |
| MmugDNA.15705.1.S1_at   | MmugDNA.15705.1 | 5.73  | 5.99  | 0.2  | 0.01 | -1.2  | 0.271859 | 0.167424 | 0.615834 | 0.443785 |
| MmugDNA.15707.1.S1_at   | MmugDNA.15707.1 | 4.17  | 4.22  | 0.08 | 0.13 | -1.04 | 0.74639  | 0.316165 | 0.891402 | 0.56963  |
| MmugDNA.1571.1.S1_at    | MmugDNA.1571.1  | 8.83  | 7.89  | 0.1  | 1.31 | 1.91  | 0.090024 | 0.02833  | 0.445441 | 0.210111 |
| MmugDNA.15711.1.S1_at   | MmugDNA.15711.1 | 8.83  | 8.65  | 0.07 | 0.55 | 1.13  | 0.72194  | 0.862285 | 0.878435 | 0.921685 |
| MmugDNA.15712.1.S1_x_at | MmugDNA.15712.1 | 7.83  | 7.59  | 0.99 | 0.63 | 1.18  | 0.206753 | 0.261252 | 0.568816 | 0.527724 |



|                         |                 |       |       |      |      |       |          |          |          |          |
|-------------------------|-----------------|-------|-------|------|------|-------|----------|----------|----------|----------|
| MmugDNA.15713.1.S1_at   | MmugDNA.15713.1 | 5.86  | 6.02  | 0.2  | 0.11 | -1.12 | 0.892527 | 0.367245 | 0.957242 | 0.606869 |
| MmugDNA.15714.1.S1_at   | MmugDNA.15714.1 | 5.76  | 5.73  | 0.19 | 0.04 | 1.02  | 0.517842 | 0.337231 | 0.769067 | 0.584438 |
| MmugDNA.15716.1.S1_at   | MmugDNA.15716.1 | 10.52 | 9.97  | 0.18 | 0.54 | 1.46  | 0.105151 | 0.13425  | 0.465599 | 0.406457 |
| MmugDNA.15717.1.S1_at   | MmugDNA.15717.1 | 5.79  | 5.47  | 0.48 | 0.16 | 1.25  | 0.31885  | 0.347547 | 0.648688 | 0.592019 |
| MmugDNA.15718.1.S1_at   | MmugDNA.15718.1 | 4.7   | 4.71  | 0.09 | 0.17 | -1.01 | 0.222108 | 0.278434 | 0.580671 | 0.542212 |
| MmugDNA.1572.1.S1_at    | MmugDNA.1572.1  | 6.28  | 6.28  | 0.14 | 0    | 1     | 0.377271 | 0.254537 | 0.685705 | 0.522863 |
| MmugDNA.15720.1.S1_at   | MmugDNA.15720.1 | 6.23  | 6.08  | 0.15 | 0.07 | 1.11  | 0.198841 | 0.092852 | 0.561936 | 0.349024 |
| MmugDNA.15722.1.S1_at   | MmugDNA.15722.1 | 5.19  | 5.22  | 0.09 | 0.07 | -1.02 | 0.338644 | 0.157468 | 0.660988 | 0.432984 |
| MmugDNA.15724.1.S1_at   | MmugDNA.15724.1 | 6.92  | 6.71  | 0.35 | 0.08 | 1.16  | 0.408873 | 0.580879 | 0.705637 | 0.749967 |
| MmugDNA.15725.1.S1_at   | MmugDNA.15725.1 | 10.38 | 10.41 | 0.11 | 0.27 | -1.03 | 0.737755 | 0.012172 | 0.887343 | 0.142744 |
| MmugDNA.15727.1.S1_at   | MmugDNA.15727.1 | 6.98  | 6.34  | 0.23 | 0.44 | 1.57  | 0.033297 | 0.015501 | 0.32798  | 0.158044 |
| MmugDNA.15728.1.S1_at   | MmugDNA.15728.1 | 5.06  | 4.39  | 0.65 | 0.32 | 1.59  | 0.144033 | 0.217654 | 0.510652 | 0.491255 |
| MmugDNA.15729.1.S1_at   | MmugDNA.15729.1 | 6.33  | 6     | 0.13 | 0.37 | 1.26  | 0.297639 | 0.390868 | 0.63339  | 0.624588 |
| MmugDNA.1573.1.S1_at    | MmugDNA.1573.1  | 6.46  | 6.06  | 0.22 | 0.29 | 1.32  | 0.030049 | 0.000103 | 0.316741 | 0.028099 |
| MmugDNA.15730.1.S1_at   | MmugDNA.15730.1 | 6.24  | 5.62  | 0.24 | 0.16 | 1.54  | 0.008451 | 0.004412 | 0.218339 | 0.092879 |
| MmugDNA.15731.1.S1_at   | MmugDNA.15731.1 | 6.75  | 6.56  | 0.35 | 0.29 | 1.14  | 0.336599 | 0.207618 | 0.659537 | 0.481906 |
| MmugDNA.15734.1.S1_at   | MmugDNA.15734.1 | 4.64  | 4.61  | 0.33 | 0.28 | 1.02  | 0.817424 | 0.474322 | 0.925944 | 0.68135  |
| MmugDNA.15735.1.S1_at   | MmugDNA.15735.1 | 3.91  | 4.58  | 0.16 | 0.69 | -1.59 | 0.145639 | 0.197452 | 0.51146  | 0.472385 |
| MmugDNA.15736.1.S1_at   | MmugDNA.15736.1 | 7.57  | 7.14  | 0.28 | 0.44 | 1.35  | 0.118421 | 0.153232 | 0.482826 | 0.428062 |
| MmugDNA.15737.1.S1_s_at | MmugDNA.15737.1 | 7.35  | 6.91  | 0.22 | 0.38 | 1.36  | 0.640763 | 0.565413 | 0.83776  | 0.739886 |
| MmugDNA.15738.1.S1_at   | MmugDNA.15738.1 | 9.33  | 10.92 | 1.38 | 1.5  | -3.01 | 0.273205 | 0.355416 | 0.616667 | 0.597738 |
| MmugDNA.15739.1.S1_at   | MmugDNA.15739.1 | 9.28  | 9     | 0.43 | 0.38 | 1.21  | 0.319585 | 0.343831 | 0.649068 | 0.589516 |
| MmugDNA.1574.1.S1_at    | MmugDNA.1574.1  | 4.52  | 4.48  | 0.25 | 0.22 | 1.03  | 0.963822 | 0.976029 | 0.985992 | 0.986894 |
| MmugDNA.15741.1.S1_at   | MmugDNA.15741.1 | 5.38  | 5.48  | 0.1  | 0.15 | -1.07 | 0.38263  | 0.29485  | 0.688839 | 0.554412 |
| MmugDNA.15742.1.S1_at   | MmugDNA.15742.1 | 11.01 | 11    | 0.08 | 0.04 | 1     | 0.951742 | 0.950798 | 0.98195  | 0.972054 |
| MmugDNA.15743.1.S1_at   | MmugDNA.15743.1 | 5.38  | 5.19  | 0.16 | 0.1  | 1.14  | 0.242811 | 0.471497 | 0.594598 | 0.6795   |
| MmugDNA.15745.1.S1_at   | MmugDNA.15745.1 | 9.46  | 9.37  | 0.31 | 0.11 | 1.07  | 0.982772 | 0.64057  | 0.993636 | 0.789015 |
| MmugDNA.15748.1.S1_at   | MmugDNA.15748.1 | 7.39  | 7.67  | 0.29 | 0.31 | -1.21 | 0.275181 | 0.207441 | 0.617699 | 0.481698 |
| MmugDNA.15749.1.S1_at   | MmugDNA.15749.1 | 9.11  | 8.5   | 0.7  | 1.13 | 1.52  | 0.661451 | 0.557325 | 0.848148 | 0.735031 |
| MmugDNA.1575.1.S1_at    | MmugDNA.1575.1  | 8.72  | 8.45  | 0.12 | 0.35 | 1.21  | 0.170478 | 0.126791 | 0.534249 | 0.397446 |
| MmugDNA.15750.1.S1_at   | MmugDNA.15750.1 | 3.92  | 3.9   | 0.18 | 0.12 | 1.01  | 0.943098 | 0.99337  | 0.978387 | 0.996064 |
| MmugDNA.15753.1.S1_at   | MmugDNA.15753.1 | 3.05  | 3.14  | 0.21 | 0.14 | -1.07 | 0.587151 | 0.833186 | 0.808418 | 0.904313 |
| MmugDNA.15755.1.S1_at   | MmugDNA.15755.1 | 6.58  | 5.77  | 0.85 | 0.59 | 1.75  | 0.091231 | 0.032583 | 0.447111 | 0.223585 |
| MmugDNA.15756.1.S1_at   | MmugDNA.15756.1 | 8.63  | 8.21  | 0.3  | 0.41 | 1.35  | 0.088852 | 0.097059 | 0.443814 | 0.35455  |
| MmugDNA.15757.1.S1_at   | MmugDNA.15757.1 | 3.15  | 3.25  | 0.03 | 0.07 | -1.07 | 0.196496 | 0.18835  | 0.559808 | 0.46433  |
| MmugDNA.15758.1.S1_at   | MmugDNA.15758.1 | 6.51  | 6.8   | 0.23 | 0.32 | -1.22 | 0.265676 | 0.132237 | 0.611323 | 0.404274 |
| MmugDNA.1576.1.S1_at    | MmugDNA.1576.1  | 5.1   | 5.14  | 0.22 | 0.2  | -1.02 | 0.428929 | 0.643602 | 0.717166 | 0.791036 |
| MmugDNA.15761.1.S1_at   | MmugDNA.15761.1 | 5.66  | 5.71  | 0.14 | 0.1  | -1.04 | 0.675846 | 0.226717 | 0.854832 | 0.499176 |
| MmugDNA.15763.1.S1_at   | MmugDNA.15763.1 | 6.26  | 6.48  | 0.56 | 0.98 | -1.16 | 0.419921 | 0.554555 | 0.712173 | 0.733264 |
| MmugDNA.15764.1.S1_at   | MmugDNA.15764.1 | 6.57  | 6.47  | 0.18 | 0.09 | 1.07  | 0.619214 | 0.445605 | 0.825427 | 0.662468 |
| MmugDNA.15765.1.S1_at   | MmugDNA.15765.1 | 5.96  | 5.65  | 0.3  | 0.09 | 1.24  | 0.120919 | 0.103775 | 0.48574  | 0.364519 |

|                         |                 |       |       |      |      |       |          |          |          |          |
|-------------------------|-----------------|-------|-------|------|------|-------|----------|----------|----------|----------|
| MmugDNA.15766.1.S1_at   | MmugDNA.15766.1 | 8.61  | 7.53  | 0.19 | 0.46 | 2.1   | 0.021792 | 0.016137 | 0.28382  | 0.161012 |
| MmugDNA.15767.1.S1_at   | MmugDNA.15767.1 | 6.39  | 7.57  | 0.81 | 1.43 | -2.27 | 0.275008 | 0.372015 | 0.617642 | 0.61084  |
| MmugDNA.15768.1.S1_at   | MmugDNA.15768.1 | 5.04  | 4.34  | 1.05 | 0.21 | 1.62  | 0.23162  | 0.28886  | 0.587487 | 0.549994 |
| MmugDNA.15769.1.S1_at   | MmugDNA.15769.1 | 8.84  | 5.37  | 0.79 | 1.77 | 11.11 | 0.057827 | 0.0405   | 0.38911  | 0.246264 |
| MmugDNA.1577.1.S1_at    | MmugDNA.1577.1  | 3.16  | 3.21  | 1.23 | 0.23 | -1.04 | 0.420992 | 0.46827  | 0.712822 | 0.6777   |
| MmugDNA.15771.1.S1_at   | MmugDNA.15771.1 | 5.09  | 5.85  | 1.37 | 1.01 | -1.69 | 0.611958 | 0.703221 | 0.821903 | 0.827928 |
| MmugDNA.15772.1.S1_at   | MmugDNA.15772.1 | 8.62  | 8.15  | 0.34 | 0.62 | 1.38  | 0.357479 | 0.370568 | 0.67246  | 0.609618 |
| MmugDNA.15773.1.S1_at   | MmugDNA.15773.1 | 8.32  | 8.61  | 0.12 | 0.36 | -1.22 | 0.273253 | 0.016243 | 0.616697 | 0.161591 |
| MmugDNA.15774.1.S1_at   | MmugDNA.15774.1 | 8.84  | 9.54  | 0.19 | 0.4  | -1.63 | 0.086236 | 0.009196 | 0.440216 | 0.126573 |
| MmugDNA.15776.1.S1_at   | MmugDNA.15776.1 | 6.54  | 6.08  | 0.51 | 0.29 | 1.38  | 0.156782 | 0.086768 | 0.521541 | 0.339521 |
| MmugDNA.15777.1.S1_at   | MmugDNA.15777.1 | 9.53  | 8.57  | 0.22 | 0.57 | 1.94  | 0.030455 | 0.036343 | 0.318556 | 0.235105 |
| MmugDNA.15778.1.S1_at   | MmugDNA.15778.1 | 5.27  | 5.49  | 0.22 | 0.11 | -1.16 | 0.216471 | 0.242472 | 0.576105 | 0.512835 |
| MmugDNA.15779.1.S1_at   | MmugDNA.15779.1 | 7.53  | 7.96  | 0.07 | 0.09 | -1.35 | 0.003001 | 0.007679 | 0.171022 | 0.117153 |
| MmugDNA.1578.1.S1_s_at  | MmugDNA.1578.1  | 14.39 | 14.36 | 0.05 | 0.05 | 1.02  | 0.567817 | 0.095549 | 0.798292 | 0.352627 |
| MmugDNA.15781.1.S1_at   | MmugDNA.15781.1 | 6.45  | 8.49  | 0.96 | 1.49 | -4.11 | 0.225217 | 0.127848 | 0.583088 | 0.398767 |
| MmugDNA.15784.1.S1_at   | MmugDNA.15784.1 | 3.1   | 3.07  | 0.42 | 0.16 | 1.02  | 0.351272 | 0.245234 | 0.669117 | 0.515029 |
| MmugDNA.15785.1.S1_at   | MmugDNA.15785.1 | 3.52  | 3.16  | 0.28 | 0.55 | 1.28  | 0.962823 | 0.25443  | 0.985644 | 0.522732 |
| MmugDNA.15786.1.S1_at   | MmugDNA.15786.1 | 5.8   | 5.87  | 0.35 | 0.2  | -1.05 | 0.606951 | 0.692929 | 0.81915  | 0.821308 |
| MmugDNA.15787.1.S1_at   | MmugDNA.15787.1 | 6.86  | 6.43  | 0.69 | 0.77 | 1.35  | 0.459903 | 0.656897 | 0.736616 | 0.799401 |
| MmugDNA.15788.1.S1_at   | MmugDNA.15788.1 | 7.35  | 7.52  | 0.11 | 0.04 | -1.12 | 0.034807 | 0.030407 | 0.333964 | 0.216319 |
| MmugDNA.15789.1.S1_at   | MmugDNA.15789.1 | 4.37  | 4.4   | 0.09 | 0.41 | -1.02 | 0.298124 | 0.227564 | 0.633823 | 0.499841 |
| MmugDNA.1579.1.S1_at    | MmugDNA.1579.1  | 4.85  | 4.75  | 0.64 | 0.05 | 1.07  | 0.248502 | 0.32153  | 0.599309 | 0.573226 |
| MmugDNA.15790.1.S1_at   | MmugDNA.15790.1 | 5.87  | 6.36  | 0.23 | 0.65 | -1.41 | 0.1593   | 0.195232 | 0.524174 | 0.470253 |
| MmugDNA.15791.1.S1_x_at | MmugDNA.15791.1 | 4.45  | 4.48  | 0.08 | 0.15 | -1.02 | 0.895655 | 0.526112 | 0.958318 | 0.715385 |
| MmugDNA.15792.1.S1_at   | MmugDNA.15792.1 | 5.59  | 5.49  | 0.09 | 0.05 | 1.07  | 0.094958 | 0.069391 | 0.452531 | 0.309617 |
| MmugDNA.15794.1.S1_at   | MmugDNA.15794.1 | 4.54  | 4.53  | 0.15 | 0.04 | 1     | 0.744444 | 0.68203  | 0.890646 | 0.814299 |
| MmugDNA.15795.1.S1_at   | MmugDNA.15795.1 | 3.39  | 3.38  | 0.15 | 0.03 | 1.01  | 0.467245 | 0.439989 | 0.74068  | 0.658626 |
| MmugDNA.15796.1.S1_at   | MmugDNA.15796.1 | 3.25  | 3.49  | 0.37 | 0.42 | -1.18 | 0.781225 | 0.368962 | 0.908721 | 0.608491 |
| MmugDNA.15797.1.S1_at   | MmugDNA.15797.1 | 5.38  | 5.39  | 0.15 | 0.04 | -1.01 | 0.6179   | 0.579367 | 0.824923 | 0.749058 |
| MmugDNA.15799.1.S1_at   | MmugDNA.15799.1 | 5.29  | 5.93  | 1.44 | 0.26 | -1.56 | 0.842844 | 0.46402  | 0.936661 | 0.674785 |
| MmugDNA.158.1.S1_at     | MmugDNA.158.1   | 7.73  | 8.19  | 0.1  | 0.34 | -1.37 | 0.080384 | 0.06115  | 0.430491 | 0.293981 |
| MmugDNA.158.1.S1_s_at   | MmugDNA.158.1   | 11.6  | 12.35 | 0.12 | 0.38 | -1.68 | 0.052797 | 0.047057 | 0.378449 | 0.261469 |
| MmugDNA.1580.1.S1_at    | MmugDNA.1580.1  | 4.43  | 4.49  | 0.09 | 0.22 | -1.04 | 0.401943 | 0.392568 | 0.701106 | 0.625813 |
| MmugDNA.15800.1.S1_at   | MmugDNA.15800.1 | 7.51  | 7.67  | 0.18 | 0.28 | -1.12 | 0.168405 | 0.223094 | 0.532644 | 0.49588  |
| MmugDNA.15801.1.S1_at   | MmugDNA.15801.1 | 7.52  | 6.17  | 0.05 | 0.35 | 2.55  | 0.004773 | 0.002197 | 0.184674 | 0.069235 |
| MmugDNA.15803.1.S1_at   | MmugDNA.15803.1 | 6.23  | 6.35  | 0.29 | 0.13 | -1.09 | 0.58892  | 0.196844 | 0.809161 | 0.471968 |
| MmugDNA.2525.1.S1_s_at  | MmugDNA.2525.1  | 5.12  | 5.09  | 0.12 | 0.07 | 1.02  | 0.302004 | 0.203074 | 0.636808 | 0.477343 |
| MmugDNA.15805.1.S1_at   | MmugDNA.15805.1 | 4.25  | 4.63  | 0.14 | 0.54 | -1.3  | 0.827507 | 0.592755 | 0.930018 | 0.75786  |
| MmugDNA.15806.1.S1_at   | MmugDNA.15806.1 | 8.22  | 7.86  | 0.38 | 0.8  | 1.29  | 0.804492 | 0.756302 | 0.919555 | 0.858165 |
| MmugDNA.15807.1.S1_at   | MmugDNA.15807.1 | 4.73  | 4.54  | 0.21 | 0.09 | 1.14  | 0.084643 | 0.063372 | 0.437449 | 0.298403 |
| MmugDNA.15808.1.S1_s_at | MmugDNA.15808.1 | 13.25 | 13.18 | 0.1  | 0.13 | 1.05  | 0.225959 | 0.29377  | 0.583922 | 0.553758 |

|                         |                 |       |       |      |      |       |          |          |          |          |
|-------------------------|-----------------|-------|-------|------|------|-------|----------|----------|----------|----------|
| MmugDNA.1581.1.S1_at    | MmugDNA.1581.1  | 13.79 | 13.87 | 0.14 | 0.12 | -1.05 | 0.690029 | 0.514888 | 0.861893 | 0.707931 |
| MmugDNA.1581.1.S1_s_at  | MmugDNA.1581.1  | 13.84 | 13.93 | 0.18 | 0.06 | -1.06 | 0.601731 | 0.571522 | 0.816094 | 0.743824 |
| MmugDNA.15810.1.S1_at   | MmugDNA.15810.1 | 9.41  | 9.3   | 0.13 | 0.48 | 1.08  | 0.745505 | 0.891723 | 0.891131 | 0.938272 |
| MmugDNA.15812.1.S1_at   | MmugDNA.15812.1 | 4.6   | 4.81  | 0.21 | 0.21 | -1.16 | 0.286985 | 0.237164 | 0.625695 | 0.507906 |
| MmugDNA.15813.1.S1_at   | MmugDNA.15813.1 | 5.56  | 5     | 0.88 | 0.54 | 1.48  | 0.172961 | 0.290717 | 0.536625 | 0.551382 |
| MmugDNA.15814.1.S1_at   | MmugDNA.15814.1 | 4.91  | 5.06  | 0.06 | 0.16 | -1.11 | 0.299086 | 0.191531 | 0.634655 | 0.466841 |
| MmugDNA.15815.1.S1_at   | MmugDNA.15815.1 | 3.06  | 2.84  | 0.21 | 0.17 | 1.17  | 0.185313 | 0.329063 | 0.548765 | 0.578482 |
| MmugDNA.15816.1.S1_at   | MmugDNA.15816.1 | 10.48 | 9.49  | 0.14 | 0.27 | 1.98  | 0.014209 | 0.006518 | 0.251566 | 0.109602 |
| MmugDNA.1582.1.S1_at    | MmugDNA.1582.1  | 7.3   | 7.31  | 0.67 | 0.14 | -1.01 | 0.783268 | 0.812007 | 0.909454 | 0.891493 |
| MmugDNA.15823.1.S1_at   | MmugDNA.15823.1 | 6.94  | 7.04  | 0.09 | 0.04 | -1.07 | 0.17239  | 0.171833 | 0.535894 | 0.448237 |
| MmugDNA.15824.1.S1_at   | MmugDNA.15824.1 | 3.78  | 3.78  | 0.35 | 0.11 | -1    | 0.867871 | 0.572123 | 0.947272 | 0.744261 |
| MmugDNA.15825.1.S1_at   | MmugDNA.15825.1 | 4.15  | 3.78  | 0.69 | 0.32 | 1.29  | 0.126661 | 0.126075 | 0.492802 | 0.39672  |
| MmugDNA.15826.1.S1_at   | MmugDNA.15826.1 | 3.48  | 3.33  | 0.11 | 0.18 | 1.11  | 0.45465  | 0.288922 | 0.733343 | 0.550032 |
| MmugDNA.15827.1.S1_at   | MmugDNA.15827.1 | 5.98  | 5.47  | 0.47 | 0.14 | 1.43  | 0.122643 | 0.113214 | 0.487896 | 0.379229 |
| MmugDNA.15828.1.S1_at   | MmugDNA.15828.1 | 8.33  | 7.73  | 0.17 | 0.27 | 1.51  | 0.131771 | 0.082231 | 0.498041 | 0.331091 |
| MmugDNA.15829.1.S1_at   | MmugDNA.15829.1 | 8.31  | 8.07  | 0.14 | 0.41 | 1.18  | 0.272424 | 0.354001 | 0.616062 | 0.596966 |
| MmugDNA.15830.1.S1_at   | MmugDNA.15830.1 | 6.54  | 6.56  | 0.13 | 0.02 | -1.01 | 0.280625 | 0.317405 | 0.621742 | 0.570619 |
| MmugDNA.15831.1.S1_at   | MmugDNA.15831.1 | 6.8   | 6.97  | 0.53 | 0.25 | -1.13 | 0.513451 | 0.514821 | 0.766379 | 0.707919 |
| MmugDNA.15832.1.S1_at   | MmugDNA.15832.1 | 5.01  | 5.44  | 0.05 | 0.4  | -1.34 | 0.461266 | 0.687676 | 0.737488 | 0.81766  |
| MmugDNA.15833.1.S1_at   | MmugDNA.15833.1 | 5.97  | 5.8   | 0.39 | 0.33 | 1.13  | 0.54585  | 0.619442 | 0.785219 | 0.774669 |
| MmugDNA.15834.1.S1_at   | MmugDNA.15834.1 | 5.02  | 5.08  | 0.03 | 0.41 | -1.04 | 0.432441 | 0.561245 | 0.719041 | 0.737239 |
| MmugDNA.15836.1.S1_at   | MmugDNA.15836.1 | 7.79  | 7.98  | 0.42 | 1.15 | -1.14 | 0.358922 | 0.48872  | 0.673592 | 0.691325 |
| MmugDNA.15838.1.S1_at   | MmugDNA.15838.1 | 11.36 | 10.7  | 0.06 | 0.5  | 1.58  | 0.075332 | 0.066187 | 0.422257 | 0.302785 |
| MmugDNA.15839.1.S1_at   | MmugDNA.15839.1 | 6.6   | 6.62  | 0.02 | 0.06 | -1.02 | 0.596625 | 0.565088 | 0.813111 | 0.739714 |
| MmugDNA.1584.1.S1_at    | MmugDNA.1584.1  | 8.41  | 8.97  | 0.31 | 0.94 | -1.47 | 0.409091 | 0.190662 | 0.705737 | 0.466119 |
| MmugDNA.15840.1.S1_at   | MmugDNA.15840.1 | 3.54  | 3.54  | 0.07 | 0.12 | 1     | 0.478598 | 0.294837 | 0.747332 | 0.554412 |
| MmugDNA.15842.1.S1_at   | MmugDNA.15842.1 | 6.29  | 10.1  | 1.67 | 2.93 | -14.1 | 0.350105 | 0.201099 | 0.668338 | 0.475516 |
| MmugDNA.33376.1.S1_s_at | MmugDNA.33376.1 | 8.11  | 8.08  | 0.26 | 0.15 | 1.02  | 0.382896 | 0.546087 | 0.688989 | 0.727769 |
| MmugDNA.15844.1.S1_at   | MmugDNA.15844.1 | 6.05  | 5.94  | 0.22 | 0.27 | 1.08  | 0.892852 | 0.590077 | 0.957322 | 0.756117 |
| MmugDNA.15845.1.S1_at   | MmugDNA.15845.1 | 2.7   | 2.99  | 0.4  | 0.08 | -1.22 | 0.872797 | 0.958545 | 0.949183 | 0.976506 |
| MmugDNA.15846.1.S1_at   | MmugDNA.15846.1 | 10.21 | 10.68 | 0.21 | 0.28 | -1.38 | 0.080095 | 0.109625 | 0.430306 | 0.373602 |
| MmugDNA.15848.1.S1_at   | MmugDNA.15848.1 | 3.17  | 3.18  | 0.26 | 0.14 | -1.01 | 0.713986 | 0.875063 | 0.874635 | 0.929125 |
| MmugDNA.15849.1.S1_s_at | MmugDNA.15849.1 | 13.15 | 13.25 | 0.14 | 0.27 | -1.07 | 0.762513 | 0.599319 | 0.899996 | 0.761415 |
| MmugDNA.1585.1.S1_at    | MmugDNA.1585.1  | 4.85  | 4.49  | 0.8  | 0.56 | 1.29  | 0.419823 | 0.595174 | 0.712083 | 0.759007 |
| MmugDNA.15850.1.S1_at   | MmugDNA.15850.1 | 3.63  | 3.77  | 0.24 | 0.19 | -1.11 | 0.594595 | 0.394287 | 0.812049 | 0.626868 |
| MmugDNA.15852.1.S1_at   | MmugDNA.15852.1 | 5.21  | 4.49  | 0.45 | 0.17 | 1.65  | 0.145733 | 0.133095 | 0.511599 | 0.404734 |
| MmugDNA.15854.1.S1_at   | MmugDNA.15854.1 | 3.2   | 3.25  | 0.13 | 0.07 | -1.04 | 0.116822 | 0.1647   | 0.48074  | 0.44101  |
| MmugDNA.15855.1.S1_at   | MmugDNA.15855.1 | 5.28  | 5.52  | 0.14 | 0.28 | -1.18 | 0.714558 | 0.27945  | 0.874952 | 0.543049 |
| MmugDNA.15856.1.S1_at   | MmugDNA.15856.1 | 9.13  | 9.3   | 0.53 | 0.5  | -1.12 | 0.388067 | 0.320516 | 0.692266 | 0.572648 |
| MmugDNA.15858.1.S1_at   | MmugDNA.15858.1 | 3.73  | 4.12  | 0.5  | 0.3  | -1.31 | 0.7983   | 0.685175 | 0.916441 | 0.816369 |
| MmugDNA.15862.1.S1_at   | MmugDNA.15862.1 | 13.87 | 13.32 | 0.09 | 0.24 | 1.47  | 0.019024 | 0.01333  | 0.272726 | 0.148042 |

|                       |                 |       |       |      |      |       |          |          |          |          |
|-----------------------|-----------------|-------|-------|------|------|-------|----------|----------|----------|----------|
| MmugDNA.15863.1.S1_at | MmugDNA.15863.1 | 10.05 | 10.46 | 0.14 | 0.28 | -1.33 | 0.070775 | 0.068751 | 0.414661 | 0.308711 |
| MmugDNA.15864.1.S1_at | MmugDNA.15864.1 | 5.16  | 5.26  | 0.36 | 0.05 | -1.08 | 0.634588 | 0.462043 | 0.834577 | 0.673537 |
| MmugDNA.15866.1.S1_at | MmugDNA.15866.1 | 4.13  | 3.82  | 0.08 | 0.05 | 1.24  | 0.0093   | 0.007599 | 0.223832 | 0.11661  |
| MmugDNA.15868.1.S1_at | MmugDNA.15868.1 | 4.93  | 4.94  | 0.13 | 0.38 | -1    | 0.375308 | 0.52909  | 0.684633 | 0.717133 |
| MmugDNA.1587.1.S1_at  | MmugDNA.1587.1  | 6.77  | 5.97  | 0.43 | 0.22 | 1.74  | 0.013329 | 0.009999 | 0.246471 | 0.131262 |
| MmugDNA.15870.1.S1_at | MmugDNA.15870.1 | 6.81  | 7.27  | 0.14 | 0.27 | -1.37 | 0.09909  | 0.023028 | 0.458783 | 0.189855 |
| MmugDNA.15871.1.S1_at | MmugDNA.15871.1 | 8.52  | 8.72  | 0.07 | 0.34 | -1.15 | 0.967458 | 0.983515 | 0.98784  | 0.990825 |
| MmugDNA.15872.1.S1_at | MmugDNA.15872.1 | 4.55  | 4.49  | 0.04 | 0.33 | 1.04  | 0.674047 | 0.821361 | 0.853952 | 0.897125 |
| MmugDNA.15873.1.S1_at | MmugDNA.15873.1 | 4.78  | 4.89  | 0.24 | 0.29 | -1.08 | 0.836403 | 0.964621 | 0.933802 | 0.980347 |
| MmugDNA.15874.1.S1_at | MmugDNA.15874.1 | 6.95  | 6.57  | 0.29 | 0.44 | 1.31  | 0.73267  | 0.065954 | 0.884569 | 0.302191 |
| MmugDNA.15875.1.S1_at | MmugDNA.15875.1 | 8     | 6.98  | 0.35 | 0.45 | 2.03  | 0.067357 | 0.064663 | 0.40751  | 0.300314 |
| MmugDNA.15876.1.S1_at | MmugDNA.15876.1 | 6.67  | 7.63  | 1    | 0.56 | -1.94 | 0.148641 | 0.106193 | 0.51391  | 0.36856  |
| MmugDNA.15877.1.S1_at | MmugDNA.15877.1 | 5.96  | 5.88  | 0.21 | 0.17 | 1.06  | 0.90862  | 0.532126 | 0.963816 | 0.718995 |
| MmugDNA.15879.1.S1_at | MmugDNA.15879.1 | 8.45  | 8.87  | 0.12 | 0.06 | -1.34 | 0.005298 | 0.001524 | 0.191107 | 0.059307 |
| MmugDNA.1588.1.S1_at  | MmugDNA.1588.1  | 5.6   | 5.66  | 0.18 | 0.02 | -1.04 | 0.711138 | 0.772369 | 0.873412 | 0.867685 |
| MmugDNA.15880.1.S1_at | MmugDNA.15880.1 | 6.2   | 6.06  | 0.29 | 0.27 | 1.1   | 0.536995 | 0.519671 | 0.779741 | 0.711241 |
| MmugDNA.15882.1.S1_at | MmugDNA.15882.1 | 9.13  | 9.91  | 0.25 | 0.47 | -1.72 | 0.091421 | 0.021168 | 0.447175 | 0.182251 |
| MmugDNA.15883.1.S1_at | MmugDNA.15883.1 | 5.17  | 5.37  | 0.3  | 1.04 | -1.15 | 0.264381 | 0.28186  | 0.610152 | 0.544844 |
| MmugDNA.15885.1.S1_at | MmugDNA.15885.1 | 5.82  | 5.83  | 0.33 | 0.15 | -1.01 | 0.852598 | 0.895602 | 0.940647 | 0.940329 |
| MmugDNA.15886.1.S1_at | MmugDNA.15886.1 | 4.98  | 5.46  | 0.02 | 0.23 | -1.39 | 0.017249 | 0.02487  | 0.26697  | 0.19759  |
| MmugDNA.15889.1.S1_at | MmugDNA.15889.1 | 6.75  | 6.64  | 1.44 | 0.48 | 1.08  | 0.517041 | 0.373838 | 0.76846  | 0.61248  |
| MmugDNA.15891.1.S1_at | MmugDNA.15891.1 | 4.47  | 4.3   | 0.06 | 0.12 | 1.12  | 0.09542  | 0.486839 | 0.453425 | 0.690091 |
| MmugDNA.15892.1.S1_at | MmugDNA.15892.1 | 4.25  | 4.26  | 1.09 | 0.31 | -1    | 0.341971 | 0.344913 | 0.662985 | 0.590225 |
| MmugDNA.15893.1.S1_at | MmugDNA.15893.1 | 9.46  | 9.78  | 0.26 | 0.15 | -1.25 | 0.202208 | 0.271829 | 0.564549 | 0.536584 |
| MmugDNA.15894.1.S1_at | MmugDNA.15894.1 | 9.56  | 9.11  | 0.17 | 0.24 | 1.36  | 0.077193 | 0.04029  | 0.426681 | 0.245902 |
| MmugDNA.15895.1.S1_at | MmugDNA.15895.1 | 7.15  | 6.88  | 0.16 | 0.29 | 1.2   | 0.234025 | 0.238583 | 0.588542 | 0.509192 |
| MmugDNA.15896.1.S1_at | MmugDNA.15896.1 | 4.73  | 4.86  | 0.41 | 0.21 | -1.09 | 0.602478 | 0.818223 | 0.816561 | 0.895149 |
| MmugDNA.15897.1.S1_at | MmugDNA.15897.1 | 10.03 | 9.69  | 0.35 | 0.45 | 1.26  | 0.631709 | 0.839198 | 0.832821 | 0.908339 |
| MmugDNA.15899.1.S1_at | MmugDNA.15899.1 | 4.87  | 4.87  | 0.1  | 0.06 | 1     | 0.239423 | 0.434054 | 0.59245  | 0.654223 |
| MmugDNA.1590.1.S1_at  | MmugDNA.1590.1  | 4.37  | 3.67  | 0.86 | 0.42 | 1.63  | 0.143932 | 0.122575 | 0.510565 | 0.39249  |
| MmugDNA.15900.1.S1_at | MmugDNA.15900.1 | 3.5   | 3.63  | 0.07 | 0.17 | -1.1  | 0.294088 | 0.242407 | 0.631118 | 0.51282  |
| MmugDNA.15901.1.S1_at | MmugDNA.15901.1 | 10.59 | 10.89 | 0.23 | 0.39 | -1.23 | 0.32159  | 0.114746 | 0.650303 | 0.381295 |
| MmugDNA.15902.1.S1_at | MmugDNA.15902.1 | 2.86  | 2.89  | 0.07 | 0.2  | -1.02 | 0.863942 | 0.972369 | 0.945408 | 0.985097 |
| MmugDNA.15903.1.S1_at | MmugDNA.15903.1 | 3.96  | 3.98  | 0.36 | 0.26 | -1.01 | 0.4212   | 0.388872 | 0.712907 | 0.623206 |
| MmugDNA.15905.1.S1_at | MmugDNA.15905.1 | 4.79  | 5.01  | 0.54 | 0.07 | -1.17 | 0.791792 | 0.944093 | 0.913493 | 0.968306 |
| MmugDNA.15907.1.S1_at | MmugDNA.15907.1 | 4.29  | 4.37  | 0.29 | 0.1  | -1.06 | 0.678545 | 0.559426 | 0.856055 | 0.736296 |
| MmugDNA.15908.1.S1_at | MmugDNA.15908.1 | 3.71  | 3.71  | 0.03 | 0.02 | 1     | 0.974315 | 0.322538 | 0.989954 | 0.573991 |
| MmugDNA.15909.1.S1_at | MmugDNA.15909.1 | 7.22  | 7.19  | 0.04 | 0.29 | 1.03  | 0.895105 | 0.590984 | 0.95808  | 0.756566 |
| MmugDNA.1591.1.S1_at  | MmugDNA.1591.1  | 6.97  | 6.29  | 0.29 | 1.1  | 1.6   | 0.356327 | 0.465377 | 0.671491 | 0.675748 |
| MmugDNA.15910.1.S1_at | MmugDNA.15910.1 | 6.47  | 6.33  | 0.22 | 0.2  | 1.1   | 0.494438 | 0.564123 | 0.756791 | 0.738997 |
| MmugDNA.15914.1.S1_at | MmugDNA.15914.1 | 5.68  | 5.82  | 0.18 | 0.14 | -1.1  | 0.198398 | 0.243628 | 0.561534 | 0.513777 |

|                         |                 |       |       |      |      |       |          |          |          |          |
|-------------------------|-----------------|-------|-------|------|------|-------|----------|----------|----------|----------|
| MmugDNA.15915.1.S1_at   | MmugDNA.15915.1 | 4.4   | 4.6   | 0.16 | 0.42 | -1.14 | 0.447743 | 0.212494 | 0.729195 | 0.486502 |
| MmugDNA.15919.1.S1_at   | MmugDNA.15919.1 | 4.81  | 5     | 0.06 | 0.1  | -1.14 | 0.062481 | 0.115782 | 0.398319 | 0.382814 |
| MmugDNA.1592.1.S1_at    | MmugDNA.1592.1  | 3.34  | 3.24  | 0.09 | 0.16 | 1.07  | 0.893681 | 0.387239 | 0.957703 | 0.622004 |
| MmugDNA.15920.1.S1_at   | MmugDNA.15920.1 | 5.3   | 5.01  | 0.69 | 0.43 | 1.22  | 0.265695 | 0.342352 | 0.611333 | 0.588413 |
| MmugDNA.15922.1.S1_at   | MmugDNA.15922.1 | 3.36  | 3.23  | 0.25 | 0.18 | 1.09  | 0.743626 | 0.906147 | 0.890194 | 0.946915 |
| MmugDNA.15924.1.S1_at   | MmugDNA.15924.1 | 3.81  | 3.43  | 0.44 | 0.1  | 1.31  | 0.178519 | 0.161428 | 0.54288  | 0.437604 |
| MmugDNA.15925.1.S1_at   | MmugDNA.15925.1 | 4.02  | 3.95  | 0.06 | 0.18 | 1.05  | 0.747948 | 0.073043 | 0.892185 | 0.316017 |
| MmugDNA.15926.1.S1_at   | MmugDNA.15926.1 | 4.29  | 4.37  | 0.13 | 0.07 | -1.05 | 0.158584 | 0.280108 | 0.52369  | 0.543369 |
| MmugDNA.15928.1.S1_at   | MmugDNA.15928.1 | 5.8   | 5.79  | 0.66 | 0.37 | 1.01  | 0.445411 | 0.606219 | 0.727647 | 0.765727 |
| MmugDNA.15929.1.S1_at   | MmugDNA.15929.1 | 8.01  | 8.94  | 0.16 | 0.21 | -1.9  | 0.003657 | 0.001291 | 0.179515 | 0.055585 |
| MmugDNA.1593.1.S1_at    | MmugDNA.1593.1  | 5.46  | 5.5   | 0.14 | 0.06 | -1.03 | 0.356329 | 0.857752 | 0.671491 | 0.918846 |
| MmugDNA.15930.1.S1_at   | MmugDNA.15930.1 | 5.99  | 6.19  | 0.06 | 0.08 | -1.15 | 0.040339 | 0.014656 | 0.349277 | 0.154231 |
| MmugDNA.15931.1.S1_at   | MmugDNA.15931.1 | 3.48  | 3.34  | 0.65 | 0.75 | 1.1   | 0.860144 | 0.513941 | 0.943524 | 0.707322 |
| MmugDNA.15933.1.S1_at   | MmugDNA.15933.1 | 8.42  | 7.54  | 0.16 | 0.37 | 1.85  | 0.030629 | 0.015672 | 0.319495 | 0.158598 |
| MmugDNA.17973.1.S1_s_at | MmugDNA.17973.1 | 10.33 | 9.96  | 0.36 | 0.43 | 1.29  | 0.502694 | 0.642124 | 0.760493 | 0.790028 |
| MmugDNA.15935.1.S1_s_at | MmugDNA.15935.1 | 5.61  | 5.17  | 0.27 | 0.77 | 1.36  | 0.380176 | 0.519305 | 0.68724  | 0.710961 |
| MmugDNA.15936.1.S1_at   | MmugDNA.15936.1 | 9.28  | 9.47  | 0.23 | 0.5  | -1.14 | 0.353818 | 0.418735 | 0.670266 | 0.643089 |
| MmugDNA.15936.1.S1_s_at | MmugDNA.15936.1 | 10.65 | 11    | 0.36 | 0.28 | -1.27 | 0.20286  | 0.125529 | 0.565472 | 0.396226 |
| MmugDNA.15937.1.S1_at   | MmugDNA.15937.1 | 5.85  | 5.92  | 0.21 | 0.1  | -1.04 | 0.732817 | 0.413104 | 0.884645 | 0.639419 |
| MmugDNA.15939.1.S1_at   | MmugDNA.15939.1 | 9.22  | 10    | 0.06 | 0.47 | -1.72 | 0.12825  | 0.042914 | 0.494307 | 0.251759 |
| MmugDNA.1594.1.S1_at    | MmugDNA.1594.1  | 12.31 | 11.56 | 0.29 | 0.63 | 1.69  | 0.051153 | 0.040934 | 0.375935 | 0.247161 |
| MmugDNA.15941.1.S1_at   | MmugDNA.15941.1 | 4.1   | 3.64  | 0.3  | 0.07 | 1.38  | 0.22765  | 0.499741 | 0.585103 | 0.698494 |
| MmugDNA.15942.1.S1_at   | MmugDNA.15942.1 | 6.44  | 6.92  | 0.11 | 0.19 | -1.39 | 0.028282 | 0.01924  | 0.310316 | 0.174494 |
| MmugDNA.15942.1.S1_s_at | MmugDNA.15942.1 | 5.58  | 5.65  | 0.07 | 0.08 | -1.05 | 0.265989 | 0.226905 | 0.611558 | 0.499276 |
| MmugDNA.15945.1.S1_at   | MmugDNA.15945.1 | 5.5   | 5.41  | 0.17 | 0.06 | 1.07  | 0.430871 | 0.592475 | 0.718362 | 0.757832 |
| MmugDNA.15946.1.S1_at   | MmugDNA.15946.1 | 5.66  | 5.94  | 0.73 | 0.61 | -1.21 | 0.484598 | 0.555166 | 0.750543 | 0.733715 |
| MmugDNA.15947.1.S1_at   | MmugDNA.15947.1 | 5.01  | 5.33  | 0.19 | 0.16 | -1.25 | 0.46056  | 0.663244 | 0.737044 | 0.802876 |
| MmugDNA.1595.1.S1_at    | MmugDNA.1595.1  | 3.64  | 3.69  | 0.27 | 0.11 | -1.04 | 0.54632  | 0.640673 | 0.785392 | 0.789053 |
| MmugDNA.15950.1.S1_at   | MmugDNA.15950.1 | 10.1  | 10.68 | 0.24 | 0.32 | -1.49 | 0.06787  | 0.067625 | 0.408606 | 0.306185 |
| MmugDNA.15951.1.S1_at   | MmugDNA.15951.1 | 11    | 11.91 | 0.09 | 0.04 | -1.88 | 0.000093 | 0.000754 | 0.112653 | 0.045364 |
| MmugDNA.15952.1.S1_at   | MmugDNA.15952.1 | 7.1   | 7.5   | 0.34 | 0.59 | -1.32 | 0.246608 | 0.270836 | 0.597806 | 0.536026 |
| MmugDNA.15953.1.S1_at   | MmugDNA.15953.1 | 4.79  | 4.96  | 0.1  | 0.15 | -1.13 | 0.141763 | 0.167915 | 0.509159 | 0.444485 |
| MmugDNA.15956.1.S1_at   | MmugDNA.15956.1 | 3.95  | 4.15  | 0.4  | 0.64 | -1.15 | 0.269127 | 0.374728 | 0.613808 | 0.613037 |
| MmugDNA.15958.1.S1_at   | MmugDNA.15958.1 | 5.34  | 5.47  | 0.07 | 0.08 | -1.09 | 0.537813 | 0.090561 | 0.780212 | 0.345026 |
| MmugDNA.15963.1.S1_at   | MmugDNA.15963.1 | 6.07  | 6.7   | 1.1  | 0.42 | -1.55 | 0.986718 | 0.98727  | 0.99532  | 0.992852 |
| MmugDNA.15964.1.S1_at   | MmugDNA.15964.1 | 5.28  | 4.46  | 0.52 | 0.32 | 1.76  | 0.083575 | 0.069736 | 0.43582  | 0.310191 |
| MmugDNA.28448.1.S1_s_at | MmugDNA.28448.1 | 7.63  | 7.76  | 0.23 | 0.14 | -1.1  | 0.82093  | 0.408846 | 0.92718  | 0.6359   |
| MmugDNA.15966.1.S1_at   | MmugDNA.15966.1 | 8.79  | 8.93  | 0.1  | 0.07 | -1.11 | 0.025393 | 0.009654 | 0.299142 | 0.129267 |
| MmugDNA.15967.1.S1_at   | MmugDNA.15967.1 | 6.55  | 6.06  | 1.46 | 0.42 | 1.41  | 0.759906 | 0.85425  | 0.898651 | 0.916971 |
| MmugDNA.15968.1.S1_at   | MmugDNA.15968.1 | 6.18  | 6.23  | 0.58 | 0.54 | -1.03 | 0.489043 | 0.027914 | 0.753453 | 0.208547 |
| MmugDNA.1597.1.S1_at    | MmugDNA.1597.1  | 3.96  | 4.05  | 0.04 | 0.12 | -1.07 | 0.14617  | 0.153731 | 0.512187 | 0.428413 |

|                         |                 |       |       |      |      |       |          |          |          |          |
|-------------------------|-----------------|-------|-------|------|------|-------|----------|----------|----------|----------|
| MmugDNA.15970.1.S1_at   | MmugDNA.15970.1 | 4.95  | 4.91  | 0.56 | 0.07 | 1.03  | 0.296085 | 0.184778 | 0.632176 | 0.460661 |
| MmugDNA.15971.1.S1_at   | MmugDNA.15971.1 | 3.95  | 4.36  | 0.08 | 0.15 | -1.32 | 0.006383 | 0.001361 | 0.198947 | 0.056687 |
| MmugDNA.15972.1.S1_at   | MmugDNA.15972.1 | 6.8   | 5.92  | 0.3  | 2.03 | 1.84  | 0.716764 | 0.894215 | 0.875623 | 0.939665 |
| MmugDNA.15973.1.S1_s_at | MmugDNA.15973.1 | 5.59  | 5.92  | 0.11 | 0.27 | -1.25 | 0.360106 | 0.252956 | 0.674232 | 0.521261 |
| MmugDNA.15975.1.S1_at   | MmugDNA.15975.1 | 6.39  | 6.22  | 0.13 | 0.11 | 1.13  | 0.415146 | 0.268067 | 0.709376 | 0.533841 |
| MmugDNA.15976.1.S1_at   | MmugDNA.15976.1 | 9.47  | 9.36  | 0.23 | 0.53 | 1.08  | 0.412153 | 0.555313 | 0.707831 | 0.733767 |
| MmugDNA.15977.1.S1_at   | MmugDNA.15977.1 | 5.81  | 6.35  | 0.05 | 0.17 | -1.46 | 0.013079 | 0.00876  | 0.245262 | 0.124009 |
| MmugDNA.15979.1.S1_at   | MmugDNA.15979.1 | 3.24  | 3.32  | 0.38 | 0    | -1.06 | 0.56844  | 0.651321 | 0.798666 | 0.796191 |
| MmugDNA.1598.1.S1_at    | MmugDNA.1598.1  | 6.22  | 6.25  | 0.24 | 0.04 | -1.02 | 0.794484 | 0.915466 | 0.914722 | 0.952567 |
| MmugDNA.15980.1.S1_at   | MmugDNA.15980.1 | 4     | 4.62  | 0.1  | 0.56 | -1.54 | 0.10639  | 0.224683 | 0.466831 | 0.497614 |
| MmugDNA.15981.1.S1_at   | MmugDNA.15981.1 | 11.6  | 11.28 | 0.05 | 0.15 | 1.25  | 0.028217 | 0.028384 | 0.310087 | 0.210319 |
| MmugDNA.15982.1.S1_at   | MmugDNA.15982.1 | 5.27  | 5.55  | 0.35 | 0.23 | -1.21 | 0.355866 | 0.058445 | 0.671276 | 0.288529 |
| MmugDNA.15985.1.S1_s_at | MmugDNA.15985.1 | 10.71 | 10.82 | 0.28 | 0.12 | -1.08 | 0.713195 | 0.32241  | 0.874355 | 0.573972 |
| MmugDNA.15988.1.S1_s_at | MmugDNA.15988.1 | 4.15  | 4.21  | 0.11 | 0.07 | -1.04 | 0.848126 | 0.375989 | 0.939154 | 0.613815 |
| MmugDNA.15989.1.S1_s_at | MmugDNA.15989.1 | 4.21  | 4.4   | 0.07 | 0.14 | -1.13 | 0.350855 | 0.404887 | 0.668803 | 0.633393 |
| MmugDNA.15991.1.S1_at   | MmugDNA.15991.1 | 3.15  | 3.32  | 0.09 | 0.79 | -1.12 | 0.279597 | 0.345424 | 0.621136 | 0.590736 |
| MmugDNA.15996.1.S1_s_at | MmugDNA.15996.1 | 13.94 | 13.84 | 0.08 | 0.11 | 1.08  | 0.418937 | 0.194408 | 0.711627 | 0.469481 |
| MmugDNA.15998.1.S1_at   | MmugDNA.15998.1 | 6.37  | 6.41  | 0.1  | 0.22 | -1.03 | 0.739263 | 0.405693 | 0.888118 | 0.633894 |
| MmugDNA.15999.1.S1_at   | MmugDNA.15999.1 | 10.92 | 10.35 | 0.07 | 0.16 | 1.48  | 0.005384 | 0.00031  | 0.191107 | 0.035135 |
| MmugDNA.160.1.S1_at     | MmugDNA.160.1   | 4.89  | 4.17  | 0.31 | 0.17 | 1.64  | 0.101572 | 0.227313 | 0.461313 | 0.499643 |
| MmugDNA.1600.1.S1_at    | MmugDNA.1600.1  | 3.59  | 3.47  | 0.39 | 0.08 | 1.08  | 0.21721  | 0.251921 | 0.576846 | 0.520632 |
| MmugDNA.16000.1.S1_at   | MmugDNA.16000.1 | 6.82  | 5.94  | 0.84 | 0.56 | 1.84  | 0.382833 | 0.546004 | 0.688989 | 0.727708 |
| MmugDNA.16001.1.S1_s_at | MmugDNA.16001.1 | 9.49  | 9.65  | 1.32 | 0.59 | -1.12 | 0.720263 | 0.406482 | 0.877386 | 0.634352 |
| MmugDNA.16003.1.S1_at   | MmugDNA.16003.1 | 5.17  | 5.48  | 0.28 | 0.3  | -1.24 | 0.831018 | 0.658259 | 0.931586 | 0.800244 |
| MmugDNA.16004.1.S1_at   | MmugDNA.16004.1 | 3.7   | 3.27  | 0.49 | 0.3  | 1.35  | 0.470922 | 0.569756 | 0.742796 | 0.742626 |
| MmugDNA.16005.1.S1_at   | MmugDNA.16005.1 | 3.2   | 3.16  | 0.06 | 0.07 | 1.03  | 0.500522 | 0.375101 | 0.759592 | 0.613186 |
| MmugDNA.16006.1.S1_at   | MmugDNA.16006.1 | 8.61  | 7.98  | 0.11 | 0.09 | 1.55  | 0.001239 | 0.000352 | 0.145267 | 0.037121 |
| MmugDNA.16007.1.S1_at   | MmugDNA.16007.1 | 3.11  | 3.46  | 0.16 | 0.28 | -1.27 | 0.242995 | 0.317404 | 0.594744 | 0.570619 |
| MmugDNA.16008.1.S1_at   | MmugDNA.16008.1 | 6.04  | 5.91  | 0.6  | 0.22 | 1.09  | 0.722788 | 0.48565  | 0.878819 | 0.68924  |
| MmugDNA.16009.1.S1_at   | MmugDNA.16009.1 | 5.19  | 5.18  | 0.01 | 0.11 | 1     | 0.806993 | 0.128821 | 0.920954 | 0.400277 |
| MmugDNA.16014.1.S1_at   | MmugDNA.16014.1 | 4.5   | 4.78  | 0.18 | 0.04 | -1.21 | 0.063315 | 0.032034 | 0.400486 | 0.221575 |
| MmugDNA.16015.1.S1_at   | MmugDNA.16015.1 | 6.92  | 7.03  | 0.21 | 0.28 | -1.08 | 0.319068 | 0.406633 | 0.648688 | 0.634468 |
| MmugDNA.16016.1.S1_at   | MmugDNA.16016.1 | 5.91  | 5.93  | 0.26 | 0.75 | -1.02 | 0.846546 | 0.527928 | 0.938388 | 0.716348 |
| MmugDNA.16017.1.S1_at   | MmugDNA.16017.1 | 3.09  | 3.12  | 0.02 | 0.29 | -1.02 | 0.715289 | 0.926815 | 0.875005 | 0.958404 |
| MmugDNA.16018.1.S1_at   | MmugDNA.16018.1 | 7.04  | 7.25  | 0.28 | 0.04 | -1.15 | 0.88584  | 0.78897  | 0.954212 | 0.878011 |
| MmugDNA.16019.1.S1_at   | MmugDNA.16019.1 | 5.23  | 5.22  | 0.04 | 0.22 | 1.01  | 0.738059 | 0.39523  | 0.887509 | 0.62738  |
| MmugDNA.1602.1.S1_at    | MmugDNA.1602.1  | 3.55  | 3.78  | 0.03 | 0.15 | -1.18 | 0.168385 | 0.21961  | 0.532644 | 0.49321  |
| MmugDNA.21938.1.S1_s_at | MmugDNA.21938.1 | 6.87  | 6.95  | 0.7  | 0.61 | -1.06 | 0.704952 | 0.782692 | 0.869857 | 0.874202 |
| MmugDNA.16023.1.S1_at   | MmugDNA.16023.1 | 9.77  | 9.63  | 0.28 | 0.1  | 1.1   | 0.211513 | 0.076804 | 0.572267 | 0.322252 |
| MmugDNA.16026.1.S1_at   | MmugDNA.16026.1 | 10.3  | 10.82 | 0.15 | 0.66 | -1.43 | 0.380286 | 0.497073 | 0.68724  | 0.696431 |
| MmugDNA.16027.1.S1_at   | MmugDNA.16027.1 | 8.15  | 8.15  | 0.1  | 0.16 | 1     | 0.749173 | 0.043922 | 0.892627 | 0.254098 |

|                       |                 |       |       |      |      |       |          |          |          |          |
|-----------------------|-----------------|-------|-------|------|------|-------|----------|----------|----------|----------|
| MmugDNA.16029.1.S1_at | MmugDNA.16029.1 | 3.19  | 3.36  | 0.06 | 0.09 | -1.13 | 0.061993 | 0.123002 | 0.396905 | 0.392923 |
| MmugDNA.16030.1.S1_at | MmugDNA.16030.1 | 3.58  | 3.56  | 0.15 | 0.22 | 1.02  | 0.87543  | 0.615669 | 0.950065 | 0.772141 |
| MmugDNA.16032.1.S1_at | MmugDNA.16032.1 | 3.07  | 3.21  | 0.24 | 0.08 | -1.11 | 0.863057 | 0.423046 | 0.944982 | 0.646145 |
| MmugDNA.16033.1.S1_at | MmugDNA.16033.1 | 12.06 | 12.59 | 0.03 | 0.17 | -1.44 | 0.004768 | 0.001882 | 0.184674 | 0.064979 |
| MmugDNA.16034.1.S1_at | MmugDNA.16034.1 | 3.26  | 3.25  | 0.38 | 0.08 | 1     | 0.334741 | 0.373114 | 0.658461 | 0.61196  |
| MmugDNA.16035.1.S1_at | MmugDNA.16035.1 | 5.65  | 5.42  | 0.67 | 0.05 | 1.17  | 0.518411 | 0.655871 | 0.769463 | 0.798739 |
| MmugDNA.16036.1.S1_at | MmugDNA.16036.1 | 6.78  | 6.79  | 0.22 | 0.03 | -1.01 | 0.360254 | 0.176275 | 0.674296 | 0.452719 |
| MmugDNA.16037.1.S1_at | MmugDNA.16037.1 | 3.61  | 3.72  | 0.08 | 0.11 | -1.08 | 0.125978 | 0.216364 | 0.492046 | 0.489938 |
| MmugDNA.16038.1.S1_at | MmugDNA.16038.1 | 3.24  | 3.24  | 0.11 | 0.13 | 1     | 0.927478 | 0.090618 | 0.972003 | 0.345151 |
| MmugDNA.16039.1.S1_at | MmugDNA.16039.1 | 6.55  | 5.97  | 0.13 | 0.04 | 1.49  | 0.002067 | 0.000339 | 0.155636 | 0.036516 |
| MmugDNA.1604.1.S1_at  | MmugDNA.1604.1  | 5.52  | 4.84  | 0.28 | 0.28 | 1.6   | 0.028084 | 0.037317 | 0.309743 | 0.237622 |
| MmugDNA.16042.1.S1_at | MmugDNA.16042.1 | 6.68  | 7.26  | 0.23 | 0.25 | -1.49 | 0.104896 | 0.099745 | 0.46527  | 0.358295 |
| MmugDNA.16043.1.S1_at | MmugDNA.16043.1 | 5.65  | 5.49  | 0.17 | 0.05 | 1.12  | 0.235413 | 0.291449 | 0.589352 | 0.551823 |
| MmugDNA.16044.1.S1_at | MmugDNA.16044.1 | 5.42  | 5.47  | 0.14 | 0.05 | -1.04 | 0.631625 | 0.404853 | 0.832775 | 0.633361 |
| MmugDNA.16046.1.S1_at | MmugDNA.16046.1 | 5.09  | 5.31  | 0.13 | 0.15 | -1.16 | 0.179085 | 0.309108 | 0.543382 | 0.564787 |
| MmugDNA.16047.1.S1_at | MmugDNA.16047.1 | 11.08 | 11.24 | 0.02 | 0.06 | -1.12 | 0.010214 | 0.006466 | 0.228247 | 0.109304 |
| MmugDNA.1605.1.S1_at  | MmugDNA.1605.1  | 6.39  | 6.43  | 0.19 | 0.05 | -1.03 | 0.597215 | 0.743311 | 0.813431 | 0.851281 |
| MmugDNA.16055.1.S1_at | MmugDNA.16055.1 | 3.02  | 3.51  | 0.51 | 0.19 | -1.41 | 0.780688 | 0.933131 | 0.9086   | 0.962029 |
| MmugDNA.16056.1.S1_at | MmugDNA.16056.1 | 4.08  | 3.87  | 0.14 | 0.13 | 1.15  | 0.062478 | 0.09842  | 0.398319 | 0.356538 |
| MmugDNA.16061.1.S1_at | MmugDNA.16061.1 | 4.77  | 4.3   | 0.72 | 0.16 | 1.38  | 0.588931 | 0.789917 | 0.809161 | 0.878631 |
| MmugDNA.16064.1.S1_at | MmugDNA.16064.1 | 6.54  | 6.67  | 0.3  | 0.26 | -1.1  | 0.451906 | 0.502378 | 0.731768 | 0.700134 |
| MmugDNA.16065.1.S1_at | MmugDNA.16065.1 | 3.98  | 3.83  | 0.36 | 0.15 | 1.11  | 0.358094 | 0.462768 | 0.673042 | 0.674113 |
| MmugDNA.16066.1.S1_at | MmugDNA.16066.1 | 3.79  | 3.87  | 0.27 | 0.04 | -1.06 | 0.598281 | 0.811355 | 0.813939 | 0.891139 |
| MmugDNA.16067.1.S1_at | MmugDNA.16067.1 | 10.89 | 11.88 | 0.3  | 0.19 | -2    | 0.005479 | 0.00166  | 0.191178 | 0.061666 |
| MmugDNA.16068.1.S1_at | MmugDNA.16068.1 | 5.53  | 5.54  | 0.16 | 0.07 | -1.01 | 0.794018 | 0.55746  | 0.914561 | 0.735045 |
| MmugDNA.1607.1.S1_at  | MmugDNA.1607.1  | 7.12  | 7.76  | 0.37 | 0.66 | -1.56 | 0.103089 | 0.125589 | 0.46271  | 0.396226 |
| MmugDNA.16070.1.S1_at | MmugDNA.16070.1 | 7.09  | 8.11  | 1.25 | 0.41 | -2.03 | 0.926369 | 0.992849 | 0.971724 | 0.995769 |
| MmugDNA.16071.1.S1_at | MmugDNA.16071.1 | 8.87  | 10.11 | 0.05 | 0.27 | -2.37 | 0.001205 | 0.000048 | 0.145267 | 0.025273 |
| MmugDNA.16072.1.S1_at | MmugDNA.16072.1 | 6.1   | 7.14  | 0.3  | 0.12 | -2.06 | 0.002743 | 0.000808 | 0.165355 | 0.046123 |
| MmugDNA.16074.1.S1_at | MmugDNA.16074.1 | 5.65  | 5.69  | 0.28 | 0.1  | -1.03 | 0.561561 | 0.659697 | 0.794894 | 0.800854 |
| MmugDNA.16076.1.S1_at | MmugDNA.16076.1 | 4.6   | 4.39  | 0.17 | 0.09 | 1.16  | 0.102597 | 0.403873 | 0.462465 | 0.632446 |
| MmugDNA.16077.1.S1_at | MmugDNA.16077.1 | 3.4   | 3.48  | 0.24 | 0.19 | -1.06 | 0.951054 | 0.969614 | 0.981599 | 0.983359 |
| MmugDNA.16078.1.S1_at | MmugDNA.16078.1 | 6.95  | 7.43  | 0.28 | 0.88 | -1.4  | 0.309082 | 0.428689 | 0.641346 | 0.650253 |
| MmugDNA.16080.1.S1_at | MmugDNA.16080.1 | 5.68  | 5.67  | 0.06 | 0.07 | 1     | 0.249664 | 0.626994 | 0.600196 | 0.780117 |
| MmugDNA.16081.1.S1_at | MmugDNA.16081.1 | 4.68  | 4.6   | 0.2  | 0.39 | 1.06  | 0.596851 | 0.792309 | 0.81323  | 0.880001 |
| MmugDNA.16082.1.S1_at | MmugDNA.16082.1 | 6.22  | 6.21  | 0.24 | 0    | 1.01  | 0.328932 | 0.272403 | 0.654754 | 0.537122 |
| MmugDNA.16083.1.S1_at | MmugDNA.16083.1 | 10.13 | 9.53  | 0.33 | 0.54 | 1.51  | 0.079113 | 0.074003 | 0.428733 | 0.31757  |
| MmugDNA.16084.1.S1_at | MmugDNA.16084.1 | 4.91  | 4.94  | 0.06 | 0.08 | -1.02 | 0.452538 | 0.417222 | 0.732207 | 0.642079 |
| MmugDNA.16085.1.S1_at | MmugDNA.16085.1 | 4.74  | 4.49  | 0.4  | 0.13 | 1.19  | 0.243532 | 0.156232 | 0.59533  | 0.43161  |
| MmugDNA.16087.1.S1_at | MmugDNA.16087.1 | 4.22  | 4.02  | 0.62 | 0.04 | 1.15  | 0.541172 | 0.581948 | 0.782503 | 0.750784 |
| MmugDNA.16088.1.S1_at | MmugDNA.16088.1 | 4.81  | 4.75  | 0.1  | 0.23 | 1.04  | 0.773979 | 0.436347 | 0.904999 | 0.655923 |

|                       |                 |       |       |      |      |       |          |          |          |          |
|-----------------------|-----------------|-------|-------|------|------|-------|----------|----------|----------|----------|
| MmugDNA.16090.1.S1_at | MmugDNA.16090.1 | 7.51  | 9.51  | 0.73 | 1.85 | -4.01 | 0.266603 | 0.147917 | 0.612037 | 0.422296 |
| MmugDNA.16091.1.S1_at | MmugDNA.16091.1 | 9.86  | 8.89  | 0.24 | 0.08 | 1.97  | 0.001857 | 0.000495 | 0.155636 | 0.038955 |
| MmugDNA.16093.1.S1_at | MmugDNA.16093.1 | 6.96  | 6.89  | 0.48 | 0.1  | 1.05  | 0.962765 | 0.134599 | 0.985642 | 0.406629 |
| MmugDNA.16094.1.S1_at | MmugDNA.16094.1 | 12.51 | 12.66 | 0.26 | 0.31 | -1.11 | 0.340617 | 0.262791 | 0.662091 | 0.529136 |
| MmugDNA.16095.1.S1_at | MmugDNA.16095.1 | 10.28 | 9.91  | 0.1  | 0.09 | 1.3   | 0.015272 | 0.006933 | 0.257698 | 0.112493 |
| MmugDNA.16096.1.S1_at | MmugDNA.16096.1 | 4.46  | 4.17  | 0.42 | 0.34 | 1.22  | 0.38663  | 0.472501 | 0.691563 | 0.680025 |
| MmugDNA.16099.1.S1_at | MmugDNA.16099.1 | 3.52  | 3.49  | 0.33 | 0.27 | 1.02  | 0.756209 | 0.921828 | 0.896405 | 0.955932 |
| MmugDNA.161.1.S1_at   | MmugDNA.161.1   | 8.17  | 9.68  | 0.41 | 0.3  | -2.83 | 0.020023 | 0.006405 | 0.276484 | 0.108767 |
| MmugDNA.1610.1.S1_at  | MmugDNA.1610.1  | 7.64  | 9.04  | 0.49 | 0.54 | -2.62 | 0.034488 | 0.024905 | 0.333247 | 0.197692 |
| MmugDNA.16100.1.S1_at | MmugDNA.16100.1 | 6.09  | 6.32  | 0.22 | 0.17 | -1.17 | 0.400108 | 0.543728 | 0.699692 | 0.726303 |
| MmugDNA.16102.1.S1_at | MmugDNA.16102.1 | 3.51  | 3.46  | 0.56 | 0.18 | 1.04  | 0.2298   | 0.344826 | 0.587007 | 0.590153 |
| MmugDNA.16103.1.S1_at | MmugDNA.16103.1 | 9.45  | 9.52  | 0.22 | 0.33 | -1.05 | 0.804106 | 0.582316 | 0.919394 | 0.75096  |
| MmugDNA.16106.1.S1_at | MmugDNA.16106.1 | 8.1   | 8.02  | 0.28 | 0.2  | 1.06  | 0.853882 | 0.232478 | 0.940937 | 0.504244 |
| MmugDNA.16107.1.S1_at | MmugDNA.16107.1 | 8.14  | 7.97  | 0.16 | 1.01 | 1.12  | 0.680543 | 0.143095 | 0.857226 | 0.416995 |
| MmugDNA.16108.1.S1_at | MmugDNA.16108.1 | 4.59  | 4.62  | 0.08 | 0.2  | -1.02 | 0.961013 | 0.677868 | 0.984976 | 0.811841 |
| MmugDNA.1611.1.S1_at  | MmugDNA.1611.1  | 3.17  | 3.14  | 0    | 0.22 | 1.02  | 0.498922 | 0.288541 | 0.758768 | 0.549821 |
| MmugDNA.16110.1.S1_at | MmugDNA.16110.1 | 5.09  | 5.11  | 0.89 | 0.72 | -1.01 | 0.649442 | 0.385071 | 0.842493 | 0.620662 |
| MmugDNA.16111.1.S1_at | MmugDNA.16111.1 | 6.24  | 6.29  | 0.04 | 0.2  | -1.04 | 0.518471 | 0.884481 | 0.769471 | 0.93419  |
| MmugDNA.16112.1.S1_at | MmugDNA.16112.1 | 7.56  | 8.06  | 0.75 | 0.88 | -1.42 | 0.899618 | 0.669699 | 0.959901 | 0.806828 |
| MmugDNA.16114.1.S1_at | MmugDNA.16114.1 | 11.58 | 11.03 | 0.1  | 0.63 | 1.47  | 0.18665  | 0.214046 | 0.550106 | 0.487633 |
| MmugDNA.16115.1.S1_at | MmugDNA.16115.1 | 3.73  | 3.82  | 0.11 | 0.12 | -1.06 | 0.810009 | 0.309029 | 0.922491 | 0.564721 |
| MmugDNA.16117.1.S1_at | MmugDNA.16117.1 | 5.69  | 5.91  | 0.08 | 0.17 | -1.16 | 0.056418 | 0.134129 | 0.386477 | 0.406393 |
| MmugDNA.16119.1.S1_at | MmugDNA.16119.1 | 6.86  | 7.19  | 0.12 | 0.07 | -1.26 | 0.057756 | 0.039138 | 0.388999 | 0.243072 |
| MmugDNA.1612.1.S1_at  | MmugDNA.1612.1  | 5.31  | 5.43  | 0.14 | 0.31 | -1.09 | 0.753959 | 0.672128 | 0.895103 | 0.808318 |
| MmugDNA.16120.1.S1_at | MmugDNA.16120.1 | 9.74  | 10.08 | 0.05 | 0.53 | -1.27 | 0.298501 | 0.414402 | 0.633999 | 0.640293 |
| MmugDNA.16121.1.S1_at | MmugDNA.16121.1 | 4.39  | 4.42  | 0.46 | 0.51 | -1.02 | 0.383937 | 0.534684 | 0.689646 | 0.720504 |
| MmugDNA.16123.1.S1_at | MmugDNA.16123.1 | 4.47  | 4.2   | 0.29 | 0.37 | 1.2   | 0.756758 | 0.509973 | 0.896682 | 0.704535 |
| MmugDNA.16124.1.S1_at | MmugDNA.16124.1 | 4.98  | 4.86  | 0.16 | 0.14 | 1.09  | 0.144178 | 0.176247 | 0.510652 | 0.452718 |
| MmugDNA.16125.1.S1_at | MmugDNA.16125.1 | 3.39  | 3.39  | 0.03 | 0.11 | 1     | 0.29441  | 0.64364  | 0.631219 | 0.791063 |
| MmugDNA.16126.1.S1_at | MmugDNA.16126.1 | 4.34  | 4.52  | 0.4  | 0.04 | -1.13 | 0.451555 | 0.424193 | 0.731625 | 0.646793 |
| MmugDNA.16129.1.S1_at | MmugDNA.16129.1 | 10.38 | 11.02 | 0.25 | 0.65 | -1.56 | 0.199111 | 0.029677 | 0.562104 | 0.214008 |
| MmugDNA.1613.1.S1_at  | MmugDNA.1613.1  | 4.82  | 4.87  | 0.18 | 0.1  | -1.04 | 0.938951 | 0.584677 | 0.976761 | 0.752482 |
| MmugDNA.16130.1.S1_at | MmugDNA.16130.1 | 7.77  | 6.92  | 0.21 | 1.17 | 1.8   | 0.423049 | 0.476537 | 0.713793 | 0.682769 |
| MmugDNA.16133.1.S1_at | MmugDNA.16133.1 | 4.01  | 4.1   | 0.2  | 0.05 | -1.06 | 0.987964 | 0.546976 | 0.995743 | 0.728283 |
| MmugDNA.16134.1.S1_at | MmugDNA.16134.1 | 5.64  | 5.84  | 0.15 | 0.05 | -1.14 | 0.132103 | 0.19606  | 0.498298 | 0.471082 |
| MmugDNA.16135.1.S1_at | MmugDNA.16135.1 | 3.49  | 3.76  | 0.28 | 0.18 | -1.21 | 0.602041 | 0.281605 | 0.816272 | 0.544655 |
| MmugDNA.16136.1.S1_at | MmugDNA.16136.1 | 3.33  | 3.25  | 0.06 | 0.16 | 1.06  | 0.382356 | 0.336989 | 0.688648 | 0.58423  |
| MmugDNA.16138.1.S1_at | MmugDNA.16138.1 | 6.6   | 7.41  | 0.13 | 0.34 | -1.76 | 0.040816 | 0.098507 | 0.350469 | 0.356636 |
| MmugDNA.16139.1.S1_at | MmugDNA.16139.1 | 3.43  | 3.41  | 0.31 | 0.04 | 1.01  | 0.35477  | 0.243133 | 0.670686 | 0.513356 |
| MmugDNA.16145.1.S1_at | MmugDNA.16145.1 | 5.61  | 5.38  | 0.25 | 0.2  | 1.17  | 0.468278 | 0.606425 | 0.741049 | 0.765747 |
| MmugDNA.16146.1.S1_at | MmugDNA.16146.1 | 6.24  | 6.48  | 0.47 | 1.91 | -1.18 | 0.792691 | 0.901738 | 0.914011 | 0.944082 |



|                         |                 |       |       |      |      |       |          |          |          |          |
|-------------------------|-----------------|-------|-------|------|------|-------|----------|----------|----------|----------|
| MmugDNA.16147.1.S1_at   | MmugDNA.16147.1 | 4.09  | 4.08  | 0.14 | 0.04 | 1.01  | 0.748391 | 0.808619 | 0.892444 | 0.889834 |
| MmugDNA.16149.1.S1_at   | MmugDNA.16149.1 | 5.38  | 5.31  | 0.73 | 0.49 | 1.05  | 0.281764 | 0.36684  | 0.62238  | 0.606544 |
| MmugDNA.1615.1.S1_at    | MmugDNA.1615.1  | 4.08  | 4.3   | 0    | 0.08 | -1.17 | 0.003612 | 0.18329  | 0.179515 | 0.459553 |
| MmugDNA.16151.1.S1_at   | MmugDNA.16151.1 | 6.76  | 6.6   | 0.1  | 0.31 | 1.12  | 0.518305 | 0.708471 | 0.769365 | 0.830919 |
| MmugDNA.16152.1.S1_at   | MmugDNA.16152.1 | 9.87  | 10.25 | 0.19 | 0.18 | -1.3  | 0.030761 | 0.020174 | 0.319798 | 0.178414 |
| MmugDNA.16153.1.S1_at   | MmugDNA.16153.1 | 3.9   | 3.9   | 0.02 | 0.04 | -1    | 0.573724 | 0.697187 | 0.801332 | 0.824045 |
| MmugDNA.16154.1.S1_at   | MmugDNA.16154.1 | 10.14 | 9.27  | 0.54 | 0.44 | 1.83  | 0.222147 | 0.176063 | 0.580675 | 0.452526 |
| MmugDNA.16155.1.S1_at   | MmugDNA.16155.1 | 4.21  | 4.39  | 0.07 | 0.21 | -1.13 | 0.135106 | 0.141399 | 0.501995 | 0.414874 |
| MmugDNA.16157.1.S1_at   | MmugDNA.16157.1 | 4.61  | 4.57  | 0.2  | 0.2  | 1.03  | 0.571584 | 0.662758 | 0.800254 | 0.802564 |
| MmugDNA.1616.1.S1_at    | MmugDNA.1616.1  | 4.47  | 4.31  | 0.17 | 0.13 | 1.11  | 0.356162 | 0.669499 | 0.671391 | 0.806643 |
| MmugDNA.16161.1.S1_at   | MmugDNA.16161.1 | 5.76  | 5.97  | 0.07 | 0.2  | -1.16 | 0.313861 | 0.337446 | 0.645387 | 0.584658 |
| MmugDNA.16163.1.S1_at   | MmugDNA.16163.1 | 8.54  | 8.83  | 0.31 | 0.36 | -1.23 | 0.147271 | 0.188701 | 0.513087 | 0.464634 |
| MmugDNA.16164.1.S1_at   | MmugDNA.16164.1 | 4.55  | 4.56  | 0.13 | 0.11 | -1.01 | 0.27006  | 0.190243 | 0.614629 | 0.46589  |
| MmugDNA.16167.1.S1_at   | MmugDNA.16167.1 | 6.18  | 6.19  | 0.09 | 0.05 | -1.01 | 0.468686 | 0.911201 | 0.741184 | 0.949924 |
| MmugDNA.16171.1.S1_at   | MmugDNA.16171.1 | 5.38  | 5.11  | 0.47 | 0.52 | 1.21  | 0.581799 | 0.7975   | 0.805447 | 0.883261 |
| MmugDNA.16172.1.S1_at   | MmugDNA.16172.1 | 10.55 | 10.48 | 0.01 | 0.3  | 1.05  | 0.61476  | 0.013764 | 0.823258 | 0.150306 |
| MmugDNA.16174.1.S1_at   | MmugDNA.16174.1 | 11.42 | 12.56 | 0.2  | 1.36 | -2.21 | 0.405735 | 0.271857 | 0.703322 | 0.536619 |
| MmugDNA.16175.1.S1_at   | MmugDNA.16175.1 | 5.83  | 5.46  | 0.02 | 0.29 | 1.29  | 0.231124 | 0.083798 | 0.587369 | 0.334647 |
| MmugDNA.16176.1.S1_at   | MmugDNA.16176.1 | 5.27  | 5.44  | 0.17 | 0.14 | -1.12 | 0.195157 | 0.198112 | 0.558582 | 0.473108 |
| MmugDNA.16177.1.S1_at   | MmugDNA.16177.1 | 5.62  | 7.09  | 0.19 | 1.35 | -2.78 | 0.151178 | 0.125266 | 0.515947 | 0.395827 |
| MmugDNA.16178.1.S1_at   | MmugDNA.16178.1 | 3.4   | 3.5   | 0.07 | 0.13 | -1.07 | 0.484835 | 0.756037 | 0.750701 | 0.857974 |
| MmugDNA.16180.1.S1_at   | MmugDNA.16180.1 | 9.81  | 10.6  | 0.21 | 0.35 | -1.74 | 0.016939 | 0.01425  | 0.266211 | 0.152403 |
| MmugDNA.16182.1.S1_at   | MmugDNA.16182.1 | 9.49  | 8.65  | 0.33 | 0.55 | 1.79  | 0.086406 | 0.02706  | 0.440232 | 0.205689 |
| MmugDNA.16184.1.S1_at   | MmugDNA.16184.1 | 7.05  | 7.04  | 0.7  | 0.55 | 1.01  | 0.604691 | 0.499652 | 0.817926 | 0.698453 |
| MmugDNA.1619.1.S1_at    | MmugDNA.1619.1  | 5.38  | 5.52  | 0.75 | 0.48 | -1.1  | 0.669578 | 0.400927 | 0.852167 | 0.630658 |
| MmugDNA.16190.1.S1_at   | MmugDNA.16190.1 | 3.75  | 3.85  | 1.21 | 0.14 | -1.07 | 0.46347  | 0.63765  | 0.738845 | 0.787067 |
| MmugDNA.16191.1.S1_at   | MmugDNA.16191.1 | 8.6   | 6.74  | 0.37 | 1.92 | 3.63  | 0.221475 | 0.271274 | 0.580261 | 0.536408 |
| MmugDNA.16192.1.S1_s_at | MmugDNA.16192.1 | 3.5   | 3.39  | 0.09 | 0.04 | 1.08  | 0.127706 | 0.121273 | 0.493978 | 0.390351 |
| MmugDNA.16194.1.S1_at   | MmugDNA.16194.1 | 5.31  | 5.21  | 0.08 | 0.27 | 1.08  | 0.488252 | 0.699249 | 0.752806 | 0.825277 |
| MmugDNA.16195.1.S1_at   | MmugDNA.16195.1 | 4.92  | 5.05  | 0.02 | 0.08 | -1.1  | 0.051098 | 0.361434 | 0.375935 | 0.602201 |
| MmugDNA.16196.1.S1_at   | MmugDNA.16196.1 | 7.67  | 7.71  | 0.09 | 0.11 | -1.02 | 0.592766 | 0.256529 | 0.811174 | 0.524275 |
| MmugDNA.16197.1.S1_at   | MmugDNA.16197.1 | 4.75  | 4.72  | 0.13 | 0.25 | 1.02  | 0.955907 | 0.985117 | 0.9834   | 0.991531 |
| MmugDNA.16197.1.S1_s_at | MmugDNA.16197.1 | 6.39  | 6.31  | 0.01 | 0.13 | 1.05  | 0.309474 | 0.369894 | 0.641555 | 0.609138 |
| MmugDNA.16198.1.S1_at   | MmugDNA.16198.1 | 6.54  | 6.18  | 0.35 | 0.58 | 1.28  | 0.342506 | 0.351095 | 0.663271 | 0.594778 |
| MmugDNA.16199.1.S1_at   | MmugDNA.16199.1 | 4.34  | 4.08  | 0.94 | 0.18 | 1.2   | 0.262454 | 0.325457 | 0.608991 | 0.575812 |
| MmugDNA.162.1.S1_at     | MmugDNA.162.1   | 4.59  | 4.53  | 0.39 | 0.02 | 1.04  | 0.40941  | 0.47872  | 0.705878 | 0.684691 |
| MmugDNA.16201.1.S1_at   | MmugDNA.16201.1 | 4.51  | 4.37  | 0.18 | 0.16 | 1.1   | 0.353657 | 0.219832 | 0.670266 | 0.493388 |
| MmugDNA.16203.1.S1_at   | MmugDNA.16203.1 | 5.62  | 5.6   | 0.21 | 0.07 | 1.01  | 0.791041 | 0.668448 | 0.913224 | 0.805964 |
| MmugDNA.16204.1.S1_at   | MmugDNA.16204.1 | 5.63  | 5.51  | 0.12 | 0.14 | 1.09  | 0.300021 | 0.387919 | 0.635344 | 0.622509 |
| MmugDNA.16205.1.S1_at   | MmugDNA.16205.1 | 3.03  | 3     | 0.13 | 0.06 | 1.02  | 0.988004 | 0.796491 | 0.995765 | 0.882699 |
| MmugDNA.16206.1.S1_at   | MmugDNA.16206.1 | 6.26  | 5.93  | 0.09 | 0.19 | 1.25  | 0.089586 | 0.042952 | 0.44526  | 0.251794 |

|                         |                 |       |       |      |      |       |          |          |          |          |
|-------------------------|-----------------|-------|-------|------|------|-------|----------|----------|----------|----------|
| MmugDNA.16207.1.S1_at   | MmugDNA.16207.1 | 3.48  | 3.89  | 0.08 | 0.4  | -1.32 | 0.169988 | 0.30706  | 0.534161 | 0.563427 |
| MmugDNA.16208.1.S1_at   | MmugDNA.16208.1 | 3.65  | 3.46  | 0.18 | 0.04 | 1.15  | 0.308433 | 0.296476 | 0.640817 | 0.555528 |
| MmugDNA.16209.1.S1_at   | MmugDNA.16209.1 | 5.67  | 5.54  | 0.17 | 0.23 | 1.1   | 0.486561 | 0.554323 | 0.751689 | 0.733158 |
| MmugDNA.16212.1.S1_at   | MmugDNA.16212.1 | 3.72  | 3.7   | 0.06 | 0.22 | 1.02  | 0.4017   | 0.534918 | 0.700992 | 0.720616 |
| MmugDNA.16215.1.S1_at   | MmugDNA.16215.1 | 10.27 | 9.35  | 0.39 | 0.15 | 1.9   | 0.012955 | 0.006727 | 0.24501  | 0.110963 |
| MmugDNA.16216.1.S1_at   | MmugDNA.16216.1 | 11.52 | 11.37 | 0.18 | 0.41 | 1.11  | 0.198141 | 0.23069  | 0.561111 | 0.502381 |
| MmugDNA.16219.1.S1_at   | MmugDNA.16219.1 | 4.96  | 5.06  | 0.22 | 0.17 | -1.07 | 0.859761 | 0.302415 | 0.943422 | 0.560109 |
| MmugDNA.1622.1.S1_at    | MmugDNA.1622.1  | 5.49  | 4.42  | 0.23 | 1.08 | 2.11  | 0.468406 | 0.351525 | 0.741049 | 0.595094 |
| MmugDNA.16220.1.S1_at   | MmugDNA.16220.1 | 11.19 | 11.28 | 0.09 | 0.15 | -1.07 | 0.331093 | 0.363057 | 0.656117 | 0.603503 |
| MmugDNA.16221.1.S1_at   | MmugDNA.16221.1 | 11.74 | 11.17 | 0.07 | 0.39 | 1.49  | 0.110913 | 0.128016 | 0.472762 | 0.398985 |
| MmugDNA.16222.1.S1_at   | MmugDNA.16222.1 | 4.8   | 4.91  | 0.55 | 0.37 | -1.08 | 0.956841 | 0.312565 | 0.983787 | 0.567268 |
| MmugDNA.16223.1.S1_at   | MmugDNA.16223.1 | 8.23  | 8.16  | 0.13 | 0.15 | 1.05  | 0.340802 | 0.779596 | 0.662186 | 0.872221 |
| MmugDNA.16224.1.S1_s_at | MmugDNA.16224.1 | 13.24 | 12.69 | 0.42 | 0.52 | 1.47  | 0.229148 | 0.218401 | 0.586439 | 0.491958 |
| MmugDNA.16225.1.S1_at   | MmugDNA.16225.1 | 5.24  | 5.26  | 0.23 | 0.06 | -1.02 | 0.366794 | 0.541704 | 0.679209 | 0.725057 |
| MmugDNA.16226.1.S1_at   | MmugDNA.16226.1 | 6.24  | 6.19  | 0.15 | 0.5  | 1.04  | 0.996129 | 0.76243  | 0.998461 | 0.861818 |
| MmugDNA.16227.1.S1_at   | MmugDNA.16227.1 | 4.38  | 4.36  | 0.21 | 0.14 | 1.01  | 0.669063 | 0.748131 | 0.852043 | 0.853384 |
| MmugDNA.16228.1.S1_at   | MmugDNA.16228.1 | 3.73  | 3.69  | 0.03 | 0.08 | 1.03  | 0.546936 | 0.428049 | 0.785828 | 0.649619 |
| MmugDNA.16229.1.S1_at   | MmugDNA.16229.1 | 8.59  | 8.29  | 0.27 | 0.79 | 1.24  | 0.168    | 0.075243 | 0.532454 | 0.319434 |
| MmugDNA.1623.1.S1_at    | MmugDNA.1623.1  | 5.83  | 5.78  | 0.08 | 0.05 | 1.03  | 0.569475 | 0.781624 | 0.799047 | 0.873418 |
| MmugDNA.16230.1.S1_at   | MmugDNA.16230.1 | 9.07  | 9.36  | 0.15 | 0.23 | -1.22 | 0.303073 | 0.050418 | 0.637335 | 0.269746 |
| MmugDNA.16231.1.S1_at   | MmugDNA.16231.1 | 12.98 | 12.66 | 0.1  | 0.76 | 1.25  | 0.15748  | 0.129238 | 0.522379 | 0.400635 |
| MmugDNA.16232.1.S1_at   | MmugDNA.16232.1 | 5.36  | 5.8   | 0.24 | 0.2  | -1.36 | 0.042184 | 0.021191 | 0.35448  | 0.182325 |
| MmugDNA.16233.1.S1_at   | MmugDNA.16233.1 | 6.84  | 7.24  | 1.12 | 1.54 | -1.32 | 0.769213 | 0.927988 | 0.902992 | 0.959116 |
| MmugDNA.16235.1.S1_at   | MmugDNA.16235.1 | 3.89  | 4.06  | 0.08 | 0.1  | -1.12 | 0.020923 | 0.014889 | 0.281582 | 0.155096 |
| MmugDNA.16236.1.S1_at   | MmugDNA.16236.1 | 7     | 7.06  | 0.3  | 0.05 | -1.04 | 0.758121 | 0.925009 | 0.897606 | 0.957597 |
| MmugDNA.16237.1.S1_at   | MmugDNA.16237.1 | 3.48  | 3.52  | 0.09 | 0.25 | -1.03 | 0.918379 | 0.492021 | 0.96831  | 0.693403 |
| MmugDNA.16238.1.S1_at   | MmugDNA.16238.1 | 5.14  | 4.85  | 0.06 | 0.14 | 1.22  | 0.063692 | 0.050313 | 0.401367 | 0.269573 |
| MmugDNA.16239.1.S1_at   | MmugDNA.16239.1 | 10.25 | 9.87  | 0.52 | 0.59 | 1.31  | 0.842407 | 0.228554 | 0.936474 | 0.500752 |
| MmugDNA.16239.1.S1_s_at | MmugDNA.16239.1 | 9.31  | 8.94  | 0.72 | 0.64 | 1.29  | 0.775553 | 0.236375 | 0.905841 | 0.507308 |
| MmugDNA.1624.1.S1_at    | MmugDNA.1624.1  | 11.54 | 11.46 | 0.21 | 0.18 | 1.06  | 0.955735 | 0.672285 | 0.983358 | 0.808488 |
| MmugDNA.16241.1.S1_at   | MmugDNA.16241.1 | 7.37  | 7.79  | 0.06 | 0.92 | -1.34 | 0.520913 | 0.379243 | 0.77105  | 0.616218 |
| MmugDNA.16242.1.S1_at   | MmugDNA.16242.1 | 3.68  | 3.61  | 0.19 | 0.27 | 1.04  | 0.979939 | 0.896111 | 0.992671 | 0.940629 |
| MmugDNA.16244.1.S1_at   | MmugDNA.16244.1 | 6.46  | 5.13  | 1.33 | 2.5  | 2.51  | 0.963909 | 0.307806 | 0.985998 | 0.56397  |
| MmugDNA.16246.1.S1_at   | MmugDNA.16246.1 | 5.24  | 5.02  | 0.44 | 0.25 | 1.17  | 0.473864 | 0.428552 | 0.744652 | 0.650098 |
| MmugDNA.16247.1.S1_at   | MmugDNA.16247.1 | 3.07  | 3.07  | 0.11 | 0.03 | 1     | 0.409089 | 0.177626 | 0.705737 | 0.454005 |
| MmugDNA.16248.1.S1_at   | MmugDNA.16248.1 | 8.48  | 8.01  | 0.29 | 0.15 | 1.39  | 0.141468 | 0.033923 | 0.509067 | 0.227782 |
| MmugDNA.16248.1.S1_s_at | MmugDNA.16248.1 | 11.01 | 10.41 | 0.18 | 0.31 | 1.52  | 0.051366 | 0.01709  | 0.376001 | 0.165617 |
| MmugDNA.16249.1.S1_at   | MmugDNA.16249.1 | 4.82  | 4.95  | 0.17 | 0.08 | -1.09 | 0.163459 | 0.193913 | 0.527867 | 0.469013 |
| MmugDNA.1625.1.S1_at    | MmugDNA.1625.1  | 8.6   | 9.4   | 0.16 | 0.56 | -1.74 | 0.127434 | 0.135186 | 0.493834 | 0.407236 |
| MmugDNA.16250.1.S1_at   | MmugDNA.16250.1 | 6.32  | 6.46  | 0.08 | 0.11 | -1.11 | 0.165819 | 0.185823 | 0.529848 | 0.461654 |
| MmugDNA.16251.1.S1_at   | MmugDNA.16251.1 | 6.73  | 6.74  | 0.03 | 0.1  | -1.01 | 0.236342 | 0.254436 | 0.590381 | 0.522732 |

|                         |                 |       |       |      |      |       |          |          |          |          |
|-------------------------|-----------------|-------|-------|------|------|-------|----------|----------|----------|----------|
| MmugDNA.16252.1.S1_at   | MmugDNA.16252.1 | 8.44  | 7.5   | 0.48 | 0.82 | 1.92  | 0.065219 | 0.05449  | 0.404147 | 0.278959 |
| MmugDNA.16254.1.S1_at   | MmugDNA.16254.1 | 6.08  | 5.82  | 0.08 | 0.39 | 1.2   | 0.101387 | 0.116895 | 0.461313 | 0.384277 |
| MmugDNA.16256.1.S1_at   | MmugDNA.16256.1 | 4.25  | 4.42  | 0.24 | 0.02 | -1.13 | 0.387983 | 0.48726  | 0.692205 | 0.690367 |
| MmugDNA.16257.1.S1_at   | MmugDNA.16257.1 | 7.36  | 7.2   | 0.16 | 0.24 | 1.12  | 0.54199  | 0.575156 | 0.783068 | 0.746352 |
| MmugDNA.16258.1.S1_at   | MmugDNA.16258.1 | 3.61  | 3.5   | 0.04 | 0.21 | 1.08  | 0.927398 | 0.985724 | 0.971995 | 0.991878 |
| MmugDNA.16259.1.S1_at   | MmugDNA.16259.1 | 5.28  | 4.43  | 0.7  | 0.16 | 1.81  | 0.095685 | 0.064282 | 0.453501 | 0.299722 |
| MmugDNA.1626.1.S1_at    | MmugDNA.1626.1  | 3.13  | 3.12  | 0.09 | 0.06 | 1     | 0.772529 | 0.481525 | 0.904254 | 0.686493 |
| MmugDNA.16261.1.S1_at   | MmugDNA.16261.1 | 4.12  | 4.08  | 0.3  | 0.1  | 1.03  | 0.701915 | 0.846001 | 0.868197 | 0.912303 |
| MmugDNA.16263.1.S1_at   | MmugDNA.16263.1 | 10.16 | 9.98  | 0.03 | 0.55 | 1.13  | 0.993626 | 0.999925 | 0.997754 | 0.999968 |
| MmugDNA.16264.1.S1_at   | MmugDNA.16264.1 | 3.18  | 3.12  | 0.29 | 0.29 | 1.04  | 0.859002 | 0.824362 | 0.943112 | 0.899093 |
| MmugDNA.16265.1.S1_at   | MmugDNA.16265.1 | 3.06  | 3.12  | 0.08 | 0.24 | -1.04 | 0.601032 | 0.73214  | 0.815637 | 0.844852 |
| MmugDNA.16267.1.S1_at   | MmugDNA.16267.1 | 3.38  | 3.5   | 0.22 | 0.25 | -1.09 | 0.880951 | 0.980407 | 0.952105 | 0.989333 |
| MmugDNA.16269.1.S1_at   | MmugDNA.16269.1 | 5.67  | 5.71  | 0    | 0.12 | -1.03 | 0.178402 | 0.021919 | 0.542772 | 0.185265 |
| MmugDNA.16270.1.S1_at   | MmugDNA.16270.1 | 3.86  | 4     | 1.6  | 0.03 | -1.1  | 0.436493 | 0.580744 | 0.721751 | 0.749903 |
| MmugDNA.16270.1.S1_x_at | MmugDNA.16270.1 | 6.97  | 7.17  | 0.89 | 0.25 | -1.15 | 0.443319 | 0.569425 | 0.726034 | 0.742382 |
| MmugDNA.16271.1.S1_at   | MmugDNA.16271.1 | 4.4   | 4.47  | 0.04 | 0.16 | -1.05 | 0.221364 | 0.473278 | 0.580216 | 0.680582 |
| MmugDNA.16272.1.S1_at   | MmugDNA.16272.1 | 3.88  | 4.29  | 0.42 | 0.43 | -1.33 | 0.676903 | 0.851447 | 0.85524  | 0.915468 |
| MmugDNA.16273.1.S1_at   | MmugDNA.16273.1 | 4.64  | 4.81  | 0.08 | 0.05 | -1.12 | 0.01759  | 0.003287 | 0.267454 | 0.082551 |
| MmugDNA.16275.1.S1_at   | MmugDNA.16275.1 | 4.89  | 4.89  | 0.04 | 0.08 | 1     | 0.546023 | 0.694367 | 0.785264 | 0.822254 |
| MmugDNA.16276.1.S1_at   | MmugDNA.16276.1 | 8.21  | 8.35  | 0.07 | 0.13 | -1.1  | 0.586602 | 0.37979  | 0.808193 | 0.616576 |
| MmugDNA.16277.1.S1_at   | MmugDNA.16277.1 | 9.36  | 9.4   | 0.08 | 0.39 | -1.03 | 0.873097 | 0.974111 | 0.94924  | 0.98586  |
| MmugDNA.16278.1.S1_at   | MmugDNA.16278.1 | 11.82 | 11.74 | 0.1  | 0.02 | 1.06  | 0.37354  | 0.574403 | 0.683245 | 0.745847 |
| MmugDNA.1628.1.S1_at    | MmugDNA.1628.1  | 13.41 | 13.39 | 0.09 | 0.04 | 1.02  | 0.318747 | 0.154194 | 0.648672 | 0.428949 |
| MmugDNA.16281.1.S1_at   | MmugDNA.16281.1 | 3.51  | 3.56  | 0.23 | 0.25 | -1.03 | 0.664592 | 0.434986 | 0.849598 | 0.654901 |
| MmugDNA.16283.1.S1_s_at | MmugDNA.16283.1 | 4.88  | 5.05  | 0.22 | 0.05 | -1.13 | 0.57891  | 0.588243 | 0.804059 | 0.754847 |
| MmugDNA.16284.1.S1_at   | MmugDNA.16284.1 | 10.76 | 10.8  | 0.07 | 0.3  | -1.03 | 0.795281 | 0.319943 | 0.915081 | 0.572283 |
| MmugDNA.16285.1.S1_at   | MmugDNA.16285.1 | 3.65  | 3.43  | 0.22 | 0.28 | 1.16  | 0.41511  | 0.445392 | 0.709338 | 0.662343 |
| MmugDNA.16285.1.S1_s_at | MmugDNA.16285.1 | 4.89  | 5.26  | 0.21 | 0.18 | -1.29 | 0.413328 | 0.508003 | 0.70838  | 0.703358 |
| MmugDNA.16286.1.S1_at   | MmugDNA.16286.1 | 4.45  | 4.46  | 0.18 | 0.17 | -1.01 | 0.856386 | 0.302408 | 0.942006 | 0.560109 |
| MmugDNA.16287.1.S1_at   | MmugDNA.16287.1 | 4.39  | 4.35  | 0.44 | 0.08 | 1.02  | 0.894732 | 0.984461 | 0.957917 | 0.991287 |
| MmugDNA.16288.1.S1_at   | MmugDNA.16288.1 | 6.16  | 6.08  | 0.06 | 0.15 | 1.05  | 0.423119 | 0.595871 | 0.71384  | 0.759258 |
| MmugDNA.16289.1.S1_at   | MmugDNA.16289.1 | 5.1   | 4.86  | 0.74 | 0.36 | 1.19  | 0.189648 | 0.294317 | 0.552487 | 0.55407  |
| MmugDNA.1629.1.S1_at    | MmugDNA.1629.1  | 4.89  | 3.94  | 0.55 | 0.07 | 1.94  | 0.033678 | 0.020973 | 0.330119 | 0.181633 |
| MmugDNA.16290.1.S1_at   | MmugDNA.16290.1 | 7.65  | 7.64  | 0.32 | 0.1  | 1.01  | 0.91125  | 0.914375 | 0.965013 | 0.951844 |
| MmugDNA.16292.1.S1_at   | MmugDNA.16292.1 | 8.16  | 8.69  | 0.32 | 0.69 | -1.45 | 0.378815 | 0.208064 | 0.68656  | 0.482049 |
| MmugDNA.16293.1.S1_at   | MmugDNA.16293.1 | 3.25  | 3.4   | 0.2  | 0.1  | -1.11 | 0.90642  | 0.50117  | 0.962826 | 0.699449 |
| MmugDNA.16294.1.S1_at   | MmugDNA.16294.1 | 7     | 7.07  | 0.35 | 0.69 | -1.05 | 0.801768 | 0.907016 | 0.918258 | 0.947344 |
| MmugDNA.16295.1.S1_at   | MmugDNA.16295.1 | 9.71  | 10.07 | 0.26 | 0.14 | -1.28 | 0.168981 | 0.196473 | 0.533243 | 0.471516 |
| MmugDNA.16295.1.S1_s_at | MmugDNA.16295.1 | 6.4   | 5.88  | 0.72 | 0.56 | 1.44  | 0.160556 | 0.130214 | 0.525625 | 0.401949 |
| MmugDNA.16296.1.S1_at   | MmugDNA.16296.1 | 5.42  | 5.42  | 0.7  | 0.08 | 1     | 0.379808 | 0.511031 | 0.68708  | 0.705358 |
| MmugDNA.16298.1.S1_at   | MmugDNA.16298.1 | 4.6   | 4.71  | 0.06 | 0.09 | -1.08 | 0.476843 | 0.048793 | 0.746299 | 0.265812 |

|                         |                 |       |       |      |      |       |          |          |          |          |
|-------------------------|-----------------|-------|-------|------|------|-------|----------|----------|----------|----------|
| MmugDNA.16299.1.S1_at   | MmugDNA.16299.1 | 6.04  | 6.64  | 0.34 | 0.28 | -1.52 | 0.222683 | 0.153431 | 0.581112 | 0.42827  |
| MmugDNA.163.1.S1_at     | MmugDNA.163.1   | 3.43  | 3.48  | 0.37 | 0.09 | -1.03 | 0.942049 | 0.765941 | 0.977822 | 0.864021 |
| MmugDNA.1630.1.S1_at    | MmugDNA.1630.1  | 4.41  | 4.84  | 0.72 | 0.22 | -1.34 | 0.958045 | 0.749867 | 0.984107 | 0.854631 |
| MmugDNA.16300.1.S1_at   | MmugDNA.16300.1 | 8.61  | 7.33  | 0.37 | 0.52 | 2.42  | 0.032235 | 0.020801 | 0.3244   | 0.180908 |
| MmugDNA.35467.1.S1_at   | MmugDNA.35467.1 | 9.81  | 9.17  | 0.26 | 0.53 | 1.56  | 0.138719 | 0.0987   | 0.505884 | 0.356809 |
| MmugDNA.35467.1.S1_s_at | MmugDNA.35467.1 | 9.68  | 8.84  | 0.18 | 0.58 | 1.8   | 0.109284 | 0.096902 | 0.470811 | 0.354311 |
| MmugDNA.16301.1.S1_at   | MmugDNA.16301.1 | 5.25  | 5.23  | 0.1  | 0.23 | 1.02  | 0.763444 | 0.651485 | 0.900278 | 0.796226 |
| MmugDNA.16302.1.S1_at   | MmugDNA.16302.1 | 3.54  | 3.79  | 0.12 | 0.09 | -1.19 | 0.072644 | 0.067595 | 0.417383 | 0.306076 |
| MmugDNA.16303.1.S1_at   | MmugDNA.16303.1 | 10.74 | 10.74 | 0.09 | 0.22 | 1     | 0.415875 | 0.545918 | 0.70957  | 0.727697 |
| MmugDNA.16304.1.S1_at   | MmugDNA.16304.1 | 8.98  | 7.59  | 0.7  | 0.89 | 2.62  | 0.147013 | 0.122958 | 0.51306  | 0.392923 |
| MmugDNA.16305.1.S1_s_at | MmugDNA.16305.1 | 8.08  | 8.36  | 0.35 | 0.53 | -1.21 | 0.846083 | 0.26812  | 0.938232 | 0.533867 |
| MmugDNA.16306.1.S1_at   | MmugDNA.16306.1 | 5.62  | 5.6   | 0.14 | 0.02 | 1.01  | 0.500949 | 0.305791 | 0.759772 | 0.562731 |
| MmugDNA.16307.1.S1_at   | MmugDNA.16307.1 | 5.95  | 4.97  | 0.26 | 0.28 | 1.96  | 0.028369 | 0.017143 | 0.311036 | 0.165888 |
| MmugDNA.16308.1.S1_at   | MmugDNA.16308.1 | 5.81  | 5.06  | 0.42 | 0.21 | 1.69  | 0.071842 | 0.089444 | 0.415886 | 0.343748 |
| MmugDNA.16309.1.S1_at   | MmugDNA.16309.1 | 3.64  | 3.62  | 0.22 | 0.16 | 1.01  | 0.546212 | 0.796098 | 0.785343 | 0.882495 |
| MmugDNA.16309.1.S1_x_at | MmugDNA.16309.1 | 3.44  | 3.64  | 0.37 | 0.16 | -1.15 | 0.752661 | 0.26493  | 0.894426 | 0.530915 |
| MmugDNA.16310.1.S1_at   | MmugDNA.16310.1 | 3.63  | 3.76  | 0.34 | 0.07 | -1.1  | 0.773379 | 0.495946 | 0.904809 | 0.695811 |
| MmugDNA.16312.1.S1_at   | MmugDNA.16312.1 | 9.64  | 9.47  | 0.39 | 0.17 | 1.13  | 0.331571 | 0.283987 | 0.656424 | 0.546237 |
| MmugDNA.16313.1.S1_at   | MmugDNA.16313.1 | 4.71  | 4.62  | 0.16 | 0.25 | 1.06  | 0.535014 | 0.226534 | 0.778933 | 0.499001 |
| MmugDNA.16315.1.S1_at   | MmugDNA.16315.1 | 9.67  | 10.27 | 0.04 | 0.29 | -1.51 | 0.021105 | 0.010459 | 0.282266 | 0.133651 |
| MmugDNA.16316.1.S1_at   | MmugDNA.16316.1 | 4.35  | 4.36  | 0.08 | 0.04 | -1    | 0.596696 | 0.496666 | 0.813157 | 0.696119 |
| MmugDNA.16317.1.S1_at   | MmugDNA.16317.1 | 4.64  | 5.43  | 0.66 | 0.14 | -1.74 | 0.315562 | 0.358067 | 0.646683 | 0.599613 |
| MmugDNA.16319.1.S1_at   | MmugDNA.16319.1 | 10.13 | 9.99  | 0.15 | 0.09 | 1.1   | 0.069219 | 0.150308 | 0.411431 | 0.424877 |
| MmugDNA.16320.1.S1_at   | MmugDNA.16320.1 | 4.65  | 4.42  | 0.34 | 0.2  | 1.18  | 0.192851 | 0.023822 | 0.556141 | 0.193328 |
| MmugDNA.16322.1.S1_at   | MmugDNA.16322.1 | 9.96  | 9.94  | 0.38 | 0.8  | 1.01  | 0.532589 | 0.079458 | 0.777793 | 0.326766 |
| MmugDNA.16324.1.S1_at   | MmugDNA.16324.1 | 8.37  | 8.25  | 0.46 | 1.16 | 1.08  | 0.603557 | 0.159478 | 0.8172   | 0.435612 |
| MmugDNA.16325.1.S1_at   | MmugDNA.16325.1 | 4.44  | 4.59  | 0.12 | 0.3  | -1.1  | 0.981449 | 0.871416 | 0.993316 | 0.926844 |
| MmugDNA.16326.1.S1_at   | MmugDNA.16326.1 | 9.08  | 8.91  | 0.12 | 0.17 | 1.13  | 0.117108 | 0.026253 | 0.481132 | 0.202991 |
| MmugDNA.16328.1.S1_at   | MmugDNA.16328.1 | 9.74  | 9.43  | 0.11 | 0.24 | 1.24  | 0.104402 | 0.102803 | 0.464351 | 0.363328 |
| MmugDNA.16328.1.S1_s_at | MmugDNA.16328.1 | 9.05  | 8.65  | 0.13 | 0.15 | 1.31  | 0.017771 | 0.012757 | 0.267882 | 0.145496 |
| MmugDNA.16329.1.S1_at   | MmugDNA.16329.1 | 6.6   | 8.01  | 0.07 | 0.26 | -2.65 | 0.000535 | 0.000217 | 0.136818 | 0.032385 |
| MmugDNA.1633.1.S1_at    | MmugDNA.1633.1  | 5.79  | 5.84  | 0.1  | 0.1  | -1.04 | 0.667345 | 0.57934  | 0.850942 | 0.749058 |
| MmugDNA.16330.1.S1_at   | MmugDNA.16330.1 | 5.8   | 5.86  | 0.19 | 0.17 | -1.05 | 0.904642 | 0.988567 | 0.961834 | 0.993572 |
| MmugDNA.16331.1.S1_at   | MmugDNA.16331.1 | 3.25  | 3.28  | 0.45 | 0.1  | -1.02 | 0.450088 | 0.669184 | 0.730786 | 0.806492 |
| MmugDNA.16333.1.S1_at   | MmugDNA.16333.1 | 11.34 | 11.14 | 0.01 | 0.15 | 1.15  | 0.104862 | 0.110928 | 0.46527  | 0.375356 |
| MmugDNA.16334.1.S1_at   | MmugDNA.16334.1 | 12.41 | 12.41 | 0.11 | 0.21 | 1     | 0.670015 | 0.754104 | 0.852318 | 0.856848 |
| MmugDNA.16336.1.S1_at   | MmugDNA.16336.1 | 3.8   | 3.9   | 0.15 | 0.16 | -1.07 | 0.465677 | 0.665503 | 0.740048 | 0.804009 |
| MmugDNA.16338.1.S1_at   | MmugDNA.16338.1 | 12.63 | 12.77 | 0.11 | 0.19 | -1.1  | 0.120887 | 0.15693  | 0.48574  | 0.432372 |
| MmugDNA.16339.1.S1_at   | MmugDNA.16339.1 | 5.68  | 5.4   | 0.17 | 0.16 | 1.21  | 0.240711 | 0.316814 | 0.593526 | 0.570212 |
| MmugDNA.1634.1.S1_at    | MmugDNA.1634.1  | 6.48  | 5.29  | 0.46 | 0.88 | 2.29  | 0.253408 | 0.031829 | 0.602055 | 0.220909 |
| MmugDNA.16341.1.S1_at   | MmugDNA.16341.1 | 3.39  | 3.69  | 0.1  | 0.12 | -1.23 | 0.062948 | 0.044703 | 0.399633 | 0.255871 |

|                         |                 |       |       |      |      |       |          |          |          |          |
|-------------------------|-----------------|-------|-------|------|------|-------|----------|----------|----------|----------|
| MmugDNA.16342.1.S1_at   | MmugDNA.16342.1 | 4.54  | 5.17  | 0.29 | 0.21 | -1.55 | 0.036226 | 0.098642 | 0.339133 | 0.356743 |
| MmugDNA.16344.1.S1_at   | MmugDNA.16344.1 | 4.2   | 4.39  | 0.68 | 0.26 | -1.14 | 0.656787 | 0.812297 | 0.845614 | 0.891561 |
| MmugDNA.16346.1.S1_at   | MmugDNA.16346.1 | 8.43  | 7.85  | 0.21 | 0.21 | 1.49  | 0.052162 | 0.040531 | 0.377155 | 0.246264 |
| MmugDNA.16347.1.S1_at   | MmugDNA.16347.1 | 5.55  | 5.58  | 0.03 | 0.16 | -1.02 | 0.235212 | 0.211125 | 0.589342 | 0.485153 |
| MmugDNA.16348.1.S1_at   | MmugDNA.16348.1 | 3.39  | 3.4   | 0.14 | 0.07 | -1.01 | 0.540886 | 0.74797  | 0.782216 | 0.853341 |
| MmugDNA.1635.1.S1_at    | MmugDNA.1635.1  | 5.31  | 5.61  | 0.04 | 0.42 | -1.23 | 0.81375  | 0.886413 | 0.924402 | 0.93539  |
| MmugDNA.16350.1.S1_at   | MmugDNA.16350.1 | 6.98  | 7.59  | 0.53 | 1.19 | -1.52 | 0.129184 | 0.145449 | 0.495175 | 0.419421 |
| MmugDNA.16351.1.S1_at   | MmugDNA.16351.1 | 9.34  | 10.83 | 0.43 | 1    | -2.81 | 0.074007 | 0.06057  | 0.419667 | 0.292769 |
| MmugDNA.16352.1.S1_at   | MmugDNA.16352.1 | 3.36  | 3.29  | 0.21 | 0.08 | 1.05  | 0.59745  | 0.467253 | 0.813537 | 0.677016 |
| MmugDNA.16353.1.S1_at   | MmugDNA.16353.1 | 6.46  | 6.58  | 0.16 | 0.2  | -1.09 | 0.400015 | 0.505804 | 0.699692 | 0.702218 |
| MmugDNA.16354.1.S1_at   | MmugDNA.16354.1 | 3.45  | 3.51  | 0.03 | 0.18 | -1.04 | 0.345444 | 0.241824 | 0.665175 | 0.512386 |
| MmugDNA.16355.1.S1_at   | MmugDNA.16355.1 | 4.76  | 4.94  | 0.09 | 0.25 | -1.13 | 0.16722  | 0.246149 | 0.531352 | 0.515864 |
| MmugDNA.16357.1.S1_at   | MmugDNA.16357.1 | 5.71  | 5.43  | 0.17 | 0.21 | 1.22  | 0.0663   | 0.065536 | 0.406371 | 0.301415 |
| MmugDNA.16357.1.S1_s_at | MmugDNA.16357.1 | 7.05  | 6.85  | 0.12 | 0.16 | 1.15  | 0.229444 | 0.127509 | 0.586579 | 0.398403 |
| MmugDNA.16358.1.S1_at   | MmugDNA.16358.1 | 3.32  | 3.31  | 0.14 | 0.11 | 1.01  | 0.912216 | 0.925575 | 0.96522  | 0.957863 |
| MmugDNA.16359.1.S1_at   | MmugDNA.16359.1 | 5.33  | 5.65  | 0.36 | 0.58 | -1.25 | 0.613657 | 0.618343 | 0.822845 | 0.774009 |
| MmugDNA.1636.1.S1_at    | MmugDNA.1636.1  | 4.39  | 4.49  | 0.29 | 0.18 | -1.07 | 0.711811 | 0.583468 | 0.873712 | 0.751805 |
| MmugDNA.16360.1.S1_at   | MmugDNA.16360.1 | 3.98  | 4.23  | 0.07 | 0.19 | -1.19 | 0.107464 | 0.147762 | 0.468045 | 0.422056 |
| MmugDNA.16361.1.S1_at   | MmugDNA.16361.1 | 5.85  | 5.38  | 0.21 | 0.47 | 1.38  | 0.220178 | 0.200174 | 0.579297 | 0.474603 |
| MmugDNA.16363.1.S1_at   | MmugDNA.16363.1 | 7.16  | 7.01  | 0.1  | 0.32 | 1.11  | 0.894138 | 0.83915  | 0.957854 | 0.908325 |
| MmugDNA.16365.1.S1_at   | MmugDNA.16365.1 | 6.07  | 6.26  | 0.2  | 0.01 | -1.14 | 0.608303 | 0.739314 | 0.819872 | 0.848911 |
| MmugDNA.16369.1.S1_at   | MmugDNA.16369.1 | 10.75 | 10.32 | 0.03 | 0.25 | 1.34  | 0.029349 | 0.018265 | 0.313819 | 0.169975 |
| MmugDNA.1637.1.S1_at    | MmugDNA.1637.1  | 4.82  | 4.95  | 0.14 | 0.07 | -1.1  | 0.053256 | 0.042932 | 0.379848 | 0.251759 |
| MmugDNA.16371.1.S1_at   | MmugDNA.16371.1 | 4.04  | 3.82  | 0.66 | 0.18 | 1.16  | 0.548714 | 0.599416 | 0.786872 | 0.76144  |
| MmugDNA.16373.1.S1_at   | MmugDNA.16373.1 | 4.51  | 4.58  | 0.05 | 0.07 | -1.05 | 0.120763 | 0.134175 | 0.48574  | 0.406421 |
| MmugDNA.16374.1.S1_at   | MmugDNA.16374.1 | 3.91  | 3.95  | 0.13 | 0.2  | -1.03 | 0.671522 | 0.783041 | 0.852716 | 0.874447 |
| MmugDNA.16375.1.S1_at   | MmugDNA.16375.1 | 3.1   | 3.14  | 0.03 | 0.29 | -1.03 | 0.311327 | 0.31385  | 0.643352 | 0.568091 |
| MmugDNA.16376.1.S1_at   | MmugDNA.16376.1 | 7.77  | 8.03  | 1.09 | 0.63 | -1.2  | 0.857162 | 0.849945 | 0.942194 | 0.914673 |
| MmugDNA.16377.1.S1_at   | MmugDNA.16377.1 | 6.15  | 7.44  | 0.44 | 1.7  | -2.44 | 0.325077 | 0.385653 | 0.652338 | 0.621079 |
| MmugDNA.16378.1.S1_s_at | MmugDNA.16378.1 | 12.22 | 12.18 | 0.05 | 0.11 | 1.03  | 0.460691 | 0.263029 | 0.737118 | 0.529397 |
| MmugDNA.16379.1.S1_at   | MmugDNA.16379.1 | 3.46  | 3.28  | 0.33 | 0.21 | 1.13  | 0.182695 | 0.270739 | 0.546895 | 0.53602  |
| MmugDNA.1638.1.S1_at    | MmugDNA.1638.1  | 4.15  | 4.15  | 0    | 0.02 | 1     | 0.373901 | 0.431385 | 0.683245 | 0.652321 |
| MmugDNA.16380.1.S1_at   | MmugDNA.16380.1 | 5.41  | 5.7   | 0.06 | 0.13 | -1.22 | 0.096111 | 0.094495 | 0.454303 | 0.35125  |
| MmugDNA.16381.1.S1_at   | MmugDNA.16381.1 | 12.09 | 11.54 | 0.01 | 0.06 | 1.46  | 0.000176 | 0.000011 | 0.118376 | 0.016526 |
| MmugDNA.16383.1.S1_at   | MmugDNA.16383.1 | 4.74  | 4.27  | 0.48 | 0.18 | 1.39  | 0.177593 | 0.171695 | 0.541714 | 0.448078 |
| MmugDNA.16384.1.S1_at   | MmugDNA.16384.1 | 5.52  | 5.5   | 0.1  | 0.16 | 1.02  | 0.422412 | 0.47905  | 0.713459 | 0.684903 |
| MmugDNA.16385.1.S1_at   | MmugDNA.16385.1 | 5.14  | 5.23  | 0.29 | 0.33 | -1.07 | 0.785949 | 0.578341 | 0.911007 | 0.748428 |
| MmugDNA.16386.1.S1_at   | MmugDNA.16386.1 | 3.12  | 3.21  | 0.05 | 0.06 | -1.06 | 0.112331 | 0.09926  | 0.474794 | 0.357513 |
| MmugDNA.16388.1.S1_at   | MmugDNA.16388.1 | 4.55  | 4.48  | 0.54 | 0.23 | 1.04  | 0.810819 | 0.695033 | 0.922872 | 0.822716 |
| MmugDNA.16389.1.S1_at   | MmugDNA.16389.1 | 6.41  | 7.06  | 0.82 | 0.47 | -1.57 | 0.329737 | 0.194563 | 0.655349 | 0.46966  |
| MmugDNA.16391.1.S1_at   | MmugDNA.16391.1 | 7.15  | 7.05  | 0.13 | 0.17 | 1.06  | 0.632017 | 0.808376 | 0.832958 | 0.889697 |

|                         |                 |       |       |      |      |       |          |          |          |          |
|-------------------------|-----------------|-------|-------|------|------|-------|----------|----------|----------|----------|
| MmugDNA.16392.1.S1_at   | MmugDNA.16392.1 | 4.5   | 4.51  | 0.1  | 0.23 | -1    | 0.991014 | 0.494557 | 0.996869 | 0.694909 |
| MmugDNA.16393.1.S1_at   | MmugDNA.16393.1 | 6.73  | 6.49  | 0.53 | 0.48 | 1.18  | 0.658816 | 0.126538 | 0.846726 | 0.39714  |
| MmugDNA.16394.1.S1_s_at | MmugDNA.16394.1 | 5.1   | 5.09  | 0.11 | 0.09 | 1.01  | 0.770011 | 0.730386 | 0.90333  | 0.844012 |
| MmugDNA.16395.1.S1_at   | MmugDNA.16395.1 | 4.75  | 3.99  | 0.54 | 0.2  | 1.69  | 0.363525 | 0.641387 | 0.676752 | 0.789506 |
| MmugDNA.16396.1.S1_at   | MmugDNA.16396.1 | 10.1  | 9.64  | 0.41 | 0.64 | 1.37  | 0.294902 | 0.37425  | 0.631455 | 0.612738 |
| MmugDNA.16398.1.S1_at   | MmugDNA.16398.1 | 8.09  | 9.04  | 0.93 | 0.3  | -1.93 | 0.103645 | 0.088234 | 0.463383 | 0.341721 |
| MmugDNA.16399.1.S1_s_at | MmugDNA.16399.1 | 10.17 | 9.98  | 0.01 | 0.16 | 1.14  | 0.356069 | 0.019527 | 0.671384 | 0.175499 |
| MmugDNA.164.1.S1_at     | MmugDNA.164.1   | 5.43  | 5.38  | 0.13 | 0.15 | 1.03  | 0.274225 | 0.225455 | 0.617262 | 0.498127 |
| MmugDNA.1640.1.S1_at    | MmugDNA.1640.1  | 6.16  | 7.59  | 0.64 | 0.51 | -2.7  | 0.066171 | 0.041466 | 0.40632  | 0.248496 |
| MmugDNA.16402.1.S1_at   | MmugDNA.16402.1 | 8.22  | 7.87  | 0.14 | 0.15 | 1.28  | 0.047663 | 0.136562 | 0.367037 | 0.409076 |
| MmugDNA.16403.1.S1_at   | MmugDNA.16403.1 | 5.84  | 6.03  | 0.12 | 0.13 | -1.15 | 0.307685 | 0.16813  | 0.640082 | 0.444724 |
| MmugDNA.16405.1.S1_a_at | MmugDNA.16405.1 | 5.17  | 5.29  | 0.29 | 0.26 | -1.09 | 0.776706 | 0.877116 | 0.906474 | 0.92996  |
| MmugDNA.16405.1.S1_at   | MmugDNA.16405.1 | 3.88  | 3.97  | 0.09 | 0.09 | -1.06 | 0.620478 | 0.169538 | 0.826026 | 0.446167 |
| MmugDNA.16406.1.S1_at   | MmugDNA.16406.1 | 4.65  | 4.77  | 0.28 | 0.11 | -1.09 | 0.857618 | 0.714369 | 0.942323 | 0.834282 |
| MmugDNA.16408.1.S1_at   | MmugDNA.16408.1 | 4.36  | 4.15  | 0.62 | 0.31 | 1.16  | 0.365907 | 0.478474 | 0.678686 | 0.684481 |
| MmugDNA.16409.1.S1_at   | MmugDNA.16409.1 | 8.28  | 7.88  | 0.37 | 0.43 | 1.32  | 0.181626 | 0.200158 | 0.546263 | 0.474603 |
| MmugDNA.1641.1.S1_at    | MmugDNA.1641.1  | 6.41  | 6.19  | 0.53 | 0.31 | 1.16  | 0.259216 | 0.352405 | 0.60632  | 0.595722 |
| MmugDNA.16410.1.S1_at   | MmugDNA.16410.1 | 6.54  | 6.08  | 0.16 | 0.18 | 1.38  | 0.027934 | 0.010141 | 0.309162 | 0.131979 |
| MmugDNA.16411.1.S1_at   | MmugDNA.16411.1 | 6.15  | 6.31  | 0.06 | 0.04 | -1.11 | 0.020453 | 0.183057 | 0.278215 | 0.459493 |
| MmugDNA.16413.1.S1_at   | MmugDNA.16413.1 | 2.81  | 3.05  | 0.03 | 0.2  | -1.18 | 0.326282 | 0.458836 | 0.653184 | 0.671456 |
| MmugDNA.16414.1.S1_at   | MmugDNA.16414.1 | 7.75  | 6.48  | 0.15 | 0.54 | 2.42  | 0.014323 | 0.006787 | 0.251885 | 0.111388 |
| MmugDNA.35039.1.S1_s_at | MmugDNA.35039.1 | 10.05 | 9.9   | 0.13 | 0.21 | 1.11  | 0.145981 | 0.175772 | 0.511992 | 0.452344 |
| MmugDNA.16416.1.S1_at   | MmugDNA.16416.1 | 4.73  | 4.41  | 0.48 | 0.77 | 1.25  | 0.549486 | 0.229311 | 0.78733  | 0.501527 |
| MmugDNA.16417.1.S1_at   | MmugDNA.16417.1 | 11    | 10.87 | 0.06 | 0.21 | 1.1   | 0.3088   | 0.133187 | 0.641165 | 0.40493  |
| MmugDNA.16418.1.S1_at   | MmugDNA.16418.1 | 4.28  | 4.33  | 0.17 | 0.06 | -1.04 | 0.206312 | 0.24656  | 0.568606 | 0.515917 |
| MmugDNA.16419.1.S1_at   | MmugDNA.16419.1 | 5.08  | 5.18  | 0.17 | 0.02 | -1.07 | 0.663808 | 0.30881  | 0.849135 | 0.56463  |
| MmugDNA.1642.1.S1_at    | MmugDNA.1642.1  | 4.54  | 4.74  | 0.3  | 0.08 | -1.15 | 0.540855 | 0.325234 | 0.782193 | 0.575648 |
| MmugDNA.16422.1.S1_at   | MmugDNA.16422.1 | 6.99  | 7.04  | 0.01 | 0.12 | -1.04 | 0.340182 | 0.36576  | 0.661654 | 0.605685 |
| MmugDNA.16423.1.S1_at   | MmugDNA.16423.1 | 2.47  | 2.67  | 0.12 | 0.08 | -1.15 | 0.332721 | 0.228966 | 0.656938 | 0.501254 |
| MmugDNA.16425.1.S1_at   | MmugDNA.16425.1 | 6.74  | 4.45  | 0.42 | 0.34 | 4.88  | 0.002961 | 0.001952 | 0.170703 | 0.065813 |
| MmugDNA.16428.1.S1_at   | MmugDNA.16428.1 | 4.1   | 4.05  | 0.06 | 0.06 | 1.04  | 0.486197 | 0.206161 | 0.751435 | 0.480351 |
| MmugDNA.16429.1.S1_at   | MmugDNA.16429.1 | 6.9   | 5.73  | 0.41 | 1.01 | 2.25  | 0.550329 | 0.737755 | 0.787834 | 0.848078 |
| MmugDNA.1643.1.S1_at    | MmugDNA.1643.1  | 6.43  | 5.98  | 0.29 | 0.17 | 1.36  | 0.056178 | 0.03666  | 0.386006 | 0.235973 |
| MmugDNA.16430.1.S1_at   | MmugDNA.16430.1 | 2.75  | 2.79  | 0.09 | 0.28 | -1.03 | 0.311013 | 0.360235 | 0.643007 | 0.601283 |
| MmugDNA.16430.1.S1_s_at | MmugDNA.16430.1 | 4.9   | 4.73  | 0    | 0.19 | 1.12  | 0.605837 | 0.76213  | 0.818576 | 0.861653 |
| MmugDNA.16434.1.S1_at   | MmugDNA.16434.1 | 8.96  | 8.57  | 0.19 | 0.35 | 1.31  | 0.130476 | 0.084831 | 0.496851 | 0.336352 |
| MmugDNA.16435.1.S1_at   | MmugDNA.16435.1 | 6.1   | 6.21  | 0.19 | 0.29 | -1.08 | 0.816141 | 0.664493 | 0.92532  | 0.803396 |
| MmugDNA.16436.1.S1_at   | MmugDNA.16436.1 | 6.01  | 5.79  | 0.14 | 0.05 | 1.16  | 0.063893 | 0.116563 | 0.401767 | 0.383705 |
| MmugDNA.16437.1.S1_at   | MmugDNA.16437.1 | 3.44  | 3.49  | 0.15 | 0.26 | -1.04 | 0.996206 | 0.769241 | 0.99849  | 0.866004 |
| MmugDNA.16438.1.S1_at   | MmugDNA.16438.1 | 7.7   | 7.57  | 0.08 | 0.19 | 1.09  | 0.307509 | 0.046463 | 0.640019 | 0.260089 |
| MmugDNA.16439.1.S1_at   | MmugDNA.16439.1 | 6.52  | 6.09  | 0.84 | 0.42 | 1.34  | 0.345283 | 0.412491 | 0.665128 | 0.638915 |

|                         |                 |       |       |      |      |       |          |          |          |          |
|-------------------------|-----------------|-------|-------|------|------|-------|----------|----------|----------|----------|
| MmugDNA.1644.1.S1_at    | MmugDNA.1644.1  | 10    | 9.87  | 0.31 | 0.06 | 1.1   | 0.632597 | 0.513944 | 0.833252 | 0.707322 |
| MmugDNA.16440.1.S1_at   | MmugDNA.16440.1 | 3.58  | 3.57  | 0.1  | 0.19 | 1.01  | 0.866952 | 0.557989 | 0.94691  | 0.735338 |
| MmugDNA.16441.1.S1_at   | MmugDNA.16441.1 | 4.84  | 5     | 0.13 | 0.18 | -1.12 | 0.327996 | 0.633295 | 0.654202 | 0.784071 |
| MmugDNA.16442.1.S1_at   | MmugDNA.16442.1 | 6.14  | 6.02  | 0.35 | 0.09 | 1.08  | 0.653526 | 0.447077 | 0.84417  | 0.663283 |
| MmugDNA.16443.1.S1_at   | MmugDNA.16443.1 | 10.25 | 10.15 | 0.13 | 0.23 | 1.07  | 0.380396 | 0.130421 | 0.687269 | 0.402257 |
| MmugDNA.16444.1.S1_at   | MmugDNA.16444.1 | 6.32  | 4.9   | 0.63 | 0.75 | 2.68  | 0.082339 | 0.056124 | 0.433725 | 0.282786 |
| MmugDNA.16445.1.S1_at   | MmugDNA.16445.1 | 3.51  | 3.82  | 0.83 | 0.2  | -1.25 | 0.715321 | 0.709587 | 0.875005 | 0.831691 |
| MmugDNA.16446.1.S1_at   | MmugDNA.16446.1 | 6.08  | 5.98  | 1.65 | 0.52 | 1.07  | 0.954893 | 0.98424  | 0.983073 | 0.991234 |
| MmugDNA.1645.1.S1_at    | MmugDNA.1645.1  | 5.08  | 6.28  | 0.79 | 0.95 | -2.3  | 0.383594 | 0.124249 | 0.689442 | 0.394547 |
| MmugDNA.16453.1.S1_at   | MmugDNA.16453.1 | 8.51  | 8.99  | 0.05 | 0.06 | -1.39 | 0.000564 | 0.00711  | 0.136818 | 0.113555 |
| MmugDNA.16453.1.S1_s_at | MmugDNA.16453.1 | 6.05  | 6.43  | 0.08 | 0.11 | -1.3  | 0.006021 | 0.118292 | 0.195046 | 0.386305 |
| MmugDNA.16455.1.S1_at   | MmugDNA.16455.1 | 5.7   | 6     | 0.1  | 0.18 | -1.23 | 0.0597   | 0.023685 | 0.39273  | 0.192689 |
| MmugDNA.16456.1.S1_at   | MmugDNA.16456.1 | 7.06  | 6.95  | 0.27 | 0.26 | 1.08  | 0.809606 | 0.506353 | 0.922251 | 0.702371 |
| MmugDNA.16457.1.S1_at   | MmugDNA.16457.1 | 3.07  | 3.1   | 0.69 | 0.61 | -1.02 | 0.97207  | 0.758216 | 0.989324 | 0.859308 |
| MmugDNA.1646.1.S1_at    | MmugDNA.1646.1  | 7.25  | 7.35  | 0.1  | 0.13 | -1.07 | 0.511566 | 0.362291 | 0.765318 | 0.602931 |
| MmugDNA.16460.1.S1_at   | MmugDNA.16460.1 | 6.61  | 6.48  | 0.18 | 0.24 | 1.09  | 0.721411 | 0.611698 | 0.878074 | 0.769516 |
| MmugDNA.16461.1.S1_at   | MmugDNA.16461.1 | 7.42  | 7.79  | 0.29 | 0.34 | -1.29 | 0.255156 | 0.276556 | 0.603094 | 0.540566 |
| MmugDNA.16462.1.S1_at   | MmugDNA.16462.1 | 5.44  | 6.21  | 0.07 | 0.5  | -1.7  | 0.064427 | 0.056252 | 0.402975 | 0.283133 |
| MmugDNA.16463.1.S1_at   | MmugDNA.16463.1 | 7.59  | 7.41  | 0.11 | 0.14 | 1.13  | 0.087017 | 0.006601 | 0.440882 | 0.110088 |
| MmugDNA.16465.1.S1_at   | MmugDNA.16465.1 | 5     | 5     | 0.05 | 0.14 | 1     | 0.314564 | 0.326373 | 0.645928 | 0.57656  |
| MmugDNA.16467.1.S1_at   | MmugDNA.16467.1 | 7.88  | 8.17  | 0.22 | 0.32 | -1.22 | 0.88614  | 0.848269 | 0.954381 | 0.913873 |
| MmugDNA.16468.1.S1_at   | MmugDNA.16468.1 | 6.23  | 6.1   | 0.21 | 0.44 | 1.1   | 0.254172 | 0.33281  | 0.602339 | 0.581217 |
| MmugDNA.1647.1.S1_at    | MmugDNA.1647.1  | 12.31 | 11.24 | 0.1  | 0.76 | 2.11  | 0.072395 | 0.069468 | 0.416971 | 0.309778 |
| MmugDNA.16470.1.S1_at   | MmugDNA.16470.1 | 3.52  | 3.14  | 1.43 | 0.4  | 1.31  | 0.301865 | 0.273355 | 0.636716 | 0.5378   |
| MmugDNA.16471.1.S1_at   | MmugDNA.16471.1 | 6.84  | 8.41  | 0.27 | 0.91 | -2.98 | 0.05273  | 0.043937 | 0.378449 | 0.254098 |
| MmugDNA.41646.1.S1_s_at | MmugDNA.41646.1 | 9.03  | 8.29  | 0.23 | 0.09 | 1.67  | 0.007098 | 0.013293 | 0.20405  | 0.147978 |
| MmugDNA.16473.1.S1_at   | MmugDNA.16473.1 | 5.59  | 5.81  | 0.12 | 0.11 | -1.17 | 0.091951 | 0.269616 | 0.448512 | 0.534868 |
| MmugDNA.16475.1.S1_at   | MmugDNA.16475.1 | 10.2  | 10.15 | 0.36 | 0.1  | 1.03  | 0.956265 | 0.613186 | 0.983483 | 0.770473 |
| MmugDNA.16479.1.S1_at   | MmugDNA.16479.1 | 3.69  | 3.6   | 0.22 | 0.16 | 1.07  | 0.853649 | 0.965795 | 0.940915 | 0.980824 |
| MmugDNA.1648.1.S1_at    | MmugDNA.1648.1  | 8.44  | 9.71  | 0.25 | 0.66 | -2.41 | 0.08987  | 0.084462 | 0.44539  | 0.33582  |
| MmugDNA.16481.1.S1_at   | MmugDNA.16481.1 | 4.98  | 5.14  | 0.07 | 0.18 | -1.12 | 0.18883  | 0.127773 | 0.551869 | 0.398627 |
| MmugDNA.16482.1.S1_at   | MmugDNA.16482.1 | 5.72  | 5.92  | 0.07 | 0.23 | -1.15 | 0.194021 | 0.1674   | 0.557713 | 0.443785 |
| MmugDNA.16483.1.S1_at   | MmugDNA.16483.1 | 4.47  | 4.39  | 0.31 | 0.06 | 1.06  | 0.946568 | 0.304938 | 0.979457 | 0.562064 |
| MmugDNA.16483.1.S1_s_at | MmugDNA.16483.1 | 3.8   | 3.57  | 0.19 | 0.09 | 1.18  | 0.298431 | 0.425304 | 0.633969 | 0.647696 |
| MmugDNA.16485.1.S1_at   | MmugDNA.16485.1 | 5.4   | 4.75  | 0.68 | 0.08 | 1.57  | 0.111361 | 0.205004 | 0.473544 | 0.479296 |
| MmugDNA.16486.1.S1_at   | MmugDNA.16486.1 | 10.41 | 9.77  | 0.17 | 0.26 | 1.56  | 0.053284 | 0.03967  | 0.379884 | 0.244271 |
| MmugDNA.16487.1.S1_at   | MmugDNA.16487.1 | 10.35 | 10.48 | 0.16 | 0.35 | -1.09 | 0.71162  | 0.151043 | 0.873646 | 0.425701 |
| MmugDNA.16488.1.S1_at   | MmugDNA.16488.1 | 10.95 | 10.7  | 0.02 | 0.09 | 1.19  | 0.007225 | 0.00386  | 0.205899 | 0.088378 |
| MmugDNA.16488.1.S1_s_at | MmugDNA.16488.1 | 12.16 | 11.97 | 0.2  | 0.19 | 1.14  | 0.275375 | 0.165296 | 0.617833 | 0.441488 |
| MmugDNA.16489.1.S1_at   | MmugDNA.16489.1 | 8.44  | 10    | 0.15 | 0.67 | -2.94 | 0.010181 | 0.002188 | 0.228247 | 0.0691   |
| MmugDNA.1649.1.S1_at    | MmugDNA.1649.1  | 6.23  | 6.84  | 0.24 | 0.57 | -1.53 | 0.181127 | 0.276387 | 0.545694 | 0.540334 |

|                         |                 |       |       |      |      |       |          |          |          |          |
|-------------------------|-----------------|-------|-------|------|------|-------|----------|----------|----------|----------|
| MmugDNA.16491.1.S1_at   | MmugDNA.16491.1 | 6.15  | 6.66  | 0.96 | 0.35 | -1.42 | 0.145124 | 0.130256 | 0.511224 | 0.402007 |
| MmugDNA.16492.1.S1_at   | MmugDNA.16492.1 | 5.71  | 5.72  | 0.16 | 0.03 | -1.01 | 0.512148 | 0.685829 | 0.765453 | 0.816612 |
| MmugDNA.16494.1.S1_s_at | MmugDNA.16494.1 | 7.82  | 8.12  | 0.23 | 0.54 | -1.23 | 0.444255 | 0.253652 | 0.726881 | 0.521986 |
| MmugDNA.16496.1.S1_at   | MmugDNA.16496.1 | 6.02  | 5.71  | 0.21 | 0.45 | 1.24  | 0.348555 | 0.13304  | 0.667173 | 0.404715 |
| MmugDNA.16498.1.S1_at   | MmugDNA.16498.1 | 5.42  | 5.29  | 0.17 | 0.05 | 1.1   | 0.302661 | 0.328511 | 0.637025 | 0.578137 |
| MmugDNA.16499.1.S1_at   | MmugDNA.16499.1 | 6.26  | 6.42  | 0.03 | 0.06 | -1.12 | 0.018094 | 0.007782 | 0.268759 | 0.117732 |
| MmugDNA.165.1.S1_at     | MmugDNA.165.1   | 4.32  | 4.67  | 0.04 | 0.55 | -1.27 | 0.357421 | 0.549624 | 0.672398 | 0.729956 |
| MmugDNA.16501.1.S1_at   | MmugDNA.16501.1 | 7.5   | 6.87  | 0.44 | 0.94 | 1.54  | 0.69385  | 0.29511  | 0.864268 | 0.554551 |
| MmugDNA.16502.1.S1_at   | MmugDNA.16502.1 | 4.94  | 4.54  | 0.34 | 0.29 | 1.32  | 0.865248 | 0.098704 | 0.94589  | 0.356809 |
| MmugDNA.16503.1.S1_at   | MmugDNA.16503.1 | 3     | 3.11  | 0.04 | 0.26 | -1.08 | 0.47531  | 0.649638 | 0.745706 | 0.795053 |
| MmugDNA.16504.1.S1_at   | MmugDNA.16504.1 | 3.15  | 3.08  | 0.15 | 0    | 1.05  | 0.275623 | 0.021545 | 0.617878 | 0.183828 |
| MmugDNA.16505.1.S1_at   | MmugDNA.16505.1 | 7.74  | 7.27  | 1.24 | 2.23 | 1.39  | 0.577674 | 0.140097 | 0.803559 | 0.413394 |
| MmugDNA.16506.1.S1_at   | MmugDNA.16506.1 | 6.3   | 6.32  | 0.12 | 0.04 | -1.02 | 0.603456 | 0.414149 | 0.817154 | 0.640063 |
| MmugDNA.16507.1.S1_at   | MmugDNA.16507.1 | 6.32  | 6.03  | 0.15 | 0.61 | 1.22  | 0.881269 | 0.962153 | 0.95225  | 0.978723 |
| MmugDNA.16508.1.S1_at   | MmugDNA.16508.1 | 6.18  | 6.16  | 0.48 | 0.24 | 1.01  | 0.905042 | 0.052325 | 0.962071 | 0.274201 |
| MmugDNA.16509.1.S1_at   | MmugDNA.16509.1 | 6     | 6.02  | 0.46 | 0.06 | -1.01 | 0.859279 | 0.92488  | 0.943167 | 0.9575   |
| MmugDNA.16510.1.S1_at   | MmugDNA.16510.1 | 4.08  | 4.03  | 0    | 0.26 | 1.04  | 0.555009 | 0.55152  | 0.791149 | 0.731023 |
| MmugDNA.16511.1.S1_at   | MmugDNA.16511.1 | 9.85  | 9.69  | 0.27 | 0.11 | 1.11  | 0.443648 | 0.484226 | 0.726292 | 0.688408 |
| MmugDNA.16512.1.S1_at   | MmugDNA.16512.1 | 4.5   | 4.78  | 0.32 | 0.32 | -1.21 | 0.70657  | 0.104923 | 0.870731 | 0.366485 |
| MmugDNA.16513.1.S1_at   | MmugDNA.16513.1 | 6.42  | 6.42  | 0.46 | 0.06 | -1    | 0.369427 | 0.494258 | 0.680714 | 0.694771 |
| MmugDNA.16514.1.S1_at   | MmugDNA.16514.1 | 4.86  | 4.75  | 0.18 | 0.13 | 1.08  | 0.898164 | 0.088195 | 0.959278 | 0.341721 |
| MmugDNA.16515.1.S1_at   | MmugDNA.16515.1 | 3.19  | 3.1   | 0.35 | 0.3  | 1.06  | 0.724963 | 0.870564 | 0.879971 | 0.926446 |
| MmugDNA.16516.1.S1_x_at | MmugDNA.16516.1 | 12.86 | 12.69 | 0.38 | 0.12 | 1.13  | 0.194936 | 0.251111 | 0.558521 | 0.519792 |
| MmugDNA.16517.1.S1_at   | MmugDNA.16517.1 | 9.21  | 10.16 | 0.16 | 0.42 | -1.94 | 0.015588 | 0.007228 | 0.259345 | 0.114199 |
| MmugDNA.16518.1.S1_at   | MmugDNA.16518.1 | 7.45  | 7.72  | 0.6  | 0.37 | -1.21 | 0.376227 | 0.418931 | 0.685066 | 0.643157 |
| MmugDNA.16519.1.S1_at   | MmugDNA.16519.1 | 6     | 5.75  | 0.55 | 0.57 | 1.19  | 0.753569 | 0.204262 | 0.894902 | 0.478541 |
| MmugDNA.1652.1.S1_at    | MmugDNA.1652.1  | 3.36  | 3.26  | 0.15 | 0.09 | 1.07  | 0.683638 | 0.84235  | 0.85844  | 0.910241 |
| MmugDNA.16521.1.S1_at   | MmugDNA.16521.1 | 5.27  | 5.41  | 0.1  | 0.33 | -1.11 | 0.951122 | 0.459939 | 0.981611 | 0.671989 |
| MmugDNA.16522.1.S1_at   | MmugDNA.16522.1 | 5.28  | 5.4   | 0.14 | 0.14 | -1.08 | 0.814278 | 0.941993 | 0.924743 | 0.96711  |
| MmugDNA.16523.1.S1_at   | MmugDNA.16523.1 | 3.79  | 3.8   | 0.15 | 0.4  | -1    | 0.260298 | 0.520574 | 0.607093 | 0.711831 |
| MmugDNA.16524.1.S1_at   | MmugDNA.16524.1 | 6.62  | 6.66  | 0.3  | 0.06 | -1.03 | 0.964458 | 0.374761 | 0.986234 | 0.613063 |
| MmugDNA.17744.1.S1_at   | MmugDNA.17744.1 | 7.48  | 7.1   | 0.09 | 0.05 | 1.3   | 0.002457 | 0.000693 | 0.163555 | 0.044166 |
| MmugDNA.17744.1.S1_s_at | MmugDNA.17744.1 | 7.23  | 7.07  | 0.04 | 0.12 | 1.11  | 0.321457 | 0.114393 | 0.650183 | 0.380938 |
| MmugDNA.16526.1.S1_at   | MmugDNA.16526.1 | 5.92  | 6.16  | 0.1  | 0.17 | -1.18 | 0.1866   | 0.465563 | 0.550106 | 0.675811 |
| MmugDNA.16527.1.S1_at   | MmugDNA.16527.1 | 4.13  | 4.16  | 1.21 | 0.13 | -1.02 | 0.399043 | 0.442945 | 0.699064 | 0.660842 |
| MmugDNA.16528.1.S1_at   | MmugDNA.16528.1 | 3.33  | 3.36  | 0    | 0.04 | -1.02 | 0.422348 | 0.258984 | 0.71345  | 0.5262   |
| MmugDNA.16531.1.S1_at   | MmugDNA.16531.1 | 6.46  | 6.58  | 0.14 | 0.09 | -1.09 | 0.963426 | 0.191519 | 0.985955 | 0.466833 |
| MmugDNA.16532.1.S1_at   | MmugDNA.16532.1 | 4.23  | 4.37  | 0.07 | 0.15 | -1.1  | 0.663223 | 0.114    | 0.848941 | 0.380349 |
| MmugDNA.16533.1.S1_at   | MmugDNA.16533.1 | 9.31  | 8.78  | 0.22 | 0.18 | 1.44  | 0.039036 | 0.014892 | 0.346242 | 0.1551   |
| MmugDNA.16534.1.S1_at   | MmugDNA.16534.1 | 11.49 | 10.93 | 0.27 | 0.39 | 1.47  | 0.027597 | 0.019436 | 0.308386 | 0.175133 |
| MmugDNA.16535.1.S1_at   | MmugDNA.16535.1 | 4.62  | 4.48  | 0.31 | 0.37 | 1.11  | 0.784338 | 0.205518 | 0.910118 | 0.479794 |



|                         |                 |       |       |      |      |       |          |          |          |          |
|-------------------------|-----------------|-------|-------|------|------|-------|----------|----------|----------|----------|
| MmugDNA.16536.1.S1_at   | MmugDNA.16536.1 | 8.42  | 10.02 | 0.54 | 0.68 | -3.03 | 0.057499 | 0.037844 | 0.388505 | 0.238912 |
| MmugDNA.16537.1.S1_at   | MmugDNA.16537.1 | 6.46  | 6.35  | 0.03 | 0.21 | 1.07  | 0.334861 | 0.451887 | 0.658572 | 0.666676 |
| MmugDNA.9780.1.S1_s_at  | MmugDNA.9780.1  | 10.51 | 11.09 | 0.13 | 0.03 | -1.5  | 0.001467 | 0.000295 | 0.150304 | 0.034892 |
| MmugDNA.41245.1.S1_at   | MmugDNA.41245.1 | 5.36  | 5.57  | 0.07 | 0.26 | -1.16 | 0.145019 | 0.346162 | 0.511188 | 0.591195 |
| MmugDNA.41245.1.S1_s_at | MmugDNA.41245.1 | 10.62 | 10.72 | 0.09 | 0.37 | -1.07 | 0.382484 | 0.312009 | 0.688742 | 0.566838 |
| MmugDNA.1654.1.S1_at    | MmugDNA.1654.1  | 3.28  | 2.72  | 0.61 | 0.09 | 1.48  | 0.171728 | 0.201885 | 0.535284 | 0.476373 |
| MmugDNA.16540.1.S1_at   | MmugDNA.16540.1 | 5.71  | 6.27  | 1.27 | 0.2  | -1.47 | 0.94004  | 0.912969 | 0.977175 | 0.951043 |
| MmugDNA.16542.1.S1_at   | MmugDNA.16542.1 | 4     | 5.49  | 0.05 | 1.26 | -2.81 | 0.05047  | 0.04055  | 0.374363 | 0.246264 |
| MmugDNA.16543.1.S1_x_at | MmugDNA.16543.1 | 13.06 | 12.89 | 0.48 | 0.2  | 1.13  | 0.180474 | 0.237164 | 0.544821 | 0.507906 |
| MmugDNA.16544.1.S1_at   | MmugDNA.16544.1 | 6.1   | 5.73  | 0.14 | 0.27 | 1.3   | 0.078728 | 0.340371 | 0.428609 | 0.586725 |
| MmugDNA.16545.1.S1_at   | MmugDNA.16545.1 | 6.89  | 7.1   | 0.2  | 0.01 | -1.16 | 0.12894  | 0.160662 | 0.494943 | 0.436745 |
| MmugDNA.16546.1.S1_at   | MmugDNA.16546.1 | 8.41  | 8.72  | 0.65 | 0.53 | -1.24 | 0.19391  | 0.139062 | 0.557547 | 0.412165 |
| MmugDNA.16547.1.S1_at   | MmugDNA.16547.1 | 8.62  | 8.71  | 0.17 | 0.42 | -1.06 | 0.691329 | 0.321174 | 0.862672 | 0.573111 |
| MmugDNA.16548.1.S1_at   | MmugDNA.16548.1 | 3.37  | 3.87  | 0.42 | 1.13 | -1.41 | 0.424783 | 0.603034 | 0.714778 | 0.763871 |
| MmugDNA.16549.1.S1_at   | MmugDNA.16549.1 | 6.18  | 5.77  | 0.4  | 0.24 | 1.33  | 0.361657 | 0.11398  | 0.6754   | 0.380304 |
| MmugDNA.1655.1.S1_at    | MmugDNA.1655.1  | 4.76  | 4.36  | 0.73 | 0.04 | 1.32  | 0.353346 | 0.112434 | 0.670121 | 0.377784 |
| MmugDNA.16550.1.S1_at   | MmugDNA.16550.1 | 7.28  | 5.79  | 0.9  | 0.81 | 2.81  | 0.25285  | 0.315752 | 0.601608 | 0.569157 |
| MmugDNA.16551.1.S1_at   | MmugDNA.16551.1 | 3.47  | 3.6   | 0.41 | 0.13 | -1.1  | 0.887472 | 0.980577 | 0.954863 | 0.989391 |
| MmugDNA.16552.1.S1_x_at | MmugDNA.16552.1 | 9.8   | 10.14 | 0.41 | 0.29 | -1.27 | 0.844647 | 0.903187 | 0.93762  | 0.944982 |
| MmugDNA.16553.1.S1_at   | MmugDNA.16553.1 | 2.98  | 2.89  | 0.17 | 0.06 | 1.07  | 0.362678 | 0.57819  | 0.676176 | 0.748359 |
| MmugDNA.16555.1.S1_at   | MmugDNA.16555.1 | 7.22  | 9.53  | 1.15 | 1.6  | -4.95 | 0.186718 | 0.149867 | 0.550106 | 0.424468 |
| MmugDNA.16557.1.S1_at   | MmugDNA.16557.1 | 6.64  | 6.76  | 0.23 | 0.03 | -1.08 | 0.672586 | 0.847706 | 0.853193 | 0.913501 |
| MmugDNA.16559.1.S1_at   | MmugDNA.16559.1 | 5.63  | 6.02  | 0.07 | 0.47 | -1.31 | 0.1758   | 0.22171  | 0.539441 | 0.494901 |
| MmugDNA.16561.1.S1_at   | MmugDNA.16561.1 | 4.05  | 4.27  | 0.3  | 0.25 | -1.16 | 0.658056 | 0.868325 | 0.846303 | 0.925242 |
| MmugDNA.16562.1.S1_at   | MmugDNA.16562.1 | 5.38  | 5.1   | 0.07 | 0.07 | 1.21  | 0.006832 | 0.126583 | 0.201708 | 0.397211 |
| MmugDNA.16564.1.S1_at   | MmugDNA.16564.1 | 5.07  | 5.11  | 0.52 | 0.05 | -1.03 | 0.422551 | 0.465664 | 0.713604 | 0.675863 |
| MmugDNA.16565.1.S1_at   | MmugDNA.16565.1 | 5.72  | 6.09  | 0.11 | 0.18 | -1.28 | 0.037808 | 0.069463 | 0.342982 | 0.309778 |
| MmugDNA.16566.1.S1_at   | MmugDNA.16566.1 | 5.04  | 5.15  | 0.4  | 0.13 | -1.07 | 0.569288 | 0.625421 | 0.79903  | 0.779175 |
| MmugDNA.16567.1.S1_at   | MmugDNA.16567.1 | 7.11  | 7.11  | 0.05 | 0.21 | 1     | 0.293203 | 0.22148  | 0.630314 | 0.494795 |
| MmugDNA.16568.1.S1_at   | MmugDNA.16568.1 | 5.38  | 6.13  | 0.68 | 0.06 | -1.68 | 0.232972 | 0.089497 | 0.587954 | 0.343811 |
| MmugDNA.16569.1.S1_s_at | MmugDNA.16569.1 | 10.21 | 10.03 | 0.11 | 0.41 | 1.13  | 0.263953 | 0.394923 | 0.609765 | 0.627216 |
| MmugDNA.1657.1.S1_at    | MmugDNA.1657.1  | 3.28  | 3.36  | 0.07 | 0.14 | -1.06 | 0.577317 | 0.824629 | 0.803468 | 0.899309 |
| MmugDNA.16570.1.S1_at   | MmugDNA.16570.1 | 8.35  | 7.93  | 0.19 | 0.05 | 1.34  | 0.013633 | 0.015295 | 0.248684 | 0.157071 |
| MmugDNA.16571.1.S1_at   | MmugDNA.16571.1 | 4.87  | 4.72  | 0.1  | 0.22 | 1.11  | 0.293057 | 0.1204   | 0.630264 | 0.38925  |
| MmugDNA.16572.1.S1_at   | MmugDNA.16572.1 | 11.01 | 12.75 | 0.32 | 0.35 | -3.34 | 0.005399 | 0.002621 | 0.191107 | 0.075772 |
| MmugDNA.16573.1.S1_s_at | MmugDNA.16573.1 | 11.77 | 13.19 | 0.78 | 0.89 | -2.68 | 0.120993 | 0.075083 | 0.48574  | 0.319283 |
| MmugDNA.16574.1.S1_at   | MmugDNA.16574.1 | 5.82  | 6.74  | 0.67 | 1    | -1.9  | 0.134356 | 0.146525 | 0.500923 | 0.420581 |
| MmugDNA.16576.1.S1_at   | MmugDNA.16576.1 | 8.43  | 9.26  | 0.47 | 0.42 | -1.78 | 0.027016 | 0.017629 | 0.305887 | 0.167839 |
| MmugDNA.16576.1.S1_s_at | MmugDNA.16576.1 | 7.85  | 8.86  | 0.51 | 0.46 | -2.02 | 0.024876 | 0.012715 | 0.296896 | 0.145369 |
| MmugDNA.16577.1.S1_at   | MmugDNA.16577.1 | 3.94  | 4     | 0.1  | 0.03 | -1.04 | 0.441277 | 0.308305 | 0.724743 | 0.564425 |
| MmugDNA.16578.1.S1_at   | MmugDNA.16578.1 | 3.9   | 4.19  | 0.33 | 0.24 | -1.23 | 0.685241 | 0.898042 | 0.858887 | 0.941946 |

|                         |                 |       |       |      |      |       |          |          |          |          |
|-------------------------|-----------------|-------|-------|------|------|-------|----------|----------|----------|----------|
| MmugDNA.1658.1.S1_at    | MmugDNA.1658.1  | 12.2  | 12.47 | 0.05 | 0.23 | -1.21 | 0.351553 | 0.440991 | 0.669126 | 0.659248 |
| MmugDNA.16580.1.S1_at   | MmugDNA.16580.1 | 6.38  | 5.54  | 0.97 | 0.89 | 1.79  | 0.375691 | 0.457364 | 0.684803 | 0.670806 |
| MmugDNA.16581.1.S1_at   | MmugDNA.16581.1 | 13.15 | 12.92 | 0.07 | 0.45 | 1.17  | 0.135077 | 0.136972 | 0.501995 | 0.409769 |
| MmugDNA.16583.1.S1_at   | MmugDNA.16583.1 | 3.65  | 3.93  | 0.41 | 0.32 | -1.22 | 0.386702 | 0.625196 | 0.691563 | 0.779045 |
| MmugDNA.16584.1.S1_at   | MmugDNA.16584.1 | 5.4   | 5.71  | 0.17 | 0.23 | -1.24 | 0.040973 | 0.067459 | 0.35051  | 0.305749 |
| MmugDNA.16585.1.S1_at   | MmugDNA.16585.1 | 6.17  | 5.96  | 0.13 | 0.09 | 1.16  | 0.096918 | 0.124032 | 0.455899 | 0.39431  |
| MmugDNA.16587.1.S1_at   | MmugDNA.16587.1 | 3.63  | 3.66  | 0.13 | 0.21 | -1.02 | 0.748193 | 0.658841 | 0.892306 | 0.800473 |
| MmugDNA.16588.1.S1_at   | MmugDNA.16588.1 | 5.13  | 5.19  | 0.04 | 0.15 | -1.04 | 0.222545 | 0.209478 | 0.580951 | 0.483118 |
| MmugDNA.16589.1.S1_at   | MmugDNA.16589.1 | 8.21  | 7.69  | 0.11 | 0.46 | 1.43  | 0.11533  | 0.169597 | 0.478773 | 0.446204 |
| MmugDNA.1659.1.S1_at    | MmugDNA.1659.1  | 5.49  | 5.13  | 0.79 | 0.18 | 1.28  | 0.280336 | 0.2754   | 0.621539 | 0.539663 |
| MmugDNA.16590.1.S1_at   | MmugDNA.16590.1 | 4.31  | 5.48  | 0.34 | 1.57 | -2.25 | 0.249876 | 0.329065 | 0.600389 | 0.578482 |
| MmugDNA.16591.1.S1_at   | MmugDNA.16591.1 | 11.42 | 11.81 | 0.08 | 0.43 | -1.32 | 0.468847 | 0.539639 | 0.741287 | 0.723878 |
| MmugDNA.16592.1.S1_at   | MmugDNA.16592.1 | 6.4   | 6.45  | 0.23 | 0.03 | -1.03 | 0.826171 | 0.743355 | 0.929365 | 0.85129  |
| MmugDNA.16594.1.S1_at   | MmugDNA.16594.1 | 5.09  | 5.18  | 0.08 | 0.25 | -1.06 | 0.377926 | 0.496313 | 0.686212 | 0.695976 |
| MmugDNA.16595.1.S1_at   | MmugDNA.16595.1 | 7.45  | 7.71  | 0.17 | 0.14 | -1.19 | 0.098718 | 0.071834 | 0.458569 | 0.314082 |
| MmugDNA.16596.1.S1_at   | MmugDNA.16596.1 | 6.41  | 6.78  | 0.34 | 0.1  | -1.29 | 0.170319 | 0.149946 | 0.534249 | 0.424602 |
| MmugDNA.16598.1.S1_at   | MmugDNA.16598.1 | 5.5   | 5.43  | 0.1  | 0    | 1.05  | 0.426945 | 0.117871 | 0.716003 | 0.38579  |
| MmugDNA.16598.1.S1_s_at | MmugDNA.16598.1 | 4.08  | 4.09  | 0    | 0.22 | -1.01 | 0.99659  | 0.573689 | 0.998586 | 0.745252 |
| MmugDNA.16599.1.S1_at   | MmugDNA.16599.1 | 11.08 | 10.37 | 0.6  | 0.3  | 1.64  | 0.237616 | 0.311634 | 0.591146 | 0.566602 |
| MmugDNA.166.1.S1_at     | MmugDNA.166.1   | 5.52  | 5.35  | 0.07 | 0.17 | 1.12  | 0.172867 | 0.207668 | 0.536501 | 0.481906 |
| MmugDNA.1660.1.S1_at    | MmugDNA.1660.1  | 3.59  | 3.55  | 0.54 | 0.11 | 1.03  | 0.33014  | 0.351567 | 0.655613 | 0.595101 |
| MmugDNA.16600.1.S1_at   | MmugDNA.16600.1 | 12.6  | 12.83 | 0.13 | 0.12 | -1.17 | 0.15129  | 0.14013  | 0.516026 | 0.413394 |
| MmugDNA.16601.1.S1_at   | MmugDNA.16601.1 | 10.36 | 10.54 | 0.26 | 0.35 | -1.14 | 0.397483 | 0.509086 | 0.697942 | 0.703993 |
| MmugDNA.16602.1.S1_at   | MmugDNA.16602.1 | 9.87  | 9.28  | 0.04 | 0.53 | 1.5   | 0.127454 | 0.106435 | 0.493834 | 0.368986 |
| MmugDNA.16604.1.S1_at   | MmugDNA.16604.1 | 8.38  | 8.34  | 0.5  | 0.5  | 1.03  | 0.755061 | 0.508725 | 0.895855 | 0.703792 |
| MmugDNA.16605.1.S1_at   | MmugDNA.16605.1 | 7.17  | 7.23  | 0.14 | 0.07 | -1.05 | 0.309301 | 0.258285 | 0.641425 | 0.525596 |
| MmugDNA.16606.1.S1_s_at | MmugDNA.16606.1 | 9.66  | 9.63  | 0.16 | 0.23 | 1.02  | 0.985159 | 0.700061 | 0.99475  | 0.825946 |
| MmugDNA.16607.1.S1_at   | MmugDNA.16607.1 | 10.95 | 11.02 | 0.14 | 0.21 | -1.06 | 0.239787 | 0.319372 | 0.592769 | 0.571724 |
| MmugDNA.16609.1.S1_at   | MmugDNA.16609.1 | 6.62  | 7.27  | 0.44 | 0.76 | -1.58 | 0.29522  | 0.307263 | 0.631561 | 0.56352  |
| MmugDNA.16611.1.S1_at   | MmugDNA.16611.1 | 4.75  | 4.59  | 0.29 | 0.12 | 1.12  | 0.879149 | 0.434601 | 0.951481 | 0.654747 |
| MmugDNA.16612.1.S1_at   | MmugDNA.16612.1 | 6.12  | 6.27  | 0.13 | 0.14 | -1.11 | 0.539025 | 0.10617  | 0.780929 | 0.36856  |
| MmugDNA.16613.1.S1_at   | MmugDNA.16613.1 | 4     | 3.82  | 0.42 | 0.11 | 1.13  | 0.231232 | 0.286699 | 0.587369 | 0.548077 |
| MmugDNA.16615.1.S1_at   | MmugDNA.16615.1 | 5.18  | 4.68  | 0.22 | 0.06 | 1.41  | 0.051186 | 0.028885 | 0.375985 | 0.211763 |
| MmugDNA.16616.1.S1_at   | MmugDNA.16616.1 | 6.09  | 6.12  | 0.89 | 0.44 | -1.02 | 0.239868 | 0.378305 | 0.592803 | 0.615438 |
| MmugDNA.16618.1.S1_at   | MmugDNA.16618.1 | 3.86  | 3.87  | 0.07 | 0.06 | -1.01 | 0.875457 | 0.988029 | 0.950076 | 0.993307 |
| MmugDNA.16619.1.S1_at   | MmugDNA.16619.1 | 3.95  | 4     | 0.07 | 0.05 | -1.04 | 0.351384 | 0.157305 | 0.669126 | 0.432782 |
| MmugDNA.1662.1.S1_at    | MmugDNA.1662.1  | 10.73 | 11.03 | 0.1  | 0.14 | -1.24 | 0.028645 | 0.002374 | 0.312031 | 0.072006 |
| MmugDNA.16621.1.S1_at   | MmugDNA.16621.1 | 4.03  | 4.03  | 0.25 | 0.09 | 1     | 0.869841 | 0.917242 | 0.947917 | 0.953758 |
| MmugDNA.16622.1.S1_at   | MmugDNA.16622.1 | 4.19  | 4.12  | 0.55 | 0.33 | 1.05  | 0.57842  | 0.60084  | 0.803822 | 0.762334 |
| MmugDNA.16623.1.S1_at   | MmugDNA.16623.1 | 5.6   | 5.26  | 0.63 | 0.59 | 1.26  | 0.558832 | 0.46596  | 0.793517 | 0.676055 |
| MmugDNA.16624.1.S1_at   | MmugDNA.16624.1 | 5.02  | 5.05  | 0.08 | 0.19 | -1.02 | 0.244503 | 0.241946 | 0.596252 | 0.512489 |

|                         |                 |       |       |      |      |       |          |          |          |          |
|-------------------------|-----------------|-------|-------|------|------|-------|----------|----------|----------|----------|
| MmugDNA.16627.1.S1_at   | MmugDNA.16627.1 | 4.34  | 4.5   | 0.07 | 0.1  | -1.12 | 0.020475 | 0.006379 | 0.278215 | 0.108551 |
| MmugDNA.16628.1.S1_at   | MmugDNA.16628.1 | 7.1   | 7.01  | 0.17 | 1.06 | 1.06  | 0.904724 | 0.532093 | 0.961893 | 0.718995 |
| MmugDNA.16629.1.S1_at   | MmugDNA.16629.1 | 9.3   | 9.23  | 0.09 | 0.25 | 1.05  | 0.713452 | 0.883196 | 0.874503 | 0.933411 |
| MmugDNA.1663.1.S1_at    | MmugDNA.1663.1  | 8.13  | 7.87  | 0.05 | 0.09 | 1.19  | 0.009326 | 0.002198 | 0.223892 | 0.069235 |
| MmugDNA.16630.1.S1_at   | MmugDNA.16630.1 | 4.35  | 4.75  | 0.26 | 0.23 | -1.32 | 0.055179 | 0.045403 | 0.383618 | 0.257427 |
| MmugDNA.16631.1.S1_at   | MmugDNA.16631.1 | 4.4   | 4.58  | 0.08 | 0.02 | -1.13 | 0.071099 | 0.193565 | 0.414673 | 0.468785 |
| MmugDNA.16632.1.S1_at   | MmugDNA.16632.1 | 8.74  | 8.03  | 0.25 | 0.49 | 1.63  | 0.068272 | 0.066545 | 0.409933 | 0.303711 |
| MmugDNA.16633.1.S1_at   | MmugDNA.16633.1 | 5.56  | 5.72  | 0.21 | 0.18 | -1.11 | 0.820395 | 0.432194 | 0.926891 | 0.652775 |
| MmugDNA.16634.1.S1_at   | MmugDNA.16634.1 | 3.83  | 3.39  | 0.52 | 0.41 | 1.36  | 0.064663 | 0.087869 | 0.403239 | 0.341233 |
| MmugDNA.16635.1.S1_at   | MmugDNA.16635.1 | 3.35  | 3.79  | 0.2  | 0.41 | -1.36 | 0.315706 | 0.390807 | 0.646695 | 0.624547 |
| MmugDNA.16636.1.S1_at   | MmugDNA.16636.1 | 6.3   | 6.51  | 0.19 | 0.15 | -1.16 | 0.247971 | 0.274613 | 0.599052 | 0.539059 |
| MmugDNA.16637.1.S1_at   | MmugDNA.16637.1 | 5.4   | 5.8   | 0.29 | 0.25 | -1.31 | 0.3549   | 0.448583 | 0.670686 | 0.664435 |
| MmugDNA.16638.1.S1_at   | MmugDNA.16638.1 | 5.95  | 5.88  | 0.37 | 0.42 | 1.05  | 0.414565 | 0.485311 | 0.709338 | 0.689049 |
| MmugDNA.16639.1.S1_at   | MmugDNA.16639.1 | 6.91  | 6.08  | 0.47 | 0.27 | 1.77  | 0.056568 | 0.043602 | 0.386709 | 0.253495 |
| MmugDNA.1664.1.S1_at    | MmugDNA.1664.1  | 4.82  | 5.11  | 0.25 | 0.24 | -1.22 | 0.101413 | 0.148569 | 0.461313 | 0.423127 |
| MmugDNA.16640.1.S1_at   | MmugDNA.16640.1 | 7.79  | 8.02  | 0.68 | 0.26 | -1.17 | 0.8459   | 0.575765 | 0.938188 | 0.746758 |
| MmugDNA.16641.1.S1_at   | MmugDNA.16641.1 | 4.24  | 4.25  | 0.16 | 0.01 | -1.01 | 0.776896 | 0.535198 | 0.906596 | 0.720821 |
| MmugDNA.16642.1.S1_at   | MmugDNA.16642.1 | 12    | 11.6  | 0.13 | 0.2  | 1.32  | 0.031705 | 0.022834 | 0.322685 | 0.189246 |
| MmugDNA.16644.1.S1_at   | MmugDNA.16644.1 | 5.8   | 5.57  | 0.33 | 0.2  | 1.18  | 0.398204 | 0.514696 | 0.698574 | 0.707841 |
| MmugDNA.16646.1.S1_at   | MmugDNA.16646.1 | 8.84  | 9.22  | 0.27 | 0.59 | -1.3  | 0.469608 | 0.458616 | 0.74181  | 0.671246 |
| MmugDNA.16647.1.S1_at   | MmugDNA.16647.1 | 5.96  | 5.76  | 0.11 | 0.25 | 1.15  | 0.285374 | 0.313537 | 0.624864 | 0.56796  |
| MmugDNA.16648.1.S1_at   | MmugDNA.16648.1 | 5.78  | 5.7   | 0.11 | 0.11 | 1.06  | 0.504166 | 0.222687 | 0.761159 | 0.495617 |
| MmugDNA.1665.1.S1_at    | MmugDNA.1665.1  | 3.79  | 3.77  | 0.05 | 0.12 | 1.01  | 0.668751 | 0.693109 | 0.851986 | 0.821479 |
| MmugDNA.16650.1.S1_at   | MmugDNA.16650.1 | 5.81  | 5.83  | 0.36 | 0.28 | -1.01 | 0.686656 | 0.845314 | 0.859865 | 0.911994 |
| MmugDNA.16651.1.S1_at   | MmugDNA.16651.1 | 5.65  | 5.2   | 0.49 | 0.44 | 1.36  | 0.290363 | 0.351739 | 0.628091 | 0.595164 |
| MmugDNA.16652.1.S1_at   | MmugDNA.16652.1 | 4.8   | 4.83  | 0.08 | 0.07 | -1.02 | 0.760465 | 0.481252 | 0.899008 | 0.686318 |
| MmugDNA.16653.1.S1_at   | MmugDNA.16653.1 | 3.94  | 3.7   | 0.25 | 0.42 | 1.18  | 0.638045 | 0.796346 | 0.83648  | 0.882625 |
| MmugDNA.16654.1.S1_at   | MmugDNA.16654.1 | 3.91  | 4.1   | 0.18 | 0.12 | -1.13 | 0.379484 | 0.107869 | 0.687035 | 0.370945 |
| MmugDNA.16655.1.S1_at   | MmugDNA.16655.1 | 3.86  | 3.49  | 0.98 | 0.21 | 1.3   | 0.446885 | 0.659257 | 0.728666 | 0.80063  |
| MmugDNA.16656.1.S1_at   | MmugDNA.16656.1 | 12.06 | 12.15 | 0.09 | 0.21 | -1.07 | 0.359337 | 0.22762  | 0.673869 | 0.499898 |
| MmugDNA.16658.1.S1_at   | MmugDNA.16658.1 | 4.98  | 5.23  | 0.19 | 0.37 | -1.19 | 0.780561 | 0.807355 | 0.90855  | 0.889109 |
| MmugDNA.16659.1.S1_at   | MmugDNA.16659.1 | 3.22  | 3.09  | 0.15 | 0.14 | 1.09  | 0.154786 | 0.167574 | 0.519343 | 0.443998 |
| MmugDNA.1666.1.S1_at    | MmugDNA.1666.1  | 4.24  | 4.26  | 0.06 | 0.43 | -1.01 | 0.417565 | 0.520095 | 0.710593 | 0.711472 |
| MmugDNA.16660.1.S1_at   | MmugDNA.16660.1 | 3.12  | 3.07  | 0.09 | 0.07 | 1.04  | 0.521186 | 0.33134  | 0.771131 | 0.58006  |
| MmugDNA.16661.1.S1_at   | MmugDNA.16661.1 | 3.49  | 3.5   | 0.3  | 0.2  | -1.01 | 0.796156 | 0.900773 | 0.915412 | 0.943556 |
| MmugDNA.16662.1.S1_at   | MmugDNA.16662.1 | 3.06  | 3.3   | 0.19 | 0.1  | -1.18 | 0.430064 | 0.544995 | 0.717906 | 0.727256 |
| MmugDNA.16664.1.S1_at   | MmugDNA.16664.1 | 4.99  | 4.92  | 0.31 | 0.19 | 1.05  | 0.434412 | 0.58871  | 0.720416 | 0.755137 |
| MmugDNA.16665.1.S1_s_at | MmugDNA.16665.1 | 4.32  | 4.28  | 0.09 | 0.07 | 1.02  | 0.681916 | 0.551186 | 0.857635 | 0.730837 |
| MmugDNA.16666.1.S1_at   | MmugDNA.16666.1 | 3.61  | 3.35  | 0.05 | 0.42 | 1.2   | 0.108481 | 0.056647 | 0.469802 | 0.284094 |
| MmugDNA.16667.1.S1_at   | MmugDNA.16667.1 | 3.03  | 3.02  | 0.06 | 0.39 | 1.01  | 0.414626 | 0.516285 | 0.709338 | 0.708827 |
| MmugDNA.16669.1.S1_at   | MmugDNA.16669.1 | 5.33  | 5.55  | 0.06 | 0.22 | -1.17 | 0.135097 | 0.17785  | 0.501995 | 0.454167 |

|                         |                 |       |       |      |      |       |          |          |          |          |
|-------------------------|-----------------|-------|-------|------|------|-------|----------|----------|----------|----------|
| MmugDNA.16670.1.S1_at   | MmugDNA.16670.1 | 9.05  | 8.4   | 0.13 | 0.23 | 1.58  | 0.006058 | 0.003755 | 0.195337 | 0.087343 |
| MmugDNA.16671.1.S1_at   | MmugDNA.16671.1 | 7.39  | 7.47  | 0.18 | 0.04 | -1.06 | 0.88213  | 0.905115 | 0.952682 | 0.94617  |
| MmugDNA.16673.1.S1_at   | MmugDNA.16673.1 | 4.18  | 4.08  | 0.16 | 0.15 | 1.07  | 0.27684  | 0.016001 | 0.619005 | 0.160458 |
| MmugDNA.16674.1.S1_at   | MmugDNA.16674.1 | 3.75  | 3.81  | 0.33 | 0.07 | -1.04 | 0.443874 | 0.310453 | 0.726463 | 0.565661 |
| MmugDNA.16675.1.S1_at   | MmugDNA.16675.1 | 4.87  | 5.07  | 0.14 | 0.26 | -1.15 | 0.89963  | 0.865509 | 0.959901 | 0.923598 |
| MmugDNA.16678.1.S1_at   | MmugDNA.16678.1 | 8.28  | 8.69  | 0.34 | 0.67 | -1.33 | 0.301645 | 0.406154 | 0.63652  | 0.634211 |
| MmugDNA.16679.1.S1_x_at | MmugDNA.16679.1 | 6.51  | 6.53  | 0.56 | 0.24 | -1.01 | 0.459789 | 0.549462 | 0.736501 | 0.729879 |
| MmugDNA.16681.1.S1_at   | MmugDNA.16681.1 | 6.34  | 5.89  | 0.7  | 0.08 | 1.36  | 0.242656 | 0.310971 | 0.594467 | 0.565962 |
| MmugDNA.16682.1.S1_at   | MmugDNA.16682.1 | 6.53  | 6.38  | 0.51 | 0.75 | 1.11  | 0.571871 | 0.302433 | 0.800401 | 0.560109 |
| MmugDNA.16684.1.S1_at   | MmugDNA.16684.1 | 11.3  | 11.6  | 0.18 | 0.15 | -1.23 | 0.230727 | 0.246283 | 0.587231 | 0.515889 |
| MmugDNA.16685.1.S1_at   | MmugDNA.16685.1 | 10.19 | 10.53 | 0.21 | 0.01 | -1.26 | 0.045559 | 0.027977 | 0.36126  | 0.208777 |
| MmugDNA.16687.1.S1_at   | MmugDNA.16687.1 | 5.74  | 5.91  | 0.14 | 0.08 | -1.13 | 0.101708 | 0.152572 | 0.461313 | 0.427435 |
| MmugDNA.16688.1.S1_at   | MmugDNA.16688.1 | 7.7   | 7.79  | 0.18 | 0.02 | -1.06 | 0.461776 | 0.306324 | 0.737895 | 0.56295  |
| MmugDNA.16689.1.S1_at   | MmugDNA.16689.1 | 6.05  | 6.6   | 0.71 | 0.38 | -1.47 | 0.784691 | 0.868593 | 0.910286 | 0.925383 |
| MmugDNA.1669.1.S1_s_at  | MmugDNA.1669.1  | 9.88  | 9.97  | 0.04 | 0.65 | -1.06 | 0.911399 | 0.886568 | 0.965013 | 0.935498 |
| MmugDNA.16690.1.S1_at   | MmugDNA.16690.1 | 9.86  | 9.11  | 0.27 | 0.12 | 1.68  | 0.010837 | 0.004825 | 0.232232 | 0.096904 |
| MmugDNA.16691.1.S1_at   | MmugDNA.16691.1 | 3.67  | 3.61  | 0.57 | 0.09 | 1.04  | 0.801542 | 0.923699 | 0.918152 | 0.957083 |
| MmugDNA.16692.1.S1_at   | MmugDNA.16692.1 | 3.12  | 3.15  | 0.1  | 0.11 | -1.02 | 0.624684 | 0.765126 | 0.828393 | 0.863452 |
| MmugDNA.16693.1.S1_at   | MmugDNA.16693.1 | 4.65  | 4.64  | 0.13 | 0.08 | 1.01  | 0.526595 | 0.590125 | 0.774193 | 0.756117 |
| MmugDNA.16695.1.S1_at   | MmugDNA.16695.1 | 3.15  | 3.34  | 0.24 | 0.46 | -1.14 | 0.159423 | 0.143555 | 0.524326 | 0.417484 |
| MmugDNA.16697.1.S1_at   | MmugDNA.16697.1 | 6.02  | 6.34  | 0.31 | 0.57 | -1.25 | 0.447374 | 0.620295 | 0.728917 | 0.775303 |
| MmugDNA.16699.1.S1_at   | MmugDNA.16699.1 | 8.76  | 8.86  | 0.16 | 0.11 | -1.08 | 0.319616 | 0.314298 | 0.649068 | 0.568263 |
| MmugDNA.16700.1.S1_at   | MmugDNA.16700.1 | 8.38  | 8.7   | 0.55 | 0.6  | -1.25 | 0.201183 | 0.281983 | 0.563821 | 0.544868 |
| MmugDNA.16700.1.S1_s_at | MmugDNA.16700.1 | 10.37 | 10.79 | 0.1  | 0.37 | -1.34 | 0.046225 | 0.03346  | 0.362622 | 0.226544 |
| MmugDNA.16702.1.S1_x_at | MmugDNA.16702.1 | 6.92  | 6.76  | 0.45 | 0.19 | 1.12  | 0.454312 | 0.575765 | 0.733184 | 0.746758 |
| MmugDNA.16703.1.S1_at   | MmugDNA.16703.1 | 6.71  | 6.46  | 0.09 | 0.36 | 1.18  | 0.839111 | 0.720436 | 0.935033 | 0.838261 |
| MmugDNA.16704.1.S1_at   | MmugDNA.16704.1 | 11.88 | 11.88 | 2.08 | 0.43 | 1     | 0.445255 | 0.203687 | 0.727524 | 0.477916 |
| MmugDNA.39322.1.S1_s_at | MmugDNA.39322.1 | 12.43 | 12.64 | 0.25 | 0.07 | -1.16 | 0.48404  | 0.571346 | 0.750051 | 0.743653 |
| MmugDNA.16705.1.S1_at   | MmugDNA.16705.1 | 8.29  | 8.02  | 0.24 | 0.08 | 1.2   | 0.450185 | 0.628031 | 0.730847 | 0.780921 |
| MmugDNA.16705.1.S1_s_at | MmugDNA.16705.1 | 6.05  | 6.23  | 0.08 | 0.03 | -1.13 | 0.083276 | 0.097202 | 0.435702 | 0.354886 |
| MmugDNA.16706.1.S1_at   | MmugDNA.16706.1 | 4.43  | 4.42  | 0.15 | 0.14 | 1     | 0.239828 | 0.329946 | 0.592786 | 0.578874 |
| MmugDNA.16708.1.S1_at   | MmugDNA.16708.1 | 7.76  | 7.22  | 0.43 | 0.08 | 1.45  | 0.07779  | 0.069333 | 0.427795 | 0.309558 |
| MmugDNA.1671.1.S1_at    | MmugDNA.1671.1  | 10.51 | 10.2  | 0.17 | 0.22 | 1.24  | 0.118329 | 0.102045 | 0.482636 | 0.362102 |
| MmugDNA.16711.1.S1_at   | MmugDNA.16711.1 | 4.74  | 4.74  | 0.04 | 0.08 | -1    | 0.961596 | 0.38127  | 0.985216 | 0.617595 |
| MmugDNA.16711.1.S1_x_at | MmugDNA.16711.1 | 4.15  | 4.15  | 0.26 | 0.27 | 1     | 0.944889 | 0.507051 | 0.979001 | 0.70272  |
| MmugDNA.16712.1.S1_at   | MmugDNA.16712.1 | 3.52  | 3.53  | 0.19 | 0.11 | -1    | 0.89883  | 0.921445 | 0.959609 | 0.955761 |
| MmugDNA.16713.1.S1_at   | MmugDNA.16713.1 | 5.36  | 5.56  | 0.12 | 0.31 | -1.15 | 0.195488 | 0.048132 | 0.558901 | 0.264417 |
| MmugDNA.16714.1.S1_at   | MmugDNA.16714.1 | 4.34  | 4.16  | 0.23 | 0.23 | 1.13  | 0.389864 | 0.549344 | 0.693291 | 0.729804 |
| MmugDNA.16715.1.S1_at   | MmugDNA.16715.1 | 4.58  | 4.6   | 0.21 | 0.13 | -1.01 | 0.387347 | 0.551238 | 0.691934 | 0.730863 |
| MmugDNA.16716.1.S1_at   | MmugDNA.16716.1 | 3.08  | 2.77  | 0.36 | 0.05 | 1.23  | 0.236765 | 0.133258 | 0.590504 | 0.40503  |
| MmugDNA.16717.1.S1_s_at | MmugDNA.16717.1 | 5.64  | 5.65  | 0.23 | 0.06 | -1.01 | 0.268642 | 0.23518  | 0.613334 | 0.50629  |

|                         |                 |       |       |      |      |       |          |          |          |          |
|-------------------------|-----------------|-------|-------|------|------|-------|----------|----------|----------|----------|
| MmugDNA.16718.1.S1_at   | MmugDNA.16718.1 | 2.92  | 3     | 0.05 | 0.13 | -1.06 | 0.342959 | 0.687425 | 0.663407 | 0.817583 |
| MmugDNA.16719.1.S1_at   | MmugDNA.16719.1 | 5.03  | 5.43  | 0.16 | 0.21 | -1.31 | 0.067147 | 0.058448 | 0.407071 | 0.288529 |
| MmugDNA.1672.1.S1_at    | MmugDNA.1672.1  | 6.98  | 10.01 | 1.06 | 0.55 | -8.17 | 0.01117  | 0.006719 | 0.234598 | 0.110963 |
| MmugDNA.16720.1.S1_at   | MmugDNA.16720.1 | 4.71  | 4.65  | 0.14 | 0.14 | 1.05  | 0.251494 | 0.311673 | 0.600859 | 0.566653 |
| MmugDNA.16721.1.S1_at   | MmugDNA.16721.1 | 7.01  | 7.15  | 0.15 | 0.04 | -1.1  | 0.49389  | 0.207948 | 0.756383 | 0.482049 |
| MmugDNA.16723.1.S1_at   | MmugDNA.16723.1 | 3.95  | 4     | 0.1  | 0.06 | -1.03 | 0.567672 | 0.482444 | 0.798266 | 0.687298 |
| MmugDNA.16724.1.S1_at   | MmugDNA.16724.1 | 9.72  | 9.73  | 0.14 | 0.07 | -1.01 | 0.72717  | 0.791552 | 0.88121  | 0.879606 |
| MmugDNA.16725.1.S1_at   | MmugDNA.16725.1 | 3.29  | 3.05  | 0.24 | 0.15 | 1.18  | 0.435446 | 0.603648 | 0.721236 | 0.764215 |
| MmugDNA.16726.1.S1_at   | MmugDNA.16726.1 | 3.01  | 2.9   | 0.14 | 0.04 | 1.08  | 0.294361 | 0.302172 | 0.631216 | 0.560092 |
| MmugDNA.16727.1.S1_at   | MmugDNA.16727.1 | 5.46  | 5.71  | 0.4  | 0.12 | -1.19 | 0.259189 | 0.328425 | 0.60632  | 0.578066 |
| MmugDNA.16728.1.S1_at   | MmugDNA.16728.1 | 9.71  | 10.27 | 0.18 | 0.77 | -1.48 | 0.240898 | 0.2528   | 0.593628 | 0.521174 |
| MmugDNA.16728.1.S1_s_at | MmugDNA.16728.1 | 10.29 | 10.98 | 0.15 | 0.57 | -1.62 | 0.122607 | 0.116734 | 0.487859 | 0.383945 |
| MmugDNA.16730.1.S1_at   | MmugDNA.16730.1 | 11.6  | 11.6  | 0.33 | 0.19 | 1.01  | 0.993457 | 0.708805 | 0.997754 | 0.831137 |
| MmugDNA.16731.1.S1_s_at | MmugDNA.16731.1 | 10.06 | 10.31 | 0.45 | 0.17 | -1.19 | 0.395635 | 0.540702 | 0.696523 | 0.724513 |
| MmugDNA.16734.1.S1_at   | MmugDNA.16734.1 | 13.31 | 13.13 | 0.1  | 0.04 | 1.13  | 0.048598 | 0.011465 | 0.369025 | 0.138504 |
| MmugDNA.16735.1.S1_at   | MmugDNA.16735.1 | 3.79  | 4.1   | 0.26 | 0.48 | -1.24 | 0.674205 | 0.875116 | 0.853988 | 0.929163 |
| MmugDNA.16737.1.S1_at   | MmugDNA.16737.1 | 6.69  | 6.92  | 1.12 | 0.21 | -1.17 | 0.845776 | 0.954572 | 0.93814  | 0.974203 |
| MmugDNA.16739.1.S1_at   | MmugDNA.16739.1 | 4.51  | 4.43  | 0.09 | 0.1  | 1.06  | 0.507319 | 0.24012  | 0.762788 | 0.510813 |
| MmugDNA.1674.1.S1_at    | MmugDNA.1674.1  | 6.58  | 6.57  | 0.42 | 0.08 | 1.01  | 0.911691 | 0.340353 | 0.965088 | 0.586725 |
| MmugDNA.16740.1.S1_at   | MmugDNA.16740.1 | 4.94  | 4.55  | 0.13 | 0.56 | 1.31  | 0.305613 | 0.458953 | 0.639223 | 0.671504 |
| MmugDNA.16741.1.S1_at   | MmugDNA.16741.1 | 6.18  | 6.32  | 0.14 | 0.27 | -1.1  | 0.788603 | 0.92637  | 0.91217  | 0.958291 |
| MmugDNA.16742.1.S1_at   | MmugDNA.16742.1 | 4.54  | 4.85  | 0.77 | 0.15 | -1.25 | 0.820043 | 0.964997 | 0.926819 | 0.980553 |
| MmugDNA.16743.1.S1_at   | MmugDNA.16743.1 | 4.04  | 3.99  | 0.12 | 0.2  | 1.03  | 0.779665 | 0.646018 | 0.908204 | 0.792676 |
| MmugDNA.16744.1.S1_at   | MmugDNA.16744.1 | 7.76  | 8.51  | 0.24 | 0.16 | -1.68 | 0.009713 | 0.058873 | 0.226235 | 0.289391 |
| MmugDNA.16745.1.S1_s_at | MmugDNA.16745.1 | 6.92  | 7.1   | 0.12 | 0.24 | -1.14 | 0.173583 | 0.180675 | 0.537183 | 0.457245 |
| MmugDNA.16746.1.S1_at   | MmugDNA.16746.1 | 3.35  | 3.4   | 0.06 | 0.21 | -1.04 | 0.599402 | 0.032205 | 0.814565 | 0.222139 |
| MmugDNA.16749.1.S1_at   | MmugDNA.16749.1 | 6.49  | 5.42  | 0.69 | 0.51 | 2.1   | 0.251376 | 0.315712 | 0.600793 | 0.569143 |
| MmugDNA.16752.1.S1_at   | MmugDNA.16752.1 | 5.54  | 5.47  | 0.07 | 0.06 | 1.05  | 0.362391 | 0.030131 | 0.675977 | 0.21543  |
| MmugDNA.16754.1.S1_at   | MmugDNA.16754.1 | 7.7   | 9.27  | 0.15 | 1.05 | -2.98 | 0.098698 | 0.012803 | 0.458569 | 0.145832 |
| MmugDNA.16754.1.S1_s_at | MmugDNA.16754.1 | 7.85  | 9.86  | 0.36 | 0.93 | -4.01 | 0.050532 | 0.006889 | 0.374611 | 0.112196 |
| MmugDNA.16757.1.S1_at   | MmugDNA.16757.1 | 9.44  | 11.15 | 0.35 | 0.78 | -3.26 | 0.035972 | 0.016355 | 0.338557 | 0.161943 |
| MmugDNA.16759.1.S1_at   | MmugDNA.16759.1 | 3.42  | 2.97  | 0.4  | 0.32 | 1.37  | 0.302714 | 0.259782 | 0.63706  | 0.526648 |
| MmugDNA.1676.1.S1_at    | MmugDNA.1676.1  | 3.42  | 3.31  | 0.99 | 0.13 | 1.08  | 0.30447  | 0.373867 | 0.638542 | 0.612492 |
| MmugDNA.16760.1.S1_at   | MmugDNA.16760.1 | 4.23  | 4.24  | 0.02 | 0.08 | -1.01 | 0.416153 | 0.427633 | 0.709692 | 0.649406 |
| MmugDNA.16761.1.S1_at   | MmugDNA.16761.1 | 4.7   | 4.67  | 0.29 | 0.16 | 1.02  | 0.851265 | 0.910186 | 0.940204 | 0.949342 |
| MmugDNA.16762.1.S1_at   | MmugDNA.16762.1 | 2.98  | 3.07  | 0.04 | 0.11 | -1.06 | 0.927782 | 0.575148 | 0.972079 | 0.746352 |
| MmugDNA.16764.1.S1_at   | MmugDNA.16764.1 | 9.18  | 7.91  | 0.83 | 0.61 | 2.42  | 0.201181 | 0.01236  | 0.563821 | 0.143761 |
| MmugDNA.16767.1.S1_at   | MmugDNA.16767.1 | 3.25  | 3.2   | 0.15 | 0.18 | 1.04  | 0.565204 | 0.299438 | 0.796922 | 0.557899 |
| MmugDNA.16768.1.S1_s_at | MmugDNA.16768.1 | 11.06 | 11.39 | 0.35 | 0.78 | -1.26 | 0.562758 | 0.550252 | 0.795503 | 0.730367 |
| MmugDNA.16769.1.S1_at   | MmugDNA.16769.1 | 3.09  | 3.13  | 0.06 | 0.1  | -1.03 | 0.105871 | 0.077552 | 0.466641 | 0.323421 |
| MmugDNA.16770.1.S1_at   | MmugDNA.16770.1 | 6.65  | 5.94  | 0.8  | 0.57 | 1.64  | 0.188415 | 0.017559 | 0.551451 | 0.167672 |

|                         |                 |       |       |      |      |       |          |          |          |          |
|-------------------------|-----------------|-------|-------|------|------|-------|----------|----------|----------|----------|
| MmugDNA.16771.1.S1_at   | MmugDNA.16771.1 | 6.37  | 6.42  | 0.04 | 0.11 | -1.04 | 0.801972 | 0.122418 | 0.918304 | 0.392267 |
| MmugDNA.16772.1.S1_at   | MmugDNA.16772.1 | 3.81  | 3.99  | 0.15 | 0.12 | -1.13 | 0.101991 | 0.338289 | 0.461388 | 0.585417 |
| MmugDNA.16774.1.S1_s_at | MmugDNA.16774.1 | 14.4  | 14.38 | 0.07 | 0.07 | 1.01  | 0.972535 | 0.653775 | 0.989473 | 0.79766  |
| MmugDNA.16775.1.S1_at   | MmugDNA.16775.1 | 3.66  | 3.67  | 0.29 | 0.12 | -1    | 0.269854 | 0.480858 | 0.614491 | 0.686    |
| MmugDNA.16777.1.S1_s_at | MmugDNA.16777.1 | 8.29  | 9.9   | 0.18 | 0.06 | -3.04 | 0.000108 | 0.000044 | 0.112653 | 0.025273 |
| MmugDNA.16778.1.S1_at   | MmugDNA.16778.1 | 5.58  | 6.22  | 1.21 | 0.45 | -1.56 | 0.858549 | 0.734116 | 0.942856 | 0.845896 |
| MmugDNA.1678.1.S1_at    | MmugDNA.1678.1  | 8.18  | 8.19  | 0.08 | 0.1  | -1.01 | 0.351557 | 0.041468 | 0.669126 | 0.248496 |
| MmugDNA.16780.1.S1_at   | MmugDNA.16780.1 | 8.8   | 8.38  | 0.25 | 1.05 | 1.34  | 0.346876 | 0.495646 | 0.666049 | 0.695576 |
| MmugDNA.16781.1.S1_at   | MmugDNA.16781.1 | 6.22  | 6.2   | 0.14 | 0.16 | 1.01  | 0.51596  | 0.604768 | 0.767717 | 0.764797 |
| MmugDNA.16782.1.S1_at   | MmugDNA.16782.1 | 4.3   | 4.37  | 0.09 | 0.03 | -1.06 | 0.057589 | 0.04249  | 0.38863  | 0.25075  |
| MmugDNA.16783.1.S1_at   | MmugDNA.16783.1 | 9.05  | 9.74  | 0.03 | 0.3  | -1.62 | 0.042073 | 0.017882 | 0.353974 | 0.168819 |
| MmugDNA.16784.1.S1_at   | MmugDNA.16784.1 | 4.16  | 3.93  | 0.19 | 0.01 | 1.17  | 0.114004 | 0.167975 | 0.47744  | 0.444576 |
| MmugDNA.16786.1.S1_at   | MmugDNA.16786.1 | 5.29  | 4.53  | 0.17 | 0.22 | 1.7   | 0.013369 | 0.026167 | 0.246471 | 0.202772 |
| MmugDNA.16787.1.S1_at   | MmugDNA.16787.1 | 5.61  | 5.59  | 0.21 | 0.08 | 1.01  | 0.310042 | 0.230697 | 0.642042 | 0.502381 |
| MmugDNA.16789.1.S1_at   | MmugDNA.16789.1 | 7.15  | 7.84  | 0.81 | 0.1  | -1.62 | 0.151408 | 0.279619 | 0.516065 | 0.543186 |
| MmugDNA.16790.1.S1_s_at | MmugDNA.16790.1 | 6.79  | 8.15  | 0.88 | 0.85 | -2.56 | 0.285761 | 0.336244 | 0.625149 | 0.583736 |
| MmugDNA.16792.1.S1_at   | MmugDNA.16792.1 | 6.32  | 7.44  | 1.57 | 1.04 | -2.17 | 0.973984 | 0.961832 | 0.989786 | 0.978471 |
| MmugDNA.16794.1.S1_at   | MmugDNA.16794.1 | 4.51  | 3.83  | 0.38 | 0.46 | 1.6   | 0.247281 | 0.592687 | 0.598366 | 0.757854 |
| MmugDNA.16795.1.S1_at   | MmugDNA.16795.1 | 4.01  | 4.09  | 0.18 | 0.08 | -1.06 | 0.185976 | 0.077955 | 0.549502 | 0.324291 |
| MmugDNA.16797.1.S1_at   | MmugDNA.16797.1 | 3.06  | 3.08  | 0.05 | 0.04 | -1.02 | 0.702235 | 0.512895 | 0.868511 | 0.706595 |
| MmugDNA.16798.1.S1_at   | MmugDNA.16798.1 | 4.18  | 4.29  | 0.04 | 0.27 | -1.08 | 0.449436 | 0.524712 | 0.730214 | 0.714514 |
| MmugDNA.16799.1.S1_at   | MmugDNA.16799.1 | 7.66  | 6.32  | 0.33 | 0.48 | 2.53  | 0.035281 | 0.063208 | 0.335829 | 0.298119 |
| MmugDNA.168.1.S1_at     | MmugDNA.168.1   | 4.43  | 3.98  | 0.32 | 0.25 | 1.36  | 0.112535 | 0.18433  | 0.475019 | 0.460458 |
| MmugDNA.1680.1.S1_at    | MmugDNA.1680.1  | 3.51  | 3.29  | 0.21 | 0.15 | 1.17  | 0.741177 | 0.323884 | 0.889113 | 0.574656 |
| MmugDNA.16800.1.S1_at   | MmugDNA.16800.1 | 3.03  | 3.28  | 0.26 | 0.15 | -1.19 | 0.329758 | 0.410982 | 0.655349 | 0.637835 |
| MmugDNA.16803.1.S1_at   | MmugDNA.16803.1 | 3.94  | 3.65  | 0.1  | 0.11 | 1.23  | 0.1239   | 0.03729  | 0.489589 | 0.237598 |
| MmugDNA.16804.1.S1_at   | MmugDNA.16804.1 | 7.52  | 5.7   | 1.08 | 2.16 | 3.52  | 0.549544 | 0.407575 | 0.787363 | 0.63505  |
| MmugDNA.16806.1.S1_at   | MmugDNA.16806.1 | 6.76  | 7.15  | 0.44 | 1.04 | -1.31 | 0.451021 | 0.440304 | 0.731469 | 0.658899 |
| MmugDNA.16809.1.S1_at   | MmugDNA.16809.1 | 7.72  | 7.75  | 0.24 | 0.18 | -1.02 | 0.647487 | 0.694837 | 0.84141  | 0.822623 |
| MmugDNA.1681.1.S1_at    | MmugDNA.1681.1  | 4.51  | 4.21  | 0.49 | 0.08 | 1.24  | 0.306992 | 0.164531 | 0.63983  | 0.44076  |
| MmugDNA.16811.1.S1_at   | MmugDNA.16811.1 | 11.52 | 10.34 | 0.13 | 0.67 | 2.27  | 0.04356  | 0.036282 | 0.356798 | 0.235026 |
| MmugDNA.16813.1.S1_at   | MmugDNA.16813.1 | 4.31  | 4.22  | 0.11 | 0.25 | 1.07  | 0.742009 | 0.847248 | 0.88958  | 0.91322  |
| MmugDNA.16815.1.S1_x_at | MmugDNA.16815.1 | 9.17  | 9.13  | 0.61 | 0.22 | 1.03  | 0.307532 | 0.388027 | 0.64004  | 0.622551 |
| MmugDNA.16817.1.S1_at   | MmugDNA.16817.1 | 5.67  | 5.72  | 0.25 | 0.09 | -1.03 | 0.68629  | 0.4225   | 0.859712 | 0.645729 |
| MmugDNA.16818.1.S1_at   | MmugDNA.16818.1 | 8.93  | 9.82  | 0.45 | 1.04 | -1.85 | 0.398442 | 0.381416 | 0.698704 | 0.617681 |
| MmugDNA.16819.1.S1_at   | MmugDNA.16819.1 | 5.63  | 5.61  | 0.1  | 0.42 | 1.01  | 0.863076 | 0.662097 | 0.944982 | 0.802107 |
| MmugDNA.16821.1.S1_at   | MmugDNA.16821.1 | 3.98  | 3.99  | 0.07 | 0.17 | -1    | 0.892871 | 0.814417 | 0.957322 | 0.892923 |
| MmugDNA.16822.1.S1_at   | MmugDNA.16822.1 | 7.08  | 7.12  | 0.13 | 0.04 | -1.03 | 0.531022 | 0.716196 | 0.777    | 0.835515 |
| MmugDNA.16824.1.S1_at   | MmugDNA.16824.1 | 7.45  | 6.36  | 0.24 | 0.28 | 2.13  | 0.011975 | 0.003775 | 0.239074 | 0.08749  |
| MmugDNA.4637.1.S1_s_at  | MmugDNA.4637.1  | 12.56 | 12.53 | 0.07 | 0.11 | 1.02  | 0.616393 | 0.431509 | 0.82416  | 0.652415 |
| MmugDNA.16826.1.S1_at   | MmugDNA.16826.1 | 9.34  | 8.84  | 0.12 | 0.68 | 1.42  | 0.37762  | 0.512117 | 0.685995 | 0.706076 |

|                         |                 |       |       |      |      |       |          |          |          |          |
|-------------------------|-----------------|-------|-------|------|------|-------|----------|----------|----------|----------|
| MmugDNA.16826.1.S1_s_at | MmugDNA.16826.1 | 12.71 | 12.66 | 0.23 | 0.45 | 1.03  | 0.364012 | 0.436937 | 0.677121 | 0.656361 |
| MmugDNA.16827.1.S1_at   | MmugDNA.16827.1 | 9.84  | 9.02  | 0.04 | 0.4  | 1.77  | 0.023318 | 0.02305  | 0.290933 | 0.190012 |
| MmugDNA.16828.1.S1_at   | MmugDNA.16828.1 | 11.07 | 10.75 | 0.16 | 0.65 | 1.25  | 0.561652 | 0.755335 | 0.79493  | 0.857558 |
| MmugDNA.16829.1.S1_at   | MmugDNA.16829.1 | 5.11  | 5.13  | 0.33 | 0.02 | -1.02 | 0.795623 | 0.945325 | 0.915216 | 0.968942 |
| MmugDNA.1683.1.S1_at    | MmugDNA.1683.1  | 4.94  | 5.18  | 0.28 | 0.36 | -1.18 | 0.703229 | 0.800502 | 0.868993 | 0.885198 |
| MmugDNA.16830.1.S1_at   | MmugDNA.16830.1 | 3.38  | 3.38  | 0.02 | 0.1  | -1    | 0.452851 | 0.630671 | 0.732217 | 0.782345 |
| MmugDNA.16831.1.S1_s_at | MmugDNA.16831.1 | 7.61  | 7.88  | 0.06 | 0.35 | -1.21 | 0.25053  | 0.194361 | 0.600389 | 0.469464 |
| MmugDNA.16832.1.S1_s_at | MmugDNA.16832.1 | 4.42  | 4.05  | 0.7  | 0.36 | 1.3   | 0.280998 | 0.132272 | 0.622015 | 0.404294 |
| MmugDNA.16834.1.S1_at   | MmugDNA.16834.1 | 3.05  | 2.94  | 0.34 | 0.04 | 1.08  | 0.62633  | 0.522791 | 0.829532 | 0.713388 |
| MmugDNA.16835.1.S1_at   | MmugDNA.16835.1 | 6.85  | 7.22  | 0.13 | 0.25 | -1.29 | 0.07013  | 0.075312 | 0.413646 | 0.319475 |
| MmugDNA.16836.1.S1_at   | MmugDNA.16836.1 | 10.29 | 10.41 | 0.07 | 0.37 | -1.09 | 0.243172 | 0.292246 | 0.594848 | 0.552363 |
| MmugDNA.16837.1.S1_at   | MmugDNA.16837.1 | 12.56 | 12.76 | 0.08 | 0.15 | -1.15 | 0.297856 | 0.017984 | 0.633549 | 0.169137 |
| MmugDNA.16838.1.S1_at   | MmugDNA.16838.1 | 4.24  | 4.14  | 0.15 | 0.07 | 1.07  | 0.866637 | 0.518099 | 0.946819 | 0.710138 |
| MmugDNA.16839.1.S1_at   | MmugDNA.16839.1 | 8.92  | 9.36  | 1.32 | 0.27 | -1.36 | 0.694468 | 0.87657  | 0.864447 | 0.929709 |
| MmugDNA.1684.1.S1_at    | MmugDNA.1684.1  | 6.81  | 6.97  | 0.1  | 0.14 | -1.12 | 0.222078 | 0.036843 | 0.58065  | 0.236451 |
| MmugDNA.16841.1.S1_at   | MmugDNA.16841.1 | 4.47  | 4.54  | 0.18 | 0.05 | -1.05 | 0.600782 | 0.539293 | 0.815477 | 0.723688 |
| MmugDNA.16843.1.S1_at   | MmugDNA.16843.1 | 5.74  | 5.82  | 0.25 | 0.12 | -1.05 | 0.279226 | 0.407076 | 0.620979 | 0.634722 |
| MmugDNA.16844.1.S1_at   | MmugDNA.16844.1 | 4.55  | 4.68  | 0.17 | 0.23 | -1.09 | 0.524277 | 0.750382 | 0.77313  | 0.854787 |
| MmugDNA.16845.1.S1_at   | MmugDNA.16845.1 | 5.91  | 5.71  | 0.25 | 0.33 | 1.15  | 0.17223  | 0.253997 | 0.535585 | 0.522371 |
| MmugDNA.16846.1.S1_at   | MmugDNA.16846.1 | 5.79  | 6.09  | 0.3  | 0.49 | -1.23 | 0.679871 | 0.597213 | 0.85688  | 0.760127 |
| MmugDNA.16847.1.S1_at   | MmugDNA.16847.1 | 6.42  | 6.24  | 0.26 | 0.51 | 1.13  | 0.683746 | 0.847476 | 0.858499 | 0.913316 |
| MmugDNA.16848.1.S1_at   | MmugDNA.16848.1 | 5.14  | 5.71  | 0.77 | 0.09 | -1.49 | 0.789844 | 0.919529 | 0.912819 | 0.954822 |
| MmugDNA.16848.1.S1_s_at | MmugDNA.16848.1 | 7.67  | 7.36  | 0.03 | 0.08 | 1.24  | 0.005184 | 0.001166 | 0.190313 | 0.053615 |
| MmugDNA.1685.1.S1_at    | MmugDNA.1685.1  | 6.46  | 5.13  | 0.08 | 1.02 | 2.52  | 0.084026 | 0.080894 | 0.436557 | 0.328864 |
| MmugDNA.16851.1.S1_at   | MmugDNA.16851.1 | 4.64  | 4.68  | 0.94 | 0.22 | -1.03 | 0.994173 | 0.520616 | 0.997986 | 0.711831 |
| MmugDNA.16853.1.S1_at   | MmugDNA.16853.1 | 5.8   | 5.87  | 0.13 | 0.11 | -1.05 | 0.271092 | 0.358217 | 0.615322 | 0.599754 |
| MmugDNA.16854.1.S1_at   | MmugDNA.16854.1 | 7.34  | 6.78  | 0.17 | 0.48 | 1.48  | 0.490673 | 0.56157  | 0.754497 | 0.737502 |
| MmugDNA.16856.1.S1_at   | MmugDNA.16856.1 | 7.54  | 7.66  | 0.05 | 0.33 | -1.09 | 0.179527 | 0.090423 | 0.543676 | 0.344916 |
| MmugDNA.16858.1.S1_at   | MmugDNA.16858.1 | 8.15  | 8.03  | 0.43 | 0.42 | 1.09  | 0.714743 | 0.329928 | 0.874968 | 0.578874 |
| MmugDNA.16858.1.S1_s_at | MmugDNA.16858.1 | 9.5   | 9.67  | 0.32 | 0.48 | -1.12 | 0.86053  | 0.471744 | 0.943737 | 0.679641 |
| MmugDNA.16859.1.S1_at   | MmugDNA.16859.1 | 6.01  | 6.6   | 0.32 | 0.71 | -1.51 | 0.323092 | 0.115582 | 0.651295 | 0.382674 |
| MmugDNA.1686.1.S1_at    | MmugDNA.1686.1  | 3.81  | 3.72  | 0.27 | 0.07 | 1.06  | 0.384791 | 0.49046  | 0.690114 | 0.69247  |
| MmugDNA.16860.1.S1_at   | MmugDNA.16860.1 | 3.24  | 3.32  | 0.07 | 0.15 | -1.06 | 0.267138 | 0.349695 | 0.612309 | 0.593566 |
| MmugDNA.16861.1.S1_at   | MmugDNA.16861.1 | 7.6   | 6.95  | 0.33 | 0.19 | 1.56  | 0.076333 | 0.019095 | 0.424774 | 0.173864 |
| MmugDNA.16862.1.S1_at   | MmugDNA.16862.1 | 9.39  | 9.24  | 0.11 | 0.11 | 1.1   | 0.248093 | 0.014225 | 0.599076 | 0.152285 |
| MmugDNA.16864.1.S1_at   | MmugDNA.16864.1 | 9.29  | 9.83  | 0.25 | 0.31 | -1.45 | 0.094008 | 0.082476 | 0.451612 | 0.331542 |
| MmugDNA.16865.1.S1_at   | MmugDNA.16865.1 | 9.75  | 9     | 0.05 | 0.14 | 1.68  | 0.001422 | 0.000104 | 0.147697 | 0.028099 |
| MmugDNA.16866.1.S1_at   | MmugDNA.16866.1 | 6.5   | 7.94  | 0.59 | 0.48 | -2.71 | 0.047665 | 0.005749 | 0.367037 | 0.104378 |
| MmugDNA.9610.1.S1_s_at  | MmugDNA.9610.1  | 4.9   | 5.38  | 0.01 | 0.24 | -1.39 | 0.031693 | 0.013182 | 0.322685 | 0.14735  |
| MmugDNA.16868.1.S1_at   | MmugDNA.16868.1 | 7.47  | 5.33  | 0.5  | 1.04 | 4.42  | 0.086778 | 0.117643 | 0.440475 | 0.385352 |
| MmugDNA.1687.1.S1_at    | MmugDNA.1687.1  | 3.19  | 2.68  | 0.47 | 0.13 | 1.43  | 0.128626 | 0.153772 | 0.494653 | 0.42848  |

|                         |                 |       |       |      |      |       |          |          |          |          |
|-------------------------|-----------------|-------|-------|------|------|-------|----------|----------|----------|----------|
| MmugDNA.16870.1.S1_at   | MmugDNA.16870.1 | 8.02  | 7.92  | 0.04 | 0.09 | 1.07  | 0.14522  | 0.219083 | 0.511329 | 0.49285  |
| MmugDNA.16871.1.S1_at   | MmugDNA.16871.1 | 3.46  | 3.46  | 0.05 | 0.29 | 1     | 0.380871 | 0.402545 | 0.687597 | 0.631481 |
| MmugDNA.34483.1.S1_s_at | MmugDNA.34483.1 | 4.25  | 4.21  | 0.22 | 0.05 | 1.03  | 0.270502 | 0.2624   | 0.614805 | 0.528655 |
| MmugDNA.16875.1.S1_at   | MmugDNA.16875.1 | 5.7   | 5.76  | 0.05 | 0.13 | -1.04 | 0.305667 | 0.05793  | 0.639223 | 0.287149 |
| MmugDNA.16877.1.S1_at   | MmugDNA.16877.1 | 9.64  | 9.74  | 0.04 | 0.34 | -1.07 | 0.988712 | 0.654593 | 0.995952 | 0.798087 |
| MmugDNA.16879.1.S1_at   | MmugDNA.16879.1 | 4.96  | 5.16  | 0.12 | 0.3  | -1.15 | 0.314159 | 0.356025 | 0.645549 | 0.598012 |
| MmugDNA.1688.1.S1_at    | MmugDNA.1688.1  | 5.91  | 4.57  | 0.34 | 0.72 | 2.53  | 0.080289 | 0.078784 | 0.430342 | 0.325742 |
| MmugDNA.16880.1.S1_at   | MmugDNA.16880.1 | 7.04  | 7.13  | 0.12 | 0.09 | -1.07 | 0.642179 | 0.771178 | 0.838696 | 0.866992 |
| MmugDNA.16881.1.S1_at   | MmugDNA.16881.1 | 4.76  | 5.74  | 0.14 | 0.65 | -1.97 | 0.053542 | 0.054916 | 0.380288 | 0.279778 |
| MmugDNA.16882.1.S1_at   | MmugDNA.16882.1 | 5.35  | 5.92  | 0.08 | 0.44 | -1.48 | 0.294344 | 0.389587 | 0.631216 | 0.623668 |
| MmugDNA.16886.1.S1_at   | MmugDNA.16886.1 | 7.39  | 6.58  | 0.79 | 0.69 | 1.75  | 0.281823 | 0.366392 | 0.62238  | 0.606087 |
| MmugDNA.16887.1.S1_at   | MmugDNA.16887.1 | 5.21  | 5.13  | 0.39 | 0.25 | 1.05  | 0.800097 | 0.70861  | 0.917386 | 0.831    |
| MmugDNA.16888.1.S1_at   | MmugDNA.16888.1 | 4.66  | 4.55  | 0.25 | 0.1  | 1.08  | 0.588232 | 0.845016 | 0.80893  | 0.911799 |
| MmugDNA.16889.1.S1_at   | MmugDNA.16889.1 | 7.95  | 7.3   | 0.18 | 0.1  | 1.58  | 0.00413  | 0.002047 | 0.181739 | 0.066887 |
| MmugDNA.1689.1.S1_at    | MmugDNA.1689.1  | 3.44  | 3.38  | 0.1  | 0.31 | 1.04  | 0.854459 | 0.660452 | 0.941199 | 0.80135  |
| MmugDNA.16890.1.S1_at   | MmugDNA.16890.1 | 5.91  | 5.68  | 0.57 | 0.15 | 1.18  | 0.380831 | 0.286954 | 0.687597 | 0.548246 |
| MmugDNA.16891.1.S1_at   | MmugDNA.16891.1 | 12.6  | 12.17 | 0.11 | 0.91 | 1.34  | 0.129126 | 0.128387 | 0.495114 | 0.399645 |
| MmugDNA.16892.1.S1_at   | MmugDNA.16892.1 | 4.38  | 4.44  | 0.09 | 0.06 | -1.05 | 0.578752 | 0.368545 | 0.803966 | 0.608079 |
| MmugDNA.16893.1.S1_at   | MmugDNA.16893.1 | 6.71  | 6.68  | 1.99 | 0.38 | 1.02  | 0.979523 | 0.882757 | 0.99244  | 0.93317  |
| MmugDNA.16894.1.S1_at   | MmugDNA.16894.1 | 3.49  | 3.39  | 0.06 | 0.03 | 1.07  | 0.08977  | 0.294604 | 0.445334 | 0.554282 |
| MmugDNA.16898.1.S1_at   | MmugDNA.16898.1 | 5.8   | 5.93  | 0.4  | 0.1  | -1.1  | 0.639084 | 0.816061 | 0.836983 | 0.893893 |
| MmugDNA.16899.1.S1_at   | MmugDNA.16899.1 | 8.96  | 8.51  | 0.54 | 0.16 | 1.37  | 0.222505 | 0.143012 | 0.580951 | 0.41689  |
| MmugDNA.169.1.S1_at     | MmugDNA.169.1   | 3.81  | 3.37  | 0.3  | 0.12 | 1.36  | 0.219607 | 0.157293 | 0.579028 | 0.432782 |
| MmugDNA.1690.1.S1_at    | MmugDNA.1690.1  | 7.05  | 6.09  | 0.59 | 0.37 | 1.94  | 0.050126 | 0.035292 | 0.373435 | 0.232143 |
| MmugDNA.16900.1.S1_at   | MmugDNA.16900.1 | 11.14 | 10.73 | 0.14 | 0.6  | 1.33  | 0.252983 | 0.314552 | 0.60168  | 0.568389 |
| MmugDNA.16901.1.S1_at   | MmugDNA.16901.1 | 6.56  | 6.89  | 0.48 | 0.42 | -1.26 | 0.266365 | 0.307572 | 0.611888 | 0.563785 |
| MmugDNA.16903.1.S1_at   | MmugDNA.16903.1 | 10.35 | 11.26 | 0.26 | 0.68 | -1.88 | 0.427632 | 0.569652 | 0.716368 | 0.742564 |
| MmugDNA.16907.1.S1_at   | MmugDNA.16907.1 | 6.8   | 6.78  | 0.26 | 0.61 | 1.02  | 0.486329 | 0.495512 | 0.751507 | 0.695527 |
| MmugDNA.1691.1.S1_at    | MmugDNA.1691.1  | 9.26  | 9.94  | 0.43 | 1.06 | -1.6  | 0.783183 | 0.920199 | 0.909454 | 0.95511  |
| MmugDNA.16911.1.S1_at   | MmugDNA.16911.1 | 4.32  | 4.36  | 0.15 | 0.16 | -1.03 | 0.971981 | 0.855716 | 0.989291 | 0.917688 |
| MmugDNA.16914.1.S1_at   | MmugDNA.16914.1 | 11.19 | 11    | 0.17 | 0.43 | 1.15  | 0.322661 | 0.033889 | 0.651245 | 0.227771 |
| MmugDNA.16915.1.S1_at   | MmugDNA.16915.1 | 3.21  | 4.38  | 0.37 | 1.01 | -2.24 | 0.19573  | 0.124559 | 0.558901 | 0.394987 |
| MmugDNA.16916.1.S1_at   | MmugDNA.16916.1 | 5.81  | 5.83  | 0.18 | 0.57 | -1.01 | 0.887881 | 0.976521 | 0.954933 | 0.987202 |
| MmugDNA.16917.1.S1_at   | MmugDNA.16917.1 | 6.53  | 6.42  | 0.13 | 0.19 | 1.08  | 0.57405  | 0.287942 | 0.801477 | 0.549227 |
| MmugDNA.16918.1.S1_at   | MmugDNA.16918.1 | 11.26 | 12.14 | 0.28 | 0.21 | -1.83 | 0.019542 | 0.009883 | 0.27501  | 0.130618 |
| MmugDNA.16919.1.S1_at   | MmugDNA.16919.1 | 4.04  | 3.89  | 0.18 | 0.15 | 1.11  | 0.599382 | 0.795613 | 0.814562 | 0.882244 |
| MmugDNA.1692.1.S1_at    | MmugDNA.1692.1  | 3.11  | 3.02  | 0.21 | 0.11 | 1.07  | 0.610468 | 0.598453 | 0.821046 | 0.760839 |
| MmugDNA.16922.1.S1_at   | MmugDNA.16922.1 | 5.26  | 4.61  | 0.39 | 0.2  | 1.57  | 0.094937 | 0.105176 | 0.452515 | 0.366971 |
| MmugDNA.16924.1.S1_at   | MmugDNA.16924.1 | 5.04  | 5.04  | 0.32 | 0.11 | 1     | 0.736465 | 0.630052 | 0.886692 | 0.782128 |
| MmugDNA.16925.1.S1_at   | MmugDNA.16925.1 | 5.37  | 5.46  | 1.13 | 0.12 | -1.07 | 0.51583  | 0.701357 | 0.767629 | 0.826814 |
| MmugDNA.16926.1.S1_at   | MmugDNA.16926.1 | 3.26  | 3.26  | 0.09 | 0.19 | 1     | 0.263033 | 0.330577 | 0.609142 | 0.579307 |



|                         |                 |       |       |      |      |       |          |          |          |          |
|-------------------------|-----------------|-------|-------|------|------|-------|----------|----------|----------|----------|
| MmugDNA.16927.1.S1_at   | MmugDNA.16927.1 | 9.93  | 10.82 | 0.19 | 0.29 | -1.86 | 0.012856 | 0.020587 | 0.244372 | 0.180009 |
| MmugDNA.16928.1.S1_at   | MmugDNA.16928.1 | 11.27 | 11.47 | 0.04 | 0.23 | -1.14 | 0.163766 | 0.101392 | 0.528049 | 0.36112  |
| MmugDNA.16929.1.S1_at   | MmugDNA.16929.1 | 9.14  | 8.99  | 0.04 | 0.06 | 1.11  | 0.021284 | 0.035891 | 0.282524 | 0.233956 |
| MmugDNA.1693.1.S1_at    | MmugDNA.1693.1  | 4.4   | 4.23  | 0.48 | 0.15 | 1.13  | 0.141462 | 0.164479 | 0.509067 | 0.440679 |
| MmugDNA.16931.1.S1_at   | MmugDNA.16931.1 | 5.3   | 4.88  | 0.29 | 0.22 | 1.34  | 0.134402 | 0.161105 | 0.500999 | 0.437279 |
| MmugDNA.16932.1.S1_at   | MmugDNA.16932.1 | 3.96  | 3.94  | 0.97 | 0.17 | 1.02  | 0.302394 | 0.357567 | 0.63692  | 0.599214 |
| MmugDNA.16933.1.S1_at   | MmugDNA.16933.1 | 4.4   | 4.54  | 0.11 | 0.14 | -1.1  | 0.186719 | 0.281096 | 0.550106 | 0.544228 |
| MmugDNA.16934.1.S1_at   | MmugDNA.16934.1 | 6.89  | 6.66  | 1.07 | 0.35 | 1.17  | 0.632603 | 0.780829 | 0.833252 | 0.872833 |
| MmugDNA.16935.1.S1_at   | MmugDNA.16935.1 | 6.75  | 5.5   | 0.35 | 1.37 | 2.39  | 0.750088 | 0.499743 | 0.89292  | 0.698494 |
| MmugDNA.16936.1.S1_at   | MmugDNA.16936.1 | 3.67  | 3.68  | 0.05 | 0.05 | -1    | 0.432214 | 0.335165 | 0.718847 | 0.582938 |
| MmugDNA.16937.1.S1_at   | MmugDNA.16937.1 | 9.79  | 10.43 | 0.04 | 0.16 | -1.56 | 0.001786 | 0.000566 | 0.154452 | 0.041049 |
| MmugDNA.16938.1.S1_at   | MmugDNA.16938.1 | 5.55  | 5.66  | 0.14 | 0.1  | -1.08 | 0.254173 | 0.708529 | 0.602339 | 0.830943 |
| MmugDNA.16939.1.S1_at   | MmugDNA.16939.1 | 4.03  | 3.77  | 0.15 | 0.02 | 1.19  | 0.025097 | 0.016412 | 0.297733 | 0.162199 |
| MmugDNA.1694.1.S1_at    | MmugDNA.1694.1  | 12.5  | 12.51 | 0.08 | 0.07 | -1.01 | 0.18392  | 0.195845 | 0.547947 | 0.470737 |
| MmugDNA.16940.1.S1_at   | MmugDNA.16940.1 | 11.4  | 11.16 | 0.19 | 0.17 | 1.18  | 0.356702 | 0.131613 | 0.671691 | 0.403716 |
| MmugDNA.16941.1.S1_at   | MmugDNA.16941.1 | 3.78  | 4.33  | 0.47 | 0.35 | -1.46 | 0.29449  | 0.349387 | 0.631245 | 0.593405 |
| MmugDNA.16942.1.S1_at   | MmugDNA.16942.1 | 6.07  | 4.3   | 0.59 | 0.84 | 3.41  | 0.179672 | 0.142975 | 0.54385  | 0.416854 |
| MmugDNA.16943.1.S1_at   | MmugDNA.16943.1 | 6.65  | 7.74  | 0.34 | 1.15 | -2.13 | 0.122451 | 0.121513 | 0.487622 | 0.39064  |
| MmugDNA.16944.1.S1_at   | MmugDNA.16944.1 | 9.95  | 9.97  | 0.16 | 0.21 | -1.01 | 0.678572 | 0.634436 | 0.856069 | 0.784787 |
| MmugDNA.16945.1.S1_at   | MmugDNA.16945.1 | 3.45  | 3.27  | 0.24 | 0.07 | 1.14  | 0.33908  | 0.279333 | 0.661151 | 0.542962 |
| MmugDNA.16946.1.S1_at   | MmugDNA.16946.1 | 6.94  | 6.79  | 0.34 | 0.16 | 1.1   | 0.80886  | 0.932501 | 0.922056 | 0.961723 |
| MmugDNA.16947.1.S1_at   | MmugDNA.16947.1 | 6.2   | 6.14  | 0.03 | 0    | 1.04  | 0.11661  | 0.026746 | 0.48034  | 0.204493 |
| MmugDNA.16948.1.S1_at   | MmugDNA.16948.1 | 4.42  | 4.08  | 0.31 | 0.33 | 1.27  | 0.935951 | 0.38257  | 0.975172 | 0.61876  |
| MmugDNA.16949.1.S1_at   | MmugDNA.16949.1 | 6.14  | 6.32  | 0.01 | 0.14 | -1.13 | 0.081754 | 0.036273 | 0.432753 | 0.235    |
| MmugDNA.1695.1.S1_at    | MmugDNA.1695.1  | 5.33  | 5.37  | 0.11 | 0.34 | -1.03 | 0.502518 | 0.65728  | 0.760408 | 0.799611 |
| MmugDNA.16951.1.S1_at   | MmugDNA.16951.1 | 6.01  | 6.52  | 0.26 | 0.22 | -1.43 | 0.296747 | 0.412008 | 0.632686 | 0.638434 |
| MmugDNA.16952.1.S1_at   | MmugDNA.16952.1 | 10.17 | 10.05 | 0.25 | 0.33 | 1.09  | 0.35462  | 0.025164 | 0.670604 | 0.198794 |
| MmugDNA.16954.1.S1_at   | MmugDNA.16954.1 | 8.29  | 8.14  | 0.21 | 0.25 | 1.11  | 0.476808 | 0.491664 | 0.746293 | 0.69317  |
| MmugDNA.16955.1.S1_at   | MmugDNA.16955.1 | 9.96  | 9.78  | 0.05 | 0.22 | 1.13  | 0.286286 | 0.022815 | 0.625548 | 0.189214 |
| MmugDNA.16955.1.S1_s_at | MmugDNA.16955.1 | 9.82  | 9.95  | 0.13 | 0.24 | -1.09 | 0.315018 | 0.072221 | 0.646263 | 0.31478  |
| MmugDNA.16956.1.S1_at   | MmugDNA.16956.1 | 8.76  | 8.55  | 0.86 | 1.91 | 1.15  | 0.932727 | 0.505763 | 0.973957 | 0.702218 |
| MmugDNA.16956.1.S1_s_at | MmugDNA.16956.1 | 9.67  | 9.61  | 0.9  | 1.78 | 1.05  | 0.91413  | 0.405555 | 0.966066 | 0.633804 |
| MmugDNA.16957.1.S1_at   | MmugDNA.16957.1 | 12.52 | 12.05 | 0.06 | 0.43 | 1.38  | 0.143864 | 0.145433 | 0.510427 | 0.419421 |
| MmugDNA.1696.1.S1_at    | MmugDNA.1696.1  | 9.5   | 8.61  | 1.02 | 1.05 | 1.85  | 0.433533 | 0.579517 | 0.720057 | 0.74918  |
| MmugDNA.16960.1.S1_at   | MmugDNA.16960.1 | 7.29  | 7.11  | 0.76 | 0.25 | 1.13  | 0.462259 | 0.643993 | 0.738226 | 0.791265 |
| MmugDNA.16961.1.S1_at   | MmugDNA.16961.1 | 6.16  | 6     | 0.38 | 0.11 | 1.11  | 0.523292 | 0.375321 | 0.772491 | 0.613336 |
| MmugDNA.16962.1.S1_at   | MmugDNA.16962.1 | 8.51  | 8.28  | 0.13 | 0.57 | 1.17  | 0.503174 | 0.687497 | 0.760699 | 0.817606 |
| MmugDNA.16963.1.S1_at   | MmugDNA.16963.1 | 4.22  | 4.26  | 1.92 | 0.42 | -1.02 | 0.311703 | 0.390097 | 0.643602 | 0.624002 |
| MmugDNA.16964.1.S1_at   | MmugDNA.16964.1 | 3.26  | 3.35  | 0.21 | 0.16 | -1.06 | 0.714828 | 0.283091 | 0.874968 | 0.545692 |
| MmugDNA.16966.1.S1_at   | MmugDNA.16966.1 | 4.63  | 4.63  | 0.07 | 0.02 | 1     | 0.281193 | 0.929231 | 0.622129 | 0.959644 |
| MmugDNA.16967.1.S1_at   | MmugDNA.16967.1 | 2.98  | 3.01  | 0.26 | 0.03 | -1.02 | 0.424458 | 0.58583  | 0.714528 | 0.753068 |

|                       |                 |       |       |      |      |       |          |          |          |          |
|-----------------------|-----------------|-------|-------|------|------|-------|----------|----------|----------|----------|
| MmugDNA.16968.1.S1_at | MmugDNA.16968.1 | 6.6   | 6.72  | 0.13 | 0.1  | -1.08 | 0.648975 | 0.464275 | 0.84233  | 0.674987 |
| MmugDNA.16969.1.S1_at | MmugDNA.16969.1 | 9.62  | 10.01 | 0.1  | 0.48 | -1.32 | 0.454264 | 0.38105  | 0.733184 | 0.617478 |
| MmugDNA.1697.1.S1_at  | MmugDNA.1697.1  | 11.44 | 12.26 | 0.1  | 0.55 | -1.77 | 0.189287 | 0.248495 | 0.552435 | 0.517769 |
| MmugDNA.16970.1.S1_at | MmugDNA.16970.1 | 8.11  | 10.49 | 0.75 | 1.12 | -5.19 | 0.071025 | 0.056467 | 0.414673 | 0.283516 |
| MmugDNA.16973.1.S1_at | MmugDNA.16973.1 | 4.56  | 4.37  | 0.22 | 0.14 | 1.14  | 0.187383 | 0.166264 | 0.550456 | 0.442798 |
| MmugDNA.16974.1.S1_at | MmugDNA.16974.1 | 5.61  | 5.24  | 0.24 | 0.24 | 1.29  | 0.578901 | 0.129938 | 0.804059 | 0.401515 |
| MmugDNA.16975.1.S1_at | MmugDNA.16975.1 | 8.59  | 8.31  | 0.09 | 0.21 | 1.22  | 0.098556 | 0.284822 | 0.458486 | 0.546966 |
| MmugDNA.16976.1.S1_at | MmugDNA.16976.1 | 3.46  | 3.49  | 0.11 | 0.26 | -1.02 | 0.476072 | 0.854339 | 0.746125 | 0.91703  |
| MmugDNA.16977.1.S1_at | MmugDNA.16977.1 | 4.8   | 5.1   | 0.22 | 0.19 | -1.23 | 0.138749 | 0.189666 | 0.505884 | 0.465297 |
| MmugDNA.16978.1.S1_at | MmugDNA.16978.1 | 7.3   | 6.35  | 0.49 | 1.46 | 1.93  | 0.109607 | 0.099389 | 0.470811 | 0.357673 |
| MmugDNA.16979.1.S1_at | MmugDNA.16979.1 | 5.23  | 5.06  | 0.35 | 0.21 | 1.12  | 0.109089 | 0.037316 | 0.470811 | 0.237622 |
| MmugDNA.1698.1.S1_at  | MmugDNA.1698.1  | 8.41  | 8.54  | 0.38 | 0.42 | -1.1  | 0.612278 | 0.498474 | 0.822151 | 0.697581 |
| MmugDNA.16981.1.S1_at | MmugDNA.16981.1 | 3.52  | 3.4   | 0.11 | 0.13 | 1.08  | 0.353843 | 0.422724 | 0.670266 | 0.645895 |
| MmugDNA.16985.1.S1_at | MmugDNA.16985.1 | 6.84  | 6.05  | 0.2  | 0.55 | 1.73  | 0.06006  | 0.055891 | 0.393081 | 0.282185 |
| MmugDNA.16986.1.S1_at | MmugDNA.16986.1 | 3.03  | 2.98  | 0.12 | 0.1  | 1.03  | 0.52295  | 0.305278 | 0.772257 | 0.562255 |
| MmugDNA.16988.1.S1_at | MmugDNA.16988.1 | 10.77 | 10.84 | 0.13 | 0.03 | -1.05 | 0.242555 | 0.240217 | 0.594448 | 0.510844 |
| MmugDNA.16989.1.S1_at | MmugDNA.16989.1 | 5.8   | 5.67  | 0.82 | 0.5  | 1.1   | 0.564097 | 0.05751  | 0.796394 | 0.285898 |
| MmugDNA.16990.1.S1_at | MmugDNA.16990.1 | 7.76  | 7.03  | 0.3  | 0.38 | 1.66  | 0.062    | 0.065447 | 0.396905 | 0.301415 |
| MmugDNA.16991.1.S1_at | MmugDNA.16991.1 | 6.04  | 5.97  | 0.07 | 0.24 | 1.05  | 0.793931 | 0.483384 | 0.914508 | 0.687904 |
| MmugDNA.16992.1.S1_at | MmugDNA.16992.1 | 4.47  | 4.74  | 0.31 | 0.49 | -1.21 | 0.61469  | 0.215899 | 0.823258 | 0.489536 |
| MmugDNA.16993.1.S1_at | MmugDNA.16993.1 | 9.78  | 9.84  | 0.6  | 0.23 | -1.05 | 0.797067 | 0.794359 | 0.915839 | 0.881371 |
| MmugDNA.16994.1.S1_at | MmugDNA.16994.1 | 7.1   | 7.16  | 0.04 | 0.14 | -1.04 | 0.198616 | 0.353671 | 0.561669 | 0.596752 |
| MmugDNA.16995.1.S1_at | MmugDNA.16995.1 | 4.79  | 4.77  | 0.32 | 0.02 | 1.02  | 0.762183 | 0.369197 | 0.899955 | 0.608669 |
| MmugDNA.16996.1.S1_at | MmugDNA.16996.1 | 6.36  | 6.23  | 0.84 | 0.26 | 1.09  | 0.807566 | 0.845772 | 0.921277 | 0.912243 |
| MmugDNA.16997.1.S1_at | MmugDNA.16997.1 | 5.57  | 5.03  | 0.46 | 0.42 | 1.45  | 0.099707 | 0.368089 | 0.459668 | 0.607669 |
| MmugDNA.16998.1.S1_at | MmugDNA.16998.1 | 6.41  | 6.43  | 0.27 | 0.03 | -1.02 | 0.951945 | 0.291778 | 0.982038 | 0.552054 |
| MmugDNA.16999.1.S1_at | MmugDNA.16999.1 | 4.62  | 4.83  | 0.18 | 0.04 | -1.15 | 0.100486 | 0.095137 | 0.461009 | 0.352151 |
| MmugDNA.17.1.S1_at    | MmugDNA.17.1    | 9.46  | 9.47  | 0.31 | 0.21 | -1.01 | 0.438843 | 0.51802  | 0.723342 | 0.710089 |
| MmugDNA.1700.1.S1_at  | MmugDNA.1700.1  | 11.78 | 11.78 | 0.1  | 0.21 | 1     | 0.289622 | 0.198714 | 0.627563 | 0.473391 |
| MmugDNA.17000.1.S1_at | MmugDNA.17000.1 | 5.9   | 5.45  | 0.55 | 0.05 | 1.37  | 0.182971 | 0.197187 | 0.547134 | 0.472213 |
| MmugDNA.17001.1.S1_at | MmugDNA.17001.1 | 9.12  | 9.05  | 0.29 | 0.3  | 1.05  | 0.80163  | 0.203544 | 0.918156 | 0.477767 |
| MmugDNA.17003.1.S1_at | MmugDNA.17003.1 | 6.85  | 6.98  | 0.04 | 0.08 | -1.1  | 0.066034 | 0.085969 | 0.405773 | 0.338116 |
| MmugDNA.17007.1.S1_at | MmugDNA.17007.1 | 3.93  | 4.05  | 0.17 | 0.06 | -1.09 | 0.709637 | 0.884729 | 0.872604 | 0.934321 |
| MmugDNA.17008.1.S1_at | MmugDNA.17008.1 | 5.75  | 5.53  | 0.21 | 0.1  | 1.16  | 0.521141 | 0.461582 | 0.771131 | 0.673165 |
| MmugDNA.17009.1.S1_at | MmugDNA.17009.1 | 12.11 | 11.47 | 0.06 | 0.12 | 1.55  | 0.001274 | 0.000146 | 0.145267 | 0.029509 |
| MmugDNA.17010.1.S1_at | MmugDNA.17010.1 | 11.03 | 11.41 | 0.12 | 0.26 | -1.3  | 0.28361  | 0.007427 | 0.623677 | 0.115849 |
| MmugDNA.17011.1.S1_at | MmugDNA.17011.1 | 2.97  | 2.96  | 0.12 | 0.07 | 1.01  | 0.583893 | 0.686911 | 0.806781 | 0.817365 |
| MmugDNA.17012.1.S1_at | MmugDNA.17012.1 | 6.59  | 7.54  | 0.24 | 0.83 | -1.93 | 0.151891 | 0.18257  | 0.516547 | 0.459065 |
| MmugDNA.17014.1.S1_at | MmugDNA.17014.1 | 3.04  | 3.17  | 0.15 | 0.11 | -1.1  | 0.417004 | 0.718553 | 0.710321 | 0.837072 |
| MmugDNA.17015.1.S1_at | MmugDNA.17015.1 | 4.46  | 4.3   | 0.48 | 0.18 | 1.12  | 0.705311 | 0.316242 | 0.870004 | 0.56973  |
| MmugDNA.17019.1.S1_at | MmugDNA.17019.1 | 4.66  | 4.9   | 0.33 | 0.32 | -1.17 | 0.539215 | 0.572585 | 0.780933 | 0.744568 |

|                         |                 |       |       |      |      |        |          |          |          |          |
|-------------------------|-----------------|-------|-------|------|------|--------|----------|----------|----------|----------|
| MmugDNA.17020.1.S1_at   | MmugDNA.17020.1 | 5.71  | 5.93  | 0.09 | 0.12 | -1.16  | 0.022571 | 0.062295 | 0.287341 | 0.296419 |
| MmugDNA.17022.1.S1_at   | MmugDNA.17022.1 | 6.73  | 6.55  | 1.01 | 0.51 | 1.14   | 0.844513 | 0.42066  | 0.937554 | 0.644323 |
| MmugDNA.17023.1.S1_at   | MmugDNA.17023.1 | 2.85  | 2.85  | 0.03 | 0.14 | 1      | 0.30202  | 0.21831  | 0.636817 | 0.491857 |
| MmugDNA.17024.1.S1_at   | MmugDNA.17024.1 | 3.5   | 3.59  | 0.21 | 0.72 | -1.07  | 0.573573 | 0.741184 | 0.801305 | 0.850135 |
| MmugDNA.17026.1.S1_at   | MmugDNA.17026.1 | 4.42  | 4.56  | 0.01 | 0.23 | -1.1   | 0.992583 | 0.877505 | 0.997451 | 0.930162 |
| MmugDNA.17027.1.S1_at   | MmugDNA.17027.1 | 11.29 | 11.83 | 0.24 | 0.3  | -1.46  | 0.043381 | 0.029642 | 0.356711 | 0.213852 |
| MmugDNA.17028.1.S1_s_at | MmugDNA.17028.1 | 8.49  | 8.44  | 0.22 | 0.11 | 1.04   | 0.912413 | 0.0099   | 0.965274 | 0.130713 |
| MmugDNA.1703.1.S1_at    | MmugDNA.1703.1  | 8.65  | 8.68  | 0.26 | 0.55 | -1.03  | 0.368423 | 0.439471 | 0.679933 | 0.6582   |
| MmugDNA.17030.1.S1_at   | MmugDNA.17030.1 | 6.7   | 6.83  | 0.01 | 0.24 | -1.1   | 0.983048 | 0.994418 | 0.993782 | 0.996586 |
| MmugDNA.17032.1.S1_at   | MmugDNA.17032.1 | 12.2  | 12.18 | 0.05 | 0.08 | 1.01   | 0.688783 | 0.236971 | 0.861169 | 0.507675 |
| MmugDNA.17033.1.S1_at   | MmugDNA.17033.1 | 9.85  | 9.28  | 0.5  | 0.24 | 1.49   | 0.20145  | 0.029314 | 0.563988 | 0.21321  |
| MmugDNA.17035.1.S1_at   | MmugDNA.17035.1 | 4.52  | 4.58  | 0.38 | 0.3  | -1.04  | 0.986987 | 0.35823  | 0.995377 | 0.599754 |
| MmugDNA.17037.1.S1_at   | MmugDNA.17037.1 | 3.16  | 3.11  | 0.07 | 0.08 | 1.04   | 0.158025 | 0.061282 | 0.522944 | 0.294247 |
| MmugDNA.1704.1.S1_at    | MmugDNA.1704.1  | 8.6   | 12.15 | 1.58 | 2.67 | -11.72 | 0.513705 | 0.540095 | 0.766429 | 0.724122 |
| MmugDNA.17040.1.S1_at   | MmugDNA.17040.1 | 7.39  | 7.21  | 0.38 | 0.81 | 1.13   | 0.60251  | 0.745374 | 0.816564 | 0.852384 |
| MmugDNA.17041.1.S1_at   | MmugDNA.17041.1 | 3.69  | 3.64  | 0.27 | 0.25 | 1.03   | 0.972545 | 0.953921 | 0.989473 | 0.97374  |
| MmugDNA.17042.1.S1_at   | MmugDNA.17042.1 | 9.01  | 8     | 0.15 | 0.77 | 2.01   | 0.092353 | 0.081767 | 0.448984 | 0.330121 |
| MmugDNA.17043.1.S1_at   | MmugDNA.17043.1 | 4     | 3.95  | 0.02 | 0.21 | 1.03   | 0.93529  | 0.637948 | 0.975003 | 0.787234 |
| MmugDNA.17045.1.S1_at   | MmugDNA.17045.1 | 4.92  | 5.01  | 0.25 | 0.1  | -1.07  | 0.458216 | 0.352232 | 0.735299 | 0.595568 |
| MmugDNA.17046.1.S1_at   | MmugDNA.17046.1 | 4.73  | 4.77  | 0.08 | 0.13 | -1.03  | 0.175166 | 0.217754 | 0.538831 | 0.491309 |
| MmugDNA.17047.1.S1_at   | MmugDNA.17047.1 | 4.25  | 4.5   | 0.36 | 0.13 | -1.19  | 0.821516 | 0.964368 | 0.927425 | 0.980183 |
| MmugDNA.1705.1.S1_at    | MmugDNA.1705.1  | 3.39  | 3.16  | 0.3  | 0.13 | 1.17   | 0.310659 | 0.052768 | 0.642603 | 0.275325 |
| MmugDNA.17050.1.S1_at   | MmugDNA.17050.1 | 6.94  | 7.16  | 0.34 | 0.49 | -1.17  | 0.420208 | 0.523248 | 0.712267 | 0.713624 |
| MmugDNA.17054.1.S1_at   | MmugDNA.17054.1 | 4.3   | 4.24  | 0.15 | 0.11 | 1.04   | 0.918739 | 0.336326 | 0.968381 | 0.583813 |
| MmugDNA.17055.1.S1_at   | MmugDNA.17055.1 | 6.43  | 6.76  | 0.2  | 0.13 | -1.26  | 0.340258 | 0.3764   | 0.661654 | 0.614243 |
| MmugDNA.17057.1.S1_at   | MmugDNA.17057.1 | 9.76  | 10.09 | 0.55 | 0.74 | -1.25  | 0.385483 | 0.529769 | 0.690634 | 0.717498 |
| MmugDNA.17057.1.S1_s_at | MmugDNA.17057.1 | 10.71 | 10.7  | 0.29 | 0.6  | 1      | 0.646579 | 0.663601 | 0.840949 | 0.803032 |
| MmugDNA.17058.1.S1_at   | MmugDNA.17058.1 | 4.76  | 4.78  | 0.45 | 0.03 | -1.01  | 0.434924 | 0.448734 | 0.72094  | 0.664584 |
| MmugDNA.1706.1.S1_at    | MmugDNA.1706.1  | 6.41  | 6.08  | 0.27 | 0.35 | 1.25   | 0.136031 | 0.284345 | 0.502862 | 0.54659  |
| MmugDNA.17060.1.S1_s_at | MmugDNA.17060.1 | 8.62  | 8.44  | 0.36 | 0.3  | 1.13   | 0.463134 | 0.577954 | 0.738614 | 0.748185 |
| MmugDNA.17061.1.S1_at   | MmugDNA.17061.1 | 4.43  | 4.52  | 0.69 | 0.16 | -1.07  | 0.718639 | 0.722431 | 0.876527 | 0.839239 |
| MmugDNA.17062.1.S1_at   | MmugDNA.17062.1 | 6.61  | 6.6   | 0.15 | 0.04 | 1.01   | 0.905073 | 0.939503 | 0.962071 | 0.965642 |
| MmugDNA.17063.1.S1_at   | MmugDNA.17063.1 | 3.1   | 3.35  | 0.16 | 0.19 | -1.19  | 0.154947 | 0.134628 | 0.519586 | 0.406629 |
| MmugDNA.17064.1.S1_at   | MmugDNA.17064.1 | 5.19  | 5.02  | 0.14 | 0.15 | 1.13   | 0.535162 | 0.682433 | 0.778933 | 0.814526 |
| MmugDNA.17066.1.S1_at   | MmugDNA.17066.1 | 7     | 7.46  | 0.19 | 0.3  | -1.37  | 0.134893 | 0.175606 | 0.501995 | 0.45218  |
| MmugDNA.17067.1.S1_at   | MmugDNA.17067.1 | 5.42  | 4.79  | 0.21 | 0.36 | 1.54   | 0.041607 | 0.040493 | 0.352305 | 0.246264 |
| MmugDNA.1707.1.S1_at    | MmugDNA.1707.1  | 13.05 | 12.8  | 0.06 | 0.06 | 1.19   | 0.015131 | 0.028566 | 0.257529 | 0.210791 |
| MmugDNA.17070.1.S1_at   | MmugDNA.17070.1 | 3.93  | 4.21  | 0.14 | 0.61 | -1.22  | 0.495676 | 0.635258 | 0.757268 | 0.78529  |
| MmugDNA.17071.1.S1_at   | MmugDNA.17071.1 | 4.48  | 4.49  | 0.04 | 0.01 | -1.01  | 0.200378 | 0.729945 | 0.563205 | 0.843733 |
| MmugDNA.17074.1.S1_at   | MmugDNA.17074.1 | 4.66  | 4.46  | 0.18 | 0.26 | 1.14   | 0.83953  | 0.438035 | 0.9352   | 0.657058 |
| MmugDNA.17077.1.S1_at   | MmugDNA.17077.1 | 3.61  | 3.43  | 0.19 | 0.2  | 1.13   | 0.240784 | 0.723103 | 0.593579 | 0.839592 |

|                         |                 |      |       |      |      |       |          |          |          |          |
|-------------------------|-----------------|------|-------|------|------|-------|----------|----------|----------|----------|
| MmugDNA.17078.1.S1_at   | MmugDNA.17078.1 | 3.08 | 3.53  | 0.33 | 0.12 | -1.38 | 0.119465 | 0.124731 | 0.484135 | 0.39513  |
| MmugDNA.17079.1.S1_at   | MmugDNA.17079.1 | 3.38 | 3.4   | 0.06 | 0.08 | -1.01 | 0.432558 | 0.304848 | 0.719094 | 0.561994 |
| MmugDNA.1708.1.S1_at    | MmugDNA.1708.1  | 6.98 | 7.05  | 0.08 | 0.23 | -1.05 | 0.542921 | 0.541767 | 0.783702 | 0.725057 |
| MmugDNA.17080.1.S1_at   | MmugDNA.17080.1 | 4.58 | 4.77  | 0.08 | 0.08 | -1.14 | 0.021503 | 0.09791  | 0.282524 | 0.355715 |
| MmugDNA.17081.1.S1_at   | MmugDNA.17081.1 | 5.89 | 6.23  | 0.55 | 0.42 | -1.27 | 0.908616 | 0.375011 | 0.963816 | 0.613186 |
| MmugDNA.17082.1.S1_at   | MmugDNA.17082.1 | 6.48 | 6.25  | 0.36 | 0.27 | 1.17  | 0.211799 | 0.031898 | 0.572347 | 0.220981 |
| MmugDNA.17085.1.S1_at   | MmugDNA.17085.1 | 6.34 | 6.29  | 0.35 | 0.41 | 1.04  | 0.591404 | 0.784383 | 0.810425 | 0.87518  |
| MmugDNA.17086.1.S1_at   | MmugDNA.17086.1 | 8.87 | 8.07  | 0.12 | 0.28 | 1.74  | 0.00413  | 0.000229 | 0.181739 | 0.032385 |
| MmugDNA.17087.1.S1_at   | MmugDNA.17087.1 | 4.48 | 4.93  | 0.04 | 0.23 | -1.36 | 0.042704 | 0.036231 | 0.355382 | 0.234925 |
| MmugDNA.17089.1.S1_at   | MmugDNA.17089.1 | 5.32 | 5.26  | 0    | 0.05 | 1.04  | 0.038327 | 0.30546  | 0.34385  | 0.562418 |
| MmugDNA.1709.1.S1_at    | MmugDNA.1709.1  | 4.1  | 4.01  | 0.22 | 0.03 | 1.07  | 0.336331 | 0.324537 | 0.659402 | 0.57507  |
| MmugDNA.17090.1.S1_at   | MmugDNA.17090.1 | 5.06 | 4.94  | 1.12 | 0.3  | 1.09  | 0.242901 | 0.136726 | 0.594709 | 0.409287 |
| MmugDNA.17091.1.S1_at   | MmugDNA.17091.1 | 3.27 | 3.28  | 0.05 | 0.1  | -1.01 | 0.253772 | 0.1688   | 0.602284 | 0.445458 |
| MmugDNA.17092.1.S1_at   | MmugDNA.17092.1 | 8.08 | 6.95  | 0.38 | 1    | 2.18  | 0.615267 | 0.78744  | 0.823342 | 0.877025 |
| MmugDNA.17094.1.S1_at   | MmugDNA.17094.1 | 8.21 | 8.28  | 0.21 | 0.09 | -1.05 | 0.638188 | 0.411382 | 0.836511 | 0.638119 |
| MmugDNA.17095.1.S1_at   | MmugDNA.17095.1 | 4.18 | 4.19  | 1.01 | 0.43 | -1.01 | 0.443203 | 0.549077 | 0.725992 | 0.729559 |
| MmugDNA.17096.1.S1_at   | MmugDNA.17096.1 | 3.85 | 3.76  | 0.18 | 0.34 | 1.07  | 0.775375 | 0.960457 | 0.905707 | 0.977507 |
| MmugDNA.17098.1.S1_at   | MmugDNA.17098.1 | 5.88 | 5.93  | 0.16 | 0.13 | -1.04 | 0.947647 | 0.311954 | 0.979939 | 0.566833 |
| MmugDNA.171.1.S1_at     | MmugDNA.171.1   | 4.13 | 4.24  | 0.32 | 0.3  | -1.08 | 0.802889 | 0.370755 | 0.918811 | 0.609736 |
| MmugDNA.1710.1.S1_at    | MmugDNA.1710.1  | 6.45 | 5.79  | 0.55 | 0.58 | 1.58  | 0.474181 | 0.37819  | 0.744894 | 0.615438 |
| MmugDNA.17101.1.S1_at   | MmugDNA.17101.1 | 5.25 | 5.59  | 0.22 | 0.29 | -1.27 | 0.228074 | 0.380905 | 0.58544  | 0.617426 |
| MmugDNA.17102.1.S1_s_at | MmugDNA.17102.1 | 7.89 | 8.77  | 0.39 | 0.19 | -1.84 | 0.058133 | 0.061206 | 0.389948 | 0.294035 |
| MmugDNA.17104.1.S1_at   | MmugDNA.17104.1 | 6.6  | 6.26  | 0.44 | 0.45 | 1.27  | 0.159425 | 0.198559 | 0.524326 | 0.473391 |
| MmugDNA.17106.1.S1_s_at | MmugDNA.17106.1 | 9.96 | 10.81 | 0.34 | 0.84 | -1.8  | 0.191244 | 0.161545 | 0.554194 | 0.43767  |
| MmugDNA.17107.1.S1_at   | MmugDNA.17107.1 | 7.99 | 7.23  | 0.07 | 0.48 | 1.7   | 0.080083 | 0.056361 | 0.430284 | 0.283382 |
| MmugDNA.17108.1.S1_at   | MmugDNA.17108.1 | 4.9  | 4.86  | 0    | 0.3  | 1.03  | 0.869639 | 0.965351 | 0.947917 | 0.980657 |
| MmugDNA.17110.1.S1_at   | MmugDNA.17110.1 | 3.69 | 3.68  | 0.12 | 0.06 | 1.01  | 0.993227 | 0.996861 | 0.997679 | 0.998202 |
| MmugDNA.17112.1.S1_at   | MmugDNA.17112.1 | 3.32 | 3.65  | 0.81 | 0.1  | -1.26 | 0.712314 | 0.87752  | 0.873984 | 0.930162 |
| MmugDNA.17114.1.S1_at   | MmugDNA.17114.1 | 4.29 | 4.35  | 0.13 | 0.15 | -1.04 | 0.67726  | 0.611406 | 0.855435 | 0.769296 |
| MmugDNA.17115.1.S1_at   | MmugDNA.17115.1 | 7.97 | 7.32  | 0.27 | 1.2  | 1.58  | 0.482298 | 0.659267 | 0.749404 | 0.80063  |
| MmugDNA.17116.1.S1_at   | MmugDNA.17116.1 | 8.78 | 7.77  | 0.55 | 0.64 | 2.02  | 0.285144 | 0.230168 | 0.624705 | 0.502015 |
| MmugDNA.17117.1.S1_at   | MmugDNA.17117.1 | 2.73 | 2.87  | 0.13 | 0.09 | -1.1  | 0.415044 | 0.208418 | 0.709338 | 0.482316 |
| MmugDNA.17119.1.S1_at   | MmugDNA.17119.1 | 3.26 | 3.26  | 0.1  | 0.16 | -1.01 | 0.724198 | 0.555319 | 0.879441 | 0.733767 |
| MmugDNA.1712.1.S1_at    | MmugDNA.1712.1  | 4.04 | 3.68  | 0.75 | 0.24 | 1.28  | 0.238029 | 0.326141 | 0.591399 | 0.576328 |
| MmugDNA.17120.1.S1_at   | MmugDNA.17120.1 | 6.32 | 7.13  | 0.36 | 0.79 | -1.76 | 0.250661 | 0.322032 | 0.600389 | 0.57365  |
| MmugDNA.17121.1.S1_at   | MmugDNA.17121.1 | 13   | 13.03 | 0.13 | 0.14 | -1.02 | 0.351303 | 0.426087 | 0.669126 | 0.648279 |
| MmugDNA.17123.1.S1_at   | MmugDNA.17123.1 | 4.2  | 4.06  | 0.57 | 0.16 | 1.1   | 0.616937 | 0.63783  | 0.824363 | 0.787216 |
| MmugDNA.17124.1.S1_at   | MmugDNA.17124.1 | 6.64 | 6.27  | 0.21 | 0.24 | 1.29  | 0.042366 | 0.072673 | 0.354659 | 0.31561  |
| MmugDNA.17126.1.S1_at   | MmugDNA.17126.1 | 5.62 | 4.88  | 0.61 | 0.32 | 1.68  | 0.133954 | 0.053822 | 0.500505 | 0.277535 |
| MmugDNA.17127.1.S1_at   | MmugDNA.17127.1 | 6.59 | 6.48  | 0.15 | 0.61 | 1.08  | 0.419156 | 0.56083  | 0.711691 | 0.736987 |
| MmugDNA.17127.1.S1_s_at | MmugDNA.17127.1 | 6.43 | 6.78  | 0.15 | 0.45 | -1.28 | 0.102496 | 0.086372 | 0.462361 | 0.338805 |

|                         |                 |       |       |      |      |       |          |          |          |          |
|-------------------------|-----------------|-------|-------|------|------|-------|----------|----------|----------|----------|
| MmugDNA.17128.1.S1_at   | MmugDNA.17128.1 | 3.81  | 3.48  | 0.7  | 0.15 | 1.26  | 0.169809 | 0.183253 | 0.534043 | 0.459553 |
| MmugDNA.17129.1.S1_at   | MmugDNA.17129.1 | 5.37  | 6.81  | 1.15 | 1.59 | -2.71 | 0.362219 | 0.270198 | 0.67582  | 0.535543 |
| MmugDNA.1713.1.S1_at    | MmugDNA.1713.1  | 4.15  | 3.78  | 0.7  | 0.14 | 1.29  | 0.356662 | 0.559467 | 0.671685 | 0.736301 |
| MmugDNA.17130.1.S1_at   | MmugDNA.17130.1 | 5.83  | 6.05  | 0.16 | 0.09 | -1.17 | 0.049607 | 0.131738 | 0.371557 | 0.40387  |
| MmugDNA.17131.1.S1_at   | MmugDNA.17131.1 | 5.59  | 6.8   | 0.45 | 0.67 | -2.31 | 0.074776 | 0.070614 | 0.420894 | 0.311913 |
| MmugDNA.17132.1.S1_at   | MmugDNA.17132.1 | 5.09  | 5.2   | 0.12 | 0.01 | -1.08 | 0.197995 | 0.068789 | 0.561022 | 0.308711 |
| MmugDNA.17133.1.S1_at   | MmugDNA.17133.1 | 4.55  | 4.55  | 0.38 | 0.15 | 1     | 0.262396 | 0.322412 | 0.60891  | 0.573972 |
| MmugDNA.17134.1.S1_at   | MmugDNA.17134.1 | 6.47  | 6.35  | 0.16 | 0.34 | 1.08  | 0.594997 | 0.789732 | 0.812253 | 0.878519 |
| MmugDNA.17136.1.S1_at   | MmugDNA.17136.1 | 7.31  | 5.77  | 1.39 | 0.62 | 2.92  | 0.353026 | 0.321719 | 0.669964 | 0.573355 |
| MmugDNA.17137.1.S1_at   | MmugDNA.17137.1 | 8.61  | 10.97 | 0.17 | 0.94 | -5.13 | 0.032035 | 0.009367 | 0.323873 | 0.127634 |
| MmugDNA.17138.1.S1_at   | MmugDNA.17138.1 | 3.55  | 3.5   | 0.16 | 0.32 | 1.03  | 0.554882 | 0.750088 | 0.791099 | 0.854691 |
| MmugDNA.17141.1.S1_at   | MmugDNA.17141.1 | 2.91  | 2.93  | 0.04 | 0.21 | -1.02 | 0.560326 | 0.760856 | 0.79421  | 0.86105  |
| MmugDNA.17144.1.S1_at   | MmugDNA.17144.1 | 3.04  | 3.09  | 0.2  | 0.05 | -1.03 | 0.485329 | 0.697328 | 0.750894 | 0.824132 |
| MmugDNA.17146.1.S1_at   | MmugDNA.17146.1 | 5.4   | 5.39  | 0.22 | 0.29 | 1.01  | 0.973359 | 0.997299 | 0.989597 | 0.998549 |
| MmugDNA.17147.1.S1_at   | MmugDNA.17147.1 | 6.79  | 6.74  | 0.09 | 0.13 | 1.03  | 0.993761 | 0.862066 | 0.997801 | 0.921619 |
| MmugDNA.17148.1.S1_at   | MmugDNA.17148.1 | 5.25  | 5.65  | 0.15 | 0.47 | -1.32 | 0.390978 | 0.353352 | 0.693848 | 0.596477 |
| MmugDNA.17149.1.S1_at   | MmugDNA.17149.1 | 4.35  | 3.89  | 0.7  | 0.24 | 1.37  | 0.314102 | 0.213933 | 0.645522 | 0.487596 |
| MmugDNA.17150.1.S1_at   | MmugDNA.17150.1 | 6.71  | 6.26  | 0.22 | 0.24 | 1.36  | 0.073814 | 0.072695 | 0.419443 | 0.31561  |
| MmugDNA.17151.1.S1_at   | MmugDNA.17151.1 | 4.48  | 4.66  | 0.06 | 0.09 | -1.13 | 0.184405 | 0.479165 | 0.548138 | 0.684975 |
| MmugDNA.17152.1.S1_at   | MmugDNA.17152.1 | 3.56  | 3.98  | 0.15 | 0.03 | -1.34 | 0.005946 | 0.019017 | 0.193926 | 0.173605 |
| MmugDNA.17153.1.S1_at   | MmugDNA.17153.1 | 5.1   | 5     | 0.15 | 0.02 | 1.07  | 0.278855 | 0.410363 | 0.620835 | 0.637229 |
| MmugDNA.17154.1.S1_at   | MmugDNA.17154.1 | 6.13  | 5.94  | 0.17 | 0.19 | 1.14  | 0.355043 | 0.498844 | 0.670716 | 0.697821 |
| MmugDNA.17155.1.S1_at   | MmugDNA.17155.1 | 2.96  | 2.96  | 0.04 | 0.02 | 1     | 0.246285 | 0.344762 | 0.597666 | 0.590101 |
| MmugDNA.17156.1.S1_at   | MmugDNA.17156.1 | 4.71  | 4.57  | 0.12 | 0.17 | 1.1   | 0.119993 | 0.110268 | 0.484491 | 0.374403 |
| MmugDNA.17157.1.S1_at   | MmugDNA.17157.1 | 7.56  | 7.52  | 0.1  | 0.05 | 1.03  | 0.818606 | 0.386108 | 0.926355 | 0.621345 |
| MmugDNA.17157.1.S1_x_at | MmugDNA.17157.1 | 7.69  | 7.72  | 0.04 | 0.15 | -1.02 | 0.697222 | 0.777908 | 0.865585 | 0.870964 |
| MmugDNA.1716.1.S1_at    | MmugDNA.1716.1  | 7.23  | 7.18  | 0.43 | 0.15 | 1.03  | 0.667703 | 0.43618  | 0.851281 | 0.655879 |
| MmugDNA.17160.1.S1_at   | MmugDNA.17160.1 | 8.68  | 9.11  | 0.17 | 0.16 | -1.34 | 0.151091 | 0.355851 | 0.51582  | 0.597864 |
| MmugDNA.17161.1.S1_at   | MmugDNA.17161.1 | 3.21  | 3.22  | 0.12 | 0.09 | -1.01 | 0.850394 | 0.52779  | 0.939943 | 0.716271 |
| MmugDNA.17162.1.S1_at   | MmugDNA.17162.1 | 5.76  | 6.52  | 0.49 | 0.74 | -1.69 | 0.502659 | 0.0095   | 0.760491 | 0.128375 |
| MmugDNA.17163.1.S1_at   | MmugDNA.17163.1 | 6.68  | 7.34  | 0.46 | 0.14 | -1.58 | 0.075681 | 0.064719 | 0.423241 | 0.300314 |
| MmugDNA.17165.1.S1_at   | MmugDNA.17165.1 | 5.21  | 4.93  | 0.38 | 0.29 | 1.22  | 0.095417 | 0.101478 | 0.453425 | 0.361278 |
| MmugDNA.17167.1.S1_at   | MmugDNA.17167.1 | 6.04  | 5.77  | 0.4  | 0.41 | 1.21  | 0.25773  | 0.336918 | 0.605259 | 0.584156 |
| MmugDNA.17168.1.S1_at   | MmugDNA.17168.1 | 3.52  | 3.53  | 0.07 | 0.18 | -1    | 0.907338 | 0.801709 | 0.9632   | 0.885902 |
| MmugDNA.17169.1.S1_at   | MmugDNA.17169.1 | 7.81  | 7.94  | 0.1  | 0.23 | -1.09 | 0.688659 | 0.081583 | 0.861108 | 0.329808 |
| MmugDNA.1717.1.S1_at    | MmugDNA.1717.1  | 11.49 | 11.05 | 0.17 | 1.05 | 1.36  | 0.47622  | 0.541888 | 0.746145 | 0.725146 |
| MmugDNA.17170.1.S1_at   | MmugDNA.17170.1 | 6     | 6.07  | 0.25 | 0.05 | -1.05 | 0.949374 | 0.516798 | 0.980726 | 0.70925  |
| MmugDNA.17171.1.S1_at   | MmugDNA.17171.1 | 8.17  | 8.63  | 0.58 | 0.63 | -1.38 | 0.84829  | 0.483505 | 0.939211 | 0.687943 |
| MmugDNA.17172.1.S1_at   | MmugDNA.17172.1 | 8.79  | 7.89  | 0.09 | 0.27 | 1.87  | 0.008254 | 0.001929 | 0.216948 | 0.065719 |
| MmugDNA.17173.1.S1_at   | MmugDNA.17173.1 | 3.41  | 3.42  | 0.22 | 0    | -1.01 | 0.553187 | 0.527233 | 0.789894 | 0.715896 |
| MmugDNA.17175.1.S1_at   | MmugDNA.17175.1 | 8.13  | 8.12  | 0.63 | 0.57 | 1.01  | 0.611957 | 0.50854  | 0.821903 | 0.703695 |

|                         |                 |       |       |      |      |       |          |          |          |          |
|-------------------------|-----------------|-------|-------|------|------|-------|----------|----------|----------|----------|
| MmugDNA.17176.1.S1_at   | MmugDNA.17176.1 | 3.66  | 3.7   | 0.1  | 0.05 | -1.03 | 0.906637 | 0.273286 | 0.96294  | 0.537788 |
| MmugDNA.17177.1.S1_at   | MmugDNA.17177.1 | 5.59  | 5.32  | 0.33 | 0.52 | 1.21  | 0.989206 | 0.985517 | 0.99615  | 0.991808 |
| MmugDNA.17178.1.S1_at   | MmugDNA.17178.1 | 8.55  | 8.87  | 0.12 | 0.07 | -1.25 | 0.025171 | 0.027761 | 0.297955 | 0.208034 |
| MmugDNA.17179.1.S1_at   | MmugDNA.17179.1 | 4.84  | 4.58  | 0.16 | 0.37 | 1.2   | 0.817116 | 0.525771 | 0.9259   | 0.715217 |
| MmugDNA.1718.1.S1_at    | MmugDNA.1718.1  | 10.4  | 10.98 | 0.21 | 0.36 | -1.49 | 0.143612 | 0.064555 | 0.510312 | 0.300255 |
| MmugDNA.17180.1.S1_at   | MmugDNA.17180.1 | 10.65 | 10.75 | 0.03 | 0.15 | -1.08 | 0.989539 | 0.062183 | 0.996281 | 0.296296 |
| MmugDNA.17181.1.S1_at   | MmugDNA.17181.1 | 3.71  | 3.77  | 0.17 | 0.06 | -1.04 | 0.472886 | 0.311485 | 0.744065 | 0.566468 |
| MmugDNA.17183.1.S1_at   | MmugDNA.17183.1 | 12.2  | 11.93 | 0.05 | 0.22 | 1.2   | 0.048002 | 0.036023 | 0.367582 | 0.234255 |
| MmugDNA.17184.1.S1_at   | MmugDNA.17184.1 | 5.24  | 5.36  | 0.17 | 0.08 | -1.09 | 0.221104 | 0.217205 | 0.580053 | 0.490853 |
| MmugDNA.17185.1.S1_at   | MmugDNA.17185.1 | 10.18 | 10    | 0.15 | 0.29 | 1.13  | 0.462974 | 0.325095 | 0.738493 | 0.575545 |
| MmugDNA.17186.1.S1_at   | MmugDNA.17186.1 | 8.55  | 9.9   | 1.05 | 0.35 | -2.56 | 0.440312 | 0.310235 | 0.724195 | 0.56542  |
| MmugDNA.17187.1.S1_at   | MmugDNA.17187.1 | 8.82  | 9.08  | 0.29 | 0.09 | -1.2  | 0.838254 | 0.644866 | 0.934646 | 0.791927 |
| MmugDNA.1719.1.S1_at    | MmugDNA.1719.1  | 5.03  | 4.85  | 0.34 | 0.07 | 1.13  | 0.340549 | 0.132047 | 0.662001 | 0.404043 |
| MmugDNA.17190.1.S1_at   | MmugDNA.17190.1 | 4.66  | 5.94  | 0.6  | 1.41 | -2.43 | 0.332144 | 0.356806 | 0.656683 | 0.598603 |
| MmugDNA.17191.1.S1_at   | MmugDNA.17191.1 | 5.46  | 6.47  | 0.27 | 0.84 | -2.01 | 0.109883 | 0.06326  | 0.47102  | 0.298244 |
| MmugDNA.17192.1.S1_at   | MmugDNA.17192.1 | 8.39  | 10.31 | 0.23 | 0.32 | -3.77 | 0.001366 | 0.000257 | 0.146228 | 0.033501 |
| MmugDNA.17192.1.S1_s_at | MmugDNA.17192.1 | 7.36  | 8.36  | 0.06 | 0.21 | -1.99 | 0.000855 | 0.000592 | 0.139544 | 0.041912 |
| MmugDNA.17194.1.S1_at   | MmugDNA.17194.1 | 6.41  | 6.76  | 0.22 | 0.24 | -1.27 | 0.130424 | 0.131232 | 0.496851 | 0.403252 |
| MmugDNA.17195.1.S1_at   | MmugDNA.17195.1 | 7.56  | 8.29  | 0.09 | 0.47 | -1.65 | 0.048338 | 0.038523 | 0.368264 | 0.241267 |
| MmugDNA.17197.1.S1_at   | MmugDNA.17197.1 | 10.81 | 10.45 | 0.37 | 0.19 | 1.28  | 0.203551 | 0.167844 | 0.566055 | 0.444426 |
| MmugDNA.17199.1.S1_at   | MmugDNA.17199.1 | 5.67  | 4.85  | 0.79 | 0.24 | 1.76  | 0.186639 | 0.24588  | 0.550106 | 0.51552  |
| MmugDNA.172.1.S1_s_at   | MmugDNA.172.1   | 9.04  | 8.9   | 0.1  | 0.7  | 1.1   | 0.601944 | 0.777006 | 0.816272 | 0.870467 |
| MmugDNA.1720.1.S1_at    | MmugDNA.1720.1  | 4.46  | 4.36  | 0.34 | 0.89 | 1.07  | 0.714311 | 0.368709 | 0.87477  | 0.608226 |
| MmugDNA.17200.1.S1_at   | MmugDNA.17200.1 | 6.13  | 6.63  | 0.2  | 1.16 | -1.41 | 0.545205 | 0.654676 | 0.784786 | 0.798114 |
| MmugDNA.17202.1.S1_at   | MmugDNA.17202.1 | 6.75  | 6.73  | 0.07 | 0.05 | 1.01  | 0.404277 | 0.448465 | 0.702606 | 0.664297 |
| MmugDNA.17204.1.S1_at   | MmugDNA.17204.1 | 2.98  | 2.96  | 0.32 | 0.05 | 1.01  | 0.883014 | 0.948894 | 0.952961 | 0.97078  |
| MmugDNA.17206.1.S1_at   | MmugDNA.17206.1 | 3.77  | 3.65  | 0.34 | 0.55 | 1.09  | 0.685972 | 0.312028 | 0.859586 | 0.56685  |
| MmugDNA.17207.1.S1_at   | MmugDNA.17207.1 | 5.54  | 5.37  | 0.29 | 0.02 | 1.13  | 0.415773 | 0.10897  | 0.709528 | 0.37269  |
| MmugDNA.17210.1.S1_at   | MmugDNA.17210.1 | 6.88  | 6.23  | 0.45 | 0.65 | 1.57  | 0.170545 | 0.172196 | 0.534306 | 0.448608 |
| MmugDNA.17211.1.S1_at   | MmugDNA.17211.1 | 3.95  | 4.29  | 0.24 | 0.57 | -1.26 | 0.70944  | 0.389188 | 0.872518 | 0.623403 |
| MmugDNA.17214.1.S1_at   | MmugDNA.17214.1 | 3.41  | 3.31  | 0.41 | 0.17 | 1.07  | 0.931957 | 0.989523 | 0.973717 | 0.994037 |
| MmugDNA.17215.1.S1_at   | MmugDNA.17215.1 | 6.3   | 6.45  | 0.04 | 0.21 | -1.11 | 0.268168 | 0.351594 | 0.613047 | 0.595109 |
| MmugDNA.17217.1.S1_at   | MmugDNA.17217.1 | 8.17  | 7.92  | 0.43 | 0.24 | 1.19  | 0.994853 | 0.720712 | 0.998209 | 0.838368 |
| MmugDNA.1722.1.S1_at    | MmugDNA.1722.1  | 4.7   | 4.78  | 0.06 | 0.16 | -1.06 | 0.483044 | 0.365357 | 0.749775 | 0.605473 |
| MmugDNA.17222.1.S1_at   | MmugDNA.17222.1 | 5.08  | 5.33  | 0.26 | 0.15 | -1.19 | 0.939732 | 0.35938  | 0.977013 | 0.600671 |
| MmugDNA.17223.1.S1_at   | MmugDNA.17223.1 | 8.78  | 9.12  | 0.14 | 0.19 | -1.27 | 0.032087 | 0.007544 | 0.324151 | 0.116437 |
| MmugDNA.17226.1.S1_at   | MmugDNA.17226.1 | 4.49  | 4.65  | 0.05 | 0.23 | -1.12 | 0.094194 | 0.0293   | 0.451714 | 0.21321  |
| MmugDNA.17228.1.S1_at   | MmugDNA.17228.1 | 6.03  | 6.09  | 0.15 | 0.25 | -1.04 | 0.323845 | 0.30502  | 0.651789 | 0.562176 |
| MmugDNA.1723.1.S1_at    | MmugDNA.1723.1  | 9.66  | 8.07  | 0.67 | 1.01 | 3.02  | 0.119499 | 0.116486 | 0.484145 | 0.383671 |
| MmugDNA.17230.1.S1_at   | MmugDNA.17230.1 | 4.32  | 5.83  | 0.83 | 1.14 | -2.84 | 0.614872 | 0.733872 | 0.823286 | 0.845895 |
| MmugDNA.17231.1.S1_at   | MmugDNA.17231.1 | 4.83  | 5     | 0.12 | 0.06 | -1.13 | 0.093043 | 0.061778 | 0.450349 | 0.295327 |

|                         |                 |       |       |      |      |       |          |          |          |          |
|-------------------------|-----------------|-------|-------|------|------|-------|----------|----------|----------|----------|
| MmugDNA.17232.1.S1_at   | MmugDNA.17232.1 | 9.51  | 9.15  | 0.36 | 0.13 | 1.29  | 0.226937 | 0.242797 | 0.584827 | 0.513151 |
| MmugDNA.17233.1.S1_at   | MmugDNA.17233.1 | 7.13  | 7.46  | 0.23 | 0.86 | -1.26 | 0.498561 | 0.590864 | 0.758502 | 0.75649  |
| MmugDNA.17234.1.S1_at   | MmugDNA.17234.1 | 4.24  | 4.13  | 0.23 | 0.12 | 1.08  | 0.211743 | 0.391658 | 0.572347 | 0.625282 |
| MmugDNA.17235.1.S1_at   | MmugDNA.17235.1 | 3.89  | 4.07  | 1.19 | 0.24 | -1.13 | 0.638434 | 0.490936 | 0.836621 | 0.692666 |
| MmugDNA.17236.1.S1_at   | MmugDNA.17236.1 | 7.53  | 7.44  | 0    | 0.14 | 1.06  | 0.902563 | 0.840531 | 0.961142 | 0.909112 |
| MmugDNA.17237.1.S1_at   | MmugDNA.17237.1 | 5.89  | 6.08  | 0.34 | 0.32 | -1.14 | 0.538255 | 0.286779 | 0.780442 | 0.548145 |
| MmugDNA.17239.1.S1_at   | MmugDNA.17239.1 | 5.49  | 5.39  | 0.2  | 0.18 | 1.07  | 0.305658 | 0.346618 | 0.639223 | 0.591439 |
| MmugDNA.1724.1.S1_at    | MmugDNA.1724.1  | 5.65  | 5.58  | 0.11 | 0.11 | 1.05  | 0.682571 | 0.133598 | 0.857981 | 0.40555  |
| MmugDNA.17240.1.S1_at   | MmugDNA.17240.1 | 10.83 | 10.13 | 0.13 | 0.29 | 1.63  | 0.064307 | 0.005988 | 0.402894 | 0.1058   |
| MmugDNA.17243.1.S1_at   | MmugDNA.17243.1 | 5.84  | 5.99  | 0.19 | 0    | -1.11 | 0.201781 | 0.124546 | 0.564031 | 0.394987 |
| MmugDNA.17244.1.S1_at   | MmugDNA.17244.1 | 5.24  | 5.4   | 0.13 | 0.03 | -1.12 | 0.234384 | 0.539924 | 0.588668 | 0.723995 |
| MmugDNA.17245.1.S1_at   | MmugDNA.17245.1 | 3.67  | 3.39  | 0.26 | 0.05 | 1.21  | 0.569043 | 0.339058 | 0.798952 | 0.585891 |
| MmugDNA.23475.1.S1_s_at | MmugDNA.23475.1 | 11.95 | 12.4  | 0.23 | 0.21 | -1.36 | 0.061536 | 0.021367 | 0.396286 | 0.183015 |
| MmugDNA.17247.1.S1_at   | MmugDNA.17247.1 | 5.56  | 4.85  | 0.42 | 0.23 | 1.64  | 0.091277 | 0.075745 | 0.447137 | 0.32034  |
| MmugDNA.17248.1.S1_at   | MmugDNA.17248.1 | 5.26  | 5.44  | 0.12 | 0.32 | -1.14 | 0.426504 | 0.493146 | 0.715839 | 0.694001 |
| MmugDNA.17249.1.S1_at   | MmugDNA.17249.1 | 8.22  | 7.64  | 0.28 | 0.35 | 1.49  | 0.120626 | 0.192595 | 0.485724 | 0.468095 |
| MmugDNA.1725.1.S1_at    | MmugDNA.1725.1  | 3.74  | 3.84  | 1.21 | 0.26 | -1.07 | 0.418471 | 0.355447 | 0.711356 | 0.597738 |
| MmugDNA.17251.1.S1_at   | MmugDNA.17251.1 | 12.01 | 12.7  | 0.07 | 0.25 | -1.61 | 0.014792 | 0.007943 | 0.255385 | 0.118702 |
| MmugDNA.17252.1.S1_at   | MmugDNA.17252.1 | 3.1   | 3.22  | 0.35 | 0.07 | -1.08 | 0.962572 | 0.989479 | 0.985589 | 0.994037 |
| MmugDNA.17255.1.S1_at   | MmugDNA.17255.1 | 9.74  | 9.85  | 0.11 | 0.22 | -1.08 | 0.666501 | 0.327255 | 0.850466 | 0.577173 |
| MmugDNA.17257.1.S1_at   | MmugDNA.17257.1 | 5.52  | 5.3   | 0.05 | 0.36 | 1.16  | 0.945381 | 0.970621 | 0.979132 | 0.984019 |
| MmugDNA.17258.1.S1_at   | MmugDNA.17258.1 | 6.88  | 6.91  | 0.17 | 0.07 | -1.02 | 0.344788 | 0.560663 | 0.664814 | 0.736915 |
| MmugDNA.1726.1.S1_at    | MmugDNA.1726.1  | 5.76  | 5.85  | 0.2  | 0.04 | -1.07 | 0.479494 | 0.520875 | 0.747663 | 0.711968 |
| MmugDNA.17260.1.S1_at   | MmugDNA.17260.1 | 5.44  | 5.48  | 0.2  | 0.14 | -1.03 | 0.960671 | 0.997617 | 0.9849   | 0.998769 |
| MmugDNA.17261.1.S1_at   | MmugDNA.17261.1 | 7.31  | 7.49  | 0.11 | 0.05 | -1.13 | 0.051504 | 0.204637 | 0.376072 | 0.478995 |
| MmugDNA.17262.1.S1_at   | MmugDNA.17262.1 | 11.33 | 11.14 | 0.26 | 0.61 | 1.14  | 0.929451 | 0.976517 | 0.972728 | 0.987202 |
| MmugDNA.17263.1.S1_at   | MmugDNA.17263.1 | 6.09  | 6.2   | 0.1  | 0.05 | -1.08 | 0.219921 | 0.041052 | 0.579133 | 0.247372 |
| MmugDNA.17264.1.S1_at   | MmugDNA.17264.1 | 5.55  | 5.16  | 0.36 | 0.1  | 1.31  | 0.13194  | 0.154656 | 0.498114 | 0.429564 |
| MmugDNA.17265.1.S1_at   | MmugDNA.17265.1 | 3.71  | 3.82  | 0.07 | 0.18 | -1.08 | 0.342074 | 0.248835 | 0.663038 | 0.517951 |
| MmugDNA.17266.1.S1_at   | MmugDNA.17266.1 | 3.96  | 3.95  | 0.15 | 0.11 | 1.01  | 0.48959  | 0.301306 | 0.753948 | 0.559356 |
| MmugDNA.17267.1.S1_at   | MmugDNA.17267.1 | 6.97  | 6.55  | 0.33 | 0.39 | 1.33  | 0.103969 | 0.137964 | 0.464069 | 0.410912 |
| MmugDNA.17267.1.S1_s_at | MmugDNA.17267.1 | 7.36  | 6.75  | 0.37 | 0.14 | 1.52  | 0.023726 | 0.013231 | 0.292771 | 0.147534 |
| MmugDNA.17268.1.S1_at   | MmugDNA.17268.1 | 4.95  | 4.59  | 0.17 | 0.22 | 1.29  | 0.167978 | 0.152749 | 0.53244  | 0.427571 |
| MmugDNA.1727.1.S1_at    | MmugDNA.1727.1  | 7.48  | 7.55  | 0.2  | 0.58 | -1.05 | 0.520386 | 0.457517 | 0.770745 | 0.670864 |
| MmugDNA.17270.1.S1_at   | MmugDNA.17270.1 | 6.78  | 5.79  | 0.77 | 0.43 | 1.99  | 0.10158  | 0.131394 | 0.461313 | 0.403563 |
| MmugDNA.17271.1.S1_at   | MmugDNA.17271.1 | 5.72  | 5.87  | 0.05 | 0.12 | -1.11 | 0.064404 | 0.132218 | 0.402975 | 0.404274 |
| MmugDNA.17272.1.S1_at   | MmugDNA.17272.1 | 5.98  | 6.25  | 0.18 | 0.36 | -1.2  | 0.266165 | 0.347276 | 0.611747 | 0.591911 |
| MmugDNA.17273.1.S1_at   | MmugDNA.17273.1 | 6.8   | 6.97  | 0.15 | 0.1  | -1.13 | 0.129124 | 0.118167 | 0.495114 | 0.386086 |
| MmugDNA.17274.1.S1_at   | MmugDNA.17274.1 | 6.07  | 7.78  | 0.51 | 0.22 | -3.27 | 0.004039 | 0.001622 | 0.181739 | 0.060897 |
| MmugDNA.17275.1.S1_s_at | MmugDNA.17275.1 | 7.51  | 7.64  | 0.11 | 0.08 | -1.1  | 0.148714 | 0.126904 | 0.51391  | 0.397605 |
| MmugDNA.17276.1.S1_at   | MmugDNA.17276.1 | 6.67  | 6.48  | 1.03 | 0.66 | 1.15  | 0.594295 | 0.78044  | 0.811777 | 0.872614 |

|                         |                 |       |       |      |      |       |          |          |          |          |
|-------------------------|-----------------|-------|-------|------|------|-------|----------|----------|----------|----------|
| MmugDNA.17278.1.S1_at   | MmugDNA.17278.1 | 4.01  | 4.05  | 0.16 | 0.14 | -1.03 | 0.373286 | 0.513241 | 0.683245 | 0.706851 |
| MmugDNA.17279.1.S1_at   | MmugDNA.17279.1 | 9.08  | 9.13  | 0.07 | 1.03 | -1.03 | 0.909312 | 0.227392 | 0.964077 | 0.499659 |
| MmugDNA.1728.1.S1_at    | MmugDNA.1728.1  | 5.82  | 5.85  | 0.05 | 0.13 | -1.02 | 0.618381 | 0.061771 | 0.825194 | 0.295327 |
| MmugDNA.17280.1.S1_at   | MmugDNA.17280.1 | 4.9   | 5.12  | 0.07 | 0.58 | -1.16 | 0.426809 | 0.549782 | 0.715983 | 0.730055 |
| MmugDNA.17281.1.S1_at   | MmugDNA.17281.1 | 3.84  | 3.97  | 0.03 | 0.11 | -1.09 | 0.25121  | 0.385247 | 0.600697 | 0.620709 |
| MmugDNA.17282.1.S1_at   | MmugDNA.17282.1 | 9.14  | 9.54  | 0.67 | 0.64 | -1.31 | 0.610406 | 0.773631 | 0.821014 | 0.868415 |
| MmugDNA.17283.1.S1_at   | MmugDNA.17283.1 | 3.91  | 4.15  | 0.31 | 0.21 | -1.18 | 0.886181 | 0.787898 | 0.954405 | 0.877314 |
| MmugDNA.17284.1.S1_at   | MmugDNA.17284.1 | 9.33  | 8.93  | 0.3  | 0.26 | 1.32  | 0.337586 | 0.505222 | 0.660077 | 0.702062 |
| MmugDNA.17285.1.S1_at   | MmugDNA.17285.1 | 3.29  | 3.16  | 0.12 | 0.07 | 1.09  | 0.249386 | 0.254585 | 0.600193 | 0.522869 |
| MmugDNA.17287.1.S1_at   | MmugDNA.17287.1 | 6.51  | 6.72  | 0.24 | 0.33 | -1.16 | 0.318617 | 0.331231 | 0.648593 | 0.579978 |
| MmugDNA.17288.1.S1_at   | MmugDNA.17288.1 | 3.7   | 3.79  | 0.06 | 0.08 | -1.06 | 0.182179 | 0.171316 | 0.546503 | 0.447809 |
| MmugDNA.17289.1.S1_at   | MmugDNA.17289.1 | 4.49  | 4.31  | 0.3  | 0.15 | 1.13  | 0.716616 | 0.79065  | 0.875506 | 0.878957 |
| MmugDNA.17290.1.S1_at   | MmugDNA.17290.1 | 5.31  | 6.01  | 0.05 | 0.79 | -1.63 | 0.147424 | 0.197403 | 0.513235 | 0.472311 |
| MmugDNA.17291.1.S1_at   | MmugDNA.17291.1 | 5.38  | 4.98  | 0.36 | 0.22 | 1.32  | 0.261065 | 0.467271 | 0.607554 | 0.677016 |
| MmugDNA.17293.1.S1_s_at | MmugDNA.17293.1 | 8.19  | 9.18  | 0.49 | 0.83 | -1.98 | 0.154465 | 0.138655 | 0.51902  | 0.411705 |
| MmugDNA.17296.1.S1_at   | MmugDNA.17296.1 | 4.51  | 4.26  | 0.3  | 0.28 | 1.19  | 0.603495 | 0.642331 | 0.817186 | 0.790154 |
| MmugDNA.17297.1.S1_at   | MmugDNA.17297.1 | 4.22  | 4.12  | 0.15 | 0.1  | 1.07  | 0.29014  | 0.082037 | 0.628012 | 0.330756 |
| MmugDNA.17298.1.S1_at   | MmugDNA.17298.1 | 4.8   | 4.45  | 0.4  | 0.6  | 1.28  | 0.593461 | 0.798145 | 0.811455 | 0.883809 |
| MmugDNA.1730.1.S1_at    | MmugDNA.1730.1  | 6.65  | 7.44  | 0.33 | 0.24 | -1.73 | 0.099678 | 0.064235 | 0.459668 | 0.299668 |
| MmugDNA.17301.1.S1_at   | MmugDNA.17301.1 | 7.18  | 7.53  | 0.11 | 0.26 | -1.28 | 0.427098 | 0.295086 | 0.716089 | 0.554551 |
| MmugDNA.37783.1.S1_x_at | MmugDNA.37783.1 | 3.05  | 3.17  | 0.11 | 0.22 | -1.08 | 0.733738 | 0.800387 | 0.885206 | 0.885129 |
| MmugDNA.17303.1.S1_at   | MmugDNA.17303.1 | 4.43  | 4.39  | 0.18 | 0.31 | 1.03  | 0.876114 | 0.309492 | 0.95032  | 0.564987 |
| MmugDNA.17304.1.S1_at   | MmugDNA.17304.1 | 9.5   | 9.94  | 0.39 | 0.5  | -1.36 | 0.416421 | 0.354148 | 0.709947 | 0.597059 |
| MmugDNA.17305.1.S1_at   | MmugDNA.17305.1 | 5.98  | 6.43  | 0.14 | 0.1  | -1.37 | 0.027038 | 0.018719 | 0.305915 | 0.171803 |
| MmugDNA.17306.1.S1_at   | MmugDNA.17306.1 | 5.85  | 6.13  | 1.29 | 0.1  | -1.21 | 0.570637 | 0.273702 | 0.799614 | 0.53817  |
| MmugDNA.17307.1.S1_at   | MmugDNA.17307.1 | 4.15  | 4.16  | 0.03 | 0.05 | -1    | 0.455229 | 0.764138 | 0.733701 | 0.862852 |
| MmugDNA.17308.1.S1_at   | MmugDNA.17308.1 | 8.21  | 7.61  | 0.6  | 0.28 | 1.52  | 0.145855 | 0.159309 | 0.511704 | 0.43531  |
| MmugDNA.17309.1.S1_at   | MmugDNA.17309.1 | 4.47  | 4.42  | 0.07 | 0.18 | 1.03  | 0.233415 | 0.277185 | 0.588137 | 0.541154 |
| MmugDNA.1731.1.S1_at    | MmugDNA.1731.1  | 8.36  | 7.85  | 0.85 | 0.34 | 1.43  | 0.153298 | 0.154869 | 0.517764 | 0.429849 |
| MmugDNA.17310.1.S1_at   | MmugDNA.17310.1 | 9.63  | 9.17  | 0.13 | 0.13 | 1.37  | 0.008557 | 0.002273 | 0.21941  | 0.070312 |
| MmugDNA.17311.1.S1_at   | MmugDNA.17311.1 | 5.83  | 5.78  | 0.1  | 0.73 | 1.03  | 0.431407 | 0.398402 | 0.71858  | 0.629374 |
| MmugDNA.17312.1.S1_at   | MmugDNA.17312.1 | 7.2   | 7.11  | 0.14 | 0.05 | 1.06  | 0.501136 | 0.238323 | 0.759789 | 0.508904 |
| MmugDNA.17313.1.S1_at   | MmugDNA.17313.1 | 4.29  | 4.31  | 0.21 | 0.15 | -1.01 | 0.681994 | 0.515145 | 0.857664 | 0.708126 |
| MmugDNA.17314.1.S1_at   | MmugDNA.17314.1 | 6.55  | 7.5   | 0.81 | 0.77 | -1.93 | 0.502163 | 0.472189 | 0.760244 | 0.679876 |
| MmugDNA.17315.1.S1_at   | MmugDNA.17315.1 | 6.21  | 5.99  | 0.16 | 0.09 | 1.17  | 0.042466 | 0.00068  | 0.355049 | 0.04413  |
| MmugDNA.17316.1.S1_at   | MmugDNA.17316.1 | 11.24 | 11.24 | 0.23 | 0.17 | -1    | 0.968931 | 0.982852 | 0.988244 | 0.990596 |
| MmugDNA.17317.1.S1_at   | MmugDNA.17317.1 | 4.19  | 4     | 0.14 | 0.16 | 1.14  | 0.876587 | 0.455593 | 0.950613 | 0.669584 |
| MmugDNA.17318.1.S1_at   | MmugDNA.17318.1 | 9.46  | 9.23  | 0.45 | 0.45 | 1.18  | 0.19326  | 0.155079 | 0.556738 | 0.430197 |
| MmugDNA.1732.1.S1_at    | MmugDNA.1732.1  | 6.19  | 6.18  | 0.07 | 0.2  | 1.01  | 0.752475 | 0.796816 | 0.894361 | 0.882803 |
| MmugDNA.17320.1.S1_at   | MmugDNA.17320.1 | 4.39  | 4.36  | 0.29 | 0.13 | 1.02  | 0.542268 | 0.707025 | 0.783145 | 0.830116 |
| MmugDNA.17321.1.S1_at   | MmugDNA.17321.1 | 3.56  | 3.33  | 0.16 | 0.06 | 1.18  | 0.290443 | 0.188941 | 0.628091 | 0.464854 |



|                         |                 |       |       |      |      |       |          |          |          |          |
|-------------------------|-----------------|-------|-------|------|------|-------|----------|----------|----------|----------|
| MmugDNA.17323.1.S1_at   | MmugDNA.17323.1 | 3.01  | 2.86  | 0.04 | 0.18 | 1.11  | 0.659984 | 0.736772 | 0.847435 | 0.847693 |
| MmugDNA.17324.1.S1_at   | MmugDNA.17324.1 | 5.68  | 5.52  | 0.04 | 0.15 | 1.12  | 0.138412 | 0.193126 | 0.505745 | 0.468554 |
| MmugDNA.17325.1.S1_at   | MmugDNA.17325.1 | 8.31  | 8.25  | 0.33 | 0.23 | 1.04  | 0.269826 | 0.224638 | 0.614491 | 0.497613 |
| MmugDNA.17326.1.S1_at   | MmugDNA.17326.1 | 5.03  | 5.01  | 0.08 | 0.11 | 1.01  | 0.380123 | 0.465969 | 0.68724  | 0.676055 |
| MmugDNA.17327.1.S1_at   | MmugDNA.17327.1 | 7.53  | 8.01  | 1.21 | 0.39 | -1.39 | 0.803058 | 0.74629  | 0.918891 | 0.85272  |
| MmugDNA.17328.1.S1_at   | MmugDNA.17328.1 | 5.81  | 5.99  | 0.1  | 0.14 | -1.13 | 0.243792 | 0.410203 | 0.595593 | 0.637131 |
| MmugDNA.1733.1.S1_at    | MmugDNA.1733.1  | 4.64  | 5.7   | 0.15 | 0.41 | -2.08 | 0.007979 | 0.029317 | 0.214639 | 0.21321  |
| MmugDNA.1733.1.S1_s_at  | MmugDNA.1733.1  | 8.8   | 9.82  | 0.31 | 0.91 | -2.02 | 0.147644 | 0.187662 | 0.513287 | 0.463673 |
| MmugDNA.17330.1.S1_at   | MmugDNA.17330.1 | 4.36  | 4.53  | 0.18 | 0.1  | -1.13 | 0.131935 | 0.150788 | 0.498114 | 0.425322 |
| MmugDNA.17331.1.S1_s_at | MmugDNA.17331.1 | 7.82  | 9.63  | 0.91 | 0.46 | -3.51 | 0.034584 | 0.025723 | 0.333297 | 0.201029 |
| MmugDNA.17332.1.S1_at   | MmugDNA.17332.1 | 5.41  | 5.23  | 0.26 | 0.05 | 1.14  | 0.25465  | 0.054777 | 0.602549 | 0.279545 |
| MmugDNA.17333.1.S1_x_at | MmugDNA.17333.1 | 4.35  | 4.07  | 0.39 | 0.19 | 1.21  | 0.164024 | 0.353747 | 0.528211 | 0.596815 |
| MmugDNA.17334.1.S1_at   | MmugDNA.17334.1 | 3.42  | 3.46  | 0.03 | 0.04 | -1.03 | 0.242339 | 0.480869 | 0.594351 | 0.686    |
| MmugDNA.17335.1.S1_at   | MmugDNA.17335.1 | 7.6   | 7.6   | 0.06 | 0.06 | 1     | 0.58586  | 0.916607 | 0.80777  | 0.953322 |
| MmugDNA.17336.1.S1_s_at | MmugDNA.17336.1 | 12.33 | 12.42 | 0.13 | 0.04 | -1.07 | 0.15697  | 0.148937 | 0.521736 | 0.423294 |
| MmugDNA.17337.1.S1_at   | MmugDNA.17337.1 | 11.2  | 10.98 | 0.1  | 0.09 | 1.16  | 0.25225  | 0.072714 | 0.601282 | 0.31565  |
| MmugDNA.17338.1.S1_at   | MmugDNA.17338.1 | 2.86  | 2.85  | 0.07 | 0.11 | 1.01  | 0.435723 | 0.593103 | 0.721326 | 0.758067 |
| MmugDNA.17339.1.S1_at   | MmugDNA.17339.1 | 5.15  | 5.02  | 0.53 | 0.16 | 1.1   | 0.836254 | 0.219456 | 0.933695 | 0.493156 |
| MmugDNA.17339.1.S1_s_at | MmugDNA.17339.1 | 5.7   | 5.66  | 0.9  | 0.53 | 1.03  | 0.956146 | 0.997663 | 0.983483 | 0.998797 |
| MmugDNA.17340.1.S1_at   | MmugDNA.17340.1 | 3.2   | 3.21  | 0.03 | 0.01 | -1.01 | 0.948229 | 0.994213 | 0.980164 | 0.99645  |
| MmugDNA.17341.1.S1_at   | MmugDNA.17341.1 | 4.49  | 4.43  | 0.72 | 0.95 | 1.04  | 0.903374 | 0.787821 | 0.961444 | 0.877302 |
| MmugDNA.17342.1.S1_s_at | MmugDNA.17342.1 | 10.76 | 10.26 | 0.14 | 0.17 | 1.41  | 0.019612 | 0.0032   | 0.275549 | 0.082002 |
| MmugDNA.17343.1.S1_at   | MmugDNA.17343.1 | 3.09  | 3.08  | 0.1  | 0.04 | 1.01  | 0.984402 | 0.702103 | 0.994476 | 0.827304 |
| MmugDNA.17345.1.S1_s_at | MmugDNA.17345.1 | 9.74  | 9.7   | 0.37 | 0.98 | 1.02  | 0.680591 | 0.80785  | 0.85724  | 0.8894   |
| MmugDNA.17346.1.S1_at   | MmugDNA.17346.1 | 3.73  | 3.63  | 0.13 | 0.14 | 1.08  | 0.183311 | 0.64652  | 0.547348 | 0.792953 |
| MmugDNA.17347.1.S1_at   | MmugDNA.17347.1 | 11.54 | 11.86 | 0.42 | 0.38 | -1.24 | 0.378401 | 0.524049 | 0.686437 | 0.714164 |
| MmugDNA.17349.1.S1_at   | MmugDNA.17349.1 | 6.91  | 6.32  | 1    | 0.93 | 1.5   | 0.583769 | 0.749446 | 0.806776 | 0.85442  |
| MmugDNA.1735.1.S1_at    | MmugDNA.1735.1  | 3.32  | 3.71  | 0.18 | 0.14 | -1.3  | 0.065346 | 0.0407   | 0.404414 | 0.246689 |
| MmugDNA.17351.1.S1_at   | MmugDNA.17351.1 | 5.17  | 4.8   | 0.51 | 0.33 | 1.3   | 0.412773 | 0.59302  | 0.708045 | 0.758    |
| MmugDNA.17352.1.S1_at   | MmugDNA.17352.1 | 4.41  | 4.23  | 0.05 | 0.14 | 1.13  | 0.126602 | 0.129273 | 0.492802 | 0.400682 |
| MmugDNA.17353.1.S1_at   | MmugDNA.17353.1 | 3.66  | 3.86  | 0.06 | 0.21 | -1.14 | 0.210169 | 0.117146 | 0.571368 | 0.384582 |
| MmugDNA.17354.1.S1_at   | MmugDNA.17354.1 | 6.65  | 6.83  | 0.11 | 0.07 | -1.13 | 0.153938 | 0.168812 | 0.518553 | 0.445458 |
| MmugDNA.17355.1.S1_at   | MmugDNA.17355.1 | 7.17  | 6.79  | 0.17 | 1.89 | 1.3   | 0.243227 | 0.28407  | 0.594876 | 0.546307 |
| MmugDNA.17356.1.S1_x_at | MmugDNA.17356.1 | 8.94  | 8.48  | 0.29 | 0.1  | 1.38  | 0.068593 | 0.064435 | 0.410201 | 0.300008 |
| MmugDNA.17357.1.S1_at   | MmugDNA.17357.1 | 8.86  | 8.38  | 0.18 | 0.31 | 1.39  | 0.197369 | 0.209383 | 0.56039  | 0.483069 |
| MmugDNA.17358.1.S1_at   | MmugDNA.17358.1 | 5.34  | 5.58  | 0.06 | 0.2  | -1.17 | 0.164004 | 0.17667  | 0.528211 | 0.453138 |
| MmugDNA.17359.1.S1_at   | MmugDNA.17359.1 | 7.81  | 7.95  | 0.5  | 0.37 | -1.11 | 0.859376 | 0.965134 | 0.943196 | 0.980605 |
| MmugDNA.1736.1.S1_at    | MmugDNA.1736.1  | 7.11  | 7.43  | 0.14 | 0.76 | -1.25 | 0.377962 | 0.209806 | 0.68623  | 0.483538 |
| MmugDNA.17361.1.S1_at   | MmugDNA.17361.1 | 3.04  | 3.04  | 0.04 | 0.13 | -1    | 0.7648   | 0.882857 | 0.900939 | 0.933206 |
| MmugDNA.17363.1.S1_at   | MmugDNA.17363.1 | 6.58  | 8.57  | 0.81 | 1.71 | -3.98 | 0.272072 | 0.198349 | 0.615959 | 0.473267 |
| MmugDNA.17364.1.S1_at   | MmugDNA.17364.1 | 5.04  | 5.26  | 0.07 | 0.12 | -1.16 | 0.065854 | 0.26308  | 0.405296 | 0.529402 |

|                         |                 |       |       |      |      |       |          |          |          |          |
|-------------------------|-----------------|-------|-------|------|------|-------|----------|----------|----------|----------|
| MmugDNA.17367.1.S1_at   | MmugDNA.17367.1 | 6.97  | 7.01  | 0.35 | 0.1  | -1.03 | 0.954744 | 0.367701 | 0.983073 | 0.607374 |
| MmugDNA.17368.1.S1_at   | MmugDNA.17368.1 | 4.86  | 5.31  | 1.12 | 0.28 | -1.36 | 0.813516 | 0.91914  | 0.924315 | 0.954586 |
| MmugDNA.1737.1.S1_at    | MmugDNA.1737.1  | 3.85  | 3.41  | 0.11 | 0.16 | 1.35  | 0.015168 | 0.001898 | 0.257663 | 0.065035 |
| MmugDNA.17370.1.S1_at   | MmugDNA.17370.1 | 10.1  | 12.15 | 0.65 | 1.06 | -4.13 | 0.082964 | 0.066705 | 0.434807 | 0.304114 |
| MmugDNA.17370.1.S1_s_at | MmugDNA.17370.1 | 11.27 | 13.1  | 0.7  | 0.74 | -3.56 | 0.077852 | 0.059298 | 0.427855 | 0.290528 |
| MmugDNA.17371.1.S1_at   | MmugDNA.17371.1 | 6.54  | 5.48  | 0.49 | 0.39 | 2.08  | 0.02333  | 0.007851 | 0.290973 | 0.118059 |
| MmugDNA.17372.1.S1_at   | MmugDNA.17372.1 | 5.18  | 5.41  | 0.54 | 0.21 | -1.17 | 0.573174 | 0.417664 | 0.801055 | 0.642365 |
| MmugDNA.17374.1.S1_at   | MmugDNA.17374.1 | 5.46  | 5.47  | 0.24 | 0.04 | -1    | 0.606574 | 0.860085 | 0.818943 | 0.920245 |
| MmugDNA.17375.1.S1_at   | MmugDNA.17375.1 | 6.63  | 6.9   | 0.08 | 0.33 | -1.21 | 0.705712 | 0.788424 | 0.870247 | 0.877622 |
| MmugDNA.17376.1.S1_at   | MmugDNA.17376.1 | 6.01  | 8.32  | 1.73 | 3.17 | -4.97 | 0.467411 | 0.358902 | 0.74068  | 0.600291 |
| MmugDNA.17377.1.S1_s_at | MmugDNA.17377.1 | 11.39 | 11.62 | 0.29 | 0.22 | -1.18 | 0.289835 | 0.193469 | 0.627775 | 0.468739 |
| MmugDNA.17378.1.S1_at   | MmugDNA.17378.1 | 10.63 | 10.53 | 0.34 | 0.52 | 1.07  | 0.970566 | 0.979695 | 0.988669 | 0.989107 |
| MmugDNA.17379.1.S1_at   | MmugDNA.17379.1 | 6.73  | 7.5   | 0.25 | 0.43 | -1.71 | 0.038221 | 0.034467 | 0.343727 | 0.229717 |
| MmugDNA.1738.1.S1_at    | MmugDNA.1738.1  | 5.98  | 6.02  | 0.68 | 0.07 | -1.03 | 0.431831 | 0.446418 | 0.718638 | 0.662842 |
| MmugDNA.17380.1.S1_at   | MmugDNA.17380.1 | 7.73  | 6.85  | 0.85 | 0.5  | 1.84  | 0.284614 | 0.286292 | 0.624327 | 0.547784 |
| MmugDNA.17381.1.S1_at   | MmugDNA.17381.1 | 7.22  | 7.54  | 0.2  | 0.15 | -1.25 | 0.04984  | 0.08282  | 0.372242 | 0.332331 |
| MmugDNA.17382.1.S1_at   | MmugDNA.17382.1 | 3.52  | 3.6   | 0.12 | 0.11 | -1.05 | 0.590418 | 0.472592 | 0.809851 | 0.68007  |
| MmugDNA.17383.1.S1_at   | MmugDNA.17383.1 | 5.75  | 6.11  | 0.2  | 0.31 | -1.28 | 0.121643 | 0.134491 | 0.486508 | 0.406626 |
| MmugDNA.17385.1.S1_at   | MmugDNA.17385.1 | 6.14  | 6.15  | 0.21 | 0.32 | -1.01 | 0.822633 | 0.234915 | 0.927793 | 0.506125 |
| MmugDNA.17386.1.S1_at   | MmugDNA.17386.1 | 4.96  | 5.01  | 0.2  | 0.05 | -1.03 | 0.211506 | 0.180176 | 0.572267 | 0.456751 |
| MmugDNA.17387.1.S1_at   | MmugDNA.17387.1 | 6.08  | 6.31  | 0.33 | 0.07 | -1.17 | 0.402833 | 0.056432 | 0.701662 | 0.283516 |
| MmugDNA.17388.1.S1_at   | MmugDNA.17388.1 | 9.52  | 9.48  | 0.31 | 0.16 | 1.02  | 0.995521 | 0.913876 | 0.99841  | 0.951561 |
| MmugDNA.17389.1.S1_at   | MmugDNA.17389.1 | 4.08  | 3.63  | 0.3  | 0.09 | 1.37  | 0.087964 | 0.124185 | 0.442256 | 0.394496 |
| MmugDNA.1739.1.S1_at    | MmugDNA.1739.1  | 4.12  | 4.12  | 0.21 | 0.2  | 1     | 0.500019 | 0.207853 | 0.759402 | 0.482049 |
| MmugDNA.17391.1.S1_at   | MmugDNA.17391.1 | 12.23 | 12.28 | 0.09 | 0.24 | -1.04 | 0.328378 | 0.50441  | 0.654375 | 0.701557 |
| MmugDNA.17392.1.S1_at   | MmugDNA.17392.1 | 3.99  | 3.95  | 0.06 | 0.17 | 1.03  | 0.748537 | 0.264044 | 0.892494 | 0.530185 |
| MmugDNA.17394.1.S1_at   | MmugDNA.17394.1 | 4     | 4.04  | 0.14 | 0.05 | -1.03 | 0.160382 | 0.258613 | 0.525374 | 0.52584  |
| MmugDNA.17396.1.S1_at   | MmugDNA.17396.1 | 3.71  | 3.77  | 0.23 | 0.11 | -1.04 | 0.960256 | 0.976895 | 0.98486  | 0.987434 |
| MmugDNA.17398.1.S1_at   | MmugDNA.17398.1 | 3.15  | 3.05  | 0.05 | 0.19 | 1.07  | 0.608453 | 0.59633  | 0.819993 | 0.759474 |
| MmugDNA.17399.1.S1_at   | MmugDNA.17399.1 | 3.57  | 3.68  | 0.14 | 0.15 | -1.08 | 0.356693 | 0.398651 | 0.671691 | 0.629458 |
| MmugDNA.174.1.S1_at     | MmugDNA.174.1   | 8.31  | 7.98  | 0.03 | 0.17 | 1.26  | 0.04004  | 0.090035 | 0.348657 | 0.344402 |
| MmugDNA.1740.1.S1_at    | MmugDNA.1740.1  | 4.28  | 4.86  | 0.16 | 1.4  | -1.49 | 0.3641   | 0.480946 | 0.677212 | 0.686018 |
| MmugDNA.17401.1.S1_at   | MmugDNA.17401.1 | 4.35  | 4.07  | 0.26 | 0.21 | 1.22  | 0.059905 | 0.045021 | 0.392991 | 0.256691 |
| MmugDNA.17402.1.S1_at   | MmugDNA.17402.1 | 6.12  | 6.07  | 0.35 | 0.36 | 1.04  | 0.420307 | 0.574177 | 0.712325 | 0.745679 |
| MmugDNA.17403.1.S1_at   | MmugDNA.17403.1 | 4.26  | 4.43  | 0.07 | 0.24 | -1.12 | 0.32337  | 0.3814   | 0.651559 | 0.617681 |
| MmugDNA.17404.1.S1_s_at | MmugDNA.17404.1 | 9.88  | 8.4   | 0.69 | 0.75 | 2.78  | 0.032639 | 0.013974 | 0.32573  | 0.151567 |
| MmugDNA.17405.1.S1_at   | MmugDNA.17405.1 | 7.99  | 7.97  | 0.21 | 0.13 | 1.01  | 0.986843 | 0.080028 | 0.995328 | 0.327429 |
| MmugDNA.17408.1.S1_at   | MmugDNA.17408.1 | 6.44  | 6.46  | 0.17 | 0.05 | -1.02 | 0.890593 | 0.515426 | 0.956235 | 0.708291 |
| MmugDNA.1741.1.S1_at    | MmugDNA.1741.1  | 7.85  | 7.92  | 0.18 | 0.13 | -1.05 | 0.360695 | 0.286366 | 0.674646 | 0.547791 |
| MmugDNA.17410.1.S1_at   | MmugDNA.17410.1 | 6.16  | 6.17  | 0.05 | 0.03 | -1    | 0.90997  | 0.272131 | 0.964329 | 0.536939 |
| MmugDNA.17411.1.S1_at   | MmugDNA.17411.1 | 7.28  | 6.71  | 0.59 | 0.45 | 1.48  | 0.487435 | 0.547494 | 0.75211  | 0.728479 |

|                         |                 |      |      |      |      |        |          |          |          |          |
|-------------------------|-----------------|------|------|------|------|--------|----------|----------|----------|----------|
| MmugDNA.17412.1.S1_at   | MmugDNA.17412.1 | 5.19 | 4.21 | 0.66 | 0.16 | 1.97   | 0.068542 | 0.162463 | 0.410201 | 0.438575 |
| MmugDNA.17414.1.S1_at   | MmugDNA.17414.1 | 7.95 | 8.12 | 0.18 | 0    | -1.13  | 0.259136 | 0.272682 | 0.606268 | 0.537433 |
| MmugDNA.17414.1.S1_s_at | MmugDNA.17414.1 | 6.45 | 6.59 | 0.4  | 0.61 | -1.11  | 0.668751 | 0.856715 | 0.851986 | 0.918126 |
| MmugDNA.17415.1.S1_at   | MmugDNA.17415.1 | 3.36 | 3.04 | 0.24 | 0.21 | 1.25   | 0.272917 | 0.129157 | 0.616391 | 0.400611 |
| MmugDNA.17416.1.S1_at   | MmugDNA.17416.1 | 6.23 | 6.33 | 0.04 | 0.06 | -1.07  | 0.139494 | 0.017994 | 0.506967 | 0.169171 |
| MmugDNA.17417.1.S1_at   | MmugDNA.17417.1 | 6.4  | 6.24 | 0.32 | 0    | 1.11   | 0.441097 | 0.273447 | 0.724743 | 0.537868 |
| MmugDNA.17418.1.S1_at   | MmugDNA.17418.1 | 3.68 | 3.81 | 0.21 | 0.06 | -1.09  | 0.894186 | 0.981763 | 0.957854 | 0.989984 |
| MmugDNA.17420.1.S1_at   | MmugDNA.17420.1 | 3.99 | 3.63 | 0.47 | 0.25 | 1.28   | 0.237349 | 0.374298 | 0.590859 | 0.612779 |
| MmugDNA.17421.1.S1_at   | MmugDNA.17421.1 | 6.88 | 6.64 | 0.12 | 0.33 | 1.18   | 0.304411 | 0.091905 | 0.638542 | 0.347243 |
| MmugDNA.17423.1.S1_at   | MmugDNA.17423.1 | 3.28 | 3.4  | 0.14 | 0.12 | -1.09  | 0.130827 | 0.18255  | 0.497198 | 0.459065 |
| MmugDNA.17424.1.S1_at   | MmugDNA.17424.1 | 4.38 | 4.51 | 0.05 | 0.04 | -1.09  | 0.107075 | 0.085348 | 0.467743 | 0.337226 |
| MmugDNA.17425.1.S1_at   | MmugDNA.17425.1 | 9.24 | 8.5  | 0.68 | 1.34 | 1.67   | 0.169003 | 0.203436 | 0.533243 | 0.477634 |
| MmugDNA.17427.1.S1_at   | MmugDNA.17427.1 | 7.06 | 6.63 | 0.44 | 0.38 | 1.35   | 0.585616 | 0.051865 | 0.807608 | 0.273151 |
| MmugDNA.17428.1.S1_at   | MmugDNA.17428.1 | 7.2  | 7.06 | 0.58 | 0.41 | 1.11   | 0.733114 | 0.421744 | 0.884841 | 0.645254 |
| MmugDNA.17429.1.S1_at   | MmugDNA.17429.1 | 3.23 | 3.11 | 0.06 | 0.37 | 1.09   | 0.69945  | 0.810864 | 0.866851 | 0.890858 |
| MmugDNA.1743.1.S1_at    | MmugDNA.1743.1  | 6.14 | 6.25 | 0.12 | 0.05 | -1.08  | 0.202828 | 0.103323 | 0.565472 | 0.364168 |
| MmugDNA.17431.1.S1_at   | MmugDNA.17431.1 | 4.73 | 4.48 | 0.31 | 0.24 | 1.19   | 0.667928 | 0.927954 | 0.851379 | 0.959116 |
| MmugDNA.17432.1.S1_at   | MmugDNA.17432.1 | 3.45 | 3.57 | 0.07 | 0.07 | -1.09  | 0.127459 | 0.370488 | 0.493834 | 0.609544 |
| MmugDNA.17434.1.S1_at   | MmugDNA.17434.1 | 2.96 | 3.16 | 0.11 | 0.11 | -1.15  | 0.473038 | 0.525846 | 0.744128 | 0.715222 |
| MmugDNA.17435.1.S1_at   | MmugDNA.17435.1 | 3.2  | 3.28 | 0.05 | 0.08 | -1.06  | 0.570726 | 0.141241 | 0.799645 | 0.414749 |
| MmugDNA.17436.1.S1_at   | MmugDNA.17436.1 | 4.12 | 4.1  | 0.2  | 0.24 | 1.01   | 0.872976 | 0.686927 | 0.94924  | 0.817365 |
| MmugDNA.17437.1.S1_at   | MmugDNA.17437.1 | 6.82 | 6.78 | 0.28 | 0.02 | 1.03   | 0.506062 | 0.566508 | 0.761997 | 0.74062  |
| MmugDNA.17438.1.S1_at   | MmugDNA.17438.1 | 4.24 | 4.16 | 0.32 | 0.48 | 1.06   | 0.762099 | 0.660585 | 0.899896 | 0.801437 |
| MmugDNA.17439.1.S1_at   | MmugDNA.17439.1 | 3.4  | 4.24 | 0.29 | 0.07 | -1.79  | 0.007973 | 0.002699 | 0.214639 | 0.076461 |
| MmugDNA.1744.1.S1_at    | MmugDNA.1744.1  | 3.38 | 3.26 | 0.35 | 0.17 | 1.09   | 0.678474 | 0.644884 | 0.856026 | 0.791927 |
| MmugDNA.17440.1.S1_at   | MmugDNA.17440.1 | 4.71 | 4.86 | 0.06 | 0.34 | -1.11  | 0.863557 | 0.680341 | 0.945247 | 0.813384 |
| MmugDNA.17441.1.S1_at   | MmugDNA.17441.1 | 3.59 | 3.21 | 0.35 | 0.16 | 1.3    | 0.10561  | 0.080502 | 0.466487 | 0.328159 |
| MmugDNA.17442.1.S1_at   | MmugDNA.17442.1 | 9.46 | 8.09 | 0.06 | 0.45 | 2.58   | 0.014595 | 0.006842 | 0.254235 | 0.111782 |
| MmugDNA.17443.1.S1_at   | MmugDNA.17443.1 | 3.72 | 3.66 | 0.13 | 0.24 | 1.04   | 0.994961 | 0.985942 | 0.998227 | 0.99201  |
| MmugDNA.17445.1.S1_at   | MmugDNA.17445.1 | 2.95 | 2.9  | 0.37 | 0.07 | 1.04   | 0.612324 | 0.492359 | 0.822151 | 0.693485 |
| MmugDNA.17446.1.S1_at   | MmugDNA.17446.1 | 3.72 | 3.78 | 0.05 | 0.04 | -1.04  | 0.30855  | 0.125661 | 0.640924 | 0.396249 |
| MmugDNA.17447.1.S1_at   | MmugDNA.17447.1 | 8.22 | 8.82 | 0.28 | 0.29 | -1.51  | 0.064835 | 0.046918 | 0.403617 | 0.261301 |
| MmugDNA.17449.1.S1_at   | MmugDNA.17449.1 | 4.82 | 8.95 | 2.13 | 3.04 | -17.48 | 0.432324 | 0.273262 | 0.71893  | 0.537788 |
| MmugDNA.1745.1.S1_at    | MmugDNA.1745.1  | 9.18 | 10   | 0.48 | 0.43 | -1.76  | 0.279003 | 0.206581 | 0.620884 | 0.480619 |
| MmugDNA.17455.1.S1_at   | MmugDNA.17455.1 | 4.97 | 5.01 | 0.33 | 0.18 | -1.03  | 0.787563 | 0.803039 | 0.911638 | 0.886557 |
| MmugDNA.17456.1.S1_at   | MmugDNA.17456.1 | 3.2  | 3.25 | 0.07 | 0.1  | -1.04  | 0.986359 | 0.507897 | 0.995151 | 0.703358 |
| MmugDNA.17457.1.S1_at   | MmugDNA.17457.1 | 6.52 | 6.61 | 0.35 | 0.41 | -1.06  | 0.80949  | 0.941966 | 0.922228 | 0.96711  |
| MmugDNA.17458.1.S1_at   | MmugDNA.17458.1 | 5.67 | 5.71 | 0.07 | 0.26 | -1.03  | 0.71682  | 0.718941 | 0.875634 | 0.83732  |
| MmugDNA.17458.1.S1_s_at | MmugDNA.17458.1 | 6.46 | 6.41 | 0.11 | 0.25 | 1.04   | 0.478962 | 0.653963 | 0.747575 | 0.797743 |
| MmugDNA.17459.1.S1_at   | MmugDNA.17459.1 | 4.48 | 4.93 | 0.27 | 0.36 | -1.36  | 0.063576 | 0.094332 | 0.40097  | 0.350889 |
| MmugDNA.1746.1.S1_at    | MmugDNA.1746.1  | 4.04 | 4.78 | 0.4  | 0.85 | -1.68  | 0.209476 | 0.275677 | 0.570957 | 0.539923 |

|                         |                 |       |       |      |      |       |          |          |          |          |
|-------------------------|-----------------|-------|-------|------|------|-------|----------|----------|----------|----------|
| MmugDNA.17460.1.S1_at   | MmugDNA.17460.1 | 6.25  | 5.79  | 0.68 | 0.48 | 1.37  | 0.818364 | 0.485288 | 0.926289 | 0.689049 |
| MmugDNA.17461.1.S1_at   | MmugDNA.17461.1 | 6.19  | 5.48  | 0.9  | 0.45 | 1.64  | 0.152874 | 0.150931 | 0.517325 | 0.425523 |
| MmugDNA.17462.1.S1_at   | MmugDNA.17462.1 | 11.27 | 10.87 | 0.17 | 0.18 | 1.32  | 0.081199 | 0.106552 | 0.431848 | 0.369099 |
| MmugDNA.17464.1.S1_at   | MmugDNA.17464.1 | 6.83  | 6.26  | 0.27 | 0.54 | 1.48  | 0.160712 | 0.14939  | 0.525811 | 0.423821 |
| MmugDNA.17465.1.S1_s_at | MmugDNA.17465.1 | 13.43 | 13.46 | 0.05 | 0.1  | -1.02 | 0.341188 | 0.064121 | 0.66233  | 0.299475 |
| MmugDNA.17466.1.S1_at   | MmugDNA.17466.1 | 4.43  | 4.43  | 0.18 | 0.05 | 1     | 0.759512 | 0.825547 | 0.898442 | 0.899762 |
| MmugDNA.1747.1.S1_at    | MmugDNA.1747.1  | 3.62  | 3.62  | 0.15 | 0.27 | -1.01 | 0.830948 | 0.853253 | 0.931586 | 0.916534 |
| MmugDNA.17471.1.S1_at   | MmugDNA.17471.1 | 9.39  | 9.32  | 0.23 | 1.47 | 1.05  | 0.351693 | 0.173289 | 0.669126 | 0.449791 |
| MmugDNA.17472.1.S1_at   | MmugDNA.17472.1 | 6.14  | 6.24  | 0.12 | 0.11 | -1.07 | 0.167138 | 0.484958 | 0.531295 | 0.688893 |
| MmugDNA.17473.1.S1_x_at | MmugDNA.17473.1 | 3.33  | 3.06  | 0.67 | 0.23 | 1.21  | 0.273058 | 0.352072 | 0.616536 | 0.595431 |
| MmugDNA.17474.1.S1_at   | MmugDNA.17474.1 | 7.71  | 7.4   | 0.09 | 0.55 | 1.24  | 0.993879 | 0.780426 | 0.997881 | 0.872614 |
| MmugDNA.17475.1.S1_s_at | MmugDNA.17475.1 | 6.98  | 6.82  | 0.77 | 0.69 | 1.12  | 0.780064 | 0.518409 | 0.908464 | 0.71038  |
| MmugDNA.17476.1.S1_at   | MmugDNA.17476.1 | 10.7  | 10.6  | 0.26 | 0.39 | 1.07  | 0.839686 | 0.40798  | 0.93528  | 0.635339 |
| MmugDNA.17477.1.S1_at   | MmugDNA.17477.1 | 4.82  | 4.96  | 0.26 | 0.13 | -1.1  | 0.966444 | 0.992125 | 0.987299 | 0.995515 |
| MmugDNA.17478.1.S1_at   | MmugDNA.17478.1 | 7.57  | 6.39  | 0.09 | 1.03 | 2.27  | 0.322121 | 0.350492 | 0.650854 | 0.594195 |
| MmugDNA.17479.1.S1_at   | MmugDNA.17479.1 | 11.01 | 10.88 | 0.13 | 0.64 | 1.09  | 0.812474 | 0.865299 | 0.923656 | 0.923554 |
| MmugDNA.17480.1.S1_at   | MmugDNA.17480.1 | 5.69  | 7.58  | 1.32 | 2.7  | -3.7  | 0.997699 | 0.194178 | 0.999071 | 0.469267 |
| MmugDNA.17481.1.S1_at   | MmugDNA.17481.1 | 5.95  | 5.97  | 0.07 | 0.11 | -1.01 | 0.398813 | 0.541557 | 0.698928 | 0.725015 |
| MmugDNA.33838.1.S1_at   | MmugDNA.33838.1 | 5.98  | 5.91  | 0.12 | 0.09 | 1.05  | 0.88054  | 0.070903 | 0.951941 | 0.312437 |
| MmugDNA.33838.1.S1_s_at | MmugDNA.33838.1 | 4.65  | 4.81  | 0.15 | 0.08 | -1.12 | 0.069803 | 0.087716 | 0.412907 | 0.340964 |
| MmugDNA.17483.1.S1_at   | MmugDNA.17483.1 | 5.92  | 5.99  | 0.14 | 0.05 | -1.05 | 0.522539 | 0.769343 | 0.772116 | 0.866048 |
| MmugDNA.1473.1.S1_s_at  | MmugDNA.1473.1  | 3.47  | 3.65  | 0.05 | 0.14 | -1.13 | 0.089213 | 0.152749 | 0.444888 | 0.427571 |
| MmugDNA.17486.1.S1_at   | MmugDNA.17486.1 | 5.65  | 5.85  | 0.07 | 0.2  | -1.15 | 0.470087 | 0.178289 | 0.742134 | 0.454627 |
| MmugDNA.17487.1.S1_at   | MmugDNA.17487.1 | 4.11  | 4.01  | 0.08 | 0.16 | 1.07  | 0.783307 | 0.28003  | 0.90948  | 0.543369 |
| MmugDNA.17488.1.S1_at   | MmugDNA.17488.1 | 6.46  | 6.65  | 0.48 | 0.35 | -1.14 | 0.869633 | 0.545005 | 0.947917 | 0.727256 |
| MmugDNA.356.1.S1_s_at   | MmugDNA.356.1   | 13.29 | 13.33 | 0.13 | 0.03 | -1.03 | 0.682113 | 0.869554 | 0.857752 | 0.925994 |
| MmugDNA.1749.1.S1_at    | MmugDNA.1749.1  | 3.44  | 3.65  | 0.02 | 0.14 | -1.15 | 0.16332  | 0.340596 | 0.527696 | 0.586789 |
| MmugDNA.17490.1.S1_at   | MmugDNA.17490.1 | 2.62  | 2.62  | 0.1  | 0.03 | -1    | 0.879302 | 0.864761 | 0.951526 | 0.923286 |
| MmugDNA.17491.1.S1_at   | MmugDNA.17491.1 | 4.09  | 4.11  | 0.11 | 0.18 | -1.01 | 0.541895 | 0.771457 | 0.783019 | 0.86719  |
| MmugDNA.17493.1.S1_at   | MmugDNA.17493.1 | 5.29  | 5.14  | 0.75 | 0.34 | 1.1   | 0.277227 | 0.353475 | 0.619397 | 0.596547 |
| MmugDNA.17494.1.S1_at   | MmugDNA.17494.1 | 11.98 | 12.73 | 0.2  | 0.16 | -1.68 | 0.009507 | 0.006979 | 0.225957 | 0.112771 |
| MmugDNA.17495.1.S1_at   | MmugDNA.17495.1 | 4.59  | 4.63  | 0.02 | 0.44 | -1.03 | 0.485831 | 0.604794 | 0.751144 | 0.764799 |
| MmugDNA.17496.1.S1_at   | MmugDNA.17496.1 | 9.51  | 10.37 | 0.06 | 0.26 | -1.81 | 0.003914 | 0.001507 | 0.180728 | 0.0591   |
| MmugDNA.17498.1.S1_at   | MmugDNA.17498.1 | 6.16  | 4.22  | 0.32 | 0.58 | 3.83  | 0.009122 | 0.008558 | 0.222023 | 0.122746 |
| MmugDNA.175.1.S1_at     | MmugDNA.175.1   | 5.63  | 6.28  | 1.22 | 0.47 | -1.57 | 0.771549 | 0.927566 | 0.903868 | 0.958853 |
| MmugDNA.1750.1.S1_at    | MmugDNA.1750.1  | 5.18  | 3.62  | 1.57 | 1.72 | 2.95  | 0.686607 | 0.7475   | 0.85983  | 0.853149 |
| MmugDNA.17501.1.S1_at   | MmugDNA.17501.1 | 5.99  | 6.14  | 0.06 | 0.2  | -1.11 | 0.205924 | 0.237954 | 0.568403 | 0.508495 |
| MmugDNA.17502.1.S1_at   | MmugDNA.17502.1 | 9.44  | 8.91  | 0.08 | 0.54 | 1.44  | 0.053475 | 0.037956 | 0.380257 | 0.239302 |
| MmugDNA.17504.1.S1_at   | MmugDNA.17504.1 | 7.46  | 6.95  | 0.18 | 0.15 | 1.43  | 0.021293 | 0.018073 | 0.282524 | 0.169379 |
| MmugDNA.17507.1.S1_at   | MmugDNA.17507.1 | 6.09  | 6.69  | 1.18 | 1.21 | -1.52 | 0.712092 | 0.66572  | 0.873815 | 0.804156 |
| MmugDNA.17508.1.S1_at   | MmugDNA.17508.1 | 7.42  | 7.32  | 0.05 | 0.2  | 1.07  | 0.714878 | 0.332582 | 0.874998 | 0.580972 |

|                         |                 |       |       |      |      |        |          |          |          |          |
|-------------------------|-----------------|-------|-------|------|------|--------|----------|----------|----------|----------|
| MmugDNA.17509.1.S1_at   | MmugDNA.17509.1 | 3.71  | 4.07  | 0.08 | 0.35 | -1.29  | 0.14518  | 0.14013  | 0.511322 | 0.413394 |
| MmugDNA.1751.1.S1_at    | MmugDNA.1751.1  | 6.56  | 6.52  | 0.13 | 0.29 | 1.02   | 0.479148 | 0.753761 | 0.747575 | 0.856661 |
| MmugDNA.17510.1.S1_at   | MmugDNA.17510.1 | 4.4   | 4.61  | 0.06 | 0.11 | -1.15  | 0.04206  | 0.065585 | 0.353974 | 0.301476 |
| MmugDNA.17512.1.S1_at   | MmugDNA.17512.1 | 4.66  | 4.99  | 0.45 | 0.08 | -1.26  | 0.268658 | 0.706872 | 0.613344 | 0.829968 |
| MmugDNA.17514.1.S1_at   | MmugDNA.17514.1 | 4.4   | 4.29  | 0.17 | 0.14 | 1.08   | 0.266475 | 0.509666 | 0.611921 | 0.704276 |
| MmugDNA.17515.1.S1_at   | MmugDNA.17515.1 | 7.65  | 7.53  | 0.2  | 0.37 | 1.08   | 0.77227  | 0.108261 | 0.904121 | 0.371557 |
| MmugDNA.17516.1.S1_at   | MmugDNA.17516.1 | 2.89  | 3.15  | 0.17 | 0.17 | -1.2   | 0.271806 | 0.3796   | 0.615816 | 0.616523 |
| MmugDNA.17517.1.S1_at   | MmugDNA.17517.1 | 8.76  | 8.41  | 0.3  | 0.41 | 1.28   | 0.158993 | 0.222115 | 0.52416  | 0.495113 |
| MmugDNA.17520.1.S1_at   | MmugDNA.17520.1 | 4.59  | 4.22  | 0.21 | 0    | 1.29   | 0.119312 | 0.035758 | 0.484049 | 0.233437 |
| MmugDNA.17521.1.S1_at   | MmugDNA.17521.1 | 4.63  | 4.72  | 0.05 | 0.13 | -1.07  | 0.893221 | 0.61097  | 0.95754  | 0.768967 |
| MmugDNA.17522.1.S1_at   | MmugDNA.17522.1 | 3.67  | 3.67  | 0.09 | 0.06 | 1      | 0.703375 | 0.501971 | 0.868993 | 0.699986 |
| MmugDNA.17524.1.S1_at   | MmugDNA.17524.1 | 4.08  | 4.11  | 0.26 | 0.1  | -1.02  | 0.76446  | 0.964084 | 0.900789 | 0.980052 |
| MmugDNA.17525.1.S1_s_at | MmugDNA.17525.1 | 11.15 | 10.94 | 0.14 | 0.38 | 1.16   | 0.322478 | 0.346029 | 0.651101 | 0.59115  |
| MmugDNA.17528.1.S1_at   | MmugDNA.17528.1 | 3.72  | 3.79  | 0.18 | 0.14 | -1.05  | 0.754036 | 0.825678 | 0.895143 | 0.899784 |
| MmugDNA.17529.1.S1_at   | MmugDNA.17529.1 | 3.35  | 3.2   | 0.07 | 0.16 | 1.11   | 0.42546  | 0.459744 | 0.715096 | 0.671948 |
| MmugDNA.1753.1.S1_at    | MmugDNA.1753.1  | 5.34  | 5.21  | 0.08 | 0.03 | 1.09   | 0.089726 | 0.053693 | 0.445334 | 0.277304 |
| MmugDNA.17532.1.S1_at   | MmugDNA.17532.1 | 5.19  | 5.23  | 0.91 | 0.19 | -1.03  | 0.951538 | 0.925494 | 0.981848 | 0.957833 |
| MmugDNA.17534.1.S1_at   | MmugDNA.17534.1 | 10.12 | 10.41 | 0.12 | 0.34 | -1.22  | 0.912147 | 0.987611 | 0.96522  | 0.993078 |
| MmugDNA.17534.1.S1_s_at | MmugDNA.17534.1 | 11.06 | 11.25 | 0.13 | 0.36 | -1.14  | 0.894787 | 0.950238 | 0.957917 | 0.971666 |
| MmugDNA.17535.1.S1_at   | MmugDNA.17535.1 | 13.11 | 12.88 | 0.09 | 0.04 | 1.17   | 0.006942 | 0.001999 | 0.202482 | 0.066331 |
| MmugDNA.17536.1.S1_at   | MmugDNA.17536.1 | 3.29  | 3.34  | 0.14 | 0.06 | -1.03  | 0.88001  | 0.151767 | 0.951785 | 0.426413 |
| MmugDNA.1754.1.S1_at    | MmugDNA.1754.1  | 6.36  | 6.5   | 0.02 | 0.04 | -1.11  | 0.012497 | 0.076242 | 0.242029 | 0.321157 |
| MmugDNA.17540.1.S1_at   | MmugDNA.17540.1 | 12.3  | 12.24 | 0.09 | 0.08 | 1.04   | 0.285604 | 0.267167 | 0.625066 | 0.532773 |
| MmugDNA.17541.1.S1_at   | MmugDNA.17541.1 | 4.9   | 4.36  | 1.25 | 0.47 | 1.45   | 0.333817 | 0.501701 | 0.657939 | 0.6998   |
| MmugDNA.17543.1.S1_at   | MmugDNA.17543.1 | 6.74  | 6.92  | 0.2  | 0.12 | -1.13  | 0.255944 | 0.013672 | 0.603671 | 0.14967  |
| MmugDNA.17544.1.S1_at   | MmugDNA.17544.1 | 6.61  | 6.59  | 0.16 | 0.17 | 1.02   | 0.295994 | 0.182001 | 0.632176 | 0.458537 |
| MmugDNA.17545.1.S1_at   | MmugDNA.17545.1 | 6.24  | 6.39  | 0.15 | 0.21 | -1.11  | 0.291908 | 0.344316 | 0.629223 | 0.589762 |
| MmugDNA.17546.1.S1_at   | MmugDNA.17546.1 | 9.55  | 8.05  | 0.06 | 0.16 | 2.84   | 0.000098 | 0.000006 | 0.112653 | 0.016421 |
| MmugDNA.11755.1.S1_s_at | MmugDNA.11755.1 | 9.24  | 7.95  | 0.12 | 0.19 | 2.44   | 0.000603 | 0.000059 | 0.136818 | 0.025666 |
| MmugDNA.17548.1.S1_at   | MmugDNA.17548.1 | 8.41  | 9.1   | 0.67 | 0.53 | -1.61  | 0.048421 | 0.042154 | 0.368686 | 0.249773 |
| MmugDNA.17549.1.S1_s_at | MmugDNA.17549.1 | 10.46 | 10.73 | 0.23 | 0.19 | -1.2   | 0.8717   | 0.854046 | 0.948667 | 0.91692  |
| MmugDNA.1755.1.S1_at    | MmugDNA.1755.1  | 5.21  | 5.37  | 0.04 | 0.1  | -1.11  | 0.06329  | 0.016115 | 0.400486 | 0.160891 |
| MmugDNA.17550.1.S1_at   | MmugDNA.17550.1 | 5.68  | 5.35  | 0.34 | 0.2  | 1.26   | 0.256314 | 0.320419 | 0.603942 | 0.572648 |
| MmugDNA.17551.1.S1_at   | MmugDNA.17551.1 | 6.46  | 6.85  | 0.98 | 1.61 | -1.3   | 0.734522 | 0.559793 | 0.88571  | 0.736394 |
| MmugDNA.17552.1.S1_at   | MmugDNA.17552.1 | 5.91  | 6.01  | 0.1  | 0.19 | -1.07  | 0.587389 | 0.722821 | 0.808571 | 0.839457 |
| MmugDNA.17553.1.S1_at   | MmugDNA.17553.1 | 7.24  | 10.96 | 2.2  | 2.12 | -13.15 | 0.331869 | 0.314725 | 0.656523 | 0.568449 |
| MmugDNA.17556.1.S1_at   | MmugDNA.17556.1 | 12.15 | 12.14 | 0.25 | 0.04 | 1.01   | 0.885605 | 0.596138 | 0.954118 | 0.759357 |
| MmugDNA.17557.1.S1_at   | MmugDNA.17557.1 | 7.31  | 7.5   | 0.13 | 0.11 | -1.14  | 0.057915 | 0.051854 | 0.389427 | 0.273151 |
| MmugDNA.17558.1.S1_at   | MmugDNA.17558.1 | 10.86 | 10.91 | 0.1  | 0.23 | -1.03  | 0.929059 | 0.264766 | 0.972621 | 0.530791 |
| MmugDNA.17559.1.S1_at   | MmugDNA.17559.1 | 4.08  | 4.08  | 0.08 | 0.12 | 1      | 0.235274 | 0.343115 | 0.589342 | 0.588883 |
| MmugDNA.1756.1.S1_at    | MmugDNA.1756.1  | 4.65  | 5.22  | 0.14 | 0.63 | -1.49  | 0.195881 | 0.236864 | 0.558998 | 0.507587 |

|                         |                 |       |       |      |      |       |          |          |          |          |
|-------------------------|-----------------|-------|-------|------|------|-------|----------|----------|----------|----------|
| MmugDNA.17560.1.S1_at   | MmugDNA.17560.1 | 6.32  | 6.53  | 0.11 | 0.09 | -1.16 | 0.062878 | 0.040098 | 0.399527 | 0.245388 |
| MmugDNA.17561.1.S1_at   | MmugDNA.17561.1 | 4.32  | 4.18  | 0.12 | 0.11 | 1.1   | 0.214475 | 0.720843 | 0.57499  | 0.838368 |
| MmugDNA.17563.1.S1_at   | MmugDNA.17563.1 | 6.52  | 6.54  | 0.04 | 0    | -1.02 | 0.250973 | 0.742083 | 0.600488 | 0.850611 |
| MmugDNA.17564.1.S1_at   | MmugDNA.17564.1 | 10.69 | 10.74 | 0.87 | 0.26 | -1.03 | 0.749004 | 0.179105 | 0.892627 | 0.455436 |
| MmugDNA.17565.1.S1_at   | MmugDNA.17565.1 | 9.62  | 9.83  | 0.15 | 1.31 | -1.16 | 0.464268 | 0.617386 | 0.739156 | 0.773397 |
| MmugDNA.17566.1.S1_at   | MmugDNA.17566.1 | 10.86 | 10.9  | 0.16 | 0.93 | -1.03 | 0.338776 | 0.435064 | 0.660988 | 0.655    |
| MmugDNA.17569.1.S1_at   | MmugDNA.17569.1 | 6.55  | 5.66  | 0.5  | 0.24 | 1.85  | 0.15135  | 0.176812 | 0.516063 | 0.453219 |
| MmugDNA.1757.1.S1_at    | MmugDNA.1757.1  | 6.3   | 6.16  | 0.64 | 0.53 | 1.1   | 0.327202 | 0.508653 | 0.653675 | 0.703759 |
| MmugDNA.17570.1.S1_at   | MmugDNA.17570.1 | 5.86  | 6.97  | 0.46 | 0.4  | -2.16 | 0.059758 | 0.060827 | 0.39273  | 0.293348 |
| MmugDNA.17572.1.S1_s_at | MmugDNA.17572.1 | 8.93  | 9.19  | 0.89 | 0.73 | -1.2  | 0.44599  | 0.1706   | 0.728075 | 0.447204 |
| MmugDNA.17576.1.S1_at   | MmugDNA.17576.1 | 9.07  | 9.21  | 0.1  | 0.6  | -1.1  | 0.57117  | 0.226441 | 0.799907 | 0.498888 |
| MmugDNA.17577.1.S1_at   | MmugDNA.17577.1 | 5.16  | 5     | 1    | 0.76 | 1.12  | 0.344    | 0.374784 | 0.66419  | 0.613081 |
| MmugDNA.17578.1.S1_at   | MmugDNA.17578.1 | 4.98  | 5.11  | 0.26 | 0.03 | -1.09 | 0.401694 | 0.555148 | 0.700992 | 0.733715 |
| MmugDNA.1758.1.S1_at    | MmugDNA.1758.1  | 4.78  | 4.23  | 0.23 | 0.62 | 1.47  | 0.637327 | 0.828671 | 0.836017 | 0.901558 |
| MmugDNA.17580.1.S1_at   | MmugDNA.17580.1 | 4.21  | 4.2   | 0.08 | 0.23 | 1     | 0.283693 | 0.755931 | 0.623679 | 0.8579   |
| MmugDNA.17581.1.S1_at   | MmugDNA.17581.1 | 11.42 | 10.7  | 0.17 | 1.08 | 1.65  | 0.387927 | 0.522627 | 0.692145 | 0.713274 |
| MmugDNA.17582.1.S1_at   | MmugDNA.17582.1 | 4.35  | 4.42  | 0.15 | 0.07 | -1.05 | 0.411719 | 0.62455  | 0.707523 | 0.778718 |
| MmugDNA.17584.1.S1_s_at | MmugDNA.17584.1 | 7.7   | 7.92  | 0.15 | 0.21 | -1.16 | 0.217084 | 0.073981 | 0.576631 | 0.317505 |
| MmugDNA.17586.1.S1_s_at | MmugDNA.17586.1 | 10.77 | 10.24 | 0.1  | 0.76 | 1.45  | 0.327274 | 0.474957 | 0.653682 | 0.681837 |
| MmugDNA.17588.1.S1_at   | MmugDNA.17588.1 | 6.41  | 6.7   | 0.14 | 0.14 | -1.22 | 0.062609 | 0.047999 | 0.398605 | 0.264109 |
| MmugDNA.17589.1.S1_at   | MmugDNA.17589.1 | 5.17  | 5.2   | 0.16 | 0.13 | -1.02 | 0.894044 | 0.637333 | 0.957854 | 0.786824 |
| MmugDNA.1759.1.S1_at    | MmugDNA.1759.1  | 4.06  | 4.31  | 0.09 | 0.06 | -1.19 | 0.04722  | 0.01536  | 0.365679 | 0.157392 |
| MmugDNA.1759.1.S1_s_at  | MmugDNA.1759.1  | 6.83  | 6.9   | 0.13 | 0.11 | -1.05 | 0.462168 | 0.696534 | 0.738226 | 0.823764 |
| MmugDNA.17590.1.S1_at   | MmugDNA.17590.1 | 8.18  | 7.79  | 0.14 | 0.15 | 1.31  | 0.017671 | 0.001443 | 0.267454 | 0.057912 |
| MmugDNA.17591.1.S1_at   | MmugDNA.17591.1 | 4.97  | 4.95  | 1.15 | 0    | 1.02  | 0.360055 | 0.335305 | 0.674197 | 0.58305  |
| MmugDNA.17592.1.S1_at   | MmugDNA.17592.1 | 6.38  | 6.42  | 0.13 | 0.09 | -1.02 | 0.685233 | 0.725989 | 0.858887 | 0.84134  |
| MmugDNA.17593.1.S1_at   | MmugDNA.17593.1 | 9.71  | 10.29 | 0.12 | 0.11 | -1.49 | 0.004627 | 0.001397 | 0.1844   | 0.057005 |
| MmugDNA.17593.1.S1_s_at | MmugDNA.17593.1 | 10.22 | 10.68 | 0.17 | 0.15 | -1.38 | 0.020294 | 0.010538 | 0.277443 | 0.134072 |
| MmugDNA.17594.1.S1_at   | MmugDNA.17594.1 | 4.82  | 4.84  | 0.36 | 0.45 | -1.01 | 0.48605  | 0.546812 | 0.751299 | 0.728203 |
| MmugDNA.17595.1.S1_at   | MmugDNA.17595.1 | 5.41  | 5.62  | 0.13 | 0.04 | -1.16 | 0.084011 | 0.031862 | 0.43653  | 0.220909 |
| MmugDNA.17596.1.S1_at   | MmugDNA.17596.1 | 4.41  | 4.33  | 0.13 | 0.5  | 1.06  | 0.290432 | 0.509556 | 0.628091 | 0.704254 |
| MmugDNA.17597.1.S1_at   | MmugDNA.17597.1 | 8.03  | 8.75  | 0.23 | 0.53 | -1.64 | 0.363954 | 0.060652 | 0.677075 | 0.292871 |
| MmugDNA.17598.1.S1_at   | MmugDNA.17598.1 | 5.95  | 5.72  | 0.26 | 0.89 | 1.17  | 0.744642 | 0.91152  | 0.890702 | 0.950138 |
| MmugDNA.17600.1.S1_at   | MmugDNA.17600.1 | 5.29  | 5.31  | 0.25 | 0.04 | -1.02 | 0.470927 | 0.661603 | 0.742796 | 0.801881 |
| MmugDNA.17602.1.S1_at   | MmugDNA.17602.1 | 6.42  | 5.8   | 0.31 | 0.24 | 1.54  | 0.058747 | 0.048867 | 0.390921 | 0.265858 |
| MmugDNA.17605.1.S1_at   | MmugDNA.17605.1 | 6.3   | 7.05  | 0.32 | 0.44 | -1.69 | 0.183514 | 0.109381 | 0.547696 | 0.373156 |
| MmugDNA.17607.1.S1_at   | MmugDNA.17607.1 | 10.88 | 10.83 | 0.11 | 0.8  | 1.04  | 0.340065 | 0.471421 | 0.661611 | 0.679435 |
| MmugDNA.17608.1.S1_at   | MmugDNA.17608.1 | 7.1   | 7.22  | 0.27 | 0.18 | -1.08 | 0.683488 | 0.489328 | 0.85844  | 0.691792 |
| MmugDNA.17609.1.S1_at   | MmugDNA.17609.1 | 4.34  | 3.96  | 0.34 | 0.01 | 1.31  | 0.370103 | 0.098842 | 0.681113 | 0.357002 |
| MmugDNA.17610.1.S1_at   | MmugDNA.17610.1 | 4.72  | 4.73  | 0.25 | 0.14 | -1.01 | 0.524402 | 0.348304 | 0.773192 | 0.592478 |
| MmugDNA.17611.1.S1_at   | MmugDNA.17611.1 | 4.87  | 4.82  | 0    | 0.14 | 1.03  | 0.696511 | 0.791968 | 0.865298 | 0.879808 |

|                         |                 |       |       |      |      |       |          |          |          |          |
|-------------------------|-----------------|-------|-------|------|------|-------|----------|----------|----------|----------|
| MmugDNA.17613.1.S1_at   | MmugDNA.17613.1 | 3.52  | 3.8   | 0.32 | 0.56 | -1.21 | 0.310471 | 0.29733  | 0.64249  | 0.556071 |
| MmugDNA.17615.1.S1_at   | MmugDNA.17615.1 | 5.68  | 5.84  | 0.26 | 0.08 | -1.12 | 0.946184 | 0.266817 | 0.979359 | 0.53241  |
| MmugDNA.17616.1.S1_at   | MmugDNA.17616.1 | 4.63  | 4.64  | 0.17 | 0.1  | -1.01 | 0.891351 | 0.565276 | 0.956661 | 0.739795 |
| MmugDNA.17618.1.S1_at   | MmugDNA.17618.1 | 4.14  | 4.16  | 0.17 | 0.28 | -1.01 | 0.836655 | 0.486623 | 0.933929 | 0.689946 |
| MmugDNA.17619.1.S1_at   | MmugDNA.17619.1 | 6.46  | 6.42  | 0.16 | 0.16 | 1.03  | 0.390977 | 0.069766 | 0.693848 | 0.310269 |
| MmugDNA.1762.1.S1_at    | MmugDNA.1762.1  | 3.09  | 3.1   | 0    | 0.09 | -1    | 0.888285 | 0.65475  | 0.955159 | 0.798154 |
| MmugDNA.17620.1.S1_at   | MmugDNA.17620.1 | 6.92  | 7.15  | 0.09 | 0.53 | -1.18 | 0.520837 | 0.175449 | 0.771038 | 0.452157 |
| MmugDNA.17621.1.S1_at   | MmugDNA.17621.1 | 6.21  | 6.57  | 0.06 | 0.1  | -1.28 | 0.005726 | 0.001774 | 0.191956 | 0.0634   |
| MmugDNA.17622.1.S1_at   | MmugDNA.17622.1 | 7.16  | 7.32  | 0.83 | 0.21 | -1.12 | 0.984522 | 0.996018 | 0.994531 | 0.997565 |
| MmugDNA.17623.1.S1_at   | MmugDNA.17623.1 | 3.47  | 3.42  | 0.16 | 0.15 | 1.03  | 0.465733 | 0.565418 | 0.740103 | 0.739886 |
| MmugDNA.17626.1.S1_at   | MmugDNA.17626.1 | 4.3   | 4.18  | 0.25 | 0.31 | 1.09  | 0.949165 | 0.883356 | 0.980663 | 0.933542 |
| MmugDNA.17627.1.S1_at   | MmugDNA.17627.1 | 3.53  | 3.51  | 0.35 | 0.18 | 1.01  | 0.642597 | 0.394749 | 0.838763 | 0.627208 |
| MmugDNA.17628.1.S1_at   | MmugDNA.17628.1 | 3.24  | 3.42  | 0.13 | 0.11 | -1.13 | 0.424312 | 0.46522  | 0.714453 | 0.675638 |
| MmugDNA.17629.1.S1_at   | MmugDNA.17629.1 | 8.98  | 9.04  | 0.14 | 0.57 | -1.05 | 0.994092 | 0.875138 | 0.997979 | 0.929167 |
| MmugDNA.17630.1.S1_at   | MmugDNA.17630.1 | 8.87  | 8.8   | 0.25 | 0.48 | 1.05  | 0.780703 | 0.948567 | 0.9086   | 0.970655 |
| MmugDNA.17631.1.S1_at   | MmugDNA.17631.1 | 3.04  | 3.06  | 1.57 | 0.22 | -1.02 | 0.391154 | 0.423084 | 0.693921 | 0.646145 |
| MmugDNA.17633.1.S1_at   | MmugDNA.17633.1 | 4.54  | 3.76  | 0.34 | 1.04 | 1.71  | 0.782311 | 0.67667  | 0.909162 | 0.811032 |
| MmugDNA.17634.1.S1_at   | MmugDNA.17634.1 | 11.68 | 11.5  | 0.08 | 0.23 | 1.13  | 0.062975 | 0.109353 | 0.399757 | 0.373154 |
| MmugDNA.17635.1.S1_at   | MmugDNA.17635.1 | 5.52  | 5.49  | 0.12 | 0.07 | 1.02  | 0.696471 | 0.374467 | 0.86529  | 0.6129   |
| MmugDNA.17637.1.S1_at   | MmugDNA.17637.1 | 7.85  | 7.77  | 0.1  | 0.05 | 1.06  | 0.244601 | 0.266003 | 0.596278 | 0.531815 |
| MmugDNA.17637.1.S1_s_at | MmugDNA.17637.1 | 11.8  | 11.74 | 0.45 | 0.31 | 1.04  | 0.790454 | 0.821958 | 0.913046 | 0.897581 |
| MmugDNA.17638.1.S1_at   | MmugDNA.17638.1 | 11.18 | 10.83 | 0.16 | 0.13 | 1.27  | 0.116485 | 0.027364 | 0.48032  | 0.206695 |
| MmugDNA.17639.1.S1_at   | MmugDNA.17639.1 | 3.44  | 3.45  | 0.02 | 0.1  | -1    | 0.739712 | 0.523541 | 0.888213 | 0.713784 |
| MmugDNA.1764.1.S1_at    | MmugDNA.1764.1  | 6.89  | 7.17  | 0.44 | 0.52 | -1.22 | 0.792127 | 0.512689 | 0.913702 | 0.706478 |
| MmugDNA.17641.1.S1_at   | MmugDNA.17641.1 | 7.12  | 7.32  | 0.21 | 0.12 | -1.15 | 0.386206 | 0.31241  | 0.69118  | 0.567174 |
| MmugDNA.17645.1.S1_at   | MmugDNA.17645.1 | 5.29  | 5.37  | 0.05 | 0.04 | -1.06 | 0.109589 | 0.019177 | 0.470811 | 0.1742   |
| MmugDNA.17646.1.S1_at   | MmugDNA.17646.1 | 5.19  | 4.42  | 1.33 | 0.55 | 1.71  | 0.440992 | 0.312133 | 0.72466  | 0.566904 |
| MmugDNA.17647.1.S1_at   | MmugDNA.17647.1 | 5.52  | 5.72  | 0.1  | 0.2  | -1.15 | 0.308971 | 0.496552 | 0.641293 | 0.696119 |
| MmugDNA.17648.1.S1_at   | MmugDNA.17648.1 | 5.77  | 5.38  | 0.36 | 0.17 | 1.3   | 0.356462 | 0.340522 | 0.671574 | 0.586776 |
| MmugDNA.17649.1.S1_at   | MmugDNA.17649.1 | 7.92  | 7.74  | 0.21 | 0.22 | 1.13  | 0.769649 | 0.061515 | 0.903122 | 0.294835 |
| MmugDNA.1765.1.S1_at    | MmugDNA.1765.1  | 7.28  | 7.25  | 0.44 | 0.62 | 1.02  | 0.624207 | 0.552181 | 0.828178 | 0.73155  |
| MmugDNA.17650.1.S1_at   | MmugDNA.17650.1 | 5.17  | 5.27  | 0.15 | 0    | -1.07 | 0.336739 | 0.29516  | 0.659663 | 0.55456  |
| MmugDNA.17651.1.S1_at   | MmugDNA.17651.1 | 4.97  | 5.28  | 0.19 | 0.14 | -1.23 | 0.040417 | 0.036329 | 0.349277 | 0.235105 |
| MmugDNA.17652.1.S1_at   | MmugDNA.17652.1 | 2.97  | 3.13  | 0.27 | 0.02 | -1.12 | 0.9767   | 0.721219 | 0.99108  | 0.838628 |
| MmugDNA.17652.1.S1_x_at | MmugDNA.17652.1 | 3.06  | 2.99  | 0.09 | 0.17 | 1.04  | 0.479052 | 0.806506 | 0.747575 | 0.888656 |
| MmugDNA.17653.1.S1_at   | MmugDNA.17653.1 | 7.03  | 6.09  | 0.71 | 0.46 | 1.93  | 0.283038 | 0.38325  | 0.623159 | 0.619246 |
| MmugDNA.17654.1.S1_at   | MmugDNA.17654.1 | 9.89  | 9.7   | 0.25 | 0.24 | 1.14  | 0.25203  | 0.263191 | 0.601234 | 0.529498 |
| MmugDNA.17656.1.S1_at   | MmugDNA.17656.1 | 8.03  | 8.07  | 0.52 | 0.61 | -1.03 | 0.583031 | 0.044982 | 0.806097 | 0.256531 |
| MmugDNA.1766.1.S1_at    | MmugDNA.1766.1  | 6.44  | 6.66  | 0.15 | 0.19 | -1.16 | 0.307189 | 0.308429 | 0.63988  | 0.564482 |
| MmugDNA.17660.1.S1_at   | MmugDNA.17660.1 | 6.92  | 6.95  | 0.12 | 0.34 | -1.02 | 0.325121 | 0.381474 | 0.652361 | 0.617691 |
| MmugDNA.17660.1.S1_s_at | MmugDNA.17660.1 | 7.36  | 7.44  | 0.05 | 0.51 | -1.06 | 0.314771 | 0.364646 | 0.64608  | 0.604978 |

|                         |                 |       |       |      |      |       |          |          |          |          |
|-------------------------|-----------------|-------|-------|------|------|-------|----------|----------|----------|----------|
| MmugDNA.17661.1.S1_at   | MmugDNA.17661.1 | 7.07  | 7.75  | 0.28 | 0.47 | -1.61 | 0.190494 | 0.129935 | 0.55308  | 0.401515 |
| MmugDNA.17665.1.S1_s_at | MmugDNA.17665.1 | 6.62  | 6.64  | 0.11 | 0.4  | -1.01 | 0.461524 | 0.620867 | 0.737671 | 0.775643 |
| MmugDNA.17666.1.S1_at   | MmugDNA.17666.1 | 3.38  | 3.56  | 0.07 | 0.08 | -1.13 | 0.044385 | 0.220026 | 0.358591 | 0.49344  |
| MmugDNA.17667.1.S1_at   | MmugDNA.17667.1 | 3.34  | 3.15  | 0.26 | 0.08 | 1.14  | 0.289516 | 0.41672  | 0.627563 | 0.641672 |
| MmugDNA.17668.1.S1_at   | MmugDNA.17668.1 | 4.57  | 4.84  | 0.2  | 0.28 | -1.2  | 0.510942 | 0.114726 | 0.765151 | 0.381279 |
| MmugDNA.17669.1.S1_s_at | MmugDNA.17669.1 | 3.1   | 3.19  | 0.01 | 0.15 | -1.07 | 0.441151 | 0.263555 | 0.724743 | 0.529826 |
| MmugDNA.1767.1.S1_at    | MmugDNA.1767.1  | 4.06  | 4.18  | 0.22 | 0.18 | -1.09 | 0.541993 | 0.702982 | 0.783068 | 0.827866 |
| MmugDNA.17670.1.S1_at   | MmugDNA.17670.1 | 3.3   | 3.27  | 0.32 | 0.11 | 1.02  | 0.5866   | 0.644731 | 0.808193 | 0.791816 |
| MmugDNA.17672.1.S1_at   | MmugDNA.17672.1 | 8.18  | 7.75  | 0.22 | 0.74 | 1.35  | 0.317558 | 0.45068  | 0.647954 | 0.665844 |
| MmugDNA.17673.1.S1_at   | MmugDNA.17673.1 | 10.1  | 10.47 | 0.09 | 0.23 | -1.29 | 0.060484 | 0.075285 | 0.393715 | 0.319441 |
| MmugDNA.17674.1.S1_at   | MmugDNA.17674.1 | 3.37  | 3.71  | 0.08 | 0.11 | -1.26 | 0.023199 | 0.012154 | 0.290295 | 0.142648 |
| MmugDNA.17675.1.S1_at   | MmugDNA.17675.1 | 3.05  | 2.92  | 0.22 | 0.22 | 1.1   | 0.941814 | 0.994663 | 0.977821 | 0.996682 |
| MmugDNA.17677.1.S1_at   | MmugDNA.17677.1 | 5.25  | 5.27  | 0.13 | 0.19 | -1.01 | 0.279332 | 0.373246 | 0.621058 | 0.612061 |
| MmugDNA.17679.1.S1_at   | MmugDNA.17679.1 | 4.76  | 4.77  | 0.06 | 0.05 | -1.01 | 0.206442 | 0.44529  | 0.56878  | 0.662338 |
| MmugDNA.1768.1.S1_at    | MmugDNA.1768.1  | 5.13  | 5     | 0.2  | 0.08 | 1.09  | 0.362185 | 0.092783 | 0.675782 | 0.348989 |
| MmugDNA.17680.1.S1_at   | MmugDNA.17680.1 | 9.83  | 9.05  | 0.34 | 0.44 | 1.72  | 0.039299 | 0.013934 | 0.346898 | 0.151384 |
| MmugDNA.17683.1.S1_at   | MmugDNA.17683.1 | 6.02  | 6.26  | 0.04 | 0.07 | -1.18 | 0.00551  | 0.001636 | 0.191603 | 0.061167 |
| MmugDNA.17685.1.S1_at   | MmugDNA.17685.1 | 4.13  | 4.12  | 0.05 | 0.05 | 1     | 0.582347 | 0.97094  | 0.80572  | 0.984138 |
| MmugDNA.17687.1.S1_at   | MmugDNA.17687.1 | 4.65  | 4.22  | 0.13 | 0.47 | 1.35  | 0.583787 | 0.594124 | 0.806776 | 0.758517 |
| MmugDNA.17688.1.S1_at   | MmugDNA.17688.1 | 4.78  | 4.76  | 0.15 | 0.03 | 1.02  | 0.580956 | 0.575872 | 0.804828 | 0.746841 |
| MmugDNA.1769.1.S1_at    | MmugDNA.1769.1  | 6.25  | 5.29  | 0.69 | 0.35 | 1.95  | 0.092487 | 0.09577  | 0.449178 | 0.352753 |
| MmugDNA.17691.1.S1_at   | MmugDNA.17691.1 | 4.6   | 4.59  | 0.63 | 0.88 | 1.01  | 0.61894  | 0.508981 | 0.825395 | 0.703967 |
| MmugDNA.17692.1.S1_at   | MmugDNA.17692.1 | 11.68 | 11.85 | 0.28 | 0.27 | -1.12 | 0.576591 | 0.765836 | 0.803158 | 0.863939 |
| MmugDNA.17692.1.S1_s_at | MmugDNA.17692.1 | 11.31 | 11.64 | 0.35 | 0.34 | -1.25 | 0.271728 | 0.359044 | 0.615789 | 0.600414 |
| MmugDNA.17694.1.S1_at   | MmugDNA.17694.1 | 9.77  | 10.02 | 0.18 | 0.33 | -1.19 | 0.51986  | 0.061802 | 0.770398 | 0.295352 |
| MmugDNA.17695.1.S1_at   | MmugDNA.17695.1 | 4.15  | 3.23  | 1.31 | 0.15 | 1.89  | 0.249578 | 0.24511  | 0.600196 | 0.514861 |
| MmugDNA.17697.1.S1_at   | MmugDNA.17697.1 | 10.21 | 10.21 | 0.16 | 0.39 | -1    | 0.430055 | 0.627384 | 0.717906 | 0.780374 |
| MmugDNA.17698.1.S1_at   | MmugDNA.17698.1 | 3.94  | 4.02  | 0.14 | 0.17 | -1.05 | 0.993412 | 0.917351 | 0.997754 | 0.953807 |
| MmugDNA.177.1.S1_at     | MmugDNA.177.1   | 4.73  | 4.64  | 0.14 | 0.07 | 1.06  | 0.745233 | 0.919688 | 0.891027 | 0.954878 |
| MmugDNA.1770.1.S1_at    | MmugDNA.1770.1  | 3.01  | 3.05  | 0.08 | 0.19 | -1.03 | 0.637933 | 0.417995 | 0.836355 | 0.642531 |
| MmugDNA.17700.1.S1_at   | MmugDNA.17700.1 | 5.28  | 5.34  | 0.02 | 0.27 | -1.05 | 0.59757  | 0.687544 | 0.813537 | 0.817614 |
| MmugDNA.17701.1.S1_at   | MmugDNA.17701.1 | 3.98  | 4.19  | 0.19 | 0.06 | -1.16 | 0.119047 | 0.222465 | 0.483725 | 0.495518 |
| MmugDNA.17702.1.S1_at   | MmugDNA.17702.1 | 6.99  | 6.99  | 0.12 | 0.21 | -1    | 0.61544  | 0.408313 | 0.823469 | 0.635596 |
| MmugDNA.17703.1.S1_at   | MmugDNA.17703.1 | 9.2   | 9.17  | 0.1  | 1.39 | 1.02  | 0.872594 | 0.780268 | 0.949073 | 0.872567 |
| MmugDNA.17703.1.S1_x_at | MmugDNA.17703.1 | 9.43  | 9.47  | 0.08 | 1.44 | -1.03 | 0.841526 | 0.789892 | 0.936214 | 0.878631 |
| MmugDNA.17706.1.S1_at   | MmugDNA.17706.1 | 6.23  | 6.35  | 0.24 | 0.35 | -1.08 | 0.569352 | 0.54971  | 0.79903  | 0.730002 |
| MmugDNA.17707.1.S1_at   | MmugDNA.17707.1 | 6.58  | 6.22  | 0.48 | 1.49 | 1.28  | 0.685171 | 0.864052 | 0.858887 | 0.922865 |
| MmugDNA.17708.1.S1_at   | MmugDNA.17708.1 | 10.17 | 9.55  | 0.19 | 0.35 | 1.54  | 0.052701 | 0.039536 | 0.378395 | 0.243767 |
| MmugDNA.1771.1.S1_at    | MmugDNA.1771.1  | 5.78  | 5.36  | 0.07 | 0.19 | 1.34  | 0.011965 | 0.029363 | 0.239065 | 0.213234 |
| MmugDNA.17710.1.S1_at   | MmugDNA.17710.1 | 5.47  | 5.69  | 0.18 | 0.09 | -1.17 | 0.570394 | 0.320481 | 0.799483 | 0.572648 |
| MmugDNA.17711.1.S1_at   | MmugDNA.17711.1 | 3.34  | 3.35  | 0.1  | 0.01 | -1.01 | 0.301567 | 0.678212 | 0.636486 | 0.812051 |



|                         |                 |       |       |      |      |       |          |          |          |          |
|-------------------------|-----------------|-------|-------|------|------|-------|----------|----------|----------|----------|
| MmugDNA.17712.1.S1_at   | MmugDNA.17712.1 | 9.88  | 9.41  | 0.18 | 0.23 | 1.39  | 0.043028 | 0.037707 | 0.355958 | 0.23859  |
| MmugDNA.17713.1.S1_at   | MmugDNA.17713.1 | 7.56  | 5.75  | 0.41 | 0.12 | 3.5   | 0.002484 | 0.000806 | 0.163555 | 0.04607  |
| MmugDNA.17714.1.S1_at   | MmugDNA.17714.1 | 7.19  | 7.02  | 0.28 | 0.75 | 1.13  | 0.653209 | 0.688092 | 0.844033 | 0.817914 |
| MmugDNA.17716.1.S1_at   | MmugDNA.17716.1 | 5.6   | 7.01  | 0.38 | 1.04 | -2.67 | 0.135196 | 0.134797 | 0.501995 | 0.406854 |
| MmugDNA.17716.1.S1_s_at | MmugDNA.17716.1 | 5.71  | 7.01  | 1.35 | 2.58 | -2.46 | 0.514662 | 0.443075 | 0.76706  | 0.660962 |
| MmugDNA.17717.1.S1_at   | MmugDNA.17717.1 | 7.58  | 7.23  | 0.63 | 0.17 | 1.28  | 0.406313 | 0.31271  | 0.703645 | 0.567299 |
| MmugDNA.17718.1.S1_at   | MmugDNA.17718.1 | 4.19  | 4.21  | 0.03 | 0.02 | -1.02 | 0.291084 | 0.667997 | 0.628725 | 0.8057   |
| MmugDNA.17719.1.S1_x_at | MmugDNA.17719.1 | 12.88 | 12.61 | 0.39 | 0.22 | 1.2   | 0.145247 | 0.200375 | 0.511329 | 0.47478  |
| MmugDNA.1772.1.S1_at    | MmugDNA.1772.1  | 4.51  | 4.63  | 0.03 | 0.36 | -1.09 | 0.56286  | 0.742264 | 0.79556  | 0.850709 |
| MmugDNA.33829.1.S1_s_at | MmugDNA.33829.1 | 14.41 | 14.4  | 0.02 | 0.05 | 1.01  | 0.671261 | 0.833883 | 0.852602 | 0.904791 |
| MmugDNA.17721.1.S1_at   | MmugDNA.17721.1 | 6.18  | 6.01  | 0.44 | 0.52 | 1.12  | 0.335964 | 0.387135 | 0.65921  | 0.621935 |
| MmugDNA.17722.1.S1_at   | MmugDNA.17722.1 | 2.79  | 2.76  | 0.28 | 0.06 | 1.03  | 0.231031 | 0.213035 | 0.587369 | 0.487005 |
| MmugDNA.17723.1.S1_at   | MmugDNA.17723.1 | 4.35  | 4.35  | 0.09 | 0.14 | -1    | 0.562418 | 0.076024 | 0.795341 | 0.320716 |
| MmugDNA.17724.1.S1_at   | MmugDNA.17724.1 | 6.39  | 5.91  | 0.3  | 0.48 | 1.39  | 0.246945 | 0.306087 | 0.598047 | 0.562804 |
| MmugDNA.17725.1.S1_at   | MmugDNA.17725.1 | 6.19  | 6.92  | 0.18 | 0.87 | -1.66 | 0.220385 | 0.295934 | 0.579347 | 0.555241 |
| MmugDNA.17726.1.S1_at   | MmugDNA.17726.1 | 5.49  | 5.42  | 0.04 | 0.16 | 1.05  | 0.49419  | 0.679467 | 0.756533 | 0.812835 |
| MmugDNA.17726.1.S1_x_at | MmugDNA.17726.1 | 6.99  | 6.87  | 0.2  | 0.11 | 1.09  | 0.854229 | 0.810035 | 0.941079 | 0.890518 |
| MmugDNA.17729.1.S1_at   | MmugDNA.17729.1 | 4.33  | 4.06  | 0.19 | 0.17 | 1.2   | 0.3212   | 0.469645 | 0.649887 | 0.678318 |
| MmugDNA.1773.1.S1_at    | MmugDNA.1773.1  | 9.93  | 8.9   | 0.11 | 0.09 | 2.05  | 0.000175 | 0.000051 | 0.118376 | 0.025273 |
| MmugDNA.17731.1.S1_at   | MmugDNA.17731.1 | 5.53  | 5.66  | 0.13 | 0.18 | -1.09 | 0.706925 | 0.875422 | 0.870891 | 0.929245 |
| MmugDNA.17732.1.S1_at   | MmugDNA.17732.1 | 2.93  | 2.95  | 0.26 | 0.11 | -1.02 | 0.885598 | 0.898924 | 0.954118 | 0.942467 |
| MmugDNA.17733.1.S1_at   | MmugDNA.17733.1 | 9.86  | 10.19 | 0.52 | 0.17 | -1.26 | 0.256691 | 0.003119 | 0.604414 | 0.081345 |
| MmugDNA.17739.1.S1_at   | MmugDNA.17739.1 | 4.87  | 4.91  | 0.26 | 0.1  | -1.03 | 0.926306 | 0.926846 | 0.971724 | 0.958409 |
| MmugDNA.1774.1.S1_at    | MmugDNA.1774.1  | 4.45  | 3.64  | 1.11 | 0.23 | 1.74  | 0.325292 | 0.286275 | 0.652582 | 0.547784 |
| MmugDNA.17740.1.S1_at   | MmugDNA.17740.1 | 3.69  | 3.68  | 0.04 | 0.23 | 1.01  | 0.447034 | 0.400664 | 0.72871  | 0.630467 |
| MmugDNA.17741.1.S1_at   | MmugDNA.17741.1 | 6.17  | 5.74  | 0.58 | 0.3  | 1.35  | 0.322083 | 0.225775 | 0.650801 | 0.498159 |
| MmugDNA.17742.1.S1_at   | MmugDNA.17742.1 | 3.93  | 3.69  | 0.31 | 0.08 | 1.18  | 0.73284  | 0.441958 | 0.884652 | 0.660058 |
| MmugDNA.17743.1.S1_at   | MmugDNA.17743.1 | 7.09  | 7.37  | 0.97 | 0.39 | -1.22 | 0.463673 | 0.183141 | 0.738895 | 0.459531 |
| MmugDNA.17745.1.S1_at   | MmugDNA.17745.1 | 6.42  | 5.73  | 0.48 | 0.18 | 1.62  | 0.057899 | 0.094607 | 0.389419 | 0.351371 |
| MmugDNA.17746.1.S1_at   | MmugDNA.17746.1 | 5.78  | 7.01  | 0.59 | 1.75 | -2.34 | 0.384619 | 0.345699 | 0.690108 | 0.590854 |
| MmugDNA.17747.1.S1_at   | MmugDNA.17747.1 | 7.54  | 6.98  | 0.5  | 0.33 | 1.47  | 0.068506 | 0.026668 | 0.410201 | 0.20423  |
| MmugDNA.17748.1.S1_at   | MmugDNA.17748.1 | 4.31  | 4.48  | 0.14 | 0.1  | -1.13 | 0.090386 | 0.511803 | 0.445834 | 0.705797 |
| MmugDNA.17749.1.S1_at   | MmugDNA.17749.1 | 4.58  | 4.88  | 0.11 | 0.18 | -1.23 | 0.049076 | 0.043723 | 0.370633 | 0.253809 |
| MmugDNA.1775.1.S1_at    | MmugDNA.1775.1  | 5.02  | 5     | 0.05 | 0.23 | 1.02  | 0.530752 | 0.767286 | 0.776921 | 0.864856 |
| MmugDNA.17751.1.S1_at   | MmugDNA.17751.1 | 3.39  | 3.19  | 0.12 | 0.07 | 1.15  | 0.086416 | 0.027857 | 0.440232 | 0.208453 |
| MmugDNA.17753.1.S1_at   | MmugDNA.17753.1 | 2.93  | 2.92  | 0.08 | 0.07 | 1     | 0.711762 | 0.392417 | 0.873712 | 0.625813 |
| MmugDNA.17754.1.S1_at   | MmugDNA.17754.1 | 5.5   | 6.87  | 0.45 | 0.52 | -2.58 | 0.092628 | 0.00758  | 0.449245 | 0.116553 |
| MmugDNA.17755.1.S1_at   | MmugDNA.17755.1 | 4.28  | 4.42  | 0.17 | 0.13 | -1.11 | 0.323516 | 0.381609 | 0.65165  | 0.617822 |
| MmugDNA.17756.1.S1_at   | MmugDNA.17756.1 | 4.89  | 4.78  | 0.02 | 0.05 | 1.08  | 0.102976 | 0.187639 | 0.46254  | 0.463663 |
| MmugDNA.17757.1.S1_at   | MmugDNA.17757.1 | 6.15  | 6.22  | 0.18 | 0.25 | -1.05 | 0.825659 | 0.620284 | 0.929258 | 0.775303 |
| MmugDNA.17759.1.S1_at   | MmugDNA.17759.1 | 6.46  | 6.58  | 0.16 | 0.07 | -1.09 | 0.370489 | 0.007842 | 0.681501 | 0.118014 |

|                         |                 |       |       |      |      |       |          |          |          |          |
|-------------------------|-----------------|-------|-------|------|------|-------|----------|----------|----------|----------|
| MmugDNA.17761.1.S1_at   | MmugDNA.17761.1 | 4.03  | 3.74  | 0.15 | 1.52 | 1.22  | 0.541236 | 0.783641 | 0.78255  | 0.874711 |
| MmugDNA.17763.1.S1_at   | MmugDNA.17763.1 | 6.43  | 4.63  | 2    | 0.37 | 3.47  | 0.277404 | 0.143781 | 0.619559 | 0.41759  |
| MmugDNA.17765.1.S1_at   | MmugDNA.17765.1 | 8.47  | 7.63  | 0.09 | 0.16 | 1.8   | 0.001829 | 0.001611 | 0.155496 | 0.060665 |
| MmugDNA.17766.1.S1_at   | MmugDNA.17766.1 | 4.97  | 4.74  | 0.14 | 0.09 | 1.17  | 0.07702  | 0.066392 | 0.426176 | 0.303314 |
| MmugDNA.17767.1.S1_s_at | MmugDNA.17767.1 | 10.33 | 8.97  | 0.21 | 0.47 | 2.56  | 0.011569 | 0.005327 | 0.236558 | 0.100928 |
| MmugDNA.17768.1.S1_at   | MmugDNA.17768.1 | 5.95  | 5.54  | 0.43 | 0.27 | 1.33  | 0.05089  | 0.001838 | 0.37568  | 0.064374 |
| MmugDNA.1777.1.S1_at    | MmugDNA.1777.1  | 3.89  | 4.02  | 0.07 | 0.02 | -1.09 | 0.120506 | 0.626914 | 0.485559 | 0.780046 |
| MmugDNA.17770.1.S1_at   | MmugDNA.17770.1 | 4.1   | 4     | 0.13 | 0.03 | 1.07  | 0.61446  | 0.141204 | 0.823199 | 0.414709 |
| MmugDNA.17771.1.S1_at   | MmugDNA.17771.1 | 10.24 | 10.38 | 0.27 | 0.1  | -1.1  | 0.437793 | 0.634255 | 0.722586 | 0.784729 |
| MmugDNA.42843.1.S1_s_at | MmugDNA.42843.1 | 12.22 | 12.27 | 0.15 | 0.34 | -1.03 | 0.581956 | 0.712922 | 0.805507 | 0.833561 |
| MmugDNA.17774.1.S1_at   | MmugDNA.17774.1 | 6.95  | 7.08  | 0.24 | 0.14 | -1.1  | 0.965263 | 0.935579 | 0.986736 | 0.963632 |
| MmugDNA.17775.1.S1_s_at | MmugDNA.17775.1 | 9.41  | 8.85  | 0.06 | 0.39 | 1.47  | 0.08967  | 0.118583 | 0.445334 | 0.38654  |
| MmugDNA.17776.1.S1_at   | MmugDNA.17776.1 | 6.27  | 6.53  | 0.08 | 0.1  | -1.2  | 0.040875 | 0.097774 | 0.350506 | 0.355638 |
| MmugDNA.17777.1.S1_at   | MmugDNA.17777.1 | 6.66  | 5.91  | 0.51 | 0.4  | 1.68  | 0.090568 | 0.105038 | 0.446017 | 0.366736 |
| MmugDNA.17778.1.S1_at   | MmugDNA.17778.1 | 5.41  | 5.79  | 1.73 | 0.61 | -1.3  | 0.940578 | 0.848608 | 0.97745  | 0.914061 |
| MmugDNA.1778.1.S1_at    | MmugDNA.1778.1  | 8.91  | 8.58  | 0.23 | 0.28 | 1.26  | 0.097018 | 0.083311 | 0.456113 | 0.333375 |
| MmugDNA.17780.1.S1_at   | MmugDNA.17780.1 | 4.03  | 4.02  | 0.06 | 0.03 | 1     | 0.98966  | 0.959739 | 0.996313 | 0.977189 |
| MmugDNA.17783.1.S1_at   | MmugDNA.17783.1 | 3.13  | 3.13  | 0.29 | 0.18 | 1     | 0.620754 | 0.577842 | 0.826104 | 0.748148 |
| MmugDNA.17784.1.S1_at   | MmugDNA.17784.1 | 5.87  | 6.2   | 1.02 | 0.21 | -1.26 | 0.641584 | 0.741441 | 0.838334 | 0.850285 |
| MmugDNA.17785.1.S1_at   | MmugDNA.17785.1 | 5.51  | 5.97  | 0.55 | 1.02 | -1.37 | 0.56074  | 0.59417  | 0.794413 | 0.758517 |
| MmugDNA.17786.1.S1_at   | MmugDNA.17786.1 | 4.02  | 3.68  | 0.3  | 0.09 | 1.26  | 0.11463  | 0.131022 | 0.477912 | 0.403053 |
| MmugDNA.17787.1.S1_at   | MmugDNA.17787.1 | 8.98  | 8.08  | 0.33 | 0.92 | 1.86  | 0.520802 | 0.583937 | 0.771038 | 0.75206  |
| MmugDNA.17788.1.S1_at   | MmugDNA.17788.1 | 6.91  | 6.83  | 0.17 | 0.18 | 1.06  | 0.852445 | 0.57359  | 0.940647 | 0.745228 |
| MmugDNA.17789.1.S1_at   | MmugDNA.17789.1 | 7.54  | 7.76  | 0.23 | 0.88 | -1.17 | 0.901224 | 0.852595 | 0.960522 | 0.916218 |
| MmugDNA.17790.1.S1_at   | MmugDNA.17790.1 | 9.76  | 8.9   | 0.49 | 0.52 | 1.81  | 0.100477 | 0.084417 | 0.461009 | 0.335713 |
| MmugDNA.17792.1.S1_at   | MmugDNA.17792.1 | 7.27  | 7.08  | 0.15 | 0.22 | 1.15  | 0.953085 | 0.626238 | 0.982522 | 0.779684 |
| MmugDNA.17794.1.S1_at   | MmugDNA.17794.1 | 6.13  | 4.65  | 0.36 | 0.64 | 2.79  | 0.013128 | 0.00221  | 0.245277 | 0.069408 |
| MmugDNA.17795.1.S1_at   | MmugDNA.17795.1 | 7.78  | 8.62  | 0.29 | 0.41 | -1.79 | 0.03787  | 0.029373 | 0.343205 | 0.213239 |
| MmugDNA.17796.1.S1_at   | MmugDNA.17796.1 | 7.31  | 6.12  | 0.45 | 0.54 | 2.28  | 0.04089  | 0.025887 | 0.350506 | 0.2017   |
| MmugDNA.17797.1.S1_at   | MmugDNA.17797.1 | 10.66 | 10.62 | 0.05 | 0.16 | 1.02  | 0.766831 | 0.788973 | 0.901915 | 0.878011 |
| MmugDNA.17799.1.S1_at   | MmugDNA.17799.1 | 5.2   | 5.16  | 0.42 | 0.32 | 1.03  | 0.271654 | 0.32069  | 0.615767 | 0.572784 |
| MmugDNA.178.1.S1_at     | MmugDNA.178.1   | 6.86  | 6.37  | 0.18 | 0.73 | 1.41  | 0.320307 | 0.330974 | 0.649463 | 0.579657 |
| MmugDNA.1780.1.S1_at    | MmugDNA.1780.1  | 10.21 | 9.84  | 0.18 | 0.12 | 1.29  | 0.061033 | 0.007043 | 0.394911 | 0.113131 |
| MmugDNA.17800.1.S1_at   | MmugDNA.17800.1 | 7.37  | 6.92  | 0.17 | 0.12 | 1.37  | 0.050619 | 0.379218 | 0.374816 | 0.616197 |
| MmugDNA.17801.1.S1_at   | MmugDNA.17801.1 | 11.4  | 11.56 | 0.13 | 0.46 | -1.12 | 0.173745 | 0.204804 | 0.537255 | 0.479209 |
| MmugDNA.17802.1.S1_at   | MmugDNA.17802.1 | 11.6  | 11.31 | 0.06 | 0.11 | 1.22  | 0.023115 | 0.012412 | 0.290254 | 0.144066 |
| MmugDNA.17802.1.S1_s_at | MmugDNA.17802.1 | 12.35 | 12.05 | 0.08 | 0.06 | 1.23  | 0.013124 | 0.008502 | 0.245277 | 0.1223   |
| MmugDNA.17803.1.S1_at   | MmugDNA.17803.1 | 9.39  | 8.98  | 0.06 | 0.34 | 1.33  | 0.100237 | 0.096467 | 0.460878 | 0.35409  |
| MmugDNA.17804.1.S1_at   | MmugDNA.17804.1 | 5.07  | 5.2   | 0.64 | 0.32 | -1.09 | 0.794866 | 0.824776 | 0.914844 | 0.89939  |
| MmugDNA.17806.1.S1_at   | MmugDNA.17806.1 | 5.72  | 5.59  | 0.06 | 0.21 | 1.09  | 0.725395 | 0.757525 | 0.880256 | 0.858852 |
| MmugDNA.17807.1.S1_at   | MmugDNA.17807.1 | 6.64  | 6.54  | 0.14 | 0.07 | 1.07  | 0.138799 | 0.139519 | 0.505917 | 0.412743 |

|                        |                 |       |       |      |      |       |          |          |          |          |
|------------------------|-----------------|-------|-------|------|------|-------|----------|----------|----------|----------|
| MmugDNA.17808.1.S1_at  | MmugDNA.17808.1 | 7.56  | 7.47  | 0.22 | 0.51 | 1.06  | 0.189777 | 0.232751 | 0.552667 | 0.504385 |
| MmugDNA.17809.1.S1_at  | MmugDNA.17809.1 | 9.86  | 9.72  | 0.07 | 0.43 | 1.1   | 0.650214 | 0.842608 | 0.842758 | 0.910315 |
| MmugDNA.1781.1.S1_at   | MmugDNA.1781.1  | 2.78  | 2.56  | 0.18 | 0.01 | 1.16  | 0.08164  | 0.095929 | 0.432665 | 0.353204 |
| MmugDNA.17810.1.S1_at  | MmugDNA.17810.1 | 4.98  | 4.87  | 0.3  | 0.01 | 1.08  | 0.612321 | 0.419789 | 0.822151 | 0.643717 |
| MmugDNA.17811.1.S1_at  | MmugDNA.17811.1 | 7.79  | 10.04 | 0.81 | 0.52 | -4.77 | 0.015147 | 0.007926 | 0.257529 | 0.11857  |
| MmugDNA.17812.1.S1_at  | MmugDNA.17812.1 | 6.87  | 9.36  | 0.91 | 2.09 | -5.63 | 0.17938  | 0.193814 | 0.543593 | 0.468847 |
| MmugDNA.17813.1.S1_at  | MmugDNA.17813.1 | 5.01  | 5.1   | 0.32 | 0.19 | -1.06 | 0.444956 | 0.323683 | 0.727353 | 0.574558 |
| MmugDNA.17814.1.S1_at  | MmugDNA.17814.1 | 4.51  | 4.54  | 0.14 | 0.13 | -1.02 | 0.884522 | 0.193816 | 0.953771 | 0.468847 |
| MmugDNA.17815.1.S1_at  | MmugDNA.17815.1 | 8.98  | 9.06  | 0.31 | 0.14 | -1.06 | 0.33098  | 0.109359 | 0.656063 | 0.373154 |
| MmugDNA.17816.1.S1_at  | MmugDNA.17816.1 | 3.05  | 3.03  | 0.14 | 0.08 | 1.01  | 0.45114  | 0.641061 | 0.731475 | 0.789381 |
| MmugDNA.17817.1.S1_at  | MmugDNA.17817.1 | 8.15  | 8.3   | 0.41 | 0.3  | -1.11 | 0.756242 | 0.858159 | 0.896415 | 0.919096 |
| MmugDNA.17818.1.S1_at  | MmugDNA.17818.1 | 6.31  | 6.31  | 0.01 | 0.01 | 1     | 0.26477  | 0.920312 | 0.610545 | 0.95511  |
| MmugDNA.1782.1.S1_at   | MmugDNA.1782.1  | 3.72  | 4.35  | 0.34 | 0.08 | -1.55 | 0.016641 | 0.011503 | 0.26475  | 0.138705 |
| MmugDNA.17820.1.S1_at  | MmugDNA.17820.1 | 7.93  | 8.27  | 0.16 | 0.25 | -1.26 | 0.118899 | 0.045935 | 0.483449 | 0.258774 |
| MmugDNA.17821.1.S1_at  | MmugDNA.17821.1 | 9.33  | 9.9   | 0.22 | 0.81 | -1.48 | 0.464605 | 0.635135 | 0.739398 | 0.785229 |
| MmugDNA.17822.1.S1_at  | MmugDNA.17822.1 | 3.92  | 4     | 0.19 | 0.07 | -1.05 | 0.599757 | 0.342251 | 0.814796 | 0.588375 |
| MmugDNA.17823.1.S1_at  | MmugDNA.17823.1 | 5.53  | 5.54  | 0.19 | 0.18 | -1.01 | 0.48599  | 0.37276  | 0.751269 | 0.611661 |
| MmugDNA.17824.1.S1_at  | MmugDNA.17824.1 | 5.93  | 6.3   | 0.29 | 0.37 | -1.29 | 0.272344 | 0.192708 | 0.616016 | 0.468219 |
| MmugDNA.17825.1.S1_at  | MmugDNA.17825.1 | 4.28  | 4.03  | 0.09 | 0.24 | 1.19  | 0.281785 | 0.47759  | 0.62238  | 0.68363  |
| MmugDNA.17827.1.S1_at  | MmugDNA.17827.1 | 9.8   | 8.8   | 0.13 | 0.23 | 2.01  | 0.004322 | 0.001057 | 0.182631 | 0.05169  |
| MmugDNA.1783.1.S1_s_at | MmugDNA.1783.1  | 8.21  | 7.84  | 0.44 | 0.02 | 1.29  | 0.186446 | 0.109827 | 0.550106 | 0.373762 |
| MmugDNA.17830.1.S1_at  | MmugDNA.17830.1 | 5.88  | 5.82  | 0.2  | 0.15 | 1.04  | 0.197182 | 0.554947 | 0.5601   | 0.733559 |
| MmugDNA.17831.1.S1_at  | MmugDNA.17831.1 | 4.91  | 4.95  | 0.33 | 0.58 | -1.03 | 0.400393 | 0.431619 | 0.699936 | 0.652439 |
| MmugDNA.17833.1.S1_at  | MmugDNA.17833.1 | 3.33  | 3.35  | 0.02 | 0.17 | -1.01 | 0.584378 | 0.815559 | 0.80696  | 0.893609 |
| MmugDNA.17836.1.S1_at  | MmugDNA.17836.1 | 6.95  | 6.45  | 0.42 | 0.39 | 1.41  | 0.494894 | 0.506165 | 0.756991 | 0.702359 |
| MmugDNA.17839.1.S1_at  | MmugDNA.17839.1 | 5.03  | 4.97  | 0.23 | 0.17 | 1.04  | 0.969521 | 0.984962 | 0.988405 | 0.991478 |
| MmugDNA.1784.1.S1_at   | MmugDNA.1784.1  | 8.49  | 6.8   | 1.81 | 0.83 | 3.22  | 0.237281 | 0.19577  | 0.590811 | 0.470637 |
| MmugDNA.17841.1.S1_at  | MmugDNA.17841.1 | 5.73  | 5.49  | 1.39 | 0.56 | 1.18  | 0.870606 | 0.825496 | 0.948314 | 0.899753 |
| MmugDNA.17844.1.S1_at  | MmugDNA.17844.1 | 5.79  | 6.03  | 0.38 | 0.19 | -1.18 | 0.559972 | 0.486826 | 0.79419  | 0.690091 |
| MmugDNA.17845.1.S1_at  | MmugDNA.17845.1 | 4.21  | 3.77  | 1.01 | 1.15 | 1.36  | 0.863647 | 0.80679  | 0.945247 | 0.888839 |
| MmugDNA.17846.1.S1_at  | MmugDNA.17846.1 | 6.73  | 6.94  | 0.71 | 0.29 | -1.16 | 0.746624 | 0.308333 | 0.89152  | 0.564425 |
| MmugDNA.17847.1.S1_at  | MmugDNA.17847.1 | 7.58  | 5.88  | 0.07 | 0.55 | 3.26  | 0.005905 | 0.001377 | 0.19355  | 0.056928 |
| MmugDNA.17849.1.S1_at  | MmugDNA.17849.1 | 8.16  | 8.05  | 0.1  | 0.23 | 1.08  | 0.426422 | 0.302935 | 0.715792 | 0.560383 |
| MmugDNA.1785.1.S1_at   | MmugDNA.1785.1  | 3.65  | 3.64  | 0.08 | 0.18 | 1.01  | 0.933822 | 0.994665 | 0.97439  | 0.996682 |
| MmugDNA.17850.1.S1_at  | MmugDNA.17850.1 | 4.67  | 4.44  | 1.05 | 0.13 | 1.17  | 0.24263  | 0.26167  | 0.594448 | 0.528129 |
| MmugDNA.17852.1.S1_at  | MmugDNA.17852.1 | 6.37  | 6.43  | 0.11 | 0.1  | -1.04 | 0.410496 | 0.388244 | 0.706382 | 0.622692 |
| MmugDNA.17853.1.S1_at  | MmugDNA.17853.1 | 5.89  | 5.93  | 0.26 | 0.06 | -1.02 | 0.815245 | 0.28909  | 0.924888 | 0.550254 |
| MmugDNA.17854.1.S1_at  | MmugDNA.17854.1 | 6.19  | 6.34  | 0.01 | 0.18 | -1.11 | 0.320481 | 0.142857 | 0.649472 | 0.416786 |
| MmugDNA.17856.1.S1_at  | MmugDNA.17856.1 | 11.68 | 11.31 | 0.23 | 0.25 | 1.29  | 0.09193  | 0.071464 | 0.448512 | 0.313678 |
| MmugDNA.17857.1.S1_at  | MmugDNA.17857.1 | 6.92  | 6.61  | 0.15 | 0.42 | 1.24  | 0.291762 | 0.433787 | 0.629048 | 0.653992 |
| MmugDNA.1786.1.S1_at   | MmugDNA.1786.1  | 9.36  | 9.44  | 0.35 | 0.23 | -1.06 | 0.168638 | 0.25713  | 0.532849 | 0.524854 |

|                         |                 |       |       |      |      |       |          |          |          |          |
|-------------------------|-----------------|-------|-------|------|------|-------|----------|----------|----------|----------|
| MmugDNA.17861.1.S1_at   | MmugDNA.17861.1 | 5.52  | 5.85  | 0.1  | 0.19 | -1.26 | 0.11852  | 0.162991 | 0.48294  | 0.439145 |
| MmugDNA.17863.1.S1_at   | MmugDNA.17863.1 | 4.56  | 4.59  | 0.29 | 0.15 | -1.02 | 0.587581 | 0.768926 | 0.808602 | 0.865762 |
| MmugDNA.18234.1.S1_at   | MmugDNA.18234.1 | 6.72  | 6.8   | 0.19 | 0.21 | -1.05 | 0.716974 | 0.897906 | 0.875711 | 0.941859 |
| MmugDNA.18234.1.S1_s_at | MmugDNA.18234.1 | 5.1   | 4.94  | 0.09 | 0.12 | 1.11  | 0.399075 | 0.332686 | 0.699088 | 0.581058 |
| MmugDNA.17864.1.S1_at   | MmugDNA.17864.1 | 6.51  | 5.66  | 0.66 | 0.29 | 1.8   | 0.318956 | 0.024806 | 0.648688 | 0.197344 |
| MmugDNA.17866.1.S1_at   | MmugDNA.17866.1 | 9.34  | 9.2   | 0.32 | 0.73 | 1.1   | 0.533413 | 0.687073 | 0.778179 | 0.817434 |
| MmugDNA.17868.1.S1_at   | MmugDNA.17868.1 | 10.81 | 10.07 | 0.06 | 0.44 | 1.66  | 0.027723 | 0.004626 | 0.308669 | 0.094988 |
| MmugDNA.17869.1.S1_at   | MmugDNA.17869.1 | 3.55  | 3.34  | 0.19 | 0.12 | 1.15  | 0.375817 | 0.106183 | 0.684803 | 0.36856  |
| MmugDNA.1787.1.S1_at    | MmugDNA.1787.1  | 7.19  | 6.56  | 0.27 | 0.07 | 1.55  | 0.027987 | 0.005601 | 0.309449 | 0.10339  |
| MmugDNA.17870.1.S1_at   | MmugDNA.17870.1 | 4.37  | 4.45  | 0.02 | 0.26 | -1.06 | 0.450895 | 0.163612 | 0.73143  | 0.439768 |
| MmugDNA.17871.1.S1_at   | MmugDNA.17871.1 | 3.79  | 3.69  | 0.03 | 0.03 | 1.07  | 0.022913 | 0.01555  | 0.288889 | 0.158118 |
| MmugDNA.17872.1.S1_at   | MmugDNA.17872.1 | 5.66  | 5.59  | 0.12 | 0.1  | 1.05  | 0.831005 | 0.537702 | 0.931586 | 0.722661 |
| MmugDNA.17873.1.S1_at   | MmugDNA.17873.1 | 7.45  | 7.65  | 0.39 | 0.45 | -1.15 | 0.338051 | 0.378416 | 0.660525 | 0.615443 |
| MmugDNA.17874.1.S1_at   | MmugDNA.17874.1 | 5.98  | 6.09  | 0.19 | 0.22 | -1.08 | 0.438628 | 0.251936 | 0.72318  | 0.520632 |
| MmugDNA.17875.1.S1_at   | MmugDNA.17875.1 | 10.23 | 9.65  | 0.23 | 0.25 | 1.5   | 0.021397 | 0.010005 | 0.282524 | 0.131262 |
| MmugDNA.17876.1.S1_at   | MmugDNA.17876.1 | 3.44  | 3.71  | 0.11 | 0.49 | -1.21 | 0.502297 | 0.689875 | 0.760275 | 0.819167 |
| MmugDNA.17877.1.S1_at   | MmugDNA.17877.1 | 8.13  | 8.57  | 0.2  | 0.11 | -1.35 | 0.025331 | 0.015155 | 0.29891  | 0.156391 |
| MmugDNA.17877.1.S1_s_at | MmugDNA.17877.1 | 9.28  | 9.71  | 0.11 | 0.14 | -1.35 | 0.02242  | 0.01339  | 0.286629 | 0.14827  |
| MmugDNA.17878.1.S1_at   | MmugDNA.17878.1 | 10.79 | 10.89 | 0.3  | 0.19 | -1.07 | 0.998005 | 0.202882 | 0.999237 | 0.477312 |
| MmugDNA.1788.1.S1_at    | MmugDNA.1788.1  | 9.97  | 9.16  | 0.09 | 0.29 | 1.75  | 0.019219 | 0.031321 | 0.273202 | 0.218936 |
| MmugDNA.17882.1.S1_at   | MmugDNA.17882.1 | 3.95  | 4.07  | 0.06 | 0.18 | -1.09 | 0.186529 | 0.206924 | 0.550106 | 0.481052 |
| MmugDNA.17883.1.S1_at   | MmugDNA.17883.1 | 4.9   | 4.95  | 0.05 | 0.09 | -1.03 | 0.452751 | 0.212584 | 0.732217 | 0.486525 |
| MmugDNA.17886.1.S1_at   | MmugDNA.17886.1 | 4.98  | 4.74  | 0.53 | 0.12 | 1.18  | 0.157491 | 0.195387 | 0.522386 | 0.470253 |
| MmugDNA.17888.1.S1_at   | MmugDNA.17888.1 | 5.51  | 5.5   | 0.12 | 0.08 | 1.01  | 0.968234 | 0.363134 | 0.988064 | 0.60356  |
| MmugDNA.17889.1.S1_at   | MmugDNA.17889.1 | 9.95  | 9.42  | 0.13 | 1.24 | 1.44  | 0.167406 | 0.078725 | 0.531591 | 0.325673 |
| MmugDNA.1789.1.S1_at    | MmugDNA.1789.1  | 3.77  | 3.83  | 0.12 | 0.18 | -1.05 | 0.197039 | 0.246557 | 0.560025 | 0.515917 |
| MmugDNA.17890.1.S1_at   | MmugDNA.17890.1 | 7.08  | 7.46  | 0.37 | 0.59 | -1.3  | 0.268058 | 0.34848  | 0.612954 | 0.592593 |
| MmugDNA.17891.1.S1_at   | MmugDNA.17891.1 | 11.08 | 11.38 | 0.15 | 0.18 | -1.23 | 0.132015 | 0.165025 | 0.498128 | 0.44123  |
| MmugDNA.17892.1.S1_at   | MmugDNA.17892.1 | 7.79  | 8.06  | 0.34 | 0.31 | -1.2  | 0.228789 | 0.075111 | 0.586136 | 0.319301 |
| MmugDNA.17894.1.S1_at   | MmugDNA.17894.1 | 6.2   | 6.6   | 0.15 | 0.05 | -1.32 | 0.004692 | 0.001546 | 0.184492 | 0.05949  |
| MmugDNA.17895.1.S1_at   | MmugDNA.17895.1 | 3.16  | 3.2   | 0.19 | 0.01 | -1.03 | 0.505245 | 0.646195 | 0.761548 | 0.792676 |
| MmugDNA.17896.1.S1_s_at | MmugDNA.17896.1 | 6.66  | 6.71  | 0.2  | 0.14 | -1.04 | 0.209102 | 0.266033 | 0.570667 | 0.531815 |
| MmugDNA.17897.1.S1_at   | MmugDNA.17897.1 | 4.21  | 4.38  | 0    | 0.19 | -1.13 | 0.200091 | 0.398201 | 0.563056 | 0.629257 |
| MmugDNA.17898.1.S1_at   | MmugDNA.17898.1 | 7.02  | 6.86  | 0.49 | 0.46 | 1.11  | 0.325758 | 0.476426 | 0.653033 | 0.682725 |
| MmugDNA.17899.1.S1_at   | MmugDNA.17899.1 | 7.81  | 7.3   | 0.12 | 0.41 | 1.43  | 0.051602 | 0.00928  | 0.376072 | 0.127101 |
| MmugDNA.17900.1.S1_at   | MmugDNA.17900.1 | 7.17  | 7.01  | 0.18 | 0.24 | 1.11  | 0.438292 | 0.42732  | 0.722942 | 0.649175 |
| MmugDNA.17901.1.S1_at   | MmugDNA.17901.1 | 3.68  | 3.84  | 0.13 | 0.11 | -1.12 | 0.443494 | 0.244485 | 0.726153 | 0.514295 |
| MmugDNA.17902.1.S1_at   | MmugDNA.17902.1 | 7.03  | 6.95  | 0.09 | 0.27 | 1.06  | 0.78579  | 0.947342 | 0.910907 | 0.970134 |
| MmugDNA.17903.1.S1_at   | MmugDNA.17903.1 | 4.9   | 5.04  | 0.11 | 0.05 | -1.1  | 0.144181 | 0.075273 | 0.510652 | 0.319441 |
| MmugDNA.17904.1.S1_at   | MmugDNA.17904.1 | 6.08  | 6.6   | 0.56 | 0.28 | -1.44 | 0.372975 | 0.40707  | 0.683189 | 0.634722 |
| MmugDNA.17905.1.S1_at   | MmugDNA.17905.1 | 3.96  | 4.13  | 0.19 | 0.05 | -1.13 | 0.262898 | 0.440176 | 0.609115 | 0.658775 |

|                         |                 |       |       |      |      |       |          |          |          |          |
|-------------------------|-----------------|-------|-------|------|------|-------|----------|----------|----------|----------|
| MmugDNA.17908.1.S1_at   | MmugDNA.17908.1 | 10.42 | 10.09 | 0.13 | 0.05 | 1.26  | 0.007402 | 0.006922 | 0.207702 | 0.112445 |
| MmugDNA.1791.1.S1_at    | MmugDNA.1791.1  | 3.7   | 3.68  | 0.17 | 0.03 | 1.02  | 0.676136 | 0.428363 | 0.854832 | 0.649908 |
| MmugDNA.17911.1.S1_at   | MmugDNA.17911.1 | 13.5  | 13.47 | 0.11 | 0.08 | 1.02  | 0.15753  | 0.024074 | 0.522447 | 0.194476 |
| MmugDNA.3786.1.S1_s_at  | MmugDNA.3786.1  | 14.02 | 13.88 | 0.09 | 0.02 | 1.1   | 0.034704 | 0.006682 | 0.333625 | 0.110612 |
| MmugDNA.17912.1.S1_at   | MmugDNA.17912.1 | 3.29  | 3.31  | 0.04 | 0.08 | -1.01 | 0.75354  | 0.598199 | 0.894902 | 0.760681 |
| MmugDNA.17913.1.S1_at   | MmugDNA.17913.1 | 6.17  | 5.61  | 0.95 | 0.48 | 1.47  | 0.964733 | 0.413545 | 0.986377 | 0.639648 |
| MmugDNA.17914.1.S1_at   | MmugDNA.17914.1 | 3.14  | 3.08  | 0.08 | 0.07 | 1.04  | 0.330935 | 0.103513 | 0.656063 | 0.364346 |
| MmugDNA.17915.1.S1_at   | MmugDNA.17915.1 | 6.57  | 6.54  | 0.18 | 0.2  | 1.02  | 0.595896 | 0.333627 | 0.812684 | 0.581808 |
| MmugDNA.31853.1.S1_s_at | MmugDNA.31853.1 | 3.48  | 3.4   | 0.23 | 0.29 | 1.06  | 0.854168 | 0.953088 | 0.941079 | 0.973379 |
| MmugDNA.17916.1.S1_at   | MmugDNA.17916.1 | 9.45  | 9.8   | 0.28 | 0.42 | -1.28 | 0.151428 | 0.213154 | 0.516099 | 0.487068 |
| MmugDNA.19343.1.S1_s_at | MmugDNA.19343.1 | 4.99  | 5.09  | 0.08 | 0.02 | -1.07 | 0.092292 | 0.119948 | 0.448803 | 0.388671 |
| MmugDNA.17918.1.S1_at   | MmugDNA.17918.1 | 4.18  | 4.62  | 0.19 | 0.19 | -1.36 | 0.043848 | 0.048669 | 0.357071 | 0.265629 |
| MmugDNA.1792.1.S1_at    | MmugDNA.1792.1  | 11.04 | 11.17 | 0.07 | 0.13 | -1.1  | 0.264031 | 0.457987 | 0.609857 | 0.670999 |
| MmugDNA.17920.1.S1_at   | MmugDNA.17920.1 | 11.21 | 10.81 | 0.21 | 0.24 | 1.32  | 0.301692 | 0.202552 | 0.636547 | 0.476882 |
| MmugDNA.17921.1.S1_at   | MmugDNA.17921.1 | 4.41  | 4.55  | 0.14 | 0.05 | -1.1  | 0.460864 | 0.878256 | 0.737195 | 0.930529 |
| MmugDNA.17922.1.S1_at   | MmugDNA.17922.1 | 7.42  | 7.57  | 0.28 | 0.03 | -1.11 | 0.452821 | 0.634124 | 0.732217 | 0.784644 |
| MmugDNA.17923.1.S1_at   | MmugDNA.17923.1 | 4.95  | 4.95  | 0.08 | 0.04 | -1    | 0.993098 | 0.987868 | 0.997652 | 0.993223 |
| MmugDNA.17924.1.S1_at   | MmugDNA.17924.1 | 3.38  | 3.48  | 0.39 | 0.23 | -1.07 | 0.963509 | 0.972634 | 0.985967 | 0.98528  |
| MmugDNA.17926.1.S1_at   | MmugDNA.17926.1 | 5.54  | 5.55  | 0.17 | 0.04 | -1.01 | 0.428788 | 0.268335 | 0.71704  | 0.534041 |
| MmugDNA.17927.1.S1_at   | MmugDNA.17927.1 | 3.33  | 3.37  | 0.04 | 0.09 | -1.03 | 0.521026 | 0.123037 | 0.771067 | 0.392988 |
| MmugDNA.17928.1.S1_at   | MmugDNA.17928.1 | 8.4   | 7.49  | 0.21 | 0.96 | 1.89  | 0.188656 | 0.261836 | 0.551613 | 0.528265 |
| MmugDNA.17929.1.S1_at   | MmugDNA.17929.1 | 3.55  | 3.77  | 0.26 | 0.14 | -1.17 | 0.518493 | 0.191069 | 0.769471 | 0.466358 |
| MmugDNA.1793.1.S1_at    | MmugDNA.1793.1  | 9.06  | 8.69  | 0.31 | 0.55 | 1.29  | 0.286304 | 0.264385 | 0.625548 | 0.530385 |
| MmugDNA.17930.1.S1_at   | MmugDNA.17930.1 | 3.99  | 4     | 0.06 | 0.09 | -1.01 | 0.952976 | 0.968321 | 0.982489 | 0.982558 |
| MmugDNA.17932.1.S1_at   | MmugDNA.17932.1 | 4.83  | 3.64  | 0.25 | 0.6  | 2.29  | 0.08637  | 0.012954 | 0.440232 | 0.146485 |
| MmugDNA.17933.1.S1_at   | MmugDNA.17933.1 | 5.08  | 5.18  | 0.15 | 0.18 | -1.07 | 0.559577 | 0.278942 | 0.793957 | 0.542661 |
| MmugDNA.17934.1.S1_at   | MmugDNA.17934.1 | 5.68  | 5.34  | 0.42 | 0.24 | 1.26  | 0.21427  | 0.006112 | 0.574703 | 0.10649  |
| MmugDNA.17935.1.S1_at   | MmugDNA.17935.1 | 11.76 | 11.14 | 0.23 | 0.25 | 1.54  | 0.03577  | 0.025402 | 0.33757  | 0.199747 |
| MmugDNA.17936.1.S1_at   | MmugDNA.17936.1 | 3.15  | 3.13  | 0.15 | 0.11 | 1.02  | 0.574789 | 0.329576 | 0.801864 | 0.578781 |
| MmugDNA.17937.1.S1_at   | MmugDNA.17937.1 | 5.16  | 4.96  | 0.14 | 0.03 | 1.15  | 0.087618 | 0.028877 | 0.442009 | 0.211763 |
| MmugDNA.1794.1.S1_at    | MmugDNA.1794.1  | 4.97  | 5.08  | 0.32 | 0.11 | -1.08 | 0.744982 | 0.773818 | 0.890928 | 0.868485 |
| MmugDNA.17942.1.S1_at   | MmugDNA.17942.1 | 4.23  | 4.49  | 0.06 | 0.23 | -1.2  | 0.128601 | 0.024509 | 0.494653 | 0.195985 |
| MmugDNA.17944.1.S1_at   | MmugDNA.17944.1 | 5.71  | 5.91  | 0.19 | 0.49 | -1.14 | 0.293337 | 0.364928 | 0.630392 | 0.60517  |
| MmugDNA.17945.1.S1_at   | MmugDNA.17945.1 | 9.95  | 11.08 | 0.51 | 0.48 | -2.19 | 0.061779 | 0.053734 | 0.396609 | 0.277384 |
| MmugDNA.17948.1.S1_at   | MmugDNA.17948.1 | 4.49  | 4.61  | 0.07 | 0.11 | -1.09 | 0.065001 | 0.146116 | 0.403744 | 0.420099 |
| MmugDNA.17949.1.S1_at   | MmugDNA.17949.1 | 4.75  | 4.76  | 0.48 | 0.43 | -1.01 | 0.970193 | 0.344758 | 0.988595 | 0.590101 |
| MmugDNA.1795.1.S1_at    | MmugDNA.1795.1  | 4.42  | 4.42  | 0    | 0.08 | 1     | 0.35477  | 0.823392 | 0.670686 | 0.898498 |
| MmugDNA.17953.1.S1_at   | MmugDNA.17953.1 | 5.7   | 6.97  | 0.9  | 0.64 | -2.42 | 0.118265 | 0.132526 | 0.482489 | 0.404544 |
| MmugDNA.17954.1.S1_at   | MmugDNA.17954.1 | 3.87  | 3.92  | 0.17 | 0.11 | -1.04 | 0.720159 | 0.257887 | 0.87732  | 0.525467 |
| MmugDNA.17955.1.S1_at   | MmugDNA.17955.1 | 3.87  | 4.07  | 0.13 | 0.11 | -1.14 | 0.250123 | 0.41656  | 0.600389 | 0.641647 |
| MmugDNA.42536.1.S1_s_at | MmugDNA.42536.1 | 14.05 | 14.15 | 0.14 | 0.12 | -1.07 | 0.693552 | 0.402083 | 0.864141 | 0.631176 |

|                         |                 |       |       |      |      |       |          |          |          |          |
|-------------------------|-----------------|-------|-------|------|------|-------|----------|----------|----------|----------|
| MmugDNA.17957.1.S1_at   | MmugDNA.17957.1 | 3.92  | 4.08  | 0.03 | 0.38 | -1.12 | 0.773403 | 0.463074 | 0.904813 | 0.674206 |
| MmugDNA.17958.1.S1_at   | MmugDNA.17958.1 | 5.91  | 5.64  | 0.19 | 0.79 | 1.21  | 0.263491 | 0.353898 | 0.609402 | 0.596886 |
| MmugDNA.17959.1.S1_at   | MmugDNA.17959.1 | 8.2   | 8.03  | 0.05 | 0.2  | 1.13  | 0.160659 | 0.220653 | 0.525746 | 0.494069 |
| MmugDNA.1796.1.S1_at    | MmugDNA.1796.1  | 3.54  | 3.51  | 0.18 | 0.04 | 1.02  | 0.549829 | 0.692129 | 0.787481 | 0.82091  |
| MmugDNA.24774.1.S1_s_at | MmugDNA.24774.1 | 10.6  | 10.91 | 0.46 | 0.45 | -1.24 | 0.421688 | 0.514274 | 0.713215 | 0.707592 |
| MmugDNA.17961.1.S1_at   | MmugDNA.17961.1 | 12.8  | 12.73 | 0.18 | 0.44 | 1.05  | 0.747097 | 0.845852 | 0.891702 | 0.912246 |
| MmugDNA.17962.1.S1_at   | MmugDNA.17962.1 | 8.48  | 7.54  | 0.41 | 0.4  | 1.92  | 0.062631 | 0.0992   | 0.398671 | 0.357381 |
| MmugDNA.17964.1.S1_at   | MmugDNA.17964.1 | 5.76  | 5.71  | 0.41 | 0.06 | 1.03  | 0.875307 | 0.04562  | 0.949951 | 0.257766 |
| MmugDNA.17964.1.S1_s_at | MmugDNA.17964.1 | 5.26  | 5.31  | 0.09 | 0.07 | -1.04 | 0.687614 | 0.583886 | 0.860572 | 0.752043 |
| MmugDNA.17966.1.S1_x_at | MmugDNA.17966.1 | 10.8  | 10.99 | 0.36 | 0.45 | -1.14 | 0.166614 | 0.071164 | 0.530266 | 0.313063 |
| MmugDNA.1797.1.S1_at    | MmugDNA.1797.1  | 9.23  | 8.78  | 0.02 | 0.51 | 1.36  | 0.367504 | 0.193375 | 0.679502 | 0.468698 |
| MmugDNA.17970.1.S1_at   | MmugDNA.17970.1 | 9.03  | 8.77  | 0.36 | 0.2  | 1.2   | 0.123748 | 0.042057 | 0.489534 | 0.249589 |
| MmugDNA.17971.1.S1_at   | MmugDNA.17971.1 | 3.76  | 3.69  | 0.06 | 0.04 | 1.05  | 0.160584 | 0.158692 | 0.525652 | 0.434745 |
| MmugDNA.17972.1.S1_at   | MmugDNA.17972.1 | 5.86  | 5.62  | 0.54 | 0.57 | 1.18  | 0.670145 | 0.400364 | 0.852353 | 0.630177 |
| MmugDNA.17974.1.S1_at   | MmugDNA.17974.1 | 6.16  | 5.93  | 0.14 | 0.24 | 1.17  | 0.125828 | 0.128114 | 0.491824 | 0.399126 |
| MmugDNA.17975.1.S1_s_at | MmugDNA.17975.1 | 11.62 | 11.78 | 0.62 | 0.94 | -1.11 | 0.592629 | 0.745481 | 0.811115 | 0.852409 |
| MmugDNA.17976.1.S1_at   | MmugDNA.17976.1 | 5.15  | 5.8   | 0.15 | 0.32 | -1.57 | 0.057336 | 0.0814   | 0.387904 | 0.329571 |
| MmugDNA.17978.1.S1_at   | MmugDNA.17978.1 | 5.18  | 5.2   | 0.79 | 0.5  | -1.01 | 0.799512 | 0.406072 | 0.91698  | 0.634197 |
| MmugDNA.17979.1.S1_at   | MmugDNA.17979.1 | 7.22  | 8.44  | 0.51 | 0.41 | -2.33 | 0.059091 | 0.042258 | 0.390977 | 0.250023 |
| MmugDNA.17980.1.S1_at   | MmugDNA.17980.1 | 6.33  | 7.29  | 0.68 | 0.53 | -1.94 | 0.123122 | 0.138477 | 0.488707 | 0.411453 |
| MmugDNA.17981.1.S1_at   | MmugDNA.17981.1 | 7.05  | 7.12  | 0.62 | 0.64 | -1.05 | 0.45076  | 0.592648 | 0.731278 | 0.757854 |
| MmugDNA.17982.1.S1_at   | MmugDNA.17982.1 | 6.18  | 6.26  | 0.1  | 0.09 | -1.06 | 0.070829 | 0.05054  | 0.414661 | 0.270205 |
| MmugDNA.17983.1.S1_at   | MmugDNA.17983.1 | 4.41  | 3.9   | 0.29 | 0.27 | 1.42  | 0.082363 | 0.412173 | 0.433785 | 0.638576 |
| MmugDNA.17984.1.S1_at   | MmugDNA.17984.1 | 4.5   | 4.58  | 0.11 | 0.14 | -1.06 | 0.629219 | 0.47315  | 0.831363 | 0.68048  |
| MmugDNA.17985.1.S1_at   | MmugDNA.17985.1 | 12.69 | 12.6  | 0.02 | 0.88 | 1.06  | 0.465421 | 0.539499 | 0.739873 | 0.723763 |
| MmugDNA.17987.1.S1_at   | MmugDNA.17987.1 | 5.47  | 4.82  | 1.06 | 0.45 | 1.57  | 0.323488 | 0.262825 | 0.65165  | 0.529164 |
| MmugDNA.17988.1.S1_at   | MmugDNA.17988.1 | 6     | 6.1   | 0.47 | 0.3  | -1.07 | 0.642929 | 0.377138 | 0.839056 | 0.614819 |
| MmugDNA.1799.1.S1_at    | MmugDNA.1799.1  | 4.7   | 4.89  | 0.09 | 0.16 | -1.14 | 0.663034 | 0.134137 | 0.848864 | 0.406393 |
| MmugDNA.17990.1.S1_at   | MmugDNA.17990.1 | 6.28  | 6.22  | 0.24 | 0.12 | 1.04  | 0.88953  | 0.816814 | 0.955773 | 0.894329 |
| MmugDNA.17993.1.S1_at   | MmugDNA.17993.1 | 5.28  | 4.76  | 0.29 | 0.11 | 1.43  | 0.030065 | 0.039378 | 0.316741 | 0.243406 |
| MmugDNA.17999.1.S1_at   | MmugDNA.17999.1 | 5.83  | 5.88  | 0.11 | 0.25 | -1.03 | 0.884941 | 0.777091 | 0.953894 | 0.870506 |
| MmugDNA.18.1.S1_at      | MmugDNA.18.1    | 4.63  | 4     | 0.32 | 0.24 | 1.55  | 0.047234 | 0.089808 | 0.365679 | 0.34404  |
| MmugDNA.18000.1.S1_at   | MmugDNA.18000.1 | 4.95  | 3.9   | 0.1  | 1.07 | 2.07  | 0.5703   | 0.488581 | 0.799452 | 0.691222 |
| MmugDNA.18002.1.S1_at   | MmugDNA.18002.1 | 3.26  | 3.16  | 0.33 | 0.22 | 1.07  | 0.810067 | 0.953064 | 0.922538 | 0.973379 |
| MmugDNA.18003.1.S1_at   | MmugDNA.18003.1 | 5.94  | 6.02  | 0.15 | 0.23 | -1.06 | 0.724735 | 0.827664 | 0.879818 | 0.901081 |
| MmugDNA.18004.1.S1_at   | MmugDNA.18004.1 | 8.95  | 9.75  | 0.86 | 0.37 | -1.75 | 0.362671 | 0.337918 | 0.676176 | 0.585111 |
| MmugDNA.18007.1.S1_at   | MmugDNA.18007.1 | 7.02  | 8.01  | 0.49 | 0.69 | -1.99 | 0.058877 | 0.040976 | 0.390921 | 0.247202 |
| MmugDNA.18007.1.S1_s_at | MmugDNA.18007.1 | 8.14  | 9.3   | 0.32 | 0.72 | -2.23 | 0.063815 | 0.062207 | 0.401662 | 0.296296 |
| MmugDNA.18008.1.S1_at   | MmugDNA.18008.1 | 5.76  | 5.65  | 0.18 | 0.1  | 1.08  | 0.19523  | 0.264406 | 0.558698 | 0.530385 |
| MmugDNA.18009.1.S1_at   | MmugDNA.18009.1 | 4.89  | 5.44  | 0.78 | 0.51 | -1.47 | 0.50763  | 0.201817 | 0.762989 | 0.476367 |
| MmugDNA.1801.1.S1_at    | MmugDNA.1801.1  | 3.65  | 3.39  | 0.19 | 0.19 | 1.19  | 0.236482 | 0.110101 | 0.590476 | 0.374235 |

|                         |                 |       |       |      |      |       |          |          |          |          |
|-------------------------|-----------------|-------|-------|------|------|-------|----------|----------|----------|----------|
| MmugDNA.18012.1.S1_at   | MmugDNA.18012.1 | 6.76  | 6.9   | 0.09 | 0.12 | -1.1  | 0.204103 | 0.284762 | 0.566605 | 0.546966 |
| MmugDNA.18014.1.S1_at   | MmugDNA.18014.1 | 4.31  | 3.94  | 0.88 | 0.29 | 1.29  | 0.146912 | 0.15585  | 0.51298  | 0.431223 |
| MmugDNA.18016.1.S1_at   | MmugDNA.18016.1 | 6.06  | 6.17  | 0.12 | 0.16 | -1.08 | 0.703938 | 0.428045 | 0.869377 | 0.649619 |
| MmugDNA.18017.1.S1_at   | MmugDNA.18017.1 | 9.92  | 10.01 | 0.15 | 0.22 | -1.07 | 0.603972 | 0.048608 | 0.817401 | 0.265596 |
| MmugDNA.18018.1.S1_at   | MmugDNA.18018.1 | 4.96  | 5.19  | 0.12 | 0.17 | -1.17 | 0.071    | 0.126808 | 0.414673 | 0.397446 |
| MmugDNA.18019.1.S1_at   | MmugDNA.18019.1 | 3.92  | 4.19  | 0.15 | 0.07 | -1.21 | 0.084706 | 0.074627 | 0.437545 | 0.318313 |
| MmugDNA.18020.1.S1_at   | MmugDNA.18020.1 | 3.95  | 3.63  | 0.24 | 0.67 | 1.25  | 0.872572 | 0.643489 | 0.949073 | 0.790956 |
| MmugDNA.18021.1.S1_at   | MmugDNA.18021.1 | 4.54  | 4.85  | 0.58 | 0.28 | -1.24 | 0.318611 | 0.219171 | 0.648593 | 0.492915 |
| MmugDNA.18022.1.S1_at   | MmugDNA.18022.1 | 3.76  | 3.65  | 0.12 | 0.51 | 1.08  | 0.819512 | 0.5286   | 0.926528 | 0.71669  |
| MmugDNA.18023.1.S1_at   | MmugDNA.18023.1 | 6.3   | 6.39  | 0.18 | 0.14 | -1.06 | 0.34529  | 0.398855 | 0.665128 | 0.629585 |
| MmugDNA.18024.1.S1_at   | MmugDNA.18024.1 | 6.75  | 6.15  | 0.4  | 1.24 | 1.51  | 0.779512 | 0.781145 | 0.90816  | 0.873038 |
| MmugDNA.18025.1.S1_at   | MmugDNA.18025.1 | 3.19  | 3.2   | 0.09 | 0.05 | -1.01 | 0.203675 | 0.325651 | 0.566259 | 0.575963 |
| MmugDNA.18027.1.S1_at   | MmugDNA.18027.1 | 5.8   | 5.79  | 0.02 | 0.43 | 1.01  | 0.996421 | 0.366349 | 0.998557 | 0.606087 |
| MmugDNA.18029.1.S1_at   | MmugDNA.18029.1 | 6.33  | 6.48  | 0.21 | 0.12 | -1.11 | 0.119233 | 0.123169 | 0.483934 | 0.39322  |
| MmugDNA.1803.1.S1_at    | MmugDNA.1803.1  | 3.69  | 3.61  | 0.06 | 0.06 | 1.06  | 0.380671 | 0.668362 | 0.68755  | 0.805934 |
| MmugDNA.18030.1.S1_at   | MmugDNA.18030.1 | 5.38  | 5.54  | 0.2  | 0.23 | -1.12 | 0.879485 | 0.863296 | 0.951533 | 0.922356 |
| MmugDNA.18033.1.S1_at   | MmugDNA.18033.1 | 5.11  | 5.11  | 0.07 | 0.08 | 1     | 0.241047 | 0.368596 | 0.593741 | 0.608098 |
| MmugDNA.18034.1.S1_at   | MmugDNA.18034.1 | 8.26  | 8.51  | 0.12 | 0.15 | -1.18 | 0.090759 | 0.007884 | 0.446311 | 0.118304 |
| MmugDNA.18035.1.S1_at   | MmugDNA.18035.1 | 3.46  | 3.47  | 0.08 | 0.17 | -1.01 | 0.560697 | 0.516896 | 0.794395 | 0.709316 |
| MmugDNA.18036.1.S1_at   | MmugDNA.18036.1 | 2.98  | 3.05  | 0.3  | 0.41 | -1.04 | 0.825588 | 0.856886 | 0.929243 | 0.918235 |
| MmugDNA.18037.1.S1_at   | MmugDNA.18037.1 | 7.5   | 10.29 | 2.56 | 1.61 | -6.89 | 0.195224 | 0.244581 | 0.558698 | 0.514387 |
| MmugDNA.18038.1.S1_at   | MmugDNA.18038.1 | 6.67  | 5.67  | 0.23 | 0.13 | 2.01  | 0.002612 | 0.001066 | 0.164386 | 0.051835 |
| MmugDNA.1804.1.S1_at    | MmugDNA.1804.1  | 4.68  | 4.56  | 0.35 | 0.63 | 1.09  | 0.549825 | 0.271636 | 0.787481 | 0.536577 |
| MmugDNA.18040.1.S1_at   | MmugDNA.18040.1 | 4.78  | 4.51  | 0.83 | 0.04 | 1.21  | 0.645525 | 0.768031 | 0.840383 | 0.865326 |
| MmugDNA.18040.1.S1_s_at | MmugDNA.18040.1 | 3.88  | 3.88  | 0.06 | 0.12 | 1     | 0.658159 | 0.49976  | 0.846374 | 0.698494 |
| MmugDNA.18041.1.S1_at   | MmugDNA.18041.1 | 8.1   | 8.42  | 0.27 | 0.06 | -1.25 | 0.042638 | 0.029457 | 0.355272 | 0.213368 |
| MmugDNA.18042.1.S1_at   | MmugDNA.18042.1 | 4.82  | 4.76  | 0.22 | 0.12 | 1.05  | 0.986726 | 0.833449 | 0.99532  | 0.904502 |
| MmugDNA.18043.1.S1_at   | MmugDNA.18043.1 | 7.64  | 8.06  | 0.49 | 0.3  | -1.33 | 0.249593 | 0.119822 | 0.600196 | 0.388577 |
| MmugDNA.18044.1.S1_at   | MmugDNA.18044.1 | 5.39  | 5.29  | 0.17 | 0.14 | 1.07  | 0.636989 | 0.829256 | 0.83591  | 0.901825 |
| MmugDNA.18045.1.S1_at   | MmugDNA.18045.1 | 11.26 | 11.09 | 0.26 | 0.53 | 1.13  | 0.758415 | 0.613528 | 0.897812 | 0.770578 |
| MmugDNA.18047.1.S1_at   | MmugDNA.18047.1 | 4.33  | 4.26  | 0.06 | 0.2  | 1.05  | 0.902997 | 0.979034 | 0.961391 | 0.988665 |
| MmugDNA.18048.1.S1_at   | MmugDNA.18048.1 | 3.74  | 3.84  | 0.12 | 0.27 | -1.08 | 0.82799  | 0.308917 | 0.930199 | 0.564656 |
| MmugDNA.18049.1.S1_s_at | MmugDNA.18049.1 | 3.04  | 3.37  | 0.16 | 0.35 | -1.25 | 0.608737 | 0.517327 | 0.820185 | 0.709435 |
| MmugDNA.1805.1.S1_at    | MmugDNA.1805.1  | 7.51  | 8.45  | 0.23 | 0.58 | -1.92 | 0.054978 | 0.053978 | 0.382822 | 0.27777  |
| MmugDNA.18050.1.S1_at   | MmugDNA.18050.1 | 3.14  | 3.09  | 0.05 | 0.46 | 1.03  | 0.529242 | 0.504713 | 0.775959 | 0.70178  |
| MmugDNA.18051.1.S1_at   | MmugDNA.18051.1 | 9.03  | 8.58  | 0.31 | 0.35 | 1.37  | 0.750264 | 0.128717 | 0.892983 | 0.400135 |
| MmugDNA.18052.1.S1_at   | MmugDNA.18052.1 | 4.91  | 4.8   | 0.1  | 0.02 | 1.08  | 0.182431 | 0.065447 | 0.546756 | 0.301415 |
| MmugDNA.18053.1.S1_at   | MmugDNA.18053.1 | 7.19  | 7.52  | 1.26 | 0.74 | -1.26 | 0.899883 | 0.976513 | 0.960048 | 0.987202 |
| MmugDNA.18054.1.S1_at   | MmugDNA.18054.1 | 3.45  | 3.45  | 0.1  | 0.02 | 1     | 0.487126 | 0.184694 | 0.751954 | 0.460645 |
| MmugDNA.18056.1.S1_at   | MmugDNA.18056.1 | 4.83  | 4.13  | 0.38 | 0.32 | 1.63  | 0.146088 | 0.16467  | 0.512187 | 0.440974 |
| MmugDNA.18057.1.S1_at   | MmugDNA.18057.1 | 5.77  | 5.88  | 0.22 | 0.09 | -1.08 | 0.980764 | 0.712567 | 0.993045 | 0.833385 |

|                         |                 |       |       |      |      |       |          |          |          |          |
|-------------------------|-----------------|-------|-------|------|------|-------|----------|----------|----------|----------|
| MmugDNA.18058.1.S1_at   | MmugDNA.18058.1 | 5.99  | 5.95  | 0.1  | 0.07 | 1.02  | 0.821724 | 0.683738 | 0.927464 | 0.815491 |
| MmugDNA.18059.1.S1_at   | MmugDNA.18059.1 | 5.03  | 5.04  | 0.14 | 0.14 | -1.01 | 0.852655 | 0.977828 | 0.940647 | 0.9879   |
| MmugDNA.1806.1.S1_at    | MmugDNA.1806.1  | 11.1  | 10.82 | 0.09 | 0.15 | 1.22  | 0.05075  | 0.180452 | 0.375332 | 0.457115 |
| MmugDNA.18061.1.S1_a_at | MmugDNA.18061.1 | 7.01  | 7.04  | 0.33 | 0.17 | -1.02 | 0.460756 | 0.422506 | 0.737133 | 0.645729 |
| MmugDNA.18061.1.S1_at   | MmugDNA.18061.1 | 4.98  | 5.12  | 0.17 | 0.3  | -1.1  | 0.250528 | 0.321254 | 0.600389 | 0.573153 |
| MmugDNA.18062.1.S1_at   | MmugDNA.18062.1 | 4.64  | 4.54  | 1.1  | 0.26 | 1.07  | 0.366964 | 0.501764 | 0.679255 | 0.699813 |
| MmugDNA.18063.1.S1_at   | MmugDNA.18063.1 | 4.48  | 4.59  | 0.01 | 0.05 | -1.09 | 0.028489 | 0.739452 | 0.311425 | 0.848995 |
| MmugDNA.18064.1.S1_at   | MmugDNA.18064.1 | 5.33  | 5.39  | 0.07 | 0.12 | -1.04 | 0.410238 | 0.521849 | 0.706234 | 0.712654 |
| MmugDNA.18066.1.S1_at   | MmugDNA.18066.1 | 11.66 | 12.65 | 0.6  | 0.61 | -1.98 | 0.286563 | 0.347325 | 0.625572 | 0.591939 |
| MmugDNA.18067.1.S1_at   | MmugDNA.18067.1 | 5.83  | 6.01  | 0.11 | 0.14 | -1.13 | 0.224888 | 0.287484 | 0.582924 | 0.548718 |
| MmugDNA.18068.1.S1_at   | MmugDNA.18068.1 | 3.36  | 3.38  | 0.11 | 0.13 | -1.01 | 0.419238 | 0.630203 | 0.711714 | 0.782181 |
| MmugDNA.1807.1.S1_at    | MmugDNA.1807.1  | 6.37  | 4.81  | 1.09 | 0.56 | 2.94  | 0.192928 | 0.291715 | 0.556235 | 0.552054 |
| MmugDNA.18071.1.S1_at   | MmugDNA.18071.1 | 3.95  | 3.92  | 0.13 | 0.34 | 1.02  | 0.825706 | 0.52139  | 0.929258 | 0.712376 |
| MmugDNA.18072.1.S1_s_at | MmugDNA.18072.1 | 7.15  | 7.27  | 0.35 | 0.12 | -1.09 | 0.867829 | 0.385176 | 0.947272 | 0.62067  |
| MmugDNA.18073.1.S1_at   | MmugDNA.18073.1 | 5.4   | 5.2   | 1.22 | 0.42 | 1.15  | 0.671878 | 0.298728 | 0.852716 | 0.557321 |
| MmugDNA.18074.1.S1_at   | MmugDNA.18074.1 | 6.83  | 7.09  | 0.09 | 0.09 | -1.2  | 0.052209 | 0.043341 | 0.377155 | 0.252853 |
| MmugDNA.18075.1.S1_at   | MmugDNA.18075.1 | 3.46  | 3.44  | 0.1  | 0.02 | 1.02  | 0.614839 | 0.804492 | 0.823286 | 0.887566 |
| MmugDNA.18076.1.S1_at   | MmugDNA.18076.1 | 3.75  | 3.72  | 0.14 | 0.09 | 1.02  | 0.708101 | 0.568419 | 0.871566 | 0.741962 |
| MmugDNA.18077.1.S1_at   | MmugDNA.18077.1 | 4.31  | 4.32  | 0.21 | 0.18 | -1.01 | 0.629991 | 0.733623 | 0.831842 | 0.845775 |
| MmugDNA.18078.1.S1_at   | MmugDNA.18078.1 | 5.54  | 5.41  | 0.25 | 0.29 | 1.1   | 0.492323 | 0.45251  | 0.755666 | 0.667112 |
| MmugDNA.18079.1.S1_at   | MmugDNA.18079.1 | 3.92  | 3.9   | 0.12 | 0.17 | 1.01  | 0.830588 | 0.379622 | 0.931519 | 0.616523 |
| MmugDNA.1808.1.S1_at    | MmugDNA.1808.1  | 5.62  | 5.62  | 0.07 | 0.02 | 1     | 0.27277  | 0.755381 | 0.616391 | 0.857562 |
| MmugDNA.18080.1.S1_at   | MmugDNA.18080.1 | 7.97  | 7.25  | 0.36 | 0.14 | 1.65  | 0.079829 | 0.08341  | 0.430147 | 0.333699 |
| MmugDNA.18081.1.S1_at   | MmugDNA.18081.1 | 9.29  | 8.3   | 0.38 | 0.22 | 1.98  | 0.062944 | 0.072028 | 0.399633 | 0.314459 |
| MmugDNA.18082.1.S1_at   | MmugDNA.18082.1 | 6.46  | 6.67  | 0.21 | 0.2  | -1.16 | 0.246347 | 0.240991 | 0.597666 | 0.511657 |
| MmugDNA.18084.1.S1_at   | MmugDNA.18084.1 | 7.12  | 6.64  | 0.07 | 0.29 | 1.39  | 0.041379 | 0.046375 | 0.351626 | 0.259844 |
| MmugDNA.18085.1.S1_at   | MmugDNA.18085.1 | 6.07  | 6.1   | 0.03 | 0.63 | -1.02 | 0.819437 | 0.826229 | 0.926528 | 0.900203 |
| MmugDNA.18086.1.S1_at   | MmugDNA.18086.1 | 6.58  | 6.32  | 0.28 | 0.11 | 1.19  | 0.405977 | 0.397675 | 0.7035   | 0.629038 |
| MmugDNA.18088.1.S1_at   | MmugDNA.18088.1 | 4.39  | 4.08  | 0.13 | 0.23 | 1.24  | 0.2263   | 0.569697 | 0.584347 | 0.742585 |
| MmugDNA.18089.1.S1_at   | MmugDNA.18089.1 | 10.16 | 10.45 | 0.18 | 0.25 | -1.23 | 0.141935 | 0.041587 | 0.509233 | 0.248831 |
| MmugDNA.1809.1.S1_at    | MmugDNA.1809.1  | 4.01  | 3.84  | 0.78 | 0.59 | 1.12  | 0.78612  | 0.688637 | 0.911069 | 0.818251 |
| MmugDNA.18090.1.S1_at   | MmugDNA.18090.1 | 3.75  | 3.83  | 0.04 | 0.15 | -1.06 | 0.932938 | 0.995207 | 0.973979 | 0.996999 |
| MmugDNA.18091.1.S1_at   | MmugDNA.18091.1 | 5.55  | 5.58  | 0.29 | 0.32 | -1.02 | 0.811513 | 0.974867 | 0.92323  | 0.986264 |
| MmugDNA.18092.1.S1_at   | MmugDNA.18092.1 | 9.17  | 7.58  | 0.13 | 0.84 | 3.02  | 0.08706  | 0.085477 | 0.44093  | 0.337473 |
| MmugDNA.18093.1.S1_at   | MmugDNA.18093.1 | 9.8   | 11.23 | 0.42 | 0.34 | -2.7  | 0.00998  | 0.005041 | 0.226899 | 0.098963 |
| MmugDNA.18094.1.S1_at   | MmugDNA.18094.1 | 3.72  | 3.55  | 0.56 | 0.02 | 1.12  | 0.203977 | 0.242946 | 0.566495 | 0.513319 |
| MmugDNA.18097.1.S1_at   | MmugDNA.18097.1 | 5.06  | 5.23  | 0.02 | 0.1  | -1.12 | 0.094711 | 0.148435 | 0.452166 | 0.423007 |
| MmugDNA.18098.1.S1_s_at | MmugDNA.18098.1 | 5.57  | 5.67  | 0.27 | 0.06 | -1.08 | 0.469471 | 0.664039 | 0.741717 | 0.803247 |
| MmugDNA.181.1.S1_at     | MmugDNA.181.1   | 12.11 | 11.56 | 0.02 | 0.04 | 1.46  | 0.000042 | 0.000001 | 0.112653 | 0.007307 |
| MmugDNA.1810.1.S1_at    | MmugDNA.1810.1  | 4.76  | 4.96  | 0.02 | 0.09 | -1.15 | 0.022122 | 0.093818 | 0.284595 | 0.350281 |
| MmugDNA.18101.1.S1_at   | MmugDNA.18101.1 | 3.8   | 6.4   | 0.39 | 1.98 | -6.05 | 0.106617 | 0.049994 | 0.467185 | 0.268839 |



|                         |                 |       |       |      |      |       |          |          |          |          |
|-------------------------|-----------------|-------|-------|------|------|-------|----------|----------|----------|----------|
| MmugDNA.18102.1.S1_at   | MmugDNA.18102.1 | 4.14  | 4.38  | 0.07 | 0.06 | -1.18 | 0.008256 | 0.003284 | 0.216948 | 0.082541 |
| MmugDNA.18103.1.S1_at   | MmugDNA.18103.1 | 5.41  | 5.45  | 0.26 | 0.13 | -1.02 | 0.799863 | 0.279623 | 0.917271 | 0.543186 |
| MmugDNA.18103.1.S1_x_at | MmugDNA.18103.1 | 5.34  | 5.05  | 0.3  | 0.09 | 1.22  | 0.194286 | 0.060457 | 0.557805 | 0.292547 |
| MmugDNA.18104.1.S1_at   | MmugDNA.18104.1 | 3.87  | 3.96  | 0.23 | 0.23 | -1.06 | 0.752773 | 0.32009  | 0.894478 | 0.572459 |
| MmugDNA.18106.1.S1_at   | MmugDNA.18106.1 | 6.14  | 6.49  | 0.29 | 0.49 | -1.27 | 0.379608 | 0.061967 | 0.687063 | 0.295763 |
| MmugDNA.18107.1.S1_at   | MmugDNA.18107.1 | 6.76  | 6.92  | 0.2  | 0.15 | -1.11 | 0.6964   | 0.901667 | 0.865242 | 0.944043 |
| MmugDNA.18108.1.S1_at   | MmugDNA.18108.1 | 9.94  | 9.15  | 0.1  | 0.54 | 1.73  | 0.052756 | 0.05227  | 0.378449 | 0.274146 |
| MmugDNA.18109.1.S1_at   | MmugDNA.18109.1 | 3.74  | 3.78  | 0.15 | 0.17 | -1.03 | 0.754979 | 0.693887 | 0.895812 | 0.821989 |
| MmugDNA.1811.1.S1_at    | MmugDNA.1811.1  | 9     | 9.7   | 0.2  | 0.85 | -1.62 | 0.233851 | 0.191227 | 0.588317 | 0.466553 |
| MmugDNA.18110.1.S1_at   | MmugDNA.18110.1 | 6.52  | 6.62  | 0.12 | 0.08 | -1.07 | 0.322945 | 0.47671  | 0.651259 | 0.682871 |
| MmugDNA.18115.1.S1_at   | MmugDNA.18115.1 | 5.79  | 5.67  | 0.15 | 0.24 | 1.09  | 0.693587 | 0.412153 | 0.864148 | 0.638565 |
| MmugDNA.18116.1.S1_s_at | MmugDNA.18116.1 | 3.62  | 3.64  | 0.11 | 0.07 | -1.01 | 0.411107 | 0.686435 | 0.706976 | 0.817012 |
| MmugDNA.18117.1.S1_at   | MmugDNA.18117.1 | 4.45  | 4.48  | 0.22 | 0.09 | -1.02 | 0.573219 | 0.643493 | 0.801079 | 0.790956 |
| MmugDNA.18118.1.S1_at   | MmugDNA.18118.1 | 2.86  | 2.86  | 0.12 | 0.08 | -1    | 0.973289 | 0.336144 | 0.989593 | 0.583675 |
| MmugDNA.18119.1.S1_at   | MmugDNA.18119.1 | 3.9   | 3.64  | 0.11 | 0.13 | 1.2   | 0.020649 | 0.027627 | 0.279122 | 0.207522 |
| MmugDNA.18120.1.S1_at   | MmugDNA.18120.1 | 5.29  | 5.18  | 0.13 | 0.08 | 1.08  | 0.130673 | 0.146764 | 0.49705  | 0.420799 |
| MmugDNA.18121.1.S1_at   | MmugDNA.18121.1 | 6.59  | 9.65  | 0.42 | 0.72 | -8.31 | 0.002574 | 0.001214 | 0.164386 | 0.054455 |
| MmugDNA.18125.1.S1_at   | MmugDNA.18125.1 | 3.45  | 3.71  | 0.21 | 0.14 | -1.2  | 0.103328 | 0.194144 | 0.462888 | 0.469266 |
| MmugDNA.18126.1.S1_at   | MmugDNA.18126.1 | 9.75  | 8.27  | 0.36 | 0.64 | 2.79  | 0.028669 | 0.015865 | 0.312031 | 0.159789 |
| MmugDNA.18129.1.S1_at   | MmugDNA.18129.1 | 8.19  | 6.7   | 0.56 | 0.13 | 2.8   | 0.02558  | 0.015062 | 0.299772 | 0.155853 |
| MmugDNA.1813.1.S1_at    | MmugDNA.1813.1  | 3.65  | 3.66  | 0.06 | 0.03 | -1    | 0.580859 | 0.516573 | 0.804812 | 0.709034 |
| MmugDNA.18131.1.S1_at   | MmugDNA.18131.1 | 5.73  | 5.77  | 0.35 | 0.03 | -1.03 | 0.894485 | 0.940935 | 0.957917 | 0.966553 |
| MmugDNA.18132.1.S1_at   | MmugDNA.18132.1 | 4.47  | 5     | 0.28 | 0.18 | -1.44 | 0.103308 | 0.11241  | 0.462888 | 0.377784 |
| MmugDNA.31631.1.S1_s_at | MmugDNA.31631.1 | 6.81  | 6.98  | 0.02 | 0.07 | -1.13 | 0.037675 | 0.098781 | 0.342468 | 0.356894 |
| MmugDNA.18135.1.S1_at   | MmugDNA.18135.1 | 7.78  | 7.89  | 0.66 | 0.32 | -1.08 | 0.933592 | 0.762527 | 0.974246 | 0.86188  |
| MmugDNA.18137.1.S1_at   | MmugDNA.18137.1 | 8.15  | 7.8   | 0.07 | 0.21 | 1.28  | 0.052818 | 0.164644 | 0.378449 | 0.44095  |
| MmugDNA.18139.1.S1_at   | MmugDNA.18139.1 | 6.3   | 6.38  | 0.1  | 0.12 | -1.06 | 0.590453 | 0.404994 | 0.809851 | 0.633428 |
| MmugDNA.1814.1.S1_at    | MmugDNA.1814.1  | 6.63  | 6.82  | 0.31 | 0.24 | -1.15 | 0.151868 | 0.109073 | 0.516547 | 0.372869 |
| MmugDNA.18140.1.S1_at   | MmugDNA.18140.1 | 11.92 | 11.39 | 0.03 | 0.17 | 1.44  | 0.015396 | 0.007171 | 0.258258 | 0.113839 |
| MmugDNA.18142.1.S1_at   | MmugDNA.18142.1 | 5.41  | 5.68  | 1.77 | 0.37 | -1.2  | 0.546835 | 0.588915 | 0.785716 | 0.75527  |
| MmugDNA.18143.1.S1_at   | MmugDNA.18143.1 | 5.53  | 5.68  | 0.8  | 0.18 | -1.11 | 0.436332 | 0.590755 | 0.721646 | 0.756437 |
| MmugDNA.18144.1.S1_at   | MmugDNA.18144.1 | 5.58  | 5.85  | 0.21 | 0.52 | -1.2  | 0.75998  | 0.570937 | 0.898719 | 0.743422 |
| MmugDNA.18145.1.S1_at   | MmugDNA.18145.1 | 5.01  | 5     | 0.21 | 0.14 | 1.01  | 0.678289 | 0.393154 | 0.85592  | 0.626102 |
| MmugDNA.18146.1.S1_at   | MmugDNA.18146.1 | 3.12  | 3.13  | 0.06 | 0.13 | -1.01 | 0.262865 | 0.319807 | 0.609088 | 0.572154 |
| MmugDNA.18147.1.S1_at   | MmugDNA.18147.1 | 5.89  | 5.64  | 0.38 | 0.54 | 1.18  | 0.448627 | 0.373711 | 0.729722 | 0.612403 |
| MmugDNA.18148.1.S1_at   | MmugDNA.18148.1 | 7.11  | 8.73  | 0.88 | 2.08 | -3.08 | 0.556484 | 0.404564 | 0.791842 | 0.63306  |
| MmugDNA.18149.1.S1_at   | MmugDNA.18149.1 | 6.63  | 7.22  | 0.74 | 0.1  | -1.51 | 0.303519 | 0.427945 | 0.637706 | 0.649602 |
| MmugDNA.1815.1.S1_at    | MmugDNA.1815.1  | 5.48  | 5.39  | 0.05 | 0.16 | 1.06  | 0.735247 | 0.208322 | 0.88618  | 0.482199 |
| MmugDNA.18151.1.S1_at   | MmugDNA.18151.1 | 5.3   | 5.27  | 0.19 | 0.3  | 1.02  | 0.623707 | 0.666795 | 0.828033 | 0.804789 |
| MmugDNA.18152.1.S1_at   | MmugDNA.18152.1 | 7.2   | 7.19  | 0.15 | 0.09 | 1.01  | 0.905785 | 0.440845 | 0.962495 | 0.659138 |
| MmugDNA.18153.1.S1_at   | MmugDNA.18153.1 | 5.28  | 4.27  | 0.21 | 0.24 | 2     | 0.005678 | 0.000328 | 0.191943 | 0.035797 |

|                         |                 |       |       |      |      |       |          |          |          |          |
|-------------------------|-----------------|-------|-------|------|------|-------|----------|----------|----------|----------|
| MmugDNA.18154.1.S1_at   | MmugDNA.18154.1 | 6.72  | 6.39  | 0.36 | 0.23 | 1.26  | 0.264422 | 0.348459 | 0.610159 | 0.592593 |
| MmugDNA.18155.1.S1_at   | MmugDNA.18155.1 | 9.2   | 9.36  | 0.65 | 0.2  | -1.12 | 0.993007 | 0.99993  | 0.997597 | 0.999968 |
| MmugDNA.18156.1.S1_at   | MmugDNA.18156.1 | 9.98  | 9.59  | 0.3  | 0.49 | 1.32  | 0.30115  | 0.387122 | 0.636252 | 0.621935 |
| MmugDNA.18157.1.S1_at   | MmugDNA.18157.1 | 5.95  | 6.11  | 0.12 | 0.11 | -1.11 | 0.509005 | 0.604743 | 0.764172 | 0.764797 |
| MmugDNA.18159.1.S1_at   | MmugDNA.18159.1 | 11.63 | 12.53 | 0.13 | 0.26 | -1.86 | 0.015399 | 0.011264 | 0.258258 | 0.138076 |
| MmugDNA.1816.1.S1_at    | MmugDNA.1816.1  | 7.55  | 8.39  | 0.4  | 0.72 | -1.79 | 0.129039 | 0.134636 | 0.495114 | 0.406629 |
| MmugDNA.18160.1.S1_at   | MmugDNA.18160.1 | 9.97  | 9.41  | 0.32 | 0.15 | 1.47  | 0.085991 | 0.084189 | 0.440024 | 0.335266 |
| MmugDNA.18161.1.S1_at   | MmugDNA.18161.1 | 7.43  | 7.05  | 0.81 | 0.31 | 1.29  | 0.83329  | 0.009293 | 0.932336 | 0.127142 |
| MmugDNA.18162.1.S1_at   | MmugDNA.18162.1 | 4.65  | 4.6   | 0.34 | 0.16 | 1.04  | 0.490323 | 0.816732 | 0.75438  | 0.894294 |
| MmugDNA.18164.1.S1_at   | MmugDNA.18164.1 | 6.83  | 7.9   | 0.05 | 0.15 | -2.1  | 0.000333 | 0.002584 | 0.125814 | 0.075213 |
| MmugDNA.18165.1.S1_at   | MmugDNA.18165.1 | 5.9   | 5.58  | 0.43 | 0.35 | 1.25  | 0.631496 | 0.33035  | 0.832749 | 0.579112 |
| MmugDNA.18166.1.S1_at   | MmugDNA.18166.1 | 10.01 | 10.78 | 0.12 | 0.3  | -1.71 | 0.010572 | 0.013505 | 0.230404 | 0.148824 |
| MmugDNA.18167.1.S1_at   | MmugDNA.18167.1 | 4.7   | 4.46  | 0.35 | 0.07 | 1.18  | 0.293154 | 0.466407 | 0.630314 | 0.676284 |
| MmugDNA.18168.1.S1_at   | MmugDNA.18168.1 | 8.82  | 9.19  | 0.26 | 0.25 | -1.29 | 0.372219 | 0.187178 | 0.682724 | 0.463149 |
| MmugDNA.1817.1.S1_at    | MmugDNA.1817.1  | 5.85  | 5.94  | 0.14 | 0.34 | -1.06 | 0.268214 | 0.170735 | 0.613105 | 0.447316 |
| MmugDNA.18170.1.S1_at   | MmugDNA.18170.1 | 3.78  | 3.97  | 0.13 | 0.15 | -1.14 | 0.15595  | 0.216897 | 0.520639 | 0.490515 |
| MmugDNA.18171.1.S1_at   | MmugDNA.18171.1 | 5.42  | 5.21  | 0.3  | 0.36 | 1.16  | 0.480321 | 0.137804 | 0.748257 | 0.410769 |
| MmugDNA.18172.1.S1_at   | MmugDNA.18172.1 | 4.93  | 4.82  | 0.12 | 0.1  | 1.08  | 0.360914 | 0.022268 | 0.674935 | 0.1867   |
| MmugDNA.18173.1.S1_at   | MmugDNA.18173.1 | 7.34  | 7.42  | 0.16 | 0.9  | -1.06 | 0.924113 | 0.445969 | 0.970594 | 0.662623 |
| MmugDNA.18174.1.S1_at   | MmugDNA.18174.1 | 8.81  | 8.15  | 0.25 | 0.35 | 1.57  | 0.058843 | 0.064264 | 0.390921 | 0.299692 |
| MmugDNA.18175.1.S1_at   | MmugDNA.18175.1 | 10.83 | 10.73 | 0.36 | 0.5  | 1.07  | 0.935624 | 0.096633 | 0.975112 | 0.354145 |
| MmugDNA.18176.1.S1_at   | MmugDNA.18176.1 | 8.41  | 8.39  | 0.29 | 0.26 | 1.02  | 0.890472 | 0.054504 | 0.956183 | 0.278959 |
| MmugDNA.18177.1.S1_at   | MmugDNA.18177.1 | 8.62  | 8.04  | 0.08 | 0.19 | 1.5   | 0.013261 | 0.011379 | 0.246403 | 0.138214 |
| MmugDNA.18178.1.S1_at   | MmugDNA.18178.1 | 7.12  | 8.29  | 0.48 | 0.8  | -2.25 | 0.065878 | 0.054974 | 0.405342 | 0.279898 |
| MmugDNA.18178.1.S1_x_at | MmugDNA.18178.1 | 7.23  | 8.49  | 0.51 | 0.84 | -2.39 | 0.054364 | 0.039483 | 0.381851 | 0.243642 |
| MmugDNA.1818.1.S1_at    | MmugDNA.1818.1  | 7.66  | 7.87  | 0.27 | 0.1  | -1.16 | 0.724594 | 0.579801 | 0.879724 | 0.749289 |
| MmugDNA.18180.1.S1_at   | MmugDNA.18180.1 | 6.3   | 6.32  | 0.24 | 0.05 | -1.02 | 0.904919 | 0.53206  | 0.962042 | 0.718995 |
| MmugDNA.18182.1.S1_at   | MmugDNA.18182.1 | 5.4   | 5.36  | 0.89 | 0.82 | 1.03  | 0.972233 | 0.615597 | 0.989434 | 0.772101 |
| MmugDNA.18183.1.S1_at   | MmugDNA.18183.1 | 8.99  | 8.6   | 0.48 | 0.28 | 1.31  | 0.302289 | 0.012459 | 0.63692  | 0.14417  |
| MmugDNA.18184.1.S1_at   | MmugDNA.18184.1 | 6.44  | 7.85  | 0.12 | 0.77 | -2.66 | 0.102671 | 0.135303 | 0.462485 | 0.407381 |
| MmugDNA.18188.1.S1_at   | MmugDNA.18188.1 | 3.21  | 3.2   | 0.04 | 0.04 | 1.01  | 0.794219 | 0.062442 | 0.914561 | 0.296717 |
| MmugDNA.1819.1.S1_at    | MmugDNA.1819.1  | 3.67  | 3.82  | 0.13 | 0.34 | -1.11 | 0.662787 | 0.010328 | 0.848768 | 0.13301  |
| MmugDNA.18190.1.S1_at   | MmugDNA.18190.1 | 12.32 | 12.43 | 0.03 | 0.15 | -1.09 | 0.742038 | 0.630269 | 0.88958  | 0.782195 |
| MmugDNA.18194.1.S1_at   | MmugDNA.18194.1 | 8.83  | 7.71  | 0.09 | 0.5  | 2.18  | 0.054608 | 0.012013 | 0.382    | 0.141846 |
| MmugDNA.18196.1.S1_at   | MmugDNA.18196.1 | 3.24  | 3.53  | 0.09 | 0.13 | -1.22 | 0.040672 | 0.032183 | 0.350025 | 0.222111 |
| MmugDNA.18197.1.S1_at   | MmugDNA.18197.1 | 4.02  | 4.03  | 0.34 | 0.21 | -1.01 | 0.490945 | 0.235238 | 0.754698 | 0.50629  |
| MmugDNA.18198.1.S1_at   | MmugDNA.18198.1 | 3.69  | 3.67  | 0.16 | 0.16 | 1.01  | 0.421839 | 0.44928  | 0.713215 | 0.664983 |
| MmugDNA.18200.1.S1_at   | MmugDNA.18200.1 | 8.89  | 8.56  | 0.11 | 0.05 | 1.26  | 0.00771  | 0.005176 | 0.211405 | 0.099727 |
| MmugDNA.18201.1.S1_at   | MmugDNA.18201.1 | 6.17  | 6.1   | 0.26 | 0    | 1.05  | 0.624496 | 0.880013 | 0.828305 | 0.93148  |
| MmugDNA.18202.1.S1_at   | MmugDNA.18202.1 | 3.3   | 3.14  | 0.12 | 0.12 | 1.12  | 0.40415  | 0.225055 | 0.7026   | 0.49773  |
| MmugDNA.18203.1.S1_at   | MmugDNA.18203.1 | 9.61  | 10.32 | 0.14 | 0.43 | -1.64 | 0.025104 | 0.027244 | 0.297733 | 0.206279 |

|                         |                 |       |       |      |      |       |          |          |          |          |
|-------------------------|-----------------|-------|-------|------|------|-------|----------|----------|----------|----------|
| MmugDNA.18204.1.S1_s_at | MmugDNA.18204.1 | 5.77  | 5.71  | 0.31 | 0.49 | 1.04  | 0.592315 | 0.734149 | 0.810875 | 0.845901 |
| MmugDNA.18205.1.S1_at   | MmugDNA.18205.1 | 7.48  | 7.24  | 0.72 | 0.22 | 1.18  | 0.662814 | 0.79188  | 0.848768 | 0.87976  |
| MmugDNA.18206.1.S1_at   | MmugDNA.18206.1 | 3.72  | 3.91  | 0.11 | 0.18 | -1.14 | 0.809516 | 0.80685  | 0.922228 | 0.888868 |
| MmugDNA.18207.1.S1_at   | MmugDNA.18207.1 | 3.44  | 3.46  | 0.1  | 0.15 | -1.01 | 0.829209 | 0.550755 | 0.930683 | 0.730611 |
| MmugDNA.18208.1.S1_at   | MmugDNA.18208.1 | 3.63  | 3.51  | 0.13 | 0.06 | 1.09  | 0.227083 | 0.288471 | 0.584952 | 0.54977  |
| MmugDNA.18209.1.S1_at   | MmugDNA.18209.1 | 9.27  | 8.9   | 0.29 | 0.96 | 1.29  | 0.470318 | 0.433605 | 0.742283 | 0.653865 |
| MmugDNA.1821.1.S1_at    | MmugDNA.1821.1  | 13.08 | 13.08 | 0.18 | 0.2  | -1    | 0.80926  | 0.235934 | 0.922223 | 0.507056 |
| MmugDNA.1821.1.S1_s_at  | MmugDNA.1821.1  | 13.25 | 13.36 | 0.2  | 0.18 | -1.08 | 0.949819 | 0.2725   | 0.980994 | 0.537245 |
| MmugDNA.18210.1.S1_at   | MmugDNA.18210.1 | 6.41  | 6.14  | 0.42 | 0.76 | 1.2   | 0.794919 | 0.480292 | 0.914873 | 0.68574  |
| MmugDNA.18211.1.S1_at   | MmugDNA.18211.1 | 3.15  | 3.16  | 0.04 | 0.11 | -1.01 | 0.605059 | 0.567161 | 0.818091 | 0.74107  |
| MmugDNA.18212.1.S1_at   | MmugDNA.18212.1 | 9.14  | 8.96  | 0.11 | 0.17 | 1.14  | 0.125821 | 0.037188 | 0.491824 | 0.237285 |
| MmugDNA.18213.1.S1_at   | MmugDNA.18213.1 | 3.36  | 3.25  | 0.05 | 0.13 | 1.08  | 0.849509 | 0.979286 | 0.939603 | 0.988845 |
| MmugDNA.18214.1.S1_at   | MmugDNA.18214.1 | 4.55  | 4.62  | 0.04 | 0.17 | -1.05 | 0.203799 | 0.541245 | 0.5663   | 0.724781 |
| MmugDNA.18217.1.S1_at   | MmugDNA.18217.1 | 5.29  | 5.02  | 0.25 | 0.01 | 1.21  | 0.131371 | 0.267887 | 0.497985 | 0.533607 |
| MmugDNA.18218.1.S1_at   | MmugDNA.18218.1 | 8.87  | 8.73  | 0.28 | 0.39 | 1.11  | 0.508679 | 0.661584 | 0.763905 | 0.801876 |
| MmugDNA.18219.1.S1_at   | MmugDNA.18219.1 | 10.74 | 10.96 | 0.09 | 0.8  | -1.16 | 0.754128 | 0.794117 | 0.895204 | 0.881296 |
| MmugDNA.1822.1.S1_at    | MmugDNA.1822.1  | 6.02  | 5.64  | 0.53 | 0.96 | 1.3   | 0.858237 | 0.372203 | 0.942698 | 0.61109  |
| MmugDNA.18220.1.S1_at   | MmugDNA.18220.1 | 5.03  | 4.81  | 0.2  | 0.17 | 1.16  | 0.527969 | 0.430187 | 0.775293 | 0.651255 |
| MmugDNA.18221.1.S1_at   | MmugDNA.18221.1 | 5.68  | 5.68  | 0.94 | 0.54 | -1    | 0.440065 | 0.5226   | 0.724095 | 0.713255 |
| MmugDNA.18222.1.S1_at   | MmugDNA.18222.1 | 4.93  | 5     | 0.14 | 0.09 | -1.05 | 0.413545 | 0.490791 | 0.70853  | 0.692666 |
| MmugDNA.18223.1.S1_at   | MmugDNA.18223.1 | 5.85  | 5.97  | 0.08 | 0.08 | -1.09 | 0.693793 | 0.806357 | 0.864237 | 0.888642 |
| MmugDNA.18225.1.S1_at   | MmugDNA.18225.1 | 4.77  | 4.73  | 0.3  | 0.03 | 1.03  | 0.45342  | 0.594824 | 0.732603 | 0.758675 |
| MmugDNA.18226.1.S1_at   | MmugDNA.18226.1 | 3.02  | 2.98  | 0.04 | 0.25 | 1.03  | 0.840923 | 0.747557 | 0.936034 | 0.853168 |
| MmugDNA.18229.1.S1_at   | MmugDNA.18229.1 | 4.44  | 4.63  | 0.12 | 0.2  | -1.14 | 0.497788 | 0.047032 | 0.758068 | 0.261469 |
| MmugDNA.5447.1.S1_s_at  | MmugDNA.5447.1  | 3.86  | 4.15  | 0.08 | 0.22 | -1.22 | 0.112671 | 0.198864 | 0.4751   | 0.473475 |
| MmugDNA.18230.1.S1_at   | MmugDNA.18230.1 | 2.93  | 3.09  | 0.12 | 0.03 | -1.12 | 0.070356 | 0.103762 | 0.414002 | 0.364519 |
| MmugDNA.18231.1.S1_at   | MmugDNA.18231.1 | 3.61  | 3.61  | 0.18 | 0    | 1     | 0.957491 | 0.936831 | 0.983882 | 0.964385 |
| MmugDNA.18232.1.S1_at   | MmugDNA.18232.1 | 12.69 | 12.73 | 0.04 | 0.17 | -1.03 | 0.805708 | 0.932441 | 0.920322 | 0.961712 |
| MmugDNA.18237.1.S1_at   | MmugDNA.18237.1 | 9.33  | 9.6   | 0.1  | 0.7  | -1.21 | 0.455358 | 0.603143 | 0.733761 | 0.763963 |
| MmugDNA.18238.1.S1_at   | MmugDNA.18238.1 | 5.05  | 5.35  | 0.78 | 0.85 | -1.23 | 0.638532 | 0.489775 | 0.836621 | 0.691918 |
| MmugDNA.18239.1.S1_at   | MmugDNA.18239.1 | 5.84  | 5.62  | 0.3  | 0.04 | 1.17  | 0.314798 | 0.027092 | 0.646107 | 0.205797 |
| MmugDNA.18240.1.S1_at   | MmugDNA.18240.1 | 5.28  | 5.27  | 0.44 | 0.53 | 1.01  | 0.963042 | 0.485864 | 0.985697 | 0.689443 |
| MmugDNA.18242.1.S1_at   | MmugDNA.18242.1 | 6.05  | 5.23  | 1.35 | 0.51 | 1.76  | 0.291092 | 0.226969 | 0.628725 | 0.49928  |
| MmugDNA.18243.1.S1_at   | MmugDNA.18243.1 | 3.9   | 3.9   | 0.04 | 0.14 | 1     | 0.533389 | 0.720432 | 0.778165 | 0.838261 |
| MmugDNA.18244.1.S1_at   | MmugDNA.18244.1 | 4.17  | 4.26  | 0.46 | 0.06 | -1.06 | 0.579137 | 0.479082 | 0.804078 | 0.684931 |
| MmugDNA.18245.1.S1_at   | MmugDNA.18245.1 | 8.56  | 9.29  | 0.09 | 0.3  | -1.66 | 0.011054 | 0.007753 | 0.233745 | 0.117622 |
| MmugDNA.18245.1.S1_s_at | MmugDNA.18245.1 | 8.51  | 9.37  | 0.08 | 0.26 | -1.83 | 0.004916 | 0.006397 | 0.185749 | 0.108738 |
| MmugDNA.18246.1.S1_at   | MmugDNA.18246.1 | 3.62  | 3.65  | 0.1  | 0.15 | -1.02 | 0.353283 | 0.356531 | 0.670121 | 0.598459 |
| MmugDNA.18247.1.S1_at   | MmugDNA.18247.1 | 9.34  | 9.87  | 0.13 | 0.37 | -1.44 | 0.113741 | 0.119984 | 0.477015 | 0.388672 |
| MmugDNA.18248.1.S1_s_at | MmugDNA.18248.1 | 7.23  | 7.85  | 0.07 | 0.18 | -1.53 | 0.01353  | 0.005842 | 0.247499 | 0.10467  |
| MmugDNA.18249.1.S1_at   | MmugDNA.18249.1 | 5.78  | 5.78  | 0.04 | 0.06 | 1     | 0.23377  | 0.296529 | 0.588317 | 0.555531 |

|                         |                 |       |       |      |      |       |          |          |          |          |
|-------------------------|-----------------|-------|-------|------|------|-------|----------|----------|----------|----------|
| MmugDNA.1825.1.S1_at    | MmugDNA.1825.1  | 2.87  | 2.69  | 0.38 | 0.1  | 1.14  | 0.186932 | 0.197439 | 0.550106 | 0.472375 |
| MmugDNA.18250.1.S1_at   | MmugDNA.18250.1 | 5.49  | 5.15  | 0.33 | 0.14 | 1.27  | 0.560488 | 0.501721 | 0.794285 | 0.69981  |
| MmugDNA.18251.1.S1_at   | MmugDNA.18251.1 | 10.22 | 11.33 | 0.3  | 0.41 | -2.15 | 0.016272 | 0.010581 | 0.263592 | 0.134213 |
| MmugDNA.18251.1.S1_s_at | MmugDNA.18251.1 | 9.98  | 11.15 | 0.33 | 0.5  | -2.24 | 0.021332 | 0.014254 | 0.282524 | 0.152411 |
| MmugDNA.18252.1.S1_at   | MmugDNA.18252.1 | 4.49  | 4.02  | 0.26 | 0.07 | 1.38  | 0.114188 | 0.065627 | 0.47744  | 0.301554 |
| MmugDNA.18253.1.S1_at   | MmugDNA.18253.1 | 5.52  | 5.83  | 0.34 | 0.16 | -1.24 | 0.365591 | 0.499141 | 0.67833  | 0.698006 |
| MmugDNA.18255.1.S1_at   | MmugDNA.18255.1 | 4.68  | 4.13  | 0.51 | 0.35 | 1.47  | 0.173126 | 0.234855 | 0.536812 | 0.506125 |
| MmugDNA.37499.1.S1_s_at | MmugDNA.37499.1 | 7.72  | 7.69  | 0.08 | 0.15 | 1.03  | 0.523914 | 0.450204 | 0.772859 | 0.665549 |
| MmugDNA.18257.1.S1_at   | MmugDNA.18257.1 | 3.21  | 3.16  | 0.25 | 0.27 | 1.04  | 0.959883 | 0.993637 | 0.98484  | 0.996218 |
| MmugDNA.18258.1.S1_at   | MmugDNA.18258.1 | 5.8   | 5.12  | 0.6  | 0.17 | 1.6   | 0.107672 | 0.146269 | 0.468135 | 0.420267 |
| MmugDNA.1826.1.S1_at    | MmugDNA.1826.1  | 3.05  | 3.23  | 0.1  | 0.3  | -1.13 | 0.368865 | 0.284109 | 0.680295 | 0.546319 |
| MmugDNA.18260.1.S1_at   | MmugDNA.18260.1 | 6.71  | 5.83  | 0.52 | 0    | 1.85  | 0.037994 | 0.036351 | 0.343341 | 0.235105 |
| MmugDNA.18261.1.S1_at   | MmugDNA.18261.1 | 11.36 | 12.35 | 0.11 | 0.07 | -1.99 | 0.000215 | 0.000014 | 0.120316 | 0.017682 |
| MmugDNA.18262.1.S1_at   | MmugDNA.18262.1 | 6.09  | 5.87  | 0.38 | 0.46 | 1.16  | 0.11542  | 0.122681 | 0.478773 | 0.392657 |
| MmugDNA.18264.1.S1_at   | MmugDNA.18264.1 | 11.28 | 11.1  | 0.03 | 0.18 | 1.14  | 0.13753  | 0.151372 | 0.504654 | 0.426104 |
| MmugDNA.18265.1.S1_at   | MmugDNA.18265.1 | 5.09  | 5.16  | 0.34 | 0.67 | -1.05 | 0.762033 | 0.598027 | 0.899859 | 0.760536 |
| MmugDNA.18266.1.S1_at   | MmugDNA.18266.1 | 8.7   | 8.3   | 0.34 | 0.5  | 1.32  | 0.162787 | 0.236871 | 0.527211 | 0.507587 |
| MmugDNA.18267.1.S1_at   | MmugDNA.18267.1 | 11.09 | 11.19 | 0.18 | 0.15 | -1.07 | 0.965974 | 0.440889 | 0.987096 | 0.659138 |
| MmugDNA.18268.1.S1_at   | MmugDNA.18268.1 | 5     | 4.95  | 0.64 | 0.14 | 1.04  | 0.339874 | 0.213664 | 0.661517 | 0.487441 |
| MmugDNA.18269.1.S1_at   | MmugDNA.18269.1 | 4.15  | 3.61  | 0.24 | 0.4  | 1.46  | 0.545963 | 0.355937 | 0.78522  | 0.597902 |
| MmugDNA.1827.1.S1_at    | MmugDNA.1827.1  | 5.58  | 5.67  | 0.09 | 0.27 | -1.06 | 0.514974 | 0.167871 | 0.767243 | 0.444458 |
| MmugDNA.18271.1.S1_at   | MmugDNA.18271.1 | 7.06  | 8.55  | 0.5  | 0.35 | -2.82 | 0.011598 | 0.002098 | 0.236828 | 0.067756 |
| MmugDNA.18272.1.S1_at   | MmugDNA.18272.1 | 6.14  | 6.08  | 0.29 | 0.54 | 1.04  | 0.796147 | 0.819709 | 0.915412 | 0.896133 |
| MmugDNA.18273.1.S1_at   | MmugDNA.18273.1 | 3.86  | 3.9   | 0.42 | 0.06 | -1.03 | 0.458933 | 0.703027 | 0.735799 | 0.827866 |
| MmugDNA.18274.1.S1_at   | MmugDNA.18274.1 | 4.47  | 4.39  | 0.17 | 0.3  | 1.06  | 0.751267 | 0.004036 | 0.893694 | 0.090281 |
| MmugDNA.18275.1.S1_at   | MmugDNA.18275.1 | 3.54  | 3.66  | 0.17 | 0.16 | -1.09 | 0.838645 | 0.73867  | 0.934745 | 0.848486 |
| MmugDNA.18276.1.S1_at   | MmugDNA.18276.1 | 3.63  | 3.69  | 0.22 | 0.28 | -1.05 | 0.814511 | 0.880597 | 0.924758 | 0.9318   |
| MmugDNA.18277.1.S1_at   | MmugDNA.18277.1 | 3.51  | 3.51  | 0.04 | 0.13 | 1     | 0.682368 | 0.889405 | 0.85789  | 0.936977 |
| MmugDNA.18282.1.S1_at   | MmugDNA.18282.1 | 6.51  | 6.14  | 0.15 | 0.22 | 1.3   | 0.018774 | 0.120251 | 0.2715   | 0.389181 |
| MmugDNA.18283.1.S1_at   | MmugDNA.18283.1 | 3.56  | 3.54  | 0.32 | 0    | 1.01  | 0.555979 | 0.40356  | 0.791585 | 0.632215 |
| MmugDNA.18284.1.S1_at   | MmugDNA.18284.1 | 4.17  | 4.49  | 0.12 | 0.13 | -1.25 | 0.061385 | 0.067593 | 0.395682 | 0.306076 |
| MmugDNA.18285.1.S1_at   | MmugDNA.18285.1 | 7.75  | 6.99  | 0.53 | 0.55 | 1.69  | 0.234866 | 0.099171 | 0.58906  | 0.357379 |
| MmugDNA.18286.1.S1_at   | MmugDNA.18286.1 | 10.82 | 11.11 | 0.23 | 0.06 | -1.22 | 0.038497 | 0.004167 | 0.344476 | 0.091036 |
| MmugDNA.18287.1.S1_at   | MmugDNA.18287.1 | 9.63  | 8.14  | 0.27 | 0.17 | 2.81  | 0.001107 | 0.000141 | 0.144223 | 0.029307 |
| MmugDNA.18288.1.S1_at   | MmugDNA.18288.1 | 5.29  | 5.28  | 0.06 | 0.24 | 1.01  | 0.40782  | 0.520403 | 0.704863 | 0.711727 |
| MmugDNA.18289.1.S1_at   | MmugDNA.18289.1 | 5.59  | 5.63  | 0.14 | 0.02 | -1.03 | 0.225414 | 0.339125 | 0.583513 | 0.585891 |
| MmugDNA.1829.1.S1_at    | MmugDNA.1829.1  | 5.54  | 6.09  | 0.1  | 0.36 | -1.47 | 0.115195 | 0.03704  | 0.478607 | 0.236886 |
| MmugDNA.18291.1.S1_at   | MmugDNA.18291.1 | 9.82  | 9.65  | 0.23 | 0.46 | 1.13  | 0.58137  | 0.405651 | 0.805085 | 0.633894 |
| MmugDNA.18292.1.S1_at   | MmugDNA.18292.1 | 2.8   | 2.93  | 0.02 | 0.02 | -1.09 | 0.002399 | 0.074503 | 0.163555 | 0.318173 |
| MmugDNA.18293.1.S1_at   | MmugDNA.18293.1 | 6.25  | 6.12  | 0.2  | 0.03 | 1.09  | 0.805225 | 0.935654 | 0.920016 | 0.963691 |
| MmugDNA.18295.1.S1_at   | MmugDNA.18295.1 | 6.35  | 7.44  | 0.76 | 1.69 | -2.13 | 0.388975 | 0.332902 | 0.692814 | 0.581281 |

|                         |                 |       |       |      |      |       |          |          |          |          |
|-------------------------|-----------------|-------|-------|------|------|-------|----------|----------|----------|----------|
| MmugDNA.18296.1.S1_at   | MmugDNA.18296.1 | 10.39 | 10.7  | 0.15 | 0.16 | -1.24 | 0.08168  | 0.019161 | 0.432665 | 0.1742   |
| MmugDNA.18298.1.S1_at   | MmugDNA.18298.1 | 5.88  | 5.57  | 0.2  | 0.04 | 1.24  | 0.177464 | 0.053256 | 0.541506 | 0.276449 |
| MmugDNA.18299.1.S1_at   | MmugDNA.18299.1 | 4.13  | 3.79  | 0.23 | 0.08 | 1.26  | 0.112181 | 0.125436 | 0.474694 | 0.396079 |
| MmugDNA.183.1.S1_at     | MmugDNA.183.1   | 3.77  | 3.76  | 0    | 0.07 | 1     | 0.482724 | 0.480349 | 0.749529 | 0.68574  |
| MmugDNA.18300.1.S1_at   | MmugDNA.18300.1 | 5.19  | 5.2   | 0.07 | 0.11 | -1.01 | 0.484363 | 0.212527 | 0.750333 | 0.486502 |
| MmugDNA.18302.1.S1_at   | MmugDNA.18302.1 | 11.07 | 11.13 | 0.11 | 0.31 | -1.04 | 0.780667 | 0.664494 | 0.9086   | 0.803396 |
| MmugDNA.18303.1.S1_at   | MmugDNA.18303.1 | 4.32  | 4.41  | 0.08 | 0.11 | -1.06 | 0.521145 | 0.71867  | 0.771131 | 0.837178 |
| MmugDNA.18304.1.S1_at   | MmugDNA.18304.1 | 5.52  | 5.21  | 0.72 | 0.13 | 1.24  | 0.162834 | 0.206935 | 0.527239 | 0.481052 |
| MmugDNA.18305.1.S1_at   | MmugDNA.18305.1 | 5.68  | 8.96  | 0.57 | 0.7  | -9.7  | 0.004513 | 0.001231 | 0.183797 | 0.05478  |
| MmugDNA.18306.1.S1_at   | MmugDNA.18306.1 | 6.55  | 6.48  | 0.12 | 0.26 | 1.05  | 0.942258 | 0.712523 | 0.977916 | 0.833383 |
| MmugDNA.18308.1.S1_at   | MmugDNA.18308.1 | 8.72  | 9.63  | 0.28 | 0.71 | -1.88 | 0.475904 | 0.545798 | 0.746016 | 0.727653 |
| MmugDNA.1831.1.S1_at    | MmugDNA.1831.1  | 7.95  | 6.89  | 0.52 | 0.37 | 2.1   | 0.089092 | 0.209267 | 0.444494 | 0.48303  |
| MmugDNA.18311.1.S1_at   | MmugDNA.18311.1 | 9.84  | 9.86  | 0.07 | 0.34 | -1.02 | 0.254702 | 0.336361 | 0.602587 | 0.58383  |
| MmugDNA.18312.1.S1_at   | MmugDNA.18312.1 | 4.87  | 4.21  | 0.62 | 0.33 | 1.58  | 0.230434 | 0.293574 | 0.587222 | 0.553567 |
| MmugDNA.18313.1.S1_at   | MmugDNA.18313.1 | 6.95  | 8.22  | 0.78 | 0.78 | -2.41 | 0.113512 | 0.093973 | 0.476916 | 0.350467 |
| MmugDNA.18314.1.S1_at   | MmugDNA.18314.1 | 8.31  | 8.43  | 0.02 | 0.25 | -1.09 | 0.961526 | 0.99752  | 0.985194 | 0.99871  |
| MmugDNA.18315.1.S1_at   | MmugDNA.18315.1 | 10.14 | 8.72  | 0.1  | 1.04 | 2.68  | 0.08154  | 0.074353 | 0.432522 | 0.318046 |
| MmugDNA.18316.1.S1_at   | MmugDNA.18316.1 | 10.85 | 10.93 | 0.22 | 0.44 | -1.05 | 0.309259 | 0.229499 | 0.641409 | 0.501527 |
| MmugDNA.18317.1.S1_at   | MmugDNA.18317.1 | 3.55  | 3.47  | 0.09 | 0.17 | 1.05  | 0.196804 | 0.350832 | 0.559808 | 0.594561 |
| MmugDNA.18318.1.S1_at   | MmugDNA.18318.1 | 3.19  | 3.28  | 0.09 | 0.08 | -1.06 | 0.560001 | 0.755211 | 0.79419  | 0.857498 |
| MmugDNA.41120.1.S1_x_at | MmugDNA.41120.1 | 12.88 | 12.57 | 0.41 | 0.16 | 1.24  | 0.161157 | 0.216719 | 0.526204 | 0.490311 |
| MmugDNA.18320.1.S1_at   | MmugDNA.18320.1 | 7.39  | 7.6   | 0.2  | 0.47 | -1.16 | 0.298784 | 0.402144 | 0.634269 | 0.631235 |
| MmugDNA.18321.1.S1_at   | MmugDNA.18321.1 | 7.95  | 8.09  | 0.63 | 1.07 | -1.1  | 0.525176 | 0.499734 | 0.773484 | 0.698494 |
| MmugDNA.18322.1.S1_at   | MmugDNA.18322.1 | 5.18  | 5.25  | 0.13 | 0.36 | -1.04 | 0.663556 | 0.761115 | 0.849018 | 0.861205 |
| MmugDNA.18324.1.S1_at   | MmugDNA.18324.1 | 12.16 | 12.46 | 0.2  | 0.37 | -1.23 | 0.230162 | 0.331798 | 0.587112 | 0.580389 |
| MmugDNA.18325.1.S1_at   | MmugDNA.18325.1 | 5.98  | 6.04  | 0.14 | 0.09 | -1.04 | 0.96749  | 0.128861 | 0.98784  | 0.400277 |
| MmugDNA.18327.1.S1_at   | MmugDNA.18327.1 | 11.6  | 10.87 | 0.12 | 0.13 | 1.66  | 0.002051 | 0.001156 | 0.155636 | 0.053615 |
| MmugDNA.18328.1.S1_at   | MmugDNA.18328.1 | 4.23  | 4.19  | 0.17 | 0.2  | 1.03  | 0.340709 | 0.444794 | 0.662167 | 0.662072 |
| MmugDNA.18329.1.S1_at   | MmugDNA.18329.1 | 2.91  | 2.98  | 0.01 | 0.24 | -1.05 | 0.568548 | 0.70039  | 0.798666 | 0.826107 |
| MmugDNA.18330.1.S1_at   | MmugDNA.18330.1 | 8.79  | 8.91  | 0.03 | 0.19 | -1.09 | 0.410236 | 0.331402 | 0.706234 | 0.580076 |
| MmugDNA.18330.1.S1_x_at | MmugDNA.18330.1 | 8.75  | 8.85  | 0.05 | 0.2  | -1.07 | 0.412179 | 0.42242  | 0.707853 | 0.645722 |
| MmugDNA.18331.1.S1_at   | MmugDNA.18331.1 | 4.37  | 4.29  | 0.28 | 0.15 | 1.06  | 0.193766 | 0.237188 | 0.557435 | 0.507918 |
| MmugDNA.18334.1.S1_at   | MmugDNA.18334.1 | 8.77  | 9.13  | 0.24 | 0.14 | -1.28 | 0.087815 | 0.117947 | 0.442117 | 0.385845 |
| MmugDNA.18336.1.S1_at   | MmugDNA.18336.1 | 4.05  | 3.92  | 0.08 | 0.15 | 1.1   | 0.625779 | 0.212774 | 0.829159 | 0.486769 |
| MmugDNA.18338.1.S1_at   | MmugDNA.18338.1 | 6.68  | 5.67  | 0.43 | 0.67 | 2.02  | 0.070789 | 0.065279 | 0.414661 | 0.301239 |
| MmugDNA.18339.1.S1_at   | MmugDNA.18339.1 | 4.62  | 5.72  | 0.2  | 2.72 | -2.14 | 0.405191 | 0.259989 | 0.703082 | 0.52675  |
| MmugDNA.1834.1.S1_at    | MmugDNA.1834.1  | 10.8  | 10.59 | 0.46 | 0.32 | 1.15  | 0.986503 | 0.391128 | 0.995219 | 0.624833 |
| MmugDNA.18340.1.S1_at   | MmugDNA.18340.1 | 11.69 | 12.3  | 0.27 | 0.3  | -1.52 | 0.055557 | 0.035388 | 0.384224 | 0.232427 |
| MmugDNA.18341.1.S1_at   | MmugDNA.18341.1 | 6.64  | 6.55  | 0.22 | 0.13 | 1.06  | 0.368876 | 0.398656 | 0.680295 | 0.629458 |
| MmugDNA.18342.1.S1_at   | MmugDNA.18342.1 | 3.78  | 3.82  | 0.16 | 0.36 | -1.03 | 0.21117  | 0.255405 | 0.571977 | 0.523445 |
| MmugDNA.18343.1.S1_at   | MmugDNA.18343.1 | 2.96  | 2.9   | 0.18 | 0.08 | 1.04  | 0.661108 | 0.263785 | 0.84802  | 0.530066 |

|                         |                 |       |       |      |      |       |          |          |          |          |
|-------------------------|-----------------|-------|-------|------|------|-------|----------|----------|----------|----------|
| MmugDNA.18343.1.S1_x_at | MmugDNA.18343.1 | 3.04  | 3.07  | 0.09 | 0.18 | -1.02 | 0.824978 | 0.454396 | 0.929089 | 0.668576 |
| MmugDNA.18344.1.S1_at   | MmugDNA.18344.1 | 6.72  | 6.94  | 0.18 | 0.24 | -1.16 | 0.110386 | 0.011076 | 0.471863 | 0.137002 |
| MmugDNA.18345.1.S1_at   | MmugDNA.18345.1 | 6.29  | 6.47  | 0.16 | 0.11 | -1.14 | 0.121916 | 0.203073 | 0.486935 | 0.477343 |
| MmugDNA.1835.1.S1_at    | MmugDNA.1835.1  | 8.53  | 6.95  | 0.26 | 0.62 | 2.98  | 0.034514 | 0.014605 | 0.333289 | 0.15408  |
| MmugDNA.18352.1.S1_s_at | MmugDNA.18352.1 | 9.09  | 8.94  | 0.13 | 0.21 | 1.11  | 0.351648 | 0.206145 | 0.669126 | 0.480348 |
| MmugDNA.18356.1.S1_at   | MmugDNA.18356.1 | 5.97  | 6.07  | 0.51 | 0.11 | -1.07 | 0.682465 | 0.199925 | 0.85794  | 0.474603 |
| MmugDNA.1836.1.S1_at    | MmugDNA.1836.1  | 9.44  | 10.33 | 0.34 | 0.39 | -1.85 | 0.060054 | 0.025537 | 0.393081 | 0.200461 |
| MmugDNA.18360.1.S1_at   | MmugDNA.18360.1 | 3.47  | 3.41  | 1.05 | 0.19 | 1.04  | 0.281139 | 0.313615 | 0.622118 | 0.567977 |
| MmugDNA.18362.1.S1_at   | MmugDNA.18362.1 | 8.8   | 8.53  | 0.14 | 0.09 | 1.21  | 0.143199 | 0.25945  | 0.510106 | 0.526418 |
| MmugDNA.18364.1.S1_at   | MmugDNA.18364.1 | 5.52  | 5.53  | 0.02 | 0.11 | -1.01 | 0.407552 | 0.599905 | 0.704692 | 0.761677 |
| MmugDNA.18365.1.S1_at   | MmugDNA.18365.1 | 4.21  | 4.26  | 0.77 | 0.14 | -1.04 | 0.444767 | 0.499788 | 0.727179 | 0.698515 |
| MmugDNA.18367.1.S1_at   | MmugDNA.18367.1 | 3.11  | 3.35  | 0.12 | 0.21 | -1.18 | 0.544615 | 0.707544 | 0.784455 | 0.830395 |
| MmugDNA.18368.1.S1_at   | MmugDNA.18368.1 | 6.49  | 6.17  | 0.16 | 0.08 | 1.25  | 0.024048 | 0.009474 | 0.294041 | 0.128164 |
| MmugDNA.18369.1.S1_at   | MmugDNA.18369.1 | 3.77  | 3.88  | 0.02 | 0.08 | -1.08 | 0.077057 | 0.09352  | 0.426331 | 0.349846 |
| MmugDNA.18370.1.S1_at   | MmugDNA.18370.1 | 7.51  | 8.36  | 1.62 | 1.95 | -1.81 | 0.689705 | 0.733187 | 0.861744 | 0.845567 |
| MmugDNA.18371.1.S1_at   | MmugDNA.18371.1 | 12.07 | 12.19 | 0.06 | 0.27 | -1.08 | 0.980954 | 0.964452 | 0.993141 | 0.980225 |
| MmugDNA.18372.1.S1_at   | MmugDNA.18372.1 | 3.93  | 3.95  | 0.16 | 0.39 | -1.02 | 0.232657 | 0.313355 | 0.587814 | 0.567811 |
| MmugDNA.18375.1.S1_at   | MmugDNA.18375.1 | 6.61  | 5.59  | 1    | 0.93 | 2.02  | 0.488609 | 0.245164 | 0.753196 | 0.514922 |
| MmugDNA.18377.1.S1_at   | MmugDNA.18377.1 | 3.48  | 3.54  | 0.6  | 0.38 | -1.04 | 0.52398  | 0.754787 | 0.772859 | 0.857323 |
| MmugDNA.18379.1.S1_at   | MmugDNA.18379.1 | 6.57  | 6.85  | 0.39 | 0.17 | -1.22 | 0.38792  | 0.351932 | 0.692145 | 0.595335 |
| MmugDNA.1838.1.S1_at    | MmugDNA.1838.1  | 2.84  | 2.77  | 0.05 | 0.11 | 1.05  | 0.617832 | 0.104694 | 0.824915 | 0.366073 |
| MmugDNA.18380.1.S1_at   | MmugDNA.18380.1 | 5.73  | 5.68  | 0.15 | 0.19 | 1.03  | 0.159843 | 0.179456 | 0.524737 | 0.455929 |
| MmugDNA.18381.1.S1_at   | MmugDNA.18381.1 | 4.66  | 4     | 0.63 | 0.39 | 1.58  | 0.131335 | 0.197068 | 0.497985 | 0.472213 |
| MmugDNA.18383.1.S1_at   | MmugDNA.18383.1 | 5.74  | 5.73  | 0.18 | 0.08 | 1.01  | 0.410012 | 0.546186 | 0.706179 | 0.727803 |
| MmugDNA.18384.1.S1_at   | MmugDNA.18384.1 | 5.67  | 5.93  | 0.46 | 0.32 | -1.2  | 0.781702 | 0.597098 | 0.908921 | 0.760085 |
| MmugDNA.18386.1.S1_at   | MmugDNA.18386.1 | 3.25  | 3.24  | 0.11 | 0.08 | 1.01  | 0.705694 | 0.879657 | 0.870245 | 0.931253 |
| MmugDNA.18387.1.S1_at   | MmugDNA.18387.1 | 5.75  | 5.67  | 0.2  | 0.26 | 1.05  | 0.609402 | 0.629505 | 0.820443 | 0.781907 |
| MmugDNA.18388.1.S1_at   | MmugDNA.18388.1 | 3.28  | 3.26  | 0.01 | 0.09 | 1.01  | 0.5127   | 0.175479 | 0.765738 | 0.452157 |
| MmugDNA.18389.1.S1_at   | MmugDNA.18389.1 | 3.09  | 3.23  | 0.1  | 0.06 | -1.1  | 0.168152 | 0.388896 | 0.53256  | 0.623208 |
| MmugDNA.1839.1.S1_at    | MmugDNA.1839.1  | 10.53 | 10.54 | 0.24 | 0.42 | -1.01 | 0.989572 | 0.999859 | 0.996281 | 0.999954 |
| MmugDNA.18390.1.S1_at   | MmugDNA.18390.1 | 9.55  | 9.55  | 0.07 | 0.1  | 1     | 0.723847 | 0.038494 | 0.879238 | 0.241138 |
| MmugDNA.18392.1.S1_at   | MmugDNA.18392.1 | 4.26  | 4.38  | 0.08 | 0.11 | -1.09 | 0.152686 | 0.20136  | 0.517325 | 0.47589  |
| MmugDNA.18393.1.S1_at   | MmugDNA.18393.1 | 9.88  | 9.75  | 0.3  | 0.53 | 1.1   | 0.91553  | 0.153457 | 0.966579 | 0.42827  |
| MmugDNA.18394.1.S1_at   | MmugDNA.18394.1 | 5.85  | 5.29  | 0.39 | 0.41 | 1.48  | 0.760264 | 0.826525 | 0.898894 | 0.900356 |
| MmugDNA.18395.1.S1_at   | MmugDNA.18395.1 | 5.35  | 5.62  | 0.1  | 0.17 | -1.21 | 0.069027 | 0.059508 | 0.411078 | 0.290548 |
| MmugDNA.18396.1.S1_at   | MmugDNA.18396.1 | 6.1   | 6.31  | 0.24 | 0.13 | -1.16 | 0.468535 | 0.555518 | 0.741077 | 0.733893 |
| MmugDNA.18397.1.S1_at   | MmugDNA.18397.1 | 7.79  | 8.58  | 1.09 | 0.99 | -1.73 | 0.659869 | 0.708718 | 0.847377 | 0.831054 |
| MmugDNA.184.1.S1_at     | MmugDNA.184.1   | 3.97  | 3.93  | 0.19 | 0.18 | 1.03  | 0.573608 | 0.715437 | 0.801311 | 0.835033 |
| MmugDNA.1840.1.S1_at    | MmugDNA.1840.1  | 10.84 | 10.1  | 0.13 | 0.2  | 1.67  | 0.005679 | 0.001337 | 0.191943 | 0.056366 |
| MmugDNA.18400.1.S1_at   | MmugDNA.18400.1 | 7.78  | 9.02  | 1.06 | 0.89 | -2.35 | 0.072064 | 0.064228 | 0.416191 | 0.299668 |
| MmugDNA.18402.1.S1_at   | MmugDNA.18402.1 | 4.52  | 4.52  | 0.31 | 0.27 | 1     | 0.945307 | 0.507578 | 0.979088 | 0.703118 |

|                         |                 |       |       |      |      |       |          |          |          |          |
|-------------------------|-----------------|-------|-------|------|------|-------|----------|----------|----------|----------|
| MmugDNA.18403.1.S1_at   | MmugDNA.18403.1 | 4.36  | 4.17  | 0.27 | 0.17 | 1.14  | 0.397031 | 0.132993 | 0.697473 | 0.404666 |
| MmugDNA.18404.1.S1_at   | MmugDNA.18404.1 | 9.87  | 10.15 | 0.04 | 0.29 | -1.22 | 0.052799 | 0.043356 | 0.378449 | 0.252896 |
| MmugDNA.18405.1.S1_s_at | MmugDNA.18405.1 | 8.19  | 7.52  | 0.31 | 0.4  | 1.59  | 0.151149 | 0.028801 | 0.515946 | 0.211552 |
| MmugDNA.18406.1.S1_at   | MmugDNA.18406.1 | 3.4   | 3.31  | 0.14 | 0.11 | 1.07  | 0.547491 | 0.273651 | 0.786248 | 0.538093 |
| MmugDNA.18408.1.S1_at   | MmugDNA.18408.1 | 8.43  | 8.49  | 0.09 | 0.15 | -1.04 | 0.476362 | 0.116523 | 0.746223 | 0.383679 |
| MmugDNA.18409.1.S1_at   | MmugDNA.18409.1 | 4.76  | 4.88  | 0.46 | 0.17 | -1.09 | 0.746734 | 0.861146 | 0.891546 | 0.920989 |
| MmugDNA.18411.1.S1_at   | MmugDNA.18411.1 | 10.33 | 10.59 | 0.17 | 0.22 | -1.2  | 0.094295 | 0.1627   | 0.451807 | 0.43882  |
| MmugDNA.18416.1.S1_at   | MmugDNA.18416.1 | 4.97  | 4.91  | 0.1  | 0.14 | 1.04  | 0.860193 | 0.50222  | 0.943524 | 0.70006  |
| MmugDNA.18417.1.S1_at   | MmugDNA.18417.1 | 3.15  | 3.54  | 0.25 | 0.13 | -1.32 | 0.117913 | 0.107639 | 0.482063 | 0.370586 |
| MmugDNA.18418.1.S1_at   | MmugDNA.18418.1 | 4.71  | 4.82  | 0.1  | 0.16 | -1.08 | 0.148585 | 0.270904 | 0.51391  | 0.536026 |
| MmugDNA.18419.1.S1_at   | MmugDNA.18419.1 | 2.81  | 2.83  | 0.07 | 0.13 | -1.01 | 0.335949 | 0.370857 | 0.65921  | 0.609828 |
| MmugDNA.1842.1.S1_at    | MmugDNA.1842.1  | 5.68  | 5.27  | 0.91 | 0.31 | 1.33  | 0.158128 | 0.241348 | 0.522944 | 0.511952 |
| MmugDNA.1842.1.S1_s_at  | MmugDNA.1842.1  | 12.55 | 12.58 | 0.22 | 0.19 | -1.02 | 0.810695 | 0.045795 | 0.922872 | 0.258337 |
| MmugDNA.36421.1.S1_s_at | MmugDNA.36421.1 | 6.48  | 6.56  | 0.13 | 0.2  | -1.05 | 0.612434 | 0.187986 | 0.822158 | 0.464083 |
| MmugDNA.18421.1.S1_at   | MmugDNA.18421.1 | 9.26  | 9.51  | 0.09 | 0.45 | -1.19 | 0.967323 | 0.235181 | 0.987802 | 0.50629  |
| MmugDNA.18422.1.S1_at   | MmugDNA.18422.1 | 5.12  | 5.15  | 0.07 | 0.06 | -1.02 | 0.131717 | 0.153556 | 0.498041 | 0.428309 |
| MmugDNA.18424.1.S1_at   | MmugDNA.18424.1 | 3.67  | 3.66  | 0.19 | 0.1  | 1     | 0.655923 | 0.850241 | 0.845225 | 0.914842 |
| MmugDNA.18427.1.S1_at   | MmugDNA.18427.1 | 5.58  | 6.3   | 0.23 | 0.84 | -1.64 | 0.317014 | 0.440791 | 0.647775 | 0.659136 |
| MmugDNA.18428.1.S1_at   | MmugDNA.18428.1 | 4.93  | 5.03  | 0.23 | 0.11 | -1.08 | 0.114459 | 0.144931 | 0.477887 | 0.418859 |
| MmugDNA.18429.1.S1_at   | MmugDNA.18429.1 | 8.02  | 8.41  | 0.08 | 0.46 | -1.31 | 0.068078 | 0.068179 | 0.409262 | 0.307314 |
| MmugDNA.1843.1.S1_at    | MmugDNA.1843.1  | 7.53  | 7.53  | 0.47 | 0.71 | -1    | 0.975009 | 0.315015 | 0.990238 | 0.568759 |
| MmugDNA.18430.1.S1_at   | MmugDNA.18430.1 | 4.76  | 4.53  | 0.39 | 0.05 | 1.17  | 0.457099 | 0.457744 | 0.734708 | 0.670897 |
| MmugDNA.18433.1.S1_at   | MmugDNA.18433.1 | 6.24  | 6     | 0.29 | 0.15 | 1.18  | 0.44609  | 0.544193 | 0.728161 | 0.726643 |
| MmugDNA.18436.1.S1_at   | MmugDNA.18436.1 | 4.46  | 4.45  | 0.1  | 0.2  | 1.01  | 0.583771 | 0.459306 | 0.806776 | 0.671698 |
| MmugDNA.18437.1.S1_at   | MmugDNA.18437.1 | 7.07  | 7.8   | 0.37 | 0.75 | -1.67 | 0.192951 | 0.251442 | 0.556235 | 0.520175 |
| MmugDNA.18438.1.S1_at   | MmugDNA.18438.1 | 7.6   | 8.07  | 0.12 | 0.19 | -1.39 | 0.02085  | 0.046498 | 0.281033 | 0.260176 |
| MmugDNA.18439.1.S1_at   | MmugDNA.18439.1 | 12.08 | 12.16 | 0.1  | 0.14 | -1.06 | 0.146851 | 0.170715 | 0.512866 | 0.447316 |
| MmugDNA.1844.1.S1_at    | MmugDNA.1844.1  | 6.6   | 6.38  | 0.17 | 0.27 | 1.17  | 0.338098 | 0.205181 | 0.66054  | 0.47957  |
| MmugDNA.18440.1.S1_at   | MmugDNA.18440.1 | 9.86  | 10.85 | 0.08 | 0.34 | -1.99 | 0.013126 | 0.00583  | 0.245277 | 0.104661 |
| MmugDNA.18442.1.S1_at   | MmugDNA.18442.1 | 4.07  | 4.07  | 0.25 | 0.22 | -1    | 0.23499  | 0.274524 | 0.58923  | 0.538987 |
| MmugDNA.18443.1.S1_at   | MmugDNA.18443.1 | 5.6   | 6.94  | 0.17 | 0.67 | -2.54 | 0.024221 | 0.018124 | 0.294535 | 0.169609 |
| MmugDNA.18444.1.S1_at   | MmugDNA.18444.1 | 7.58  | 7.82  | 0.05 | 0.02 | -1.18 | 0.001349 | 0.000133 | 0.146228 | 0.029087 |
| MmugDNA.18447.1.S1_at   | MmugDNA.18447.1 | 5.02  | 4.38  | 0.56 | 0.3  | 1.57  | 0.17064  | 0.194596 | 0.534444 | 0.469707 |
| MmugDNA.18448.1.S1_at   | MmugDNA.18448.1 | 6.29  | 6.46  | 0.41 | 0.1  | -1.12 | 0.74343  | 0.907934 | 0.890159 | 0.947889 |
| MmugDNA.43373.1.S1_s_at | MmugDNA.43373.1 | 5.93  | 5.85  | 0.04 | 0.19 | 1.06  | 0.513553 | 0.7368   | 0.766403 | 0.847693 |
| MmugDNA.18449.1.S1_s_at | MmugDNA.18449.1 | 7.71  | 8.76  | 0.67 | 0.59 | -2.06 | 0.051112 | 0.008893 | 0.375935 | 0.124737 |
| MmugDNA.1845.1.S1_at    | MmugDNA.1845.1  | 7.05  | 7.16  | 0.08 | 0.19 | -1.08 | 0.968352 | 0.406948 | 0.98809  | 0.634629 |
| MmugDNA.18450.1.S1_s_at | MmugDNA.18450.1 | 8.65  | 8.51  | 0.15 | 0.57 | 1.1   | 0.481671 | 0.626564 | 0.749268 | 0.779867 |
| MmugDNA.18452.1.S1_at   | MmugDNA.18452.1 | 2.98  | 2.98  | 0.09 | 0.24 | 1     | 0.823384 | 0.815275 | 0.928164 | 0.89344  |
| MmugDNA.18454.1.S1_at   | MmugDNA.18454.1 | 4.76  | 5.87  | 0.48 | 0.6  | -2.17 | 0.088748 | 0.111895 | 0.443684 | 0.377006 |
| MmugDNA.18456.1.S1_at   | MmugDNA.18456.1 | 7.44  | 7     | 0.46 | 0.45 | 1.36  | 0.416919 | 0.154942 | 0.71026  | 0.42993  |

|                         |                 |       |      |      |      |       |          |          |          |          |
|-------------------------|-----------------|-------|------|------|------|-------|----------|----------|----------|----------|
| MmugDNA.18459.1.S1_at   | MmugDNA.18459.1 | 8.35  | 8.37 | 0.18 | 0.26 | -1.01 | 0.755467 | 0.487712 | 0.896094 | 0.690656 |
| MmugDNA.1846.1.S1_at    | MmugDNA.1846.1  | 3.32  | 3.15 | 0.15 | 0.09 | 1.12  | 0.355609 | 0.4167   | 0.671139 | 0.64167  |
| MmugDNA.18460.1.S1_at   | MmugDNA.18460.1 | 7.85  | 8.12 | 0.17 | 0.16 | -1.2  | 0.193596 | 0.22554  | 0.557178 | 0.498155 |
| MmugDNA.18462.1.S1_at   | MmugDNA.18462.1 | 4.19  | 4.04 | 0.14 | 0.03 | 1.11  | 0.119765 | 0.102639 | 0.484387 | 0.362991 |
| MmugDNA.18464.1.S1_at   | MmugDNA.18464.1 | 3.03  | 2.96 | 0.04 | 0.09 | 1.05  | 0.290065 | 0.553219 | 0.628003 | 0.73239  |
| MmugDNA.18466.1.S1_at   | MmugDNA.18466.1 | 4.28  | 4.46 | 0.07 | 0.12 | -1.14 | 0.067721 | 0.059542 | 0.408357 | 0.290548 |
| MmugDNA.18467.1.S1_at   | MmugDNA.18467.1 | 9.78  | 9.3  | 0.29 | 0.56 | 1.39  | 0.451438 | 0.420296 | 0.731565 | 0.644084 |
| MmugDNA.18468.1.S1_at   | MmugDNA.18468.1 | 4.92  | 4.99 | 0.1  | 0.17 | -1.06 | 0.933245 | 0.932548 | 0.974038 | 0.961739 |
| MmugDNA.18469.1.S1_at   | MmugDNA.18469.1 | 7.19  | 6.76 | 0.42 | 0.83 | 1.35  | 0.659253 | 0.809056 | 0.847039 | 0.889981 |
| MmugDNA.18470.1.S1_at   | MmugDNA.18470.1 | 10.31 | 10   | 0.23 | 0.52 | 1.24  | 0.3429   | 0.297682 | 0.663407 | 0.556351 |
| MmugDNA.18471.1.S1_at   | MmugDNA.18471.1 | 8.57  | 8.77 | 0.15 | 0.2  | -1.15 | 0.109086 | 0.111575 | 0.470811 | 0.376407 |
| MmugDNA.18472.1.S1_at   | MmugDNA.18472.1 | 6.64  | 6.52 | 0.15 | 0.8  | 1.08  | 0.367333 | 0.479149 | 0.679471 | 0.68497  |
| MmugDNA.18475.1.S1_at   | MmugDNA.18475.1 | 6.21  | 5.81 | 0.39 | 0.23 | 1.33  | 0.066601 | 0.018415 | 0.406564 | 0.170755 |
| MmugDNA.18476.1.S1_at   | MmugDNA.18476.1 | 5.95  | 6.16 | 0.21 | 0.09 | -1.16 | 0.342532 | 0.268133 | 0.663271 | 0.533873 |
| MmugDNA.18478.1.S1_at   | MmugDNA.18478.1 | 6.03  | 6.08 | 0.15 | 0.04 | -1.03 | 0.436201 | 0.486001 | 0.721644 | 0.689551 |
| MmugDNA.18479.1.S1_at   | MmugDNA.18479.1 | 2.97  | 2.86 | 0.19 | 0.06 | 1.07  | 0.447963 | 0.440475 | 0.729382 | 0.658967 |
| MmugDNA.1848.1.S1_at    | MmugDNA.1848.1  | 4.94  | 5.11 | 0.05 | 0.28 | -1.12 | 0.490112 | 0.651405 | 0.754288 | 0.796212 |
| MmugDNA.18480.1.S1_at   | MmugDNA.18480.1 | 6.57  | 6.79 | 0.06 | 0.48 | -1.17 | 0.578831 | 0.765248 | 0.804033 | 0.863535 |
| MmugDNA.18482.1.S1_at   | MmugDNA.18482.1 | 5.92  | 6.02 | 0.04 | 0.07 | -1.08 | 0.05535  | 0.274313 | 0.383689 | 0.538751 |
| MmugDNA.18484.1.S1_at   | MmugDNA.18484.1 | 6.36  | 6.41 | 0.22 | 0.21 | -1.04 | 0.446288 | 0.31249  | 0.72824  | 0.567211 |
| MmugDNA.18485.1.S1_at   | MmugDNA.18485.1 | 4.9   | 5.28 | 0.26 | 0.14 | -1.3  | 0.037213 | 0.243806 | 0.341004 | 0.513949 |
| MmugDNA.18487.1.S1_at   | MmugDNA.18487.1 | 5.68  | 5.67 | 0.76 | 0.1  | 1.01  | 0.624925 | 0.825909 | 0.828566 | 0.899981 |
| MmugDNA.18489.1.S1_at   | MmugDNA.18489.1 | 4.05  | 3.85 | 0.13 | 0.11 | 1.15  | 0.037449 | 0.305258 | 0.3415   | 0.562255 |
| MmugDNA.1849.1.S1_at    | MmugDNA.1849.1  | 4.37  | 4.65 | 0.06 | 0.35 | -1.21 | 0.170415 | 0.15753  | 0.534249 | 0.433108 |
| MmugDNA.18491.1.S1_at   | MmugDNA.18491.1 | 5.48  | 5.57 | 0.19 | 0.2  | -1.07 | 0.427333 | 0.474293 | 0.716187 | 0.68135  |
| MmugDNA.18491.1.S1_s_at | MmugDNA.18491.1 | 5.64  | 5.35 | 0.03 | 0.18 | 1.22  | 0.158149 | 0.029743 | 0.522944 | 0.214138 |
| MmugDNA.18492.1.S1_at   | MmugDNA.18492.1 | 3.77  | 5.07 | 0.32 | 0.57 | -2.46 | 0.059831 | 0.012331 | 0.392923 | 0.143659 |
| MmugDNA.18493.1.S1_at   | MmugDNA.18493.1 | 5.79  | 5.72 | 0.14 | 0.07 | 1.06  | 0.726974 | 0.024127 | 0.88121  | 0.1945   |
| MmugDNA.18494.1.S1_at   | MmugDNA.18494.1 | 4.15  | 4.39 | 0.2  | 0.21 | -1.18 | 0.565018 | 0.696871 | 0.796891 | 0.823978 |
| MmugDNA.18497.1.S1_at   | MmugDNA.18497.1 | 5.28  | 4.81 | 0.56 | 0.22 | 1.38  | 0.809112 | 0.702254 | 0.922185 | 0.827401 |
| MmugDNA.18497.1.S1_s_at | MmugDNA.18497.1 | 6.56  | 5.73 | 0.57 | 0.38 | 1.78  | 0.064424 | 0.075878 | 0.402975 | 0.320523 |
| MmugDNA.185.1.S1_at     | MmugDNA.185.1   | 9.34  | 9.87 | 0.03 | 0.47 | -1.44 | 0.124222 | 0.135111 | 0.489984 | 0.407128 |
| MmugDNA.1850.1.S1_s_at  | MmugDNA.1850.1  | 5.72  | 5.96 | 0.57 | 0.39 | -1.18 | 0.940899 | 0.119318 | 0.977549 | 0.387834 |
| MmugDNA.18501.1.S1_at   | MmugDNA.18501.1 | 8.34  | 7.68 | 1.2  | 0.62 | 1.58  | 0.385059 | 0.506151 | 0.690226 | 0.702359 |
| MmugDNA.18503.1.S1_at   | MmugDNA.18503.1 | 5.28  | 4.37 | 0.94 | 1.12 | 1.88  | 0.6247   | 0.546425 | 0.828394 | 0.728034 |
| MmugDNA.18504.1.S1_at   | MmugDNA.18504.1 | 6.14  | 5.79 | 0.04 | 0.12 | 1.28  | 0.004986 | 0.005486 | 0.187218 | 0.102081 |
| MmugDNA.18505.1.S1_at   | MmugDNA.18505.1 | 3.53  | 3.57 | 0.04 | 0.1  | -1.03 | 0.172074 | 0.300515 | 0.535422 | 0.558841 |
| MmugDNA.18506.1.S1_at   | MmugDNA.18506.1 | 11.47 | 11.4 | 0.02 | 0.15 | 1.04  | 0.707269 | 0.511176 | 0.871029 | 0.705422 |
| MmugDNA.18507.1.S1_at   | MmugDNA.18507.1 | 3.21  | 3.48 | 0.78 | 0.09 | -1.21 | 0.735349 | 0.87659  | 0.886196 | 0.929709 |
| MmugDNA.18509.1.S1_at   | MmugDNA.18509.1 | 7     | 7.33 | 1.18 | 0.66 | -1.25 | 0.671573 | 0.876573 | 0.852716 | 0.929709 |
| MmugDNA.1851.1.S1_at    | MmugDNA.1851.1  | 5.95  | 6.03 | 0.29 | 0.19 | -1.06 | 0.650362 | 0.684781 | 0.842789 | 0.816146 |



|                         |                 |       |       |      |      |       |          |          |          |          |
|-------------------------|-----------------|-------|-------|------|------|-------|----------|----------|----------|----------|
| MmugDNA.18512.1.S1_at   | MmugDNA.18512.1 | 4.25  | 4.22  | 0.04 | 0.04 | 1.02  | 0.674998 | 0.057492 | 0.854371 | 0.285856 |
| MmugDNA.18514.1.S1_at   | MmugDNA.18514.1 | 7.47  | 6.87  | 0.24 | 0.25 | 1.51  | 0.037753 | 0.027545 | 0.342742 | 0.207227 |
| MmugDNA.18517.1.S1_at   | MmugDNA.18517.1 | 2.87  | 2.98  | 0.06 | 0.07 | -1.08 | 0.087049 | 0.109253 | 0.44093  | 0.37308  |
| MmugDNA.18518.1.S1_at   | MmugDNA.18518.1 | 6.22  | 6.22  | 0.27 | 0.09 | 1.01  | 0.369974 | 0.393812 | 0.681104 | 0.626565 |
| MmugDNA.1852.1.S1_at    | MmugDNA.1852.1  | 4.91  | 4.32  | 0.32 | 0.25 | 1.5   | 0.076586 | 0.084672 | 0.425098 | 0.33618  |
| MmugDNA.18521.1.S1_at   | MmugDNA.18521.1 | 5.5   | 5.37  | 0.29 | 1.47 | 1.09  | 0.843508 | 0.778208 | 0.937058 | 0.871222 |
| MmugDNA.18523.1.S1_at   | MmugDNA.18523.1 | 8.29  | 7.39  | 0.01 | 0.76 | 1.86  | 0.064058 | 0.02628  | 0.402086 | 0.203051 |
| MmugDNA.18524.1.S1_at   | MmugDNA.18524.1 | 11.64 | 10.39 | 0.03 | 0.97 | 2.38  | 0.090364 | 0.093901 | 0.445788 | 0.350423 |
| MmugDNA.18525.1.S1_at   | MmugDNA.18525.1 | 4.72  | 4.81  | 0.22 | 0.25 | -1.06 | 0.347285 | 0.59818  | 0.6664   | 0.760675 |
| MmugDNA.18526.1.S1_at   | MmugDNA.18526.1 | 6.39  | 6.3   | 0.13 | 0.33 | 1.06  | 0.718346 | 0.90399  | 0.876382 | 0.945483 |
| MmugDNA.18527.1.S1_at   | MmugDNA.18527.1 | 8.31  | 8.32  | 0.18 | 0.07 | -1.01 | 0.882541 | 0.882267 | 0.952793 | 0.932845 |
| MmugDNA.18529.1.S1_at   | MmugDNA.18529.1 | 7.45  | 7.23  | 0.07 | 0.24 | 1.16  | 0.800147 | 0.468155 | 0.917386 | 0.677624 |
| MmugDNA.1853.1.S1_at    | MmugDNA.1853.1  | 3.56  | 3.17  | 0.49 | 0.22 | 1.3   | 0.224919 | 0.31403  | 0.582943 | 0.568178 |
| MmugDNA.18530.1.S1_at   | MmugDNA.18530.1 | 6.47  | 6.45  | 0.62 | 0.45 | 1.02  | 0.759378 | 0.729908 | 0.898381 | 0.843733 |
| MmugDNA.18531.1.S1_at   | MmugDNA.18531.1 | 3.85  | 3.85  | 0.08 | 0.12 | 1     | 0.833004 | 0.631178 | 0.93227  | 0.782716 |
| MmugDNA.18532.1.S1_at   | MmugDNA.18532.1 | 7.8   | 7.93  | 0.08 | 0.11 | -1.09 | 0.155184 | 0.151597 | 0.519985 | 0.426333 |
| MmugDNA.18533.1.S1_at   | MmugDNA.18533.1 | 6.93  | 5.49  | 0.62 | 0.42 | 2.71  | 0.123264 | 0.025668 | 0.488847 | 0.200834 |
| MmugDNA.18534.1.S1_at   | MmugDNA.18534.1 | 8.76  | 8.24  | 0.25 | 0.44 | 1.44  | 0.449719 | 0.157061 | 0.730493 | 0.432547 |
| MmugDNA.18535.1.S1_at   | MmugDNA.18535.1 | 8.27  | 7.96  | 0.32 | 0.07 | 1.24  | 0.057633 | 0.107891 | 0.388822 | 0.370945 |
| MmugDNA.18536.1.S1_at   | MmugDNA.18536.1 | 5.47  | 4.82  | 0.97 | 0.24 | 1.57  | 0.356373 | 0.418797 | 0.671526 | 0.643118 |
| MmugDNA.18537.1.S1_at   | MmugDNA.18537.1 | 5.74  | 5.64  | 0.45 | 0.02 | 1.08  | 0.419247 | 0.286389 | 0.711714 | 0.547815 |
| MmugDNA.1854.1.S1_at    | MmugDNA.1854.1  | 6.4   | 5     | 0.72 | 0.65 | 2.64  | 0.142794 | 0.161398 | 0.509783 | 0.437598 |
| MmugDNA.18540.1.S1_at   | MmugDNA.18540.1 | 9.41  | 9.13  | 0.07 | 0.47 | 1.21  | 0.979199 | 0.434829 | 0.992334 | 0.654843 |
| MmugDNA.18542.1.S1_at   | MmugDNA.18542.1 | 5.85  | 5.95  | 0.09 | 0.08 | -1.07 | 0.68602  | 0.033064 | 0.859592 | 0.225068 |
| MmugDNA.18543.1.S1_at   | MmugDNA.18543.1 | 3.15  | 3.12  | 0.71 | 0.14 | 1.02  | 0.356271 | 0.525535 | 0.671447 | 0.715101 |
| MmugDNA.18545.1.S1_at   | MmugDNA.18545.1 | 3.61  | 3.71  | 0.22 | 0.12 | -1.07 | 0.720033 | 0.862851 | 0.877245 | 0.922029 |
| MmugDNA.18546.1.S1_at   | MmugDNA.18546.1 | 8.01  | 8.24  | 0.24 | 0.02 | -1.17 | 0.152893 | 0.034176 | 0.517325 | 0.228728 |
| MmugDNA.18547.1.S1_at   | MmugDNA.18547.1 | 6.04  | 6.37  | 0.23 | 0.37 | -1.25 | 0.175631 | 0.261722 | 0.539405 | 0.528157 |
| MmugDNA.18549.1.S1_at   | MmugDNA.18549.1 | 4.9   | 4.62  | 0.22 | 0.21 | 1.21  | 0.152426 | 0.051791 | 0.517115 | 0.273131 |
| MmugDNA.1855.1.S1_at    | MmugDNA.1855.1  | 10.94 | 10.91 | 0.14 | 0.11 | 1.02  | 0.866737 | 0.094296 | 0.946842 | 0.350889 |
| MmugDNA.18550.1.S1_at   | MmugDNA.18550.1 | 6.54  | 6.64  | 0.46 | 0.27 | -1.08 | 0.635641 | 0.762734 | 0.835068 | 0.862004 |
| MmugDNA.18553.1.S1_at   | MmugDNA.18553.1 | 12.84 | 12.59 | 0.11 | 0.12 | 1.19  | 0.120675 | 0.168562 | 0.48574  | 0.445172 |
| MmugDNA.18553.1.S1_s_at | MmugDNA.18553.1 | 12.21 | 11.89 | 0.14 | 0.19 | 1.25  | 0.377116 | 0.258172 | 0.685542 | 0.525574 |
| MmugDNA.18554.1.S1_at   | MmugDNA.18554.1 | 9.31  | 8.32  | 0.09 | 0.4  | 1.98  | 0.019811 | 0.011307 | 0.275549 | 0.138076 |
| MmugDNA.16984.1.S1_at   | MmugDNA.16984.1 | 7.47  | 7.6   | 0.11 | 0.07 | -1.09 | 0.465267 | 0.005766 | 0.739851 | 0.104378 |
| MmugDNA.16984.1.S1_s_at | MmugDNA.16984.1 | 4.05  | 4.68  | 0.17 | 0.16 | -1.55 | 0.008536 | 0.013392 | 0.219376 | 0.14827  |
| MmugDNA.1856.1.S1_at    | MmugDNA.1856.1  | 5.49  | 5.27  | 0.28 | 0.38 | 1.16  | 0.281106 | 0.205872 | 0.622118 | 0.480109 |
| MmugDNA.18560.1.S1_at   | MmugDNA.18560.1 | 5.06  | 5.09  | 0.18 | 0.21 | -1.02 | 0.78231  | 0.588288 | 0.909162 | 0.754859 |
| MmugDNA.18561.1.S1_at   | MmugDNA.18561.1 | 5.94  | 5.82  | 0.12 | 0.06 | 1.08  | 0.126689 | 0.172973 | 0.492802 | 0.449611 |
| MmugDNA.18562.1.S1_at   | MmugDNA.18562.1 | 5.28  | 5.81  | 0.26 | 0.54 | -1.45 | 0.203048 | 0.123993 | 0.565661 | 0.394262 |
| MmugDNA.18564.1.S1_at   | MmugDNA.18564.1 | 7.37  | 7.29  | 0.09 | 0.04 | 1.06  | 0.07324  | 0.015258 | 0.418483 | 0.15693  |

|                         |                 |       |       |      |      |        |          |          |          |          |
|-------------------------|-----------------|-------|-------|------|------|--------|----------|----------|----------|----------|
| MmugDNA.18565.1.S1_at   | MmugDNA.18565.1 | 3.32  | 4.11  | 0.08 | 0.76 | -1.74  | 0.131644 | 0.182569 | 0.498041 | 0.459065 |
| MmugDNA.18567.1.S1_at   | MmugDNA.18567.1 | 6.75  | 6.85  | 0.16 | 0.1  | -1.07  | 0.627545 | 0.696158 | 0.830191 | 0.823455 |
| MmugDNA.18568.1.S1_at   | MmugDNA.18568.1 | 7.34  | 7.19  | 0.24 | 0.42 | 1.11   | 0.60688  | 0.055774 | 0.819106 | 0.282044 |
| MmugDNA.18568.1.S1_s_at | MmugDNA.18568.1 | 5.84  | 5.76  | 0.13 | 0.19 | 1.06   | 0.973099 | 0.052514 | 0.989572 | 0.274757 |
| MmugDNA.18570.1.S1_at   | MmugDNA.18570.1 | 7.76  | 7.79  | 0.59 | 0.71 | -1.02  | 0.662348 | 0.839541 | 0.84852  | 0.90858  |
| MmugDNA.18571.1.S1_at   | MmugDNA.18571.1 | 4.81  | 5.04  | 0.06 | 0.17 | -1.17  | 0.21414  | 0.226821 | 0.574528 | 0.499232 |
| MmugDNA.18572.1.S1_at   | MmugDNA.18572.1 | 5.5   | 5.45  | 0.24 | 0.03 | 1.04   | 0.524399 | 0.670533 | 0.773192 | 0.807399 |
| MmugDNA.18575.1.S1_at   | MmugDNA.18575.1 | 3.51  | 3.75  | 0.07 | 0.04 | -1.17  | 0.009982 | 0.003543 | 0.226899 | 0.085371 |
| MmugDNA.18576.1.S1_at   | MmugDNA.18576.1 | 5.08  | 4.91  | 0.37 | 0.09 | 1.13   | 0.475934 | 0.421324 | 0.746034 | 0.644968 |
| MmugDNA.18577.1.S1_at   | MmugDNA.18577.1 | 3.88  | 3.92  | 0.01 | 0.1  | -1.03  | 0.13331  | 0.024427 | 0.499806 | 0.195598 |
| MmugDNA.18579.1.S1_at   | MmugDNA.18579.1 | 5.41  | 5.54  | 0.12 | 0.19 | -1.09  | 0.351332 | 0.575466 | 0.669126 | 0.746538 |
| MmugDNA.1858.1.S1_at    | MmugDNA.1858.1  | 3.27  | 3.57  | 0.09 | 0.15 | -1.22  | 0.094459 | 0.103259 | 0.452059 | 0.364143 |
| MmugDNA.18580.1.S1_at   | MmugDNA.18580.1 | 9.65  | 11.1  | 0.44 | 1.38 | -2.74  | 0.461682 | 0.55932  | 0.737811 | 0.736241 |
| MmugDNA.18581.1.S1_at   | MmugDNA.18581.1 | 4.93  | 4.93  | 0.23 | 0.09 | -1     | 0.763614 | 0.806586 | 0.900388 | 0.888726 |
| MmugDNA.18582.1.S1_at   | MmugDNA.18582.1 | 7.55  | 8.01  | 0.31 | 0.32 | -1.37  | 0.456685 | 0.124585 | 0.734529 | 0.394995 |
| MmugDNA.18583.1.S1_at   | MmugDNA.18583.1 | 7.63  | 7.46  | 0.2  | 0.44 | 1.12   | 0.779753 | 0.197672 | 0.908216 | 0.472633 |
| MmugDNA.18587.1.S1_at   | MmugDNA.18587.1 | 5.05  | 5.99  | 0.1  | 1.12 | -1.92  | 0.146696 | 0.126273 | 0.512668 | 0.39678  |
| MmugDNA.18589.1.S1_at   | MmugDNA.18589.1 | 11.19 | 10.18 | 0.25 | 0.89 | 2.01   | 0.04609  | 0.033472 | 0.362442 | 0.226577 |
| MmugDNA.1859.1.S1_at    | MmugDNA.1859.1  | 3.46  | 3.44  | 0.06 | 0.1  | 1.01   | 0.897528 | 0.817399 | 0.95917  | 0.894691 |
| MmugDNA.18591.1.S1_at   | MmugDNA.18591.1 | 6.81  | 6.34  | 0.27 | 0.45 | 1.38   | 0.19963  | 0.210688 | 0.562699 | 0.484747 |
| MmugDNA.18594.1.S1_at   | MmugDNA.18594.1 | 11.27 | 11.38 | 0.1  | 0.06 | -1.07  | 0.323003 | 0.147074 | 0.651295 | 0.421208 |
| MmugDNA.18596.1.S1_at   | MmugDNA.18596.1 | 6.96  | 7.09  | 0.07 | 0.21 | -1.09  | 0.869579 | 0.971209 | 0.947917 | 0.984355 |
| MmugDNA.18598.1.S1_at   | MmugDNA.18598.1 | 4.28  | 4.3   | 0.05 | 0.13 | -1.01  | 0.686396 | 0.118038 | 0.859743 | 0.385881 |
| MmugDNA.18599.1.S1_at   | MmugDNA.18599.1 | 5.2   | 5.12  | 0.38 | 0.34 | 1.06   | 0.700455 | 0.519483 | 0.867446 | 0.711062 |
| MmugDNA.186.1.S1_at     | MmugDNA.186.1   | 7.91  | 7.6   | 0.29 | 0.11 | 1.24   | 0.48111  | 0.651512 | 0.748945 | 0.796241 |
| MmugDNA.18601.1.S1_at   | MmugDNA.18601.1 | 9.42  | 12.77 | 1.55 | 1.57 | -10.21 | 0.188149 | 0.117524 | 0.551088 | 0.385295 |
| MmugDNA.18602.1.S1_s_at | MmugDNA.18602.1 | 6.69  | 8.63  | 0.23 | 1.42 | -3.84  | 0.034621 | 0.024702 | 0.333297 | 0.196795 |
| MmugDNA.18603.1.S1_at   | MmugDNA.18603.1 | 3.12  | 5.97  | 1.14 | 2.16 | -7.19  | 0.269891 | 0.008887 | 0.614513 | 0.124698 |
| MmugDNA.18604.1.S1_at   | MmugDNA.18604.1 | 7.93  | 7.42  | 0.89 | 0.11 | 1.43   | 0.254663 | 0.234124 | 0.602549 | 0.505319 |
| MmugDNA.18605.1.S1_at   | MmugDNA.18605.1 | 5.29  | 5.6   | 0.27 | 0.24 | -1.25  | 0.713917 | 0.524134 | 0.874591 | 0.714207 |
| MmugDNA.18608.1.S1_at   | MmugDNA.18608.1 | 4.78  | 4.89  | 0.14 | 0.13 | -1.08  | 0.153999 | 0.188444 | 0.518553 | 0.464433 |
| MmugDNA.18609.1.S1_at   | MmugDNA.18609.1 | 5.12  | 5.34  | 0.43 | 0.09 | -1.16  | 0.487681 | 0.571324 | 0.752254 | 0.743642 |
| MmugDNA.1861.1.S1_at    | MmugDNA.1861.1  | 11.64 | 11.66 | 0.13 | 0.08 | -1.02  | 0.733689 | 0.541001 | 0.885206 | 0.724694 |
| MmugDNA.18610.1.S1_at   | MmugDNA.18610.1 | 6.7   | 6.45  | 0.32 | 0.17 | 1.19   | 0.900679 | 0.471111 | 0.960386 | 0.679173 |
| MmugDNA.18613.1.S1_at   | MmugDNA.18613.1 | 9.82  | 8.65  | 0.13 | 0.18 | 2.26   | 0.001136 | 0.000173 | 0.144733 | 0.030511 |
| MmugDNA.18616.1.S1_at   | MmugDNA.18616.1 | 8.87  | 8.41  | 0.58 | 0.9  | 1.37   | 0.361295 | 0.378419 | 0.675166 | 0.615443 |
| MmugDNA.18617.1.S1_at   | MmugDNA.18617.1 | 11.15 | 10.6  | 0.28 | 0.41 | 1.47   | 0.178971 | 0.238263 | 0.543331 | 0.508825 |
| MmugDNA.18618.1.S1_at   | MmugDNA.18618.1 | 9.22  | 7.8   | 0.24 | 0.16 | 2.68   | 0.00134  | 0.000132 | 0.146228 | 0.029087 |
| MmugDNA.1862.1.S1_at    | MmugDNA.1862.1  | 8.47  | 9.32  | 0.24 | 0.45 | -1.81  | 0.024344 | 0.020207 | 0.294535 | 0.178561 |
| MmugDNA.18620.1.S1_at   | MmugDNA.18620.1 | 4.52  | 4.36  | 0.31 | 0.05 | 1.12   | 0.366723 | 0.470306 | 0.679209 | 0.678599 |
| MmugDNA.18622.1.S1_at   | MmugDNA.18622.1 | 10.87 | 10.48 | 0.21 | 0.18 | 1.31   | 0.065568 | 0.094669 | 0.404648 | 0.351481 |

|                         |                 |       |       |      |      |       |          |          |          |          |
|-------------------------|-----------------|-------|-------|------|------|-------|----------|----------|----------|----------|
| MmugDNA.18622.1.S1_s_at | MmugDNA.18622.1 | 10.81 | 10.3  | 0.24 | 0.17 | 1.42  | 0.036011 | 0.027529 | 0.338683 | 0.207161 |
| MmugDNA.18623.1.S1_at   | MmugDNA.18623.1 | 2.81  | 2.78  | 0.01 | 0.04 | 1.02  | 0.307224 | 0.497123 | 0.639889 | 0.696465 |
| MmugDNA.18624.1.S1_at   | MmugDNA.18624.1 | 8.18  | 7.85  | 0.19 | 0.56 | 1.26  | 0.256206 | 0.411559 | 0.603894 | 0.638261 |
| MmugDNA.18625.1.S1_s_at | MmugDNA.18625.1 | 3.11  | 3.16  | 0.18 | 0.07 | -1.03 | 0.888974 | 0.282173 | 0.955537 | 0.544937 |
| MmugDNA.18626.1.S1_at   | MmugDNA.18626.1 | 6.75  | 7.35  | 0.17 | 0.71 | -1.52 | 0.161548 | 0.213654 | 0.526481 | 0.487441 |
| MmugDNA.18627.1.S1_at   | MmugDNA.18627.1 | 5.97  | 5.88  | 0.11 | 0.05 | 1.06  | 0.190016 | 0.033586 | 0.552832 | 0.226848 |
| MmugDNA.18628.1.S1_at   | MmugDNA.18628.1 | 5.55  | 5.5   | 0.2  | 0.22 | 1.04  | 0.590309 | 0.785499 | 0.809851 | 0.875823 |
| MmugDNA.18629.1.S1_at   | MmugDNA.18629.1 | 3.91  | 3.82  | 0.07 | 0.26 | 1.06  | 0.90808  | 0.371328 | 0.963602 | 0.610172 |
| MmugDNA.1863.1.S1_at    | MmugDNA.1863.1  | 3.47  | 3.56  | 0.05 | 0.07 | -1.07 | 0.67483  | 0.879935 | 0.854234 | 0.931461 |
| MmugDNA.18632.1.S1_at   | MmugDNA.18632.1 | 5.44  | 5.28  | 0.19 | 0.06 | 1.12  | 0.515592 | 0.247784 | 0.767629 | 0.517199 |
| MmugDNA.18634.1.S1_at   | MmugDNA.18634.1 | 6.57  | 7.55  | 0.87 | 0.98 | -1.98 | 0.51744  | 0.378667 | 0.76879  | 0.615681 |
| MmugDNA.18634.1.S1_s_at | MmugDNA.18634.1 | 6.31  | 7.41  | 1.15 | 0.95 | -2.15 | 0.466901 | 0.3142   | 0.740422 | 0.568185 |
| MmugDNA.18636.1.S1_s_at | MmugDNA.18636.1 | 10.76 | 10.83 | 0.02 | 0.2  | -1.05 | 0.53644  | 0.793842 | 0.77949  | 0.881112 |
| MmugDNA.18637.1.S1_at   | MmugDNA.18637.1 | 3.93  | 4.32  | 0.01 | 0.25 | -1.31 | 0.164133 | 0.087412 | 0.528211 | 0.340589 |
| MmugDNA.18639.1.S1_at   | MmugDNA.18639.1 | 4.26  | 4.15  | 0.33 | 0.08 | 1.08  | 0.271944 | 0.131462 | 0.615834 | 0.403584 |
| MmugDNA.1864.1.S1_at    | MmugDNA.1864.1  | 4.76  | 4.86  | 0.82 | 0.57 | -1.07 | 0.645755 | 0.66164  | 0.840447 | 0.801903 |
| MmugDNA.18640.1.S1_at   | MmugDNA.18640.1 | 3.99  | 3.21  | 0.74 | 0.37 | 1.72  | 0.323496 | 0.276646 | 0.65165  | 0.540596 |
| MmugDNA.27602.1.S1_at   | MmugDNA.27602.1 | 12.41 | 12.71 | 0.05 | 0.17 | -1.23 | 0.042629 | 0.011418 | 0.355272 | 0.138384 |
| MmugDNA.27602.1.S1_s_at | MmugDNA.27602.1 | 11.37 | 11.74 | 0.06 | 0.16 | -1.29 | 0.013738 | 0.003328 | 0.249565 | 0.083001 |
| MmugDNA.18641.1.S1_at   | MmugDNA.18641.1 | 3.68  | 3.57  | 0.54 | 0.18 | 1.08  | 0.706503 | 0.875282 | 0.870694 | 0.929211 |
| MmugDNA.18642.1.S1_at   | MmugDNA.18642.1 | 3.19  | 3.24  | 0.15 | 0.18 | -1.03 | 0.786281 | 0.528703 | 0.911108 | 0.716773 |
| MmugDNA.18644.1.S1_at   | MmugDNA.18644.1 | 8.62  | 8.47  | 0.03 | 0.28 | 1.11  | 0.416245 | 0.126777 | 0.709786 | 0.397446 |
| MmugDNA.18646.1.S1_at   | MmugDNA.18646.1 | 4.36  | 4.38  | 0.13 | 0.14 | -1.01 | 0.714696 | 0.574673 | 0.874968 | 0.746072 |
| MmugDNA.18646.1.S1_s_at | MmugDNA.18646.1 | 3.47  | 3.5   | 0.25 | 0.23 | -1.02 | 0.200136 | 0.380893 | 0.563105 | 0.617426 |
| MmugDNA.18649.1.S1_at   | MmugDNA.18649.1 | 4.31  | 4.08  | 0.22 | 0    | 1.17  | 0.457247 | 0.407632 | 0.734775 | 0.635077 |
| MmugDNA.18651.1.S1_at   | MmugDNA.18651.1 | 7.6   | 7.61  | 0.24 | 0.49 | -1    | 0.714108 | 0.003739 | 0.874661 | 0.08718  |
| MmugDNA.18654.1.S1_at   | MmugDNA.18654.1 | 6.5   | 6.42  | 0.17 | 0.09 | 1.06  | 0.208364 | 0.07746  | 0.570251 | 0.323279 |
| MmugDNA.18656.1.S1_at   | MmugDNA.18656.1 | 7.02  | 6.98  | 0.19 | 0.1  | 1.02  | 0.414713 | 0.559659 | 0.709338 | 0.736365 |
| MmugDNA.18658.1.S1_at   | MmugDNA.18658.1 | 11.06 | 11.41 | 0.24 | 0.48 | -1.28 | 0.565986 | 0.224237 | 0.797441 | 0.497164 |
| MmugDNA.18660.1.S1_at   | MmugDNA.18660.1 | 7.48  | 6.81  | 0.24 | 0.65 | 1.59  | 0.492882 | 0.143643 | 0.755888 | 0.417555 |
| MmugDNA.18661.1.S1_at   | MmugDNA.18661.1 | 6.81  | 6.9   | 0.07 | 0.08 | -1.06 | 0.171913 | 0.076982 | 0.535422 | 0.322421 |
| MmugDNA.18663.1.S1_at   | MmugDNA.18663.1 | 7.52  | 7.5   | 0.87 | 0.41 | 1.01  | 0.861463 | 0.020457 | 0.944134 | 0.179597 |
| MmugDNA.18666.1.S1_at   | MmugDNA.18666.1 | 4.17  | 3.94  | 0.14 | 0.15 | 1.18  | 0.277762 | 0.205929 | 0.619903 | 0.48015  |
| MmugDNA.18669.1.S1_at   | MmugDNA.18669.1 | 4.56  | 4.56  | 0.75 | 1.13 | -1    | 0.611801 | 0.808515 | 0.821845 | 0.889757 |
| MmugDNA.1867.1.S1_at    | MmugDNA.1867.1  | 6.57  | 7.12  | 0.2  | 0.44 | -1.46 | 0.074594 | 0.069397 | 0.420539 | 0.30962  |
| MmugDNA.18671.1.S1_at   | MmugDNA.18671.1 | 9.96  | 10.48 | 0.08 | 0.05 | -1.43 | 0.00071  | 0.000644 | 0.136818 | 0.042928 |
| MmugDNA.18672.1.S1_at   | MmugDNA.18672.1 | 6.49  | 6.56  | 0.08 | 0.14 | -1.05 | 0.412135 | 0.263315 | 0.707824 | 0.529582 |
| MmugDNA.18675.1.S1_at   | MmugDNA.18675.1 | 2.91  | 2.91  | 0.05 | 0.01 | 1     | 0.32747  | 0.322816 | 0.65384  | 0.574157 |
| MmugDNA.18676.1.S1_at   | MmugDNA.18676.1 | 3.56  | 3.35  | 0.12 | 0.21 | 1.16  | 0.160344 | 0.301236 | 0.525289 | 0.559356 |
| MmugDNA.18677.1.S1_at   | MmugDNA.18677.1 | 4.37  | 4.62  | 0.04 | 0.18 | -1.19 | 0.077969 | 0.126078 | 0.428012 | 0.39672  |
| MmugDNA.18678.1.S1_at   | MmugDNA.18678.1 | 6.69  | 6.55  | 0.27 | 0.02 | 1.1   | 0.413383 | 0.382533 | 0.708424 | 0.618735 |

|                         |                 |       |       |      |      |       |          |          |          |          |
|-------------------------|-----------------|-------|-------|------|------|-------|----------|----------|----------|----------|
| MmugDNA.18679.1.S1_at   | MmugDNA.18679.1 | 3.27  | 3.25  | 0.07 | 0.03 | 1.02  | 0.879731 | 0.204699 | 0.951669 | 0.479056 |
| MmugDNA.1868.1.S1_at    | MmugDNA.1868.1  | 6.7   | 6.41  | 0.07 | 0.24 | 1.22  | 0.122361 | 0.053112 | 0.487496 | 0.276193 |
| MmugDNA.18680.1.S1_at   | MmugDNA.18680.1 | 2.61  | 2.82  | 0.12 | 0.1  | -1.16 | 0.218888 | 0.283375 | 0.578257 | 0.545922 |
| MmugDNA.18683.1.S1_at   | MmugDNA.18683.1 | 9.72  | 10.2  | 0.43 | 0.29 | -1.4  | 0.194324 | 0.234614 | 0.557805 | 0.505828 |
| MmugDNA.18686.1.S1_at   | MmugDNA.18686.1 | 6.49  | 6.55  | 0.06 | 0.03 | -1.04 | 0.140246 | 0.24944  | 0.508065 | 0.518532 |
| MmugDNA.18689.1.S1_at   | MmugDNA.18689.1 | 5.33  | 5.47  | 0.15 | 0.1  | -1.11 | 0.249959 | 0.269806 | 0.600389 | 0.535088 |
| MmugDNA.1869.1.S1_at    | MmugDNA.1869.1  | 10.96 | 10.92 | 0.18 | 0.48 | 1.02  | 0.964959 | 0.887051 | 0.986551 | 0.935666 |
| MmugDNA.18691.1.S1_at   | MmugDNA.18691.1 | 8.44  | 8.53  | 0.45 | 0.5  | -1.07 | 0.670883 | 0.861314 | 0.852532 | 0.921113 |
| MmugDNA.18691.1.S1_x_at | MmugDNA.18691.1 | 8.49  | 8.46  | 0.47 | 0.44 | 1.02  | 0.678893 | 0.811046 | 0.8563   | 0.890966 |
| MmugDNA.18692.1.S1_at   | MmugDNA.18692.1 | 2.89  | 2.9   | 0.37 | 0.17 | -1.01 | 0.528671 | 0.31201  | 0.775742 | 0.566838 |
| MmugDNA.18692.1.S1_x_at | MmugDNA.18692.1 | 2.77  | 2.64  | 0.32 | 0.16 | 1.1   | 0.318096 | 0.427046 | 0.64802  | 0.649087 |
| MmugDNA.18693.1.S1_at   | MmugDNA.18693.1 | 4.84  | 4.94  | 0.25 | 0.13 | -1.07 | 0.338085 | 0.398721 | 0.66054  | 0.629464 |
| MmugDNA.18694.1.S1_at   | MmugDNA.18694.1 | 3.93  | 4.16  | 0.1  | 0.09 | -1.17 | 0.119172 | 0.124008 | 0.48378  | 0.394273 |
| MmugDNA.18695.1.S1_at   | MmugDNA.18695.1 | 10.16 | 10.13 | 0.09 | 0.3  | 1.02  | 0.825607 | 0.361001 | 0.929243 | 0.60201  |
| MmugDNA.18696.1.S1_at   | MmugDNA.18696.1 | 13.55 | 13.39 | 0.07 | 0.09 | 1.12  | 0.036405 | 0.017624 | 0.339201 | 0.167839 |
| MmugDNA.18697.1.S1_at   | MmugDNA.18697.1 | 6.16  | 6.31  | 0.39 | 0.33 | -1.11 | 0.155931 | 0.213533 | 0.520607 | 0.48741  |
| MmugDNA.187.1.S1_at     | MmugDNA.187.1   | 6.86  | 6.8   | 0.3  | 0.19 | 1.04  | 0.6713   | 0.775147 | 0.852602 | 0.869083 |
| MmugDNA.21327.1.S1_s_at | MmugDNA.21327.1 | 5.8   | 5.58  | 0.22 | 0.47 | 1.16  | 0.51839  | 0.541409 | 0.769463 | 0.724909 |
| MmugDNA.18700.1.S1_at   | MmugDNA.18700.1 | 4.04  | 4.16  | 0.15 | 0    | -1.09 | 0.499245 | 0.226295 | 0.759062 | 0.498753 |
| MmugDNA.18702.1.S1_at   | MmugDNA.18702.1 | 5.76  | 6.51  | 0.17 | 0.63 | -1.68 | 0.05809  | 0.042797 | 0.389761 | 0.251394 |
| MmugDNA.18703.1.S1_at   | MmugDNA.18703.1 | 5.77  | 6.1   | 1.29 | 0.24 | -1.26 | 0.659326 | 0.71246  | 0.847112 | 0.833371 |
| MmugDNA.18705.1.S1_at   | MmugDNA.18705.1 | 5.21  | 6.33  | 0.14 | 1    | -2.18 | 0.125904 | 0.135618 | 0.491972 | 0.407744 |
| MmugDNA.18706.1.S1_at   | MmugDNA.18706.1 | 8.63  | 8.28  | 0.46 | 0.72 | 1.28  | 0.742923 | 0.450913 | 0.890085 | 0.66589  |
| MmugDNA.18706.1.S1_s_at | MmugDNA.18706.1 | 7.75  | 7.29  | 0.91 | 0.8  | 1.38  | 0.777373 | 0.656462 | 0.906953 | 0.799097 |
| MmugDNA.18708.1.S1_at   | MmugDNA.18708.1 | 4.04  | 4.08  | 0.39 | 0.38 | -1.03 | 0.594416 | 0.664995 | 0.81188  | 0.803726 |
| MmugDNA.18709.1.S1_at   | MmugDNA.18709.1 | 10.6  | 10.36 | 0.17 | 0.28 | 1.19  | 0.689425 | 0.59964  | 0.861525 | 0.761524 |
| MmugDNA.1871.1.S1_at    | MmugDNA.1871.1  | 3.33  | 3.41  | 0.05 | 0.09 | -1.06 | 0.429378 | 0.279059 | 0.717507 | 0.542782 |
| MmugDNA.16218.1.S1_s_at | MmugDNA.16218.1 | 5.92  | 5.99  | 0.23 | 0.24 | -1.05 | 0.734699 | 0.908689 | 0.885764 | 0.948291 |
| MmugDNA.18711.1.S1_at   | MmugDNA.18711.1 | 4.12  | 3.8   | 0.17 | 1.67 | 1.24  | 0.494595 | 0.637522 | 0.756791 | 0.787003 |
| MmugDNA.18712.1.S1_at   | MmugDNA.18712.1 | 9.14  | 9.3   | 0.42 | 0.84 | -1.12 | 0.860933 | 0.743259 | 0.943905 | 0.851277 |
| MmugDNA.18713.1.S1_at   | MmugDNA.18713.1 | 4.19  | 4.22  | 0.27 | 0.07 | -1.02 | 0.363509 | 0.577873 | 0.676747 | 0.748169 |
| MmugDNA.18714.1.S1_at   | MmugDNA.18714.1 | 7.31  | 6.87  | 0.24 | 0.31 | 1.36  | 0.138729 | 0.006654 | 0.505884 | 0.110505 |
| MmugDNA.18716.1.S1_at   | MmugDNA.18716.1 | 11.65 | 11.61 | 0.21 | 0.39 | 1.03  | 0.466587 | 0.550584 | 0.740258 | 0.730588 |
| MmugDNA.18718.1.S1_at   | MmugDNA.18718.1 | 3.97  | 4.08  | 0.12 | 0.18 | -1.08 | 0.294707 | 0.70444  | 0.631442 | 0.828481 |
| MmugDNA.18719.1.S1_at   | MmugDNA.18719.1 | 4.6   | 4.61  | 0    | 0.12 | -1.01 | 0.622855 | 0.77682  | 0.827733 | 0.870313 |
| MmugDNA.1872.1.S1_at    | MmugDNA.1872.1  | 3.64  | 3.56  | 0.25 | 0.38 | 1.05  | 0.706379 | 0.27119  | 0.870663 | 0.536264 |
| MmugDNA.18721.1.S1_at   | MmugDNA.18721.1 | 8.05  | 7.52  | 0.21 | 1.04 | 1.44  | 0.446719 | 0.59959  | 0.728511 | 0.761524 |
| MmugDNA.18723.1.S1_at   | MmugDNA.18723.1 | 5     | 5.05  | 0.12 | 0.07 | -1.04 | 0.845732 | 0.025569 | 0.93814  | 0.200613 |
| MmugDNA.18725.1.S1_at   | MmugDNA.18725.1 | 7.21  | 6.15  | 0.11 | 0.48 | 2.08  | 0.050712 | 0.062795 | 0.375265 | 0.297193 |
| MmugDNA.18726.1.S1_at   | MmugDNA.18726.1 | 3.96  | 3.88  | 0.52 | 0.07 | 1.06  | 0.278856 | 0.262691 | 0.620835 | 0.529054 |
| MmugDNA.18727.1.S1_at   | MmugDNA.18727.1 | 5.73  | 5.25  | 0.83 | 0.28 | 1.4   | 0.109355 | 0.06504  | 0.470811 | 0.301009 |

|                         |                 |       |       |      |      |        |          |          |          |          |
|-------------------------|-----------------|-------|-------|------|------|--------|----------|----------|----------|----------|
| MmugDNA.18728.1.S1_at   | MmugDNA.18728.1 | 10.5  | 10.09 | 0.26 | 0.52 | 1.33   | 0.307071 | 0.121644 | 0.639861 | 0.39083  |
| MmugDNA.18729.1.S1_at   | MmugDNA.18729.1 | 7.95  | 7.11  | 0.63 | 0.45 | 1.78   | 0.236442 | 0.013669 | 0.590463 | 0.14967  |
| MmugDNA.18731.1.S1_at   | MmugDNA.18731.1 | 6.96  | 7.56  | 1.17 | 1.29 | -1.51  | 0.654421 | 0.43907  | 0.844586 | 0.657845 |
| MmugDNA.18732.1.S1_at   | MmugDNA.18732.1 | 7.14  | 7.07  | 0.05 | 0.15 | 1.04   | 0.572573 | 0.295787 | 0.800799 | 0.555196 |
| MmugDNA.18733.1.S1_at   | MmugDNA.18733.1 | 11.38 | 11.62 | 0.05 | 0.27 | -1.18  | 0.468139 | 0.526855 | 0.741008 | 0.715627 |
| MmugDNA.7472.1.S1_s_at  | MmugDNA.7472.1  | 2.93  | 2.78  | 0.33 | 0.18 | 1.12   | 0.694834 | 0.401692 | 0.864679 | 0.631068 |
| MmugDNA.18737.1.S1_at   | MmugDNA.18737.1 | 4.25  | 4.07  | 0.54 | 0.87 | 1.14   | 0.352653 | 0.407202 | 0.669719 | 0.634801 |
| MmugDNA.18738.1.S1_at   | MmugDNA.18738.1 | 3.98  | 3.59  | 0.14 | 0.4  | 1.31   | 0.201049 | 0.147427 | 0.563821 | 0.421669 |
| MmugDNA.18739.1.S1_at   | MmugDNA.18739.1 | 7.89  | 8.66  | 0.14 | 0.24 | -1.71  | 0.004772 | 0.005882 | 0.184674 | 0.104899 |
| MmugDNA.1874.1.S1_at    | MmugDNA.1874.1  | 10.52 | 10.85 | 0.07 | 0.24 | -1.26  | 0.230948 | 0.030447 | 0.587369 | 0.216485 |
| MmugDNA.1874.1.S1_s_at  | MmugDNA.1874.1  | 8.97  | 9.28  | 0.02 | 0.28 | -1.24  | 0.376966 | 0.065672 | 0.685505 | 0.301631 |
| MmugDNA.18740.1.S1_at   | MmugDNA.18740.1 | 10.65 | 12.11 | 0.29 | 0.19 | -2.73  | 0.001864 | 0.00063  | 0.155636 | 0.042867 |
| MmugDNA.18740.1.S1_s_at | MmugDNA.18740.1 | 9.43  | 10.99 | 0.36 | 0.26 | -2.95  | 0.002621 | 0.00085  | 0.164386 | 0.047089 |
| MmugDNA.18742.1.S1_at   | MmugDNA.18742.1 | 3.34  | 3.38  | 0.08 | 0.14 | -1.03  | 0.947271 | 0.258162 | 0.979721 | 0.525574 |
| MmugDNA.19469.1.S1_at   | MmugDNA.19469.1 | 2.95  | 3.03  | 0.18 | 0.11 | -1.05  | 0.943222 | 0.735577 | 0.978425 | 0.846993 |
| MmugDNA.19469.1.S1_s_at | MmugDNA.19469.1 | 7.3   | 6.73  | 0.75 | 0.84 | 1.49   | 0.492771 | 0.172492 | 0.755881 | 0.448864 |
| MmugDNA.18745.1.S1_at   | MmugDNA.18745.1 | 4.98  | 5.12  | 0.13 | 0.03 | -1.1   | 0.054152 | 0.098582 | 0.381696 | 0.356709 |
| MmugDNA.18746.1.S1_at   | MmugDNA.18746.1 | 3.54  | 3.78  | 0.04 | 0.12 | -1.19  | 0.02019  | 0.034937 | 0.277239 | 0.231062 |
| MmugDNA.18747.1.S1_at   | MmugDNA.18747.1 | 7.92  | 12.46 | 2.39 | 2.89 | -23.29 | 0.438788 | 0.307219 | 0.723309 | 0.563499 |
| MmugDNA.18749.1.S1_at   | MmugDNA.18749.1 | 7.1   | 7.58  | 1.06 | 1.24 | -1.4   | 0.531987 | 0.647473 | 0.7776   | 0.793487 |
| MmugDNA.18750.1.S1_at   | MmugDNA.18750.1 | 4.38  | 3.95  | 0.18 | 0.06 | 1.35   | 0.017949 | 0.002685 | 0.268278 | 0.076408 |
| MmugDNA.18753.1.S1_s_at | MmugDNA.18753.1 | 10.91 | 10.82 | 0.12 | 0.43 | 1.07   | 0.72847  | 0.793613 | 0.881975 | 0.88095  |
| MmugDNA.18754.1.S1_at   | MmugDNA.18754.1 | 9.19  | 9.29  | 0.12 | 1.15 | -1.08  | 0.493578 | 0.668258 | 0.756276 | 0.805864 |
| MmugDNA.18758.1.S1_at   | MmugDNA.18758.1 | 2.48  | 2.69  | 0.19 | 0.04 | -1.16  | 0.490983 | 0.662314 | 0.754706 | 0.802245 |
| MmugDNA.18761.1.S1_at   | MmugDNA.18761.1 | 11.02 | 10.96 | 0.03 | 0.17 | 1.04   | 0.969287 | 0.899468 | 0.988296 | 0.942861 |
| MmugDNA.18762.1.S1_at   | MmugDNA.18762.1 | 7.07  | 7.16  | 0.15 | 0.6  | -1.06  | 0.962685 | 0.990047 | 0.985598 | 0.994314 |
| MmugDNA.18763.1.S1_at   | MmugDNA.18763.1 | 3.48  | 3.48  | 0.19 | 0.07 | -1.01  | 0.533092 | 0.085351 | 0.777969 | 0.337226 |
| MmugDNA.18764.1.S1_at   | MmugDNA.18764.1 | 6.55  | 6.38  | 0.05 | 0.17 | 1.13   | 0.343335 | 0.51601  | 0.663541 | 0.70867  |
| MmugDNA.18765.1.S1_at   | MmugDNA.18765.1 | 3.3   | 3.32  | 1.15 | 0.44 | -1.02  | 0.502963 | 0.513328 | 0.760601 | 0.706881 |
| MmugDNA.18766.1.S1_at   | MmugDNA.18766.1 | 6.89  | 6.95  | 0.2  | 0.02 | -1.04  | 0.221229 | 0.337201 | 0.580161 | 0.584418 |
| MmugDNA.18767.1.S1_at   | MmugDNA.18767.1 | 3.48  | 3.49  | 0.09 | 0.42 | -1     | 0.819392 | 0.394347 | 0.926528 | 0.626944 |
| MmugDNA.18768.1.S1_at   | MmugDNA.18768.1 | 7.05  | 7.11  | 0.08 | 0.28 | -1.04  | 0.311285 | 0.190831 | 0.643293 | 0.466228 |
| MmugDNA.18769.1.S1_at   | MmugDNA.18769.1 | 11.29 | 12.35 | 0.45 | 0.4  | -2.08  | 0.176435 | 0.198866 | 0.54005  | 0.473475 |
| MmugDNA.1877.1.S1_at    | MmugDNA.1877.1  | 8.36  | 8.29  | 0.13 | 0.02 | 1.05   | 0.984674 | 0.041357 | 0.994566 | 0.247995 |
| MmugDNA.18771.1.S1_at   | MmugDNA.18771.1 | 5.69  | 4.61  | 0.19 | 0.35 | 2.12   | 0.008435 | 0.001877 | 0.218339 | 0.064979 |
| MmugDNA.18772.1.S1_at   | MmugDNA.18772.1 | 6.44  | 6.38  | 0.23 | 0.21 | 1.04   | 0.854636 | 0.524259 | 0.941248 | 0.714248 |
| MmugDNA.18773.1.S1_at   | MmugDNA.18773.1 | 7.14  | 7.29  | 0.17 | 0.09 | -1.11  | 0.072526 | 0.078555 | 0.417112 | 0.325285 |
| MmugDNA.18775.1.S1_at   | MmugDNA.18775.1 | 8.53  | 8.16  | 0.38 | 0.62 | 1.29   | 0.654893 | 0.704286 | 0.84477  | 0.828392 |
| MmugDNA.18779.1.S1_at   | MmugDNA.18779.1 | 6.25  | 6.03  | 0.06 | 0.08 | 1.16   | 0.01648  | 0.006265 | 0.264215 | 0.107376 |
| MmugDNA.1878.1.S1_at    | MmugDNA.1878.1  | 11.3  | 11.39 | 0.17 | 0.17 | -1.07  | 0.168816 | 0.103811 | 0.533155 | 0.364519 |
| MmugDNA.18780.1.S1_at   | MmugDNA.18780.1 | 4.3   | 4.45  | 0.41 | 0.18 | -1.11  | 0.920271 | 0.468359 | 0.968914 | 0.677714 |

|                         |                 |       |       |      |      |       |          |          |          |          |
|-------------------------|-----------------|-------|-------|------|------|-------|----------|----------|----------|----------|
| MmugDNA.18781.1.S1_at   | MmugDNA.18781.1 | 6.44  | 6.51  | 1.23 | 0.23 | -1.06 | 0.781577 | 0.924401 | 0.908868 | 0.95736  |
| MmugDNA.18782.1.S1_at   | MmugDNA.18782.1 | 6.69  | 6.46  | 0.17 | 0.06 | 1.17  | 0.406534 | 0.217423 | 0.703729 | 0.491035 |
| MmugDNA.18784.1.S1_at   | MmugDNA.18784.1 | 4.99  | 3.58  | 1.02 | 0.01 | 2.66  | 0.079052 | 0.066719 | 0.428609 | 0.304114 |
| MmugDNA.18785.1.S1_at   | MmugDNA.18785.1 | 10.02 | 10.44 | 0.28 | 0.44 | -1.33 | 0.800646 | 0.126311 | 0.917779 | 0.396786 |
| MmugDNA.18786.1.S1_at   | MmugDNA.18786.1 | 9.61  | 9.01  | 0.1  | 0.2  | 1.51  | 0.008659 | 0.005508 | 0.220083 | 0.102269 |
| MmugDNA.18787.1.S1_at   | MmugDNA.18787.1 | 4.05  | 4.03  | 0.26 | 0.04 | 1.01  | 0.887546 | 0.849312 | 0.954863 | 0.914475 |
| MmugDNA.18788.1.S1_at   | MmugDNA.18788.1 | 6.2   | 5.78  | 0.64 | 0.13 | 1.34  | 0.332668 | 0.479774 | 0.656938 | 0.68541  |
| MmugDNA.18789.1.S1_at   | MmugDNA.18789.1 | 3.85  | 3.82  | 0.18 | 0.26 | 1.02  | 0.670198 | 0.882475 | 0.852382 | 0.933022 |
| MmugDNA.18790.1.S1_at   | MmugDNA.18790.1 | 5.58  | 5.85  | 0.22 | 0.18 | -1.2  | 0.655909 | 0.471251 | 0.845225 | 0.679282 |
| MmugDNA.18791.1.S1_at   | MmugDNA.18791.1 | 9.22  | 8.45  | 0.74 | 0.93 | 1.71  | 0.289326 | 0.392071 | 0.62733  | 0.625583 |
| MmugDNA.18792.1.S1_at   | MmugDNA.18792.1 | 4.66  | 4.54  | 0.17 | 0.05 | 1.08  | 0.592271 | 0.123367 | 0.810875 | 0.393391 |
| MmugDNA.18797.1.S1_at   | MmugDNA.18797.1 | 3.92  | 3.27  | 0.64 | 0.15 | 1.57  | 0.111023 | 0.10649  | 0.472906 | 0.369078 |
| MmugDNA.18798.1.S1_at   | MmugDNA.18798.1 | 5.72  | 5.66  | 0.16 | 0.19 | 1.04  | 0.821321 | 0.144612 | 0.927303 | 0.418466 |
| MmugDNA.188.1.S1_at     | MmugDNA.188.1   | 7.18  | 6.66  | 0.3  | 0.14 | 1.44  | 0.213552 | 0.099543 | 0.573715 | 0.357959 |
| MmugDNA.18800.1.S1_at   | MmugDNA.18800.1 | 3.16  | 3.48  | 0.13 | 0.09 | -1.24 | 0.040519 | 0.020572 | 0.349494 | 0.179964 |
| MmugDNA.18801.1.S1_at   | MmugDNA.18801.1 | 7.2   | 5.88  | 0.4  | 0.52 | 2.5   | 0.04529  | 0.039244 | 0.360634 | 0.243274 |
| MmugDNA.18803.1.S1_at   | MmugDNA.18803.1 | 4.44  | 4.12  | 0.12 | 0.17 | 1.25  | 0.090512 | 0.085552 | 0.445901 | 0.337567 |
| MmugDNA.18805.1.S1_at   | MmugDNA.18805.1 | 4.5   | 4.66  | 0.03 | 0.08 | -1.12 | 0.025147 | 0.001734 | 0.297733 | 0.062895 |
| MmugDNA.18806.1.S1_at   | MmugDNA.18806.1 | 5.62  | 5.89  | 0.2  | 0.09 | -1.2  | 0.181153 | 0.190124 | 0.545715 | 0.465774 |
| MmugDNA.18808.1.S1_at   | MmugDNA.18808.1 | 5.31  | 5.46  | 0.04 | 0.26 | -1.11 | 0.336556 | 0.527603 | 0.659526 | 0.716154 |
| MmugDNA.18809.1.S1_at   | MmugDNA.18809.1 | 3.9   | 3.9   | 0    | 0.12 | -1    | 0.342125 | 0.705167 | 0.663078 | 0.829041 |
| MmugDNA.1881.1.S1_at    | MmugDNA.1881.1  | 5.61  | 5.15  | 0.36 | 0.39 | 1.37  | 0.246903 | 0.288266 | 0.598025 | 0.549535 |
| MmugDNA.18810.1.S1_at   | MmugDNA.18810.1 | 4.29  | 4.39  | 0.21 | 0.12 | -1.07 | 0.695261 | 0.057824 | 0.864865 | 0.286866 |
| MmugDNA.18811.1.S1_at   | MmugDNA.18811.1 | 11.46 | 10.87 | 0.05 | 0.39 | 1.51  | 0.070205 | 0.056238 | 0.413758 | 0.283092 |
| MmugDNA.18812.1.S1_at   | MmugDNA.18812.1 | 11.51 | 11.17 | 0.14 | 0.33 | 1.27  | 0.063759 | 0.041753 | 0.401553 | 0.248933 |
| MmugDNA.18813.1.S1_at   | MmugDNA.18813.1 | 8.63  | 10.87 | 1.59 | 1.09 | -4.73 | 0.047759 | 0.058648 | 0.367162 | 0.288897 |
| MmugDNA.18815.1.S1_at   | MmugDNA.18815.1 | 7.52  | 7.34  | 0.13 | 0.43 | 1.13  | 0.536006 | 0.490816 | 0.779351 | 0.692666 |
| MmugDNA.18816.1.S1_at   | MmugDNA.18816.1 | 4.55  | 4.55  | 0.17 | 0.32 | 1     | 0.246091 | 0.399741 | 0.597474 | 0.629951 |
| MmugDNA.18818.1.S1_at   | MmugDNA.18818.1 | 4.57  | 4.72  | 0.18 | 0.14 | -1.11 | 0.263786 | 0.133052 | 0.609674 | 0.404726 |
| MmugDNA.18819.1.S1_at   | MmugDNA.18819.1 | 8.71  | 8.35  | 0.46 | 0.65 | 1.28  | 0.096589 | 0.104231 | 0.455338 | 0.365373 |
| MmugDNA.18820.1.S1_at   | MmugDNA.18820.1 | 7.3   | 7.58  | 0.15 | 0.14 | -1.22 | 0.168592 | 0.17433  | 0.532849 | 0.450745 |
| MmugDNA.18821.1.S1_at   | MmugDNA.18821.1 | 4.29  | 4.29  | 0.03 | 0.02 | -1    | 0.431241 | 0.28697  | 0.718513 | 0.548246 |
| MmugDNA.18822.1.S1_at   | MmugDNA.18822.1 | 4.83  | 4.55  | 0.16 | 0.16 | 1.21  | 0.055624 | 0.051866 | 0.384246 | 0.273151 |
| MmugDNA.29296.1.S1_s_at | MmugDNA.29296.1 | 12.08 | 11.88 | 0.04 | 0.11 | 1.14  | 0.017152 | 0.028313 | 0.266906 | 0.21008  |
| MmugDNA.18825.1.S1_at   | MmugDNA.18825.1 | 3.34  | 3.27  | 0.17 | 0.04 | 1.05  | 0.858866 | 0.589445 | 0.943028 | 0.755656 |
| MmugDNA.18829.1.S1_at   | MmugDNA.18829.1 | 3.08  | 3.25  | 0.07 | 0.15 | -1.13 | 0.42809  | 0.545335 | 0.716622 | 0.727505 |
| MmugDNA.18829.1.S1_s_at | MmugDNA.18829.1 | 5.05  | 5.12  | 0.19 | 0.25 | -1.05 | 0.697059 | 0.903496 | 0.865585 | 0.945191 |
| MmugDNA.1883.1.S1_at    | MmugDNA.1883.1  | 12.65 | 12.73 | 0.05 | 0.37 | -1.05 | 0.649133 | 0.684001 | 0.84237  | 0.81565  |
| MmugDNA.18831.1.S1_at   | MmugDNA.18831.1 | 10.34 | 10.33 | 0.37 | 0.4  | 1.01  | 0.947241 | 0.939589 | 0.97971  | 0.965668 |
| MmugDNA.18832.1.S1_at   | MmugDNA.18832.1 | 10.38 | 10.39 | 0.08 | 0.42 | -1.01 | 0.672919 | 0.433332 | 0.853295 | 0.653652 |
| MmugDNA.18833.1.S1_at   | MmugDNA.18833.1 | 8.12  | 8.32  | 0.07 | 0.36 | -1.15 | 0.812403 | 0.93843  | 0.923648 | 0.965059 |

|                         |                 |       |       |      |      |       |          |          |          |          |
|-------------------------|-----------------|-------|-------|------|------|-------|----------|----------|----------|----------|
| MmugDNA.18835.1.S1_at   | MmugDNA.18835.1 | 9.11  | 7.38  | 0.34 | 0.4  | 3.31  | 0.008506 | 0.003722 | 0.219031 | 0.086946 |
| MmugDNA.18836.1.S1_at   | MmugDNA.18836.1 | 10.38 | 8.95  | 0.22 | 0.3  | 2.71  | 0.003055 | 0.001298 | 0.172102 | 0.055585 |
| MmugDNA.18837.1.S1_at   | MmugDNA.18837.1 | 4.6   | 4.08  | 0.88 | 0.3  | 1.43  | 0.255079 | 0.355789 | 0.603075 | 0.597864 |
| MmugDNA.18838.1.S1_at   | MmugDNA.18838.1 | 7.25  | 8.24  | 1.31 | 2.13 | -1.98 | 0.950052 | 0.980939 | 0.981139 | 0.989478 |
| MmugDNA.18839.1.S1_at   | MmugDNA.18839.1 | 3.51  | 3.46  | 0.3  | 0.06 | 1.04  | 0.769549 | 0.4634   | 0.903086 | 0.674383 |
| MmugDNA.1884.1.S1_at    | MmugDNA.1884.1  | 6.82  | 6.09  | 0.67 | 0.21 | 1.65  | 0.21103  | 0.235909 | 0.571977 | 0.507056 |
| MmugDNA.18841.1.S1_at   | MmugDNA.18841.1 | 3.29  | 3.3   | 0.16 | 0.08 | -1.01 | 0.69743  | 0.802874 | 0.865678 | 0.886465 |
| MmugDNA.18842.1.S1_at   | MmugDNA.18842.1 | 2.67  | 2.64  | 0.02 | 0.06 | 1.02  | 0.579571 | 0.581416 | 0.804347 | 0.750451 |
| MmugDNA.18847.1.S1_at   | MmugDNA.18847.1 | 5.91  | 5.7   | 0.16 | 0.13 | 1.16  | 0.35062  | 0.544091 | 0.668568 | 0.726614 |
| MmugDNA.18848.1.S1_at   | MmugDNA.18848.1 | 3.9   | 3.9   | 0.19 | 0.28 | -1    | 0.614498 | 0.615959 | 0.823208 | 0.772359 |
| MmugDNA.18849.1.S1_at   | MmugDNA.18849.1 | 5.55  | 4.87  | 0.82 | 0.59 | 1.6   | 0.359422 | 0.475274 | 0.673869 | 0.682031 |
| MmugDNA.34587.1.S1_s_at | MmugDNA.34587.1 | 12.74 | 12.59 | 0.02 | 0.21 | 1.11  | 0.390465 | 0.027377 | 0.693683 | 0.206695 |
| MmugDNA.18850.1.S1_at   | MmugDNA.18850.1 | 9.56  | 10.08 | 0.53 | 0.16 | -1.43 | 0.310508 | 0.446517 | 0.642516 | 0.662842 |
| MmugDNA.18851.1.S1_at   | MmugDNA.18851.1 | 10.86 | 10.26 | 0.22 | 0.67 | 1.52  | 0.217081 | 0.051315 | 0.576631 | 0.271959 |
| MmugDNA.18852.1.S1_at   | MmugDNA.18852.1 | 3.17  | 3.11  | 0.09 | 0.08 | 1.04  | 0.496597 | 0.153864 | 0.757608 | 0.428509 |
| MmugDNA.18853.1.S1_at   | MmugDNA.18853.1 | 10.69 | 10.35 | 0.2  | 0.4  | 1.26  | 0.670244 | 0.13851  | 0.852382 | 0.411492 |
| MmugDNA.18854.1.S1_at   | MmugDNA.18854.1 | 7.23  | 7.41  | 0.39 | 1.05 | -1.13 | 0.565735 | 0.229896 | 0.797313 | 0.501802 |
| MmugDNA.18855.1.S1_at   | MmugDNA.18855.1 | 5.18  | 4.99  | 0.13 | 0.17 | 1.14  | 0.247993 | 0.116923 | 0.599056 | 0.384297 |
| MmugDNA.18856.1.S1_at   | MmugDNA.18856.1 | 9.44  | 8.72  | 0.12 | 0.06 | 1.64  | 0.000982 | 0.000134 | 0.139813 | 0.029087 |
| MmugDNA.18858.1.S1_at   | MmugDNA.18858.1 | 5.36  | 6.04  | 0.75 | 1.32 | -1.61 | 0.503196 | 0.228976 | 0.760699 | 0.501254 |
| MmugDNA.18859.1.S1_at   | MmugDNA.18859.1 | 9.66  | 10.15 | 0.5  | 0.46 | -1.4  | 0.87032  | 0.625646 | 0.948199 | 0.779265 |
| MmugDNA.1886.1.S1_at    | MmugDNA.1886.1  | 8.77  | 8.35  | 0.24 | 0.71 | 1.34  | 0.366369 | 0.287945 | 0.67904  | 0.549227 |
| MmugDNA.18861.1.S1_at   | MmugDNA.18861.1 | 7.83  | 7.78  | 0.75 | 0.58 | 1.04  | 0.42811  | 0.221211 | 0.716622 | 0.494537 |
| MmugDNA.18862.1.S1_at   | MmugDNA.18862.1 | 3.43  | 3.36  | 0.06 | 0.13 | 1.05  | 0.378234 | 0.580854 | 0.68637  | 0.749953 |
| MmugDNA.18865.1.S1_at   | MmugDNA.18865.1 | 5.72  | 5.73  | 0.12 | 0.13 | -1.01 | 0.461034 | 0.572732 | 0.737355 | 0.744687 |
| MmugDNA.18868.1.S1_at   | MmugDNA.18868.1 | 7.5   | 7.92  | 0.14 | 0.38 | -1.34 | 0.317025 | 0.346754 | 0.647775 | 0.591536 |
| MmugDNA.18870.1.S1_at   | MmugDNA.18870.1 | 3.92  | 4.08  | 0.47 | 0.05 | -1.12 | 0.763852 | 0.925348 | 0.900476 | 0.957778 |
| MmugDNA.18871.1.S1_at   | MmugDNA.18871.1 | 6.65  | 6.45  | 0.14 | 0.32 | 1.15  | 0.97455  | 0.98249  | 0.990048 | 0.99036  |
| MmugDNA.18874.1.S1_at   | MmugDNA.18874.1 | 9     | 9.65  | 0.34 | 0.35 | -1.56 | 0.078566 | 0.084416 | 0.428609 | 0.335713 |
| MmugDNA.18875.1.S1_at   | MmugDNA.18875.1 | 5.74  | 5.94  | 0.17 | 0.21 | -1.15 | 0.66084  | 0.844622 | 0.847904 | 0.91156  |
| MmugDNA.18876.1.S1_at   | MmugDNA.18876.1 | 5.4   | 5.31  | 0.18 | 0.12 | 1.06  | 0.532317 | 0.736127 | 0.777633 | 0.84733  |
| MmugDNA.18877.1.S1_at   | MmugDNA.18877.1 | 3.92  | 3.98  | 0.33 | 0.2  | -1.04 | 0.581994 | 0.843493 | 0.805507 | 0.910881 |
| MmugDNA.18879.1.S1_at   | MmugDNA.18879.1 | 7.9   | 8.21  | 0.21 | 0.3  | -1.23 | 0.449477 | 0.614943 | 0.730249 | 0.771635 |
| MmugDNA.1888.1.S1_at    | MmugDNA.1888.1  | 4.76  | 5.11  | 0.18 | 0.53 | -1.27 | 0.342563 | 0.246257 | 0.663287 | 0.515889 |
| MmugDNA.18881.1.S1_at   | MmugDNA.18881.1 | 6.31  | 6.41  | 0.55 | 0.27 | -1.08 | 0.500184 | 0.595577 | 0.759412 | 0.759091 |
| MmugDNA.18882.1.S1_at   | MmugDNA.18882.1 | 5.52  | 5.62  | 0.08 | 0.23 | -1.08 | 0.516058 | 0.719023 | 0.76772  | 0.83736  |
| MmugDNA.18883.1.S1_at   | MmugDNA.18883.1 | 6.22  | 6.43  | 0.19 | 0.03 | -1.16 | 0.148532 | 0.075978 | 0.51391  | 0.320676 |
| MmugDNA.18884.1.S1_at   | MmugDNA.18884.1 | 6.92  | 7.09  | 0.08 | 0.38 | -1.12 | 0.375848 | 0.48306  | 0.684803 | 0.687687 |
| MmugDNA.18885.1.S1_at   | MmugDNA.18885.1 | 8.97  | 8.7   | 0.16 | 0.4  | 1.2   | 0.456823 | 0.21991  | 0.734562 | 0.493423 |
| MmugDNA.18886.1.S1_at   | MmugDNA.18886.1 | 3.15  | 3.15  | 0.05 | 0.13 | -1    | 0.681974 | 0.840694 | 0.857659 | 0.909196 |
| MmugDNA.18887.1.S1_at   | MmugDNA.18887.1 | 4.48  | 4.42  | 0.54 | 0.04 | 1.04  | 0.317477 | 0.346035 | 0.647924 | 0.59115  |

|                         |                 |       |       |      |      |       |          |          |          |          |
|-------------------------|-----------------|-------|-------|------|------|-------|----------|----------|----------|----------|
| MmugDNA.18888.1.S1_at   | MmugDNA.18888.1 | 3.96  | 4.05  | 0.07 | 0.16 | -1.06 | 0.265474 | 0.410961 | 0.611089 | 0.63782  |
| MmugDNA.18889.1.S1_s_at | MmugDNA.18889.1 | 9.23  | 9.42  | 0.33 | 0.1  | -1.14 | 0.487502 | 0.406149 | 0.75211  | 0.634211 |
| MmugDNA.1889.1.S1_at    | MmugDNA.1889.1  | 9.18  | 7.44  | 0.47 | 0.37 | 3.33  | 0.012081 | 0.005744 | 0.239963 | 0.104342 |
| MmugDNA.18891.1.S1_s_at | MmugDNA.18891.1 | 8.76  | 8.01  | 1.06 | 1.24 | 1.69  | 0.798749 | 0.599015 | 0.916658 | 0.761257 |
| MmugDNA.18893.1.S1_at   | MmugDNA.18893.1 | 5.32  | 5.22  | 0.28 | 0.04 | 1.08  | 0.4975   | 0.266489 | 0.758019 | 0.532235 |
| MmugDNA.18894.1.S1_at   | MmugDNA.18894.1 | 7.56  | 7.37  | 0.2  | 0.32 | 1.14  | 0.315508 | 0.057716 | 0.646683 | 0.2866   |
| MmugDNA.18895.1.S1_at   | MmugDNA.18895.1 | 4.68  | 4.74  | 0.03 | 0.08 | -1.04 | 0.151482 | 0.46113  | 0.51615  | 0.672857 |
| MmugDNA.18896.1.S1_at   | MmugDNA.18896.1 | 10.22 | 10.74 | 0.26 | 0.16 | -1.43 | 0.015829 | 0.006054 | 0.261411 | 0.106152 |
| MmugDNA.18898.1.S1_at   | MmugDNA.18898.1 | 4.55  | 4.5   | 0.23 | 0.01 | 1.04  | 0.589284 | 0.790147 | 0.809218 | 0.878708 |
| MmugDNA.18899.1.S1_at   | MmugDNA.18899.1 | 3.95  | 4.02  | 0.17 | 0.03 | -1.05 | 0.52791  | 0.644447 | 0.775285 | 0.791578 |
| MmugDNA.189.1.S1_at     | MmugDNA.189.1   | 9.89  | 10.32 | 0.33 | 0.59 | -1.35 | 0.245194 | 0.009727 | 0.596918 | 0.129723 |
| MmugDNA.1890.1.S1_at    | MmugDNA.1890.1  | 5.68  | 5.49  | 0.3  | 0.29 | 1.14  | 0.975156 | 0.99787  | 0.990346 | 0.998947 |
| MmugDNA.18900.1.S1_at   | MmugDNA.18900.1 | 10.86 | 12.08 | 0.32 | 0.2  | -2.33 | 0.004586 | 0.001136 | 0.1844   | 0.053082 |
| MmugDNA.18901.1.S1_at   | MmugDNA.18901.1 | 7.01  | 6.81  | 0.3  | 0.13 | 1.15  | 0.236288 | 0.165597 | 0.590342 | 0.44189  |
| MmugDNA.18902.1.S1_at   | MmugDNA.18902.1 | 4.44  | 4.41  | 0.12 | 0.21 | 1.02  | 0.644255 | 0.884343 | 0.839719 | 0.9341   |
| MmugDNA.18904.1.S1_s_at | MmugDNA.18904.1 | 3.66  | 3.44  | 0.54 | 0.09 | 1.17  | 0.519527 | 0.618308 | 0.770186 | 0.774002 |
| MmugDNA.18906.1.S1_at   | MmugDNA.18906.1 | 5.46  | 7.21  | 0.39 | 0.95 | -3.35 | 0.053353 | 0.041294 | 0.380173 | 0.247995 |
| MmugDNA.18908.1.S1_at   | MmugDNA.18908.1 | 5.05  | 5.3   | 0.08 | 0.08 | -1.19 | 0.028795 | 0.102838 | 0.312166 | 0.363428 |
| MmugDNA.1891.1.S1_at    | MmugDNA.1891.1  | 6.09  | 6.11  | 0.12 | 0.1  | -1.01 | 0.793605 | 0.927195 | 0.914488 | 0.958627 |
| MmugDNA.18910.1.S1_at   | MmugDNA.18910.1 | 7.69  | 7.34  | 0.23 | 0.21 | 1.27  | 0.064126 | 0.009754 | 0.402252 | 0.129954 |
| MmugDNA.18911.1.S1_at   | MmugDNA.18911.1 | 2.58  | 2.59  | 0    | 0.06 | -1.01 | 0.700279 | 0.85784  | 0.867396 | 0.918921 |
| MmugDNA.18912.1.S1_at   | MmugDNA.18912.1 | 7.8   | 9.24  | 1.07 | 0.96 | -2.71 | 0.355096 | 0.435997 | 0.670794 | 0.655713 |
| MmugDNA.18914.1.S1_at   | MmugDNA.18914.1 | 6.85  | 6.79  | 0.08 | 0.08 | 1.04  | 0.136923 | 0.04089  | 0.504163 | 0.247132 |
| MmugDNA.18915.1.S1_at   | MmugDNA.18915.1 | 8.01  | 8.09  | 0.2  | 0.76 | -1.06 | 0.378307 | 0.482936 | 0.686432 | 0.687681 |
| MmugDNA.18916.1.S1_at   | MmugDNA.18916.1 | 13.38 | 13.12 | 0.08 | 0.23 | 1.2   | 0.098872 | 0.12823  | 0.458711 | 0.399322 |
| MmugDNA.18916.1.S1_s_at | MmugDNA.18916.1 | 13.01 | 12.71 | 0.12 | 0.23 | 1.23  | 0.117385 | 0.129995 | 0.481484 | 0.401576 |
| MmugDNA.18918.1.S1_at   | MmugDNA.18918.1 | 4.26  | 4.48  | 0.39 | 0.12 | -1.17 | 0.986161 | 0.59543  | 0.995065 | 0.759091 |
| MmugDNA.18919.1.S1_at   | MmugDNA.18919.1 | 6.04  | 5.72  | 0.97 | 0.24 | 1.25  | 0.371488 | 0.50696  | 0.682207 | 0.702692 |
| MmugDNA.1892.1.S1_at    | MmugDNA.1892.1  | 6.4   | 6.58  | 0.09 | 0.19 | -1.13 | 0.306162 | 0.46317  | 0.639463 | 0.674261 |
| MmugDNA.18920.1.S1_at   | MmugDNA.18920.1 | 6.41  | 6.37  | 0.15 | 0.09 | 1.03  | 0.220778 | 0.302573 | 0.579701 | 0.560201 |
| MmugDNA.19032.1.S1_s_at | MmugDNA.19032.1 | 6.19  | 6.33  | 0.27 | 0.23 | -1.11 | 0.659723 | 0.673937 | 0.847313 | 0.809483 |
| MmugDNA.18922.1.S1_at   | MmugDNA.18922.1 | 5.77  | 5.3   | 0.64 | 0.26 | 1.39  | 0.133221 | 0.084939 | 0.499568 | 0.336554 |
| MmugDNA.18924.1.S1_at   | MmugDNA.18924.1 | 9.97  | 10.12 | 0.07 | 0.12 | -1.11 | 0.1196   | 0.095454 | 0.484145 | 0.352482 |
| MmugDNA.18926.1.S1_at   | MmugDNA.18926.1 | 8.54  | 8.64  | 0.15 | 0.25 | -1.07 | 0.615496 | 0.659272 | 0.823502 | 0.80063  |
| MmugDNA.18927.1.S1_at   | MmugDNA.18927.1 | 8.2   | 8.4   | 0.29 | 0.08 | -1.15 | 0.193976 | 0.337833 | 0.557614 | 0.585027 |
| MmugDNA.18929.1.S1_at   | MmugDNA.18929.1 | 7.15  | 6.75  | 0.19 | 0.48 | 1.32  | 0.387777 | 0.14925  | 0.692117 | 0.42373  |
| MmugDNA.1893.1.S1_at    | MmugDNA.1893.1  | 8.22  | 7.83  | 0.21 | 0.26 | 1.31  | 0.07303  | 0.135276 | 0.418323 | 0.40737  |
| MmugDNA.18930.1.S1_at   | MmugDNA.18930.1 | 5.46  | 5.51  | 0.01 | 0.13 | -1.03 | 0.194105 | 0.342341 | 0.557718 | 0.588413 |
| MmugDNA.18931.1.S1_at   | MmugDNA.18931.1 | 5.11  | 6.68  | 0.63 | 1.39 | -2.96 | 0.165901 | 0.21335  | 0.529851 | 0.487225 |
| MmugDNA.18933.1.S1_at   | MmugDNA.18933.1 | 6.15  | 5.76  | 0.14 | 0.12 | 1.31  | 0.028106 | 0.01885  | 0.309743 | 0.172706 |
| MmugDNA.18934.1.S1_at   | MmugDNA.18934.1 | 7.17  | 7.12  | 0.16 | 0.08 | 1.03  | 0.689791 | 0.67284  | 0.861775 | 0.808824 |



|                         |                 |       |       |      |      |       |          |          |          |          |
|-------------------------|-----------------|-------|-------|------|------|-------|----------|----------|----------|----------|
| MmugDNA.18935.1.S1_at   | MmugDNA.18935.1 | 3.82  | 4.59  | 0.09 | 0.34 | -1.7  | 0.063484 | 0.074866 | 0.400654 | 0.31874  |
| MmugDNA.18936.1.S1_at   | MmugDNA.18936.1 | 5.62  | 6.21  | 1.25 | 0.2  | -1.5  | 0.871094 | 0.672528 | 0.948463 | 0.808615 |
| MmugDNA.18939.1.S1_at   | MmugDNA.18939.1 | 3.81  | 3.85  | 0.1  | 0.16 | -1.03 | 0.819203 | 0.766204 | 0.926528 | 0.864166 |
| MmugDNA.1894.1.S1_s_at  | MmugDNA.1894.1  | 7.57  | 9.02  | 0.65 | 0.6  | -2.73 | 0.054341 | 0.052625 | 0.381851 | 0.274903 |
| MmugDNA.18941.1.S1_at   | MmugDNA.18941.1 | 6.22  | 7.03  | 0.53 | 0.38 | -1.76 | 0.234625 | 0.34848  | 0.588808 | 0.592593 |
| MmugDNA.18943.1.S1_at   | MmugDNA.18943.1 | 3.88  | 4.1   | 0.19 | 0.12 | -1.16 | 0.051814 | 0.032925 | 0.376487 | 0.22466  |
| MmugDNA.18944.1.S1_at   | MmugDNA.18944.1 | 5.73  | 5.77  | 0.23 | 0.28 | -1.03 | 0.957425 | 0.975883 | 0.983882 | 0.986856 |
| MmugDNA.18945.1.S1_at   | MmugDNA.18945.1 | 8.02  | 7.57  | 0.2  | 0.42 | 1.36  | 0.181604 | 0.223146 | 0.546263 | 0.495907 |
| MmugDNA.18946.1.S1_at   | MmugDNA.18946.1 | 7.11  | 7.11  | 0.14 | 0.1  | 1.01  | 0.792163 | 0.486018 | 0.913702 | 0.689551 |
| MmugDNA.18947.1.S1_at   | MmugDNA.18947.1 | 5.69  | 5.01  | 0.51 | 0.57 | 1.6   | 0.29089  | 0.33261  | 0.628644 | 0.580982 |
| MmugDNA.18949.1.S1_at   | MmugDNA.18949.1 | 6.85  | 7.76  | 0.3  | 0.35 | -1.87 | 0.015092 | 0.00326  | 0.257529 | 0.082278 |
| MmugDNA.1895.1.S1_at    | MmugDNA.1895.1  | 6.39  | 5.65  | 0.3  | 0.35 | 1.67  | 0.037126 | 0.057135 | 0.340777 | 0.284945 |
| MmugDNA.18950.1.S1_at   | MmugDNA.18950.1 | 10.03 | 10.3  | 0.23 | 0.2  | -1.2  | 0.09569  | 0.022936 | 0.453501 | 0.189455 |
| MmugDNA.18950.1.S1_s_at | MmugDNA.18950.1 | 8.63  | 9.07  | 0.35 | 0.29 | -1.35 | 0.180588 | 0.158181 | 0.544908 | 0.433986 |
| MmugDNA.18951.1.S1_at   | MmugDNA.18951.1 | 6.66  | 6.39  | 0.43 | 0.33 | 1.21  | 0.191711 | 0.15634  | 0.554768 | 0.43161  |
| MmugDNA.18952.1.S1_at   | MmugDNA.18952.1 | 3.58  | 3.59  | 0.18 | 0.22 | -1.01 | 0.505751 | 0.3114   | 0.761789 | 0.566451 |
| MmugDNA.18954.1.S1_at   | MmugDNA.18954.1 | 6     | 5.98  | 0.25 | 0.06 | 1.01  | 0.447895 | 0.486198 | 0.729361 | 0.689643 |
| MmugDNA.18954.1.S1_x_at | MmugDNA.18954.1 | 6.21  | 6.1   | 0.47 | 0.08 | 1.07  | 0.680759 | 0.879284 | 0.857314 | 0.931101 |
| MmugDNA.18957.1.S1_at   | MmugDNA.18957.1 | 8.41  | 8.16  | 0.23 | 0.97 | 1.19  | 0.230598 | 0.304413 | 0.587222 | 0.561712 |
| MmugDNA.18959.1.S1_at   | MmugDNA.18959.1 | 2.53  | 2.63  | 0.38 | 0.39 | -1.07 | 0.748158 | 0.821652 | 0.892284 | 0.897303 |
| MmugDNA.1896.1.S1_at    | MmugDNA.1896.1  | 6.13  | 5.24  | 0.85 | 0.28 | 1.86  | 0.139005 | 0.107964 | 0.506234 | 0.37105  |
| MmugDNA.18960.1.S1_at   | MmugDNA.18960.1 | 6.85  | 6.62  | 0.32 | 0.01 | 1.17  | 0.303147 | 0.283461 | 0.637386 | 0.545959 |
| MmugDNA.18961.1.S1_at   | MmugDNA.18961.1 | 5.31  | 5.26  | 0.19 | 0.22 | 1.03  | 0.848634 | 0.932507 | 0.939211 | 0.961723 |
| MmugDNA.18962.1.S1_at   | MmugDNA.18962.1 | 7.28  | 7.34  | 0.08 | 0.15 | -1.04 | 0.21733  | 0.265413 | 0.576909 | 0.531363 |
| MmugDNA.18963.1.S1_at   | MmugDNA.18963.1 | 9.01  | 8.78  | 0.4  | 1.05 | 1.17  | 0.801214 | 0.813986 | 0.918016 | 0.892693 |
| MmugDNA.18964.1.S1_at   | MmugDNA.18964.1 | 10.02 | 8.68  | 0.28 | 0.65 | 2.53  | 0.031456 | 0.024001 | 0.321864 | 0.194183 |
| MmugDNA.18965.1.S1_at   | MmugDNA.18965.1 | 3.59  | 3.8   | 0.06 | 0.19 | -1.16 | 0.111194 | 0.124592 | 0.473262 | 0.394995 |
| MmugDNA.18966.1.S1_at   | MmugDNA.18966.1 | 5.63  | 6.13  | 0.21 | 0.23 | -1.41 | 0.05349  | 0.02002  | 0.380257 | 0.177698 |
| MmugDNA.18967.1.S1_at   | MmugDNA.18967.1 | 5.32  | 5.33  | 0.06 | 0.16 | -1.01 | 0.497354 | 0.88847  | 0.757933 | 0.936383 |
| MmugDNA.18968.1.S1_at   | MmugDNA.18968.1 | 8.01  | 9.87  | 0.25 | 0.56 | -3.63 | 0.013844 | 0.005288 | 0.249758 | 0.100736 |
| MmugDNA.1897.1.S1_at    | MmugDNA.1897.1  | 5.7   | 5.74  | 0.13 | 0.08 | -1.03 | 0.31666  | 0.614512 | 0.647624 | 0.771283 |
| MmugDNA.18972.1.S1_at   | MmugDNA.18972.1 | 4.16  | 4.16  | 0.18 | 0.01 | -1    | 0.92427  | 0.856998 | 0.970608 | 0.918317 |
| MmugDNA.18974.1.S1_at   | MmugDNA.18974.1 | 6.22  | 6.39  | 0.09 | 0.15 | -1.13 | 0.077699 | 0.074341 | 0.427714 | 0.318046 |
| MmugDNA.18975.1.S1_at   | MmugDNA.18975.1 | 10.09 | 9.3   | 0.04 | 0.23 | 1.72  | 0.00713  | 0.001239 | 0.20473  | 0.054781 |
| MmugDNA.18977.1.S1_at   | MmugDNA.18977.1 | 4.01  | 4.01  | 0.09 | 0.09 | 1     | 0.230213 | 0.470106 | 0.587112 | 0.678572 |
| MmugDNA.18978.1.S1_at   | MmugDNA.18978.1 | 9.14  | 8.79  | 0.3  | 0.2  | 1.28  | 0.120798 | 0.034821 | 0.48574  | 0.230811 |
| MmugDNA.18979.1.S1_at   | MmugDNA.18979.1 | 8.16  | 8.32  | 0.13 | 0.37 | -1.12 | 0.708866 | 0.426684 | 0.872162 | 0.648796 |
| MmugDNA.1898.1.S1_at    | MmugDNA.1898.1  | 7.74  | 7.74  | 0.08 | 0.02 | 1     | 0.2948   | 0.294326 | 0.631442 | 0.55407  |
| MmugDNA.18981.1.S1_at   | MmugDNA.18981.1 | 6.14  | 6.33  | 0.19 | 0.32 | -1.14 | 0.434953 | 0.556319 | 0.72094  | 0.734492 |
| MmugDNA.18982.1.S1_s_at | MmugDNA.18982.1 | 12.15 | 12.41 | 0.24 | 0.25 | -1.2  | 0.506569 | 0.224026 | 0.762432 | 0.497046 |
| MmugDNA.18983.1.S1_at   | MmugDNA.18983.1 | 5.49  | 5.7   | 0.18 | 0.25 | -1.16 | 0.439211 | 0.599018 | 0.723488 | 0.761257 |

|                         |                 |       |       |      |      |       |          |          |          |          |
|-------------------------|-----------------|-------|-------|------|------|-------|----------|----------|----------|----------|
| MmugDNA.18984.1.S1_s_at | MmugDNA.18984.1 | 6.71  | 6.72  | 0.09 | 0.07 | -1.01 | 0.770155 | 0.278602 | 0.90333  | 0.542329 |
| MmugDNA.18985.1.S1_at   | MmugDNA.18985.1 | 4.09  | 3.98  | 0.1  | 0.11 | 1.08  | 0.109273 | 0.114541 | 0.470811 | 0.381098 |
| MmugDNA.18986.1.S1_at   | MmugDNA.18986.1 | 4.87  | 5.09  | 0.24 | 0.73 | -1.17 | 0.819408 | 0.966683 | 0.926528 | 0.98148  |
| MmugDNA.18987.1.S1_at   | MmugDNA.18987.1 | 3.95  | 3.47  | 0.33 | 0.1  | 1.4   | 0.289864 | 0.592378 | 0.627813 | 0.757744 |
| MmugDNA.18988.1.S1_at   | MmugDNA.18988.1 | 4.78  | 4.49  | 0.2  | 0.17 | 1.22  | 0.608578 | 0.263212 | 0.820098 | 0.52952  |
| MmugDNA.18989.1.S1_at   | MmugDNA.18989.1 | 6.46  | 6.52  | 0.25 | 0.46 | -1.04 | 0.54453  | 0.669984 | 0.784442 | 0.806988 |
| MmugDNA.1899.1.S1_at    | MmugDNA.1899.1  | 3.67  | 3.86  | 0.03 | 0.13 | -1.14 | 0.065201 | 0.211065 | 0.404085 | 0.485086 |
| MmugDNA.18994.1.S1_at   | MmugDNA.18994.1 | 5.48  | 5.64  | 0.1  | 0.51 | -1.12 | 0.668947 | 0.540624 | 0.851986 | 0.724463 |
| MmugDNA.18995.1.S1_at   | MmugDNA.18995.1 | 4.86  | 4.97  | 0.15 | 0.17 | -1.08 | 0.28882  | 0.233079 | 0.626809 | 0.50445  |
| MmugDNA.18997.1.S1_at   | MmugDNA.18997.1 | 5.68  | 5.12  | 0.12 | 0.28 | 1.48  | 0.095372 | 0.040806 | 0.453396 | 0.246935 |
| MmugDNA.19.1.S1_at      | MmugDNA.19.1    | 6.44  | 7.95  | 0.98 | 1.81 | -2.85 | 0.380719 | 0.528865 | 0.687575 | 0.71692  |
| MmugDNA.190.1.S1_at     | MmugDNA.190.1   | 11.36 | 11.44 | 0.04 | 0.27 | -1.05 | 0.815799 | 0.307522 | 0.925154 | 0.563781 |
| MmugDNA.19001.1.S1_at   | MmugDNA.19001.1 | 4.92  | 4.87  | 0.36 | 0.18 | 1.04  | 0.368317 | 0.197192 | 0.679832 | 0.472213 |
| MmugDNA.19002.1.S1_at   | MmugDNA.19002.1 | 3.71  | 3.69  | 0.24 | 0.12 | 1.02  | 0.82005  | 0.684211 | 0.926819 | 0.815834 |
| MmugDNA.19003.1.S1_at   | MmugDNA.19003.1 | 4.11  | 4.24  | 0.31 | 0.12 | -1.09 | 0.397865 | 0.551301 | 0.698334 | 0.730915 |
| MmugDNA.19004.1.S1_at   | MmugDNA.19004.1 | 3.16  | 3.06  | 0.15 | 0.08 | 1.07  | 0.361605 | 0.501749 | 0.675385 | 0.699813 |
| MmugDNA.19006.1.S1_at   | MmugDNA.19006.1 | 5.16  | 4.76  | 0.13 | 0.31 | 1.32  | 0.319086 | 0.24541  | 0.648688 | 0.515213 |
| MmugDNA.19007.1.S1_at   | MmugDNA.19007.1 | 10.18 | 11.04 | 0.27 | 0.81 | -1.82 | 0.164509 | 0.210537 | 0.528421 | 0.484477 |
| MmugDNA.19009.1.S1_at   | MmugDNA.19009.1 | 7.63  | 6.96  | 0.27 | 0.34 | 1.6   | 0.12202  | 0.156651 | 0.486982 | 0.432153 |
| MmugDNA.1901.1.S1_at    | MmugDNA.1901.1  | 10.73 | 10.03 | 0.25 | 0.49 | 1.62  | 0.175449 | 0.191515 | 0.539219 | 0.466833 |
| MmugDNA.19010.1.S1_at   | MmugDNA.19010.1 | 6.27  | 6.19  | 0.27 | 0.05 | 1.06  | 0.53765  | 0.703361 | 0.780064 | 0.828004 |
| MmugDNA.19011.1.S1_at   | MmugDNA.19011.1 | 3.58  | 3.77  | 0.13 | 0.14 | -1.14 | 0.142678 | 0.110572 | 0.509765 | 0.374848 |
| MmugDNA.19012.1.S1_a_at | MmugDNA.19012.1 | 3.3   | 3.4   | 0.05 | 0.1  | -1.07 | 0.254291 | 0.144087 | 0.602363 | 0.417974 |
| MmugDNA.19012.1.S1_at   | MmugDNA.19012.1 | 6.36  | 6.25  | 0.3  | 0.18 | 1.08  | 0.751762 | 0.655898 | 0.89392  | 0.798739 |
| MmugDNA.19014.1.S1_at   | MmugDNA.19014.1 | 8.59  | 7.79  | 0.29 | 1    | 1.74  | 0.095621 | 0.085694 | 0.453501 | 0.337761 |
| MmugDNA.19015.1.S1_at   | MmugDNA.19015.1 | 6.27  | 6.27  | 0.2  | 0.05 | -1    | 0.413619 | 0.223433 | 0.70853  | 0.49623  |
| MmugDNA.29089.1.S1_at   | MmugDNA.29089.1 | 2.84  | 2.88  | 0.08 | 0.11 | -1.03 | 0.735384 | 0.3567   | 0.886206 | 0.598516 |
| MmugDNA.29089.1.S1_s_at | MmugDNA.29089.1 | 4.13  | 4.09  | 0.13 | 0.09 | 1.03  | 0.402045 | 0.241016 | 0.701135 | 0.511657 |
| MmugDNA.19018.1.S1_at   | MmugDNA.19018.1 | 9.76  | 8.91  | 0.23 | 0.22 | 1.81  | 0.016493 | 0.008426 | 0.264215 | 0.121867 |
| MmugDNA.19020.1.S1_at   | MmugDNA.19020.1 | 4.16  | 4.18  | 0.08 | 0.38 | -1.01 | 0.943652 | 0.838157 | 0.978535 | 0.907587 |
| MmugDNA.19021.1.S1_at   | MmugDNA.19021.1 | 11.37 | 10.85 | 0.01 | 0.15 | 1.43  | 0.00452  | 0.00081  | 0.183876 | 0.046161 |
| MmugDNA.19023.1.S1_at   | MmugDNA.19023.1 | 4.71  | 4.78  | 0.17 | 0.16 | -1.05 | 0.468303 | 0.653558 | 0.741049 | 0.797506 |
| MmugDNA.19024.1.S1_at   | MmugDNA.19024.1 | 10.08 | 10.13 | 0.39 | 0.24 | -1.03 | 0.626361 | 0.793723 | 0.829535 | 0.881035 |
| MmugDNA.19025.1.S1_at   | MmugDNA.19025.1 | 4.76  | 4.71  | 0.15 | 0.12 | 1.03  | 0.600528 | 0.419945 | 0.815277 | 0.643765 |
| MmugDNA.19027.1.S1_at   | MmugDNA.19027.1 | 3.6   | 3.58  | 0.2  | 0.12 | 1.01  | 0.336513 | 0.424116 | 0.659517 | 0.646737 |
| MmugDNA.19028.1.S1_at   | MmugDNA.19028.1 | 12.14 | 12.12 | 0.14 | 0.17 | 1.02  | 0.773762 | 0.6434   | 0.90499  | 0.790897 |
| MmugDNA.19029.1.S1_at   | MmugDNA.19029.1 | 3.67  | 3.75  | 0.18 | 0.18 | -1.06 | 0.810938 | 0.113033 | 0.922893 | 0.378888 |
| MmugDNA.1903.1.S1_at    | MmugDNA.1903.1  | 10.16 | 9.8   | 0.17 | 0.23 | 1.28  | 0.159928 | 0.096202 | 0.524745 | 0.353519 |
| MmugDNA.1903.1.S1_s_at  | MmugDNA.1903.1  | 9.13  | 8.74  | 0.18 | 0.33 | 1.31  | 0.417395 | 0.049417 | 0.710512 | 0.267237 |
| MmugDNA.19030.1.S1_at   | MmugDNA.19030.1 | 5.86  | 6.05  | 0.1  | 0.19 | -1.14 | 0.187249 | 0.140723 | 0.550364 | 0.414079 |
| MmugDNA.19031.1.S1_at   | MmugDNA.19031.1 | 5.92  | 5.94  | 0.2  | 0.13 | -1.02 | 0.903642 | 0.324426 | 0.961578 | 0.575042 |

|                         |                 |       |       |      |      |       |          |          |          |          |
|-------------------------|-----------------|-------|-------|------|------|-------|----------|----------|----------|----------|
| MmugDNA.19034.1.S1_at   | MmugDNA.19034.1 | 3.8   | 3.66  | 0.84 | 0.03 | 1.1   | 0.282731 | 0.349646 | 0.623085 | 0.593541 |
| MmugDNA.19035.1.S1_at   | MmugDNA.19035.1 | 5.39  | 5.57  | 0.05 | 0.11 | -1.14 | 0.089895 | 0.06678  | 0.44539  | 0.304293 |
| MmugDNA.19037.1.S1_at   | MmugDNA.19037.1 | 7.52  | 7.38  | 0.33 | 0.21 | 1.11  | 0.114579 | 0.116565 | 0.477887 | 0.383705 |
| MmugDNA.16452.1.S1_s_at | MmugDNA.16452.1 | 9.84  | 10.11 | 0.39 | 0.29 | -1.21 | 0.882523 | 0.007516 | 0.952793 | 0.116291 |
| MmugDNA.1904.1.S1_at    | MmugDNA.1904.1  | 3.12  | 3.1   | 0.19 | 0.04 | 1.02  | 0.931752 | 0.954721 | 0.973613 | 0.974331 |
| MmugDNA.19041.1.S1_at   | MmugDNA.19041.1 | 7.47  | 7.19  | 0.12 | 0.06 | 1.21  | 0.028229 | 0.043889 | 0.310131 | 0.254098 |
| MmugDNA.19042.1.S1_at   | MmugDNA.19042.1 | 7.78  | 7.44  | 0.24 | 0.3  | 1.26  | 0.27997  | 0.108528 | 0.621313 | 0.37207  |
| MmugDNA.19044.1.S1_at   | MmugDNA.19044.1 | 10.95 | 10.26 | 0.29 | 0.22 | 1.62  | 0.037019 | 0.025269 | 0.340567 | 0.199443 |
| MmugDNA.19044.1.S1_s_at | MmugDNA.19044.1 | 10.32 | 9.56  | 0.26 | 0.21 | 1.7   | 0.035209 | 0.031438 | 0.335371 | 0.219107 |
| MmugDNA.19045.1.S1_at   | MmugDNA.19045.1 | 11.55 | 11.47 | 0.26 | 0.09 | 1.06  | 0.440783 | 0.336884 | 0.724519 | 0.584144 |
| MmugDNA.19046.1.S1_at   | MmugDNA.19046.1 | 10.35 | 10.2  | 0.1  | 0.23 | 1.1   | 0.373785 | 0.355693 | 0.683245 | 0.597864 |
| MmugDNA.19048.1.S1_at   | MmugDNA.19048.1 | 9.97  | 10.49 | 0.3  | 0.37 | -1.43 | 0.256207 | 0.332015 | 0.603894 | 0.580557 |
| MmugDNA.1905.1.S1_at    | MmugDNA.1905.1  | 10.67 | 10.56 | 0.13 | 0.31 | 1.08  | 0.920807 | 0.793515 | 0.969092 | 0.880859 |
| MmugDNA.19052.1.S1_at   | MmugDNA.19052.1 | 5.43  | 5.42  | 0.09 | 0.05 | 1     | 0.43987  | 0.287246 | 0.723896 | 0.548526 |
| MmugDNA.19053.1.S1_at   | MmugDNA.19053.1 | 3.88  | 4.28  | 0.26 | 0.24 | -1.32 | 0.588733 | 0.744583 | 0.809114 | 0.852091 |
| MmugDNA.19054.1.S1_at   | MmugDNA.19054.1 | 4.59  | 4.62  | 0.53 | 0.18 | -1.02 | 0.516528 | 0.722922 | 0.768129 | 0.839489 |
| MmugDNA.19055.1.S1_at   | MmugDNA.19055.1 | 6.76  | 7.43  | 0.15 | 0.18 | -1.59 | 0.011558 | 0.004679 | 0.236469 | 0.095361 |
| MmugDNA.19057.1.S1_at   | MmugDNA.19057.1 | 7.11  | 7.17  | 0.11 | 0.15 | -1.04 | 0.258441 | 0.192471 | 0.60566  | 0.467952 |
| MmugDNA.19058.1.S1_at   | MmugDNA.19058.1 | 3.97  | 3.99  | 0.05 | 0.12 | -1.01 | 0.31162  | 0.216222 | 0.64356  | 0.489784 |
| MmugDNA.19059.1.S1_at   | MmugDNA.19059.1 | 3.38  | 3.33  | 0.14 | 0.29 | 1.04  | 0.859821 | 0.70598  | 0.94345  | 0.829628 |
| MmugDNA.1906.1.S1_at    | MmugDNA.1906.1  | 11.22 | 10.34 | 0.21 | 0.32 | 1.83  | 0.014896 | 0.005773 | 0.256179 | 0.104378 |
| MmugDNA.19060.1.S1_at   | MmugDNA.19060.1 | 6.63  | 6.76  | 0.27 | 0.06 | -1.09 | 0.733231 | 0.473777 | 0.884906 | 0.68101  |
| MmugDNA.19061.1.S1_at   | MmugDNA.19061.1 | 4.63  | 4.72  | 0.04 | 0.25 | -1.07 | 0.810726 | 0.591417 | 0.922872 | 0.756977 |
| MmugDNA.19062.1.S1_at   | MmugDNA.19062.1 | 8.51  | 7.77  | 0.31 | 0.29 | 1.68  | 0.026693 | 0.018344 | 0.304027 | 0.170313 |
| MmugDNA.19063.1.S1_at   | MmugDNA.19063.1 | 3.97  | 3.9   | 0.61 | 0.21 | 1.05  | 0.998957 | 0.69504  | 0.9997   | 0.822716 |
| MmugDNA.19064.1.S1_at   | MmugDNA.19064.1 | 4.09  | 4.24  | 0.09 | 0.14 | -1.11 | 0.22789  | 0.370781 | 0.585293 | 0.60976  |
| MmugDNA.19065.1.S1_at   | MmugDNA.19065.1 | 4.65  | 4.93  | 0.15 | 0.07 | -1.21 | 0.055758 | 0.063134 | 0.384612 | 0.29795  |
| MmugDNA.19067.1.S1_at   | MmugDNA.19067.1 | 3.17  | 3.39  | 0.05 | 0.1  | -1.16 | 0.027526 | 0.045262 | 0.308386 | 0.257084 |
| MmugDNA.33637.1.S1_s_at | MmugDNA.33637.1 | 10.33 | 10.29 | 0.15 | 0.41 | 1.03  | 0.25103  | 0.332168 | 0.600539 | 0.580593 |
| MmugDNA.19071.1.S1_at   | MmugDNA.19071.1 | 6.21  | 7.91  | 0.83 | 1.02 | -3.24 | 0.095986 | 0.045077 | 0.454074 | 0.256789 |
| MmugDNA.19072.1.S1_at   | MmugDNA.19072.1 | 3.87  | 3.89  | 0.39 | 0.3  | -1.01 | 0.690179 | 0.011383 | 0.861929 | 0.138214 |
| MmugDNA.19073.1.S1_at   | MmugDNA.19073.1 | 7.79  | 7.79  | 0.08 | 0.17 | -1    | 0.786022 | 0.899296 | 0.911051 | 0.942757 |
| MmugDNA.19076.1.S1_at   | MmugDNA.19076.1 | 11.33 | 12.04 | 0.08 | 0.14 | -1.64 | 0.000815 | 0.000385 | 0.136818 | 0.037273 |
| MmugDNA.19076.1.S1_s_at | MmugDNA.19076.1 | 11.71 | 12.5  | 0.05 | 0.05 | -1.72 | 0.000049 | 0.000052 | 0.112653 | 0.025333 |
| MmugDNA.19077.1.S1_at   | MmugDNA.19077.1 | 6.88  | 6.88  | 0.12 | 0.04 | 1     | 0.921933 | 0.980374 | 0.969683 | 0.989333 |
| MmugDNA.19078.1.S1_at   | MmugDNA.19078.1 | 4.95  | 5.23  | 0.76 | 0.26 | -1.21 | 0.561705 | 0.328884 | 0.79493  | 0.578452 |
| MmugDNA.19079.1.S1_at   | MmugDNA.19079.1 | 10.28 | 11.06 | 0.71 | 0.13 | -1.72 | 0.117597 | 0.115796 | 0.48184  | 0.382835 |
| MmugDNA.19079.1.S1_s_at | MmugDNA.19079.1 | 9.63  | 10.47 | 0.87 | 0.15 | -1.78 | 0.156833 | 0.173984 | 0.521577 | 0.450247 |
| MmugDNA.1908.1.S1_at    | MmugDNA.1908.1  | 7.17  | 7.48  | 0.23 | 0.03 | -1.24 | 0.145052 | 0.168018 | 0.511204 | 0.444641 |
| MmugDNA.1908.1.S1_s_at  | MmugDNA.1908.1  | 5.77  | 5.82  | 0.1  | 0.05 | -1.03 | 0.762543 | 0.900183 | 0.899996 | 0.943311 |
| MmugDNA.19080.1.S1_at   | MmugDNA.19080.1 | 5.07  | 4.98  | 0.43 | 0.17 | 1.06  | 0.354754 | 0.517648 | 0.670686 | 0.70974  |

|                         |                 |       |       |      |      |       |          |          |          |          |
|-------------------------|-----------------|-------|-------|------|------|-------|----------|----------|----------|----------|
| MmugDNA.19081.1.S1_at   | MmugDNA.19081.1 | 5.34  | 5.24  | 0.22 | 0.19 | 1.07  | 0.525505 | 0.457908 | 0.773765 | 0.670999 |
| MmugDNA.19082.1.S1_at   | MmugDNA.19082.1 | 5.23  | 5.5   | 0.31 | 0.15 | -1.21 | 0.408476 | 0.560937 | 0.705199 | 0.737054 |
| MmugDNA.19083.1.S1_at   | MmugDNA.19083.1 | 3.66  | 4.9   | 0.44 | 1.63 | -2.35 | 0.246876 | 0.274686 | 0.597999 | 0.539162 |
| MmugDNA.19084.1.S1_at   | MmugDNA.19084.1 | 5.02  | 5.01  | 0.08 | 0.08 | 1.01  | 0.422892 | 0.579035 | 0.713754 | 0.74883  |
| MmugDNA.19085.1.S1_at   | MmugDNA.19085.1 | 8.98  | 8.64  | 0.2  | 0.16 | 1.26  | 0.073461 | 0.049964 | 0.418755 | 0.268752 |
| MmugDNA.19087.1.S1_at   | MmugDNA.19087.1 | 5.51  | 5.5   | 0.29 | 0.68 | 1.01  | 0.676259 | 0.089869 | 0.854865 | 0.344073 |
| MmugDNA.19088.1.S1_at   | MmugDNA.19088.1 | 5.53  | 5.6   | 0.55 | 0.49 | -1.05 | 0.677959 | 0.13482  | 0.855721 | 0.406878 |
| MmugDNA.19089.1.S1_s_at | MmugDNA.19089.1 | 11.56 | 11.78 | 0.27 | 0.47 | -1.17 | 0.406371 | 0.0636   | 0.703645 | 0.29873  |
| MmugDNA.1909.1.S1_at    | MmugDNA.1909.1  | 5.7   | 5.7   | 0.03 | 0.18 | -1    | 0.294888 | 0.607634 | 0.631455 | 0.766457 |
| MmugDNA.19090.1.S1_at   | MmugDNA.19090.1 | 6.46  | 6.58  | 0.16 | 0.08 | -1.08 | 0.619058 | 0.004634 | 0.825405 | 0.094988 |
| MmugDNA.19091.1.S1_at   | MmugDNA.19091.1 | 11.52 | 11.09 | 0.11 | 0.15 | 1.34  | 0.018166 | 0.010772 | 0.269313 | 0.135471 |
| MmugDNA.19093.1.S1_at   | MmugDNA.19093.1 | 2.8   | 2.97  | 0.04 | 0.1  | -1.12 | 0.053271 | 0.094954 | 0.379848 | 0.352054 |
| MmugDNA.19094.1.S1_at   | MmugDNA.19094.1 | 4     | 4.04  | 0.07 | 0.09 | -1.03 | 0.173993 | 0.291148 | 0.537538 | 0.551652 |
| MmugDNA.19095.1.S1_at   | MmugDNA.19095.1 | 4.68  | 4.72  | 0.09 | 0.02 | -1.03 | 0.44312  | 0.038915 | 0.725992 | 0.242288 |
| MmugDNA.19098.1.S1_at   | MmugDNA.19098.1 | 3.15  | 3.28  | 0.16 | 0.17 | -1.09 | 0.9031   | 0.411182 | 0.961412 | 0.637937 |
| MmugDNA.19099.1.S1_at   | MmugDNA.19099.1 | 5.15  | 4.9   | 0.14 | 0.17 | 1.19  | 0.062412 | 0.058373 | 0.397999 | 0.288369 |
| MmugDNA.191.1.S1_at     | MmugDNA.191.1   | 6.04  | 6.01  | 0.37 | 0.2  | 1.02  | 0.473237 | 0.384104 | 0.744128 | 0.619926 |
| MmugDNA.19100.1.S1_at   | MmugDNA.19100.1 | 8.41  | 8.44  | 0.15 | 0.2  | -1.02 | 0.991043 | 0.313475 | 0.996869 | 0.567926 |
| MmugDNA.19101.1.S1_at   | MmugDNA.19101.1 | 6.69  | 6.05  | 0.68 | 0.26 | 1.56  | 0.246478 | 0.192262 | 0.597777 | 0.467715 |
| MmugDNA.19102.1.S1_at   | MmugDNA.19102.1 | 10.71 | 10.69 | 0.08 | 0.58 | 1.02  | 0.835768 | 0.917944 | 0.933507 | 0.954037 |
| MmugDNA.19103.1.S1_at   | MmugDNA.19103.1 | 2.98  | 3.13  | 0.17 | 0.07 | -1.11 | 0.697507 | 0.344703 | 0.865682 | 0.59007  |
| MmugDNA.19104.1.S1_at   | MmugDNA.19104.1 | 10.63 | 10.38 | 0.12 | 0.31 | 1.19  | 0.504668 | 0.143971 | 0.761366 | 0.41789  |
| MmugDNA.19105.1.S1_at   | MmugDNA.19105.1 | 12.78 | 12.42 | 0.05 | 0.17 | 1.28  | 0.021067 | 0.024596 | 0.281953 | 0.196239 |
| MmugDNA.19106.1.S1_at   | MmugDNA.19106.1 | 8.29  | 7.24  | 0.38 | 0.51 | 2.07  | 0.086841 | 0.092926 | 0.440497 | 0.349024 |
| MmugDNA.19106.1.S1_x_at | MmugDNA.19106.1 | 7.8   | 6.98  | 0.36 | 0.35 | 1.76  | 0.086287 | 0.100716 | 0.440224 | 0.360108 |
| MmugDNA.19108.1.S1_at   | MmugDNA.19108.1 | 4.52  | 4.54  | 0.07 | 0.08 | -1.01 | 0.483073 | 0.452419 | 0.749775 | 0.667088 |
| MmugDNA.19110.1.S1_at   | MmugDNA.19110.1 | 9.96  | 9.41  | 0.13 | 0.28 | 1.46  | 0.017384 | 0.009128 | 0.267445 | 0.125994 |
| MmugDNA.19114.1.S1_at   | MmugDNA.19114.1 | 5.66  | 5.66  | 0.22 | 0.15 | -1    | 0.37955  | 0.470114 | 0.687061 | 0.678572 |
| MmugDNA.19115.1.S1_at   | MmugDNA.19115.1 | 6.01  | 6.21  | 0.1  | 0.03 | -1.15 | 0.125301 | 0.237771 | 0.49131  | 0.50826  |
| MmugDNA.19116.1.S1_at   | MmugDNA.19116.1 | 6.58  | 6.49  | 0.09 | 0.28 | 1.06  | 0.98746  | 0.518359 | 0.995558 | 0.71038  |
| MmugDNA.19117.1.S1_at   | MmugDNA.19117.1 | 4.84  | 5.01  | 0.62 | 0.74 | -1.13 | 0.742134 | 0.8388   | 0.889655 | 0.908076 |
| MmugDNA.19118.1.S1_at   | MmugDNA.19118.1 | 9.78  | 10.64 | 0.36 | 0.5  | -1.81 | 0.115434 | 0.137064 | 0.478773 | 0.409836 |
| MmugDNA.19119.1.S1_at   | MmugDNA.19119.1 | 12.12 | 12.33 | 0.08 | 0.12 | -1.16 | 0.036894 | 0.005455 | 0.34048  | 0.101952 |
| MmugDNA.19119.1.S1_s_at | MmugDNA.19119.1 | 11.31 | 11.72 | 0.07 | 0.13 | -1.33 | 0.012582 | 0.001952 | 0.242665 | 0.065813 |
| MmugDNA.1912.1.S1_at    | MmugDNA.1912.1  | 6.86  | 6.99  | 0.26 | 0.34 | -1.09 | 0.981132 | 0.969443 | 0.993209 | 0.983275 |
| MmugDNA.19121.1.S1_at   | MmugDNA.19121.1 | 5.95  | 5.72  | 0.23 | 0.03 | 1.17  | 0.155783 | 0.110313 | 0.520384 | 0.374403 |
| MmugDNA.19122.1.S1_at   | MmugDNA.19122.1 | 6.97  | 7.05  | 0.05 | 0.04 | -1.06 | 0.049652 | 0.012606 | 0.37169  | 0.144807 |
| MmugDNA.19124.1.S1_at   | MmugDNA.19124.1 | 5.04  | 5.05  | 0.12 | 0.1  | -1    | 0.93711  | 0.979016 | 0.975769 | 0.988665 |
| MmugDNA.19128.1.S1_at   | MmugDNA.19128.1 | 4.03  | 4.01  | 0.26 | 0.21 | 1.01  | 0.611626 | 0.771398 | 0.821755 | 0.867177 |
| MmugDNA.19129.1.S1_at   | MmugDNA.19129.1 | 8.91  | 8.43  | 0.1  | 0.03 | 1.39  | 0.001262 | 0.000225 | 0.145267 | 0.032385 |
| MmugDNA.1913.1.S1_at    | MmugDNA.1913.1  | 11.02 | 10.11 | 0.08 | 0.53 | 1.88  | 0.049487 | 0.031195 | 0.371515 | 0.218399 |

|                         |                 |       |       |      |      |       |          |          |          |          |
|-------------------------|-----------------|-------|-------|------|------|-------|----------|----------|----------|----------|
| MmugDNA.19130.1.S1_at   | MmugDNA.19130.1 | 4.3   | 4.44  | 0.37 | 0.12 | -1.11 | 0.569893 | 0.600174 | 0.79921  | 0.761928 |
| MmugDNA.19131.1.S1_at   | MmugDNA.19131.1 | 6.6   | 6.3   | 0.88 | 0.43 | 1.22  | 0.834089 | 0.630481 | 0.932558 | 0.782239 |
| MmugDNA.19133.1.S1_at   | MmugDNA.19133.1 | 3.51  | 3.51  | 0.22 | 0.09 | 1     | 0.914542 | 0.670277 | 0.966289 | 0.807201 |
| MmugDNA.19134.1.S1_at   | MmugDNA.19134.1 | 12.15 | 12.1  | 0.11 | 0.1  | 1.03  | 0.28638  | 0.469196 | 0.625572 | 0.678155 |
| MmugDNA.19135.1.S1_at   | MmugDNA.19135.1 | 13.09 | 13.11 | 0.11 | 0.04 | -1.01 | 0.938064 | 0.472423 | 0.976251 | 0.67999  |
| MmugDNA.19136.1.S1_at   | MmugDNA.19136.1 | 10.76 | 10.35 | 0.03 | 0.23 | 1.33  | 0.03814  | 0.006474 | 0.343587 | 0.109314 |
| MmugDNA.19137.1.S1_at   | MmugDNA.19137.1 | 4.25  | 4.13  | 0.22 | 0.09 | 1.08  | 0.94318  | 0.974398 | 0.978419 | 0.986069 |
| MmugDNA.19139.1.S1_at   | MmugDNA.19139.1 | 4.37  | 4.38  | 0.09 | 0.16 | -1    | 0.819265 | 0.871389 | 0.926528 | 0.926844 |
| MmugDNA.1914.1.S1_at    | MmugDNA.1914.1  | 3.76  | 3.77  | 0.49 | 0.15 | -1.01 | 0.419355 | 0.401288 | 0.711792 | 0.630903 |
| MmugDNA.19140.1.S1_at   | MmugDNA.19140.1 | 6.15  | 6.4   | 0.1  | 0.05 | -1.19 | 0.019088 | 0.004044 | 0.273018 | 0.090281 |
| MmugDNA.19141.1.S1_at   | MmugDNA.19141.1 | 6.94  | 6.88  | 0.11 | 0.04 | 1.05  | 0.277399 | 0.677449 | 0.619559 | 0.81167  |
| MmugDNA.19142.1.S1_at   | MmugDNA.19142.1 | 3.53  | 3.44  | 0.14 | 0.03 | 1.06  | 0.856514 | 0.230424 | 0.94203  | 0.502199 |
| MmugDNA.19143.1.S1_at   | MmugDNA.19143.1 | 7.33  | 8.22  | 0.35 | 0.51 | -1.85 | 0.107623 | 0.029492 | 0.468117 | 0.213423 |
| MmugDNA.19144.1.S1_at   | MmugDNA.19144.1 | 3.78  | 3.7   | 0    | 0.23 | 1.06  | 0.595356 | 0.275128 | 0.812365 | 0.539542 |
| MmugDNA.19146.1.S1_at   | MmugDNA.19146.1 | 3.74  | 4.33  | 0.11 | 0.22 | -1.51 | 0.014439 | 0.00226  | 0.252427 | 0.070029 |
| MmugDNA.19147.1.S1_at   | MmugDNA.19147.1 | 3.44  | 3.82  | 0.08 | 0.1  | -1.3  | 0.023409 | 0.007121 | 0.29136  | 0.113654 |
| MmugDNA.19148.1.S1_at   | MmugDNA.19148.1 | 6.64  | 6.35  | 0.3  | 0.23 | 1.22  | 0.226112 | 0.116124 | 0.584146 | 0.383464 |
| MmugDNA.19149.1.S1_at   | MmugDNA.19149.1 | 5.98  | 5.91  | 0.71 | 0.22 | 1.05  | 0.775785 | 0.883625 | 0.905945 | 0.93366  |
| MmugDNA.1915.1.S1_at    | MmugDNA.1915.1  | 9.34  | 9.19  | 0.56 | 0.12 | 1.11  | 0.71706  | 0.801373 | 0.875713 | 0.885714 |
| MmugDNA.19150.1.S1_at   | MmugDNA.19150.1 | 6.12  | 5.03  | 0.15 | 0.62 | 2.14  | 0.049906 | 0.046573 | 0.372507 | 0.260267 |
| MmugDNA.19151.1.S1_at   | MmugDNA.19151.1 | 7.19  | 7.71  | 0.12 | 0.76 | -1.43 | 0.743967 | 0.905875 | 0.890339 | 0.946743 |
| MmugDNA.19152.1.S1_at   | MmugDNA.19152.1 | 6.37  | 7.59  | 0.44 | 0.75 | -2.34 | 0.032853 | 0.017025 | 0.326361 | 0.165384 |
| MmugDNA.19154.1.S1_at   | MmugDNA.19154.1 | 4.1   | 4.22  | 0.17 | 0.09 | -1.09 | 0.185346 | 0.275251 | 0.54877  | 0.53963  |
| MmugDNA.19155.1.S1_at   | MmugDNA.19155.1 | 6.53  | 5.82  | 0.19 | 1.16 | 1.64  | 0.376278 | 0.140751 | 0.685101 | 0.414115 |
| MmugDNA.19156.1.S1_s_at | MmugDNA.19156.1 | 10.64 | 10.81 | 0.42 | 0.09 | -1.12 | 0.497821 | 0.342321 | 0.758096 | 0.588413 |
| MmugDNA.19157.1.S1_at   | MmugDNA.19157.1 | 4.74  | 5.02  | 0.1  | 0.01 | -1.21 | 0.009899 | 0.009519 | 0.226846 | 0.1285   |
| MmugDNA.19158.1.S1_at   | MmugDNA.19158.1 | 12.1  | 12.15 | 0.23 | 0.47 | -1.03 | 0.669281 | 0.627645 | 0.852138 | 0.780625 |
| MmugDNA.19159.1.S1_at   | MmugDNA.19159.1 | 3.63  | 3.76  | 0.05 | 0.34 | -1.1  | 0.204555 | 0.273286 | 0.567089 | 0.537788 |
| MmugDNA.19160.1.S1_at   | MmugDNA.19160.1 | 4.07  | 3.64  | 0.99 | 0.13 | 1.34  | 0.299954 | 0.303295 | 0.635282 | 0.560748 |
| MmugDNA.19163.1.S1_at   | MmugDNA.19163.1 | 7.47  | 8.06  | 0.37 | 0.31 | -1.51 | 0.10054  | 0.005113 | 0.461009 | 0.099199 |
| MmugDNA.19164.1.S1_at   | MmugDNA.19164.1 | 9.31  | 8.81  | 0.01 | 0.28 | 1.41  | 0.108131 | 0.064555 | 0.468974 | 0.300255 |
| MmugDNA.19165.1.S1_at   | MmugDNA.19165.1 | 5.32  | 5.56  | 0.24 | 0.12 | -1.18 | 0.340941 | 0.147153 | 0.662203 | 0.421376 |
| MmugDNA.19169.1.S1_at   | MmugDNA.19169.1 | 7.98  | 8.16  | 0.13 | 0.03 | -1.13 | 0.172691 | 0.173652 | 0.536292 | 0.450003 |
| MmugDNA.19171.1.S1_at   | MmugDNA.19171.1 | 5.43  | 5.51  | 0.11 | 0.03 | -1.05 | 0.283332 | 0.355291 | 0.623353 | 0.597653 |
| MmugDNA.19172.1.S1_at   | MmugDNA.19172.1 | 6.62  | 6.1   | 0.9  | 0.52 | 1.44  | 0.436535 | 0.607582 | 0.721778 | 0.766437 |
| MmugDNA.19173.1.S1_at   | MmugDNA.19173.1 | 7.8   | 7.78  | 0.15 | 0.18 | 1.02  | 0.953017 | 0.183771 | 0.982492 | 0.459871 |
| MmugDNA.19174.1.S1_at   | MmugDNA.19174.1 | 2.91  | 2.86  | 0.06 | 0.1  | 1.04  | 0.590671 | 0.655797 | 0.809946 | 0.798709 |
| MmugDNA.19175.1.S1_at   | MmugDNA.19175.1 | 3.89  | 4.1   | 0.13 | 0.24 | -1.15 | 0.684191 | 0.883645 | 0.858637 | 0.933662 |
| MmugDNA.19176.1.S1_at   | MmugDNA.19176.1 | 5.81  | 5.36  | 0.37 | 0.14 | 1.36  | 0.231817 | 0.244144 | 0.587568 | 0.514148 |
| MmugDNA.19177.1.S1_at   | MmugDNA.19177.1 | 5.25  | 5.43  | 0.22 | 0.12 | -1.14 | 0.586651 | 0.611895 | 0.808206 | 0.769622 |
| MmugDNA.19178.1.S1_at   | MmugDNA.19178.1 | 9.59  | 9.28  | 0.32 | 0.67 | 1.24  | 0.142841 | 0.145117 | 0.509783 | 0.419075 |

|                         |                 |       |       |      |      |        |          |          |          |          |
|-------------------------|-----------------|-------|-------|------|------|--------|----------|----------|----------|----------|
| MmugDNA.19179.1.S1_at   | MmugDNA.19179.1 | 4.89  | 4.67  | 0.72 | 0.51 | 1.16   | 0.562322 | 0.252849 | 0.795269 | 0.521174 |
| MmugDNA.1918.1.S1_at    | MmugDNA.1918.1  | 4.14  | 4.01  | 0.06 | 0.19 | 1.1    | 0.946074 | 0.941887 | 0.979359 | 0.967077 |
| MmugDNA.19180.1.S1_at   | MmugDNA.19180.1 | 4.7   | 4.34  | 0.86 | 0.33 | 1.29   | 0.760327 | 0.126859 | 0.89894  | 0.397534 |
| MmugDNA.2125.1.S1_s_at  | MmugDNA.2125.1  | 13.31 | 13.17 | 0.04 | 0.08 | 1.1    | 0.066528 | 0.011318 | 0.406564 | 0.138076 |
| MmugDNA.19182.1.S1_at   | MmugDNA.19182.1 | 5.78  | 5.42  | 0.26 | 0.28 | 1.28   | 0.227385 | 0.398339 | 0.585103 | 0.629355 |
| MmugDNA.19184.1.S1_at   | MmugDNA.19184.1 | 3.41  | 3.75  | 0.54 | 0.24 | -1.27  | 0.661362 | 0.505001 | 0.848124 | 0.70197  |
| MmugDNA.19185.1.S1_at   | MmugDNA.19185.1 | 5.92  | 6.4   | 0.46 | 0.24 | -1.39  | 0.1302   | 0.047907 | 0.496613 | 0.263765 |
| MmugDNA.19186.1.S1_at   | MmugDNA.19186.1 | 5.79  | 4.7   | 0.69 | 0.77 | 2.14   | 0.323849 | 0.273215 | 0.651789 | 0.537788 |
| MmugDNA.19187.1.S1_at   | MmugDNA.19187.1 | 5.7   | 5.58  | 0.26 | 0.31 | 1.09   | 0.511344 | 0.12124  | 0.765295 | 0.390351 |
| MmugDNA.19188.1.S1_at   | MmugDNA.19188.1 | 5.57  | 6.12  | 0.35 | 0.74 | -1.46  | 0.186967 | 0.157597 | 0.550106 | 0.433131 |
| MmugDNA.19189.1.S1_at   | MmugDNA.19189.1 | 6.17  | 6.72  | 0.6  | 0.56 | -1.47  | 0.452214 | 0.582817 | 0.731949 | 0.751399 |
| MmugDNA.1919.1.S1_at    | MmugDNA.1919.1  | 7.24  | 7.23  | 0.13 | 0.01 | 1      | 0.988902 | 0.601786 | 0.996043 | 0.763113 |
| MmugDNA.19190.1.S1_at   | MmugDNA.19190.1 | 4.38  | 4.29  | 0.33 | 0.13 | 1.06   | 0.361066 | 0.248749 | 0.675048 | 0.517931 |
| MmugDNA.19191.1.S1_at   | MmugDNA.19191.1 | 6.05  | 6.42  | 0.02 | 0.18 | -1.29  | 0.025407 | 0.020172 | 0.299142 | 0.178414 |
| MmugDNA.19192.1.S1_at   | MmugDNA.19192.1 | 10.25 | 11.01 | 0.35 | 2.23 | -1.7   | 0.724028 | 0.882558 | 0.879336 | 0.933072 |
| MmugDNA.19193.1.S1_at   | MmugDNA.19193.1 | 5.31  | 5.16  | 0.08 | 0.21 | 1.11   | 0.086721 | 0.085438 | 0.440475 | 0.337416 |
| MmugDNA.19194.1.S1_at   | MmugDNA.19194.1 | 7.12  | 7.18  | 0.2  | 0.02 | -1.05  | 0.723107 | 0.714053 | 0.878988 | 0.834108 |
| MmugDNA.19195.1.S1_at   | MmugDNA.19195.1 | 9.22  | 8.91  | 0.07 | 0.16 | 1.24   | 0.04518  | 0.002319 | 0.360276 | 0.071105 |
| MmugDNA.19196.1.S1_at   | MmugDNA.19196.1 | 4.1   | 3.74  | 0.8  | 0.32 | 1.29   | 0.14152  | 0.114874 | 0.509111 | 0.381554 |
| MmugDNA.19197.1.S1_at   | MmugDNA.19197.1 | 3.11  | 3.1   | 0.14 | 0.14 | 1.01   | 0.954503 | 0.704851 | 0.983073 | 0.828846 |
| MmugDNA.19198.1.S1_at   | MmugDNA.19198.1 | 9.74  | 10    | 0.32 | 1.29 | -1.2   | 0.565849 | 0.663136 | 0.797377 | 0.80284  |
| MmugDNA.19199.1.S1_at   | MmugDNA.19199.1 | 5.64  | 4.97  | 0.57 | 0.33 | 1.59   | 0.131716 | 0.139183 | 0.498041 | 0.412324 |
| MmugDNA.192.1.S1_at     | MmugDNA.192.1   | 6.55  | 5.17  | 0.49 | 0.54 | 2.61   | 0.057295 | 0.048908 | 0.387873 | 0.265919 |
| MmugDNA.19200.1.S1_at   | MmugDNA.19200.1 | 5.04  | 5.01  | 0.08 | 0.31 | 1.02   | 0.476731 | 0.497207 | 0.746293 | 0.696514 |
| MmugDNA.19201.1.S1_at   | MmugDNA.19201.1 | 8.47  | 8.42  | 0.37 | 0.29 | 1.04   | 0.395849 | 0.502612 | 0.696652 | 0.700236 |
| MmugDNA.19202.1.S1_at   | MmugDNA.19202.1 | 5.49  | 4.98  | 0.81 | 0.19 | 1.43   | 0.140515 | 0.182923 | 0.508385 | 0.45941  |
| MmugDNA.19205.1.S1_at   | MmugDNA.19205.1 | 2.76  | 2.81  | 0.09 | 0.28 | -1.03  | 0.262663 | 0.425529 | 0.609039 | 0.647884 |
| MmugDNA.19206.1.S1_at   | MmugDNA.19206.1 | 3.2   | 3.2   | 0.52 | 0.07 | -1     | 0.400482 | 0.369462 | 0.700068 | 0.60886  |
| MmugDNA.1921.1.S1_at    | MmugDNA.1921.1  | 6.81  | 6.95  | 0.65 | 0.41 | -1.1   | 0.737457 | 0.009016 | 0.887187 | 0.125499 |
| MmugDNA.19210.1.S1_at   | MmugDNA.19210.1 | 10.37 | 8.42  | 0.13 | 0.24 | 3.88   | 0.000178 | 0.000009 | 0.118376 | 0.016421 |
| MmugDNA.19211.1.S1_at   | MmugDNA.19211.1 | 5.49  | 5.45  | 0.28 | 0.07 | 1.02   | 0.942245 | 0.264304 | 0.977916 | 0.530366 |
| MmugDNA.33352.1.S1_s_at | MmugDNA.33352.1 | 10.34 | 10.93 | 0.08 | 0.15 | -1.51  | 0.003684 | 0.001049 | 0.179515 | 0.051466 |
| MmugDNA.19213.1.S1_at   | MmugDNA.19213.1 | 7.51  | 7.46  | 0.07 | 0.06 | 1.03   | 0.282897 | 0.157385 | 0.623131 | 0.432859 |
| MmugDNA.19215.1.S1_at   | MmugDNA.19215.1 | 6.35  | 7.31  | 1.03 | 0.46 | -1.94  | 0.432428 | 0.608865 | 0.719041 | 0.76736  |
| MmugDNA.19216.1.S1_at   | MmugDNA.19216.1 | 3.72  | 7.25  | 1.57 | 0.92 | -11.52 | 0.066279 | 0.048219 | 0.406371 | 0.264675 |
| MmugDNA.19218.1.S1_at   | MmugDNA.19218.1 | 2.87  | 2.87  | 0.21 | 0.17 | 1      | 0.947858 | 0.961822 | 0.980005 | 0.978471 |
| MmugDNA.1922.1.S1_at    | MmugDNA.1922.1  | 9.58  | 9.76  | 0.08 | 0.09 | -1.13  | 0.363608 | 0.483336 | 0.676811 | 0.687887 |
| MmugDNA.19223.1.S1_at   | MmugDNA.19223.1 | 3.62  | 4.01  | 0.19 | 0.97 | -1.31  | 0.336295 | 0.458288 | 0.659402 | 0.671096 |
| MmugDNA.19226.1.S1_at   | MmugDNA.19226.1 | 5.41  | 5.49  | 0.15 | 0.46 | -1.06  | 0.639566 | 0.827795 | 0.837243 | 0.901152 |
| MmugDNA.19227.1.S1_at   | MmugDNA.19227.1 | 9.88  | 10.1  | 0.17 | 0.17 | -1.17  | 0.164366 | 0.02567  | 0.528264 | 0.200834 |
| MmugDNA.19228.1.S1_at   | MmugDNA.19228.1 | 5.73  | 5.75  | 0.16 | 0.21 | -1.01  | 0.820495 | 0.678643 | 0.926918 | 0.81231  |

|                         |                 |       |       |      |      |        |          |          |          |          |
|-------------------------|-----------------|-------|-------|------|------|--------|----------|----------|----------|----------|
| MmugDNA.26886.1.S1_at   | MmugDNA.26886.1 | 9.31  | 9.36  | 0.33 | 0.33 | -1.03  | 0.58409  | 0.763927 | 0.806847 | 0.862744 |
| MmugDNA.26886.1.S1_s_at | MmugDNA.26886.1 | 11.28 | 11.44 | 0.27 | 0.16 | -1.12  | 0.897739 | 0.849925 | 0.959172 | 0.914673 |
| MmugDNA.19232.1.S1_at   | MmugDNA.19232.1 | 4.94  | 4.7   | 0.51 | 0.04 | 1.19   | 0.180863 | 0.192787 | 0.545334 | 0.468274 |
| MmugDNA.19234.1.S1_at   | MmugDNA.19234.1 | 5.17  | 5.47  | 0.04 | 0.17 | -1.23  | 0.016371 | 0.018299 | 0.263839 | 0.17013  |
| MmugDNA.19235.1.S1_at   | MmugDNA.19235.1 | 5.54  | 5.42  | 0.08 | 0.21 | 1.08   | 0.296327 | 0.17768  | 0.632355 | 0.454073 |
| MmugDNA.19237.1.S1_at   | MmugDNA.19237.1 | 3.97  | 3.84  | 0.2  | 0.05 | 1.09   | 0.147259 | 0.273755 | 0.513087 | 0.538254 |
| MmugDNA.19239.1.S1_at   | MmugDNA.19239.1 | 5.46  | 4.7   | 0.1  | 0.18 | 1.7    | 0.002912 | 0.004728 | 0.170045 | 0.095802 |
| MmugDNA.1924.1.S1_at    | MmugDNA.1924.1  | 5.93  | 5.92  | 0.16 | 0.5  | 1.01   | 0.954114 | 0.084381 | 0.983003 | 0.335713 |
| MmugDNA.19240.1.S1_at   | MmugDNA.19240.1 | 5.17  | 5.24  | 0.24 | 0.15 | -1.05  | 0.594182 | 0.840429 | 0.811686 | 0.90902  |
| MmugDNA.19241.1.S1_at   | MmugDNA.19241.1 | 5.57  | 5.96  | 0.39 | 0.18 | -1.32  | 0.114489 | 0.115996 | 0.477887 | 0.383164 |
| MmugDNA.19243.1.S1_at   | MmugDNA.19243.1 | 7.33  | 7.17  | 0.21 | 0.17 | 1.12   | 0.401902 | 0.329921 | 0.701106 | 0.578874 |
| MmugDNA.19244.1.S1_at   | MmugDNA.19244.1 | 6.41  | 5.73  | 0.1  | 0.23 | 1.6    | 0.004325 | 0.011    | 0.182631 | 0.136623 |
| MmugDNA.19245.1.S1_at   | MmugDNA.19245.1 | 6.21  | 10.2  | 1.19 | 2.88 | -15.87 | 0.241789 | 0.202092 | 0.593977 | 0.476545 |
| MmugDNA.19247.1.S1_at   | MmugDNA.19247.1 | 4.7   | 4.6   | 0.11 | 0.21 | 1.07   | 0.585991 | 0.763928 | 0.807817 | 0.862744 |
| MmugDNA.19248.1.S1_at   | MmugDNA.19248.1 | 6.57  | 6.61  | 0.23 | 0.15 | -1.03  | 0.759091 | 0.618721 | 0.898239 | 0.774185 |
| MmugDNA.19249.1.S1_at   | MmugDNA.19249.1 | 4.87  | 5.11  | 0.02 | 0.14 | -1.18  | 0.136991 | 0.009962 | 0.50425  | 0.131094 |
| MmugDNA.1925.1.S1_at    | MmugDNA.1925.1  | 11.92 | 11.65 | 0.13 | 1.24 | 1.21   | 0.274204 | 0.148413 | 0.617262 | 0.423003 |
| MmugDNA.19251.1.S1_at   | MmugDNA.19251.1 | 5.11  | 4.88  | 0.2  | 0.41 | 1.17   | 0.425475 | 0.241125 | 0.715099 | 0.511749 |
| MmugDNA.19253.1.S1_at   | MmugDNA.19253.1 | 3.96  | 3.71  | 0.11 | 0.07 | 1.19   | 0.074467 | 0.104246 | 0.42023  | 0.365376 |
| MmugDNA.19256.1.S1_s_at | MmugDNA.19256.1 | 7.85  | 10.91 | 1.47 | 2.56 | -8.36  | 0.290366 | 0.110608 | 0.628091 | 0.374854 |
| MmugDNA.19257.1.S1_at   | MmugDNA.19257.1 | 11.69 | 11.41 | 0.11 | 0.6  | 1.21   | 0.382477 | 0.428055 | 0.688742 | 0.649619 |
| MmugDNA.19259.1.S1_at   | MmugDNA.19259.1 | 5.68  | 5.8   | 0.23 | 0.13 | -1.08  | 0.326296 | 0.437833 | 0.653184 | 0.656977 |
| MmugDNA.1926.1.S1_at    | MmugDNA.1926.1  | 3.56  | 3.52  | 0.13 | 0.08 | 1.03   | 0.435625 | 0.462842 | 0.721273 | 0.674149 |
| MmugDNA.19260.1.S1_at   | MmugDNA.19260.1 | 10.82 | 10.66 | 0.28 | 0.38 | 1.12   | 0.591072 | 0.674524 | 0.810224 | 0.809854 |
| MmugDNA.19261.1.S1_at   | MmugDNA.19261.1 | 6.24  | 6.27  | 0.22 | 0.23 | -1.02  | 0.976901 | 0.387865 | 0.991169 | 0.622486 |
| MmugDNA.19263.1.S1_at   | MmugDNA.19263.1 | 9.96  | 9.26  | 0.34 | 0.17 | 1.62   | 0.067018 | 0.060168 | 0.407016 | 0.291882 |
| MmugDNA.19267.1.S1_at   | MmugDNA.19267.1 | 4.15  | 3.94  | 0.14 | 0.3  | 1.16   | 0.639975 | 0.368468 | 0.837503 | 0.60798  |
| MmugDNA.19268.1.S1_at   | MmugDNA.19268.1 | 10.08 | 9.96  | 0.01 | 0.32 | 1.08   | 0.192874 | 0.179878 | 0.556171 | 0.456429 |
| MmugDNA.19270.1.S1_at   | MmugDNA.19270.1 | 5.07  | 4.58  | 0.17 | 0.17 | 1.41   | 0.027712 | 0.048072 | 0.308669 | 0.26428  |
| MmugDNA.19271.1.S1_s_at | MmugDNA.19271.1 | 13.14 | 13.22 | 0.09 | 0.59 | -1.06  | 0.483858 | 0.547085 | 0.749945 | 0.728283 |
| MmugDNA.19273.1.S1_at   | MmugDNA.19273.1 | 11.44 | 11.33 | 0.08 | 0.07 | 1.08   | 0.106357 | 0.120658 | 0.466831 | 0.389476 |
| MmugDNA.19274.1.S1_at   | MmugDNA.19274.1 | 4.7   | 5.21  | 0.38 | 0.28 | -1.42  | 0.48668  | 0.654481 | 0.751702 | 0.79808  |
| MmugDNA.19275.1.S1_at   | MmugDNA.19275.1 | 5.22  | 5.56  | 0.17 | 0.45 | -1.27  | 0.466155 | 0.206907 | 0.740195 | 0.481052 |
| MmugDNA.19277.1.S1_at   | MmugDNA.19277.1 | 9.52  | 9.16  | 0.1  | 0.54 | 1.28   | 0.259994 | 0.317208 | 0.606878 | 0.570458 |
| MmugDNA.19278.1.S1_at   | MmugDNA.19278.1 | 12.09 | 11.64 | 0.11 | 0.5  | 1.36   | 0.211161 | 0.288914 | 0.571977 | 0.550032 |
| MmugDNA.19279.1.S1_at   | MmugDNA.19279.1 | 11.66 | 11.32 | 0.33 | 0.26 | 1.26   | 0.591458 | 0.780866 | 0.810446 | 0.872849 |
| MmugDNA.1928.1.S1_at    | MmugDNA.1928.1  | 5.55  | 5.82  | 0.09 | 0.03 | -1.2   | 0.01431  | 0.039242 | 0.251885 | 0.243274 |
| MmugDNA.19280.1.S1_at   | MmugDNA.19280.1 | 7.67  | 7.02  | 0.13 | 0.45 | 1.57   | 0.31262  | 0.346292 | 0.644415 | 0.59124  |
| MmugDNA.19281.1.S1_at   | MmugDNA.19281.1 | 5.8   | 6.05  | 0.22 | 0.14 | -1.19  | 0.196316 | 0.339622 | 0.559558 | 0.586217 |
| MmugDNA.19283.1.S1_at   | MmugDNA.19283.1 | 6.97  | 7.02  | 0.09 | 0.05 | -1.04  | 0.32606  | 0.189313 | 0.653184 | 0.465078 |
| MmugDNA.19285.1.S1_s_at | MmugDNA.19285.1 | 11.54 | 11.89 | 0.41 | 0.39 | -1.28  | 0.326655 | 0.430876 | 0.653184 | 0.651894 |

|                         |                 |       |       |      |      |       |          |          |          |          |
|-------------------------|-----------------|-------|-------|------|------|-------|----------|----------|----------|----------|
| MmugDNA.19288.1.S1_at   | MmugDNA.19288.1 | 3.39  | 3.35  | 0.15 | 0.46 | 1.03  | 0.874562 | 0.870405 | 0.949695 | 0.926446 |
| MmugDNA.19289.1.S1_at   | MmugDNA.19289.1 | 12.64 | 12.42 | 0.21 | 0.2  | 1.17  | 0.34735  | 0.490908 | 0.666415 | 0.692666 |
| MmugDNA.19290.1.S1_at   | MmugDNA.19290.1 | 4.7   | 4.78  | 0.1  | 0.06 | -1.06 | 0.730185 | 0.104457 | 0.882997 | 0.365719 |
| MmugDNA.19291.1.S1_x_at | MmugDNA.19291.1 | 11.38 | 11.2  | 0.32 | 0.14 | 1.13  | 0.141349 | 0.1835   | 0.509019 | 0.459641 |
| MmugDNA.19292.1.S1_at   | MmugDNA.19292.1 | 3.21  | 3.31  | 0.26 | 0.09 | -1.07 | 0.599963 | 0.522925 | 0.814992 | 0.713429 |
| MmugDNA.19293.1.S1_at   | MmugDNA.19293.1 | 5.27  | 5.4   | 0.52 | 0.61 | -1.1  | 0.413805 | 0.506256 | 0.708642 | 0.702368 |
| MmugDNA.19294.1.S1_at   | MmugDNA.19294.1 | 3.16  | 3.25  | 0.09 | 0.05 | -1.07 | 0.856113 | 0.174478 | 0.941848 | 0.450952 |
| MmugDNA.19296.1.S1_at   | MmugDNA.19296.1 | 5.01  | 5.36  | 0.1  | 0.14 | -1.27 | 0.05401  | 0.204453 | 0.381259 | 0.478821 |
| MmugDNA.19297.1.S1_at   | MmugDNA.19297.1 | 8.59  | 8.91  | 0.42 | 0.45 | -1.25 | 0.805061 | 0.236787 | 0.919928 | 0.50753  |
| MmugDNA.19299.1.S1_s_at | MmugDNA.19299.1 | 11.26 | 11.19 | 0.1  | 0.33 | 1.05  | 0.415899 | 0.567189 | 0.70957  | 0.741088 |
| MmugDNA.193.1.S1_at     | MmugDNA.193.1   | 5.14  | 5.44  | 0.21 | 0.07 | -1.22 | 0.161275 | 0.070542 | 0.526348 | 0.311777 |
| MmugDNA.1930.1.S1_at    | MmugDNA.1930.1  | 5.07  | 6.1   | 0.53 | 0.59 | -2.04 | 0.453287 | 0.406393 | 0.7325   | 0.634305 |
| MmugDNA.19303.1.S1_at   | MmugDNA.19303.1 | 6.93  | 7.07  | 0.44 | 0.12 | -1.1  | 0.930864 | 0.793303 | 0.973359 | 0.880679 |
| MmugDNA.19304.1.S1_at   | MmugDNA.19304.1 | 9.9   | 9.49  | 0.03 | 0.39 | 1.33  | 0.499397 | 0.231594 | 0.759163 | 0.503379 |
| MmugDNA.19305.1.S1_at   | MmugDNA.19305.1 | 6.49  | 5.58  | 0.22 | 0.25 | 1.88  | 0.00521  | 0.022679 | 0.19073  | 0.188657 |
| MmugDNA.16930.1.S1_x_at | MmugDNA.16930.1 | 4.38  | 4.89  | 0.06 | 0.56 | -1.42 | 0.127247 | 0.136152 | 0.493644 | 0.408473 |
| MmugDNA.19307.1.S1_at   | MmugDNA.19307.1 | 10.68 | 10.25 | 0.04 | 0.25 | 1.34  | 0.05241  | 0.04802  | 0.377577 | 0.264118 |
| MmugDNA.19308.1.S1_at   | MmugDNA.19308.1 | 11.4  | 11.15 | 0.13 | 0.2  | 1.19  | 0.117663 | 0.128894 | 0.48184  | 0.400327 |
| MmugDNA.19309.1.S1_at   | MmugDNA.19309.1 | 4.82  | 4.99  | 0.1  | 0.16 | -1.13 | 0.173574 | 0.194965 | 0.537183 | 0.470117 |
| MmugDNA.1931.1.S1_at    | MmugDNA.1931.1  | 6.54  | 6.67  | 0.14 | 0.19 | -1.1  | 0.129708 | 0.367256 | 0.495908 | 0.606869 |
| MmugDNA.19310.1.S1_at   | MmugDNA.19310.1 | 8.15  | 8.09  | 0.41 | 0.68 | 1.04  | 0.659583 | 0.844561 | 0.847196 | 0.911531 |
| MmugDNA.19312.1.S1_at   | MmugDNA.19312.1 | 7.8   | 7.69  | 0.73 | 0.55 | 1.08  | 0.840198 | 0.948988 | 0.935562 | 0.970785 |
| MmugDNA.19313.1.S1_at   | MmugDNA.19313.1 | 13.12 | 13.31 | 0.15 | 0.19 | -1.14 | 0.300027 | 0.402251 | 0.635344 | 0.631271 |
| MmugDNA.19314.1.S1_at   | MmugDNA.19314.1 | 5.35  | 7.08  | 0.52 | 0.31 | -3.32 | 0.009104 | 0.004064 | 0.222023 | 0.090288 |
| MmugDNA.19317.1.S1_at   | MmugDNA.19317.1 | 8.3   | 8.4   | 0.03 | 0.13 | -1.07 | 0.391968 | 0.376244 | 0.694373 | 0.614089 |
| MmugDNA.19319.1.S1_at   | MmugDNA.19319.1 | 6.68  | 7.24  | 0.2  | 0.51 | -1.47 | 0.038153 | 0.023112 | 0.343587 | 0.190371 |
| MmugDNA.1932.1.S1_at    | MmugDNA.1932.1  | 7.3   | 6.8   | 0.03 | 0.44 | 1.42  | 0.098633 | 0.039583 | 0.458486 | 0.244002 |
| MmugDNA.19321.1.S1_at   | MmugDNA.19321.1 | 9.49  | 10.44 | 0.2  | 0.35 | -1.93 | 0.00986  | 0.006178 | 0.226637 | 0.106774 |
| MmugDNA.19322.1.S1_at   | MmugDNA.19322.1 | 6.33  | 5.96  | 0.21 | 0.29 | 1.29  | 0.120323 | 0.023131 | 0.485252 | 0.190443 |
| MmugDNA.19323.1.S1_at   | MmugDNA.19323.1 | 4.5   | 4.47  | 0.18 | 0.1  | 1.02  | 0.439031 | 0.400942 | 0.72347  | 0.630658 |
| MmugDNA.19325.1.S1_at   | MmugDNA.19325.1 | 4.47  | 4.55  | 0.07 | 0.27 | -1.06 | 0.218703 | 0.264082 | 0.578242 | 0.530214 |
| MmugDNA.19326.1.S1_at   | MmugDNA.19326.1 | 11.63 | 12.36 | 0.02 | 0.38 | -1.66 | 0.084781 | 0.013314 | 0.43769  | 0.148042 |
| MmugDNA.19327.1.S1_at   | MmugDNA.19327.1 | 4.33  | 4.61  | 0    | 0.15 | -1.22 | 0.030649 | 0.005092 | 0.319618 | 0.099108 |
| MmugDNA.19328.1.S1_at   | MmugDNA.19328.1 | 8.73  | 9.66  | 0.58 | 0.08 | -1.91 | 0.027295 | 0.039043 | 0.307317 | 0.242798 |
| MmugDNA.19329.1.S1_at   | MmugDNA.19329.1 | 9.63  | 10.31 | 0.4  | 0.23 | -1.6  | 0.017185 | 0.009822 | 0.266942 | 0.130205 |
| MmugDNA.1933.1.S1_at    | MmugDNA.1933.1  | 10.04 | 9.19  | 0.11 | 0.1  | 1.8   | 0.000585 | 0.001237 | 0.136818 | 0.05478  |
| MmugDNA.19330.1.S1_at   | MmugDNA.19330.1 | 5.77  | 6.02  | 0.37 | 0.55 | -1.19 | 0.500081 | 0.288016 | 0.759402 | 0.549277 |
| MmugDNA.19333.1.S1_at   | MmugDNA.19333.1 | 4.54  | 4.58  | 0.16 | 0.11 | -1.03 | 0.798944 | 0.883546 | 0.916772 | 0.933618 |
| MmugDNA.19334.1.S1_at   | MmugDNA.19334.1 | 8.27  | 7.86  | 0.27 | 0.19 | 1.33  | 0.122457 | 0.107407 | 0.487622 | 0.370219 |
| MmugDNA.19335.1.S1_at   | MmugDNA.19335.1 | 4.55  | 4.4   | 0.14 | 0.07 | 1.11  | 0.287401 | 0.271751 | 0.625987 | 0.536577 |
| MmugDNA.19336.1.S1_at   | MmugDNA.19336.1 | 4.52  | 4.51  | 0.43 | 0.17 | 1     | 0.260834 | 0.324885 | 0.60749  | 0.575416 |



|                         |                 |       |       |      |      |       |          |          |          |          |
|-------------------------|-----------------|-------|-------|------|------|-------|----------|----------|----------|----------|
| MmugDNA.19337.1.S1_at   | MmugDNA.19337.1 | 4.47  | 4.88  | 0.13 | 0.43 | -1.33 | 0.08669  | 0.079686 | 0.440475 | 0.326981 |
| MmugDNA.32562.1.S1_s_at | MmugDNA.32562.1 | 8.14  | 8.22  | 0.14 | 0.12 | -1.06 | 0.996456 | 0.124108 | 0.998564 | 0.394389 |
| MmugDNA.19339.1.S1_at   | MmugDNA.19339.1 | 9.36  | 7.96  | 0.71 | 2.14 | 2.64  | 0.162036 | 0.137593 | 0.526638 | 0.410558 |
| MmugDNA.19340.1.S1_at   | MmugDNA.19340.1 | 3.2   | 3.21  | 0.06 | 0.26 | -1.01 | 0.967323 | 0.888854 | 0.987802 | 0.936694 |
| MmugDNA.19344.1.S1_at   | MmugDNA.19344.1 | 4.8   | 4.79  | 0.33 | 0.1  | 1     | 0.930934 | 0.890322 | 0.973359 | 0.937508 |
| MmugDNA.27164.1.S1_s_at | MmugDNA.27164.1 | 9.67  | 10.05 | 0.22 | 0.73 | -1.3  | 0.422255 | 0.359633 | 0.71345  | 0.600904 |
| MmugDNA.19346.1.S1_at   | MmugDNA.19346.1 | 10.26 | 10.26 | 0.01 | 0.25 | 1     | 0.894399 | 0.888158 | 0.957917 | 0.936222 |
| MmugDNA.1935.1.S1_at    | MmugDNA.1935.1  | 6.39  | 6.57  | 0.1  | 0.13 | -1.13 | 0.05985  | 0.145765 | 0.392969 | 0.419756 |
| MmugDNA.19350.1.S1_at   | MmugDNA.19350.1 | 5.89  | 6.15  | 0.24 | 0.06 | -1.2  | 0.388388 | 0.245032 | 0.692437 | 0.514813 |
| MmugDNA.19351.1.S1_at   | MmugDNA.19351.1 | 10.5  | 10.54 | 0.39 | 0.58 | -1.02 | 0.658783 | 0.812909 | 0.846726 | 0.891875 |
| MmugDNA.19354.1.S1_at   | MmugDNA.19354.1 | 5.23  | 5.35  | 0.1  | 0.19 | -1.09 | 0.427781 | 0.387181 | 0.716428 | 0.621949 |
| MmugDNA.19355.1.S1_at   | MmugDNA.19355.1 | 6.81  | 6.46  | 0.23 | 0.82 | 1.27  | 0.46593  | 0.495602 | 0.740195 | 0.695576 |
| MmugDNA.19356.1.S1_at   | MmugDNA.19356.1 | 11.22 | 9.94  | 0.28 | 0.57 | 2.42  | 0.010736 | 0.007155 | 0.23109  | 0.113788 |
| MmugDNA.19357.1.S1_at   | MmugDNA.19357.1 | 11.82 | 10.15 | 0.19 | 0.72 | 3.19  | 0.011572 | 0.007685 | 0.236558 | 0.117153 |
| MmugDNA.19359.1.S1_at   | MmugDNA.19359.1 | 6     | 7.51  | 0.58 | 0.71 | -2.84 | 0.090571 | 0.082225 | 0.446017 | 0.331091 |
| MmugDNA.1936.1.S1_at    | MmugDNA.1936.1  | 8.03  | 8.15  | 0.09 | 0.27 | -1.09 | 0.746872 | 0.911062 | 0.891554 | 0.949838 |
| MmugDNA.19360.1.S1_at   | MmugDNA.19360.1 | 5.68  | 5.67  | 0.46 | 0.18 | 1     | 0.452888 | 0.581321 | 0.732217 | 0.75041  |
| MmugDNA.19363.1.S1_at   | MmugDNA.19363.1 | 7.01  | 7.61  | 0.37 | 0.45 | -1.52 | 0.127393 | 0.145914 | 0.493834 | 0.419892 |
| MmugDNA.19364.1.S1_at   | MmugDNA.19364.1 | 6     | 5.24  | 0.56 | 0.15 | 1.69  | 0.059062 | 0.027973 | 0.390921 | 0.208777 |
| MmugDNA.19365.1.S1_at   | MmugDNA.19365.1 | 5.5   | 5     | 0.37 | 0.27 | 1.42  | 0.265271 | 0.41619  | 0.610859 | 0.641398 |
| MmugDNA.19366.1.S1_at   | MmugDNA.19366.1 | 8.57  | 8.3   | 0.33 | 0.68 | 1.21  | 0.232979 | 0.135239 | 0.587954 | 0.407303 |
| MmugDNA.19367.1.S1_at   | MmugDNA.19367.1 | 4.35  | 4.31  | 0.32 | 0.09 | 1.03  | 0.923509 | 0.887666 | 0.970294 | 0.93601  |
| MmugDNA.19368.1.S1_at   | MmugDNA.19368.1 | 7.01  | 7.14  | 0.21 | 0.08 | -1.09 | 0.385004 | 0.427502 | 0.690208 | 0.649302 |
| MmugDNA.19369.1.S1_at   | MmugDNA.19369.1 | 6.97  | 6.45  | 0.23 | 0.17 | 1.44  | 0.08799  | 0.14441  | 0.442265 | 0.418323 |
| MmugDNA.19369.1.S1_s_at | MmugDNA.19369.1 | 6.23  | 5.5   | 0.24 | 0.24 | 1.66  | 0.070806 | 0.070395 | 0.414661 | 0.311676 |
| MmugDNA.1937.1.S1_at    | MmugDNA.1937.1  | 3.33  | 3.33  | 0.01 | 0.12 | 1     | 0.402773 | 0.211612 | 0.701615 | 0.485681 |
| MmugDNA.19371.1.S1_at   | MmugDNA.19371.1 | 6.26  | 4.35  | 1.57 | 0.27 | 3.74  | 0.087401 | 0.069143 | 0.441776 | 0.30917  |
| MmugDNA.19372.1.S1_at   | MmugDNA.19372.1 | 5.75  | 5.78  | 0.1  | 0.17 | -1.02 | 0.398351 | 0.321967 | 0.698654 | 0.573575 |
| MmugDNA.19373.1.S1_at   | MmugDNA.19373.1 | 3.33  | 3.46  | 0    | 0.09 | -1.09 | 0.120791 | 0.42721  | 0.48574  | 0.649175 |
| MmugDNA.19374.1.S1_at   | MmugDNA.19374.1 | 3.34  | 3.46  | 0.49 | 0.09 | -1.09 | 0.742274 | 0.75117  | 0.889744 | 0.855371 |
| MmugDNA.19375.1.S1_at   | MmugDNA.19375.1 | 5.82  | 5.81  | 0.16 | 0.03 | 1.01  | 0.457856 | 0.602982 | 0.735139 | 0.763857 |
| MmugDNA.19376.1.S1_at   | MmugDNA.19376.1 | 6.09  | 6.53  | 0.59 | 0.48 | -1.35 | 0.826904 | 0.211039 | 0.929656 | 0.485047 |
| MmugDNA.19378.1.S1_at   | MmugDNA.19378.1 | 8.61  | 8.21  | 0.2  | 0.44 | 1.32  | 0.21645  | 0.044336 | 0.576078 | 0.255042 |
| MmugDNA.19379.1.S1_at   | MmugDNA.19379.1 | 4.49  | 4.54  | 0.42 | 0.12 | -1.04 | 0.565759 | 0.336849 | 0.797313 | 0.584113 |
| MmugDNA.1938.1.S1_at    | MmugDNA.1938.1  | 5.58  | 6.79  | 0.94 | 1.55 | -2.31 | 0.468877 | 0.472613 | 0.741287 | 0.68007  |
| MmugDNA.19381.1.S1_at   | MmugDNA.19381.1 | 6.17  | 7.57  | 0.73 | 1.3  | -2.65 | 0.224293 | 0.235241 | 0.582637 | 0.50629  |
| MmugDNA.19384.1.S1_at   | MmugDNA.19384.1 | 4.89  | 5.26  | 0.09 | 0.33 | -1.3  | 0.0346   | 0.028979 | 0.333297 | 0.212129 |
| MmugDNA.19386.1.S1_at   | MmugDNA.19386.1 | 4.95  | 4.97  | 0.1  | 0.22 | -1.01 | 0.823727 | 0.981979 | 0.928331 | 0.990145 |
| MmugDNA.19387.1.S1_at   | MmugDNA.19387.1 | 8.59  | 8.84  | 0.19 | 0.47 | -1.19 | 0.451014 | 0.567064 | 0.731469 | 0.740985 |
| MmugDNA.19389.1.S1_at   | MmugDNA.19389.1 | 8.84  | 8.83  | 1.2  | 0.56 | 1.01  | 0.577239 | 0.710676 | 0.803447 | 0.83219  |
| MmugDNA.19391.1.S1_at   | MmugDNA.19391.1 | 5.13  | 5.73  | 0.35 | 0.53 | -1.51 | 0.293475 | 0.09829  | 0.63057  | 0.356337 |

|                         |                 |       |       |      |      |       |          |          |          |          |
|-------------------------|-----------------|-------|-------|------|------|-------|----------|----------|----------|----------|
| MmugDNA.19392.1.S1_at   | MmugDNA.19392.1 | 12.51 | 12.19 | 0.02 | 0.06 | 1.25  | 0.000784 | 0.00216  | 0.136818 | 0.068763 |
| MmugDNA.19393.1.S1_at   | MmugDNA.19393.1 | 3.77  | 3.62  | 0.2  | 0.34 | 1.11  | 0.817888 | 0.958898 | 0.926097 | 0.976709 |
| MmugDNA.19395.1.S1_at   | MmugDNA.19395.1 | 4.92  | 4.9   | 0.02 | 0.21 | 1.01  | 0.606638 | 0.806833 | 0.818943 | 0.888868 |
| MmugDNA.19396.1.S1_at   | MmugDNA.19396.1 | 3.84  | 3.8   | 0.28 | 0.1  | 1.03  | 0.292208 | 0.209784 | 0.629464 | 0.483538 |
| MmugDNA.19397.1.S1_at   | MmugDNA.19397.1 | 5.56  | 5.6   | 0.33 | 0.39 | -1.03 | 0.649023 | 0.709339 | 0.84235  | 0.831579 |
| MmugDNA.19398.1.S1_at   | MmugDNA.19398.1 | 3.94  | 3.96  | 0.22 | 0.28 | -1.02 | 0.766845 | 0.94237  | 0.901915 | 0.967292 |
| MmugDNA.19399.1.S1_at   | MmugDNA.19399.1 | 10.7  | 9.14  | 0.44 | 1.09 | 2.96  | 0.083953 | 0.039799 | 0.436395 | 0.244507 |
| MmugDNA.194.1.S1_at     | MmugDNA.194.1   | 3.02  | 3.1   | 0.18 | 0.07 | -1.05 | 0.444378 | 0.695248 | 0.726948 | 0.822869 |
| MmugDNA.1940.1.S1_at    | MmugDNA.1940.1  | 8.29  | 7.58  | 0.3  | 0.16 | 1.64  | 0.019299 | 0.034049 | 0.273655 | 0.22837  |
| MmugDNA.19400.1.S1_at   | MmugDNA.19400.1 | 4.5   | 4.43  | 0.41 | 0.08 | 1.05  | 0.961146 | 0.883767 | 0.984976 | 0.933691 |
| MmugDNA.19401.1.S1_at   | MmugDNA.19401.1 | 4     | 3.87  | 0.13 | 0.18 | 1.09  | 0.718001 | 0.688106 | 0.876254 | 0.817914 |
| MmugDNA.19403.1.S1_at   | MmugDNA.19403.1 | 4.15  | 4.22  | 0.09 | 0.04 | -1.05 | 0.430895 | 0.751938 | 0.718362 | 0.855729 |
| MmugDNA.19404.1.S1_at   | MmugDNA.19404.1 | 3.72  | 3.75  | 0.06 | 0.04 | -1.03 | 0.139824 | 0.088545 | 0.50747  | 0.341972 |
| MmugDNA.19405.1.S1_at   | MmugDNA.19405.1 | 5.46  | 5.41  | 0.08 | 0.18 | 1.04  | 0.504058 | 0.296953 | 0.761108 | 0.555895 |
| MmugDNA.19406.1.S1_at   | MmugDNA.19406.1 | 3.65  | 3.63  | 0.03 | 0.18 | 1.01  | 0.419003 | 0.6106   | 0.711689 | 0.76874  |
| MmugDNA.19407.1.S1_at   | MmugDNA.19407.1 | 6.28  | 6.51  | 0.07 | 0.3  | -1.17 | 0.119713 | 0.124203 | 0.484302 | 0.394496 |
| MmugDNA.19409.1.S1_at   | MmugDNA.19409.1 | 5.29  | 5.07  | 0.33 | 0.25 | 1.17  | 0.511301 | 0.671965 | 0.765295 | 0.808177 |
| MmugDNA.19410.1.S1_at   | MmugDNA.19410.1 | 8.13  | 8.29  | 0.28 | 0.23 | -1.12 | 0.589857 | 0.697092 | 0.809648 | 0.824045 |
| MmugDNA.19412.1.S1_at   | MmugDNA.19412.1 | 7.68  | 7.42  | 0.3  | 0.33 | 1.2   | 0.548762 | 0.545771 | 0.786912 | 0.727653 |
| MmugDNA.19413.1.S1_at   | MmugDNA.19413.1 | 6.76  | 5.53  | 0.46 | 1.23 | 2.35  | 0.545181 | 0.691349 | 0.784779 | 0.820406 |
| MmugDNA.19414.1.S1_at   | MmugDNA.19414.1 | 5.07  | 4.99  | 0.12 | 0.12 | 1.05  | 0.221949 | 0.500799 | 0.580625 | 0.699278 |
| MmugDNA.19415.1.S1_at   | MmugDNA.19415.1 | 5.57  | 5.7   | 0.33 | 0.11 | -1.09 | 0.786593 | 0.935507 | 0.91125  | 0.96359  |
| MmugDNA.19415.1.S1_x_at | MmugDNA.19415.1 | 5.75  | 5.73  | 0.23 | 0.02 | 1.02  | 0.724588 | 0.827118 | 0.879724 | 0.900723 |
| MmugDNA.19416.1.S1_at   | MmugDNA.19416.1 | 4.32  | 4.13  | 0.15 | 0.24 | 1.14  | 0.752611 | 0.744869 | 0.894415 | 0.852198 |
| MmugDNA.19419.1.S1_at   | MmugDNA.19419.1 | 4.38  | 4.42  | 0.09 | 0.26 | -1.03 | 0.765471 | 0.497765 | 0.901309 | 0.697059 |
| MmugDNA.19421.1.S1_at   | MmugDNA.19421.1 | 6.92  | 5.65  | 0.46 | 0.73 | 2.43  | 0.07238  | 0.068356 | 0.416949 | 0.307912 |
| MmugDNA.19422.1.S1_s_at | MmugDNA.19422.1 | 7.27  | 7.46  | 0.07 | 0.05 | -1.15 | 0.051689 | 0.127411 | 0.376214 | 0.398249 |
| MmugDNA.19423.1.S1_at   | MmugDNA.19423.1 | 4.27  | 4.5   | 0.77 | 0.18 | -1.17 | 0.655694 | 0.403378 | 0.845095 | 0.632083 |
| MmugDNA.19424.1.S1_at   | MmugDNA.19424.1 | 4.15  | 4.27  | 0.03 | 0.09 | -1.09 | 0.070944 | 0.03885  | 0.414673 | 0.242022 |
| MmugDNA.19425.1.S1_at   | MmugDNA.19425.1 | 11.29 | 12.03 | 0.13 | 0.37 | -1.67 | 0.043781 | 0.036048 | 0.357051 | 0.234272 |
| MmugDNA.19426.1.S1_at   | MmugDNA.19426.1 | 6.51  | 6.55  | 0.16 | 0.27 | -1.03 | 0.77638  | 0.657448 | 0.90634  | 0.799704 |
| MmugDNA.19427.1.S1_at   | MmugDNA.19427.1 | 9.58  | 8.84  | 0.34 | 0.26 | 1.67  | 0.031077 | 0.023635 | 0.32048  | 0.192555 |
| MmugDNA.19429.1.S1_at   | MmugDNA.19429.1 | 4.19  | 4.05  | 0.33 | 0.12 | 1.1   | 0.262558 | 0.460154 | 0.609039 | 0.672064 |
| MmugDNA.1943.1.S1_at    | MmugDNA.1943.1  | 4.03  | 4.11  | 0.09 | 0.11 | -1.06 | 0.868756 | 0.629708 | 0.947725 | 0.781989 |
| MmugDNA.19431.1.S1_at   | MmugDNA.19431.1 | 8.52  | 7.58  | 0.32 | 0.29 | 1.92  | 0.019966 | 0.01001  | 0.276365 | 0.131262 |
| MmugDNA.19432.1.S1_at   | MmugDNA.19432.1 | 5.22  | 4.93  | 0.28 | 0.25 | 1.23  | 0.152114 | 0.074535 | 0.516888 | 0.318173 |
| MmugDNA.19433.1.S1_at   | MmugDNA.19433.1 | 4.83  | 4.58  | 0.38 | 0.03 | 1.19  | 0.322453 | 0.394213 | 0.6511   | 0.626807 |
| MmugDNA.19434.1.S1_at   | MmugDNA.19434.1 | 5.28  | 5.25  | 0.22 | 0.09 | 1.02  | 0.82305  | 0.855339 | 0.928066 | 0.917526 |
| MmugDNA.31007.1.S1_s_at | MmugDNA.31007.1 | 12.2  | 12.96 | 0.65 | 0.77 | -1.7  | 0.672692 | 0.568296 | 0.853193 | 0.741876 |
| MmugDNA.19437.1.S1_at   | MmugDNA.19437.1 | 5.52  | 6.07  | 0.61 | 0.3  | -1.46 | 0.957586 | 0.318284 | 0.983922 | 0.571151 |
| MmugDNA.19439.1.S1_at   | MmugDNA.19439.1 | 5.39  | 5.49  | 0.1  | 0.15 | -1.07 | 0.340212 | 0.322192 | 0.661654 | 0.573769 |

|                         |                 |       |       |      |      |       |          |          |          |          |
|-------------------------|-----------------|-------|-------|------|------|-------|----------|----------|----------|----------|
| MmugDNA.1944.1.S1_at    | MmugDNA.1944.1  | 4.19  | 4.56  | 1.13 | 0.78 | -1.29 | 0.70143  | 0.880115 | 0.868043 | 0.931533 |
| MmugDNA.19440.1.S1_at   | MmugDNA.19440.1 | 9.17  | 9.17  | 0.27 | 0.14 | 1     | 0.662883 | 0.597266 | 0.848771 | 0.76013  |
| MmugDNA.19440.1.S1_x_at | MmugDNA.19440.1 | 8.53  | 8.51  | 0.42 | 0.16 | 1.01  | 0.252988 | 0.243274 | 0.60168  | 0.513356 |
| MmugDNA.19441.1.S1_at   | MmugDNA.19441.1 | 5.65  | 5.67  | 0.09 | 0.02 | -1.01 | 0.831991 | 0.886665 | 0.931946 | 0.935519 |
| MmugDNA.19442.1.S1_at   | MmugDNA.19442.1 | 4.41  | 4.25  | 0.12 | 0.37 | 1.12  | 0.477545 | 0.591025 | 0.746773 | 0.756581 |
| MmugDNA.19444.1.S1_at   | MmugDNA.19444.1 | 10.97 | 10.13 | 0.04 | 0.37 | 1.79  | 0.012025 | 0.004666 | 0.239716 | 0.095314 |
| MmugDNA.19445.1.S1_at   | MmugDNA.19445.1 | 5.74  | 5.31  | 0.35 | 0.1  | 1.34  | 0.092749 | 0.094358 | 0.449546 | 0.350889 |
| MmugDNA.19446.1.S1_s_at | MmugDNA.19446.1 | 5.29  | 5.58  | 0.55 | 0.59 | -1.23 | 0.46552  | 0.383862 | 0.739942 | 0.61978  |
| MmugDNA.19447.1.S1_at   | MmugDNA.19447.1 | 7.46  | 7.02  | 0.4  | 0.62 | 1.35  | 0.508943 | 0.422284 | 0.764159 | 0.645637 |
| MmugDNA.19448.1.S1_at   | MmugDNA.19448.1 | 3.64  | 3.71  | 0.23 | 0.34 | -1.05 | 0.383032 | 0.224267 | 0.689068 | 0.497164 |
| MmugDNA.1945.1.S1_at    | MmugDNA.1945.1  | 4.68  | 4.5   | 0.08 | 0.25 | 1.13  | 0.534505 | 0.44609  | 0.778763 | 0.662692 |
| MmugDNA.19450.1.S1_at   | MmugDNA.19450.1 | 6.19  | 5.52  | 1.05 | 1.06 | 1.59  | 0.65756  | 0.395219 | 0.846035 | 0.62738  |
| MmugDNA.19451.1.S1_at   | MmugDNA.19451.1 | 3.56  | 3.41  | 0.26 | 0.2  | 1.11  | 0.210654 | 0.487933 | 0.57191  | 0.690787 |
| MmugDNA.19452.1.S1_at   | MmugDNA.19452.1 | 5.52  | 5.57  | 0.07 | 0.15 | -1.04 | 0.213157 | 0.237696 | 0.573477 | 0.50826  |
| MmugDNA.19453.1.S1_at   | MmugDNA.19453.1 | 10.46 | 10.23 | 0.11 | 0.16 | 1.17  | 0.082097 | 0.069351 | 0.433268 | 0.309558 |
| MmugDNA.19454.1.S1_at   | MmugDNA.19454.1 | 6.97  | 7.13  | 0.19 | 0.15 | -1.12 | 0.128166 | 0.145916 | 0.494307 | 0.419892 |
| MmugDNA.19458.1.S1_at   | MmugDNA.19458.1 | 5.83  | 6.66  | 0.27 | 1.2  | -1.77 | 0.320746 | 0.430726 | 0.64956  | 0.651717 |
| MmugDNA.19459.1.S1_at   | MmugDNA.19459.1 | 4.67  | 5.12  | 0.5  | 0.22 | -1.37 | 0.610153 | 0.450511 | 0.820924 | 0.665705 |
| MmugDNA.1946.1.S1_at    | MmugDNA.1946.1  | 5.22  | 6.04  | 0.72 | 0.08 | -1.77 | 0.104754 | 0.161245 | 0.465114 | 0.437386 |
| MmugDNA.19460.1.S1_at   | MmugDNA.19460.1 | 6.52  | 6.83  | 0.04 | 0.24 | -1.24 | 0.027363 | 0.017871 | 0.307451 | 0.168774 |
| MmugDNA.19461.1.S1_at   | MmugDNA.19461.1 | 4.85  | 5.04  | 0.74 | 0.12 | -1.14 | 0.668835 | 0.74211  | 0.851986 | 0.850618 |
| MmugDNA.19462.1.S1_at   | MmugDNA.19462.1 | 5.63  | 5.5   | 0.39 | 0.15 | 1.09  | 0.621883 | 0.422099 | 0.827071 | 0.645462 |
| MmugDNA.19465.1.S1_at   | MmugDNA.19465.1 | 5.69  | 4.71  | 0.33 | 0.34 | 1.97  | 0.02432  | 0.029222 | 0.294535 | 0.212898 |
| MmugDNA.19466.1.S1_at   | MmugDNA.19466.1 | 6.21  | 5.7   | 0.26 | 0.47 | 1.42  | 0.191672 | 0.160166 | 0.554732 | 0.436296 |
| MmugDNA.19467.1.S1_at   | MmugDNA.19467.1 | 5.14  | 5.1   | 0.36 | 0.35 | 1.03  | 0.986821 | 0.711554 | 0.995328 | 0.832754 |
| MmugDNA.19468.1.S1_at   | MmugDNA.19468.1 | 13.86 | 13.94 | 0.12 | 0.2  | -1.06 | 0.710119 | 0.887364 | 0.872852 | 0.935852 |
| MmugDNA.19468.1.S1_s_at | MmugDNA.19468.1 | 14.63 | 14.62 | 0.05 | 0.07 | 1.01  | 0.818457 | 0.956933 | 0.926289 | 0.975609 |
| MmugDNA.1947.1.S1_at    | MmugDNA.1947.1  | 3     | 3.21  | 0.17 | 0.18 | -1.16 | 0.415273 | 0.336855 | 0.709433 | 0.584113 |
| MmugDNA.19470.1.S1_at   | MmugDNA.19470.1 | 3.76  | 4.14  | 0.2  | 0.29 | -1.3  | 0.209527 | 0.035714 | 0.570957 | 0.233368 |
| MmugDNA.19471.1.S1_at   | MmugDNA.19471.1 | 6.26  | 6.33  | 0.34 | 0.08 | -1.05 | 0.566    | 0.581837 | 0.797441 | 0.750784 |
| MmugDNA.19472.1.S1_at   | MmugDNA.19472.1 | 8.02  | 7.52  | 0.51 | 0.79 | 1.41  | 0.123278 | 0.130254 | 0.488865 | 0.402007 |
| MmugDNA.19473.1.S1_at   | MmugDNA.19473.1 | 9.23  | 9.89  | 0.2  | 0.03 | -1.58 | 0.004551 | 0.005306 | 0.184109 | 0.10082  |
| MmugDNA.19474.1.S1_at   | MmugDNA.19474.1 | 12.03 | 12.05 | 0.08 | 0.15 | -1.01 | 0.615252 | 0.670066 | 0.823342 | 0.807031 |
| MmugDNA.19474.1.S1_s_at | MmugDNA.19474.1 | 10.82 | 10.84 | 0.07 | 0.06 | -1.02 | 0.877683 | 0.388107 | 0.950993 | 0.622607 |
| MmugDNA.38013.1.S1_at   | MmugDNA.38013.1 | 3     | 3     | 0.18 | 0.12 | 1     | 0.880756 | 0.492052 | 0.952026 | 0.693403 |
| MmugDNA.38013.1.S1_s_at | MmugDNA.38013.1 | 8.91  | 10.6  | 0.47 | 0.61 | -3.24 | 0.018683 | 0.015646 | 0.271185 | 0.158546 |
| MmugDNA.19477.1.S1_at   | MmugDNA.19477.1 | 3.95  | 4.15  | 0.11 | 0.09 | -1.15 | 0.071933 | 0.128106 | 0.416008 | 0.399122 |
| MmugDNA.19478.1.S1_at   | MmugDNA.19478.1 | 6.35  | 6.28  | 0.04 | 0.14 | 1.06  | 0.504098 | 0.330466 | 0.761108 | 0.579193 |
| MmugDNA.19479.1.S1_at   | MmugDNA.19479.1 | 4.85  | 4.67  | 0.19 | 0.17 | 1.13  | 0.867443 | 0.889129 | 0.947135 | 0.936796 |
| MmugDNA.1948.1.S1_at    | MmugDNA.1948.1  | 8.08  | 8.3   | 0.19 | 0.17 | -1.16 | 0.102664 | 0.084672 | 0.462485 | 0.33618  |
| MmugDNA.19480.1.S1_at   | MmugDNA.19480.1 | 6.92  | 6.15  | 0.45 | 0.36 | 1.71  | 0.173741 | 0.152596 | 0.537255 | 0.427435 |

|                         |                 |       |       |      |      |        |          |          |          |          |
|-------------------------|-----------------|-------|-------|------|------|--------|----------|----------|----------|----------|
| MmugDNA.19482.1.S1_at   | MmugDNA.19482.1 | 10.16 | 9.89  | 0.2  | 0.38 | 1.2    | 0.21548  | 0.231844 | 0.575924 | 0.503592 |
| MmugDNA.19483.1.S1_at   | MmugDNA.19483.1 | 12.49 | 12.64 | 0.17 | 0.19 | -1.11  | 0.390039 | 0.487658 | 0.693398 | 0.690634 |
| MmugDNA.19485.1.S1_s_at | MmugDNA.19485.1 | 7.95  | 11.61 | 1.61 | 1.28 | -12.69 | 0.088531 | 0.068402 | 0.443347 | 0.307955 |
| MmugDNA.19487.1.S1_at   | MmugDNA.19487.1 | 6.62  | 6.88  | 0.16 | 0.03 | -1.2   | 0.192472 | 0.22989  | 0.555679 | 0.501802 |
| MmugDNA.19489.1.S1_at   | MmugDNA.19489.1 | 4.01  | 4.24  | 0.74 | 0.23 | -1.17  | 0.510363 | 0.330921 | 0.764987 | 0.579609 |
| MmugDNA.1949.1.S1_at    | MmugDNA.1949.1  | 3.2   | 3.13  | 0.24 | 0.14 | 1.05   | 0.99235  | 0.722511 | 0.997401 | 0.839261 |
| MmugDNA.19490.1.S1_at   | MmugDNA.19490.1 | 11.45 | 11.52 | 0.18 | 0.11 | -1.05  | 0.76063  | 0.927617 | 0.899102 | 0.958869 |
| MmugDNA.19491.1.S1_at   | MmugDNA.19491.1 | 5.79  | 5.69  | 0.12 | 0.16 | 1.07   | 0.312336 | 0.339453 | 0.644081 | 0.586093 |
| MmugDNA.19493.1.S1_at   | MmugDNA.19493.1 | 7.65  | 6.38  | 0.47 | 0.6  | 2.4    | 0.170982 | 0.202959 | 0.534989 | 0.477343 |
| MmugDNA.19494.1.S1_s_at | MmugDNA.19494.1 | 8.01  | 7.57  | 0.14 | 0.21 | 1.35   | 0.071101 | 0.047125 | 0.414673 | 0.261659 |
| MmugDNA.19495.1.S1_at   | MmugDNA.19495.1 | 3.68  | 3.21  | 0.39 | 0.13 | 1.39   | 0.158999 | 0.091739 | 0.52416  | 0.346977 |
| MmugDNA.19496.1.S1_at   | MmugDNA.19496.1 | 3.14  | 3.65  | 0.27 | 0.69 | -1.42  | 0.340372 | 0.248831 | 0.661779 | 0.517951 |
| MmugDNA.19497.1.S1_at   | MmugDNA.19497.1 | 4.44  | 4.69  | 0.23 | 0.51 | -1.19  | 0.337647 | 0.393574 | 0.660171 | 0.626497 |
| MmugDNA.19498.1.S1_at   | MmugDNA.19498.1 | 11.57 | 10.9  | 0.23 | 0.37 | 1.59   | 0.040441 | 0.031258 | 0.349277 | 0.218668 |
| MmugDNA.19499.1.S1_at   | MmugDNA.19499.1 | 11.05 | 9.91  | 0.28 | 0.5  | 2.2    | 0.018241 | 0.009318 | 0.269591 | 0.127446 |
| MmugDNA.1950.1.S1_at    | MmugDNA.1950.1  | 5.97  | 7.61  | 0.24 | 1.24 | -3.13  | 0.216073 | 0.275963 | 0.575954 | 0.540057 |
| MmugDNA.19500.1.S1_at   | MmugDNA.19500.1 | 8.71  | 7.9   | 0.28 | 1.35 | 1.76   | 0.258926 | 0.353069 | 0.606156 | 0.596363 |
| MmugDNA.19501.1.S1_at   | MmugDNA.19501.1 | 5.5   | 5.53  | 1.13 | 0.25 | -1.02  | 0.326314 | 0.401788 | 0.653184 | 0.631068 |
| MmugDNA.19502.1.S1_at   | MmugDNA.19502.1 | 8.37  | 9.25  | 0.16 | 0.3  | -1.84  | 0.005566 | 0.003108 | 0.191807 | 0.081305 |
| MmugDNA.19503.1.S1_at   | MmugDNA.19503.1 | 5.18  | 5.36  | 0.23 | 0.25 | -1.13  | 0.56493  | 0.280835 | 0.796834 | 0.544021 |
| MmugDNA.19504.1.S1_at   | MmugDNA.19504.1 | 8.15  | 8.21  | 0.45 | 0.53 | -1.04  | 0.504475 | 0.030859 | 0.76127  | 0.217427 |
| MmugDNA.19505.1.S1_at   | MmugDNA.19505.1 | 5.99  | 6.13  | 0.15 | 0.18 | -1.1   | 0.195053 | 0.232064 | 0.558557 | 0.503781 |
| MmugDNA.19507.1.S1_at   | MmugDNA.19507.1 | 5.01  | 5.28  | 0.14 | 0.12 | -1.21  | 0.148816 | 0.041291 | 0.51391  | 0.247995 |
| MmugDNA.19508.1.S1_at   | MmugDNA.19508.1 | 6.06  | 7.25  | 1.18 | 0.55 | -2.29  | 0.479456 | 0.374292 | 0.747663 | 0.612779 |
| MmugDNA.19509.1.S1_at   | MmugDNA.19509.1 | 3.78  | 3.17  | 0.44 | 0.21 | 1.53   | 0.066259 | 0.027809 | 0.406371 | 0.208293 |
| MmugDNA.1951.1.S1_at    | MmugDNA.1951.1  | 5.32  | 4.76  | 0.62 | 0.78 | 1.47   | 0.680603 | 0.755843 | 0.85724  | 0.857865 |
| MmugDNA.19510.1.S1_at   | MmugDNA.19510.1 | 7.75  | 5.81  | 0.31 | 0.47 | 3.86   | 0.00338  | 0.002511 | 0.177513 | 0.074158 |
| MmugDNA.19511.1.S1_at   | MmugDNA.19511.1 | 6.07  | 5.62  | 0.54 | 0.59 | 1.37   | 0.544409 | 0.724262 | 0.784363 | 0.840433 |
| MmugDNA.19514.1.S1_at   | MmugDNA.19514.1 | 7.54  | 8.2   | 0.26 | 0.29 | -1.58  | 0.061818 | 0.091241 | 0.396701 | 0.346216 |
| MmugDNA.19516.1.S1_at   | MmugDNA.19516.1 | 4.58  | 4.58  | 0.04 | 0.08 | -1     | 0.435619 | 0.675668 | 0.721273 | 0.810429 |
| MmugDNA.19517.1.S1_at   | MmugDNA.19517.1 | 3.7   | 3.85  | 0.2  | 0.2  | -1.11  | 0.439101 | 0.592594 | 0.723488 | 0.757847 |
| MmugDNA.25286.1.S1_s_at | MmugDNA.25286.1 | 7.37  | 7.29  | 0.17 | 0.21 | 1.06   | 0.432788 | 0.577049 | 0.719273 | 0.747634 |
| MmugDNA.19519.1.S1_at   | MmugDNA.19519.1 | 5.09  | 4.45  | 0.42 | 0.29 | 1.56   | 0.117094 | 0.094607 | 0.481132 | 0.351371 |
| MmugDNA.1952.1.S1_at    | MmugDNA.1952.1  | 6.68  | 6.63  | 0.15 | 0.54 | 1.04   | 0.833205 | 0.924004 | 0.932318 | 0.957162 |
| MmugDNA.19521.1.S1_at   | MmugDNA.19521.1 | 3.65  | 3.46  | 0.98 | 0.15 | 1.14   | 0.306138 | 0.367348 | 0.639455 | 0.607004 |
| MmugDNA.19522.1.S1_at   | MmugDNA.19522.1 | 9.86  | 10.63 | 0.29 | 0.15 | -1.71  | 0.017886 | 0.009282 | 0.26813  | 0.127101 |
| MmugDNA.19523.1.S1_at   | MmugDNA.19523.1 | 9.87  | 11.17 | 0.27 | 0.81 | -2.47  | 0.059985 | 0.063498 | 0.393081 | 0.298444 |
| MmugDNA.19523.1.S1_s_at | MmugDNA.19523.1 | 9.09  | 10.41 | 0.18 | 0.73 | -2.5   | 0.040987 | 0.037968 | 0.35051  | 0.239302 |
| MmugDNA.19524.1.S1_at   | MmugDNA.19524.1 | 8.94  | 9.18  | 0.08 | 0.09 | -1.18  | 0.01339  | 0.05005  | 0.246478 | 0.268916 |
| MmugDNA.19525.1.S1_at   | MmugDNA.19525.1 | 5.32  | 5.33  | 0.19 | 0.12 | -1.01  | 0.917552 | 0.754132 | 0.967956 | 0.856862 |
| MmugDNA.19526.1.S1_at   | MmugDNA.19526.1 | 12.27 | 12.49 | 0.02 | 0.06 | -1.16  | 0.00444  | 0.005725 | 0.183475 | 0.104271 |

|                         |                 |       |       |      |      |       |          |          |          |          |
|-------------------------|-----------------|-------|-------|------|------|-------|----------|----------|----------|----------|
| MmugDNA.19527.1.S1_at   | MmugDNA.19527.1 | 5.39  | 5.66  | 0.26 | 0.36 | -1.2  | 0.149974 | 0.379869 | 0.514522 | 0.616629 |
| MmugDNA.19527.1.S1_s_at | MmugDNA.19527.1 | 3.78  | 4.6   | 0.58 | 0.46 | -1.77 | 0.247123 | 0.307884 | 0.598177 | 0.563992 |
| MmugDNA.19529.1.S1_at   | MmugDNA.19529.1 | 4.2   | 4.35  | 0.4  | 0.14 | -1.11 | 0.863202 | 0.939881 | 0.944982 | 0.96581  |
| MmugDNA.1953.1.S1_at    | MmugDNA.1953.1  | 7.53  | 7.15  | 0.14 | 0.24 | 1.29  | 0.093713 | 0.071729 | 0.45102  | 0.313981 |
| MmugDNA.19531.1.S1_at   | MmugDNA.19531.1 | 4.7   | 4.75  | 0.11 | 0.09 | -1.04 | 0.312262 | 0.371    | 0.644026 | 0.609964 |
| MmugDNA.19532.1.S1_at   | MmugDNA.19532.1 | 6.87  | 6.54  | 0.2  | 1.46 | 1.26  | 0.577883 | 0.552958 | 0.803619 | 0.732213 |
| MmugDNA.19535.1.S1_at   | MmugDNA.19535.1 | 5.34  | 6.64  | 1.34 | 0.86 | -2.47 | 0.524452 | 0.637236 | 0.773192 | 0.786759 |
| MmugDNA.19536.1.S1_at   | MmugDNA.19536.1 | 5.68  | 4.4   | 0.19 | 0.19 | 2.43  | 0.001622 | 0.000498 | 0.152811 | 0.038955 |
| MmugDNA.19537.1.S1_at   | MmugDNA.19537.1 | 4.42  | 4.7   | 0.3  | 0.91 | -1.21 | 0.85109  | 0.970176 | 0.940172 | 0.983723 |
| MmugDNA.19539.1.S1_at   | MmugDNA.19539.1 | 5.35  | 4.93  | 0.2  | 0.33 | 1.34  | 0.077691 | 0.051443 | 0.427714 | 0.272231 |
| MmugDNA.1954.1.S1_at    | MmugDNA.1954.1  | 8.59  | 8.32  | 0.13 | 0.83 | 1.2   | 0.634705 | 0.760084 | 0.834648 | 0.86059  |
| MmugDNA.19541.1.S1_at   | MmugDNA.19541.1 | 6.89  | 7.08  | 0.44 | 0.77 | -1.14 | 0.711419 | 0.751992 | 0.873637 | 0.855739 |
| MmugDNA.19542.1.S1_at   | MmugDNA.19542.1 | 6.63  | 6.64  | 0.02 | 0.06 | -1    | 0.677189 | 0.033746 | 0.855385 | 0.227391 |
| MmugDNA.19544.1.S1_at   | MmugDNA.19544.1 | 6.77  | 6.29  | 0.13 | 0.52 | 1.4   | 0.475648 | 0.26826  | 0.745899 | 0.533981 |
| MmugDNA.19547.1.S1_at   | MmugDNA.19547.1 | 4.95  | 4.97  | 0.12 | 0.06 | -1.02 | 0.600892 | 0.610929 | 0.815542 | 0.768948 |
| MmugDNA.19548.1.S1_at   | MmugDNA.19548.1 | 5.15  | 5.63  | 0.17 | 0.59 | -1.4  | 0.201292 | 0.17564  | 0.563927 | 0.452208 |
| MmugDNA.19549.1.S1_at   | MmugDNA.19549.1 | 9.62  | 9.11  | 0.6  | 0.27 | 1.43  | 0.195815 | 0.145699 | 0.558979 | 0.419653 |
| MmugDNA.1955.1.S1_at    | MmugDNA.1955.1  | 4.75  | 4.73  | 0.09 | 0.02 | 1.01  | 0.365703 | 0.09961  | 0.678419 | 0.358095 |
| MmugDNA.19550.1.S1_at   | MmugDNA.19550.1 | 7.13  | 8.42  | 0.39 | 0.25 | -2.45 | 0.015344 | 0.012669 | 0.258162 | 0.145097 |
| MmugDNA.19554.1.S1_at   | MmugDNA.19554.1 | 5.92  | 6.09  | 0.3  | 0.14 | -1.13 | 0.997301 | 0.189845 | 0.99892  | 0.465403 |
| MmugDNA.19555.1.S1_at   | MmugDNA.19555.1 | 6.75  | 6.74  | 0.04 | 0.09 | 1     | 0.625614 | 0.389234 | 0.829059 | 0.623403 |
| MmugDNA.19557.1.S1_at   | MmugDNA.19557.1 | 11.39 | 11.77 | 0.14 | 0.44 | -1.31 | 0.104057 | 0.072262 | 0.464179 | 0.314904 |
| MmugDNA.19558.1.S1_at   | MmugDNA.19558.1 | 5.78  | 5.84  | 0.19 | 0.24 | -1.04 | 0.78791  | 0.315896 | 0.911709 | 0.569327 |
| MmugDNA.19559.1.S1_at   | MmugDNA.19559.1 | 6.06  | 5.97  | 0.17 | 0.31 | 1.06  | 0.905967 | 0.298061 | 0.962577 | 0.556707 |
| MmugDNA.1956.1.S1_at    | MmugDNA.1956.1  | 5.26  | 5.74  | 0.66 | 0.11 | -1.4  | 0.736642 | 0.89461  | 0.886752 | 0.939853 |
| MmugDNA.19560.1.S1_at   | MmugDNA.19560.1 | 5.92  | 5.87  | 0.47 | 0.05 | 1.04  | 0.642373 | 0.495258 | 0.838763 | 0.695411 |
| MmugDNA.19563.1.S1_at   | MmugDNA.19563.1 | 3.22  | 3.03  | 0.1  | 0.11 | 1.13  | 0.089321 | 0.090261 | 0.445016 | 0.344673 |
| MmugDNA.19564.1.S1_s_at | MmugDNA.19564.1 | 10.82 | 11.28 | 0.06 | 0.11 | -1.38 | 0.004608 | 0.003297 | 0.1844   | 0.082571 |
| MmugDNA.19565.1.S1_at   | MmugDNA.19565.1 | 6.09  | 6.44  | 1.32 | 0.15 | -1.27 | 0.826306 | 0.94484  | 0.929418 | 0.968794 |
| MmugDNA.19569.1.S1_at   | MmugDNA.19569.1 | 5.09  | 5.1   | 0.43 | 0.2  | -1.01 | 0.901182 | 0.832926 | 0.960522 | 0.904143 |
| MmugDNA.1957.1.S1_at    | MmugDNA.1957.1  | 5.2   | 4.73  | 1.28 | 1.09 | 1.38  | 0.754949 | 0.737293 | 0.895812 | 0.847869 |
| MmugDNA.19570.1.S1_at   | MmugDNA.19570.1 | 3.39  | 3.39  | 0    | 0.04 | -1    | 0.286337 | 0.285166 | 0.625548 | 0.547098 |
| MmugDNA.19571.1.S1_at   | MmugDNA.19571.1 | 6.31  | 6.42  | 0.19 | 0.22 | -1.08 | 0.62378  | 0.815131 | 0.828047 | 0.893355 |
| MmugDNA.19572.1.S1_at   | MmugDNA.19572.1 | 6.81  | 6.8   | 0.17 | 0.09 | 1.01  | 0.297832 | 0.37796  | 0.633549 | 0.615264 |
| MmugDNA.19573.1.S1_at   | MmugDNA.19573.1 | 8.35  | 8.54  | 0.48 | 0.65 | -1.15 | 0.298919 | 0.121755 | 0.634431 | 0.391043 |
| MmugDNA.1958.1.S1_at    | MmugDNA.1958.1  | 4.58  | 4.74  | 0.67 | 0.14 | -1.12 | 0.736598 | 0.724447 | 0.886719 | 0.840485 |
| MmugDNA.19582.1.S1_at   | MmugDNA.19582.1 | 7.28  | 7.25  | 0.29 | 0.03 | 1.03  | 0.87339  | 0.481783 | 0.949255 | 0.686748 |
| MmugDNA.19582.1.S1_x_at | MmugDNA.19582.1 | 7.22  | 7.06  | 0.28 | 0.01 | 1.12  | 0.998701 | 0.962306 | 0.999529 | 0.978822 |
| MmugDNA.19583.1.S1_at   | MmugDNA.19583.1 | 8.44  | 6.59  | 0.12 | 1.12 | 3.6   | 0.040022 | 0.017562 | 0.348657 | 0.167672 |
| MmugDNA.19584.1.S1_at   | MmugDNA.19584.1 | 4.27  | 4.26  | 0    | 0.2  | 1.01  | 0.86952  | 0.985545 | 0.947917 | 0.991808 |
| MmugDNA.19585.1.S1_at   | MmugDNA.19585.1 | 4.09  | 4.1   | 0.11 | 0.05 | -1    | 0.255425 | 0.344048 | 0.60322  | 0.58962  |

|                         |                 |       |       |      |      |       |          |          |          |          |
|-------------------------|-----------------|-------|-------|------|------|-------|----------|----------|----------|----------|
| MmugDNA.19587.1.S1_at   | MmugDNA.19587.1 | 11.5  | 12.07 | 0.57 | 0.44 | -1.48 | 0.186468 | 0.095313 | 0.550106 | 0.35236  |
| MmugDNA.5697.1.S1_s_at  | MmugDNA.5697.1  | 12.24 | 12.78 | 0.54 | 0.39 | -1.45 | 0.227576 | 0.132695 | 0.585103 | 0.404544 |
| MmugDNA.19589.1.S1_at   | MmugDNA.19589.1 | 9.46  | 9.45  | 0.4  | 0.28 | 1.01  | 0.664866 | 0.68397  | 0.849728 | 0.81565  |
| MmugDNA.1959.1.S1_at    | MmugDNA.1959.1  | 3.46  | 3.46  | 0.04 | 0.02 | 1     | 0.253202 | 0.32466  | 0.60185  | 0.575208 |
| MmugDNA.19590.1.S1_at   | MmugDNA.19590.1 | 5.67  | 5.78  | 0.16 | 0.18 | -1.08 | 0.185466 | 0.194375 | 0.548882 | 0.469464 |
| MmugDNA.19591.1.S1_at   | MmugDNA.19591.1 | 5.4   | 6.75  | 1.23 | 1.03 | -2.54 | 0.707482 | 0.500811 | 0.871109 | 0.699278 |
| MmugDNA.19592.1.S1_at   | MmugDNA.19592.1 | 7.76  | 7.84  | 0.06 | 0.05 | -1.06 | 0.395772 | 0.091777 | 0.696603 | 0.346977 |
| MmugDNA.19593.1.S1_at   | MmugDNA.19593.1 | 3.99  | 4.02  | 0.17 | 0.03 | -1.02 | 0.873796 | 0.571243 | 0.949428 | 0.743629 |
| MmugDNA.19595.1.S1_at   | MmugDNA.19595.1 | 7.15  | 7.55  | 0.11 | 0.24 | -1.31 | 0.062301 | 0.050913 | 0.397683 | 0.270955 |
| MmugDNA.19596.1.S1_at   | MmugDNA.19596.1 | 3.79  | 3.41  | 0.49 | 0.11 | 1.3   | 0.251559 | 0.158521 | 0.600961 | 0.434442 |
| MmugDNA.19597.1.S1_at   | MmugDNA.19597.1 | 3.6   | 3.53  | 0.41 | 0.21 | 1.05  | 0.913338 | 0.698886 | 0.965673 | 0.825026 |
| MmugDNA.196.1.S1_at     | MmugDNA.196.1   | 5.06  | 4.23  | 0.28 | 0.02 | 1.78  | 0.006406 | 0.02482  | 0.199201 | 0.197372 |
| MmugDNA.1960.1.S1_at    | MmugDNA.1960.1  | 5.76  | 5.78  | 0.04 | 0.17 | -1.02 | 0.250196 | 0.25542  | 0.600389 | 0.523445 |
| MmugDNA.19600.1.S1_at   | MmugDNA.19600.1 | 4.65  | 4.48  | 1.3  | 0.32 | 1.12  | 0.309169 | 0.269928 | 0.641361 | 0.535208 |
| MmugDNA.19602.1.S1_at   | MmugDNA.19602.1 | 4.66  | 4.83  | 0.04 | 0.76 | -1.13 | 0.222014 | 0.394691 | 0.580625 | 0.627208 |
| MmugDNA.19603.1.S1_at   | MmugDNA.19603.1 | 3.36  | 3.52  | 0.19 | 0.22 | -1.12 | 0.358553 | 0.506735 | 0.673282 | 0.702575 |
| MmugDNA.19606.1.S1_at   | MmugDNA.19606.1 | 8.8   | 7.83  | 0.16 | 0.5  | 1.96  | 0.027047 | 0.021204 | 0.305915 | 0.182326 |
| MmugDNA.19607.1.S1_at   | MmugDNA.19607.1 | 4.85  | 4.9   | 0.42 | 0.03 | -1.04 | 0.485752 | 0.628758 | 0.751144 | 0.781403 |
| MmugDNA.19608.1.S1_at   | MmugDNA.19608.1 | 3.24  | 3.4   | 0.09 | 0.14 | -1.11 | 0.310114 | 0.209999 | 0.642078 | 0.48375  |
| MmugDNA.19609.1.S1_at   | MmugDNA.19609.1 | 4.73  | 4.85  | 0.79 | 0.35 | -1.08 | 0.667031 | 0.851147 | 0.850767 | 0.91535  |
| MmugDNA.19610.1.S1_at   | MmugDNA.19610.1 | 3.76  | 4.1   | 0.22 | 0.36 | -1.27 | 0.224279 | 0.12867  | 0.582637 | 0.400083 |
| MmugDNA.19611.1.S1_at   | MmugDNA.19611.1 | 3.4   | 3.61  | 0.16 | 0.2  | -1.16 | 0.31712  | 0.750771 | 0.647855 | 0.855064 |
| MmugDNA.19612.1.S1_at   | MmugDNA.19612.1 | 6.32  | 7.61  | 0.6  | 0.59 | -2.45 | 0.087904 | 0.086579 | 0.442238 | 0.33911  |
| MmugDNA.19616.1.S1_at   | MmugDNA.19616.1 | 4.79  | 4.55  | 0.04 | 0.12 | 1.18  | 0.034714 | 0.027501 | 0.333642 | 0.207161 |
| MmugDNA.19617.1.S1_at   | MmugDNA.19617.1 | 4.21  | 4.14  | 0.07 | 0.18 | 1.04  | 0.306481 | 0.171483 | 0.639593 | 0.447895 |
| MmugDNA.19618.1.S1_at   | MmugDNA.19618.1 | 4.09  | 4.17  | 0.04 | 0.19 | -1.06 | 0.556366 | 0.71327  | 0.79173  | 0.833666 |
| MmugDNA.19619.1.S1_at   | MmugDNA.19619.1 | 12.33 | 11.97 | 0.11 | 0.25 | 1.28  | 0.069629 | 0.051608 | 0.412649 | 0.272636 |
| MmugDNA.1962.1.S1_at    | MmugDNA.1962.1  | 3.87  | 3.85  | 0.09 | 0.3  | 1.01  | 0.894729 | 0.371266 | 0.957917 | 0.610135 |
| MmugDNA.19620.1.S1_at   | MmugDNA.19620.1 | 3.27  | 3.47  | 0.21 | 0.11 | -1.15 | 0.669393 | 0.310019 | 0.852167 | 0.565253 |
| MmugDNA.19621.1.S1_at   | MmugDNA.19621.1 | 9.85  | 10.26 | 0.06 | 0.41 | -1.33 | 0.154494 | 0.229355 | 0.51902  | 0.501527 |
| MmugDNA.19623.1.S1_at   | MmugDNA.19623.1 | 5.91  | 7.54  | 0.33 | 0.24 | -3.08 | 0.002312 | 0.000736 | 0.161798 | 0.044846 |
| MmugDNA.19623.1.S1_s_at | MmugDNA.19623.1 | 8.77  | 10.1  | 0.29 | 0.04 | -2.52 | 0.000939 | 0.000356 | 0.139813 | 0.037229 |
| MmugDNA.19624.1.S1_at   | MmugDNA.19624.1 | 6.81  | 6.1   | 0.11 | 0.2  | 1.64  | 0.009062 | 0.007084 | 0.222023 | 0.113353 |
| MmugDNA.19625.1.S1_at   | MmugDNA.19625.1 | 5.78  | 8.57  | 1.22 | 1.02 | -6.91 | 0.085931 | 0.058067 | 0.440024 | 0.28759  |
| MmugDNA.19626.1.S1_at   | MmugDNA.19626.1 | 7.32  | 6.78  | 0.12 | 0.6  | 1.45  | 0.068356 | 0.059354 | 0.410012 | 0.29054  |
| MmugDNA.19627.1.S1_at   | MmugDNA.19627.1 | 12.16 | 12.41 | 0.12 | 0    | -1.18 | 0.056307 | 0.047025 | 0.38633  | 0.261469 |
| MmugDNA.19628.1.S1_at   | MmugDNA.19628.1 | 4.63  | 4.18  | 0.13 | 0.37 | 1.36  | 0.08287  | 0.271459 | 0.434645 | 0.536512 |
| MmugDNA.19629.1.S1_at   | MmugDNA.19629.1 | 5.99  | 5.95  | 0.2  | 0.11 | 1.02  | 0.559651 | 0.634784 | 0.793999 | 0.785035 |
| MmugDNA.1963.1.S1_at    | MmugDNA.1963.1  | 4.95  | 5.56  | 0.2  | 0.41 | -1.53 | 0.183203 | 0.153506 | 0.547309 | 0.42827  |
| MmugDNA.19630.1.S1_at   | MmugDNA.19630.1 | 7.07  | 7.23  | 0.12 | 0.19 | -1.11 | 0.210174 | 0.109438 | 0.571368 | 0.373277 |
| MmugDNA.19631.1.S1_at   | MmugDNA.19631.1 | 6.45  | 6.62  | 0.15 | 0.2  | -1.13 | 0.125244 | 0.132336 | 0.49131  | 0.404294 |

|                         |                 |       |       |      |      |       |          |          |          |          |
|-------------------------|-----------------|-------|-------|------|------|-------|----------|----------|----------|----------|
| MmugDNA.6510.1.S1_s_at  | MmugDNA.6510.1  | 9.2   | 11.11 | 0.24 | 0.5  | -3.76 | 0.008211 | 0.004163 | 0.216841 | 0.091036 |
| MmugDNA.19633.1.S1_at   | MmugDNA.19633.1 | 9.21  | 6.34  | 0.41 | 0.43 | 7.31  | 0.00219  | 0.00249  | 0.159615 | 0.073794 |
| MmugDNA.19634.1.S1_at   | MmugDNA.19634.1 | 5.07  | 5.07  | 0.15 | 0.2  | 1     | 0.544021 | 0.641714 | 0.784219 | 0.789688 |
| MmugDNA.19635.1.S1_at   | MmugDNA.19635.1 | 7.04  | 7.45  | 0.07 | 0.31 | -1.33 | 0.067488 | 0.04694  | 0.407949 | 0.261301 |
| MmugDNA.19636.1.S1_at   | MmugDNA.19636.1 | 5.83  | 5.88  | 0.1  | 0.18 | -1.04 | 0.313548 | 0.265075 | 0.645195 | 0.531    |
| MmugDNA.19637.1.S1_at   | MmugDNA.19637.1 | 6.88  | 6.74  | 0.25 | 0.09 | 1.1   | 0.886448 | 0.351446 | 0.954596 | 0.595067 |
| MmugDNA.19638.1.S1_at   | MmugDNA.19638.1 | 4.26  | 3.68  | 0.5  | 0.3  | 1.5   | 0.150343 | 0.191793 | 0.515093 | 0.467133 |
| MmugDNA.19639.1.S1_at   | MmugDNA.19639.1 | 3.52  | 3.67  | 0.16 | 0.18 | -1.11 | 0.735864 | 0.895686 | 0.886439 | 0.940369 |
| MmugDNA.1964.1.S1_at    | MmugDNA.1964.1  | 8.19  | 7.87  | 0.43 | 0.06 | 1.25  | 0.720751 | 0.615078 | 0.877776 | 0.771731 |
| MmugDNA.1964.1.S1_s_at  | MmugDNA.1964.1  | 8.23  | 7.83  | 0.53 | 0.07 | 1.32  | 0.676132 | 0.853941 | 0.854832 | 0.916872 |
| MmugDNA.19640.1.S1_at   | MmugDNA.19640.1 | 8.42  | 7.45  | 0.55 | 0.26 | 1.96  | 0.224662 | 0.026445 | 0.58277  | 0.203765 |
| MmugDNA.19641.1.S1_at   | MmugDNA.19641.1 | 7.18  | 5.97  | 0.21 | 0.38 | 2.31  | 0.025232 | 0.030026 | 0.298273 | 0.215056 |
| MmugDNA.19642.1.S1_s_at | MmugDNA.19642.1 | 7.09  | 8.03  | 0.14 | 0.2  | -1.93 | 0.002328 | 0.001922 | 0.161798 | 0.06556  |
| MmugDNA.19646.1.S1_at   | MmugDNA.19646.1 | 5.05  | 5.28  | 0.18 | 0.14 | -1.17 | 0.17146  | 0.226936 | 0.535166 | 0.499276 |
| MmugDNA.19647.1.S1_at   | MmugDNA.19647.1 | 4.72  | 4.71  | 0.17 | 0.19 | 1     | 0.314113 | 0.246912 | 0.645522 | 0.516238 |
| MmugDNA.19648.1.S1_at   | MmugDNA.19648.1 | 7.74  | 8.74  | 0.56 | 0.41 | -2    | 0.055866 | 0.037926 | 0.384905 | 0.239302 |
| MmugDNA.19649.1.S1_at   | MmugDNA.19649.1 | 6.57  | 6.34  | 1.65 | 0.92 | 1.18  | 0.835236 | 0.870514 | 0.933181 | 0.926446 |
| MmugDNA.1965.1.S1_at    | MmugDNA.1965.1  | 5.49  | 5.44  | 0.95 | 0.43 | 1.03  | 0.929605 | 0.738672 | 0.972741 | 0.848486 |
| MmugDNA.19650.1.S1_at   | MmugDNA.19650.1 | 8.47  | 8.52  | 0.22 | 0.15 | -1.03 | 0.469306 | 0.459706 | 0.741612 | 0.671948 |
| MmugDNA.19652.1.S1_at   | MmugDNA.19652.1 | 4.99  | 5.1   | 0.16 | 0.12 | -1.08 | 0.455666 | 0.59717  | 0.733922 | 0.760104 |
| MmugDNA.19654.1.S1_at   | MmugDNA.19654.1 | 7.21  | 7.18  | 0.65 | 0.17 | 1.02  | 0.324187 | 0.17045  | 0.651856 | 0.447103 |
| MmugDNA.19656.1.S1_at   | MmugDNA.19656.1 | 11.33 | 12.23 | 0.07 | 0.08 | -1.87 | 0.000146 | 0.000059 | 0.112653 | 0.025666 |
| MmugDNA.19657.1.S1_at   | MmugDNA.19657.1 | 4.92  | 4.39  | 0.65 | 0.29 | 1.44  | 0.060797 | 0.05207  | 0.394325 | 0.273761 |
| MmugDNA.19658.1.S1_at   | MmugDNA.19658.1 | 12.69 | 12.83 | 0.03 | 0.29 | -1.1  | 0.803462 | 0.468271 | 0.919138 | 0.6777   |
| MmugDNA.19659.1.S1_at   | MmugDNA.19659.1 | 9.58  | 9.22  | 0.31 | 0.29 | 1.28  | 0.095243 | 0.008114 | 0.453089 | 0.119642 |
| MmugDNA.1966.1.S1_at    | MmugDNA.1966.1  | 4.18  | 3.52  | 0.6  | 0.09 | 1.58  | 0.209645 | 0.278314 | 0.571003 | 0.542037 |
| MmugDNA.19661.1.S1_at   | MmugDNA.19661.1 | 5.63  | 5.68  | 0.05 | 0.06 | -1.03 | 0.55741  | 0.051406 | 0.792435 | 0.272192 |
| MmugDNA.19662.1.S1_at   | MmugDNA.19662.1 | 3.9   | 4.03  | 0.07 | 0.14 | -1.09 | 0.164935 | 0.192811 | 0.528821 | 0.468296 |
| MmugDNA.19664.1.S1_at   | MmugDNA.19664.1 | 11.84 | 11.75 | 0.13 | 0.03 | 1.07  | 0.102567 | 0.105438 | 0.462417 | 0.367279 |
| MmugDNA.19665.1.S1_at   | MmugDNA.19665.1 | 8.64  | 8.17  | 0.17 | 0.43 | 1.39  | 0.075729 | 0.047014 | 0.423419 | 0.261469 |
| MmugDNA.19667.1.S1_at   | MmugDNA.19667.1 | 4.13  | 4.12  | 0.08 | 0.25 | 1.01  | 0.827675 | 0.696852 | 0.930084 | 0.823975 |
| MmugDNA.19668.1.S1_at   | MmugDNA.19668.1 | 7.25  | 6.8   | 0.82 | 0.32 | 1.38  | 0.305493 | 0.36311  | 0.639223 | 0.60356  |
| MmugDNA.19669.1.S1_at   | MmugDNA.19669.1 | 3.89  | 3.74  | 0.19 | 0.07 | 1.11  | 0.681706 | 0.433186 | 0.857635 | 0.653513 |
| MmugDNA.19670.1.S1_at   | MmugDNA.19670.1 | 8.96  | 8.98  | 0.52 | 0.19 | -1.02 | 0.369674 | 0.240628 | 0.680816 | 0.511328 |
| MmugDNA.19672.1.S1_at   | MmugDNA.19672.1 | 3.24  | 3.26  | 0.15 | 0.11 | -1.01 | 0.290928 | 0.178786 | 0.628648 | 0.455095 |
| MmugDNA.19673.1.S1_at   | MmugDNA.19673.1 | 5.15  | 5.17  | 0.26 | 0.23 | -1.02 | 0.637019 | 0.834712 | 0.83591  | 0.905374 |
| MmugDNA.19675.1.S1_at   | MmugDNA.19675.1 | 4.24  | 4.56  | 0.45 | 0.24 | -1.25 | 0.501859 | 0.245803 | 0.760163 | 0.515519 |
| MmugDNA.19676.1.S1_at   | MmugDNA.19676.1 | 4.33  | 3.87  | 0.46 | 0.25 | 1.37  | 0.078043 | 0.069349 | 0.428012 | 0.309558 |
| MmugDNA.19678.1.S1_at   | MmugDNA.19678.1 | 3.09  | 2.84  | 0.12 | 0.17 | 1.19  | 0.11728  | 0.058353 | 0.481331 | 0.288356 |
| MmugDNA.1968.1.S1_at    | MmugDNA.1968.1  | 7.35  | 6.84  | 0.2  | 0.2  | 1.43  | 0.093549 | 0.004231 | 0.450945 | 0.091435 |
| MmugDNA.1968.1.S1_s_at  | MmugDNA.1968.1  | 7.59  | 6.96  | 0.19 | 0.4  | 1.55  | 0.114139 | 0.021298 | 0.47744  | 0.182706 |

|                         |                 |       |       |      |      |       |          |          |          |          |
|-------------------------|-----------------|-------|-------|------|------|-------|----------|----------|----------|----------|
| MmugDNA.19680.1.S1_at   | MmugDNA.19680.1 | 5.82  | 5.84  | 0.19 | 0.05 | -1.01 | 0.876848 | 0.98014  | 0.950675 | 0.989236 |
| MmugDNA.19681.1.S1_at   | MmugDNA.19681.1 | 3.9   | 4.2   | 0.21 | 0.18 | -1.24 | 0.262713 | 0.092214 | 0.609039 | 0.347969 |
| MmugDNA.19683.1.S1_at   | MmugDNA.19683.1 | 5.65  | 5.7   | 0.37 | 0.09 | -1.03 | 0.405686 | 0.543415 | 0.703322 | 0.726105 |
| MmugDNA.19684.1.S1_at   | MmugDNA.19684.1 | 8.28  | 8.05  | 0.27 | 0.22 | 1.18  | 0.306805 | 0.011247 | 0.63971  | 0.138014 |
| MmugDNA.19687.1.S1_at   | MmugDNA.19687.1 | 3.57  | 4.01  | 0.09 | 0.43 | -1.36 | 0.324435 | 0.399768 | 0.651941 | 0.629973 |
| MmugDNA.19688.1.S1_at   | MmugDNA.19688.1 | 9.42  | 8.56  | 0.11 | 0.17 | 1.82  | 0.00197  | 0.003659 | 0.155636 | 0.086526 |
| MmugDNA.1969.1.S1_at    | MmugDNA.1969.1  | 10.95 | 10.4  | 0.13 | 0.26 | 1.47  | 0.068085 | 0.000729 | 0.409262 | 0.044699 |
| MmugDNA.19690.1.S1_at   | MmugDNA.19690.1 | 4.75  | 5.93  | 0.24 | 0.1  | -2.26 | 0.001721 | 0.005054 | 0.154452 | 0.099022 |
| MmugDNA.19692.1.S1_at   | MmugDNA.19692.1 | 5.49  | 5.6   | 0.4  | 0.07 | -1.08 | 0.656161 | 0.868008 | 0.845317 | 0.925053 |
| MmugDNA.19693.1.S1_at   | MmugDNA.19693.1 | 6.33  | 6.95  | 0.47 | 0.38 | -1.54 | 0.285246 | 0.099378 | 0.624811 | 0.357673 |
| MmugDNA.19694.1.S1_at   | MmugDNA.19694.1 | 6.12  | 6.28  | 0.11 | 0.09 | -1.12 | 0.322729 | 0.225311 | 0.651245 | 0.497892 |
| MmugDNA.19696.1.S1_at   | MmugDNA.19696.1 | 3.39  | 3.45  | 0.11 | 0.09 | -1.04 | 0.59898  | 0.684782 | 0.814306 | 0.816146 |
| MmugDNA.19697.1.S1_x_at | MmugDNA.19697.1 | 10.63 | 10.23 | 0.54 | 0.17 | 1.32  | 0.206121 | 0.280311 | 0.568474 | 0.543544 |
| MmugDNA.19698.1.S1_at   | MmugDNA.19698.1 | 11.05 | 10.83 | 0.04 | 0.23 | 1.17  | 0.070022 | 0.008093 | 0.413492 | 0.119551 |
| MmugDNA.38719.1.S1_s_at | MmugDNA.38719.1 | 9.72  | 9.55  | 0.06 | 0.18 | 1.13  | 0.065084 | 0.001534 | 0.403867 | 0.059437 |
| MmugDNA.19699.1.S1_at   | MmugDNA.19699.1 | 8.91  | 8.88  | 0.14 | 0.09 | 1.02  | 0.999845 | 0.069272 | 0.999967 | 0.309468 |
| MmugDNA.1970.1.S1_at    | MmugDNA.1970.1  | 3.63  | 3.77  | 0.46 | 0.05 | -1.1  | 0.651882 | 0.622391 | 0.843369 | 0.776887 |
| MmugDNA.19700.1.S1_at   | MmugDNA.19700.1 | 3.86  | 3.94  | 0.14 | 0.2  | -1.06 | 0.968438 | 0.880934 | 0.988134 | 0.932026 |
| MmugDNA.19702.1.S1_at   | MmugDNA.19702.1 | 9.72  | 9.9   | 0.07 | 0.14 | -1.13 | 0.04356  | 0.02973  | 0.356798 | 0.214096 |
| MmugDNA.19703.1.S1_at   | MmugDNA.19703.1 | 5.24  | 4.99  | 0.17 | 0.19 | 1.19  | 0.188399 | 0.367368 | 0.55145  | 0.607012 |
| MmugDNA.19705.1.S1_at   | MmugDNA.19705.1 | 4.9   | 4.92  | 0.24 | 0.17 | -1.01 | 0.91981  | 0.920283 | 0.968755 | 0.95511  |
| MmugDNA.19707.1.S1_at   | MmugDNA.19707.1 | 7.06  | 6.77  | 0.25 | 0.21 | 1.23  | 0.451153 | 0.333607 | 0.731475 | 0.581808 |
| MmugDNA.19708.1.S1_at   | MmugDNA.19708.1 | 6.32  | 6.84  | 0.43 | 1.07 | -1.42 | 0.434894 | 0.610622 | 0.720937 | 0.76874  |
| MmugDNA.19708.1.S1_s_at | MmugDNA.19708.1 | 5.89  | 6.61  | 0.24 | 1.22 | -1.64 | 0.376446 | 0.377957 | 0.685219 | 0.615264 |
| MmugDNA.19709.1.S1_x_at | MmugDNA.19709.1 | 4.69  | 4.97  | 0.14 | 0.29 | -1.21 | 0.208371 | 0.219736 | 0.570251 | 0.493388 |
| MmugDNA.1971.1.S1_at    | MmugDNA.1971.1  | 6.45  | 6.54  | 0.33 | 0.04 | -1.07 | 0.730566 | 0.828567 | 0.883214 | 0.901537 |
| MmugDNA.19710.1.S1_at   | MmugDNA.19710.1 | 8.14  | 9.01  | 0.36 | 0.63 | -1.82 | 0.136629 | 0.050766 | 0.503755 | 0.270457 |
| MmugDNA.19711.1.S1_at   | MmugDNA.19711.1 | 6.42  | 6.44  | 0.04 | 0.3  | -1.01 | 0.633424 | 0.835812 | 0.833692 | 0.906066 |
| MmugDNA.19713.1.S1_at   | MmugDNA.19713.1 | 4.9   | 5.2   | 0.09 | 0.32 | -1.23 | 0.216035 | 0.105562 | 0.575954 | 0.367526 |
| MmugDNA.19715.1.S1_at   | MmugDNA.19715.1 | 2.75  | 2.74  | 0.05 | 0.18 | 1.01  | 0.456728 | 0.636089 | 0.734529 | 0.785876 |
| MmugDNA.19716.1.S1_at   | MmugDNA.19716.1 | 7.28  | 5.92  | 0.53 | 0.66 | 2.57  | 0.058474 | 0.162144 | 0.390457 | 0.438282 |
| MmugDNA.19717.1.S1_at   | MmugDNA.19717.1 | 4.62  | 4.25  | 0.4  | 0.1  | 1.29  | 0.751117 | 0.918994 | 0.893635 | 0.95449  |
| MmugDNA.19719.1.S1_at   | MmugDNA.19719.1 | 7.25  | 9.46  | 0.75 | 0.39 | -4.61 | 0.008283 | 0.00352  | 0.217127 | 0.085137 |
| MmugDNA.1972.1.S1_at    | MmugDNA.1972.1  | 7.27  | 7.26  | 0.12 | 0.03 | 1.01  | 0.994733 | 0.952172 | 0.998151 | 0.972894 |
| MmugDNA.19720.1.S1_at   | MmugDNA.19720.1 | 9.82  | 10.24 | 0.22 | 0.3  | -1.34 | 0.070667 | 0.040997 | 0.414661 | 0.247202 |
| MmugDNA.19721.1.S1_at   | MmugDNA.19721.1 | 3.72  | 3.76  | 0.11 | 0.03 | -1.03 | 0.607239 | 0.23644  | 0.819285 | 0.507314 |
| MmugDNA.19722.1.S1_at   | MmugDNA.19722.1 | 12.35 | 11.89 | 0.18 | 0.14 | 1.37  | 0.047283 | 0.02073  | 0.365758 | 0.180654 |
| MmugDNA.19723.1.S1_at   | MmugDNA.19723.1 | 5.8   | 5.86  | 0.17 | 0.12 | -1.04 | 0.90077  | 0.282394 | 0.960386 | 0.545076 |
| MmugDNA.19724.1.S1_at   | MmugDNA.19724.1 | 13.03 | 12.83 | 0.09 | 0.18 | 1.15  | 0.148919 | 0.053746 | 0.51391  | 0.277384 |
| MmugDNA.19726.1.S1_at   | MmugDNA.19726.1 | 3.47  | 3.49  | 0.05 | 0.12 | -1.01 | 0.900178 | 0.236533 | 0.960239 | 0.507364 |
| MmugDNA.19728.1.S1_at   | MmugDNA.19728.1 | 7.15  | 6.68  | 0.68 | 0.48 | 1.38  | 0.948235 | 0.886803 | 0.980164 | 0.935553 |



|                         |                 |       |       |      |      |       |          |          |          |          |
|-------------------------|-----------------|-------|-------|------|------|-------|----------|----------|----------|----------|
| MmugDNA.19728.1.S1_x_at | MmugDNA.19728.1 | 7.11  | 6.5   | 0.55 | 0.44 | 1.53  | 0.914753 | 0.481622 | 0.966289 | 0.686557 |
| MmugDNA.1973.1.S1_at    | MmugDNA.1973.1  | 3.43  | 3.13  | 0.59 | 0.35 | 1.23  | 0.818443 | 0.947567 | 0.926289 | 0.970252 |
| MmugDNA.19730.1.S1_at   | MmugDNA.19730.1 | 8.8   | 9.29  | 0.93 | 0.16 | -1.4  | 0.456896 | 0.602175 | 0.734604 | 0.763204 |
| MmugDNA.19731.1.S1_at   | MmugDNA.19731.1 | 9.91  | 10.56 | 0.25 | 0.76 | -1.57 | 0.294362 | 0.383459 | 0.631216 | 0.619433 |
| MmugDNA.19732.1.S1_at   | MmugDNA.19732.1 | 3.99  | 4.03  | 0.14 | 0.41 | -1.02 | 0.376633 | 0.108296 | 0.685249 | 0.371557 |
| MmugDNA.19732.1.S1_s_at | MmugDNA.19732.1 | 6.81  | 5.95  | 0.94 | 0.84 | 1.81  | 0.384982 | 0.397322 | 0.690208 | 0.628781 |
| MmugDNA.19733.1.S1_at   | MmugDNA.19733.1 | 3.32  | 3.62  | 0.11 | 0.2  | -1.24 | 0.262159 | 0.252629 | 0.608867 | 0.521174 |
| MmugDNA.19734.1.S1_at   | MmugDNA.19734.1 | 4.64  | 4.84  | 0.04 | 0.23 | -1.15 | 0.268128 | 0.275885 | 0.613029 | 0.540035 |
| MmugDNA.19735.1.S1_at   | MmugDNA.19735.1 | 5.04  | 5.04  | 0.02 | 0.1  | -1    | 0.511661 | 0.219891 | 0.765318 | 0.493401 |
| MmugDNA.19737.1.S1_at   | MmugDNA.19737.1 | 4.36  | 4     | 0.33 | 0.07 | 1.29  | 0.076361 | 0.037152 | 0.424794 | 0.237229 |
| MmugDNA.19739.1.S1_at   | MmugDNA.19739.1 | 6.06  | 6.36  | 0.3  | 0.05 | -1.23 | 0.513953 | 0.557866 | 0.766673 | 0.735286 |
| MmugDNA.1974.1.S1_at    | MmugDNA.1974.1  | 6.68  | 6.99  | 0.21 | 0.18 | -1.24 | 0.078966 | 0.0705   | 0.428609 | 0.311777 |
| MmugDNA.19740.1.S1_at   | MmugDNA.19740.1 | 4.64  | 4.63  | 0.07 | 0.1  | 1.01  | 0.423498 | 0.666474 | 0.71414  | 0.804596 |
| MmugDNA.19741.1.S1_at   | MmugDNA.19741.1 | 3.02  | 3.11  | 0.12 | 0.14 | -1.06 | 0.758556 | 0.924467 | 0.897919 | 0.957385 |
| MmugDNA.19742.1.S1_at   | MmugDNA.19742.1 | 2.92  | 2.84  | 0.1  | 0.05 | 1.06  | 0.842837 | 0.179094 | 0.936661 | 0.455436 |
| MmugDNA.19743.1.S1_at   | MmugDNA.19743.1 | 6.15  | 6.29  | 0.58 | 0.16 | -1.1  | 0.770785 | 0.577469 | 0.903413 | 0.747923 |
| MmugDNA.19744.1.S1_at   | MmugDNA.19744.1 | 8.11  | 7.72  | 0.21 | 0.41 | 1.31  | 0.230621 | 0.318795 | 0.587222 | 0.571379 |
| MmugDNA.19745.1.S1_at   | MmugDNA.19745.1 | 5.86  | 5.65  | 0.81 | 0.22 | 1.16  | 0.660317 | 0.467972 | 0.847582 | 0.677457 |
| MmugDNA.19746.1.S1_at   | MmugDNA.19746.1 | 7.57  | 8.77  | 0.89 | 1.69 | -2.29 | 0.373629 | 0.519562 | 0.683245 | 0.711134 |
| MmugDNA.19747.1.S1_at   | MmugDNA.19747.1 | 10.61 | 11.87 | 0.91 | 1.5  | -2.38 | 0.404011 | 0.530725 | 0.702538 | 0.718104 |
| MmugDNA.19749.1.S1_at   | MmugDNA.19749.1 | 10.61 | 9.99  | 0.23 | 0.19 | 1.54  | 0.014456 | 0.029652 | 0.252636 | 0.213852 |
| MmugDNA.19750.1.S1_x_at | MmugDNA.19750.1 | 7.72  | 8.87  | 0.23 | 0.98 | -2.21 | 0.120786 | 0.085049 | 0.48574  | 0.336812 |
| MmugDNA.19753.1.S1_at   | MmugDNA.19753.1 | 4.76  | 4.46  | 0.19 | 0.13 | 1.22  | 0.086598 | 0.103301 | 0.440445 | 0.364143 |
| MmugDNA.19757.1.S1_at   | MmugDNA.19757.1 | 4.85  | 5.15  | 0.56 | 0.07 | -1.23 | 0.957437 | 0.992554 | 0.983882 | 0.995715 |
| MmugDNA.19758.1.S1_at   | MmugDNA.19758.1 | 4.98  | 5.03  | 0.05 | 0.22 | -1.04 | 0.461153 | 0.023638 | 0.737457 | 0.192555 |
| MmugDNA.1976.1.S1_s_at  | MmugDNA.1976.1  | 10.77 | 10.39 | 0.11 | 0.37 | 1.31  | 0.46429  | 0.177395 | 0.739156 | 0.453745 |
| MmugDNA.19761.1.S1_at   | MmugDNA.19761.1 | 4.44  | 4.17  | 0.19 | 0.15 | 1.2   | 0.123897 | 0.089763 | 0.489589 | 0.34404  |
| MmugDNA.19762.1.S1_at   | MmugDNA.19762.1 | 10.56 | 9.81  | 0.11 | 0.14 | 1.68  | 0.003766 | 0.000334 | 0.179914 | 0.036179 |
| MmugDNA.19763.1.S1_at   | MmugDNA.19763.1 | 4.51  | 4.54  | 0.01 | 0.22 | -1.02 | 0.524332 | 0.294763 | 0.773171 | 0.554345 |
| MmugDNA.19764.1.S1_at   | MmugDNA.19764.1 | 8.43  | 7.73  | 0.07 | 0.2  | 1.62  | 0.005674 | 0.002122 | 0.191943 | 0.068137 |
| MmugDNA.19766.1.S1_at   | MmugDNA.19766.1 | 7.41  | 7.6   | 0.13 | 0.3  | -1.15 | 0.289248 | 0.038543 | 0.627275 | 0.241322 |
| MmugDNA.19767.1.S1_s_at | MmugDNA.19767.1 | 6.65  | 6.58  | 0.12 | 0.22 | 1.05  | 0.613764 | 0.353042 | 0.822905 | 0.596356 |
| MmugDNA.1977.1.S1_at    | MmugDNA.1977.1  | 5.1   | 5.05  | 0.45 | 0.01 | 1.03  | 0.77842  | 0.639055 | 0.907432 | 0.788038 |
| MmugDNA.19771.1.S1_at   | MmugDNA.19771.1 | 7.33  | 7.34  | 0.15 | 0.84 | -1.01 | 0.999701 | 0.169054 | 0.999967 | 0.445593 |
| MmugDNA.19772.1.S1_at   | MmugDNA.19772.1 | 3.65  | 3.63  | 0.03 | 0.02 | 1.01  | 0.859141 | 0.927048 | 0.943112 | 0.958505 |
| MmugDNA.19773.1.S1_at   | MmugDNA.19773.1 | 12.59 | 12.32 | 0.34 | 0.35 | 1.2   | 0.393717 | 0.315311 | 0.695488 | 0.568939 |
| MmugDNA.19775.1.S1_at   | MmugDNA.19775.1 | 9.96  | 10.05 | 0.12 | 0.05 | -1.06 | 0.291202 | 0.253965 | 0.628725 | 0.522345 |
| MmugDNA.19776.1.S1_at   | MmugDNA.19776.1 | 3.64  | 3.69  | 0.21 | 0.03 | -1.04 | 0.726342 | 0.937658 | 0.880953 | 0.964687 |
| MmugDNA.19778.1.S1_at   | MmugDNA.19778.1 | 6.83  | 6.8   | 0.62 | 0.08 | 1.02  | 0.300726 | 0.238232 | 0.635955 | 0.508825 |
| MmugDNA.19779.1.S1_at   | MmugDNA.19779.1 | 7.01  | 6.35  | 0.51 | 0.28 | 1.58  | 0.143061 | 0.187023 | 0.510004 | 0.462938 |
| MmugDNA.19779.1.S1_s_at | MmugDNA.19779.1 | 9.63  | 9.05  | 0.16 | 0.22 | 1.49  | 0.017996 | 0.009063 | 0.268422 | 0.125855 |

|                         |                 |       |       |      |      |       |          |          |          |          |
|-------------------------|-----------------|-------|-------|------|------|-------|----------|----------|----------|----------|
| MmugDNA.1978.1.S1_at    | MmugDNA.1978.1  | 6.56  | 6.86  | 0.11 | 0.55 | -1.23 | 0.79698  | 0.964013 | 0.915801 | 0.980031 |
| MmugDNA.19780.1.S1_at   | MmugDNA.19780.1 | 3.24  | 3.36  | 0.05 | 0.05 | -1.09 | 0.061618 | 0.314116 | 0.396441 | 0.568185 |
| MmugDNA.19781.1.S1_at   | MmugDNA.19781.1 | 12.1  | 11.87 | 0.06 | 0.35 | 1.17  | 0.10772  | 0.103194 | 0.468203 | 0.364123 |
| MmugDNA.19782.1.S1_at   | MmugDNA.19782.1 | 5.32  | 5.32  | 0.4  | 0.05 | 1     | 0.608885 | 0.785725 | 0.82022  | 0.875928 |
| MmugDNA.19783.1.S1_at   | MmugDNA.19783.1 | 6.54  | 6.53  | 0.2  | 0.15 | 1.01  | 0.259908 | 0.350148 | 0.606878 | 0.593918 |
| MmugDNA.19785.1.S1_at   | MmugDNA.19785.1 | 3.91  | 3.93  | 0.04 | 0.1  | -1.02 | 0.57003  | 0.200638 | 0.799327 | 0.475191 |
| MmugDNA.19787.1.S1_at   | MmugDNA.19787.1 | 7.13  | 7.45  | 0.6  | 0.58 | -1.25 | 0.479047 | 0.587643 | 0.747575 | 0.754408 |
| MmugDNA.19788.1.S1_at   | MmugDNA.19788.1 | 10.48 | 10.26 | 0.4  | 0.41 | 1.17  | 0.528946 | 0.660899 | 0.775764 | 0.801634 |
| MmugDNA.19788.1.S1_s_at | MmugDNA.19788.1 | 9.81  | 9.84  | 0.13 | 0.36 | -1.02 | 0.490301 | 0.189388 | 0.75438  | 0.465117 |
| MmugDNA.19789.1.S1_at   | MmugDNA.19789.1 | 4.5   | 4.62  | 0.09 | 0.08 | -1.09 | 0.17318  | 0.118389 | 0.536866 | 0.3864   |
| MmugDNA.1979.1.S1_at    | MmugDNA.1979.1  | 6.25  | 5.9   | 1.43 | 0.48 | 1.27  | 0.64002  | 0.791997 | 0.837512 | 0.879813 |
| MmugDNA.19790.1.S1_at   | MmugDNA.19790.1 | 5.46  | 5.5   | 0.53 | 0.39 | -1.03 | 0.848776 | 0.920954 | 0.939211 | 0.955491 |
| MmugDNA.19792.1.S1_at   | MmugDNA.19792.1 | 6.99  | 6.97  | 0.5  | 0.22 | 1.01  | 0.697646 | 0.810593 | 0.865694 | 0.890812 |
| MmugDNA.19793.1.S1_at   | MmugDNA.19793.1 | 3.91  | 3.28  | 1.05 | 0.35 | 1.55  | 0.297835 | 0.184008 | 0.633549 | 0.460195 |
| MmugDNA.19794.1.S1_at   | MmugDNA.19794.1 | 3.54  | 3.34  | 0.05 | 0.08 | 1.15  | 0.033701 | 0.134748 | 0.330119 | 0.40678  |
| MmugDNA.19795.1.S1_at   | MmugDNA.19795.1 | 6.91  | 7.11  | 0.07 | 0.1  | -1.15 | 0.017803 | 0.028636 | 0.267882 | 0.210901 |
| MmugDNA.19796.1.S1_s_at | MmugDNA.19796.1 | 5.79  | 6.07  | 0.07 | 0.31 | -1.22 | 0.239286 | 0.329765 | 0.592443 | 0.578874 |
| MmugDNA.19797.1.S1_at   | MmugDNA.19797.1 | 8.96  | 8.68  | 0.37 | 0.17 | 1.21  | 0.178083 | 0.222095 | 0.542365 | 0.495113 |
| MmugDNA.19798.1.S1_at   | MmugDNA.19798.1 | 6.69  | 8.74  | 0.53 | 0.88 | -4.14 | 0.02198  | 0.012077 | 0.284455 | 0.14216  |
| MmugDNA.1980.1.S1_at    | MmugDNA.1980.1  | 6.62  | 6.37  | 0.13 | 0.36 | 1.19  | 0.979081 | 0.396269 | 0.992315 | 0.628074 |
| MmugDNA.19800.1.S1_at   | MmugDNA.19800.1 | 9.16  | 9.2   | 0.39 | 0.21 | -1.03 | 0.299617 | 0.434947 | 0.634993 | 0.654901 |
| MmugDNA.19804.1.S1_s_at | MmugDNA.19804.1 | 4.92  | 4.58  | 0.26 | 0.31 | 1.26  | 0.971336 | 0.378332 | 0.989052 | 0.615443 |
| MmugDNA.19805.1.S1_at   | MmugDNA.19805.1 | 5.29  | 5.04  | 0.42 | 0.01 | 1.18  | 0.992312 | 0.995932 | 0.997401 | 0.997533 |
| MmugDNA.19806.1.S1_s_at | MmugDNA.19806.1 | 8.1   | 8.72  | 0.22 | 0.43 | -1.54 | 0.251324 | 0.339815 | 0.600793 | 0.586394 |
| MmugDNA.19807.1.S1_at   | MmugDNA.19807.1 | 5.54  | 5.54  | 0.01 | 0.23 | 1     | 0.361319 | 0.339875 | 0.675166 | 0.586417 |
| MmugDNA.19808.1.S1_at   | MmugDNA.19808.1 | 5.46  | 5.39  | 0.42 | 0.11 | 1.05  | 0.596181 | 0.732357 | 0.812808 | 0.844986 |
| MmugDNA.1981.1.S1_at    | MmugDNA.1981.1  | 2.94  | 3.19  | 0.16 | 0.11 | -1.19 | 0.167425 | 0.252239 | 0.531619 | 0.520924 |
| MmugDNA.19812.1.S1_at   | MmugDNA.19812.1 | 6.66  | 6.57  | 0.14 | 0.92 | 1.07  | 0.959157 | 0.605845 | 0.9845   | 0.765513 |
| MmugDNA.19813.1.S1_at   | MmugDNA.19813.1 | 9.67  | 10.52 | 0.25 | 0.74 | -1.8  | 0.159165 | 0.198395 | 0.52416  | 0.473292 |
| MmugDNA.19814.1.S1_at   | MmugDNA.19814.1 | 4.31  | 4.31  | 0.03 | 0.14 | 1     | 0.500728 | 0.103149 | 0.759658 | 0.364041 |
| MmugDNA.19815.1.S1_at   | MmugDNA.19815.1 | 4.37  | 4.32  | 0.03 | 0.04 | 1.04  | 0.150208 | 0.110263 | 0.514831 | 0.374403 |
| MmugDNA.19816.1.S1_at   | MmugDNA.19816.1 | 9.02  | 8.38  | 1.33 | 0.65 | 1.55  | 0.960973 | 0.204828 | 0.984976 | 0.479209 |
| MmugDNA.19817.1.S1_at   | MmugDNA.19817.1 | 4.51  | 4.26  | 0.29 | 0.24 | 1.19  | 0.226565 | 0.385599 | 0.58449  | 0.621049 |
| MmugDNA.19818.1.S1_at   | MmugDNA.19818.1 | 4.22  | 4.22  | 1.47 | 0.16 | 1     | 0.405715 | 0.383916 | 0.703322 | 0.61978  |
| MmugDNA.19819.1.S1_at   | MmugDNA.19819.1 | 9.63  | 8.82  | 0.14 | 0.86 | 1.76  | 0.205246 | 0.257567 | 0.567726 | 0.525302 |
| MmugDNA.1982.1.S1_at    | MmugDNA.1982.1  | 3.84  | 3.9   | 0.05 | 0.14 | -1.04 | 0.191553 | 0.315273 | 0.554539 | 0.568939 |
| MmugDNA.19821.1.S1_at   | MmugDNA.19821.1 | 5.8   | 5.98  | 0.06 | 0.1  | -1.13 | 0.074209 | 0.23907  | 0.419963 | 0.509827 |
| MmugDNA.19822.1.S1_at   | MmugDNA.19822.1 | 3.18  | 3.33  | 0.12 | 0.1  | -1.1  | 0.405713 | 0.294737 | 0.703322 | 0.554345 |
| MmugDNA.19828.1.S1_at   | MmugDNA.19828.1 | 9.83  | 9.37  | 0.27 | 0.07 | 1.37  | 0.043227 | 0.021487 | 0.356669 | 0.183659 |
| MmugDNA.19829.1.S1_at   | MmugDNA.19829.1 | 5.53  | 5.53  | 0.27 | 0.03 | -1    | 0.8229   | 0.878286 | 0.927957 | 0.930529 |
| MmugDNA.1983.1.S1_at    | MmugDNA.1983.1  | 9.11  | 8.8   | 0.49 | 0.18 | 1.24  | 0.117557 | 0.15911  | 0.481754 | 0.435217 |

|                         |                 |       |       |      |      |       |          |          |          |          |
|-------------------------|-----------------|-------|-------|------|------|-------|----------|----------|----------|----------|
| MmugDNA.19831.1.S1_at   | MmugDNA.19831.1 | 10.32 | 9.85  | 0.04 | 0.38 | 1.39  | 0.065714 | 0.051361 | 0.404984 | 0.272082 |
| MmugDNA.19832.1.S1_at   | MmugDNA.19832.1 | 4.83  | 4.86  | 0.08 | 0.14 | -1.02 | 0.581253 | 0.422965 | 0.805019 | 0.646141 |
| MmugDNA.19833.1.S1_at   | MmugDNA.19833.1 | 3.72  | 3.69  | 0.06 | 0.18 | 1.02  | 0.903419 | 0.447318 | 0.961454 | 0.663434 |
| MmugDNA.19834.1.S1_at   | MmugDNA.19834.1 | 4.36  | 4.52  | 0.17 | 0.21 | -1.12 | 0.814469 | 0.825672 | 0.924758 | 0.899784 |
| MmugDNA.1984.1.S1_at    | MmugDNA.1984.1  | 4.28  | 4.39  | 0.47 | 0.17 | -1.08 | 0.429522 | 0.582877 | 0.717612 | 0.751428 |
| MmugDNA.19843.1.S1_at   | MmugDNA.19843.1 | 11.42 | 11.63 | 0.11 | 0.09 | -1.15 | 0.063493 | 0.024855 | 0.400654 | 0.197532 |
| MmugDNA.19844.1.S1_at   | MmugDNA.19844.1 | 3.34  | 3.13  | 0.12 | 0.07 | 1.16  | 0.195781 | 0.167018 | 0.558925 | 0.443466 |
| MmugDNA.19845.1.S1_at   | MmugDNA.19845.1 | 5.46  | 5.47  | 0    | 0.13 | -1.01 | 0.650416 | 0.640341 | 0.842789 | 0.788874 |
| MmugDNA.19846.1.S1_at   | MmugDNA.19846.1 | 3.72  | 4.16  | 0.02 | 0.49 | -1.36 | 0.192309 | 0.285082 | 0.555414 | 0.547096 |
| MmugDNA.19847.1.S1_at   | MmugDNA.19847.1 | 8.76  | 8.61  | 0.08 | 0.24 | 1.11  | 0.469571 | 0.329524 | 0.741809 | 0.578781 |
| MmugDNA.19848.1.S1_at   | MmugDNA.19848.1 | 9.95  | 10.37 | 0.2  | 0.06 | -1.34 | 0.022826 | 0.011378 | 0.288206 | 0.138214 |
| MmugDNA.19849.1.S1_at   | MmugDNA.19849.1 | 6.62  | 6.22  | 0.36 | 0.79 | 1.32  | 0.163153 | 0.223338 | 0.527489 | 0.49612  |
| MmugDNA.1985.1.S1_at    | MmugDNA.1985.1  | 2.98  | 2.99  | 0.14 | 0.02 | -1.01 | 0.378955 | 0.192785 | 0.686586 | 0.468274 |
| MmugDNA.19850.1.S1_at   | MmugDNA.19850.1 | 9.06  | 8.98  | 0.1  | 0.1  | 1.06  | 0.407724 | 0.866589 | 0.704805 | 0.924174 |
| MmugDNA.19851.1.S1_at   | MmugDNA.19851.1 | 10.2  | 10.57 | 0.26 | 0.48 | -1.29 | 0.286301 | 0.290109 | 0.625548 | 0.551128 |
| MmugDNA.19852.1.S1_at   | MmugDNA.19852.1 | 7.9   | 8.59  | 0.3  | 0.48 | -1.61 | 0.095398 | 0.131887 | 0.453406 | 0.403906 |
| MmugDNA.19853.1.S1_at   | MmugDNA.19853.1 | 6.61  | 6.61  | 0.08 | 0.04 | -1    | 0.408115 | 0.358827 | 0.70497  | 0.600291 |
| MmugDNA.19854.1.S1_at   | MmugDNA.19854.1 | 5.39  | 5.45  | 0.33 | 0.05 | -1.04 | 0.513684 | 0.230818 | 0.766429 | 0.502498 |
| MmugDNA.19855.1.S1_at   | MmugDNA.19855.1 | 6.16  | 6.45  | 0.58 | 0.11 | -1.22 | 0.974553 | 0.986645 | 0.990048 | 0.992465 |
| MmugDNA.19856.1.S1_at   | MmugDNA.19856.1 | 5.52  | 5.62  | 0.07 | 0.07 | -1.07 | 0.147607 | 0.59725  | 0.513287 | 0.76013  |
| MmugDNA.19859.1.S1_at   | MmugDNA.19859.1 | 9.45  | 10.53 | 0.45 | 0.33 | -2.11 | 0.026146 | 0.014431 | 0.301461 | 0.153335 |
| MmugDNA.1986.1.S1_at    | MmugDNA.1986.1  | 9.21  | 10.09 | 0.4  | 0.53 | -1.84 | 0.064496 | 0.060314 | 0.402975 | 0.292254 |
| MmugDNA.19860.1.S1_s_at | MmugDNA.19860.1 | 9.26  | 10.21 | 0.5  | 1.3  | -1.94 | 0.460138 | 0.430266 | 0.736725 | 0.651316 |
| MmugDNA.19861.1.S1_at   | MmugDNA.19861.1 | 5.35  | 5.29  | 0.11 | 0.12 | 1.05  | 0.640749 | 0.412522 | 0.83776  | 0.63893  |
| MmugDNA.19862.1.S1_at   | MmugDNA.19862.1 | 8.27  | 8.81  | 0.39 | 0.48 | -1.46 | 0.226209 | 0.210319 | 0.584285 | 0.484192 |
| MmugDNA.19863.1.S1_at   | MmugDNA.19863.1 | 3.68  | 3.97  | 0.18 | 0.12 | -1.22 | 0.074297 | 0.064969 | 0.419963 | 0.300855 |
| MmugDNA.19866.1.S1_at   | MmugDNA.19866.1 | 4.97  | 4.82  | 0.24 | 0.03 | 1.1   | 0.64648  | 0.81297  | 0.840925 | 0.891895 |
| MmugDNA.19868.1.S1_at   | MmugDNA.19868.1 | 9.02  | 8.74  | 0.24 | 0.34 | 1.21  | 0.078302 | 0.159795 | 0.428302 | 0.435871 |
| MmugDNA.19869.1.S1_at   | MmugDNA.19869.1 | 7.42  | 7.57  | 0.22 | 0.15 | -1.11 | 0.874461 | 0.347115 | 0.949658 | 0.591815 |
| MmugDNA.19870.1.S1_at   | MmugDNA.19870.1 | 11.66 | 11.65 | 0.14 | 0.35 | 1     | 0.265118 | 0.334399 | 0.610829 | 0.582387 |
| MmugDNA.19870.1.S1_s_at | MmugDNA.19870.1 | 12.03 | 12.01 | 0.14 | 0.3  | 1.02  | 0.308543 | 0.393956 | 0.640924 | 0.6267   |
| MmugDNA.506.1.S1_s_at   | MmugDNA.506.1   | 10.85 | 10.76 | 0.11 | 0.25 | 1.07  | 0.877321 | 0.286661 | 0.950869 | 0.548077 |
| MmugDNA.19873.1.S1_at   | MmugDNA.19873.1 | 4.47  | 4.48  | 0.01 | 0.09 | -1    | 0.369517 | 0.461567 | 0.680763 | 0.673162 |
| MmugDNA.19874.1.S1_at   | MmugDNA.19874.1 | 7.1   | 7.21  | 0.12 | 0.16 | -1.07 | 0.624171 | 0.813096 | 0.828178 | 0.891939 |
| MmugDNA.19876.1.S1_at   | MmugDNA.19876.1 | 4.52  | 4.51  | 0.11 | 0.03 | 1.01  | 0.980326 | 0.505572 | 0.99289  | 0.702218 |
| MmugDNA.19877.1.S1_at   | MmugDNA.19877.1 | 6.06  | 6     | 0.26 | 0.36 | 1.04  | 0.293172 | 0.436785 | 0.630314 | 0.65629  |
| MmugDNA.19878.1.S1_at   | MmugDNA.19878.1 | 3.18  | 3.42  | 0.16 | 0.13 | -1.18 | 0.220092 | 0.179531 | 0.579296 | 0.456008 |
| MmugDNA.19879.1.S1_at   | MmugDNA.19879.1 | 6.26  | 6.27  | 0.2  | 0.06 | -1    | 0.854356 | 0.966673 | 0.941105 | 0.98148  |
| MmugDNA.1988.1.S1_at    | MmugDNA.1988.1  | 10.69 | 11.07 | 0.23 | 0.67 | -1.3  | 0.568306 | 0.6835   | 0.798562 | 0.815372 |
| MmugDNA.19880.1.S1_at   | MmugDNA.19880.1 | 5.29  | 5.3   | 0.19 | 0.18 | -1.01 | 0.362839 | 0.629699 | 0.676226 | 0.781989 |
| MmugDNA.19882.1.S1_at   | MmugDNA.19882.1 | 8.17  | 7.89  | 0.31 | 0.73 | 1.21  | 0.9796   | 0.902255 | 0.992441 | 0.944435 |

|                         |                 |       |       |      |      |       |          |          |          |          |
|-------------------------|-----------------|-------|-------|------|------|-------|----------|----------|----------|----------|
| MmugDNA.19885.1.S1_at   | MmugDNA.19885.1 | 6.5   | 6.46  | 0.36 | 0.23 | 1.03  | 0.880204 | 0.452307 | 0.951822 | 0.667046 |
| MmugDNA.19886.1.S1_at   | MmugDNA.19886.1 | 9.8   | 9.56  | 0.08 | 0.28 | 1.18  | 0.873047 | 0.112749 | 0.94924  | 0.378404 |
| MmugDNA.19887.1.S1_at   | MmugDNA.19887.1 | 4.21  | 3.79  | 0.34 | 0.19 | 1.33  | 0.129192 | 0.252584 | 0.495175 | 0.521145 |
| MmugDNA.19889.1.S1_at   | MmugDNA.19889.1 | 7.95  | 8.2   | 0.92 | 0.45 | -1.19 | 0.310069 | 0.407183 | 0.642047 | 0.634794 |
| MmugDNA.1989.1.S1_at    | MmugDNA.1989.1  | 5.5   | 5.68  | 0.09 | 0.15 | -1.13 | 0.109148 | 0.113219 | 0.470811 | 0.379229 |
| MmugDNA.19890.1.S1_at   | MmugDNA.19890.1 | 11.54 | 12.17 | 0.42 | 0.32 | -1.55 | 0.196791 | 0.169196 | 0.559808 | 0.445812 |
| MmugDNA.19891.1.S1_at   | MmugDNA.19891.1 | 4.01  | 4.02  | 0.17 | 0.1  | -1.01 | 0.566948 | 0.689164 | 0.797863 | 0.818618 |
| MmugDNA.19892.1.S1_s_at | MmugDNA.19892.1 | 7.48  | 7     | 0.41 | 0.48 | 1.39  | 0.268715 | 0.144767 | 0.613394 | 0.418614 |
| MmugDNA.19893.1.S1_at   | MmugDNA.19893.1 | 4.04  | 3.82  | 0.41 | 0.37 | 1.16  | 0.671722 | 0.849651 | 0.852716 | 0.914616 |
| MmugDNA.19894.1.S1_at   | MmugDNA.19894.1 | 4.33  | 4.34  | 0.03 | 0.09 | -1.01 | 0.398215 | 0.874367 | 0.698574 | 0.928629 |
| MmugDNA.19895.1.S1_at   | MmugDNA.19895.1 | 9.52  | 9.06  | 0.17 | 0.25 | 1.37  | 0.027941 | 0.013045 | 0.309162 | 0.14696  |
| MmugDNA.19896.1.S1_at   | MmugDNA.19896.1 | 3.24  | 3.32  | 0.55 | 0.08 | -1.06 | 0.479341 | 0.695601 | 0.747644 | 0.823073 |
| MmugDNA.19897.1.S1_at   | MmugDNA.19897.1 | 5.85  | 4.79  | 1.21 | 1.02 | 2.09  | 0.365993 | 0.46934  | 0.678773 | 0.678197 |
| MmugDNA.19898.1.S1_at   | MmugDNA.19898.1 | 5.52  | 5.91  | 0.14 | 0.14 | -1.31 | 0.058984 | 0.165701 | 0.390921 | 0.441982 |
| MmugDNA.199.1.S1_at     | MmugDNA.199.1   | 7.28  | 7.12  | 0.32 | 0.06 | 1.12  | 0.177384 | 0.205028 | 0.541483 | 0.479318 |
| MmugDNA.1990.1.S1_s_at  | MmugDNA.1990.1  | 7.07  | 10.15 | 1.18 | 0.85 | -8.48 | 0.038194 | 0.022589 | 0.343685 | 0.188092 |
| MmugDNA.19900.1.S1_at   | MmugDNA.19900.1 | 7.62  | 6.65  | 0.38 | 0.91 | 1.96  | 0.136848 | 0.236518 | 0.504003 | 0.507364 |
| MmugDNA.19901.1.S1_at   | MmugDNA.19901.1 | 5.21  | 5.21  | 0.33 | 0.3  | -1    | 0.573064 | 0.592522 | 0.801055 | 0.757844 |
| MmugDNA.19903.1.S1_at   | MmugDNA.19903.1 | 4.58  | 4.45  | 0.29 | 0.09 | 1.09  | 0.861526 | 0.436344 | 0.944164 | 0.655923 |
| MmugDNA.19904.1.S1_at   | MmugDNA.19904.1 | 4.76  | 4.49  | 0.32 | 0.17 | 1.2   | 0.144129 | 0.107195 | 0.510652 | 0.36989  |
| MmugDNA.19905.1.S1_at   | MmugDNA.19905.1 | 11.21 | 11.7  | 0.05 | 0.2  | -1.4  | 0.010783 | 0.005346 | 0.231453 | 0.101089 |
| MmugDNA.19906.1.S1_at   | MmugDNA.19906.1 | 7.78  | 8.13  | 0.44 | 0.44 | -1.27 | 0.434668 | 0.184023 | 0.720676 | 0.460209 |
| MmugDNA.19907.1.S1_at   | MmugDNA.19907.1 | 4.83  | 4.99  | 0.33 | 0.12 | -1.12 | 0.801524 | 0.416914 | 0.918152 | 0.641838 |
| MmugDNA.1991.1.S1_at    | MmugDNA.1991.1  | 5.63  | 5.61  | 0.58 | 0.18 | 1.02  | 0.349309 | 0.442852 | 0.667639 | 0.660759 |
| MmugDNA.19911.1.S1_at   | MmugDNA.19911.1 | 7.67  | 7.35  | 0.2  | 0.17 | 1.24  | 0.195524 | 0.099643 | 0.558901 | 0.358128 |
| MmugDNA.19912.1.S1_at   | MmugDNA.19912.1 | 3.71  | 3.74  | 0.27 | 0.07 | -1.02 | 0.963622 | 0.416589 | 0.985982 | 0.641647 |
| MmugDNA.19913.1.S1_at   | MmugDNA.19913.1 | 7.16  | 7.16  | 0.74 | 0.23 | 1     | 0.7148   | 0.895478 | 0.874968 | 0.940264 |
| MmugDNA.19914.1.S1_at   | MmugDNA.19914.1 | 4.29  | 3.64  | 0.47 | 0.22 | 1.56  | 0.159139 | 0.231163 | 0.52416  | 0.5029   |
| MmugDNA.19916.1.S1_at   | MmugDNA.19916.1 | 11.14 | 10.43 | 0.16 | 0.35 | 1.64  | 0.075354 | 0.051732 | 0.422257 | 0.272993 |
| MmugDNA.19917.1.S1_at   | MmugDNA.19917.1 | 5.32  | 5.46  | 0.16 | 0.25 | -1.1  | 0.249661 | 0.39778  | 0.600196 | 0.629114 |
| MmugDNA.19918.1.S1_at   | MmugDNA.19918.1 | 4.55  | 4.7   | 0.16 | 0.09 | -1.12 | 0.189481 | 0.362013 | 0.552479 | 0.602727 |
| MmugDNA.19919.1.S1_at   | MmugDNA.19919.1 | 3.42  | 3.26  | 0.2  | 0.4  | 1.12  | 0.880103 | 0.74108  | 0.951822 | 0.850126 |
| MmugDNA.1992.1.S1_at    | MmugDNA.1992.1  | 6.73  | 6.75  | 0.24 | 0.19 | -1.02 | 0.62941  | 0.76909  | 0.831446 | 0.865855 |
| MmugDNA.19920.1.S1_at   | MmugDNA.19920.1 | 6.67  | 6.7   | 0.18 | 0.35 | -1.02 | 0.90133  | 0.978101 | 0.960579 | 0.988066 |
| MmugDNA.19925.1.S1_at   | MmugDNA.19925.1 | 4.45  | 4.32  | 0.05 | 0.2  | 1.1   | 0.278728 | 0.31663  | 0.620785 | 0.569963 |
| MmugDNA.19926.1.S1_at   | MmugDNA.19926.1 | 9.66  | 9.61  | 0.22 | 0.22 | 1.04  | 0.64214  | 0.668725 | 0.838696 | 0.806133 |
| MmugDNA.19927.1.S1_at   | MmugDNA.19927.1 | 6.86  | 6.7   | 0.2  | 0.06 | 1.12  | 0.189758 | 0.13103  | 0.552667 | 0.403053 |
| MmugDNA.19928.1.S1_at   | MmugDNA.19928.1 | 3.82  | 3.58  | 0.09 | 0.34 | 1.18  | 0.797481 | 0.752539 | 0.916098 | 0.855916 |
| MmugDNA.19929.1.S1_at   | MmugDNA.19929.1 | 3.67  | 3.75  | 0.05 | 0.2  | -1.06 | 0.524659 | 0.505129 | 0.773218 | 0.70197  |
| MmugDNA.19930.1.S1_at   | MmugDNA.19930.1 | 3.68  | 3.03  | 0.15 | 0.12 | 1.57  | 0.003196 | 0.001938 | 0.174359 | 0.065795 |
| MmugDNA.19931.1.S1_at   | MmugDNA.19931.1 | 6.45  | 6.78  | 0.27 | 0.01 | -1.26 | 0.320573 | 0.446697 | 0.649472 | 0.662885 |

|                         |                 |       |       |      |      |       |          |          |          |          |
|-------------------------|-----------------|-------|-------|------|------|-------|----------|----------|----------|----------|
| MmugDNA.19932.1.S1_at   | MmugDNA.19932.1 | 3.95  | 4.06  | 0.16 | 0.33 | -1.08 | 0.484424 | 0.116318 | 0.750383 | 0.383671 |
| MmugDNA.19933.1.S1_at   | MmugDNA.19933.1 | 4.76  | 4.88  | 0.15 | 0.07 | -1.08 | 0.912898 | 0.623682 | 0.965496 | 0.778057 |
| MmugDNA.19934.1.S1_at   | MmugDNA.19934.1 | 4.21  | 4.13  | 0.15 | 0.23 | 1.06  | 0.487562 | 0.663221 | 0.75218  | 0.802867 |
| MmugDNA.19935.1.S1_at   | MmugDNA.19935.1 | 7.94  | 7.66  | 0.08 | 0.55 | 1.21  | 0.119425 | 0.173201 | 0.484134 | 0.449779 |
| MmugDNA.19936.1.S1_at   | MmugDNA.19936.1 | 4.6   | 4.68  | 0.06 | 0.42 | -1.06 | 0.586314 | 0.710069 | 0.808037 | 0.831904 |
| MmugDNA.19939.1.S1_at   | MmugDNA.19939.1 | 8.02  | 7.69  | 0.17 | 0.64 | 1.26  | 0.653765 | 0.831188 | 0.844319 | 0.903172 |
| MmugDNA.19939.1.S1_s_at | MmugDNA.19939.1 | 7.9   | 7.26  | 0.17 | 0.84 | 1.55  | 0.742374 | 0.910369 | 0.889822 | 0.949414 |
| MmugDNA.19942.1.S1_at   | MmugDNA.19942.1 | 3.51  | 3.43  | 0.05 | 0.26 | 1.05  | 0.557167 | 0.599815 | 0.792388 | 0.7616   |
| MmugDNA.19943.1.S1_s_at | MmugDNA.19943.1 | 11.62 | 11.62 | 0.23 | 0.03 | 1     | 0.937266 | 0.974982 | 0.975845 | 0.986326 |
| MmugDNA.19944.1.S1_at   | MmugDNA.19944.1 | 5.28  | 5.39  | 0.08 | 0.19 | -1.08 | 0.208101 | 0.261681 | 0.570011 | 0.528129 |
| MmugDNA.19945.1.S1_at   | MmugDNA.19945.1 | 6.14  | 6.74  | 0.27 | 0.6  | -1.52 | 0.799873 | 0.409502 | 0.917271 | 0.636528 |
| MmugDNA.19946.1.S1_at   | MmugDNA.19946.1 | 3.93  | 3.94  | 0.41 | 0.25 | -1.01 | 0.640463 | 0.799287 | 0.837628 | 0.884463 |
| MmugDNA.19949.1.S1_at   | MmugDNA.19949.1 | 6.05  | 5.92  | 0.05 | 0.27 | 1.09  | 0.421365 | 0.449584 | 0.712975 | 0.665135 |
| MmugDNA.1995.1.S1_at    | MmugDNA.1995.1  | 7.2   | 7.65  | 1.34 | 0.37 | -1.37 | 0.75391  | 0.780236 | 0.895085 | 0.87255  |
| MmugDNA.19951.1.S1_s_at | MmugDNA.19951.1 | 6.78  | 6.8   | 0.64 | 0.35 | -1.01 | 0.456268 | 0.272497 | 0.734378 | 0.537245 |
| MmugDNA.19952.1.S1_at   | MmugDNA.19952.1 | 3.79  | 3.78  | 0.13 | 0    | 1.01  | 0.535976 | 0.591722 | 0.779351 | 0.757198 |
| MmugDNA.19957.1.S1_at   | MmugDNA.19957.1 | 9.56  | 9.07  | 0.2  | 0.44 | 1.4   | 0.178551 | 0.107382 | 0.54288  | 0.370219 |
| MmugDNA.19958.1.S1_at   | MmugDNA.19958.1 | 9.72  | 9.34  | 0.03 | 0.58 | 1.3   | 0.157756 | 0.150776 | 0.522564 | 0.425322 |
| MmugDNA.19959.1.S1_at   | MmugDNA.19959.1 | 9.44  | 8.59  | 0.18 | 0.49 | 1.8   | 0.06748  | 0.061429 | 0.407949 | 0.294704 |
| MmugDNA.1996.1.S1_at    | MmugDNA.1996.1  | 9.57  | 9.34  | 0.03 | 0.11 | 1.18  | 0.026218 | 0.013335 | 0.301892 | 0.148042 |
| MmugDNA.19960.1.S1_at   | MmugDNA.19960.1 | 12.23 | 12.43 | 0.15 | 0.64 | -1.15 | 0.994212 | 0.506786 | 0.997987 | 0.702575 |
| MmugDNA.19962.1.S1_at   | MmugDNA.19962.1 | 7.26  | 7.25  | 0.12 | 0.16 | 1.01  | 0.868527 | 0.845986 | 0.947555 | 0.912303 |
| MmugDNA.19962.1.S1_s_at | MmugDNA.19962.1 | 7.52  | 7.53  | 0.04 | 0.11 | -1.01 | 0.440875 | 0.075371 | 0.724535 | 0.319655 |
| MmugDNA.19963.1.S1_at   | MmugDNA.19963.1 | 4.83  | 4.65  | 0    | 0.17 | 1.13  | 0.442605 | 0.252016 | 0.725706 | 0.520646 |
| MmugDNA.19964.1.S1_at   | MmugDNA.19964.1 | 6.05  | 6.11  | 0.11 | 0.07 | -1.04 | 0.199747 | 0.285061 | 0.562833 | 0.547095 |
| MmugDNA.19967.1.S1_at   | MmugDNA.19967.1 | 3.9   | 3.9   | 0.09 | 0.08 | 1     | 0.809456 | 0.02444  | 0.922228 | 0.19564  |
| MmugDNA.19968.1.S1_at   | MmugDNA.19968.1 | 6.1   | 6.17  | 0.26 | 0.18 | -1.05 | 0.865406 | 0.776585 | 0.946023 | 0.870105 |
| MmugDNA.19969.1.S1_at   | MmugDNA.19969.1 | 7.09  | 6.74  | 0.77 | 0.63 | 1.27  | 0.473456 | 0.649016 | 0.744256 | 0.794525 |
| MmugDNA.19970.1.S1_at   | MmugDNA.19970.1 | 8.21  | 8.16  | 0.27 | 0.53 | 1.04  | 0.648039 | 0.635566 | 0.841735 | 0.785437 |
| MmugDNA.19971.1.S1_at   | MmugDNA.19971.1 | 4.68  | 4.75  | 0.1  | 0.22 | -1.05 | 0.826614 | 0.961711 | 0.929552 | 0.978408 |
| MmugDNA.19973.1.S1_at   | MmugDNA.19973.1 | 9.46  | 9.97  | 0.25 | 0.37 | -1.43 | 0.063856 | 0.045309 | 0.401767 | 0.257167 |
| MmugDNA.571.1.S1_s_at   | MmugDNA.571.1   | 7.42  | 7.52  | 0.44 | 0.43 | -1.07 | 0.323237 | 0.439337 | 0.651461 | 0.658078 |
| MmugDNA.19976.1.S1_at   | MmugDNA.19976.1 | 3.19  | 3.3   | 0.32 | 0.1  | -1.08 | 0.869922 | 0.73924  | 0.947952 | 0.848883 |
| MmugDNA.19977.1.S1_at   | MmugDNA.19977.1 | 6.82  | 7.09  | 0.37 | 0.23 | -1.21 | 0.279429 | 0.121325 | 0.621094 | 0.390351 |
| MmugDNA.19978.1.S1_at   | MmugDNA.19978.1 | 9.29  | 8.95  | 0.1  | 0.54 | 1.27  | 0.5078   | 0.592869 | 0.763137 | 0.757932 |
| MmugDNA.1998.1.S1_at    | MmugDNA.1998.1  | 10.11 | 8.72  | 0.43 | 0.04 | 2.64  | 0.003698 | 0.000892 | 0.179515 | 0.047789 |
| MmugDNA.1998.1.S1_s_at  | MmugDNA.1998.1  | 10.9  | 10.62 | 0.38 | 0.26 | 1.22  | 0.114585 | 0.123215 | 0.477887 | 0.393273 |
| MmugDNA.19980.1.S1_at   | MmugDNA.19980.1 | 4.5   | 3.83  | 0.48 | 0.12 | 1.59  | 0.067509 | 0.034982 | 0.407949 | 0.231166 |
| MmugDNA.19981.1.S1_at   | MmugDNA.19981.1 | 5.78  | 6     | 0.11 | 0.11 | -1.16 | 0.246342 | 0.479969 | 0.597666 | 0.685569 |
| MmugDNA.19982.1.S1_at   | MmugDNA.19982.1 | 8.66  | 8.39  | 0.11 | 0.27 | 1.21  | 0.353793 | 0.376812 | 0.670266 | 0.614593 |
| MmugDNA.19983.1.S1_at   | MmugDNA.19983.1 | 12.8  | 13.49 | 0.15 | 0.2  | -1.62 | 0.005359 | 0.001238 | 0.191107 | 0.05478  |

|                         |                 |       |       |      |      |       |          |          |          |          |
|-------------------------|-----------------|-------|-------|------|------|-------|----------|----------|----------|----------|
| MmugDNA.19983.1.S1_s_at | MmugDNA.19983.1 | 10.61 | 12.32 | 0.37 | 0.49 | -3.28 | 0.008642 | 0.003155 | 0.21986  | 0.081739 |
| MmugDNA.19984.1.S1_at   | MmugDNA.19984.1 | 3.79  | 3.8   | 0.26 | 0.14 | -1.01 | 0.979574 | 0.992928 | 0.99244  | 0.995829 |
| MmugDNA.19985.1.S1_at   | MmugDNA.19985.1 | 6.16  | 6.21  | 0.15 | 0.06 | -1.04 | 0.680402 | 0.187973 | 0.857151 | 0.464078 |
| MmugDNA.19986.1.S1_at   | MmugDNA.19986.1 | 3.5   | 3.39  | 0.08 | 0.11 | 1.08  | 0.418748 | 0.456938 | 0.711529 | 0.670591 |
| MmugDNA.19987.1.S1_at   | MmugDNA.19987.1 | 9.3   | 10.57 | 0.49 | 0.16 | -2.42 | 0.013293 | 0.006926 | 0.246471 | 0.112445 |
| MmugDNA.19987.1.S1_s_at | MmugDNA.19987.1 | 10.37 | 11.58 | 0.24 | 0.13 | -2.31 | 0.001956 | 0.002036 | 0.155636 | 0.066885 |
| MmugDNA.19989.1.S1_at   | MmugDNA.19989.1 | 10.86 | 9.89  | 0.24 | 0.32 | 1.96  | 0.007387 | 0.002049 | 0.207702 | 0.066887 |
| MmugDNA.1999.1.S1_at    | MmugDNA.1999.1  | 11.33 | 11.83 | 0.28 | 0.8  | -1.42 | 0.249017 | 0.199445 | 0.599743 | 0.474035 |
| MmugDNA.19990.1.S1_s_at | MmugDNA.19990.1 | 13.7  | 13.56 | 0.19 | 0.51 | 1.1   | 0.184923 | 0.064799 | 0.548379 | 0.300493 |
| MmugDNA.19991.1.S1_at   | MmugDNA.19991.1 | 5.97  | 5.87  | 0.31 | 0.15 | 1.07  | 0.962675 | 0.363855 | 0.985598 | 0.604215 |
| MmugDNA.19993.1.S1_at   | MmugDNA.19993.1 | 8.84  | 8.16  | 0.51 | 0.05 | 1.61  | 0.09062  | 0.120641 | 0.446136 | 0.389476 |
| MmugDNA.19994.1.S1_at   | MmugDNA.19994.1 | 8.96  | 8.51  | 0.25 | 0.42 | 1.37  | 0.185534 | 0.223346 | 0.548924 | 0.49612  |
| MmugDNA.19995.1.S1_at   | MmugDNA.19995.1 | 3.92  | 4.29  | 0.63 | 0.18 | -1.3  | 0.824833 | 0.320003 | 0.929018 | 0.57237  |
| MmugDNA.19996.1.S1_at   | MmugDNA.19996.1 | 6.79  | 6.23  | 1.63 | 0.79 | 1.48  | 0.919219 | 0.990712 | 0.968577 | 0.994757 |
| MmugDNA.2.1.S1_at       | MmugDNA.2.1     | 4.34  | 4.46  | 0.09 | 0.2  | -1.09 | 0.5731   | 0.102634 | 0.801055 | 0.362991 |
| MmugDNA.20.1.S1_at      | MmugDNA.20.1    | 6.07  | 6.09  | 0.05 | 0.01 | -1.01 | 0.214416 | 0.272793 | 0.574919 | 0.537505 |
| MmugDNA.200.1.S1_at     | MmugDNA.200.1   | 4.99  | 4.93  | 0.29 | 0.14 | 1.04  | 0.462239 | 0.461142 | 0.738226 | 0.672857 |
| MmugDNA.2000.1.S1_at    | MmugDNA.2000.1  | 5.71  | 5.9   | 0.24 | 0.15 | -1.14 | 0.768881 | 0.227209 | 0.902863 | 0.49956  |
| MmugDNA.20001.1.S1_at   | MmugDNA.20001.1 | 6.57  | 6.7   | 0.19 | 0.1  | -1.09 | 0.35932  | 0.445535 | 0.673869 | 0.662445 |
| MmugDNA.20002.1.S1_at   | MmugDNA.20002.1 | 10.62 | 10.85 | 0.22 | 0.2  | -1.17 | 0.08205  | 0.018103 | 0.433268 | 0.169534 |
| MmugDNA.20006.1.S1_at   | MmugDNA.20006.1 | 8.87  | 9.59  | 0.16 | 0.23 | -1.65 | 0.013817 | 0.009013 | 0.249758 | 0.125499 |
| MmugDNA.20007.1.S1_at   | MmugDNA.20007.1 | 4.39  | 4.48  | 0.09 | 0.1  | -1.06 | 0.224834 | 0.236629 | 0.582867 | 0.50743  |
| MmugDNA.20008.1.S1_at   | MmugDNA.20008.1 | 7.34  | 7.21  | 0.32 | 0.33 | 1.09  | 0.833467 | 0.972644 | 0.932338 | 0.98528  |
| MmugDNA.20009.1.S1_at   | MmugDNA.20009.1 | 9.05  | 9.4   | 0.16 | 0.15 | -1.28 | 0.054672 | 0.031598 | 0.382115 | 0.219905 |
| MmugDNA.2001.1.S1_at    | MmugDNA.2001.1  | 6.29  | 6     | 0.29 | 0.11 | 1.22  | 0.223618 | 0.028637 | 0.582102 | 0.210901 |
| MmugDNA.20010.1.S1_at   | MmugDNA.20010.1 | 6.38  | 6.53  | 0.5  | 0.58 | -1.11 | 0.372663 | 0.287149 | 0.682946 | 0.548447 |
| MmugDNA.20011.1.S1_at   | MmugDNA.20011.1 | 3.98  | 4.07  | 0.25 | 0.27 | -1.07 | 0.920002 | 0.29492  | 0.968811 | 0.554462 |
| MmugDNA.20013.1.S1_at   | MmugDNA.20013.1 | 4.1   | 4.61  | 0.6  | 0.15 | -1.43 | 0.506797 | 0.685453 | 0.762475 | 0.816523 |
| MmugDNA.20014.1.S1_at   | MmugDNA.20014.1 | 2.96  | 3.05  | 0.08 | 0.08 | -1.07 | 0.238707 | 0.190531 | 0.592009 | 0.465906 |
| MmugDNA.20015.1.S1_at   | MmugDNA.20015.1 | 11.08 | 11.33 | 0.44 | 0.24 | -1.19 | 0.934327 | 0.984158 | 0.974571 | 0.991189 |
| MmugDNA.20016.1.S1_at   | MmugDNA.20016.1 | 3.72  | 3.78  | 0.17 | 0.12 | -1.05 | 0.571047 | 0.263978 | 0.7999   | 0.530153 |
| MmugDNA.20017.1.S1_at   | MmugDNA.20017.1 | 11.16 | 10.32 | 0.01 | 0.15 | 1.79  | 0.000939 | 0.000193 | 0.139813 | 0.030888 |
| MmugDNA.20018.1.S1_at   | MmugDNA.20018.1 | 5.79  | 5.75  | 0.11 | 0.1  | 1.03  | 0.935149 | 0.071068 | 0.974926 | 0.312745 |
| MmugDNA.20019.1.S1_at   | MmugDNA.20019.1 | 4.34  | 4.23  | 0.33 | 0.11 | 1.08  | 0.985362 | 0.636844 | 0.99475  | 0.786404 |
| MmugDNA.2002.1.S1_at    | MmugDNA.2002.1  | 5.51  | 7.34  | 0.62 | 0.63 | -3.55 | 0.023106 | 0.006311 | 0.290224 | 0.107847 |
| MmugDNA.20023.1.S1_at   | MmugDNA.20023.1 | 3.76  | 4.08  | 0.18 | 0.24 | -1.25 | 0.415702 | 0.119786 | 0.709528 | 0.388567 |
| MmugDNA.20024.1.S1_at   | MmugDNA.20024.1 | 5.71  | 5.69  | 0.08 | 0.32 | 1.02  | 0.900946 | 0.988388 | 0.960391 | 0.993461 |
| MmugDNA.20025.1.S1_at   | MmugDNA.20025.1 | 4.4   | 4.48  | 0.02 | 0.12 | -1.06 | 0.335891 | 0.252959 | 0.65921  | 0.521261 |
| MmugDNA.20026.1.S1_at   | MmugDNA.20026.1 | 10.22 | 10.75 | 0.26 | 0.44 | -1.44 | 0.174777 | 0.211737 | 0.538344 | 0.485757 |
| MmugDNA.20027.1.S1_s_at | MmugDNA.20027.1 | 11.72 | 12.25 | 0.15 | 0.26 | -1.44 | 0.024018 | 0.013451 | 0.293842 | 0.148623 |
| MmugDNA.20028.1.S1_at   | MmugDNA.20028.1 | 11.5  | 11.44 | 0.03 | 0.09 | 1.05  | 0.215553 | 0.289873 | 0.575924 | 0.550831 |

|                         |                 |       |       |      |      |       |          |          |          |          |
|-------------------------|-----------------|-------|-------|------|------|-------|----------|----------|----------|----------|
| MmugDNA.20029.1.S1_at   | MmugDNA.20029.1 | 6.17  | 6.16  | 0.13 | 0.14 | 1.01  | 0.745065 | 0.707331 | 0.890933 | 0.830238 |
| MmugDNA.2003.1.S1_at    | MmugDNA.2003.1  | 8.59  | 9.62  | 0.33 | 0.95 | -2.05 | 0.137258 | 0.159895 | 0.504356 | 0.435987 |
| MmugDNA.20030.1.S1_at   | MmugDNA.20030.1 | 7.69  | 7.57  | 0.28 | 0.17 | 1.09  | 0.871087 | 0.62593  | 0.948463 | 0.7794   |
| MmugDNA.20032.1.S1_at   | MmugDNA.20032.1 | 5.06  | 5.07  | 0.09 | 0.2  | -1.01 | 0.588401 | 0.221184 | 0.808931 | 0.494511 |
| MmugDNA.20033.1.S1_at   | MmugDNA.20033.1 | 6.81  | 7.89  | 0.91 | 0.42 | -2.12 | 0.436989 | 0.45986  | 0.722145 | 0.671989 |
| MmugDNA.20033.1.S1_x_at | MmugDNA.20033.1 | 7.45  | 8.08  | 1.16 | 0.48 | -1.55 | 0.514498 | 0.544322 | 0.76693  | 0.726748 |
| MmugDNA.20034.1.S1_at   | MmugDNA.20034.1 | 11.63 | 11.52 | 0.14 | 0.39 | 1.08  | 0.442273 | 0.052992 | 0.725456 | 0.275841 |
| MmugDNA.20035.1.S1_at   | MmugDNA.20035.1 | 7.39  | 8.47  | 0.15 | 0.65 | -2.11 | 0.112024 | 0.019294 | 0.474496 | 0.174723 |
| MmugDNA.20036.1.S1_at   | MmugDNA.20036.1 | 8.84  | 8.9   | 0.03 | 0.21 | -1.05 | 0.338395 | 0.226096 | 0.66086  | 0.498585 |
| MmugDNA.20038.1.S1_at   | MmugDNA.20038.1 | 6.14  | 6.4   | 0.06 | 0.09 | -1.19 | 0.008025 | 0.001954 | 0.215137 | 0.065813 |
| MmugDNA.20039.1.S1_at   | MmugDNA.20039.1 | 5.98  | 6.06  | 0.25 | 0.09 | -1.06 | 0.796139 | 0.27189  | 0.915412 | 0.536644 |
| MmugDNA.2004.1.S1_at    | MmugDNA.2004.1  | 6.22  | 6.3   | 0.24 | 0.11 | -1.06 | 0.707651 | 0.680215 | 0.871175 | 0.813309 |
| MmugDNA.20040.1.S1_at   | MmugDNA.20040.1 | 3.01  | 3.01  | 0.32 | 0.04 | 1     | 0.630093 | 0.830741 | 0.831894 | 0.902874 |
| MmugDNA.20041.1.S1_at   | MmugDNA.20041.1 | 5.23  | 5.13  | 0.16 | 0.09 | 1.07  | 0.694255 | 0.461649 | 0.864407 | 0.673228 |
| MmugDNA.35850.1.S1_s_at | MmugDNA.35850.1 | 5.57  | 5.68  | 0.13 | 0.34 | -1.08 | 0.325444 | 0.458885 | 0.65274  | 0.671498 |
| MmugDNA.20043.1.S1_at   | MmugDNA.20043.1 | 6.16  | 6.33  | 0.04 | 0.11 | -1.13 | 0.024343 | 0.041327 | 0.294535 | 0.247995 |
| MmugDNA.20044.1.S1_at   | MmugDNA.20044.1 | 7.62  | 7.13  | 0.2  | 0.24 | 1.41  | 0.108052 | 0.135299 | 0.468863 | 0.407381 |
| MmugDNA.20044.1.S1_s_at | MmugDNA.20044.1 | 7.88  | 7.42  | 0.19 | 0.09 | 1.38  | 0.022514 | 0.045467 | 0.287341 | 0.2575   |
| MmugDNA.20045.1.S1_at   | MmugDNA.20045.1 | 9.42  | 9.24  | 0.34 | 0.09 | 1.13  | 0.166543 | 0.206853 | 0.530253 | 0.481011 |
| MmugDNA.20048.1.S1_at   | MmugDNA.20048.1 | 5.29  | 5.31  | 0.03 | 0.16 | -1.01 | 0.453698 | 0.625686 | 0.732829 | 0.779265 |
| MmugDNA.20049.1.S1_at   | MmugDNA.20049.1 | 5.21  | 5.73  | 0.75 | 0.17 | -1.44 | 0.998412 | 0.941448 | 0.99939  | 0.966805 |
| MmugDNA.2005.1.S1_at    | MmugDNA.2005.1  | 3.54  | 3.43  | 0.12 | 0.27 | 1.08  | 0.560765 | 0.159289 | 0.794427 | 0.43531  |
| MmugDNA.20052.1.S1_at   | MmugDNA.20052.1 | 8.28  | 8.8   | 0.32 | 0.92 | -1.44 | 0.449873 | 0.141963 | 0.730497 | 0.415505 |
| MmugDNA.20056.1.S1_at   | MmugDNA.20056.1 | 9.29  | 9.45  | 0.19 | 0.17 | -1.12 | 0.392517 | 0.371201 | 0.694657 | 0.610135 |
| MmugDNA.20057.1.S1_s_at | MmugDNA.20057.1 | 5.72  | 6.19  | 0.21 | 0.25 | -1.39 | 0.066223 | 0.164326 | 0.406371 | 0.440566 |
| MmugDNA.20058.1.S1_at   | MmugDNA.20058.1 | 4.97  | 4.82  | 0.24 | 0.24 | 1.11  | 0.52513  | 0.41473  | 0.773438 | 0.640456 |
| MmugDNA.20059.1.S1_at   | MmugDNA.20059.1 | 3.59  | 3.68  | 0.03 | 0.11 | -1.06 | 0.593184 | 0.329384 | 0.81131  | 0.578733 |
| MmugDNA.2006.1.S1_at    | MmugDNA.2006.1  | 6.49  | 7.55  | 0.22 | 0.32 | -2.08 | 0.015731 | 0.01176  | 0.260601 | 0.140492 |
| MmugDNA.20060.1.S1_at   | MmugDNA.20060.1 | 11.52 | 11.84 | 0.02 | 0.28 | -1.25 | 0.407603 | 0.555017 | 0.70471  | 0.733598 |
| MmugDNA.20061.1.S1_at   | MmugDNA.20061.1 | 3.61  | 3.77  | 0.04 | 0.14 | -1.12 | 0.396615 | 0.801205 | 0.697117 | 0.885679 |
| MmugDNA.20062.1.S1_at   | MmugDNA.20062.1 | 5.45  | 5.75  | 0.11 | 0.17 | -1.23 | 0.081602 | 0.060075 | 0.432665 | 0.291767 |
| MmugDNA.20063.1.S1_at   | MmugDNA.20063.1 | 10.34 | 11.08 | 0.1  | 0.26 | -1.67 | 0.007994 | 0.003    | 0.214679 | 0.079958 |
| MmugDNA.20064.1.S1_at   | MmugDNA.20064.1 | 8.99  | 10.17 | 0.09 | 0.14 | -2.28 | 0.000258 | 0.000032 | 0.12562  | 0.022097 |
| MmugDNA.20065.1.S1_at   | MmugDNA.20065.1 | 5.84  | 6.29  | 0.11 | 0.31 | -1.36 | 0.08487  | 0.052235 | 0.437796 | 0.274065 |
| MmugDNA.20068.1.S1_at   | MmugDNA.20068.1 | 6.85  | 7.19  | 0.11 | 0.58 | -1.27 | 0.219837 | 0.226151 | 0.579133 | 0.498644 |
| MmugDNA.20069.1.S1_at   | MmugDNA.20069.1 | 9.54  | 10.01 | 0.11 | 0.53 | -1.38 | 0.637291 | 0.009895 | 0.836    | 0.13068  |
| MmugDNA.2007.1.S1_at    | MmugDNA.2007.1  | 5.84  | 5.88  | 0.09 | 0.03 | -1.03 | 0.684864 | 0.133627 | 0.858795 | 0.40557  |
| MmugDNA.20070.1.S1_at   | MmugDNA.20070.1 | 4.69  | 4.7   | 0.06 | 0.07 | -1.01 | 0.182494 | 0.211767 | 0.546767 | 0.485757 |
| MmugDNA.20071.1.S1_at   | MmugDNA.20071.1 | 5.32  | 4.99  | 0.48 | 1.06 | 1.25  | 0.7187   | 0.894307 | 0.876551 | 0.939697 |
| MmugDNA.20072.1.S1_at   | MmugDNA.20072.1 | 4.57  | 4.69  | 0.85 | 0.14 | -1.09 | 0.492402 | 0.658517 | 0.755722 | 0.800401 |
| MmugDNA.20072.1.S1_s_at | MmugDNA.20072.1 | 8.45  | 7.13  | 0.31 | 0.13 | 2.49  | 0.003833 | 0.001092 | 0.179914 | 0.052283 |

|                         |                 |       |       |      |      |        |          |          |          |          |
|-------------------------|-----------------|-------|-------|------|------|--------|----------|----------|----------|----------|
| MmugDNA.20074.1.S1_at   | MmugDNA.20074.1 | 9.89  | 9.16  | 0.27 | 0.21 | 1.65   | 0.011607 | 0.004631 | 0.236889 | 0.094988 |
| MmugDNA.20075.1.S1_at   | MmugDNA.20075.1 | 7.97  | 7.46  | 0.16 | 0.74 | 1.43   | 0.496439 | 0.469198 | 0.757501 | 0.678155 |
| MmugDNA.20076.1.S1_at   | MmugDNA.20076.1 | 5.67  | 5.55  | 0.72 | 0.6  | 1.09   | 0.909035 | 0.868789 | 0.963975 | 0.925437 |
| MmugDNA.20077.1.S1_at   | MmugDNA.20077.1 | 7.14  | 7.48  | 0.8  | 0.66 | -1.26  | 0.241248 | 0.299569 | 0.593801 | 0.557945 |
| MmugDNA.20078.1.S1_at   | MmugDNA.20078.1 | 5.87  | 5.79  | 0.07 | 0.15 | 1.06   | 0.165207 | 0.200904 | 0.529274 | 0.475395 |
| MmugDNA.2008.1.S1_at    | MmugDNA.2008.1  | 9.4   | 8.63  | 0.4  | 0.14 | 1.7    | 0.029197 | 0.014354 | 0.313575 | 0.152926 |
| MmugDNA.20080.1.S1_at   | MmugDNA.20080.1 | 6.43  | 6.57  | 0.05 | 0.01 | -1.1   | 0.008416 | 0.004124 | 0.21832  | 0.090887 |
| MmugDNA.20081.1.S1_at   | MmugDNA.20081.1 | 4.87  | 4.9   | 0.3  | 0.04 | -1.02  | 0.451779 | 0.54206  | 0.73168  | 0.725196 |
| MmugDNA.20082.1.S1_at   | MmugDNA.20082.1 | 5.25  | 4.83  | 0.35 | 0.61 | 1.34   | 0.809823 | 0.43509  | 0.922372 | 0.655005 |
| MmugDNA.20083.1.S1_at   | MmugDNA.20083.1 | 3.65  | 3.84  | 0.07 | 0.26 | -1.13  | 0.161744 | 0.146956 | 0.526573 | 0.421011 |
| MmugDNA.20084.1.S1_at   | MmugDNA.20084.1 | 6.78  | 6.06  | 0.37 | 0.2  | 1.65   | 0.110817 | 0.058623 | 0.472704 | 0.288825 |
| MmugDNA.20086.1.S1_at   | MmugDNA.20086.1 | 3.57  | 3.8   | 0.39 | 0.26 | -1.18  | 0.727031 | 0.819456 | 0.88121  | 0.895996 |
| MmugDNA.20087.1.S1_at   | MmugDNA.20087.1 | 8.5   | 9.01  | 0.19 | 0.08 | -1.42  | 0.013507 | 0.005918 | 0.24733  | 0.105276 |
| MmugDNA.20088.1.S1_at   | MmugDNA.20088.1 | 9.2   | 8.65  | 0.2  | 0.22 | 1.46   | 0.083702 | 0.15693  | 0.43598  | 0.432372 |
| MmugDNA.20089.1.S1_at   | MmugDNA.20089.1 | 8.22  | 11.89 | 1.25 | 1.48 | -12.73 | 0.133732 | 0.1027   | 0.500334 | 0.363111 |
| MmugDNA.2009.1.S1_at    | MmugDNA.2009.1  | 6.71  | 5.09  | 0.38 | 0.85 | 3.09   | 0.03679  | 0.046139 | 0.340439 | 0.259209 |
| MmugDNA.20091.1.S1_at   | MmugDNA.20091.1 | 4.55  | 4.42  | 0.08 | 0    | 1.09   | 0.018354 | 0.05494  | 0.270007 | 0.279837 |
| MmugDNA.20092.1.S1_at   | MmugDNA.20092.1 | 2.76  | 2.92  | 0.1  | 0.18 | -1.12  | 0.30765  | 0.246268 | 0.640082 | 0.515889 |
| MmugDNA.20093.1.S1_at   | MmugDNA.20093.1 | 6.17  | 6.52  | 0.86 | 0.94 | -1.27  | 0.64022  | 0.457221 | 0.837608 | 0.670746 |
| MmugDNA.20094.1.S1_at   | MmugDNA.20094.1 | 5.47  | 4.57  | 0.49 | 0.36 | 1.87   | 0.096008 | 0.044652 | 0.454098 | 0.255716 |
| MmugDNA.20096.1.S1_at   | MmugDNA.20096.1 | 10.01 | 9.88  | 0.51 | 0.71 | 1.1    | 0.739226 | 0.907553 | 0.888118 | 0.947728 |
| MmugDNA.20097.1.S1_at   | MmugDNA.20097.1 | 8.53  | 8.49  | 0.14 | 0.11 | 1.03   | 0.366771 | 0.618525 | 0.679209 | 0.774147 |
| MmugDNA.20098.1.S1_at   | MmugDNA.20098.1 | 3.77  | 3.99  | 0.3  | 0.69 | -1.17  | 0.227128 | 0.272882 | 0.584952 | 0.537598 |
| MmugDNA.20099.1.S1_at   | MmugDNA.20099.1 | 3.1   | 3.25  | 0.13 | 0.04 | -1.11  | 0.1249   | 0.311933 | 0.490844 | 0.566833 |
| MmugDNA.20101.1.S1_at   | MmugDNA.20101.1 | 6.89  | 7.74  | 0.52 | 0.44 | -1.81  | 0.101914 | 0.141101 | 0.461313 | 0.414602 |
| MmugDNA.20102.1.S1_at   | MmugDNA.20102.1 | 4.08  | 4.64  | 0.64 | 0.76 | -1.48  | 0.514866 | 0.598259 | 0.767211 | 0.760715 |
| MmugDNA.20103.1.S1_at   | MmugDNA.20103.1 | 3.66  | 3.63  | 0    | 0.3  | 1.02   | 0.756158 | 0.861817 | 0.896385 | 0.92146  |
| MmugDNA.20104.1.S1_at   | MmugDNA.20104.1 | 4.62  | 4.73  | 0.24 | 0.18 | -1.07  | 0.839231 | 0.855621 | 0.935078 | 0.917679 |
| MmugDNA.20105.1.S1_at   | MmugDNA.20105.1 | 4.4   | 4.43  | 0.15 | 0    | -1.02  | 0.738204 | 0.744419 | 0.887581 | 0.852014 |
| MmugDNA.20107.1.S1_at   | MmugDNA.20107.1 | 5.28  | 5.14  | 0.11 | 0.11 | 1.1    | 0.082808 | 0.185893 | 0.434551 | 0.461752 |
| MmugDNA.20108.1.S1_at   | MmugDNA.20108.1 | 6.88  | 6.72  | 0.62 | 0.89 | 1.12   | 0.375164 | 0.578723 | 0.684418 | 0.748611 |
| MmugDNA.20109.1.S1_at   | MmugDNA.20109.1 | 5.57  | 5.99  | 0.19 | 0.22 | -1.34  | 0.101826 | 0.102118 | 0.461313 | 0.362168 |
| MmugDNA.2011.1.S1_at    | MmugDNA.2011.1  | 8.9   | 9.63  | 0.15 | 0.58 | -1.66  | 0.206609 | 0.174569 | 0.568816 | 0.451078 |
| MmugDNA.2011.1.S1_s_at  | MmugDNA.2011.1  | 10.22 | 11.14 | 0.12 | 0.57 | -1.89  | 0.138408 | 0.100465 | 0.505745 | 0.359612 |
| MmugDNA.20112.1.S1_at   | MmugDNA.20112.1 | 3.51  | 3.32  | 0.22 | 0.44 | 1.13   | 0.566857 | 0.60315  | 0.79782  | 0.763963 |
| MmugDNA.20113.1.S1_at   | MmugDNA.20113.1 | 4.15  | 3.95  | 0.41 | 0.11 | 1.14   | 0.288971 | 0.335103 | 0.626983 | 0.582853 |
| MmugDNA.20114.1.S1_at   | MmugDNA.20114.1 | 10.6  | 11.28 | 0.31 | 0.27 | -1.61  | 0.093083 | 0.113975 | 0.450362 | 0.380304 |
| MmugDNA.20114.1.S1_s_at | MmugDNA.20114.1 | 11.23 | 11.79 | 0.22 | 0.24 | -1.48  | 0.063565 | 0.064231 | 0.400948 | 0.299668 |
| MmugDNA.20115.1.S1_at   | MmugDNA.20115.1 | 6.07  | 6.26  | 0.23 | 0.06 | -1.13  | 0.928036 | 0.701492 | 0.972249 | 0.826875 |
| MmugDNA.20116.1.S1_at   | MmugDNA.20116.1 | 8.42  | 7.94  | 0.25 | 0.28 | 1.39   | 0.337547 | 0.05349  | 0.660048 | 0.276963 |
| MmugDNA.41342.1.S1_at   | MmugDNA.41342.1 | 9.13  | 8.25  | 0.08 | 0.44 | 1.83   | 0.072204 | 0.19623  | 0.416574 | 0.471236 |



|                         |                 |       |       |      |      |       |          |          |          |          |
|-------------------------|-----------------|-------|-------|------|------|-------|----------|----------|----------|----------|
| MmugDNA.41342.1.S1_s_at | MmugDNA.41342.1 | 8.35  | 7.82  | 0.23 | 0.27 | 1.44  | 0.137869 | 0.195665 | 0.505301 | 0.470495 |
| MmugDNA.20118.1.S1_at   | MmugDNA.20118.1 | 9.43  | 9.72  | 0.08 | 0.11 | -1.22 | 0.015902 | 0.026493 | 0.261669 | 0.203897 |
| MmugDNA.20119.1.S1_at   | MmugDNA.20119.1 | 3.67  | 3.65  | 0.42 | 0.08 | 1.01  | 0.786312 | 0.937731 | 0.911108 | 0.964687 |
| MmugDNA.2012.1.S1_at    | MmugDNA.2012.1  | 3.8   | 3.73  | 0.36 | 0.13 | 1.05  | 0.209601 | 0.235383 | 0.570957 | 0.506431 |
| MmugDNA.20120.1.S1_at   | MmugDNA.20120.1 | 11.52 | 11.04 | 0.1  | 0.41 | 1.4   | 0.167682 | 0.025901 | 0.531986 | 0.201714 |
| MmugDNA.20121.1.S1_at   | MmugDNA.20121.1 | 8.42  | 8.27  | 0.08 | 0.22 | 1.11  | 0.160466 | 0.195624 | 0.525449 | 0.470481 |
| MmugDNA.20122.1.S1_at   | MmugDNA.20122.1 | 5.88  | 5.64  | 0.51 | 0.34 | 1.19  | 0.208727 | 0.153135 | 0.570418 | 0.428011 |
| MmugDNA.20123.1.S1_at   | MmugDNA.20123.1 | 3.03  | 3.04  | 0.2  | 0    | -1    | 0.995577 | 0.997404 | 0.99841  | 0.998632 |
| MmugDNA.20124.1.S1_at   | MmugDNA.20124.1 | 6.03  | 6.09  | 0.22 | 0.27 | -1.05 | 0.273711 | 0.335679 | 0.617179 | 0.583441 |
| MmugDNA.20125.1.S1_at   | MmugDNA.20125.1 | 4.05  | 4.14  | 0    | 0.11 | -1.06 | 0.286823 | 0.390082 | 0.625572 | 0.624002 |
| MmugDNA.20130.1.S1_at   | MmugDNA.20130.1 | 9.73  | 8.44  | 0.18 | 0.62 | 2.45  | 0.01698  | 0.008099 | 0.266367 | 0.119551 |
| MmugDNA.20132.1.S1_at   | MmugDNA.20132.1 | 9.3   | 9.26  | 0.23 | 0.15 | 1.03  | 0.351831 | 0.322655 | 0.669192 | 0.574024 |
| MmugDNA.20133.1.S1_at   | MmugDNA.20133.1 | 10.05 | 9.78  | 0.17 | 0.24 | 1.2   | 0.262343 | 0.159772 | 0.608902 | 0.435871 |
| MmugDNA.20135.1.S1_at   | MmugDNA.20135.1 | 10.11 | 10.68 | 0.09 | 0.1  | -1.48 | 0.002182 | 0.010512 | 0.159615 | 0.133936 |
| MmugDNA.20136.1.S1_at   | MmugDNA.20136.1 | 6.94  | 6.45  | 0.45 | 0.15 | 1.4   | 0.640717 | 0.075172 | 0.83776  | 0.319373 |
| MmugDNA.20137.1.S1_at   | MmugDNA.20137.1 | 8.09  | 7.47  | 0.94 | 0.23 | 1.53  | 0.28632  | 0.425859 | 0.625548 | 0.6481   |
| MmugDNA.20138.1.S1_at   | MmugDNA.20138.1 | 8.54  | 10.08 | 0.31 | 0.21 | -2.92 | 0.002545 | 0.00063  | 0.164386 | 0.042867 |
| MmugDNA.20139.1.S1_s_at | MmugDNA.20139.1 | 4.16  | 3.87  | 0.25 | 0.21 | 1.22  | 0.169753 | 0.126607 | 0.533943 | 0.397214 |
| MmugDNA.20140.1.S1_at   | MmugDNA.20140.1 | 7.73  | 7.71  | 0.19 | 0.5  | 1.01  | 0.514822 | 0.433721 | 0.767192 | 0.653946 |
| MmugDNA.20141.1.S1_at   | MmugDNA.20141.1 | 4.39  | 4.53  | 0.46 | 0.19 | -1.1  | 0.460689 | 0.637081 | 0.737118 | 0.786624 |
| MmugDNA.20142.1.S1_at   | MmugDNA.20142.1 | 6.83  | 6.75  | 0.26 | 0.46 | 1.06  | 0.665806 | 0.840407 | 0.850107 | 0.909015 |
| MmugDNA.20143.1.S1_at   | MmugDNA.20143.1 | 7.3   | 6.76  | 0.39 | 0.39 | 1.45  | 0.106874 | 0.137737 | 0.467551 | 0.410738 |
| MmugDNA.20147.1.S1_at   | MmugDNA.20147.1 | 7     | 5.26  | 1.48 | 0.31 | 3.36  | 0.34667  | 0.331986 | 0.666013 | 0.580544 |
| MmugDNA.20148.1.S1_at   | MmugDNA.20148.1 | 6.6   | 5.78  | 0.59 | 0.7  | 1.76  | 0.434873 | 0.121415 | 0.720924 | 0.390499 |
| MmugDNA.20149.1.S1_at   | MmugDNA.20149.1 | 6.73  | 6.16  | 0.68 | 0.26 | 1.49  | 0.252985 | 0.383222 | 0.60168  | 0.61922  |
| MmugDNA.2015.1.S1_at    | MmugDNA.2015.1  | 9.04  | 9.43  | 0.28 | 0.2  | -1.31 | 0.103056 | 0.107864 | 0.462601 | 0.370945 |
| MmugDNA.20151.1.S1_at   | MmugDNA.20151.1 | 9.49  | 10.11 | 0.17 | 0.51 | -1.54 | 0.349854 | 0.249258 | 0.668052 | 0.518332 |
| MmugDNA.20151.1.S1_x_at | MmugDNA.20151.1 | 9.64  | 10.18 | 0.12 | 0.52 | -1.46 | 0.392779 | 0.34051  | 0.694783 | 0.586776 |
| MmugDNA.20152.1.S1_at   | MmugDNA.20152.1 | 5.88  | 5.95  | 0.02 | 0.14 | -1.05 | 0.296869 | 0.299089 | 0.632758 | 0.557663 |
| MmugDNA.20153.1.S1_at   | MmugDNA.20153.1 | 3.95  | 3.88  | 0.07 | 0.08 | 1.05  | 0.144069 | 0.225204 | 0.510652 | 0.497865 |
| MmugDNA.20154.1.S1_at   | MmugDNA.20154.1 | 6.68  | 7.11  | 0.43 | 0.19 | -1.35 | 0.510999 | 0.722711 | 0.765203 | 0.839378 |
| MmugDNA.20155.1.S1_at   | MmugDNA.20155.1 | 7.66  | 8.03  | 0.03 | 0.28 | -1.29 | 0.062288 | 0.014111 | 0.397683 | 0.15195  |
| MmugDNA.31444.1.S1_s_at | MmugDNA.31444.1 | 7.39  | 7.5   | 0.19 | 0.08 | -1.08 | 0.405433 | 0.518803 | 0.703166 | 0.710724 |
| MmugDNA.31444.1.S1_x_at | MmugDNA.31444.1 | 6.37  | 6.48  | 0.23 | 0.12 | -1.08 | 0.501063 | 0.577906 | 0.759772 | 0.748185 |
| MmugDNA.2016.1.S1_at    | MmugDNA.2016.1  | 5.44  | 5.32  | 0.17 | 0.14 | 1.09  | 0.416284 | 0.142907 | 0.709829 | 0.416854 |
| MmugDNA.20160.1.S1_at   | MmugDNA.20160.1 | 5.78  | 7.07  | 0.29 | 1.41 | -2.45 | 0.130881 | 0.118736 | 0.497198 | 0.386775 |
| MmugDNA.20161.1.S1_at   | MmugDNA.20161.1 | 5.77  | 5.83  | 0.24 | 0.06 | -1.04 | 0.591607 | 0.764781 | 0.810512 | 0.863209 |
| MmugDNA.20162.1.S1_at   | MmugDNA.20162.1 | 6.02  | 5.56  | 0.58 | 0.36 | 1.37  | 0.141637 | 0.151714 | 0.509159 | 0.426383 |
| MmugDNA.20163.1.S1_at   | MmugDNA.20163.1 | 3.71  | 3.82  | 0.32 | 0.07 | -1.09 | 0.931657 | 0.934557 | 0.973573 | 0.962917 |
| MmugDNA.20166.1.S1_at   | MmugDNA.20166.1 | 5.23  | 4.9   | 0.06 | 0.15 | 1.26  | 0.060377 | 0.072134 | 0.393472 | 0.314635 |
| MmugDNA.20167.1.S1_at   | MmugDNA.20167.1 | 11.82 | 11.71 | 0.05 | 0.05 | 1.08  | 0.111764 | 0.140198 | 0.474019 | 0.413405 |

|                       |                 |       |       |      |      |       |          |          |          |          |
|-----------------------|-----------------|-------|-------|------|------|-------|----------|----------|----------|----------|
| MmugDNA.20168.1.S1_at | MmugDNA.20168.1 | 3.07  | 2.89  | 0.15 | 0.03 | 1.13  | 0.085708 | 0.064727 | 0.439704 | 0.300314 |
| MmugDNA.20169.1.S1_at | MmugDNA.20169.1 | 5.64  | 5.58  | 0.35 | 0.13 | 1.05  | 0.761115 | 0.89847  | 0.899297 | 0.942214 |
| MmugDNA.2017.1.S1_at  | MmugDNA.2017.1  | 3.51  | 3.61  | 0.04 | 0.25 | -1.07 | 0.170561 | 0.255721 | 0.534325 | 0.523675 |
| MmugDNA.20171.1.S1_at | MmugDNA.20171.1 | 5.44  | 5.11  | 0.79 | 0.41 | 1.26  | 0.346863 | 0.42199  | 0.666049 | 0.645406 |
| MmugDNA.20172.1.S1_at | MmugDNA.20172.1 | 6.1   | 6.88  | 0.32 | 0.47 | -1.71 | 0.167511 | 0.225009 | 0.531668 | 0.49773  |
| MmugDNA.20173.1.S1_at | MmugDNA.20173.1 | 7     | 7.14  | 0.33 | 0.47 | -1.1  | 0.835549 | 0.942032 | 0.9334   | 0.967113 |
| MmugDNA.20176.1.S1_at | MmugDNA.20176.1 | 5.89  | 5.99  | 0.29 | 0.07 | -1.07 | 0.700427 | 0.403392 | 0.867446 | 0.632085 |
| MmugDNA.20178.1.S1_at | MmugDNA.20178.1 | 4.37  | 4.46  | 0.45 | 0.38 | -1.06 | 0.759222 | 0.74633  | 0.898265 | 0.85272  |
| MmugDNA.20180.1.S1_at | MmugDNA.20180.1 | 9.79  | 9.68  | 0.12 | 0.06 | 1.08  | 0.312702 | 0.001195 | 0.644539 | 0.05421  |
| MmugDNA.20181.1.S1_at | MmugDNA.20181.1 | 4.64  | 4.66  | 0.39 | 0.29 | -1.01 | 0.984136 | 0.89587  | 0.99433  | 0.940488 |
| MmugDNA.20183.1.S1_at | MmugDNA.20183.1 | 3.34  | 3.46  | 0.03 | 0.07 | -1.09 | 0.067575 | 0.489861 | 0.408063 | 0.691972 |
| MmugDNA.20185.1.S1_at | MmugDNA.20185.1 | 3.67  | 3.81  | 0.11 | 0.15 | -1.1  | 0.132861 | 0.160902 | 0.498985 | 0.437116 |
| MmugDNA.20186.1.S1_at | MmugDNA.20186.1 | 4.94  | 4.94  | 0.04 | 0.12 | 1.01  | 0.828691 | 0.967251 | 0.930492 | 0.981908 |
| MmugDNA.20187.1.S1_at | MmugDNA.20187.1 | 7.18  | 7.3   | 0.35 | 0.11 | -1.09 | 0.728465 | 0.88795  | 0.881975 | 0.936115 |
| MmugDNA.20188.1.S1_at | MmugDNA.20188.1 | 6.75  | 4.98  | 0.14 | 0.43 | 3.41  | 0.002347 | 0.000466 | 0.162    | 0.038572 |
| MmugDNA.20189.1.S1_at | MmugDNA.20189.1 | 5.97  | 6.39  | 0.04 | 0.18 | -1.34 | 0.014086 | 0.028188 | 0.250983 | 0.2095   |
| MmugDNA.2019.1.S1_at  | MmugDNA.2019.1  | 12.29 | 12.08 | 0.31 | 0.68 | 1.16  | 0.407658 | 0.490939 | 0.704743 | 0.692666 |
| MmugDNA.20190.1.S1_at | MmugDNA.20190.1 | 8.01  | 6.92  | 0.04 | 0.06 | 2.13  | 0.000013 | 5.42E-07 | 0.112653 | 0.005999 |
| MmugDNA.20191.1.S1_at | MmugDNA.20191.1 | 6.71  | 6.71  | 0.02 | 0.06 | 1     | 0.280314 | 0.320867 | 0.621522 | 0.572849 |
| MmugDNA.20194.1.S1_at | MmugDNA.20194.1 | 5.06  | 6.48  | 0.24 | 1.55 | -2.67 | 0.148449 | 0.190468 | 0.513907 | 0.465906 |
| MmugDNA.20196.1.S1_at | MmugDNA.20196.1 | 9.3   | 9.56  | 0.22 | 0.53 | -1.19 | 0.313336 | 0.409294 | 0.645086 | 0.63643  |
| MmugDNA.20199.1.S1_at | MmugDNA.20199.1 | 7.81  | 7.05  | 0.55 | 0.39 | 1.69  | 0.143103 | 0.212989 | 0.510004 | 0.486926 |
| MmugDNA.2020.1.S1_at  | MmugDNA.2020.1  | 3.51  | 3.43  | 0.4  | 0.22 | 1.05  | 0.317715 | 0.3896   | 0.64802  | 0.623668 |
| MmugDNA.20200.1.S1_at | MmugDNA.20200.1 | 4.46  | 4.38  | 0.1  | 0.18 | 1.06  | 0.40219  | 0.536842 | 0.701293 | 0.722119 |
| MmugDNA.20202.1.S1_at | MmugDNA.20202.1 | 9.38  | 8.87  | 0.32 | 0.26 | 1.42  | 0.152215 | 0.15915  | 0.51689  | 0.435217 |
| MmugDNA.20204.1.S1_at | MmugDNA.20204.1 | 5.31  | 5.42  | 0.22 | 0.13 | -1.08 | 0.700417 | 0.335556 | 0.867446 | 0.583326 |
| MmugDNA.20205.1.S1_at | MmugDNA.20205.1 | 6.73  | 6.93  | 0.17 | 0.11 | -1.15 | 0.165946 | 0.229353 | 0.529851 | 0.501527 |
| MmugDNA.20207.1.S1_at | MmugDNA.20207.1 | 9.11  | 9.79  | 0.13 | 0.81 | -1.6  | 0.66462  | 0.739783 | 0.849598 | 0.849224 |
| MmugDNA.20208.1.S1_at | MmugDNA.20208.1 | 6.52  | 6.96  | 1.08 | 0.35 | -1.36 | 0.342144 | 0.395967 | 0.663078 | 0.627802 |
| MmugDNA.20209.1.S1_at | MmugDNA.20209.1 | 4.93  | 4.98  | 0.28 | 0.04 | -1.03 | 0.518414 | 0.427952 | 0.769463 | 0.649602 |
| MmugDNA.20210.1.S1_at | MmugDNA.20210.1 | 9.4   | 9.01  | 0.16 | 0.21 | 1.31  | 0.035289 | 0.024405 | 0.335829 | 0.19551  |
| MmugDNA.20211.1.S1_at | MmugDNA.20211.1 | 3.15  | 3.43  | 0.29 | 0.22 | -1.22 | 0.989529 | 0.349434 | 0.996281 | 0.593409 |
| MmugDNA.20212.1.S1_at | MmugDNA.20212.1 | 2.69  | 2.66  | 0.05 | 0    | 1.02  | 0.388361 | 0.344403 | 0.692437 | 0.58981  |
| MmugDNA.20213.1.S1_at | MmugDNA.20213.1 | 7.25  | 7.64  | 0.4  | 0.51 | -1.31 | 0.813601 | 0.559926 | 0.924352 | 0.736439 |
| MmugDNA.20214.1.S1_at | MmugDNA.20214.1 | 3.82  | 3.67  | 0.18 | 0.13 | 1.11  | 0.236983 | 0.197299 | 0.590726 | 0.472213 |
| MmugDNA.20215.1.S1_at | MmugDNA.20215.1 | 5.51  | 5.52  | 0.24 | 0.22 | -1.01 | 0.936534 | 0.851307 | 0.975429 | 0.915393 |
| MmugDNA.20216.1.S1_at | MmugDNA.20216.1 | 4.65  | 3.82  | 1.59 | 0.17 | 1.79  | 0.162455 | 0.20323  | 0.52672  | 0.477415 |
| MmugDNA.20217.1.S1_at | MmugDNA.20217.1 | 6.63  | 6.47  | 0.21 | 0.46 | 1.11  | 0.536321 | 0.718202 | 0.77949  | 0.836902 |
| MmugDNA.20218.1.S1_at | MmugDNA.20218.1 | 5.5   | 6.2   | 0.18 | 1.49 | -1.63 | 0.495688 | 0.191691 | 0.757268 | 0.46695  |
| MmugDNA.2022.1.S1_at  | MmugDNA.2022.1  | 6.27  | 5.94  | 0.25 | 0.19 | 1.26  | 0.208595 | 0.113409 | 0.570384 | 0.379509 |
| MmugDNA.20222.1.S1_at | MmugDNA.20222.1 | 10.57 | 9.51  | 0.48 | 0.54 | 2.08  | 0.043952 | 0.034246 | 0.357516 | 0.228903 |

|                         |                 |       |       |      |      |       |          |          |          |          |
|-------------------------|-----------------|-------|-------|------|------|-------|----------|----------|----------|----------|
| MmugDNA.20222.1.S1_s_at | MmugDNA.20222.1 | 12.81 | 12.54 | 0.24 | 0.25 | 1.21  | 0.053193 | 0.052316 | 0.379651 | 0.274201 |
| MmugDNA.20223.1.S1_at   | MmugDNA.20223.1 | 5.29  | 4.49  | 1.02 | 0.24 | 1.75  | 0.211919 | 0.207808 | 0.572404 | 0.482031 |
| MmugDNA.20224.1.S1_at   | MmugDNA.20224.1 | 9.54  | 9.44  | 0.07 | 0.07 | 1.07  | 0.22272  | 0.000194 | 0.581163 | 0.030888 |
| MmugDNA.20225.1.S1_at   | MmugDNA.20225.1 | 3.44  | 3.17  | 0.98 | 0.33 | 1.21  | 0.350644 | 0.29469  | 0.668568 | 0.554326 |
| MmugDNA.20226.1.S1_at   | MmugDNA.20226.1 | 4.11  | 3.97  | 0.13 | 0.5  | 1.1   | 0.792591 | 0.928759 | 0.913959 | 0.959449 |
| MmugDNA.20228.1.S1_at   | MmugDNA.20228.1 | 4.8   | 4.77  | 0.08 | 0.07 | 1.02  | 0.611608 | 0.05398  | 0.821755 | 0.27777  |
| MmugDNA.20229.1.S1_at   | MmugDNA.20229.1 | 7.07  | 6.45  | 0.21 | 0.91 | 1.54  | 0.710127 | 0.878616 | 0.872852 | 0.930729 |
| MmugDNA.2023.1.S1_at    | MmugDNA.2023.1  | 3.9   | 3.95  | 0.03 | 0.27 | -1.04 | 0.646911 | 0.822106 | 0.84111  | 0.897658 |
| MmugDNA.20230.1.S1_at   | MmugDNA.20230.1 | 8.07  | 7.76  | 0.18 | 0.71 | 1.24  | 0.517615 | 0.656708 | 0.768927 | 0.79927  |
| MmugDNA.20231.1.S1_at   | MmugDNA.20231.1 | 10.97 | 10.78 | 0.14 | 0.65 | 1.14  | 0.437871 | 0.539819 | 0.722586 | 0.723976 |
| MmugDNA.20232.1.S1_at   | MmugDNA.20232.1 | 3.74  | 3.55  | 0.16 | 0.33 | 1.14  | 0.652551 | 0.651361 | 0.843759 | 0.796212 |
| MmugDNA.20233.1.S1_at   | MmugDNA.20233.1 | 4.18  | 4.1   | 0.17 | 0.45 | 1.06  | 0.782226 | 0.872355 | 0.909138 | 0.927442 |
| MmugDNA.20235.1.S1_at   | MmugDNA.20235.1 | 3.3   | 3.46  | 0.12 | 0.1  | -1.11 | 0.088731 | 0.104527 | 0.443653 | 0.365803 |
| MmugDNA.20236.1.S1_at   | MmugDNA.20236.1 | 9.88  | 9.96  | 0.08 | 0.31 | -1.06 | 0.504327 | 0.666661 | 0.761207 | 0.804716 |
| MmugDNA.20237.1.S1_at   | MmugDNA.20237.1 | 6.05  | 6.2   | 0.06 | 0.1  | -1.11 | 0.078687 | 0.048907 | 0.428609 | 0.265919 |
| MmugDNA.20238.1.S1_at   | MmugDNA.20238.1 | 10.45 | 10.7  | 0.17 | 0.28 | -1.19 | 0.147532 | 0.130383 | 0.513287 | 0.402234 |
| MmugDNA.20239.1.S1_at   | MmugDNA.20239.1 | 5.32  | 5.13  | 0.14 | 0.32 | 1.14  | 0.989449 | 0.970325 | 0.996281 | 0.983836 |
| MmugDNA.2024.1.S1_at    | MmugDNA.2024.1  | 10.2  | 9.99  | 1.11 | 1.44 | 1.16  | 0.604862 | 0.641083 | 0.817986 | 0.78939  |
| MmugDNA.20240.1.S1_s_at | MmugDNA.20240.1 | 5.46  | 5.5   | 0.08 | 0.23 | -1.03 | 0.299766 | 0.481118 | 0.635078 | 0.686152 |
| MmugDNA.20242.1.S1_at   | MmugDNA.20242.1 | 5.82  | 5.63  | 0.2  | 0.18 | 1.13  | 0.350668 | 0.495631 | 0.668568 | 0.695576 |
| MmugDNA.20243.1.S1_at   | MmugDNA.20243.1 | 5.27  | 4.56  | 1.24 | 0.87 | 1.64  | 0.330066 | 0.306465 | 0.655539 | 0.563029 |
| MmugDNA.20244.1.S1_at   | MmugDNA.20244.1 | 9.4   | 8.67  | 0.2  | 0.14 | 1.66  | 0.005603 | 0.003332 | 0.191807 | 0.083001 |
| MmugDNA.20245.1.S1_at   | MmugDNA.20245.1 | 5.86  | 6.95  | 0.38 | 0.21 | -2.12 | 0.017242 | 0.020359 | 0.26697  | 0.17912  |
| MmugDNA.20246.1.S1_at   | MmugDNA.20246.1 | 5.6   | 5.23  | 0.13 | 0.1  | 1.29  | 0.025699 | 0.005443 | 0.300275 | 0.101853 |
| MmugDNA.20247.1.S1_at   | MmugDNA.20247.1 | 11.72 | 9.91  | 0.75 | 0.59 | 3.51  | 0.029508 | 0.019642 | 0.314644 | 0.176149 |
| MmugDNA.20248.1.S1_at   | MmugDNA.20248.1 | 5.73  | 6.22  | 0.02 | 0.48 | -1.41 | 0.160144 | 0.029168 | 0.525023 | 0.212798 |
| MmugDNA.20249.1.S1_at   | MmugDNA.20249.1 | 10.15 | 9.5   | 0.14 | 0.28 | 1.57  | 0.035028 | 0.027744 | 0.334571 | 0.208003 |
| MmugDNA.2025.1.S1_at    | MmugDNA.2025.1  | 3.61  | 3.59  | 0.1  | 0.06 | 1.02  | 0.887658 | 0.102618 | 0.954863 | 0.362991 |
| MmugDNA.20250.1.S1_at   | MmugDNA.20250.1 | 2.94  | 2.9   | 0.09 | 0.06 | 1.03  | 0.8228   | 0.15609  | 0.927904 | 0.431551 |
| MmugDNA.20251.1.S1_at   | MmugDNA.20251.1 | 5.82  | 3.62  | 0.24 | 0.59 | 4.58  | 0.005537 | 0.001225 | 0.191802 | 0.054593 |
| MmugDNA.20252.1.S1_at   | MmugDNA.20252.1 | 10.42 | 10.51 | 0.24 | 0.21 | -1.06 | 0.541153 | 0.518889 | 0.782498 | 0.710789 |
| MmugDNA.20252.1.S1_x_at | MmugDNA.20252.1 | 10.47 | 10.5  | 0.26 | 0.22 | -1.02 | 0.452026 | 0.411274 | 0.731815 | 0.637991 |
| MmugDNA.20253.1.S1_at   | MmugDNA.20253.1 | 4.26  | 4.49  | 0.13 | 0.31 | -1.17 | 0.188565 | 0.159092 | 0.551538 | 0.435217 |
| MmugDNA.20254.1.S1_at   | MmugDNA.20254.1 | 4.78  | 4.79  | 0.03 | 0.04 | -1.01 | 0.750195 | 0.041582 | 0.89292  | 0.248831 |
| MmugDNA.20255.1.S1_at   | MmugDNA.20255.1 | 4.68  | 4.61  | 0.28 | 0.19 | 1.05  | 0.76418  | 0.93265  | 0.900711 | 0.961739 |
| MmugDNA.20256.1.S1_at   | MmugDNA.20256.1 | 9.57  | 11.18 | 0.53 | 1    | -3.06 | 0.086663 | 0.074097 | 0.440475 | 0.317745 |
| MmugDNA.20257.1.S1_at   | MmugDNA.20257.1 | 9.69  | 10.67 | 0.63 | 0.29 | -1.98 | 0.104184 | 0.051795 | 0.464201 | 0.273131 |
| MmugDNA.20258.1.S1_at   | MmugDNA.20258.1 | 2.95  | 3.17  | 0.31 | 0.26 | -1.17 | 0.677114 | 0.51157  | 0.855332 | 0.705677 |
| MmugDNA.20259.1.S1_at   | MmugDNA.20259.1 | 4.01  | 3.85  | 0.14 | 0.08 | 1.12  | 0.203213 | 0.458058 | 0.565864 | 0.671038 |
| MmugDNA.20260.1.S1_at   | MmugDNA.20260.1 | 5.88  | 6.07  | 0.26 | 0.12 | -1.14 | 0.284708 | 0.388381 | 0.62439  | 0.622797 |
| MmugDNA.20261.1.S1_at   | MmugDNA.20261.1 | 4.24  | 4.35  | 0.96 | 0.3  | -1.09 | 0.58804  | 0.771579 | 0.808837 | 0.86729  |

|                         |                 |       |       |      |      |       |          |          |          |          |
|-------------------------|-----------------|-------|-------|------|------|-------|----------|----------|----------|----------|
| MmugDNA.20262.1.S1_at   | MmugDNA.20262.1 | 3.16  | 3.16  | 0.07 | 0.02 | -1    | 0.372189 | 0.012777 | 0.682724 | 0.145663 |
| MmugDNA.20263.1.S1_at   | MmugDNA.20263.1 | 4.35  | 4.36  | 0.46 | 0.04 | -1.01 | 0.364174 | 0.284445 | 0.677268 | 0.546637 |
| MmugDNA.20264.1.S1_at   | MmugDNA.20264.1 | 3.6   | 3.55  | 0.26 | 0.2  | 1.03  | 0.456517 | 0.656272 | 0.734509 | 0.798992 |
| MmugDNA.20265.1.S1_at   | MmugDNA.20265.1 | 5.08  | 5.48  | 0.34 | 0.71 | -1.32 | 0.21186  | 0.292072 | 0.572347 | 0.552232 |
| MmugDNA.20266.1.S1_at   | MmugDNA.20266.1 | 3.65  | 3.68  | 0.22 | 0.03 | -1.02 | 0.638533 | 0.833097 | 0.836621 | 0.90427  |
| MmugDNA.20267.1.S1_at   | MmugDNA.20267.1 | 10.89 | 10.9  | 0.26 | 0.27 | -1.01 | 0.857042 | 0.005255 | 0.942171 | 0.100401 |
| MmugDNA.20267.1.S1_s_at | MmugDNA.20267.1 | 11.92 | 12    | 0.16 | 0.19 | -1.05 | 0.866671 | 0.001597 | 0.946819 | 0.060468 |
| MmugDNA.20268.1.S1_at   | MmugDNA.20268.1 | 5.97  | 6.22  | 0.17 | 0.2  | -1.19 | 0.399537 | 0.376946 | 0.699439 | 0.614678 |
| MmugDNA.20269.1.S1_at   | MmugDNA.20269.1 | 4.88  | 4.94  | 0.34 | 0.18 | -1.04 | 0.503716 | 0.260271 | 0.760979 | 0.526809 |
| MmugDNA.20270.1.S1_at   | MmugDNA.20270.1 | 4.85  | 4.65  | 0.99 | 0.45 | 1.15  | 0.494142 | 0.521309 | 0.756525 | 0.712346 |
| MmugDNA.20273.1.S1_at   | MmugDNA.20273.1 | 3.67  | 3.63  | 0.26 | 0.08 | 1.03  | 0.954597 | 0.982537 | 0.983073 | 0.99036  |
| MmugDNA.20274.1.S1_at   | MmugDNA.20274.1 | 3.58  | 3.7   | 0.15 | 0.15 | -1.09 | 0.715983 | 0.589968 | 0.875256 | 0.756034 |
| MmugDNA.20276.1.S1_at   | MmugDNA.20276.1 | 4.86  | 4.87  | 0.1  | 0.13 | -1.01 | 0.467849 | 0.627001 | 0.740845 | 0.780117 |
| MmugDNA.20279.1.S1_at   | MmugDNA.20279.1 | 3.85  | 4.15  | 0.7  | 0.27 | -1.23 | 0.831329 | 0.742226 | 0.931682 | 0.850683 |
| MmugDNA.2028.1.S1_at    | MmugDNA.2028.1  | 5.83  | 5.13  | 0.72 | 0.64 | 1.63  | 0.144466 | 0.109498 | 0.511015 | 0.373339 |
| MmugDNA.20280.1.S1_at   | MmugDNA.20280.1 | 11.95 | 12.03 | 0.2  | 0.01 | -1.05 | 0.737057 | 0.929438 | 0.886925 | 0.959707 |
| MmugDNA.20281.1.S1_at   | MmugDNA.20281.1 | 11.51 | 11.45 | 0.24 | 0.12 | 1.04  | 0.720265 | 0.84516  | 0.877386 | 0.911899 |
| MmugDNA.20282.1.S1_at   | MmugDNA.20282.1 | 4.94  | 5.01  | 0.08 | 0.04 | -1.05 | 0.24705  | 0.131601 | 0.598082 | 0.403716 |
| MmugDNA.20283.1.S1_at   | MmugDNA.20283.1 | 3.4   | 3.2   | 0.24 | 0.15 | 1.15  | 0.143343 | 0.197582 | 0.510223 | 0.472564 |
| MmugDNA.20284.1.S1_at   | MmugDNA.20284.1 | 8.6   | 8.32  | 0.14 | 0.25 | 1.21  | 0.263845 | 0.0655   | 0.609676 | 0.301415 |
| MmugDNA.39169.1.S1_at   | MmugDNA.39169.1 | 4.02  | 4.07  | 0.94 | 0.1  | -1.03 | 0.447006 | 0.446697 | 0.72871  | 0.662885 |
| MmugDNA.39169.1.S1_s_at | MmugDNA.39169.1 | 11.66 | 11.33 | 0.65 | 0.43 | 1.26  | 0.735062 | 0.428852 | 0.886019 | 0.650408 |
| MmugDNA.20286.1.S1_at   | MmugDNA.20286.1 | 4.31  | 4.28  | 0.09 | 0.1  | 1.02  | 0.784644 | 0.061406 | 0.910286 | 0.294656 |
| MmugDNA.20288.1.S1_at   | MmugDNA.20288.1 | 3.5   | 3.35  | 0.11 | 0.07 | 1.11  | 0.173358 | 0.403744 | 0.537006 | 0.632356 |
| MmugDNA.20289.1.S1_at   | MmugDNA.20289.1 | 7.06  | 7.18  | 0.07 | 0.45 | -1.08 | 0.574488 | 0.769879 | 0.801702 | 0.866376 |
| MmugDNA.20290.1.S1_at   | MmugDNA.20290.1 | 3.61  | 3.46  | 0.17 | 0.14 | 1.11  | 0.554326 | 0.005962 | 0.790679 | 0.105589 |
| MmugDNA.20293.1.S1_at   | MmugDNA.20293.1 | 6.68  | 7.08  | 0.11 | 0.11 | -1.32 | 0.02278  | 0.013497 | 0.288168 | 0.148777 |
| MmugDNA.20294.1.S1_at   | MmugDNA.20294.1 | 8.56  | 7.95  | 0.05 | 0.36 | 1.52  | 0.139306 | 0.084709 | 0.506801 | 0.336196 |
| MmugDNA.20296.1.S1_at   | MmugDNA.20296.1 | 11.15 | 10.81 | 0.03 | 0.05 | 1.26  | 0.000453 | 0.000581 | 0.133116 | 0.041459 |
| MmugDNA.20297.1.S1_at   | MmugDNA.20297.1 | 5.34  | 4.95  | 0.33 | 0.64 | 1.31  | 0.449331 | 0.654786 | 0.73019  | 0.798154 |
| MmugDNA.20298.1.S1_at   | MmugDNA.20298.1 | 5.5   | 4.31  | 0.56 | 0.64 | 2.28  | 0.090849 | 0.091339 | 0.446466 | 0.346281 |
| MmugDNA.203.1.S1_at     | MmugDNA.203.1   | 3.25  | 3.3   | 0.11 | 0.05 | -1.03 | 0.374115 | 0.558808 | 0.683335 | 0.735887 |
| MmugDNA.2030.1.S1_at    | MmugDNA.2030.1  | 6.56  | 6.69  | 0.07 | 0.1  | -1.09 | 0.163812 | 0.189781 | 0.528049 | 0.465403 |
| MmugDNA.20300.1.S1_at   | MmugDNA.20300.1 | 12.74 | 12.72 | 0.08 | 0.57 | 1.01  | 0.848233 | 0.565965 | 0.939211 | 0.740174 |
| MmugDNA.20301.1.S1_at   | MmugDNA.20301.1 | 4.14  | 4.12  | 0.48 | 0.09 | 1.02  | 0.281346 | 0.398684 | 0.622212 | 0.629458 |
| MmugDNA.20305.1.S1_at   | MmugDNA.20305.1 | 4.48  | 4.68  | 0.07 | 0.27 | -1.15 | 0.348235 | 0.303857 | 0.667097 | 0.561225 |
| MmugDNA.20307.1.S1_at   | MmugDNA.20307.1 | 3.27  | 3.14  | 0.07 | 0.05 | 1.09  | 0.078922 | 0.089846 | 0.428609 | 0.344058 |
| MmugDNA.20309.1.S1_at   | MmugDNA.20309.1 | 4.27  | 4.26  | 0.25 | 0.1  | 1     | 0.343507 | 0.452652 | 0.663676 | 0.667247 |
| MmugDNA.2031.1.S1_s_at  | MmugDNA.2031.1  | 11.19 | 11.42 | 0.1  | 0.17 | -1.17 | 0.168639 | 0.063815 | 0.532849 | 0.29906  |
| MmugDNA.20310.1.S1_at   | MmugDNA.20310.1 | 9.04  | 7.91  | 0.09 | 0.47 | 2.19  | 0.036263 | 0.015214 | 0.339201 | 0.156741 |
| MmugDNA.20312.1.S1_at   | MmugDNA.20312.1 | 8.04  | 8.82  | 0.29 | 0.38 | -1.71 | 0.107506 | 0.121079 | 0.468045 | 0.390082 |

|                         |                 |       |       |      |      |       |          |          |          |          |
|-------------------------|-----------------|-------|-------|------|------|-------|----------|----------|----------|----------|
| MmugDNA.20314.1.S1_at   | MmugDNA.20314.1 | 4.05  | 4.01  | 0.49 | 0.17 | 1.03  | 0.492603 | 0.300973 | 0.755881 | 0.559198 |
| MmugDNA.20315.1.S1_at   | MmugDNA.20315.1 | 5.09  | 5.04  | 0.32 | 0.09 | 1.03  | 0.841918 | 0.953744 | 0.936278 | 0.973663 |
| MmugDNA.20316.1.S1_at   | MmugDNA.20316.1 | 10.33 | 10.56 | 0.14 | 0.62 | -1.18 | 0.206768 | 0.318984 | 0.568816 | 0.571552 |
| MmugDNA.20317.1.S1_at   | MmugDNA.20317.1 | 10.69 | 10.57 | 0.1  | 0.26 | 1.09  | 0.652917 | 0.200384 | 0.843896 | 0.47478  |
| MmugDNA.20318.1.S1_at   | MmugDNA.20318.1 | 5.04  | 5.09  | 0.13 | 0.03 | -1.03 | 0.456324 | 0.63627  | 0.73441  | 0.786026 |
| MmugDNA.2032.1.S1_at    | MmugDNA.2032.1  | 8.11  | 7.74  | 0.77 | 0.23 | 1.29  | 0.166256 | 0.161418 | 0.529929 | 0.437604 |
| MmugDNA.20320.1.S1_at   | MmugDNA.20320.1 | 11.85 | 11.91 | 0.18 | 0.16 | -1.04 | 0.910715 | 0.059642 | 0.964728 | 0.290838 |
| MmugDNA.20322.1.S1_at   | MmugDNA.20322.1 | 5.55  | 5.59  | 0.2  | 0.13 | -1.03 | 0.326721 | 0.279086 | 0.653192 | 0.542782 |
| MmugDNA.20323.1.S1_at   | MmugDNA.20323.1 | 8.9   | 7.05  | 0.28 | 0.17 | 3.59  | 0.000645 | 0.000087 | 0.136818 | 0.027016 |
| MmugDNA.20324.1.S1_at   | MmugDNA.20324.1 | 7.65  | 7.81  | 0.31 | 0.68 | -1.12 | 0.17112  | 0.240205 | 0.535105 | 0.51084  |
| MmugDNA.20326.1.S1_at   | MmugDNA.20326.1 | 10.67 | 11.64 | 0.13 | 0.18 | -1.96 | 0.002178 | 0.000393 | 0.159615 | 0.037471 |
| MmugDNA.20329.1.S1_at   | MmugDNA.20329.1 | 5.72  | 5.88  | 0.04 | 0.16 | -1.12 | 0.130752 | 0.219431 | 0.497065 | 0.493156 |
| MmugDNA.2033.1.S1_at    | MmugDNA.2033.1  | 6.25  | 6.46  | 0.15 | 0.36 | -1.16 | 0.126497 | 0.136485 | 0.492798 | 0.408936 |
| MmugDNA.20330.1.S1_at   | MmugDNA.20330.1 | 5.04  | 5.05  | 0.15 | 0.1  | -1.01 | 0.326953 | 0.472963 | 0.653374 | 0.680272 |
| MmugDNA.20331.1.S1_at   | MmugDNA.20331.1 | 2.89  | 2.95  | 0.08 | 0.03 | -1.04 | 0.394768 | 0.265968 | 0.696088 | 0.531796 |
| MmugDNA.20332.1.S1_at   | MmugDNA.20332.1 | 3.51  | 3.55  | 0.23 | 0.11 | -1.02 | 0.325643 | 0.481906 | 0.652943 | 0.68685  |
| MmugDNA.20334.1.S1_at   | MmugDNA.20334.1 | 12.77 | 13.17 | 0.12 | 0.27 | -1.32 | 0.076204 | 0.021958 | 0.424738 | 0.185407 |
| MmugDNA.20335.1.S1_at   | MmugDNA.20335.1 | 5.15  | 5.07  | 0.11 | 0.1  | 1.05  | 0.571373 | 0.759983 | 0.800086 | 0.860514 |
| MmugDNA.20336.1.S1_at   | MmugDNA.20336.1 | 3.64  | 3.53  | 0.15 | 0.12 | 1.08  | 0.388931 | 0.106939 | 0.692814 | 0.369499 |
| MmugDNA.20337.1.S1_at   | MmugDNA.20337.1 | 6.51  | 6.67  | 1.09 | 0.22 | -1.12 | 0.555371 | 0.692296 | 0.791366 | 0.820975 |
| MmugDNA.20338.1.S1_at   | MmugDNA.20338.1 | 10.23 | 9.24  | 0.68 | 1.24 | 1.99  | 0.186664 | 0.136187 | 0.550106 | 0.408517 |
| MmugDNA.20339.1.S1_at   | MmugDNA.20339.1 | 8.32  | 8.2   | 0.17 | 0.41 | 1.08  | 0.849644 | 0.705892 | 0.939616 | 0.829555 |
| MmugDNA.2034.1.S1_at    | MmugDNA.2034.1  | 7.17  | 7.02  | 0.24 | 0.48 | 1.11  | 0.407178 | 0.557387 | 0.704414 | 0.735031 |
| MmugDNA.20340.1.S1_at   | MmugDNA.20340.1 | 3.04  | 2.97  | 0.19 | 0.06 | 1.05  | 0.292281 | 0.310608 | 0.629514 | 0.565787 |
| MmugDNA.20341.1.S1_at   | MmugDNA.20341.1 | 4.81  | 4.42  | 0.26 | 0.44 | 1.31  | 0.255839 | 0.211158 | 0.603662 | 0.485194 |
| MmugDNA.20343.1.S1_at   | MmugDNA.20343.1 | 4.99  | 5.09  | 0.2  | 0.29 | -1.07 | 0.282879 | 0.237234 | 0.623131 | 0.507954 |
| MmugDNA.20344.1.S1_at   | MmugDNA.20344.1 | 8.26  | 8.35  | 0.3  | 0.09 | -1.06 | 0.744727 | 0.868689 | 0.890744 | 0.925405 |
| MmugDNA.20345.1.S1_at   | MmugDNA.20345.1 | 4.75  | 4.67  | 0.32 | 0.1  | 1.06  | 0.354209 | 0.494089 | 0.670411 | 0.694663 |
| MmugDNA.20346.1.S1_at   | MmugDNA.20346.1 | 3.23  | 3.11  | 0.16 | 0.16 | 1.09  | 0.189456 | 0.239455 | 0.552479 | 0.510147 |
| MmugDNA.20347.1.S1_at   | MmugDNA.20347.1 | 3.56  | 3.81  | 0.03 | 0.11 | -1.19 | 0.04107  | 0.028438 | 0.350547 | 0.210443 |
| MmugDNA.2035.1.S1_at    | MmugDNA.2035.1  | 3.53  | 3.45  | 0.03 | 0.15 | 1.05  | 0.945064 | 0.472085 | 0.97906  | 0.679861 |
| MmugDNA.20351.1.S1_at   | MmugDNA.20351.1 | 5.8   | 6.21  | 0.12 | 0.08 | -1.33 | 0.019866 | 0.035747 | 0.275714 | 0.233437 |
| MmugDNA.20352.1.S1_at   | MmugDNA.20352.1 | 6.15  | 5.27  | 0.62 | 0.61 | 1.83  | 0.182675 | 0.209132 | 0.546887 | 0.482939 |
| MmugDNA.20353.1.S1_at   | MmugDNA.20353.1 | 7.6   | 7.13  | 0.02 | 0.3  | 1.38  | 0.076828 | 0.005136 | 0.425685 | 0.099462 |
| MmugDNA.20355.1.S1_at   | MmugDNA.20355.1 | 5.37  | 5.19  | 0.28 | 0.08 | 1.13  | 0.102808 | 0.180155 | 0.46254  | 0.456751 |
| MmugDNA.20356.1.S1_at   | MmugDNA.20356.1 | 7.78  | 6.6   | 0.17 | 0.46 | 2.27  | 0.012726 | 0.007251 | 0.243533 | 0.114309 |
| MmugDNA.2036.1.S1_at    | MmugDNA.2036.1  | 7.28  | 6.86  | 0.11 | 0.6  | 1.34  | 0.847875 | 0.394431 | 0.939063 | 0.626982 |
| MmugDNA.20360.1.S1_at   | MmugDNA.20360.1 | 4.93  | 4.83  | 0.11 | 0.07 | 1.07  | 0.431085 | 0.141379 | 0.718464 | 0.414874 |
| MmugDNA.20361.1.S1_at   | MmugDNA.20361.1 | 3.08  | 3.08  | 0.41 | 0.27 | 1     | 0.652549 | 0.81144  | 0.843759 | 0.891158 |
| MmugDNA.20363.1.S1_at   | MmugDNA.20363.1 | 5.7   | 6.32  | 0.23 | 0.33 | -1.53 | 0.050937 | 0.038445 | 0.37568  | 0.240974 |
| MmugDNA.25887.1.S1_s_at | MmugDNA.25887.1 | 12.07 | 12.15 | 0.07 | 0.09 | -1.05 | 0.44064  | 0.029567 | 0.724412 | 0.213618 |

|                         |                 |       |       |      |      |       |          |          |          |          |
|-------------------------|-----------------|-------|-------|------|------|-------|----------|----------|----------|----------|
| MmugDNA.20366.1.S1_at   | MmugDNA.20366.1 | 3.5   | 3.46  | 0.32 | 0.05 | 1.03  | 0.358012 | 0.134974 | 0.672935 | 0.406951 |
| MmugDNA.20367.1.S1_at   | MmugDNA.20367.1 | 3.81  | 3.71  | 0.03 | 0.08 | 1.07  | 0.110579 | 0.142194 | 0.472297 | 0.415754 |
| MmugDNA.20368.1.S1_at   | MmugDNA.20368.1 | 13.14 | 13.08 | 0.11 | 0.14 | 1.04  | 0.441222 | 0.560234 | 0.724743 | 0.736553 |
| MmugDNA.20369.1.S1_at   | MmugDNA.20369.1 | 3.89  | 3.93  | 0.13 | 0.18 | -1.02 | 0.602847 | 0.360537 | 0.816768 | 0.601613 |
| MmugDNA.2037.1.S1_at    | MmugDNA.2037.1  | 9.57  | 10.07 | 0.06 | 0.25 | -1.42 | 0.070802 | 0.080346 | 0.414661 | 0.327965 |
| MmugDNA.20370.1.S1_at   | MmugDNA.20370.1 | 3.84  | 3.84  | 0.06 | 0.14 | 1     | 0.663154 | 0.865105 | 0.848936 | 0.923484 |
| MmugDNA.20371.1.S1_at   | MmugDNA.20371.1 | 7.1   | 6.51  | 0.43 | 0.33 | 1.51  | 0.345564 | 0.369646 | 0.665245 | 0.608957 |
| MmugDNA.20372.1.S1_s_at | MmugDNA.20372.1 | 6.43  | 6.58  | 0.1  | 0.07 | -1.11 | 0.218575 | 0.070687 | 0.578123 | 0.312056 |
| MmugDNA.20374.1.S1_at   | MmugDNA.20374.1 | 6.45  | 6.03  | 0.63 | 0.53 | 1.34  | 0.210697 | 0.022172 | 0.571933 | 0.186409 |
| MmugDNA.20375.1.S1_at   | MmugDNA.20375.1 | 8.3   | 8.19  | 0.34 | 0.47 | 1.08  | 0.721515 | 0.256133 | 0.87812  | 0.524069 |
| MmugDNA.20376.1.S1_at   | MmugDNA.20376.1 | 5.46  | 5.54  | 0.12 | 0.1  | -1.06 | 0.122642 | 0.153726 | 0.487896 | 0.428413 |
| MmugDNA.20382.1.S1_at   | MmugDNA.20382.1 | 6.62  | 5.78  | 1.01 | 0.33 | 1.79  | 0.262311 | 0.289481 | 0.608902 | 0.550495 |
| MmugDNA.20383.1.S1_at   | MmugDNA.20383.1 | 8.53  | 7.78  | 0.49 | 0.37 | 1.68  | 0.044432 | 0.034663 | 0.358591 | 0.230352 |
| MmugDNA.20384.1.S1_at   | MmugDNA.20384.1 | 6.99  | 7.15  | 0.05 | 0.23 | -1.12 | 0.669571 | 0.85735  | 0.852167 | 0.918545 |
| MmugDNA.20385.1.S1_at   | MmugDNA.20385.1 | 5.12  | 5.8   | 0.26 | 0.31 | -1.6  | 0.033593 | 0.037467 | 0.329782 | 0.237837 |
| MmugDNA.20387.1.S1_at   | MmugDNA.20387.1 | 10.78 | 10.32 | 0.46 | 0.67 | 1.37  | 0.715153 | 0.483771 | 0.875005 | 0.688117 |
| MmugDNA.20388.1.S1_at   | MmugDNA.20388.1 | 3.5   | 3.18  | 0.21 | 0.26 | 1.25  | 0.204723 | 0.269278 | 0.567258 | 0.534534 |
| MmugDNA.20389.1.S1_at   | MmugDNA.20389.1 | 9.54  | 7.82  | 0.3  | 0.52 | 3.3   | 0.023141 | 0.013464 | 0.290295 | 0.148626 |
| MmugDNA.2039.1.S1_s_at  | MmugDNA.2039.1  | 5.88  | 5.8   | 0.17 | 0.28 | 1.06  | 0.648026 | 0.050328 | 0.841735 | 0.269595 |
| MmugDNA.20390.1.S1_at   | MmugDNA.20390.1 | 4.15  | 4.43  | 0.15 | 0.3  | -1.21 | 0.116362 | 0.10574  | 0.480059 | 0.367881 |
| MmugDNA.20391.1.S1_at   | MmugDNA.20391.1 | 4.23  | 4.53  | 0.06 | 0.18 | -1.23 | 0.114025 | 0.083563 | 0.47744  | 0.334152 |
| MmugDNA.20392.1.S1_at   | MmugDNA.20392.1 | 4.73  | 4.58  | 0.61 | 0.13 | 1.11  | 0.45379  | 0.570238 | 0.732887 | 0.743016 |
| MmugDNA.20393.1.S1_at   | MmugDNA.20393.1 | 5.49  | 5.13  | 0.39 | 0.04 | 1.28  | 0.335676 | 0.433948 | 0.659165 | 0.65412  |
| MmugDNA.20394.1.S1_at   | MmugDNA.20394.1 | 8.66  | 9.57  | 0.39 | 0.41 | -1.89 | 0.103661 | 0.117989 | 0.463383 | 0.385881 |
| MmugDNA.20395.1.S1_at   | MmugDNA.20395.1 | 6.02  | 5.9   | 0.1  | 0.21 | 1.08  | 0.663768 | 0.17101  | 0.849105 | 0.447561 |
| MmugDNA.20396.1.S1_at   | MmugDNA.20396.1 | 6.07  | 6.18  | 0.33 | 0.2  | -1.08 | 0.761297 | 0.471104 | 0.899431 | 0.679173 |
| MmugDNA.20398.1.S1_s_at | MmugDNA.20398.1 | 10.85 | 11.05 | 0.2  | 0.43 | -1.16 | 0.898156 | 0.981256 | 0.959278 | 0.989643 |
| MmugDNA.2040.1.S1_at    | MmugDNA.2040.1  | 6.13  | 6.36  | 0.34 | 0.29 | -1.17 | 0.870562 | 0.478895 | 0.948314 | 0.684774 |
| MmugDNA.2040.1.S1_s_at  | MmugDNA.2040.1  | 5.92  | 6.91  | 0.59 | 0.3  | -1.99 | 0.200385 | 0.225007 | 0.563205 | 0.49773  |
| MmugDNA.20400.1.S1_at   | MmugDNA.20400.1 | 6.58  | 7.1   | 0.04 | 0.27 | -1.43 | 0.083268 | 0.131564 | 0.435702 | 0.403665 |
| MmugDNA.20401.1.S1_at   | MmugDNA.20401.1 | 8.03  | 8.23  | 0.1  | 0.33 | -1.15 | 0.968262 | 0.151846 | 0.988074 | 0.42651  |
| MmugDNA.20402.1.S1_at   | MmugDNA.20402.1 | 3.73  | 3.4   | 0.1  | 0.31 | 1.26  | 0.08424  | 0.145959 | 0.436922 | 0.41997  |
| MmugDNA.20403.1.S1_at   | MmugDNA.20403.1 | 10.8  | 10.17 | 0.34 | 0.63 | 1.55  | 0.126009 | 0.139932 | 0.492065 | 0.413293 |
| MmugDNA.20404.1.S1_at   | MmugDNA.20404.1 | 10.71 | 10.83 | 0.17 | 0.3  | -1.09 | 0.371159 | 0.002866 | 0.681841 | 0.078799 |
| MmugDNA.20406.1.S1_at   | MmugDNA.20406.1 | 5.94  | 6.21  | 0.57 | 0.38 | -1.21 | 0.943119 | 0.121984 | 0.978387 | 0.391416 |
| MmugDNA.20407.1.S1_at   | MmugDNA.20407.1 | 11.86 | 11.72 | 0.36 | 0.38 | 1.1   | 0.652225 | 0.095152 | 0.843581 | 0.35218  |
| MmugDNA.20408.1.S1_at   | MmugDNA.20408.1 | 3.09  | 3.07  | 0.04 | 0.12 | 1.01  | 0.667085 | 0.76761  | 0.850778 | 0.865109 |
| MmugDNA.20409.1.S1_at   | MmugDNA.20409.1 | 3.94  | 4.01  | 0.1  | 0.08 | -1.05 | 0.146256 | 0.377699 | 0.512346 | 0.615086 |
| MmugDNA.2041.1.S1_at    | MmugDNA.2041.1  | 5.41  | 4.87  | 0.77 | 0.17 | 1.46  | 0.287283 | 0.320601 | 0.625926 | 0.572702 |
| MmugDNA.2041.1.S1_s_at  | MmugDNA.2041.1  | 3.11  | 3.17  | 0.19 | 0.06 | -1.04 | 0.87072  | 0.223446 | 0.948341 | 0.496239 |
| MmugDNA.20410.1.S1_at   | MmugDNA.20410.1 | 5.48  | 5.04  | 0.18 | 0.14 | 1.36  | 0.126852 | 0.112405 | 0.493023 | 0.377784 |

|                         |                 |       |       |      |      |       |          |          |          |          |
|-------------------------|-----------------|-------|-------|------|------|-------|----------|----------|----------|----------|
| MmugDNA.20411.1.S1_at   | MmugDNA.20411.1 | 5.17  | 5.39  | 0.86 | 0.11 | -1.16 | 0.722652 | 0.859057 | 0.878815 | 0.919754 |
| MmugDNA.20412.1.S1_at   | MmugDNA.20412.1 | 4.17  | 4.48  | 0.3  | 0.25 | -1.24 | 0.575924 | 0.248086 | 0.802615 | 0.517567 |
| MmugDNA.20413.1.S1_s_at | MmugDNA.20413.1 | 11.7  | 11.07 | 0.08 | 0.21 | 1.55  | 0.014156 | 0.004937 | 0.251402 | 0.097906 |
| MmugDNA.20414.1.S1_at   | MmugDNA.20414.1 | 5.81  | 5.95  | 0.2  | 0.26 | -1.1  | 0.265548 | 0.341774 | 0.611167 | 0.587862 |
| MmugDNA.20417.1.S1_s_at | MmugDNA.20417.1 | 11.89 | 12.15 | 0.14 | 0.14 | -1.2  | 0.115007 | 0.004363 | 0.478345 | 0.092486 |
| MmugDNA.20419.1.S1_at   | MmugDNA.20419.1 | 12.07 | 11.89 | 0.12 | 0.15 | 1.14  | 0.38386  | 0.05603  | 0.689644 | 0.2826   |
| MmugDNA.2042.1.S1_at    | MmugDNA.2042.1  | 5.77  | 5.73  | 0.51 | 0.2  | 1.03  | 0.791546 | 0.666284 | 0.913408 | 0.804419 |
| MmugDNA.20422.1.S1_at   | MmugDNA.20422.1 | 7.92  | 7.44  | 0.19 | 0.09 | 1.4   | 0.005832 | 0.002168 | 0.193198 | 0.068824 |
| MmugDNA.20424.1.S1_at   | MmugDNA.20424.1 | 8.56  | 8.19  | 0.33 | 0.3  | 1.29  | 0.20491  | 0.11203  | 0.567457 | 0.377203 |
| MmugDNA.20426.1.S1_at   | MmugDNA.20426.1 | 5.71  | 6.09  | 1.27 | 0.53 | -1.3  | 0.609791 | 0.7816   | 0.820687 | 0.87341  |
| MmugDNA.20428.1.S1_at   | MmugDNA.20428.1 | 6.77  | 6.9   | 0.29 | 0.19 | -1.1  | 0.612044 | 0.432201 | 0.821962 | 0.652775 |
| MmugDNA.20429.1.S1_at   | MmugDNA.20429.1 | 3.45  | 3.36  | 0.1  | 0.1  | 1.06  | 0.304759 | 0.235923 | 0.638784 | 0.507056 |
| MmugDNA.2043.1.S1_at    | MmugDNA.2043.1  | 3.09  | 3.2   | 0.26 | 0.16 | -1.08 | 0.854179 | 0.428145 | 0.941079 | 0.649689 |
| MmugDNA.20431.1.S1_at   | MmugDNA.20431.1 | 7.1   | 7.12  | 0.27 | 0.05 | -1.01 | 0.947858 | 0.862017 | 0.980005 | 0.921585 |
| MmugDNA.20432.1.S1_at   | MmugDNA.20432.1 | 11.13 | 10.42 | 0.23 | 0.15 | 1.63  | 0.009245 | 0.000597 | 0.223361 | 0.041941 |
| MmugDNA.20433.1.S1_at   | MmugDNA.20433.1 | 7.43  | 6.48  | 0.05 | 0.87 | 1.94  | 0.16711  | 0.117398 | 0.531273 | 0.38505  |
| MmugDNA.20434.1.S1_at   | MmugDNA.20434.1 | 4.79  | 4.52  | 0.03 | 0.22 | 1.2   | 0.113852 | 0.030545 | 0.477183 | 0.216711 |
| MmugDNA.20435.1.S1_at   | MmugDNA.20435.1 | 6.07  | 5.91  | 1.02 | 0.74 | 1.11  | 0.371141 | 0.507365 | 0.681832 | 0.702917 |
| MmugDNA.20436.1.S1_at   | MmugDNA.20436.1 | 11.04 | 10.99 | 0.11 | 0.53 | 1.04  | 0.296698 | 0.211945 | 0.632686 | 0.48595  |
| MmugDNA.20437.1.S1_at   | MmugDNA.20437.1 | 5.12  | 5.28  | 0.22 | 0.1  | -1.11 | 0.274082 | 0.442065 | 0.617262 | 0.660148 |
| MmugDNA.20438.1.S1_at   | MmugDNA.20438.1 | 8.94  | 8.86  | 0.37 | 0.12 | 1.06  | 0.341781 | 0.360383 | 0.662882 | 0.601434 |
| MmugDNA.20439.1.S1_at   | MmugDNA.20439.1 | 3.93  | 3.63  | 0.58 | 0.42 | 1.24  | 0.54759  | 0.38414  | 0.786269 | 0.619927 |
| MmugDNA.20441.1.S1_at   | MmugDNA.20441.1 | 7.25  | 7.58  | 0.04 | 0.33 | -1.25 | 0.055161 | 0.020285 | 0.383547 | 0.178761 |
| MmugDNA.20443.1.S1_at   | MmugDNA.20443.1 | 3.1   | 3.16  | 0    | 0.03 | -1.04 | 0.116251 | 0.079066 | 0.479808 | 0.32614  |
| MmugDNA.20444.1.S1_at   | MmugDNA.20444.1 | 5.5   | 4.66  | 0.22 | 1.04 | 1.8   | 0.729844 | 0.675076 | 0.88278  | 0.810146 |
| MmugDNA.20445.1.S1_at   | MmugDNA.20445.1 | 9.8   | 11.15 | 0.95 | 0.88 | -2.55 | 0.06351  | 0.050148 | 0.400654 | 0.269087 |
| MmugDNA.20446.1.S1_at   | MmugDNA.20446.1 | 3.52  | 3.51  | 0.15 | 0.08 | 1.01  | 0.61029  | 0.184431 | 0.821014 | 0.460468 |
| MmugDNA.20448.1.S1_at   | MmugDNA.20448.1 | 9.47  | 9.5   | 0.2  | 0.3  | -1.02 | 0.827362 | 0.148888 | 0.92997  | 0.42326  |
| MmugDNA.2045.1.S1_at    | MmugDNA.2045.1  | 5.1   | 4.52  | 0.74 | 0.27 | 1.49  | 0.199467 | 0.208925 | 0.562465 | 0.482749 |
| MmugDNA.20450.1.S1_at   | MmugDNA.20450.1 | 7.93  | 7.55  | 0.22 | 0.39 | 1.3   | 0.40576  | 0.487799 | 0.703341 | 0.690669 |
| MmugDNA.20452.1.S1_at   | MmugDNA.20452.1 | 4     | 4     | 0.03 | 0.13 | 1     | 0.525698 | 0.293883 | 0.773877 | 0.553872 |
| MmugDNA.20456.1.S1_at   | MmugDNA.20456.1 | 13.1  | 13.08 | 0.26 | 0.19 | 1.02  | 0.99047  | 0.761514 | 0.996659 | 0.861416 |
| MmugDNA.20458.1.S1_at   | MmugDNA.20458.1 | 5.13  | 5.32  | 0.08 | 0.28 | -1.15 | 0.217003 | 0.104753 | 0.576574 | 0.366183 |
| MmugDNA.2046.1.S1_s_at  | MmugDNA.2046.1  | 12.04 | 12.16 | 0.09 | 0.23 | -1.09 | 0.82271  | 0.009196 | 0.927841 | 0.126573 |
| MmugDNA.20460.1.S1_at   | MmugDNA.20460.1 | 3.99  | 3.95  | 0.19 | 0.26 | 1.03  | 0.894537 | 0.910263 | 0.957917 | 0.949391 |
| MmugDNA.20461.1.S1_at   | MmugDNA.20461.1 | 5.38  | 5.11  | 0.39 | 0.08 | 1.21  | 0.349268 | 0.168733 | 0.667584 | 0.445379 |
| MmugDNA.20462.1.S1_at   | MmugDNA.20462.1 | 7.47  | 8.17  | 0.56 | 1.41 | -1.63 | 0.482829 | 0.668334 | 0.749617 | 0.805919 |
| MmugDNA.20463.1.S1_at   | MmugDNA.20463.1 | 7.5   | 6.76  | 0.27 | 0.41 | 1.68  | 0.133481 | 0.072106 | 0.50015  | 0.314595 |
| MmugDNA.20464.1.S1_at   | MmugDNA.20464.1 | 5.99  | 5.54  | 0.31 | 0.12 | 1.36  | 0.19816  | 0.290301 | 0.56113  | 0.551169 |
| MmugDNA.20466.1.S1_at   | MmugDNA.20466.1 | 4.49  | 4.58  | 0.24 | 0.13 | -1.07 | 0.678527 | 0.892752 | 0.856053 | 0.938818 |
| MmugDNA.20468.1.S1_at   | MmugDNA.20468.1 | 4.15  | 4.15  | 0.09 | 0.12 | 1     | 0.859148 | 0.199072 | 0.943112 | 0.473647 |

|                         |                 |       |       |      |      |        |          |          |          |          |
|-------------------------|-----------------|-------|-------|------|------|--------|----------|----------|----------|----------|
| MmugDNA.20469.1.S1_at   | MmugDNA.20469.1 | 8     | 8.48  | 0.28 | 0.63 | -1.4   | 0.16064  | 0.076401 | 0.525738 | 0.321372 |
| MmugDNA.2047.1.S1_at    | MmugDNA.2047.1  | 8.13  | 7.53  | 0.84 | 0.82 | 1.52   | 0.228047 | 0.317994 | 0.585428 | 0.571046 |
| MmugDNA.20471.1.S1_at   | MmugDNA.20471.1 | 12    | 11.97 | 0.21 | 0.51 | 1.02   | 0.783135 | 0.905898 | 0.909454 | 0.946748 |
| MmugDNA.20472.1.S1_at   | MmugDNA.20472.1 | 3.5   | 3.33  | 0.07 | 0.15 | 1.12   | 0.147966 | 0.161984 | 0.513442 | 0.438108 |
| MmugDNA.20472.1.S1_x_at | MmugDNA.20472.1 | 5.05  | 4.85  | 0.2  | 0.14 | 1.15   | 0.05483  | 0.064961 | 0.382442 | 0.300855 |
| MmugDNA.20474.1.S1_at   | MmugDNA.20474.1 | 3.77  | 3.67  | 0.15 | 0.07 | 1.07   | 0.122275 | 0.149018 | 0.48746  | 0.423337 |
| MmugDNA.20475.1.S1_at   | MmugDNA.20475.1 | 7.4   | 7.41  | 0.22 | 0.21 | -1.01  | 0.541558 | 0.529934 | 0.782728 | 0.71758  |
| MmugDNA.20476.1.S1_at   | MmugDNA.20476.1 | 4.45  | 4.06  | 0.12 | 0.88 | 1.3    | 0.724064 | 0.470095 | 0.87936  | 0.678572 |
| MmugDNA.20477.1.S1_at   | MmugDNA.20477.1 | 4.71  | 4.71  | 0.08 | 0.13 | -1     | 0.402632 | 0.374708 | 0.701533 | 0.613037 |
| MmugDNA.20478.1.S1_at   | MmugDNA.20478.1 | 11.41 | 11.09 | 0.17 | 0.37 | 1.25   | 0.208849 | 0.266743 | 0.570476 | 0.53241  |
| MmugDNA.20478.1.S1_s_at | MmugDNA.20478.1 | 12.59 | 12.33 | 0.13 | 0.28 | 1.19   | 0.148705 | 0.170371 | 0.51391  | 0.447103 |
| MmugDNA.20479.1.S1_at   | MmugDNA.20479.1 | 9.8   | 9.39  | 0.3  | 0.32 | 1.33   | 0.23241  | 0.291995 | 0.587814 | 0.552163 |
| MmugDNA.2048.1.S1_at    | MmugDNA.2048.1  | 6.06  | 6.41  | 1.22 | 0.99 | -1.27  | 0.793172 | 0.917861 | 0.914247 | 0.954026 |
| MmugDNA.20480.1.S1_at   | MmugDNA.20480.1 | 8.1   | 8.26  | 0.19 | 0.05 | -1.12  | 0.660108 | 0.428167 | 0.847439 | 0.649705 |
| MmugDNA.20481.1.S1_at   | MmugDNA.20481.1 | 7.64  | 7.39  | 0.83 | 0.31 | 1.19   | 0.288681 | 0.349126 | 0.626793 | 0.593178 |
| MmugDNA.20483.1.S1_at   | MmugDNA.20483.1 | 7.92  | 8.29  | 0.01 | 0.4  | -1.29  | 0.567948 | 0.737646 | 0.798337 | 0.848008 |
| MmugDNA.20484.1.S1_at   | MmugDNA.20484.1 | 5.97  | 6.12  | 0.17 | 0.27 | -1.11  | 0.628686 | 0.67887  | 0.830911 | 0.812474 |
| MmugDNA.20485.1.S1_at   | MmugDNA.20485.1 | 4.78  | 4.94  | 0.17 | 0.2  | -1.11  | 0.500611 | 0.301855 | 0.759592 | 0.559788 |
| MmugDNA.20486.1.S1_at   | MmugDNA.20486.1 | 4.8   | 4.96  | 0.14 | 0.09 | -1.12  | 0.398045 | 0.272734 | 0.698523 | 0.537479 |
| MmugDNA.20488.1.S1_at   | MmugDNA.20488.1 | 3.53  | 3.61  | 0.26 | 0.24 | -1.06  | 0.692607 | 0.867457 | 0.86351  | 0.924699 |
| MmugDNA.2049.1.S1_at    | MmugDNA.2049.1  | 5.84  | 5.88  | 0.04 | 0.09 | -1.02  | 0.869785 | 0.949178 | 0.947917 | 0.970886 |
| MmugDNA.20490.1.S1_at   | MmugDNA.20490.1 | 7.56  | 7.6   | 0.15 | 0.04 | -1.03  | 0.963766 | 0.212649 | 0.985982 | 0.48659  |
| MmugDNA.20491.1.S1_s_at | MmugDNA.20491.1 | 3.13  | 3.13  | 0.05 | 0    | 1      | 0.412553 | 0.820741 | 0.707935 | 0.896776 |
| MmugDNA.20495.1.S1_at   | MmugDNA.20495.1 | 7.42  | 5.49  | 0.66 | 1.38 | 3.82   | 0.101625 | 0.062284 | 0.461313 | 0.296416 |
| MmugDNA.20497.1.S1_at   | MmugDNA.20497.1 | 10.99 | 11.55 | 0.12 | 0.33 | -1.47  | 0.022565 | 0.007661 | 0.287341 | 0.117089 |
| MmugDNA.20498.1.S1_at   | MmugDNA.20498.1 | 3.59  | 3.49  | 0.43 | 0.09 | 1.07   | 0.753084 | 0.928765 | 0.894607 | 0.959449 |
| MmugDNA.20499.1.S1_at   | MmugDNA.20499.1 | 5.39  | 5.49  | 0.19 | 0.09 | -1.07  | 0.950966 | 0.37066  | 0.981558 | 0.609675 |
| MmugDNA.205.1.S1_at     | MmugDNA.205.1   | 5.48  | 5.43  | 0.32 | 0.23 | 1.03   | 0.689019 | 0.677898 | 0.861273 | 0.811841 |
| MmugDNA.20500.1.S1_at   | MmugDNA.20500.1 | 3.54  | 3.54  | 0.16 | 0    | 1      | 0.359251 | 0.365286 | 0.673869 | 0.605413 |
| MmugDNA.20501.1.S1_at   | MmugDNA.20501.1 | 10.54 | 10.43 | 0.11 | 0.3  | 1.08   | 0.530774 | 0.129447 | 0.776921 | 0.400867 |
| MmugDNA.20502.1.S1_at   | MmugDNA.20502.1 | 5.17  | 5.27  | 0.07 | 0.05 | -1.07  | 0.043801 | 0.041699 | 0.357051 | 0.24887  |
| MmugDNA.20503.1.S1_at   | MmugDNA.20503.1 | 5.32  | 5.3   | 0.12 | 0.32 | 1.01   | 0.635508 | 0.71694  | 0.83497  | 0.836151 |
| MmugDNA.20504.1.S1_at   | MmugDNA.20504.1 | 9.27  | 8.54  | 1.12 | 0.92 | 1.66   | 0.502941 | 0.375017 | 0.760591 | 0.613186 |
| MmugDNA.20506.1.S1_at   | MmugDNA.20506.1 | 10.29 | 10.33 | 0.15 | 0.2  | -1.03  | 0.440114 | 0.683007 | 0.724095 | 0.815061 |
| MmugDNA.20507.1.S1_at   | MmugDNA.20507.1 | 7.39  | 11.89 | 0.77 | 0.46 | -22.57 | 0.000855 | 0.000361 | 0.139544 | 0.037273 |
| MmugDNA.20508.1.S1_at   | MmugDNA.20508.1 | 2.96  | 3.04  | 0.11 | 0.13 | -1.05  | 0.296544 | 0.386709 | 0.632614 | 0.62187  |
| MmugDNA.20509.1.S1_at   | MmugDNA.20509.1 | 3.73  | 3.71  | 0.13 | 0.2  | 1.01   | 0.884532 | 0.819103 | 0.953771 | 0.895759 |
| MmugDNA.2051.1.S1_at    | MmugDNA.2051.1  | 5.89  | 6.11  | 0.04 | 0.29 | -1.16  | 0.818392 | 0.744862 | 0.926289 | 0.852198 |
| MmugDNA.20510.1.S1_at   | MmugDNA.20510.1 | 5.4   | 5.13  | 0.69 | 0.08 | 1.2    | 0.326254 | 0.427956 | 0.653184 | 0.649602 |
| MmugDNA.20511.1.S1_at   | MmugDNA.20511.1 | 3.33  | 3.33  | 0    | 0.13 | 1      | 0.399539 | 0.407971 | 0.699439 | 0.635339 |
| MmugDNA.20513.1.S1_at   | MmugDNA.20513.1 | 5.73  | 8.28  | 1.79 | 1.4  | -5.82  | 0.322264 | 0.339823 | 0.650918 | 0.586394 |



|                         |                 |       |       |      |      |       |          |          |          |          |
|-------------------------|-----------------|-------|-------|------|------|-------|----------|----------|----------|----------|
| MmugDNA.20514.1.S1_at   | MmugDNA.20514.1 | 5.94  | 6     | 0.37 | 0.05 | -1.04 | 0.440814 | 0.524506 | 0.724535 | 0.714395 |
| MmugDNA.20515.1.S1_at   | MmugDNA.20515.1 | 4.67  | 4.9   | 0.07 | 0.11 | -1.17 | 0.074627 | 0.119999 | 0.420587 | 0.388672 |
| MmugDNA.20517.1.S1_at   | MmugDNA.20517.1 | 6.48  | 6.68  | 0.08 | 0.12 | -1.15 | 0.102523 | 0.040347 | 0.462369 | 0.245984 |
| MmugDNA.20519.1.S1_at   | MmugDNA.20519.1 | 7.25  | 7.87  | 0.37 | 0.16 | -1.53 | 0.023579 | 0.041665 | 0.291854 | 0.24887  |
| MmugDNA.2052.1.S1_at    | MmugDNA.2052.1  | 4.62  | 4.93  | 0.35 | 0.11 | -1.24 | 0.2244   | 0.29353  | 0.582716 | 0.553502 |
| MmugDNA.20522.1.S1_at   | MmugDNA.20522.1 | 5.72  | 5.79  | 0.16 | 0.07 | -1.05 | 0.891194 | 0.791294 | 0.95657  | 0.879433 |
| MmugDNA.20523.1.S1_at   | MmugDNA.20523.1 | 6.5   | 6.73  | 0.41 | 0.16 | -1.17 | 0.588725 | 0.424049 | 0.809114 | 0.646666 |
| MmugDNA.20523.1.S1_s_at | MmugDNA.20523.1 | 7.41  | 8.24  | 0.18 | 0.47 | -1.77 | 0.040597 | 0.050729 | 0.349883 | 0.270368 |
| MmugDNA.20524.1.S1_at   | MmugDNA.20524.1 | 3.32  | 3.2   | 0.09 | 0.15 | 1.09  | 0.837808 | 0.327241 | 0.934478 | 0.577173 |
| MmugDNA.20525.1.S1_at   | MmugDNA.20525.1 | 11.8  | 11.48 | 0.15 | 0.19 | 1.25  | 0.192111 | 0.071987 | 0.555187 | 0.314305 |
| MmugDNA.20526.1.S1_at   | MmugDNA.20526.1 | 5.88  | 5.82  | 0.26 | 0.35 | 1.04  | 0.978147 | 0.117359 | 0.991843 | 0.384998 |
| MmugDNA.20527.1.S1_at   | MmugDNA.20527.1 | 4.16  | 4.17  | 0.29 | 0.15 | -1.01 | 0.703979 | 0.752468 | 0.869387 | 0.855897 |
| MmugDNA.20528.1.S1_at   | MmugDNA.20528.1 | 4.92  | 5.57  | 0.34 | 0.17 | -1.57 | 0.044333 | 0.03782  | 0.358414 | 0.238869 |
| MmugDNA.20529.1.S1_at   | MmugDNA.20529.1 | 5.87  | 4.98  | 0.64 | 0.71 | 1.85  | 0.403208 | 0.285287 | 0.701936 | 0.547192 |
| MmugDNA.2053.1.S1_at    | MmugDNA.2053.1  | 4.21  | 4.11  | 0.14 | 0.12 | 1.07  | 0.511111 | 0.641682 | 0.765243 | 0.789672 |
| MmugDNA.20530.1.S1_at   | MmugDNA.20530.1 | 2.86  | 3.03  | 0.03 | 0.16 | -1.12 | 0.097081 | 0.079887 | 0.456113 | 0.327207 |
| MmugDNA.20531.1.S1_at   | MmugDNA.20531.1 | 5.38  | 5.28  | 0.33 | 0.3  | 1.07  | 0.795953 | 0.449547 | 0.915358 | 0.665113 |
| MmugDNA.20532.1.S1_at   | MmugDNA.20532.1 | 9.74  | 9.44  | 0.19 | 0.3  | 1.23  | 0.257488 | 0.240503 | 0.604901 | 0.511123 |
| MmugDNA.20533.1.S1_at   | MmugDNA.20533.1 | 4.96  | 5.06  | 1.63 | 0.26 | -1.07 | 0.840273 | 0.970023 | 0.935593 | 0.983605 |
| MmugDNA.20534.1.S1_at   | MmugDNA.20534.1 | 11.55 | 10.91 | 0.11 | 0.05 | 1.55  | 0.000864 | 0.000209 | 0.139813 | 0.032262 |
| MmugDNA.20536.1.S1_at   | MmugDNA.20536.1 | 9.56  | 9.04  | 0.23 | 0.27 | 1.44  | 0.055299 | 0.06242  | 0.383689 | 0.296669 |
| MmugDNA.20537.1.S1_at   | MmugDNA.20537.1 | 11.02 | 10.68 | 0.24 | 0.36 | 1.27  | 0.259755 | 0.058719 | 0.606733 | 0.289005 |
| MmugDNA.20538.1.S1_at   | MmugDNA.20538.1 | 5.56  | 4.78  | 0.52 | 0.48 | 1.72  | 0.183983 | 0.16445  | 0.547964 | 0.440678 |
| MmugDNA.20539.1.S1_at   | MmugDNA.20539.1 | 4.5   | 4.38  | 0.22 | 0.15 | 1.09  | 0.189627 | 0.104808 | 0.552487 | 0.366313 |
| MmugDNA.20541.1.S1_at   | MmugDNA.20541.1 | 4.18  | 3.82  | 0.25 | 0.29 | 1.28  | 0.75661  | 0.546429 | 0.896619 | 0.728034 |
| MmugDNA.20543.1.S1_at   | MmugDNA.20543.1 | 3.31  | 3.08  | 0.33 | 0.19 | 1.17  | 0.233058 | 0.316945 | 0.587988 | 0.570275 |
| MmugDNA.20544.1.S1_at   | MmugDNA.20544.1 | 6.3   | 6.3   | 0.37 | 0    | -1    | 0.379762 | 0.391115 | 0.687063 | 0.624833 |
| MmugDNA.20545.1.S1_s_at | MmugDNA.20545.1 | 5.62  | 5.62  | 0.1  | 0.14 | -1    | 0.231008 | 0.320855 | 0.587369 | 0.572849 |
| MmugDNA.20546.1.S1_at   | MmugDNA.20546.1 | 4.5   | 4.51  | 0.74 | 0.13 | -1    | 0.389666 | 0.432235 | 0.693149 | 0.652776 |
| MmugDNA.20547.1.S1_at   | MmugDNA.20547.1 | 7.35  | 6.93  | 0.36 | 1.12 | 1.33  | 0.938869 | 0.348908 | 0.976746 | 0.592939 |
| MmugDNA.20548.1.S1_at   | MmugDNA.20548.1 | 4.67  | 4.54  | 0.21 | 0.16 | 1.09  | 0.48172  | 0.025987 | 0.749268 | 0.202122 |
| MmugDNA.20550.1.S1_at   | MmugDNA.20550.1 | 4.67  | 4.86  | 0.2  | 0.25 | -1.14 | 0.399262 | 0.190812 | 0.699208 | 0.466228 |
| MmugDNA.20551.1.S1_at   | MmugDNA.20551.1 | 9.7   | 9.65  | 0.17 | 0.77 | 1.04  | 0.753347 | 0.768754 | 0.894798 | 0.865653 |
| MmugDNA.20552.1.S1_at   | MmugDNA.20552.1 | 6.08  | 6.15  | 0.19 | 0.29 | -1.05 | 0.46597  | 0.318217 | 0.740195 | 0.571088 |
| MmugDNA.20553.1.S1_at   | MmugDNA.20553.1 | 10.64 | 11.04 | 0.15 | 0.62 | -1.32 | 0.319721 | 0.442389 | 0.649072 | 0.660386 |
| MmugDNA.20554.1.S1_at   | MmugDNA.20554.1 | 6.44  | 8.47  | 1.06 | 2.17 | -4.07 | 0.304381 | 0.364915 | 0.638542 | 0.60517  |
| MmugDNA.20555.1.S1_at   | MmugDNA.20555.1 | 5.05  | 5.06  | 0.22 | 0.32 | -1.01 | 0.62163  | 0.825589 | 0.826845 | 0.89978  |
| MmugDNA.20556.1.S1_at   | MmugDNA.20556.1 | 7.42  | 7.59  | 0.09 | 0.08 | -1.13 | 0.033528 | 0.628759 | 0.329396 | 0.781403 |
| MmugDNA.20557.1.S1_at   | MmugDNA.20557.1 | 9.85  | 9.56  | 0.45 | 0.71 | 1.22  | 0.258212 | 0.324507 | 0.605532 | 0.57507  |
| MmugDNA.20558.1.S1_at   | MmugDNA.20558.1 | 5.98  | 6.25  | 0.07 | 1.01 | -1.21 | 0.668481 | 0.532331 | 0.851876 | 0.719017 |
| MmugDNA.20559.1.S1_at   | MmugDNA.20559.1 | 11.54 | 11.34 | 0.11 | 0.04 | 1.15  | 0.020335 | 0.001689 | 0.277448 | 0.062186 |

|                         |                 |       |       |      |      |        |          |          |          |          |
|-------------------------|-----------------|-------|-------|------|------|--------|----------|----------|----------|----------|
| MmugDNA.2056.1.S1_at    | MmugDNA.2056.1  | 3.79  | 3.74  | 0.14 | 0.17 | 1.03   | 0.76574  | 0.814377 | 0.901439 | 0.892923 |
| MmugDNA.20562.1.S1_at   | MmugDNA.20562.1 | 3.9   | 3.41  | 0.72 | 0.44 | 1.4    | 0.397815 | 0.401202 | 0.698293 | 0.630823 |
| MmugDNA.20563.1.S1_at   | MmugDNA.20563.1 | 8.87  | 9.04  | 0.38 | 0.22 | -1.13  | 0.935291 | 0.618967 | 0.975003 | 0.774229 |
| MmugDNA.20564.1.S1_s_at | MmugDNA.20564.1 | 10.9  | 10.91 | 0.06 | 0.11 | -1.01  | 0.851521 | 0.163672 | 0.940264 | 0.439841 |
| MmugDNA.20565.1.S1_at   | MmugDNA.20565.1 | 8.1   | 8.77  | 0.27 | 0.23 | -1.59  | 0.080697 | 0.004393 | 0.431219 | 0.092744 |
| MmugDNA.20566.1.S1_at   | MmugDNA.20566.1 | 4.15  | 3.95  | 0.39 | 0.16 | 1.14   | 0.675357 | 0.747553 | 0.854501 | 0.853168 |
| MmugDNA.20567.1.S1_at   | MmugDNA.20567.1 | 9.11  | 8.8   | 0.13 | 0.48 | 1.24   | 0.342217 | 0.470722 | 0.663129 | 0.67902  |
| MmugDNA.20568.1.S1_s_at | MmugDNA.20568.1 | 3.44  | 3.24  | 0.28 | 0.43 | 1.15   | 0.55055  | 0.500863 | 0.787958 | 0.699296 |
| MmugDNA.20569.1.S1_at   | MmugDNA.20569.1 | 5.09  | 5.46  | 0.44 | 0.54 | -1.3   | 0.626852 | 0.012586 | 0.82981  | 0.144644 |
| MmugDNA.2057.1.S1_at    | MmugDNA.2057.1  | 4.91  | 5.15  | 0.06 | 0.32 | -1.18  | 0.108366 | 0.071047 | 0.469594 | 0.312704 |
| MmugDNA.20571.1.S1_at   | MmugDNA.20571.1 | 6.62  | 5.98  | 0.52 | 0.29 | 1.56   | 0.401187 | 0.477736 | 0.700699 | 0.683745 |
| MmugDNA.20572.1.S1_at   | MmugDNA.20572.1 | 9.51  | 9.37  | 0.36 | 0.36 | 1.11   | 0.131721 | 0.09241  | 0.498041 | 0.348296 |
| MmugDNA.20575.1.S1_at   | MmugDNA.20575.1 | 4.52  | 4.98  | 0.52 | 0.19 | -1.38  | 0.860615 | 0.561515 | 0.943753 | 0.737449 |
| MmugDNA.20576.1.S1_at   | MmugDNA.20576.1 | 4.9   | 5.04  | 0.17 | 0.23 | -1.1   | 0.914639 | 0.855925 | 0.966289 | 0.917744 |
| MmugDNA.20578.1.S1_at   | MmugDNA.20578.1 | 4.64  | 4.89  | 0.32 | 0.1  | -1.19  | 0.940772 | 0.484314 | 0.977466 | 0.688463 |
| MmugDNA.20579.1.S1_at   | MmugDNA.20579.1 | 9.19  | 9.49  | 0.27 | 0.21 | -1.23  | 0.369097 | 0.398036 | 0.680511 | 0.629138 |
| MmugDNA.2058.1.S1_at    | MmugDNA.2058.1  | 13.16 | 13.01 | 0.08 | 0.18 | 1.11   | 0.387518 | 0.576784 | 0.691999 | 0.747419 |
| MmugDNA.2058.1.S1_s_at  | MmugDNA.2058.1  | 13.27 | 13.21 | 0.04 | 0.14 | 1.05   | 0.323662 | 0.473751 | 0.65165  | 0.68101  |
| MmugDNA.20580.1.S1_at   | MmugDNA.20580.1 | 8.3   | 8.89  | 0.19 | 1.16 | -1.51  | 0.995308 | 0.081238 | 0.998318 | 0.329351 |
| MmugDNA.20582.1.S1_at   | MmugDNA.20582.1 | 6.13  | 10.93 | 0.36 | 0.86 | -27.86 | 0.001569 | 0.004613 | 0.151907 | 0.094882 |
| MmugDNA.20583.1.S1_at   | MmugDNA.20583.1 | 4.92  | 4.63  | 0.36 | 0.2  | 1.22   | 0.216997 | 0.286844 | 0.576574 | 0.548162 |
| MmugDNA.20584.1.S1_at   | MmugDNA.20584.1 | 6.36  | 6.38  | 0.11 | 0.22 | -1.01  | 0.494383 | 0.675318 | 0.756771 | 0.81026  |
| MmugDNA.20585.1.S1_s_at | MmugDNA.20585.1 | 7.89  | 8.57  | 0.19 | 0.08 | -1.59  | 0.012021 | 0.007329 | 0.239714 | 0.115015 |
| MmugDNA.20587.1.S1_at   | MmugDNA.20587.1 | 5.11  | 4.92  | 0.21 | 0.1  | 1.14   | 0.402977 | 0.623866 | 0.701716 | 0.778232 |
| MmugDNA.20589.1.S1_at   | MmugDNA.20589.1 | 7.89  | 7.81  | 0.13 | 0.01 | 1.06   | 0.314524 | 0.308945 | 0.645887 | 0.564656 |
| MmugDNA.2059.1.S1_at    | MmugDNA.2059.1  | 4.32  | 4.37  | 0.08 | 0.05 | -1.04  | 0.162253 | 0.199711 | 0.526638 | 0.474335 |
| MmugDNA.20590.1.S1_at   | MmugDNA.20590.1 | 7.28  | 6.4   | 0.14 | 0.4  | 1.85   | 0.05939  | 0.048032 | 0.39211  | 0.264118 |
| MmugDNA.20591.1.S1_at   | MmugDNA.20591.1 | 4.3   | 4.39  | 0.69 | 0.21 | -1.06  | 0.541452 | 0.520551 | 0.782715 | 0.711831 |
| MmugDNA.20592.1.S1_at   | MmugDNA.20592.1 | 6.85  | 7.08  | 0.5  | 0.1  | -1.17  | 0.34396  | 0.353537 | 0.664163 | 0.596602 |
| MmugDNA.20593.1.S1_at   | MmugDNA.20593.1 | 5.89  | 5.85  | 0.14 | 0.17 | 1.03   | 0.704379 | 0.153302 | 0.869588 | 0.428139 |
| MmugDNA.20594.1.S1_at   | MmugDNA.20594.1 | 7.35  | 7.19  | 0.07 | 0.09 | 1.12   | 0.067099 | 0.027163 | 0.407071 | 0.205893 |
| MmugDNA.20595.1.S1_at   | MmugDNA.20595.1 | 3.63  | 3.58  | 0.01 | 0.03 | 1.03   | 0.220939 | 0.039329 | 0.57985  | 0.243406 |
| MmugDNA.20596.1.S1_s_at | MmugDNA.20596.1 | 3.73  | 3.97  | 0.13 | 0.02 | -1.18  | 0.041408 | 0.063481 | 0.35171  | 0.298441 |
| MmugDNA.20597.1.S1_at   | MmugDNA.20597.1 | 8.01  | 7.93  | 0.27 | 0.15 | 1.06   | 0.475155 | 0.291996 | 0.745579 | 0.552163 |
| MmugDNA.20599.1.S1_at   | MmugDNA.20599.1 | 10.81 | 11.24 | 0.09 | 0.1  | -1.35  | 0.003377 | 0.002923 | 0.177513 | 0.079414 |
| MmugDNA.206.1.S1_at     | MmugDNA.206.1   | 2.64  | 2.64  | 0.01 | 0.02 | 1      | 0.274802 | 0.448922 | 0.617628 | 0.664695 |
| MmugDNA.2060.1.S1_at    | MmugDNA.2060.1  | 5.15  | 6.48  | 0.24 | 0.92 | -2.51  | 0.070857 | 0.043742 | 0.414661 | 0.253863 |
| MmugDNA.20600.1.S1_at   | MmugDNA.20600.1 | 8.6   | 8.4   | 0.22 | 0.13 | 1.15   | 0.459558 | 0.264305 | 0.73631  | 0.530366 |
| MmugDNA.20603.1.S1_at   | MmugDNA.20603.1 | 5.35  | 5.37  | 0.16 | 0.21 | -1.01  | 0.612477 | 0.759692 | 0.822168 | 0.860313 |
| MmugDNA.20605.1.S1_at   | MmugDNA.20605.1 | 5.26  | 5.16  | 0.18 | 0.06 | 1.07   | 0.429767 | 0.817318 | 0.717708 | 0.89464  |
| MmugDNA.20606.1.S1_at   | MmugDNA.20606.1 | 6.81  | 6.89  | 0.05 | 0.04 | -1.05  | 0.571531 | 0.054127 | 0.800223 | 0.277968 |

|                         |                 |       |       |      |      |       |          |          |          |          |
|-------------------------|-----------------|-------|-------|------|------|-------|----------|----------|----------|----------|
| MmugDNA.20607.1.S1_at   | MmugDNA.20607.1 | 4.61  | 4.81  | 0.43 | 0.08 | -1.15 | 0.563033 | 0.396868 | 0.7957   | 0.62846  |
| MmugDNA.20608.1.S1_at   | MmugDNA.20608.1 | 8.99  | 9.44  | 0.28 | 0.41 | -1.36 | 0.140384 | 0.09472  | 0.508282 | 0.351535 |
| MmugDNA.20609.1.S1_at   | MmugDNA.20609.1 | 7.5   | 7.16  | 0.38 | 0.77 | 1.27  | 0.188012 | 0.22139  | 0.551017 | 0.494644 |
| MmugDNA.2061.1.S1_at    | MmugDNA.2061.1  | 6.63  | 6.76  | 0.17 | 0.8  | -1.09 | 0.874024 | 0.966746 | 0.949547 | 0.981494 |
| MmugDNA.20613.1.S1_at   | MmugDNA.20613.1 | 10.81 | 11.42 | 0.12 | 0.05 | -1.54 | 0.001583 | 0.001594 | 0.151907 | 0.06044  |
| MmugDNA.20614.1.S1_at   | MmugDNA.20614.1 | 4.37  | 4.65  | 0.3  | 0.14 | -1.21 | 0.19505  | 0.162056 | 0.558557 | 0.43817  |
| MmugDNA.20615.1.S1_at   | MmugDNA.20615.1 | 9.38  | 9.82  | 0.68 | 0.36 | -1.35 | 0.652188 | 0.84297  | 0.843581 | 0.910558 |
| MmugDNA.20617.1.S1_at   | MmugDNA.20617.1 | 3.73  | 3.67  | 1.06 | 0.43 | 1.04  | 0.418742 | 0.630622 | 0.711529 | 0.782345 |
| MmugDNA.20618.1.S1_s_at | MmugDNA.20618.1 | 10.15 | 10.1  | 0.03 | 0.33 | 1.03  | 0.597112 | 0.631672 | 0.813397 | 0.782925 |
| MmugDNA.20619.1.S1_at   | MmugDNA.20619.1 | 7.57  | 7.75  | 0.13 | 0.08 | -1.13 | 0.211224 | 0.258704 | 0.572018 | 0.525949 |
| MmugDNA.20619.1.S1_x_at | MmugDNA.20619.1 | 7.1   | 7.29  | 0.16 | 0.06 | -1.14 | 0.147532 | 0.171077 | 0.513287 | 0.447611 |
| MmugDNA.2062.1.S1_at    | MmugDNA.2062.1  | 3.37  | 3.31  | 0.2  | 0.1  | 1.04  | 0.772912 | 0.91774  | 0.904523 | 0.954011 |
| MmugDNA.20620.1.S1_at   | MmugDNA.20620.1 | 8.52  | 8.07  | 0.06 | 0.48 | 1.37  | 0.625226 | 0.134401 | 0.82872  | 0.406603 |
| MmugDNA.20621.1.S1_at   | MmugDNA.20621.1 | 4.49  | 4.43  | 0.06 | 0.44 | 1.04  | 0.656452 | 0.850312 | 0.845392 | 0.914874 |
| MmugDNA.20622.1.S1_at   | MmugDNA.20622.1 | 5.88  | 5.71  | 0.15 | 0.14 | 1.13  | 0.46885  | 0.256143 | 0.741287 | 0.524069 |
| MmugDNA.20623.1.S1_at   | MmugDNA.20623.1 | 2.7   | 2.71  | 0.04 | 0.16 | -1.01 | 0.874792 | 0.789792 | 0.949796 | 0.878553 |
| MmugDNA.20624.1.S1_at   | MmugDNA.20624.1 | 5.13  | 4.52  | 0.17 | 0.05 | 1.53  | 0.005389 | 0.19693  | 0.191107 | 0.472072 |
| MmugDNA.20625.1.S1_at   | MmugDNA.20625.1 | 3.02  | 2.96  | 0.07 | 0.04 | 1.04  | 0.514531 | 0.675929 | 0.76693  | 0.810621 |
| MmugDNA.20626.1.S1_at   | MmugDNA.20626.1 | 6.11  | 6.63  | 0.48 | 0.53 | -1.43 | 0.318356 | 0.344043 | 0.64835  | 0.58962  |
| MmugDNA.20627.1.S1_at   | MmugDNA.20627.1 | 6.99  | 6.84  | 0.25 | 0.18 | 1.11  | 0.70759  | 0.724867 | 0.871161 | 0.840716 |
| MmugDNA.20628.1.S1_at   | MmugDNA.20628.1 | 11    | 11.06 | 0.23 | 0.06 | -1.05 | 0.651029 | 0.80741  | 0.842972 | 0.889121 |
| MmugDNA.20629.1.S1_at   | MmugDNA.20629.1 | 4.7   | 4.9   | 0.03 | 0.2  | -1.15 | 0.118112 | 0.131725 | 0.482198 | 0.403854 |
| MmugDNA.20630.1.S1_at   | MmugDNA.20630.1 | 10.69 | 10.95 | 0.16 | 0.17 | -1.2  | 0.285625 | 0.22473  | 0.625066 | 0.497614 |
| MmugDNA.20631.1.S1_at   | MmugDNA.20631.1 | 6.91  | 6.98  | 0.16 | 0.31 | -1.05 | 0.303515 | 0.519473 | 0.637706 | 0.711062 |
| MmugDNA.20632.1.S1_at   | MmugDNA.20632.1 | 3.55  | 3.82  | 0.1  | 0.31 | -1.2  | 0.19689  | 0.425845 | 0.559903 | 0.6481   |
| MmugDNA.20633.1.S1_at   | MmugDNA.20633.1 | 9.35  | 8.7   | 0.4  | 0.34 | 1.58  | 0.108608 | 0.098308 | 0.470004 | 0.356377 |
| MmugDNA.20634.1.S1_at   | MmugDNA.20634.1 | 7.08  | 6.91  | 0.06 | 0.27 | 1.12  | 0.393673 | 0.20987  | 0.695456 | 0.483643 |
| MmugDNA.20635.1.S1_at   | MmugDNA.20635.1 | 5.23  | 5.05  | 0.15 | 0.14 | 1.13  | 0.210109 | 0.107911 | 0.571339 | 0.370945 |
| MmugDNA.20637.1.S1_at   | MmugDNA.20637.1 | 5.26  | 5.25  | 0.02 | 0.04 | 1     | 0.23016  | 0.223324 | 0.587112 | 0.49612  |
| MmugDNA.20638.1.S1_at   | MmugDNA.20638.1 | 3.73  | 3.71  | 0.22 | 0.24 | 1.02  | 0.543253 | 0.272102 | 0.783788 | 0.536923 |
| MmugDNA.20639.1.S1_at   | MmugDNA.20639.1 | 6.64  | 6.73  | 0.08 | 0.14 | -1.07 | 0.537044 | 0.729393 | 0.779741 | 0.843541 |
| MmugDNA.2064.1.S1_at    | MmugDNA.2064.1  | 8.21  | 9.11  | 0.66 | 1.48 | -1.87 | 0.754651 | 0.588179 | 0.89558  | 0.754803 |
| MmugDNA.20640.1.S1_at   | MmugDNA.20640.1 | 9.24  | 8.99  | 0.18 | 0.09 | 1.19  | 0.129805 | 0.076265 | 0.495916 | 0.321227 |
| MmugDNA.20641.1.S1_at   | MmugDNA.20641.1 | 5.73  | 5.95  | 0.1  | 0.19 | -1.17 | 0.242742 | 0.50581  | 0.59454  | 0.702218 |
| MmugDNA.20643.1.S1_at   | MmugDNA.20643.1 | 10.04 | 10.19 | 0.17 | 0.19 | -1.11 | 0.729987 | 0.004306 | 0.882822 | 0.092019 |
| MmugDNA.20644.1.S1_at   | MmugDNA.20644.1 | 2.67  | 2.76  | 0.01 | 0.04 | -1.06 | 0.017195 | 0.004346 | 0.266942 | 0.092371 |
| MmugDNA.20645.1.S1_s_at | MmugDNA.20645.1 | 11.83 | 11.91 | 0.08 | 0.28 | -1.05 | 0.765309 | 0.038154 | 0.901251 | 0.239949 |
| MmugDNA.20646.1.S1_at   | MmugDNA.20646.1 | 9.47  | 9.2   | 0.36 | 0.16 | 1.2   | 0.170189 | 0.206853 | 0.534249 | 0.481011 |
| MmugDNA.20647.1.S1_at   | MmugDNA.20647.1 | 4.74  | 4.34  | 0.82 | 0.75 | 1.31  | 0.374858 | 0.384993 | 0.684072 | 0.620583 |
| MmugDNA.20648.1.S1_at   | MmugDNA.20648.1 | 8.33  | 7.79  | 0.37 | 0.45 | 1.45  | 0.158649 | 0.197542 | 0.523734 | 0.472537 |
| MmugDNA.20649.1.S1_at   | MmugDNA.20649.1 | 4.5   | 4.7   | 0.47 | 0.18 | -1.15 | 0.591135 | 0.243763 | 0.810224 | 0.513899 |

|                         |                 |       |       |      |      |       |          |          |          |          |
|-------------------------|-----------------|-------|-------|------|------|-------|----------|----------|----------|----------|
| MmugDNA.2065.1.S1_at    | MmugDNA.2065.1  | 2.86  | 2.86  | 0.02 | 0.12 | -1    | 0.401477 | 0.769875 | 0.700872 | 0.866376 |
| MmugDNA.20651.1.S1_at   | MmugDNA.20651.1 | 5.2   | 5.32  | 0.17 | 0.25 | -1.09 | 0.649518 | 0.238267 | 0.842493 | 0.508825 |
| MmugDNA.20652.1.S1_at   | MmugDNA.20652.1 | 4.58  | 4.55  | 0.05 | 0.12 | 1.03  | 0.91061  | 0.848695 | 0.964679 | 0.914071 |
| MmugDNA.20653.1.S1_at   | MmugDNA.20653.1 | 4.65  | 4.66  | 0.07 | 0.36 | -1.01 | 0.487131 | 0.681093 | 0.751954 | 0.813786 |
| MmugDNA.20654.1.S1_x_at | MmugDNA.20654.1 | 12.83 | 12.78 | 0.18 | 0.08 | 1.04  | 0.772365 | 0.862179 | 0.90415  | 0.921663 |
| MmugDNA.20655.1.S1_at   | MmugDNA.20655.1 | 6.2   | 6.24  | 0.04 | 0.56 | -1.03 | 0.842048 | 0.967172 | 0.93631  | 0.981863 |
| MmugDNA.20656.1.S1_at   | MmugDNA.20656.1 | 4.96  | 4.66  | 0.2  | 0.1  | 1.23  | 0.083747 | 0.09425  | 0.436042 | 0.350889 |
| MmugDNA.20657.1.S1_at   | MmugDNA.20657.1 | 3.58  | 3.75  | 0.12 | 0.16 | -1.12 | 0.35224  | 0.129815 | 0.669556 | 0.40147  |
| MmugDNA.20658.1.S1_at   | MmugDNA.20658.1 | 6.12  | 6.19  | 0.1  | 0.27 | -1.05 | 0.605267 | 0.183164 | 0.81824  | 0.459531 |
| MmugDNA.20659.1.S1_at   | MmugDNA.20659.1 | 4.98  | 4.59  | 0.42 | 0.26 | 1.31  | 0.094715 | 0.051348 | 0.452166 | 0.272052 |
| MmugDNA.20661.1.S1_at   | MmugDNA.20661.1 | 10.59 | 9.82  | 0.21 | 0.3  | 1.7   | 0.021207 | 0.008853 | 0.282524 | 0.12451  |
| MmugDNA.20662.1.S1_at   | MmugDNA.20662.1 | 11.15 | 11.31 | 0.1  | 0.22 | -1.11 | 0.789426 | 0.782318 | 0.912587 | 0.873935 |
| MmugDNA.20663.1.S1_at   | MmugDNA.20663.1 | 6.73  | 6.56  | 0.32 | 0.15 | 1.13  | 0.981196 | 0.243072 | 0.993225 | 0.513356 |
| MmugDNA.20664.1.S1_at   | MmugDNA.20664.1 | 7     | 7.89  | 0.14 | 0.54 | -1.85 | 0.180893 | 0.227988 | 0.54536  | 0.500211 |
| MmugDNA.20665.1.S1_at   | MmugDNA.20665.1 | 5.15  | 5.2   | 0.4  | 0.03 | -1.04 | 0.524902 | 0.344615 | 0.773313 | 0.589982 |
| MmugDNA.20667.1.S1_at   | MmugDNA.20667.1 | 5.91  | 6.42  | 0.57 | 0.86 | -1.43 | 0.168929 | 0.144999 | 0.53321  | 0.418938 |
| MmugDNA.20668.1.S1_at   | MmugDNA.20668.1 | 12.05 | 12.14 | 0.1  | 0.03 | -1.07 | 0.371281 | 0.434877 | 0.681945 | 0.654867 |
| MmugDNA.2067.1.S1_at    | MmugDNA.2067.1  | 6.75  | 6.66  | 0.15 | 0.13 | 1.06  | 0.662472 | 0.193441 | 0.848638 | 0.468711 |
| MmugDNA.20673.1.S1_at   | MmugDNA.20673.1 | 5.72  | 4.94  | 0.88 | 1.04 | 1.72  | 0.957122 | 0.490102 | 0.983802 | 0.692168 |
| MmugDNA.20674.1.S1_at   | MmugDNA.20674.1 | 3.06  | 3.06  | 0.03 | 0.03 | 1     | 1        | 0.354605 | 1        | 0.597297 |
| MmugDNA.20676.1.S1_at   | MmugDNA.20676.1 | 12    | 11.9  | 0.17 | 0.23 | 1.07  | 0.778347 | 0.027014 | 0.907414 | 0.205513 |
| MmugDNA.20677.1.S1_at   | MmugDNA.20677.1 | 3.68  | 3.57  | 0.47 | 1.16 | 1.08  | 0.550737 | 0.589005 | 0.788077 | 0.755312 |
| MmugDNA.20678.1.S1_at   | MmugDNA.20678.1 | 5.44  | 5.5   | 0.07 | 0.12 | -1.04 | 0.286535 | 0.33491  | 0.625572 | 0.58275  |
| MmugDNA.20679.1.S1_at   | MmugDNA.20679.1 | 3     | 2.93  | 0.07 | 0.17 | 1.05  | 0.115931 | 0.13823  | 0.479402 | 0.411198 |
| MmugDNA.2068.1.S1_at    | MmugDNA.2068.1  | 6.62  | 6.65  | 0.33 | 0.8  | -1.03 | 0.650442 | 0.224733 | 0.842789 | 0.497614 |
| MmugDNA.20680.1.S1_at   | MmugDNA.20680.1 | 7.79  | 7.77  | 0.21 | 0.17 | 1.02  | 0.799437 | 0.193103 | 0.916962 | 0.468554 |
| MmugDNA.20680.1.S1_s_at | MmugDNA.20680.1 | 9.84  | 9.38  | 0.27 | 0.49 | 1.38  | 0.350553 | 0.168829 | 0.668568 | 0.445458 |
| MmugDNA.20681.1.S1_at   | MmugDNA.20681.1 | 6.3   | 6.03  | 0.35 | 0.06 | 1.2   | 0.296867 | 0.409813 | 0.632758 | 0.636825 |
| MmugDNA.20682.1.S1_s_at | MmugDNA.20682.1 | 7.63  | 7.52  | 0.16 | 0.23 | 1.08  | 0.354892 | 0.488877 | 0.670686 | 0.691436 |
| MmugDNA.20684.1.S1_at   | MmugDNA.20684.1 | 4.3   | 4.47  | 0.03 | 0.16 | -1.13 | 0.314389 | 0.249229 | 0.645738 | 0.518313 |
| MmugDNA.20688.1.S1_at   | MmugDNA.20688.1 | 2.95  | 2.95  | 0.21 | 0.06 | -1    | 0.60009  | 0.767114 | 0.815064 | 0.864712 |
| MmugDNA.20689.1.S1_at   | MmugDNA.20689.1 | 8.23  | 8.65  | 0.29 | 0.21 | -1.34 | 0.225173 | 0.030005 | 0.58306  | 0.214994 |
| MmugDNA.2069.1.S1_at    | MmugDNA.2069.1  | 8.05  | 8.44  | 1.54 | 0.53 | -1.3  | 0.564797 | 0.791601 | 0.796834 | 0.879621 |
| MmugDNA.20690.1.S1_at   | MmugDNA.20690.1 | 3.3   | 3.4   | 0.17 | 0.11 | -1.07 | 0.516805 | 0.75681  | 0.768274 | 0.858443 |
| MmugDNA.20691.1.S1_at   | MmugDNA.20691.1 | 7.71  | 7.92  | 0.25 | 0.07 | -1.15 | 0.319365 | 0.15354  | 0.648832 | 0.428309 |
| MmugDNA.20692.1.S1_at   | MmugDNA.20692.1 | 5.76  | 5.82  | 0.25 | 0.17 | -1.04 | 0.605264 | 0.794243 | 0.81824  | 0.881316 |
| MmugDNA.20695.1.S1_at   | MmugDNA.20695.1 | 8.81  | 7.84  | 0.07 | 0.32 | 1.95  | 0.012193 | 0.161704 | 0.240358 | 0.437771 |
| MmugDNA.29371.1.S1_at   | MmugDNA.29371.1 | 8.01  | 8.08  | 0.18 | 0.12 | -1.05 | 0.894567 | 0.956304 | 0.957917 | 0.975137 |
| MmugDNA.29371.1.S1_s_at | MmugDNA.29371.1 | 8.65  | 7.68  | 0.05 | 0.35 | 1.95  | 0.012413 | 0.146678 | 0.241435 | 0.420711 |
| MmugDNA.20696.1.S1_at   | MmugDNA.20696.1 | 5.62  | 5.64  | 0.3  | 0.23 | -1.02 | 0.605524 | 0.677439 | 0.818327 | 0.81167  |
| MmugDNA.20697.1.S1_at   | MmugDNA.20697.1 | 4.87  | 5.07  | 0.07 | 0.06 | -1.15 | 0.051694 | 0.046529 | 0.376214 | 0.260221 |

|                         |                 |       |       |      |      |       |          |          |          |          |
|-------------------------|-----------------|-------|-------|------|------|-------|----------|----------|----------|----------|
| MmugDNA.20699.1.S1_at   | MmugDNA.20699.1 | 5.66  | 8.65  | 1.52 | 1    | -7.94 | 0.04976  | 0.039296 | 0.372013 | 0.243338 |
| MmugDNA.207.1.S1_at     | MmugDNA.207.1   | 6.02  | 8.33  | 1.15 | 2.18 | -4.94 | 0.256861 | 0.214264 | 0.60443  | 0.487891 |
| MmugDNA.2070.1.S1_at    | MmugDNA.2070.1  | 5.73  | 5.8   | 0.12 | 0.12 | -1.05 | 0.863989 | 0.770803 | 0.945408 | 0.866807 |
| MmugDNA.20700.1.S1_at   | MmugDNA.20700.1 | 5.22  | 5.28  | 0.08 | 0.14 | -1.04 | 0.217246 | 0.210312 | 0.576846 | 0.484192 |
| MmugDNA.20701.1.S1_at   | MmugDNA.20701.1 | 7.11  | 6.99  | 0.24 | 0.11 | 1.08  | 0.541127 | 0.629344 | 0.782498 | 0.781818 |
| MmugDNA.20703.1.S1_at   | MmugDNA.20703.1 | 6.21  | 5.89  | 0.31 | 0.18 | 1.24  | 0.179003 | 0.221081 | 0.543331 | 0.494477 |
| MmugDNA.20704.1.S1_at   | MmugDNA.20704.1 | 5.7   | 5.43  | 0.14 | 0.12 | 1.2   | 0.026075 | 0.007555 | 0.30146  | 0.116437 |
| MmugDNA.20705.1.S1_at   | MmugDNA.20705.1 | 11.57 | 11.16 | 0.09 | 0.19 | 1.33  | 0.013646 | 0.009821 | 0.248684 | 0.130205 |
| MmugDNA.20707.1.S1_at   | MmugDNA.20707.1 | 12.6  | 11.39 | 0.14 | 0.11 | 2.31  | 0.000303 | 0.000015 | 0.12562  | 0.018351 |
| MmugDNA.20708.1.S1_at   | MmugDNA.20708.1 | 6.13  | 6.12  | 0.39 | 0.12 | 1.01  | 0.480574 | 0.341184 | 0.748477 | 0.587303 |
| MmugDNA.20709.1.S1_at   | MmugDNA.20709.1 | 3.58  | 3.77  | 0.14 | 0.12 | -1.14 | 0.156162 | 0.158945 | 0.520803 | 0.435111 |
| MmugDNA.20710.1.S1_at   | MmugDNA.20710.1 | 6.96  | 6.92  | 0.14 | 0.08 | 1.03  | 0.740722 | 0.313737 | 0.888749 | 0.568083 |
| MmugDNA.25418.1.S1_s_at | MmugDNA.25418.1 | 10.6  | 10.79 | 0.12 | 0.12 | -1.15 | 0.119717 | 0.024984 | 0.484302 | 0.19808  |
| MmugDNA.20713.1.S1_at   | MmugDNA.20713.1 | 5.23  | 5.23  | 0.07 | 0.12 | 1     | 0.43366  | 0.603733 | 0.720156 | 0.764262 |
| MmugDNA.20715.1.S1_at   | MmugDNA.20715.1 | 4.64  | 4.78  | 0.1  | 0.19 | -1.1  | 0.209907 | 0.200931 | 0.571144 | 0.475426 |
| MmugDNA.20716.1.S1_at   | MmugDNA.20716.1 | 11.16 | 11.64 | 0.02 | 0.43 | -1.4  | 0.129137 | 0.119355 | 0.495114 | 0.387887 |
| MmugDNA.20717.1.S1_s_at | MmugDNA.20717.1 | 13.12 | 13.09 | 0.08 | 0.05 | 1.02  | 0.854199 | 0.005753 | 0.941079 | 0.104378 |
| MmugDNA.20718.1.S1_at   | MmugDNA.20718.1 | 12.05 | 11.8  | 0.12 | 0.08 | 1.19  | 0.090163 | 0.018612 | 0.445655 | 0.171539 |
| MmugDNA.20720.1.S1_at   | MmugDNA.20720.1 | 11.22 | 10.85 | 0.17 | 0.64 | 1.29  | 0.399991 | 0.272739 | 0.699692 | 0.537479 |
| MmugDNA.20721.1.S1_at   | MmugDNA.20721.1 | 12.42 | 12.03 | 0.1  | 0.55 | 1.31  | 0.305044 | 0.393401 | 0.639014 | 0.626287 |
| MmugDNA.20722.1.S1_at   | MmugDNA.20722.1 | 2.96  | 3.01  | 0.01 | 0.05 | -1.03 | 0.197058 | 0.169268 | 0.560042 | 0.44588  |
| MmugDNA.20723.1.S1_s_at | MmugDNA.20723.1 | 2.89  | 2.89  | 0.12 | 0.01 | 1     | 0.880766 | 0.908657 | 0.952026 | 0.948282 |
| MmugDNA.20724.1.S1_at   | MmugDNA.20724.1 | 3.16  | 3.12  | 0.02 | 0.12 | 1.03  | 0.658704 | 0.815816 | 0.846726 | 0.893773 |
| MmugDNA.33850.1.S1_s_at | MmugDNA.33850.1 | 3.48  | 3.58  | 0.08 | 0.14 | -1.07 | 0.475477 | 0.770808 | 0.745779 | 0.866807 |
| MmugDNA.20729.1.S1_at   | MmugDNA.20729.1 | 2.88  | 3.07  | 0.03 | 0.1  | -1.14 | 0.078036 | 0.079618 | 0.428012 | 0.326981 |
| MmugDNA.2073.1.S1_at    | MmugDNA.2073.1  | 5.63  | 5.68  | 0.01 | 0.16 | -1.03 | 0.292548 | 0.31279  | 0.629871 | 0.567319 |
| MmugDNA.20733.1.S1_at   | MmugDNA.20733.1 | 10.5  | 10.66 | 0.17 | 0.17 | -1.12 | 0.615873 | 0.539579 | 0.823818 | 0.723833 |
| MmugDNA.20735.1.S1_at   | MmugDNA.20735.1 | 11.71 | 11.58 | 0.19 | 0.1  | 1.09  | 0.896704 | 0.271626 | 0.958843 | 0.536577 |
| MmugDNA.20736.1.S1_at   | MmugDNA.20736.1 | 10.2  | 10.08 | 0.31 | 0.18 | 1.08  | 0.505048 | 0.689264 | 0.761548 | 0.818665 |
| MmugDNA.12659.1.S1_s_at | MmugDNA.12659.1 | 6.2   | 6.21  | 0.37 | 0.18 | -1.01 | 0.717305 | 0.739578 | 0.875778 | 0.849084 |
| MmugDNA.20739.1.S1_at   | MmugDNA.20739.1 | 4.88  | 4.89  | 0.12 | 0.06 | -1.01 | 0.496513 | 0.343496 | 0.757501 | 0.58925  |
| MmugDNA.2074.1.S1_at    | MmugDNA.2074.1  | 4.39  | 4.37  | 0.06 | 0.07 | 1.01  | 0.576899 | 0.698566 | 0.8033   | 0.824875 |
| MmugDNA.20740.1.S1_at   | MmugDNA.20740.1 | 3.51  | 3.6   | 0.08 | 0.02 | -1.06 | 0.126594 | 0.075721 | 0.492802 | 0.320317 |
| MmugDNA.20741.1.S1_at   | MmugDNA.20741.1 | 8.43  | 8.68  | 0.06 | 0.42 | -1.19 | 0.113686 | 0.065519 | 0.476946 | 0.301415 |
| MmugDNA.20742.1.S1_at   | MmugDNA.20742.1 | 4.3   | 3.96  | 0.75 | 0.45 | 1.27  | 0.357137 | 0.257071 | 0.672128 | 0.524783 |
| MmugDNA.20743.1.S1_at   | MmugDNA.20743.1 | 8.18  | 6.59  | 0.75 | 1.1  | 3     | 0.144718 | 0.164739 | 0.511058 | 0.441047 |
| MmugDNA.20744.1.S1_at   | MmugDNA.20744.1 | 6.72  | 6.6   | 0.42 | 0.25 | 1.08  | 0.864379 | 0.354702 | 0.945529 | 0.597404 |
| MmugDNA.20745.1.S1_s_at | MmugDNA.20745.1 | 11.75 | 12    | 0.07 | 0.63 | -1.18 | 0.785553 | 0.727848 | 0.910827 | 0.842701 |
| MmugDNA.20746.1.S1_at   | MmugDNA.20746.1 | 5     | 5.27  | 0.28 | 0.2  | -1.21 | 0.501045 | 0.517746 | 0.759772 | 0.709857 |
| MmugDNA.20747.1.S1_at   | MmugDNA.20747.1 | 8.68  | 10.11 | 0.11 | 0.25 | -2.7  | 0.000674 | 0.000095 | 0.136818 | 0.027665 |
| MmugDNA.20747.1.S1_x_at | MmugDNA.20747.1 | 8.56  | 9.81  | 0.09 | 0.17 | -2.37 | 0.000282 | 0.000023 | 0.12562  | 0.019635 |

|                         |                 |       |       |      |      |        |          |          |          |          |
|-------------------------|-----------------|-------|-------|------|------|--------|----------|----------|----------|----------|
| MmugDNA.20748.1.S1_at   | MmugDNA.20748.1 | 4.79  | 4.75  | 0.23 | 0.11 | 1.02   | 0.683211 | 0.818715 | 0.858347 | 0.895529 |
| MmugDNA.20749.1.S1_at   | MmugDNA.20749.1 | 3.71  | 3.62  | 0.16 | 0.13 | 1.06   | 0.556081 | 0.580466 | 0.791585 | 0.749728 |
| MmugDNA.2075.1.S1_at    | MmugDNA.2075.1  | 8.8   | 8.36  | 0.18 | 0.04 | 1.36   | 0.011295 | 0.002859 | 0.235353 | 0.078756 |
| MmugDNA.20750.1.S1_at   | MmugDNA.20750.1 | 5.75  | 5.74  | 0.49 | 0.1  | 1.01   | 0.498009 | 0.367805 | 0.758164 | 0.607466 |
| MmugDNA.20751.1.S1_at   | MmugDNA.20751.1 | 10.74 | 11.28 | 0.09 | 0.21 | -1.46  | 0.013124 | 0.008633 | 0.245277 | 0.123154 |
| MmugDNA.20752.1.S1_at   | MmugDNA.20752.1 | 12.25 | 11.99 | 0.04 | 0.17 | 1.2    | 0.066522 | 0.102782 | 0.406564 | 0.363305 |
| MmugDNA.20753.1.S1_at   | MmugDNA.20753.1 | 5.49  | 5.52  | 0.29 | 0.18 | -1.02  | 0.600392 | 0.783767 | 0.815205 | 0.874778 |
| MmugDNA.20754.1.S1_at   | MmugDNA.20754.1 | 2.99  | 3     | 0.23 | 0.13 | -1.01  | 0.451065 | 0.675491 | 0.731469 | 0.810353 |
| MmugDNA.20755.1.S1_at   | MmugDNA.20755.1 | 5.01  | 4.78  | 0.27 | 0.42 | 1.17   | 0.564066 | 0.75069  | 0.796391 | 0.855009 |
| MmugDNA.20756.1.S1_at   | MmugDNA.20756.1 | 6.6   | 6.47  | 0.94 | 0.5  | 1.1    | 0.449821 | 0.620356 | 0.730493 | 0.775353 |
| MmugDNA.20757.1.S1_at   | MmugDNA.20757.1 | 5.96  | 6.61  | 0.4  | 0.83 | -1.57  | 0.271378 | 0.3384   | 0.615673 | 0.585432 |
| MmugDNA.20758.1.S1_at   | MmugDNA.20758.1 | 6.54  | 8.23  | 2.18 | 0.61 | -3.25  | 0.412665 | 0.531089 | 0.70797  | 0.718415 |
| MmugDNA.20759.1.S1_at   | MmugDNA.20759.1 | 4.93  | 5.44  | 0.29 | 0.25 | -1.43  | 0.100646 | 0.192776 | 0.461009 | 0.468274 |
| MmugDNA.2076.1.S1_at    | MmugDNA.2076.1  | 4.96  | 5     | 0.04 | 0.2  | -1.03  | 0.250209 | 0.290979 | 0.600389 | 0.551525 |
| MmugDNA.20760.1.S1_at   | MmugDNA.20760.1 | 5.83  | 8.99  | 2.04 | 1.77 | -8.94  | 0.238997 | 0.140147 | 0.592117 | 0.413394 |
| MmugDNA.20761.1.S1_at   | MmugDNA.20761.1 | 6.28  | 6.16  | 0.26 | 0.08 | 1.08   | 0.619083 | 0.365056 | 0.825418 | 0.605259 |
| MmugDNA.20761.1.S1_x_at | MmugDNA.20761.1 | 6.67  | 6.36  | 0.4  | 0.11 | 1.25   | 0.222039 | 0.158791 | 0.580632 | 0.434881 |
| MmugDNA.20762.1.S1_at   | MmugDNA.20762.1 | 11.94 | 12.09 | 0.06 | 0.25 | -1.11  | 0.368049 | 0.491034 | 0.679753 | 0.692751 |
| MmugDNA.20763.1.S1_at   | MmugDNA.20763.1 | 3.72  | 3.7   | 0.47 | 0.27 | 1.02   | 0.397799 | 0.560004 | 0.698289 | 0.736439 |
| MmugDNA.20765.1.S1_at   | MmugDNA.20765.1 | 7.27  | 7.08  | 0.43 | 0.55 | 1.14   | 0.230792 | 0.197721 | 0.587332 | 0.472633 |
| MmugDNA.20766.1.S1_at   | MmugDNA.20766.1 | 6.07  | 6.78  | 0.21 | 0.13 | -1.63  | 0.023024 | 0.000112 | 0.289574 | 0.028233 |
| MmugDNA.20767.1.S1_at   | MmugDNA.20767.1 | 4.58  | 4.91  | 0.17 | 0.21 | -1.26  | 0.201957 | 0.250682 | 0.564224 | 0.51941  |
| MmugDNA.1306.1.S1_s_at  | MmugDNA.1306.1  | 6.24  | 6.19  | 0.1  | 0.1  | 1.03   | 0.55903  | 0.624883 | 0.793628 | 0.778939 |
| MmugDNA.20769.1.S1_at   | MmugDNA.20769.1 | 13.45 | 13.45 | 0.05 | 0.8  | 1      | 0.352302 | 0.308774 | 0.669556 | 0.56463  |
| MmugDNA.2077.1.S1_at    | MmugDNA.2077.1  | 10.93 | 10.39 | 0.22 | 0.15 | 1.45   | 0.030368 | 0.0199   | 0.318297 | 0.177357 |
| MmugDNA.20771.1.S1_at   | MmugDNA.20771.1 | 3.52  | 3.59  | 0.08 | 0.24 | -1.05  | 0.243551 | 0.32243  | 0.595335 | 0.573972 |
| MmugDNA.20772.1.S1_s_at | MmugDNA.20772.1 | 10.74 | 10.31 | 0.13 | 0.95 | 1.35   | 0.52884  | 0.53166  | 0.775764 | 0.718819 |
| MmugDNA.20773.1.S1_at   | MmugDNA.20773.1 | 3.38  | 3.39  | 0.16 | 0.21 | -1     | 0.250912 | 0.346736 | 0.600488 | 0.591536 |
| MmugDNA.20774.1.S1_at   | MmugDNA.20774.1 | 7.32  | 11.72 | 2.37 | 2.61 | -21.23 | 0.149601 | 0.102158 | 0.514118 | 0.362212 |
| MmugDNA.20775.1.S1_at   | MmugDNA.20775.1 | 11.24 | 11.21 | 0.07 | 0.03 | 1.03   | 0.841586 | 0.078547 | 0.936215 | 0.325285 |
| MmugDNA.20777.1.S1_at   | MmugDNA.20777.1 | 5.05  | 4.95  | 0.42 | 0.03 | 1.07   | 0.64261  | 0.821598 | 0.838763 | 0.897299 |
| MmugDNA.20778.1.S1_at   | MmugDNA.20778.1 | 8.47  | 8.48  | 0.02 | 0.21 | -1.01  | 0.852563 | 0.521978 | 0.940647 | 0.712775 |
| MmugDNA.20779.1.S1_at   | MmugDNA.20779.1 | 3.36  | 3.4   | 0.23 | 0.38 | -1.03  | 0.772157 | 0.94115  | 0.904039 | 0.966652 |
| MmugDNA.2078.1.S1_at    | MmugDNA.2078.1  | 9.86  | 9.52  | 0.09 | 0.32 | 1.27   | 0.112587 | 0.100989 | 0.475092 | 0.360558 |
| MmugDNA.20781.1.S1_at   | MmugDNA.20781.1 | 10.08 | 10.85 | 0.22 | 0.27 | -1.7   | 0.029324 | 0.004301 | 0.313768 | 0.092019 |
| MmugDNA.20782.1.S1_at   | MmugDNA.20782.1 | 5.21  | 4.33  | 0.91 | 0.45 | 1.85   | 0.119341 | 0.233292 | 0.484049 | 0.50468  |
| MmugDNA.20783.1.S1_at   | MmugDNA.20783.1 | 4.26  | 4.65  | 0.17 | 0.1  | -1.3   | 0.045355 | 0.032662 | 0.360827 | 0.223791 |
| MmugDNA.20786.1.S1_at   | MmugDNA.20786.1 | 6.7   | 6.65  | 0.48 | 0.1  | 1.04   | 0.887439 | 0.897535 | 0.954863 | 0.941525 |
| MmugDNA.20787.1.S1_at   | MmugDNA.20787.1 | 3.42  | 3.2   | 0.16 | 0.12 | 1.17   | 0.095985 | 0.104716 | 0.454074 | 0.3661   |
| MmugDNA.20788.1.S1_at   | MmugDNA.20788.1 | 6.96  | 5.93  | 0.43 | 0.56 | 2.04   | 0.040458 | 0.037106 | 0.349277 | 0.237165 |
| MmugDNA.20789.1.S1_at   | MmugDNA.20789.1 | 6.08  | 6     | 0    | 0.1  | 1.06   | 0.245162 | 0.285911 | 0.596872 | 0.547484 |

|                         |                 |       |       |      |      |       |          |          |          |          |
|-------------------------|-----------------|-------|-------|------|------|-------|----------|----------|----------|----------|
| MmugDNA.2079.1.S1_at    | MmugDNA.2079.1  | 4.49  | 4.16  | 0.64 | 0.17 | 1.26  | 0.492087 | 0.10812  | 0.755441 | 0.371347 |
| MmugDNA.20791.1.S1_at   | MmugDNA.20791.1 | 5.57  | 6.05  | 0.82 | 0.44 | -1.39 | 0.407406 | 0.55462  | 0.704624 | 0.73333  |
| MmugDNA.20792.1.S1_at   | MmugDNA.20792.1 | 8.96  | 7.94  | 0.71 | 0.43 | 2.03  | 0.069687 | 0.070831 | 0.412747 | 0.31231  |
| MmugDNA.20793.1.S1_at   | MmugDNA.20793.1 | 5.01  | 5.04  | 0.58 | 0.52 | -1.02 | 0.490667 | 0.306243 | 0.754497 | 0.562907 |
| MmugDNA.20795.1.S1_at   | MmugDNA.20795.1 | 5.51  | 5.86  | 0.32 | 0.04 | -1.28 | 0.432644 | 0.632839 | 0.719191 | 0.783788 |
| MmugDNA.20796.1.S1_at   | MmugDNA.20796.1 | 3.96  | 4.08  | 0.54 | 0.55 | -1.09 | 0.818355 | 0.666033 | 0.926289 | 0.804374 |
| MmugDNA.20797.1.S1_at   | MmugDNA.20797.1 | 3.6   | 3.59  | 0.4  | 0.07 | 1.01  | 0.548935 | 0.770171 | 0.787065 | 0.866555 |
| MmugDNA.20798.1.S1_at   | MmugDNA.20798.1 | 8.95  | 9.39  | 0.16 | 0.47 | -1.35 | 0.141173 | 0.149192 | 0.508734 | 0.423692 |
| MmugDNA.20799.1.S1_at   | MmugDNA.20799.1 | 5.78  | 5.83  | 0    | 0.4  | -1.04 | 0.699037 | 0.833651 | 0.86659  | 0.904613 |
| MmugDNA.2080.1.S1_at    | MmugDNA.2080.1  | 4.84  | 4.93  | 0.32 | 0.04 | -1.06 | 0.572985 | 0.414802 | 0.801055 | 0.640456 |
| MmugDNA.20801.1.S1_at   | MmugDNA.20801.1 | 8.43  | 7.57  | 0.25 | 0.7  | 1.81  | 0.278426 | 0.309027 | 0.620536 | 0.564721 |
| MmugDNA.20803.1.S1_s_at | MmugDNA.20803.1 | 5.72  | 5.55  | 0.11 | 0.15 | 1.13  | 0.490094 | 0.383477 | 0.754288 | 0.619444 |
| MmugDNA.20804.1.S1_at   | MmugDNA.20804.1 | 4.19  | 4.26  | 0.12 | 0.06 | -1.05 | 0.451374 | 0.165209 | 0.731557 | 0.441389 |
| MmugDNA.20805.1.S1_at   | MmugDNA.20805.1 | 3.51  | 3.51  | 0.03 | 0.39 | 1     | 0.34897  | 0.336405 | 0.667377 | 0.583831 |
| MmugDNA.20806.1.S1_at   | MmugDNA.20806.1 | 10.21 | 10.17 | 0.25 | 0.38 | 1.03  | 0.534245 | 0.656963 | 0.77862  | 0.799401 |
| MmugDNA.20807.1.S1_at   | MmugDNA.20807.1 | 8.97  | 9.11  | 0.43 | 0.73 | -1.1  | 0.727057 | 0.904773 | 0.88121  | 0.946059 |
| MmugDNA.20808.1.S1_at   | MmugDNA.20808.1 | 3.46  | 3.65  | 0.09 | 0.23 | -1.14 | 0.058279 | 0.048052 | 0.390177 | 0.264201 |
| MmugDNA.2081.1.S1_at    | MmugDNA.2081.1  | 3.09  | 3.1   | 0.1  | 0.17 | -1.01 | 0.575384 | 0.645597 | 0.80225  | 0.792428 |
| MmugDNA.20811.1.S1_at   | MmugDNA.20811.1 | 7.34  | 7.46  | 0.09 | 0.09 | -1.09 | 0.07053  | 0.065544 | 0.414379 | 0.301415 |
| MmugDNA.20812.1.S1_at   | MmugDNA.20812.1 | 10.2  | 9.78  | 0.01 | 0.26 | 1.33  | 0.044457 | 0.0541   | 0.358591 | 0.277914 |
| MmugDNA.20813.1.S1_at   | MmugDNA.20813.1 | 3.8   | 3.85  | 0.2  | 0.31 | -1.04 | 0.304828 | 0.437016 | 0.638843 | 0.656424 |
| MmugDNA.20814.1.S1_at   | MmugDNA.20814.1 | 4.45  | 3.9   | 0.59 | 0.69 | 1.46  | 0.412373 | 0.453892 | 0.707889 | 0.668329 |
| MmugDNA.20815.1.S1_at   | MmugDNA.20815.1 | 2.93  | 2.95  | 0.02 | 0.13 | -1.02 | 0.268431 | 0.455822 | 0.613168 | 0.669659 |
| MmugDNA.20816.1.S1_at   | MmugDNA.20816.1 | 3.85  | 3.54  | 0.31 | 0.13 | 1.24  | 0.148773 | 0.177805 | 0.51391  | 0.454111 |
| MmugDNA.20817.1.S1_at   | MmugDNA.20817.1 | 5.35  | 5.4   | 0.16 | 0.14 | -1.04 | 0.656218 | 0.556716 | 0.845317 | 0.734725 |
| MmugDNA.2082.1.S1_at    | MmugDNA.2082.1  | 5.82  | 6.21  | 0.49 | 0.38 | -1.31 | 0.414877 | 0.494351 | 0.709338 | 0.694829 |
| MmugDNA.20820.1.S1_at   | MmugDNA.20820.1 | 4.72  | 4.61  | 0.33 | 0.15 | 1.08  | 0.352245 | 0.296954 | 0.669556 | 0.555895 |
| MmugDNA.20821.1.S1_at   | MmugDNA.20821.1 | 3.51  | 3.4   | 0.21 | 0.1  | 1.08  | 0.478521 | 0.569429 | 0.747296 | 0.742382 |
| MmugDNA.20822.1.S1_at   | MmugDNA.20822.1 | 6.24  | 6.3   | 0.03 | 0.06 | -1.05 | 0.140245 | 0.132483 | 0.508065 | 0.404534 |
| MmugDNA.20823.1.S1_at   | MmugDNA.20823.1 | 8.99  | 8.38  | 0.22 | 0.65 | 1.53  | 0.514779 | 0.028532 | 0.767191 | 0.210754 |
| MmugDNA.20824.1.S1_at   | MmugDNA.20824.1 | 4.69  | 4.3   | 0.5  | 0.24 | 1.31  | 0.351071 | 0.448771 | 0.66895  | 0.664601 |
| MmugDNA.20826.1.S1_at   | MmugDNA.20826.1 | 3.6   | 3.54  | 0.23 | 0.09 | 1.04  | 0.649006 | 0.344936 | 0.842349 | 0.590239 |
| MmugDNA.20827.1.S1_at   | MmugDNA.20827.1 | 4.65  | 4.49  | 0.29 | 0.17 | 1.12  | 0.461941 | 0.636649 | 0.738048 | 0.786329 |
| MmugDNA.20828.1.S1_at   | MmugDNA.20828.1 | 7.55  | 9.05  | 0.42 | 0.58 | -2.83 | 0.03775  | 0.026357 | 0.342742 | 0.203321 |
| MmugDNA.20829.1.S1_at   | MmugDNA.20829.1 | 3.58  | 3.52  | 0.26 | 0.17 | 1.04  | 0.495237 | 0.344355 | 0.757116 | 0.589762 |
| MmugDNA.20830.1.S1_at   | MmugDNA.20830.1 | 10.74 | 9.75  | 0.02 | 0.52 | 1.99  | 0.086821 | 0.087764 | 0.440476 | 0.341027 |
| MmugDNA.20831.1.S1_at   | MmugDNA.20831.1 | 6.73  | 6.72  | 0.12 | 0.07 | 1.01  | 0.869485 | 0.196273 | 0.947917 | 0.471236 |
| MmugDNA.20831.1.S1_s_at | MmugDNA.20831.1 | 9.99  | 8.91  | 0.09 | 0.09 | 2.12  | 0.00012  | 0.000456 | 0.112653 | 0.038572 |
| MmugDNA.20832.1.S1_at   | MmugDNA.20832.1 | 8.29  | 7.2   | 0.76 | 0.16 | 2.14  | 0.271123 | 0.235609 | 0.615322 | 0.506671 |
| MmugDNA.20833.1.S1_at   | MmugDNA.20833.1 | 3.96  | 3.95  | 0.15 | 0.21 | 1     | 0.301401 | 0.322889 | 0.636366 | 0.574228 |
| MmugDNA.20836.1.S1_at   | MmugDNA.20836.1 | 5.09  | 4.79  | 0.33 | 0.05 | 1.23  | 0.211145 | 0.330453 | 0.571977 | 0.579193 |

|                         |                 |       |       |      |      |       |          |          |          |          |
|-------------------------|-----------------|-------|-------|------|------|-------|----------|----------|----------|----------|
| MmugDNA.20837.1.S1_at   | MmugDNA.20837.1 | 3.35  | 3.29  | 0.1  | 0.11 | 1.04  | 0.982534 | 0.967352 | 0.993509 | 0.98199  |
| MmugDNA.20838.1.S1_at   | MmugDNA.20838.1 | 5.03  | 5.08  | 0.09 | 0.17 | -1.04 | 0.90744  | 0.962377 | 0.963251 | 0.978876 |
| MmugDNA.2084.1.S1_at    | MmugDNA.2084.1  | 3.33  | 3.61  | 0.27 | 0.25 | -1.22 | 0.546999 | 0.223597 | 0.785876 | 0.496451 |
| MmugDNA.20841.1.S1_at   | MmugDNA.20841.1 | 4.93  | 5.04  | 0.07 | 0.13 | -1.08 | 0.237596 | 0.173756 | 0.591146 | 0.450128 |
| MmugDNA.20844.1.S1_at   | MmugDNA.20844.1 | 3.47  | 3.42  | 0.17 | 0.23 | 1.04  | 0.651852 | 0.815478 | 0.84335  | 0.893588 |
| MmugDNA.20845.1.S1_at   | MmugDNA.20845.1 | 8.79  | 7.9   | 0.06 | 0.52 | 1.86  | 0.125452 | 0.268705 | 0.491333 | 0.534138 |
| MmugDNA.20847.1.S1_at   | MmugDNA.20847.1 | 5.65  | 5.27  | 0.35 | 0.34 | 1.3   | 0.150443 | 0.097956 | 0.515256 | 0.355858 |
| MmugDNA.20849.1.S1_at   | MmugDNA.20849.1 | 8.76  | 7.39  | 0.4  | 0.43 | 2.58  | 0.008975 | 0.011654 | 0.222023 | 0.139826 |
| MmugDNA.2085.1.S1_at    | MmugDNA.2085.1  | 7.17  | 7.06  | 0.12 | 0.55 | 1.08  | 0.909738 | 0.937421 | 0.964238 | 0.964687 |
| MmugDNA.20850.1.S1_s_at | MmugDNA.20850.1 | 10.58 | 10.67 | 0.21 | 0.68 | -1.06 | 0.716705 | 0.88564  | 0.875572 | 0.934982 |
| MmugDNA.20851.1.S1_at   | MmugDNA.20851.1 | 4.13  | 4.05  | 0.06 | 0.29 | 1.06  | 0.779303 | 0.800777 | 0.908022 | 0.885425 |
| MmugDNA.20852.1.S1_at   | MmugDNA.20852.1 | 4.78  | 4.98  | 1.21 | 0.95 | -1.15 | 0.982044 | 0.944557 | 0.993449 | 0.968614 |
| MmugDNA.20853.1.S1_at   | MmugDNA.20853.1 | 4.74  | 4.72  | 0.11 | 0.03 | 1.02  | 0.654555 | 0.250882 | 0.844616 | 0.51958  |
| MmugDNA.20854.1.S1_at   | MmugDNA.20854.1 | 4.79  | 4.72  | 0.31 | 0.19 | 1.05  | 0.581658 | 0.70331  | 0.805315 | 0.827962 |
| MmugDNA.20856.1.S1_at   | MmugDNA.20856.1 | 3.55  | 3.68  | 0.08 | 0.23 | -1.09 | 0.203215 | 0.465746 | 0.565864 | 0.6759   |
| MmugDNA.20857.1.S1_at   | MmugDNA.20857.1 | 3.52  | 3.78  | 0.65 | 0.13 | -1.2  | 0.851884 | 0.571559 | 0.940401 | 0.743837 |
| MmugDNA.20858.1.S1_at   | MmugDNA.20858.1 | 4.1   | 3.81  | 0.21 | 0.1  | 1.22  | 0.119132 | 0.109088 | 0.483768 | 0.372869 |
| MmugDNA.20859.1.S1_at   | MmugDNA.20859.1 | 3.88  | 3.36  | 0.88 | 0.15 | 1.43  | 0.359423 | 0.37991  | 0.673869 | 0.616659 |
| MmugDNA.20860.1.S1_at   | MmugDNA.20860.1 | 7.15  | 6.96  | 0.32 | 0.56 | 1.14  | 0.579203 | 0.673805 | 0.804148 | 0.80947  |
| MmugDNA.20862.1.S1_at   | MmugDNA.20862.1 | 6.84  | 7.15  | 0.21 | 0.04 | -1.24 | 0.075092 | 0.070599 | 0.421864 | 0.311901 |
| MmugDNA.20862.1.S1_s_at | MmugDNA.20862.1 | 8.75  | 9.19  | 0.28 | 0.59 | -1.36 | 0.390887 | 0.315311 | 0.693845 | 0.568939 |
| MmugDNA.9246.1.S1_s_at  | MmugDNA.9246.1  | 11.25 | 11.05 | 0.02 | 0.48 | 1.15  | 0.810217 | 0.943255 | 0.922629 | 0.967814 |
| MmugDNA.20864.1.S1_at   | MmugDNA.20864.1 | 7.82  | 7.74  | 0.16 | 0.04 | 1.06  | 0.981147 | 0.309221 | 0.993209 | 0.564807 |
| MmugDNA.20866.1.S1_at   | MmugDNA.20866.1 | 11.65 | 11.39 | 0.21 | 0.07 | 1.19  | 0.263012 | 0.318809 | 0.609142 | 0.571379 |
| MmugDNA.20867.1.S1_at   | MmugDNA.20867.1 | 4.19  | 4.21  | 0    | 0.15 | -1.01 | 0.305207 | 0.56846  | 0.639039 | 0.741979 |
| MmugDNA.20868.1.S1_at   | MmugDNA.20868.1 | 6.52  | 6.55  | 0.21 | 0.16 | -1.02 | 0.28564  | 0.116782 | 0.625066 | 0.38408  |
| MmugDNA.20869.1.S1_at   | MmugDNA.20869.1 | 3.93  | 3.17  | 1.01 | 0.61 | 1.69  | 0.21839  | 0.280569 | 0.577884 | 0.543746 |
| MmugDNA.2087.1.S1_at    | MmugDNA.2087.1  | 8.12  | 7.49  | 0.14 | 0.39 | 1.54  | 0.167163 | 0.1973   | 0.531295 | 0.472213 |
| MmugDNA.20870.1.S1_at   | MmugDNA.20870.1 | 8.48  | 8.77  | 0.13 | 0.22 | -1.22 | 0.050469 | 0.033432 | 0.374363 | 0.226501 |
| MmugDNA.20872.1.S1_at   | MmugDNA.20872.1 | 8.07  | 8.25  | 0.18 | 0.57 | -1.14 | 0.353653 | 0.50873  | 0.670266 | 0.703792 |
| MmugDNA.20873.1.S1_at   | MmugDNA.20873.1 | 4.14  | 4.3   | 0.15 | 0.09 | -1.12 | 0.81259  | 0.407721 | 0.923719 | 0.635141 |
| MmugDNA.20874.1.S1_at   | MmugDNA.20874.1 | 3.41  | 3.51  | 0.16 | 0.11 | -1.07 | 0.733035 | 0.89368  | 0.884807 | 0.939323 |
| MmugDNA.20875.1.S1_at   | MmugDNA.20875.1 | 3.42  | 3.8   | 0.75 | 0.43 | -1.3  | 0.947838 | 0.485851 | 0.980005 | 0.689442 |
| MmugDNA.20876.1.S1_at   | MmugDNA.20876.1 | 5.18  | 5.18  | 0.46 | 0.16 | -1    | 0.392274 | 0.394419 | 0.694587 | 0.626982 |
| MmugDNA.20877.1.S1_at   | MmugDNA.20877.1 | 6.46  | 6.45  | 0.21 | 0.26 | 1.01  | 0.327318 | 0.259476 | 0.653682 | 0.526418 |
| MmugDNA.20878.1.S1_at   | MmugDNA.20878.1 | 4.37  | 4.36  | 0.03 | 0.17 | 1     | 0.884529 | 0.739889 | 0.953771 | 0.849294 |
| MmugDNA.20879.1.S1_at   | MmugDNA.20879.1 | 6.99  | 6.9   | 0.1  | 0.15 | 1.07  | 0.751184 | 0.33348  | 0.893648 | 0.581694 |
| MmugDNA.2088.1.S1_at    | MmugDNA.2088.1  | 9.03  | 9.68  | 0.18 | 0.38 | -1.57 | 0.076178 | 0.030218 | 0.424738 | 0.21576  |
| MmugDNA.20881.1.S1_at   | MmugDNA.20881.1 | 3.06  | 3.14  | 0.11 | 0.05 | -1.05 | 0.369017 | 0.367034 | 0.680411 | 0.606673 |
| MmugDNA.20882.1.S1_at   | MmugDNA.20882.1 | 11.2  | 10.83 | 0.14 | 0.33 | 1.29  | 0.065632 | 0.093399 | 0.404759 | 0.349611 |
| MmugDNA.20883.1.S1_at   | MmugDNA.20883.1 | 8.64  | 7.89  | 0.45 | 0.32 | 1.68  | 0.156044 | 0.204292 | 0.520741 | 0.478541 |



|                         |                 |       |       |      |      |        |          |          |          |          |
|-------------------------|-----------------|-------|-------|------|------|--------|----------|----------|----------|----------|
| MmugDNA.20884.1.S1_at   | MmugDNA.20884.1 | 2.95  | 3.09  | 0.12 | 0.11 | -1.1   | 0.857092 | 0.436384 | 0.942171 | 0.655959 |
| MmugDNA.20886.1.S1_at   | MmugDNA.20886.1 | 3.34  | 3.4   | 0.04 | 0.12 | -1.04  | 0.440275 | 0.077393 | 0.724158 | 0.323204 |
| MmugDNA.20887.1.S1_at   | MmugDNA.20887.1 | 4.97  | 5.16  | 0.17 | 0.15 | -1.14  | 0.237283 | 0.424725 | 0.590811 | 0.647239 |
| MmugDNA.20888.1.S1_at   | MmugDNA.20888.1 | 5.21  | 5.12  | 0.2  | 0.17 | 1.06   | 0.236939 | 0.659609 | 0.590644 | 0.800804 |
| MmugDNA.20889.1.S1_at   | MmugDNA.20889.1 | 10.92 | 10.54 | 0.27 | 0.07 | 1.3    | 0.316029 | 0.081103 | 0.646827 | 0.329276 |
| MmugDNA.2089.1.S1_at    | MmugDNA.2089.1  | 3.75  | 3.76  | 0.08 | 0.09 | -1.01  | 0.867598 | 0.265288 | 0.947146 | 0.53127  |
| MmugDNA.20890.1.S1_at   | MmugDNA.20890.1 | 4     | 3.98  | 0.26 | 0.12 | 1.02   | 0.21629  | 0.188238 | 0.575963 | 0.464251 |
| MmugDNA.20891.1.S1_at   | MmugDNA.20891.1 | 6.91  | 7.65  | 0.31 | 0.15 | -1.67  | 0.028022 | 0.026559 | 0.309521 | 0.203915 |
| MmugDNA.20892.1.S1_at   | MmugDNA.20892.1 | 9.71  | 9.35  | 0.08 | 0.39 | 1.29   | 0.152178 | 0.046581 | 0.51689  | 0.260267 |
| MmugDNA.20892.1.S1_s_at | MmugDNA.20892.1 | 10.46 | 10.16 | 0.03 | 0.3  | 1.23   | 0.058371 | 0.013798 | 0.390304 | 0.150555 |
| MmugDNA.20893.1.S1_at   | MmugDNA.20893.1 | 5.4   | 5.27  | 0.32 | 0.38 | 1.09   | 0.894859 | 0.220219 | 0.957956 | 0.493655 |
| MmugDNA.20894.1.S1_at   | MmugDNA.20894.1 | 5.13  | 4.86  | 0.69 | 1.23 | 1.21   | 0.71358  | 0.835219 | 0.874503 | 0.905645 |
| MmugDNA.20895.1.S1_at   | MmugDNA.20895.1 | 6.25  | 6.17  | 0.23 | 0.18 | 1.06   | 0.753034 | 0.932635 | 0.894568 | 0.961739 |
| MmugDNA.20896.1.S1_at   | MmugDNA.20896.1 | 6.01  | 6.07  | 0.13 | 0.14 | -1.05  | 0.11413  | 0.12566  | 0.47744  | 0.396249 |
| MmugDNA.20897.1.S1_at   | MmugDNA.20897.1 | 6.59  | 6.01  | 0.43 | 0.06 | 1.49   | 0.076835 | 0.121146 | 0.425685 | 0.390217 |
| MmugDNA.20898.1.S1_at   | MmugDNA.20898.1 | 8.39  | 12.41 | 1.72 | 3.08 | -16.24 | 0.437973 | 0.264215 | 0.722687 | 0.530286 |
| MmugDNA.2090.1.S1_at    | MmugDNA.2090.1  | 4.46  | 4.48  | 0.16 | 0.06 | -1.02  | 0.547126 | 0.624919 | 0.785952 | 0.778939 |
| MmugDNA.20900.1.S1_at   | MmugDNA.20900.1 | 2.62  | 2.58  | 0.13 | 0.07 | 1.03   | 0.679381 | 0.653814 | 0.856585 | 0.79769  |
| MmugDNA.20901.1.S1_at   | MmugDNA.20901.1 | 7.89  | 8.22  | 0.21 | 0.65 | -1.26  | 0.15044  | 0.177355 | 0.515256 | 0.453742 |
| MmugDNA.20902.1.S1_at   | MmugDNA.20902.1 | 9.37  | 9.56  | 0.37 | 0.66 | -1.14  | 0.214021 | 0.241792 | 0.574384 | 0.51238  |
| MmugDNA.20903.1.S1_at   | MmugDNA.20903.1 | 3.03  | 2.99  | 0.04 | 0.06 | 1.02   | 0.583027 | 0.145806 | 0.806097 | 0.419833 |
| MmugDNA.20904.1.S1_at   | MmugDNA.20904.1 | 8.15  | 8.39  | 0.46 | 0.73 | -1.18  | 0.242567 | 0.24716  | 0.594448 | 0.516341 |
| MmugDNA.20905.1.S1_at   | MmugDNA.20905.1 | 9.52  | 9.16  | 0.2  | 0.36 | 1.29   | 0.078141 | 0.131942 | 0.428221 | 0.404002 |
| MmugDNA.20908.1.S1_at   | MmugDNA.20908.1 | 11.96 | 12.09 | 0.26 | 0.31 | -1.1   | 0.317208 | 0.443151 | 0.647885 | 0.661011 |
| MmugDNA.20909.1.S1_at   | MmugDNA.20909.1 | 7.5   | 7.49  | 0.18 | 0.71 | 1.01   | 0.791487 | 0.805909 | 0.91338  | 0.888395 |
| MmugDNA.2091.1.S1_at    | MmugDNA.2091.1  | 3.05  | 3     | 0.23 | 0.14 | 1.04   | 0.424954 | 0.58876  | 0.71495  | 0.755137 |
| MmugDNA.20910.1.S1_at   | MmugDNA.20910.1 | 7.54  | 6.75  | 0.42 | 0.1  | 1.73   | 0.044603 | 0.009266 | 0.358786 | 0.127089 |
| MmugDNA.20911.1.S1_at   | MmugDNA.20911.1 | 3.08  | 3.09  | 0.18 | 0.07 | -1.01  | 0.858206 | 0.456985 | 0.942698 | 0.670592 |
| MmugDNA.20912.1.S1_at   | MmugDNA.20912.1 | 12.41 | 12.32 | 0.03 | 0.15 | 1.06   | 0.346295 | 0.149543 | 0.665754 | 0.424095 |
| MmugDNA.20913.1.S1_at   | MmugDNA.20913.1 | 4.93  | 5.22  | 0.06 | 0.6  | -1.22  | 0.449287 | 0.47284  | 0.730188 | 0.680163 |
| MmugDNA.20914.1.S1_at   | MmugDNA.20914.1 | 3.44  | 3.42  | 0.6  | 0.25 | 1.02   | 0.535703 | 0.483387 | 0.779283 | 0.687904 |
| MmugDNA.20915.1.S1_at   | MmugDNA.20915.1 | 4.86  | 4.51  | 1.06 | 0.24 | 1.27   | 0.265679 | 0.441433 | 0.611323 | 0.659611 |
| MmugDNA.20917.1.S1_at   | MmugDNA.20917.1 | 7.79  | 7.2   | 0.31 | 0.46 | 1.5    | 0.14252  | 0.162265 | 0.509696 | 0.438447 |
| MmugDNA.20918.1.S1_at   | MmugDNA.20918.1 | 3.19  | 3.31  | 0.09 | 0.07 | -1.09  | 0.120608 | 0.193135 | 0.485724 | 0.468554 |
| MmugDNA.20919.1.S1_at   | MmugDNA.20919.1 | 4.71  | 4.85  | 0.59 | 0.09 | -1.1   | 0.564574 | 0.534639 | 0.796664 | 0.720477 |
| MmugDNA.2092.1.S1_at    | MmugDNA.2092.1  | 5.28  | 5.3   | 0.29 | 0.12 | -1.01  | 0.688473 | 0.876386 | 0.860974 | 0.929683 |
| MmugDNA.20922.1.S1_at   | MmugDNA.20922.1 | 4.09  | 4.33  | 0.37 | 0.08 | -1.18  | 0.880964 | 0.306961 | 0.952105 | 0.563427 |
| MmugDNA.20923.1.S1_at   | MmugDNA.20923.1 | 3.91  | 4.16  | 0.14 | 0.39 | -1.19  | 0.316004 | 0.410106 | 0.6468   | 0.637065 |
| MmugDNA.20924.1.S1_at   | MmugDNA.20924.1 | 3.94  | 7.63  | 0.37 | 1.6  | -12.9  | 0.041392 | 0.028886 | 0.351626 | 0.211763 |
| MmugDNA.20925.1.S1_at   | MmugDNA.20925.1 | 5.98  | 5.98  | 0.1  | 0.27 | 1      | 0.390532 | 0.2619   | 0.693732 | 0.528287 |
| MmugDNA.20926.1.S1_at   | MmugDNA.20926.1 | 6.55  | 4.67  | 1.7  | 0.72 | 3.68   | 0.213121 | 0.214064 | 0.573477 | 0.487645 |

|                         |                 |       |       |      |      |       |          |          |          |          |
|-------------------------|-----------------|-------|-------|------|------|-------|----------|----------|----------|----------|
| MmugDNA.20927.1.S1_at   | MmugDNA.20927.1 | 8.32  | 8.74  | 0.34 | 0.07 | -1.34 | 0.100558 | 0.093973 | 0.461009 | 0.350467 |
| MmugDNA.20929.1.S1_at   | MmugDNA.20929.1 | 4.31  | 4.23  | 0.21 | 0.18 | 1.06  | 0.295223 | 0.397898 | 0.631561 | 0.629138 |
| MmugDNA.32454.1.S1_s_at | MmugDNA.32454.1 | 3.92  | 4.23  | 0.07 | 0.19 | -1.24 | 0.117495 | 0.07264  | 0.481614 | 0.315579 |
| MmugDNA.20931.1.S1_at   | MmugDNA.20931.1 | 4.52  | 4.52  | 0.03 | 0.13 | -1    | 0.46932  | 0.660021 | 0.741612 | 0.801028 |
| MmugDNA.20933.1.S1_at   | MmugDNA.20933.1 | 4.95  | 4.99  | 0.11 | 0.14 | -1.02 | 0.820474 | 0.349608 | 0.926918 | 0.593539 |
| MmugDNA.20934.1.S1_at   | MmugDNA.20934.1 | 9.91  | 9.88  | 0.05 | 0.08 | 1.02  | 0.789691 | 0.333384 | 0.912703 | 0.581668 |
| MmugDNA.20935.1.S1_at   | MmugDNA.20935.1 | 3.73  | 3.79  | 0.31 | 0.21 | -1.04 | 0.755444 | 0.729967 | 0.896094 | 0.843733 |
| MmugDNA.20938.1.S1_at   | MmugDNA.20938.1 | 6.27  | 5.9   | 0.41 | 0.25 | 1.29  | 0.097301 | 0.092301 | 0.456295 | 0.348137 |
| MmugDNA.20939.1.S1_at   | MmugDNA.20939.1 | 7.35  | 7.27  | 0.48 | 0.35 | 1.06  | 0.182708 | 0.285135 | 0.546904 | 0.547098 |
| MmugDNA.2094.1.S1_s_at  | MmugDNA.2094.1  | 8.43  | 7.99  | 0.06 | 0.46 | 1.36  | 0.195021 | 0.227368 | 0.558557 | 0.499659 |
| MmugDNA.20940.1.S1_at   | MmugDNA.20940.1 | 4.79  | 4.29  | 0.91 | 0.17 | 1.41  | 0.188425 | 0.159798 | 0.551451 | 0.435871 |
| MmugDNA.20941.1.S1_s_at | MmugDNA.20941.1 | 5.57  | 5.55  | 0.18 | 0.21 | 1.01  | 0.988478 | 0.679721 | 0.995944 | 0.812998 |
| MmugDNA.20942.1.S1_at   | MmugDNA.20942.1 | 3.59  | 3.73  | 0.19 | 0.03 | -1.1  | 0.866779 | 0.493847 | 0.946842 | 0.694433 |
| MmugDNA.20943.1.S1_at   | MmugDNA.20943.1 | 5.9   | 5.7   | 0.17 | 0.13 | 1.15  | 0.559568 | 0.849806 | 0.793957 | 0.914673 |
| MmugDNA.20944.1.S1_at   | MmugDNA.20944.1 | 2.85  | 2.75  | 0.16 | 0.19 | 1.07  | 0.609651 | 0.800307 | 0.820621 | 0.885129 |
| MmugDNA.20945.1.S1_at   | MmugDNA.20945.1 | 6.59  | 6.65  | 0.22 | 0.09 | -1.04 | 0.456972 | 0.471412 | 0.734619 | 0.679435 |
| MmugDNA.20946.1.S1_at   | MmugDNA.20946.1 | 7.29  | 6.58  | 0.31 | 0.31 | 1.64  | 0.023122 | 0.021687 | 0.290272 | 0.184333 |
| MmugDNA.20947.1.S1_at   | MmugDNA.20947.1 | 3.65  | 3.43  | 1.03 | 0.19 | 1.17  | 0.268427 | 0.405082 | 0.613168 | 0.633481 |
| MmugDNA.20948.1.S1_at   | MmugDNA.20948.1 | 5.81  | 5.76  | 0.06 | 0.18 | 1.04  | 0.681737 | 0.333101 | 0.857635 | 0.581387 |
| MmugDNA.20949.1.S1_at   | MmugDNA.20949.1 | 4.4   | 3.98  | 0.47 | 0.14 | 1.34  | 0.350385 | 0.562419 | 0.668486 | 0.738025 |
| MmugDNA.2095.1.S1_at    | MmugDNA.2095.1  | 4.64  | 5.23  | 1.17 | 0.85 | -1.51 | 0.306228 | 0.266107 | 0.639466 | 0.531943 |
| MmugDNA.20950.1.S1_at   | MmugDNA.20950.1 | 11.71 | 11.54 | 0.13 | 0.44 | 1.13  | 0.727416 | 0.840712 | 0.881325 | 0.909196 |
| MmugDNA.20951.1.S1_at   | MmugDNA.20951.1 | 5.54  | 5.77  | 0.5  | 0.03 | -1.17 | 0.85192  | 0.745309 | 0.940401 | 0.852351 |
| MmugDNA.20952.1.S1_at   | MmugDNA.20952.1 | 6.92  | 7.05  | 0.24 | 0.21 | -1.09 | 0.682733 | 0.66947  | 0.858083 | 0.806626 |
| MmugDNA.20953.1.S1_at   | MmugDNA.20953.1 | 4.91  | 5.16  | 0.03 | 0.06 | -1.18 | 0.002207 | 0.002802 | 0.159615 | 0.078041 |
| MmugDNA.20954.1.S1_at   | MmugDNA.20954.1 | 4.49  | 4.1   | 0.25 | 0.2  | 1.31  | 0.063781 | 0.046068 | 0.401568 | 0.258977 |
| MmugDNA.20955.1.S1_at   | MmugDNA.20955.1 | 5.56  | 5.65  | 0.17 | 0.1  | -1.06 | 0.58344  | 0.469456 | 0.806494 | 0.678248 |
| MmugDNA.20956.1.S1_at   | MmugDNA.20956.1 | 8.35  | 7.8   | 0.16 | 0.22 | 1.47  | 0.021167 | 0.010807 | 0.282498 | 0.135636 |
| MmugDNA.20959.1.S1_at   | MmugDNA.20959.1 | 3.25  | 3.27  | 0.03 | 0.06 | -1.02 | 0.168266 | 0.224188 | 0.53256  | 0.497164 |
| MmugDNA.2096.1.S1_at    | MmugDNA.2096.1  | 8.38  | 9.54  | 0.26 | 0.31 | -2.24 | 0.007623 | 0.002692 | 0.210602 | 0.076455 |
| MmugDNA.20960.1.S1_at   | MmugDNA.20960.1 | 3.92  | 6.55  | 0.12 | 1.14 | -6.2  | 0.039053 | 0.028991 | 0.346242 | 0.212154 |
| MmugDNA.20961.1.S1_at   | MmugDNA.20961.1 | 5.31  | 5.84  | 0.39 | 0.6  | -1.44 | 0.953909 | 0.401256 | 0.982913 | 0.63089  |
| MmugDNA.20962.1.S1_at   | MmugDNA.20962.1 | 3.46  | 3.46  | 0.09 | 0.04 | 1     | 0.617335 | 0.169634 | 0.824669 | 0.446221 |
| MmugDNA.20965.1.S1_at   | MmugDNA.20965.1 | 4.87  | 4.9   | 0.25 | 0.45 | -1.02 | 0.963011 | 0.858883 | 0.985684 | 0.919647 |
| MmugDNA.20966.1.S1_at   | MmugDNA.20966.1 | 13.3  | 13.4  | 0.03 | 0.11 | -1.08 | 0.645674 | 0.190476 | 0.840435 | 0.465906 |
| MmugDNA.20966.1.S1_s_at | MmugDNA.20966.1 | 13.47 | 13.57 | 0.04 | 0.12 | -1.07 | 0.873146 | 0.369585 | 0.94924  | 0.608948 |
| MmugDNA.20967.1.S1_at   | MmugDNA.20967.1 | 7.84  | 7.63  | 0.33 | 0.38 | 1.16  | 0.937168 | 0.950512 | 0.975794 | 0.971855 |
| MmugDNA.20968.1.S1_at   | MmugDNA.20968.1 | 3.32  | 3.45  | 0.08 | 0.15 | -1.09 | 0.60553  | 0.781778 | 0.818327 | 0.873516 |
| MmugDNA.20969.1.S1_at   | MmugDNA.20969.1 | 5.51  | 4.78  | 0.37 | 0.05 | 1.66  | 0.017735 | 0.007972 | 0.267685 | 0.118702 |
| MmugDNA.2097.1.S1_at    | MmugDNA.2097.1  | 4.44  | 4.23  | 0.3  | 0.18 | 1.16  | 0.462388 | 0.259164 | 0.738226 | 0.526264 |
| MmugDNA.33235.1.S1_s_at | MmugDNA.33235.1 | 6.37  | 7.2   | 0.35 | 0.1  | -1.78 | 0.006511 | 0.010664 | 0.199625 | 0.13482  |

|                         |                 |       |       |      |      |       |          |          |          |          |
|-------------------------|-----------------|-------|-------|------|------|-------|----------|----------|----------|----------|
| MmugDNA.20971.1.S1_at   | MmugDNA.20971.1 | 4.91  | 4.37  | 0.41 | 0.21 | 1.46  | 0.282666 | 0.342697 | 0.62304  | 0.588666 |
| MmugDNA.20972.1.S1_at   | MmugDNA.20972.1 | 4.95  | 4.96  | 0.14 | 0.01 | -1.01 | 0.83355  | 0.984005 | 0.932352 | 0.991111 |
| MmugDNA.20973.1.S1_at   | MmugDNA.20973.1 | 3.37  | 3.49  | 0.32 | 0.13 | -1.09 | 0.78628  | 0.317187 | 0.911108 | 0.570458 |
| MmugDNA.20974.1.S1_at   | MmugDNA.20974.1 | 6.8   | 6.77  | 0.08 | 0.15 | 1.02  | 0.684545 | 0.592695 | 0.858788 | 0.757854 |
| MmugDNA.20975.1.S1_at   | MmugDNA.20975.1 | 8.23  | 9.15  | 0.39 | 0.57 | -1.89 | 0.072053 | 0.076143 | 0.416191 | 0.320969 |
| MmugDNA.20976.1.S1_at   | MmugDNA.20976.1 | 4.1   | 4.09  | 0.26 | 0.16 | 1.01  | 0.94016  | 0.984448 | 0.977243 | 0.991287 |
| MmugDNA.20977.1.S1_at   | MmugDNA.20977.1 | 8.47  | 7.1   | 0.27 | 0.72 | 2.59  | 0.075775 | 0.07025  | 0.423493 | 0.311287 |
| MmugDNA.20978.1.S1_at   | MmugDNA.20978.1 | 5.83  | 5.92  | 0.14 | 0.2  | -1.06 | 0.34534  | 0.485637 | 0.665135 | 0.68924  |
| MmugDNA.2098.1.S1_at    | MmugDNA.2098.1  | 4.42  | 4.22  | 0.33 | 0.18 | 1.15  | 0.681308 | 0.138873 | 0.857536 | 0.412037 |
| MmugDNA.20980.1.S1_at   | MmugDNA.20980.1 | 8.73  | 9.46  | 0.52 | 0.73 | -1.66 | 0.651049 | 0.604486 | 0.842972 | 0.764647 |
| MmugDNA.20980.1.S1_s_at | MmugDNA.20980.1 | 6.5   | 7.15  | 0.24 | 0.34 | -1.58 | 0.015692 | 0.009807 | 0.260208 | 0.130166 |
| MmugDNA.20981.1.S1_at   | MmugDNA.20981.1 | 6.41  | 6.91  | 0.24 | 0.51 | -1.41 | 0.689758 | 0.811586 | 0.861769 | 0.891244 |
| MmugDNA.20982.1.S1_at   | MmugDNA.20982.1 | 3.14  | 3.27  | 0.08 | 0.22 | -1.1  | 0.381892 | 0.48407  | 0.688284 | 0.688318 |
| MmugDNA.20984.1.S1_at   | MmugDNA.20984.1 | 8.29  | 9.03  | 0.32 | 0.41 | -1.67 | 0.156957 | 0.168706 | 0.521736 | 0.445379 |
| MmugDNA.20985.1.S1_at   | MmugDNA.20985.1 | 9.5   | 9.68  | 0.51 | 0.32 | -1.13 | 0.534576 | 0.709411 | 0.778781 | 0.831622 |
| MmugDNA.20987.1.S1_at   | MmugDNA.20987.1 | 12.37 | 10.66 | 0.51 | 0.14 | 3.27  | 0.010278 | 0.004094 | 0.228514 | 0.090584 |
| MmugDNA.20988.1.S1_at   | MmugDNA.20988.1 | 9.37  | 8.82  | 0.12 | 0.62 | 1.46  | 0.194419 | 0.255122 | 0.557827 | 0.52317  |
| MmugDNA.20989.1.S1_at   | MmugDNA.20989.1 | 5.79  | 6.88  | 0.56 | 0.52 | -2.12 | 0.075519 | 0.072988 | 0.422779 | 0.315986 |
| MmugDNA.2099.1.S1_at    | MmugDNA.2099.1  | 12.53 | 12.22 | 0.49 | 0.21 | 1.24  | 0.850695 | 0.812759 | 0.940027 | 0.891794 |
| MmugDNA.20990.1.S1_at   | MmugDNA.20990.1 | 4.69  | 4.69  | 0.02 | 0.13 | 1     | 0.505624 | 0.209144 | 0.761685 | 0.482939 |
| MmugDNA.20991.1.S1_at   | MmugDNA.20991.1 | 5.97  | 5.97  | 0.03 | 0.13 | 1     | 0.293989 | 0.33741  | 0.631046 | 0.58462  |
| MmugDNA.20992.1.S1_at   | MmugDNA.20992.1 | 4.6   | 3.87  | 0.88 | 0.2  | 1.65  | 0.38588  | 0.268666 | 0.690905 | 0.534138 |
| MmugDNA.20993.1.S1_at   | MmugDNA.20993.1 | 12.2  | 11.1  | 0.32 | 0.66 | 2.13  | 0.195097 | 0.210397 | 0.558557 | 0.484267 |
| MmugDNA.20994.1.S1_at   | MmugDNA.20994.1 | 4.19  | 4.16  | 0.3  | 0.04 | 1.02  | 0.618436 | 0.812372 | 0.8252   | 0.891607 |
| MmugDNA.20996.1.S1_at   | MmugDNA.20996.1 | 4.24  | 4.24  | 0.1  | 0.04 | 1     | 0.269139 | 0.406057 | 0.613808 | 0.634197 |
| MmugDNA.20997.1.S1_at   | MmugDNA.20997.1 | 3.24  | 3.26  | 0.09 | 0.17 | -1.01 | 0.597855 | 0.065941 | 0.813757 | 0.302161 |
| MmugDNA.20998.1.S1_at   | MmugDNA.20998.1 | 8.2   | 7.89  | 0.47 | 0.58 | 1.23  | 0.463954 | 0.629649 | 0.738998 | 0.781989 |
| MmugDNA.20999.1.S1_at   | MmugDNA.20999.1 | 6.73  | 7.12  | 0.27 | 0.02 | -1.31 | 0.196096 | 0.451273 | 0.559231 | 0.666113 |
| MmugDNA.2100.1.S1_at    | MmugDNA.2100.1  | 10.27 | 10.41 | 0.13 | 0.47 | -1.1  | 0.219324 | 0.173541 | 0.57872  | 0.449938 |
| MmugDNA.21000.1.S1_at   | MmugDNA.21000.1 | 5.72  | 5.78  | 0.11 | 0.07 | -1.04 | 0.870635 | 0.043325 | 0.948314 | 0.252847 |
| MmugDNA.21001.1.S1_at   | MmugDNA.21001.1 | 7.73  | 8.06  | 0.25 | 0.45 | -1.26 | 0.684075 | 0.05466  | 0.858586 | 0.279311 |
| MmugDNA.21003.1.S1_at   | MmugDNA.21003.1 | 7.03  | 7.22  | 0.13 | 0.65 | -1.15 | 0.683986 | 0.80574  | 0.858543 | 0.888331 |
| MmugDNA.21006.1.S1_at   | MmugDNA.21006.1 | 4.46  | 4.06  | 0.28 | 0.08 | 1.32  | 0.191783 | 0.335203 | 0.554827 | 0.582968 |
| MmugDNA.21008.1.S1_at   | MmugDNA.21008.1 | 11.4  | 11.38 | 0.17 | 0.18 | 1.01  | 0.955982 | 0.751382 | 0.983421 | 0.855447 |
| MmugDNA.21010.1.S1_at   | MmugDNA.21010.1 | 8.22  | 8.42  | 0.47 | 0.24 | -1.15 | 0.799976 | 0.421003 | 0.917312 | 0.644662 |
| MmugDNA.21010.1.S1_s_at | MmugDNA.21010.1 | 7.46  | 7.81  | 0.42 | 0.3  | -1.28 | 0.52759  | 0.571997 | 0.775008 | 0.744171 |
| MmugDNA.21011.1.S1_at   | MmugDNA.21011.1 | 7.63  | 7.05  | 0.05 | 0.72 | 1.5   | 0.206178 | 0.171349 | 0.568505 | 0.447813 |
| MmugDNA.21012.1.S1_at   | MmugDNA.21012.1 | 5.2   | 5.14  | 0.23 | 0.22 | 1.05  | 0.691322 | 0.888089 | 0.862672 | 0.936183 |
| MmugDNA.21014.1.S1_at   | MmugDNA.21014.1 | 5.11  | 5.19  | 0.15 | 0.21 | -1.06 | 0.613803 | 0.799837 | 0.822923 | 0.884906 |
| MmugDNA.21015.1.S1_at   | MmugDNA.21015.1 | 6.54  | 6.21  | 0.36 | 0.51 | 1.26  | 0.7071   | 0.727266 | 0.870958 | 0.84224  |
| MmugDNA.21016.1.S1_at   | MmugDNA.21016.1 | 5.49  | 3.92  | 1.07 | 0.46 | 2.96  | 0.150637 | 0.176245 | 0.515411 | 0.452718 |

|                         |                 |       |       |      |      |       |          |          |          |          |
|-------------------------|-----------------|-------|-------|------|------|-------|----------|----------|----------|----------|
| MmugDNA.21017.1.S1_at   | MmugDNA.21017.1 | 8.2   | 8.42  | 1.15 | 0.44 | -1.16 | 0.983993 | 0.997303 | 0.994302 | 0.998549 |
| MmugDNA.21018.1.S1_at   | MmugDNA.21018.1 | 3.09  | 3.08  | 0.17 | 0.07 | 1.01  | 0.233656 | 0.198003 | 0.588317 | 0.472955 |
| MmugDNA.21019.1.S1_at   | MmugDNA.21019.1 | 7.26  | 9.25  | 0.55 | 1.23 | -3.97 | 0.206952 | 0.179277 | 0.56893  | 0.455692 |
| MmugDNA.2102.1.S1_at    | MmugDNA.2102.1  | 6.02  | 6.05  | 0.01 | 0.25 | -1.02 | 0.443158 | 0.599324 | 0.725992 | 0.761415 |
| MmugDNA.21020.1.S1_at   | MmugDNA.21020.1 | 6.05  | 6.03  | 0.15 | 0.19 | 1.01  | 0.77467  | 0.751995 | 0.905357 | 0.855739 |
| MmugDNA.21021.1.S1_at   | MmugDNA.21021.1 | 4.34  | 4.54  | 0.14 | 0.13 | -1.15 | 0.165702 | 0.46305  | 0.529716 | 0.674193 |
| MmugDNA.21022.1.S1_at   | MmugDNA.21022.1 | 3.55  | 3.36  | 0.34 | 0.75 | 1.14  | 0.685563 | 0.525134 | 0.859209 | 0.714766 |
| MmugDNA.21024.1.S1_at   | MmugDNA.21024.1 | 5.86  | 5.6   | 0.09 | 0.19 | 1.2   | 0.315002 | 0.33711  | 0.646263 | 0.584337 |
| MmugDNA.21025.1.S1_at   | MmugDNA.21025.1 | 8.22  | 7.61  | 0.4  | 0.17 | 1.52  | 0.04068  | 0.035683 | 0.350025 | 0.233314 |
| MmugDNA.21027.1.S1_at   | MmugDNA.21027.1 | 5.09  | 5.05  | 0.1  | 0.42 | 1.03  | 0.684581 | 0.654539 | 0.858795 | 0.798087 |
| MmugDNA.21028.1.S1_at   | MmugDNA.21028.1 | 3.72  | 3.37  | 0.22 | 0.13 | 1.28  | 0.101264 | 0.103662 | 0.461009 | 0.364465 |
| MmugDNA.21029.1.S1_at   | MmugDNA.21029.1 | 7.06  | 6.64  | 0.13 | 0.2  | 1.34  | 0.063773 | 0.157141 | 0.401568 | 0.432616 |
| MmugDNA.2103.1.S1_at    | MmugDNA.2103.1  | 4.16  | 4.23  | 1.43 | 0.35 | -1.05 | 0.531894 | 0.723201 | 0.77755  | 0.839645 |
| MmugDNA.21030.1.S1_at   | MmugDNA.21030.1 | 5.47  | 6.03  | 0.16 | 0.25 | -1.47 | 0.03646  | 0.016786 | 0.339338 | 0.164091 |
| MmugDNA.21031.1.S1_at   | MmugDNA.21031.1 | 7.62  | 6.83  | 0.46 | 0.04 | 1.73  | 0.117531 | 0.07043  | 0.481723 | 0.311729 |
| MmugDNA.21033.1.S1_at   | MmugDNA.21033.1 | 3.69  | 3.7   | 0.65 | 0.07 | -1.01 | 0.619048 | 0.813283 | 0.825405 | 0.892071 |
| MmugDNA.21034.1.S1_at   | MmugDNA.21034.1 | 6.75  | 6.89  | 0.28 | 0.18 | -1.1  | 0.35512  | 0.496873 | 0.670815 | 0.696265 |
| MmugDNA.21035.1.S1_s_at | MmugDNA.21035.1 | 9.36  | 9.37  | 0.08 | 0.32 | -1.01 | 0.856983 | 0.939148 | 0.942171 | 0.965446 |
| MmugDNA.21036.1.S1_at   | MmugDNA.21036.1 | 5.1   | 5.25  | 0.16 | 0.09 | -1.11 | 0.138936 | 0.161711 | 0.506229 | 0.437771 |
| MmugDNA.21037.1.S1_at   | MmugDNA.21037.1 | 6.57  | 6.83  | 0.5  | 0.27 | -1.19 | 0.101794 | 0.102268 | 0.461313 | 0.36236  |
| MmugDNA.21039.1.S1_at   | MmugDNA.21039.1 | 5.64  | 5.62  | 0.21 | 0.01 | 1.01  | 0.680377 | 0.826704 | 0.857147 | 0.900485 |
| MmugDNA.2104.1.S1_at    | MmugDNA.2104.1  | 5.35  | 4.75  | 0.23 | 0.1  | 1.52  | 0.015753 | 0.03775  | 0.260733 | 0.238716 |
| MmugDNA.21040.1.S1_at   | MmugDNA.21040.1 | 6.26  | 6.14  | 0.74 | 0.19 | 1.09  | 0.391029 | 0.337535 | 0.693889 | 0.584716 |
| MmugDNA.21043.1.S1_at   | MmugDNA.21043.1 | 7.18  | 7.18  | 1.64 | 0.4  | 1     | 0.851352 | 0.956129 | 0.940204 | 0.975053 |
| MmugDNA.21044.1.S1_at   | MmugDNA.21044.1 | 7.43  | 7.26  | 0.12 | 0.16 | 1.12  | 0.162247 | 0.331258 | 0.526638 | 0.579981 |
| MmugDNA.21045.1.S1_at   | MmugDNA.21045.1 | 5.11  | 5     | 0.99 | 0.86 | 1.08  | 0.478291 | 0.558815 | 0.747114 | 0.735887 |
| MmugDNA.21046.1.S1_at   | MmugDNA.21046.1 | 12.4  | 12.41 | 0.24 | 0.09 | -1    | 0.50969  | 0.474984 | 0.764485 | 0.681837 |
| MmugDNA.21049.1.S1_at   | MmugDNA.21049.1 | 4.88  | 4.18  | 0.2  | 0.33 | 1.62  | 0.035071 | 0.033445 | 0.334694 | 0.226517 |
| MmugDNA.2105.1.S1_at    | MmugDNA.2105.1  | 5.02  | 5.06  | 0.23 | 0.12 | -1.03 | 0.373524 | 0.514547 | 0.683245 | 0.707765 |
| MmugDNA.21050.1.S1_at   | MmugDNA.21050.1 | 6.57  | 7.78  | 0.34 | 0.82 | -2.3  | 0.030265 | 0.006054 | 0.317712 | 0.106152 |
| MmugDNA.21052.1.S1_at   | MmugDNA.21052.1 | 6.89  | 9.78  | 0.86 | 1.39 | -7.4  | 0.067507 | 0.043784 | 0.407949 | 0.25387  |
| MmugDNA.21053.1.S1_at   | MmugDNA.21053.1 | 3.27  | 3.11  | 0.63 | 0.17 | 1.12  | 0.218759 | 0.279657 | 0.578251 | 0.543212 |
| MmugDNA.21054.1.S1_at   | MmugDNA.21054.1 | 4.09  | 4.16  | 0    | 0.18 | -1.05 | 0.801786 | 0.391788 | 0.918258 | 0.625301 |
| MmugDNA.21055.1.S1_at   | MmugDNA.21055.1 | 7.33  | 4.78  | 0.48 | 1.05 | 5.83  | 0.04393  | 0.0503   | 0.35746  | 0.269573 |
| MmugDNA.21056.1.S1_at   | MmugDNA.21056.1 | 6.64  | 6.41  | 0.24 | 0.19 | 1.18  | 0.235417 | 0.255754 | 0.589352 | 0.523692 |
| MmugDNA.21057.1.S1_at   | MmugDNA.21057.1 | 4.9   | 4.62  | 0.21 | 0.07 | 1.22  | 0.187149 | 0.655066 | 0.550236 | 0.798277 |
| MmugDNA.2106.1.S1_at    | MmugDNA.2106.1  | 6.65  | 6.82  | 0.07 | 0.06 | -1.12 | 0.036614 | 0.055632 | 0.340048 | 0.281649 |
| MmugDNA.21060.1.S1_at   | MmugDNA.21060.1 | 7.65  | 7.97  | 0.15 | 0.38 | -1.25 | 0.197811 | 0.250843 | 0.560816 | 0.51956  |
| MmugDNA.21061.1.S1_s_at | MmugDNA.21061.1 | 9.59  | 10.22 | 0.16 | 0.58 | -1.55 | 0.105603 | 0.104282 | 0.466487 | 0.365479 |
| MmugDNA.21062.1.S1_at   | MmugDNA.21062.1 | 8.68  | 8.81  | 0.23 | 0.15 | -1.09 | 0.526017 | 0.054638 | 0.773971 | 0.279266 |
| MmugDNA.21063.1.S1_at   | MmugDNA.21063.1 | 12.24 | 11.55 | 0.15 | 0.47 | 1.61  | 0.093277 | 0.059971 | 0.450474 | 0.291581 |

|                         |                 |       |       |      |      |       |          |          |          |          |
|-------------------------|-----------------|-------|-------|------|------|-------|----------|----------|----------|----------|
| MmugDNA.21064.1.S1_at   | MmugDNA.21064.1 | 8.83  | 7.94  | 0.46 | 0.31 | 1.85  | 0.0297   | 0.00887  | 0.31509  | 0.12465  |
| MmugDNA.21066.1.S1_at   | MmugDNA.21066.1 | 11.42 | 11.43 | 0.02 | 0.11 | -1.01 | 0.280953 | 0.278703 | 0.622015 | 0.542416 |
| MmugDNA.21068.1.S1_at   | MmugDNA.21068.1 | 4.32  | 4.48  | 0.15 | 0.1  | -1.11 | 0.921264 | 0.839663 | 0.969264 | 0.908582 |
| MmugDNA.21068.1.S1_s_at | MmugDNA.21068.1 | 2.96  | 2.95  | 0.04 | 0.07 | 1     | 0.36671  | 0.187359 | 0.679209 | 0.463379 |
| MmugDNA.21069.1.S1_at   | MmugDNA.21069.1 | 8.29  | 10.04 | 0.25 | 1.84 | -3.36 | 0.162283 | 0.186654 | 0.526638 | 0.462457 |
| MmugDNA.2107.1.S1_at    | MmugDNA.2107.1  | 4.12  | 3.63  | 0.87 | 0.37 | 1.4   | 0.214392 | 0.167135 | 0.574885 | 0.443621 |
| MmugDNA.21070.1.S1_at   | MmugDNA.21070.1 | 7.83  | 9.11  | 0.37 | 0.77 | -2.43 | 0.024817 | 0.004641 | 0.296682 | 0.095    |
| MmugDNA.21072.1.S1_at   | MmugDNA.21072.1 | 6.2   | 6.09  | 0.06 | 0.41 | 1.08  | 0.648085 | 0.807113 | 0.841735 | 0.888946 |
| MmugDNA.21073.1.S1_at   | MmugDNA.21073.1 | 4.43  | 4.43  | 0.14 | 0    | -1    | 0.389639 | 0.16179  | 0.693124 | 0.437876 |
| MmugDNA.21075.1.S1_at   | MmugDNA.21075.1 | 8.6   | 9.4   | 0.37 | 0.45 | -1.74 | 0.307573 | 0.402875 | 0.640077 | 0.631631 |
| MmugDNA.21076.1.S1_at   | MmugDNA.21076.1 | 9.3   | 10.17 | 0.3  | 1.02 | -1.83 | 0.337703 | 0.223967 | 0.660206 | 0.497019 |
| MmugDNA.21078.1.S1_at   | MmugDNA.21078.1 | 2.71  | 2.71  | 0    | 0.11 | 1     | 0.359751 | 0.221381 | 0.673991 | 0.494644 |
| MmugDNA.21079.1.S1_at   | MmugDNA.21079.1 | 4.84  | 4.84  | 0.12 | 0.11 | 1     | 0.457164 | 0.553717 | 0.734738 | 0.732777 |
| MmugDNA.21081.1.S1_at   | MmugDNA.21081.1 | 4.16  | 4.11  | 0.11 | 0.29 | 1.03  | 0.387212 | 0.594842 | 0.691895 | 0.758675 |
| MmugDNA.21087.1.S1_at   | MmugDNA.21087.1 | 9.99  | 11.49 | 0.62 | 0.84 | -2.83 | 0.056946 | 0.050417 | 0.387418 | 0.269746 |
| MmugDNA.21089.1.S1_at   | MmugDNA.21089.1 | 9.94  | 9.12  | 0.09 | 0.2  | 1.77  | 0.005301 | 0.001674 | 0.191107 | 0.061979 |
| MmugDNA.13762.1.S1_at   | MmugDNA.13762.1 | 10.67 | 10.16 | 0.59 | 1.02 | 1.42  | 0.531313 | 0.694897 | 0.777132 | 0.822638 |
| MmugDNA.13762.1.S1_s_at | MmugDNA.13762.1 | 11.08 | 10.76 | 0.69 | 1.05 | 1.25  | 0.7161   | 0.858008 | 0.87529  | 0.919035 |
| MmugDNA.21092.1.S1_at   | MmugDNA.21092.1 | 4.42  | 4.47  | 1.11 | 0.35 | -1.04 | 0.426686 | 0.560008 | 0.715928 | 0.736439 |
| MmugDNA.21093.1.S1_at   | MmugDNA.21093.1 | 4.28  | 4.41  | 0.3  | 0.05 | -1.09 | 0.333484 | 0.062962 | 0.657597 | 0.297586 |
| MmugDNA.21094.1.S1_at   | MmugDNA.21094.1 | 3.15  | 3.21  | 0.1  | 0.15 | -1.04 | 0.135567 | 0.200995 | 0.502421 | 0.475442 |
| MmugDNA.21096.1.S1_at   | MmugDNA.21096.1 | 12.94 | 12.78 | 0.1  | 0.59 | 1.12  | 0.237319 | 0.309348 | 0.590811 | 0.564912 |
| MmugDNA.21097.1.S1_at   | MmugDNA.21097.1 | 6.08  | 6.11  | 0.13 | 0.18 | -1.02 | 0.571837 | 0.561825 | 0.800395 | 0.737654 |
| MmugDNA.21099.1.S1_at   | MmugDNA.21099.1 | 3.77  | 3.77  | 0.11 | 0.11 | -1    | 0.324512 | 0.51841  | 0.651941 | 0.71038  |
| MmugDNA.2110.1.S1_at    | MmugDNA.2110.1  | 3.83  | 3.72  | 0.22 | 0.11 | 1.08  | 0.177892 | 0.217473 | 0.542126 | 0.491035 |
| MmugDNA.21101.1.S1_s_at | MmugDNA.21101.1 | 6.2   | 5.75  | 0.42 | 0.44 | 1.37  | 0.275993 | 0.047722 | 0.618086 | 0.263325 |
| MmugDNA.21102.1.S1_at   | MmugDNA.21102.1 | 6.53  | 6.6   | 0.63 | 0.42 | -1.05 | 0.201204 | 0.3391   | 0.563821 | 0.585891 |
| MmugDNA.21103.1.S1_at   | MmugDNA.21103.1 | 6.01  | 6.32  | 0.35 | 0.37 | -1.24 | 0.711034 | 0.021914 | 0.873387 | 0.185265 |
| MmugDNA.21106.1.S1_at   | MmugDNA.21106.1 | 6.87  | 6.28  | 0.19 | 0.24 | 1.51  | 0.022048 | 0.023311 | 0.28446  | 0.191355 |
| MmugDNA.21107.1.S1_at   | MmugDNA.21107.1 | 5.9   | 5.84  | 0.12 | 0.05 | 1.04  | 0.149599 | 0.168553 | 0.514118 | 0.445172 |
| MmugDNA.2111.1.S1_at    | MmugDNA.2111.1  | 3.7   | 3.64  | 0.16 | 0.12 | 1.04  | 0.831687 | 0.807029 | 0.931835 | 0.888946 |
| MmugDNA.21110.1.S1_at   | MmugDNA.21110.1 | 9.84  | 9.49  | 0.22 | 0.48 | 1.28  | 0.808769 | 0.816548 | 0.922032 | 0.894202 |
| MmugDNA.21111.1.S1_at   | MmugDNA.21111.1 | 4.87  | 4.89  | 0.14 | 0.07 | -1.01 | 0.396136 | 0.820112 | 0.696828 | 0.896336 |
| MmugDNA.21112.1.S1_at   | MmugDNA.21112.1 | 8.77  | 6.85  | 0.15 | 0.85 | 3.79  | 0.00821  | 0.002734 | 0.216841 | 0.07708  |
| MmugDNA.21113.1.S1_at   | MmugDNA.21113.1 | 4.33  | 4.65  | 0.14 | 0.19 | -1.25 | 0.069159 | 0.112261 | 0.411264 | 0.37755  |
| MmugDNA.21114.1.S1_at   | MmugDNA.21114.1 | 5.86  | 5.81  | 0.29 | 0.06 | 1.03  | 0.532092 | 0.664218 | 0.777626 | 0.803247 |
| MmugDNA.21115.1.S1_at   | MmugDNA.21115.1 | 8.82  | 8.24  | 0.12 | 0.32 | 1.49  | 0.030953 | 0.0208   | 0.320347 | 0.180908 |
| MmugDNA.21116.1.S1_at   | MmugDNA.21116.1 | 8.23  | 8     | 0.19 | 0.06 | 1.18  | 0.040438 | 0.003845 | 0.349277 | 0.088232 |
| MmugDNA.21117.1.S1_at   | MmugDNA.21117.1 | 11.98 | 11.89 | 0.08 | 0.2  | 1.07  | 0.542892 | 0.687267 | 0.783702 | 0.817523 |
| MmugDNA.21117.1.S1_s_at | MmugDNA.21117.1 | 12.45 | 12.29 | 0.06 | 0.21 | 1.12  | 0.502655 | 0.620105 | 0.760491 | 0.775227 |
| MmugDNA.21119.1.S1_at   | MmugDNA.21119.1 | 11.53 | 11.26 | 0.1  | 0.2  | 1.2   | 0.120483 | 0.069968 | 0.485505 | 0.31072  |

|                         |                 |       |       |      |      |       |          |          |          |          |
|-------------------------|-----------------|-------|-------|------|------|-------|----------|----------|----------|----------|
| MmugDNA.21121.1.S1_at   | MmugDNA.21121.1 | 10.47 | 10.13 | 0.23 | 0.71 | 1.26  | 0.454011 | 0.434836 | 0.733088 | 0.654843 |
| MmugDNA.21123.1.S1_at   | MmugDNA.21123.1 | 10.98 | 11.26 | 0.19 | 0.57 | -1.21 | 0.835264 | 0.943828 | 0.933181 | 0.96811  |
| MmugDNA.21124.1.S1_at   | MmugDNA.21124.1 | 3.8   | 3.08  | 0.46 | 0.13 | 1.65  | 0.040863 | 0.277168 | 0.350506 | 0.541154 |
| MmugDNA.21129.1.S1_at   | MmugDNA.21129.1 | 8.52  | 8     | 0.12 | 0.08 | 1.43  | 0.003504 | 0.000731 | 0.178634 | 0.044701 |
| MmugDNA.2113.1.S1_at    | MmugDNA.2113.1  | 9.61  | 9.24  | 0.26 | 0.36 | 1.29  | 0.153915 | 0.050704 | 0.518553 | 0.270338 |
| MmugDNA.21130.1.S1_at   | MmugDNA.21130.1 | 6.9   | 7.13  | 0.14 | 0.77 | -1.17 | 0.598342 | 0.71637  | 0.813939 | 0.835633 |
| MmugDNA.21131.1.S1_at   | MmugDNA.21131.1 | 2.78  | 2.88  | 0.22 | 0.25 | -1.08 | 0.587976 | 0.713627 | 0.808837 | 0.833863 |
| MmugDNA.21132.1.S1_at   | MmugDNA.21132.1 | 7.44  | 7.85  | 0.55 | 0.55 | -1.34 | 0.175183 | 0.086419 | 0.538831 | 0.338882 |
| MmugDNA.21133.1.S1_at   | MmugDNA.21133.1 | 6.22  | 5.62  | 0.11 | 0.67 | 1.51  | 0.618632 | 0.772222 | 0.825259 | 0.867607 |
| MmugDNA.21134.1.S1_at   | MmugDNA.21134.1 | 3.81  | 3.77  | 0.52 | 0.01 | 1.03  | 0.329726 | 0.250285 | 0.655349 | 0.519282 |
| MmugDNA.21135.1.S1_at   | MmugDNA.21135.1 | 3.6   | 3.36  | 0.32 | 0.16 | 1.18  | 0.23227  | 0.218277 | 0.587814 | 0.491804 |
| MmugDNA.21137.1.S1_at   | MmugDNA.21137.1 | 5.36  | 5.58  | 0.16 | 0.05 | -1.17 | 0.033135 | 0.025816 | 0.327107 | 0.201408 |
| MmugDNA.21139.1.S1_at   | MmugDNA.21139.1 | 4.36  | 3.75  | 0.82 | 1.48 | 1.53  | 0.830436 | 0.774883 | 0.931462 | 0.868962 |
| MmugDNA.2114.1.S1_at    | MmugDNA.2114.1  | 3.74  | 4.03  | 0.4  | 0.29 | -1.23 | 0.567196 | 0.589427 | 0.798031 | 0.755652 |
| MmugDNA.21140.1.S1_at   | MmugDNA.21140.1 | 9.28  | 8.88  | 0.29 | 1.29 | 1.32  | 0.34696  | 0.318036 | 0.666124 | 0.571046 |
| MmugDNA.21141.1.S1_at   | MmugDNA.21141.1 | 6.54  | 5.89  | 0.23 | 0.29 | 1.56  | 0.05608  | 0.078505 | 0.385675 | 0.325285 |
| MmugDNA.21142.1.S1_at   | MmugDNA.21142.1 | 7.57  | 7.96  | 0.38 | 0.69 | -1.31 | 0.406556 | 0.058454 | 0.703729 | 0.288529 |
| MmugDNA.21143.1.S1_at   | MmugDNA.21143.1 | 10.06 | 10.84 | 0.66 | 0.36 | -1.71 | 0.080269 | 0.078303 | 0.430342 | 0.324949 |
| MmugDNA.21147.1.S1_at   | MmugDNA.21147.1 | 4.05  | 3.67  | 0.68 | 0.39 | 1.3   | 0.452479 | 0.298345 | 0.732157 | 0.55702  |
| MmugDNA.21149.1.S1_at   | MmugDNA.21149.1 | 11.7  | 11.11 | 0.15 | 0.27 | 1.51  | 0.032571 | 0.020048 | 0.325457 | 0.177855 |
| MmugDNA.21151.1.S1_at   | MmugDNA.21151.1 | 3.49  | 3.73  | 0.2  | 0.12 | -1.18 | 0.220363 | 0.540176 | 0.579323 | 0.724194 |
| MmugDNA.21152.1.S1_at   | MmugDNA.21152.1 | 5.07  | 7.22  | 0.72 | 0.9  | -4.46 | 0.08873  | 0.096754 | 0.443653 | 0.354171 |
| MmugDNA.21153.1.S1_at   | MmugDNA.21153.1 | 3.06  | 2.97  | 0.24 | 0.08 | 1.06  | 0.403727 | 0.683099 | 0.702281 | 0.815134 |
| MmugDNA.21154.1.S1_at   | MmugDNA.21154.1 | 3.77  | 3.76  | 0.04 | 0.12 | 1.01  | 0.501264 | 0.590695 | 0.759902 | 0.756416 |
| MmugDNA.24977.1.S1_s_at | MmugDNA.24977.1 | 8.3   | 8.56  | 0.45 | 0.04 | -1.2  | 0.934378 | 0.816179 | 0.974602 | 0.893967 |
| MmugDNA.21156.1.S1_at   | MmugDNA.21156.1 | 9.15  | 8.61  | 0.03 | 0.93 | 1.45  | 0.973584 | 0.911828 | 0.989603 | 0.950281 |
| MmugDNA.21157.1.S1_at   | MmugDNA.21157.1 | 5.23  | 5.15  | 0.15 | 0.26 | 1.06  | 0.785641 | 0.153305 | 0.91087  | 0.428139 |
| MmugDNA.21159.1.S1_at   | MmugDNA.21159.1 | 4.46  | 4.57  | 0.34 | 0.49 | -1.08 | 0.831511 | 0.972845 | 0.931771 | 0.985352 |
| MmugDNA.2116.1.S1_at    | MmugDNA.2116.1  | 11.37 | 11.85 | 0.33 | 0.78 | -1.39 | 0.325861 | 0.177235 | 0.653063 | 0.453664 |
| MmugDNA.21161.1.S1_at   | MmugDNA.21161.1 | 5.26  | 5.24  | 0.75 | 0.08 | 1.02  | 0.602624 | 0.666178 | 0.816617 | 0.804415 |
| MmugDNA.21163.1.S1_at   | MmugDNA.21163.1 | 7.29  | 7.23  | 0.34 | 0.24 | 1.05  | 0.452847 | 0.340456 | 0.732217 | 0.586776 |
| MmugDNA.21165.1.S1_at   | MmugDNA.21165.1 | 6.08  | 5.98  | 0.19 | 0.21 | 1.07  | 0.810853 | 0.417899 | 0.922872 | 0.642478 |
| MmugDNA.21167.1.S1_at   | MmugDNA.21167.1 | 6.45  | 6.13  | 0.16 | 0.49 | 1.25  | 0.757219 | 0.851299 | 0.897006 | 0.915393 |
| MmugDNA.21168.1.S1_at   | MmugDNA.21168.1 | 6.24  | 6.38  | 0.07 | 0.01 | -1.1  | 0.024923 | 0.156144 | 0.297145 | 0.43161  |
| MmugDNA.21169.1.S1_at   | MmugDNA.21169.1 | 9.53  | 10.05 | 0.29 | 0.2  | -1.43 | 0.063    | 0.004679 | 0.399858 | 0.095361 |
| MmugDNA.34148.1.S1_s_at | MmugDNA.34148.1 | 9.88  | 10.16 | 0.15 | 0.15 | -1.21 | 0.157936 | 0.223598 | 0.52291  | 0.496451 |
| MmugDNA.2117.1.S1_at    | MmugDNA.2117.1  | 5.19  | 5.25  | 0.17 | 0    | -1.04 | 0.175469 | 0.120978 | 0.539219 | 0.38997  |
| MmugDNA.21170.1.S1_at   | MmugDNA.21170.1 | 4.56  | 4.62  | 0.08 | 0.13 | -1.05 | 0.169429 | 0.316316 | 0.533686 | 0.569809 |
| MmugDNA.21172.1.S1_at   | MmugDNA.21172.1 | 12.84 | 12.85 | 0.05 | 0.08 | -1.01 | 0.612446 | 0.759504 | 0.822158 | 0.860136 |
| MmugDNA.21173.1.S1_at   | MmugDNA.21173.1 | 6.86  | 4.96  | 0.95 | 0.54 | 3.74  | 0.041456 | 0.023539 | 0.351747 | 0.192231 |
| MmugDNA.21174.1.S1_at   | MmugDNA.21174.1 | 5.14  | 5.34  | 0.25 | 0.16 | -1.15 | 0.212116 | 0.276419 | 0.572526 | 0.540378 |

|                         |                 |       |       |      |      |       |          |          |          |          |
|-------------------------|-----------------|-------|-------|------|------|-------|----------|----------|----------|----------|
| MmugDNA.21175.1.S1_at   | MmugDNA.21175.1 | 5.8   | 6.05  | 0.11 | 0.23 | -1.19 | 0.159086 | 0.175924 | 0.52416  | 0.452486 |
| MmugDNA.21176.1.S1_at   | MmugDNA.21176.1 | 9.32  | 9.31  | 0.19 | 0.41 | 1     | 0.361815 | 0.447098 | 0.675478 | 0.663294 |
| MmugDNA.21177.1.S1_at   | MmugDNA.21177.1 | 5.46  | 4.69  | 0.82 | 0.59 | 1.71  | 0.194636 | 0.16909  | 0.558055 | 0.44561  |
| MmugDNA.21178.1.S1_at   | MmugDNA.21178.1 | 4.4   | 3.94  | 0.27 | 0.16 | 1.38  | 0.154742 | 0.059872 | 0.519305 | 0.291315 |
| MmugDNA.21179.1.S1_at   | MmugDNA.21179.1 | 9.29  | 8.75  | 0.23 | 0.23 | 1.46  | 0.051568 | 0.043945 | 0.376072 | 0.254098 |
| MmugDNA.2118.1.S1_at    | MmugDNA.2118.1  | 5.12  | 6.7   | 1.89 | 0.4  | -2.99 | 0.816404 | 0.719782 | 0.925448 | 0.837888 |
| MmugDNA.21180.1.S1_at   | MmugDNA.21180.1 | 10.23 | 9.29  | 0.31 | 0.58 | 1.92  | 0.099897 | 0.095124 | 0.459906 | 0.352151 |
| MmugDNA.21181.1.S1_at   | MmugDNA.21181.1 | 5.66  | 5.24  | 0.54 | 0.17 | 1.34  | 0.565967 | 0.362126 | 0.797437 | 0.602821 |
| MmugDNA.21182.1.S1_at   | MmugDNA.21182.1 | 5.31  | 5.25  | 0.21 | 0.02 | 1.04  | 0.700031 | 0.833112 | 0.867253 | 0.90427  |
| MmugDNA.21183.1.S1_at   | MmugDNA.21183.1 | 6.33  | 6.47  | 0.2  | 0.18 | -1.1  | 0.448221 | 0.618988 | 0.72951  | 0.774229 |
| MmugDNA.21184.1.S1_at   | MmugDNA.21184.1 | 6.67  | 6.5   | 0.58 | 0.55 | 1.13  | 0.379228 | 0.348206 | 0.68682  | 0.592413 |
| MmugDNA.21185.1.S1_at   | MmugDNA.21185.1 | 8.29  | 8.04  | 0.12 | 0.35 | 1.19  | 0.332665 | 0.51186  | 0.656938 | 0.705797 |
| MmugDNA.21186.1.S1_at   | MmugDNA.21186.1 | 3.86  | 4.15  | 0.1  | 0.17 | -1.22 | 0.099089 | 0.297697 | 0.458783 | 0.556361 |
| MmugDNA.21187.1.S1_at   | MmugDNA.21187.1 | 5.16  | 5.17  | 0.49 | 0.16 | -1.01 | 0.461773 | 0.682115 | 0.737895 | 0.814349 |
| MmugDNA.2119.1.S1_at    | MmugDNA.2119.1  | 5.6   | 5.66  | 0.15 | 0.25 | -1.04 | 0.284235 | 0.358259 | 0.62409  | 0.599765 |
| MmugDNA.21190.1.S1_at   | MmugDNA.21190.1 | 10.59 | 10.2  | 0.28 | 0.51 | 1.31  | 0.573088 | 0.501127 | 0.801055 | 0.699443 |
| MmugDNA.21192.1.S1_at   | MmugDNA.21192.1 | 6.71  | 6.68  | 0.15 | 0.09 | 1.02  | 0.909947 | 0.960787 | 0.964324 | 0.97771  |
| MmugDNA.21193.1.S1_at   | MmugDNA.21193.1 | 12.61 | 12.24 | 0.24 | 0.02 | 1.29  | 0.101304 | 0.017706 | 0.461117 | 0.168321 |
| MmugDNA.21194.1.S1_at   | MmugDNA.21194.1 | 4.44  | 4.91  | 0.27 | 0.67 | -1.39 | 0.160486 | 0.210623 | 0.525449 | 0.484617 |
| MmugDNA.21196.1.S1_at   | MmugDNA.21196.1 | 4.45  | 4.65  | 0.25 | 0.18 | -1.15 | 0.746388 | 0.806887 | 0.891402 | 0.888872 |
| MmugDNA.21197.1.S1_at   | MmugDNA.21197.1 | 4.12  | 4.12  | 0.12 | 0.2  | -1    | 0.500158 | 0.301294 | 0.759402 | 0.559356 |
| MmugDNA.21198.1.S1_at   | MmugDNA.21198.1 | 4.92  | 5.25  | 1.52 | 0.68 | -1.25 | 0.391482 | 0.395627 | 0.694099 | 0.627583 |
| MmugDNA.212.1.S1_s_at   | MmugDNA.212.1   | 4.08  | 4.25  | 0.16 | 0.3  | -1.13 | 0.909665 | 0.853609 | 0.964238 | 0.91673  |
| MmugDNA.2120.1.S1_at    | MmugDNA.2120.1  | 7.51  | 7.2   | 0.13 | 0.55 | 1.24  | 0.960287 | 0.731654 | 0.98486  | 0.844499 |
| MmugDNA.21200.1.S1_at   | MmugDNA.21200.1 | 2.97  | 3.01  | 0.24 | 0.15 | -1.03 | 0.767767 | 0.719326 | 0.902473 | 0.837566 |
| MmugDNA.21201.1.S1_at   | MmugDNA.21201.1 | 4.75  | 4.67  | 0.34 | 0.18 | 1.06  | 0.985491 | 0.554429 | 0.99475  | 0.733205 |
| MmugDNA.21202.1.S1_at   | MmugDNA.21202.1 | 3.48  | 3.25  | 0.1  | 0.07 | 1.18  | 0.055301 | 0.121558 | 0.383689 | 0.390683 |
| MmugDNA.21203.1.S1_x_at | MmugDNA.21203.1 | 6.41  | 6.37  | 0.28 | 0.29 | 1.02  | 0.897198 | 0.928808 | 0.959134 | 0.959449 |
| MmugDNA.21204.1.S1_at   | MmugDNA.21204.1 | 2.89  | 2.78  | 0.7  | 0.12 | 1.08  | 0.339314 | 0.423657 | 0.661232 | 0.646464 |
| MmugDNA.21205.1.S1_at   | MmugDNA.21205.1 | 5.12  | 5.12  | 0    | 0.26 | 1     | 0.965065 | 0.997832 | 0.986602 | 0.998927 |
| MmugDNA.21206.1.S1_at   | MmugDNA.21206.1 | 7.62  | 8.23  | 0.4  | 0.79 | -1.53 | 0.493445 | 0.283292 | 0.75618  | 0.545836 |
| MmugDNA.21207.1.S1_at   | MmugDNA.21207.1 | 7.08  | 6.72  | 0.92 | 0.7  | 1.29  | 0.824679 | 0.773674 | 0.928991 | 0.868427 |
| MmugDNA.21208.1.S1_at   | MmugDNA.21208.1 | 5.5   | 5.29  | 0.58 | 0.26 | 1.15  | 0.802248 | 0.465097 | 0.918464 | 0.67557  |
| MmugDNA.21209.1.S1_at   | MmugDNA.21209.1 | 8.77  | 8.01  | 0.37 | 1.04 | 1.7   | 0.206015 | 0.10331  | 0.568449 | 0.364146 |
| MmugDNA.2121.1.S1_at    | MmugDNA.2121.1  | 10.53 | 9.39  | 0.35 | 0.29 | 2.21  | 0.016311 | 0.008418 | 0.263592 | 0.121839 |
| MmugDNA.21210.1.S1_at   | MmugDNA.21210.1 | 4.1   | 4.62  | 0.18 | 0.27 | -1.43 | 0.149842 | 0.163217 | 0.514409 | 0.439324 |
| MmugDNA.21212.1.S1_at   | MmugDNA.21212.1 | 3.84  | 3.79  | 0.08 | 0.28 | 1.04  | 0.765402 | 0.702761 | 0.901297 | 0.827685 |
| MmugDNA.21213.1.S1_at   | MmugDNA.21213.1 | 5.1   | 4.81  | 0.55 | 0.44 | 1.22  | 0.332442 | 0.288087 | 0.65685  | 0.549319 |
| MmugDNA.21215.1.S1_at   | MmugDNA.21215.1 | 5.65  | 6.02  | 0.12 | 0.16 | -1.29 | 0.148515 | 0.295831 | 0.513907 | 0.555208 |
| MmugDNA.21217.1.S1_at   | MmugDNA.21217.1 | 3.56  | 3.3   | 0.05 | 0.16 | 1.2   | 0.12859  | 0.144314 | 0.494653 | 0.418196 |
| MmugDNA.21218.1.S1_at   | MmugDNA.21218.1 | 6.29  | 6.08  | 0.15 | 0.33 | 1.16  | 0.124024 | 0.094294 | 0.489711 | 0.350889 |

|                         |                 |       |       |      |      |       |          |          |          |          |
|-------------------------|-----------------|-------|-------|------|------|-------|----------|----------|----------|----------|
| MmugDNA.21219.1.S1_at   | MmugDNA.21219.1 | 4.12  | 4.35  | 0.96 | 0.07 | -1.17 | 0.545907 | 0.605904 | 0.785219 | 0.765543 |
| MmugDNA.2122.1.S1_at    | MmugDNA.2122.1  | 12.89 | 12.78 | 0.57 | 0.3  | 1.08  | 0.357613 | 0.492225 | 0.672471 | 0.693477 |
| MmugDNA.21220.1.S1_at   | MmugDNA.21220.1 | 3.64  | 3.67  | 0.04 | 0.08 | -1.02 | 0.648231 | 0.445003 | 0.84178  | 0.662212 |
| MmugDNA.21221.1.S1_at   | MmugDNA.21221.1 | 4.36  | 4.19  | 0.17 | 0.15 | 1.13  | 0.431818 | 0.394622 | 0.718638 | 0.627137 |
| MmugDNA.21222.1.S1_at   | MmugDNA.21222.1 | 3.92  | 3.69  | 0.31 | 0.04 | 1.17  | 0.688623 | 0.796713 | 0.861105 | 0.882782 |
| MmugDNA.21223.1.S1_at   | MmugDNA.21223.1 | 7.2   | 7.13  | 0.28 | 0.34 | 1.05  | 0.943922 | 0.611478 | 0.97854  | 0.769353 |
| MmugDNA.21224.1.S1_at   | MmugDNA.21224.1 | 7.75  | 7.73  | 0.25 | 0.34 | 1.01  | 0.560966 | 0.509615 | 0.794541 | 0.704267 |
| MmugDNA.21225.1.S1_at   | MmugDNA.21225.1 | 5.1   | 5.08  | 0.07 | 0.15 | 1.02  | 0.962277 | 0.338318 | 0.985519 | 0.585417 |
| MmugDNA.21226.1.S1_at   | MmugDNA.21226.1 | 5.75  | 6.05  | 0.07 | 0.29 | -1.23 | 0.11902  | 0.093134 | 0.483719 | 0.349303 |
| MmugDNA.21228.1.S1_at   | MmugDNA.21228.1 | 4.7   | 4.76  | 0.12 | 0.06 | -1.04 | 0.863978 | 0.117802 | 0.945408 | 0.385702 |
| MmugDNA.8392.1.S1_s_at  | MmugDNA.8392.1  | 11.05 | 11.31 | 0.11 | 0.13 | -1.2  | 0.046795 | 0.033416 | 0.364126 | 0.22646  |
| MmugDNA.21231.1.S1_at   | MmugDNA.21231.1 | 5.65  | 5.63  | 0.16 | 0.13 | 1.01  | 0.619678 | 0.588127 | 0.825711 | 0.754761 |
| MmugDNA.21232.1.S1_at   | MmugDNA.21232.1 | 6.26  | 6.74  | 0.06 | 0.69 | -1.39 | 0.244012 | 0.258356 | 0.595699 | 0.525631 |
| MmugDNA.21232.1.S1_s_at | MmugDNA.21232.1 | 5.66  | 8.02  | 1.18 | 2.3  | -5.12 | 0.353036 | 0.270755 | 0.669964 | 0.536024 |
| MmugDNA.21233.1.S1_at   | MmugDNA.21233.1 | 6.24  | 6.39  | 0.2  | 0.15 | -1.11 | 0.315809 | 0.41686  | 0.646695 | 0.641776 |
| MmugDNA.21235.1.S1_s_at | MmugDNA.21235.1 | 11.86 | 11.67 | 0.15 | 0.35 | 1.14  | 0.481846 | 0.528976 | 0.749333 | 0.71703  |
| MmugDNA.21237.1.S1_at   | MmugDNA.21237.1 | 4.99  | 4.59  | 0.33 | 0.14 | 1.32  | 0.317327 | 0.41496  | 0.64789  | 0.640553 |
| MmugDNA.21238.1.S1_at   | MmugDNA.21238.1 | 3.48  | 3.51  | 0.07 | 0.02 | -1.02 | 0.33633  | 0.430393 | 0.659402 | 0.651399 |
| MmugDNA.21239.1.S1_at   | MmugDNA.21239.1 | 4.41  | 4.04  | 0.12 | 0.19 | 1.29  | 0.075299 | 0.283986 | 0.422217 | 0.546237 |
| MmugDNA.21241.1.S1_at   | MmugDNA.21241.1 | 5.39  | 5.64  | 0.07 | 0.27 | -1.19 | 0.133198 | 0.127104 | 0.499568 | 0.397922 |
| MmugDNA.21243.1.S1_at   | MmugDNA.21243.1 | 6.08  | 6.09  | 0.05 | 0.11 | -1.01 | 0.835888 | 0.554056 | 0.933581 | 0.73295  |
| MmugDNA.21244.1.S1_at   | MmugDNA.21244.1 | 5.2   | 4.25  | 0.09 | 0.43 | 1.94  | 0.018649 | 0.007088 | 0.270832 | 0.113367 |
| MmugDNA.21245.1.S1_at   | MmugDNA.21245.1 | 4.48  | 4.64  | 0.14 | 0.17 | -1.11 | 0.477374 | 0.560876 | 0.746589 | 0.736993 |
| MmugDNA.21247.1.S1_s_at | MmugDNA.21247.1 | 6.5   | 6.74  | 0.23 | 0.09 | -1.18 | 0.521832 | 0.642248 | 0.77159  | 0.790088 |
| MmugDNA.21248.1.S1_at   | MmugDNA.21248.1 | 4.91  | 4.81  | 0.07 | 0.03 | 1.07  | 0.240597 | 0.048697 | 0.593462 | 0.265699 |
| MmugDNA.21251.1.S1_at   | MmugDNA.21251.1 | 4.06  | 3.94  | 0.34 | 0.17 | 1.09  | 0.92772  | 0.900793 | 0.972035 | 0.943558 |
| MmugDNA.21253.1.S1_at   | MmugDNA.21253.1 | 3.94  | 3.96  | 0.28 | 0.2  | -1.01 | 0.539318 | 0.749599 | 0.781017 | 0.854505 |
| MmugDNA.21254.1.S1_at   | MmugDNA.21254.1 | 6.66  | 7.96  | 0.74 | 1.19 | -2.46 | 0.274309 | 0.279319 | 0.617262 | 0.542962 |
| MmugDNA.21255.1.S1_at   | MmugDNA.21255.1 | 6.84  | 8.14  | 0.31 | 1.43 | -2.46 | 0.260039 | 0.240979 | 0.606878 | 0.511657 |
| MmugDNA.6929.1.S1_at    | MmugDNA.6929.1  | 7.54  | 7.82  | 0.15 | 0.37 | -1.22 | 0.152833 | 0.181131 | 0.517325 | 0.457582 |
| MmugDNA.6929.1.S1_s_at  | MmugDNA.6929.1  | 6.71  | 7.77  | 0.23 | 1.19 | -2.09 | 0.251081 | 0.239895 | 0.600579 | 0.510627 |
| MmugDNA.21256.1.S1_at   | MmugDNA.21256.1 | 6.51  | 6.63  | 0.12 | 0.11 | -1.09 | 0.117333 | 0.088054 | 0.481472 | 0.341547 |
| MmugDNA.21257.1.S1_at   | MmugDNA.21257.1 | 6.54  | 6.52  | 0.15 | 0.17 | 1.01  | 0.791066 | 0.80892  | 0.913234 | 0.889962 |
| MmugDNA.21258.1.S1_at   | MmugDNA.21258.1 | 7.06  | 7.04  | 0.77 | 0.82 | 1.01  | 0.55491  | 0.737594 | 0.791099 | 0.847993 |
| MmugDNA.21259.1.S1_at   | MmugDNA.21259.1 | 6.26  | 6.17  | 0.51 | 0.26 | 1.06  | 0.43202  | 0.418648 | 0.718823 | 0.643031 |
| MmugDNA.2126.1.S1_at    | MmugDNA.2126.1  | 4.81  | 4.91  | 0.9  | 0.34 | -1.08 | 0.685809 | 0.882879 | 0.859435 | 0.933206 |
| MmugDNA.21260.1.S1_at   | MmugDNA.21260.1 | 4.67  | 4.15  | 0.66 | 0.06 | 1.44  | 0.183527 | 0.145143 | 0.547696 | 0.419105 |
| MmugDNA.21261.1.S1_at   | MmugDNA.21261.1 | 9.82  | 9.79  | 0.21 | 0.39 | 1.02  | 0.220844 | 0.279998 | 0.579718 | 0.543369 |
| MmugDNA.21262.1.S1_at   | MmugDNA.21262.1 | 3.36  | 3.4   | 0.15 | 0.25 | -1.03 | 0.519428 | 0.780484 | 0.770186 | 0.872614 |
| MmugDNA.21263.1.S1_at   | MmugDNA.21263.1 | 6.62  | 6.97  | 0.31 | 0.1  | -1.27 | 0.341398 | 0.413216 | 0.662564 | 0.639484 |
| MmugDNA.21264.1.S1_at   | MmugDNA.21264.1 | 5.31  | 4.87  | 0.53 | 0.31 | 1.36  | 0.376489 | 0.197905 | 0.685245 | 0.472828 |



|                         |                 |       |       |      |      |       |          |          |          |          |
|-------------------------|-----------------|-------|-------|------|------|-------|----------|----------|----------|----------|
| MmugDNA.21265.1.S1_at   | MmugDNA.21265.1 | 5.54  | 5.44  | 0.54 | 0.45 | 1.08  | 0.782774 | 0.750703 | 0.909285 | 0.855009 |
| MmugDNA.21267.1.S1_at   | MmugDNA.21267.1 | 5.26  | 5.14  | 0.37 | 0.02 | 1.09  | 0.281141 | 0.076372 | 0.622118 | 0.321368 |
| MmugDNA.21268.1.S1_at   | MmugDNA.21268.1 | 6.91  | 7.29  | 0.15 | 0.2  | -1.3  | 0.032788 | 0.193056 | 0.326108 | 0.468554 |
| MmugDNA.2127.1.S1_at    | MmugDNA.2127.1  | 12.46 | 12.49 | 0.17 | 0.19 | -1.02 | 0.833855 | 0.970829 | 0.932454 | 0.984101 |
| MmugDNA.21271.1.S1_at   | MmugDNA.21271.1 | 3.92  | 3.97  | 0.23 | 0.1  | -1.04 | 0.683594 | 0.285913 | 0.85844  | 0.547484 |
| MmugDNA.21272.1.S1_at   | MmugDNA.21272.1 | 9.57  | 9.8   | 0.1  | 0.23 | -1.17 | 0.806817 | 0.122221 | 0.92086  | 0.391921 |
| MmugDNA.21277.1.S1_at   | MmugDNA.21277.1 | 6.13  | 6.12  | 0.18 | 0.12 | 1.01  | 0.514097 | 0.764678 | 0.766736 | 0.863167 |
| MmugDNA.21278.1.S1_at   | MmugDNA.21278.1 | 3.84  | 3.84  | 0.03 | 0.05 | 1     | 0.6437   | 0.135624 | 0.839585 | 0.407744 |
| MmugDNA.21278.1.S1_s_at | MmugDNA.21278.1 | 3.26  | 3.25  | 0.1  | 0.12 | 1.01  | 0.8766   | 0.951341 | 0.950613 | 0.972417 |
| MmugDNA.21279.1.S1_at   | MmugDNA.21279.1 | 3.39  | 4.8   | 0.76 | 1.09 | -2.65 | 0.241866 | 0.195654 | 0.594018 | 0.470491 |
| MmugDNA.2128.1.S1_at    | MmugDNA.2128.1  | 7.74  | 8.9   | 0.36 | 0.73 | -2.23 | 0.161526 | 0.058704 | 0.526452 | 0.288956 |
| MmugDNA.21280.1.S1_at   | MmugDNA.21280.1 | 9.55  | 9.15  | 0.05 | 0.72 | 1.32  | 0.35891  | 0.352623 | 0.673592 | 0.595866 |
| MmugDNA.21281.1.S1_at   | MmugDNA.21281.1 | 11.79 | 12.06 | 0.09 | 0.02 | -1.21 | 0.014339 | 0.004289 | 0.251885 | 0.091951 |
| MmugDNA.21282.1.S1_at   | MmugDNA.21282.1 | 5.84  | 5.72  | 0.19 | 0.25 | 1.09  | 0.66402  | 0.853879 | 0.849245 | 0.916852 |
| MmugDNA.21284.1.S1_at   | MmugDNA.21284.1 | 2.94  | 3.01  | 0.02 | 0.14 | -1.04 | 0.451389 | 0.586417 | 0.731557 | 0.753459 |
| MmugDNA.21285.1.S1_at   | MmugDNA.21285.1 | 2.67  | 2.83  | 0.05 | 0.1  | -1.12 | 0.163013 | 0.17063  | 0.527385 | 0.447219 |
| MmugDNA.21286.1.S1_at   | MmugDNA.21286.1 | 7.21  | 7.08  | 0.32 | 0.44 | 1.1   | 0.685163 | 0.75566  | 0.858887 | 0.85776  |
| MmugDNA.21288.1.S1_at   | MmugDNA.21288.1 | 3.29  | 3.07  | 0.41 | 0.06 | 1.16  | 0.192036 | 0.552044 | 0.555096 | 0.731461 |
| MmugDNA.2129.1.S1_at    | MmugDNA.2129.1  | 9.91  | 8.82  | 0.04 | 1.41 | 2.13  | 0.202983 | 0.198543 | 0.565608 | 0.473391 |
| MmugDNA.21290.1.S1_at   | MmugDNA.21290.1 | 6.29  | 6.22  | 0.1  | 0.5  | 1.05  | 0.790289 | 0.379784 | 0.912974 | 0.616576 |
| MmugDNA.21291.1.S1_at   | MmugDNA.21291.1 | 5.5   | 5.78  | 0.15 | 0.5  | -1.21 | 0.501394 | 0.186547 | 0.759972 | 0.462364 |
| MmugDNA.21292.1.S1_at   | MmugDNA.21292.1 | 6.73  | 6.73  | 0.19 | 0.08 | -1    | 0.991056 | 0.991153 | 0.996869 | 0.99503  |
| MmugDNA.21293.1.S1_at   | MmugDNA.21293.1 | 5.85  | 5.5   | 1.36 | 0.46 | 1.27  | 0.243056 | 0.336114 | 0.594744 | 0.583652 |
| MmugDNA.21294.1.S1_at   | MmugDNA.21294.1 | 3.78  | 3.91  | 0.01 | 0.24 | -1.09 | 0.251902 | 0.272768 | 0.601195 | 0.537505 |
| MmugDNA.21295.1.S1_at   | MmugDNA.21295.1 | 11.92 | 12.39 | 0.19 | 0.19 | -1.38 | 0.039121 | 0.023536 | 0.346539 | 0.192231 |
| MmugDNA.21296.1.S1_at   | MmugDNA.21296.1 | 7.4   | 5.62  | 1.94 | 1.49 | 3.43  | 0.632577 | 0.210187 | 0.833252 | 0.484033 |
| MmugDNA.21297.1.S1_at   | MmugDNA.21297.1 | 5.46  | 5.29  | 0.25 | 0.41 | 1.12  | 0.891157 | 0.983645 | 0.956569 | 0.990902 |
| MmugDNA.21298.1.S1_at   | MmugDNA.21298.1 | 9.98  | 10.4  | 0.16 | 0.46 | -1.34 | 0.502921 | 0.678487 | 0.760591 | 0.81221  |
| MmugDNA.21299.1.S1_at   | MmugDNA.21299.1 | 8.67  | 9.04  | 0.14 | 0.13 | -1.3  | 0.017864 | 0.034554 | 0.26813  | 0.229979 |
| MmugDNA.21301.1.S1_at   | MmugDNA.21301.1 | 6.08  | 6     | 0.26 | 0.08 | 1.06  | 0.300874 | 0.230787 | 0.636012 | 0.502452 |
| MmugDNA.21302.1.S1_at   | MmugDNA.21302.1 | 7.53  | 8.42  | 0.24 | 0.39 | -1.85 | 0.013337 | 0.006765 | 0.246471 | 0.111315 |
| MmugDNA.21303.1.S1_at   | MmugDNA.21303.1 | 4.31  | 4.16  | 0.13 | 0.13 | 1.11  | 0.2308   | 0.68048  | 0.587332 | 0.813477 |
| MmugDNA.21304.1.S1_s_at | MmugDNA.21304.1 | 8.35  | 8.48  | 0.13 | 0.56 | -1.09 | 0.65092  | 0.821116 | 0.84297  | 0.897052 |
| MmugDNA.21305.1.S1_at   | MmugDNA.21305.1 | 4.09  | 4.4   | 0.38 | 0.24 | -1.24 | 0.678965 | 0.86421  | 0.856302 | 0.922972 |
| MmugDNA.21306.1.S1_at   | MmugDNA.21306.1 | 4.01  | 3.99  | 0.24 | 0.23 | 1.02  | 0.355023 | 0.241588 | 0.670716 | 0.512194 |
| MmugDNA.21307.1.S1_at   | MmugDNA.21307.1 | 13.41 | 13.43 | 0.04 | 0.13 | -1.01 | 0.684999 | 0.117992 | 0.858887 | 0.385881 |
| MmugDNA.21308.1.S1_at   | MmugDNA.21308.1 | 5.45  | 5.14  | 0.79 | 0.62 | 1.24  | 0.163169 | 0.224607 | 0.527489 | 0.497613 |
| MmugDNA.21309.1.S1_at   | MmugDNA.21309.1 | 4.61  | 4.71  | 0.1  | 0.26 | -1.07 | 0.310942 | 0.248031 | 0.642912 | 0.517532 |
| MmugDNA.2131.1.S1_at    | MmugDNA.2131.1  | 3.46  | 3.42  | 0.05 | 0.4  | 1.02  | 0.407996 | 0.470881 | 0.70497  | 0.679128 |
| MmugDNA.21310.1.S1_at   | MmugDNA.21310.1 | 4.43  | 4.48  | 0.14 | 0.13 | -1.03 | 0.357259 | 0.212087 | 0.672175 | 0.486036 |
| MmugDNA.21311.1.S1_at   | MmugDNA.21311.1 | 4.64  | 5.92  | 0.22 | 0.27 | -2.42 | 0.003206 | 0.008072 | 0.174606 | 0.119402 |

|                         |                 |       |       |      |      |       |          |          |          |          |
|-------------------------|-----------------|-------|-------|------|------|-------|----------|----------|----------|----------|
| MmugDNA.21312.1.S1_at   | MmugDNA.21312.1 | 5.81  | 5.81  | 0.19 | 0.03 | -1    | 0.40666  | 0.483046 | 0.703786 | 0.687687 |
| MmugDNA.21313.1.S1_at   | MmugDNA.21313.1 | 9.47  | 9.57  | 0.27 | 0.16 | -1.07 | 0.425459 | 0.143492 | 0.715096 | 0.417442 |
| MmugDNA.21314.1.S1_at   | MmugDNA.21314.1 | 9.41  | 9.25  | 0.33 | 0.3  | 1.12  | 0.940493 | 0.088343 | 0.97745  | 0.341767 |
| MmugDNA.21316.1.S1_at   | MmugDNA.21316.1 | 10.97 | 10.68 | 0.14 | 0.58 | 1.23  | 0.458899 | 0.61633  | 0.735767 | 0.772571 |
| MmugDNA.21318.1.S1_at   | MmugDNA.21318.1 | 3.87  | 3.93  | 0.31 | 0.25 | -1.04 | 0.87595  | 0.397128 | 0.950267 | 0.628653 |
| MmugDNA.21319.1.S1_at   | MmugDNA.21319.1 | 4.68  | 4.13  | 0.51 | 0.14 | 1.46  | 0.049436 | 0.095631 | 0.371383 | 0.35267  |
| MmugDNA.2132.1.S1_at    | MmugDNA.2132.1  | 8.09  | 8.57  | 0.56 | 0.43 | -1.4  | 0.690112 | 0.832435 | 0.861921 | 0.903893 |
| MmugDNA.21320.1.S1_at   | MmugDNA.21320.1 | 5.57  | 5.73  | 0.04 | 0.17 | -1.12 | 0.097348 | 0.076897 | 0.45638  | 0.322402 |
| MmugDNA.21321.1.S1_at   | MmugDNA.21321.1 | 7.07  | 6.72  | 0.26 | 0.59 | 1.28  | 0.567028 | 0.127099 | 0.797911 | 0.397922 |
| MmugDNA.21322.1.S1_at   | MmugDNA.21322.1 | 5.78  | 7.2   | 0.83 | 1.01 | -2.67 | 0.289555 | 0.307087 | 0.627563 | 0.563432 |
| MmugDNA.21323.1.S1_at   | MmugDNA.21323.1 | 5.28  | 4.84  | 0.41 | 0.28 | 1.36  | 0.473086 | 0.338981 | 0.744128 | 0.585891 |
| MmugDNA.21324.1.S1_at   | MmugDNA.21324.1 | 3.42  | 3.65  | 0.1  | 0.09 | -1.18 | 0.034333 | 0.032543 | 0.332668 | 0.223428 |
| MmugDNA.21325.1.S1_at   | MmugDNA.21325.1 | 6.38  | 6.06  | 0.35 | 0.69 | 1.24  | 0.450613 | 0.679538 | 0.731129 | 0.812884 |
| MmugDNA.21326.1.S1_at   | MmugDNA.21326.1 | 5.67  | 5.66  | 0.07 | 0.11 | 1.01  | 0.462955 | 0.642959 | 0.738484 | 0.79055  |
| MmugDNA.21328.1.S1_at   | MmugDNA.21328.1 | 3.9   | 3.91  | 0.06 | 0.24 | -1.01 | 0.92655  | 0.520136 | 0.971724 | 0.711472 |
| MmugDNA.21329.1.S1_at   | MmugDNA.21329.1 | 7.4   | 7.13  | 0.19 | 0.25 | 1.21  | 0.19006  | 0.230257 | 0.552832 | 0.502102 |
| MmugDNA.2133.1.S1_at    | MmugDNA.2133.1  | 6.1   | 5.7   | 1.12 | 0.56 | 1.32  | 0.459686 | 0.335869 | 0.736403 | 0.583533 |
| MmugDNA.21330.1.S1_at   | MmugDNA.21330.1 | 7.63  | 7.39  | 0.12 | 0.69 | 1.18  | 0.631313 | 0.649309 | 0.832618 | 0.794742 |
| MmugDNA.21331.1.S1_at   | MmugDNA.21331.1 | 6.03  | 6.12  | 0.1  | 0.07 | -1.07 | 0.280791 | 0.109766 | 0.621843 | 0.373701 |
| MmugDNA.21332.1.S1_at   | MmugDNA.21332.1 | 5.97  | 5.99  | 0.3  | 0.03 | -1.01 | 0.377103 | 0.530215 | 0.685542 | 0.717793 |
| MmugDNA.21333.1.S1_s_at | MmugDNA.21333.1 | 10.72 | 10.18 | 0.14 | 0.21 | 1.45  | 0.012361 | 0.005249 | 0.240921 | 0.100352 |
| MmugDNA.21334.1.S1_at   | MmugDNA.21334.1 | 6.35  | 6.8   | 0.27 | 0.46 | -1.37 | 0.624471 | 0.847039 | 0.828299 | 0.913065 |
| MmugDNA.21335.1.S1_at   | MmugDNA.21335.1 | 4.12  | 3.97  | 0.3  | 0.77 | 1.11  | 0.868258 | 0.360018 | 0.947379 | 0.601198 |
| MmugDNA.21336.1.S1_at   | MmugDNA.21336.1 | 7.64  | 9.45  | 0.59 | 0.35 | -3.5  | 0.015181 | 0.013605 | 0.257698 | 0.149283 |
| MmugDNA.21337.1.S1_at   | MmugDNA.21337.1 | 4.63  | 4.73  | 0.07 | 0.14 | -1.07 | 0.190559 | 0.379473 | 0.553097 | 0.616406 |
| MmugDNA.21340.1.S1_at   | MmugDNA.21340.1 | 5.96  | 6.04  | 0.26 | 0.18 | -1.06 | 0.41355  | 0.520723 | 0.70853  | 0.711925 |
| MmugDNA.21341.1.S1_at   | MmugDNA.21341.1 | 8.89  | 8.59  | 0.39 | 0.66 | 1.23  | 0.931822 | 0.315119 | 0.973649 | 0.568849 |
| MmugDNA.21342.1.S1_at   | MmugDNA.21342.1 | 3.86  | 3.98  | 0.17 | 0.14 | -1.09 | 0.369002 | 0.50567  | 0.680407 | 0.702218 |
| MmugDNA.21343.1.S1_at   | MmugDNA.21343.1 | 11.26 | 12.37 | 0.18 | 0.54 | -2.16 | 0.058882 | 0.044284 | 0.390921 | 0.254966 |
| MmugDNA.21344.1.S1_at   | MmugDNA.21344.1 | 11.62 | 11.58 | 0.02 | 0.27 | 1.03  | 0.958877 | 0.698679 | 0.984371 | 0.824936 |
| MmugDNA.21348.1.S1_at   | MmugDNA.21348.1 | 5.11  | 4.82  | 0.33 | 0.17 | 1.23  | 0.229226 | 0.272687 | 0.586472 | 0.537433 |
| MmugDNA.2135.1.S1_at    | MmugDNA.2135.1  | 4.09  | 4.22  | 0.18 | 0.08 | -1.1  | 0.157989 | 0.251368 | 0.522944 | 0.5201   |
| MmugDNA.21350.1.S1_at   | MmugDNA.21350.1 | 4.98  | 5.16  | 0.18 | 0.14 | -1.13 | 0.306763 | 0.098905 | 0.639665 | 0.357049 |
| MmugDNA.21351.1.S1_at   | MmugDNA.21351.1 | 7.6   | 7.05  | 0.54 | 0.5  | 1.46  | 0.083578 | 0.084038 | 0.43582  | 0.334991 |
| MmugDNA.21352.1.S1_at   | MmugDNA.21352.1 | 6.54  | 6.52  | 0.04 | 0.07 | 1.02  | 0.986973 | 0.611131 | 0.995377 | 0.769079 |
| MmugDNA.21354.1.S1_at   | MmugDNA.21354.1 | 3.14  | 3.28  | 0.05 | 0.32 | -1.1  | 0.34807  | 0.414627 | 0.666977 | 0.640456 |
| MmugDNA.21355.1.S1_at   | MmugDNA.21355.1 | 7.13  | 6.93  | 0.08 | 0.43 | 1.15  | 0.21318  | 0.269088 | 0.573477 | 0.534445 |
| MmugDNA.21356.1.S1_at   | MmugDNA.21356.1 | 3.61  | 3.73  | 0.2  | 0.07 | -1.08 | 0.345466 | 0.414221 | 0.665175 | 0.640137 |
| MmugDNA.21357.1.S1_at   | MmugDNA.21357.1 | 11.61 | 12.3  | 0.27 | 0.41 | -1.61 | 0.075348 | 0.061722 | 0.422257 | 0.29518  |
| MmugDNA.21357.1.S1_s_at | MmugDNA.21357.1 | 10.08 | 11.27 | 0.36 | 0.77 | -2.28 | 0.10465  | 0.111307 | 0.464981 | 0.375989 |
| MmugDNA.21358.1.S1_at   | MmugDNA.21358.1 | 7.99  | 7.19  | 0.37 | 0.41 | 1.74  | 0.066299 | 0.102069 | 0.406371 | 0.362122 |

|                         |                 |       |       |      |      |       |          |          |          |          |
|-------------------------|-----------------|-------|-------|------|------|-------|----------|----------|----------|----------|
| MmugDNA.21360.1.S1_at   | MmugDNA.21360.1 | 5.3   | 5.31  | 0.08 | 0.13 | -1    | 0.58221  | 0.681612 | 0.805573 | 0.814092 |
| MmugDNA.21361.1.S1_at   | MmugDNA.21361.1 | 11.62 | 12.06 | 0.26 | 0.35 | -1.36 | 0.061863 | 0.060519 | 0.396761 | 0.292656 |
| MmugDNA.21362.1.S1_at   | MmugDNA.21362.1 | 3.87  | 3.64  | 0.18 | 0.29 | 1.18  | 0.889715 | 0.876219 | 0.955822 | 0.929606 |
| MmugDNA.21363.1.S1_at   | MmugDNA.21363.1 | 6.5   | 6.76  | 0.29 | 0.15 | -1.2  | 0.141593 | 0.101118 | 0.509159 | 0.360749 |
| MmugDNA.21364.1.S1_at   | MmugDNA.21364.1 | 5.98  | 5.94  | 0.11 | 0.02 | 1.03  | 0.529032 | 0.120442 | 0.775807 | 0.38925  |
| MmugDNA.21365.1.S1_at   | MmugDNA.21365.1 | 9.91  | 9.72  | 0.09 | 0.24 | 1.14  | 0.086265 | 0.068617 | 0.440224 | 0.308486 |
| MmugDNA.21366.1.S1_at   | MmugDNA.21366.1 | 6.39  | 5.88  | 0.42 | 0.3  | 1.42  | 0.510245 | 0.12123  | 0.764853 | 0.390351 |
| MmugDNA.21367.1.S1_at   | MmugDNA.21367.1 | 6.17  | 6.34  | 0.16 | 0.15 | -1.12 | 0.20026  | 0.196236 | 0.563139 | 0.471236 |
| MmugDNA.21368.1.S1_at   | MmugDNA.21368.1 | 4.58  | 4.58  | 0.01 | 0.01 | 1     | 0.948884 | 0.932626 | 0.980457 | 0.961739 |
| MmugDNA.21369.1.S1_at   | MmugDNA.21369.1 | 5.52  | 5.66  | 0.29 | 0.12 | -1.1  | 0.543733 | 0.534471 | 0.78401  | 0.720382 |
| MmugDNA.2137.1.S1_at    | MmugDNA.2137.1  | 6.87  | 6.8   | 1.29 | 0.57 | 1.05  | 0.616603 | 0.449987 | 0.824231 | 0.665414 |
| MmugDNA.21370.1.S1_at   | MmugDNA.21370.1 | 3.84  | 3.87  | 0.49 | 0.13 | -1.03 | 0.761936 | 0.89563  | 0.899804 | 0.940329 |
| MmugDNA.21372.1.S1_at   | MmugDNA.21372.1 | 10.1  | 10.26 | 0.08 | 0.49 | -1.12 | 0.239386 | 0.277804 | 0.592443 | 0.541664 |
| MmugDNA.21373.1.S1_at   | MmugDNA.21373.1 | 4.17  | 4.12  | 0.12 | 0.09 | 1.04  | 0.994627 | 0.114459 | 0.998128 | 0.381021 |
| MmugDNA.21374.1.S1_at   | MmugDNA.21374.1 | 3.33  | 3.34  | 0.06 | 0.04 | -1    | 0.486185 | 0.160948 | 0.751435 | 0.437116 |
| MmugDNA.21375.1.S1_at   | MmugDNA.21375.1 | 11.5  | 11.68 | 0.15 | 0.26 | -1.13 | 0.96023  | 0.823072 | 0.98486  | 0.898353 |
| MmugDNA.21378.1.S1_at   | MmugDNA.21378.1 | 5.17  | 5.43  | 0.25 | 0.09 | -1.2  | 0.114213 | 0.265603 | 0.477454 | 0.531449 |
| MmugDNA.21379.1.S1_at   | MmugDNA.21379.1 | 8.87  | 9.53  | 0.24 | 0.58 | -1.58 | 0.154008 | 0.0444   | 0.518553 | 0.255192 |
| MmugDNA.2138.1.S1_at    | MmugDNA.2138.1  | 6.61  | 7.54  | 0.05 | 0.69 | -1.9  | 0.075242 | 0.076989 | 0.422131 | 0.322421 |
| MmugDNA.2138.1.S1_s_at  | MmugDNA.2138.1  | 7.15  | 8.08  | 0.15 | 0.74 | -1.91 | 0.103584 | 0.09054  | 0.463302 | 0.345015 |
| MmugDNA.21381.1.S1_at   | MmugDNA.21381.1 | 10.37 | 9.78  | 0.27 | 0.21 | 1.5   | 0.097091 | 0.084161 | 0.456115 | 0.335181 |
| MmugDNA.21383.1.S1_at   | MmugDNA.21383.1 | 5.54  | 4.91  | 0.34 | 0.16 | 1.55  | 0.09885  | 0.111448 | 0.458711 | 0.376126 |
| MmugDNA.21384.1.S1_at   | MmugDNA.21384.1 | 6.42  | 6.1   | 0.52 | 0.62 | 1.25  | 0.722171 | 0.384983 | 0.878615 | 0.620583 |
| MmugDNA.21385.1.S1_at   | MmugDNA.21385.1 | 5.31  | 5.19  | 0.35 | 0.29 | 1.08  | 0.67113  | 0.231215 | 0.852601 | 0.5029   |
| MmugDNA.21388.1.S1_at   | MmugDNA.21388.1 | 3.9   | 3.9   | 0.09 | 0.17 | -1    | 0.698856 | 0.385922 | 0.866441 | 0.621161 |
| MmugDNA.21388.1.S1_s_at | MmugDNA.21388.1 | 5.6   | 5.6   | 0.07 | 0.12 | 1     | 0.834031 | 0.634127 | 0.932552 | 0.784644 |
| MmugDNA.21389.1.S1_at   | MmugDNA.21389.1 | 8.1   | 7.82  | 0.23 | 0.64 | 1.21  | 0.840384 | 0.700826 | 0.935678 | 0.826511 |
| MmugDNA.2139.1.S1_at    | MmugDNA.2139.1  | 10.18 | 10.65 | 0.26 | 0.39 | -1.39 | 0.359127 | 0.384312 | 0.673869 | 0.619996 |
| MmugDNA.21390.1.S1_at   | MmugDNA.21390.1 | 3.71  | 3.79  | 0.07 | 0.2  | -1.06 | 0.456441 | 0.495825 | 0.734509 | 0.695746 |
| MmugDNA.21392.1.S1_at   | MmugDNA.21392.1 | 4.85  | 4.53  | 0.21 | 0.26 | 1.25  | 0.73618  | 0.096058 | 0.886493 | 0.353319 |
| MmugDNA.21393.1.S1_at   | MmugDNA.21393.1 | 4.88  | 4.95  | 0.73 | 0.1  | -1.05 | 0.555391 | 0.718418 | 0.791373 | 0.837032 |
| MmugDNA.21394.1.S1_at   | MmugDNA.21394.1 | 5.53  | 5.35  | 0.18 | 0.09 | 1.14  | 0.174697 | 0.081342 | 0.538288 | 0.329437 |
| MmugDNA.21395.1.S1_at   | MmugDNA.21395.1 | 2.95  | 2.99  | 0.36 | 0.04 | -1.02 | 0.610693 | 0.611817 | 0.821211 | 0.769593 |
| MmugDNA.21396.1.S1_at   | MmugDNA.21396.1 | 3.27  | 3.33  | 0.04 | 0.26 | -1.04 | 0.654357 | 0.834173 | 0.844578 | 0.904977 |
| MmugDNA.21397.1.S1_at   | MmugDNA.21397.1 | 5.23  | 5.1   | 0.22 | 0.19 | 1.1   | 0.664607 | 0.909584 | 0.849598 | 0.94895  |
| MmugDNA.21398.1.S1_at   | MmugDNA.21398.1 | 2.92  | 3.02  | 0.11 | 0.07 | -1.07 | 0.264957 | 0.030171 | 0.610696 | 0.215629 |
| MmugDNA.21399.1.S1_at   | MmugDNA.21399.1 | 3.18  | 3.48  | 0.28 | 0.41 | -1.23 | 0.589013 | 0.782958 | 0.809183 | 0.87441  |
| MmugDNA.214.1.S1_at     | MmugDNA.214.1   | 10.6  | 10.68 | 0.03 | 0.26 | -1.06 | 0.655287 | 0.80878  | 0.844842 | 0.889895 |
| MmugDNA.21400.1.S1_at   | MmugDNA.21400.1 | 3.51  | 3.55  | 0.05 | 0.09 | -1.03 | 0.184828 | 0.319706 | 0.548357 | 0.572051 |
| MmugDNA.21401.1.S1_at   | MmugDNA.21401.1 | 5.86  | 5.13  | 0.42 | 0.36 | 1.65  | 0.096098 | 0.095962 | 0.454282 | 0.353252 |
| MmugDNA.21402.1.S1_at   | MmugDNA.21402.1 | 9.23  | 9.18  | 0.13 | 0.1  | 1.03  | 0.69565  | 0.849953 | 0.864996 | 0.914673 |

|                         |                 |       |       |      |      |       |          |          |          |          |
|-------------------------|-----------------|-------|-------|------|------|-------|----------|----------|----------|----------|
| MmugDNA.21405.1.S1_at   | MmugDNA.21405.1 | 7.28  | 8.13  | 0.14 | 1.15 | -1.8  | 0.315327 | 0.376267 | 0.64659  | 0.614101 |
| MmugDNA.21406.1.S1_at   | MmugDNA.21406.1 | 8.38  | 8.02  | 0.16 | 0.37 | 1.29  | 0.11085  | 0.217101 | 0.47274  | 0.490681 |
| MmugDNA.21408.1.S1_at   | MmugDNA.21408.1 | 6.15  | 5.35  | 0.94 | 0.35 | 1.74  | 0.325599 | 0.465424 | 0.652943 | 0.675748 |
| MmugDNA.21409.1.S1_at   | MmugDNA.21409.1 | 7.78  | 9.84  | 0.08 | 1.38 | -4.18 | 0.188638 | 0.231643 | 0.551613 | 0.503446 |
| MmugDNA.2141.1.S1_at    | MmugDNA.2141.1  | 4.94  | 4.98  | 0.4  | 0.11 | -1.03 | 0.472271 | 0.416781 | 0.743607 | 0.64171  |
| MmugDNA.21411.1.S1_at   | MmugDNA.21411.1 | 6.11  | 6.12  | 0.05 | 0.16 | -1.01 | 0.329899 | 0.250935 | 0.655349 | 0.519612 |
| MmugDNA.21412.1.S1_at   | MmugDNA.21412.1 | 5.56  | 5.31  | 0.34 | 0.65 | 1.19  | 0.554945 | 0.138129 | 0.7911   | 0.411042 |
| MmugDNA.21413.1.S1_at   | MmugDNA.21413.1 | 6.42  | 6.04  | 0.59 | 0.15 | 1.31  | 0.143785 | 0.15918  | 0.510387 | 0.435217 |
| MmugDNA.21415.1.S1_at   | MmugDNA.21415.1 | 11.29 | 12.05 | 0.31 | 0.22 | -1.69 | 0.017986 | 0.013426 | 0.268364 | 0.148459 |
| MmugDNA.21416.1.S1_at   | MmugDNA.21416.1 | 5.61  | 4.66  | 0.15 | 0.49 | 1.93  | 0.087211 | 0.106796 | 0.441182 | 0.369391 |
| MmugDNA.21417.1.S1_at   | MmugDNA.21417.1 | 4.8   | 5.28  | 0.16 | 0.37 | -1.4  | 0.247513 | 0.308666 | 0.598709 | 0.56461  |
| MmugDNA.21418.1.S1_at   | MmugDNA.21418.1 | 6.82  | 6.81  | 0.03 | 0.15 | 1.01  | 0.52707  | 0.478831 | 0.774556 | 0.684739 |
| MmugDNA.21419.1.S1_at   | MmugDNA.21419.1 | 7.96  | 7.64  | 0.31 | 0.31 | 1.25  | 0.484954 | 0.48891  | 0.750701 | 0.691464 |
| MmugDNA.21420.1.S1_at   | MmugDNA.21420.1 | 3.68  | 3.18  | 0.17 | 0.21 | 1.41  | 0.033362 | 0.080863 | 0.328518 | 0.328831 |
| MmugDNA.21421.1.S1_at   | MmugDNA.21421.1 | 9.86  | 9.72  | 0.51 | 0.68 | 1.1   | 0.680462 | 0.388318 | 0.857185 | 0.62274  |
| MmugDNA.21422.1.S1_at   | MmugDNA.21422.1 | 7.45  | 7.64  | 0.14 | 0.11 | -1.14 | 0.098258 | 0.067412 | 0.457816 | 0.305664 |
| MmugDNA.21422.1.S1_s_at | MmugDNA.21422.1 | 7.16  | 7.29  | 0.25 | 0.08 | -1.09 | 0.934026 | 0.240047 | 0.974468 | 0.510742 |
| MmugDNA.21424.1.S1_at   | MmugDNA.21424.1 | 5.01  | 4.98  | 0.26 | 0.18 | 1.02  | 0.19388  | 0.250378 | 0.55753  | 0.519391 |
| MmugDNA.21425.1.S1_at   | MmugDNA.21425.1 | 8.87  | 8.25  | 0.08 | 0.1  | 1.54  | 0.001346 | 0.000955 | 0.146228 | 0.049326 |
| MmugDNA.21426.1.S1_at   | MmugDNA.21426.1 | 5.13  | 5.31  | 0.06 | 0.19 | -1.13 | 0.131797 | 0.028365 | 0.498041 | 0.21025  |
| MmugDNA.21427.1.S1_at   | MmugDNA.21427.1 | 11.11 | 11.68 | 0.11 | 0.16 | -1.49 | 0.008763 | 0.006807 | 0.221033 | 0.111444 |
| MmugDNA.21428.1.S1_at   | MmugDNA.21428.1 | 5.47  | 4.61  | 1.06 | 0.41 | 1.82  | 0.268424 | 0.150012 | 0.613168 | 0.424621 |
| MmugDNA.21429.1.S1_at   | MmugDNA.21429.1 | 3.07  | 3.35  | 0.49 | 0.02 | -1.22 | 0.971979 | 0.991883 | 0.989291 | 0.995442 |
| MmugDNA.21429.1.S1_s_at | MmugDNA.21429.1 | 6.68  | 6.62  | 0.65 | 0.21 | 1.04  | 0.970026 | 0.989163 | 0.988483 | 0.993825 |
| MmugDNA.2143.1.S1_at    | MmugDNA.2143.1  | 10.23 | 10.29 | 0.11 | 0.62 | -1.04 | 0.975593 | 0.98893  | 0.990584 | 0.993666 |
| MmugDNA.21430.1.S1_at   | MmugDNA.21430.1 | 2.79  | 2.65  | 0.13 | 0    | 1.1   | 0.436044 | 0.60114  | 0.721553 | 0.762532 |
| MmugDNA.21432.1.S1_at   | MmugDNA.21432.1 | 7.07  | 6.48  | 0.73 | 0.4  | 1.51  | 0.270558 | 0.340211 | 0.614842 | 0.586637 |
| MmugDNA.21433.1.S1_at   | MmugDNA.21433.1 | 4.99  | 5.05  | 0.01 | 0.03 | -1.04 | 0.027861 | 0.01054  | 0.309107 | 0.134072 |
| MmugDNA.21434.1.S1_at   | MmugDNA.21434.1 | 6.96  | 7.1   | 0.07 | 0.17 | -1.1  | 0.499837 | 0.661278 | 0.759402 | 0.801687 |
| MmugDNA.21437.1.S1_at   | MmugDNA.21437.1 | 5.88  | 5.89  | 0.12 | 0.04 | -1.01 | 0.771631 | 0.936161 | 0.90393  | 0.963987 |
| MmugDNA.21438.1.S1_at   | MmugDNA.21438.1 | 3.81  | 3.68  | 0.28 | 0.12 | 1.1   | 0.478973 | 0.584908 | 0.747575 | 0.75256  |
| MmugDNA.21440.1.S1_at   | MmugDNA.21440.1 | 11.98 | 11.88 | 0.07 | 0.05 | 1.07  | 0.1613   | 0.259115 | 0.526364 | 0.526263 |
| MmugDNA.21442.1.S1_at   | MmugDNA.21442.1 | 4.97  | 5.07  | 0.37 | 0.1  | -1.07 | 0.704783 | 0.151723 | 0.869805 | 0.426383 |
| MmugDNA.21443.1.S1_at   | MmugDNA.21443.1 | 5.02  | 4.16  | 0.34 | 0.05 | 1.81  | 0.012227 | 0.008352 | 0.240418 | 0.121226 |
| MmugDNA.21444.1.S1_at   | MmugDNA.21444.1 | 7.49  | 7.59  | 0.14 | 0.17 | -1.07 | 0.983983 | 0.485992 | 0.994302 | 0.689551 |
| MmugDNA.21445.1.S1_at   | MmugDNA.21445.1 | 10.85 | 10.53 | 0.22 | 0.65 | 1.25  | 0.295713 | 0.319066 | 0.63209  | 0.571622 |
| MmugDNA.21447.1.S1_at   | MmugDNA.21447.1 | 9.02  | 8.69  | 0.17 | 0.3  | 1.25  | 0.049357 | 0.05553  | 0.371317 | 0.281454 |
| MmugDNA.21448.1.S1_at   | MmugDNA.21448.1 | 7.24  | 7.78  | 0.54 | 1.68 | -1.46 | 0.623329 | 0.807999 | 0.827933 | 0.889467 |
| MmugDNA.21449.1.S1_at   | MmugDNA.21449.1 | 3.52  | 3.51  | 0.06 | 0.02 | 1     | 0.634112 | 0.263517 | 0.834242 | 0.529826 |
| MmugDNA.21449.1.S1_s_at | MmugDNA.21449.1 | 9.46  | 9.14  | 0.12 | 0.41 | 1.25  | 0.289895 | 0.320589 | 0.627854 | 0.572701 |
| MmugDNA.21450.1.S1_at   | MmugDNA.21450.1 | 7.55  | 7.05  | 1.2  | 0.45 | 1.42  | 0.629368 | 0.810112 | 0.831446 | 0.890539 |

|                         |                 |       |       |      |      |       |          |          |          |          |
|-------------------------|-----------------|-------|-------|------|------|-------|----------|----------|----------|----------|
| MmugDNA.21451.1.S1_at   | MmugDNA.21451.1 | 8.11  | 8.64  | 0.25 | 0.73 | -1.45 | 0.10386  | 0.106651 | 0.463825 | 0.369205 |
| MmugDNA.21452.1.S1_s_at | MmugDNA.21452.1 | 11.95 | 12.17 | 0.28 | 0.28 | -1.17 | 0.995128 | 0.263628 | 0.998262 | 0.529913 |
| MmugDNA.21453.1.S1_at   | MmugDNA.21453.1 | 6.31  | 6.59  | 0.54 | 0.34 | -1.22 | 0.615366 | 0.739786 | 0.823401 | 0.849224 |
| MmugDNA.21454.1.S1_at   | MmugDNA.21454.1 | 4.64  | 4.48  | 1.17 | 0.57 | 1.11  | 0.59736  | 0.790567 | 0.813526 | 0.878916 |
| MmugDNA.21455.1.S1_at   | MmugDNA.21455.1 | 3.41  | 3.57  | 0.43 | 0.07 | -1.12 | 0.720545 | 0.868419 | 0.877606 | 0.925323 |
| MmugDNA.21456.1.S1_at   | MmugDNA.21456.1 | 10.16 | 9.93  | 0.06 | 0.3  | 1.18  | 0.219766 | 0.249423 | 0.579133 | 0.518532 |
| MmugDNA.21457.1.S1_at   | MmugDNA.21457.1 | 5.33  | 5.67  | 0.29 | 0.18 | -1.26 | 0.321848 | 0.394082 | 0.650475 | 0.626734 |
| MmugDNA.21458.1.S1_at   | MmugDNA.21458.1 | 3.52  | 3.71  | 0.2  | 0.21 | -1.14 | 0.936697 | 0.361227 | 0.975523 | 0.602104 |
| MmugDNA.21459.1.S1_at   | MmugDNA.21459.1 | 4.94  | 5.26  | 0.43 | 0.57 | -1.25 | 0.865626 | 0.795106 | 0.946166 | 0.881926 |
| MmugDNA.2146.1.S1_at    | MmugDNA.2146.1  | 4.58  | 4.66  | 0.1  | 0.05 | -1.06 | 0.608316 | 0.805224 | 0.819872 | 0.888036 |
| MmugDNA.21460.1.S1_at   | MmugDNA.21460.1 | 4.39  | 4.41  | 0.07 | 0.27 | -1.01 | 0.944566 | 0.648142 | 0.978858 | 0.794002 |
| MmugDNA.21461.1.S1_at   | MmugDNA.21461.1 | 9.34  | 8.01  | 0.1  | 0.81 | 2.5   | 0.13164  | 0.055503 | 0.498041 | 0.281404 |
| MmugDNA.21463.1.S1_at   | MmugDNA.21463.1 | 9.49  | 9.49  | 0.27 | 0.85 | -1    | 0.827711 | 0.828037 | 0.930084 | 0.901214 |
| MmugDNA.21464.1.S1_at   | MmugDNA.21464.1 | 9.57  | 9.17  | 0.12 | 0.42 | 1.32  | 0.561999 | 0.694181 | 0.795109 | 0.822159 |
| MmugDNA.21464.1.S1_s_at | MmugDNA.21464.1 | 10.65 | 10.09 | 0.13 | 0.35 | 1.47  | 0.257103 | 0.311419 | 0.60448  | 0.566456 |
| MmugDNA.21465.1.S1_at   | MmugDNA.21465.1 | 5.22  | 4.72  | 0.62 | 0.16 | 1.41  | 0.110592 | 0.094946 | 0.472297 | 0.352054 |
| MmugDNA.21466.1.S1_at   | MmugDNA.21466.1 | 3.95  | 3.69  | 0.34 | 0.11 | 1.2   | 0.606248 | 0.786818 | 0.818776 | 0.876684 |
| MmugDNA.21468.1.S1_at   | MmugDNA.21468.1 | 4.14  | 4.3   | 0.13 | 0.21 | -1.12 | 0.227445 | 0.222413 | 0.585103 | 0.495479 |
| MmugDNA.21469.1.S1_at   | MmugDNA.21469.1 | 13.09 | 12.99 | 0.32 | 0.15 | 1.07  | 0.597516 | 0.474414 | 0.813537 | 0.681427 |
| MmugDNA.2147.1.S1_at    | MmugDNA.2147.1  | 3.95  | 4     | 0.3  | 0.11 | -1.04 | 0.374403 | 0.501188 | 0.683641 | 0.699449 |
| MmugDNA.21470.1.S1_at   | MmugDNA.21470.1 | 4.58  | 4.58  | 0.05 | 0.12 | 1     | 0.342992 | 0.326112 | 0.663407 | 0.576315 |
| MmugDNA.21471.1.S1_at   | MmugDNA.21471.1 | 6.76  | 7.1   | 0.42 | 1.26 | -1.27 | 0.676531 | 0.590422 | 0.855025 | 0.756223 |
| MmugDNA.21473.1.S1_at   | MmugDNA.21473.1 | 4.72  | 4.88  | 0.2  | 0.24 | -1.11 | 0.95703  | 0.877729 | 0.983802 | 0.930219 |
| MmugDNA.21474.1.S1_at   | MmugDNA.21474.1 | 4.6   | 4.59  | 0.25 | 0.09 | 1     | 0.362123 | 0.13624  | 0.675706 | 0.408621 |
| MmugDNA.21475.1.S1_at   | MmugDNA.21475.1 | 3.58  | 3.77  | 0.98 | 0.53 | -1.14 | 0.588301 | 0.614068 | 0.808931 | 0.771067 |
| MmugDNA.21477.1.S1_at   | MmugDNA.21477.1 | 3.51  | 3.59  | 0.01 | 0.09 | -1.06 | 0.323042 | 0.700094 | 0.651295 | 0.825946 |
| MmugDNA.21478.1.S1_at   | MmugDNA.21478.1 | 12.22 | 12.18 | 0.12 | 0.7  | 1.03  | 0.279785 | 0.267861 | 0.621281 | 0.533607 |
| MmugDNA.21479.1.S1_at   | MmugDNA.21479.1 | 7.83  | 8.43  | 0.2  | 0.3  | -1.51 | 0.042945 | 0.033812 | 0.355764 | 0.227489 |
| MmugDNA.2148.1.S1_at    | MmugDNA.2148.1  | 3.51  | 3.5   | 0.04 | 0.12 | 1.01  | 0.468408 | 0.792889 | 0.741049 | 0.880387 |
| MmugDNA.21480.1.S1_at   | MmugDNA.21480.1 | 5.38  | 5.44  | 0.11 | 0.64 | -1.05 | 0.318001 | 0.436201 | 0.64802  | 0.655879 |
| MmugDNA.21481.1.S1_at   | MmugDNA.21481.1 | 5.97  | 5.95  | 0.24 | 0.81 | 1.01  | 0.299175 | 0.396946 | 0.634742 | 0.628506 |
| MmugDNA.21482.1.S1_at   | MmugDNA.21482.1 | 10.96 | 11.83 | 0.14 | 0.58 | -1.83 | 0.146104 | 0.144546 | 0.512187 | 0.418409 |
| MmugDNA.21484.1.S1_at   | MmugDNA.21484.1 | 3.05  | 3.22  | 0.03 | 0.1  | -1.12 | 0.038677 | 0.057114 | 0.345054 | 0.284945 |
| MmugDNA.21485.1.S1_at   | MmugDNA.21485.1 | 4.64  | 5.22  | 0.79 | 0.64 | -1.49 | 0.920333 | 0.977248 | 0.96895  | 0.987636 |
| MmugDNA.21486.1.S1_at   | MmugDNA.21486.1 | 8.27  | 6.56  | 0.31 | 0.32 | 3.28  | 0.002597 | 0.002484 | 0.164386 | 0.073652 |
| MmugDNA.21488.1.S1_at   | MmugDNA.21488.1 | 4.82  | 4.63  | 0.26 | 0.49 | 1.14  | 0.381606 | 0.414263 | 0.688049 | 0.640164 |
| MmugDNA.2149.1.S1_at    | MmugDNA.2149.1  | 9.81  | 8.97  | 0.43 | 0.47 | 1.79  | 0.102197 | 0.101176 | 0.461767 | 0.360831 |
| MmugDNA.21490.1.S1_at   | MmugDNA.21490.1 | 3.78  | 3.93  | 0.19 | 0.11 | -1.11 | 0.256226 | 0.257983 | 0.603894 | 0.525559 |
| MmugDNA.21491.1.S1_at   | MmugDNA.21491.1 | 8.81  | 7.22  | 0.52 | 0.33 | 3.01  | 0.025974 | 0.014557 | 0.301367 | 0.153907 |
| MmugDNA.21493.1.S1_at   | MmugDNA.21493.1 | 4.92  | 5.18  | 0.38 | 0.33 | -1.2  | 0.572236 | 0.160936 | 0.800678 | 0.437116 |
| MmugDNA.21494.1.S1_at   | MmugDNA.21494.1 | 2.88  | 2.95  | 0.08 | 0.03 | -1.05 | 0.289472 | 0.05099  | 0.627555 | 0.271078 |

|                         |                 |       |       |      |      |       |          |          |          |          |
|-------------------------|-----------------|-------|-------|------|------|-------|----------|----------|----------|----------|
| MmugDNA.21495.1.S1_at   | MmugDNA.21495.1 | 3.23  | 3.19  | 0.38 | 0.38 | 1.03  | 0.591434 | 0.504215 | 0.810444 | 0.701456 |
| MmugDNA.21496.1.S1_at   | MmugDNA.21496.1 | 4.85  | 4.87  | 0.03 | 0.05 | -1.01 | 0.226761 | 0.462228 | 0.584737 | 0.673604 |
| MmugDNA.21497.1.S1_at   | MmugDNA.21497.1 | 9.97  | 10.61 | 0    | 0.5  | -1.56 | 0.091284 | 0.090675 | 0.447137 | 0.345151 |
| MmugDNA.21498.1.S1_at   | MmugDNA.21498.1 | 4.16  | 4.19  | 0.15 | 0.08 | -1.02 | 0.965848 | 0.956171 | 0.987081 | 0.975058 |
| MmugDNA.21499.1.S1_at   | MmugDNA.21499.1 | 11.01 | 10.9  | 0.14 | 0.36 | 1.08  | 0.347497 | 0.509959 | 0.666488 | 0.704535 |
| MmugDNA.215.1.S1_at     | MmugDNA.215.1   | 11.11 | 11.14 | 0.19 | 0.29 | -1.02 | 0.375855 | 0.24793  | 0.684803 | 0.517401 |
| MmugDNA.21500.1.S1_at   | MmugDNA.21500.1 | 5.51  | 5.55  | 0.13 | 0.06 | -1.03 | 0.223993 | 0.43726  | 0.582459 | 0.656613 |
| MmugDNA.21501.1.S1_at   | MmugDNA.21501.1 | 13.01 | 12.69 | 0.25 | 0.54 | 1.25  | 0.355037 | 0.448873 | 0.670716 | 0.664672 |
| MmugDNA.21503.1.S1_at   | MmugDNA.21503.1 | 4.53  | 4.53  | 0.04 | 0.07 | -1    | 0.230917 | 0.208041 | 0.587369 | 0.482049 |
| MmugDNA.21504.1.S1_at   | MmugDNA.21504.1 | 4.02  | 3.85  | 0.12 | 0.34 | 1.13  | 0.832063 | 0.401749 | 0.931955 | 0.631068 |
| MmugDNA.21505.1.S1_at   | MmugDNA.21505.1 | 5.27  | 5.28  | 0.22 | 0.09 | -1    | 0.872807 | 0.972216 | 0.949183 | 0.985011 |
| MmugDNA.21506.1.S1_at   | MmugDNA.21506.1 | 6.5   | 5.89  | 0.45 | 0.15 | 1.53  | 0.078452 | 0.053396 | 0.428503 | 0.27666  |
| MmugDNA.21507.1.S1_at   | MmugDNA.21507.1 | 7.3   | 7.24  | 0.11 | 0.26 | 1.04  | 0.258765 | 0.330203 | 0.605963 | 0.579016 |
| MmugDNA.21508.1.S1_at   | MmugDNA.21508.1 | 5.81  | 4.76  | 0.65 | 0.15 | 2.07  | 0.081264 | 0.077547 | 0.431938 | 0.323421 |
| MmugDNA.21509.1.S1_at   | MmugDNA.21509.1 | 7.54  | 8.55  | 0.41 | 0.41 | -2.02 | 0.031217 | 0.014512 | 0.32089  | 0.153682 |
| MmugDNA.2151.1.S1_at    | MmugDNA.2151.1  | 6.31  | 6.07  | 0.68 | 0.82 | 1.18  | 0.476971 | 0.651144 | 0.746384 | 0.796048 |
| MmugDNA.24188.1.S1_s_at | MmugDNA.24188.1 | 11.35 | 10.76 | 0.08 | 0.31 | 1.51  | 0.034627 | 0.018528 | 0.333297 | 0.171243 |
| MmugDNA.21512.1.S1_at   | MmugDNA.21512.1 | 6.42  | 6.42  | 0.05 | 0.19 | -1    | 0.686379 | 0.900565 | 0.859743 | 0.943469 |
| MmugDNA.21513.1.S1_at   | MmugDNA.21513.1 | 4.59  | 4.75  | 0.11 | 0.13 | -1.12 | 0.699922 | 0.257181 | 0.867213 | 0.524938 |
| MmugDNA.21514.1.S1_at   | MmugDNA.21514.1 | 8.62  | 7.08  | 0.25 | 0.19 | 2.89  | 0.001891 | 0.000693 | 0.155636 | 0.044166 |
| MmugDNA.21517.1.S1_at   | MmugDNA.21517.1 | 6.31  | 6.17  | 0.32 | 0.2  | 1.1   | 0.910748 | 0.648688 | 0.964728 | 0.794407 |
| MmugDNA.21519.1.S1_at   | MmugDNA.21519.1 | 12.44 | 12.42 | 0.07 | 0.21 | 1.01  | 0.816132 | 0.29002  | 0.92532  | 0.551016 |
| MmugDNA.2152.1.S1_at    | MmugDNA.2152.1  | 2.9   | 2.9   | 0.04 | 0    | 1     | 0.256279 | 0.327082 | 0.603927 | 0.577104 |
| MmugDNA.21520.1.S1_at   | MmugDNA.21520.1 | 4.3   | 4.43  | 0.37 | 0.08 | -1.09 | 0.149101 | 0.307536 | 0.514001 | 0.563781 |
| MmugDNA.21521.1.S1_at   | MmugDNA.21521.1 | 5.83  | 5.83  | 0.06 | 0.04 | -1    | 0.302343 | 0.473438 | 0.63692  | 0.680697 |
| MmugDNA.21522.1.S1_at   | MmugDNA.21522.1 | 3.76  | 3.87  | 0.1  | 0.55 | -1.08 | 0.569432 | 0.75911  | 0.79904  | 0.859979 |
| MmugDNA.21527.1.S1_at   | MmugDNA.21527.1 | 4.04  | 3.45  | 0.34 | 0.03 | 1.5   | 0.125485 | 0.053227 | 0.491333 | 0.276445 |
| MmugDNA.2153.1.S1_at    | MmugDNA.2153.1  | 3.67  | 3.52  | 0.53 | 0.16 | 1.11  | 0.315847 | 0.310335 | 0.646713 | 0.565544 |
| MmugDNA.21531.1.S1_at   | MmugDNA.21531.1 | 3.03  | 3.45  | 0.13 | 0.43 | -1.34 | 0.084357 | 0.203552 | 0.436943 | 0.477767 |
| MmugDNA.21532.1.S1_at   | MmugDNA.21532.1 | 3.3   | 3.4   | 0.12 | 0.08 | -1.07 | 0.112625 | 0.144989 | 0.475095 | 0.418937 |
| MmugDNA.21533.1.S1_at   | MmugDNA.21533.1 | 7.43  | 6.92  | 0.26 | 0.41 | 1.43  | 0.076192 | 0.040922 | 0.424738 | 0.247161 |
| MmugDNA.21535.1.S1_at   | MmugDNA.21535.1 | 6.56  | 6.28  | 0.09 | 0.4  | 1.22  | 0.673987 | 0.875258 | 0.853911 | 0.929211 |
| MmugDNA.21536.1.S1_at   | MmugDNA.21536.1 | 9.72  | 9.6   | 0.22 | 0.88 | 1.08  | 0.775795 | 0.841968 | 0.905945 | 0.909959 |
| MmugDNA.21537.1.S1_at   | MmugDNA.21537.1 | 9.07  | 8.78  | 0.32 | 0.18 | 1.22  | 0.424368 | 0.59831  | 0.714453 | 0.76073  |
| MmugDNA.21538.1.S1_at   | MmugDNA.21538.1 | 4.24  | 4.24  | 0.12 | 0.19 | 1     | 0.710318 | 0.878547 | 0.872994 | 0.930686 |
| MmugDNA.2154.1.S1_at    | MmugDNA.2154.1  | 6.86  | 6.63  | 0.15 | 0.39 | 1.17  | 0.19222  | 0.162285 | 0.555316 | 0.438447 |
| MmugDNA.21541.1.S1_at   | MmugDNA.21541.1 | 3.26  | 3.25  | 0.24 | 0.11 | 1.01  | 0.635406 | 0.819148 | 0.83497  | 0.89579  |
| MmugDNA.21542.1.S1_at   | MmugDNA.21542.1 | 12.39 | 12.22 | 0.54 | 1.06 | 1.13  | 0.480056 | 0.595624 | 0.748066 | 0.759123 |
| MmugDNA.21544.1.S1_at   | MmugDNA.21544.1 | 4.83  | 4.76  | 0.73 | 0.03 | 1.05  | 0.328291 | 0.223389 | 0.654312 | 0.496174 |
| MmugDNA.21545.1.S1_at   | MmugDNA.21545.1 | 6.59  | 6.29  | 0.11 | 0.07 | 1.23  | 0.020121 | 0.000822 | 0.27674  | 0.046584 |
| MmugDNA.21547.1.S1_at   | MmugDNA.21547.1 | 6.25  | 6.36  | 1.2  | 0.24 | -1.08 | 0.480448 | 0.657693 | 0.74839  | 0.799912 |

|                         |                 |       |       |      |      |        |          |          |          |          |
|-------------------------|-----------------|-------|-------|------|------|--------|----------|----------|----------|----------|
| MmugDNA.21548.1.S1_s_at | MmugDNA.21548.1 | 7.94  | 8.81  | 0.47 | 0.37 | -1.82  | 0.041101 | 0.01478  | 0.350569 | 0.154626 |
| MmugDNA.21549.1.S1_at   | MmugDNA.21549.1 | 9.5   | 8.5   | 0.3  | 0.3  | 2      | 0.012943 | 0.008069 | 0.244895 | 0.119402 |
| MmugDNA.2155.1.S1_at    | MmugDNA.2155.1  | 4.37  | 4.29  | 0.1  | 0.1  | 1.05   | 0.518548 | 0.136607 | 0.769532 | 0.409115 |
| MmugDNA.21550.1.S1_at   | MmugDNA.21550.1 | 3.31  | 3.13  | 0.05 | 0.08 | 1.13   | 0.062384 | 0.303996 | 0.397995 | 0.561344 |
| MmugDNA.21553.1.S1_at   | MmugDNA.21553.1 | 6.97  | 7.19  | 0.12 | 0.12 | -1.17  | 0.174414 | 0.389977 | 0.538041 | 0.624002 |
| MmugDNA.21554.1.S1_at   | MmugDNA.21554.1 | 5.1   | 6.31  | 0.68 | 0.25 | -2.32  | 0.103016 | 0.05724  | 0.46254  | 0.285059 |
| MmugDNA.21557.1.S1_at   | MmugDNA.21557.1 | 10.49 | 10.21 | 0.18 | 0.26 | 1.21   | 0.102513 | 0.065921 | 0.462361 | 0.302141 |
| MmugDNA.21558.1.S1_at   | MmugDNA.21558.1 | 5.98  | 6.17  | 0.11 | 0.07 | -1.14  | 0.148605 | 0.033561 | 0.51391  | 0.226764 |
| MmugDNA.21559.1.S1_at   | MmugDNA.21559.1 | 10.3  | 10.33 | 0.16 | 0.41 | -1.02  | 0.411953 | 0.175562 | 0.707648 | 0.45218  |
| MmugDNA.2156.1.S1_at    | MmugDNA.2156.1  | 3.88  | 3.84  | 0.35 | 0.14 | 1.03   | 0.324657 | 0.307032 | 0.652027 | 0.563427 |
| MmugDNA.21560.1.S1_at   | MmugDNA.21560.1 | 6.54  | 6.76  | 0.32 | 0.67 | -1.17  | 0.925784 | 0.589259 | 0.97147  | 0.755509 |
| MmugDNA.21560.1.S1_s_at | MmugDNA.21560.1 | 9.71  | 10.34 | 0.61 | 1.16 | -1.54  | 0.280752 | 0.179422 | 0.621836 | 0.455908 |
| MmugDNA.21563.1.S1_at   | MmugDNA.21563.1 | 6.17  | 5.95  | 0.15 | 0.27 | 1.16   | 0.384984 | 0.457978 | 0.690208 | 0.670999 |
| MmugDNA.21564.1.S1_at   | MmugDNA.21564.1 | 5.1   | 5.1   | 0.08 | 0.18 | -1     | 0.802402 | 0.890693 | 0.918478 | 0.937697 |
| MmugDNA.21565.1.S1_at   | MmugDNA.21565.1 | 5.92  | 5.85  | 0.04 | 0.71 | 1.05   | 0.477948 | 0.664095 | 0.747094 | 0.803247 |
| MmugDNA.21568.1.S1_at   | MmugDNA.21568.1 | 6.22  | 5.96  | 1.04 | 0.18 | 1.2    | 0.228493 | 0.324314 | 0.585917 | 0.574924 |
| MmugDNA.21569.1.S1_at   | MmugDNA.21569.1 | 9.64  | 9.72  | 0.36 | 0.34 | -1.06  | 0.350929 | 0.140267 | 0.66887  | 0.413448 |
| MmugDNA.21570.1.S1_at   | MmugDNA.21570.1 | 3.19  | 3.33  | 0.11 | 0.09 | -1.1   | 0.074231 | 0.202847 | 0.419963 | 0.477312 |
| MmugDNA.21571.1.S1_at   | MmugDNA.21571.1 | 6.2   | 6.56  | 0.09 | 0.12 | -1.29  | 0.03145  | 0.020175 | 0.321864 | 0.178414 |
| MmugDNA.21572.1.S1_at   | MmugDNA.21572.1 | 5.04  | 5.11  | 0.2  | 0.15 | -1.05  | 0.490369 | 0.714428 | 0.754397 | 0.834313 |
| MmugDNA.21573.1.S1_at   | MmugDNA.21573.1 | 7.52  | 7.54  | 0.23 | 0.23 | -1.01  | 0.368233 | 0.123995 | 0.679796 | 0.394262 |
| MmugDNA.21574.1.S1_at   | MmugDNA.21574.1 | 3.6   | 3.64  | 0.54 | 0.16 | -1.02  | 0.51295  | 0.6042   | 0.765869 | 0.764542 |
| MmugDNA.21576.1.S1_at   | MmugDNA.21576.1 | 4.81  | 4.84  | 0.27 | 0.07 | -1.02  | 0.699166 | 0.484404 | 0.866641 | 0.688478 |
| MmugDNA.21577.1.S1_at   | MmugDNA.21577.1 | 4.71  | 4.96  | 0.25 | 0.33 | -1.2   | 0.359406 | 0.484602 | 0.673869 | 0.688576 |
| MmugDNA.21578.1.S1_at   | MmugDNA.21578.1 | 6.83  | 5.91  | 0.32 | 0.35 | 1.89   | 0.059736 | 0.119391 | 0.39273  | 0.387887 |
| MmugDNA.21579.1.S1_at   | MmugDNA.21579.1 | 7.69  | 6.75  | 0.12 | 0.35 | 1.92   | 0.015895 | 0.026602 | 0.261669 | 0.204008 |
| MmugDNA.2158.1.S1_at    | MmugDNA.2158.1  | 4.05  | 3.83  | 0.42 | 0.15 | 1.16   | 0.926083 | 0.966753 | 0.971589 | 0.981494 |
| MmugDNA.21580.1.S1_at   | MmugDNA.21580.1 | 4.98  | 4.66  | 1.05 | 0.26 | 1.25   | 0.161184 | 0.229861 | 0.526215 | 0.501802 |
| MmugDNA.21581.1.S1_at   | MmugDNA.21581.1 | 5.09  | 5.49  | 0.06 | 0.51 | -1.31  | 0.20138  | 0.188849 | 0.563974 | 0.464789 |
| MmugDNA.21582.1.S1_at   | MmugDNA.21582.1 | 7.02  | 7     | 0.14 | 0.08 | 1.02   | 0.585529 | 0.576336 | 0.807608 | 0.747186 |
| MmugDNA.21583.1.S1_at   | MmugDNA.21583.1 | 12.92 | 13.01 | 0.07 | 0.09 | -1.06  | 0.502056 | 0.543339 | 0.760244 | 0.726059 |
| MmugDNA.21584.1.S1_at   | MmugDNA.21584.1 | 7.7   | 7.97  | 0.15 | 0.17 | -1.21  | 0.124921 | 0.041187 | 0.490861 | 0.247733 |
| MmugDNA.21584.1.S1_s_at | MmugDNA.21584.1 | 7.09  | 6.99  | 0.21 | 0.11 | 1.07   | 0.825341 | 0.646196 | 0.929183 | 0.792676 |
| MmugDNA.21585.1.S1_at   | MmugDNA.21585.1 | 4.25  | 4.21  | 0.81 | 0.12 | 1.03   | 0.30127  | 0.437761 | 0.636303 | 0.656927 |
| MmugDNA.21587.1.S1_at   | MmugDNA.21587.1 | 10.66 | 10.2  | 0.15 | 0.37 | 1.38   | 0.073429 | 0.04066  | 0.41875  | 0.246578 |
| MmugDNA.21588.1.S1_at   | MmugDNA.21588.1 | 6.04  | 10.37 | 1.21 | 3.52 | -20.06 | 0.433293 | 0.339557 | 0.719896 | 0.586165 |
| MmugDNA.21591.1.S1_at   | MmugDNA.21591.1 | 3.29  | 3.42  | 0.09 | 0.13 | -1.09  | 0.474533 | 0.677659 | 0.745215 | 0.811756 |
| MmugDNA.21592.1.S1_at   | MmugDNA.21592.1 | 3.69  | 4.22  | 0.28 | 0.38 | -1.44  | 0.08573  | 0.081248 | 0.439713 | 0.329351 |
| MmugDNA.21594.1.S1_at   | MmugDNA.21594.1 | 4.03  | 4.01  | 0.05 | 0.12 | 1.02   | 0.871062 | 0.385562 | 0.948463 | 0.621027 |
| MmugDNA.21595.1.S1_at   | MmugDNA.21595.1 | 3.55  | 3.63  | 0.09 | 0.09 | -1.06  | 0.359549 | 0.19049  | 0.673945 | 0.465906 |
| MmugDNA.21596.1.S1_at   | MmugDNA.21596.1 | 5.76  | 5.63  | 0.18 | 0.06 | 1.09   | 0.267253 | 0.223339 | 0.612397 | 0.49612  |

|                         |                 |       |       |      |      |       |          |          |          |          |
|-------------------------|-----------------|-------|-------|------|------|-------|----------|----------|----------|----------|
| MmugDNA.21597.1.S1_at   | MmugDNA.21597.1 | 9.91  | 10.05 | 0.14 | 0.33 | -1.1  | 0.767686 | 0.898459 | 0.902457 | 0.942214 |
| MmugDNA.21597.1.S1_s_at | MmugDNA.21597.1 | 11.09 | 11.23 | 0.21 | 0.37 | -1.1  | 0.93175  | 0.957517 | 0.973613 | 0.975944 |
| MmugDNA.21598.1.S1_at   | MmugDNA.21598.1 | 5.21  | 5.31  | 0.07 | 0.05 | -1.07 | 0.219716 | 0.309848 | 0.579133 | 0.565046 |
| MmugDNA.216.1.S1_at     | MmugDNA.216.1   | 9.9   | 9.87  | 0.16 | 0.13 | 1.02  | 0.731747 | 0.558222 | 0.884008 | 0.735467 |
| MmugDNA.2160.1.S1_at    | MmugDNA.2160.1  | 4.81  | 5.4   | 0.44 | 0.8  | -1.5  | 0.49723  | 0.159448 | 0.757913 | 0.435568 |
| MmugDNA.21600.1.S1_at   | MmugDNA.21600.1 | 5.65  | 5.99  | 0.32 | 0.09 | -1.27 | 0.442359 | 0.66151  | 0.725508 | 0.801842 |
| MmugDNA.21601.1.S1_at   | MmugDNA.21601.1 | 3.41  | 3.57  | 0.07 | 0.04 | -1.11 | 0.063352 | 0.051585 | 0.400486 | 0.272597 |
| MmugDNA.21604.1.S1_at   | MmugDNA.21604.1 | 3.96  | 3.89  | 0.12 | 0.06 | 1.05  | 0.155132 | 0.187686 | 0.519877 | 0.46368  |
| MmugDNA.21605.1.S1_at   | MmugDNA.21605.1 | 4.64  | 4.28  | 0.36 | 0.21 | 1.29  | 0.133645 | 0.25779  | 0.500334 | 0.52542  |
| MmugDNA.21606.1.S1_at   | MmugDNA.21606.1 | 5.25  | 5.24  | 0.36 | 0.11 | 1.01  | 0.833268 | 0.903455 | 0.932336 | 0.945185 |
| MmugDNA.21609.1.S1_at   | MmugDNA.21609.1 | 4.46  | 4.39  | 0.23 | 0.12 | 1.06  | 0.384601 | 0.857516 | 0.690107 | 0.918676 |
| MmugDNA.21610.1.S1_at   | MmugDNA.21610.1 | 6.56  | 7     | 0.24 | 0.43 | -1.36 | 0.197956 | 0.240125 | 0.561022 | 0.510813 |
| MmugDNA.21611.1.S1_at   | MmugDNA.21611.1 | 6.96  | 7.02  | 0.05 | 0.24 | -1.04 | 0.690497 | 0.162308 | 0.862183 | 0.438447 |
| MmugDNA.21613.1.S1_at   | MmugDNA.21613.1 | 11.14 | 11.01 | 0.15 | 0.43 | 1.09  | 0.661123 | 0.738049 | 0.84802  | 0.848158 |
| MmugDNA.21614.1.S1_at   | MmugDNA.21614.1 | 7.3   | 7.11  | 1.48 | 0.52 | 1.14  | 0.613238 | 0.624165 | 0.822591 | 0.778457 |
| MmugDNA.21615.1.S1_at   | MmugDNA.21615.1 | 7.31  | 8.43  | 0.61 | 0.89 | -2.18 | 0.138343 | 0.13208  | 0.505745 | 0.404051 |
| MmugDNA.21616.1.S1_at   | MmugDNA.21616.1 | 4.73  | 4.94  | 0.17 | 0.12 | -1.15 | 0.120293 | 0.071192 | 0.485252 | 0.31311  |
| MmugDNA.21617.1.S1_at   | MmugDNA.21617.1 | 10.18 | 9.31  | 0.23 | 0.16 | 1.83  | 0.009315 | 0.004684 | 0.223832 | 0.095363 |
| MmugDNA.21618.1.S1_at   | MmugDNA.21618.1 | 9.23  | 9.06  | 0.43 | 0.04 | 1.13  | 0.955169 | 0.992537 | 0.983189 | 0.995715 |
| MmugDNA.21619.1.S1_at   | MmugDNA.21619.1 | 4.8   | 5.06  | 0.14 | 0.32 | -1.2  | 0.372219 | 0.39887  | 0.682724 | 0.629591 |
| MmugDNA.21623.1.S1_at   | MmugDNA.21623.1 | 4.68  | 4.78  | 0.06 | 0.11 | -1.07 | 0.480965 | 0.715886 | 0.7488   | 0.83531  |
| MmugDNA.21624.1.S1_at   | MmugDNA.21624.1 | 4.12  | 3.91  | 0.1  | 0.08 | 1.16  | 0.059876 | 0.632836 | 0.392969 | 0.783788 |
| MmugDNA.21625.1.S1_at   | MmugDNA.21625.1 | 4.12  | 4.14  | 0.44 | 0.15 | -1.01 | 0.409799 | 0.509169 | 0.70606  | 0.704028 |
| MmugDNA.21626.1.S1_at   | MmugDNA.21626.1 | 3.28  | 3.23  | 0.06 | 0.06 | 1.03  | 0.507892 | 0.541757 | 0.763209 | 0.725057 |
| MmugDNA.21627.1.S1_at   | MmugDNA.21627.1 | 5.07  | 4.92  | 0.45 | 0.26 | 1.11  | 0.259439 | 0.253337 | 0.606548 | 0.521662 |
| MmugDNA.21628.1.S1_at   | MmugDNA.21628.1 | 4.53  | 4.54  | 0.01 | 0.24 | -1.01 | 0.802041 | 0.238248 | 0.918343 | 0.508825 |
| MmugDNA.2163.1.S1_s_at  | MmugDNA.2163.1  | 3.15  | 3.08  | 0.08 | 0.04 | 1.05  | 0.099707 | 0.156201 | 0.459668 | 0.43161  |
| MmugDNA.21631.1.S1_at   | MmugDNA.21631.1 | 5.59  | 5.83  | 0.26 | 0.1  | -1.18 | 0.304358 | 0.518802 | 0.638539 | 0.710724 |
| MmugDNA.21632.1.S1_at   | MmugDNA.21632.1 | 12.04 | 11.97 | 0.1  | 0.23 | 1.05  | 0.330402 | 0.037437 | 0.655656 | 0.237777 |
| MmugDNA.21635.1.S1_at   | MmugDNA.21635.1 | 3.67  | 3.52  | 0.07 | 0.19 | 1.11  | 0.301803 | 0.204178 | 0.636715 | 0.478507 |
| MmugDNA.21637.1.S1_at   | MmugDNA.21637.1 | 4.12  | 4.3   | 0.27 | 0.07 | -1.13 | 0.937024 | 0.118253 | 0.975769 | 0.386244 |
| MmugDNA.21638.1.S1_at   | MmugDNA.21638.1 | 9.58  | 9.21  | 0.07 | 0.25 | 1.29  | 0.040999 | 0.008924 | 0.35051  | 0.124951 |
| MmugDNA.21639.1.S1_at   | MmugDNA.21639.1 | 6.88  | 6.89  | 0.05 | 0.07 | -1    | 0.770644 | 0.096689 | 0.903354 | 0.35417  |
| MmugDNA.2164.1.S1_at    | MmugDNA.2164.1  | 3.08  | 3.2   | 0.17 | 0.06 | -1.09 | 0.610728 | 0.796716 | 0.821237 | 0.882782 |
| MmugDNA.21640.1.S1_at   | MmugDNA.21640.1 | 9.53  | 9.68  | 0.18 | 0.19 | -1.11 | 0.428822 | 0.611252 | 0.71704  | 0.769195 |
| MmugDNA.21641.1.S1_at   | MmugDNA.21641.1 | 10.41 | 9.89  | 0.22 | 0.2  | 1.44  | 0.03428  | 0.017546 | 0.332352 | 0.167632 |
| MmugDNA.21642.1.S1_at   | MmugDNA.21642.1 | 3.14  | 3.34  | 0.04 | 0.14 | -1.16 | 0.081974 | 0.186166 | 0.433268 | 0.462007 |
| MmugDNA.21643.1.S1_at   | MmugDNA.21643.1 | 11.04 | 9.94  | 0.18 | 0.76 | 2.15  | 0.055907 | 0.044908 | 0.385086 | 0.256424 |
| MmugDNA.21644.1.S1_at   | MmugDNA.21644.1 | 7.94  | 7.9   | 0.04 | 0.09 | 1.03  | 0.738091 | 0.573931 | 0.887516 | 0.745476 |
| MmugDNA.21645.1.S1_at   | MmugDNA.21645.1 | 4.04  | 3.83  | 0.11 | 0.07 | 1.16  | 0.042737 | 0.019965 | 0.355382 | 0.17752  |
| MmugDNA.21647.1.S1_at   | MmugDNA.21647.1 | 8.88  | 9.35  | 0.27 | 0.11 | -1.39 | 0.029629 | 0.013964 | 0.314964 | 0.151509 |



|                         |                 |       |       |      |      |       |          |          |          |          |
|-------------------------|-----------------|-------|-------|------|------|-------|----------|----------|----------|----------|
| MmugDNA.21648.1.S1_at   | MmugDNA.21648.1 | 5.74  | 5.79  | 0.13 | 0.18 | -1.04 | 0.896404 | 0.095198 | 0.958707 | 0.35218  |
| MmugDNA.21649.1.S1_at   | MmugDNA.21649.1 | 4.81  | 5.05  | 0.05 | 0.41 | -1.18 | 0.374159 | 0.528721 | 0.683345 | 0.71678  |
| MmugDNA.2165.1.S1_at    | MmugDNA.2165.1  | 8.17  | 8.12  | 0.45 | 0.99 | 1.03  | 0.970232 | 0.916545 | 0.988606 | 0.953277 |
| MmugDNA.21650.1.S1_at   | MmugDNA.21650.1 | 7.98  | 7.59  | 1.56 | 0.7  | 1.31  | 0.234364 | 0.328308 | 0.588666 | 0.578012 |
| MmugDNA.21652.1.S1_at   | MmugDNA.21652.1 | 9.79  | 10.21 | 0.18 | 0.4  | -1.34 | 0.085978 | 0.012381 | 0.440024 | 0.143958 |
| MmugDNA.21653.1.S1_at   | MmugDNA.21653.1 | 10.17 | 8.61  | 0.41 | 0.13 | 2.94  | 0.007759 | 0.002631 | 0.212166 | 0.075845 |
| MmugDNA.21654.1.S1_at   | MmugDNA.21654.1 | 6.75  | 7.83  | 0.18 | 0.25 | -2.11 | 0.004373 | 0.002688 | 0.183061 | 0.076436 |
| MmugDNA.21656.1.S1_at   | MmugDNA.21656.1 | 7.43  | 8.97  | 0.52 | 0.23 | -2.9  | 0.009726 | 0.004277 | 0.226235 | 0.091847 |
| MmugDNA.21657.1.S1_at   | MmugDNA.21657.1 | 8.47  | 9.37  | 0.46 | 0.26 | -1.86 | 0.016759 | 0.008405 | 0.265281 | 0.121726 |
| MmugDNA.21658.1.S1_at   | MmugDNA.21658.1 | 6.07  | 6.06  | 0.06 | 0.13 | 1.01  | 0.467492 | 0.745988 | 0.740695 | 0.852688 |
| MmugDNA.21659.1.S1_at   | MmugDNA.21659.1 | 6.49  | 6.23  | 1    | 0.61 | 1.2   | 0.662938 | 0.641274 | 0.848783 | 0.789506 |
| MmugDNA.2166.1.S1_at    | MmugDNA.2166.1  | 3.38  | 3.67  | 0.31 | 0.33 | -1.22 | 0.973193 | 0.429489 | 0.989572 | 0.650934 |
| MmugDNA.21660.1.S1_at   | MmugDNA.21660.1 | 3.43  | 2.99  | 0.26 | 0.11 | 1.36  | 0.15167  | 0.078539 | 0.516326 | 0.325285 |
| MmugDNA.21662.1.S1_at   | MmugDNA.21662.1 | 4.41  | 4.34  | 0.6  | 0.32 | 1.05  | 0.6024   | 0.514402 | 0.81654  | 0.707675 |
| MmugDNA.21663.1.S1_at   | MmugDNA.21663.1 | 4.3   | 4.58  | 0.1  | 0.09 | -1.21 | 0.053872 | 0.074354 | 0.381017 | 0.318046 |
| MmugDNA.21664.1.S1_at   | MmugDNA.21664.1 | 5.69  | 3.04  | 0.94 | 1.45 | 6.28  | 0.076596 | 0.03505  | 0.425098 | 0.231385 |
| MmugDNA.21666.1.S1_at   | MmugDNA.21666.1 | 6.42  | 6.11  | 0.54 | 0.91 | 1.24  | 0.580615 | 0.431264 | 0.804757 | 0.652249 |
| MmugDNA.21667.1.S1_s_at | MmugDNA.21667.1 | 6.41  | 7.91  | 0.41 | 0.57 | -2.83 | 0.019117 | 0.012854 | 0.273018 | 0.145997 |
| MmugDNA.21668.1.S1_at   | MmugDNA.21668.1 | 2.82  | 3.08  | 0.13 | 0.13 | -1.2  | 0.103121 | 0.12465  | 0.462758 | 0.395085 |
| MmugDNA.21669.1.S1_at   | MmugDNA.21669.1 | 5.4   | 5.63  | 0.29 | 0.13 | -1.17 | 0.319574 | 0.413324 | 0.649068 | 0.639596 |
| MmugDNA.21670.1.S1_at   | MmugDNA.21670.1 | 3.74  | 3.59  | 0.28 | 0.06 | 1.11  | 0.390912 | 0.53827  | 0.693845 | 0.723014 |
| MmugDNA.21672.1.S1_at   | MmugDNA.21672.1 | 5.87  | 5.95  | 0.69 | 0.14 | -1.06 | 0.600076 | 0.705898 | 0.815064 | 0.829555 |
| MmugDNA.21673.1.S1_at   | MmugDNA.21673.1 | 5.03  | 5.02  | 0.66 | 0.13 | 1.01  | 0.292739 | 0.2506   | 0.630064 | 0.51941  |
| MmugDNA.21674.1.S1_at   | MmugDNA.21674.1 | 3.66  | 3.47  | 0.03 | 0.11 | 1.14  | 0.096046 | 0.217277 | 0.454186 | 0.490911 |
| MmugDNA.21675.1.S1_at   | MmugDNA.21675.1 | 5.51  | 5.89  | 0.72 | 1.01 | -1.3  | 0.208253 | 0.249883 | 0.570117 | 0.518876 |
| MmugDNA.21676.1.S1_at   | MmugDNA.21676.1 | 5.78  | 5.68  | 0.63 | 0.25 | 1.07  | 0.827058 | 0.85004  | 0.92975  | 0.914681 |
| MmugDNA.21677.1.S1_at   | MmugDNA.21677.1 | 3.36  | 3.51  | 0.18 | 0.14 | -1.11 | 0.288077 | 0.327787 | 0.626381 | 0.577604 |
| MmugDNA.21678.1.S1_at   | MmugDNA.21678.1 | 4.71  | 3.98  | 0.17 | 0.23 | 1.66  | 0.038286 | 0.051529 | 0.34385  | 0.27241  |
| MmugDNA.21679.1.S1_at   | MmugDNA.21679.1 | 3.52  | 3.58  | 0.07 | 0.07 | -1.04 | 0.437121 | 0.349239 | 0.722208 | 0.593267 |
| MmugDNA.21680.1.S1_at   | MmugDNA.21680.1 | 6.29  | 6.4   | 0.84 | 0.45 | -1.08 | 0.749742 | 0.904997 | 0.892763 | 0.946165 |
| MmugDNA.21681.1.S1_at   | MmugDNA.21681.1 | 11.13 | 10.32 | 0.16 | 0.18 | 1.76  | 0.006993 | 0.001554 | 0.202858 | 0.059629 |
| MmugDNA.21683.1.S1_at   | MmugDNA.21683.1 | 4.75  | 4.11  | 0.38 | 0.35 | 1.57  | 0.20188  | 0.178195 | 0.564129 | 0.454531 |
| MmugDNA.21685.1.S1_at   | MmugDNA.21685.1 | 3.59  | 3.69  | 0.04 | 0.24 | -1.07 | 0.217284 | 0.298093 | 0.576846 | 0.556726 |
| MmugDNA.21686.1.S1_at   | MmugDNA.21686.1 | 8.09  | 8.32  | 0.09 | 0.14 | -1.18 | 0.355481 | 0.002893 | 0.671091 | 0.079107 |
| MmugDNA.21687.1.S1_at   | MmugDNA.21687.1 | 6.24  | 6.25  | 0.06 | 0.16 | -1.01 | 0.614078 | 0.800224 | 0.823094 | 0.885129 |
| MmugDNA.21688.1.S1_at   | MmugDNA.21688.1 | 5.47  | 5.62  | 0.05 | 0.16 | -1.11 | 0.137025 | 0.208653 | 0.504271 | 0.482544 |
| MmugDNA.21689.1.S1_at   | MmugDNA.21689.1 | 7.46  | 8.91  | 1.34 | 1.83 | -2.74 | 0.176969 | 0.202171 | 0.54084  | 0.476559 |
| MmugDNA.2169.1.S1_at    | MmugDNA.2169.1  | 7.14  | 7.1   | 0.04 | 0.24 | 1.03  | 0.853573 | 0.809729 | 0.940892 | 0.890333 |
| MmugDNA.21690.1.S1_at   | MmugDNA.21690.1 | 7.35  | 7.49  | 0.25 | 0.57 | -1.1  | 0.9457   | 0.506822 | 0.979255 | 0.702605 |
| MmugDNA.21693.1.S1_at   | MmugDNA.21693.1 | 4.79  | 4.77  | 0.2  | 0.1  | 1.01  | 0.797288 | 0.704901 | 0.915995 | 0.828857 |
| MmugDNA.21694.1.S1_at   | MmugDNA.21694.1 | 3.39  | 3.35  | 0.15 | 0.68 | 1.02  | 0.40818  | 0.645055 | 0.70497  | 0.791993 |

|                        |                 |       |       |      |      |       |          |          |          |          |
|------------------------|-----------------|-------|-------|------|------|-------|----------|----------|----------|----------|
| MmugDNA.21696.1.S1_at  | MmugDNA.21696.1 | 10.37 | 10.04 | 0.17 | 1.41 | 1.26  | 0.587834 | 0.703986 | 0.808759 | 0.828326 |
| MmugDNA.21698.1.S1_at  | MmugDNA.21698.1 | 6.31  | 5.95  | 0.18 | 0.19 | 1.28  | 0.019574 | 0.001934 | 0.275212 | 0.065795 |
| MmugDNA.217.1.S1_at    | MmugDNA.217.1   | 3.81  | 4.28  | 0.21 | 0.38 | -1.39 | 0.227595 | 0.232913 | 0.585103 | 0.50445  |
| MmugDNA.21700.1.S1_at  | MmugDNA.21700.1 | 3.65  | 3.68  | 0.15 | 0.02 | -1.03 | 0.654484 | 0.665175 | 0.844586 | 0.803767 |
| MmugDNA.21703.1.S1_at  | MmugDNA.21703.1 | 4.75  | 3.15  | 0.69 | 0.2  | 3.04  | 0.052598 | 0.057407 | 0.378269 | 0.285608 |
| MmugDNA.21704.1.S1_at  | MmugDNA.21704.1 | 6.85  | 7.56  | 0.45 | 0.38 | -1.64 | 0.350832 | 0.188063 | 0.668785 | 0.464164 |
| MmugDNA.21707.1.S1_at  | MmugDNA.21707.1 | 4.29  | 4.16  | 0.3  | 0.26 | 1.1   | 0.279092 | 0.362643 | 0.620933 | 0.603188 |
| MmugDNA.21709.1.S1_at  | MmugDNA.21709.1 | 3.2   | 2.99  | 0.76 | 0.08 | 1.16  | 0.229197 | 0.27171  | 0.586444 | 0.536577 |
| MmugDNA.2171.1.S1_at   | MmugDNA.2171.1  | 5.92  | 6.09  | 0.56 | 0.11 | -1.13 | 0.79734  | 0.528156 | 0.916012 | 0.716456 |
| MmugDNA.21710.1.S1_at  | MmugDNA.21710.1 | 9.73  | 8.97  | 0.32 | 0.57 | 1.69  | 0.167963 | 0.069384 | 0.53244  | 0.309615 |
| MmugDNA.21711.1.S1_at  | MmugDNA.21711.1 | 4.1   | 4.72  | 0.27 | 0.25 | -1.54 | 0.091208 | 0.125652 | 0.447111 | 0.396249 |
| MmugDNA.21712.1.S1_at  | MmugDNA.21712.1 | 9.06  | 8.78  | 0.26 | 0.35 | 1.21  | 0.547694 | 0.313079 | 0.786269 | 0.567649 |
| MmugDNA.21713.1.S1_at  | MmugDNA.21713.1 | 4.14  | 3.95  | 0.94 | 0.09 | 1.14  | 0.350616 | 0.461498 | 0.668568 | 0.673152 |
| MmugDNA.21715.1.S1_at  | MmugDNA.21715.1 | 9.15  | 8.79  | 0.11 | 0.09 | 1.28  | 0.010439 | 0.016841 | 0.229855 | 0.164506 |
| MmugDNA.21716.1.S1_at  | MmugDNA.21716.1 | 11.11 | 11.06 | 0.02 | 0.2  | 1.04  | 0.719359 | 0.053657 | 0.876814 | 0.277225 |
| MmugDNA.21717.1.S1_at  | MmugDNA.21717.1 | 4.44  | 3.96  | 0.2  | 0.17 | 1.39  | 0.086789 | 0.226919 | 0.440475 | 0.499276 |
| MmugDNA.21718.1.S1_at  | MmugDNA.21718.1 | 4.08  | 4.35  | 0.14 | 0.13 | -1.21 | 0.113924 | 0.243354 | 0.477339 | 0.513384 |
| MmugDNA.21720.1.S1_at  | MmugDNA.21720.1 | 5.25  | 5.47  | 0.09 | 0.16 | -1.17 | 0.083324 | 0.145304 | 0.435702 | 0.41934  |
| MmugDNA.21721.1.S1_at  | MmugDNA.21721.1 | 10.08 | 9.97  | 0.09 | 0.18 | 1.08  | 0.128724 | 0.215147 | 0.494664 | 0.488943 |
| MmugDNA.21724.1.S1_at  | MmugDNA.21724.1 | 5.12  | 5.08  | 0.12 | 0.2  | 1.03  | 0.717251 | 0.317303 | 0.87574  | 0.570532 |
| MmugDNA.21727.1.S1_at  | MmugDNA.21727.1 | 5.03  | 5.85  | 0.43 | 0.29 | -1.77 | 0.231481 | 0.253513 | 0.587406 | 0.521823 |
| MmugDNA.21728.1.S1_at  | MmugDNA.21728.1 | 6.12  | 5.96  | 0.29 | 0.42 | 1.11  | 0.891457 | 0.964164 | 0.956755 | 0.980052 |
| MmugDNA.21729.1.S1_at  | MmugDNA.21729.1 | 6.31  | 6.28  | 0.09 | 0.04 | 1.02  | 0.322746 | 0.022763 | 0.651245 | 0.188931 |
| MmugDNA.21730.1.S1_at  | MmugDNA.21730.1 | 7.31  | 7.42  | 0.09 | 0.09 | -1.08 | 0.161962 | 0.143675 | 0.526638 | 0.417555 |
| MmugDNA.21731.1.S1_at  | MmugDNA.21731.1 | 4.01  | 4.41  | 0.08 | 0.24 | -1.32 | 0.043551 | 0.043168 | 0.356798 | 0.252528 |
| MmugDNA.21732.1.S1_at  | MmugDNA.21732.1 | 8.77  | 9.66  | 0.46 | 0.41 | -1.86 | 0.045716 | 0.025682 | 0.361579 | 0.200834 |
| MmugDNA.21733.1.S1_at  | MmugDNA.21733.1 | 5.91  | 4.67  | 1.06 | 0.17 | 2.36  | 0.317659 | 0.432119 | 0.648004 | 0.652775 |
| MmugDNA.9679.1.S1_s_at | MmugDNA.9679.1  | 10.83 | 10.44 | 0.17 | 0.35 | 1.32  | 0.199098 | 0.06859  | 0.562104 | 0.308466 |
| MmugDNA.21736.1.S1_at  | MmugDNA.21736.1 | 3.01  | 2.81  | 0.35 | 0.29 | 1.15  | 0.213665 | 0.546911 | 0.573925 | 0.728281 |
| MmugDNA.21739.1.S1_at  | MmugDNA.21739.1 | 4.82  | 4.79  | 0.14 | 0.13 | 1.02  | 0.662671 | 0.703738 | 0.848768 | 0.828214 |
| MmugDNA.2174.1.S1_at   | MmugDNA.2174.1  | 6.18  | 5.07  | 0.36 | 1.05 | 2.16  | 0.503715 | 0.59549  | 0.760979 | 0.759091 |
| MmugDNA.21741.1.S1_at  | MmugDNA.21741.1 | 9.02  | 8.94  | 0.07 | 0.18 | 1.06  | 0.424775 | 0.335378 | 0.714778 | 0.583158 |
| MmugDNA.21742.1.S1_at  | MmugDNA.21742.1 | 4.94  | 4.84  | 0.1  | 0.32 | 1.07  | 0.819147 | 0.951265 | 0.926528 | 0.972381 |
| MmugDNA.21743.1.S1_at  | MmugDNA.21743.1 | 3.52  | 3.53  | 0.43 | 0.12 | -1.01 | 0.405172 | 0.503049 | 0.703082 | 0.700559 |
| MmugDNA.21744.1.S1_at  | MmugDNA.21744.1 | 5.37  | 5.41  | 0.12 | 0.31 | -1.03 | 0.991422 | 0.702804 | 0.99695  | 0.827716 |
| MmugDNA.21746.1.S1_at  | MmugDNA.21746.1 | 9.06  | 9.51  | 0.42 | 0.61 | -1.37 | 0.13397  | 0.110186 | 0.500516 | 0.374331 |
| MmugDNA.21747.1.S1_at  | MmugDNA.21747.1 | 5     | 5.05  | 0.11 | 0    | -1.04 | 0.836996 | 0.730695 | 0.934109 | 0.844055 |
| MmugDNA.21750.1.S1_at  | MmugDNA.21750.1 | 5.47  | 5.47  | 0.07 | 0.04 | 1     | 0.77029  | 0.859573 | 0.90333  | 0.919999 |
| MmugDNA.21751.1.S1_at  | MmugDNA.21751.1 | 7.12  | 6.93  | 0.28 | 0.22 | 1.14  | 0.343868 | 0.219182 | 0.664081 | 0.492919 |
| MmugDNA.21752.1.S1_at  | MmugDNA.21752.1 | 3.24  | 3.37  | 0.28 | 0.1  | -1.1  | 0.676082 | 0.46208  | 0.854832 | 0.673537 |
| MmugDNA.21753.1.S1_at  | MmugDNA.21753.1 | 8.67  | 8.4   | 0.41 | 0.83 | 1.21  | 0.878977 | 0.625054 | 0.951455 | 0.778973 |

|                         |                 |       |       |      |      |       |          |          |          |          |
|-------------------------|-----------------|-------|-------|------|------|-------|----------|----------|----------|----------|
| MmugDNA.21754.1.S1_s_at | MmugDNA.21754.1 | 6.8   | 6.94  | 0.38 | 0.32 | -1.1  | 0.666079 | 0.852664 | 0.850262 | 0.916254 |
| MmugDNA.21755.1.S1_at   | MmugDNA.21755.1 | 5.34  | 5.74  | 0.07 | 0.21 | -1.33 | 0.088812 | 0.089558 | 0.443684 | 0.343811 |
| MmugDNA.21757.1.S1_at   | MmugDNA.21757.1 | 4.1   | 4.29  | 0.03 | 0.17 | -1.14 | 0.145099 | 0.14156  | 0.511224 | 0.415063 |
| MmugDNA.21758.1.S1_at   | MmugDNA.21758.1 | 7.49  | 7.06  | 0.31 | 0.6  | 1.35  | 0.120744 | 0.142406 | 0.48574  | 0.415965 |
| MmugDNA.21759.1.S1_at   | MmugDNA.21759.1 | 7.07  | 7.06  | 0.04 | 0.18 | 1.01  | 0.380231 | 0.523871 | 0.68724  | 0.714052 |
| MmugDNA.21760.1.S1_at   | MmugDNA.21760.1 | 4.33  | 4.19  | 0.07 | 0.32 | 1.1   | 0.78868  | 0.925959 | 0.912194 | 0.958059 |
| MmugDNA.21761.1.S1_at   | MmugDNA.21761.1 | 5.51  | 5.6   | 1.09 | 0.4  | -1.06 | 0.533966 | 0.631561 | 0.77847  | 0.782845 |
| MmugDNA.21763.1.S1_at   | MmugDNA.21763.1 | 3.56  | 3.69  | 0.23 | 0.23 | -1.09 | 0.487361 | 0.649942 | 0.75209  | 0.795295 |
| MmugDNA.21764.1.S1_at   | MmugDNA.21764.1 | 4.76  | 4.99  | 0.36 | 0.09 | -1.18 | 0.90334  | 0.494663 | 0.961429 | 0.69497  |
| MmugDNA.21765.1.S1_at   | MmugDNA.21765.1 | 3.07  | 3.06  | 0.16 | 0.19 | 1.01  | 0.541629 | 0.732374 | 0.782793 | 0.844986 |
| MmugDNA.21766.1.S1_at   | MmugDNA.21766.1 | 5.46  | 5.76  | 0.45 | 0.05 | -1.22 | 0.38108  | 0.321699 | 0.687687 | 0.573346 |
| MmugDNA.21767.1.S1_at   | MmugDNA.21767.1 | 4.61  | 3.99  | 0.66 | 0.57 | 1.53  | 0.2569   | 0.371385 | 0.60443  | 0.610177 |
| MmugDNA.21769.1.S1_at   | MmugDNA.21769.1 | 9.53  | 8.73  | 0.68 | 0.25 | 1.75  | 0.384817 | 0.433556 | 0.690114 | 0.653828 |
| MmugDNA.2177.1.S1_at    | MmugDNA.2177.1  | 5.84  | 5.97  | 0.18 | 0.08 | -1.09 | 0.201068 | 0.233306 | 0.563821 | 0.50468  |
| MmugDNA.21770.1.S1_at   | MmugDNA.21770.1 | 10.25 | 9.93  | 0.33 | 0.43 | 1.25  | 0.811999 | 0.772599 | 0.923484 | 0.867785 |
| MmugDNA.21771.1.S1_at   | MmugDNA.21771.1 | 7.61  | 7.19  | 0.29 | 0.28 | 1.34  | 0.061876 | 0.068725 | 0.396761 | 0.308711 |
| MmugDNA.21772.1.S1_at   | MmugDNA.21772.1 | 4.14  | 4.18  | 0.21 | 0.09 | -1.02 | 0.495533 | 0.297879 | 0.757268 | 0.556563 |
| MmugDNA.21773.1.S1_at   | MmugDNA.21773.1 | 6.91  | 6.87  | 0.28 | 0.18 | 1.02  | 0.385805 | 0.361657 | 0.690905 | 0.602408 |
| MmugDNA.21774.1.S1_at   | MmugDNA.21774.1 | 4.33  | 4.58  | 0.99 | 0.12 | -1.19 | 0.542771 | 0.497991 | 0.783614 | 0.697181 |
| MmugDNA.21775.1.S1_at   | MmugDNA.21775.1 | 4.89  | 5.16  | 0.2  | 0.44 | -1.21 | 0.238882 | 0.06958  | 0.59202  | 0.309848 |
| MmugDNA.21776.1.S1_at   | MmugDNA.21776.1 | 8.92  | 8.62  | 0.72 | 0.33 | 1.23  | 0.891745 | 0.093798 | 0.956869 | 0.350281 |
| MmugDNA.21777.1.S1_at   | MmugDNA.21777.1 | 3.27  | 3.46  | 0.18 | 0.11 | -1.14 | 0.262004 | 0.222599 | 0.608668 | 0.495617 |
| MmugDNA.21778.1.S1_at   | MmugDNA.21778.1 | 9.04  | 8.73  | 0.2  | 0.74 | 1.24  | 0.740458 | 0.253197 | 0.888634 | 0.521578 |
| MmugDNA.21779.1.S1_at   | MmugDNA.21779.1 | 5.41  | 4.75  | 0.32 | 0.41 | 1.58  | 0.107406 | 0.121317 | 0.468045 | 0.390351 |
| MmugDNA.2178.1.S1_s_at  | MmugDNA.2178.1  | 10.68 | 11.62 | 1.26 | 0.75 | -1.92 | 0.273897 | 0.317257 | 0.617262 | 0.570489 |
| MmugDNA.21780.1.S1_at   | MmugDNA.21780.1 | 9.23  | 8.84  | 0.21 | 0.17 | 1.31  | 0.054168 | 0.047114 | 0.381696 | 0.261624 |
| MmugDNA.21781.1.S1_at   | MmugDNA.21781.1 | 10.17 | 9.13  | 0.15 | 0.5  | 2.06  | 0.049594 | 0.030812 | 0.371542 | 0.217376 |
| MmugDNA.21782.1.S1_at   | MmugDNA.21782.1 | 10.45 | 9.99  | 0.53 | 0.3  | 1.38  | 0.510118 | 0.596673 | 0.764729 | 0.75976  |
| MmugDNA.21783.1.S1_at   | MmugDNA.21783.1 | 10.24 | 9.89  | 0.15 | 0.54 | 1.27  | 0.262277 | 0.073211 | 0.608902 | 0.316124 |
| MmugDNA.21784.1.S1_at   | MmugDNA.21784.1 | 4.58  | 3.46  | 0.56 | 0.09 | 2.17  | 0.023778 | 0.008028 | 0.292771 | 0.119047 |
| MmugDNA.21785.1.S1_at   | MmugDNA.21785.1 | 4.44  | 4.56  | 0.26 | 0.21 | -1.09 | 0.614977 | 0.347303 | 0.823328 | 0.59192  |
| MmugDNA.21786.1.S1_at   | MmugDNA.21786.1 | 4.07  | 4.08  | 0.1  | 0.02 | -1.01 | 0.598371 | 0.502854 | 0.813939 | 0.700392 |
| MmugDNA.21788.1.S1_at   | MmugDNA.21788.1 | 5.56  | 5.27  | 0.16 | 0.17 | 1.22  | 0.187304 | 0.189283 | 0.550374 | 0.465059 |
| MmugDNA.21789.1.S1_at   | MmugDNA.21789.1 | 5.09  | 5.19  | 0.08 | 0.22 | -1.07 | 0.181715 | 0.153599 | 0.546282 | 0.428341 |
| MmugDNA.2179.1.S1_at    | MmugDNA.2179.1  | 4.57  | 4.6   | 0.18 | 0.24 | -1.02 | 0.827682 | 0.152958 | 0.930084 | 0.42777  |
| MmugDNA.21790.1.S1_at   | MmugDNA.21790.1 | 5.81  | 7.77  | 0.27 | 1.73 | -3.89 | 0.157114 | 0.191396 | 0.521923 | 0.466769 |
| MmugDNA.21791.1.S1_at   | MmugDNA.21791.1 | 5.02  | 5.24  | 0.33 | 0.12 | -1.16 | 0.950413 | 0.809886 | 0.981318 | 0.89045  |
| MmugDNA.21792.1.S1_at   | MmugDNA.21792.1 | 4.22  | 4.22  | 0.07 | 0.12 | 1     | 0.367198 | 0.612423 | 0.67932  | 0.770044 |
| MmugDNA.21793.1.S1_at   | MmugDNA.21793.1 | 4.02  | 4.26  | 0.18 | 0.05 | -1.19 | 0.25073  | 0.074229 | 0.600389 | 0.318046 |
| MmugDNA.21794.1.S1_at   | MmugDNA.21794.1 | 8.12  | 8.23  | 0.18 | 0.14 | -1.08 | 0.186864 | 0.163422 | 0.550106 | 0.439629 |
| MmugDNA.21796.1.S1_at   | MmugDNA.21796.1 | 5.98  | 5.77  | 0.28 | 0.14 | 1.16  | 0.235941 | 0.308656 | 0.589881 | 0.56461  |

|                         |                 |       |       |      |      |        |          |          |          |          |
|-------------------------|-----------------|-------|-------|------|------|--------|----------|----------|----------|----------|
| MmugDNA.21797.1.S1_at   | MmugDNA.21797.1 | 5.55  | 5.23  | 0.24 | 0.22 | 1.25   | 0.397513 | 0.517246 | 0.697949 | 0.709435 |
| MmugDNA.21798.1.S1_at   | MmugDNA.21798.1 | 4.28  | 3.78  | 0.46 | 0.17 | 1.42   | 0.106828 | 0.130819 | 0.467551 | 0.403015 |
| MmugDNA.21799.1.S1_at   | MmugDNA.21799.1 | 4.35  | 4.51  | 0.14 | 0.23 | -1.12  | 0.255895 | 0.360867 | 0.603662 | 0.601938 |
| MmugDNA.218.1.S1_at     | MmugDNA.218.1   | 4.88  | 5.21  | 0.52 | 0.29 | -1.26  | 0.239529 | 0.169065 | 0.592545 | 0.445593 |
| MmugDNA.2180.1.S1_at    | MmugDNA.2180.1  | 5.18  | 4.43  | 0.54 | 1.75 | 1.69   | 0.723027 | 0.265962 | 0.878961 | 0.531796 |
| MmugDNA.21800.1.S1_at   | MmugDNA.21800.1 | 4.94  | 6.13  | 0.84 | 0.32 | -2.29  | 0.107222 | 0.054858 | 0.467913 | 0.279693 |
| MmugDNA.21801.1.S1_at   | MmugDNA.21801.1 | 3.95  | 3.9   | 0.1  | 0.11 | 1.03   | 0.803965 | 0.376662 | 0.919355 | 0.614483 |
| MmugDNA.21802.1.S1_at   | MmugDNA.21802.1 | 5.15  | 4.33  | 0.2  | 0.21 | 1.77   | 0.008171 | 0.002977 | 0.216841 | 0.079958 |
| MmugDNA.21804.1.S1_at   | MmugDNA.21804.1 | 4.21  | 4.14  | 0.22 | 0.03 | 1.05   | 0.828814 | 0.73326  | 0.930517 | 0.845573 |
| MmugDNA.21805.1.S1_at   | MmugDNA.21805.1 | 5.34  | 4.82  | 0.23 | 0.39 | 1.43   | 0.182366 | 0.258365 | 0.546756 | 0.525631 |
| MmugDNA.2181.1.S1_at    | MmugDNA.2181.1  | 4.28  | 4.42  | 0.04 | 0.3  | -1.09  | 0.160343 | 0.203008 | 0.525289 | 0.477343 |
| MmugDNA.21810.1.S1_at   | MmugDNA.21810.1 | 5.04  | 4.92  | 0.23 | 0.07 | 1.08   | 0.179995 | 0.044962 | 0.544166 | 0.256489 |
| MmugDNA.21812.1.S1_at   | MmugDNA.21812.1 | 6.56  | 6.48  | 0.45 | 0.52 | 1.06   | 0.185404 | 0.350178 | 0.548852 | 0.593948 |
| MmugDNA.21813.1.S1_at   | MmugDNA.21813.1 | 3.87  | 3.98  | 0.21 | 0.31 | -1.08  | 0.953419 | 0.98869  | 0.982754 | 0.993595 |
| MmugDNA.21815.1.S1_x_at | MmugDNA.21815.1 | 7.27  | 7.45  | 0.54 | 0.17 | -1.13  | 0.692362 | 0.772704 | 0.86337  | 0.867816 |
| MmugDNA.21816.1.S1_at   | MmugDNA.21816.1 | 4.62  | 4.54  | 0.24 | 0.07 | 1.06   | 0.397191 | 0.493673 | 0.697545 | 0.694288 |
| MmugDNA.21819.1.S1_at   | MmugDNA.21819.1 | 4.98  | 5     | 0.12 | 0.13 | -1.01  | 0.625078 | 0.08374  | 0.828647 | 0.334485 |
| MmugDNA.2182.1.S1_at    | MmugDNA.2182.1  | 4.6   | 4.31  | 0.47 | 0.14 | 1.22   | 0.328646 | 0.427072 | 0.654431 | 0.649087 |
| MmugDNA.21820.1.S1_at   | MmugDNA.21820.1 | 5.97  | 9.99  | 1.93 | 3.3  | -16.13 | 0.535684 | 0.349409 | 0.779283 | 0.593406 |
| MmugDNA.21821.1.S1_at   | MmugDNA.21821.1 | 5.44  | 5.23  | 0.22 | 0.27 | 1.15   | 0.10672  | 0.109739 | 0.467499 | 0.373701 |
| MmugDNA.21822.1.S1_at   | MmugDNA.21822.1 | 5.88  | 5.9   | 0.1  | 0.18 | -1.02  | 0.50841  | 0.195895 | 0.7637   | 0.470812 |
| MmugDNA.21823.1.S1_at   | MmugDNA.21823.1 | 13.24 | 12.91 | 0.08 | 0.28 | 1.25   | 0.135177 | 0.136064 | 0.501995 | 0.408363 |
| MmugDNA.21824.1.S1_at   | MmugDNA.21824.1 | 3.67  | 3.37  | 0.21 | 0.19 | 1.23   | 0.078729 | 0.222741 | 0.428609 | 0.49569  |
| MmugDNA.21825.1.S1_at   | MmugDNA.21825.1 | 11.59 | 9.93  | 0.26 | 0.58 | 3.18   | 0.019103 | 0.01022  | 0.273018 | 0.132544 |
| MmugDNA.21827.1.S1_at   | MmugDNA.21827.1 | 10.25 | 11.02 | 0.21 | 0.2  | -1.7   | 0.035699 | 0.028851 | 0.337364 | 0.211661 |
| MmugDNA.21828.1.S1_at   | MmugDNA.21828.1 | 9.25  | 8.86  | 0.48 | 0.57 | 1.31   | 0.613607 | 0.145074 | 0.822845 | 0.419047 |
| MmugDNA.2183.1.S1_at    | MmugDNA.2183.1  | 7.17  | 7.59  | 0.45 | 0.4  | -1.34  | 0.319949 | 0.341751 | 0.649244 | 0.587862 |
| MmugDNA.21830.1.S1_at   | MmugDNA.21830.1 | 9.57  | 8.98  | 0.78 | 0.88 | 1.51   | 0.983729 | 0.430905 | 0.994242 | 0.651894 |
| MmugDNA.21831.1.S1_at   | MmugDNA.21831.1 | 4.45  | 4.48  | 0.22 | 0.11 | -1.02  | 0.774923 | 0.920269 | 0.905462 | 0.95511  |
| MmugDNA.21832.1.S1_at   | MmugDNA.21832.1 | 5.52  | 6.53  | 0.57 | 0.72 | -2.01  | 0.239944 | 0.310451 | 0.592852 | 0.565661 |
| MmugDNA.21833.1.S1_at   | MmugDNA.21833.1 | 8.47  | 8.07  | 0.39 | 0.49 | 1.32   | 0.678027 | 0.841254 | 0.855759 | 0.909576 |
| MmugDNA.21834.1.S1_at   | MmugDNA.21834.1 | 4.02  | 3.9   | 0.22 | 0.15 | 1.09   | 0.814688 | 0.613863 | 0.924758 | 0.770884 |
| MmugDNA.21836.1.S1_at   | MmugDNA.21836.1 | 7.63  | 6.34  | 0.65 | 0.32 | 2.43   | 0.095691 | 0.165057 | 0.453501 | 0.441242 |
| MmugDNA.21837.1.S1_at   | MmugDNA.21837.1 | 10.16 | 10    | 0.08 | 0.3  | 1.12   | 0.381858 | 0.125462 | 0.688282 | 0.396116 |
| MmugDNA.21837.1.S1_s_at | MmugDNA.21837.1 | 9.8   | 9.82  | 0.09 | 0.27 | -1.01  | 0.851573 | 0.100673 | 0.940264 | 0.360037 |
| MmugDNA.21838.1.S1_s_at | MmugDNA.21838.1 | 7.35  | 7.28  | 0.2  | 0.65 | 1.05   | 0.701877 | 0.655715 | 0.868197 | 0.7987   |
| MmugDNA.21841.1.S1_s_at | MmugDNA.21841.1 | 7.15  | 7.2   | 0.11 | 0.14 | -1.03  | 0.706919 | 0.081562 | 0.870891 | 0.329764 |
| MmugDNA.33727.1.S1_s_at | MmugDNA.33727.1 | 7.86  | 7.68  | 0.23 | 0.51 | 1.13   | 0.572296 | 0.311867 | 0.800678 | 0.56683  |
| MmugDNA.21843.1.S1_at   | MmugDNA.21843.1 | 8.49  | 8.1   | 0.37 | 0.45 | 1.31   | 0.717811 | 0.199494 | 0.876127 | 0.474096 |
| MmugDNA.21845.1.S1_at   | MmugDNA.21845.1 | 6.45  | 6.74  | 0.65 | 0.37 | -1.22  | 0.955816 | 0.90502  | 0.983384 | 0.946165 |
| MmugDNA.21846.1.S1_at   | MmugDNA.21846.1 | 5.6   | 5.77  | 0.24 | 0.4  | -1.13  | 0.448582 | 0.631919 | 0.729722 | 0.78303  |

|                         |                 |       |       |      |      |       |          |          |          |          |
|-------------------------|-----------------|-------|-------|------|------|-------|----------|----------|----------|----------|
| MmugDNA.21848.1.S1_at   | MmugDNA.21848.1 | 8.96  | 8.01  | 0.48 | 0.38 | 1.93  | 0.066565 | 0.060899 | 0.406564 | 0.293504 |
| MmugDNA.21849.1.S1_at   | MmugDNA.21849.1 | 3.87  | 3.25  | 0.77 | 0.13 | 1.53  | 0.195894 | 0.221528 | 0.558998 | 0.494849 |
| MmugDNA.21850.1.S1_at   | MmugDNA.21850.1 | 3.92  | 3.78  | 0.15 | 0    | 1.1   | 0.498354 | 0.684327 | 0.75837  | 0.815899 |
| MmugDNA.21851.1.S1_at   | MmugDNA.21851.1 | 6.18  | 6.08  | 0.11 | 0.19 | 1.08  | 0.969893 | 0.866106 | 0.98846  | 0.923808 |
| MmugDNA.21853.1.S1_at   | MmugDNA.21853.1 | 3.05  | 3.08  | 0.1  | 0.03 | -1.02 | 0.761543 | 0.921488 | 0.899581 | 0.955761 |
| MmugDNA.21854.1.S1_at   | MmugDNA.21854.1 | 3.93  | 4.03  | 0.12 | 0.14 | -1.08 | 0.818352 | 0.045467 | 0.926289 | 0.2575   |
| MmugDNA.21855.1.S1_s_at | MmugDNA.21855.1 | 6.02  | 6.21  | 0    | 0.14 | -1.14 | 0.123947 | 0.039762 | 0.489682 | 0.244402 |
| MmugDNA.21857.1.S1_at   | MmugDNA.21857.1 | 4.09  | 4.27  | 0.09 | 0.19 | -1.13 | 0.115507 | 0.133579 | 0.478809 | 0.405542 |
| MmugDNA.21858.1.S1_at   | MmugDNA.21858.1 | 10.74 | 10.58 | 0.1  | 0.12 | 1.12  | 0.297651 | 0.796111 | 0.63339  | 0.882495 |
| MmugDNA.21858.1.S1_s_at | MmugDNA.21858.1 | 10.33 | 10.2  | 0.12 | 0.12 | 1.09  | 0.684788 | 0.060693 | 0.858795 | 0.292935 |
| MmugDNA.21859.1.S1_at   | MmugDNA.21859.1 | 4.24  | 4.18  | 0.08 | 0.09 | 1.05  | 0.163078 | 0.324663 | 0.52748  | 0.575208 |
| MmugDNA.21860.1.S1_at   | MmugDNA.21860.1 | 5.25  | 5.46  | 0.05 | 0.27 | -1.15 | 0.266384 | 0.095686 | 0.61189  | 0.3527   |
| MmugDNA.21861.1.S1_at   | MmugDNA.21861.1 | 5.74  | 5.48  | 1.19 | 0.26 | 1.2   | 0.437897 | 0.46372  | 0.722606 | 0.674626 |
| MmugDNA.21862.1.S1_at   | MmugDNA.21862.1 | 6.42  | 6.44  | 0.25 | 0.13 | -1.01 | 0.419136 | 0.557103 | 0.711691 | 0.73494  |
| MmugDNA.21863.1.S1_at   | MmugDNA.21863.1 | 3.37  | 3.49  | 0.18 | 0.27 | -1.08 | 0.774587 | 0.919918 | 0.905301 | 0.954962 |
| MmugDNA.21864.1.S1_at   | MmugDNA.21864.1 | 6.02  | 6.08  | 0.32 | 0.09 | -1.04 | 0.697249 | 0.854714 | 0.865585 | 0.91719  |
| MmugDNA.21869.1.S1_at   | MmugDNA.21869.1 | 8.3   | 7.51  | 0.2  | 0.25 | 1.73  | 0.007905 | 0.000938 | 0.214199 | 0.049026 |
| MmugDNA.21871.1.S1_at   | MmugDNA.21871.1 | 4.05  | 4.22  | 0.25 | 0.36 | -1.13 | 0.90201  | 0.950361 | 0.960872 | 0.971738 |
| MmugDNA.21872.1.S1_at   | MmugDNA.21872.1 | 7.5   | 6.64  | 0.19 | 0.51 | 1.82  | 0.0989   | 0.07702  | 0.458711 | 0.32248  |
| MmugDNA.21874.1.S1_at   | MmugDNA.21874.1 | 5.46  | 5.48  | 0.12 | 0.17 | -1.02 | 0.993012 | 0.908011 | 0.997597 | 0.947889 |
| MmugDNA.21877.1.S1_at   | MmugDNA.21877.1 | 6.08  | 5.68  | 0.19 | 0.07 | 1.32  | 0.031357 | 0.018603 | 0.321546 | 0.171539 |
| MmugDNA.21879.1.S1_at   | MmugDNA.21879.1 | 7.92  | 7.6   | 0.6  | 0.8  | 1.25  | 0.123514 | 0.147477 | 0.489253 | 0.421765 |
| MmugDNA.2188.1.S1_at    | MmugDNA.2188.1  | 10.79 | 11.12 | 0.19 | 0.34 | -1.25 | 0.128116 | 0.094449 | 0.494307 | 0.351129 |
| MmugDNA.21880.1.S1_at   | MmugDNA.21880.1 | 4.94  | 5.28  | 0.62 | 0.74 | -1.26 | 0.90916  | 0.568812 | 0.964012 | 0.74211  |
| MmugDNA.21881.1.S1_at   | MmugDNA.21881.1 | 3.12  | 3.19  | 0.01 | 0.09 | -1.05 | 0.30085  | 0.559672 | 0.636012 | 0.736365 |
| MmugDNA.21882.1.S1_at   | MmugDNA.21882.1 | 5.8   | 5.93  | 0.12 | 0.08 | -1.1  | 0.189398 | 0.184344 | 0.552479 | 0.460458 |
| MmugDNA.21883.1.S1_at   | MmugDNA.21883.1 | 2.8   | 2.81  | 0.05 | 0.02 | -1.01 | 0.995289 | 0.791849 | 0.998318 | 0.87976  |
| MmugDNA.21884.1.S1_at   | MmugDNA.21884.1 | 3.56  | 4.07  | 0.23 | 0.75 | -1.42 | 0.223088 | 0.260075 | 0.581707 | 0.52675  |
| MmugDNA.21885.1.S1_s_at | MmugDNA.21885.1 | 11.27 | 11.82 | 0.11 | 0.31 | -1.47 | 0.167757 | 0.123211 | 0.532027 | 0.393273 |
| MmugDNA.21886.1.S1_at   | MmugDNA.21886.1 | 3.09  | 2.8   | 0.15 | 0.13 | 1.23  | 0.108809 | 0.132829 | 0.470333 | 0.404544 |
| MmugDNA.21888.1.S1_at   | MmugDNA.21888.1 | 3.35  | 3.13  | 0.79 | 0.09 | 1.16  | 0.254417 | 0.259165 | 0.602398 | 0.526264 |
| MmugDNA.2189.1.S1_at    | MmugDNA.2189.1  | 6.81  | 6.75  | 0.08 | 0.1  | 1.05  | 0.432143 | 0.259434 | 0.718823 | 0.526418 |
| MmugDNA.21890.1.S1_s_at | MmugDNA.21890.1 | 9.64  | 8.84  | 0.24 | 0.13 | 1.74  | 0.01609  | 0.010133 | 0.262631 | 0.131974 |
| MmugDNA.21891.1.S1_at   | MmugDNA.21891.1 | 5.97  | 5.98  | 0.15 | 0.18 | -1    | 0.553163 | 0.770009 | 0.789894 | 0.866428 |
| MmugDNA.21892.1.S1_at   | MmugDNA.21892.1 | 5.63  | 5.54  | 0.23 | 0.21 | 1.07  | 0.913311 | 0.924607 | 0.965663 | 0.957386 |
| MmugDNA.21893.1.S1_at   | MmugDNA.21893.1 | 5.5   | 5.77  | 0.13 | 0.21 | -1.21 | 0.205492 | 0.179556 | 0.568017 | 0.456011 |
| MmugDNA.21896.1.S1_at   | MmugDNA.21896.1 | 5     | 4.95  | 0.08 | 0.27 | 1.03  | 0.588772 | 0.525221 | 0.809146 | 0.714809 |
| MmugDNA.21897.1.S1_at   | MmugDNA.21897.1 | 3.98  | 4.04  | 0.06 | 0.12 | -1.04 | 0.245303 | 0.436104 | 0.596967 | 0.655802 |
| MmugDNA.21898.1.S1_at   | MmugDNA.21898.1 | 10.36 | 10.21 | 0.25 | 0.53 | 1.11  | 0.442216 | 0.55579  | 0.725406 | 0.734106 |
| MmugDNA.2190.1.S1_at    | MmugDNA.2190.1  | 6.45  | 6.72  | 0.2  | 0.25 | -1.21 | 0.585028 | 0.238418 | 0.807271 | 0.50907  |
| MmugDNA.21900.1.S1_at   | MmugDNA.21900.1 | 5.4   | 5.42  | 0.02 | 0.01 | -1.02 | 0.357307 | 0.955211 | 0.672207 | 0.97461  |

|                         |                 |       |       |      |      |       |          |          |          |          |
|-------------------------|-----------------|-------|-------|------|------|-------|----------|----------|----------|----------|
| MmugDNA.21901.1.S1_at   | MmugDNA.21901.1 | 9.97  | 9.69  | 0.27 | 0.44 | 1.21  | 0.414802 | 0.236755 | 0.709338 | 0.507512 |
| MmugDNA.21902.1.S1_at   | MmugDNA.21902.1 | 5.68  | 4.86  | 0.18 | 0.3  | 1.77  | 0.02321  | 0.015079 | 0.290295 | 0.155923 |
| MmugDNA.21903.1.S1_at   | MmugDNA.21903.1 | 6.59  | 6.93  | 0.76 | 0.21 | -1.27 | 0.43168  | 0.556053 | 0.718606 | 0.734325 |
| MmugDNA.21905.1.S1_at   | MmugDNA.21905.1 | 8.61  | 9.51  | 0.29 | 0.37 | -1.87 | 0.024709 | 0.007438 | 0.296144 | 0.115858 |
| MmugDNA.21906.1.S1_at   | MmugDNA.21906.1 | 12.81 | 12.6  | 0.07 | 0.35 | 1.16  | 0.468537 | 0.628806 | 0.741077 | 0.781444 |
| MmugDNA.21907.1.S1_at   | MmugDNA.21907.1 | 3.53  | 3.68  | 0.27 | 0.29 | -1.11 | 0.317944 | 0.454102 | 0.64802  | 0.668398 |
| MmugDNA.21908.1.S1_at   | MmugDNA.21908.1 | 4.57  | 4.68  | 0.16 | 0.31 | -1.08 | 0.648827 | 0.582025 | 0.84222  | 0.750784 |
| MmugDNA.21909.1.S1_at   | MmugDNA.21909.1 | 5.07  | 5.24  | 0.27 | 0.33 | -1.12 | 0.937392 | 0.995057 | 0.975858 | 0.996929 |
| MmugDNA.2191.1.S1_at    | MmugDNA.2191.1  | 3.57  | 3.74  | 0.37 | 0.16 | -1.13 | 0.872303 | 0.286688 | 0.948981 | 0.548077 |
| MmugDNA.21910.1.S1_at   | MmugDNA.21910.1 | 4.43  | 4.58  | 0.11 | 0.09 | -1.11 | 0.157333 | 0.199155 | 0.522148 | 0.473759 |
| MmugDNA.21911.1.S1_at   | MmugDNA.21911.1 | 6.43  | 6.72  | 0.12 | 0.05 | -1.22 | 0.016942 | 0.018269 | 0.266211 | 0.169975 |
| MmugDNA.21913.1.S1_at   | MmugDNA.21913.1 | 9.23  | 9.43  | 0.16 | 0.16 | -1.15 | 0.070896 | 0.040505 | 0.414673 | 0.246264 |
| MmugDNA.21914.1.S1_at   | MmugDNA.21914.1 | 7.15  | 6.93  | 0.38 | 0.84 | 1.17  | 0.670302 | 0.28023  | 0.852382 | 0.543487 |
| MmugDNA.21915.1.S1_at   | MmugDNA.21915.1 | 5.16  | 7.16  | 0.64 | 0.62 | -4    | 0.024208 | 0.012518 | 0.294535 | 0.144362 |
| MmugDNA.21916.1.S1_at   | MmugDNA.21916.1 | 3.3   | 3.17  | 0.07 | 0.02 | 1.09  | 0.027226 | 0.007369 | 0.307021 | 0.115284 |
| MmugDNA.21917.1.S1_at   | MmugDNA.21917.1 | 5.94  | 5.96  | 0.07 | 0.16 | -1.02 | 0.350559 | 0.125675 | 0.668568 | 0.396249 |
| MmugDNA.21918.1.S1_at   | MmugDNA.21918.1 | 5.62  | 5.74  | 0.05 | 0.37 | -1.08 | 0.371486 | 0.496804 | 0.682207 | 0.696208 |
| MmugDNA.21919.1.S1_s_at | MmugDNA.21919.1 | 8.53  | 9.07  | 0.94 | 0.92 | -1.46 | 0.668318 | 0.382232 | 0.85173  | 0.618433 |
| MmugDNA.2192.1.S1_at    | MmugDNA.2192.1  | 4.14  | 4.13  | 0.29 | 0.11 | 1.01  | 0.531507 | 0.347287 | 0.777243 | 0.591911 |
| MmugDNA.21921.1.S1_at   | MmugDNA.21921.1 | 3.85  | 3.94  | 0.09 | 0.12 | -1.06 | 0.372378 | 0.093418 | 0.682812 | 0.349657 |
| MmugDNA.21922.1.S1_at   | MmugDNA.21922.1 | 3.59  | 3.64  | 0.16 | 0.06 | -1.03 | 0.722603 | 0.569725 | 0.878815 | 0.742604 |
| MmugDNA.21923.1.S1_at   | MmugDNA.21923.1 | 5.23  | 5.32  | 0.43 | 0.23 | -1.06 | 0.748671 | 0.505926 | 0.892533 | 0.702265 |
| MmugDNA.21923.1.S1_s_at | MmugDNA.21923.1 | 2.82  | 2.86  | 0.72 | 0.16 | -1.02 | 0.540126 | 0.476154 | 0.781591 | 0.682535 |
| MmugDNA.21925.1.S1_at   | MmugDNA.21925.1 | 6.78  | 6.44  | 0.05 | 0.7  | 1.26  | 0.932074 | 0.987849 | 0.973719 | 0.993223 |
| MmugDNA.21926.1.S1_at   | MmugDNA.21926.1 | 4.39  | 4.36  | 0.03 | 0.04 | 1.02  | 0.421407 | 0.280548 | 0.713023 | 0.543725 |
| MmugDNA.21927.1.S1_at   | MmugDNA.21927.1 | 5.87  | 6.14  | 0.21 | 0.15 | -1.21 | 0.130941 | 0.096581 | 0.497248 | 0.354126 |
| MmugDNA.21929.1.S1_at   | MmugDNA.21929.1 | 4.97  | 4.98  | 0.11 | 0.08 | -1    | 0.492747 | 0.663737 | 0.755881 | 0.803123 |
| MmugDNA.2193.1.S1_at    | MmugDNA.2193.1  | 4.99  | 4.96  | 0.1  | 0.02 | 1.02  | 0.905289 | 0.183256 | 0.962165 | 0.459553 |
| MmugDNA.21930.1.S1_at   | MmugDNA.21930.1 | 6.16  | 6.63  | 0.19 | 0.02 | -1.38 | 0.031627 | 0.020496 | 0.322463 | 0.179723 |
| MmugDNA.21931.1.S1_at   | MmugDNA.21931.1 | 11.95 | 12.2  | 0.17 | 0.23 | -1.19 | 0.08867  | 0.101916 | 0.443562 | 0.361927 |
| MmugDNA.21932.1.S1_at   | MmugDNA.21932.1 | 10.27 | 10.25 | 0.13 | 0.21 | 1.01  | 0.743012 | 0.031944 | 0.890085 | 0.221125 |
| MmugDNA.21933.1.S1_at   | MmugDNA.21933.1 | 6.37  | 6.62  | 0.12 | 0.28 | -1.19 | 0.12787  | 0.253102 | 0.494071 | 0.521426 |
| MmugDNA.21935.1.S1_at   | MmugDNA.21935.1 | 5.02  | 5.26  | 0.62 | 0.13 | -1.18 | 0.90513  | 0.654413 | 0.962112 | 0.798021 |
| MmugDNA.21936.1.S1_at   | MmugDNA.21936.1 | 3.66  | 3.66  | 0.13 | 0.27 | 1     | 0.680164 | 0.266804 | 0.857055 | 0.53241  |
| MmugDNA.21937.1.S1_at   | MmugDNA.21937.1 | 5.46  | 5.32  | 0.29 | 0.27 | 1.1   | 0.91833  | 0.985674 | 0.96831  | 0.991846 |
| MmugDNA.21939.1.S1_at   | MmugDNA.21939.1 | 6.76  | 6.75  | 0.14 | 0.23 | 1.01  | 0.763667 | 0.422877 | 0.900401 | 0.646054 |
| MmugDNA.2194.1.S1_at    | MmugDNA.2194.1  | 3.06  | 3.04  | 0.05 | 0.06 | 1.01  | 0.862085 | 0.576882 | 0.944541 | 0.747519 |
| MmugDNA.21940.1.S1_at   | MmugDNA.21940.1 | 3.21  | 3.29  | 0.02 | 0.16 | -1.06 | 0.932887 | 0.931248 | 0.973979 | 0.96095  |
| MmugDNA.21941.1.S1_at   | MmugDNA.21941.1 | 10.38 | 10.09 | 0.08 | 0.13 | 1.22  | 0.034288 | 0.025326 | 0.332352 | 0.199522 |
| MmugDNA.21942.1.S1_at   | MmugDNA.21942.1 | 5.42  | 5.33  | 0.3  | 0.14 | 1.06  | 0.611944 | 0.028635 | 0.821903 | 0.210901 |
| MmugDNA.21943.1.S1_at   | MmugDNA.21943.1 | 6.76  | 6.57  | 0.37 | 0.35 | 1.15  | 0.971562 | 0.515534 | 0.989111 | 0.708385 |

|                         |                 |       |       |      |      |       |          |          |          |          |
|-------------------------|-----------------|-------|-------|------|------|-------|----------|----------|----------|----------|
| MmugDNA.21944.1.S1_at   | MmugDNA.21944.1 | 11.81 | 11.58 | 0.24 | 0.09 | 1.17  | 0.340799 | 0.460017 | 0.662186 | 0.671989 |
| MmugDNA.21944.1.S1_s_at | MmugDNA.21944.1 | 10.28 | 9.96  | 0.16 | 0.1  | 1.25  | 0.026742 | 0.003504 | 0.304291 | 0.08503  |
| MmugDNA.21946.1.S1_at   | MmugDNA.21946.1 | 7.01  | 7.07  | 0.37 | 0.29 | -1.04 | 0.550396 | 0.734492 | 0.787888 | 0.846185 |
| MmugDNA.21949.1.S1_at   | MmugDNA.21949.1 | 6.67  | 6.66  | 0.19 | 0.09 | 1.01  | 0.828413 | 0.554914 | 0.930342 | 0.733553 |
| MmugDNA.2195.1.S1_at    | MmugDNA.2195.1  | 4.95  | 4.23  | 0.97 | 0.25 | 1.64  | 0.385407 | 0.28353  | 0.690574 | 0.54596  |
| MmugDNA.21950.1.S1_at   | MmugDNA.21950.1 | 11.74 | 10.44 | 0.21 | 0.37 | 2.48  | 0.011786 | 0.002513 | 0.237691 | 0.074158 |
| MmugDNA.21951.1.S1_at   | MmugDNA.21951.1 | 10.55 | 9.58  | 0.16 | 0.47 | 1.97  | 0.087624 | 0.097169 | 0.442009 | 0.354801 |
| MmugDNA.21952.1.S1_at   | MmugDNA.21952.1 | 6.61  | 6.06  | 0.1  | 0.41 | 1.47  | 0.032672 | 0.027007 | 0.325817 | 0.205501 |
| MmugDNA.21956.1.S1_at   | MmugDNA.21956.1 | 11.99 | 12.52 | 0.08 | 0.29 | -1.45 | 0.042412 | 0.035446 | 0.354936 | 0.232564 |
| MmugDNA.21957.1.S1_at   | MmugDNA.21957.1 | 6.91  | 6.39  | 0.13 | 0.25 | 1.43  | 0.031718 | 0.022183 | 0.322685 | 0.186422 |
| MmugDNA.21958.1.S1_at   | MmugDNA.21958.1 | 6.84  | 7.22  | 0.11 | 0.67 | -1.3  | 0.396618 | 0.550271 | 0.697117 | 0.730374 |
| MmugDNA.21959.1.S1_at   | MmugDNA.21959.1 | 5.75  | 5.86  | 0.19 | 0.12 | -1.08 | 0.121435 | 0.131515 | 0.48619  | 0.403658 |
| MmugDNA.2196.1.S1_at    | MmugDNA.2196.1  | 6.92  | 8.12  | 0.5  | 0.53 | -2.29 | 0.016154 | 0.011946 | 0.262923 | 0.141411 |
| MmugDNA.21960.1.S1_at   | MmugDNA.21960.1 | 3.14  | 3.08  | 0.11 | 0.16 | 1.04  | 0.56428  | 0.145165 | 0.796461 | 0.419147 |
| MmugDNA.21961.1.S1_at   | MmugDNA.21961.1 | 2.94  | 2.95  | 0.12 | 0.07 | -1.01 | 0.854158 | 0.640361 | 0.941079 | 0.788874 |
| MmugDNA.21962.1.S1_at   | MmugDNA.21962.1 | 12.08 | 12.79 | 0.07 | 0.29 | -1.64 | 0.027532 | 0.03321  | 0.308386 | 0.225663 |
| MmugDNA.21963.1.S1_at   | MmugDNA.21963.1 | 6.35  | 6.55  | 1.35 | 0.41 | -1.15 | 0.503502 | 0.586078 | 0.760916 | 0.75324  |
| MmugDNA.21964.1.S1_at   | MmugDNA.21964.1 | 4.35  | 4.31  | 0.02 | 0.08 | 1.03  | 0.703587 | 0.849572 | 0.869102 | 0.914595 |
| MmugDNA.21965.1.S1_at   | MmugDNA.21965.1 | 4.07  | 3.83  | 0.22 | 0.03 | 1.18  | 0.143267 | 0.128811 | 0.510159 | 0.400277 |
| MmugDNA.21966.1.S1_at   | MmugDNA.21966.1 | 6.05  | 6.2   | 0.24 | 0.31 | -1.11 | 0.502224 | 0.277393 | 0.760268 | 0.541326 |
| MmugDNA.21967.1.S1_at   | MmugDNA.21967.1 | 6.14  | 6.21  | 0.11 | 0.13 | -1.05 | 0.335715 | 0.109861 | 0.659165 | 0.373829 |
| MmugDNA.21968.1.S1_at   | MmugDNA.21968.1 | 8.84  | 8.53  | 0.22 | 0.25 | 1.24  | 0.212022 | 0.425702 | 0.572526 | 0.648009 |
| MmugDNA.21969.1.S1_at   | MmugDNA.21969.1 | 4.5   | 4.46  | 0.27 | 0.11 | 1.03  | 0.943477 | 0.758198 | 0.978516 | 0.859308 |
| MmugDNA.2197.1.S1_at    | MmugDNA.2197.1  | 6.75  | 7.03  | 0.2  | 0.08 | -1.22 | 0.062126 | 0.045977 | 0.397269 | 0.258818 |
| MmugDNA.21970.1.S1_at   | MmugDNA.21970.1 | 5.75  | 5.85  | 0.16 | 0.19 | -1.07 | 0.444716 | 0.169139 | 0.727131 | 0.445716 |
| MmugDNA.21971.1.S1_at   | MmugDNA.21971.1 | 12.81 | 13.13 | 0.21 | 0.37 | -1.25 | 0.378695 | 0.198622 | 0.68656  | 0.473391 |
| MmugDNA.13035.1.S1_s_at | MmugDNA.13035.1 | 12.63 | 12.96 | 0.14 | 0.4  | -1.25 | 0.306325 | 0.195406 | 0.639467 | 0.470253 |
| MmugDNA.21972.1.S1_at   | MmugDNA.21972.1 | 9.42  | 7.82  | 0.49 | 0.8  | 3.02  | 0.058206 | 0.046028 | 0.390133 | 0.258971 |
| MmugDNA.21973.1.S1_at   | MmugDNA.21973.1 | 9.52  | 9.34  | 0.21 | 0.8  | 1.13  | 0.295282 | 0.361185 | 0.631605 | 0.60207  |
| MmugDNA.21975.1.S1_at   | MmugDNA.21975.1 | 7.52  | 8.22  | 1.28 | 0.67 | -1.63 | 0.402946 | 0.600005 | 0.701716 | 0.761762 |
| MmugDNA.21976.1.S1_at   | MmugDNA.21976.1 | 3.68  | 3.7   | 0.21 | 0.14 | -1.01 | 0.426932 | 0.599691 | 0.716003 | 0.761534 |
| MmugDNA.21977.1.S1_at   | MmugDNA.21977.1 | 4.04  | 4.04  | 0.1  | 0.16 | 1     | 0.252022 | 0.376973 | 0.601234 | 0.614684 |
| MmugDNA.21978.1.S1_at   | MmugDNA.21978.1 | 11.46 | 12.3  | 0.09 | 0.07 | -1.78 | 0.000286 | 0.000192 | 0.12562  | 0.030888 |
| MmugDNA.21979.1.S1_at   | MmugDNA.21979.1 | 4.02  | 4.84  | 0.06 | 0.43 | -1.77 | 0.081162 | 0.102453 | 0.431848 | 0.362675 |
| MmugDNA.2198.1.S1_at    | MmugDNA.2198.1  | 8.12  | 6.39  | 0.48 | 1.37 | 3.32  | 0.098012 | 0.041966 | 0.457356 | 0.24943  |
| MmugDNA.21980.1.S1_at   | MmugDNA.21980.1 | 6.28  | 5.85  | 0.75 | 0.8  | 1.35  | 0.259075 | 0.379607 | 0.606191 | 0.616523 |
| MmugDNA.21981.1.S1_at   | MmugDNA.21981.1 | 6.11  | 6.47  | 0.14 | 0.15 | -1.28 | 0.06825  | 0.064795 | 0.409909 | 0.300493 |
| MmugDNA.21982.1.S1_at   | MmugDNA.21982.1 | 9.88  | 10.4  | 0.21 | 0.38 | -1.43 | 0.042634 | 0.048628 | 0.355272 | 0.265602 |
| MmugDNA.21983.1.S1_x_at | MmugDNA.21983.1 | 7.21  | 7.19  | 0.45 | 0.39 | 1.02  | 0.267729 | 0.296513 | 0.612723 | 0.555528 |
| MmugDNA.21984.1.S1_at   | MmugDNA.21984.1 | 6.35  | 6.25  | 0.66 | 0.37 | 1.07  | 0.581698 | 0.213551 | 0.805349 | 0.48741  |
| MmugDNA.21985.1.S1_at   | MmugDNA.21985.1 | 8.4   | 8.39  | 0.11 | 0.16 | 1     | 0.900835 | 0.177707 | 0.960386 | 0.454073 |

|                         |                 |       |       |      |      |       |          |          |          |          |
|-------------------------|-----------------|-------|-------|------|------|-------|----------|----------|----------|----------|
| MmugDNA.21986.1.S1_at   | MmugDNA.21986.1 | 9.05  | 7.9   | 0.29 | 0.23 | 2.21  | 0.008158 | 0.004784 | 0.216841 | 0.096484 |
| MmugDNA.21988.1.S1_at   | MmugDNA.21988.1 | 3.61  | 3.66  | 0.26 | 0.04 | -1.04 | 0.524943 | 0.519085 | 0.773313 | 0.710813 |
| MmugDNA.2199.1.S1_at    | MmugDNA.2199.1  | 9.17  | 9.76  | 0.21 | 0.68 | -1.5  | 0.265182 | 0.358119 | 0.610859 | 0.59966  |
| MmugDNA.569.1.S1_s_at   | MmugDNA.569.1   | 9.62  | 10.16 | 0.25 | 0.7  | -1.46 | 0.271046 | 0.356219 | 0.615322 | 0.598166 |
| MmugDNA.21990.1.S1_at   | MmugDNA.21990.1 | 3.85  | 4.18  | 0.07 | 0.27 | -1.26 | 0.33936  | 0.423905 | 0.66127  | 0.646571 |
| MmugDNA.21991.1.S1_at   | MmugDNA.21991.1 | 8.76  | 8.27  | 0.39 | 0.7  | 1.4   | 0.504037 | 0.294705 | 0.761108 | 0.554335 |
| MmugDNA.21992.1.S1_at   | MmugDNA.21992.1 | 7.19  | 8.51  | 0.44 | 0.35 | -2.49 | 0.008348 | 0.002843 | 0.217705 | 0.078566 |
| MmugDNA.21993.1.S1_at   | MmugDNA.21993.1 | 7.75  | 7.96  | 0.26 | 0.42 | -1.15 | 0.278707 | 0.335629 | 0.620785 | 0.583403 |
| MmugDNA.21996.1.S1_at   | MmugDNA.21996.1 | 5.34  | 5.53  | 0.02 | 0.08 | -1.14 | 0.018798 | 0.007341 | 0.2715   | 0.11509  |
| MmugDNA.21997.1.S1_at   | MmugDNA.21997.1 | 3.66  | 3.74  | 0.19 | 0.48 | -1.06 | 0.548719 | 0.112432 | 0.786872 | 0.377784 |
| MmugDNA.21999.1.S1_at   | MmugDNA.21999.1 | 7.34  | 7.42  | 0.23 | 0.09 | -1.06 | 0.992517 | 0.637726 | 0.997431 | 0.787114 |
| MmugDNA.22.1.S1_at      | MmugDNA.22.1    | 5.17  | 5.58  | 0.2  | 0.26 | -1.33 | 0.113025 | 0.126652 | 0.475614 | 0.39731  |
| MmugDNA.220.1.S1_at     | MmugDNA.220.1   | 3.3   | 3.32  | 0.09 | 0.13 | -1.02 | 0.86783  | 0.360303 | 0.947272 | 0.601339 |
| MmugDNA.22000.1.S1_at   | MmugDNA.22000.1 | 6.31  | 6.35  | 0.17 | 0.06 | -1.03 | 0.513257 | 0.390646 | 0.766181 | 0.624421 |
| MmugDNA.22002.1.S1_at   | MmugDNA.22002.1 | 5.17  | 5.19  | 0.25 | 0.09 | -1.02 | 0.382627 | 0.410251 | 0.688839 | 0.637167 |
| MmugDNA.22003.1.S1_at   | MmugDNA.22003.1 | 5.48  | 5.43  | 0.06 | 0.21 | 1.03  | 0.995671 | 0.532977 | 0.998446 | 0.71934  |
| MmugDNA.22004.1.S1_at   | MmugDNA.22004.1 | 8.87  | 7.14  | 0.65 | 0.99 | 3.33  | 0.309364 | 0.075115 | 0.641455 | 0.319301 |
| MmugDNA.22005.1.S1_s_at | MmugDNA.22005.1 | 4.49  | 4.69  | 0.53 | 0.09 | -1.15 | 0.765006 | 0.579698 | 0.901054 | 0.749267 |
| MmugDNA.22006.1.S1_at   | MmugDNA.22006.1 | 5.07  | 5.04  | 0.23 | 0.15 | 1.02  | 0.823299 | 0.004079 | 0.928131 | 0.090423 |
| MmugDNA.22007.1.S1_at   | MmugDNA.22007.1 | 8.15  | 9.17  | 0.27 | 1.15 | -2.03 | 0.236548 | 0.165369 | 0.590504 | 0.441544 |
| MmugDNA.22008.1.S1_at   | MmugDNA.22008.1 | 5.49  | 5.44  | 0.21 | 0.15 | 1.04  | 0.757283 | 0.862547 | 0.897006 | 0.921853 |
| MmugDNA.22009.1.S1_at   | MmugDNA.22009.1 | 3.29  | 3.04  | 0.3  | 0    | 1.19  | 0.384461 | 0.475463 | 0.689949 | 0.682155 |
| MmugDNA.22010.1.S1_at   | MmugDNA.22010.1 | 6.6   | 6.22  | 0.36 | 0.07 | 1.31  | 0.131818 | 0.047857 | 0.498041 | 0.263679 |
| MmugDNA.22011.1.S1_at   | MmugDNA.22011.1 | 3.46  | 3.09  | 0.12 | 0.05 | 1.29  | 0.014158 | 0.062432 | 0.251402 | 0.296699 |
| MmugDNA.22012.1.S1_at   | MmugDNA.22012.1 | 6.46  | 6.11  | 0.14 | 0.15 | 1.27  | 0.070438 | 0.063902 | 0.414257 | 0.29906  |
| MmugDNA.22013.1.S1_at   | MmugDNA.22013.1 | 6.07  | 6.16  | 0.24 | 0.21 | -1.06 | 0.396411 | 0.523261 | 0.696939 | 0.713624 |
| MmugDNA.22014.1.S1_at   | MmugDNA.22014.1 | 10.61 | 10.74 | 0.06 | 0.26 | -1.1  | 0.309315 | 0.315944 | 0.641428 | 0.569367 |
| MmugDNA.22015.1.S1_at   | MmugDNA.22015.1 | 4.74  | 4.8   | 0.23 | 0.29 | -1.04 | 0.826991 | 0.763095 | 0.929706 | 0.862257 |
| MmugDNA.22015.1.S1_x_at | MmugDNA.22015.1 | 5.03  | 4.77  | 0.22 | 0.13 | 1.2   | 0.085047 | 0.115963 | 0.438104 | 0.383164 |
| MmugDNA.22016.1.S1_at   | MmugDNA.22016.1 | 3.75  | 3.9   | 0.12 | 0.04 | -1.11 | 0.289054 | 0.548466 | 0.627041 | 0.729187 |
| MmugDNA.22017.1.S1_at   | MmugDNA.22017.1 | 4.75  | 4.75  | 0.04 | 0.03 | 1     | 0.591894 | 0.9769   | 0.810675 | 0.987434 |
| MmugDNA.22019.1.S1_at   | MmugDNA.22019.1 | 3.76  | 3.77  | 0.1  | 0.09 | -1.01 | 0.2751   | 0.708899 | 0.617694 | 0.831167 |
| MmugDNA.2202.1.S1_at    | MmugDNA.2202.1  | 3.69  | 3.7   | 0.08 | 0    | -1    | 0.345611 | 0.399634 | 0.665264 | 0.629912 |
| MmugDNA.22022.1.S1_at   | MmugDNA.22022.1 | 5.42  | 5.23  | 0.13 | 0.17 | 1.14  | 0.715784 | 0.276608 | 0.875256 | 0.540596 |
| MmugDNA.22023.1.S1_at   | MmugDNA.22023.1 | 5.69  | 4.31  | 0.33 | 0.31 | 2.6   | 0.007685 | 0.020883 | 0.211086 | 0.181338 |
| MmugDNA.22024.1.S1_at   | MmugDNA.22024.1 | 3.4   | 3.12  | 0.27 | 0.07 | 1.22  | 0.178649 | 0.004392 | 0.542945 | 0.092744 |
| MmugDNA.22025.1.S1_at   | MmugDNA.22025.1 | 5.32  | 5.33  | 0.21 | 0.14 | -1    | 0.59904  | 0.813039 | 0.814366 | 0.891895 |
| MmugDNA.22027.1.S1_at   | MmugDNA.22027.1 | 8.32  | 8.28  | 0.12 | 0.49 | 1.03  | 0.898066 | 0.175459 | 0.959278 | 0.452157 |
| MmugDNA.22028.1.S1_at   | MmugDNA.22028.1 | 2.58  | 2.9   | 0.08 | 0.55 | -1.25 | 0.27356  | 0.33337  | 0.617127 | 0.581668 |
| MmugDNA.22029.1.S1_at   | MmugDNA.22029.1 | 3.88  | 4.02  | 0.15 | 0.16 | -1.1  | 0.381569 | 0.040565 | 0.688005 | 0.246274 |
| MmugDNA.6145.1.S1_s_at  | MmugDNA.6145.1  | 12.94 | 12.54 | 0.06 | 0.15 | 1.31  | 0.024179 | 0.052982 | 0.294535 | 0.275815 |



|                         |                 |       |       |      |      |       |          |          |          |          |
|-------------------------|-----------------|-------|-------|------|------|-------|----------|----------|----------|----------|
| MmugDNA.22030.1.S1_at   | MmugDNA.22030.1 | 2.92  | 2.91  | 0.19 | 0.11 | 1     | 0.46325  | 0.561888 | 0.738665 | 0.737659 |
| MmugDNA.22031.1.S1_at   | MmugDNA.22031.1 | 5.52  | 5.01  | 0.66 | 0.27 | 1.43  | 0.316849 | 0.331629 | 0.647775 | 0.580208 |
| MmugDNA.22032.1.S1_at   | MmugDNA.22032.1 | 4.04  | 4.16  | 0.37 | 0.56 | -1.08 | 0.914467 | 0.808713 | 0.966289 | 0.889895 |
| MmugDNA.22033.1.S1_at   | MmugDNA.22033.1 | 3.3   | 3.53  | 0.22 | 0.17 | -1.17 | 0.363906 | 0.154974 | 0.677018 | 0.429973 |
| MmugDNA.22034.1.S1_at   | MmugDNA.22034.1 | 4.67  | 5.57  | 0.44 | 0.41 | -1.86 | 0.060573 | 0.088531 | 0.393743 | 0.341947 |
| MmugDNA.22035.1.S1_at   | MmugDNA.22035.1 | 6.73  | 6.84  | 0.35 | 0.24 | -1.08 | 0.834938 | 0.000788 | 0.933081 | 0.045969 |
| MmugDNA.22036.1.S1_at   | MmugDNA.22036.1 | 3.5   | 3.5   | 0.1  | 0.16 | 1     | 0.603981 | 0.763365 | 0.817401 | 0.862471 |
| MmugDNA.22037.1.S1_at   | MmugDNA.22037.1 | 12.55 | 11.83 | 0.15 | 0.29 | 1.65  | 0.006633 | 0.001429 | 0.200721 | 0.057607 |
| MmugDNA.22038.1.S1_at   | MmugDNA.22038.1 | 3.99  | 3.79  | 0.07 | 0.22 | 1.15  | 0.618171 | 0.237495 | 0.825111 | 0.508163 |
| MmugDNA.22039.1.S1_at   | MmugDNA.22039.1 | 3.72  | 3.73  | 0.08 | 0.22 | -1.01 | 0.795163 | 0.937148 | 0.915026 | 0.964571 |
| MmugDNA.2204.1.S1_at    | MmugDNA.2204.1  | 13.13 | 13.15 | 0.05 | 0.08 | -1.01 | 0.784558 | 0.936435 | 0.910258 | 0.964171 |
| MmugDNA.22041.1.S1_at   | MmugDNA.22041.1 | 5.17  | 4.86  | 0.22 | 0.12 | 1.24  | 0.214533 | 0.5869   | 0.575059 | 0.753893 |
| MmugDNA.22042.1.S1_at   | MmugDNA.22042.1 | 10.84 | 10.73 | 0.1  | 0.28 | 1.08  | 0.778383 | 0.514767 | 0.907418 | 0.707865 |
| MmugDNA.22043.1.S1_at   | MmugDNA.22043.1 | 10.22 | 10.9  | 0.17 | 0.22 | -1.6  | 0.042603 | 0.033499 | 0.355272 | 0.226577 |
| MmugDNA.22044.1.S1_at   | MmugDNA.22044.1 | 9.1   | 10.02 | 0.73 | 0.42 | -1.89 | 0.141264 | 0.121066 | 0.508853 | 0.390064 |
| MmugDNA.22045.1.S1_at   | MmugDNA.22045.1 | 10.57 | 10.3  | 0.18 | 0.34 | 1.2   | 0.56899  | 0.70796  | 0.79891  | 0.830569 |
| MmugDNA.22046.1.S1_at   | MmugDNA.22046.1 | 11.1  | 11.23 | 0.21 | 0.1  | -1.1  | 0.155619 | 0.028251 | 0.520357 | 0.209847 |
| MmugDNA.22047.1.S1_s_at | MmugDNA.22047.1 | 11.62 | 11.57 | 0.1  | 0.11 | 1.03  | 0.310815 | 0.475198 | 0.64275  | 0.682031 |
| MmugDNA.22048.1.S1_at   | MmugDNA.22048.1 | 4.48  | 4.41  | 0.17 | 0.08 | 1.05  | 0.344085 | 0.467651 | 0.664205 | 0.677207 |
| MmugDNA.22049.1.S1_at   | MmugDNA.22049.1 | 8.31  | 6.91  | 0.46 | 0.16 | 2.64  | 0.014137 | 0.00678  | 0.251402 | 0.111388 |
| MmugDNA.2205.1.S1_at    | MmugDNA.2205.1  | 4     | 4.12  | 0    | 0.34 | -1.09 | 0.511417 | 0.519353 | 0.765308 | 0.710998 |
| MmugDNA.22050.1.S1_at   | MmugDNA.22050.1 | 7.78  | 6.97  | 0.41 | 0.22 | 1.75  | 0.03226  | 0.011423 | 0.324427 | 0.138412 |
| MmugDNA.22051.1.S1_x_at | MmugDNA.22051.1 | 11.6  | 10.98 | 0.42 | 0.29 | 1.54  | 0.137822 | 0.189856 | 0.505265 | 0.465403 |
| MmugDNA.22053.1.S1_at   | MmugDNA.22053.1 | 9.17  | 9.21  | 0.12 | 0.42 | -1.03 | 0.89994  | 0.834979 | 0.96007  | 0.905534 |
| MmugDNA.22054.1.S1_at   | MmugDNA.22054.1 | 4.76  | 4.74  | 0.29 | 0.05 | 1.01  | 0.309938 | 0.395285 | 0.641889 | 0.62738  |
| MmugDNA.22056.1.S1_at   | MmugDNA.22056.1 | 4.53  | 4.64  | 0.13 | 0.16 | -1.08 | 0.500953 | 0.533219 | 0.759772 | 0.719483 |
| MmugDNA.22058.1.S1_at   | MmugDNA.22058.1 | 9.94  | 10.14 | 0.19 | 0.44 | -1.15 | 0.188462 | 0.201226 | 0.551451 | 0.475667 |
| MmugDNA.2206.1.S1_at    | MmugDNA.2206.1  | 5.61  | 5.22  | 0.57 | 0.54 | 1.31  | 0.857039 | 0.627977 | 0.942171 | 0.780909 |
| MmugDNA.22061.1.S1_at   | MmugDNA.22061.1 | 11.92 | 12.72 | 0.02 | 0.22 | -1.74 | 0.006288 | 0.001689 | 0.1975   | 0.062186 |
| MmugDNA.22062.1.S1_at   | MmugDNA.22062.1 | 13.17 | 13.15 | 0.02 | 0.25 | 1.01  | 0.402285 | 0.198616 | 0.701365 | 0.473391 |
| MmugDNA.22064.1.S1_at   | MmugDNA.22064.1 | 5.04  | 5.07  | 0.26 | 0.14 | -1.02 | 0.577775 | 0.731525 | 0.803559 | 0.844387 |
| MmugDNA.22065.1.S1_at   | MmugDNA.22065.1 | 3.74  | 3.58  | 0.59 | 0.21 | 1.12  | 0.334091 | 0.596178 | 0.658035 | 0.759371 |
| MmugDNA.22070.1.S1_at   | MmugDNA.22070.1 | 7.36  | 6.69  | 0.07 | 0.08 | 1.6   | 0.000365 | 0.000042 | 0.12893  | 0.025273 |
| MmugDNA.22071.1.S1_at   | MmugDNA.22071.1 | 6.61  | 6.69  | 0.11 | 0.03 | -1.06 | 0.180244 | 0.161673 | 0.54443  | 0.437771 |
| MmugDNA.22076.1.S1_at   | MmugDNA.22076.1 | 5.06  | 5.41  | 0.16 | 0.19 | -1.28 | 0.36027  | 0.668301 | 0.674302 | 0.805897 |
| MmugDNA.12895.1.S1_s_at | MmugDNA.12895.1 | 6.07  | 6.26  | 0.15 | 0.05 | -1.14 | 0.135288 | 0.313144 | 0.502087 | 0.567709 |
| MmugDNA.22078.1.S1_at   | MmugDNA.22078.1 | 4.97  | 5.45  | 0.17 | 0.58 | -1.39 | 0.171562 | 0.189819 | 0.535209 | 0.465403 |
| MmugDNA.2208.1.S1_at    | MmugDNA.2208.1  | 4.06  | 3.9   | 0.06 | 0.21 | 1.11  | 0.796434 | 0.828036 | 0.915513 | 0.901214 |
| MmugDNA.22080.1.S1_at   | MmugDNA.22080.1 | 5.37  | 5.33  | 0.06 | 0.03 | 1.03  | 0.858414 | 0.147899 | 0.942805 | 0.422265 |
| MmugDNA.22081.1.S1_at   | MmugDNA.22081.1 | 6.3   | 6.28  | 1.2  | 0.34 | 1.01  | 0.820754 | 0.659519 | 0.927139 | 0.800801 |
| MmugDNA.22082.1.S1_at   | MmugDNA.22082.1 | 3.55  | 3.88  | 0.26 | 0.16 | -1.26 | 0.146684 | 0.205988 | 0.512668 | 0.480224 |

|                         |                 |       |       |      |      |       |          |          |          |          |
|-------------------------|-----------------|-------|-------|------|------|-------|----------|----------|----------|----------|
| MmugDNA.22085.1.S1_at   | MmugDNA.22085.1 | 3.04  | 3.09  | 0.23 | 0.08 | -1.03 | 0.399197 | 0.632003 | 0.699174 | 0.783079 |
| MmugDNA.22086.1.S1_at   | MmugDNA.22086.1 | 5.9   | 5.96  | 0.06 | 0.25 | -1.05 | 0.885879 | 0.731425 | 0.954217 | 0.84431  |
| MmugDNA.22087.1.S1_at   | MmugDNA.22087.1 | 3.39  | 3.32  | 0.1  | 0.06 | 1.04  | 0.294128 | 0.230548 | 0.631154 | 0.50226  |
| MmugDNA.22088.1.S1_at   | MmugDNA.22088.1 | 3.36  | 3.39  | 0.5  | 0.02 | -1.02 | 0.41333  | 0.37416  | 0.70838  | 0.612678 |
| MmugDNA.22089.1.S1_at   | MmugDNA.22089.1 | 11.43 | 10.78 | 0.21 | 0.4  | 1.57  | 0.089428 | 0.078272 | 0.445076 | 0.32487  |
| MmugDNA.2209.1.S1_at    | MmugDNA.2209.1  | 5.84  | 5.78  | 0.17 | 0.18 | 1.05  | 0.787386 | 0.193416 | 0.91159  | 0.468711 |
| MmugDNA.22090.1.S1_at   | MmugDNA.22090.1 | 5.91  | 3.56  | 0.48 | 1.29 | 5.1   | 0.133149 | 0.151692 | 0.499568 | 0.426383 |
| MmugDNA.22092.1.S1_at   | MmugDNA.22092.1 | 5.76  | 5.9   | 0.2  | 0.1  | -1.1  | 0.565255 | 0.14461  | 0.796922 | 0.418466 |
| MmugDNA.22093.1.S1_at   | MmugDNA.22093.1 | 4.26  | 4.22  | 0.2  | 0.23 | 1.03  | 0.857937 | 0.67401  | 0.942556 | 0.809495 |
| MmugDNA.22100.1.S1_at   | MmugDNA.22100.1 | 8.94  | 8.66  | 0.3  | 0.35 | 1.22  | 0.069866 | 0.041969 | 0.41291  | 0.24943  |
| MmugDNA.22101.1.S1_at   | MmugDNA.22101.1 | 3.65  | 3.75  | 0.73 | 0.08 | -1.07 | 0.504104 | 0.639737 | 0.761108 | 0.78843  |
| MmugDNA.22102.1.S1_at   | MmugDNA.22102.1 | 8.98  | 8.9   | 0.17 | 0.15 | 1.05  | 0.534542 | 0.472698 | 0.778781 | 0.68007  |
| MmugDNA.22103.1.S1_at   | MmugDNA.22103.1 | 6.46  | 6.69  | 0.08 | 0.12 | -1.18 | 0.114074 | 0.1796   | 0.47744  | 0.45603  |
| MmugDNA.22104.1.S1_at   | MmugDNA.22104.1 | 6.47  | 6.62  | 0.16 | 0.01 | -1.12 | 0.226454 | 0.201868 | 0.584429 | 0.476373 |
| MmugDNA.22105.1.S1_at   | MmugDNA.22105.1 | 7.05  | 6.5   | 0.96 | 0.4  | 1.46  | 0.132335 | 0.15348  | 0.498572 | 0.42827  |
| MmugDNA.22106.1.S1_at   | MmugDNA.22106.1 | 5.95  | 8.3   | 0.26 | 0.49 | -5.08 | 0.001872 | 0.000481 | 0.155636 | 0.038665 |
| MmugDNA.22107.1.S1_at   | MmugDNA.22107.1 | 9.38  | 9.24  | 0.07 | 0.34 | 1.1   | 0.588175 | 0.359782 | 0.808927 | 0.601077 |
| MmugDNA.22108.1.S1_at   | MmugDNA.22108.1 | 5.6   | 5.62  | 0.21 | 0.05 | -1.02 | 0.925851 | 0.061633 | 0.97147  | 0.295095 |
| MmugDNA.22109.1.S1_at   | MmugDNA.22109.1 | 3.8   | 3.69  | 0.05 | 0.15 | 1.08  | 0.288568 | 0.203755 | 0.626714 | 0.478011 |
| MmugDNA.2211.1.S1_at    | MmugDNA.2211.1  | 4.71  | 4.68  | 0.22 | 0.14 | 1.02  | 0.92337  | 0.250348 | 0.970253 | 0.519362 |
| MmugDNA.22113.1.S1_at   | MmugDNA.22113.1 | 5.35  | 5.22  | 0.18 | 0.06 | 1.09  | 0.300197 | 0.266176 | 0.635545 | 0.532    |
| MmugDNA.22114.1.S1_at   | MmugDNA.22114.1 | 8.52  | 7.38  | 0.15 | 0.33 | 2.2   | 0.006017 | 0.007452 | 0.195046 | 0.115872 |
| MmugDNA.22117.1.S1_at   | MmugDNA.22117.1 | 6.11  | 6     | 0.55 | 0.59 | 1.08  | 0.466866 | 0.432358 | 0.740411 | 0.652794 |
| MmugDNA.2212.1.S1_at    | MmugDNA.2212.1  | 5.54  | 5.69  | 0.41 | 0.42 | -1.11 | 0.410701 | 0.56243  | 0.706555 | 0.738025 |
| MmugDNA.22120.1.S1_at   | MmugDNA.22120.1 | 5.16  | 5.17  | 0.14 | 0.11 | -1.01 | 0.752699 | 0.846558 | 0.894451 | 0.912681 |
| MmugDNA.22122.1.S1_at   | MmugDNA.22122.1 | 10.11 | 10.04 | 0.39 | 0.43 | 1.05  | 0.444943 | 0.105423 | 0.727353 | 0.367279 |
| MmugDNA.22123.1.S1_at   | MmugDNA.22123.1 | 5.84  | 5.61  | 0.39 | 0.22 | 1.17  | 0.241189 | 0.303959 | 0.593763 | 0.561344 |
| MmugDNA.22124.1.S1_at   | MmugDNA.22124.1 | 8.26  | 8.02  | 0.31 | 0.64 | 1.18  | 0.502084 | 0.605112 | 0.760244 | 0.764917 |
| MmugDNA.22126.1.S1_at   | MmugDNA.22126.1 | 9.35  | 9.32  | 0.12 | 0.73 | 1.02  | 0.50422  | 0.44063  | 0.761176 | 0.659029 |
| MmugDNA.22127.1.S1_x_at | MmugDNA.22127.1 | 11.16 | 10.64 | 0.54 | 0.28 | 1.44  | 0.129701 | 0.167526 | 0.495908 | 0.443968 |
| MmugDNA.22128.1.S1_at   | MmugDNA.22128.1 | 6.03  | 6.13  | 0.18 | 0.23 | -1.07 | 0.966053 | 0.519768 | 0.987096 | 0.711338 |
| MmugDNA.22129.1.S1_at   | MmugDNA.22129.1 | 4.1   | 4.18  | 0.19 | 0.22 | -1.06 | 0.823307 | 0.928843 | 0.928131 | 0.959449 |
| MmugDNA.2213.1.S1_at    | MmugDNA.2213.1  | 3.08  | 2.99  | 0.33 | 0.06 | 1.06  | 0.281483 | 0.270046 | 0.622236 | 0.535338 |
| MmugDNA.22130.1.S1_at   | MmugDNA.22130.1 | 10.87 | 10.78 | 0.06 | 0.09 | 1.06  | 0.544193 | 0.399072 | 0.784268 | 0.62969  |
| MmugDNA.22133.1.S1_at   | MmugDNA.22133.1 | 9.4   | 9.11  | 0.17 | 0.3  | 1.23  | 0.287009 | 0.056884 | 0.625695 | 0.284636 |
| MmugDNA.22135.1.S1_at   | MmugDNA.22135.1 | 3.82  | 3.84  | 0.16 | 0.07 | -1.02 | 0.349025 | 0.437597 | 0.667394 | 0.656798 |
| MmugDNA.22136.1.S1_at   | MmugDNA.22136.1 | 13.07 | 12.93 | 0.07 | 0.29 | 1.1   | 0.535894 | 0.685575 | 0.779351 | 0.816542 |
| MmugDNA.22137.1.S1_at   | MmugDNA.22137.1 | 5.31  | 5.3   | 0.05 | 0.16 | 1.01  | 0.462451 | 0.361454 | 0.738248 | 0.602215 |
| MmugDNA.22138.1.S1_s_at | MmugDNA.22138.1 | 9.07  | 8.94  | 0.41 | 0.27 | 1.09  | 0.145537 | 0.078772 | 0.51146  | 0.325725 |
| MmugDNA.22139.1.S1_at   | MmugDNA.22139.1 | 7.18  | 7.38  | 0.44 | 0.08 | -1.14 | 0.25828  | 0.187249 | 0.605606 | 0.463238 |
| MmugDNA.22141.1.S1_at   | MmugDNA.22141.1 | 5.91  | 5.75  | 0.74 | 0.37 | 1.11  | 0.706541 | 0.780686 | 0.87072  | 0.872739 |

|                         |                 |       |       |      |      |        |          |          |          |          |
|-------------------------|-----------------|-------|-------|------|------|--------|----------|----------|----------|----------|
| MmugDNA.22142.1.S1_at   | MmugDNA.22142.1 | 7.24  | 7.16  | 0.06 | 0.5  | 1.06   | 0.806998 | 0.761481 | 0.920954 | 0.861416 |
| MmugDNA.22144.1.S1_at   | MmugDNA.22144.1 | 3.48  | 3.49  | 0.07 | 0    | -1     | 0.866768 | 0.910659 | 0.946842 | 0.949583 |
| MmugDNA.22145.1.S1_at   | MmugDNA.22145.1 | 3.89  | 3.92  | 0.21 | 0.11 | -1.02  | 0.861349 | 0.967789 | 0.944107 | 0.982192 |
| MmugDNA.22146.1.S1_at   | MmugDNA.22146.1 | 5.1   | 5.26  | 0.03 | 0.08 | -1.12  | 0.047038 | 0.277363 | 0.364849 | 0.541302 |
| MmugDNA.22147.1.S1_at   | MmugDNA.22147.1 | 5.75  | 5.4   | 0.93 | 0.8  | 1.28   | 0.27584  | 0.336035 | 0.61793  | 0.583647 |
| MmugDNA.22149.1.S1_at   | MmugDNA.22149.1 | 10.98 | 9.9   | 0.63 | 2.27 | 2.11   | 0.370885 | 0.291839 | 0.681748 | 0.552086 |
| MmugDNA.22151.1.S1_at   | MmugDNA.22151.1 | 7.88  | 8.22  | 0.13 | 0.11 | -1.26  | 0.027568 | 0.018162 | 0.308386 | 0.169673 |
| MmugDNA.22152.1.S1_at   | MmugDNA.22152.1 | 5.8   | 5.77  | 0.18 | 0.14 | 1.02   | 0.80947  | 0.242877 | 0.922228 | 0.513274 |
| MmugDNA.22153.1.S1_at   | MmugDNA.22153.1 | 6.92  | 7.18  | 0.25 | 0.64 | -1.2   | 0.852194 | 0.086367 | 0.940569 | 0.338805 |
| MmugDNA.22155.1.S1_at   | MmugDNA.22155.1 | 10.07 | 11.08 | 0.12 | 0.41 | -2.01  | 0.015783 | 0.009404 | 0.261064 | 0.127832 |
| MmugDNA.22157.1.S1_at   | MmugDNA.22157.1 | 8.23  | 9.52  | 0.31 | 0.25 | -2.44  | 0.004737 | 0.000498 | 0.184674 | 0.038955 |
| MmugDNA.22158.1.S1_at   | MmugDNA.22158.1 | 11.17 | 12.27 | 0.2  | 0.47 | -2.14  | 0.017566 | 0.008792 | 0.267454 | 0.124117 |
| MmugDNA.22159.1.S1_at   | MmugDNA.22159.1 | 5.92  | 5.93  | 0.43 | 0.99 | -1.01  | 0.741885 | 0.692365 | 0.889478 | 0.820984 |
| MmugDNA.2216.1.S1_at    | MmugDNA.2216.1  | 3.56  | 3.51  | 0.08 | 0.03 | 1.03   | 0.795641 | 0.91206  | 0.915217 | 0.950407 |
| MmugDNA.22161.1.S1_at   | MmugDNA.22161.1 | 5.57  | 5.36  | 0.12 | 0.09 | 1.16   | 0.316823 | 0.068493 | 0.647775 | 0.308214 |
| MmugDNA.22163.1.S1_at   | MmugDNA.22163.1 | 4.19  | 4.22  | 0.1  | 0.13 | -1.02  | 0.321554 | 0.668676 | 0.650266 | 0.806111 |
| MmugDNA.22164.1.S1_at   | MmugDNA.22164.1 | 5.9   | 5.9   | 0.04 | 0.17 | 1      | 0.313838 | 0.526123 | 0.645387 | 0.715385 |
| MmugDNA.22166.1.S1_s_at | MmugDNA.22166.1 | 7.65  | 8.01  | 0.05 | 0.31 | -1.28  | 0.165549 | 0.012669 | 0.529547 | 0.145097 |
| MmugDNA.22166.1.S1_x_at | MmugDNA.22166.1 | 8.1   | 8.3   | 0.28 | 0.2  | -1.15  | 0.382732 | 0.070106 | 0.68893  | 0.310998 |
| MmugDNA.22168.1.S1_at   | MmugDNA.22168.1 | 5.8   | 5.66  | 0.41 | 0.58 | 1.1    | 0.958455 | 0.984537 | 0.984324 | 0.991307 |
| MmugDNA.22169.1.S1_at   | MmugDNA.22169.1 | 8.02  | 8     | 0.22 | 0.24 | 1.02   | 0.759891 | 0.268205 | 0.898651 | 0.533916 |
| MmugDNA.2217.1.S1_at    | MmugDNA.2217.1  | 3.45  | 3.54  | 0.06 | 0.29 | -1.07  | 0.553415 | 0.71398  | 0.790112 | 0.83406  |
| MmugDNA.22171.1.S1_at   | MmugDNA.22171.1 | 4.31  | 4.36  | 0.16 | 0.06 | -1.04  | 0.903137 | 0.609481 | 0.961412 | 0.767788 |
| MmugDNA.22173.1.S1_at   | MmugDNA.22173.1 | 4.01  | 4.82  | 0.83 | 0.78 | -1.75  | 0.686028 | 0.249371 | 0.859592 | 0.518496 |
| MmugDNA.22177.1.S1_at   | MmugDNA.22177.1 | 3.16  | 3.08  | 0.14 | 0.08 | 1.06   | 0.172138 | 0.227695 | 0.535455 | 0.499962 |
| MmugDNA.22179.1.S1_at   | MmugDNA.22179.1 | 7.61  | 8.59  | 0.24 | 0.8  | -1.97  | 0.117987 | 0.122333 | 0.482063 | 0.392032 |
| MmugDNA.22180.1.S1_at   | MmugDNA.22180.1 | 3.48  | 3.35  | 0.08 | 0.17 | 1.09   | 0.363491 | 0.189535 | 0.676738 | 0.465277 |
| MmugDNA.22181.1.S1_at   | MmugDNA.22181.1 | 3.29  | 3.37  | 0.33 | 0.11 | -1.06  | 0.631205 | 0.55546  | 0.832572 | 0.733834 |
| MmugDNA.22182.1.S1_at   | MmugDNA.22182.1 | 5.1   | 4.51  | 0.98 | 0.34 | 1.51   | 0.348887 | 0.398388 | 0.667271 | 0.629374 |
| MmugDNA.22183.1.S1_at   | MmugDNA.22183.1 | 8.58  | 8.52  | 0.14 | 0.47 | 1.04   | 0.956929 | 0.96938  | 0.983802 | 0.983237 |
| MmugDNA.22184.1.S1_at   | MmugDNA.22184.1 | 12.2  | 11.44 | 0.06 | 0.35 | 1.7    | 0.018353 | 0.01086  | 0.270007 | 0.13586  |
| MmugDNA.22185.1.S1_at   | MmugDNA.22185.1 | 5.96  | 5.93  | 0.22 | 0.11 | 1.02   | 0.955967 | 0.650111 | 0.983421 | 0.795406 |
| MmugDNA.22187.1.S1_at   | MmugDNA.22187.1 | 2.92  | 2.99  | 0.05 | 0.21 | -1.06  | 0.703292 | 0.665714 | 0.868993 | 0.804156 |
| MmugDNA.22188.1.S1_at   | MmugDNA.22188.1 | 5.53  | 5.84  | 1.13 | 0.35 | -1.24  | 0.623934 | 0.831701 | 0.828158 | 0.903453 |
| MmugDNA.22189.1.S1_at   | MmugDNA.22189.1 | 5.29  | 5.29  | 0.11 | 0.13 | 1      | 0.495463 | 0.28682  | 0.757254 | 0.548162 |
| MmugDNA.2219.1.S1_at    | MmugDNA.2219.1  | 4.92  | 4.92  | 0.11 | 0.17 | -1     | 0.985097 | 0.842549 | 0.99475  | 0.910315 |
| MmugDNA.22193.1.S1_at   | MmugDNA.22193.1 | 8.3   | 9.1   | 0.67 | 1.01 | -1.75  | 0.389859 | 0.336114 | 0.693291 | 0.583652 |
| MmugDNA.10744.1.S1_at   | MmugDNA.10744.1 | 6.79  | 12.03 | 2.79 | 3.6  | -37.8  | 0.578501 | 0.354106 | 0.803828 | 0.597048 |
| MmugDNA.10744.1.S1_s_at | MmugDNA.10744.1 | 6.09  | 10.03 | 2.26 | 2.56 | -15.35 | 0.414953 | 0.296781 | 0.709338 | 0.555779 |
| MmugDNA.22194.1.S1_at   | MmugDNA.22194.1 | 9.73  | 9.73  | 0.24 | 0.32 | 1      | 0.300517 | 0.427134 | 0.635931 | 0.649124 |
| MmugDNA.22196.1.S1_at   | MmugDNA.22196.1 | 7.16  | 7.03  | 0.62 | 0.91 | 1.1    | 0.713545 | 0.780492 | 0.874503 | 0.872614 |

|                         |                 |       |       |      |      |       |          |          |          |          |
|-------------------------|-----------------|-------|-------|------|------|-------|----------|----------|----------|----------|
| MmugDNA.22198.1.S1_at   | MmugDNA.22198.1 | 6.74  | 6.88  | 0.34 | 1.02 | -1.1  | 0.517962 | 0.653425 | 0.76914  | 0.797435 |
| MmugDNA.22198.1.S1_s_at | MmugDNA.22198.1 | 9.24  | 9.45  | 0.27 | 1.09 | -1.16 | 0.76809  | 0.822284 | 0.902515 | 0.89777  |
| MmugDNA.222.1.S1_at     | MmugDNA.222.1   | 7.41  | 9.39  | 0.8  | 0.64 | -3.95 | 0.026656 | 0.019686 | 0.303736 | 0.176286 |
| MmugDNA.22201.1.S1_at   | MmugDNA.22201.1 | 9.26  | 8.07  | 0.07 | 0.63 | 2.27  | 0.028792 | 0.03053  | 0.312166 | 0.216711 |
| MmugDNA.22202.1.S1_at   | MmugDNA.22202.1 | 5.69  | 5.75  | 0.09 | 0.64 | -1.05 | 0.589005 | 0.144144 | 0.809183 | 0.418024 |
| MmugDNA.22203.1.S1_at   | MmugDNA.22203.1 | 11.57 | 12.07 | 0.28 | 0.39 | -1.41 | 0.441148 | 0.577485 | 0.724743 | 0.747923 |
| MmugDNA.22204.1.S1_at   | MmugDNA.22204.1 | 5.13  | 5.11  | 0.1  | 0.02 | 1.02  | 0.328915 | 0.668104 | 0.654754 | 0.80577  |
| MmugDNA.22205.1.S1_at   | MmugDNA.22205.1 | 8.13  | 7.97  | 0.09 | 0.29 | 1.11  | 0.94145  | 0.109437 | 0.977713 | 0.373277 |
| MmugDNA.22206.1.S1_at   | MmugDNA.22206.1 | 8.29  | 8.1   | 0.75 | 0.16 | 1.14  | 0.32274  | 0.398296 | 0.651245 | 0.629324 |
| MmugDNA.22207.1.S1_at   | MmugDNA.22207.1 | 7.38  | 7.76  | 0.06 | 0.34 | -1.29 | 0.175281 | 0.190528 | 0.538985 | 0.465906 |
| MmugDNA.22208.1.S1_at   | MmugDNA.22208.1 | 3.71  | 3.84  | 0.11 | 0.03 | -1.09 | 0.499502 | 0.817058 | 0.759212 | 0.894492 |
| MmugDNA.22209.1.S1_at   | MmugDNA.22209.1 | 5.18  | 5.34  | 0.06 | 0.09 | -1.11 | 0.091417 | 0.081566 | 0.447175 | 0.329764 |
| MmugDNA.2221.1.S1_at    | MmugDNA.2221.1  | 3.13  | 4.7   | 0.63 | 0.99 | -2.97 | 0.140765 | 0.161272 | 0.508448 | 0.437434 |
| MmugDNA.22210.1.S1_at   | MmugDNA.22210.1 | 4.81  | 4.95  | 0.03 | 0.31 | -1.1  | 0.88553  | 0.37018  | 0.954118 | 0.609371 |
| MmugDNA.22211.1.S1_at   | MmugDNA.22211.1 | 6.74  | 6.8   | 0.23 | 0.47 | -1.04 | 0.507303 | 0.472694 | 0.762788 | 0.68007  |
| MmugDNA.22212.1.S1_at   | MmugDNA.22212.1 | 4.51  | 4.5   | 0.37 | 0.32 | 1     | 0.835116 | 0.84496  | 0.93317  | 0.911795 |
| MmugDNA.22213.1.S1_at   | MmugDNA.22213.1 | 2.99  | 3.36  | 0.07 | 0.16 | -1.29 | 0.060035 | 0.078701 | 0.393081 | 0.325673 |
| MmugDNA.22214.1.S1_at   | MmugDNA.22214.1 | 3.73  | 3.64  | 0.27 | 0.08 | 1.06  | 0.694385 | 0.624527 | 0.864407 | 0.778707 |
| MmugDNA.22215.1.S1_at   | MmugDNA.22215.1 | 5.22  | 5.23  | 0.89 | 0.79 | -1.01 | 0.625771 | 0.47474  | 0.829159 | 0.681695 |
| MmugDNA.22216.1.S1_at   | MmugDNA.22216.1 | 4.54  | 4.73  | 0.24 | 0.08 | -1.14 | 0.151402 | 0.228674 | 0.516065 | 0.500897 |
| MmugDNA.22217.1.S1_at   | MmugDNA.22217.1 | 6.42  | 6.44  | 0.09 | 0.17 | -1.02 | 0.708672 | 0.837102 | 0.871964 | 0.906887 |
| MmugDNA.6319.1.S1_s_at  | MmugDNA.6319.1  | 12.36 | 12.08 | 0.3  | 0.22 | 1.22  | 0.277044 | 0.197381 | 0.619197 | 0.472311 |
| MmugDNA.2222.1.S1_at    | MmugDNA.2222.1  | 7.38  | 5.68  | 0.69 | 0.76 | 3.25  | 0.098966 | 0.069481 | 0.458711 | 0.309802 |
| MmugDNA.22220.1.S1_at   | MmugDNA.22220.1 | 7.3   | 7.46  | 0.13 | 0.09 | -1.12 | 0.149524 | 0.144621 | 0.514055 | 0.418466 |
| MmugDNA.22222.1.S1_at   | MmugDNA.22222.1 | 9.4   | 9.21  | 0.09 | 0.29 | 1.14  | 0.367332 | 0.508259 | 0.679471 | 0.703491 |
| MmugDNA.22222.1.S1_s_at | MmugDNA.22222.1 | 9.7   | 9.6   | 0.12 | 0.25 | 1.07  | 0.518061 | 0.293036 | 0.769229 | 0.552978 |
| MmugDNA.22223.1.S1_at   | MmugDNA.22223.1 | 5.79  | 6.35  | 0.13 | 0.03 | -1.48 | 0.003012 | 0.000491 | 0.171022 | 0.038921 |
| MmugDNA.22225.1.S1_at   | MmugDNA.22225.1 | 6.53  | 6.71  | 0.15 | 0.23 | -1.13 | 0.600651 | 0.276716 | 0.815382 | 0.540618 |
| MmugDNA.22226.1.S1_at   | MmugDNA.22226.1 | 4.69  | 4.95  | 0.11 | 0.2  | -1.2  | 0.310642 | 0.018645 | 0.642603 | 0.171648 |
| MmugDNA.22227.1.S1_at   | MmugDNA.22227.1 | 5.27  | 5.51  | 0.45 | 0.03 | -1.18 | 0.90388  | 0.85692  | 0.961578 | 0.918253 |
| MmugDNA.22228.1.S1_at   | MmugDNA.22228.1 | 9.41  | 9.4   | 0.51 | 0.14 | 1     | 0.494991 | 0.302696 | 0.756991 | 0.560276 |
| MmugDNA.22230.1.S1_s_at | MmugDNA.22230.1 | 6.17  | 6.18  | 0.11 | 0.08 | -1.01 | 0.508344 | 0.471627 | 0.763692 | 0.679537 |
| MmugDNA.22232.1.S1_at   | MmugDNA.22232.1 | 4.06  | 3.81  | 0.14 | 0.2  | 1.19  | 0.71179  | 0.072553 | 0.873712 | 0.315511 |
| MmugDNA.22236.1.S1_at   | MmugDNA.22236.1 | 11.9  | 11.43 | 0.18 | 0.19 | 1.39  | 0.076504 | 0.068764 | 0.425086 | 0.308711 |
| MmugDNA.22237.1.S1_at   | MmugDNA.22237.1 | 3.56  | 3.79  | 0.12 | 0.07 | -1.17 | 0.072993 | 0.104386 | 0.418323 | 0.365672 |
| MmugDNA.22238.1.S1_at   | MmugDNA.22238.1 | 6.05  | 6.13  | 0.31 | 0.23 | -1.06 | 0.89709  | 0.780836 | 0.959096 | 0.872833 |
| MmugDNA.22239.1.S1_at   | MmugDNA.22239.1 | 4.24  | 4.1   | 0.27 | 0.07 | 1.1   | 0.411136 | 0.724003 | 0.706987 | 0.840254 |
| MmugDNA.2224.1.S1_at    | MmugDNA.2224.1  | 5.62  | 5.63  | 0    | 0.25 | -1.01 | 0.826553 | 0.70392  | 0.929552 | 0.828312 |
| MmugDNA.22242.1.S1_at   | MmugDNA.22242.1 | 3.76  | 3.72  | 0.29 | 0.43 | 1.03  | 0.956974 | 0.965214 | 0.983802 | 0.98061  |
| MmugDNA.22243.1.S1_at   | MmugDNA.22243.1 | 5.78  | 5.86  | 0.02 | 0.09 | -1.06 | 0.22812  | 0.014818 | 0.585454 | 0.154879 |
| MmugDNA.22245.1.S1_at   | MmugDNA.22245.1 | 3.39  | 3.39  | 0.09 | 0.04 | 1     | 0.30619  | 0.491303 | 0.639463 | 0.692931 |

|                         |                 |       |       |      |      |        |          |          |          |          |
|-------------------------|-----------------|-------|-------|------|------|--------|----------|----------|----------|----------|
| MmugDNA.22247.1.S1_at   | MmugDNA.22247.1 | 3.05  | 2.92  | 0    | 0.32 | 1.1    | 0.812375 | 0.92204  | 0.923648 | 0.956039 |
| MmugDNA.22249.1.S1_at   | MmugDNA.22249.1 | 11.37 | 10.36 | 0.26 | 0.63 | 2.01   | 0.159349 | 0.091421 | 0.524174 | 0.34639  |
| MmugDNA.22250.1.S1_at   | MmugDNA.22250.1 | 4.59  | 4.81  | 0.16 | 0.07 | -1.17  | 0.4397   | 0.48968  | 0.723752 | 0.691862 |
| MmugDNA.22254.1.S1_at   | MmugDNA.22254.1 | 10.94 | 11.09 | 0.14 | 0.29 | -1.11  | 0.448836 | 0.089528 | 0.729864 | 0.343811 |
| MmugDNA.22255.1.S1_at   | MmugDNA.22255.1 | 4.06  | 4.02  | 0.51 | 0.14 | 1.02   | 0.344995 | 0.403616 | 0.66494  | 0.63225  |
| MmugDNA.22256.1.S1_at   | MmugDNA.22256.1 | 3.49  | 3.83  | 0.6  | 0.19 | -1.27  | 0.989852 | 0.524633 | 0.996392 | 0.714463 |
| MmugDNA.22257.1.S1_at   | MmugDNA.22257.1 | 5.57  | 4.31  | 1.23 | 0.47 | 2.4    | 0.146687 | 0.110278 | 0.512668 | 0.374403 |
| MmugDNA.22258.1.S1_at   | MmugDNA.22258.1 | 3.95  | 3.72  | 0.41 | 0.58 | 1.17   | 0.800942 | 0.59388  | 0.917935 | 0.758418 |
| MmugDNA.22259.1.S1_at   | MmugDNA.22259.1 | 4.33  | 4.43  | 0.3  | 0.22 | -1.08  | 0.690943 | 0.328037 | 0.862535 | 0.577844 |
| MmugDNA.2226.1.S1_at    | MmugDNA.2226.1  | 6.61  | 6.73  | 0.19 | 0.17 | -1.09  | 0.668024 | 0.498511 | 0.851396 | 0.697582 |
| MmugDNA.22261.1.S1_at   | MmugDNA.22261.1 | 6.71  | 7.65  | 0.45 | 0.69 | -1.91  | 0.131701 | 0.065138 | 0.498041 | 0.301205 |
| MmugDNA.22265.1.S1_at   | MmugDNA.22265.1 | 5.57  | 6.2   | 1.3  | 0.17 | -1.55  | 0.878715 | 0.65893  | 0.95133  | 0.800473 |
| MmugDNA.22267.1.S1_at   | MmugDNA.22267.1 | 6.35  | 6.2   | 0.06 | 0.07 | 1.11   | 0.021813 | 0.006811 | 0.28382  | 0.111444 |
| MmugDNA.22268.1.S1_at   | MmugDNA.22268.1 | 5.58  | 5.59  | 0.9  | 0.31 | -1.01  | 0.392718 | 0.444791 | 0.694744 | 0.662072 |
| MmugDNA.24074.1.S1_at   | MmugDNA.24074.1 | 3.26  | 2.86  | 0.56 | 0.07 | 1.31   | 0.270513 | 0.224064 | 0.614805 | 0.497048 |
| MmugDNA.24074.1.S1_s_at | MmugDNA.24074.1 | 5.01  | 5     | 0.1  | 0.03 | 1.01   | 0.384062 | 0.20776  | 0.689679 | 0.482016 |
| MmugDNA.2227.1.S1_at    | MmugDNA.2227.1  | 8.3   | 7.96  | 0.12 | 0.09 | 1.27   | 0.03312  | 0.019452 | 0.327101 | 0.175136 |
| MmugDNA.22270.1.S1_at   | MmugDNA.22270.1 | 4.05  | 3.9   | 0.26 | 0.31 | 1.11   | 0.76987  | 0.228034 | 0.903262 | 0.500228 |
| MmugDNA.22271.1.S1_at   | MmugDNA.22271.1 | 7.1   | 5.86  | 1.16 | 0.5  | 2.35   | 0.202901 | 0.254179 | 0.565526 | 0.522481 |
| MmugDNA.22272.1.S1_at   | MmugDNA.22272.1 | 6.15  | 5.79  | 0.51 | 0.6  | 1.29   | 0.381057 | 0.533342 | 0.687669 | 0.719567 |
| MmugDNA.22273.1.S1_at   | MmugDNA.22273.1 | 3.72  | 3.75  | 0.27 | 0.07 | -1.02  | 0.967637 | 0.419881 | 0.987896 | 0.643733 |
| MmugDNA.22274.1.S1_at   | MmugDNA.22274.1 | 10.43 | 10.18 | 0.15 | 0.4  | 1.19   | 0.250555 | 0.023924 | 0.600389 | 0.19376  |
| MmugDNA.22275.1.S1_at   | MmugDNA.22275.1 | 8.14  | 8.32  | 0.64 | 0.54 | -1.13  | 0.879607 | 0.632204 | 0.95159  | 0.783289 |
| MmugDNA.22276.1.S1_at   | MmugDNA.22276.1 | 8.28  | 8.17  | 0.16 | 0.12 | 1.08   | 0.288296 | 0.242748 | 0.626514 | 0.5131   |
| MmugDNA.22277.1.S1_at   | MmugDNA.22277.1 | 3.25  | 3.23  | 0.2  | 0.24 | 1.01   | 0.977073 | 0.254807 | 0.99123  | 0.523051 |
| MmugDNA.22278.1.S1_at   | MmugDNA.22278.1 | 11.07 | 11.56 | 0.2  | 0.41 | -1.4   | 0.399014 | 0.557019 | 0.699064 | 0.734903 |
| MmugDNA.2228.1.S1_at    | MmugDNA.2228.1  | 3.28  | 3.32  | 0.17 | 0.1  | -1.03  | 0.453365 | 0.690548 | 0.732582 | 0.819619 |
| MmugDNA.22280.1.S1_at   | MmugDNA.22280.1 | 6.05  | 6.13  | 0.09 | 0.18 | -1.05  | 0.140328 | 0.257598 | 0.508113 | 0.525302 |
| MmugDNA.22281.1.S1_at   | MmugDNA.22281.1 | 5.87  | 5.93  | 0.13 | 0.05 | -1.04  | 0.25778  | 0.374553 | 0.605259 | 0.6129   |
| MmugDNA.22286.1.S1_at   | MmugDNA.22286.1 | 8.07  | 8.15  | 0.27 | 0.61 | -1.06  | 0.911888 | 0.583505 | 0.965151 | 0.751817 |
| MmugDNA.22286.1.S1_s_at | MmugDNA.22286.1 | 10.9  | 10.92 | 0.17 | 0.59 | -1.01  | 0.872655 | 0.733271 | 0.9491   | 0.845573 |
| MmugDNA.22288.1.S1_at   | MmugDNA.22288.1 | 7.34  | 7.7   | 0.23 | 0.35 | -1.29  | 0.613774 | 0.239787 | 0.822905 | 0.510505 |
| MmugDNA.22289.1.S1_at   | MmugDNA.22289.1 | 4.49  | 4.35  | 0.17 | 0.13 | 1.11   | 0.922854 | 0.904941 | 0.970065 | 0.946143 |
| MmugDNA.2229.1.S1_at    | MmugDNA.2229.1  | 7.65  | 8.07  | 0.39 | 0.32 | -1.34  | 0.457919 | 0.454401 | 0.735139 | 0.668576 |
| MmugDNA.22290.1.S1_at   | MmugDNA.22290.1 | 9.11  | 8.95  | 0.34 | 0.11 | 1.11   | 0.42298  | 0.641373 | 0.713789 | 0.789506 |
| MmugDNA.22291.1.S1_at   | MmugDNA.22291.1 | 5.11  | 5.24  | 0.14 | 0.24 | -1.1   | 0.665959 | 0.766961 | 0.85018  | 0.864663 |
| MmugDNA.22292.1.S1_at   | MmugDNA.22292.1 | 3.7   | 3.69  | 0.16 | 0.08 | 1      | 0.614057 | 0.810821 | 0.823094 | 0.890845 |
| MmugDNA.22293.1.S1_at   | MmugDNA.22293.1 | 5.37  | 4.93  | 0.04 | 0.16 | 1.36   | 0.011341 | 0.034529 | 0.235384 | 0.229979 |
| MmugDNA.22294.1.S1_at   | MmugDNA.22294.1 | 7.48  | 8.32  | 0.16 | 0.45 | -1.8   | 0.101386 | 0.131871 | 0.461313 | 0.403891 |
| MmugDNA.22296.1.S1_at   | MmugDNA.22296.1 | 3.55  | 3.75  | 0.09 | 0.05 | -1.15  | 0.03174  | 0.011927 | 0.322685 | 0.141312 |
| MmugDNA.22297.1.S1_at   | MmugDNA.22297.1 | 10.02 | 13.79 | 1.6  | 2.38 | -13.57 | 0.414884 | 0.21947  | 0.709338 | 0.493156 |

|                         |                 |       |       |      |      |       |          |          |          |          |
|-------------------------|-----------------|-------|-------|------|------|-------|----------|----------|----------|----------|
| MmugDNA.22299.1.S1_at   | MmugDNA.22299.1 | 7.23  | 7.28  | 1.28 | 0.43 | -1.03 | 0.994278 | 0.762169 | 0.997997 | 0.861664 |
| MmugDNA.22300.1.S1_at   | MmugDNA.22300.1 | 6.32  | 6.29  | 0.18 | 0.29 | 1.02  | 0.777704 | 0.127513 | 0.907092 | 0.398403 |
| MmugDNA.22302.1.S1_at   | MmugDNA.22302.1 | 3.1   | 3.07  | 0.08 | 0.12 | 1.02  | 0.386813 | 0.512765 | 0.691681 | 0.7065   |
| MmugDNA.22303.1.S1_at   | MmugDNA.22303.1 | 7.56  | 6.36  | 0.43 | 0.43 | 2.3   | 0.014763 | 0.000856 | 0.255038 | 0.047266 |
| MmugDNA.22304.1.S1_at   | MmugDNA.22304.1 | 8.03  | 8.02  | 0.41 | 0.36 | 1     | 0.690177 | 0.550761 | 0.861929 | 0.730611 |
| MmugDNA.22305.1.S1_at   | MmugDNA.22305.1 | 5.79  | 4.57  | 0.97 | 0.54 | 2.33  | 0.317065 | 0.44319  | 0.647775 | 0.661021 |
| MmugDNA.22306.1.S1_at   | MmugDNA.22306.1 | 5.4   | 4.74  | 0.27 | 0.26 | 1.57  | 0.019319 | 0.034927 | 0.273655 | 0.231062 |
| MmugDNA.22307.1.S1_at   | MmugDNA.22307.1 | 3.5   | 3.39  | 0.11 | 0.17 | 1.07  | 0.686105 | 0.586243 | 0.859624 | 0.7534   |
| MmugDNA.22308.1.S1_at   | MmugDNA.22308.1 | 4.78  | 5.04  | 0.05 | 0.1  | -1.2  | 0.014361 | 0.011066 | 0.251885 | 0.136934 |
| MmugDNA.2231.1.S1_at    | MmugDNA.2231.1  | 3.28  | 3.37  | 0.05 | 0.09 | -1.07 | 0.357626 | 0.237132 | 0.672471 | 0.507879 |
| MmugDNA.22310.1.S1_at   | MmugDNA.22310.1 | 12.64 | 12.59 | 0.04 | 0.25 | 1.04  | 0.618221 | 0.726736 | 0.825111 | 0.841963 |
| MmugDNA.22311.1.S1_at   | MmugDNA.22311.1 | 7.76  | 5.08  | 0.67 | 1.33 | 6.4   | 0.041072 | 0.017104 | 0.350547 | 0.165728 |
| MmugDNA.22313.1.S1_at   | MmugDNA.22313.1 | 8.29  | 7.63  | 0.37 | 0.27 | 1.59  | 0.067175 | 0.086967 | 0.407109 | 0.33984  |
| MmugDNA.22315.1.S1_at   | MmugDNA.22315.1 | 4.45  | 4.46  | 0.02 | 0.25 | -1    | 0.379563 | 0.397586 | 0.687061 | 0.628973 |
| MmugDNA.22316.1.S1_at   | MmugDNA.22316.1 | 4.97  | 5.02  | 0.14 | 0.12 | -1.03 | 0.175166 | 0.472163 | 0.538831 | 0.679874 |
| MmugDNA.22317.1.S1_at   | MmugDNA.22317.1 | 6.36  | 6.13  | 0.29 | 0.47 | 1.17  | 0.755847 | 0.737908 | 0.896248 | 0.848144 |
| MmugDNA.22318.1.S1_at   | MmugDNA.22318.1 | 6.37  | 5.26  | 0.62 | 0.36 | 2.17  | 0.034422 | 0.02693  | 0.333077 | 0.205254 |
| MmugDNA.2232.1.S1_s_at  | MmugDNA.2232.1  | 8.25  | 7.16  | 0.36 | 0.47 | 2.12  | 0.016752 | 0.008604 | 0.265281 | 0.123072 |
| MmugDNA.22321.1.S1_at   | MmugDNA.22321.1 | 6.01  | 4.49  | 0.69 | 0.58 | 2.86  | 0.067249 | 0.062113 | 0.407273 | 0.296141 |
| MmugDNA.22322.1.S1_at   | MmugDNA.22322.1 | 10.76 | 10.67 | 0.3  | 0.14 | 1.06  | 0.773449 | 0.935058 | 0.90483  | 0.963246 |
| MmugDNA.22323.1.S1_x_at | MmugDNA.22323.1 | 5.01  | 5.13  | 0.16 | 0.37 | -1.09 | 0.838854 | 0.064693 | 0.93492  | 0.300314 |
| MmugDNA.22324.1.S1_at   | MmugDNA.22324.1 | 4.42  | 4.44  | 0.21 | 0.2  | -1.02 | 0.542624 | 0.538513 | 0.783466 | 0.723211 |
| MmugDNA.22325.1.S1_at   | MmugDNA.22325.1 | 8.37  | 8.64  | 0.3  | 0.55 | -1.21 | 0.515095 | 0.320585 | 0.767272 | 0.572701 |
| MmugDNA.22326.1.S1_at   | MmugDNA.22326.1 | 7.64  | 6.51  | 0.92 | 0.28 | 2.19  | 0.121259 | 0.185264 | 0.48598  | 0.461194 |
| MmugDNA.22329.1.S1_at   | MmugDNA.22329.1 | 4.45  | 5.32  | 0.09 | 0.44 | -1.83 | 0.026353 | 0.021535 | 0.302842 | 0.183818 |
| MmugDNA.2233.1.S1_at    | MmugDNA.2233.1  | 11.67 | 11.53 | 0.02 | 0.55 | 1.1   | 0.677024 | 0.538824 | 0.855271 | 0.723368 |
| MmugDNA.22331.1.S1_s_at | MmugDNA.22331.1 | 6.21  | 7.28  | 1.28 | 1.26 | -2.09 | 0.768477 | 0.31539  | 0.902719 | 0.568939 |
| MmugDNA.22333.1.S1_at   | MmugDNA.22333.1 | 7.01  | 7.09  | 0.4  | 0.74 | -1.05 | 0.663598 | 0.866668 | 0.849022 | 0.924203 |
| MmugDNA.22334.1.S1_at   | MmugDNA.22334.1 | 9.46  | 9.78  | 0.08 | 0.67 | -1.25 | 0.880764 | 0.447741 | 0.952026 | 0.663819 |
| MmugDNA.22335.1.S1_at   | MmugDNA.22335.1 | 12.72 | 13.01 | 0.04 | 0.28 | -1.23 | 0.460318 | 0.609472 | 0.736877 | 0.767788 |
| MmugDNA.22336.1.S1_at   | MmugDNA.22336.1 | 4.43  | 4.38  | 0.09 | 0.03 | 1.03  | 0.412445 | 0.272379 | 0.707896 | 0.537122 |
| MmugDNA.22337.1.S1_at   | MmugDNA.22337.1 | 6.81  | 8.06  | 0.76 | 1.59 | -2.39 | 0.344828 | 0.336241 | 0.664827 | 0.583736 |
| MmugDNA.22338.1.S1_at   | MmugDNA.22338.1 | 5.76  | 5.79  | 0.2  | 0.14 | -1.02 | 0.803582 | 0.955513 | 0.919152 | 0.974745 |
| MmugDNA.22339.1.S1_at   | MmugDNA.22339.1 | 4     | 3.99  | 0.16 | 0.26 | 1.01  | 0.614211 | 0.51693  | 0.823171 | 0.709326 |
| MmugDNA.2234.1.S1_at    | MmugDNA.2234.1  | 4.38  | 4.37  | 0.22 | 0.07 | 1.01  | 0.446233 | 0.569609 | 0.728224 | 0.742525 |
| MmugDNA.22340.1.S1_at   | MmugDNA.22340.1 | 7.55  | 7.77  | 0.05 | 0.12 | -1.16 | 0.018568 | 0.00359  | 0.270581 | 0.085714 |
| MmugDNA.22341.1.S1_at   | MmugDNA.22341.1 | 10.29 | 10.02 | 0.18 | 0.39 | 1.2   | 0.507884 | 0.603336 | 0.763209 | 0.764052 |
| MmugDNA.22342.1.S1_at   | MmugDNA.22342.1 | 13.09 | 13.1  | 0.07 | 0.02 | -1.01 | 0.33211  | 0.346762 | 0.656679 | 0.591536 |
| MmugDNA.22348.1.S1_at   | MmugDNA.22348.1 | 6.82  | 7.75  | 0.04 | 0.4  | -1.91 | 0.021718 | 0.007676 | 0.283391 | 0.117153 |
| MmugDNA.22349.1.S1_at   | MmugDNA.22349.1 | 5.78  | 5.63  | 0.2  | 0.1  | 1.11  | 0.323279 | 0.238501 | 0.651499 | 0.5091   |
| MmugDNA.2235.1.S1_at    | MmugDNA.2235.1  | 5.89  | 5.66  | 0.3  | 0.23 | 1.18  | 0.166413 | 0.158291 | 0.530062 | 0.43403  |

|                       |                 |       |       |      |      |       |          |          |          |          |
|-----------------------|-----------------|-------|-------|------|------|-------|----------|----------|----------|----------|
| MmugDNA.22350.1.S1_at | MmugDNA.22350.1 | 8.7   | 8.71  | 0.18 | 0.49 | -1.01 | 0.785681 | 0.387056 | 0.910876 | 0.621935 |
| MmugDNA.22351.1.S1_at | MmugDNA.22351.1 | 13.3  | 13.31 | 0.12 | 0.2  | -1    | 0.478034 | 0.108328 | 0.747094 | 0.371601 |
| MmugDNA.22352.1.S1_at | MmugDNA.22352.1 | 6.1   | 6.16  | 0.07 | 0.09 | -1.04 | 0.094998 | 0.017001 | 0.452582 | 0.165304 |
| MmugDNA.22353.1.S1_at | MmugDNA.22353.1 | 5.22  | 6.08  | 0.31 | 0.42 | -1.81 | 0.013149 | 0.005458 | 0.245277 | 0.101952 |
| MmugDNA.22355.1.S1_at | MmugDNA.22355.1 | 6.18  | 6.45  | 0.18 | 0.22 | -1.2  | 0.09717  | 0.076185 | 0.456142 | 0.321047 |
| MmugDNA.22356.1.S1_at | MmugDNA.22356.1 | 3.52  | 3.73  | 0.18 | 0.06 | -1.15 | 0.07739  | 0.069831 | 0.427131 | 0.310353 |
| MmugDNA.22357.1.S1_at | MmugDNA.22357.1 | 4.93  | 5.1   | 0.24 | 0.21 | -1.12 | 0.635323 | 0.802199 | 0.834967 | 0.886112 |
| MmugDNA.22358.1.S1_at | MmugDNA.22358.1 | 3.94  | 4.05  | 0.25 | 0.06 | -1.08 | 0.521484 | 0.713415 | 0.771399 | 0.833698 |
| MmugDNA.2236.1.S1_at  | MmugDNA.2236.1  | 3.52  | 3.53  | 0.03 | 0.14 | -1.01 | 0.710845 | 0.787839 | 0.873277 | 0.877304 |
| MmugDNA.22361.1.S1_at | MmugDNA.22361.1 | 8.37  | 8.18  | 0.34 | 0.48 | 1.15  | 0.415302 | 0.280415 | 0.709459 | 0.543648 |
| MmugDNA.22363.1.S1_at | MmugDNA.22363.1 | 4.86  | 4.93  | 0.08 | 0.1  | -1.05 | 0.67166  | 0.400949 | 0.852716 | 0.630658 |
| MmugDNA.22365.1.S1_at | MmugDNA.22365.1 | 4.38  | 4.48  | 0.28 | 0.11 | -1.07 | 0.204808 | 0.256873 | 0.567387 | 0.524698 |
| MmugDNA.22367.1.S1_at | MmugDNA.22367.1 | 4.23  | 4.17  | 0.47 | 0    | 1.04  | 0.306954 | 0.43334  | 0.639795 | 0.653652 |
| MmugDNA.22368.1.S1_at | MmugDNA.22368.1 | 3.2   | 3.11  | 0.28 | 0.24 | 1.07  | 0.315988 | 0.37947  | 0.646799 | 0.616406 |
| MmugDNA.22369.1.S1_at | MmugDNA.22369.1 | 9.79  | 7.76  | 0.48 | 1.12 | 4.09  | 0.069533 | 0.049187 | 0.412367 | 0.266611 |
| MmugDNA.2237.1.S1_at  | MmugDNA.2237.1  | 3.58  | 3.57  | 0.27 | 0.08 | 1.01  | 0.954919 | 0.967812 | 0.983073 | 0.982192 |
| MmugDNA.22370.1.S1_at | MmugDNA.22370.1 | 5.77  | 5.89  | 0.22 | 0.11 | -1.08 | 0.497944 | 0.726877 | 0.758109 | 0.842011 |
| MmugDNA.22372.1.S1_at | MmugDNA.22372.1 | 3.45  | 3.5   | 0.05 | 0.13 | -1.03 | 0.207333 | 0.268422 | 0.569475 | 0.534106 |
| MmugDNA.22374.1.S1_at | MmugDNA.22374.1 | 8.79  | 8.59  | 0.34 | 0.21 | 1.15  | 0.701152 | 0.044859 | 0.86792  | 0.256375 |
| MmugDNA.22375.1.S1_at | MmugDNA.22375.1 | 4.14  | 4.25  | 0.65 | 0.3  | -1.08 | 0.593929 | 0.369497 | 0.811676 | 0.608861 |
| MmugDNA.22377.1.S1_at | MmugDNA.22377.1 | 5.02  | 5.02  | 0.28 | 0.58 | 1     | 0.364748 | 0.40273  | 0.677622 | 0.631543 |
| MmugDNA.22378.1.S1_at | MmugDNA.22378.1 | 8.72  | 8.87  | 0.75 | 0.34 | -1.11 | 0.79347  | 0.592846 | 0.914411 | 0.757932 |
| MmugDNA.22379.1.S1_at | MmugDNA.22379.1 | 6.03  | 6.2   | 0.13 | 0.14 | -1.12 | 0.087961 | 0.081133 | 0.442256 | 0.32931  |
| MmugDNA.2238.1.S1_at  | MmugDNA.2238.1  | 5.86  | 5.85  | 0.07 | 0.09 | 1     | 0.987539 | 0.999809 | 0.995569 | 0.999948 |
| MmugDNA.22381.1.S1_at | MmugDNA.22381.1 | 6.19  | 6.24  | 0.09 | 0.21 | -1.04 | 0.715362 | 0.725115 | 0.875007 | 0.84088  |
| MmugDNA.22382.1.S1_at | MmugDNA.22382.1 | 7.68  | 9.63  | 0.72 | 1.08 | -3.86 | 0.056693 | 0.045867 | 0.386838 | 0.258448 |
| MmugDNA.22384.1.S1_at | MmugDNA.22384.1 | 7.04  | 7.13  | 0.09 | 0.08 | -1.07 | 0.423777 | 0.240922 | 0.714199 | 0.511624 |
| MmugDNA.22385.1.S1_at | MmugDNA.22385.1 | 3.94  | 3.84  | 0.16 | 0.07 | 1.07  | 0.083803 | 0.115748 | 0.43619  | 0.382814 |
| MmugDNA.22386.1.S1_at | MmugDNA.22386.1 | 4.68  | 4.05  | 0.62 | 0.18 | 1.54  | 0.202606 | 0.390318 | 0.565062 | 0.624142 |
| MmugDNA.2239.1.S1_at  | MmugDNA.2239.1  | 4.19  | 4.15  | 0.06 | 0.09 | 1.02  | 0.972406 | 0.294635 | 0.989473 | 0.554306 |
| MmugDNA.22390.1.S1_at | MmugDNA.22390.1 | 5.83  | 8.95  | 0.95 | 1.37 | -8.72 | 0.010663 | 0.009881 | 0.230991 | 0.130618 |
| MmugDNA.22391.1.S1_at | MmugDNA.22391.1 | 5.95  | 5.53  | 0.87 | 0.63 | 1.34  | 0.40867  | 0.549984 | 0.705448 | 0.730214 |
| MmugDNA.22393.1.S1_at | MmugDNA.22393.1 | 5.55  | 5.61  | 0.87 | 0.73 | -1.04 | 0.589098 | 0.372872 | 0.809193 | 0.611735 |
| MmugDNA.22394.1.S1_at | MmugDNA.22394.1 | 8.43  | 8.16  | 0.27 | 0.46 | 1.21  | 0.393432 | 0.071519 | 0.695216 | 0.313706 |
| MmugDNA.22395.1.S1_at | MmugDNA.22395.1 | 3.54  | 3.5   | 0.17 | 0.05 | 1.03  | 0.950693 | 0.165062 | 0.981376 | 0.441242 |
| MmugDNA.22396.1.S1_at | MmugDNA.22396.1 | 5.32  | 5.53  | 0.1  | 0.16 | -1.15 | 0.254966 | 0.056335 | 0.603051 | 0.283348 |
| MmugDNA.22397.1.S1_at | MmugDNA.22397.1 | 6.06  | 4.81  | 0.6  | 0.2  | 2.37  | 0.030751 | 0.019038 | 0.31976  | 0.173644 |
| MmugDNA.22398.1.S1_at | MmugDNA.22398.1 | 3.5   | 3.32  | 0.12 | 0.06 | 1.13  | 0.249796 | 0.257222 | 0.600329 | 0.525002 |
| MmugDNA.22399.1.S1_at | MmugDNA.22399.1 | 10.69 | 10.09 | 0.64 | 0.29 | 1.51  | 0.614651 | 0.681128 | 0.823258 | 0.813791 |
| MmugDNA.224.1.S1_at   | MmugDNA.224.1   | 3.48  | 3.84  | 0.13 | 0.18 | -1.28 | 0.047524 | 0.035705 | 0.366608 | 0.233368 |
| MmugDNA.22400.1.S1_at | MmugDNA.22400.1 | 10.49 | 10.55 | 0.13 | 0.14 | -1.04 | 0.986074 | 0.667893 | 0.995014 | 0.805681 |

|                         |                 |       |       |      |      |       |          |          |          |          |
|-------------------------|-----------------|-------|-------|------|------|-------|----------|----------|----------|----------|
| MmugDNA.22402.1.S1_at   | MmugDNA.22402.1 | 10.58 | 9.73  | 0.04 | 0.46 | 1.81  | 0.050084 | 0.008795 | 0.373272 | 0.124117 |
| MmugDNA.22403.1.S1_at   | MmugDNA.22403.1 | 11.09 | 11.55 | 0.22 | 0.74 | -1.38 | 0.341993 | 0.423534 | 0.662986 | 0.646441 |
| MmugDNA.22404.1.S1_at   | MmugDNA.22404.1 | 3.94  | 3.87  | 0.15 | 0.63 | 1.05  | 0.381679 | 0.279077 | 0.688087 | 0.542782 |
| MmugDNA.22405.1.S1_at   | MmugDNA.22405.1 | 11.17 | 10.51 | 0.13 | 0.48 | 1.57  | 0.102957 | 0.099797 | 0.46254  | 0.358407 |
| MmugDNA.22406.1.S1_at   | MmugDNA.22406.1 | 6.93  | 6.8   | 0.18 | 0.15 | 1.1   | 0.145121 | 0.179717 | 0.511224 | 0.456204 |
| MmugDNA.22408.1.S1_at   | MmugDNA.22408.1 | 11.26 | 10.5  | 0.22 | 0.42 | 1.69  | 0.055752 | 0.04323  | 0.384612 | 0.252677 |
| MmugDNA.22409.1.S1_at   | MmugDNA.22409.1 | 7.92  | 7.79  | 0.51 | 0.31 | 1.1   | 0.321503 | 0.53374  | 0.650251 | 0.719857 |
| MmugDNA.2241.1.S1_at    | MmugDNA.2241.1  | 5.93  | 5.82  | 0.14 | 0.15 | 1.08  | 0.396651 | 0.285092 | 0.69713  | 0.547096 |
| MmugDNA.22410.1.S1_at   | MmugDNA.22410.1 | 6.6   | 7.97  | 0.27 | 0.46 | -2.58 | 0.012249 | 0.003821 | 0.240456 | 0.08794  |
| MmugDNA.22411.1.S1_at   | MmugDNA.22411.1 | 4.67  | 4.85  | 0.19 | 0.11 | -1.14 | 0.128783 | 0.121406 | 0.494664 | 0.390493 |
| MmugDNA.22412.1.S1_at   | MmugDNA.22412.1 | 9.95  | 10.57 | 1.13 | 1.8  | -1.53 | 0.440098 | 0.563586 | 0.724095 | 0.738718 |
| MmugDNA.22413.1.S1_at   | MmugDNA.22413.1 | 5.72  | 5.62  | 0.67 | 0.24 | 1.07  | 0.209829 | 0.180346 | 0.571078 | 0.456981 |
| MmugDNA.22414.1.S1_at   | MmugDNA.22414.1 | 4.81  | 4.27  | 0.29 | 0.39 | 1.45  | 0.066797 | 0.046267 | 0.406981 | 0.259486 |
| MmugDNA.22415.1.S1_at   | MmugDNA.22415.1 | 6.31  | 6.34  | 0.13 | 0.1  | -1.02 | 0.749609 | 0.274287 | 0.89273  | 0.538751 |
| MmugDNA.22416.1.S1_at   | MmugDNA.22416.1 | 3.41  | 3.37  | 0.25 | 0.15 | 1.03  | 0.726765 | 0.76967  | 0.881115 | 0.86625  |
| MmugDNA.22417.1.S1_at   | MmugDNA.22417.1 | 8.43  | 7.9   | 0.06 | 0.35 | 1.44  | 0.195493 | 0.138266 | 0.558901 | 0.411198 |
| MmugDNA.22419.1.S1_at   | MmugDNA.22419.1 | 4.59  | 7.79  | 1.38 | 1.74 | -9.21 | 0.157359 | 0.185117 | 0.522148 | 0.460962 |
| MmugDNA.22420.1.S1_at   | MmugDNA.22420.1 | 10.24 | 9.65  | 0.19 | 0.18 | 1.5   | 0.010551 | 0.005738 | 0.230404 | 0.104271 |
| MmugDNA.22423.1.S1_at   | MmugDNA.22423.1 | 11.08 | 10.87 | 0.37 | 0.56 | 1.16  | 0.891929 | 0.595874 | 0.956956 | 0.759258 |
| MmugDNA.22424.1.S1_at   | MmugDNA.22424.1 | 4.87  | 4.51  | 0.2  | 0.06 | 1.28  | 0.109427 | 0.352628 | 0.470811 | 0.595866 |
| MmugDNA.22425.1.S1_at   | MmugDNA.22425.1 | 3.57  | 3.7   | 0.09 | 0.05 | -1.1  | 0.088652 | 0.204919 | 0.443511 | 0.479254 |
| MmugDNA.22427.1.S1_at   | MmugDNA.22427.1 | 5.82  | 5.92  | 0.12 | 0.08 | -1.07 | 0.30553  | 0.161476 | 0.639223 | 0.437616 |
| MmugDNA.22428.1.S1_at   | MmugDNA.22428.1 | 10.68 | 11.41 | 0.71 | 0.41 | -1.66 | 0.354788 | 0.131539 | 0.670686 | 0.403658 |
| MmugDNA.2243.1.S1_at    | MmugDNA.2243.1  | 4.84  | 4.46  | 0.29 | 0.39 | 1.3   | 0.330991 | 0.214293 | 0.656063 | 0.487902 |
| MmugDNA.22430.1.S1_at   | MmugDNA.22430.1 | 8.34  | 9.29  | 0.32 | 0.5  | -1.93 | 0.038046 | 0.02359  | 0.343416 | 0.192389 |
| MmugDNA.28289.1.S1_s_at | MmugDNA.28289.1 | 12.53 | 12.59 | 0.02 | 0.04 | -1.04 | 0.113476 | 0.01099  | 0.47686  | 0.136575 |
| MmugDNA.22433.1.S1_at   | MmugDNA.22433.1 | 8.25  | 7.93  | 0.83 | 1    | 1.24  | 0.660127 | 0.465174 | 0.847439 | 0.675626 |
| MmugDNA.22434.1.S1_at   | MmugDNA.22434.1 | 5.77  | 5.93  | 0.34 | 0.13 | -1.12 | 0.549006 | 0.194663 | 0.787067 | 0.469765 |
| MmugDNA.22435.1.S1_at   | MmugDNA.22435.1 | 6.44  | 6.32  | 0.22 | 0.21 | 1.09  | 0.979069 | 0.169581 | 0.992315 | 0.446192 |
| MmugDNA.1042.1.S1_s_at  | MmugDNA.1042.1  | 6.12  | 7.12  | 0.05 | 0.48 | -1.99 | 0.021902 | 0.010726 | 0.284133 | 0.135271 |
| MmugDNA.22437.1.S1_at   | MmugDNA.22437.1 | 2.92  | 3.09  | 0.09 | 0.28 | -1.12 | 0.361128 | 0.51622  | 0.675116 | 0.708757 |
| MmugDNA.22438.1.S1_at   | MmugDNA.22438.1 | 6     | 5.97  | 0.18 | 0.01 | 1.02  | 0.292817 | 0.200018 | 0.630131 | 0.474603 |
| MmugDNA.22439.1.S1_at   | MmugDNA.22439.1 | 5.48  | 6     | 0.24 | 0.06 | -1.44 | 0.040197 | 0.04555  | 0.349219 | 0.257596 |
| MmugDNA.2244.1.S1_at    | MmugDNA.2244.1  | 5.95  | 6.24  | 0.19 | 0.23 | -1.22 | 0.298289 | 0.397058 | 0.633851 | 0.628607 |
| MmugDNA.22440.1.S1_at   | MmugDNA.22440.1 | 6.35  | 6.19  | 0.08 | 0.32 | 1.12  | 0.186102 | 0.123348 | 0.549625 | 0.393391 |
| MmugDNA.22441.1.S1_s_at | MmugDNA.22441.1 | 4.56  | 4.39  | 0.11 | 0.15 | 1.12  | 0.525543 | 0.48262  | 0.773765 | 0.687368 |
| MmugDNA.22442.1.S1_at   | MmugDNA.22442.1 | 6.72  | 5.75  | 0.4  | 0.63 | 1.96  | 0.108254 | 0.082509 | 0.469353 | 0.331625 |
| MmugDNA.22443.1.S1_at   | MmugDNA.22443.1 | 8.58  | 8.56  | 0.2  | 0.3  | 1.01  | 0.677692 | 0.003423 | 0.855562 | 0.084135 |
| MmugDNA.22444.1.S1_at   | MmugDNA.22444.1 | 10.36 | 10.61 | 0.35 | 0.42 | -1.19 | 0.320215 | 0.019508 | 0.64942  | 0.175439 |
| MmugDNA.22445.1.S1_at   | MmugDNA.22445.1 | 9.1   | 9.93  | 0.19 | 0.78 | -1.78 | 0.144881 | 0.131825 | 0.511188 | 0.403891 |
| MmugDNA.22447.1.S1_at   | MmugDNA.22447.1 | 3.81  | 3.89  | 0.13 | 0.47 | -1.06 | 0.953493 | 0.297063 | 0.982811 | 0.555996 |



|                         |                 |       |       |      |      |       |          |          |          |          |
|-------------------------|-----------------|-------|-------|------|------|-------|----------|----------|----------|----------|
| MmugDNA.22448.1.S1_at   | MmugDNA.22448.1 | 13.36 | 13.33 | 0.06 | 0.05 | 1.02  | 0.229303 | 0.33398  | 0.586472 | 0.582063 |
| MmugDNA.22449.1.S1_at   | MmugDNA.22449.1 | 8.69  | 7.64  | 0.25 | 0.43 | 2.08  | 0.007481 | 0.001761 | 0.208917 | 0.063161 |
| MmugDNA.22450.1.S1_at   | MmugDNA.22450.1 | 5.45  | 5.84  | 0.13 | 0.39 | -1.31 | 0.131863 | 0.197189 | 0.498114 | 0.472213 |
| MmugDNA.22451.1.S1_at   | MmugDNA.22451.1 | 4.09  | 3.34  | 0.27 | 0.08 | 1.68  | 0.019788 | 0.012914 | 0.275549 | 0.146309 |
| MmugDNA.22452.1.S1_at   | MmugDNA.22452.1 | 11.55 | 11.28 | 0.07 | 0.86 | 1.21  | 0.216265 | 0.084001 | 0.575963 | 0.3349   |
| MmugDNA.22454.1.S1_at   | MmugDNA.22454.1 | 5.91  | 5.02  | 0.86 | 1.03 | 1.85  | 0.705037 | 0.33587  | 0.869884 | 0.583533 |
| MmugDNA.22457.1.S1_at   | MmugDNA.22457.1 | 10.34 | 10    | 0.32 | 0.7  | 1.26  | 0.535507 | 0.563752 | 0.779148 | 0.738808 |
| MmugDNA.22458.1.S1_at   | MmugDNA.22458.1 | 4.66  | 4.99  | 1    | 0.22 | -1.26 | 0.719535 | 0.71021  | 0.876961 | 0.831904 |
| MmugDNA.22459.1.S1_at   | MmugDNA.22459.1 | 11.06 | 11.03 | 0.16 | 0.13 | 1.02  | 0.845256 | 0.212442 | 0.937902 | 0.486432 |
| MmugDNA.2246.1.S1_at    | MmugDNA.2246.1  | 4.05  | 3.96  | 0.1  | 0.18 | 1.07  | 0.828686 | 0.317421 | 0.930492 | 0.570627 |
| MmugDNA.22460.1.S1_at   | MmugDNA.22460.1 | 5.02  | 4.88  | 0.6  | 0.43 | 1.1   | 0.667532 | 0.877223 | 0.851131 | 0.930041 |
| MmugDNA.22461.1.S1_at   | MmugDNA.22461.1 | 3.19  | 3.12  | 0.28 | 0.16 | 1.05  | 0.749411 | 0.79465  | 0.892711 | 0.881638 |
| MmugDNA.22462.1.S1_at   | MmugDNA.22462.1 | 6.06  | 5.97  | 0.12 | 0.04 | 1.07  | 0.377107 | 0.269288 | 0.685542 | 0.534534 |
| MmugDNA.31457.1.S1_s_at | MmugDNA.31457.1 | 6.89  | 7     | 0.28 | 0.12 | -1.08 | 0.547111 | 0.633923 | 0.785952 | 0.784538 |
| MmugDNA.22465.1.S1_at   | MmugDNA.22465.1 | 6.55  | 6.57  | 0.04 | 0.05 | -1.02 | 0.215568 | 0.766653 | 0.575924 | 0.864438 |
| MmugDNA.22466.1.S1_at   | MmugDNA.22466.1 | 5.43  | 5.53  | 0.05 | 0.08 | -1.07 | 0.241569 | 0.43964  | 0.593941 | 0.658383 |
| MmugDNA.22468.1.S1_at   | MmugDNA.22468.1 | 3.94  | 4.31  | 0.1  | 0.23 | -1.3  | 0.166972 | 0.04821  | 0.531023 | 0.264671 |
| MmugDNA.22469.1.S1_at   | MmugDNA.22469.1 | 4.5   | 4.46  | 0.34 | 0.02 | 1.03  | 0.561531 | 0.465785 | 0.794887 | 0.675937 |
| MmugDNA.22470.1.S1_at   | MmugDNA.22470.1 | 3.04  | 3.17  | 0.05 | 0.09 | -1.09 | 0.094533 | 0.143798 | 0.452166 | 0.417593 |
| MmugDNA.22471.1.S1_at   | MmugDNA.22471.1 | 5.62  | 5.94  | 0.72 | 0.67 | -1.25 | 0.397423 | 0.564073 | 0.697881 | 0.738956 |
| MmugDNA.22472.1.S1_at   | MmugDNA.22472.1 | 9.79  | 8.96  | 0.08 | 0.41 | 1.77  | 0.066811 | 0.079879 | 0.406981 | 0.327207 |
| MmugDNA.22473.1.S1_at   | MmugDNA.22473.1 | 8.17  | 9.52  | 0.78 | 1.24 | -2.54 | 0.186754 | 0.118427 | 0.550106 | 0.386431 |
| MmugDNA.22475.1.S1_at   | MmugDNA.22475.1 | 6.64  | 8.66  | 0.86 | 0.77 | -4.06 | 0.04231  | 0.019061 | 0.354594 | 0.173688 |
| MmugDNA.22477.1.S1_at   | MmugDNA.22477.1 | 12.21 | 12.6  | 0.03 | 0.05 | -1.3  | 0.000295 | 0.000161 | 0.12562  | 0.030478 |
| MmugDNA.22477.1.S1_s_at | MmugDNA.22477.1 | 11.96 | 12.63 | 0.04 | 0.08 | -1.59 | 0.000132 | 0.000048 | 0.112653 | 0.025273 |
| MmugDNA.22478.1.S1_at   | MmugDNA.22478.1 | 4.23  | 4.14  | 0.05 | 0.09 | 1.06  | 0.406286 | 0.582736 | 0.703645 | 0.751337 |
| MmugDNA.2248.1.S1_at    | MmugDNA.2248.1  | 7.71  | 7.52  | 0.66 | 0.12 | 1.14  | 0.267538 | 0.253978 | 0.612616 | 0.522353 |
| MmugDNA.22480.1.S1_at   | MmugDNA.22480.1 | 4.25  | 3.67  | 0.34 | 0.73 | 1.5   | 0.481912 | 0.357803 | 0.749333 | 0.599418 |
| MmugDNA.22483.1.S1_at   | MmugDNA.22483.1 | 10.31 | 9.3   | 0.39 | 0.23 | 2.01  | 0.014085 | 0.006724 | 0.250983 | 0.110963 |
| MmugDNA.22484.1.S1_at   | MmugDNA.22484.1 | 6.14  | 5.99  | 0.09 | 0.39 | 1.11  | 0.332638 | 0.450728 | 0.656938 | 0.665844 |
| MmugDNA.22486.1.S1_at   | MmugDNA.22486.1 | 3.66  | 3.73  | 0.28 | 0.09 | -1.05 | 0.454483 | 0.394574 | 0.733201 | 0.627098 |
| MmugDNA.22488.1.S1_at   | MmugDNA.22488.1 | 8.14  | 8.59  | 0.39 | 0.85 | -1.37 | 0.294623 | 0.363245 | 0.631382 | 0.603657 |
| MmugDNA.22489.1.S1_at   | MmugDNA.22489.1 | 11.24 | 10.93 | 0.21 | 0.29 | 1.24  | 0.210217 | 0.267059 | 0.571368 | 0.532638 |
| MmugDNA.2249.1.S1_at    | MmugDNA.2249.1  | 5.74  | 5.84  | 0.42 | 0.14 | -1.07 | 0.263207 | 0.172421 | 0.609297 | 0.448837 |
| MmugDNA.22490.1.S1_at   | MmugDNA.22490.1 | 4.04  | 4.15  | 0.13 | 0.23 | -1.07 | 0.284764 | 0.392626 | 0.624417 | 0.625813 |
| MmugDNA.22491.1.S1_at   | MmugDNA.22491.1 | 4.04  | 3.88  | 0.3  | 0.31 | 1.12  | 0.873548 | 0.620184 | 0.94929  | 0.77525  |
| MmugDNA.22492.1.S1_at   | MmugDNA.22492.1 | 5.68  | 5.56  | 0.29 | 0.47 | 1.09  | 0.505695 | 0.691351 | 0.761733 | 0.820406 |
| MmugDNA.22493.1.S1_at   | MmugDNA.22493.1 | 3.57  | 3.64  | 0.01 | 0.12 | -1.05 | 0.364803 | 0.432809 | 0.677652 | 0.653151 |
| MmugDNA.22494.1.S1_at   | MmugDNA.22494.1 | 6.7   | 6.81  | 0.19 | 0.17 | -1.08 | 0.95703  | 0.979989 | 0.983802 | 0.989229 |
| MmugDNA.22496.1.S1_at   | MmugDNA.22496.1 | 7.13  | 7.46  | 0.04 | 0.81 | -1.26 | 0.155276 | 0.067898 | 0.520164 | 0.306745 |
| MmugDNA.22497.1.S1_at   | MmugDNA.22497.1 | 6.39  | 6.51  | 0.05 | 0.07 | -1.09 | 0.231928 | 0.141301 | 0.587671 | 0.414874 |

|                         |                 |       |       |      |      |       |          |          |          |          |
|-------------------------|-----------------|-------|-------|------|------|-------|----------|----------|----------|----------|
| MmugDNA.22498.1.S1_at   | MmugDNA.22498.1 | 5.63  | 6.26  | 0.78 | 1.62 | -1.55 | 0.601289 | 0.547752 | 0.815685 | 0.72866  |
| MmugDNA.22499.1.S1_at   | MmugDNA.22499.1 | 3.18  | 3.18  | 0.11 | 0.04 | 1     | 0.65334  | 0.739186 | 0.844065 | 0.848856 |
| MmugDNA.225.1.S1_at     | MmugDNA.225.1   | 7.73  | 6.61  | 0.46 | 0.48 | 2.18  | 0.094761 | 0.131445 | 0.452166 | 0.403584 |
| MmugDNA.2250.1.S1_at    | MmugDNA.2250.1  | 8.52  | 8.47  | 0.21 | 1.02 | 1.04  | 0.952773 | 0.938571 | 0.982337 | 0.965059 |
| MmugDNA.22501.1.S1_at   | MmugDNA.22501.1 | 3.9   | 3.53  | 0.13 | 0.39 | 1.29  | 0.414411 | 0.154808 | 0.709245 | 0.429828 |
| MmugDNA.22503.1.S1_at   | MmugDNA.22503.1 | 9.63  | 9.7   | 0.13 | 0.08 | -1.05 | 0.640906 | 0.089661 | 0.837842 | 0.343848 |
| MmugDNA.15819.1.S1_s_at | MmugDNA.15819.1 | 10.54 | 10.68 | 0.07 | 0.11 | -1.1  | 0.20167  | 0.063978 | 0.563988 | 0.299066 |
| MmugDNA.22504.1.S1_at   | MmugDNA.22504.1 | 8.48  | 6.49  | 0.34 | 1.17 | 3.96  | 0.18658  | 0.205465 | 0.550106 | 0.479764 |
| MmugDNA.22506.1.S1_at   | MmugDNA.22506.1 | 7.78  | 10.93 | 1.73 | 3.09 | -8.83 | 0.457282 | 0.573655 | 0.7348   | 0.745229 |
| MmugDNA.22506.1.S1_s_at | MmugDNA.22506.1 | 8.47  | 10.65 | 1.4  | 2.58 | -4.53 | 0.404189 | 0.501752 | 0.7026   | 0.699813 |
| MmugDNA.22507.1.S1_at   | MmugDNA.22507.1 | 7.49  | 7.73  | 0.18 | 0.09 | -1.19 | 0.109252 | 0.063823 | 0.470811 | 0.29906  |
| MmugDNA.22508.1.S1_at   | MmugDNA.22508.1 | 11.38 | 11.46 | 0.15 | 0.17 | -1.06 | 0.911688 | 0.233368 | 0.965088 | 0.504725 |
| MmugDNA.2251.1.S1_at    | MmugDNA.2251.1  | 6.33  | 6.33  | 0    | 0.04 | 1     | 0.440032 | 0.336092 | 0.72409  | 0.583652 |
| MmugDNA.22510.1.S1_at   | MmugDNA.22510.1 | 8.99  | 8.56  | 0.3  | 0.54 | 1.35  | 0.430494 | 0.565598 | 0.718071 | 0.739997 |
| MmugDNA.22511.1.S1_at   | MmugDNA.22511.1 | 5.63  | 5.57  | 0.03 | 0.25 | 1.04  | 0.626841 | 0.265438 | 0.82981  | 0.531363 |
| MmugDNA.22513.1.S1_at   | MmugDNA.22513.1 | 5.45  | 4.56  | 1.14 | 0.37 | 1.85  | 0.397497 | 0.535955 | 0.697944 | 0.721454 |
| MmugDNA.22514.1.S1_at   | MmugDNA.22514.1 | 3.86  | 3.84  | 0.2  | 0.07 | 1.01  | 0.708773 | 0.206247 | 0.872069 | 0.480404 |
| MmugDNA.22515.1.S1_at   | MmugDNA.22515.1 | 8.28  | 8.19  | 0.14 | 0.07 | 1.07  | 0.16378  | 0.291086 | 0.528049 | 0.551574 |
| MmugDNA.22516.1.S1_at   | MmugDNA.22516.1 | 4.66  | 4.58  | 0.09 | 0.16 | 1.06  | 0.491262 | 0.130226 | 0.754914 | 0.401961 |
| MmugDNA.22517.1.S1_at   | MmugDNA.22517.1 | 6.08  | 6.16  | 0.18 | 0.15 | -1.06 | 0.575132 | 0.754848 | 0.802119 | 0.857323 |
| MmugDNA.22519.1.S1_at   | MmugDNA.22519.1 | 10.64 | 10.7  | 0.11 | 0.13 | -1.04 | 0.564834 | 0.631454 | 0.796834 | 0.782839 |
| MmugDNA.22521.1.S1_at   | MmugDNA.22521.1 | 4.43  | 4.45  | 0.03 | 0.13 | -1.02 | 0.349574 | 0.361185 | 0.667902 | 0.60207  |
| MmugDNA.22522.1.S1_at   | MmugDNA.22522.1 | 4.95  | 5.01  | 0.09 | 0.19 | -1.04 | 0.137009 | 0.150064 | 0.504271 | 0.424698 |
| MmugDNA.22523.1.S1_at   | MmugDNA.22523.1 | 6     | 6.01  | 0.14 | 0    | -1.01 | 0.329788 | 0.193306 | 0.655349 | 0.468656 |
| MmugDNA.22524.1.S1_at   | MmugDNA.22524.1 | 3.59  | 3.75  | 0.21 | 0.14 | -1.12 | 0.781019 | 0.407537 | 0.908719 | 0.63505  |
| MmugDNA.22525.1.S1_at   | MmugDNA.22525.1 | 7.23  | 6     | 0.37 | 0.6  | 2.35  | 0.105977 | 0.106032 | 0.466831 | 0.368427 |
| MmugDNA.22527.1.S1_at   | MmugDNA.22527.1 | 5.08  | 4.49  | 0.03 | 0.29 | 1.5   | 0.062341 | 0.029904 | 0.397836 | 0.214615 |
| MmugDNA.22528.1.S1_at   | MmugDNA.22528.1 | 6.45  | 6.61  | 0.04 | 0.15 | -1.12 | 0.164328 | 0.166189 | 0.528238 | 0.442753 |
| MmugDNA.22529.1.S1_at   | MmugDNA.22529.1 | 11.12 | 10.81 | 0.17 | 0.28 | 1.24  | 0.362394 | 0.399374 | 0.675977 | 0.629776 |
| MmugDNA.2253.1.S1_at    | MmugDNA.2253.1  | 3.38  | 3.37  | 0.32 | 0.18 | 1.01  | 0.773229 | 0.770865 | 0.904749 | 0.866807 |
| MmugDNA.22530.1.S1_at   | MmugDNA.22530.1 | 4.93  | 4.95  | 0.18 | 0.07 | -1.01 | 0.875908 | 0.93298  | 0.950267 | 0.961911 |
| MmugDNA.22531.1.S1_s_at | MmugDNA.22531.1 | 8.79  | 8.05  | 0.2  | 0.16 | 1.67  | 0.004829 | 0.005995 | 0.184854 | 0.105892 |
| MmugDNA.22533.1.S1_at   | MmugDNA.22533.1 | 4.59  | 4.64  | 0.81 | 0.38 | -1.04 | 0.2893   | 0.344974 | 0.627311 | 0.590239 |
| MmugDNA.22534.1.S1_s_at | MmugDNA.22534.1 | 9.75  | 9.53  | 0.97 | 0.4  | 1.16  | 0.565601 | 0.587338 | 0.797218 | 0.754144 |
| MmugDNA.22535.1.S1_at   | MmugDNA.22535.1 | 8.64  | 8.5   | 0.1  | 0.26 | 1.1   | 0.823515 | 0.931428 | 0.928175 | 0.961034 |
| MmugDNA.22536.1.S1_at   | MmugDNA.22536.1 | 9.89  | 9.35  | 0.41 | 0.25 | 1.45  | 0.129559 | 0.211553 | 0.495744 | 0.485658 |
| MmugDNA.22538.1.S1_at   | MmugDNA.22538.1 | 4.56  | 4.6   | 0.25 | 0.07 | -1.02 | 0.380405 | 0.565197 | 0.687269 | 0.739754 |
| MmugDNA.22539.1.S1_at   | MmugDNA.22539.1 | 6.31  | 5.49  | 0.24 | 0.15 | 1.78  | 0.010019 | 0.002596 | 0.226901 | 0.075412 |
| MmugDNA.2254.1.S1_at    | MmugDNA.2254.1  | 4.7   | 4.55  | 0.11 | 0.08 | 1.1   | 0.186629 | 0.057593 | 0.550106 | 0.286152 |
| MmugDNA.22540.1.S1_at   | MmugDNA.22540.1 | 6.02  | 6.02  | 0.08 | 0.08 | 1     | 0.260966 | 0.50618  | 0.607554 | 0.70236  |
| MmugDNA.22541.1.S1_at   | MmugDNA.22541.1 | 8.35  | 8.05  | 0.12 | 0.64 | 1.23  | 0.299616 | 0.323388 | 0.634993 | 0.574453 |

|                        |                 |       |       |      |      |       |          |          |          |          |
|------------------------|-----------------|-------|-------|------|------|-------|----------|----------|----------|----------|
| MmugDNA.22542.1.S1_at  | MmugDNA.22542.1 | 4.27  | 4.08  | 0.25 | 0.47 | 1.15  | 0.543349 | 0.674648 | 0.783788 | 0.80993  |
| MmugDNA.22544.1.S1_at  | MmugDNA.22544.1 | 9.19  | 10.12 | 0.28 | 0.71 | -1.9  | 0.102257 | 0.105555 | 0.461919 | 0.367526 |
| MmugDNA.22547.1.S1_at  | MmugDNA.22547.1 | 6.74  | 6.03  | 0.23 | 0.29 | 1.63  | 0.05027  | 0.035511 | 0.373929 | 0.232714 |
| MmugDNA.22548.1.S1_at  | MmugDNA.22548.1 | 5.75  | 5.37  | 0.2  | 0.2  | 1.3   | 0.077767 | 0.067656 | 0.427756 | 0.306199 |
| MmugDNA.22550.1.S1_at  | MmugDNA.22550.1 | 2.93  | 2.82  | 0.03 | 0.02 | 1.08  | 0.002797 | 0.278089 | 0.16633  | 0.541754 |
| MmugDNA.22551.1.S1_at  | MmugDNA.22551.1 | 9.56  | 9.49  | 0.37 | 0.2  | 1.05  | 0.952277 | 0.314635 | 0.982156 | 0.568415 |
| MmugDNA.22552.1.S1_at  | MmugDNA.22552.1 | 4.4   | 4.7   | 0.19 | 0.46 | -1.23 | 0.736265 | 0.754812 | 0.88654  | 0.857323 |
| MmugDNA.22553.1.S1_at  | MmugDNA.22553.1 | 3.14  | 3.12  | 0.14 | 0.1  | 1.01  | 0.238533 | 0.37232  | 0.591896 | 0.611225 |
| MmugDNA.22555.1.S1_at  | MmugDNA.22555.1 | 6.34  | 6.24  | 0.07 | 0.12 | 1.08  | 0.998183 | 0.973651 | 0.999298 | 0.985648 |
| MmugDNA.22556.1.S1_at  | MmugDNA.22556.1 | 3.25  | 3.22  | 0.14 | 0.02 | 1.03  | 0.919553 | 0.240793 | 0.968755 | 0.511521 |
| MmugDNA.22557.1.S1_at  | MmugDNA.22557.1 | 6.11  | 6.32  | 0.12 | 0.19 | -1.16 | 0.071291 | 0.098731 | 0.415023 | 0.356811 |
| MmugDNA.22558.1.S1_at  | MmugDNA.22558.1 | 9.02  | 9.02  | 0.05 | 0.1  | -1    | 0.512078 | 0.580035 | 0.765453 | 0.749408 |
| MmugDNA.22559.1.S1_at  | MmugDNA.22559.1 | 6.27  | 6.29  | 0.31 | 0.38 | -1.02 | 0.382988 | 0.272944 | 0.689061 | 0.53761  |
| MmugDNA.2256.1.S1_at   | MmugDNA.2256.1  | 3.35  | 3.48  | 0.02 | 0.13 | -1.1  | 0.343194 | 0.263072 | 0.663497 | 0.529402 |
| MmugDNA.22561.1.S1_at  | MmugDNA.22561.1 | 3.8   | 3.61  | 0.61 | 0.15 | 1.15  | 0.40131  | 0.490859 | 0.700774 | 0.692666 |
| MmugDNA.22562.1.S1_at  | MmugDNA.22562.1 | 4.53  | 4.27  | 0.24 | 0.18 | 1.2   | 0.195408 | 0.19364  | 0.558901 | 0.468785 |
| MmugDNA.22563.1.S1_at  | MmugDNA.22563.1 | 4.63  | 4.74  | 0.01 | 0.26 | -1.08 | 0.511359 | 0.386184 | 0.765295 | 0.621435 |
| MmugDNA.22564.1.S1_at  | MmugDNA.22564.1 | 5.8   | 6.03  | 0.05 | 0.18 | -1.17 | 0.103467 | 0.163852 | 0.463014 | 0.440054 |
| MmugDNA.22565.1.S1_at  | MmugDNA.22565.1 | 3.24  | 3.45  | 0.48 | 0.28 | -1.16 | 0.554585 | 0.263547 | 0.790867 | 0.529826 |
| MmugDNA.22566.1.S1_at  | MmugDNA.22566.1 | 3.35  | 3.39  | 0.07 | 0.04 | -1.03 | 0.226674 | 0.607581 | 0.584603 | 0.766437 |
| MmugDNA.22567.1.S1_at  | MmugDNA.22567.1 | 6.76  | 6.78  | 0.04 | 0.15 | -1.02 | 0.946477 | 0.534145 | 0.979443 | 0.720143 |
| MmugDNA.2257.1.S1_at   | MmugDNA.2257.1  | 7.01  | 7.57  | 0.15 | 0.26 | -1.48 | 0.023172 | 0.010612 | 0.290295 | 0.134345 |
| MmugDNA.22570.1.S1_at  | MmugDNA.22570.1 | 6.14  | 6.02  | 0.06 | 0.03 | 1.09  | 0.026182 | 0.002922 | 0.301676 | 0.079414 |
| MmugDNA.22571.1.S1_at  | MmugDNA.22571.1 | 10.64 | 10.16 | 0.23 | 0.76 | 1.4   | 0.651216 | 0.362198 | 0.843066 | 0.602845 |
| MmugDNA.22572.1.S1_at  | MmugDNA.22572.1 | 5.99  | 6.14  | 0.36 | 0.29 | -1.12 | 0.727049 | 0.901413 | 0.88121  | 0.943931 |
| MmugDNA.22574.1.S1_at  | MmugDNA.22574.1 | 7.15  | 7.1   | 0.09 | 0.14 | 1.04  | 0.638521 | 0.811942 | 0.836621 | 0.891493 |
| MmugDNA.22575.1.S1_at  | MmugDNA.22575.1 | 6.28  | 4.94  | 0.28 | 0.96 | 2.53  | 0.089069 | 0.081395 | 0.444475 | 0.329571 |
| MmugDNA.22576.1.S1_at  | MmugDNA.22576.1 | 4.09  | 4.13  | 0.07 | 0.14 | -1.03 | 0.837221 | 0.608507 | 0.934184 | 0.767091 |
| MmugDNA.22577.1.S1_at  | MmugDNA.22577.1 | 8.7   | 7.96  | 0.34 | 0.2  | 1.67  | 0.048369 | 0.051152 | 0.368344 | 0.271638 |
| MmugDNA.22578.1.S1_at  | MmugDNA.22578.1 | 6.9   | 7.32  | 0.3  | 0.18 | -1.34 | 0.316445 | 0.060657 | 0.647377 | 0.292871 |
| MmugDNA.22580.1.S1_at  | MmugDNA.22580.1 | 8.78  | 8.4   | 0.99 | 0.91 | 1.3   | 0.391487 | 0.542313 | 0.694099 | 0.725385 |
| MmugDNA.22581.1.S1_at  | MmugDNA.22581.1 | 4.14  | 4.28  | 0.46 | 0.27 | -1.1  | 0.40802  | 0.312777 | 0.70497  | 0.567314 |
| MmugDNA.22583.1.S1_at  | MmugDNA.22583.1 | 3.05  | 2.99  | 0.17 | 0.09 | 1.04  | 0.592936 | 0.751475 | 0.811221 | 0.855508 |
| MmugDNA.22584.1.S1_at  | MmugDNA.22584.1 | 4.72  | 4.4   | 0.18 | 0.07 | 1.25  | 0.168854 | 0.143065 | 0.533155 | 0.416953 |
| MmugDNA.1433.1.S1_at   | MmugDNA.1433.1  | 9.25  | 9.83  | 0.27 | 0.39 | -1.49 | 0.505084 | 0.67397  | 0.761548 | 0.809483 |
| MmugDNA.1433.1.S1_s_at | MmugDNA.1433.1  | 10.57 | 11.14 | 0.3  | 0.46 | -1.48 | 0.379728 | 0.456255 | 0.687063 | 0.670036 |
| MmugDNA.22586.1.S1_at  | MmugDNA.22586.1 | 4.52  | 4.31  | 0.66 | 0.13 | 1.16  | 0.45686  | 0.589833 | 0.73457  | 0.755973 |
| MmugDNA.22587.1.S1_at  | MmugDNA.22587.1 | 3.87  | 4.43  | 0.32 | 0.41 | -1.48 | 0.18206  | 0.141589 | 0.546458 | 0.415102 |
| MmugDNA.22588.1.S1_at  | MmugDNA.22588.1 | 8.57  | 8.82  | 0.03 | 0.22 | -1.19 | 0.122794 | 0.066661 | 0.48812  | 0.303999 |
| MmugDNA.22589.1.S1_at  | MmugDNA.22589.1 | 3.62  | 3.76  | 0.21 | 0.19 | -1.1  | 0.42587  | 0.43397  | 0.715367 | 0.654135 |
| MmugDNA.22590.1.S1_at  | MmugDNA.22590.1 | 4.9   | 4.85  | 0.16 | 0.04 | 1.04  | 0.598338 | 0.711079 | 0.813939 | 0.8324   |

|                         |                 |       |       |      |      |       |          |          |          |          |
|-------------------------|-----------------|-------|-------|------|------|-------|----------|----------|----------|----------|
| MmugDNA.22591.1.S1_at   | MmugDNA.22591.1 | 11.53 | 11.3  | 0.1  | 0.4  | 1.17  | 0.474104 | 0.57547  | 0.744851 | 0.746538 |
| MmugDNA.22592.1.S1_at   | MmugDNA.22592.1 | 7.44  | 7.14  | 0.18 | 0.67 | 1.23  | 0.226726 | 0.080389 | 0.584677 | 0.328028 |
| MmugDNA.22593.1.S1_at   | MmugDNA.22593.1 | 4.71  | 4.82  | 0.14 | 0.07 | -1.08 | 0.151581 | 0.260092 | 0.516191 | 0.52675  |
| MmugDNA.22598.1.S1_at   | MmugDNA.22598.1 | 9.62  | 8.94  | 0.27 | 0.65 | 1.6   | 0.151727 | 0.195026 | 0.516455 | 0.470176 |
| MmugDNA.22599.1.S1_at   | MmugDNA.22599.1 | 5.91  | 5.32  | 0.24 | 0.52 | 1.51  | 0.09655  | 0.041625 | 0.455338 | 0.24887  |
| MmugDNA.2260.1.S1_s_at  | MmugDNA.2260.1  | 10.56 | 10.94 | 0.16 | 0.55 | -1.3  | 0.952726 | 0.626788 | 0.982319 | 0.779995 |
| MmugDNA.22600.1.S1_at   | MmugDNA.22600.1 | 3.82  | 3.64  | 0.32 | 0.2  | 1.13  | 0.169915 | 0.143652 | 0.534129 | 0.417555 |
| MmugDNA.22601.1.S1_at   | MmugDNA.22601.1 | 9.49  | 8.23  | 0.29 | 0.31 | 2.39  | 0.004603 | 0.003264 | 0.1844   | 0.082278 |
| MmugDNA.22602.1.S1_at   | MmugDNA.22602.1 | 12.12 | 12.09 | 0.1  | 0.2  | 1.02  | 0.814798 | 0.384243 | 0.924758 | 0.619994 |
| MmugDNA.22603.1.S1_at   | MmugDNA.22603.1 | 5.78  | 8.01  | 0.9  | 1.65 | -4.67 | 0.223348 | 0.197617 | 0.581813 | 0.472566 |
| MmugDNA.22604.1.S1_at   | MmugDNA.22604.1 | 7.74  | 7.91  | 0.19 | 0.47 | -1.12 | 0.57039  | 0.383682 | 0.799483 | 0.61968  |
| MmugDNA.22605.1.S1_at   | MmugDNA.22605.1 | 3.16  | 3     | 0.13 | 0.05 | 1.12  | 0.115421 | 0.107523 | 0.478773 | 0.370389 |
| MmugDNA.22606.1.S1_at   | MmugDNA.22606.1 | 5.24  | 5.35  | 0.3  | 0.56 | -1.08 | 0.88672  | 0.889576 | 0.954695 | 0.937097 |
| MmugDNA.22608.1.S1_at   | MmugDNA.22608.1 | 3.79  | 3.49  | 0.26 | 0.06 | 1.23  | 0.457939 | 0.045831 | 0.735139 | 0.258354 |
| MmugDNA.2261.1.S1_at    | MmugDNA.2261.1  | 7.94  | 6.95  | 0.23 | 0.81 | 1.99  | 0.140914 | 0.134975 | 0.508448 | 0.406951 |
| MmugDNA.22611.1.S1_at   | MmugDNA.22611.1 | 12.69 | 12.3  | 0.41 | 0.26 | 1.31  | 0.216973 | 0.237369 | 0.576571 | 0.508098 |
| MmugDNA.22612.1.S1_at   | MmugDNA.22612.1 | 5.08  | 5.06  | 0.13 | 0.08 | 1.01  | 0.401913 | 0.131987 | 0.701106 | 0.404024 |
| MmugDNA.22613.1.S1_at   | MmugDNA.22613.1 | 2.85  | 3.05  | 0.04 | 0.23 | -1.15 | 0.080183 | 0.051718 | 0.430341 | 0.272972 |
| MmugDNA.22614.1.S1_at   | MmugDNA.22614.1 | 5.38  | 5.97  | 0.21 | 0.54 | -1.5  | 0.120734 | 0.10236  | 0.48574  | 0.362527 |
| MmugDNA.22615.1.S1_at   | MmugDNA.22615.1 | 11.03 | 11.85 | 0.77 | 0.38 | -1.76 | 0.220772 | 0.171935 | 0.579701 | 0.448352 |
| MmugDNA.22615.1.S1_s_at | MmugDNA.22615.1 | 11.86 | 12.06 | 0.24 | 0.39 | -1.15 | 0.942973 | 0.511249 | 0.978331 | 0.705465 |
| MmugDNA.22616.1.S1_at   | MmugDNA.22616.1 | 7.22  | 7.28  | 0.08 | 0.09 | -1.04 | 0.422388 | 0.202118 | 0.71345  | 0.476557 |
| MmugDNA.22618.1.S1_at   | MmugDNA.22618.1 | 3.31  | 3.19  | 0.19 | 0.1  | 1.09  | 0.361167 | 0.633025 | 0.675116 | 0.783894 |
| MmugDNA.2262.1.S1_at    | MmugDNA.2262.1  | 12.84 | 12.74 | 0.09 | 0.28 | 1.07  | 0.350069 | 0.257816 | 0.668318 | 0.525442 |
| MmugDNA.22621.1.S1_at   | MmugDNA.22621.1 | 5.41  | 5.33  | 1.11 | 0.22 | 1.05  | 0.911507 | 0.990187 | 0.965029 | 0.9944   |
| MmugDNA.22623.1.S1_at   | MmugDNA.22623.1 | 8.19  | 8.04  | 0.2  | 0.7  | 1.11  | 0.271865 | 0.31464  | 0.615834 | 0.568415 |
| MmugDNA.22624.1.S1_at   | MmugDNA.22624.1 | 10.45 | 9.94  | 0.24 | 1.02 | 1.42  | 0.173384 | 0.17397  | 0.537006 | 0.450247 |
| MmugDNA.22625.1.S1_at   | MmugDNA.22625.1 | 7.45  | 7.47  | 0.12 | 0.09 | -1.01 | 0.604266 | 0.505167 | 0.817623 | 0.702005 |
| MmugDNA.22626.1.S1_at   | MmugDNA.22626.1 | 11.47 | 12.17 | 0.11 | 0.51 | -1.62 | 0.06335  | 0.073681 | 0.400486 | 0.317014 |
| MmugDNA.22628.1.S1_at   | MmugDNA.22628.1 | 8     | 8.6   | 0.22 | 0.13 | -1.51 | 0.016798 | 0.027575 | 0.26556  | 0.207355 |
| MmugDNA.2263.1.S1_at    | MmugDNA.2263.1  | 5.13  | 5.28  | 0.44 | 0.12 | -1.11 | 0.704521 | 0.527848 | 0.86969  | 0.71629  |
| MmugDNA.22630.1.S1_at   | MmugDNA.22630.1 | 3.46  | 3.5   | 0.03 | 0.04 | -1.03 | 0.125681 | 0.191514 | 0.491732 | 0.466833 |
| MmugDNA.22633.1.S1_at   | MmugDNA.22633.1 | 13.8  | 13.77 | 0.05 | 0.09 | 1.02  | 0.464299 | 0.396016 | 0.739156 | 0.627823 |
| MmugDNA.22635.1.S1_at   | MmugDNA.22635.1 | 3.49  | 3.58  | 0.19 | 0.01 | -1.07 | 0.38755  | 0.549618 | 0.691999 | 0.729956 |
| MmugDNA.22637.1.S1_at   | MmugDNA.22637.1 | 6.84  | 6.87  | 0.1  | 0.06 | -1.02 | 0.308438 | 0.508467 | 0.640817 | 0.70363  |
| MmugDNA.22638.1.S1_at   | MmugDNA.22638.1 | 8.86  | 8.56  | 0.1  | 0.12 | 1.23  | 0.02151  | 0.260769 | 0.282524 | 0.52721  |
| MmugDNA.22639.1.S1_at   | MmugDNA.22639.1 | 3.48  | 3.6   | 0.06 | 0.13 | -1.09 | 0.12322  | 0.14323  | 0.488828 | 0.417179 |
| MmugDNA.2264.1.S1_at    | MmugDNA.2264.1  | 6.18  | 6.54  | 1.42 | 0.5  | -1.29 | 0.639596 | 0.796314 | 0.837247 | 0.882625 |
| MmugDNA.22641.1.S1_at   | MmugDNA.22641.1 | 3.33  | 3.52  | 0.34 | 0.26 | -1.14 | 0.906932 | 0.325356 | 0.963023 | 0.575769 |
| MmugDNA.22643.1.S1_at   | MmugDNA.22643.1 | 11.19 | 11.67 | 0.2  | 0.46 | -1.39 | 0.16593  | 0.233292 | 0.529851 | 0.50468  |
| MmugDNA.22644.1.S1_at   | MmugDNA.22644.1 | 3.17  | 3.02  | 0.28 | 0.16 | 1.11  | 0.483328 | 0.2482   | 0.749882 | 0.517574 |

|                         |                 |       |       |      |      |       |          |          |          |          |
|-------------------------|-----------------|-------|-------|------|------|-------|----------|----------|----------|----------|
| MmugDNA.22644.1.S1_x_at | MmugDNA.22644.1 | 3.65  | 3.32  | 0.29 | 0.15 | 1.25  | 0.174258 | 0.112111 | 0.537904 | 0.377398 |
| MmugDNA.22645.1.S1_at   | MmugDNA.22645.1 | 4.4   | 4.22  | 0.48 | 0.11 | 1.14  | 0.427508 | 0.554879 | 0.716263 | 0.733544 |
| MmugDNA.22646.1.S1_at   | MmugDNA.22646.1 | 3.34  | 3.49  | 0.06 | 0.03 | -1.11 | 0.057372 | 0.048031 | 0.388093 | 0.264118 |
| MmugDNA.22647.1.S1_at   | MmugDNA.22647.1 | 4.9   | 4.82  | 0.26 | 0.41 | 1.05  | 0.93206  | 0.799504 | 0.973719 | 0.884661 |
| MmugDNA.22648.1.S1_at   | MmugDNA.22648.1 | 5.77  | 5.71  | 0.49 | 0.17 | 1.04  | 0.657559 | 0.860759 | 0.846035 | 0.920687 |
| MmugDNA.22649.1.S1_at   | MmugDNA.22649.1 | 7.57  | 6.61  | 0.88 | 0.64 | 1.95  | 0.086753 | 0.017944 | 0.440475 | 0.168998 |
| MmugDNA.22650.1.S1_at   | MmugDNA.22650.1 | 3.03  | 2.99  | 0.21 | 0.22 | 1.03  | 0.373647 | 0.406164 | 0.683245 | 0.634211 |
| MmugDNA.22651.1.S1_at   | MmugDNA.22651.1 | 5.25  | 5.28  | 0.33 | 0.23 | -1.03 | 0.503676 | 0.589872 | 0.760979 | 0.755987 |
| MmugDNA.22653.1.S1_at   | MmugDNA.22653.1 | 6.69  | 6.66  | 0.14 | 0.17 | 1.02  | 0.785441 | 0.92029  | 0.910738 | 0.95511  |
| MmugDNA.22654.1.S1_at   | MmugDNA.22654.1 | 6.68  | 6.57  | 0.37 | 0.02 | 1.08  | 0.650902 | 0.466341 | 0.84297  | 0.67624  |
| MmugDNA.22656.1.S1_at   | MmugDNA.22656.1 | 6.39  | 6.41  | 0.16 | 0.17 | -1.01 | 0.276831 | 0.365419 | 0.619005 | 0.605537 |
| MmugDNA.22657.1.S1_at   | MmugDNA.22657.1 | 9.43  | 9.55  | 0.49 | 0.52 | -1.09 | 0.84602  | 0.952379 | 0.938232 | 0.973038 |
| MmugDNA.22658.1.S1_at   | MmugDNA.22658.1 | 6.37  | 6.43  | 0.28 | 0.11 | -1.04 | 0.916364 | 0.900406 | 0.967189 | 0.94344  |
| MmugDNA.22661.1.S1_at   | MmugDNA.22661.1 | 7.57  | 7.06  | 0.03 | 0.26 | 1.42  | 0.075613 | 0.031654 | 0.423038 | 0.22018  |
| MmugDNA.22662.1.S1_at   | MmugDNA.22662.1 | 8.98  | 9.07  | 0.47 | 0.47 | -1.06 | 0.673952 | 0.532619 | 0.853911 | 0.719151 |
| MmugDNA.22664.1.S1_at   | MmugDNA.22664.1 | 4.15  | 4.15  | 0.17 | 0.19 | 1     | 0.230552 | 0.27591  | 0.587222 | 0.540035 |
| MmugDNA.22666.1.S1_at   | MmugDNA.22666.1 | 10.05 | 10.27 | 0.01 | 0.21 | -1.16 | 0.120827 | 0.051769 | 0.48574  | 0.273102 |
| MmugDNA.22667.1.S1_at   | MmugDNA.22667.1 | 3.9   | 3.92  | 0.29 | 0.02 | -1.02 | 0.875804 | 0.951603 | 0.950257 | 0.972522 |
| MmugDNA.22668.1.S1_at   | MmugDNA.22668.1 | 5.89  | 5.92  | 0.11 | 0.1  | -1.02 | 0.806393 | 0.443866 | 0.920614 | 0.661533 |
| MmugDNA.22669.1.S1_at   | MmugDNA.22669.1 | 5.34  | 5.33  | 0.23 | 0.07 | 1.01  | 0.573744 | 0.623455 | 0.801332 | 0.777793 |
| MmugDNA.2267.1.S1_at    | MmugDNA.2267.1  | 5.68  | 6.11  | 0.27 | 0.27 | -1.34 | 0.086027 | 0.120472 | 0.440041 | 0.38925  |
| MmugDNA.22670.1.S1_at   | MmugDNA.22670.1 | 7.29  | 7.01  | 0.4  | 0.15 | 1.21  | 0.144253 | 0.173085 | 0.510664 | 0.449765 |
| MmugDNA.22671.1.S1_at   | MmugDNA.22671.1 | 11.37 | 11.44 | 0.06 | 0.04 | -1.05 | 0.353099 | 0.067153 | 0.669964 | 0.305165 |
| MmugDNA.22671.1.S1_s_at | MmugDNA.22671.1 | 12.29 | 12.32 | 0.13 | 0.03 | -1.02 | 0.381508 | 0.00135  | 0.68795  | 0.056546 |
| MmugDNA.22672.1.S1_at   | MmugDNA.22672.1 | 5.43  | 5.53  | 0.19 | 0.06 | -1.07 | 0.354759 | 0.456778 | 0.670686 | 0.67045  |
| MmugDNA.22673.1.S1_at   | MmugDNA.22673.1 | 10.53 | 10.47 | 0.33 | 0.52 | 1.04  | 0.607686 | 0.598831 | 0.819497 | 0.761155 |
| MmugDNA.22674.1.S1_at   | MmugDNA.22674.1 | 12.1  | 11.41 | 0.14 | 0.44 | 1.61  | 0.05701  | 0.02615  | 0.387418 | 0.202721 |
| MmugDNA.22675.1.S1_at   | MmugDNA.22675.1 | 4.59  | 4.39  | 0.21 | 0.03 | 1.15  | 0.534903 | 0.615306 | 0.778892 | 0.771918 |
| MmugDNA.22676.1.S1_at   | MmugDNA.22676.1 | 6.18  | 6.95  | 0.17 | 0.56 | -1.7  | 0.125457 | 0.067293 | 0.491333 | 0.30541  |
| MmugDNA.22677.1.S1_at   | MmugDNA.22677.1 | 5.8   | 5.75  | 0.07 | 0.29 | 1.04  | 0.283339 | 0.329536 | 0.623353 | 0.578781 |
| MmugDNA.22678.1.S1_at   | MmugDNA.22678.1 | 10.49 | 10.89 | 0.29 | 0.07 | -1.32 | 0.288704 | 0.095172 | 0.626793 | 0.35218  |
| MmugDNA.2268.1.S1_at    | MmugDNA.2268.1  | 6.43  | 6.59  | 0.04 | 0.15 | -1.12 | 0.1617   | 0.027009 | 0.526573 | 0.205501 |
| MmugDNA.2268.1.S1_x_at  | MmugDNA.2268.1  | 6.39  | 6.5   | 0.02 | 0.01 | -1.08 | 0.000683 | 0.020008 | 0.136818 | 0.17768  |
| MmugDNA.22680.1.S1_at   | MmugDNA.22680.1 | 4.72  | 4.23  | 0.98 | 0.72 | 1.41  | 0.409465 | 0.573533 | 0.705878 | 0.745197 |
| MmugDNA.22681.1.S1_at   | MmugDNA.22681.1 | 4.09  | 3.75  | 0.37 | 0.08 | 1.27  | 0.580125 | 0.734062 | 0.804451 | 0.845896 |
| MmugDNA.22682.1.S1_at   | MmugDNA.22682.1 | 4.87  | 5.69  | 0.12 | 0.09 | -1.77 | 0.000889 | 0.000092 | 0.139813 | 0.027225 |
| MmugDNA.22683.1.S1_at   | MmugDNA.22683.1 | 5.28  | 5.69  | 0.16 | 0.55 | -1.33 | 0.100338 | 0.113787 | 0.460878 | 0.380021 |
| MmugDNA.22684.1.S1_at   | MmugDNA.22684.1 | 3.44  | 3.73  | 0.2  | 0.04 | -1.22 | 0.246531 | 0.236803 | 0.597782 | 0.507545 |
| MmugDNA.22685.1.S1_at   | MmugDNA.22685.1 | 3.6   | 3.64  | 0.06 | 0.14 | -1.02 | 0.165875 | 0.303266 | 0.529848 | 0.560748 |
| MmugDNA.22686.1.S1_at   | MmugDNA.22686.1 | 2.91  | 3.11  | 0.04 | 0.21 | -1.15 | 0.128721 | 0.095998 | 0.494664 | 0.353302 |
| MmugDNA.22687.1.S1_at   | MmugDNA.22687.1 | 6.31  | 8.03  | 0.18 | 0.62 | -3.29 | 0.012147 | 0.004899 | 0.240358 | 0.097632 |

|                         |                 |       |       |      |      |       |          |          |          |          |
|-------------------------|-----------------|-------|-------|------|------|-------|----------|----------|----------|----------|
| MmugDNA.22689.1.S1_at   | MmugDNA.22689.1 | 3.71  | 3.07  | 0.5  | 0.47 | 1.55  | 0.410843 | 0.250426 | 0.70666  | 0.519391 |
| MmugDNA.22690.1.S1_at   | MmugDNA.22690.1 | 5.21  | 5.28  | 0.37 | 0.28 | -1.05 | 0.358398 | 0.568895 | 0.673196 | 0.742129 |
| MmugDNA.22691.1.S1_at   | MmugDNA.22691.1 | 5.47  | 6.43  | 0.54 | 1.12 | -1.94 | 0.188011 | 0.226669 | 0.551017 | 0.499139 |
| MmugDNA.22694.1.S1_at   | MmugDNA.22694.1 | 6.02  | 5.36  | 0.51 | 0.11 | 1.58  | 0.095936 | 0.049564 | 0.454003 | 0.267592 |
| MmugDNA.22695.1.S1_at   | MmugDNA.22695.1 | 7.49  | 6.56  | 0.29 | 0.65 | 1.91  | 0.390239 | 0.015007 | 0.69348  | 0.155713 |
| MmugDNA.22696.1.S1_at   | MmugDNA.22696.1 | 4.63  | 4.61  | 0.27 | 0.1  | 1.01  | 0.990871 | 0.419228 | 0.99683  | 0.643398 |
| MmugDNA.22697.1.S1_at   | MmugDNA.22697.1 | 4.63  | 4.7   | 0.1  | 0.08 | -1.05 | 0.67988  | 0.8097   | 0.85688  | 0.890319 |
| MmugDNA.22698.1.S1_at   | MmugDNA.22698.1 | 6.34  | 6.53  | 0.08 | 0.1  | -1.14 | 0.071664 | 0.209978 | 0.415639 | 0.483744 |
| MmugDNA.22699.1.S1_at   | MmugDNA.22699.1 | 2.81  | 2.81  | 0.12 | 0.1  | -1    | 0.692445 | 0.867658 | 0.863394 | 0.924791 |
| MmugDNA.227.1.S1_at     | MmugDNA.227.1   | 5.11  | 5.07  | 0.43 | 0.1  | 1.03  | 0.343325 | 0.413724 | 0.663541 | 0.639742 |
| MmugDNA.2270.1.S1_at    | MmugDNA.2270.1  | 6.24  | 5.43  | 1.03 | 0.22 | 1.75  | 0.208687 | 0.285553 | 0.570402 | 0.547395 |
| MmugDNA.22700.1.S1_at   | MmugDNA.22700.1 | 12.36 | 12.31 | 0.07 | 0.37 | 1.03  | 0.962823 | 0.248348 | 0.985644 | 0.5176   |
| MmugDNA.22701.1.S1_at   | MmugDNA.22701.1 | 10.62 | 10.79 | 0.17 | 0.43 | -1.13 | 0.768663 | 0.217172 | 0.902722 | 0.490822 |
| MmugDNA.22702.1.S1_at   | MmugDNA.22702.1 | 5.32  | 5.32  | 0.17 | 0.09 | -1.01 | 0.326548 | 0.484832 | 0.653184 | 0.688773 |
| MmugDNA.22703.1.S1_at   | MmugDNA.22703.1 | 11.71 | 11.72 | 0.02 | 0.16 | -1.01 | 0.989437 | 0.883084 | 0.996281 | 0.933312 |
| MmugDNA.22704.1.S1_at   | MmugDNA.22704.1 | 5.08  | 5.02  | 0.06 | 0.2  | 1.04  | 0.338769 | 0.360576 | 0.660988 | 0.601624 |
| MmugDNA.22705.1.S1_at   | MmugDNA.22705.1 | 7.09  | 6.72  | 0.55 | 0.22 | 1.29  | 0.076552 | 0.071932 | 0.425098 | 0.314293 |
| MmugDNA.22706.1.S1_at   | MmugDNA.22706.1 | 5.56  | 5.64  | 0.15 | 1.05 | -1.06 | 0.493947 | 0.592082 | 0.756411 | 0.757476 |
| MmugDNA.22707.1.S1_at   | MmugDNA.22707.1 | 6.94  | 6.79  | 0.11 | 0.12 | 1.11  | 0.505534 | 0.323123 | 0.76168  | 0.574351 |
| MmugDNA.22708.1.S1_at   | MmugDNA.22708.1 | 12.35 | 11.84 | 0.11 | 0.17 | 1.43  | 0.012831 | 0.005153 | 0.244076 | 0.09964  |
| MmugDNA.22709.1.S1_at   | MmugDNA.22709.1 | 3.18  | 3.18  | 0.08 | 0.09 | -1    | 0.78463  | 0.662216 | 0.910286 | 0.802201 |
| MmugDNA.2271.1.S1_s_at  | MmugDNA.2271.1  | 3.88  | 6.16  | 0.12 | 1.33 | -4.86 | 0.047265 | 0.085813 | 0.365689 | 0.337901 |
| MmugDNA.22713.1.S1_s_at | MmugDNA.22713.1 | 5.46  | 5.47  | 0.14 | 0.08 | -1    | 0.86471  | 0.906025 | 0.945595 | 0.946832 |
| MmugDNA.22714.1.S1_at   | MmugDNA.22714.1 | 5.25  | 4.75  | 0.13 | 0.41 | 1.42  | 0.339576 | 0.036642 | 0.661307 | 0.235943 |
| MmugDNA.22715.1.S1_s_at | MmugDNA.22715.1 | 10.77 | 10.89 | 0.19 | 0.55 | -1.09 | 0.615602 | 0.752339 | 0.823612 | 0.855799 |
| MmugDNA.22716.1.S1_at   | MmugDNA.22716.1 | 10.76 | 10.57 | 0.43 | 0.76 | 1.14  | 0.889459 | 0.715293 | 0.955727 | 0.834966 |
| MmugDNA.22717.1.S1_at   | MmugDNA.22717.1 | 10.34 | 10.45 | 0.25 | 0.5  | -1.08 | 0.925754 | 0.153744 | 0.97147  | 0.428426 |
| MmugDNA.22718.1.S1_at   | MmugDNA.22718.1 | 10.78 | 11.21 | 0.19 | 0.4  | -1.35 | 0.506718 | 0.223685 | 0.762448 | 0.496603 |
| MmugDNA.22719.1.S1_at   | MmugDNA.22719.1 | 4.15  | 4.44  | 0.23 | 0.15 | -1.22 | 0.213412 | 0.322484 | 0.573606 | 0.573991 |
| MmugDNA.22719.1.S1_s_at | MmugDNA.22719.1 | 5.75  | 5.77  | 0.1  | 0.08 | -1.01 | 0.573749 | 0.730758 | 0.801332 | 0.844055 |
| MmugDNA.2272.1.S1_at    | MmugDNA.2272.1  | 5.93  | 5.89  | 0.32 | 0.29 | 1.03  | 0.967207 | 0.453656 | 0.987781 | 0.668074 |
| MmugDNA.22720.1.S1_at   | MmugDNA.22720.1 | 3.78  | 3.83  | 0.07 | 0.17 | -1.03 | 0.606595 | 0.718989 | 0.818943 | 0.83734  |
| MmugDNA.22721.1.S1_at   | MmugDNA.22721.1 | 5.88  | 5.85  | 0.09 | 0.14 | 1.02  | 0.361224 | 0.351027 | 0.675116 | 0.594737 |
| MmugDNA.22723.1.S1_at   | MmugDNA.22723.1 | 4.83  | 4.98  | 0.17 | 0.08 | -1.11 | 0.235289 | 0.150235 | 0.589342 | 0.42486  |
| MmugDNA.22724.1.S1_at   | MmugDNA.22724.1 | 5.95  | 6     | 0.1  | 0.04 | -1.03 | 0.243493 | 0.177211 | 0.595296 | 0.453647 |
| MmugDNA.22725.1.S1_at   | MmugDNA.22725.1 | 5.67  | 5.66  | 0.21 | 0.08 | 1.01  | 0.294348 | 0.394875 | 0.631216 | 0.627216 |
| MmugDNA.22727.1.S1_at   | MmugDNA.22727.1 | 3.48  | 3.53  | 0.22 | 0.07 | -1.04 | 0.943824 | 0.429885 | 0.978535 | 0.651109 |
| MmugDNA.22728.1.S1_at   | MmugDNA.22728.1 | 9.22  | 8.08  | 0.24 | 0.51 | 2.2   | 0.01806  | 0.005466 | 0.268633 | 0.102078 |
| MmugDNA.22729.1.S1_at   | MmugDNA.22729.1 | 4.04  | 4.04  | 0.09 | 0.02 | 1     | 0.959413 | 0.668    | 0.984613 | 0.8057   |
| MmugDNA.2273.1.S1_at    | MmugDNA.2273.1  | 12.51 | 12.31 | 0.14 | 0.17 | 1.15  | 0.206577 | 0.143778 | 0.568816 | 0.41759  |
| MmugDNA.22730.1.S1_at   | MmugDNA.22730.1 | 9.37  | 9.13  | 0.25 | 0.2  | 1.18  | 0.234135 | 0.299698 | 0.588621 | 0.558037 |

|                         |                 |       |       |      |      |       |          |          |          |          |
|-------------------------|-----------------|-------|-------|------|------|-------|----------|----------|----------|----------|
| MmugDNA.22732.1.S1_at   | MmugDNA.22732.1 | 7.56  | 7.45  | 0.25 | 0.26 | 1.08  | 0.886759 | 0.980199 | 0.954695 | 0.989257 |
| MmugDNA.22733.1.S1_at   | MmugDNA.22733.1 | 6.18  | 6.16  | 0.25 | 0.04 | 1.02  | 0.693835 | 0.803093 | 0.864268 | 0.886577 |
| MmugDNA.22734.1.S1_at   | MmugDNA.22734.1 | 9.19  | 9.78  | 0.23 | 0.28 | -1.51 | 0.055837 | 0.072119 | 0.384802 | 0.314611 |
| MmugDNA.4390.1.S1_at    | MmugDNA.4390.1  | 9.95  | 10.37 | 0.09 | 0.95 | -1.33 | 0.869297 | 0.421104 | 0.947917 | 0.644743 |
| MmugDNA.4390.1.S1_s_at  | MmugDNA.4390.1  | 10.84 | 11.54 | 0.19 | 1.02 | -1.63 | 0.851956 | 0.640396 | 0.940421 | 0.788874 |
| MmugDNA.22739.1.S1_at   | MmugDNA.22739.1 | 9.11  | 9.42  | 0.09 | 0.37 | -1.24 | 0.063452 | 0.004931 | 0.400574 | 0.097846 |
| MmugDNA.2274.1.S1_at    | MmugDNA.2274.1  | 6.52  | 6.67  | 0.12 | 0.08 | -1.11 | 0.055386 | 0.052491 | 0.383694 | 0.274693 |
| MmugDNA.22740.1.S1_at   | MmugDNA.22740.1 | 6.03  | 7.66  | 0.25 | 0.27 | -3.11 | 0.001621 | 0.000116 | 0.152811 | 0.028664 |
| MmugDNA.22741.1.S1_at   | MmugDNA.22741.1 | 5.84  | 5.5   | 0.42 | 0.63 | 1.26  | 0.09969  | 0.172409 | 0.459668 | 0.448837 |
| MmugDNA.22742.1.S1_at   | MmugDNA.22742.1 | 6.2   | 6.24  | 0.08 | 0.13 | -1.03 | 0.874022 | 0.10919  | 0.949547 | 0.37308  |
| MmugDNA.22743.1.S1_at   | MmugDNA.22743.1 | 3     | 3.08  | 0.05 | 0.1  | -1.06 | 0.150894 | 0.107435 | 0.515645 | 0.370267 |
| MmugDNA.22744.1.S1_at   | MmugDNA.22744.1 | 3.37  | 3.68  | 0.22 | 0.22 | -1.24 | 0.074756 | 0.058017 | 0.420823 | 0.287396 |
| MmugDNA.22744.1.S1_s_at | MmugDNA.22744.1 | 5.9   | 6.68  | 0.34 | 0.14 | -1.71 | 0.049281 | 0.053918 | 0.371105 | 0.277732 |
| MmugDNA.22744.1.S1_x_at | MmugDNA.22744.1 | 5.81  | 6.16  | 0.07 | 0.14 | -1.27 | 0.016096 | 0.008504 | 0.262631 | 0.1223   |
| MmugDNA.22745.1.S1_at   | MmugDNA.22745.1 | 8.76  | 8.3   | 0.31 | 0.34 | 1.37  | 0.208898 | 0.188834 | 0.570476 | 0.464789 |
| MmugDNA.22746.1.S1_at   | MmugDNA.22746.1 | 6.67  | 5.71  | 0.03 | 1.48 | 1.95  | 0.343863 | 0.348638 | 0.664081 | 0.592648 |
| MmugDNA.22747.1.S1_at   | MmugDNA.22747.1 | 8.97  | 8.78  | 0.19 | 0.68 | 1.15  | 0.309223 | 0.279312 | 0.641388 | 0.542962 |
| MmugDNA.22749.1.S1_at   | MmugDNA.22749.1 | 8.54  | 8.46  | 0.27 | 0.44 | 1.05  | 0.932126 | 0.020598 | 0.973735 | 0.180074 |
| MmugDNA.2275.1.S1_at    | MmugDNA.2275.1  | 8.06  | 7.73  | 0.35 | 0.04 | 1.26  | 0.560559 | 0.687721 | 0.794291 | 0.817664 |
| MmugDNA.22750.1.S1_at   | MmugDNA.22750.1 | 7.38  | 6.02  | 1.44 | 0.59 | 2.56  | 0.193561 | 0.242153 | 0.557166 | 0.512652 |
| MmugDNA.22751.1.S1_at   | MmugDNA.22751.1 | 3.86  | 3.67  | 0.16 | 0.18 | 1.14  | 0.224501 | 0.208543 | 0.582716 | 0.482453 |
| MmugDNA.22752.1.S1_at   | MmugDNA.22752.1 | 4.91  | 5.03  | 0.06 | 0.14 | -1.09 | 0.188052 | 0.13263  | 0.551056 | 0.404544 |
| MmugDNA.22753.1.S1_at   | MmugDNA.22753.1 | 4.81  | 4.65  | 0.09 | 0.1  | 1.11  | 0.221643 | 0.014247 | 0.58035  | 0.152403 |
| MmugDNA.22754.1.S1_at   | MmugDNA.22754.1 | 8.5   | 8.45  | 0.36 | 0.26 | 1.04  | 0.597498 | 0.805917 | 0.813537 | 0.888395 |
| MmugDNA.22755.1.S1_at   | MmugDNA.22755.1 | 3.58  | 3.44  | 0.49 | 0.06 | 1.1   | 0.181254 | 0.31932  | 0.54572  | 0.571724 |
| MmugDNA.22758.1.S1_at   | MmugDNA.22758.1 | 4.3   | 4.27  | 0.09 | 0.12 | 1.02  | 0.602418 | 0.896494 | 0.816543 | 0.940901 |
| MmugDNA.22759.1.S1_at   | MmugDNA.22759.1 | 6.76  | 5.87  | 0.84 | 0.25 | 1.86  | 0.15222  | 0.136862 | 0.51689  | 0.409568 |
| MmugDNA.2276.1.S1_at    | MmugDNA.2276.1  | 6.4   | 6.09  | 0.95 | 0.63 | 1.24  | 0.269579 | 0.210196 | 0.614187 | 0.484033 |
| MmugDNA.22760.1.S1_at   | MmugDNA.22760.1 | 9.35  | 9.46  | 0.19 | 0.57 | -1.07 | 0.695445 | 0.144309 | 0.864936 | 0.418196 |
| MmugDNA.22761.1.S1_at   | MmugDNA.22761.1 | 5.62  | 5.73  | 0.09 | 0.19 | -1.08 | 0.336735 | 0.031119 | 0.659663 | 0.218175 |
| MmugDNA.22763.1.S1_at   | MmugDNA.22763.1 | 3.86  | 4.11  | 0.06 | 0.38 | -1.2  | 0.285757 | 0.308728 | 0.625149 | 0.564619 |
| MmugDNA.22764.1.S1_at   | MmugDNA.22764.1 | 5.66  | 5.69  | 0.45 | 0.16 | -1.02 | 0.752898 | 0.815376 | 0.894568 | 0.893521 |
| MmugDNA.22765.1.S1_at   | MmugDNA.22765.1 | 3.84  | 4.28  | 0.2  | 0.22 | -1.36 | 0.128938 | 0.284444 | 0.494943 | 0.546637 |
| MmugDNA.22767.1.S1_at   | MmugDNA.22767.1 | 3.52  | 3.54  | 0.1  | 0.06 | -1.01 | 0.449878 | 0.447901 | 0.730497 | 0.663881 |
| MmugDNA.22768.1.S1_at   | MmugDNA.22768.1 | 5.39  | 5.53  | 0.36 | 0.42 | -1.1  | 0.755775 | 0.395745 | 0.896232 | 0.627639 |
| MmugDNA.2277.1.S1_at    | MmugDNA.2277.1  | 4.65  | 4.8   | 0.13 | 0.18 | -1.11 | 0.460413 | 0.247698 | 0.73692  | 0.517122 |
| MmugDNA.22770.1.S1_at   | MmugDNA.22770.1 | 3.57  | 3.51  | 0.72 | 0.46 | 1.04  | 0.523992 | 0.357666 | 0.772859 | 0.599285 |
| MmugDNA.22771.1.S1_s_at | MmugDNA.22771.1 | 7.65  | 7.87  | 0.14 | 0.34 | -1.16 | 0.286877 | 0.281474 | 0.625572 | 0.54458  |
| MmugDNA.22772.1.S1_at   | MmugDNA.22772.1 | 4.03  | 4.2   | 0.06 | 0.06 | -1.13 | 0.023332 | 0.002517 | 0.290973 | 0.074158 |
| MmugDNA.22774.1.S1_at   | MmugDNA.22774.1 | 6.73  | 7.47  | 0.44 | 0.18 | -1.67 | 0.057909 | 0.020733 | 0.389427 | 0.180654 |
| MmugDNA.22775.1.S1_at   | MmugDNA.22775.1 | 13.02 | 12.61 | 0.14 | 0.6  | 1.32  | 0.106175 | 0.111277 | 0.466831 | 0.375963 |

|                         |                 |       |       |      |      |       |          |          |          |          |
|-------------------------|-----------------|-------|-------|------|------|-------|----------|----------|----------|----------|
| MmugDNA.22776.1.S1_at   | MmugDNA.22776.1 | 3.48  | 3.34  | 0.88 | 0.05 | 1.1   | 0.271888 | 0.27718  | 0.615834 | 0.541154 |
| MmugDNA.22777.1.S1_at   | MmugDNA.22777.1 | 8.97  | 10.45 | 0.18 | 0.31 | -2.79 | 0.002581 | 0.00113  | 0.164386 | 0.053028 |
| MmugDNA.22778.1.S1_at   | MmugDNA.22778.1 | 4.47  | 4.49  | 0.07 | 0.09 | -1.02 | 0.84131  | 0.692112 | 0.936191 | 0.82091  |
| MmugDNA.22779.1.S1_at   | MmugDNA.22779.1 | 10.61 | 10.43 | 0.16 | 0.18 | 1.13  | 0.640459 | 0.491202 | 0.837628 | 0.692848 |
| MmugDNA.2278.1.S1_at    | MmugDNA.2278.1  | 9.22  | 8.68  | 0.68 | 1.31 | 1.46  | 0.393447 | 0.20109  | 0.69522  | 0.475515 |
| MmugDNA.22781.1.S1_at   | MmugDNA.22781.1 | 4.87  | 4.21  | 0.34 | 0.25 | 1.58  | 0.134159 | 0.198256 | 0.500726 | 0.473234 |
| MmugDNA.22784.1.S1_at   | MmugDNA.22784.1 | 8.66  | 8     | 0.25 | 0.25 | 1.59  | 0.063894 | 0.096184 | 0.401767 | 0.353501 |
| MmugDNA.22785.1.S1_at   | MmugDNA.22785.1 | 8.13  | 7.83  | 0.93 | 0.33 | 1.23  | 0.492549 | 0.552615 | 0.755881 | 0.731885 |
| MmugDNA.22789.1.S1_at   | MmugDNA.22789.1 | 10.89 | 10.57 | 0.11 | 0.08 | 1.25  | 0.013221 | 0.018434 | 0.245934 | 0.170756 |
| MmugDNA.22790.1.S1_at   | MmugDNA.22790.1 | 4.08  | 4.13  | 0.31 | 0.28 | -1.04 | 0.614112 | 0.805045 | 0.823094 | 0.887934 |
| MmugDNA.22791.1.S1_at   | MmugDNA.22791.1 | 5.93  | 6     | 0.03 | 0.04 | -1.04 | 0.040425 | 0.170435 | 0.349277 | 0.447103 |
| MmugDNA.22793.1.S1_at   | MmugDNA.22793.1 | 10.28 | 10.74 | 0.27 | 0.81 | -1.37 | 0.84907  | 0.684681 | 0.939334 | 0.8161   |
| MmugDNA.22793.1.S1_s_at | MmugDNA.22793.1 | 10.32 | 10.66 | 0.34 | 0.97 | -1.27 | 0.674735 | 0.801491 | 0.854234 | 0.885789 |
| MmugDNA.22794.1.S1_at   | MmugDNA.22794.1 | 3.38  | 3.42  | 0.33 | 0.08 | -1.03 | 0.388832 | 0.465941 | 0.692804 | 0.676055 |
| MmugDNA.22795.1.S1_at   | MmugDNA.22795.1 | 6.76  | 7.06  | 0.37 | 0.41 | -1.23 | 0.874417 | 0.340399 | 0.949658 | 0.586725 |
| MmugDNA.22796.1.S1_at   | MmugDNA.22796.1 | 7.22  | 6.99  | 0.13 | 0.16 | 1.18  | 0.051533 | 0.041351 | 0.376072 | 0.247995 |
| MmugDNA.22797.1.S1_at   | MmugDNA.22797.1 | 3.44  | 3.71  | 0.13 | 0.29 | -1.21 | 0.104427 | 0.133795 | 0.464351 | 0.405793 |
| MmugDNA.22799.1.S1_at   | MmugDNA.22799.1 | 6.67  | 5.72  | 0.23 | 0.39 | 1.94  | 0.01528  | 0.006946 | 0.257746 | 0.112568 |
| MmugDNA.22800.1.S1_at   | MmugDNA.22800.1 | 5.34  | 5.29  | 0.21 | 0.2  | 1.04  | 0.17127  | 0.112752 | 0.535163 | 0.378404 |
| MmugDNA.22801.1.S1_at   | MmugDNA.22801.1 | 4.35  | 4.38  | 0.35 | 0.31 | -1.03 | 0.88309  | 0.86846  | 0.952961 | 0.925329 |
| MmugDNA.22802.1.S1_at   | MmugDNA.22802.1 | 6.6   | 6.17  | 0.7  | 0.94 | 1.35  | 0.276808 | 0.405677 | 0.618989 | 0.633894 |
| MmugDNA.22803.1.S1_at   | MmugDNA.22803.1 | 8.28  | 7.57  | 0.3  | 0.48 | 1.63  | 0.254375 | 0.013485 | 0.602363 | 0.148703 |
| MmugDNA.22806.1.S1_at   | MmugDNA.22806.1 | 10.66 | 10.1  | 0.32 | 0.12 | 1.48  | 0.044006 | 0.022846 | 0.357601 | 0.189246 |
| MmugDNA.22808.1.S1_at   | MmugDNA.22808.1 | 4.49  | 4.57  | 0.08 | 0.14 | -1.06 | 0.774036 | 0.650466 | 0.904999 | 0.795661 |
| MmugDNA.22809.1.S1_at   | MmugDNA.22809.1 | 5.91  | 6.16  | 0.12 | 0.15 | -1.18 | 0.024166 | 0.03263  | 0.294535 | 0.223676 |
| MmugDNA.22812.1.S1_at   | MmugDNA.22812.1 | 4.18  | 4.3   | 0.13 | 0.24 | -1.08 | 0.322924 | 0.346032 | 0.651259 | 0.59115  |
| MmugDNA.22813.1.S1_at   | MmugDNA.22813.1 | 7.52  | 7.94  | 0.06 | 0.17 | -1.33 | 0.021043 | 0.006192 | 0.281947 | 0.106774 |
| MmugDNA.22814.1.S1_at   | MmugDNA.22814.1 | 7.71  | 7.64  | 1.07 | 0.38 | 1.05  | 0.484619 | 0.397134 | 0.750553 | 0.628653 |
| MmugDNA.22815.1.S1_at   | MmugDNA.22815.1 | 5.6   | 5.72  | 0.19 | 0.2  | -1.09 | 0.852448 | 0.776067 | 0.940647 | 0.869726 |
| MmugDNA.22816.1.S1_at   | MmugDNA.22816.1 | 7.61  | 7.63  | 0.21 | 0.62 | -1.02 | 0.912926 | 0.956038 | 0.965496 | 0.975043 |
| MmugDNA.22817.1.S1_at   | MmugDNA.22817.1 | 5.84  | 5.77  | 0.36 | 0.41 | 1.05  | 0.516561 | 0.570129 | 0.768145 | 0.74291  |
| MmugDNA.22818.1.S1_at   | MmugDNA.22818.1 | 7.93  | 7.63  | 0.16 | 0.17 | 1.23  | 0.030471 | 0.060996 | 0.318601 | 0.293811 |
| MmugDNA.22819.1.S1_at   | MmugDNA.22819.1 | 10.3  | 11.46 | 0.54 | 0.97 | -2.23 | 0.262504 | 0.164876 | 0.609006 | 0.441191 |
| MmugDNA.22820.1.S1_at   | MmugDNA.22820.1 | 9.9   | 10.1  | 0.18 | 0.83 | -1.15 | 0.219759 | 0.215415 | 0.579133 | 0.489109 |
| MmugDNA.22820.1.S1_s_at | MmugDNA.22820.1 | 11.65 | 11.72 | 0.17 | 0.48 | -1.05 | 0.208207 | 0.118599 | 0.570088 | 0.386567 |
| MmugDNA.22823.1.S1_at   | MmugDNA.22823.1 | 6.42  | 6.27  | 0.15 | 0.25 | 1.11  | 0.818457 | 0.31647  | 0.926289 | 0.569888 |
| MmugDNA.22824.1.S1_at   | MmugDNA.22824.1 | 3.01  | 3.25  | 0.09 | 0.15 | -1.18 | 0.183878 | 0.208362 | 0.547947 | 0.482269 |
| MmugDNA.22826.1.S1_at   | MmugDNA.22826.1 | 4.01  | 3.83  | 0.13 | 0.03 | 1.13  | 0.21985  | 0.815577 | 0.579133 | 0.893609 |
| MmugDNA.22827.1.S1_at   | MmugDNA.22827.1 | 6.03  | 6     | 0.2  | 0.16 | 1.02  | 0.744399 | 0.83171  | 0.890646 | 0.903453 |
| MmugDNA.22828.1.S1_at   | MmugDNA.22828.1 | 6.25  | 6.28  | 0.13 | 0.21 | -1.02 | 0.615925 | 0.796804 | 0.823836 | 0.882803 |
| MmugDNA.22829.1.S1_at   | MmugDNA.22829.1 | 11.44 | 9.85  | 0.9  | 0.42 | 3.01  | 0.073305 | 0.062577 | 0.418512 | 0.297022 |



|                         |                 |       |       |      |      |       |          |          |          |          |
|-------------------------|-----------------|-------|-------|------|------|-------|----------|----------|----------|----------|
| MmugDNA.15639.1.S1_s_at | MmugDNA.15639.1 | 11.22 | 11.11 | 0.05 | 0.1  | 1.08  | 0.284473 | 0.411828 | 0.624317 | 0.638434 |
| MmugDNA.22830.1.S1_s_at | MmugDNA.22830.1 | 11.06 | 10.96 | 0.32 | 0.31 | 1.07  | 0.579034 | 0.238826 | 0.804078 | 0.509485 |
| MmugDNA.22831.1.S1_at   | MmugDNA.22831.1 | 5.21  | 5.28  | 0.08 | 0.21 | -1.05 | 0.524927 | 0.707733 | 0.773313 | 0.830472 |
| MmugDNA.22832.1.S1_at   | MmugDNA.22832.1 | 10.95 | 10.9  | 0.2  | 0.5  | 1.04  | 0.322144 | 0.332928 | 0.650863 | 0.581307 |
| MmugDNA.22833.1.S1_at   | MmugDNA.22833.1 | 3.38  | 3.47  | 0.12 | 0.06 | -1.07 | 0.151626 | 0.222853 | 0.516237 | 0.495769 |
| MmugDNA.22834.1.S1_at   | MmugDNA.22834.1 | 11.11 | 10.52 | 0.16 | 0.25 | 1.5   | 0.020511 | 0.011003 | 0.278319 | 0.136623 |
| MmugDNA.22835.1.S1_at   | MmugDNA.22835.1 | 10.8  | 10.83 | 0.05 | 0.3  | -1.02 | 0.7415   | 0.207808 | 0.889293 | 0.482031 |
| MmugDNA.22837.1.S1_at   | MmugDNA.22837.1 | 9.64  | 10.5  | 0.09 | 0.23 | -1.81 | 0.007402 | 0.002931 | 0.207702 | 0.079548 |
| MmugDNA.22838.1.S1_at   | MmugDNA.22838.1 | 5.96  | 5.61  | 0.15 | 0.04 | 1.27  | 0.018417 | 0.059776 | 0.270303 | 0.291114 |
| MmugDNA.22839.1.S1_at   | MmugDNA.22839.1 | 4.88  | 5.16  | 0.1  | 0.1  | -1.22 | 0.045948 | 0.013991 | 0.362058 | 0.151593 |
| MmugDNA.2284.1.S1_at    | MmugDNA.2284.1  | 12.5  | 12.44 | 0.11 | 0.17 | 1.05  | 0.622425 | 0.113217 | 0.827386 | 0.379229 |
| MmugDNA.22840.1.S1_at   | MmugDNA.22840.1 | 3.62  | 3.76  | 0.04 | 0.13 | -1.1  | 0.04347  | 0.032335 | 0.356741 | 0.222605 |
| MmugDNA.22841.1.S1_at   | MmugDNA.22841.1 | 11.09 | 11.06 | 0.07 | 0.78 | 1.02  | 0.719326 | 0.906365 | 0.876813 | 0.947011 |
| MmugDNA.22842.1.S1_at   | MmugDNA.22842.1 | 5.57  | 5.37  | 0.2  | 0.26 | 1.15  | 0.379584 | 0.401402 | 0.687061 | 0.631018 |
| MmugDNA.22843.1.S1_at   | MmugDNA.22843.1 | 5.22  | 5.26  | 0.03 | 0.11 | -1.03 | 0.246105 | 0.059548 | 0.597474 | 0.290548 |
| MmugDNA.22844.1.S1_at   | MmugDNA.22844.1 | 3.66  | 3.66  | 0.12 | 0.05 | -1    | 0.412745 | 0.491212 | 0.708019 | 0.692848 |
| MmugDNA.22845.1.S1_at   | MmugDNA.22845.1 | 6.87  | 6.87  | 0.29 | 0.17 | 1     | 0.791839 | 0.338931 | 0.913508 | 0.585891 |
| MmugDNA.22846.1.S1_at   | MmugDNA.22846.1 | 8.04  | 7.99  | 0.23 | 0.19 | 1.03  | 0.868327 | 0.975098 | 0.947394 | 0.986405 |
| MmugDNA.22847.1.S1_at   | MmugDNA.22847.1 | 4.77  | 4.98  | 0.19 | 0.02 | -1.16 | 0.131955 | 0.164205 | 0.498114 | 0.440466 |
| MmugDNA.22848.1.S1_at   | MmugDNA.22848.1 | 3.55  | 3.7   | 0.35 | 0.07 | -1.11 | 0.82893  | 0.937551 | 0.930604 | 0.964687 |
| MmugDNA.22849.1.S1_at   | MmugDNA.22849.1 | 12.28 | 12.29 | 0.11 | 0.15 | -1    | 0.314772 | 0.340629 | 0.64608  | 0.586801 |
| MmugDNA.22849.1.S1_s_at | MmugDNA.22849.1 | 11.7  | 11.72 | 0.14 | 0.19 | -1.01 | 0.202295 | 0.201671 | 0.564612 | 0.476208 |
| MmugDNA.2285.1.S1_at    | MmugDNA.2285.1  | 5.37  | 6.01  | 0.24 | 0.59 | -1.56 | 0.119353 | 0.183068 | 0.484049 | 0.459493 |
| MmugDNA.22852.1.S1_at   | MmugDNA.22852.1 | 3.75  | 3.71  | 0.08 | 0.19 | 1.02  | 0.612925 | 0.681813 | 0.822476 | 0.81415  |
| MmugDNA.22854.1.S1_at   | MmugDNA.22854.1 | 10.32 | 10.06 | 0.29 | 0.34 | 1.2   | 0.814948 | 0.47357  | 0.924789 | 0.680843 |
| MmugDNA.22855.1.S1_at   | MmugDNA.22855.1 | 5.56  | 5.62  | 0.13 | 0    | -1.04 | 0.661387 | 0.730114 | 0.848124 | 0.843808 |
| MmugDNA.22857.1.S1_at   | MmugDNA.22857.1 | 6.47  | 5.99  | 0.38 | 0.4  | 1.4   | 0.152423 | 0.160236 | 0.517115 | 0.436398 |
| MmugDNA.22858.1.S1_at   | MmugDNA.22858.1 | 4.47  | 4.43  | 0.32 | 0.6  | 1.03  | 0.676122 | 0.788828 | 0.854832 | 0.877997 |
| MmugDNA.22859.1.S1_at   | MmugDNA.22859.1 | 5.66  | 5.51  | 0.37 | 0.66 | 1.11  | 0.935742 | 0.993622 | 0.975129 | 0.996218 |
| MmugDNA.22861.1.S1_at   | MmugDNA.22861.1 | 3.22  | 3.13  | 0.07 | 0    | 1.06  | 0.167469 | 0.014199 | 0.531631 | 0.152173 |
| MmugDNA.22862.1.S1_at   | MmugDNA.22862.1 | 7.59  | 7.16  | 0.25 | 0.61 | 1.34  | 0.343951 | 0.228064 | 0.664163 | 0.500249 |
| MmugDNA.22864.1.S1_at   | MmugDNA.22864.1 | 10.06 | 10.04 | 0.36 | 0.41 | 1.01  | 0.956383 | 0.085205 | 0.983508 | 0.337096 |
| MmugDNA.22865.1.S1_at   | MmugDNA.22865.1 | 6.33  | 6.52  | 0.11 | 0.11 | -1.15 | 0.079719 | 0.093122 | 0.430147 | 0.349303 |
| MmugDNA.22868.1.S1_at   | MmugDNA.22868.1 | 3.85  | 4.02  | 0.78 | 0.3  | -1.12 | 0.927383 | 0.65459  | 0.971995 | 0.798087 |
| MmugDNA.22869.1.S1_at   | MmugDNA.22869.1 | 8.2   | 7.78  | 0.13 | 0.04 | 1.34  | 0.005372 | 0.006151 | 0.191107 | 0.106774 |
| MmugDNA.2287.1.S1_at    | MmugDNA.2287.1  | 5.42  | 5.44  | 0.11 | 0.24 | -1.02 | 0.555616 | 0.18559  | 0.791454 | 0.461566 |
| MmugDNA.22870.1.S1_at   | MmugDNA.22870.1 | 10.09 | 10.79 | 0.08 | 0.16 | -1.63 | 0.001655 | 0.000518 | 0.15365  | 0.039625 |
| MmugDNA.22872.1.S1_at   | MmugDNA.22872.1 | 3.36  | 3.21  | 0.3  | 0.13 | 1.11  | 0.37416  | 0.629065 | 0.683345 | 0.781597 |
| MmugDNA.22873.1.S1_at   | MmugDNA.22873.1 | 3.52  | 3.53  | 0.12 | 0.24 | -1.01 | 0.653539 | 0.138139 | 0.84417  | 0.411051 |
| MmugDNA.22874.1.S1_at   | MmugDNA.22874.1 | 6.34  | 7.28  | 0.55 | 1.31 | -1.92 | 0.309172 | 0.413551 | 0.641361 | 0.639648 |
| MmugDNA.22877.1.S1_at   | MmugDNA.22877.1 | 5.57  | 5.35  | 0.44 | 0.12 | 1.16  | 0.17587  | 0.180674 | 0.539441 | 0.457245 |

|                         |                 |       |       |      |      |       |          |          |          |          |
|-------------------------|-----------------|-------|-------|------|------|-------|----------|----------|----------|----------|
| MmugDNA.22879.1.S1_at   | MmugDNA.22879.1 | 3.78  | 3.93  | 0.07 | 0.72 | -1.1  | 0.648186 | 0.823345 | 0.84178  | 0.898479 |
| MmugDNA.22880.1.S1_at   | MmugDNA.22880.1 | 5.56  | 5.72  | 0.16 | 0.35 | -1.11 | 0.777119 | 0.26575  | 0.906816 | 0.531611 |
| MmugDNA.22881.1.S1_at   | MmugDNA.22881.1 | 4.49  | 4.6   | 0.08 | 0.03 | -1.08 | 0.081738 | 0.004115 | 0.432753 | 0.090887 |
| MmugDNA.22882.1.S1_at   | MmugDNA.22882.1 | 5.34  | 5.42  | 0.11 | 0.12 | -1.06 | 0.958477 | 0.978194 | 0.984324 | 0.98807  |
| MmugDNA.22883.1.S1_at   | MmugDNA.22883.1 | 3.13  | 3.15  | 0.12 | 0.14 | -1.01 | 0.831806 | 0.94637  | 0.931835 | 0.969598 |
| MmugDNA.22884.1.S1_at   | MmugDNA.22884.1 | 5.81  | 5.83  | 0.01 | 0.21 | -1.01 | 0.595023 | 0.806943 | 0.812268 | 0.888903 |
| MmugDNA.22885.1.S1_at   | MmugDNA.22885.1 | 3.46  | 3.27  | 0.06 | 0.5  | 1.13  | 0.651299 | 0.841666 | 0.84311  | 0.909744 |
| MmugDNA.22886.1.S1_at   | MmugDNA.22886.1 | 5.27  | 5.69  | 0.09 | 0.87 | -1.33 | 0.597032 | 0.459429 | 0.813377 | 0.671741 |
| MmugDNA.22887.1.S1_s_at | MmugDNA.22887.1 | 10.46 | 10.94 | 0.2  | 0.22 | -1.4  | 0.139494 | 0.02129  | 0.506967 | 0.182681 |
| MmugDNA.22889.1.S1_at   | MmugDNA.22889.1 | 3.74  | 3.58  | 0.38 | 0.17 | 1.12  | 0.410516 | 0.465538 | 0.706382 | 0.675802 |
| MmugDNA.22890.1.S1_at   | MmugDNA.22890.1 | 4.46  | 4     | 0.65 | 0.32 | 1.37  | 0.250108 | 0.503239 | 0.600389 | 0.700743 |
| MmugDNA.22891.1.S1_at   | MmugDNA.22891.1 | 7.64  | 7.55  | 0.15 | 0.03 | 1.06  | 0.123236 | 0.224658 | 0.488828 | 0.497613 |
| MmugDNA.22892.1.S1_at   | MmugDNA.22892.1 | 3.99  | 4     | 0.5  | 0.15 | -1.01 | 0.369596 | 0.387499 | 0.680782 | 0.622163 |
| MmugDNA.22893.1.S1_at   | MmugDNA.22893.1 | 7.67  | 7.78  | 0.16 | 0.97 | -1.08 | 0.839937 | 0.91744  | 0.935467 | 0.953833 |
| MmugDNA.22894.1.S1_at   | MmugDNA.22894.1 | 11.65 | 11.17 | 0.11 | 0.26 | 1.39  | 0.116049 | 0.07892  | 0.479523 | 0.325912 |
| MmugDNA.22895.1.S1_at   | MmugDNA.22895.1 | 5.58  | 5.5   | 0.14 | 0.06 | 1.06  | 0.43017  | 0.041635 | 0.717956 | 0.24887  |
| MmugDNA.22896.1.S1_at   | MmugDNA.22896.1 | 12.53 | 11.84 | 0.13 | 0.17 | 1.61  | 0.005865 | 0.001273 | 0.19355  | 0.055241 |
| MmugDNA.22898.1.S1_at   | MmugDNA.22898.1 | 5.2   | 5.25  | 0.56 | 0.05 | -1.04 | 0.89781  | 0.971365 | 0.95918  | 0.984419 |
| MmugDNA.22899.1.S1_at   | MmugDNA.22899.1 | 5.53  | 5.34  | 0.08 | 0.11 | 1.14  | 0.141412 | 0.198856 | 0.509067 | 0.473475 |
| MmugDNA.229.1.S1_at     | MmugDNA.229.1   | 8.17  | 7.68  | 0.17 | 0.39 | 1.4   | 0.048908 | 0.037435 | 0.369995 | 0.237777 |
| MmugDNA.22900.1.S1_at   | MmugDNA.22900.1 | 4.51  | 4.59  | 0.29 | 0.52 | -1.06 | 0.560576 | 0.731833 | 0.794291 | 0.844668 |
| MmugDNA.22902.1.S1_at   | MmugDNA.22902.1 | 6.07  | 5.87  | 0.19 | 0.2  | 1.14  | 0.888654 | 0.879423 | 0.95536  | 0.931144 |
| MmugDNA.22903.1.S1_at   | MmugDNA.22903.1 | 5.87  | 5.88  | 0.54 | 0.11 | -1    | 0.922743 | 0.834006 | 0.970061 | 0.904868 |
| MmugDNA.22904.1.S1_s_at | MmugDNA.22904.1 | 10    | 10.11 | 0.02 | 0.14 | -1.08 | 0.790916 | 0.604198 | 0.913202 | 0.764542 |
| MmugDNA.22905.1.S1_s_at | MmugDNA.22905.1 | 11.08 | 11.48 | 0.24 | 0.28 | -1.32 | 0.178455 | 0.117559 | 0.542847 | 0.38531  |
| MmugDNA.22906.1.S1_at   | MmugDNA.22906.1 | 6.17  | 6.02  | 0.08 | 0.2  | 1.11  | 0.10871  | 0.25497  | 0.470214 | 0.52317  |
| MmugDNA.22907.1.S1_at   | MmugDNA.22907.1 | 3.18  | 3.2   | 0.03 | 0.16 | -1.01 | 0.628746 | 0.83144  | 0.830966 | 0.903345 |
| MmugDNA.22908.1.S1_at   | MmugDNA.22908.1 | 11.1  | 11.13 | 0.05 | 0.02 | -1.02 | 0.264452 | 0.015278 | 0.610172 | 0.156987 |
| MmugDNA.22909.1.S1_at   | MmugDNA.22909.1 | 6.92  | 7.01  | 0.17 | 0.41 | -1.07 | 0.946738 | 0.784164 | 0.979465 | 0.875049 |
| MmugDNA.22910.1.S1_at   | MmugDNA.22910.1 | 4.42  | 4.95  | 0.21 | 1.01 | -1.44 | 0.413635 | 0.464937 | 0.708535 | 0.675523 |
| MmugDNA.26086.1.S1_s_at | MmugDNA.26086.1 | 9.33  | 8.75  | 0.52 | 0.25 | 1.5   | 0.055801 | 0.064236 | 0.384768 | 0.299668 |
| MmugDNA.22912.1.S1_s_at | MmugDNA.22912.1 | 8.53  | 10.11 | 0.59 | 0.73 | -3    | 0.039244 | 0.029136 | 0.346898 | 0.212747 |
| MmugDNA.22913.1.S1_at   | MmugDNA.22913.1 | 9.29  | 8.81  | 0.14 | 0.15 | 1.4   | 0.015373 | 0.020172 | 0.258258 | 0.178414 |
| MmugDNA.22914.1.S1_at   | MmugDNA.22914.1 | 7     | 6.17  | 0.2  | 0.67 | 1.78  | 0.069551 | 0.066868 | 0.412433 | 0.304529 |
| MmugDNA.22915.1.S1_at   | MmugDNA.22915.1 | 5.59  | 5.43  | 0.79 | 0.17 | 1.12  | 0.201164 | 0.210876 | 0.563821 | 0.484934 |
| MmugDNA.22916.1.S1_at   | MmugDNA.22916.1 | 9.06  | 9.33  | 0.14 | 0.83 | -1.2  | 0.58218  | 0.778373 | 0.805554 | 0.871278 |
| MmugDNA.22917.1.S1_at   | MmugDNA.22917.1 | 8.32  | 7.1   | 0.4  | 1.09 | 2.33  | 0.283534 | 0.044739 | 0.623624 | 0.256009 |
| MmugDNA.22918.1.S1_at   | MmugDNA.22918.1 | 5.02  | 4.94  | 0.01 | 0.28 | 1.06  | 0.64047  | 0.811179 | 0.837628 | 0.89102  |
| MmugDNA.22919.1.S1_at   | MmugDNA.22919.1 | 10.09 | 9.9   | 0.27 | 0.27 | 1.14  | 0.76653  | 0.491746 | 0.901848 | 0.693249 |
| MmugDNA.22920.1.S1_at   | MmugDNA.22920.1 | 3.8   | 4.22  | 0.1  | 0.3  | -1.34 | 0.049811 | 0.074532 | 0.372194 | 0.318173 |
| MmugDNA.22921.1.S1_at   | MmugDNA.22921.1 | 4.87  | 5.07  | 0.42 | 0.37 | -1.15 | 0.62973  | 0.849085 | 0.831685 | 0.914324 |

|                         |                 |       |       |      |      |       |          |          |          |          |
|-------------------------|-----------------|-------|-------|------|------|-------|----------|----------|----------|----------|
| MmugDNA.22922.1.S1_at   | MmugDNA.22922.1 | 2.91  | 2.99  | 0.07 | 0.2  | -1.06 | 0.266936 | 0.608267 | 0.612291 | 0.766971 |
| MmugDNA.22924.1.S1_at   | MmugDNA.22924.1 | 2.95  | 2.97  | 0.09 | 0.07 | -1.01 | 0.5769   | 0.804444 | 0.8033   | 0.887549 |
| MmugDNA.22924.1.S1_s_at | MmugDNA.22924.1 | 2.72  | 3.02  | 0.27 | 0.29 | -1.23 | 0.452279 | 0.270721 | 0.731986 | 0.53602  |
| MmugDNA.22925.1.S1_at   | MmugDNA.22925.1 | 7.72  | 7.12  | 0.29 | 0.47 | 1.51  | 0.290728 | 0.10012  | 0.628456 | 0.359055 |
| MmugDNA.22927.1.S1_at   | MmugDNA.22927.1 | 5.79  | 6.02  | 0.12 | 0.19 | -1.18 | 0.076838 | 0.056337 | 0.425685 | 0.283348 |
| MmugDNA.22928.1.S1_at   | MmugDNA.22928.1 | 6.71  | 7.01  | 0.36 | 0.45 | -1.24 | 0.746045 | 0.582977 | 0.891243 | 0.751492 |
| MmugDNA.2293.1.S1_at    | MmugDNA.2293.1  | 4.95  | 4.7   | 0.19 | 0.21 | 1.19  | 0.225004 | 0.296074 | 0.583024 | 0.555339 |
| MmugDNA.22930.1.S1_at   | MmugDNA.22930.1 | 4.17  | 4.16  | 0.11 | 0.09 | 1.01  | 0.206208 | 0.294792 | 0.568505 | 0.55437  |
| MmugDNA.22931.1.S1_at   | MmugDNA.22931.1 | 5.02  | 4.59  | 0.31 | 0.03 | 1.34  | 0.056824 | 0.212033 | 0.387214 | 0.486013 |
| MmugDNA.22933.1.S1_at   | MmugDNA.22933.1 | 9.65  | 9.96  | 0.16 | 0.49 | -1.25 | 0.514879 | 0.47144  | 0.767211 | 0.679444 |
| MmugDNA.22935.1.S1_at   | MmugDNA.22935.1 | 2.93  | 2.94  | 0.08 | 0.09 | -1.01 | 0.46772  | 0.31065  | 0.740845 | 0.565787 |
| MmugDNA.22937.1.S1_at   | MmugDNA.22937.1 | 4.87  | 4.86  | 0.01 | 0.24 | 1.01  | 0.930447 | 0.937669 | 0.973174 | 0.964687 |
| MmugDNA.22938.1.S1_at   | MmugDNA.22938.1 | 3.56  | 3.55  | 0.07 | 0.08 | 1.01  | 0.68835  | 0.16334  | 0.860959 | 0.43947  |
| MmugDNA.22939.1.S1_at   | MmugDNA.22939.1 | 4.35  | 4.59  | 0.24 | 0.4  | -1.19 | 0.190415 | 0.271459 | 0.553062 | 0.536512 |
| MmugDNA.22940.1.S1_at   | MmugDNA.22940.1 | 6.9   | 8.06  | 0.31 | 0.77 | -2.22 | 0.051172 | 0.044402 | 0.375935 | 0.255192 |
| MmugDNA.22943.1.S1_at   | MmugDNA.22943.1 | 8     | 7.3   | 0.31 | 0.63 | 1.62  | 0.303559 | 0.391921 | 0.637748 | 0.625419 |
| MmugDNA.22944.1.S1_at   | MmugDNA.22944.1 | 9.13  | 8.64  | 0.03 | 0.23 | 1.41  | 0.054542 | 0.062054 | 0.381851 | 0.29597  |
| MmugDNA.22945.1.S1_at   | MmugDNA.22945.1 | 7.61  | 7.94  | 0.25 | 0.11 | -1.26 | 0.186024 | 0.164934 | 0.549579 | 0.44123  |
| MmugDNA.22946.1.S1_at   | MmugDNA.22946.1 | 5.64  | 5.61  | 0.21 | 0.14 | 1.02  | 0.881683 | 0.450146 | 0.952505 | 0.665505 |
| MmugDNA.22948.1.S1_at   | MmugDNA.22948.1 | 7.73  | 7.17  | 0.29 | 0.2  | 1.48  | 0.064521 | 0.075892 | 0.402975 | 0.320523 |
| MmugDNA.22949.1.S1_at   | MmugDNA.22949.1 | 7.23  | 7.52  | 0.19 | 0.27 | -1.22 | 0.154442 | 0.185493 | 0.51902  | 0.461566 |
| MmugDNA.2295.1.S1_at    | MmugDNA.2295.1  | 6.44  | 6.14  | 0.2  | 0.66 | 1.23  | 0.368188 | 0.362984 | 0.679785 | 0.603471 |
| MmugDNA.22951.1.S1_at   | MmugDNA.22951.1 | 5.39  | 5.37  | 0.16 | 0.11 | 1.01  | 0.281491 | 0.399442 | 0.622236 | 0.629798 |
| MmugDNA.22952.1.S1_at   | MmugDNA.22952.1 | 6.15  | 6.69  | 0.25 | 0.31 | -1.45 | 0.282062 | 0.060046 | 0.622553 | 0.291714 |
| MmugDNA.22953.1.S1_at   | MmugDNA.22953.1 | 9.01  | 10.11 | 0.5  | 0.35 | -2.15 | 0.033871 | 0.023755 | 0.330262 | 0.192931 |
| MmugDNA.22954.1.S1_at   | MmugDNA.22954.1 | 3.51  | 3.55  | 0.05 | 0.2  | -1.03 | 0.748393 | 0.779696 | 0.892444 | 0.872303 |
| MmugDNA.22956.1.S1_x_at | MmugDNA.22956.1 | 13.17 | 13.02 | 0.41 | 0.18 | 1.11  | 0.227645 | 0.306779 | 0.585103 | 0.563337 |
| MmugDNA.22957.1.S1_at   | MmugDNA.22957.1 | 2.99  | 3.01  | 0.17 | 0.23 | -1.01 | 0.525225 | 0.571202 | 0.773534 | 0.743594 |
| MmugDNA.22959.1.S1_at   | MmugDNA.22959.1 | 5.78  | 5.77  | 0.52 | 0.13 | 1     | 0.863215 | 0.948562 | 0.944982 | 0.970655 |
| MmugDNA.2296.1.S1_at    | MmugDNA.2296.1  | 5.85  | 6.08  | 0.38 | 0.06 | -1.17 | 0.443101 | 0.733641 | 0.725992 | 0.845776 |
| MmugDNA.22960.1.S1_at   | MmugDNA.22960.1 | 6.26  | 8.58  | 0.98 | 2.07 | -4.99 | 0.31239  | 0.222795 | 0.644141 | 0.49573  |
| MmugDNA.22961.1.S1_at   | MmugDNA.22961.1 | 10.39 | 10.37 | 0.05 | 0.64 | 1.02  | 0.978781 | 0.787393 | 0.99222  | 0.876991 |
| MmugDNA.22962.1.S1_at   | MmugDNA.22962.1 | 6.45  | 6.42  | 0.38 | 0.1  | 1.02  | 0.837444 | 0.724676 | 0.934307 | 0.840629 |
| MmugDNA.23219.1.S1_at   | MmugDNA.23219.1 | 8.24  | 9.39  | 0.47 | 0.82 | -2.22 | 0.101738 | 0.053461 | 0.461313 | 0.276864 |
| MmugDNA.23219.1.S1_s_at | MmugDNA.23219.1 | 8.54  | 9.78  | 0.47 | 0.97 | -2.37 | 0.112124 | 0.07588  | 0.474673 | 0.320523 |
| MmugDNA.22964.1.S1_at   | MmugDNA.22964.1 | 4.13  | 4.15  | 0.34 | 0.21 | -1.01 | 0.265259 | 0.347519 | 0.610859 | 0.592019 |
| MmugDNA.22966.1.S1_at   | MmugDNA.22966.1 | 3.09  | 3.2   | 0.04 | 0.11 | -1.08 | 0.08896  | 0.120855 | 0.444128 | 0.38974  |
| MmugDNA.22968.1.S1_at   | MmugDNA.22968.1 | 6.71  | 6.62  | 0.3  | 0.47 | 1.07  | 0.964013 | 0.989739 | 0.986041 | 0.994108 |
| MmugDNA.22969.1.S1_at   | MmugDNA.22969.1 | 3.44  | 3.29  | 0.06 | 0.2  | 1.1   | 0.987015 | 0.457492 | 0.995377 | 0.670863 |
| MmugDNA.2297.1.S1_at    | MmugDNA.2297.1  | 6.8   | 6.94  | 0.11 | 0.34 | -1.1  | 0.200373 | 0.373377 | 0.563205 | 0.61221  |
| MmugDNA.22970.1.S1_at   | MmugDNA.22970.1 | 5.95  | 6.04  | 0.15 | 0.21 | -1.07 | 0.238804 | 0.236373 | 0.592015 | 0.507308 |

|                         |                 |       |       |      |      |       |          |          |          |          |
|-------------------------|-----------------|-------|-------|------|------|-------|----------|----------|----------|----------|
| MmugDNA.22971.1.S1_at   | MmugDNA.22971.1 | 8     | 8.43  | 0.2  | 0.33 | -1.34 | 0.140883 | 0.125358 | 0.508448 | 0.396001 |
| MmugDNA.22973.1.S1_at   | MmugDNA.22973.1 | 3.61  | 3.6   | 0.05 | 0.03 | 1.01  | 0.372127 | 0.433328 | 0.682724 | 0.653652 |
| MmugDNA.22974.1.S1_at   | MmugDNA.22974.1 | 3.5   | 3.5   | 0.04 | 0.09 | -1    | 0.224692 | 0.65636  | 0.58277  | 0.799062 |
| MmugDNA.22976.1.S1_s_at | MmugDNA.22976.1 | 10.81 | 10.98 | 0.18 | 0.07 | -1.13 | 0.389464 | 0.469481 | 0.692994 | 0.678248 |
| MmugDNA.22977.1.S1_at   | MmugDNA.22977.1 | 4.07  | 4.17  | 0.02 | 0.14 | -1.07 | 0.460557 | 0.688622 | 0.737044 | 0.818251 |
| MmugDNA.22978.1.S1_at   | MmugDNA.22978.1 | 4.31  | 3.84  | 0.52 | 0.22 | 1.39  | 0.34963  | 0.427675 | 0.667907 | 0.649406 |
| MmugDNA.22979.1.S1_at   | MmugDNA.22979.1 | 7.12  | 6.19  | 0.29 | 0.65 | 1.91  | 0.191118 | 0.221652 | 0.554009 | 0.494901 |
| MmugDNA.2298.1.S1_at    | MmugDNA.2298.1  | 3.04  | 3.19  | 0.05 | 0.06 | -1.11 | 0.024359 | 0.184318 | 0.294535 | 0.460458 |
| MmugDNA.22980.1.S1_at   | MmugDNA.22980.1 | 3.51  | 3.61  | 0.22 | 0.07 | -1.07 | 0.737327 | 0.685657 | 0.887063 | 0.816563 |
| MmugDNA.22981.1.S1_at   | MmugDNA.22981.1 | 5.9   | 5.96  | 0.13 | 0.13 | -1.04 | 0.611501 | 0.420263 | 0.821704 | 0.64407  |
| MmugDNA.22982.1.S1_at   | MmugDNA.22982.1 | 6.73  | 7.16  | 0.69 | 0.2  | -1.35 | 0.934762 | 0.261952 | 0.974762 | 0.528351 |
| MmugDNA.22983.1.S1_at   | MmugDNA.22983.1 | 4.23  | 4.46  | 0.03 | 0.14 | -1.17 | 0.017461 | 0.005758 | 0.267445 | 0.104378 |
| MmugDNA.22984.1.S1_at   | MmugDNA.22984.1 | 4.96  | 4.83  | 0.17 | 0.04 | 1.1   | 0.23304  | 0.085694 | 0.587988 | 0.337761 |
| MmugDNA.22987.1.S1_at   | MmugDNA.22987.1 | 3.8   | 3.8   | 0.02 | 0.11 | -1    | 0.337976 | 0.197107 | 0.660473 | 0.472213 |
| MmugDNA.22988.1.S1_at   | MmugDNA.22988.1 | 7.42  | 7.67  | 0.45 | 0.54 | -1.19 | 0.252284 | 0.330925 | 0.601282 | 0.579609 |
| MmugDNA.22988.1.S1_s_at | MmugDNA.22988.1 | 10.31 | 10.23 | 0.5  | 0.3  | 1.06  | 0.688113 | 0.717796 | 0.860858 | 0.836614 |
| MmugDNA.22989.1.S1_at   | MmugDNA.22989.1 | 4.25  | 4.49  | 0.44 | 0.25 | -1.18 | 0.627025 | 0.31379  | 0.829854 | 0.568083 |
| MmugDNA.22990.1.S1_at   | MmugDNA.22990.1 | 8.22  | 8.46  | 0.08 | 0.16 | -1.18 | 0.155402 | 0.4085   | 0.520164 | 0.635694 |
| MmugDNA.22992.1.S1_at   | MmugDNA.22992.1 | 5.6   | 5.81  | 0.44 | 0.48 | -1.15 | 0.668666 | 0.814258 | 0.851986 | 0.892898 |
| MmugDNA.22993.1.S1_at   | MmugDNA.22993.1 | 5.75  | 5.94  | 0.16 | 0.13 | -1.14 | 0.214893 | 0.258995 | 0.57547  | 0.526202 |
| MmugDNA.22994.1.S1_at   | MmugDNA.22994.1 | 4.32  | 3.99  | 1.28 | 0.09 | 1.26  | 0.256362 | 0.271655 | 0.603974 | 0.536577 |
| MmugDNA.22995.1.S1_at   | MmugDNA.22995.1 | 11.84 | 11.69 | 0.08 | 0.17 | 1.1   | 0.092697 | 0.013922 | 0.449372 | 0.151344 |
| MmugDNA.22996.1.S1_at   | MmugDNA.22996.1 | 10.63 | 10.74 | 0.23 | 0.05 | -1.08 | 0.815454 | 0.8632   | 0.925005 | 0.92229  |
| MmugDNA.22997.1.S1_at   | MmugDNA.22997.1 | 6.02  | 5.76  | 0.11 | 0.52 | 1.19  | 0.998157 | 0.876125 | 0.999291 | 0.92958  |
| MmugDNA.22998.1.S1_at   | MmugDNA.22998.1 | 4.35  | 4.71  | 0.45 | 0.11 | -1.29 | 0.51243  | 0.293029 | 0.765592 | 0.552978 |
| MmugDNA.22999.1.S1_at   | MmugDNA.22999.1 | 3.27  | 3.38  | 0.17 | 0.13 | -1.08 | 0.590243 | 0.537521 | 0.809851 | 0.722606 |
| MmugDNA.23.1.S1_at      | MmugDNA.23.1    | 5.01  | 5.52  | 0.06 | 0.23 | -1.42 | 0.051499 | 0.034761 | 0.376072 | 0.230665 |
| MmugDNA.230.1.S1_at     | MmugDNA.230.1   | 4.32  | 3.84  | 0.39 | 0.11 | 1.39  | 0.170055 | 0.238799 | 0.534161 | 0.509485 |
| MmugDNA.23000.1.S1_at   | MmugDNA.23000.1 | 10.8  | 10.69 | 0.54 | 0.53 | 1.08  | 0.855074 | 0.736709 | 0.941425 | 0.847693 |
| MmugDNA.23001.1.S1_at   | MmugDNA.23001.1 | 5.44  | 5.4   | 0.13 | 0.06 | 1.02  | 0.440736 | 0.711159 | 0.724464 | 0.832439 |
| MmugDNA.23002.1.S1_at   | MmugDNA.23002.1 | 3.43  | 3.54  | 0.07 | 0.09 | -1.08 | 0.042278 | 0.067648 | 0.354563 | 0.306199 |
| MmugDNA.23004.1.S1_at   | MmugDNA.23004.1 | 5.58  | 5.94  | 0.13 | 0.42 | -1.28 | 0.658078 | 0.85211  | 0.846306 | 0.915883 |
| MmugDNA.23005.1.S1_at   | MmugDNA.23005.1 | 6.55  | 7.37  | 0.39 | 0.45 | -1.77 | 0.146774 | 0.29558  | 0.512699 | 0.555053 |
| MmugDNA.23006.1.S1_at   | MmugDNA.23006.1 | 5.02  | 5.04  | 0.18 | 0.02 | -1.01 | 0.830329 | 0.945738 | 0.931421 | 0.969149 |
| MmugDNA.23008.1.S1_at   | MmugDNA.23008.1 | 5.68  | 5.58  | 0.11 | 0.11 | 1.07  | 0.319055 | 0.473253 | 0.648688 | 0.680582 |
| MmugDNA.23009.1.S1_at   | MmugDNA.23009.1 | 4.36  | 4.43  | 0.26 | 0.1  | -1.05 | 0.246544 | 0.217219 | 0.597786 | 0.490864 |
| MmugDNA.2301.1.S1_at    | MmugDNA.2301.1  | 8.53  | 8.09  | 0.39 | 0.74 | 1.35  | 0.432121 | 0.291483 | 0.718823 | 0.551848 |
| MmugDNA.23010.1.S1_x_at | MmugDNA.23010.1 | 9.89  | 9.61  | 0.55 | 0.18 | 1.21  | 0.172765 | 0.225401 | 0.536395 | 0.498035 |
| MmugDNA.23011.1.S1_at   | MmugDNA.23011.1 | 8.34  | 7.67  | 0.27 | 0.45 | 1.59  | 0.206345 | 0.182697 | 0.568651 | 0.459186 |
| MmugDNA.23012.1.S1_at   | MmugDNA.23012.1 | 7.52  | 7.86  | 0.68 | 0.53 | -1.27 | 0.950461 | 0.932975 | 0.981318 | 0.961911 |
| MmugDNA.23013.1.S1_at   | MmugDNA.23013.1 | 7.95  | 8.01  | 0.18 | 0.08 | -1.05 | 0.536801 | 0.527513 | 0.779659 | 0.716154 |

|                         |                 |       |       |      |      |       |          |          |          |          |
|-------------------------|-----------------|-------|-------|------|------|-------|----------|----------|----------|----------|
| MmugDNA.23014.1.S1_at   | MmugDNA.23014.1 | 3.51  | 3.51  | 0.19 | 0.04 | 1.01  | 0.934607 | 0.8943   | 0.974715 | 0.939697 |
| MmugDNA.23016.1.S1_at   | MmugDNA.23016.1 | 4.04  | 4.28  | 0.39 | 0.15 | -1.18 | 0.711945 | 0.759913 | 0.873755 | 0.860508 |
| MmugDNA.23017.1.S1_at   | MmugDNA.23017.1 | 5.49  | 4.9   | 0.85 | 0.42 | 1.5   | 0.75735  | 0.937135 | 0.897033 | 0.964571 |
| MmugDNA.23018.1.S1_at   | MmugDNA.23018.1 | 9.78  | 8.8   | 0.26 | 0.57 | 1.97  | 0.022771 | 0.015556 | 0.288168 | 0.158118 |
| MmugDNA.23019.1.S1_at   | MmugDNA.23019.1 | 8.82  | 7.99  | 0.35 | 0.53 | 1.78  | 0.134098 | 0.034825 | 0.50068  | 0.230811 |
| MmugDNA.2302.1.S1_at    | MmugDNA.2302.1  | 6.33  | 6.31  | 0.09 | 0.26 | 1.01  | 0.666087 | 0.848119 | 0.850262 | 0.913786 |
| MmugDNA.23020.1.S1_at   | MmugDNA.23020.1 | 12.28 | 12.17 | 0.16 | 0.39 | 1.08  | 0.735664 | 0.891617 | 0.886382 | 0.938242 |
| MmugDNA.23022.1.S1_s_at | MmugDNA.23022.1 | 11.28 | 11.52 | 0.1  | 0.14 | -1.18 | 0.037288 | 0.020215 | 0.341194 | 0.178591 |
| MmugDNA.23024.1.S1_at   | MmugDNA.23024.1 | 5.16  | 5.62  | 0.24 | 0.39 | -1.38 | 0.167782 | 0.190598 | 0.532027 | 0.465984 |
| MmugDNA.23026.1.S1_at   | MmugDNA.23026.1 | 3.82  | 3.22  | 0.65 | 0.22 | 1.51  | 0.230183 | 0.139033 | 0.587112 | 0.412159 |
| MmugDNA.23029.1.S1_at   | MmugDNA.23029.1 | 5.53  | 5.59  | 0.05 | 0.23 | -1.04 | 0.493117 | 0.562696 | 0.756007 | 0.7381   |
| MmugDNA.2303.1.S1_at    | MmugDNA.2303.1  | 7.59  | 6.73  | 1.02 | 0.5  | 1.81  | 0.255104 | 0.171566 | 0.603094 | 0.447981 |
| MmugDNA.23030.1.S1_at   | MmugDNA.23030.1 | 7.32  | 8.57  | 0.3  | 0.42 | -2.38 | 0.013513 | 0.005294 | 0.247359 | 0.100738 |
| MmugDNA.23031.1.S1_at   | MmugDNA.23031.1 | 3.46  | 3.41  | 0.01 | 0.05 | 1.03  | 0.16269  | 0.719561 | 0.526998 | 0.837728 |
| MmugDNA.23032.1.S1_at   | MmugDNA.23032.1 | 4.88  | 4.81  | 0.1  | 0.03 | 1.05  | 0.171183 | 0.356182 | 0.535126 | 0.598158 |
| MmugDNA.23033.1.S1_at   | MmugDNA.23033.1 | 4.13  | 4.05  | 0.21 | 0.23 | 1.05  | 0.817791 | 0.960534 | 0.926038 | 0.977546 |
| MmugDNA.23034.1.S1_at   | MmugDNA.23034.1 | 9.64  | 11.31 | 0.03 | 0.45 | -3.19 | 0.00572  | 0.003427 | 0.191956 | 0.084173 |
| MmugDNA.23035.1.S1_at   | MmugDNA.23035.1 | 3.99  | 4.15  | 0.41 | 0.24 | -1.12 | 0.328702 | 0.445453 | 0.654467 | 0.662388 |
| MmugDNA.23036.1.S1_s_at | MmugDNA.23036.1 | 12.31 | 12.66 | 0.14 | 0.07 | -1.28 | 0.031509 | 0.037359 | 0.321992 | 0.237723 |
| MmugDNA.23037.1.S1_at   | MmugDNA.23037.1 | 5.22  | 5.33  | 0.05 | 0.2  | -1.08 | 0.560282 | 0.332348 | 0.794209 | 0.580773 |
| MmugDNA.23038.1.S1_at   | MmugDNA.23038.1 | 7.03  | 8.29  | 0.28 | 0.51 | -2.4  | 0.027558 | 0.01942  | 0.308386 | 0.175117 |
| MmugDNA.23039.1.S1_at   | MmugDNA.23039.1 | 5.81  | 5.78  | 0.44 | 0.13 | 1.02  | 0.510525 | 0.400395 | 0.765078 | 0.630187 |
| MmugDNA.3986.1.S1_at    | MmugDNA.3986.1  | 10.22 | 10.08 | 0.26 | 0.31 | 1.1   | 0.478652 | 0.652018 | 0.747332 | 0.796529 |
| MmugDNA.3986.1.S1_s_at  | MmugDNA.3986.1  | 10.66 | 10.44 | 0.21 | 0.23 | 1.16  | 0.387282 | 0.51306  | 0.691895 | 0.706712 |
| MmugDNA.23044.1.S1_at   | MmugDNA.23044.1 | 6.9   | 6.67  | 0.19 | 0.15 | 1.17  | 0.388152 | 0.059265 | 0.692266 | 0.29047  |
| MmugDNA.23048.1.S1_at   | MmugDNA.23048.1 | 3.61  | 3.45  | 0.06 | 0.05 | 1.12  | 0.066864 | 0.232258 | 0.406981 | 0.503975 |
| MmugDNA.2305.1.S1_at    | MmugDNA.2305.1  | 5.18  | 5.13  | 0.03 | 0.01 | 1.03  | 0.089116 | 0.578272 | 0.44457  | 0.748372 |
| MmugDNA.23050.1.S1_at   | MmugDNA.23050.1 | 3.37  | 3.34  | 0.35 | 0.13 | 1.02  | 0.363556 | 0.583553 | 0.676763 | 0.751822 |
| MmugDNA.23051.1.S1_at   | MmugDNA.23051.1 | 11.42 | 10.48 | 0.29 | 0.89 | 1.91  | 0.152245 | 0.172962 | 0.51692  | 0.449606 |
| MmugDNA.23052.1.S1_at   | MmugDNA.23052.1 | 3.31  | 3.33  | 0.14 | 0    | -1.01 | 0.741145 | 0.610086 | 0.889101 | 0.768367 |
| MmugDNA.23054.1.S1_at   | MmugDNA.23054.1 | 5.2   | 6.98  | 0.53 | 0.66 | -3.44 | 0.087899 | 0.043364 | 0.442238 | 0.252916 |
| MmugDNA.23056.1.S1_at   | MmugDNA.23056.1 | 9.92  | 10.04 | 0.08 | 0.39 | -1.08 | 0.788581 | 0.128082 | 0.91217  | 0.399072 |
| MmugDNA.23057.1.S1_at   | MmugDNA.23057.1 | 8.44  | 7.29  | 0.16 | 0.34 | 2.21  | 0.00491  | 0.002622 | 0.185749 | 0.075772 |
| MmugDNA.23059.1.S1_at   | MmugDNA.23059.1 | 5.99  | 6.08  | 0.17 | 0.09 | -1.06 | 0.524857 | 0.154489 | 0.773313 | 0.429395 |
| MmugDNA.23061.1.S1_at   | MmugDNA.23061.1 | 10.76 | 10.38 | 0.12 | 0.6  | 1.3   | 0.307018 | 0.387504 | 0.639854 | 0.622163 |
| MmugDNA.23061.1.S1_s_at | MmugDNA.23061.1 | 9.79  | 9.4   | 0.18 | 0.71 | 1.31  | 0.391084 | 0.520635 | 0.693921 | 0.711831 |
| MmugDNA.23062.1.S1_at   | MmugDNA.23062.1 | 3.68  | 3.54  | 0.1  | 0.19 | 1.11  | 0.585968 | 0.614164 | 0.807817 | 0.771143 |
| MmugDNA.23063.1.S1_at   | MmugDNA.23063.1 | 6.26  | 6.24  | 0.08 | 0.36 | 1.02  | 0.824098 | 0.941515 | 0.928595 | 0.966846 |
| MmugDNA.23065.1.S1_at   | MmugDNA.23065.1 | 5.24  | 5.17  | 0.75 | 0.4  | 1.04  | 0.74297  | 0.816352 | 0.890085 | 0.894082 |
| MmugDNA.42207.1.S1_s_at | MmugDNA.42207.1 | 13.6  | 13.52 | 0.08 | 0.08 | 1.06  | 0.271078 | 0.382794 | 0.615322 | 0.618907 |
| MmugDNA.23067.1.S1_at   | MmugDNA.23067.1 | 6.38  | 6.09  | 0.38 | 0.3  | 1.22  | 0.346131 | 0.323928 | 0.665656 | 0.57466  |

|                         |                 |       |       |      |      |       |          |          |          |          |
|-------------------------|-----------------|-------|-------|------|------|-------|----------|----------|----------|----------|
| MmugDNA.23069.1.S1_at   | MmugDNA.23069.1 | 9.76  | 11.08 | 0.69 | 0.9  | -2.5  | 0.252213 | 0.161143 | 0.601282 | 0.437288 |
| MmugDNA.23071.1.S1_at   | MmugDNA.23071.1 | 4.44  | 5.19  | 0.59 | 0.12 | -1.68 | 0.288776 | 0.295232 | 0.626809 | 0.554615 |
| MmugDNA.23072.1.S1_at   | MmugDNA.23072.1 | 6.12  | 5.87  | 0.21 | 0.17 | 1.19  | 0.119679 | 0.319021 | 0.484259 | 0.571591 |
| MmugDNA.23073.1.S1_at   | MmugDNA.23073.1 | 6.45  | 5.96  | 0.44 | 0.08 | 1.41  | 0.38754  | 0.319109 | 0.691999 | 0.57166  |
| MmugDNA.23074.1.S1_at   | MmugDNA.23074.1 | 8.64  | 7.75  | 0.39 | 0.78 | 1.86  | 0.10094  | 0.086628 | 0.461009 | 0.339176 |
| MmugDNA.23076.1.S1_at   | MmugDNA.23076.1 | 8.1   | 9.67  | 0.29 | 0.67 | -2.98 | 0.031941 | 0.02081  | 0.323475 | 0.180917 |
| MmugDNA.23077.1.S1_at   | MmugDNA.23077.1 | 6.27  | 6.06  | 0.36 | 0.42 | 1.16  | 0.892091 | 0.732096 | 0.957027 | 0.844824 |
| MmugDNA.23077.1.S1_x_at | MmugDNA.23077.1 | 6.22  | 6.15  | 0.26 | 0.4  | 1.05  | 0.821709 | 0.959563 | 0.927464 | 0.977061 |
| MmugDNA.23078.1.S1_at   | MmugDNA.23078.1 | 5.41  | 4.97  | 0.35 | 0.05 | 1.35  | 0.199799 | 0.293306 | 0.562888 | 0.553239 |
| MmugDNA.23079.1.S1_at   | MmugDNA.23079.1 | 3.78  | 3.69  | 0.03 | 0.1  | 1.07  | 0.287692 | 0.030747 | 0.626103 | 0.217245 |
| MmugDNA.2308.1.S1_at    | MmugDNA.2308.1  | 4.52  | 3.82  | 1.04 | 0.33 | 1.63  | 0.279312 | 0.194404 | 0.62104  | 0.469481 |
| MmugDNA.23081.1.S1_at   | MmugDNA.23081.1 | 11.8  | 12.17 | 0.08 | 0.24 | -1.29 | 0.072753 | 0.097893 | 0.417691 | 0.355679 |
| MmugDNA.23083.1.S1_at   | MmugDNA.23083.1 | 9.59  | 9.43  | 0.2  | 0.1  | 1.12  | 0.106697 | 0.041135 | 0.467457 | 0.247659 |
| MmugDNA.23085.1.S1_at   | MmugDNA.23085.1 | 6.02  | 5.95  | 0.07 | 0.13 | 1.06  | 0.559102 | 0.465688 | 0.793647 | 0.675863 |
| MmugDNA.23086.1.S1_at   | MmugDNA.23086.1 | 5.04  | 4.83  | 0.1  | 0.11 | 1.15  | 0.070522 | 0.309778 | 0.414379 | 0.565044 |
| MmugDNA.23087.1.S1_at   | MmugDNA.23087.1 | 6.65  | 6.71  | 0.18 | 0.14 | -1.05 | 0.945968 | 0.781041 | 0.979359 | 0.87297  |
| MmugDNA.23089.1.S1_at   | MmugDNA.23089.1 | 5.2   | 5.44  | 0.07 | 0.36 | -1.18 | 0.414557 | 0.213162 | 0.709338 | 0.487068 |
| MmugDNA.23090.1.S1_at   | MmugDNA.23090.1 | 7.56  | 7.32  | 1.23 | 0.76 | 1.18  | 0.713708 | 0.459916 | 0.874558 | 0.671989 |
| MmugDNA.23091.1.S1_at   | MmugDNA.23091.1 | 4.93  | 6.2   | 1.36 | 0.89 | -2.41 | 0.982423 | 0.972814 | 0.993449 | 0.985352 |
| MmugDNA.23092.1.S1_at   | MmugDNA.23092.1 | 6.51  | 6.65  | 0.48 | 0.51 | -1.1  | 0.563382 | 0.679857 | 0.79597  | 0.8131   |
| MmugDNA.23093.1.S1_at   | MmugDNA.23093.1 | 5.98  | 5.94  | 0.15 | 0.11 | 1.03  | 0.885996 | 0.545845 | 0.954323 | 0.72769  |
| MmugDNA.23094.1.S1_at   | MmugDNA.23094.1 | 4.29  | 4.53  | 0.19 | 0.11 | -1.18 | 0.348402 | 0.448067 | 0.667173 | 0.663986 |
| MmugDNA.23096.1.S1_at   | MmugDNA.23096.1 | 6.43  | 6.58  | 0.08 | 0.16 | -1.11 | 0.659514 | 0.387663 | 0.847196 | 0.622281 |
| MmugDNA.23097.1.S1_at   | MmugDNA.23097.1 | 5.92  | 5.65  | 0.22 | 0.13 | 1.21  | 0.438033 | 0.297111 | 0.722717 | 0.555996 |
| MmugDNA.23099.1.S1_at   | MmugDNA.23099.1 | 8.07  | 9.71  | 0.75 | 1.7  | -3.11 | 0.35297  | 0.243908 | 0.669964 | 0.514069 |
| MmugDNA.231.1.S1_x_at   | MmugDNA.231.1   | 5.03  | 5.28  | 0.08 | 0.23 | -1.19 | 0.117413 | 0.104034 | 0.481525 | 0.36495  |
| MmugDNA.2310.1.S1_at    | MmugDNA.2310.1  | 6.99  | 6.58  | 0.31 | 0.27 | 1.32  | 0.149871 | 0.031606 | 0.514437 | 0.219905 |
| MmugDNA.23100.1.S1_at   | MmugDNA.23100.1 | 3.71  | 3.69  | 0.16 | 0.13 | 1.02  | 0.666244 | 0.882917 | 0.850305 | 0.933228 |
| MmugDNA.23101.1.S1_s_at | MmugDNA.23101.1 | 6.85  | 6.95  | 0.13 | 0.2  | -1.07 | 0.507177 | 0.674547 | 0.762788 | 0.809864 |
| MmugDNA.23102.1.S1_at   | MmugDNA.23102.1 | 3.85  | 3.84  | 0.12 | 0.16 | 1.01  | 0.578994 | 0.378931 | 0.80407  | 0.615882 |
| MmugDNA.23103.1.S1_at   | MmugDNA.23103.1 | 9.21  | 8.37  | 0.2  | 0.21 | 1.78  | 0.010918 | 0.007471 | 0.232918 | 0.115888 |
| MmugDNA.23103.1.S1_x_at | MmugDNA.23103.1 | 9.74  | 9.04  | 0.18 | 0.21 | 1.63  | 0.019468 | 0.013993 | 0.274596 | 0.151593 |
| MmugDNA.23104.1.S1_at   | MmugDNA.23104.1 | 5.26  | 5.28  | 0.04 | 0.11 | -1.01 | 0.524692 | 0.756839 | 0.773227 | 0.858443 |
| MmugDNA.23105.1.S1_at   | MmugDNA.23105.1 | 3.26  | 3.63  | 0.15 | 0.14 | -1.29 | 0.066844 | 0.233157 | 0.406981 | 0.504458 |
| MmugDNA.23105.1.S1_s_at | MmugDNA.23105.1 | 6.76  | 7.04  | 0.31 | 0.07 | -1.21 | 0.054397 | 0.050945 | 0.381851 | 0.270968 |
| MmugDNA.23106.1.S1_at   | MmugDNA.23106.1 | 2.75  | 2.96  | 0.63 | 0.14 | -1.15 | 0.695986 | 0.879959 | 0.865073 | 0.931461 |
| MmugDNA.23107.1.S1_at   | MmugDNA.23107.1 | 3.7   | 3.69  | 0.15 | 0.27 | 1.01  | 0.26957  | 0.408794 | 0.614187 | 0.6359   |
| MmugDNA.23109.1.S1_at   | MmugDNA.23109.1 | 5.4   | 5.54  | 0.19 | 0.07 | -1.1  | 0.215468 | 0.239019 | 0.575924 | 0.509794 |
| MmugDNA.2311.1.S1_at    | MmugDNA.2311.1  | 10.63 | 10.22 | 0.18 | 0.14 | 1.33  | 0.098031 | 0.077562 | 0.457356 | 0.323421 |
| MmugDNA.23110.1.S1_at   | MmugDNA.23110.1 | 5.11  | 5.07  | 0.08 | 0.1  | 1.03  | 0.616559 | 0.229956 | 0.824231 | 0.501802 |
| MmugDNA.23111.1.S1_at   | MmugDNA.23111.1 | 4.4   | 3.65  | 0.38 | 0.11 | 1.68  | 0.060514 | 0.04433  | 0.393715 | 0.255035 |

|                         |                 |       |       |      |      |       |          |          |          |          |
|-------------------------|-----------------|-------|-------|------|------|-------|----------|----------|----------|----------|
| MmugDNA.23112.1.S1_at   | MmugDNA.23112.1 | 6.15  | 6.04  | 0.15 | 0.15 | 1.08  | 0.417055 | 0.493061 | 0.710321 | 0.693984 |
| MmugDNA.23113.1.S1_at   | MmugDNA.23113.1 | 4.02  | 3.62  | 0.32 | 0.25 | 1.31  | 0.781985 | 0.731143 | 0.909023 | 0.844204 |
| MmugDNA.23114.1.S1_at   | MmugDNA.23114.1 | 11.86 | 11.55 | 0.33 | 0.69 | 1.24  | 0.648505 | 0.561974 | 0.841967 | 0.737666 |
| MmugDNA.23116.1.S1_at   | MmugDNA.23116.1 | 4.97  | 4.95  | 0.18 | 0.1  | 1.02  | 0.623172 | 0.535609 | 0.827836 | 0.721162 |
| MmugDNA.23117.1.S1_at   | MmugDNA.23117.1 | 8.69  | 8.71  | 0.19 | 0.64 | -1.01 | 0.899252 | 0.07277  | 0.959714 | 0.315651 |
| MmugDNA.23118.1.S1_at   | MmugDNA.23118.1 | 5.86  | 5.8   | 0.09 | 0.18 | 1.04  | 0.622609 | 0.504307 | 0.827553 | 0.701474 |
| MmugDNA.23119.1.S1_at   | MmugDNA.23119.1 | 5.21  | 5.34  | 0.33 | 0.08 | -1.09 | 0.881526 | 0.938145 | 0.9524   | 0.964949 |
| MmugDNA.2312.1.S1_at    | MmugDNA.2312.1  | 4.31  | 4.35  | 0.04 | 0.05 | -1.03 | 0.161379 | 0.327673 | 0.526364 | 0.577472 |
| MmugDNA.23122.1.S1_at   | MmugDNA.23122.1 | 7.97  | 7.27  | 0.09 | 0.39 | 1.63  | 0.019668 | 0.007258 | 0.275549 | 0.114309 |
| MmugDNA.23123.1.S1_at   | MmugDNA.23123.1 | 10.21 | 9.82  | 0.53 | 0.26 | 1.31  | 0.83175  | 0.852829 | 0.931835 | 0.91634  |
| MmugDNA.23124.1.S1_at   | MmugDNA.23124.1 | 9.66  | 9.76  | 0.23 | 0.33 | -1.07 | 0.294247 | 0.156664 | 0.631204 | 0.432167 |
| MmugDNA.23125.1.S1_at   | MmugDNA.23125.1 | 6.71  | 6.7   | 0.03 | 0.18 | 1     | 0.327694 | 0.511227 | 0.654066 | 0.705455 |
| MmugDNA.23126.1.S1_at   | MmugDNA.23126.1 | 3.81  | 3.93  | 0.2  | 0.13 | -1.09 | 0.421111 | 0.1705   | 0.712872 | 0.447141 |
| MmugDNA.23127.1.S1_at   | MmugDNA.23127.1 | 3.94  | 4     | 0.06 | 0.11 | -1.04 | 0.40345  | 0.153616 | 0.70203  | 0.428341 |
| MmugDNA.2313.1.S1_at    | MmugDNA.2313.1  | 5.66  | 5.51  | 0.02 | 0.29 | 1.11  | 0.993444 | 0.856849 | 0.997754 | 0.918214 |
| MmugDNA.23130.1.S1_at   | MmugDNA.23130.1 | 3.25  | 3.21  | 0.01 | 0.17 | 1.03  | 0.557444 | 0.769487 | 0.792462 | 0.866136 |
| MmugDNA.23131.1.S1_at   | MmugDNA.23131.1 | 6.49  | 5.98  | 0.32 | 0.12 | 1.42  | 0.056312 | 0.093578 | 0.38633  | 0.349952 |
| MmugDNA.23132.1.S1_at   | MmugDNA.23132.1 | 7.69  | 8.05  | 0.22 | 0.71 | -1.28 | 0.317968 | 0.18005  | 0.64802  | 0.456601 |
| MmugDNA.23132.1.S1_s_at | MmugDNA.23132.1 | 9.94  | 10.37 | 0.15 | 0.81 | -1.35 | 0.423051 | 0.278761 | 0.713793 | 0.542468 |
| MmugDNA.23134.1.S1_at   | MmugDNA.23134.1 | 9.28  | 9.57  | 0.57 | 0.32 | -1.22 | 0.928423 | 0.966862 | 0.972486 | 0.981586 |
| MmugDNA.23138.1.S1_at   | MmugDNA.23138.1 | 12.36 | 12.84 | 0.22 | 0.24 | -1.39 | 0.064379 | 0.062418 | 0.402975 | 0.296669 |
| MmugDNA.23139.1.S1_at   | MmugDNA.23139.1 | 5.78  | 5.72  | 0.01 | 0.1  | 1.05  | 0.147803 | 0.168372 | 0.51336  | 0.445027 |
| MmugDNA.23140.1.S1_at   | MmugDNA.23140.1 | 3.24  | 3.21  | 0.25 | 0.17 | 1.02  | 0.725158 | 0.831503 | 0.880066 | 0.903392 |
| MmugDNA.23142.1.S1_at   | MmugDNA.23142.1 | 6.82  | 6.92  | 0.06 | 0.39 | -1.07 | 0.674599 | 0.44524  | 0.854194 | 0.662338 |
| MmugDNA.23145.1.S1_at   | MmugDNA.23145.1 | 7.44  | 5.19  | 1.21 | 1.09 | 4.76  | 0.059632 | 0.060444 | 0.39273  | 0.292512 |
| MmugDNA.23146.1.S1_at   | MmugDNA.23146.1 | 3.49  | 4.32  | 0.18 | 1.06 | -1.78 | 0.246451 | 0.383701 | 0.597777 | 0.61969  |
| MmugDNA.23147.1.S1_at   | MmugDNA.23147.1 | 3.06  | 3.04  | 0.08 | 0.09 | 1.01  | 0.339699 | 0.38842  | 0.661347 | 0.622841 |
| MmugDNA.23148.1.S1_at   | MmugDNA.23148.1 | 3.81  | 3.73  | 0.08 | 0.28 | 1.05  | 0.650923 | 0.840698 | 0.84297  | 0.909196 |
| MmugDNA.23150.1.S1_at   | MmugDNA.23150.1 | 7.43  | 6.75  | 0.75 | 0.69 | 1.6   | 0.147225 | 0.160774 | 0.513087 | 0.436897 |
| MmugDNA.23151.1.S1_at   | MmugDNA.23151.1 | 7.73  | 8.2   | 0.11 | 0.9  | -1.38 | 0.267719 | 0.295868 | 0.612723 | 0.555241 |
| MmugDNA.23152.1.S1_at   | MmugDNA.23152.1 | 12.71 | 12.01 | 0.11 | 0.33 | 1.62  | 0.0537   | 0.043853 | 0.380746 | 0.25403  |
| MmugDNA.23153.1.S1_at   | MmugDNA.23153.1 | 4.37  | 4.37  | 0.17 | 0.01 | 1     | 0.345792 | 0.332291 | 0.665318 | 0.580733 |
| MmugDNA.23154.1.S1_at   | MmugDNA.23154.1 | 4.14  | 4.66  | 0.42 | 0.3  | -1.43 | 0.568215 | 0.50059  | 0.798497 | 0.699154 |
| MmugDNA.23155.1.S1_at   | MmugDNA.23155.1 | 4.37  | 4.13  | 0.17 | 0.17 | 1.18  | 0.068485 | 0.056301 | 0.410201 | 0.283274 |
| MmugDNA.23156.1.S1_s_at | MmugDNA.23156.1 | 9.27  | 9.79  | 0.35 | 0.19 | -1.43 | 0.418602 | 0.112821 | 0.711419 | 0.37844  |
| MmugDNA.23157.1.S1_at   | MmugDNA.23157.1 | 3.31  | 3.39  | 0.27 | 0.24 | -1.06 | 0.637256 | 0.85441  | 0.836    | 0.91705  |
| MmugDNA.23159.1.S1_at   | MmugDNA.23159.1 | 5.55  | 5.61  | 0.04 | 0.03 | -1.04 | 0.163105 | 0.460051 | 0.527489 | 0.671989 |
| MmugDNA.23161.1.S1_at   | MmugDNA.23161.1 | 4.55  | 4.59  | 0.29 | 0.09 | -1.03 | 0.98653  | 0.321511 | 0.995227 | 0.573226 |
| MmugDNA.23163.1.S1_at   | MmugDNA.23163.1 | 3.52  | 3.15  | 1.11 | 0.13 | 1.29  | 0.252292 | 0.253311 | 0.601282 | 0.521662 |
| MmugDNA.23164.1.S1_at   | MmugDNA.23164.1 | 5.8   | 6.89  | 0.43 | 1.24 | -2.12 | 0.654332 | 0.419377 | 0.844578 | 0.643466 |
| MmugDNA.23165.1.S1_at   | MmugDNA.23165.1 | 9.03  | 9.69  | 0.34 | 0.34 | -1.59 | 0.137574 | 0.160411 | 0.504744 | 0.436528 |

|                         |                 |       |       |      |      |       |          |          |          |          |
|-------------------------|-----------------|-------|-------|------|------|-------|----------|----------|----------|----------|
| MmugDNA.23166.1.S1_at   | MmugDNA.23166.1 | 4.04  | 7.04  | 0.77 | 1.27 | -8    | 0.101416 | 0.097616 | 0.461313 | 0.355473 |
| MmugDNA.23167.1.S1_x_at | MmugDNA.23167.1 | 9.28  | 9.17  | 0.48 | 0.26 | 1.08  | 0.394313 | 0.522885 | 0.695726 | 0.713429 |
| MmugDNA.23168.1.S1_at   | MmugDNA.23168.1 | 5.47  | 5.46  | 0.08 | 0.13 | 1.01  | 0.874105 | 0.410091 | 0.949565 | 0.637065 |
| MmugDNA.23169.1.S1_at   | MmugDNA.23169.1 | 7.43  | 7.41  | 0.42 | 0.52 | 1.02  | 0.385882 | 0.531248 | 0.690905 | 0.718529 |
| MmugDNA.23170.1.S1_at   | MmugDNA.23170.1 | 4.89  | 4.72  | 0.4  | 0.08 | 1.13  | 0.830771 | 0.387009 | 0.93155  | 0.621935 |
| MmugDNA.23171.1.S1_at   | MmugDNA.23171.1 | 6.05  | 5.49  | 0.68 | 0.37 | 1.47  | 0.295063 | 0.354201 | 0.631503 | 0.597105 |
| MmugDNA.23172.1.S1_at   | MmugDNA.23172.1 | 3.52  | 3.62  | 0.39 | 0.03 | -1.07 | 0.57093  | 0.515232 | 0.799804 | 0.70821  |
| MmugDNA.23175.1.S1_at   | MmugDNA.23175.1 | 5.81  | 5.58  | 0.54 | 0.25 | 1.17  | 0.200251 | 0.177283 | 0.563139 | 0.45372  |
| MmugDNA.23176.1.S1_at   | MmugDNA.23176.1 | 10.32 | 11.28 | 0.06 | 0.09 | -1.95 | 0.000114 | 0.000008 | 0.112653 | 0.016421 |
| MmugDNA.23178.1.S1_at   | MmugDNA.23178.1 | 9.47  | 7.92  | 0.14 | 0.33 | 2.93  | 0.002893 | 0.001068 | 0.169151 | 0.051862 |
| MmugDNA.2318.1.S1_at    | MmugDNA.2318.1  | 5.23  | 5.33  | 0.11 | 0.2  | -1.07 | 0.301242 | 0.570458 | 0.636303 | 0.743121 |
| MmugDNA.23180.1.S1_at   | MmugDNA.23180.1 | 6.24  | 6.71  | 0.41 | 0.13 | -1.39 | 0.16007  | 0.186301 | 0.524858 | 0.462168 |
| MmugDNA.23184.1.S1_at   | MmugDNA.23184.1 | 3.82  | 3.98  | 0.17 | 0.13 | -1.12 | 0.299391 | 0.430935 | 0.634922 | 0.651921 |
| MmugDNA.23185.1.S1_at   | MmugDNA.23185.1 | 7.46  | 7.3   | 0.14 | 0.23 | 1.11  | 0.433991 | 0.625659 | 0.720302 | 0.779265 |
| MmugDNA.23186.1.S1_at   | MmugDNA.23186.1 | 5.55  | 5.41  | 0.28 | 0.13 | 1.1   | 0.414377 | 0.569329 | 0.709245 | 0.742375 |
| MmugDNA.23188.1.S1_at   | MmugDNA.23188.1 | 7.28  | 6.49  | 0.75 | 0.9  | 1.72  | 0.158083 | 0.318404 | 0.522944 | 0.571239 |
| MmugDNA.23189.1.S1_at   | MmugDNA.23189.1 | 4.63  | 4.72  | 0    | 0.16 | -1.06 | 0.380062 | 0.540525 | 0.687187 | 0.724446 |
| MmugDNA.2319.1.S1_at    | MmugDNA.2319.1  | 7.47  | 6.29  | 0.41 | 0.06 | 2.26  | 0.008249 | 0.007059 | 0.216948 | 0.113278 |
| MmugDNA.23190.1.S1_at   | MmugDNA.23190.1 | 6.61  | 6.84  | 0.3  | 0.08 | -1.17 | 0.318787 | 0.459998 | 0.648688 | 0.671989 |
| MmugDNA.23191.1.S1_at   | MmugDNA.23191.1 | 3.01  | 3.11  | 0.17 | 0.1  | -1.07 | 0.968579 | 0.333106 | 0.988176 | 0.581387 |
| MmugDNA.23192.1.S1_at   | MmugDNA.23192.1 | 5.24  | 3.77  | 1.18 | 0.62 | 2.77  | 0.275897 | 0.269734 | 0.617968 | 0.53502  |
| MmugDNA.23193.1.S1_at   | MmugDNA.23193.1 | 3.92  | 3.92  | 0.09 | 0.29 | 1     | 0.388681 | 0.465402 | 0.692749 | 0.675748 |
| MmugDNA.23194.1.S1_at   | MmugDNA.23194.1 | 7.57  | 8.24  | 0.39 | 0.98 | -1.6  | 0.109582 | 0.061546 | 0.470811 | 0.294865 |
| MmugDNA.23196.1.S1_at   | MmugDNA.23196.1 | 5.35  | 6.84  | 0.91 | 0.79 | -2.8  | 0.1064   | 0.110678 | 0.466831 | 0.374854 |
| MmugDNA.23198.1.S1_at   | MmugDNA.23198.1 | 5.27  | 5.3   | 0.71 | 0.44 | -1.03 | 0.593944 | 0.404614 | 0.811676 | 0.6331   |
| MmugDNA.23199.1.S1_at   | MmugDNA.23199.1 | 3.85  | 3.66  | 0.14 | 0.1  | 1.14  | 0.067606 | 0.022846 | 0.408178 | 0.189246 |
| MmugDNA.23201.1.S1_at   | MmugDNA.23201.1 | 10.11 | 10.61 | 0.45 | 0.23 | -1.41 | 0.044124 | 0.037799 | 0.35798  | 0.238765 |
| MmugDNA.23203.1.S1_at   | MmugDNA.23203.1 | 7.81  | 7.92  | 0.14 | 0.15 | -1.08 | 0.406375 | 0.062202 | 0.703645 | 0.296296 |
| MmugDNA.23204.1.S1_at   | MmugDNA.23204.1 | 10.08 | 9.76  | 0.36 | 0.45 | 1.24  | 0.809169 | 0.875997 | 0.922211 | 0.929526 |
| MmugDNA.23205.1.S1_at   | MmugDNA.23205.1 | 9.11  | 9.51  | 0.09 | 0.17 | -1.33 | 0.027951 | 0.031717 | 0.309162 | 0.220503 |
| MmugDNA.23206.1.S1_at   | MmugDNA.23206.1 | 6.76  | 6.4   | 0.1  | 0.56 | 1.28  | 0.850474 | 0.744061 | 0.939983 | 0.851697 |
| MmugDNA.23208.1.S1_at   | MmugDNA.23208.1 | 4.63  | 4.75  | 1.06 | 0.62 | -1.09 | 0.8637   | 0.671693 | 0.945252 | 0.808089 |
| MmugDNA.23209.1.S1_at   | MmugDNA.23209.1 | 5.53  | 6.73  | 0.39 | 1.39 | -2.29 | 0.184188 | 0.221557 | 0.548032 | 0.494892 |
| MmugDNA.23210.1.S1_x_at | MmugDNA.23210.1 | 11.37 | 10.67 | 0.39 | 0.92 | 1.63  | 0.48832  | 0.503488 | 0.752866 | 0.700892 |
| MmugDNA.23212.1.S1_at   | MmugDNA.23212.1 | 4.32  | 4.19  | 0.08 | 0.13 | 1.09  | 0.338053 | 0.323265 | 0.660525 | 0.574408 |
| MmugDNA.23213.1.S1_at   | MmugDNA.23213.1 | 5.96  | 6.41  | 1.59 | 0.37 | -1.37 | 0.729731 | 0.796762 | 0.88278  | 0.882803 |
| MmugDNA.23214.1.S1_at   | MmugDNA.23214.1 | 3.99  | 4.15  | 0.13 | 0.17 | -1.12 | 0.612271 | 0.430097 | 0.822151 | 0.651143 |
| MmugDNA.23215.1.S1_at   | MmugDNA.23215.1 | 10.38 | 10.24 | 0.04 | 0.17 | 1.11  | 0.25273  | 0.34393  | 0.60151  | 0.589617 |
| MmugDNA.23218.1.S1_at   | MmugDNA.23218.1 | 4.81  | 4.45  | 0.86 | 0.22 | 1.28  | 0.187567 | 0.191262 | 0.550528 | 0.466553 |
| MmugDNA.2322.1.S1_at    | MmugDNA.2322.1  | 3.73  | 3.78  | 0.06 | 0.2  | -1.04 | 0.266343 | 0.28668  | 0.611888 | 0.548077 |
| MmugDNA.23220.1.S1_at   | MmugDNA.23220.1 | 6.35  | 6.15  | 0.21 | 0.07 | 1.15  | 0.078056 | 0.123381 | 0.428012 | 0.393391 |



|                       |                 |       |       |      |      |        |          |          |          |          |
|-----------------------|-----------------|-------|-------|------|------|--------|----------|----------|----------|----------|
| MmugDNA.23221.1.S1_at | MmugDNA.23221.1 | 3.67  | 3.83  | 0.14 | 0.04 | -1.12  | 0.05149  | 0.03141  | 0.376072 | 0.219107 |
| MmugDNA.23223.1.S1_at | MmugDNA.23223.1 | 11.66 | 11.43 | 0.14 | 0.2  | 1.17   | 0.133618 | 0.152434 | 0.500334 | 0.427274 |
| MmugDNA.23224.1.S1_at | MmugDNA.23224.1 | 4.39  | 4.39  | 0.12 | 0.16 | -1     | 0.662123 | 0.152662 | 0.848422 | 0.427485 |
| MmugDNA.23225.1.S1_at | MmugDNA.23225.1 | 6.6   | 7.96  | 0.32 | 0.87 | -2.57  | 0.032813 | 0.022184 | 0.326124 | 0.186422 |
| MmugDNA.23226.1.S1_at | MmugDNA.23226.1 | 6.34  | 6.2   | 0.24 | 0.06 | 1.1    | 0.397738 | 0.512714 | 0.698251 | 0.706493 |
| MmugDNA.23227.1.S1_at | MmugDNA.23227.1 | 4.39  | 5     | 0.2  | 0.93 | -1.53  | 0.123077 | 0.176888 | 0.488585 | 0.453303 |
| MmugDNA.23228.1.S1_at | MmugDNA.23228.1 | 3.85  | 4.05  | 0.15 | 0.11 | -1.15  | 0.200462 | 0.191633 | 0.563327 | 0.466918 |
| MmugDNA.23229.1.S1_at | MmugDNA.23229.1 | 3.86  | 3.82  | 0.1  | 0.28 | 1.02   | 0.753125 | 0.790751 | 0.894632 | 0.878973 |
| MmugDNA.2323.1.S1_at  | MmugDNA.2323.1  | 3.06  | 3.09  | 0.41 | 0.26 | -1.02  | 0.5585   | 0.747824 | 0.793281 | 0.853252 |
| MmugDNA.23230.1.S1_at | MmugDNA.23230.1 | 9.29  | 9.24  | 0.14 | 0.35 | 1.03   | 0.796811 | 0.743066 | 0.915707 | 0.851135 |
| MmugDNA.23231.1.S1_at | MmugDNA.23231.1 | 3.83  | 3.91  | 0.41 | 0.1  | -1.05  | 0.793921 | 0.858855 | 0.914508 | 0.919637 |
| MmugDNA.23232.1.S1_at | MmugDNA.23232.1 | 5.46  | 5.94  | 0.05 | 0.2  | -1.39  | 0.030609 | 0.022068 | 0.31944  | 0.185927 |
| MmugDNA.23233.1.S1_at | MmugDNA.23233.1 | 5.35  | 5.51  | 0.23 | 0.1  | -1.12  | 0.493906 | 0.493019 | 0.756383 | 0.69397  |
| MmugDNA.23235.1.S1_at | MmugDNA.23235.1 | 11.59 | 11.39 | 0.15 | 0.18 | 1.15   | 0.268408 | 0.188165 | 0.613168 | 0.464251 |
| MmugDNA.23237.1.S1_at | MmugDNA.23237.1 | 4.26  | 3.94  | 0.03 | 0.2  | 1.25   | 0.048284 | 0.033898 | 0.368148 | 0.227771 |
| MmugDNA.23238.1.S1_at | MmugDNA.23238.1 | 13.05 | 13.05 | 0.08 | 0.11 | 1      | 0.233225 | 0.00603  | 0.588012 | 0.106089 |
| MmugDNA.23239.1.S1_at | MmugDNA.23239.1 | 10.38 | 10.6  | 0.07 | 0.25 | -1.16  | 0.099231 | 0.043468 | 0.459116 | 0.253142 |
| MmugDNA.23240.1.S1_at | MmugDNA.23240.1 | 9.61  | 8.95  | 0.39 | 0.25 | 1.59   | 0.030395 | 0.016081 | 0.318297 | 0.160703 |
| MmugDNA.23241.1.S1_at | MmugDNA.23241.1 | 3.26  | 6.93  | 0.48 | 0.39 | -12.66 | 0.000873 | 0.00133  | 0.139813 | 0.056205 |
| MmugDNA.23242.1.S1_at | MmugDNA.23242.1 | 4.9   | 5.13  | 0.19 | 0.04 | -1.17  | 0.130912 | 0.159624 | 0.497246 | 0.435785 |
| MmugDNA.23244.1.S1_at | MmugDNA.23244.1 | 3.62  | 3.63  | 0.21 | 0.05 | -1.01  | 0.328485 | 0.463795 | 0.654375 | 0.674656 |
| MmugDNA.23246.1.S1_at | MmugDNA.23246.1 | 6.28  | 6.09  | 0.11 | 0.12 | 1.14   | 0.322417 | 0.134177 | 0.651095 | 0.406421 |
| MmugDNA.23248.1.S1_at | MmugDNA.23248.1 | 6.22  | 5.63  | 0.56 | 0.83 | 1.51   | 0.820119 | 0.581111 | 0.92682  | 0.750212 |
| MmugDNA.23249.1.S1_at | MmugDNA.23249.1 | 8.06  | 8.09  | 0.12 | 0.36 | -1.02  | 0.737652 | 0.135745 | 0.887266 | 0.407925 |
| MmugDNA.2325.1.S1_at  | MmugDNA.2325.1  | 3.88  | 3.88  | 0.19 | 0.14 | -1     | 0.237203 | 0.346975 | 0.590811 | 0.591769 |
| MmugDNA.23252.1.S1_at | MmugDNA.23252.1 | 4.8   | 4.71  | 1.33 | 0.39 | 1.06   | 0.652173 | 0.667932 | 0.843581 | 0.805689 |
| MmugDNA.23253.1.S1_at | MmugDNA.23253.1 | 4.91  | 4.89  | 0.12 | 0.17 | 1.01   | 0.449118 | 0.467676 | 0.730082 | 0.677207 |
| MmugDNA.23255.1.S1_at | MmugDNA.23255.1 | 3.73  | 3.19  | 0.45 | 0.37 | 1.45   | 0.097394 | 0.167004 | 0.45638  | 0.443466 |
| MmugDNA.23257.1.S1_at | MmugDNA.23257.1 | 3.41  | 3.45  | 0.05 | 0.1  | -1.03  | 0.695678 | 0.434078 | 0.864996 | 0.654223 |
| MmugDNA.23258.1.S1_at | MmugDNA.23258.1 | 7.27  | 7.15  | 0.11 | 0.14 | 1.09   | 0.186294 | 0.336912 | 0.549915 | 0.584156 |
| MmugDNA.23259.1.S1_at | MmugDNA.23259.1 | 4.75  | 4.87  | 0.08 | 0.08 | -1.08  | 0.106017 | 0.133196 | 0.466831 | 0.404934 |
| MmugDNA.2326.1.S1_at  | MmugDNA.2326.1  | 5.61  | 5.55  | 0.13 | 0.04 | 1.05   | 0.483439 | 0.643338 | 0.749882 | 0.79084  |
| MmugDNA.23260.1.S1_at | MmugDNA.23260.1 | 5.47  | 5.97  | 0.43 | 0.63 | -1.41  | 0.140299 | 0.172224 | 0.508076 | 0.448609 |
| MmugDNA.23261.1.S1_at | MmugDNA.23261.1 | 4.46  | 4.77  | 0.22 | 0.12 | -1.24  | 0.259693 | 0.276848 | 0.606733 | 0.540757 |
| MmugDNA.23263.1.S1_at | MmugDNA.23263.1 | 5.02  | 5.04  | 0.14 | 0.09 | -1.01  | 0.408026 | 0.362145 | 0.70497  | 0.602827 |
| MmugDNA.23264.1.S1_at | MmugDNA.23264.1 | 6.99  | 7.39  | 0.43 | 0.14 | -1.32  | 0.095749 | 0.088393 | 0.453606 | 0.341877 |
| MmugDNA.23265.1.S1_at | MmugDNA.23265.1 | 5.85  | 6.07  | 0.32 | 0.15 | -1.17  | 0.635098 | 0.828764 | 0.834812 | 0.901565 |
| MmugDNA.23266.1.S1_at | MmugDNA.23266.1 | 9.28  | 9.62  | 0.12 | 0.15 | -1.26  | 0.015808 | 0.018387 | 0.261297 | 0.170558 |
| MmugDNA.23268.1.S1_at | MmugDNA.23268.1 | 7.33  | 5.06  | 0.41 | 0.26 | 4.83   | 0.001303 | 0.000297 | 0.145684 | 0.034892 |
| MmugDNA.23269.1.S1_at | MmugDNA.23269.1 | 2.86  | 2.85  | 0.04 | 0.01 | 1      | 0.710521 | 0.496262 | 0.873061 | 0.695931 |
| MmugDNA.2327.1.S1_at  | MmugDNA.2327.1  | 5.06  | 5.06  | 0.01 | 0.08 | -1     | 0.97382  | 0.970722 | 0.989688 | 0.98405  |

|                         |                 |       |       |      |      |       |          |          |          |          |
|-------------------------|-----------------|-------|-------|------|------|-------|----------|----------|----------|----------|
| MmugDNA.23270.1.S1_at   | MmugDNA.23270.1 | 9     | 8.34  | 0.24 | 0.26 | 1.59  | 0.033507 | 0.0504   | 0.329295 | 0.269732 |
| MmugDNA.23272.1.S1_at   | MmugDNA.23272.1 | 3.76  | 3.69  | 0.07 | 0.23 | 1.05  | 0.676215 | 0.593527 | 0.85485  | 0.758329 |
| MmugDNA.23273.1.S1_at   | MmugDNA.23273.1 | 5.5   | 5.81  | 0.1  | 0.33 | -1.24 | 0.121359 | 0.141576 | 0.486033 | 0.415087 |
| MmugDNA.23274.1.S1_at   | MmugDNA.23274.1 | 6.9   | 6.79  | 0.46 | 0.79 | 1.08  | 0.637815 | 0.400914 | 0.836262 | 0.630658 |
| MmugDNA.23275.1.S1_at   | MmugDNA.23275.1 | 5.18  | 5.41  | 0.03 | 0.27 | -1.18 | 0.690105 | 0.319873 | 0.861921 | 0.572234 |
| MmugDNA.23276.1.S1_at   | MmugDNA.23276.1 | 6.31  | 6.15  | 0.15 | 0.09 | 1.12  | 0.406481 | 0.143089 | 0.703713 | 0.416995 |
| MmugDNA.23277.1.S1_at   | MmugDNA.23277.1 | 4.81  | 4.18  | 0.35 | 0.08 | 1.55  | 0.034415 | 0.028924 | 0.331747 | 0.211953 |
| MmugDNA.23278.1.S1_at   | MmugDNA.23278.1 | 3.55  | 3.38  | 0.18 | 0.12 | 1.13  | 0.096271 | 0.110471 | 0.45461  | 0.374684 |
| MmugDNA.23279.1.S1_at   | MmugDNA.23279.1 | 3.9   | 3.03  | 0    | 0.21 | 1.82  | 0.002149 | 0.000025 | 0.15882  | 0.020254 |
| MmugDNA.2328.1.S1_at    | MmugDNA.2328.1  | 6.24  | 6.22  | 0.32 | 0.57 | 1.01  | 0.903759 | 0.982548 | 0.961578 | 0.99036  |
| MmugDNA.23280.1.S1_at   | MmugDNA.23280.1 | 7.58  | 7.01  | 0.28 | 0.18 | 1.48  | 0.012634 | 0.007069 | 0.242692 | 0.113284 |
| MmugDNA.23281.1.S1_at   | MmugDNA.23281.1 | 10.23 | 10.01 | 0.29 | 1.28 | 1.16  | 0.829238 | 0.334292 | 0.930696 | 0.582323 |
| MmugDNA.23282.1.S1_s_at | MmugDNA.23282.1 | 11.42 | 11.44 | 0.28 | 0.15 | -1.02 | 0.518745 | 0.793892 | 0.769592 | 0.881131 |
| MmugDNA.23283.1.S1_at   | MmugDNA.23283.1 | 5.34  | 4.74  | 0.42 | 0.12 | 1.52  | 0.099014 | 0.07247  | 0.458711 | 0.315294 |
| MmugDNA.23284.1.S1_at   | MmugDNA.23284.1 | 5.94  | 6.21  | 0.14 | 0.15 | -1.2  | 0.118582 | 0.308005 | 0.48294  | 0.564176 |
| MmugDNA.23285.1.S1_at   | MmugDNA.23285.1 | 5.46  | 5.57  | 0.04 | 0.09 | -1.08 | 0.063242 | 0.010792 | 0.400486 | 0.135577 |
| MmugDNA.23286.1.S1_at   | MmugDNA.23286.1 | 3.25  | 3.22  | 0.14 | 0.13 | 1.02  | 0.438802 | 0.582826 | 0.723309 | 0.751399 |
| MmugDNA.23287.1.S1_at   | MmugDNA.23287.1 | 5.62  | 5.62  | 0.09 | 0.05 | 1     | 0.672332 | 0.568744 | 0.853001 | 0.742094 |
| MmugDNA.23288.1.S1_at   | MmugDNA.23288.1 | 4.43  | 4.45  | 0.07 | 0.14 | -1.01 | 0.811615 | 0.931701 | 0.923289 | 0.961211 |
| MmugDNA.2329.1.S1_at    | MmugDNA.2329.1  | 5.08  | 5.15  | 0.03 | 0.25 | -1.05 | 0.268116 | 0.270856 | 0.613029 | 0.536026 |
| MmugDNA.23291.1.S1_at   | MmugDNA.23291.1 | 3.09  | 3.15  | 0.05 | 0.31 | -1.04 | 0.661189 | 0.773445 | 0.848063 | 0.868298 |
| MmugDNA.23293.1.S1_at   | MmugDNA.23293.1 | 8.64  | 8.59  | 0.22 | 0.14 | 1.04  | 0.681302 | 0.080072 | 0.857536 | 0.327455 |
| MmugDNA.23294.1.S1_at   | MmugDNA.23294.1 | 2.82  | 2.79  | 0.05 | 0.1  | 1.02  | 0.742751 | 0.926823 | 0.890032 | 0.958404 |
| MmugDNA.23295.1.S1_at   | MmugDNA.23295.1 | 4.01  | 3.16  | 1.17 | 0.02 | 1.79  | 0.297347 | 0.259766 | 0.633201 | 0.526648 |
| MmugDNA.23296.1.S1_s_at | MmugDNA.23296.1 | 11.14 | 11.48 | 0.2  | 0.49 | -1.27 | 0.952833 | 0.778285 | 0.982379 | 0.871272 |
| MmugDNA.23297.1.S1_at   | MmugDNA.23297.1 | 6.28  | 6.45  | 0.17 | 0.1  | -1.13 | 0.829101 | 0.490851 | 0.930604 | 0.692666 |
| MmugDNA.23298.1.S1_at   | MmugDNA.23298.1 | 4.02  | 4.02  | 0.26 | 0.11 | 1     | 0.618541 | 0.351917 | 0.825259 | 0.595331 |
| MmugDNA.233.1.S1_at     | MmugDNA.233.1   | 5.91  | 6.08  | 0.32 | 0.07 | -1.12 | 0.303126 | 0.260402 | 0.637386 | 0.526975 |
| MmugDNA.23300.1.S1_at   | MmugDNA.23300.1 | 6.53  | 6.56  | 0.02 | 0.39 | -1.02 | 0.412383 | 0.570934 | 0.707889 | 0.743422 |
| MmugDNA.23301.1.S1_at   | MmugDNA.23301.1 | 7.16  | 7.14  | 0.12 | 0.08 | 1.01  | 0.750135 | 0.800489 | 0.89292  | 0.885198 |
| MmugDNA.23305.1.S1_at   | MmugDNA.23305.1 | 7.46  | 7.68  | 0.1  | 0.09 | -1.16 | 0.029807 | 0.005184 | 0.315451 | 0.099739 |
| MmugDNA.23306.1.S1_at   | MmugDNA.23306.1 | 9.16  | 8.94  | 0.05 | 0.31 | 1.16  | 0.971079 | 0.153511 | 0.988868 | 0.42827  |
| MmugDNA.23308.1.S1_at   | MmugDNA.23308.1 | 2.76  | 2.68  | 0.03 | 0.19 | 1.06  | 0.864003 | 0.346071 | 0.945408 | 0.591154 |
| MmugDNA.23309.1.S1_at   | MmugDNA.23309.1 | 13.01 | 12.74 | 0.13 | 0.16 | 1.21  | 0.025219 | 0.014509 | 0.298184 | 0.153682 |
| MmugDNA.23310.1.S1_at   | MmugDNA.23310.1 | 12.08 | 12.22 | 0.25 | 0.23 | -1.1  | 0.496286 | 0.528437 | 0.757473 | 0.716634 |
| MmugDNA.23311.1.S1_at   | MmugDNA.23311.1 | 12.13 | 12.53 | 0.25 | 0.51 | -1.31 | 0.36992  | 0.374557 | 0.681073 | 0.6129   |
| MmugDNA.23312.1.S1_at   | MmugDNA.23312.1 | 4.75  | 5.62  | 0.41 | 1.16 | -1.83 | 0.167321 | 0.142216 | 0.531441 | 0.415754 |
| MmugDNA.23313.1.S1_at   | MmugDNA.23313.1 | 8.45  | 8.77  | 0.06 | 0.26 | -1.25 | 0.393198 | 0.727438 | 0.695036 | 0.842336 |
| MmugDNA.23314.1.S1_at   | MmugDNA.23314.1 | 5.04  | 4.89  | 0.07 | 0.08 | 1.11  | 0.084132 | 0.003158 | 0.436782 | 0.081739 |
| MmugDNA.23315.1.S1_at   | MmugDNA.23315.1 | 9.51  | 9.38  | 0.1  | 0.52 | 1.09  | 0.224821 | 0.346598 | 0.582867 | 0.591427 |
| MmugDNA.16921.1.S1_s_at | MmugDNA.16921.1 | 10.03 | 10.04 | 0.16 | 0.11 | -1    | 0.491203 | 0.21416  | 0.754889 | 0.487789 |

|                         |                 |       |       |      |      |       |          |          |          |          |
|-------------------------|-----------------|-------|-------|------|------|-------|----------|----------|----------|----------|
| MmugDNA.23317.1.S1_at   | MmugDNA.23317.1 | 11.01 | 12.15 | 0.36 | 0.6  | -2.2  | 0.049309 | 0.040824 | 0.371194 | 0.246981 |
| MmugDNA.23318.1.S1_at   | MmugDNA.23318.1 | 3.16  | 3.2   | 0.03 | 0.15 | -1.03 | 0.822963 | 0.806337 | 0.927994 | 0.888642 |
| MmugDNA.23319.1.S1_at   | MmugDNA.23319.1 | 6.97  | 7.06  | 0.11 | 0.08 | -1.07 | 0.333507 | 0.281522 | 0.657597 | 0.54464  |
| MmugDNA.2332.1.S1_at    | MmugDNA.2332.1  | 5.82  | 5.73  | 0.5  | 0.23 | 1.06  | 0.397759 | 0.478713 | 0.698264 | 0.684691 |
| MmugDNA.23320.1.S1_at   | MmugDNA.23320.1 | 12.64 | 12.55 | 0.05 | 0.17 | 1.06  | 0.910551 | 0.811722 | 0.964646 | 0.891337 |
| MmugDNA.23321.1.S1_at   | MmugDNA.23321.1 | 7.59  | 6.53  | 0.45 | 0.15 | 2.09  | 0.019462 | 0.010866 | 0.274579 | 0.135879 |
| MmugDNA.23323.1.S1_at   | MmugDNA.23323.1 | 10.41 | 9.78  | 0.19 | 0.09 | 1.55  | 0.004052 | 0.000385 | 0.181739 | 0.037273 |
| MmugDNA.23324.1.S1_at   | MmugDNA.23324.1 | 4.59  | 5.57  | 1.37 | 0.28 | -1.98 | 0.966087 | 0.678968 | 0.987096 | 0.812533 |
| MmugDNA.23325.1.S1_at   | MmugDNA.23325.1 | 11.49 | 11.2  | 0.06 | 0.24 | 1.22  | 0.060946 | 0.030104 | 0.394705 | 0.215348 |
| MmugDNA.23327.1.S1_at   | MmugDNA.23327.1 | 8.07  | 7.85  | 0.15 | 0.45 | 1.17  | 0.51103  | 0.779162 | 0.765227 | 0.871904 |
| MmugDNA.23329.1.S1_at   | MmugDNA.23329.1 | 9.02  | 11.98 | 0.42 | 0.51 | -7.75 | 0.0017   | 0.000174 | 0.15365  | 0.030511 |
| MmugDNA.23330.1.S1_at   | MmugDNA.23330.1 | 3.82  | 3.84  | 0.15 | 0.07 | -1.01 | 0.508739 | 0.48809  | 0.763905 | 0.690896 |
| MmugDNA.23331.1.S1_at   | MmugDNA.23331.1 | 3.33  | 3.41  | 0.67 | 0.07 | -1.06 | 0.547238 | 0.628224 | 0.786069 | 0.781087 |
| MmugDNA.23332.1.S1_at   | MmugDNA.23332.1 | 8.64  | 7.54  | 0.27 | 0.11 | 2.14  | 0.00547  | 0.012499 | 0.191178 | 0.144302 |
| MmugDNA.23333.1.S1_at   | MmugDNA.23333.1 | 6.08  | 5.4   | 0.28 | 0.29 | 1.6   | 0.076058 | 0.04151  | 0.42445  | 0.24862  |
| MmugDNA.23335.1.S1_at   | MmugDNA.23335.1 | 2.94  | 2.77  | 0.2  | 0.05 | 1.12  | 0.288485 | 0.510295 | 0.626713 | 0.704814 |
| MmugDNA.23336.1.S1_s_at | MmugDNA.23336.1 | 8.94  | 9.58  | 0.26 | 0.44 | -1.56 | 0.100821 | 0.037085 | 0.461009 | 0.237117 |
| MmugDNA.23338.1.S1_at   | MmugDNA.23338.1 | 5.61  | 5.78  | 0.34 | 0.23 | -1.13 | 0.661345 | 0.556883 | 0.848124 | 0.734847 |
| MmugDNA.23339.1.S1_at   | MmugDNA.23339.1 | 10.75 | 10.15 | 0.5  | 0.14 | 1.52  | 0.162195 | 0.134493 | 0.526638 | 0.406626 |
| MmugDNA.23340.1.S1_at   | MmugDNA.23340.1 | 3.4   | 3.52  | 0.14 | 0.08 | -1.09 | 0.257095 | 0.319348 | 0.60448  | 0.571724 |
| MmugDNA.23341.1.S1_at   | MmugDNA.23341.1 | 6.85  | 7.33  | 0.32 | 0.19 | -1.39 | 0.092027 | 0.089196 | 0.448698 | 0.343259 |
| MmugDNA.23342.1.S1_at   | MmugDNA.23342.1 | 9.64  | 9.53  | 0.23 | 0.22 | 1.08  | 0.214173 | 0.274899 | 0.574589 | 0.53934  |
| MmugDNA.23343.1.S1_at   | MmugDNA.23343.1 | 4.81  | 4.25  | 0.38 | 0.1  | 1.48  | 0.09246  | 0.090662 | 0.449162 | 0.345151 |
| MmugDNA.23344.1.S1_at   | MmugDNA.23344.1 | 11.62 | 11.45 | 0.19 | 0.16 | 1.13  | 0.278261 | 0.163116 | 0.620425 | 0.43928  |
| MmugDNA.23345.1.S1_at   | MmugDNA.23345.1 | 2.88  | 3.16  | 0.1  | 0.08 | -1.21 | 0.087805 | 0.178589 | 0.442117 | 0.454817 |
| MmugDNA.23345.1.S1_s_at | MmugDNA.23345.1 | 5.96  | 5.74  | 0.1  | 0.16 | 1.17  | 0.21114  | 0.202165 | 0.571977 | 0.476559 |
| MmugDNA.23347.1.S1_at   | MmugDNA.23347.1 | 5.08  | 5.05  | 0.41 | 0.49 | 1.02  | 0.695526 | 0.015041 | 0.864969 | 0.155766 |
| MmugDNA.23348.1.S1_at   | MmugDNA.23348.1 | 2.88  | 2.94  | 0.14 | 0.05 | -1.04 | 0.584579 | 0.429769 | 0.807089 | 0.651032 |
| MmugDNA.23349.1.S1_at   | MmugDNA.23349.1 | 3.26  | 3.15  | 0.13 | 0.01 | 1.08  | 0.18002  | 0.128052 | 0.544188 | 0.399035 |
| MmugDNA.2335.1.S1_at    | MmugDNA.2335.1  | 4.54  | 4.56  | 0.23 | 0.15 | -1.01 | 0.688888 | 0.471045 | 0.861215 | 0.679172 |
| MmugDNA.23350.1.S1_at   | MmugDNA.23350.1 | 4     | 3.93  | 0.45 | 0.32 | 1.05  | 0.916258 | 0.942677 | 0.967097 | 0.967498 |
| MmugDNA.23351.1.S1_at   | MmugDNA.23351.1 | 4.78  | 4.82  | 0.53 | 0.14 | -1.03 | 0.467251 | 0.548677 | 0.74068  | 0.729318 |
| MmugDNA.23353.1.S1_at   | MmugDNA.23353.1 | 6.09  | 6.14  | 0.17 | 0.1  | -1.03 | 0.848873 | 0.960337 | 0.939232 | 0.977459 |
| MmugDNA.23354.1.S1_at   | MmugDNA.23354.1 | 11.46 | 11.69 | 0.07 | 0.16 | -1.17 | 0.174774 | 0.055328 | 0.538344 | 0.281024 |
| MmugDNA.23354.1.S1_s_at | MmugDNA.23354.1 | 12.14 | 12.11 | 0.02 | 0.1  | 1.02  | 0.224394 | 0.082238 | 0.582716 | 0.331091 |
| MmugDNA.23355.1.S1_at   | MmugDNA.23355.1 | 7.48  | 7.38  | 0.18 | 0.06 | 1.07  | 0.743714 | 0.488303 | 0.890194 | 0.691049 |
| MmugDNA.23357.1.S1_at   | MmugDNA.23357.1 | 4.58  | 4.68  | 0.09 | 0.38 | -1.07 | 0.987441 | 0.942892 | 0.995558 | 0.967564 |
| MmugDNA.23359.1.S1_x_at | MmugDNA.23359.1 | 9.64  | 9.34  | 0.31 | 0.28 | 1.23  | 0.483022 | 0.532899 | 0.749775 | 0.71929  |
| MmugDNA.2336.1.S1_at    | MmugDNA.2336.1  | 8.51  | 7.86  | 0.08 | 0.26 | 1.57  | 0.005687 | 0.004287 | 0.191943 | 0.091951 |
| MmugDNA.23360.1.S1_at   | MmugDNA.23360.1 | 3.68  | 3.76  | 0.28 | 0.39 | -1.06 | 0.690884 | 0.570403 | 0.862496 | 0.743103 |
| MmugDNA.23361.1.S1_at   | MmugDNA.23361.1 | 5.89  | 5.86  | 0.23 | 0.13 | 1.02  | 0.332643 | 0.35577  | 0.656938 | 0.597864 |

|                         |                 |       |       |      |      |       |          |          |          |          |
|-------------------------|-----------------|-------|-------|------|------|-------|----------|----------|----------|----------|
| MmugDNA.23362.1.S1_at   | MmugDNA.23362.1 | 2.78  | 2.78  | 0.14 | 0.09 | 1     | 0.973034 | 0.704053 | 0.989562 | 0.828326 |
| MmugDNA.23363.1.S1_at   | MmugDNA.23363.1 | 6.3   | 6.36  | 0.58 | 0.62 | -1.04 | 0.44483  | 0.721366 | 0.727237 | 0.838685 |
| MmugDNA.23364.1.S1_at   | MmugDNA.23364.1 | 3.14  | 3.17  | 0.06 | 0.24 | -1.03 | 0.384185 | 0.523736 | 0.689782 | 0.713976 |
| MmugDNA.23365.1.S1_at   | MmugDNA.23365.1 | 7.29  | 6.84  | 0.54 | 0.18 | 1.37  | 0.20113  | 0.265543 | 0.563821 | 0.531418 |
| MmugDNA.23366.1.S1_s_at | MmugDNA.23366.1 | 6.3   | 6.23  | 0.22 | 0.14 | 1.05  | 0.489625 | 0.219857 | 0.75397  | 0.493388 |
| MmugDNA.23367.1.S1_at   | MmugDNA.23367.1 | 7.57  | 7.29  | 0.9  | 0.48 | 1.21  | 0.267417 | 0.14179  | 0.612568 | 0.415331 |
| MmugDNA.23367.1.S1_s_at | MmugDNA.23367.1 | 7.41  | 7.31  | 0.83 | 0.32 | 1.08  | 0.40196  | 0.41852  | 0.701106 | 0.642927 |
| MmugDNA.23368.1.S1_at   | MmugDNA.23368.1 | 4.67  | 4.71  | 0.17 | 0.1  | -1.03 | 0.928766 | 0.080779 | 0.972607 | 0.328657 |
| MmugDNA.23369.1.S1_at   | MmugDNA.23369.1 | 3.33  | 3.32  | 0.04 | 0.03 | 1.01  | 0.675287 | 0.079741 | 0.854473 | 0.327009 |
| MmugDNA.23370.1.S1_at   | MmugDNA.23370.1 | 4.9   | 4.95  | 0.22 | 0.27 | -1.04 | 0.49638  | 0.495292 | 0.757473 | 0.695411 |
| MmugDNA.23371.1.S1_at   | MmugDNA.23371.1 | 10.04 | 11    | 0.16 | 0.31 | -1.94 | 0.004921 | 0.001238 | 0.185812 | 0.05478  |
| MmugDNA.23372.1.S1_at   | MmugDNA.23372.1 | 8.03  | 7.9   | 0.36 | 0.06 | 1.1   | 0.153579 | 0.174088 | 0.518023 | 0.450385 |
| MmugDNA.23374.1.S1_at   | MmugDNA.23374.1 | 8.1   | 8.14  | 0.27 | 0.42 | -1.03 | 0.230327 | 0.114219 | 0.587222 | 0.380761 |
| MmugDNA.23375.1.S1_at   | MmugDNA.23375.1 | 6.89  | 8.72  | 0.37 | 0.59 | -3.56 | 0.011174 | 0.003148 | 0.234598 | 0.081732 |
| MmugDNA.23376.1.S1_at   | MmugDNA.23376.1 | 3.84  | 3.71  | 0.42 | 0.22 | 1.1   | 0.401493 | 0.310088 | 0.700872 | 0.565307 |
| MmugDNA.23377.1.S1_at   | MmugDNA.23377.1 | 3.79  | 3.38  | 0.58 | 0.03 | 1.33  | 0.315891 | 0.440699 | 0.64672  | 0.659076 |
| MmugDNA.23380.1.S1_at   | MmugDNA.23380.1 | 10.86 | 11.31 | 0.07 | 0.32 | -1.37 | 0.213552 | 0.033644 | 0.573715 | 0.227006 |
| MmugDNA.23381.1.S1_at   | MmugDNA.23381.1 | 13.59 | 13.54 | 0.07 | 0.06 | 1.03  | 0.086329 | 0.084205 | 0.440224 | 0.33528  |
| MmugDNA.23382.1.S1_at   | MmugDNA.23382.1 | 5.54  | 5.64  | 0.78 | 0.36 | -1.07 | 0.819483 | 0.767876 | 0.926528 | 0.865256 |
| MmugDNA.23383.1.S1_at   | MmugDNA.23383.1 | 8.42  | 8.32  | 0.53 | 0.35 | 1.08  | 0.761677 | 0.514464 | 0.899666 | 0.707693 |
| MmugDNA.23384.1.S1_at   | MmugDNA.23384.1 | 3.96  | 3.27  | 0.49 | 0.17 | 1.61  | 0.18586  | 0.191628 | 0.549376 | 0.466918 |
| MmugDNA.23385.1.S1_at   | MmugDNA.23385.1 | 7.37  | 7.47  | 0.48 | 0.16 | -1.07 | 0.990302 | 0.041697 | 0.996541 | 0.24887  |
| MmugDNA.23386.1.S1_at   | MmugDNA.23386.1 | 3.33  | 3.35  | 0.03 | 0.17 | -1.02 | 0.238248 | 0.23645  | 0.591578 | 0.507314 |
| MmugDNA.23389.1.S1_at   | MmugDNA.23389.1 | 7.31  | 7.58  | 1.01 | 0.53 | -1.21 | 0.846478 | 0.922408 | 0.93835  | 0.956308 |
| MmugDNA.2339.1.S1_at    | MmugDNA.2339.1  | 3.96  | 3.9   | 0.17 | 0    | 1.04  | 0.585638 | 0.810065 | 0.807608 | 0.890518 |
| MmugDNA.23390.1.S1_at   | MmugDNA.23390.1 | 4.53  | 4.15  | 0.36 | 0.06 | 1.3   | 0.05514  | 0.040266 | 0.383547 | 0.245902 |
| MmugDNA.23391.1.S1_at   | MmugDNA.23391.1 | 5.07  | 5.23  | 0.1  | 0.17 | -1.11 | 0.083633 | 0.082237 | 0.435945 | 0.331091 |
| MmugDNA.23393.1.S1_at   | MmugDNA.23393.1 | 4.81  | 5.95  | 0.13 | 0.58 | -2.21 | 0.058435 | 0.044493 | 0.390361 | 0.255279 |
| MmugDNA.23394.1.S1_at   | MmugDNA.23394.1 | 10.26 | 9.99  | 0.16 | 0.55 | 1.2   | 0.651045 | 0.432215 | 0.842972 | 0.652775 |
| MmugDNA.23395.1.S1_at   | MmugDNA.23395.1 | 5.75  | 5.71  | 0.02 | 0.12 | 1.03  | 0.592207 | 0.801686 | 0.810873 | 0.885902 |
| MmugDNA.23396.1.S1_at   | MmugDNA.23396.1 | 13.46 | 13.51 | 0.03 | 0.05 | -1.04 | 0.099494 | 0.015091 | 0.459387 | 0.155995 |
| MmugDNA.23397.1.S1_at   | MmugDNA.23397.1 | 4.23  | 4.28  | 0.08 | 0.05 | -1.04 | 0.142742 | 0.299479 | 0.509765 | 0.557916 |
| MmugDNA.23398.1.S1_at   | MmugDNA.23398.1 | 7.37  | 7.74  | 0.28 | 0.97 | -1.3  | 0.420045 | 0.182274 | 0.712178 | 0.458766 |
| MmugDNA.28352.1.S1_at   | MmugDNA.28352.1 | 12.45 | 12.12 | 0.26 | 0.07 | 1.26  | 0.118843 | 0.024175 | 0.483393 | 0.194641 |
| MmugDNA.28352.1.S1_s_at | MmugDNA.28352.1 | 12.37 | 12.27 | 0.15 | 0.13 | 1.07  | 0.168185 | 0.07499  | 0.53256  | 0.319038 |
| MmugDNA.234.1.S1_at     | MmugDNA.234.1   | 4.13  | 3.93  | 0.12 | 0.02 | 1.15  | 0.104745 | 0.03964  | 0.465114 | 0.244183 |
| MmugDNA.2340.1.S1_at    | MmugDNA.2340.1  | 6.32  | 6.2   | 0.24 | 0.14 | 1.09  | 0.195554 | 0.24067  | 0.558901 | 0.511396 |
| MmugDNA.23400.1.S1_at   | MmugDNA.23400.1 | 4.57  | 4.59  | 0.21 | 0.23 | -1.02 | 0.873022 | 0.96857  | 0.94924  | 0.982645 |
| MmugDNA.23401.1.S1_at   | MmugDNA.23401.1 | 7.32  | 7.29  | 0.71 | 0.16 | 1.03  | 0.986341 | 0.470605 | 0.995151 | 0.678925 |
| MmugDNA.23402.1.S1_at   | MmugDNA.23402.1 | 4.3   | 4.16  | 0.79 | 0.23 | 1.1   | 0.335985 | 0.399483 | 0.65921  | 0.629825 |
| MmugDNA.23404.1.S1_at   | MmugDNA.23404.1 | 5.46  | 5.5   | 0.3  | 0.11 | -1.03 | 0.646918 | 0.480089 | 0.84111  | 0.685659 |

|                         |                 |       |       |      |      |       |          |          |          |          |
|-------------------------|-----------------|-------|-------|------|------|-------|----------|----------|----------|----------|
| MmugDNA.23406.1.S1_at   | MmugDNA.23406.1 | 4.42  | 4.78  | 0.06 | 0.71 | -1.29 | 0.372392 | 0.57661  | 0.682812 | 0.747284 |
| MmugDNA.23408.1.S1_at   | MmugDNA.23408.1 | 4.35  | 4.45  | 0.08 | 0.17 | -1.07 | 0.472    | 0.370485 | 0.743454 | 0.609544 |
| MmugDNA.23409.1.S1_at   | MmugDNA.23409.1 | 5.28  | 5.25  | 0.17 | 0.04 | 1.02  | 0.63888  | 0.844331 | 0.836869 | 0.911376 |
| MmugDNA.2341.1.S1_at    | MmugDNA.2341.1  | 5.68  | 5.78  | 0.04 | 0.02 | -1.07 | 0.011383 | 0.002239 | 0.235384 | 0.069669 |
| MmugDNA.23410.1.S1_at   | MmugDNA.23410.1 | 11.55 | 11.72 | 0.13 | 0.08 | -1.13 | 0.297408 | 0.136049 | 0.633201 | 0.408363 |
| MmugDNA.23411.1.S1_at   | MmugDNA.23411.1 | 3.24  | 3.27  | 0.08 | 0.07 | -1.02 | 0.466845 | 0.430339 | 0.740411 | 0.651374 |
| MmugDNA.23412.1.S1_at   | MmugDNA.23412.1 | 6.2   | 6.32  | 0.2  | 0    | -1.09 | 0.628339 | 0.678499 | 0.830741 | 0.81221  |
| MmugDNA.23412.1.S1_x_at | MmugDNA.23412.1 | 8.17  | 8.2   | 0.15 | 0.12 | -1.02 | 0.470025 | 0.427098 | 0.742104 | 0.649106 |
| MmugDNA.23413.1.S1_at   | MmugDNA.23413.1 | 10.61 | 10.49 | 0.14 | 0.14 | 1.09  | 0.421017 | 0.576598 | 0.712842 | 0.747284 |
| MmugDNA.23415.1.S1_at   | MmugDNA.23415.1 | 9.2   | 8.92  | 0.33 | 0.4  | 1.22  | 0.299532 | 0.360834 | 0.634993 | 0.601938 |
| MmugDNA.23416.1.S1_at   | MmugDNA.23416.1 | 9.04  | 9.28  | 0.49 | 0.45 | -1.18 | 0.537141 | 0.710292 | 0.779831 | 0.831912 |
| MmugDNA.23417.1.S1_at   | MmugDNA.23417.1 | 5.74  | 5.75  | 0.06 | 0.09 | -1.01 | 0.67273  | 0.156739 | 0.853193 | 0.432216 |
| MmugDNA.23418.1.S1_at   | MmugDNA.23418.1 | 7.14  | 7.47  | 0.51 | 0.24 | -1.25 | 0.615036 | 0.796932 | 0.823342 | 0.882822 |
| MmugDNA.23419.1.S1_at   | MmugDNA.23419.1 | 3.8   | 4.25  | 0.41 | 0.13 | -1.37 | 0.396642 | 0.517204 | 0.69713  | 0.709435 |
| MmugDNA.2342.1.S1_at    | MmugDNA.2342.1  | 2.82  | 2.84  | 0.14 | 0.12 | -1.01 | 0.887147 | 0.951514 | 0.954863 | 0.972522 |
| MmugDNA.23420.1.S1_at   | MmugDNA.23420.1 | 4.29  | 4.53  | 0.08 | 0.2  | -1.18 | 0.394393 | 0.320802 | 0.69577  | 0.572849 |
| MmugDNA.23421.1.S1_at   | MmugDNA.23421.1 | 3.95  | 3.86  | 0.05 | 0.15 | 1.06  | 0.575626 | 0.376429 | 0.802428 | 0.614271 |
| MmugDNA.23422.1.S1_at   | MmugDNA.23422.1 | 10.53 | 10.62 | 0.15 | 0.09 | -1.07 | 0.378621 | 0.2082   | 0.68654  | 0.482086 |
| MmugDNA.23426.1.S1_at   | MmugDNA.23426.1 | 3.23  | 3.21  | 0.1  | 0.06 | 1.01  | 0.427353 | 0.588366 | 0.716187 | 0.754874 |
| MmugDNA.23427.1.S1_at   | MmugDNA.23427.1 | 6.77  | 7.5   | 0.28 | 0.14 | -1.66 | 0.012322 | 0.00491  | 0.240894 | 0.097662 |
| MmugDNA.23429.1.S1_at   | MmugDNA.23429.1 | 5.92  | 6.3   | 0.26 | 0.19 | -1.3  | 0.241674 | 0.061705 | 0.593941 | 0.295166 |
| MmugDNA.2343.1.S1_at    | MmugDNA.2343.1  | 3.45  | 3.31  | 0.08 | 0.05 | 1.1   | 0.04151  | 0.077861 | 0.351839 | 0.324099 |
| MmugDNA.23430.1.S1_at   | MmugDNA.23430.1 | 3.23  | 3.17  | 0.13 | 0.2  | 1.04  | 0.66156  | 0.457658 | 0.848148 | 0.670889 |
| MmugDNA.23432.1.S1_at   | MmugDNA.23432.1 | 5.23  | 5.42  | 0.1  | 0.07 | -1.15 | 0.028066 | 0.018516 | 0.309619 | 0.171214 |
| MmugDNA.23433.1.S1_at   | MmugDNA.23433.1 | 4.93  | 3.99  | 0.52 | 0.19 | 1.91  | 0.032074 | 0.06851  | 0.324083 | 0.308262 |
| MmugDNA.23435.1.S1_at   | MmugDNA.23435.1 | 11.78 | 11.78 | 0.22 | 0.54 | -1    | 0.737208 | 0.674317 | 0.887008 | 0.809716 |
| MmugDNA.23437.1.S1_at   | MmugDNA.23437.1 | 6.34  | 6.58  | 0.21 | 0.15 | -1.18 | 0.367484 | 0.28048  | 0.679502 | 0.543671 |
| MmugDNA.23438.1.S1_at   | MmugDNA.23438.1 | 5.09  | 5.38  | 1.23 | 0.32 | -1.22 | 0.895242 | 0.892846 | 0.958083 | 0.93888  |
| MmugDNA.23439.1.S1_at   | MmugDNA.23439.1 | 5.09  | 6.02  | 0.78 | 0.68 | -1.9  | 0.552287 | 0.57916  | 0.789376 | 0.748918 |
| MmugDNA.2344.1.S1_at    | MmugDNA.2344.1  | 5.08  | 5.42  | 0.32 | 0.35 | -1.27 | 0.327944 | 0.580644 | 0.654202 | 0.749827 |
| MmugDNA.23440.1.S1_at   | MmugDNA.23440.1 | 4.14  | 4.08  | 0.04 | 0.24 | 1.04  | 0.583599 | 0.421192 | 0.806671 | 0.644807 |
| MmugDNA.23441.1.S1_at   | MmugDNA.23441.1 | 5.63  | 5.79  | 0.17 | 0.39 | -1.12 | 0.628252 | 0.727904 | 0.830688 | 0.842707 |
| MmugDNA.23443.1.S1_at   | MmugDNA.23443.1 | 5.63  | 5.1   | 0.27 | 0.24 | 1.45  | 0.069058 | 0.074749 | 0.411166 | 0.318471 |
| MmugDNA.23444.1.S1_at   | MmugDNA.23444.1 | 6.75  | 6.26  | 0.83 | 0.72 | 1.4   | 0.317516 | 0.353877 | 0.647938 | 0.596873 |
| MmugDNA.23446.1.S1_at   | MmugDNA.23446.1 | 7.34  | 6.09  | 1.06 | 0.5  | 2.39  | 0.61136  | 0.705828 | 0.821648 | 0.829542 |
| MmugDNA.23447.1.S1_at   | MmugDNA.23447.1 | 3.15  | 3.24  | 0.02 | 0.04 | -1.06 | 0.033103 | 0.091735 | 0.327101 | 0.346977 |
| MmugDNA.23449.1.S1_at   | MmugDNA.23449.1 | 4.15  | 4.1   | 0.15 | 0.12 | 1.04  | 0.561644 | 0.581434 | 0.79493  | 0.750451 |
| MmugDNA.2345.1.S1_at    | MmugDNA.2345.1  | 4.46  | 4.43  | 0.21 | 0.14 | 1.02  | 0.827785 | 0.747354 | 0.930092 | 0.853149 |
| MmugDNA.23450.1.S1_at   | MmugDNA.23450.1 | 4.34  | 3.26  | 1.02 | 0.17 | 2.11  | 0.120642 | 0.077371 | 0.485738 | 0.323177 |
| MmugDNA.23452.1.S1_at   | MmugDNA.23452.1 | 8.94  | 10.13 | 0.14 | 0.3  | -2.28 | 0.002651 | 0.000602 | 0.164386 | 0.041985 |
| MmugDNA.23453.1.S1_at   | MmugDNA.23453.1 | 4.89  | 4.93  | 0.11 | 0.23 | -1.02 | 0.751661 | 0.687975 | 0.893893 | 0.817831 |

|                         |                 |      |       |      |      |       |          |          |          |          |
|-------------------------|-----------------|------|-------|------|------|-------|----------|----------|----------|----------|
| MmugDNA.23454.1.S1_at   | MmugDNA.23454.1 | 9.9  | 10.24 | 0.59 | 0.87 | -1.27 | 0.904473 | 0.030427 | 0.961782 | 0.216377 |
| MmugDNA.23455.1.S1_at   | MmugDNA.23455.1 | 3.47 | 3.45  | 0.1  | 0.05 | 1.01  | 0.597176 | 0.839533 | 0.813431 | 0.90858  |
| MmugDNA.23456.1.S1_at   | MmugDNA.23456.1 | 6.87 | 6.3   | 0.82 | 0.37 | 1.49  | 0.260675 | 0.115355 | 0.607375 | 0.382394 |
| MmugDNA.23457.1.S1_at   | MmugDNA.23457.1 | 4.93 | 4.82  | 0.22 | 0.1  | 1.08  | 0.183042 | 0.083309 | 0.547134 | 0.333375 |
| MmugDNA.23458.1.S1_at   | MmugDNA.23458.1 | 5.95 | 6.17  | 0.22 | 0.6  | -1.16 | 0.588361 | 0.265089 | 0.808931 | 0.531    |
| MmugDNA.23459.1.S1_at   | MmugDNA.23459.1 | 5    | 4.91  | 0.43 | 0.21 | 1.06  | 0.573789 | 0.704042 | 0.801346 | 0.828326 |
| MmugDNA.2346.1.S1_at    | MmugDNA.2346.1  | 4.81 | 5.03  | 0.06 | 0.17 | -1.16 | 0.150321 | 0.211379 | 0.51508  | 0.48553  |
| MmugDNA.23461.1.S1_at   | MmugDNA.23461.1 | 9.73 | 9.73  | 0.15 | 0.6  | 1     | 0.395219 | 0.540985 | 0.696396 | 0.72469  |
| MmugDNA.23462.1.S1_at   | MmugDNA.23462.1 | 4.81 | 4.83  | 0.15 | 0.15 | -1.01 | 0.713553 | 0.618649 | 0.874503 | 0.774185 |
| MmugDNA.23463.1.S1_at   | MmugDNA.23463.1 | 3.77 | 4.1   | 0.11 | 0.23 | -1.26 | 0.085707 | 0.126807 | 0.439704 | 0.397446 |
| MmugDNA.23464.1.S1_at   | MmugDNA.23464.1 | 6.95 | 7.02  | 0.06 | 0.51 | -1.05 | 0.798735 | 0.456725 | 0.916658 | 0.670428 |
| MmugDNA.23465.1.S1_at   | MmugDNA.23465.1 | 9.95 | 9     | 0.2  | 0.32 | 1.93  | 0.018133 | 0.006524 | 0.268961 | 0.10961  |
| MmugDNA.23466.1.S1_at   | MmugDNA.23466.1 | 5.83 | 6     | 0.17 | 0.49 | -1.12 | 0.737623 | 0.466588 | 0.887266 | 0.676398 |
| MmugDNA.23467.1.S1_at   | MmugDNA.23467.1 | 5.78 | 5.83  | 0.41 | 0.58 | -1.04 | 0.946264 | 0.252887 | 0.979359 | 0.521223 |
| MmugDNA.23468.1.S1_at   | MmugDNA.23468.1 | 8.89 | 10.03 | 0.39 | 0.19 | -2.21 | 0.020594 | 0.010765 | 0.27902  | 0.135471 |
| MmugDNA.23469.1.S1_at   | MmugDNA.23469.1 | 5.49 | 6.2   | 0.32 | 0.37 | -1.64 | 0.105204 | 0.282078 | 0.465675 | 0.544937 |
| MmugDNA.23470.1.S1_at   | MmugDNA.23470.1 | 7.6  | 7.84  | 0.15 | 0.38 | -1.18 | 0.172117 | 0.175489 | 0.535422 | 0.452157 |
| MmugDNA.23471.1.S1_at   | MmugDNA.23471.1 | 7.05 | 6.86  | 0.39 | 1.14 | 1.15  | 0.873186 | 0.978489 | 0.94924  | 0.988285 |
| MmugDNA.23472.1.S1_at   | MmugDNA.23472.1 | 8.02 | 9.37  | 0.51 | 0.26 | -2.55 | 0.017863 | 0.010258 | 0.26813  | 0.132655 |
| MmugDNA.23476.1.S1_at   | MmugDNA.23476.1 | 3.62 | 3.67  | 0.07 | 0.12 | -1.04 | 0.833327 | 0.792355 | 0.932336 | 0.880015 |
| MmugDNA.23477.1.S1_at   | MmugDNA.23477.1 | 6.1  | 6.13  | 0.15 | 0.32 | -1.02 | 0.856496 | 0.960592 | 0.94203  | 0.977548 |
| MmugDNA.23478.1.S1_at   | MmugDNA.23478.1 | 3.9  | 4.15  | 0.14 | 0.66 | -1.19 | 0.410218 | 0.130782 | 0.706234 | 0.402959 |
| MmugDNA.23479.1.S1_at   | MmugDNA.23479.1 | 6.43 | 6.45  | 0.33 | 0.42 | -1.01 | 0.669649 | 0.824541 | 0.852235 | 0.89925  |
| MmugDNA.2348.1.S1_at    | MmugDNA.2348.1  | 4.17 | 4.16  | 0.17 | 0.06 | 1.01  | 0.652444 | 0.684127 | 0.843704 | 0.81577  |
| MmugDNA.23480.1.S1_at   | MmugDNA.23480.1 | 6.28 | 6.24  | 0.05 | 0.01 | 1.03  | 0.152063 | 0.188683 | 0.516808 | 0.46461  |
| MmugDNA.23481.1.S1_at   | MmugDNA.23481.1 | 7.93 | 7.97  | 0.14 | 0.14 | -1.03 | 0.814254 | 0.159011 | 0.924743 | 0.435213 |
| MmugDNA.23482.1.S1_at   | MmugDNA.23482.1 | 5.12 | 5.14  | 0.06 | 0.08 | -1.01 | 0.32059  | 0.096033 | 0.649472 | 0.353302 |
| MmugDNA.23482.1.S1_s_at | MmugDNA.23482.1 | 8.1  | 8.77  | 0.18 | 0.3  | -1.59 | 0.063504 | 0.054668 | 0.400654 | 0.279311 |
| MmugDNA.23483.1.S1_at   | MmugDNA.23483.1 | 7.83 | 8.73  | 0.92 | 0.41 | -1.86 | 0.381193 | 0.399851 | 0.687774 | 0.630048 |
| MmugDNA.23484.1.S1_at   | MmugDNA.23484.1 | 5.3  | 4.88  | 0.39 | 0.44 | 1.34  | 0.163304 | 0.175934 | 0.527696 | 0.452486 |
| MmugDNA.23485.1.S1_at   | MmugDNA.23485.1 | 9.92 | 8.78  | 0.2  | 0.24 | 2.21  | 0.00174  | 0.000714 | 0.154452 | 0.044419 |
| MmugDNA.23512.1.S1_s_at | MmugDNA.23512.1 | 4.47 | 4.6   | 0.19 | 0.19 | -1.09 | 0.511763 | 0.338418 | 0.765318 | 0.585432 |
| MmugDNA.23488.1.S1_at   | MmugDNA.23488.1 | 3.31 | 3.29  | 0.28 | 0.12 | 1.01  | 0.801635 | 0.281873 | 0.918156 | 0.544844 |
| MmugDNA.2349.1.S1_at    | MmugDNA.2349.1  | 3.22 | 3.2   | 0.16 | 0.15 | 1.01  | 0.279905 | 0.3948   | 0.621287 | 0.627216 |
| MmugDNA.23490.1.S1_at   | MmugDNA.23490.1 | 5.08 | 4.98  | 0.46 | 0.18 | 1.07  | 0.473308 | 0.528541 | 0.744154 | 0.716664 |
| MmugDNA.23491.1.S1_at   | MmugDNA.23491.1 | 8.12 | 8.24  | 0.28 | 0.39 | -1.09 | 0.599331 | 0.437649 | 0.814562 | 0.656833 |
| MmugDNA.23493.1.S1_at   | MmugDNA.23493.1 | 4.51 | 4.58  | 0.03 | 0.27 | -1.05 | 0.64558  | 0.821302 | 0.840383 | 0.897125 |
| MmugDNA.23494.1.S1_at   | MmugDNA.23494.1 | 5.72 | 5.9   | 0.38 | 0.81 | -1.13 | 0.786666 | 0.338829 | 0.911298 | 0.585883 |
| MmugDNA.23495.1.S1_at   | MmugDNA.23495.1 | 5.55 | 6.02  | 0.28 | 0.44 | -1.38 | 0.09144  | 0.087513 | 0.447175 | 0.340677 |
| MmugDNA.23496.1.S1_at   | MmugDNA.23496.1 | 8.84 | 8.19  | 0.23 | 0.33 | 1.57  | 0.035905 | 0.002819 | 0.338042 | 0.078275 |
| MmugDNA.23497.1.S1_at   | MmugDNA.23497.1 | 8.43 | 9.42  | 0.1  | 0.61 | -1.99 | 0.089402 | 0.100698 | 0.445032 | 0.360078 |

|                         |                 |       |       |      |      |       |          |          |          |          |
|-------------------------|-----------------|-------|-------|------|------|-------|----------|----------|----------|----------|
| MmugDNA.23499.1.S1_at   | MmugDNA.23499.1 | 4.46  | 4.29  | 0.7  | 0.02 | 1.12  | 0.369567 | 0.559987 | 0.680782 | 0.736439 |
| MmugDNA.2350.1.S1_at    | MmugDNA.2350.1  | 6.3   | 6.37  | 0.13 | 0.27 | -1.05 | 0.426441 | 0.307392 | 0.715792 | 0.563638 |
| MmugDNA.23502.1.S1_at   | MmugDNA.23502.1 | 4.33  | 4.51  | 0.82 | 0.11 | -1.13 | 0.499135 | 0.689967 | 0.758916 | 0.819224 |
| MmugDNA.23503.1.S1_at   | MmugDNA.23503.1 | 3.42  | 3.58  | 0.21 | 0.13 | -1.12 | 0.46401  | 0.242399 | 0.739007 | 0.51282  |
| MmugDNA.23504.1.S1_s_at | MmugDNA.23504.1 | 7.6   | 8.14  | 0.77 | 1.97 | -1.46 | 0.947755 | 0.154068 | 0.979992 | 0.428867 |
| MmugDNA.23505.1.S1_at   | MmugDNA.23505.1 | 3.04  | 3.04  | 0.09 | 0.14 | 1     | 0.624594 | 0.870199 | 0.828337 | 0.926372 |
| MmugDNA.23506.1.S1_s_at | MmugDNA.23506.1 | 14.42 | 14.41 | 0.06 | 0.04 | 1.01  | 0.79294  | 0.694422 | 0.914102 | 0.822288 |
| MmugDNA.23507.1.S1_at   | MmugDNA.23507.1 | 4.22  | 4.42  | 0.15 | 0.05 | -1.15 | 0.09657  | 0.130845 | 0.455338 | 0.403037 |
| MmugDNA.23508.1.S1_at   | MmugDNA.23508.1 | 5.23  | 5.37  | 0.35 | 0.11 | -1.1  | 0.996468 | 0.221294 | 0.998564 | 0.494618 |
| MmugDNA.23509.1.S1_at   | MmugDNA.23509.1 | 11.81 | 12.13 | 0.05 | 0.08 | -1.24 | 0.003591 | 0.000758 | 0.179515 | 0.045403 |
| MmugDNA.2351.1.S1_at    | MmugDNA.2351.1  | 5.82  | 5.78  | 0.43 | 0.29 | 1.03  | 0.509791 | 0.268524 | 0.76452  | 0.534123 |
| MmugDNA.23516.1.S1_at   | MmugDNA.23516.1 | 12.97 | 13.14 | 0.09 | 0.21 | -1.13 | 0.756658 | 0.260959 | 0.896628 | 0.527351 |
| MmugDNA.23517.1.S1_at   | MmugDNA.23517.1 | 7.04  | 7.1   | 0.69 | 0.63 | -1.04 | 0.41912  | 0.244297 | 0.711691 | 0.514184 |
| MmugDNA.23518.1.S1_at   | MmugDNA.23518.1 | 7.13  | 6.75  | 1.23 | 0.52 | 1.31  | 0.651587 | 0.866531 | 0.843256 | 0.92415  |
| MmugDNA.23519.1.S1_at   | MmugDNA.23519.1 | 3.24  | 3.03  | 0.11 | 0.16 | 1.15  | 0.383034 | 0.413407 | 0.689068 | 0.639648 |
| MmugDNA.2352.1.S1_at    | MmugDNA.2352.1  | 7.71  | 7.09  | 0.39 | 0.26 | 1.54  | 0.09345  | 0.107393 | 0.45067  | 0.370219 |
| MmugDNA.23520.1.S1_at   | MmugDNA.23520.1 | 6.86  | 7.08  | 0.39 | 0.32 | -1.16 | 0.450418 | 0.177867 | 0.730948 | 0.454181 |
| MmugDNA.23521.1.S1_at   | MmugDNA.23521.1 | 8.43  | 8.31  | 0.27 | 0.53 | 1.09  | 0.731448 | 0.831962 | 0.883821 | 0.90356  |
| MmugDNA.23522.1.S1_at   | MmugDNA.23522.1 | 6.11  | 5.55  | 0.47 | 0.41 | 1.47  | 0.177611 | 0.201894 | 0.541737 | 0.476373 |
| MmugDNA.23524.1.S1_at   | MmugDNA.23524.1 | 5.71  | 5.86  | 0.38 | 0.1  | -1.11 | 0.88864  | 0.725556 | 0.95536  | 0.841059 |
| MmugDNA.23525.1.S1_at   | MmugDNA.23525.1 | 3.99  | 3.89  | 0.33 | 0.17 | 1.07  | 0.428388 | 0.277919 | 0.71683  | 0.541664 |
| MmugDNA.23526.1.S1_at   | MmugDNA.23526.1 | 3.54  | 3.3   | 0.07 | 0.2  | 1.18  | 0.190414 | 0.24996  | 0.553062 | 0.518974 |
| MmugDNA.23527.1.S1_at   | MmugDNA.23527.1 | 4.9   | 4.56  | 0.58 | 0.08 | 1.27  | 0.118486 | 0.083977 | 0.48294  | 0.3349   |
| MmugDNA.23528.1.S1_at   | MmugDNA.23528.1 | 12.37 | 12.35 | 0.21 | 0.28 | 1.01  | 0.745998 | 0.831262 | 0.891243 | 0.903226 |
| MmugDNA.23529.1.S1_at   | MmugDNA.23529.1 | 6.56  | 6.64  | 0.27 | 0.06 | -1.05 | 0.645095 | 0.52801  | 0.840161 | 0.716422 |
| MmugDNA.2353.1.S1_at    | MmugDNA.2353.1  | 5.75  | 5.67  | 0.23 | 0.02 | 1.05  | 0.185293 | 0.152844 | 0.548759 | 0.427654 |
| MmugDNA.23530.1.S1_at   | MmugDNA.23530.1 | 2.97  | 2.93  | 0.1  | 0.13 | 1.03  | 0.751213 | 0.359475 | 0.893649 | 0.600754 |
| MmugDNA.23531.1.S1_at   | MmugDNA.23531.1 | 3.98  | 4.33  | 0.12 | 0.32 | -1.27 | 0.164263 | 0.11888  | 0.528238 | 0.387068 |
| MmugDNA.23533.1.S1_at   | MmugDNA.23533.1 | 5.3   | 5.46  | 0.84 | 0.47 | -1.12 | 0.844188 | 0.41606  | 0.937436 | 0.641342 |
| MmugDNA.23534.1.S1_at   | MmugDNA.23534.1 | 9.85  | 9.57  | 0.22 | 0.29 | 1.21  | 0.333618 | 0.133411 | 0.657695 | 0.405246 |
| MmugDNA.23536.1.S1_at   | MmugDNA.23536.1 | 3.61  | 3.61  | 0.07 | 0.15 | -1    | 0.937806 | 0.366233 | 0.976051 | 0.606013 |
| MmugDNA.23537.1.S1_at   | MmugDNA.23537.1 | 3.2   | 2.99  | 0.26 | 0.13 | 1.15  | 0.302593 | 0.356699 | 0.636976 | 0.598516 |
| MmugDNA.23539.1.S1_at   | MmugDNA.23539.1 | 8.75  | 8.76  | 0.49 | 0.43 | -1.01 | 0.781846 | 0.463637 | 0.908945 | 0.67456  |
| MmugDNA.2354.1.S1_at    | MmugDNA.2354.1  | 4.5   | 4.53  | 0.17 | 0.28 | -1.02 | 0.383612 | 0.516985 | 0.689442 | 0.709346 |
| MmugDNA.23540.1.S1_at   | MmugDNA.23540.1 | 6.28  | 6.26  | 0.19 | 0.14 | 1.01  | 0.826616 | 0.961615 | 0.929552 | 0.978382 |
| MmugDNA.23541.1.S1_at   | MmugDNA.23541.1 | 10.82 | 10.99 | 0.23 | 0.88 | -1.12 | 0.74526  | 0.752311 | 0.891039 | 0.855787 |
| MmugDNA.23543.1.S1_s_at | MmugDNA.23543.1 | 10.51 | 10.88 | 0.21 | 0.36 | -1.29 | 0.110951 | 0.137497 | 0.472762 | 0.410458 |
| MmugDNA.23545.1.S1_at   | MmugDNA.23545.1 | 10.81 | 10.69 | 0.11 | 0.09 | 1.09  | 0.171424 | 0.268299 | 0.535166 | 0.534021 |
| MmugDNA.23546.1.S1_at   | MmugDNA.23546.1 | 2.98  | 2.9   | 0.09 | 0.07 | 1.06  | 0.331781 | 0.360721 | 0.656472 | 0.60179  |
| MmugDNA.23547.1.S1_at   | MmugDNA.23547.1 | 7.67  | 8.53  | 1.55 | 2.35 | -1.81 | 0.888039 | 0.465135 | 0.955006 | 0.675606 |
| MmugDNA.23549.1.S1_at   | MmugDNA.23549.1 | 4.4   | 4.37  | 0.32 | 0.12 | 1.02  | 0.950346 | 0.908028 | 0.981318 | 0.947889 |

|                         |                 |       |       |      |      |        |          |          |          |          |
|-------------------------|-----------------|-------|-------|------|------|--------|----------|----------|----------|----------|
| MmugDNA.2355.1.S1_at    | MmugDNA.2355.1  | 3.36  | 3.25  | 0.09 | 0.04 | 1.07   | 0.231385 | 0.284803 | 0.587372 | 0.546966 |
| MmugDNA.23550.1.S1_at   | MmugDNA.23550.1 | 4.75  | 4.83  | 0.21 | 0.11 | -1.06  | 0.752215 | 0.622564 | 0.894237 | 0.777066 |
| MmugDNA.23551.1.S1_at   | MmugDNA.23551.1 | 6.56  | 6.9   | 0.12 | 0.08 | -1.27  | 0.049749 | 0.037837 | 0.37199  | 0.238912 |
| MmugDNA.23552.1.S1_at   | MmugDNA.23552.1 | 4.23  | 4.2   | 0.26 | 0.05 | 1.02   | 0.565209 | 0.766047 | 0.796922 | 0.864085 |
| MmugDNA.23553.1.S1_at   | MmugDNA.23553.1 | 8     | 7.09  | 0.22 | 0.33 | 1.88   | 0.019307 | 0.006406 | 0.273655 | 0.108767 |
| MmugDNA.23554.1.S1_at   | MmugDNA.23554.1 | 6.89  | 6.74  | 0.3  | 0.05 | 1.11   | 0.539686 | 0.458188 | 0.781249 | 0.671077 |
| MmugDNA.23555.1.S1_at   | MmugDNA.23555.1 | 6.05  | 6.93  | 0.21 | 0.47 | -1.85  | 0.056417 | 0.01751  | 0.386477 | 0.167516 |
| MmugDNA.23557.1.S1_at   | MmugDNA.23557.1 | 5.39  | 5.34  | 0.08 | 0.03 | 1.04   | 0.376371 | 0.003355 | 0.685198 | 0.083359 |
| MmugDNA.23558.1.S1_at   | MmugDNA.23558.1 | 7.55  | 7.43  | 0.19 | 0.27 | 1.09   | 0.42743  | 0.546831 | 0.716222 | 0.728203 |
| MmugDNA.2356.1.S1_at    | MmugDNA.2356.1  | 4.03  | 3.46  | 0.08 | 0.73 | 1.48   | 0.615782 | 0.743617 | 0.82378  | 0.851428 |
| MmugDNA.23562.1.S1_at   | MmugDNA.23562.1 | 5.72  | 9.67  | 1.62 | 2.74 | -15.48 | 0.316509 | 0.284172 | 0.647482 | 0.546381 |
| MmugDNA.23563.1.S1_at   | MmugDNA.23563.1 | 5.65  | 5.67  | 0.04 | 0.19 | -1.01  | 0.632616 | 0.340952 | 0.833252 | 0.587051 |
| MmugDNA.23565.1.S1_at   | MmugDNA.23565.1 | 3.62  | 3.84  | 0.09 | 0.12 | -1.17  | 0.136881 | 0.027678 | 0.504055 | 0.207762 |
| MmugDNA.23566.1.S1_at   | MmugDNA.23566.1 | 7     | 7.13  | 0.12 | 0.12 | -1.09  | 0.222863 | 0.196451 | 0.581379 | 0.471483 |
| MmugDNA.23544.1.S1_s_at | MmugDNA.23544.1 | 6.82  | 11.76 | 2.41 | 3.7  | -30.7  | 0.386314 | 0.339132 | 0.691258 | 0.585891 |
| MmugDNA.23568.1.S1_at   | MmugDNA.23568.1 | 4.4   | 4.18  | 0.19 | 0.14 | 1.16   | 0.246802 | 0.407751 | 0.597932 | 0.635158 |
| MmugDNA.23569.1.S1_at   | MmugDNA.23569.1 | 5.45  | 5.39  | 0.33 | 0.18 | 1.04   | 0.279574 | 0.210071 | 0.621136 | 0.483853 |
| MmugDNA.2357.1.S1_at    | MmugDNA.2357.1  | 3.6   | 3.43  | 0.06 | 0.36 | 1.13   | 0.982437 | 0.104938 | 0.993449 | 0.366498 |
| MmugDNA.23570.1.S1_at   | MmugDNA.23570.1 | 5.47  | 5.61  | 0.04 | 0.24 | -1.11  | 0.279244 | 0.466013 | 0.620979 | 0.676083 |
| MmugDNA.23571.1.S1_at   | MmugDNA.23571.1 | 4.38  | 3.79  | 0.06 | 0.13 | 1.5    | 0.003572 | 0.005712 | 0.179515 | 0.104201 |
| MmugDNA.23573.1.S1_at   | MmugDNA.23573.1 | 11.46 | 11.45 | 0.07 | 0.21 | 1.01   | 0.249497 | 0.206514 | 0.600196 | 0.480571 |
| MmugDNA.23574.1.S1_at   | MmugDNA.23574.1 | 9.69  | 9     | 0.28 | 0.39 | 1.62   | 0.051363 | 0.018529 | 0.376001 | 0.171243 |
| MmugDNA.23576.1.S1_at   | MmugDNA.23576.1 | 11.18 | 10.29 | 0.21 | 0.15 | 1.85   | 0.002859 | 0.000495 | 0.168913 | 0.038955 |
| MmugDNA.23578.1.S1_at   | MmugDNA.23578.1 | 4.98  | 4.14  | 1.12 | 0.65 | 1.78   | 0.241246 | 0.256096 | 0.593801 | 0.524057 |
| MmugDNA.23579.1.S1_at   | MmugDNA.23579.1 | 7.63  | 7.82  | 0.08 | 0.34 | -1.15  | 0.227184 | 0.313809 | 0.585031 | 0.568083 |
| MmugDNA.2358.1.S1_at    | MmugDNA.2358.1  | 4.56  | 4.64  | 0.88 | 0.07 | -1.06  | 0.64371  | 0.717296 | 0.839585 | 0.836345 |
| MmugDNA.23580.1.S1_at   | MmugDNA.23580.1 | 11.61 | 11.53 | 0.2  | 0.81 | 1.05   | 0.967642 | 0.716205 | 0.987896 | 0.835515 |
| MmugDNA.23585.1.S1_at   | MmugDNA.23585.1 | 2.89  | 2.96  | 0.08 | 0.17 | -1.05  | 0.624198 | 0.173314 | 0.828178 | 0.449791 |
| MmugDNA.23587.1.S1_at   | MmugDNA.23587.1 | 4.67  | 4.92  | 0.39 | 0.65 | -1.19  | 0.466498 | 0.589933 | 0.740215 | 0.756007 |
| MmugDNA.23589.1.S1_at   | MmugDNA.23589.1 | 8.97  | 8.86  | 0.21 | 0.6  | 1.08   | 0.880271 | 0.905758 | 0.951822 | 0.946695 |
| MmugDNA.23590.1.S1_at   | MmugDNA.23590.1 | 5.46  | 5.72  | 0.06 | 0.08 | -1.2   | 0.009139 | 0.00299  | 0.22233  | 0.079958 |
| MmugDNA.23591.1.S1_at   | MmugDNA.23591.1 | 5.37  | 5.35  | 0.23 | 0.13 | 1.01   | 0.559148 | 0.180427 | 0.793647 | 0.457077 |
| MmugDNA.23594.1.S1_at   | MmugDNA.23594.1 | 5.23  | 5.14  | 0.4  | 0.32 | 1.06   | 0.832173 | 0.938675 | 0.931993 | 0.96511  |
| MmugDNA.23595.1.S1_at   | MmugDNA.23595.1 | 8.67  | 7.87  | 1.01 | 0.31 | 1.75   | 0.105076 | 0.135496 | 0.465541 | 0.407591 |
| MmugDNA.23597.1.S1_at   | MmugDNA.23597.1 | 3.36  | 3.41  | 0.06 | 0.15 | -1.04  | 0.550888 | 0.605298 | 0.788228 | 0.765071 |
| MmugDNA.23598.1.S1_at   | MmugDNA.23598.1 | 5.95  | 5.42  | 0.31 | 0.14 | 1.44   | 0.078665 | 0.07815  | 0.428609 | 0.324634 |
| MmugDNA.23599.1.S1_at   | MmugDNA.23599.1 | 9.39  | 9.15  | 0.3  | 0.32 | 1.18   | 0.616965 | 0.511428 | 0.824363 | 0.705549 |
| MmugDNA.236.1.S1_at     | MmugDNA.236.1   | 3.5   | 3.28  | 0.22 | 0.34 | 1.16   | 0.822557 | 0.310167 | 0.927767 | 0.565379 |
| MmugDNA.2360.1.S1_at    | MmugDNA.2360.1  | 8.22  | 8.09  | 0.45 | 1.03 | 1.1    | 0.530666 | 0.593553 | 0.776893 | 0.758329 |
| MmugDNA.23600.1.S1_at   | MmugDNA.23600.1 | 8.22  | 9.91  | 0.35 | 0.38 | -3.22  | 0.003984 | 0.000874 | 0.181715 | 0.047471 |
| MmugDNA.23601.1.S1_at   | MmugDNA.23601.1 | 6.63  | 7.32  | 0.33 | 1.07 | -1.61  | 0.319856 | 0.383997 | 0.649205 | 0.619866 |



|                         |                 |       |       |      |      |       |          |          |          |          |
|-------------------------|-----------------|-------|-------|------|------|-------|----------|----------|----------|----------|
| MmugDNA.23602.1.S1_at   | MmugDNA.23602.1 | 10.69 | 10.47 | 0.07 | 0.39 | 1.16  | 0.296023 | 0.396806 | 0.632176 | 0.628452 |
| MmugDNA.23604.1.S1_at   | MmugDNA.23604.1 | 6.68  | 6.73  | 0.13 | 0.1  | -1.03 | 0.260434 | 0.103549 | 0.607292 | 0.364346 |
| MmugDNA.13635.1.S1_at   | MmugDNA.13635.1 | 8.87  | 8.44  | 0.44 | 0.15 | 1.34  | 0.692484 | 0.850439 | 0.863401 | 0.914942 |
| MmugDNA.13635.1.S1_s_at | MmugDNA.13635.1 | 5.21  | 5.2   | 0.05 | 0.27 | 1     | 0.467589 | 0.56487  | 0.740736 | 0.739484 |
| MmugDNA.23606.1.S1_at   | MmugDNA.23606.1 | 3.63  | 4.06  | 0.24 | 0.16 | -1.34 | 0.089538 | 0.087934 | 0.445161 | 0.341336 |
| MmugDNA.23608.1.S1_at   | MmugDNA.23608.1 | 5.92  | 6.12  | 0.13 | 0.17 | -1.15 | 0.276809 | 0.346562 | 0.618989 | 0.591427 |
| MmugDNA.2361.1.S1_at    | MmugDNA.2361.1  | 7.12  | 7.97  | 0.55 | 0.27 | -1.8  | 0.092172 | 0.139443 | 0.448698 | 0.412743 |
| MmugDNA.23610.1.S1_at   | MmugDNA.23610.1 | 11.3  | 12.01 | 0.1  | 0.37 | -1.64 | 0.024763 | 0.004522 | 0.296308 | 0.093974 |
| MmugDNA.23611.1.S1_at   | MmugDNA.23611.1 | 4.25  | 7.36  | 0.83 | 1.97 | -8.64 | 0.109376 | 0.059919 | 0.470811 | 0.291408 |
| MmugDNA.23612.1.S1_at   | MmugDNA.23612.1 | 10    | 9.18  | 0.26 | 0.19 | 1.77  | 0.006275 | 0.001611 | 0.1975   | 0.060665 |
| MmugDNA.23613.1.S1_at   | MmugDNA.23613.1 | 5.78  | 7.36  | 0.53 | 1.04 | -2.99 | 0.143072 | 0.155132 | 0.510004 | 0.430275 |
| MmugDNA.23614.1.S1_at   | MmugDNA.23614.1 | 8.92  | 9.96  | 0.34 | 0.31 | -2.06 | 0.017523 | 0.010078 | 0.267445 | 0.13168  |
| MmugDNA.23616.1.S1_at   | MmugDNA.23616.1 | 10.73 | 10.82 | 0.14 | 0.49 | -1.07 | 0.261858 | 0.334353 | 0.60844  | 0.582352 |
| MmugDNA.23617.1.S1_at   | MmugDNA.23617.1 | 4.43  | 4.29  | 0.2  | 0.07 | 1.1   | 0.463489 | 0.692068 | 0.738845 | 0.82091  |
| MmugDNA.23618.1.S1_s_at | MmugDNA.23618.1 | 5.46  | 5.55  | 0.37 | 0.31 | -1.07 | 0.431806 | 0.584483 | 0.718638 | 0.752435 |
| MmugDNA.2362.1.S1_at    | MmugDNA.2362.1  | 3.49  | 3.63  | 0.2  | 0.03 | -1.11 | 0.277564 | 0.344254 | 0.619758 | 0.589762 |
| MmugDNA.23620.1.S1_at   | MmugDNA.23620.1 | 3.4   | 3.47  | 0.14 | 0.14 | -1.05 | 0.111223 | 0.179918 | 0.473262 | 0.456453 |
| MmugDNA.23621.1.S1_at   | MmugDNA.23621.1 | 7.17  | 8.11  | 0.44 | 0.35 | -1.91 | 0.105319 | 0.21824  | 0.465877 | 0.491764 |
| MmugDNA.23622.1.S1_at   | MmugDNA.23622.1 | 7.39  | 8.17  | 0.42 | 0.15 | -1.72 | 0.017626 | 0.006206 | 0.267454 | 0.106829 |
| MmugDNA.23623.1.S1_at   | MmugDNA.23623.1 | 4.05  | 4.08  | 0.04 | 0.03 | -1.02 | 0.155288 | 0.679281 | 0.520164 | 0.81275  |
| MmugDNA.23624.1.S1_at   | MmugDNA.23624.1 | 9.79  | 9.49  | 0.59 | 1.63 | 1.23  | 0.257028 | 0.332988 | 0.60447  | 0.581326 |
| MmugDNA.23625.1.S1_at   | MmugDNA.23625.1 | 3.74  | 3.4   | 0.92 | 0.04 | 1.26  | 0.231206 | 0.242094 | 0.587369 | 0.512652 |
| MmugDNA.23626.1.S1_at   | MmugDNA.23626.1 | 4.27  | 4.12  | 0.14 | 0.29 | 1.12  | 0.504992 | 0.716266 | 0.761548 | 0.835531 |
| MmugDNA.23627.1.S1_at   | MmugDNA.23627.1 | 11.38 | 10.12 | 0.1  | 0.37 | 2.38  | 0.011287 | 0.005382 | 0.235353 | 0.101199 |
| MmugDNA.23629.1.S1_at   | MmugDNA.23629.1 | 4.1   | 4.17  | 0.11 | 0.21 | -1.05 | 0.378371 | 0.463153 | 0.686437 | 0.674261 |
| MmugDNA.2363.1.S1_at    | MmugDNA.2363.1  | 9.61  | 8.35  | 0.02 | 0.91 | 2.4   | 0.075212 | 0.066984 | 0.422122 | 0.304846 |
| MmugDNA.23631.1.S1_at   | MmugDNA.23631.1 | 3.87  | 4.28  | 0.1  | 0.25 | -1.32 | 0.153462 | 0.177942 | 0.517857 | 0.454286 |
| MmugDNA.23632.1.S1_at   | MmugDNA.23632.1 | 4.81  | 4.81  | 0.05 | 0.07 | 1     | 0.23455  | 0.403375 | 0.588797 | 0.632083 |
| MmugDNA.23633.1.S1_at   | MmugDNA.23633.1 | 8.1   | 7.63  | 0.24 | 0.16 | 1.39  | 0.060946 | 0.070292 | 0.394705 | 0.31135  |
| MmugDNA.23635.1.S1_at   | MmugDNA.23635.1 | 3.08  | 3.03  | 0.12 | 0.1  | 1.04  | 0.431991 | 0.641374 | 0.718806 | 0.789506 |
| MmugDNA.23636.1.S1_at   | MmugDNA.23636.1 | 4.99  | 5.01  | 0.17 | 0.12 | -1.01 | 0.917603 | 0.125583 | 0.967956 | 0.396226 |
| MmugDNA.23637.1.S1_at   | MmugDNA.23637.1 | 9.11  | 9.72  | 0.33 | 0.29 | -1.53 | 0.058758 | 0.026024 | 0.390921 | 0.202199 |
| MmugDNA.23638.1.S1_at   | MmugDNA.23638.1 | 4.04  | 4.18  | 0.35 | 0.1  | -1.11 | 0.931035 | 0.955953 | 0.97337  | 0.975016 |
| MmugDNA.23640.1.S1_at   | MmugDNA.23640.1 | 6.85  | 7.67  | 0.57 | 0.06 | -1.77 | 0.21992  | 0.19296  | 0.579133 | 0.468455 |
| MmugDNA.23643.1.S1_at   | MmugDNA.23643.1 | 5.14  | 5.29  | 0.26 | 0.15 | -1.11 | 0.909279 | 0.99557  | 0.964061 | 0.997264 |
| MmugDNA.23644.1.S1_at   | MmugDNA.23644.1 | 11.91 | 11.88 | 0.18 | 0.08 | 1.02  | 0.317847 | 0.487521 | 0.64802  | 0.690559 |
| MmugDNA.12021.1.S1_s_at | MmugDNA.12021.1 | 3.22  | 3.4   | 0.16 | 0.15 | -1.13 | 0.440114 | 0.624232 | 0.724095 | 0.778505 |
| MmugDNA.23648.1.S1_at   | MmugDNA.23648.1 | 6.92  | 7.02  | 0.03 | 0.09 | -1.07 | 0.134991 | 0.422312 | 0.501995 | 0.645653 |
| MmugDNA.23649.1.S1_at   | MmugDNA.23649.1 | 6.03  | 6.29  | 0.35 | 0.67 | -1.19 | 0.389987 | 0.53241  | 0.693398 | 0.719052 |
| MmugDNA.2365.1.S1_at    | MmugDNA.2365.1  | 5.12  | 4.63  | 0.1  | 0.13 | 1.41  | 0.010237 | 0.004822 | 0.228255 | 0.096904 |
| MmugDNA.23650.1.S1_at   | MmugDNA.23650.1 | 7.66  | 7.59  | 0.19 | 0.02 | 1.05  | 0.778736 | 0.933171 | 0.907681 | 0.962032 |

|                         |                 |       |       |      |      |       |          |          |          |          |
|-------------------------|-----------------|-------|-------|------|------|-------|----------|----------|----------|----------|
| MmugDNA.23651.1.S1_at   | MmugDNA.23651.1 | 4.16  | 4.15  | 0.19 | 0.05 | 1.01  | 0.917801 | 0.887739 | 0.968032 | 0.936023 |
| MmugDNA.23652.1.S1_at   | MmugDNA.23652.1 | 12.34 | 12.35 | 0.2  | 0.03 | -1    | 0.733543 | 0.293638 | 0.885148 | 0.553638 |
| MmugDNA.23653.1.S1_at   | MmugDNA.23653.1 | 5.85  | 5.84  | 0.15 | 0.14 | 1     | 0.51152  | 0.707242 | 0.765318 | 0.830225 |
| MmugDNA.23654.1.S1_at   | MmugDNA.23654.1 | 6.14  | 3.75  | 0.81 | 0.18 | 5.26  | 0.010006 | 0.018237 | 0.226899 | 0.169844 |
| MmugDNA.23655.1.S1_at   | MmugDNA.23655.1 | 6.07  | 6.24  | 0.23 | 0.19 | -1.13 | 0.468951 | 0.518432 | 0.741339 | 0.710391 |
| MmugDNA.23656.1.S1_at   | MmugDNA.23656.1 | 2.61  | 2.66  | 0.03 | 0.08 | -1.04 | 0.14943  | 0.18796  | 0.514001 | 0.464078 |
| MmugDNA.23657.1.S1_at   | MmugDNA.23657.1 | 2.76  | 2.66  | 0.06 | 0.11 | 1.07  | 0.951696 | 0.282695 | 0.981942 | 0.545446 |
| MmugDNA.23658.1.S1_at   | MmugDNA.23658.1 | 3.46  | 3.35  | 0.08 | 0.1  | 1.08  | 0.501933 | 0.526676 | 0.76024  | 0.715627 |
| MmugDNA.23659.1.S1_at   | MmugDNA.23659.1 | 7.42  | 7.37  | 0.21 | 0.03 | 1.04  | 0.876167 | 0.318942 | 0.950338 | 0.571532 |
| MmugDNA.2366.1.S1_at    | MmugDNA.2366.1  | 4.7   | 5.12  | 0.22 | 0.2  | -1.33 | 0.08737  | 0.124359 | 0.441738 | 0.394826 |
| MmugDNA.23661.1.S1_at   | MmugDNA.23661.1 | 4.15  | 4.22  | 0    | 0.12 | -1.05 | 0.367976 | 0.212255 | 0.679739 | 0.486151 |
| MmugDNA.23663.1.S1_at   | MmugDNA.23663.1 | 4.29  | 4.23  | 0.29 | 0.24 | 1.04  | 0.792142 | 0.936462 | 0.913702 | 0.964171 |
| MmugDNA.23664.1.S1_at   | MmugDNA.23664.1 | 9.21  | 9.12  | 0.57 | 0.23 | 1.06  | 0.249474 | 0.121957 | 0.600196 | 0.391384 |
| MmugDNA.23666.1.S1_at   | MmugDNA.23666.1 | 5.18  | 5.2   | 0.29 | 0.26 | -1.01 | 0.551041 | 0.548675 | 0.788383 | 0.729318 |
| MmugDNA.23667.1.S1_at   | MmugDNA.23667.1 | 5.11  | 5.19  | 0.22 | 0.11 | -1.06 | 0.538641 | 0.704044 | 0.7807   | 0.828326 |
| MmugDNA.23669.1.S1_at   | MmugDNA.23669.1 | 3.15  | 3.15  | 0.12 | 0.22 | 1     | 0.246747 | 0.296837 | 0.59791  | 0.5558   |
| MmugDNA.2367.1.S1_at    | MmugDNA.2367.1  | 6.52  | 6.49  | 0.16 | 0.16 | 1.02  | 0.982238 | 0.825307 | 0.993449 | 0.899641 |
| MmugDNA.23671.1.S1_at   | MmugDNA.23671.1 | 4.27  | 3.41  | 0.41 | 0.31 | 1.82  | 0.127644 | 0.094305 | 0.493916 | 0.350889 |
| MmugDNA.23672.1.S1_at   | MmugDNA.23672.1 | 6.1   | 5.64  | 0.27 | 0.74 | 1.38  | 0.70292  | 0.70068  | 0.868924 | 0.826376 |
| MmugDNA.23673.1.S1_at   | MmugDNA.23673.1 | 4.68  | 4.68  | 0.14 | 0.07 | -1    | 0.467875 | 0.747459 | 0.740845 | 0.853149 |
| MmugDNA.23674.1.S1_at   | MmugDNA.23674.1 | 4.73  | 5.01  | 2.32 | 0.84 | -1.22 | 0.711564 | 0.643691 | 0.873642 | 0.791108 |
| MmugDNA.23675.1.S1_at   | MmugDNA.23675.1 | 5.98  | 6.68  | 1.06 | 0.49 | -1.63 | 0.877954 | 0.887798 | 0.951036 | 0.936048 |
| MmugDNA.23677.1.S1_at   | MmugDNA.23677.1 | 3.79  | 3.8   | 0.07 | 0.02 | -1.01 | 0.677177 | 0.032982 | 0.855385 | 0.224867 |
| MmugDNA.23679.1.S1_at   | MmugDNA.23679.1 | 3.65  | 3.67  | 0.5  | 0.13 | -1.02 | 0.347396 | 0.337517 | 0.666415 | 0.584716 |
| MmugDNA.2368.1.S1_at    | MmugDNA.2368.1  | 5.28  | 5.52  | 0.55 | 0.28 | -1.18 | 0.801198 | 0.268448 | 0.918016 | 0.534123 |
| MmugDNA.23680.1.S1_at   | MmugDNA.23680.1 | 3.95  | 4.25  | 0.2  | 0.1  | -1.23 | 0.071408 | 0.098769 | 0.415249 | 0.356875 |
| MmugDNA.23681.1.S1_at   | MmugDNA.23681.1 | 6.35  | 5.81  | 0.57 | 0.12 | 1.45  | 0.136338 | 0.161213 | 0.503458 | 0.437386 |
| MmugDNA.23682.1.S1_at   | MmugDNA.23682.1 | 6.4   | 6.21  | 0.08 | 0.4  | 1.14  | 0.875813 | 0.219468 | 0.950257 | 0.493156 |
| MmugDNA.23683.1.S1_at   | MmugDNA.23683.1 | 10.96 | 11.63 | 0.3  | 0.19 | -1.59 | 0.050974 | 0.058127 | 0.375705 | 0.287755 |
| MmugDNA.23684.1.S1_at   | MmugDNA.23684.1 | 9.17  | 9.7   | 1.16 | 0.59 | -1.45 | 0.599547 | 0.555323 | 0.814615 | 0.733767 |
| MmugDNA.23684.1.S1_x_at | MmugDNA.23684.1 | 8.89  | 9.45  | 1.11 | 0.66 | -1.48 | 0.633144 | 0.588377 | 0.833528 | 0.754874 |
| MmugDNA.23685.1.S1_at   | MmugDNA.23685.1 | 3.95  | 3.75  | 0.16 | 0.28 | 1.15  | 0.140921 | 0.127245 | 0.508448 | 0.397935 |
| MmugDNA.23686.1.S1_at   | MmugDNA.23686.1 | 8.18  | 8.05  | 0.04 | 0.2  | 1.1   | 0.326675 | 0.291803 | 0.653184 | 0.552063 |
| MmugDNA.23688.1.S1_at   | MmugDNA.23688.1 | 4.96  | 4.94  | 0.19 | 0.11 | 1.01  | 0.388909 | 0.226603 | 0.692804 | 0.499067 |
| MmugDNA.2369.1.S1_at    | MmugDNA.2369.1  | 4.32  | 4.45  | 0.26 | 0.06 | -1.09 | 0.484843 | 0.181925 | 0.750701 | 0.458456 |
| MmugDNA.23690.1.S1_at   | MmugDNA.23690.1 | 9.78  | 9.77  | 0.21 | 0.16 | 1.01  | 0.982211 | 0.452931 | 0.993449 | 0.667359 |
| MmugDNA.23691.1.S1_at   | MmugDNA.23691.1 | 4.8   | 4.85  | 0.14 | 0.35 | -1.04 | 0.882153 | 0.983794 | 0.952688 | 0.990974 |
| MmugDNA.23692.1.S1_at   | MmugDNA.23692.1 | 5.18  | 5.22  | 0.03 | 0.03 | -1.02 | 0.293897 | 0.847093 | 0.631033 | 0.91309  |
| MmugDNA.23696.1.S1_at   | MmugDNA.23696.1 | 4     | 4.11  | 0.01 | 0.2  | -1.08 | 0.396002 | 0.606279 | 0.696706 | 0.765727 |
| MmugDNA.23697.1.S1_at   | MmugDNA.23697.1 | 4.91  | 5.04  | 0.12 | 0.12 | -1.1  | 0.557867 | 0.013105 | 0.792872 | 0.147251 |
| MmugDNA.23698.1.S1_a_at | MmugDNA.23698.1 | 5.35  | 5.3   | 0.15 | 0.13 | 1.04  | 0.763091 | 0.366215 | 0.900082 | 0.606003 |

|                         |                 |       |       |      |      |       |          |          |          |          |
|-------------------------|-----------------|-------|-------|------|------|-------|----------|----------|----------|----------|
| MmugDNA.23698.1.S1_at   | MmugDNA.23698.1 | 3.39  | 3.48  | 0.01 | 0.19 | -1.06 | 0.275165 | 0.300059 | 0.617694 | 0.558262 |
| MmugDNA.23699.1.S1_at   | MmugDNA.23699.1 | 5.23  | 5.41  | 0.02 | 0.14 | -1.13 | 0.290342 | 0.057496 | 0.628091 | 0.285856 |
| MmugDNA.2370.1.S1_at    | MmugDNA.2370.1  | 4.34  | 3.29  | 0.32 | 0.34 | 2.07  | 0.036166 | 0.036749 | 0.339036 | 0.236287 |
| MmugDNA.23700.1.S1_at   | MmugDNA.23700.1 | 4     | 3.95  | 0.22 | 0.14 | 1.03  | 0.821572 | 0.267867 | 0.927464 | 0.533607 |
| MmugDNA.23701.1.S1_at   | MmugDNA.23701.1 | 10.29 | 11.3  | 0.36 | 1.01 | -2.01 | 0.445087 | 0.494236 | 0.72741  | 0.694758 |
| MmugDNA.23703.1.S1_at   | MmugDNA.23703.1 | 4.24  | 4.02  | 0.6  | 0.22 | 1.17  | 0.223913 | 0.445966 | 0.582336 | 0.662623 |
| MmugDNA.23705.1.S1_at   | MmugDNA.23705.1 | 3.04  | 3.17  | 0.12 | 0.09 | -1.1  | 0.214898 | 0.171428 | 0.57547  | 0.447886 |
| MmugDNA.23706.1.S1_at   | MmugDNA.23706.1 | 8.47  | 8.43  | 0.11 | 0.1  | 1.03  | 0.287213 | 0.005291 | 0.625848 | 0.100738 |
| MmugDNA.23706.1.S1_s_at | MmugDNA.23706.1 | 9.49  | 8.98  | 0.25 | 0.15 | 1.43  | 0.142434 | 0.031345 | 0.509648 | 0.219013 |
| MmugDNA.23707.1.S1_at   | MmugDNA.23707.1 | 9.63  | 7.88  | 0.06 | 1.24 | 3.37  | 0.073263 | 0.029155 | 0.418483 | 0.212767 |
| MmugDNA.23708.1.S1_at   | MmugDNA.23708.1 | 5.86  | 6.05  | 0.1  | 0.3  | -1.14 | 0.939723 | 0.948964 | 0.977013 | 0.97078  |
| MmugDNA.2371.1.S1_at    | MmugDNA.2371.1  | 8.58  | 8.23  | 0.58 | 0.37 | 1.28  | 0.221285 | 0.192492 | 0.580161 | 0.467952 |
| MmugDNA.23710.1.S1_at   | MmugDNA.23710.1 | 8.12  | 7.38  | 0.25 | 0.36 | 1.67  | 0.088164 | 0.042371 | 0.442584 | 0.250522 |
| MmugDNA.23711.1.S1_at   | MmugDNA.23711.1 | 3.96  | 3.61  | 0.25 | 0.09 | 1.27  | 0.085718 | 0.043556 | 0.439704 | 0.253261 |
| MmugDNA.23712.1.S1_at   | MmugDNA.23712.1 | 4.98  | 4.83  | 0.36 | 0.24 | 1.11  | 0.428327 | 0.602523 | 0.716796 | 0.763461 |
| MmugDNA.23713.1.S1_at   | MmugDNA.23713.1 | 7.31  | 7.32  | 0.15 | 0.07 | -1    | 0.570117 | 0.144282 | 0.799365 | 0.418196 |
| MmugDNA.23714.1.S1_at   | MmugDNA.23714.1 | 7.9   | 7.58  | 0.2  | 0.08 | 1.25  | 0.073881 | 0.127353 | 0.419443 | 0.398184 |
| MmugDNA.23715.1.S1_at   | MmugDNA.23715.1 | 7.27  | 7.38  | 0.03 | 0.1  | -1.08 | 0.129716 | 0.230467 | 0.495908 | 0.502232 |
| MmugDNA.23716.1.S1_at   | MmugDNA.23716.1 | 4.67  | 3.62  | 0.07 | 0.2  | 2.07  | 0.00179  | 0.000289 | 0.154452 | 0.034892 |
| MmugDNA.23717.1.S1_at   | MmugDNA.23717.1 | 5.55  | 5.13  | 0.82 | 0.45 | 1.34  | 0.452831 | 0.656167 | 0.732217 | 0.798919 |
| MmugDNA.2372.1.S1_at    | MmugDNA.2372.1  | 4.28  | 4.32  | 0.23 | 0.42 | -1.02 | 0.641795 | 0.218214 | 0.838548 | 0.491764 |
| MmugDNA.23720.1.S1_at   | MmugDNA.23720.1 | 4.92  | 7.07  | 1.3  | 2.3  | -4.47 | 0.471072 | 0.32586  | 0.742883 | 0.57614  |
| MmugDNA.23721.1.S1_at   | MmugDNA.23721.1 | 5.11  | 5.07  | 0.29 | 0.18 | 1.03  | 0.46426  | 0.119604 | 0.739156 | 0.388247 |
| MmugDNA.23723.1.S1_at   | MmugDNA.23723.1 | 3.8   | 3.94  | 0.04 | 0.13 | -1.09 | 0.151581 | 0.10195  | 0.516191 | 0.361984 |
| MmugDNA.23724.1.S1_at   | MmugDNA.23724.1 | 8.8   | 8.04  | 0.04 | 0.26 | 1.69  | 0.015121 | 0.008131 | 0.257529 | 0.11972  |
| MmugDNA.23726.1.S1_at   | MmugDNA.23726.1 | 5.8   | 5.62  | 0.18 | 0.07 | 1.13  | 0.106183 | 0.080266 | 0.466831 | 0.327882 |
| MmugDNA.23727.1.S1_at   | MmugDNA.23727.1 | 6.51  | 5.95  | 0.31 | 0.28 | 1.47  | 0.085562 | 0.109647 | 0.43949  | 0.373629 |
| MmugDNA.23728.1.S1_at   | MmugDNA.23728.1 | 9.67  | 10.42 | 0.63 | 0.44 | -1.68 | 0.059954 | 0.035752 | 0.393081 | 0.233437 |
| MmugDNA.23729.1.S1_at   | MmugDNA.23729.1 | 6.12  | 5.83  | 0.22 | 0.15 | 1.22  | 0.125324 | 0.267728 | 0.49131  | 0.533525 |
| MmugDNA.2373.1.S1_at    | MmugDNA.2373.1  | 7.53  | 7.27  | 0.44 | 1.24 | 1.19  | 0.967676 | 0.761702 | 0.987896 | 0.861459 |
| MmugDNA.23730.1.S1_at   | MmugDNA.23730.1 | 5.53  | 5.12  | 0.3  | 0.18 | 1.33  | 0.102927 | 0.21163  | 0.46254  | 0.485681 |
| MmugDNA.23731.1.S1_at   | MmugDNA.23731.1 | 8.91  | 8.77  | 0.22 | 0.57 | 1.1   | 0.873445 | 0.947789 | 0.94926  | 0.970347 |
| MmugDNA.23732.1.S1_at   | MmugDNA.23732.1 | 5.25  | 4     | 0.37 | 0.12 | 2.38  | 0.011886 | 0.020857 | 0.238637 | 0.181218 |
| MmugDNA.23733.1.S1_at   | MmugDNA.23733.1 | 7.88  | 7.19  | 0.52 | 0.26 | 1.61  | 0.140871 | 0.184779 | 0.508448 | 0.460661 |
| MmugDNA.23735.1.S1_at   | MmugDNA.23735.1 | 3.66  | 3.58  | 0.06 | 0.29 | 1.05  | 0.71198  | 0.696148 | 0.873777 | 0.823455 |
| MmugDNA.23736.1.S1_at   | MmugDNA.23736.1 | 4.18  | 4.35  | 0.11 | 0.04 | -1.13 | 0.2609   | 0.403184 | 0.60749  | 0.631984 |
| MmugDNA.23737.1.S1_at   | MmugDNA.23737.1 | 4.92  | 5.08  | 0.48 | 0.29 | -1.12 | 0.897407 | 0.512397 | 0.95917  | 0.706278 |
| MmugDNA.23738.1.S1_at   | MmugDNA.23738.1 | 4.93  | 5.59  | 0.12 | 0.51 | -1.58 | 0.121793 | 0.135725 | 0.486739 | 0.407917 |
| MmugDNA.23739.1.S1_at   | MmugDNA.23739.1 | 4.13  | 7.25  | 1.41 | 1.83 | -8.71 | 0.173409 | 0.132351 | 0.537006 | 0.404294 |
| MmugDNA.2374.1.S1_at    | MmugDNA.2374.1  | 3.49  | 3.7   | 0.11 | 0.13 | -1.16 | 0.254173 | 0.343675 | 0.602339 | 0.589384 |
| MmugDNA.23742.1.S1_at   | MmugDNA.23742.1 | 5.98  | 6.19  | 0.16 | 0.11 | -1.16 | 0.056439 | 0.070921 | 0.386477 | 0.312444 |

|                         |                 |       |       |      |      |       |          |          |          |          |
|-------------------------|-----------------|-------|-------|------|------|-------|----------|----------|----------|----------|
| MmugDNA.23743.1.S1_at   | MmugDNA.23743.1 | 11.54 | 11.15 | 0.31 | 0.19 | 1.32  | 0.193335 | 0.248191 | 0.5568   | 0.517574 |
| MmugDNA.23744.1.S1_at   | MmugDNA.23744.1 | 3.76  | 3.69  | 0.18 | 0.05 | 1.04  | 0.469062 | 0.37825  | 0.741428 | 0.615438 |
| MmugDNA.23745.1.S1_at   | MmugDNA.23745.1 | 11.41 | 11.44 | 0.18 | 0.08 | -1.02 | 0.474035 | 0.578284 | 0.744809 | 0.748372 |
| MmugDNA.23746.1.S1_at   | MmugDNA.23746.1 | 4.22  | 3.96  | 0.22 | 0.16 | 1.2   | 0.255002 | 0.293853 | 0.603068 | 0.553861 |
| MmugDNA.23747.1.S1_at   | MmugDNA.23747.1 | 5.18  | 4.98  | 0.16 | 0.73 | 1.15  | 0.946357 | 0.618196 | 0.979389 | 0.77393  |
| MmugDNA.23748.1.S1_at   | MmugDNA.23748.1 | 4.8   | 4.55  | 0.6  | 0.04 | 1.18  | 0.315419 | 0.342275 | 0.64668  | 0.588397 |
| MmugDNA.23749.1.S1_at   | MmugDNA.23749.1 | 5.35  | 5.62  | 0.09 | 0.02 | -1.21 | 0.007459 | 0.002805 | 0.208525 | 0.078098 |
| MmugDNA.23750.1.S1_at   | MmugDNA.23750.1 | 12.77 | 12.29 | 0.3  | 0.7  | 1.39  | 0.18222  | 0.225599 | 0.546557 | 0.498155 |
| MmugDNA.23751.1.S1_at   | MmugDNA.23751.1 | 5.12  | 5.98  | 0.48 | 0.2  | -1.83 | 0.052009 | 0.035122 | 0.376949 | 0.231645 |
| MmugDNA.23752.1.S1_at   | MmugDNA.23752.1 | 10.49 | 9.51  | 0.09 | 0.32 | 1.97  | 0.007661 | 0.0029   | 0.211069 | 0.079107 |
| MmugDNA.23753.1.S1_at   | MmugDNA.23753.1 | 5.07  | 4.87  | 0.1  | 0.18 | 1.15  | 0.148352 | 0.155929 | 0.513732 | 0.431331 |
| MmugDNA.23754.1.S1_at   | MmugDNA.23754.1 | 4.38  | 5.05  | 0.67 | 0.41 | -1.58 | 0.319578 | 0.231276 | 0.649068 | 0.502954 |
| MmugDNA.23755.1.S1_at   | MmugDNA.23755.1 | 8.13  | 6.63  | 0.28 | 0.36 | 2.84  | 0.007951 | 0.053849 | 0.214568 | 0.277598 |
| MmugDNA.23756.1.S1_at   | MmugDNA.23756.1 | 11.21 | 11.17 | 0.06 | 0.4  | 1.03  | 0.906991 | 0.150445 | 0.963023 | 0.424978 |
| MmugDNA.23759.1.S1_at   | MmugDNA.23759.1 | 6.31  | 6.16  | 0.2  | 0.12 | 1.11  | 0.29847  | 0.222783 | 0.633981 | 0.495724 |
| MmugDNA.23760.1.S1_at   | MmugDNA.23760.1 | 13.07 | 13.02 | 0.08 | 0.03 | 1.04  | 0.137278 | 0.204991 | 0.504356 | 0.479296 |
| MmugDNA.23761.1.S1_at   | MmugDNA.23761.1 | 10.25 | 8.79  | 0.15 | 0.14 | 2.75  | 0.000212 | 0.000129 | 0.120316 | 0.029087 |
| MmugDNA.23762.1.S1_at   | MmugDNA.23762.1 | 5.67  | 7.98  | 0.67 | 0.83 | -4.95 | 0.014265 | 0.012669 | 0.25187  | 0.145097 |
| MmugDNA.23763.1.S1_at   | MmugDNA.23763.1 | 4.92  | 4.04  | 0.93 | 1.06 | 1.84  | 0.381774 | 0.371764 | 0.688164 | 0.610541 |
| MmugDNA.23764.1.S1_at   | MmugDNA.23764.1 | 12.31 | 11.81 | 0.15 | 0.06 | 1.41  | 0.004115 | 0.000942 | 0.181739 | 0.049026 |
| MmugDNA.23766.1.S1_at   | MmugDNA.23766.1 | 9.84  | 9.04  | 0.2  | 1.26 | 1.74  | 0.102621 | 0.10612  | 0.462485 | 0.368498 |
| MmugDNA.23767.1.S1_at   | MmugDNA.23767.1 | 4.96  | 3.57  | 0.16 | 0.98 | 2.62  | 0.222414 | 0.235984 | 0.580951 | 0.507056 |
| MmugDNA.37120.1.S1_s_at | MmugDNA.37120.1 | 6.96  | 6.94  | 0.45 | 0.34 | 1.01  | 0.305448 | 0.416188 | 0.639223 | 0.641398 |
| MmugDNA.23769.1.S1_at   | MmugDNA.23769.1 | 6.72  | 6.25  | 0.49 | 0.23 | 1.39  | 0.191276 | 0.263765 | 0.554198 | 0.530066 |
| MmugDNA.2377.1.S1_at    | MmugDNA.2377.1  | 6.71  | 6.64  | 0.13 | 0.05 | 1.05  | 0.319036 | 0.296495 | 0.648688 | 0.555528 |
| MmugDNA.23770.1.S1_at   | MmugDNA.23770.1 | 3.78  | 3.97  | 0.32 | 0.17 | -1.14 | 0.532865 | 0.749799 | 0.777862 | 0.854601 |
| MmugDNA.23773.1.S1_at   | MmugDNA.23773.1 | 8.9   | 8.62  | 0.13 | 0.53 | 1.22  | 0.440215 | 0.552566 | 0.724158 | 0.73184  |
| MmugDNA.23774.1.S1_at   | MmugDNA.23774.1 | 3.99  | 4.04  | 0.19 | 0.08 | -1.03 | 0.69625  | 0.219317 | 0.86516  | 0.493094 |
| MmugDNA.23775.1.S1_at   | MmugDNA.23775.1 | 3.64  | 2.79  | 1.05 | 0.27 | 1.79  | 0.207761 | 0.162589 | 0.569822 | 0.43872  |
| MmugDNA.23776.1.S1_at   | MmugDNA.23776.1 | 5.56  | 5.06  | 0.16 | 0.49 | 1.41  | 0.387299 | 0.529805 | 0.691895 | 0.717498 |
| MmugDNA.23777.1.S1_at   | MmugDNA.23777.1 | 6.93  | 7.8   | 0.41 | 0.95 | -1.83 | 0.351119 | 0.439264 | 0.669018 | 0.658025 |
| MmugDNA.23778.1.S1_at   | MmugDNA.23778.1 | 3.29  | 3.13  | 0.06 | 0.31 | 1.11  | 0.959581 | 0.992745 | 0.984651 | 0.995715 |
| MmugDNA.23779.1.S1_at   | MmugDNA.23779.1 | 5.75  | 5.07  | 0.21 | 0.18 | 1.6   | 0.012373 | 0.020762 | 0.240921 | 0.180781 |
| MmugDNA.2378.1.S1_at    | MmugDNA.2378.1  | 8.6   | 8.15  | 0.18 | 0.11 | 1.37  | 0.059374 | 0.048024 | 0.392105 | 0.264118 |
| MmugDNA.23780.1.S1_at   | MmugDNA.23780.1 | 5.79  | 5.6   | 0.13 | 0.96 | 1.14  | 0.64927  | 0.26382  | 0.842381 | 0.530086 |
| MmugDNA.23782.1.S1_at   | MmugDNA.23782.1 | 5.31  | 5.54  | 0.11 | 0.15 | -1.18 | 0.074306 | 0.204971 | 0.419963 | 0.479296 |
| MmugDNA.23783.1.S1_at   | MmugDNA.23783.1 | 3.84  | 4.03  | 0.05 | 0    | -1.14 | 0.003774 | 0.012057 | 0.179914 | 0.142044 |
| MmugDNA.23784.1.S1_at   | MmugDNA.23784.1 | 4.97  | 4.92  | 0.06 | 0.2  | 1.03  | 0.883203 | 0.349644 | 0.952984 | 0.593541 |
| MmugDNA.23785.1.S1_at   | MmugDNA.23785.1 | 2.82  | 2.86  | 0.22 | 0.07 | -1.03 | 0.944444 | 0.429629 | 0.978798 | 0.650973 |
| MmugDNA.23786.1.S1_at   | MmugDNA.23786.1 | 3.98  | 3.84  | 0.28 | 0.02 | 1.1   | 0.463605 | 0.526409 | 0.738895 | 0.715557 |
| MmugDNA.23787.1.S1_at   | MmugDNA.23787.1 | 4.81  | 5.17  | 0.12 | 0.24 | -1.29 | 0.129503 | 0.084716 | 0.495744 | 0.336196 |

|                         |                 |       |       |      |      |       |          |          |          |          |
|-------------------------|-----------------|-------|-------|------|------|-------|----------|----------|----------|----------|
| MmugDNA.23789.1.S1_at   | MmugDNA.23789.1 | 3.78  | 3.52  | 0.21 | 0.11 | 1.19  | 0.053472 | 0.042505 | 0.380257 | 0.250786 |
| MmugDNA.2379.1.S1_at    | MmugDNA.2379.1  | 10.9  | 10.2  | 0.17 | 0.43 | 1.62  | 0.021303 | 0.00783  | 0.282524 | 0.117929 |
| MmugDNA.23791.1.S1_s_at | MmugDNA.23791.1 | 10.98 | 10.92 | 0.31 | 0.66 | 1.04  | 0.352986 | 0.423659 | 0.669964 | 0.646464 |
| MmugDNA.23794.1.S1_at   | MmugDNA.23794.1 | 2.76  | 2.65  | 0.12 | 0.06 | 1.08  | 0.591055 | 0.538617 | 0.810224 | 0.723301 |
| MmugDNA.23795.1.S1_at   | MmugDNA.23795.1 | 6.22  | 6.26  | 0.23 | 0.27 | -1.02 | 0.797561 | 0.886717 | 0.91611  | 0.935519 |
| MmugDNA.23796.1.S1_at   | MmugDNA.23796.1 | 6.11  | 7.09  | 0.52 | 0.36 | -1.97 | 0.163019 | 0.091422 | 0.527385 | 0.34639  |
| MmugDNA.23797.1.S1_at   | MmugDNA.23797.1 | 8.8   | 8.66  | 0.13 | 0.13 | 1.1   | 0.597701 | 0.095068 | 0.813655 | 0.352124 |
| MmugDNA.23798.1.S1_at   | MmugDNA.23798.1 | 5.85  | 6.29  | 0.15 | 0.24 | -1.36 | 0.070913 | 0.06185  | 0.414673 | 0.295524 |
| MmugDNA.23799.1.S1_at   | MmugDNA.23799.1 | 4.53  | 4.23  | 0.29 | 0.02 | 1.23  | 0.348103 | 0.46953  | 0.666985 | 0.678282 |
| MmugDNA.2380.1.S1_at    | MmugDNA.2380.1  | 3.66  | 3.92  | 0.73 | 0.43 | -1.19 | 0.989809 | 0.98311  | 0.996368 | 0.990726 |
| MmugDNA.23800.1.S1_at   | MmugDNA.23800.1 | 3.07  | 2.81  | 0.21 | 0.07 | 1.2   | 0.323086 | 0.689953 | 0.651295 | 0.819224 |
| MmugDNA.23801.1.S1_at   | MmugDNA.23801.1 | 3.96  | 4.2   | 0.03 | 0.12 | -1.18 | 0.056686 | 0.084507 | 0.386838 | 0.335901 |
| MmugDNA.23802.1.S1_at   | MmugDNA.23802.1 | 3.82  | 3.63  | 0.23 | 0.13 | 1.14  | 0.180417 | 0.209973 | 0.544726 | 0.483744 |
| MmugDNA.23803.1.S1_at   | MmugDNA.23803.1 | 12.91 | 12.66 | 0.09 | 0.13 | 1.19  | 0.045593 | 0.031427 | 0.36131  | 0.219107 |
| MmugDNA.23804.1.S1_at   | MmugDNA.23804.1 | 2.98  | 3.09  | 0.06 | 0.05 | -1.08 | 0.230405 | 0.451803 | 0.587222 | 0.66662  |
| MmugDNA.23805.1.S1_at   | MmugDNA.23805.1 | 12.22 | 12.42 | 0.1  | 0.33 | -1.15 | 0.348706 | 0.112208 | 0.667209 | 0.377537 |
| MmugDNA.23805.1.S1_x_at | MmugDNA.23805.1 | 12.21 | 12.36 | 0.11 | 0.32 | -1.11 | 0.339925 | 0.098222 | 0.661567 | 0.356262 |
| MmugDNA.23806.1.S1_at   | MmugDNA.23806.1 | 5.28  | 5.28  | 0.04 | 0.22 | 1     | 0.309839 | 0.152678 | 0.641784 | 0.427505 |
| MmugDNA.23807.1.S1_at   | MmugDNA.23807.1 | 4.32  | 4.67  | 0.23 | 0.21 | -1.28 | 0.461625 | 0.342479 | 0.737765 | 0.588536 |
| MmugDNA.23808.1.S1_at   | MmugDNA.23808.1 | 3.38  | 3.39  | 0.1  | 0.29 | -1.01 | 0.545608 | 0.365283 | 0.785051 | 0.605413 |
| MmugDNA.23809.1.S1_at   | MmugDNA.23809.1 | 2.82  | 2.88  | 0.19 | 0.28 | -1.04 | 0.80502  | 0.592522 | 0.919921 | 0.757844 |
| MmugDNA.2381.1.S1_at    | MmugDNA.2381.1  | 10.02 | 9.5   | 0.17 | 0.2  | 1.43  | 0.029046 | 0.01239  | 0.312556 | 0.144023 |
| MmugDNA.23810.1.S1_at   | MmugDNA.23810.1 | 3.06  | 3.22  | 0.19 | 0.4  | -1.12 | 0.225518 | 0.309317 | 0.583621 | 0.564912 |
| MmugDNA.23811.1.S1_at   | MmugDNA.23811.1 | 9.4   | 9.56  | 0.27 | 0.52 | -1.12 | 0.473036 | 0.438366 | 0.744128 | 0.65735  |
| MmugDNA.23813.1.S1_at   | MmugDNA.23813.1 | 5     | 4.81  | 0.49 | 0.04 | 1.14  | 0.497933 | 0.66944  | 0.758109 | 0.806626 |
| MmugDNA.23814.1.S1_at   | MmugDNA.23814.1 | 7.71  | 7.79  | 0.43 | 0.06 | -1.05 | 0.756908 | 0.906032 | 0.896832 | 0.946832 |
| MmugDNA.23815.1.S1_at   | MmugDNA.23815.1 | 9.99  | 9.34  | 1.76 | 0.49 | 1.56  | 0.141878 | 0.273416 | 0.509205 | 0.537863 |
| MmugDNA.23816.1.S1_at   | MmugDNA.23816.1 | 8.52  | 7.25  | 0.54 | 0.24 | 2.42  | 0.022769 | 0.015302 | 0.288168 | 0.157071 |
| MmugDNA.23818.1.S1_at   | MmugDNA.23818.1 | 2.97  | 2.96  | 0.4  | 0.13 | 1     | 0.568806 | 0.767756 | 0.798884 | 0.865182 |
| MmugDNA.23819.1.S1_at   | MmugDNA.23819.1 | 11.27 | 10.98 | 0.35 | 0.61 | 1.23  | 0.178182 | 0.217727 | 0.542428 | 0.491309 |
| MmugDNA.2382.1.S1_at    | MmugDNA.2382.1  | 4.72  | 4.74  | 0.1  | 0.07 | -1.01 | 0.887352 | 0.021104 | 0.954863 | 0.181869 |
| MmugDNA.23820.1.S1_at   | MmugDNA.23820.1 | 6.84  | 6.51  | 0.33 | 0.41 | 1.26  | 0.36962  | 0.268684 | 0.680787 | 0.534138 |
| MmugDNA.23821.1.S1_at   | MmugDNA.23821.1 | 4.77  | 5.22  | 0.19 | 0.26 | -1.37 | 0.273125 | 0.102083 | 0.616618 | 0.362122 |
| MmugDNA.23822.1.S1_s_at | MmugDNA.23822.1 | 7.83  | 8.01  | 0    | 0.24 | -1.13 | 0.309492 | 0.329627 | 0.641555 | 0.578813 |
| MmugDNA.23823.1.S1_at   | MmugDNA.23823.1 | 5.78  | 5.87  | 0.04 | 0.46 | -1.07 | 0.650174 | 0.818102 | 0.842727 | 0.89509  |
| MmugDNA.23825.1.S1_at   | MmugDNA.23825.1 | 13.57 | 13.6  | 0.02 | 0.09 | -1.02 | 0.560929 | 0.068476 | 0.794511 | 0.308214 |
| MmugDNA.23826.1.S1_at   | MmugDNA.23826.1 | 3.5   | 3.71  | 0.04 | 0.14 | -1.16 | 0.080836 | 0.08554  | 0.431352 | 0.337567 |
| MmugDNA.23827.1.S1_at   | MmugDNA.23827.1 | 13.55 | 13.23 | 0.07 | 0.82 | 1.25  | 0.171001 | 0.12274  | 0.534989 | 0.392729 |
| MmugDNA.23828.1.S1_at   | MmugDNA.23828.1 | 4.73  | 4.66  | 0.45 | 0.22 | 1.05  | 0.642503 | 0.294215 | 0.838763 | 0.554004 |
| MmugDNA.23829.1.S1_at   | MmugDNA.23829.1 | 6.59  | 6.22  | 0.1  | 0.49 | 1.29  | 0.336539 | 0.576555 | 0.659517 | 0.747267 |
| MmugDNA.2383.1.S1_x_at  | MmugDNA.2383.1  | 7.9   | 8.04  | 0.84 | 0.15 | -1.11 | 0.487645 | 0.496875 | 0.752231 | 0.696265 |

|                         |                 |       |       |      |      |       |          |          |          |          |
|-------------------------|-----------------|-------|-------|------|------|-------|----------|----------|----------|----------|
| MmugDNA.23830.1.S1_at   | MmugDNA.23830.1 | 8.16  | 7.33  | 0.36 | 0.63 | 1.78  | 0.179622 | 0.157342 | 0.543821 | 0.432821 |
| MmugDNA.23831.1.S1_at   | MmugDNA.23831.1 | 6.05  | 5.82  | 0.14 | 0.18 | 1.17  | 0.079284 | 0.058494 | 0.429178 | 0.288569 |
| MmugDNA.23832.1.S1_at   | MmugDNA.23832.1 | 3.68  | 3.64  | 0.84 | 0.07 | 1.02  | 0.351272 | 0.369108 | 0.669117 | 0.608618 |
| MmugDNA.23834.1.S1_at   | MmugDNA.23834.1 | 4.26  | 3.83  | 0.24 | 0.13 | 1.34  | 0.078869 | 0.077142 | 0.428609 | 0.322685 |
| MmugDNA.23835.1.S1_at   | MmugDNA.23835.1 | 7.05  | 6.55  | 0.95 | 0.36 | 1.41  | 0.293559 | 0.330794 | 0.6307   | 0.579563 |
| MmugDNA.23836.1.S1_at   | MmugDNA.23836.1 | 4.9   | 4.86  | 0.17 | 0.08 | 1.03  | 0.484978 | 0.238188 | 0.750701 | 0.508821 |
| MmugDNA.23837.1.S1_at   | MmugDNA.23837.1 | 3.23  | 3.2   | 0.07 | 0.06 | 1.02  | 0.124536 | 0.11796  | 0.490508 | 0.385858 |
| MmugDNA.23838.1.S1_at   | MmugDNA.23838.1 | 5.46  | 5.4   | 0.14 | 0.16 | 1.04  | 0.871435 | 0.978156 | 0.948511 | 0.988066 |
| MmugDNA.23839.1.S1_at   | MmugDNA.23839.1 | 9.5   | 9.13  | 0.09 | 0.38 | 1.3   | 0.142729 | 0.080262 | 0.509765 | 0.327882 |
| MmugDNA.2384.1.S1_at    | MmugDNA.2384.1  | 9.65  | 9.75  | 0.11 | 0.11 | -1.07 | 0.329598 | 0.330875 | 0.655218 | 0.57958  |
| MmugDNA.23840.1.S1_at   | MmugDNA.23840.1 | 5.52  | 5.52  | 0.04 | 0    | 1     | 0.373901 | 0.734999 | 0.683245 | 0.846622 |
| MmugDNA.23841.1.S1_at   | MmugDNA.23841.1 | 3.54  | 3.54  | 0.23 | 0.07 | -1    | 0.442927 | 0.620185 | 0.725962 | 0.77525  |
| MmugDNA.23842.1.S1_at   | MmugDNA.23842.1 | 5.03  | 5.27  | 0.77 | 0.13 | -1.18 | 0.654396 | 0.394872 | 0.844586 | 0.627216 |
| MmugDNA.23843.1.S1_at   | MmugDNA.23843.1 | 11.44 | 11.19 | 0.22 | 0.2  | 1.19  | 0.211177 | 0.332988 | 0.571977 | 0.581326 |
| MmugDNA.23844.1.S1_at   | MmugDNA.23844.1 | 3.62  | 3.61  | 0.26 | 0.16 | 1.01  | 0.716603 | 0.833602 | 0.875506 | 0.904597 |
| MmugDNA.23845.1.S1_at   | MmugDNA.23845.1 | 4.67  | 4.51  | 0.35 | 0.26 | 1.12  | 0.73365  | 0.6781   | 0.885206 | 0.811973 |
| MmugDNA.23846.1.S1_at   | MmugDNA.23846.1 | 12.68 | 12.72 | 0.12 | 0.06 | -1.03 | 0.206812 | 0.080571 | 0.568816 | 0.328327 |
| MmugDNA.23847.1.S1_at   | MmugDNA.23847.1 | 11.01 | 11.68 | 0.1  | 0.13 | -1.59 | 0.001885 | 0.001179 | 0.155636 | 0.05381  |
| MmugDNA.23848.1.S1_at   | MmugDNA.23848.1 | 3.54  | 3.33  | 0.07 | 0.18 | 1.15  | 0.098352 | 0.089019 | 0.458095 | 0.342876 |
| MmugDNA.23849.1.S1_at   | MmugDNA.23849.1 | 8.9   | 8.66  | 0.1  | 0.64 | 1.18  | 0.72886  | 0.637663 | 0.882265 | 0.787067 |
| MmugDNA.2385.1.S1_at    | MmugDNA.2385.1  | 4.59  | 4.15  | 0.05 | 0.22 | 1.35  | 0.080059 | 0.212142 | 0.430204 | 0.486036 |
| MmugDNA.23850.1.S1_at   | MmugDNA.23850.1 | 8.96  | 9.53  | 0.36 | 0.22 | -1.48 | 0.057306 | 0.046623 | 0.387873 | 0.260458 |
| MmugDNA.23851.1.S1_at   | MmugDNA.23851.1 | 5.34  | 5.28  | 0.19 | 0.3  | 1.04  | 0.66485  | 0.414815 | 0.849728 | 0.640456 |
| MmugDNA.23852.1.S1_at   | MmugDNA.23852.1 | 6.99  | 6.11  | 0.72 | 0.49 | 1.85  | 0.114616 | 0.079355 | 0.477912 | 0.326697 |
| MmugDNA.23853.1.S1_at   | MmugDNA.23853.1 | 6.54  | 6.51  | 0.17 | 0.22 | 1.02  | 0.346762 | 0.597154 | 0.666045 | 0.760102 |
| MmugDNA.23855.1.S1_at   | MmugDNA.23855.1 | 2.87  | 2.76  | 0.15 | 0.11 | 1.08  | 0.371231 | 0.30323  | 0.681905 | 0.560731 |
| MmugDNA.23856.1.S1_at   | MmugDNA.23856.1 | 9.45  | 10.8  | 0.37 | 0.29 | -2.55 | 0.004803 | 0.001077 | 0.184674 | 0.051912 |
| MmugDNA.23857.1.S1_at   | MmugDNA.23857.1 | 12.59 | 12.63 | 0.11 | 0.29 | -1.03 | 0.74563  | 0.218371 | 0.891179 | 0.491929 |
| MmugDNA.23858.1.S1_at   | MmugDNA.23858.1 | 9.67  | 9.24  | 0.25 | 0.2  | 1.35  | 0.065975 | 0.083672 | 0.405613 | 0.334346 |
| MmugDNA.23859.1.S1_at   | MmugDNA.23859.1 | 10.73 | 10.06 | 0.11 | 0.12 | 1.59  | 0.001614 | 0.000781 | 0.152612 | 0.045664 |
| MmugDNA.2386.1.S1_at    | MmugDNA.2386.1  | 5.06  | 4.95  | 0.18 | 0.41 | 1.08  | 0.994867 | 0.874093 | 0.998209 | 0.928468 |
| MmugDNA.23860.1.S1_at   | MmugDNA.23860.1 | 8.29  | 7.75  | 0.26 | 0.51 | 1.46  | 0.448787 | 0.502896 | 0.729823 | 0.700417 |
| MmugDNA.23861.1.S1_at   | MmugDNA.23861.1 | 4.07  | 5.15  | 0.22 | 0.25 | -2.11 | 0.003369 | 0.001299 | 0.177484 | 0.055585 |
| MmugDNA.23861.1.S1_s_at | MmugDNA.23861.1 | 6.22  | 7.52  | 0.56 | 0.23 | -2.47 | 0.009214 | 0.002908 | 0.222983 | 0.079157 |
| MmugDNA.23863.1.S1_at   | MmugDNA.23863.1 | 5.5   | 5.76  | 1.34 | 0.79 | -1.2  | 0.371657 | 0.423318 | 0.682352 | 0.646277 |
| MmugDNA.23864.1.S1_at   | MmugDNA.23864.1 | 6.33  | 5.93  | 0.62 | 0.4  | 1.32  | 0.244061 | 0.408757 | 0.595777 | 0.6359   |
| MmugDNA.23865.1.S1_at   | MmugDNA.23865.1 | 5.79  | 6.03  | 0.2  | 0.23 | -1.18 | 0.122946 | 0.526065 | 0.488394 | 0.715374 |
| MmugDNA.23866.1.S1_at   | MmugDNA.23866.1 | 4.55  | 4.48  | 0.27 | 0.29 | 1.06  | 0.877104 | 0.199687 | 0.95073  | 0.474335 |
| MmugDNA.23867.1.S1_at   | MmugDNA.23867.1 | 5.93  | 6.5   | 0.63 | 0.21 | -1.48 | 0.466138 | 0.605274 | 0.740195 | 0.765059 |
| MmugDNA.23868.1.S1_at   | MmugDNA.23868.1 | 7.59  | 7.56  | 0.27 | 0.09 | 1.02  | 0.879473 | 0.823207 | 0.951533 | 0.89837  |
| MmugDNA.23869.1.S1_at   | MmugDNA.23869.1 | 4.88  | 4.91  | 0.15 | 0.19 | -1.02 | 0.66802  | 0.540939 | 0.851396 | 0.724649 |

|                         |                 |       |       |      |      |       |          |          |          |          |
|-------------------------|-----------------|-------|-------|------|------|-------|----------|----------|----------|----------|
| MmugDNA.2387.1.S1_at    | MmugDNA.2387.1  | 2.8   | 2.76  | 0.11 | 0.03 | 1.03  | 0.416788 | 0.881172 | 0.710179 | 0.932188 |
| MmugDNA.23870.1.S1_at   | MmugDNA.23870.1 | 6.02  | 6.32  | 0.17 | 0.09 | -1.23 | 0.06886  | 0.021212 | 0.410654 | 0.182364 |
| MmugDNA.23871.1.S1_at   | MmugDNA.23871.1 | 3.9   | 3.98  | 0.04 | 0.05 | -1.06 | 0.239656 | 0.706093 | 0.592634 | 0.829633 |
| MmugDNA.23872.1.S1_at   | MmugDNA.23872.1 | 4.04  | 3.46  | 0.42 | 0.06 | 1.5   | 0.072482 | 0.039263 | 0.417038 | 0.243333 |
| MmugDNA.23873.1.S1_at   | MmugDNA.23873.1 | 10.15 | 9.97  | 0.09 | 0.29 | 1.13  | 0.168304 | 0.091348 | 0.532617 | 0.346281 |
| MmugDNA.23874.1.S1_at   | MmugDNA.23874.1 | 4.74  | 4.04  | 0.28 | 0.27 | 1.63  | 0.073715 | 0.14446  | 0.419243 | 0.418323 |
| MmugDNA.23875.1.S1_at   | MmugDNA.23875.1 | 3.65  | 3.62  | 0.08 | 0.13 | 1.03  | 0.412866 | 0.137885 | 0.708123 | 0.410846 |
| MmugDNA.39181.1.S1_at   | MmugDNA.39181.1 | 3.85  | 3.91  | 0.18 | 0.1  | -1.04 | 0.979101 | 0.986804 | 0.992315 | 0.992556 |
| MmugDNA.39181.1.S1_s_at | MmugDNA.39181.1 | 4.23  | 4.14  | 0.15 | 0.13 | 1.06  | 0.567758 | 0.090314 | 0.798292 | 0.3447   |
| MmugDNA.23877.1.S1_at   | MmugDNA.23877.1 | 5.46  | 5.47  | 0.04 | 0.16 | -1    | 0.860111 | 0.955355 | 0.943524 | 0.974645 |
| MmugDNA.23878.1.S1_at   | MmugDNA.23878.1 | 6.06  | 6.89  | 0.23 | 0.09 | -1.77 | 0.004378 | 0.002443 | 0.183061 | 0.073201 |
| MmugDNA.2388.1.S1_at    | MmugDNA.2388.1  | 3.83  | 4.08  | 0.16 | 0.22 | -1.2  | 0.164528 | 0.196663 | 0.528451 | 0.471715 |
| MmugDNA.23880.1.S1_at   | MmugDNA.23880.1 | 3.88  | 3.87  | 0.07 | 0.06 | 1     | 0.562248 | 0.686602 | 0.795227 | 0.81711  |
| MmugDNA.23881.1.S1_at   | MmugDNA.23881.1 | 6     | 6.12  | 0.31 | 0.17 | -1.08 | 0.770418 | 0.291408 | 0.90333  | 0.551823 |
| MmugDNA.23882.1.S1_at   | MmugDNA.23882.1 | 4.6   | 4.58  | 0.07 | 0.05 | 1.01  | 0.794565 | 0.891967 | 0.914727 | 0.938422 |
| MmugDNA.23883.1.S1_at   | MmugDNA.23883.1 | 5.42  | 5.62  | 0.27 | 0.36 | -1.15 | 0.218957 | 0.225294 | 0.578361 | 0.497892 |
| MmugDNA.23884.1.S1_at   | MmugDNA.23884.1 | 3.13  | 3.14  | 0.16 | 0.13 | -1    | 0.848435 | 0.972831 | 0.939211 | 0.985352 |
| MmugDNA.23885.1.S1_at   | MmugDNA.23885.1 | 7.67  | 7.6   | 0.38 | 0.49 | 1.05  | 0.805697 | 0.894549 | 0.920322 | 0.939811 |
| MmugDNA.23886.1.S1_at   | MmugDNA.23886.1 | 9.51  | 9.47  | 0.27 | 0.21 | 1.03  | 0.792673 | 0.639828 | 0.914011 | 0.788487 |
| MmugDNA.23888.1.S1_at   | MmugDNA.23888.1 | 3.96  | 3.31  | 0.29 | 0.66 | 1.57  | 0.531448 | 0.301734 | 0.777199 | 0.559671 |
| MmugDNA.2389.1.S1_at    | MmugDNA.2389.1  | 9.97  | 10.07 | 0.06 | 0.21 | -1.07 | 0.695641 | 0.478744 | 0.864996 | 0.684706 |
| MmugDNA.23890.1.S1_at   | MmugDNA.23890.1 | 5.02  | 4.57  | 0.59 | 0.32 | 1.37  | 0.282106 | 0.34432  | 0.622553 | 0.589762 |
| MmugDNA.23891.1.S1_at   | MmugDNA.23891.1 | 8.74  | 7.98  | 0.26 | 0.61 | 1.7   | 0.336271 | 0.212831 | 0.659402 | 0.486774 |
| MmugDNA.23892.1.S1_at   | MmugDNA.23892.1 | 11.91 | 11.63 | 0.05 | 0.38 | 1.22  | 0.348645 | 0.42604  | 0.667173 | 0.648241 |
| MmugDNA.23892.1.S1_s_at | MmugDNA.23892.1 | 10.99 | 10.61 | 0.08 | 0.52 | 1.3   | 0.422274 | 0.596888 | 0.71345  | 0.759909 |
| MmugDNA.23893.1.S1_at   | MmugDNA.23893.1 | 3.94  | 4.29  | 0.13 | 0.11 | -1.27 | 0.052207 | 0.147042 | 0.377155 | 0.421162 |
| MmugDNA.23895.1.S1_at   | MmugDNA.23895.1 | 4.39  | 4.57  | 0.67 | 0.24 | -1.14 | 0.794926 | 0.180954 | 0.914873 | 0.457426 |
| MmugDNA.23897.1.S1_at   | MmugDNA.23897.1 | 3.67  | 3.64  | 0.73 | 0.18 | 1.02  | 0.268453 | 0.362734 | 0.613168 | 0.603245 |
| MmugDNA.23898.1.S1_at   | MmugDNA.23898.1 | 9.57  | 10.23 | 0.19 | 0.37 | -1.57 | 0.032728 | 0.015529 | 0.326012 | 0.158053 |
| MmugDNA.23899.1.S1_at   | MmugDNA.23899.1 | 6.39  | 6     | 0.29 | 0.17 | 1.31  | 0.070582 | 0.097251 | 0.414439 | 0.354908 |
| MmugDNA.239.1.S1_at     | MmugDNA.239.1   | 12.08 | 11.61 | 0.25 | 0.09 | 1.39  | 0.097943 | 0.123722 | 0.457244 | 0.393867 |
| MmugDNA.2390.1.S1_at    | MmugDNA.2390.1  | 6.05  | 6.09  | 0.17 | 0.13 | -1.03 | 0.906199 | 0.98847  | 0.9627   | 0.993525 |
| MmugDNA.23900.1.S1_at   | MmugDNA.23900.1 | 4.59  | 4.51  | 0.59 | 0.14 | 1.05  | 0.651732 | 0.893081 | 0.843319 | 0.939015 |
| MmugDNA.23901.1.S1_at   | MmugDNA.23901.1 | 6.66  | 6.52  | 0.05 | 0.25 | 1.1   | 0.63348  | 0.832122 | 0.833742 | 0.903678 |
| MmugDNA.23902.1.S1_at   | MmugDNA.23902.1 | 6.55  | 7.15  | 0.18 | 0.87 | -1.52 | 0.318127 | 0.332111 | 0.648034 | 0.580584 |
| MmugDNA.23903.1.S1_at   | MmugDNA.23903.1 | 8.35  | 8.32  | 0.39 | 1.06 | 1.02  | 0.883589 | 0.945011 | 0.953245 | 0.968834 |
| MmugDNA.23904.1.S1_at   | MmugDNA.23904.1 | 7.71  | 7.15  | 0.04 | 0.13 | 1.47  | 0.003122 | 0.005015 | 0.172434 | 0.098672 |
| MmugDNA.23906.1.S1_at   | MmugDNA.23906.1 | 4.3   | 4.34  | 0.14 | 0.05 | -1.03 | 0.15054  | 0.180742 | 0.515372 | 0.457294 |
| MmugDNA.23907.1.S1_at   | MmugDNA.23907.1 | 6.29  | 6.59  | 0.18 | 0.23 | -1.23 | 0.190331 | 0.259426 | 0.553031 | 0.526418 |
| MmugDNA.23908.1.S1_at   | MmugDNA.23908.1 | 3.94  | 3.92  | 0.09 | 0.03 | 1.02  | 0.768191 | 0.147627 | 0.902594 | 0.421901 |
| MmugDNA.2391.1.S1_at    | MmugDNA.2391.1  | 5.49  | 5.42  | 0.27 | 0.04 | 1.05  | 0.280538 | 0.209687 | 0.621702 | 0.48341  |

|                         |                 |       |       |      |      |       |          |          |          |          |
|-------------------------|-----------------|-------|-------|------|------|-------|----------|----------|----------|----------|
| MmugDNA.23910.1.S1_at   | MmugDNA.23910.1 | 6.27  | 6.27  | 0.02 | 0.09 | 1     | 0.417429 | 0.349512 | 0.710512 | 0.593484 |
| MmugDNA.23911.1.S1_at   | MmugDNA.23911.1 | 8.34  | 8.68  | 0.29 | 0.59 | -1.26 | 0.64869  | 0.564248 | 0.842124 | 0.739128 |
| MmugDNA.23912.1.S1_at   | MmugDNA.23912.1 | 5.42  | 5.46  | 0.13 | 0.06 | -1.03 | 0.49277  | 0.434833 | 0.755881 | 0.654843 |
| MmugDNA.23913.1.S1_at   | MmugDNA.23913.1 | 6.55  | 6.52  | 0.07 | 0.13 | 1.02  | 0.702414 | 0.848319 | 0.868671 | 0.91389  |
| MmugDNA.23914.1.S1_at   | MmugDNA.23914.1 | 7.49  | 7.72  | 0.35 | 0.33 | -1.17 | 0.265178 | 0.072449 | 0.610859 | 0.315294 |
| MmugDNA.23915.1.S1_at   | MmugDNA.23915.1 | 6.55  | 6.64  | 0.09 | 0.88 | -1.06 | 0.790985 | 0.78789  | 0.913202 | 0.877314 |
| MmugDNA.23916.1.S1_at   | MmugDNA.23916.1 | 4.08  | 3.93  | 0.1  | 0.14 | 1.11  | 0.528667 | 0.075948 | 0.775742 | 0.320634 |
| MmugDNA.23917.1.S1_at   | MmugDNA.23917.1 | 6.95  | 6.86  | 0.2  | 0.02 | 1.07  | 0.161015 | 0.175034 | 0.526189 | 0.451682 |
| MmugDNA.23918.1.S1_at   | MmugDNA.23918.1 | 5.72  | 5.26  | 1.4  | 0.79 | 1.38  | 0.768001 | 0.679928 | 0.902473 | 0.8131   |
| MmugDNA.23919.1.S1_at   | MmugDNA.23919.1 | 7.49  | 7     | 1.62 | 1.62 | 1.41  | 0.849467 | 0.964165 | 0.939578 | 0.980052 |
| MmugDNA.2392.1.S1_at    | MmugDNA.2392.1  | 3.7   | 3.62  | 0.24 | 0.06 | 1.05  | 0.469906 | 0.545266 | 0.741982 | 0.727457 |
| MmugDNA.23920.1.S1_at   | MmugDNA.23920.1 | 3.34  | 3.33  | 0.13 | 0.23 | 1     | 0.493808 | 0.735228 | 0.756364 | 0.846794 |
| MmugDNA.23921.1.S1_at   | MmugDNA.23921.1 | 3.82  | 3.87  | 0.31 | 0.02 | -1.03 | 0.941122 | 0.815908 | 0.97764  | 0.893781 |
| MmugDNA.23922.1.S1_at   | MmugDNA.23922.1 | 5.13  | 5.27  | 0.16 | 0.21 | -1.1  | 0.893833 | 0.893247 | 0.957768 | 0.939152 |
| MmugDNA.23923.1.S1_at   | MmugDNA.23923.1 | 10.92 | 10.63 | 0.21 | 0.18 | 1.22  | 0.178096 | 0.048447 | 0.542373 | 0.26532  |
| MmugDNA.23924.1.S1_at   | MmugDNA.23924.1 | 6.56  | 6.4   | 0.47 | 0.13 | 1.12  | 0.210728 | 0.304733 | 0.571933 | 0.561921 |
| MmugDNA.23926.1.S1_s_at | MmugDNA.23926.1 | 9.68  | 9.38  | 0.09 | 0.24 | 1.23  | 0.060728 | 0.009996 | 0.394325 | 0.131262 |
| MmugDNA.23927.1.S1_at   | MmugDNA.23927.1 | 6.46  | 6.56  | 0.06 | 0.09 | -1.07 | 0.230931 | 0.125703 | 0.587369 | 0.396249 |
| MmugDNA.23930.1.S1_at   | MmugDNA.23930.1 | 6.19  | 6.1   | 0.07 | 0.2  | 1.07  | 0.424136 | 0.475865 | 0.714371 | 0.682387 |
| MmugDNA.23931.1.S1_at   | MmugDNA.23931.1 | 8.08  | 8.55  | 0.39 | 0.22 | -1.39 | 0.389821 | 0.55323  | 0.693291 | 0.73239  |
| MmugDNA.23934.1.S1_at   | MmugDNA.23934.1 | 5.62  | 5.19  | 0.21 | 0.16 | 1.34  | 0.109826 | 0.084082 | 0.470963 | 0.335065 |
| MmugDNA.23935.1.S1_at   | MmugDNA.23935.1 | 6.91  | 6.93  | 0.18 | 0.15 | -1.02 | 0.821342 | 0.724796 | 0.927303 | 0.840693 |
| MmugDNA.23936.1.S1_at   | MmugDNA.23936.1 | 8.93  | 8.37  | 0.23 | 0.36 | 1.47  | 0.136957 | 0.078947 | 0.504163 | 0.325957 |
| MmugDNA.23937.1.S1_at   | MmugDNA.23937.1 | 10.05 | 9.16  | 0.22 | 0.65 | 1.85  | 0.073291 | 0.070251 | 0.418512 | 0.311287 |
| MmugDNA.23939.1.S1_at   | MmugDNA.23939.1 | 8.73  | 8.62  | 0.3  | 0.02 | 1.08  | 0.593613 | 0.567994 | 0.811547 | 0.74176  |
| MmugDNA.23939.1.S1_s_at | MmugDNA.23939.1 | 9.29  | 9.28  | 0.36 | 0.23 | 1.01  | 0.89723  | 0.301029 | 0.959134 | 0.559198 |
| MmugDNA.23940.1.S1_at   | MmugDNA.23940.1 | 5.33  | 5.71  | 1.75 | 0.52 | -1.3  | 0.894168 | 0.800369 | 0.957854 | 0.885129 |
| MmugDNA.23941.1.S1_at   | MmugDNA.23941.1 | 4.2   | 4.19  | 0.55 | 0.46 | 1.01  | 0.232297 | 0.366256 | 0.587814 | 0.606019 |
| MmugDNA.23943.1.S1_at   | MmugDNA.23943.1 | 6.93  | 6.56  | 0.16 | 0.09 | 1.29  | 0.094575 | 0.26842  | 0.452166 | 0.534106 |
| MmugDNA.23944.1.S1_at   | MmugDNA.23944.1 | 5.16  | 5.28  | 0.16 | 0.2  | -1.09 | 0.38335  | 0.419619 | 0.68929  | 0.643568 |
| MmugDNA.23946.1.S1_at   | MmugDNA.23946.1 | 6.64  | 6.34  | 0.08 | 0.43 | 1.23  | 0.579876 | 0.306095 | 0.804451 | 0.562804 |
| MmugDNA.23947.1.S1_at   | MmugDNA.23947.1 | 6.52  | 6.5   | 0.4  | 0.03 | 1.01  | 0.373715 | 0.193187 | 0.683245 | 0.468578 |
| MmugDNA.23948.1.S1_at   | MmugDNA.23948.1 | 3.56  | 3.83  | 0.04 | 0.17 | -1.21 | 0.045231 | 0.020621 | 0.360434 | 0.180141 |
| MmugDNA.23949.1.S1_at   | MmugDNA.23949.1 | 4.48  | 4.54  | 0.5  | 0.14 | -1.04 | 0.65487  | 0.523965 | 0.84477  | 0.714099 |
| MmugDNA.23950.1.S1_at   | MmugDNA.23950.1 | 6.93  | 6.81  | 0.06 | 0.15 | 1.09  | 0.191245 | 0.286644 | 0.554194 | 0.548077 |
| MmugDNA.23951.1.S1_at   | MmugDNA.23951.1 | 5.97  | 6.43  | 0.36 | 0.65 | -1.38 | 0.231008 | 0.196959 | 0.587369 | 0.472072 |
| MmugDNA.23953.1.S1_at   | MmugDNA.23953.1 | 5.52  | 5.84  | 0.09 | 0.16 | -1.25 | 0.133713 | 0.144648 | 0.500334 | 0.418477 |
| MmugDNA.23955.1.S1_at   | MmugDNA.23955.1 | 8.3   | 7.83  | 0.52 | 0.44 | 1.38  | 0.173641 | 0.214227 | 0.53719  | 0.487856 |
| MmugDNA.23956.1.S1_at   | MmugDNA.23956.1 | 7.55  | 7.2   | 0.66 | 0.22 | 1.28  | 0.503249 | 0.685718 | 0.760699 | 0.816612 |
| MmugDNA.23957.1.S1_at   | MmugDNA.23957.1 | 4.37  | 5.79  | 0.93 | 1.06 | -2.67 | 0.127928 | 0.143484 | 0.494075 | 0.417442 |
| MmugDNA.23958.1.S1_at   | MmugDNA.23958.1 | 3.77  | 4.27  | 0.16 | 0.45 | -1.41 | 0.131807 | 0.22965  | 0.498041 | 0.50163  |



|                         |                 |       |       |      |      |       |          |          |          |          |
|-------------------------|-----------------|-------|-------|------|------|-------|----------|----------|----------|----------|
| MmugDNA.23959.1.S1_at   | MmugDNA.23959.1 | 6.03  | 5.94  | 0.02 | 0.51 | 1.06  | 0.770516 | 0.836307 | 0.90333  | 0.90636  |
| MmugDNA.2396.1.S1_at    | MmugDNA.2396.1  | 3.34  | 3.41  | 0.14 | 0.23 | -1.05 | 0.649679 | 0.821687 | 0.842495 | 0.897323 |
| MmugDNA.23960.1.S1_at   | MmugDNA.23960.1 | 6.42  | 6.33  | 0.21 | 0.1  | 1.06  | 0.704395 | 0.412965 | 0.869588 | 0.63928  |
| MmugDNA.23961.1.S1_at   | MmugDNA.23961.1 | 6.79  | 7.03  | 0.13 | 0.59 | -1.18 | 0.8668   | 0.489369 | 0.946842 | 0.691792 |
| MmugDNA.23962.1.S1_at   | MmugDNA.23962.1 | 8.32  | 9.31  | 0.09 | 0.15 | -1.98 | 0.000732 | 0.000375 | 0.136818 | 0.037273 |
| MmugDNA.23963.1.S1_at   | MmugDNA.23963.1 | 5.09  | 5.28  | 0.06 | 0.09 | -1.13 | 0.031502 | 0.02225  | 0.321991 | 0.186618 |
| MmugDNA.23964.1.S1_at   | MmugDNA.23964.1 | 6.9   | 6.94  | 0.42 | 0.51 | -1.03 | 0.92013  | 0.545984 | 0.968842 | 0.727708 |
| MmugDNA.23965.1.S1_at   | MmugDNA.23965.1 | 4.55  | 4.44  | 0.1  | 0.11 | 1.09  | 0.473741 | 0.259448 | 0.744526 | 0.526418 |
| MmugDNA.23966.1.S1_at   | MmugDNA.23966.1 | 5.64  | 5.78  | 0.31 | 0.13 | -1.1  | 0.979561 | 0.311101 | 0.99244  | 0.566159 |
| MmugDNA.23967.1.S1_at   | MmugDNA.23967.1 | 5.39  | 5.29  | 0.2  | 0.13 | 1.08  | 0.776851 | 0.203674 | 0.906563 | 0.477907 |
| MmugDNA.23968.1.S1_at   | MmugDNA.23968.1 | 5.34  | 5.05  | 0.9  | 0.13 | 1.22  | 0.921014 | 0.924698 | 0.969194 | 0.957442 |
| MmugDNA.23968.1.S1_s_at | MmugDNA.23968.1 | 7.14  | 7.01  | 0.63 | 0.44 | 1.09  | 0.336012 | 0.338876 | 0.65921  | 0.585891 |
| MmugDNA.23969.1.S1_at   | MmugDNA.23969.1 | 5.4   | 4.19  | 0.89 | 0.85 | 2.31  | 0.350295 | 0.265102 | 0.66846  | 0.531    |
| MmugDNA.23970.1.S1_at   | MmugDNA.23970.1 | 5.02  | 5.7   | 0.21 | 0.26 | -1.6  | 0.055026 | 0.047038 | 0.383056 | 0.261469 |
| MmugDNA.23971.1.S1_at   | MmugDNA.23971.1 | 10.38 | 10.62 | 0.08 | 0.49 | -1.18 | 0.433611 | 0.530685 | 0.720128 | 0.718104 |
| MmugDNA.23972.1.S1_at   | MmugDNA.23972.1 | 4.08  | 5.73  | 0.45 | 1.69 | -3.14 | 0.186269 | 0.185985 | 0.549871 | 0.461839 |
| MmugDNA.23972.1.S1_s_at | MmugDNA.23972.1 | 4.83  | 6.43  | 0.22 | 1.21 | -3.02 | 0.083305 | 0.078359 | 0.435702 | 0.325024 |
| MmugDNA.23973.1.S1_at   | MmugDNA.23973.1 | 6.21  | 6.16  | 0.16 | 0.14 | 1.04  | 0.61112  | 0.083682 | 0.821498 | 0.334355 |
| MmugDNA.23974.1.S1_at   | MmugDNA.23974.1 | 3.07  | 2.91  | 0.15 | 0.09 | 1.11  | 0.207934 | 0.159215 | 0.569864 | 0.435217 |
| MmugDNA.23975.1.S1_at   | MmugDNA.23975.1 | 4.88  | 5.03  | 0.25 | 0.45 | -1.11 | 0.426284 | 0.522683 | 0.715685 | 0.713295 |
| MmugDNA.23976.1.S1_at   | MmugDNA.23976.1 | 8.04  | 8.15  | 0.19 | 0.35 | -1.08 | 0.552865 | 0.491846 | 0.789712 | 0.693275 |
| MmugDNA.23977.1.S1_at   | MmugDNA.23977.1 | 6.48  | 6.53  | 0.03 | 0.11 | -1.03 | 0.405254 | 0.652181 | 0.703082 | 0.796592 |
| MmugDNA.23978.1.S1_at   | MmugDNA.23978.1 | 3.4   | 3.58  | 0.68 | 0.21 | -1.13 | 0.706479 | 0.912113 | 0.870694 | 0.950444 |
| MmugDNA.2398.1.S1_at    | MmugDNA.2398.1  | 4.31  | 4.32  | 0.2  | 0.04 | -1    | 0.948628 | 0.93158  | 0.98032  | 0.961152 |
| MmugDNA.23980.1.S1_at   | MmugDNA.23980.1 | 3.64  | 3.55  | 0.26 | 0.15 | 1.07  | 0.403381 | 0.560985 | 0.701956 | 0.737076 |
| MmugDNA.23981.1.S1_at   | MmugDNA.23981.1 | 8.35  | 7.89  | 0.5  | 0.47 | 1.38  | 0.121665 | 0.139069 | 0.486508 | 0.412165 |
| MmugDNA.23984.1.S1_at   | MmugDNA.23984.1 | 5.67  | 5.66  | 0.07 | 0.18 | 1.01  | 0.620259 | 0.520805 | 0.826026 | 0.711942 |
| MmugDNA.23985.1.S1_at   | MmugDNA.23985.1 | 8.74  | 10.51 | 0.38 | 0.54 | -3.41 | 0.018316 | 0.009495 | 0.269797 | 0.128349 |
| MmugDNA.23987.1.S1_at   | MmugDNA.23987.1 | 3.83  | 3.83  | 0.11 | 0.11 | -1    | 0.480305 | 0.532491 | 0.748256 | 0.719065 |
| MmugDNA.23988.1.S1_at   | MmugDNA.23988.1 | 5.49  | 5.78  | 1.73 | 0.8  | -1.22 | 0.825464 | 0.304698 | 0.929243 | 0.561914 |
| MmugDNA.23989.1.S1_s_at | MmugDNA.23989.1 | 4.07  | 3.86  | 0.32 | 0.11 | 1.16  | 0.462327 | 0.076302 | 0.738226 | 0.321334 |
| MmugDNA.23990.1.S1_at   | MmugDNA.23990.1 | 5.77  | 5.91  | 0.29 | 0.09 | -1.1  | 0.166158 | 0.079997 | 0.529929 | 0.327352 |
| MmugDNA.23991.1.S1_at   | MmugDNA.23991.1 | 3.84  | 3.84  | 0.04 | 0.08 | -1    | 0.717146 | 0.911775 | 0.875719 | 0.950259 |
| MmugDNA.23992.1.S1_at   | MmugDNA.23992.1 | 5.04  | 5.27  | 0.15 | 0.2  | -1.17 | 0.079632 | 0.324239 | 0.430004 | 0.57488  |
| MmugDNA.23993.1.S1_at   | MmugDNA.23993.1 | 6.61  | 6.46  | 0.24 | 0.13 | 1.11  | 0.739849 | 0.269532 | 0.888303 | 0.534806 |
| MmugDNA.23994.1.S1_at   | MmugDNA.23994.1 | 5.31  | 6.05  | 0.25 | 0.3  | -1.67 | 0.044197 | 0.020255 | 0.358273 | 0.178702 |
| MmugDNA.23996.1.S1_at   | MmugDNA.23996.1 | 12.93 | 12.72 | 0.27 | 0.48 | 1.16  | 0.65302  | 0.827307 | 0.843896 | 0.900836 |
| MmugDNA.23997.1.S1_at   | MmugDNA.23997.1 | 4.42  | 4.26  | 0.42 | 0.18 | 1.11  | 0.370993 | 0.429674 | 0.681748 | 0.650982 |
| MmugDNA.23999.1.S1_at   | MmugDNA.23999.1 | 4.1   | 4.15  | 0.34 | 0.05 | -1.04 | 0.921977 | 0.989677 | 0.969683 | 0.994108 |
| MmugDNA.24.1.S1_at      | MmugDNA.24.1    | 6.05  | 4.21  | 0.33 | 0.52 | 3.57  | 0.012629 | 0.006669 | 0.242681 | 0.110588 |
| MmugDNA.240.1.S1_at     | MmugDNA.240.1   | 4.48  | 4.27  | 0.41 | 0.16 | 1.15  | 0.344653 | 0.509798 | 0.664708 | 0.704385 |

|                         |                 |       |       |      |      |       |          |          |          |          |
|-------------------------|-----------------|-------|-------|------|------|-------|----------|----------|----------|----------|
| MmugDNA.2400.1.S1_at    | MmugDNA.2400.1  | 5.63  | 5.61  | 0.18 | 0.14 | 1.01  | 0.961131 | 0.943459 | 0.984976 | 0.967902 |
| MmugDNA.24000.1.S1_at   | MmugDNA.24000.1 | 5.55  | 5.6   | 0.04 | 0.09 | -1.04 | 0.989437 | 0.977222 | 0.996281 | 0.987628 |
| MmugDNA.24002.1.S1_at   | MmugDNA.24002.1 | 6.77  | 6.74  | 0.25 | 0.12 | 1.02  | 0.848781 | 0.945002 | 0.939211 | 0.968834 |
| MmugDNA.24008.1.S1_at   | MmugDNA.24008.1 | 3.99  | 3.99  | 0.03 | 0.1  | 1     | 0.522008 | 0.167613 | 0.771756 | 0.444043 |
| MmugDNA.24009.1.S1_at   | MmugDNA.24009.1 | 3.81  | 3.96  | 0.03 | 0.08 | -1.11 | 0.021253 | 0.021578 | 0.282524 | 0.18405  |
| MmugDNA.31059.1.S1_at   | MmugDNA.31059.1 | 13.63 | 13.31 | 0.13 | 0.14 | 1.25  | 0.090125 | 0.002862 | 0.445578 | 0.078756 |
| MmugDNA.31059.1.S1_s_at | MmugDNA.31059.1 | 12.19 | 12.02 | 0.12 | 0.2  | 1.13  | 0.179884 | 0.000806 | 0.544019 | 0.04607  |
| MmugDNA.24011.1.S1_at   | MmugDNA.24011.1 | 4.31  | 4.3   | 0.07 | 0.11 | 1     | 0.561247 | 0.899164 | 0.794726 | 0.942655 |
| MmugDNA.24012.1.S1_at   | MmugDNA.24012.1 | 3.93  | 3.94  | 0.03 | 0.15 | -1.01 | 0.395589 | 0.207172 | 0.696523 | 0.481307 |
| MmugDNA.24013.1.S1_at   | MmugDNA.24013.1 | 11.26 | 11.33 | 0.25 | 0.17 | -1.05 | 0.614698 | 0.065537 | 0.823258 | 0.301415 |
| MmugDNA.24014.1.S1_at   | MmugDNA.24014.1 | 12.31 | 11.99 | 0.13 | 0.27 | 1.25  | 0.143123 | 0.164803 | 0.510004 | 0.441106 |
| MmugDNA.24015.1.S1_at   | MmugDNA.24015.1 | 5.3   | 5.75  | 0.13 | 0.21 | -1.37 | 0.070162 | 0.08029  | 0.413686 | 0.327939 |
| MmugDNA.24016.1.S1_at   | MmugDNA.24016.1 | 3.64  | 3.71  | 0.06 | 0.15 | -1.05 | 0.383991 | 0.550095 | 0.689677 | 0.730241 |
| MmugDNA.24018.1.S1_at   | MmugDNA.24018.1 | 5.61  | 5.67  | 0.3  | 0.42 | -1.04 | 0.276643 | 0.034357 | 0.6188   | 0.229283 |
| MmugDNA.24019.1.S1_at   | MmugDNA.24019.1 | 3.27  | 3.29  | 0.01 | 0.09 | -1.02 | 0.791716 | 0.880628 | 0.913465 | 0.931813 |
| MmugDNA.2402.1.S1_at    | MmugDNA.2402.1  | 4.17  | 4.1   | 0.06 | 0.27 | 1.05  | 0.819005 | 0.852865 | 0.926528 | 0.916359 |
| MmugDNA.24020.1.S1_at   | MmugDNA.24020.1 | 3.98  | 3.5   | 0.16 | 0.2  | 1.4   | 0.056714 | 0.057161 | 0.386849 | 0.284972 |
| MmugDNA.24021.1.S1_at   | MmugDNA.24021.1 | 11.58 | 10.78 | 0.17 | 0.49 | 1.74  | 0.052111 | 0.012099 | 0.376989 | 0.142307 |
| MmugDNA.24022.1.S1_at   | MmugDNA.24022.1 | 5.67  | 5.52  | 0.17 | 0.02 | 1.11  | 0.207298 | 0.054472 | 0.569466 | 0.278959 |
| MmugDNA.24025.1.S1_at   | MmugDNA.24025.1 | 6.3   | 7.36  | 0.25 | 0.68 | -2.08 | 0.076743 | 0.087782 | 0.42557  | 0.341044 |
| MmugDNA.24029.1.S1_at   | MmugDNA.24029.1 | 5.59  | 5.78  | 0.14 | 0.08 | -1.14 | 0.482131 | 0.264033 | 0.749398 | 0.530183 |
| MmugDNA.24030.1.S1_at   | MmugDNA.24030.1 | 11.73 | 12.88 | 0.47 | 0.63 | -2.21 | 0.064934 | 0.056454 | 0.403744 | 0.283516 |
| MmugDNA.24031.1.S1_at   | MmugDNA.24031.1 | 5.79  | 5.85  | 0.23 | 0.02 | -1.04 | 0.687685 | 0.810817 | 0.860624 | 0.890845 |
| MmugDNA.24032.1.S1_at   | MmugDNA.24032.1 | 3.81  | 3.88  | 0.13 | 0.18 | -1.05 | 0.976811 | 0.789043 | 0.991117 | 0.878071 |
| MmugDNA.24033.1.S1_at   | MmugDNA.24033.1 | 5.23  | 6.03  | 1.4  | 0.65 | -1.74 | 0.929003 | 0.992644 | 0.972607 | 0.995715 |
| MmugDNA.24034.1.S1_at   | MmugDNA.24034.1 | 4.13  | 3.62  | 0.45 | 0.11 | 1.43  | 0.148256 | 0.10931  | 0.513702 | 0.373084 |
| MmugDNA.24035.1.S1_at   | MmugDNA.24035.1 | 8.39  | 7.82  | 0.26 | 0.15 | 1.48  | 0.077847 | 0.099109 | 0.427855 | 0.357246 |
| MmugDNA.24037.1.S1_at   | MmugDNA.24037.1 | 3.44  | 3.34  | 0.14 | 0.11 | 1.08  | 0.164448 | 0.213574 | 0.528313 | 0.48741  |
| MmugDNA.24038.1.S1_at   | MmugDNA.24038.1 | 3.9   | 4.13  | 0.23 | 0.18 | -1.18 | 0.430303 | 0.602045 | 0.717986 | 0.763167 |
| MmugDNA.2404.1.S1_at    | MmugDNA.2404.1  | 7.51  | 7.21  | 0.31 | 0.2  | 1.23  | 0.157185 | 0.188251 | 0.521923 | 0.464261 |
| MmugDNA.24040.1.S1_at   | MmugDNA.24040.1 | 3.88  | 4.03  | 0.33 | 0.47 | -1.11 | 0.530389 | 0.662243 | 0.776854 | 0.802209 |
| MmugDNA.24041.1.S1_at   | MmugDNA.24041.1 | 5.82  | 5.83  | 0.19 | 0.06 | -1.01 | 0.780595 | 0.463111 | 0.90855  | 0.67424  |
| MmugDNA.24042.1.S1_at   | MmugDNA.24042.1 | 11.74 | 11.39 | 0.14 | 0.44 | 1.28  | 0.698076 | 0.136548 | 0.865981 | 0.409055 |
| MmugDNA.24043.1.S1_at   | MmugDNA.24043.1 | 7.06  | 6.91  | 0.21 | 0.26 | 1.11  | 0.451783 | 0.61307  | 0.73168  | 0.770391 |
| MmugDNA.24045.1.S1_s_at | MmugDNA.24045.1 | 7.99  | 7.24  | 0.12 | 0.44 | 1.68  | 0.041625 | 0.029778 | 0.352305 | 0.214208 |
| MmugDNA.24046.1.S1_at   | MmugDNA.24046.1 | 6.55  | 6.39  | 1.03 | 0.19 | 1.12  | 0.285299 | 0.225654 | 0.624811 | 0.498155 |
| MmugDNA.24049.1.S1_at   | MmugDNA.24049.1 | 5.16  | 5.06  | 0.65 | 0.18 | 1.07  | 0.397435 | 0.536148 | 0.697881 | 0.721538 |
| MmugDNA.2405.1.S1_at    | MmugDNA.2405.1  | 5.28  | 5.88  | 0.18 | 0.26 | -1.51 | 0.068467 | 0.073855 | 0.410144 | 0.31722  |
| MmugDNA.24050.1.S1_at   | MmugDNA.24050.1 | 3.94  | 3.8   | 0.3  | 0.3  | 1.1   | 0.881255 | 0.446288 | 0.95225  | 0.662743 |
| MmugDNA.24051.1.S1_at   | MmugDNA.24051.1 | 7.03  | 9.09  | 0.93 | 2.09 | -4.14 | 0.396928 | 0.47251  | 0.697407 | 0.680025 |
| MmugDNA.24052.1.S1_at   | MmugDNA.24052.1 | 5.39  | 5.37  | 0.17 | 0.37 | 1.01  | 0.874958 | 0.961464 | 0.949827 | 0.978247 |

|                         |                 |       |       |      |      |       |          |          |          |          |
|-------------------------|-----------------|-------|-------|------|------|-------|----------|----------|----------|----------|
| MmugDNA.24053.1.S1_at   | MmugDNA.24053.1 | 4.16  | 4.18  | 0.32 | 0.18 | -1.02 | 0.295959 | 0.123394 | 0.632176 | 0.393391 |
| MmugDNA.24054.1.S1_at   | MmugDNA.24054.1 | 4.64  | 4.63  | 0.21 | 0.09 | 1     | 0.668818 | 0.673315 | 0.851986 | 0.809102 |
| MmugDNA.24055.1.S1_at   | MmugDNA.24055.1 | 6.94  | 6.7   | 0.13 | 0.2  | 1.18  | 0.426027 | 0.417109 | 0.715482 | 0.642022 |
| MmugDNA.24056.1.S1_at   | MmugDNA.24056.1 | 7.66  | 7.57  | 0.19 | 0.2  | 1.06  | 0.573613 | 0.711816 | 0.801311 | 0.832894 |
| MmugDNA.24057.1.S1_at   | MmugDNA.24057.1 | 5.53  | 5.52  | 0.11 | 0.05 | 1     | 0.574417 | 0.516518 | 0.801702 | 0.709034 |
| MmugDNA.24058.1.S1_at   | MmugDNA.24058.1 | 5.94  | 6.06  | 0.14 | 0.28 | -1.08 | 0.321022 | 0.399141 | 0.649764 | 0.62969  |
| MmugDNA.24059.1.S1_at   | MmugDNA.24059.1 | 7.34  | 8.58  | 0.3  | 1.06 | -2.36 | 0.419295 | 0.560736 | 0.71174  | 0.736921 |
| MmugDNA.2406.1.S1_at    | MmugDNA.2406.1  | 7.62  | 7.89  | 0.01 | 0.4  | -1.2  | 0.271084 | 0.215384 | 0.615322 | 0.489067 |
| MmugDNA.24060.1.S1_at   | MmugDNA.24060.1 | 7.04  | 5.64  | 0.54 | 0.41 | 2.64  | 0.040307 | 0.026864 | 0.349277 | 0.205049 |
| MmugDNA.24061.1.S1_at   | MmugDNA.24061.1 | 5.55  | 5.29  | 0.3  | 0.03 | 1.2   | 0.180003 | 0.117627 | 0.544166 | 0.385348 |
| MmugDNA.24062.1.S1_at   | MmugDNA.24062.1 | 6.32  | 6.12  | 0.41 | 0.91 | 1.14  | 0.696318 | 0.429287 | 0.86516  | 0.650754 |
| MmugDNA.24063.1.S1_at   | MmugDNA.24063.1 | 5.77  | 5.7   | 0.1  | 0.06 | 1.05  | 0.787206 | 0.783399 | 0.911485 | 0.874571 |
| MmugDNA.24064.1.S1_at   | MmugDNA.24064.1 | 7.75  | 8.09  | 0.11 | 0.43 | -1.26 | 0.50269  | 0.45793  | 0.760493 | 0.670999 |
| MmugDNA.24064.1.S1_x_at | MmugDNA.24064.1 | 7.93  | 8.27  | 0.11 | 0.52 | -1.27 | 0.578555 | 0.686734 | 0.803867 | 0.817214 |
| MmugDNA.24065.1.S1_at   | MmugDNA.24065.1 | 9.2   | 9.19  | 0.16 | 0.17 | 1.01  | 0.897923 | 0.895065 | 0.959199 | 0.940055 |
| MmugDNA.24066.1.S1_at   | MmugDNA.24066.1 | 6.18  | 5.83  | 0.22 | 0.26 | 1.28  | 0.171432 | 0.458607 | 0.535166 | 0.671246 |
| MmugDNA.24067.1.S1_at   | MmugDNA.24067.1 | 6.08  | 6.97  | 0.47 | 0.1  | -1.85 | 0.052819 | 0.005939 | 0.378449 | 0.105426 |
| MmugDNA.24068.1.S1_at   | MmugDNA.24068.1 | 6.34  | 6.01  | 0.54 | 0.17 | 1.25  | 0.349842 | 0.280213 | 0.668052 | 0.543487 |
| MmugDNA.2407.1.S1_at    | MmugDNA.2407.1  | 10.31 | 10.44 | 0.17 | 0.57 | -1.09 | 0.733322 | 0.883708 | 0.884989 | 0.933691 |
| MmugDNA.24070.1.S1_at   | MmugDNA.24070.1 | 6.61  | 6.22  | 0.59 | 0.15 | 1.31  | 0.08012  | 0.030424 | 0.430315 | 0.216377 |
| MmugDNA.24072.1.S1_at   | MmugDNA.24072.1 | 7     | 7.32  | 0.1  | 0.35 | -1.25 | 0.198098 | 0.17499  | 0.561111 | 0.451647 |
| MmugDNA.24073.1.S1_at   | MmugDNA.24073.1 | 4.47  | 4.33  | 0.15 | 0.25 | 1.11  | 0.141966 | 0.259581 | 0.509263 | 0.526502 |
| MmugDNA.24075.1.S1_at   | MmugDNA.24075.1 | 6.28  | 6.18  | 0.24 | 0.03 | 1.07  | 0.153394 | 0.069904 | 0.517785 | 0.310552 |
| MmugDNA.24077.1.S1_at   | MmugDNA.24077.1 | 7.61  | 6.59  | 0.34 | 0.47 | 2.03  | 0.037878 | 0.027679 | 0.343205 | 0.207762 |
| MmugDNA.24079.1.S1_s_at | MmugDNA.24079.1 | 11.13 | 10.91 | 0.19 | 0.49 | 1.16  | 0.114824 | 0.129391 | 0.478048 | 0.4008   |
| MmugDNA.2408.1.S1_at    | MmugDNA.2408.1  | 9.38  | 9.74  | 0.28 | 0.36 | -1.29 | 0.183435 | 0.213488 | 0.547598 | 0.487391 |
| MmugDNA.24080.1.S1_at   | MmugDNA.24080.1 | 5     | 5.09  | 0.14 | 0.13 | -1.06 | 0.438204 | 0.56744  | 0.722864 | 0.741344 |
| MmugDNA.24082.1.S1_at   | MmugDNA.24082.1 | 5.42  | 5.55  | 0.36 | 0.41 | -1.09 | 0.81944  | 0.235692 | 0.926528 | 0.506807 |
| MmugDNA.24083.1.S1_at   | MmugDNA.24083.1 | 6.75  | 6.12  | 1.05 | 0.36 | 1.54  | 0.166252 | 0.209887 | 0.529929 | 0.48366  |
| MmugDNA.24084.1.S1_at   | MmugDNA.24084.1 | 7.39  | 6.63  | 0.03 | 0.22 | 1.69  | 0.00402  | 0.03386  | 0.181739 | 0.227647 |
| MmugDNA.24085.1.S1_at   | MmugDNA.24085.1 | 8.19  | 8.01  | 0.87 | 0.18 | 1.13  | 0.319653 | 0.362384 | 0.649068 | 0.602965 |
| MmugDNA.24086.1.S1_at   | MmugDNA.24086.1 | 5.85  | 5.79  | 0.06 | 0.23 | 1.04  | 0.608081 | 0.606442 | 0.819826 | 0.765747 |
| MmugDNA.24087.1.S1_at   | MmugDNA.24087.1 | 4.3   | 5.83  | 0.62 | 0.96 | -2.88 | 0.099886 | 0.0787   | 0.459906 | 0.325673 |
| MmugDNA.24088.1.S1_at   | MmugDNA.24088.1 | 6.33  | 6.48  | 0.12 | 0.04 | -1.11 | 0.098107 | 0.290861 | 0.457358 | 0.551436 |
| MmugDNA.24089.1.S1_at   | MmugDNA.24089.1 | 8.39  | 8.57  | 0.32 | 0.29 | -1.14 | 0.469614 | 0.235042 | 0.74181  | 0.506255 |
| MmugDNA.24089.1.S1_s_at | MmugDNA.24089.1 | 6.32  | 6.17  | 0.34 | 0.08 | 1.11  | 0.180173 | 0.184067 | 0.544371 | 0.460277 |
| MmugDNA.2409.1.S1_at    | MmugDNA.2409.1  | 4.7   | 4.53  | 0.22 | 0.08 | 1.12  | 0.196052 | 0.25341  | 0.559231 | 0.521713 |
| MmugDNA.24090.1.S1_at   | MmugDNA.24090.1 | 5.76  | 6.04  | 0.04 | 0.14 | -1.21 | 0.037502 | 0.05251  | 0.3415   | 0.274757 |
| MmugDNA.24092.1.S1_at   | MmugDNA.24092.1 | 5.2   | 5.3   | 0.59 | 0.27 | -1.07 | 0.511101 | 0.684965 | 0.765243 | 0.816272 |
| MmugDNA.24093.1.S1_at   | MmugDNA.24093.1 | 6.58  | 4.51  | 1.03 | 1.01 | 4.21  | 0.165744 | 0.158051 | 0.529716 | 0.433821 |
| MmugDNA.24094.1.S1_at   | MmugDNA.24094.1 | 6.49  | 6.63  | 0.18 | 0.27 | -1.1  | 0.760431 | 0.255758 | 0.899008 | 0.523692 |

|                         |                 |       |       |      |      |       |          |          |          |          |
|-------------------------|-----------------|-------|-------|------|------|-------|----------|----------|----------|----------|
| MmugDNA.24095.1.S1_at   | MmugDNA.24095.1 | 12.49 | 12.28 | 0.08 | 0.26 | 1.15  | 0.641913 | 0.45577  | 0.838598 | 0.669659 |
| MmugDNA.24096.1.S1_at   | MmugDNA.24096.1 | 4.3   | 4.41  | 0.1  | 0.16 | -1.08 | 0.249566 | 0.726813 | 0.600196 | 0.841963 |
| MmugDNA.24097.1.S1_at   | MmugDNA.24097.1 | 3.55  | 3.55  | 0.06 | 0.24 | -1    | 0.386612 | 0.438031 | 0.691563 | 0.657058 |
| MmugDNA.24098.1.S1_at   | MmugDNA.24098.1 | 4.58  | 4.6   | 0.18 | 0.12 | -1.01 | 0.521339 | 0.505366 | 0.77125  | 0.702079 |
| MmugDNA.24099.1.S1_at   | MmugDNA.24099.1 | 8.61  | 8.8   | 0.67 | 0.64 | -1.14 | 0.698423 | 0.638923 | 0.866106 | 0.787922 |
| MmugDNA.24099.1.S1_s_at | MmugDNA.24099.1 | 9.28  | 9.33  | 0.56 | 0.65 | -1.03 | 0.46673  | 0.548661 | 0.740411 | 0.729318 |
| MmugDNA.2410.1.S1_at    | MmugDNA.2410.1  | 5.57  | 5.82  | 0.25 | 0.25 | -1.19 | 0.502179 | 0.273457 | 0.760244 | 0.537868 |
| MmugDNA.24101.1.S1_at   | MmugDNA.24101.1 | 3.79  | 3.76  | 0.21 | 0.14 | 1.02  | 0.875733 | 0.790705 | 0.950257 | 0.878973 |
| MmugDNA.24102.1.S1_at   | MmugDNA.24102.1 | 7.76  | 7.66  | 0.18 | 0.75 | 1.07  | 0.9898   | 0.62435  | 0.996368 | 0.778577 |
| MmugDNA.24103.1.S1_at   | MmugDNA.24103.1 | 8.03  | 8.49  | 0.19 | 0.4  | -1.38 | 0.263249 | 0.360217 | 0.609336 | 0.601275 |
| MmugDNA.24104.1.S1_at   | MmugDNA.24104.1 | 4.46  | 4     | 0.87 | 0.34 | 1.38  | 0.358449 | 0.400645 | 0.673231 | 0.630467 |
| MmugDNA.24105.1.S1_at   | MmugDNA.24105.1 | 2.94  | 3.27  | 0.27 | 0.26 | -1.26 | 0.220364 | 0.253782 | 0.579323 | 0.52217  |
| MmugDNA.24106.1.S1_at   | MmugDNA.24106.1 | 3.63  | 3.64  | 0.04 | 0.18 | -1.01 | 0.347722 | 0.001744 | 0.666645 | 0.062895 |
| MmugDNA.24107.1.S1_at   | MmugDNA.24107.1 | 6.75  | 6.97  | 0.19 | 0.07 | -1.16 | 0.22289  | 0.237708 | 0.581421 | 0.50826  |
| MmugDNA.24108.1.S1_at   | MmugDNA.24108.1 | 3.74  | 3.89  | 0.14 | 0.01 | -1.11 | 0.426478 | 0.728254 | 0.715829 | 0.842893 |
| MmugDNA.2411.1.S1_at    | MmugDNA.2411.1  | 6.22  | 6.44  | 0.25 | 0.5  | -1.16 | 0.271755 | 0.320402 | 0.615789 | 0.572648 |
| MmugDNA.24110.1.S1_at   | MmugDNA.24110.1 | 6.22  | 6.33  | 0.08 | 0.02 | -1.08 | 0.021439 | 0.002823 | 0.282524 | 0.078299 |
| MmugDNA.24111.1.S1_at   | MmugDNA.24111.1 | 3.68  | 3.59  | 0.18 | 0.03 | 1.06  | 0.425417 | 0.335074 | 0.715093 | 0.582853 |
| MmugDNA.24113.1.S1_at   | MmugDNA.24113.1 | 4.78  | 4.22  | 0.53 | 0.23 | 1.47  | 0.18921  | 0.156198 | 0.552372 | 0.43161  |
| MmugDNA.24114.1.S1_at   | MmugDNA.24114.1 | 13.12 | 12.81 | 0.05 | 0.34 | 1.24  | 0.079142 | 0.071558 | 0.428846 | 0.313714 |
| MmugDNA.24116.1.S1_at   | MmugDNA.24116.1 | 6.74  | 5.47  | 0.52 | 0.35 | 2.41  | 0.027023 | 0.016958 | 0.305897 | 0.165103 |
| MmugDNA.24117.1.S1_at   | MmugDNA.24117.1 | 4.36  | 4.11  | 0.48 | 0.33 | 1.19  | 0.49851  | 0.556845 | 0.758468 | 0.734831 |
| MmugDNA.24118.1.S1_at   | MmugDNA.24118.1 | 3.9   | 3.86  | 0    | 0.1  | 1.03  | 0.254662 | 0.198346 | 0.602549 | 0.473267 |
| MmugDNA.2412.1.S1_at    | MmugDNA.2412.1  | 5.13  | 5.02  | 0.17 | 0.28 | 1.09  | 0.842086 | 0.45381  | 0.93631  | 0.668264 |
| MmugDNA.24120.1.S1_at   | MmugDNA.24120.1 | 4.3   | 4.55  | 0.07 | 0.14 | -1.19 | 0.026808 | 0.005636 | 0.304808 | 0.10371  |
| MmugDNA.24121.1.S1_at   | MmugDNA.24121.1 | 5.92  | 5.8   | 0.23 | 0.08 | 1.08  | 0.870886 | 0.352078 | 0.948399 | 0.595431 |
| MmugDNA.24122.1.S1_at   | MmugDNA.24122.1 | 4.87  | 4.16  | 0.87 | 0.31 | 1.64  | 0.133503 | 0.104158 | 0.50015  | 0.365261 |
| MmugDNA.24123.1.S1_at   | MmugDNA.24123.1 | 12.45 | 12.62 | 0.16 | 0.04 | -1.12 | 0.144987 | 0.291874 | 0.511188 | 0.552094 |
| MmugDNA.24124.1.S1_at   | MmugDNA.24124.1 | 8.09  | 8.81  | 0.23 | 0.59 | -1.64 | 0.152783 | 0.116421 | 0.517325 | 0.383671 |
| MmugDNA.24125.1.S1_s_at | MmugDNA.24125.1 | 9.13  | 8.34  | 0.23 | 0.47 | 1.73  | 0.044557 | 0.021089 | 0.358786 | 0.181869 |
| MmugDNA.24126.1.S1_at   | MmugDNA.24126.1 | 5.07  | 5     | 0.35 | 0.28 | 1.05  | 0.440342 | 0.522265 | 0.724222 | 0.713019 |
| MmugDNA.24128.1.S1_at   | MmugDNA.24128.1 | 3.75  | 4.49  | 0.06 | 0.55 | -1.67 | 0.028429 | 0.011719 | 0.311219 | 0.140206 |
| MmugDNA.24129.1.S1_at   | MmugDNA.24129.1 | 6.68  | 7.22  | 0.11 | 0.45 | -1.45 | 0.110348 | 0.086415 | 0.471863 | 0.338882 |
| MmugDNA.24130.1.S1_at   | MmugDNA.24130.1 | 11.17 | 11.24 | 0.08 | 0.76 | -1.05 | 0.958763 | 0.959022 | 0.984371 | 0.976779 |
| MmugDNA.24131.1.S1_at   | MmugDNA.24131.1 | 10.07 | 9.74  | 0.07 | 0.18 | 1.26  | 0.033934 | 0.016298 | 0.330557 | 0.161803 |
| MmugDNA.24132.1.S1_at   | MmugDNA.24132.1 | 10.03 | 9.54  | 0.18 | 0.08 | 1.4   | 0.00986  | 0.001783 | 0.226637 | 0.063434 |
| MmugDNA.24133.1.S1_at   | MmugDNA.24133.1 | 3.84  | 3.72  | 0.87 | 0.18 | 1.09  | 0.294976 | 0.268052 | 0.631503 | 0.533832 |
| MmugDNA.24134.1.S1_at   | MmugDNA.24134.1 | 7.01  | 7.28  | 0.8  | 0.49 | -1.2  | 0.491618 | 0.638855 | 0.755132 | 0.787894 |
| MmugDNA.24136.1.S1_at   | MmugDNA.24136.1 | 5.69  | 5.58  | 1.53 | 0.45 | 1.08  | 0.660937 | 0.612712 | 0.847945 | 0.770151 |
| MmugDNA.24137.1.S1_at   | MmugDNA.24137.1 | 4.28  | 4.44  | 0.02 | 0.17 | -1.12 | 0.58993  | 0.469207 | 0.809673 | 0.678155 |
| MmugDNA.24138.1.S1_at   | MmugDNA.24138.1 | 4.91  | 4.86  | 0.79 | 0.41 | 1.04  | 0.582555 | 0.706795 | 0.805828 | 0.829922 |

|                         |                 |       |       |      |      |       |          |          |          |          |
|-------------------------|-----------------|-------|-------|------|------|-------|----------|----------|----------|----------|
| MmugDNA.24139.1.S1_at   | MmugDNA.24139.1 | 8.15  | 8.44  | 0.23 | 0.07 | -1.22 | 0.136146 | 0.130161 | 0.503003 | 0.401855 |
| MmugDNA.24140.1.S1_at   | MmugDNA.24140.1 | 6.29  | 6.51  | 0.67 | 0.38 | -1.16 | 0.718276 | 0.343602 | 0.876382 | 0.589322 |
| MmugDNA.24141.1.S1_at   | MmugDNA.24141.1 | 7.41  | 7.99  | 0.25 | 1.05 | -1.49 | 0.134273 | 0.120323 | 0.500798 | 0.38925  |
| MmugDNA.24142.1.S1_at   | MmugDNA.24142.1 | 4.53  | 4.63  | 0.16 | 0.1  | -1.07 | 0.559864 | 0.708467 | 0.794172 | 0.830919 |
| MmugDNA.24143.1.S1_at   | MmugDNA.24143.1 | 4.59  | 4.59  | 0.17 | 0.06 | 1     | 0.941361 | 0.870458 | 0.977687 | 0.926446 |
| MmugDNA.24143.1.S1_s_at | MmugDNA.24143.1 | 3.99  | 4.05  | 0.06 | 0.12 | -1.04 | 0.115543 | 0.13721  | 0.478809 | 0.410063 |
| MmugDNA.24145.1.S1_at   | MmugDNA.24145.1 | 3.31  | 3.5   | 0.12 | 0.09 | -1.14 | 0.044368 | 0.06884  | 0.358532 | 0.308714 |
| MmugDNA.24149.1.S1_at   | MmugDNA.24149.1 | 4.37  | 4.36  | 0.01 | 0.05 | 1     | 0.679482 | 0.192255 | 0.856645 | 0.467715 |
| MmugDNA.2415.1.S1_at    | MmugDNA.2415.1  | 8.06  | 7.5   | 0.07 | 0.31 | 1.47  | 0.102834 | 0.037514 | 0.46254  | 0.23801  |
| MmugDNA.24150.1.S1_at   | MmugDNA.24150.1 | 11.9  | 11.23 | 0.65 | 0.06 | 1.59  | 0.511562 | 0.071272 | 0.765318 | 0.313318 |
| MmugDNA.24152.1.S1_at   | MmugDNA.24152.1 | 9.36  | 8.87  | 0.17 | 0.09 | 1.41  | 0.016026 | 0.001966 | 0.262409 | 0.065838 |
| MmugDNA.24153.1.S1_at   | MmugDNA.24153.1 | 7.35  | 6.78  | 0.25 | 0.27 | 1.49  | 0.084191 | 0.097399 | 0.436904 | 0.355097 |
| MmugDNA.24154.1.S1_at   | MmugDNA.24154.1 | 6.59  | 6.07  | 1.27 | 0.34 | 1.44  | 0.513528 | 0.717688 | 0.766403 | 0.836543 |
| MmugDNA.24155.1.S1_at   | MmugDNA.24155.1 | 7.2   | 8.36  | 0.3  | 1.02 | -2.24 | 0.137434 | 0.150266 | 0.504538 | 0.424877 |
| MmugDNA.24156.1.S1_at   | MmugDNA.24156.1 | 3.91  | 3.59  | 0.49 | 0.19 | 1.25  | 0.232171 | 0.303027 | 0.587814 | 0.560475 |
| MmugDNA.24159.1.S1_at   | MmugDNA.24159.1 | 3.86  | 4     | 0.1  | 0.12 | -1.1  | 0.239571 | 0.16436  | 0.592595 | 0.440612 |
| MmugDNA.24162.1.S1_at   | MmugDNA.24162.1 | 3.8   | 3.57  | 0.33 | 0.21 | 1.18  | 0.247391 | 0.090465 | 0.598469 | 0.344952 |
| MmugDNA.24163.1.S1_at   | MmugDNA.24163.1 | 4.88  | 4.77  | 0.13 | 0.16 | 1.09  | 0.786948 | 0.134624 | 0.911405 | 0.406629 |
| MmugDNA.24164.1.S1_at   | MmugDNA.24164.1 | 6.71  | 7.46  | 0.77 | 0.9  | -1.69 | 0.930057 | 0.958096 | 0.972958 | 0.976277 |
| MmugDNA.24165.1.S1_at   | MmugDNA.24165.1 | 6.79  | 6.17  | 0.21 | 0.17 | 1.54  | 0.010631 | 0.011852 | 0.230991 | 0.140973 |
| MmugDNA.24166.1.S1_at   | MmugDNA.24166.1 | 11.11 | 11.93 | 0.19 | 0.3  | -1.77 | 0.016655 | 0.008755 | 0.26475  | 0.124009 |
| MmugDNA.23302.1.S1_s_at | MmugDNA.23302.1 | 14.32 | 14.31 | 0.04 | 0.07 | 1     | 0.561706 | 0.590554 | 0.79493  | 0.756311 |
| MmugDNA.24168.1.S1_at   | MmugDNA.24168.1 | 5.09  | 5.11  | 0.1  | 0.08 | -1.02 | 0.600228 | 0.357595 | 0.815185 | 0.599221 |
| MmugDNA.2417.1.S1_at    | MmugDNA.2417.1  | 9.65  | 8.86  | 0.14 | 0.56 | 1.73  | 0.067855 | 0.060554 | 0.408606 | 0.292748 |
| MmugDNA.24170.1.S1_at   | MmugDNA.24170.1 | 3.81  | 3.87  | 0.17 | 0.05 | -1.04 | 0.722205 | 0.956686 | 0.878635 | 0.975395 |
| MmugDNA.24171.1.S1_at   | MmugDNA.24171.1 | 3.12  | 3.19  | 0.2  | 0.09 | -1.05 | 0.533499 | 0.562241 | 0.77827  | 0.737898 |
| MmugDNA.24173.1.S1_at   | MmugDNA.24173.1 | 7.21  | 7.56  | 0.94 | 0.27 | -1.28 | 0.759579 | 0.422236 | 0.898447 | 0.645596 |
| MmugDNA.24175.1.S1_at   | MmugDNA.24175.1 | 4.31  | 4.13  | 0.18 | 0.08 | 1.13  | 0.459756 | 0.801247 | 0.736493 | 0.88568  |
| MmugDNA.24176.1.S1_at   | MmugDNA.24176.1 | 5.88  | 5.95  | 0.15 | 0.2  | -1.05 | 0.249896 | 0.337686 | 0.600389 | 0.584863 |
| MmugDNA.24177.1.S1_at   | MmugDNA.24177.1 | 5.42  | 5.65  | 0.35 | 0.45 | -1.17 | 0.211132 | 0.065874 | 0.571977 | 0.302111 |
| MmugDNA.24178.1.S1_at   | MmugDNA.24178.1 | 8.2   | 8.05  | 1.35 | 2.68 | 1.11  | 0.831349 | 0.922371 | 0.931682 | 0.956288 |
| MmugDNA.24179.1.S1_at   | MmugDNA.24179.1 | 10.62 | 10.72 | 0.12 | 0.43 | -1.07 | 0.867534 | 0.174732 | 0.947135 | 0.451299 |
| MmugDNA.2418.1.S1_at    | MmugDNA.2418.1  | 6.08  | 6.39  | 0.19 | 0.17 | -1.23 | 0.116386 | 0.14888  | 0.480083 | 0.42326  |
| MmugDNA.24182.1.S1_at   | MmugDNA.24182.1 | 5.43  | 5.46  | 0.31 | 0.11 | -1.02 | 0.595517 | 0.761478 | 0.812376 | 0.861416 |
| MmugDNA.24183.1.S1_at   | MmugDNA.24183.1 | 6.39  | 6.6   | 0.07 | 0.11 | -1.16 | 0.045947 | 0.04581  | 0.362058 | 0.258337 |
| MmugDNA.24184.1.S1_at   | MmugDNA.24184.1 | 6.67  | 5.46  | 0.21 | 0.43 | 2.31  | 0.005316 | 0.001376 | 0.191107 | 0.05691  |
| MmugDNA.24186.1.S1_at   | MmugDNA.24186.1 | 3.38  | 3.39  | 0.1  | 0.14 | -1    | 0.910019 | 0.719768 | 0.964362 | 0.837888 |
| MmugDNA.24189.1.S1_at   | MmugDNA.24189.1 | 6.02  | 6.02  | 0.09 | 0.14 | -1    | 0.590693 | 0.791554 | 0.809954 | 0.879606 |
| MmugDNA.24193.1.S1_at   | MmugDNA.24193.1 | 6.75  | 6.29  | 0.37 | 0.45 | 1.38  | 0.326659 | 0.314026 | 0.653184 | 0.568178 |
| MmugDNA.24194.1.S1_at   | MmugDNA.24194.1 | 5.41  | 5.6   | 0.19 | 0.23 | -1.14 | 0.775855 | 0.368338 | 0.905981 | 0.607917 |
| MmugDNA.24195.1.S1_at   | MmugDNA.24195.1 | 6.04  | 6.29  | 0.07 | 0.11 | -1.19 | 0.124825 | 0.087477 | 0.49077  | 0.340617 |

|                         |                 |       |       |      |      |       |          |          |          |          |
|-------------------------|-----------------|-------|-------|------|------|-------|----------|----------|----------|----------|
| MmugDNA.24196.1.S1_at   | MmugDNA.24196.1 | 8.86  | 8.83  | 0.11 | 0.14 | 1.02  | 0.334857 | 0.369726 | 0.658572 | 0.609048 |
| MmugDNA.24197.1.S1_at   | MmugDNA.24197.1 | 4.41  | 4.72  | 0.34 | 0.27 | -1.24 | 0.126069 | 0.131704 | 0.492146 | 0.403854 |
| MmugDNA.24199.1.S1_at   | MmugDNA.24199.1 | 8.1   | 10.57 | 0.87 | 1.13 | -5.56 | 0.080167 | 0.064076 | 0.430341 | 0.299311 |
| MmugDNA.242.1.S1_at     | MmugDNA.242.1   | 10.2  | 11.15 | 0.21 | 0.86 | -1.94 | 0.340857 | 0.298279 | 0.662186 | 0.556936 |
| MmugDNA.2420.1.S1_at    | MmugDNA.2420.1  | 7.68  | 7.3   | 0.51 | 0.32 | 1.3   | 0.127342 | 0.176535 | 0.493834 | 0.452925 |
| MmugDNA.24200.1.S1_at   | MmugDNA.24200.1 | 6.54  | 6.43  | 0.26 | 0.1  | 1.09  | 0.502764 | 0.218754 | 0.760493 | 0.492438 |
| MmugDNA.24201.1.S1_at   | MmugDNA.24201.1 | 5.33  | 5.24  | 0.2  | 0.06 | 1.06  | 0.570744 | 0.687216 | 0.799645 | 0.817518 |
| MmugDNA.24202.1.S1_at   | MmugDNA.24202.1 | 6.2   | 6.26  | 0.18 | 0.12 | -1.05 | 0.932744 | 0.972718 | 0.973957 | 0.985334 |
| MmugDNA.24204.1.S1_at   | MmugDNA.24204.1 | 7.51  | 7.51  | 0.35 | 0.88 | 1     | 0.904203 | 0.972002 | 0.961669 | 0.984884 |
| MmugDNA.24207.1.S1_at   | MmugDNA.24207.1 | 6.63  | 6.78  | 0.17 | 0.22 | -1.11 | 0.370209 | 0.13952  | 0.681113 | 0.412743 |
| MmugDNA.24209.1.S1_at   | MmugDNA.24209.1 | 5.15  | 4.62  | 0.66 | 0.1  | 1.45  | 0.281224 | 0.382487 | 0.622129 | 0.618714 |
| MmugDNA.2421.1.S1_at    | MmugDNA.2421.1  | 5.31  | 5.36  | 0.22 | 0.09 | -1.04 | 0.463008 | 0.260243 | 0.738524 | 0.526807 |
| MmugDNA.24211.1.S1_at   | MmugDNA.24211.1 | 2.94  | 2.85  | 0.15 | 0.05 | 1.06  | 0.561396 | 0.258439 | 0.794874 | 0.525699 |
| MmugDNA.24213.1.S1_at   | MmugDNA.24213.1 | 8.51  | 8.34  | 0.19 | 0.24 | 1.13  | 0.184944 | 0.083219 | 0.548379 | 0.333211 |
| MmugDNA.24214.1.S1_at   | MmugDNA.24214.1 | 8.26  | 7.27  | 0.5  | 0.8  | 2     | 0.65367  | 0.220364 | 0.844257 | 0.493783 |
| MmugDNA.24216.1.S1_at   | MmugDNA.24216.1 | 3.55  | 3.52  | 0.29 | 0.22 | 1.02  | 0.801942 | 0.903862 | 0.918289 | 0.945424 |
| MmugDNA.24217.1.S1_at   | MmugDNA.24217.1 | 7.1   | 8.09  | 0.37 | 0.37 | -2    | 0.0173   | 0.006472 | 0.267101 | 0.109304 |
| MmugDNA.24218.1.S1_at   | MmugDNA.24218.1 | 6.41  | 5.54  | 0.56 | 0.87 | 1.82  | 0.151183 | 0.158928 | 0.515947 | 0.435097 |
| MmugDNA.24219.1.S1_at   | MmugDNA.24219.1 | 5.22  | 5.26  | 0.56 | 0.32 | -1.03 | 0.671574 | 0.017936 | 0.852716 | 0.168998 |
| MmugDNA.2422.1.S1_at    | MmugDNA.2422.1  | 3.25  | 3.32  | 0.24 | 0.07 | -1.05 | 0.683649 | 0.89652  | 0.85844  | 0.940905 |
| MmugDNA.24220.1.S1_at   | MmugDNA.24220.1 | 3.87  | 4.29  | 0.03 | 0.29 | -1.34 | 0.196859 | 0.18423  | 0.559876 | 0.460382 |
| MmugDNA.24221.1.S1_at   | MmugDNA.24221.1 | 3.51  | 3.53  | 0.12 | 0.09 | -1.01 | 0.429718 | 0.332457 | 0.71769  | 0.58087  |
| MmugDNA.24222.1.S1_at   | MmugDNA.24222.1 | 11.23 | 11.22 | 0.04 | 0.25 | 1.01  | 0.729365 | 0.545517 | 0.882512 | 0.727564 |
| MmugDNA.24223.1.S1_at   | MmugDNA.24223.1 | 6.88  | 6.97  | 1.2  | 0.44 | -1.07 | 0.866561 | 0.754811 | 0.946778 | 0.857323 |
| MmugDNA.24225.1.S1_at   | MmugDNA.24225.1 | 12.29 | 12.33 | 0.05 | 0.2  | -1.03 | 0.866508 | 0.323768 | 0.946759 | 0.574609 |
| MmugDNA.24226.1.S1_at   | MmugDNA.24226.1 | 13.4  | 13.16 | 0.07 | 0.26 | 1.18  | 0.243954 | 0.28347  | 0.595699 | 0.545959 |
| MmugDNA.24227.1.S1_at   | MmugDNA.24227.1 | 10.16 | 10.36 | 0.23 | 0.23 | -1.15 | 0.161171 | 0.120491 | 0.526204 | 0.38925  |
| MmugDNA.24229.1.S1_at   | MmugDNA.24229.1 | 4.16  | 4.42  | 0.13 | 0.18 | -1.19 | 0.143144 | 0.209381 | 0.510028 | 0.483069 |
| MmugDNA.2423.1.S1_at    | MmugDNA.2423.1  | 3.27  | 3.39  | 0.22 | 0.22 | -1.09 | 0.532207 | 0.691027 | 0.777626 | 0.820095 |
| MmugDNA.24232.1.S1_s_at | MmugDNA.24232.1 | 8.72  | 8.74  | 0.14 | 0.03 | -1.02 | 0.392253 | 0.511539 | 0.694576 | 0.705677 |
| MmugDNA.24233.1.S1_at   | MmugDNA.24233.1 | 4.28  | 4.45  | 0.02 | 0.11 | -1.13 | 0.182803 | 0.135754 | 0.547126 | 0.407925 |
| MmugDNA.24234.1.S1_at   | MmugDNA.24234.1 | 7.06  | 6.59  | 0.28 | 0.25 | 1.39  | 0.043938 | 0.046194 | 0.35746  | 0.25935  |
| MmugDNA.24235.1.S1_at   | MmugDNA.24235.1 | 7.95  | 7.77  | 0.25 | 0.44 | 1.13  | 0.251764 | 0.132586 | 0.601071 | 0.404544 |
| MmugDNA.24236.1.S1_at   | MmugDNA.24236.1 | 7.15  | 8.43  | 0.36 | 0.75 | -2.43 | 0.017647 | 0.008419 | 0.267454 | 0.121839 |
| MmugDNA.24237.1.S1_at   | MmugDNA.24237.1 | 5.76  | 7.04  | 0.56 | 1.04 | -2.41 | 0.224253 | 0.218092 | 0.582619 | 0.491683 |
| MmugDNA.24239.1.S1_at   | MmugDNA.24239.1 | 3.28  | 3.27  | 0.12 | 0.14 | 1.01  | 0.495991 | 0.6653   | 0.757394 | 0.803874 |
| MmugDNA.2424.1.S1_at    | MmugDNA.2424.1  | 5.1   | 4.49  | 0.85 | 0.15 | 1.52  | 0.090416 | 0.058737 | 0.445834 | 0.28904  |
| MmugDNA.24240.1.S1_x_at | MmugDNA.24240.1 | 12.74 | 12.51 | 0.41 | 0.2  | 1.17  | 0.148702 | 0.180752 | 0.51391  | 0.457294 |
| MmugDNA.24241.1.S1_at   | MmugDNA.24241.1 | 3.9   | 3.67  | 0.4  | 0.21 | 1.17  | 0.668742 | 0.12974  | 0.851986 | 0.401362 |
| MmugDNA.24242.1.S1_at   | MmugDNA.24242.1 | 3.48  | 3.63  | 0.06 | 0.39 | -1.12 | 0.597555 | 0.723889 | 0.813537 | 0.840177 |
| MmugDNA.24244.1.S1_at   | MmugDNA.24244.1 | 5.61  | 5.47  | 0.23 | 0.23 | 1.1   | 0.219411 | 0.182575 | 0.578771 | 0.459065 |

|                         |                 |       |       |      |      |       |          |          |          |          |
|-------------------------|-----------------|-------|-------|------|------|-------|----------|----------|----------|----------|
| MmugDNA.24245.1.S1_at   | MmugDNA.24245.1 | 2.95  | 3.06  | 0.1  | 0.06 | -1.08 | 0.342805 | 0.185776 | 0.663407 | 0.461631 |
| MmugDNA.24247.1.S1_at   | MmugDNA.24247.1 | 8.16  | 8.73  | 0.49 | 0.33 | -1.48 | 0.20546  | 0.043477 | 0.567961 | 0.253152 |
| MmugDNA.24248.1.S1_at   | MmugDNA.24248.1 | 4.28  | 3.98  | 0.41 | 0.34 | 1.23  | 0.423836 | 0.466365 | 0.714199 | 0.67624  |
| MmugDNA.24249.1.S1_at   | MmugDNA.24249.1 | 6.5   | 6.78  | 0.2  | 0.03 | -1.22 | 0.236713 | 0.291546 | 0.590504 | 0.551927 |
| MmugDNA.24250.1.S1_at   | MmugDNA.24250.1 | 3.49  | 3.39  | 0.18 | 0.01 | 1.07  | 0.937475 | 0.232627 | 0.975871 | 0.504359 |
| MmugDNA.10242.1.S1_s_at | MmugDNA.10242.1 | 6.29  | 6.3   | 0.16 | 0.07 | -1.01 | 0.543896 | 0.542907 | 0.78417  | 0.725841 |
| MmugDNA.24253.1.S1_at   | MmugDNA.24253.1 | 10.98 | 10.4  | 0.1  | 0.39 | 1.49  | 0.083386 | 0.078797 | 0.43582  | 0.325757 |
| MmugDNA.24254.1.S1_at   | MmugDNA.24254.1 | 4.75  | 5.26  | 0.75 | 0.37 | -1.43 | 0.977142 | 0.642447 | 0.991249 | 0.790222 |
| MmugDNA.24255.1.S1_at   | MmugDNA.24255.1 | 8.38  | 8     | 0.3  | 0.22 | 1.3   | 0.060551 | 0.000776 | 0.393743 | 0.045626 |
| MmugDNA.24256.1.S1_at   | MmugDNA.24256.1 | 10.82 | 11.22 | 0.25 | 0.63 | -1.32 | 0.837757 | 0.738451 | 0.934478 | 0.848307 |
| MmugDNA.24257.1.S1_at   | MmugDNA.24257.1 | 8.75  | 8.59  | 0.27 | 0.43 | 1.12  | 0.446846 | 0.527813 | 0.72864  | 0.716283 |
| MmugDNA.24258.1.S1_at   | MmugDNA.24258.1 | 5.61  | 5.23  | 0.37 | 0.31 | 1.3   | 0.079057 | 0.145457 | 0.428609 | 0.419421 |
| MmugDNA.24259.1.S1_at   | MmugDNA.24259.1 | 8.27  | 7.71  | 0.43 | 0.28 | 1.48  | 0.057667 | 0.049904 | 0.388861 | 0.268519 |
| MmugDNA.2426.1.S1_at    | MmugDNA.2426.1  | 6.46  | 6.6   | 0.13 | 0.12 | -1.1  | 0.127384 | 0.326041 | 0.493834 | 0.576285 |
| MmugDNA.24260.1.S1_at   | MmugDNA.24260.1 | 12.29 | 12.08 | 0.07 | 0.33 | 1.15  | 0.346722 | 0.472749 | 0.666013 | 0.680089 |
| MmugDNA.24261.1.S1_at   | MmugDNA.24261.1 | 5.15  | 5.29  | 0.1  | 0.12 | -1.1  | 0.098747 | 0.137305 | 0.458602 | 0.410231 |
| MmugDNA.24262.1.S1_at   | MmugDNA.24262.1 | 5.65  | 5.15  | 0.4  | 0.62 | 1.42  | 0.974757 | 0.243364 | 0.990134 | 0.513385 |
| MmugDNA.24264.1.S1_at   | MmugDNA.24264.1 | 3.35  | 3.33  | 0.82 | 0.19 | 1.01  | 0.285028 | 0.338049 | 0.624632 | 0.585223 |
| MmugDNA.24265.1.S1_at   | MmugDNA.24265.1 | 2.98  | 2.98  | 0.07 | 0.07 | -1    | 0.537455 | 0.76197  | 0.780029 | 0.861597 |
| MmugDNA.24268.1.S1_at   | MmugDNA.24268.1 | 5.63  | 5.86  | 0.18 | 0.1  | -1.17 | 0.08768  | 0.267852 | 0.442009 | 0.533607 |
| MmugDNA.24269.1.S1_at   | MmugDNA.24269.1 | 11.16 | 10.92 | 0.14 | 0.27 | 1.18  | 0.482182 | 0.461829 | 0.749398 | 0.673361 |
| MmugDNA.24270.1.S1_at   | MmugDNA.24270.1 | 9.2   | 9.54  | 0.26 | 0.47 | -1.27 | 0.297746 | 0.359336 | 0.633515 | 0.600635 |
| MmugDNA.24271.1.S1_at   | MmugDNA.24271.1 | 3.61  | 3.46  | 0.13 | 0.16 | 1.11  | 0.215251 | 0.385912 | 0.575639 | 0.621161 |
| MmugDNA.24272.1.S1_at   | MmugDNA.24272.1 | 3.73  | 3.77  | 0.1  | 0.3  | -1.03 | 0.613201 | 0.795398 | 0.822591 | 0.882153 |
| MmugDNA.24273.1.S1_at   | MmugDNA.24273.1 | 5.42  | 5.08  | 0.61 | 0.26 | 1.27  | 0.149893 | 0.190968 | 0.51445  | 0.46629  |
| MmugDNA.24276.1.S1_at   | MmugDNA.24276.1 | 4.06  | 3.96  | 0.23 | 0.14 | 1.07  | 0.581412 | 0.673523 | 0.805122 | 0.809257 |
| MmugDNA.24277.1.S1_at   | MmugDNA.24277.1 | 7.98  | 8.37  | 0.21 | 0.35 | -1.31 | 0.068283 | 0.056883 | 0.409933 | 0.284636 |
| MmugDNA.24279.1.S1_at   | MmugDNA.24279.1 | 4.06  | 4.28  | 0.3  | 0.41 | -1.16 | 0.769725 | 0.920349 | 0.903186 | 0.95511  |
| MmugDNA.2428.1.S1_at    | MmugDNA.2428.1  | 5.66  | 5.59  | 0.19 | 0.21 | 1.05  | 0.618999 | 0.72871  | 0.825395 | 0.843181 |
| MmugDNA.24280.1.S1_at   | MmugDNA.24280.1 | 7.08  | 7.05  | 0.11 | 0.16 | 1.02  | 0.800978 | 0.23065  | 0.917935 | 0.502361 |
| MmugDNA.24281.1.S1_at   | MmugDNA.24281.1 | 5.23  | 5.34  | 0.26 | 0.05 | -1.08 | 0.530694 | 0.319275 | 0.776893 | 0.571722 |
| MmugDNA.24282.1.S1_at   | MmugDNA.24282.1 | 6.87  | 6.03  | 0.45 | 0.94 | 1.78  | 0.470155 | 0.651166 | 0.742165 | 0.796057 |
| MmugDNA.24283.1.S1_at   | MmugDNA.24283.1 | 9.26  | 9.27  | 0.08 | 0.37 | -1    | 0.822244 | 0.900479 | 0.927632 | 0.943447 |
| MmugDNA.24284.1.S1_at   | MmugDNA.24284.1 | 5.09  | 5.21  | 0.08 | 0.12 | -1.09 | 0.582947 | 0.002573 | 0.806087 | 0.075105 |
| MmugDNA.24285.1.S1_at   | MmugDNA.24285.1 | 5.68  | 5.64  | 0.19 | 0.18 | 1.03  | 0.758876 | 0.294102 | 0.898097 | 0.553936 |
| MmugDNA.24288.1.S1_s_at | MmugDNA.24288.1 | 7.07  | 7.03  | 0.1  | 0.19 | 1.03  | 0.635267 | 0.294061 | 0.83494  | 0.553912 |
| MmugDNA.24289.1.S1_at   | MmugDNA.24289.1 | 3.35  | 3.43  | 0.15 | 0.07 | -1.06 | 0.275321 | 0.096459 | 0.617789 | 0.35409  |
| MmugDNA.2429.1.S1_at    | MmugDNA.2429.1  | 5.74  | 6.52  | 0.29 | 1.1  | -1.72 | 0.3187   | 0.431325 | 0.648651 | 0.652268 |
| MmugDNA.24290.1.S1_at   | MmugDNA.24290.1 | 6.93  | 6.44  | 0.24 | 0.43 | 1.4   | 0.092126 | 0.061437 | 0.448698 | 0.294704 |
| MmugDNA.24292.1.S1_at   | MmugDNA.24292.1 | 4.74  | 4.7   | 0.19 | 0.01 | 1.03  | 0.707314 | 0.856708 | 0.871064 | 0.918126 |
| MmugDNA.24293.1.S1_at   | MmugDNA.24293.1 | 8.41  | 8.06  | 0.26 | 0.07 | 1.28  | 0.086281 | 0.029916 | 0.440224 | 0.214643 |

|                         |                 |       |       |      |      |       |          |          |          |          |
|-------------------------|-----------------|-------|-------|------|------|-------|----------|----------|----------|----------|
| MmugDNA.24294.1.S1_at   | MmugDNA.24294.1 | 6.55  | 6.72  | 0.1  | 0.13 | -1.13 | 0.166117 | 0.042239 | 0.529918 | 0.249997 |
| MmugDNA.24295.1.S1_at   | MmugDNA.24295.1 | 5.23  | 5.22  | 0.13 | 0.2  | 1.01  | 0.534749 | 0.505027 | 0.778804 | 0.70197  |
| MmugDNA.24296.1.S1_at   | MmugDNA.24296.1 | 8.72  | 8.56  | 0.46 | 0.43 | 1.12  | 0.627745 | 0.707154 | 0.830307 | 0.830195 |
| MmugDNA.24296.1.S1_s_at | MmugDNA.24296.1 | 8.68  | 8.44  | 0.66 | 0.42 | 1.19  | 0.870376 | 0.523449 | 0.948231 | 0.713714 |
| MmugDNA.24297.1.S1_at   | MmugDNA.24297.1 | 7.25  | 7.56  | 0.18 | 0.17 | -1.24 | 0.214255 | 0.259476 | 0.574692 | 0.526418 |
| MmugDNA.24297.1.S1_s_at | MmugDNA.24297.1 | 7.42  | 7.57  | 0.18 | 0.36 | -1.11 | 0.572652 | 0.495785 | 0.80088  | 0.695734 |
| MmugDNA.24298.1.S1_at   | MmugDNA.24298.1 | 4.17  | 3.79  | 0.22 | 0.24 | 1.3   | 0.117711 | 0.159774 | 0.481864 | 0.435871 |
| MmugDNA.24299.1.S1_at   | MmugDNA.24299.1 | 7.93  | 7.61  | 0.42 | 0.09 | 1.26  | 0.177781 | 0.170585 | 0.541903 | 0.447204 |
| MmugDNA.24299.1.S1_x_at | MmugDNA.24299.1 | 8.19  | 7.92  | 0.67 | 0.17 | 1.21  | 0.172337 | 0.179754 | 0.53579  | 0.456267 |
| MmugDNA.243.1.S1_at     | MmugDNA.243.1   | 3.59  | 3.72  | 0.09 | 0.03 | -1.1  | 0.067695 | 0.049565 | 0.408357 | 0.267592 |
| MmugDNA.2430.1.S1_at    | MmugDNA.2430.1  | 3.42  | 3.44  | 0.4  | 0.11 | -1.02 | 0.403084 | 0.454018 | 0.701829 | 0.668366 |
| MmugDNA.24300.1.S1_at   | MmugDNA.24300.1 | 11.43 | 11.16 | 0.34 | 0.84 | 1.2   | 0.14616  | 0.139575 | 0.512187 | 0.412837 |
| MmugDNA.24301.1.S1_at   | MmugDNA.24301.1 | 3.23  | 3.51  | 0.09 | 0.16 | -1.22 | 0.151686 | 0.096851 | 0.516346 | 0.354254 |
| MmugDNA.24302.1.S1_at   | MmugDNA.24302.1 | 10.45 | 10.09 | 0.32 | 0.41 | 1.28  | 0.811675 | 0.014836 | 0.923289 | 0.154918 |
| MmugDNA.24303.1.S1_at   | MmugDNA.24303.1 | 7.06  | 8.13  | 0.39 | 0.23 | -2.09 | 0.032167 | 0.025132 | 0.3244   | 0.198651 |
| MmugDNA.24304.1.S1_at   | MmugDNA.24304.1 | 5.79  | 5.8   | 0.5  | 0.14 | -1.01 | 0.392927 | 0.520295 | 0.694885 | 0.711612 |
| MmugDNA.24307.1.S1_s_at | MmugDNA.24307.1 | 9.74  | 9.8   | 0.04 | 0.32 | -1.04 | 0.258963 | 0.010889 | 0.606157 | 0.135939 |
| MmugDNA.24309.1.S1_at   | MmugDNA.24309.1 | 4.92  | 5.83  | 0.32 | 1.39 | -1.88 | 0.24886  | 0.035911 | 0.599659 | 0.234002 |
| MmugDNA.24310.1.S1_at   | MmugDNA.24310.1 | 5.48  | 5.55  | 0.25 | 0.23 | -1.05 | 0.414949 | 0.54808  | 0.709338 | 0.728874 |
| MmugDNA.24311.1.S1_at   | MmugDNA.24311.1 | 6.52  | 6.39  | 0.01 | 0    | 1.09  | 0.000129 | 0.008913 | 0.112653 | 0.12491  |
| MmugDNA.24312.1.S1_s_at | MmugDNA.24312.1 | 9.27  | 8.98  | 0.51 | 0.31 | 1.22  | 0.467579 | 0.401908 | 0.740736 | 0.63109  |
| MmugDNA.24313.1.S1_at   | MmugDNA.24313.1 | 4.56  | 4.32  | 0.23 | 0.06 | 1.19  | 0.158343 | 0.156936 | 0.523176 | 0.432372 |
| MmugDNA.24314.1.S1_at   | MmugDNA.24314.1 | 5.93  | 5.95  | 0.05 | 0.04 | -1.01 | 0.804442 | 0.057457 | 0.919555 | 0.285751 |
| MmugDNA.24315.1.S1_s_at | MmugDNA.24315.1 | 7.5   | 7.51  | 0.04 | 0.31 | -1.01 | 0.896038 | 0.339084 | 0.958557 | 0.585891 |
| MmugDNA.24316.1.S1_at   | MmugDNA.24316.1 | 5.24  | 4.97  | 0.74 | 0.13 | 1.2   | 0.278492 | 0.084077 | 0.620536 | 0.335065 |
| MmugDNA.24317.1.S1_at   | MmugDNA.24317.1 | 3.22  | 3.19  | 0.14 | 0    | 1.02  | 0.999123 | 0.97952  | 0.99976  | 0.988986 |
| MmugDNA.24318.1.S1_at   | MmugDNA.24318.1 | 11.65 | 11.54 | 0.29 | 0.31 | 1.07  | 0.859911 | 0.139142 | 0.943454 | 0.412266 |
| MmugDNA.24319.1.S1_at   | MmugDNA.24319.1 | 7.53  | 7.77  | 0.09 | 0.21 | -1.19 | 0.110874 | 0.137154 | 0.472762 | 0.410034 |
| MmugDNA.2432.1.S1_at    | MmugDNA.2432.1  | 5.71  | 5.65  | 0.09 | 0.07 | 1.04  | 0.349481 | 0.078562 | 0.667798 | 0.325285 |
| MmugDNA.24320.1.S1_at   | MmugDNA.24320.1 | 2.82  | 2.8   | 0.12 | 0.08 | 1.01  | 0.398722 | 0.693523 | 0.698864 | 0.82172  |
| MmugDNA.24321.1.S1_at   | MmugDNA.24321.1 | 3.7   | 3.69  | 0.24 | 0.04 | 1     | 0.452583 | 0.155305 | 0.732213 | 0.430664 |
| MmugDNA.24322.1.S1_at   | MmugDNA.24322.1 | 3.31  | 3.32  | 0.58 | 0.32 | -1.01 | 0.447625 | 0.28526  | 0.729146 | 0.54718  |
| MmugDNA.24323.1.S1_at   | MmugDNA.24323.1 | 4.29  | 3.92  | 0.23 | 0.1  | 1.29  | 0.088266 | 0.104243 | 0.44292  | 0.365376 |
| MmugDNA.24324.1.S1_at   | MmugDNA.24324.1 | 4.76  | 4.43  | 0.39 | 0.45 | 1.25  | 0.530564 | 0.655713 | 0.776893 | 0.7987   |
| MmugDNA.24326.1.S1_at   | MmugDNA.24326.1 | 3.33  | 3.41  | 0.09 | 0.43 | -1.06 | 0.281157 | 0.427752 | 0.622118 | 0.649503 |
| MmugDNA.24327.1.S1_at   | MmugDNA.24327.1 | 5.87  | 5.02  | 0.3  | 0.39 | 1.8   | 0.099808 | 0.097347 | 0.459718 | 0.355066 |
| MmugDNA.24329.1.S1_at   | MmugDNA.24329.1 | 8.19  | 7.9   | 0.3  | 0.27 | 1.22  | 0.079622 | 0.069782 | 0.430004 | 0.310316 |
| MmugDNA.2433.1.S1_at    | MmugDNA.2433.1  | 3.69  | 3.66  | 0.36 | 0.2  | 1.02  | 0.525888 | 0.736609 | 0.773971 | 0.847627 |
| MmugDNA.24331.1.S1_at   | MmugDNA.24331.1 | 10.37 | 10.67 | 0.17 | 0.17 | -1.22 | 0.104729 | 0.01721  | 0.465114 | 0.166206 |
| MmugDNA.24332.1.S1_at   | MmugDNA.24332.1 | 4.4   | 4.4   | 0.12 | 0.08 | -1    | 0.552429 | 0.279164 | 0.789494 | 0.542814 |
| MmugDNA.24334.1.S1_at   | MmugDNA.24334.1 | 4.97  | 4.91  | 0.24 | 0.09 | 1.04  | 0.865147 | 0.844126 | 0.945858 | 0.911248 |



|                         |                 |       |       |      |      |       |          |          |          |          |
|-------------------------|-----------------|-------|-------|------|------|-------|----------|----------|----------|----------|
| MmugDNA.24335.1.S1_at   | MmugDNA.24335.1 | 9.57  | 9.76  | 0.11 | 0.07 | -1.14 | 0.028687 | 0.052761 | 0.312031 | 0.275315 |
| MmugDNA.24336.1.S1_at   | MmugDNA.24336.1 | 3.58  | 3.55  | 0.17 | 0.1  | 1.02  | 0.60439  | 0.70704  | 0.817728 | 0.830116 |
| MmugDNA.24337.1.S1_at   | MmugDNA.24337.1 | 4.36  | 4.36  | 0.12 | 0.15 | 1     | 0.235479 | 0.207635 | 0.589395 | 0.481906 |
| MmugDNA.24338.1.S1_at   | MmugDNA.24338.1 | 10.69 | 11.45 | 0.07 | 0.11 | -1.7  | 0.000567 | 0.002719 | 0.136818 | 0.076776 |
| MmugDNA.24339.1.S1_at   | MmugDNA.24339.1 | 11.65 | 10.5  | 0.26 | 0.16 | 2.22  | 0.003351 | 0.000797 | 0.177442 | 0.046064 |
| MmugDNA.2434.1.S1_at    | MmugDNA.2434.1  | 2.87  | 2.84  | 0.25 | 0.14 | 1.02  | 0.693218 | 0.875964 | 0.863846 | 0.929526 |
| MmugDNA.24340.1.S1_at   | MmugDNA.24340.1 | 11.07 | 11.86 | 0.06 | 0.06 | -1.72 | 0.000065 | 0.000238 | 0.112653 | 0.032465 |
| MmugDNA.24344.1.S1_at   | MmugDNA.24344.1 | 4.85  | 4.92  | 0.47 | 0.25 | -1.05 | 0.809565 | 0.773052 | 0.922244 | 0.868023 |
| MmugDNA.24345.1.S1_at   | MmugDNA.24345.1 | 6.61  | 5.58  | 0.65 | 0.76 | 2.03  | 0.344074 | 0.307063 | 0.664205 | 0.563427 |
| MmugDNA.24346.1.S1_at   | MmugDNA.24346.1 | 7.5   | 7.44  | 0.06 | 0.17 | 1.04  | 0.645176 | 0.602546 | 0.840224 | 0.763472 |
| MmugDNA.24347.1.S1_s_at | MmugDNA.24347.1 | 6.08  | 6.95  | 0.06 | 1    | -1.82 | 0.10024  | 0.053412 | 0.460878 | 0.276707 |
| MmugDNA.24348.1.S1_at   | MmugDNA.24348.1 | 3.69  | 3.57  | 0.29 | 0.4  | 1.09  | 0.931949 | 0.894824 | 0.973717 | 0.939987 |
| MmugDNA.24349.1.S1_at   | MmugDNA.24349.1 | 5.67  | 5.59  | 0.23 | 0.23 | 1.06  | 0.383982 | 0.499351 | 0.689677 | 0.698217 |
| MmugDNA.2435.1.S1_at    | MmugDNA.2435.1  | 6.65  | 7.12  | 0.72 | 0.92 | -1.39 | 0.538506 | 0.681781 | 0.780615 | 0.81413  |
| MmugDNA.24351.1.S1_at   | MmugDNA.24351.1 | 9.89  | 9.49  | 0.06 | 0.25 | 1.32  | 0.131967 | 0.120401 | 0.498114 | 0.38925  |
| MmugDNA.24352.1.S1_at   | MmugDNA.24352.1 | 3.66  | 3.78  | 0.03 | 0.08 | -1.09 | 0.075547 | 0.068614 | 0.422804 | 0.308486 |
| MmugDNA.24353.1.S1_at   | MmugDNA.24353.1 | 6.29  | 8.26  | 0.85 | 2.22 | -3.91 | 0.480138 | 0.151065 | 0.748124 | 0.425719 |
| MmugDNA.24354.1.S1_at   | MmugDNA.24354.1 | 3.28  | 3.29  | 0.14 | 0.11 | -1.01 | 0.946695 | 0.637888 | 0.979465 | 0.787216 |
| MmugDNA.24355.1.S1_at   | MmugDNA.24355.1 | 5.3   | 4.48  | 0.7  | 0.51 | 1.76  | 0.100811 | 0.385933 | 0.461009 | 0.621161 |
| MmugDNA.24356.1.S1_at   | MmugDNA.24356.1 | 3.23  | 3.36  | 0.17 | 0.16 | -1.09 | 0.874897 | 0.967942 | 0.949827 | 0.982248 |
| MmugDNA.24357.1.S1_at   | MmugDNA.24357.1 | 13.3  | 13.35 | 0.19 | 0.26 | -1.03 | 0.445276 | 0.607031 | 0.727524 | 0.766185 |
| MmugDNA.24358.1.S1_at   | MmugDNA.24358.1 | 5.91  | 5.84  | 0.07 | 0.08 | 1.05  | 0.712366 | 0.137899 | 0.874007 | 0.410846 |
| MmugDNA.24359.1.S1_at   | MmugDNA.24359.1 | 3.02  | 3.22  | 0.08 | 0.19 | -1.15 | 0.193382 | 0.10387  | 0.556856 | 0.364519 |
| MmugDNA.24360.1.S1_at   | MmugDNA.24360.1 | 4.68  | 4.49  | 0.32 | 0.25 | 1.14  | 0.368964 | 0.448362 | 0.680384 | 0.664212 |
| MmugDNA.24361.1.S1_at   | MmugDNA.24361.1 | 4.89  | 5.34  | 0.06 | 0.32 | -1.36 | 0.224601 | 0.30629  | 0.58277  | 0.562919 |
| MmugDNA.24362.1.S1_at   | MmugDNA.24362.1 | 9.16  | 8.27  | 0.04 | 0.35 | 1.85  | 0.01389  | 0.003599 | 0.249758 | 0.085874 |
| MmugDNA.24365.1.S1_at   | MmugDNA.24365.1 | 3.83  | 3.82  | 0.45 | 0.44 | 1     | 0.976081 | 0.75331  | 0.990729 | 0.85647  |
| MmugDNA.24366.1.S1_at   | MmugDNA.24366.1 | 4.74  | 5.21  | 0.37 | 0.47 | -1.39 | 0.091852 | 0.019952 | 0.448332 | 0.177476 |
| MmugDNA.24367.1.S1_at   | MmugDNA.24367.1 | 7.69  | 8.37  | 0.22 | 0.16 | -1.6  | 0.010656 | 0.009384 | 0.230991 | 0.127665 |
| MmugDNA.24368.1.S1_at   | MmugDNA.24368.1 | 4.91  | 4.93  | 0.1  | 0.38 | -1.01 | 0.62582  | 0.462956 | 0.829172 | 0.674149 |
| MmugDNA.24369.1.S1_at   | MmugDNA.24369.1 | 8.41  | 9     | 0.38 | 0.78 | -1.5  | 0.891654 | 0.419874 | 0.956867 | 0.643733 |
| MmugDNA.2437.1.S1_at    | MmugDNA.2437.1  | 5.09  | 5.38  | 0.06 | 0.21 | -1.23 | 0.341849 | 0.607698 | 0.662882 | 0.766491 |
| MmugDNA.24370.1.S1_at   | MmugDNA.24370.1 | 6.92  | 8.07  | 0.27 | 1.82 | -2.23 | 0.552751 | 0.389285 | 0.789698 | 0.623403 |
| MmugDNA.24371.1.S1_at   | MmugDNA.24371.1 | 8.77  | 8.87  | 0.11 | 0.15 | -1.07 | 0.496707 | 0.760485 | 0.75763  | 0.860842 |
| MmugDNA.24372.1.S1_at   | MmugDNA.24372.1 | 9.09  | 8.37  | 0.35 | 0.26 | 1.66  | 0.033821 | 0.004606 | 0.330243 | 0.094858 |
| MmugDNA.24373.1.S1_at   | MmugDNA.24373.1 | 4.27  | 4.02  | 0.48 | 0.14 | 1.19  | 0.554658 | 0.746574 | 0.790926 | 0.852873 |
| MmugDNA.24374.1.S1_s_at | MmugDNA.24374.1 | 7.77  | 8.18  | 0.12 | 0.19 | -1.33 | 0.01639  | 0.002642 | 0.263839 | 0.076012 |
| MmugDNA.24375.1.S1_at   | MmugDNA.24375.1 | 3.5   | 3.45  | 0.24 | 0.22 | 1.03  | 0.902302 | 0.929341 | 0.961025 | 0.959675 |
| MmugDNA.24376.1.S1_at   | MmugDNA.24376.1 | 4.32  | 4.26  | 0.13 | 0.31 | 1.04  | 0.673036 | 0.224296 | 0.853341 | 0.497208 |
| MmugDNA.24377.1.S1_at   | MmugDNA.24377.1 | 3.4   | 3.38  | 0.08 | 0.09 | 1.01  | 0.575401 | 0.417757 | 0.80225  | 0.642391 |
| MmugDNA.24378.1.S1_at   | MmugDNA.24378.1 | 4.54  | 4.18  | 0.17 | 0.24 | 1.29  | 0.173598 | 0.106625 | 0.537183 | 0.36916  |

|                         |                 |       |       |      |      |       |          |          |          |          |
|-------------------------|-----------------|-------|-------|------|------|-------|----------|----------|----------|----------|
| MmugDNA.24381.1.S1_at   | MmugDNA.24381.1 | 4.33  | 4.63  | 0.56 | 0.11 | -1.23 | 0.927063 | 0.629092 | 0.971962 | 0.781597 |
| MmugDNA.24382.1.S1_at   | MmugDNA.24382.1 | 9.92  | 10.29 | 0.05 | 0.25 | -1.29 | 0.242163 | 0.037851 | 0.594305 | 0.238921 |
| MmugDNA.24383.1.S1_at   | MmugDNA.24383.1 | 4.45  | 4.61  | 0.22 | 0.26 | -1.12 | 0.216294 | 0.221059 | 0.575963 | 0.494471 |
| MmugDNA.24384.1.S1_at   | MmugDNA.24384.1 | 8.26  | 6.96  | 0.25 | 0.34 | 2.46  | 0.012188 | 0.007357 | 0.240358 | 0.115199 |
| MmugDNA.24385.1.S1_at   | MmugDNA.24385.1 | 5.44  | 5.49  | 0.41 | 0.25 | -1.04 | 0.678489 | 0.772657 | 0.856026 | 0.867785 |
| MmugDNA.24386.1.S1_at   | MmugDNA.24386.1 | 8.38  | 8.4   | 0.12 | 0.22 | -1.01 | 0.86829  | 0.583367 | 0.94738  | 0.751729 |
| MmugDNA.24387.1.S1_at   | MmugDNA.24387.1 | 5.3   | 6.44  | 0.65 | 1.73 | -2.2  | 0.369644 | 0.287984 | 0.680793 | 0.549255 |
| MmugDNA.24388.1.S1_at   | MmugDNA.24388.1 | 5.29  | 5.28  | 0.23 | 0.03 | 1     | 0.96167  | 0.918438 | 0.985248 | 0.95425  |
| MmugDNA.24389.1.S1_at   | MmugDNA.24389.1 | 4.66  | 4.47  | 0.07 | 0.05 | 1.14  | 0.017946 | 0.007924 | 0.268278 | 0.11857  |
| MmugDNA.24391.1.S1_at   | MmugDNA.24391.1 | 3.51  | 3.39  | 0.01 | 0.32 | 1.09  | 0.558929 | 0.201643 | 0.793598 | 0.476208 |
| MmugDNA.24392.1.S1_at   | MmugDNA.24392.1 | 4.16  | 3.96  | 0.32 | 0.17 | 1.15  | 0.146296 | 0.171317 | 0.51241  | 0.447809 |
| MmugDNA.24393.1.S1_at   | MmugDNA.24393.1 | 8.47  | 9.33  | 0.46 | 0.29 | -1.81 | 0.057484 | 0.056695 | 0.388505 | 0.284213 |
| MmugDNA.24394.1.S1_at   | MmugDNA.24394.1 | 4.43  | 4.49  | 0.28 | 0.14 | -1.04 | 0.982943 | 0.348875 | 0.993752 | 0.592917 |
| MmugDNA.24396.1.S1_at   | MmugDNA.24396.1 | 10.61 | 10.48 | 0.18 | 0.39 | 1.09  | 0.862055 | 0.60328  | 0.944528 | 0.764037 |
| MmugDNA.24398.1.S1_at   | MmugDNA.24398.1 | 4.58  | 4.81  | 0.35 | 0.29 | -1.17 | 0.994128 | 0.608024 | 0.997979 | 0.766737 |
| MmugDNA.24399.1.S1_at   | MmugDNA.24399.1 | 3.28  | 3.46  | 0.05 | 0.08 | -1.13 | 0.017348 | 0.010157 | 0.267225 | 0.132095 |
| MmugDNA.244.1.S1_at     | MmugDNA.244.1   | 4.71  | 4.6   | 0.58 | 0.25 | 1.08  | 0.656366 | 0.61671  | 0.845384 | 0.77288  |
| MmugDNA.2440.1.S1_at    | MmugDNA.2440.1  | 7.04  | 6.36  | 0.52 | 0.37 | 1.61  | 0.159884 | 0.178762 | 0.524745 | 0.455062 |
| MmugDNA.24400.1.S1_at   | MmugDNA.24400.1 | 6.37  | 6.38  | 0    | 0.11 | -1.01 | 0.953813 | 0.301581 | 0.982872 | 0.55955  |
| MmugDNA.24401.1.S1_at   | MmugDNA.24401.1 | 5.36  | 5.35  | 0.13 | 0.12 | 1     | 0.948073 | 0.761684 | 0.980091 | 0.861459 |
| MmugDNA.24402.1.S1_at   | MmugDNA.24402.1 | 7.23  | 7.06  | 0.44 | 0.27 | 1.13  | 0.310075 | 0.396882 | 0.642047 | 0.62846  |
| MmugDNA.24404.1.S1_at   | MmugDNA.24404.1 | 8.47  | 7.68  | 0.18 | 0.14 | 1.73  | 0.003787 | 0.001326 | 0.179914 | 0.056164 |
| MmugDNA.24404.1.S1_s_at | MmugDNA.24404.1 | 9.57  | 8.5   | 0.07 | 0.12 | 2.1   | 0.000206 | 0.000019 | 0.120316 | 0.019635 |
| MmugDNA.24405.1.S1_at   | MmugDNA.24405.1 | 3.38  | 3.39  | 0.13 | 0    | -1    | 0.932862 | 0.680445 | 0.973979 | 0.813453 |
| MmugDNA.24406.1.S1_at   | MmugDNA.24406.1 | 9     | 8.84  | 0.18 | 0.22 | 1.12  | 0.343571 | 0.146616 | 0.663694 | 0.420646 |
| MmugDNA.24407.1.S1_at   | MmugDNA.24407.1 | 4.11  | 4.07  | 0.08 | 0.35 | 1.03  | 0.919335 | 0.959965 | 0.968622 | 0.977362 |
| MmugDNA.24408.1.S1_at   | MmugDNA.24408.1 | 11.06 | 11    | 0.21 | 0.68 | 1.05  | 0.346437 | 0.300554 | 0.665833 | 0.558854 |
| MmugDNA.24409.1.S1_at   | MmugDNA.24409.1 | 3.78  | 3.8   | 1.05 | 0.28 | -1.02 | 0.30215  | 0.455189 | 0.636884 | 0.669157 |
| MmugDNA.2441.1.S1_at    | MmugDNA.2441.1  | 10.14 | 7.63  | 0.18 | 0.54 | 5.69  | 0.001536 | 0.000259 | 0.151506 | 0.033501 |
| MmugDNA.24410.1.S1_at   | MmugDNA.24410.1 | 8.8   | 8.37  | 0.83 | 0.2  | 1.35  | 0.352477 | 0.498641 | 0.66965  | 0.697648 |
| MmugDNA.24411.1.S1_at   | MmugDNA.24411.1 | 13.7  | 13.57 | 0.08 | 0.07 | 1.1   | 0.063418 | 0.018217 | 0.400499 | 0.169777 |
| MmugDNA.24412.1.S1_at   | MmugDNA.24412.1 | 3.53  | 3.23  | 0.3  | 0.17 | 1.23  | 0.196236 | 0.290619 | 0.559427 | 0.551363 |
| MmugDNA.24414.1.S1_at   | MmugDNA.24414.1 | 3.21  | 3.37  | 0.03 | 0.92 | -1.11 | 0.271111 | 0.259412 | 0.615322 | 0.526418 |
| MmugDNA.24415.1.S1_at   | MmugDNA.24415.1 | 4.95  | 4.92  | 0.71 | 0.63 | 1.02  | 0.856679 | 0.728937 | 0.942134 | 0.843315 |
| MmugDNA.24416.1.S1_at   | MmugDNA.24416.1 | 4.77  | 4.51  | 0.95 | 0.48 | 1.19  | 0.681375 | 0.583909 | 0.8576   | 0.752043 |
| MmugDNA.24417.1.S1_at   | MmugDNA.24417.1 | 5.6   | 5.51  | 0.43 | 0.21 | 1.07  | 0.284507 | 0.364475 | 0.624317 | 0.604845 |
| MmugDNA.24418.1.S1_at   | MmugDNA.24418.1 | 8.07  | 8.46  | 0.16 | 0.05 | -1.31 | 0.036641 | 0.017169 | 0.340048 | 0.16599  |
| MmugDNA.24419.1.S1_at   | MmugDNA.24419.1 | 6.68  | 6.71  | 0.11 | 0.26 | -1.02 | 0.346256 | 0.046233 | 0.665754 | 0.259397 |
| MmugDNA.2442.1.S1_at    | MmugDNA.2442.1  | 8.75  | 8.5   | 0.13 | 0.11 | 1.19  | 0.054697 | 0.226554 | 0.38215  | 0.499001 |
| MmugDNA.24420.1.S1_at   | MmugDNA.24420.1 | 4.98  | 4.38  | 0.54 | 0.32 | 1.52  | 0.32179  | 0.112306 | 0.650384 | 0.377592 |
| MmugDNA.24420.1.S1_s_at | MmugDNA.24420.1 | 9.99  | 10.51 | 0.29 | 0.68 | -1.43 | 0.270127 | 0.358568 | 0.614663 | 0.600072 |

|                         |                 |       |       |      |      |       |          |          |          |          |
|-------------------------|-----------------|-------|-------|------|------|-------|----------|----------|----------|----------|
| MmugDNA.24423.1.S1_at   | MmugDNA.24423.1 | 5.84  | 5.85  | 0.09 | 0.1  | -1    | 0.338768 | 0.387395 | 0.660988 | 0.622065 |
| MmugDNA.24424.1.S1_at   | MmugDNA.24424.1 | 5.67  | 6.26  | 0.2  | 0.28 | -1.5  | 0.0772   | 0.060009 | 0.426681 | 0.291649 |
| MmugDNA.24425.1.S1_at   | MmugDNA.24425.1 | 4.48  | 5.16  | 0.4  | 1.01 | -1.6  | 0.338618 | 0.447172 | 0.660988 | 0.663366 |
| MmugDNA.24427.1.S1_at   | MmugDNA.24427.1 | 10.66 | 11.1  | 0.19 | 0.37 | -1.36 | 0.392637 | 0.39107  | 0.694693 | 0.624817 |
| MmugDNA.24428.1.S1_at   | MmugDNA.24428.1 | 12.44 | 12.7  | 0.08 | 0.12 | -1.2  | 0.017534 | 0.005631 | 0.267445 | 0.103694 |
| MmugDNA.24429.1.S1_at   | MmugDNA.24429.1 | 3.9   | 3.97  | 0.13 | 0.13 | -1.05 | 0.909201 | 0.695361 | 0.964021 | 0.82295  |
| MmugDNA.2443.1.S1_at    | MmugDNA.2443.1  | 5.96  | 5.88  | 0.08 | 0.54 | 1.06  | 0.472056 | 0.649587 | 0.743512 | 0.795009 |
| MmugDNA.24430.1.S1_at   | MmugDNA.24430.1 | 9.87  | 8.84  | 0.05 | 0.4  | 2.03  | 0.014045 | 0.002573 | 0.250965 | 0.075105 |
| MmugDNA.24433.1.S1_at   | MmugDNA.24433.1 | 7.83  | 8.42  | 0.42 | 0.64 | -1.51 | 0.260216 | 0.312666 | 0.607076 | 0.567299 |
| MmugDNA.24434.1.S1_at   | MmugDNA.24434.1 | 7.66  | 7.97  | 0.3  | 0.19 | -1.24 | 0.152591 | 0.225276 | 0.517325 | 0.497892 |
| MmugDNA.24435.1.S1_at   | MmugDNA.24435.1 | 7.89  | 7.61  | 0.21 | 0.67 | 1.21  | 0.79023  | 0.377716 | 0.912958 | 0.615086 |
| MmugDNA.24436.1.S1_at   | MmugDNA.24436.1 | 4.72  | 4.54  | 0.49 | 0.52 | 1.13  | 0.308316 | 0.292839 | 0.640689 | 0.552832 |
| MmugDNA.24438.1.S1_at   | MmugDNA.24438.1 | 4.99  | 5.08  | 0.11 | 0.08 | -1.06 | 0.131589 | 0.215378 | 0.498041 | 0.489067 |
| MmugDNA.24439.1.S1_at   | MmugDNA.24439.1 | 3.91  | 3.91  | 0.26 | 0.19 | 1     | 0.464862 | 0.291607 | 0.739608 | 0.551985 |
| MmugDNA.2444.1.S1_at    | MmugDNA.2444.1  | 7.22  | 6.89  | 0.09 | 0.18 | 1.25  | 0.138444 | 0.10818  | 0.505745 | 0.371527 |
| MmugDNA.24440.1.S1_at   | MmugDNA.24440.1 | 6.74  | 6.98  | 0.09 | 0.05 | -1.18 | 0.015655 | 0.021059 | 0.260084 | 0.181869 |
| MmugDNA.24443.1.S1_at   | MmugDNA.24443.1 | 3.02  | 3.03  | 0.13 | 0.17 | -1    | 0.709764 | 0.879415 | 0.872658 | 0.931144 |
| MmugDNA.24444.1.S1_at   | MmugDNA.24444.1 | 6.44  | 6.46  | 0.1  | 0.1  | -1.01 | 0.363855 | 0.404186 | 0.676986 | 0.632691 |
| MmugDNA.24446.1.S1_at   | MmugDNA.24446.1 | 7.23  | 6.47  | 0.37 | 1.1  | 1.7   | 0.260453 | 0.360188 | 0.607292 | 0.601275 |
| MmugDNA.24447.1.S1_at   | MmugDNA.24447.1 | 7.82  | 7.15  | 0.38 | 0.8  | 1.59  | 0.936492 | 0.082662 | 0.975425 | 0.331987 |
| MmugDNA.24449.1.S1_at   | MmugDNA.24449.1 | 8.75  | 8.82  | 0.25 | 0.46 | -1.05 | 0.562591 | 0.676303 | 0.795395 | 0.810904 |
| MmugDNA.2445.1.S1_at    | MmugDNA.2445.1  | 5.46  | 4.96  | 0.96 | 0.49 | 1.41  | 0.222641 | 0.206539 | 0.581087 | 0.480577 |
| MmugDNA.24452.1.S1_at   | MmugDNA.24452.1 | 6.9   | 6.9   | 0.21 | 0.02 | -1    | 0.370853 | 0.440545 | 0.681748 | 0.65901  |
| MmugDNA.24453.1.S1_s_at | MmugDNA.24453.1 | 8.68  | 9.2   | 0.14 | 0.2  | -1.43 | 0.056321 | 0.043242 | 0.38633  | 0.252677 |
| MmugDNA.24455.1.S1_x_at | MmugDNA.24455.1 | 9.96  | 9.64  | 0.53 | 0.21 | 1.25  | 0.368161 | 0.466674 | 0.679759 | 0.676425 |
| MmugDNA.24457.1.S1_at   | MmugDNA.24457.1 | 9.41  | 10.33 | 0.56 | 0.66 | -1.89 | 0.256559 | 0.157602 | 0.604278 | 0.433131 |
| MmugDNA.24458.1.S1_at   | MmugDNA.24458.1 | 5.21  | 5.21  | 0.07 | 0.01 | -1    | 0.368081 | 0.779926 | 0.679753 | 0.872422 |
| MmugDNA.24459.1.S1_at   | MmugDNA.24459.1 | 4.75  | 4.86  | 0.14 | 0.24 | -1.08 | 0.514452 | 0.596121 | 0.76693  | 0.759357 |
| MmugDNA.24460.1.S1_at   | MmugDNA.24460.1 | 5.52  | 5.82  | 0.21 | 0.04 | -1.23 | 0.057386 | 0.148489 | 0.388098 | 0.423016 |
| MmugDNA.24461.1.S1_at   | MmugDNA.24461.1 | 4.77  | 4.61  | 0.09 | 0.09 | 1.11  | 0.218306 | 0.099058 | 0.577874 | 0.357208 |
| MmugDNA.24464.1.S1_at   | MmugDNA.24464.1 | 6.62  | 6.38  | 0.21 | 0.43 | 1.19  | 0.216842 | 0.250454 | 0.576425 | 0.519391 |
| MmugDNA.24465.1.S1_at   | MmugDNA.24465.1 | 3.9   | 3.72  | 0.02 | 0.17 | 1.14  | 0.165163 | 0.148803 | 0.529172 | 0.423201 |
| MmugDNA.24466.1.S1_at   | MmugDNA.24466.1 | 2.95  | 2.76  | 0.01 | 0.1  | 1.14  | 0.054197 | 0.146564 | 0.381696 | 0.420583 |
| MmugDNA.24467.1.S1_at   | MmugDNA.24467.1 | 12.34 | 12    | 0.1  | 0.09 | 1.26  | 0.01386  | 0.007221 | 0.249758 | 0.114121 |
| MmugDNA.24468.1.S1_at   | MmugDNA.24468.1 | 4.84  | 5.17  | 0.4  | 0.33 | -1.25 | 0.706731 | 0.832794 | 0.870833 | 0.904055 |
| MmugDNA.24469.1.S1_at   | MmugDNA.24469.1 | 4.26  | 4.18  | 0.18 | 0.34 | 1.06  | 0.378997 | 0.597624 | 0.686586 | 0.760279 |
| MmugDNA.2447.1.S1_at    | MmugDNA.2447.1  | 11.9  | 12.12 | 0.2  | 0.22 | -1.17 | 0.103271 | 0.130919 | 0.462888 | 0.403037 |
| MmugDNA.24470.1.S1_at   | MmugDNA.24470.1 | 5.97  | 6.61  | 0.65 | 0.94 | -1.55 | 0.412588 | 0.302247 | 0.707935 | 0.560092 |
| MmugDNA.24472.1.S1_at   | MmugDNA.24472.1 | 4.56  | 4.55  | 0.17 | 0.1  | 1.01  | 0.287935 | 0.30718  | 0.626313 | 0.563487 |
| MmugDNA.24473.1.S1_at   | MmugDNA.24473.1 | 4.82  | 5.02  | 0.07 | 0.28 | -1.15 | 0.08982  | 0.095729 | 0.445351 | 0.352735 |
| MmugDNA.24475.1.S1_at   | MmugDNA.24475.1 | 12.14 | 12    | 0.09 | 0.15 | 1.1   | 0.346164 | 0.566108 | 0.665696 | 0.740262 |

|                         |                 |       |       |      |      |       |          |          |          |          |
|-------------------------|-----------------|-------|-------|------|------|-------|----------|----------|----------|----------|
| MmugDNA.24479.1.S1_at   | MmugDNA.24479.1 | 6.92  | 7.49  | 0.49 | 1.3  | -1.49 | 0.399982 | 0.217002 | 0.699692 | 0.490626 |
| MmugDNA.2448.1.S1_at    | MmugDNA.2448.1  | 4.43  | 4.51  | 1.12 | 0.41 | -1.06 | 0.454818 | 0.623924 | 0.73345  | 0.77828  |
| MmugDNA.24480.1.S1_at   | MmugDNA.24480.1 | 12.06 | 12.03 | 0.08 | 0.5  | 1.02  | 0.397732 | 0.168772 | 0.698251 | 0.445439 |
| MmugDNA.24481.1.S1_at   | MmugDNA.24481.1 | 8.9   | 9.49  | 0.5  | 1.94 | -1.5  | 0.626503 | 0.809355 | 0.82962  | 0.890107 |
| MmugDNA.24482.1.S1_at   | MmugDNA.24482.1 | 8.63  | 8.15  | 0.17 | 0.26 | 1.39  | 0.055306 | 0.000619 | 0.383689 | 0.042444 |
| MmugDNA.24483.1.S1_at   | MmugDNA.24483.1 | 4.98  | 4.91  | 0.08 | 0.18 | 1.05  | 0.565125 | 0.304476 | 0.796922 | 0.561741 |
| MmugDNA.10687.1.S1_s_at | MmugDNA.10687.1 | 10.41 | 10.25 | 0.22 | 0.16 | 1.12  | 0.773314 | 0.573858 | 0.904772 | 0.745436 |
| MmugDNA.24485.1.S1_at   | MmugDNA.24485.1 | 4.7   | 4.88  | 0.01 | 0.1  | -1.13 | 0.130703 | 0.042385 | 0.497065 | 0.250533 |
| MmugDNA.24486.1.S1_at   | MmugDNA.24486.1 | 4.44  | 4.47  | 0.21 | 0.08 | -1.02 | 0.712075 | 0.596699 | 0.873815 | 0.75976  |
| MmugDNA.24487.1.S1_at   | MmugDNA.24487.1 | 4.09  | 4.09  | 0.08 | 0.17 | -1    | 0.535958 | 0.082717 | 0.779351 | 0.332171 |
| MmugDNA.24488.1.S1_at   | MmugDNA.24488.1 | 5.28  | 5.56  | 0.24 | 0.09 | -1.21 | 0.465283 | 0.550782 | 0.739853 | 0.730611 |
| MmugDNA.24489.1.S1_at   | MmugDNA.24489.1 | 4.42  | 4.42  | 0.04 | 0.11 | 1     | 0.841441 | 0.413995 | 0.936191 | 0.639979 |
| MmugDNA.24490.1.S1_at   | MmugDNA.24490.1 | 4.73  | 4.32  | 0.2  | 0.18 | 1.33  | 0.124282 | 0.048877 | 0.49013  | 0.265858 |
| MmugDNA.24491.1.S1_at   | MmugDNA.24491.1 | 3.61  | 3.61  | 0.15 | 0.14 | -1    | 0.484116 | 0.2408   | 0.750126 | 0.511521 |
| MmugDNA.24492.1.S1_at   | MmugDNA.24492.1 | 5.38  | 5.36  | 0.29 | 0.12 | 1.02  | 0.498098 | 0.17662  | 0.758234 | 0.453098 |
| MmugDNA.24493.1.S1_at   | MmugDNA.24493.1 | 4.76  | 4.72  | 0.5  | 0.01 | 1.03  | 0.307552 | 0.131847 | 0.640058 | 0.403891 |
| MmugDNA.24494.1.S1_at   | MmugDNA.24494.1 | 3.82  | 4.02  | 0.15 | 0.22 | -1.15 | 0.932509 | 0.841039 | 0.973874 | 0.909421 |
| MmugDNA.24495.1.S1_at   | MmugDNA.24495.1 | 5.45  | 5.88  | 0.45 | 0.25 | -1.35 | 0.916898 | 0.987917 | 0.967497 | 0.993253 |
| MmugDNA.24496.1.S1_at   | MmugDNA.24496.1 | 5.4   | 5.46  | 0.14 | 0.28 | -1.04 | 0.284418 | 0.063554 | 0.624252 | 0.298646 |
| MmugDNA.24497.1.S1_at   | MmugDNA.24497.1 | 6.3   | 6.07  | 0.06 | 0.27 | 1.17  | 0.419146 | 0.784162 | 0.711691 | 0.875049 |
| MmugDNA.24499.1.S1_at   | MmugDNA.24499.1 | 4.1   | 4.19  | 0.18 | 0.05 | -1.06 | 0.627656 | 0.688227 | 0.83025  | 0.818003 |
| MmugDNA.245.1.S1_at     | MmugDNA.245.1   | 10.04 | 9.63  | 0.06 | 0.18 | 1.32  | 0.008052 | 0.000054 | 0.215429 | 0.025666 |
| MmugDNA.24501.1.S1_at   | MmugDNA.24501.1 | 3.9   | 3.9   | 0.11 | 0.08 | 1     | 0.830495 | 0.553836 | 0.931462 | 0.732843 |
| MmugDNA.24502.1.S1_at   | MmugDNA.24502.1 | 5.92  | 6.11  | 0.04 | 0.14 | -1.14 | 0.085956 | 0.156738 | 0.440024 | 0.432216 |
| MmugDNA.24503.1.S1_at   | MmugDNA.24503.1 | 4.18  | 4.38  | 0.21 | 0.28 | -1.14 | 0.500014 | 0.237459 | 0.759402 | 0.508127 |
| MmugDNA.24504.1.S1_at   | MmugDNA.24504.1 | 10.71 | 10.09 | 0.11 | 0.04 | 1.54  | 0.001039 | 0.0005   | 0.142738 | 0.038996 |
| MmugDNA.24505.1.S1_at   | MmugDNA.24505.1 | 11.92 | 11.6  | 0.23 | 1.07 | 1.25  | 0.628029 | 0.568644 | 0.830492 | 0.742052 |
| MmugDNA.24506.1.S1_at   | MmugDNA.24506.1 | 5.57  | 6.79  | 0.05 | 0.94 | -2.34 | 0.090269 | 0.089017 | 0.445754 | 0.342876 |
| MmugDNA.24507.1.S1_at   | MmugDNA.24507.1 | 7.46  | 8.08  | 0.46 | 0.56 | -1.54 | 0.152441 | 0.17423  | 0.517115 | 0.450573 |
| MmugDNA.24508.1.S1_at   | MmugDNA.24508.1 | 6.08  | 6.07  | 0.25 | 0.42 | 1.01  | 0.770203 | 0.875308 | 0.90333  | 0.929211 |
| MmugDNA.2451.1.S1_at    | MmugDNA.2451.1  | 3.7   | 3.66  | 0.04 | 0.03 | 1.03  | 0.226355 | 0.268661 | 0.584404 | 0.534138 |
| MmugDNA.24511.1.S1_at   | MmugDNA.24511.1 | 5.58  | 5.46  | 0.17 | 0.14 | 1.08  | 0.448043 | 0.196274 | 0.729421 | 0.471236 |
| MmugDNA.24513.1.S1_at   | MmugDNA.24513.1 | 7.05  | 10.14 | 1.23 | 2.22 | -8.55 | 0.247627 | 0.170379 | 0.598821 | 0.447103 |
| MmugDNA.24513.1.S1_s_at | MmugDNA.24513.1 | 6.59  | 9.82  | 1.38 | 2.27 | -9.4  | 0.253463 | 0.168911 | 0.602055 | 0.445458 |
| MmugDNA.24514.1.S1_s_at | MmugDNA.24514.1 | 7.96  | 10.71 | 1.2  | 2.24 | -6.72 | 0.274447 | 0.184357 | 0.617441 | 0.460458 |
| MmugDNA.24516.1.S1_s_at | MmugDNA.24516.1 | 10.28 | 9.78  | 0.27 | 0.07 | 1.41  | 0.03011  | 0.009351 | 0.316939 | 0.127602 |
| MmugDNA.24517.1.S1_at   | MmugDNA.24517.1 | 12.9  | 13.16 | 0.18 | 0.15 | -1.2  | 0.133728 | 0.018603 | 0.500334 | 0.171539 |
| MmugDNA.24518.1.S1_at   | MmugDNA.24518.1 | 6.1   | 6.02  | 0.19 | 0.14 | 1.06  | 0.388826 | 0.550774 | 0.692804 | 0.730611 |
| MmugDNA.24519.1.S1_at   | MmugDNA.24519.1 | 7.35  | 7.47  | 1.03 | 0.39 | -1.09 | 0.742096 | 0.679391 | 0.88963  | 0.812799 |
| MmugDNA.2452.1.S1_at    | MmugDNA.2452.1  | 8.4   | 7.91  | 0.28 | 0.65 | 1.4   | 0.159324 | 0.194205 | 0.524174 | 0.469312 |
| MmugDNA.24520.1.S1_at   | MmugDNA.24520.1 | 4.93  | 5.53  | 0.17 | 0.45 | -1.52 | 0.10267  | 0.185998 | 0.462485 | 0.461851 |

|                       |                 |       |       |      |      |       |          |          |          |          |
|-----------------------|-----------------|-------|-------|------|------|-------|----------|----------|----------|----------|
| MmugDNA.24521.1.S1_at | MmugDNA.24521.1 | 4.46  | 4.53  | 0.36 | 0.15 | -1.05 | 0.728657 | 0.396012 | 0.88208  | 0.627823 |
| MmugDNA.24522.1.S1_at | MmugDNA.24522.1 | 6.86  | 6.88  | 0.12 | 0.2  | -1.01 | 0.885716 | 0.690045 | 0.954177 | 0.819235 |
| MmugDNA.24524.1.S1_at | MmugDNA.24524.1 | 8.05  | 7.71  | 0.44 | 0.41 | 1.27  | 0.749041 | 0.887709 | 0.892627 | 0.93601  |
| MmugDNA.24525.1.S1_at | MmugDNA.24525.1 | 4.7   | 4.66  | 0.09 | 0.19 | 1.03  | 0.454574 | 0.607136 | 0.73328  | 0.766223 |
| MmugDNA.24526.1.S1_at | MmugDNA.24526.1 | 5.12  | 5.52  | 0.24 | 0.11 | -1.32 | 0.032793 | 0.017052 | 0.326108 | 0.165465 |
| MmugDNA.24527.1.S1_at | MmugDNA.24527.1 | 10.01 | 9.12  | 0.6  | 0.34 | 1.85  | 0.121053 | 0.064322 | 0.485798 | 0.299804 |
| MmugDNA.24528.1.S1_at | MmugDNA.24528.1 | 14.31 | 14.3  | 0.05 | 0.06 | 1.01  | 0.659627 | 0.86583  | 0.847231 | 0.923757 |
| MmugDNA.24529.1.S1_at | MmugDNA.24529.1 | 6.95  | 7.06  | 0.35 | 0.15 | -1.08 | 0.38729  | 0.362169 | 0.691895 | 0.602827 |
| MmugDNA.2453.1.S1_at  | MmugDNA.2453.1  | 7.51  | 8.34  | 0.47 | 0.19 | -1.78 | 0.122086 | 0.11144  | 0.487099 | 0.376126 |
| MmugDNA.24530.1.S1_at | MmugDNA.24530.1 | 4.26  | 4.26  | 0.1  | 0.07 | 1     | 0.785007 | 0.455252 | 0.910465 | 0.669198 |
| MmugDNA.24531.1.S1_at | MmugDNA.24531.1 | 4.34  | 4.4   | 0.04 | 0.07 | -1.04 | 0.095681 | 0.095989 | 0.453501 | 0.353302 |
| MmugDNA.24532.1.S1_at | MmugDNA.24532.1 | 4.2   | 4.21  | 0.21 | 0.2  | -1    | 0.490066 | 0.562735 | 0.754288 | 0.738115 |
| MmugDNA.24534.1.S1_at | MmugDNA.24534.1 | 6.58  | 6.7   | 0.08 | 0.09 | -1.09 | 0.062782 | 0.370411 | 0.399296 | 0.609492 |
| MmugDNA.24535.1.S1_at | MmugDNA.24535.1 | 5.45  | 5.67  | 0.06 | 0.13 | -1.17 | 0.073318 | 0.244323 | 0.418512 | 0.514184 |
| MmugDNA.24536.1.S1_at | MmugDNA.24536.1 | 7.15  | 6.24  | 1.35 | 0.27 | 1.88  | 0.577113 | 0.306484 | 0.80344  | 0.563029 |
| MmugDNA.24537.1.S1_at | MmugDNA.24537.1 | 4.85  | 4.78  | 0.43 | 0.34 | 1.05  | 0.392901 | 0.491097 | 0.694881 | 0.692777 |
| MmugDNA.24539.1.S1_at | MmugDNA.24539.1 | 5.69  | 5.85  | 0.15 | 0.25 | -1.11 | 0.607011 | 0.697036 | 0.819156 | 0.824045 |
| MmugDNA.2454.1.S1_at  | MmugDNA.2454.1  | 3.33  | 3.27  | 0.14 | 0.09 | 1.04  | 0.465604 | 0.254547 | 0.739987 | 0.522863 |
| MmugDNA.24540.1.S1_at | MmugDNA.24540.1 | 6.7   | 6.52  | 0.18 | 0.12 | 1.14  | 0.528697 | 0.49458  | 0.775752 | 0.694909 |
| MmugDNA.24541.1.S1_at | MmugDNA.24541.1 | 3.55  | 3.53  | 0.07 | 0.07 | 1.01  | 0.819388 | 0.924771 | 0.926528 | 0.957465 |
| MmugDNA.24542.1.S1_at | MmugDNA.24542.1 | 5.23  | 5.35  | 0.15 | 0.14 | -1.09 | 0.313517 | 0.54655  | 0.645195 | 0.728079 |
| MmugDNA.24543.1.S1_at | MmugDNA.24543.1 | 2.96  | 3     | 0.02 | 0.24 | -1.03 | 0.512128 | 0.231218 | 0.765453 | 0.5029   |
| MmugDNA.24544.1.S1_at | MmugDNA.24544.1 | 7.66  | 8.59  | 0.56 | 0.36 | -1.91 | 0.137152 | 0.152822 | 0.504356 | 0.427616 |
| MmugDNA.24545.1.S1_at | MmugDNA.24545.1 | 6.47  | 6.3   | 0.84 | 0.48 | 1.12  | 0.432179 | 0.518983 | 0.718847 | 0.710813 |
| MmugDNA.24546.1.S1_at | MmugDNA.24546.1 | 7.03  | 7.15  | 0.07 | 0.31 | -1.09 | 0.807982 | 0.502649 | 0.921552 | 0.700236 |
| MmugDNA.24547.1.S1_at | MmugDNA.24547.1 | 7.54  | 7.42  | 0.23 | 0.03 | 1.09  | 0.405513 | 0.190396 | 0.703259 | 0.465906 |
| MmugDNA.24548.1.S1_at | MmugDNA.24548.1 | 4.81  | 4.62  | 0.17 | 0.24 | 1.14  | 0.522525 | 0.747621 | 0.772116 | 0.853205 |
| MmugDNA.24549.1.S1_at | MmugDNA.24549.1 | 3.7   | 3.88  | 0.12 | 0.47 | -1.13 | 0.271275 | 0.255633 | 0.615465 | 0.523617 |
| MmugDNA.2455.1.S1_at  | MmugDNA.2455.1  | 3.97  | 4.98  | 1.33 | 0.44 | -2.01 | 0.60628  | 0.772457 | 0.818776 | 0.867741 |
| MmugDNA.24550.1.S1_at | MmugDNA.24550.1 | 5.02  | 5.22  | 0.04 | 0.23 | -1.14 | 0.560907 | 0.548413 | 0.7945   | 0.729154 |
| MmugDNA.24552.1.S1_at | MmugDNA.24552.1 | 4.41  | 4.62  | 0.11 | 0.15 | -1.15 | 0.159799 | 0.374843 | 0.52471  | 0.613091 |
| MmugDNA.24553.1.S1_at | MmugDNA.24553.1 | 5.64  | 5.64  | 0.18 | 0.07 | -1.01 | 0.932229 | 0.993909 | 0.973774 | 0.996321 |
| MmugDNA.24554.1.S1_at | MmugDNA.24554.1 | 6.83  | 8     | 0.38 | 1.21 | -2.25 | 0.18442  | 0.221371 | 0.548138 | 0.494644 |
| MmugDNA.24556.1.S1_at | MmugDNA.24556.1 | 8.58  | 8.14  | 0.54 | 0.81 | 1.36  | 0.993228 | 0.96125  | 0.997679 | 0.978105 |
| MmugDNA.24557.1.S1_at | MmugDNA.24557.1 | 12.4  | 12.79 | 0.41 | 0.26 | -1.32 | 0.331609 | 0.269439 | 0.656441 | 0.534742 |
| MmugDNA.24558.1.S1_at | MmugDNA.24558.1 | 3.62  | 3.54  | 0.08 | 0.06 | 1.06  | 0.439748 | 0.470943 | 0.723763 | 0.679153 |
| MmugDNA.24559.1.S1_at | MmugDNA.24559.1 | 4.33  | 4.38  | 0.23 | 0.22 | -1.04 | 0.915665 | 0.982458 | 0.966683 | 0.99036  |
| MmugDNA.2456.1.S1_at  | MmugDNA.2456.1  | 6.34  | 6.16  | 0.13 | 0.15 | 1.14  | 0.100098 | 0.010861 | 0.460668 | 0.13586  |
| MmugDNA.24560.1.S1_at | MmugDNA.24560.1 | 3.9   | 3.94  | 0.01 | 0.07 | -1.03 | 0.641225 | 0.931367 | 0.838134 | 0.961034 |
| MmugDNA.24561.1.S1_at | MmugDNA.24561.1 | 5.66  | 5.59  | 0.71 | 0.22 | 1.05  | 0.809466 | 0.318281 | 0.922228 | 0.571151 |
| MmugDNA.24562.1.S1_at | MmugDNA.24562.1 | 6.85  | 7.71  | 0.27 | 0.58 | -1.81 | 0.062133 | 0.052978 | 0.397269 | 0.275815 |

|                         |                 |       |       |      |      |       |          |          |          |          |
|-------------------------|-----------------|-------|-------|------|------|-------|----------|----------|----------|----------|
| MmugDNA.24564.1.S1_at   | MmugDNA.24564.1 | 6.21  | 5.9   | 0.18 | 0.31 | 1.24  | 0.158414 | 0.17303  | 0.5233   | 0.449673 |
| MmugDNA.24565.1.S1_at   | MmugDNA.24565.1 | 3.11  | 3.23  | 0.21 | 0.27 | -1.09 | 0.651421 | 0.812745 | 0.843157 | 0.891794 |
| MmugDNA.24568.1.S1_at   | MmugDNA.24568.1 | 9.12  | 9.56  | 0.17 | 0.1  | -1.36 | 0.028866 | 0.013102 | 0.312166 | 0.147241 |
| MmugDNA.24569.1.S1_at   | MmugDNA.24569.1 | 5.67  | 5.14  | 0.25 | 0.12 | 1.45  | 0.040283 | 0.056398 | 0.349277 | 0.283382 |
| MmugDNA.2457.1.S1_at    | MmugDNA.2457.1  | 4.44  | 3.59  | 0.84 | 0.32 | 1.8   | 0.119794 | 0.234233 | 0.484387 | 0.505485 |
| MmugDNA.24571.1.S1_at   | MmugDNA.24571.1 | 12.65 | 12.17 | 0.18 | 0.65 | 1.4   | 0.093649 | 0.075055 | 0.450966 | 0.31921  |
| MmugDNA.24572.1.S1_at   | MmugDNA.24572.1 | 9.03  | 8.97  | 0.08 | 0.36 | 1.05  | 0.466537 | 0.003734 | 0.740215 | 0.087162 |
| MmugDNA.24573.1.S1_at   | MmugDNA.24573.1 | 3.28  | 3.2   | 0.12 | 0.06 | 1.06  | 0.202951 | 0.384287 | 0.565548 | 0.619994 |
| MmugDNA.24574.1.S1_at   | MmugDNA.24574.1 | 4.8   | 4.78  | 0.22 | 0.23 | 1.02  | 0.907825 | 0.449154 | 0.963427 | 0.664892 |
| MmugDNA.24576.1.S1_at   | MmugDNA.24576.1 | 6.93  | 6.92  | 1.05 | 0.54 | 1.01  | 0.707093 | 0.646175 | 0.870958 | 0.792676 |
| MmugDNA.24577.1.S1_at   | MmugDNA.24577.1 | 3.67  | 3.6   | 0.12 | 0.16 | 1.05  | 0.722927 | 0.851994 | 0.878924 | 0.915852 |
| MmugDNA.24578.1.S1_at   | MmugDNA.24578.1 | 8.19  | 7.62  | 0.2  | 0.45 | 1.49  | 0.264764 | 0.116301 | 0.610545 | 0.383671 |
| MmugDNA.24579.1.S1_at   | MmugDNA.24579.1 | 10.81 | 12.17 | 0.6  | 0.3  | -2.56 | 0.020901 | 0.005384 | 0.281371 | 0.101199 |
| MmugDNA.2458.1.S1_at    | MmugDNA.2458.1  | 4.12  | 4.11  | 0.51 | 0.61 | 1.01  | 0.95212  | 0.989073 | 0.982156 | 0.993772 |
| MmugDNA.24580.1.S1_at   | MmugDNA.24580.1 | 4.13  | 4.47  | 0.18 | 0.27 | -1.26 | 0.152011 | 0.241541 | 0.516723 | 0.512152 |
| MmugDNA.24581.1.S1_at   | MmugDNA.24581.1 | 5.16  | 5.03  | 0.31 | 0.16 | 1.09  | 0.190656 | 0.198056 | 0.553275 | 0.473041 |
| MmugDNA.24583.1.S1_at   | MmugDNA.24583.1 | 4.26  | 4.29  | 0.24 | 0.18 | -1.02 | 0.72784  | 0.847473 | 0.881596 | 0.913316 |
| MmugDNA.24584.1.S1_at   | MmugDNA.24584.1 | 4.68  | 4.25  | 0.28 | 0.14 | 1.35  | 0.096855 | 0.119827 | 0.455899 | 0.388577 |
| MmugDNA.24587.1.S1_at   | MmugDNA.24587.1 | 10.02 | 9.63  | 0.62 | 0.27 | 1.31  | 0.524426 | 0.704215 | 0.773192 | 0.828375 |
| MmugDNA.24588.1.S1_at   | MmugDNA.24588.1 | 3.03  | 3.03  | 0.15 | 0.42 | 1     | 0.478775 | 0.651973 | 0.747481 | 0.796529 |
| MmugDNA.24589.1.S1_at   | MmugDNA.24589.1 | 2.9   | 3.36  | 0.36 | 0.1  | -1.37 | 0.311632 | 0.419857 | 0.64356  | 0.643733 |
| MmugDNA.2459.1.S1_at    | MmugDNA.2459.1  | 8.93  | 8.91  | 0.36 | 0.05 | 1.01  | 0.67999  | 0.873742 | 0.856999 | 0.928207 |
| MmugDNA.24590.1.S1_at   | MmugDNA.24590.1 | 3.2   | 3.26  | 0.1  | 0.07 | -1.04 | 0.20514  | 0.32599  | 0.567639 | 0.576235 |
| MmugDNA.24591.1.S1_at   | MmugDNA.24591.1 | 4.07  | 4.21  | 0.21 | 0.13 | -1.1  | 0.182452 | 0.151133 | 0.546756 | 0.425795 |
| MmugDNA.24592.1.S1_at   | MmugDNA.24592.1 | 7.77  | 8.56  | 0.23 | 0.22 | -1.73 | 0.00833  | 0.008747 | 0.217675 | 0.123975 |
| MmugDNA.24593.1.S1_at   | MmugDNA.24593.1 | 5.29  | 5.21  | 0.08 | 0.07 | 1.06  | 0.15292  | 0.246736 | 0.517325 | 0.51609  |
| MmugDNA.24594.1.S1_at   | MmugDNA.24594.1 | 9.95  | 9.14  | 0.12 | 0.42 | 1.75  | 0.027466 | 0.01456  | 0.308086 | 0.153907 |
| MmugDNA.24596.1.S1_s_at | MmugDNA.24596.1 | 11.41 | 11.35 | 0.02 | 0.16 | 1.04  | 0.208278 | 0.01659  | 0.570141 | 0.163051 |
| MmugDNA.24597.1.S1_at   | MmugDNA.24597.1 | 8.37  | 9.28  | 0.28 | 0.53 | -1.89 | 0.094114 | 0.070174 | 0.451714 | 0.311142 |
| MmugDNA.24599.1.S1_at   | MmugDNA.24599.1 | 5.32  | 5.63  | 0.2  | 0.29 | -1.24 | 0.184615 | 0.144299 | 0.548202 | 0.418196 |
| MmugDNA.246.1.S1_at     | MmugDNA.246.1   | 4.85  | 4.72  | 0.48 | 0.1  | 1.09  | 0.231336 | 0.424567 | 0.587372 | 0.647146 |
| MmugDNA.2460.1.S1_at    | MmugDNA.2460.1  | 6.2   | 5.68  | 0.64 | 0.04 | 1.44  | 0.295021 | 0.181806 | 0.631503 | 0.458382 |
| MmugDNA.24601.1.S1_at   | MmugDNA.24601.1 | 9.59  | 9.77  | 0.53 | 0.98 | -1.13 | 0.532925 | 0.641479 | 0.777862 | 0.789564 |
| MmugDNA.24603.1.S1_at   | MmugDNA.24603.1 | 6.29  | 6.49  | 0.12 | 0.11 | -1.15 | 0.059025 | 0.088324 | 0.390921 | 0.341743 |
| MmugDNA.22320.1.S1_at   | MmugDNA.22320.1 | 3.02  | 3.17  | 0.1  | 0.04 | -1.11 | 0.132601 | 0.10201  | 0.49874  | 0.362076 |
| MmugDNA.22320.1.S1_s_at | MmugDNA.22320.1 | 3.28  | 3.32  | 0.2  | 0.06 | -1.03 | 0.894595 | 0.983452 | 0.957917 | 0.99078  |
| MmugDNA.24626.1.S1_s_at | MmugDNA.24626.1 | 10.85 | 10.44 | 0.23 | 0.33 | 1.32  | 0.253864 | 0.332668 | 0.60233  | 0.581046 |
| MmugDNA.24606.1.S1_at   | MmugDNA.24606.1 | 3.57  | 3.56  | 0.21 | 0.13 | 1.01  | 0.367337 | 0.438288 | 0.679471 | 0.657289 |
| MmugDNA.24607.1.S1_at   | MmugDNA.24607.1 | 3.47  | 3.15  | 0.39 | 0.14 | 1.25  | 0.35504  | 0.476972 | 0.670716 | 0.683096 |
| MmugDNA.24608.1.S1_at   | MmugDNA.24608.1 | 5.97  | 5.64  | 0.26 | 0.15 | 1.26  | 0.046177 | 0.045187 | 0.362604 | 0.256979 |
| MmugDNA.24609.1.S1_at   | MmugDNA.24609.1 | 6.63  | 6.97  | 0.62 | 0.38 | -1.26 | 0.187051 | 0.198699 | 0.550144 | 0.473391 |

|                         |                 |       |       |      |      |       |          |          |          |          |
|-------------------------|-----------------|-------|-------|------|------|-------|----------|----------|----------|----------|
| MmugDNA.2461.1.S1_s_at  | MmugDNA.2461.1  | 8.08  | 8.07  | 0.04 | 0.08 | 1     | 0.86705  | 0.013216 | 0.946953 | 0.147492 |
| MmugDNA.18215.1.S1_s_at | MmugDNA.18215.1 | 6.51  | 6.37  | 0.08 | 0.09 | 1.1   | 0.323781 | 0.03932  | 0.651741 | 0.243401 |
| MmugDNA.24611.1.S1_at   | MmugDNA.24611.1 | 5.35  | 5.35  | 0.11 | 0.14 | -1    | 0.958619 | 0.998147 | 0.984337 | 0.999039 |
| MmugDNA.24612.1.S1_at   | MmugDNA.24612.1 | 11    | 10.53 | 0.21 | 0.17 | 1.38  | 0.044648 | 0.034979 | 0.358927 | 0.231166 |
| MmugDNA.24613.1.S1_at   | MmugDNA.24613.1 | 3.75  | 3.69  | 0.43 | 0.21 | 1.04  | 0.580933 | 0.557704 | 0.804828 | 0.735173 |
| MmugDNA.24615.1.S1_at   | MmugDNA.24615.1 | 5.83  | 4.99  | 0.67 | 0.45 | 1.79  | 0.123732 | 0.152951 | 0.489534 | 0.42777  |
| MmugDNA.24617.1.S1_at   | MmugDNA.24617.1 | 12.78 | 11.56 | 0.04 | 0.6  | 2.32  | 0.024805 | 0.014873 | 0.296613 | 0.155055 |
| MmugDNA.24618.1.S1_at   | MmugDNA.24618.1 | 5.36  | 6.13  | 0.23 | 0.66 | -1.71 | 0.142594 | 0.111653 | 0.509727 | 0.376592 |
| MmugDNA.24619.1.S1_at   | MmugDNA.24619.1 | 9.8   | 9.43  | 0.24 | 0.19 | 1.29  | 0.058209 | 0.112352 | 0.390133 | 0.377686 |
| MmugDNA.24620.1.S1_at   | MmugDNA.24620.1 | 4.38  | 6.24  | 0.49 | 1.12 | -3.63 | 0.07209  | 0.036096 | 0.416191 | 0.234417 |
| MmugDNA.24621.1.S1_at   | MmugDNA.24621.1 | 4.07  | 3.57  | 0.3  | 0.1  | 1.41  | 0.202092 | 0.103857 | 0.564374 | 0.364519 |
| MmugDNA.24622.1.S1_at   | MmugDNA.24622.1 | 6.68  | 6.77  | 0.11 | 0.06 | -1.06 | 0.256935 | 0.351664 | 0.604434 | 0.595164 |
| MmugDNA.24623.1.S1_at   | MmugDNA.24623.1 | 3.52  | 3.54  | 0.28 | 0.11 | -1.01 | 0.446342 | 0.408231 | 0.728244 | 0.635527 |
| MmugDNA.24627.1.S1_at   | MmugDNA.24627.1 | 4.59  | 4.77  | 0.28 | 1.3  | -1.13 | 0.26412  | 0.396994 | 0.609857 | 0.628563 |
| MmugDNA.24628.1.S1_at   | MmugDNA.24628.1 | 11.26 | 11.52 | 0.12 | 0.2  | -1.2  | 0.042828 | 0.018678 | 0.355382 | 0.171717 |
| MmugDNA.24629.1.S1_at   | MmugDNA.24629.1 | 6.31  | 6.84  | 0.57 | 0.16 | -1.44 | 0.163004 | 0.246405 | 0.527385 | 0.515899 |
| MmugDNA.2463.1.S1_at    | MmugDNA.2463.1  | 3.02  | 3.07  | 0.76 | 0.42 | -1.04 | 0.798991 | 0.435824 | 0.916797 | 0.65554  |
| MmugDNA.24632.1.S1_at   | MmugDNA.24632.1 | 3.26  | 3.24  | 0.12 | 0.24 | 1.01  | 0.671797 | 0.826232 | 0.852716 | 0.900203 |
| MmugDNA.24634.1.S1_at   | MmugDNA.24634.1 | 6.38  | 6.46  | 0.18 | 0.12 | -1.05 | 0.239374 | 0.309192 | 0.592443 | 0.564807 |
| MmugDNA.24637.1.S1_at   | MmugDNA.24637.1 | 10.44 | 9.92  | 0.05 | 0.23 | 1.43  | 0.008726 | 0.001624 | 0.220556 | 0.060918 |
| MmugDNA.24639.1.S1_at   | MmugDNA.24639.1 | 4.37  | 4.05  | 0.24 | 0.29 | 1.25  | 0.089304 | 0.119133 | 0.445007 | 0.387496 |
| MmugDNA.2464.1.S1_at    | MmugDNA.2464.1  | 6.51  | 6.56  | 0.17 | 0.08 | -1.04 | 0.49741  | 0.566002 | 0.757987 | 0.740179 |
| MmugDNA.24640.1.S1_at   | MmugDNA.24640.1 | 12.1  | 12.28 | 0.05 | 0.16 | -1.13 | 0.221116 | 0.067413 | 0.580053 | 0.305664 |
| MmugDNA.24641.1.S1_at   | MmugDNA.24641.1 | 3.83  | 3.8   | 0.08 | 0.21 | 1.02  | 0.573276 | 0.723425 | 0.801137 | 0.83986  |
| MmugDNA.24642.1.S1_at   | MmugDNA.24642.1 | 3.78  | 3.69  | 0.8  | 0.09 | 1.07  | 0.34519  | 0.259474 | 0.66508  | 0.526418 |
| MmugDNA.24643.1.S1_at   | MmugDNA.24643.1 | 5.26  | 5.25  | 0.17 | 0.15 | 1     | 0.570471 | 0.771786 | 0.799521 | 0.867347 |
| MmugDNA.24644.1.S1_at   | MmugDNA.24644.1 | 5.41  | 5.36  | 0.18 | 0.11 | 1.03  | 0.511536 | 0.626532 | 0.765318 | 0.779856 |
| MmugDNA.24647.1.S1_at   | MmugDNA.24647.1 | 7.25  | 7.1   | 0.13 | 0.03 | 1.11  | 0.555761 | 0.78753  | 0.791477 | 0.877072 |
| MmugDNA.24648.1.S1_at   | MmugDNA.24648.1 | 5.81  | 6.29  | 0.35 | 0.27 | -1.4  | 0.358316 | 0.658361 | 0.673123 | 0.8003   |
| MmugDNA.24649.1.S1_at   | MmugDNA.24649.1 | 5.03  | 4.59  | 0.78 | 0.48 | 1.35  | 0.598871 | 0.550862 | 0.814178 | 0.730625 |
| MmugDNA.2465.1.S1_at    | MmugDNA.2465.1  | 4.12  | 4.24  | 0.77 | 0.16 | -1.09 | 0.777848 | 0.582275 | 0.907146 | 0.750926 |
| MmugDNA.24650.1.S1_at   | MmugDNA.24650.1 | 5.26  | 5.25  | 0.22 | 0.1  | 1.01  | 0.555839 | 0.764116 | 0.7915   | 0.862852 |
| MmugDNA.24654.1.S1_at   | MmugDNA.24654.1 | 6.84  | 7     | 0.39 | 0.24 | -1.12 | 0.605952 | 0.511428 | 0.818647 | 0.705549 |
| MmugDNA.24655.1.S1_at   | MmugDNA.24655.1 | 10.37 | 10.34 | 0.08 | 0.16 | 1.02  | 0.933325 | 0.711647 | 0.974045 | 0.832789 |
| MmugDNA.24655.1.S1_s_at | MmugDNA.24655.1 | 10.45 | 10.31 | 0.13 | 0.22 | 1.1   | 0.787025 | 0.591093 | 0.911435 | 0.756649 |
| MmugDNA.24656.1.S1_at   | MmugDNA.24656.1 | 11.67 | 11.78 | 0.06 | 0.14 | -1.08 | 0.065422 | 0.119529 | 0.404567 | 0.388186 |
| MmugDNA.24657.1.S1_at   | MmugDNA.24657.1 | 4.06  | 3.72  | 0.81 | 0.71 | 1.26  | 0.673109 | 0.66378  | 0.853353 | 0.80314  |
| MmugDNA.24658.1.S1_at   | MmugDNA.24658.1 | 5.05  | 5.01  | 0.52 | 0.21 | 1.02  | 0.772048 | 0.928092 | 0.903991 | 0.959154 |
| MmugDNA.2466.1.S1_at    | MmugDNA.2466.1  | 4.83  | 4.96  | 0.03 | 0.26 | -1.09 | 0.149963 | 0.199326 | 0.514522 | 0.474002 |
| MmugDNA.24660.1.S1_at   | MmugDNA.24660.1 | 7.15  | 6.95  | 0.39 | 0.17 | 1.15  | 0.967863 | 0.063911 | 0.987919 | 0.29906  |
| MmugDNA.24661.1.S1_at   | MmugDNA.24661.1 | 6.27  | 5.18  | 0.78 | 0.61 | 2.13  | 0.199693 | 0.265822 | 0.562758 | 0.531695 |

|                         |                 |       |       |      |      |       |          |          |          |          |
|-------------------------|-----------------|-------|-------|------|------|-------|----------|----------|----------|----------|
| MmugDNA.24662.1.S1_at   | MmugDNA.24662.1 | 10.16 | 11.22 | 0.4  | 0.33 | -2.09 | 0.040754 | 0.044154 | 0.35029  | 0.254547 |
| MmugDNA.24663.1.S1_at   | MmugDNA.24663.1 | 3.2   | 3.2   | 0.06 | 0.64 | -1    | 0.329924 | 0.43313  | 0.655349 | 0.653502 |
| MmugDNA.24664.1.S1_at   | MmugDNA.24664.1 | 10.34 | 11.71 | 0.51 | 0.22 | -2.59 | 0.0119   | 0.008116 | 0.238748 | 0.119642 |
| MmugDNA.24665.1.S1_at   | MmugDNA.24665.1 | 4.82  | 5.07  | 0.28 | 0.22 | -1.19 | 0.444851 | 0.631494 | 0.727249 | 0.782845 |
| MmugDNA.24666.1.S1_at   | MmugDNA.24666.1 | 7.98  | 8.91  | 0.19 | 1.67 | -1.9  | 0.925733 | 0.828603 | 0.97147  | 0.901542 |
| MmugDNA.24669.1.S1_at   | MmugDNA.24669.1 | 12.36 | 12.38 | 0.07 | 0.03 | -1.01 | 0.353411 | 0.65027  | 0.67013  | 0.79555  |
| MmugDNA.24670.1.S1_at   | MmugDNA.24670.1 | 9.19  | 9.64  | 0.18 | 0.22 | -1.37 | 0.192251 | 0.338438 | 0.555316 | 0.585436 |
| MmugDNA.24670.1.S1_s_at | MmugDNA.24670.1 | 9.42  | 9.86  | 0.19 | 0.15 | -1.35 | 0.078996 | 0.149304 | 0.428609 | 0.423805 |
| MmugDNA.24672.1.S1_at   | MmugDNA.24672.1 | 5.34  | 5.57  | 0.16 | 0.12 | -1.18 | 0.179828 | 0.195584 | 0.544019 | 0.470441 |
| MmugDNA.24673.1.S1_at   | MmugDNA.24673.1 | 5.33  | 5.49  | 0.35 | 0.14 | -1.12 | 0.47108  | 0.585186 | 0.742883 | 0.752781 |
| MmugDNA.24675.1.S1_at   | MmugDNA.24675.1 | 4.82  | 5.13  | 0.18 | 0.46 | -1.23 | 0.179173 | 0.229486 | 0.543481 | 0.501527 |
| MmugDNA.24676.1.S1_at   | MmugDNA.24676.1 | 4.38  | 4.33  | 0.26 | 0.17 | 1.04  | 0.805954 | 0.686963 | 0.920412 | 0.817365 |
| MmugDNA.24677.1.S1_at   | MmugDNA.24677.1 | 3.66  | 3.71  | 0.06 | 0.06 | -1.03 | 0.368467 | 0.217082 | 0.67994  | 0.490668 |
| MmugDNA.24678.1.S1_at   | MmugDNA.24678.1 | 5.53  | 5.49  | 0.25 | 0.07 | 1.03  | 0.860528 | 0.721393 | 0.943737 | 0.838685 |
| MmugDNA.2468.1.S1_at    | MmugDNA.2468.1  | 7.06  | 6.64  | 0.15 | 0.14 | 1.33  | 0.039442 | 0.034785 | 0.347229 | 0.230686 |
| MmugDNA.24680.1.S1_at   | MmugDNA.24680.1 | 3.73  | 3.83  | 0.12 | 0.08 | -1.07 | 0.888143 | 0.114065 | 0.955059 | 0.380421 |
| MmugDNA.24683.1.S1_at   | MmugDNA.24683.1 | 9.09  | 10.77 | 0.26 | 0.84 | -3.19 | 0.019187 | 0.010481 | 0.273111 | 0.133867 |
| MmugDNA.24684.1.S1_at   | MmugDNA.24684.1 | 7.28  | 6.96  | 0.88 | 0.39 | 1.25  | 0.503786 | 0.090081 | 0.761    | 0.344402 |
| MmugDNA.24686.1.S1_at   | MmugDNA.24686.1 | 6     | 6     | 0.02 | 0.14 | 1     | 0.452123 | 0.530175 | 0.731939 | 0.717775 |
| MmugDNA.24687.1.S1_at   | MmugDNA.24687.1 | 6.54  | 7.23  | 0.42 | 0.54 | -1.61 | 0.747367 | 0.189189 | 0.89179  | 0.464997 |
| MmugDNA.24688.1.S1_at   | MmugDNA.24688.1 | 9.9   | 12.54 | 1.01 | 0.23 | -6.2  | 0.013272 | 0.007013 | 0.246471 | 0.113029 |
| MmugDNA.24689.1.S1_at   | MmugDNA.24689.1 | 5.47  | 5.84  | 0.07 | 0.15 | -1.29 | 0.044841 | 0.052002 | 0.359058 | 0.273539 |
| MmugDNA.2469.1.S1_at    | MmugDNA.2469.1  | 5.45  | 4.97  | 0.6  | 0.2  | 1.4   | 0.280042 | 0.21172  | 0.62132  | 0.485746 |
| MmugDNA.24693.1.S1_at   | MmugDNA.24693.1 | 5.06  | 5.01  | 0.5  | 0.08 | 1.03  | 0.526552 | 0.624763 | 0.774151 | 0.77888  |
| MmugDNA.24694.1.S1_at   | MmugDNA.24694.1 | 7.86  | 7.5   | 0.33 | 0.55 | 1.28  | 0.740136 | 0.336951 | 0.888432 | 0.584184 |
| MmugDNA.24695.1.S1_at   | MmugDNA.24695.1 | 4.54  | 4.56  | 0.14 | 0.35 | -1.02 | 0.290429 | 0.243125 | 0.628091 | 0.513356 |
| MmugDNA.24696.1.S1_at   | MmugDNA.24696.1 | 4.65  | 4.18  | 0.55 | 0.63 | 1.39  | 0.746558 | 0.408597 | 0.891508 | 0.635757 |
| MmugDNA.24697.1.S1_at   | MmugDNA.24697.1 | 11.66 | 11.28 | 0.07 | 0.18 | 1.3   | 0.036644 | 0.023892 | 0.340048 | 0.193629 |
| MmugDNA.24698.1.S1_at   | MmugDNA.24698.1 | 4.2   | 4.16  | 0.45 | 0.22 | 1.03  | 0.501698 | 0.53515  | 0.760131 | 0.720819 |
| MmugDNA.24699.1.S1_at   | MmugDNA.24699.1 | 9.23  | 9.15  | 0.1  | 0.86 | 1.06  | 0.924322 | 0.526489 | 0.970608 | 0.715574 |
| MmugDNA.24700.1.S1_at   | MmugDNA.24700.1 | 9.74  | 9.5   | 0.18 | 0.19 | 1.18  | 0.409211 | 0.22751  | 0.705783 | 0.499805 |
| MmugDNA.24701.1.S1_at   | MmugDNA.24701.1 | 8.22  | 7.67  | 0.19 | 0.34 | 1.47  | 0.047619 | 0.045203 | 0.366897 | 0.256979 |
| MmugDNA.24702.1.S1_at   | MmugDNA.24702.1 | 12.56 | 11.74 | 0.14 | 0.52 | 1.77  | 0.043429 | 0.018075 | 0.356711 | 0.169379 |
| MmugDNA.24704.1.S1_at   | MmugDNA.24704.1 | 8.01  | 7.56  | 0.32 | 0.46 | 1.37  | 0.282316 | 0.178327 | 0.622739 | 0.454672 |
| MmugDNA.24706.1.S1_at   | MmugDNA.24706.1 | 3.48  | 3.37  | 0.3  | 0.17 | 1.08  | 0.256107 | 0.13599  | 0.603805 | 0.408287 |
| MmugDNA.24709.1.S1_at   | MmugDNA.24709.1 | 5.84  | 5.95  | 0.06 | 0.21 | -1.08 | 0.319058 | 0.417448 | 0.648688 | 0.64224  |
| MmugDNA.2471.1.S1_at    | MmugDNA.2471.1  | 5.27  | 5.62  | 0.14 | 0.04 | -1.28 | 0.012505 | 0.005702 | 0.24203  | 0.104102 |
| MmugDNA.24710.1.S1_s_at | MmugDNA.24710.1 | 12.37 | 11.94 | 0.19 | 0.17 | 1.34  | 0.083458 | 0.083637 | 0.43582  | 0.334255 |
| MmugDNA.24714.1.S1_at   | MmugDNA.24714.1 | 9.99  | 10.05 | 0.25 | 0.92 | -1.05 | 0.688096 | 0.838758 | 0.860858 | 0.908049 |
| MmugDNA.24716.1.S1_at   | MmugDNA.24716.1 | 5.71  | 5.91  | 0.15 | 0.08 | -1.14 | 0.098021 | 0.14504  | 0.457356 | 0.418994 |
| MmugDNA.24717.1.S1_at   | MmugDNA.24717.1 | 5.71  | 5.3   | 0.39 | 0.17 | 1.33  | 0.502061 | 0.383365 | 0.760244 | 0.619375 |



|                         |                 |       |       |      |      |       |          |          |          |          |
|-------------------------|-----------------|-------|-------|------|------|-------|----------|----------|----------|----------|
| MmugDNA.24719.1.S1_at   | MmugDNA.24719.1 | 4.95  | 5.18  | 0.42 | 0.08 | -1.17 | 0.507523 | 0.690054 | 0.762938 | 0.819235 |
| MmugDNA.2472.1.S1_at    | MmugDNA.2472.1  | 4.72  | 3.83  | 1.09 | 0.21 | 1.86  | 0.225461 | 0.329859 | 0.583548 | 0.578874 |
| MmugDNA.24720.1.S1_at   | MmugDNA.24720.1 | 4.06  | 3.56  | 0.37 | 0.08 | 1.41  | 0.252847 | 0.362381 | 0.601608 | 0.602965 |
| MmugDNA.24723.1.S1_at   | MmugDNA.24723.1 | 12.67 | 12.12 | 0.24 | 0.32 | 1.46  | 0.088919 | 0.085721 | 0.444028 | 0.337761 |
| MmugDNA.24725.1.S1_at   | MmugDNA.24725.1 | 3.87  | 3.76  | 0.3  | 0.09 | 1.08  | 0.540625 | 0.730225 | 0.782032 | 0.843882 |
| MmugDNA.24726.1.S1_at   | MmugDNA.24726.1 | 9.92  | 10.16 | 0.29 | 0.13 | -1.18 | 0.349044 | 0.029584 | 0.667394 | 0.213628 |
| MmugDNA.24729.1.S1_at   | MmugDNA.24729.1 | 9.32  | 7.82  | 0.64 | 0.74 | 2.84  | 0.061754 | 0.054918 | 0.396609 | 0.279778 |
| MmugDNA.24732.1.S1_at   | MmugDNA.24732.1 | 6.94  | 6.21  | 0.16 | 0.11 | 1.66  | 0.002818 | 0.001308 | 0.166999 | 0.055684 |
| MmugDNA.24732.1.S1_s_at | MmugDNA.24732.1 | 6.48  | 6.2   | 0.04 | 0.03 | 1.21  | 0.00069  | 0.00216  | 0.136818 | 0.068763 |
| MmugDNA.24733.1.S1_at   | MmugDNA.24733.1 | 4.3   | 4.38  | 0.07 | 0.06 | -1.05 | 0.580983 | 0.262127 | 0.804832 | 0.528402 |
| MmugDNA.24734.1.S1_at   | MmugDNA.24734.1 | 3.56  | 3.7   | 0.18 | 0.3  | -1.11 | 0.457451 | 0.559663 | 0.734933 | 0.736365 |
| MmugDNA.24735.1.S1_s_at | MmugDNA.24735.1 | 9.25  | 8.99  | 0.26 | 0.27 | 1.2   | 0.352045 | 0.075259 | 0.669358 | 0.319434 |
| MmugDNA.24738.1.S1_at   | MmugDNA.24738.1 | 6.22  | 6.22  | 0.13 | 0.18 | -1    | 0.907    | 0.879265 | 0.963023 | 0.9311   |
| MmugDNA.2474.1.S1_at    | MmugDNA.2474.1  | 5.33  | 5.42  | 0.17 | 0.05 | -1.06 | 0.480177 | 0.158621 | 0.748124 | 0.434612 |
| MmugDNA.24741.1.S1_at   | MmugDNA.24741.1 | 3.28  | 3.5   | 0.04 | 0.09 | -1.16 | 0.029357 | 0.004225 | 0.313849 | 0.091435 |
| MmugDNA.24745.1.S1_at   | MmugDNA.24745.1 | 3.49  | 4.29  | 0.43 | 0.37 | -1.74 | 0.182026 | 0.101033 | 0.546458 | 0.360691 |
| MmugDNA.24748.1.S1_at   | MmugDNA.24748.1 | 8.56  | 8.83  | 0.34 | 0.02 | -1.2  | 0.08362  | 0.007493 | 0.435945 | 0.116204 |
| MmugDNA.2475.1.S1_at    | MmugDNA.2475.1  | 8.22  | 8.83  | 0.09 | 0.14 | -1.52 | 0.004472 | 0.015007 | 0.183586 | 0.155713 |
| MmugDNA.24750.1.S1_at   | MmugDNA.24750.1 | 5.85  | 5.35  | 0.03 | 0.23 | 1.41  | 0.017256 | 0.012959 | 0.26697  | 0.146501 |
| MmugDNA.24751.1.S1_at   | MmugDNA.24751.1 | 4.9   | 4.73  | 0.18 | 0.59 | 1.13  | 0.544808 | 0.649939 | 0.784626 | 0.795295 |
| MmugDNA.24752.1.S1_at   | MmugDNA.24752.1 | 5.51  | 5.41  | 0.29 | 0.12 | 1.07  | 0.841929 | 0.875172 | 0.936278 | 0.929179 |
| MmugDNA.24754.1.S1_at   | MmugDNA.24754.1 | 4.77  | 4.67  | 0.04 | 0.23 | 1.07  | 0.923185 | 0.8019   | 0.970146 | 0.885989 |
| MmugDNA.24755.1.S1_at   | MmugDNA.24755.1 | 5.51  | 5.82  | 1.2  | 0.24 | -1.24 | 0.536282 | 0.697979 | 0.779483 | 0.824551 |
| MmugDNA.24756.1.S1_at   | MmugDNA.24756.1 | 9.77  | 9.82  | 0.14 | 0.78 | -1.03 | 0.802373 | 0.929187 | 0.918464 | 0.959644 |
| MmugDNA.24757.1.S1_at   | MmugDNA.24757.1 | 5.01  | 4.94  | 0.18 | 0.2  | 1.04  | 0.378613 | 0.000084 | 0.68654  | 0.027016 |
| MmugDNA.24758.1.S1_at   | MmugDNA.24758.1 | 5.27  | 5.85  | 0.13 | 0.37 | -1.49 | 0.055713 | 0.063816 | 0.384603 | 0.29906  |
| MmugDNA.24759.1.S1_at   | MmugDNA.24759.1 | 6.82  | 6.67  | 0.12 | 0.26 | 1.11  | 0.969377 | 0.212878 | 0.988296 | 0.486798 |
| MmugDNA.24760.1.S1_at   | MmugDNA.24760.1 | 8.57  | 8.86  | 0.55 | 1.01 | -1.22 | 0.568086 | 0.438792 | 0.798402 | 0.657691 |
| MmugDNA.24762.1.S1_at   | MmugDNA.24762.1 | 11.91 | 12.31 | 0.12 | 0.19 | -1.32 | 0.063823 | 0.009699 | 0.401669 | 0.129542 |
| MmugDNA.24763.1.S1_at   | MmugDNA.24763.1 | 6.94  | 6.96  | 0.29 | 0.22 | -1.01 | 0.53155  | 0.152892 | 0.777284 | 0.427765 |
| MmugDNA.24764.1.S1_at   | MmugDNA.24764.1 | 8.48  | 8.06  | 0.14 | 0.15 | 1.34  | 0.034381 | 0.059364 | 0.33285  | 0.29054  |
| MmugDNA.24765.1.S1_at   | MmugDNA.24765.1 | 11.03 | 11.56 | 0.12 | 0.49 | -1.44 | 0.127302 | 0.090307 | 0.493787 | 0.3447   |
| MmugDNA.24766.1.S1_at   | MmugDNA.24766.1 | 12.07 | 12.07 | 0.36 | 0.2  | 1.01  | 0.418554 | 0.462791 | 0.711383 | 0.674127 |
| MmugDNA.24766.1.S1_s_at | MmugDNA.24766.1 | 12.54 | 12.56 | 0.42 | 0.21 | -1.01 | 0.442814 | 0.491374 | 0.725848 | 0.692976 |
| MmugDNA.24767.1.S1_at   | MmugDNA.24767.1 | 9.11  | 8.43  | 0.1  | 0.43 | 1.6   | 0.096338 | 0.034391 | 0.454844 | 0.229384 |
| MmugDNA.24768.1.S1_at   | MmugDNA.24768.1 | 7.53  | 7.27  | 0.52 | 0.95 | 1.2   | 0.529683 | 0.130079 | 0.77625  | 0.401724 |
| MmugDNA.24769.1.S1_at   | MmugDNA.24769.1 | 5.73  | 5.93  | 0.2  | 0.3  | -1.15 | 0.315613 | 0.402048 | 0.646683 | 0.631153 |
| MmugDNA.2477.1.S1_at    | MmugDNA.2477.1  | 4.83  | 5.24  | 0.07 | 0.52 | -1.33 | 0.11511  | 0.098911 | 0.478463 | 0.357049 |
| MmugDNA.2477.1.S1_x_at  | MmugDNA.2477.1  | 5.36  | 5.66  | 0.23 | 0.08 | -1.23 | 0.052282 | 0.034308 | 0.377309 | 0.229145 |
| MmugDNA.24770.1.S1_at   | MmugDNA.24770.1 | 7.27  | 7.6   | 0.35 | 0.16 | -1.26 | 0.074693 | 0.078167 | 0.42065  | 0.324661 |
| MmugDNA.24772.1.S1_at   | MmugDNA.24772.1 | 5.49  | 5.43  | 0.38 | 0.02 | 1.04  | 0.284358 | 0.059152 | 0.624174 | 0.290162 |

|                         |                 |       |       |      |      |       |          |          |          |          |
|-------------------------|-----------------|-------|-------|------|------|-------|----------|----------|----------|----------|
| MmugDNA.24775.1.S1_at   | MmugDNA.24775.1 | 2.91  | 2.9   | 0.1  | 0.03 | 1.01  | 0.546133 | 0.187277 | 0.785337 | 0.463284 |
| MmugDNA.24776.1.S1_at   | MmugDNA.24776.1 | 9.59  | 9.5   | 0.09 | 0.31 | 1.06  | 0.538859 | 0.658707 | 0.780847 | 0.800473 |
| MmugDNA.24777.1.S1_at   | MmugDNA.24777.1 | 5.31  | 4.89  | 0.31 | 0.1  | 1.33  | 0.231742 | 0.189658 | 0.587568 | 0.465297 |
| MmugDNA.24779.1.S1_at   | MmugDNA.24779.1 | 3.45  | 3.46  | 0.07 | 0.02 | -1.01 | 0.522043 | 0.601946 | 0.771756 | 0.763127 |
| MmugDNA.24781.1.S1_at   | MmugDNA.24781.1 | 4.29  | 4.24  | 0.81 | 0.06 | 1.03  | 0.36813  | 0.55004  | 0.679753 | 0.730241 |
| MmugDNA.24782.1.S1_at   | MmugDNA.24782.1 | 5.41  | 5.37  | 0.16 | 0.09 | 1.03  | 0.496472 | 0.676357 | 0.757501 | 0.810914 |
| MmugDNA.24785.1.S1_s_at | MmugDNA.24785.1 | 12.85 | 12.37 | 0.07 | 0.14 | 1.39  | 0.009668 | 0.004839 | 0.226235 | 0.097041 |
| MmugDNA.24786.1.S1_at   | MmugDNA.24786.1 | 3.88  | 4.17  | 0.42 | 0.27 | -1.22 | 0.556094 | 0.712345 | 0.791585 | 0.833347 |
| MmugDNA.24786.1.S1_s_at | MmugDNA.24786.1 | 4.91  | 5.08  | 0.01 | 0.08 | -1.12 | 0.016319 | 0.006381 | 0.263592 | 0.108551 |
| MmugDNA.24787.1.S1_at   | MmugDNA.24787.1 | 4.74  | 4.7   | 0.04 | 0.02 | 1.03  | 0.242593 | 0.157567 | 0.594448 | 0.433131 |
| MmugDNA.24788.1.S1_at   | MmugDNA.24788.1 | 4.53  | 4.36  | 0.17 | 0.31 | 1.12  | 0.781866 | 0.937979 | 0.908945 | 0.964856 |
| MmugDNA.2479.1.S1_at    | MmugDNA.2479.1  | 6.26  | 6.18  | 0.36 | 0.81 | 1.05  | 0.855507 | 0.936309 | 0.941542 | 0.964102 |
| MmugDNA.24790.1.S1_at   | MmugDNA.24790.1 | 6.35  | 6.2   | 0.78 | 0.22 | 1.11  | 0.369226 | 0.422876 | 0.680609 | 0.646054 |
| MmugDNA.24790.1.S1_x_at | MmugDNA.24790.1 | 7.07  | 6.89  | 0.81 | 0.16 | 1.14  | 0.235128 | 0.256262 | 0.589342 | 0.524079 |
| MmugDNA.24792.1.S1_at   | MmugDNA.24792.1 | 5.66  | 5.57  | 0.37 | 0.03 | 1.06  | 0.210563 | 0.120739 | 0.5718   | 0.389579 |
| MmugDNA.24795.1.S1_at   | MmugDNA.24795.1 | 6.23  | 6.19  | 0.32 | 0.4  | 1.03  | 0.64554  | 0.845569 | 0.840383 | 0.912145 |
| MmugDNA.24796.1.S1_at   | MmugDNA.24796.1 | 4.33  | 4.16  | 0.34 | 0.18 | 1.13  | 0.490077 | 0.49796  | 0.754288 | 0.697158 |
| MmugDNA.24799.1.S1_at   | MmugDNA.24799.1 | 4.49  | 4.37  | 0.21 | 0.14 | 1.09  | 0.567343 | 0.278469 | 0.798078 | 0.54224  |
| MmugDNA.248.1.S1_at     | MmugDNA.248.1   | 5.1   | 5.1   | 0.28 | 0.06 | 1     | 0.982097 | 0.882868 | 0.993449 | 0.933206 |
| MmugDNA.2480.1.S1_at    | MmugDNA.2480.1  | 5.79  | 6.16  | 0.43 | 0.39 | -1.3  | 0.780752 | 0.960578 | 0.908616 | 0.977548 |
| MmugDNA.24800.1.S1_at   | MmugDNA.24800.1 | 2.83  | 2.79  | 0.03 | 0.17 | 1.03  | 0.603901 | 0.746139 | 0.817352 | 0.852688 |
| MmugDNA.24801.1.S1_at   | MmugDNA.24801.1 | 6.66  | 5.08  | 0.59 | 0.09 | 2.99  | 0.012074 | 0.007796 | 0.23996  | 0.117765 |
| MmugDNA.24802.1.S1_at   | MmugDNA.24802.1 | 3.57  | 3.75  | 0.07 | 0.06 | -1.13 | 0.0538   | 0.394647 | 0.380879 | 0.627158 |
| MmugDNA.24805.1.S1_at   | MmugDNA.24805.1 | 8.45  | 8.81  | 0.34 | 0.08 | -1.29 | 0.101092 | 0.120255 | 0.461009 | 0.389181 |
| MmugDNA.24806.1.S1_at   | MmugDNA.24806.1 | 4.55  | 4.47  | 0.28 | 0.1  | 1.06  | 0.585164 | 0.814075 | 0.807357 | 0.892736 |
| MmugDNA.24807.1.S1_at   | MmugDNA.24807.1 | 6.36  | 6.51  | 0.59 | 0.33 | -1.11 | 0.473258 | 0.448416 | 0.744128 | 0.664262 |
| MmugDNA.24808.1.S1_at   | MmugDNA.24808.1 | 3.2   | 3.22  | 0.17 | 0.13 | -1.01 | 0.574174 | 0.495321 | 0.801608 | 0.695427 |
| MmugDNA.24808.1.S1_x_at | MmugDNA.24808.1 | 5.47  | 5.43  | 0.28 | 0.06 | 1.03  | 0.351635 | 0.293139 | 0.669126 | 0.553061 |
| MmugDNA.24811.1.S1_at   | MmugDNA.24811.1 | 12.84 | 12.76 | 0.07 | 0.2  | 1.05  | 0.492764 | 0.632962 | 0.755881 | 0.783881 |
| MmugDNA.24812.1.S1_at   | MmugDNA.24812.1 | 3.7   | 3.98  | 0.09 | 0.11 | -1.21 | 0.018317 | 0.014145 | 0.269797 | 0.15208  |
| MmugDNA.24813.1.S1_at   | MmugDNA.24813.1 | 6.33  | 6.52  | 0.85 | 0.45 | -1.14 | 0.890867 | 0.328051 | 0.956354 | 0.577849 |
| MmugDNA.24814.1.S1_at   | MmugDNA.24814.1 | 5.5   | 5.56  | 0.56 | 0.15 | -1.04 | 0.696435 | 0.877871 | 0.865265 | 0.93029  |
| MmugDNA.24815.1.S1_at   | MmugDNA.24815.1 | 3.6   | 3.55  | 0.13 | 0.04 | 1.03  | 0.208872 | 0.783014 | 0.570476 | 0.874447 |
| MmugDNA.24817.1.S1_at   | MmugDNA.24817.1 | 7.62  | 6.16  | 0.38 | 1.72 | 2.74  | 0.214132 | 0.098986 | 0.574528 | 0.357049 |
| MmugDNA.24818.1.S1_at   | MmugDNA.24818.1 | 9.18  | 7.38  | 0.33 | 1.9  | 3.47  | 0.248942 | 0.155439 | 0.599669 | 0.430802 |
| MmugDNA.2482.1.S1_at    | MmugDNA.2482.1  | 6.62  | 6.51  | 0.83 | 0.06 | 1.08  | 0.267809 | 0.266634 | 0.612756 | 0.532396 |
| MmugDNA.24821.1.S1_s_at | MmugDNA.24821.1 | 3.92  | 5.28  | 0.32 | 1.87 | -2.56 | 0.274236 | 0.351609 | 0.617262 | 0.595114 |
| MmugDNA.24822.1.S1_at   | MmugDNA.24822.1 | 5.04  | 5.04  | 0.13 | 0.08 | 1     | 0.699599 | 0.74214  | 0.866955 | 0.850621 |
| MmugDNA.24824.1.S1_at   | MmugDNA.24824.1 | 5.94  | 5.02  | 0.66 | 0.92 | 1.88  | 0.427263 | 0.579534 | 0.716187 | 0.749182 |
| MmugDNA.24825.1.S1_at   | MmugDNA.24825.1 | 9.22  | 10    | 0.04 | 0.35 | -1.72 | 0.019692 | 0.004414 | 0.275549 | 0.092896 |
| MmugDNA.24826.1.S1_at   | MmugDNA.24826.1 | 5.59  | 4.25  | 0.29 | 0.21 | 2.54  | 0.004462 | 0.001948 | 0.183586 | 0.065813 |

|                         |                 |       |       |      |      |        |          |          |          |          |
|-------------------------|-----------------|-------|-------|------|------|--------|----------|----------|----------|----------|
| MmugDNA.24827.1.S1_at   | MmugDNA.24827.1 | 5.54  | 4.92  | 0.13 | 0.76 | 1.54   | 0.319697 | 0.500375 | 0.649068 | 0.699024 |
| MmugDNA.24829.1.S1_at   | MmugDNA.24829.1 | 4.92  | 4.94  | 0.04 | 0.14 | -1.02  | 0.205766 | 0.348104 | 0.568299 | 0.592293 |
| MmugDNA.2483.1.S1_at    | MmugDNA.2483.1  | 5.8   | 5.06  | 0.39 | 0.73 | 1.68   | 0.594326 | 0.647138 | 0.811799 | 0.793279 |
| MmugDNA.24830.1.S1_at   | MmugDNA.24830.1 | 7.81  | 8.94  | 0.28 | 0.3  | -2.2   | 0.011695 | 0.005278 | 0.23742  | 0.100662 |
| MmugDNA.24831.1.S1_at   | MmugDNA.24831.1 | 6.1   | 6.36  | 0.41 | 0.44 | -1.2   | 0.718338 | 0.29617  | 0.876382 | 0.555371 |
| MmugDNA.24832.1.S1_at   | MmugDNA.24832.1 | 9.8   | 9.63  | 0.05 | 0.68 | 1.12   | 0.75418  | 0.870798 | 0.895244 | 0.926571 |
| MmugDNA.24834.1.S1_at   | MmugDNA.24834.1 | 4.79  | 4.44  | 1.07 | 0.31 | 1.28   | 0.201755 | 0.234546 | 0.564028 | 0.505741 |
| MmugDNA.24835.1.S1_at   | MmugDNA.24835.1 | 13.25 | 12.77 | 0.09 | 0.22 | 1.39   | 0.014633 | 0.005772 | 0.254381 | 0.104378 |
| MmugDNA.24836.1.S1_at   | MmugDNA.24836.1 | 11.94 | 11.63 | 0.15 | 0.04 | 1.24   | 0.026061 | 0.014877 | 0.30146  | 0.155055 |
| MmugDNA.24837.1.S1_s_at | MmugDNA.24837.1 | 12.1  | 12.07 | 0.05 | 0.14 | 1.02   | 0.808759 | 0.938161 | 0.922032 | 0.964949 |
| MmugDNA.2484.1.S1_at    | MmugDNA.2484.1  | 4.28  | 3.82  | 0.84 | 0.24 | 1.37   | 0.138571 | 0.161701 | 0.505769 | 0.437771 |
| MmugDNA.24840.1.S1_at   | MmugDNA.24840.1 | 8.22  | 8.2   | 0.06 | 0.57 | 1.01   | 0.423534 | 0.581999 | 0.714153 | 0.750784 |
| MmugDNA.24842.1.S1_at   | MmugDNA.24842.1 | 11.55 | 12.02 | 0.14 | 0.4  | -1.39  | 0.081995 | 0.076329 | 0.433268 | 0.321368 |
| MmugDNA.24843.1.S1_at   | MmugDNA.24843.1 | 7.9   | 7.59  | 0.19 | 0.5  | 1.24   | 0.591082 | 0.651753 | 0.810224 | 0.796356 |
| MmugDNA.24843.1.S1_s_at | MmugDNA.24843.1 | 9.73  | 9.22  | 0.14 | 0.4  | 1.42   | 0.151957 | 0.131451 | 0.516573 | 0.403584 |
| MmugDNA.24843.1.S1_x_at | MmugDNA.24843.1 | 9.72  | 9.36  | 0.1  | 0.47 | 1.29   | 0.328194 | 0.389727 | 0.654312 | 0.623783 |
| MmugDNA.24844.1.S1_at   | MmugDNA.24844.1 | 9.72  | 9.86  | 0.13 | 0.55 | -1.1   | 0.68111  | 0.306041 | 0.85748  | 0.562782 |
| MmugDNA.24845.1.S1_at   | MmugDNA.24845.1 | 6.76  | 6.76  | 0.06 | 0.06 | -1     | 0.42875  | 0.107455 | 0.71704  | 0.370311 |
| MmugDNA.24846.1.S1_at   | MmugDNA.24846.1 | 10.05 | 9.58  | 0.17 | 0.1  | 1.39   | 0.018941 | 0.010351 | 0.272319 | 0.133191 |
| MmugDNA.24847.1.S1_at   | MmugDNA.24847.1 | 5.2   | 5.02  | 0.68 | 0.19 | 1.13   | 0.225015 | 0.274978 | 0.583024 | 0.539402 |
| MmugDNA.24848.1.S1_at   | MmugDNA.24848.1 | 5.74  | 5.65  | 0.32 | 0.29 | 1.06   | 0.65063  | 0.260964 | 0.842789 | 0.527351 |
| MmugDNA.24849.1.S1_at   | MmugDNA.24849.1 | 7.17  | 7.63  | 0.98 | 0.49 | -1.37  | 0.179316 | 0.271045 | 0.543593 | 0.536178 |
| MmugDNA.2485.1.S1_at    | MmugDNA.2485.1  | 6.35  | 6.57  | 0.31 | 0.25 | -1.17  | 0.299347 | 0.328938 | 0.634876 | 0.578482 |
| MmugDNA.24850.1.S1_at   | MmugDNA.24850.1 | 3.2   | 3.19  | 0.12 | 0.13 | 1.01   | 0.814644 | 0.8939   | 0.924758 | 0.939452 |
| MmugDNA.24851.1.S1_at   | MmugDNA.24851.1 | 4.64  | 4.7   | 0.04 | 0.18 | -1.05  | 0.176778 | 0.125803 | 0.540507 | 0.396313 |
| MmugDNA.24852.1.S1_at   | MmugDNA.24852.1 | 4.88  | 5.2   | 0.25 | 0.06 | -1.26  | 0.088634 | 0.09029  | 0.443482 | 0.3447   |
| MmugDNA.24853.1.S1_at   | MmugDNA.24853.1 | 3.32  | 3.25  | 0.33 | 0.01 | 1.05   | 0.673152 | 0.814583 | 0.853359 | 0.892959 |
| MmugDNA.24854.1.S1_at   | MmugDNA.24854.1 | 3.69  | 3.71  | 0.07 | 0.13 | -1.01  | 0.917843 | 0.973582 | 0.968032 | 0.985645 |
| MmugDNA.24855.1.S1_at   | MmugDNA.24855.1 | 3.91  | 3.84  | 0.06 | 0.04 | 1.04   | 0.205461 | 0.001094 | 0.567961 | 0.052283 |
| MmugDNA.24856.1.S1_at   | MmugDNA.24856.1 | 9.77  | 9.31  | 0.68 | 0.29 | 1.37   | 0.623405 | 0.816146 | 0.827977 | 0.893955 |
| MmugDNA.24857.1.S1_at   | MmugDNA.24857.1 | 6.9   | 7.19  | 0.06 | 0.53 | -1.23  | 0.307401 | 0.244058 | 0.639999 | 0.514111 |
| MmugDNA.24858.1.S1_at   | MmugDNA.24858.1 | 7.53  | 6.6   | 0.54 | 0.53 | 1.91   | 0.114588 | 0.029574 | 0.477887 | 0.213628 |
| MmugDNA.24859.1.S1_at   | MmugDNA.24859.1 | 4.13  | 4.1   | 0.08 | 0.17 | 1.02   | 0.807243 | 0.965669 | 0.921028 | 0.980751 |
| MmugDNA.2486.1.S1_at    | MmugDNA.2486.1  | 3.65  | 3.4   | 0.65 | 1.11 | 1.19   | 0.635869 | 0.773402 | 0.835187 | 0.868269 |
| MmugDNA.24860.1.S1_at   | MmugDNA.24860.1 | 5.58  | 5.68  | 0.21 | 0.08 | -1.08  | 0.360567 | 0.574839 | 0.674645 | 0.746142 |
| MmugDNA.24863.1.S1_at   | MmugDNA.24863.1 | 8.96  | 13.44 | 1.48 | 2.29 | -22.34 | 0.209039 | 0.151824 | 0.570648 | 0.426505 |
| MmugDNA.24864.1.S1_at   | MmugDNA.24864.1 | 3.94  | 4     | 0.01 | 0.04 | -1.04  | 0.076478 | 0.223085 | 0.425064 | 0.49588  |
| MmugDNA.24866.1.S1_at   | MmugDNA.24866.1 | 7.14  | 9.48  | 0.77 | 0.7  | -5.06  | 0.019719 | 0.017239 | 0.275549 | 0.166344 |
| MmugDNA.24867.1.S1_at   | MmugDNA.24867.1 | 4.47  | 4.58  | 1.38 | 0.48 | -1.08  | 0.419982 | 0.5133   | 0.712178 | 0.706881 |
| MmugDNA.24868.1.S1_at   | MmugDNA.24868.1 | 6.44  | 6.4   | 0.03 | 0.06 | 1.03   | 0.946064 | 0.005532 | 0.979359 | 0.102614 |
| MmugDNA.24869.1.S1_at   | MmugDNA.24869.1 | 4.13  | 4.45  | 0.09 | 0.23 | -1.25  | 0.044906 | 0.034035 | 0.359175 | 0.228307 |

|                         |                 |       |       |      |      |       |          |          |          |          |
|-------------------------|-----------------|-------|-------|------|------|-------|----------|----------|----------|----------|
| MmugDNA.2487.1.S1_at    | MmugDNA.2487.1  | 7.31  | 7.23  | 0.14 | 0.21 | 1.06  | 0.197038 | 0.240813 | 0.560025 | 0.511521 |
| MmugDNA.24870.1.S1_at   | MmugDNA.24870.1 | 5.76  | 5.7   | 0.23 | 0.08 | 1.04  | 0.232413 | 0.290506 | 0.587814 | 0.55123  |
| MmugDNA.24871.1.S1_at   | MmugDNA.24871.1 | 5     | 5.09  | 0.55 | 0.11 | -1.07 | 0.862708 | 0.64835  | 0.944773 | 0.794176 |
| MmugDNA.24872.1.S1_at   | MmugDNA.24872.1 | 8.09  | 8.43  | 0.2  | 0.12 | -1.27 | 0.054923 | 0.130961 | 0.382788 | 0.403037 |
| MmugDNA.24873.1.S1_at   | MmugDNA.24873.1 | 5.7   | 6.55  | 1.48 | 0.11 | -1.81 | 0.98765  | 0.939272 | 0.995597 | 0.965536 |
| MmugDNA.24874.1.S1_at   | MmugDNA.24874.1 | 3.84  | 4.08  | 0.42 | 0.26 | -1.18 | 0.613103 | 0.708909 | 0.822517 | 0.831167 |
| MmugDNA.24875.1.S1_at   | MmugDNA.24875.1 | 3.99  | 3.9   | 0.16 | 0.14 | 1.06  | 0.945076 | 0.041522 | 0.97906  | 0.24862  |
| MmugDNA.24876.1.S1_at   | MmugDNA.24876.1 | 4.5   | 4.1   | 0.34 | 0.24 | 1.32  | 0.256849 | 0.37277  | 0.60443  | 0.611661 |
| MmugDNA.24877.1.S1_at   | MmugDNA.24877.1 | 8.89  | 8.85  | 0.47 | 0.66 | 1.03  | 0.647485 | 0.841267 | 0.84141  | 0.909576 |
| MmugDNA.2488.1.S1_at    | MmugDNA.2488.1  | 4.19  | 4.19  | 0.15 | 0.25 | 1     | 0.999535 | 0.468557 | 0.999907 | 0.677755 |
| MmugDNA.24881.1.S1_at   | MmugDNA.24881.1 | 7.15  | 7.2   | 0.13 | 0.05 | -1.04 | 0.879509 | 0.953351 | 0.951533 | 0.97351  |
| MmugDNA.24882.1.S1_at   | MmugDNA.24882.1 | 8.9   | 8.72  | 0.15 | 0.65 | 1.13  | 0.652743 | 0.839191 | 0.843845 | 0.908339 |
| MmugDNA.24883.1.S1_at   | MmugDNA.24883.1 | 6.36  | 5.9   | 0.26 | 0.33 | 1.38  | 0.61179  | 0.546658 | 0.821845 | 0.728135 |
| MmugDNA.24884.1.S1_at   | MmugDNA.24884.1 | 4.1   | 3.96  | 0.19 | 0.1  | 1.11  | 0.866283 | 0.688297 | 0.94664  | 0.818012 |
| MmugDNA.24885.1.S1_at   | MmugDNA.24885.1 | 2.75  | 2.6   | 0.09 | 0.1  | 1.11  | 0.286247 | 0.327816 | 0.62554  | 0.577604 |
| MmugDNA.24886.1.S1_x_at | MmugDNA.24886.1 | 8.73  | 8.58  | 0.69 | 0.31 | 1.11  | 0.269506 | 0.379937 | 0.614187 | 0.616659 |
| MmugDNA.24889.1.S1_at   | MmugDNA.24889.1 | 4.32  | 4.28  | 0.47 | 0.61 | 1.03  | 0.866198 | 0.94279  | 0.946595 | 0.967515 |
| MmugDNA.2489.1.S1_at    | MmugDNA.2489.1  | 6.87  | 6.44  | 0.91 | 0.44 | 1.35  | 0.32232  | 0.447444 | 0.651006 | 0.663509 |
| MmugDNA.24890.1.S1_at   | MmugDNA.24890.1 | 6.1   | 5.83  | 0.63 | 0.82 | 1.2   | 0.846779 | 0.33203  | 0.938469 | 0.580563 |
| MmugDNA.24891.1.S1_at   | MmugDNA.24891.1 | 9.76  | 9.74  | 0.26 | 0.24 | 1.02  | 0.447469 | 0.104369 | 0.729026 | 0.365636 |
| MmugDNA.24892.1.S1_at   | MmugDNA.24892.1 | 9.85  | 10.19 | 0.09 | 0.2  | -1.27 | 0.05776  | 0.045302 | 0.388999 | 0.257157 |
| MmugDNA.24893.1.S1_at   | MmugDNA.24893.1 | 4.25  | 4.25  | 0.17 | 0.14 | -1    | 0.414923 | 0.642212 | 0.709338 | 0.79008  |
| MmugDNA.24894.1.S1_at   | MmugDNA.24894.1 | 5.68  | 5.85  | 0.23 | 0.09 | -1.13 | 0.954694 | 0.096807 | 0.983073 | 0.354207 |
| MmugDNA.24895.1.S1_at   | MmugDNA.24895.1 | 2.92  | 2.83  | 0.06 | 0.12 | 1.06  | 0.538191 | 0.722307 | 0.780442 | 0.83917  |
| MmugDNA.24896.1.S1_at   | MmugDNA.24896.1 | 13.39 | 13.26 | 0.07 | 0.1  | 1.09  | 0.153307 | 0.178939 | 0.517764 | 0.455243 |
| MmugDNA.24897.1.S1_at   | MmugDNA.24897.1 | 3.07  | 3.03  | 0.1  | 0.06 | 1.03  | 0.31193  | 0.484547 | 0.643771 | 0.688536 |
| MmugDNA.24898.1.S1_at   | MmugDNA.24898.1 | 4.85  | 4.8   | 0.12 | 0.21 | 1.04  | 0.770587 | 0.373628 | 0.903345 | 0.612389 |
| MmugDNA.24899.1.S1_at   | MmugDNA.24899.1 | 3.8   | 3.78  | 0.27 | 0.28 | 1.01  | 0.503582 | 0.259778 | 0.760979 | 0.526648 |
| MmugDNA.249.1.S1_at     | MmugDNA.249.1   | 8.09  | 7.43  | 0.36 | 0.11 | 1.58  | 0.069913 | 0.135556 | 0.413049 | 0.407655 |
| MmugDNA.24900.1.S1_at   | MmugDNA.24900.1 | 7.95  | 7.53  | 0.38 | 0.55 | 1.34  | 0.140286 | 0.093814 | 0.508065 | 0.350281 |
| MmugDNA.24901.1.S1_at   | MmugDNA.24901.1 | 7.79  | 7.19  | 0.18 | 0.39 | 1.52  | 0.064577 | 0.066215 | 0.402975 | 0.302858 |
| MmugDNA.24902.1.S1_at   | MmugDNA.24902.1 | 5.5   | 5.49  | 0.33 | 0.22 | 1.01  | 0.95885  | 0.924676 | 0.984371 | 0.957439 |
| MmugDNA.24903.1.S1_at   | MmugDNA.24903.1 | 3.79  | 3.96  | 0.32 | 0.96 | -1.12 | 0.564252 | 0.243222 | 0.796461 | 0.513356 |
| MmugDNA.24904.1.S1_at   | MmugDNA.24904.1 | 4.14  | 4.31  | 0.07 | 0.29 | -1.12 | 0.286089 | 0.460895 | 0.625392 | 0.672763 |
| MmugDNA.24905.1.S1_s_at | MmugDNA.24905.1 | 10.41 | 11.45 | 0.32 | 1.18 | -2.06 | 0.268863 | 0.197162 | 0.613528 | 0.472213 |
| MmugDNA.24906.1.S1_at   | MmugDNA.24906.1 | 3.01  | 2.73  | 0.23 | 0.19 | 1.21  | 0.13408  | 0.19097  | 0.50068  | 0.46629  |
| MmugDNA.24908.1.S1_at   | MmugDNA.24908.1 | 4.89  | 4.93  | 0.05 | 0.11 | -1.03 | 0.197837 | 0.275851 | 0.560845 | 0.540035 |
| MmugDNA.24909.1.S1_at   | MmugDNA.24909.1 | 12.98 | 12.71 | 0.14 | 0.23 | 1.2   | 0.437814 | 0.01082  | 0.722586 | 0.135641 |
| MmugDNA.24909.1.S1_s_at | MmugDNA.24909.1 | 12.17 | 11.95 | 0.14 | 0.25 | 1.16  | 0.711105 | 0.011378 | 0.873412 | 0.138214 |
| MmugDNA.2491.1.S1_at    | MmugDNA.2491.1  | 3.46  | 3.34  | 0.15 | 0.1  | 1.08  | 0.242161 | 0.340195 | 0.594305 | 0.586637 |
| MmugDNA.24910.1.S1_at   | MmugDNA.24910.1 | 4.55  | 4.45  | 0.25 | 0.06 | 1.07  | 0.237583 | 0.089348 | 0.591146 | 0.343595 |

|                         |                 |       |       |      |      |       |          |          |          |          |
|-------------------------|-----------------|-------|-------|------|------|-------|----------|----------|----------|----------|
| MmugDNA.24912.1.S1_at   | MmugDNA.24912.1 | 3.4   | 3.36  | 0.11 | 0.22 | 1.03  | 0.542069 | 0.694224 | 0.783075 | 0.822191 |
| MmugDNA.24913.1.S1_at   | MmugDNA.24913.1 | 5.89  | 4.44  | 0.27 | 0.85 | 2.72  | 0.045957 | 0.039852 | 0.362069 | 0.244748 |
| MmugDNA.24914.1.S1_at   | MmugDNA.24914.1 | 3.67  | 3.55  | 0.14 | 0.17 | 1.08  | 0.27673  | 0.210213 | 0.618907 | 0.484033 |
| MmugDNA.24915.1.S1_at   | MmugDNA.24915.1 | 6.2   | 4.94  | 0.98 | 1.03 | 2.39  | 0.179433 | 0.207053 | 0.543593 | 0.481115 |
| MmugDNA.24916.1.S1_at   | MmugDNA.24916.1 | 7.24  | 8.1   | 0.75 | 0.81 | -1.81 | 0.562191 | 0.711593 | 0.795196 | 0.832761 |
| MmugDNA.24917.1.S1_at   | MmugDNA.24917.1 | 6.04  | 5.56  | 0.65 | 0.22 | 1.39  | 0.257921 | 0.160604 | 0.605348 | 0.436745 |
| MmugDNA.24919.1.S1_at   | MmugDNA.24919.1 | 4.68  | 4.54  | 0.38 | 0.09 | 1.1   | 0.55011  | 0.42796  | 0.78767  | 0.649602 |
| MmugDNA.2492.1.S1_at    | MmugDNA.2492.1  | 3.94  | 4.14  | 0.29 | 0.22 | -1.15 | 0.150606 | 0.187495 | 0.515411 | 0.463586 |
| MmugDNA.24920.1.S1_at   | MmugDNA.24920.1 | 5.23  | 5.34  | 0.29 | 0.09 | -1.08 | 0.861218 | 0.451126 | 0.944021 | 0.666073 |
| MmugDNA.24921.1.S1_at   | MmugDNA.24921.1 | 3.57  | 3.57  | 0.35 | 0.19 | -1    | 0.956189 | 0.926954 | 0.983483 | 0.958446 |
| MmugDNA.24922.1.S1_at   | MmugDNA.24922.1 | 7.94  | 7.45  | 0.06 | 0.83 | 1.41  | 0.350964 | 0.473603 | 0.668889 | 0.680872 |
| MmugDNA.24923.1.S1_at   | MmugDNA.24923.1 | 3.97  | 3.97  | 0.69 | 0.17 | 1     | 0.441257 | 0.446679 | 0.724743 | 0.662885 |
| MmugDNA.24924.1.S1_at   | MmugDNA.24924.1 | 5.41  | 4.69  | 0.23 | 0.33 | 1.64  | 0.077858 | 0.070862 | 0.427855 | 0.312357 |
| MmugDNA.24925.1.S1_at   | MmugDNA.24925.1 | 3.48  | 3.76  | 0.33 | 0.52 | -1.22 | 0.191683 | 0.217232 | 0.554735 | 0.490872 |
| MmugDNA.24926.1.S1_at   | MmugDNA.24926.1 | 4.35  | 5     | 0.73 | 0.48 | -1.57 | 0.453144 | 0.598971 | 0.732336 | 0.761244 |
| MmugDNA.24929.1.S1_at   | MmugDNA.24929.1 | 5.73  | 5.93  | 0.13 | 0.14 | -1.15 | 0.069381 | 0.08023  | 0.412035 | 0.32783  |
| MmugDNA.2493.1.S1_at    | MmugDNA.2493.1  | 6.74  | 6.58  | 0.07 | 0.18 | 1.12  | 0.415706 | 0.616918 | 0.709528 | 0.77303  |
| MmugDNA.24930.1.S1_at   | MmugDNA.24930.1 | 8.49  | 5.57  | 0.84 | 0.13 | 7.53  | 0.006895 | 0.008939 | 0.202181 | 0.125013 |
| MmugDNA.24931.1.S1_s_at | MmugDNA.24931.1 | 3.12  | 3.27  | 0.08 | 0.04 | -1.1  | 0.234343 | 0.354376 | 0.588656 | 0.597166 |
| MmugDNA.24932.1.S1_at   | MmugDNA.24932.1 | 11.26 | 11.56 | 0.31 | 0.49 | -1.23 | 0.579973 | 0.326574 | 0.804451 | 0.576612 |
| MmugDNA.24932.1.S1_s_at | MmugDNA.24932.1 | 10.5  | 10.94 | 0.37 | 0.47 | -1.36 | 0.403314 | 0.094309 | 0.701955 | 0.350889 |
| MmugDNA.24933.1.S1_at   | MmugDNA.24933.1 | 9.34  | 9.46  | 0.07 | 0.2  | -1.08 | 0.136333 | 0.087513 | 0.503458 | 0.340677 |
| MmugDNA.24934.1.S1_at   | MmugDNA.24934.1 | 9.24  | 8.98  | 0.57 | 0.11 | 1.2   | 0.361499 | 0.529542 | 0.675263 | 0.717341 |
| MmugDNA.24935.1.S1_at   | MmugDNA.24935.1 | 10.09 | 9.22  | 0.68 | 0.31 | 1.83  | 0.097617 | 0.02815  | 0.456709 | 0.209306 |
| MmugDNA.24937.1.S1_at   | MmugDNA.24937.1 | 8.78  | 8.61  | 0.28 | 0.2  | 1.13  | 0.713961 | 0.355231 | 0.874625 | 0.597576 |
| MmugDNA.24938.1.S1_at   | MmugDNA.24938.1 | 11.18 | 11.64 | 0.14 | 0.18 | -1.38 | 0.014247 | 0.00769  | 0.251724 | 0.117153 |
| MmugDNA.24939.1.S1_at   | MmugDNA.24939.1 | 6.41  | 5.77  | 0.12 | 0.54 | 1.57  | 0.095731 | 0.024895 | 0.453561 | 0.197685 |
| MmugDNA.2494.1.S1_at    | MmugDNA.2494.1  | 4.94  | 4.78  | 0.15 | 0.25 | 1.12  | 0.562298 | 0.094621 | 0.795269 | 0.351374 |
| MmugDNA.24940.1.S1_at   | MmugDNA.24940.1 | 9.6   | 8.54  | 0.32 | 1.43 | 2.09  | 0.291422 | 0.34016  | 0.628798 | 0.58661  |
| MmugDNA.24941.1.S1_at   | MmugDNA.24941.1 | 3.83  | 3.84  | 0.14 | 0.03 | -1.01 | 0.522638 | 0.710911 | 0.772177 | 0.832314 |
| MmugDNA.24942.1.S1_at   | MmugDNA.24942.1 | 5.51  | 5.51  | 0.11 | 0.07 | 1     | 0.685196 | 0.32311  | 0.858887 | 0.574351 |
| MmugDNA.24943.1.S1_at   | MmugDNA.24943.1 | 4.84  | 4.75  | 0.3  | 0.3  | 1.06  | 0.151526 | 0.329796 | 0.516168 | 0.578874 |
| MmugDNA.24944.1.S1_at   | MmugDNA.24944.1 | 7.68  | 8.67  | 1.21 | 0.42 | -1.98 | 0.94027  | 0.781813 | 0.977318 | 0.873524 |
| MmugDNA.24947.1.S1_at   | MmugDNA.24947.1 | 7.69  | 7.42  | 0.33 | 0.16 | 1.21  | 0.978836 | 0.020663 | 0.992232 | 0.180392 |
| MmugDNA.24948.1.S1_at   | MmugDNA.24948.1 | 4.85  | 5.91  | 0.37 | 0.54 | -2.09 | 0.057202 | 0.089722 | 0.387591 | 0.34398  |
| MmugDNA.24949.1.S1_at   | MmugDNA.24949.1 | 4.29  | 4.29  | 0.08 | 0.03 | 1     | 0.305933 | 0.166615 | 0.639227 | 0.443115 |
| MmugDNA.2495.1.S1_at    | MmugDNA.2495.1  | 4.16  | 4.38  | 0.15 | 0.15 | -1.17 | 0.051887 | 0.029478 | 0.376668 | 0.213368 |
| MmugDNA.24952.1.S1_at   | MmugDNA.24952.1 | 7.98  | 8.03  | 0.25 | 0.39 | -1.04 | 0.202509 | 0.291697 | 0.564912 | 0.552054 |
| MmugDNA.24953.1.S1_at   | MmugDNA.24953.1 | 6.53  | 6.75  | 0.17 | 0    | -1.16 | 0.216811 | 0.146296 | 0.576422 | 0.420301 |
| MmugDNA.24954.1.S1_at   | MmugDNA.24954.1 | 7.52  | 7.29  | 0.02 | 0.14 | 1.17  | 0.153337 | 0.023151 | 0.517783 | 0.190549 |
| MmugDNA.24955.1.S1_at   | MmugDNA.24955.1 | 4.88  | 3.67  | 0.57 | 0.15 | 2.32  | 0.051338 | 0.019531 | 0.376001 | 0.175505 |

|                         |                 |       |       |      |      |       |          |          |          |          |
|-------------------------|-----------------|-------|-------|------|------|-------|----------|----------|----------|----------|
| MmugDNA.24956.1.S1_at   | MmugDNA.24956.1 | 5.72  | 7.56  | 0.53 | 0.63 | -3.58 | 0.018543 | 0.013563 | 0.270581 | 0.149001 |
| MmugDNA.24958.1.S1_at   | MmugDNA.24958.1 | 3.65  | 3.44  | 0.07 | 0.22 | 1.15  | 0.594091 | 0.290279 | 0.811686 | 0.551169 |
| MmugDNA.2496.1.S1_at    | MmugDNA.2496.1  | 9.35  | 8.83  | 0.15 | 0.11 | 1.43  | 0.011215 | 0.0051   | 0.234875 | 0.099108 |
| MmugDNA.24961.1.S1_at   | MmugDNA.24961.1 | 3.62  | 3.63  | 0.12 | 0.06 | -1.01 | 0.324791 | 0.340133 | 0.652117 | 0.586602 |
| MmugDNA.24962.1.S1_at   | MmugDNA.24962.1 | 10.64 | 11.21 | 0.11 | 0.17 | -1.48 | 0.02352  | 0.004675 | 0.291638 | 0.095353 |
| MmugDNA.24963.1.S1_at   | MmugDNA.24963.1 | 12.21 | 12.18 | 0.04 | 0.12 | 1.03  | 0.6724   | 0.828905 | 0.853046 | 0.901662 |
| MmugDNA.24965.1.S1_at   | MmugDNA.24965.1 | 4.02  | 4.01  | 0.46 | 0.26 | 1.01  | 0.907001 | 0.02842  | 0.963023 | 0.210385 |
| MmugDNA.24966.1.S1_at   | MmugDNA.24966.1 | 5.28  | 5.3   | 0.12 | 0.18 | -1.02 | 0.864669 | 0.953888 | 0.945589 | 0.973725 |
| MmugDNA.24967.1.S1_at   | MmugDNA.24967.1 | 4.15  | 4.47  | 0.12 | 0.06 | -1.25 | 0.04816  | 0.066106 | 0.367807 | 0.302572 |
| MmugDNA.24969.1.S1_at   | MmugDNA.24969.1 | 5.22  | 5.44  | 0.19 | 0.29 | -1.16 | 0.322565 | 0.252559 | 0.651229 | 0.521128 |
| MmugDNA.24969.1.S1_x_at | MmugDNA.24969.1 | 4.82  | 4.99  | 0.14 | 0.06 | -1.13 | 0.100358 | 0.221374 | 0.460878 | 0.494644 |
| MmugDNA.24971.1.S1_at   | MmugDNA.24971.1 | 7.82  | 7.73  | 0.21 | 0.21 | 1.07  | 0.997514 | 0.491863 | 0.998986 | 0.693275 |
| MmugDNA.24973.1.S1_at   | MmugDNA.24973.1 | 3.42  | 3.41  | 0.05 | 0.12 | 1.01  | 0.422707 | 0.574763 | 0.713669 | 0.746142 |
| MmugDNA.24974.1.S1_at   | MmugDNA.24974.1 | 4.53  | 4.47  | 0.22 | 0.03 | 1.04  | 0.265036 | 0.695248 | 0.61074  | 0.822869 |
| MmugDNA.24975.1.S1_at   | MmugDNA.24975.1 | 3.13  | 3.02  | 0.21 | 0.07 | 1.08  | 0.227224 | 0.339007 | 0.585089 | 0.585891 |
| MmugDNA.2498.1.S1_at    | MmugDNA.2498.1  | 4.19  | 4.21  | 0.26 | 0.15 | -1.02 | 0.844598 | 0.942939 | 0.937585 | 0.967574 |
| MmugDNA.24980.1.S1_at   | MmugDNA.24980.1 | 3.29  | 3.21  | 0.26 | 0.06 | 1.05  | 0.431149 | 0.231593 | 0.718464 | 0.503379 |
| MmugDNA.24981.1.S1_at   | MmugDNA.24981.1 | 5.79  | 6.2   | 0.08 | 0.06 | -1.33 | 0.002791 | 0.00094  | 0.16633  | 0.049026 |
| MmugDNA.24982.1.S1_at   | MmugDNA.24982.1 | 5.03  | 5.04  | 0.2  | 0.1  | -1.01 | 0.842464 | 0.901448 | 0.936474 | 0.943931 |
| MmugDNA.24983.1.S1_at   | MmugDNA.24983.1 | 3.45  | 3.71  | 0.14 | 0.06 | -1.19 | 0.129205 | 0.084866 | 0.495175 | 0.336416 |
| MmugDNA.24985.1.S1_at   | MmugDNA.24985.1 | 4.05  | 4.05  | 0.09 | 0.06 | 1     | 0.745809 | 0.701645 | 0.891243 | 0.826974 |
| MmugDNA.24986.1.S1_at   | MmugDNA.24986.1 | 3.01  | 3.2   | 0.12 | 0.13 | -1.13 | 0.168534 | 0.404734 | 0.532805 | 0.633231 |
| MmugDNA.24987.1.S1_at   | MmugDNA.24987.1 | 7.88  | 8.18  | 0.69 | 0.35 | -1.23 | 0.459918 | 0.489368 | 0.736616 | 0.691792 |
| MmugDNA.24988.1.S1_at   | MmugDNA.24988.1 | 5.9   | 5.89  | 0.15 | 0.01 | 1.01  | 0.654749 | 0.824713 | 0.844752 | 0.899382 |
| MmugDNA.24989.1.S1_at   | MmugDNA.24989.1 | 4.27  | 4.27  | 0.37 | 0.15 | -1    | 0.427716 | 0.258103 | 0.716428 | 0.525574 |
| MmugDNA.2499.1.S1_at    | MmugDNA.2499.1  | 9.93  | 10.18 | 0.23 | 0.68 | -1.19 | 0.827002 | 0.379475 | 0.929706 | 0.616406 |
| MmugDNA.24990.1.S1_at   | MmugDNA.24990.1 | 6.55  | 6.75  | 0.19 | 0.1  | -1.15 | 0.615221 | 0.837515 | 0.823342 | 0.907127 |
| MmugDNA.24991.1.S1_at   | MmugDNA.24991.1 | 4.97  | 4.85  | 0.36 | 0.11 | 1.08  | 0.659511 | 0.938567 | 0.847196 | 0.965059 |
| MmugDNA.24992.1.S1_at   | MmugDNA.24992.1 | 3.91  | 4.53  | 0.3  | 0.52 | -1.54 | 0.085897 | 0.085533 | 0.440024 | 0.337566 |
| MmugDNA.24993.1.S1_at   | MmugDNA.24993.1 | 3.26  | 3.04  | 0.09 | 0.09 | 1.16  | 0.023033 | 0.027054 | 0.289574 | 0.205689 |
| MmugDNA.24994.1.S1_at   | MmugDNA.24994.1 | 8.2   | 9.84  | 0.17 | 0.48 | -3.12 | 0.004784 | 0.002063 | 0.184674 | 0.06723  |
| MmugDNA.24995.1.S1_at   | MmugDNA.24995.1 | 10.95 | 10    | 0.04 | 0.51 | 1.93  | 0.030488 | 0.019978 | 0.318657 | 0.177532 |
| MmugDNA.24996.1.S1_at   | MmugDNA.24996.1 | 7.69  | 7.76  | 0.1  | 0.49 | -1.05 | 0.626171 | 0.363987 | 0.829408 | 0.60434  |
| MmugDNA.24997.1.S1_at   | MmugDNA.24997.1 | 7.01  | 7.38  | 0.29 | 1.47 | -1.29 | 0.740656 | 0.870655 | 0.888738 | 0.926473 |
| MmugDNA.24999.1.S1_at   | MmugDNA.24999.1 | 5.86  | 8.07  | 0.95 | 1.95 | -4.64 | 0.197565 | 0.125804 | 0.560592 | 0.396313 |
| MmugDNA.250.1.S1_at     | MmugDNA.250.1   | 6.42  | 6.53  | 1.26 | 0.07 | -1.08 | 0.42238  | 0.383148 | 0.71345  | 0.619153 |
| MmugDNA.2500.1.S1_x_at  | MmugDNA.2500.1  | 5.21  | 5.1   | 1.11 | 0.15 | 1.08  | 0.308689 | 0.377816 | 0.641054 | 0.615206 |
| MmugDNA.25000.1.S1_at   | MmugDNA.25000.1 | 9.73  | 9.89  | 0.28 | 0.31 | -1.12 | 0.831208 | 0.161765 | 0.931682 | 0.437853 |
| MmugDNA.25001.1.S1_at   | MmugDNA.25001.1 | 6.57  | 6.59  | 0.15 | 0.1  | -1.01 | 0.463974 | 0.590255 | 0.738998 | 0.756124 |
| MmugDNA.25004.1.S1_at   | MmugDNA.25004.1 | 3.62  | 4.18  | 0.08 | 0.15 | -1.48 | 0.004672 | 0.00488  | 0.1844   | 0.097538 |
| MmugDNA.25005.1.S1_at   | MmugDNA.25005.1 | 10.12 | 9.5   | 0.04 | 0.25 | 1.53  | 0.006607 | 0.001546 | 0.200269 | 0.05949  |

|                         |                 |       |       |      |      |       |          |          |          |          |
|-------------------------|-----------------|-------|-------|------|------|-------|----------|----------|----------|----------|
| MmugDNA.25006.1.S1_x_at | MmugDNA.25006.1 | 5.64  | 5.5   | 0.64 | 0.29 | 1.1   | 0.287558 | 0.21154  | 0.626024 | 0.485658 |
| MmugDNA.25008.1.S1_at   | MmugDNA.25008.1 | 4.03  | 4.67  | 0.15 | 0.54 | -1.55 | 0.147295 | 0.260068 | 0.513097 | 0.52675  |
| MmugDNA.25009.1.S1_at   | MmugDNA.25009.1 | 4.32  | 4.27  | 0.85 | 0.29 | 1.04  | 0.457461 | 0.298446 | 0.734933 | 0.557143 |
| MmugDNA.2501.1.S1_at    | MmugDNA.2501.1  | 8.38  | 7.38  | 0.86 | 1.32 | 2.01  | 0.192963 | 0.145533 | 0.556235 | 0.419442 |
| MmugDNA.25010.1.S1_at   | MmugDNA.25010.1 | 3.56  | 3.55  | 0.12 | 0.12 | 1     | 0.47943  | 0.629897 | 0.747663 | 0.782009 |
| MmugDNA.25011.1.S1_at   | MmugDNA.25011.1 | 3.33  | 3.44  | 0.06 | 0.04 | -1.08 | 0.127532 | 0.232202 | 0.493834 | 0.503915 |
| MmugDNA.25014.1.S1_at   | MmugDNA.25014.1 | 8.73  | 9.76  | 0.07 | 0.6  | -2.03 | 0.118344 | 0.051599 | 0.48266  | 0.272617 |
| MmugDNA.25015.1.S1_at   | MmugDNA.25015.1 | 5.1   | 6.68  | 0.22 | 0.73 | -3    | 0.028921 | 0.011882 | 0.312442 | 0.141097 |
| MmugDNA.25016.1.S1_at   | MmugDNA.25016.1 | 6.03  | 5.47  | 0.25 | 0.42 | 1.48  | 0.049853 | 0.059543 | 0.372242 | 0.290548 |
| MmugDNA.25017.1.S1_at   | MmugDNA.25017.1 | 7.57  | 7.26  | 0.26 | 0.36 | 1.24  | 0.168138 | 0.227186 | 0.53256  | 0.499529 |
| MmugDNA.25019.1.S1_at   | MmugDNA.25019.1 | 6.75  | 7.81  | 0.22 | 0.96 | -2.08 | 0.170394 | 0.120473 | 0.534249 | 0.38925  |
| MmugDNA.2502.1.S1_at    | MmugDNA.2502.1  | 7.08  | 6.94  | 0.27 | 1.04 | 1.1   | 0.743767 | 0.807039 | 0.890199 | 0.888946 |
| MmugDNA.25021.1.S1_at   | MmugDNA.25021.1 | 5.41  | 5.46  | 0.17 | 0.09 | -1.03 | 0.630442 | 0.850527 | 0.832023 | 0.914981 |
| MmugDNA.25022.1.S1_at   | MmugDNA.25022.1 | 4.21  | 4.02  | 0.29 | 0.27 | 1.14  | 0.793149 | 0.102789 | 0.914241 | 0.363305 |
| MmugDNA.25023.1.S1_at   | MmugDNA.25023.1 | 4.48  | 4.56  | 0.32 | 0.61 | -1.06 | 0.284518 | 0.304905 | 0.624317 | 0.562044 |
| MmugDNA.25025.1.S1_at   | MmugDNA.25025.1 | 3.4   | 3.45  | 0.09 | 0.04 | -1.04 | 0.55295  | 0.784174 | 0.789712 | 0.875049 |
| MmugDNA.25026.1.S1_at   | MmugDNA.25026.1 | 7.08  | 7.27  | 0.14 | 0.19 | -1.14 | 0.51662  | 0.684671 | 0.768145 | 0.8161   |
| MmugDNA.25029.1.S1_at   | MmugDNA.25029.1 | 3.63  | 3.51  | 0.71 | 0.89 | 1.08  | 0.843506 | 0.91742  | 0.937058 | 0.95383  |
| MmugDNA.25030.1.S1_at   | MmugDNA.25030.1 | 8.38  | 8.44  | 0.06 | 0.17 | -1.05 | 0.388156 | 0.096017 | 0.692266 | 0.353302 |
| MmugDNA.25031.1.S1_at   | MmugDNA.25031.1 | 10.3  | 10.13 | 0.24 | 0.37 | 1.12  | 0.620414 | 0.657031 | 0.826026 | 0.799401 |
| MmugDNA.25032.1.S1_at   | MmugDNA.25032.1 | 4.55  | 5.69  | 0.19 | 0.43 | -2.2  | 0.010619 | 0.004539 | 0.230922 | 0.094138 |
| MmugDNA.25037.1.S1_at   | MmugDNA.25037.1 | 10.15 | 9.89  | 0.35 | 1.53 | 1.19  | 0.763427 | 0.7368   | 0.900278 | 0.847693 |
| MmugDNA.25039.1.S1_at   | MmugDNA.25039.1 | 5.33  | 4.71  | 0.26 | 0.29 | 1.54  | 0.097561 | 0.091939 | 0.456658 | 0.347267 |
| MmugDNA.18410.1.S1_s_at | MmugDNA.18410.1 | 5.65  | 6.11  | 0.23 | 0.54 | -1.38 | 0.296073 | 0.248813 | 0.632176 | 0.517951 |
| MmugDNA.25040.1.S1_at   | MmugDNA.25040.1 | 12.63 | 12.21 | 0.55 | 0.19 | 1.34  | 0.364666 | 0.270528 | 0.677517 | 0.535835 |
| MmugDNA.25041.1.S1_at   | MmugDNA.25041.1 | 4.73  | 4.81  | 0.1  | 0.2  | -1.06 | 0.24633  | 0.307245 | 0.597666 | 0.563506 |
| MmugDNA.25042.1.S1_at   | MmugDNA.25042.1 | 7.37  | 6.64  | 0.55 | 0.29 | 1.65  | 0.119413 | 0.04443  | 0.484134 | 0.25521  |
| MmugDNA.25043.1.S1_at   | MmugDNA.25043.1 | 4.39  | 4.54  | 0.16 | 0.14 | -1.11 | 0.890019 | 0.019808 | 0.956021 | 0.177036 |
| MmugDNA.25046.1.S1_at   | MmugDNA.25046.1 | 6.07  | 6.06  | 0.1  | 0.12 | 1.01  | 0.889694 | 0.318062 | 0.955822 | 0.571046 |
| MmugDNA.25047.1.S1_at   | MmugDNA.25047.1 | 9.01  | 8.59  | 0.21 | 0.47 | 1.34  | 0.197992 | 0.160584 | 0.561022 | 0.436745 |
| MmugDNA.25048.1.S1_at   | MmugDNA.25048.1 | 3.41  | 3.48  | 0.9  | 0.23 | -1.05 | 0.466377 | 0.471223 | 0.740215 | 0.679261 |
| MmugDNA.25049.1.S1_at   | MmugDNA.25049.1 | 8.29  | 8.2   | 0.2  | 0.16 | 1.06  | 0.263892 | 0.170719 | 0.609706 | 0.447316 |
| MmugDNA.25050.1.S1_at   | MmugDNA.25050.1 | 9.58  | 10.29 | 0.1  | 0.39 | -1.64 | 0.033238 | 0.037475 | 0.327577 | 0.237853 |
| MmugDNA.25051.1.S1_at   | MmugDNA.25051.1 | 12.14 | 12.05 | 0.02 | 0.1  | 1.06  | 0.42262  | 0.026782 | 0.713606 | 0.20472  |
| MmugDNA.25052.1.S1_at   | MmugDNA.25052.1 | 5.65  | 5.63  | 0.05 | 0.62 | 1.01  | 0.944808 | 0.994486 | 0.978994 | 0.996631 |
| MmugDNA.25054.1.S1_at   | MmugDNA.25054.1 | 3.5   | 3.45  | 0.46 | 0.29 | 1.03  | 0.757173 | 0.389236 | 0.897005 | 0.623403 |
| MmugDNA.25055.1.S1_at   | MmugDNA.25055.1 | 3.87  | 4     | 0.12 | 0.16 | -1.1  | 0.955181 | 0.486166 | 0.983189 | 0.689643 |
| MmugDNA.25056.1.S1_at   | MmugDNA.25056.1 | 8.45  | 8.41  | 0.06 | 0.34 | 1.03  | 0.865201 | 0.70161  | 0.94589  | 0.826955 |
| MmugDNA.25057.1.S1_s_at | MmugDNA.25057.1 | 7.81  | 7.85  | 0.16 | 0.45 | -1.02 | 0.580827 | 0.779315 | 0.804812 | 0.872047 |
| MmugDNA.25059.1.S1_at   | MmugDNA.25059.1 | 3.77  | 3.49  | 0.12 | 0.06 | 1.21  | 0.095856 | 0.172426 | 0.453861 | 0.448837 |
| MmugDNA.2506.1.S1_at    | MmugDNA.2506.1  | 4.66  | 4.41  | 0.02 | 0.3  | 1.18  | 0.195447 | 0.229346 | 0.558901 | 0.501527 |

|                         |                 |       |       |      |      |       |          |          |          |          |
|-------------------------|-----------------|-------|-------|------|------|-------|----------|----------|----------|----------|
| MmugDNA.25062.1.S1_at   | MmugDNA.25062.1 | 10.27 | 9.25  | 0.39 | 0.38 | 2.02  | 0.042725 | 0.003188 | 0.355382 | 0.08199  |
| MmugDNA.25063.1.S1_at   | MmugDNA.25063.1 | 10.71 | 9.88  | 0.13 | 0.41 | 1.78  | 0.034984 | 0.015318 | 0.334374 | 0.157152 |
| MmugDNA.25064.1.S1_at   | MmugDNA.25064.1 | 3.46  | 3.49  | 0.06 | 0.12 | -1.02 | 0.849306 | 0.785183 | 0.939516 | 0.875656 |
| MmugDNA.25065.1.S1_at   | MmugDNA.25065.1 | 5.32  | 5.03  | 0.33 | 0.94 | 1.22  | 0.811054 | 0.493662 | 0.922946 | 0.694288 |
| MmugDNA.25066.1.S1_at   | MmugDNA.25066.1 | 5.51  | 5.48  | 0.03 | 0.06 | 1.02  | 0.38706  | 0.266412 | 0.691843 | 0.532211 |
| MmugDNA.25067.1.S1_at   | MmugDNA.25067.1 | 12.49 | 11.85 | 0.09 | 0.3  | 1.56  | 0.013173 | 0.010526 | 0.245552 | 0.134019 |
| MmugDNA.25067.1.S1_x_at | MmugDNA.25067.1 | 12.43 | 11.83 | 0.1  | 0.32 | 1.51  | 0.015984 | 0.012319 | 0.262097 | 0.143659 |
| MmugDNA.25069.1.S1_at   | MmugDNA.25069.1 | 5.48  | 5.64  | 0.49 | 0.93 | -1.12 | 0.527758 | 0.394963 | 0.775085 | 0.627216 |
| MmugDNA.2507.1.S1_at    | MmugDNA.2507.1  | 6.95  | 6.58  | 0.21 | 0.95 | 1.3   | 0.715045 | 0.580302 | 0.875005 | 0.749618 |
| MmugDNA.25070.1.S1_at   | MmugDNA.25070.1 | 3.48  | 3.47  | 0.52 | 0.2  | 1.01  | 0.506509 | 0.527149 | 0.762415 | 0.715861 |
| MmugDNA.25073.1.S1_at   | MmugDNA.25073.1 | 5.05  | 5.25  | 0.08 | 0.16 | -1.15 | 0.113616 | 0.123645 | 0.476938 | 0.393692 |
| MmugDNA.25074.1.S1_at   | MmugDNA.25074.1 | 10.35 | 9.87  | 0.03 | 0.87 | 1.4   | 0.408869 | 0.287977 | 0.705637 | 0.549255 |
| MmugDNA.25075.1.S1_at   | MmugDNA.25075.1 | 8.48  | 8.28  | 0.16 | 0.27 | 1.15  | 0.298196 | 0.330257 | 0.633823 | 0.579044 |
| MmugDNA.25077.1.S1_at   | MmugDNA.25077.1 | 8.59  | 8.12  | 0.09 | 0.08 | 1.38  | 0.003942 | 0.000968 | 0.181    | 0.049591 |
| MmugDNA.25078.1.S1_at   | MmugDNA.25078.1 | 3.91  | 4.07  | 0.43 | 0.06 | -1.12 | 0.730501 | 0.447124 | 0.88321  | 0.663315 |
| MmugDNA.2508.1.S1_at    | MmugDNA.2508.1  | 2.95  | 3.06  | 0.16 | 0.06 | -1.08 | 0.335656 | 0.483725 | 0.659165 | 0.688112 |
| MmugDNA.25080.1.S1_at   | MmugDNA.25080.1 | 3.96  | 4.55  | 1.14 | 0.64 | -1.51 | 0.997789 | 0.960659 | 0.999131 | 0.977598 |
| MmugDNA.25082.1.S1_at   | MmugDNA.25082.1 | 5.45  | 5.62  | 0.04 | 0.2  | -1.13 | 0.219678 | 0.405996 | 0.579133 | 0.634136 |
| MmugDNA.5329.1.S1_s_at  | MmugDNA.5329.1  | 10.05 | 9.62  | 0.08 | 0.13 | 1.35  | 0.011115 | 0.006147 | 0.234282 | 0.106774 |
| MmugDNA.25084.1.S1_at   | MmugDNA.25084.1 | 9.64  | 9.38  | 0.23 | 0.06 | 1.2   | 0.097759 | 0.101544 | 0.456904 | 0.361393 |
| MmugDNA.25085.1.S1_at   | MmugDNA.25085.1 | 4.93  | 4.2   | 0.15 | 0.3  | 1.66  | 0.027713 | 0.036114 | 0.308669 | 0.234485 |
| MmugDNA.25086.1.S1_at   | MmugDNA.25086.1 | 8.94  | 9.06  | 0.5  | 0.46 | -1.09 | 0.335292 | 0.194287 | 0.659098 | 0.469384 |
| MmugDNA.25087.1.S1_at   | MmugDNA.25087.1 | 3.47  | 3.39  | 0.04 | 0.06 | 1.06  | 0.081468 | 0.055631 | 0.432455 | 0.281649 |
| MmugDNA.25089.1.S1_at   | MmugDNA.25089.1 | 10.32 | 10.13 | 0.08 | 0.17 | 1.14  | 0.435456 | 0.111922 | 0.721236 | 0.377007 |
| MmugDNA.2509.1.S1_at    | MmugDNA.2509.1  | 8.68  | 8.08  | 0.12 | 0.53 | 1.51  | 0.10045  | 0.105708 | 0.461009 | 0.3678   |
| MmugDNA.25091.1.S1_at   | MmugDNA.25091.1 | 5.18  | 5.25  | 0.31 | 0.17 | -1.05 | 0.250924 | 0.313666 | 0.600488 | 0.568012 |
| MmugDNA.25092.1.S1_at   | MmugDNA.25092.1 | 6.28  | 6.35  | 0.04 | 0.01 | -1.05 | 0.186415 | 0.13736  | 0.550106 | 0.41029  |
| MmugDNA.25093.1.S1_at   | MmugDNA.25093.1 | 5.71  | 5.65  | 0.1  | 0.09 | 1.04  | 0.180111 | 0.051453 | 0.544307 | 0.272242 |
| MmugDNA.25095.1.S1_at   | MmugDNA.25095.1 | 4.34  | 4.04  | 0.21 | 0.19 | 1.23  | 0.131623 | 0.597217 | 0.498041 | 0.760127 |
| MmugDNA.25096.1.S1_at   | MmugDNA.25096.1 | 8.93  | 8.76  | 0.15 | 0.31 | 1.13  | 0.351649 | 0.456431 | 0.669126 | 0.670188 |
| MmugDNA.25097.1.S1_at   | MmugDNA.25097.1 | 3.25  | 3.23  | 0.15 | 0.06 | 1.01  | 0.915352 | 0.7346   | 0.966534 | 0.846255 |
| MmugDNA.25098.1.S1_at   | MmugDNA.25098.1 | 4.25  | 4.2   | 0.05 | 0.11 | 1.04  | 0.494595 | 0.355196 | 0.756791 | 0.59757  |
| MmugDNA.25099.1.S1_at   | MmugDNA.25099.1 | 9.46  | 9.35  | 0.53 | 1    | 1.08  | 0.944169 | 0.95423  | 0.978677 | 0.973995 |
| MmugDNA.251.1.S1_at     | MmugDNA.251.1   | 4.9   | 5.08  | 0.12 | 0.26 | -1.13 | 0.490232 | 0.677931 | 0.754366 | 0.811843 |
| MmugDNA.2510.1.S1_at    | MmugDNA.2510.1  | 8.54  | 7.85  | 0.11 | 0.41 | 1.62  | 0.081921 | 0.081339 | 0.433162 | 0.329437 |
| MmugDNA.25100.1.S1_at   | MmugDNA.25100.1 | 11.76 | 12.15 | 0.1  | 0.07 | -1.31 | 0.015062 | 0.006855 | 0.257205 | 0.11185  |
| MmugDNA.25101.1.S1_at   | MmugDNA.25101.1 | 8.94  | 8.06  | 0.48 | 1.02 | 1.84  | 0.087433 | 0.088166 | 0.441776 | 0.341721 |
| MmugDNA.25102.1.S1_at   | MmugDNA.25102.1 | 10.32 | 10.81 | 0.79 | 0.5  | -1.4  | 0.677523 | 0.59369  | 0.855526 | 0.758395 |
| MmugDNA.25104.1.S1_at   | MmugDNA.25104.1 | 5.15  | 5.23  | 0.56 | 0.3  | -1.05 | 0.57484  | 0.341597 | 0.801864 | 0.587795 |
| MmugDNA.25105.1.S1_at   | MmugDNA.25105.1 | 12.34 | 12.42 | 0.07 | 0.25 | -1.05 | 0.301384 | 0.410149 | 0.636366 | 0.637086 |
| MmugDNA.25106.1.S1_at   | MmugDNA.25106.1 | 11.79 | 11.97 | 0.03 | 0.13 | -1.14 | 0.076211 | 0.092116 | 0.424738 | 0.34776  |



|                         |                 |       |       |      |      |       |          |          |          |          |
|-------------------------|-----------------|-------|-------|------|------|-------|----------|----------|----------|----------|
| MmugDNA.25107.1.S1_at   | MmugDNA.25107.1 | 6.35  | 4.65  | 0.2  | 0.12 | 3.25  | 0.000302 | 0.000032 | 0.12562  | 0.022097 |
| MmugDNA.25108.1.S1_at   | MmugDNA.25108.1 | 12.03 | 11    | 0.23 | 0.43 | 2.05  | 0.018003 | 0.01103  | 0.268422 | 0.136793 |
| MmugDNA.25109.1.S1_at   | MmugDNA.25109.1 | 5.75  | 5.92  | 0.19 | 0.07 | -1.13 | 0.324487 | 0.512131 | 0.651941 | 0.706076 |
| MmugDNA.25109.1.S1_s_at | MmugDNA.25109.1 | 5.77  | 5.85  | 0.08 | 0.25 | -1.06 | 0.681772 | 0.428993 | 0.857635 | 0.650509 |
| MmugDNA.2511.1.S1_at    | MmugDNA.2511.1  | 7.02  | 6.02  | 0.1  | 1.23 | 1.99  | 0.407932 | 0.436507 | 0.704957 | 0.656032 |
| MmugDNA.25110.1.S1_at   | MmugDNA.25110.1 | 4.62  | 4.72  | 0.04 | 0.21 | -1.07 | 0.435308 | 0.552079 | 0.721198 | 0.73147  |
| MmugDNA.25112.1.S1_at   | MmugDNA.25112.1 | 8.29  | 6.82  | 0.19 | 0.67 | 2.77  | 0.040206 | 0.027953 | 0.349219 | 0.208689 |
| MmugDNA.25113.1.S1_at   | MmugDNA.25113.1 | 7.2   | 5.65  | 1.28 | 1.02 | 2.93  | 0.362537 | 0.472365 | 0.676103 | 0.67998  |
| MmugDNA.25116.1.S1_at   | MmugDNA.25116.1 | 7.82  | 8.42  | 0.22 | 0.45 | -1.52 | 0.284584 | 0.022254 | 0.624327 | 0.186618 |
| MmugDNA.25117.1.S1_at   | MmugDNA.25117.1 | 3.97  | 3.59  | 0.15 | 0.16 | 1.3   | 0.055968 | 0.007846 | 0.385352 | 0.118032 |
| MmugDNA.25118.1.S1_at   | MmugDNA.25118.1 | 9.75  | 9.12  | 0.05 | 1.66 | 1.54  | 0.25957  | 0.318787 | 0.606665 | 0.571379 |
| MmugDNA.25119.1.S1_at   | MmugDNA.25119.1 | 4.64  | 4.65  | 0.26 | 0.13 | -1    | 0.859466 | 0.698966 | 0.94324  | 0.825058 |
| MmugDNA.25120.1.S1_at   | MmugDNA.25120.1 | 4.45  | 4.39  | 0.09 | 0.03 | 1.04  | 0.391945 | 0.182885 | 0.694373 | 0.459362 |
| MmugDNA.25122.1.S1_at   | MmugDNA.25122.1 | 6.52  | 6.99  | 0.02 | 0.33 | -1.38 | 0.249417 | 0.130398 | 0.600196 | 0.402257 |
| MmugDNA.25124.1.S1_at   | MmugDNA.25124.1 | 5     | 5.01  | 0.25 | 0.07 | -1    | 0.423917 | 0.383452 | 0.714199 | 0.619433 |
| MmugDNA.25125.1.S1_at   | MmugDNA.25125.1 | 6.15  | 6.09  | 0.73 | 0.94 | 1.04  | 0.655    | 0.855836 | 0.84477  | 0.917723 |
| MmugDNA.25126.1.S1_at   | MmugDNA.25126.1 | 3.37  | 3.12  | 0.11 | 0.23 | 1.19  | 0.268006 | 0.053683 | 0.612875 | 0.277304 |
| MmugDNA.25127.1.S1_at   | MmugDNA.25127.1 | 6.04  | 6.04  | 0.11 | 0.13 | -1.01 | 0.924149 | 0.347642 | 0.970594 | 0.592039 |
| MmugDNA.25128.1.S1_at   | MmugDNA.25128.1 | 7.2   | 7.39  | 0.24 | 0.23 | -1.14 | 0.767203 | 0.726099 | 0.902175 | 0.841422 |
| MmugDNA.25129.1.S1_at   | MmugDNA.25129.1 | 4.29  | 4.39  | 0.23 | 0.07 | -1.07 | 0.988771 | 0.999954 | 0.995968 | 0.999973 |
| MmugDNA.2513.1.S1_at    | MmugDNA.2513.1  | 9.53  | 9.25  | 0.23 | 0.45 | 1.21  | 0.218874 | 0.309818 | 0.578257 | 0.565044 |
| MmugDNA.25130.1.S1_at   | MmugDNA.25130.1 | 4.26  | 4.27  | 0.37 | 0.01 | -1.01 | 0.929267 | 0.79075  | 0.972671 | 0.878973 |
| MmugDNA.25131.1.S1_at   | MmugDNA.25131.1 | 5.84  | 6.99  | 0.82 | 1.01 | -2.21 | 0.079858 | 0.076655 | 0.430147 | 0.32195  |
| MmugDNA.25132.1.S1_at   | MmugDNA.25132.1 | 3.54  | 3.17  | 0.35 | 0.17 | 1.29  | 0.189773 | 0.312143 | 0.552667 | 0.566904 |
| MmugDNA.25133.1.S1_at   | MmugDNA.25133.1 | 5.06  | 4.49  | 0.49 | 0.04 | 1.48  | 0.338224 | 0.326732 | 0.660678 | 0.576725 |
| MmugDNA.25134.1.S1_at   | MmugDNA.25134.1 | 3.74  | 3.66  | 0.15 | 0.09 | 1.06  | 0.967947 | 0.978634 | 0.98795  | 0.988411 |
| MmugDNA.25135.1.S1_at   | MmugDNA.25135.1 | 5.68  | 5.62  | 0.01 | 0.15 | 1.04  | 0.57149  | 0.136874 | 0.800186 | 0.409568 |
| MmugDNA.25136.1.S1_at   | MmugDNA.25136.1 | 4.22  | 4.4   | 0.37 | 0.19 | -1.13 | 0.741555 | 0.476133 | 0.889293 | 0.682524 |
| MmugDNA.25138.1.S1_at   | MmugDNA.25138.1 | 6.69  | 6.8   | 0.1  | 0.16 | -1.08 | 0.325297 | 0.157903 | 0.652582 | 0.433583 |
| MmugDNA.25139.1.S1_at   | MmugDNA.25139.1 | 10.53 | 10.2  | 0.28 | 0.31 | 1.26  | 0.632805 | 0.423291 | 0.833331 | 0.646277 |
| MmugDNA.2514.1.S1_at    | MmugDNA.2514.1  | 5.47  | 5.57  | 0.1  | 0.07 | -1.08 | 0.094143 | 0.109346 | 0.451714 | 0.373154 |
| MmugDNA.25141.1.S1_at   | MmugDNA.25141.1 | 11.22 | 11.33 | 0.02 | 0.26 | -1.08 | 0.454092 | 0.080525 | 0.733133 | 0.328189 |
| MmugDNA.25142.1.S1_at   | MmugDNA.25142.1 | 7.96  | 8.21  | 0.59 | 0.41 | -1.19 | 0.228265 | 0.129644 | 0.585703 | 0.401242 |
| MmugDNA.25143.1.S1_at   | MmugDNA.25143.1 | 12.13 | 10.91 | 1.17 | 0.83 | 2.33  | 0.541453 | 0.245254 | 0.782715 | 0.515049 |
| MmugDNA.25144.1.S1_at   | MmugDNA.25144.1 | 5.7   | 5.71  | 0.22 | 0.4  | -1.01 | 0.698195 | 0.532791 | 0.866049 | 0.719235 |
| MmugDNA.25145.1.S1_at   | MmugDNA.25145.1 | 3.41  | 4.4   | 0.25 | 0.98 | -1.99 | 0.200631 | 0.288911 | 0.5634   | 0.550032 |
| MmugDNA.25148.1.S1_at   | MmugDNA.25148.1 | 10.33 | 10.36 | 0.24 | 0.17 | -1.02 | 0.709267 | 0.093217 | 0.872412 | 0.34931  |
| MmugDNA.25149.1.S1_at   | MmugDNA.25149.1 | 8.65  | 7.42  | 0.23 | 0.32 | 2.36  | 0.005077 | 0.009095 | 0.188737 | 0.125944 |
| MmugDNA.2515.1.S1_at    | MmugDNA.2515.1  | 12.17 | 12.5  | 0.2  | 0.26 | -1.25 | 0.276954 | 0.219384 | 0.619155 | 0.493156 |
| MmugDNA.25150.1.S1_at   | MmugDNA.25150.1 | 9.31  | 10.98 | 0.17 | 0.48 | -3.19 | 0.007339 | 0.002592 | 0.207019 | 0.075326 |
| MmugDNA.25151.1.S1_at   | MmugDNA.25151.1 | 5.67  | 5.6   | 0.09 | 0.6  | 1.05  | 0.473427 | 0.636835 | 0.744256 | 0.786404 |

|                         |                 |       |       |      |      |       |          |          |          |          |
|-------------------------|-----------------|-------|-------|------|------|-------|----------|----------|----------|----------|
| MmugDNA.25152.1.S1_at   | MmugDNA.25152.1 | 9.06  | 9.07  | 0.23 | 0.56 | -1    | 0.762547 | 0.87647  | 0.899996 | 0.929683 |
| MmugDNA.25154.1.S1_at   | MmugDNA.25154.1 | 10.53 | 10.2  | 0.11 | 0.2  | 1.26  | 0.065769 | 0.062186 | 0.405134 | 0.296296 |
| MmugDNA.25155.1.S1_at   | MmugDNA.25155.1 | 13.07 | 12.52 | 0.14 | 0.3  | 1.46  | 0.033873 | 0.017259 | 0.330262 | 0.166393 |
| MmugDNA.25156.1.S1_at   | MmugDNA.25156.1 | 13.74 | 13.49 | 0.07 | 0.18 | 1.18  | 0.048488 | 0.020615 | 0.368878 | 0.180141 |
| MmugDNA.25157.1.S1_at   | MmugDNA.25157.1 | 11.2  | 11.11 | 0.09 | 0.26 | 1.06  | 0.476224 | 0.770659 | 0.746145 | 0.866801 |
| MmugDNA.25157.1.S1_s_at | MmugDNA.25157.1 | 10.73 | 10.64 | 0.23 | 0.32 | 1.06  | 0.554769 | 0.739368 | 0.791063 | 0.848935 |
| MmugDNA.25158.1.S1_at   | MmugDNA.25158.1 | 3.7   | 3.88  | 0.45 | 0.06 | -1.13 | 0.785181 | 0.46946  | 0.910556 | 0.678248 |
| MmugDNA.2516.1.S1_at    | MmugDNA.2516.1  | 6.96  | 7.29  | 0.05 | 0.32 | -1.26 | 0.142705 | 0.125275 | 0.509765 | 0.395832 |
| MmugDNA.25160.1.S1_at   | MmugDNA.25160.1 | 4.62  | 4.4   | 0.15 | 0.21 | 1.17  | 0.155603 | 0.139525 | 0.520357 | 0.412743 |
| MmugDNA.25161.1.S1_at   | MmugDNA.25161.1 | 3.9   | 3.96  | 0.21 | 0.38 | -1.04 | 0.336411 | 0.315076 | 0.659444 | 0.56883  |
| MmugDNA.25162.1.S1_at   | MmugDNA.25162.1 | 9.5   | 8.89  | 0.03 | 0.59 | 1.53  | 0.085987 | 0.063345 | 0.440024 | 0.29838  |
| MmugDNA.25163.1.S1_at   | MmugDNA.25163.1 | 6.48  | 5.9   | 0.24 | 0.41 | 1.49  | 0.092554 | 0.046025 | 0.449243 | 0.258971 |
| MmugDNA.25166.1.S1_at   | MmugDNA.25166.1 | 9.31  | 8.7   | 0.11 | 0.54 | 1.52  | 0.313076 | 0.399308 | 0.644926 | 0.629737 |
| MmugDNA.25167.1.S1_at   | MmugDNA.25167.1 | 4.74  | 4.85  | 0.83 | 0.22 | -1.08 | 0.704615 | 0.594748 | 0.869745 | 0.758628 |
| MmugDNA.25168.1.S1_at   | MmugDNA.25168.1 | 3.01  | 3.08  | 0.05 | 0.16 | -1.05 | 0.901541 | 0.928496 | 0.960673 | 0.95936  |
| MmugDNA.2517.1.S1_at    | MmugDNA.2517.1  | 8.46  | 7.6   | 0.42 | 0.26 | 1.8   | 0.07384  | 0.066654 | 0.419443 | 0.303999 |
| MmugDNA.25170.1.S1_at   | MmugDNA.25170.1 | 3.38  | 3.47  | 0.13 | 0.1  | -1.06 | 0.833739 | 0.221147 | 0.932403 | 0.494498 |
| MmugDNA.25171.1.S1_at   | MmugDNA.25171.1 | 3.77  | 3.75  | 0.14 | 0.11 | 1.02  | 0.643527 | 0.620378 | 0.839421 | 0.775363 |
| MmugDNA.25172.1.S1_at   | MmugDNA.25172.1 | 3.67  | 3.67  | 0.01 | 0.28 | -1    | 0.363149 | 0.355437 | 0.676565 | 0.597738 |
| MmugDNA.25174.1.S1_at   | MmugDNA.25174.1 | 7.28  | 6.09  | 0.31 | 0.33 | 2.28  | 0.006545 | 0.002235 | 0.199625 | 0.069621 |
| MmugDNA.25175.1.S1_at   | MmugDNA.25175.1 | 2.81  | 2.64  | 0.11 | 0.18 | 1.12  | 0.672249 | 0.387121 | 0.852937 | 0.621935 |
| MmugDNA.25177.1.S1_at   | MmugDNA.25177.1 | 4.46  | 4.91  | 0.63 | 0.07 | -1.36 | 0.896996 | 0.839643 | 0.959039 | 0.908582 |
| MmugDNA.25178.1.S1_at   | MmugDNA.25178.1 | 3.9   | 4.13  | 0.04 | 0.1  | -1.17 | 0.032639 | 0.04566  | 0.32573  | 0.25794  |
| MmugDNA.25179.1.S1_s_at | MmugDNA.25179.1 | 13.78 | 13.58 | 0.05 | 0.11 | 1.15  | 0.018492 | 0.005095 | 0.270581 | 0.099108 |
| MmugDNA.2518.1.S1_at    | MmugDNA.2518.1  | 3.92  | 3.83  | 0.27 | 0.15 | 1.07  | 0.37938  | 0.364087 | 0.686918 | 0.604449 |
| MmugDNA.25180.1.S1_at   | MmugDNA.25180.1 | 3.52  | 3.57  | 0.06 | 0    | -1.03 | 0.208258 | 0.284776 | 0.570117 | 0.546966 |
| MmugDNA.25183.1.S1_at   | MmugDNA.25183.1 | 9.14  | 6.63  | 1.84 | 0.41 | 5.68  | 0.076174 | 0.05389  | 0.424738 | 0.277685 |
| MmugDNA.25185.1.S1_at   | MmugDNA.25185.1 | 11.01 | 10.6  | 0.1  | 0.51 | 1.33  | 0.097224 | 0.096471 | 0.456142 | 0.35409  |
| MmugDNA.25186.1.S1_at   | MmugDNA.25186.1 | 3.82  | 6.79  | 0.98 | 2.62 | -7.87 | 0.298061 | 0.256291 | 0.633753 | 0.524079 |
| MmugDNA.25187.1.S1_at   | MmugDNA.25187.1 | 11.17 | 9.68  | 0.14 | 0.3  | 2.8   | 0.002163 | 0.000295 | 0.159051 | 0.034892 |
| MmugDNA.25188.1.S1_at   | MmugDNA.25188.1 | 5.3   | 4.87  | 0.27 | 0    | 1.35  | 0.065325 | 0.038973 | 0.404407 | 0.24253  |
| MmugDNA.25189.1.S1_at   | MmugDNA.25189.1 | 5.65  | 5.46  | 0.23 | 0.29 | 1.14  | 0.597554 | 0.461172 | 0.813537 | 0.67288  |
| MmugDNA.25190.1.S1_at   | MmugDNA.25190.1 | 6.13  | 6.29  | 0.08 | 0.25 | -1.11 | 0.955647 | 0.723792 | 0.983316 | 0.840126 |
| MmugDNA.25191.1.S1_at   | MmugDNA.25191.1 | 6.87  | 6.74  | 0.26 | 0.15 | 1.09  | 0.595493 | 0.795081 | 0.812365 | 0.881926 |
| MmugDNA.25191.1.S1_s_at | MmugDNA.25191.1 | 9.67  | 9.38  | 0.24 | 0.32 | 1.22  | 0.670078 | 0.340525 | 0.852318 | 0.586776 |
| MmugDNA.25192.1.S1_at   | MmugDNA.25192.1 | 10.82 | 10.71 | 0.11 | 0.38 | 1.08  | 0.544001 | 0.724097 | 0.784219 | 0.840308 |
| MmugDNA.25193.1.S1_at   | MmugDNA.25193.1 | 9.53  | 9.26  | 0.17 | 0.4  | 1.2   | 0.6148   | 0.785377 | 0.823258 | 0.875742 |
| MmugDNA.25194.1.S1_at   | MmugDNA.25194.1 | 3.18  | 3.2   | 0.23 | 0.03 | -1.01 | 0.974032 | 0.783057 | 0.989791 | 0.874447 |
| MmugDNA.25195.1.S1_at   | MmugDNA.25195.1 | 7.09  | 7.17  | 0.95 | 0.11 | -1.06 | 0.441317 | 0.612206 | 0.724743 | 0.769863 |
| MmugDNA.25196.1.S1_at   | MmugDNA.25196.1 | 8.45  | 8.03  | 0.21 | 0.42 | 1.33  | 0.273601 | 0.348121 | 0.617166 | 0.592302 |
| MmugDNA.25196.1.S1_x_at | MmugDNA.25196.1 | 8.26  | 8     | 0.17 | 0.47 | 1.2   | 0.329922 | 0.498923 | 0.655349 | 0.697877 |

|                         |                 |       |       |      |      |       |          |          |          |          |
|-------------------------|-----------------|-------|-------|------|------|-------|----------|----------|----------|----------|
| MmugDNA.25197.1.S1_at   | MmugDNA.25197.1 | 9.86  | 8.22  | 0.41 | 0.45 | 3.13  | 0.008157 | 0.002811 | 0.216841 | 0.078181 |
| MmugDNA.25199.1.S1_at   | MmugDNA.25199.1 | 12.02 | 11.74 | 0.12 | 0.4  | 1.22  | 0.209169 | 0.254236 | 0.57081  | 0.522538 |
| MmugDNA.2520.1.S1_at    | MmugDNA.2520.1  | 4.03  | 4.17  | 0.15 | 0.04 | -1.1  | 0.301337 | 0.277313 | 0.636366 | 0.541265 |
| MmugDNA.25200.1.S1_at   | MmugDNA.25200.1 | 8.9   | 8.84  | 0.28 | 0.37 | 1.04  | 0.420044 | 0.126203 | 0.712178 | 0.396748 |
| MmugDNA.25201.1.S1_at   | MmugDNA.25201.1 | 4.24  | 4.28  | 0.15 | 0.11 | -1.03 | 0.694351 | 0.349554 | 0.864407 | 0.593537 |
| MmugDNA.25202.1.S1_at   | MmugDNA.25202.1 | 7.35  | 7.25  | 0.46 | 0.37 | 1.07  | 0.632399 | 0.57761  | 0.833214 | 0.748013 |
| MmugDNA.25206.1.S1_at   | MmugDNA.25206.1 | 9.16  | 8.5   | 0.12 | 0.36 | 1.58  | 0.018041 | 0.005073 | 0.268431 | 0.09907  |
| MmugDNA.25207.1.S1_at   | MmugDNA.25207.1 | 5.19  | 4.99  | 0.27 | 0.11 | 1.14  | 0.106207 | 0.386466 | 0.466831 | 0.621593 |
| MmugDNA.25209.1.S1_at   | MmugDNA.25209.1 | 10.23 | 10.04 | 0.09 | 0.15 | 1.14  | 0.128639 | 0.066881 | 0.494653 | 0.304535 |
| MmugDNA.25210.1.S1_at   | MmugDNA.25210.1 | 5.76  | 5.88  | 0.11 | 0.23 | -1.09 | 0.395612 | 0.51098  | 0.696523 | 0.705318 |
| MmugDNA.25212.1.S1_at   | MmugDNA.25212.1 | 7.5   | 7.31  | 1.08 | 0.36 | 1.14  | 0.795279 | 0.541097 | 0.915081 | 0.72475  |
| MmugDNA.25214.1.S1_at   | MmugDNA.25214.1 | 4.74  | 4.03  | 1.14 | 0.28 | 1.64  | 0.223348 | 0.18025  | 0.581813 | 0.456804 |
| MmugDNA.25215.1.S1_at   | MmugDNA.25215.1 | 3.51  | 3.63  | 0    | 0.12 | -1.08 | 0.532036 | 0.296213 | 0.777626 | 0.555413 |
| MmugDNA.25216.1.S1_at   | MmugDNA.25216.1 | 7.98  | 8.07  | 0.06 | 0.76 | -1.06 | 0.893582 | 0.692863 | 0.957655 | 0.821279 |
| MmugDNA.25217.1.S1_at   | MmugDNA.25217.1 | 3.9   | 4.31  | 0    | 0.43 | -1.33 | 0.527176 | 0.248137 | 0.774581 | 0.517567 |
| MmugDNA.25219.1.S1_at   | MmugDNA.25219.1 | 7.19  | 6.77  | 0.6  | 0.05 | 1.34  | 0.262733 | 0.216041 | 0.609039 | 0.48965  |
| MmugDNA.25222.1.S1_at   | MmugDNA.25222.1 | 4.29  | 4.29  | 0.27 | 0.07 | -1    | 0.598177 | 0.512942 | 0.813939 | 0.706623 |
| MmugDNA.25224.1.S1_at   | MmugDNA.25224.1 | 12.05 | 11.52 | 0.13 | 0.2  | 1.45  | 0.013003 | 0.006506 | 0.245262 | 0.109521 |
| MmugDNA.7346.1.S1_s_at  | MmugDNA.7346.1  | 13.51 | 13.53 | 0.32 | 0.13 | -1.02 | 0.63463  | 0.826751 | 0.834598 | 0.900506 |
| MmugDNA.25227.1.S1_at   | MmugDNA.25227.1 | 5.19  | 5.09  | 0.08 | 0.14 | 1.07  | 0.523573 | 0.766027 | 0.772643 | 0.864085 |
| MmugDNA.25228.1.S1_at   | MmugDNA.25228.1 | 5.16  | 5.23  | 0.39 | 0.4  | -1.05 | 0.637794 | 0.794184 | 0.836256 | 0.881296 |
| MmugDNA.2523.1.S1_at    | MmugDNA.2523.1  | 3.21  | 3.22  | 0.14 | 0.19 | -1.01 | 0.398256 | 0.407533 | 0.698594 | 0.63505  |
| MmugDNA.25230.1.S1_at   | MmugDNA.25230.1 | 5.52  | 5.43  | 0.11 | 0.1  | 1.07  | 0.645089 | 0.088928 | 0.840161 | 0.34275  |
| MmugDNA.25231.1.S1_at   | MmugDNA.25231.1 | 11.6  | 11.75 | 0.17 | 0.16 | -1.11 | 0.443145 | 0.6148   | 0.725992 | 0.771546 |
| MmugDNA.25232.1.S1_at   | MmugDNA.25232.1 | 5.43  | 5.49  | 0.14 | 0.11 | -1.05 | 0.994291 | 0.908702 | 0.997997 | 0.948291 |
| MmugDNA.25233.1.S1_at   | MmugDNA.25233.1 | 3.66  | 4     | 0.67 | 0.22 | -1.27 | 0.955821 | 0.639583 | 0.983384 | 0.788351 |
| MmugDNA.25234.1.S1_at   | MmugDNA.25234.1 | 4.23  | 4.47  | 0.01 | 0.21 | -1.18 | 0.398824 | 0.655705 | 0.698928 | 0.7987   |
| MmugDNA.25236.1.S1_at   | MmugDNA.25236.1 | 6.27  | 6.28  | 0.14 | 0.27 | -1.01 | 0.984131 | 0.65018  | 0.99433  | 0.795459 |
| MmugDNA.25238.1.S1_at   | MmugDNA.25238.1 | 6.47  | 6.68  | 0.05 | 0.11 | -1.15 | 0.054963 | 0.000954 | 0.382822 | 0.049326 |
| MmugDNA.25239.1.S1_at   | MmugDNA.25239.1 | 5.78  | 5.09  | 0.1  | 0.34 | 1.61  | 0.071965 | 0.064678 | 0.41606  | 0.300314 |
| MmugDNA.2524.1.S1_at    | MmugDNA.2524.1  | 3.63  | 3.85  | 0.07 | 0.18 | -1.17 | 0.22796  | 0.279777 | 0.585346 | 0.543246 |
| MmugDNA.25240.1.S1_at   | MmugDNA.25240.1 | 9.93  | 10.66 | 0.1  | 0.45 | -1.66 | 0.062822 | 0.046478 | 0.399328 | 0.260115 |
| MmugDNA.25241.1.S1_at   | MmugDNA.25241.1 | 6.33  | 6.49  | 0.15 | 0.27 | -1.12 | 0.995029 | 0.823793 | 0.998246 | 0.898803 |
| MmugDNA.25242.1.S1_at   | MmugDNA.25242.1 | 7.95  | 7.55  | 0.36 | 0.47 | 1.32  | 0.616541 | 0.10042  | 0.824231 | 0.359541 |
| MmugDNA.25244.1.S1_at   | MmugDNA.25244.1 | 3.15  | 2.96  | 0.13 | 0.11 | 1.14  | 0.109856 | 0.064483 | 0.471008 | 0.300133 |
| MmugDNA.25245.1.S1_at   | MmugDNA.25245.1 | 6.54  | 6.76  | 0.06 | 0.09 | -1.16 | 0.00779  | 0.001736 | 0.212611 | 0.062895 |
| MmugDNA.25246.1.S1_at   | MmugDNA.25246.1 | 8.53  | 7.35  | 0.18 | 0.23 | 2.26  | 0.001569 | 0.000355 | 0.151907 | 0.037229 |
| MmugDNA.25247.1.S1_at   | MmugDNA.25247.1 | 3.33  | 3.33  | 0    | 0.01 | 1     | 0.373901 | 0.902097 | 0.683245 | 0.944306 |
| MmugDNA.25248.1.S1_at   | MmugDNA.25248.1 | 3.4   | 3.33  | 0.17 | 0.22 | 1.05  | 0.26069  | 0.493068 | 0.607375 | 0.693984 |
| MmugDNA.25249.1.S1_s_at | MmugDNA.25249.1 | 5.35  | 5.37  | 0.07 | 0.1  | -1.01 | 0.780232 | 0.353003 | 0.908487 | 0.596329 |
| MmugDNA.25251.1.S1_at   | MmugDNA.25251.1 | 4.66  | 4.65  | 0.19 | 0.16 | 1.01  | 0.655215 | 0.444904 | 0.844826 | 0.662121 |

|                         |                 |       |       |      |      |       |          |          |          |          |
|-------------------------|-----------------|-------|-------|------|------|-------|----------|----------|----------|----------|
| MmugDNA.25252.1.S1_at   | MmugDNA.25252.1 | 4.65  | 4.71  | 0.14 | 0.16 | -1.04 | 0.317354 | 0.387261 | 0.64789  | 0.62202  |
| MmugDNA.25253.1.S1_at   | MmugDNA.25253.1 | 4.59  | 4.45  | 0.23 | 0.06 | 1.1   | 0.125134 | 0.16031  | 0.491199 | 0.43644  |
| MmugDNA.25254.1.S1_at   | MmugDNA.25254.1 | 2.8   | 2.75  | 0.05 | 0.08 | 1.04  | 0.317157 | 0.365557 | 0.647872 | 0.605602 |
| MmugDNA.25254.1.S1_s_at | MmugDNA.25254.1 | 4.77  | 4.83  | 0.45 | 0.04 | -1.04 | 0.544291 | 0.476711 | 0.784293 | 0.682871 |
| MmugDNA.25256.1.S1_s_at | MmugDNA.25256.1 | 5.61  | 4.74  | 0.48 | 0.46 | 1.83  | 0.217016 | 0.091554 | 0.576574 | 0.346652 |
| MmugDNA.25259.1.S1_at   | MmugDNA.25259.1 | 11.52 | 10.85 | 0.06 | 0.4  | 1.59  | 0.122109 | 0.144235 | 0.487116 | 0.418146 |
| MmugDNA.25259.1.S1_s_at | MmugDNA.25259.1 | 9.49  | 8.99  | 0.05 | 0.39 | 1.41  | 0.101818 | 0.090133 | 0.461313 | 0.344432 |
| MmugDNA.2526.1.S1_at    | MmugDNA.2526.1  | 4.89  | 3.98  | 0.45 | 0.19 | 1.87  | 0.068553 | 0.047389 | 0.410201 | 0.262438 |
| MmugDNA.25260.1.S1_at   | MmugDNA.25260.1 | 4.28  | 4.61  | 0.31 | 0.15 | -1.25 | 0.142992 | 0.15021  | 0.509942 | 0.42486  |
| MmugDNA.25261.1.S1_at   | MmugDNA.25261.1 | 6.09  | 6.03  | 0.17 | 0.07 | 1.05  | 0.717157 | 0.617417 | 0.875719 | 0.773417 |
| MmugDNA.25262.1.S1_at   | MmugDNA.25262.1 | 5.28  | 5.98  | 0.83 | 0.54 | -1.62 | 0.394396 | 0.405003 | 0.69577  | 0.633428 |
| MmugDNA.25264.1.S1_at   | MmugDNA.25264.1 | 4.64  | 4.72  | 0.43 | 0.15 | -1.06 | 0.833806 | 0.530332 | 0.932439 | 0.717877 |
| MmugDNA.25265.1.S1_at   | MmugDNA.25265.1 | 11.34 | 10.75 | 0.36 | 0.37 | 1.51  | 0.213147 | 0.005776 | 0.573477 | 0.104378 |
| MmugDNA.25266.1.S1_at   | MmugDNA.25266.1 | 4.18  | 4.12  | 0.19 | 0.05 | 1.04  | 0.212968 | 0.095214 | 0.573396 | 0.35218  |
| MmugDNA.25268.1.S1_at   | MmugDNA.25268.1 | 5.59  | 5.92  | 0.31 | 0.13 | -1.26 | 0.12162  | 0.079444 | 0.486508 | 0.326766 |
| MmugDNA.25269.1.S1_at   | MmugDNA.25269.1 | 11.11 | 10.6  | 0.38 | 0.07 | 1.42  | 0.071432 | 0.052049 | 0.41529  | 0.273735 |
| MmugDNA.25270.1.S1_at   | MmugDNA.25270.1 | 7.77  | 7.85  | 0.21 | 0.08 | -1.06 | 0.36069  | 0.572568 | 0.674646 | 0.744566 |
| MmugDNA.25270.1.S1_s_at | MmugDNA.25270.1 | 5.98  | 6.05  | 0.16 | 0.22 | -1.05 | 0.724598 | 0.885869 | 0.879724 | 0.935095 |
| MmugDNA.25271.1.S1_at   | MmugDNA.25271.1 | 4.46  | 4.48  | 0.37 | 0.13 | -1.01 | 0.768568 | 0.968692 | 0.902719 | 0.982746 |
| MmugDNA.25273.1.S1_at   | MmugDNA.25273.1 | 6.72  | 6.85  | 0.37 | 0.12 | -1.09 | 0.596213 | 0.330313 | 0.812808 | 0.579074 |
| MmugDNA.25274.1.S1_at   | MmugDNA.25274.1 | 4.83  | 4.91  | 0.11 | 0.28 | -1.06 | 0.340394 | 0.615394 | 0.661796 | 0.771962 |
| MmugDNA.25275.1.S1_at   | MmugDNA.25275.1 | 4.69  | 4.68  | 0.11 | 0    | 1.01  | 0.294807 | 0.310735 | 0.631442 | 0.565809 |
| MmugDNA.25276.1.S1_at   | MmugDNA.25276.1 | 8.44  | 8.66  | 0.19 | 0.24 | -1.16 | 0.319884 | 0.447402 | 0.649219 | 0.66348  |
| MmugDNA.25278.1.S1_at   | MmugDNA.25278.1 | 4.04  | 3.81  | 0.86 | 0.36 | 1.17  | 0.30817  | 0.268912 | 0.640608 | 0.534356 |
| MmugDNA.25279.1.S1_at   | MmugDNA.25279.1 | 5.12  | 4.78  | 0.72 | 0.29 | 1.27  | 0.171029 | 0.109543 | 0.534989 | 0.373395 |
| MmugDNA.2528.1.S1_at    | MmugDNA.2528.1  | 6.42  | 5.43  | 0.43 | 0.11 | 1.99  | 0.05305  | 0.045624 | 0.379207 | 0.257766 |
| MmugDNA.25280.1.S1_at   | MmugDNA.25280.1 | 7.34  | 7.32  | 0.22 | 0.47 | 1.01  | 0.977358 | 0.014407 | 0.991347 | 0.153215 |
| MmugDNA.25282.1.S1_at   | MmugDNA.25282.1 | 5.31  | 5.14  | 0.22 | 0.21 | 1.12  | 0.330394 | 0.378537 | 0.655656 | 0.615564 |
| MmugDNA.25283.1.S1_at   | MmugDNA.25283.1 | 10.91 | 11.18 | 0.27 | 0.6  | -1.2  | 0.497977 | 0.52823  | 0.758137 | 0.716462 |
| MmugDNA.25284.1.S1_at   | MmugDNA.25284.1 | 4.58  | 4.27  | 0.53 | 0.12 | 1.24  | 0.10357  | 0.125707 | 0.463302 | 0.396249 |
| MmugDNA.25287.1.S1_at   | MmugDNA.25287.1 | 4.12  | 4.32  | 0.2  | 0.09 | -1.15 | 0.585571 | 0.5426   | 0.807608 | 0.725615 |
| MmugDNA.25288.1.S1_at   | MmugDNA.25288.1 | 3.37  | 3.57  | 0.23 | 0.03 | -1.15 | 0.555763 | 0.724316 | 0.791477 | 0.840433 |
| MmugDNA.25289.1.S1_at   | MmugDNA.25289.1 | 4.24  | 4.44  | 0.94 | 0.27 | -1.15 | 0.434787 | 0.442606 | 0.720824 | 0.660578 |
| MmugDNA.2529.1.S1_at    | MmugDNA.2529.1  | 3.4   | 3.31  | 0.17 | 0.08 | 1.06  | 0.461395 | 0.146842 | 0.737557 | 0.42088  |
| MmugDNA.25290.1.S1_at   | MmugDNA.25290.1 | 2.9   | 2.99  | 0.11 | 0.04 | -1.07 | 0.246503 | 0.173129 | 0.597777 | 0.449765 |
| MmugDNA.25291.1.S1_at   | MmugDNA.25291.1 | 8.4   | 8.41  | 0.22 | 0.21 | -1.01 | 0.832633 | 0.880644 | 0.932191 | 0.931813 |
| MmugDNA.25293.1.S1_at   | MmugDNA.25293.1 | 3.85  | 3.84  | 0.12 | 0.08 | 1     | 0.923991 | 0.980411 | 0.970588 | 0.989333 |
| MmugDNA.25294.1.S1_at   | MmugDNA.25294.1 | 4.77  | 4.83  | 0.03 | 0.04 | -1.04 | 0.146827 | 0.395463 | 0.512818 | 0.627492 |
| MmugDNA.25296.1.S1_at   | MmugDNA.25296.1 | 5.53  | 5.96  | 0.55 | 0.73 | -1.35 | 0.526311 | 0.07675  | 0.77404  | 0.322168 |
| MmugDNA.25297.1.S1_at   | MmugDNA.25297.1 | 5.07  | 5.26  | 0.16 | 0.06 | -1.14 | 0.542249 | 0.712331 | 0.783138 | 0.833347 |
| MmugDNA.25298.1.S1_at   | MmugDNA.25298.1 | 5.99  | 6.05  | 0.33 | 0.22 | -1.04 | 0.955515 | 0.212952 | 0.983289 | 0.4869   |

|                         |                 |       |       |      |      |       |          |          |          |          |
|-------------------------|-----------------|-------|-------|------|------|-------|----------|----------|----------|----------|
| MmugDNA.253.1.S1_at     | MmugDNA.253.1   | 6.5   | 6.09  | 0.22 | 0.33 | 1.33  | 0.533319 | 0.753518 | 0.778085 | 0.856527 |
| MmugDNA.2530.1.S1_x_at  | MmugDNA.2530.1  | 5.97  | 5.98  | 0.41 | 0.11 | -1.01 | 0.406227 | 0.193191 | 0.703645 | 0.468578 |
| MmugDNA.25300.1.S1_at   | MmugDNA.25300.1 | 3.61  | 3.68  | 0    | 0.1  | -1.05 | 0.896619 | 0.550186 | 0.95881  | 0.730298 |
| MmugDNA.25301.1.S1_at   | MmugDNA.25301.1 | 9.19  | 9.39  | 0.03 | 0.24 | -1.15 | 0.224624 | 0.213781 | 0.58277  | 0.487564 |
| MmugDNA.25303.1.S1_at   | MmugDNA.25303.1 | 8.28  | 7.96  | 0.45 | 0.49 | 1.25  | 0.231232 | 0.12214  | 0.587369 | 0.39178  |
| MmugDNA.25304.1.S1_at   | MmugDNA.25304.1 | 4.08  | 4.05  | 0.14 | 0.08 | 1.02  | 0.893506 | 0.985072 | 0.957637 | 0.991524 |
| MmugDNA.25306.1.S1_at   | MmugDNA.25306.1 | 8.85  | 7.73  | 0.26 | 0.55 | 2.17  | 0.022688 | 0.012533 | 0.287966 | 0.144417 |
| MmugDNA.25308.1.S1_at   | MmugDNA.25308.1 | 8.32  | 7.61  | 0.3  | 0.9  | 1.64  | 0.086387 | 0.098802 | 0.440232 | 0.356945 |
| MmugDNA.25309.1.S1_at   | MmugDNA.25309.1 | 6.66  | 6.6   | 0.23 | 0.59 | 1.04  | 0.500034 | 0.530313 | 0.759402 | 0.71787  |
| MmugDNA.2531.1.S1_at    | MmugDNA.2531.1  | 5.18  | 5.3   | 0.08 | 0.1  | -1.09 | 0.082916 | 0.039404 | 0.434718 | 0.243495 |
| MmugDNA.25310.1.S1_at   | MmugDNA.25310.1 | 6.06  | 6.07  | 0.33 | 0.05 | -1    | 0.807959 | 0.507802 | 0.921546 | 0.703336 |
| MmugDNA.25311.1.S1_at   | MmugDNA.25311.1 | 4.57  | 4.63  | 0.27 | 0.25 | -1.05 | 0.421081 | 0.468427 | 0.712872 | 0.677714 |
| MmugDNA.25312.1.S1_at   | MmugDNA.25312.1 | 9.43  | 10.24 | 0.23 | 0.33 | -1.75 | 0.043471 | 0.010007 | 0.356741 | 0.131262 |
| MmugDNA.25313.1.S1_at   | MmugDNA.25313.1 | 10.1  | 10.05 | 0.18 | 0.16 | 1.04  | 0.977316 | 0.767874 | 0.991326 | 0.865256 |
| MmugDNA.25314.1.S1_at   | MmugDNA.25314.1 | 6.15  | 6.32  | 0    | 0.18 | -1.12 | 0.551264 | 0.70728  | 0.788574 | 0.83023  |
| MmugDNA.25316.1.S1_at   | MmugDNA.25316.1 | 2.76  | 2.73  | 0.02 | 0.06 | 1.02  | 0.426603 | 0.798592 | 0.715846 | 0.884032 |
| MmugDNA.25317.1.S1_at   | MmugDNA.25317.1 | 6.39  | 5.94  | 0.3  | 0.22 | 1.36  | 0.273861 | 0.264358 | 0.617262 | 0.530385 |
| MmugDNA.25319.1.S1_at   | MmugDNA.25319.1 | 6.06  | 6.8   | 0.17 | 0.55 | -1.67 | 0.142713 | 0.246567 | 0.509765 | 0.515917 |
| MmugDNA.2532.1.S1_at    | MmugDNA.2532.1  | 3.99  | 3.85  | 0.16 | 0.14 | 1.1   | 0.848771 | 0.647161 | 0.939211 | 0.793288 |
| MmugDNA.25320.1.S1_at   | MmugDNA.25320.1 | 4.34  | 3.97  | 0.29 | 0.25 | 1.29  | 0.313579 | 0.683298 | 0.645195 | 0.815238 |
| MmugDNA.25323.1.S1_x_at | MmugDNA.25323.1 | 8.04  | 7.98  | 0.16 | 0.19 | 1.04  | 0.755366 | 0.296895 | 0.896082 | 0.555864 |
| MmugDNA.25324.1.S1_at   | MmugDNA.25324.1 | 7.19  | 9.4   | 0.49 | 0.52 | -4.64 | 0.007652 | 0.003494 | 0.211007 | 0.084997 |
| MmugDNA.25325.1.S1_at   | MmugDNA.25325.1 | 8.35  | 7.93  | 0.26 | 0.54 | 1.33  | 0.907686 | 0.110009 | 0.963338 | 0.374138 |
| MmugDNA.25326.1.S1_at   | MmugDNA.25326.1 | 4     | 4.03  | 0.07 | 0.15 | -1.02 | 0.645225 | 0.816693 | 0.840224 | 0.89427  |
| MmugDNA.25328.1.S1_at   | MmugDNA.25328.1 | 3.42  | 3.43  | 0.07 | 0.2  | -1.01 | 0.732776 | 0.919496 | 0.884623 | 0.954822 |
| MmugDNA.25329.1.S1_at   | MmugDNA.25329.1 | 5.09  | 5.42  | 0.12 | 0.53 | -1.26 | 0.415547 | 0.198174 | 0.709528 | 0.473148 |
| MmugDNA.25330.1.S1_at   | MmugDNA.25330.1 | 3.27  | 3.29  | 0.28 | 0.07 | -1.01 | 0.864381 | 0.682633 | 0.945529 | 0.814669 |
| MmugDNA.25331.1.S1_at   | MmugDNA.25331.1 | 10.98 | 10.81 | 0.19 | 0.45 | 1.12  | 0.444235 | 0.079895 | 0.726871 | 0.327207 |
| MmugDNA.25332.1.S1_at   | MmugDNA.25332.1 | 3.4   | 3.47  | 0.16 | 0.12 | -1.05 | 0.384135 | 0.543782 | 0.689715 | 0.726357 |
| MmugDNA.25333.1.S1_at   | MmugDNA.25333.1 | 3.5   | 3.47  | 0.3  | 0.21 | 1.02  | 0.968036 | 0.432213 | 0.987964 | 0.652775 |
| MmugDNA.25334.1.S1_at   | MmugDNA.25334.1 | 5.06  | 6.21  | 0.53 | 1.11 | -2.22 | 0.257088 | 0.243284 | 0.60448  | 0.513356 |
| MmugDNA.25335.1.S1_at   | MmugDNA.25335.1 | 5.85  | 5.66  | 0.18 | 0.21 | 1.14  | 0.602708 | 0.699124 | 0.816696 | 0.825184 |
| MmugDNA.25336.1.S1_at   | MmugDNA.25336.1 | 7.49  | 6     | 0.58 | 0.27 | 2.81  | 0.014907 | 0.011453 | 0.256274 | 0.13846  |
| MmugDNA.25339.1.S1_at   | MmugDNA.25339.1 | 6.42  | 7.33  | 0.62 | 0.59 | -1.88 | 0.140572 | 0.172375 | 0.508385 | 0.448831 |
| MmugDNA.2534.1.S1_at    | MmugDNA.2534.1  | 4.91  | 5.23  | 0.51 | 0.25 | -1.24 | 0.646488 | 0.907354 | 0.840925 | 0.947602 |
| MmugDNA.25340.1.S1_at   | MmugDNA.25340.1 | 9.01  | 9.59  | 0.08 | 0.44 | -1.49 | 0.05123  | 0.006786 | 0.376001 | 0.111388 |
| MmugDNA.25344.1.S1_at   | MmugDNA.25344.1 | 8.22  | 8.7   | 0.17 | 0.11 | -1.39 | 0.008989 | 0.000637 | 0.222023 | 0.042882 |
| MmugDNA.25345.1.S1_at   | MmugDNA.25345.1 | 4.88  | 4.96  | 0.13 | 0.05 | -1.06 | 0.576959 | 0.281962 | 0.80331  | 0.544868 |
| MmugDNA.25346.1.S1_at   | MmugDNA.25346.1 | 5.92  | 5.54  | 0.47 | 0.38 | 1.31  | 0.273618 | 0.433745 | 0.617179 | 0.653964 |
| MmugDNA.25349.1.S1_at   | MmugDNA.25349.1 | 4.66  | 4.86  | 0.14 | 0.04 | -1.15 | 0.127239 | 0.126702 | 0.493644 | 0.397372 |
| MmugDNA.2535.1.S1_at    | MmugDNA.2535.1  | 4.28  | 4.17  | 0.25 | 0.39 | 1.08  | 0.643013 | 0.687254 | 0.839123 | 0.817523 |

|                         |                 |       |       |      |      |       |          |          |          |          |
|-------------------------|-----------------|-------|-------|------|------|-------|----------|----------|----------|----------|
| MmugDNA.25350.1.S1_at   | MmugDNA.25350.1 | 3.83  | 3.89  | 0.11 | 0.12 | -1.05 | 0.520471 | 0.666712 | 0.770806 | 0.804734 |
| MmugDNA.25351.1.S1_at   | MmugDNA.25351.1 | 4.39  | 4.52  | 0.28 | 0.2  | -1.09 | 0.50176  | 0.375827 | 0.760131 | 0.613706 |
| MmugDNA.25352.1.S1_at   | MmugDNA.25352.1 | 3.65  | 3.46  | 0.11 | 0.04 | 1.15  | 0.043274 | 0.01724  | 0.3567   | 0.166344 |
| MmugDNA.25355.1.S1_at   | MmugDNA.25355.1 | 4.03  | 3.99  | 0.07 | 0.15 | 1.03  | 0.774099 | 0.883264 | 0.90503  | 0.933464 |
| MmugDNA.25356.1.S1_at   | MmugDNA.25356.1 | 4.46  | 4.74  | 0.07 | 0.22 | -1.21 | 0.062613 | 0.065587 | 0.398605 | 0.301476 |
| MmugDNA.25357.1.S1_at   | MmugDNA.25357.1 | 10.63 | 10.32 | 0.2  | 0.03 | 1.24  | 0.066809 | 0.061686 | 0.406981 | 0.295135 |
| MmugDNA.25358.1.S1_at   | MmugDNA.25358.1 | 8.28  | 9.75  | 1.19 | 1.04 | -2.78 | 0.159906 | 0.134894 | 0.524745 | 0.406878 |
| MmugDNA.2536.1.S1_at    | MmugDNA.2536.1  | 5.94  | 6.02  | 0.22 | 0.25 | -1.06 | 0.283332 | 0.24017  | 0.623353 | 0.51084  |
| MmugDNA.25360.1.S1_at   | MmugDNA.25360.1 | 4.24  | 4.3   | 0.18 | 0.14 | -1.04 | 0.731697 | 0.915012 | 0.884008 | 0.952293 |
| MmugDNA.25361.1.S1_at   | MmugDNA.25361.1 | 11.27 | 10.84 | 0.13 | 0.09 | 1.34  | 0.008291 | 0.000728 | 0.217127 | 0.044699 |
| MmugDNA.25363.1.S1_at   | MmugDNA.25363.1 | 6.87  | 7     | 0.44 | 0.42 | -1.1  | 0.553058 | 0.246874 | 0.789816 | 0.516237 |
| MmugDNA.25364.1.S1_at   | MmugDNA.25364.1 | 6.48  | 6.66  | 0.62 | 0.26 | -1.13 | 0.446931 | 0.109507 | 0.728666 | 0.373339 |
| MmugDNA.31429.1.S1_at   | MmugDNA.31429.1 | 12.75 | 12.78 | 0.06 | 0.17 | -1.02 | 0.592046 | 0.63387  | 0.810758 | 0.784509 |
| MmugDNA.31429.1.S1_s_at | MmugDNA.31429.1 | 12.61 | 12.7  | 0.03 | 0.14 | -1.06 | 0.378206 | 0.395751 | 0.686343 | 0.627639 |
| MmugDNA.25366.1.S1_at   | MmugDNA.25366.1 | 4.32  | 4.68  | 0.09 | 0.3  | -1.28 | 0.089984 | 0.066561 | 0.445437 | 0.303733 |
| MmugDNA.25368.1.S1_at   | MmugDNA.25368.1 | 5.68  | 5.58  | 0.07 | 0.21 | 1.08  | 0.607057 | 0.22958  | 0.819156 | 0.501574 |
| MmugDNA.2537.1.S1_at    | MmugDNA.2537.1  | 11.69 | 11.41 | 0.14 | 0.12 | 1.21  | 0.025699 | 0.003155 | 0.300275 | 0.081739 |
| MmugDNA.25371.1.S1_at   | MmugDNA.25371.1 | 5.03  | 4.94  | 0.13 | 0.2  | 1.07  | 0.919784 | 0.221954 | 0.968755 | 0.495044 |
| MmugDNA.25372.1.S1_at   | MmugDNA.25372.1 | 6.1   | 6.21  | 0.32 | 0.08 | -1.08 | 0.618731 | 0.815563 | 0.825288 | 0.893609 |
| MmugDNA.25373.1.S1_at   | MmugDNA.25373.1 | 11.05 | 10.73 | 0.16 | 0.29 | 1.25  | 0.038966 | 0.025583 | 0.345975 | 0.200662 |
| MmugDNA.25374.1.S1_at   | MmugDNA.25374.1 | 5.84  | 5.95  | 0.18 | 0.28 | -1.08 | 0.614203 | 0.39519  | 0.823171 | 0.627379 |
| MmugDNA.25375.1.S1_at   | MmugDNA.25375.1 | 6.15  | 7.08  | 0.38 | 0.34 | -1.91 | 0.03722  | 0.018775 | 0.341014 | 0.172226 |
| MmugDNA.25377.1.S1_at   | MmugDNA.25377.1 | 9.35  | 9.91  | 0.25 | 0.49 | -1.47 | 0.106979 | 0.096101 | 0.467584 | 0.353322 |
| MmugDNA.25378.1.S1_at   | MmugDNA.25378.1 | 4.92  | 4.92  | 0.2  | 0.14 | -1    | 0.241783 | 0.299076 | 0.593977 | 0.557663 |
| MmugDNA.25379.1.S1_at   | MmugDNA.25379.1 | 12.83 | 12.58 | 0.12 | 0.2  | 1.19  | 0.149544 | 0.140751 | 0.514055 | 0.414115 |
| MmugDNA.2538.1.S1_at    | MmugDNA.2538.1  | 10.18 | 8.91  | 0.42 | 0.45 | 2.42  | 0.007527 | 0.002664 | 0.209134 | 0.076299 |
| MmugDNA.34811.1.S1_at   | MmugDNA.34811.1 | 10.54 | 10.7  | 0.04 | 0.1  | -1.12 | 0.036538 | 0.011986 | 0.339765 | 0.141658 |
| MmugDNA.34811.1.S1_s_at | MmugDNA.34811.1 | 11.73 | 11.86 | 0.08 | 0.05 | -1.09 | 0.040457 | 0.013741 | 0.349277 | 0.150134 |
| MmugDNA.25382.1.S1_at   | MmugDNA.25382.1 | 7.77  | 8.67  | 0.54 | 0.33 | -1.86 | 0.113113 | 0.121562 | 0.475864 | 0.390683 |
| MmugDNA.25383.1.S1_at   | MmugDNA.25383.1 | 5.1   | 4.66  | 0.81 | 0.39 | 1.35  | 0.5865   | 0.789526 | 0.808146 | 0.878424 |
| MmugDNA.25385.1.S1_s_at | MmugDNA.25385.1 | 9.93  | 10.12 | 0.09 | 0.36 | -1.14 | 0.175225 | 0.064609 | 0.538908 | 0.300314 |
| MmugDNA.25387.1.S1_at   | MmugDNA.25387.1 | 4.04  | 4.2   | 0.14 | 0.09 | -1.12 | 0.095274 | 0.079267 | 0.453089 | 0.326444 |
| MmugDNA.25388.1.S1_at   | MmugDNA.25388.1 | 6.42  | 5.93  | 0.19 | 0.59 | 1.4   | 0.498368 | 0.541126 | 0.75837  | 0.72475  |
| MmugDNA.2539.1.S1_at    | MmugDNA.2539.1  | 3.31  | 3.33  | 0.26 | 0.06 | -1.01 | 0.741565 | 0.911065 | 0.889293 | 0.949838 |
| MmugDNA.25390.1.S1_at   | MmugDNA.25390.1 | 4.16  | 3.64  | 0.35 | 0.26 | 1.44  | 0.225905 | 0.132599 | 0.583922 | 0.404544 |
| MmugDNA.25391.1.S1_at   | MmugDNA.25391.1 | 6.59  | 6.88  | 0.23 | 0.07 | -1.22 | 0.336825 | 0.421734 | 0.659663 | 0.645254 |
| MmugDNA.25391.1.S1_x_at | MmugDNA.25391.1 | 6.57  | 6.8   | 0.2  | 0.05 | -1.18 | 0.270299 | 0.353327 | 0.614663 | 0.596477 |
| MmugDNA.25393.1.S1_at   | MmugDNA.25393.1 | 4.36  | 4.36  | 0.19 | 0.03 | 1     | 0.465139 | 0.78157  | 0.739804 | 0.873395 |
| MmugDNA.25394.1.S1_at   | MmugDNA.25394.1 | 3.88  | 3.78  | 0.36 | 0.11 | 1.07  | 0.620579 | 0.813034 | 0.826037 | 0.891895 |
| MmugDNA.25395.1.S1_at   | MmugDNA.25395.1 | 5.35  | 5.47  | 0.64 | 0.14 | -1.09 | 0.436497 | 0.470968 | 0.721751 | 0.679162 |
| MmugDNA.25397.1.S1_at   | MmugDNA.25397.1 | 7.7   | 7.74  | 0.37 | 0.4  | -1.03 | 0.845522 | 0.046028 | 0.93804  | 0.258971 |

|                         |                 |       |       |      |      |        |          |          |          |          |
|-------------------------|-----------------|-------|-------|------|------|--------|----------|----------|----------|----------|
| MmugDNA.25398.1.S1_at   | MmugDNA.25398.1 | 10.09 | 10.35 | 0.23 | 0.13 | -1.2   | 0.444362 | 0.427405 | 0.726944 | 0.649237 |
| MmugDNA.25398.1.S1_s_at | MmugDNA.25398.1 | 9.8   | 10.05 | 0.13 | 0.13 | -1.19  | 0.197649 | 0.210894 | 0.560636 | 0.484934 |
| MmugDNA.2540.1.S1_at    | MmugDNA.2540.1  | 5.44  | 5.32  | 0.22 | 0.01 | 1.09   | 0.309663 | 0.566671 | 0.641662 | 0.740723 |
| MmugDNA.2540.1.S1_s_at  | MmugDNA.2540.1  | 7.55  | 7.19  | 0.21 | 0.17 | 1.29   | 0.214948 | 0.010074 | 0.57547  | 0.13168  |
| MmugDNA.25401.1.S1_at   | MmugDNA.25401.1 | 9.95  | 9.82  | 0.24 | 0.69 | 1.09   | 0.940547 | 0.74599  | 0.97745  | 0.852688 |
| MmugDNA.25402.1.S1_at   | MmugDNA.25402.1 | 4.88  | 5.33  | 0.18 | 0.25 | -1.37  | 0.155384 | 0.184728 | 0.520164 | 0.460645 |
| MmugDNA.25403.1.S1_at   | MmugDNA.25403.1 | 3.12  | 3.14  | 0.51 | 0.14 | -1.02  | 0.403298 | 0.586135 | 0.701955 | 0.753294 |
| MmugDNA.25405.1.S1_at   | MmugDNA.25405.1 | 5.54  | 6.06  | 0.09 | 0.17 | -1.44  | 0.016703 | 0.048873 | 0.265    | 0.265858 |
| MmugDNA.25406.1.S1_at   | MmugDNA.25406.1 | 5.45  | 5.45  | 0.02 | 0.1  | 1      | 0.491514 | 0.546135 | 0.755082 | 0.727787 |
| MmugDNA.25407.1.S1_at   | MmugDNA.25407.1 | 10.08 | 11.49 | 0.53 | 3.13 | -2.66  | 0.749226 | 0.860731 | 0.892627 | 0.920675 |
| MmugDNA.25408.1.S1_at   | MmugDNA.25408.1 | 6.68  | 6.61  | 0.47 | 0.42 | 1.05   | 0.798034 | 0.160527 | 0.916275 | 0.436692 |
| MmugDNA.2541.1.S1_at    | MmugDNA.2541.1  | 13.04 | 12.65 | 0.09 | 0.04 | 1.31   | 0.002351 | 0.000128 | 0.162    | 0.029087 |
| MmugDNA.25410.1.S1_at   | MmugDNA.25410.1 | 3.71  | 3.57  | 0.16 | 0.31 | 1.11   | 0.811243 | 0.568477 | 0.923061 | 0.741983 |
| MmugDNA.25411.1.S1_at   | MmugDNA.25411.1 | 5.37  | 9.31  | 1.86 | 1.94 | -15.36 | 0.128841 | 0.100074 | 0.494711 | 0.358965 |
| MmugDNA.25412.1.S1_at   | MmugDNA.25412.1 | 5.15  | 5.26  | 0.62 | 0.05 | -1.07  | 0.521127 | 0.452828 | 0.771131 | 0.667356 |
| MmugDNA.25413.1.S1_at   | MmugDNA.25413.1 | 9.53  | 9.34  | 0.18 | 0.62 | 1.14   | 0.692997 | 0.740599 | 0.86374  | 0.849805 |
| MmugDNA.25414.1.S1_at   | MmugDNA.25414.1 | 5.65  | 5.9   | 0.19 | 0.05 | -1.19  | 0.059753 | 0.116628 | 0.39273  | 0.383829 |
| MmugDNA.25415.1.S1_at   | MmugDNA.25415.1 | 3.55  | 3.36  | 0.12 | 0.24 | 1.14   | 0.310638 | 0.419675 | 0.642603 | 0.643599 |
| MmugDNA.25417.1.S1_at   | MmugDNA.25417.1 | 3.87  | 3.91  | 0.15 | 0.1  | -1.02  | 0.782713 | 0.462432 | 0.909285 | 0.673754 |
| MmugDNA.25419.1.S1_at   | MmugDNA.25419.1 | 3.52  | 3.65  | 0.11 | 0.09 | -1.09  | 0.191807 | 0.242553 | 0.554827 | 0.512882 |
| MmugDNA.25420.1.S1_at   | MmugDNA.25420.1 | 4.09  | 3.6   | 0.99 | 0.28 | 1.4    | 0.377652 | 0.302622 | 0.686017 | 0.560201 |
| MmugDNA.25421.1.S1_at   | MmugDNA.25421.1 | 5.95  | 5.98  | 0.07 | 0.19 | -1.02  | 0.674179 | 0.859735 | 0.853988 | 0.920075 |
| MmugDNA.25422.1.S1_at   | MmugDNA.25422.1 | 8.68  | 7.44  | 1.18 | 1.01 | 2.36   | 0.613721 | 0.380885 | 0.822876 | 0.617426 |
| MmugDNA.25423.1.S1_at   | MmugDNA.25423.1 | 4.63  | 4.6   | 0.21 | 0.07 | 1.02   | 0.300767 | 0.180183 | 0.635977 | 0.456751 |
| MmugDNA.25424.1.S1_at   | MmugDNA.25424.1 | 3.75  | 3.89  | 0.62 | 0.07 | -1.1   | 0.595491 | 0.651605 | 0.812365 | 0.796299 |
| MmugDNA.25425.1.S1_at   | MmugDNA.25425.1 | 5.89  | 5.76  | 0.16 | 0.16 | 1.09   | 0.810575 | 0.947074 | 0.922837 | 0.969997 |
| MmugDNA.25426.1.S1_at   | MmugDNA.25426.1 | 4.34  | 4.62  | 0.25 | 0.51 | -1.22  | 0.979699 | 0.123485 | 0.992484 | 0.393518 |
| MmugDNA.25427.1.S1_at   | MmugDNA.25427.1 | 5.26  | 4.78  | 0.28 | 0.16 | 1.39   | 0.14662  | 0.137436 | 0.512668 | 0.410368 |
| MmugDNA.25429.1.S1_at   | MmugDNA.25429.1 | 5.93  | 6.15  | 0.12 | 0.26 | -1.17  | 0.131795 | 0.108757 | 0.498041 | 0.372285 |
| MmugDNA.25430.1.S1_at   | MmugDNA.25430.1 | 5.07  | 5.4   | 0.02 | 0.16 | -1.26  | 0.026562 | 0.012464 | 0.303505 | 0.14417  |
| MmugDNA.25432.1.S1_at   | MmugDNA.25432.1 | 6.17  | 5.19  | 0.7  | 0.79 | 1.97   | 0.39896  | 0.356146 | 0.699049 | 0.59815  |
| MmugDNA.25434.1.S1_at   | MmugDNA.25434.1 | 9.04  | 8.95  | 0.13 | 0.08 | 1.07   | 0.364783 | 0.114486 | 0.677652 | 0.381041 |
| MmugDNA.25435.1.S1_at   | MmugDNA.25435.1 | 4.62  | 4.63  | 0.53 | 0.31 | -1.01  | 0.916727 | 0.48369  | 0.967379 | 0.688112 |
| MmugDNA.25437.1.S1_at   | MmugDNA.25437.1 | 11.41 | 10.8  | 0.25 | 0.27 | 1.53   | 0.058927 | 0.023265 | 0.390921 | 0.191218 |
| MmugDNA.25437.1.S1_s_at | MmugDNA.25437.1 | 10.68 | 10.26 | 0.25 | 0.23 | 1.33   | 0.116376 | 0.018213 | 0.480081 | 0.169777 |
| MmugDNA.25438.1.S1_at   | MmugDNA.25438.1 | 4.5   | 4.68  | 0.16 | 0.09 | -1.14  | 0.112441 | 0.116468 | 0.474902 | 0.383671 |
| MmugDNA.2544.1.S1_at    | MmugDNA.2544.1  | 3.31  | 3.38  | 0.18 | 0.17 | -1.05  | 0.629695 | 0.084422 | 0.83168  | 0.335713 |
| MmugDNA.25441.1.S1_at   | MmugDNA.25441.1 | 6.7   | 6.1   | 0.15 | 0.56 | 1.52   | 0.334025 | 0.414637 | 0.658024 | 0.640456 |
| MmugDNA.25442.1.S1_at   | MmugDNA.25442.1 | 9.83  | 9.4   | 0.22 | 0.46 | 1.35   | 0.562714 | 0.185897 | 0.795483 | 0.461752 |
| MmugDNA.25443.1.S1_at   | MmugDNA.25443.1 | 10.75 | 10.84 | 0.2  | 0.23 | -1.06  | 0.801862 | 0.625308 | 0.918278 | 0.779111 |
| MmugDNA.25445.1.S1_at   | MmugDNA.25445.1 | 4.55  | 4.73  | 0.05 | 0.41 | -1.14  | 0.443825 | 0.209696 | 0.726424 | 0.48341  |

|                         |                 |       |       |      |      |       |          |          |          |          |
|-------------------------|-----------------|-------|-------|------|------|-------|----------|----------|----------|----------|
| MmugDNA.25446.1.S1_at   | MmugDNA.25446.1 | 9.65  | 9.17  | 0.22 | 0.06 | 1.4   | 0.015315 | 0.001178 | 0.25801  | 0.05381  |
| MmugDNA.25447.1.S1_at   | MmugDNA.25447.1 | 3.69  | 3.77  | 0.08 | 0.31 | -1.06 | 0.595408 | 0.25066  | 0.812365 | 0.51941  |
| MmugDNA.25448.1.S1_at   | MmugDNA.25448.1 | 10.83 | 10.3  | 0.13 | 0.05 | 1.44  | 0.003498 | 0.000715 | 0.178634 | 0.044419 |
| MmugDNA.25449.1.S1_s_at | MmugDNA.25449.1 | 5.86  | 5.76  | 0.09 | 0.18 | 1.07  | 0.899819 | 0.127169 | 0.960025 | 0.397922 |
| MmugDNA.2545.1.S1_at    | MmugDNA.2545.1  | 6.7   | 6.56  | 0.31 | 0.48 | 1.1   | 0.584042 | 0.734007 | 0.806847 | 0.845896 |
| MmugDNA.25451.1.S1_at   | MmugDNA.25451.1 | 3.28  | 3.1   | 0.26 | 0.02 | 1.14  | 0.790545 | 0.919977 | 0.913071 | 0.954967 |
| MmugDNA.25453.1.S1_at   | MmugDNA.25453.1 | 8.85  | 9.5   | 0.06 | 0.16 | -1.57 | 0.003154 | 0.001827 | 0.173324 | 0.064165 |
| MmugDNA.25455.1.S1_at   | MmugDNA.25455.1 | 8.77  | 10.15 | 0.35 | 0.83 | -2.59 | 0.09046  | 0.096894 | 0.445834 | 0.354311 |
| MmugDNA.25456.1.S1_at   | MmugDNA.25456.1 | 8.7   | 7.91  | 0.42 | 0.81 | 1.72  | 0.108599 | 0.113833 | 0.470004 | 0.380062 |
| MmugDNA.25457.1.S1_at   | MmugDNA.25457.1 | 4.52  | 4.3   | 0.66 | 0.18 | 1.17  | 0.874954 | 0.666924 | 0.949827 | 0.804898 |
| MmugDNA.25458.1.S1_at   | MmugDNA.25458.1 | 3.55  | 3.65  | 0    | 0.18 | -1.07 | 0.41114  | 0.578447 | 0.706987 | 0.748527 |
| MmugDNA.25460.1.S1_x_at | MmugDNA.25460.1 | 6.15  | 5.54  | 1.25 | 0.76 | 1.53  | 0.493342 | 0.546499 | 0.756149 | 0.728079 |
| MmugDNA.25462.1.S1_at   | MmugDNA.25462.1 | 2.89  | 2.89  | 0.04 | 0.05 | -1    | 0.545991 | 0.706776 | 0.785239 | 0.829917 |
| MmugDNA.25464.1.S1_at   | MmugDNA.25464.1 | 7.63  | 7.02  | 0.35 | 0.31 | 1.53  | 0.238226 | 0.301312 | 0.591564 | 0.559356 |
| MmugDNA.25465.1.S1_at   | MmugDNA.25465.1 | 5.18  | 5.21  | 0    | 0.16 | -1.02 | 0.629912 | 0.864427 | 0.831779 | 0.923115 |
| MmugDNA.25466.1.S1_at   | MmugDNA.25466.1 | 8.86  | 9.09  | 0.12 | 0.12 | -1.17 | 0.333296 | 0.386323 | 0.657525 | 0.621534 |
| MmugDNA.25467.1.S1_at   | MmugDNA.25467.1 | 4.84  | 4.92  | 0.05 | 0.09 | -1.06 | 0.344681 | 0.272301 | 0.664708 | 0.537053 |
| MmugDNA.2547.1.S1_at    | MmugDNA.2547.1  | 5.44  | 5.4   | 0.34 | 0.05 | 1.03  | 0.908454 | 0.454004 | 0.963748 | 0.668362 |
| MmugDNA.25470.1.S1_at   | MmugDNA.25470.1 | 5.96  | 5.84  | 0.63 | 0.22 | 1.09  | 0.336048 | 0.394276 | 0.65921  | 0.626868 |
| MmugDNA.25473.1.S1_at   | MmugDNA.25473.1 | 3.69  | 3.56  | 0.06 | 0.1  | 1.09  | 0.281526 | 0.318164 | 0.622236 | 0.571046 |
| MmugDNA.25474.1.S1_at   | MmugDNA.25474.1 | 4.87  | 4.93  | 0.09 | 0.26 | -1.05 | 0.353794 | 0.331255 | 0.670266 | 0.579981 |
| MmugDNA.25475.1.S1_at   | MmugDNA.25475.1 | 6.22  | 6.4   | 0.07 | 0.06 | -1.13 | 0.02328  | 0.084318 | 0.290606 | 0.335576 |
| MmugDNA.25476.1.S1_at   | MmugDNA.25476.1 | 3.8   | 3.38  | 0.22 | 0.1  | 1.34  | 0.040532 | 0.036585 | 0.349543 | 0.235834 |
| MmugDNA.25479.1.S1_at   | MmugDNA.25479.1 | 7.84  | 7.22  | 0.18 | 0.35 | 1.53  | 0.021467 | 0.01052  | 0.282524 | 0.13398  |
| MmugDNA.2548.1.S1_at    | MmugDNA.2548.1  | 6.69  | 6.68  | 0.28 | 0.07 | 1.01  | 0.896704 | 0.767148 | 0.958843 | 0.864719 |
| MmugDNA.25480.1.S1_at   | MmugDNA.25480.1 | 5.82  | 5.75  | 0.08 | 0.08 | 1.05  | 0.132008 | 0.278853 | 0.498128 | 0.542599 |
| MmugDNA.25482.1.S1_at   | MmugDNA.25482.1 | 3.66  | 3.56  | 0.32 | 0.23 | 1.07  | 0.537444 | 0.809283 | 0.780029 | 0.890102 |
| MmugDNA.25483.1.S1_at   | MmugDNA.25483.1 | 4.41  | 4.04  | 0.31 | 0.23 | 1.29  | 0.500886 | 0.779862 | 0.759735 | 0.872389 |
| MmugDNA.25484.1.S1_at   | MmugDNA.25484.1 | 6.13  | 7.28  | 0.19 | 0.49 | -2.21 | 0.015673 | 0.007454 | 0.260208 | 0.115872 |
| MmugDNA.25485.1.S1_at   | MmugDNA.25485.1 | 9.88  | 9.77  | 0.13 | 0.18 | 1.08  | 0.455021 | 0.555363 | 0.733643 | 0.733767 |
| MmugDNA.25486.1.S1_at   | MmugDNA.25486.1 | 4.9   | 4.84  | 0.41 | 0.21 | 1.05  | 0.407784 | 0.494832 | 0.704863 | 0.695116 |
| MmugDNA.25488.1.S1_at   | MmugDNA.25488.1 | 5.95  | 5.67  | 0.3  | 0.33 | 1.22  | 0.466507 | 0.406794 | 0.740215 | 0.634501 |
| MmugDNA.25489.1.S1_at   | MmugDNA.25489.1 | 4.26  | 4.23  | 0.09 | 0.18 | 1.02  | 0.827429 | 0.881301 | 0.92997  | 0.932281 |
| MmugDNA.25490.1.S1_s_at | MmugDNA.25490.1 | 5.45  | 6.08  | 0.5  | 0.32 | -1.55 | 0.375691 | 0.449888 | 0.684803 | 0.665343 |
| MmugDNA.25491.1.S1_s_at | MmugDNA.25491.1 | 7.75  | 8.01  | 0.38 | 0.76 | -1.2  | 0.70355  | 0.295431 | 0.869081 | 0.554885 |
| MmugDNA.25493.1.S1_at   | MmugDNA.25493.1 | 8.39  | 8.81  | 0.25 | 0.58 | -1.33 | 0.216593 | 0.245448 | 0.576225 | 0.515213 |
| MmugDNA.25495.1.S1_at   | MmugDNA.25495.1 | 3.93  | 3.95  | 0.02 | 0.01 | -1.02 | 0.682706 | 0.336427 | 0.858083 | 0.583831 |
| MmugDNA.25497.1.S1_at   | MmugDNA.25497.1 | 6.1   | 6.39  | 0.18 | 0.1  | -1.22 | 0.055639 | 0.052201 | 0.384291 | 0.274044 |
| MmugDNA.25498.1.S1_at   | MmugDNA.25498.1 | 4.58  | 4.64  | 0.08 | 0.15 | -1.04 | 0.598759 | 0.706424 | 0.814088 | 0.829634 |
| MmugDNA.25499.1.S1_at   | MmugDNA.25499.1 | 4.36  | 4.35  | 0.05 | 0.16 | 1     | 0.411588 | 0.510226 | 0.707473 | 0.704755 |
| MmugDNA.255.1.S1_at     | MmugDNA.255.1   | 7.16  | 6.03  | 0.55 | 0.7  | 2.2   | 0.093955 | 0.079826 | 0.451538 | 0.327156 |



|                         |                 |       |       |      |      |       |          |          |          |          |
|-------------------------|-----------------|-------|-------|------|------|-------|----------|----------|----------|----------|
| MmugDNA.25500.1.S1_at   | MmugDNA.25500.1 | 6.4   | 6.5   | 0.18 | 0.07 | -1.07 | 0.229904 | 0.295756 | 0.587007 | 0.555186 |
| MmugDNA.25501.1.S1_at   | MmugDNA.25501.1 | 7.17  | 7.33  | 0.21 | 1.01 | -1.12 | 0.733732 | 0.892268 | 0.885206 | 0.938598 |
| MmugDNA.25502.1.S1_at   | MmugDNA.25502.1 | 6.26  | 5.78  | 0.38 | 0.49 | 1.39  | 0.170459 | 0.136329 | 0.534249 | 0.408746 |
| MmugDNA.25503.1.S1_at   | MmugDNA.25503.1 | 9.84  | 10.33 | 0.38 | 1.16 | -1.4  | 0.725991 | 0.788718 | 0.880705 | 0.877894 |
| MmugDNA.25505.1.S1_at   | MmugDNA.25505.1 | 6.81  | 6.95  | 0.11 | 0.09 | -1.1  | 0.149335 | 0.151227 | 0.514001 | 0.425924 |
| MmugDNA.25506.1.S1_at   | MmugDNA.25506.1 | 7     | 7.66  | 0.1  | 0.39 | -1.59 | 0.109808 | 0.129486 | 0.470963 | 0.400938 |
| MmugDNA.2551.1.S1_at    | MmugDNA.2551.1  | 4.23  | 3.89  | 0.31 | 0.23 | 1.26  | 0.182865 | 0.162705 | 0.547133 | 0.43882  |
| MmugDNA.25510.1.S1_s_at | MmugDNA.25510.1 | 4.31  | 4.38  | 0.69 | 0.27 | -1.05 | 0.839116 | 0.401963 | 0.935033 | 0.631137 |
| MmugDNA.25512.1.S1_at   | MmugDNA.25512.1 | 9.58  | 9.11  | 0.15 | 0.69 | 1.39  | 0.323352 | 0.437914 | 0.651559 | 0.657026 |
| MmugDNA.25514.1.S1_at   | MmugDNA.25514.1 | 4.43  | 4.51  | 0.05 | 0.31 | -1.05 | 0.234778 | 0.24418  | 0.588895 | 0.514164 |
| MmugDNA.25516.1.S1_at   | MmugDNA.25516.1 | 5.05  | 5.42  | 0.15 | 0.14 | -1.29 | 0.033727 | 0.010885 | 0.330119 | 0.135939 |
| MmugDNA.25517.1.S1_at   | MmugDNA.25517.1 | 3.72  | 3.9   | 0.05 | 0.06 | -1.13 | 0.019686 | 0.052869 | 0.275549 | 0.275522 |
| MmugDNA.25517.1.S1_s_at | MmugDNA.25517.1 | 4.99  | 5.12  | 0.09 | 0.21 | -1.1  | 0.270013 | 0.315129 | 0.614607 | 0.568849 |
| MmugDNA.25518.1.S1_at   | MmugDNA.25518.1 | 5.76  | 5.77  | 0.39 | 0.04 | -1    | 0.385363 | 0.200603 | 0.690536 | 0.47515  |
| MmugDNA.25519.1.S1_at   | MmugDNA.25519.1 | 3.66  | 3.68  | 0.25 | 0.26 | -1.01 | 0.504495 | 0.381478 | 0.76127  | 0.617691 |
| MmugDNA.2552.1.S1_at    | MmugDNA.2552.1  | 6.46  | 6.48  | 0.23 | 0.14 | -1.02 | 0.289677 | 0.422287 | 0.627563 | 0.645637 |
| MmugDNA.25520.1.S1_at   | MmugDNA.25520.1 | 3.87  | 3.93  | 0.06 | 0.13 | -1.05 | 0.421903 | 0.634013 | 0.713215 | 0.784594 |
| MmugDNA.25521.1.S1_at   | MmugDNA.25521.1 | 3.69  | 3.37  | 0.28 | 0.15 | 1.25  | 0.354599 | 0.61732  | 0.670604 | 0.773333 |
| MmugDNA.25522.1.S1_at   | MmugDNA.25522.1 | 3.53  | 3.62  | 0.07 | 0.09 | -1.06 | 0.11079  | 0.103577 | 0.472704 | 0.364346 |
| MmugDNA.25523.1.S1_at   | MmugDNA.25523.1 | 6.09  | 6.19  | 0.43 | 0.13 | -1.07 | 0.904641 | 0.55244  | 0.961834 | 0.731747 |
| MmugDNA.25524.1.S1_at   | MmugDNA.25524.1 | 5.1   | 5.16  | 0.01 | 0.05 | -1.05 | 0.161828 | 0.049819 | 0.526573 | 0.268305 |
| MmugDNA.25526.1.S1_at   | MmugDNA.25526.1 | 10.94 | 8.73  | 0.17 | 0.84 | 4.63  | 0.009842 | 0.00522  | 0.226637 | 0.100105 |
| MmugDNA.25528.1.S1_at   | MmugDNA.25528.1 | 4.95  | 4.94  | 0.51 | 0.64 | 1.01  | 0.599841 | 0.808755 | 0.814882 | 0.889895 |
| MmugDNA.2553.1.S1_at    | MmugDNA.2553.1  | 5.74  | 5.6   | 0.35 | 0.15 | 1.1   | 0.636534 | 0.31323  | 0.835619 | 0.567753 |
| MmugDNA.25531.1.S1_at   | MmugDNA.25531.1 | 10.26 | 9.89  | 0.34 | 0.55 | 1.3   | 0.197101 | 0.132966 | 0.560096 | 0.404626 |
| MmugDNA.25532.1.S1_s_at | MmugDNA.25532.1 | 9     | 9.21  | 0.09 | 0.11 | -1.15 | 0.061584 | 0.066027 | 0.396368 | 0.302361 |
| MmugDNA.25533.1.S1_at   | MmugDNA.25533.1 | 3.71  | 3.64  | 0.14 | 0.05 | 1.05  | 0.160031 | 0.486143 | 0.52484  | 0.689635 |
| MmugDNA.25534.1.S1_at   | MmugDNA.25534.1 | 10.06 | 9.29  | 0.2  | 0.48 | 1.71  | 0.120063 | 0.084503 | 0.484663 | 0.335901 |
| MmugDNA.25536.1.S1_at   | MmugDNA.25536.1 | 7.46  | 7.58  | 0.06 | 0.12 | -1.09 | 0.071714 | 0.063363 | 0.415695 | 0.298403 |
| MmugDNA.25537.1.S1_at   | MmugDNA.25537.1 | 5.13  | 5.04  | 0.28 | 0.15 | 1.06  | 0.36849  | 0.197068 | 0.67994  | 0.472213 |
| MmugDNA.25539.1.S1_at   | MmugDNA.25539.1 | 13.05 | 13.19 | 0.11 | 0.02 | -1.1  | 0.27719  | 0.358957 | 0.619342 | 0.600344 |
| MmugDNA.2554.1.S1_at    | MmugDNA.2554.1  | 6.1   | 5.87  | 0.12 | 0.14 | 1.18  | 0.125503 | 0.057985 | 0.491333 | 0.287289 |
| MmugDNA.25542.1.S1_at   | MmugDNA.25542.1 | 7.97  | 7.22  | 0.47 | 0.62 | 1.68  | 0.167637 | 0.166309 | 0.531909 | 0.442861 |
| MmugDNA.25543.1.S1_at   | MmugDNA.25543.1 | 3.06  | 3.03  | 0.14 | 0.07 | 1.02  | 0.934935 | 0.916287 | 0.97484  | 0.953121 |
| MmugDNA.25544.1.S1_at   | MmugDNA.25544.1 | 7.53  | 7.42  | 0.5  | 0.26 | 1.07  | 0.311658 | 0.113039 | 0.64356  | 0.378888 |
| MmugDNA.25545.1.S1_at   | MmugDNA.25545.1 | 11.63 | 11.38 | 0.14 | 0.42 | 1.19  | 0.425143 | 0.065056 | 0.714996 | 0.301009 |
| MmugDNA.25546.1.S1_at   | MmugDNA.25546.1 | 4.49  | 4.3   | 1.24 | 0.06 | 1.14  | 0.279553 | 0.245801 | 0.621136 | 0.515519 |
| MmugDNA.25547.1.S1_at   | MmugDNA.25547.1 | 6.3   | 6.52  | 0.12 | 0.29 | -1.17 | 0.372502 | 0.42617  | 0.682812 | 0.648368 |
| MmugDNA.25548.1.S1_at   | MmugDNA.25548.1 | 6.21  | 6.08  | 0.15 | 0.13 | 1.1   | 0.594782 | 0.134453 | 0.812178 | 0.406605 |
| MmugDNA.25549.1.S1_at   | MmugDNA.25549.1 | 6.84  | 6.95  | 0.31 | 0.26 | -1.08 | 0.671766 | 0.783246 | 0.852716 | 0.874547 |
| MmugDNA.2555.1.S1_at    | MmugDNA.2555.1  | 6.03  | 5.24  | 0.19 | 0.56 | 1.73  | 0.093117 | 0.216724 | 0.450362 | 0.490311 |

|                        |                 |       |       |      |      |       |          |          |          |          |
|------------------------|-----------------|-------|-------|------|------|-------|----------|----------|----------|----------|
| MmugDNA.25550.1.S1_at  | MmugDNA.25550.1 | 7.28  | 7.47  | 0.02 | 0.12 | -1.14 | 0.038759 | 0.033769 | 0.345351 | 0.227414 |
| MmugDNA.25551.1.S1_at  | MmugDNA.25551.1 | 3.24  | 3.4   | 0.15 | 0.15 | -1.12 | 0.257414 | 0.111707 | 0.604808 | 0.376691 |
| MmugDNA.25554.1.S1_at  | MmugDNA.25554.1 | 9.72  | 8.55  | 0.45 | 1.45 | 2.24  | 0.372892 | 0.293712 | 0.683101 | 0.553707 |
| MmugDNA.25555.1.S1_at  | MmugDNA.25555.1 | 6.47  | 6.68  | 0.32 | 0.46 | -1.16 | 0.302879 | 0.035482 | 0.637146 | 0.232579 |
| MmugDNA.25556.1.S1_at  | MmugDNA.25556.1 | 3.66  | 3.66  | 0.03 | 0    | 1     | 0.373901 | 0.421875 | 0.683245 | 0.645369 |
| MmugDNA.25557.1.S1_at  | MmugDNA.25557.1 | 8.88  | 10.05 | 0.43 | 0.4  | -2.25 | 0.016666 | 0.008228 | 0.26475  | 0.120459 |
| MmugDNA.25558.1.S1_at  | MmugDNA.25558.1 | 4.09  | 4.52  | 0    | 0.49 | -1.35 | 0.282932 | 0.339853 | 0.623159 | 0.586417 |
| MmugDNA.25559.1.S1_at  | MmugDNA.25559.1 | 5.6   | 5.83  | 0.45 | 0.35 | -1.17 | 0.94078  | 0.31519  | 0.977466 | 0.568899 |
| MmugDNA.2556.1.S1_at   | MmugDNA.2556.1  | 9.08  | 8.41  | 0.07 | 0.29 | 1.59  | 0.040701 | 0.035124 | 0.350031 | 0.231645 |
| MmugDNA.25560.1.S1_at  | MmugDNA.25560.1 | 2.76  | 2.76  | 0.11 | 0.03 | -1    | 0.992796 | 0.670119 | 0.997551 | 0.807077 |
| MmugDNA.25562.1.S1_at  | MmugDNA.25562.1 | 4.3   | 4.85  | 0.38 | 0.34 | -1.47 | 0.495032 | 0.411867 | 0.757014 | 0.638434 |
| MmugDNA.25563.1.S1_at  | MmugDNA.25563.1 | 4.8   | 4.68  | 0.84 | 0.23 | 1.09  | 0.324514 | 0.445404 | 0.651941 | 0.662343 |
| MmugDNA.25564.1.S1_at  | MmugDNA.25564.1 | 9.61  | 8.94  | 0.17 | 0.96 | 1.59  | 0.093944 | 0.101611 | 0.451538 | 0.361509 |
| MmugDNA.25565.1.S1_at  | MmugDNA.25565.1 | 4.29  | 4.28  | 0.1  | 0.08 | 1.01  | 0.273653 | 0.405842 | 0.617179 | 0.634037 |
| MmugDNA.25566.1.S1_at  | MmugDNA.25566.1 | 4.56  | 4.46  | 0.24 | 0.08 | 1.07  | 0.942033 | 0.54174  | 0.977822 | 0.725057 |
| MmugDNA.25567.1.S1_at  | MmugDNA.25567.1 | 3.78  | 3.71  | 0.09 | 0.08 | 1.05  | 0.068339 | 0.134952 | 0.410012 | 0.406951 |
| MmugDNA.25568.1.S1_at  | MmugDNA.25568.1 | 7.95  | 7.12  | 0.06 | 0.17 | 1.78  | 0.00166  | 0.000302 | 0.15365  | 0.034907 |
| MmugDNA.25569.1.S1_at  | MmugDNA.25569.1 | 5.41  | 5.15  | 0.19 | 0.17 | 1.2   | 0.087673 | 0.087164 | 0.442009 | 0.340133 |
| MmugDNA.2557.1.S1_x_at | MmugDNA.2557.1  | 11.71 | 11.38 | 0.66 | 0.29 | 1.26  | 0.16     | 0.192355 | 0.52484  | 0.467834 |
| MmugDNA.25571.1.S1_at  | MmugDNA.25571.1 | 7.53  | 5.5   | 0.82 | 0.88 | 4.07  | 0.127842 | 0.042196 | 0.494071 | 0.24989  |
| MmugDNA.25574.1.S1_at  | MmugDNA.25574.1 | 8.11  | 8.79  | 0.5  | 0.43 | -1.6  | 0.2078   | 0.149749 | 0.569822 | 0.424364 |
| MmugDNA.25575.1.S1_at  | MmugDNA.25575.1 | 4.95  | 4.97  | 0.33 | 0.24 | -1.02 | 0.442004 | 0.572156 | 0.725332 | 0.744268 |
| MmugDNA.25576.1.S1_at  | MmugDNA.25576.1 | 10.4  | 10.02 | 0.33 | 0.28 | 1.3   | 0.336207 | 0.536058 | 0.659381 | 0.721454 |
| MmugDNA.25577.1.S1_at  | MmugDNA.25577.1 | 6.46  | 5.64  | 0.32 | 0.48 | 1.76  | 0.128297 | 0.093087 | 0.49431  | 0.349292 |
| MmugDNA.25578.1.S1_at  | MmugDNA.25578.1 | 6.7   | 6.89  | 0.56 | 0.3  | -1.14 | 0.821619 | 0.517325 | 0.927464 | 0.709435 |
| MmugDNA.25579.1.S1_at  | MmugDNA.25579.1 | 5.16  | 5.22  | 0.11 | 0.14 | -1.04 | 0.963661 | 0.194998 | 0.985982 | 0.470146 |
| MmugDNA.2558.1.S1_at   | MmugDNA.2558.1  | 2.71  | 2.6   | 0.1  | 0.16 | 1.08  | 0.551003 | 0.463536 | 0.788351 | 0.674489 |
| MmugDNA.25580.1.S1_at  | MmugDNA.25580.1 | 11.9  | 11.6  | 0.17 | 0.36 | 1.24  | 0.179374 | 0.058482 | 0.543593 | 0.288549 |
| MmugDNA.25581.1.S1_at  | MmugDNA.25581.1 | 4.72  | 4.95  | 0.05 | 0.25 | -1.18 | 0.263674 | 0.183094 | 0.6096   | 0.459493 |
| MmugDNA.25582.1.S1_at  | MmugDNA.25582.1 | 4.52  | 4.65  | 0.06 | 0.08 | -1.09 | 0.192454 | 0.069298 | 0.555663 | 0.309515 |
| MmugDNA.25584.1.S1_at  | MmugDNA.25584.1 | 10.92 | 11.71 | 0.69 | 0.36 | -1.73 | 0.094812 | 0.086486 | 0.452244 | 0.33905  |
| MmugDNA.25585.1.S1_at  | MmugDNA.25585.1 | 3.66  | 3.53  | 0.56 | 0.06 | 1.09  | 0.248265 | 0.244397 | 0.599152 | 0.514233 |
| MmugDNA.25586.1.S1_at  | MmugDNA.25586.1 | 6.28  | 6.41  | 0.32 | 0.43 | -1.09 | 0.567537 | 0.438842 | 0.798174 | 0.657715 |
| MmugDNA.25588.1.S1_at  | MmugDNA.25588.1 | 3.82  | 3.19  | 0.85 | 0.27 | 1.54  | 0.320745 | 0.577956 | 0.64956  | 0.748185 |
| MmugDNA.25589.1.S1_at  | MmugDNA.25589.1 | 7.59  | 7.66  | 0.1  | 0.06 | -1.05 | 0.713406 | 0.050032 | 0.874492 | 0.268904 |
| MmugDNA.2559.1.S1_at   | MmugDNA.2559.1  | 9.8   | 8.85  | 0.21 | 0.52 | 1.93  | 0.1138   | 0.073708 | 0.477124 | 0.317051 |
| MmugDNA.25591.1.S1_at  | MmugDNA.25591.1 | 5.67  | 5.75  | 0.19 | 0.14 | -1.06 | 0.846748 | 0.637331 | 0.938469 | 0.786824 |
| MmugDNA.25592.1.S1_at  | MmugDNA.25592.1 | 3.6   | 3.43  | 0.28 | 0.24 | 1.13  | 0.39413  | 0.597578 | 0.695705 | 0.760257 |
| MmugDNA.25593.1.S1_at  | MmugDNA.25593.1 | 6.12  | 5.58  | 0.28 | 0.57 | 1.45  | 0.340902 | 0.168359 | 0.662203 | 0.445015 |
| MmugDNA.25595.1.S1_at  | MmugDNA.25595.1 | 6.01  | 5.91  | 0.62 | 0.2  | 1.07  | 0.34908  | 0.40958  | 0.667394 | 0.636594 |
| MmugDNA.25596.1.S1_at  | MmugDNA.25596.1 | 8.52  | 9.92  | 0.44 | 0.95 | -2.64 | 0.065318 | 0.0652   | 0.404407 | 0.301239 |

|                         |                 |       |       |      |      |       |          |          |          |          |
|-------------------------|-----------------|-------|-------|------|------|-------|----------|----------|----------|----------|
| MmugDNA.25597.1.S1_at   | MmugDNA.25597.1 | 6.57  | 6.7   | 0.07 | 0.11 | -1.09 | 0.651934 | 0.459341 | 0.843416 | 0.671726 |
| MmugDNA.25598.1.S1_at   | MmugDNA.25598.1 | 6.54  | 6.92  | 0.42 | 0.19 | -1.29 | 0.635533 | 0.354998 | 0.83497  | 0.597466 |
| MmugDNA.25599.1.S1_at   | MmugDNA.25599.1 | 5.76  | 5.84  | 0.14 | 0.08 | -1.05 | 0.476636 | 0.39577  | 0.746273 | 0.627639 |
| MmugDNA.256.1.S1_at     | MmugDNA.256.1   | 2.5   | 2.55  | 0.66 | 0.09 | -1.04 | 0.4783   | 0.524574 | 0.747114 | 0.714424 |
| MmugDNA.2560.1.S1_s_at  | MmugDNA.2560.1  | 8.48  | 8.26  | 0.17 | 0.12 | 1.16  | 0.409193 | 0.445353 | 0.705781 | 0.662341 |
| MmugDNA.25600.1.S1_at   | MmugDNA.25600.1 | 5.87  | 5.97  | 0.12 | 0.17 | -1.07 | 0.885283 | 0.91862  | 0.954022 | 0.954356 |
| MmugDNA.25602.1.S1_at   | MmugDNA.25602.1 | 6.45  | 6.5   | 0.04 | 0.08 | -1.04 | 0.827762 | 0.395871 | 0.930092 | 0.627744 |
| MmugDNA.25603.1.S1_at   | MmugDNA.25603.1 | 11.68 | 11.37 | 0.29 | 0.72 | 1.25  | 0.455271 | 0.319473 | 0.73371  | 0.571823 |
| MmugDNA.25604.1.S1_at   | MmugDNA.25604.1 | 6.37  | 6.73  | 0.41 | 0.23 | -1.28 | 0.288382 | 0.47478  | 0.626604 | 0.681695 |
| MmugDNA.25605.1.S1_at   | MmugDNA.25605.1 | 5.87  | 5.83  | 0.22 | 0.16 | 1.03  | 0.426962 | 0.60907  | 0.716003 | 0.767545 |
| MmugDNA.25606.1.S1_at   | MmugDNA.25606.1 | 11.96 | 12.07 | 0.2  | 0.33 | -1.08 | 0.649399 | 0.010264 | 0.842465 | 0.132661 |
| MmugDNA.25606.1.S1_s_at | MmugDNA.25606.1 | 11.14 | 11.27 | 0.25 | 0.4  | -1.09 | 0.62123  | 0.008577 | 0.826488 | 0.122911 |
| MmugDNA.25607.1.S1_at   | MmugDNA.25607.1 | 3.8   | 3.86  | 0.12 | 0.09 | -1.05 | 0.4625   | 0.151394 | 0.738248 | 0.426104 |
| MmugDNA.25608.1.S1_at   | MmugDNA.25608.1 | 5.05  | 5.18  | 0.3  | 0.19 | -1.09 | 0.829397 | 0.414527 | 0.930756 | 0.640403 |
| MmugDNA.25609.1.S1_at   | MmugDNA.25609.1 | 4.46  | 4.5   | 0.56 | 0.26 | -1.03 | 0.715294 | 0.767909 | 0.875005 | 0.865256 |
| MmugDNA.2561.1.S1_at    | MmugDNA.2561.1  | 9.72  | 10.2  | 0.22 | 0.24 | -1.39 | 0.034068 | 0.010192 | 0.331126 | 0.132348 |
| MmugDNA.25610.1.S1_at   | MmugDNA.25610.1 | 2.96  | 3.29  | 0.34 | 0.32 | -1.26 | 0.301699 | 0.560224 | 0.636547 | 0.736553 |
| MmugDNA.25611.1.S1_at   | MmugDNA.25611.1 | 8.97  | 8.71  | 0.18 | 0.57 | 1.2   | 0.455339 | 0.474977 | 0.733752 | 0.681837 |
| MmugDNA.25612.1.S1_at   | MmugDNA.25612.1 | 4.1   | 4.09  | 0.22 | 0.23 | 1.01  | 0.811473 | 0.394442 | 0.923224 | 0.626982 |
| MmugDNA.25613.1.S1_at   | MmugDNA.25613.1 | 8.93  | 8.33  | 0.75 | 0.88 | 1.51  | 0.312442 | 0.452574 | 0.644204 | 0.667169 |
| MmugDNA.25614.1.S1_at   | MmugDNA.25614.1 | 6.57  | 6.87  | 0.36 | 0.11 | -1.23 | 0.230772 | 0.382085 | 0.587317 | 0.618309 |
| MmugDNA.25615.1.S1_at   | MmugDNA.25615.1 | 6.31  | 5.86  | 0.25 | 0.24 | 1.37  | 0.198091 | 0.211362 | 0.561111 | 0.48553  |
| MmugDNA.25618.1.S1_at   | MmugDNA.25618.1 | 9.15  | 9.19  | 0.3  | 0.49 | -1.02 | 0.8326   | 0.469252 | 0.932191 | 0.678175 |
| MmugDNA.2562.1.S1_at    | MmugDNA.2562.1  | 6.95  | 7.24  | 0.1  | 1.01 | -1.22 | 0.635961 | 0.829694 | 0.835221 | 0.902187 |
| MmugDNA.25620.1.S1_s_at | MmugDNA.25620.1 | 6.88  | 6.96  | 0.06 | 0.05 | -1.06 | 0.050939 | 0.024316 | 0.37568  | 0.195185 |
| MmugDNA.25623.1.S1_at   | MmugDNA.25623.1 | 5.14  | 5.1   | 0.7  | 0.6  | 1.03  | 0.97195  | 0.718111 | 0.989291 | 0.836865 |
| MmugDNA.25624.1.S1_at   | MmugDNA.25624.1 | 7.35  | 7.73  | 0.8  | 0.22 | -1.3  | 0.356037 | 0.480554 | 0.671384 | 0.685885 |
| MmugDNA.25625.1.S1_at   | MmugDNA.25625.1 | 5.6   | 8.04  | 1.26 | 2.57 | -5.45 | 0.411715 | 0.180425 | 0.707523 | 0.457077 |
| MmugDNA.25627.1.S1_at   | MmugDNA.25627.1 | 8.66  | 9.69  | 0.85 | 1.49 | -2.04 | 0.435873 | 0.453207 | 0.721497 | 0.66762  |
| MmugDNA.25628.1.S1_at   | MmugDNA.25628.1 | 7.95  | 7.87  | 0.15 | 0.13 | 1.05  | 0.658866 | 0.036032 | 0.846726 | 0.234255 |
| MmugDNA.25629.1.S1_at   | MmugDNA.25629.1 | 5.81  | 5.61  | 0.27 | 0.17 | 1.15  | 0.315817 | 0.359867 | 0.646695 | 0.601105 |
| MmugDNA.25630.1.S1_at   | MmugDNA.25630.1 | 8.15  | 7.94  | 0.29 | 0.32 | 1.16  | 0.975358 | 0.732897 | 0.990439 | 0.845436 |
| MmugDNA.25631.1.S1_at   | MmugDNA.25631.1 | 4.54  | 4.45  | 0.36 | 0.09 | 1.07  | 0.643785 | 0.194289 | 0.839654 | 0.469384 |
| MmugDNA.25632.1.S1_at   | MmugDNA.25632.1 | 9.89  | 9.64  | 0.24 | 0.3  | 1.19  | 0.202769 | 0.088208 | 0.565368 | 0.341721 |
| MmugDNA.25633.1.S1_at   | MmugDNA.25633.1 | 2.85  | 2.92  | 0.09 | 0.12 | -1.05 | 0.279205 | 0.654285 | 0.620979 | 0.797979 |
| MmugDNA.25635.1.S1_at   | MmugDNA.25635.1 | 3.39  | 3.41  | 0.06 | 0.25 | -1.02 | 0.31735  | 0.34999  | 0.64789  | 0.593743 |
| MmugDNA.25636.1.S1_at   | MmugDNA.25636.1 | 3.65  | 3.69  | 0.15 | 0.12 | -1.03 | 0.359431 | 0.394018 | 0.673869 | 0.626734 |
| MmugDNA.25637.1.S1_at   | MmugDNA.25637.1 | 12.34 | 12.16 | 0.18 | 0.5  | 1.13  | 0.715819 | 0.66927  | 0.875256 | 0.806514 |
| MmugDNA.25638.1.S1_at   | MmugDNA.25638.1 | 6.89  | 7.04  | 0.19 | 0.06 | -1.11 | 0.484282 | 0.378288 | 0.750251 | 0.615438 |
| MmugDNA.25639.1.S1_at   | MmugDNA.25639.1 | 4.66  | 4.74  | 0.27 | 0.28 | -1.06 | 0.571295 | 0.579743 | 0.80004  | 0.74927  |
| MmugDNA.25640.1.S1_at   | MmugDNA.25640.1 | 5.5   | 5.86  | 1.26 | 0.43 | -1.29 | 0.472142 | 0.540607 | 0.743515 | 0.724459 |

|                         |                 |       |       |      |      |        |          |          |          |          |
|-------------------------|-----------------|-------|-------|------|------|--------|----------|----------|----------|----------|
| MmugDNA.25641.1.S1_at   | MmugDNA.25641.1 | 5.53  | 5.99  | 0.11 | 0.26 | -1.37  | 0.043764 | 0.036138 | 0.357051 | 0.234582 |
| MmugDNA.25643.1.S1_at   | MmugDNA.25643.1 | 4.14  | 4.23  | 0.53 | 0.11 | -1.06  | 0.653338 | 0.578242 | 0.844065 | 0.748372 |
| MmugDNA.25644.1.S1_at   | MmugDNA.25644.1 | 11.2  | 10.83 | 0.2  | 0.15 | 1.3    | 0.064441 | 0.037567 | 0.402975 | 0.238211 |
| MmugDNA.25648.1.S1_at   | MmugDNA.25648.1 | 5.6   | 5.33  | 0.27 | 0.28 | 1.2    | 0.651997 | 0.80084  | 0.843456 | 0.885464 |
| MmugDNA.25650.1.S1_at   | MmugDNA.25650.1 | 4.13  | 3.98  | 0.17 | 0.12 | 1.11   | 0.434148 | 0.133087 | 0.720325 | 0.404734 |
| MmugDNA.25651.1.S1_at   | MmugDNA.25651.1 | 4.42  | 4.42  | 0.13 | 0.08 | -1     | 0.78271  | 0.271158 | 0.909285 | 0.536259 |
| MmugDNA.25654.1.S1_at   | MmugDNA.25654.1 | 7.2   | 6.92  | 0.5  | 0.13 | 1.21   | 0.339152 | 0.321941 | 0.661173 | 0.573573 |
| MmugDNA.25655.1.S1_at   | MmugDNA.25655.1 | 4.49  | 4.51  | 0.06 | 0.36 | -1.01  | 0.396195 | 0.445661 | 0.696871 | 0.662478 |
| MmugDNA.25657.1.S1_at   | MmugDNA.25657.1 | 4.83  | 10.83 | 3.04 | 4.43 | -63.93 | 0.599343 | 0.34676  | 0.814562 | 0.591536 |
| MmugDNA.25657.1.S1_s_at | MmugDNA.25657.1 | 5.25  | 10.73 | 2.69 | 3.96 | -44.72 | 0.570635 | 0.335782 | 0.799614 | 0.583515 |
| MmugDNA.25658.1.S1_at   | MmugDNA.25658.1 | 6.13  | 6.59  | 0.44 | 0.36 | -1.37  | 0.237813 | 0.208497 | 0.591288 | 0.482435 |
| MmugDNA.25659.1.S1_at   | MmugDNA.25659.1 | 6.3   | 6.03  | 0.21 | 0.1  | 1.21   | 0.191071 | 0.11881  | 0.553932 | 0.386946 |
| MmugDNA.25660.1.S1_at   | MmugDNA.25660.1 | 7.56  | 6.72  | 0.34 | 0.92 | 1.78   | 0.28654  | 0.36745  | 0.625572 | 0.607095 |
| MmugDNA.25661.1.S1_at   | MmugDNA.25661.1 | 7.11  | 6.71  | 1.63 | 0.46 | 1.31   | 0.207694 | 0.321919 | 0.569822 | 0.573567 |
| MmugDNA.25662.1.S1_at   | MmugDNA.25662.1 | 9.24  | 8.89  | 0.17 | 0.21 | 1.28   | 0.441285 | 0.274122 | 0.724743 | 0.538575 |
| MmugDNA.25663.1.S1_at   | MmugDNA.25663.1 | 6.22  | 6.26  | 0.12 | 0.27 | -1.02  | 0.960225 | 0.880024 | 0.98486  | 0.93148  |
| MmugDNA.25664.1.S1_at   | MmugDNA.25664.1 | 9.03  | 9.84  | 0.32 | 0.44 | -1.76  | 0.071011 | 0.047915 | 0.414673 | 0.26377  |
| MmugDNA.25665.1.S1_at   | MmugDNA.25665.1 | 3.81  | 3.76  | 0.18 | 0.14 | 1.04   | 0.943926 | 0.760613 | 0.97854  | 0.860949 |
| MmugDNA.25668.1.S1_at   | MmugDNA.25668.1 | 8.4   | 8.18  | 0.44 | 0.34 | 1.16   | 0.303527 | 0.484439 | 0.637706 | 0.688478 |
| MmugDNA.25668.1.S1_s_at | MmugDNA.25668.1 | 11.65 | 11.33 | 0.1  | 0.01 | 1.25   | 0.004722 | 0.000996 | 0.184492 | 0.050485 |
| MmugDNA.25669.1.S1_at   | MmugDNA.25669.1 | 4.93  | 4.8   | 0.24 | 0.09 | 1.09   | 0.419842 | 0.349986 | 0.712083 | 0.593743 |
| MmugDNA.2567.1.S1_at    | MmugDNA.2567.1  | 5.73  | 5.88  | 0    | 0.31 | -1.11  | 0.593676 | 0.534071 | 0.811568 | 0.720079 |
| MmugDNA.25670.1.S1_at   | MmugDNA.25670.1 | 6.23  | 6.88  | 0.07 | 0.55 | -1.57  | 0.367064 | 0.422988 | 0.679287 | 0.646145 |
| MmugDNA.24730.1.S1_at   | MmugDNA.24730.1 | 4.02  | 4.01  | 0.15 | 0.09 | 1.01   | 0.786409 | 0.953747 | 0.91117  | 0.973663 |
| MmugDNA.24730.1.S1_s_at | MmugDNA.24730.1 | 5.92  | 6.05  | 0.23 | 0.06 | -1.1   | 0.281488 | 0.403517 | 0.622236 | 0.632188 |
| MmugDNA.25672.1.S1_at   | MmugDNA.25672.1 | 4.64  | 4.64  | 0.16 | 0.07 | 1      | 0.430445 | 0.597485 | 0.718048 | 0.760211 |
| MmugDNA.25673.1.S1_at   | MmugDNA.25673.1 | 6.4   | 6.23  | 1.21 | 0.61 | 1.13   | 0.428135 | 0.630214 | 0.71663  | 0.782181 |
| MmugDNA.25675.1.S1_at   | MmugDNA.25675.1 | 7.08  | 7.34  | 0.52 | 0.52 | -1.2   | 0.741337 | 0.369204 | 0.889265 | 0.608669 |
| MmugDNA.25676.1.S1_at   | MmugDNA.25676.1 | 7.22  | 6.35  | 0.35 | 0.44 | 1.83   | 0.031113 | 0.025035 | 0.320562 | 0.198273 |
| MmugDNA.25676.1.S1_x_at | MmugDNA.25676.1 | 7.72  | 6.87  | 0.22 | 0.32 | 1.8    | 0.013822 | 0.007726 | 0.249758 | 0.117463 |
| MmugDNA.25677.1.S1_s_at | MmugDNA.25677.1 | 6.91  | 6.48  | 0.46 | 0.36 | 1.35   | 0.261404 | 0.096795 | 0.607983 | 0.354207 |
| MmugDNA.2568.1.S1_at    | MmugDNA.2568.1  | 11.87 | 11.84 | 0.98 | 1.3  | 1.02   | 0.715123 | 0.334054 | 0.875005 | 0.582104 |
| MmugDNA.25680.1.S1_at   | MmugDNA.25680.1 | 9.99  | 9.95  | 0.19 | 0.2  | 1.03   | 0.68214  | 0.777483 | 0.857766 | 0.870723 |
| MmugDNA.25682.1.S1_at   | MmugDNA.25682.1 | 7.98  | 8.06  | 0.18 | 0.28 | -1.05  | 0.520847 | 0.557429 | 0.771038 | 0.735031 |
| MmugDNA.25683.1.S1_at   | MmugDNA.25683.1 | 6.69  | 7.6   | 0.5  | 0.66 | -1.88  | 0.106418 | 0.111973 | 0.46687  | 0.37707  |
| MmugDNA.25684.1.S1_at   | MmugDNA.25684.1 | 9.85  | 9.78  | 0.25 | 0.24 | 1.05   | 0.2213   | 0.292739 | 0.580161 | 0.552783 |
| MmugDNA.25685.1.S1_at   | MmugDNA.25685.1 | 4.74  | 4.38  | 0.06 | 0.38 | 1.29   | 0.152347 | 0.036814 | 0.51708  | 0.236386 |
| MmugDNA.25686.1.S1_at   | MmugDNA.25686.1 | 3.59  | 3.59  | 0.16 | 0.16 | 1      | 0.461077 | 0.685073 | 0.737403 | 0.816309 |
| MmugDNA.25687.1.S1_at   | MmugDNA.25687.1 | 3.9   | 3.85  | 0.24 | 0.05 | 1.03   | 0.205542 | 0.25024  | 0.568054 | 0.519271 |
| MmugDNA.25688.1.S1_at   | MmugDNA.25688.1 | 2.75  | 2.88  | 0.08 | 0.08 | -1.09  | 0.054796 | 0.129644 | 0.382363 | 0.401242 |
| MmugDNA.25689.1.S1_at   | MmugDNA.25689.1 | 6.64  | 6.87  | 0.03 | 0.4  | -1.17  | 0.322853 | 0.438421 | 0.651245 | 0.657396 |

|                         |                 |       |       |      |      |       |          |          |          |          |
|-------------------------|-----------------|-------|-------|------|------|-------|----------|----------|----------|----------|
| MmugDNA.2569.1.S1_s_at  | MmugDNA.2569.1  | 10.88 | 11.82 | 0.07 | 0.14 | -1.91 | 0.000683 | 0.000509 | 0.136818 | 0.039357 |
| MmugDNA.25690.1.S1_at   | MmugDNA.25690.1 | 5.74  | 5.65  | 0.33 | 0.15 | 1.06  | 0.415664 | 0.19186  | 0.709528 | 0.467233 |
| MmugDNA.25691.1.S1_at   | MmugDNA.25691.1 | 9.31  | 10.77 | 0.94 | 1.14 | -2.75 | 0.285738 | 0.391464 | 0.625149 | 0.625086 |
| MmugDNA.25692.1.S1_at   | MmugDNA.25692.1 | 7.31  | 8.27  | 0.46 | 0.28 | -1.95 | 0.045971 | 0.025136 | 0.362069 | 0.198657 |
| MmugDNA.25694.1.S1_at   | MmugDNA.25694.1 | 6.78  | 7.08  | 0.17 | 0.22 | -1.24 | 0.052432 | 0.00863  | 0.377579 | 0.123154 |
| MmugDNA.25695.1.S1_at   | MmugDNA.25695.1 | 2.99  | 2.92  | 0.05 | 0.07 | 1.05  | 0.302061 | 0.22688  | 0.636849 | 0.499276 |
| MmugDNA.25696.1.S1_at   | MmugDNA.25696.1 | 7.26  | 6.52  | 0.21 | 0.04 | 1.66  | 0.004288 | 0.002549 | 0.18216  | 0.074581 |
| MmugDNA.25697.1.S1_at   | MmugDNA.25697.1 | 8.71  | 9.06  | 0.32 | 0.23 | -1.28 | 0.112891 | 0.024263 | 0.475423 | 0.194952 |
| MmugDNA.25699.1.S1_at   | MmugDNA.25699.1 | 5.02  | 5.11  | 0.33 | 0.02 | -1.07 | 0.812821 | 0.945757 | 0.923923 | 0.969149 |
| MmugDNA.257.1.S1_at     | MmugDNA.257.1   | 6.14  | 6.27  | 0.04 | 0.09 | -1.09 | 0.08208  | 0.081292 | 0.433268 | 0.329351 |
| MmugDNA.2570.1.S1_at    | MmugDNA.2570.1  | 3.88  | 3.86  | 0.14 | 0.14 | 1.01  | 0.606647 | 0.819188 | 0.818943 | 0.895796 |
| MmugDNA.25700.1.S1_at   | MmugDNA.25700.1 | 4.03  | 3.64  | 0.1  | 0.86 | 1.31  | 0.775123 | 0.58375  | 0.905526 | 0.751983 |
| MmugDNA.25701.1.S1_at   | MmugDNA.25701.1 | 3.64  | 4.1   | 0.26 | 0.28 | -1.38 | 0.533131 | 0.710908 | 0.777978 | 0.832314 |
| MmugDNA.25702.1.S1_at   | MmugDNA.25702.1 | 5.78  | 5.93  | 0.14 | 0.12 | -1.11 | 0.465072 | 0.315565 | 0.739785 | 0.569053 |
| MmugDNA.25705.1.S1_at   | MmugDNA.25705.1 | 4.32  | 4.34  | 0.31 | 0.25 | -1.02 | 0.809268 | 0.897151 | 0.922223 | 0.941309 |
| MmugDNA.25706.1.S1_at   | MmugDNA.25706.1 | 5.54  | 5.44  | 0.29 | 0.07 | 1.07  | 0.566455 | 0.556922 | 0.797591 | 0.734847 |
| MmugDNA.25707.1.S1_at   | MmugDNA.25707.1 | 12.31 | 11.71 | 0.14 | 0.14 | 1.52  | 0.007139 | 0.005826 | 0.204886 | 0.104661 |
| MmugDNA.25708.1.S1_at   | MmugDNA.25708.1 | 5.42  | 4.39  | 0.63 | 0.25 | 2.05  | 0.169454 | 0.149269 | 0.533686 | 0.42373  |
| MmugDNA.25709.1.S1_at   | MmugDNA.25709.1 | 7.03  | 6.4   | 0.34 | 0.43 | 1.54  | 0.577529 | 0.176635 | 0.803534 | 0.453117 |
| MmugDNA.25710.1.S1_at   | MmugDNA.25710.1 | 2.85  | 2.79  | 0.11 | 0.04 | 1.04  | 0.581058 | 0.238041 | 0.804843 | 0.50861  |
| MmugDNA.25711.1.S1_at   | MmugDNA.25711.1 | 5.26  | 5.32  | 0.18 | 0.1  | -1.04 | 0.649239 | 0.885785 | 0.84237  | 0.935063 |
| MmugDNA.25712.1.S1_at   | MmugDNA.25712.1 | 7.62  | 8.62  | 0.16 | 0.99 | -2    | 0.190074 | 0.252757 | 0.552832 | 0.521174 |
| MmugDNA.25713.1.S1_at   | MmugDNA.25713.1 | 8.83  | 9.33  | 0.19 | 0.28 | -1.41 | 0.034615 | 0.030737 | 0.333297 | 0.217205 |
| MmugDNA.25714.1.S1_at   | MmugDNA.25714.1 | 9.86  | 9.92  | 0.1  | 0.25 | -1.04 | 0.510409 | 0.36978  | 0.765019 | 0.609079 |
| MmugDNA.25715.1.S1_at   | MmugDNA.25715.1 | 5.02  | 4.19  | 0.35 | 0.28 | 1.77  | 0.034591 | 0.020268 | 0.333297 | 0.17872  |
| MmugDNA.25717.1.S1_s_at | MmugDNA.25717.1 | 9.53  | 9.4   | 0.13 | 0.34 | 1.09  | 0.59044  | 0.756386 | 0.809851 | 0.858223 |
| MmugDNA.25718.1.S1_at   | MmugDNA.25718.1 | 10.49 | 10.47 | 0.65 | 0.2  | 1.02  | 0.821188 | 0.810545 | 0.927252 | 0.890812 |
| MmugDNA.2572.1.S1_at    | MmugDNA.2572.1  | 8.12  | 8.74  | 0.51 | 0.52 | -1.54 | 0.173651 | 0.107602 | 0.53719  | 0.370497 |
| MmugDNA.25720.1.S1_at   | MmugDNA.25720.1 | 6.65  | 7.28  | 0.3  | 0.09 | -1.54 | 0.022469 | 0.012532 | 0.287048 | 0.144417 |
| MmugDNA.25721.1.S1_at   | MmugDNA.25721.1 | 5.05  | 5.03  | 0.37 | 0.53 | 1.02  | 0.631769 | 0.574838 | 0.83284  | 0.746142 |
| MmugDNA.25722.1.S1_at   | MmugDNA.25722.1 | 6.71  | 6.54  | 0.34 | 0.6  | 1.13  | 0.999887 | 0.856428 | 0.999967 | 0.917996 |
| MmugDNA.25723.1.S1_at   | MmugDNA.25723.1 | 5.82  | 5.7   | 1.14 | 0.52 | 1.09  | 0.86977  | 0.914572 | 0.947917 | 0.951966 |
| MmugDNA.25724.1.S1_at   | MmugDNA.25724.1 | 12.32 | 11.93 | 0.21 | 0.08 | 1.3   | 0.034157 | 0.023556 | 0.331747 | 0.192238 |
| MmugDNA.25726.1.S1_at   | MmugDNA.25726.1 | 5.64  | 6.34  | 0.04 | 0.23 | -1.62 | 0.006845 | 0.001599 | 0.201708 | 0.060468 |
| MmugDNA.25727.1.S1_at   | MmugDNA.25727.1 | 11.72 | 11.27 | 0.1  | 0.66 | 1.37  | 0.194365 | 0.227642 | 0.557827 | 0.499898 |
| MmugDNA.25728.1.S1_at   | MmugDNA.25728.1 | 6.98  | 6.08  | 0.02 | 0.26 | 1.87  | 0.005794 | 0.001806 | 0.193191 | 0.063714 |
| MmugDNA.25731.1.S1_at   | MmugDNA.25731.1 | 8.75  | 8.79  | 0.32 | 0.39 | -1.03 | 0.718538 | 0.303344 | 0.876527 | 0.560808 |
| MmugDNA.25732.1.S1_at   | MmugDNA.25732.1 | 3.73  | 4     | 0.12 | 0.65 | -1.21 | 0.179652 | 0.196254 | 0.543821 | 0.471236 |
| MmugDNA.25733.1.S1_at   | MmugDNA.25733.1 | 5.53  | 5.61  | 0.25 | 0.21 | -1.06 | 0.982579 | 0.968899 | 0.993516 | 0.982889 |
| MmugDNA.25734.1.S1_at   | MmugDNA.25734.1 | 3.52  | 3.58  | 0.13 | 0.2  | -1.04 | 0.200098 | 0.234443 | 0.563056 | 0.505674 |
| MmugDNA.25735.1.S1_at   | MmugDNA.25735.1 | 5.21  | 5.19  | 0.17 | 0.22 | 1.02  | 0.554342 | 0.761284 | 0.790679 | 0.861304 |

|                         |                 |       |       |      |      |       |          |          |          |          |
|-------------------------|-----------------|-------|-------|------|------|-------|----------|----------|----------|----------|
| MmugDNA.25737.1.S1_at   | MmugDNA.25737.1 | 4.28  | 4.24  | 0.43 | 0.37 | 1.03  | 0.914258 | 0.910282 | 0.966155 | 0.949391 |
| MmugDNA.25738.1.S1_at   | MmugDNA.25738.1 | 6.73  | 6.62  | 0.42 | 0.33 | 1.08  | 0.743059 | 0.118622 | 0.890085 | 0.38662  |
| MmugDNA.25739.1.S1_at   | MmugDNA.25739.1 | 5.19  | 5.22  | 0.09 | 0.01 | -1.02 | 0.711848 | 0.589983 | 0.873736 | 0.756034 |
| MmugDNA.2574.1.S1_at    | MmugDNA.2574.1  | 7.24  | 8.16  | 0.19 | 0.23 | -1.9  | 0.005855 | 0.003178 | 0.19355  | 0.081873 |
| MmugDNA.25740.1.S1_at   | MmugDNA.25740.1 | 10.36 | 9.89  | 0.11 | 0.3  | 1.38  | 0.024933 | 0.014743 | 0.297145 | 0.15446  |
| MmugDNA.25741.1.S1_at   | MmugDNA.25741.1 | 4.69  | 4.88  | 0.16 | 0.26 | -1.14 | 0.075219 | 0.100093 | 0.422122 | 0.358984 |
| MmugDNA.25742.1.S1_at   | MmugDNA.25742.1 | 7.96  | 6.94  | 0.27 | 0.04 | 2.03  | 0.003089 | 0.00016  | 0.172102 | 0.030478 |
| MmugDNA.25744.1.S1_at   | MmugDNA.25744.1 | 3.76  | 3.77  | 0.21 | 0.26 | -1.01 | 0.596057 | 0.765031 | 0.812756 | 0.863388 |
| MmugDNA.25745.1.S1_at   | MmugDNA.25745.1 | 4.24  | 4.3   | 0.33 | 0.11 | -1.05 | 0.729351 | 0.855803 | 0.882512 | 0.917707 |
| MmugDNA.25747.1.S1_at   | MmugDNA.25747.1 | 4.04  | 4.05  | 0.26 | 0.13 | -1.01 | 0.662814 | 0.487743 | 0.848768 | 0.690658 |
| MmugDNA.25748.1.S1_at   | MmugDNA.25748.1 | 10.49 | 10.22 | 0.08 | 0.24 | 1.21  | 0.111021 | 0.115367 | 0.472906 | 0.382394 |
| MmugDNA.25749.1.S1_at   | MmugDNA.25749.1 | 6.12  | 6.12  | 0.15 | 0.16 | 1     | 0.953732 | 0.992034 | 0.982865 | 0.995515 |
| MmugDNA.2575.1.S1_at    | MmugDNA.2575.1  | 9.88  | 10.27 | 0.17 | 0.17 | -1.32 | 0.023934 | 0.01513  | 0.293436 | 0.156224 |
| MmugDNA.2575.1.S1_s_at  | MmugDNA.2575.1  | 9.2   | 10.08 | 0.21 | 0.23 | -1.84 | 0.007166 | 0.003345 | 0.205112 | 0.083256 |
| MmugDNA.25750.1.S1_at   | MmugDNA.25750.1 | 4.1   | 4.16  | 0.29 | 0.17 | -1.05 | 0.982306 | 0.912557 | 0.993449 | 0.950757 |
| MmugDNA.25751.1.S1_at   | MmugDNA.25751.1 | 4.5   | 4.65  | 1.21 | 0.16 | -1.11 | 0.418071 | 0.588674 | 0.711128 | 0.755137 |
| MmugDNA.25752.1.S1_at   | MmugDNA.25752.1 | 8.88  | 8.85  | 0.4  | 0.79 | 1.02  | 0.273244 | 0.313483 | 0.616697 | 0.567926 |
| MmugDNA.25752.1.S1_s_at | MmugDNA.25752.1 | 10.02 | 10.12 | 0.57 | 0.74 | -1.07 | 0.414818 | 0.507975 | 0.709338 | 0.703358 |
| MmugDNA.25754.1.S1_at   | MmugDNA.25754.1 | 4.3   | 4.17  | 0.55 | 0.07 | 1.1   | 0.649141 | 0.255197 | 0.84237  | 0.523252 |
| MmugDNA.25756.1.S1_at   | MmugDNA.25756.1 | 7.58  | 10.21 | 0.36 | 0.45 | -6.17 | 0.001374 | 0.000259 | 0.146228 | 0.033501 |
| MmugDNA.25757.1.S1_at   | MmugDNA.25757.1 | 4.99  | 5     | 0.42 | 0.29 | -1.01 | 0.253218 | 0.311573 | 0.60185  | 0.566537 |
| MmugDNA.25758.1.S1_at   | MmugDNA.25758.1 | 3.56  | 3.53  | 0.85 | 0.25 | 1.02  | 0.348208 | 0.515043 | 0.667097 | 0.708042 |
| MmugDNA.2576.1.S1_at    | MmugDNA.2576.1  | 6.24  | 6.16  | 0.21 | 0.09 | 1.05  | 0.658034 | 0.645306 | 0.846303 | 0.792172 |
| MmugDNA.25760.1.S1_at   | MmugDNA.25760.1 | 6.91  | 6.16  | 0.38 | 0.35 | 1.68  | 0.061714 | 0.030707 | 0.396604 | 0.217148 |
| MmugDNA.25761.1.S1_at   | MmugDNA.25761.1 | 2.94  | 2.87  | 0.09 | 0.08 | 1.05  | 0.327788 | 0.204298 | 0.654129 | 0.478541 |
| MmugDNA.25762.1.S1_at   | MmugDNA.25762.1 | 3.21  | 3.21  | 0.12 | 0.09 | 1     | 0.571682 | 0.720851 | 0.800348 | 0.838368 |
| MmugDNA.25763.1.S1_at   | MmugDNA.25763.1 | 5.23  | 4.77  | 0.47 | 0.26 | 1.37  | 0.221304 | 0.296761 | 0.580161 | 0.555779 |
| MmugDNA.25767.1.S1_at   | MmugDNA.25767.1 | 12.7  | 12.32 | 0.05 | 0.4  | 1.3   | 0.053721 | 0.044253 | 0.380746 | 0.25493  |
| MmugDNA.25769.1.S1_s_at | MmugDNA.25769.1 | 7.29  | 7.17  | 0.12 | 0.46 | 1.09  | 0.543159 | 0.644897 | 0.783788 | 0.791927 |
| MmugDNA.2577.1.S1_at    | MmugDNA.2577.1  | 2.94  | 2.92  | 0.08 | 0.06 | 1.01  | 0.913599 | 0.92008  | 0.965794 | 0.955037 |
| MmugDNA.25772.1.S1_at   | MmugDNA.25772.1 | 2.94  | 2.95  | 0.13 | 0.01 | -1    | 0.515385 | 0.692063 | 0.767423 | 0.82091  |
| MmugDNA.25773.1.S1_at   | MmugDNA.25773.1 | 5.09  | 4.94  | 0.18 | 0.07 | 1.11  | 0.333553 | 0.111371 | 0.65764  | 0.376087 |
| MmugDNA.25774.1.S1_at   | MmugDNA.25774.1 | 4.77  | 4.76  | 0.06 | 0.08 | 1.01  | 0.440275 | 0.629394 | 0.724158 | 0.781843 |
| MmugDNA.25775.1.S1_at   | MmugDNA.25775.1 | 7.45  | 7.44  | 0.13 | 0.25 | 1.01  | 0.394681 | 0.738032 | 0.69601  | 0.848158 |
| MmugDNA.25776.1.S1_at   | MmugDNA.25776.1 | 4.44  | 4.44  | 0.78 | 0.16 | 1     | 0.30598  | 0.160917 | 0.639227 | 0.437116 |
| MmugDNA.25778.1.S1_at   | MmugDNA.25778.1 | 5.36  | 5.35  | 0.28 | 0.12 | 1.01  | 0.237913 | 0.376551 | 0.591296 | 0.614375 |
| MmugDNA.2578.1.S1_at    | MmugDNA.2578.1  | 6.78  | 6.68  | 1.06 | 0.37 | 1.07  | 0.495129 | 0.679184 | 0.75708  | 0.812736 |
| MmugDNA.25780.1.S1_at   | MmugDNA.25780.1 | 4.09  | 4.17  | 0.03 | 0.23 | -1.05 | 0.223733 | 0.217284 | 0.582123 | 0.490911 |
| MmugDNA.25781.1.S1_at   | MmugDNA.25781.1 | 6.07  | 6.37  | 0.03 | 0.13 | -1.23 | 0.013146 | 0.058796 | 0.245277 | 0.289228 |
| MmugDNA.25782.1.S1_s_at | MmugDNA.25782.1 | 10.58 | 10.09 | 0.09 | 0.66 | 1.4   | 0.878736 | 0.049348 | 0.95133  | 0.267081 |
| MmugDNA.25783.1.S1_at   | MmugDNA.25783.1 | 2.97  | 3.1   | 0.06 | 0.16 | -1.09 | 0.345721 | 0.522471 | 0.665264 | 0.713153 |

|                         |                 |       |       |      |      |       |          |          |          |          |
|-------------------------|-----------------|-------|-------|------|------|-------|----------|----------|----------|----------|
| MmugDNA.25784.1.S1_at   | MmugDNA.25784.1 | 7.99  | 7.86  | 0.15 | 0.41 | 1.09  | 0.679573 | 0.810487 | 0.856669 | 0.890812 |
| MmugDNA.25785.1.S1_at   | MmugDNA.25785.1 | 8.88  | 8.35  | 0.79 | 0.9  | 1.44  | 0.101675 | 0.088975 | 0.461313 | 0.342831 |
| MmugDNA.25786.1.S1_at   | MmugDNA.25786.1 | 5.72  | 4.73  | 0.29 | 0.3  | 1.99  | 0.026077 | 0.122783 | 0.30146  | 0.392771 |
| MmugDNA.25787.1.S1_at   | MmugDNA.25787.1 | 4.71  | 4.65  | 0.06 | 0.22 | 1.05  | 0.667905 | 0.491153 | 0.851379 | 0.692801 |
| MmugDNA.25788.1.S1_at   | MmugDNA.25788.1 | 4.99  | 5     | 0.11 | 0.05 | -1.01 | 0.750556 | 0.171    | 0.89321  | 0.447561 |
| MmugDNA.2579.1.S1_at    | MmugDNA.2579.1  | 5.11  | 4.99  | 0.19 | 0.6  | 1.09  | 0.893386 | 0.853848 | 0.957601 | 0.916838 |
| MmugDNA.25791.1.S1_s_at | MmugDNA.25791.1 | 14.42 | 14.4  | 0.05 | 0.02 | 1.02  | 0.67597  | 0.156943 | 0.854832 | 0.432372 |
| MmugDNA.25792.1.S1_at   | MmugDNA.25792.1 | 6.26  | 6.72  | 0.48 | 0.39 | -1.38 | 0.250761 | 0.221139 | 0.600389 | 0.494498 |
| MmugDNA.25797.1.S1_at   | MmugDNA.25797.1 | 3.6   | 3.68  | 0.05 | 0.12 | -1.06 | 0.209786 | 0.328154 | 0.571042 | 0.577915 |
| MmugDNA.25798.1.S1_at   | MmugDNA.25798.1 | 6.01  | 5.5   | 0.1  | 0.09 | 1.42  | 0.001875 | 0.0001   | 0.155636 | 0.027996 |
| MmugDNA.25799.1.S1_at   | MmugDNA.25799.1 | 3.38  | 3.48  | 0.13 | 0.13 | -1.07 | 0.300633 | 0.361303 | 0.635955 | 0.602104 |
| MmugDNA.2580.1.S1_at    | MmugDNA.2580.1  | 8.61  | 9.01  | 0.12 | 0.46 | -1.32 | 0.191025 | 0.292574 | 0.553891 | 0.552628 |
| MmugDNA.25800.1.S1_at   | MmugDNA.25800.1 | 4.11  | 6.15  | 0.97 | 0.62 | -4.09 | 0.066723 | 0.067418 | 0.406934 | 0.305664 |
| MmugDNA.25801.1.S1_at   | MmugDNA.25801.1 | 3.72  | 4.76  | 0.12 | 0.68 | -2.04 | 0.075342 | 0.076177 | 0.422257 | 0.321047 |
| MmugDNA.25802.1.S1_at   | MmugDNA.25802.1 | 5.45  | 5.23  | 0.02 | 0.04 | 1.17  | 0.001058 | 0.011721 | 0.143433 | 0.140206 |
| MmugDNA.25803.1.S1_at   | MmugDNA.25803.1 | 9.1   | 9.08  | 0.04 | 0.05 | 1.02  | 0.933038 | 0.008759 | 0.973979 | 0.124009 |
| MmugDNA.25804.1.S1_at   | MmugDNA.25804.1 | 8.98  | 9.92  | 0.12 | 0.2  | -1.92 | 0.003074 | 0.00027  | 0.172102 | 0.033828 |
| MmugDNA.25806.1.S1_at   | MmugDNA.25806.1 | 4.99  | 4.89  | 0.03 | 0.19 | 1.07  | 0.382485 | 0.531303 | 0.688742 | 0.718555 |
| MmugDNA.25807.1.S1_at   | MmugDNA.25807.1 | 3.9   | 4.06  | 0.04 | 0.24 | -1.12 | 0.332774 | 0.505865 | 0.65701  | 0.702226 |
| MmugDNA.25808.1.S1_at   | MmugDNA.25808.1 | 3.68  | 3.59  | 0.35 | 0.09 | 1.07  | 0.425227 | 0.746882 | 0.715027 | 0.853023 |
| MmugDNA.25809.1.S1_at   | MmugDNA.25809.1 | 3.56  | 3.45  | 0.18 | 0.19 | 1.07  | 0.265316 | 0.400271 | 0.610859 | 0.630158 |
| MmugDNA.2581.1.S1_at    | MmugDNA.2581.1  | 5.14  | 5.08  | 0.32 | 0.18 | 1.04  | 0.399992 | 0.508126 | 0.699692 | 0.70337  |
| MmugDNA.25811.1.S1_at   | MmugDNA.25811.1 | 7.63  | 8.11  | 0.24 | 0.46 | -1.39 | 0.053308 | 0.035999 | 0.380005 | 0.234197 |
| MmugDNA.25812.1.S1_s_at | MmugDNA.25812.1 | 14.27 | 14.28 | 0.05 | 0.03 | -1.01 | 0.969856 | 0.93943  | 0.98846  | 0.965611 |
| MmugDNA.25815.1.S1_at   | MmugDNA.25815.1 | 8.62  | 9.2   | 0.12 | 0.4  | -1.49 | 0.161289 | 0.192457 | 0.526361 | 0.467952 |
| MmugDNA.25816.1.S1_s_at | MmugDNA.25816.1 | 9.12  | 9.56  | 0.14 | 0.24 | -1.35 | 0.250061 | 0.242954 | 0.600389 | 0.513319 |
| MmugDNA.25817.1.S1_at   | MmugDNA.25817.1 | 3.64  | 3.59  | 0.16 | 0.12 | 1.03  | 0.725746 | 0.181815 | 0.880512 | 0.458382 |
| MmugDNA.25818.1.S1_at   | MmugDNA.25818.1 | 4.07  | 4.01  | 0.52 | 0    | 1.04  | 0.65754  | 0.699299 | 0.846035 | 0.825318 |
| MmugDNA.15311.1.S1_x_at | MmugDNA.15311.1 | 3.88  | 5.12  | 0.18 | 1.26 | -2.37 | 0.198959 | 0.195726 | 0.562029 | 0.470621 |
| MmugDNA.2582.1.S1_at    | MmugDNA.2582.1  | 4.11  | 4.7   | 0.2  | 0.2  | -1.5  | 0.058573 | 0.045001 | 0.390818 | 0.256602 |
| MmugDNA.25820.1.S1_at   | MmugDNA.25820.1 | 7.14  | 7.43  | 0.23 | 0.06 | -1.22 | 0.259026 | 0.293321 | 0.606181 | 0.553239 |
| MmugDNA.25821.1.S1_at   | MmugDNA.25821.1 | 3.39  | 3.35  | 0.85 | 0.23 | 1.03  | 0.465435 | 0.412865 | 0.739873 | 0.639181 |
| MmugDNA.25822.1.S1_at   | MmugDNA.25822.1 | 3.08  | 2.97  | 0.1  | 0.15 | 1.08  | 0.229432 | 0.399629 | 0.586579 | 0.629912 |
| MmugDNA.25823.1.S1_at   | MmugDNA.25823.1 | 5.48  | 5.25  | 0.35 | 0.08 | 1.17  | 0.083696 | 0.052226 | 0.43598  | 0.274065 |
| MmugDNA.25825.1.S1_at   | MmugDNA.25825.1 | 7.38  | 7.33  | 0.17 | 0.87 | 1.04  | 0.421892 | 0.483646 | 0.713215 | 0.688088 |
| MmugDNA.25826.1.S1_at   | MmugDNA.25826.1 | 3.56  | 3.65  | 0.44 | 0.04 | -1.07 | 0.569331 | 0.409005 | 0.79903  | 0.636073 |
| MmugDNA.25827.1.S1_s_at | MmugDNA.25827.1 | 7.28  | 8.6   | 0.17 | 0.27 | -2.51 | 0.002329 | 0.000557 | 0.161798 | 0.041049 |
| MmugDNA.25828.1.S1_at   | MmugDNA.25828.1 | 12.39 | 12.45 | 0.17 | 0.1  | -1.04 | 0.621055 | 0.812645 | 0.826318 | 0.891778 |
| MmugDNA.25829.1.S1_at   | MmugDNA.25829.1 | 3.38  | 3.38  | 0.1  | 0.05 | 1     | 0.962478 | 0.899677 | 0.985577 | 0.942903 |
| MmugDNA.25832.1.S1_at   | MmugDNA.25832.1 | 3.22  | 3.56  | 0.06 | 0.24 | -1.26 | 0.329067 | 0.440491 | 0.654811 | 0.658967 |
| MmugDNA.25834.1.S1_at   | MmugDNA.25834.1 | 3.2   | 3.28  | 0.47 | 0.3  | -1.06 | 0.962921 | 0.546105 | 0.985684 | 0.727769 |

|                         |                 |       |       |      |      |       |          |          |          |          |
|-------------------------|-----------------|-------|-------|------|------|-------|----------|----------|----------|----------|
| MmugDNA.25835.1.S1_at   | MmugDNA.25835.1 | 8.06  | 7.35  | 0.22 | 0.04 | 1.63  | 0.010397 | 0.007144 | 0.229439 | 0.113735 |
| MmugDNA.25836.1.S1_at   | MmugDNA.25836.1 | 9.76  | 9.27  | 0.21 | 0.15 | 1.4   | 0.073525 | 0.113348 | 0.418848 | 0.379441 |
| MmugDNA.25838.1.S1_at   | MmugDNA.25838.1 | 5.41  | 5.57  | 0.14 | 0.13 | -1.12 | 0.170445 | 0.234126 | 0.534249 | 0.505319 |
| MmugDNA.25839.1.S1_at   | MmugDNA.25839.1 | 10.24 | 9.94  | 0.27 | 0.14 | 1.23  | 0.113073 | 0.137456 | 0.475736 | 0.41037  |
| MmugDNA.2584.1.S1_at    | MmugDNA.2584.1  | 8.69  | 10.73 | 0.41 | 0.43 | -4.1  | 0.007355 | 0.001336 | 0.207312 | 0.056352 |
| MmugDNA.25840.1.S1_at   | MmugDNA.25840.1 | 9.8   | 9.27  | 0.36 | 0.3  | 1.45  | 0.052119 | 0.027117 | 0.376989 | 0.205797 |
| MmugDNA.25841.1.S1_at   | MmugDNA.25841.1 | 6.88  | 6.83  | 0.24 | 0.2  | 1.03  | 0.596346 | 0.750315 | 0.812857 | 0.854766 |
| MmugDNA.25842.1.S1_at   | MmugDNA.25842.1 | 8.27  | 8.13  | 0.33 | 0.66 | 1.1   | 0.940619 | 0.4313   | 0.97745  | 0.652249 |
| MmugDNA.25844.1.S1_at   | MmugDNA.25844.1 | 3.75  | 3.4   | 0.57 | 0.44 | 1.27  | 0.826885 | 0.607229 | 0.929656 | 0.766302 |
| MmugDNA.25847.1.S1_at   | MmugDNA.25847.1 | 6.89  | 6.44  | 0.25 | 0.3  | 1.37  | 0.162649 | 0.041705 | 0.526931 | 0.24887  |
| MmugDNA.25848.1.S1_at   | MmugDNA.25848.1 | 5.52  | 5.32  | 0.97 | 0.21 | 1.15  | 0.261663 | 0.37772  | 0.608304 | 0.615086 |
| MmugDNA.25849.1.S1_at   | MmugDNA.25849.1 | 10.8  | 10.86 | 0.14 | 0.09 | -1.04 | 0.878044 | 0.208853 | 0.951038 | 0.482717 |
| MmugDNA.2585.1.S1_at    | MmugDNA.2585.1  | 10.98 | 11.24 | 0.02 | 0.19 | -1.2  | 0.172899 | 0.2194   | 0.536559 | 0.493156 |
| MmugDNA.25850.1.S1_at   | MmugDNA.25850.1 | 12.33 | 12.24 | 0.11 | 0.13 | 1.06  | 0.359797 | 0.536438 | 0.673991 | 0.721763 |
| MmugDNA.25851.1.S1_at   | MmugDNA.25851.1 | 4.8   | 4.78  | 0.3  | 0.06 | 1.01  | 0.973368 | 0.628271 | 0.989597 | 0.781109 |
| MmugDNA.25852.1.S1_at   | MmugDNA.25852.1 | 5.47  | 5.46  | 0.36 | 0.25 | 1.01  | 0.55014  | 0.083182 | 0.787671 | 0.333113 |
| MmugDNA.25853.1.S1_at   | MmugDNA.25853.1 | 6.33  | 5.72  | 0.51 | 0.18 | 1.53  | 0.122342 | 0.164485 | 0.48746  | 0.440679 |
| MmugDNA.25854.1.S1_at   | MmugDNA.25854.1 | 5.22  | 5.18  | 0.46 | 0.16 | 1.03  | 0.307782 | 0.237729 | 0.640183 | 0.50826  |
| MmugDNA.25855.1.S1_at   | MmugDNA.25855.1 | 4.27  | 4.45  | 0.31 | 0.42 | -1.14 | 0.388319 | 0.138513 | 0.692426 | 0.411492 |
| MmugDNA.25856.1.S1_at   | MmugDNA.25856.1 | 2.78  | 2.72  | 0.07 | 0.28 | 1.04  | 0.565728 | 0.742746 | 0.797313 | 0.851023 |
| MmugDNA.25857.1.S1_at   | MmugDNA.25857.1 | 5.58  | 5.42  | 0.63 | 0.54 | 1.12  | 0.16202  | 0.254891 | 0.526638 | 0.523091 |
| MmugDNA.25858.1.S1_at   | MmugDNA.25858.1 | 5.14  | 5.31  | 0.18 | 0.24 | -1.13 | 0.309453 | 0.416749 | 0.641539 | 0.641698 |
| MmugDNA.25859.1.S1_at   | MmugDNA.25859.1 | 4.97  | 5.09  | 0.67 | 0.74 | -1.09 | 0.624371 | 0.616141 | 0.828251 | 0.772496 |
| MmugDNA.25860.1.S1_at   | MmugDNA.25860.1 | 3.66  | 3.66  | 0.02 | 0.09 | -1    | 0.611969 | 0.949463 | 0.821903 | 0.971102 |
| MmugDNA.25862.1.S1_at   | MmugDNA.25862.1 | 7.08  | 6.89  | 0.14 | 0.35 | 1.14  | 0.717001 | 0.782705 | 0.875711 | 0.874202 |
| MmugDNA.25863.1.S1_at   | MmugDNA.25863.1 | 8     | 6.46  | 0.17 | 0.54 | 2.92  | 0.010493 | 0.017839 | 0.229964 | 0.168707 |
| MmugDNA.25865.1.S1_at   | MmugDNA.25865.1 | 10.84 | 10.7  | 0.14 | 0.05 | 1.11  | 0.158685 | 0.179339 | 0.52378  | 0.455805 |
| MmugDNA.25866.1.S1_at   | MmugDNA.25866.1 | 5.74  | 5.72  | 0    | 0.21 | 1.01  | 0.461771 | 0.405756 | 0.737895 | 0.633949 |
| MmugDNA.25868.1.S1_at   | MmugDNA.25868.1 | 14.57 | 14.52 | 0.02 | 0.02 | 1.03  | 0.284315 | 0.371018 | 0.62413  | 0.609964 |
| MmugDNA.2587.1.S1_at    | MmugDNA.2587.1  | 6.64  | 6.92  | 0.06 | 0.05 | -1.21 | 0.002785 | 0.01585  | 0.166278 | 0.15969  |
| MmugDNA.25871.1.S1_at   | MmugDNA.25871.1 | 4.91  | 5.13  | 0.02 | 0.15 | -1.16 | 0.096757 | 0.067045 | 0.455737 | 0.304872 |
| MmugDNA.25872.1.S1_at   | MmugDNA.25872.1 | 7.86  | 7.62  | 0.14 | 0.56 | 1.18  | 0.699755 | 0.673872 | 0.867067 | 0.809483 |
| MmugDNA.25873.1.S1_x_at | MmugDNA.25873.1 | 3.63  | 3.7   | 0.08 | 0.12 | -1.05 | 0.399949 | 0.365542 | 0.699692 | 0.605602 |
| MmugDNA.25874.1.S1_at   | MmugDNA.25874.1 | 4.14  | 4.1   | 0.3  | 0.34 | 1.03  | 0.942779 | 0.809409 | 0.978214 | 0.890131 |
| MmugDNA.25875.1.S1_at   | MmugDNA.25875.1 | 8.18  | 8.49  | 0.65 | 0.78 | -1.24 | 0.318873 | 0.432175 | 0.648688 | 0.652775 |
| MmugDNA.25876.1.S1_at   | MmugDNA.25876.1 | 6.23  | 6.36  | 0.15 | 0.16 | -1.1  | 0.683459 | 0.181999 | 0.85844  | 0.458537 |
| MmugDNA.25877.1.S1_at   | MmugDNA.25877.1 | 6.76  | 5.88  | 0.39 | 0.16 | 1.83  | 0.057942 | 0.036263 | 0.38951  | 0.235    |
| MmugDNA.25878.1.S1_at   | MmugDNA.25878.1 | 5.09  | 5.18  | 0.1  | 0.07 | -1.06 | 0.952671 | 0.283518 | 0.982319 | 0.545959 |
| MmugDNA.25880.1.S1_at   | MmugDNA.25880.1 | 3.24  | 3.25  | 0.07 | 0    | -1.01 | 0.647084 | 0.596564 | 0.841216 | 0.759662 |
| MmugDNA.25882.1.S1_at   | MmugDNA.25882.1 | 8.34  | 8.62  | 0.43 | 1.08 | -1.22 | 0.77908  | 0.225028 | 0.907881 | 0.49773  |
| MmugDNA.25883.1.S1_at   | MmugDNA.25883.1 | 9.11  | 9.06  | 0.09 | 0.32 | 1.04  | 0.749163 | 0.451825 | 0.892627 | 0.66662  |



|                         |                 |       |       |      |      |       |          |          |          |          |
|-------------------------|-----------------|-------|-------|------|------|-------|----------|----------|----------|----------|
| MmugDNA.25885.1.S1_at   | MmugDNA.25885.1 | 4.49  | 4.63  | 0.44 | 0.79 | -1.11 | 0.716992 | 0.375587 | 0.875711 | 0.613533 |
| MmugDNA.25886.1.S1_at   | MmugDNA.25886.1 | 6.66  | 6.18  | 0.67 | 0.86 | 1.4   | 0.941899 | 0.945408 | 0.977821 | 0.968942 |
| MmugDNA.25889.1.S1_at   | MmugDNA.25889.1 | 2.93  | 3.02  | 0.18 | 0.05 | -1.07 | 0.469849 | 0.437192 | 0.741958 | 0.656591 |
| MmugDNA.25890.1.S1_at   | MmugDNA.25890.1 | 8.84  | 12.04 | 0.13 | 0.8  | -9.19 | 0.004043 | 0.00231  | 0.181739 | 0.070884 |
| MmugDNA.25891.1.S1_at   | MmugDNA.25891.1 | 5.14  | 5.32  | 0.07 | 0.13 | -1.14 | 0.210334 | 0.063803 | 0.57154  | 0.29906  |
| MmugDNA.25892.1.S1_at   | MmugDNA.25892.1 | 3.4   | 3.59  | 0.05 | 0.28 | -1.14 | 0.182841 | 0.281333 | 0.547133 | 0.544391 |
| MmugDNA.25893.1.S1_at   | MmugDNA.25893.1 | 4.6   | 4.49  | 0.09 | 0.04 | 1.08  | 0.099353 | 0.096906 | 0.459226 | 0.354311 |
| MmugDNA.25894.1.S1_at   | MmugDNA.25894.1 | 3.91  | 4.2   | 0.29 | 0.16 | -1.22 | 0.554194 | 0.522396 | 0.790667 | 0.713139 |
| MmugDNA.25895.1.S1_at   | MmugDNA.25895.1 | 4.09  | 4.21  | 0.1  | 0.15 | -1.08 | 0.369343 | 0.404459 | 0.680609 | 0.632988 |
| MmugDNA.25898.1.S1_at   | MmugDNA.25898.1 | 4.05  | 3.93  | 0.13 | 0.14 | 1.08  | 0.297497 | 0.500481 | 0.633292 | 0.69907  |
| MmugDNA.25899.1.S1_at   | MmugDNA.25899.1 | 7     | 6.37  | 0.2  | 0.25 | 1.54  | 0.060496 | 0.05309  | 0.393715 | 0.276139 |
| MmugDNA.259.1.S1_at     | MmugDNA.259.1   | 3.62  | 2.92  | 0.37 | 0.09 | 1.61  | 0.089812 | 0.058703 | 0.445351 | 0.288956 |
| MmugDNA.2590.1.S1_at    | MmugDNA.2590.1  | 8.79  | 8.56  | 0.09 | 0.27 | 1.17  | 0.104164 | 0.085566 | 0.464201 | 0.337567 |
| MmugDNA.25901.1.S1_s_at | MmugDNA.25901.1 | 8.44  | 7.77  | 0.9  | 0.57 | 1.59  | 0.301421 | 0.128024 | 0.636366 | 0.398986 |
| MmugDNA.25902.1.S1_at   | MmugDNA.25902.1 | 10.08 | 9.24  | 0.23 | 0.15 | 1.79  | 0.010727 | 0.003165 | 0.23109  | 0.081793 |
| MmugDNA.25904.1.S1_at   | MmugDNA.25904.1 | 6.58  | 6.1   | 0.43 | 0.89 | 1.39  | 0.69515  | 0.421195 | 0.864809 | 0.644807 |
| MmugDNA.25905.1.S1_at   | MmugDNA.25905.1 | 9.7   | 10.08 | 0.45 | 0.09 | -1.3  | 0.239839 | 0.231699 | 0.592786 | 0.503526 |
| MmugDNA.12980.1.S1_s_at | MmugDNA.12980.1 | 14.51 | 14.47 | 0.04 | 0.06 | 1.03  | 0.164953 | 0.2045   | 0.528821 | 0.478845 |
| MmugDNA.12980.1.S1_x_at | MmugDNA.12980.1 | 13.62 | 13.63 | 0.25 | 0.13 | -1    | 0.923163 | 0.93028  | 0.970143 | 0.960382 |
| MmugDNA.25907.1.S1_at   | MmugDNA.25907.1 | 7.66  | 7.1   | 0.22 | 0.11 | 1.47  | 0.029237 | 0.017157 | 0.313575 | 0.16594  |
| MmugDNA.25908.1.S1_at   | MmugDNA.25908.1 | 14.13 | 14.14 | 0.11 | 0.08 | -1    | 0.891713 | 0.988579 | 0.956867 | 0.993572 |
| MmugDNA.25909.1.S1_at   | MmugDNA.25909.1 | 6.35  | 6.48  | 0.09 | 0.02 | -1.1  | 0.026636 | 0.049157 | 0.303736 | 0.266534 |
| MmugDNA.25910.1.S1_at   | MmugDNA.25910.1 | 2.87  | 2.86  | 0.49 | 0.06 | 1.01  | 0.346334 | 0.548555 | 0.66578  | 0.729268 |
| MmugDNA.25911.1.S1_at   | MmugDNA.25911.1 | 8.79  | 8.42  | 0.39 | 0.37 | 1.29  | 0.285578 | 0.181017 | 0.625066 | 0.457529 |
| MmugDNA.25912.1.S1_at   | MmugDNA.25912.1 | 6.61  | 6.77  | 0.31 | 0.91 | -1.12 | 0.413848 | 0.447238 | 0.708694 | 0.663409 |
| MmugDNA.25913.1.S1_at   | MmugDNA.25913.1 | 4.65  | 4.72  | 0.06 | 0.1  | -1.05 | 0.234673 | 0.314344 | 0.588808 | 0.568273 |
| MmugDNA.25914.1.S1_at   | MmugDNA.25914.1 | 10.45 | 10.25 | 0.43 | 0.52 | 1.15  | 0.229276 | 0.319036 | 0.586472 | 0.571591 |
| MmugDNA.25915.1.S1_at   | MmugDNA.25915.1 | 3.61  | 3.45  | 0.3  | 0.08 | 1.12  | 0.165605 | 0.122957 | 0.529657 | 0.392923 |
| MmugDNA.25916.1.S1_at   | MmugDNA.25916.1 | 6.97  | 9.86  | 0.72 | 0.25 | -7.39 | 0.003736 | 0.00153  | 0.179914 | 0.059426 |
| MmugDNA.25917.1.S1_at   | MmugDNA.25917.1 | 6.89  | 6.92  | 0.08 | 0.08 | -1.02 | 0.607183 | 0.474518 | 0.819255 | 0.681511 |
| MmugDNA.25918.1.S1_at   | MmugDNA.25918.1 | 3.54  | 3.54  | 0.23 | 0.02 | 1     | 0.347658 | 0.368096 | 0.666603 | 0.607669 |
| MmugDNA.25919.1.S1_at   | MmugDNA.25919.1 | 3.3   | 3.35  | 0.37 | 0.12 | -1.04 | 0.704664 | 0.654395 | 0.869745 | 0.798021 |
| MmugDNA.25920.1.S1_at   | MmugDNA.25920.1 | 3.33  | 3.49  | 0.13 | 0.18 | -1.11 | 0.696645 | 0.222462 | 0.865384 | 0.495518 |
| MmugDNA.25922.1.S1_at   | MmugDNA.25922.1 | 3.78  | 3.78  | 0.07 | 0.17 | 1     | 0.767315 | 0.312747 | 0.902227 | 0.567299 |
| MmugDNA.25926.1.S1_at   | MmugDNA.25926.1 | 5.95  | 5.74  | 0.23 | 0.11 | 1.16  | 0.682756 | 0.858699 | 0.858092 | 0.919548 |
| MmugDNA.25928.1.S1_at   | MmugDNA.25928.1 | 3.38  | 3.48  | 0.05 | 0.25 | -1.07 | 0.346732 | 0.197279 | 0.666013 | 0.472213 |
| MmugDNA.2593.1.S1_at    | MmugDNA.2593.1  | 5.74  | 6.17  | 0.4  | 0.98 | -1.34 | 0.141259 | 0.163681 | 0.508853 | 0.439841 |
| MmugDNA.25930.1.S1_at   | MmugDNA.25930.1 | 5.23  | 4.91  | 0.36 | 0.25 | 1.25  | 0.250934 | 0.211859 | 0.600488 | 0.485854 |
| MmugDNA.25930.1.S1_s_at | MmugDNA.25930.1 | 5.04  | 4.84  | 1    | 0.58 | 1.15  | 0.356132 | 0.522447 | 0.671384 | 0.713139 |
| MmugDNA.25932.1.S1_at   | MmugDNA.25932.1 | 5.7   | 5.69  | 0.07 | 0.13 | 1.01  | 0.781709 | 0.550307 | 0.908921 | 0.730382 |
| MmugDNA.25933.1.S1_at   | MmugDNA.25933.1 | 4.48  | 4.57  | 0.19 | 0.04 | -1.06 | 0.966629 | 0.905624 | 0.987399 | 0.946574 |

|                         |                 |       |       |      |      |       |          |          |          |          |
|-------------------------|-----------------|-------|-------|------|------|-------|----------|----------|----------|----------|
| MmugDNA.25934.1.S1_at   | MmugDNA.25934.1 | 5.79  | 5.93  | 0.2  | 0.11 | -1.1  | 0.176514 | 0.211549 | 0.540136 | 0.485658 |
| MmugDNA.25935.1.S1_at   | MmugDNA.25935.1 | 6.47  | 7.25  | 0.23 | 0.15 | -1.72 | 0.004666 | 0.003524 | 0.1844   | 0.085139 |
| MmugDNA.25937.1.S1_at   | MmugDNA.25937.1 | 6.3   | 6.52  | 0.16 | 0.69 | -1.17 | 0.305551 | 0.418313 | 0.639223 | 0.642707 |
| MmugDNA.25938.1.S1_at   | MmugDNA.25938.1 | 3.16  | 3.42  | 0.46 | 0.13 | -1.19 | 0.970694 | 0.464988 | 0.988685 | 0.675534 |
| MmugDNA.25939.1.S1_s_at | MmugDNA.25939.1 | 11.69 | 11.49 | 0.24 | 0.14 | 1.15  | 0.61446  | 0.280348 | 0.823199 | 0.543556 |
| MmugDNA.2594.1.S1_at    | MmugDNA.2594.1  | 6.17  | 6.22  | 0.33 | 0.02 | -1.03 | 0.466016 | 0.51841  | 0.740195 | 0.71038  |
| MmugDNA.25940.1.S1_at   | MmugDNA.25940.1 | 3.48  | 3.48  | 0.17 | 0.05 | 1     | 0.368515 | 0.30213  | 0.67994  | 0.560071 |
| MmugDNA.25942.1.S1_at   | MmugDNA.25942.1 | 6.38  | 6.23  | 0.3  | 0.38 | 1.11  | 0.652679 | 0.626074 | 0.843828 | 0.779551 |
| MmugDNA.25944.1.S1_at   | MmugDNA.25944.1 | 3.45  | 3.39  | 0.06 | 0.29 | 1.05  | 0.736209 | 0.894778 | 0.886493 | 0.939961 |
| MmugDNA.25945.1.S1_at   | MmugDNA.25945.1 | 6.72  | 6.68  | 0.06 | 0.05 | 1.03  | 0.185125 | 0.133618 | 0.548609 | 0.405565 |
| MmugDNA.25947.1.S1_at   | MmugDNA.25947.1 | 5.9   | 5.88  | 0.07 | 0.11 | 1.01  | 0.678447 | 0.860544 | 0.856021 | 0.920569 |
| MmugDNA.25948.1.S1_at   | MmugDNA.25948.1 | 4.7   | 4.75  | 0.07 | 0.11 | -1.04 | 0.515573 | 0.310279 | 0.767629 | 0.565461 |
| MmugDNA.25949.1.S1_at   | MmugDNA.25949.1 | 3.66  | 3.77  | 0.19 | 0.06 | -1.08 | 0.996892 | 0.122759 | 0.998744 | 0.39274  |
| MmugDNA.2595.1.S1_at    | MmugDNA.2595.1  | 7.53  | 7.4   | 0.27 | 0.15 | 1.09  | 0.495639 | 0.086083 | 0.757268 | 0.33835  |
| MmugDNA.25952.1.S1_at   | MmugDNA.25952.1 | 4.66  | 4.77  | 0.05 | 0.18 | -1.08 | 0.432603 | 0.188526 | 0.719146 | 0.464458 |
| MmugDNA.25953.1.S1_at   | MmugDNA.25953.1 | 7.26  | 6.09  | 0.58 | 0.54 | 2.24  | 0.068353 | 0.062777 | 0.410012 | 0.297193 |
| MmugDNA.25956.1.S1_at   | MmugDNA.25956.1 | 3.9   | 4.22  | 0.07 | 0.11 | -1.26 | 0.031141 | 0.109069 | 0.32069  | 0.372869 |
| MmugDNA.25957.1.S1_at   | MmugDNA.25957.1 | 6.57  | 5.8   | 0.09 | 0.66 | 1.71  | 0.117184 | 0.094093 | 0.481176 | 0.350744 |
| MmugDNA.25959.1.S1_at   | MmugDNA.25959.1 | 3.51  | 3.34  | 0.12 | 0.11 | 1.12  | 0.147977 | 0.305791 | 0.513442 | 0.562731 |
| MmugDNA.2596.1.S1_at    | MmugDNA.2596.1  | 4.15  | 4.26  | 0.09 | 0.12 | -1.09 | 0.118011 | 0.132349 | 0.482083 | 0.404294 |
| MmugDNA.25960.1.S1_at   | MmugDNA.25960.1 | 11.76 | 11.44 | 0.07 | 0.23 | 1.25  | 0.179894 | 0.162415 | 0.544019 | 0.438575 |
| MmugDNA.25961.1.S1_at   | MmugDNA.25961.1 | 6.97  | 6.68  | 0.3  | 0.44 | 1.22  | 0.106256 | 0.171588 | 0.466831 | 0.448017 |
| MmugDNA.25962.1.S1_at   | MmugDNA.25962.1 | 3.36  | 3.32  | 0.03 | 0.08 | 1.03  | 0.187268 | 0.491877 | 0.550364 | 0.693275 |
| MmugDNA.25965.1.S1_at   | MmugDNA.25965.1 | 11.25 | 11.29 | 0.09 | 0.13 | -1.03 | 0.621844 | 0.653988 | 0.827054 | 0.797755 |
| MmugDNA.25966.1.S1_at   | MmugDNA.25966.1 | 11.4  | 11.36 | 0.13 | 0.24 | 1.03  | 0.713671 | 0.770502 | 0.874533 | 0.866725 |
| MmugDNA.3279.1.S1_at    | MmugDNA.3279.1  | 10.93 | 11    | 0.08 | 0.24 | -1.05 | 0.979032 | 0.547098 | 0.992315 | 0.728283 |
| MmugDNA.3279.1.S1_s_at  | MmugDNA.3279.1  | 9.74  | 9.79  | 0.01 | 0.31 | -1.03 | 0.850764 | 0.479741 | 0.940047 | 0.685409 |
| MmugDNA.25967.1.S1_at   | MmugDNA.25967.1 | 3.47  | 3.76  | 0.28 | 0.2  | -1.22 | 0.573307 | 0.04111  | 0.801138 | 0.247611 |
| MmugDNA.25968.1.S1_at   | MmugDNA.25968.1 | 6     | 5.89  | 0.73 | 0.28 | 1.08  | 0.834052 | 0.808908 | 0.932555 | 0.889962 |
| MmugDNA.2597.1.S1_at    | MmugDNA.2597.1  | 3.25  | 3.27  | 0.02 | 0.12 | -1.01 | 0.632714 | 0.801806 | 0.833252 | 0.885933 |
| MmugDNA.25971.1.S1_at   | MmugDNA.25971.1 | 14.21 | 14.34 | 0.04 | 0.05 | -1.1  | 0.037281 | 0.022004 | 0.341194 | 0.18564  |
| MmugDNA.24445.1.S1_s_at | MmugDNA.24445.1 | 14.47 | 14.47 | 0.04 | 0.01 | -1    | 0.327852 | 0.400196 | 0.654144 | 0.630158 |
| MmugDNA.25972.1.S1_at   | MmugDNA.25972.1 | 7.34  | 7.12  | 0.11 | 0.22 | 1.16  | 0.15473  | 0.00073  | 0.519305 | 0.044701 |
| MmugDNA.25974.1.S1_at   | MmugDNA.25974.1 | 4.34  | 4.59  | 0.14 | 0.18 | -1.19 | 0.286686 | 0.413864 | 0.625572 | 0.639865 |
| MmugDNA.25975.1.S1_at   | MmugDNA.25975.1 | 8.06  | 7.89  | 0.11 | 0.55 | 1.12  | 0.895405 | 0.961268 | 0.958114 | 0.978105 |
| MmugDNA.25976.1.S1_at   | MmugDNA.25976.1 | 3.86  | 3.83  | 0.17 | 0.07 | 1.02  | 0.804025 | 0.920347 | 0.919371 | 0.95511  |
| MmugDNA.28095.1.S1_s_at | MmugDNA.28095.1 | 13.9  | 13.93 | 0.06 | 0.06 | -1.01 | 0.533913 | 0.368404 | 0.778436 | 0.607932 |
| MmugDNA.25979.1.S1_at   | MmugDNA.25979.1 | 3.56  | 3.49  | 0.08 | 0.06 | 1.05  | 0.482112 | 0.829846 | 0.749398 | 0.902225 |
| MmugDNA.2598.1.S1_at    | MmugDNA.2598.1  | 5.8   | 5.93  | 0.07 | 0.11 | -1.09 | 0.202882 | 0.072166 | 0.565506 | 0.314694 |
| MmugDNA.25980.1.S1_at   | MmugDNA.25980.1 | 6.86  | 7.07  | 0.35 | 0.28 | -1.16 | 0.232149 | 0.295651 | 0.587814 | 0.555108 |
| MmugDNA.25981.1.S1_at   | MmugDNA.25981.1 | 12.75 | 12.47 | 0.06 | 0.08 | 1.21  | 0.014596 | 0.006962 | 0.254235 | 0.112719 |

|                       |                 |       |       |      |      |       |          |          |          |          |
|-----------------------|-----------------|-------|-------|------|------|-------|----------|----------|----------|----------|
| MmugDNA.25982.1.S1_at | MmugDNA.25982.1 | 6.86  | 6.94  | 0.12 | 0.26 | -1.06 | 0.628635 | 0.262151 | 0.830903 | 0.528414 |
| MmugDNA.25983.1.S1_at | MmugDNA.25983.1 | 3.51  | 4.21  | 0.09 | 0.37 | -1.62 | 0.07148  | 0.051232 | 0.415479 | 0.271799 |
| MmugDNA.25984.1.S1_at | MmugDNA.25984.1 | 3.55  | 3.39  | 0.19 | 0.01 | 1.12  | 0.070584 | 0.182301 | 0.414439 | 0.458768 |
| MmugDNA.25987.1.S1_at | MmugDNA.25987.1 | 8.47  | 8.87  | 0.17 | 0.24 | -1.32 | 0.039281 | 0.124196 | 0.346898 | 0.394496 |
| MmugDNA.25988.1.S1_at | MmugDNA.25988.1 | 6.3   | 6.49  | 0.3  | 0.9  | -1.13 | 0.953352 | 0.232882 | 0.982703 | 0.50445  |
| MmugDNA.25989.1.S1_at | MmugDNA.25989.1 | 9.1   | 8.74  | 0.29 | 0.37 | 1.28  | 0.37186  | 0.243996 | 0.682547 | 0.514069 |
| MmugDNA.2599.1.S1_at  | MmugDNA.2599.1  | 6.7   | 6.77  | 0.2  | 0.17 | -1.05 | 0.147366 | 0.185228 | 0.513141 | 0.461174 |
| MmugDNA.25990.1.S1_at | MmugDNA.25990.1 | 9.46  | 9.05  | 0.2  | 0.23 | 1.33  | 0.075119 | 0.070833 | 0.421924 | 0.31231  |
| MmugDNA.25991.1.S1_at | MmugDNA.25991.1 | 6.88  | 6.44  | 0.39 | 0.3  | 1.35  | 0.166108 | 0.115503 | 0.529918 | 0.38267  |
| MmugDNA.25992.1.S1_at | MmugDNA.25992.1 | 6.22  | 6.16  | 0.27 | 0.61 | 1.04  | 0.315166 | 0.446649 | 0.646362 | 0.66287  |
| MmugDNA.25994.1.S1_at | MmugDNA.25994.1 | 11.52 | 11.08 | 0.24 | 0.44 | 1.36  | 0.226286 | 0.228245 | 0.58434  | 0.500443 |
| MmugDNA.25995.1.S1_at | MmugDNA.25995.1 | 5.21  | 4.48  | 0.67 | 0.17 | 1.67  | 0.243389 | 0.485185 | 0.595159 | 0.688969 |
| MmugDNA.25996.1.S1_at | MmugDNA.25996.1 | 6.34  | 6.23  | 0.1  | 0.04 | 1.08  | 0.243792 | 0.085233 | 0.595593 | 0.337096 |
| MmugDNA.25997.1.S1_at | MmugDNA.25997.1 | 5.18  | 5.15  | 0.55 | 0.33 | 1.02  | 0.411641 | 0.400858 | 0.70748  | 0.630658 |
| MmugDNA.25998.1.S1_at | MmugDNA.25998.1 | 4.96  | 5.45  | 0.22 | 0.12 | -1.4  | 0.046557 | 0.048457 | 0.363306 | 0.265349 |
| MmugDNA.25999.1.S1_at | MmugDNA.25999.1 | 12.88 | 12.33 | 0.12 | 0.06 | 1.47  | 0.002428 | 0.001821 | 0.163555 | 0.063997 |
| MmugDNA.26.1.S1_at    | MmugDNA.26.1    | 4.08  | 4.51  | 1.05 | 0.41 | -1.35 | 0.793046 | 0.560384 | 0.914172 | 0.736645 |
| MmugDNA.260.1.S1_at   | MmugDNA.260.1   | 5.43  | 5.55  | 0.34 | 0.82 | -1.09 | 0.985461 | 0.907024 | 0.99475  | 0.947344 |
| MmugDNA.26000.1.S1_at | MmugDNA.26000.1 | 6.43  | 6.68  | 0.15 | 0.14 | -1.18 | 0.250774 | 0.055222 | 0.600389 | 0.280676 |
| MmugDNA.26001.1.S1_at | MmugDNA.26001.1 | 4.21  | 4.15  | 0.02 | 0.13 | 1.04  | 0.450277 | 0.546697 | 0.730899 | 0.728135 |
| MmugDNA.26002.1.S1_at | MmugDNA.26002.1 | 5.78  | 5.95  | 0.15 | 0.38 | -1.13 | 0.828169 | 0.932825 | 0.930243 | 0.961845 |
| MmugDNA.26003.1.S1_at | MmugDNA.26003.1 | 4.11  | 4.07  | 0.17 | 0.13 | 1.03  | 0.983465 | 0.85712  | 0.994052 | 0.918374 |
| MmugDNA.26004.1.S1_at | MmugDNA.26004.1 | 4.46  | 4.65  | 0.62 | 0.45 | -1.14 | 0.945843 | 0.312242 | 0.979337 | 0.566963 |
| MmugDNA.26006.1.S1_at | MmugDNA.26006.1 | 7.52  | 7.3   | 0.19 | 0.36 | 1.16  | 0.085003 | 0.006811 | 0.438076 | 0.111444 |
| MmugDNA.26007.1.S1_at | MmugDNA.26007.1 | 9.35  | 9.39  | 0.59 | 0.68 | -1.03 | 0.555998 | 0.291805 | 0.791585 | 0.552063 |
| MmugDNA.26008.1.S1_at | MmugDNA.26008.1 | 12.15 | 12.4  | 0.3  | 0.59 | -1.19 | 0.53422  | 0.548311 | 0.77862  | 0.729053 |
| MmugDNA.26009.1.S1_at | MmugDNA.26009.1 | 8.88  | 8.84  | 0.41 | 0.62 | 1.03  | 0.415085 | 0.348868 | 0.709338 | 0.592917 |
| MmugDNA.2601.1.S1_at  | MmugDNA.2601.1  | 8.68  | 8.69  | 0.17 | 0.1  | -1.01 | 0.874665 | 0.872664 | 0.949743 | 0.927592 |
| MmugDNA.26010.1.S1_at | MmugDNA.26010.1 | 7.26  | 6.57  | 0.04 | 0.66 | 1.61  | 0.117744 | 0.041176 | 0.481889 | 0.247733 |
| MmugDNA.26011.1.S1_at | MmugDNA.26011.1 | 5.78  | 5.59  | 0.27 | 0.14 | 1.14  | 0.71361  | 0.565016 | 0.874503 | 0.739639 |
| MmugDNA.26012.1.S1_at | MmugDNA.26012.1 | 5.72  | 6.25  | 0.39 | 1.08 | -1.45 | 0.46576  | 0.355505 | 0.740123 | 0.597777 |
| MmugDNA.26013.1.S1_at | MmugDNA.26013.1 | 3.99  | 4.15  | 0    | 0.19 | -1.11 | 0.668955 | 0.598768 | 0.851986 | 0.761123 |
| MmugDNA.26014.1.S1_at | MmugDNA.26014.1 | 6.89  | 6.97  | 0.13 | 0.08 | -1.06 | 0.674225 | 0.657337 | 0.853988 | 0.799643 |
| MmugDNA.26016.1.S1_at | MmugDNA.26016.1 | 5.07  | 5.25  | 0.19 | 0.04 | -1.14 | 0.217177 | 0.286603 | 0.576831 | 0.548065 |
| MmugDNA.26017.1.S1_at | MmugDNA.26017.1 | 10.42 | 10.7  | 0.38 | 0.22 | -1.21 | 0.498088 | 0.537088 | 0.758234 | 0.722271 |
| MmugDNA.26018.1.S1_at | MmugDNA.26018.1 | 5.67  | 6.14  | 0.07 | 0.22 | -1.38 | 0.039159 | 0.035658 | 0.346585 | 0.233228 |
| MmugDNA.26019.1.S1_at | MmugDNA.26019.1 | 6.37  | 6.31  | 0.09 | 0.42 | 1.04  | 0.544549 | 0.080963 | 0.784445 | 0.32901  |
| MmugDNA.2602.1.S1_at  | MmugDNA.2602.1  | 5.72  | 5.34  | 0.23 | 0.15 | 1.3   | 0.131679 | 0.17744  | 0.498041 | 0.453773 |
| MmugDNA.26020.1.S1_at | MmugDNA.26020.1 | 7.59  | 6.59  | 0.36 | 0.14 | 2     | 0.011086 | 0.00422  | 0.23396  | 0.091392 |
| MmugDNA.26021.1.S1_at | MmugDNA.26021.1 | 4.14  | 4.15  | 0.13 | 0.09 | -1.01 | 0.470982 | 0.660666 | 0.742816 | 0.801499 |
| MmugDNA.26023.1.S1_at | MmugDNA.26023.1 | 5.37  | 7.37  | 0.74 | 1.77 | -3.99 | 0.206454 | 0.246585 | 0.56878  | 0.515917 |

|                         |                 |       |       |      |      |       |          |          |          |          |
|-------------------------|-----------------|-------|-------|------|------|-------|----------|----------|----------|----------|
| MmugDNA.26024.1.S1_at   | MmugDNA.26024.1 | 5.29  | 5.68  | 0.12 | 0.12 | -1.31 | 0.029436 | 0.216097 | 0.31418  | 0.489686 |
| MmugDNA.26025.1.S1_at   | MmugDNA.26025.1 | 7.12  | 7.2   | 0.1  | 0.48 | -1.05 | 0.78581  | 0.948387 | 0.910907 | 0.970565 |
| MmugDNA.26026.1.S1_at   | MmugDNA.26026.1 | 4.4   | 4.43  | 0.28 | 0.05 | -1.02 | 0.477085 | 0.139319 | 0.746452 | 0.412518 |
| MmugDNA.26027.1.S1_at   | MmugDNA.26027.1 | 11    | 11.04 | 0.14 | 0.83 | -1.03 | 0.42288  | 0.561676 | 0.713754 | 0.73751  |
| MmugDNA.26029.1.S1_at   | MmugDNA.26029.1 | 4.51  | 5.29  | 0.13 | 0.11 | -1.72 | 0.002204 | 0.000702 | 0.159615 | 0.04424  |
| MmugDNA.2603.1.S1_at    | MmugDNA.2603.1  | 3.3   | 3.44  | 0.11 | 0.1  | -1.1  | 0.092107 | 0.111852 | 0.448698 | 0.376915 |
| MmugDNA.26030.1.S1_at   | MmugDNA.26030.1 | 11.74 | 11.27 | 0.23 | 0.27 | 1.38  | 0.082333 | 0.089794 | 0.433725 | 0.34404  |
| MmugDNA.26031.1.S1_at   | MmugDNA.26031.1 | 4.68  | 4.76  | 0.2  | 0.19 | -1.06 | 0.93273  | 0.984765 | 0.973957 | 0.991423 |
| MmugDNA.26032.1.S1_at   | MmugDNA.26032.1 | 5.19  | 5.29  | 0.22 | 0.07 | -1.07 | 0.488431 | 0.508837 | 0.752978 | 0.703867 |
| MmugDNA.26033.1.S1_at   | MmugDNA.26033.1 | 10.94 | 10.34 | 0.18 | 0.31 | 1.51  | 0.026892 | 0.004586 | 0.305076 | 0.094513 |
| MmugDNA.26034.1.S1_at   | MmugDNA.26034.1 | 6.53  | 6.72  | 0.12 | 0.12 | -1.14 | 0.084711 | 0.07622  | 0.437545 | 0.321127 |
| MmugDNA.26035.1.S1_at   | MmugDNA.26035.1 | 4.43  | 4.24  | 0.87 | 0.47 | 1.14  | 0.337996 | 0.470661 | 0.660478 | 0.67895  |
| MmugDNA.26036.1.S1_at   | MmugDNA.26036.1 | 6.05  | 5.88  | 0.25 | 0.13 | 1.12  | 0.273907 | 0.02935  | 0.617262 | 0.213228 |
| MmugDNA.26037.1.S1_at   | MmugDNA.26037.1 | 5.21  | 4.98  | 0.39 | 0.06 | 1.17  | 0.524774 | 0.472261 | 0.77328  | 0.679922 |
| MmugDNA.26038.1.S1_at   | MmugDNA.26038.1 | 3.65  | 3.67  | 0.12 | 0.26 | -1.01 | 0.630895 | 0.721548 | 0.832393 | 0.838748 |
| MmugDNA.26039.1.S1_at   | MmugDNA.26039.1 | 5.85  | 6.06  | 0.06 | 0.17 | -1.16 | 0.387331 | 0.173576 | 0.691929 | 0.449956 |
| MmugDNA.2604.1.S1_at    | MmugDNA.2604.1  | 5.36  | 4.68  | 0.54 | 0.14 | 1.61  | 0.071145 | 0.075777 | 0.414673 | 0.320348 |
| MmugDNA.26040.1.S1_at   | MmugDNA.26040.1 | 6.97  | 6.92  | 0.28 | 0.35 | 1.03  | 0.406345 | 0.55803  | 0.703645 | 0.735346 |
| MmugDNA.26041.1.S1_at   | MmugDNA.26041.1 | 6     | 5.7   | 0.46 | 0.36 | 1.23  | 0.704003 | 0.536297 | 0.869397 | 0.721629 |
| MmugDNA.26042.1.S1_at   | MmugDNA.26042.1 | 6.71  | 6.69  | 0.14 | 0.24 | 1.01  | 0.870931 | 0.947137 | 0.948399 | 0.97002  |
| MmugDNA.26043.1.S1_at   | MmugDNA.26043.1 | 5.02  | 5.05  | 0.37 | 0.03 | -1.02 | 0.475417 | 0.770894 | 0.745766 | 0.866807 |
| MmugDNA.26046.1.S1_at   | MmugDNA.26046.1 | 4.63  | 4.46  | 0.31 | 0.17 | 1.12  | 0.199937 | 0.12459  | 0.562997 | 0.394995 |
| MmugDNA.26047.1.S1_at   | MmugDNA.26047.1 | 5.8   | 5.74  | 0.15 | 0.08 | 1.04  | 0.794158 | 0.634113 | 0.914561 | 0.784644 |
| MmugDNA.26048.1.S1_at   | MmugDNA.26048.1 | 3.05  | 3     | 0.01 | 0.2  | 1.03  | 0.720426 | 0.7255   | 0.87753  | 0.841043 |
| MmugDNA.26049.1.S1_at   | MmugDNA.26049.1 | 10.04 | 9.77  | 0.31 | 0.55 | 1.2   | 0.177588 | 0.204527 | 0.541714 | 0.478866 |
| MmugDNA.26050.1.S1_at   | MmugDNA.26050.1 | 5.29  | 5.55  | 0.17 | 0.29 | -1.2  | 0.659233 | 0.570568 | 0.847039 | 0.743175 |
| MmugDNA.26050.1.S1_s_at | MmugDNA.26050.1 | 5.63  | 5.83  | 0.12 | 0.33 | -1.15 | 0.318503 | 0.459695 | 0.648499 | 0.671948 |
| MmugDNA.26051.1.S1_at   | MmugDNA.26051.1 | 3.07  | 2.91  | 0.17 | 0.12 | 1.12  | 0.259918 | 0.227982 | 0.606878 | 0.500211 |
| MmugDNA.26052.1.S1_at   | MmugDNA.26052.1 | 6.22  | 6.34  | 0.06 | 0.13 | -1.09 | 0.143042 | 0.170639 | 0.509977 | 0.447219 |
| MmugDNA.26053.1.S1_at   | MmugDNA.26053.1 | 6.31  | 6.29  | 0.21 | 0.24 | 1.02  | 0.82672  | 0.878891 | 0.9296   | 0.930872 |
| MmugDNA.26054.1.S1_at   | MmugDNA.26054.1 | 6.16  | 6.37  | 0.05 | 0.04 | -1.16 | 0.004746 | 0.003907 | 0.184674 | 0.088806 |
| MmugDNA.26055.1.S1_at   | MmugDNA.26055.1 | 6.06  | 5.63  | 0.16 | 0.47 | 1.35  | 0.217272 | 0.346379 | 0.576846 | 0.59124  |
| MmugDNA.26056.1.S1_at   | MmugDNA.26056.1 | 5.34  | 5.5   | 0.07 | 0.14 | -1.12 | 0.074097 | 0.083276 | 0.419667 | 0.333372 |
| MmugDNA.26057.1.S1_at   | MmugDNA.26057.1 | 5.57  | 5.51  | 0.18 | 0.45 | 1.04  | 0.717813 | 0.680657 | 0.876127 | 0.813542 |
| MmugDNA.26058.1.S1_at   | MmugDNA.26058.1 | 3.82  | 3.79  | 0.27 | 0.66 | 1.02  | 0.459187 | 0.687503 | 0.735961 | 0.817606 |
| MmugDNA.26059.1.S1_at   | MmugDNA.26059.1 | 7.63  | 9.48  | 0.39 | 0.18 | -3.61 | 0.002432 | 0.002214 | 0.163555 | 0.069424 |
| MmugDNA.2606.1.S1_x_at  | MmugDNA.2606.1  | 3.02  | 3.05  | 0.15 | 0.15 | -1.02 | 0.81719  | 0.948841 | 0.9259   | 0.97077  |
| MmugDNA.26060.1.S1_at   | MmugDNA.26060.1 | 5.23  | 5.16  | 0.23 | 0.08 | 1.05  | 0.311883 | 0.34641  | 0.643771 | 0.591247 |
| MmugDNA.26061.1.S1_at   | MmugDNA.26061.1 | 5.69  | 7.55  | 0.34 | 1.35 | -3.62 | 0.118668 | 0.116038 | 0.48294  | 0.383257 |
| MmugDNA.26062.1.S1_at   | MmugDNA.26062.1 | 4.91  | 4.91  | 0.01 | 0.05 | 1     | 0.427477 | 0.230779 | 0.716255 | 0.502452 |
| MmugDNA.26063.1.S1_at   | MmugDNA.26063.1 | 3.79  | 3.97  | 0.05 | 0.04 | -1.14 | 0.01824  | 0.094038 | 0.269591 | 0.350662 |

|                         |                 |       |       |      |      |       |          |          |          |          |
|-------------------------|-----------------|-------|-------|------|------|-------|----------|----------|----------|----------|
| MmugDNA.26064.1.S1_at   | MmugDNA.26064.1 | 3.21  | 3.15  | 0.54 | 0.08 | 1.04  | 0.298161 | 0.421016 | 0.633823 | 0.644663 |
| MmugDNA.41422.1.S1_s_at | MmugDNA.41422.1 | 6.1   | 6.66  | 0.37 | 0.7  | -1.47 | 0.301142 | 0.365633 | 0.636252 | 0.605647 |
| MmugDNA.26066.1.S1_at   | MmugDNA.26066.1 | 6.86  | 6.22  | 1.47 | 1.03 | 1.55  | 0.116481 | 0.015909 | 0.48032  | 0.160062 |
| MmugDNA.26067.1.S1_at   | MmugDNA.26067.1 | 5.42  | 5.45  | 0.12 | 0.3  | -1.02 | 0.783142 | 0.319284 | 0.909454 | 0.571722 |
| MmugDNA.26068.1.S1_at   | MmugDNA.26068.1 | 3.22  | 3.37  | 0.24 | 0.07 | -1.1  | 0.970309 | 0.722571 | 0.988617 | 0.839293 |
| MmugDNA.26070.1.S1_at   | MmugDNA.26070.1 | 7.82  | 8.11  | 0.26 | 0.95 | -1.22 | 0.385203 | 0.538934 | 0.690372 | 0.72339  |
| MmugDNA.26071.1.S1_s_at | MmugDNA.26071.1 | 8.06  | 7.82  | 0.31 | 0.28 | 1.18  | 0.410693 | 0.166916 | 0.706555 | 0.443394 |
| MmugDNA.26073.1.S1_at   | MmugDNA.26073.1 | 6.89  | 5.79  | 0.33 | 0.08 | 2.14  | 0.004201 | 0.003031 | 0.181739 | 0.080386 |
| MmugDNA.26074.1.S1_at   | MmugDNA.26074.1 | 4.84  | 5.68  | 0.93 | 0.42 | -1.78 | 0.304669 | 0.398339 | 0.638761 | 0.629355 |
| MmugDNA.26075.1.S1_at   | MmugDNA.26075.1 | 4.05  | 4.04  | 0.23 | 0.35 | 1.01  | 0.906462 | 0.953398 | 0.962831 | 0.97351  |
| MmugDNA.26078.1.S1_at   | MmugDNA.26078.1 | 7.29  | 7.22  | 0.41 | 1.17 | 1.05  | 0.932289 | 0.926109 | 0.973784 | 0.95813  |
| MmugDNA.26079.1.S1_at   | MmugDNA.26079.1 | 7.56  | 7.83  | 0.05 | 0.29 | -1.21 | 0.306875 | 0.41351  | 0.639788 | 0.639648 |
| MmugDNA.2608.1.S1_at    | MmugDNA.2608.1  | 5.56  | 5.87  | 0.09 | 0.24 | -1.24 | 0.079608 | 0.068589 | 0.430004 | 0.308466 |
| MmugDNA.26080.1.S1_at   | MmugDNA.26080.1 | 6.81  | 6.77  | 0.41 | 0.26 | 1.03  | 0.903889 | 0.830143 | 0.961578 | 0.902493 |
| MmugDNA.26081.1.S1_at   | MmugDNA.26081.1 | 5.44  | 5.43  | 0.22 | 0.11 | 1.01  | 0.416588 | 0.403251 | 0.710051 | 0.631996 |
| MmugDNA.26082.1.S1_at   | MmugDNA.26082.1 | 9.76  | 9.68  | 0.76 | 1.08 | 1.05  | 0.694093 | 0.37472  | 0.864407 | 0.613037 |
| MmugDNA.26083.1.S1_at   | MmugDNA.26083.1 | 2.8   | 2.89  | 0.12 | 0.05 | -1.07 | 0.975878 | 0.379452 | 0.990682 | 0.616406 |
| MmugDNA.26085.1.S1_at   | MmugDNA.26085.1 | 3.78  | 4.04  | 0.33 | 0.62 | -1.2  | 0.7036   | 0.681549 | 0.869102 | 0.814092 |
| MmugDNA.26087.1.S1_at   | MmugDNA.26087.1 | 5.4   | 5.5   | 0.11 | 0.13 | -1.08 | 0.12412  | 0.179922 | 0.489857 | 0.456453 |
| MmugDNA.26088.1.S1_at   | MmugDNA.26088.1 | 3.76  | 3.77  | 0.14 | 0.14 | -1.01 | 0.468557 | 0.62737  | 0.741077 | 0.780374 |
| MmugDNA.26089.1.S1_at   | MmugDNA.26089.1 | 3.45  | 3.45  | 0.05 | 0.1  | -1    | 0.665234 | 0.426325 | 0.849897 | 0.648491 |
| MmugDNA.2609.1.S1_at    | MmugDNA.2609.1  | 7.39  | 7.85  | 0.1  | 0.11 | -1.37 | 0.011434 | 0.007461 | 0.235747 | 0.115888 |
| MmugDNA.26090.1.S1_at   | MmugDNA.26090.1 | 4.28  | 4.21  | 0.15 | 0.1  | 1.05  | 0.743997 | 0.255611 | 0.890339 | 0.523608 |
| MmugDNA.26091.1.S1_at   | MmugDNA.26091.1 | 11.68 | 11.56 | 0.18 | 0.15 | 1.09  | 0.216106 | 0.149828 | 0.575954 | 0.424427 |
| MmugDNA.26092.1.S1_at   | MmugDNA.26092.1 | 4.25  | 3.97  | 0.21 | 0.31 | 1.21  | 0.365438 | 0.568452 | 0.678264 | 0.741979 |
| MmugDNA.26093.1.S1_at   | MmugDNA.26093.1 | 4.04  | 4.11  | 0.56 | 0.15 | -1.05 | 0.375959 | 0.546956 | 0.684829 | 0.728283 |
| MmugDNA.26096.1.S1_at   | MmugDNA.26096.1 | 4.73  | 4.62  | 0.17 | 0.24 | 1.08  | 0.519008 | 0.394442 | 0.769826 | 0.626982 |
| MmugDNA.26097.1.S1_at   | MmugDNA.26097.1 | 2.62  | 2.62  | 0.15 | 0.12 | -1    | 0.533152 | 0.674441 | 0.777978 | 0.809792 |
| MmugDNA.26098.1.S1_at   | MmugDNA.26098.1 | 5.29  | 5.17  | 0.17 | 0.52 | 1.09  | 0.951771 | 0.299606 | 0.98195  | 0.557956 |
| MmugDNA.26099.1.S1_at   | MmugDNA.26099.1 | 5.13  | 5.13  | 0.03 | 0.03 | -1    | 0.77956  | 0.897514 | 0.90816  | 0.941525 |
| MmugDNA.261.1.S1_at     | MmugDNA.261.1   | 4.25  | 4.16  | 0.07 | 0.38 | 1.06  | 0.569296 | 0.730224 | 0.79903  | 0.843882 |
| MmugDNA.2610.1.S1_at    | MmugDNA.2610.1  | 8.88  | 10.14 | 0.31 | 0.51 | -2.39 | 0.037151 | 0.040684 | 0.340777 | 0.246648 |
| MmugDNA.2610.1.S1_s_at  | MmugDNA.2610.1  | 7.18  | 8.49  | 0.28 | 0.64 | -2.48 | 0.047802 | 0.043877 | 0.367233 | 0.254088 |
| MmugDNA.26100.1.S1_at   | MmugDNA.26100.1 | 6.29  | 5.9   | 0.52 | 0.15 | 1.31  | 0.197178 | 0.241219 | 0.5601   | 0.511821 |
| MmugDNA.26101.1.S1_at   | MmugDNA.26101.1 | 10.17 | 9.18  | 0.52 | 0.69 | 1.98  | 0.05259  | 0.065942 | 0.378269 | 0.302161 |
| MmugDNA.26102.1.S1_at   | MmugDNA.26102.1 | 5.47  | 5.68  | 0.19 | 0.15 | -1.16 | 0.143308 | 0.046813 | 0.510223 | 0.261106 |
| MmugDNA.26103.1.S1_at   | MmugDNA.26103.1 | 6.21  | 6.25  | 0.15 | 0.05 | -1.03 | 0.162601 | 0.088403 | 0.526894 | 0.341877 |
| MmugDNA.26105.1.S1_at   | MmugDNA.26105.1 | 3.28  | 3.35  | 0.6  | 0.35 | -1.05 | 0.870567 | 0.499079 | 0.948314 | 0.697988 |
| MmugDNA.26106.1.S1_at   | MmugDNA.26106.1 | 6.84  | 6.24  | 0.56 | 0.21 | 1.51  | 0.125751 | 0.131868 | 0.491824 | 0.403891 |
| MmugDNA.26107.1.S1_s_at | MmugDNA.26107.1 | 14.64 | 14.59 | 0    | 0.02 | 1.03  | 0.077597 | 0.012499 | 0.427486 | 0.144302 |
| MmugDNA.26109.1.S1_at   | MmugDNA.26109.1 | 9.1   | 8.92  | 0.23 | 0.45 | 1.13  | 0.665623 | 0.853378 | 0.850023 | 0.916579 |

|                         |                 |       |      |      |      |       |          |          |          |          |
|-------------------------|-----------------|-------|------|------|------|-------|----------|----------|----------|----------|
| MmugDNA.2611.1.S1_at    | MmugDNA.2611.1  | 7.27  | 7.27 | 0.13 | 0.07 | -1    | 0.629417 | 0.323729 | 0.831446 | 0.574587 |
| MmugDNA.26110.1.S1_at   | MmugDNA.26110.1 | 3.59  | 3.41 | 0.42 | 0.14 | 1.13  | 0.74671  | 0.90844  | 0.891546 | 0.948167 |
| MmugDNA.26111.1.S1_at   | MmugDNA.26111.1 | 6.75  | 6.56 | 0.09 | 0.51 | 1.14  | 0.755408 | 0.187042 | 0.896094 | 0.462965 |
| MmugDNA.26112.1.S1_at   | MmugDNA.26112.1 | 4.39  | 4.26 | 0.23 | 0.03 | 1.09  | 0.106612 | 0.08104  | 0.467185 | 0.329189 |
| MmugDNA.26113.1.S1_at   | MmugDNA.26113.1 | 6.5   | 5.55 | 0.57 | 0.03 | 1.93  | 0.129908 | 0.084664 | 0.495954 | 0.33618  |
| MmugDNA.26115.1.S1_at   | MmugDNA.26115.1 | 4.86  | 5.03 | 0.16 | 0.1  | -1.12 | 0.324392 | 0.322938 | 0.651941 | 0.574261 |
| MmugDNA.33058.1.S1_s_at | MmugDNA.33058.1 | 8.25  | 8.12 | 0.11 | 0.17 | 1.09  | 0.211744 | 0.378961 | 0.572347 | 0.615912 |
| MmugDNA.26117.1.S1_at   | MmugDNA.26117.1 | 5.32  | 5.48 | 0.15 | 0.17 | -1.11 | 0.384417 | 0.735151 | 0.689941 | 0.846742 |
| MmugDNA.26118.1.S1_at   | MmugDNA.26118.1 | 6.7   | 6.53 | 0.1  | 0.12 | 1.12  | 0.237297 | 0.262327 | 0.590811 | 0.528633 |
| MmugDNA.26119.1.S1_at   | MmugDNA.26119.1 | 6.76  | 7.5  | 0.31 | 0.41 | -1.67 | 0.059796 | 0.055864 | 0.392879 | 0.282172 |
| MmugDNA.26120.1.S1_at   | MmugDNA.26120.1 | 6.34  | 6.96 | 0.77 | 0.45 | -1.54 | 0.616812 | 0.804429 | 0.824331 | 0.887549 |
| MmugDNA.26121.1.S1_at   | MmugDNA.26121.1 | 4.52  | 4.62 | 0.76 | 0.22 | -1.07 | 0.946941 | 0.211629 | 0.979514 | 0.485681 |
| MmugDNA.26122.1.S1_at   | MmugDNA.26122.1 | 6.82  | 7.15 | 0.21 | 0.18 | -1.26 | 0.27029  | 0.218749 | 0.614663 | 0.492438 |
| MmugDNA.26123.1.S1_at   | MmugDNA.26123.1 | 7.61  | 6.81 | 0.53 | 0.38 | 1.74  | 0.038598 | 0.12444  | 0.344737 | 0.394865 |
| MmugDNA.26124.1.S1_at   | MmugDNA.26124.1 | 4.69  | 4.68 | 0.07 | 0.03 | 1.01  | 0.434182 | 0.866057 | 0.720325 | 0.923791 |
| MmugDNA.26125.1.S1_at   | MmugDNA.26125.1 | 6.34  | 7.62 | 0.35 | 0.64 | -2.42 | 0.04269  | 0.033309 | 0.355382 | 0.226131 |
| MmugDNA.26126.1.S1_at   | MmugDNA.26126.1 | 4.7   | 4.7  | 0.03 | 0.03 | -1    | 0.510709 | 0.761156 | 0.765151 | 0.86123  |
| MmugDNA.26127.1.S1_at   | MmugDNA.26127.1 | 5.95  | 5.86 | 0.29 | 0.09 | 1.07  | 0.89755  | 0.479323 | 0.95917  | 0.685088 |
| MmugDNA.26128.1.S1_at   | MmugDNA.26128.1 | 7.91  | 7.75 | 0.14 | 0.16 | 1.11  | 0.097168 | 0.092223 | 0.456142 | 0.347969 |
| MmugDNA.26129.1.S1_at   | MmugDNA.26129.1 | 5.6   | 5.79 | 0.16 | 0.14 | -1.14 | 0.26572  | 0.233144 | 0.611346 | 0.504458 |
| MmugDNA.2613.1.S1_at    | MmugDNA.2613.1  | 4.51  | 3.75 | 0.73 | 0.36 | 1.69  | 0.211141 | 0.265536 | 0.571977 | 0.531418 |
| MmugDNA.26130.1.S1_s_at | MmugDNA.26130.1 | 6.93  | 7.31 | 0.08 | 0.16 | -1.31 | 0.067042 | 0.041765 | 0.407016 | 0.248947 |
| MmugDNA.26131.1.S1_at   | MmugDNA.26131.1 | 8.58  | 8.25 | 0.57 | 0.83 | 1.26  | 0.275719 | 0.372895 | 0.617878 | 0.611752 |
| MmugDNA.26133.1.S1_at   | MmugDNA.26133.1 | 5.63  | 5.16 | 0.71 | 0.15 | 1.39  | 0.270207 | 0.351684 | 0.614663 | 0.595164 |
| MmugDNA.26134.1.S1_at   | MmugDNA.26134.1 | 4.79  | 5.15 | 0.06 | 0.13 | -1.28 | 0.015204 | 0.01066  | 0.257698 | 0.134819 |
| MmugDNA.26135.1.S1_at   | MmugDNA.26135.1 | 3.15  | 3.08 | 0.93 | 0.04 | 1.04  | 0.346555 | 0.344008 | 0.665986 | 0.58962  |
| MmugDNA.26136.1.S1_s_at | MmugDNA.26136.1 | 8.03  | 8.6  | 0.42 | 0.47 | -1.48 | 0.201595 | 0.191566 | 0.563988 | 0.466896 |
| MmugDNA.26137.1.S1_at   | MmugDNA.26137.1 | 3.17  | 3.23 | 0.08 | 0.09 | -1.05 | 0.810125 | 0.180684 | 0.922564 | 0.457245 |
| MmugDNA.26138.1.S1_at   | MmugDNA.26138.1 | 3.15  | 3.01 | 0.52 | 0.1  | 1.1   | 0.514968 | 0.684984 | 0.767243 | 0.816278 |
| MmugDNA.26139.1.S1_at   | MmugDNA.26139.1 | 7.02  | 6.85 | 0.52 | 0.53 | 1.12  | 0.656182 | 0.811401 | 0.845317 | 0.891158 |
| MmugDNA.26141.1.S1_at   | MmugDNA.26141.1 | 3.62  | 3.39 | 0.23 | 0.2  | 1.17  | 0.242087 | 0.168677 | 0.594285 | 0.445352 |
| MmugDNA.26142.1.S1_at   | MmugDNA.26142.1 | 9.16  | 8.91 | 0.06 | 0.23 | 1.19  | 0.064763 | 0.058579 | 0.403383 | 0.288743 |
| MmugDNA.26143.1.S1_at   | MmugDNA.26143.1 | 5.88  | 4.82 | 0.3  | 0.64 | 2.09  | 0.159583 | 0.155857 | 0.524452 | 0.431223 |
| MmugDNA.26144.1.S1_at   | MmugDNA.26144.1 | 2.91  | 2.92 | 0.09 | 0.03 | -1.01 | 0.892944 | 0.065212 | 0.957322 | 0.301239 |
| MmugDNA.26145.1.S1_at   | MmugDNA.26145.1 | 7.47  | 7.72 | 0.48 | 0.75 | -1.19 | 0.971393 | 0.979683 | 0.989061 | 0.989107 |
| MmugDNA.26146.1.S1_at   | MmugDNA.26146.1 | 8.17  | 8.53 | 0.3  | 0.39 | -1.28 | 0.369742 | 0.378854 | 0.68087  | 0.615818 |
| MmugDNA.26147.1.S1_at   | MmugDNA.26147.1 | 4.28  | 4.45 | 0.12 | 0.18 | -1.13 | 0.28742  | 0.269963 | 0.625987 | 0.535239 |
| MmugDNA.2615.1.S1_at    | MmugDNA.2615.1  | 10.06 | 10.2 | 0.24 | 0.09 | -1.1  | 0.131312 | 0.135215 | 0.497943 | 0.407277 |
| MmugDNA.26152.1.S1_at   | MmugDNA.26152.1 | 4.55  | 4.82 | 0.06 | 0.09 | -1.2  | 0.011827 | 0.191112 | 0.237777 | 0.466378 |
| MmugDNA.26153.1.S1_at   | MmugDNA.26153.1 | 5.98  | 5.89 | 0.65 | 0.83 | 1.06  | 0.839021 | 0.957202 | 0.934987 | 0.975789 |
| MmugDNA.26154.1.S1_at   | MmugDNA.26154.1 | 7.51  | 7.6  | 0.28 | 0.09 | -1.06 | 0.711572 | 0.38889  | 0.873642 | 0.623208 |

|                         |                 |       |       |      |      |       |          |          |          |          |
|-------------------------|-----------------|-------|-------|------|------|-------|----------|----------|----------|----------|
| MmugDNA.26156.1.S1_at   | MmugDNA.26156.1 | 10.04 | 10.04 | 0.27 | 0.57 | -1    | 0.958531 | 0.967729 | 0.984337 | 0.982165 |
| MmugDNA.26157.1.S1_at   | MmugDNA.26157.1 | 5.72  | 5.58  | 0.03 | 0.2  | 1.1   | 0.715717 | 0.039148 | 0.875251 | 0.243072 |
| MmugDNA.26159.1.S1_at   | MmugDNA.26159.1 | 7.92  | 7.33  | 0.36 | 0.76 | 1.5   | 0.183873 | 0.320538 | 0.547947 | 0.572648 |
| MmugDNA.2616.1.S1_at    | MmugDNA.2616.1  | 2.84  | 2.76  | 0.06 | 0.07 | 1.06  | 0.501358 | 0.236675 | 0.759966 | 0.507459 |
| MmugDNA.26160.1.S1_at   | MmugDNA.26160.1 | 11.31 | 11.62 | 0.05 | 0.28 | -1.24 | 0.24321  | 0.33194  | 0.594876 | 0.580503 |
| MmugDNA.26161.1.S1_at   | MmugDNA.26161.1 | 5.95  | 5.7   | 0.15 | 0.09 | 1.19  | 0.073047 | 0.252937 | 0.418338 | 0.521261 |
| MmugDNA.26162.1.S1_at   | MmugDNA.26162.1 | 7     | 7.12  | 0.25 | 0.04 | -1.09 | 0.90747  | 0.98497  | 0.963263 | 0.991478 |
| MmugDNA.26164.1.S1_at   | MmugDNA.26164.1 | 11.47 | 11.88 | 0.05 | 0.14 | -1.32 | 0.004781 | 0.008783 | 0.184674 | 0.124066 |
| MmugDNA.26166.1.S1_at   | MmugDNA.26166.1 | 7.3   | 7.14  | 0.34 | 0.63 | 1.12  | 0.657115 | 0.130516 | 0.84573  | 0.402373 |
| MmugDNA.26167.1.S1_at   | MmugDNA.26167.1 | 5.17  | 4.7   | 0.27 | 0.06 | 1.38  | 0.159346 | 0.094677 | 0.524174 | 0.351481 |
| MmugDNA.26168.1.S1_at   | MmugDNA.26168.1 | 5.29  | 5.25  | 0.1  | 0.13 | 1.03  | 0.483989 | 0.406779 | 0.750017 | 0.634497 |
| MmugDNA.2617.1.S1_at    | MmugDNA.2617.1  | 6     | 6.07  | 0.12 | 0.07 | -1.05 | 0.445857 | 0.415472 | 0.728005 | 0.64091  |
| MmugDNA.26172.1.S1_at   | MmugDNA.26172.1 | 10.31 | 10.29 | 0.13 | 0.21 | 1.01  | 0.805529 | 0.835035 | 0.920245 | 0.905549 |
| MmugDNA.26173.1.S1_at   | MmugDNA.26173.1 | 5.25  | 5.21  | 0.04 | 0.14 | 1.03  | 0.372224 | 0.423833 | 0.682724 | 0.646547 |
| MmugDNA.26175.1.S1_s_at | MmugDNA.26175.1 | 12.87 | 13.38 | 0.23 | 0.61 | -1.42 | 0.260791 | 0.236109 | 0.607423 | 0.507179 |
| MmugDNA.26176.1.S1_at   | MmugDNA.26176.1 | 8.79  | 9.19  | 0.19 | 0.56 | -1.32 | 0.544805 | 0.516206 | 0.784626 | 0.708757 |
| MmugDNA.26178.1.S1_at   | MmugDNA.26178.1 | 5.69  | 5.77  | 0.08 | 0.19 | -1.05 | 0.31169  | 0.489122 | 0.643601 | 0.691616 |
| MmugDNA.2618.1.S1_at    | MmugDNA.2618.1  | 5.73  | 5.46  | 0.33 | 0.32 | 1.2   | 0.349687 | 0.472133 | 0.667907 | 0.679868 |
| MmugDNA.26180.1.S1_at   | MmugDNA.26180.1 | 8.28  | 7.36  | 0.28 | 0.35 | 1.89  | 0.035876 | 0.010665 | 0.338042 | 0.13482  |
| MmugDNA.26181.1.S1_at   | MmugDNA.26181.1 | 5.4   | 4.99  | 0.6  | 0.34 | 1.33  | 0.428687 | 0.639824 | 0.717033 | 0.788487 |
| MmugDNA.26182.1.S1_at   | MmugDNA.26182.1 | 8.25  | 8.08  | 1.5  | 0.35 | 1.13  | 0.893305 | 0.887467 | 0.957572 | 0.935867 |
| MmugDNA.26183.1.S1_at   | MmugDNA.26183.1 | 6.4   | 6.41  | 0.07 | 0.63 | -1    | 0.398524 | 0.193057 | 0.698752 | 0.468554 |
| MmugDNA.26184.1.S1_at   | MmugDNA.26184.1 | 4.71  | 4.72  | 0.08 | 0.16 | -1    | 0.378187 | 0.283684 | 0.686332 | 0.546118 |
| MmugDNA.26185.1.S1_at   | MmugDNA.26185.1 | 6.44  | 6.59  | 0.11 | 0.07 | -1.12 | 0.09051  | 0.035563 | 0.445901 | 0.232813 |
| MmugDNA.26186.1.S1_at   | MmugDNA.26186.1 | 9.18  | 8.64  | 0.06 | 0.86 | 1.45  | 0.345823 | 0.034854 | 0.665318 | 0.230897 |
| MmugDNA.26189.1.S1_at   | MmugDNA.26189.1 | 11.65 | 11.91 | 0.18 | 0.32 | -1.19 | 0.295862 | 0.128432 | 0.632176 | 0.399714 |
| MmugDNA.2619.1.S1_at    | MmugDNA.2619.1  | 6.85  | 7.1   | 0.22 | 0.24 | -1.18 | 0.280992 | 0.284152 | 0.622015 | 0.546362 |
| MmugDNA.26190.1.S1_at   | MmugDNA.26190.1 | 3.66  | 3.65  | 0.16 | 0.01 | 1     | 0.763619 | 0.090904 | 0.900388 | 0.345537 |
| MmugDNA.26191.1.S1_at   | MmugDNA.26191.1 | 7.33  | 8.35  | 0.42 | 0.33 | -2.03 | 0.025563 | 0.0153   | 0.299708 | 0.157071 |
| MmugDNA.26192.1.S1_at   | MmugDNA.26192.1 | 4.6   | 4.6   | 0.08 | 0.07 | 1     | 0.874251 | 0.119355 | 0.949565 | 0.387887 |
| MmugDNA.26194.1.S1_at   | MmugDNA.26194.1 | 5     | 4.85  | 0.37 | 0.16 | 1.11  | 0.194444 | 0.641444 | 0.557868 | 0.78954  |
| MmugDNA.26196.1.S1_at   | MmugDNA.26196.1 | 5.23  | 5.55  | 0.12 | 0.31 | -1.25 | 0.499565 | 0.639625 | 0.759223 | 0.788365 |
| MmugDNA.26197.1.S1_at   | MmugDNA.26197.1 | 3.33  | 3.32  | 0.26 | 0.06 | 1.01  | 0.279274 | 0.410296 | 0.621007 | 0.637216 |
| MmugDNA.26198.1.S1_at   | MmugDNA.26198.1 | 4.88  | 4.84  | 0.1  | 0.05 | 1.03  | 0.713605 | 0.700968 | 0.874503 | 0.826604 |
| MmugDNA.26199.1.S1_at   | MmugDNA.26199.1 | 6.11  | 6.01  | 0.1  | 0.17 | 1.07  | 0.543385 | 0.713395 | 0.783794 | 0.833698 |
| MmugDNA.26200.1.S1_at   | MmugDNA.26200.1 | 4.67  | 4.4   | 0.38 | 0.16 | 1.21  | 0.416002 | 0.598792 | 0.709616 | 0.761124 |
| MmugDNA.26201.1.S1_at   | MmugDNA.26201.1 | 4.86  | 4.96  | 0.05 | 0.09 | -1.07 | 0.162026 | 0.191479 | 0.526638 | 0.466821 |
| MmugDNA.26202.1.S1_at   | MmugDNA.26202.1 | 3.86  | 3.93  | 0.11 | 0.22 | -1.05 | 0.831288 | 0.590892 | 0.931682 | 0.756503 |
| MmugDNA.26203.1.S1_at   | MmugDNA.26203.1 | 3.39  | 3.37  | 0.19 | 0.46 | 1.01  | 0.644217 | 0.417668 | 0.839719 | 0.642365 |
| MmugDNA.26205.1.S1_at   | MmugDNA.26205.1 | 4.61  | 4.8   | 0.24 | 0.34 | -1.14 | 0.350249 | 0.548211 | 0.668443 | 0.728958 |
| MmugDNA.26206.1.S1_at   | MmugDNA.26206.1 | 5.59  | 6.24  | 0.05 | 0.2  | -1.56 | 0.004223 | 0.001178 | 0.181739 | 0.05381  |

|                         |                 |       |       |      |      |        |          |          |          |          |
|-------------------------|-----------------|-------|-------|------|------|--------|----------|----------|----------|----------|
| MmugDNA.26207.1.S1_at   | MmugDNA.26207.1 | 5.23  | 5.28  | 0.03 | 0.25 | -1.04  | 0.705269 | 0.891273 | 0.870004 | 0.938047 |
| MmugDNA.26208.1.S1_at   | MmugDNA.26208.1 | 9.32  | 9.18  | 0.22 | 0.18 | 1.1    | 0.505154 | 0.576403 | 0.761548 | 0.747202 |
| MmugDNA.26210.1.S1_at   | MmugDNA.26210.1 | 6.12  | 6.33  | 0.08 | 0.13 | -1.16  | 0.076864 | 0.070304 | 0.425685 | 0.311377 |
| MmugDNA.26211.1.S1_at   | MmugDNA.26211.1 | 3.89  | 3.68  | 0.25 | 0.14 | 1.15   | 0.319666 | 0.232584 | 0.649068 | 0.504359 |
| MmugDNA.26213.1.S1_s_at | MmugDNA.26213.1 | 5.26  | 5.71  | 0.13 | 0.25 | -1.36  | 0.028893 | 0.01631  | 0.312291 | 0.161818 |
| MmugDNA.26214.1.S1_at   | MmugDNA.26214.1 | 12.88 | 13.03 | 0.29 | 0.24 | -1.11  | 0.258941 | 0.126397 | 0.606157 | 0.396917 |
| MmugDNA.26215.1.S1_at   | MmugDNA.26215.1 | 5.21  | 5.13  | 0.2  | 0.02 | 1.05   | 0.721095 | 0.780641 | 0.877952 | 0.872726 |
| MmugDNA.26216.1.S1_at   | MmugDNA.26216.1 | 5.32  | 5.2   | 0.31 | 0.24 | 1.08   | 0.885584 | 0.639155 | 0.954118 | 0.788117 |
| MmugDNA.26217.1.S1_at   | MmugDNA.26217.1 | 3.99  | 4.1   | 0.07 | 0.12 | -1.08  | 0.323159 | 0.098447 | 0.651333 | 0.356564 |
| MmugDNA.26218.1.S1_at   | MmugDNA.26218.1 | 6.21  | 5.98  | 0.44 | 0.38 | 1.17   | 0.555672 | 0.471175 | 0.791477 | 0.679213 |
| MmugDNA.26220.1.S1_at   | MmugDNA.26220.1 | 11.36 | 10.86 | 0.18 | 0.29 | 1.41   | 0.033813 | 0.001391 | 0.33023  | 0.057005 |
| MmugDNA.26221.1.S1_at   | MmugDNA.26221.1 | 5.82  | 5.98  | 0.22 | 0.11 | -1.12  | 0.340021 | 0.398685 | 0.661611 | 0.629458 |
| MmugDNA.26222.1.S1_at   | MmugDNA.26222.1 | 7.62  | 6.67  | 0.08 | 0.54 | 1.93   | 0.130645 | 0.158771 | 0.49705  | 0.434869 |
| MmugDNA.26223.1.S1_at   | MmugDNA.26223.1 | 3.24  | 3.31  | 0.19 | 0.11 | -1.05  | 0.715219 | 0.743165 | 0.875005 | 0.851188 |
| MmugDNA.26224.1.S1_at   | MmugDNA.26224.1 | 3.11  | 3.1   | 0.14 | 0.08 | 1.01   | 0.365215 | 0.439581 | 0.678084 | 0.658313 |
| MmugDNA.26224.1.S1_s_at | MmugDNA.26224.1 | 3.56  | 3.5   | 0    | 0.06 | 1.04   | 0.16331  | 0.18505  | 0.527696 | 0.460891 |
| MmugDNA.26225.1.S1_at   | MmugDNA.26225.1 | 4.31  | 7.83  | 1.71 | 2.96 | -11.48 | 0.41302  | 0.308669 | 0.708285 | 0.56461  |
| MmugDNA.26227.1.S1_at   | MmugDNA.26227.1 | 6.43  | 6.08  | 0.48 | 0.28 | 1.27   | 0.285977 | 0.450732 | 0.625381 | 0.665844 |
| MmugDNA.26228.1.S1_at   | MmugDNA.26228.1 | 3.05  | 3.17  | 0.14 | 0.15 | -1.08  | 0.629789 | 0.570876 | 0.831741 | 0.743422 |
| MmugDNA.26229.1.S1_at   | MmugDNA.26229.1 | 12.16 | 12.42 | 0    | 0.09 | -1.2   | 0.017495 | 0.004498 | 0.267445 | 0.093593 |
| MmugDNA.26230.1.S1_at   | MmugDNA.26230.1 | 6.59  | 5.84  | 0.41 | 0.35 | 1.69   | 0.066469 | 0.074016 | 0.406564 | 0.317579 |
| MmugDNA.26231.1.S1_at   | MmugDNA.26231.1 | 6.61  | 5.7   | 0.49 | 0.58 | 1.88   | 0.156085 | 0.146512 | 0.520741 | 0.420576 |
| MmugDNA.26232.1.S1_at   | MmugDNA.26232.1 | 3.56  | 3.64  | 0.07 | 0.13 | -1.06  | 0.300865 | 0.403269 | 0.636012 | 0.631998 |
| MmugDNA.26233.1.S1_at   | MmugDNA.26233.1 | 7.53  | 7.4   | 0.43 | 0.05 | 1.1    | 0.230712 | 0.17871  | 0.587231 | 0.454995 |
| MmugDNA.26234.1.S1_at   | MmugDNA.26234.1 | 3.66  | 3.54  | 0.03 | 0.3  | 1.09   | 0.877828 | 0.680822 | 0.951009 | 0.813597 |
| MmugDNA.26235.1.S1_at   | MmugDNA.26235.1 | 3.91  | 3.75  | 0.07 | 0.03 | 1.11   | 0.031788 | 0.10938  | 0.32289  | 0.373156 |
| MmugDNA.26236.1.S1_at   | MmugDNA.26236.1 | 4.66  | 4.31  | 0.14 | 0.16 | 1.28   | 0.061172 | 0.114965 | 0.395197 | 0.381719 |
| MmugDNA.26237.1.S1_at   | MmugDNA.26237.1 | 5.09  | 5.15  | 0.16 | 0.15 | -1.04  | 0.552803 | 0.705618 | 0.789705 | 0.829349 |
| MmugDNA.26238.1.S1_at   | MmugDNA.26238.1 | 5.19  | 5.54  | 0.06 | 0.13 | -1.28  | 0.011939 | 0.005066 | 0.239065 | 0.09907  |
| MmugDNA.26239.1.S1_at   | MmugDNA.26239.1 | 4.19  | 4.37  | 0.12 | 0.18 | -1.13  | 0.458565 | 0.625697 | 0.735566 | 0.779265 |
| MmugDNA.26240.1.S1_at   | MmugDNA.26240.1 | 4.36  | 4.42  | 0.76 | 0.32 | -1.05  | 0.904296 | 0.176056 | 0.961691 | 0.452526 |
| MmugDNA.26241.1.S1_at   | MmugDNA.26241.1 | 9.77  | 9.49  | 0.15 | 0.18 | 1.21   | 0.039537 | 0.021614 | 0.347318 | 0.184324 |
| MmugDNA.26241.1.S1_s_at | MmugDNA.26241.1 | 8.54  | 8.14  | 0.13 | 0.3  | 1.32   | 0.197796 | 0.204202 | 0.560816 | 0.478507 |
| MmugDNA.26242.1.S1_at   | MmugDNA.26242.1 | 4.65  | 4.62  | 0.12 | 0.16 | 1.02   | 0.429937 | 0.541356 | 0.717824 | 0.724874 |
| MmugDNA.26244.1.S1_at   | MmugDNA.26244.1 | 10.04 | 10.91 | 0.16 | 0.6  | -1.83  | 0.226244 | 0.211035 | 0.584304 | 0.485047 |
| MmugDNA.26245.1.S1_at   | MmugDNA.26245.1 | 7.8   | 8.77  | 0.65 | 0.83 | -1.95  | 0.204813 | 0.106301 | 0.567387 | 0.368766 |
| MmugDNA.26246.1.S1_at   | MmugDNA.26246.1 | 6.89  | 7.5   | 0.21 | 0.67 | -1.53  | 0.209777 | 0.203441 | 0.571042 | 0.477634 |
| MmugDNA.521.1.S1_s_at   | MmugDNA.521.1   | 8.85  | 9.26  | 0.47 | 0.15 | -1.33  | 0.635327 | 0.009578 | 0.834967 | 0.129001 |
| MmugDNA.26248.1.S1_at   | MmugDNA.26248.1 | 3.21  | 3.22  | 0.06 | 0.14 | -1.01  | 0.394201 | 0.732    | 0.695705 | 0.844751 |
| MmugDNA.26249.1.S1_at   | MmugDNA.26249.1 | 5.89  | 5.22  | 0.41 | 0.58 | 1.58   | 0.071801 | 0.099729 | 0.415886 | 0.358285 |
| MmugDNA.2625.1.S1_at    | MmugDNA.2625.1  | 3.9   | 3.38  | 0.29 | 0.12 | 1.44   | 0.032241 | 0.075138 | 0.3244   | 0.319331 |



|                         |                 |       |       |      |      |        |          |          |          |          |
|-------------------------|-----------------|-------|-------|------|------|--------|----------|----------|----------|----------|
| MmugDNA.26250.1.S1_at   | MmugDNA.26250.1 | 8.04  | 7.67  | 0.05 | 0.25 | 1.29   | 0.244664 | 0.09119  | 0.596291 | 0.346097 |
| MmugDNA.26252.1.S1_at   | MmugDNA.26252.1 | 8.29  | 8.39  | 0.11 | 0.11 | -1.07  | 0.613565 | 0.106425 | 0.822835 | 0.368978 |
| MmugDNA.26252.1.S1_s_at | MmugDNA.26252.1 | 8.06  | 8.35  | 0.02 | 0.24 | -1.22  | 0.339833 | 0.366381 | 0.661507 | 0.606087 |
| MmugDNA.26253.1.S1_at   | MmugDNA.26253.1 | 8.69  | 8.06  | 0.28 | 0.33 | 1.54   | 0.073155 | 0.009995 | 0.418452 | 0.131262 |
| MmugDNA.26254.1.S1_at   | MmugDNA.26254.1 | 6.47  | 9.99  | 1.04 | 1.18 | -11.49 | 0.041012 | 0.03108  | 0.35051  | 0.218117 |
| MmugDNA.26255.1.S1_at   | MmugDNA.26255.1 | 12.58 | 12.58 | 0.14 | 0.16 | -1     | 0.514088 | 0.377666 | 0.766736 | 0.615086 |
| MmugDNA.26257.1.S1_at   | MmugDNA.26257.1 | 9.13  | 8.5   | 0.29 | 0.37 | 1.55   | 0.050913 | 0.02426  | 0.37568  | 0.194952 |
| MmugDNA.26258.1.S1_at   | MmugDNA.26258.1 | 6.18  | 6.1   | 0.16 | 0.14 | 1.05   | 0.999295 | 0.310955 | 0.999768 | 0.565951 |
| MmugDNA.26259.1.S1_at   | MmugDNA.26259.1 | 3.75  | 3.62  | 0.31 | 0.07 | 1.09   | 0.149743 | 0.165136 | 0.51433  | 0.441373 |
| MmugDNA.2626.1.S1_at    | MmugDNA.2626.1  | 7.81  | 7.77  | 0.08 | 0.1  | 1.03   | 0.76584  | 0.144095 | 0.901515 | 0.417974 |
| MmugDNA.26260.1.S1_at   | MmugDNA.26260.1 | 4.45  | 3.9   | 0.26 | 0.26 | 1.47   | 0.104264 | 0.066665 | 0.464319 | 0.303999 |
| MmugDNA.26262.1.S1_at   | MmugDNA.26262.1 | 8.66  | 8.19  | 0.1  | 0.29 | 1.39   | 0.018491 | 0.009983 | 0.270581 | 0.131219 |
| MmugDNA.26263.1.S1_at   | MmugDNA.26263.1 | 5.72  | 6.13  | 0.99 | 0.6  | -1.33  | 0.802269 | 0.964744 | 0.918464 | 0.980422 |
| MmugDNA.26265.1.S1_at   | MmugDNA.26265.1 | 5.94  | 6.64  | 0.23 | 0.48 | -1.62  | 0.08537  | 0.128957 | 0.438975 | 0.400429 |
| MmugDNA.26266.1.S1_at   | MmugDNA.26266.1 | 10.97 | 10.92 | 0.36 | 0.38 | 1.04   | 0.496842 | 0.207542 | 0.757692 | 0.48185  |
| MmugDNA.26266.1.S1_s_at | MmugDNA.26266.1 | 9.56  | 9.58  | 0.33 | 0.37 | -1.02  | 0.430193 | 0.270573 | 0.717961 | 0.535837 |
| MmugDNA.26267.1.S1_at   | MmugDNA.26267.1 | 3.43  | 3.59  | 1.3  | 0.21 | -1.12  | 0.489819 | 0.350866 | 0.754118 | 0.594581 |
| MmugDNA.26268.1.S1_at   | MmugDNA.26268.1 | 6.04  | 5.71  | 0.19 | 0.14 | 1.26   | 0.166072 | 0.358782 | 0.529901 | 0.600242 |
| MmugDNA.26269.1.S1_at   | MmugDNA.26269.1 | 7.76  | 7.45  | 0.12 | 0.07 | 1.25   | 0.011364 | 0.011977 | 0.235384 | 0.14165  |
| MmugDNA.2627.1.S1_at    | MmugDNA.2627.1  | 5.49  | 5.57  | 0.82 | 0.32 | -1.06  | 0.540848 | 0.532367 | 0.782193 | 0.719017 |
| MmugDNA.26270.1.S1_at   | MmugDNA.26270.1 | 3.52  | 3.47  | 0.08 | 0.06 | 1.03   | 0.42966  | 0.64217  | 0.717683 | 0.790047 |
| MmugDNA.26271.1.S1_at   | MmugDNA.26271.1 | 4.53  | 4.23  | 0.48 | 0.24 | 1.23   | 0.152952 | 0.174001 | 0.517325 | 0.450247 |
| MmugDNA.26273.1.S1_at   | MmugDNA.26273.1 | 9.81  | 10.3  | 0.56 | 0.56 | -1.4   | 0.476611 | 0.63114  | 0.746273 | 0.782688 |
| MmugDNA.26274.1.S1_at   | MmugDNA.26274.1 | 5.1   | 5.21  | 0.22 | 0.35 | -1.08  | 0.962131 | 0.960253 | 0.985456 | 0.977459 |
| MmugDNA.26275.1.S1_at   | MmugDNA.26275.1 | 6.61  | 6.53  | 0.15 | 0.71 | 1.06   | 0.71061  | 0.4654   | 0.873089 | 0.675748 |
| MmugDNA.26276.1.S1_at   | MmugDNA.26276.1 | 5.92  | 5.92  | 0.14 | 0.1  | -1     | 0.992966 | 0.796145 | 0.997597 | 0.882501 |
| MmugDNA.26277.1.S1_at   | MmugDNA.26277.1 | 6.79  | 5.85  | 0.59 | 0.29 | 1.92   | 0.123634 | 0.101754 | 0.489435 | 0.361627 |
| MmugDNA.26278.1.S1_at   | MmugDNA.26278.1 | 7.17  | 7.14  | 0.05 | 0.13 | 1.02   | 0.66366  | 0.470259 | 0.849069 | 0.678575 |
| MmugDNA.26279.1.S1_at   | MmugDNA.26279.1 | 4.85  | 5.19  | 0.19 | 0.37 | -1.26  | 0.633159 | 0.355594 | 0.833528 | 0.597844 |
| MmugDNA.2628.1.S1_at    | MmugDNA.2628.1  | 6.22  | 6.07  | 0.23 | 0.14 | 1.11   | 0.575573 | 0.823595 | 0.802396 | 0.898664 |
| MmugDNA.26280.1.S1_at   | MmugDNA.26280.1 | 3.23  | 3.4   | 0.01 | 0.07 | -1.12  | 0.015559 | 0.012466 | 0.259146 | 0.14417  |
| MmugDNA.26282.1.S1_at   | MmugDNA.26282.1 | 4.65  | 4.46  | 0.57 | 0.68 | 1.14   | 0.804479 | 0.345472 | 0.919555 | 0.590746 |
| MmugDNA.26283.1.S1_at   | MmugDNA.26283.1 | 4.98  | 4.95  | 0.05 | 0.05 | 1.02   | 0.967189 | 0.973062 | 0.987781 | 0.985401 |
| MmugDNA.26284.1.S1_at   | MmugDNA.26284.1 | 5.38  | 5.4   | 0.24 | 0.09 | -1.02  | 0.710136 | 0.370336 | 0.872852 | 0.609407 |
| MmugDNA.26285.1.S1_at   | MmugDNA.26285.1 | 7.79  | 9.32  | 0.5  | 0.45 | -2.89  | 0.017564 | 0.012846 | 0.267454 | 0.14598  |
| MmugDNA.26287.1.S1_at   | MmugDNA.26287.1 | 5     | 4.99  | 0.13 | 0.05 | 1.01   | 0.457683 | 0.386781 | 0.735025 | 0.621895 |
| MmugDNA.2629.1.S1_at    | MmugDNA.2629.1  | 4.81  | 4.81  | 0.08 | 0.1  | 1      | 0.897676 | 0.323027 | 0.95917  | 0.57432  |
| MmugDNA.26290.1.S1_at   | MmugDNA.26290.1 | 5.4   | 4.99  | 0.45 | 0.55 | 1.33   | 0.820236 | 0.939455 | 0.92682  | 0.965611 |
| MmugDNA.26291.1.S1_at   | MmugDNA.26291.1 | 4.88  | 6.34  | 0.58 | 0.83 | -2.75  | 0.045774 | 0.039428 | 0.361816 | 0.243529 |
| MmugDNA.26292.1.S1_at   | MmugDNA.26292.1 | 6.42  | 7.77  | 0.37 | 0.64 | -2.54  | 0.052551 | 0.040856 | 0.378142 | 0.247004 |
| MmugDNA.26293.1.S1_at   | MmugDNA.26293.1 | 3.76  | 3.82  | 0.1  | 0.15 | -1.04  | 0.674796 | 0.862741 | 0.854234 | 0.921968 |

|                         |                 |       |       |      |      |       |          |          |          |          |
|-------------------------|-----------------|-------|-------|------|------|-------|----------|----------|----------|----------|
| MmugDNA.26294.1.S1_at   | MmugDNA.26294.1 | 4.66  | 4.58  | 0.09 | 0.19 | 1.06  | 0.158744 | 0.315053 | 0.52391  | 0.568808 |
| MmugDNA.26295.1.S1_at   | MmugDNA.26295.1 | 3.55  | 3.67  | 0.29 | 0.1  | -1.09 | 0.934146 | 0.984643 | 0.974481 | 0.991346 |
| MmugDNA.26296.1.S1_at   | MmugDNA.26296.1 | 8.9   | 9.22  | 0.4  | 0.19 | -1.25 | 0.730442 | 0.823703 | 0.883189 | 0.898726 |
| MmugDNA.26297.1.S1_at   | MmugDNA.26297.1 | 6.69  | 5.76  | 0.76 | 0.16 | 1.9   | 0.399109 | 0.323427 | 0.699102 | 0.574466 |
| MmugDNA.26299.1.S1_at   | MmugDNA.26299.1 | 6.56  | 6.63  | 0.16 | 0.18 | -1.05 | 0.879157 | 0.89157  | 0.951481 | 0.938242 |
| MmugDNA.263.1.S1_at     | MmugDNA.263.1   | 5.27  | 5.38  | 0.27 | 0.17 | -1.08 | 0.603076 | 0.814422 | 0.816953 | 0.892923 |
| MmugDNA.2630.1.S1_at    | MmugDNA.2630.1  | 5.31  | 5.17  | 0.32 | 0.07 | 1.1   | 0.741539 | 0.658085 | 0.889293 | 0.800181 |
| MmugDNA.26300.1.S1_at   | MmugDNA.26300.1 | 5.46  | 5.49  | 0.04 | 0.12 | -1.02 | 0.498473 | 0.511861 | 0.758433 | 0.705797 |
| MmugDNA.26301.1.S1_s_at | MmugDNA.26301.1 | 8.19  | 9.55  | 0.54 | 0.92 | -2.57 | 0.148698 | 0.165582 | 0.51391  | 0.44189  |
| MmugDNA.26302.1.S1_at   | MmugDNA.26302.1 | 11.86 | 11.44 | 0.06 | 0.24 | 1.34  | 0.040351 | 0.038795 | 0.349277 | 0.241916 |
| MmugDNA.26303.1.S1_at   | MmugDNA.26303.1 | 6.18  | 7.51  | 0.94 | 0.36 | -2.5  | 0.205592 | 0.276036 | 0.568057 | 0.540071 |
| MmugDNA.26304.1.S1_at   | MmugDNA.26304.1 | 7.09  | 6.98  | 0.23 | 0.17 | 1.08  | 0.957557 | 0.120017 | 0.983922 | 0.388672 |
| MmugDNA.26306.1.S1_at   | MmugDNA.26306.1 | 8.27  | 9.04  | 0.12 | 0.74 | -1.71 | 0.171874 | 0.133739 | 0.535422 | 0.40572  |
| MmugDNA.26308.1.S1_at   | MmugDNA.26308.1 | 4.27  | 4.28  | 0.23 | 0.04 | -1    | 0.868295 | 0.96501  | 0.94738  | 0.980553 |
| MmugDNA.26308.1.S1_s_at | MmugDNA.26308.1 | 3.77  | 3.6   | 0.3  | 0.16 | 1.13  | 0.698472 | 0.398378 | 0.866127 | 0.629374 |
| MmugDNA.26309.1.S1_at   | MmugDNA.26309.1 | 3.06  | 3.37  | 0.06 | 0.15 | -1.24 | 0.051609 | 0.153697 | 0.376072 | 0.428413 |
| MmugDNA.2631.1.S1_at    | MmugDNA.2631.1  | 13.41 | 13.57 | 0.13 | 0.88 | -1.12 | 0.465138 | 0.352447 | 0.739804 | 0.595723 |
| MmugDNA.26311.1.S1_s_at | MmugDNA.26311.1 | 10.07 | 9.83  | 0.36 | 0.02 | 1.18  | 0.102553 | 0.014462 | 0.462417 | 0.153457 |
| MmugDNA.26312.1.S1_at   | MmugDNA.26312.1 | 12.11 | 12.08 | 0.32 | 0.39 | 1.02  | 0.415104 | 0.305799 | 0.709338 | 0.562731 |
| MmugDNA.26313.1.S1_at   | MmugDNA.26313.1 | 6.95  | 7.5   | 0.17 | 0.55 | -1.46 | 0.174243 | 0.241233 | 0.537904 | 0.511831 |
| MmugDNA.26315.1.S1_at   | MmugDNA.26315.1 | 4.18  | 4.12  | 0.5  | 0.08 | 1.04  | 0.516625 | 0.367164 | 0.768145 | 0.606832 |
| MmugDNA.26319.1.S1_at   | MmugDNA.26319.1 | 4.91  | 4.77  | 0.37 | 0.39 | 1.1   | 0.777224 | 0.441851 | 0.906858 | 0.659939 |
| MmugDNA.2632.1.S1_at    | MmugDNA.2632.1  | 6.5   | 6.35  | 0.75 | 0.68 | 1.1   | 0.721201 | 0.899487 | 0.878012 | 0.942862 |
| MmugDNA.26320.1.S1_at   | MmugDNA.26320.1 | 5.03  | 3.64  | 1.16 | 0.09 | 2.62  | 0.103589 | 0.121712 | 0.463302 | 0.390956 |
| MmugDNA.26322.1.S1_s_at | MmugDNA.26322.1 | 10.37 | 10.87 | 0.34 | 0.69 | -1.41 | 0.329896 | 0.452096 | 0.655349 | 0.666799 |
| MmugDNA.26324.1.S1_at   | MmugDNA.26324.1 | 13.54 | 13.44 | 0.21 | 0.29 | 1.07  | 0.913034 | 0.052372 | 0.965583 | 0.274345 |
| MmugDNA.26325.1.S1_at   | MmugDNA.26325.1 | 4.52  | 4.59  | 0.14 | 0.01 | -1.05 | 0.354134 | 0.357938 | 0.67034  | 0.599532 |
| MmugDNA.26326.1.S1_at   | MmugDNA.26326.1 | 4.25  | 4.57  | 0.22 | 0.4  | -1.25 | 0.266911 | 0.177431 | 0.612291 | 0.453773 |
| MmugDNA.26327.1.S1_at   | MmugDNA.26327.1 | 3.5   | 3.51  | 0.14 | 0.03 | -1.01 | 0.748449 | 0.914806 | 0.89247  | 0.952124 |
| MmugDNA.26329.1.S1_at   | MmugDNA.26329.1 | 5.48  | 6.99  | 0.66 | 0.43 | -2.85 | 0.101913 | 0.071493 | 0.461313 | 0.313706 |
| MmugDNA.26330.1.S1_at   | MmugDNA.26330.1 | 7.72  | 8.07  | 0.21 | 0.18 | -1.28 | 0.083004 | 0.017594 | 0.4349   | 0.167721 |
| MmugDNA.26331.1.S1_at   | MmugDNA.26331.1 | 10.37 | 10.88 | 0.18 | 0.24 | -1.42 | 0.025524 | 0.010416 | 0.299597 | 0.133522 |
| MmugDNA.26332.1.S1_at   | MmugDNA.26332.1 | 5.22  | 5.37  | 0.33 | 0.09 | -1.11 | 0.971921 | 0.962449 | 0.989291 | 0.97891  |
| MmugDNA.26333.1.S1_at   | MmugDNA.26333.1 | 4.03  | 4.13  | 0.07 | 0.06 | -1.07 | 0.062401 | 0.055537 | 0.397999 | 0.281454 |
| MmugDNA.26334.1.S1_at   | MmugDNA.26334.1 | 4.02  | 3.61  | 0.21 | 0.13 | 1.33  | 0.173513 | 0.461515 | 0.537172 | 0.673152 |
| MmugDNA.26335.1.S1_at   | MmugDNA.26335.1 | 4.59  | 4.58  | 0.15 | 0.14 | 1     | 0.245074 | 0.603225 | 0.596739 | 0.764033 |
| MmugDNA.27336.1.S1_s_at | MmugDNA.27336.1 | 10.79 | 10.52 | 0.1  | 0.23 | 1.21  | 0.046738 | 0.035568 | 0.363894 | 0.232813 |
| MmugDNA.26337.1.S1_at   | MmugDNA.26337.1 | 6.08  | 6.19  | 0.18 | 0.12 | -1.09 | 0.412315 | 0.554693 | 0.707888 | 0.733408 |
| MmugDNA.26338.1.S1_at   | MmugDNA.26338.1 | 12.86 | 12.53 | 0.21 | 0.12 | 1.26  | 0.114837 | 0.108222 | 0.478048 | 0.371557 |
| MmugDNA.26339.1.S1_at   | MmugDNA.26339.1 | 4.38  | 4.57  | 0.11 | 0.16 | -1.14 | 0.07099  | 0.065402 | 0.414673 | 0.301415 |
| MmugDNA.2634.1.S1_at    | MmugDNA.2634.1  | 10.21 | 9.33  | 0.52 | 0.7  | 1.84  | 0.078796 | 0.012134 | 0.428609 | 0.142546 |

|                         |                 |       |       |      |      |        |          |          |          |          |
|-------------------------|-----------------|-------|-------|------|------|--------|----------|----------|----------|----------|
| MmugDNA.26340.1.S1_at   | MmugDNA.26340.1 | 4.7   | 8.24  | 1.73 | 2.77 | -11.57 | 0.34457  | 0.232662 | 0.664637 | 0.504359 |
| MmugDNA.26341.1.S1_at   | MmugDNA.26341.1 | 4.84  | 4.78  | 0.07 | 0.22 | 1.04   | 0.486317 | 0.3537   | 0.751507 | 0.596782 |
| MmugDNA.26342.1.S1_at   | MmugDNA.26342.1 | 4.34  | 4.37  | 0.19 | 0.24 | -1.02  | 0.36384  | 0.476071 | 0.676981 | 0.682475 |
| MmugDNA.26343.1.S1_at   | MmugDNA.26343.1 | 4.53  | 4.71  | 0.05 | 0.1  | -1.13  | 0.039305 | 0.030982 | 0.346898 | 0.21786  |
| MmugDNA.26344.1.S1_at   | MmugDNA.26344.1 | 6.72  | 6.12  | 0.21 | 0.09 | 1.52   | 0.009927 | 0.003883 | 0.226899 | 0.0887   |
| MmugDNA.26345.1.S1_at   | MmugDNA.26345.1 | 5.91  | 6.49  | 0.16 | 0.36 | -1.49  | 0.107211 | 0.099559 | 0.467913 | 0.35796  |
| MmugDNA.26346.1.S1_at   | MmugDNA.26346.1 | 6.08  | 7.18  | 0.28 | 0.55 | -2.14  | 0.05756  | 0.060586 | 0.38863  | 0.292769 |
| MmugDNA.26348.1.S1_at   | MmugDNA.26348.1 | 3.76  | 3.94  | 0.31 | 0.16 | -1.14  | 0.632372 | 0.565239 | 0.833214 | 0.739765 |
| MmugDNA.26349.1.S1_at   | MmugDNA.26349.1 | 11.74 | 10.99 | 0.48 | 0.15 | 1.68   | 0.171807 | 0.116594 | 0.535371 | 0.383771 |
| MmugDNA.26350.1.S1_at   | MmugDNA.26350.1 | 6.88  | 6.66  | 0.49 | 0.43 | 1.17   | 0.284958 | 0.20661  | 0.62459  | 0.480635 |
| MmugDNA.26351.1.S1_at   | MmugDNA.26351.1 | 3.25  | 3.37  | 0.1  | 0.09 | -1.08  | 0.477925 | 0.627212 | 0.747094 | 0.780325 |
| MmugDNA.26352.1.S1_at   | MmugDNA.26352.1 | 4.16  | 4.01  | 0.85 | 0.34 | 1.11   | 0.447573 | 0.312133 | 0.729106 | 0.566904 |
| MmugDNA.26354.1.S1_at   | MmugDNA.26354.1 | 9.41  | 9.55  | 0.39 | 0.76 | -1.1   | 0.365662 | 0.079853 | 0.678366 | 0.327179 |
| MmugDNA.26356.1.S1_at   | MmugDNA.26356.1 | 5.28  | 5.22  | 0.09 | 0.1  | 1.05   | 0.988558 | 0.264543 | 0.995952 | 0.53051  |
| MmugDNA.26359.1.S1_at   | MmugDNA.26359.1 | 5.9   | 5.41  | 0.41 | 0.59 | 1.4    | 0.705128 | 0.25768  | 0.869952 | 0.525332 |
| MmugDNA.2636.1.S1_at    | MmugDNA.2636.1  | 6.07  | 5.94  | 0.11 | 0.03 | 1.09   | 0.118576 | 0.163007 | 0.48294  | 0.439145 |
| MmugDNA.26360.1.S1_at   | MmugDNA.26360.1 | 9.99  | 10.6  | 0.15 | 0.27 | -1.53  | 0.011962 | 0.005721 | 0.239065 | 0.104271 |
| MmugDNA.26361.1.S1_at   | MmugDNA.26361.1 | 3.26  | 3.37  | 0.18 | 0.16 | -1.08  | 0.896441 | 0.985024 | 0.958707 | 0.991497 |
| MmugDNA.26362.1.S1_at   | MmugDNA.26362.1 | 5.61  | 6.32  | 0.12 | 0.32 | -1.63  | 0.014721 | 0.007832 | 0.254893 | 0.117929 |
| MmugDNA.26363.1.S1_s_at | MmugDNA.26363.1 | 10.74 | 11.56 | 0.3  | 0.2  | -1.76  | 0.022274 | 0.009656 | 0.285326 | 0.129267 |
| MmugDNA.26364.1.S1_at   | MmugDNA.26364.1 | 5.25  | 5.62  | 0.08 | 0.19 | -1.29  | 0.075189 | 0.093625 | 0.422122 | 0.349995 |
| MmugDNA.26365.1.S1_at   | MmugDNA.26365.1 | 12.76 | 13.06 | 0.02 | 0.1  | -1.23  | 0.008435 | 0.002291 | 0.218339 | 0.07045  |
| MmugDNA.26366.1.S1_at   | MmugDNA.26366.1 | 11.02 | 9.84  | 0.1  | 0.28 | 2.27   | 0.004014 | 0.001024 | 0.181739 | 0.051079 |
| MmugDNA.26368.1.S1_at   | MmugDNA.26368.1 | 6.32  | 6.28  | 0.51 | 0.05 | 1.03   | 0.825433 | 0.602495 | 0.929243 | 0.763444 |
| MmugDNA.26369.1.S1_at   | MmugDNA.26369.1 | 5.77  | 6.09  | 0.14 | 0.16 | -1.25  | 0.036656 | 0.071524 | 0.340048 | 0.313706 |
| MmugDNA.26369.1.S1_s_at | MmugDNA.26369.1 | 6.71  | 6.79  | 0.03 | 0.1  | -1.05  | 0.26885  | 0.331467 | 0.613528 | 0.580121 |
| MmugDNA.26370.1.S1_at   | MmugDNA.26370.1 | 6.79  | 6.9   | 0.51 | 0.43 | -1.08  | 0.618921 | 0.651485 | 0.825395 | 0.796226 |
| MmugDNA.26371.1.S1_at   | MmugDNA.26371.1 | 4.26  | 3.94  | 0.25 | 0.24 | 1.25   | 0.209805 | 0.21146  | 0.571042 | 0.485578 |
| MmugDNA.26372.1.S1_at   | MmugDNA.26372.1 | 11.08 | 11.73 | 0.13 | 0.12 | -1.56  | 0.003767 | 0.000942 | 0.179914 | 0.049026 |
| MmugDNA.26373.1.S1_at   | MmugDNA.26373.1 | 3.65  | 3.23  | 0.91 | 0.17 | 1.34   | 0.368828 | 0.274427 | 0.680253 | 0.538914 |
| MmugDNA.26374.1.S1_at   | MmugDNA.26374.1 | 3.39  | 3.34  | 0.05 | 0.34 | 1.03   | 0.733784 | 0.815383 | 0.885206 | 0.893521 |
| MmugDNA.26375.1.S1_s_at | MmugDNA.26375.1 | 3.33  | 3.36  | 0.08 | 0.18 | -1.02  | 0.23877  | 0.049829 | 0.592015 | 0.268305 |
| MmugDNA.26377.1.S1_at   | MmugDNA.26377.1 | 3.93  | 3.9   | 0.35 | 0.24 | 1.02   | 0.466701 | 0.684723 | 0.740398 | 0.816113 |
| MmugDNA.26378.1.S1_at   | MmugDNA.26378.1 | 6     | 6.17  | 0.17 | 0.24 | -1.13  | 0.376517 | 0.417474 | 0.685245 | 0.64224  |
| MmugDNA.26379.1.S1_at   | MmugDNA.26379.1 | 10.11 | 10.33 | 0.27 | 0.02 | -1.17  | 0.117976 | 0.16711  | 0.482063 | 0.4436   |
| MmugDNA.26379.1.S1_s_at | MmugDNA.26379.1 | 9.61  | 10.1  | 0.24 | 0.32 | -1.41  | 0.05538  | 0.055877 | 0.383694 | 0.282172 |
| MmugDNA.2638.1.S1_at    | MmugDNA.2638.1  | 5.09  | 5.03  | 0.02 | 0.17 | 1.04   | 0.663421 | 0.764346 | 0.84899  | 0.86305  |
| MmugDNA.26380.1.S1_at   | MmugDNA.26380.1 | 5.54  | 5.46  | 0.28 | 0.1  | 1.06   | 0.483058 | 0.53568  | 0.749775 | 0.72122  |
| MmugDNA.26381.1.S1_at   | MmugDNA.26381.1 | 5.1   | 5.24  | 0.11 | 0.11 | -1.1   | 0.1122   | 0.100865 | 0.474694 | 0.360398 |
| MmugDNA.26383.1.S1_at   | MmugDNA.26383.1 | 5.6   | 5.62  | 0.38 | 0.2  | -1.02  | 0.834824 | 0.932015 | 0.933053 | 0.961384 |
| MmugDNA.26384.1.S1_at   | MmugDNA.26384.1 | 6.53  | 6.53  | 0.23 | 0.07 | 1      | 0.752006 | 0.852674 | 0.894089 | 0.916254 |

|                         |                 |       |       |      |      |       |          |          |          |          |
|-------------------------|-----------------|-------|-------|------|------|-------|----------|----------|----------|----------|
| MmugDNA.26385.1.S1_x_at | MmugDNA.26385.1 | 8.61  | 7.97  | 0.54 | 0.57 | 1.56  | 0.220056 | 0.301522 | 0.579237 | 0.55955  |
| MmugDNA.26386.1.S1_at   | MmugDNA.26386.1 | 6.23  | 6.46  | 0.25 | 0.19 | -1.18 | 0.669889 | 0.857524 | 0.852318 | 0.918676 |
| MmugDNA.26387.1.S1_at   | MmugDNA.26387.1 | 4.37  | 3.89  | 0.56 | 0.18 | 1.39  | 0.231051 | 0.122913 | 0.587369 | 0.392923 |
| MmugDNA.26388.1.S1_at   | MmugDNA.26388.1 | 5.13  | 5.83  | 0.92 | 0.32 | -1.62 | 0.976982 | 0.974352 | 0.991218 | 0.986047 |
| MmugDNA.26389.1.S1_at   | MmugDNA.26389.1 | 7.03  | 7.36  | 1.29 | 0.2  | -1.25 | 0.681896 | 0.822621 | 0.857635 | 0.89799  |
| MmugDNA.26390.1.S1_x_at | MmugDNA.26390.1 | 8.45  | 8.18  | 0.93 | 0.21 | 1.21  | 0.216041 | 0.282443 | 0.575954 | 0.545139 |
| MmugDNA.26392.1.S1_at   | MmugDNA.26392.1 | 6.84  | 6.2   | 0.45 | 0.16 | 1.56  | 0.095471 | 0.030072 | 0.453501 | 0.215243 |
| MmugDNA.26393.1.S1_at   | MmugDNA.26393.1 | 11.18 | 10.79 | 0.09 | 0.1  | 1.31  | 0.0074   | 0.000306 | 0.207702 | 0.034907 |
| MmugDNA.26395.1.S1_at   | MmugDNA.26395.1 | 7.61  | 6.99  | 0.59 | 0.77 | 1.53  | 0.570204 | 0.416494 | 0.799401 | 0.641647 |
| MmugDNA.26398.1.S1_at   | MmugDNA.26398.1 | 10.21 | 9.84  | 0.22 | 0.31 | 1.29  | 0.202416 | 0.261921 | 0.564714 | 0.528309 |
| MmugDNA.264.1.S1_at     | MmugDNA.264.1   | 4.13  | 4.55  | 0.99 | 0.09 | -1.35 | 0.770591 | 0.84479  | 0.903345 | 0.911667 |
| MmugDNA.26400.1.S1_at   | MmugDNA.26400.1 | 5.38  | 5.43  | 0.19 | 0.06 | -1.04 | 0.773262 | 0.946795 | 0.904752 | 0.96978  |
| MmugDNA.26401.1.S1_at   | MmugDNA.26401.1 | 5.21  | 5.26  | 0.18 | 0.06 | -1.04 | 0.569411 | 0.123911 | 0.79904  | 0.394201 |
| MmugDNA.26402.1.S1_at   | MmugDNA.26402.1 | 4.21  | 4.27  | 0.1  | 0.06 | -1.04 | 0.901395 | 0.102244 | 0.960615 | 0.36236  |
| MmugDNA.26403.1.S1_at   | MmugDNA.26403.1 | 10.04 | 10.65 | 0.13 | 0.74 | -1.54 | 0.182958 | 0.223269 | 0.547134 | 0.496078 |
| MmugDNA.26404.1.S1_at   | MmugDNA.26404.1 | 3.99  | 3.93  | 0.49 | 0.14 | 1.05  | 0.258633 | 0.24886  | 0.605843 | 0.517951 |
| MmugDNA.26405.1.S1_at   | MmugDNA.26405.1 | 12.72 | 12.91 | 0.25 | 0.14 | -1.14 | 0.267113 | 0.386944 | 0.612309 | 0.621935 |
| MmugDNA.26405.1.S1_s_at | MmugDNA.26405.1 | 12.91 | 13.02 | 0.28 | 0.17 | -1.08 | 0.325438 | 0.475895 | 0.65274  | 0.682387 |
| MmugDNA.26406.1.S1_at   | MmugDNA.26406.1 | 10.55 | 11.12 | 0.14 | 0.67 | -1.48 | 0.198869 | 0.240684 | 0.561939 | 0.511405 |
| MmugDNA.26407.1.S1_at   | MmugDNA.26407.1 | 3.46  | 3.61  | 0.29 | 0.14 | -1.11 | 0.286093 | 0.120807 | 0.625392 | 0.389657 |
| MmugDNA.26409.1.S1_at   | MmugDNA.26409.1 | 7.2   | 5.69  | 0.92 | 0.49 | 2.85  | 0.055264 | 0.029401 | 0.383689 | 0.213352 |
| MmugDNA.27697.1.S1_s_at | MmugDNA.27697.1 | 3.25  | 3.28  | 0.05 | 0.13 | -1.02 | 0.201098 | 0.521237 | 0.563821 | 0.712315 |
| MmugDNA.26411.1.S1_at   | MmugDNA.26411.1 | 3.15  | 3.24  | 0.02 | 0.12 | -1.07 | 0.86703  | 0.708979 | 0.946953 | 0.831212 |
| MmugDNA.26412.1.S1_at   | MmugDNA.26412.1 | 11.12 | 11.4  | 0.18 | 0.26 | -1.22 | 0.253045 | 0.313291 | 0.601764 | 0.567753 |
| MmugDNA.26414.1.S1_at   | MmugDNA.26414.1 | 4.39  | 4.15  | 0.13 | 0.14 | 1.18  | 0.435629 | 0.120038 | 0.721273 | 0.388718 |
| MmugDNA.26415.1.S1_at   | MmugDNA.26415.1 | 4.23  | 4.32  | 0    | 0.15 | -1.06 | 0.345726 | 0.281893 | 0.665264 | 0.544852 |
| MmugDNA.26416.1.S1_at   | MmugDNA.26416.1 | 6.92  | 6.95  | 0.19 | 0.07 | -1.02 | 0.903256 | 0.979611 | 0.961415 | 0.989059 |
| MmugDNA.26417.1.S1_at   | MmugDNA.26417.1 | 3.94  | 3.95  | 0.33 | 0.06 | -1    | 0.390914 | 0.338081 | 0.693845 | 0.585259 |
| MmugDNA.26418.1.S1_at   | MmugDNA.26418.1 | 3.91  | 3.92  | 0.25 | 0.12 | -1.01 | 0.480538 | 0.659764 | 0.748465 | 0.800854 |
| MmugDNA.26419.1.S1_at   | MmugDNA.26419.1 | 6.67  | 6.65  | 0.11 | 0.07 | 1.01  | 0.904104 | 0.955377 | 0.96166  | 0.974645 |
| MmugDNA.2642.1.S1_at    | MmugDNA.2642.1  | 6.52  | 5.77  | 0.37 | 0.36 | 1.69  | 0.034748 | 0.016933 | 0.33381  | 0.165006 |
| MmugDNA.26420.1.S1_at   | MmugDNA.26420.1 | 4.78  | 4.73  | 0.14 | 0.25 | 1.03  | 0.687421 | 0.367214 | 0.860396 | 0.606858 |
| MmugDNA.26421.1.S1_at   | MmugDNA.26421.1 | 4.15  | 3.91  | 0.43 | 0.26 | 1.17  | 0.850728 | 0.970961 | 0.940027 | 0.984141 |
| MmugDNA.26422.1.S1_at   | MmugDNA.26422.1 | 5.07  | 5.26  | 0.2  | 0.04 | -1.14 | 0.117695 | 0.16991  | 0.48184  | 0.446569 |
| MmugDNA.26423.1.S1_at   | MmugDNA.26423.1 | 4.37  | 4.36  | 0.13 | 0.02 | 1.01  | 0.949499 | 0.673649 | 0.980798 | 0.809337 |
| MmugDNA.26424.1.S1_at   | MmugDNA.26424.1 | 4.65  | 4.58  | 0.05 | 0.24 | 1.05  | 0.666421 | 0.844502 | 0.850439 | 0.911523 |
| MmugDNA.26425.1.S1_at   | MmugDNA.26425.1 | 5.47  | 5.92  | 0.32 | 0.25 | -1.36 | 0.153071 | 0.188533 | 0.517474 | 0.464458 |
| MmugDNA.26427.1.S1_at   | MmugDNA.26427.1 | 5.99  | 6.33  | 0.2  | 0.44 | -1.26 | 0.094213 | 0.035959 | 0.451714 | 0.234139 |
| MmugDNA.26428.1.S1_at   | MmugDNA.26428.1 | 12.05 | 11.18 | 0.29 | 0.02 | 1.83  | 0.006239 | 0.002433 | 0.19726  | 0.073093 |
| MmugDNA.26429.1.S1_at   | MmugDNA.26429.1 | 4.1   | 4.24  | 0.67 | 0.31 | -1.1  | 0.950608 | 0.419406 | 0.981366 | 0.643466 |
| MmugDNA.2643.1.S1_at    | MmugDNA.2643.1  | 11.57 | 11.62 | 0.19 | 0.43 | -1.04 | 0.602842 | 0.663617 | 0.816768 | 0.803033 |

|                         |                 |       |       |      |      |       |          |          |          |          |
|-------------------------|-----------------|-------|-------|------|------|-------|----------|----------|----------|----------|
| MmugDNA.26431.1.S1_at   | MmugDNA.26431.1 | 7.17  | 7.05  | 0.81 | 0.08 | 1.08  | 0.452656 | 0.620083 | 0.732216 | 0.775227 |
| MmugDNA.26433.1.S1_at   | MmugDNA.26433.1 | 3.45  | 3.29  | 0.19 | 0.06 | 1.12  | 0.107145 | 0.09383  | 0.467913 | 0.350281 |
| MmugDNA.26434.1.S1_at   | MmugDNA.26434.1 | 4.38  | 4.36  | 0.02 | 0.1  | 1.01  | 0.263239 | 0.193307 | 0.609336 | 0.468656 |
| MmugDNA.26437.1.S1_at   | MmugDNA.26437.1 | 4.51  | 4.36  | 0.21 | 0.08 | 1.11  | 0.155862 | 0.639669 | 0.520508 | 0.788389 |
| MmugDNA.26438.1.S1_at   | MmugDNA.26438.1 | 5.19  | 4.92  | 0.78 | 0.24 | 1.21  | 0.46505  | 0.647423 | 0.739772 | 0.793471 |
| MmugDNA.26439.1.S1_at   | MmugDNA.26439.1 | 5.3   | 5.3   | 0.06 | 0.06 | -1    | 0.864523 | 0.079691 | 0.94556  | 0.326981 |
| MmugDNA.2644.1.S1_at    | MmugDNA.2644.1  | 8.63  | 8.05  | 0.34 | 0.27 | 1.5   | 0.043557 | 0.014567 | 0.356798 | 0.153907 |
| MmugDNA.26440.1.S1_at   | MmugDNA.26440.1 | 3.6   | 3.85  | 0.08 | 0.28 | -1.19 | 0.15569  | 0.157663 | 0.520357 | 0.433137 |
| MmugDNA.26441.1.S1_at   | MmugDNA.26441.1 | 8.41  | 8.15  | 0.31 | 0.91 | 1.2   | 0.880693 | 0.791215 | 0.952025 | 0.879378 |
| MmugDNA.26442.1.S1_at   | MmugDNA.26442.1 | 9     | 8.74  | 0.06 | 0.27 | 1.2   | 0.268889 | 0.084429 | 0.613528 | 0.335717 |
| MmugDNA.26443.1.S1_at   | MmugDNA.26443.1 | 3.33  | 3.4   | 0.01 | 0.22 | -1.05 | 0.591865 | 0.859576 | 0.810672 | 0.919999 |
| MmugDNA.26444.1.S1_at   | MmugDNA.26444.1 | 6.98  | 5.93  | 0.67 | 1.1  | 2.06  | 0.318457 | 0.321506 | 0.648431 | 0.573226 |
| MmugDNA.26445.1.S1_at   | MmugDNA.26445.1 | 13.17 | 12.87 | 0.28 | 0.66 | 1.23  | 0.546576 | 0.724369 | 0.785591 | 0.840457 |
| MmugDNA.26448.1.S1_at   | MmugDNA.26448.1 | 10.28 | 10.31 | 0.21 | 0.23 | -1.02 | 0.402245 | 0.501577 | 0.701365 | 0.699719 |
| MmugDNA.26449.1.S1_at   | MmugDNA.26449.1 | 9.55  | 8.87  | 0.22 | 0.76 | 1.6   | 0.219837 | 0.282807 | 0.579133 | 0.545524 |
| MmugDNA.2645.1.S1_at    | MmugDNA.2645.1  | 8.01  | 7.52  | 0.4  | 0.61 | 1.41  | 0.169327 | 0.175287 | 0.533651 | 0.452061 |
| MmugDNA.26450.1.S1_at   | MmugDNA.26450.1 | 5.19  | 5.19  | 0.17 | 0.03 | -1    | 0.828447 | 0.756507 | 0.930342 | 0.858223 |
| MmugDNA.26451.1.S1_at   | MmugDNA.26451.1 | 9.23  | 8.95  | 0.18 | 0.34 | 1.21  | 0.487933 | 0.031753 | 0.752511 | 0.22064  |
| MmugDNA.26452.1.S1_at   | MmugDNA.26452.1 | 7.9   | 8.12  | 0.28 | 0.28 | -1.16 | 0.39539  | 0.245695 | 0.696442 | 0.515484 |
| MmugDNA.26452.1.S1_s_at | MmugDNA.26452.1 | 7.31  | 7.37  | 0.15 | 0.21 | -1.04 | 0.556026 | 0.376726 | 0.791585 | 0.614539 |
| MmugDNA.26453.1.S1_at   | MmugDNA.26453.1 | 3.21  | 3.17  | 0.05 | 0.16 | 1.03  | 0.892712 | 0.855795 | 0.957283 | 0.917707 |
| MmugDNA.26454.1.S1_at   | MmugDNA.26454.1 | 3.55  | 3.55  | 0.29 | 0.1  | -1.01 | 0.369239 | 0.500227 | 0.680609 | 0.698951 |
| MmugDNA.26455.1.S1_at   | MmugDNA.26455.1 | 12.37 | 12.95 | 0.14 | 0.17 | -1.49 | 0.006295 | 0.002585 | 0.197615 | 0.075213 |
| MmugDNA.26456.1.S1_at   | MmugDNA.26456.1 | 5.28  | 5.55  | 0.07 | 0.47 | -1.2  | 0.488072 | 0.351276 | 0.752663 | 0.594937 |
| MmugDNA.26457.1.S1_at   | MmugDNA.26457.1 | 4.63  | 4.51  | 0.24 | 0.15 | 1.09  | 0.892804 | 0.163989 | 0.957322 | 0.440128 |
| MmugDNA.26458.1.S1_at   | MmugDNA.26458.1 | 10.35 | 10.77 | 0.13 | 0.19 | -1.34 | 0.044774 | 0.017055 | 0.359043 | 0.165465 |
| MmugDNA.26459.1.S1_at   | MmugDNA.26459.1 | 10.08 | 10.02 | 0.13 | 0.18 | 1.04  | 0.185036 | 0.276177 | 0.548475 | 0.540179 |
| MmugDNA.26460.1.S1_at   | MmugDNA.26460.1 | 7.12  | 7.08  | 0.03 | 0.36 | 1.03  | 0.42308  | 0.194542 | 0.713797 | 0.469632 |
| MmugDNA.26462.1.S1_at   | MmugDNA.26462.1 | 6.96  | 7.1   | 0.26 | 0.11 | -1.1  | 0.473674 | 0.560118 | 0.744486 | 0.73651  |
| MmugDNA.26463.1.S1_at   | MmugDNA.26463.1 | 6.8   | 6.75  | 0.12 | 0.25 | 1.03  | 0.651245 | 0.67851  | 0.843066 | 0.81221  |
| MmugDNA.26464.1.S1_at   | MmugDNA.26464.1 | 4.17  | 4.11  | 0.16 | 0.25 | 1.04  | 0.9453   | 0.574127 | 0.979088 | 0.745639 |
| MmugDNA.26465.1.S1_at   | MmugDNA.26465.1 | 4.55  | 4.44  | 0.24 | 0.5  | 1.08  | 0.922294 | 0.458569 | 0.969885 | 0.671232 |
| MmugDNA.26468.1.S1_at   | MmugDNA.26468.1 | 9.44  | 10.45 | 0.22 | 0.21 | -2.01 | 0.003353 | 0.00151  | 0.177442 | 0.059146 |
| MmugDNA.26469.1.S1_at   | MmugDNA.26469.1 | 6.92  | 5.42  | 0.41 | 0.5  | 2.82  | 0.018547 | 0.009165 | 0.270581 | 0.126331 |
| MmugDNA.26470.1.S1_at   | MmugDNA.26470.1 | 5.85  | 5.85  | 0.26 | 0.45 | -1    | 0.38465  | 0.299693 | 0.690114 | 0.558037 |
| MmugDNA.26471.1.S1_at   | MmugDNA.26471.1 | 8.38  | 8.2   | 0.03 | 0.31 | 1.13  | 0.768002 | 0.358021 | 0.902473 | 0.599604 |
| MmugDNA.26472.1.S1_at   | MmugDNA.26472.1 | 13.22 | 13.22 | 0.07 | 0.04 | 1     | 0.80099  | 0.236184 | 0.917935 | 0.507225 |
| MmugDNA.26473.1.S1_at   | MmugDNA.26473.1 | 3.83  | 3.56  | 0.13 | 0.38 | 1.21  | 0.997991 | 0.732022 | 0.999237 | 0.844757 |
| MmugDNA.26474.1.S1_at   | MmugDNA.26474.1 | 12.87 | 13.07 | 0.15 | 0.23 | -1.15 | 0.104883 | 0.062782 | 0.46527  | 0.297193 |
| MmugDNA.26475.1.S1_at   | MmugDNA.26475.1 | 4.84  | 4.82  | 0.27 | 0.07 | 1.01  | 0.612404 | 0.453941 | 0.822158 | 0.668338 |
| MmugDNA.26477.1.S1_at   | MmugDNA.26477.1 | 12.06 | 10.21 | 0.76 | 0.38 | 3.6   | 0.027603 | 0.014839 | 0.308386 | 0.154918 |

|                         |                 |       |       |      |      |       |          |          |          |          |
|-------------------------|-----------------|-------|-------|------|------|-------|----------|----------|----------|----------|
| MmugDNA.26478.1.S1_at   | MmugDNA.26478.1 | 9.94  | 10.41 | 0.22 | 0.15 | -1.38 | 0.041453 | 0.011764 | 0.351747 | 0.140492 |
| MmugDNA.26479.1.S1_at   | MmugDNA.26479.1 | 9.96  | 10.18 | 0.13 | 0.47 | -1.17 | 0.163814 | 0.214573 | 0.528049 | 0.488385 |
| MmugDNA.2648.1.S1_at    | MmugDNA.2648.1  | 3.62  | 3.7   | 0.18 | 0.2  | -1.06 | 0.676737 | 0.832474 | 0.855219 | 0.903893 |
| MmugDNA.26480.1.S1_at   | MmugDNA.26480.1 | 5.93  | 5.78  | 0.14 | 0.42 | 1.11  | 0.180041 | 0.310028 | 0.544219 | 0.565253 |
| MmugDNA.26481.1.S1_at   | MmugDNA.26481.1 | 13.85 | 13.87 | 0.1  | 0.06 | -1.01 | 0.658732 | 0.707775 | 0.846726 | 0.830472 |
| MmugDNA.26482.1.S1_at   | MmugDNA.26482.1 | 12.78 | 12.73 | 0.06 | 0.12 | 1.03  | 0.587153 | 0.095512 | 0.808418 | 0.352588 |
| MmugDNA.26483.1.S1_at   | MmugDNA.26483.1 | 3.39  | 3.39  | 0.03 | 0.01 | 1     | 0.268844 | 0.408029 | 0.613528 | 0.635378 |
| MmugDNA.26484.1.S1_x_at | MmugDNA.26484.1 | 7.72  | 7.64  | 0.66 | 0.17 | 1.05  | 0.320782 | 0.459026 | 0.649589 | 0.671535 |
| MmugDNA.26486.1.S1_at   | MmugDNA.26486.1 | 10.31 | 9.88  | 0.31 | 0.76 | 1.35  | 0.37309  | 0.376757 | 0.683245 | 0.614541 |
| MmugDNA.26487.1.S1_at   | MmugDNA.26487.1 | 4.02  | 4.28  | 0.25 | 0.53 | -1.2  | 0.296704 | 0.198881 | 0.632686 | 0.473482 |
| MmugDNA.26487.1.S1_x_at | MmugDNA.26487.1 | 4.61  | 4.74  | 0.1  | 0.43 | -1.09 | 0.222519 | 0.036423 | 0.580951 | 0.235375 |
| MmugDNA.26488.1.S1_at   | MmugDNA.26488.1 | 8.11  | 8.32  | 0.12 | 0.05 | -1.16 | 0.068757 | 0.229541 | 0.410653 | 0.501534 |
| MmugDNA.2649.1.S1_at    | MmugDNA.2649.1  | 2.76  | 2.96  | 0.01 | 0.14 | -1.15 | 0.071831 | 0.090684 | 0.415886 | 0.345151 |
| MmugDNA.26490.1.S1_at   | MmugDNA.26490.1 | 3.43  | 3.35  | 0.43 | 0.21 | 1.06  | 0.382856 | 0.078114 | 0.688989 | 0.324578 |
| MmugDNA.26492.1.S1_at   | MmugDNA.26492.1 | 7.24  | 6.32  | 0.2  | 0.6  | 1.89  | 0.060519 | 0.058237 | 0.393715 | 0.287992 |
| MmugDNA.26493.1.S1_at   | MmugDNA.26493.1 | 5.66  | 5.26  | 0.27 | 0.06 | 1.31  | 0.158783 | 0.198887 | 0.523973 | 0.473482 |
| MmugDNA.26494.1.S1_at   | MmugDNA.26494.1 | 8.67  | 7.03  | 0.55 | 0.3  | 3.1   | 0.020228 | 0.01037  | 0.277311 | 0.133236 |
| MmugDNA.26495.1.S1_at   | MmugDNA.26495.1 | 3.7   | 3.85  | 0.12 | 0.11 | -1.11 | 0.25031  | 0.323376 | 0.600389 | 0.574453 |
| MmugDNA.26496.1.S1_at   | MmugDNA.26496.1 | 9.39  | 8.68  | 0.49 | 1.52 | 1.64  | 0.697234 | 0.827617 | 0.865585 | 0.901081 |
| MmugDNA.26497.1.S1_at   | MmugDNA.26497.1 | 8.31  | 7.57  | 0.97 | 0.36 | 1.67  | 0.25691  | 0.308114 | 0.60443  | 0.564219 |
| MmugDNA.26497.1.S1_x_at | MmugDNA.26497.1 | 8.35  | 7.98  | 0.92 | 0.16 | 1.3   | 0.206099 | 0.236691 | 0.568474 | 0.507459 |
| MmugDNA.26498.1.S1_at   | MmugDNA.26498.1 | 4.15  | 4.14  | 0.14 | 0.23 | 1     | 0.620311 | 0.782189 | 0.826026 | 0.873828 |
| MmugDNA.26499.1.S1_at   | MmugDNA.26499.1 | 5.91  | 5.84  | 0.55 | 0.36 | 1.05  | 0.797515 | 0.93799  | 0.916098 | 0.964856 |
| MmugDNA.265.1.S1_at     | MmugDNA.265.1   | 9.13  | 8.88  | 0.05 | 1.04 | 1.19  | 0.648063 | 0.572234 | 0.841735 | 0.744313 |
| MmugDNA.2650.1.S1_at    | MmugDNA.2650.1  | 3.82  | 3.84  | 0.09 | 0.22 | -1.02 | 0.713317 | 0.418817 | 0.874423 | 0.643118 |
| MmugDNA.26501.1.S1_at   | MmugDNA.26501.1 | 10.53 | 10.96 | 0.18 | 0.24 | -1.34 | 0.076344 | 0.152034 | 0.424774 | 0.42681  |
| MmugDNA.26502.1.S1_at   | MmugDNA.26502.1 | 4     | 3.98  | 0.3  | 0.21 | 1.01  | 0.742181 | 0.598281 | 0.889679 | 0.760715 |
| MmugDNA.26503.1.S1_at   | MmugDNA.26503.1 | 6.36  | 6.7   | 0.16 | 0.4  | -1.26 | 0.241804 | 0.08806  | 0.593977 | 0.341547 |
| MmugDNA.26504.1.S1_at   | MmugDNA.26504.1 | 5.3   | 5.1   | 0.44 | 0.16 | 1.15  | 0.281718 | 0.392095 | 0.62238  | 0.625588 |
| MmugDNA.26507.1.S1_at   | MmugDNA.26507.1 | 5.83  | 5.84  | 0.21 | 0.07 | -1.01 | 0.523915 | 0.071955 | 0.772859 | 0.314293 |
| MmugDNA.26508.1.S1_at   | MmugDNA.26508.1 | 13.15 | 13.32 | 0.12 | 0.16 | -1.12 | 0.465039 | 0.41594  | 0.739772 | 0.641275 |
| MmugDNA.2651.1.S1_at    | MmugDNA.2651.1  | 7.48  | 7.13  | 0.63 | 0.41 | 1.28  | 0.637355 | 0.832322 | 0.836032 | 0.903821 |
| MmugDNA.2651.1.S1_s_at  | MmugDNA.2651.1  | 3.22  | 3.11  | 0.01 | 0.21 | 1.08  | 0.456578 | 0.340658 | 0.734529 | 0.586818 |
| MmugDNA.2651.1.S1_x_at  | MmugDNA.2651.1  | 5.63  | 5.46  | 0.64 | 0.33 | 1.13  | 0.730421 | 0.800504 | 0.883184 | 0.885198 |
| MmugDNA.26512.1.S1_at   | MmugDNA.26512.1 | 5.26  | 7.05  | 0.45 | 0.98 | -3.45 | 0.020615 | 0.012495 | 0.279075 | 0.144302 |
| MmugDNA.26513.1.S1_at   | MmugDNA.26513.1 | 3.05  | 3.09  | 0.11 | 0.04 | -1.02 | 0.760336 | 0.566216 | 0.89894  | 0.74033  |
| MmugDNA.26515.1.S1_at   | MmugDNA.26515.1 | 6     | 5.7   | 0.31 | 0.27 | 1.23  | 0.250279 | 0.571177 | 0.600389 | 0.743594 |
| MmugDNA.26516.1.S1_at   | MmugDNA.26516.1 | 4.95  | 5.91  | 1.24 | 0.18 | -1.95 | 0.747944 | 0.91504  | 0.892185 | 0.952293 |
| MmugDNA.26517.1.S1_at   | MmugDNA.26517.1 | 6.56  | 7.08  | 0    | 0.47 | -1.43 | 0.156941 | 0.139771 | 0.521736 | 0.413114 |
| MmugDNA.26518.1.S1_s_at | MmugDNA.26518.1 | 6.26  | 6.59  | 0.22 | 0.57 | -1.26 | 0.141723 | 0.184921 | 0.509159 | 0.460776 |
| MmugDNA.26519.1.S1_at   | MmugDNA.26519.1 | 3.04  | 3.56  | 0.46 | 0.1  | -1.43 | 0.415045 | 0.452355 | 0.709338 | 0.667046 |

|                         |                 |       |       |      |      |       |          |          |          |          |
|-------------------------|-----------------|-------|-------|------|------|-------|----------|----------|----------|----------|
| MmugDNA.2652.1.S1_at    | MmugDNA.2652.1  | 5.35  | 5.29  | 0.08 | 0.03 | 1.04  | 0.720433 | 0.060808 | 0.87753  | 0.293306 |
| MmugDNA.26521.1.S1_at   | MmugDNA.26521.1 | 4.49  | 4.51  | 0.97 | 0.2  | -1.02 | 0.426746 | 0.386093 | 0.71596  | 0.621345 |
| MmugDNA.26521.1.S1_x_at | MmugDNA.26521.1 | 4.94  | 5     | 0.79 | 0.09 | -1.04 | 0.38878  | 0.483021 | 0.692804 | 0.687687 |
| MmugDNA.26522.1.S1_at   | MmugDNA.26522.1 | 10.09 | 11.07 | 0.16 | 0.17 | -1.97 | 0.002671 | 0.00076  | 0.164386 | 0.04544  |
| MmugDNA.26523.1.S1_s_at | MmugDNA.26523.1 | 9.14  | 8.91  | 0.32 | 1.23 | 1.18  | 0.885266 | 0.98143  | 0.954022 | 0.989775 |
| MmugDNA.26524.1.S1_at   | MmugDNA.26524.1 | 3.87  | 4.34  | 0.31 | 0.12 | -1.39 | 0.206687 | 0.252987 | 0.568816 | 0.521279 |
| MmugDNA.26526.1.S1_at   | MmugDNA.26526.1 | 4.35  | 4.5   | 0.37 | 0.09 | -1.11 | 0.697781 | 0.878884 | 0.865777 | 0.930872 |
| MmugDNA.26527.1.S1_at   | MmugDNA.26527.1 | 11.8  | 11.07 | 0.1  | 0.53 | 1.67  | 0.252969 | 0.219003 | 0.60168  | 0.492768 |
| MmugDNA.26528.1.S1_at   | MmugDNA.26528.1 | 5.93  | 5.35  | 0.38 | 0.08 | 1.49  | 0.184737 | 0.259976 | 0.54835  | 0.52675  |
| MmugDNA.2653.1.S1_at    | MmugDNA.2653.1  | 4.99  | 4.65  | 0.53 | 0.14 | 1.27  | 0.408193 | 0.568648 | 0.70497  | 0.742052 |
| MmugDNA.26530.1.S1_at   | MmugDNA.26530.1 | 6.63  | 6.19  | 0.39 | 0.27 | 1.36  | 0.472139 | 0.244202 | 0.743515 | 0.514167 |
| MmugDNA.32549.1.S1_s_at | MmugDNA.32549.1 | 14.78 | 14.77 | 0    | 0    | 1.01  | 0.008761 | 0.012961 | 0.221033 | 0.146501 |
| MmugDNA.32549.1.S1_x_at | MmugDNA.32549.1 | 14.45 | 14.42 | 0.02 | 0.03 | 1.02  | 0.093391 | 0.078229 | 0.450649 | 0.324765 |
| MmugDNA.26534.1.S1_at   | MmugDNA.26534.1 | 10.89 | 10.64 | 0.11 | 0.11 | 1.19  | 0.043447 | 0.036675 | 0.356741 | 0.235973 |
| MmugDNA.26535.1.S1_at   | MmugDNA.26535.1 | 14.39 | 14.45 | 0.07 | 0.04 | -1.04 | 0.2833   | 0.415412 | 0.623353 | 0.640873 |
| MmugDNA.26536.1.S1_at   | MmugDNA.26536.1 | 5.08  | 4.94  | 0.26 | 0.19 | 1.1   | 0.209597 | 0.055403 | 0.570957 | 0.28129  |
| MmugDNA.26538.1.S1_at   | MmugDNA.26538.1 | 5.7   | 5.95  | 1.16 | 0.98 | -1.19 | 0.878388 | 0.661221 | 0.951188 | 0.801687 |
| MmugDNA.26539.1.S1_at   | MmugDNA.26539.1 | 6.68  | 6.94  | 0.2  | 0.15 | -1.2  | 0.215008 | 0.261625 | 0.575507 | 0.528095 |
| MmugDNA.2654.1.S1_at    | MmugDNA.2654.1  | 5.21  | 5.25  | 0.03 | 0.09 | -1.02 | 0.194081 | 0.734012 | 0.557718 | 0.845896 |
| MmugDNA.26540.1.S1_at   | MmugDNA.26540.1 | 4.99  | 4.48  | 0.25 | 0.33 | 1.42  | 0.210449 | 0.265037 | 0.57172  | 0.531    |
| MmugDNA.26542.1.S1_at   | MmugDNA.26542.1 | 3.62  | 3.81  | 0.1  | 0.16 | -1.14 | 0.134176 | 0.179994 | 0.500726 | 0.456552 |
| MmugDNA.26543.1.S1_at   | MmugDNA.26543.1 | 9.99  | 10.49 | 0.11 | 0.1  | -1.41 | 0.006546 | 0.002828 | 0.199625 | 0.078363 |
| MmugDNA.26544.1.S1_at   | MmugDNA.26544.1 | 2.81  | 2.95  | 0.27 | 0.11 | -1.1  | 0.925004 | 0.744964 | 0.970923 | 0.852232 |
| MmugDNA.26546.1.S1_at   | MmugDNA.26546.1 | 8.43  | 8.31  | 0.08 | 0.42 | 1.09  | 0.677634 | 0.643733 | 0.855562 | 0.791112 |
| MmugDNA.26548.1.S1_at   | MmugDNA.26548.1 | 8.35  | 7.62  | 0.54 | 0.23 | 1.66  | 0.197316 | 0.243751 | 0.560362 | 0.513899 |
| MmugDNA.26549.1.S1_at   | MmugDNA.26549.1 | 5.76  | 5.73  | 0.21 | 0.06 | 1.02  | 0.695283 | 0.687362 | 0.864865 | 0.817576 |
| MmugDNA.2655.1.S1_at    | MmugDNA.2655.1  | 6.78  | 6.76  | 0.76 | 0.21 | 1.02  | 0.950625 | 0.989284 | 0.981366 | 0.993909 |
| MmugDNA.36289.1.S1_s_at | MmugDNA.36289.1 | 10.53 | 9.35  | 0.59 | 0.64 | 2.28  | 0.143407 | 0.224016 | 0.510312 | 0.497045 |
| MmugDNA.26551.1.S1_at   | MmugDNA.26551.1 | 8.58  | 8.95  | 0.17 | 0.46 | -1.29 | 0.182012 | 0.212791 | 0.546458 | 0.486769 |
| MmugDNA.26554.1.S1_at   | MmugDNA.26554.1 | 4.05  | 4.03  | 0.07 | 0.15 | 1.01  | 0.313856 | 0.36097  | 0.645387 | 0.60201  |
| MmugDNA.26555.1.S1_at   | MmugDNA.26555.1 | 13.3  | 12.62 | 0.16 | 0.68 | 1.6   | 0.07209  | 0.04976  | 0.416191 | 0.268151 |
| MmugDNA.26558.1.S1_at   | MmugDNA.26558.1 | 9.92  | 9.61  | 0.27 | 0.09 | 1.24  | 0.068448 | 0.04851  | 0.410144 | 0.265472 |
| MmugDNA.26559.1.S1_at   | MmugDNA.26559.1 | 4.34  | 3.83  | 0.66 | 0.16 | 1.42  | 0.215798 | 0.132326 | 0.575954 | 0.404294 |
| MmugDNA.26560.1.S1_at   | MmugDNA.26560.1 | 5.54  | 6     | 0.23 | 0.58 | -1.37 | 0.142317 | 0.06892  | 0.509631 | 0.308874 |
| MmugDNA.26562.1.S1_at   | MmugDNA.26562.1 | 9.51  | 9.62  | 0.74 | 0.16 | -1.09 | 0.809396 | 0.82014  | 0.922228 | 0.896336 |
| MmugDNA.26562.1.S1_s_at | MmugDNA.26562.1 | 11.15 | 11.18 | 0.82 | 0.41 | -1.02 | 0.763167 | 0.928466 | 0.900112 | 0.959353 |
| MmugDNA.26563.1.S1_at   | MmugDNA.26563.1 | 5.33  | 5.48  | 0.17 | 0.12 | -1.11 | 0.187314 | 0.383391 | 0.550374 | 0.619384 |
| MmugDNA.26565.1.S1_at   | MmugDNA.26565.1 | 7.97  | 7.7   | 0.22 | 0.14 | 1.21  | 0.07886  | 0.066556 | 0.428609 | 0.303733 |
| MmugDNA.26566.1.S1_at   | MmugDNA.26566.1 | 3.15  | 3.2   | 0.13 | 0.11 | -1.03 | 0.700648 | 0.841509 | 0.86753  | 0.909663 |
| MmugDNA.26567.1.S1_at   | MmugDNA.26567.1 | 10.23 | 10.28 | 0.09 | 0.14 | -1.04 | 0.41802  | 0.682517 | 0.71107  | 0.814568 |
| MmugDNA.26567.1.S1_s_at | MmugDNA.26567.1 | 11.18 | 11.29 | 0.13 | 0.05 | -1.08 | 0.615233 | 0.526256 | 0.823342 | 0.715488 |

|                         |                 |       |       |      |      |       |          |          |          |          |
|-------------------------|-----------------|-------|-------|------|------|-------|----------|----------|----------|----------|
| MmugDNA.26569.1.S1_at   | MmugDNA.26569.1 | 3.19  | 3.27  | 0.2  | 0.11 | -1.06 | 0.617293 | 0.580311 | 0.824662 | 0.749618 |
| MmugDNA.2657.1.S1_at    | MmugDNA.2657.1  | 5.35  | 5.28  | 0.17 | 0.03 | 1.05  | 0.523655 | 0.703214 | 0.772676 | 0.827928 |
| MmugDNA.26570.1.S1_at   | MmugDNA.26570.1 | 2.91  | 3.01  | 1.41 | 0.15 | -1.07 | 0.433244 | 0.573278 | 0.719871 | 0.744994 |
| MmugDNA.26570.1.S1_x_at | MmugDNA.26570.1 | 2.81  | 2.78  | 1.43 | 0.06 | 1.02  | 0.35988  | 0.462276 | 0.674027 | 0.673638 |
| MmugDNA.26571.1.S1_at   | MmugDNA.26571.1 | 3.16  | 3.09  | 0.27 | 0.16 | 1.05  | 0.974318 | 0.706094 | 0.989954 | 0.829633 |
| MmugDNA.26572.1.S1_at   | MmugDNA.26572.1 | 6.19  | 6.35  | 0.12 | 0.34 | -1.12 | 0.23525  | 0.235177 | 0.589342 | 0.50629  |
| MmugDNA.26573.1.S1_at   | MmugDNA.26573.1 | 4.03  | 3.92  | 0.34 | 0.13 | 1.08  | 0.487834 | 0.608914 | 0.752402 | 0.767385 |
| MmugDNA.26574.1.S1_at   | MmugDNA.26574.1 | 9.52  | 8.95  | 0.24 | 0.23 | 1.49  | 0.086275 | 0.065931 | 0.440224 | 0.30216  |
| MmugDNA.26576.1.S1_at   | MmugDNA.26576.1 | 3.34  | 3.15  | 0.43 | 0.15 | 1.14  | 0.186977 | 0.237658 | 0.550106 | 0.50826  |
| MmugDNA.2658.1.S1_at    | MmugDNA.2658.1  | 7.08  | 7.68  | 0.16 | 0.45 | -1.52 | 0.0399   | 0.03021  | 0.34828  | 0.21576  |
| MmugDNA.26580.1.S1_at   | MmugDNA.26580.1 | 10.02 | 10.21 | 0.25 | 0.21 | -1.14 | 0.988867 | 0.500246 | 0.996043 | 0.698951 |
| MmugDNA.26581.1.S1_at   | MmugDNA.26581.1 | 4.33  | 4.33  | 0.12 | 0.61 | 1     | 0.323778 | 0.445789 | 0.651741 | 0.662505 |
| MmugDNA.26582.1.S1_at   | MmugDNA.26582.1 | 8.65  | 8.45  | 0.86 | 1.34 | 1.15  | 0.565558 | 0.53294  | 0.797194 | 0.719308 |
| MmugDNA.26583.1.S1_at   | MmugDNA.26583.1 | 6.1   | 6.2   | 0.3  | 0.44 | -1.07 | 0.607727 | 0.789652 | 0.819497 | 0.87847  |
| MmugDNA.31842.1.S1_s_at | MmugDNA.31842.1 | 3.21  | 3.39  | 0.11 | 0.14 | -1.14 | 0.04338  | 0.042459 | 0.356711 | 0.250702 |
| MmugDNA.26586.1.S1_at   | MmugDNA.26586.1 | 8.64  | 8.67  | 0.06 | 0.36 | -1.02 | 0.377088 | 0.67529  | 0.685542 | 0.81026  |
| MmugDNA.26587.1.S1_at   | MmugDNA.26587.1 | 7.6   | 7.58  | 0.12 | 0.09 | 1.01  | 0.938137 | 0.389834 | 0.976291 | 0.623878 |
| MmugDNA.26589.1.S1_x_at | MmugDNA.26589.1 | 7.36  | 7.4   | 0.45 | 0.07 | -1.02 | 0.447719 | 0.603512 | 0.729195 | 0.764189 |
| MmugDNA.2659.1.S1_at    | MmugDNA.2659.1  | 9.67  | 9.68  | 0.56 | 0.62 | -1.01 | 0.889357 | 0.926102 | 0.955717 | 0.95813  |
| MmugDNA.26590.1.S1_at   | MmugDNA.26590.1 | 9.89  | 9.65  | 0.17 | 0.86 | 1.18  | 0.617383 | 0.619506 | 0.824674 | 0.774712 |
| MmugDNA.26591.1.S1_at   | MmugDNA.26591.1 | 5.97  | 7.76  | 0.99 | 0.69 | -3.47 | 0.038315 | 0.029445 | 0.34385  | 0.213368 |
| MmugDNA.26592.1.S1_at   | MmugDNA.26592.1 | 7.63  | 7.58  | 0.07 | 0.08 | 1.04  | 0.397962 | 0.716485 | 0.698458 | 0.835749 |
| MmugDNA.26594.1.S1_at   | MmugDNA.26594.1 | 4.02  | 4.22  | 0.09 | 0.04 | -1.15 | 0.069667 | 0.200785 | 0.412699 | 0.475282 |
| MmugDNA.26595.1.S1_at   | MmugDNA.26595.1 | 10.13 | 9.75  | 0.03 | 0.1  | 1.3   | 0.008212 | 0.011937 | 0.216841 | 0.141357 |
| MmugDNA.26596.1.S1_at   | MmugDNA.26596.1 | 9.55  | 8.52  | 0.2  | 0.29 | 2.05  | 0.008142 | 0.002429 | 0.216841 | 0.073093 |
| MmugDNA.26598.1.S1_at   | MmugDNA.26598.1 | 10.09 | 10.54 | 0.52 | 0.25 | -1.36 | 0.170137 | 0.210388 | 0.534249 | 0.484266 |
| MmugDNA.26599.1.S1_at   | MmugDNA.26599.1 | 5.53  | 5.81  | 0.13 | 0.21 | -1.21 | 0.095974 | 0.104455 | 0.454074 | 0.365719 |
| MmugDNA.266.1.S1_s_at   | MmugDNA.266.1   | 3.2   | 3.2   | 0.02 | 0.21 | 1     | 0.424546 | 0.291296 | 0.714559 | 0.551803 |
| MmugDNA.26600.1.S1_at   | MmugDNA.26600.1 | 5.03  | 5.16  | 0.26 | 0.06 | -1.1  | 0.661311 | 0.395672 | 0.848124 | 0.627623 |
| MmugDNA.26601.1.S1_at   | MmugDNA.26601.1 | 4.68  | 4.91  | 0.5  | 1.13 | -1.17 | 0.433922 | 0.584897 | 0.720297 | 0.75256  |
| MmugDNA.26603.1.S1_at   | MmugDNA.26603.1 | 4.73  | 4.82  | 0.09 | 0.14 | -1.06 | 0.156733 | 0.176008 | 0.521541 | 0.452526 |
| MmugDNA.26605.1.S1_at   | MmugDNA.26605.1 | 9.58  | 9.54  | 0.36 | 0.1  | 1.03  | 0.870618 | 0.027767 | 0.948314 | 0.208035 |
| MmugDNA.26606.1.S1_at   | MmugDNA.26606.1 | 7.89  | 8.31  | 0.28 | 0.37 | -1.33 | 0.08975  | 0.087073 | 0.445334 | 0.340038 |
| MmugDNA.26607.1.S1_at   | MmugDNA.26607.1 | 4.37  | 4.17  | 0.21 | 0.15 | 1.15  | 0.490553 | 0.073364 | 0.754483 | 0.316469 |
| MmugDNA.26608.1.S1_at   | MmugDNA.26608.1 | 10.95 | 11.32 | 0.06 | 0.19 | -1.3  | 0.074864 | 0.056343 | 0.421257 | 0.283351 |
| MmugDNA.26609.1.S1_at   | MmugDNA.26609.1 | 10.18 | 7.92  | 0.59 | 1.29 | 4.78  | 0.071196 | 0.06474  | 0.414877 | 0.30035  |
| MmugDNA.26611.1.S1_at   | MmugDNA.26611.1 | 6.56  | 6.5   | 0.07 | 0.53 | 1.04  | 0.765282 | 0.564318 | 0.901251 | 0.739165 |
| MmugDNA.26612.1.S1_at   | MmugDNA.26612.1 | 8.83  | 7.79  | 0.54 | 0.32 | 2.06  | 0.020423 | 0.012812 | 0.278047 | 0.14584  |
| MmugDNA.26614.1.S1_at   | MmugDNA.26614.1 | 11.71 | 10.85 | 0.14 | 0.19 | 1.82  | 0.003255 | 0.000798 | 0.17596  | 0.046064 |
| MmugDNA.26615.1.S1_at   | MmugDNA.26615.1 | 6.46  | 6.77  | 0.23 | 0.12 | -1.24 | 0.097666 | 0.08514  | 0.456709 | 0.336972 |
| MmugDNA.26616.1.S1_at   | MmugDNA.26616.1 | 5.66  | 5.79  | 0.33 | 0.05 | -1.09 | 0.674839 | 0.546532 | 0.854234 | 0.728079 |



|                         |                 |       |       |      |      |       |          |          |          |          |
|-------------------------|-----------------|-------|-------|------|------|-------|----------|----------|----------|----------|
| MmugDNA.26617.1.S1_at   | MmugDNA.26617.1 | 3.56  | 3.98  | 0.24 | 0.38 | -1.34 | 0.416053 | 0.601989 | 0.709642 | 0.763151 |
| MmugDNA.26618.1.S1_at   | MmugDNA.26618.1 | 5.27  | 5.53  | 0.25 | 0.14 | -1.2  | 0.617227 | 0.602033 | 0.824628 | 0.763167 |
| MmugDNA.26619.1.S1_at   | MmugDNA.26619.1 | 4.18  | 4.3   | 0.47 | 0.29 | -1.08 | 0.854341 | 0.316159 | 0.941105 | 0.56963  |
| MmugDNA.26620.1.S1_at   | MmugDNA.26620.1 | 7.05  | 6.58  | 0.24 | 0.72 | 1.39  | 0.786973 | 0.085576 | 0.911414 | 0.337567 |
| MmugDNA.26621.1.S1_at   | MmugDNA.26621.1 | 3.71  | 3.78  | 0.11 | 0.07 | -1.05 | 0.190221 | 0.485008 | 0.553    | 0.688893 |
| MmugDNA.26622.1.S1_at   | MmugDNA.26622.1 | 3.66  | 3.69  | 0.04 | 0.2  | -1.02 | 0.626342 | 0.798642 | 0.829532 | 0.884045 |
| MmugDNA.26624.1.S1_at   | MmugDNA.26624.1 | 6.49  | 6.43  | 0.39 | 0.11 | 1.04  | 0.63619  | 0.463997 | 0.835356 | 0.674769 |
| MmugDNA.26625.1.S1_at   | MmugDNA.26625.1 | 3.23  | 3.37  | 0.19 | 0.2  | -1.1  | 0.998963 | 0.553223 | 0.9997   | 0.73239  |
| MmugDNA.26628.1.S1_at   | MmugDNA.26628.1 | 5.82  | 4.71  | 0.48 | 0.2  | 2.15  | 0.072271 | 0.095692 | 0.416651 | 0.3527   |
| MmugDNA.2663.1.S1_at    | MmugDNA.2663.1  | 3.58  | 3.59  | 0    | 0.07 | -1    | 0.448575 | 0.315429 | 0.729722 | 0.568949 |
| MmugDNA.26630.1.S1_at   | MmugDNA.26630.1 | 5.6   | 7.27  | 1.11 | 1.48 | -3.19 | 0.192317 | 0.178444 | 0.555414 | 0.454778 |
| MmugDNA.26631.1.S1_at   | MmugDNA.26631.1 | 3.76  | 3.74  | 0.08 | 0.24 | 1.02  | 0.47557  | 0.809501 | 0.745847 | 0.890191 |
| MmugDNA.26632.1.S1_at   | MmugDNA.26632.1 | 5.02  | 5     | 0.05 | 0.06 | 1.02  | 0.688846 | 0.008603 | 0.861215 | 0.123072 |
| MmugDNA.26633.1.S1_at   | MmugDNA.26633.1 | 6.14  | 6.23  | 0.16 | 0.07 | -1.06 | 0.699661 | 0.631619 | 0.867011 | 0.782878 |
| MmugDNA.26634.1.S1_at   | MmugDNA.26634.1 | 4.34  | 4.32  | 0.3  | 0.17 | 1.02  | 0.988351 | 0.635462 | 0.995905 | 0.785405 |
| MmugDNA.26635.1.S1_at   | MmugDNA.26635.1 | 4.71  | 4.61  | 0.47 | 0.22 | 1.07  | 0.493314 | 0.746163 | 0.756133 | 0.852688 |
| MmugDNA.26636.1.S1_at   | MmugDNA.26636.1 | 4.76  | 4.57  | 0.2  | 0.28 | 1.14  | 0.253456 | 0.337086 | 0.602055 | 0.584337 |
| MmugDNA.26638.1.S1_at   | MmugDNA.26638.1 | 3.45  | 3.52  | 0.37 | 0.25 | -1.05 | 0.841668 | 0.887905 | 0.936215 | 0.936115 |
| MmugDNA.26639.1.S1_at   | MmugDNA.26639.1 | 6.4   | 6.46  | 0.09 | 0.19 | -1.04 | 0.577147 | 0.451938 | 0.80344  | 0.666713 |
| MmugDNA.26640.1.S1_at   | MmugDNA.26640.1 | 3.6   | 3.84  | 0.62 | 0.74 | -1.19 | 0.604337 | 0.528527 | 0.817698 | 0.716664 |
| MmugDNA.26641.1.S1_at   | MmugDNA.26641.1 | 8.26  | 7.96  | 0.26 | 0.28 | 1.22  | 0.297034 | 0.098021 | 0.632904 | 0.355964 |
| MmugDNA.26644.1.S1_at   | MmugDNA.26644.1 | 6.42  | 6.33  | 0.11 | 0.08 | 1.07  | 0.136031 | 0.672777 | 0.502862 | 0.808768 |
| MmugDNA.26647.1.S1_at   | MmugDNA.26647.1 | 6.67  | 7.04  | 0.19 | 0.11 | -1.29 | 0.042059 | 0.023089 | 0.353974 | 0.190213 |
| MmugDNA.26649.1.S1_at   | MmugDNA.26649.1 | 5.31  | 5.41  | 0.07 | 0.03 | -1.07 | 0.09314  | 0.255416 | 0.450362 | 0.523445 |
| MmugDNA.2665.1.S1_at    | MmugDNA.2665.1  | 7.89  | 7.32  | 0.2  | 0.24 | 1.48  | 0.034779 | 0.00619  | 0.333943 | 0.106774 |
| MmugDNA.26650.1.S1_at   | MmugDNA.26650.1 | 6.7   | 6.2   | 0.19 | 0.52 | 1.42  | 0.067085 | 0.146104 | 0.407071 | 0.420092 |
| MmugDNA.26651.1.S1_at   | MmugDNA.26651.1 | 5.62  | 5.46  | 1.13 | 0.54 | 1.11  | 0.749915 | 0.901457 | 0.892789 | 0.943931 |
| MmugDNA.26652.1.S1_at   | MmugDNA.26652.1 | 4.21  | 4.51  | 0.17 | 0.13 | -1.23 | 0.129648 | 0.1715   | 0.495794 | 0.447895 |
| MmugDNA.26653.1.S1_at   | MmugDNA.26653.1 | 3.82  | 3.66  | 0.59 | 0.08 | 1.11  | 0.299358 | 0.415499 | 0.634876 | 0.64091  |
| MmugDNA.26654.1.S1_at   | MmugDNA.26654.1 | 7.9   | 7.91  | 0.3  | 0.56 | -1.01 | 0.658843 | 0.432846 | 0.846726 | 0.653185 |
| MmugDNA.26655.1.S1_at   | MmugDNA.26655.1 | 3.52  | 3.75  | 0.17 | 0.14 | -1.17 | 0.077717 | 0.057645 | 0.427714 | 0.286357 |
| MmugDNA.26656.1.S1_at   | MmugDNA.26656.1 | 11.95 | 10.91 | 0.27 | 0.53 | 2.06  | 0.066591 | 0.05947  | 0.406564 | 0.290548 |
| MmugDNA.26657.1.S1_at   | MmugDNA.26657.1 | 5.54  | 5.51  | 0.28 | 0.18 | 1.03  | 0.454418 | 0.67773  | 0.733188 | 0.811787 |
| MmugDNA.26658.1.S1_at   | MmugDNA.26658.1 | 4.66  | 3.91  | 0.91 | 0.15 | 1.67  | 0.215567 | 0.229274 | 0.575924 | 0.501527 |
| MmugDNA.26659.1.S1_at   | MmugDNA.26659.1 | 6.93  | 7.12  | 0.15 | 0.21 | -1.14 | 0.24865  | 0.260354 | 0.599429 | 0.526915 |
| MmugDNA.2666.1.S1_at    | MmugDNA.2666.1  | 9.56  | 9.17  | 0.25 | 0.66 | 1.31  | 0.765416 | 0.171233 | 0.901297 | 0.447792 |
| MmugDNA.26660.1.S1_at   | MmugDNA.26660.1 | 7.8   | 7.87  | 0.28 | 0.06 | -1.05 | 0.715194 | 0.842035 | 0.875005 | 0.910013 |
| MmugDNA.26662.1.S1_at   | MmugDNA.26662.1 | 3.11  | 3.55  | 0    | 0.26 | -1.36 | 0.130474 | 0.101863 | 0.496851 | 0.361836 |
| MmugDNA.26663.1.S1_at   | MmugDNA.26663.1 | 6.35  | 4.65  | 1.5  | 0.63 | 3.24  | 0.284049 | 0.211947 | 0.623933 | 0.48595  |
| MmugDNA.26663.1.S1_x_at | MmugDNA.26663.1 | 6.98  | 5.53  | 1.2  | 0.53 | 2.73  | 0.234103 | 0.171972 | 0.588621 | 0.448364 |
| MmugDNA.26665.1.S1_at   | MmugDNA.26665.1 | 5.24  | 5.91  | 1.37 | 0.43 | -1.6  | 0.765948 | 0.917828 | 0.901561 | 0.954011 |

|                         |                 |       |       |      |      |       |          |          |          |          |
|-------------------------|-----------------|-------|-------|------|------|-------|----------|----------|----------|----------|
| MmugDNA.26666.1.S1_at   | MmugDNA.26666.1 | 4.46  | 4.48  | 0.2  | 0.03 | -1.02 | 0.910538 | 0.614517 | 0.964646 | 0.771283 |
| MmugDNA.26667.1.S1_at   | MmugDNA.26667.1 | 7.9   | 7.81  | 1.12 | 0.08 | 1.06  | 0.564049 | 0.759026 | 0.796391 | 0.859964 |
| MmugDNA.2667.1.S1_at    | MmugDNA.2667.1  | 5.78  | 5.9   | 0.24 | 0.08 | -1.09 | 0.54656  | 0.413513 | 0.785591 | 0.639648 |
| MmugDNA.26671.1.S1_at   | MmugDNA.26671.1 | 9.62  | 9.54  | 0.24 | 0.2  | 1.06  | 0.36273  | 0.486808 | 0.676211 | 0.690091 |
| MmugDNA.26675.1.S1_at   | MmugDNA.26675.1 | 8.44  | 9.03  | 1.34 | 0.68 | -1.5  | 0.944941 | 0.990735 | 0.97903  | 0.994762 |
| MmugDNA.26676.1.S1_at   | MmugDNA.26676.1 | 5.77  | 6.15  | 0.72 | 0.79 | -1.3  | 0.57106  | 0.665353 | 0.7999   | 0.803901 |
| MmugDNA.26677.1.S1_s_at | MmugDNA.26677.1 | 5.74  | 5.76  | 0.17 | 0.11 | -1.01 | 0.76172  | 0.929228 | 0.89969  | 0.959644 |
| MmugDNA.26678.1.S1_at   | MmugDNA.26678.1 | 3.92  | 3.6   | 0.28 | 0.34 | 1.25  | 0.948873 | 0.783731 | 0.980457 | 0.874756 |
| MmugDNA.26680.1.S1_at   | MmugDNA.26680.1 | 5.09  | 5.47  | 0.17 | 0.04 | -1.3  | 0.015721 | 0.014634 | 0.260601 | 0.154176 |
| MmugDNA.26682.1.S1_at   | MmugDNA.26682.1 | 5.36  | 5.15  | 0.51 | 0.03 | 1.16  | 0.516524 | 0.710094 | 0.768129 | 0.831904 |
| MmugDNA.26683.1.S1_at   | MmugDNA.26683.1 | 5.35  | 5.25  | 0.15 | 0.06 | 1.08  | 0.154078 | 0.176131 | 0.518614 | 0.452581 |
| MmugDNA.26684.1.S1_at   | MmugDNA.26684.1 | 6.06  | 5.91  | 0.09 | 0.08 | 1.11  | 0.082729 | 0.083285 | 0.434391 | 0.333372 |
| MmugDNA.26685.1.S1_at   | MmugDNA.26685.1 | 11.06 | 11.15 | 0.07 | 0.66 | -1.07 | 0.731809 | 0.863374 | 0.884033 | 0.922402 |
| MmugDNA.26688.1.S1_at   | MmugDNA.26688.1 | 7.77  | 7.4   | 0.23 | 0.58 | 1.3   | 0.913851 | 0.937301 | 0.965964 | 0.964687 |
| MmugDNA.26690.1.S1_at   | MmugDNA.26690.1 | 4.4   | 4.37  | 0.14 | 0.17 | 1.02  | 0.539179 | 0.441258 | 0.780929 | 0.659477 |
| MmugDNA.26691.1.S1_at   | MmugDNA.26691.1 | 7.81  | 8.97  | 0.31 | 0.8  | -2.24 | 0.117549 | 0.089927 | 0.481754 | 0.344119 |
| MmugDNA.26692.1.S1_at   | MmugDNA.26692.1 | 8.2   | 8.07  | 0.66 | 2.53 | 1.09  | 0.351757 | 0.158185 | 0.669172 | 0.433986 |
| MmugDNA.26694.1.S1_at   | MmugDNA.26694.1 | 4.35  | 3.81  | 0.19 | 0.27 | 1.46  | 0.208422 | 0.342246 | 0.570275 | 0.588375 |
| MmugDNA.26697.1.S1_at   | MmugDNA.26697.1 | 8.1   | 8.89  | 0.62 | 0.72 | -1.73 | 0.540646 | 0.515319 | 0.782041 | 0.708237 |
| MmugDNA.26698.1.S1_at   | MmugDNA.26698.1 | 7.55  | 7.22  | 0.36 | 0.08 | 1.26  | 0.495658 | 0.187798 | 0.757268 | 0.463856 |
| MmugDNA.26699.1.S1_at   | MmugDNA.26699.1 | 3.02  | 3.04  | 0.05 | 0.2  | -1.02 | 0.39029  | 0.533116 | 0.69348  | 0.719436 |
| MmugDNA.39929.1.S1_s_at | MmugDNA.39929.1 | 7.94  | 8.2   | 0.22 | 0.1  | -1.2  | 0.164106 | 0.194374 | 0.528211 | 0.469464 |
| MmugDNA.2670.1.S1_at    | MmugDNA.2670.1  | 3.24  | 3.29  | 0.15 | 0.38 | -1.04 | 0.232031 | 0.28653  | 0.58772  | 0.547946 |
| MmugDNA.26700.1.S1_at   | MmugDNA.26700.1 | 4.59  | 4.53  | 0.38 | 0.23 | 1.05  | 0.258564 | 0.182549 | 0.605793 | 0.459065 |
| MmugDNA.26701.1.S1_at   | MmugDNA.26701.1 | 6.2   | 5.83  | 0.39 | 0.28 | 1.29  | 0.472709 | 0.755118 | 0.743935 | 0.857465 |
| MmugDNA.26703.1.S1_at   | MmugDNA.26703.1 | 8.87  | 7.91  | 0.28 | 1.24 | 1.94  | 0.081584 | 0.096994 | 0.432654 | 0.354502 |
| MmugDNA.26704.1.S1_at   | MmugDNA.26704.1 | 5.39  | 5.51  | 0.13 | 0.12 | -1.09 | 0.634828 | 0.823906 | 0.834768 | 0.898817 |
| MmugDNA.26705.1.S1_at   | MmugDNA.26705.1 | 3.56  | 3.88  | 0.21 | 0.35 | -1.25 | 0.08615  | 0.033417 | 0.44011  | 0.22646  |
| MmugDNA.26706.1.S1_at   | MmugDNA.26706.1 | 5.13  | 4.96  | 1.31 | 0.55 | 1.13  | 0.332862 | 0.320514 | 0.657109 | 0.572648 |
| MmugDNA.26708.1.S1_at   | MmugDNA.26708.1 | 5.41  | 5.23  | 1.24 | 0.18 | 1.13  | 0.571791 | 0.763019 | 0.800374 | 0.862233 |
| MmugDNA.26709.1.S1_at   | MmugDNA.26709.1 | 5.41  | 4.29  | 1.09 | 0.3  | 2.17  | 0.083928 | 0.062098 | 0.436311 | 0.296094 |
| MmugDNA.2671.1.S1_at    | MmugDNA.2671.1  | 5.76  | 4.94  | 0.49 | 0.06 | 1.76  | 0.154014 | 0.13132  | 0.518553 | 0.403407 |
| MmugDNA.26710.1.S1_at   | MmugDNA.26710.1 | 5.59  | 5.65  | 0.29 | 0.11 | -1.04 | 0.951874 | 0.986138 | 0.981985 | 0.992143 |
| MmugDNA.26711.1.S1_at   | MmugDNA.26711.1 | 4.98  | 4.87  | 0.24 | 0.35 | 1.08  | 0.734815 | 0.884275 | 0.885884 | 0.934066 |
| MmugDNA.26712.1.S1_at   | MmugDNA.26712.1 | 10.11 | 8.78  | 0.65 | 0.63 | 2.51  | 0.204174 | 0.286894 | 0.566614 | 0.548205 |
| MmugDNA.26713.1.S1_at   | MmugDNA.26713.1 | 3.81  | 4.02  | 0.19 | 0.15 | -1.15 | 0.19561  | 0.307689 | 0.558901 | 0.563871 |
| MmugDNA.26714.1.S1_at   | MmugDNA.26714.1 | 5.84  | 5.03  | 0.13 | 0.62 | 1.76  | 0.067161 | 0.090307 | 0.407071 | 0.3447   |
| MmugDNA.26716.1.S1_s_at | MmugDNA.26716.1 | 4.41  | 3.77  | 0.56 | 0.18 | 1.56  | 0.095682 | 0.062329 | 0.453501 | 0.296502 |
| MmugDNA.26717.1.S1_at   | MmugDNA.26717.1 | 3.9   | 3.93  | 0.38 | 0.14 | -1.02 | 0.839965 | 0.966264 | 0.935467 | 0.981168 |
| MmugDNA.26718.1.S1_at   | MmugDNA.26718.1 | 4.79  | 4.97  | 0.65 | 0.31 | -1.13 | 0.738182 | 0.86859  | 0.887574 | 0.925383 |
| MmugDNA.26719.1.S1_at   | MmugDNA.26719.1 | 5.34  | 5.84  | 0.41 | 0.57 | -1.42 | 0.453953 | 0.084002 | 0.733035 | 0.3349   |

|                         |                 |       |       |      |      |       |          |          |          |          |
|-------------------------|-----------------|-------|-------|------|------|-------|----------|----------|----------|----------|
| MmugDNA.2672.1.S1_at    | MmugDNA.2672.1  | 7     | 7.38  | 0.32 | 0.44 | -1.31 | 0.886118 | 0.2883   | 0.954381 | 0.549561 |
| MmugDNA.26720.1.S1_at   | MmugDNA.26720.1 | 4.98  | 4.94  | 0.13 | 0.15 | 1.02  | 0.395117 | 0.493273 | 0.696396 | 0.694018 |
| MmugDNA.26721.1.S1_at   | MmugDNA.26721.1 | 3.59  | 3.9   | 0.04 | 0.24 | -1.25 | 0.10317  | 0.227141 | 0.462878 | 0.499494 |
| MmugDNA.26722.1.S1_at   | MmugDNA.26722.1 | 9.28  | 8.64  | 0.23 | 0.28 | 1.56  | 0.043609 | 0.001412 | 0.356868 | 0.057381 |
| MmugDNA.26723.1.S1_at   | MmugDNA.26723.1 | 2.8   | 3.02  | 0.26 | 0.06 | -1.17 | 0.306495 | 0.139233 | 0.639593 | 0.412402 |
| MmugDNA.26724.1.S1_at   | MmugDNA.26724.1 | 7.05  | 6.72  | 0.13 | 0.26 | 1.25  | 0.241911 | 0.275521 | 0.594092 | 0.53974  |
| MmugDNA.26725.1.S1_at   | MmugDNA.26725.1 | 6.93  | 5.96  | 0.71 | 0.53 | 1.96  | 0.060641 | 0.014576 | 0.393928 | 0.15396  |
| MmugDNA.26726.1.S1_at   | MmugDNA.26726.1 | 11.4  | 11.35 | 0.24 | 0.02 | 1.04  | 0.262519 | 0.323142 | 0.609006 | 0.574351 |
| MmugDNA.26727.1.S1_at   | MmugDNA.26727.1 | 3.16  | 3     | 0.05 | 0.24 | 1.11  | 0.44045  | 0.180529 | 0.724349 | 0.457138 |
| MmugDNA.26728.1.S1_at   | MmugDNA.26728.1 | 6.53  | 5.66  | 0.81 | 0.13 | 1.83  | 0.178196 | 0.188002 | 0.542428 | 0.4641   |
| MmugDNA.26730.1.S1_at   | MmugDNA.26730.1 | 5.88  | 5.88  | 0.9  | 0.71 | -1    | 0.615933 | 0.853949 | 0.823836 | 0.916872 |
| MmugDNA.26731.1.S1_at   | MmugDNA.26731.1 | 5.01  | 5.09  | 0.11 | 0.06 | -1.05 | 0.190146 | 0.268748 | 0.552944 | 0.534151 |
| MmugDNA.26733.1.S1_at   | MmugDNA.26733.1 | 6.28  | 6.45  | 0.42 | 0.53 | -1.12 | 0.754496 | 0.500975 | 0.895475 | 0.699362 |
| MmugDNA.26736.1.S1_at   | MmugDNA.26736.1 | 7.04  | 7.13  | 0.18 | 0.01 | -1.06 | 0.142105 | 0.067886 | 0.509437 | 0.306745 |
| MmugDNA.34775.1.S1_at   | MmugDNA.34775.1 | 3.19  | 3.25  | 0.15 | 0.08 | -1.04 | 0.847028 | 0.337208 | 0.938542 | 0.584418 |
| MmugDNA.34775.1.S1_s_at | MmugDNA.34775.1 | 6.21  | 6.2   | 0.23 | 0.09 | 1.01  | 0.666188 | 0.74079  | 0.850305 | 0.84994  |
| MmugDNA.26738.1.S1_at   | MmugDNA.26738.1 | 5.03  | 5.46  | 0.52 | 0.69 | -1.35 | 0.932214 | 0.602858 | 0.973774 | 0.763758 |
| MmugDNA.26739.1.S1_at   | MmugDNA.26739.1 | 5.58  | 5.62  | 0.15 | 0.15 | -1.03 | 0.93232  | 0.105661 | 0.973784 | 0.367776 |
| MmugDNA.2674.1.S1_at    | MmugDNA.2674.1  | 6.89  | 6.85  | 0.08 | 0.26 | 1.03  | 0.887348 | 0.884111 | 0.954863 | 0.933911 |
| MmugDNA.26740.1.S1_at   | MmugDNA.26740.1 | 4.97  | 5.01  | 0.24 | 0.05 | -1.02 | 0.599195 | 0.500333 | 0.814514 | 0.699009 |
| MmugDNA.26741.1.S1_at   | MmugDNA.26741.1 | 6.6   | 6.53  | 0.56 | 0.79 | 1.05  | 0.753897 | 0.457926 | 0.895085 | 0.670999 |
| MmugDNA.26742.1.S1_s_at | MmugDNA.26742.1 | 8.23  | 8.08  | 0.12 | 0.11 | 1.11  | 0.076233 | 0.010985 | 0.424738 | 0.136546 |
| MmugDNA.26743.1.S1_at   | MmugDNA.26743.1 | 8.43  | 8.78  | 0.1  | 0.39 | -1.27 | 0.105813 | 0.107358 | 0.466616 | 0.370219 |
| MmugDNA.26744.1.S1_s_at | MmugDNA.26744.1 | 4.88  | 4.6   | 0.42 | 0.13 | 1.22  | 0.251611 | 0.320218 | 0.601004 | 0.572561 |
| MmugDNA.26745.1.S1_s_at | MmugDNA.26745.1 | 10.93 | 10.49 | 0.13 | 0.24 | 1.36  | 0.081689 | 0.061786 | 0.432665 | 0.295327 |
| MmugDNA.26747.1.S1_at   | MmugDNA.26747.1 | 7.01  | 7.36  | 1.1  | 0.82 | -1.27 | 0.837117 | 0.545368 | 0.93416  | 0.727517 |
| MmugDNA.26748.1.S1_at   | MmugDNA.26748.1 | 9.66  | 9.5   | 0.07 | 0.07 | 1.12  | 0.044673 | 0.013633 | 0.35902  | 0.149433 |
| MmugDNA.26748.1.S1_s_at | MmugDNA.26748.1 | 11.98 | 11.67 | 0.1  | 0.08 | 1.24  | 0.014718 | 0.0067   | 0.254893 | 0.110751 |
| MmugDNA.2675.1.S1_at    | MmugDNA.2675.1  | 8.27  | 8.49  | 0.01 | 0.39 | -1.16 | 0.121235 | 0.0792   | 0.48598  | 0.32639  |
| MmugDNA.26750.1.S1_at   | MmugDNA.26750.1 | 6.7   | 6.73  | 0.14 | 0.12 | -1.02 | 0.852571 | 0.259108 | 0.940647 | 0.526263 |
| MmugDNA.26753.1.S1_at   | MmugDNA.26753.1 | 6.26  | 6.23  | 0.25 | 0.07 | 1.02  | 0.53649  | 0.256223 | 0.77949  | 0.524075 |
| MmugDNA.26754.1.S1_at   | MmugDNA.26754.1 | 5.23  | 4.9   | 0.16 | 0.31 | 1.26  | 0.20171  | 0.378928 | 0.563988 | 0.615882 |
| MmugDNA.26755.1.S1_at   | MmugDNA.26755.1 | 4.62  | 4.63  | 0.1  | 0.06 | -1.01 | 0.525039 | 0.671529 | 0.773369 | 0.807948 |
| MmugDNA.26756.1.S1_s_at | MmugDNA.26756.1 | 11.01 | 10.72 | 0.17 | 0.04 | 1.22  | 0.017795 | 0.009377 | 0.267882 | 0.127634 |
| MmugDNA.26757.1.S1_at   | MmugDNA.26757.1 | 9.01  | 8.14  | 0.16 | 0.34 | 1.82  | 0.016978 | 0.000719 | 0.266367 | 0.044427 |
| MmugDNA.26758.1.S1_s_at | MmugDNA.26758.1 | 11.23 | 11.16 | 0.09 | 0.23 | 1.05  | 0.684586 | 0.039422 | 0.858795 | 0.243529 |
| MmugDNA.2676.1.S1_at    | MmugDNA.2676.1  | 5.04  | 5.03  | 0.12 | 0.06 | 1.01  | 0.626785 | 0.777911 | 0.82981  | 0.870964 |
| MmugDNA.26760.1.S1_at   | MmugDNA.26760.1 | 8.4   | 8.31  | 0.38 | 0.35 | 1.06  | 0.684195 | 0.850633 | 0.858637 | 0.915021 |
| MmugDNA.26761.1.S1_at   | MmugDNA.26761.1 | 3.69  | 3.65  | 0.51 | 0.17 | 1.03  | 0.354516 | 0.416509 | 0.670587 | 0.641647 |
| MmugDNA.26762.1.S1_at   | MmugDNA.26762.1 | 6.95  | 7.18  | 0.09 | 0.11 | -1.17 | 0.061422 | 0.065222 | 0.395837 | 0.301239 |
| MmugDNA.26764.1.S1_at   | MmugDNA.26764.1 | 8.97  | 8.81  | 1.39 | 0.44 | 1.12  | 0.592758 | 0.777422 | 0.811174 | 0.870674 |

|                         |                 |       |       |      |      |       |          |          |          |          |
|-------------------------|-----------------|-------|-------|------|------|-------|----------|----------|----------|----------|
| MmugDNA.26765.1.S1_at   | MmugDNA.26765.1 | 5.87  | 5.89  | 1.01 | 0.19 | -1.02 | 0.396298 | 0.547664 | 0.696939 | 0.728596 |
| MmugDNA.26766.1.S1_at   | MmugDNA.26766.1 | 4.54  | 4.43  | 0.12 | 0.11 | 1.08  | 0.841448 | 0.463492 | 0.936191 | 0.674461 |
| MmugDNA.26768.1.S1_s_at | MmugDNA.26768.1 | 2.77  | 2.98  | 0.06 | 0.1  | -1.16 | 0.031532 | 0.026298 | 0.322015 | 0.203132 |
| MmugDNA.26769.1.S1_at   | MmugDNA.26769.1 | 6.9   | 7.16  | 0.22 | 0.16 | -1.2  | 0.417213 | 0.432569 | 0.710406 | 0.652991 |
| MmugDNA.2677.1.S1_at    | MmugDNA.2677.1  | 9.86  | 8.82  | 0.23 | 0.58 | 2.05  | 0.043818 | 0.031507 | 0.357051 | 0.219534 |
| MmugDNA.26771.1.S1_at   | MmugDNA.26771.1 | 7.8   | 8.33  | 0.38 | 0.8  | -1.44 | 0.275621 | 0.292796 | 0.617878 | 0.552823 |
| MmugDNA.26772.1.S1_at   | MmugDNA.26772.1 | 6.55  | 6.72  | 0.32 | 0.18 | -1.13 | 0.298733 | 0.324154 | 0.634211 | 0.574853 |
| MmugDNA.26773.1.S1_at   | MmugDNA.26773.1 | 4.3   | 4.36  | 0.17 | 0.43 | -1.04 | 0.296379 | 0.438645 | 0.632368 | 0.657605 |
| MmugDNA.26775.1.S1_at   | MmugDNA.26775.1 | 11.65 | 11.15 | 0.43 | 0.31 | 1.42  | 0.358491 | 0.172472 | 0.673252 | 0.448864 |
| MmugDNA.26776.1.S1_at   | MmugDNA.26776.1 | 5.72  | 5.73  | 0.25 | 0.24 | -1.01 | 0.843213 | 0.063886 | 0.936941 | 0.29906  |
| MmugDNA.26777.1.S1_at   | MmugDNA.26777.1 | 10.3  | 9.82  | 0.1  | 0.19 | 1.39  | 0.069519 | 0.075468 | 0.412367 | 0.319857 |
| MmugDNA.26778.1.S1_at   | MmugDNA.26778.1 | 4.76  | 4.08  | 0.42 | 0.19 | 1.61  | 0.064925 | 0.051813 | 0.403744 | 0.273151 |
| MmugDNA.26779.1.S1_at   | MmugDNA.26779.1 | 4.16  | 4.31  | 0.1  | 0.03 | -1.11 | 0.026898 | 0.186341 | 0.305076 | 0.46218  |
| MmugDNA.2678.1.S1_at    | MmugDNA.2678.1  | 5.11  | 5.08  | 0.09 | 0.04 | 1.02  | 0.558017 | 0.397362 | 0.792892 | 0.628812 |
| MmugDNA.26780.1.S1_at   | MmugDNA.26780.1 | 6     | 6.08  | 0.25 | 0.38 | -1.05 | 0.410273 | 0.299599 | 0.706234 | 0.557956 |
| MmugDNA.26781.1.S1_at   | MmugDNA.26781.1 | 3.43  | 3.7   | 0.12 | 0.09 | -1.2  | 0.068309 | 0.067234 | 0.410012 | 0.305302 |
| MmugDNA.26782.1.S1_at   | MmugDNA.26782.1 | 4.6   | 4.29  | 0.4  | 0.08 | 1.24  | 0.199129 | 0.186064 | 0.562104 | 0.461931 |
| MmugDNA.26783.1.S1_at   | MmugDNA.26783.1 | 3.76  | 3.75  | 0.15 | 0.24 | 1     | 0.797809 | 0.963692 | 0.916116 | 0.979798 |
| MmugDNA.26784.1.S1_at   | MmugDNA.26784.1 | 4.86  | 5.05  | 0.79 | 0.34 | -1.14 | 0.955199 | 0.607777 | 0.983189 | 0.766554 |
| MmugDNA.26785.1.S1_at   | MmugDNA.26785.1 | 4.13  | 4.08  | 0.26 | 0.08 | 1.04  | 0.914962 | 0.762723 | 0.966361 | 0.862004 |
| MmugDNA.26786.1.S1_at   | MmugDNA.26786.1 | 4.21  | 4.02  | 0.13 | 0.11 | 1.14  | 0.619282 | 0.285022 | 0.825435 | 0.547095 |
| MmugDNA.26788.1.S1_at   | MmugDNA.26788.1 | 3.7   | 3.58  | 0.19 | 0.22 | 1.09  | 0.464309 | 0.632993 | 0.739156 | 0.783894 |
| MmugDNA.26789.1.S1_at   | MmugDNA.26789.1 | 10.82 | 10.43 | 0.11 | 0.16 | 1.31  | 0.017707 | 0.009737 | 0.267594 | 0.129787 |
| MmugDNA.26790.1.S1_at   | MmugDNA.26790.1 | 5.13  | 4     | 0.3  | 0.14 | 2.19  | 0.004398 | 0.066608 | 0.183061 | 0.303842 |
| MmugDNA.26791.1.S1_at   | MmugDNA.26791.1 | 6.67  | 6.68  | 0.23 | 0.1  | -1.01 | 0.419275 | 0.397797 | 0.711739 | 0.629114 |
| MmugDNA.26792.1.S1_at   | MmugDNA.26792.1 | 6     | 5.41  | 0.23 | 0.18 | 1.51  | 0.015403 | 0.00932  | 0.258258 | 0.127446 |
| MmugDNA.26793.1.S1_at   | MmugDNA.26793.1 | 8.79  | 8.6   | 0.26 | 0.21 | 1.14  | 0.537854 | 0.423365 | 0.780212 | 0.646277 |
| MmugDNA.26794.1.S1_s_at | MmugDNA.26794.1 | 12.01 | 11.74 | 0.05 | 0.06 | 1.21  | 0.003239 | 0.000865 | 0.175612 | 0.047425 |
| MmugDNA.26795.1.S1_at   | MmugDNA.26795.1 | 3.6   | 3.25  | 0.49 | 0.06 | 1.27  | 0.457459 | 0.214033 | 0.734933 | 0.487633 |
| MmugDNA.26798.1.S1_at   | MmugDNA.26798.1 | 6     | 6.21  | 0.24 | 0.16 | -1.15 | 0.389792 | 0.502731 | 0.693279 | 0.700289 |
| MmugDNA.268.1.S1_at     | MmugDNA.268.1   | 6.15  | 6.23  | 0.14 | 0.1  | -1.05 | 0.677034 | 0.837687 | 0.855271 | 0.907261 |
| MmugDNA.2680.1.S1_at    | MmugDNA.2680.1  | 7.67  | 7.37  | 0.29 | 0.12 | 1.23  | 0.238617 | 0.353126 | 0.591896 | 0.596383 |
| MmugDNA.26800.1.S1_s_at | MmugDNA.26800.1 | 10.82 | 11.2  | 0.09 | 0.15 | -1.31 | 0.023208 | 0.018484 | 0.290295 | 0.171015 |
| MmugDNA.26801.1.S1_at   | MmugDNA.26801.1 | 7.24  | 7.57  | 0.4  | 0.63 | -1.26 | 0.772037 | 0.206266 | 0.903991 | 0.480426 |
| MmugDNA.26802.1.S1_at   | MmugDNA.26802.1 | 4.52  | 4.54  | 0.47 | 0.13 | -1.01 | 0.377561 | 0.357984 | 0.685995 | 0.59957  |
| MmugDNA.26803.1.S1_at   | MmugDNA.26803.1 | 3.66  | 3.85  | 1.13 | 0.69 | -1.14 | 0.648666 | 0.456118 | 0.842124 | 0.669909 |
| MmugDNA.26804.1.S1_at   | MmugDNA.26804.1 | 10.1  | 9.45  | 0.14 | 0.22 | 1.56  | 0.013367 | 0.006763 | 0.246471 | 0.111308 |
| MmugDNA.26805.1.S1_at   | MmugDNA.26805.1 | 4.47  | 4.48  | 0.23 | 0.07 | -1.01 | 0.71933  | 0.791321 | 0.876813 | 0.879439 |
| MmugDNA.26807.1.S1_at   | MmugDNA.26807.1 | 2.74  | 2.83  | 0.05 | 0.08 | -1.07 | 0.123831 | 0.227741 | 0.489589 | 0.499979 |
| MmugDNA.26810.1.S1_at   | MmugDNA.26810.1 | 3.36  | 3.44  | 0.46 | 0.04 | -1.06 | 0.598449 | 0.844251 | 0.813939 | 0.911327 |
| MmugDNA.26811.1.S1_at   | MmugDNA.26811.1 | 2.9   | 2.91  | 0.31 | 0.14 | -1.01 | 0.463852 | 0.193777 | 0.738998 | 0.468847 |

|                         |                 |       |       |      |      |       |          |          |          |          |
|-------------------------|-----------------|-------|-------|------|------|-------|----------|----------|----------|----------|
| MmugDNA.26811.1.S1_x_at | MmugDNA.26811.1 | 2.67  | 2.81  | 0.54 | 0.11 | -1.1  | 0.588597 | 0.697503 | 0.809084 | 0.824228 |
| MmugDNA.26812.1.S1_at   | MmugDNA.26812.1 | 3     | 3.4   | 0.17 | 1.14 | -1.31 | 0.287397 | 0.391141 | 0.625987 | 0.624834 |
| MmugDNA.26813.1.S1_at   | MmugDNA.26813.1 | 9.44  | 10.66 | 0.63 | 0.87 | -2.34 | 0.105221 | 0.095663 | 0.465675 | 0.35269  |
| MmugDNA.26815.1.S1_at   | MmugDNA.26815.1 | 9.14  | 8.45  | 0.1  | 0.3  | 1.61  | 0.017507 | 0.022036 | 0.267445 | 0.185855 |
| MmugDNA.26816.1.S1_at   | MmugDNA.26816.1 | 4.65  | 5.05  | 0.14 | 0.07 | -1.32 | 0.00471  | 0.401545 | 0.184492 | 0.631068 |
| MmugDNA.26817.1.S1_at   | MmugDNA.26817.1 | 8.55  | 7.99  | 0.22 | 0.31 | 1.47  | 0.05217  | 0.057112 | 0.377155 | 0.284945 |
| MmugDNA.26819.1.S1_at   | MmugDNA.26819.1 | 6.39  | 6.62  | 0.18 | 0.09 | -1.17 | 0.051492 | 0.045412 | 0.376072 | 0.257437 |
| MmugDNA.26820.1.S1_at   | MmugDNA.26820.1 | 3     | 2.81  | 0.33 | 0.1  | 1.14  | 0.238317 | 0.305459 | 0.591578 | 0.562418 |
| MmugDNA.26821.1.S1_at   | MmugDNA.26821.1 | 7.44  | 9.47  | 0.87 | 0.53 | -4.07 | 0.024415 | 0.01265  | 0.294575 | 0.145088 |
| MmugDNA.26823.1.S1_at   | MmugDNA.26823.1 | 4.21  | 3.8   | 0.42 | 0.3  | 1.33  | 0.559964 | 0.612986 | 0.79419  | 0.770331 |
| MmugDNA.26824.1.S1_at   | MmugDNA.26824.1 | 5.32  | 5.5   | 0.14 | 0.18 | -1.13 | 0.970171 | 0.986349 | 0.988591 | 0.992243 |
| MmugDNA.26825.1.S1_at   | MmugDNA.26825.1 | 6.42  | 6.14  | 0.14 | 0.25 | 1.22  | 0.21511  | 0.031165 | 0.575523 | 0.218378 |
| MmugDNA.26827.1.S1_at   | MmugDNA.26827.1 | 4.89  | 4.89  | 0.08 | 0.12 | -1    | 0.290686 | 0.379652 | 0.628456 | 0.616523 |
| MmugDNA.26829.1.S1_at   | MmugDNA.26829.1 | 5.86  | 5.99  | 0.12 | 0.11 | -1.1  | 0.190226 | 0.025848 | 0.553    | 0.201605 |
| MmugDNA.2683.1.S1_at    | MmugDNA.2683.1  | 4.76  | 5.31  | 0.61 | 0.49 | -1.46 | 0.787182 | 0.416422 | 0.911485 | 0.641587 |
| MmugDNA.26830.1.S1_at   | MmugDNA.26830.1 | 8.04  | 8.2   | 0.11 | 0.58 | -1.12 | 0.529043 | 0.457478 | 0.775807 | 0.670862 |
| MmugDNA.26831.1.S1_at   | MmugDNA.26831.1 | 4.24  | 4.17  | 0.89 | 0.15 | 1.05  | 0.350184 | 0.434672 | 0.668409 | 0.654756 |
| MmugDNA.26832.1.S1_at   | MmugDNA.26832.1 | 2.9   | 2.92  | 0.03 | 0.19 | -1.02 | 0.702802 | 0.597372 | 0.868924 | 0.760178 |
| MmugDNA.26833.1.S1_at   | MmugDNA.26833.1 | 3.75  | 3.95  | 0.16 | 0.39 | -1.15 | 0.147944 | 0.113691 | 0.513442 | 0.379818 |
| MmugDNA.26834.1.S1_at   | MmugDNA.26834.1 | 8.71  | 8.61  | 0.25 | 0.3  | 1.07  | 0.359823 | 0.435761 | 0.673991 | 0.655508 |
| MmugDNA.26835.1.S1_at   | MmugDNA.26835.1 | 8.14  | 8.24  | 0.05 | 0.99 | -1.07 | 0.822393 | 0.95728  | 0.927702 | 0.975831 |
| MmugDNA.26836.1.S1_at   | MmugDNA.26836.1 | 10.78 | 10.61 | 0.05 | 0.3  | 1.13  | 0.151299 | 0.107395 | 0.516026 | 0.370219 |
| MmugDNA.26839.1.S1_at   | MmugDNA.26839.1 | 9.23  | 8.44  | 0.43 | 0.41 | 1.73  | 0.079045 | 0.059455 | 0.428609 | 0.290548 |
| MmugDNA.2684.1.S1_at    | MmugDNA.2684.1  | 6.13  | 7.32  | 0.15 | 0.46 | -2.28 | 0.008947 | 0.004328 | 0.221638 | 0.092251 |
| MmugDNA.26840.1.S1_at   | MmugDNA.26840.1 | 6.45  | 6.06  | 1.54 | 0.57 | 1.31  | 0.363676 | 0.560367 | 0.676829 | 0.736645 |
| MmugDNA.26842.1.S1_at   | MmugDNA.26842.1 | 5.42  | 5.26  | 0.51 | 0.05 | 1.12  | 0.623917 | 0.605107 | 0.828158 | 0.764917 |
| MmugDNA.26843.1.S1_at   | MmugDNA.26843.1 | 4.29  | 4.25  | 0.16 | 0.08 | 1.02  | 0.660072 | 0.600746 | 0.847439 | 0.76224  |
| MmugDNA.26844.1.S1_at   | MmugDNA.26844.1 | 6.87  | 7.98  | 0.36 | 0.51 | -2.16 | 0.019015 | 0.015203 | 0.272726 | 0.156703 |
| MmugDNA.26845.1.S1_at   | MmugDNA.26845.1 | 9.58  | 9.63  | 0.06 | 0.68 | -1.03 | 0.343503 | 0.272339 | 0.663676 | 0.537108 |
| MmugDNA.26846.1.S1_at   | MmugDNA.26846.1 | 7.39  | 8.27  | 0.68 | 0.48 | -1.84 | 0.35398  | 0.415611 | 0.670266 | 0.641007 |
| MmugDNA.26847.1.S1_at   | MmugDNA.26847.1 | 5.36  | 5.68  | 0.11 | 1.28 | -1.25 | 0.223676 | 0.319785 | 0.582123 | 0.572135 |
| MmugDNA.26848.1.S1_s_at | MmugDNA.26848.1 | 4.95  | 5     | 0.17 | 0.12 | -1.04 | 0.373339 | 0.486067 | 0.683245 | 0.689573 |
| MmugDNA.26849.1.S1_at   | MmugDNA.26849.1 | 4.36  | 4.54  | 0.06 | 0.37 | -1.14 | 0.415486 | 0.310803 | 0.709528 | 0.565832 |
| MmugDNA.2685.1.S1_at    | MmugDNA.2685.1  | 4.62  | 4.61  | 0.42 | 0.39 | 1     | 0.561728 | 0.553651 | 0.794939 | 0.732764 |
| MmugDNA.26850.1.S1_at   | MmugDNA.26850.1 | 5.13  | 5.13  | 0.14 | 0.1  | -1    | 0.712337 | 0.732208 | 0.873993 | 0.844899 |
| MmugDNA.26851.1.S1_at   | MmugDNA.26851.1 | 9.21  | 8.5   | 0.23 | 0.1  | 1.64  | 0.00599  | 0.006187 | 0.194748 | 0.106774 |
| MmugDNA.26852.1.S1_at   | MmugDNA.26852.1 | 5.68  | 5.61  | 0.11 | 0.31 | 1.05  | 0.883463 | 0.499021 | 0.953148 | 0.697958 |
| MmugDNA.26853.1.S1_at   | MmugDNA.26853.1 | 2.98  | 2.97  | 0.38 | 0.15 | 1.01  | 0.483908 | 0.631218 | 0.749945 | 0.782734 |
| MmugDNA.26856.1.S1_at   | MmugDNA.26856.1 | 10.35 | 11.82 | 0.47 | 0.73 | -2.77 | 0.041325 | 0.039759 | 0.351549 | 0.244402 |
| MmugDNA.26857.1.S1_at   | MmugDNA.26857.1 | 10.99 | 10.59 | 0.53 | 0.67 | 1.31  | 0.950081 | 0.578108 | 0.981147 | 0.7483   |
| MmugDNA.26858.1.S1_at   | MmugDNA.26858.1 | 9     | 7.48  | 0.35 | 0.3  | 2.87  | 0.003072 | 0.000804 | 0.172102 | 0.04607  |

|                         |                 |       |       |      |      |       |          |          |          |          |
|-------------------------|-----------------|-------|-------|------|------|-------|----------|----------|----------|----------|
| MmugDNA.26859.1.S1_at   | MmugDNA.26859.1 | 3.4   | 3.38  | 0.13 | 0.2  | 1.02  | 0.978437 | 0.850011 | 0.992061 | 0.914673 |
| MmugDNA.2686.1.S1_at    | MmugDNA.2686.1  | 12.28 | 12.68 | 0.14 | 0.27 | -1.33 | 0.087654 | 0.073481 | 0.442009 | 0.316769 |
| MmugDNA.26860.1.S1_at   | MmugDNA.26860.1 | 4.5   | 4.65  | 0.11 | 0.22 | -1.11 | 0.273857 | 0.290431 | 0.617262 | 0.551169 |
| MmugDNA.26862.1.S1_at   | MmugDNA.26862.1 | 6.92  | 7.03  | 0.16 | 0.11 | -1.08 | 0.23914  | 0.252901 | 0.592277 | 0.521232 |
| MmugDNA.26864.1.S1_at   | MmugDNA.26864.1 | 7.77  | 7.97  | 0.02 | 0.14 | -1.14 | 0.078957 | 0.121915 | 0.428609 | 0.391296 |
| MmugDNA.26864.1.S1_s_at | MmugDNA.26864.1 | 9.89  | 9.84  | 0.13 | 0.15 | 1.04  | 0.99991  | 0.030552 | 0.999967 | 0.216711 |
| MmugDNA.26865.1.S1_at   | MmugDNA.26865.1 | 6.75  | 6.88  | 0.19 | 0.03 | -1.09 | 0.360989 | 0.522727 | 0.675003 | 0.713338 |
| MmugDNA.26866.1.S1_at   | MmugDNA.26866.1 | 6.27  | 6.07  | 0.32 | 0.23 | 1.15  | 0.851582 | 0.214595 | 0.940264 | 0.4884   |
| MmugDNA.26867.1.S1_at   | MmugDNA.26867.1 | 3.4   | 3.72  | 0.01 | 0.32 | -1.25 | 0.511723 | 0.504308 | 0.765318 | 0.701474 |
| MmugDNA.26868.1.S1_at   | MmugDNA.26868.1 | 3.26  | 3.35  | 0.11 | 0.2  | -1.06 | 0.535532 | 0.659537 | 0.77916  | 0.800801 |
| MmugDNA.26869.1.S1_at   | MmugDNA.26869.1 | 5.07  | 5     | 0.19 | 0.22 | 1.05  | 0.665705 | 0.687376 | 0.85006  | 0.817576 |
| MmugDNA.2687.1.S1_at    | MmugDNA.2687.1  | 5.51  | 6.8   | 0.17 | 0.5  | -2.44 | 0.009708 | 0.005105 | 0.226235 | 0.099108 |
| MmugDNA.26870.1.S1_at   | MmugDNA.26870.1 | 11.47 | 10.4  | 0.23 | 0.56 | 2.1   | 0.023479 | 0.012636 | 0.291591 | 0.145032 |
| MmugDNA.26871.1.S1_at   | MmugDNA.26871.1 | 3.59  | 3.63  | 0.11 | 0.23 | -1.03 | 0.339099 | 0.538685 | 0.661151 | 0.723313 |
| MmugDNA.26874.1.S1_at   | MmugDNA.26874.1 | 8.12  | 7.81  | 0.17 | 0.19 | 1.24  | 0.090245 | 0.103281 | 0.445742 | 0.364143 |
| MmugDNA.26875.1.S1_at   | MmugDNA.26875.1 | 10.09 | 10.16 | 0.04 | 0.1  | -1.05 | 0.647758 | 0.212498 | 0.841658 | 0.486502 |
| MmugDNA.26876.1.S1_at   | MmugDNA.26876.1 | 8.28  | 8.49  | 0.93 | 0.72 | -1.15 | 0.852748 | 0.926978 | 0.940647 | 0.958453 |
| MmugDNA.26877.1.S1_at   | MmugDNA.26877.1 | 8.47  | 8.7   | 0.07 | 0.28 | -1.18 | 0.714333 | 0.789232 | 0.874776 | 0.878225 |
| MmugDNA.26878.1.S1_at   | MmugDNA.26878.1 | 5.5   | 7.31  | 0.33 | 1.72 | -3.48 | 0.170724 | 0.198382 | 0.534594 | 0.473292 |
| MmugDNA.26879.1.S1_at   | MmugDNA.26879.1 | 4.25  | 3.92  | 0.26 | 0.06 | 1.26  | 0.073409 | 0.115516 | 0.41875  | 0.38267  |
| MmugDNA.2688.1.S1_at    | MmugDNA.2688.1  | 3.97  | 4.05  | 0.23 | 0.33 | -1.06 | 0.589856 | 0.802806 | 0.809648 | 0.886441 |
| MmugDNA.26880.1.S1_at   | MmugDNA.26880.1 | 4.24  | 4.31  | 0.17 | 0.02 | -1.05 | 0.795385 | 0.410446 | 0.915142 | 0.637311 |
| MmugDNA.26882.1.S1_at   | MmugDNA.26882.1 | 6.45  | 6.64  | 0.16 | 0.04 | -1.14 | 0.044752 | 0.033854 | 0.359043 | 0.227639 |
| MmugDNA.26883.1.S1_at   | MmugDNA.26883.1 | 5.4   | 4.96  | 0.66 | 0.37 | 1.36  | 0.352915 | 0.065217 | 0.669964 | 0.301239 |
| MmugDNA.26887.1.S1_at   | MmugDNA.26887.1 | 3.79  | 3.85  | 0.22 | 0.2  | -1.04 | 0.369649 | 0.590576 | 0.680793 | 0.756311 |
| MmugDNA.26888.1.S1_at   | MmugDNA.26888.1 | 4.42  | 5.02  | 0.28 | 0.46 | -1.51 | 0.314172 | 0.422065 | 0.645549 | 0.645447 |
| MmugDNA.26889.1.S1_at   | MmugDNA.26889.1 | 4.35  | 4.35  | 0.15 | 0.41 | 1     | 0.390038 | 0.320853 | 0.693398 | 0.572849 |
| MmugDNA.2689.1.S1_at    | MmugDNA.2689.1  | 8.96  | 8.93  | 0.23 | 0.48 | 1.02  | 0.733595 | 0.847981 | 0.88516  | 0.913675 |
| MmugDNA.26890.1.S1_at   | MmugDNA.26890.1 | 3.81  | 3.7   | 0.45 | 0.02 | 1.08  | 0.598806 | 0.347146 | 0.81411  | 0.591815 |
| MmugDNA.26891.1.S1_at   | MmugDNA.26891.1 | 5.17  | 4.2   | 0.32 | 0.53 | 1.96  | 0.033197 | 0.018607 | 0.327417 | 0.171539 |
| MmugDNA.26892.1.S1_at   | MmugDNA.26892.1 | 3.63  | 3.72  | 0.11 | 0.1  | -1.06 | 0.359448 | 0.359232 | 0.673869 | 0.600537 |
| MmugDNA.26893.1.S1_at   | MmugDNA.26893.1 | 6.8   | 6.63  | 0.51 | 0.76 | 1.13  | 0.917089 | 0.984843 | 0.967626 | 0.991445 |
| MmugDNA.26894.1.S1_at   | MmugDNA.26894.1 | 8.03  | 7.34  | 0.15 | 0.79 | 1.61  | 0.153744 | 0.074409 | 0.518413 | 0.318058 |
| MmugDNA.26895.1.S1_at   | MmugDNA.26895.1 | 3.53  | 4.08  | 0.16 | 0.49 | -1.46 | 0.174957 | 0.284353 | 0.538679 | 0.54659  |
| MmugDNA.26896.1.S1_at   | MmugDNA.26896.1 | 4.51  | 4.54  | 0.19 | 0.25 | -1.02 | 0.714837 | 0.535109 | 0.874968 | 0.720807 |
| MmugDNA.26897.1.S1_at   | MmugDNA.26897.1 | 5.13  | 5.92  | 0.34 | 0.49 | -1.72 | 0.110186 | 0.093103 | 0.471834 | 0.349292 |
| MmugDNA.26898.1.S1_at   | MmugDNA.26898.1 | 3.84  | 3.95  | 0.09 | 0.01 | -1.08 | 0.115288 | 0.096587 | 0.478767 | 0.354126 |
| MmugDNA.269.1.S1_at     | MmugDNA.269.1   | 9.52  | 10.83 | 0.93 | 0.88 | -2.49 | 0.351816 | 0.234495 | 0.669189 | 0.505674 |
| MmugDNA.2690.1.S1_at    | MmugDNA.2690.1  | 8.42  | 7.76  | 0.1  | 0.76 | 1.58  | 0.563267 | 0.75395  | 0.795924 | 0.856765 |
| MmugDNA.26900.1.S1_at   | MmugDNA.26900.1 | 6.98  | 6.52  | 0.24 | 0.23 | 1.38  | 0.156762 | 0.419884 | 0.521541 | 0.643733 |
| MmugDNA.26901.1.S1_at   | MmugDNA.26901.1 | 6.5   | 5.07  | 0.36 | 1    | 2.69  | 0.228463 | 0.269084 | 0.585917 | 0.534445 |

|                         |                 |       |       |      |      |       |          |          |          |          |
|-------------------------|-----------------|-------|-------|------|------|-------|----------|----------|----------|----------|
| MmugDNA.26906.1.S1_at   | MmugDNA.26906.1 | 11.4  | 11.3  | 0.17 | 0.13 | 1.07  | 0.822535 | 0.823018 | 0.927767 | 0.898312 |
| MmugDNA.26907.1.S1_at   | MmugDNA.26907.1 | 6.38  | 6.25  | 0.62 | 0.53 | 1.1   | 0.879381 | 0.317887 | 0.951533 | 0.571044 |
| MmugDNA.26908.1.S1_at   | MmugDNA.26908.1 | 6.7   | 6.04  | 0.89 | 0.46 | 1.58  | 0.192699 | 0.255532 | 0.556004 | 0.523538 |
| MmugDNA.26909.1.S1_at   | MmugDNA.26909.1 | 6.39  | 5.76  | 0.64 | 0.26 | 1.54  | 0.216898 | 0.141019 | 0.576456 | 0.414507 |
| MmugDNA.2691.1.S1_at    | MmugDNA.2691.1  | 10.11 | 10.47 | 0.21 | 0.27 | -1.28 | 0.059832 | 0.047713 | 0.392923 | 0.263325 |
| MmugDNA.26910.1.S1_at   | MmugDNA.26910.1 | 10.88 | 10.56 | 0.13 | 0.28 | 1.25  | 0.169503 | 0.173268 | 0.533686 | 0.449791 |
| MmugDNA.26912.1.S1_at   | MmugDNA.26912.1 | 12.38 | 11.59 | 0.18 | 1.15 | 1.73  | 0.112761 | 0.063287 | 0.475249 | 0.298244 |
| MmugDNA.26913.1.S1_at   | MmugDNA.26913.1 | 6.36  | 8.41  | 0.45 | 1.22 | -4.15 | 0.176698 | 0.187712 | 0.540348 | 0.463689 |
| MmugDNA.26914.1.S1_at   | MmugDNA.26914.1 | 3.73  | 3.66  | 0.03 | 0.24 | 1.05  | 0.574572 | 0.351069 | 0.801783 | 0.594752 |
| MmugDNA.26916.1.S1_at   | MmugDNA.26916.1 | 4.11  | 4.47  | 0.38 | 0.14 | -1.29 | 0.421905 | 0.764661 | 0.713215 | 0.863166 |
| MmugDNA.26917.1.S1_at   | MmugDNA.26917.1 | 3.36  | 3.35  | 0.11 | 0.06 | 1.01  | 0.399339 | 0.30164  | 0.699241 | 0.559555 |
| MmugDNA.26918.1.S1_at   | MmugDNA.26918.1 | 2.85  | 2.94  | 0.11 | 0.11 | -1.07 | 0.781773 | 0.705812 | 0.908921 | 0.829541 |
| MmugDNA.26919.1.S1_at   | MmugDNA.26919.1 | 4.7   | 4.71  | 0.22 | 0.08 | -1.01 | 0.455548 | 0.274708 | 0.733844 | 0.53918  |
| MmugDNA.2692.1.S1_at    | MmugDNA.2692.1  | 5.61  | 5.41  | 0.12 | 0.07 | 1.15  | 0.088504 | 0.270904 | 0.443318 | 0.536026 |
| MmugDNA.26920.1.S1_at   | MmugDNA.26920.1 | 5.59  | 4.56  | 0.89 | 0.24 | 2.04  | 0.104986 | 0.06461  | 0.4654   | 0.300314 |
| MmugDNA.26921.1.S1_at   | MmugDNA.26921.1 | 10.99 | 10.78 | 0.05 | 0.35 | 1.16  | 0.342868 | 0.074069 | 0.663407 | 0.317699 |
| MmugDNA.26922.1.S1_at   | MmugDNA.26922.1 | 3.04  | 2.95  | 0.04 | 0.13 | 1.06  | 0.356654 | 0.161294 | 0.671685 | 0.437434 |
| MmugDNA.26924.1.S1_at   | MmugDNA.26924.1 | 7.01  | 7.11  | 0.25 | 0.35 | -1.07 | 0.560143 | 0.500852 | 0.79419  | 0.699296 |
| MmugDNA.26927.1.S1_at   | MmugDNA.26927.1 | 3.29  | 3.25  | 0.15 | 0.11 | 1.03  | 0.999985 | 0.937016 | 1        | 0.964492 |
| MmugDNA.2018.1.S1_at    | MmugDNA.2018.1  | 10.61 | 10.41 | 0.1  | 0.12 | 1.16  | 0.144575 | 0.140963 | 0.511015 | 0.414474 |
| MmugDNA.2018.1.S1_s_at  | MmugDNA.2018.1  | 11.21 | 11    | 0.05 | 0.07 | 1.15  | 0.0487   | 0.067967 | 0.369426 | 0.306909 |
| MmugDNA.26930.1.S1_at   | MmugDNA.26930.1 | 4.06  | 3.83  | 0.28 | 0.17 | 1.17  | 0.279207 | 0.220471 | 0.620979 | 0.493818 |
| MmugDNA.26931.1.S1_at   | MmugDNA.26931.1 | 6.44  | 6.5   | 0.07 | 0.08 | -1.04 | 0.392007 | 0.095265 | 0.694392 | 0.352254 |
| MmugDNA.26934.1.S1_at   | MmugDNA.26934.1 | 8.85  | 8.68  | 0.34 | 0.59 | 1.12  | 0.997857 | 0.685414 | 0.999161 | 0.816513 |
| MmugDNA.26935.1.S1_at   | MmugDNA.26935.1 | 11.48 | 11.75 | 0.14 | 0.1  | -1.2  | 0.107996 | 0.056932 | 0.468731 | 0.284714 |
| MmugDNA.26936.1.S1_at   | MmugDNA.26936.1 | 6.66  | 6.87  | 0.21 | 0.38 | -1.15 | 0.481436 | 0.21776  | 0.749267 | 0.491309 |
| MmugDNA.26937.1.S1_at   | MmugDNA.26937.1 | 5.51  | 5.32  | 0.29 | 0.08 | 1.14  | 0.891724 | 0.881823 | 0.956867 | 0.932594 |
| MmugDNA.26938.1.S1_at   | MmugDNA.26938.1 | 3.77  | 3.94  | 0.1  | 0.17 | -1.13 | 0.202325 | 0.174959 | 0.564612 | 0.451599 |
| MmugDNA.26939.1.S1_at   | MmugDNA.26939.1 | 3.7   | 3.7   | 0.07 | 0.08 | 1     | 0.595592 | 0.694895 | 0.812393 | 0.822638 |
| MmugDNA.26940.1.S1_at   | MmugDNA.26940.1 | 4.76  | 4.73  | 0.29 | 0.23 | 1.02  | 0.855506 | 0.821085 | 0.941542 | 0.897041 |
| MmugDNA.26941.1.S1_at   | MmugDNA.26941.1 | 5.18  | 5.11  | 0.03 | 0.29 | 1.05  | 0.783584 | 0.775825 | 0.909642 | 0.869553 |
| MmugDNA.26942.1.S1_at   | MmugDNA.26942.1 | 5.55  | 5.63  | 0.12 | 0.17 | -1.05 | 0.412258 | 0.457288 | 0.707873 | 0.670746 |
| MmugDNA.26943.1.S1_s_at | MmugDNA.26943.1 | 10.91 | 10.47 | 0.34 | 0.15 | 1.36  | 0.138566 | 0.109531 | 0.505769 | 0.373377 |
| MmugDNA.26944.1.S1_at   | MmugDNA.26944.1 | 4.24  | 4.27  | 0.43 | 0.32 | -1.02 | 0.917859 | 0.216497 | 0.968032 | 0.490113 |
| MmugDNA.26945.1.S1_at   | MmugDNA.26945.1 | 4.65  | 4.72  | 0.23 | 0.07 | -1.06 | 0.586431 | 0.680793 | 0.808135 | 0.813594 |
| MmugDNA.26946.1.S1_at   | MmugDNA.26946.1 | 12.83 | 12.48 | 0.03 | 0.11 | 1.27  | 0.004263 | 0.00146  | 0.18216  | 0.058204 |
| MmugDNA.26946.1.S1_s_at | MmugDNA.26946.1 | 12.18 | 11.8  | 0.09 | 0.21 | 1.3   | 0.039754 | 0.020578 | 0.347969 | 0.179964 |
| MmugDNA.26948.1.S1_s_at | MmugDNA.26948.1 | 10.46 | 10.21 | 0.11 | 0.15 | 1.19  | 0.087815 | 0.040269 | 0.442117 | 0.245902 |
| MmugDNA.26950.1.S1_at   | MmugDNA.26950.1 | 8.27  | 6.9   | 0.8  | 0.79 | 2.58  | 0.129587 | 0.088215 | 0.495744 | 0.341721 |
| MmugDNA.26952.1.S1_at   | MmugDNA.26952.1 | 4.69  | 4.68  | 0.04 | 0.1  | 1     | 0.728147 | 0.314201 | 0.881806 | 0.568185 |
| MmugDNA.26953.1.S1_at   | MmugDNA.26953.1 | 9.85  | 8.77  | 0.39 | 1.04 | 2.12  | 0.100574 | 0.105852 | 0.461009 | 0.368111 |

|                         |                 |       |       |      |      |       |          |          |          |          |
|-------------------------|-----------------|-------|-------|------|------|-------|----------|----------|----------|----------|
| MmugDNA.26954.1.S1_at   | MmugDNA.26954.1 | 4.05  | 4.11  | 0.06 | 0.13 | -1.05 | 0.284252 | 0.754825 | 0.624097 | 0.857323 |
| MmugDNA.26955.1.S1_at   | MmugDNA.26955.1 | 5.73  | 5.69  | 0.06 | 0.08 | 1.03  | 0.608667 | 0.282973 | 0.820157 | 0.545692 |
| MmugDNA.26956.1.S1_at   | MmugDNA.26956.1 | 9.33  | 9.39  | 0.18 | 0.3  | -1.04 | 0.61669  | 0.074067 | 0.824285 | 0.317699 |
| MmugDNA.26958.1.S1_at   | MmugDNA.26958.1 | 4.06  | 4.18  | 0.35 | 0.38 | -1.08 | 0.560103 | 0.462322 | 0.79419  | 0.673686 |
| MmugDNA.2696.1.S1_at    | MmugDNA.2696.1  | 8.51  | 8.99  | 0.42 | 0.18 | -1.4  | 0.193218 | 0.22801  | 0.556706 | 0.500218 |
| MmugDNA.26960.1.S1_at   | MmugDNA.26960.1 | 11.66 | 12.13 | 0.05 | 0.16 | -1.39 | 0.004369 | 0.001162 | 0.183061 | 0.053615 |
| MmugDNA.26961.1.S1_at   | MmugDNA.26961.1 | 3.55  | 3.55  | 0.1  | 0.19 | 1     | 0.471553 | 0.405701 | 0.743268 | 0.633894 |
| MmugDNA.26963.1.S1_at   | MmugDNA.26963.1 | 6.47  | 6.88  | 0.13 | 0.42 | -1.33 | 0.060121 | 0.049645 | 0.393081 | 0.267876 |
| MmugDNA.26965.1.S1_at   | MmugDNA.26965.1 | 8.54  | 8.82  | 0.6  | 1.04 | -1.22 | 0.152459 | 0.183785 | 0.517115 | 0.459871 |
| MmugDNA.26966.1.S1_at   | MmugDNA.26966.1 | 3.54  | 3.7   | 0.24 | 0.07 | -1.12 | 0.314817 | 0.407377 | 0.646122 | 0.634981 |
| MmugDNA.26967.1.S1_at   | MmugDNA.26967.1 | 10.37 | 10.88 | 0.36 | 0.12 | -1.42 | 0.033588 | 0.032503 | 0.329782 | 0.223265 |
| MmugDNA.26969.1.S1_at   | MmugDNA.26969.1 | 6.04  | 6.36  | 0.14 | 0.17 | -1.25 | 0.324188 | 0.434948 | 0.651856 | 0.654901 |
| MmugDNA.2697.1.S1_at    | MmugDNA.2697.1  | 6.37  | 6.46  | 0.14 | 0.01 | -1.07 | 0.812271 | 0.948215 | 0.923615 | 0.970472 |
| MmugDNA.26970.1.S1_at   | MmugDNA.26970.1 | 3.68  | 3.69  | 0.14 | 0.1  | -1.01 | 0.217617 | 0.167167 | 0.577214 | 0.443636 |
| MmugDNA.26970.1.S1_x_at | MmugDNA.26970.1 | 5.37  | 5.55  | 0.16 | 0.15 | -1.13 | 0.133757 | 0.151318 | 0.500334 | 0.426073 |
| MmugDNA.26973.1.S1_at   | MmugDNA.26973.1 | 7.07  | 7.18  | 0.21 | 0.15 | -1.08 | 0.971325 | 0.599193 | 0.989052 | 0.761359 |
| MmugDNA.26974.1.S1_at   | MmugDNA.26974.1 | 3.96  | 4.12  | 0.15 | 0.68 | -1.12 | 0.268012 | 0.399711 | 0.612875 | 0.629951 |
| MmugDNA.26977.1.S1_at   | MmugDNA.26977.1 | 5.22  | 5.29  | 0.01 | 0.09 | -1.05 | 0.191551 | 0.158853 | 0.554539 | 0.43496  |
| MmugDNA.26979.1.S1_at   | MmugDNA.26979.1 | 7.28  | 7.08  | 0.32 | 1.3  | 1.15  | 0.7679   | 0.762303 | 0.902473 | 0.861726 |
| MmugDNA.26980.1.S1_at   | MmugDNA.26980.1 | 4.46  | 4.68  | 0.11 | 0.07 | -1.16 | 0.074243 | 0.105206 | 0.419963 | 0.366982 |
| MmugDNA.26981.1.S1_at   | MmugDNA.26981.1 | 3.27  | 3.33  | 0.01 | 0.04 | -1.05 | 0.115512 | 0.471912 | 0.478809 | 0.679793 |
| MmugDNA.26984.1.S1_at   | MmugDNA.26984.1 | 8.96  | 9.23  | 0.23 | 0.08 | -1.2  | 0.218303 | 0.01301  | 0.577874 | 0.146803 |
| MmugDNA.26985.1.S1_at   | MmugDNA.26985.1 | 5.7   | 5.73  | 0.02 | 0.05 | -1.02 | 0.67035  | 0.444    | 0.852386 | 0.661632 |
| MmugDNA.26986.1.S1_at   | MmugDNA.26986.1 | 5.84  | 5.88  | 0.33 | 0.2  | -1.03 | 0.557858 | 0.685813 | 0.792872 | 0.816612 |
| MmugDNA.26987.1.S1_at   | MmugDNA.26987.1 | 3.09  | 3.09  | 0.06 | 0.09 | 1     | 0.944327 | 0.878225 | 0.978764 | 0.93052  |
| MmugDNA.26988.1.S1_at   | MmugDNA.26988.1 | 5.62  | 5.8   | 0.24 | 0.23 | -1.13 | 0.837087 | 0.512289 | 0.934152 | 0.706182 |
| MmugDNA.26989.1.S1_at   | MmugDNA.26989.1 | 10.72 | 10.8  | 0.11 | 0.08 | -1.05 | 0.140111 | 0.196397 | 0.508065 | 0.471418 |
| MmugDNA.2699.1.S1_at    | MmugDNA.2699.1  | 3.89  | 3.87  | 0.3  | 0.06 | 1.01  | 0.920753 | 0.937428 | 0.969092 | 0.964687 |
| MmugDNA.26991.1.S1_s_at | MmugDNA.26991.1 | 11.2  | 11.25 | 0.22 | 0.26 | -1.04 | 0.349268 | 0.48694  | 0.667584 | 0.690118 |
| MmugDNA.26991.1.S1_x_at | MmugDNA.26991.1 | 4.97  | 4.71  | 0.3  | 0.26 | 1.19  | 0.309269 | 0.575903 | 0.641409 | 0.746847 |
| MmugDNA.26992.1.S1_at   | MmugDNA.26992.1 | 5.35  | 5.18  | 0.2  | 0.1  | 1.13  | 0.165406 | 0.290196 | 0.529362 | 0.551169 |
| MmugDNA.26995.1.S1_at   | MmugDNA.26995.1 | 5.9   | 5.99  | 0.1  | 0.26 | -1.06 | 0.724188 | 0.667319 | 0.879441 | 0.805297 |
| MmugDNA.26996.1.S1_at   | MmugDNA.26996.1 | 3.31  | 3.19  | 1.28 | 0.13 | 1.08  | 0.32216  | 0.34698  | 0.650863 | 0.591769 |
| MmugDNA.26998.1.S1_at   | MmugDNA.26998.1 | 2.99  | 3     | 0.1  | 0.02 | -1.01 | 0.598416 | 0.222681 | 0.813939 | 0.495617 |
| MmugDNA.26999.1.S1_at   | MmugDNA.26999.1 | 4     | 3.85  | 0.37 | 0.08 | 1.1   | 0.176196 | 0.282501 | 0.539756 | 0.545215 |
| MmugDNA.27.1.S1_at      | MmugDNA.27.1    | 7.26  | 7.43  | 0.1  | 0.23 | -1.13 | 0.311109 | 0.265466 | 0.643066 | 0.531363 |
| MmugDNA.270.1.S1_at     | MmugDNA.270.1   | 5.72  | 5.91  | 0.11 | 0.24 | -1.14 | 0.931421 | 0.561939 | 0.97348  | 0.737659 |
| MmugDNA.2700.1.S1_at    | MmugDNA.2700.1  | 4.39  | 3.91  | 0.33 | 0.22 | 1.39  | 0.235742 | 0.065053 | 0.589652 | 0.301009 |
| MmugDNA.27003.1.S1_at   | MmugDNA.27003.1 | 6.1   | 6.91  | 0.18 | 0.53 | -1.75 | 0.089754 | 0.095606 | 0.445334 | 0.352645 |
| MmugDNA.27005.1.S1_at   | MmugDNA.27005.1 | 7.62  | 7.97  | 0.15 | 0.06 | -1.27 | 0.022226 | 0.010366 | 0.284988 | 0.133236 |
| MmugDNA.27007.1.S1_at   | MmugDNA.27007.1 | 6.27  | 6     | 0.15 | 0.03 | 1.21  | 0.050983 | 0.00765  | 0.375705 | 0.117015 |



|                         |                 |       |       |      |      |        |          |          |          |          |
|-------------------------|-----------------|-------|-------|------|------|--------|----------|----------|----------|----------|
| MmugDNA.27008.1.S1_at   | MmugDNA.27008.1 | 4.82  | 5.45  | 1.07 | 0.49 | -1.54  | 0.694331 | 0.823275 | 0.864407 | 0.898426 |
| MmugDNA.27010.1.S1_at   | MmugDNA.27010.1 | 4.9   | 4.96  | 0.42 | 0.48 | -1.05  | 0.96989  | 0.001573 | 0.98846  | 0.060185 |
| MmugDNA.27013.1.S1_at   | MmugDNA.27013.1 | 7.54  | 7.81  | 0.29 | 0.27 | -1.21  | 0.296154 | 0.146941 | 0.632176 | 0.421008 |
| MmugDNA.27014.1.S1_at   | MmugDNA.27014.1 | 6.49  | 6.75  | 0.33 | 0.25 | -1.2   | 0.327128 | 0.180795 | 0.653601 | 0.457306 |
| MmugDNA.27015.1.S1_at   | MmugDNA.27015.1 | 8.66  | 9.55  | 0.55 | 0.09 | -1.86  | 0.048744 | 0.039207 | 0.369504 | 0.243157 |
| MmugDNA.27016.1.S1_at   | MmugDNA.27016.1 | 6.68  | 6.63  | 0.12 | 0.03 | 1.04   | 0.493962 | 0.484976 | 0.756411 | 0.688893 |
| MmugDNA.27021.1.S1_at   | MmugDNA.27021.1 | 4.16  | 4.2   | 0.09 | 0.13 | -1.02  | 0.881435 | 0.502093 | 0.952341 | 0.700051 |
| MmugDNA.27024.1.S1_at   | MmugDNA.27024.1 | 6.69  | 6.48  | 0.14 | 0.18 | 1.16   | 0.446506 | 0.35243  | 0.728373 | 0.595722 |
| MmugDNA.27025.1.S1_at   | MmugDNA.27025.1 | 4.87  | 4.84  | 0.24 | 0.14 | 1.02   | 0.367666 | 0.192122 | 0.679512 | 0.467591 |
| MmugDNA.27026.1.S1_at   | MmugDNA.27026.1 | 5.3   | 5.79  | 0.18 | 0.01 | -1.41  | 0.008924 | 0.01258  | 0.221598 | 0.14463  |
| MmugDNA.27028.1.S1_at   | MmugDNA.27028.1 | 9.27  | 8.95  | 0.4  | 0.12 | 1.25   | 0.915528 | 0.977783 | 0.966579 | 0.987873 |
| MmugDNA.2703.1.S1_at    | MmugDNA.2703.1  | 4.4   | 3.59  | 0.42 | 0.44 | 1.75   | 0.363312 | 0.51089  | 0.676615 | 0.70525  |
| MmugDNA.27031.1.S1_at   | MmugDNA.27031.1 | 6.54  | 6.56  | 0.19 | 0.11 | -1.01  | 0.216211 | 0.266269 | 0.575962 | 0.532086 |
| MmugDNA.27032.1.S1_at   | MmugDNA.27032.1 | 3.67  | 3.61  | 0.2  | 0.06 | 1.04   | 0.526027 | 0.459776 | 0.773971 | 0.671958 |
| MmugDNA.27033.1.S1_at   | MmugDNA.27033.1 | 3.75  | 3.94  | 0.24 | 0.23 | -1.14  | 0.468355 | 0.202637 | 0.741049 | 0.47704  |
| MmugDNA.27034.1.S1_at   | MmugDNA.27034.1 | 3.77  | 3.9   | 0.1  | 0.3  | -1.09  | 0.408183 | 0.53932  | 0.70497  | 0.723689 |
| MmugDNA.27034.1.S1_s_at | MmugDNA.27034.1 | 3.95  | 4.01  | 0.11 | 0.09 | -1.04  | 0.563435 | 0.598027 | 0.79597  | 0.760536 |
| MmugDNA.27035.1.S1_at   | MmugDNA.27035.1 | 7.51  | 7.29  | 0.09 | 0.55 | 1.17   | 0.61853  | 0.46886  | 0.825259 | 0.677906 |
| MmugDNA.27036.1.S1_at   | MmugDNA.27036.1 | 6.35  | 5.95  | 0.57 | 0.28 | 1.32   | 0.175734 | 0.205963 | 0.539441 | 0.480207 |
| MmugDNA.27037.1.S1_at   | MmugDNA.27037.1 | 5.9   | 12.09 | 2.37 | 3.98 | -72.98 | 0.387226 | 0.185358 | 0.691895 | 0.461323 |
| MmugDNA.27039.1.S1_at   | MmugDNA.27039.1 | 5.26  | 5.95  | 0.18 | 0.61 | -1.62  | 0.184283 | 0.249906 | 0.548081 | 0.518889 |
| MmugDNA.27040.1.S1_at   | MmugDNA.27040.1 | 6.57  | 6.65  | 0.3  | 0.09 | -1.06  | 0.477416 | 0.364153 | 0.746593 | 0.604488 |
| MmugDNA.27041.1.S1_at   | MmugDNA.27041.1 | 5.41  | 5.9   | 0.39 | 0.34 | -1.4   | 0.509662 | 0.30854  | 0.764485 | 0.564575 |
| MmugDNA.27043.1.S1_at   | MmugDNA.27043.1 | 4.74  | 5.4   | 0.77 | 0.69 | -1.59  | 0.261433 | 0.200102 | 0.608009 | 0.474603 |
| MmugDNA.27047.1.S1_at   | MmugDNA.27047.1 | 7.59  | 6.84  | 0.09 | 0.75 | 1.68   | 0.186886 | 0.238471 | 0.550106 | 0.509084 |
| MmugDNA.27048.1.S1_at   | MmugDNA.27048.1 | 2.89  | 2.98  | 0.13 | 0.13 | -1.06  | 0.961589 | 0.787499 | 0.985216 | 0.877072 |
| MmugDNA.27049.1.S1_at   | MmugDNA.27049.1 | 3.35  | 3.18  | 0.17 | 0.17 | 1.13   | 0.250271 | 0.74204  | 0.600389 | 0.850608 |
| MmugDNA.2705.1.S1_at    | MmugDNA.2705.1  | 7.19  | 7     | 0.08 | 0.05 | 1.14   | 0.009716 | 0.004496 | 0.226235 | 0.093593 |
| MmugDNA.27051.1.S1_at   | MmugDNA.27051.1 | 5.91  | 5.1   | 0.52 | 1.17 | 1.76   | 0.286695 | 0.401886 | 0.625572 | 0.63109  |
| MmugDNA.27054.1.S1_at   | MmugDNA.27054.1 | 3.9   | 3.68  | 0.05 | 0.08 | 1.16   | 0.007456 | 0.001792 | 0.208525 | 0.063581 |
| MmugDNA.27055.1.S1_at   | MmugDNA.27055.1 | 5.5   | 5.68  | 0.17 | 0.04 | -1.14  | 0.348902 | 0.468143 | 0.667271 | 0.677624 |
| MmugDNA.27057.1.S1_at   | MmugDNA.27057.1 | 3.2   | 3.24  | 0.06 | 0.07 | -1.03  | 0.529717 | 0.292312 | 0.776279 | 0.552389 |
| MmugDNA.27058.1.S1_at   | MmugDNA.27058.1 | 11.83 | 11.65 | 0.26 | 1.34 | 1.13   | 0.367757 | 0.459041 | 0.679581 | 0.671535 |
| MmugDNA.2706.1.S1_at    | MmugDNA.2706.1  | 5.47  | 5.65  | 0.11 | 0.01 | -1.13  | 0.174566 | 0.043718 | 0.538195 | 0.253804 |
| MmugDNA.27060.1.S1_at   | MmugDNA.27060.1 | 3.2   | 3.35  | 0.02 | 0.12 | -1.11  | 0.039099 | 0.266447 | 0.346461 | 0.532234 |
| MmugDNA.27061.1.S1_at   | MmugDNA.27061.1 | 6.84  | 7.3   | 0.12 | 0.52 | -1.37  | 0.215914 | 0.305827 | 0.575954 | 0.562731 |
| MmugDNA.27062.1.S1_at   | MmugDNA.27062.1 | 3.87  | 3.75  | 0.21 | 0.02 | 1.09   | 0.585411 | 0.767095 | 0.807572 | 0.864712 |
| MmugDNA.27063.1.S1_at   | MmugDNA.27063.1 | 5.76  | 5.19  | 0.36 | 0.13 | 1.48   | 0.067154 | 0.059976 | 0.407071 | 0.291581 |
| MmugDNA.27064.1.S1_at   | MmugDNA.27064.1 | 3.27  | 3.34  | 0.42 | 0.11 | -1.04  | 0.521173 | 0.190549 | 0.771131 | 0.465929 |
| MmugDNA.27065.1.S1_at   | MmugDNA.27065.1 | 6.45  | 6.67  | 0.04 | 0.2  | -1.16  | 0.346639 | 0.400235 | 0.666013 | 0.630158 |
| MmugDNA.27066.1.S1_at   | MmugDNA.27066.1 | 4.29  | 4.34  | 0.31 | 0.1  | -1.04  | 0.749082 | 0.558303 | 0.892627 | 0.735514 |

|                         |                 |       |       |      |      |       |          |          |          |          |
|-------------------------|-----------------|-------|-------|------|------|-------|----------|----------|----------|----------|
| MmugDNA.27067.1.S1_at   | MmugDNA.27067.1 | 3.96  | 4.06  | 0.15 | 0.08 | -1.07 | 0.472005 | 0.20168  | 0.743454 | 0.476208 |
| MmugDNA.27068.1.S1_x_at | MmugDNA.27068.1 | 6.15  | 5.57  | 0.29 | 0.18 | 1.5   | 0.134819 | 0.208535 | 0.501826 | 0.482453 |
| MmugDNA.27069.1.S1_at   | MmugDNA.27069.1 | 3.37  | 3.28  | 0.2  | 0.04 | 1.07  | 0.152951 | 0.149269 | 0.517325 | 0.42373  |
| MmugDNA.36044.1.S1_at   | MmugDNA.36044.1 | 5.89  | 5.79  | 0.25 | 0.48 | 1.07  | 0.732702 | 0.870576 | 0.88457  | 0.926446 |
| MmugDNA.36044.1.S1_s_at | MmugDNA.36044.1 | 9.92  | 9.67  | 0.08 | 0.22 | 1.19  | 0.056704 | 0.036732 | 0.386847 | 0.236262 |
| MmugDNA.27072.1.S1_at   | MmugDNA.27072.1 | 3.37  | 3.58  | 0.06 | 0.15 | -1.15 | 0.074118 | 0.106475 | 0.419692 | 0.369055 |
| MmugDNA.27073.1.S1_at   | MmugDNA.27073.1 | 5.24  | 5.32  | 0.26 | 0.35 | -1.06 | 0.765    | 0.529313 | 0.901054 | 0.717233 |
| MmugDNA.27073.1.S1_s_at | MmugDNA.27073.1 | 9.43  | 9.75  | 0.04 | 0.48 | -1.25 | 0.342749 | 0.41855  | 0.663407 | 0.642955 |
| MmugDNA.27073.1.S1_x_at | MmugDNA.27073.1 | 5.92  | 6.06  | 0.09 | 0.35 | -1.1  | 0.661818 | 0.74009  | 0.848232 | 0.849396 |
| MmugDNA.27074.1.S1_at   | MmugDNA.27074.1 | 6.26  | 6.28  | 0.37 | 0.19 | -1.02 | 0.540533 | 0.264116 | 0.781948 | 0.530214 |
| MmugDNA.27075.1.S1_at   | MmugDNA.27075.1 | 7.91  | 6.85  | 1.01 | 0.76 | 2.08  | 0.244332 | 0.10325  | 0.596096 | 0.364143 |
| MmugDNA.27076.1.S1_s_at | MmugDNA.27076.1 | 7.53  | 7.6   | 0.15 | 0.07 | -1.05 | 0.950097 | 0.037618 | 0.981147 | 0.238384 |
| MmugDNA.27077.1.S1_at   | MmugDNA.27077.1 | 6.04  | 6.06  | 0.12 | 0.22 | -1.01 | 0.818193 | 0.79582  | 0.926284 | 0.88238  |
| MmugDNA.27078.1.S1_at   | MmugDNA.27078.1 | 6.11  | 6.03  | 0.05 | 0.11 | 1.06  | 0.841485 | 0.0802   | 0.936193 | 0.327801 |
| MmugDNA.27079.1.S1_at   | MmugDNA.27079.1 | 8.9   | 8.34  | 0.72 | 0.56 | 1.48  | 0.682385 | 0.359969 | 0.85789  | 0.601195 |
| MmugDNA.2708.1.S1_at    | MmugDNA.2708.1  | 3.66  | 3.8   | 0.2  | 0.26 | -1.11 | 0.815649 | 0.916495 | 0.925109 | 0.953262 |
| MmugDNA.27081.1.S1_at   | MmugDNA.27081.1 | 3.61  | 3.69  | 0.04 | 0.21 | -1.06 | 0.894742 | 0.86826  | 0.957917 | 0.925234 |
| MmugDNA.27083.1.S1_at   | MmugDNA.27083.1 | 6.24  | 5.96  | 0.21 | 0.4  | 1.21  | 0.532657 | 0.730636 | 0.777827 | 0.844055 |
| MmugDNA.27085.1.S1_at   | MmugDNA.27085.1 | 5.67  | 4.49  | 0.89 | 0.26 | 2.28  | 0.086993 | 0.096672 | 0.4408   | 0.35417  |
| MmugDNA.27086.1.S1_at   | MmugDNA.27086.1 | 3.73  | 3.56  | 0.39 | 1    | 1.12  | 0.644246 | 0.530779 | 0.839719 | 0.718133 |
| MmugDNA.27087.1.S1_at   | MmugDNA.27087.1 | 3.33  | 3.33  | 0.07 | 0.06 | -1    | 0.574044 | 0.912289 | 0.801477 | 0.950571 |
| MmugDNA.27088.1.S1_at   | MmugDNA.27088.1 | 3.75  | 3.89  | 0.04 | 0.14 | -1.1  | 0.128525 | 0.122591 | 0.494653 | 0.39249  |
| MmugDNA.27089.1.S1_at   | MmugDNA.27089.1 | 10.19 | 10.25 | 0.15 | 0.17 | -1.04 | 0.510635 | 0.70634  | 0.765151 | 0.829634 |
| MmugDNA.2709.1.S1_at    | MmugDNA.2709.1  | 3.31  | 3.14  | 0.15 | 0.39 | 1.12  | 0.671424 | 0.776103 | 0.852688 | 0.869726 |
| MmugDNA.27091.1.S1_at   | MmugDNA.27091.1 | 8.1   | 9.11  | 1.06 | 0.58 | -2.02 | 0.411194 | 0.557399 | 0.707034 | 0.735031 |
| MmugDNA.27092.1.S1_at   | MmugDNA.27092.1 | 6.5   | 7.19  | 0.11 | 0.08 | -1.61 | 0.001774 | 0.000411 | 0.154452 | 0.037913 |
| MmugDNA.27094.1.S1_at   | MmugDNA.27094.1 | 9.24  | 9.25  | 0.11 | 0.29 | -1    | 0.818886 | 0.951756 | 0.92651  | 0.9726   |
| MmugDNA.27095.1.S1_at   | MmugDNA.27095.1 | 2.79  | 2.69  | 0.05 | 0.08 | 1.07  | 0.10652  | 0.020723 | 0.467045 | 0.180645 |
| MmugDNA.27096.1.S1_at   | MmugDNA.27096.1 | 7.54  | 7.69  | 0.19 | 0.24 | -1.11 | 0.732235 | 0.737506 | 0.884299 | 0.847993 |
| MmugDNA.7891.1.S1_s_at  | MmugDNA.7891.1  | 8.68  | 8.53  | 0.07 | 0.09 | 1.1   | 0.076315 | 0.07169  | 0.424762 | 0.313904 |
| MmugDNA.27098.1.S1_at   | MmugDNA.27098.1 | 8.01  | 8.22  | 0.05 | 0.25 | -1.16 | 0.060004 | 0.075396 | 0.393081 | 0.319693 |
| MmugDNA.27099.1.S1_at   | MmugDNA.27099.1 | 11.42 | 11.71 | 0.07 | 0.31 | -1.23 | 0.14487  | 0.166089 | 0.511188 | 0.442666 |
| MmugDNA.271.1.S1_at     | MmugDNA.271.1   | 5.15  | 4.63  | 0.1  | 1.07 | 1.43  | 0.868485 | 0.413604 | 0.947527 | 0.639669 |
| MmugDNA.2710.1.S1_at    | MmugDNA.2710.1  | 5.75  | 5.36  | 0.6  | 0.13 | 1.3   | 0.088617 | 0.048021 | 0.44348  | 0.264118 |
| MmugDNA.27100.1.S1_at   | MmugDNA.27100.1 | 2.76  | 2.71  | 0.04 | 0.05 | 1.04  | 0.505857 | 0.346409 | 0.76184  | 0.591247 |
| MmugDNA.27101.1.S1_at   | MmugDNA.27101.1 | 3.94  | 3.76  | 0.33 | 0.24 | 1.14  | 0.335681 | 0.283493 | 0.659165 | 0.545959 |
| MmugDNA.27102.1.S1_at   | MmugDNA.27102.1 | 5.21  | 5.31  | 0.56 | 0.33 | -1.07 | 0.535551 | 0.703123 | 0.77916  | 0.827872 |
| MmugDNA.27103.1.S1_at   | MmugDNA.27103.1 | 9.53  | 8.32  | 0.78 | 1.76 | 2.32  | 0.127043 | 0.179146 | 0.493251 | 0.45549  |
| MmugDNA.27104.1.S1_at   | MmugDNA.27104.1 | 5.34  | 5.05  | 1.16 | 0.15 | 1.22  | 0.231289 | 0.314048 | 0.587369 | 0.568178 |
| MmugDNA.27105.1.S1_at   | MmugDNA.27105.1 | 3.75  | 3.59  | 0.4  | 0.43 | 1.12  | 0.57471  | 0.723828 | 0.801827 | 0.840144 |
| MmugDNA.27106.1.S1_at   | MmugDNA.27106.1 | 5.83  | 5.25  | 0.34 | 0.23 | 1.5   | 0.145027 | 0.389794 | 0.511188 | 0.623851 |

|                         |                 |       |       |      |      |       |          |          |          |          |
|-------------------------|-----------------|-------|-------|------|------|-------|----------|----------|----------|----------|
| MmugDNA.27109.1.S1_at   | MmugDNA.27109.1 | 3.47  | 3.5   | 0.3  | 0.22 | -1.03 | 0.962654 | 0.611655 | 0.985598 | 0.769481 |
| MmugDNA.2711.1.S1_at    | MmugDNA.2711.1  | 6.02  | 6.8   | 0.41 | 0.44 | -1.72 | 0.055345 | 0.009203 | 0.383689 | 0.126579 |
| MmugDNA.27110.1.S1_at   | MmugDNA.27110.1 | 5.41  | 6.83  | 0.28 | 1.3  | -2.68 | 0.179699 | 0.217068 | 0.543901 | 0.490668 |
| MmugDNA.27112.1.S1_at   | MmugDNA.27112.1 | 3.29  | 3.55  | 0.15 | 0.14 | -1.19 | 0.133798 | 0.153927 | 0.500334 | 0.42862  |
| MmugDNA.27113.1.S1_at   | MmugDNA.27113.1 | 3.64  | 3.47  | 0.57 | 0.65 | 1.13  | 0.815033 | 0.643798 | 0.924824 | 0.791129 |
| MmugDNA.27114.1.S1_at   | MmugDNA.27114.1 | 4.11  | 3.56  | 0.16 | 0.43 | 1.46  | 0.189955 | 0.063064 | 0.55279  | 0.297788 |
| MmugDNA.27115.1.S1_at   | MmugDNA.27115.1 | 4.42  | 5.18  | 0.25 | 0.71 | -1.69 | 0.143942 | 0.14405  | 0.510567 | 0.417912 |
| MmugDNA.27118.1.S1_at   | MmugDNA.27118.1 | 5.25  | 4.87  | 0.96 | 0.3  | 1.31  | 0.274658 | 0.266967 | 0.617579 | 0.532513 |
| MmugDNA.2712.1.S1_at    | MmugDNA.2712.1  | 6.94  | 7.23  | 0.44 | 0.26 | -1.22 | 0.47589  | 0.172593 | 0.746016 | 0.449    |
| MmugDNA.27120.1.S1_at   | MmugDNA.27120.1 | 4.84  | 4.94  | 0.31 | 0.11 | -1.07 | 0.672332 | 0.081533 | 0.853001 | 0.329764 |
| MmugDNA.27121.1.S1_at   | MmugDNA.27121.1 | 4.15  | 4.38  | 0.05 | 0.52 | -1.17 | 0.423864 | 0.668834 | 0.714199 | 0.806227 |
| MmugDNA.27122.1.S1_at   | MmugDNA.27122.1 | 7.97  | 7.11  | 0.29 | 0.41 | 1.81  | 0.155421 | 0.18483  | 0.520164 | 0.460768 |
| MmugDNA.27122.1.S1_s_at | MmugDNA.27122.1 | 8.75  | 8.64  | 0.3  | 0.13 | 1.08  | 0.838291 | 0.198659 | 0.934646 | 0.473391 |
| MmugDNA.27123.1.S1_at   | MmugDNA.27123.1 | 6.21  | 6.17  | 0.21 | 0.12 | 1.03  | 0.739021 | 0.709999 | 0.888088 | 0.831887 |
| MmugDNA.27124.1.S1_at   | MmugDNA.27124.1 | 5.33  | 5.63  | 0.22 | 0.57 | -1.23 | 0.985648 | 0.836941 | 0.994806 | 0.906826 |
| MmugDNA.27125.1.S1_at   | MmugDNA.27125.1 | 3.89  | 3.44  | 0.13 | 0.32 | 1.36  | 0.03359  | 0.023966 | 0.329782 | 0.194025 |
| MmugDNA.2713.1.S1_at    | MmugDNA.2713.1  | 8.81  | 8.81  | 0.65 | 0.45 | -1    | 0.904406 | 0.821448 | 0.961729 | 0.897172 |
| MmugDNA.27130.1.S1_at   | MmugDNA.27130.1 | 4.99  | 4.82  | 0.23 | 0.12 | 1.12  | 0.298239 | 0.182848 | 0.633823 | 0.459357 |
| MmugDNA.27131.1.S1_at   | MmugDNA.27131.1 | 5.48  | 5.78  | 0.05 | 0.38 | -1.23 | 0.230944 | 0.476804 | 0.587369 | 0.682948 |
| MmugDNA.27132.1.S1_at   | MmugDNA.27132.1 | 7.5   | 7.46  | 0.32 | 0.02 | 1.03  | 0.660366 | 0.84745  | 0.84761  | 0.913316 |
| MmugDNA.27134.1.S1_at   | MmugDNA.27134.1 | 5.81  | 6.03  | 0.24 | 0.3  | -1.16 | 0.403882 | 0.234485 | 0.702465 | 0.505674 |
| MmugDNA.27135.1.S1_at   | MmugDNA.27135.1 | 6.84  | 6.03  | 0.25 | 0.07 | 1.75  | 0.003981 | 0.000555 | 0.181715 | 0.040995 |
| MmugDNA.27136.1.S1_at   | MmugDNA.27136.1 | 8.4   | 6.63  | 0.32 | 0.73 | 3.4   | 0.026565 | 0.030935 | 0.303505 | 0.217705 |
| MmugDNA.27137.1.S1_at   | MmugDNA.27137.1 | 7.01  | 6.87  | 0.41 | 0.22 | 1.11  | 0.305124 | 0.382306 | 0.639014 | 0.618482 |
| MmugDNA.27138.1.S1_at   | MmugDNA.27138.1 | 5.6   | 5.09  | 0.4  | 0.34 | 1.42  | 0.429636 | 0.004703 | 0.717667 | 0.09546  |
| MmugDNA.27140.1.S1_at   | MmugDNA.27140.1 | 7.65  | 7.61  | 0.1  | 0.04 | 1.03  | 0.451874 | 0.788969 | 0.731768 | 0.878011 |
| MmugDNA.27141.1.S1_at   | MmugDNA.27141.1 | 3.93  | 3.9   | 0.29 | 0.36 | 1.02  | 0.666638 | 0.800391 | 0.850512 | 0.885129 |
| MmugDNA.27142.1.S1_at   | MmugDNA.27142.1 | 3.53  | 3.58  | 0.49 | 0.16 | -1.03 | 0.48121  | 0.443332 | 0.749026 | 0.661168 |
| MmugDNA.27143.1.S1_at   | MmugDNA.27143.1 | 4.13  | 4.14  | 0.12 | 0.13 | -1    | 0.983388 | 0.702468 | 0.994011 | 0.827542 |
| MmugDNA.27144.1.S1_at   | MmugDNA.27144.1 | 8.56  | 8.15  | 0.06 | 0.46 | 1.32  | 0.710021 | 0.573117 | 0.872791 | 0.744941 |
| MmugDNA.27145.1.S1_at   | MmugDNA.27145.1 | 6.13  | 6.22  | 0.11 | 0.19 | -1.07 | 0.471228 | 0.667485 | 0.742951 | 0.805333 |
| MmugDNA.27146.1.S1_at   | MmugDNA.27146.1 | 4.82  | 4.96  | 0.16 | 0.15 | -1.1  | 0.655327 | 0.386435 | 0.84487  | 0.621593 |
| MmugDNA.27147.1.S1_at   | MmugDNA.27147.1 | 3.66  | 3.82  | 0.1  | 0.13 | -1.11 | 0.104101 | 0.277911 | 0.464201 | 0.541664 |
| MmugDNA.27148.1.S1_at   | MmugDNA.27148.1 | 10.67 | 10.49 | 0.08 | 0.54 | 1.14  | 0.215686 | 0.0896   | 0.575945 | 0.343811 |
| MmugDNA.27149.1.S1_at   | MmugDNA.27149.1 | 7.36  | 6.14  | 0.71 | 0.17 | 2.33  | 0.034384 | 0.026922 | 0.33285  | 0.205227 |
| MmugDNA.2715.1.S1_at    | MmugDNA.2715.1  | 6.42  | 6.18  | 0.14 | 0.12 | 1.18  | 0.081376 | 0.126867 | 0.432224 | 0.397534 |
| MmugDNA.27150.1.S1_at   | MmugDNA.27150.1 | 9.25  | 9.04  | 0.05 | 0.35 | 1.16  | 0.305686 | 0.125423 | 0.639223 | 0.396079 |
| MmugDNA.27151.1.S1_at   | MmugDNA.27151.1 | 10.76 | 10.86 | 0.14 | 0.55 | -1.07 | 0.675186 | 0.702758 | 0.854428 | 0.827685 |
| MmugDNA.27152.1.S1_at   | MmugDNA.27152.1 | 7.39  | 7.43  | 0.52 | 0.68 | -1.03 | 0.960211 | 0.334326 | 0.98486  | 0.582352 |
| MmugDNA.27153.1.S1_x_at | MmugDNA.27153.1 | 9.87  | 9.66  | 0.65 | 0.32 | 1.16  | 0.348178 | 0.503072 | 0.667068 | 0.700566 |
| MmugDNA.27154.1.S1_at   | MmugDNA.27154.1 | 3.92  | 4.02  | 0.06 | 0.04 | -1.08 | 0.03725  | 0.034239 | 0.341168 | 0.228886 |

|                         |                 |       |       |      |      |        |          |          |          |          |
|-------------------------|-----------------|-------|-------|------|------|--------|----------|----------|----------|----------|
| MmugDNA.27156.1.S1_at   | MmugDNA.27156.1 | 7.91  | 7.99  | 0.21 | 0.41 | -1.05  | 0.330484 | 0.045706 | 0.655746 | 0.258049 |
| MmugDNA.27158.1.S1_at   | MmugDNA.27158.1 | 4.51  | 4.42  | 0.16 | 0.1  | 1.07   | 0.283696 | 0.309436 | 0.623679 | 0.564979 |
| MmugDNA.27159.1.S1_at   | MmugDNA.27159.1 | 3.37  | 3.38  | 0.13 | 0.31 | -1.01  | 0.333596 | 0.27613  | 0.657695 | 0.540169 |
| MmugDNA.2716.1.S1_at    | MmugDNA.2716.1  | 4.11  | 3.39  | 0.48 | 1.28 | 1.64   | 0.793191 | 0.678243 | 0.914249 | 0.812064 |
| MmugDNA.27161.1.S1_at   | MmugDNA.27161.1 | 5.45  | 4.9   | 0.44 | 0.2  | 1.47   | 0.082218 | 0.053229 | 0.43352  | 0.276445 |
| MmugDNA.27162.1.S1_at   | MmugDNA.27162.1 | 5.81  | 5.88  | 0.05 | 0.13 | -1.05  | 0.377224 | 0.289742 | 0.685691 | 0.550776 |
| MmugDNA.27165.1.S1_at   | MmugDNA.27165.1 | 9.42  | 9.74  | 0.27 | 0.21 | -1.25  | 0.243062 | 0.1439   | 0.594744 | 0.41782  |
| MmugDNA.27165.1.S1_s_at | MmugDNA.27165.1 | 9.68  | 9.94  | 0.29 | 0.19 | -1.19  | 0.191451 | 0.190314 | 0.554456 | 0.465906 |
| MmugDNA.27166.1.S1_at   | MmugDNA.27166.1 | 5.5   | 5.51  | 0.03 | 0.15 | -1     | 0.454461 | 0.618683 | 0.733188 | 0.774185 |
| MmugDNA.27167.1.S1_at   | MmugDNA.27167.1 | 4.07  | 4.25  | 0.14 | 0.88 | -1.14  | 0.718897 | 0.670734 | 0.87676  | 0.807469 |
| MmugDNA.27168.1.S1_at   | MmugDNA.27168.1 | 3.8   | 4.21  | 0.15 | 0.17 | -1.32  | 0.082082 | 0.080424 | 0.433268 | 0.328057 |
| MmugDNA.27169.1.S1_at   | MmugDNA.27169.1 | 9.97  | 9.08  | 0.17 | 1    | 1.86   | 0.21122  | 0.152001 | 0.572018 | 0.426741 |
| MmugDNA.2717.1.S1_at    | MmugDNA.2717.1  | 7.89  | 7.99  | 0.88 | 0.25 | -1.07  | 0.929867 | 0.547252 | 0.972875 | 0.728342 |
| MmugDNA.27170.1.S1_at   | MmugDNA.27170.1 | 10.14 | 10.07 | 0.17 | 0.44 | 1.06   | 0.671706 | 0.865308 | 0.852716 | 0.923554 |
| MmugDNA.27172.1.S1_at   | MmugDNA.27172.1 | 6.4   | 6     | 1.32 | 0.88 | 1.32   | 0.839351 | 0.891716 | 0.935098 | 0.938272 |
| MmugDNA.27175.1.S1_at   | MmugDNA.27175.1 | 8.12  | 8.51  | 0.23 | 0.09 | -1.31  | 0.167702 | 0.006169 | 0.532014 | 0.106774 |
| MmugDNA.27176.1.S1_at   | MmugDNA.27176.1 | 4.47  | 4.5   | 0.1  | 0.23 | -1.02  | 0.25097  | 0.396098 | 0.600488 | 0.627915 |
| MmugDNA.27178.1.S1_at   | MmugDNA.27178.1 | 9.73  | 8.82  | 0.14 | 0.62 | 1.88   | 0.137064 | 0.12338  | 0.504341 | 0.393391 |
| MmugDNA.27179.1.S1_at   | MmugDNA.27179.1 | 10.3  | 9.43  | 0.11 | 0.59 | 1.82   | 0.069738 | 0.056652 | 0.412893 | 0.284094 |
| MmugDNA.2718.1.S1_at    | MmugDNA.2718.1  | 4.16  | 4.17  | 0.24 | 0.19 | -1.01  | 0.579673 | 0.746177 | 0.804441 | 0.852688 |
| MmugDNA.27180.1.S1_at   | MmugDNA.27180.1 | 9.23  | 8.18  | 0.14 | 0.96 | 2.07   | 0.173636 | 0.20951  | 0.53719  | 0.48315  |
| MmugDNA.27182.1.S1_at   | MmugDNA.27182.1 | 10.97 | 11.2  | 0.09 | 0.31 | -1.17  | 0.123428 | 0.143682 | 0.489117 | 0.417555 |
| MmugDNA.27183.1.S1_at   | MmugDNA.27183.1 | 7.75  | 7.55  | 0.28 | 0.32 | 1.15   | 0.17312  | 0.177426 | 0.536812 | 0.453773 |
| MmugDNA.27186.1.S1_at   | MmugDNA.27186.1 | 9.12  | 10.17 | 0.14 | 0.4  | -2.07  | 0.012858 | 0.005479 | 0.244372 | 0.102081 |
| MmugDNA.27187.1.S1_at   | MmugDNA.27187.1 | 6.21  | 5.73  | 1.07 | 0.57 | 1.39   | 0.786731 | 0.743355 | 0.911324 | 0.85129  |
| MmugDNA.27188.1.S1_at   | MmugDNA.27188.1 | 3.59  | 3.8   | 0.13 | 0.09 | -1.15  | 0.044599 | 0.040567 | 0.358786 | 0.246274 |
| MmugDNA.27190.1.S1_at   | MmugDNA.27190.1 | 5.51  | 5.68  | 0.09 | 0.17 | -1.12  | 0.512602 | 0.470214 | 0.765694 | 0.678572 |
| MmugDNA.27191.1.S1_at   | MmugDNA.27191.1 | 7.29  | 6.75  | 0.34 | 0.39 | 1.45   | 0.170489 | 0.15689  | 0.534249 | 0.432372 |
| MmugDNA.27192.1.S1_at   | MmugDNA.27192.1 | 10.31 | 10.4  | 0.08 | 0.9  | -1.06  | 0.505508 | 0.687726 | 0.761662 | 0.817664 |
| MmugDNA.27193.1.S1_at   | MmugDNA.27193.1 | 6.92  | 6.52  | 0.66 | 0.64 | 1.31   | 0.557884 | 0.408073 | 0.792875 | 0.635428 |
| MmugDNA.27194.1.S1_at   | MmugDNA.27194.1 | 7.72  | 8.49  | 0.93 | 0.41 | -1.7   | 0.849776 | 0.9214   | 0.939683 | 0.955761 |
| MmugDNA.27196.1.S1_at   | MmugDNA.27196.1 | 4.7   | 4.5   | 0.27 | 0.25 | 1.15   | 0.318263 | 0.453417 | 0.648221 | 0.667816 |
| MmugDNA.27198.1.S1_at   | MmugDNA.27198.1 | 5.06  | 5.32  | 0.41 | 0.33 | -1.2   | 0.796137 | 0.785277 | 0.915412 | 0.875687 |
| MmugDNA.272.1.S1_at     | MmugDNA.272.1   | 3.94  | 9.11  | 2.68 | 2.43 | -36.06 | 0.205183 | 0.167707 | 0.567639 | 0.444225 |
| MmugDNA.2720.1.S1_at    | MmugDNA.2720.1  | 9.94  | 10.03 | 0.39 | 1.09 | -1.06  | 0.835096 | 0.768277 | 0.93317  | 0.865456 |
| MmugDNA.27200.1.S1_at   | MmugDNA.27200.1 | 11.92 | 11.58 | 0.12 | 0.12 | 1.27   | 0.110623 | 0.116174 | 0.472383 | 0.383524 |
| MmugDNA.27202.1.S1_at   | MmugDNA.27202.1 | 7.88  | 8.05  | 0.1  | 0.18 | -1.13  | 0.322915 | 0.416706 | 0.651259 | 0.64167  |
| MmugDNA.27203.1.S1_at   | MmugDNA.27203.1 | 9.86  | 10.01 | 0.03 | 0.1  | -1.11  | 0.071731 | 0.025797 | 0.415752 | 0.201349 |
| MmugDNA.27205.1.S1_at   | MmugDNA.27205.1 | 8.22  | 6.99  | 0.54 | 1.05 | 2.33   | 0.169832 | 0.080947 | 0.534043 | 0.328993 |
| MmugDNA.27206.1.S1_at   | MmugDNA.27206.1 | 9.4   | 9.52  | 0.16 | 0.07 | -1.09  | 0.275447 | 0.375679 | 0.617878 | 0.613577 |
| MmugDNA.27207.1.S1_at   | MmugDNA.27207.1 | 9.39  | 9.51  | 0.17 | 0.21 | -1.08  | 0.296463 | 0.406529 | 0.632467 | 0.634382 |

|                         |                 |       |       |      |      |       |          |          |          |          |
|-------------------------|-----------------|-------|-------|------|------|-------|----------|----------|----------|----------|
| MmugDNA.27209.1.S1_at   | MmugDNA.27209.1 | 6.57  | 6.6   | 0.23 | 0.24 | -1.02 | 0.420494 | 0.659639 | 0.712506 | 0.800823 |
| MmugDNA.2721.1.S1_s_at  | MmugDNA.2721.1  | 8.55  | 9.6   | 0.16 | 0.47 | -2.07 | 0.019351 | 0.011835 | 0.273818 | 0.14094  |
| MmugDNA.27210.1.S1_at   | MmugDNA.27210.1 | 5.87  | 5.96  | 0.18 | 0.07 | -1.06 | 0.390938 | 0.541171 | 0.693845 | 0.724774 |
| MmugDNA.27211.1.S1_at   | MmugDNA.27211.1 | 10.28 | 10.33 | 0.33 | 0.14 | -1.03 | 0.811111 | 0.040291 | 0.92299  | 0.245902 |
| MmugDNA.27211.1.S1_s_at | MmugDNA.27211.1 | 8.33  | 8.12  | 0.35 | 0.2  | 1.16  | 0.999186 | 0.094374 | 0.999761 | 0.350924 |
| MmugDNA.27212.1.S1_at   | MmugDNA.27212.1 | 5.45  | 5.56  | 0.12 | 0.03 | -1.07 | 0.180207 | 0.277848 | 0.544371 | 0.541664 |
| MmugDNA.27215.1.S1_at   | MmugDNA.27215.1 | 4.09  | 4.04  | 0.04 | 0.1  | 1.03  | 0.526728 | 0.694346 | 0.774345 | 0.822254 |
| MmugDNA.27216.1.S1_at   | MmugDNA.27216.1 | 5.25  | 5.13  | 0.17 | 0.06 | 1.09  | 0.605617 | 0.198855 | 0.818424 | 0.473475 |
| MmugDNA.27217.1.S1_s_at | MmugDNA.27217.1 | 10.75 | 11.98 | 0.28 | 0.2  | -2.35 | 0.006985 | 0.002263 | 0.202858 | 0.070074 |
| MmugDNA.3139.1.S1_s_at  | MmugDNA.3139.1  | 7.13  | 7.3   | 0.23 | 0.09 | -1.13 | 0.484702 | 0.616472 | 0.750645 | 0.772691 |
| MmugDNA.27220.1.S1_at   | MmugDNA.27220.1 | 3.62  | 3.8   | 0.23 | 0.16 | -1.13 | 0.791521 | 0.298142 | 0.913399 | 0.556797 |
| MmugDNA.27221.1.S1_at   | MmugDNA.27221.1 | 3.11  | 3.28  | 0.17 | 0.11 | -1.13 | 0.093437 | 0.07317  | 0.450649 | 0.316064 |
| MmugDNA.27222.1.S1_at   | MmugDNA.27222.1 | 6.52  | 6.75  | 0.15 | 0.31 | -1.17 | 0.216199 | 0.314642 | 0.575962 | 0.568415 |
| MmugDNA.27224.1.S1_at   | MmugDNA.27224.1 | 5.68  | 5.68  | 0.46 | 0.26 | -1.01 | 0.650926 | 0.890765 | 0.84297  | 0.937717 |
| MmugDNA.27225.1.S1_at   | MmugDNA.27225.1 | 7.09  | 7.2   | 0.26 | 0.08 | -1.08 | 0.720229 | 0.44568  | 0.877383 | 0.662478 |
| MmugDNA.27227.1.S1_at   | MmugDNA.27227.1 | 7.07  | 6.77  | 0.33 | 0.32 | 1.23  | 0.227926 | 0.113499 | 0.585344 | 0.37961  |
| MmugDNA.27228.1.S1_at   | MmugDNA.27228.1 | 4.12  | 4.56  | 0.12 | 0.33 | -1.36 | 0.281485 | 0.257049 | 0.622236 | 0.524781 |
| MmugDNA.2723.1.S1_at    | MmugDNA.2723.1  | 9.64  | 9.95  | 0.2  | 0.35 | -1.24 | 0.092445 | 0.068738 | 0.449152 | 0.308711 |
| MmugDNA.27231.1.S1_at   | MmugDNA.27231.1 | 6.39  | 6.37  | 0.18 | 0.16 | 1.01  | 0.933992 | 0.745674 | 0.974452 | 0.85256  |
| MmugDNA.27233.1.S1_at   | MmugDNA.27233.1 | 3.32  | 3.46  | 0.11 | 0.01 | -1.1  | 0.087054 | 0.098985 | 0.44093  | 0.357049 |
| MmugDNA.39057.1.S1_at   | MmugDNA.39057.1 | 6.86  | 7.1   | 0.12 | 0.14 | -1.18 | 0.429802 | 0.502087 | 0.71774  | 0.700051 |
| MmugDNA.39057.1.S1_s_at | MmugDNA.39057.1 | 8.01  | 8.29  | 0.16 | 0.17 | -1.21 | 0.232188 | 0.312728 | 0.587814 | 0.567299 |
| MmugDNA.27236.1.S1_at   | MmugDNA.27236.1 | 10.28 | 10.66 | 0.28 | 0.39 | -1.31 | 0.466704 | 0.676333 | 0.740398 | 0.810904 |
| MmugDNA.2724.1.S1_at    | MmugDNA.2724.1  | 9.82  | 10.47 | 0.34 | 0.65 | -1.57 | 0.326284 | 0.283566 | 0.653184 | 0.54601  |
| MmugDNA.27243.1.S1_at   | MmugDNA.27243.1 | 11.31 | 11.23 | 0.05 | 0.58 | 1.06  | 0.907093 | 0.652115 | 0.963057 | 0.796591 |
| MmugDNA.27244.1.S1_at   | MmugDNA.27244.1 | 3.25  | 3.25  | 0.08 | 0.01 | -1    | 0.394178 | 0.418839 | 0.695705 | 0.643118 |
| MmugDNA.27245.1.S1_at   | MmugDNA.27245.1 | 6.86  | 7.02  | 0.03 | 0.08 | -1.12 | 0.032755 | 0.036886 | 0.326038 | 0.236506 |
| MmugDNA.27247.1.S1_at   | MmugDNA.27247.1 | 3.12  | 3.15  | 0.08 | 0.14 | -1.02 | 0.269529 | 0.241209 | 0.614187 | 0.511821 |
| MmugDNA.27248.1.S1_at   | MmugDNA.27248.1 | 3.13  | 2.95  | 0.04 | 0.07 | 1.13  | 0.023481 | 0.011575 | 0.291591 | 0.139225 |
| MmugDNA.27249.1.S1_at   | MmugDNA.27249.1 | 9.41  | 9.45  | 0.2  | 0.72 | -1.03 | 0.955385 | 0.991936 | 0.983289 | 0.995469 |
| MmugDNA.2725.1.S1_at    | MmugDNA.2725.1  | 5.48  | 5.27  | 0.68 | 0.34 | 1.16  | 0.607439 | 0.872959 | 0.819336 | 0.927791 |
| MmugDNA.27251.1.S1_at   | MmugDNA.27251.1 | 4.75  | 5.14  | 0.05 | 0.07 | -1.31 | 0.001482 | 0.000196 | 0.150888 | 0.030951 |
| MmugDNA.27252.1.S1_at   | MmugDNA.27252.1 | 7.65  | 7.87  | 0.59 | 0.38 | -1.16 | 0.897641 | 0.98492  | 0.95917  | 0.991478 |
| MmugDNA.27253.1.S1_at   | MmugDNA.27253.1 | 3.86  | 4     | 0.1  | 0.12 | -1.1  | 0.448541 | 0.294669 | 0.729722 | 0.554326 |
| MmugDNA.27254.1.S1_s_at | MmugDNA.27254.1 | 6.09  | 4.81  | 0.72 | 0.63 | 2.44  | 0.067698 | 0.111399 | 0.408357 | 0.376126 |
| MmugDNA.27255.1.S1_at   | MmugDNA.27255.1 | 5.36  | 5     | 1.44 | 0.22 | 1.28  | 0.554999 | 0.722862 | 0.791149 | 0.839464 |
| MmugDNA.27256.1.S1_at   | MmugDNA.27256.1 | 10.05 | 10.05 | 0.2  | 0.39 | -1    | 0.982279 | 0.490871 | 0.993449 | 0.692666 |
| MmugDNA.2242.1.S1_s_at  | MmugDNA.2242.1  | 9.78  | 9.72  | 0.1  | 0.3  | 1.04  | 0.655504 | 0.199868 | 0.844995 | 0.474559 |
| MmugDNA.27257.1.S1_at   | MmugDNA.27257.1 | 4.16  | 4.08  | 0.53 | 0.15 | 1.06  | 0.216054 | 0.220656 | 0.575954 | 0.494069 |
| MmugDNA.27259.1.S1_at   | MmugDNA.27259.1 | 4.28  | 4.18  | 0.07 | 0.05 | 1.07  | 0.106472 | 0.291316 | 0.466952 | 0.551803 |
| MmugDNA.2726.1.S1_at    | MmugDNA.2726.1  | 10.11 | 10.14 | 0.13 | 0.39 | -1.02 | 0.339088 | 0.016962 | 0.661151 | 0.165103 |

|                         |                 |       |       |      |      |       |          |          |          |          |
|-------------------------|-----------------|-------|-------|------|------|-------|----------|----------|----------|----------|
| MmugDNA.27260.1.S1_at   | MmugDNA.27260.1 | 6.49  | 6.63  | 0.02 | 0.09 | -1.1  | 0.029808 | 0.011861 | 0.315451 | 0.140973 |
| MmugDNA.27261.1.S1_at   | MmugDNA.27261.1 | 7.49  | 6.67  | 0.21 | 0.25 | 1.77  | 0.017326 | 0.015021 | 0.267196 | 0.155736 |
| MmugDNA.27264.1.S1_at   | MmugDNA.27264.1 | 3.59  | 3.59  | 0.07 | 0.09 | -1    | 0.232572 | 0.359823 | 0.587814 | 0.601086 |
| MmugDNA.27266.1.S1_at   | MmugDNA.27266.1 | 7.6   | 8.27  | 0.23 | 0.23 | -1.59 | 0.023775 | 0.009623 | 0.292771 | 0.12918  |
| MmugDNA.27268.1.S1_at   | MmugDNA.27268.1 | 5.59  | 5.39  | 0.38 | 0.15 | 1.15  | 0.729801 | 0.890629 | 0.88278  | 0.937649 |
| MmugDNA.27269.1.S1_at   | MmugDNA.27269.1 | 9.25  | 8.71  | 0.27 | 0.44 | 1.45  | 0.381435 | 0.276636 | 0.687881 | 0.540596 |
| MmugDNA.27270.1.S1_at   | MmugDNA.27270.1 | 7.48  | 7.47  | 0.02 | 0.03 | 1.01  | 0.987737 | 0.109237 | 0.995628 | 0.37308  |
| MmugDNA.27271.1.S1_at   | MmugDNA.27271.1 | 3.38  | 3.52  | 0.38 | 0.1  | -1.1  | 0.741713 | 0.407702 | 0.889333 | 0.635135 |
| MmugDNA.27273.1.S1_at   | MmugDNA.27273.1 | 5.56  | 6.9   | 0.73 | 1.55 | -2.52 | 0.406794 | 0.380219 | 0.70391  | 0.616914 |
| MmugDNA.27275.1.S1_at   | MmugDNA.27275.1 | 5.14  | 5.3   | 0.31 | 0.42 | -1.12 | 0.532438 | 0.1862   | 0.77773  | 0.46207  |
| MmugDNA.27277.1.S1_at   | MmugDNA.27277.1 | 5.39  | 5.86  | 0.23 | 0.12 | -1.38 | 0.044552 | 0.038326 | 0.358786 | 0.240641 |
| MmugDNA.2728.1.S1_at    | MmugDNA.2728.1  | 5.26  | 5.31  | 0.05 | 0.06 | -1.04 | 0.645391 | 0.581099 | 0.840339 | 0.750212 |
| MmugDNA.27281.1.S1_at   | MmugDNA.27281.1 | 7.68  | 7.6   | 0.15 | 0.13 | 1.06  | 0.691068 | 0.526683 | 0.862551 | 0.715627 |
| MmugDNA.27282.1.S1_at   | MmugDNA.27282.1 | 10.2  | 11.03 | 0.2  | 1    | -1.78 | 0.255816 | 0.255918 | 0.603657 | 0.523862 |
| MmugDNA.27283.1.S1_at   | MmugDNA.27283.1 | 8.64  | 8.84  | 0.35 | 0.5  | -1.15 | 0.562073 | 0.67648  | 0.795109 | 0.81095  |
| MmugDNA.27285.1.S1_at   | MmugDNA.27285.1 | 3.68  | 4.01  | 0.51 | 0.09 | -1.26 | 0.993954 | 0.781568 | 0.997929 | 0.873395 |
| MmugDNA.27286.1.S1_at   | MmugDNA.27286.1 | 9.23  | 9.23  | 0.34 | 0.22 | 1.01  | 0.713047 | 0.591959 | 0.874274 | 0.757386 |
| MmugDNA.27287.1.S1_at   | MmugDNA.27287.1 | 4.39  | 4.69  | 0.15 | 0.04 | -1.23 | 0.054184 | 0.083732 | 0.381696 | 0.33448  |
| MmugDNA.27288.1.S1_at   | MmugDNA.27288.1 | 5.68  | 6.06  | 0.1  | 0.26 | -1.3  | 0.088788 | 0.130979 | 0.443684 | 0.403037 |
| MmugDNA.39152.1.S1_s_at | MmugDNA.39152.1 | 7.44  | 5.2   | 0.78 | 0.28 | 4.73  | 0.004938 | 0.001071 | 0.185837 | 0.051873 |
| MmugDNA.27290.1.S1_s_at | MmugDNA.27290.1 | 12.53 | 12.52 | 0.06 | 0.05 | 1     | 0.519858 | 0.5242   | 0.770398 | 0.714207 |
| MmugDNA.27291.1.S1_at   | MmugDNA.27291.1 | 3.13  | 3.24  | 0.26 | 0.14 | -1.08 | 0.827378 | 0.611275 | 0.92997  | 0.769205 |
| MmugDNA.27293.1.S1_at   | MmugDNA.27293.1 | 7.79  | 5.6   | 0.11 | 0.7  | 4.57  | 0.010847 | 0.003969 | 0.232239 | 0.089594 |
| MmugDNA.27294.1.S1_at   | MmugDNA.27294.1 | 10.29 | 9.96  | 0.09 | 0.36 | 1.26  | 0.307856 | 0.078754 | 0.640287 | 0.325716 |
| MmugDNA.27295.1.S1_at   | MmugDNA.27295.1 | 7.89  | 8     | 0.25 | 0.75 | -1.08 | 0.523564 | 0.622129 | 0.772643 | 0.77667  |
| MmugDNA.27296.1.S1_at   | MmugDNA.27296.1 | 3.51  | 3.13  | 0.35 | 0.15 | 1.3   | 0.150524 | 0.187159 | 0.515372 | 0.46313  |
| MmugDNA.27297.1.S1_at   | MmugDNA.27297.1 | 3.26  | 3.63  | 0.16 | 0.39 | -1.29 | 0.181222 | 0.322383 | 0.54572  | 0.573972 |
| MmugDNA.27299.1.S1_at   | MmugDNA.27299.1 | 8.87  | 8.07  | 0.2  | 0.34 | 1.75  | 0.017464 | 0.010819 | 0.267445 | 0.135641 |
| MmugDNA.273.1.S1_at     | MmugDNA.273.1   | 12.58 | 12.58 | 0.21 | 0.03 | 1     | 0.952355 | 0.93591  | 0.982165 | 0.96389  |
| MmugDNA.2730.1.S1_at    | MmugDNA.2730.1  | 6.61  | 6.38  | 0.12 | 0.3  | 1.17  | 0.34062  | 0.517811 | 0.662091 | 0.709928 |
| MmugDNA.27301.1.S1_at   | MmugDNA.27301.1 | 7.26  | 7.37  | 0.23 | 0.05 | -1.08 | 0.496153 | 0.532178 | 0.757473 | 0.718995 |
| MmugDNA.27302.1.S1_at   | MmugDNA.27302.1 | 3.81  | 3.77  | 0.95 | 0.35 | 1.03  | 0.790229 | 0.697672 | 0.912958 | 0.824317 |
| MmugDNA.27303.1.S1_at   | MmugDNA.27303.1 | 8.07  | 6.74  | 0.57 | 1.32 | 2.51  | 0.289617 | 0.123884 | 0.627563 | 0.394194 |
| MmugDNA.27304.1.S1_at   | MmugDNA.27304.1 | 9.49  | 9.09  | 1.36 | 0.36 | 1.32  | 0.835704 | 0.920675 | 0.933475 | 0.955279 |
| MmugDNA.27305.1.S1_at   | MmugDNA.27305.1 | 4.46  | 4.79  | 0.19 | 0.36 | -1.26 | 0.124769 | 0.199758 | 0.49077  | 0.474382 |
| MmugDNA.27306.1.S1_at   | MmugDNA.27306.1 | 3.6   | 3.45  | 0.13 | 0.15 | 1.11  | 0.117078 | 0.128159 | 0.481132 | 0.399148 |
| MmugDNA.27307.1.S1_at   | MmugDNA.27307.1 | 2.84  | 2.75  | 0.03 | 0.04 | 1.07  | 0.014742 | 0.151872 | 0.254893 | 0.426512 |
| MmugDNA.27308.1.S1_at   | MmugDNA.27308.1 | 7.28  | 6.68  | 0.07 | 0.29 | 1.51  | 0.035742 | 0.059535 | 0.337534 | 0.290548 |
| MmugDNA.27309.1.S1_at   | MmugDNA.27309.1 | 5.38  | 5.36  | 0.29 | 0.14 | 1.01  | 0.891312 | 0.887352 | 0.956658 | 0.935852 |
| MmugDNA.2731.1.S1_at    | MmugDNA.2731.1  | 5.88  | 6.52  | 0.56 | 0.48 | -1.56 | 0.09364  | 0.07153  | 0.450966 | 0.313706 |
| MmugDNA.27310.1.S1_at   | MmugDNA.27310.1 | 8.41  | 9.13  | 0.13 | 0.8  | -1.65 | 0.705952 | 0.79433  | 0.870378 | 0.881371 |

|                         |                 |       |       |      |      |       |          |          |          |          |
|-------------------------|-----------------|-------|-------|------|------|-------|----------|----------|----------|----------|
| MmugDNA.27311.1.S1_at   | MmugDNA.27311.1 | 3.2   | 3.35  | 0.02 | 0.09 | -1.11 | 0.167913 | 0.052932 | 0.532336 | 0.275692 |
| MmugDNA.27312.1.S1_at   | MmugDNA.27312.1 | 4.64  | 4.49  | 0.07 | 0.25 | 1.11  | 0.203503 | 0.281735 | 0.566041 | 0.544807 |
| MmugDNA.27314.1.S1_at   | MmugDNA.27314.1 | 8.32  | 9.38  | 0.95 | 0.32 | -2.09 | 0.122658 | 0.106885 | 0.487896 | 0.369499 |
| MmugDNA.27315.1.S1_at   | MmugDNA.27315.1 | 7.5   | 7.21  | 1.43 | 0.29 | 1.22  | 0.827695 | 0.617131 | 0.930084 | 0.773224 |
| MmugDNA.27316.1.S1_at   | MmugDNA.27316.1 | 3.87  | 3.51  | 0.22 | 0.12 | 1.29  | 0.187324 | 0.083511 | 0.550374 | 0.334048 |
| MmugDNA.27316.1.S1_x_at | MmugDNA.27316.1 | 4     | 3.99  | 0.26 | 0.12 | 1     | 0.479854 | 0.461221 | 0.747914 | 0.672916 |
| MmugDNA.27317.1.S1_at   | MmugDNA.27317.1 | 3.85  | 3.69  | 0.39 | 0.28 | 1.12  | 0.239528 | 0.086036 | 0.592545 | 0.338256 |
| MmugDNA.27319.1.S1_at   | MmugDNA.27319.1 | 8.89  | 9.16  | 0.16 | 0.31 | -1.2  | 0.402318 | 0.372635 | 0.701375 | 0.61161  |
| MmugDNA.2732.1.S1_at    | MmugDNA.2732.1  | 6.99  | 7.37  | 0.33 | 0.32 | -1.31 | 0.544417 | 0.501903 | 0.784363 | 0.699953 |
| MmugDNA.27321.1.S1_at   | MmugDNA.27321.1 | 7.89  | 8.29  | 0.05 | 0.32 | -1.33 | 0.128915 | 0.125772 | 0.494923 | 0.396313 |
| MmugDNA.27322.1.S1_at   | MmugDNA.27322.1 | 5.7   | 4.59  | 0.24 | 0.34 | 2.16  | 0.014827 | 0.028776 | 0.255626 | 0.211515 |
| MmugDNA.27323.1.S1_at   | MmugDNA.27323.1 | 6.33  | 6.28  | 0.38 | 0.11 | 1.04  | 0.404082 | 0.266978 | 0.702538 | 0.532515 |
| MmugDNA.27324.1.S1_at   | MmugDNA.27324.1 | 8.31  | 8.31  | 0.63 | 0.63 | -1    | 0.778849 | 0.91276  | 0.90775  | 0.950874 |
| MmugDNA.27325.1.S1_at   | MmugDNA.27325.1 | 7.74  | 7.41  | 0.26 | 0.9  | 1.25  | 0.190289 | 0.243208 | 0.553031 | 0.513356 |
| MmugDNA.27326.1.S1_at   | MmugDNA.27326.1 | 5.92  | 6.42  | 0.22 | 0.15 | -1.42 | 0.06173  | 0.039426 | 0.396604 | 0.243529 |
| MmugDNA.27328.1.S1_at   | MmugDNA.27328.1 | 7.8   | 8.85  | 0.11 | 0.97 | -2.07 | 0.482183 | 0.450637 | 0.749398 | 0.665844 |
| MmugDNA.27329.1.S1_at   | MmugDNA.27329.1 | 8.04  | 7.23  | 0.53 | 1.07 | 1.75  | 0.32266  | 0.235548 | 0.651245 | 0.506633 |
| MmugDNA.27331.1.S1_at   | MmugDNA.27331.1 | 5.85  | 5.92  | 0.31 | 0.08 | -1.05 | 0.853952 | 0.969631 | 0.940993 | 0.983359 |
| MmugDNA.27333.1.S1_at   | MmugDNA.27333.1 | 3.38  | 3.44  | 0.13 | 0.15 | -1.05 | 0.687997 | 0.49925  | 0.860848 | 0.698117 |
| MmugDNA.27334.1.S1_at   | MmugDNA.27334.1 | 5.04  | 4.75  | 0.12 | 0.15 | 1.22  | 0.056449 | 0.058104 | 0.386477 | 0.287718 |
| MmugDNA.27335.1.S1_at   | MmugDNA.27335.1 | 3.33  | 3.67  | 0.24 | 0.06 | -1.27 | 0.082975 | 0.532544 | 0.434823 | 0.719092 |
| MmugDNA.27338.1.S1_at   | MmugDNA.27338.1 | 6.68  | 7.23  | 0.32 | 0.62 | -1.47 | 0.094677 | 0.044912 | 0.452166 | 0.256424 |
| MmugDNA.2734.1.S1_at    | MmugDNA.2734.1  | 8.57  | 8.62  | 0.12 | 0.65 | -1.03 | 0.688424 | 0.764056 | 0.860974 | 0.862833 |
| MmugDNA.27340.1.S1_at   | MmugDNA.27340.1 | 5.97  | 5.35  | 0.58 | 0.69 | 1.54  | 0.274018 | 0.359486 | 0.617262 | 0.600754 |
| MmugDNA.27343.1.S1_s_at | MmugDNA.27343.1 | 9.46  | 10.09 | 0.34 | 0.59 | -1.54 | 0.11915  | 0.179784 | 0.48378  | 0.456321 |
| MmugDNA.27346.1.S1_at   | MmugDNA.27346.1 | 3.35  | 3.23  | 0.15 | 1.16 | 1.09  | 0.481512 | 0.493114 | 0.749268 | 0.694001 |
| MmugDNA.27347.1.S1_at   | MmugDNA.27347.1 | 3     | 3.01  | 0.29 | 0.02 | -1.01 | 0.996507 | 0.52055  | 0.998565 | 0.711831 |
| MmugDNA.27348.1.S1_at   | MmugDNA.27348.1 | 5.88  | 7.64  | 0.35 | 0.92 | -3.39 | 0.041687 | 0.029819 | 0.352383 | 0.214326 |
| MmugDNA.27349.1.S1_at   | MmugDNA.27349.1 | 5.43  | 5.64  | 0.24 | 0.47 | -1.15 | 0.271208 | 0.244019 | 0.615378 | 0.514069 |
| MmugDNA.27350.1.S1_at   | MmugDNA.27350.1 | 4.51  | 4.77  | 0.14 | 0.1  | -1.2  | 0.031288 | 0.136111 | 0.321232 | 0.408419 |
| MmugDNA.27354.1.S1_at   | MmugDNA.27354.1 | 5.42  | 5.39  | 0.07 | 0.04 | 1.02  | 0.813187 | 0.399159 | 0.92416  | 0.62969  |
| MmugDNA.27355.1.S1_at   | MmugDNA.27355.1 | 8.95  | 8.27  | 0.07 | 0.4  | 1.6   | 0.133904 | 0.050338 | 0.500447 | 0.269619 |
| MmugDNA.27357.1.S1_at   | MmugDNA.27357.1 | 3.83  | 3.89  | 0.3  | 0.13 | -1.04 | 0.985259 | 0.396669 | 0.99475  | 0.628434 |
| MmugDNA.27359.1.S1_at   | MmugDNA.27359.1 | 7.84  | 7.46  | 0.13 | 0.72 | 1.3   | 0.136171 | 0.051521 | 0.503051 | 0.27241  |
| MmugDNA.2736.1.S1_at    | MmugDNA.2736.1  | 8.05  | 8.27  | 0.41 | 1.01 | -1.17 | 0.626843 | 0.810832 | 0.82981  | 0.890845 |
| MmugDNA.27360.1.S1_at   | MmugDNA.27360.1 | 8.48  | 7.76  | 0.69 | 0.92 | 1.64  | 0.338437 | 0.51341  | 0.66086  | 0.706881 |
| MmugDNA.27365.1.S1_at   | MmugDNA.27365.1 | 10.3  | 10.19 | 0.18 | 0.24 | 1.08  | 0.505469 | 0.634694 | 0.761643 | 0.784978 |
| MmugDNA.27366.1.S1_at   | MmugDNA.27366.1 | 4.29  | 3.88  | 0.95 | 0.29 | 1.33  | 0.327989 | 0.322571 | 0.654202 | 0.573991 |
| MmugDNA.27367.1.S1_at   | MmugDNA.27367.1 | 10.5  | 10.86 | 0.19 | 0.3  | -1.28 | 0.085141 | 0.125552 | 0.438391 | 0.396226 |
| MmugDNA.27367.1.S1_x_at | MmugDNA.27367.1 | 10.87 | 11.23 | 0.22 | 0.25 | -1.28 | 0.077765 | 0.113286 | 0.427756 | 0.379339 |
| MmugDNA.27368.1.S1_at   | MmugDNA.27368.1 | 4.62  | 5.24  | 0.35 | 0.52 | -1.54 | 0.27044  | 0.395148 | 0.614785 | 0.627379 |

|                         |                 |       |       |      |      |       |          |          |          |          |
|-------------------------|-----------------|-------|-------|------|------|-------|----------|----------|----------|----------|
| MmugDNA.27369.1.S1_at   | MmugDNA.27369.1 | 7.46  | 7.8   | 0.15 | 0.26 | -1.26 | 0.124454 | 0.113477 | 0.490368 | 0.379588 |
| MmugDNA.27370.1.S1_at   | MmugDNA.27370.1 | 4.99  | 4.91  | 0.79 | 0.41 | 1.06  | 0.377569 | 0.515288 | 0.685995 | 0.70823  |
| MmugDNA.27370.1.S1_s_at | MmugDNA.27370.1 | 5.15  | 4.67  | 0.26 | 0.29 | 1.4   | 0.280647 | 0.258885 | 0.621742 | 0.52608  |
| MmugDNA.27371.1.S1_at   | MmugDNA.27371.1 | 9.06  | 7.74  | 0.21 | 0.46 | 2.5   | 0.024881 | 0.022076 | 0.296896 | 0.185927 |
| MmugDNA.27372.1.S1_at   | MmugDNA.27372.1 | 4.96  | 5.65  | 0.02 | 0.17 | -1.61 | 0.004225 | 0.014566 | 0.181739 | 0.153907 |
| MmugDNA.27373.1.S1_at   | MmugDNA.27373.1 | 9.16  | 8.13  | 0.12 | 0.17 | 2.04  | 0.000767 | 0.000538 | 0.136818 | 0.040466 |
| MmugDNA.27374.1.S1_at   | MmugDNA.27374.1 | 2.74  | 2.84  | 0.05 | 0.03 | -1.07 | 0.038794 | 0.05461  | 0.345488 | 0.279211 |
| MmugDNA.27375.1.S1_at   | MmugDNA.27375.1 | 10.62 | 10.01 | 0.29 | 0.48 | 1.52  | 0.162372 | 0.160752 | 0.526658 | 0.436897 |
| MmugDNA.41358.1.S1_at   | MmugDNA.41358.1 | 4.23  | 3.87  | 0.11 | 0.18 | 1.28  | 0.109835 | 0.13502  | 0.470963 | 0.406995 |
| MmugDNA.41358.1.S1_s_at | MmugDNA.41358.1 | 5.93  | 5.4   | 0.14 | 0.29 | 1.44  | 0.045305 | 0.04447  | 0.360699 | 0.255242 |
| MmugDNA.27377.1.S1_at   | MmugDNA.27377.1 | 9.22  | 9.9   | 0.32 | 0.44 | -1.6  | 0.05889  | 0.055437 | 0.390921 | 0.281336 |
| MmugDNA.27378.1.S1_at   | MmugDNA.27378.1 | 6.43  | 5.96  | 0.07 | 0.17 | 1.39  | 0.010212 | 0.006902 | 0.228247 | 0.11226  |
| MmugDNA.27379.1.S1_at   | MmugDNA.27379.1 | 4.85  | 3.99  | 0.27 | 0.55 | 1.81  | 0.177419 | 0.240743 | 0.541483 | 0.511469 |
| MmugDNA.27380.1.S1_s_at | MmugDNA.27380.1 | 7.67  | 8.06  | 0.07 | 0.64 | -1.31 | 0.098693 | 0.093624 | 0.458569 | 0.349995 |
| MmugDNA.27386.1.S1_at   | MmugDNA.27386.1 | 4.26  | 4.44  | 0.07 | 0.14 | -1.14 | 0.446924 | 0.119205 | 0.728666 | 0.387659 |
| MmugDNA.27388.1.S1_at   | MmugDNA.27388.1 | 7.15  | 7.88  | 0.34 | 0.58 | -1.67 | 0.453812 | 0.641816 | 0.7329   | 0.789771 |
| MmugDNA.27389.1.S1_at   | MmugDNA.27389.1 | 5.33  | 5.33  | 0.18 | 0.05 | -1    | 0.933322 | 0.675677 | 0.974045 | 0.810429 |
| MmugDNA.27390.1.S1_at   | MmugDNA.27390.1 | 3.88  | 3.86  | 0.25 | 0.12 | 1.02  | 0.212099 | 0.241807 | 0.572526 | 0.51238  |
| MmugDNA.27391.1.S1_at   | MmugDNA.27391.1 | 9.92  | 8.9   | 0.38 | 1.38 | 2.03  | 0.241276 | 0.346584 | 0.593801 | 0.591427 |
| MmugDNA.27392.1.S1_at   | MmugDNA.27392.1 | 6.94  | 6.82  | 0.64 | 0.2  | 1.08  | 0.337294 | 0.184394 | 0.659871 | 0.460458 |
| MmugDNA.27393.1.S1_at   | MmugDNA.27393.1 | 3.27  | 3.31  | 0.04 | 0.13 | -1.03 | 0.197138 | 0.256376 | 0.560096 | 0.524114 |
| MmugDNA.27394.1.S1_at   | MmugDNA.27394.1 | 3.85  | 4.1   | 0.19 | 0.19 | -1.19 | 0.213744 | 0.323079 | 0.573948 | 0.574351 |
| MmugDNA.27395.1.S1_at   | MmugDNA.27395.1 | 10.76 | 11.05 | 0.11 | 0.69 | -1.22 | 0.160299 | 0.188088 | 0.525289 | 0.464169 |
| MmugDNA.27396.1.S1_at   | MmugDNA.27396.1 | 5.9   | 5.83  | 0.09 | 0.19 | 1.05  | 0.192982 | 0.220019 | 0.556235 | 0.49344  |
| MmugDNA.27397.1.S1_at   | MmugDNA.27397.1 | 10.61 | 10.47 | 0.27 | 0.12 | 1.11  | 0.159469 | 0.16888  | 0.52434  | 0.445458 |
| MmugDNA.27398.1.S1_at   | MmugDNA.27398.1 | 3.61  | 3.78  | 0.31 | 0.37 | -1.13 | 0.396098 | 0.769939 | 0.696805 | 0.866376 |
| MmugDNA.27399.1.S1_at   | MmugDNA.27399.1 | 5.49  | 5.45  | 0.17 | 0.15 | 1.03  | 0.815671 | 0.865568 | 0.925113 | 0.923598 |
| MmugDNA.274.1.S1_at     | MmugDNA.274.1   | 9.52  | 9.19  | 0.17 | 0.39 | 1.25  | 0.254138 | 0.052709 | 0.602339 | 0.275206 |
| MmugDNA.2740.1.S1_at    | MmugDNA.2740.1  | 7.75  | 7.97  | 0.57 | 0.64 | -1.17 | 0.534672 | 0.720902 | 0.778804 | 0.838368 |
| MmugDNA.27400.1.S1_at   | MmugDNA.27400.1 | 7.35  | 8.11  | 0.82 | 0.42 | -1.69 | 0.152164 | 0.11794  | 0.51689  | 0.385845 |
| MmugDNA.27401.1.S1_at   | MmugDNA.27401.1 | 4.49  | 4.69  | 0.15 | 0.26 | -1.15 | 0.594856 | 0.343591 | 0.812187 | 0.589322 |
| MmugDNA.27402.1.S1_at   | MmugDNA.27402.1 | 5.79  | 5.85  | 0.05 | 0.17 | -1.04 | 0.865096 | 0.598951 | 0.945844 | 0.761244 |
| MmugDNA.27404.1.S1_at   | MmugDNA.27404.1 | 7.09  | 6.37  | 0.25 | 0.54 | 1.64  | 0.158991 | 0.138914 | 0.52416  | 0.412037 |
| MmugDNA.27405.1.S1_at   | MmugDNA.27405.1 | 5.68  | 5.83  | 0.84 | 0.54 | -1.11 | 0.657508 | 0.324536 | 0.846035 | 0.57507  |
| MmugDNA.27406.1.S1_at   | MmugDNA.27406.1 | 8.24  | 8.68  | 0.15 | 0.02 | -1.36 | 0.005451 | 0.016123 | 0.191107 | 0.160936 |
| MmugDNA.27407.1.S1_at   | MmugDNA.27407.1 | 5.6   | 5.36  | 0.23 | 0.19 | 1.18  | 0.581819 | 0.843596 | 0.805453 | 0.910913 |
| MmugDNA.27408.1.S1_at   | MmugDNA.27408.1 | 5.01  | 5.02  | 0.12 | 0.15 | -1    | 0.481691 | 0.501673 | 0.749268 | 0.6998   |
| MmugDNA.27409.1.S1_at   | MmugDNA.27409.1 | 4.64  | 4.8   | 0.07 | 0.05 | -1.12 | 0.015591 | 0.014248 | 0.259345 | 0.152403 |
| MmugDNA.2741.1.S1_at    | MmugDNA.2741.1  | 7.44  | 6.91  | 0.34 | 0.44 | 1.45  | 0.411945 | 0.589889 | 0.707648 | 0.755987 |
| MmugDNA.27410.1.S1_at   | MmugDNA.27410.1 | 3.09  | 3.15  | 0.03 | 0.28 | -1.05 | 0.271898 | 0.379068 | 0.615834 | 0.616029 |
| MmugDNA.27411.1.S1_at   | MmugDNA.27411.1 | 8.24  | 8.02  | 0.03 | 0.59 | 1.17  | 0.58849  | 0.785627 | 0.809011 | 0.875891 |



|                         |                 |       |       |      |      |       |          |          |          |          |
|-------------------------|-----------------|-------|-------|------|------|-------|----------|----------|----------|----------|
| MmugDNA.27413.1.S1_at   | MmugDNA.27413.1 | 6.18  | 5.92  | 0.18 | 0.24 | 1.2   | 0.210871 | 0.269268 | 0.571977 | 0.534534 |
| MmugDNA.27414.1.S1_at   | MmugDNA.27414.1 | 5.9   | 5.75  | 0.1  | 0.1  | 1.11  | 0.100895 | 0.184719 | 0.461009 | 0.460645 |
| MmugDNA.27415.1.S1_at   | MmugDNA.27415.1 | 7.09  | 7.4   | 0.17 | 0.2  | -1.24 | 0.142166 | 0.17475  | 0.509437 | 0.451302 |
| MmugDNA.27416.1.S1_at   | MmugDNA.27416.1 | 2.7   | 2.69  | 0.1  | 0.09 | 1     | 0.973627 | 0.994578 | 0.989613 | 0.99666  |
| MmugDNA.27417.1.S1_at   | MmugDNA.27417.1 | 4.77  | 4.83  | 0.04 | 0.04 | -1.05 | 0.082458 | 0.225224 | 0.434039 | 0.497865 |
| MmugDNA.27418.1.S1_at   | MmugDNA.27418.1 | 8.71  | 8.41  | 0.15 | 0.13 | 1.23  | 0.060223 | 0.00043  | 0.393081 | 0.038359 |
| MmugDNA.27419.1.S1_at   | MmugDNA.27419.1 | 8.22  | 8.37  | 0.23 | 0.34 | -1.11 | 0.263829 | 0.265184 | 0.609674 | 0.531121 |
| MmugDNA.2742.1.S1_at    | MmugDNA.2742.1  | 6.31  | 6.54  | 0.86 | 0.28 | -1.17 | 0.624735 | 0.455813 | 0.828409 | 0.669659 |
| MmugDNA.27420.1.S1_at   | MmugDNA.27420.1 | 6.25  | 6.37  | 0.23 | 0.16 | -1.09 | 0.832117 | 0.31431  | 0.931955 | 0.568263 |
| MmugDNA.27421.1.S1_at   | MmugDNA.27421.1 | 3.59  | 3.78  | 0.18 | 0.24 | -1.14 | 0.711536 | 0.618207 | 0.873642 | 0.77393  |
| MmugDNA.27422.1.S1_at   | MmugDNA.27422.1 | 11.98 | 11.9  | 0.09 | 0.21 | 1.06  | 0.34438  | 0.134888 | 0.664537 | 0.406878 |
| MmugDNA.27423.1.S1_at   | MmugDNA.27423.1 | 3.66  | 3.82  | 0.05 | 0.19 | -1.12 | 0.851796 | 0.698006 | 0.940397 | 0.82456  |
| MmugDNA.27424.1.S1_at   | MmugDNA.27424.1 | 7.63  | 7.5   | 0.11 | 0.17 | 1.09  | 0.255202 | 0.039487 | 0.603094 | 0.243642 |
| MmugDNA.27426.1.S1_at   | MmugDNA.27426.1 | 4.33  | 4.54  | 0.05 | 0.07 | -1.16 | 0.052673 | 0.109233 | 0.378395 | 0.37308  |
| MmugDNA.27430.1.S1_at   | MmugDNA.27430.1 | 4.42  | 4.48  | 0    | 0.14 | -1.04 | 0.279988 | 0.132733 | 0.621313 | 0.404544 |
| MmugDNA.27431.1.S1_at   | MmugDNA.27431.1 | 13.33 | 13.33 | 0.1  | 0.04 | -1    | 0.438471 | 0.562962 | 0.72304  | 0.738285 |
| MmugDNA.27433.1.S1_at   | MmugDNA.27433.1 | 5.8   | 5.8   | 0.25 | 0.23 | 1     | 0.228731 | 0.298309 | 0.586121 | 0.556972 |
| MmugDNA.27434.1.S1_at   | MmugDNA.27434.1 | 6.1   | 6.64  | 0.4  | 0.46 | -1.45 | 0.370952 | 0.538648 | 0.681748 | 0.723301 |
| MmugDNA.27436.1.S1_at   | MmugDNA.27436.1 | 5.03  | 4.86  | 0.35 | 0.55 | 1.13  | 0.298395 | 0.46452  | 0.63393  | 0.675158 |
| MmugDNA.27437.1.S1_at   | MmugDNA.27437.1 | 6.18  | 5.35  | 0.69 | 0.01 | 1.78  | 0.110209 | 0.035209 | 0.471834 | 0.231826 |
| MmugDNA.27439.1.S1_at   | MmugDNA.27439.1 | 5.32  | 5.09  | 0.37 | 0.46 | 1.17  | 0.449804 | 0.029163 | 0.730493 | 0.212798 |
| MmugDNA.27440.1.S1_at   | MmugDNA.27440.1 | 4.53  | 4.39  | 0.33 | 0.05 | 1.1   | 0.538675 | 0.694577 | 0.780728 | 0.822424 |
| MmugDNA.27441.1.S1_at   | MmugDNA.27441.1 | 7.77  | 7.33  | 0.06 | 0.59 | 1.36  | 0.234674 | 0.221932 | 0.588808 | 0.495019 |
| MmugDNA.27442.1.S1_at   | MmugDNA.27442.1 | 5.64  | 5.34  | 0.33 | 0.18 | 1.23  | 0.142332 | 0.345976 | 0.509631 | 0.59115  |
| MmugDNA.27443.1.S1_at   | MmugDNA.27443.1 | 6.8   | 6.86  | 0.45 | 0.65 | -1.04 | 0.359446 | 0.148004 | 0.673869 | 0.422406 |
| MmugDNA.27444.1.S1_at   | MmugDNA.27444.1 | 2.73  | 2.83  | 0.07 | 0.17 | -1.07 | 0.834688 | 0.263268 | 0.932951 | 0.529531 |
| MmugDNA.27445.1.S1_at   | MmugDNA.27445.1 | 7.24  | 7.17  | 0.32 | 0.07 | 1.05  | 0.715076 | 0.887034 | 0.875005 | 0.935666 |
| MmugDNA.27446.1.S1_at   | MmugDNA.27446.1 | 6.38  | 6.49  | 0.1  | 0.24 | -1.08 | 0.573952 | 0.095057 | 0.801437 | 0.352124 |
| MmugDNA.27447.1.S1_at   | MmugDNA.27447.1 | 2.65  | 2.59  | 0.35 | 0.2  | 1.04  | 0.327549 | 0.295056 | 0.653899 | 0.554551 |
| MmugDNA.27448.1.S1_at   | MmugDNA.27448.1 | 5     | 5.06  | 0.04 | 0.11 | -1.04 | 0.397557 | 0.168194 | 0.697979 | 0.444824 |
| MmugDNA.27449.1.S1_at   | MmugDNA.27449.1 | 5.73  | 5.93  | 0.18 | 0.08 | -1.15 | 0.286609 | 0.271755 | 0.625572 | 0.536577 |
| MmugDNA.2745.1.S1_at    | MmugDNA.2745.1  | 3.8   | 3.73  | 0.14 | 0.08 | 1.05  | 0.590111 | 0.66398  | 0.809764 | 0.803247 |
| MmugDNA.27450.1.S1_at   | MmugDNA.27450.1 | 4.44  | 4.76  | 0.08 | 0.38 | -1.25 | 0.433842 | 0.253847 | 0.720251 | 0.522185 |
| MmugDNA.27451.1.S1_at   | MmugDNA.27451.1 | 5.47  | 5.43  | 0.07 | 0.13 | 1.02  | 0.468939 | 0.635234 | 0.741339 | 0.785279 |
| MmugDNA.27453.1.S1_at   | MmugDNA.27453.1 | 8.39  | 8     | 0.26 | 0.13 | 1.31  | 0.082552 | 0.08027  | 0.434069 | 0.327882 |
| MmugDNA.27453.1.S1_s_at | MmugDNA.27453.1 | 5.6   | 5.47  | 0.44 | 0.44 | 1.09  | 0.614281 | 0.418239 | 0.823188 | 0.642683 |
| MmugDNA.27454.1.S1_at   | MmugDNA.27454.1 | 3.12  | 3.1   | 0.22 | 0.06 | 1.01  | 0.322988 | 0.454802 | 0.651295 | 0.668859 |
| MmugDNA.27455.1.S1_at   | MmugDNA.27455.1 | 4.81  | 4.97  | 0.31 | 0.4  | -1.12 | 0.225945 | 0.441452 | 0.583922 | 0.65962  |
| MmugDNA.27456.1.S1_at   | MmugDNA.27456.1 | 11.86 | 11.78 | 0.3  | 0.34 | 1.06  | 0.553807 | 0.724271 | 0.790416 | 0.840433 |
| MmugDNA.27457.1.S1_at   | MmugDNA.27457.1 | 11.6  | 11.4  | 0.06 | 0.07 | 1.15  | 0.020089 | 0.007343 | 0.27674  | 0.11509  |
| MmugDNA.27458.1.S1_at   | MmugDNA.27458.1 | 4.98  | 4.84  | 0.2  | 0.19 | 1.1   | 0.792465 | 0.847322 | 0.913891 | 0.913262 |

|                         |                 |       |       |      |      |       |          |          |          |          |
|-------------------------|-----------------|-------|-------|------|------|-------|----------|----------|----------|----------|
| MmugDNA.27459.1.S1_at   | MmugDNA.27459.1 | 4.99  | 5.51  | 1.5  | 1.14 | -1.44 | 0.516064 | 0.419986 | 0.76772  | 0.643787 |
| MmugDNA.2746.1.S1_at    | MmugDNA.2746.1  | 4.55  | 4.42  | 0.24 | 0.44 | 1.09  | 0.670829 | 0.43437  | 0.852505 | 0.654536 |
| MmugDNA.27460.1.S1_at   | MmugDNA.27460.1 | 3.24  | 3.25  | 0.27 | 0.04 | -1.01 | 0.958164 | 0.528055 | 0.984153 | 0.716428 |
| MmugDNA.27461.1.S1_at   | MmugDNA.27461.1 | 8.15  | 8.3   | 0.22 | 0.42 | -1.11 | 0.79332  | 0.825477 | 0.914348 | 0.899751 |
| MmugDNA.27462.1.S1_at   | MmugDNA.27462.1 | 3.18  | 3.34  | 0.65 | 0.1  | -1.11 | 0.575861 | 0.785247 | 0.802607 | 0.875672 |
| MmugDNA.27465.1.S1_at   | MmugDNA.27465.1 | 5.19  | 5.66  | 0.2  | 0.26 | -1.39 | 0.174316 | 0.22101  | 0.537982 | 0.494401 |
| MmugDNA.27466.1.S1_at   | MmugDNA.27466.1 | 3.99  | 3.67  | 0.44 | 0.25 | 1.25  | 0.197332 | 0.115277 | 0.560375 | 0.382292 |
| MmugDNA.27468.1.S1_at   | MmugDNA.27468.1 | 7.6   | 7.88  | 0.11 | 0.15 | -1.21 | 0.041615 | 0.035088 | 0.352305 | 0.231521 |
| MmugDNA.27469.1.S1_at   | MmugDNA.27469.1 | 10.83 | 11.35 | 0.22 | 0.39 | -1.43 | 0.086588 | 0.069485 | 0.440436 | 0.309802 |
| MmugDNA.2747.1.S1_at    | MmugDNA.2747.1  | 3.67  | 3.77  | 0.06 | 0.05 | -1.08 | 0.088612 | 0.086449 | 0.44348  | 0.338938 |
| MmugDNA.27470.1.S1_at   | MmugDNA.27470.1 | 8.15  | 8.12  | 0.46 | 0.89 | 1.02  | 0.995765 | 0.843398 | 0.998446 | 0.910815 |
| MmugDNA.27472.1.S1_at   | MmugDNA.27472.1 | 3.35  | 3.59  | 0.1  | 0.05 | -1.18 | 0.074692 | 0.215431 | 0.42065  | 0.489123 |
| MmugDNA.27473.1.S1_at   | MmugDNA.27473.1 | 9.99  | 11.76 | 0.11 | 0.36 | -3.41 | 0.002372 | 0.001044 | 0.162635 | 0.051426 |
| MmugDNA.27473.1.S1_s_at | MmugDNA.27473.1 | 8.71  | 10.01 | 0.07 | 0.38 | -2.45 | 0.002324 | 0.000424 | 0.161798 | 0.038316 |
| MmugDNA.27474.1.S1_at   | MmugDNA.27474.1 | 6.25  | 5.2   | 1.49 | 2.2  | 2.08  | 0.755453 | 0.921335 | 0.896094 | 0.955739 |
| MmugDNA.27475.1.S1_at   | MmugDNA.27475.1 | 2.91  | 2.91  | 0.01 | 0.04 | -1    | 0.960063 | 0.835627 | 0.98486  | 0.905921 |
| MmugDNA.27478.1.S1_at   | MmugDNA.27478.1 | 5.64  | 5.75  | 0.17 | 0.1  | -1.08 | 0.398223 | 0.364874 | 0.698574 | 0.605148 |
| MmugDNA.27479.1.S1_at   | MmugDNA.27479.1 | 10.97 | 10.65 | 0.06 | 0.14 | 1.25  | 0.026819 | 0.001876 | 0.304834 | 0.064979 |
| MmugDNA.2748.1.S1_at    | MmugDNA.2748.1  | 12.19 | 12.15 | 0.05 | 0.08 | 1.02  | 0.941829 | 0.001271 | 0.977821 | 0.055241 |
| MmugDNA.27480.1.S1_at   | MmugDNA.27480.1 | 11.26 | 11.3  | 0.13 | 0.13 | -1.03 | 0.371119 | 0.731273 | 0.681832 | 0.84425  |
| MmugDNA.27480.1.S1_s_at | MmugDNA.27480.1 | 11.29 | 11.11 | 0.14 | 0.19 | 1.13  | 0.663716 | 0.608669 | 0.84908  | 0.767185 |
| MmugDNA.27481.1.S1_at   | MmugDNA.27481.1 | 6.09  | 5.25  | 0.28 | 0.19 | 1.79  | 0.022621 | 0.026527 | 0.287448 | 0.203899 |
| MmugDNA.27482.1.S1_at   | MmugDNA.27482.1 | 4.22  | 4.34  | 0.12 | 0.18 | -1.09 | 0.555546 | 0.203825 | 0.791454 | 0.478081 |
| MmugDNA.27483.1.S1_at   | MmugDNA.27483.1 | 4.24  | 4.29  | 0.31 | 0.11 | -1.04 | 0.551779 | 0.392766 | 0.788949 | 0.625846 |
| MmugDNA.27485.1.S1_at   | MmugDNA.27485.1 | 4.42  | 4.44  | 0.15 | 0.16 | -1.02 | 0.666926 | 0.550016 | 0.850736 | 0.730238 |
| MmugDNA.27486.1.S1_at   | MmugDNA.27486.1 | 5.77  | 5.62  | 0.01 | 0.17 | 1.11  | 0.169823 | 0.383005 | 0.534043 | 0.61904  |
| MmugDNA.27487.1.S1_at   | MmugDNA.27487.1 | 10.25 | 9.69  | 0.19 | 0.08 | 1.47  | 0.007662 | 0.003084 | 0.211069 | 0.081159 |
| MmugDNA.27488.1.S1_at   | MmugDNA.27488.1 | 6.12  | 6.34  | 0.21 | 0.13 | -1.16 | 0.079427 | 0.075879 | 0.429513 | 0.320523 |
| MmugDNA.38170.1.S1_at   | MmugDNA.38170.1 | 7.3   | 7.55  | 0.12 | 0.27 | -1.19 | 0.071849 | 0.054825 | 0.415886 | 0.279675 |
| MmugDNA.38170.1.S1_s_at | MmugDNA.38170.1 | 6.6   | 7.45  | 0.19 | 0.49 | -1.81 | 0.032414 | 0.014042 | 0.324908 | 0.15177  |
| MmugDNA.2749.1.S1_at    | MmugDNA.2749.1  | 4.3   | 4.42  | 0.12 | 0.38 | -1.09 | 0.663968 | 0.290094 | 0.849245 | 0.551128 |
| MmugDNA.27490.1.S1_at   | MmugDNA.27490.1 | 5.83  | 5.13  | 0.26 | 0.18 | 1.63  | 0.06559  | 0.024046 | 0.404648 | 0.194371 |
| MmugDNA.27491.1.S1_at   | MmugDNA.27491.1 | 3.06  | 5.33  | 1.18 | 2.09 | -4.81 | 0.331797 | 0.161449 | 0.656478 | 0.437604 |
| MmugDNA.27492.1.S1_at   | MmugDNA.27492.1 | 2.76  | 2.77  | 0.03 | 0.06 | -1    | 0.786137 | 0.142488 | 0.911069 | 0.416082 |
| MmugDNA.27493.1.S1_at   | MmugDNA.27493.1 | 8.47  | 8.23  | 0.22 | 0.46 | 1.18  | 0.151388 | 0.186899 | 0.516064 | 0.46276  |
| MmugDNA.27494.1.S1_at   | MmugDNA.27494.1 | 6.16  | 6.06  | 0.32 | 0.08 | 1.07  | 0.83805  | 0.179683 | 0.934582 | 0.456153 |
| MmugDNA.27496.1.S1_at   | MmugDNA.27496.1 | 3.19  | 3.12  | 0.18 | 0.1  | 1.05  | 0.826002 | 0.301179 | 0.929365 | 0.559356 |
| MmugDNA.27498.1.S1_at   | MmugDNA.27498.1 | 6.83  | 6.31  | 0.52 | 0.7  | 1.43  | 0.195658 | 0.227389 | 0.558901 | 0.499659 |
| MmugDNA.275.1.S1_at     | MmugDNA.275.1   | 7.74  | 7.89  | 0.2  | 0.21 | -1.11 | 0.403095 | 0.581616 | 0.701829 | 0.750589 |
| MmugDNA.2750.1.S1_at    | MmugDNA.2750.1  | 7.31  | 9.14  | 1.56 | 1.31 | -3.54 | 0.317358 | 0.345686 | 0.64789  | 0.590854 |
| MmugDNA.27500.1.S1_at   | MmugDNA.27500.1 | 5.76  | 5.8   | 0.47 | 0.23 | -1.03 | 0.294067 | 0.318091 | 0.631118 | 0.571046 |

|                         |                 |       |       |      |      |       |          |          |          |          |
|-------------------------|-----------------|-------|-------|------|------|-------|----------|----------|----------|----------|
| MmugDNA.27501.1.S1_at   | MmugDNA.27501.1 | 3.88  | 3.77  | 0.42 | 0.26 | 1.08  | 0.473165 | 0.487792 | 0.744128 | 0.690669 |
| MmugDNA.27502.1.S1_at   | MmugDNA.27502.1 | 3.2   | 3.61  | 0.03 | 0.26 | -1.34 | 0.097662 | 0.07182  | 0.456709 | 0.314082 |
| MmugDNA.27503.1.S1_at   | MmugDNA.27503.1 | 13.08 | 12.92 | 0.13 | 0.24 | 1.12  | 0.211355 | 0.24934  | 0.572137 | 0.518461 |
| MmugDNA.27504.1.S1_at   | MmugDNA.27504.1 | 5.18  | 4.2   | 0.11 | 0.76 | 1.97  | 0.085507 | 0.018427 | 0.439394 | 0.170755 |
| MmugDNA.27505.1.S1_at   | MmugDNA.27505.1 | 3.95  | 3.97  | 0.18 | 0.15 | -1.01 | 0.74506  | 0.958831 | 0.890933 | 0.976695 |
| MmugDNA.27506.1.S1_at   | MmugDNA.27506.1 | 5.37  | 5.5   | 0.44 | 0.06 | -1.09 | 0.738496 | 0.839761 | 0.887709 | 0.908633 |
| MmugDNA.27507.1.S1_at   | MmugDNA.27507.1 | 7.75  | 7.98  | 0.17 | 0.21 | -1.18 | 0.11799  | 0.214841 | 0.482063 | 0.488729 |
| MmugDNA.27508.1.S1_at   | MmugDNA.27508.1 | 3.54  | 3.52  | 0.18 | 0.1  | 1.01  | 0.363405 | 0.061365 | 0.676671 | 0.294488 |
| MmugDNA.27509.1.S1_at   | MmugDNA.27509.1 | 11.18 | 10.73 | 0.23 | 0.28 | 1.37  | 0.272599 | 0.236128 | 0.616227 | 0.507179 |
| MmugDNA.2751.1.S1_at    | MmugDNA.2751.1  | 5.01  | 5.29  | 0.13 | 0.1  | -1.22 | 0.081479 | 0.073154 | 0.432455 | 0.316064 |
| MmugDNA.27510.1.S1_at   | MmugDNA.27510.1 | 3.6   | 3.57  | 0.18 | 0.21 | 1.01  | 0.782756 | 0.936769 | 0.909285 | 0.964351 |
| MmugDNA.27511.1.S1_at   | MmugDNA.27511.1 | 3.74  | 3.72  | 0.35 | 0.29 | 1.01  | 0.836014 | 0.894979 | 0.933635 | 0.940055 |
| MmugDNA.27512.1.S1_at   | MmugDNA.27512.1 | 7.68  | 9.33  | 0.09 | 0.26 | -3.13 | 0.000566 | 0.000158 | 0.136818 | 0.030199 |
| MmugDNA.27512.1.S1_x_at | MmugDNA.27512.1 | 8.01  | 9.44  | 0.07 | 0.25 | -2.68 | 0.000945 | 0.000115 | 0.139813 | 0.028568 |
| MmugDNA.27513.1.S1_at   | MmugDNA.27513.1 | 6.17  | 5.87  | 0.57 | 0.79 | 1.23  | 0.709452 | 0.801583 | 0.872518 | 0.885853 |
| MmugDNA.27514.1.S1_at   | MmugDNA.27514.1 | 6.88  | 7.09  | 0.21 | 0.39 | -1.16 | 0.658233 | 0.747271 | 0.846407 | 0.853149 |
| MmugDNA.27516.1.S1_at   | MmugDNA.27516.1 | 4.82  | 4.89  | 0.28 | 0.2  | -1.05 | 0.502939 | 0.608264 | 0.760591 | 0.766971 |
| MmugDNA.27517.1.S1_at   | MmugDNA.27517.1 | 2.98  | 2.98  | 0.01 | 0.02 | 1     | 0.254232 | 0.792057 | 0.602339 | 0.879814 |
| MmugDNA.27518.1.S1_at   | MmugDNA.27518.1 | 11.86 | 11.85 | 0.11 | 0.03 | 1.01  | 0.341648 | 0.592601 | 0.6627   | 0.757847 |
| MmugDNA.27519.1.S1_at   | MmugDNA.27519.1 | 5.51  | 5.4   | 0.25 | 0.12 | 1.08  | 0.245878 | 0.309538 | 0.597293 | 0.564987 |
| MmugDNA.39509.1.S1_s_at | MmugDNA.39509.1 | 7.11  | 7.22  | 0.13 | 0.33 | -1.08 | 0.562124 | 0.726951 | 0.795137 | 0.84203  |
| MmugDNA.27522.1.S1_at   | MmugDNA.27522.1 | 11.09 | 11.15 | 0.17 | 0.38 | -1.04 | 0.565124 | 0.756489 | 0.796922 | 0.858223 |
| MmugDNA.27523.1.S1_at   | MmugDNA.27523.1 | 4.98  | 4.94  | 0.2  | 0.25 | 1.02  | 0.93302  | 0.881599 | 0.973979 | 0.932407 |
| MmugDNA.27524.1.S1_at   | MmugDNA.27524.1 | 4.26  | 4.23  | 0.19 | 0.07 | 1.02  | 0.738862 | 0.436343 | 0.888031 | 0.655923 |
| MmugDNA.27525.1.S1_at   | MmugDNA.27525.1 | 7.86  | 7.98  | 0.18 | 0.41 | -1.09 | 0.284495 | 0.400366 | 0.624317 | 0.630177 |
| MmugDNA.27526.1.S1_at   | MmugDNA.27526.1 | 11.18 | 10.47 | 0.24 | 0.28 | 1.63  | 0.024392 | 0.008104 | 0.294535 | 0.119551 |
| MmugDNA.27527.1.S1_at   | MmugDNA.27527.1 | 4.18  | 4.3   | 0.03 | 0.16 | -1.08 | 0.270158 | 0.348236 | 0.614663 | 0.592441 |
| MmugDNA.27528.1.S1_at   | MmugDNA.27528.1 | 6.02  | 6.54  | 0.09 | 0.21 | -1.43 | 0.024566 | 0.072909 | 0.295214 | 0.315942 |
| MmugDNA.27529.1.S1_at   | MmugDNA.27529.1 | 5.14  | 5.65  | 0.26 | 0.45 | -1.42 | 0.125965 | 0.146686 | 0.492046 | 0.420713 |
| MmugDNA.2753.1.S1_at    | MmugDNA.2753.1  | 3.47  | 3.56  | 0.25 | 0.21 | -1.06 | 0.796311 | 0.402011 | 0.91548  | 0.631153 |
| MmugDNA.27530.1.S1_at   | MmugDNA.27530.1 | 3.68  | 3.88  | 0.34 | 0.22 | -1.15 | 0.588548 | 0.315143 | 0.809056 | 0.568855 |
| MmugDNA.27531.1.S1_at   | MmugDNA.27531.1 | 4.47  | 4.43  | 0.07 | 0.04 | 1.03  | 0.768461 | 0.127698 | 0.902719 | 0.398581 |
| MmugDNA.27532.1.S1_at   | MmugDNA.27532.1 | 4.74  | 4.62  | 0.37 | 0.04 | 1.09  | 0.701455 | 0.668921 | 0.868043 | 0.806313 |
| MmugDNA.27533.1.S1_at   | MmugDNA.27533.1 | 7.95  | 7.59  | 0.4  | 0.53 | 1.29  | 0.091948 | 0.094222 | 0.448512 | 0.350889 |
| MmugDNA.27534.1.S1_at   | MmugDNA.27534.1 | 3.66  | 3.8   | 0.35 | 0.31 | -1.1  | 0.770674 | 0.186572 | 0.903354 | 0.462364 |
| MmugDNA.27535.1.S1_at   | MmugDNA.27535.1 | 5.51  | 5.76  | 0.25 | 0.24 | -1.19 | 0.588651 | 0.706386 | 0.809106 | 0.829634 |
| MmugDNA.27536.1.S1_at   | MmugDNA.27536.1 | 3.26  | 3.25  | 0.17 | 0.19 | 1.01  | 0.524756 | 0.451352 | 0.77328  | 0.666168 |
| MmugDNA.27537.1.S1_at   | MmugDNA.27537.1 | 10.11 | 10.15 | 0.05 | 0.4  | -1.03 | 0.512362 | 0.480455 | 0.765592 | 0.685781 |
| MmugDNA.27538.1.S1_at   | MmugDNA.27538.1 | 3.82  | 3.7   | 0.15 | 0.02 | 1.09  | 0.172196 | 0.118574 | 0.535575 | 0.38654  |
| MmugDNA.2754.1.S1_at    | MmugDNA.2754.1  | 6.04  | 6.01  | 0.03 | 0.1  | 1.02  | 0.678116 | 0.116427 | 0.85579  | 0.383671 |
| MmugDNA.27540.1.S1_at   | MmugDNA.27540.1 | 5.4   | 5.53  | 0.25 | 0.34 | -1.09 | 0.601909 | 0.841011 | 0.816272 | 0.909421 |

|                         |                 |       |       |      |      |        |          |          |          |          |
|-------------------------|-----------------|-------|-------|------|------|--------|----------|----------|----------|----------|
| MmugDNA.27541.1.S1_at   | MmugDNA.27541.1 | 9.14  | 8.63  | 0.34 | 0.49 | 1.42   | 0.565871 | 0.596685 | 0.797387 | 0.75976  |
| MmugDNA.27542.1.S1_at   | MmugDNA.27542.1 | 6.71  | 6.86  | 0.87 | 0.46 | -1.11  | 0.410926 | 0.473998 | 0.706734 | 0.681163 |
| MmugDNA.27543.1.S1_at   | MmugDNA.27543.1 | 5.87  | 5.95  | 0.03 | 0.07 | -1.06  | 0.078248 | 0.057191 | 0.428221 | 0.285009 |
| MmugDNA.27544.1.S1_at   | MmugDNA.27544.1 | 4.4   | 4.44  | 0.34 | 0.21 | -1.03  | 0.677631 | 0.877883 | 0.855562 | 0.93029  |
| MmugDNA.27545.1.S1_at   | MmugDNA.27545.1 | 3.63  | 3.65  | 0.21 | 0.25 | -1.02  | 0.66958  | 0.414748 | 0.852167 | 0.640456 |
| MmugDNA.27546.1.S1_s_at | MmugDNA.27546.1 | 3.85  | 3.92  | 0.26 | 0.08 | -1.05  | 0.837994 | 0.469909 | 0.934571 | 0.678572 |
| MmugDNA.27547.1.S1_at   | MmugDNA.27547.1 | 6.39  | 6.09  | 0.14 | 0.14 | 1.24   | 0.091052 | 0.120822 | 0.446891 | 0.389657 |
| MmugDNA.27548.1.S1_s_at | MmugDNA.27548.1 | 8.08  | 8.65  | 0.05 | 0.5  | -1.48  | 0.113623 | 0.075256 | 0.476938 | 0.319434 |
| MmugDNA.27549.1.S1_at   | MmugDNA.27549.1 | 3.88  | 3.87  | 0.19 | 0.33 | 1.01   | 0.586953 | 0.556595 | 0.808376 | 0.734636 |
| MmugDNA.27550.1.S1_at   | MmugDNA.27550.1 | 5.62  | 4.83  | 0.82 | 0.11 | 1.73   | 0.467817 | 0.406697 | 0.740845 | 0.634487 |
| MmugDNA.27551.1.S1_at   | MmugDNA.27551.1 | 10.4  | 9.96  | 0.39 | 0.19 | 1.35   | 0.148494 | 0.171046 | 0.513907 | 0.447597 |
| MmugDNA.27553.1.S1_at   | MmugDNA.27553.1 | 3.93  | 4.27  | 0.94 | 0.2  | -1.27  | 0.625743 | 0.805574 | 0.829159 | 0.888295 |
| MmugDNA.27554.1.S1_at   | MmugDNA.27554.1 | 6.24  | 9.19  | 0.94 | 1.99 | -7.69  | 0.147068 | 0.142776 | 0.51306  | 0.416687 |
| MmugDNA.27555.1.S1_at   | MmugDNA.27555.1 | 9.36  | 8.94  | 0.31 | 0.15 | 1.34   | 0.137397 | 0.083857 | 0.504538 | 0.334752 |
| MmugDNA.27556.1.S1_at   | MmugDNA.27556.1 | 10.26 | 10.43 | 0.14 | 0.08 | -1.13  | 0.082294 | 0.157604 | 0.433666 | 0.433131 |
| MmugDNA.27558.1.S1_at   | MmugDNA.27558.1 | 9.02  | 7.36  | 0.31 | 0.75 | 3.16   | 0.036919 | 0.037433 | 0.340493 | 0.237777 |
| MmugDNA.27559.1.S1_at   | MmugDNA.27559.1 | 3.71  | 3.47  | 0.25 | 0.1  | 1.18   | 0.181587 | 0.084479 | 0.546263 | 0.335864 |
| MmugDNA.2756.1.S1_at    | MmugDNA.2756.1  | 7.02  | 6.95  | 0.1  | 0.05 | 1.05   | 0.852301 | 0.264411 | 0.940645 | 0.530385 |
| MmugDNA.27560.1.S1_at   | MmugDNA.27560.1 | 11.9  | 11.38 | 0.15 | 0.07 | 1.43   | 0.003794 | 0.00022  | 0.179914 | 0.032385 |
| MmugDNA.27561.1.S1_at   | MmugDNA.27561.1 | 8.49  | 8.34  | 0.4  | 0.86 | 1.11   | 0.558209 | 0.444505 | 0.793037 | 0.662072 |
| MmugDNA.27562.1.S1_at   | MmugDNA.27562.1 | 6.23  | 6.24  | 0.02 | 0.2  | -1.01  | 0.386696 | 0.518355 | 0.691563 | 0.71038  |
| MmugDNA.27563.1.S1_at   | MmugDNA.27563.1 | 6.67  | 6.82  | 0.21 | 0.07 | -1.11  | 0.35963  | 0.380553 | 0.673991 | 0.61719  |
| MmugDNA.27565.1.S1_at   | MmugDNA.27565.1 | 4.4   | 4.54  | 0.03 | 0.28 | -1.11  | 0.984878 | 0.995099 | 0.99466  | 0.996947 |
| MmugDNA.27566.1.S1_at   | MmugDNA.27566.1 | 6.79  | 6.9   | 0.15 | 0.1  | -1.08  | 0.919083 | 0.099615 | 0.968512 | 0.358095 |
| MmugDNA.27567.1.S1_at   | MmugDNA.27567.1 | 7.56  | 7.88  | 1.37 | 0.51 | -1.25  | 0.240489 | 0.31374  | 0.593366 | 0.568083 |
| MmugDNA.27568.1.S1_at   | MmugDNA.27568.1 | 3.73  | 3.58  | 0.04 | 0.16 | 1.11   | 0.445549 | 0.487387 | 0.727782 | 0.690473 |
| MmugDNA.27569.1.S1_at   | MmugDNA.27569.1 | 3.3   | 3.48  | 0.07 | 0.11 | -1.13  | 0.133981 | 0.168914 | 0.500516 | 0.445458 |
| MmugDNA.2757.1.S1_at    | MmugDNA.2757.1  | 3.44  | 3.55  | 0.12 | 0.24 | -1.08  | 0.353793 | 0.45928  | 0.670266 | 0.671678 |
| MmugDNA.27570.1.S1_at   | MmugDNA.27570.1 | 6.71  | 6.89  | 0.01 | 0.21 | -1.13  | 0.257833 | 0.192364 | 0.605259 | 0.467834 |
| MmugDNA.27571.1.S1_at   | MmugDNA.27571.1 | 10.77 | 10.79 | 0.29 | 0.45 | -1.02  | 0.888985 | 0.766433 | 0.955537 | 0.86428  |
| MmugDNA.27572.1.S1_at   | MmugDNA.27572.1 | 2.77  | 2.79  | 0.17 | 0.1  | -1.01  | 0.662303 | 0.560006 | 0.848507 | 0.736439 |
| MmugDNA.27573.1.S1_at   | MmugDNA.27573.1 | 4.1   | 4.08  | 0.11 | 0.16 | 1.01   | 0.734586 | 0.441237 | 0.88571  | 0.659477 |
| MmugDNA.27574.1.S1_at   | MmugDNA.27574.1 | 7.48  | 12.51 | 1.69 | 3.67 | -32.74 | 0.375922 | 0.20968  | 0.684819 | 0.48341  |
| MmugDNA.27575.1.S1_at   | MmugDNA.27575.1 | 5.12  | 5.15  | 0.01 | 0.11 | -1.03  | 0.560875 | 0.034659 | 0.794476 | 0.230352 |
| MmugDNA.27576.1.S1_at   | MmugDNA.27576.1 | 7.81  | 7.11  | 0.26 | 0.34 | 1.62   | 0.05869  | 0.02018  | 0.390921 | 0.178424 |
| MmugDNA.27578.1.S1_at   | MmugDNA.27578.1 | 9.5   | 9.93  | 0.2  | 0.3  | -1.34  | 0.167627 | 0.219417 | 0.531909 | 0.493156 |
| MmugDNA.2758.1.S1_at    | MmugDNA.2758.1  | 4.11  | 4.53  | 0.72 | 1.34 | -1.34  | 0.560127 | 0.336071 | 0.79419  | 0.583652 |
| MmugDNA.27581.1.S1_at   | MmugDNA.27581.1 | 4.87  | 5.05  | 0.04 | 0.11 | -1.14  | 0.159976 | 0.281771 | 0.524824 | 0.544844 |
| MmugDNA.27582.1.S1_at   | MmugDNA.27582.1 | 2.98  | 2.94  | 0.02 | 0.18 | 1.03   | 0.257858 | 0.302929 | 0.605259 | 0.560383 |
| MmugDNA.27583.1.S1_at   | MmugDNA.27583.1 | 6.61  | 7.44  | 0.72 | 0.43 | -1.77  | 0.180292 | 0.184171 | 0.544489 | 0.460382 |
| MmugDNA.27585.1.S1_at   | MmugDNA.27585.1 | 8.93  | 9     | 0.12 | 0.17 | -1.05  | 0.59601  | 0.5659   | 0.812742 | 0.740154 |

|                         |                 |       |       |      |      |       |          |          |          |          |
|-------------------------|-----------------|-------|-------|------|------|-------|----------|----------|----------|----------|
| MmugDNA.27586.1.S1_at   | MmugDNA.27586.1 | 10.07 | 9.57  | 0.28 | 0.57 | 1.41  | 0.252466 | 0.26013  | 0.601373 | 0.526776 |
| MmugDNA.27587.1.S1_at   | MmugDNA.27587.1 | 5.27  | 4     | 0.62 | 0.19 | 2.4   | 0.071696 | 0.05906  | 0.415695 | 0.289927 |
| MmugDNA.27588.1.S1_at   | MmugDNA.27588.1 | 4.44  | 3.95  | 0.82 | 1.05 | 1.4   | 0.528175 | 0.712417 | 0.775373 | 0.833371 |
| MmugDNA.27589.1.S1_at   | MmugDNA.27589.1 | 4.25  | 4.24  | 0.48 | 0.08 | 1.01  | 0.366888 | 0.384165 | 0.67921  | 0.61993  |
| MmugDNA.2759.1.S1_at    | MmugDNA.2759.1  | 7.74  | 8.35  | 0.98 | 0.42 | -1.52 | 0.633048 | 0.797286 | 0.833487 | 0.883122 |
| MmugDNA.27590.1.S1_at   | MmugDNA.27590.1 | 7.29  | 6.89  | 0.54 | 0.24 | 1.32  | 0.866665 | 0.035852 | 0.946819 | 0.233788 |
| MmugDNA.27591.1.S1_at   | MmugDNA.27591.1 | 4.46  | 3.68  | 0.28 | 0.47 | 1.71  | 0.228847 | 0.204615 | 0.586178 | 0.478993 |
| MmugDNA.27592.1.S1_at   | MmugDNA.27592.1 | 3.65  | 3.64  | 0.11 | 0.09 | 1     | 0.254031 | 0.257328 | 0.602339 | 0.525115 |
| MmugDNA.36405.1.S1_at   | MmugDNA.36405.1 | 11.47 | 11.59 | 0.19 | 0.15 | -1.09 | 0.832781 | 0.228364 | 0.932258 | 0.50054  |
| MmugDNA.36405.1.S1_s_at | MmugDNA.36405.1 | 14.52 | 14.51 | 0.02 | 0.02 | 1.01  | 0.161746 | 0.248602 | 0.526573 | 0.517903 |
| MmugDNA.27595.1.S1_at   | MmugDNA.27595.1 | 2.95  | 3.09  | 0.09 | 0.18 | -1.1  | 0.128801 | 0.166574 | 0.494664 | 0.443065 |
| MmugDNA.27596.1.S1_at   | MmugDNA.27596.1 | 4.76  | 4.72  | 0.73 | 0.05 | 1.03  | 0.345816 | 0.37164  | 0.665318 | 0.610431 |
| MmugDNA.27597.1.S1_at   | MmugDNA.27597.1 | 3.04  | 3.03  | 0.18 | 0.16 | 1.01  | 0.691072 | 0.865584 | 0.862551 | 0.923598 |
| MmugDNA.27598.1.S1_at   | MmugDNA.27598.1 | 5.35  | 5.51  | 0.48 | 0.02 | -1.12 | 0.719323 | 0.572621 | 0.876813 | 0.744597 |
| MmugDNA.27599.1.S1_at   | MmugDNA.27599.1 | 9.27  | 8.16  | 0.06 | 0.5  | 2.16  | 0.01798  | 0.009722 | 0.268362 | 0.129718 |
| MmugDNA.276.1.S1_at     | MmugDNA.276.1   | 11.63 | 11.97 | 0.15 | 0.18 | -1.27 | 0.09464  | 0.026186 | 0.452166 | 0.202799 |
| MmugDNA.2760.1.S1_at    | MmugDNA.2760.1  | 12.8  | 13.09 | 0.12 | 0.77 | -1.22 | 0.799815 | 0.40013  | 0.917271 | 0.630158 |
| MmugDNA.27600.1.S1_at   | MmugDNA.27600.1 | 5.48  | 5.56  | 0.21 | 0.3  | -1.05 | 0.766101 | 0.683533 | 0.901664 | 0.815375 |
| MmugDNA.27601.1.S1_at   | MmugDNA.27601.1 | 5.7   | 5.87  | 0.25 | 0.37 | -1.12 | 0.674529 | 0.535473 | 0.854194 | 0.721033 |
| MmugDNA.27603.1.S1_at   | MmugDNA.27603.1 | 5.68  | 5.36  | 0.3  | 0.22 | 1.25  | 0.119247 | 0.142506 | 0.483955 | 0.416106 |
| MmugDNA.27604.1.S1_at   | MmugDNA.27604.1 | 10.55 | 10.63 | 0.11 | 0.13 | -1.05 | 0.268955 | 0.130785 | 0.613651 | 0.402959 |
| MmugDNA.27605.1.S1_at   | MmugDNA.27605.1 | 8.23  | 9.54  | 0.31 | 0.34 | -2.46 | 0.01123  | 0.005927 | 0.234875 | 0.105331 |
| MmugDNA.27607.1.S1_at   | MmugDNA.27607.1 | 4.1   | 3.75  | 0.28 | 0.24 | 1.27  | 0.438102 | 0.559978 | 0.722782 | 0.736439 |
| MmugDNA.27608.1.S1_at   | MmugDNA.27608.1 | 6.03  | 6.2   | 0.09 | 0.18 | -1.13 | 0.313287 | 0.54404  | 0.645086 | 0.726592 |
| MmugDNA.27609.1.S1_at   | MmugDNA.27609.1 | 5.31  | 5.06  | 0.43 | 0.34 | 1.2   | 0.231778 | 0.301813 | 0.587568 | 0.559758 |
| MmugDNA.2761.1.S1_at    | MmugDNA.2761.1  | 10.3  | 10.91 | 0.31 | 0.53 | -1.52 | 0.111385 | 0.121966 | 0.473544 | 0.391389 |
| MmugDNA.27610.1.S1_at   | MmugDNA.27610.1 | 5.61  | 5.82  | 0.22 | 0.08 | -1.16 | 0.427199 | 0.081995 | 0.716176 | 0.330664 |
| MmugDNA.27611.1.S1_at   | MmugDNA.27611.1 | 2.66  | 2.61  | 0.09 | 0.08 | 1.03  | 0.859653 | 0.430408 | 0.943362 | 0.651404 |
| MmugDNA.27613.1.S1_at   | MmugDNA.27613.1 | 3.66  | 3.66  | 0.03 | 0    | 1     | 0.426563 | 0.752739 | 0.715846 | 0.855968 |
| MmugDNA.27614.1.S1_at   | MmugDNA.27614.1 | 3.82  | 3.89  | 0.16 | 0.11 | -1.05 | 0.48651  | 0.677513 | 0.751654 | 0.811672 |
| MmugDNA.27615.1.S1_at   | MmugDNA.27615.1 | 6.28  | 6.48  | 0.12 | 0.09 | -1.15 | 0.441297 | 0.555624 | 0.724743 | 0.733978 |
| MmugDNA.27616.1.S1_at   | MmugDNA.27616.1 | 8.19  | 7.73  | 0.11 | 0.37 | 1.38  | 0.435687 | 0.119516 | 0.721315 | 0.388167 |
| MmugDNA.27618.1.S1_at   | MmugDNA.27618.1 | 4.44  | 4.37  | 0.12 | 0.22 | 1.05  | 0.401655 | 0.557095 | 0.700992 | 0.73494  |
| MmugDNA.27619.1.S1_at   | MmugDNA.27619.1 | 3.81  | 3.43  | 0.15 | 0.23 | 1.3   | 0.155661 | 0.188314 | 0.520357 | 0.46433  |
| MmugDNA.2762.1.S1_at    | MmugDNA.2762.1  | 5.5   | 6     | 0.12 | 0.21 | -1.42 | 0.056732 | 0.076556 | 0.386885 | 0.32166  |
| MmugDNA.27620.1.S1_at   | MmugDNA.27620.1 | 7.12  | 7.12  | 0.07 | 0.3  | 1     | 0.970323 | 0.341662 | 0.988617 | 0.587796 |
| MmugDNA.27622.1.S1_at   | MmugDNA.27622.1 | 3.44  | 3.53  | 0.07 | 0.08 | -1.06 | 0.525542 | 0.173533 | 0.773765 | 0.449938 |
| MmugDNA.27623.1.S1_at   | MmugDNA.27623.1 | 6.54  | 6.94  | 0.28 | 0.8  | -1.32 | 0.446065 | 0.57899  | 0.728153 | 0.748791 |
| MmugDNA.27624.1.S1_at   | MmugDNA.27624.1 | 8.25  | 8.26  | 0.21 | 0.26 | -1.01 | 0.798133 | 0.085744 | 0.916369 | 0.337761 |
| MmugDNA.27625.1.S1_at   | MmugDNA.27625.1 | 3.9   | 3.96  | 0.37 | 0.19 | -1.04 | 0.542396 | 0.762311 | 0.783266 | 0.861726 |
| MmugDNA.27627.1.S1_at   | MmugDNA.27627.1 | 3.8   | 3.72  | 0.18 | 0.07 | 1.06  | 0.220223 | 0.316324 | 0.579311 | 0.569809 |

|                       |                 |       |       |      |      |        |          |          |          |          |
|-----------------------|-----------------|-------|-------|------|------|--------|----------|----------|----------|----------|
| MmugDNA.27629.1.S1_at | MmugDNA.27629.1 | 6.55  | 5.84  | 0.26 | 0.49 | 1.63   | 0.058074 | 0.103403 | 0.389756 | 0.3643   |
| MmugDNA.2763.1.S1_at  | MmugDNA.2763.1  | 4.95  | 4.95  | 0.09 | 0    | 1      | 0.373901 | 0.184664 | 0.683245 | 0.460645 |
| MmugDNA.27630.1.S1_at | MmugDNA.27630.1 | 4.46  | 4.57  | 1.01 | 0.73 | -1.08  | 0.616132 | 0.77502  | 0.82404  | 0.869033 |
| MmugDNA.27632.1.S1_at | MmugDNA.27632.1 | 6.48  | 6.48  | 0.55 | 0.68 | -1     | 0.897837 | 0.593792 | 0.95918  | 0.758418 |
| MmugDNA.27633.1.S1_at | MmugDNA.27633.1 | 4.98  | 5.31  | 0.48 | 0.76 | -1.25  | 0.688166 | 0.352825 | 0.860859 | 0.596151 |
| MmugDNA.27634.1.S1_at | MmugDNA.27634.1 | 9.65  | 9.58  | 0.35 | 0.46 | 1.05   | 0.838909 | 0.965191 | 0.934952 | 0.98061  |
| MmugDNA.27635.1.S1_at | MmugDNA.27635.1 | 6.82  | 6.97  | 0.03 | 0.1  | -1.11  | 0.03051  | 0.0491   | 0.318753 | 0.266518 |
| MmugDNA.27636.1.S1_at | MmugDNA.27636.1 | 8.9   | 12.79 | 1.44 | 2.18 | -14.79 | 0.27125  | 0.252437 | 0.615435 | 0.521061 |
| MmugDNA.27637.1.S1_at | MmugDNA.27637.1 | 7.19  | 7.26  | 0.23 | 0.09 | -1.05  | 0.678437 | 0.090139 | 0.856021 | 0.344432 |
| MmugDNA.27638.1.S1_at | MmugDNA.27638.1 | 9.72  | 9.23  | 0.14 | 0.27 | 1.4    | 0.21375  | 0.381369 | 0.573948 | 0.617681 |
| MmugDNA.27639.1.S1_at | MmugDNA.27639.1 | 9.01  | 9.04  | 0.17 | 0.59 | -1.02  | 0.434077 | 0.584846 | 0.720304 | 0.75256  |
| MmugDNA.27640.1.S1_at | MmugDNA.27640.1 | 11.92 | 11.71 | 0.11 | 0.11 | 1.15   | 0.034696 | 0.03421  | 0.333612 | 0.228779 |
| MmugDNA.27641.1.S1_at | MmugDNA.27641.1 | 7.2   | 6.9   | 0.11 | 0.57 | 1.23   | 0.605318 | 0.746868 | 0.81824  | 0.853023 |
| MmugDNA.27642.1.S1_at | MmugDNA.27642.1 | 6.3   | 5.6   | 0.83 | 0.73 | 1.62   | 0.227138 | 0.324915 | 0.584952 | 0.575451 |
| MmugDNA.27643.1.S1_at | MmugDNA.27643.1 | 4.55  | 4.64  | 0.17 | 0.12 | -1.06  | 0.17599  | 0.288483 | 0.539464 | 0.54977  |
| MmugDNA.27644.1.S1_at | MmugDNA.27644.1 | 8.4   | 7.43  | 0.54 | 0.65 | 1.96   | 0.081394 | 0.042263 | 0.432279 | 0.250026 |
| MmugDNA.27645.1.S1_at | MmugDNA.27645.1 | 10.67 | 10.42 | 0.12 | 1.23 | 1.19   | 0.263797 | 0.327416 | 0.609674 | 0.577284 |
| MmugDNA.27646.1.S1_at | MmugDNA.27646.1 | 6.65  | 7.01  | 0.08 | 0.93 | -1.28  | 0.628623 | 0.417724 | 0.830903 | 0.642382 |
| MmugDNA.27647.1.S1_at | MmugDNA.27647.1 | 10.19 | 9.76  | 0.22 | 1.05 | 1.34   | 0.532123 | 0.608447 | 0.777626 | 0.767074 |
| MmugDNA.27648.1.S1_at | MmugDNA.27648.1 | 5.47  | 5.33  | 1.41 | 0.67 | 1.1    | 0.556193 | 0.757627 | 0.791621 | 0.858927 |
| MmugDNA.2765.1.S1_at  | MmugDNA.2765.1  | 8.25  | 8.52  | 0.24 | 0.32 | -1.21  | 0.16541  | 0.143256 | 0.529362 | 0.417211 |
| MmugDNA.27650.1.S1_at | MmugDNA.27650.1 | 6.71  | 6.69  | 0.19 | 0.2  | 1.02   | 0.512808 | 0.830796 | 0.765743 | 0.902905 |
| MmugDNA.27651.1.S1_at | MmugDNA.27651.1 | 3.95  | 3.32  | 0.5  | 0.03 | 1.55   | 0.137185 | 0.05724  | 0.504356 | 0.285059 |
| MmugDNA.27653.1.S1_at | MmugDNA.27653.1 | 4.39  | 4.5   | 0.23 | 0.28 | -1.08  | 0.626964 | 0.652018 | 0.829836 | 0.796529 |
| MmugDNA.27654.1.S1_at | MmugDNA.27654.1 | 3.34  | 3.1   | 0.07 | 0.18 | 1.18   | 0.289057 | 0.596038 | 0.627041 | 0.759325 |
| MmugDNA.27656.1.S1_at | MmugDNA.27656.1 | 5.38  | 5.55  | 0.05 | 0.25 | -1.13  | 0.272077 | 0.132866 | 0.615959 | 0.404544 |
| MmugDNA.27657.1.S1_at | MmugDNA.27657.1 | 4.23  | 4.17  | 0.17 | 0.14 | 1.04   | 0.82598  | 0.471013 | 0.929365 | 0.679162 |
| MmugDNA.27658.1.S1_at | MmugDNA.27658.1 | 5.43  | 5.51  | 0.03 | 0.05 | -1.06  | 0.076289 | 0.196995 | 0.424738 | 0.472105 |
| MmugDNA.2766.1.S1_at  | MmugDNA.2766.1  | 6.08  | 5.96  | 0.29 | 0.18 | 1.08   | 0.418274 | 0.108502 | 0.711206 | 0.372066 |
| MmugDNA.27661.1.S1_at | MmugDNA.27661.1 | 3.23  | 3.38  | 0.29 | 0.05 | -1.11  | 0.950601 | 0.843806 | 0.981366 | 0.911025 |
| MmugDNA.27662.1.S1_at | MmugDNA.27662.1 | 3.16  | 3.17  | 0.5  | 0.2  | -1.01  | 0.452747 | 0.613532 | 0.732217 | 0.770578 |
| MmugDNA.27665.1.S1_at | MmugDNA.27665.1 | 6.12  | 6.15  | 0.17 | 0.12 | -1.02  | 0.411684 | 0.295049 | 0.707523 | 0.554551 |
| MmugDNA.27667.1.S1_at | MmugDNA.27667.1 | 5.93  | 5.61  | 0.91 | 0.2  | 1.24   | 0.19546  | 0.225025 | 0.558901 | 0.49773  |
| MmugDNA.27669.1.S1_at | MmugDNA.27669.1 | 6.87  | 7.5   | 0.65 | 0.59 | -1.55  | 0.10706  | 0.086676 | 0.467743 | 0.339267 |
| MmugDNA.27670.1.S1_at | MmugDNA.27670.1 | 3.45  | 3.45  | 0.03 | 0.1  | -1     | 0.274268 | 0.56946  | 0.617262 | 0.742405 |
| MmugDNA.27672.1.S1_at | MmugDNA.27672.1 | 7.64  | 7.87  | 0.51 | 0.86 | -1.17  | 0.923084 | 0.868973 | 0.970098 | 0.925578 |
| MmugDNA.27673.1.S1_at | MmugDNA.27673.1 | 3.73  | 3.95  | 0.1  | 0.04 | -1.16  | 0.017327 | 0.040755 | 0.267196 | 0.246735 |
| MmugDNA.27674.1.S1_at | MmugDNA.27674.1 | 3.26  | 3.44  | 0.52 | 0.14 | -1.13  | 0.827532 | 0.968574 | 0.930026 | 0.982645 |
| MmugDNA.27677.1.S1_at | MmugDNA.27677.1 | 6.08  | 6.01  | 0.01 | 0.22 | 1.05   | 0.543295 | 0.585383 | 0.783788 | 0.752844 |
| MmugDNA.27678.1.S1_at | MmugDNA.27678.1 | 10.74 | 10.06 | 0.13 | 0.41 | 1.61   | 0.036276 | 0.024998 | 0.339201 | 0.198121 |
| MmugDNA.27679.1.S1_at | MmugDNA.27679.1 | 5.09  | 5.09  | 0.01 | 0.2  | 1      | 0.364913 | 0.38093  | 0.677761 | 0.617426 |

|                         |                 |       |       |      |      |       |          |          |          |          |
|-------------------------|-----------------|-------|-------|------|------|-------|----------|----------|----------|----------|
| MmugDNA.27680.1.S1_at   | MmugDNA.27680.1 | 11.65 | 11.34 | 0.13 | 0.39 | 1.24  | 0.07644  | 0.065521 | 0.425064 | 0.301415 |
| MmugDNA.27686.1.S1_at   | MmugDNA.27686.1 | 11.92 | 11.79 | 0.09 | 0.14 | 1.1   | 0.629874 | 0.510748 | 0.831779 | 0.705145 |
| MmugDNA.2769.1.S1_at    | MmugDNA.2769.1  | 6.02  | 5.82  | 1.07 | 0.27 | 1.15  | 0.294749 | 0.426307 | 0.631442 | 0.648483 |
| MmugDNA.27692.1.S1_at   | MmugDNA.27692.1 | 3.17  | 3.31  | 0.1  | 0.05 | -1.1  | 0.054985 | 0.099298 | 0.382823 | 0.357562 |
| MmugDNA.27694.1.S1_at   | MmugDNA.27694.1 | 6.35  | 6.37  | 0.15 | 0.13 | -1.02 | 0.443918 | 0.346534 | 0.72651  | 0.591411 |
| MmugDNA.2770.1.S1_at    | MmugDNA.2770.1  | 6.22  | 6.16  | 0.08 | 0.23 | 1.04  | 0.644749 | 0.82109  | 0.839813 | 0.897041 |
| MmugDNA.27700.1.S1_at   | MmugDNA.27700.1 | 9.31  | 9.65  | 0.1  | 0.2  | -1.27 | 0.128151 | 0.044346 | 0.494307 | 0.255072 |
| MmugDNA.27702.1.S1_at   | MmugDNA.27702.1 | 4.6   | 4.08  | 0.56 | 0.22 | 1.43  | 0.137081 | 0.109505 | 0.504356 | 0.373339 |
| MmugDNA.27704.1.S1_at   | MmugDNA.27704.1 | 3.85  | 3.68  | 0.08 | 0.29 | 1.12  | 0.643218 | 0.615517 | 0.839266 | 0.772025 |
| MmugDNA.27705.1.S1_at   | MmugDNA.27705.1 | 9.15  | 9.42  | 0.25 | 0.1  | -1.21 | 0.465189 | 0.122298 | 0.739822 | 0.391979 |
| MmugDNA.27707.1.S1_at   | MmugDNA.27707.1 | 7.34  | 7.35  | 0.08 | 0.03 | -1.01 | 0.769911 | 0.008781 | 0.90328  | 0.124066 |
| MmugDNA.27708.1.S1_at   | MmugDNA.27708.1 | 7.55  | 7.58  | 0.8  | 0.58 | -1.02 | 0.526454 | 0.73685  | 0.774093 | 0.847693 |
| MmugDNA.27709.1.S1_at   | MmugDNA.27709.1 | 5.1   | 4.48  | 0.97 | 0.29 | 1.54  | 0.34863  | 0.170951 | 0.667173 | 0.447561 |
| MmugDNA.2771.1.S1_at    | MmugDNA.2771.1  | 7.88  | 7.73  | 0.25 | 0.33 | 1.11  | 0.991256 | 0.95335  | 0.996914 | 0.97351  |
| MmugDNA.27711.1.S1_at   | MmugDNA.27711.1 | 7.39  | 7.66  | 1.1  | 0.3  | -1.2  | 0.469875 | 0.584895 | 0.741958 | 0.75256  |
| MmugDNA.27712.1.S1_at   | MmugDNA.27712.1 | 8.23  | 8.25  | 0.1  | 0.28 | -1.01 | 0.426791 | 0.231855 | 0.715983 | 0.503594 |
| MmugDNA.27713.1.S1_at   | MmugDNA.27713.1 | 7     | 7.31  | 0.98 | 1.3  | -1.24 | 0.762463 | 0.507366 | 0.899996 | 0.702917 |
| MmugDNA.27714.1.S1_at   | MmugDNA.27714.1 | 3.97  | 4.03  | 0.13 | 0.13 | -1.05 | 0.865238 | 0.054684 | 0.94589  | 0.27934  |
| MmugDNA.27716.1.S1_at   | MmugDNA.27716.1 | 7.3   | 7.47  | 0.43 | 0.26 | -1.12 | 0.895215 | 0.137405 | 0.958083 | 0.410338 |
| MmugDNA.27717.1.S1_at   | MmugDNA.27717.1 | 3.48  | 3.74  | 0.31 | 0.11 | -1.2  | 0.686721 | 0.234858 | 0.859918 | 0.506125 |
| MmugDNA.27718.1.S1_at   | MmugDNA.27718.1 | 3.45  | 3.53  | 0.06 | 0.12 | -1.06 | 0.414964 | 0.677625 | 0.709338 | 0.811734 |
| MmugDNA.27719.1.S1_at   | MmugDNA.27719.1 | 8.06  | 8.1   | 0.52 | 0.52 | -1.03 | 0.607054 | 0.710008 | 0.819156 | 0.831887 |
| MmugDNA.2772.1.S1_at    | MmugDNA.2772.1  | 4.93  | 5.1   | 0.15 | 0.16 | -1.13 | 0.999155 | 0.774554 | 0.99976  | 0.868769 |
| MmugDNA.27721.1.S1_at   | MmugDNA.27721.1 | 2.53  | 2.51  | 0.03 | 0.03 | 1.01  | 0.692327 | 0.920372 | 0.863369 | 0.955115 |
| MmugDNA.27721.1.S1_x_at | MmugDNA.27721.1 | 2.42  | 2.57  | 0.04 | 0.09 | -1.11 | 0.119034 | 0.030074 | 0.483719 | 0.215243 |
| MmugDNA.27722.1.S1_at   | MmugDNA.27722.1 | 9.72  | 9.85  | 0.33 | 0.3  | -1.09 | 0.228767 | 0.296045 | 0.586121 | 0.555314 |
| MmugDNA.27723.1.S1_at   | MmugDNA.27723.1 | 5.36  | 5.39  | 0.15 | 0.19 | -1.02 | 0.809217 | 0.939523 | 0.922223 | 0.965642 |
| MmugDNA.27724.1.S1_at   | MmugDNA.27724.1 | 5.73  | 6.89  | 0.53 | 0.47 | -2.24 | 0.127731 | 0.127094 | 0.494001 | 0.397922 |
| MmugDNA.27725.1.S1_at   | MmugDNA.27725.1 | 9.97  | 9.93  | 0.14 | 0.19 | 1.02  | 0.63464  | 0.782802 | 0.834598 | 0.874272 |
| MmugDNA.27726.1.S1_at   | MmugDNA.27726.1 | 4.59  | 4.52  | 0.37 | 0.3  | 1.04  | 0.190563 | 0.259534 | 0.553097 | 0.526448 |
| MmugDNA.27727.1.S1_at   | MmugDNA.27727.1 | 9.68  | 9.8   | 0.07 | 0.26 | -1.09 | 0.31033  | 0.125737 | 0.642323 | 0.396313 |
| MmugDNA.27728.1.S1_at   | MmugDNA.27728.1 | 3.32  | 3.32  | 0.11 | 0.23 | -1    | 0.669521 | 0.064917 | 0.852167 | 0.300818 |
| MmugDNA.2773.1.S1_at    | MmugDNA.2773.1  | 7.81  | 6.73  | 0.22 | 0.47 | 2.12  | 0.025138 | 0.013406 | 0.297733 | 0.148363 |
| MmugDNA.27731.1.S1_at   | MmugDNA.27731.1 | 7.31  | 7.45  | 0.7  | 0.16 | -1.1  | 0.615325 | 0.625916 | 0.823377 | 0.7794   |
| MmugDNA.27732.1.S1_at   | MmugDNA.27732.1 | 11.04 | 10.86 | 0.03 | 0.34 | 1.13  | 0.425312 | 0.306991 | 0.715047 | 0.563427 |
| MmugDNA.27733.1.S1_at   | MmugDNA.27733.1 | 3.36  | 3.45  | 0.1  | 0.05 | -1.07 | 0.14279  | 0.279505 | 0.509783 | 0.543055 |
| MmugDNA.27735.1.S1_at   | MmugDNA.27735.1 | 11.92 | 11.1  | 0.14 | 0.15 | 1.76  | 0.002473 | 0.000424 | 0.163555 | 0.038316 |
| MmugDNA.27737.1.S1_at   | MmugDNA.27737.1 | 5.26  | 5.19  | 0.44 | 0.04 | 1.05  | 0.301141 | 0.304612 | 0.636252 | 0.561838 |
| MmugDNA.27738.1.S1_at   | MmugDNA.27738.1 | 3.02  | 3.01  | 0.13 | 0.42 | 1     | 0.286816 | 0.433594 | 0.625572 | 0.653865 |
| MmugDNA.27739.1.S1_at   | MmugDNA.27739.1 | 4.69  | 4.43  | 0.09 | 0.05 | 1.2   | 0.01073  | 0.013622 | 0.23109  | 0.1494   |
| MmugDNA.27740.1.S1_at   | MmugDNA.27740.1 | 7.01  | 7.49  | 1.57 | 0.65 | -1.4  | 0.875131 | 0.979898 | 0.949888 | 0.989228 |

|                         |                 |       |       |      |      |       |          |          |          |          |
|-------------------------|-----------------|-------|-------|------|------|-------|----------|----------|----------|----------|
| MmugDNA.27742.1.S1_s_at | MmugDNA.27742.1 | 11.13 | 10.48 | 0.1  | 0.17 | 1.57  | 0.007571 | 0.002429 | 0.209555 | 0.073093 |
| MmugDNA.27743.1.S1_at   | MmugDNA.27743.1 | 4.11  | 4.15  | 0.48 | 0.24 | -1.03 | 0.764056 | 0.561207 | 0.900638 | 0.737235 |
| MmugDNA.27745.1.S1_at   | MmugDNA.27745.1 | 4.43  | 4.1   | 0.28 | 0.09 | 1.26  | 0.137729 | 0.4154   | 0.504995 | 0.640873 |
| MmugDNA.27748.1.S1_at   | MmugDNA.27748.1 | 5.55  | 6.13  | 0.31 | 0.39 | -1.5  | 0.278399 | 0.158292 | 0.620536 | 0.43403  |
| MmugDNA.27749.1.S1_at   | MmugDNA.27749.1 | 9.45  | 9.82  | 0.22 | 0.06 | -1.29 | 0.054509 | 0.037865 | 0.381851 | 0.238987 |
| MmugDNA.31397.1.S1_s_at | MmugDNA.31397.1 | 10.19 | 10.35 | 0.23 | 0.08 | -1.11 | 0.103247 | 0.075605 | 0.462888 | 0.32003  |
| MmugDNA.2775.1.S1_at    | MmugDNA.2775.1  | 7.77  | 7.32  | 0.17 | 0.23 | 1.37  | 0.10145  | 0.068397 | 0.461313 | 0.307955 |
| MmugDNA.27750.1.S1_at   | MmugDNA.27750.1 | 3.47  | 3.5   | 0.11 | 0.11 | -1.02 | 0.883903 | 0.637133 | 0.953435 | 0.786653 |
| MmugDNA.27751.1.S1_at   | MmugDNA.27751.1 | 5.07  | 5.44  | 0.4  | 0.28 | -1.3  | 0.270203 | 0.429054 | 0.614663 | 0.650583 |
| MmugDNA.27754.1.S1_at   | MmugDNA.27754.1 | 5.47  | 5.32  | 0.25 | 0.16 | 1.11  | 0.148077 | 0.153616 | 0.513463 | 0.428341 |
| MmugDNA.27755.1.S1_at   | MmugDNA.27755.1 | 4.4   | 3.97  | 0.63 | 0.11 | 1.34  | 0.296005 | 0.318508 | 0.632176 | 0.571239 |
| MmugDNA.27756.1.S1_at   | MmugDNA.27756.1 | 6.99  | 5.68  | 0.34 | 0.29 | 2.47  | 0.003285 | 0.006446 | 0.176846 | 0.109087 |
| MmugDNA.2776.1.S1_at    | MmugDNA.2776.1  | 7.91  | 8.54  | 0.61 | 0.92 | -1.55 | 0.401253 | 0.464141 | 0.700767 | 0.674916 |
| MmugDNA.27761.1.S1_at   | MmugDNA.27761.1 | 4.69  | 4.84  | 0.07 | 0.06 | -1.11 | 0.061614 | 0.043923 | 0.396441 | 0.254098 |
| MmugDNA.27764.1.S1_at   | MmugDNA.27764.1 | 4.19  | 3.77  | 0.21 | 0.36 | 1.34  | 0.181642 | 0.053325 | 0.546264 | 0.276481 |
| MmugDNA.27765.1.S1_at   | MmugDNA.27765.1 | 3.27  | 3.27  | 0.08 | 0.14 | 1     | 0.241032 | 0.31658  | 0.593741 | 0.569949 |
| MmugDNA.27767.1.S1_at   | MmugDNA.27767.1 | 5.51  | 4.9   | 0.49 | 0.12 | 1.52  | 0.242559 | 0.334651 | 0.594448 | 0.582581 |
| MmugDNA.27770.1.S1_at   | MmugDNA.27770.1 | 5.07  | 4.78  | 0.11 | 0.45 | 1.22  | 0.251385 | 0.323806 | 0.600793 | 0.574609 |
| MmugDNA.27771.1.S1_at   | MmugDNA.27771.1 | 7.03  | 6.97  | 0.42 | 0.12 | 1.04  | 0.763145 | 0.931817 | 0.900106 | 0.961265 |
| MmugDNA.27774.1.S1_at   | MmugDNA.27774.1 | 7.11  | 7.18  | 0.12 | 0.07 | -1.05 | 0.603029 | 0.160646 | 0.816911 | 0.436745 |
| MmugDNA.27775.1.S1_at   | MmugDNA.27775.1 | 5.43  | 5.46  | 0.27 | 0.11 | -1.02 | 0.594964 | 0.764497 | 0.812253 | 0.863128 |
| MmugDNA.27777.1.S1_at   | MmugDNA.27777.1 | 5.77  | 5.69  | 0.02 | 0.1  | 1.05  | 0.319698 | 0.434984 | 0.649068 | 0.654901 |
| MmugDNA.27778.1.S1_at   | MmugDNA.27778.1 | 11.49 | 11.68 | 0.15 | 0.13 | -1.14 | 0.793734 | 0.042618 | 0.914508 | 0.251037 |
| MmugDNA.27778.1.S1_s_at | MmugDNA.27778.1 | 11.27 | 11.37 | 0.16 | 0.02 | -1.07 | 0.957735 | 0.009204 | 0.98396  | 0.126579 |
| MmugDNA.27780.1.S1_at   | MmugDNA.27780.1 | 4.71  | 4.88  | 0.03 | 0.07 | -1.13 | 0.012292 | 0.004258 | 0.240706 | 0.091808 |
| MmugDNA.27782.1.S1_at   | MmugDNA.27782.1 | 7.73  | 7.7   | 0.16 | 0.66 | 1.02  | 0.967826 | 0.995143 | 0.987919 | 0.996973 |
| MmugDNA.27783.1.S1_at   | MmugDNA.27783.1 | 8.57  | 8.57  | 0.09 | 0.26 | 1     | 0.333157 | 0.318671 | 0.657472 | 0.571315 |
| MmugDNA.27784.1.S1_at   | MmugDNA.27784.1 | 7.3   | 7.29  | 0.1  | 0.31 | 1.01  | 0.454238 | 0.481074 | 0.733184 | 0.686127 |
| MmugDNA.27786.1.S1_at   | MmugDNA.27786.1 | 3.65  | 3.71  | 0.01 | 0.14 | -1.04 | 0.481581 | 0.421395 | 0.749268 | 0.644994 |
| MmugDNA.27789.1.S1_at   | MmugDNA.27789.1 | 7.61  | 7.85  | 0.05 | 0.12 | -1.18 | 0.059202 | 0.050294 | 0.391406 | 0.269573 |
| MmugDNA.2779.1.S1_at    | MmugDNA.2779.1  | 3.58  | 3.63  | 0.03 | 0.07 | -1.03 | 0.085289 | 0.017126 | 0.438726 | 0.165775 |
| MmugDNA.27791.1.S1_at   | MmugDNA.27791.1 | 4.18  | 4.35  | 0.15 | 0.07 | -1.12 | 0.416581 | 0.59384  | 0.710051 | 0.758418 |
| MmugDNA.27792.1.S1_at   | MmugDNA.27792.1 | 3.45  | 3.42  | 0.12 | 0.1  | 1.02  | 0.196771 | 0.267899 | 0.559808 | 0.533607 |
| MmugDNA.27794.1.S1_at   | MmugDNA.27794.1 | 6.46  | 5.91  | 0.33 | 0.44 | 1.46  | 0.389137 | 0.171006 | 0.692939 | 0.447561 |
| MmugDNA.27795.1.S1_at   | MmugDNA.27795.1 | 4.99  | 4.78  | 0.25 | 0.09 | 1.16  | 0.79552  | 0.902825 | 0.915216 | 0.944844 |
| MmugDNA.27796.1.S1_at   | MmugDNA.27796.1 | 5.62  | 5.47  | 0.48 | 0.57 | 1.11  | 0.67775  | 0.285653 | 0.855584 | 0.547395 |
| MmugDNA.27797.1.S1_at   | MmugDNA.27797.1 | 3.67  | 3.78  | 0.1  | 0    | -1.08 | 0.468365 | 0.559603 | 0.741049 | 0.736365 |
| MmugDNA.27798.1.S1_at   | MmugDNA.27798.1 | 5.42  | 5.71  | 0.37 | 0.28 | -1.22 | 0.208697 | 0.114936 | 0.570402 | 0.381665 |
| MmugDNA.27799.1.S1_at   | MmugDNA.27799.1 | 4.65  | 4.96  | 0.38 | 0.28 | -1.24 | 0.162427 | 0.263963 | 0.526706 | 0.530153 |
| MmugDNA.27800.1.S1_at   | MmugDNA.27800.1 | 5.68  | 4.28  | 1.14 | 0.65 | 2.64  | 0.220717 | 0.169704 | 0.579701 | 0.446287 |
| MmugDNA.27802.1.S1_at   | MmugDNA.27802.1 | 5.67  | 5.56  | 0.33 | 0.31 | 1.09  | 0.49311  | 0.717579 | 0.756007 | 0.836471 |



|                         |                 |       |       |      |      |       |          |          |          |          |
|-------------------------|-----------------|-------|-------|------|------|-------|----------|----------|----------|----------|
| MmugDNA.27803.1.S1_at   | MmugDNA.27803.1 | 3.17  | 3.25  | 0.11 | 0.15 | -1.05 | 0.241496 | 0.112602 | 0.593941 | 0.378094 |
| MmugDNA.27806.1.S1_at   | MmugDNA.27806.1 | 3.34  | 3.3   | 0.14 | 0.21 | 1.03  | 0.603112 | 0.170995 | 0.816981 | 0.447561 |
| MmugDNA.27807.1.S1_at   | MmugDNA.27807.1 | 5.88  | 5.89  | 0.12 | 0.03 | -1.01 | 0.74986  | 0.452927 | 0.892776 | 0.667359 |
| MmugDNA.27809.1.S1_at   | MmugDNA.27809.1 | 5.25  | 6.37  | 0.19 | 0.47 | -2.19 | 0.014114 | 0.007467 | 0.251232 | 0.115888 |
| MmugDNA.27810.1.S1_at   | MmugDNA.27810.1 | 5.85  | 5.17  | 0.58 | 0.61 | 1.6   | 0.421854 | 0.550096 | 0.713215 | 0.730241 |
| MmugDNA.27811.1.S1_at   | MmugDNA.27811.1 | 4.51  | 4.8   | 0.2  | 0.14 | -1.22 | 0.060509 | 0.059162 | 0.393715 | 0.290182 |
| MmugDNA.27812.1.S1_at   | MmugDNA.27812.1 | 6.01  | 5.96  | 0.17 | 0.13 | 1.03  | 0.846052 | 0.462022 | 0.938232 | 0.673527 |
| MmugDNA.27813.1.S1_at   | MmugDNA.27813.1 | 9.02  | 9.15  | 0.08 | 0.07 | -1.09 | 0.303736 | 0.137713 | 0.638019 | 0.410711 |
| MmugDNA.27814.1.S1_at   | MmugDNA.27814.1 | 8.22  | 9.13  | 0.46 | 0.84 | -1.88 | 0.275392 | 0.350335 | 0.617833 | 0.594081 |
| MmugDNA.27815.1.S1_at   | MmugDNA.27815.1 | 7.58  | 7.09  | 1.06 | 1.49 | 1.4   | 0.956597 | 0.896023 | 0.983613 | 0.940574 |
| MmugDNA.27817.1.S1_at   | MmugDNA.27817.1 | 8.22  | 7.78  | 0.03 | 1.43 | 1.36  | 0.204144 | 0.267294 | 0.566605 | 0.532924 |
| MmugDNA.27818.1.S1_at   | MmugDNA.27818.1 | 5.21  | 5.34  | 0.18 | 0.08 | -1.1  | 0.799246 | 0.726588 | 0.91691  | 0.841849 |
| MmugDNA.27819.1.S1_at   | MmugDNA.27819.1 | 6.27  | 6.43  | 0.75 | 0.67 | -1.12 | 0.854659 | 0.215283 | 0.941248 | 0.489018 |
| MmugDNA.27820.1.S1_at   | MmugDNA.27820.1 | 5.59  | 5.95  | 0.17 | 0.08 | -1.28 | 0.053392 | 0.100613 | 0.380257 | 0.359897 |
| MmugDNA.27821.1.S1_at   | MmugDNA.27821.1 | 3.27  | 3.33  | 0.14 | 0.08 | -1.04 | 0.212129 | 0.229925 | 0.572526 | 0.501802 |
| MmugDNA.27822.1.S1_at   | MmugDNA.27822.1 | 3.84  | 4.46  | 0.38 | 0.16 | -1.54 | 0.14442  | 0.01775  | 0.510994 | 0.168367 |
| MmugDNA.25318.1.S1_s_at | MmugDNA.25318.1 | 5.52  | 5.55  | 0.08 | 0.13 | -1.02 | 0.435974 | 0.568172 | 0.721547 | 0.741859 |
| MmugDNA.27823.1.S1_at   | MmugDNA.27823.1 | 9.73  | 9.72  | 0.17 | 0.09 | 1.01  | 0.389202 | 0.233071 | 0.692956 | 0.50445  |
| MmugDNA.27824.1.S1_at   | MmugDNA.27824.1 | 4.05  | 4.44  | 0.42 | 0.43 | -1.31 | 0.320812 | 0.363783 | 0.649625 | 0.604189 |
| MmugDNA.27825.1.S1_at   | MmugDNA.27825.1 | 11.08 | 11.14 | 0.09 | 2.06 | -1.04 | 0.493373 | 0.457212 | 0.756158 | 0.670746 |
| MmugDNA.27826.1.S1_at   | MmugDNA.27826.1 | 5.28  | 5.11  | 0.18 | 0.2  | 1.12  | 0.736887 | 0.553223 | 0.886925 | 0.73239  |
| MmugDNA.27828.1.S1_at   | MmugDNA.27828.1 | 10.96 | 10.56 | 0.13 | 0.46 | 1.32  | 0.460704 | 0.512172 | 0.737118 | 0.706087 |
| MmugDNA.2783.1.S1_at    | MmugDNA.2783.1  | 4.05  | 3.99  | 0.05 | 0.11 | 1.05  | 0.248877 | 0.339461 | 0.599659 | 0.586093 |
| MmugDNA.27830.1.S1_at   | MmugDNA.27830.1 | 9.33  | 9.39  | 0.31 | 0.56 | -1.04 | 0.908862 | 0.96984  | 0.963873 | 0.983503 |
| MmugDNA.27831.1.S1_at   | MmugDNA.27831.1 | 5.35  | 6.03  | 0.07 | 0.11 | -1.6  | 0.000968 | 0.0054   | 0.139813 | 0.101438 |
| MmugDNA.27832.1.S1_at   | MmugDNA.27832.1 | 5.91  | 6.78  | 0.31 | 0.47 | -1.83 | 0.067878 | 0.043183 | 0.408606 | 0.252557 |
| MmugDNA.27834.1.S1_at   | MmugDNA.27834.1 | 6.93  | 6.95  | 0.11 | 0.05 | -1.01 | 0.686096 | 0.936078 | 0.859624 | 0.963958 |
| MmugDNA.27837.1.S1_at   | MmugDNA.27837.1 | 10.2  | 10.15 | 0.2  | 0.56 | 1.04  | 0.676904 | 0.85612  | 0.85524  | 0.917842 |
| MmugDNA.27838.1.S1_at   | MmugDNA.27838.1 | 4.87  | 4.91  | 0.34 | 0.79 | -1.03 | 0.369985 | 0.551344 | 0.681104 | 0.730922 |
| MmugDNA.2784.1.S1_at    | MmugDNA.2784.1  | 4.47  | 4.78  | 0.14 | 0.08 | -1.23 | 0.107385 | 0.220907 | 0.468045 | 0.494317 |
| MmugDNA.27840.1.S1_at   | MmugDNA.27840.1 | 11.06 | 10.8  | 0.33 | 0.21 | 1.19  | 0.216191 | 0.069321 | 0.575962 | 0.309558 |
| MmugDNA.27841.1.S1_at   | MmugDNA.27841.1 | 12.44 | 12    | 0.09 | 0.18 | 1.36  | 0.01768  | 0.008622 | 0.267454 | 0.123117 |
| MmugDNA.27842.1.S1_at   | MmugDNA.27842.1 | 6.24  | 6.24  | 0.08 | 0.13 | -1    | 0.744883 | 0.304858 | 0.89089  | 0.561994 |
| MmugDNA.27843.1.S1_at   | MmugDNA.27843.1 | 5.1   | 4.94  | 0.21 | 0.38 | 1.11  | 0.822649 | 0.817181 | 0.927793 | 0.894545 |
| MmugDNA.27846.1.S1_at   | MmugDNA.27846.1 | 7.48  | 7.36  | 0.09 | 0.55 | 1.09  | 0.651652 | 0.793092 | 0.843273 | 0.88052  |
| MmugDNA.27847.1.S1_at   | MmugDNA.27847.1 | 4.9   | 4.55  | 0.26 | 0.27 | 1.27  | 0.140499 | 0.195224 | 0.508385 | 0.470253 |
| MmugDNA.27849.1.S1_at   | MmugDNA.27849.1 | 3.07  | 3.07  | 0.02 | 0.08 | 1     | 0.368993 | 0.7048   | 0.680407 | 0.828831 |
| MmugDNA.27851.1.S1_at   | MmugDNA.27851.1 | 7.86  | 8.78  | 0.48 | 1.04 | -1.89 | 0.349891 | 0.458412 | 0.668074 | 0.671165 |
| MmugDNA.27852.1.S1_at   | MmugDNA.27852.1 | 12.35 | 12.23 | 0.09 | 0.8  | 1.09  | 0.653441 | 0.620491 | 0.844126 | 0.775449 |
| MmugDNA.27853.1.S1_at   | MmugDNA.27853.1 | 11.23 | 11.02 | 0.26 | 1.05 | 1.16  | 0.252554 | 0.316961 | 0.601373 | 0.570275 |
| MmugDNA.27854.1.S1_at   | MmugDNA.27854.1 | 9.62  | 8.99  | 0.22 | 0.48 | 1.55  | 0.343001 | 0.202878 | 0.663407 | 0.477312 |

|                         |                 |       |       |      |      |       |          |          |          |          |
|-------------------------|-----------------|-------|-------|------|------|-------|----------|----------|----------|----------|
| MmugDNA.27855.1.S1_at   | MmugDNA.27855.1 | 5.28  | 5.82  | 0.48 | 0.28 | -1.46 | 0.442346 | 0.230489 | 0.725508 | 0.502251 |
| MmugDNA.27856.1.S1_s_at | MmugDNA.27856.1 | 6.05  | 6.22  | 0.57 | 0.08 | -1.13 | 0.236611 | 0.205772 | 0.590504 | 0.48007  |
| MmugDNA.27858.1.S1_at   | MmugDNA.27858.1 | 7     | 6.73  | 0.34 | 0.11 | 1.2   | 0.149097 | 0.148936 | 0.514001 | 0.423294 |
| MmugDNA.27860.1.S1_at   | MmugDNA.27860.1 | 4.04  | 4.05  | 0.25 | 0    | -1    | 0.535476 | 0.591012 | 0.779125 | 0.756581 |
| MmugDNA.27861.1.S1_at   | MmugDNA.27861.1 | 3.89  | 3.6   | 0.76 | 0.4  | 1.23  | 0.815913 | 0.947294 | 0.925228 | 0.970103 |
| MmugDNA.27862.1.S1_at   | MmugDNA.27862.1 | 3.32  | 3.33  | 0.08 | 0.05 | -1.01 | 0.767656 | 0.889676 | 0.902446 | 0.937154 |
| MmugDNA.27863.1.S1_at   | MmugDNA.27863.1 | 5.33  | 4.81  | 0.4  | 0.09 | 1.44  | 0.08572  | 0.432123 | 0.439704 | 0.652775 |
| MmugDNA.27864.1.S1_at   | MmugDNA.27864.1 | 7.5   | 7.35  | 0.93 | 0.6  | 1.11  | 0.401759 | 0.225092 | 0.701003 | 0.497741 |
| MmugDNA.27865.1.S1_at   | MmugDNA.27865.1 | 10.49 | 10.23 | 0.11 | 0.15 | 1.19  | 0.210714 | 0.08313  | 0.571933 | 0.332999 |
| MmugDNA.27866.1.S1_at   | MmugDNA.27866.1 | 4.52  | 5     | 0.83 | 1.12 | -1.39 | 0.944127 | 0.992595 | 0.978677 | 0.995715 |
| MmugDNA.27867.1.S1_at   | MmugDNA.27867.1 | 6.66  | 6.27  | 0.18 | 0.15 | 1.31  | 0.106605 | 0.353788 | 0.467185 | 0.596815 |
| MmugDNA.27868.1.S1_at   | MmugDNA.27868.1 | 5.72  | 5.38  | 0.49 | 0.15 | 1.26  | 0.10513  | 0.098978 | 0.46558  | 0.357049 |
| MmugDNA.2787.1.S1_at    | MmugDNA.2787.1  | 3.7   | 3.72  | 0.2  | 0.05 | -1.01 | 0.456706 | 0.675232 | 0.734529 | 0.81026  |
| MmugDNA.27871.1.S1_at   | MmugDNA.27871.1 | 4.13  | 4.14  | 0.33 | 0.14 | -1    | 0.835069 | 0.764407 | 0.93317  | 0.863093 |
| MmugDNA.27872.1.S1_at   | MmugDNA.27872.1 | 7.15  | 6.88  | 0.1  | 0.04 | 1.21  | 0.03224  | 0.043394 | 0.3244   | 0.252955 |
| MmugDNA.27874.1.S1_at   | MmugDNA.27874.1 | 6.21  | 6.39  | 0.07 | 0.05 | -1.14 | 0.030266 | 0.031851 | 0.317712 | 0.220909 |
| MmugDNA.27875.1.S1_at   | MmugDNA.27875.1 | 12.27 | 12.28 | 0.24 | 0.05 | -1.01 | 0.316701 | 0.528657 | 0.647624 | 0.716749 |
| MmugDNA.27877.1.S1_at   | MmugDNA.27877.1 | 4.63  | 5.39  | 1.59 | 0.14 | -1.7  | 0.834078 | 0.964135 | 0.932558 | 0.980052 |
| MmugDNA.27878.1.S1_at   | MmugDNA.27878.1 | 3.68  | 3.16  | 0.44 | 0.84 | 1.44  | 0.592248 | 0.781932 | 0.810875 | 0.873615 |
| MmugDNA.27879.1.S1_at   | MmugDNA.27879.1 | 8.58  | 8.44  | 0.53 | 0.96 | 1.1   | 0.574654 | 0.248263 | 0.801812 | 0.517596 |
| MmugDNA.27880.1.S1_at   | MmugDNA.27880.1 | 5.82  | 5.9   | 0.36 | 0.19 | -1.06 | 0.530822 | 0.559472 | 0.776921 | 0.736301 |
| MmugDNA.27881.1.S1_at   | MmugDNA.27881.1 | 7.75  | 8.25  | 0.31 | 0.61 | -1.41 | 0.536547 | 0.557535 | 0.77949  | 0.73509  |
| MmugDNA.27882.1.S1_at   | MmugDNA.27882.1 | 6.82  | 6.51  | 0.37 | 0.24 | 1.24  | 0.11382  | 0.14228  | 0.477131 | 0.41579  |
| MmugDNA.27883.1.S1_at   | MmugDNA.27883.1 | 4.6   | 4.6   | 0.52 | 0.16 | 1     | 0.278943 | 0.302752 | 0.620884 | 0.560307 |
| MmugDNA.27884.1.S1_at   | MmugDNA.27884.1 | 4.28  | 4.46  | 0.09 | 0.12 | -1.13 | 0.081638 | 0.122555 | 0.432665 | 0.392468 |
| MmugDNA.27887.1.S1_at   | MmugDNA.27887.1 | 9.04  | 9.2   | 0.44 | 0.97 | -1.12 | 0.987299 | 0.395556 | 0.995543 | 0.627565 |
| MmugDNA.27889.1.S1_at   | MmugDNA.27889.1 | 9.32  | 9.5   | 0.46 | 1.05 | -1.13 | 0.839824 | 0.796933 | 0.935389 | 0.882822 |
| MmugDNA.2789.1.S1_at    | MmugDNA.2789.1  | 10.31 | 8.51  | 0.49 | 0.61 | 3.5   | 0.010179 | 0.002155 | 0.228247 | 0.068763 |
| MmugDNA.27890.1.S1_s_at | MmugDNA.27890.1 | 9.98  | 9.73  | 0.28 | 0.26 | 1.19  | 0.338004 | 0.173808 | 0.660478 | 0.450128 |
| MmugDNA.27891.1.S1_at   | MmugDNA.27891.1 | 6.43  | 6.44  | 0.02 | 0.1  | -1    | 0.306561 | 0.25066  | 0.639593 | 0.51941  |
| MmugDNA.27892.1.S1_at   | MmugDNA.27892.1 | 5.91  | 5.9   | 0.27 | 0.04 | 1.01  | 0.967381 | 0.568553 | 0.987804 | 0.742027 |
| MmugDNA.27893.1.S1_at   | MmugDNA.27893.1 | 6.2   | 6.38  | 0.23 | 0.11 | -1.13 | 0.542569 | 0.466817 | 0.783429 | 0.676543 |
| MmugDNA.27894.1.S1_at   | MmugDNA.27894.1 | 3.62  | 3.92  | 0.21 | 0.21 | -1.23 | 0.334755 | 0.489404 | 0.658461 | 0.691792 |
| MmugDNA.27896.1.S1_at   | MmugDNA.27896.1 | 6.98  | 6.7   | 0.39 | 0.04 | 1.22  | 0.122771 | 0.168542 | 0.488115 | 0.445172 |
| MmugDNA.27897.1.S1_at   | MmugDNA.27897.1 | 4.85  | 4.95  | 0.19 | 0.04 | -1.08 | 0.234748 | 0.329328 | 0.588876 | 0.57871  |
| MmugDNA.27898.1.S1_at   | MmugDNA.27898.1 | 3.58  | 3.55  | 0.55 | 0.18 | 1.02  | 0.345573 | 0.501695 | 0.665245 | 0.6998   |
| MmugDNA.27899.1.S1_at   | MmugDNA.27899.1 | 4.97  | 5.04  | 0.19 | 0.29 | -1.05 | 0.656136 | 0.752934 | 0.845317 | 0.856089 |
| MmugDNA.279.1.S1_at     | MmugDNA.279.1   | 5.69  | 5.73  | 0.11 | 0.42 | -1.03 | 0.984074 | 0.840124 | 0.99433  | 0.908905 |
| MmugDNA.2790.1.S1_at    | MmugDNA.2790.1  | 9.42  | 9.39  | 0.25 | 0.15 | 1.02  | 0.205367 | 0.189207 | 0.567878 | 0.464997 |
| MmugDNA.27901.1.S1_at   | MmugDNA.27901.1 | 5.94  | 5.83  | 0.61 | 0.44 | 1.08  | 0.71929  | 0.688678 | 0.876813 | 0.818281 |
| MmugDNA.27902.1.S1_at   | MmugDNA.27902.1 | 3.37  | 3.35  | 0.06 | 0.16 | 1.02  | 0.215572 | 0.224657 | 0.575924 | 0.497613 |

|                         |                 |       |       |      |      |       |          |          |          |          |
|-------------------------|-----------------|-------|-------|------|------|-------|----------|----------|----------|----------|
| MmugDNA.27906.1.S1_at   | MmugDNA.27906.1 | 5.71  | 5.53  | 0.66 | 0.22 | 1.13  | 0.537592 | 0.416616 | 0.780064 | 0.641647 |
| MmugDNA.27908.1.S1_at   | MmugDNA.27908.1 | 5.86  | 6.47  | 0.55 | 0.69 | -1.52 | 0.24797  | 0.322149 | 0.599052 | 0.573743 |
| MmugDNA.27909.1.S1_at   | MmugDNA.27909.1 | 9.02  | 8.49  | 0.04 | 0.11 | 1.44  | 0.001578 | 0.000797 | 0.151907 | 0.046064 |
| MmugDNA.2791.1.S1_at    | MmugDNA.2791.1  | 10.75 | 9.38  | 0.6  | 0.94 | 2.59  | 0.048137 | 0.025265 | 0.367807 | 0.199437 |
| MmugDNA.27911.1.S1_at   | MmugDNA.27911.1 | 11.08 | 10.92 | 0.13 | 0.29 | 1.12  | 0.146677 | 0.188192 | 0.512668 | 0.464251 |
| MmugDNA.27916.1.S1_at   | MmugDNA.27916.1 | 3.62  | 3.38  | 0.45 | 0.15 | 1.19  | 0.536181 | 0.414475 | 0.779378 | 0.640342 |
| MmugDNA.27917.1.S1_at   | MmugDNA.27917.1 | 4.45  | 4.61  | 0.19 | 0.1  | -1.11 | 0.600363 | 0.041856 | 0.815205 | 0.249172 |
| MmugDNA.27918.1.S1_at   | MmugDNA.27918.1 | 4.41  | 4.9   | 0.02 | 0.2  | -1.4  | 0.030865 | 0.01794  | 0.32011  | 0.168998 |
| MmugDNA.27919.1.S1_at   | MmugDNA.27919.1 | 7.19  | 6.34  | 0.75 | 0.52 | 1.81  | 0.089845 | 0.087478 | 0.44539  | 0.340617 |
| MmugDNA.27920.1.S1_at   | MmugDNA.27920.1 | 5.03  | 5.2   | 0.51 | 0.11 | -1.13 | 0.41242  | 0.558608 | 0.707892 | 0.735766 |
| MmugDNA.27921.1.S1_at   | MmugDNA.27921.1 | 8.75  | 9.59  | 0.08 | 0.18 | -1.79 | 0.002432 | 0.000312 | 0.163555 | 0.035198 |
| MmugDNA.27923.1.S1_at   | MmugDNA.27923.1 | 4.63  | 4.65  | 0.14 | 0.06 | -1.02 | 0.717019 | 0.629849 | 0.875712 | 0.782009 |
| MmugDNA.27924.1.S1_at   | MmugDNA.27924.1 | 3.28  | 3.5   | 0.04 | 0.19 | -1.17 | 0.088621 | 0.058095 | 0.44348  | 0.2877   |
| MmugDNA.27925.1.S1_at   | MmugDNA.27925.1 | 4.3   | 4.3   | 0.18 | 0.05 | -1    | 0.951039 | 0.126725 | 0.981599 | 0.397398 |
| MmugDNA.27926.1.S1_at   | MmugDNA.27926.1 | 5.3   | 5.03  | 0.46 | 0.41 | 1.2   | 0.924955 | 0.994217 | 0.97091  | 0.99645  |
| MmugDNA.27927.1.S1_at   | MmugDNA.27927.1 | 11.45 | 10.06 | 0.72 | 0.31 | 2.62  | 0.017481 | 0.004631 | 0.267445 | 0.094988 |
| MmugDNA.27927.1.S1_s_at | MmugDNA.27927.1 | 10.88 | 9.47  | 0.76 | 0.28 | 2.64  | 0.018779 | 0.006719 | 0.2715   | 0.110963 |
| MmugDNA.27928.1.S1_at   | MmugDNA.27928.1 | 4.89  | 4.9   | 0.06 | 0.17 | -1.01 | 0.839341 | 0.585319 | 0.935098 | 0.752844 |
| MmugDNA.2793.1.S1_at    | MmugDNA.2793.1  | 7.52  | 7.6   | 0.25 | 0.06 | -1.06 | 0.683275 | 0.864222 | 0.858347 | 0.922972 |
| MmugDNA.2774.1.S1_at    | MmugDNA.2774.1  | 6.53  | 6.7   | 0.12 | 0.13 | -1.13 | 0.125784 | 0.082817 | 0.491824 | 0.332331 |
| MmugDNA.2774.1.S1_s_at  | MmugDNA.2774.1  | 5.75  | 6.04  | 0.18 | 0.14 | -1.22 | 0.092056 | 0.147149 | 0.448698 | 0.421376 |
| MmugDNA.27930.1.S1_at   | MmugDNA.27930.1 | 8.85  | 9.33  | 0.97 | 0.34 | -1.4  | 0.478649 | 0.067265 | 0.747332 | 0.305363 |
| MmugDNA.27931.1.S1_at   | MmugDNA.27931.1 | 6.36  | 5.61  | 0.71 | 0.99 | 1.68  | 0.328268 | 0.095179 | 0.654312 | 0.35218  |
| MmugDNA.27932.1.S1_at   | MmugDNA.27932.1 | 11.57 | 11.33 | 0.11 | 0.34 | 1.18  | 0.951272 | 0.638648 | 0.981684 | 0.787767 |
| MmugDNA.27933.1.S1_s_at | MmugDNA.27933.1 | 12.43 | 11.9  | 0.18 | 0.6  | 1.45  | 0.240767 | 0.242922 | 0.593579 | 0.513293 |
| MmugDNA.27935.1.S1_at   | MmugDNA.27935.1 | 6.04  | 6.11  | 0.19 | 0.17 | -1.05 | 0.784971 | 0.471295 | 0.910465 | 0.679323 |
| MmugDNA.27935.1.S1_s_at | MmugDNA.27935.1 | 5.86  | 5.57  | 0.25 | 0.36 | 1.22  | 0.333923 | 0.14901  | 0.658024 | 0.423337 |
| MmugDNA.27936.1.S1_s_at | MmugDNA.27936.1 | 7.36  | 7.7   | 0.21 | 0.15 | -1.27 | 0.040676 | 0.058962 | 0.350025 | 0.289669 |
| MmugDNA.27937.1.S1_at   | MmugDNA.27937.1 | 4.83  | 6.75  | 1.02 | 1.73 | -3.77 | 0.205892 | 0.07831  | 0.568383 | 0.324949 |
| MmugDNA.27938.1.S1_at   | MmugDNA.27938.1 | 3     | 2.86  | 0.49 | 0.13 | 1.1   | 0.305336 | 0.266475 | 0.639126 | 0.532234 |
| MmugDNA.27939.1.S1_at   | MmugDNA.27939.1 | 4.31  | 4.12  | 0.28 | 0.21 | 1.15  | 0.757488 | 0.886702 | 0.897137 | 0.935519 |
| MmugDNA.2794.1.S1_at    | MmugDNA.2794.1  | 4.96  | 5.08  | 0.11 | 0.08 | -1.09 | 0.208432 | 0.470561 | 0.570275 | 0.678898 |
| MmugDNA.27941.1.S1_at   | MmugDNA.27941.1 | 3.36  | 3.31  | 0.13 | 0.15 | 1.03  | 0.838092 | 0.203177 | 0.934582 | 0.477415 |
| MmugDNA.27942.1.S1_at   | MmugDNA.27942.1 | 10.1  | 10.12 | 0.17 | 0.12 | -1.01 | 0.982348 | 0.064648 | 0.993449 | 0.300314 |
| MmugDNA.27942.1.S1_s_at | MmugDNA.27942.1 | 10.67 | 10.67 | 0.16 | 0.14 | -1    | 0.700577 | 0.85482  | 0.867516 | 0.917266 |
| MmugDNA.27943.1.S1_at   | MmugDNA.27943.1 | 6.72  | 6.74  | 0.23 | 0.57 | -1.01 | 0.984895 | 0.942985 | 0.99466  | 0.967603 |
| MmugDNA.27944.1.S1_at   | MmugDNA.27944.1 | 11.35 | 11.35 | 0.71 | 0.16 | -1    | 0.729183 | 0.663375 | 0.882443 | 0.802979 |
| MmugDNA.27945.1.S1_at   | MmugDNA.27945.1 | 2.84  | 2.88  | 0.12 | 0.1  | -1.02 | 0.831671 | 0.786356 | 0.931835 | 0.876293 |
| MmugDNA.27946.1.S1_at   | MmugDNA.27946.1 | 4.62  | 4.6   | 0.2  | 0.01 | 1.02  | 0.573836 | 0.769304 | 0.80137  | 0.866034 |
| MmugDNA.27947.1.S1_at   | MmugDNA.27947.1 | 5.5   | 5.62  | 0.31 | 0.57 | -1.09 | 0.778315 | 0.343067 | 0.907414 | 0.588878 |
| MmugDNA.27948.1.S1_at   | MmugDNA.27948.1 | 2.6   | 2.65  | 0.05 | 0.12 | -1.04 | 0.283284 | 0.213838 | 0.623353 | 0.48758  |

|                         |                 |       |       |      |      |       |          |          |          |          |
|-------------------------|-----------------|-------|-------|------|------|-------|----------|----------|----------|----------|
| MmugDNA.27948.1.S1_s_at | MmugDNA.27948.1 | 5.8   | 6.01  | 0.06 | 0.02 | -1.16 | 0.007036 | 0.099407 | 0.203774 | 0.357689 |
| MmugDNA.27949.1.S1_at   | MmugDNA.27949.1 | 12.05 | 12.34 | 0.1  | 0.25 | -1.22 | 0.149866 | 0.152144 | 0.514437 | 0.426919 |
| MmugDNA.27950.1.S1_at   | MmugDNA.27950.1 | 4.07  | 4.24  | 0.19 | 0.27 | -1.13 | 0.495546 | 0.671633 | 0.757268 | 0.808036 |
| MmugDNA.27951.1.S1_at   | MmugDNA.27951.1 | 5.68  | 5.7   | 0.2  | 0.11 | -1.01 | 0.627563 | 0.692698 | 0.830191 | 0.821139 |
| MmugDNA.27952.1.S1_at   | MmugDNA.27952.1 | 3.67  | 3.74  | 0.07 | 0.19 | -1.05 | 0.201725 | 0.251271 | 0.563988 | 0.519984 |
| MmugDNA.27953.1.S1_at   | MmugDNA.27953.1 | 9.72  | 9.41  | 0.24 | 0.57 | 1.24  | 0.283946 | 0.291874 | 0.623838 | 0.552094 |
| MmugDNA.27956.1.S1_at   | MmugDNA.27956.1 | 3.67  | 3.67  | 0.3  | 0.02 | -1    | 0.631512 | 0.64496  | 0.832749 | 0.791968 |
| MmugDNA.27958.1.S1_at   | MmugDNA.27958.1 | 11.33 | 11.17 | 0.29 | 0.25 | 1.12  | 0.230015 | 0.20639  | 0.587112 | 0.480546 |
| MmugDNA.27959.1.S1_at   | MmugDNA.27959.1 | 5.94  | 7.82  | 0.68 | 1.94 | -3.66 | 0.246799 | 0.214512 | 0.597932 | 0.488274 |
| MmugDNA.2796.1.S1_at    | MmugDNA.2796.1  | 6.73  | 6.36  | 0.41 | 0.21 | 1.29  | 0.201116 | 0.255085 | 0.563821 | 0.52317  |
| MmugDNA.27960.1.S1_at   | MmugDNA.27960.1 | 10.75 | 11.15 | 0.27 | 0.12 | -1.32 | 0.132785 | 0.228415 | 0.498856 | 0.500587 |
| MmugDNA.27962.1.S1_at   | MmugDNA.27962.1 | 11.94 | 11.95 | 0.06 | 0.11 | -1    | 0.842576 | 0.089628 | 0.936481 | 0.343821 |
| MmugDNA.27964.1.S1_at   | MmugDNA.27964.1 | 6.42  | 6.81  | 0.1  | 0.23 | -1.31 | 0.054041 | 0.060036 | 0.381327 | 0.291714 |
| MmugDNA.27965.1.S1_at   | MmugDNA.27965.1 | 3.63  | 3.83  | 0.1  | 0.14 | -1.15 | 0.086735 | 0.237431 | 0.440475 | 0.508117 |
| MmugDNA.27966.1.S1_at   | MmugDNA.27966.1 | 9.44  | 9.57  | 0.18 | 0.36 | -1.1  | 0.341101 | 0.497211 | 0.662256 | 0.696514 |
| MmugDNA.27967.1.S1_at   | MmugDNA.27967.1 | 7.14  | 6.39  | 0.24 | 0.24 | 1.68  | 0.019799 | 0.008481 | 0.275549 | 0.122133 |
| MmugDNA.27968.1.S1_at   | MmugDNA.27968.1 | 2.94  | 2.96  | 0.19 | 0.06 | -1.02 | 0.974916 | 0.634957 | 0.990211 | 0.785108 |
| MmugDNA.27969.1.S1_at   | MmugDNA.27969.1 | 3.47  | 4.25  | 0.14 | 0.52 | -1.71 | 0.07161  | 0.058247 | 0.415587 | 0.287992 |
| MmugDNA.27970.1.S1_at   | MmugDNA.27970.1 | 6.18  | 5.83  | 0.19 | 0.64 | 1.27  | 0.370715 | 0.191281 | 0.681582 | 0.466553 |
| MmugDNA.27972.1.S1_at   | MmugDNA.27972.1 | 10.39 | 10.34 | 0.01 | 0.28 | 1.04  | 0.641547 | 0.810622 | 0.838311 | 0.890812 |
| MmugDNA.27974.1.S1_at   | MmugDNA.27974.1 | 10.25 | 10.51 | 0.24 | 0.16 | -1.2  | 0.252857 | 0.162523 | 0.601608 | 0.438649 |
| MmugDNA.27974.1.S1_s_at | MmugDNA.27974.1 | 12.7  | 12.73 | 0.14 | 0.05 | -1.03 | 0.96493  | 0.992423 | 0.98654  | 0.995715 |
| MmugDNA.27975.1.S1_s_at | MmugDNA.27975.1 | 12.83 | 12.23 | 0.09 | 0.09 | 1.51  | 0.001818 | 0.000374 | 0.155483 | 0.037273 |
| MmugDNA.27976.1.S1_at   | MmugDNA.27976.1 | 9.35  | 9.63  | 0.23 | 0.45 | -1.21 | 0.376915 | 0.146024 | 0.68545  | 0.420022 |
| MmugDNA.27979.1.S1_at   | MmugDNA.27979.1 | 3.64  | 3.48  | 0.28 | 0.16 | 1.11  | 0.378736 | 0.27543  | 0.68656  | 0.539682 |
| MmugDNA.2798.1.S1_at    | MmugDNA.2798.1  | 8.39  | 9.11  | 0.18 | 0.65 | -1.65 | 0.268248 | 0.246011 | 0.613105 | 0.515719 |
| MmugDNA.27981.1.S1_at   | MmugDNA.27981.1 | 10.29 | 10.16 | 0.15 | 0.7  | 1.1   | 0.607246 | 0.803744 | 0.819285 | 0.887111 |
| MmugDNA.27982.1.S1_at   | MmugDNA.27982.1 | 4.41  | 5.08  | 0.62 | 0.56 | -1.58 | 0.170894 | 0.246538 | 0.534859 | 0.515917 |
| MmugDNA.27984.1.S1_at   | MmugDNA.27984.1 | 8.77  | 9.04  | 0.1  | 0.3  | -1.2  | 0.231354 | 0.270737 | 0.587372 | 0.53602  |
| MmugDNA.27985.1.S1_at   | MmugDNA.27985.1 | 4.41  | 4.35  | 0.23 | 0.21 | 1.04  | 0.580229 | 0.277481 | 0.804537 | 0.541411 |
| MmugDNA.27986.1.S1_at   | MmugDNA.27986.1 | 8.25  | 7.41  | 0.11 | 0.17 | 1.8   | 0.002162 | 0.001044 | 0.159051 | 0.051426 |
| MmugDNA.27988.1.S1_at   | MmugDNA.27988.1 | 6.18  | 7.25  | 0.5  | 0.18 | -2.1  | 0.035035 | 0.086225 | 0.334571 | 0.33863  |
| MmugDNA.27989.1.S1_at   | MmugDNA.27989.1 | 10.62 | 7.75  | 0.93 | 2.11 | 7.31  | 0.103126 | 0.110222 | 0.462758 | 0.374349 |
| MmugDNA.27991.1.S1_at   | MmugDNA.27991.1 | 4.75  | 4.46  | 0.28 | 0.11 | 1.22  | 0.12076  | 0.219257 | 0.48574  | 0.493026 |
| MmugDNA.27993.1.S1_at   | MmugDNA.27993.1 | 3.27  | 3.27  | 0.05 | 0.03 | 1     | 0.535151 | 0.662966 | 0.778933 | 0.802687 |
| MmugDNA.27994.1.S1_at   | MmugDNA.27994.1 | 3.59  | 3.5   | 0.2  | 0.13 | 1.06  | 0.449973 | 0.535124 | 0.730629 | 0.720807 |
| MmugDNA.27995.1.S1_at   | MmugDNA.27995.1 | 4.83  | 5.15  | 0.7  | 0.29 | -1.25 | 0.258403 | 0.376516 | 0.60566  | 0.614337 |
| MmugDNA.27996.1.S1_at   | MmugDNA.27996.1 | 7.92  | 8     | 0.06 | 0.11 | -1.06 | 0.27954  | 0.165795 | 0.621136 | 0.442107 |
| MmugDNA.27998.1.S1_at   | MmugDNA.27998.1 | 9.19  | 8.74  | 0.33 | 1.56 | 1.36  | 0.66163  | 0.232354 | 0.848148 | 0.504088 |
| MmugDNA.27999.1.S1_at   | MmugDNA.27999.1 | 5.79  | 5.73  | 0.08 | 0.08 | 1.04  | 0.715942 | 0.783824 | 0.875256 | 0.874823 |
| MmugDNA.28.1.S1_at      | MmugDNA.28.1    | 4.06  | 3.79  | 0.58 | 0.19 | 1.21  | 0.253208 | 0.388449 | 0.60185  | 0.622858 |

|                         |                 |       |       |      |      |       |          |          |          |          |
|-------------------------|-----------------|-------|-------|------|------|-------|----------|----------|----------|----------|
| MmugDNA.280.1.S1_at     | MmugDNA.280.1   | 4.51  | 4.22  | 0.26 | 0.21 | 1.22  | 0.14236  | 0.484681 | 0.509648 | 0.688615 |
| MmugDNA.2800.1.S1_at    | MmugDNA.2800.1  | 4.83  | 4.75  | 0.24 | 0.07 | 1.05  | 0.298535 | 0.466145 | 0.634047 | 0.676144 |
| MmugDNA.28000.1.S1_at   | MmugDNA.28000.1 | 4.42  | 4.56  | 0.02 | 0.1  | -1.1  | 0.061783 | 0.136417 | 0.396609 | 0.408839 |
| MmugDNA.28003.1.S1_at   | MmugDNA.28003.1 | 5.02  | 5.15  | 0.29 | 0.49 | -1.1  | 0.518658 | 0.503891 | 0.769592 | 0.701193 |
| MmugDNA.28004.1.S1_at   | MmugDNA.28004.1 | 4     | 4.23  | 0.18 | 0.21 | -1.17 | 0.457056 | 0.211235 | 0.734661 | 0.48533  |
| MmugDNA.28006.1.S1_at   | MmugDNA.28006.1 | 9.52  | 8.91  | 0.08 | 0.3  | 1.52  | 0.027142 | 0.015282 | 0.306629 | 0.156987 |
| MmugDNA.28007.1.S1_at   | MmugDNA.28007.1 | 6.28  | 6.68  | 0.87 | 1.65 | -1.32 | 0.445656 | 0.613027 | 0.727845 | 0.770364 |
| MmugDNA.28008.1.S1_at   | MmugDNA.28008.1 | 8.7   | 7.73  | 0.47 | 0.39 | 1.96  | 0.031534 | 0.019628 | 0.322015 | 0.176052 |
| MmugDNA.28009.1.S1_s_at | MmugDNA.28009.1 | 6.55  | 6.16  | 0.11 | 0.94 | 1.31  | 0.489551 | 0.184353 | 0.753948 | 0.460458 |
| MmugDNA.28010.1.S1_at   | MmugDNA.28010.1 | 6.18  | 8.18  | 0.04 | 0.32 | -4.01 | 0.00062  | 0.001129 | 0.136818 | 0.053019 |
| MmugDNA.28011.1.S1_at   | MmugDNA.28011.1 | 5.24  | 4.98  | 0.6  | 0.02 | 1.2   | 0.171477 | 0.192076 | 0.535166 | 0.467522 |
| MmugDNA.28012.1.S1_at   | MmugDNA.28012.1 | 6.74  | 6.63  | 1.73 | 1.1  | 1.07  | 0.45666  | 0.418603 | 0.734529 | 0.642999 |
| MmugDNA.28013.1.S1_s_at | MmugDNA.28013.1 | 11.41 | 11.09 | 0.18 | 0.23 | 1.25  | 0.23125  | 0.156359 | 0.587369 | 0.431641 |
| MmugDNA.28014.1.S1_at   | MmugDNA.28014.1 | 10.81 | 11.24 | 0.34 | 0.7  | -1.35 | 0.283867 | 0.321491 | 0.623797 | 0.573226 |
| MmugDNA.28016.1.S1_at   | MmugDNA.28016.1 | 3.98  | 4.18  | 0.22 | 0.06 | -1.15 | 0.201684 | 0.079708 | 0.563988 | 0.326981 |
| MmugDNA.28017.1.S1_at   | MmugDNA.28017.1 | 3.03  | 3.15  | 0.2  | 0.09 | -1.09 | 0.988247 | 0.447213 | 0.995887 | 0.663391 |
| MmugDNA.28018.1.S1_at   | MmugDNA.28018.1 | 5.63  | 4.4   | 0.36 | 0.6  | 2.36  | 0.15328  | 0.401069 | 0.517764 | 0.630671 |
| MmugDNA.28019.1.S1_at   | MmugDNA.28019.1 | 4.46  | 4.4   | 0.24 | 0.06 | 1.04  | 0.523607 | 0.716752 | 0.772643 | 0.835987 |
| MmugDNA.2802.1.S1_at    | MmugDNA.2802.1  | 7.42  | 7.4   | 0.2  | 0.04 | 1.02  | 0.935545 | 0.91509  | 0.975112 | 0.952307 |
| MmugDNA.28021.1.S1_at   | MmugDNA.28021.1 | 5.45  | 5.82  | 0.2  | 0.16 | -1.29 | 0.057736 | 0.096197 | 0.388964 | 0.353519 |
| MmugDNA.28022.1.S1_at   | MmugDNA.28022.1 | 3.46  | 3.47  | 0    | 0.12 | -1.01 | 0.44327  | 0.792694 | 0.726011 | 0.880287 |
| MmugDNA.28024.1.S1_at   | MmugDNA.28024.1 | 8.12  | 7.64  | 0.34 | 0.16 | 1.4   | 0.087683 | 0.116485 | 0.442009 | 0.383671 |
| MmugDNA.28025.1.S1_at   | MmugDNA.28025.1 | 6.33  | 5.47  | 0.09 | 0.42 | 1.81  | 0.021287 | 0.012895 | 0.282524 | 0.14622  |
| MmugDNA.28026.1.S1_at   | MmugDNA.28026.1 | 7.48  | 7.37  | 0.45 | 0.52 | 1.08  | 0.792355 | 0.913268 | 0.913837 | 0.951159 |
| MmugDNA.28028.1.S1_at   | MmugDNA.28028.1 | 7.86  | 7.74  | 0.26 | 0.58 | 1.08  | 0.293064 | 0.423796 | 0.630264 | 0.646542 |
| MmugDNA.22897.1.S1_s_at | MmugDNA.22897.1 | 13.73 | 14.12 | 0.12 | 0.05 | -1.31 | 0.007202 | 0.003673 | 0.205458 | 0.086568 |
| MmugDNA.2803.1.S1_at    | MmugDNA.2803.1  | 3.01  | 3.1   | 0.09 | 0.06 | -1.06 | 0.556505 | 0.807771 | 0.791846 | 0.889345 |
| MmugDNA.28030.1.S1_at   | MmugDNA.28030.1 | 7.27  | 7.02  | 0.11 | 0.22 | 1.19  | 0.556995 | 0.103535 | 0.79225  | 0.364346 |
| MmugDNA.28031.1.S1_at   | MmugDNA.28031.1 | 9.82  | 9.69  | 0.25 | 0.4  | 1.09  | 0.748565 | 0.673005 | 0.892494 | 0.808913 |
| MmugDNA.28032.1.S1_at   | MmugDNA.28032.1 | 4.09  | 4.06  | 0.12 | 0.31 | 1.02  | 0.727586 | 0.045217 | 0.88145  | 0.257005 |
| MmugDNA.28035.1.S1_at   | MmugDNA.28035.1 | 4.29  | 4.26  | 0.15 | 0.09 | 1.02  | 0.970261 | 0.976396 | 0.988606 | 0.98717  |
| MmugDNA.28039.1.S1_at   | MmugDNA.28039.1 | 6.57  | 5.86  | 1.03 | 0.77 | 1.64  | 0.685126 | 0.871412 | 0.858887 | 0.926844 |
| MmugDNA.28040.1.S1_at   | MmugDNA.28040.1 | 7.3   | 7.25  | 0.52 | 0.09 | 1.03  | 0.353447 | 0.22853  | 0.67013  | 0.500752 |
| MmugDNA.28041.1.S1_at   | MmugDNA.28041.1 | 3.36  | 3.52  | 0.27 | 0.1  | -1.12 | 0.557483 | 0.886438 | 0.792475 | 0.935397 |
| MmugDNA.28043.1.S1_at   | MmugDNA.28043.1 | 5.87  | 5.87  | 0.43 | 0.05 | -1    | 0.714656 | 0.60667  | 0.874968 | 0.765925 |
| MmugDNA.28044.1.S1_at   | MmugDNA.28044.1 | 6.38  | 6.12  | 0.11 | 0.2  | 1.2   | 0.0804   | 0.167582 | 0.430491 | 0.443998 |
| MmugDNA.28045.1.S1_s_at | MmugDNA.28045.1 | 11.92 | 11.44 | 0.11 | 0.26 | 1.39  | 0.060184 | 0.057108 | 0.393081 | 0.284945 |
| MmugDNA.28046.1.S1_at   | MmugDNA.28046.1 | 5.14  | 4.7   | 0.07 | 0.28 | 1.36  | 0.08455  | 0.065537 | 0.437266 | 0.301415 |
| MmugDNA.28047.1.S1_at   | MmugDNA.28047.1 | 5.42  | 5.3   | 0.38 | 0.04 | 1.09  | 0.479135 | 0.369659 | 0.747575 | 0.608957 |
| MmugDNA.28048.1.S1_at   | MmugDNA.28048.1 | 6.65  | 7.92  | 0.85 | 0.5  | -2.42 | 0.079726 | 0.073706 | 0.430147 | 0.317051 |
| MmugDNA.2805.1.S1_at    | MmugDNA.2805.1  | 5.38  | 5.4   | 0.36 | 0.09 | -1.01 | 0.485226 | 0.656584 | 0.750812 | 0.799169 |

|                         |                 |       |       |      |      |       |          |          |          |          |
|-------------------------|-----------------|-------|-------|------|------|-------|----------|----------|----------|----------|
| MmugDNA.28050.1.S1_at   | MmugDNA.28050.1 | 6.62  | 6.34  | 0.92 | 0.34 | 1.21  | 0.696154 | 0.856286 | 0.86514  | 0.917926 |
| MmugDNA.28051.1.S1_at   | MmugDNA.28051.1 | 5.95  | 5.52  | 0.63 | 0.12 | 1.34  | 0.083635 | 0.09181  | 0.435945 | 0.346977 |
| MmugDNA.28052.1.S1_at   | MmugDNA.28052.1 | 4.46  | 4.59  | 1.46 | 1.14 | -1.1  | 0.656196 | 0.830714 | 0.845317 | 0.902872 |
| MmugDNA.28054.1.S1_at   | MmugDNA.28054.1 | 4.75  | 4.08  | 0.54 | 0.72 | 1.6   | 0.288563 | 0.349807 | 0.626714 | 0.593595 |
| MmugDNA.28055.1.S1_at   | MmugDNA.28055.1 | 3.5   | 3.76  | 0.12 | 0.19 | -1.19 | 0.361741 | 0.586387 | 0.675406 | 0.753454 |
| MmugDNA.28056.1.S1_at   | MmugDNA.28056.1 | 7.28  | 7.18  | 0.27 | 0.57 | 1.08  | 0.923589 | 0.811696 | 0.970342 | 0.891328 |
| MmugDNA.28058.1.S1_at   | MmugDNA.28058.1 | 4.48  | 4.22  | 0.2  | 0.12 | 1.2   | 0.33956  | 0.438146 | 0.661307 | 0.657187 |
| MmugDNA.28059.1.S1_at   | MmugDNA.28059.1 | 6.98  | 7.08  | 0.18 | 0.09 | -1.07 | 0.486328 | 0.576919 | 0.751507 | 0.747521 |
| MmugDNA.28061.1.S1_at   | MmugDNA.28061.1 | 6.37  | 6.25  | 0.18 | 0.1  | 1.09  | 0.873283 | 0.962561 | 0.94924  | 0.978987 |
| MmugDNA.28062.1.S1_s_at | MmugDNA.28062.1 | 5.91  | 6.2   | 0.05 | 0.14 | -1.22 | 0.060169 | 0.03034  | 0.393081 | 0.216116 |
| MmugDNA.28063.1.S1_at   | MmugDNA.28063.1 | 7.12  | 7.06  | 0.05 | 0.12 | 1.05  | 0.99658  | 0.056523 | 0.998586 | 0.283744 |
| MmugDNA.28064.1.S1_at   | MmugDNA.28064.1 | 7.03  | 9.16  | 0.72 | 0.48 | -4.39 | 0.029278 | 0.029118 | 0.313575 | 0.212733 |
| MmugDNA.28065.1.S1_at   | MmugDNA.28065.1 | 5.12  | 5.44  | 1.14 | 0.06 | -1.24 | 0.632444 | 0.828138 | 0.833214 | 0.901214 |
| MmugDNA.28066.1.S1_at   | MmugDNA.28066.1 | 7.41  | 7.19  | 0.77 | 0.23 | 1.16  | 0.182039 | 0.22676  | 0.546458 | 0.499176 |
| MmugDNA.28068.1.S1_at   | MmugDNA.28068.1 | 3.79  | 3.96  | 0.78 | 0.25 | -1.12 | 0.571102 | 0.536325 | 0.7999   | 0.721648 |
| MmugDNA.28069.1.S1_at   | MmugDNA.28069.1 | 6.48  | 6.08  | 0.26 | 0.1  | 1.32  | 0.220358 | 0.284714 | 0.579323 | 0.546925 |
| MmugDNA.28070.1.S1_at   | MmugDNA.28070.1 | 8.39  | 8.52  | 0.15 | 0.19 | -1.1  | 0.886725 | 0.69866  | 0.954695 | 0.824932 |
| MmugDNA.28071.1.S1_at   | MmugDNA.28071.1 | 10.15 | 10.44 | 0.22 | 0.27 | -1.22 | 0.106447 | 0.072921 | 0.466881 | 0.315955 |
| MmugDNA.28072.1.S1_at   | MmugDNA.28072.1 | 9.96  | 12.68 | 0.89 | 1.71 | -6.55 | 0.127467 | 0.055692 | 0.493834 | 0.281818 |
| MmugDNA.28074.1.S1_at   | MmugDNA.28074.1 | 9.58  | 9.15  | 0.71 | 0.61 | 1.34  | 0.580075 | 0.279209 | 0.804451 | 0.54288  |
| MmugDNA.28075.1.S1_at   | MmugDNA.28075.1 | 6.3   | 6.56  | 0.14 | 0.12 | -1.19 | 0.084998 | 0.138347 | 0.438076 | 0.411244 |
| MmugDNA.28077.1.S1_at   | MmugDNA.28077.1 | 11.54 | 10.72 | 0.18 | 0.15 | 1.77  | 0.005462 | 0.001843 | 0.191178 | 0.064452 |
| MmugDNA.28078.1.S1_at   | MmugDNA.28078.1 | 4.69  | 4.79  | 0.14 | 0.16 | -1.07 | 0.444724 | 0.487554 | 0.727131 | 0.690562 |
| MmugDNA.2808.1.S1_at    | MmugDNA.2808.1  | 4.25  | 4.21  | 0.07 | 0.11 | 1.03  | 0.355685 | 0.102145 | 0.671185 | 0.362212 |
| MmugDNA.28080.1.S1_at   | MmugDNA.28080.1 | 6.21  | 6.26  | 0.05 | 0.15 | -1.04 | 0.768005 | 0.918905 | 0.902473 | 0.954473 |
| MmugDNA.28081.1.S1_at   | MmugDNA.28081.1 | 4.49  | 4.52  | 0.06 | 0.13 | -1.02 | 0.616859 | 0.170255 | 0.824344 | 0.446987 |
| MmugDNA.28082.1.S1_at   | MmugDNA.28082.1 | 5.94  | 5.69  | 0.24 | 0.25 | 1.19  | 0.274044 | 0.479676 | 0.617262 | 0.685353 |
| MmugDNA.28083.1.S1_at   | MmugDNA.28083.1 | 3.17  | 3.51  | 0.45 | 0.26 | -1.26 | 0.82906  | 0.309008 | 0.930604 | 0.564721 |
| MmugDNA.28084.1.S1_at   | MmugDNA.28084.1 | 10.41 | 9.93  | 0.3  | 0.14 | 1.39  | 0.30534  | 0.418868 | 0.639126 | 0.643141 |
| MmugDNA.28085.1.S1_at   | MmugDNA.28085.1 | 5.45  | 5.22  | 0.24 | 0.16 | 1.17  | 0.287668 | 0.174872 | 0.626103 | 0.45155  |
| MmugDNA.28087.1.S1_at   | MmugDNA.28087.1 | 4.35  | 4.42  | 0.33 | 0.16 | -1.04 | 0.72294  | 0.663848 | 0.878924 | 0.803202 |
| MmugDNA.28088.1.S1_at   | MmugDNA.28088.1 | 8.99  | 8.83  | 0.09 | 0.37 | 1.12  | 0.284309 | 0.461115 | 0.62413  | 0.672855 |
| MmugDNA.28089.1.S1_s_at | MmugDNA.28089.1 | 8.95  | 9.08  | 0.23 | 0.23 | -1.09 | 0.77051  | 0.535316 | 0.90333  | 0.720887 |
| MmugDNA.2809.1.S1_at    | MmugDNA.2809.1  | 5.72  | 5.93  | 0.27 | 0.6  | -1.16 | 0.345164 | 0.450149 | 0.665079 | 0.665505 |
| MmugDNA.28090.1.S1_at   | MmugDNA.28090.1 | 5.3   | 5.32  | 0.15 | 0.03 | -1.01 | 0.945951 | 0.967891 | 0.979359 | 0.982235 |
| MmugDNA.28091.1.S1_at   | MmugDNA.28091.1 | 4.73  | 4.75  | 0.12 | 0.19 | -1.02 | 0.905864 | 0.95189  | 0.962542 | 0.972702 |
| MmugDNA.28092.1.S1_at   | MmugDNA.28092.1 | 5.52  | 4.75  | 0.2  | 0.37 | 1.7   | 0.055817 | 0.046724 | 0.384768 | 0.260831 |
| MmugDNA.28093.1.S1_at   | MmugDNA.28093.1 | 4.42  | 4.42  | 0.28 | 0.05 | 1     | 0.372497 | 0.511711 | 0.682812 | 0.705797 |
| MmugDNA.28094.1.S1_at   | MmugDNA.28094.1 | 5.15  | 4.55  | 0.55 | 0.21 | 1.51  | 0.187655 | 0.188656 | 0.550643 | 0.464569 |
| MmugDNA.28098.1.S1_at   | MmugDNA.28098.1 | 6.53  | 7.56  | 0.45 | 0.24 | -2.04 | 0.059061 | 0.044063 | 0.390921 | 0.254195 |
| MmugDNA.28099.1.S1_at   | MmugDNA.28099.1 | 4.21  | 4.56  | 0.1  | 0.05 | -1.28 | 0.004688 | 0.009653 | 0.184492 | 0.129267 |

|                         |                 |       |       |      |      |       |          |          |          |          |
|-------------------------|-----------------|-------|-------|------|------|-------|----------|----------|----------|----------|
| MmugDNA.281.1.S1_at     | MmugDNA.281.1   | 2.98  | 3.06  | 0.09 | 0.03 | -1.05 | 0.322246 | 0.328207 | 0.650906 | 0.577947 |
| MmugDNA.2810.1.S1_at    | MmugDNA.2810.1  | 3.55  | 3.56  | 0.31 | 0.35 | -1.01 | 0.56417  | 0.318247 | 0.796418 | 0.571122 |
| MmugDNA.28100.1.S1_at   | MmugDNA.28100.1 | 3.63  | 3.82  | 0.15 | 0.09 | -1.14 | 0.242216 | 0.25248  | 0.594305 | 0.521077 |
| MmugDNA.28102.1.S1_at   | MmugDNA.28102.1 | 10.34 | 11.68 | 0.45 | 0.77 | -2.54 | 0.052659 | 0.019988 | 0.378392 | 0.177571 |
| MmugDNA.28103.1.S1_at   | MmugDNA.28103.1 | 6.96  | 6.32  | 0.08 | 0.35 | 1.56  | 0.109199 | 0.075611 | 0.470811 | 0.320031 |
| MmugDNA.28104.1.S1_at   | MmugDNA.28104.1 | 3.85  | 3.67  | 0.04 | 0.14 | 1.13  | 0.067729 | 0.331375 | 0.408357 | 0.580076 |
| MmugDNA.28105.1.S1_at   | MmugDNA.28105.1 | 5.86  | 6.72  | 0.35 | 0.57 | -1.82 | 0.156552 | 0.171906 | 0.521396 | 0.448352 |
| MmugDNA.28106.1.S1_at   | MmugDNA.28106.1 | 6.02  | 6.25  | 0.33 | 0.98 | -1.17 | 0.557464 | 0.668609 | 0.792469 | 0.806109 |
| MmugDNA.28107.1.S1_s_at | MmugDNA.28107.1 | 6.21  | 6.22  | 0.08 | 0.11 | -1.01 | 0.569518 | 0.761323 | 0.799054 | 0.86133  |
| MmugDNA.28108.1.S1_at   | MmugDNA.28108.1 | 6.75  | 6.2   | 0.73 | 1    | 1.46  | 0.287948 | 0.384161 | 0.626313 | 0.61993  |
| MmugDNA.2811.1.S1_at    | MmugDNA.2811.1  | 3.95  | 3.95  | 0.11 | 0.27 | 1     | 0.624624 | 0.722947 | 0.828356 | 0.839489 |
| MmugDNA.28110.1.S1_at   | MmugDNA.28110.1 | 7.05  | 7.07  | 0.41 | 0.54 | -1.01 | 0.825603 | 0.939612 | 0.929243 | 0.965668 |
| MmugDNA.28111.1.S1_at   | MmugDNA.28111.1 | 5.57  | 8.66  | 1.13 | 2.29 | -8.51 | 0.162202 | 0.156061 | 0.526638 | 0.431494 |
| MmugDNA.28111.1.S1_x_at | MmugDNA.28111.1 | 5.62  | 8.16  | 0.73 | 2.15 | -5.8  | 0.215506 | 0.244832 | 0.575924 | 0.514655 |
| MmugDNA.28112.1.S1_at   | MmugDNA.28112.1 | 4.52  | 4.53  | 0.18 | 0.16 | -1.01 | 0.683562 | 0.681053 | 0.85844  | 0.813776 |
| MmugDNA.28114.1.S1_at   | MmugDNA.28114.1 | 2.99  | 3.2   | 0.04 | 0.25 | -1.16 | 0.366121 | 0.591927 | 0.678919 | 0.757386 |
| MmugDNA.28115.1.S1_at   | MmugDNA.28115.1 | 4.93  | 4.89  | 0.07 | 0.43 | 1.03  | 0.964208 | 0.924801 | 0.986164 | 0.957467 |
| MmugDNA.28116.1.S1_x_at | MmugDNA.28116.1 | 10.48 | 10.28 | 0.4  | 0.17 | 1.15  | 0.253983 | 0.313576 | 0.602339 | 0.567977 |
| MmugDNA.28119.1.S1_at   | MmugDNA.28119.1 | 11.23 | 11.6  | 0.23 | 1.09 | -1.29 | 0.597509 | 0.318503 | 0.813537 | 0.571239 |
| MmugDNA.2812.1.S1_at    | MmugDNA.2812.1  | 3.39  | 3.52  | 0.12 | 0.12 | -1.09 | 0.632467 | 0.472113 | 0.833217 | 0.679861 |
| MmugDNA.28120.1.S1_at   | MmugDNA.28120.1 | 6.89  | 5.79  | 0.56 | 0.37 | 2.14  | 0.067009 | 0.071008 | 0.407016 | 0.312637 |
| MmugDNA.28122.1.S1_at   | MmugDNA.28122.1 | 5.08  | 5.08  | 0.23 | 0.15 | 1     | 0.867276 | 0.765765 | 0.947077 | 0.863914 |
| MmugDNA.28123.1.S1_at   | MmugDNA.28123.1 | 5.46  | 5.73  | 0.8  | 0.33 | -1.2  | 0.82528  | 0.880163 | 0.929153 | 0.931547 |
| MmugDNA.28124.1.S1_at   | MmugDNA.28124.1 | 10.43 | 10.24 | 0.08 | 0.34 | 1.14  | 0.137218 | 0.179166 | 0.504356 | 0.455496 |
| MmugDNA.28125.1.S1_at   | MmugDNA.28125.1 | 4.57  | 4.18  | 0.3  | 0.53 | 1.32  | 0.77622  | 0.883803 | 0.906244 | 0.933691 |
| MmugDNA.28126.1.S1_at   | MmugDNA.28126.1 | 7.99  | 8.71  | 0.28 | 0.16 | -1.64 | 0.020499 | 0.015508 | 0.278295 | 0.158052 |
| MmugDNA.28127.1.S1_at   | MmugDNA.28127.1 | 4.9   | 4.8   | 0.13 | 0.15 | 1.07  | 0.201602 | 0.326658 | 0.563988 | 0.576683 |
| MmugDNA.28129.1.S1_at   | MmugDNA.28129.1 | 5.77  | 5.75  | 0.36 | 0.48 | 1.01  | 0.510921 | 0.710125 | 0.765151 | 0.831904 |
| MmugDNA.2813.1.S1_at    | MmugDNA.2813.1  | 8.01  | 7.81  | 0.11 | 0.07 | 1.14  | 0.112262 | 0.007072 | 0.474778 | 0.113284 |
| MmugDNA.28130.1.S1_s_at | MmugDNA.28130.1 | 10.29 | 10.39 | 0.08 | 0.07 | -1.07 | 0.086115 | 0.092899 | 0.440066 | 0.349024 |
| MmugDNA.28131.1.S1_at   | MmugDNA.28131.1 | 7.8   | 8.22  | 0.15 | 0.23 | -1.34 | 0.094197 | 0.096939 | 0.451714 | 0.354379 |
| MmugDNA.28132.1.S1_x_at | MmugDNA.28132.1 | 7.06  | 6.74  | 0.61 | 0.4  | 1.25  | 0.169003 | 0.178226 | 0.533243 | 0.454572 |
| MmugDNA.28133.1.S1_at   | MmugDNA.28133.1 | 11.12 | 10.84 | 0.08 | 0.07 | 1.21  | 0.037424 | 0.006031 | 0.341462 | 0.106089 |
| MmugDNA.28134.1.S1_at   | MmugDNA.28134.1 | 5.63  | 5.67  | 0.36 | 0.11 | -1.03 | 0.65099  | 0.810561 | 0.84297  | 0.890812 |
| MmugDNA.28135.1.S1_at   | MmugDNA.28135.1 | 5.98  | 6.01  | 0.12 | 0.22 | -1.02 | 0.315762 | 0.507945 | 0.646695 | 0.703358 |
| MmugDNA.28136.1.S1_at   | MmugDNA.28136.1 | 6.21  | 6.38  | 0.07 | 0.16 | -1.13 | 0.076574 | 0.085966 | 0.425098 | 0.338116 |
| MmugDNA.28138.1.S1_at   | MmugDNA.28138.1 | 4.45  | 4.53  | 0.24 | 0.08 | -1.06 | 0.675283 | 0.541214 | 0.854473 | 0.724781 |
| MmugDNA.28139.1.S1_at   | MmugDNA.28139.1 | 4.13  | 4.22  | 0.23 | 0.22 | -1.07 | 0.290135 | 0.361618 | 0.628012 | 0.602374 |
| MmugDNA.2814.1.S1_at    | MmugDNA.2814.1  | 6.5   | 5.15  | 0.93 | 0.45 | 2.55  | 0.244739 | 0.12497  | 0.596374 | 0.395386 |
| MmugDNA.28140.1.S1_at   | MmugDNA.28140.1 | 5.71  | 6.12  | 1.33 | 0.35 | -1.33 | 0.624385 | 0.801937 | 0.828251 | 0.885989 |
| MmugDNA.28141.1.S1_at   | MmugDNA.28141.1 | 7.74  | 8.61  | 0.44 | 0.15 | -1.83 | 0.025367 | 0.015494 | 0.299142 | 0.158044 |

|                         |                 |       |       |      |      |       |          |          |          |          |
|-------------------------|-----------------|-------|-------|------|------|-------|----------|----------|----------|----------|
| MmugDNA.28142.1.S1_at   | MmugDNA.28142.1 | 4.23  | 4.46  | 0.15 | 0.22 | -1.17 | 0.433881 | 0.208751 | 0.720251 | 0.482608 |
| MmugDNA.28143.1.S1_at   | MmugDNA.28143.1 | 4.65  | 4.64  | 0.08 | 0.07 | 1.01  | 0.732591 | 0.455255 | 0.884502 | 0.669198 |
| MmugDNA.28144.1.S1_at   | MmugDNA.28144.1 | 6.07  | 5.82  | 0.13 | 0.17 | 1.19  | 0.220266 | 0.381471 | 0.579323 | 0.617691 |
| MmugDNA.28145.1.S1_s_at | MmugDNA.28145.1 | 8.82  | 8.58  | 0.35 | 0.41 | 1.18  | 0.17488  | 0.070122 | 0.538538 | 0.311029 |
| MmugDNA.28146.1.S1_at   | MmugDNA.28146.1 | 7.03  | 7.27  | 0.15 | 0.06 | -1.18 | 0.227006 | 0.303384 | 0.584884 | 0.560842 |
| MmugDNA.28148.1.S1_at   | MmugDNA.28148.1 | 4.3   | 3.59  | 0.62 | 0.23 | 1.64  | 0.148348 | 0.190121 | 0.513732 | 0.465774 |
| MmugDNA.28149.1.S1_at   | MmugDNA.28149.1 | 9.86  | 9.53  | 0.24 | 0.32 | 1.26  | 0.256775 | 0.027381 | 0.604419 | 0.206695 |
| MmugDNA.2815.1.S1_at    | MmugDNA.2815.1  | 5.06  | 5.01  | 0.07 | 0.09 | 1.03  | 0.973257 | 0.877387 | 0.98958  | 0.930136 |
| MmugDNA.28150.1.S1_at   | MmugDNA.28150.1 | 3.47  | 3.28  | 0.45 | 0.14 | 1.15  | 0.28701  | 0.392545 | 0.625695 | 0.625813 |
| MmugDNA.28151.1.S1_at   | MmugDNA.28151.1 | 4.07  | 4.01  | 0.26 | 0.04 | 1.04  | 0.842559 | 0.47201  | 0.936481 | 0.679835 |
| MmugDNA.28152.1.S1_at   | MmugDNA.28152.1 | 6.05  | 6.22  | 0.17 | 0.02 | -1.13 | 0.562491 | 0.569965 | 0.795358 | 0.742751 |
| MmugDNA.28153.1.S1_at   | MmugDNA.28153.1 | 9.18  | 8.6   | 0.1  | 0.17 | 1.5   | 0.00769  | 0.000137 | 0.211086 | 0.02919  |
| MmugDNA.28154.1.S1_at   | MmugDNA.28154.1 | 10.69 | 10.8  | 0.14 | 0.25 | -1.08 | 0.381103 | 0.160417 | 0.687695 | 0.436528 |
| MmugDNA.28156.1.S1_at   | MmugDNA.28156.1 | 10.36 | 10.05 | 0.12 | 0.47 | 1.24  | 0.43781  | 0.528691 | 0.722586 | 0.716773 |
| MmugDNA.28157.1.S1_at   | MmugDNA.28157.1 | 5.41  | 5.48  | 0.16 | 0.13 | -1.05 | 0.919682 | 0.031249 | 0.968755 | 0.218668 |
| MmugDNA.28160.1.S1_at   | MmugDNA.28160.1 | 4.43  | 4.68  | 0.18 | 0.32 | -1.19 | 0.278117 | 0.158187 | 0.620214 | 0.433986 |
| MmugDNA.28161.1.S1_at   | MmugDNA.28161.1 | 9.57  | 8.08  | 0.29 | 0.38 | 2.79  | 0.008454 | 0.002891 | 0.218339 | 0.079107 |
| MmugDNA.28162.1.S1_at   | MmugDNA.28162.1 | 4.01  | 3.95  | 0.15 | 0.1  | 1.05  | 0.214059 | 0.092712 | 0.574428 | 0.348867 |
| MmugDNA.28163.1.S1_at   | MmugDNA.28163.1 | 5.22  | 5.04  | 0.19 | 0.14 | 1.13  | 0.123746 | 0.372334 | 0.489534 | 0.611229 |
| MmugDNA.28166.1.S1_at   | MmugDNA.28166.1 | 5.09  | 5.18  | 0.28 | 0.18 | -1.06 | 0.683876 | 0.366056 | 0.858543 | 0.605891 |
| MmugDNA.28168.1.S1_at   | MmugDNA.28168.1 | 2.75  | 2.61  | 0.19 | 0.14 | 1.1   | 0.632    | 0.77555  | 0.832958 | 0.869402 |
| MmugDNA.2817.1.S1_at    | MmugDNA.2817.1  | 10.61 | 10.63 | 0.1  | 0.16 | -1.01 | 0.509696 | 0.676546 | 0.764485 | 0.810956 |
| MmugDNA.28170.1.S1_at   | MmugDNA.28170.1 | 9.19  | 8.88  | 0.17 | 0.16 | 1.24  | 0.021119 | 0.01374  | 0.282335 | 0.150134 |
| MmugDNA.28171.1.S1_at   | MmugDNA.28171.1 | 6.3   | 7.47  | 0.49 | 0.76 | -2.25 | 0.100965 | 0.104466 | 0.461009 | 0.365719 |
| MmugDNA.28172.1.S1_at   | MmugDNA.28172.1 | 3.56  | 3.54  | 0.24 | 0.1  | 1.01  | 0.374741 | 0.352052 | 0.683975 | 0.595426 |
| MmugDNA.28173.1.S1_at   | MmugDNA.28173.1 | 5.78  | 5.85  | 1.47 | 0.14 | -1.05 | 0.405226 | 0.46939  | 0.703082 | 0.678209 |
| MmugDNA.28174.1.S1_at   | MmugDNA.28174.1 | 4.41  | 4.64  | 0.12 | 0.16 | -1.17 | 0.153074 | 0.145537 | 0.517474 | 0.419442 |
| MmugDNA.28175.1.S1_at   | MmugDNA.28175.1 | 4.12  | 3.89  | 0.16 | 0.23 | 1.17  | 0.433949 | 0.102473 | 0.720302 | 0.362722 |
| MmugDNA.28176.1.S1_at   | MmugDNA.28176.1 | 4.16  | 4.1   | 0.13 | 0.12 | 1.05  | 0.640066 | 0.605958 | 0.837532 | 0.765547 |
| MmugDNA.28177.1.S1_s_at | MmugDNA.28177.1 | 10.74 | 10.48 | 0.17 | 0.07 | 1.2   | 0.17373  | 0.158414 | 0.537255 | 0.434313 |
| MmugDNA.28178.1.S1_at   | MmugDNA.28178.1 | 4.32  | 4.05  | 0.04 | 0.29 | 1.21  | 0.144107 | 0.109735 | 0.510652 | 0.373701 |
| MmugDNA.2818.1.S1_at    | MmugDNA.2818.1  | 6.99  | 7.01  | 0.18 | 0.11 | -1.02 | 0.635452 | 0.496627 | 0.83497  | 0.696119 |
| MmugDNA.28180.1.S1_at   | MmugDNA.28180.1 | 8.19  | 8.25  | 0.09 | 0.27 | -1.04 | 0.243831 | 0.215142 | 0.595594 | 0.488943 |
| MmugDNA.28181.1.S1_at   | MmugDNA.28181.1 | 10.47 | 8.35  | 0.24 | 0.4  | 4.34  | 0.001221 | 0.000065 | 0.145267 | 0.025805 |
| MmugDNA.28182.1.S1_at   | MmugDNA.28182.1 | 10.9  | 11.6  | 0.49 | 1.61 | -1.62 | 0.64207  | 0.687757 | 0.83868  | 0.817665 |
| MmugDNA.28183.1.S1_at   | MmugDNA.28183.1 | 3.42  | 3.43  | 0.06 | 0.21 | -1.01 | 0.331046 | 0.445942 | 0.656096 | 0.662623 |
| MmugDNA.28184.1.S1_at   | MmugDNA.28184.1 | 4.16  | 5.05  | 1.19 | 0.13 | -1.85 | 0.835975 | 0.169875 | 0.933635 | 0.446566 |
| MmugDNA.28185.1.S1_at   | MmugDNA.28185.1 | 8.46  | 8.53  | 0.11 | 0.81 | -1.05 | 0.857757 | 0.491507 | 0.942417 | 0.693004 |
| MmugDNA.28187.1.S1_at   | MmugDNA.28187.1 | 5.04  | 5.13  | 0.02 | 0.09 | -1.06 | 0.233706 | 0.69443  | 0.588317 | 0.822288 |
| MmugDNA.28188.1.S1_at   | MmugDNA.28188.1 | 7.62  | 7.7   | 0.47 | 0.61 | -1.06 | 0.7342   | 0.711326 | 0.885445 | 0.832597 |
| MmugDNA.28189.1.S1_at   | MmugDNA.28189.1 | 5.19  | 5.33  | 0.12 | 0.18 | -1.1  | 0.126632 | 0.14337  | 0.492802 | 0.417384 |



|                         |                 |       |       |      |      |        |          |          |          |          |
|-------------------------|-----------------|-------|-------|------|------|--------|----------|----------|----------|----------|
| MmugDNA.13537.1.S1_s_at | MmugDNA.13537.1 | 4.66  | 4.87  | 0.33 | 0.15 | -1.15  | 0.749623 | 0.535488 | 0.89273  | 0.721035 |
| MmugDNA.28193.1.S1_at   | MmugDNA.28193.1 | 5.14  | 5.17  | 0.06 | 0.16 | -1.02  | 0.932639 | 0.968511 | 0.973934 | 0.982645 |
| MmugDNA.28194.1.S1_at   | MmugDNA.28194.1 | 3.32  | 3.66  | 0.11 | 0.2  | -1.27  | 0.064544 | 0.088417 | 0.402975 | 0.341877 |
| MmugDNA.28195.1.S1_at   | MmugDNA.28195.1 | 9.81  | 10.13 | 0.05 | 0.46 | -1.25  | 0.105095 | 0.107906 | 0.465545 | 0.370945 |
| MmugDNA.28196.1.S1_at   | MmugDNA.28196.1 | 4.92  | 4.65  | 0.21 | 0.11 | 1.2    | 0.143597 | 0.212807 | 0.510312 | 0.486769 |
| MmugDNA.28197.1.S1_at   | MmugDNA.28197.1 | 5.8   | 9.3   | 1.58 | 2.27 | -11.31 | 0.237804 | 0.173697 | 0.591288 | 0.450043 |
| MmugDNA.28199.1.S1_at   | MmugDNA.28199.1 | 10.12 | 9.21  | 0.11 | 0.13 | 1.88   | 0.000818 | 0.000073 | 0.136818 | 0.026477 |
| MmugDNA.282.1.S1_at     | MmugDNA.282.1   | 4.06  | 3.64  | 0.77 | 0.33 | 1.33   | 0.376551 | 0.429522 | 0.685245 | 0.650957 |
| MmugDNA.28200.1.S1_at   | MmugDNA.28200.1 | 5.17  | 5.03  | 0.75 | 0.55 | 1.1    | 0.758194 | 0.83538  | 0.897631 | 0.905783 |
| MmugDNA.28201.1.S1_at   | MmugDNA.28201.1 | 11.81 | 11.73 | 0.09 | 0.3  | 1.06   | 0.634908 | 0.059179 | 0.834793 | 0.290208 |
| MmugDNA.28202.1.S1_at   | MmugDNA.28202.1 | 4.69  | 4.63  | 0.87 | 0.21 | 1.04   | 0.323555 | 0.440156 | 0.65165  | 0.658763 |
| MmugDNA.28203.1.S1_at   | MmugDNA.28203.1 | 5.62  | 5.45  | 0.31 | 0.05 | 1.12   | 0.63269  | 0.914059 | 0.833252 | 0.951684 |
| MmugDNA.28204.1.S1_at   | MmugDNA.28204.1 | 8.12  | 8.36  | 0.18 | 0.34 | -1.18  | 0.538193 | 0.740933 | 0.780442 | 0.850031 |
| MmugDNA.28205.1.S1_at   | MmugDNA.28205.1 | 10.81 | 11.03 | 0.19 | 0.32 | -1.17  | 0.853469 | 0.629532 | 0.940874 | 0.781923 |
| MmugDNA.28207.1.S1_at   | MmugDNA.28207.1 | 5.71  | 5.66  | 0.06 | 0.65 | 1.04   | 0.392865 | 0.399096 | 0.694841 | 0.62969  |
| MmugDNA.28208.1.S1_at   | MmugDNA.28208.1 | 3.27  | 3.27  | 0.07 | 0.04 | -1     | 0.749215 | 0.263413 | 0.892627 | 0.529715 |
| MmugDNA.28209.1.S1_at   | MmugDNA.28209.1 | 5.25  | 4.95  | 0.27 | 0.04 | 1.23   | 0.138436 | 0.078506 | 0.505745 | 0.325285 |
| MmugDNA.2821.1.S1_at    | MmugDNA.2821.1  | 3.74  | 3.71  | 0.03 | 0.12 | 1.02   | 0.69198  | 0.115126 | 0.863163 | 0.382007 |
| MmugDNA.28212.1.S1_at   | MmugDNA.28212.1 | 12.49 | 12.3  | 0.28 | 1.19 | 1.14   | 0.370386 | 0.506358 | 0.681414 | 0.702371 |
| MmugDNA.28213.1.S1_at   | MmugDNA.28213.1 | 9.94  | 9.51  | 0.09 | 0.13 | 1.34   | 0.011453 | 0.091091 | 0.235947 | 0.345932 |
| MmugDNA.28213.1.S1_s_at | MmugDNA.28213.1 | 7.96  | 7.78  | 0.08 | 0.16 | 1.13   | 0.082204 | 0.146459 | 0.43352  | 0.420523 |
| MmugDNA.28214.1.S1_at   | MmugDNA.28214.1 | 8.22  | 7.52  | 0.18 | 0.53 | 1.63   | 0.07985  | 0.016719 | 0.430147 | 0.163766 |
| MmugDNA.28215.1.S1_at   | MmugDNA.28215.1 | 4.8   | 4.76  | 0.25 | 0.06 | 1.02   | 0.71824  | 0.782665 | 0.876373 | 0.874202 |
| MmugDNA.28216.1.S1_at   | MmugDNA.28216.1 | 8.79  | 9.18  | 0.5  | 0.31 | -1.31  | 0.566921 | 0.77425  | 0.797859 | 0.868735 |
| MmugDNA.28217.1.S1_s_at | MmugDNA.28217.1 | 5.96  | 6.19  | 0.05 | 0.16 | -1.17  | 0.19088  | 0.047866 | 0.553627 | 0.263695 |
| MmugDNA.28218.1.S1_at   | MmugDNA.28218.1 | 5.95  | 5.9   | 0.84 | 0.44 | 1.03   | 0.833461 | 0.937588 | 0.932338 | 0.964687 |
| MmugDNA.28219.1.S1_at   | MmugDNA.28219.1 | 3.97  | 3.99  | 0.14 | 0.13 | -1.01  | 0.908338 | 0.648901 | 0.96372  | 0.794501 |
| MmugDNA.2822.1.S1_at    | MmugDNA.2822.1  | 8.31  | 9.01  | 0.37 | 1.39 | -1.63  | 0.892119 | 0.908566 | 0.957038 | 0.948227 |
| MmugDNA.28220.1.S1_at   | MmugDNA.28220.1 | 4.35  | 4.49  | 0.11 | 0.09 | -1.1   | 0.147019 | 0.197399 | 0.51306  | 0.472311 |
| MmugDNA.28221.1.S1_at   | MmugDNA.28221.1 | 9.69  | 9.25  | 0.16 | 1.02 | 1.36   | 0.643943 | 0.833963 | 0.8397   | 0.904859 |
| MmugDNA.28222.1.S1_at   | MmugDNA.28222.1 | 10.36 | 10.06 | 0.24 | 0.03 | 1.24   | 0.150191 | 0.044847 | 0.514831 | 0.256375 |
| MmugDNA.28223.1.S1_at   | MmugDNA.28223.1 | 2.83  | 2.69  | 0.14 | 0.12 | 1.1    | 0.605936 | 0.839877 | 0.818647 | 0.908703 |
| MmugDNA.28224.1.S1_at   | MmugDNA.28224.1 | 4.86  | 6.5   | 0.39 | 0.56 | -3.1   | 0.048605 | 0.040197 | 0.369025 | 0.245726 |
| MmugDNA.28225.1.S1_at   | MmugDNA.28225.1 | 10.75 | 10.74 | 0.12 | 0.16 | 1.01   | 0.274035 | 0.579674 | 0.617262 | 0.749254 |
| MmugDNA.28226.1.S1_at   | MmugDNA.28226.1 | 10.59 | 9.6   | 0.07 | 0.21 | 1.98   | 0.001729 | 0.00032  | 0.154452 | 0.035444 |
| MmugDNA.28227.1.S1_at   | MmugDNA.28227.1 | 6.67  | 6.09  | 0.15 | 0.55 | 1.5    | 0.520488 | 0.617228 | 0.77081  | 0.77329  |
| MmugDNA.28228.1.S1_at   | MmugDNA.28228.1 | 3.14  | 3.18  | 0.13 | 0.1  | -1.03  | 0.913481 | 0.84963  | 0.965725 | 0.914612 |
| MmugDNA.28229.1.S1_at   | MmugDNA.28229.1 | 3.05  | 3.15  | 0.18 | 0.2  | -1.07  | 0.754977 | 0.53757  | 0.895812 | 0.722606 |
| MmugDNA.2823.1.S1_at    | MmugDNA.2823.1  | 5.94  | 5.38  | 1.19 | 0.42 | 1.47   | 0.142184 | 0.160156 | 0.509437 | 0.436296 |
| MmugDNA.28231.1.S1_at   | MmugDNA.28231.1 | 3.5   | 3.56  | 0.08 | 0.05 | -1.04  | 0.500094 | 0.111168 | 0.759402 | 0.375798 |
| MmugDNA.28232.1.S1_at   | MmugDNA.28232.1 | 9.73  | 9.45  | 0.16 | 0.15 | 1.21   | 0.034543 | 0.002394 | 0.333292 | 0.072408 |

|                         |                 |       |       |      |      |       |          |          |          |          |
|-------------------------|-----------------|-------|-------|------|------|-------|----------|----------|----------|----------|
| MmugDNA.28233.1.S1_at   | MmugDNA.28233.1 | 2.59  | 2.79  | 0.02 | 0.09 | -1.15 | 0.075365 | 0.024171 | 0.422277 | 0.19464  |
| MmugDNA.28235.1.S1_s_at | MmugDNA.28235.1 | 12.25 | 12.27 | 0.14 | 0.1  | -1.01 | 0.479324 | 0.043523 | 0.747644 | 0.253227 |
| MmugDNA.28236.1.S1_at   | MmugDNA.28236.1 | 3.77  | 3.66  | 0.14 | 0.23 | 1.07  | 0.654142 | 0.717399 | 0.844551 | 0.836425 |
| MmugDNA.28237.1.S1_at   | MmugDNA.28237.1 | 9.28  | 9.13  | 0.1  | 0.07 | 1.11  | 0.060271 | 0.151714 | 0.393081 | 0.426383 |
| MmugDNA.28238.1.S1_at   | MmugDNA.28238.1 | 4.59  | 4.44  | 0.18 | 0.13 | 1.11  | 0.626966 | 0.835497 | 0.829836 | 0.905854 |
| MmugDNA.28239.1.S1_at   | MmugDNA.28239.1 | 4.96  | 4.83  | 0.06 | 0.05 | 1.1   | 0.098907 | 0.105101 | 0.458711 | 0.366755 |
| MmugDNA.2824.1.S1_at    | MmugDNA.2824.1  | 8.2   | 8.67  | 0.13 | 0.2  | -1.38 | 0.037385 | 0.024109 | 0.341309 | 0.1945   |
| MmugDNA.28240.1.S1_at   | MmugDNA.28240.1 | 5.25  | 5.39  | 0.08 | 0.19 | -1.11 | 0.235628 | 0.079725 | 0.589497 | 0.326982 |
| MmugDNA.28241.1.S1_at   | MmugDNA.28241.1 | 9.95  | 9.34  | 0.31 | 0.19 | 1.53  | 0.051377 | 0.004704 | 0.376003 | 0.09546  |
| MmugDNA.28242.1.S1_at   | MmugDNA.28242.1 | 3.66  | 3.78  | 0.06 | 0.26 | -1.09 | 0.574272 | 0.461831 | 0.801619 | 0.673361 |
| MmugDNA.28243.1.S1_at   | MmugDNA.28243.1 | 4.55  | 4.75  | 0.15 | 0.05 | -1.15 | 0.092608 | 0.024883 | 0.449245 | 0.197662 |
| MmugDNA.28245.1.S1_at   | MmugDNA.28245.1 | 6.84  | 6.61  | 0.19 | 0.05 | 1.17  | 0.475259 | 0.116997 | 0.745669 | 0.384404 |
| MmugDNA.28247.1.S1_at   | MmugDNA.28247.1 | 6.27  | 6.1   | 0.07 | 0.07 | 1.13  | 0.067824 | 0.073836 | 0.408558 | 0.317166 |
| MmugDNA.28248.1.S1_at   | MmugDNA.28248.1 | 11.72 | 11.63 | 0.19 | 0.13 | 1.06  | 0.542434 | 0.328881 | 0.783298 | 0.578452 |
| MmugDNA.28249.1.S1_at   | MmugDNA.28249.1 | 3.58  | 3.48  | 0.4  | 1.08 | 1.07  | 0.480411 | 0.616796 | 0.748355 | 0.772969 |
| MmugDNA.2825.1.S1_at    | MmugDNA.2825.1  | 3.76  | 3.45  | 0.14 | 0.05 | 1.24  | 0.011127 | 0.006944 | 0.234301 | 0.112568 |
| MmugDNA.28251.1.S1_at   | MmugDNA.28251.1 | 10.2  | 9.92  | 0.12 | 0.66 | 1.21  | 0.403926 | 0.210944 | 0.702465 | 0.484934 |
| MmugDNA.28253.1.S1_at   | MmugDNA.28253.1 | 4.22  | 4.23  | 0.18 | 1.21 | -1.01 | 0.760372 | 0.604279 | 0.898962 | 0.764558 |
| MmugDNA.28254.1.S1_x_at | MmugDNA.28254.1 | 6.59  | 6.53  | 0.58 | 0.27 | 1.05  | 0.614222 | 0.601918 | 0.823171 | 0.763122 |
| MmugDNA.28255.1.S1_at   | MmugDNA.28255.1 | 9.25  | 8.47  | 0.31 | 0.5  | 1.72  | 0.080559 | 0.081605 | 0.430701 | 0.329818 |
| MmugDNA.28256.1.S1_at   | MmugDNA.28256.1 | 4.43  | 4.46  | 0.56 | 0.67 | -1.02 | 0.967661 | 0.42675  | 0.987896 | 0.648857 |
| MmugDNA.28257.1.S1_at   | MmugDNA.28257.1 | 3.12  | 3.22  | 0.09 | 0.03 | -1.07 | 0.145645 | 0.112801 | 0.51146  | 0.37844  |
| MmugDNA.28258.1.S1_at   | MmugDNA.28258.1 | 6.24  | 6.24  | 0.02 | 0.13 | -1.01 | 0.88964  | 0.400168 | 0.955822 | 0.630158 |
| MmugDNA.28259.1.S1_at   | MmugDNA.28259.1 | 8     | 8.47  | 1.79 | 0.59 | -1.38 | 0.84592  | 0.901471 | 0.938188 | 0.943931 |
| MmugDNA.2826.1.S1_at    | MmugDNA.2826.1  | 8.43  | 8.87  | 0.36 | 0.32 | -1.37 | 0.243814 | 0.208168 | 0.595593 | 0.482086 |
| MmugDNA.28261.1.S1_at   | MmugDNA.28261.1 | 4.58  | 4.67  | 0.05 | 0.17 | -1.06 | 0.355252 | 0.321596 | 0.670893 | 0.573303 |
| MmugDNA.28262.1.S1_at   | MmugDNA.28262.1 | 4.15  | 4.05  | 0.1  | 0.1  | 1.07  | 0.766733 | 0.969591 | 0.901912 | 0.983356 |
| MmugDNA.28263.1.S1_at   | MmugDNA.28263.1 | 5.73  | 6.06  | 0.42 | 0.26 | -1.26 | 0.736974 | 0.797695 | 0.886925 | 0.883459 |
| MmugDNA.28264.1.S1_at   | MmugDNA.28264.1 | 3.9   | 3.86  | 0.32 | 0.21 | 1.02  | 0.26393  | 0.264149 | 0.609746 | 0.530214 |
| MmugDNA.28265.1.S1_s_at | MmugDNA.28265.1 | 7.1   | 6.74  | 0.19 | 0.26 | 1.28  | 0.129479 | 0.004557 | 0.495744 | 0.094355 |
| MmugDNA.28266.1.S1_at   | MmugDNA.28266.1 | 5.89  | 5.9   | 0.08 | 0.15 | -1.01 | 0.912074 | 0.522926 | 0.96522  | 0.713429 |
| MmugDNA.28267.1.S1_at   | MmugDNA.28267.1 | 6.57  | 7.56  | 0.44 | 0.32 | -1.98 | 0.0608   | 0.035199 | 0.394325 | 0.231787 |
| MmugDNA.28268.1.S1_at   | MmugDNA.28268.1 | 4.91  | 5.07  | 0.15 | 0.11 | -1.12 | 0.048992 | 0.061003 | 0.37042  | 0.293811 |
| MmugDNA.28269.1.S1_at   | MmugDNA.28269.1 | 4.34  | 4.31  | 0.21 | 0.23 | 1.02  | 0.719845 | 0.643534 | 0.87715  | 0.790981 |
| MmugDNA.2827.1.S1_at    | MmugDNA.2827.1  | 9.18  | 9.95  | 0.15 | 1.63 | -1.7  | 0.551086 | 0.347505 | 0.788427 | 0.592019 |
| MmugDNA.28270.1.S1_at   | MmugDNA.28270.1 | 3.24  | 3.2   | 0.31 | 0.06 | 1.03  | 0.84458  | 0.771965 | 0.937584 | 0.867436 |
| MmugDNA.28271.1.S1_at   | MmugDNA.28271.1 | 5.56  | 5.1   | 0.25 | 0.45 | 1.38  | 0.313046 | 0.231221 | 0.644915 | 0.5029   |
| MmugDNA.28272.1.S1_at   | MmugDNA.28272.1 | 7.06  | 5.72  | 0.02 | 0.77 | 2.53  | 0.113506 | 0.119983 | 0.476916 | 0.388672 |
| MmugDNA.28273.1.S1_at   | MmugDNA.28273.1 | 5.49  | 5.47  | 0.14 | 0.22 | 1.01  | 0.467537 | 0.790247 | 0.740707 | 0.878754 |
| MmugDNA.28274.1.S1_at   | MmugDNA.28274.1 | 5.57  | 5.34  | 0.16 | 0.11 | 1.18  | 0.085436 | 0.023634 | 0.439228 | 0.192555 |
| MmugDNA.28275.1.S1_at   | MmugDNA.28275.1 | 6.5   | 6.35  | 0.23 | 0.74 | 1.11  | 0.350427 | 0.423185 | 0.668494 | 0.646188 |

|                         |                 |       |       |      |      |       |          |          |          |          |
|-------------------------|-----------------|-------|-------|------|------|-------|----------|----------|----------|----------|
| MmugDNA.28276.1.S1_at   | MmugDNA.28276.1 | 4.15  | 4.25  | 0.22 | 0.26 | -1.08 | 0.64638  | 0.511794 | 0.840888 | 0.705797 |
| MmugDNA.28277.1.S1_at   | MmugDNA.28277.1 | 5.43  | 5.25  | 0.24 | 0.2  | 1.13  | 0.720053 | 0.903481 | 0.877249 | 0.945191 |
| MmugDNA.28280.1.S1_at   | MmugDNA.28280.1 | 5.19  | 5.39  | 0.25 | 0.11 | -1.15 | 0.701441 | 0.776129 | 0.868043 | 0.869726 |
| MmugDNA.28281.1.S1_at   | MmugDNA.28281.1 | 6.75  | 5.45  | 0.56 | 0.83 | 2.46  | 0.157741 | 0.148792 | 0.522564 | 0.423201 |
| MmugDNA.28283.1.S1_at   | MmugDNA.28283.1 | 4.69  | 4.75  | 0.16 | 0.18 | -1.05 | 0.919015 | 0.488423 | 0.968459 | 0.691144 |
| MmugDNA.28285.1.S1_at   | MmugDNA.28285.1 | 3.37  | 3.27  | 0.81 | 0.06 | 1.07  | 0.300434 | 0.377008 | 0.635857 | 0.614703 |
| MmugDNA.28286.1.S1_at   | MmugDNA.28286.1 | 5.04  | 5.03  | 0.78 | 0.16 | 1.01  | 0.462905 | 0.330056 | 0.738484 | 0.578938 |
| MmugDNA.28286.1.S1_s_at | MmugDNA.28286.1 | 5.93  | 5.94  | 0.16 | 0.07 | -1.01 | 0.825011 | 0.062461 | 0.929089 | 0.296717 |
| MmugDNA.28287.1.S1_at   | MmugDNA.28287.1 | 4.65  | 4.34  | 0.1  | 0.2  | 1.24  | 0.030948 | 0.016334 | 0.320347 | 0.161853 |
| MmugDNA.2829.1.S1_at    | MmugDNA.2829.1  | 4     | 4.04  | 0.26 | 0.42 | -1.03 | 0.843816 | 0.890821 | 0.937208 | 0.937722 |
| MmugDNA.28290.1.S1_at   | MmugDNA.28290.1 | 11.62 | 11.26 | 0.16 | 0.13 | 1.29  | 0.021248 | 0.014882 | 0.282524 | 0.155055 |
| MmugDNA.28292.1.S1_at   | MmugDNA.28292.1 | 5.19  | 5.25  | 0.01 | 0.04 | -1.05 | 0.190212 | 0.130941 | 0.553    | 0.403037 |
| MmugDNA.28293.1.S1_at   | MmugDNA.28293.1 | 8.94  | 9.38  | 0.25 | 0.36 | -1.36 | 0.095659 | 0.09556  | 0.453501 | 0.352631 |
| MmugDNA.28293.1.S1_s_at | MmugDNA.28293.1 | 9.67  | 10.13 | 0.4  | 0.46 | -1.37 | 0.12602  | 0.141483 | 0.492065 | 0.415019 |
| MmugDNA.28296.1.S1_at   | MmugDNA.28296.1 | 6.57  | 6.5   | 0.15 | 0.32 | 1.05  | 0.18889  | 0.135101 | 0.551906 | 0.407128 |
| MmugDNA.28297.1.S1_at   | MmugDNA.28297.1 | 6.06  | 6.02  | 0.33 | 0.2  | 1.03  | 0.696067 | 0.903406 | 0.865113 | 0.945171 |
| MmugDNA.28298.1.S1_at   | MmugDNA.28298.1 | 12.24 | 12.49 | 0.2  | 0.24 | -1.18 | 0.057241 | 0.026265 | 0.387792 | 0.203033 |
| MmugDNA.28299.1.S1_at   | MmugDNA.28299.1 | 6.51  | 6.49  | 0.2  | 0.14 | 1.01  | 0.380879 | 0.516569 | 0.687597 | 0.709034 |
| MmugDNA.30962.1.S1_at   | MmugDNA.30962.1 | 7.83  | 7.95  | 0.76 | 0.68 | -1.09 | 0.580351 | 0.645721 | 0.804567 | 0.792516 |
| MmugDNA.30962.1.S1_s_at | MmugDNA.30962.1 | 7.26  | 7.14  | 0.32 | 0.14 | 1.09  | 0.5312   | 0.712204 | 0.777112 | 0.833243 |
| MmugDNA.283.1.S1_at     | MmugDNA.283.1   | 5.71  | 5.57  | 0.2  | 0.06 | 1.1   | 0.401979 | 0.64152  | 0.701106 | 0.789578 |
| MmugDNA.28300.1.S1_at   | MmugDNA.28300.1 | 6.64  | 6.6   | 0.03 | 0.12 | 1.03  | 0.191104 | 0.374859 | 0.554    | 0.613091 |
| MmugDNA.28302.1.S1_at   | MmugDNA.28302.1 | 5.57  | 5.7   | 0.14 | 0.32 | -1.09 | 0.491422 | 0.709889 | 0.755082 | 0.831863 |
| MmugDNA.28303.1.S1_at   | MmugDNA.28303.1 | 6.15  | 6.57  | 0.78 | 0.28 | -1.34 | 0.951785 | 0.925528 | 0.98195  | 0.957833 |
| MmugDNA.28304.1.S1_at   | MmugDNA.28304.1 | 4.39  | 5.71  | 0.37 | 0.67 | -2.51 | 0.019477 | 0.00903  | 0.274645 | 0.125559 |
| MmugDNA.28306.1.S1_at   | MmugDNA.28306.1 | 6.82  | 6.94  | 0.09 | 0.1  | -1.09 | 0.112249 | 0.081227 | 0.474778 | 0.329351 |
| MmugDNA.28308.1.S1_at   | MmugDNA.28308.1 | 4.17  | 4.31  | 0.38 | 0.21 | -1.1  | 0.552609 | 0.268164 | 0.78961  | 0.533876 |
| MmugDNA.2831.1.S1_at    | MmugDNA.2831.1  | 9.55  | 9.44  | 0.27 | 0.71 | 1.08  | 0.234925 | 0.309543 | 0.589124 | 0.564987 |
| MmugDNA.32394.1.S1_at   | MmugDNA.32394.1 | 9.91  | 9.34  | 0.26 | 1.03 | 1.48  | 0.166975 | 0.164072 | 0.531023 | 0.440265 |
| MmugDNA.32394.1.S1_s_at | MmugDNA.32394.1 | 10.16 | 9.87  | 0.3  | 0.83 | 1.23  | 0.194485 | 0.230505 | 0.557955 | 0.502251 |
| MmugDNA.28310.1.S1_at   | MmugDNA.28310.1 | 3.39  | 3.54  | 0.4  | 0.24 | -1.11 | 0.821035 | 0.929258 | 0.92718  | 0.959645 |
| MmugDNA.8184.1.S1_s_at  | MmugDNA.8184.1  | 13.51 | 13.77 | 0.12 | 0.65 | -1.2  | 0.699405 | 0.655813 | 0.866851 | 0.798709 |
| MmugDNA.28312.1.S1_at   | MmugDNA.28312.1 | 11.17 | 10.56 | 0.15 | 0.11 | 1.52  | 0.008367 | 0.00327  | 0.217891 | 0.082312 |
| MmugDNA.4576.1.S1_at    | MmugDNA.4576.1  | 13.2  | 13.19 | 0.01 | 0.07 | 1     | 0.852711 | 0.964315 | 0.940647 | 0.980149 |
| MmugDNA.4576.1.S1_s_at  | MmugDNA.4576.1  | 13.03 | 13.06 | 0.03 | 0.03 | -1.03 | 0.915269 | 0.987758 | 0.966496 | 0.993169 |
| MmugDNA.28315.1.S1_at   | MmugDNA.28315.1 | 4.91  | 4.75  | 0.13 | 0.14 | 1.11  | 0.340073 | 0.362525 | 0.661611 | 0.603067 |
| MmugDNA.28317.1.S1_at   | MmugDNA.28317.1 | 8.41  | 8.48  | 0.25 | 0.18 | -1.05 | 0.324964 | 0.442159 | 0.652259 | 0.66021  |
| MmugDNA.28318.1.S1_at   | MmugDNA.28318.1 | 5.12  | 5.34  | 0.14 | 0.23 | -1.17 | 0.488819 | 0.512935 | 0.753318 | 0.706623 |
| MmugDNA.2832.1.S1_at    | MmugDNA.2832.1  | 9.66  | 9.63  | 0.08 | 0.14 | 1.02  | 0.256677 | 0.206175 | 0.604414 | 0.480364 |
| MmugDNA.28320.1.S1_at   | MmugDNA.28320.1 | 6.44  | 5.58  | 0.48 | 0.06 | 1.82  | 0.046121 | 0.143921 | 0.362498 | 0.417858 |
| MmugDNA.28321.1.S1_at   | MmugDNA.28321.1 | 3.45  | 3.26  | 0.05 | 0.08 | 1.14  | 0.017486 | 0.086656 | 0.267445 | 0.339212 |

|                         |                 |       |       |      |      |       |          |          |          |          |
|-------------------------|-----------------|-------|-------|------|------|-------|----------|----------|----------|----------|
| MmugDNA.28324.1.S1_at   | MmugDNA.28324.1 | 5.24  | 4.99  | 0.64 | 0.28 | 1.19  | 0.325452 | 0.242753 | 0.65274  | 0.5131   |
| MmugDNA.28325.1.S1_at   | MmugDNA.28325.1 | 5.37  | 4.97  | 0.28 | 0.31 | 1.33  | 0.41776  | 0.168415 | 0.710734 | 0.445092 |
| MmugDNA.28326.1.S1_at   | MmugDNA.28326.1 | 7.03  | 5.68  | 0.51 | 0.98 | 2.55  | 0.100295 | 0.087068 | 0.460878 | 0.340038 |
| MmugDNA.28327.1.S1_at   | MmugDNA.28327.1 | 4.81  | 5.02  | 0.23 | 0.13 | -1.16 | 0.697288 | 0.854045 | 0.865592 | 0.91692  |
| MmugDNA.28329.1.S1_at   | MmugDNA.28329.1 | 7.75  | 7     | 0.24 | 1.03 | 1.68  | 0.401618 | 0.561366 | 0.700966 | 0.737362 |
| MmugDNA.28330.1.S1_at   | MmugDNA.28330.1 | 12.73 | 12.38 | 0.15 | 0.11 | 1.27  | 0.063874 | 0.042141 | 0.401767 | 0.249753 |
| MmugDNA.28332.1.S1_at   | MmugDNA.28332.1 | 4.98  | 4.87  | 0.21 | 0.07 | 1.08  | 0.205438 | 0.303506 | 0.567958 | 0.561    |
| MmugDNA.28334.1.S1_at   | MmugDNA.28334.1 | 7.44  | 7.05  | 0.76 | 0.38 | 1.31  | 0.159973 | 0.194142 | 0.524824 | 0.469266 |
| MmugDNA.28335.1.S1_at   | MmugDNA.28335.1 | 12.3  | 12.77 | 0.17 | 0.28 | -1.39 | 0.048781 | 0.026556 | 0.369576 | 0.203915 |
| MmugDNA.28336.1.S1_at   | MmugDNA.28336.1 | 4.49  | 4.23  | 1.87 | 0.41 | 1.2   | 0.31206  | 0.191738 | 0.643813 | 0.467043 |
| MmugDNA.28337.1.S1_at   | MmugDNA.28337.1 | 5.8   | 5.65  | 0.39 | 0.24 | 1.11  | 0.54349  | 0.492821 | 0.783803 | 0.693802 |
| MmugDNA.28338.1.S1_at   | MmugDNA.28338.1 | 5.79  | 6.17  | 0.23 | 0.21 | -1.3  | 0.241241 | 0.341681 | 0.593801 | 0.587796 |
| MmugDNA.28339.1.S1_at   | MmugDNA.28339.1 | 8.47  | 10.18 | 0.3  | 0.53 | -3.26 | 0.009595 | 0.006112 | 0.226235 | 0.10649  |
| MmugDNA.2834.1.S1_at    | MmugDNA.2834.1  | 10.19 | 10.18 | 0.17 | 0.05 | 1     | 0.908455 | 0.142826 | 0.963748 | 0.416786 |
| MmugDNA.28340.1.S1_at   | MmugDNA.28340.1 | 4.78  | 4.86  | 0.28 | 0.23 | -1.06 | 0.146766 | 0.140987 | 0.512699 | 0.414507 |
| MmugDNA.28341.1.S1_at   | MmugDNA.28341.1 | 5.67  | 5.53  | 0.51 | 0.16 | 1.11  | 0.451313 | 0.640386 | 0.731547 | 0.788874 |
| MmugDNA.28342.1.S1_at   | MmugDNA.28342.1 | 5.45  | 5.55  | 0.3  | 0.07 | -1.07 | 0.853977 | 0.762568 | 0.941001 | 0.861882 |
| MmugDNA.28343.1.S1_at   | MmugDNA.28343.1 | 5.42  | 5.82  | 0.18 | 1.02 | -1.32 | 0.480965 | 0.573501 | 0.7488   | 0.745173 |
| MmugDNA.28344.1.S1_s_at | MmugDNA.28344.1 | 8.17  | 9.17  | 0.96 | 1.48 | -1.99 | 0.505833 | 0.687368 | 0.761826 | 0.817576 |
| MmugDNA.28345.1.S1_at   | MmugDNA.28345.1 | 10.41 | 10.26 | 0.21 | 0.66 | 1.11  | 0.253327 | 0.329093 | 0.601947 | 0.578482 |
| MmugDNA.28346.1.S1_at   | MmugDNA.28346.1 | 3.24  | 3.4   | 0.09 | 0.12 | -1.12 | 0.247901 | 0.229895 | 0.599052 | 0.501802 |
| MmugDNA.28348.1.S1_s_at | MmugDNA.28348.1 | 12.55 | 12.6  | 0.04 | 0.21 | -1.04 | 0.709976 | 0.888356 | 0.87278  | 0.936338 |
| MmugDNA.2835.1.S1_at    | MmugDNA.2835.1  | 7.37  | 8.1   | 0.9  | 1.19 | -1.67 | 0.998697 | 0.985236 | 0.999529 | 0.991633 |
| MmugDNA.28350.1.S1_at   | MmugDNA.28350.1 | 4.92  | 4.85  | 0.51 | 0.69 | 1.05  | 0.620749 | 0.571867 | 0.826104 | 0.744056 |
| MmugDNA.28353.1.S1_at   | MmugDNA.28353.1 | 7.37  | 7.59  | 0.18 | 0.06 | -1.16 | 0.492782 | 0.57109  | 0.755881 | 0.743541 |
| MmugDNA.28354.1.S1_at   | MmugDNA.28354.1 | 3.2   | 3.28  | 0.23 | 0.17 | -1.06 | 0.934499 | 0.837584 | 0.974687 | 0.907168 |
| MmugDNA.28355.1.S1_at   | MmugDNA.28355.1 | 4.17  | 4.14  | 0.18 | 0.09 | 1.03  | 0.47865  | 0.677959 | 0.747332 | 0.811858 |
| MmugDNA.28356.1.S1_at   | MmugDNA.28356.1 | 4.59  | 4.78  | 0.39 | 0.28 | -1.14 | 0.738849 | 0.727882 | 0.888031 | 0.842703 |
| MmugDNA.28357.1.S1_s_at | MmugDNA.28357.1 | 11.43 | 11.23 | 0.16 | 0.11 | 1.15  | 0.074058 | 0.0447   | 0.419667 | 0.255871 |
| MmugDNA.28358.1.S1_at   | MmugDNA.28358.1 | 2.89  | 2.98  | 0.08 | 0.13 | -1.07 | 0.403595 | 0.67     | 0.702178 | 0.806989 |
| MmugDNA.28359.1.S1_at   | MmugDNA.28359.1 | 6.94  | 6.72  | 0.56 | 1.04 | 1.16  | 0.697418 | 0.73778  | 0.865678 | 0.848088 |
| MmugDNA.28360.1.S1_at   | MmugDNA.28360.1 | 4.67  | 4.53  | 0.12 | 0.38 | 1.1   | 0.580635 | 0.893961 | 0.804762 | 0.939462 |
| MmugDNA.28362.1.S1_at   | MmugDNA.28362.1 | 6.95  | 7.32  | 0.31 | 0.61 | -1.29 | 0.999795 | 0.965871 | 0.999967 | 0.980863 |
| MmugDNA.28363.1.S1_at   | MmugDNA.28363.1 | 5.25  | 5.26  | 0.36 | 0.32 | -1.01 | 0.603633 | 0.543289 | 0.817248 | 0.726012 |
| MmugDNA.28364.1.S1_at   | MmugDNA.28364.1 | 3.16  | 3.2   | 0.14 | 0.22 | -1.03 | 0.334753 | 0.438674 | 0.658461 | 0.65762  |
| MmugDNA.28365.1.S1_at   | MmugDNA.28365.1 | 5.83  | 6.09  | 0.42 | 0.29 | -1.2  | 0.794838 | 0.261438 | 0.914837 | 0.527919 |
| MmugDNA.28366.1.S1_at   | MmugDNA.28366.1 | 6.9   | 6.7   | 0.26 | 1.21 | 1.15  | 0.755865 | 0.848899 | 0.896248 | 0.914216 |
| MmugDNA.28368.1.S1_at   | MmugDNA.28368.1 | 5.82  | 5.74  | 0.14 | 0.12 | 1.06  | 0.315864 | 0.157233 | 0.646713 | 0.432721 |
| MmugDNA.2837.1.S1_at    | MmugDNA.2837.1  | 6.33  | 6.35  | 0.29 | 0.09 | -1.01 | 0.923486 | 0.472025 | 0.970294 | 0.679835 |
| MmugDNA.28370.1.S1_at   | MmugDNA.28370.1 | 11.23 | 11.92 | 0.1  | 0.06 | -1.62 | 0.000398 | 0.00286  | 0.12978  | 0.078756 |
| MmugDNA.28371.1.S1_at   | MmugDNA.28371.1 | 4     | 4.14  | 0.69 | 0.21 | -1.1  | 0.33861  | 0.606281 | 0.660988 | 0.765727 |

|                         |                 |       |      |      |      |       |          |          |          |          |
|-------------------------|-----------------|-------|------|------|------|-------|----------|----------|----------|----------|
| MmugDNA.28372.1.S1_at   | MmugDNA.28372.1 | 3.18  | 3.2  | 0.15 | 0.02 | -1.01 | 0.607368 | 0.413497 | 0.819324 | 0.639648 |
| MmugDNA.28373.1.S1_at   | MmugDNA.28373.1 | 6.87  | 7.11 | 0.07 | 0.08 | -1.18 | 0.015211 | 0.012399 | 0.257698 | 0.144058 |
| MmugDNA.28374.1.S1_at   | MmugDNA.28374.1 | 4.37  | 3.9  | 0.11 | 0.66 | 1.38  | 0.32422  | 0.293969 | 0.651856 | 0.553909 |
| MmugDNA.28375.1.S1_at   | MmugDNA.28375.1 | 4.6   | 4.88 | 0.16 | 0.2  | -1.21 | 0.182989 | 0.118704 | 0.547134 | 0.38672  |
| MmugDNA.28377.1.S1_at   | MmugDNA.28377.1 | 5.94  | 5.84 | 0.34 | 0.16 | 1.07  | 0.41048  | 0.341653 | 0.706382 | 0.587796 |
| MmugDNA.28378.1.S1_at   | MmugDNA.28378.1 | 8.22  | 8.54 | 0.05 | 0.19 | -1.25 | 0.033643 | 0.016326 | 0.330119 | 0.16183  |
| MmugDNA.28379.1.S1_at   | MmugDNA.28379.1 | 5.32  | 5.25 | 0.19 | 0.06 | 1.04  | 0.388951 | 0.50254  | 0.692814 | 0.700192 |
| MmugDNA.2838.1.S1_at    | MmugDNA.2838.1  | 5.24  | 5.54 | 0.1  | 0.16 | -1.23 | 0.018856 | 0.011063 | 0.271977 | 0.136934 |
| MmugDNA.28381.1.S1_at   | MmugDNA.28381.1 | 4.62  | 4.62 | 0.32 | 0.07 | -1    | 0.964481 | 0.142336 | 0.986234 | 0.415907 |
| MmugDNA.28383.1.S1_at   | MmugDNA.28383.1 | 7.01  | 7.22 | 0.07 | 0.18 | -1.16 | 0.085908 | 0.080181 | 0.440024 | 0.327772 |
| MmugDNA.28384.1.S1_at   | MmugDNA.28384.1 | 7.21  | 5.91 | 0.48 | 0.15 | 2.45  | 0.032218 | 0.023576 | 0.3244   | 0.192311 |
| MmugDNA.28385.1.S1_at   | MmugDNA.28385.1 | 4.01  | 3.9  | 0.72 | 0.52 | 1.08  | 0.44297  | 0.567999 | 0.725962 | 0.74176  |
| MmugDNA.28386.1.S1_at   | MmugDNA.28386.1 | 7.01  | 6.81 | 0.23 | 0.56 | 1.15  | 0.576255 | 0.19939  | 0.802833 | 0.474002 |
| MmugDNA.28387.1.S1_at   | MmugDNA.28387.1 | 7.58  | 7.4  | 0.61 | 0.19 | 1.14  | 0.89822  | 0.961714 | 0.959278 | 0.978408 |
| MmugDNA.28388.1.S1_at   | MmugDNA.28388.1 | 3.46  | 3.34 | 0.06 | 0.2  | 1.08  | 0.1817   | 0.271776 | 0.546282 | 0.536577 |
| MmugDNA.28389.1.S1_at   | MmugDNA.28389.1 | 4.98  | 4.99 | 0.51 | 0.1  | -1.01 | 0.316871 | 0.425672 | 0.647775 | 0.648002 |
| MmugDNA.2839.1.S1_at    | MmugDNA.2839.1  | 6.97  | 6.78 | 0.23 | 0.07 | 1.14  | 0.30078  | 0.172041 | 0.635979 | 0.448447 |
| MmugDNA.28391.1.S1_at   | MmugDNA.28391.1 | 6.64  | 6.64 | 0.34 | 0.22 | -1    | 0.934533 | 0.871638 | 0.97469  | 0.92696  |
| MmugDNA.28392.1.S1_at   | MmugDNA.28392.1 | 5.4   | 6.1  | 1.23 | 0.07 | -1.63 | 0.94674  | 0.967486 | 0.979465 | 0.982071 |
| MmugDNA.28394.1.S1_at   | MmugDNA.28394.1 | 3.57  | 3.83 | 0.27 | 0.11 | -1.2  | 0.346967 | 0.472512 | 0.666124 | 0.680025 |
| MmugDNA.28395.1.S1_at   | MmugDNA.28395.1 | 5.5   | 5.49 | 0.41 | 0.07 | 1     | 0.577516 | 0.770617 | 0.803534 | 0.866798 |
| MmugDNA.28396.1.S1_at   | MmugDNA.28396.1 | 6.94  | 7.12 | 0.17 | 0.06 | -1.13 | 0.528876 | 0.448894 | 0.775764 | 0.664672 |
| MmugDNA.28397.1.S1_at   | MmugDNA.28397.1 | 4.1   | 4.1  | 0.16 | 0.25 | 1     | 0.244524 | 0.342893 | 0.596252 | 0.588712 |
| MmugDNA.28398.1.S1_at   | MmugDNA.28398.1 | 3.5   | 3.54 | 0.06 | 0.2  | -1.03 | 0.418361 | 0.529312 | 0.711317 | 0.717233 |
| MmugDNA.28399.1.S1_x_at | MmugDNA.28399.1 | 6.06  | 6.55 | 0.39 | 0.6  | -1.4  | 0.869387 | 0.783242 | 0.947917 | 0.874547 |
| MmugDNA.284.1.S1_at     | MmugDNA.284.1   | 6.65  | 6.7  | 0.2  | 0.23 | -1.04 | 0.349745 | 0.401993 | 0.667941 | 0.631153 |
| MmugDNA.28400.1.S1_at   | MmugDNA.28400.1 | 12.06 | 12   | 0.1  | 0.37 | 1.05  | 0.420223 | 0.269165 | 0.712267 | 0.534497 |
| MmugDNA.28403.1.S1_at   | MmugDNA.28403.1 | 4.74  | 4.63 | 0.08 | 0.15 | 1.07  | 0.908708 | 0.733273 | 0.963816 | 0.845573 |
| MmugDNA.28404.1.S1_at   | MmugDNA.28404.1 | 5.6   | 5.49 | 0.06 | 0.11 | 1.08  | 0.954608 | 0.431971 | 0.983073 | 0.652723 |
| MmugDNA.28405.1.S1_at   | MmugDNA.28405.1 | 7.39  | 7.14 | 0.75 | 0.89 | 1.19  | 0.297129 | 0.225044 | 0.632994 | 0.49773  |
| MmugDNA.28406.1.S1_at   | MmugDNA.28406.1 | 6.25  | 5.88 | 0.44 | 0.47 | 1.29  | 0.144025 | 0.095236 | 0.510652 | 0.352197 |
| MmugDNA.28407.1.S1_at   | MmugDNA.28407.1 | 3.05  | 3.1  | 0.09 | 0.03 | -1.04 | 0.279363 | 0.546182 | 0.621073 | 0.727803 |
| MmugDNA.28408.1.S1_at   | MmugDNA.28408.1 | 6.75  | 7.13 | 0.07 | 0.66 | -1.3  | 0.129304 | 0.089674 | 0.495408 | 0.343848 |
| MmugDNA.28409.1.S1_at   | MmugDNA.28409.1 | 8.76  | 9.92 | 0.16 | 0.93 | -2.23 | 0.091302 | 0.045393 | 0.447137 | 0.257395 |
| MmugDNA.2841.1.S1_at    | MmugDNA.2841.1  | 3.81  | 3.69 | 0.24 | 0.27 | 1.09  | 0.825277 | 0.970282 | 0.929153 | 0.983812 |
| MmugDNA.28410.1.S1_at   | MmugDNA.28410.1 | 4.04  | 4.32 | 0.11 | 0.17 | -1.21 | 0.328422 | 0.452961 | 0.654375 | 0.667385 |
| MmugDNA.28411.1.S1_at   | MmugDNA.28411.1 | 4.67  | 4.85 | 0.21 | 0.46 | -1.13 | 0.608756 | 0.480513 | 0.820185 | 0.685845 |
| MmugDNA.28412.1.S1_at   | MmugDNA.28412.1 | 9.29  | 9.29 | 0.28 | 0.49 | -1    | 0.924148 | 0.305191 | 0.970594 | 0.562255 |
| MmugDNA.28416.1.S1_at   | MmugDNA.28416.1 | 3.23  | 3.24 | 0.06 | 0.1  | -1    | 0.259751 | 0.35094  | 0.606733 | 0.594649 |
| MmugDNA.28417.1.S1_at   | MmugDNA.28417.1 | 5.1   | 5.2  | 0.33 | 0.12 | -1.07 | 0.924603 | 0.644378 | 0.970804 | 0.791566 |
| MmugDNA.2842.1.S1_at    | MmugDNA.2842.1  | 3.17  | 3.04 | 0.53 | 0.08 | 1.1   | 0.22961  | 0.19831  | 0.586761 | 0.473267 |

|                         |                 |       |       |      |      |       |          |          |          |          |
|-------------------------|-----------------|-------|-------|------|------|-------|----------|----------|----------|----------|
| MmugDNA.28421.1.S1_at   | MmugDNA.28421.1 | 6.22  | 6.96  | 0.36 | 0.26 | -1.67 | 0.044781 | 0.000338 | 0.359043 | 0.036485 |
| MmugDNA.28424.1.S1_at   | MmugDNA.28424.1 | 2.81  | 2.78  | 0.09 | 0.22 | 1.02  | 0.789824 | 0.535841 | 0.912816 | 0.721345 |
| MmugDNA.28425.1.S1_at   | MmugDNA.28425.1 | 9.27  | 10.1  | 0.61 | 0.3  | -1.78 | 0.06162  | 0.055874 | 0.396441 | 0.282172 |
| MmugDNA.28426.1.S1_at   | MmugDNA.28426.1 | 5.4   | 5.59  | 0.35 | 0.21 | -1.15 | 0.625573 | 0.457748 | 0.829053 | 0.670897 |
| MmugDNA.28427.1.S1_at   | MmugDNA.28427.1 | 7.47  | 8.25  | 0.74 | 0.97 | -1.72 | 0.295185 | 0.332139 | 0.631561 | 0.580584 |
| MmugDNA.28428.1.S1_at   | MmugDNA.28428.1 | 6.3   | 6.42  | 0.23 | 0.22 | -1.09 | 0.356673 | 0.377322 | 0.671685 | 0.614891 |
| MmugDNA.28429.1.S1_at   | MmugDNA.28429.1 | 11.57 | 10.95 | 0.19 | 0.35 | 1.54  | 0.072644 | 0.060986 | 0.417383 | 0.293811 |
| MmugDNA.2843.1.S1_at    | MmugDNA.2843.1  | 4.88  | 5.32  | 0.3  | 0.05 | -1.36 | 0.097509 | 0.095617 | 0.456537 | 0.352645 |
| MmugDNA.28431.1.S1_x_at | MmugDNA.28431.1 | 7.77  | 7.76  | 0.11 | 0.04 | 1.01  | 0.988291 | 0.526266 | 0.995887 | 0.715488 |
| MmugDNA.28432.1.S1_at   | MmugDNA.28432.1 | 10.25 | 10.05 | 0.27 | 0.58 | 1.15  | 0.49402  | 0.602009 | 0.756411 | 0.763157 |
| MmugDNA.28433.1.S1_at   | MmugDNA.28433.1 | 8.31  | 8.49  | 0.46 | 1.15 | -1.13 | 0.199307 | 0.207224 | 0.56224  | 0.481364 |
| MmugDNA.28434.1.S1_at   | MmugDNA.28434.1 | 10.58 | 10.96 | 0.07 | 0.26 | -1.3  | 0.086038 | 0.034185 | 0.440052 | 0.228728 |
| MmugDNA.28435.1.S1_at   | MmugDNA.28435.1 | 9.05  | 9.18  | 0.1  | 0.42 | -1.09 | 0.799423 | 0.807951 | 0.916962 | 0.889436 |
| MmugDNA.28436.1.S1_at   | MmugDNA.28436.1 | 4.26  | 4.45  | 0.02 | 0.09 | -1.14 | 0.02439  | 0.014826 | 0.294535 | 0.154895 |
| MmugDNA.28438.1.S1_at   | MmugDNA.28438.1 | 13.55 | 13.47 | 0.01 | 0.16 | 1.06  | 0.323073 | 0.455433 | 0.651295 | 0.669404 |
| MmugDNA.2844.1.S1_s_at  | MmugDNA.2844.1  | 5.29  | 5.17  | 0.13 | 0.21 | 1.09  | 0.844916 | 0.378255 | 0.937773 | 0.615438 |
| MmugDNA.28442.1.S1_s_at | MmugDNA.28442.1 | 4.75  | 5.45  | 1.39 | 0.22 | -1.63 | 0.941496 | 0.922964 | 0.977713 | 0.956659 |
| MmugDNA.28445.1.S1_at   | MmugDNA.28445.1 | 3.76  | 4.09  | 0.05 | 0.6  | -1.26 | 0.392339 | 0.505581 | 0.694651 | 0.702218 |
| MmugDNA.28447.1.S1_at   | MmugDNA.28447.1 | 5.75  | 5.8   | 0.16 | 0.34 | -1.03 | 0.358493 | 0.459624 | 0.673252 | 0.671921 |
| MmugDNA.28449.1.S1_at   | MmugDNA.28449.1 | 5.41  | 5.31  | 0.28 | 0.23 | 1.07  | 0.588851 | 0.80646  | 0.809161 | 0.888651 |
| MmugDNA.2845.1.S1_at    | MmugDNA.2845.1  | 5.89  | 5.97  | 0.1  | 0.14 | -1.05 | 0.164149 | 0.165494 | 0.528211 | 0.44175  |
| MmugDNA.28450.1.S1_at   | MmugDNA.28450.1 | 8.18  | 8.91  | 0.47 | 0.78 | -1.66 | 0.241125 | 0.306498 | 0.593741 | 0.563035 |
| MmugDNA.28452.1.S1_at   | MmugDNA.28452.1 | 4.74  | 4.28  | 1.16 | 0.3  | 1.38  | 0.448458 | 0.460033 | 0.729671 | 0.671989 |
| MmugDNA.28454.1.S1_at   | MmugDNA.28454.1 | 5.17  | 5.58  | 0.13 | 0.39 | -1.33 | 0.236582 | 0.07351  | 0.590504 | 0.316778 |
| MmugDNA.28456.1.S1_at   | MmugDNA.28456.1 | 4.03  | 3.94  | 0.62 | 0.15 | 1.07  | 0.286872 | 0.214609 | 0.625572 | 0.488411 |
| MmugDNA.28457.1.S1_at   | MmugDNA.28457.1 | 6.56  | 6.44  | 0.4  | 0.17 | 1.09  | 0.447124 | 0.176869 | 0.728756 | 0.453303 |
| MmugDNA.28458.1.S1_at   | MmugDNA.28458.1 | 9.06  | 9.04  | 0.19 | 0.21 | 1.01  | 0.883057 | 0.008479 | 0.952961 | 0.122133 |
| MmugDNA.28459.1.S1_at   | MmugDNA.28459.1 | 8.99  | 9.54  | 0.22 | 0.23 | -1.46 | 0.179463 | 0.197986 | 0.543609 | 0.472936 |
| MmugDNA.28460.1.S1_at   | MmugDNA.28460.1 | 7.75  | 7.88  | 0.09 | 0.54 | -1.09 | 0.787132 | 0.636575 | 0.911476 | 0.786262 |
| MmugDNA.28463.1.S1_at   | MmugDNA.28463.1 | 5.51  | 5.34  | 0.23 | 0.1  | 1.13  | 0.726976 | 0.892477 | 0.88121  | 0.938696 |
| MmugDNA.28464.1.S1_at   | MmugDNA.28464.1 | 7.38  | 7.72  | 0.15 | 0.2  | -1.27 | 0.062294 | 0.060671 | 0.397683 | 0.292876 |
| MmugDNA.28466.1.S1_at   | MmugDNA.28466.1 | 6.45  | 6.83  | 0.59 | 0.95 | -1.3  | 0.992439 | 0.307577 | 0.997401 | 0.563785 |
| MmugDNA.28468.1.S1_at   | MmugDNA.28468.1 | 7.77  | 8.09  | 1.02 | 0.27 | -1.25 | 0.655608 | 0.78803  | 0.845018 | 0.877426 |
| MmugDNA.28470.1.S1_at   | MmugDNA.28470.1 | 3.15  | 3.86  | 0.99 | 0.18 | -1.64 | 0.946855 | 0.918799 | 0.979482 | 0.954387 |
| MmugDNA.28475.1.S1_at   | MmugDNA.28475.1 | 13.08 | 13.23 | 0.02 | 0.09 | -1.1  | 0.028185 | 0.00386  | 0.310041 | 0.088378 |
| MmugDNA.28476.1.S1_at   | MmugDNA.28476.1 | 11.03 | 11.04 | 0.07 | 0.12 | -1.01 | 0.985565 | 0.931155 | 0.994792 | 0.960891 |
| MmugDNA.28477.1.S1_at   | MmugDNA.28477.1 | 4.17  | 4.51  | 0.17 | 0.02 | -1.26 | 0.026247 | 0.005737 | 0.3021   | 0.104271 |
| MmugDNA.2848.1.S1_at    | MmugDNA.2848.1  | 3.94  | 4.01  | 0.14 | 0.1  | -1.04 | 0.284653 | 0.352549 | 0.624327 | 0.595789 |
| MmugDNA.28480.1.S1_at   | MmugDNA.28480.1 | 5.42  | 5.47  | 0.23 | 0.17 | -1.03 | 0.846478 | 0.942151 | 0.93835  | 0.967154 |
| MmugDNA.28481.1.S1_at   | MmugDNA.28481.1 | 3.32  | 3.25  | 0.15 | 0.16 | 1.05  | 0.987376 | 0.619137 | 0.995543 | 0.774379 |
| MmugDNA.28482.1.S1_at   | MmugDNA.28482.1 | 6.27  | 6.48  | 0.1  | 0.05 | -1.15 | 0.053989 | 0.090765 | 0.381209 | 0.345227 |

|                         |                 |       |       |      |      |       |          |          |          |          |
|-------------------------|-----------------|-------|-------|------|------|-------|----------|----------|----------|----------|
| MmugDNA.28483.1.S1_at   | MmugDNA.28483.1 | 3.44  | 3.86  | 0.12 | 0.14 | -1.34 | 0.024947 | 0.016878 | 0.297238 | 0.164713 |
| MmugDNA.28484.1.S1_at   | MmugDNA.28484.1 | 5.73  | 5.62  | 0.12 | 0.04 | 1.08  | 0.259053 | 0.121153 | 0.606181 | 0.390217 |
| MmugDNA.28486.1.S1_at   | MmugDNA.28486.1 | 4.15  | 3.97  | 0.02 | 0.37 | 1.14  | 0.983013 | 0.917811 | 0.993768 | 0.954011 |
| MmugDNA.28487.1.S1_at   | MmugDNA.28487.1 | 9.59  | 9.21  | 0.05 | 0.21 | 1.31  | 0.033966 | 0.057147 | 0.330623 | 0.284972 |
| MmugDNA.28488.1.S1_at   | MmugDNA.28488.1 | 8.6   | 8.88  | 0.35 | 0.82 | -1.22 | 0.242232 | 0.142077 | 0.594307 | 0.415655 |
| MmugDNA.28491.1.S1_at   | MmugDNA.28491.1 | 6.06  | 8.21  | 0.82 | 0.9  | -4.42 | 0.07976  | 0.108731 | 0.430147 | 0.372257 |
| MmugDNA.28492.1.S1_at   | MmugDNA.28492.1 | 3.91  | 3.96  | 0.09 | 0.7  | -1.03 | 0.337084 | 0.418321 | 0.659871 | 0.642707 |
| MmugDNA.28494.1.S1_at   | MmugDNA.28494.1 | 4.43  | 4.26  | 0.54 | 0.78 | 1.12  | 0.65442  | 0.483157 | 0.844586 | 0.687762 |
| MmugDNA.28496.1.S1_at   | MmugDNA.28496.1 | 6.57  | 6.02  | 0.7  | 0.42 | 1.46  | 0.08324  | 0.038303 | 0.435702 | 0.240571 |
| MmugDNA.28498.1.S1_at   | MmugDNA.28498.1 | 2.96  | 3.01  | 0.77 | 0.27 | -1.04 | 0.5739   | 0.763816 | 0.801395 | 0.862673 |
| MmugDNA.28499.1.S1_at   | MmugDNA.28499.1 | 3.99  | 3.76  | 0.46 | 0.13 | 1.17  | 0.455332 | 0.388119 | 0.733752 | 0.622607 |
| MmugDNA.285.1.S1_at     | MmugDNA.285.1   | 6.63  | 8.12  | 0.25 | 1.04 | -2.79 | 0.04958  | 0.053354 | 0.371523 | 0.27654  |
| MmugDNA.2850.1.S1_at    | MmugDNA.2850.1  | 10.46 | 8.27  | 1.31 | 0.37 | 4.57  | 0.140789 | 0.06436  | 0.508448 | 0.299875 |
| MmugDNA.28500.1.S1_at   | MmugDNA.28500.1 | 6.58  | 6.68  | 0.24 | 0.11 | -1.07 | 0.851747 | 0.668613 | 0.940367 | 0.806109 |
| MmugDNA.28502.1.S1_at   | MmugDNA.28502.1 | 3.8   | 3.69  | 0.74 | 0.16 | 1.08  | 0.623696 | 0.761017 | 0.828033 | 0.861185 |
| MmugDNA.28503.1.S1_at   | MmugDNA.28503.1 | 8.85  | 8.22  | 0.08 | 0.16 | 1.54  | 0.003547 | 0.000699 | 0.179515 | 0.04424  |
| MmugDNA.28505.1.S1_at   | MmugDNA.28505.1 | 5.1   | 4.9   | 0.14 | 0.24 | 1.15  | 0.493804 | 0.046784 | 0.756364 | 0.261029 |
| MmugDNA.28506.1.S1_at   | MmugDNA.28506.1 | 3.53  | 3.38  | 0.37 | 0.06 | 1.11  | 0.207185 | 0.200683 | 0.569274 | 0.47524  |
| MmugDNA.28507.1.S1_at   | MmugDNA.28507.1 | 10.27 | 10.28 | 0.08 | 0.28 | -1.01 | 0.334748 | 0.292893 | 0.658461 | 0.552857 |
| MmugDNA.28508.1.S1_at   | MmugDNA.28508.1 | 6.13  | 6.01  | 0.39 | 0.27 | 1.09  | 0.828031 | 0.452331 | 0.930199 | 0.667046 |
| MmugDNA.28509.1.S1_at   | MmugDNA.28509.1 | 4.61  | 4.57  | 0.15 | 0.24 | 1.03  | 0.622142 | 0.622207 | 0.827285 | 0.776749 |
| MmugDNA.2851.1.S1_at    | MmugDNA.2851.1  | 11.71 | 11.91 | 0.25 | 0.33 | -1.15 | 0.755199 | 0.148404 | 0.895951 | 0.423003 |
| MmugDNA.28510.1.S1_at   | MmugDNA.28510.1 | 5.79  | 5.88  | 0.29 | 0.08 | -1.06 | 0.68249  | 0.228846 | 0.85794  | 0.501117 |
| MmugDNA.28511.1.S1_s_at | MmugDNA.28511.1 | 9.49  | 9.96  | 0.35 | 0.27 | -1.39 | 0.097036 | 0.028417 | 0.456113 | 0.210385 |
| MmugDNA.28512.1.S1_at   | MmugDNA.28512.1 | 4.1   | 4.3   | 0.17 | 0.17 | -1.14 | 0.51446  | 0.628955 | 0.76693  | 0.781556 |
| MmugDNA.28513.1.S1_at   | MmugDNA.28513.1 | 12.33 | 12.02 | 0.07 | 0.83 | 1.24  | 0.53601  | 0.732431 | 0.779351 | 0.845008 |
| MmugDNA.28515.1.S1_at   | MmugDNA.28515.1 | 7.47  | 7.64  | 0.07 | 0.16 | -1.12 | 0.061295 | 0.025304 | 0.395362 | 0.199522 |
| MmugDNA.28516.1.S1_s_at | MmugDNA.28516.1 | 10.14 | 9.81  | 0.22 | 0.06 | 1.26  | 0.049429 | 0.014311 | 0.371383 | 0.152747 |
| MmugDNA.28517.1.S1_at   | MmugDNA.28517.1 | 3.19  | 3.25  | 0.08 | 0.21 | -1.04 | 0.241186 | 0.331531 | 0.593763 | 0.580171 |
| MmugDNA.28518.1.S1_at   | MmugDNA.28518.1 | 5.02  | 5.4   | 0.21 | 0.14 | -1.3  | 0.016434 | 0.010015 | 0.264023 | 0.131262 |
| MmugDNA.28519.1.S1_at   | MmugDNA.28519.1 | 7.41  | 7.24  | 0.37 | 0.18 | 1.13  | 0.209655 | 0.20228  | 0.571003 | 0.476687 |
| MmugDNA.2852.1.S1_at    | MmugDNA.2852.1  | 3.85  | 4.23  | 0.04 | 0.08 | -1.31 | 0.003165 | 0.023354 | 0.17359  | 0.191568 |
| MmugDNA.28520.1.S1_at   | MmugDNA.28520.1 | 5.7   | 5.32  | 0.8  | 0.28 | 1.3   | 0.238038 | 0.364679 | 0.591399 | 0.605001 |
| MmugDNA.28521.1.S1_at   | MmugDNA.28521.1 | 6.52  | 6.66  | 0.02 | 0.21 | -1.11 | 0.255978 | 0.390313 | 0.603671 | 0.624142 |
| MmugDNA.28522.1.S1_at   | MmugDNA.28522.1 | 8.96  | 8.42  | 0.19 | 0.99 | 1.45  | 0.394335 | 0.455118 | 0.695742 | 0.669109 |
| MmugDNA.28523.1.S1_at   | MmugDNA.28523.1 | 11.51 | 11.22 | 0.21 | 0.25 | 1.22  | 0.07031  | 0.085896 | 0.413911 | 0.338068 |
| MmugDNA.28524.1.S1_at   | MmugDNA.28524.1 | 4.87  | 4.54  | 0.25 | 0.2  | 1.25  | 0.164324 | 0.564699 | 0.528238 | 0.739425 |
| MmugDNA.28525.1.S1_at   | MmugDNA.28525.1 | 7.17  | 6.49  | 0.1  | 0.14 | 1.6   | 0.002245 | 0.012329 | 0.160628 | 0.143659 |
| MmugDNA.28526.1.S1_at   | MmugDNA.28526.1 | 3.26  | 3.51  | 0.06 | 0.1  | -1.19 | 0.067059 | 0.161662 | 0.407062 | 0.437771 |
| MmugDNA.28528.1.S1_at   | MmugDNA.28528.1 | 8.09  | 8.19  | 0.2  | 0.28 | -1.07 | 0.204703 | 0.0991   | 0.567258 | 0.357241 |
| MmugDNA.28529.1.S1_at   | MmugDNA.28529.1 | 7.26  | 5.25  | 0.17 | 1.39 | 4.02  | 0.241437 | 0.31683  | 0.593941 | 0.570212 |

|                         |                 |       |       |      |      |       |          |          |          |          |
|-------------------------|-----------------|-------|-------|------|------|-------|----------|----------|----------|----------|
| MmugDNA.28532.1.S1_at   | MmugDNA.28532.1 | 3.05  | 3.05  | 0.11 | 0.02 | 1     | 0.297983 | 0.855336 | 0.633647 | 0.917526 |
| MmugDNA.28533.1.S1_at   | MmugDNA.28533.1 | 6.19  | 6.34  | 0.09 | 0.12 | -1.11 | 0.13785  | 0.050708 | 0.505265 | 0.270338 |
| MmugDNA.28536.1.S1_at   | MmugDNA.28536.1 | 3.63  | 3.46  | 0.44 | 0.08 | 1.13  | 0.485582 | 0.549592 | 0.751041 | 0.729956 |
| MmugDNA.28537.1.S1_at   | MmugDNA.28537.1 | 6.6   | 6.66  | 0.16 | 0.06 | -1.04 | 0.543366 | 0.72544  | 0.783788 | 0.841043 |
| MmugDNA.28539.1.S1_at   | MmugDNA.28539.1 | 11.51 | 11.05 | 0.31 | 0.8  | 1.37  | 0.277661 | 0.257949 | 0.619819 | 0.525531 |
| MmugDNA.2854.1.S1_at    | MmugDNA.2854.1  | 6.81  | 6.91  | 0.19 | 0.21 | -1.07 | 0.520105 | 0.713769 | 0.770623 | 0.833937 |
| MmugDNA.28540.1.S1_at   | MmugDNA.28540.1 | 3.25  | 3.31  | 0.23 | 0.1  | -1.04 | 0.906125 | 0.383783 | 0.962684 | 0.619734 |
| MmugDNA.28541.1.S1_at   | MmugDNA.28541.1 | 4.82  | 4.51  | 0.12 | 0.75 | 1.24  | 0.426347 | 0.338914 | 0.715769 | 0.585891 |
| MmugDNA.28542.1.S1_at   | MmugDNA.28542.1 | 3.13  | 3.15  | 0.03 | 0.22 | -1.01 | 0.386902 | 0.204284 | 0.691718 | 0.478541 |
| MmugDNA.28542.1.S1_x_at | MmugDNA.28542.1 | 3.45  | 3.6   | 0.24 | 0.15 | -1.12 | 0.375909 | 0.298557 | 0.684819 | 0.557183 |
| MmugDNA.28543.1.S1_at   | MmugDNA.28543.1 | 10.7  | 10.78 | 0.24 | 0.39 | -1.06 | 0.763817 | 0.858083 | 0.900476 | 0.919063 |
| MmugDNA.28545.1.S1_at   | MmugDNA.28545.1 | 5.76  | 5.6   | 0.18 | 0.19 | 1.12  | 0.837486 | 0.848009 | 0.934307 | 0.913686 |
| MmugDNA.28547.1.S1_at   | MmugDNA.28547.1 | 5.2   | 4.64  | 0.12 | 0.2  | 1.48  | 0.014713 | 0.040326 | 0.254893 | 0.245973 |
| MmugDNA.28548.1.S1_at   | MmugDNA.28548.1 | 5.88  | 5.51  | 0.1  | 0.37 | 1.29  | 0.058487 | 0.034908 | 0.390492 | 0.231062 |
| MmugDNA.28549.1.S1_s_at | MmugDNA.28549.1 | 11.45 | 11.57 | 0.03 | 0.34 | -1.09 | 0.576905 | 0.341646 | 0.8033   | 0.587796 |
| MmugDNA.28550.1.S1_at   | MmugDNA.28550.1 | 8.97  | 7.91  | 0.38 | 0.32 | 2.08  | 0.038314 | 0.039682 | 0.34385  | 0.244271 |
| MmugDNA.28551.1.S1_at   | MmugDNA.28551.1 | 7.33  | 7.41  | 0.51 | 0.28 | -1.06 | 0.666141 | 0.856301 | 0.850289 | 0.917926 |
| MmugDNA.28552.1.S1_at   | MmugDNA.28552.1 | 8.11  | 8.03  | 0.04 | 0.25 | 1.05  | 0.738099 | 0.57652  | 0.887516 | 0.747267 |
| MmugDNA.28553.1.S1_at   | MmugDNA.28553.1 | 5.01  | 4.85  | 0.43 | 0.3  | 1.12  | 0.999743 | 0.864758 | 0.999967 | 0.923286 |
| MmugDNA.28555.1.S1_at   | MmugDNA.28555.1 | 5.15  | 5.14  | 0.2  | 0.03 | 1.01  | 0.756251 | 0.060999 | 0.896415 | 0.293811 |
| MmugDNA.28556.1.S1_at   | MmugDNA.28556.1 | 5.24  | 5.11  | 0.37 | 0.3  | 1.09  | 0.277854 | 0.201078 | 0.619995 | 0.475509 |
| MmugDNA.28557.1.S1_s_at | MmugDNA.28557.1 | 2.93  | 3.06  | 0.09 | 0.04 | -1.1  | 0.25019  | 0.638979 | 0.600389 | 0.787973 |
| MmugDNA.28558.1.S1_at   | MmugDNA.28558.1 | 4.99  | 4.97  | 0.18 | 0.21 | 1.01  | 0.498342 | 0.70637  | 0.75837  | 0.829634 |
| MmugDNA.28559.1.S1_at   | MmugDNA.28559.1 | 4.55  | 4.45  | 0.03 | 0.06 | 1.07  | 0.098998 | 0.465268 | 0.458711 | 0.67567  |
| MmugDNA.2856.1.S1_at    | MmugDNA.2856.1  | 3.48  | 3.41  | 0.21 | 0.1  | 1.05  | 0.253906 | 0.332882 | 0.602339 | 0.581266 |
| MmugDNA.28560.1.S1_at   | MmugDNA.28560.1 | 9.87  | 9.48  | 0.05 | 0.16 | 1.32  | 0.007421 | 0.00003  | 0.208026 | 0.022097 |
| MmugDNA.28562.1.S1_at   | MmugDNA.28562.1 | 6.29  | 6.44  | 0.18 | 0.08 | -1.11 | 0.492774 | 0.485057 | 0.755881 | 0.688908 |
| MmugDNA.28563.1.S1_at   | MmugDNA.28563.1 | 6.66  | 6.27  | 0.09 | 0.03 | 1.31  | 0.003295 | 0.001343 | 0.177194 | 0.056396 |
| MmugDNA.28564.1.S1_at   | MmugDNA.28564.1 | 5.19  | 5.33  | 0.31 | 0.87 | -1.1  | 0.486326 | 0.617442 | 0.751507 | 0.77343  |
| MmugDNA.28565.1.S1_at   | MmugDNA.28565.1 | 3.86  | 3.88  | 0.16 | 0.29 | -1.01 | 0.978597 | 0.962411 | 0.992128 | 0.978891 |
| MmugDNA.28567.1.S1_at   | MmugDNA.28567.1 | 6.18  | 5.91  | 0.09 | 0.18 | 1.2   | 0.420239 | 0.058977 | 0.712267 | 0.289669 |
| MmugDNA.28568.1.S1_at   | MmugDNA.28568.1 | 5.47  | 5.41  | 0.35 | 0.26 | 1.05  | 0.174283 | 0.185799 | 0.53795  | 0.461631 |
| MmugDNA.28573.1.S1_at   | MmugDNA.28573.1 | 4.73  | 4.9   | 0.68 | 0.24 | -1.12 | 0.960612 | 0.742945 | 0.9849   | 0.851083 |
| MmugDNA.28575.1.S1_at   | MmugDNA.28575.1 | 7.24  | 6.35  | 0.31 | 0.4  | 1.85  | 0.048853 | 0.02026  | 0.369844 | 0.178715 |
| MmugDNA.28576.1.S1_at   | MmugDNA.28576.1 | 5.1   | 5.39  | 0.29 | 0.7  | -1.23 | 0.456828 | 0.625119 | 0.734562 | 0.779004 |
| MmugDNA.28577.1.S1_at   | MmugDNA.28577.1 | 5.96  | 5.74  | 0.3  | 0.27 | 1.16  | 0.634453 | 0.665665 | 0.834524 | 0.804131 |
| MmugDNA.28578.1.S1_at   | MmugDNA.28578.1 | 5.19  | 5.36  | 0.24 | 0.08 | -1.12 | 0.263387 | 0.374554 | 0.609348 | 0.6129   |
| MmugDNA.28579.1.S1_at   | MmugDNA.28579.1 | 7.19  | 6.7   | 0.27 | 0.08 | 1.4   | 0.043873 | 0.042697 | 0.357149 | 0.251049 |
| MmugDNA.2858.1.S1_at    | MmugDNA.2858.1  | 4.23  | 4.21  | 0.24 | 0.16 | 1.02  | 0.659563 | 0.442819 | 0.847196 | 0.660759 |
| MmugDNA.28580.1.S1_at   | MmugDNA.28580.1 | 11.21 | 11.98 | 0.46 | 0.77 | -1.7  | 0.208609 | 0.216981 | 0.570384 | 0.4906   |
| MmugDNA.28581.1.S1_at   | MmugDNA.28581.1 | 7.29  | 6.84  | 0.34 | 0.22 | 1.37  | 0.047081 | 0.038842 | 0.365054 | 0.242022 |



|                         |                 |       |       |      |      |       |          |          |          |          |
|-------------------------|-----------------|-------|-------|------|------|-------|----------|----------|----------|----------|
| MmugDNA.28582.1.S1_at   | MmugDNA.28582.1 | 4.1   | 3.99  | 0.21 | 0.15 | 1.08  | 0.453096 | 0.326287 | 0.732285 | 0.576452 |
| MmugDNA.28583.1.S1_at   | MmugDNA.28583.1 | 4.69  | 4.96  | 0.34 | 0.09 | -1.21 | 0.220926 | 0.130415 | 0.57985  | 0.402257 |
| MmugDNA.28584.1.S1_at   | MmugDNA.28584.1 | 3.39  | 3.26  | 0.06 | 0.14 | 1.1   | 0.802459 | 0.33811  | 0.918523 | 0.585286 |
| MmugDNA.28585.1.S1_at   | MmugDNA.28585.1 | 4.07  | 4.07  | 0.22 | 0.16 | -1.01 | 0.549011 | 0.198583 | 0.787067 | 0.473391 |
| MmugDNA.28586.1.S1_at   | MmugDNA.28586.1 | 4.77  | 4.81  | 0.09 | 0.07 | -1.03 | 0.181978 | 0.227068 | 0.546458 | 0.499415 |
| MmugDNA.28587.1.S1_at   | MmugDNA.28587.1 | 8.66  | 8.43  | 0.53 | 0.5  | 1.17  | 0.85122  | 0.402816 | 0.940204 | 0.631615 |
| MmugDNA.28588.1.S1_at   | MmugDNA.28588.1 | 4.96  | 5.33  | 0.21 | 0.48 | -1.29 | 0.155497 | 0.183582 | 0.520211 | 0.459681 |
| MmugDNA.28589.1.S1_at   | MmugDNA.28589.1 | 4.71  | 4.33  | 0.38 | 0.15 | 1.31  | 0.188098 | 0.148803 | 0.551073 | 0.423201 |
| MmugDNA.2859.1.S1_at    | MmugDNA.2859.1  | 3.25  | 3.24  | 0.05 | 0.2  | 1.01  | 0.316306 | 0.365739 | 0.647209 | 0.605685 |
| MmugDNA.28590.1.S1_at   | MmugDNA.28590.1 | 6.57  | 6.96  | 1.02 | 0.73 | -1.31 | 0.59854  | 0.768359 | 0.81395  | 0.865493 |
| MmugDNA.28592.1.S1_at   | MmugDNA.28592.1 | 3.2   | 3.12  | 0.14 | 0.07 | 1.05  | 0.33296  | 0.271024 | 0.657205 | 0.536155 |
| MmugDNA.28593.1.S1_at   | MmugDNA.28593.1 | 7.65  | 7.05  | 0.14 | 0.39 | 1.53  | 0.210897 | 0.318064 | 0.571977 | 0.571046 |
| MmugDNA.28594.1.S1_at   | MmugDNA.28594.1 | 6.45  | 5.77  | 1.01 | 0.4  | 1.61  | 0.123389 | 0.131116 | 0.489063 | 0.403084 |
| MmugDNA.28595.1.S1_at   | MmugDNA.28595.1 | 4.98  | 5.03  | 0.07 | 0.05 | -1.04 | 0.90506  | 0.638706 | 0.962071 | 0.787808 |
| MmugDNA.28596.1.S1_at   | MmugDNA.28596.1 | 4.51  | 4.68  | 0.14 | 0.3  | -1.13 | 0.331004 | 0.374249 | 0.656063 | 0.612738 |
| MmugDNA.28597.1.S1_at   | MmugDNA.28597.1 | 4.19  | 4.18  | 0.17 | 0.18 | 1.01  | 0.543308 | 0.215524 | 0.783788 | 0.489269 |
| MmugDNA.28598.1.S1_at   | MmugDNA.28598.1 | 7.82  | 8     | 0.29 | 1.25 | -1.13 | 0.64043  | 0.736447 | 0.837628 | 0.84751  |
| MmugDNA.2860.1.S1_at    | MmugDNA.2860.1  | 4.2   | 4.21  | 0.06 | 0.11 | -1    | 0.919183 | 0.53969  | 0.968566 | 0.72391  |
| MmugDNA.28600.1.S1_at   | MmugDNA.28600.1 | 5.82  | 5.9   | 0.16 | 0.19 | -1.06 | 0.860188 | 0.208135 | 0.943524 | 0.482082 |
| MmugDNA.28601.1.S1_at   | MmugDNA.28601.1 | 7.44  | 7.46  | 0.16 | 0.79 | -1.01 | 0.362799 | 0.490331 | 0.676226 | 0.692363 |
| MmugDNA.28602.1.S1_at   | MmugDNA.28602.1 | 5.9   | 5.88  | 0.1  | 0.21 | 1.01  | 0.971767 | 0.998911 | 0.989245 | 0.99944  |
| MmugDNA.28604.1.S1_at   | MmugDNA.28604.1 | 9.56  | 9.7   | 0.32 | 0.21 | -1.1  | 0.306938 | 0.401633 | 0.639788 | 0.631068 |
| MmugDNA.28605.1.S1_at   | MmugDNA.28605.1 | 6.4   | 6.99  | 0.22 | 0.66 | -1.51 | 0.153225 | 0.195277 | 0.51772  | 0.470253 |
| MmugDNA.28606.1.S1_s_at | MmugDNA.28606.1 | 10.65 | 10.82 | 0.16 | 0.17 | -1.12 | 0.329482 | 0.465198 | 0.655089 | 0.675638 |
| MmugDNA.28607.1.S1_at   | MmugDNA.28607.1 | 6.09  | 6.07  | 0.15 | 0.15 | 1.02  | 0.50497  | 0.707494 | 0.761548 | 0.830363 |
| MmugDNA.28608.1.S1_at   | MmugDNA.28608.1 | 6.98  | 6.31  | 0.72 | 1.31 | 1.59  | 0.251825 | 0.313496 | 0.601162 | 0.567926 |
| MmugDNA.28609.1.S1_at   | MmugDNA.28609.1 | 3.69  | 3.54  | 0.42 | 0.09 | 1.11  | 0.23716  | 0.332292 | 0.590811 | 0.580733 |
| MmugDNA.2861.1.S1_at    | MmugDNA.2861.1  | 4.31  | 4.37  | 0.09 | 0.2  | -1.04 | 0.69333  | 0.336512 | 0.863948 | 0.583862 |
| MmugDNA.28610.1.S1_at   | MmugDNA.28610.1 | 10.07 | 9.91  | 0.57 | 1    | 1.12  | 0.6078   | 0.712766 | 0.81953  | 0.8335   |
| MmugDNA.28611.1.S1_at   | MmugDNA.28611.1 | 3.82  | 4.09  | 0.18 | 0.06 | -1.2  | 0.071263 | 0.074787 | 0.414993 | 0.31853  |
| MmugDNA.28612.1.S1_at   | MmugDNA.28612.1 | 9.11  | 6.99  | 0.31 | 0.75 | 4.34  | 0.017299 | 0.006059 | 0.267101 | 0.106152 |
| MmugDNA.28613.1.S1_at   | MmugDNA.28613.1 | 3.16  | 3.25  | 0.11 | 0.14 | -1.06 | 0.682071 | 0.157213 | 0.85774  | 0.432687 |
| MmugDNA.28614.1.S1_at   | MmugDNA.28614.1 | 4.95  | 5.67  | 0.07 | 0.61 | -1.64 | 0.148107 | 0.214713 | 0.513463 | 0.488578 |
| MmugDNA.28615.1.S1_at   | MmugDNA.28615.1 | 3.34  | 3.48  | 0.19 | 0.27 | -1.1  | 0.714046 | 0.836547 | 0.874661 | 0.906546 |
| MmugDNA.28616.1.S1_at   | MmugDNA.28616.1 | 3.59  | 3.53  | 0.25 | 0.12 | 1.04  | 0.684681 | 0.338748 | 0.858795 | 0.585819 |
| MmugDNA.28617.1.S1_at   | MmugDNA.28617.1 | 5.41  | 5.99  | 0.21 | 0.31 | -1.5  | 0.09329  | 0.080336 | 0.450474 | 0.327965 |
| MmugDNA.28618.1.S1_at   | MmugDNA.28618.1 | 7.96  | 7.87  | 0.52 | 1.14 | 1.07  | 0.694465 | 0.877055 | 0.864447 | 0.92994  |
| MmugDNA.28619.1.S1_at   | MmugDNA.28619.1 | 3.77  | 3.23  | 0.41 | 0.33 | 1.46  | 0.406038 | 0.556109 | 0.7035   | 0.73438  |
| MmugDNA.2862.1.S1_at    | MmugDNA.2862.1  | 4.66  | 4.65  | 0.23 | 0.08 | 1.01  | 0.918467 | 0.990064 | 0.96831  | 0.994314 |
| MmugDNA.28620.1.S1_at   | MmugDNA.28620.1 | 3.36  | 3.33  | 0.3  | 0.11 | 1.02  | 0.65301  | 0.758556 | 0.843896 | 0.859634 |
| MmugDNA.28622.1.S1_at   | MmugDNA.28622.1 | 8.59  | 6.6   | 0.34 | 0.33 | 3.98  | 0.002787 | 0.000635 | 0.166278 | 0.042882 |

|                         |                 |       |       |      |      |       |          |          |          |          |
|-------------------------|-----------------|-------|-------|------|------|-------|----------|----------|----------|----------|
| MmugDNA.28622.1.S1_s_at | MmugDNA.28622.1 | 9.55  | 7.64  | 0.42 | 0.46 | 3.77  | 0.009315 | 0.004524 | 0.223832 | 0.093974 |
| MmugDNA.28623.1.S1_at   | MmugDNA.28623.1 | 10.9  | 10.53 | 0.06 | 0.13 | 1.3   | 0.007444 | 0.00137  | 0.208324 | 0.05691  |
| MmugDNA.28624.1.S1_at   | MmugDNA.28624.1 | 5.09  | 5.2   | 0.25 | 0.13 | -1.08 | 0.176628 | 0.236133 | 0.54033  | 0.507179 |
| MmugDNA.28628.1.S1_at   | MmugDNA.28628.1 | 6.35  | 6.26  | 0.11 | 0.07 | 1.07  | 0.567475 | 0.145632 | 0.798158 | 0.419554 |
| MmugDNA.28629.1.S1_s_at | MmugDNA.28629.1 | 8.03  | 7.63  | 0.2  | 0.13 | 1.32  | 0.042957 | 0.033764 | 0.355774 | 0.22741  |
| MmugDNA.28630.1.S1_at   | MmugDNA.28630.1 | 6.5   | 6.34  | 0.92 | 0.3  | 1.12  | 0.286765 | 0.383099 | 0.625572 | 0.619136 |
| MmugDNA.40354.1.S1_s_at | MmugDNA.40354.1 | 11.79 | 11.62 | 0.08 | 0.13 | 1.12  | 0.050919 | 0.045573 | 0.37568  | 0.257646 |
| MmugDNA.28633.1.S1_at   | MmugDNA.28633.1 | 7.67  | 7.54  | 0.07 | 0.26 | 1.1   | 0.361203 | 0.500341 | 0.675116 | 0.699009 |
| MmugDNA.28636.1.S1_at   | MmugDNA.28636.1 | 4.61  | 4.8   | 0.26 | 0.23 | -1.15 | 0.606685 | 0.799222 | 0.818965 | 0.884446 |
| MmugDNA.28638.1.S1_at   | MmugDNA.28638.1 | 8.02  | 7.31  | 0.2  | 0.93 | 1.64  | 0.351685 | 0.407241 | 0.669126 | 0.634843 |
| MmugDNA.28639.1.S1_at   | MmugDNA.28639.1 | 8.34  | 8.79  | 0.54 | 0.33 | -1.37 | 0.237124 | 0.348014 | 0.590811 | 0.592215 |
| MmugDNA.23581.1.S1_at   | MmugDNA.23581.1 | 10.84 | 10.54 | 0.1  | 0.17 | 1.23  | 0.038546 | 0.00783  | 0.344633 | 0.117929 |
| MmugDNA.23581.1.S1_s_at | MmugDNA.23581.1 | 9.34  | 9.2   | 0.08 | 0.18 | 1.1   | 0.142765 | 0.141998 | 0.509778 | 0.415564 |
| MmugDNA.28640.1.S1_at   | MmugDNA.28640.1 | 4.7   | 4.63  | 0.36 | 0.04 | 1.05  | 0.714398 | 0.305592 | 0.874835 | 0.562504 |
| MmugDNA.28642.1.S1_at   | MmugDNA.28642.1 | 4.4   | 4.25  | 0.3  | 0.13 | 1.12  | 0.15053  | 0.170207 | 0.515372 | 0.446906 |
| MmugDNA.28644.1.S1_at   | MmugDNA.28644.1 | 11.38 | 11    | 0.16 | 0.3  | 1.3   | 0.20072  | 0.225626 | 0.5634   | 0.498155 |
| MmugDNA.28645.1.S1_at   | MmugDNA.28645.1 | 5.99  | 6.16  | 0.06 | 0.13 | -1.13 | 0.070172 | 0.08923  | 0.413702 | 0.34333  |
| MmugDNA.28646.1.S1_at   | MmugDNA.28646.1 | 7.73  | 7.89  | 0.14 | 0.46 | -1.12 | 0.532547 | 0.684422 | 0.777757 | 0.815943 |
| MmugDNA.28647.1.S1_at   | MmugDNA.28647.1 | 7.33  | 7.4   | 0.22 | 0.06 | -1.05 | 0.692451 | 0.656926 | 0.863394 | 0.799401 |
| MmugDNA.28648.1.S1_at   | MmugDNA.28648.1 | 4.97  | 5.23  | 0.12 | 0.15 | -1.2  | 0.182648 | 0.163824 | 0.546869 | 0.440054 |
| MmugDNA.28649.1.S1_at   | MmugDNA.28649.1 | 4.13  | 4.3   | 0.13 | 0.17 | -1.13 | 0.121834 | 0.119904 | 0.486761 | 0.388593 |
| MmugDNA.2865.1.S1_at    | MmugDNA.2865.1  | 9.93  | 9.64  | 0.25 | 0.05 | 1.22  | 0.395435 | 0.413938 | 0.69645  | 0.639942 |
| MmugDNA.28650.1.S1_at   | MmugDNA.28650.1 | 5.34  | 5.31  | 0.19 | 0.06 | 1.02  | 0.708136 | 0.622106 | 0.871568 | 0.77667  |
| MmugDNA.28651.1.S1_at   | MmugDNA.28651.1 | 3.51  | 3.41  | 0.06 | 0.2  | 1.07  | 0.963661 | 0.380009 | 0.985982 | 0.616686 |
| MmugDNA.130.1.S1_s_at   | MmugDNA.130.1   | 7.1   | 6.32  | 0.27 | 0.08 | 1.72  | 0.010173 | 0.015279 | 0.228247 | 0.156987 |
| MmugDNA.28653.1.S1_at   | MmugDNA.28653.1 | 9.93  | 8.72  | 0.22 | 0.49 | 2.31  | 0.019518 | 0.006419 | 0.275001 | 0.108813 |
| MmugDNA.28654.1.S1_at   | MmugDNA.28654.1 | 8.33  | 8.32  | 0.14 | 0.33 | 1.01  | 0.243167 | 0.32044  | 0.594848 | 0.572648 |
| MmugDNA.28655.1.S1_at   | MmugDNA.28655.1 | 3.29  | 3.47  | 0.47 | 0.25 | -1.13 | 0.73392  | 0.260212 | 0.88527  | 0.526807 |
| MmugDNA.28655.1.S1_s_at | MmugDNA.28655.1 | 5.47  | 5.49  | 0.46 | 0.33 | -1.02 | 0.816151 | 0.417196 | 0.92532  | 0.642069 |
| MmugDNA.28656.1.S1_at   | MmugDNA.28656.1 | 6.16  | 6.12  | 0.07 | 0.12 | 1.03  | 0.932074 | 0.114701 | 0.973719 | 0.381252 |
| MmugDNA.28657.1.S1_at   | MmugDNA.28657.1 | 4.07  | 4.44  | 0.23 | 0.37 | -1.29 | 0.64725  | 0.824327 | 0.841267 | 0.899073 |
| MmugDNA.28658.1.S1_at   | MmugDNA.28658.1 | 9.72  | 9.68  | 0.05 | 0.77 | 1.02  | 0.97083  | 0.743529 | 0.988729 | 0.851395 |
| MmugDNA.28659.1.S1_at   | MmugDNA.28659.1 | 8.39  | 8.24  | 0.54 | 0.2  | 1.11  | 0.476429 | 0.596398 | 0.746232 | 0.759542 |
| MmugDNA.2866.1.S1_at    | MmugDNA.2866.1  | 10.14 | 10.22 | 0.07 | 0.08 | -1.06 | 0.215597 | 0.143755 | 0.575924 | 0.417583 |
| MmugDNA.28660.1.S1_at   | MmugDNA.28660.1 | 7.85  | 7.95  | 0.3  | 0.2  | -1.07 | 0.136681 | 0.141015 | 0.503841 | 0.414507 |
| MmugDNA.28661.1.S1_at   | MmugDNA.28661.1 | 6.92  | 7.17  | 0.05 | 0.14 | -1.19 | 0.201964 | 0.009886 | 0.564224 | 0.130618 |
| MmugDNA.28662.1.S1_at   | MmugDNA.28662.1 | 3.48  | 3.58  | 0.17 | 0.47 | -1.07 | 0.234308 | 0.545482 | 0.588656 | 0.727564 |
| MmugDNA.28663.1.S1_at   | MmugDNA.28663.1 | 9.08  | 8.66  | 0.18 | 0.58 | 1.34  | 0.664681 | 0.849275 | 0.849635 | 0.914453 |
| MmugDNA.28664.1.S1_at   | MmugDNA.28664.1 | 6.78  | 7.19  | 0.66 | 0.5  | -1.33 | 0.425718 | 0.269625 | 0.715281 | 0.534868 |
| MmugDNA.28665.1.S1_at   | MmugDNA.28665.1 | 5.6   | 5.71  | 0.19 | 0.09 | -1.08 | 0.920794 | 0.263251 | 0.969092 | 0.529531 |
| MmugDNA.28667.1.S1_at   | MmugDNA.28667.1 | 10.05 | 10.27 | 0.18 | 0.24 | -1.17 | 0.617737 | 0.770348 | 0.82487  | 0.866591 |

|                         |                 |       |       |      |      |       |          |          |          |          |
|-------------------------|-----------------|-------|-------|------|------|-------|----------|----------|----------|----------|
| MmugDNA.28668.1.S1_at   | MmugDNA.28668.1 | 11.22 | 10.95 | 0.04 | 0.4  | 1.21  | 0.315814 | 0.202939 | 0.646695 | 0.477343 |
| MmugDNA.28669.1.S1_at   | MmugDNA.28669.1 | 4.54  | 3.34  | 0.08 | 0.29 | 2.3   | 0.002357 | 0.002786 | 0.162    | 0.077966 |
| MmugDNA.2867.1.S1_at    | MmugDNA.2867.1  | 7.49  | 7.56  | 0.07 | 0.25 | -1.05 | 0.543898 | 0.263706 | 0.78417  | 0.529988 |
| MmugDNA.28670.1.S1_at   | MmugDNA.28670.1 | 10.86 | 10.91 | 0.25 | 0.2  | -1.03 | 0.823168 | 0.325888 | 0.928109 | 0.576171 |
| MmugDNA.28671.1.S1_at   | MmugDNA.28671.1 | 4.14  | 4.02  | 0.23 | 0.07 | 1.09  | 0.408331 | 0.553715 | 0.705117 | 0.732777 |
| MmugDNA.28673.1.S1_at   | MmugDNA.28673.1 | 3.92  | 4.01  | 0.07 | 0.25 | -1.06 | 0.595078 | 0.445639 | 0.812276 | 0.662468 |
| MmugDNA.28674.1.S1_at   | MmugDNA.28674.1 | 7.45  | 6.45  | 0.21 | 0.29 | 2     | 0.019678 | 0.02573  | 0.275549 | 0.201029 |
| MmugDNA.28675.1.S1_at   | MmugDNA.28675.1 | 5.43  | 5.54  | 0.02 | 0.1  | -1.07 | 0.203186 | 0.003711 | 0.565864 | 0.086814 |
| MmugDNA.28676.1.S1_at   | MmugDNA.28676.1 | 4.16  | 4.12  | 0.62 | 0.17 | 1.03  | 0.474906 | 0.476342 | 0.745447 | 0.682695 |
| MmugDNA.28677.1.S1_at   | MmugDNA.28677.1 | 4.08  | 4.09  | 0.24 | 0    | -1.01 | 0.399592 | 0.659475 | 0.699507 | 0.800789 |
| MmugDNA.28679.1.S1_at   | MmugDNA.28679.1 | 4.86  | 4.98  | 0.01 | 0.1  | -1.08 | 0.48459  | 0.286796 | 0.750543 | 0.548149 |
| MmugDNA.2868.1.S1_at    | MmugDNA.2868.1  | 5.11  | 5.29  | 0.12 | 0.26 | -1.13 | 0.587989 | 0.591714 | 0.808837 | 0.757198 |
| MmugDNA.28680.1.S1_at   | MmugDNA.28680.1 | 10.11 | 10.06 | 0.03 | 0.32 | 1.03  | 0.703284 | 0.630456 | 0.868993 | 0.782237 |
| MmugDNA.28681.1.S1_at   | MmugDNA.28681.1 | 6     | 6.08  | 0.26 | 0.03 | -1.05 | 0.72605  | 0.505336 | 0.880708 | 0.702073 |
| MmugDNA.28684.1.S1_at   | MmugDNA.28684.1 | 3.49  | 3.49  | 0.03 | 0.22 | -1    | 0.465231 | 0.505838 | 0.739822 | 0.702218 |
| MmugDNA.28685.1.S1_at   | MmugDNA.28685.1 | 4.72  | 4.67  | 0.81 | 0.69 | 1.04  | 0.943697 | 0.770928 | 0.978535 | 0.866807 |
| MmugDNA.28687.1.S1_at   | MmugDNA.28687.1 | 4.45  | 4.34  | 0.66 | 0.14 | 1.08  | 0.267137 | 0.61154  | 0.612309 | 0.76941  |
| MmugDNA.28688.1.S1_at   | MmugDNA.28688.1 | 6.23  | 6.51  | 0.05 | 0.2  | -1.21 | 0.084417 | 0.090412 | 0.436964 | 0.344899 |
| MmugDNA.2869.1.S1_at    | MmugDNA.2869.1  | 4.24  | 3.76  | 0.58 | 0.3  | 1.39  | 0.166532 | 0.123095 | 0.530253 | 0.393102 |
| MmugDNA.28690.1.S1_at   | MmugDNA.28690.1 | 4.92  | 4.81  | 0.13 | 0.18 | 1.08  | 0.833335 | 0.934852 | 0.932336 | 0.963108 |
| MmugDNA.28691.1.S1_at   | MmugDNA.28691.1 | 8.03  | 8.46  | 0.33 | 0.47 | -1.35 | 0.647975 | 0.843542 | 0.841735 | 0.910896 |
| MmugDNA.28692.1.S1_at   | MmugDNA.28692.1 | 7.52  | 7.5   | 0.7  | 0.65 | 1.01  | 0.9302   | 0.222658 | 0.972992 | 0.495617 |
| MmugDNA.28693.1.S1_s_at | MmugDNA.28693.1 | 8.29  | 9.06  | 0.05 | 0.06 | -1.71 | 0.00009  | 0.000007 | 0.112653 | 0.016421 |
| MmugDNA.28695.1.S1_s_at | MmugDNA.28695.1 | 11.8  | 11.83 | 0.06 | 0.19 | -1.02 | 0.871658 | 0.535258 | 0.94866  | 0.720836 |
| MmugDNA.28696.1.S1_at   | MmugDNA.28696.1 | 7.91  | 6.66  | 0.62 | 1.27 | 2.37  | 0.384459 | 0.306555 | 0.689949 | 0.563101 |
| MmugDNA.28697.1.S1_at   | MmugDNA.28697.1 | 4.15  | 4.15  | 0.1  | 0.11 | 1     | 0.231405 | 0.299464 | 0.587372 | 0.557907 |
| MmugDNA.28699.1.S1_at   | MmugDNA.28699.1 | 5.34  | 6.91  | 1.04 | 0.24 | -2.98 | 0.141543 | 0.137371 | 0.509111 | 0.41029  |
| MmugDNA.287.1.S1_at     | MmugDNA.287.1   | 11.51 | 12.1  | 0.25 | 0.38 | -1.5  | 0.133763 | 0.065014 | 0.500334 | 0.300961 |
| MmugDNA.28701.1.S1_at   | MmugDNA.28701.1 | 4.34  | 4.36  | 0.22 | 0.15 | -1.01 | 0.838356 | 0.869922 | 0.934652 | 0.926178 |
| MmugDNA.28702.1.S1_at   | MmugDNA.28702.1 | 10.48 | 10.95 | 0.18 | 0.42 | -1.38 | 0.198568 | 0.145422 | 0.561652 | 0.419421 |
| MmugDNA.28703.1.S1_at   | MmugDNA.28703.1 | 10.33 | 10.15 | 0.13 | 0.03 | 1.13  | 0.041151 | 0.001986 | 0.350833 | 0.066165 |
| MmugDNA.28705.1.S1_at   | MmugDNA.28705.1 | 9.24  | 9.78  | 0.13 | 0.06 | -1.45 | 0.005597 | 0.002521 | 0.191807 | 0.074158 |
| MmugDNA.28707.1.S1_at   | MmugDNA.28707.1 | 9.11  | 9.03  | 0.26 | 0.01 | 1.06  | 0.211203 | 0.320769 | 0.572018 | 0.572849 |
| MmugDNA.28708.1.S1_at   | MmugDNA.28708.1 | 5.43  | 5.67  | 0.11 | 0.19 | -1.18 | 0.150936 | 0.096505 | 0.515667 | 0.35409  |
| MmugDNA.28709.1.S1_at   | MmugDNA.28709.1 | 5.21  | 5.31  | 0.26 | 0.07 | -1.07 | 0.991345 | 0.357134 | 0.996946 | 0.59881  |
| MmugDNA.2871.1.S1_s_at  | MmugDNA.2871.1  | 8.64  | 9.26  | 0.12 | 0.02 | -1.53 | 0.000772 | 0.010035 | 0.136818 | 0.131317 |
| MmugDNA.28710.1.S1_at   | MmugDNA.28710.1 | 6.87  | 5.81  | 0.07 | 1.14 | 2.08  | 0.609322 | 0.335799 | 0.82044  | 0.583525 |
| MmugDNA.28711.1.S1_at   | MmugDNA.28711.1 | 4.22  | 7.02  | 1.09 | 2.6  | -6.94 | 0.250385 | 0.212612 | 0.600389 | 0.486547 |
| MmugDNA.28712.1.S1_at   | MmugDNA.28712.1 | 3.09  | 3.19  | 0.12 | 0.08 | -1.07 | 0.208555 | 0.262782 | 0.570374 | 0.529136 |
| MmugDNA.28714.1.S1_at   | MmugDNA.28714.1 | 6.28  | 6.45  | 0.03 | 0.11 | -1.12 | 0.192113 | 0.090583 | 0.555187 | 0.345079 |
| MmugDNA.28715.1.S1_at   | MmugDNA.28715.1 | 6.46  | 6.49  | 0.33 | 0.31 | -1.03 | 0.452467 | 0.000582 | 0.732157 | 0.04147  |

|                         |                 |       |       |      |      |       |          |          |          |          |
|-------------------------|-----------------|-------|-------|------|------|-------|----------|----------|----------|----------|
| MmugDNA.28716.1.S1_at   | MmugDNA.28716.1 | 8.71  | 8.3   | 0.1  | 0.25 | 1.33  | 0.042825 | 0.12186  | 0.355382 | 0.391189 |
| MmugDNA.28717.1.S1_at   | MmugDNA.28717.1 | 9.61  | 10.17 | 0.26 | 0.77 | -1.47 | 0.602861 | 0.490736 | 0.816768 | 0.692666 |
| MmugDNA.28718.1.S1_at   | MmugDNA.28718.1 | 8.54  | 8.33  | 0.08 | 0.26 | 1.15  | 0.233824 | 0.015716 | 0.588317 | 0.158858 |
| MmugDNA.28719.1.S1_at   | MmugDNA.28719.1 | 8.81  | 9.11  | 0.22 | 0.91 | -1.23 | 0.645212 | 0.34752  | 0.840224 | 0.592019 |
| MmugDNA.2872.1.S1_at    | MmugDNA.2872.1  | 4.13  | 4.56  | 0.25 | 0.04 | -1.35 | 0.055356 | 0.052853 | 0.383689 | 0.275521 |
| MmugDNA.28720.1.S1_at   | MmugDNA.28720.1 | 11.39 | 11.42 | 0.18 | 0.15 | -1.02 | 0.741657 | 0.722938 | 0.889293 | 0.839489 |
| MmugDNA.28722.1.S1_at   | MmugDNA.28722.1 | 12.66 | 12.96 | 0.11 | 0.43 | -1.23 | 0.748742 | 0.198165 | 0.892559 | 0.473148 |
| MmugDNA.28723.1.S1_at   | MmugDNA.28723.1 | 10.58 | 10.88 | 0.07 | 0.61 | -1.24 | 0.922971 | 0.263018 | 0.970084 | 0.529397 |
| MmugDNA.28725.1.S1_at   | MmugDNA.28725.1 | 12.06 | 11.68 | 0.39 | 0.13 | 1.3   | 0.16253  | 0.102248 | 0.526802 | 0.36236  |
| MmugDNA.28725.1.S1_s_at | MmugDNA.28725.1 | 12.19 | 12.03 | 0.33 | 0.11 | 1.11  | 0.283825 | 0.209436 | 0.623797 | 0.483069 |
| MmugDNA.28726.1.S1_at   | MmugDNA.28726.1 | 6.46  | 6.38  | 0.39 | 0.14 | 1.06  | 0.595475 | 0.521872 | 0.812365 | 0.712667 |
| MmugDNA.28727.1.S1_at   | MmugDNA.28727.1 | 4.79  | 4.26  | 0.6  | 0.74 | 1.45  | 0.753948 | 0.865283 | 0.895103 | 0.923554 |
| MmugDNA.28728.1.S1_at   | MmugDNA.28728.1 | 4.61  | 5.18  | 1.37 | 0.29 | -1.49 | 0.969044 | 0.998346 | 0.988244 | 0.999091 |
| MmugDNA.28729.1.S1_at   | MmugDNA.28729.1 | 3.55  | 3.78  | 0.08 | 0.13 | -1.18 | 0.151805 | 0.181911 | 0.516514 | 0.458442 |
| MmugDNA.28730.1.S1_at   | MmugDNA.28730.1 | 2.84  | 3.01  | 0.42 | 0.1  | -1.12 | 0.782806 | 0.92209  | 0.909285 | 0.956072 |
| MmugDNA.28731.1.S1_at   | MmugDNA.28731.1 | 6     | 5.96  | 0.24 | 0.1  | 1.03  | 0.642857 | 0.875707 | 0.838982 | 0.929398 |
| MmugDNA.28732.1.S1_at   | MmugDNA.28732.1 | 5.68  | 5.67  | 0.27 | 0.27 | 1     | 0.677109 | 0.688456 | 0.855332 | 0.818166 |
| MmugDNA.28733.1.S1_at   | MmugDNA.28733.1 | 4.96  | 4.77  | 0.48 | 0.1  | 1.13  | 0.261762 | 0.454842 | 0.60838  | 0.668889 |
| MmugDNA.28734.1.S1_at   | MmugDNA.28734.1 | 3.98  | 3.92  | 0.06 | 0.22 | 1.04  | 0.688767 | 0.96987  | 0.861169 | 0.983507 |
| MmugDNA.28735.1.S1_at   | MmugDNA.28735.1 | 5.29  | 5.29  | 0.12 | 0.07 | 1.01  | 0.639007 | 0.229824 | 0.836932 | 0.501802 |
| MmugDNA.28736.1.S1_at   | MmugDNA.28736.1 | 8.03  | 8     | 0.34 | 0.99 | 1.02  | 0.887013 | 0.952648 | 0.954777 | 0.973147 |
| MmugDNA.28737.1.S1_at   | MmugDNA.28737.1 | 7.42  | 7.69  | 0.43 | 0.24 | -1.21 | 0.203    | 0.229825 | 0.565625 | 0.501802 |
| MmugDNA.28739.1.S1_at   | MmugDNA.28739.1 | 5.53  | 6.06  | 0.08 | 0.22 | -1.44 | 0.0264   | 0.005371 | 0.303006 | 0.101194 |
| MmugDNA.28740.1.S1_at   | MmugDNA.28740.1 | 12.37 | 9.65  | 0.8  | 0.86 | 6.6   | 0.058991 | 0.034942 | 0.390921 | 0.231062 |
| MmugDNA.28741.1.S1_at   | MmugDNA.28741.1 | 11.11 | 10.68 | 0.06 | 0.07 | 1.35  | 0.000913 | 0.000618 | 0.139813 | 0.042444 |
| MmugDNA.28743.1.S1_at   | MmugDNA.28743.1 | 9.89  | 9.25  | 0.3  | 0.45 | 1.56  | 0.125508 | 0.075814 | 0.491333 | 0.320402 |
| MmugDNA.28744.1.S1_at   | MmugDNA.28744.1 | 5.19  | 5.03  | 0.48 | 0.1  | 1.12  | 0.258829 | 0.196545 | 0.606013 | 0.471582 |
| MmugDNA.28745.1.S1_at   | MmugDNA.28745.1 | 9.09  | 9.81  | 0.57 | 0.84 | -1.65 | 0.227108 | 0.164134 | 0.584952 | 0.440346 |
| MmugDNA.28746.1.S1_at   | MmugDNA.28746.1 | 5.99  | 5.7   | 0.24 | 0.22 | 1.22  | 0.043213 | 0.035139 | 0.356669 | 0.231645 |
| MmugDNA.28747.1.S1_at   | MmugDNA.28747.1 | 7.74  | 7.92  | 0.09 | 0.36 | -1.13 | 0.892228 | 0.64624  | 0.957096 | 0.792712 |
| MmugDNA.28750.1.S1_at   | MmugDNA.28750.1 | 6.68  | 6.68  | 0.38 | 0.57 | 1     | 0.245974 | 0.273969 | 0.597361 | 0.538503 |
| MmugDNA.28751.1.S1_at   | MmugDNA.28751.1 | 10.23 | 10.36 | 0.52 | 0.75 | -1.09 | 0.749545 | 0.241671 | 0.89273  | 0.512225 |
| MmugDNA.28753.1.S1_at   | MmugDNA.28753.1 | 3.11  | 3.2   | 0.02 | 0.08 | -1.06 | 0.052901 | 0.049772 | 0.378593 | 0.26818  |
| MmugDNA.28754.1.S1_at   | MmugDNA.28754.1 | 6.66  | 6.85  | 0.08 | 0.11 | -1.14 | 0.06969  | 0.061993 | 0.412747 | 0.295862 |
| MmugDNA.28755.1.S1_at   | MmugDNA.28755.1 | 4.42  | 4.88  | 0.99 | 0.47 | -1.37 | 0.851913 | 0.454565 | 0.940401 | 0.668668 |
| MmugDNA.28756.1.S1_at   | MmugDNA.28756.1 | 4.33  | 5.25  | 0.06 | 0.66 | -1.9  | 0.08992  | 0.047395 | 0.44539  | 0.262443 |
| MmugDNA.28759.1.S1_at   | MmugDNA.28759.1 | 7.14  | 6.47  | 0.36 | 0.33 | 1.58  | 0.141704 | 0.258537 | 0.509159 | 0.525796 |
| MmugDNA.2876.1.S1_at    | MmugDNA.2876.1  | 3.84  | 4.08  | 0.01 | 0.14 | -1.18 | 0.118904 | 0.079275 | 0.483449 | 0.326444 |
| MmugDNA.28760.1.S1_at   | MmugDNA.28760.1 | 4.5   | 5.07  | 0.16 | 0.58 | -1.49 | 0.086456 | 0.106507 | 0.440232 | 0.369078 |
| MmugDNA.28761.1.S1_at   | MmugDNA.28761.1 | 7.39  | 7.55  | 0.14 | 0.1  | -1.12 | 0.340963 | 0.374132 | 0.662222 | 0.612678 |
| MmugDNA.28762.1.S1_at   | MmugDNA.28762.1 | 8.16  | 8.38  | 0.65 | 0.68 | -1.17 | 0.725211 | 0.353925 | 0.880085 | 0.596894 |

|                         |                 |       |       |      |      |       |          |          |          |          |
|-------------------------|-----------------|-------|-------|------|------|-------|----------|----------|----------|----------|
| MmugDNA.28763.1.S1_at   | MmugDNA.28763.1 | 4.6   | 4.61  | 0.13 | 0.26 | -1.01 | 0.794523 | 0.484186 | 0.914727 | 0.688399 |
| MmugDNA.36143.1.S1_s_at | MmugDNA.36143.1 | 6.13  | 6.81  | 0.5  | 0.2  | -1.6  | 0.394633 | 0.524194 | 0.69601  | 0.714207 |
| MmugDNA.28765.1.S1_at   | MmugDNA.28765.1 | 10.98 | 10.91 | 0.17 | 0.08 | 1.05  | 0.202606 | 0.164301 | 0.565062 | 0.440539 |
| MmugDNA.28766.1.S1_at   | MmugDNA.28766.1 | 5.61  | 5.16  | 0.2  | 0.27 | 1.37  | 0.035356 | 0.024311 | 0.336165 | 0.195175 |
| MmugDNA.28767.1.S1_at   | MmugDNA.28767.1 | 2.72  | 2.96  | 0.08 | 0.57 | -1.19 | 0.157635 | 0.292215 | 0.522514 | 0.552363 |
| MmugDNA.28768.1.S1_at   | MmugDNA.28768.1 | 6.42  | 6.4   | 0.47 | 0.05 | 1.01  | 0.305578 | 0.345545 | 0.639223 | 0.59079  |
| MmugDNA.28769.1.S1_at   | MmugDNA.28769.1 | 3.56  | 3.7   | 0.11 | 0.04 | -1.1  | 0.091675 | 0.051979 | 0.447788 | 0.273453 |
| MmugDNA.2877.1.S1_at    | MmugDNA.2877.1  | 3.54  | 3.61  | 0.07 | 0.31 | -1.05 | 0.226616 | 0.255321 | 0.584563 | 0.523394 |
| MmugDNA.28770.1.S1_at   | MmugDNA.28770.1 | 7.99  | 8.53  | 0.28 | 0.05 | -1.45 | 0.033464 | 0.022092 | 0.329009 | 0.185972 |
| MmugDNA.28771.1.S1_at   | MmugDNA.28771.1 | 8.47  | 7.16  | 0.22 | 0.68 | 2.49  | 0.026449 | 0.014558 | 0.303201 | 0.153907 |
| MmugDNA.28772.1.S1_at   | MmugDNA.28772.1 | 4.29  | 4.07  | 0.28 | 0.19 | 1.17  | 0.277575 | 0.177364 | 0.619758 | 0.453742 |
| MmugDNA.28774.1.S1_at   | MmugDNA.28774.1 | 3.01  | 3.02  | 0.07 | 0.26 | -1.01 | 0.793405 | 0.286042 | 0.914377 | 0.547527 |
| MmugDNA.28775.1.S1_at   | MmugDNA.28775.1 | 7.56  | 8.47  | 0.2  | 0.96 | -1.88 | 0.450944 | 0.292814 | 0.731464 | 0.552823 |
| MmugDNA.28777.1.S1_at   | MmugDNA.28777.1 | 7.46  | 7.42  | 0.62 | 0.25 | 1.03  | 0.500582 | 0.133441 | 0.759592 | 0.405282 |
| MmugDNA.28778.1.S1_at   | MmugDNA.28778.1 | 11.05 | 10.21 | 0.32 | 0.06 | 1.8   | 0.012196 | 0.000983 | 0.240358 | 0.050067 |
| MmugDNA.28780.1.S1_at   | MmugDNA.28780.1 | 4.9   | 5.27  | 0.32 | 0.16 | -1.29 | 0.465801 | 0.165033 | 0.740131 | 0.44123  |
| MmugDNA.28781.1.S1_s_at | MmugDNA.28781.1 | 8.7   | 7.14  | 0.14 | 0.87 | 2.95  | 0.041079 | 0.031121 | 0.350551 | 0.218175 |
| MmugDNA.28782.1.S1_at   | MmugDNA.28782.1 | 10    | 10.02 | 0.53 | 0.35 | -1.01 | 0.256981 | 0.079054 | 0.604435 | 0.326117 |
| MmugDNA.28782.1.S1_s_at | MmugDNA.28782.1 | 9.67  | 9.54  | 0.61 | 0.37 | 1.09  | 0.425955 | 0.122923 | 0.715442 | 0.392923 |
| MmugDNA.28783.1.S1_at   | MmugDNA.28783.1 | 3.47  | 3.7   | 0.22 | 0.21 | -1.18 | 0.821392 | 0.082867 | 0.927315 | 0.332423 |
| MmugDNA.28784.1.S1_at   | MmugDNA.28784.1 | 4.25  | 3.94  | 0.25 | 0.16 | 1.24  | 0.210932 | 0.090869 | 0.571977 | 0.345474 |
| MmugDNA.28785.1.S1_at   | MmugDNA.28785.1 | 8.82  | 9.91  | 0.21 | 0.16 | -2.12 | 0.001334 | 0.003049 | 0.146228 | 0.08051  |
| MmugDNA.28786.1.S1_at   | MmugDNA.28786.1 | 3.75  | 3.64  | 0.33 | 0.19 | 1.08  | 0.820783 | 0.47613  | 0.927152 | 0.682524 |
| MmugDNA.28788.1.S1_at   | MmugDNA.28788.1 | 11.88 | 12.16 | 0.19 | 0.39 | -1.22 | 0.184403 | 0.212553 | 0.548138 | 0.486502 |
| MmugDNA.28789.1.S1_s_at | MmugDNA.28789.1 | 11.08 | 11.42 | 0.24 | 0.06 | -1.27 | 0.05973  | 0.008446 | 0.39273  | 0.121922 |
| MmugDNA.2879.1.S1_at    | MmugDNA.2879.1  | 2.9   | 2.88  | 0.05 | 0.07 | 1.01  | 0.375778 | 0.227995 | 0.684803 | 0.500211 |
| MmugDNA.28790.1.S1_at   | MmugDNA.28790.1 | 4.42  | 4.52  | 0.03 | 0.12 | -1.07 | 0.270477 | 0.319594 | 0.614788 | 0.571885 |
| MmugDNA.28791.1.S1_at   | MmugDNA.28791.1 | 6.82  | 5.55  | 0.46 | 0.89 | 2.4   | 0.216696 | 0.387309 | 0.576318 | 0.622027 |
| MmugDNA.28793.1.S1_at   | MmugDNA.28793.1 | 3.96  | 3.85  | 0.06 | 0.19 | 1.08  | 0.855302 | 0.970741 | 0.9415   | 0.984051 |
| MmugDNA.28794.1.S1_at   | MmugDNA.28794.1 | 5.66  | 5.86  | 0.17 | 0.2  | -1.15 | 0.205872 | 0.488019 | 0.568383 | 0.690855 |
| MmugDNA.28795.1.S1_at   | MmugDNA.28795.1 | 7.2   | 7.26  | 0.47 | 0.19 | -1.05 | 0.704871 | 0.17087  | 0.869834 | 0.447512 |
| MmugDNA.28796.1.S1_at   | MmugDNA.28796.1 | 3.75  | 3.8   | 0.03 | 0.05 | -1.04 | 0.133479 | 0.0975   | 0.50015  | 0.355299 |
| MmugDNA.28797.1.S1_at   | MmugDNA.28797.1 | 7.44  | 7.49  | 0.12 | 0.41 | -1.03 | 0.946017 | 0.482114 | 0.979359 | 0.687016 |
| MmugDNA.28798.1.S1_at   | MmugDNA.28798.1 | 6.6   | 6.89  | 0.1  | 0.28 | -1.22 | 0.125781 | 0.107421 | 0.491824 | 0.370243 |
| MmugDNA.28799.1.S1_at   | MmugDNA.28799.1 | 3.47  | 3.66  | 0.4  | 0.43 | -1.14 | 0.954734 | 0.890091 | 0.983073 | 0.937419 |
| MmugDNA.288.1.S1_at     | MmugDNA.288.1   | 10.21 | 11.58 | 0.37 | 0.57 | -2.6  | 0.025058 | 0.015743 | 0.297733 | 0.158972 |
| MmugDNA.28800.1.S1_at   | MmugDNA.28800.1 | 4.84  | 3.82  | 0.56 | 0.3  | 2.03  | 0.096156 | 0.054557 | 0.454327 | 0.279114 |
| MmugDNA.28801.1.S1_at   | MmugDNA.28801.1 | 6.08  | 6.14  | 0.07 | 0.14 | -1.04 | 0.57463  | 0.571195 | 0.801801 | 0.743594 |
| MmugDNA.28802.1.S1_at   | MmugDNA.28802.1 | 6.08  | 5.89  | 0.27 | 0.23 | 1.14  | 0.288388 | 0.071945 | 0.626604 | 0.314293 |
| MmugDNA.28803.1.S1_at   | MmugDNA.28803.1 | 10.09 | 9.78  | 0.17 | 0.15 | 1.24  | 0.039207 | 0.029202 | 0.346891 | 0.212898 |
| MmugDNA.28804.1.S1_at   | MmugDNA.28804.1 | 5.32  | 5.4   | 0.09 | 0.16 | -1.06 | 0.384016 | 0.516583 | 0.689677 | 0.709034 |

|                         |                 |       |       |      |      |        |          |          |          |          |
|-------------------------|-----------------|-------|-------|------|------|--------|----------|----------|----------|----------|
| MmugDNA.28805.1.S1_at   | MmugDNA.28805.1 | 2.63  | 2.71  | 0.08 | 0.21 | -1.05  | 0.13412  | 0.185717 | 0.500681 | 0.46163  |
| MmugDNA.28806.1.S1_at   | MmugDNA.28806.1 | 7.07  | 6.94  | 0.46 | 0.15 | 1.09   | 0.324395 | 0.391255 | 0.651941 | 0.624942 |
| MmugDNA.28807.1.S1_at   | MmugDNA.28807.1 | 9.55  | 9.09  | 0.42 | 0.31 | 1.38   | 0.233196 | 0.285036 | 0.587994 | 0.547095 |
| MmugDNA.28808.1.S1_at   | MmugDNA.28808.1 | 7.5   | 11.06 | 1.88 | 2.96 | -11.78 | 0.337229 | 0.251577 | 0.659871 | 0.520309 |
| MmugDNA.28809.1.S1_at   | MmugDNA.28809.1 | 6.97  | 6.46  | 0.2  | 0.68 | 1.43   | 0.977135 | 0.510927 | 0.991249 | 0.705282 |
| MmugDNA.28810.1.S1_at   | MmugDNA.28810.1 | 7.07  | 8.8   | 0.59 | 0.67 | -3.33  | 0.045813 | 0.038196 | 0.361834 | 0.240129 |
| MmugDNA.28811.1.S1_at   | MmugDNA.28811.1 | 7.85  | 7.66  | 0.3  | 0.12 | 1.14   | 0.353567 | 0.221722 | 0.67018  | 0.494901 |
| MmugDNA.28812.1.S1_at   | MmugDNA.28812.1 | 3.97  | 3.96  | 0.1  | 0.01 | 1.01   | 0.796082 | 0.797441 | 0.915412 | 0.883215 |
| MmugDNA.28813.1.S1_at   | MmugDNA.28813.1 | 10.1  | 11.76 | 0.86 | 0.48 | -3.16  | 0.037949 | 0.03129  | 0.343341 | 0.218776 |
| MmugDNA.28814.1.S1_at   | MmugDNA.28814.1 | 12.28 | 12.12 | 0.11 | 0.14 | 1.12   | 0.305143 | 0.017656 | 0.639018 | 0.168002 |
| MmugDNA.28815.1.S1_at   | MmugDNA.28815.1 | 4.83  | 4.83  | 0.07 | 0.07 | 1      | 0.941122 | 0.20803  | 0.97764  | 0.482049 |
| MmugDNA.28816.1.S1_at   | MmugDNA.28816.1 | 7.04  | 7.04  | 0.5  | 0.29 | -1     | 0.933699 | 0.370644 | 0.974319 | 0.609667 |
| MmugDNA.28817.1.S1_at   | MmugDNA.28817.1 | 4.73  | 4.32  | 0.57 | 0.35 | 1.33   | 0.438396 | 0.598432 | 0.723035 | 0.760839 |
| MmugDNA.28818.1.S1_at   | MmugDNA.28818.1 | 3.25  | 3.05  | 0.12 | 0.17 | 1.15   | 0.084173 | 0.274215 | 0.436855 | 0.538698 |
| MmugDNA.28819.1.S1_at   | MmugDNA.28819.1 | 3.84  | 3.9   | 0.2  | 0.15 | -1.04  | 0.143756 | 0.282751 | 0.510387 | 0.545473 |
| MmugDNA.28823.1.S1_at   | MmugDNA.28823.1 | 5.11  | 5.32  | 0.28 | 0.24 | -1.16  | 0.588946 | 0.805281 | 0.809161 | 0.888065 |
| MmugDNA.28824.1.S1_s_at | MmugDNA.28824.1 | 11.86 | 11.46 | 0.01 | 0.18 | 1.32   | 0.032872 | 0.001862 | 0.326361 | 0.064697 |
| MmugDNA.28825.1.S1_at   | MmugDNA.28825.1 | 8.49  | 6.46  | 0.58 | 0.2  | 4.1    | 0.004107 | 0.001375 | 0.181739 | 0.05691  |
| MmugDNA.28826.1.S1_at   | MmugDNA.28826.1 | 3.62  | 3.62  | 0.16 | 0    | -1     | 0.958594 | 0.63658  | 0.984337 | 0.786262 |
| MmugDNA.28827.1.S1_at   | MmugDNA.28827.1 | 5.93  | 5.86  | 0.13 | 0.12 | 1.05   | 0.567789 | 0.757433 | 0.798292 | 0.858821 |
| MmugDNA.28829.1.S1_at   | MmugDNA.28829.1 | 3.51  | 3.45  | 0.1  | 0.09 | 1.04   | 0.603432 | 0.578647 | 0.817154 | 0.748603 |
| MmugDNA.2883.1.S1_at    | MmugDNA.2883.1  | 3.75  | 3.83  | 0.11 | 0.13 | -1.05  | 0.94151  | 0.712645 | 0.977713 | 0.83344  |
| MmugDNA.28830.1.S1_at   | MmugDNA.28830.1 | 4.96  | 4.97  | 0.47 | 0.18 | -1.01  | 0.967777 | 0.99413  | 0.987919 | 0.996429 |
| MmugDNA.28832.1.S1_at   | MmugDNA.28832.1 | 3.03  | 3.09  | 0.53 | 0.02 | -1.04  | 0.483497 | 0.515454 | 0.749892 | 0.708312 |
| MmugDNA.28833.1.S1_at   | MmugDNA.28833.1 | 9.74  | 9.27  | 0.35 | 0.26 | 1.38   | 0.362896 | 0.215913 | 0.676248 | 0.489546 |
| MmugDNA.28834.1.S1_at   | MmugDNA.28834.1 | 11.35 | 11.42 | 0.02 | 0.03 | -1.05  | 0.027418 | 0.000881 | 0.307806 | 0.047602 |
| MmugDNA.28834.1.S1_s_at | MmugDNA.28834.1 | 11.82 | 11.9  | 0.01 | 0.02 | -1.06  | 0.002513 | 0.006657 | 0.164187 | 0.110505 |
| MmugDNA.28835.1.S1_at   | MmugDNA.28835.1 | 8.15  | 7.88  | 0.02 | 0.06 | 1.21   | 0.002115 | 0.114909 | 0.157411 | 0.381621 |
| MmugDNA.28836.1.S1_at   | MmugDNA.28836.1 | 5.69  | 5.32  | 0.97 | 0.13 | 1.29   | 0.210955 | 0.239942 | 0.571977 | 0.510627 |
| MmugDNA.28838.1.S1_at   | MmugDNA.28838.1 | 3.08  | 3.26  | 0.11 | 0.04 | -1.13  | 0.037488 | 0.030684 | 0.3415   | 0.217148 |
| MmugDNA.28839.1.S1_at   | MmugDNA.28839.1 | 6.94  | 5.86  | 0.05 | 0.3  | 2.12   | 0.003245 | 0.0037   | 0.175695 | 0.086769 |
| MmugDNA.28841.1.S1_at   | MmugDNA.28841.1 | 5.43  | 5.53  | 0.09 | 0.25 | -1.07  | 0.380907 | 0.488868 | 0.687607 | 0.691436 |
| MmugDNA.28844.1.S1_at   | MmugDNA.28844.1 | 4.58  | 4.68  | 0.21 | 0.08 | -1.07  | 0.834177 | 0.285665 | 0.932602 | 0.547395 |
| MmugDNA.28845.1.S1_at   | MmugDNA.28845.1 | 4.17  | 4.06  | 0.11 | 0.23 | 1.08   | 0.290811 | 0.333392 | 0.628551 | 0.581668 |
| MmugDNA.28846.1.S1_at   | MmugDNA.28846.1 | 5.8   | 5.98  | 0.12 | 0.17 | -1.13  | 0.30447  | 0.409367 | 0.638542 | 0.636452 |
| MmugDNA.28847.1.S1_at   | MmugDNA.28847.1 | 4.15  | 3.89  | 0.53 | 0.34 | 1.19   | 0.37969  | 0.391918 | 0.687063 | 0.625419 |
| MmugDNA.28849.1.S1_at   | MmugDNA.28849.1 | 5.76  | 5.12  | 0.39 | 0.09 | 1.56   | 0.047431 | 0.06607  | 0.366315 | 0.302434 |
| MmugDNA.2885.1.S1_at    | MmugDNA.2885.1  | 4.02  | 4.01  | 0.11 | 0.12 | 1.01   | 0.438922 | 0.477355 | 0.723412 | 0.683422 |
| MmugDNA.28850.1.S1_at   | MmugDNA.28850.1 | 6.4   | 6.52  | 0.11 | 0.36 | -1.09  | 0.610756 | 0.816553 | 0.821255 | 0.894202 |
| MmugDNA.28851.1.S1_at   | MmugDNA.28851.1 | 3.58  | 3.2   | 0.27 | 0.15 | 1.3    | 0.182138 | 0.140099 | 0.546458 | 0.413394 |
| MmugDNA.28852.1.S1_at   | MmugDNA.28852.1 | 3.06  | 3.14  | 0.25 | 0.03 | -1.06  | 0.69155  | 0.24874  | 0.862864 | 0.517931 |

|                         |                 |       |       |      |      |       |          |          |          |          |
|-------------------------|-----------------|-------|-------|------|------|-------|----------|----------|----------|----------|
| MmugDNA.28852.1.S1_s_at | MmugDNA.28852.1 | 8.86  | 8.33  | 0.2  | 0.38 | 1.45  | 0.125965 | 0.073969 | 0.492046 | 0.317476 |
| MmugDNA.28853.1.S1_at   | MmugDNA.28853.1 | 6.12  | 6.13  | 0.04 | 0.09 | -1.01 | 0.253947 | 0.316023 | 0.602339 | 0.569488 |
| MmugDNA.28854.1.S1_at   | MmugDNA.28854.1 | 3.09  | 3.09  | 0.15 | 0.08 | 1     | 0.660891 | 0.894437 | 0.847928 | 0.939731 |
| MmugDNA.28856.1.S1_at   | MmugDNA.28856.1 | 3.03  | 3.01  | 0.18 | 0.15 | 1.01  | 0.796749 | 0.984031 | 0.915701 | 0.991118 |
| MmugDNA.28857.1.S1_at   | MmugDNA.28857.1 | 4.75  | 4.8   | 0.24 | 0.06 | -1.04 | 0.727628 | 0.527137 | 0.881457 | 0.715861 |
| MmugDNA.28858.1.S1_at   | MmugDNA.28858.1 | 7.49  | 7.41  | 0.27 | 0.17 | 1.06  | 0.208636 | 0.160595 | 0.570384 | 0.436745 |
| MmugDNA.28859.1.S1_at   | MmugDNA.28859.1 | 4.97  | 4.66  | 0.72 | 0.03 | 1.25  | 0.448104 | 0.422416 | 0.729435 | 0.645722 |
| MmugDNA.2886.1.S1_at    | MmugDNA.2886.1  | 5.1   | 3.99  | 0.62 | 0.12 | 2.16  | 0.099752 | 0.078055 | 0.459718 | 0.324529 |
| MmugDNA.28860.1.S1_at   | MmugDNA.28860.1 | 5.37  | 5.36  | 0.14 | 0.23 | 1.01  | 0.974843 | 0.99648  | 0.990192 | 0.997934 |
| MmugDNA.28861.1.S1_at   | MmugDNA.28861.1 | 5.23  | 5.12  | 0.14 | 0.24 | 1.08  | 0.545514 | 0.188164 | 0.785008 | 0.464251 |
| MmugDNA.28862.1.S1_at   | MmugDNA.28862.1 | 4.29  | 4.22  | 0.26 | 0.49 | 1.05  | 0.547838 | 0.573069 | 0.786375 | 0.744941 |
| MmugDNA.28863.1.S1_at   | MmugDNA.28863.1 | 10.59 | 10.05 | 0.28 | 0.77 | 1.46  | 0.164308 | 0.101088 | 0.528238 | 0.360724 |
| MmugDNA.28864.1.S1_at   | MmugDNA.28864.1 | 13.44 | 13.58 | 0.03 | 0.04 | -1.11 | 0.013418 | 0.023731 | 0.246639 | 0.192891 |
| MmugDNA.28865.1.S1_at   | MmugDNA.28865.1 | 11.41 | 10.7  | 0.19 | 0.55 | 1.63  | 0.099012 | 0.068799 | 0.458711 | 0.308711 |
| MmugDNA.28866.1.S1_at   | MmugDNA.28866.1 | 4.41  | 4.34  | 0.15 | 0.1  | 1.05  | 0.346581 | 0.130111 | 0.666013 | 0.401746 |
| MmugDNA.28867.1.S1_at   | MmugDNA.28867.1 | 3.84  | 3.84  | 0    | 0.04 | 1     | 0.415785 | 0.303834 | 0.709528 | 0.561225 |
| MmugDNA.28868.1.S1_at   | MmugDNA.28868.1 | 11.61 | 10.81 | 0.2  | 0.56 | 1.74  | 0.034792 | 0.020826 | 0.333964 | 0.180995 |
| MmugDNA.28869.1.S1_s_at | MmugDNA.28869.1 | 9.09  | 9.41  | 0.17 | 0.34 | -1.25 | 0.682475 | 0.484449 | 0.85794  | 0.688478 |
| MmugDNA.2887.1.S1_at    | MmugDNA.2887.1  | 7.53  | 7.62  | 0.22 | 0.11 | -1.06 | 0.5445   | 0.324841 | 0.784442 | 0.575375 |
| MmugDNA.28871.1.S1_at   | MmugDNA.28871.1 | 8.09  | 7.84  | 0.21 | 0.94 | 1.19  | 0.798    | 0.821464 | 0.916257 | 0.897172 |
| MmugDNA.28872.1.S1_at   | MmugDNA.28872.1 | 4.24  | 4.85  | 0.39 | 0.78 | -1.52 | 0.285695 | 0.360944 | 0.625135 | 0.601991 |
| MmugDNA.28873.1.S1_at   | MmugDNA.28873.1 | 9.43  | 8.7   | 0.16 | 0.25 | 1.66  | 0.021838 | 0.012826 | 0.283865 | 0.145883 |
| MmugDNA.28874.1.S1_at   | MmugDNA.28874.1 | 9.5   | 9.3   | 0.21 | 0.45 | 1.15  | 0.69393  | 0.796418 | 0.864299 | 0.882655 |
| MmugDNA.28876.1.S1_at   | MmugDNA.28876.1 | 5.3   | 5.39  | 0.14 | 0.24 | -1.07 | 0.357562 | 0.516524 | 0.672471 | 0.709034 |
| MmugDNA.28877.1.S1_at   | MmugDNA.28877.1 | 11.08 | 11.05 | 0.1  | 0.3  | 1.02  | 0.917388 | 0.907546 | 0.967843 | 0.947728 |
| MmugDNA.28878.1.S1_at   | MmugDNA.28878.1 | 5.11  | 5.12  | 0.02 | 0.03 | -1    | 0.455639 | 0.724666 | 0.733901 | 0.840629 |
| MmugDNA.2888.1.S1_at    | MmugDNA.2888.1  | 10.06 | 9.47  | 0.27 | 0.38 | 1.51  | 0.048725 | 0.107464 | 0.369504 | 0.370311 |
| MmugDNA.28881.1.S1_at   | MmugDNA.28881.1 | 8.19  | 8.23  | 0.27 | 0.04 | -1.03 | 0.627999 | 0.812168 | 0.830492 | 0.89155  |
| MmugDNA.28882.1.S1_at   | MmugDNA.28882.1 | 3.64  | 3.91  | 0.15 | 0.16 | -1.21 | 0.228805 | 0.304381 | 0.58615  | 0.561684 |
| MmugDNA.28884.1.S1_at   | MmugDNA.28884.1 | 8.73  | 8.57  | 0.23 | 0.37 | 1.12  | 0.159028 | 0.178047 | 0.52416  | 0.454422 |
| MmugDNA.28885.1.S1_at   | MmugDNA.28885.1 | 9.97  | 9.11  | 0.09 | 0.4  | 1.81  | 0.044009 | 0.024922 | 0.357601 | 0.197766 |
| MmugDNA.28886.1.S1_at   | MmugDNA.28886.1 | 4.53  | 4.38  | 0.31 | 0.27 | 1.1   | 0.814263 | 0.094151 | 0.924743 | 0.350859 |
| MmugDNA.28887.1.S1_at   | MmugDNA.28887.1 | 4.15  | 4.32  | 0.15 | 0.16 | -1.13 | 0.204929 | 0.284886 | 0.567457 | 0.54701  |
| MmugDNA.28888.1.S1_at   | MmugDNA.28888.1 | 5.28  | 5.19  | 0.38 | 0.29 | 1.06  | 0.643716 | 0.638757 | 0.839585 | 0.787827 |
| MmugDNA.2889.1.S1_at    | MmugDNA.2889.1  | 2.96  | 2.9   | 0.02 | 0.08 | 1.04  | 0.27195  | 0.531112 | 0.615834 | 0.718416 |
| MmugDNA.28891.1.S1_at   | MmugDNA.28891.1 | 5.43  | 5.52  | 0.17 | 0.02 | -1.06 | 0.55422  | 0.008618 | 0.790667 | 0.123117 |
| MmugDNA.28892.1.S1_at   | MmugDNA.28892.1 | 5.76  | 5.45  | 1.02 | 0.34 | 1.24  | 0.333612 | 0.301193 | 0.657695 | 0.559356 |
| MmugDNA.28893.1.S1_at   | MmugDNA.28893.1 | 6.49  | 6.84  | 0.07 | 0.09 | -1.27 | 0.011662 | 0.007018 | 0.237051 | 0.113044 |
| MmugDNA.28894.1.S1_at   | MmugDNA.28894.1 | 6.34  | 6.71  | 0.22 | 0.29 | -1.29 | 0.225136 | 0.311292 | 0.58306  | 0.566351 |
| MmugDNA.28895.1.S1_at   | MmugDNA.28895.1 | 5.5   | 5.51  | 0.27 | 0.19 | -1.01 | 0.759049 | 0.617285 | 0.898221 | 0.773326 |
| MmugDNA.28896.1.S1_at   | MmugDNA.28896.1 | 3.71  | 3.59  | 0.16 | 0.19 | 1.09  | 0.391132 | 0.329466 | 0.693921 | 0.578781 |

|                         |                 |       |       |      |      |       |          |          |          |          |
|-------------------------|-----------------|-------|-------|------|------|-------|----------|----------|----------|----------|
| MmugDNA.28897.1.S1_at   | MmugDNA.28897.1 | 6.5   | 6.96  | 0.18 | 0.28 | -1.38 | 0.075225 | 0.075988 | 0.422122 | 0.320676 |
| MmugDNA.28898.1.S1_at   | MmugDNA.28898.1 | 3.09  | 3.01  | 0.29 | 0.33 | 1.06  | 0.867129 | 0.897217 | 0.946979 | 0.941342 |
| MmugDNA.28899.1.S1_at   | MmugDNA.28899.1 | 3.95  | 3.89  | 0.2  | 0.09 | 1.05  | 0.677528 | 0.299285 | 0.855526 | 0.557769 |
| MmugDNA.2890.1.S1_at    | MmugDNA.2890.1  | 5.34  | 5.54  | 0.92 | 0.32 | -1.15 | 0.950585 | 0.934771 | 0.981366 | 0.963044 |
| MmugDNA.28900.1.S1_at   | MmugDNA.28900.1 | 6.32  | 6.28  | 0.15 | 0.12 | 1.03  | 0.811586 | 0.827223 | 0.923289 | 0.9008   |
| MmugDNA.28901.1.S1_at   | MmugDNA.28901.1 | 5.44  | 5.56  | 0.23 | 0.13 | -1.09 | 0.465496 | 0.12105  | 0.739925 | 0.39006  |
| MmugDNA.28902.1.S1_at   | MmugDNA.28902.1 | 11.35 | 10.78 | 0.09 | 0.21 | 1.48  | 0.02854  | 0.00781  | 0.311661 | 0.117858 |
| MmugDNA.28904.1.S1_at   | MmugDNA.28904.1 | 3.46  | 3.46  | 0.03 | 0.03 | 1     | 0.924363 | 0.064983 | 0.970632 | 0.300855 |
| MmugDNA.28905.1.S1_at   | MmugDNA.28905.1 | 6.7   | 6.73  | 0.34 | 0.36 | -1.02 | 0.445901 | 0.542591 | 0.728042 | 0.725615 |
| MmugDNA.28906.1.S1_at   | MmugDNA.28906.1 | 7.04  | 7.23  | 0.11 | 0.09 | -1.14 | 0.164413 | 0.099988 | 0.528313 | 0.3588   |
| MmugDNA.28908.1.S1_at   | MmugDNA.28908.1 | 6.91  | 7.03  | 0.11 | 0.18 | -1.08 | 0.951685 | 0.994061 | 0.981942 | 0.996398 |
| MmugDNA.28908.1.S1_s_at | MmugDNA.28908.1 | 8.39  | 8.31  | 0.19 | 0.15 | 1.06  | 0.776324 | 0.824836 | 0.906309 | 0.899424 |
| MmugDNA.28909.1.S1_at   | MmugDNA.28909.1 | 3.98  | 4.29  | 0.1  | 0.31 | -1.25 | 0.420213 | 0.588256 | 0.712267 | 0.754847 |
| MmugDNA.2891.1.S1_at    | MmugDNA.2891.1  | 5.52  | 5.64  | 0.08 | 0.03 | -1.09 | 0.073056 | 0.034391 | 0.418338 | 0.229384 |
| MmugDNA.28910.1.S1_at   | MmugDNA.28910.1 | 5.06  | 5.12  | 0.24 | 0.58 | -1.04 | 0.526183 | 0.416122 | 0.773996 | 0.64135  |
| MmugDNA.28912.1.S1_at   | MmugDNA.28912.1 | 3.46  | 3.71  | 0.43 | 0.25 | -1.2  | 0.662072 | 0.887289 | 0.848422 | 0.93582  |
| MmugDNA.28913.1.S1_at   | MmugDNA.28913.1 | 5.6   | 5.46  | 0.7  | 0.41 | 1.11  | 0.199056 | 0.213245 | 0.5621   | 0.487131 |
| MmugDNA.28914.1.S1_at   | MmugDNA.28914.1 | 12.3  | 11.82 | 0.13 | 0.21 | 1.4   | 0.036426 | 0.022694 | 0.339201 | 0.188693 |
| MmugDNA.28915.1.S1_at   | MmugDNA.28915.1 | 3.2   | 3.15  | 0.19 | 0.01 | 1.04  | 0.6053   | 0.858136 | 0.81824  | 0.91909  |
| MmugDNA.28917.1.S1_at   | MmugDNA.28917.1 | 3.92  | 4.33  | 0.17 | 0.62 | -1.34 | 0.118111 | 0.159207 | 0.482198 | 0.435217 |
| MmugDNA.28920.1.S1_at   | MmugDNA.28920.1 | 3.91  | 4.23  | 0.06 | 0.05 | -1.25 | 0.002623 | 0.010653 | 0.164386 | 0.134769 |
| MmugDNA.28921.1.S1_at   | MmugDNA.28921.1 | 4.89  | 4.95  | 0.53 | 0.16 | -1.04 | 0.499696 | 0.399434 | 0.759313 | 0.629798 |
| MmugDNA.28923.1.S1_at   | MmugDNA.28923.1 | 4.82  | 4.94  | 0.2  | 0.31 | -1.09 | 0.849168 | 0.802755 | 0.939404 | 0.886441 |
| MmugDNA.28924.1.S1_at   | MmugDNA.28924.1 | 6.73  | 6.65  | 0.15 | 0.11 | 1.06  | 0.173314 | 0.184714 | 0.537006 | 0.460645 |
| MmugDNA.28925.1.S1_at   | MmugDNA.28925.1 | 4.68  | 4.69  | 0.13 | 0.07 | -1    | 0.711097 | 0.761498 | 0.873412 | 0.861416 |
| MmugDNA.28926.1.S1_at   | MmugDNA.28926.1 | 6.47  | 7.16  | 0.32 | 0.3  | -1.61 | 0.121703 | 0.088966 | 0.486508 | 0.342822 |
| MmugDNA.28928.1.S1_at   | MmugDNA.28928.1 | 10.44 | 9.84  | 0.23 | 0.51 | 1.52  | 0.13363  | 0.141977 | 0.500334 | 0.415525 |
| MmugDNA.28929.1.S1_at   | MmugDNA.28929.1 | 4.67  | 4.71  | 0.14 | 0.08 | -1.03 | 0.516499 | 0.006083 | 0.768129 | 0.106306 |
| MmugDNA.2893.1.S1_at    | MmugDNA.2893.1  | 6.48  | 6.63  | 0.28 | 0.1  | -1.12 | 0.637063 | 0.76136  | 0.83594  | 0.861352 |
| MmugDNA.28930.1.S1_at   | MmugDNA.28930.1 | 8.52  | 8.02  | 0.29 | 0.84 | 1.42  | 0.425258 | 0.526801 | 0.715047 | 0.715627 |
| MmugDNA.28931.1.S1_at   | MmugDNA.28931.1 | 7.99  | 8.45  | 0.27 | 0.92 | -1.37 | 0.128775 | 0.140353 | 0.494664 | 0.413542 |
| MmugDNA.28932.1.S1_at   | MmugDNA.28932.1 | 5.72  | 5.86  | 0.41 | 0.14 | -1.1  | 0.848479 | 0.369256 | 0.939211 | 0.608691 |
| MmugDNA.28934.1.S1_at   | MmugDNA.28934.1 | 4.43  | 4.94  | 0.26 | 0.25 | -1.42 | 0.138469 | 0.074959 | 0.505745 | 0.318932 |
| MmugDNA.28935.1.S1_at   | MmugDNA.28935.1 | 4.88  | 5.11  | 0.25 | 0.27 | -1.17 | 0.755606 | 0.172511 | 0.896094 | 0.448864 |
| MmugDNA.28937.1.S1_at   | MmugDNA.28937.1 | 5.12  | 4.36  | 0.86 | 0.92 | 1.68  | 0.762758 | 0.671786 | 0.900031 | 0.808157 |
| MmugDNA.28939.1.S1_at   | MmugDNA.28939.1 | 4.02  | 4.02  | 0.01 | 0    | 1     | 0.316994 | 0.688154 | 0.647775 | 0.817952 |
| MmugDNA.2894.1.S1_at    | MmugDNA.2894.1  | 5.52  | 5.78  | 0.57 | 0.23 | -1.19 | 0.488941 | 0.567068 | 0.753397 | 0.740985 |
| MmugDNA.28940.1.S1_at   | MmugDNA.28940.1 | 10.32 | 9.99  | 0.15 | 0.38 | 1.26  | 0.239015 | 0.187555 | 0.59213  | 0.463628 |
| MmugDNA.28941.1.S1_at   | MmugDNA.28941.1 | 3.05  | 2.89  | 0.26 | 0.17 | 1.12  | 0.833522 | 0.721597 | 0.932352 | 0.838759 |
| MmugDNA.28942.1.S1_at   | MmugDNA.28942.1 | 8.52  | 8.6   | 0.2  | 0.61 | -1.06 | 0.989981 | 0.752313 | 0.996447 | 0.855787 |
| MmugDNA.28943.1.S1_at   | MmugDNA.28943.1 | 4.3   | 4.27  | 0.19 | 0.18 | 1.01  | 0.451072 | 0.61606  | 0.731469 | 0.77245  |



|                         |                 |       |       |      |      |       |          |          |          |          |
|-------------------------|-----------------|-------|-------|------|------|-------|----------|----------|----------|----------|
| MmugDNA.28944.1.S1_at   | MmugDNA.28944.1 | 4.9   | 5.74  | 0.52 | 0.34 | -1.78 | 0.04725  | 0.022088 | 0.365679 | 0.185972 |
| MmugDNA.28945.1.S1_at   | MmugDNA.28945.1 | 5.85  | 5.68  | 0.31 | 0.85 | 1.13  | 0.801544 | 0.901563 | 0.918152 | 0.943991 |
| MmugDNA.28946.1.S1_at   | MmugDNA.28946.1 | 4.53  | 4.35  | 1.38 | 0.46 | 1.13  | 0.216098 | 0.25341  | 0.575954 | 0.521713 |
| MmugDNA.28947.1.S1_at   | MmugDNA.28947.1 | 8.97  | 9.64  | 0.47 | 1.33 | -1.59 | 0.593185 | 0.665756 | 0.81131  | 0.804165 |
| MmugDNA.28948.1.S1_at   | MmugDNA.28948.1 | 9.74  | 9.59  | 0.4  | 0.17 | 1.11  | 0.279105 | 0.377105 | 0.620933 | 0.614795 |
| MmugDNA.28948.1.S1_s_at | MmugDNA.28948.1 | 10.82 | 10.58 | 0.4  | 0.25 | 1.18  | 0.282905 | 0.374859 | 0.623131 | 0.613091 |
| MmugDNA.28949.1.S1_at   | MmugDNA.28949.1 | 5.06  | 5.11  | 0.26 | 0.5  | -1.04 | 0.723891 | 0.86397  | 0.879238 | 0.922815 |
| MmugDNA.28950.1.S1_at   | MmugDNA.28950.1 | 5.34  | 5.55  | 0.04 | 0.19 | -1.16 | 0.334613 | 0.157253 | 0.658444 | 0.432729 |
| MmugDNA.28951.1.S1_at   | MmugDNA.28951.1 | 5.94  | 5.94  | 0.56 | 0.12 | -1    | 0.350294 | 0.32625  | 0.66846  | 0.576452 |
| MmugDNA.28952.1.S1_at   | MmugDNA.28952.1 | 4.67  | 4.56  | 0.18 | 0.07 | 1.08  | 0.395931 | 0.603008 | 0.696652 | 0.763857 |
| MmugDNA.28953.1.S1_at   | MmugDNA.28953.1 | 2.72  | 2.82  | 0.11 | 0.3  | -1.07 | 0.648234 | 0.825154 | 0.84178  | 0.899551 |
| MmugDNA.28954.1.S1_at   | MmugDNA.28954.1 | 11.44 | 11.47 | 0.22 | 0.21 | -1.02 | 0.864373 | 0.540017 | 0.945529 | 0.724035 |
| MmugDNA.28955.1.S1_at   | MmugDNA.28955.1 | 12.05 | 12.48 | 0.22 | 0.23 | -1.35 | 0.13112  | 0.246182 | 0.497595 | 0.515883 |
| MmugDNA.28956.1.S1_s_at | MmugDNA.28956.1 | 9.15  | 8.62  | 0.21 | 0.09 | 1.44  | 0.029228 | 0.010933 | 0.313575 | 0.136187 |
| MmugDNA.28957.1.S1_at   | MmugDNA.28957.1 | 10.08 | 9.51  | 0.32 | 0.25 | 1.49  | 0.153569 | 0.093251 | 0.51802  | 0.349378 |
| MmugDNA.2896.1.S1_at    | MmugDNA.2896.1  | 11.19 | 11.24 | 0.29 | 0.34 | -1.04 | 0.849354 | 0.328216 | 0.93953  | 0.577947 |
| MmugDNA.28960.1.S1_x_at | MmugDNA.28960.1 | 8.86  | 8.36  | 0.18 | 0.14 | 1.42  | 0.013823 | 0.004844 | 0.249758 | 0.097102 |
| MmugDNA.28961.1.S1_a_at | MmugDNA.28961.1 | 4.01  | 4.14  | 0.1  | 0.16 | -1.1  | 0.147766 | 0.138618 | 0.513337 | 0.41168  |
| MmugDNA.28962.1.S1_s_at | MmugDNA.28962.1 | 9.44  | 8.79  | 0.12 | 0.19 | 1.57  | 0.003065 | 0.000541 | 0.172102 | 0.040593 |
| MmugDNA.28964.1.S1_at   | MmugDNA.28964.1 | 5.27  | 4.64  | 0.55 | 0.84 | 1.55  | 0.240222 | 0.306217 | 0.593068 | 0.562907 |
| MmugDNA.28966.1.S1_at   | MmugDNA.28966.1 | 4.02  | 3.74  | 0.48 | 0.59 | 1.21  | 0.870184 | 0.246413 | 0.9481   | 0.515899 |
| MmugDNA.28967.1.S1_at   | MmugDNA.28967.1 | 3.38  | 3.39  | 0.08 | 0.13 | -1    | 0.223327 | 0.316838 | 0.581813 | 0.570212 |
| MmugDNA.28968.1.S1_at   | MmugDNA.28968.1 | 6.9   | 5.93  | 0.19 | 0.11 | 1.95  | 0.001928 | 0.000375 | 0.155636 | 0.037273 |
| MmugDNA.28969.1.S1_at   | MmugDNA.28969.1 | 6.81  | 7.53  | 0.2  | 0.37 | -1.64 | 0.061853 | 0.019795 | 0.396761 | 0.176951 |
| MmugDNA.28970.1.S1_at   | MmugDNA.28970.1 | 6.86  | 7.27  | 0.61 | 0.8  | -1.33 | 0.484978 | 0.628007 | 0.750701 | 0.780911 |
| MmugDNA.28971.1.S1_at   | MmugDNA.28971.1 | 6.57  | 6.65  | 0.42 | 0.15 | -1.06 | 0.928627 | 0.463283 | 0.972578 | 0.674323 |
| MmugDNA.28971.1.S1_x_at | MmugDNA.28971.1 | 6.27  | 6.49  | 0.64 | 0.11 | -1.16 | 0.970144 | 0.569913 | 0.988583 | 0.742739 |
| MmugDNA.28972.1.S1_at   | MmugDNA.28972.1 | 6     | 6.11  | 0.37 | 0.31 | -1.08 | 0.776764 | 0.387569 | 0.906522 | 0.622193 |
| MmugDNA.28973.1.S1_at   | MmugDNA.28973.1 | 6     | 7.68  | 0.55 | 0.56 | -3.19 | 0.016842 | 0.007795 | 0.266013 | 0.117765 |
| MmugDNA.28974.1.S1_at   | MmugDNA.28974.1 | 9.17  | 8.94  | 0.24 | 0.58 | 1.18  | 0.255368 | 0.305217 | 0.603191 | 0.562255 |
| MmugDNA.28975.1.S1_at   | MmugDNA.28975.1 | 5.43  | 5.7   | 0.14 | 0.36 | -1.21 | 0.148316 | 0.047292 | 0.513732 | 0.262176 |
| MmugDNA.28976.1.S1_at   | MmugDNA.28976.1 | 6.2   | 6.19  | 0.61 | 0.56 | 1.01  | 0.682369 | 0.250857 | 0.85789  | 0.51956  |
| MmugDNA.28977.1.S1_at   | MmugDNA.28977.1 | 9.96  | 9.3   | 0.14 | 0.32 | 1.58  | 0.075752 | 0.079995 | 0.423457 | 0.327352 |
| MmugDNA.28978.1.S1_at   | MmugDNA.28978.1 | 4.81  | 5.61  | 0.29 | 0.67 | -1.74 | 0.142292 | 0.160516 | 0.509602 | 0.436686 |
| MmugDNA.2898.1.S1_at    | MmugDNA.2898.1  | 5.75  | 5.97  | 0.09 | 0.14 | -1.17 | 0.083909 | 0.035003 | 0.436311 | 0.231203 |
| MmugDNA.28980.1.S1_at   | MmugDNA.28980.1 | 3.72  | 3.64  | 0.1  | 0.1  | 1.06  | 0.593003 | 0.847751 | 0.811221 | 0.913501 |
| MmugDNA.28981.1.S1_at   | MmugDNA.28981.1 | 10.7  | 11.11 | 0.21 | 0.33 | -1.33 | 0.656479 | 0.100547 | 0.845392 | 0.359831 |
| MmugDNA.28983.1.S1_at   | MmugDNA.28983.1 | 4.49  | 4.73  | 0.16 | 0.04 | -1.18 | 0.262056 | 0.278629 | 0.608753 | 0.54233  |
| MmugDNA.28985.1.S1_at   | MmugDNA.28985.1 | 4.67  | 4.7   | 0.14 | 0    | -1.02 | 0.592821 | 0.825373 | 0.81121  | 0.899693 |
| MmugDNA.28988.1.S1_s_at | MmugDNA.28988.1 | 9.91  | 9.94  | 0.25 | 0.25 | -1.02 | 0.618691 | 0.321319 | 0.82527  | 0.57319  |
| MmugDNA.28989.1.S1_at   | MmugDNA.28989.1 | 6.8   | 7.06  | 0.23 | 0.12 | -1.2  | 0.241831 | 0.283087 | 0.594001 | 0.545692 |

|                       |                 |       |       |      |      |       |          |          |          |          |
|-----------------------|-----------------|-------|-------|------|------|-------|----------|----------|----------|----------|
| MmugDNA.28990.1.S1_at | MmugDNA.28990.1 | 6.45  | 6.68  | 0.15 | 0.35 | -1.17 | 0.596342 | 0.318525 | 0.812857 | 0.571239 |
| MmugDNA.28991.1.S1_at | MmugDNA.28991.1 | 4.35  | 4.39  | 0.1  | 0.14 | -1.02 | 0.477183 | 0.536872 | 0.746539 | 0.722119 |
| MmugDNA.28992.1.S1_at | MmugDNA.28992.1 | 4.52  | 4.68  | 0.1  | 0.17 | -1.11 | 0.385954 | 0.570324 | 0.690975 | 0.743056 |
| MmugDNA.28994.1.S1_at | MmugDNA.28994.1 | 3.04  | 3.11  | 0.04 | 0.18 | -1.04 | 0.768216 | 0.749732 | 0.902604 | 0.854564 |
| MmugDNA.28995.1.S1_at | MmugDNA.28995.1 | 3     | 3.01  | 0.1  | 0.2  | -1.01 | 0.906142 | 0.75765  | 0.962684 | 0.858927 |
| MmugDNA.28996.1.S1_at | MmugDNA.28996.1 | 4.68  | 4.68  | 0.01 | 0.11 | 1     | 0.976023 | 0.998656 | 0.990716 | 0.99928  |
| MmugDNA.28999.1.S1_at | MmugDNA.28999.1 | 6.88  | 6.99  | 0.1  | 0.42 | -1.08 | 0.529675 | 0.705032 | 0.77625  | 0.828945 |
| MmugDNA.290.1.S1_at   | MmugDNA.290.1   | 10.68 | 10.79 | 0.31 | 0.16 | -1.08 | 0.316759 | 0.431215 | 0.647694 | 0.652219 |
| MmugDNA.2900.1.S1_at  | MmugDNA.2900.1  | 6.5   | 6.27  | 0.13 | 0.39 | 1.17  | 0.61215  | 0.710945 | 0.822084 | 0.832335 |
| MmugDNA.29000.1.S1_at | MmugDNA.29000.1 | 2.9   | 4.28  | 0.78 | 0.5  | -2.6  | 0.281705 | 0.568271 | 0.62238  | 0.741876 |
| MmugDNA.29002.1.S1_at | MmugDNA.29002.1 | 3.8   | 3.48  | 0.09 | 0.68 | 1.25  | 0.882483 | 0.957237 | 0.952793 | 0.975806 |
| MmugDNA.29003.1.S1_at | MmugDNA.29003.1 | 5.62  | 5.55  | 0.07 | 0.11 | 1.05  | 0.935118 | 0.487596 | 0.974926 | 0.690565 |
| MmugDNA.29004.1.S1_at | MmugDNA.29004.1 | 6.6   | 6.68  | 0.09 | 0.07 | -1.05 | 0.27597  | 0.14051  | 0.61808  | 0.413727 |
| MmugDNA.29005.1.S1_at | MmugDNA.29005.1 | 4.78  | 4.75  | 0.15 | 0.31 | 1.02  | 0.829512 | 0.952502 | 0.930814 | 0.973066 |
| MmugDNA.29008.1.S1_at | MmugDNA.29008.1 | 6.92  | 6.98  | 0.17 | 0.17 | -1.05 | 0.672891 | 0.051388 | 0.853295 | 0.272154 |
| MmugDNA.29009.1.S1_at | MmugDNA.29009.1 | 10.49 | 10.19 | 0.36 | 0.56 | 1.23  | 0.63724  | 0.716248 | 0.836    | 0.835531 |
| MmugDNA.29010.1.S1_at | MmugDNA.29010.1 | 7.7   | 7.97  | 0.32 | 0.33 | -1.2  | 0.912934 | 0.467482 | 0.965496 | 0.677091 |
| MmugDNA.29011.1.S1_at | MmugDNA.29011.1 | 3.36  | 3.4   | 0.12 | 0.32 | -1.02 | 0.278152 | 0.36124  | 0.620235 | 0.602104 |
| MmugDNA.29012.1.S1_at | MmugDNA.29012.1 | 3.56  | 3.54  | 0.13 | 0.03 | 1.01  | 0.63814  | 0.713699 | 0.836489 | 0.833916 |
| MmugDNA.29013.1.S1_at | MmugDNA.29013.1 | 8.21  | 8.29  | 0.18 | 0.03 | -1.06 | 0.72757  | 0.057553 | 0.88145  | 0.286008 |
| MmugDNA.29015.1.S1_at | MmugDNA.29015.1 | 8.65  | 8.46  | 0.45 | 0.74 | 1.14  | 0.908124 | 0.784209 | 0.963616 | 0.875049 |
| MmugDNA.29016.1.S1_at | MmugDNA.29016.1 | 12.1  | 12.41 | 0.1  | 0.07 | -1.23 | 0.018962 | 0.025295 | 0.272319 | 0.199522 |
| MmugDNA.29017.1.S1_at | MmugDNA.29017.1 | 3.3   | 3.15  | 0.16 | 0.03 | 1.11  | 0.148182 | 0.506008 | 0.513545 | 0.702337 |
| MmugDNA.29019.1.S1_at | MmugDNA.29019.1 | 9.62  | 9.3   | 0.24 | 0.32 | 1.24  | 0.151219 | 0.175439 | 0.515989 | 0.452157 |
| MmugDNA.29020.1.S1_at | MmugDNA.29020.1 | 5.29  | 5.23  | 0.22 | 0.26 | 1.04  | 0.801031 | 0.442618 | 0.917961 | 0.660578 |
| MmugDNA.29021.1.S1_at | MmugDNA.29021.1 | 5.38  | 5.38  | 0.02 | 0.1  | -1    | 0.274855 | 0.2517   | 0.617628 | 0.520444 |
| MmugDNA.29024.1.S1_at | MmugDNA.29024.1 | 5.22  | 5.43  | 0.1  | 0.3  | -1.16 | 0.100038 | 0.109282 | 0.460429 | 0.37308  |
| MmugDNA.29026.1.S1_at | MmugDNA.29026.1 | 10.38 | 9.88  | 0.08 | 0.18 | 1.41  | 0.006102 | 0.002119 | 0.195505 | 0.068092 |
| MmugDNA.29027.1.S1_at | MmugDNA.29027.1 | 5.41  | 5.66  | 0.13 | 0.2  | -1.19 | 0.278771 | 0.068054 | 0.620824 | 0.307142 |
| MmugDNA.29028.1.S1_at | MmugDNA.29028.1 | 3.9   | 3.6   | 0.04 | 0.15 | 1.23  | 0.041923 | 0.047165 | 0.353435 | 0.261755 |
| MmugDNA.2903.1.S1_at  | MmugDNA.2903.1  | 9.04  | 8.71  | 0.2  | 0.63 | 1.26  | 0.712699 | 0.361499 | 0.874192 | 0.602232 |
| MmugDNA.29031.1.S1_at | MmugDNA.29031.1 | 6.59  | 7.1   | 0.4  | 0.15 | -1.43 | 0.028138 | 0.018324 | 0.30978  | 0.170215 |
| MmugDNA.29032.1.S1_at | MmugDNA.29032.1 | 6.76  | 6.4   | 0.2  | 0.28 | 1.28  | 0.372541 | 0.498519 | 0.682813 | 0.697582 |
| MmugDNA.29033.1.S1_at | MmugDNA.29033.1 | 10.57 | 10.38 | 0.23 | 0.08 | 1.14  | 0.08088  | 0.07607  | 0.431371 | 0.320843 |
| MmugDNA.29034.1.S1_at | MmugDNA.29034.1 | 9.37  | 9.13  | 0.36 | 0.93 | 1.18  | 0.700062 | 0.863662 | 0.867253 | 0.922638 |
| MmugDNA.29035.1.S1_at | MmugDNA.29035.1 | 3.61  | 3.66  | 0.35 | 0.07 | -1.03 | 0.407596 | 0.510721 | 0.70471  | 0.705126 |
| MmugDNA.29037.1.S1_at | MmugDNA.29037.1 | 5.13  | 4.47  | 0.45 | 0.04 | 1.58  | 0.193554 | 0.257873 | 0.557166 | 0.525467 |
| MmugDNA.29039.1.S1_at | MmugDNA.29039.1 | 10.41 | 10.79 | 0.28 | 0.09 | -1.3  | 0.072855 | 0.298836 | 0.418008 | 0.557444 |
| MmugDNA.2904.1.S1_at  | MmugDNA.2904.1  | 5.81  | 5.22  | 0.34 | 0.44 | 1.5   | 0.220552 | 0.276221 | 0.579612 | 0.540183 |
| MmugDNA.29041.1.S1_at | MmugDNA.29041.1 | 4.8   | 4.62  | 0.51 | 0.42 | 1.13  | 0.396497 | 0.453526 | 0.697022 | 0.667957 |
| MmugDNA.29043.1.S1_at | MmugDNA.29043.1 | 8.81  | 9.03  | 0.29 | 0.28 | -1.17 | 0.173575 | 0.116544 | 0.537183 | 0.383705 |

|                         |                 |       |       |      |      |       |          |          |          |          |
|-------------------------|-----------------|-------|-------|------|------|-------|----------|----------|----------|----------|
| MmugDNA.29044.1.S1_at   | MmugDNA.29044.1 | 5.96  | 6.02  | 0.04 | 0.21 | -1.04 | 0.636308 | 0.755057 | 0.835468 | 0.857434 |
| MmugDNA.29045.1.S1_at   | MmugDNA.29045.1 | 4.24  | 4.15  | 0.28 | 0.06 | 1.06  | 0.493149 | 0.045783 | 0.756013 | 0.258303 |
| MmugDNA.29050.1.S1_at   | MmugDNA.29050.1 | 8.59  | 8.64  | 0.31 | 0.45 | -1.04 | 0.954983 | 0.785355 | 0.983073 | 0.875741 |
| MmugDNA.29051.1.S1_at   | MmugDNA.29051.1 | 8.94  | 8.57  | 0.29 | 0.5  | 1.29  | 0.782825 | 0.392932 | 0.909285 | 0.625917 |
| MmugDNA.29052.1.S1_at   | MmugDNA.29052.1 | 6.18  | 5.73  | 1.04 | 0.51 | 1.37  | 0.435043 | 0.527549 | 0.72094  | 0.716154 |
| MmugDNA.29054.1.S1_at   | MmugDNA.29054.1 | 4.39  | 4.5   | 0.07 | 0.09 | -1.08 | 0.383455 | 0.20186  | 0.689384 | 0.476373 |
| MmugDNA.29056.1.S1_at   | MmugDNA.29056.1 | 7.25  | 7.17  | 0.1  | 0.06 | 1.06  | 0.588054 | 0.849423 | 0.808837 | 0.914533 |
| MmugDNA.29057.1.S1_at   | MmugDNA.29057.1 | 3.57  | 3.51  | 0.03 | 0.07 | 1.04  | 0.962523 | 0.183581 | 0.985588 | 0.459681 |
| MmugDNA.29058.1.S1_at   | MmugDNA.29058.1 | 10.89 | 10.59 | 0.03 | 0.31 | 1.23  | 0.147364 | 0.179039 | 0.513141 | 0.455404 |
| MmugDNA.29059.1.S1_at   | MmugDNA.29059.1 | 3.83  | 3.99  | 0.22 | 0.57 | -1.11 | 0.243427 | 0.251901 | 0.595206 | 0.520632 |
| MmugDNA.29060.1.S1_at   | MmugDNA.29060.1 | 5.27  | 4.91  | 0.23 | 0.28 | 1.29  | 0.137839 | 0.134757 | 0.505265 | 0.40678  |
| MmugDNA.29061.1.S1_at   | MmugDNA.29061.1 | 4.75  | 5.07  | 0.16 | 0.1  | -1.25 | 0.042295 | 0.031793 | 0.354575 | 0.220741 |
| MmugDNA.43339.1.S1_s_at | MmugDNA.43339.1 | 6.73  | 7.08  | 0.5  | 0.51 | -1.28 | 0.434177 | 0.031371 | 0.720325 | 0.219065 |
| MmugDNA.29063.1.S1_at   | MmugDNA.29063.1 | 4.47  | 4.5   | 0.02 | 0.22 | -1.02 | 0.706903 | 0.889363 | 0.870891 | 0.93695  |
| MmugDNA.29064.1.S1_at   | MmugDNA.29064.1 | 3.78  | 3.81  | 0.02 | 0.11 | -1.02 | 0.56947  | 0.708424 | 0.799047 | 0.830919 |
| MmugDNA.29065.1.S1_at   | MmugDNA.29065.1 | 6.99  | 7.07  | 0.72 | 0.11 | -1.06 | 0.913099 | 0.814578 | 0.965594 | 0.892959 |
| MmugDNA.29067.1.S1_at   | MmugDNA.29067.1 | 5.47  | 5.52  | 0.19 | 0.25 | -1.03 | 0.791365 | 0.261085 | 0.91336  | 0.527481 |
| MmugDNA.29069.1.S1_at   | MmugDNA.29069.1 | 8.35  | 8.48  | 0.2  | 0.15 | -1.1  | 0.988697 | 0.403969 | 0.995952 | 0.63254  |
| MmugDNA.2907.1.S1_at    | MmugDNA.2907.1  | 3.69  | 3.69  | 0.56 | 0.19 | 1     | 0.390753 | 0.233887 | 0.693809 | 0.505169 |
| MmugDNA.29070.1.S1_at   | MmugDNA.29070.1 | 6.1   | 6.06  | 0.38 | 0.07 | 1.03  | 0.927399 | 0.977782 | 0.971995 | 0.987873 |
| MmugDNA.29071.1.S1_at   | MmugDNA.29071.1 | 5.22  | 5.24  | 0.14 | 0.03 | -1.01 | 0.793591 | 0.94359  | 0.914488 | 0.967955 |
| MmugDNA.29072.1.S1_at   | MmugDNA.29072.1 | 7.04  | 7.22  | 0.47 | 0.05 | -1.14 | 0.859172 | 0.752662 | 0.943112 | 0.855968 |
| MmugDNA.29074.1.S1_at   | MmugDNA.29074.1 | 7.91  | 8.44  | 0.65 | 2.25 | -1.44 | 0.617551 | 0.81129  | 0.824768 | 0.891123 |
| MmugDNA.29076.1.S1_at   | MmugDNA.29076.1 | 7.07  | 6.91  | 0.93 | 0.36 | 1.12  | 0.614696 | 0.10594  | 0.823258 | 0.36826  |
| MmugDNA.29077.1.S1_at   | MmugDNA.29077.1 | 8.83  | 8.35  | 0.26 | 0.01 | 1.4   | 0.092232 | 0.06277  | 0.448724 | 0.297193 |
| MmugDNA.29078.1.S1_at   | MmugDNA.29078.1 | 5.55  | 5.69  | 0.16 | 0.25 | -1.1  | 0.394228 | 0.597325 | 0.695705 | 0.760137 |
| MmugDNA.29079.1.S1_at   | MmugDNA.29079.1 | 6.23  | 7.44  | 0.4  | 1.13 | -2.32 | 0.107598 | 0.127674 | 0.468045 | 0.398581 |
| MmugDNA.2908.1.S1_at    | MmugDNA.2908.1  | 3.93  | 4.1   | 0.33 | 0.16 | -1.12 | 0.937978 | 0.195846 | 0.976203 | 0.470737 |
| MmugDNA.29080.1.S1_at   | MmugDNA.29080.1 | 7.93  | 8.34  | 0.19 | 0.45 | -1.33 | 0.135214 | 0.082413 | 0.501995 | 0.331381 |
| MmugDNA.29081.1.S1_at   | MmugDNA.29081.1 | 10.85 | 11.02 | 0.31 | 0.14 | -1.13 | 0.89189  | 0.245596 | 0.956948 | 0.515348 |
| MmugDNA.29082.1.S1_at   | MmugDNA.29082.1 | 3.46  | 3.51  | 0.07 | 0.15 | -1.04 | 0.415523 | 0.6284   | 0.709528 | 0.781141 |
| MmugDNA.29083.1.S1_at   | MmugDNA.29083.1 | 5.29  | 5.29  | 0.12 | 0.03 | -1    | 0.502776 | 0.263481 | 0.760493 | 0.529799 |
| MmugDNA.29084.1.S1_at   | MmugDNA.29084.1 | 10.37 | 10.06 | 0.05 | 0.87 | 1.24  | 0.525706 | 0.229615 | 0.773877 | 0.501574 |
| MmugDNA.29085.1.S1_at   | MmugDNA.29085.1 | 5.68  | 5.66  | 0.08 | 0.37 | 1.02  | 0.894609 | 0.98803  | 0.957917 | 0.993307 |
| MmugDNA.29086.1.S1_at   | MmugDNA.29086.1 | 11.59 | 11.87 | 0.16 | 0.09 | -1.22 | 0.091637 | 0.013439 | 0.447726 | 0.148537 |
| MmugDNA.29087.1.S1_at   | MmugDNA.29087.1 | 6.87  | 5.54  | 0.2  | 0.75 | 2.51  | 0.013971 | 0.004621 | 0.250102 | 0.094974 |
| MmugDNA.2909.1.S1_at    | MmugDNA.2909.1  | 5.24  | 5.24  | 0.08 | 0.09 | 1     | 0.973651 | 0.893775 | 0.989619 | 0.939386 |
| MmugDNA.29091.1.S1_at   | MmugDNA.29091.1 | 7.01  | 6.98  | 0.15 | 0.04 | 1.02  | 0.816397 | 0.200246 | 0.925448 | 0.474689 |
| MmugDNA.29092.1.S1_at   | MmugDNA.29092.1 | 4.1   | 3.93  | 0.09 | 0.2  | 1.12  | 0.095289 | 0.081262 | 0.453089 | 0.329351 |
| MmugDNA.29095.1.S1_at   | MmugDNA.29095.1 | 4.83  | 4.62  | 0.34 | 0.21 | 1.15  | 0.166321 | 0.23654  | 0.529929 | 0.507364 |
| MmugDNA.29096.1.S1_s_at | MmugDNA.29096.1 | 8.01  | 8.67  | 0.15 | 0.29 | -1.58 | 0.017662 | 0.00351  | 0.267454 | 0.08503  |

|                         |                 |       |       |      |      |       |          |          |          |          |
|-------------------------|-----------------|-------|-------|------|------|-------|----------|----------|----------|----------|
| MmugDNA.29097.1.S1_at   | MmugDNA.29097.1 | 3.8   | 3.75  | 0.01 | 0.1  | 1.04  | 0.277625 | 0.205287 | 0.619765 | 0.479606 |
| MmugDNA.29098.1.S1_at   | MmugDNA.29098.1 | 11.27 | 11.75 | 0.18 | 0.28 | -1.4  | 0.32456  | 0.158974 | 0.651941 | 0.435156 |
| MmugDNA.29099.1.S1_at   | MmugDNA.29099.1 | 13.63 | 13.35 | 0.06 | 0.07 | 1.21  | 0.007308 | 0.002517 | 0.206925 | 0.074158 |
| MmugDNA.291.1.S1_at     | MmugDNA.291.1   | 5.66  | 5.48  | 0.34 | 0.26 | 1.13  | 0.400079 | 0.078863 | 0.699692 | 0.325838 |
| MmugDNA.2910.1.S1_at    | MmugDNA.2910.1  | 9.72  | 9.54  | 0.35 | 0.94 | 1.14  | 0.188295 | 0.22354  | 0.551276 | 0.496385 |
| MmugDNA.29102.1.S1_at   | MmugDNA.29102.1 | 5.71  | 5.75  | 0.47 | 0.16 | -1.03 | 0.987407 | 0.997989 | 0.995543 | 0.999008 |
| MmugDNA.29103.1.S1_at   | MmugDNA.29103.1 | 5.96  | 5.79  | 1.76 | 0.47 | 1.13  | 0.995923 | 0.975738 | 0.998451 | 0.98677  |
| MmugDNA.29105.1.S1_at   | MmugDNA.29105.1 | 3.09  | 3.13  | 0.01 | 0.17 | -1.03 | 0.806583 | 0.885651 | 0.920772 | 0.934982 |
| MmugDNA.29106.1.S1_at   | MmugDNA.29106.1 | 4.97  | 5.46  | 0.86 | 0.27 | -1.41 | 0.971741 | 0.605064 | 0.989237 | 0.764917 |
| MmugDNA.29107.1.S1_at   | MmugDNA.29107.1 | 3.5   | 3.26  | 0.19 | 0.16 | 1.17  | 0.682965 | 0.712409 | 0.858255 | 0.833371 |
| MmugDNA.29108.1.S1_at   | MmugDNA.29108.1 | 11.21 | 11.08 | 0.05 | 0.57 | 1.09  | 0.456743 | 0.628502 | 0.734529 | 0.781231 |
| MmugDNA.29109.1.S1_at   | MmugDNA.29109.1 | 3.17  | 3.21  | 0.58 | 0.14 | -1.03 | 0.585049 | 0.755406 | 0.807271 | 0.857572 |
| MmugDNA.2911.1.S1_at    | MmugDNA.2911.1  | 5.38  | 5.39  | 0.1  | 0.07 | -1.01 | 0.181594 | 0.444958 | 0.546263 | 0.662174 |
| MmugDNA.29111.1.S1_at   | MmugDNA.29111.1 | 7.55  | 7.86  | 0.09 | 0.13 | -1.24 | 0.054792 | 0.04451  | 0.382363 | 0.255346 |
| MmugDNA.29112.1.S1_at   | MmugDNA.29112.1 | 4.26  | 3.7   | 0.51 | 0.39 | 1.48  | 0.45633  | 0.208015 | 0.73441  | 0.482049 |
| MmugDNA.29113.1.S1_at   | MmugDNA.29113.1 | 9.5   | 9.95  | 0.31 | 0.94 | -1.36 | 0.480874 | 0.630396 | 0.748782 | 0.782237 |
| MmugDNA.29114.1.S1_at   | MmugDNA.29114.1 | 5.83  | 6.01  | 0.22 | 0.18 | -1.14 | 0.456799 | 0.543236 | 0.734561 | 0.726012 |
| MmugDNA.29115.1.S1_at   | MmugDNA.29115.1 | 5.36  | 5.74  | 0.45 | 0.51 | -1.31 | 0.73532  | 0.534651 | 0.886196 | 0.720477 |
| MmugDNA.29116.1.S1_at   | MmugDNA.29116.1 | 7.36  | 7.43  | 0.13 | 0.07 | -1.05 | 0.465587 | 0.324747 | 0.739981 | 0.575287 |
| MmugDNA.29117.1.S1_at   | MmugDNA.29117.1 | 8.66  | 8.59  | 0.19 | 0.39 | 1.05  | 0.594936 | 0.804259 | 0.812253 | 0.887401 |
| MmugDNA.29117.1.S1_s_at | MmugDNA.29117.1 | 8.23  | 8.07  | 0.2  | 0.34 | 1.11  | 0.455979 | 0.711426 | 0.734225 | 0.832667 |
| MmugDNA.29120.1.S1_at   | MmugDNA.29120.1 | 7.67  | 7.39  | 0.21 | 0.38 | 1.21  | 0.233278 | 0.276513 | 0.588091 | 0.540522 |
| MmugDNA.29121.1.S1_at   | MmugDNA.29121.1 | 5.63  | 5.72  | 0.02 | 0.07 | -1.07 | 0.117439 | 0.104941 | 0.481525 | 0.366498 |
| MmugDNA.29122.1.S1_s_at | MmugDNA.29122.1 | 7     | 7.07  | 0.06 | 0.06 | -1.05 | 0.166645 | 0.162814 | 0.530289 | 0.438932 |
| MmugDNA.29123.1.S1_at   | MmugDNA.29123.1 | 5.88  | 4.58  | 0.44 | 0.33 | 2.47  | 0.01669  | 0.011316 | 0.264879 | 0.138076 |
| MmugDNA.29124.1.S1_at   | MmugDNA.29124.1 | 4.18  | 4.3   | 0.05 | 0.04 | -1.08 | 0.021966 | 0.012699 | 0.28441  | 0.145316 |
| MmugDNA.29125.1.S1_at   | MmugDNA.29125.1 | 5.31  | 4.88  | 0.37 | 0.4  | 1.35  | 0.234594 | 0.36421  | 0.588808 | 0.604513 |
| MmugDNA.29126.1.S1_at   | MmugDNA.29126.1 | 6.14  | 6.36  | 0.22 | 0.16 | -1.17 | 0.983832 | 0.246239 | 0.994289 | 0.515889 |
| MmugDNA.29128.1.S1_at   | MmugDNA.29128.1 | 4.98  | 5.06  | 0.06 | 0.14 | -1.06 | 0.127971 | 0.033907 | 0.494126 | 0.227771 |
| MmugDNA.29129.1.S1_at   | MmugDNA.29129.1 | 4.71  | 4.82  | 0.03 | 0.16 | -1.08 | 0.09403  | 0.061949 | 0.451612 | 0.295734 |
| MmugDNA.2913.1.S1_at    | MmugDNA.2913.1  | 6.47  | 6.59  | 0.31 | 0.07 | -1.09 | 0.619693 | 0.475282 | 0.825711 | 0.682031 |
| MmugDNA.29131.1.S1_at   | MmugDNA.29131.1 | 10.26 | 9.22  | 0.26 | 0.14 | 2.06  | 0.003499 | 0.000871 | 0.178634 | 0.047471 |
| MmugDNA.29132.1.S1_s_at | MmugDNA.29132.1 | 10.81 | 10.29 | 0.22 | 0.23 | 1.44  | 0.046567 | 0.036886 | 0.363306 | 0.236506 |
| MmugDNA.29133.1.S1_at   | MmugDNA.29133.1 | 4.64  | 4.32  | 0.2  | 0.4  | 1.25  | 0.449139 | 0.093211 | 0.730082 | 0.34931  |
| MmugDNA.29135.1.S1_at   | MmugDNA.29135.1 | 9.92  | 8.98  | 0.3  | 0.52 | 1.92  | 0.091854 | 0.072803 | 0.448332 | 0.315651 |
| MmugDNA.29137.1.S1_at   | MmugDNA.29137.1 | 4.85  | 4.85  | 0.04 | 0.1  | -1    | 0.760477 | 0.195159 | 0.899008 | 0.470241 |
| MmugDNA.2914.1.S1_at    | MmugDNA.2914.1  | 4.8   | 4.97  | 0    | 0.3  | -1.12 | 0.29902  | 0.096749 | 0.634566 | 0.354171 |
| MmugDNA.29140.1.S1_s_at | MmugDNA.29140.1 | 8.4   | 8.52  | 0.2  | 0.61 | -1.09 | 0.561839 | 0.764997 | 0.795002 | 0.863388 |
| MmugDNA.29141.1.S1_at   | MmugDNA.29141.1 | 8.38  | 8.66  | 0.63 | 0.63 | -1.21 | 0.316855 | 0.359289 | 0.647775 | 0.600575 |
| MmugDNA.29142.1.S1_s_at | MmugDNA.29142.1 | 12.98 | 12.82 | 0.14 | 0.17 | 1.12  | 0.4596   | 0.037591 | 0.736355 | 0.238336 |
| MmugDNA.29143.1.S1_at   | MmugDNA.29143.1 | 12.11 | 12.09 | 0.2  | 0.29 | 1.01  | 0.97451  | 0.019345 | 0.990048 | 0.174785 |

|                         |                 |      |      |      |      |       |          |          |          |          |
|-------------------------|-----------------|------|------|------|------|-------|----------|----------|----------|----------|
| MmugDNA.29145.1.S1_at   | MmugDNA.29145.1 | 5.09 | 5.2  | 0.06 | 0.16 | -1.08 | 0.212286 | 0.222062 | 0.572552 | 0.495112 |
| MmugDNA.29148.1.S1_at   | MmugDNA.29148.1 | 6.96 | 6.97 | 0.26 | 0.05 | -1    | 0.828326 | 0.90308  | 0.930285 | 0.944962 |
| MmugDNA.29149.1.S1_at   | MmugDNA.29149.1 | 3.35 | 2.98 | 0.19 | 0.11 | 1.29  | 0.05626  | 0.187093 | 0.386221 | 0.463003 |
| MmugDNA.29150.1.S1_at   | MmugDNA.29150.1 | 3.4  | 3.57 | 0.07 | 0.05 | -1.13 | 0.096061 | 0.114496 | 0.454186 | 0.381041 |
| MmugDNA.29152.1.S1_at   | MmugDNA.29152.1 | 11.6 | 11.5 | 0.13 | 0.42 | 1.07  | 0.691084 | 0.866617 | 0.862551 | 0.924185 |
| MmugDNA.29153.1.S1_at   | MmugDNA.29153.1 | 5.27 | 5.1  | 0.39 | 0.27 | 1.12  | 0.884924 | 0.98233  | 0.953894 | 0.990348 |
| MmugDNA.29155.1.S1_at   | MmugDNA.29155.1 | 5.79 | 5.56 | 0.45 | 0.21 | 1.18  | 0.101539 | 0.054394 | 0.461313 | 0.278799 |
| MmugDNA.29156.1.S1_at   | MmugDNA.29156.1 | 6.63 | 6.1  | 0.21 | 0.51 | 1.45  | 0.513249 | 0.42473  | 0.766181 | 0.647239 |
| MmugDNA.29158.1.S1_at   | MmugDNA.29158.1 | 4.2  | 4.18 | 0.09 | 0.29 | 1.01  | 0.768931 | 0.691299 | 0.902867 | 0.820381 |
| MmugDNA.29159.1.S1_at   | MmugDNA.29159.1 | 7.39 | 6.75 | 0.17 | 0.68 | 1.56  | 0.676496 | 0.863753 | 0.855001 | 0.922638 |
| MmugDNA.2916.1.S1_at    | MmugDNA.2916.1  | 8    | 7.66 | 0.09 | 0.12 | 1.26  | 0.014736 | 0.01779  | 0.254893 | 0.168549 |
| MmugDNA.29160.1.S1_at   | MmugDNA.29160.1 | 4.16 | 4.09 | 0.17 | 0.1  | 1.05  | 0.470839 | 0.645837 | 0.74274  | 0.792616 |
| MmugDNA.29161.1.S1_at   | MmugDNA.29161.1 | 5.15 | 4.25 | 0.38 | 1.14 | 1.86  | 0.971271 | 0.998025 | 0.989025 | 0.999008 |
| MmugDNA.29162.1.S1_at   | MmugDNA.29162.1 | 6.21 | 6.33 | 0.17 | 0.21 | -1.09 | 0.206924 | 0.23408  | 0.56893  | 0.505319 |
| MmugDNA.29163.1.S1_at   | MmugDNA.29163.1 | 3.63 | 3.38 | 0.3  | 0.08 | 1.18  | 0.335666 | 0.320746 | 0.659165 | 0.572846 |
| MmugDNA.29166.1.S1_at   | MmugDNA.29166.1 | 8.99 | 8.64 | 0.24 | 0.18 | 1.28  | 0.041067 | 0.078859 | 0.350547 | 0.325838 |
| MmugDNA.29167.1.S1_at   | MmugDNA.29167.1 | 3.2  | 3.23 | 0.04 | 0.13 | -1.02 | 0.84346  | 0.888609 | 0.937058 | 0.936492 |
| MmugDNA.29168.1.S1_at   | MmugDNA.29168.1 | 8.34 | 9.01 | 0.14 | 0.17 | -1.59 | 0.008592 | 0.003205 | 0.219458 | 0.082023 |
| MmugDNA.29169.1.S1_at   | MmugDNA.29169.1 | 9.28 | 9.3  | 0.34 | 0.88 | -1.01 | 0.76628  | 0.279119 | 0.901717 | 0.542807 |
| MmugDNA.2917.1.S1_at    | MmugDNA.2917.1  | 9.98 | 9.53 | 0.4  | 0.29 | 1.36  | 0.084384 | 0.037621 | 0.436943 | 0.238384 |
| MmugDNA.29170.1.S1_at   | MmugDNA.29170.1 | 8.82 | 9.32 | 0.11 | 0.36 | -1.42 | 0.062936 | 0.053272 | 0.399633 | 0.276463 |
| MmugDNA.29170.1.S1_s_at | MmugDNA.29170.1 | 7.8  | 7.75 | 0.56 | 0.29 | 1.03  | 0.840839 | 0.904251 | 0.935988 | 0.945683 |
| MmugDNA.29171.1.S1_at   | MmugDNA.29171.1 | 8.78 | 8.7  | 0.3  | 0.55 | 1.06  | 0.953621 | 0.137265 | 0.982865 | 0.410165 |
| MmugDNA.29173.1.S1_at   | MmugDNA.29173.1 | 3.63 | 4.11 | 0.08 | 0.54 | -1.4  | 0.152066 | 0.155099 | 0.516808 | 0.43023  |
| MmugDNA.29175.1.S1_s_at | MmugDNA.29175.1 | 6.17 | 6.46 | 0.18 | 0.28 | -1.22 | 0.104798 | 0.119092 | 0.465197 | 0.387386 |
| MmugDNA.29177.1.S1_at   | MmugDNA.29177.1 | 4.06 | 3.77 | 0.28 | 0.19 | 1.23  | 0.532699 | 0.294418 | 0.777862 | 0.554169 |
| MmugDNA.29178.1.S1_at   | MmugDNA.29178.1 | 7.87 | 7.93 | 0.05 | 0.23 | -1.04 | 0.371246 | 0.000564 | 0.681905 | 0.041049 |
| MmugDNA.29179.1.S1_at   | MmugDNA.29179.1 | 2.97 | 3.04 | 0.05 | 0.02 | -1.05 | 0.42948  | 0.239675 | 0.717565 | 0.510389 |
| MmugDNA.2918.1.S1_at    | MmugDNA.2918.1  | 8.11 | 8.14 | 0.08 | 0.11 | -1.02 | 0.811208 | 0.143834 | 0.923061 | 0.417676 |
| MmugDNA.29180.1.S1_at   | MmugDNA.29180.1 | 5.45 | 4.56 | 0.36 | 0.62 | 1.86  | 0.063616 | 0.061547 | 0.401128 | 0.294865 |
| MmugDNA.29181.1.S1_at   | MmugDNA.29181.1 | 7.34 | 7.39 | 0.17 | 0.34 | -1.03 | 0.822846 | 0.129945 | 0.927935 | 0.401515 |
| MmugDNA.29182.1.S1_at   | MmugDNA.29182.1 | 9.62 | 8.59 | 0.45 | 0.52 | 2.04  | 0.057134 | 0.056392 | 0.387418 | 0.283382 |
| MmugDNA.29184.1.S1_at   | MmugDNA.29184.1 | 5.61 | 5.74 | 0.06 | 0.12 | -1.09 | 0.17455  | 0.099464 | 0.538195 | 0.357827 |
| MmugDNA.29185.1.S1_at   | MmugDNA.29185.1 | 5.73 | 4.61 | 0.87 | 0.12 | 2.17  | 0.110122 | 0.06449  | 0.471767 | 0.300137 |
| MmugDNA.29187.1.S1_at   | MmugDNA.29187.1 | 3.64 | 3.45 | 0.21 | 0.17 | 1.14  | 0.187589 | 0.159206 | 0.550542 | 0.435217 |
| MmugDNA.29187.1.S1_x_at | MmugDNA.29187.1 | 7.1  | 6.77 | 0.24 | 0.15 | 1.26  | 0.045629 | 0.041207 | 0.361322 | 0.247826 |
| MmugDNA.29189.1.S1_at   | MmugDNA.29189.1 | 9.76 | 8.84 | 0.16 | 0.33 | 1.89  | 0.018572 | 0.006181 | 0.270581 | 0.106774 |
| MmugDNA.2919.1.S1_at    | MmugDNA.2919.1  | 4.28 | 4.27 | 0.09 | 0.19 | 1.01  | 0.486953 | 0.754596 | 0.751857 | 0.857244 |
| MmugDNA.29190.1.S1_at   | MmugDNA.29190.1 | 5.5  | 5.53 | 0.24 | 0.18 | -1.02 | 0.543743 | 0.532326 | 0.78401  | 0.719017 |
| MmugDNA.29192.1.S1_at   | MmugDNA.29192.1 | 3.67 | 3.68 | 0.62 | 0.3  | -1.01 | 0.619014 | 0.543122 | 0.825395 | 0.725952 |
| MmugDNA.29193.1.S1_at   | MmugDNA.29193.1 | 6.72 | 6.88 | 0.09 | 0.17 | -1.12 | 0.123864 | 0.141708 | 0.489589 | 0.415265 |

|                         |                 |      |       |      |      |       |          |          |          |          |
|-------------------------|-----------------|------|-------|------|------|-------|----------|----------|----------|----------|
| MmugDNA.29194.1.S1_at   | MmugDNA.29194.1 | 5.89 | 6.07  | 0.16 | 0.17 | -1.14 | 0.243969 | 0.227725 | 0.595699 | 0.499979 |
| MmugDNA.29195.1.S1_at   | MmugDNA.29195.1 | 6.92 | 6.81  | 0.17 | 0.05 | 1.08  | 0.168837 | 0.015356 | 0.533155 | 0.157392 |
| MmugDNA.29198.1.S1_x_at | MmugDNA.29198.1 | 8.86 | 8.69  | 0.52 | 0.12 | 1.12  | 0.231147 | 0.243345 | 0.587369 | 0.513384 |
| MmugDNA.29199.1.S1_at   | MmugDNA.29199.1 | 4.05 | 3.23  | 0.36 | 0.42 | 1.77  | 0.118864 | 0.225675 | 0.483403 | 0.498155 |
| MmugDNA.292.1.S1_at     | MmugDNA.292.1   | 5.58 | 5.81  | 0.24 | 0.3  | -1.17 | 0.333287 | 0.099782 | 0.657525 | 0.358379 |
| MmugDNA.2920.1.S1_at    | MmugDNA.2920.1  | 3.46 | 3.39  | 0.14 | 0.16 | 1.05  | 0.53285  | 0.5895   | 0.777862 | 0.755691 |
| MmugDNA.29200.1.S1_at   | MmugDNA.29200.1 | 4.23 | 5.33  | 0.6  | 0.64 | -2.15 | 0.189559 | 0.010588 | 0.552481 | 0.134213 |
| MmugDNA.15109.1.S1_s_at | MmugDNA.15109.1 | 6.06 | 5.2   | 0.14 | 0.52 | 1.82  | 0.056672 | 0.262396 | 0.386838 | 0.528655 |
| MmugDNA.29202.1.S1_at   | MmugDNA.29202.1 | 5.09 | 4.93  | 0.06 | 0.17 | 1.12  | 0.181478 | 0.49317  | 0.546066 | 0.694004 |
| MmugDNA.29203.1.S1_at   | MmugDNA.29203.1 | 5.28 | 5.3   | 0.04 | 0.03 | -1.01 | 0.203418 | 0.269123 | 0.566041 | 0.534447 |
| MmugDNA.29205.1.S1_at   | MmugDNA.29205.1 | 4.15 | 5.07  | 0.14 | 0.6  | -1.9  | 0.060271 | 0.05934  | 0.393081 | 0.29054  |
| MmugDNA.29206.1.S1_at   | MmugDNA.29206.1 | 4.03 | 3.74  | 0.38 | 0.24 | 1.22  | 0.45675  | 0.540463 | 0.734529 | 0.724395 |
| MmugDNA.29207.1.S1_at   | MmugDNA.29207.1 | 4.05 | 4.17  | 0.17 | 0.06 | -1.09 | 0.589967 | 0.612297 | 0.809673 | 0.769941 |
| MmugDNA.29208.1.S1_at   | MmugDNA.29208.1 | 7.07 | 7.16  | 0.36 | 0.64 | -1.06 | 0.411942 | 0.263324 | 0.707648 | 0.529582 |
| MmugDNA.29209.1.S1_at   | MmugDNA.29209.1 | 5.2  | 5.28  | 0.05 | 0.14 | -1.06 | 0.141527 | 0.39505  | 0.509111 | 0.62727  |
| MmugDNA.2921.1.S1_at    | MmugDNA.2921.1  | 6.28 | 6.35  | 0.03 | 0.14 | -1.05 | 0.327761 | 0.296083 | 0.654123 | 0.555339 |
| MmugDNA.29210.1.S1_at   | MmugDNA.29210.1 | 4.4  | 4.13  | 0.38 | 0.12 | 1.21  | 0.355559 | 0.382084 | 0.671128 | 0.618309 |
| MmugDNA.29212.1.S1_at   | MmugDNA.29212.1 | 6.71 | 6.42  | 0.68 | 0.11 | 1.22  | 0.163391 | 0.143947 | 0.527749 | 0.417867 |
| MmugDNA.29214.1.S1_at   | MmugDNA.29214.1 | 5    | 4.77  | 0.27 | 0.07 | 1.17  | 0.249794 | 0.299098 | 0.600329 | 0.557663 |
| MmugDNA.29215.1.S1_at   | MmugDNA.29215.1 | 3.51 | 3.64  | 0.34 | 0.34 | -1.09 | 0.839648 | 0.5929   | 0.935272 | 0.757939 |
| MmugDNA.29216.1.S1_at   | MmugDNA.29216.1 | 3.97 | 3.94  | 0.2  | 0.15 | 1.03  | 0.619899 | 0.868455 | 0.82586  | 0.925329 |
| MmugDNA.29219.1.S1_at   | MmugDNA.29219.1 | 7.88 | 7     | 0.21 | 0.24 | 1.83  | 0.008349 | 0.011238 | 0.217705 | 0.138014 |
| MmugDNA.2922.1.S1_at    | MmugDNA.2922.1  | 7.82 | 7.39  | 0.03 | 0.09 | 1.35  | 0.002423 | 0.023131 | 0.163555 | 0.190443 |
| MmugDNA.29221.1.S1_at   | MmugDNA.29221.1 | 10.9 | 10.78 | 0.3  | 0.56 | 1.09  | 0.833247 | 0.395262 | 0.932336 | 0.62738  |
| MmugDNA.29222.1.S1_at   | MmugDNA.29222.1 | 3.39 | 3.49  | 0.33 | 0.29 | -1.07 | 0.832028 | 0.498117 | 0.931955 | 0.697266 |
| MmugDNA.29224.1.S1_at   | MmugDNA.29224.1 | 5.98 | 5.91  | 0.19 | 0.47 | 1.05  | 0.472934 | 0.321344 | 0.744096 | 0.57319  |
| MmugDNA.29225.1.S1_at   | MmugDNA.29225.1 | 5.5  | 5.69  | 0.09 | 0.11 | -1.14 | 0.055735 | 0.097684 | 0.384612 | 0.355554 |
| MmugDNA.29226.1.S1_at   | MmugDNA.29226.1 | 4.16 | 5.2   | 0.53 | 0.14 | -2.06 | 0.042786 | 0.087314 | 0.355382 | 0.340377 |
| MmugDNA.29227.1.S1_at   | MmugDNA.29227.1 | 5.89 | 5.88  | 0.05 | 0.07 | 1.01  | 0.972553 | 0.123902 | 0.989473 | 0.394201 |
| MmugDNA.29228.1.S1_at   | MmugDNA.29228.1 | 6.03 | 5.44  | 0.27 | 0.49 | 1.51  | 0.105671 | 0.043343 | 0.466498 | 0.252853 |
| MmugDNA.29229.1.S1_at   | MmugDNA.29229.1 | 4.84 | 4.39  | 1.2  | 0.11 | 1.37  | 0.549293 | 0.752051 | 0.787247 | 0.855744 |
| MmugDNA.29231.1.S1_at   | MmugDNA.29231.1 | 4.02 | 3.84  | 0.21 | 0.02 | 1.13  | 0.122159 | 0.210332 | 0.487209 | 0.484202 |
| MmugDNA.29232.1.S1_at   | MmugDNA.29232.1 | 6.57 | 6.13  | 0.21 | 0.14 | 1.36  | 0.067044 | 0.040835 | 0.407016 | 0.246981 |
| MmugDNA.29235.1.S1_at   | MmugDNA.29235.1 | 3.33 | 3.28  | 0.87 | 0.15 | 1.03  | 0.337395 | 0.25007  | 0.659935 | 0.519122 |
| MmugDNA.29236.1.S1_at   | MmugDNA.29236.1 | 8.2  | 6.59  | 0.98 | 0.56 | 3.05  | 0.078272 | 0.073427 | 0.428221 | 0.316616 |
| MmugDNA.29237.1.S1_at   | MmugDNA.29237.1 | 3.79 | 3.61  | 0.25 | 0.11 | 1.14  | 0.397127 | 0.423936 | 0.697519 | 0.646587 |
| MmugDNA.29238.1.S1_at   | MmugDNA.29238.1 | 11.2 | 10.54 | 0.43 | 1.37 | 1.58  | 0.179936 | 0.181676 | 0.54409  | 0.458271 |
| MmugDNA.29239.1.S1_at   | MmugDNA.29239.1 | 4.87 | 4.89  | 0.13 | 0.34 | -1.02 | 0.273298 | 0.218969 | 0.616747 | 0.492722 |
| MmugDNA.2924.1.S1_at    | MmugDNA.2924.1  | 7.43 | 6.88  | 1.09 | 0.31 | 1.46  | 0.623092 | 0.592545 | 0.827785 | 0.757844 |
| MmugDNA.29240.1.S1_at   | MmugDNA.29240.1 | 5.87 | 6.71  | 0.35 | 0.2  | -1.79 | 0.034488 | 0.045183 | 0.333247 | 0.256979 |
| MmugDNA.29241.1.S1_at   | MmugDNA.29241.1 | 5.38 | 5.92  | 0.11 | 0.32 | -1.45 | 0.06857  | 0.054978 | 0.410201 | 0.279898 |

|                         |                 |       |       |      |      |       |          |          |          |          |
|-------------------------|-----------------|-------|-------|------|------|-------|----------|----------|----------|----------|
| MmugDNA.29243.1.S1_at   | MmugDNA.29243.1 | 4.8   | 4.31  | 0.56 | 0.09 | 1.4   | 0.253463 | 0.407899 | 0.602055 | 0.635288 |
| MmugDNA.29245.1.S1_at   | MmugDNA.29245.1 | 5.28  | 5.32  | 0.36 | 0.2  | -1.03 | 0.943468 | 0.869848 | 0.978516 | 0.926148 |
| MmugDNA.29247.1.S1_at   | MmugDNA.29247.1 | 5.74  | 5.97  | 0.02 | 0.31 | -1.18 | 0.226523 | 0.176734 | 0.584429 | 0.453171 |
| MmugDNA.29248.1.S1_at   | MmugDNA.29248.1 | 5.73  | 5.37  | 0.21 | 0.24 | 1.28  | 0.22299  | 0.279949 | 0.581595 | 0.543359 |
| MmugDNA.29248.1.S1_s_at | MmugDNA.29248.1 | 8.58  | 8.37  | 0.3  | 0.3  | 1.16  | 0.378157 | 0.490481 | 0.686315 | 0.692472 |
| MmugDNA.29249.1.S1_at   | MmugDNA.29249.1 | 5.58  | 5.64  | 0.26 | 0.16 | -1.04 | 0.960253 | 0.694533 | 0.98486  | 0.822391 |
| MmugDNA.29250.1.S1_at   | MmugDNA.29250.1 | 12.63 | 12.67 | 0.03 | 0.21 | -1.03 | 0.286008 | 0.215108 | 0.625381 | 0.488937 |
| MmugDNA.29252.1.S1_at   | MmugDNA.29252.1 | 3.79  | 4.21  | 0.46 | 0.25 | -1.34 | 0.700702 | 0.28726  | 0.86753  | 0.548526 |
| MmugDNA.29253.1.S1_at   | MmugDNA.29253.1 | 6.76  | 6.87  | 0.01 | 0.09 | -1.08 | 0.393146 | 0.354158 | 0.695026 | 0.597059 |
| MmugDNA.29255.1.S1_at   | MmugDNA.29255.1 | 5.5   | 5.22  | 0.62 | 0.74 | 1.21  | 0.988243 | 0.715796 | 0.995887 | 0.835259 |
| MmugDNA.29256.1.S1_at   | MmugDNA.29256.1 | 6.08  | 5.46  | 0.63 | 0.4  | 1.54  | 0.225137 | 0.353356 | 0.58306  | 0.596477 |
| MmugDNA.29257.1.S1_at   | MmugDNA.29257.1 | 6.34  | 6.31  | 0.31 | 0.33 | 1.03  | 0.995789 | 0.999975 | 0.998446 | 0.999975 |
| MmugDNA.29258.1.S1_at   | MmugDNA.29258.1 | 3.4   | 3.4   | 0.14 | 0    | 1     | 0.362861 | 0.447668 | 0.676226 | 0.663731 |
| MmugDNA.29259.1.S1_at   | MmugDNA.29259.1 | 7.91  | 8.37  | 0.27 | 0.59 | -1.37 | 0.449254 | 0.461078 | 0.730188 | 0.672838 |
| MmugDNA.2926.1.S1_at    | MmugDNA.2926.1  | 6.21  | 6.01  | 0.12 | 0.25 | 1.15  | 0.094242 | 0.101893 | 0.45175  | 0.36188  |
| MmugDNA.29260.1.S1_at   | MmugDNA.29260.1 | 5.74  | 6.05  | 0.41 | 0.09 | -1.24 | 0.76986  | 0.757199 | 0.903262 | 0.858648 |
| MmugDNA.29261.1.S1_at   | MmugDNA.29261.1 | 4.76  | 4.93  | 0.26 | 0.22 | -1.12 | 0.617315 | 0.534496 | 0.824663 | 0.720396 |
| MmugDNA.29262.1.S1_at   | MmugDNA.29262.1 | 4.1   | 3.62  | 0.24 | 0.19 | 1.4   | 0.043834 | 0.025684 | 0.357051 | 0.200834 |
| MmugDNA.29264.1.S1_at   | MmugDNA.29264.1 | 12.28 | 12.32 | 0.12 | 0.3  | -1.03 | 0.473285 | 0.423355 | 0.74414  | 0.646277 |
| MmugDNA.29266.1.S1_at   | MmugDNA.29266.1 | 9.64  | 8.86  | 0.95 | 1.32 | 1.72  | 0.908742 | 0.64816  | 0.963816 | 0.794002 |
| MmugDNA.29267.1.S1_at   | MmugDNA.29267.1 | 5.08  | 4.43  | 0.41 | 0.29 | 1.57  | 0.061235 | 0.057083 | 0.395362 | 0.284945 |
| MmugDNA.29268.1.S1_at   | MmugDNA.29268.1 | 6.31  | 5.48  | 0.59 | 0.99 | 1.78  | 0.205904 | 0.287751 | 0.568383 | 0.549029 |
| MmugDNA.2927.1.S1_at    | MmugDNA.2927.1  | 4.99  | 4.95  | 0.27 | 0.67 | 1.03  | 0.899928 | 0.738872 | 0.96007  | 0.848647 |
| MmugDNA.29270.1.S1_at   | MmugDNA.29270.1 | 4.6   | 4.6   | 0.13 | 0.05 | 1     | 0.794769 | 0.38714  | 0.914801 | 0.621935 |
| MmugDNA.29271.1.S1_at   | MmugDNA.29271.1 | 9.17  | 9.56  | 0.33 | 0.49 | -1.31 | 0.41573  | 0.571128 | 0.709528 | 0.743552 |
| MmugDNA.29273.1.S1_at   | MmugDNA.29273.1 | 6.24  | 6.96  | 0.04 | 0.35 | -1.65 | 0.028256 | 0.069906 | 0.310292 | 0.310552 |
| MmugDNA.29276.1.S1_at   | MmugDNA.29276.1 | 11.27 | 11.37 | 0.1  | 0.14 | -1.07 | 0.130452 | 0.113289 | 0.496851 | 0.379339 |
| MmugDNA.29279.1.S1_x_at | MmugDNA.29279.1 | 6.91  | 6.89  | 0.82 | 0.28 | 1.02  | 0.27532  | 0.330909 | 0.617789 | 0.579609 |
| MmugDNA.29280.1.S1_at   | MmugDNA.29280.1 | 5.64  | 5.74  | 0.1  | 0.33 | -1.07 | 0.490317 | 0.662924 | 0.75438  | 0.802665 |
| MmugDNA.29282.1.S1_s_at | MmugDNA.29282.1 | 11.28 | 10.76 | 0.32 | 0.21 | 1.43  | 0.146372 | 0.023647 | 0.512517 | 0.192564 |
| MmugDNA.29283.1.S1_at   | MmugDNA.29283.1 | 3.84  | 3.84  | 0.03 | 0.08 | 1     | 0.538212 | 0.530127 | 0.780442 | 0.717729 |
| MmugDNA.29284.1.S1_at   | MmugDNA.29284.1 | 10.91 | 11.54 | 0.42 | 0.49 | -1.55 | 0.18461  | 0.206585 | 0.548202 | 0.480619 |
| MmugDNA.29286.1.S1_at   | MmugDNA.29286.1 | 6.63  | 8.02  | 0.6  | 0.26 | -2.63 | 0.041772 | 0.038395 | 0.352614 | 0.240833 |
| MmugDNA.29287.1.S1_at   | MmugDNA.29287.1 | 7.17  | 6.89  | 0.08 | 0.16 | 1.22  | 0.042904 | 0.03314  | 0.355546 | 0.225324 |
| MmugDNA.29289.1.S1_at   | MmugDNA.29289.1 | 6.8   | 7.07  | 0.56 | 1.06 | -1.2  | 0.37916  | 0.529199 | 0.686754 | 0.717207 |
| MmugDNA.2929.1.S1_at    | MmugDNA.2929.1  | 10.05 | 9.18  | 0.33 | 0.64 | 1.82  | 0.068586 | 0.034568 | 0.410201 | 0.23001  |
| MmugDNA.29290.1.S1_at   | MmugDNA.29290.1 | 13.03 | 12.68 | 0.15 | 0.31 | 1.27  | 0.203882 | 0.118832 | 0.566381 | 0.386991 |
| MmugDNA.29291.1.S1_at   | MmugDNA.29291.1 | 4.75  | 4.93  | 0.09 | 0.11 | -1.13 | 0.04981  | 0.033561 | 0.372194 | 0.226764 |
| MmugDNA.29292.1.S1_at   | MmugDNA.29292.1 | 4.78  | 6.99  | 1.39 | 0.14 | -4.61 | 0.115376 | 0.037054 | 0.478773 | 0.236952 |
| MmugDNA.29293.1.S1_s_at | MmugDNA.29293.1 | 3.68  | 3.22  | 0.14 | 0.12 | 1.38  | 0.016724 | 0.017745 | 0.265094 | 0.168367 |
| MmugDNA.29294.1.S1_at   | MmugDNA.29294.1 | 4.06  | 4.16  | 0.02 | 0.21 | -1.07 | 0.437679 | 0.585061 | 0.722586 | 0.752684 |

|                         |                 |       |       |      |      |       |          |          |          |          |
|-------------------------|-----------------|-------|-------|------|------|-------|----------|----------|----------|----------|
| MmugDNA.29295.1.S1_at   | MmugDNA.29295.1 | 9.72  | 9.2   | 0.04 | 0.5  | 1.44  | 0.180479 | 0.227889 | 0.544821 | 0.500201 |
| MmugDNA.29297.1.S1_at   | MmugDNA.29297.1 | 10.91 | 12.19 | 0.11 | 0.17 | -2.42 | 0.000464 | 0.000109 | 0.133839 | 0.028099 |
| MmugDNA.29298.1.S1_at   | MmugDNA.29298.1 | 6.01  | 5.98  | 0    | 0.29 | 1.02  | 0.942439 | 0.990655 | 0.977977 | 0.994725 |
| MmugDNA.293.1.S1_at     | MmugDNA.293.1   | 9.29  | 8.73  | 0.95 | 0.6  | 1.48  | 0.334398 | 0.321147 | 0.658376 | 0.573111 |
| MmugDNA.2930.1.S1_at    | MmugDNA.2930.1  | 10.57 | 10.72 | 0.11 | 0.42 | -1.11 | 0.577733 | 0.741393 | 0.803559 | 0.850285 |
| MmugDNA.29300.1.S1_at   | MmugDNA.29300.1 | 9.58  | 8.65  | 0.04 | 0.27 | 1.91  | 0.002568 | 0.000455 | 0.164386 | 0.038572 |
| MmugDNA.29301.1.S1_at   | MmugDNA.29301.1 | 4.21  | 4.48  | 0.24 | 0.22 | -1.21 | 0.536154 | 0.342888 | 0.779378 | 0.588712 |
| MmugDNA.29302.1.S1_at   | MmugDNA.29302.1 | 5.19  | 5.23  | 0.12 | 0.13 | -1.03 | 0.94313  | 0.87013  | 0.978387 | 0.926362 |
| MmugDNA.29303.1.S1_at   | MmugDNA.29303.1 | 10.33 | 10.04 | 0.13 | 0.72 | 1.23  | 0.470155 | 0.113724 | 0.742165 | 0.379889 |
| MmugDNA.29305.1.S1_s_at | MmugDNA.29305.1 | 4.86  | 4.3   | 0.27 | 0.25 | 1.47  | 0.057641 | 0.060486 | 0.388822 | 0.292569 |
| MmugDNA.29306.1.S1_at   | MmugDNA.29306.1 | 4.46  | 4.42  | 0.1  | 0.25 | 1.03  | 0.353971 | 0.496229 | 0.670266 | 0.695914 |
| MmugDNA.29307.1.S1_at   | MmugDNA.29307.1 | 6.55  | 7.15  | 0.24 | 0.66 | -1.52 | 0.069759 | 0.076288 | 0.412907 | 0.321299 |
| MmugDNA.29309.1.S1_at   | MmugDNA.29309.1 | 5.08  | 5.09  | 0.27 | 0.24 | -1.01 | 0.780219 | 0.694042 | 0.908487 | 0.822068 |
| MmugDNA.2931.1.S1_at    | MmugDNA.2931.1  | 4.06  | 4.15  | 0.13 | 0.07 | -1.06 | 0.715316 | 0.265419 | 0.875005 | 0.531363 |
| MmugDNA.29310.1.S1_at   | MmugDNA.29310.1 | 8.48  | 8.2   | 1.11 | 0.38 | 1.21  | 0.745121 | 0.737388 | 0.890969 | 0.847889 |
| MmugDNA.29311.1.S1_at   | MmugDNA.29311.1 | 7.82  | 7.36  | 0.29 | 0.49 | 1.38  | 0.171546 | 0.148768 | 0.53519  | 0.423201 |
| MmugDNA.29312.1.S1_at   | MmugDNA.29312.1 | 4.67  | 4.69  | 0.13 | 0.18 | -1.01 | 0.563893 | 0.633845 | 0.796337 | 0.784497 |
| MmugDNA.29313.1.S1_at   | MmugDNA.29313.1 | 3     | 2.97  | 0.1  | 0.1  | 1.02  | 0.541565 | 0.302852 | 0.782728 | 0.560356 |
| MmugDNA.29315.1.S1_at   | MmugDNA.29315.1 | 10.07 | 9.35  | 0.33 | 0.41 | 1.65  | 0.034531 | 0.00494  | 0.333289 | 0.097917 |
| MmugDNA.29317.1.S1_at   | MmugDNA.29317.1 | 10.64 | 11.11 | 0.36 | 0.12 | -1.39 | 0.102928 | 0.109091 | 0.46254  | 0.372869 |
| MmugDNA.29318.1.S1_at   | MmugDNA.29318.1 | 10.31 | 9.86  | 0.1  | 0.43 | 1.37  | 0.176912 | 0.240003 | 0.540792 | 0.510717 |
| MmugDNA.2932.1.S1_at    | MmugDNA.2932.1  | 3.58  | 3.51  | 0.06 | 0.11 | 1.05  | 0.153084 | 0.225404 | 0.517474 | 0.498035 |
| MmugDNA.29323.1.S1_at   | MmugDNA.29323.1 | 5.55  | 5.92  | 0.15 | 0.22 | -1.29 | 0.15027  | 0.225267 | 0.51501  | 0.497892 |
| MmugDNA.29324.1.S1_at   | MmugDNA.29324.1 | 3.7   | 3.85  | 0.75 | 0.14 | -1.12 | 0.587749 | 0.693478 | 0.808706 | 0.821713 |
| MmugDNA.29325.1.S1_at   | MmugDNA.29325.1 | 4.24  | 3.86  | 0.3  | 0.23 | 1.31  | 0.29011  | 0.47267  | 0.628012 | 0.68007  |
| MmugDNA.29326.1.S1_at   | MmugDNA.29326.1 | 3.79  | 4.01  | 0.24 | 0.11 | -1.17 | 0.581931 | 0.817257 | 0.805507 | 0.894592 |
| MmugDNA.29329.1.S1_at   | MmugDNA.29329.1 | 7.33  | 5.46  | 0.07 | 0.97 | 3.68  | 0.07105  | 0.017926 | 0.414673 | 0.168998 |
| MmugDNA.29331.1.S1_at   | MmugDNA.29331.1 | 11.66 | 12.12 | 0.07 | 0.27 | -1.38 | 0.037961 | 0.033964 | 0.343341 | 0.227969 |
| MmugDNA.29334.1.S1_at   | MmugDNA.29334.1 | 4.33  | 3.88  | 0.32 | 0.27 | 1.37  | 0.327925 | 0.570743 | 0.654202 | 0.743326 |
| MmugDNA.29335.1.S1_at   | MmugDNA.29335.1 | 3.94  | 4.14  | 0.09 | 0.05 | -1.14 | 0.093085 | 0.15546  | 0.450362 | 0.430824 |
| MmugDNA.7297.1.S1_s_at  | MmugDNA.7297.1  | 7.49  | 7.96  | 0.12 | 0.55 | -1.38 | 0.074244 | 0.051646 | 0.419963 | 0.272698 |
| MmugDNA.29339.1.S1_at   | MmugDNA.29339.1 | 3.92  | 4.46  | 0.45 | 0.61 | -1.46 | 0.058082 | 0.041588 | 0.389756 | 0.248831 |
| MmugDNA.29340.1.S1_at   | MmugDNA.29340.1 | 10.19 | 8.6   | 0.09 | 0.36 | 3     | 0.002915 | 0.000596 | 0.170045 | 0.041941 |
| MmugDNA.29341.1.S1_at   | MmugDNA.29341.1 | 4.3   | 4.15  | 0.12 | 0.26 | 1.11  | 0.708604 | 0.456967 | 0.871941 | 0.670592 |
| MmugDNA.29342.1.S1_at   | MmugDNA.29342.1 | 4.41  | 4.92  | 0.89 | 0.06 | -1.43 | 0.964507 | 0.968817 | 0.986241 | 0.982835 |
| MmugDNA.29343.1.S1_at   | MmugDNA.29343.1 | 11.74 | 11.2  | 0.08 | 0.67 | 1.45  | 0.290185 | 0.194744 | 0.628043 | 0.469774 |
| MmugDNA.29344.1.S1_at   | MmugDNA.29344.1 | 3.19  | 3.27  | 0.15 | 0.2  | -1.05 | 0.242073 | 0.316792 | 0.594277 | 0.570195 |
| MmugDNA.29345.1.S1_at   | MmugDNA.29345.1 | 4.48  | 4.97  | 0.92 | 1.02 | -1.4  | 0.492953 | 0.640356 | 0.755892 | 0.788874 |
| MmugDNA.29346.1.S1_at   | MmugDNA.29346.1 | 7.82  | 7.56  | 0.15 | 0.2  | 1.2   | 0.355884 | 0.227078 | 0.671276 | 0.499417 |
| MmugDNA.29346.1.S1_s_at | MmugDNA.29346.1 | 11.36 | 11.37 | 0.23 | 0.27 | -1.01 | 0.626563 | 0.652974 | 0.829678 | 0.797125 |
| MmugDNA.29347.1.S1_at   | MmugDNA.29347.1 | 3.75  | 3.38  | 0.24 | 0.06 | 1.3   | 0.063648 | 0.048529 | 0.401233 | 0.265534 |



|                         |                 |       |       |      |      |       |          |          |          |          |
|-------------------------|-----------------|-------|-------|------|------|-------|----------|----------|----------|----------|
| MmugDNA.29348.1.S1_at   | MmugDNA.29348.1 | 6.14  | 4.97  | 0.71 | 0.3  | 2.25  | 0.218422 | 0.199283 | 0.577909 | 0.473999 |
| MmugDNA.29349.1.S1_at   | MmugDNA.29349.1 | 7.59  | 7.88  | 0.07 | 0.33 | -1.22 | 0.200279 | 0.294744 | 0.563141 | 0.554345 |
| MmugDNA.29350.1.S1_at   | MmugDNA.29350.1 | 2.76  | 2.76  | 0.03 | 0.09 | 1     | 0.812555 | 0.402867 | 0.9237   | 0.631631 |
| MmugDNA.29351.1.S1_at   | MmugDNA.29351.1 | 5.94  | 5.1   | 0.59 | 1.19 | 1.8   | 0.711756 | 0.435676 | 0.873712 | 0.655454 |
| MmugDNA.29352.1.S1_at   | MmugDNA.29352.1 | 4.75  | 4.75  | 0.03 | 0.1  | 1     | 0.901022 | 0.585612 | 0.960391 | 0.752934 |
| MmugDNA.29354.1.S1_at   | MmugDNA.29354.1 | 11.12 | 11.07 | 0.06 | 0.43 | 1.04  | 0.749671 | 0.479387 | 0.892739 | 0.685126 |
| MmugDNA.29355.1.S1_at   | MmugDNA.29355.1 | 5.14  | 5.16  | 0.03 | 0.07 | -1.01 | 0.249387 | 0.654976 | 0.600193 | 0.7982   |
| MmugDNA.29356.1.S1_at   | MmugDNA.29356.1 | 9.81  | 10.7  | 0.31 | 0.04 | -1.84 | 0.00784  | 0.001951 | 0.213476 | 0.065813 |
| MmugDNA.29357.1.S1_at   | MmugDNA.29357.1 | 6.02  | 6.29  | 0.23 | 0.17 | -1.2  | 0.073619 | 0.030897 | 0.419068 | 0.217584 |
| MmugDNA.29358.1.S1_at   | MmugDNA.29358.1 | 7.36  | 7.19  | 0.26 | 0.06 | 1.13  | 0.543236 | 0.176936 | 0.783788 | 0.453337 |
| MmugDNA.29359.1.S1_at   | MmugDNA.29359.1 | 6.67  | 6.62  | 0.04 | 0.14 | 1.03  | 0.743383 | 0.725019 | 0.890141 | 0.840843 |
| MmugDNA.29360.1.S1_at   | MmugDNA.29360.1 | 5.22  | 5.5   | 0.23 | 0.22 | -1.21 | 0.742618 | 0.285799 | 0.889932 | 0.547484 |
| MmugDNA.29361.1.S1_at   | MmugDNA.29361.1 | 7.32  | 7.34  | 0.22 | 0.28 | -1.01 | 0.656047 | 0.563972 | 0.845304 | 0.738913 |
| MmugDNA.29362.1.S1_at   | MmugDNA.29362.1 | 11.03 | 10.08 | 0.23 | 1.74 | 1.93  | 0.127448 | 0.144532 | 0.493834 | 0.418408 |
| MmugDNA.29363.1.S1_at   | MmugDNA.29363.1 | 5.11  | 4.94  | 0.13 | 0.26 | 1.13  | 0.55758  | 0.746665 | 0.79259  | 0.852899 |
| MmugDNA.29364.1.S1_at   | MmugDNA.29364.1 | 10.78 | 11.35 | 0.16 | 0.26 | -1.49 | 0.023579 | 0.014303 | 0.291854 | 0.152693 |
| MmugDNA.29365.1.S1_at   | MmugDNA.29365.1 | 5.33  | 5.94  | 0.13 | 0.27 | -1.52 | 0.037137 | 0.002643 | 0.340777 | 0.076012 |
| MmugDNA.29366.1.S1_at   | MmugDNA.29366.1 | 6.69  | 7.06  | 0.23 | 0.21 | -1.29 | 0.132465 | 0.069325 | 0.498643 | 0.309558 |
| MmugDNA.29367.1.S1_at   | MmugDNA.29367.1 | 7.33  | 7.51  | 0.18 | 0.13 | -1.13 | 0.267957 | 0.153651 | 0.612874 | 0.428413 |
| MmugDNA.29368.1.S1_at   | MmugDNA.29368.1 | 4.47  | 4.53  | 0.04 | 0.14 | -1.04 | 0.715919 | 0.908079 | 0.875256 | 0.947903 |
| MmugDNA.29369.1.S1_at   | MmugDNA.29369.1 | 6.33  | 7.17  | 0.52 | 0.58 | -1.78 | 0.124007 | 0.159675 | 0.489711 | 0.435785 |
| MmugDNA.2937.1.S1_at    | MmugDNA.2937.1  | 7.53  | 7.94  | 0.18 | 0.43 | -1.33 | 0.142701 | 0.219642 | 0.509765 | 0.49324  |
| MmugDNA.29372.1.S1_at   | MmugDNA.29372.1 | 3.21  | 3.26  | 0.13 | 0.13 | -1.04 | 0.413797 | 0.210739 | 0.708642 | 0.48478  |
| MmugDNA.29373.1.S1_at   | MmugDNA.29373.1 | 4.37  | 5.57  | 0.08 | 0.9  | -2.29 | 0.093719 | 0.124696 | 0.45102  | 0.39513  |
| MmugDNA.29376.1.S1_at   | MmugDNA.29376.1 | 7.67  | 7.6   | 0.27 | 0.62 | 1.05  | 0.497348 | 0.68166  | 0.757933 | 0.814095 |
| MmugDNA.29377.1.S1_at   | MmugDNA.29377.1 | 4.64  | 4.76  | 0.19 | 0.13 | -1.09 | 0.155597 | 0.195053 | 0.520357 | 0.470179 |
| MmugDNA.29378.1.S1_at   | MmugDNA.29378.1 | 3.63  | 3.84  | 0.32 | 0.25 | -1.16 | 0.648815 | 0.348314 | 0.84222  | 0.592478 |
| MmugDNA.29379.1.S1_at   | MmugDNA.29379.1 | 6.84  | 5.69  | 0.83 | 0.5  | 2.22  | 0.101092 | 0.077553 | 0.461009 | 0.323421 |
| MmugDNA.2938.1.S1_at    | MmugDNA.2938.1  | 5.86  | 6.7   | 0.11 | 0.5  | -1.79 | 0.044076 | 0.03335  | 0.357761 | 0.226324 |
| MmugDNA.29380.1.S1_at   | MmugDNA.29380.1 | 7.38  | 7.48  | 0.09 | 0.12 | -1.08 | 0.122664 | 0.145325 | 0.487896 | 0.419365 |
| MmugDNA.29381.1.S1_at   | MmugDNA.29381.1 | 3.19  | 3.31  | 0.08 | 0.06 | -1.08 | 0.114282 | 0.117406 | 0.477541 | 0.385054 |
| MmugDNA.29382.1.S1_at   | MmugDNA.29382.1 | 7.25  | 6.97  | 1.54 | 0.24 | 1.21  | 0.79034  | 0.840363 | 0.913012 | 0.909015 |
| MmugDNA.29383.1.S1_at   | MmugDNA.29383.1 | 8.33  | 8.23  | 0.13 | 0.39 | 1.07  | 0.486626 | 0.294562 | 0.751702 | 0.554282 |
| MmugDNA.29384.1.S1_at   | MmugDNA.29384.1 | 3.96  | 4.11  | 0.08 | 0.09 | -1.1  | 0.045175 | 0.043919 | 0.360276 | 0.254098 |
| MmugDNA.29385.1.S1_at   | MmugDNA.29385.1 | 12.46 | 13.04 | 0.19 | 0.46 | -1.49 | 0.322365 | 0.44205  | 0.651073 | 0.660148 |
| MmugDNA.29386.1.S1_at   | MmugDNA.29386.1 | 3.25  | 3.23  | 0.04 | 0.16 | 1.01  | 0.90465  | 0.739909 | 0.961834 | 0.849298 |
| MmugDNA.29387.1.S1_at   | MmugDNA.29387.1 | 3.51  | 3.49  | 0.13 | 0.08 | 1.01  | 0.59849  | 0.614704 | 0.81395  | 0.771445 |
| MmugDNA.29388.1.S1_at   | MmugDNA.29388.1 | 10.51 | 10.11 | 0.27 | 0.31 | 1.32  | 0.236556 | 0.292757 | 0.590504 | 0.552783 |
| MmugDNA.29388.1.S1_s_at | MmugDNA.29388.1 | 10.85 | 10.59 | 0.25 | 0.24 | 1.2   | 0.239373 | 0.289864 | 0.592443 | 0.550831 |
| MmugDNA.29389.1.S1_at   | MmugDNA.29389.1 | 7.14  | 7.04  | 0.07 | 0.16 | 1.07  | 0.382305 | 0.269766 | 0.688612 | 0.53503  |
| MmugDNA.2939.1.S1_at    | MmugDNA.2939.1  | 3.56  | 3.37  | 0.23 | 0.13 | 1.14  | 0.272989 | 0.163499 | 0.61647  | 0.439731 |

|                         |                 |       |       |      |      |       |          |          |          |          |
|-------------------------|-----------------|-------|-------|------|------|-------|----------|----------|----------|----------|
| MmugDNA.29390.1.S1_at   | MmugDNA.29390.1 | 4.36  | 4.08  | 0.11 | 0.23 | 1.21  | 0.092891 | 0.406221 | 0.449985 | 0.634225 |
| MmugDNA.29392.1.S1_at   | MmugDNA.29392.1 | 8.7   | 10.58 | 0.25 | 0.72 | -3.68 | 0.009634 | 0.002875 | 0.226235 | 0.078929 |
| MmugDNA.29393.1.S1_at   | MmugDNA.29393.1 | 7.94  | 8.14  | 0.74 | 0.28 | -1.15 | 0.456119 | 0.276381 | 0.734293 | 0.540334 |
| MmugDNA.29394.1.S1_at   | MmugDNA.29394.1 | 4.47  | 4.91  | 0.56 | 0.66 | -1.36 | 0.373737 | 0.273334 | 0.683245 | 0.537788 |
| MmugDNA.29396.1.S1_at   | MmugDNA.29396.1 | 6.18  | 5.39  | 0.13 | 0.94 | 1.73  | 0.682103 | 0.85733  | 0.857752 | 0.918543 |
| MmugDNA.29397.1.S1_at   | MmugDNA.29397.1 | 3.43  | 3.57  | 0.07 | 0.1  | -1.1  | 0.375832 | 0.204276 | 0.684803 | 0.478541 |
| MmugDNA.29398.1.S1_at   | MmugDNA.29398.1 | 4.86  | 4.8   | 0.06 | 0.12 | 1.04  | 0.70744  | 0.172532 | 0.871104 | 0.448864 |
| MmugDNA.29399.1.S1_at   | MmugDNA.29399.1 | 11.34 | 11.01 | 0.18 | 0.21 | 1.25  | 0.068445 | 0.023637 | 0.410144 | 0.192555 |
| MmugDNA.294.1.S1_at     | MmugDNA.294.1   | 4.1   | 4.1   | 0.07 | 0.15 | -1    | 0.606106 | 0.501868 | 0.818728 | 0.699941 |
| MmugDNA.29400.1.S1_at   | MmugDNA.29400.1 | 10.58 | 10.05 | 0.23 | 0.25 | 1.45  | 0.04894  | 0.036029 | 0.370133 | 0.234255 |
| MmugDNA.29401.1.S1_at   | MmugDNA.29401.1 | 8.09  | 7.29  | 0.65 | 0.63 | 1.73  | 0.661008 | 0.856174 | 0.847974 | 0.917861 |
| MmugDNA.29402.1.S1_at   | MmugDNA.29402.1 | 10.79 | 10.6  | 0.17 | 0.39 | 1.14  | 0.525642 | 0.651974 | 0.773846 | 0.796529 |
| MmugDNA.29403.1.S1_at   | MmugDNA.29403.1 | 4.69  | 4.26  | 0.19 | 0.32 | 1.35  | 0.221779 | 0.349421 | 0.580472 | 0.593406 |
| MmugDNA.29404.1.S1_at   | MmugDNA.29404.1 | 8.95  | 8.18  | 0.96 | 0.76 | 1.71  | 0.549019 | 0.394085 | 0.787067 | 0.626734 |
| MmugDNA.29405.1.S1_at   | MmugDNA.29405.1 | 5.15  | 5.18  | 0.18 | 0.16 | -1.02 | 0.46407  | 0.245989 | 0.739049 | 0.515713 |
| MmugDNA.29406.1.S1_at   | MmugDNA.29406.1 | 7.91  | 7.8   | 0.14 | 0.15 | 1.08  | 0.779368 | 0.002658 | 0.908053 | 0.076211 |
| MmugDNA.29407.1.S1_s_at | MmugDNA.29407.1 | 9.3   | 8.42  | 0.18 | 0.77 | 1.84  | 0.044909 | 0.028135 | 0.359175 | 0.209306 |
| MmugDNA.29409.1.S1_at   | MmugDNA.29409.1 | 3.12  | 3.15  | 0.15 | 0.06 | -1.02 | 0.515232 | 0.731981 | 0.767346 | 0.844751 |
| MmugDNA.2941.1.S1_at    | MmugDNA.2941.1  | 3.72  | 3.38  | 0.84 | 0.14 | 1.27  | 0.309144 | 0.345171 | 0.641361 | 0.590438 |
| MmugDNA.29412.1.S1_at   | MmugDNA.29412.1 | 5.19  | 5.18  | 0.14 | 0.13 | 1     | 0.498849 | 0.798783 | 0.75874  | 0.884072 |
| MmugDNA.29413.1.S1_at   | MmugDNA.29413.1 | 3.46  | 3.48  | 0.05 | 0.14 | -1.02 | 0.62194  | 0.784476 | 0.827099 | 0.875181 |
| MmugDNA.29414.1.S1_at   | MmugDNA.29414.1 | 11.88 | 11.22 | 0.11 | 0.24 | 1.58  | 0.011241 | 0.005582 | 0.234881 | 0.103258 |
| MmugDNA.29415.1.S1_at   | MmugDNA.29415.1 | 8.19  | 7.52  | 0.1  | 0.15 | 1.6   | 0.003615 | 0.000861 | 0.179515 | 0.047371 |
| MmugDNA.29416.1.S1_at   | MmugDNA.29416.1 | 3.07  | 3.23  | 0.13 | 0.08 | -1.11 | 0.158815 | 0.250538 | 0.524015 | 0.519391 |
| MmugDNA.29419.1.S1_at   | MmugDNA.29419.1 | 3.67  | 3.74  | 0.03 | 0.11 | -1.05 | 0.315166 | 0.141227 | 0.646362 | 0.414749 |
| MmugDNA.29420.1.S1_at   | MmugDNA.29420.1 | 7.11  | 7.09  | 0.12 | 0.06 | 1.01  | 0.747465 | 0.898842 | 0.891879 | 0.942448 |
| MmugDNA.29421.1.S1_at   | MmugDNA.29421.1 | 5.59  | 5.66  | 0.11 | 0.12 | -1.05 | 0.484721 | 0.516101 | 0.750645 | 0.708704 |
| MmugDNA.29422.1.S1_at   | MmugDNA.29422.1 | 4.99  | 5.01  | 0.04 | 0.05 | -1.02 | 0.120206 | 0.07434  | 0.485127 | 0.318046 |
| MmugDNA.29423.1.S1_at   | MmugDNA.29423.1 | 5.3   | 5.61  | 0.24 | 0.13 | -1.24 | 0.327707 | 0.516081 | 0.654066 | 0.708704 |
| MmugDNA.29424.1.S1_at   | MmugDNA.29424.1 | 5.42  | 5.12  | 0.23 | 0.21 | 1.23  | 0.304749 | 0.150812 | 0.638784 | 0.425335 |
| MmugDNA.29425.1.S1_at   | MmugDNA.29425.1 | 7.51  | 7.59  | 0.07 | 0.19 | -1.06 | 0.121993 | 0.040929 | 0.486982 | 0.247161 |
| MmugDNA.29426.1.S1_at   | MmugDNA.29426.1 | 7.49  | 7.24  | 1.08 | 0.65 | 1.19  | 0.736034 | 0.879643 | 0.886439 | 0.931253 |
| MmugDNA.29427.1.S1_at   | MmugDNA.29427.1 | 3.6   | 3.67  | 0.18 | 0.02 | -1.05 | 0.675737 | 0.71063  | 0.854777 | 0.832169 |
| MmugDNA.29428.1.S1_at   | MmugDNA.29428.1 | 3.91  | 3.92  | 0.12 | 0.2  | -1.01 | 0.920027 | 0.87796  | 0.968811 | 0.930333 |
| MmugDNA.29429.1.S1_at   | MmugDNA.29429.1 | 9.49  | 9.09  | 0.17 | 0.31 | 1.32  | 0.12955  | 0.168421 | 0.495744 | 0.445092 |
| MmugDNA.2943.1.S1_at    | MmugDNA.2943.1  | 6.71  | 6.2   | 0.15 | 0.91 | 1.42  | 0.973393 | 0.579921 | 0.9896   | 0.749335 |
| MmugDNA.29430.1.S1_at   | MmugDNA.29430.1 | 9.54  | 10.2  | 0.14 | 0.23 | -1.58 | 0.008367 | 0.004008 | 0.217891 | 0.089969 |
| MmugDNA.27011.1.S1_s_at | MmugDNA.27011.1 | 6.12  | 6.12  | 0.02 | 0.07 | 1     | 0.798411 | 0.974887 | 0.916444 | 0.986264 |
| MmugDNA.29432.1.S1_at   | MmugDNA.29432.1 | 6.54  | 7.45  | 0.41 | 0.34 | -1.88 | 0.042377 | 0.040752 | 0.354697 | 0.246735 |
| MmugDNA.29434.1.S1_at   | MmugDNA.29434.1 | 6.17  | 6.05  | 0.38 | 0.07 | 1.09  | 0.663697 | 0.856518 | 0.849077 | 0.918027 |
| MmugDNA.29435.1.S1_at   | MmugDNA.29435.1 | 6.62  | 6.68  | 0.06 | 0.11 | -1.04 | 0.107192 | 0.426823 | 0.467913 | 0.648894 |

|                         |                 |       |       |      |      |       |          |          |          |          |
|-------------------------|-----------------|-------|-------|------|------|-------|----------|----------|----------|----------|
| MmugDNA.29437.1.S1_at   | MmugDNA.29437.1 | 6.19  | 6.12  | 0.2  | 0.21 | 1.05  | 0.55609  | 0.741747 | 0.791585 | 0.850485 |
| MmugDNA.29438.1.S1_at   | MmugDNA.29438.1 | 8.82  | 7.89  | 0.33 | 0.46 | 1.9   | 0.134178 | 0.070084 | 0.500726 | 0.31098  |
| MmugDNA.29439.1.S1_at   | MmugDNA.29439.1 | 4.28  | 4.11  | 0.34 | 0.28 | 1.12  | 0.992297 | 0.971248 | 0.997401 | 0.984375 |
| MmugDNA.29441.1.S1_at   | MmugDNA.29441.1 | 8.55  | 8.1   | 0.41 | 0.24 | 1.37  | 0.442526 | 0.055681 | 0.725648 | 0.28179  |
| MmugDNA.29442.1.S1_at   | MmugDNA.29442.1 | 7.43  | 8.56  | 0.04 | 0.38 | -2.19 | 0.005128 | 0.001784 | 0.18993  | 0.063434 |
| MmugDNA.29443.1.S1_at   | MmugDNA.29443.1 | 5.05  | 5.11  | 0.5  | 0.35 | -1.05 | 0.191278 | 0.257575 | 0.554198 | 0.525302 |
| MmugDNA.29445.1.S1_at   | MmugDNA.29445.1 | 3.13  | 3.18  | 0.16 | 0.1  | -1.03 | 0.409849 | 0.476481 | 0.706099 | 0.682725 |
| MmugDNA.29446.1.S1_at   | MmugDNA.29446.1 | 4.51  | 4.32  | 0.12 | 0.35 | 1.14  | 0.428775 | 0.571607 | 0.71704  | 0.743847 |
| MmugDNA.29447.1.S1_at   | MmugDNA.29447.1 | 4.72  | 4.27  | 0.47 | 0.15 | 1.37  | 0.124721 | 0.183002 | 0.49077  | 0.459481 |
| MmugDNA.35458.1.S1_at   | MmugDNA.35458.1 | 12.25 | 12.4  | 0.18 | 0.17 | -1.11 | 0.704794 | 0.847053 | 0.869805 | 0.913065 |
| MmugDNA.35458.1.S1_s_at | MmugDNA.35458.1 | 13.72 | 13.72 | 0.06 | 0.13 | 1     | 0.941514 | 0.810412 | 0.977713 | 0.890812 |
| MmugDNA.29450.1.S1_at   | MmugDNA.29450.1 | 11.58 | 12.04 | 0.09 | 0.09 | -1.37 | 0.003232 | 0.000419 | 0.175608 | 0.038093 |
| MmugDNA.29451.1.S1_at   | MmugDNA.29451.1 | 5.06  | 5.47  | 0.03 | 0.23 | -1.33 | 0.098033 | 0.069245 | 0.457356 | 0.309436 |
| MmugDNA.29452.1.S1_at   | MmugDNA.29452.1 | 12.7  | 12.04 | 0.12 | 0.23 | 1.58  | 0.015473 | 0.005978 | 0.258858 | 0.105736 |
| MmugDNA.29453.1.S1_at   | MmugDNA.29453.1 | 5.05  | 5.19  | 0.04 | 0.11 | -1.1  | 0.132703 | 0.34737  | 0.49874  | 0.591967 |
| MmugDNA.29454.1.S1_at   | MmugDNA.29454.1 | 9.87  | 9.75  | 0.11 | 0.18 | 1.09  | 0.484874 | 0.391458 | 0.750701 | 0.625086 |
| MmugDNA.29455.1.S1_at   | MmugDNA.29455.1 | 10.44 | 11.23 | 0.24 | 0.42 | -1.73 | 0.069736 | 0.039376 | 0.412893 | 0.243406 |
| MmugDNA.29456.1.S1_at   | MmugDNA.29456.1 | 9.88  | 9.67  | 0.07 | 0.09 | 1.16  | 0.055218 | 0.083309 | 0.383636 | 0.333375 |
| MmugDNA.29457.1.S1_at   | MmugDNA.29457.1 | 3.19  | 3.19  | 0.15 | 0.3  | -1    | 0.990071 | 0.999371 | 0.996483 | 0.999769 |
| MmugDNA.29458.1.S1_at   | MmugDNA.29458.1 | 4.13  | 4.19  | 0.3  | 0.23 | -1.04 | 0.525696 | 0.095121 | 0.773877 | 0.352151 |
| MmugDNA.29459.1.S1_at   | MmugDNA.29459.1 | 6.23  | 6.13  | 0.19 | 0.12 | 1.07  | 0.510879 | 0.64703  | 0.765151 | 0.793279 |
| MmugDNA.2946.1.S1_at    | MmugDNA.2946.1  | 4.29  | 4.09  | 0.19 | 0.1  | 1.15  | 0.322585 | 0.138058 | 0.651244 | 0.410919 |
| MmugDNA.29460.1.S1_at   | MmugDNA.29460.1 | 3.75  | 3.5   | 0.08 | 0.14 | 1.19  | 0.065325 | 0.323561 | 0.404407 | 0.574497 |
| MmugDNA.29461.1.S1_at   | MmugDNA.29461.1 | 5.29  | 5.34  | 0.12 | 0.29 | -1.04 | 0.85746  | 0.866155 | 0.942274 | 0.923842 |
| MmugDNA.29462.1.S1_at   | MmugDNA.29462.1 | 3.46  | 3.49  | 0.11 | 0.39 | -1.02 | 0.671708 | 0.861114 | 0.852716 | 0.920974 |
| MmugDNA.29463.1.S1_at   | MmugDNA.29463.1 | 2.9   | 2.88  | 0.13 | 0.11 | 1.02  | 0.674576 | 0.896298 | 0.854194 | 0.940788 |
| MmugDNA.29464.1.S1_at   | MmugDNA.29464.1 | 9.37  | 10.11 | 0.05 | 0.06 | -1.67 | 0.000083 | 0.000067 | 0.112653 | 0.025805 |
| MmugDNA.29465.1.S1_at   | MmugDNA.29465.1 | 9.52  | 8.87  | 0.33 | 0.15 | 1.57  | 0.03871  | 0.032292 | 0.345106 | 0.222452 |
| MmugDNA.29466.1.S1_at   | MmugDNA.29466.1 | 9.6   | 9.75  | 0.08 | 0.68 | -1.11 | 0.638597 | 0.698171 | 0.836645 | 0.824649 |
| MmugDNA.29468.1.S1_x_at | MmugDNA.29468.1 | 8.28  | 8.59  | 0.17 | 0.28 | -1.24 | 0.081542 | 0.030421 | 0.432522 | 0.216377 |
| MmugDNA.29469.1.S1_at   | MmugDNA.29469.1 | 6.71  | 6.83  | 0.55 | 0.29 | -1.08 | 0.738275 | 0.900143 | 0.887625 | 0.943307 |
| MmugDNA.2947.1.S1_at    | MmugDNA.2947.1  | 10.66 | 9.76  | 0.4  | 0.62 | 1.87  | 0.102331 | 0.098508 | 0.462093 | 0.356636 |
| MmugDNA.29470.1.S1_at   | MmugDNA.29470.1 | 10.41 | 11.25 | 0.26 | 0.52 | -1.8  | 0.037838 | 0.03391  | 0.343109 | 0.227771 |
| MmugDNA.29471.1.S1_at   | MmugDNA.29471.1 | 3.71  | 3.77  | 0.04 | 0.15 | -1.04 | 0.329072 | 0.135436 | 0.654811 | 0.407526 |
| MmugDNA.29472.1.S1_at   | MmugDNA.29472.1 | 3.13  | 3.1   | 0.53 | 0.12 | 1.03  | 0.972551 | 0.992688 | 0.989473 | 0.995715 |
| MmugDNA.29474.1.S1_at   | MmugDNA.29474.1 | 10.05 | 10.4  | 0.12 | 0.34 | -1.28 | 0.48976  | 0.681486 | 0.754097 | 0.814091 |
| MmugDNA.29476.1.S1_at   | MmugDNA.29476.1 | 7.68  | 7.73  | 0.11 | 0.24 | -1.04 | 0.533908 | 0.323124 | 0.778436 | 0.574351 |
| MmugDNA.29478.1.S1_at   | MmugDNA.29478.1 | 8.45  | 8.04  | 0.36 | 0.12 | 1.33  | 0.064323 | 0.041759 | 0.402942 | 0.248939 |
| MmugDNA.29479.1.S1_at   | MmugDNA.29479.1 | 10.37 | 10.38 | 0.29 | 1.17 | -1.01 | 0.801217 | 0.804608 | 0.918016 | 0.88762  |
| MmugDNA.29480.1.S1_at   | MmugDNA.29480.1 | 4.92  | 4.97  | 0.01 | 0.26 | -1.04 | 0.744832 | 0.88691  | 0.89085  | 0.935578 |
| MmugDNA.29481.1.S1_at   | MmugDNA.29481.1 | 4.86  | 4.84  | 0.21 | 0.09 | 1.02  | 0.4577   | 0.609239 | 0.735025 | 0.767684 |

|                         |                 |       |       |      |      |       |          |          |          |          |
|-------------------------|-----------------|-------|-------|------|------|-------|----------|----------|----------|----------|
| MmugDNA.29482.1.S1_at   | MmugDNA.29482.1 | 6.43  | 5.65  | 0.29 | 0.35 | 1.72  | 0.149461 | 0.108052 | 0.514037 | 0.37128  |
| MmugDNA.29484.1.S1_at   | MmugDNA.29484.1 | 4.93  | 4.94  | 0.23 | 0.12 | -1.01 | 0.786076 | 0.952404 | 0.911069 | 0.973038 |
| MmugDNA.29485.1.S1_at   | MmugDNA.29485.1 | 4.28  | 4.36  | 0.29 | 0.06 | -1.06 | 0.842302 | 0.568642 | 0.936452 | 0.742052 |
| MmugDNA.29486.1.S1_at   | MmugDNA.29486.1 | 7.93  | 8.04  | 0.18 | 0.12 | -1.08 | 0.582885 | 0.49784  | 0.806021 | 0.697071 |
| MmugDNA.29487.1.S1_at   | MmugDNA.29487.1 | 8.85  | 9.73  | 0.34 | 0.9  | -1.84 | 0.227554 | 0.286228 | 0.585103 | 0.547725 |
| MmugDNA.29488.1.S1_at   | MmugDNA.29488.1 | 6.63  | 6.75  | 0.35 | 0.27 | -1.09 | 0.766557 | 0.557338 | 0.901851 | 0.735031 |
| MmugDNA.29489.1.S1_at   | MmugDNA.29489.1 | 6.61  | 6.6   | 0.22 | 0.18 | 1.01  | 0.576111 | 0.143988 | 0.802744 | 0.417912 |
| MmugDNA.2949.1.S1_at    | MmugDNA.2949.1  | 5.96  | 6.65  | 1.04 | 0.13 | -1.62 | 0.382046 | 0.600437 | 0.688419 | 0.762128 |
| MmugDNA.29490.1.S1_at   | MmugDNA.29490.1 | 2.78  | 2.88  | 0.15 | 0.09 | -1.08 | 0.225445 | 0.373588 | 0.583536 | 0.612375 |
| MmugDNA.29491.1.S1_at   | MmugDNA.29491.1 | 4.59  | 4.01  | 0.25 | 0.38 | 1.5   | 0.055425 | 0.029149 | 0.383716 | 0.212767 |
| MmugDNA.29492.1.S1_x_at | MmugDNA.29492.1 | 9.12  | 8.77  | 0.61 | 0.25 | 1.28  | 0.220748 | 0.299551 | 0.579701 | 0.557945 |
| MmugDNA.29493.1.S1_at   | MmugDNA.29493.1 | 5.44  | 5.45  | 0.25 | 0.45 | -1.01 | 0.687392 | 0.445099 | 0.860396 | 0.662281 |
| MmugDNA.29495.1.S1_at   | MmugDNA.29495.1 | 6.49  | 6.54  | 0.12 | 0.18 | -1.03 | 0.893511 | 0.94405  | 0.957637 | 0.968301 |
| MmugDNA.29496.1.S1_at   | MmugDNA.29496.1 | 4.06  | 4.08  | 0.25 | 0.5  | -1.02 | 0.986901 | 0.860219 | 0.995355 | 0.920296 |
| MmugDNA.10539.1.S1_s_at | MmugDNA.10539.1 | 9.82  | 9.96  | 0.14 | 0.22 | -1.1  | 0.581337 | 0.713054 | 0.805072 | 0.833638 |
| MmugDNA.29498.1.S1_at   | MmugDNA.29498.1 | 9.46  | 8.86  | 0.32 | 0.36 | 1.52  | 0.054811 | 0.006788 | 0.382401 | 0.111388 |
| MmugDNA.29499.1.S1_at   | MmugDNA.29499.1 | 8.29  | 7.19  | 0.45 | 0.59 | 2.16  | 0.044741 | 0.045144 | 0.359043 | 0.256979 |
| MmugDNA.295.1.S1_at     | MmugDNA.295.1   | 8.37  | 8.88  | 0.14 | 0.84 | -1.42 | 0.342405 | 0.460918 | 0.66317  | 0.672772 |
| MmugDNA.2950.1.S1_at    | MmugDNA.2950.1  | 2.89  | 2.88  | 0.35 | 0.06 | 1.01  | 0.294711 | 0.631897 | 0.631442 | 0.78302  |
| MmugDNA.29500.1.S1_at   | MmugDNA.29500.1 | 6.66  | 6.63  | 0.16 | 0.04 | 1.02  | 0.389249 | 0.558097 | 0.692956 | 0.735404 |
| MmugDNA.29501.1.S1_at   | MmugDNA.29501.1 | 3.37  | 3.33  | 0.24 | 0.07 | 1.02  | 0.288616 | 0.337841 | 0.626746 | 0.585027 |
| MmugDNA.29502.1.S1_at   | MmugDNA.29502.1 | 4.52  | 4.43  | 0.05 | 0.09 | 1.06  | 0.190263 | 0.340921 | 0.553031 | 0.587035 |
| MmugDNA.29504.1.S1_at   | MmugDNA.29504.1 | 5.52  | 5.55  | 0.04 | 0.27 | -1.02 | 0.256508 | 0.296119 | 0.604238 | 0.555339 |
| MmugDNA.29505.1.S1_at   | MmugDNA.29505.1 | 6.18  | 6.74  | 0.37 | 0.3  | -1.48 | 0.198628 | 0.177221 | 0.561673 | 0.45365  |
| MmugDNA.29506.1.S1_at   | MmugDNA.29506.1 | 7.96  | 7.78  | 0.39 | 0.22 | 1.14  | 0.632448 | 0.396296 | 0.833214 | 0.628079 |
| MmugDNA.29508.1.S1_at   | MmugDNA.29508.1 | 11.39 | 11.9  | 0.05 | 0.19 | -1.42 | 0.006496 | 0.001487 | 0.199625 | 0.058901 |
| MmugDNA.29509.1.S1_at   | MmugDNA.29509.1 | 4.55  | 3.87  | 0.97 | 0.53 | 1.6   | 0.163939 | 0.10375  | 0.528211 | 0.364519 |
| MmugDNA.29510.1.S1_at   | MmugDNA.29510.1 | 4.36  | 4.49  | 0.12 | 0.25 | -1.09 | 0.259882 | 0.329391 | 0.606878 | 0.578733 |
| MmugDNA.29511.1.S1_at   | MmugDNA.29511.1 | 6.29  | 5.05  | 0.14 | 0.21 | 2.38  | 0.002045 | 0.000313 | 0.155636 | 0.035198 |
| MmugDNA.29512.1.S1_at   | MmugDNA.29512.1 | 4.66  | 4.65  | 0.54 | 0.3  | 1     | 0.830469 | 0.941221 | 0.931462 | 0.966693 |
| MmugDNA.29513.1.S1_at   | MmugDNA.29513.1 | 9.05  | 8.38  | 0.31 | 0.76 | 1.58  | 0.887382 | 0.975661 | 0.954863 | 0.98673  |
| MmugDNA.29516.1.S1_at   | MmugDNA.29516.1 | 5.11  | 5.24  | 0.42 | 0.83 | -1.1  | 0.814709 | 0.947624 | 0.924758 | 0.970275 |
| MmugDNA.29518.1.S1_at   | MmugDNA.29518.1 | 6.91  | 6.84  | 0.18 | 0.02 | 1.05  | 0.700668 | 0.1886   | 0.86753  | 0.464557 |
| MmugDNA.29519.1.S1_at   | MmugDNA.29519.1 | 8.69  | 8.73  | 0.24 | 0.42 | -1.03 | 0.533733 | 0.64235  | 0.778431 | 0.790158 |
| MmugDNA.2952.1.S1_at    | MmugDNA.2952.1  | 3.2   | 3.28  | 0.05 | 0.06 | -1.06 | 0.074642 | 0.129151 | 0.420587 | 0.400611 |
| MmugDNA.29520.1.S1_at   | MmugDNA.29520.1 | 10.82 | 10.12 | 0.09 | 0.32 | 1.63  | 0.026237 | 0.015507 | 0.302051 | 0.158052 |
| MmugDNA.29521.1.S1_at   | MmugDNA.29521.1 | 4.18  | 4.2   | 0.04 | 0.04 | -1.01 | 0.565466 | 0.934713 | 0.797093 | 0.963039 |
| MmugDNA.29523.1.S1_at   | MmugDNA.29523.1 | 3.39  | 3.51  | 0.03 | 0.26 | -1.09 | 0.494909 | 0.650561 | 0.756991 | 0.795663 |
| MmugDNA.29523.1.S1_s_at | MmugDNA.29523.1 | 12.53 | 12.5  | 0.01 | 0.02 | 1.02  | 0.051352 | 0.00035  | 0.376001 | 0.037097 |
| MmugDNA.29524.1.S1_at   | MmugDNA.29524.1 | 6.17  | 6.56  | 1.07 | 0.24 | -1.31 | 0.59362  | 0.813029 | 0.811547 | 0.891895 |
| MmugDNA.29525.1.S1_at   | MmugDNA.29525.1 | 11.54 | 12.37 | 0.13 | 0.07 | -1.78 | 0.000713 | 0.000563 | 0.136818 | 0.041049 |

|                         |                 |       |       |      |      |       |          |          |          |          |
|-------------------------|-----------------|-------|-------|------|------|-------|----------|----------|----------|----------|
| MmugDNA.29526.1.S1_at   | MmugDNA.29526.1 | 3.76  | 3.7   | 0.22 | 0.05 | 1.04  | 0.574193 | 0.778829 | 0.801613 | 0.871622 |
| MmugDNA.29527.1.S1_at   | MmugDNA.29527.1 | 8.6   | 8.88  | 0.14 | 0.26 | -1.21 | 0.094634 | 0.103521 | 0.452166 | 0.364346 |
| MmugDNA.29528.1.S1_at   | MmugDNA.29528.1 | 4.76  | 4.84  | 0.14 | 0.05 | -1.06 | 0.12993  | 0.490337 | 0.495974 | 0.692363 |
| MmugDNA.29532.1.S1_at   | MmugDNA.29532.1 | 4.8   | 4.84  | 0.01 | 0.02 | -1.03 | 0.173552 | 0.286448 | 0.537183 | 0.547829 |
| MmugDNA.29535.1.S1_at   | MmugDNA.29535.1 | 3.44  | 3.69  | 0.15 | 0.1  | -1.18 | 0.142238 | 0.167683 | 0.509478 | 0.444205 |
| MmugDNA.29537.1.S1_at   | MmugDNA.29537.1 | 5.01  | 4.64  | 0.41 | 0.2  | 1.29  | 0.360732 | 0.514615 | 0.674646 | 0.707767 |
| MmugDNA.29538.1.S1_at   | MmugDNA.29538.1 | 8     | 7.33  | 0.07 | 0.51 | 1.58  | 0.136689 | 0.05914  | 0.503841 | 0.290131 |
| MmugDNA.29539.1.S1_at   | MmugDNA.29539.1 | 4.64  | 4.7   | 0.12 | 0.24 | -1.04 | 0.1589   | 0.295068 | 0.524147 | 0.554551 |
| MmugDNA.29541.1.S1_at   | MmugDNA.29541.1 | 3.79  | 5.55  | 1.23 | 1.42 | -3.39 | 0.360706 | 0.199052 | 0.674646 | 0.473621 |
| MmugDNA.29542.1.S1_at   | MmugDNA.29542.1 | 8.64  | 8.67  | 0.14 | 0.35 | -1.03 | 0.655118 | 0.632693 | 0.844805 | 0.783731 |
| MmugDNA.29543.1.S1_at   | MmugDNA.29543.1 | 4.93  | 4.94  | 0.13 | 0.07 | -1    | 0.42798  | 0.189634 | 0.716548 | 0.465297 |
| MmugDNA.29544.1.S1_at   | MmugDNA.29544.1 | 9.29  | 7.7   | 0.1  | 0.36 | 3.02  | 0.001358 | 0.000281 | 0.146228 | 0.03453  |
| MmugDNA.29545.1.S1_at   | MmugDNA.29545.1 | 4.04  | 4.04  | 0.24 | 0.24 | -1    | 0.970412 | 0.906566 | 0.988627 | 0.947166 |
| MmugDNA.29546.1.S1_at   | MmugDNA.29546.1 | 6.32  | 6.46  | 0.73 | 0.04 | -1.1  | 0.517638 | 0.329693 | 0.768927 | 0.578874 |
| MmugDNA.29547.1.S1_at   | MmugDNA.29547.1 | 3.44  | 3.62  | 0.18 | 0.14 | -1.13 | 0.24307  | 0.313265 | 0.594744 | 0.567753 |
| MmugDNA.29548.1.S1_at   | MmugDNA.29548.1 | 4.03  | 4.38  | 0.62 | 0.1  | -1.28 | 0.637527 | 0.839228 | 0.836217 | 0.908353 |
| MmugDNA.29549.1.S1_s_at | MmugDNA.29549.1 | 4.93  | 4.38  | 0.12 | 0.28 | 1.47  | 0.031922 | 0.008473 | 0.323433 | 0.12211  |
| MmugDNA.2955.1.S1_at    | MmugDNA.2955.1  | 4.08  | 4.04  | 0.26 | 0.25 | 1.03  | 0.287622 | 0.386832 | 0.626102 | 0.621935 |
| MmugDNA.29550.1.S1_at   | MmugDNA.29550.1 | 10.38 | 10.88 | 0.3  | 0.5  | -1.41 | 0.359459 | 0.293177 | 0.673869 | 0.553093 |
| MmugDNA.29551.1.S1_at   | MmugDNA.29551.1 | 3.84  | 3.74  | 0.11 | 0.09 | 1.07  | 0.233037 | 0.342514 | 0.587988 | 0.588539 |
| MmugDNA.29552.1.S1_at   | MmugDNA.29552.1 | 4.93  | 4.97  | 0.22 | 0.16 | -1.03 | 0.302676 | 0.67945  | 0.637031 | 0.812834 |
| MmugDNA.29553.1.S1_at   | MmugDNA.29553.1 | 6.7   | 6.34  | 0.17 | 0.08 | 1.28  | 0.018624 | 0.008334 | 0.270832 | 0.121147 |
| MmugDNA.29554.1.S1_at   | MmugDNA.29554.1 | 2.97  | 3.02  | 0.13 | 0.06 | -1.03 | 0.66591  | 0.235572 | 0.85015  | 0.506633 |
| MmugDNA.29555.1.S1_at   | MmugDNA.29555.1 | 4.95  | 5.18  | 0.07 | 0.14 | -1.18 | 0.283228 | 0.222822 | 0.623314 | 0.495748 |
| MmugDNA.29556.1.S1_at   | MmugDNA.29556.1 | 6.35  | 6.58  | 0.06 | 0.16 | -1.17 | 0.05093  | 0.050521 | 0.37568  | 0.270134 |
| MmugDNA.29557.1.S1_at   | MmugDNA.29557.1 | 7.08  | 6.71  | 0.6  | 0.34 | 1.29  | 0.39501  | 0.371963 | 0.696305 | 0.610792 |
| MmugDNA.29559.1.S1_at   | MmugDNA.29559.1 | 6.06  | 5.37  | 0.3  | 0.11 | 1.62  | 0.01666  | 0.019088 | 0.26475  | 0.173827 |
| MmugDNA.2956.1.S1_at    | MmugDNA.2956.1  | 6.76  | 6.84  | 0.39 | 0.08 | -1.06 | 0.554194 | 0.453649 | 0.790667 | 0.668074 |
| MmugDNA.29560.1.S1_at   | MmugDNA.29560.1 | 9.2   | 8.23  | 0.98 | 1.32 | 1.95  | 0.391509 | 0.402024 | 0.694115 | 0.631153 |
| MmugDNA.29563.1.S1_at   | MmugDNA.29563.1 | 6.78  | 6.22  | 1.55 | 0.67 | 1.47  | 0.206782 | 0.272211 | 0.568816 | 0.536976 |
| MmugDNA.29564.1.S1_at   | MmugDNA.29564.1 | 3.46  | 3.46  | 0.02 | 0.01 | 1     | 0.426767 | 0.784918 | 0.715973 | 0.875471 |
| MmugDNA.29567.1.S1_at   | MmugDNA.29567.1 | 4.07  | 4.48  | 0.09 | 0.13 | -1.33 | 0.009304 | 0.00709  | 0.223832 | 0.113367 |
| MmugDNA.29568.1.S1_at   | MmugDNA.29568.1 | 7.77  | 5.93  | 1.06 | 0.17 | 3.57  | 0.044982 | 0.033044 | 0.359536 | 0.225023 |
| MmugDNA.2957.1.S1_at    | MmugDNA.2957.1  | 4.67  | 4.72  | 0.14 | 0.25 | -1.04 | 0.548384 | 0.520149 | 0.786665 | 0.711472 |
| MmugDNA.29572.1.S1_at   | MmugDNA.29572.1 | 8.19  | 7.91  | 0.54 | 0.07 | 1.21  | 0.138775 | 0.072563 | 0.505884 | 0.315511 |
| MmugDNA.29573.1.S1_at   | MmugDNA.29573.1 | 5.42  | 5.78  | 0.31 | 0.1  | -1.28 | 0.256332 | 0.210961 | 0.603956 | 0.484938 |
| MmugDNA.29574.1.S1_at   | MmugDNA.29574.1 | 7.14  | 7.79  | 0.4  | 0.56 | -1.57 | 0.238734 | 0.269242 | 0.592015 | 0.534534 |
| MmugDNA.29575.1.S1_at   | MmugDNA.29575.1 | 7.34  | 9.83  | 0.6  | 0.37 | -5.59 | 0.004428 | 0.001206 | 0.183441 | 0.054389 |
| MmugDNA.29576.1.S1_at   | MmugDNA.29576.1 | 3.02  | 3.18  | 0.02 | 0.07 | -1.12 | 0.011129 | 0.009425 | 0.234301 | 0.127893 |
| MmugDNA.29579.1.S1_at   | MmugDNA.29579.1 | 7.22  | 7.46  | 0.03 | 0.37 | -1.18 | 0.906618 | 0.325611 | 0.96294  | 0.575912 |
| MmugDNA.2958.1.S1_at    | MmugDNA.2958.1  | 4.59  | 4.62  | 0.25 | 0.21 | -1.02 | 0.573716 | 0.320612 | 0.801332 | 0.572703 |

|                        |                 |       |       |      |      |       |          |          |          |          |
|------------------------|-----------------|-------|-------|------|------|-------|----------|----------|----------|----------|
| MmugDNA.29580.1.S1_at  | MmugDNA.29580.1 | 7.14  | 7.91  | 0.21 | 1.25 | -1.71 | 0.930593 | 0.536578 | 0.973196 | 0.721903 |
| MmugDNA.29581.1.S1_at  | MmugDNA.29581.1 | 5.35  | 5.76  | 0.08 | 0.2  | -1.33 | 0.073209 | 0.04863  | 0.418452 | 0.265602 |
| MmugDNA.29583.1.S1_at  | MmugDNA.29583.1 | 8.49  | 8.7   | 0.78 | 0.24 | -1.16 | 0.434065 | 0.603691 | 0.720304 | 0.764245 |
| MmugDNA.29584.1.S1_at  | MmugDNA.29584.1 | 5.21  | 5.35  | 0.36 | 0.88 | -1.1  | 0.304408 | 0.395727 | 0.638542 | 0.627639 |
| MmugDNA.29586.1.S1_at  | MmugDNA.29586.1 | 4.16  | 4.13  | 0.08 | 0.21 | 1.02  | 0.951839 | 0.627268 | 0.981968 | 0.780361 |
| MmugDNA.29587.1.S1_at  | MmugDNA.29587.1 | 11.54 | 11.56 | 0.25 | 0.4  | -1.01 | 0.442176 | 0.531283 | 0.725394 | 0.718555 |
| MmugDNA.29589.1.S1_at  | MmugDNA.29589.1 | 4.7   | 5.97  | 1.15 | 0.67 | -2.42 | 0.617362 | 0.783941 | 0.824674 | 0.874935 |
| MmugDNA.2959.1.S1_at   | MmugDNA.2959.1  | 5.21  | 5.38  | 1.01 | 0.03 | -1.13 | 0.51543  | 0.548867 | 0.767468 | 0.729463 |
| MmugDNA.29590.1.S1_at  | MmugDNA.29590.1 | 6.26  | 6.32  | 0.15 | 0.09 | -1.04 | 0.592338 | 0.318168 | 0.810885 | 0.571046 |
| MmugDNA.29592.1.S1_at  | MmugDNA.29592.1 | 9.05  | 8.44  | 0.24 | 0.83 | 1.52  | 0.610399 | 0.806957 | 0.821014 | 0.888903 |
| MmugDNA.29595.1.S1_at  | MmugDNA.29595.1 | 2.93  | 2.87  | 0.17 | 0.18 | 1.04  | 0.156639 | 0.20522  | 0.52152  | 0.479596 |
| MmugDNA.29596.1.S1_at  | MmugDNA.29596.1 | 3.28  | 3.15  | 0.22 | 0.1  | 1.09  | 0.34229  | 0.400374 | 0.663129 | 0.630177 |
| MmugDNA.29597.1.S1_at  | MmugDNA.29597.1 | 4.42  | 4.3   | 0.14 | 0.5  | 1.09  | 0.611682 | 0.803713 | 0.821755 | 0.887094 |
| MmugDNA.29598.1.S1_at  | MmugDNA.29598.1 | 5.2   | 5.09  | 0.08 | 0.01 | 1.08  | 0.142216 | 0.124967 | 0.509437 | 0.395386 |
| MmugDNA.296.1.S1_at    | MmugDNA.296.1   | 4.79  | 4.28  | 0.06 | 0.15 | 1.42  | 0.009693 | 0.038195 | 0.226235 | 0.240129 |
| MmugDNA.29600.1.S1_at  | MmugDNA.29600.1 | 6.45  | 5.85  | 1.44 | 1.01 | 1.52  | 0.935574 | 0.647199 | 0.975112 | 0.793312 |
| MmugDNA.29601.1.S1_at  | MmugDNA.29601.1 | 5.39  | 5.35  | 0.16 | 0.05 | 1.03  | 0.67106  | 0.295793 | 0.852532 | 0.555196 |
| MmugDNA.29602.1.S1_at  | MmugDNA.29602.1 | 6.01  | 5.92  | 1.09 | 0.93 | 1.06  | 0.644437 | 0.807638 | 0.839758 | 0.889237 |
| MmugDNA.29603.1.S1_at  | MmugDNA.29603.1 | 6.15  | 6.59  | 1.43 | 0.1  | -1.36 | 0.627586 | 0.813018 | 0.830201 | 0.891895 |
| MmugDNA.29605.1.S1_at  | MmugDNA.29605.1 | 10.49 | 11.89 | 0.66 | 1.32 | -2.64 | 0.237549 | 0.248    | 0.591131 | 0.517487 |
| MmugDNA.29606.1.S1_at  | MmugDNA.29606.1 | 6.98  | 7.76  | 0.86 | 0.28 | -1.72 | 0.556152 | 0.75627  | 0.791617 | 0.858165 |
| MmugDNA.29607.1.S1_at  | MmugDNA.29607.1 | 9.95  | 9.87  | 0.13 | 0.33 | 1.06  | 0.62839  | 0.344525 | 0.830787 | 0.589905 |
| MmugDNA.29608.1.S1_at  | MmugDNA.29608.1 | 11.21 | 10.92 | 0.13 | 0.33 | 1.23  | 0.558054 | 0.639494 | 0.792924 | 0.788314 |
| MmugDNA.29609.1.S1_at  | MmugDNA.29609.1 | 5.68  | 6.29  | 0.22 | 0.65 | -1.53 | 0.705383 | 0.828778 | 0.870053 | 0.901565 |
| MmugDNA.2961.1.S1_at   | MmugDNA.2961.1  | 3.08  | 3.04  | 0.12 | 0.16 | 1.03  | 0.93772  | 0.145706 | 0.97603  | 0.419653 |
| MmugDNA.29610.1.S1_at  | MmugDNA.29610.1 | 3.19  | 3.14  | 0.31 | 0.05 | 1.04  | 0.265986 | 0.360902 | 0.611558 | 0.60194  |
| MmugDNA.29611.1.S1_at  | MmugDNA.29611.1 | 4.36  | 4.09  | 0.48 | 0.22 | 1.21  | 0.173896 | 0.2491   | 0.537415 | 0.51821  |
| MmugDNA.29612.1.S1_at  | MmugDNA.29612.1 | 7.43  | 6.58  | 0.54 | 0.79 | 1.8   | 0.184566 | 0.09678  | 0.548202 | 0.354207 |
| MmugDNA.29613.1.S1_at  | MmugDNA.29613.1 | 3.41  | 3.47  | 0.34 | 0.24 | -1.04 | 0.596003 | 0.81753  | 0.812742 | 0.894746 |
| MmugDNA.29614.1.S1_at  | MmugDNA.29614.1 | 8.91  | 8.66  | 0.13 | 0.48 | 1.19  | 0.435265 | 0.110824 | 0.721189 | 0.375124 |
| MmugDNA.5184.1.S1_s_at | MmugDNA.5184.1  | 10.01 | 9.98  | 0.29 | 0.15 | 1.02  | 0.934289 | 0.000433 | 0.97457  | 0.038359 |
| MmugDNA.29618.1.S1_at  | MmugDNA.29618.1 | 8.03  | 8.29  | 0.22 | 0.27 | -1.2  | 0.629902 | 0.06155  | 0.831779 | 0.294865 |
| MmugDNA.29619.1.S1_at  | MmugDNA.29619.1 | 7.58  | 7.83  | 0.05 | 0.17 | -1.19 | 0.148609 | 0.151556 | 0.51391  | 0.426307 |
| MmugDNA.2962.1.S1_at   | MmugDNA.2962.1  | 4.71  | 4.84  | 0.24 | 0.24 | -1.1  | 0.241497 | 0.394471 | 0.593941 | 0.62701  |
| MmugDNA.29623.1.S1_at  | MmugDNA.29623.1 | 5.66  | 5.72  | 0.56 | 0.14 | -1.04 | 0.412371 | 0.433923 | 0.707889 | 0.654102 |
| MmugDNA.29624.1.S1_at  | MmugDNA.29624.1 | 3.75  | 3.84  | 0.42 | 0.13 | -1.06 | 0.493721 | 0.503895 | 0.756299 | 0.701193 |
| MmugDNA.29626.1.S1_at  | MmugDNA.29626.1 | 5.66  | 5.75  | 0.42 | 0.12 | -1.06 | 0.756452 | 0.52449  | 0.896513 | 0.714395 |
| MmugDNA.29628.1.S1_at  | MmugDNA.29628.1 | 5.59  | 5.3   | 0.22 | 0.6  | 1.22  | 0.491569 | 0.563969 | 0.7551   | 0.738913 |
| MmugDNA.29629.1.S1_at  | MmugDNA.29629.1 | 4.72  | 5.01  | 0.09 | 0.17 | -1.22 | 0.089915 | 0.106106 | 0.44539  | 0.368498 |
| MmugDNA.29630.1.S1_at  | MmugDNA.29630.1 | 8.91  | 8.85  | 0.2  | 0.36 | 1.04  | 0.494451 | 0.729618 | 0.756791 | 0.843613 |
| MmugDNA.29631.1.S1_at  | MmugDNA.29631.1 | 3.08  | 3.09  | 0.14 | 0.1  | -1.01 | 0.781076 | 0.87135  | 0.908721 | 0.926844 |

|                         |                 |       |       |      |      |       |          |          |          |          |
|-------------------------|-----------------|-------|-------|------|------|-------|----------|----------|----------|----------|
| MmugDNA.29632.1.S1_at   | MmugDNA.29632.1 | 3.05  | 3.06  | 0.08 | 0.02 | -1.01 | 0.662306 | 0.825771 | 0.848507 | 0.899849 |
| MmugDNA.29633.1.S1_at   | MmugDNA.29633.1 | 4.86  | 4.52  | 0.45 | 0.28 | 1.27  | 0.832756 | 0.17083  | 0.932258 | 0.447451 |
| MmugDNA.29634.1.S1_at   | MmugDNA.29634.1 | 9.96  | 9.6   | 0.22 | 0.54 | 1.29  | 0.18748  | 0.236312 | 0.550517 | 0.507308 |
| MmugDNA.29635.1.S1_at   | MmugDNA.29635.1 | 3.83  | 4.02  | 0.09 | 0.11 | -1.14 | 0.188479 | 0.243328 | 0.551451 | 0.513371 |
| MmugDNA.29636.1.S1_at   | MmugDNA.29636.1 | 5.61  | 5.24  | 0.13 | 0.15 | 1.29  | 0.02789  | 0.284827 | 0.309162 | 0.546966 |
| MmugDNA.29637.1.S1_at   | MmugDNA.29637.1 | 3.38  | 3.31  | 0.06 | 0.12 | 1.05  | 0.987406 | 0.763507 | 0.995543 | 0.862471 |
| MmugDNA.29638.1.S1_at   | MmugDNA.29638.1 | 4.72  | 4.56  | 0.36 | 0.13 | 1.12  | 0.38087  | 0.176321 | 0.687597 | 0.452752 |
| MmugDNA.29639.1.S1_at   | MmugDNA.29639.1 | 8.01  | 8.72  | 0.43 | 0.35 | -1.63 | 0.1084   | 0.12848  | 0.469638 | 0.399818 |
| MmugDNA.2964.1.S1_at    | MmugDNA.2964.1  | 6.75  | 6.7   | 0.15 | 0.07 | 1.04  | 0.642067 | 0.681343 | 0.83868  | 0.813957 |
| MmugDNA.29640.1.S1_s_at | MmugDNA.29640.1 | 9.41  | 9.3   | 0.22 | 0.11 | 1.08  | 0.317044 | 0.006234 | 0.647775 | 0.107112 |
| MmugDNA.29641.1.S1_at   | MmugDNA.29641.1 | 12    | 12.05 | 0.21 | 0.04 | -1.04 | 0.681877 | 0.708122 | 0.857635 | 0.830704 |
| MmugDNA.29642.1.S1_at   | MmugDNA.29642.1 | 7.46  | 6.8   | 0.51 | 1.31 | 1.58  | 0.361195 | 0.571893 | 0.675116 | 0.744056 |
| MmugDNA.29643.1.S1_at   | MmugDNA.29643.1 | 5.88  | 5.94  | 0.05 | 0.23 | -1.04 | 0.625189 | 0.485478 | 0.82872  | 0.68914  |
| MmugDNA.29644.1.S1_at   | MmugDNA.29644.1 | 6.47  | 6.46  | 0.38 | 0.14 | 1     | 0.297857 | 0.427243 | 0.633549 | 0.649175 |
| MmugDNA.29645.1.S1_at   | MmugDNA.29645.1 | 5.17  | 4.87  | 0.19 | 0.19 | 1.24  | 0.133833 | 0.137003 | 0.500371 | 0.409836 |
| MmugDNA.29646.1.S1_at   | MmugDNA.29646.1 | 4.57  | 4.82  | 0.45 | 0.26 | -1.19 | 0.969321 | 0.590343 | 0.988296 | 0.756166 |
| MmugDNA.29647.1.S1_at   | MmugDNA.29647.1 | 4.64  | 4.68  | 0.15 | 0.12 | -1.02 | 0.548469 | 0.281129 | 0.786665 | 0.544261 |
| MmugDNA.29649.1.S1_at   | MmugDNA.29649.1 | 7.01  | 6.78  | 0.23 | 0.03 | 1.17  | 0.133731 | 0.150467 | 0.500334 | 0.425007 |
| MmugDNA.2965.1.S1_at    | MmugDNA.2965.1  | 10.05 | 9.77  | 0.23 | 0.27 | 1.21  | 0.117157 | 0.057602 | 0.481176 | 0.286171 |
| MmugDNA.29650.1.S1_at   | MmugDNA.29650.1 | 7.83  | 8.2   | 0.12 | 0.2  | -1.29 | 0.082481 | 0.071566 | 0.434039 | 0.313714 |
| MmugDNA.29651.1.S1_at   | MmugDNA.29651.1 | 5.59  | 5.8   | 0.09 | 0.28 | -1.16 | 0.1487   | 0.226757 | 0.51391  | 0.499176 |
| MmugDNA.29652.1.S1_at   | MmugDNA.29652.1 | 7.96  | 7.84  | 0.08 | 0.45 | 1.08  | 0.591466 | 0.359288 | 0.810446 | 0.600575 |
| MmugDNA.29653.1.S1_at   | MmugDNA.29653.1 | 6.01  | 5.31  | 0.45 | 1.11 | 1.62  | 0.225522 | 0.312228 | 0.583621 | 0.566963 |
| MmugDNA.29654.1.S1_s_at | MmugDNA.29654.1 | 12.07 | 12.36 | 0.08 | 0.06 | -1.22 | 0.019736 | 0.011796 | 0.275549 | 0.140638 |
| MmugDNA.29655.1.S1_at   | MmugDNA.29655.1 | 3.33  | 3.68  | 0.32 | 0.3  | -1.27 | 0.116584 | 0.125692 | 0.48034  | 0.396249 |
| MmugDNA.29657.1.S1_at   | MmugDNA.29657.1 | 6.42  | 6.72  | 0.08 | 0.24 | -1.23 | 0.317429 | 0.382258 | 0.647902 | 0.618438 |
| MmugDNA.29658.1.S1_at   | MmugDNA.29658.1 | 2.96  | 3.09  | 0.12 | 0.12 | -1.09 | 0.212776 | 0.225863 | 0.573166 | 0.498248 |
| MmugDNA.29659.1.S1_at   | MmugDNA.29659.1 | 12.52 | 12.16 | 0.26 | 0.31 | 1.29  | 0.20173  | 0.080679 | 0.563988 | 0.328487 |
| MmugDNA.2966.1.S1_at    | MmugDNA.2966.1  | 7.91  | 8.27  | 0.1  | 1.11 | -1.29 | 0.760855 | 0.859962 | 0.899135 | 0.920188 |
| MmugDNA.29660.1.S1_at   | MmugDNA.29660.1 | 5.3   | 5.27  | 0.05 | 0.07 | 1.02  | 0.982371 | 0.803567 | 0.993449 | 0.886984 |
| MmugDNA.29661.1.S1_at   | MmugDNA.29661.1 | 5.9   | 5.69  | 0.35 | 0    | 1.16  | 0.336887 | 0.472449 | 0.659663 | 0.67999  |
| MmugDNA.29662.1.S1_at   | MmugDNA.29662.1 | 6.63  | 6.48  | 0.4  | 0.19 | 1.11  | 0.833057 | 0.873273 | 0.93227  | 0.927896 |
| MmugDNA.29663.1.S1_at   | MmugDNA.29663.1 | 8.63  | 8.71  | 0.2  | 0.17 | -1.06 | 0.125659 | 0.103523 | 0.491706 | 0.364346 |
| MmugDNA.29664.1.S1_at   | MmugDNA.29664.1 | 9.58  | 8.95  | 0.22 | 0.73 | 1.54  | 0.1848   | 0.176918 | 0.548357 | 0.453317 |
| MmugDNA.29665.1.S1_at   | MmugDNA.29665.1 | 10.85 | 11.14 | 0.15 | 0.38 | -1.22 | 0.200231 | 0.061592 | 0.563139 | 0.295042 |
| MmugDNA.29666.1.S1_at   | MmugDNA.29666.1 | 5.2   | 4.5   | 0.51 | 0.05 | 1.62  | 0.275147 | 0.176009 | 0.617694 | 0.452526 |
| MmugDNA.29667.1.S1_at   | MmugDNA.29667.1 | 3.88  | 5.19  | 0.22 | 1.57 | -2.47 | 0.240403 | 0.322701 | 0.593208 | 0.574043 |
| MmugDNA.29668.1.S1_at   | MmugDNA.29668.1 | 5.08  | 5.19  | 0.11 | 0.03 | -1.08 | 0.395897 | 0.085746 | 0.696652 | 0.337761 |
| MmugDNA.2967.1.S1_at    | MmugDNA.2967.1  | 12.75 | 12.22 | 0.06 | 0.45 | 1.45  | 0.119458 | 0.130497 | 0.484135 | 0.402373 |
| MmugDNA.29671.1.S1_at   | MmugDNA.29671.1 | 10.51 | 9.96  | 0.06 | 0.26 | 1.46  | 0.071384 | 0.057464 | 0.415198 | 0.285751 |
| MmugDNA.29672.1.S1_at   | MmugDNA.29672.1 | 5     | 4.95  | 0.13 | 0.08 | 1.03  | 0.752295 | 0.844538 | 0.894293 | 0.911525 |

|                         |                 |       |       |      |      |       |          |          |          |          |
|-------------------------|-----------------|-------|-------|------|------|-------|----------|----------|----------|----------|
| MmugDNA.29673.1.S1_at   | MmugDNA.29673.1 | 4.9   | 4.92  | 0.03 | 0.17 | -1.01 | 0.642191 | 0.618527 | 0.838696 | 0.774147 |
| MmugDNA.29674.1.S1_at   | MmugDNA.29674.1 | 9.34  | 9.41  | 0.2  | 0.23 | -1.05 | 0.65705  | 0.14849  | 0.845709 | 0.423016 |
| MmugDNA.29676.1.S1_at   | MmugDNA.29676.1 | 4.35  | 4.45  | 0.19 | 1.23 | -1.07 | 0.340793 | 0.476316 | 0.662186 | 0.682693 |
| MmugDNA.29677.1.S1_at   | MmugDNA.29677.1 | 11.14 | 10.51 | 0.23 | 0.21 | 1.54  | 0.039347 | 0.005156 | 0.346971 | 0.09966  |
| MmugDNA.29678.1.S1_at   | MmugDNA.29678.1 | 3.66  | 3.81  | 0.09 | 0.19 | -1.11 | 0.164177 | 0.031538 | 0.528211 | 0.219695 |
| MmugDNA.29679.1.S1_at   | MmugDNA.29679.1 | 7.69  | 7.83  | 0.19 | 0.15 | -1.1  | 0.681183 | 0.847839 | 0.85748  | 0.91354  |
| MmugDNA.2968.1.S1_at    | MmugDNA.2968.1  | 5.63  | 5.4   | 0.49 | 0.15 | 1.17  | 0.510079 | 0.477713 | 0.764729 | 0.683731 |
| MmugDNA.29680.1.S1_at   | MmugDNA.29680.1 | 4.97  | 5.62  | 0.36 | 0.38 | -1.57 | 0.204982 | 0.255134 | 0.567457 | 0.52317  |
| MmugDNA.29682.1.S1_at   | MmugDNA.29682.1 | 6.52  | 6.4   | 0.13 | 0.23 | 1.08  | 0.455579 | 0.348416 | 0.733847 | 0.592591 |
| MmugDNA.29683.1.S1_at   | MmugDNA.29683.1 | 4.57  | 4.43  | 0.1  | 0.09 | 1.1   | 0.73489  | 0.029218 | 0.885913 | 0.212898 |
| MmugDNA.29684.1.S1_at   | MmugDNA.29684.1 | 9.66  | 9.73  | 0.15 | 0.07 | -1.05 | 0.584182 | 0.660367 | 0.806925 | 0.801285 |
| MmugDNA.29685.1.S1_at   | MmugDNA.29685.1 | 6.37  | 6.8   | 0.25 | 0.48 | -1.35 | 0.168327 | 0.254785 | 0.532644 | 0.523051 |
| MmugDNA.29686.1.S1_at   | MmugDNA.29686.1 | 4.6   | 4.66  | 0.23 | 0.04 | -1.04 | 0.631585 | 0.391483 | 0.832762 | 0.625086 |
| MmugDNA.29687.1.S1_at   | MmugDNA.29687.1 | 7.2   | 7.45  | 0.1  | 0.15 | -1.19 | 0.107206 | 0.10464  | 0.467913 | 0.365941 |
| MmugDNA.29688.1.S1_at   | MmugDNA.29688.1 | 6.58  | 6.63  | 0.55 | 0.69 | -1.04 | 0.401368 | 0.504654 | 0.700807 | 0.701754 |
| MmugDNA.29690.1.S1_at   | MmugDNA.29690.1 | 11.02 | 12.11 | 0.58 | 3.01 | -2.13 | 0.723038 | 0.818521 | 0.878961 | 0.8954   |
| MmugDNA.29691.1.S1_at   | MmugDNA.29691.1 | 7.79  | 8.02  | 0.11 | 0.1  | -1.18 | 0.088143 | 0.006588 | 0.442584 | 0.110034 |
| MmugDNA.29692.1.S1_at   | MmugDNA.29692.1 | 6.4   | 5.15  | 0.22 | 0.37 | 2.38  | 0.020254 | 0.013519 | 0.277322 | 0.148864 |
| MmugDNA.29693.1.S1_at   | MmugDNA.29693.1 | 8.3   | 7.04  | 0.83 | 0.08 | 2.39  | 0.059295 | 0.048145 | 0.391821 | 0.264422 |
| MmugDNA.29694.1.S1_at   | MmugDNA.29694.1 | 8.09  | 7.64  | 0.22 | 0.45 | 1.37  | 0.217882 | 0.275399 | 0.577569 | 0.539663 |
| MmugDNA.29694.1.S1_s_at | MmugDNA.29694.1 | 8.08  | 7.41  | 0.32 | 0.68 | 1.59  | 0.351603 | 0.459567 | 0.669126 | 0.671856 |
| MmugDNA.29695.1.S1_at   | MmugDNA.29695.1 | 3.88  | 3.65  | 0.11 | 0.2  | 1.17  | 0.189971 | 0.231742 | 0.552801 | 0.503577 |
| MmugDNA.29696.1.S1_at   | MmugDNA.29696.1 | 4.59  | 4.46  | 0.05 | 0.32 | 1.09  | 0.899187 | 0.928854 | 0.959714 | 0.959449 |
| MmugDNA.29698.1.S1_at   | MmugDNA.29698.1 | 11.01 | 11.07 | 0.21 | 0.23 | -1.04 | 0.648092 | 0.850015 | 0.841735 | 0.914673 |
| MmugDNA.29699.1.S1_at   | MmugDNA.29699.1 | 9.46  | 8.15  | 0.08 | 0.34 | 2.48  | 0.002678 | 0.001249 | 0.164386 | 0.054879 |
| MmugDNA.297.1.S1_at     | MmugDNA.297.1   | 9.46  | 9.42  | 0.17 | 0.32 | 1.03  | 0.319217 | 0.434959 | 0.648705 | 0.654901 |
| MmugDNA.2970.1.S1_at    | MmugDNA.2970.1  | 8.36  | 7.86  | 0.27 | 0.32 | 1.41  | 0.094134 | 0.118699 | 0.451714 | 0.38672  |
| MmugDNA.29700.1.S1_at   | MmugDNA.29700.1 | 4.53  | 4.72  | 0.04 | 0.13 | -1.14 | 0.099399 | 0.126839 | 0.459261 | 0.397499 |
| MmugDNA.29701.1.S1_at   | MmugDNA.29701.1 | 4.15  | 3.26  | 0.51 | 0.38 | 1.85  | 0.035277 | 0.077328 | 0.335829 | 0.323135 |
| MmugDNA.29702.1.S1_at   | MmugDNA.29702.1 | 4.59  | 4.65  | 0.06 | 0.03 | -1.04 | 0.317649 | 0.209425 | 0.648004 | 0.483069 |
| MmugDNA.29703.1.S1_at   | MmugDNA.29703.1 | 6.22  | 6.13  | 0.06 | 0.27 | 1.07  | 0.559139 | 0.713883 | 0.793647 | 0.833976 |
| MmugDNA.29704.1.S1_at   | MmugDNA.29704.1 | 9.41  | 9.68  | 0.15 | 0.26 | -1.21 | 0.076255 | 0.082849 | 0.424738 | 0.332384 |
| MmugDNA.29705.1.S1_at   | MmugDNA.29705.1 | 5.04  | 4.91  | 0.42 | 0.33 | 1.1   | 0.584901 | 0.313028 | 0.807226 | 0.567594 |
| MmugDNA.29707.1.S1_at   | MmugDNA.29707.1 | 5.48  | 5.25  | 0.66 | 0.52 | 1.17  | 0.265612 | 0.186085 | 0.611247 | 0.461931 |
| MmugDNA.29708.1.S1_at   | MmugDNA.29708.1 | 4.26  | 4.14  | 0.65 | 0.21 | 1.08  | 0.280189 | 0.458204 | 0.621476 | 0.671077 |
| MmugDNA.29709.1.S1_at   | MmugDNA.29709.1 | 5.72  | 5.95  | 0.06 | 0.13 | -1.17 | 0.090451 | 0.057406 | 0.445834 | 0.285608 |
| MmugDNA.2971.1.S1_at    | MmugDNA.2971.1  | 6.36  | 5.8   | 0.95 | 0.52 | 1.47  | 0.486503 | 0.658091 | 0.751654 | 0.800181 |
| MmugDNA.29711.1.S1_at   | MmugDNA.29711.1 | 4.66  | 4.19  | 0.29 | 0.12 | 1.39  | 0.061056 | 0.112996 | 0.394925 | 0.378851 |
| MmugDNA.29713.1.S1_at   | MmugDNA.29713.1 | 5.08  | 4.73  | 0.17 | 0.24 | 1.28  | 0.242417 | 0.064903 | 0.594405 | 0.300815 |
| MmugDNA.29714.1.S1_s_at | MmugDNA.29714.1 | 6.6   | 6.73  | 0.16 | 0.65 | -1.09 | 0.883616 | 0.983964 | 0.953255 | 0.991088 |
| MmugDNA.29715.1.S1_at   | MmugDNA.29715.1 | 3.85  | 4.1   | 0.08 | 0.53 | -1.19 | 0.124336 | 0.161238 | 0.490248 | 0.437386 |



|                         |                 |       |       |      |      |       |          |          |          |          |
|-------------------------|-----------------|-------|-------|------|------|-------|----------|----------|----------|----------|
| MmugDNA.29716.1.S1_at   | MmugDNA.29716.1 | 6.27  | 6.15  | 0.1  | 0.08 | 1.08  | 0.177278 | 0.231828 | 0.541344 | 0.503592 |
| MmugDNA.29717.1.S1_at   | MmugDNA.29717.1 | 3.51  | 3.57  | 0.07 | 0.11 | -1.04 | 0.259761 | 0.526481 | 0.606733 | 0.715574 |
| MmugDNA.29718.1.S1_at   | MmugDNA.29718.1 | 5.44  | 5.5   | 0.04 | 0.04 | -1.04 | 0.037144 | 0.072737 | 0.340777 | 0.31565  |
| MmugDNA.29719.1.S1_at   | MmugDNA.29719.1 | 5.74  | 5.77  | 0.05 | 0.09 | -1.03 | 0.146172 | 0.524187 | 0.512187 | 0.714207 |
| MmugDNA.29721.1.S1_at   | MmugDNA.29721.1 | 12.05 | 12.13 | 0.12 | 0.12 | -1.06 | 0.212255 | 0.087959 | 0.572552 | 0.341368 |
| MmugDNA.29725.1.S1_at   | MmugDNA.29725.1 | 6.87  | 6.92  | 0.09 | 0    | -1.04 | 0.827212 | 0.947626 | 0.929884 | 0.970275 |
| MmugDNA.29728.1.S1_at   | MmugDNA.29728.1 | 8.98  | 8.42  | 1.98 | 0.66 | 1.47  | 0.161479 | 0.286316 | 0.526444 | 0.547784 |
| MmugDNA.29730.1.S1_at   | MmugDNA.29730.1 | 7.58  | 7.86  | 0.2  | 0.26 | -1.21 | 0.181229 | 0.166694 | 0.54572  | 0.443415 |
| MmugDNA.29731.1.S1_at   | MmugDNA.29731.1 | 4.19  | 4.44  | 0.1  | 0.08 | -1.19 | 0.038286 | 0.191629 | 0.34385  | 0.466918 |
| MmugDNA.29732.1.S1_at   | MmugDNA.29732.1 | 3.52  | 3.51  | 0.31 | 0.08 | 1     | 0.857318 | 0.972792 | 0.942256 | 0.985352 |
| MmugDNA.29733.1.S1_at   | MmugDNA.29733.1 | 5.06  | 5     | 0.07 | 0.05 | 1.04  | 0.285924 | 0.310191 | 0.625351 | 0.565379 |
| MmugDNA.29734.1.S1_at   | MmugDNA.29734.1 | 4.59  | 4.76  | 0.12 | 0.14 | -1.13 | 0.144133 | 0.036208 | 0.510652 | 0.234837 |
| MmugDNA.29737.1.S1_at   | MmugDNA.29737.1 | 4.14  | 4.15  | 0.11 | 0.07 | -1.01 | 0.758136 | 0.799855 | 0.897606 | 0.884906 |
| MmugDNA.29738.1.S1_at   | MmugDNA.29738.1 | 10.8  | 10.81 | 0.26 | 0.36 | -1.01 | 0.702994 | 0.877884 | 0.868924 | 0.93029  |
| MmugDNA.29739.1.S1_at   | MmugDNA.29739.1 | 4.37  | 4.43  | 0.04 | 0.23 | -1.04 | 0.435114 | 0.427846 | 0.721008 | 0.649582 |
| MmugDNA.29740.1.S1_at   | MmugDNA.29740.1 | 9.62  | 9.76  | 0.15 | 0.36 | -1.1  | 0.461799 | 0.667652 | 0.737901 | 0.805472 |
| MmugDNA.29741.1.S1_at   | MmugDNA.29741.1 | 9.93  | 10.41 | 0.12 | 0.44 | -1.4  | 0.245765 | 0.035563 | 0.597234 | 0.232813 |
| MmugDNA.29745.1.S1_at   | MmugDNA.29745.1 | 6.89  | 7.45  | 0.51 | 1.76 | -1.48 | 0.487501 | 0.414782 | 0.75211  | 0.640456 |
| MmugDNA.29746.1.S1_at   | MmugDNA.29746.1 | 4.36  | 3.92  | 0.61 | 0.35 | 1.36  | 0.515195 | 0.125445 | 0.767334 | 0.396086 |
| MmugDNA.29747.1.S1_s_at | MmugDNA.29747.1 | 3.77  | 3.76  | 0.18 | 0.2  | 1.01  | 0.439373 | 0.59596  | 0.723551 | 0.759313 |
| MmugDNA.29749.1.S1_at   | MmugDNA.29749.1 | 3.54  | 3.18  | 0.53 | 0.05 | 1.29  | 0.318998 | 0.384648 | 0.648688 | 0.620255 |
| MmugDNA.29749.1.S1_s_at | MmugDNA.29749.1 | 3.21  | 3.34  | 0.11 | 0.24 | -1.1  | 0.18213  | 0.183319 | 0.546458 | 0.459553 |
| MmugDNA.29750.1.S1_at   | MmugDNA.29750.1 | 7.05  | 7.46  | 0.22 | 0.09 | -1.33 | 0.159196 | 0.188465 | 0.52416  | 0.464458 |
| MmugDNA.29751.1.S1_at   | MmugDNA.29751.1 | 9.1   | 9.66  | 0.23 | 0.23 | -1.48 | 0.040509 | 0.037113 | 0.349482 | 0.237165 |
| MmugDNA.29752.1.S1_at   | MmugDNA.29752.1 | 9.32  | 9.98  | 0.27 | 0.17 | -1.58 | 0.049743 | 0.044792 | 0.37199  | 0.256105 |
| MmugDNA.29753.1.S1_at   | MmugDNA.29753.1 | 8.02  | 8.05  | 0.27 | 0.07 | -1.02 | 0.342884 | 0.341928 | 0.663407 | 0.588008 |
| MmugDNA.29755.1.S1_at   | MmugDNA.29755.1 | 11.47 | 11.58 | 0.24 | 0.19 | -1.08 | 0.757023 | 0.626882 | 0.896948 | 0.780043 |
| MmugDNA.29756.1.S1_at   | MmugDNA.29756.1 | 3.61  | 3.62  | 0.01 | 0    | -1.01 | 0.132793 | 0.752034 | 0.498856 | 0.855744 |
| MmugDNA.29757.1.S1_at   | MmugDNA.29757.1 | 5.94  | 5.52  | 0.87 | 0.78 | 1.34  | 0.542371 | 0.733959 | 0.783266 | 0.845896 |
| MmugDNA.29758.1.S1_at   | MmugDNA.29758.1 | 6.59  | 6.62  | 0.08 | 0.27 | -1.02 | 0.43208  | 0.582091 | 0.718823 | 0.750784 |
| MmugDNA.29759.1.S1_at   | MmugDNA.29759.1 | 3.29  | 3.34  | 0.06 | 0.2  | -1.03 | 0.749872 | 0.616233 | 0.892776 | 0.772538 |
| MmugDNA.2976.1.S1_at    | MmugDNA.2976.1  | 9.75  | 8.89  | 0.28 | 0.25 | 1.81  | 0.007898 | 0.002839 | 0.214199 | 0.078566 |
| MmugDNA.29760.1.S1_at   | MmugDNA.29760.1 | 10.24 | 10.33 | 0.1  | 0.26 | -1.06 | 0.345258 | 0.479921 | 0.665128 | 0.685555 |
| MmugDNA.29762.1.S1_at   | MmugDNA.29762.1 | 7.57  | 6.95  | 0.28 | 1.23 | 1.54  | 0.913143 | 0.988926 | 0.965594 | 0.993666 |
| MmugDNA.29764.1.S1_at   | MmugDNA.29764.1 | 4.24  | 4.07  | 0.28 | 0.2  | 1.13  | 0.304311 | 0.197513 | 0.638475 | 0.472488 |
| MmugDNA.29765.1.S1_at   | MmugDNA.29765.1 | 4.86  | 5.24  | 0.26 | 0.52 | -1.3  | 0.249323 | 0.184005 | 0.60017  | 0.460195 |
| MmugDNA.29766.1.S1_at   | MmugDNA.29766.1 | 9.6   | 8.79  | 0.22 | 0.47 | 1.74  | 0.040276 | 0.040219 | 0.349277 | 0.245801 |
| MmugDNA.29767.1.S1_at   | MmugDNA.29767.1 | 3.42  | 3.17  | 0.13 | 0.03 | 1.18  | 0.091439 | 0.352127 | 0.447175 | 0.595496 |
| MmugDNA.29768.1.S1_at   | MmugDNA.29768.1 | 6.1   | 5.79  | 0.27 | 0.57 | 1.24  | 0.384207 | 0.282113 | 0.689797 | 0.544937 |
| MmugDNA.29769.1.S1_at   | MmugDNA.29769.1 | 9.25  | 9.9   | 0.03 | 0.7  | -1.57 | 0.203866 | 0.180105 | 0.56638  | 0.456699 |
| MmugDNA.2977.1.S1_at    | MmugDNA.2977.1  | 3.27  | 3.21  | 0.88 | 0.26 | 1.04  | 0.353477 | 0.368597 | 0.67013  | 0.608098 |

|                        |                 |       |      |      |      |       |          |          |          |          |
|------------------------|-----------------|-------|------|------|------|-------|----------|----------|----------|----------|
| MmugDNA.29770.1.S1_at  | MmugDNA.29770.1 | 5.61  | 5.6  | 0.27 | 0.13 | 1     | 0.640665 | 0.436919 | 0.837755 | 0.656357 |
| MmugDNA.29771.1.S1_at  | MmugDNA.29771.1 | 8.73  | 8.09 | 0.26 | 1.14 | 1.55  | 0.263709 | 0.277957 | 0.609629 | 0.541664 |
| MmugDNA.29773.1.S1_at  | MmugDNA.29773.1 | 3.61  | 3.61 | 0.09 | 0.13 | -1    | 0.956431 | 0.076716 | 0.983538 | 0.322127 |
| MmugDNA.29774.1.S1_at  | MmugDNA.29774.1 | 4.81  | 5.32 | 0.32 | 0.21 | -1.43 | 0.105033 | 0.226023 | 0.465471 | 0.498465 |
| MmugDNA.29775.1.S1_at  | MmugDNA.29775.1 | 4.04  | 4.25 | 0.63 | 0.17 | -1.16 | 0.547374 | 0.157957 | 0.786215 | 0.433697 |
| MmugDNA.29776.1.S1_at  | MmugDNA.29776.1 | 5.62  | 5.57 | 0.33 | 0.39 | 1.04  | 0.941258 | 0.386203 | 0.977671 | 0.621435 |
| MmugDNA.29777.1.S1_at  | MmugDNA.29777.1 | 4.24  | 4.3  | 0.16 | 0.32 | -1.04 | 0.243061 | 0.224481 | 0.594744 | 0.497492 |
| MmugDNA.29778.1.S1_at  | MmugDNA.29778.1 | 3.39  | 3.61 | 0.07 | 0.29 | -1.16 | 0.591621 | 0.618562 | 0.810512 | 0.774155 |
| MmugDNA.29780.1.S1_at  | MmugDNA.29780.1 | 5.86  | 6.04 | 0.33 | 0.61 | -1.14 | 0.510497 | 0.618881 | 0.765058 | 0.774212 |
| MmugDNA.29781.1.S1_at  | MmugDNA.29781.1 | 7.68  | 7.15 | 0.09 | 0.23 | 1.44  | 0.022014 | 0.025971 | 0.28446  | 0.202085 |
| MmugDNA.29782.1.S1_at  | MmugDNA.29782.1 | 6.29  | 7.28 | 0.35 | 0.31 | -1.99 | 0.012199 | 0.00751  | 0.240358 | 0.116291 |
| MmugDNA.29783.1.S1_at  | MmugDNA.29783.1 | 10.69 | 9.73 | 0.18 | 0.39 | 1.95  | 0.015839 | 0.010654 | 0.261425 | 0.134769 |
| MmugDNA.29784.1.S1_at  | MmugDNA.29784.1 | 6.98  | 5.94 | 0.26 | 0.62 | 2.06  | 0.024417 | 0.018813 | 0.294575 | 0.172431 |
| MmugDNA.29785.1.S1_at  | MmugDNA.29785.1 | 4.76  | 4.83 | 0.32 | 0.43 | -1.05 | 0.418275 | 0.606413 | 0.711206 | 0.765747 |
| MmugDNA.29786.1.S1_at  | MmugDNA.29786.1 | 5.68  | 5.77 | 0.3  | 0.11 | -1.06 | 0.619627 | 0.601384 | 0.825711 | 0.762731 |
| MmugDNA.29787.1.S1_at  | MmugDNA.29787.1 | 2.9   | 2.85 | 0.09 | 0.03 | 1.03  | 0.335619 | 0.619831 | 0.659165 | 0.775009 |
| MmugDNA.29789.1.S1_at  | MmugDNA.29789.1 | 3.12  | 2.89 | 0.09 | 0.11 | 1.18  | 0.11477  | 0.362654 | 0.478025 | 0.603188 |
| MmugDNA.2979.1.S1_at   | MmugDNA.2979.1  | 6.6   | 7.52 | 0.4  | 0.58 | -1.9  | 0.126851 | 0.167174 | 0.493023 | 0.443636 |
| MmugDNA.29790.1.S1_at  | MmugDNA.29790.1 | 3.22  | 3.38 | 0.16 | 0.07 | -1.12 | 0.165561 | 0.245739 | 0.529547 | 0.515519 |
| MmugDNA.29791.1.S1_at  | MmugDNA.29791.1 | 7.33  | 7.61 | 0.17 | 0.15 | -1.22 | 0.218956 | 0.21823  | 0.578361 | 0.491764 |
| MmugDNA.29793.1.S1_at  | MmugDNA.29793.1 | 7.7   | 7.61 | 0.16 | 0.08 | 1.07  | 0.942243 | 0.948673 | 0.977916 | 0.970685 |
| MmugDNA.29794.1.S1_at  | MmugDNA.29794.1 | 3.62  | 3.63 | 0.1  | 0.2  | -1.01 | 0.599177 | 0.566506 | 0.81451  | 0.74062  |
| MmugDNA.29795.1.S1_at  | MmugDNA.29795.1 | 3.86  | 3.71 | 0.44 | 0.13 | 1.11  | 0.283071 | 0.51865  | 0.623159 | 0.710598 |
| MmugDNA.29796.1.S1_at  | MmugDNA.29796.1 | 5.06  | 5.03 | 0.09 | 0.12 | 1.02  | 0.90318  | 0.344692 | 0.961415 | 0.59007  |
| MmugDNA.29797.1.S1_at  | MmugDNA.29797.1 | 4.23  | 4.23 | 0.05 | 0.02 | -1    | 0.231683 | 0.219755 | 0.587487 | 0.493388 |
| MmugDNA.29798.1.S1_at  | MmugDNA.29798.1 | 5.54  | 5.69 | 0.05 | 0.03 | -1.11 | 0.008453 | 0.000226 | 0.218339 | 0.032385 |
| MmugDNA.298.1.S1_at    | MmugDNA.298.1   | 5.71  | 5.95 | 0.14 | 0.27 | -1.18 | 0.402347 | 0.384835 | 0.701375 | 0.620462 |
| MmugDNA.2980.1.S1_at   | MmugDNA.2980.1  | 7.1   | 6.7  | 0.08 | 0.09 | 1.32  | 0.00417  | 0.000961 | 0.181739 | 0.049342 |
| MmugDNA.5436.1.S1_at   | MmugDNA.5436.1  | 9.64  | 8.65 | 0.39 | 0.19 | 1.98  | 0.017135 | 0.017276 | 0.266906 | 0.166459 |
| MmugDNA.5436.1.S1_s_at | MmugDNA.5436.1  | 8.33  | 7.61 | 0.22 | 0.11 | 1.64  | 0.005669 | 0.003521 | 0.191943 | 0.085137 |
| MmugDNA.29800.1.S1_at  | MmugDNA.29800.1 | 5.31  | 5.34 | 0.08 | 0.07 | -1.03 | 0.796601 | 0.020984 | 0.915624 | 0.181647 |
| MmugDNA.29803.1.S1_at  | MmugDNA.29803.1 | 9.64  | 9.68 | 0.17 | 0.09 | -1.03 | 0.711509 | 0.908569 | 0.873642 | 0.948227 |
| MmugDNA.29804.1.S1_at  | MmugDNA.29804.1 | 4.62  | 7.42 | 1.13 | 2.38 | -7    | 0.222744 | 0.082599 | 0.581166 | 0.331808 |
| MmugDNA.29805.1.S1_at  | MmugDNA.29805.1 | 4.78  | 4.66 | 0.56 | 0.39 | 1.09  | 0.717457 | 0.818006 | 0.875883 | 0.895039 |
| MmugDNA.29806.1.S1_at  | MmugDNA.29806.1 | 7.08  | 7    | 0.15 | 0.3  | 1.05  | 0.446016 | 0.596819 | 0.728094 | 0.75984  |
| MmugDNA.29808.1.S1_at  | MmugDNA.29808.1 | 7.01  | 6.21 | 0.33 | 0.05 | 1.75  | 0.014739 | 0.022706 | 0.254893 | 0.188723 |
| MmugDNA.29809.1.S1_at  | MmugDNA.29809.1 | 4.84  | 4.77 | 0.11 | 0.03 | 1.06  | 0.440874 | 0.099317 | 0.724535 | 0.357584 |
| MmugDNA.29810.1.S1_at  | MmugDNA.29810.1 | 7.69  | 7.78 | 0.11 | 0.1  | -1.07 | 0.759256 | 0.912987 | 0.898265 | 0.951043 |
| MmugDNA.29811.1.S1_at  | MmugDNA.29811.1 | 4.85  | 4.79 | 0.58 | 0.64 | 1.04  | 0.273074 | 0.252335 | 0.616536 | 0.520979 |
| MmugDNA.29816.1.S1_at  | MmugDNA.29816.1 | 6.1   | 5.74 | 0.1  | 0.19 | 1.28  | 0.03635  | 0.035327 | 0.339201 | 0.232227 |
| MmugDNA.29817.1.S1_at  | MmugDNA.29817.1 | 6.81  | 7.89 | 1.62 | 0.74 | -2.1  | 0.952722 | 0.824104 | 0.982319 | 0.898903 |

|                         |                 |       |       |      |      |       |          |          |          |          |
|-------------------------|-----------------|-------|-------|------|------|-------|----------|----------|----------|----------|
| MmugDNA.29818.1.S1_s_at | MmugDNA.29818.1 | 7.57  | 8.11  | 0.52 | 0.11 | -1.45 | 0.147817 | 0.159057 | 0.51336  | 0.435217 |
| MmugDNA.2982.1.S1_at    | MmugDNA.2982.1  | 7.77  | 7.72  | 0.25 | 0.14 | 1.03  | 0.940028 | 0.790637 | 0.977175 | 0.878957 |
| MmugDNA.29821.1.S1_at   | MmugDNA.29821.1 | 4.33  | 3.88  | 0.29 | 0.11 | 1.37  | 0.065639 | 0.047984 | 0.404759 | 0.264101 |
| MmugDNA.29823.1.S1_at   | MmugDNA.29823.1 | 5.65  | 5.56  | 0.11 | 0.22 | 1.07  | 0.706823 | 0.728017 | 0.870891 | 0.842711 |
| MmugDNA.29824.1.S1_at   | MmugDNA.29824.1 | 2.95  | 3.02  | 0.05 | 0.08 | -1.05 | 0.209531 | 0.251334 | 0.570957 | 0.520051 |
| MmugDNA.29825.1.S1_at   | MmugDNA.29825.1 | 9.61  | 9.6   | 0.18 | 0.33 | 1.01  | 0.718115 | 0.024139 | 0.876329 | 0.194527 |
| MmugDNA.29826.1.S1_at   | MmugDNA.29826.1 | 5.19  | 5.16  | 0.11 | 0.15 | 1.02  | 0.7984   | 0.947465 | 0.916444 | 0.970204 |
| MmugDNA.29827.1.S1_at   | MmugDNA.29827.1 | 10.74 | 10.53 | 0.23 | 0.36 | 1.16  | 0.957759 | 0.395327 | 0.983962 | 0.627404 |
| MmugDNA.29829.1.S1_at   | MmugDNA.29829.1 | 7.17  | 6.49  | 0.4  | 0.57 | 1.6   | 0.169059 | 0.206382 | 0.533348 | 0.480546 |
| MmugDNA.2983.1.S1_at    | MmugDNA.2983.1  | 3.54  | 3.54  | 0.09 | 0.22 | 1     | 0.900079 | 0.984149 | 0.960161 | 0.991189 |
| MmugDNA.29831.1.S1_at   | MmugDNA.29831.1 | 4.79  | 4.68  | 0.23 | 0.08 | 1.08  | 0.523081 | 0.653731 | 0.77227  | 0.797625 |
| MmugDNA.29832.1.S1_at   | MmugDNA.29832.1 | 6.49  | 5.85  | 0.08 | 0.18 | 1.56  | 0.009528 | 0.026339 | 0.225965 | 0.203321 |
| MmugDNA.29834.1.S1_at   | MmugDNA.29834.1 | 9.16  | 10.13 | 0.72 | 1.05 | -1.96 | 0.742512 | 0.332458 | 0.889888 | 0.58087  |
| MmugDNA.29835.1.S1_at   | MmugDNA.29835.1 | 4.48  | 4.91  | 0.22 | 0.36 | -1.35 | 0.41252  | 0.599654 | 0.707935 | 0.761524 |
| MmugDNA.29836.1.S1_at   | MmugDNA.29836.1 | 5.7   | 5.24  | 0.32 | 0.34 | 1.37  | 0.117972 | 0.05881  | 0.482063 | 0.289228 |
| MmugDNA.29837.1.S1_at   | MmugDNA.29837.1 | 7.74  | 6.25  | 0.79 | 0.68 | 2.81  | 0.120677 | 0.086566 | 0.48574  | 0.33911  |
| MmugDNA.29838.1.S1_at   | MmugDNA.29838.1 | 8.1   | 7.98  | 0.76 | 0.67 | 1.08  | 0.706982 | 0.697759 | 0.870899 | 0.824384 |
| MmugDNA.2984.1.S1_at    | MmugDNA.2984.1  | 5.64  | 5.65  | 0.05 | 0.12 | -1    | 0.363648 | 0.312875 | 0.676829 | 0.567453 |
| MmugDNA.29840.1.S1_at   | MmugDNA.29840.1 | 10.13 | 9.51  | 0.3  | 0.65 | 1.54  | 0.58674  | 0.420532 | 0.80826  | 0.644221 |
| MmugDNA.29840.1.S1_x_at | MmugDNA.29840.1 | 10.3  | 9.71  | 0.29 | 0.65 | 1.5   | 0.486762 | 0.375731 | 0.751736 | 0.613624 |
| MmugDNA.29841.1.S1_at   | MmugDNA.29841.1 | 7.66  | 8.44  | 0.46 | 0.33 | -1.72 | 0.128431 | 0.12899  | 0.494538 | 0.400461 |
| MmugDNA.29844.1.S1_at   | MmugDNA.29844.1 | 6.9   | 6.91  | 0.25 | 0.13 | -1.01 | 0.545009 | 0.613365 | 0.784702 | 0.770518 |
| MmugDNA.29845.1.S1_at   | MmugDNA.29845.1 | 7.11  | 7.11  | 0.05 | 0.13 | 1     | 0.912326 | 0.183412 | 0.965274 | 0.459553 |
| MmugDNA.29846.1.S1_at   | MmugDNA.29846.1 | 9.07  | 8.75  | 0.33 | 0.29 | 1.25  | 0.23524  | 0.322653 | 0.589342 | 0.574024 |
| MmugDNA.29847.1.S1_at   | MmugDNA.29847.1 | 5.17  | 5.27  | 0.2  | 0.15 | -1.08 | 0.867416 | 0.803465 | 0.947135 | 0.886895 |
| MmugDNA.29848.1.S1_at   | MmugDNA.29848.1 | 7.27  | 5.96  | 0.75 | 0.18 | 2.48  | 0.136958 | 0.187233 | 0.504163 | 0.463221 |
| MmugDNA.29849.1.S1_at   | MmugDNA.29849.1 | 3.13  | 3.2   | 0.4  | 0.01 | -1.05 | 0.520232 | 0.665421 | 0.770668 | 0.803964 |
| MmugDNA.29850.1.S1_at   | MmugDNA.29850.1 | 10.88 | 10.7  | 0.21 | 0.05 | 1.13  | 0.172217 | 0.203436 | 0.535575 | 0.477634 |
| MmugDNA.29852.1.S1_at   | MmugDNA.29852.1 | 4.33  | 4.25  | 0.02 | 0.15 | 1.05  | 0.212744 | 0.892371 | 0.573111 | 0.938624 |
| MmugDNA.29852.1.S1_x_at | MmugDNA.29852.1 | 9.14  | 8.92  | 0.31 | 0.12 | 1.17  | 0.338233 | 0.524829 | 0.660678 | 0.714619 |
| MmugDNA.29853.1.S1_at   | MmugDNA.29853.1 | 6.6   | 5.43  | 0.85 | 0.64 | 2.25  | 0.200594 | 0.184249 | 0.5634   | 0.460382 |
| MmugDNA.29854.1.S1_at   | MmugDNA.29854.1 | 5.38  | 5.05  | 0.3  | 0.15 | 1.26  | 0.097966 | 0.093149 | 0.457264 | 0.349303 |
| MmugDNA.29854.1.S1_x_at | MmugDNA.29854.1 | 6.59  | 6.17  | 0.5  | 0.07 | 1.34  | 0.130869 | 0.173989 | 0.497198 | 0.450247 |
| MmugDNA.29856.1.S1_at   | MmugDNA.29856.1 | 11.03 | 10.59 | 0.01 | 0.23 | 1.36  | 0.029568 | 0.03845  | 0.314766 | 0.24098  |
| MmugDNA.29857.1.S1_at   | MmugDNA.29857.1 | 4.17  | 4.14  | 0.13 | 0.26 | 1.02  | 0.305198 | 0.370925 | 0.639039 | 0.609902 |
| MmugDNA.29859.1.S1_at   | MmugDNA.29859.1 | 3.38  | 3.39  | 0.04 | 0.05 | -1.01 | 0.412872 | 0.50258  | 0.708123 | 0.700213 |
| MmugDNA.2986.1.S1_at    | MmugDNA.2986.1  | 6.26  | 6.11  | 0.97 | 0.81 | 1.11  | 0.3938   | 0.493273 | 0.695522 | 0.694018 |
| MmugDNA.29860.1.S1_at   | MmugDNA.29860.1 | 3.32  | 3.37  | 0.33 | 0.04 | -1.03 | 0.954607 | 0.675363 | 0.983073 | 0.81026  |
| MmugDNA.29862.1.S1_at   | MmugDNA.29862.1 | 9.79  | 9.72  | 0.57 | 1.19 | 1.05  | 0.430024 | 0.522064 | 0.717891 | 0.712853 |
| MmugDNA.29864.1.S1_at   | MmugDNA.29864.1 | 4.67  | 4.24  | 0.06 | 0.29 | 1.35  | 0.079175 | 0.105952 | 0.428897 | 0.36826  |
| MmugDNA.29865.1.S1_at   | MmugDNA.29865.1 | 2.86  | 2.89  | 0.08 | 0.07 | -1.02 | 0.408087 | 0.65424  | 0.70497  | 0.797979 |

|                         |                 |       |       |      |      |       |          |          |          |          |
|-------------------------|-----------------|-------|-------|------|------|-------|----------|----------|----------|----------|
| MmugDNA.29866.1.S1_at   | MmugDNA.29866.1 | 3.13  | 3.12  | 0.21 | 0.2  | 1.01  | 0.936581 | 0.994768 | 0.975457 | 0.996729 |
| MmugDNA.29868.1.S1_at   | MmugDNA.29868.1 | 5.88  | 6     | 0.22 | 0.03 | -1.08 | 0.175973 | 0.253392 | 0.53945  | 0.521713 |
| MmugDNA.29869.1.S1_at   | MmugDNA.29869.1 | 6.52  | 6.81  | 0.29 | 0.13 | -1.22 | 0.159323 | 0.091764 | 0.524174 | 0.346977 |
| MmugDNA.2987.1.S1_at    | MmugDNA.2987.1  | 4.55  | 4.57  | 0.26 | 0.18 | -1.02 | 0.56938  | 0.763805 | 0.79903  | 0.862673 |
| MmugDNA.29870.1.S1_at   | MmugDNA.29870.1 | 12.49 | 12.54 | 0.11 | 0.17 | -1.03 | 0.869109 | 0.11733  | 0.947856 | 0.384947 |
| MmugDNA.29874.1.S1_at   | MmugDNA.29874.1 | 9.47  | 8.35  | 0.5  | 1.06 | 2.18  | 0.444636 | 0.313795 | 0.72708  | 0.568083 |
| MmugDNA.29875.1.S1_at   | MmugDNA.29875.1 | 9.18  | 8.94  | 0.09 | 0.72 | 1.18  | 0.680527 | 0.517289 | 0.857226 | 0.709435 |
| MmugDNA.29877.1.S1_at   | MmugDNA.29877.1 | 4.88  | 4.54  | 0.32 | 0.11 | 1.27  | 0.109663 | 0.198634 | 0.470947 | 0.473391 |
| MmugDNA.29881.1.S1_at   | MmugDNA.29881.1 | 5.85  | 5.51  | 0.33 | 0.5  | 1.27  | 0.286285 | 0.209402 | 0.625548 | 0.483069 |
| MmugDNA.29882.1.S1_at   | MmugDNA.29882.1 | 4.04  | 3.78  | 0.2  | 0.03 | 1.2   | 0.159142 | 0.414589 | 0.52416  | 0.640431 |
| MmugDNA.29883.1.S1_at   | MmugDNA.29883.1 | 9.17  | 8.27  | 0.13 | 0.23 | 1.87  | 0.004615 | 0.000963 | 0.1844   | 0.049392 |
| MmugDNA.29885.1.S1_at   | MmugDNA.29885.1 | 6.26  | 6.21  | 0    | 0.09 | 1.04  | 0.958872 | 0.043098 | 0.984371 | 0.252256 |
| MmugDNA.29886.1.S1_at   | MmugDNA.29886.1 | 5.41  | 5.53  | 0.83 | 0.46 | -1.09 | 0.544161 | 0.620818 | 0.784268 | 0.775619 |
| MmugDNA.29887.1.S1_at   | MmugDNA.29887.1 | 9.69  | 9.65  | 0.14 | 0.35 | 1.03  | 0.410786 | 0.187021 | 0.70666  | 0.462938 |
| MmugDNA.29888.1.S1_at   | MmugDNA.29888.1 | 3.43  | 3.38  | 0.25 | 0.09 | 1.04  | 0.250753 | 0.211131 | 0.600389 | 0.485153 |
| MmugDNA.29889.1.S1_at   | MmugDNA.29889.1 | 5.58  | 5.58  | 0.15 | 0.11 | 1     | 0.922663 | 0.435761 | 0.970041 | 0.655508 |
| MmugDNA.29892.1.S1_at   | MmugDNA.29892.1 | 4.4   | 4.51  | 0.07 | 0.28 | -1.08 | 0.183268 | 0.127054 | 0.547309 | 0.397885 |
| MmugDNA.29893.1.S1_at   | MmugDNA.29893.1 | 7.85  | 8.1   | 0.27 | 0.61 | -1.19 | 0.624945 | 0.648613 | 0.828566 | 0.794369 |
| MmugDNA.29896.1.S1_at   | MmugDNA.29896.1 | 4.6   | 5.2   | 0.18 | 0.63 | -1.51 | 0.190286 | 0.180631 | 0.553031 | 0.457245 |
| MmugDNA.29898.1.S1_at   | MmugDNA.29898.1 | 6.13  | 6.24  | 0.17 | 0.04 | -1.08 | 0.244862 | 0.146489 | 0.596493 | 0.420533 |
| MmugDNA.29899.1.S1_at   | MmugDNA.29899.1 | 5.76  | 5.64  | 0.26 | 0.35 | 1.08  | 0.795414 | 0.924774 | 0.915155 | 0.957465 |
| MmugDNA.299.1.S1_at     | MmugDNA.299.1   | 4.42  | 4.42  | 0    | 0.06 | 1     | 0.373901 | 0.289637 | 0.683245 | 0.5507   |
| MmugDNA.2990.1.S1_at    | MmugDNA.2990.1  | 8.37  | 8.76  | 0.03 | 0.12 | -1.32 | 0.008297 | 0.003111 | 0.217127 | 0.081305 |
| MmugDNA.29900.1.S1_s_at | MmugDNA.29900.1 | 10.26 | 9.29  | 0.42 | 0.15 | 1.95  | 0.009749 | 0.001271 | 0.226235 | 0.055241 |
| MmugDNA.29901.1.S1_at   | MmugDNA.29901.1 | 6.48  | 6.86  | 0.12 | 0.29 | -1.3  | 0.157524 | 0.218093 | 0.522447 | 0.491683 |
| MmugDNA.29902.1.S1_at   | MmugDNA.29902.1 | 9.39  | 9.41  | 0.26 | 0.24 | -1.02 | 0.340194 | 0.073418 | 0.661654 | 0.316609 |
| MmugDNA.29903.1.S1_at   | MmugDNA.29903.1 | 8.63  | 7.94  | 0.27 | 0.29 | 1.61  | 0.047267 | 0.031578 | 0.365689 | 0.219857 |
| MmugDNA.29904.1.S1_at   | MmugDNA.29904.1 | 6.4   | 5.16  | 0.84 | 0.46 | 2.37  | 0.147916 | 0.127889 | 0.513442 | 0.398825 |
| MmugDNA.29905.1.S1_at   | MmugDNA.29905.1 | 4.89  | 5.03  | 0.14 | 0.09 | -1.1  | 0.343116 | 0.320463 | 0.66343  | 0.572648 |
| MmugDNA.29907.1.S1_at   | MmugDNA.29907.1 | 8.16  | 8.39  | 0.31 | 0.08 | -1.18 | 0.838728 | 0.782629 | 0.934818 | 0.874202 |
| MmugDNA.29908.1.S1_at   | MmugDNA.29908.1 | 5.6   | 5.62  | 0.18 | 0.21 | -1.01 | 0.34175  | 0.389614 | 0.662848 | 0.623668 |
| MmugDNA.29909.1.S1_at   | MmugDNA.29909.1 | 4.37  | 4.52  | 0.09 | 0.12 | -1.11 | 0.099008 | 0.331932 | 0.458711 | 0.580503 |
| MmugDNA.2991.1.S1_at    | MmugDNA.2991.1  | 5.98  | 5.87  | 0.17 | 0.49 | 1.07  | 0.609009 | 0.727308 | 0.82024  | 0.84224  |
| MmugDNA.29910.1.S1_at   | MmugDNA.29910.1 | 5.01  | 4.91  | 0.79 | 1.4  | 1.07  | 0.476205 | 0.579223 | 0.746145 | 0.748973 |
| MmugDNA.29911.1.S1_at   | MmugDNA.29911.1 | 8.79  | 9.47  | 0.1  | 0.31 | -1.6  | 0.052197 | 0.017007 | 0.377155 | 0.165333 |
| MmugDNA.29912.1.S1_at   | MmugDNA.29912.1 | 5.22  | 5.2   | 0.38 | 0.11 | 1.01  | 0.734042 | 0.910193 | 0.885333 | 0.949342 |
| MmugDNA.29913.1.S1_at   | MmugDNA.29913.1 | 3.99  | 3.88  | 0.06 | 0.39 | 1.08  | 0.786209 | 0.892276 | 0.911088 | 0.938598 |
| MmugDNA.29914.1.S1_at   | MmugDNA.29914.1 | 4.31  | 4.48  | 0.31 | 0.49 | -1.13 | 0.405201 | 0.582068 | 0.703082 | 0.750784 |
| MmugDNA.29915.1.S1_at   | MmugDNA.29915.1 | 8.63  | 10    | 0.21 | 0.51 | -2.58 | 0.010034 | 0.003898 | 0.226901 | 0.088806 |
| MmugDNA.29916.1.S1_at   | MmugDNA.29916.1 | 4.4   | 4.64  | 0.09 | 0.02 | -1.18 | 0.024845 | 0.004176 | 0.296788 | 0.091064 |
| MmugDNA.29917.1.S1_at   | MmugDNA.29917.1 | 5.19  | 4.22  | 1.04 | 1.2  | 1.96  | 0.358195 | 0.321725 | 0.673088 | 0.573355 |

|                         |                 |       |       |      |      |       |          |          |          |          |
|-------------------------|-----------------|-------|-------|------|------|-------|----------|----------|----------|----------|
| MmugDNA.29918.1.S1_at   | MmugDNA.29918.1 | 8.78  | 9.27  | 0.14 | 0.91 | -1.41 | 0.378553 | 0.072912 | 0.686535 | 0.315942 |
| MmugDNA.29919.1.S1_at   | MmugDNA.29919.1 | 4.99  | 4.61  | 0.58 | 0.45 | 1.3   | 0.207779 | 0.213832 | 0.569822 | 0.48758  |
| MmugDNA.2992.1.S1_at    | MmugDNA.2992.1  | 10.24 | 9.25  | 0.23 | 0.51 | 1.99  | 0.015145 | 0.010423 | 0.257529 | 0.133525 |
| MmugDNA.29920.1.S1_at   | MmugDNA.29920.1 | 5.38  | 5.48  | 0.16 | 0.14 | -1.07 | 0.803924 | 0.868307 | 0.919355 | 0.925241 |
| MmugDNA.29921.1.S1_at   | MmugDNA.29921.1 | 3.07  | 3.04  | 0.22 | 0.17 | 1.03  | 0.49071  | 0.68947  | 0.754526 | 0.818854 |
| MmugDNA.29923.1.S1_at   | MmugDNA.29923.1 | 7.33  | 5.49  | 0.71 | 0.41 | 3.59  | 0.064987 | 0.061937 | 0.403744 | 0.295734 |
| MmugDNA.29925.1.S1_at   | MmugDNA.29925.1 | 9.94  | 9.7   | 0.04 | 0.27 | 1.18  | 0.201389 | 0.137411 | 0.563974 | 0.410338 |
| MmugDNA.29926.1.S1_at   | MmugDNA.29926.1 | 5.62  | 6.02  | 0.09 | 0.22 | -1.31 | 0.058336 | 0.100941 | 0.39029  | 0.360509 |
| MmugDNA.29927.1.S1_at   | MmugDNA.29927.1 | 4.52  | 4.61  | 0.03 | 0.2  | -1.06 | 0.195449 | 0.18266  | 0.558901 | 0.459186 |
| MmugDNA.29928.1.S1_at   | MmugDNA.29928.1 | 5.72  | 5.82  | 0.18 | 0.22 | -1.07 | 0.551146 | 0.438846 | 0.788457 | 0.657715 |
| MmugDNA.29929.1.S1_at   | MmugDNA.29929.1 | 5.32  | 5.13  | 0.18 | 0.21 | 1.14  | 0.130304 | 0.256811 | 0.496684 | 0.524607 |
| MmugDNA.2993.1.S1_at    | MmugDNA.2993.1  | 6.02  | 5.92  | 0.22 | 0.08 | 1.07  | 0.35591  | 0.167539 | 0.671276 | 0.443979 |
| MmugDNA.29931.1.S1_at   | MmugDNA.29931.1 | 5.53  | 5.53  | 0.14 | 0.15 | 1     | 0.837976 | 0.709612 | 0.934571 | 0.831691 |
| MmugDNA.29932.1.S1_at   | MmugDNA.29932.1 | 3.39  | 3.3   | 0.18 | 0.45 | 1.06  | 0.566188 | 0.314532 | 0.79749  | 0.568372 |
| MmugDNA.29934.1.S1_at   | MmugDNA.29934.1 | 9.9   | 11.13 | 0.46 | 0.43 | -2.35 | 0.037169 | 0.027934 | 0.340777 | 0.208628 |
| MmugDNA.29935.1.S1_at   | MmugDNA.29935.1 | 8.31  | 8.27  | 0.45 | 0.39 | 1.03  | 0.951755 | 0.930497 | 0.98195  | 0.960513 |
| MmugDNA.29935.1.S1_s_at | MmugDNA.29935.1 | 9.57  | 9.63  | 0.36 | 0.17 | -1.05 | 0.490212 | 0.584556 | 0.754366 | 0.752462 |
| MmugDNA.29937.1.S1_at   | MmugDNA.29937.1 | 5.17  | 5.5   | 0.03 | 0.35 | -1.26 | 0.215558 | 0.507356 | 0.575924 | 0.702917 |
| MmugDNA.29937.1.S1_x_at | MmugDNA.29937.1 | 5.41  | 5.37  | 0.43 | 0.42 | 1.03  | 0.696932 | 0.64721  | 0.865517 | 0.793312 |
| MmugDNA.29938.1.S1_at   | MmugDNA.29938.1 | 9.82  | 8.8   | 0.15 | 0.55 | 2.03  | 0.015012 | 0.002383 | 0.256997 | 0.072165 |
| MmugDNA.2994.1.S1_at    | MmugDNA.2994.1  | 3.45  | 3.51  | 0.43 | 0.12 | -1.05 | 0.637465 | 0.239884 | 0.836156 | 0.510627 |
| MmugDNA.29940.1.S1_at   | MmugDNA.29940.1 | 3.15  | 3.32  | 0.06 | 0.1  | -1.12 | 0.084746 | 0.081773 | 0.437597 | 0.330121 |
| MmugDNA.29942.1.S1_at   | MmugDNA.29942.1 | 6.66  | 6.18  | 0.61 | 0.06 | 1.39  | 0.671016 | 0.719809 | 0.852532 | 0.837888 |
| MmugDNA.29943.1.S1_at   | MmugDNA.29943.1 | 8.07  | 7.98  | 0.59 | 0.66 | 1.06  | 0.957118 | 0.737999 | 0.983802 | 0.848158 |
| MmugDNA.29944.1.S1_at   | MmugDNA.29944.1 | 3.96  | 3.84  | 0.1  | 0.15 | 1.08  | 0.791152 | 0.029345 | 0.913249 | 0.213228 |
| MmugDNA.29945.1.S1_at   | MmugDNA.29945.1 | 12.19 | 12.42 | 0.08 | 0.24 | -1.17 | 0.188466 | 0.027905 | 0.551451 | 0.208529 |
| MmugDNA.29946.1.S1_at   | MmugDNA.29946.1 | 5.07  | 5.19  | 0.23 | 0.34 | -1.08 | 0.77397  | 0.01251  | 0.904999 | 0.144302 |
| MmugDNA.29947.1.S1_at   | MmugDNA.29947.1 | 5.55  | 5.55  | 0.09 | 0.19 | 1     | 0.339695 | 0.186672 | 0.661347 | 0.462459 |
| MmugDNA.29948.1.S1_at   | MmugDNA.29948.1 | 6.76  | 7.03  | 0.13 | 0.14 | -1.21 | 0.073007 | 0.060131 | 0.418323 | 0.291882 |
| MmugDNA.29949.1.S1_at   | MmugDNA.29949.1 | 3.77  | 3.7   | 0.08 | 0.05 | 1.05  | 0.378875 | 0.157611 | 0.686571 | 0.433131 |
| MmugDNA.2995.1.S1_at    | MmugDNA.2995.1  | 5.42  | 6.64  | 0.27 | 1.27 | -2.31 | 0.274057 | 0.37439  | 0.617262 | 0.612855 |
| MmugDNA.29951.1.S1_at   | MmugDNA.29951.1 | 8.05  | 7.94  | 0.16 | 0.22 | 1.08  | 0.476798 | 0.595541 | 0.746293 | 0.759091 |
| MmugDNA.29953.1.S1_at   | MmugDNA.29953.1 | 4.4   | 4.56  | 0.17 | 0.09 | -1.12 | 0.129835 | 0.126538 | 0.495916 | 0.39714  |
| MmugDNA.29955.1.S1_at   | MmugDNA.29955.1 | 11.02 | 10.91 | 0.17 | 0.69 | 1.08  | 0.989536 | 0.936756 | 0.996281 | 0.964351 |
| MmugDNA.29957.1.S1_at   | MmugDNA.29957.1 | 5.15  | 5.12  | 0.08 | 0.14 | 1.02  | 0.382205 | 0.415673 | 0.688565 | 0.641027 |
| MmugDNA.29959.1.S1_at   | MmugDNA.29959.1 | 9.46  | 9.51  | 0.31 | 0.22 | -1.03 | 0.623484 | 0.14654  | 0.827977 | 0.420583 |
| MmugDNA.2996.1.S1_at    | MmugDNA.2996.1  | 3.57  | 3.67  | 0.13 | 0.07 | -1.07 | 0.286012 | 0.234792 | 0.625381 | 0.506108 |
| MmugDNA.29960.1.S1_at   | MmugDNA.29960.1 | 4.93  | 4.69  | 0.47 | 0.19 | 1.18  | 0.358747 | 0.558702 | 0.673455 | 0.735856 |
| MmugDNA.29961.1.S1_at   | MmugDNA.29961.1 | 5.71  | 5.74  | 1.46 | 0.74 | -1.03 | 0.511279 | 0.702193 | 0.765295 | 0.827347 |
| MmugDNA.29963.1.S1_at   | MmugDNA.29963.1 | 4.19  | 4.37  | 0.14 | 0.07 | -1.13 | 0.164418 | 0.231831 | 0.528313 | 0.503592 |
| MmugDNA.29964.1.S1_at   | MmugDNA.29964.1 | 3.43  | 3.55  | 0.03 | 0.19 | -1.09 | 0.193603 | 0.112951 | 0.557178 | 0.378759 |

|                         |                 |       |       |      |      |        |          |          |          |          |
|-------------------------|-----------------|-------|-------|------|------|--------|----------|----------|----------|----------|
| MmugDNA.29966.1.S1_at   | MmugDNA.29966.1 | 12.37 | 12.73 | 0.07 | 0.17 | -1.28  | 0.026651 | 0.043487 | 0.303736 | 0.253159 |
| MmugDNA.29967.1.S1_at   | MmugDNA.29967.1 | 11.29 | 11.31 | 0.56 | 0.12 | -1.01  | 0.325462 | 0.401882 | 0.65274  | 0.63109  |
| MmugDNA.29968.1.S1_at   | MmugDNA.29968.1 | 5.3   | 4.57  | 0.37 | 0.32 | 1.66   | 0.070844 | 0.10866  | 0.414661 | 0.372171 |
| MmugDNA.29969.1.S1_at   | MmugDNA.29969.1 | 5.3   | 5.47  | 0.27 | 0.24 | -1.12  | 0.223888 | 0.313273 | 0.582329 | 0.567753 |
| MmugDNA.29973.1.S1_at   | MmugDNA.29973.1 | 3.72  | 3.66  | 0.09 | 0.1  | 1.04   | 0.362844 | 0.028935 | 0.676226 | 0.211979 |
| MmugDNA.29974.1.S1_at   | MmugDNA.29974.1 | 5.39  | 4.31  | 1.03 | 0.88 | 2.11   | 0.457557 | 0.31989  | 0.735003 | 0.572245 |
| MmugDNA.29976.1.S1_at   | MmugDNA.29976.1 | 3.8   | 3.71  | 0.12 | 0.15 | 1.06   | 0.486599 | 0.700097 | 0.751702 | 0.825946 |
| MmugDNA.29978.1.S1_at   | MmugDNA.29978.1 | 5.26  | 5.42  | 0.03 | 0.08 | -1.12  | 0.060893 | 0.047237 | 0.394641 | 0.261952 |
| MmugDNA.2998.1.S1_at    | MmugDNA.2998.1  | 8.32  | 8.02  | 0.17 | 0.25 | 1.23   | 0.222536 | 0.232561 | 0.580951 | 0.504341 |
| MmugDNA.29980.1.S1_at   | MmugDNA.29980.1 | 3.51  | 3.52  | 0.17 | 0.51 | -1     | 0.503886 | 0.454137 | 0.761034 | 0.668407 |
| MmugDNA.29981.1.S1_s_at | MmugDNA.29981.1 | 12.02 | 11.64 | 0.16 | 0.22 | 1.3    | 0.222725 | 0.2275   | 0.581163 | 0.499805 |
| MmugDNA.29982.1.S1_at   | MmugDNA.29982.1 | 9.52  | 9.37  | 0.11 | 0.24 | 1.12   | 0.324675 | 0.486399 | 0.652027 | 0.689764 |
| MmugDNA.33355.1.S1_at   | MmugDNA.33355.1 | 12.01 | 12.33 | 0.32 | 0.34 | -1.25  | 0.752993 | 0.735932 | 0.894568 | 0.847217 |
| MmugDNA.33355.1.S1_s_at | MmugDNA.33355.1 | 10.82 | 11.06 | 0.28 | 0.37 | -1.18  | 0.917234 | 0.8237   | 0.967721 | 0.898726 |
| MmugDNA.29984.1.S1_at   | MmugDNA.29984.1 | 6     | 5.74  | 0.12 | 0.31 | 1.2    | 0.258435 | 0.334074 | 0.60566  | 0.582104 |
| MmugDNA.29985.1.S1_at   | MmugDNA.29985.1 | 8.81  | 8.84  | 0.29 | 0.16 | -1.02  | 0.820239 | 0.615477 | 0.92682  | 0.772012 |
| MmugDNA.29986.1.S1_at   | MmugDNA.29986.1 | 5.94  | 6.03  | 0.04 | 0.33 | -1.06  | 0.590739 | 0.792399 | 0.809997 | 0.880041 |
| MmugDNA.29987.1.S1_at   | MmugDNA.29987.1 | 4.95  | 5.07  | 0.76 | 0.28 | -1.09  | 0.972724 | 0.834114 | 0.989474 | 0.904949 |
| MmugDNA.29988.1.S1_at   | MmugDNA.29988.1 | 8.59  | 7.97  | 0.2  | 0.08 | 1.54   | 0.00494  | 0.005196 | 0.185837 | 0.099895 |
| MmugDNA.29990.1.S1_s_at | MmugDNA.29990.1 | 4.26  | 4.23  | 0.07 | 0.09 | 1.02   | 0.293638 | 0.217396 | 0.630742 | 0.491012 |
| MmugDNA.29991.1.S1_at   | MmugDNA.29991.1 | 4.86  | 4.76  | 0.9  | 0.28 | 1.07   | 0.412073 | 0.206631 | 0.70774  | 0.480662 |
| MmugDNA.29992.1.S1_at   | MmugDNA.29992.1 | 11.01 | 10.27 | 0.12 | 0.5  | 1.66   | 0.0896   | 0.087449 | 0.44526  | 0.340617 |
| MmugDNA.29993.1.S1_s_at | MmugDNA.29993.1 | 7.94  | 12.73 | 2.6  | 4.16 | -27.59 | 0.505096 | 0.412637 | 0.761548 | 0.639015 |
| MmugDNA.29995.1.S1_at   | MmugDNA.29995.1 | 10.51 | 10.34 | 0.21 | 0.06 | 1.13   | 0.243092 | 0.155575 | 0.594744 | 0.43094  |
| MmugDNA.29997.1.S1_at   | MmugDNA.29997.1 | 9.19  | 8.93  | 0.44 | 0.16 | 1.2    | 0.115676 | 0.079848 | 0.479024 | 0.327179 |
| MmugDNA.29998.1.S1_at   | MmugDNA.29998.1 | 6.59  | 6.64  | 0.14 | 0.11 | -1.04  | 0.882555 | 0.337529 | 0.952793 | 0.584716 |
| MmugDNA.29999.1.S1_at   | MmugDNA.29999.1 | 8.5   | 8.8   | 0.12 | 0.56 | -1.23  | 0.797607 | 0.880392 | 0.916116 | 0.931677 |
| MmugDNA.3.1.S1_at       | MmugDNA.3.1     | 5.79  | 6.45  | 0.36 | 0.71 | -1.58  | 0.193157 | 0.173512 | 0.556562 | 0.449938 |
| MmugDNA.30.1.S1_at      | MmugDNA.30.1    | 4.08  | 4.1   | 0.14 | 0.19 | -1.01  | 0.38004  | 0.488227 | 0.687171 | 0.690997 |
| MmugDNA.300.1.S1_at     | MmugDNA.300.1   | 5.48  | 5.5   | 0.02 | 0.18 | -1.02  | 0.330329 | 0.20932  | 0.655613 | 0.483038 |
| MmugDNA.30000.1.S1_at   | MmugDNA.30000.1 | 3.26  | 3.52  | 0.12 | 0.16 | -1.2   | 0.198524 | 0.160588 | 0.561629 | 0.436745 |
| MmugDNA.30001.1.S1_at   | MmugDNA.30001.1 | 3.26  | 3     | 0.19 | 0.04 | 1.2    | 0.126933 | 0.275392 | 0.493117 | 0.539663 |
| MmugDNA.30002.1.S1_at   | MmugDNA.30002.1 | 5.94  | 6.23  | 0.68 | 0.53 | -1.23  | 0.776002 | 0.508464 | 0.906093 | 0.70363  |
| MmugDNA.31451.1.S1_s_at | MmugDNA.31451.1 | 6.47  | 6.6   | 0.08 | 0.07 | -1.1   | 0.048054 | 0.065199 | 0.367582 | 0.301239 |
| MmugDNA.30005.1.S1_at   | MmugDNA.30005.1 | 4.01  | 3.98  | 0.76 | 0.26 | 1.02   | 0.814387 | 0.524916 | 0.924758 | 0.714646 |
| MmugDNA.30006.1.S1_at   | MmugDNA.30006.1 | 7.24  | 6.72  | 0.28 | 0.13 | 1.44   | 0.045146 | 0.059401 | 0.360276 | 0.290548 |
| MmugDNA.30007.1.S1_at   | MmugDNA.30007.1 | 8.78  | 8.19  | 0.03 | 0.47 | 1.5    | 0.094912 | 0.098683 | 0.452439 | 0.356783 |
| MmugDNA.30008.1.S1_at   | MmugDNA.30008.1 | 9.08  | 9.06  | 0.17 | 1.13 | 1.01   | 0.642551 | 0.314213 | 0.838763 | 0.568185 |
| MmugDNA.30009.1.S1_s_at | MmugDNA.30009.1 | 11.75 | 11.55 | 0.19 | 0.31 | 1.14   | 0.674546 | 0.861761 | 0.854194 | 0.921441 |
| MmugDNA.30014.1.S1_at   | MmugDNA.30014.1 | 4.45  | 4.23  | 0.35 | 0.21 | 1.17   | 0.928788 | 0.642142 | 0.972607 | 0.79003  |
| MmugDNA.30015.1.S1_at   | MmugDNA.30015.1 | 11.06 | 10.8  | 0.06 | 0.34 | 1.2    | 0.897439 | 0.8333   | 0.95917  | 0.9044   |

|                         |                 |       |       |      |      |       |          |          |          |          |
|-------------------------|-----------------|-------|-------|------|------|-------|----------|----------|----------|----------|
| MmugDNA.30017.1.S1_at   | MmugDNA.30017.1 | 10.9  | 11.52 | 0.2  | 0.24 | -1.54 | 0.013426 | 0.003702 | 0.246703 | 0.086769 |
| MmugDNA.4234.1.S1_s_at  | MmugDNA.4234.1  | 10.29 | 11.17 | 0.25 | 0.33 | -1.85 | 0.016948 | 0.005358 | 0.266211 | 0.101092 |
| MmugDNA.30018.1.S1_at   | MmugDNA.30018.1 | 6.37  | 7.05  | 0.18 | 0.34 | -1.6  | 0.017219 | 0.008994 | 0.266942 | 0.125485 |
| MmugDNA.3002.1.S1_at    | MmugDNA.3002.1  | 8.86  | 9     | 0.3  | 0.39 | -1.1  | 0.354392 | 0.479116 | 0.670566 | 0.684942 |
| MmugDNA.30020.1.S1_at   | MmugDNA.30020.1 | 4.47  | 4.45  | 0.03 | 0.14 | 1.01  | 0.999262 | 0.625371 | 0.999768 | 0.779171 |
| MmugDNA.30021.1.S1_at   | MmugDNA.30021.1 | 13.65 | 13.77 | 0.03 | 0.06 | -1.09 | 0.028972 | 0.021003 | 0.312556 | 0.181715 |
| MmugDNA.30022.1.S1_at   | MmugDNA.30022.1 | 5.55  | 5.7   | 0.06 | 0.11 | -1.1  | 0.100956 | 0.046061 | 0.461009 | 0.258977 |
| MmugDNA.30023.1.S1_at   | MmugDNA.30023.1 | 6.75  | 6.86  | 0.9  | 0.27 | -1.08 | 0.673192 | 0.729579 | 0.853359 | 0.843613 |
| MmugDNA.30024.1.S1_at   | MmugDNA.30024.1 | 5.56  | 5     | 0.67 | 0.4  | 1.47  | 0.262864 | 0.569273 | 0.609088 | 0.742375 |
| MmugDNA.30025.1.S1_at   | MmugDNA.30025.1 | 6.09  | 6.69  | 0.59 | 0.44 | -1.51 | 0.554245 | 0.770923 | 0.790667 | 0.866807 |
| MmugDNA.30029.1.S1_at   | MmugDNA.30029.1 | 5.66  | 5.7   | 0.25 | 0.26 | -1.02 | 0.554156 | 0.560809 | 0.790667 | 0.736978 |
| MmugDNA.3003.1.S1_at    | MmugDNA.3003.1  | 5.05  | 5.1   | 0.22 | 0.22 | -1.03 | 0.871879 | 0.537891 | 0.948792 | 0.722779 |
| MmugDNA.30034.1.S1_at   | MmugDNA.30034.1 | 5.32  | 5.92  | 1.64 | 0.67 | -1.51 | 0.714709 | 0.792171 | 0.874968 | 0.879905 |
| MmugDNA.30035.1.S1_at   | MmugDNA.30035.1 | 4     | 4.39  | 0.16 | 0.08 | -1.31 | 0.031705 | 0.17592  | 0.322685 | 0.452486 |
| MmugDNA.30036.1.S1_at   | MmugDNA.30036.1 | 7.57  | 7.55  | 0.25 | 0.35 | 1.01  | 0.2265   | 0.299762 | 0.584429 | 0.558081 |
| MmugDNA.30037.1.S1_at   | MmugDNA.30037.1 | 7.03  | 7.43  | 0.07 | 0.25 | -1.32 | 0.059111 | 0.044526 | 0.391013 | 0.255364 |
| MmugDNA.30039.1.S1_at   | MmugDNA.30039.1 | 10.22 | 10.37 | 0.26 | 0.3  | -1.11 | 0.131455 | 0.084816 | 0.498041 | 0.336344 |
| MmugDNA.30040.1.S1_at   | MmugDNA.30040.1 | 5.31  | 5.19  | 0.19 | 0.09 | 1.09  | 0.282473 | 0.254842 | 0.622872 | 0.523051 |
| MmugDNA.30041.1.S1_at   | MmugDNA.30041.1 | 5.11  | 4.84  | 0.17 | 0.36 | 1.2   | 0.231491 | 0.319138 | 0.587406 | 0.57167  |
| MmugDNA.30043.1.S1_at   | MmugDNA.30043.1 | 9.86  | 9.27  | 0.36 | 0.09 | 1.51  | 0.068778 | 0.076877 | 0.410654 | 0.322368 |
| MmugDNA.30047.1.S1_at   | MmugDNA.30047.1 | 5.02  | 5.72  | 0.27 | 0.46 | -1.62 | 0.116097 | 0.135824 | 0.479677 | 0.408019 |
| MmugDNA.30048.1.S1_at   | MmugDNA.30048.1 | 8.74  | 8.9   | 0.06 | 0.16 | -1.11 | 0.306771 | 0.372657 | 0.639665 | 0.611617 |
| MmugDNA.30049.1.S1_at   | MmugDNA.30049.1 | 9.88  | 9.72  | 0.28 | 0.28 | 1.12  | 0.106022 | 0.080317 | 0.466831 | 0.327965 |
| MmugDNA.30050.1.S1_at   | MmugDNA.30050.1 | 7.37  | 6.73  | 0.62 | 0.27 | 1.56  | 0.107824 | 0.230346 | 0.468492 | 0.502112 |
| MmugDNA.30051.1.S1_at   | MmugDNA.30051.1 | 6.91  | 9.59  | 0.97 | 0.26 | -6.39 | 0.007996 | 0.003679 | 0.214679 | 0.086591 |
| MmugDNA.30052.1.S1_at   | MmugDNA.30052.1 | 4.22  | 3.91  | 0.2  | 0.43 | 1.25  | 0.457413 | 0.46024  | 0.734933 | 0.672134 |
| MmugDNA.30053.1.S1_at   | MmugDNA.30053.1 | 7.13  | 5.05  | 0.25 | 0.09 | 4.23  | 0.000212 | 0.002699 | 0.120316 | 0.076461 |
| MmugDNA.30053.1.S1_s_at | MmugDNA.30053.1 | 8.18  | 5.97  | 0.55 | 0.51 | 4.63  | 0.00683  | 0.004439 | 0.201708 | 0.092958 |
| MmugDNA.30054.1.S1_at   | MmugDNA.30054.1 | 11.2  | 11.88 | 0.11 | 0.49 | -1.6  | 0.306253 | 0.339003 | 0.639466 | 0.585891 |
| MmugDNA.30055.1.S1_at   | MmugDNA.30055.1 | 8.23  | 8.03  | 0.11 | 0.07 | 1.15  | 0.094507 | 0.542469 | 0.452166 | 0.725516 |
| MmugDNA.30056.1.S1_at   | MmugDNA.30056.1 | 12.02 | 11.21 | 0.16 | 0.08 | 1.75  | 0.002491 | 0.000087 | 0.163618 | 0.027016 |
| MmugDNA.30058.1.S1_at   | MmugDNA.30058.1 | 6.09  | 6.12  | 0.13 | 0.23 | -1.02 | 0.924932 | 0.937242 | 0.97091  | 0.96465  |
| MmugDNA.3006.1.S1_at    | MmugDNA.3006.1  | 4.59  | 4.45  | 0.34 | 1.05 | 1.11  | 0.568709 | 0.547167 | 0.798831 | 0.728314 |
| MmugDNA.30060.1.S1_at   | MmugDNA.30060.1 | 5.04  | 5.07  | 0.05 | 0.3  | -1.02 | 0.804441 | 0.94905  | 0.919555 | 0.970812 |
| MmugDNA.30061.1.S1_at   | MmugDNA.30061.1 | 5.74  | 6.05  | 0.21 | 0.29 | -1.24 | 0.249757 | 0.331119 | 0.600319 | 0.579835 |
| MmugDNA.30063.1.S1_at   | MmugDNA.30063.1 | 8.46  | 6.21  | 0.83 | 1.15 | 4.77  | 0.090718 | 0.0178   | 0.446279 | 0.168575 |
| MmugDNA.30065.1.S1_at   | MmugDNA.30065.1 | 3.87  | 3.78  | 0.26 | 0.34 | 1.07  | 0.633999 | 0.730813 | 0.834155 | 0.844063 |
| MmugDNA.30066.1.S1_at   | MmugDNA.30066.1 | 6.26  | 5.81  | 0.6  | 0.16 | 1.36  | 0.189148 | 0.139672 | 0.552328 | 0.413008 |
| MmugDNA.30068.1.S1_at   | MmugDNA.30068.1 | 5.36  | 6.83  | 0.95 | 1.5  | -2.77 | 0.417146 | 0.458795 | 0.710385 | 0.671427 |
| MmugDNA.3007.1.S1_at    | MmugDNA.3007.1  | 6.25  | 6.24  | 0.25 | 0.08 | 1.01  | 0.86224  | 0.733023 | 0.944609 | 0.845498 |
| MmugDNA.30070.1.S1_at   | MmugDNA.30070.1 | 5.21  | 5.31  | 0.47 | 0.06 | -1.08 | 0.723431 | 0.848415 | 0.879156 | 0.913956 |

|                         |                 |       |       |      |      |       |          |          |          |          |
|-------------------------|-----------------|-------|-------|------|------|-------|----------|----------|----------|----------|
| MmugDNA.30071.1.S1_at   | MmugDNA.30071.1 | 7.05  | 6.99  | 0.08 | 0.25 | 1.04  | 0.367439 | 0.131514 | 0.679502 | 0.403658 |
| MmugDNA.30072.1.S1_s_at | MmugDNA.30072.1 | 9.64  | 10.4  | 0.2  | 0.05 | -1.7  | 0.005418 | 0.004377 | 0.191107 | 0.092619 |
| MmugDNA.30073.1.S1_at   | MmugDNA.30073.1 | 7.26  | 7.21  | 0.27 | 0.1  | 1.04  | 0.822596 | 0.876571 | 0.927792 | 0.929709 |
| MmugDNA.30073.1.S1_s_at | MmugDNA.30073.1 | 4.33  | 4.6   | 0.97 | 0.49 | -1.21 | 0.67794  | 0.57689  | 0.855721 | 0.747519 |
| MmugDNA.30075.1.S1_at   | MmugDNA.30075.1 | 9.8   | 8.88  | 0.23 | 0.92 | 1.9   | 0.142444 | 0.094355 | 0.509648 | 0.350889 |
| MmugDNA.30077.1.S1_at   | MmugDNA.30077.1 | 5.28  | 4.9   | 0.3  | 0.44 | 1.3   | 0.428651 | 0.491277 | 0.717033 | 0.692921 |
| MmugDNA.30078.1.S1_at   | MmugDNA.30078.1 | 8.96  | 9.59  | 0.32 | 0.64 | -1.55 | 0.329595 | 0.284553 | 0.655218 | 0.546721 |
| MmugDNA.30078.1.S1_x_at | MmugDNA.30078.1 | 9.29  | 9.67  | 0.27 | 0.63 | -1.3  | 0.408097 | 0.423015 | 0.70497  | 0.646145 |
| MmugDNA.3008.1.S1_at    | MmugDNA.3008.1  | 8.73  | 9.82  | 0.04 | 0.36 | -2.13 | 0.004842 | 0.00217  | 0.185076 | 0.068844 |
| MmugDNA.30080.1.S1_at   | MmugDNA.30080.1 | 4.89  | 4.95  | 0.06 | 0.08 | -1.04 | 0.300369 | 0.318359 | 0.635797 | 0.571192 |
| MmugDNA.30081.1.S1_at   | MmugDNA.30081.1 | 4.28  | 3.91  | 0.15 | 0.28 | 1.29  | 0.118081 | 0.031896 | 0.482198 | 0.220981 |
| MmugDNA.30082.1.S1_at   | MmugDNA.30082.1 | 8.85  | 8.61  | 0.06 | 0.12 | 1.18  | 0.046052 | 0.044747 | 0.362284 | 0.256009 |
| MmugDNA.30083.1.S1_at   | MmugDNA.30083.1 | 4.49  | 4.57  | 0.14 | 0    | -1.06 | 0.39262  | 0.545892 | 0.694693 | 0.727697 |
| MmugDNA.30084.1.S1_at   | MmugDNA.30084.1 | 6.35  | 5.87  | 0.58 | 0.19 | 1.4   | 0.085846 | 0.07125  | 0.439933 | 0.313293 |
| MmugDNA.30086.1.S1_at   | MmugDNA.30086.1 | 9.52  | 9.38  | 0.45 | 0.3  | 1.1   | 0.290286 | 0.389313 | 0.628083 | 0.623403 |
| MmugDNA.30087.1.S1_at   | MmugDNA.30087.1 | 5.84  | 5.64  | 0.52 | 0.7  | 1.15  | 0.632179 | 0.717269 | 0.833067 | 0.836332 |
| MmugDNA.30088.1.S1_at   | MmugDNA.30088.1 | 6.75  | 6.87  | 0.91 | 0.32 | -1.09 | 0.711802 | 0.698466 | 0.873712 | 0.82482  |
| MmugDNA.3009.1.S1_at    | MmugDNA.3009.1  | 6.79  | 6.72  | 0.18 | 0.14 | 1.05  | 0.684301 | 0.286958 | 0.858707 | 0.548246 |
| MmugDNA.30090.1.S1_at   | MmugDNA.30090.1 | 5.55  | 5.53  | 0.5  | 0.11 | 1.01  | 0.420414 | 0.528595 | 0.712437 | 0.71669  |
| MmugDNA.30091.1.S1_at   | MmugDNA.30091.1 | 5.49  | 5.52  | 0.11 | 0.07 | -1.02 | 0.162675 | 0.153461 | 0.526983 | 0.42827  |
| MmugDNA.30092.1.S1_at   | MmugDNA.30092.1 | 7.23  | 7.08  | 0.05 | 0.16 | 1.11  | 0.050431 | 0.040086 | 0.374325 | 0.245388 |
| MmugDNA.30093.1.S1_at   | MmugDNA.30093.1 | 11.32 | 10.71 | 0.33 | 0.29 | 1.53  | 0.129841 | 0.14657  | 0.495916 | 0.420583 |
| MmugDNA.30094.1.S1_at   | MmugDNA.30094.1 | 9.55  | 8.87  | 0.54 | 0.36 | 1.61  | 0.062723 | 0.021655 | 0.399119 | 0.184333 |
| MmugDNA.30095.1.S1_at   | MmugDNA.30095.1 | 6.48  | 6.72  | 0.08 | 0.12 | -1.18 | 0.036401 | 0.017576 | 0.339201 | 0.167721 |
| MmugDNA.30096.1.S1_at   | MmugDNA.30096.1 | 5.49  | 5.73  | 0.18 | 0.09 | -1.18 | 0.104935 | 0.04769  | 0.465307 | 0.263323 |
| MmugDNA.30099.1.S1_at   | MmugDNA.30099.1 | 3.8   | 3.81  | 0.03 | 0.26 | -1    | 0.957902 | 0.598973 | 0.984036 | 0.761244 |
| MmugDNA.301.1.S1_at     | MmugDNA.301.1   | 5.55  | 5.53  | 0.21 | 0.11 | 1.01  | 0.591875 | 0.31377  | 0.810672 | 0.568083 |
| MmugDNA.3010.1.S1_at    | MmugDNA.3010.1  | 3.8   | 3.58  | 0.06 | 0.14 | 1.17  | 0.029495 | 0.020929 | 0.31462  | 0.181439 |
| MmugDNA.30100.1.S1_at   | MmugDNA.30100.1 | 4.11  | 3.99  | 0.35 | 0.19 | 1.09  | 0.179869 | 0.188617 | 0.544019 | 0.464569 |
| MmugDNA.30101.1.S1_at   | MmugDNA.30101.1 | 11.16 | 11.28 | 0.2  | 0.27 | -1.08 | 0.409605 | 0.561861 | 0.70588  | 0.737659 |
| MmugDNA.30104.1.S1_at   | MmugDNA.30104.1 | 5.95  | 5.52  | 0.33 | 0.26 | 1.34  | 0.199252 | 0.25218  | 0.562215 | 0.520863 |
| MmugDNA.30107.1.S1_at   | MmugDNA.30107.1 | 5.82  | 5.64  | 0.27 | 0.26 | 1.13  | 0.881474 | 0.710843 | 0.952363 | 0.832271 |
| MmugDNA.30109.1.S1_at   | MmugDNA.30109.1 | 5.66  | 5.69  | 0.31 | 0.11 | -1.01 | 0.643209 | 0.534083 | 0.839266 | 0.720079 |
| MmugDNA.30110.1.S1_at   | MmugDNA.30110.1 | 5.4   | 5.55  | 0.11 | 0.08 | -1.11 | 0.292937 | 0.268507 | 0.630264 | 0.534123 |
| MmugDNA.30111.1.S1_at   | MmugDNA.30111.1 | 8.3   | 8.19  | 0.27 | 0.22 | 1.08  | 0.538288 | 0.424672 | 0.780466 | 0.647214 |
| MmugDNA.30112.1.S1_at   | MmugDNA.30112.1 | 4.97  | 4.75  | 0.2  | 0.56 | 1.16  | 0.92387  | 0.43009  | 0.970527 | 0.651143 |
| MmugDNA.30113.1.S1_at   | MmugDNA.30113.1 | 10.68 | 8.88  | 0.45 | 1.44 | 3.49  | 0.104169 | 0.080321 | 0.464201 | 0.327965 |
| MmugDNA.30114.1.S1_at   | MmugDNA.30114.1 | 11.13 | 10.97 | 0.15 | 0.13 | 1.12  | 0.078156 | 0.081596 | 0.428221 | 0.329808 |
| MmugDNA.30115.1.S1_at   | MmugDNA.30115.1 | 5.69  | 5.77  | 0.33 | 0.16 | -1.06 | 0.966512 | 0.412292 | 0.987317 | 0.638705 |
| MmugDNA.30116.1.S1_at   | MmugDNA.30116.1 | 8.15  | 8.01  | 0.15 | 0.05 | 1.1   | 0.18161  | 0.283902 | 0.546263 | 0.546237 |
| MmugDNA.30117.1.S1_at   | MmugDNA.30117.1 | 5.09  | 4.9   | 0.08 | 0.24 | 1.14  | 0.738455 | 0.861103 | 0.887681 | 0.920974 |



|                         |                 |       |       |      |      |        |          |          |          |          |
|-------------------------|-----------------|-------|-------|------|------|--------|----------|----------|----------|----------|
| MmugDNA.30118.1.S1_at   | MmugDNA.30118.1 | 11.36 | 12.25 | 0.07 | 0.2  | -1.85  | 0.001936 | 0.001418 | 0.155636 | 0.057458 |
| MmugDNA.30119.1.S1_at   | MmugDNA.30119.1 | 5.32  | 5.78  | 0.89 | 0.22 | -1.38  | 0.921184 | 0.594727 | 0.969237 | 0.758628 |
| MmugDNA.3012.1.S1_s_at  | MmugDNA.3012.1  | 10.7  | 10.73 | 0.11 | 0.15 | -1.02  | 0.866439 | 0.010942 | 0.946742 | 0.13621  |
| MmugDNA.30120.1.S1_at   | MmugDNA.30120.1 | 8.14  | 7.83  | 0.11 | 0.6  | 1.24   | 0.959345 | 0.243974 | 0.984581 | 0.514069 |
| MmugDNA.30122.1.S1_at   | MmugDNA.30122.1 | 9.6   | 9.79  | 0.38 | 0.25 | -1.14  | 0.895055 | 0.500628 | 0.95808  | 0.69917  |
| MmugDNA.30123.1.S1_at   | MmugDNA.30123.1 | 3.42  | 3.61  | 0.03 | 0.04 | -1.14  | 0.004114 | 0.017125 | 0.181739 | 0.165775 |
| MmugDNA.30124.1.S1_at   | MmugDNA.30124.1 | 4.88  | 5.06  | 0.1  | 0.29 | -1.14  | 0.267033 | 0.370223 | 0.612309 | 0.609392 |
| MmugDNA.30125.1.S1_at   | MmugDNA.30125.1 | 5.37  | 5.42  | 0    | 0.07 | -1.03  | 0.213763 | 0.244486 | 0.573954 | 0.514295 |
| MmugDNA.30126.1.S1_at   | MmugDNA.30126.1 | 6.15  | 10.87 | 1.11 | 3.58 | -26.28 | 0.389211 | 0.311777 | 0.692956 | 0.56678  |
| MmugDNA.30127.1.S1_at   | MmugDNA.30127.1 | 4.37  | 4.36  | 0.14 | 0.14 | 1.01   | 0.471194 | 0.542062 | 0.742951 | 0.725196 |
| MmugDNA.30128.1.S1_s_at | MmugDNA.30128.1 | 12.32 | 12.48 | 0.03 | 0.27 | -1.12  | 0.333222 | 0.306654 | 0.657501 | 0.563224 |
| MmugDNA.30129.1.S1_at   | MmugDNA.30129.1 | 9.91  | 10.52 | 0.51 | 0.96 | -1.52  | 0.375546 | 0.22002  | 0.684803 | 0.49344  |
| MmugDNA.30130.1.S1_at   | MmugDNA.30130.1 | 9.97  | 9.3   | 0.08 | 0.17 | 1.59   | 0.003423 | 0.002452 | 0.178277 | 0.073276 |
| MmugDNA.30131.1.S1_at   | MmugDNA.30131.1 | 6.72  | 6.39  | 0.25 | 0.41 | 1.25   | 0.652938 | 0.262478 | 0.843896 | 0.528747 |
| MmugDNA.30132.1.S1_at   | MmugDNA.30132.1 | 11.09 | 10.58 | 0.15 | 0.12 | 1.42   | 0.018132 | 0.030369 | 0.268961 | 0.216116 |
| MmugDNA.30133.1.S1_at   | MmugDNA.30133.1 | 10.75 | 10.43 | 0.07 | 0.61 | 1.24   | 0.935164 | 0.975092 | 0.974926 | 0.986405 |
| MmugDNA.30134.1.S1_at   | MmugDNA.30134.1 | 4.71  | 4.53  | 0.22 | 0.18 | 1.14   | 0.212129 | 0.236104 | 0.572526 | 0.507179 |
| MmugDNA.30135.1.S1_at   | MmugDNA.30135.1 | 3.85  | 3.76  | 0.59 | 0.14 | 1.07   | 0.28872  | 0.302547 | 0.626793 | 0.560201 |
| MmugDNA.30137.1.S1_at   | MmugDNA.30137.1 | 9.12  | 9.08  | 0.42 | 0.3  | 1.02   | 0.358364 | 0.315395 | 0.67319  | 0.568939 |
| MmugDNA.30139.1.S1_at   | MmugDNA.30139.1 | 4.75  | 4.76  | 0.03 | 0.24 | -1.01  | 0.814353 | 0.967566 | 0.92475  | 0.982093 |
| MmugDNA.3014.1.S1_at    | MmugDNA.3014.1  | 11.48 | 11.44 | 0.19 | 0.43 | 1.03   | 0.916005 | 0.148645 | 0.966925 | 0.423201 |
| MmugDNA.30141.1.S1_at   | MmugDNA.30141.1 | 6.65  | 6.88  | 0.16 | 0.19 | -1.18  | 0.173256 | 0.166852 | 0.536945 | 0.443311 |
| MmugDNA.30142.1.S1_at   | MmugDNA.30142.1 | 6.6   | 6.61  | 0.18 | 0.04 | -1.01  | 0.443128 | 0.492247 | 0.725992 | 0.693477 |
| MmugDNA.30143.1.S1_at   | MmugDNA.30143.1 | 8.26  | 8.25  | 0.28 | 0.15 | 1.01   | 0.406863 | 0.571057 | 0.703984 | 0.743533 |
| MmugDNA.30146.1.S1_at   | MmugDNA.30146.1 | 4.47  | 4.14  | 0.21 | 0.21 | 1.25   | 0.114151 | 0.124679 | 0.47744  | 0.39513  |
| MmugDNA.30148.1.S1_at   | MmugDNA.30148.1 | 6.59  | 5.51  | 1.12 | 0.77 | 2.11   | 0.283064 | 0.383352 | 0.623159 | 0.619374 |
| MmugDNA.30149.1.S1_at   | MmugDNA.30149.1 | 5.01  | 5.15  | 0.2  | 0.1  | -1.1   | 0.826766 | 0.226252 | 0.9296   | 0.498699 |
| MmugDNA.30150.1.S1_at   | MmugDNA.30150.1 | 10.48 | 9.52  | 0.05 | 0.08 | 1.95   | 0.000058 | 0.000009 | 0.112653 | 0.016421 |
| MmugDNA.30151.1.S1_at   | MmugDNA.30151.1 | 6.94  | 6.45  | 0.78 | 0.37 | 1.41   | 0.318647 | 0.306165 | 0.648593 | 0.562889 |
| MmugDNA.30152.1.S1_at   | MmugDNA.30152.1 | 5.51  | 5.67  | 0.05 | 0.12 | -1.12  | 0.05403  | 0.017344 | 0.381315 | 0.166673 |
| MmugDNA.30153.1.S1_at   | MmugDNA.30153.1 | 9.75  | 9.41  | 0.17 | 0.3  | 1.27   | 0.171298 | 0.078971 | 0.535166 | 0.325986 |
| MmugDNA.30155.1.S1_at   | MmugDNA.30155.1 | 7.3   | 7.39  | 0.04 | 0.06 | -1.06  | 0.043161 | 0.013329 | 0.356517 | 0.148042 |
| MmugDNA.30157.1.S1_s_at | MmugDNA.30157.1 | 11.45 | 10.21 | 0.05 | 0.46 | 2.36   | 0.009621 | 0.007198 | 0.226235 | 0.114062 |
| MmugDNA.30158.1.S1_at   | MmugDNA.30158.1 | 4.1   | 4.03  | 0.09 | 0.83 | 1.05   | 0.718459 | 0.463608 | 0.876459 | 0.674537 |
| MmugDNA.30159.1.S1_at   | MmugDNA.30159.1 | 3.45  | 3.46  | 0.16 | 0.13 | -1     | 0.849258 | 0.524527 | 0.939484 | 0.714395 |
| MmugDNA.3016.1.S1_at    | MmugDNA.3016.1  | 3.79  | 3.99  | 0.46 | 0.17 | -1.15  | 0.563618 | 0.178453 | 0.796102 | 0.454778 |
| MmugDNA.30160.1.S1_at   | MmugDNA.30160.1 | 11.88 | 11.22 | 0.06 | 0.39 | 1.58   | 0.149777 | 0.126968 | 0.514353 | 0.397729 |
| MmugDNA.30161.1.S1_at   | MmugDNA.30161.1 | 5.24  | 5.36  | 0.95 | 0.39 | -1.08  | 0.663388 | 0.569118 | 0.84899  | 0.742251 |
| MmugDNA.30165.1.S1_at   | MmugDNA.30165.1 | 5.88  | 6.83  | 0.35 | 0.47 | -1.93  | 0.039504 | 0.023474 | 0.347288 | 0.19201  |
| MmugDNA.30166.1.S1_s_at | MmugDNA.30166.1 | 7.78  | 9.33  | 0.2  | 0.63 | -2.93  | 0.038143 | 0.034537 | 0.343587 | 0.229979 |
| MmugDNA.30167.1.S1_at   | MmugDNA.30167.1 | 13.18 | 13.31 | 0.08 | 0.3  | -1.1   | 0.140186 | 0.022363 | 0.508065 | 0.187176 |

|                         |                 |       |       |      |      |       |          |          |          |          |
|-------------------------|-----------------|-------|-------|------|------|-------|----------|----------|----------|----------|
| MmugDNA.3017.1.S1_at    | MmugDNA.3017.1  | 6.83  | 6.5   | 0.39 | 0.08 | 1.26  | 0.781473 | 0.500474 | 0.908807 | 0.69907  |
| MmugDNA.30170.1.S1_at   | MmugDNA.30170.1 | 6.29  | 7.16  | 0.98 | 0.64 | -1.82 | 0.683275 | 0.801636 | 0.858347 | 0.885894 |
| MmugDNA.30171.1.S1_at   | MmugDNA.30171.1 | 12.02 | 12.31 | 0.03 | 0.19 | -1.23 | 0.182064 | 0.186341 | 0.546458 | 0.46218  |
| MmugDNA.30172.1.S1_at   | MmugDNA.30172.1 | 3.37  | 3.36  | 0.01 | 0.23 | 1.01  | 0.420851 | 0.148759 | 0.712776 | 0.423201 |
| MmugDNA.30173.1.S1_at   | MmugDNA.30173.1 | 5.7   | 5.72  | 0.06 | 0.15 | -1.01 | 0.369983 | 0.497772 | 0.681104 | 0.697059 |
| MmugDNA.30174.1.S1_at   | MmugDNA.30174.1 | 8.05  | 8.84  | 0.37 | 0.41 | -1.73 | 0.13915  | 0.096483 | 0.506613 | 0.35409  |
| MmugDNA.30176.1.S1_at   | MmugDNA.30176.1 | 3.26  | 3.1   | 0.62 | 0.08 | 1.12  | 0.228749 | 0.229442 | 0.586121 | 0.501527 |
| MmugDNA.30178.1.S1_at   | MmugDNA.30178.1 | 10.03 | 10.5  | 0.56 | 0.77 | -1.38 | 0.638689 | 0.304282 | 0.836696 | 0.561599 |
| MmugDNA.30178.1.S1_s_at | MmugDNA.30178.1 | 10.47 | 11.43 | 0.79 | 0.95 | -1.95 | 0.51585  | 0.243763 | 0.767629 | 0.513899 |
| MmugDNA.30179.1.S1_at   | MmugDNA.30179.1 | 6.23  | 6.42  | 0.68 | 1.27 | -1.15 | 0.980201 | 0.215163 | 0.992802 | 0.488943 |
| MmugDNA.30180.1.S1_at   | MmugDNA.30180.1 | 5.99  | 5.99  | 0.14 | 0.37 | 1.01  | 0.425201 | 0.59317  | 0.715025 | 0.758097 |
| MmugDNA.30182.1.S1_at   | MmugDNA.30182.1 | 6.22  | 7.25  | 0.8  | 0.62 | -2.05 | 0.256946 | 0.139062 | 0.604434 | 0.412165 |
| MmugDNA.30184.1.S1_at   | MmugDNA.30184.1 | 6.75  | 6.93  | 0.22 | 0.08 | -1.13 | 0.268815 | 0.378606 | 0.613517 | 0.615639 |
| MmugDNA.30185.1.S1_at   | MmugDNA.30185.1 | 3.79  | 3.56  | 0.09 | 0.07 | 1.18  | 0.024306 | 0.054897 | 0.294535 | 0.279748 |
| MmugDNA.30188.1.S1_at   | MmugDNA.30188.1 | 11.3  | 11.33 | 0.13 | 0.34 | -1.02 | 0.511691 | 0.131537 | 0.765318 | 0.403658 |
| MmugDNA.30189.1.S1_at   | MmugDNA.30189.1 | 4.72  | 4.8   | 0.09 | 0.46 | -1.06 | 0.776807 | 0.875667 | 0.90655  | 0.929374 |
| MmugDNA.3019.1.S1_at    | MmugDNA.3019.1  | 4.66  | 4.67  | 0.08 | 0.33 | -1    | 0.723126 | 0.286331 | 0.878988 | 0.547784 |
| MmugDNA.30191.1.S1_at   | MmugDNA.30191.1 | 4.72  | 4.18  | 0.3  | 0.27 | 1.45  | 0.143434 | 0.109641 | 0.510312 | 0.373629 |
| MmugDNA.30192.1.S1_at   | MmugDNA.30192.1 | 6.85  | 6.49  | 0.14 | 0.04 | 1.28  | 0.009069 | 0.016258 | 0.222023 | 0.161615 |
| MmugDNA.30194.1.S1_at   | MmugDNA.30194.1 | 5.67  | 6.07  | 0.23 | 0.13 | -1.32 | 0.275477 | 0.113664 | 0.617878 | 0.379818 |
| MmugDNA.30195.1.S1_at   | MmugDNA.30195.1 | 10.61 | 10.03 | 0.13 | 0.16 | 1.5   | 0.014067 | 0.006479 | 0.250974 | 0.109342 |
| MmugDNA.30196.1.S1_at   | MmugDNA.30196.1 | 6.22  | 5.67  | 0.45 | 0.41 | 1.46  | 0.451158 | 0.44307  | 0.731475 | 0.660962 |
| MmugDNA.30197.1.S1_at   | MmugDNA.30197.1 | 7.71  | 7.14  | 0.15 | 0.2  | 1.48  | 0.009334 | 0.004122 | 0.223995 | 0.090887 |
| MmugDNA.30198.1.S1_at   | MmugDNA.30198.1 | 3.42  | 3.6   | 0.45 | 0.11 | -1.13 | 0.680076 | 0.873354 | 0.857026 | 0.927953 |
| MmugDNA.30199.1.S1_at   | MmugDNA.30199.1 | 11.56 | 11.35 | 0.09 | 0.27 | 1.15  | 0.244557 | 0.20615  | 0.596278 | 0.480348 |
| MmugDNA.302.1.S1_at     | MmugDNA.302.1   | 10.88 | 10.81 | 0.12 | 0.43 | 1.05  | 0.776091 | 0.933227 | 0.906177 | 0.962071 |
| MmugDNA.3020.1.S1_at    | MmugDNA.3020.1  | 9.11  | 8.15  | 0.31 | 0.37 | 1.95  | 0.028373 | 0.017149 | 0.311036 | 0.165888 |
| MmugDNA.30201.1.S1_at   | MmugDNA.30201.1 | 4.78  | 4.77  | 0.03 | 0.07 | 1.01  | 0.459635 | 0.728776 | 0.736367 | 0.843203 |
| MmugDNA.30202.1.S1_at   | MmugDNA.30202.1 | 2.9   | 2.98  | 0.12 | 0.2  | -1.06 | 0.204899 | 0.151525 | 0.567457 | 0.426242 |
| MmugDNA.30203.1.S1_at   | MmugDNA.30203.1 | 5.42  | 5.15  | 0.4  | 0.06 | 1.21  | 0.245908 | 0.377333 | 0.597304 | 0.614891 |
| MmugDNA.30204.1.S1_at   | MmugDNA.30204.1 | 4.07  | 4.13  | 0.23 | 0.04 | -1.04 | 0.728139 | 0.580657 | 0.881806 | 0.749827 |
| MmugDNA.30205.1.S1_at   | MmugDNA.30205.1 | 4.94  | 4.53  | 0.42 | 0.1  | 1.33  | 0.201821 | 0.271466 | 0.564072 | 0.536512 |
| MmugDNA.30206.1.S1_at   | MmugDNA.30206.1 | 4.14  | 4.16  | 0.05 | 0.12 | -1.02 | 0.288305 | 0.547453 | 0.626514 | 0.728464 |
| MmugDNA.30207.1.S1_at   | MmugDNA.30207.1 | 6.16  | 4.6   | 0.53 | 0.11 | 2.94  | 0.006906 | 0.002985 | 0.202257 | 0.079958 |
| MmugDNA.30208.1.S1_at   | MmugDNA.30208.1 | 6.28  | 6.86  | 0.54 | 0.49 | -1.5  | 0.102484 | 0.105703 | 0.46236  | 0.3678   |
| MmugDNA.30209.1.S1_at   | MmugDNA.30209.1 | 6.5   | 6.9   | 0.09 | 0.29 | -1.31 | 0.164712 | 0.204069 | 0.528656 | 0.478386 |
| MmugDNA.3021.1.S1_at    | MmugDNA.3021.1  | 7.93  | 7.94  | 0.04 | 0.18 | -1.01 | 0.871213 | 0.942368 | 0.948463 | 0.967292 |
| MmugDNA.30210.1.S1_at   | MmugDNA.30210.1 | 7.76  | 8.16  | 0.11 | 0.13 | -1.32 | 0.028394 | 0.018684 | 0.311103 | 0.171717 |
| MmugDNA.30211.1.S1_at   | MmugDNA.30211.1 | 7.09  | 7     | 0.95 | 0.32 | 1.07  | 0.438627 | 0.572184 | 0.72318  | 0.744268 |
| MmugDNA.30212.1.S1_at   | MmugDNA.30212.1 | 5.44  | 5.41  | 0.07 | 0.08 | 1.02  | 0.481574 | 0.889152 | 0.749268 | 0.936796 |
| MmugDNA.30213.1.S1_at   | MmugDNA.30213.1 | 7.43  | 7.25  | 0.19 | 0.16 | 1.13  | 0.232054 | 0.546955 | 0.587722 | 0.728283 |

|                       |                 |       |       |      |      |       |          |          |          |          |
|-----------------------|-----------------|-------|-------|------|------|-------|----------|----------|----------|----------|
| MmugDNA.30214.1.S1_at | MmugDNA.30214.1 | 3.61  | 3.55  | 0.7  | 0.21 | 1.04  | 0.36517  | 0.38082  | 0.678069 | 0.617426 |
| MmugDNA.30216.1.S1_at | MmugDNA.30216.1 | 3.54  | 3.8   | 0.14 | 0.09 | -1.2  | 0.082645 | 0.063878 | 0.434282 | 0.29906  |
| MmugDNA.30217.1.S1_at | MmugDNA.30217.1 | 6.37  | 6.62  | 0.62 | 0.2  | -1.19 | 0.850723 | 0.903131 | 0.940027 | 0.94497  |
| MmugDNA.30218.1.S1_at | MmugDNA.30218.1 | 3.7   | 3.34  | 0.56 | 0.16 | 1.28  | 0.264623 | 0.141381 | 0.61038  | 0.414874 |
| MmugDNA.3022.1.S1_at  | MmugDNA.3022.1  | 6.01  | 5.94  | 0.18 | 0.06 | 1.05  | 0.799128 | 0.878005 | 0.916874 | 0.930359 |
| MmugDNA.30221.1.S1_at | MmugDNA.30221.1 | 7.63  | 7.87  | 0.13 | 0.46 | -1.18 | 0.445066 | 0.565983 | 0.727399 | 0.740174 |
| MmugDNA.30222.1.S1_at | MmugDNA.30222.1 | 7.49  | 7.55  | 0.25 | 0.13 | -1.04 | 0.713035 | 0.565944 | 0.874274 | 0.740174 |
| MmugDNA.30223.1.S1_at | MmugDNA.30223.1 | 9.54  | 8.71  | 0.78 | 0.99 | 1.78  | 0.260789 | 0.384734 | 0.607423 | 0.620363 |
| MmugDNA.30224.1.S1_at | MmugDNA.30224.1 | 12.46 | 12.34 | 0.15 | 0.22 | 1.08  | 0.489028 | 0.236259 | 0.753453 | 0.507263 |
| MmugDNA.30225.1.S1_at | MmugDNA.30225.1 | 13.17 | 13.14 | 0.07 | 0.21 | 1.02  | 0.227843 | 0.284071 | 0.585266 | 0.546307 |
| MmugDNA.30226.1.S1_at | MmugDNA.30226.1 | 6.18  | 6     | 0.1  | 0.39 | 1.13  | 0.957648 | 0.704355 | 0.983925 | 0.828437 |
| MmugDNA.30228.1.S1_at | MmugDNA.30228.1 | 4.68  | 4.7   | 0.17 | 0.24 | -1.02 | 0.203207 | 0.246413 | 0.565864 | 0.515899 |
| MmugDNA.3023.1.S1_at  | MmugDNA.3023.1  | 9.36  | 8.66  | 0.18 | 0.25 | 1.62  | 0.006036 | 0.002578 | 0.195046 | 0.075183 |
| MmugDNA.30230.1.S1_at | MmugDNA.30230.1 | 9.46  | 9.33  | 0.16 | 0.54 | 1.1   | 0.345944 | 0.430029 | 0.665465 | 0.65111  |
| MmugDNA.30231.1.S1_at | MmugDNA.30231.1 | 4.57  | 4.88  | 0.73 | 0.05 | -1.24 | 0.825944 | 0.952962 | 0.929365 | 0.973344 |
| MmugDNA.30232.1.S1_at | MmugDNA.30232.1 | 5.96  | 5.85  | 0.35 | 0.26 | 1.08  | 0.252964 | 0.318354 | 0.60168  | 0.571192 |
| MmugDNA.30233.1.S1_at | MmugDNA.30233.1 | 4.34  | 4.2   | 0.16 | 0.19 | 1.1   | 0.36049  | 0.500732 | 0.67457  | 0.699242 |
| MmugDNA.30234.1.S1_at | MmugDNA.30234.1 | 5.28  | 5.04  | 0.09 | 0.16 | 1.18  | 0.035676 | 0.279443 | 0.3373   | 0.543049 |
| MmugDNA.30235.1.S1_at | MmugDNA.30235.1 | 5.32  | 5.42  | 0.26 | 0.29 | -1.08 | 0.854748 | 0.798215 | 0.941248 | 0.88385  |
| MmugDNA.30236.1.S1_at | MmugDNA.30236.1 | 8.12  | 8.28  | 0.23 | 0.11 | -1.12 | 0.940931 | 0.917362 | 0.977563 | 0.953807 |
| MmugDNA.30237.1.S1_at | MmugDNA.30237.1 | 6.14  | 4.87  | 1.12 | 1.33 | 2.42  | 0.276367 | 0.34375  | 0.618445 | 0.589457 |
| MmugDNA.30238.1.S1_at | MmugDNA.30238.1 | 5.56  | 5.11  | 0.55 | 0.49 | 1.36  | 0.462365 | 0.100766 | 0.738226 | 0.360174 |
| MmugDNA.30239.1.S1_at | MmugDNA.30239.1 | 6.65  | 6.73  | 0.84 | 0.2  | -1.06 | 0.358418 | 0.468526 | 0.673196 | 0.677755 |
| MmugDNA.3024.1.S1_at  | MmugDNA.3024.1  | 5.31  | 5.17  | 0.22 | 0.15 | 1.1   | 0.807862 | 0.401428 | 0.921496 | 0.631018 |
| MmugDNA.30240.1.S1_at | MmugDNA.30240.1 | 3.01  | 3.18  | 0.05 | 0.12 | -1.13 | 0.22967  | 0.367886 | 0.586886 | 0.607469 |
| MmugDNA.30241.1.S1_at | MmugDNA.30241.1 | 6.88  | 6.43  | 0.11 | 0.22 | 1.36  | 0.025612 | 0.017244 | 0.300013 | 0.166347 |
| MmugDNA.30242.1.S1_at | MmugDNA.30242.1 | 6.79  | 6.9   | 0.17 | 0.18 | -1.08 | 0.474569 | 0.657537 | 0.74525  | 0.799759 |
| MmugDNA.30243.1.S1_at | MmugDNA.30243.1 | 9.83  | 9.77  | 0.44 | 0.38 | 1.05  | 0.796579 | 0.828334 | 0.915622 | 0.901341 |
| MmugDNA.30244.1.S1_at | MmugDNA.30244.1 | 3.64  | 3.65  | 0.08 | 0.07 | -1    | 0.288105 | 0.274927 | 0.626416 | 0.539375 |
| MmugDNA.30245.1.S1_at | MmugDNA.30245.1 | 8.16  | 6.72  | 0.73 | 0.6  | 2.71  | 0.183224 | 0.238311 | 0.547309 | 0.5089   |
| MmugDNA.30246.1.S1_at | MmugDNA.30246.1 | 6.08  | 6.2   | 0.1  | 0.26 | -1.09 | 0.324664 | 0.431787 | 0.652027 | 0.652556 |
| MmugDNA.30247.1.S1_at | MmugDNA.30247.1 | 11.21 | 11.64 | 0.14 | 0.2  | -1.34 | 0.018546 | 0.012413 | 0.270581 | 0.144066 |
| MmugDNA.30248.1.S1_at | MmugDNA.30248.1 | 3.09  | 3.11  | 0.05 | 0.06 | -1.02 | 0.305129 | 0.392599 | 0.639014 | 0.625813 |
| MmugDNA.3025.1.S1_at  | MmugDNA.3025.1  | 4.76  | 4.94  | 0.17 | 0.14 | -1.13 | 0.225096 | 0.189615 | 0.58306  | 0.465297 |
| MmugDNA.30251.1.S1_at | MmugDNA.30251.1 | 7.02  | 7.14  | 0.26 | 0.16 | -1.09 | 0.759164 | 0.718676 | 0.898249 | 0.837178 |
| MmugDNA.30252.1.S1_at | MmugDNA.30252.1 | 3.48  | 3.73  | 0.11 | 0.17 | -1.19 | 0.045322 | 0.011156 | 0.360702 | 0.137506 |
| MmugDNA.30254.1.S1_at | MmugDNA.30254.1 | 8.39  | 8.72  | 0.29 | 0.27 | -1.26 | 0.186556 | 0.323947 | 0.550106 | 0.57466  |
| MmugDNA.30256.1.S1_at | MmugDNA.30256.1 | 10.41 | 10.58 | 0.11 | 0.44 | -1.12 | 0.177941 | 0.213934 | 0.542205 | 0.487596 |
| MmugDNA.30258.1.S1_at | MmugDNA.30258.1 | 5.32  | 5.53  | 0.08 | 0.15 | -1.16 | 0.043033 | 0.068097 | 0.355958 | 0.307142 |
| MmugDNA.30259.1.S1_at | MmugDNA.30259.1 | 4.33  | 4.4   | 0.17 | 0.09 | -1.06 | 0.169643 | 0.208951 | 0.533788 | 0.482751 |
| MmugDNA.30260.1.S1_at | MmugDNA.30260.1 | 5.22  | 5.26  | 0.15 | 0.09 | -1.03 | 0.545537 | 0.65576  | 0.785008 | 0.798709 |

|                         |                 |       |       |      |      |       |          |          |          |          |
|-------------------------|-----------------|-------|-------|------|------|-------|----------|----------|----------|----------|
| MmugDNA.30261.1.S1_at   | MmugDNA.30261.1 | 4.56  | 4.53  | 0.28 | 0.2  | 1.02  | 0.554852 | 0.700204 | 0.791099 | 0.825987 |
| MmugDNA.30262.1.S1_at   | MmugDNA.30262.1 | 6.78  | 6.64  | 0.2  | 0.12 | 1.1   | 0.259216 | 0.198304 | 0.60632  | 0.473267 |
| MmugDNA.30264.1.S1_at   | MmugDNA.30264.1 | 7.02  | 7.26  | 0.14 | 0.09 | -1.18 | 0.14058  | 0.184389 | 0.508385 | 0.460458 |
| MmugDNA.30265.1.S1_at   | MmugDNA.30265.1 | 5.29  | 5.26  | 0.25 | 0.16 | 1.02  | 0.496508 | 0.728241 | 0.757501 | 0.842893 |
| MmugDNA.30267.1.S1_at   | MmugDNA.30267.1 | 3.68  | 3.79  | 0.66 | 0.16 | -1.08 | 0.443176 | 0.594098 | 0.725992 | 0.758517 |
| MmugDNA.30270.1.S1_at   | MmugDNA.30270.1 | 5.78  | 5.1   | 0.58 | 0.1  | 1.6   | 0.101621 | 0.077707 | 0.461313 | 0.323851 |
| MmugDNA.30272.1.S1_at   | MmugDNA.30272.1 | 3.51  | 3.69  | 0.07 | 0.1  | -1.13 | 0.090661 | 0.243224 | 0.446193 | 0.513356 |
| MmugDNA.30273.1.S1_at   | MmugDNA.30273.1 | 6.08  | 6.73  | 0.66 | 1.12 | -1.57 | 0.745848 | 0.86012  | 0.891243 | 0.920245 |
| MmugDNA.30274.1.S1_at   | MmugDNA.30274.1 | 7.07  | 6.37  | 0.95 | 0.38 | 1.63  | 0.31135  | 0.455876 | 0.643352 | 0.669664 |
| MmugDNA.30275.1.S1_at   | MmugDNA.30275.1 | 7.25  | 10.1  | 1.38 | 1.39 | -7.2  | 0.090535 | 0.075234 | 0.445968 | 0.319432 |
| MmugDNA.30276.1.S1_s_at | MmugDNA.30276.1 | 5     | 4.59  | 0.34 | 0.15 | 1.33  | 0.584324 | 0.602196 | 0.806956 | 0.763212 |
| MmugDNA.30277.1.S1_at   | MmugDNA.30277.1 | 8.01  | 6.67  | 0.15 | 0.31 | 2.52  | 0.003152 | 0.000682 | 0.173324 | 0.044166 |
| MmugDNA.30278.1.S1_at   | MmugDNA.30278.1 | 3.73  | 3.66  | 0.09 | 0.16 | 1.05  | 0.927525 | 0.926134 | 0.972003 | 0.95813  |
| MmugDNA.30279.1.S1_at   | MmugDNA.30279.1 | 3.84  | 3.82  | 0.32 | 0.07 | 1.01  | 0.746817 | 0.922509 | 0.89155  | 0.956337 |
| MmugDNA.3028.1.S1_at    | MmugDNA.3028.1  | 7.1   | 7.02  | 0.37 | 0.22 | 1.05  | 0.924319 | 0.980922 | 0.970608 | 0.989478 |
| MmugDNA.30280.1.S1_at   | MmugDNA.30280.1 | 7.41  | 6.73  | 0.09 | 0.48 | 1.59  | 0.024096 | 0.04218  | 0.294208 | 0.249842 |
| MmugDNA.30281.1.S1_at   | MmugDNA.30281.1 | 5.6   | 6.31  | 0.4  | 0.48 | -1.64 | 0.053951 | 0.031384 | 0.381209 | 0.219065 |
| MmugDNA.30282.1.S1_at   | MmugDNA.30282.1 | 10.95 | 11.36 | 0.22 | 0.26 | -1.32 | 0.170044 | 0.118057 | 0.534161 | 0.385921 |
| MmugDNA.30283.1.S1_at   | MmugDNA.30283.1 | 5.43  | 5.3   | 0.33 | 0.09 | 1.1   | 0.732516 | 0.664865 | 0.884502 | 0.803709 |
| MmugDNA.30283.1.S1_s_at | MmugDNA.30283.1 | 10.78 | 10.85 | 0.1  | 0.29 | -1.05 | 0.409231 | 0.478797 | 0.705793 | 0.684733 |
| MmugDNA.30284.1.S1_at   | MmugDNA.30284.1 | 3.15  | 3.16  | 0.64 | 0.22 | -1    | 0.579903 | 0.446236 | 0.804451 | 0.662743 |
| MmugDNA.30285.1.S1_at   | MmugDNA.30285.1 | 10.97 | 10.8  | 0.39 | 0.98 | 1.12  | 0.468782 | 0.584776 | 0.741287 | 0.752534 |
| MmugDNA.30288.1.S1_at   | MmugDNA.30288.1 | 3.08  | 3.12  | 0.71 | 0.18 | -1.03 | 0.435681 | 0.457362 | 0.721315 | 0.670806 |
| MmugDNA.30289.1.S1_at   | MmugDNA.30289.1 | 3.06  | 3.19  | 0.12 | 0.14 | -1.09 | 0.594105 | 0.516809 | 0.811686 | 0.70925  |
| MmugDNA.3029.1.S1_at    | MmugDNA.3029.1  | 4.83  | 4.63  | 0.25 | 0.29 | 1.15  | 0.486673 | 0.120083 | 0.751702 | 0.388792 |
| MmugDNA.30290.1.S1_at   | MmugDNA.30290.1 | 9.22  | 7.7   | 0.4  | 0.35 | 2.85  | 0.015629 | 0.00734  | 0.259812 | 0.11509  |
| MmugDNA.30291.1.S1_at   | MmugDNA.30291.1 | 3.48  | 3.37  | 0.18 | 0.04 | 1.07  | 0.330289 | 0.407571 | 0.655613 | 0.63505  |
| MmugDNA.30292.1.S1_at   | MmugDNA.30292.1 | 7.34  | 9.45  | 0.67 | 0.76 | -4.33 | 0.024013 | 0.014128 | 0.293842 | 0.152052 |
| MmugDNA.30293.1.S1_at   | MmugDNA.30293.1 | 4.65  | 4.34  | 0.27 | 0.08 | 1.24  | 0.296732 | 0.402711 | 0.632686 | 0.631543 |
| MmugDNA.30295.1.S1_at   | MmugDNA.30295.1 | 10.96 | 10.73 | 0.49 | 0.17 | 1.18  | 0.817162 | 0.51691  | 0.9259   | 0.709317 |
| MmugDNA.303.1.S1_at     | MmugDNA.303.1   | 9.99  | 9.01  | 0.33 | 0.42 | 1.98  | 0.030966 | 0.021895 | 0.320419 | 0.185199 |
| MmugDNA.3030.1.S1_at    | MmugDNA.3030.1  | 2.75  | 2.83  | 0.17 | 0.06 | -1.06 | 0.793714 | 0.770279 | 0.914508 | 0.866566 |
| MmugDNA.30301.1.S1_s_at | MmugDNA.30301.1 | 10.83 | 10.43 | 0.26 | 0.1  | 1.32  | 0.171128 | 0.159779 | 0.535105 | 0.435871 |
| MmugDNA.30303.1.S1_at   | MmugDNA.30303.1 | 7.92  | 8.3   | 0.2  | 0.91 | -1.31 | 0.457252 | 0.515681 | 0.734775 | 0.708451 |
| MmugDNA.30304.1.S1_at   | MmugDNA.30304.1 | 5.87  | 6.06  | 0.16 | 0.23 | -1.14 | 0.356142 | 0.585649 | 0.671384 | 0.752957 |
| MmugDNA.30305.1.S1_at   | MmugDNA.30305.1 | 7.31  | 7.6   | 0.22 | 0.12 | -1.23 | 0.115381 | 0.122489 | 0.478773 | 0.392376 |
| MmugDNA.30306.1.S1_at   | MmugDNA.30306.1 | 12.17 | 11.67 | 0.08 | 0.28 | 1.41  | 0.02354  | 0.016032 | 0.291638 | 0.160532 |
| MmugDNA.30307.1.S1_at   | MmugDNA.30307.1 | 5.14  | 7.67  | 0.98 | 0.5  | -5.79 | 0.011651 | 0.005101 | 0.237051 | 0.099108 |
| MmugDNA.30308.1.S1_at   | MmugDNA.30308.1 | 5.21  | 5.12  | 0.15 | 0.22 | 1.06  | 0.502749 | 0.37826  | 0.760493 | 0.615438 |
| MmugDNA.30309.1.S1_s_at | MmugDNA.30309.1 | 4.66  | 4.58  | 0.26 | 0.29 | 1.05  | 0.770219 | 0.882225 | 0.90333  | 0.932845 |
| MmugDNA.3031.1.S1_at    | MmugDNA.3031.1  | 4.9   | 4.9   | 0.35 | 0.09 | -1    | 0.814983 | 0.937745 | 0.924809 | 0.964687 |

|                         |                 |       |       |      |      |       |          |          |          |          |
|-------------------------|-----------------|-------|-------|------|------|-------|----------|----------|----------|----------|
| MmugDNA.30310.1.S1_at   | MmugDNA.30310.1 | 3.98  | 3.92  | 0.09 | 0.16 | 1.04  | 0.683566 | 0.449335 | 0.85844  | 0.665021 |
| MmugDNA.30311.1.S1_at   | MmugDNA.30311.1 | 4.11  | 4.48  | 1.21 | 0.19 | -1.29 | 0.676917 | 0.87908  | 0.85524  | 0.931015 |
| MmugDNA.30312.1.S1_at   | MmugDNA.30312.1 | 3.37  | 3.55  | 0.06 | 0.11 | -1.13 | 0.165846 | 0.023852 | 0.529848 | 0.193455 |
| MmugDNA.30313.1.S1_at   | MmugDNA.30313.1 | 3.16  | 3.06  | 0.14 | 0.16 | 1.07  | 0.762575 | 0.28919  | 0.899996 | 0.550293 |
| MmugDNA.30314.1.S1_at   | MmugDNA.30314.1 | 10.04 | 9.25  | 0.1  | 0.35 | 1.73  | 0.0241   | 0.014703 | 0.294208 | 0.154371 |
| MmugDNA.30315.1.S1_at   | MmugDNA.30315.1 | 8.64  | 8.04  | 0.14 | 0.39 | 1.51  | 0.044534 | 0.03286  | 0.358786 | 0.224478 |
| MmugDNA.30316.1.S1_at   | MmugDNA.30316.1 | 6.84  | 6.47  | 0.72 | 0.9  | 1.29  | 0.196114 | 0.13685  | 0.559231 | 0.409566 |
| MmugDNA.30317.1.S1_at   | MmugDNA.30317.1 | 8.56  | 8.96  | 0.11 | 0.18 | -1.32 | 0.047478 | 0.053284 | 0.366522 | 0.276463 |
| MmugDNA.30317.1.S1_s_at | MmugDNA.30317.1 | 8.28  | 8.22  | 0.12 | 0.23 | 1.04  | 0.646897 | 0.052195 | 0.84111  | 0.274036 |
| MmugDNA.30318.1.S1_at   | MmugDNA.30318.1 | 8.9   | 8.83  | 0.03 | 0.57 | 1.05  | 0.950344 | 0.12557  | 0.981318 | 0.396226 |
| MmugDNA.3032.1.S1_at    | MmugDNA.3032.1  | 5.7   | 5.68  | 0.19 | 0.37 | 1.01  | 0.270597 | 0.296832 | 0.614902 | 0.5558   |
| MmugDNA.30320.1.S1_at   | MmugDNA.30320.1 | 3.25  | 3.29  | 0.19 | 0.06 | -1.02 | 0.546692 | 0.738173 | 0.785667 | 0.848203 |
| MmugDNA.30324.1.S1_at   | MmugDNA.30324.1 | 4.11  | 4.41  | 0.3  | 0.13 | -1.23 | 0.57383  | 0.764167 | 0.80137  | 0.862867 |
| MmugDNA.30325.1.S1_at   | MmugDNA.30325.1 | 10.44 | 10.33 | 0.05 | 0.16 | 1.07  | 0.85612  | 0.060804 | 0.941848 | 0.293306 |
| MmugDNA.30326.1.S1_at   | MmugDNA.30326.1 | 4.51  | 4.63  | 0.2  | 0.26 | -1.09 | 0.281815 | 0.319079 | 0.62238  | 0.571625 |
| MmugDNA.30327.1.S1_at   | MmugDNA.30327.1 | 3.78  | 3.77  | 0.07 | 0.17 | 1.01  | 0.485476 | 0.665269 | 0.750946 | 0.803854 |
| MmugDNA.3033.1.S1_at    | MmugDNA.3033.1  | 3.44  | 3.36  | 0.34 | 0.16 | 1.06  | 0.597153 | 0.80478  | 0.813431 | 0.887735 |
| MmugDNA.30330.1.S1_at   | MmugDNA.30330.1 | 6.75  | 6.52  | 0.26 | 0.28 | 1.17  | 0.393872 | 0.042167 | 0.695522 | 0.249821 |
| MmugDNA.30332.1.S1_at   | MmugDNA.30332.1 | 3.35  | 3.47  | 0    | 0.06 | -1.09 | 0.02289  | 0.212149 | 0.288735 | 0.486036 |
| MmugDNA.30335.1.S1_s_at | MmugDNA.30335.1 | 9.61  | 8.74  | 0.24 | 0.15 | 1.83  | 0.003397 | 0.000915 | 0.177724 | 0.048471 |
| MmugDNA.30336.1.S1_at   | MmugDNA.30336.1 | 6.56  | 6.61  | 0.08 | 0.17 | -1.04 | 0.420825 | 0.559159 | 0.712776 | 0.736091 |
| MmugDNA.30337.1.S1_at   | MmugDNA.30337.1 | 7.14  | 9.69  | 1.72 | 3.3  | -5.85 | 0.563696 | 0.318811 | 0.796168 | 0.571379 |
| MmugDNA.30338.1.S1_at   | MmugDNA.30338.1 | 5.68  | 5.94  | 0.13 | 0.23 | -1.2  | 0.689505 | 0.303729 | 0.861555 | 0.561146 |
| MmugDNA.30339.1.S1_at   | MmugDNA.30339.1 | 3.15  | 3.11  | 0.28 | 0.23 | 1.03  | 0.762718 | 0.776717 | 0.900005 | 0.870216 |
| MmugDNA.30340.1.S1_at   | MmugDNA.30340.1 | 5     | 5.19  | 0.25 | 0.18 | -1.14 | 0.107257 | 0.121375 | 0.467913 | 0.390439 |
| MmugDNA.30342.1.S1_at   | MmugDNA.30342.1 | 10.66 | 11.03 | 0.22 | 0.38 | -1.29 | 0.082567 | 0.019384 | 0.434103 | 0.175012 |
| MmugDNA.30343.1.S1_at   | MmugDNA.30343.1 | 5.27  | 5.32  | 0.34 | 0.07 | -1.04 | 0.553757 | 0.652037 | 0.790372 | 0.796529 |
| MmugDNA.30344.1.S1_at   | MmugDNA.30344.1 | 5.62  | 5.76  | 0.3  | 0.42 | -1.1  | 0.347171 | 0.356463 | 0.666259 | 0.598459 |
| MmugDNA.30344.1.S1_x_at | MmugDNA.30344.1 | 6.44  | 6.67  | 0.18 | 0.38 | -1.17 | 0.242448 | 0.184742 | 0.594425 | 0.460656 |
| MmugDNA.30345.1.S1_at   | MmugDNA.30345.1 | 3.25  | 3.27  | 0.01 | 0.12 | -1.01 | 0.518167 | 0.081242 | 0.769301 | 0.329351 |
| MmugDNA.30346.1.S1_at   | MmugDNA.30346.1 | 4.66  | 4.55  | 0.17 | 0.32 | 1.08  | 0.845341 | 0.409054 | 0.937976 | 0.636113 |
| MmugDNA.30347.1.S1_at   | MmugDNA.30347.1 | 5.33  | 5.23  | 0.26 | 0.1  | 1.08  | 0.248129 | 0.463905 | 0.599076 | 0.67471  |
| MmugDNA.30348.1.S1_at   | MmugDNA.30348.1 | 5.96  | 6.87  | 0.3  | 0.5  | -1.88 | 0.05628  | 0.053302 | 0.386292 | 0.276463 |
| MmugDNA.30349.1.S1_at   | MmugDNA.30349.1 | 9.01  | 9.33  | 0.25 | 0.24 | -1.25 | 0.094804 | 0.085429 | 0.452244 | 0.337409 |
| MmugDNA.3035.1.S1_at    | MmugDNA.3035.1  | 4.27  | 4.18  | 0.26 | 0.88 | 1.06  | 0.476424 | 0.648328 | 0.746232 | 0.794167 |
| MmugDNA.30353.1.S1_at   | MmugDNA.30353.1 | 4.63  | 4.6   | 0.05 | 0.09 | 1.02  | 0.574837 | 0.924558 | 0.801864 | 0.957386 |
| MmugDNA.30354.1.S1_at   | MmugDNA.30354.1 | 3.06  | 3.02  | 0.11 | 0.17 | 1.03  | 0.987238 | 0.63337  | 0.995537 | 0.784111 |
| MmugDNA.30356.1.S1_s_at | MmugDNA.30356.1 | 9.83  | 10.39 | 0.16 | 0.43 | -1.48 | 0.136487 | 0.038703 | 0.503566 | 0.24169  |
| MmugDNA.30357.1.S1_at   | MmugDNA.30357.1 | 6.31  | 6.08  | 0.23 | 0.09 | 1.17  | 0.606502 | 0.309297 | 0.818866 | 0.564899 |
| MmugDNA.30358.1.S1_at   | MmugDNA.30358.1 | 6.64  | 6.6   | 0.28 | 0.15 | 1.03  | 0.956336 | 0.976601 | 0.983483 | 0.987237 |
| MmugDNA.30358.1.S1_s_at | MmugDNA.30358.1 | 7.47  | 7.57  | 0.16 | 0.37 | -1.07 | 0.964338 | 0.954838 | 0.986203 | 0.974414 |

|                         |                 |       |      |      |      |       |          |          |          |          |
|-------------------------|-----------------|-------|------|------|------|-------|----------|----------|----------|----------|
| MmugDNA.3036.1.S1_at    | MmugDNA.3036.1  | 10.18 | 8.9  | 0.04 | 0.35 | 2.43  | 0.003348 | 0.000398 | 0.177442 | 0.037471 |
| MmugDNA.30360.1.S1_at   | MmugDNA.30360.1 | 7.54  | 9.11 | 0.38 | 0.08 | -2.97 | 0.004142 | 0.001536 | 0.181739 | 0.059437 |
| MmugDNA.30362.1.S1_at   | MmugDNA.30362.1 | 5.6   | 7.57 | 0.82 | 0.85 | -3.93 | 0.049321 | 0.041781 | 0.371209 | 0.248981 |
| MmugDNA.30363.1.S1_at   | MmugDNA.30363.1 | 7     | 6.87 | 0.28 | 0.29 | 1.09  | 0.74301  | 0.914714 | 0.890085 | 0.952066 |
| MmugDNA.30364.1.S1_at   | MmugDNA.30364.1 | 3.86  | 3.74 | 0.16 | 0.06 | 1.09  | 0.261896 | 0.178521 | 0.608497 | 0.454778 |
| MmugDNA.30365.1.S1_at   | MmugDNA.30365.1 | 5.85  | 6.61 | 0.09 | 0.29 | -1.7  | 0.025562 | 0.031875 | 0.299708 | 0.220938 |
| MmugDNA.30368.1.S1_at   | MmugDNA.30368.1 | 8.05  | 8.25 | 0.24 | 0.2  | -1.15 | 0.986466 | 0.194348 | 0.995218 | 0.469464 |
| MmugDNA.30369.1.S1_at   | MmugDNA.30369.1 | 9.1   | 8.94 | 0.07 | 0.24 | 1.11  | 0.838511 | 0.006397 | 0.934694 | 0.108738 |
| MmugDNA.3037.1.S1_at    | MmugDNA.3037.1  | 6.26  | 6.46 | 0.38 | 0.24 | -1.15 | 0.617547 | 0.457068 | 0.824768 | 0.67067  |
| MmugDNA.30370.1.S1_at   | MmugDNA.30370.1 | 4.06  | 3.94 | 0.24 | 0.29 | 1.08  | 0.69953  | 0.437747 | 0.86691  | 0.656924 |
| MmugDNA.30372.1.S1_at   | MmugDNA.30372.1 | 3.74  | 3.54 | 0.27 | 0.07 | 1.15  | 0.22988  | 0.357218 | 0.587007 | 0.598864 |
| MmugDNA.30373.1.S1_at   | MmugDNA.30373.1 | 6.49  | 6.57 | 0.28 | 0.12 | -1.06 | 0.305199 | 0.409361 | 0.639039 | 0.636452 |
| MmugDNA.30373.1.S1_s_at | MmugDNA.30373.1 | 3.68  | 3.73 | 0.12 | 0.07 | -1.04 | 0.427368 | 0.538681 | 0.716187 | 0.723313 |
| MmugDNA.30374.1.S1_at   | MmugDNA.30374.1 | 5.55  | 6.03 | 0.11 | 0.2  | -1.4  | 0.052967 | 0.047465 | 0.378902 | 0.262486 |
| MmugDNA.30375.1.S1_at   | MmugDNA.30375.1 | 6.27  | 6.3  | 0.28 | 0.13 | -1.02 | 0.688043 | 0.312142 | 0.860848 | 0.566904 |
| MmuSTS.724.1.S1_at      | MmuSTS.724.1    | 9.03  | 8.84 | 0.24 | 0.14 | 1.13  | 0.564437 | 0.17203  | 0.796534 | 0.448441 |
| MmuSTS.724.1.S1_s_at    | MmuSTS.724.1    | 8.66  | 8.52 | 0.27 | 0.21 | 1.1   | 0.503986 | 0.030655 | 0.761105 | 0.217119 |
| MmugDNA.30377.1.S1_at   | MmugDNA.30377.1 | 9.61  | 11.1 | 0.28 | 0.18 | -2.8  | 0.001498 | 0.000316 | 0.151147 | 0.035358 |
| MmugDNA.30379.1.S1_at   | MmugDNA.30379.1 | 4.04  | 3.76 | 0.3  | 0.06 | 1.21  | 0.169042 | 0.091275 | 0.533324 | 0.346281 |
| MmugDNA.3038.1.S1_at    | MmugDNA.3038.1  | 5.54  | 5.51 | 0.03 | 0.06 | 1.02  | 0.23329  | 0.386982 | 0.588091 | 0.621935 |
| MmugDNA.30380.1.S1_at   | MmugDNA.30380.1 | 10.04 | 9.28 | 0.05 | 0.31 | 1.69  | 0.006063 | 0.002992 | 0.195337 | 0.079958 |
| MmugDNA.30381.1.S1_at   | MmugDNA.30381.1 | 6.94  | 7.14 | 0.15 | 0.1  | -1.15 | 0.086151 | 0.133956 | 0.44011  | 0.4061   |
| MmugDNA.30382.1.S1_at   | MmugDNA.30382.1 | 5.25  | 5.69 | 0.38 | 0.61 | -1.36 | 0.85916  | 0.733032 | 0.943112 | 0.845498 |
| MmugDNA.30383.1.S1_at   | MmugDNA.30383.1 | 6.98  | 6.93 | 0.42 | 0.31 | 1.04  | 0.601608 | 0.753541 | 0.816001 | 0.856527 |
| MmugDNA.30385.1.S1_at   | MmugDNA.30385.1 | 8.32  | 8.97 | 0.5  | 0.36 | -1.57 | 0.678977 | 0.110611 | 0.856302 | 0.374854 |
| MmugDNA.30386.1.S1_at   | MmugDNA.30386.1 | 6.87  | 7.09 | 0.32 | 0.12 | -1.17 | 0.217952 | 0.288296 | 0.577569 | 0.549561 |
| MmugDNA.30388.1.S1_at   | MmugDNA.30388.1 | 3.42  | 3.33 | 0.17 | 0.09 | 1.07  | 0.635851 | 0.252614 | 0.835187 | 0.521169 |
| MmugDNA.30389.1.S1_at   | MmugDNA.30389.1 | 5.71  | 4.46 | 1.79 | 0.83 | 2.38  | 0.407536 | 0.037031 | 0.704692 | 0.236886 |
| MmugDNA.3039.1.S1_at    | MmugDNA.3039.1  | 6.95  | 6.95 | 0.5  | 0.32 | -1    | 0.244516 | 0.345705 | 0.596252 | 0.590854 |
| MmugDNA.30390.1.S1_at   | MmugDNA.30390.1 | 3     | 2.88 | 0.08 | 0.38 | 1.09  | 0.822502 | 0.440888 | 0.927767 | 0.659138 |
| MmugDNA.30393.1.S1_at   | MmugDNA.30393.1 | 9.71  | 8.42 | 0.52 | 0.61 | 2.45  | 0.031889 | 0.021101 | 0.323262 | 0.181869 |
| MmugDNA.30394.1.S1_at   | MmugDNA.30394.1 | 6.05  | 7.84 | 1.62 | 1.1  | -3.47 | 0.481924 | 0.658861 | 0.749333 | 0.800473 |
| MmugDNA.30395.1.S1_at   | MmugDNA.30395.1 | 3.4   | 3.35 | 0.26 | 0.18 | 1.03  | 0.890167 | 0.39943  | 0.956053 | 0.629798 |
| MmugDNA.30396.1.S1_at   | MmugDNA.30396.1 | 5.33  | 5.38 | 0.13 | 0.18 | -1.04 | 0.575051 | 0.142244 | 0.80205  | 0.415754 |
| MmugDNA.30397.1.S1_at   | MmugDNA.30397.1 | 7.61  | 8.6  | 0.31 | 0.15 | -1.98 | 0.012645 | 0.004671 | 0.242815 | 0.095314 |
| MmugDNA.30398.1.S1_at   | MmugDNA.30398.1 | 5     | 5.16 | 0.05 | 0.16 | -1.12 | 0.705868 | 0.840286 | 0.870325 | 0.908996 |
| MmugDNA.30399.1.S1_at   | MmugDNA.30399.1 | 9.41  | 9.23 | 0.13 | 0.61 | 1.14  | 0.689658 | 0.809139 | 0.861706 | 0.889995 |
| MmugDNA.304.1.S1_at     | MmugDNA.304.1   | 5.57  | 5.21 | 0.21 | 0.05 | 1.29  | 0.146293 | 0.26178  | 0.51241  | 0.528227 |
| MmugDNA.30400.1.S1_at   | MmugDNA.30400.1 | 2.72  | 2.85 | 0.09 | 0.07 | -1.1  | 0.151387 | 0.222618 | 0.516064 | 0.495617 |
| MmugDNA.30401.1.S1_at   | MmugDNA.30401.1 | 4.35  | 4.13 | 0.28 | 0.1  | 1.17  | 0.252784 | 0.331271 | 0.601604 | 0.579984 |
| MmugDNA.30402.1.S1_at   | MmugDNA.30402.1 | 5.32  | 4.57 | 0.54 | 0.13 | 1.69  | 0.043817 | 0.033819 | 0.357051 | 0.227489 |

|                         |                 |       |       |      |      |       |          |          |          |          |
|-------------------------|-----------------|-------|-------|------|------|-------|----------|----------|----------|----------|
| MmugDNA.30403.1.S1_s_at | MmugDNA.30403.1 | 12.4  | 13.54 | 0.28 | 0.54 | -2.21 | 0.086349 | 0.073821 | 0.440224 | 0.317146 |
| MmugDNA.30404.1.S1_at   | MmugDNA.30404.1 | 3.33  | 3.37  | 0.05 | 0.03 | -1.03 | 0.342723 | 0.498527 | 0.663407 | 0.697582 |
| MmugDNA.30405.1.S1_at   | MmugDNA.30405.1 | 6.23  | 6.38  | 0.31 | 0.26 | -1.11 | 0.460047 | 0.589835 | 0.736688 | 0.755973 |
| MmugDNA.30408.1.S1_at   | MmugDNA.30408.1 | 4.9   | 5.09  | 0.09 | 0.01 | -1.14 | 0.069154 | 0.000779 | 0.411264 | 0.045626 |
| MmugDNA.30409.1.S1_at   | MmugDNA.30409.1 | 6.75  | 8.28  | 0.55 | 0.82 | -2.9  | 0.032221 | 0.021519 | 0.3244   | 0.183771 |
| MmugDNA.3041.1.S1_at    | MmugDNA.3041.1  | 10.54 | 10.79 | 0.34 | 0.95 | -1.19 | 0.577502 | 0.162864 | 0.803534 | 0.438966 |
| MmugDNA.30410.1.S1_s_at | MmugDNA.30410.1 | 9.11  | 7.43  | 0.05 | 0.52 | 3.19  | 0.009858 | 0.029626 | 0.226637 | 0.213783 |
| MmugDNA.30411.1.S1_at   | MmugDNA.30411.1 | 3.31  | 3.56  | 0.09 | 0.18 | -1.18 | 0.03867  | 0.036353 | 0.345054 | 0.235105 |
| MmugDNA.30413.1.S1_at   | MmugDNA.30413.1 | 7.88  | 8.56  | 0.33 | 0.03 | -1.6  | 0.021373 | 0.012059 | 0.282524 | 0.142044 |
| MmugDNA.30414.1.S1_at   | MmugDNA.30414.1 | 5.29  | 4.84  | 0.77 | 0.28 | 1.37  | 0.313462 | 0.486517 | 0.645195 | 0.689881 |
| MmugDNA.30414.1.S1_s_at | MmugDNA.30414.1 | 9.03  | 10.82 | 0.58 | 1.19 | -3.44 | 0.073187 | 0.063945 | 0.418452 | 0.29906  |
| MmugDNA.30415.1.S1_at   | MmugDNA.30415.1 | 6.57  | 6.91  | 0.22 | 0.29 | -1.27 | 0.147771 | 0.181859 | 0.513337 | 0.458395 |
| MmugDNA.30417.1.S1_at   | MmugDNA.30417.1 | 3.18  | 3.4   | 0.28 | 0.08 | -1.16 | 0.943866 | 0.870729 | 0.978535 | 0.926534 |
| MmugDNA.30418.1.S1_at   | MmugDNA.30418.1 | 4.8   | 4.9   | 0.08 | 0.14 | -1.08 | 0.292566 | 0.102602 | 0.629871 | 0.362984 |
| MmugDNA.3042.1.S1_at    | MmugDNA.3042.1  | 8.02  | 7.58  | 0.1  | 0.12 | 1.36  | 0.02474  | 0.009451 | 0.296308 | 0.128022 |
| MmugDNA.30420.1.S1_at   | MmugDNA.30420.1 | 5.25  | 5.68  | 0.47 | 0.21 | -1.35 | 0.778242 | 0.753473 | 0.907397 | 0.856527 |
| MmugDNA.30421.1.S1_at   | MmugDNA.30421.1 | 4.69  | 4.7   | 0.31 | 0.07 | -1.01 | 0.912173 | 0.983661 | 0.96522  | 0.990902 |
| MmugDNA.30422.1.S1_at   | MmugDNA.30422.1 | 6.72  | 7.1   | 0.06 | 0.12 | -1.3  | 0.020233 | 0.012268 | 0.277311 | 0.143266 |
| MmugDNA.30423.1.S1_at   | MmugDNA.30423.1 | 5.2   | 4.87  | 0.53 | 0.46 | 1.26  | 0.388878 | 0.351805 | 0.692804 | 0.595256 |
| MmugDNA.30424.1.S1_at   | MmugDNA.30424.1 | 4.94  | 4.96  | 0.16 | 0.16 | -1.02 | 0.678292 | 0.482141 | 0.85592  | 0.687037 |
| MmugDNA.30426.1.S1_at   | MmugDNA.30426.1 | 12.01 | 11.49 | 0.04 | 0.37 | 1.43  | 0.071139 | 0.069668 | 0.414673 | 0.310164 |
| MmugDNA.30426.1.S1_s_at | MmugDNA.30426.1 | 13.26 | 12.98 | 0.01 | 0.22 | 1.21  | 0.077928 | 0.068789 | 0.428012 | 0.308711 |
| MmugDNA.30428.1.S1_at   | MmugDNA.30428.1 | 2.88  | 2.89  | 0.05 | 0.12 | -1.01 | 0.54239  | 0.163578 | 0.783266 | 0.439765 |
| MmugDNA.3043.1.S1_at    | MmugDNA.3043.1  | 5.95  | 5.61  | 0.46 | 0.46 | 1.27  | 0.628536 | 0.215028 | 0.83087  | 0.488898 |
| MmugDNA.30430.1.S1_at   | MmugDNA.30430.1 | 3.53  | 3.46  | 0.13 | 0.13 | 1.06  | 0.225707 | 0.088557 | 0.583746 | 0.341995 |
| MmugDNA.30431.1.S1_at   | MmugDNA.30431.1 | 3.88  | 3.86  | 0.06 | 0.14 | 1.02  | 0.569955 | 0.877517 | 0.799265 | 0.930162 |
| MmugDNA.30432.1.S1_at   | MmugDNA.30432.1 | 4.64  | 4.76  | 0.14 | 0.07 | -1.09 | 0.30874  | 0.073894 | 0.641091 | 0.31727  |
| MmugDNA.30434.1.S1_at   | MmugDNA.30434.1 | 4.18  | 4.3   | 0.46 | 0.04 | -1.09 | 0.630007 | 0.525452 | 0.831843 | 0.715025 |
| MmugDNA.30436.1.S1_at   | MmugDNA.30436.1 | 4.68  | 4.59  | 0.05 | 0.06 | 1.06  | 0.099979 | 0.655202 | 0.4602   | 0.798333 |
| MmugDNA.30437.1.S1_at   | MmugDNA.30437.1 | 5.33  | 5.7   | 0.42 | 0.3  | -1.29 | 0.359465 | 0.378483 | 0.673869 | 0.615514 |
| MmugDNA.30438.1.S1_at   | MmugDNA.30438.1 | 12.65 | 12.65 | 0.09 | 0.1  | -1    | 0.766775 | 0.23938  | 0.901912 | 0.510039 |
| MmugDNA.3044.1.S1_at    | MmugDNA.3044.1  | 4.96  | 5.05  | 0.29 | 0.07 | -1.07 | 0.737909 | 0.742469 | 0.887428 | 0.850851 |
| MmugDNA.30440.1.S1_at   | MmugDNA.30440.1 | 5.29  | 5.35  | 0.28 | 0.02 | -1.04 | 0.87168  | 0.978243 | 0.948664 | 0.988093 |
| MmugDNA.30441.1.S1_at   | MmugDNA.30441.1 | 4.41  | 4.63  | 0.76 | 0.49 | -1.17 | 0.880885 | 0.449557 | 0.952105 | 0.665113 |
| MmugDNA.30443.1.S1_at   | MmugDNA.30443.1 | 4.66  | 4.77  | 0.98 | 0.44 | -1.08 | 0.510801 | 0.475889 | 0.765151 | 0.682387 |
| MmugDNA.30444.1.S1_at   | MmugDNA.30444.1 | 4.98  | 5.53  | 0.25 | 0.19 | -1.46 | 0.035387 | 0.010464 | 0.336277 | 0.133678 |
| MmugDNA.30448.1.S1_at   | MmugDNA.30448.1 | 10.4  | 11.7  | 0.11 | 0.2  | -2.47 | 0.000572 | 0.000402 | 0.136818 | 0.037471 |
| MmugDNA.30449.1.S1_at   | MmugDNA.30449.1 | 5.29  | 5.42  | 0.17 | 0.2  | -1.1  | 0.776563 | 0.537633 | 0.906428 | 0.722616 |
| MmugDNA.30450.1.S1_at   | MmugDNA.30450.1 | 5.11  | 5.05  | 0.42 | 0.03 | 1.05  | 0.296281 | 0.470017 | 0.632283 | 0.678572 |
| MmugDNA.30451.1.S1_at   | MmugDNA.30451.1 | 5.4   | 5.51  | 0.15 | 0.11 | -1.08 | 0.89424  | 0.761973 | 0.957854 | 0.861597 |
| MmugDNA.30452.1.S1_at   | MmugDNA.30452.1 | 5.47  | 5.63  | 0.09 | 0.57 | -1.11 | 0.584502 | 0.646582 | 0.80707  | 0.792965 |

|                         |                 |       |       |      |      |       |          |          |          |          |
|-------------------------|-----------------|-------|-------|------|------|-------|----------|----------|----------|----------|
| MmugDNA.30453.1.S1_at   | MmugDNA.30453.1 | 4.45  | 4.49  | 0.07 | 0.24 | -1.03 | 0.447117 | 0.522203 | 0.728756 | 0.712954 |
| MmugDNA.30454.1.S1_at   | MmugDNA.30454.1 | 8.19  | 8.1   | 0.31 | 1.08 | 1.06  | 0.31087  | 0.138015 | 0.642812 | 0.410919 |
| MmugDNA.30455.1.S1_at   | MmugDNA.30455.1 | 6.61  | 5.82  | 0.84 | 0.2  | 1.72  | 0.177519 | 0.15432  | 0.54156  | 0.429188 |
| MmugDNA.30457.1.S1_at   | MmugDNA.30457.1 | 5.34  | 5.2   | 0.26 | 0.12 | 1.1   | 0.179393 | 0.082383 | 0.543593 | 0.331354 |
| MmugDNA.30458.1.S1_at   | MmugDNA.30458.1 | 9.31  | 8.65  | 0.58 | 0.32 | 1.57  | 0.14077  | 0.17642  | 0.508448 | 0.45282  |
| MmugDNA.30458.1.S1_x_at | MmugDNA.30458.1 | 9.09  | 8.44  | 0.61 | 0.3  | 1.56  | 0.127544 | 0.151464 | 0.493834 | 0.426214 |
| MmugDNA.30459.1.S1_at   | MmugDNA.30459.1 | 4.41  | 4.15  | 0.17 | 0.08 | 1.2   | 0.040783 | 0.42403  | 0.350343 | 0.646666 |
| MmugDNA.30460.1.S1_at   | MmugDNA.30460.1 | 8.21  | 8.85  | 0.57 | 0.58 | -1.55 | 0.229893 | 0.16734  | 0.587007 | 0.443785 |
| MmugDNA.30461.1.S1_at   | MmugDNA.30461.1 | 2.97  | 3.06  | 0.21 | 0.06 | -1.06 | 0.693031 | 0.32363  | 0.863757 | 0.574525 |
| MmugDNA.30462.1.S1_at   | MmugDNA.30462.1 | 5.61  | 5.3   | 0.31 | 0.92 | 1.23  | 0.80946  | 0.129801 | 0.922228 | 0.40147  |
| MmugDNA.30465.1.S1_at   | MmugDNA.30465.1 | 5.9   | 6.13  | 0.08 | 0.08 | -1.18 | 0.071136 | 0.088743 | 0.414673 | 0.342415 |
| MmugDNA.30468.1.S1_at   | MmugDNA.30468.1 | 4.28  | 4.03  | 0.19 | 0.2  | 1.18  | 0.18965  | 0.1755   | 0.552487 | 0.452157 |
| MmugDNA.30469.1.S1_at   | MmugDNA.30469.1 | 6.11  | 6.22  | 0.03 | 0.14 | -1.08 | 0.710996 | 0.976347 | 0.873387 | 0.98714  |
| MmugDNA.3047.1.S1_at    | MmugDNA.3047.1  | 6.72  | 6.47  | 0.48 | 0.25 | 1.19  | 0.464573 | 0.218858 | 0.739374 | 0.492611 |
| MmugDNA.30470.1.S1_at   | MmugDNA.30470.1 | 11.66 | 12.26 | 0.18 | 0.14 | -1.52 | 0.006689 | 0.005    | 0.20158  | 0.098514 |
| MmugDNA.30471.1.S1_at   | MmugDNA.30471.1 | 12.85 | 13.35 | 0.07 | 0.08 | -1.42 | 0.001693 | 0.00038  | 0.15365  | 0.037273 |
| MmugDNA.30472.1.S1_at   | MmugDNA.30472.1 | 6.99  | 4.89  | 0.4  | 0.62 | 4.28  | 0.007912 | 0.002282 | 0.214274 | 0.07037  |
| MmugDNA.30473.1.S1_at   | MmugDNA.30473.1 | 4.62  | 5.03  | 0.1  | 0.2  | -1.33 | 0.030414 | 0.078568 | 0.318324 | 0.325285 |
| MmugDNA.30474.1.S1_at   | MmugDNA.30474.1 | 5.51  | 4.42  | 0.84 | 0.08 | 2.13  | 0.07122  | 0.053738 | 0.414885 | 0.277384 |
| MmugDNA.30475.1.S1_at   | MmugDNA.30475.1 | 6.92  | 7     | 0.32 | 0.3  | -1.06 | 0.842056 | 0.539757 | 0.93631  | 0.723926 |
| MmugDNA.30476.1.S1_at   | MmugDNA.30476.1 | 4.49  | 5.11  | 0.11 | 0.36 | -1.54 | 0.025515 | 0.01591  | 0.299597 | 0.160062 |
| MmugDNA.30477.1.S1_at   | MmugDNA.30477.1 | 5.16  | 5.07  | 0.32 | 0.25 | 1.07  | 0.306627 | 0.40614  | 0.639593 | 0.634211 |
| MmugDNA.30478.1.S1_at   | MmugDNA.30478.1 | 3.58  | 3.7   | 0.19 | 0.29 | -1.09 | 0.310264 | 0.421632 | 0.642233 | 0.645195 |
| MmugDNA.30479.1.S1_at   | MmugDNA.30479.1 | 3.24  | 3.07  | 0.07 | 0.48 | 1.13  | 0.757241 | 0.864136 | 0.897006 | 0.922925 |
| MmugDNA.30479.1.S1_x_at | MmugDNA.30479.1 | 4.36  | 4.17  | 0.15 | 0.37 | 1.15  | 0.851038 | 0.948124 | 0.940172 | 0.970446 |
| MmugDNA.3048.1.S1_at    | MmugDNA.3048.1  | 3.42  | 3.38  | 0.32 | 0.05 | 1.03  | 0.806364 | 0.714703 | 0.920614 | 0.8345   |
| MmugDNA.30480.1.S1_at   | MmugDNA.30480.1 | 7.37  | 6.86  | 0.27 | 0.65 | 1.42  | 0.176382 | 0.209324 | 0.539984 | 0.483038 |
| MmugDNA.30482.1.S1_at   | MmugDNA.30482.1 | 8.64  | 7.97  | 0.27 | 0.35 | 1.59  | 0.026503 | 0.007861 | 0.303372 | 0.118059 |
| MmugDNA.30483.1.S1_at   | MmugDNA.30483.1 | 11.3  | 10.63 | 0.3  | 0.34 | 1.6   | 0.293052 | 0.382935 | 0.630264 | 0.619021 |
| MmugDNA.30484.1.S1_at   | MmugDNA.30484.1 | 9.46  | 10.12 | 0.23 | 1.68 | -1.58 | 0.680256 | 0.56068  | 0.857131 | 0.736919 |
| MmugDNA.30485.1.S1_at   | MmugDNA.30485.1 | 5.46  | 5.31  | 0.06 | 0.13 | 1.11  | 0.147218 | 0.421605 | 0.513087 | 0.645173 |
| MmugDNA.30486.1.S1_at   | MmugDNA.30486.1 | 4.04  | 3.66  | 0.25 | 0.36 | 1.31  | 0.33223  | 0.295779 | 0.656683 | 0.555196 |
| MmugDNA.30488.1.S1_at   | MmugDNA.30488.1 | 7.32  | 7.79  | 0.3  | 0.42 | -1.39 | 0.591716 | 0.794469 | 0.810588 | 0.881455 |
| MmugDNA.30489.1.S1_at   | MmugDNA.30489.1 | 9.01  | 8.41  | 0.26 | 0.26 | 1.52  | 0.064084 | 0.031962 | 0.402159 | 0.221191 |
| MmugDNA.30491.1.S1_at   | MmugDNA.30491.1 | 8.12  | 7.77  | 0.15 | 0.73 | 1.27  | 0.420094 | 0.220872 | 0.712238 | 0.494262 |
| MmugDNA.30492.1.S1_at   | MmugDNA.30492.1 | 11.16 | 10.12 | 0.09 | 1.03 | 2.06  | 0.118647 | 0.05022  | 0.48294  | 0.269367 |
| MmugDNA.30493.1.S1_at   | MmugDNA.30493.1 | 6.33  | 5.77  | 0.26 | 0.17 | 1.47  | 0.049426 | 0.030519 | 0.371383 | 0.216711 |
| MmugDNA.30494.1.S1_at   | MmugDNA.30494.1 | 6.48  | 6.42  | 0.24 | 0.18 | 1.04  | 0.937194 | 0.761711 | 0.975794 | 0.861459 |
| MmugDNA.30495.1.S1_at   | MmugDNA.30495.1 | 5.98  | 6     | 0.92 | 0.57 | -1.01 | 0.712967 | 0.445999 | 0.874274 | 0.662635 |
| MmugDNA.30497.1.S1_at   | MmugDNA.30497.1 | 3.44  | 3.33  | 0.57 | 0.25 | 1.08  | 0.832456 | 0.961707 | 0.932134 | 0.978408 |
| MmugDNA.30498.1.S1_at   | MmugDNA.30498.1 | 7.42  | 6.57  | 0.74 | 1.06 | 1.81  | 0.410293 | 0.07364  | 0.706243 | 0.316967 |



|                         |                 |       |       |      |      |       |          |          |          |          |
|-------------------------|-----------------|-------|-------|------|------|-------|----------|----------|----------|----------|
| MmugDNA.30499.1.S1_at   | MmugDNA.30499.1 | 3.39  | 3.25  | 0.09 | 0.05 | 1.1   | 0.380317 | 0.466653 | 0.687248 | 0.676425 |
| MmugDNA.305.1.S1_at     | MmugDNA.305.1   | 9.25  | 8.9   | 0.21 | 0.65 | 1.27  | 0.521819 | 0.685527 | 0.77159  | 0.816542 |
| MmugDNA.3050.1.S1_at    | MmugDNA.3050.1  | 4.12  | 3.98  | 0.35 | 0.16 | 1.1   | 0.205408 | 0.326505 | 0.567935 | 0.576576 |
| MmugDNA.30500.1.S1_at   | MmugDNA.30500.1 | 6.61  | 6.62  | 0.07 | 0.09 | -1.01 | 0.341553 | 0.40031  | 0.662638 | 0.630169 |
| MmugDNA.30501.1.S1_at   | MmugDNA.30501.1 | 5.7   | 5.71  | 0.04 | 0.13 | -1    | 0.450105 | 0.579362 | 0.730786 | 0.749058 |
| MmugDNA.30502.1.S1_at   | MmugDNA.30502.1 | 5.74  | 6.4   | 0.25 | 0.57 | -1.58 | 0.054493 | 0.08371  | 0.381851 | 0.334417 |
| MmugDNA.30504.1.S1_at   | MmugDNA.30504.1 | 9.31  | 10.82 | 0.39 | 0.88 | -2.85 | 0.081986 | 0.087225 | 0.433268 | 0.340206 |
| MmugDNA.30506.1.S1_at   | MmugDNA.30506.1 | 3.72  | 3.71  | 0.09 | 0.03 | 1     | 0.454294 | 0.796651 | 0.733184 | 0.882765 |
| MmugDNA.30508.1.S1_at   | MmugDNA.30508.1 | 9.51  | 9.31  | 0.18 | 0.11 | 1.15  | 0.132073 | 0.199367 | 0.49829  | 0.474002 |
| MmugDNA.30509.1.S1_at   | MmugDNA.30509.1 | 4.61  | 4.9   | 0.19 | 0.52 | -1.22 | 0.898695 | 0.986336 | 0.959516 | 0.992243 |
| MmugDNA.3051.1.S1_at    | MmugDNA.3051.1  | 3.52  | 3.17  | 0.16 | 0.37 | 1.27  | 0.648231 | 0.624882 | 0.84178  | 0.778939 |
| MmugDNA.30511.1.S1_at   | MmugDNA.30511.1 | 2.75  | 2.74  | 0.05 | 0.01 | 1.01  | 0.426243 | 0.897194 | 0.715663 | 0.941337 |
| MmugDNA.30513.1.S1_at   | MmugDNA.30513.1 | 7.43  | 8.32  | 0.24 | 0.37 | -1.85 | 0.101711 | 0.200899 | 0.461313 | 0.475395 |
| MmugDNA.30514.1.S1_at   | MmugDNA.30514.1 | 3.83  | 3.57  | 0.42 | 0.22 | 1.2   | 0.179883 | 0.117099 | 0.544019 | 0.384548 |
| MmugDNA.30516.1.S1_at   | MmugDNA.30516.1 | 5.47  | 5.25  | 0.27 | 0.69 | 1.16  | 0.837413 | 0.216246 | 0.934307 | 0.489816 |
| MmugDNA.30518.1.S1_at   | MmugDNA.30518.1 | 5.08  | 4.91  | 0.31 | 0.14 | 1.12  | 0.322912 | 0.292755 | 0.651259 | 0.552783 |
| MmugDNA.30519.1.S1_at   | MmugDNA.30519.1 | 8.73  | 9.06  | 0.07 | 0.64 | -1.26 | 0.133013 | 0.085263 | 0.499269 | 0.337096 |
| MmugDNA.3052.1.S1_at    | MmugDNA.3052.1  | 2.88  | 2.85  | 0.29 | 0.05 | 1.02  | 0.255646 | 0.355787 | 0.603468 | 0.597864 |
| MmugDNA.30520.1.S1_at   | MmugDNA.30520.1 | 6.75  | 6.4   | 0.06 | 0.35 | 1.28  | 0.140657 | 0.060465 | 0.508385 | 0.292553 |
| MmugDNA.30521.1.S1_at   | MmugDNA.30521.1 | 3.26  | 3.26  | 0.02 | 0.15 | 1.01  | 0.426964 | 0.557609 | 0.716003 | 0.735113 |
| MmugDNA.30522.1.S1_at   | MmugDNA.30522.1 | 7.35  | 7.2   | 0.1  | 0.17 | 1.11  | 0.503265 | 0.246792 | 0.760699 | 0.516126 |
| MmugDNA.30523.1.S1_at   | MmugDNA.30523.1 | 4.62  | 4.81  | 0.13 | 0.29 | -1.14 | 0.777584 | 0.304765 | 0.907048 | 0.561921 |
| MmugDNA.30524.1.S1_at   | MmugDNA.30524.1 | 4.61  | 4.74  | 0.33 | 0.05 | -1.09 | 0.455592 | 0.172474 | 0.733847 | 0.448864 |
| MmugDNA.30525.1.S1_at   | MmugDNA.30525.1 | 5.8   | 5.42  | 0.34 | 0.22 | 1.3   | 0.106762 | 0.238226 | 0.467551 | 0.508825 |
| MmugDNA.30527.1.S1_at   | MmugDNA.30527.1 | 4.99  | 4.8   | 0.05 | 0.13 | 1.14  | 0.079894 | 0.072795 | 0.430176 | 0.315651 |
| MmugDNA.30529.1.S1_at   | MmugDNA.30529.1 | 6.34  | 6.85  | 0.42 | 0.6  | -1.43 | 0.097866 | 0.054613 | 0.457119 | 0.279211 |
| MmugDNA.30531.1.S1_at   | MmugDNA.30531.1 | 5.65  | 5.5   | 0.09 | 0.12 | 1.11  | 0.073206 | 0.300091 | 0.418452 | 0.558262 |
| MmugDNA.30532.1.S1_at   | MmugDNA.30532.1 | 3.69  | 3.47  | 0.25 | 0.14 | 1.16  | 0.25421  | 0.517332 | 0.602339 | 0.709435 |
| MmugDNA.30533.1.S1_at   | MmugDNA.30533.1 | 8.31  | 8.11  | 0.13 | 0.86 | 1.15  | 0.603292 | 0.48939  | 0.817111 | 0.691792 |
| MmugDNA.30535.1.S1_at   | MmugDNA.30535.1 | 5.94  | 5.59  | 0.72 | 0.92 | 1.27  | 0.914798 | 0.611788 | 0.966289 | 0.769583 |
| MmugDNA.30536.1.S1_at   | MmugDNA.30536.1 | 3.32  | 3.33  | 0.55 | 0.38 | -1.01 | 0.578169 | 0.766369 | 0.803683 | 0.864264 |
| MmugDNA.30536.1.S1_x_at | MmugDNA.30536.1 | 5.27  | 4.81  | 0.45 | 0.3  | 1.37  | 0.186329 | 0.230625 | 0.549928 | 0.502327 |
| MmugDNA.30538.1.S1_at   | MmugDNA.30538.1 | 3.1   | 3.1   | 0.06 | 0.15 | 1     | 0.604505 | 0.38349  | 0.817786 | 0.619446 |
| MmugDNA.30539.1.S1_at   | MmugDNA.30539.1 | 11.09 | 11.08 | 0.21 | 0.5  | 1.01  | 0.63454  | 0.13107  | 0.834534 | 0.403084 |
| MmugDNA.30539.1.S1_x_at | MmugDNA.30539.1 | 10.9  | 10.83 | 0.28 | 0.54 | 1.05  | 0.604875 | 0.118529 | 0.817986 | 0.38654  |
| MmugDNA.3054.1.S1_at    | MmugDNA.3054.1  | 3.11  | 3.11  | 0.06 | 0.08 | -1    | 0.286486 | 0.325099 | 0.625572 | 0.575545 |
| MmugDNA.30540.1.S1_at   | MmugDNA.30540.1 | 8.87  | 8.47  | 0.11 | 0.26 | 1.32  | 0.070459 | 0.064713 | 0.414281 | 0.300314 |
| MmugDNA.30542.1.S1_at   | MmugDNA.30542.1 | 11.63 | 11.67 | 0.13 | 0.19 | -1.03 | 0.907627 | 0.216028 | 0.963338 | 0.48965  |
| MmugDNA.30543.1.S1_at   | MmugDNA.30543.1 | 4.54  | 4.87  | 0.1  | 0.27 | -1.26 | 0.083862 | 0.048837 | 0.436311 | 0.265858 |
| MmuSTS.2792.1.S1_at     | MmuSTS.2792.1   | 4.23  | 4.22  | 0.12 | 0.24 | 1.01  | 0.974575 | 0.728068 | 0.990048 | 0.842733 |
| MmuSTS.2792.1.S1_s_at   | MmuSTS.2792.1   | 4.6   | 4.67  | 0.28 | 0.05 | -1.05 | 0.762423 | 0.91226  | 0.899996 | 0.950559 |

|                         |                 |       |       |      |      |       |          |          |          |          |
|-------------------------|-----------------|-------|-------|------|------|-------|----------|----------|----------|----------|
| MmugDNA.30544.1.S1_at   | MmugDNA.30544.1 | 6.13  | 6.39  | 0.13 | 0.28 | -1.2  | 0.874161 | 0.233399 | 0.949565 | 0.504751 |
| MmugDNA.30545.1.S1_at   | MmugDNA.30545.1 | 8.55  | 8.72  | 0.36 | 0.42 | -1.12 | 0.510935 | 0.11341  | 0.765151 | 0.379509 |
| MmugDNA.30546.1.S1_at   | MmugDNA.30546.1 | 3.63  | 3.64  | 0.82 | 0.25 | -1.01 | 0.32401  | 0.400596 | 0.651826 | 0.630415 |
| MmugDNA.30547.1.S1_at   | MmugDNA.30547.1 | 6.29  | 6.37  | 0.12 | 0.1  | -1.06 | 0.358215 | 0.271887 | 0.673102 | 0.536644 |
| MmugDNA.30548.1.S1_at   | MmugDNA.30548.1 | 6.62  | 6.6   | 0.28 | 0.54 | 1.01  | 0.637632 | 0.089017 | 0.836256 | 0.342876 |
| MmugDNA.30549.1.S1_at   | MmugDNA.30549.1 | 3.3   | 3.23  | 0.09 | 0.16 | 1.04  | 0.473879 | 0.236841 | 0.744653 | 0.507565 |
| MmugDNA.3055.1.S1_at    | MmugDNA.3055.1  | 3.35  | 3.08  | 0.17 | 0.14 | 1.2   | 0.502912 | 0.033761 | 0.760591 | 0.22741  |
| MmugDNA.30550.1.S1_at   | MmugDNA.30550.1 | 7.02  | 6.09  | 0.47 | 0.43 | 1.9   | 0.072404 | 0.043998 | 0.416971 | 0.254195 |
| MmugDNA.27278.1.S1_s_at | MmugDNA.27278.1 | 6.04  | 6.14  | 0.19 | 0.03 | -1.07 | 0.851002 | 0.974709 | 0.940172 | 0.986238 |
| MmugDNA.30553.1.S1_at   | MmugDNA.30553.1 | 6.35  | 6.3   | 0.04 | 0.08 | 1.04  | 0.147947 | 0.112367 | 0.513442 | 0.37769  |
| MmugDNA.30556.1.S1_at   | MmugDNA.30556.1 | 5.58  | 5.62  | 0.17 | 0.29 | -1.03 | 0.627861 | 0.828143 | 0.830399 | 0.901214 |
| MmugDNA.30557.1.S1_at   | MmugDNA.30557.1 | 6.3   | 5.56  | 0.85 | 0.7  | 1.67  | 0.195629 | 0.190058 | 0.558901 | 0.465697 |
| MmugDNA.30558.1.S1_at   | MmugDNA.30558.1 | 3.67  | 3.76  | 0.2  | 0.08 | -1.07 | 0.884139 | 0.323457 | 0.953597 | 0.574466 |
| MmugDNA.3056.1.S1_at    | MmugDNA.3056.1  | 8.56  | 8.04  | 0.25 | 0.59 | 1.43  | 0.379133 | 0.36212  | 0.686752 | 0.602821 |
| MmugDNA.30560.1.S1_at   | MmugDNA.30560.1 | 3.75  | 3.59  | 1.07 | 0.18 | 1.12  | 0.340933 | 0.460485 | 0.662203 | 0.672362 |
| MmugDNA.30561.1.S1_at   | MmugDNA.30561.1 | 7.39  | 8.07  | 0.21 | 0.58 | -1.6  | 0.155708 | 0.172149 | 0.520357 | 0.448529 |
| MmugDNA.30561.1.S1_s_at | MmugDNA.30561.1 | 6.31  | 7.55  | 0.28 | 0.33 | -2.36 | 0.005507 | 0.002162 | 0.191603 | 0.068763 |
| MmugDNA.30564.1.S1_at   | MmugDNA.30564.1 | 11.1  | 11.02 | 0.12 | 0.48 | 1.06  | 0.840263 | 0.753563 | 0.935593 | 0.856527 |
| MmugDNA.30567.1.S1_at   | MmugDNA.30567.1 | 7.03  | 6.98  | 0.31 | 0.28 | 1.03  | 0.347492 | 0.476888 | 0.666488 | 0.683011 |
| MmugDNA.30569.1.S1_at   | MmugDNA.30569.1 | 6.73  | 4.7   | 2.21 | 2.21 | 4.09  | 0.700672 | 0.673854 | 0.86753  | 0.809483 |
| MmugDNA.3057.1.S1_at    | MmugDNA.3057.1  | 5     | 4.94  | 0    | 0.15 | 1.04  | 0.7803   | 0.67394  | 0.908487 | 0.809483 |
| MmugDNA.30570.1.S1_at   | MmugDNA.30570.1 | 9.02  | 9.85  | 0.26 | 0.06 | -1.78 | 0.00971  | 0.009407 | 0.226235 | 0.127839 |
| MmugDNA.30571.1.S1_at   | MmugDNA.30571.1 | 4.22  | 4.61  | 0.11 | 0.22 | -1.31 | 0.097881 | 0.154852 | 0.457149 | 0.429849 |
| MmugDNA.30573.1.S1_at   | MmugDNA.30573.1 | 10.94 | 10.2  | 0.14 | 0.49 | 1.67  | 0.073896 | 0.035624 | 0.419443 | 0.233105 |
| MmugDNA.30574.1.S1_at   | MmugDNA.30574.1 | 4.35  | 4.5   | 0.09 | 0.12 | -1.11 | 0.131078 | 0.013154 | 0.497517 | 0.147338 |
| MmugDNA.30575.1.S1_at   | MmugDNA.30575.1 | 7.25  | 6.78  | 0.07 | 0.23 | 1.38  | 0.010672 | 0.005354 | 0.230991 | 0.101092 |
| MmugDNA.30576.1.S1_at   | MmugDNA.30576.1 | 4.79  | 4.93  | 0.16 | 0.11 | -1.1  | 0.266826 | 0.368373 | 0.612291 | 0.607917 |
| MmugDNA.30577.1.S1_at   | MmugDNA.30577.1 | 7.09  | 7.42  | 0.24 | 0.51 | -1.26 | 0.288781 | 0.268108 | 0.626809 | 0.533862 |
| MmugDNA.30579.1.S1_at   | MmugDNA.30579.1 | 12.12 | 12.35 | 0.07 | 0.3  | -1.18 | 0.086483 | 0.085512 | 0.440232 | 0.337508 |
| MmugDNA.3058.1.S1_at    | MmugDNA.3058.1  | 5.84  | 5.92  | 0.2  | 0.09 | -1.06 | 0.897435 | 0.918332 | 0.95917  | 0.954227 |
| MmugDNA.30583.1.S1_at   | MmugDNA.30583.1 | 7.2   | 7.35  | 0.1  | 0.17 | -1.11 | 0.900673 | 0.30891  | 0.960386 | 0.564656 |
| MmugDNA.30584.1.S1_at   | MmugDNA.30584.1 | 3.77  | 3.76  | 0.07 | 0.18 | 1.01  | 0.499559 | 0.327124 | 0.759223 | 0.577136 |
| MmugDNA.30585.1.S1_at   | MmugDNA.30585.1 | 3.46  | 3.47  | 0.41 | 0.17 | -1.01 | 0.509094 | 0.386778 | 0.764172 | 0.621895 |
| MmugDNA.30586.1.S1_at   | MmugDNA.30586.1 | 5.28  | 5.57  | 0.81 | 0.32 | -1.23 | 0.537219 | 0.280986 | 0.7799   | 0.544166 |
| MmugDNA.30587.1.S1_s_at | MmugDNA.30587.1 | 7.05  | 7.53  | 0.18 | 0.24 | -1.4  | 0.024381 | 0.012841 | 0.294535 | 0.145955 |
| MmugDNA.30588.1.S1_at   | MmugDNA.30588.1 | 5.14  | 5.16  | 0.37 | 0.06 | -1.01 | 0.427602 | 0.412755 | 0.716351 | 0.63909  |
| MmugDNA.30589.1.S1_at   | MmugDNA.30589.1 | 11.05 | 10.19 | 0.31 | 0.48 | 1.82  | 0.285267 | 0.115652 | 0.624811 | 0.382714 |
| MmugDNA.30590.1.S1_at   | MmugDNA.30590.1 | 3.47  | 3.67  | 0.11 | 0.12 | -1.14 | 0.084796 | 0.077914 | 0.437699 | 0.32425  |
| MmugDNA.30591.1.S1_at   | MmugDNA.30591.1 | 5.64  | 5.68  | 0.06 | 0.08 | -1.03 | 0.54987  | 0.960125 | 0.787505 | 0.977408 |
| MmugDNA.30596.1.S1_at   | MmugDNA.30596.1 | 10.61 | 10.6  | 0.2  | 0.2  | 1.01  | 0.979217 | 0.113408 | 0.992334 | 0.379509 |
| MmugDNA.30597.1.S1_at   | MmugDNA.30597.1 | 9.82  | 9.87  | 0.24 | 0.23 | -1.04 | 0.730646 | 0.545588 | 0.883214 | 0.727579 |

|                         |                 |       |       |      |      |       |          |          |          |          |
|-------------------------|-----------------|-------|-------|------|------|-------|----------|----------|----------|----------|
| MmugDNA.30599.1.S1_at   | MmugDNA.30599.1 | 4.57  | 4.57  | 0.18 | 0.14 | 1     | 0.547455 | 0.768874 | 0.786233 | 0.865722 |
| MmugDNA.306.1.S1_at     | MmugDNA.306.1   | 3.52  | 3.52  | 0.13 | 0.03 | 1     | 0.620552 | 0.749982 | 0.826026 | 0.854652 |
| MmugDNA.306.1.S1_s_at   | MmugDNA.306.1   | 5.35  | 5.53  | 0.06 | 0.35 | -1.13 | 0.587899 | 0.756558 | 0.808787 | 0.858235 |
| MmugDNA.30600.1.S1_at   | MmugDNA.30600.1 | 3.96  | 3.89  | 0.15 | 0.14 | 1.05  | 0.237875 | 0.64105  | 0.591296 | 0.789381 |
| MmugDNA.30602.1.S1_at   | MmugDNA.30602.1 | 4.58  | 5.51  | 0.33 | 0.29 | -1.9  | 0.025146 | 0.017284 | 0.297733 | 0.166461 |
| MmugDNA.30603.1.S1_at   | MmugDNA.30603.1 | 11.44 | 11.51 | 0.13 | 0.28 | -1.05 | 0.240177 | 0.17221  | 0.59304  | 0.448609 |
| MmugDNA.30603.1.S1_s_at | MmugDNA.30603.1 | 11.78 | 11.87 | 0.11 | 0.18 | -1.06 | 0.194101 | 0.123225 | 0.557718 | 0.39328  |
| MmugDNA.30605.1.S1_at   | MmugDNA.30605.1 | 4.63  | 4.96  | 0.14 | 0.33 | -1.26 | 0.097283 | 0.118371 | 0.456253 | 0.386398 |
| MmugDNA.30606.1.S1_at   | MmugDNA.30606.1 | 4.63  | 3.59  | 0.86 | 0.29 | 2.05  | 0.089496 | 0.073241 | 0.445161 | 0.316225 |
| MmugDNA.30607.1.S1_at   | MmugDNA.30607.1 | 3.51  | 3.58  | 0.15 | 0.14 | -1.05 | 0.44761  | 0.490743 | 0.729143 | 0.692666 |
| MmugDNA.30608.1.S1_at   | MmugDNA.30608.1 | 7.6   | 7.84  | 0.26 | 0.33 | -1.18 | 0.174542 | 0.141846 | 0.538195 | 0.41535  |
| MmugDNA.3061.1.S1_at    | MmugDNA.3061.1  | 5.57  | 5.54  | 0.19 | 0.27 | 1.02  | 0.955342 | 0.914205 | 0.983289 | 0.951773 |
| MmugDNA.30610.1.S1_at   | MmugDNA.30610.1 | 6.76  | 6.68  | 0.07 | 0.09 | 1.05  | 0.813839 | 0.243264 | 0.924404 | 0.513356 |
| MmugDNA.30612.1.S1_at   | MmugDNA.30612.1 | 10.83 | 11.8  | 0.26 | 0.74 | -1.97 | 0.143228 | 0.127369 | 0.510106 | 0.398205 |
| MmugDNA.30613.1.S1_at   | MmugDNA.30613.1 | 7.26  | 8     | 0.05 | 0.33 | -1.68 | 0.045662 | 0.049887 | 0.361416 | 0.268454 |
| MmugDNA.30614.1.S1_at   | MmugDNA.30614.1 | 8.15  | 8.37  | 0.22 | 0.16 | -1.17 | 0.206141 | 0.185439 | 0.568474 | 0.46148  |
| MmugDNA.30616.1.S1_at   | MmugDNA.30616.1 | 3.91  | 4.12  | 0.1  | 0.2  | -1.16 | 0.174732 | 0.356709 | 0.538298 | 0.598516 |
| MmugDNA.30617.1.S1_at   | MmugDNA.30617.1 | 6.43  | 6.6   | 0.1  | 0.42 | -1.12 | 0.946272 | 0.147366 | 0.979359 | 0.421554 |
| MmugDNA.30617.1.S1_s_at | MmugDNA.30617.1 | 6.91  | 7.14  | 0.22 | 0.41 | -1.17 | 0.93395  | 0.321534 | 0.974429 | 0.573226 |
| MmugDNA.30618.1.S1_at   | MmugDNA.30618.1 | 8.73  | 8.67  | 0.23 | 0.31 | 1.05  | 0.773965 | 0.734037 | 0.904999 | 0.845896 |
| MmugDNA.3062.1.S1_at    | MmugDNA.3062.1  | 3.78  | 4.02  | 0.24 | 0.28 | -1.19 | 0.125079 | 0.134304 | 0.491138 | 0.406573 |
| MmugDNA.30622.1.S1_at   | MmugDNA.30622.1 | 3.52  | 3.08  | 1.01 | 0.33 | 1.36  | 0.455497 | 0.709998 | 0.733828 | 0.831887 |
| MmugDNA.30624.1.S1_at   | MmugDNA.30624.1 | 3.92  | 4.49  | 0.69 | 0.48 | -1.49 | 0.732317 | 0.814418 | 0.884344 | 0.892923 |
| MmugDNA.30625.1.S1_at   | MmugDNA.30625.1 | 10.25 | 8.88  | 0.34 | 0.45 | 2.57  | 0.011393 | 0.003831 | 0.235444 | 0.088065 |
| MmugDNA.30626.1.S1_at   | MmugDNA.30626.1 | 6.3   | 6.27  | 0.28 | 0.23 | 1.02  | 0.465784 | 0.379967 | 0.740131 | 0.616659 |
| MmugDNA.30627.1.S1_at   | MmugDNA.30627.1 | 8.1   | 8.03  | 0.24 | 1.07 | 1.05  | 0.729005 | 0.901771 | 0.88234  | 0.944082 |
| MmugDNA.30627.1.S1_s_at | MmugDNA.30627.1 | 10.71 | 10.48 | 0.06 | 0.85 | 1.18  | 0.555825 | 0.746342 | 0.7915   | 0.85272  |
| MmugDNA.3063.1.S1_at    | MmugDNA.3063.1  | 5.53  | 5.71  | 0.06 | 0.29 | -1.13 | 0.26059  | 0.156491 | 0.607303 | 0.431866 |
| MmugDNA.30630.1.S1_at   | MmugDNA.30630.1 | 5.55  | 4.88  | 1.15 | 0.1  | 1.59  | 0.2035   | 0.198164 | 0.566041 | 0.473148 |
| MmugDNA.30631.1.S1_at   | MmugDNA.30631.1 | 3.1   | 3.13  | 0.47 | 0.08 | -1.02 | 0.512767 | 0.607823 | 0.765738 | 0.766594 |
| MmugDNA.30633.1.S1_at   | MmugDNA.30633.1 | 9.52  | 10.21 | 0.4  | 0.34 | -1.62 | 0.090682 | 0.087552 | 0.446221 | 0.340753 |
| MmugDNA.30637.1.S1_at   | MmugDNA.30637.1 | 4.62  | 4.49  | 0.03 | 0.08 | 1.1   | 0.077157 | 0.103273 | 0.426664 | 0.364143 |
| MmugDNA.30638.1.S1_at   | MmugDNA.30638.1 | 3.41  | 3.4   | 0.1  | 0.13 | 1     | 0.717884 | 0.200335 | 0.876182 | 0.474729 |
| MmugDNA.30640.1.S1_at   | MmugDNA.30640.1 | 3.02  | 3.03  | 0.15 | 0.1  | -1    | 0.585129 | 0.730089 | 0.807329 | 0.843808 |
| MmugDNA.30641.1.S1_at   | MmugDNA.30641.1 | 3.95  | 3.78  | 0.06 | 0.24 | 1.12  | 0.312855 | 0.62752  | 0.64472  | 0.780488 |
| MmugDNA.30642.1.S1_at   | MmugDNA.30642.1 | 7.07  | 7.2   | 0.04 | 0.86 | -1.09 | 0.287829 | 0.312001 | 0.626278 | 0.566838 |
| MmugDNA.30647.1.S1_at   | MmugDNA.30647.1 | 4.3   | 4.45  | 0.22 | 0.25 | -1.11 | 0.562321 | 0.582054 | 0.795269 | 0.750784 |
| MmugDNA.30650.1.S1_at   | MmugDNA.30650.1 | 3.31  | 3.3   | 0.06 | 0.08 | 1     | 0.637021 | 0.915072 | 0.83591  | 0.952307 |
| MmugDNA.30651.1.S1_at   | MmugDNA.30651.1 | 5.47  | 5.4   | 0.08 | 0.3  | 1.04  | 0.566488 | 0.58555  | 0.797591 | 0.752909 |
| MmugDNA.30652.1.S1_at   | MmugDNA.30652.1 | 4.93  | 6.69  | 0.81 | 1.29 | -3.38 | 0.2111   | 0.150299 | 0.571977 | 0.424877 |
| MmugDNA.30652.1.S1_s_at | MmugDNA.30652.1 | 4.64  | 6.73  | 1.08 | 1.6  | -4.24 | 0.292802 | 0.237706 | 0.630124 | 0.50826  |

|                         |                 |       |       |      |      |       |          |          |          |          |
|-------------------------|-----------------|-------|-------|------|------|-------|----------|----------|----------|----------|
| MmugDNA.30653.1.S1_at   | MmugDNA.30653.1 | 5.48  | 5.47  | 0.83 | 0.23 | 1     | 0.366498 | 0.468258 | 0.679082 | 0.6777   |
| MmugDNA.30656.1.S1_at   | MmugDNA.30656.1 | 12.51 | 12.58 | 0.05 | 0.09 | -1.04 | 0.538256 | 0.237108 | 0.780442 | 0.507849 |
| MmugDNA.30657.1.S1_at   | MmugDNA.30657.1 | 3.17  | 3.1   | 0.08 | 0.03 | 1.05  | 0.323925 | 0.7773   | 0.651789 | 0.87064  |
| MmugDNA.30658.1.S1_at   | MmugDNA.30658.1 | 6.84  | 6.37  | 0.91 | 0.59 | 1.38  | 0.359895 | 0.456178 | 0.67403  | 0.669959 |
| MmugDNA.3066.1.S1_at    | MmugDNA.3066.1  | 9.16  | 8.78  | 0.21 | 0.45 | 1.31  | 0.67123  | 0.079307 | 0.852602 | 0.326549 |
| MmugDNA.30660.1.S1_at   | MmugDNA.30660.1 | 3.77  | 3.64  | 0.12 | 0.11 | 1.09  | 0.139279 | 0.232972 | 0.506801 | 0.50445  |
| MmugDNA.30661.1.S1_s_at | MmugDNA.30661.1 | 9.66  | 10.11 | 0.3  | 0.39 | -1.36 | 0.233811 | 0.18494  | 0.588317 | 0.460776 |
| MmugDNA.30663.1.S1_at   | MmugDNA.30663.1 | 7.76  | 8.37  | 0.31 | 0.4  | -1.52 | 0.051023 | 0.015102 | 0.375726 | 0.156008 |
| MmugDNA.30664.1.S1_at   | MmugDNA.30664.1 | 7.23  | 7.72  | 0.15 | 0.5  | -1.4  | 0.64416  | 0.827196 | 0.839719 | 0.90079  |
| MmugDNA.30668.1.S1_at   | MmugDNA.30668.1 | 3.63  | 3.81  | 0.42 | 0.16 | -1.13 | 0.816853 | 0.631577 | 0.925759 | 0.782845 |
| MmugDNA.30669.1.S1_at   | MmugDNA.30669.1 | 3.96  | 4.04  | 0.09 | 0.07 | -1.05 | 0.876085 | 0.111811 | 0.95032  | 0.376856 |
| MmugDNA.3067.1.S1_at    | MmugDNA.3067.1  | 4.1   | 4.21  | 0.3  | 0.07 | -1.08 | 0.720809 | 0.771692 | 0.877822 | 0.867344 |
| MmugDNA.30672.1.S1_at   | MmugDNA.30672.1 | 13.01 | 12.47 | 0.22 | 0.28 | 1.45  | 0.054816 | 0.036495 | 0.382401 | 0.235526 |
| MmugDNA.30673.1.S1_at   | MmugDNA.30673.1 | 8.14  | 8.16  | 0.1  | 0.12 | -1.02 | 0.304937 | 0.192622 | 0.638942 | 0.468116 |
| MmugDNA.30673.1.S1_s_at | MmugDNA.30673.1 | 11.67 | 11.75 | 0.11 | 0.16 | -1.05 | 0.732346 | 0.472712 | 0.88436  | 0.680072 |
| MmugDNA.30674.1.S1_at   | MmugDNA.30674.1 | 10.88 | 11.28 | 0.5  | 0.39 | -1.32 | 0.295219 | 0.307035 | 0.631561 | 0.563427 |
| MmugDNA.30675.1.S1_at   | MmugDNA.30675.1 | 10.79 | 10.75 | 0.2  | 0.28 | 1.03  | 0.385117 | 0.121453 | 0.690283 | 0.390578 |
| MmugDNA.30676.1.S1_at   | MmugDNA.30676.1 | 10.52 | 10    | 0.18 | 0.67 | 1.43  | 0.946672 | 0.613398 | 0.979465 | 0.770528 |
| MmugDNA.3068.1.S1_at    | MmugDNA.3068.1  | 4.17  | 4.05  | 0.22 | 0.06 | 1.09  | 0.13519  | 0.197154 | 0.501995 | 0.472213 |
| MmugDNA.30680.1.S1_at   | MmugDNA.30680.1 | 7.39  | 9.03  | 0.91 | 0.99 | -3.13 | 0.111442 | 0.081526 | 0.473657 | 0.329764 |
| MmugDNA.30681.1.S1_at   | MmugDNA.30681.1 | 5.52  | 5.14  | 1.07 | 1.07 | 1.3   | 0.421875 | 0.361473 | 0.713215 | 0.602216 |
| MmugDNA.30682.1.S1_at   | MmugDNA.30682.1 | 5.93  | 5.25  | 0.41 | 0.23 | 1.61  | 0.150735 | 0.157371 | 0.515411 | 0.432859 |
| MmugDNA.30685.1.S1_at   | MmugDNA.30685.1 | 4.13  | 4.34  | 0.14 | 0.15 | -1.16 | 0.749449 | 0.827841 | 0.892716 | 0.90116  |
| MmugDNA.30687.1.S1_at   | MmugDNA.30687.1 | 7.27  | 7.44  | 0.23 | 0.09 | -1.13 | 0.765618 | 0.339505 | 0.901387 | 0.586095 |
| MmugDNA.3069.1.S1_at    | MmugDNA.3069.1  | 10.37 | 10.62 | 0.07 | 0.13 | -1.19 | 0.058286 | 0.040581 | 0.390177 | 0.246306 |
| MmugDNA.30690.1.S1_at   | MmugDNA.30690.1 | 6.83  | 6.54  | 0.08 | 0.15 | 1.22  | 0.110567 | 0.106929 | 0.472293 | 0.369499 |
| MmugDNA.30692.1.S1_at   | MmugDNA.30692.1 | 6.48  | 6.31  | 0.2  | 0.03 | 1.13  | 0.211777 | 0.08159  | 0.572347 | 0.329808 |
| MmugDNA.30693.1.S1_at   | MmugDNA.30693.1 | 4.63  | 4.72  | 0.09 | 0.09 | -1.06 | 0.128581 | 0.265857 | 0.494653 | 0.531705 |
| MmugDNA.30695.1.S1_at   | MmugDNA.30695.1 | 4.39  | 4.78  | 0.13 | 0.26 | -1.31 | 0.094446 | 0.230416 | 0.452059 | 0.502199 |
| MmugDNA.30696.1.S1_at   | MmugDNA.30696.1 | 3.13  | 3.03  | 0.02 | 0.05 | 1.08  | 0.030768 | 0.007049 | 0.319807 | 0.113192 |
| MmugDNA.30697.1.S1_at   | MmugDNA.30697.1 | 7.48  | 7.34  | 0.25 | 0.34 | 1.1   | 0.191275 | 0.256875 | 0.554198 | 0.524698 |
| MmugDNA.30698.1.S1_at   | MmugDNA.30698.1 | 3.97  | 4.02  | 0.25 | 0.32 | -1.04 | 0.795875 | 0.684359 | 0.915327 | 0.815919 |
| MmugDNA.30699.1.S1_at   | MmugDNA.30699.1 | 5.75  | 5.19  | 0.48 | 0.2  | 1.47  | 0.134184 | 0.123298 | 0.500726 | 0.393386 |
| MmugDNA.307.1.S1_at     | MmugDNA.307.1   | 8.05  | 8.2   | 0.41 | 0.45 | -1.11 | 0.64985  | 0.543001 | 0.842533 | 0.725879 |
| MmugDNA.3070.1.S1_at    | MmugDNA.3070.1  | 3.89  | 4.11  | 0.19 | 0.29 | -1.16 | 0.315469 | 0.178165 | 0.646683 | 0.454527 |
| MmugDNA.30700.1.S1_at   | MmugDNA.30700.1 | 6.17  | 5.78  | 0.14 | 0.24 | 1.31  | 0.121975 | 0.133952 | 0.486982 | 0.4061   |
| MmugDNA.30701.1.S1_at   | MmugDNA.30701.1 | 5.04  | 4.82  | 0.21 | 0.03 | 1.16  | 0.178599 | 0.027791 | 0.542922 | 0.20819  |
| MmugDNA.30702.1.S1_x_at | MmugDNA.30702.1 | 9.91  | 9.79  | 0.54 | 0.15 | 1.08  | 0.33941  | 0.335987 | 0.661307 | 0.583601 |
| MmugDNA.30703.1.S1_at   | MmugDNA.30703.1 | 3.71  | 3.8   | 0.93 | 0.26 | -1.06 | 0.609082 | 0.734129 | 0.820318 | 0.845896 |
| MmugDNA.30704.1.S1_at   | MmugDNA.30704.1 | 4.82  | 3.77  | 0.83 | 0.77 | 2.08  | 0.398384 | 0.630942 | 0.698689 | 0.782552 |
| MmugDNA.30705.1.S1_at   | MmugDNA.30705.1 | 5.12  | 4.87  | 0.12 | 0.29 | 1.19  | 0.191006 | 0.243977 | 0.553865 | 0.514069 |

|                         |                 |       |       |      |      |       |          |          |          |          |
|-------------------------|-----------------|-------|-------|------|------|-------|----------|----------|----------|----------|
| MmugDNA.30707.1.S1_at   | MmugDNA.30707.1 | 4.39  | 4.81  | 0.29 | 0.06 | -1.34 | 0.076295 | 0.237921 | 0.424738 | 0.508478 |
| MmugDNA.30708.1.S1_at   | MmugDNA.30708.1 | 12.16 | 12.56 | 0.06 | 0.15 | -1.32 | 0.031179 | 0.016215 | 0.320865 | 0.161389 |
| MmugDNA.30709.1.S1_at   | MmugDNA.30709.1 | 7.33  | 7.24  | 0.16 | 0.25 | 1.06  | 0.25026  | 0.312495 | 0.600389 | 0.567211 |
| MmugDNA.3071.1.S1_at    | MmugDNA.3071.1  | 9.22  | 8.13  | 0.56 | 0.13 | 2.13  | 0.034895 | 0.017665 | 0.334018 | 0.168048 |
| MmugDNA.30710.1.S1_at   | MmugDNA.30710.1 | 7.17  | 8.23  | 0.82 | 1.21 | -2.08 | 0.483765 | 0.316966 | 0.749945 | 0.570275 |
| MmugDNA.30714.1.S1_at   | MmugDNA.30714.1 | 5.07  | 5.05  | 0.16 | 0.07 | 1.02  | 0.199389 | 0.189765 | 0.562384 | 0.465403 |
| MmugDNA.30716.1.S1_at   | MmugDNA.30716.1 | 12.49 | 11.81 | 0.15 | 0.18 | 1.6   | 0.004707 | 0.001732 | 0.184492 | 0.062895 |
| MmugDNA.30716.1.S1_s_at | MmugDNA.30716.1 | 11.92 | 11.11 | 0.17 | 0.13 | 1.76  | 0.002955 | 0.000869 | 0.170703 | 0.047471 |
| MmugDNA.30717.1.S1_at   | MmugDNA.30717.1 | 6.23  | 6.4   | 0.11 | 0.06 | -1.12 | 0.218276 | 0.068967 | 0.577874 | 0.308954 |
| MmugDNA.30718.1.S1_at   | MmugDNA.30718.1 | 5.12  | 5.15  | 0.03 | 0.2  | -1.02 | 0.993544 | 0.362874 | 0.997754 | 0.603383 |
| MmugDNA.3072.1.S1_at    | MmugDNA.3072.1  | 4.17  | 4.73  | 0.34 | 0.17 | -1.47 | 0.070636 | 0.142459 | 0.414588 | 0.416035 |
| MmugDNA.30720.1.S1_at   | MmugDNA.30720.1 | 2.92  | 3.02  | 0.09 | 0.03 | -1.07 | 0.101536 | 0.190305 | 0.461313 | 0.465906 |
| MmugDNA.30721.1.S1_at   | MmugDNA.30721.1 | 11.39 | 12.51 | 0.43 | 0.37 | -2.17 | 0.012086 | 0.004438 | 0.239963 | 0.092958 |
| MmugDNA.30722.1.S1_at   | MmugDNA.30722.1 | 8.83  | 8.78  | 0.21 | 0.13 | 1.04  | 0.832494 | 0.706134 | 0.932134 | 0.829634 |
| MmugDNA.30723.1.S1_at   | MmugDNA.30723.1 | 6.84  | 7.02  | 0.12 | 0.25 | -1.13 | 0.917434 | 0.747942 | 0.967854 | 0.853333 |
| MmugDNA.30724.1.S1_at   | MmugDNA.30724.1 | 4.12  | 4.02  | 0.27 | 0.15 | 1.07  | 0.56362  | 0.697474 | 0.796102 | 0.824228 |
| MmugDNA.30726.1.S1_s_at | MmugDNA.30726.1 | 10.58 | 9.15  | 0.22 | 0.29 | 2.7   | 0.003222 | 0.000397 | 0.175261 | 0.037471 |
| MmugDNA.30727.1.S1_at   | MmugDNA.30727.1 | 3.76  | 3.6   | 0.09 | 0.07 | 1.12  | 0.155229 | 0.123742 | 0.520102 | 0.393883 |
| MmugDNA.30728.1.S1_at   | MmugDNA.30728.1 | 8.26  | 8.5   | 0.26 | 0.44 | -1.18 | 0.457678 | 0.445122 | 0.735025 | 0.662296 |
| MmugDNA.30729.1.S1_s_at | MmugDNA.30729.1 | 11.3  | 11.31 | 0.11 | 0.04 | -1.01 | 0.442849 | 0.154679 | 0.725861 | 0.429605 |
| MmugDNA.3073.1.S1_at    | MmugDNA.3073.1  | 3.1   | 3.14  | 0.28 | 0.04 | -1.03 | 0.877049 | 0.840399 | 0.950716 | 0.909015 |
| MmugDNA.30731.1.S1_at   | MmugDNA.30731.1 | 4.76  | 5.13  | 0.07 | 0.33 | -1.29 | 0.120914 | 0.172215 | 0.48574  | 0.448609 |
| MmugDNA.30732.1.S1_at   | MmugDNA.30732.1 | 6.43  | 6.35  | 0.44 | 0.15 | 1.06  | 0.69722  | 0.860951 | 0.865585 | 0.920854 |
| MmugDNA.30734.1.S1_at   | MmugDNA.30734.1 | 8.55  | 7.27  | 0.2  | 0.08 | 2.44  | 0.000419 | 0.000093 | 0.130717 | 0.027285 |
| MmugDNA.30735.1.S1_at   | MmugDNA.30735.1 | 6.29  | 6.31  | 0.04 | 0.1  | -1.01 | 0.792241 | 0.236213 | 0.913752 | 0.507252 |
| MmugDNA.30736.1.S1_at   | MmugDNA.30736.1 | 10.69 | 9.35  | 0.25 | 0.91 | 2.53  | 0.109694 | 0.014353 | 0.470963 | 0.152926 |
| MmugDNA.30737.1.S1_at   | MmugDNA.30737.1 | 6.98  | 6.99  | 0.24 | 1.7  | -1    | 0.375689 | 0.501958 | 0.684803 | 0.699986 |
| MmugDNA.30738.1.S1_at   | MmugDNA.30738.1 | 4.65  | 4.64  | 0.18 | 0.13 | 1.01  | 0.648869 | 0.465028 | 0.842254 | 0.675534 |
| MmugDNA.30739.1.S1_at   | MmugDNA.30739.1 | 5.23  | 4.93  | 0.07 | 0.19 | 1.23  | 0.17539  | 0.304431 | 0.539136 | 0.561712 |
| MmugDNA.3074.1.S1_at    | MmugDNA.3074.1  | 6.61  | 6.11  | 0.74 | 0.09 | 1.41  | 0.085629 | 0.12223  | 0.439666 | 0.391926 |
| MmugDNA.30740.1.S1_at   | MmugDNA.30740.1 | 5.81  | 5.96  | 0.23 | 0.29 | -1.11 | 0.532461 | 0.786022 | 0.777734 | 0.876037 |
| MmugDNA.30741.1.S1_at   | MmugDNA.30741.1 | 4.67  | 4.43  | 0.34 | 0.04 | 1.18  | 0.348619 | 0.126945 | 0.667173 | 0.397686 |
| MmugDNA.30743.1.S1_at   | MmugDNA.30743.1 | 4.28  | 4.27  | 0.13 | 0.11 | 1.01  | 0.631726 | 0.875338 | 0.832823 | 0.929211 |
| MmugDNA.30745.1.S1_at   | MmugDNA.30745.1 | 9.26  | 8.49  | 0.39 | 0.17 | 1.71  | 0.05327  | 0.027607 | 0.379848 | 0.207455 |
| MmugDNA.30748.1.S1_at   | MmugDNA.30748.1 | 7.16  | 7.21  | 0.26 | 0.19 | -1.04 | 0.340828 | 0.468611 | 0.662186 | 0.677755 |
| MmugDNA.30749.1.S1_at   | MmugDNA.30749.1 | 12.65 | 12.47 | 0.03 | 0.21 | 1.13  | 0.695295 | 0.725165 | 0.864865 | 0.84092  |
| MmugDNA.3075.1.S1_at    | MmugDNA.3075.1  | 6.95  | 6.53  | 0.49 | 0.14 | 1.34  | 0.179126 | 0.320819 | 0.543444 | 0.572849 |
| MmugDNA.30750.1.S1_at   | MmugDNA.30750.1 | 3.29  | 3.17  | 0.05 | 0.2  | 1.09  | 0.767827 | 0.897528 | 0.902473 | 0.941525 |
| MmugDNA.30751.1.S1_s_at | MmugDNA.30751.1 | 10.42 | 10.14 | 0.12 | 0.23 | 1.21  | 0.117976 | 0.152937 | 0.482063 | 0.42777  |
| MmugDNA.30752.1.S1_at   | MmugDNA.30752.1 | 6.53  | 6.66  | 0.18 | 0.15 | -1.09 | 0.684073 | 0.168452 | 0.858586 | 0.445092 |
| MmugDNA.30753.1.S1_at   | MmugDNA.30753.1 | 12.02 | 11.93 | 0.19 | 0.09 | 1.06  | 0.154256 | 0.298562 | 0.518796 | 0.557183 |

|                         |                 |       |       |      |      |       |          |          |          |          |
|-------------------------|-----------------|-------|-------|------|------|-------|----------|----------|----------|----------|
| MmugDNA.30754.1.S1_at   | MmugDNA.30754.1 | 6.01  | 6.03  | 0.16 | 0.1  | -1.02 | 0.178018 | 0.229452 | 0.542263 | 0.501527 |
| MmugDNA.30755.1.S1_at   | MmugDNA.30755.1 | 4.29  | 4.29  | 0.05 | 0.15 | -1    | 0.393345 | 0.385093 | 0.695146 | 0.620662 |
| MmugDNA.30756.1.S1_at   | MmugDNA.30756.1 | 10.69 | 10.93 | 0.32 | 0.58 | -1.18 | 0.506154 | 0.199884 | 0.762112 | 0.474559 |
| MmugDNA.30758.1.S1_at   | MmugDNA.30758.1 | 6.39  | 6.23  | 1.46 | 1.61 | 1.11  | 0.675165 | 0.476601 | 0.854421 | 0.682787 |
| MmugDNA.30759.1.S1_at   | MmugDNA.30759.1 | 4.08  | 3.61  | 0.31 | 0.18 | 1.38  | 0.086429 | 0.101967 | 0.440232 | 0.36202  |
| MmugDNA.30760.1.S1_at   | MmugDNA.30760.1 | 5.99  | 6.07  | 0.19 | 0.08 | -1.05 | 0.289152 | 0.308939 | 0.62717  | 0.564656 |
| MmugDNA.30761.1.S1_at   | MmugDNA.30761.1 | 4.54  | 5.71  | 0.12 | 0.81 | -2.25 | 0.029829 | 0.032941 | 0.315574 | 0.224663 |
| MmugDNA.30762.1.S1_at   | MmugDNA.30762.1 | 4.72  | 5     | 0.16 | 0.03 | -1.21 | 0.10598  | 0.330025 | 0.466831 | 0.578915 |
| MmugDNA.30763.1.S1_at   | MmugDNA.30763.1 | 9.89  | 10.32 | 0.19 | 0.22 | -1.35 | 0.030396 | 0.035496 | 0.318297 | 0.232645 |
| MmugDNA.30764.1.S1_at   | MmugDNA.30764.1 | 10.6  | 10.48 | 0.35 | 0.55 | 1.09  | 0.847329 | 0.665911 | 0.938784 | 0.804281 |
| MmugDNA.30766.1.S1_at   | MmugDNA.30766.1 | 4.75  | 4.82  | 0.27 | 0.09 | -1.05 | 0.676078 | 0.371238 | 0.854832 | 0.610135 |
| MmugDNA.30767.1.S1_at   | MmugDNA.30767.1 | 4.52  | 5.07  | 0.14 | 0.48 | -1.46 | 0.048262 | 0.025883 | 0.368148 | 0.201698 |
| MmugDNA.3077.1.S1_at    | MmugDNA.3077.1  | 5.96  | 5.94  | 0.16 | 0.17 | 1.01  | 0.79943  | 0.765033 | 0.916962 | 0.863388 |
| MmugDNA.30770.1.S1_at   | MmugDNA.30770.1 | 8.17  | 8.66  | 0.22 | 0.46 | -1.4  | 0.109081 | 0.110668 | 0.470811 | 0.374854 |
| MmugDNA.30773.1.S1_at   | MmugDNA.30773.1 | 13.36 | 13.18 | 0.06 | 0.06 | 1.13  | 0.032139 | 0.017804 | 0.3244   | 0.168584 |
| MmugDNA.30773.1.S1_s_at | MmugDNA.30773.1 | 13.32 | 13.1  | 0.06 | 0.05 | 1.16  | 0.032366 | 0.020811 | 0.324736 | 0.180917 |
| MmugDNA.30774.1.S1_at   | MmugDNA.30774.1 | 5.09  | 4.89  | 0.06 | 0.19 | 1.15  | 0.099703 | 0.119863 | 0.459668 | 0.388577 |
| MmugDNA.30777.1.S1_at   | MmugDNA.30777.1 | 7.14  | 7.32  | 0.26 | 0.42 | -1.14 | 0.609292 | 0.701054 | 0.820433 | 0.826613 |
| MmugDNA.30779.1.S1_at   | MmugDNA.30779.1 | 2.73  | 2.76  | 0.29 | 0.03 | -1.02 | 0.511412 | 0.54705  | 0.765308 | 0.728283 |
| MmugDNA.3078.1.S1_at    | MmugDNA.3078.1  | 7.73  | 8.08  | 0.32 | 0.18 | -1.27 | 0.209447 | 0.045159 | 0.570957 | 0.256979 |
| MmugDNA.30782.1.S1_at   | MmugDNA.30782.1 | 3.9   | 3.96  | 0.1  | 0.05 | -1.04 | 0.426387 | 0.08619  | 0.715792 | 0.338568 |
| MmugDNA.30783.1.S1_at   | MmugDNA.30783.1 | 4.53  | 4.42  | 0.15 | 0.25 | 1.08  | 0.743648 | 0.911603 | 0.890194 | 0.950175 |
| MmugDNA.30785.1.S1_at   | MmugDNA.30785.1 | 4.16  | 3.81  | 0.38 | 0.19 | 1.27  | 0.135502 | 0.225743 | 0.5024   | 0.498159 |
| MmugDNA.30786.1.S1_at   | MmugDNA.30786.1 | 3.84  | 3.74  | 0.42 | 0.17 | 1.07  | 0.380497 | 0.714736 | 0.687322 | 0.8345   |
| MmugDNA.30787.1.S1_at   | MmugDNA.30787.1 | 4.19  | 3.85  | 0.56 | 0.13 | 1.26  | 0.158976 | 0.183048 | 0.52416  | 0.459493 |
| MmugDNA.30788.1.S1_at   | MmugDNA.30788.1 | 4.22  | 4.81  | 0.3  | 0.3  | -1.51 | 0.161114 | 0.216265 | 0.526189 | 0.48984  |
| MmugDNA.30789.1.S1_at   | MmugDNA.30789.1 | 5.67  | 5.51  | 0.16 | 0.43 | 1.12  | 0.771145 | 0.78938  | 0.903657 | 0.878335 |
| MmugDNA.3079.1.S1_at    | MmugDNA.3079.1  | 6.23  | 6.29  | 1.29 | 0.55 | -1.04 | 0.659239 | 0.851875 | 0.847039 | 0.915799 |
| MmugDNA.30791.1.S1_at   | MmugDNA.30791.1 | 3.34  | 3.27  | 0.28 | 0.06 | 1.05  | 0.24228  | 0.321064 | 0.594307 | 0.573046 |
| MmugDNA.30792.1.S1_at   | MmugDNA.30792.1 | 5.39  | 5.18  | 0.15 | 0.28 | 1.16  | 0.313225 | 0.374168 | 0.645054 | 0.612678 |
| MmugDNA.30793.1.S1_at   | MmugDNA.30793.1 | 6.35  | 6.44  | 0.09 | 0.19 | -1.06 | 0.120935 | 0.069572 | 0.48574  | 0.309848 |
| MmugDNA.30794.1.S1_at   | MmugDNA.30794.1 | 3.33  | 3.25  | 0.83 | 0.13 | 1.05  | 0.268252 | 0.298026 | 0.613105 | 0.556695 |
| MmugDNA.30795.1.S1_at   | MmugDNA.30795.1 | 3.33  | 3.41  | 0.11 | 0.2  | -1.06 | 0.740403 | 0.652147 | 0.888608 | 0.796592 |
| MmugDNA.30796.1.S1_at   | MmugDNA.30796.1 | 3.71  | 3.65  | 0.46 | 0.1  | 1.04  | 0.233352 | 0.112827 | 0.588108 | 0.37844  |
| MmugDNA.308.1.S1_at     | MmugDNA.308.1   | 8.14  | 8.17  | 0.37 | 0.19 | -1.02 | 0.747903 | 0.706699 | 0.892181 | 0.829857 |
| MmugDNA.3080.1.S1_at    | MmugDNA.3080.1  | 3.42  | 3.23  | 0.15 | 0.08 | 1.14  | 0.04137  | 0.005804 | 0.351626 | 0.104597 |
| MmugDNA.30801.1.S1_at   | MmugDNA.30801.1 | 11.8  | 11.69 | 0.03 | 0.6  | 1.08  | 0.65651  | 0.670327 | 0.845394 | 0.807235 |
| MmugDNA.30805.1.S1_at   | MmugDNA.30805.1 | 5.05  | 5.13  | 0.27 | 0.2  | -1.05 | 0.938307 | 0.624961 | 0.976372 | 0.778972 |
| MmugDNA.30806.1.S1_at   | MmugDNA.30806.1 | 5.1   | 5.12  | 0.21 | 0.08 | -1.01 | 0.671782 | 0.259106 | 0.852716 | 0.526263 |
| MmugDNA.30807.1.S1_at   | MmugDNA.30807.1 | 4.76  | 4.81  | 0.18 | 0.2  | -1.03 | 0.674713 | 0.707851 | 0.854234 | 0.830504 |
| MmugDNA.35605.1.S1_s_at | MmugDNA.35605.1 | 12.49 | 12.44 | 0.11 | 0.22 | 1.04  | 0.465424 | 0.283953 | 0.739873 | 0.546237 |

|                         |                 |       |       |      |      |       |          |          |          |          |
|-------------------------|-----------------|-------|-------|------|------|-------|----------|----------|----------|----------|
| MmugDNA.30809.1.S1_at   | MmugDNA.30809.1 | 3.98  | 3.26  | 0.37 | 0.35 | 1.64  | 0.14059  | 0.367676 | 0.508385 | 0.607369 |
| MmugDNA.3081.1.S1_at    | MmugDNA.3081.1  | 6.13  | 6.18  | 0.31 | 0.13 | -1.03 | 0.739727 | 0.420371 | 0.888213 | 0.644099 |
| MmugDNA.30810.1.S1_at   | MmugDNA.30810.1 | 5.9   | 6.03  | 0.26 | 0.22 | -1.09 | 0.371594 | 0.492354 | 0.682332 | 0.693485 |
| MmugDNA.30811.1.S1_at   | MmugDNA.30811.1 | 3.43  | 3.47  | 0.14 | 0.05 | -1.03 | 0.471326 | 0.11826  | 0.743004 | 0.386244 |
| MmugDNA.30812.1.S1_at   | MmugDNA.30812.1 | 9.47  | 9.35  | 0.25 | 0.26 | 1.09  | 0.975319 | 0.707604 | 0.990439 | 0.830424 |
| MmugDNA.30813.1.S1_at   | MmugDNA.30813.1 | 10.43 | 10.95 | 0.21 | 0.49 | -1.44 | 0.300979 | 0.209608 | 0.636069 | 0.483271 |
| MmugDNA.30814.1.S1_at   | MmugDNA.30814.1 | 6.72  | 6.56  | 0.1  | 0.43 | 1.11  | 0.4526   | 0.580593 | 0.732213 | 0.749782 |
| MmugDNA.30815.1.S1_at   | MmugDNA.30815.1 | 9.51  | 9.33  | 0.19 | 0.06 | 1.13  | 0.269936 | 0.021713 | 0.614557 | 0.184333 |
| MmugDNA.30816.1.S1_at   | MmugDNA.30816.1 | 5.54  | 5.39  | 0.2  | 0.08 | 1.11  | 0.179713 | 0.106988 | 0.543913 | 0.369557 |
| MmugDNA.30817.1.S1_at   | MmugDNA.30817.1 | 7.85  | 9.61  | 0.51 | 0.57 | -3.39 | 0.016898 | 0.010077 | 0.266107 | 0.13168  |
| MmugDNA.30819.1.S1_at   | MmugDNA.30819.1 | 3.49  | 3.3   | 0.29 | 0.05 | 1.14  | 0.085561 | 0.114516 | 0.43949  | 0.381059 |
| MmugDNA.30820.1.S1_at   | MmugDNA.30820.1 | 3.79  | 3.58  | 0.2  | 0.06 | 1.16  | 0.178714 | 0.285301 | 0.543002 | 0.547196 |
| MmugDNA.30821.1.S1_at   | MmugDNA.30821.1 | 6.3   | 5.92  | 0.67 | 0.11 | 1.3   | 0.397058 | 0.135895 | 0.697474 | 0.408103 |
| MmugDNA.30822.1.S1_at   | MmugDNA.30822.1 | 5.33  | 5.38  | 0.44 | 0.17 | -1.03 | 0.826618 | 0.65231  | 0.929552 | 0.796682 |
| MmugDNA.30823.1.S1_at   | MmugDNA.30823.1 | 3.87  | 3.97  | 0.31 | 0.13 | -1.07 | 0.69014  | 0.408115 | 0.861921 | 0.635475 |
| MmugDNA.30825.1.S1_at   | MmugDNA.30825.1 | 6.58  | 6.26  | 0.11 | 0.12 | 1.25  | 0.038938 | 0.046241 | 0.345909 | 0.259397 |
| MmugDNA.30826.1.S1_at   | MmugDNA.30826.1 | 4.92  | 4.98  | 0.09 | 0.17 | -1.04 | 0.130751 | 0.205735 | 0.497065 | 0.48007  |
| MmugDNA.30827.1.S1_at   | MmugDNA.30827.1 | 8.28  | 7.17  | 0.1  | 0.56 | 2.16  | 0.044693 | 0.039378 | 0.359043 | 0.243406 |
| MmugDNA.3083.1.S1_at    | MmugDNA.3083.1  | 11.74 | 11.72 | 0.43 | 0.25 | 1.01  | 0.419885 | 0.435344 | 0.712134 | 0.65516  |
| MmugDNA.30833.1.S1_at   | MmugDNA.30833.1 | 9.48  | 9.19  | 0.18 | 0.33 | 1.22  | 0.826038 | 0.009907 | 0.929365 | 0.130731 |
| MmugDNA.30834.1.S1_at   | MmugDNA.30834.1 | 3.6   | 3.2   | 0.24 | 0.29 | 1.32  | 0.05533  | 0.049715 | 0.383689 | 0.267995 |
| MmugDNA.30835.1.S1_at   | MmugDNA.30835.1 | 6.37  | 5.47  | 1.46 | 1.35 | 1.87  | 0.894254 | 0.725288 | 0.957854 | 0.840954 |
| MmugDNA.30838.1.S1_at   | MmugDNA.30838.1 | 6.42  | 6.69  | 0.18 | 0.12 | -1.2  | 0.132632 | 0.136268 | 0.49874  | 0.408681 |
| MmugDNA.30839.1.S1_at   | MmugDNA.30839.1 | 4.3   | 5.73  | 0.52 | 1.19 | -2.7  | 0.201516 | 0.254044 | 0.563988 | 0.522387 |
| MmugDNA.3084.1.S1_at    | MmugDNA.3084.1  | 9.25  | 9.63  | 0.39 | 0.54 | -1.3  | 0.398604 | 0.485348 | 0.698762 | 0.689081 |
| MmugDNA.30840.1.S1_at   | MmugDNA.30840.1 | 3.79  | 4.01  | 0.31 | 0.4  | -1.17 | 0.21261  | 0.243515 | 0.57292  | 0.513585 |
| MmugDNA.30843.1.S1_at   | MmugDNA.30843.1 | 5.69  | 5.7   | 0.55 | 0.08 | -1.01 | 0.88203  | 0.836915 | 0.952617 | 0.906826 |
| MmugDNA.30844.1.S1_at   | MmugDNA.30844.1 | 6.08  | 5.83  | 0.48 | 0.1  | 1.19  | 0.266947 | 0.369895 | 0.612291 | 0.609138 |
| MmugDNA.30845.1.S1_at   | MmugDNA.30845.1 | 8.02  | 7.68  | 1.05 | 1.31 | 1.27  | 0.993244 | 0.999919 | 0.997679 | 0.999968 |
| MmugDNA.30846.1.S1_at   | MmugDNA.30846.1 | 8.87  | 7.75  | 0.18 | 0.3  | 2.17  | 0.005344 | 0.003    | 0.191107 | 0.079958 |
| MmugDNA.30849.1.S1_at   | MmugDNA.30849.1 | 5.86  | 5.86  | 0.17 | 0.25 | 1     | 0.530181 | 0.739258 | 0.776636 | 0.848883 |
| MmugDNA.3085.1.S1_at    | MmugDNA.3085.1  | 10.57 | 10.83 | 0.11 | 0.38 | -1.2  | 0.232348 | 0.276769 | 0.587814 | 0.540682 |
| MmugDNA.30850.1.S1_at   | MmugDNA.30850.1 | 3.09  | 3.13  | 0.16 | 0.23 | -1.03 | 0.662172 | 0.136968 | 0.848423 | 0.409769 |
| MmugDNA.30851.1.S1_s_at | MmugDNA.30851.1 | 5.42  | 5.55  | 0.14 | 0.05 | -1.1  | 0.549134 | 0.738636 | 0.787104 | 0.848483 |
| MmugDNA.30852.1.S1_at   | MmugDNA.30852.1 | 4.28  | 4.11  | 0.34 | 0.16 | 1.13  | 0.522385 | 0.30758  | 0.772019 | 0.563785 |
| MmugDNA.30853.1.S1_at   | MmugDNA.30853.1 | 3.18  | 3.28  | 0.09 | 0.09 | -1.07 | 0.280847 | 0.487919 | 0.621889 | 0.690787 |
| MmugDNA.30855.1.S1_at   | MmugDNA.30855.1 | 12.84 | 12.78 | 0.09 | 0.03 | 1.04  | 0.250713 | 0.335897 | 0.600389 | 0.58354  |
| MmugDNA.30855.1.S1_s_at | MmugDNA.30855.1 | 11.86 | 11.86 | 0.17 | 0.11 | -1.01 | 0.287113 | 0.425341 | 0.625773 | 0.647722 |
| MmugDNA.30856.1.S1_at   | MmugDNA.30856.1 | 9.31  | 8.83  | 0.06 | 0.28 | 1.4   | 0.040357 | 0.031533 | 0.349277 | 0.219688 |
| MmugDNA.30857.1.S1_at   | MmugDNA.30857.1 | 2.73  | 2.7   | 0.17 | 0.09 | 1.02  | 0.716549 | 0.296876 | 0.875506 | 0.555847 |
| MmugDNA.30858.1.S1_at   | MmugDNA.30858.1 | 4.47  | 4.71  | 0.4  | 0.25 | -1.18 | 0.502317 | 0.549056 | 0.760275 | 0.729549 |

|                         |                 |       |       |      |      |       |          |          |          |          |
|-------------------------|-----------------|-------|-------|------|------|-------|----------|----------|----------|----------|
| MmugDNA.30859.1.S1_at   | MmugDNA.30859.1 | 9.09  | 8.52  | 0.21 | 0.39 | 1.49  | 0.050416 | 0.015824 | 0.374295 | 0.159503 |
| MmugDNA.3086.1.S1_at    | MmugDNA.3086.1  | 9.85  | 10.28 | 0.12 | 0.71 | -1.35 | 0.338956 | 0.427316 | 0.661044 | 0.649175 |
| MmugDNA.30860.1.S1_s_at | MmugDNA.30860.1 | 10.82 | 10.61 | 0.08 | 0.14 | 1.16  | 0.110764 | 0.068392 | 0.47264  | 0.307955 |
| MmugDNA.30861.1.S1_at   | MmugDNA.30861.1 | 4.37  | 4.43  | 0.28 | 0.2  | -1.04 | 0.930548 | 0.398983 | 0.973196 | 0.629665 |
| MmugDNA.30863.1.S1_at   | MmugDNA.30863.1 | 12.86 | 12.79 | 0.07 | 0.17 | 1.04  | 0.900452 | 0.07609  | 0.960307 | 0.320848 |
| MmugDNA.30864.1.S1_a_at | MmugDNA.30864.1 | 6.01  | 6.22  | 0.08 | 0.06 | -1.16 | 0.058501 | 0.098136 | 0.390536 | 0.356241 |
| MmugDNA.30865.1.S1_at   | MmugDNA.30865.1 | 5.63  | 5.9   | 0.08 | 0.16 | -1.21 | 0.071545 | 0.053311 | 0.415505 | 0.276463 |
| MmugDNA.30866.1.S1_at   | MmugDNA.30866.1 | 5.38  | 5.29  | 0.14 | 0.02 | 1.06  | 0.41329  | 0.348049 | 0.70838  | 0.59222  |
| MmugDNA.30867.1.S1_at   | MmugDNA.30867.1 | 7.54  | 8.33  | 1.71 | 1.49 | -1.73 | 0.97153  | 0.896738 | 0.989102 | 0.941007 |
| MmugDNA.30868.1.S1_at   | MmugDNA.30868.1 | 9.66  | 9.31  | 0.1  | 0.18 | 1.27  | 0.104179 | 0.058423 | 0.464201 | 0.288459 |
| MmugDNA.30869.1.S1_s_at | MmugDNA.30869.1 | 6.58  | 7.02  | 0.38 | 0.45 | -1.36 | 0.243106 | 0.246315 | 0.594744 | 0.515889 |
| MmugDNA.3087.1.S1_at    | MmugDNA.3087.1  | 9.72  | 10.43 | 0.19 | 0.35 | -1.63 | 0.067039 | 0.068805 | 0.407016 | 0.308711 |
| MmugDNA.30870.1.S1_at   | MmugDNA.30870.1 | 6.57  | 6.36  | 0.29 | 1.06 | 1.15  | 0.582039 | 0.126711 | 0.805507 | 0.397376 |
| MmugDNA.30871.1.S1_at   | MmugDNA.30871.1 | 6.89  | 6.47  | 0.3  | 0.08 | 1.34  | 0.023707 | 0.007782 | 0.292734 | 0.117732 |
| MmugDNA.30872.1.S1_at   | MmugDNA.30872.1 | 10.55 | 9.72  | 0.02 | 0.17 | 1.78  | 0.000977 | 0.000088 | 0.139813 | 0.027016 |
| MmugDNA.30875.1.S1_at   | MmugDNA.30875.1 | 8.63  | 9.14  | 0.33 | 1    | -1.43 | 0.465214 | 0.537228 | 0.739822 | 0.72233  |
| MmugDNA.30876.1.S1_at   | MmugDNA.30876.1 | 4.46  | 4.53  | 0.24 | 0.2  | -1.06 | 0.639225 | 0.788065 | 0.837052 | 0.877426 |
| MmugDNA.30877.1.S1_at   | MmugDNA.30877.1 | 10    | 9.63  | 0.18 | 0.13 | 1.29  | 0.026124 | 0.015736 | 0.301461 | 0.158941 |
| MmugDNA.30878.1.S1_at   | MmugDNA.30878.1 | 5.32  | 5.31  | 0.22 | 0.12 | 1.01  | 0.707719 | 0.612131 | 0.871238 | 0.769787 |
| MmugDNA.30879.1.S1_at   | MmugDNA.30879.1 | 4.2   | 4.21  | 0.48 | 0.2  | -1    | 0.459958 | 0.19235  | 0.736616 | 0.467834 |
| MmugDNA.3088.1.S1_at    | MmugDNA.3088.1  | 12.53 | 11.41 | 0.23 | 0.95 | 2.18  | 0.105787 | 0.05394  | 0.466579 | 0.277766 |
| MmugDNA.30880.1.S1_at   | MmugDNA.30880.1 | 3.56  | 3.65  | 0.5  | 0.41 | -1.07 | 0.675308 | 0.65519  | 0.854479 | 0.798333 |
| MmugDNA.30881.1.S1_at   | MmugDNA.30881.1 | 3.67  | 3.8   | 0.04 | 0.2  | -1.09 | 0.919353 | 0.723861 | 0.968622 | 0.840163 |
| MmugDNA.30882.1.S1_at   | MmugDNA.30882.1 | 3.79  | 3.5   | 0.14 | 0.11 | 1.22  | 0.022708 | 0.007271 | 0.288159 | 0.114408 |
| MmugDNA.30883.1.S1_at   | MmugDNA.30883.1 | 6.5   | 7.56  | 0.72 | 0.38 | -2.09 | 0.291429 | 0.015945 | 0.628798 | 0.160254 |
| MmugDNA.30884.1.S1_at   | MmugDNA.30884.1 | 5.3   | 5.15  | 0.32 | 0.02 | 1.11  | 0.475691 | 0.230926 | 0.745925 | 0.502548 |
| MmugDNA.30886.1.S1_at   | MmugDNA.30886.1 | 4.91  | 4.7   | 0.75 | 0.22 | 1.16  | 0.219278 | 0.32499  | 0.57872  | 0.575512 |
| MmugDNA.30887.1.S1_at   | MmugDNA.30887.1 | 7.06  | 6.55  | 0.14 | 0.25 | 1.43  | 0.049243 | 0.036273 | 0.370998 | 0.235    |
| MmugDNA.30889.1.S1_at   | MmugDNA.30889.1 | 9.33  | 8.71  | 0.22 | 0.42 | 1.54  | 0.395911 | 0.319307 | 0.696652 | 0.571724 |
| MmugDNA.3089.1.S1_at    | MmugDNA.3089.1  | 3.53  | 3.63  | 0.56 | 0.39 | -1.07 | 0.350324 | 0.135896 | 0.668468 | 0.408103 |
| MmugDNA.30890.1.S1_at   | MmugDNA.30890.1 | 9.75  | 8.75  | 0.09 | 0.37 | 1.99  | 0.024628 | 0.010426 | 0.295497 | 0.133525 |
| MmugDNA.30892.1.S1_at   | MmugDNA.30892.1 | 3.59  | 3.69  | 0.19 | 0.09 | -1.08 | 0.668983 | 0.7639   | 0.851986 | 0.862744 |
| MmugDNA.30893.1.S1_at   | MmugDNA.30893.1 | 8.79  | 7.56  | 0.25 | 0.25 | 2.35  | 0.005884 | 0.001491 | 0.19355  | 0.058965 |
| MmugDNA.30895.1.S1_at   | MmugDNA.30895.1 | 13.36 | 13.25 | 0.17 | 0.02 | 1.08  | 0.372538 | 0.463935 | 0.682813 | 0.674716 |
| MmugDNA.30895.1.S1_s_at | MmugDNA.30895.1 | 13.94 | 13.95 | 0.08 | 0.1  | -1.01 | 0.893474 | 0.759094 | 0.957636 | 0.859979 |
| MmugDNA.30896.1.S1_at   | MmugDNA.30896.1 | 9.96  | 10.13 | 0.18 | 0.46 | -1.13 | 0.624096 | 0.651131 | 0.828178 | 0.796048 |
| MmugDNA.30898.1.S1_at   | MmugDNA.30898.1 | 4.29  | 4.39  | 0.04 | 0.07 | -1.07 | 0.114624 | 0.305535 | 0.477912 | 0.562486 |
| MmugDNA.30899.1.S1_at   | MmugDNA.30899.1 | 4.83  | 4.39  | 0.22 | 0.42 | 1.35  | 0.309634 | 0.339504 | 0.641662 | 0.586095 |
| MmugDNA.309.1.S1_at     | MmugDNA.309.1   | 9.26  | 9.39  | 0.17 | 0.34 | -1.1  | 0.817373 | 0.555382 | 0.925944 | 0.733767 |
| MmugDNA.3090.1.S1_at    | MmugDNA.3090.1  | 9.96  | 9.11  | 0.18 | 0.31 | 1.8   | 0.02853  | 0.019304 | 0.311619 | 0.174723 |
| MmugDNA.30900.1.S1_at   | MmugDNA.30900.1 | 2.76  | 2.8   | 0.1  | 0.05 | -1.03 | 0.198302 | 0.287025 | 0.56138  | 0.548317 |



|                         |                 |       |       |      |      |        |          |          |          |          |
|-------------------------|-----------------|-------|-------|------|------|--------|----------|----------|----------|----------|
| MmugDNA.30901.1.S1_at   | MmugDNA.30901.1 | 4.26  | 4.66  | 0.29 | 0.29 | -1.32  | 0.228945 | 0.49663  | 0.586264 | 0.696119 |
| MmugDNA.30903.1.S1_at   | MmugDNA.30903.1 | 4.79  | 5.02  | 0.81 | 1.02 | -1.17  | 0.464313 | 0.671025 | 0.739156 | 0.807635 |
| MmugDNA.30904.1.S1_at   | MmugDNA.30904.1 | 3.82  | 4.01  | 0.44 | 0.39 | -1.14  | 0.676224 | 0.837399 | 0.85485  | 0.907098 |
| MmugDNA.30905.1.S1_at   | MmugDNA.30905.1 | 12.61 | 12.52 | 0.02 | 0.11 | 1.06   | 0.892334 | 0.029119 | 0.957146 | 0.212733 |
| MmugDNA.30906.1.S1_at   | MmugDNA.30906.1 | 3.09  | 3.09  | 0.21 | 0.3  | -1.01  | 0.872311 | 0.875994 | 0.948981 | 0.929526 |
| MmugDNA.30907.1.S1_at   | MmugDNA.30907.1 | 10.13 | 10.3  | 0.31 | 0.14 | -1.13  | 0.882446 | 0.895999 | 0.952793 | 0.940569 |
| MmugDNA.30908.1.S1_at   | MmugDNA.30908.1 | 4.28  | 4.34  | 0.96 | 0.29 | -1.04  | 0.318352 | 0.431004 | 0.64835  | 0.651988 |
| MmugDNA.30909.1.S1_at   | MmugDNA.30909.1 | 11.96 | 11.99 | 0.17 | 0.17 | -1.03  | 0.928924 | 0.115501 | 0.972607 | 0.38267  |
| MmugDNA.30910.1.S1_at   | MmugDNA.30910.1 | 11.55 | 11.54 | 0.09 | 0.22 | 1.01   | 0.854351 | 0.07183  | 0.941105 | 0.314082 |
| MmugDNA.30911.1.S1_at   | MmugDNA.30911.1 | 4.24  | 4.15  | 0.06 | 0.08 | 1.06   | 0.083262 | 0.005103 | 0.435702 | 0.099108 |
| MmugDNA.30912.1.S1_at   | MmugDNA.30912.1 | 8.89  | 7.84  | 0.14 | 0.91 | 2.06   | 0.100355 | 0.040401 | 0.460878 | 0.246134 |
| MmugDNA.30913.1.S1_at   | MmugDNA.30913.1 | 10.24 | 9.89  | 0.21 | 0.16 | 1.27   | 0.081249 | 0.035709 | 0.431938 | 0.233368 |
| MmugDNA.30915.1.S1_s_at | MmugDNA.30915.1 | 7.8   | 7.77  | 0.16 | 0.02 | 1.02   | 0.833067 | 0.820832 | 0.93227  | 0.896833 |
| MmugDNA.30917.1.S1_at   | MmugDNA.30917.1 | 7.72  | 7.06  | 0.34 | 0.28 | 1.59   | 0.171934 | 0.127164 | 0.535422 | 0.397922 |
| MmugDNA.30918.1.S1_at   | MmugDNA.30918.1 | 8.77  | 8.42  | 0.26 | 0.27 | 1.27   | 0.579488 | 0.771635 | 0.804291 | 0.867316 |
| MmugDNA.30920.1.S1_at   | MmugDNA.30920.1 | 3.08  | 3.23  | 0.09 | 0.13 | -1.11  | 0.125974 | 0.585399 | 0.492046 | 0.752844 |
| MmugDNA.30923.1.S1_at   | MmugDNA.30923.1 | 6.28  | 7.66  | 0.87 | 1.05 | -2.6   | 0.60352  | 0.710604 | 0.817199 | 0.832158 |
| MmugDNA.30924.1.S1_at   | MmugDNA.30924.1 | 9.49  | 9.21  | 0.36 | 0.12 | 1.21   | 0.189394 | 0.229968 | 0.552479 | 0.501807 |
| MmugDNA.30925.1.S1_at   | MmugDNA.30925.1 | 7.01  | 6.62  | 0.57 | 0.38 | 1.31   | 0.67817  | 0.752216 | 0.855827 | 0.855787 |
| MmugDNA.30926.1.S1_at   | MmugDNA.30926.1 | 3.73  | 3.72  | 0.2  | 0.09 | 1      | 0.846104 | 0.161447 | 0.938232 | 0.437604 |
| MmugDNA.30927.1.S1_at   | MmugDNA.30927.1 | 10.32 | 9     | 0.44 | 1.67 | 2.49   | 0.100771 | 0.105887 | 0.461009 | 0.368175 |
| MmugDNA.30928.1.S1_at   | MmugDNA.30928.1 | 4.05  | 4.04  | 0.05 | 0.11 | 1.01   | 0.787917 | 0.814544 | 0.911709 | 0.892959 |
| MmugDNA.3093.1.S1_at    | MmugDNA.3093.1  | 3.51  | 3.75  | 0.07 | 0.2  | -1.18  | 0.169318 | 0.253077 | 0.533651 | 0.521415 |
| MmugDNA.30930.1.S1_at   | MmugDNA.30930.1 | 6.06  | 5.96  | 0.17 | 0.16 | 1.07   | 0.437094 | 0.044052 | 0.722208 | 0.254195 |
| MmugDNA.30931.1.S1_at   | MmugDNA.30931.1 | 9.28  | 10.49 | 0.19 | 0.36 | -2.3   | 0.013068 | 0.005825 | 0.245262 | 0.104661 |
| MmugDNA.30932.1.S1_at   | MmugDNA.30932.1 | 6.87  | 6.57  | 0.05 | 0.08 | 1.23   | 0.007497 | 0.028001 | 0.209047 | 0.208898 |
| MmugDNA.30935.1.S1_at   | MmugDNA.30935.1 | 3.23  | 3.26  | 0.19 | 0.06 | -1.02  | 0.578053 | 0.431603 | 0.803619 | 0.652439 |
| MmugDNA.30936.1.S1_at   | MmugDNA.30936.1 | 3.08  | 3.13  | 0.06 | 0.04 | -1.03  | 0.132497 | 0.290794 | 0.498643 | 0.551399 |
| MmugDNA.30938.1.S1_at   | MmugDNA.30938.1 | 10.9  | 10.97 | 0.04 | 0.01 | -1.05  | 0.037963 | 0.085116 | 0.343341 | 0.336936 |
| MmugDNA.30939.1.S1_at   | MmugDNA.30939.1 | 9.96  | 8.92  | 0.52 | 0.96 | 2.05   | 0.128027 | 0.148542 | 0.494243 | 0.423074 |
| MmugDNA.3094.1.S1_at    | MmugDNA.3094.1  | 8.76  | 9.78  | 0.45 | 0.35 | -2.03  | 0.076582 | 0.019514 | 0.425098 | 0.175439 |
| MmugDNA.30940.1.S1_at   | MmugDNA.30940.1 | 5.46  | 4.66  | 1.04 | 0.31 | 1.75   | 0.259176 | 0.248448 | 0.60632  | 0.517727 |
| MmugDNA.30941.1.S1_at   | MmugDNA.30941.1 | 11.91 | 11.92 | 0.09 | 0.08 | -1     | 0.530586 | 0.270356 | 0.776893 | 0.535681 |
| MmugDNA.30942.1.S1_at   | MmugDNA.30942.1 | 4.26  | 3.83  | 0.33 | 0.28 | 1.35   | 0.30572  | 0.297129 | 0.639223 | 0.555996 |
| MmugDNA.30944.1.S1_at   | MmugDNA.30944.1 | 6.64  | 10.76 | 0.87 | 0.39 | -17.35 | 0.002661 | 0.000762 | 0.164386 | 0.04544  |
| MmugDNA.30945.1.S1_at   | MmugDNA.30945.1 | 8.92  | 9.41  | 0.47 | 0.36 | -1.4   | 0.220232 | 0.082443 | 0.579311 | 0.331433 |
| MmugDNA.30946.1.S1_at   | MmugDNA.30946.1 | 7.92  | 8.07  | 0.19 | 0.16 | -1.11  | 0.221038 | 0.255304 | 0.579967 | 0.52339  |
| MmugDNA.30946.1.S1_x_at | MmugDNA.30946.1 | 6.79  | 7.18  | 0.2  | 0.17 | -1.31  | 0.122417 | 0.121325 | 0.487622 | 0.390351 |
| MmugDNA.30948.1.S1_at   | MmugDNA.30948.1 | 4.66  | 4.9   | 0.14 | 0.1  | -1.18  | 0.222201 | 0.492039 | 0.580714 | 0.693403 |
| MmugDNA.30949.1.S1_at   | MmugDNA.30949.1 | 3.64  | 3.74  | 0.08 | 0.12 | -1.07  | 0.184124 | 0.221916 | 0.548032 | 0.495019 |
| MmugDNA.3095.1.S1_at    | MmugDNA.3095.1  | 4.72  | 4.9   | 0.15 | 0.13 | -1.13  | 0.181313 | 0.198329 | 0.545818 | 0.473267 |

|                         |                 |       |       |      |      |        |          |          |          |          |
|-------------------------|-----------------|-------|-------|------|------|--------|----------|----------|----------|----------|
| MmugDNA.30950.1.S1_at   | MmugDNA.30950.1 | 5.27  | 5.29  | 0.2  | 0.29 | -1.01  | 0.877973 | 0.841582 | 0.951036 | 0.909677 |
| MmugDNA.30951.1.S1_at   | MmugDNA.30951.1 | 6.71  | 6.39  | 0.63 | 0.18 | 1.25   | 0.186661 | 0.215036 | 0.550106 | 0.488898 |
| MmugDNA.30952.1.S1_at   | MmugDNA.30952.1 | 5.26  | 5.33  | 0.06 | 0.17 | -1.05  | 0.247236 | 0.348011 | 0.598312 | 0.592215 |
| MmugDNA.30954.1.S1_at   | MmugDNA.30954.1 | 5.03  | 5.04  | 0.23 | 0.18 | -1.01  | 0.806638 | 0.463791 | 0.920793 | 0.674656 |
| MmugDNA.30955.1.S1_at   | MmugDNA.30955.1 | 3.44  | 3.29  | 0.28 | 0.15 | 1.11   | 0.501364 | 0.75155  | 0.759966 | 0.855508 |
| MmugDNA.30956.1.S1_at   | MmugDNA.30956.1 | 8.99  | 9.44  | 0.1  | 0.31 | -1.37  | 0.057635 | 0.076055 | 0.388822 | 0.320805 |
| MmugDNA.30957.1.S1_at   | MmugDNA.30957.1 | 11.64 | 11.89 | 0.08 | 0.13 | -1.18  | 0.036178 | 0.014454 | 0.339036 | 0.153403 |
| MmugDNA.30957.1.S1_x_at | MmugDNA.30957.1 | 11.65 | 12.01 | 0.1  | 0.17 | -1.29  | 0.068786 | 0.028544 | 0.410654 | 0.210754 |
| MmugDNA.30958.1.S1_at   | MmugDNA.30958.1 | 10.44 | 10.6  | 0.28 | 0.44 | -1.12  | 0.557976 | 0.458975 | 0.792892 | 0.671504 |
| MmugDNA.30959.1.S1_at   | MmugDNA.30959.1 | 7.12  | 7.3   | 1.42 | 0.24 | -1.13  | 0.852747 | 0.955869 | 0.940647 | 0.975006 |
| MmugDNA.3096.1.S1_at    | MmugDNA.3096.1  | 9.43  | 8.97  | 0.64 | 0.6  | 1.38   | 0.123586 | 0.192215 | 0.489327 | 0.467665 |
| MmugDNA.30960.1.S1_at   | MmugDNA.30960.1 | 6.21  | 7.9   | 0.39 | 0.89 | -3.21  | 0.043006 | 0.026017 | 0.355958 | 0.202179 |
| MmugDNA.30961.1.S1_at   | MmugDNA.30961.1 | 3.7   | 3.89  | 0.24 | 0.35 | -1.13  | 0.641261 | 0.671941 | 0.838155 | 0.808177 |
| MmugDNA.30963.1.S1_at   | MmugDNA.30963.1 | 4.4   | 4.73  | 0.71 | 0.35 | -1.26  | 0.886127 | 0.970498 | 0.954381 | 0.983936 |
| MmugDNA.30964.1.S1_at   | MmugDNA.30964.1 | 3.13  | 3.22  | 0.35 | 0.04 | -1.06  | 0.780924 | 0.620532 | 0.908679 | 0.77547  |
| MmugDNA.30965.1.S1_at   | MmugDNA.30965.1 | 4.58  | 4.46  | 0.14 | 0.17 | 1.08   | 0.443465 | 0.724959 | 0.726153 | 0.840792 |
| MmugDNA.30967.1.S1_at   | MmugDNA.30967.1 | 7.56  | 7.07  | 0.1  | 0.77 | 1.4    | 0.393891 | 0.503295 | 0.695522 | 0.700767 |
| MmugDNA.30968.1.S1_at   | MmugDNA.30968.1 | 2.97  | 2.95  | 0.15 | 0.14 | 1.01   | 0.994864 | 0.648808 | 0.998209 | 0.794478 |
| MmugDNA.30969.1.S1_at   | MmugDNA.30969.1 | 10.85 | 10.65 | 0.14 | 0.6  | 1.15   | 0.749126 | 0.338477 | 0.892627 | 0.585465 |
| MmugDNA.3097.1.S1_s_at  | MmugDNA.3097.1  | 5.11  | 5.25  | 0.07 | 0.16 | -1.1   | 0.347768 | 0.107606 | 0.666669 | 0.370497 |
| MmugDNA.30970.1.S1_at   | MmugDNA.30970.1 | 5.3   | 5.55  | 0.15 | 0.13 | -1.19  | 0.223232 | 0.31525  | 0.581723 | 0.568939 |
| MmugDNA.30971.1.S1_at   | MmugDNA.30971.1 | 5.71  | 11.06 | 1.82 | 2.54 | -40.67 | 0.101016 | 0.038701 | 0.461009 | 0.24169  |
| MmugDNA.1900.1.S1_at    | MmugDNA.1900.1  | 5.18  | 3.71  | 0.5  | 1.15 | 2.77   | 0.512233 | 0.516945 | 0.765523 | 0.709329 |
| MmugDNA.1900.1.S1_s_at  | MmugDNA.1900.1  | 4.61  | 10.27 | 1.97 | 2.51 | -50.38 | 0.105035 | 0.045564 | 0.465471 | 0.257646 |
| MmugDNA.30972.1.S1_at   | MmugDNA.30972.1 | 9.75  | 10.16 | 0.31 | 0.17 | -1.33  | 0.029005 | 0.009356 | 0.312556 | 0.127602 |
| MmugDNA.30974.1.S1_at   | MmugDNA.30974.1 | 8.44  | 8.13  | 0.07 | 0.28 | 1.23   | 0.10693  | 0.023516 | 0.467551 | 0.192225 |
| MmugDNA.30975.1.S1_s_at | MmugDNA.30975.1 | 9.38  | 9.53  | 0.04 | 0.2  | -1.11  | 0.317835 | 0.426264 | 0.64802  | 0.648455 |
| MmugDNA.30977.1.S1_at   | MmugDNA.30977.1 | 10.38 | 10.81 | 0.3  | 1.24 | -1.35  | 0.858678 | 0.349733 | 0.942914 | 0.593566 |
| MmugDNA.30979.1.S1_at   | MmugDNA.30979.1 | 8.3   | 8.38  | 0.28 | 0.26 | -1.06  | 0.608381 | 0.441828 | 0.819938 | 0.659939 |
| MmugDNA.3098.1.S1_at    | MmugDNA.3098.1  | 5.8   | 5.92  | 0.7  | 0.32 | -1.09  | 0.361257 | 0.470215 | 0.675122 | 0.678572 |
| MmugDNA.30981.1.S1_at   | MmugDNA.30981.1 | 3.38  | 3.5   | 0.33 | 0.26 | -1.09  | 0.766663 | 0.565356 | 0.901901 | 0.739877 |
| MmugDNA.30982.1.S1_at   | MmugDNA.30982.1 | 4.88  | 4.95  | 0.04 | 0.24 | -1.05  | 0.170308 | 0.231076 | 0.534249 | 0.502813 |
| MmugDNA.30983.1.S1_at   | MmugDNA.30983.1 | 7.15  | 6.48  | 0.44 | 0.51 | 1.58   | 0.30692  | 0.284038 | 0.639788 | 0.546283 |
| MmugDNA.30986.1.S1_at   | MmugDNA.30986.1 | 3.11  | 2.97  | 0.3  | 0.16 | 1.1    | 0.247415 | 0.539829 | 0.598498 | 0.723976 |
| MmugDNA.30987.1.S1_at   | MmugDNA.30987.1 | 4.43  | 4.19  | 0.28 | 0.15 | 1.18   | 0.093255 | 0.071492 | 0.450461 | 0.313706 |
| MmugDNA.30988.1.S1_at   | MmugDNA.30988.1 | 7.39  | 5.55  | 0.79 | 0.15 | 3.57   | 0.041661 | 0.10537  | 0.352383 | 0.367245 |
| MmugDNA.30989.1.S1_at   | MmugDNA.30989.1 | 3.56  | 3.26  | 0.54 | 0.07 | 1.23   | 0.307314 | 0.296701 | 0.639945 | 0.555717 |
| MmugDNA.3099.1.S1_at    | MmugDNA.3099.1  | 5.75  | 5.75  | 0.03 | 0.13 | 1      | 0.920752 | 0.983667 | 0.969092 | 0.990902 |
| MmugDNA.30990.1.S1_at   | MmugDNA.30990.1 | 9.03  | 9.16  | 0.18 | 0.14 | -1.09  | 0.131663 | 0.059857 | 0.498041 | 0.291297 |
| MmugDNA.30991.1.S1_at   | MmugDNA.30991.1 | 5.88  | 5.86  | 0.31 | 0.29 | 1.02   | 0.585941 | 0.521549 | 0.807817 | 0.712483 |
| MmugDNA.30992.1.S1_at   | MmugDNA.30992.1 | 4.78  | 4.36  | 0.75 | 0.64 | 1.34   | 0.466989 | 0.701393 | 0.740517 | 0.826814 |

|                         |                 |       |       |      |      |       |          |          |          |          |
|-------------------------|-----------------|-------|-------|------|------|-------|----------|----------|----------|----------|
| MmugDNA.30993.1.S1_at   | MmugDNA.30993.1 | 4.37  | 4.36  | 0.13 | 0.44 | 1     | 0.836991 | 0.973142 | 0.934109 | 0.985426 |
| MmugDNA.30994.1.S1_at   | MmugDNA.30994.1 | 3.85  | 3.82  | 0.05 | 0.29 | 1.02  | 0.766327 | 0.665571 | 0.901727 | 0.804072 |
| MmugDNA.30995.1.S1_at   | MmugDNA.30995.1 | 9.71  | 9.94  | 0.24 | 0.72 | -1.17 | 0.675224 | 0.858973 | 0.854455 | 0.919706 |
| MmugDNA.30996.1.S1_at   | MmugDNA.30996.1 | 5.41  | 5.46  | 0.28 | 0.04 | -1.03 | 0.80352  | 0.867071 | 0.919138 | 0.924465 |
| MmugDNA.30997.1.S1_at   | MmugDNA.30997.1 | 4.21  | 4.31  | 0.12 | 0.13 | -1.07 | 0.190594 | 0.273926 | 0.553158 | 0.538452 |
| MmugDNA.30999.1.S1_at   | MmugDNA.30999.1 | 6.63  | 6.71  | 0.14 | 0.18 | -1.06 | 0.449854 | 0.521729 | 0.730497 | 0.712623 |
| MmugDNA.31.1.S1_at      | MmugDNA.31.1    | 6.52  | 6.41  | 0.1  | 0.02 | 1.08  | 0.358008 | 0.427659 | 0.672935 | 0.649406 |
| MmugDNA.310.1.S1_at     | MmugDNA.310.1   | 4.16  | 4.19  | 0.19 | 0.11 | -1.02 | 0.936023 | 0.254343 | 0.975178 | 0.522647 |
| MmugDNA.31000.1.S1_at   | MmugDNA.31000.1 | 5.32  | 5.13  | 1.5  | 0.42 | 1.14  | 0.450354 | 0.557194 | 0.730948 | 0.735006 |
| MmugDNA.31001.1.S1_at   | MmugDNA.31001.1 | 4.22  | 4.43  | 0.15 | 0.09 | -1.16 | 0.24735  | 0.273326 | 0.598451 | 0.537788 |
| MmugDNA.31003.1.S1_at   | MmugDNA.31003.1 | 5.21  | 5.62  | 0.18 | 0.13 | -1.33 | 0.14588  | 0.183275 | 0.511704 | 0.459553 |
| MmugDNA.31004.1.S1_at   | MmugDNA.31004.1 | 3.93  | 3.92  | 0.16 | 0.17 | 1     | 0.973575 | 0.910869 | 0.989603 | 0.949709 |
| MmugDNA.31005.1.S1_at   | MmugDNA.31005.1 | 10.68 | 10.45 | 0.66 | 0.25 | 1.17  | 0.596982 | 0.630721 | 0.813377 | 0.782389 |
| MmugDNA.31006.1.S1_at   | MmugDNA.31006.1 | 11.23 | 11.45 | 0.25 | 0.07 | -1.16 | 0.370893 | 0.094322 | 0.681748 | 0.350889 |
| MmugDNA.31006.1.S1_s_at | MmugDNA.31006.1 | 12.48 | 12.65 | 0.14 | 0.04 | -1.13 | 0.166186 | 0.062413 | 0.529929 | 0.296669 |
| MmugDNA.31008.1.S1_at   | MmugDNA.31008.1 | 5.13  | 7.63  | 0.51 | 1.08 | -5.65 | 0.051339 | 0.099903 | 0.376001 | 0.358619 |
| MmugDNA.31009.1.S1_at   | MmugDNA.31009.1 | 3.33  | 3.34  | 0.38 | 0.25 | -1.01 | 0.843673 | 0.835944 | 0.937109 | 0.906135 |
| MmugDNA.3101.1.S1_at    | MmugDNA.3101.1  | 6.08  | 6.32  | 0.65 | 0.19 | -1.18 | 0.740555 | 0.125744 | 0.888689 | 0.396313 |
| MmugDNA.31010.1.S1_at   | MmugDNA.31010.1 | 5.35  | 5.51  | 0.15 | 0.11 | -1.11 | 0.627482 | 0.859182 | 0.830191 | 0.919754 |
| MmugDNA.31014.1.S1_at   | MmugDNA.31014.1 | 4.83  | 4.27  | 0.42 | 0.26 | 1.48  | 0.06477  | 0.064726 | 0.403383 | 0.300314 |
| MmugDNA.31016.1.S1_at   | MmugDNA.31016.1 | 3.55  | 4.21  | 0.36 | 0.58 | -1.59 | 0.224777 | 0.174135 | 0.582807 | 0.45044  |
| MmugDNA.31017.1.S1_at   | MmugDNA.31017.1 | 8.74  | 8.08  | 0.21 | 0.07 | 1.57  | 0.006853 | 0.002433 | 0.201732 | 0.073093 |
| MmugDNA.31019.1.S1_at   | MmugDNA.31019.1 | 7.49  | 7.42  | 0.13 | 0.11 | 1.05  | 0.805001 | 0.70644  | 0.91992  | 0.829634 |
| MmugDNA.3102.1.S1_at    | MmugDNA.3102.1  | 2.74  | 2.84  | 0.08 | 0.18 | -1.07 | 0.395926 | 0.252026 | 0.696652 | 0.520647 |
| MmugDNA.3102.1.S1_x_at  | MmugDNA.3102.1  | 2.96  | 2.92  | 0.18 | 0.11 | 1.03  | 0.905282 | 0.557122 | 0.962165 | 0.734946 |
| MmugDNA.31020.1.S1_at   | MmugDNA.31020.1 | 6.51  | 5.98  | 0.08 | 0.27 | 1.45  | 0.073256 | 0.02928  | 0.418483 | 0.213122 |
| MmugDNA.31022.1.S1_at   | MmugDNA.31022.1 | 4.98  | 4.95  | 0.29 | 0.12 | 1.02  | 0.875104 | 0.945614 | 0.949887 | 0.969098 |
| MmugDNA.31023.1.S1_at   | MmugDNA.31023.1 | 4.62  | 4.22  | 0.31 | 0.42 | 1.32  | 0.629093 | 0.610597 | 0.831334 | 0.76874  |
| MmugDNA.31024.1.S1_at   | MmugDNA.31024.1 | 3.95  | 4.1   | 0.05 | 0.17 | -1.11 | 0.240895 | 0.164912 | 0.593628 | 0.441219 |
| MmugDNA.31025.1.S1_at   | MmugDNA.31025.1 | 7.5   | 7.63  | 0.02 | 0.44 | -1.09 | 0.219996 | 0.090946 | 0.579158 | 0.345594 |
| MmugDNA.31026.1.S1_at   | MmugDNA.31026.1 | 3.06  | 3.07  | 0.09 | 0.21 | -1.01 | 0.453053 | 0.248325 | 0.732285 | 0.5176   |
| MmugDNA.31027.1.S1_at   | MmugDNA.31027.1 | 4.91  | 4.85  | 0.06 | 0.07 | 1.04  | 0.318085 | 0.686935 | 0.64802  | 0.817365 |
| MmugDNA.31028.1.S1_at   | MmugDNA.31028.1 | 5.74  | 6.69  | 0.25 | 0.27 | -1.93 | 0.023269 | 0.013192 | 0.290601 | 0.147352 |
| MmugDNA.31029.1.S1_at   | MmugDNA.31029.1 | 6.42  | 6.27  | 0.3  | 0.39 | 1.11  | 0.526113 | 0.68598  | 0.773971 | 0.816691 |
| MmugDNA.31029.1.S1_s_at | MmugDNA.31029.1 | 5.36  | 5.64  | 0.48 | 0.1  | -1.21 | 0.456164 | 0.728053 | 0.734344 | 0.842733 |
| MmugDNA.3103.1.S1_at    | MmugDNA.3103.1  | 8.67  | 8.95  | 0.27 | 0.99 | -1.21 | 0.62013  | 0.439812 | 0.826025 | 0.658439 |
| MmugDNA.31031.1.S1_at   | MmugDNA.31031.1 | 5.26  | 5.31  | 0.6  | 0.05 | -1.03 | 0.405216 | 0.510629 | 0.703082 | 0.705036 |
| MmugDNA.31032.1.S1_at   | MmugDNA.31032.1 | 10.85 | 11.6  | 0.15 | 0.5  | -1.68 | 0.139006 | 0.126117 | 0.506234 | 0.39672  |
| MmugDNA.31033.1.S1_at   | MmugDNA.31033.1 | 10.6  | 10.91 | 0.32 | 0.71 | -1.23 | 0.527638 | 0.712897 | 0.775008 | 0.833557 |
| MmugDNA.9801.1.S1_s_at  | MmugDNA.9801.1  | 10.64 | 10.87 | 0.33 | 0.74 | -1.18 | 0.595489 | 0.786908 | 0.812365 | 0.876732 |
| MmugDNA.31036.1.S1_at   | MmugDNA.31036.1 | 6.4   | 6.39  | 0.16 | 0.17 | 1.01  | 0.630264 | 0.235438 | 0.832004 | 0.506489 |

|                         |                 |       |       |      |      |       |          |          |          |          |
|-------------------------|-----------------|-------|-------|------|------|-------|----------|----------|----------|----------|
| MmugDNA.31037.1.S1_at   | MmugDNA.31037.1 | 8.38  | 6.36  | 0.37 | 0.29 | 4.04  | 0.001606 | 0.00027  | 0.152612 | 0.033828 |
| MmugDNA.31038.1.S1_at   | MmugDNA.31038.1 | 6.46  | 6.47  | 0.37 | 0.31 | -1.01 | 0.652939 | 0.86171  | 0.843896 | 0.921406 |
| MmugDNA.31039.1.S1_at   | MmugDNA.31039.1 | 3.28  | 3.45  | 0.17 | 0.2  | -1.13 | 0.646401 | 0.82726  | 0.840888 | 0.900803 |
| MmugDNA.3104.1.S1_at    | MmugDNA.3104.1  | 10.67 | 10.75 | 0.12 | 0.3  | -1.06 | 0.508679 | 0.111747 | 0.763905 | 0.376787 |
| MmugDNA.31041.1.S1_at   | MmugDNA.31041.1 | 5.68  | 5.7   | 0    | 0.06 | -1.02 | 0.883045 | 0.992101 | 0.952961 | 0.995515 |
| MmugDNA.31042.1.S1_at   | MmugDNA.31042.1 | 4.85  | 4.86  | 0.06 | 0.01 | -1.01 | 0.252526 | 0.530127 | 0.601373 | 0.717729 |
| MmugDNA.31044.1.S1_at   | MmugDNA.31044.1 | 10.75 | 11.14 | 0.53 | 0.36 | -1.3  | 0.37669  | 0.264267 | 0.685249 | 0.530329 |
| MmugDNA.31045.1.S1_at   | MmugDNA.31045.1 | 7.44  | 8.33  | 0.45 | 1.09 | -1.85 | 0.709195 | 0.372404 | 0.872343 | 0.611306 |
| MmugDNA.31046.1.S1_at   | MmugDNA.31046.1 | 3.92  | 4.22  | 0.17 | 0.31 | -1.23 | 0.204915 | 0.075205 | 0.567457 | 0.319384 |
| MmugDNA.31047.1.S1_at   | MmugDNA.31047.1 | 4.84  | 4.31  | 0.48 | 0.25 | 1.44  | 0.08286  | 0.055956 | 0.434645 | 0.28236  |
| MmugDNA.31048.1.S1_at   | MmugDNA.31048.1 | 4.44  | 3.95  | 0.28 | 0.07 | 1.41  | 0.109521 | 0.180979 | 0.470811 | 0.457466 |
| MmugDNA.31050.1.S1_at   | MmugDNA.31050.1 | 8.63  | 8.63  | 0.1  | 0.39 | 1     | 0.955947 | 0.983952 | 0.983421 | 0.991088 |
| MmugDNA.31051.1.S1_at   | MmugDNA.31051.1 | 8.43  | 9.01  | 0.22 | 0.55 | -1.5  | 0.076446 | 0.026571 | 0.425064 | 0.203932 |
| MmugDNA.31052.1.S1_at   | MmugDNA.31052.1 | 5.81  | 5.62  | 1.05 | 0.66 | 1.14  | 0.728198 | 0.824788 | 0.881825 | 0.89939  |
| MmugDNA.31053.1.S1_at   | MmugDNA.31053.1 | 8.77  | 8.41  | 0.15 | 0.19 | 1.28  | 0.129282 | 0.143934 | 0.495361 | 0.417867 |
| MmugDNA.31055.1.S1_at   | MmugDNA.31055.1 | 9.26  | 10.59 | 0.21 | 0.14 | -2.51 | 0.000679 | 0.000222 | 0.136818 | 0.032385 |
| MmugDNA.31058.1.S1_at   | MmugDNA.31058.1 | 10.15 | 9.05  | 0.09 | 0.72 | 2.15  | 0.043799 | 0.042791 | 0.357051 | 0.251394 |
| MmugDNA.31061.1.S1_at   | MmugDNA.31061.1 | 3.56  | 3.41  | 0.35 | 0.21 | 1.11  | 0.245927 | 0.323263 | 0.597305 | 0.574408 |
| MmugDNA.31062.1.S1_at   | MmugDNA.31062.1 | 5.93  | 5.95  | 0.28 | 0.04 | -1.02 | 0.924059 | 0.958226 | 0.970594 | 0.976343 |
| MmugDNA.31063.1.S1_at   | MmugDNA.31063.1 | 3.26  | 3.47  | 0.07 | 0.33 | -1.16 | 0.181917 | 0.170359 | 0.546458 | 0.447103 |
| MmugDNA.31064.1.S1_at   | MmugDNA.31064.1 | 3.39  | 3.39  | 0.09 | 0.04 | -1    | 0.471933 | 0.763398 | 0.743454 | 0.862471 |
| MmugDNA.31065.1.S1_at   | MmugDNA.31065.1 | 7.02  | 7.01  | 0.18 | 0.27 | 1     | 0.506197 | 0.356579 | 0.762114 | 0.598459 |
| MmugDNA.31066.1.S1_at   | MmugDNA.31066.1 | 8.32  | 7.57  | 0.42 | 0.78 | 1.69  | 0.161351 | 0.146738 | 0.526364 | 0.42078  |
| MmugDNA.31068.1.S1_at   | MmugDNA.31068.1 | 7.45  | 7.04  | 0.28 | 0.4  | 1.32  | 0.570982 | 0.614494 | 0.799835 | 0.771283 |
| MmugDNA.31069.1.S1_at   | MmugDNA.31069.1 | 7.78  | 7.08  | 0.12 | 0.43 | 1.62  | 0.147399 | 0.171232 | 0.513223 | 0.447792 |
| MmugDNA.31069.1.S1_s_at | MmugDNA.31069.1 | 9.84  | 9.53  | 0.06 | 0.19 | 1.24  | 0.102578 | 0.130072 | 0.462417 | 0.401724 |
| MmugDNA.3107.1.S1_at    | MmugDNA.3107.1  | 8.19  | 8.23  | 0.32 | 0.41 | -1.03 | 0.691886 | 0.871493 | 0.863115 | 0.926844 |
| MmugDNA.31071.1.S1_at   | MmugDNA.31071.1 | 7.78  | 7.05  | 0.2  | 0.43 | 1.66  | 0.15512  | 0.165132 | 0.519871 | 0.441373 |
| MmugDNA.31072.1.S1_at   | MmugDNA.31072.1 | 7.23  | 7.36  | 0.56 | 0.7  | -1.1  | 0.324049 | 0.430696 | 0.651835 | 0.651691 |
| MmugDNA.31073.1.S1_at   | MmugDNA.31073.1 | 11.5  | 12.03 | 0.09 | 0.05 | -1.44 | 0.001052 | 0.000167 | 0.142994 | 0.030511 |
| MmugDNA.31074.1.S1_at   | MmugDNA.31074.1 | 4.87  | 5.11  | 0.23 | 0.16 | -1.18 | 0.185122 | 0.106396 | 0.548609 | 0.36895  |
| MmugDNA.31075.1.S1_at   | MmugDNA.31075.1 | 6.92  | 6.82  | 0.33 | 0.23 | 1.07  | 0.715051 | 0.639192 | 0.875005 | 0.788125 |
| MmugDNA.31076.1.S1_at   | MmugDNA.31076.1 | 5.47  | 5.47  | 0.12 | 0.16 | 1     | 0.95904  | 0.831694 | 0.98444  | 0.903453 |
| MmugDNA.31077.1.S1_at   | MmugDNA.31077.1 | 6.41  | 5.99  | 0.39 | 0.33 | 1.35  | 0.561477 | 0.126219 | 0.794887 | 0.396751 |
| MmugDNA.31078.1.S1_at   | MmugDNA.31078.1 | 4.49  | 4.38  | 0.03 | 0.09 | 1.08  | 0.095434 | 0.277937 | 0.453454 | 0.541664 |
| MmugDNA.31079.1.S1_at   | MmugDNA.31079.1 | 7.91  | 7.54  | 0.09 | 0.75 | 1.29  | 0.423279 | 0.38946  | 0.713996 | 0.623564 |
| MmugDNA.3108.1.S1_at    | MmugDNA.3108.1  | 9.21  | 8.01  | 0.41 | 0.57 | 2.3   | 0.101439 | 0.093005 | 0.461313 | 0.349174 |
| MmugDNA.31081.1.S1_at   | MmugDNA.31081.1 | 9.58  | 10.14 | 0.27 | 0.36 | -1.48 | 0.040072 | 0.03878  | 0.348787 | 0.241916 |
| MmugDNA.31082.1.S1_at   | MmugDNA.31082.1 | 5.05  | 4.98  | 0.18 | 0.29 | 1.05  | 0.640526 | 0.607494 | 0.837657 | 0.766417 |
| MmugDNA.31083.1.S1_at   | MmugDNA.31083.1 | 3.32  | 3.32  | 0.33 | 0.15 | -1    | 0.257982 | 0.339593 | 0.605348 | 0.586188 |
| MmugDNA.31084.1.S1_at   | MmugDNA.31084.1 | 10.17 | 10.46 | 0.35 | 0.43 | -1.22 | 0.711394 | 0.569274 | 0.873626 | 0.742375 |

|                         |                 |       |       |      |      |       |          |          |          |          |
|-------------------------|-----------------|-------|-------|------|------|-------|----------|----------|----------|----------|
| MmugDNA.31086.1.S1_at   | MmugDNA.31086.1 | 7.39  | 7.31  | 0.18 | 0.02 | 1.06  | 0.813643 | 0.801207 | 0.924368 | 0.885679 |
| MmugDNA.31087.1.S1_at   | MmugDNA.31087.1 | 9.07  | 8.84  | 0.97 | 0.16 | 1.17  | 0.46119  | 0.29234  | 0.737488 | 0.552408 |
| MmugDNA.31089.1.S1_s_at | MmugDNA.31089.1 | 10.98 | 10.63 | 0.08 | 0.16 | 1.28  | 0.100703 | 0.007258 | 0.461009 | 0.114309 |
| MmugDNA.3109.1.S1_at    | MmugDNA.3109.1  | 6.16  | 8     | 0.88 | 2.76 | -3.59 | 0.569275 | 0.038104 | 0.79903  | 0.239835 |
| MmugDNA.3109.1.S1_s_at  | MmugDNA.3109.1  | 6.12  | 7.09  | 0.59 | 1.5  | -1.96 | 0.262699 | 0.012641 | 0.609039 | 0.14505  |
| MmugDNA.31091.1.S1_at   | MmugDNA.31091.1 | 9.89  | 9.8   | 0.07 | 0.59 | 1.06  | 0.520977 | 0.104538 | 0.77105  | 0.365805 |
| MmugDNA.31093.1.S1_at   | MmugDNA.31093.1 | 10.76 | 10.52 | 0.25 | 0.13 | 1.18  | 0.182874 | 0.386733 | 0.547133 | 0.621891 |
| MmugDNA.31094.1.S1_at   | MmugDNA.31094.1 | 6.01  | 6.11  | 0.2  | 0.37 | -1.07 | 0.93378  | 0.355798 | 0.974366 | 0.597864 |
| MmugDNA.31095.1.S1_at   | MmugDNA.31095.1 | 11.64 | 11.5  | 0.32 | 0.18 | 1.1   | 0.855848 | 0.219955 | 0.941729 | 0.49344  |
| MmugDNA.31097.1.S1_at   | MmugDNA.31097.1 | 5.98  | 6.24  | 0.77 | 0.09 | -1.2  | 0.205297 | 0.216731 | 0.567776 | 0.490311 |
| MmugDNA.31099.1.S1_at   | MmugDNA.31099.1 | 7.17  | 7.51  | 0.28 | 0.39 | -1.27 | 0.136957 | 0.123143 | 0.504163 | 0.393174 |
| MmugDNA.31099.1.S1_s_at | MmugDNA.31099.1 | 8.65  | 8.94  | 0.43 | 0.56 | -1.22 | 0.203531 | 0.190674 | 0.566041 | 0.466127 |
| MmugDNA.311.1.S1_at     | MmugDNA.311.1   | 4.25  | 4.32  | 0.1  | 0.17 | -1.05 | 0.61345  | 0.829323 | 0.822743 | 0.901879 |
| MmugDNA.3110.1.S1_at    | MmugDNA.3110.1  | 2.85  | 2.82  | 0.03 | 0.21 | 1.02  | 0.447507 | 0.583192 | 0.729043 | 0.751632 |
| MmugDNA.31101.1.S1_at   | MmugDNA.31101.1 | 8.74  | 8.81  | 0.05 | 0.45 | -1.05 | 0.510873 | 0.607527 | 0.765151 | 0.766417 |
| MmugDNA.31102.1.S1_at   | MmugDNA.31102.1 | 6.09  | 5.94  | 0.47 | 0.13 | 1.11  | 0.833953 | 0.843387 | 0.932524 | 0.910815 |
| MmugDNA.31103.1.S1_at   | MmugDNA.31103.1 | 7.65  | 7.7   | 0.38 | 0.05 | -1.04 | 0.928278 | 0.457649 | 0.972406 | 0.670889 |
| MmugDNA.31104.1.S1_at   | MmugDNA.31104.1 | 5.26  | 5.13  | 0.2  | 0.41 | 1.09  | 0.864918 | 0.677409 | 0.945763 | 0.81167  |
| MmugDNA.31105.1.S1_at   | MmugDNA.31105.1 | 4.12  | 3.65  | 0.29 | 0.22 | 1.38  | 0.317342 | 0.393012 | 0.64789  | 0.625971 |
| MmugDNA.31108.1.S1_at   | MmugDNA.31108.1 | 4.17  | 4.23  | 0.34 | 0.7  | -1.04 | 0.483946 | 0.23396  | 0.749973 | 0.505221 |
| MmugDNA.3111.1.S1_at    | MmugDNA.3111.1  | 4.07  | 4.75  | 1.11 | 0.21 | -1.6  | 0.821954 | 0.909714 | 0.927484 | 0.949067 |
| MmugDNA.31110.1.S1_at   | MmugDNA.31110.1 | 3.6   | 3.5   | 0.33 | 0.1  | 1.07  | 0.698975 | 0.604056 | 0.866547 | 0.764452 |
| MmugDNA.31111.1.S1_at   | MmugDNA.31111.1 | 6.41  | 6.35  | 0.14 | 0.06 | 1.04  | 0.68116  | 0.706063 | 0.85748  | 0.829633 |
| MmugDNA.31113.1.S1_at   | MmugDNA.31113.1 | 5.18  | 5.52  | 0.69 | 0.44 | -1.26 | 0.545832 | 0.541642 | 0.785219 | 0.725033 |
| MmugDNA.31115.1.S1_at   | MmugDNA.31115.1 | 3.24  | 3.33  | 0.09 | 0.07 | -1.06 | 0.124444 | 0.282989 | 0.490364 | 0.545692 |
| MmugDNA.31116.1.S1_at   | MmugDNA.31116.1 | 6.53  | 6.6   | 0.27 | 0.16 | -1.06 | 0.475967 | 0.476592 | 0.746049 | 0.682787 |
| MmugDNA.31117.1.S1_at   | MmugDNA.31117.1 | 4.98  | 4.87  | 0.31 | 0.24 | 1.07  | 0.932643 | 0.524202 | 0.973934 | 0.714207 |
| MmugDNA.31118.1.S1_at   | MmugDNA.31118.1 | 7.15  | 7.1   | 0.03 | 0.11 | 1.04  | 0.760994 | 0.139839 | 0.899213 | 0.413131 |
| MmugDNA.31119.1.S1_at   | MmugDNA.31119.1 | 4.94  | 5.16  | 0.13 | 0.02 | -1.17 | 0.02608  | 0.018009 | 0.30146  | 0.169233 |
| MmugDNA.3112.1.S1_at    | MmugDNA.3112.1  | 3.11  | 2.96  | 0.17 | 0.07 | 1.11  | 0.441153 | 0.657766 | 0.724743 | 0.799981 |
| MmugDNA.31121.1.S1_at   | MmugDNA.31121.1 | 2.9   | 2.91  | 0.05 | 0.14 | -1    | 0.76436  | 0.948435 | 0.900715 | 0.970595 |
| MmugDNA.31123.1.S1_at   | MmugDNA.31123.1 | 5.01  | 5.18  | 0.33 | 0.02 | -1.13 | 0.389395 | 0.484631 | 0.692994 | 0.68858  |
| MmugDNA.31124.1.S1_at   | MmugDNA.31124.1 | 7.71  | 7.61  | 0.39 | 0.86 | 1.07  | 0.650628 | 0.42711  | 0.842789 | 0.649106 |
| MmugDNA.31126.1.S1_at   | MmugDNA.31126.1 | 5.07  | 4.77  | 0.18 | 0.09 | 1.23  | 0.058852 | 0.05621  | 0.390921 | 0.282978 |
| MmugDNA.31127.1.S1_at   | MmugDNA.31127.1 | 3.65  | 3.19  | 0.42 | 0.15 | 1.37  | 0.248688 | 0.113811 | 0.599492 | 0.380052 |
| MmugDNA.31128.1.S1_at   | MmugDNA.31128.1 | 7.49  | 7.7   | 0.17 | 0.17 | -1.15 | 0.454095 | 0.373797 | 0.733133 | 0.61244  |
| MmugDNA.31129.1.S1_at   | MmugDNA.31129.1 | 8.82  | 10.25 | 0.76 | 0.41 | -2.69 | 0.047492 | 0.030751 | 0.366522 | 0.217248 |
| MmugDNA.3113.1.S1_at    | MmugDNA.3113.1  | 7.3   | 6.8   | 0.53 | 0.39 | 1.42  | 0.122755 | 0.169327 | 0.488113 | 0.445925 |
| MmugDNA.31130.1.S1_at   | MmugDNA.31130.1 | 6.92  | 7.17  | 0.26 | 0.1  | -1.19 | 0.293968 | 0.294058 | 0.631039 | 0.553912 |
| MmugDNA.31130.1.S1_x_at | MmugDNA.31130.1 | 6.45  | 6.67  | 0.17 | 0.11 | -1.16 | 0.138434 | 0.129175 | 0.505745 | 0.400611 |
| MmugDNA.31133.1.S1_at   | MmugDNA.31133.1 | 5.04  | 4.97  | 0.04 | 0.16 | 1.06  | 0.92002  | 0.729318 | 0.968811 | 0.843541 |

|                         |                 |       |       |      |      |       |          |          |          |          |
|-------------------------|-----------------|-------|-------|------|------|-------|----------|----------|----------|----------|
| MmugDNA.31137.1.S1_at   | MmugDNA.31137.1 | 5.67  | 5.82  | 0.08 | 0.18 | -1.11 | 0.623513 | 0.753529 | 0.827977 | 0.856527 |
| MmugDNA.31138.1.S1_at   | MmugDNA.31138.1 | 5.32  | 5.44  | 0.1  | 0.14 | -1.08 | 0.185916 | 0.046266 | 0.549412 | 0.259486 |
| MmugDNA.31140.1.S1_at   | MmugDNA.31140.1 | 4.47  | 4.34  | 0.12 | 0    | 1.09  | 0.408157 | 0.429228 | 0.70497  | 0.650729 |
| MmugDNA.31142.1.S1_at   | MmugDNA.31142.1 | 9.69  | 8.94  | 0.31 | 0.89 | 1.68  | 0.347366 | 0.446492 | 0.666415 | 0.662842 |
| MmugDNA.31143.1.S1_at   | MmugDNA.31143.1 | 7.4   | 8.32  | 0.21 | 0.31 | -1.9  | 0.008892 | 0.002519 | 0.221598 | 0.074158 |
| MmugDNA.31144.1.S1_at   | MmugDNA.31144.1 | 4.27  | 4.32  | 0.11 | 0.1  | -1.03 | 0.668796 | 0.12045  | 0.851986 | 0.38925  |
| MmugDNA.31145.1.S1_at   | MmugDNA.31145.1 | 3.23  | 3.21  | 0.61 | 0.43 | 1.01  | 0.804382 | 0.948358 | 0.919555 | 0.970554 |
| MmugDNA.31146.1.S1_at   | MmugDNA.31146.1 | 4.75  | 4.85  | 0.2  | 0.17 | -1.07 | 0.6901   | 0.675331 | 0.861921 | 0.81026  |
| MmugDNA.31147.1.S1_at   | MmugDNA.31147.1 | 7.94  | 7.91  | 0.09 | 0.1  | 1.02  | 0.823479 | 0.745409 | 0.928174 | 0.852384 |
| MmugDNA.31147.1.S1_s_at | MmugDNA.31147.1 | 5.48  | 5.47  | 0.05 | 0.02 | 1.01  | 0.917752 | 0.048745 | 0.968032 | 0.265744 |
| MmugDNA.31149.1.S1_at   | MmugDNA.31149.1 | 3.33  | 3.34  | 0.35 | 0.04 | -1    | 0.338825 | 0.323639 | 0.660988 | 0.574525 |
| MmugDNA.3115.1.S1_at    | MmugDNA.3115.1  | 3.97  | 4.49  | 0.28 | 0.48 | -1.44 | 0.149171 | 0.147562 | 0.514001 | 0.421872 |
| MmugDNA.31151.1.S1_at   | MmugDNA.31151.1 | 4.1   | 4.1   | 0.07 | 0.11 | -1    | 0.738983 | 0.743903 | 0.888088 | 0.85159  |
| MmugDNA.31152.1.S1_at   | MmugDNA.31152.1 | 3.47  | 2.85  | 0.32 | 0.06 | 1.54  | 0.080619 | 0.089488 | 0.430935 | 0.343811 |
| MmugDNA.31153.1.S1_at   | MmugDNA.31153.1 | 6.93  | 6.23  | 0.26 | 0.57 | 1.62  | 0.123355 | 0.11773  | 0.488991 | 0.385519 |
| MmugDNA.31155.1.S1_at   | MmugDNA.31155.1 | 4.03  | 3.91  | 0.09 | 0.09 | 1.09  | 0.186093 | 0.322543 | 0.549625 | 0.573991 |
| MmugDNA.31156.1.S1_s_at | MmugDNA.31156.1 | 10.3  | 10.96 | 0.22 | 0.56 | -1.59 | 0.439244 | 0.597236 | 0.723497 | 0.76013  |
| MmugDNA.31158.1.S1_at   | MmugDNA.31158.1 | 5.1   | 5.05  | 0.2  | 0.23 | 1.04  | 0.866629 | 0.684716 | 0.946819 | 0.816113 |
| MmugDNA.3116.1.S1_at    | MmugDNA.3116.1  | 4.43  | 3.86  | 0.72 | 0.54 | 1.49  | 0.618389 | 0.811481 | 0.825194 | 0.891185 |
| MmugDNA.31160.1.S1_at   | MmugDNA.31160.1 | 5.18  | 5.36  | 0.09 | 0.78 | -1.13 | 0.607347 | 0.022963 | 0.819317 | 0.189548 |
| MmugDNA.31161.1.S1_at   | MmugDNA.31161.1 | 8.14  | 8.9   | 0.42 | 0.59 | -1.69 | 0.071221 | 0.016651 | 0.414885 | 0.163343 |
| MmugDNA.31163.1.S1_at   | MmugDNA.31163.1 | 3.21  | 3.32  | 0.03 | 0.11 | -1.08 | 0.116004 | 0.025897 | 0.479516 | 0.201714 |
| MmugDNA.31164.1.S1_at   | MmugDNA.31164.1 | 11.35 | 10.65 | 0.13 | 0.37 | 1.62  | 0.036422 | 0.011577 | 0.339201 | 0.139225 |
| MmugDNA.31165.1.S1_at   | MmugDNA.31165.1 | 3.39  | 3.39  | 0.26 | 0.09 | -1    | 0.87457  | 0.953439 | 0.949695 | 0.97351  |
| MmugDNA.31167.1.S1_s_at | MmugDNA.31167.1 | 3.17  | 3.89  | 0.15 | 0.62 | -1.65 | 0.17389  | 0.174524 | 0.537415 | 0.450998 |
| MmugDNA.31167.1.S1_x_at | MmugDNA.31167.1 | 3.11  | 3.28  | 0.13 | 0.54 | -1.12 | 0.237254 | 0.399303 | 0.590811 | 0.629737 |
| MmugDNA.31168.1.S1_at   | MmugDNA.31168.1 | 4.45  | 3.94  | 0.93 | 0.07 | 1.42  | 0.23818  | 0.221748 | 0.591555 | 0.494901 |
| MmugDNA.31169.1.S1_at   | MmugDNA.31169.1 | 7.44  | 6.58  | 0.14 | 0.41 | 1.82  | 0.030703 | 0.031605 | 0.319646 | 0.219905 |
| MmugDNA.3117.1.S1_at    | MmugDNA.3117.1  | 4.62  | 4.22  | 0.65 | 0.14 | 1.32  | 0.448918 | 0.671366 | 0.729947 | 0.807861 |
| MmugDNA.31170.1.S1_at   | MmugDNA.31170.1 | 5.53  | 4.98  | 0.68 | 0.13 | 1.46  | 0.30957  | 0.38343  | 0.641613 | 0.619424 |
| MmugDNA.31171.1.S1_at   | MmugDNA.31171.1 | 5.09  | 5.19  | 0.25 | 0.13 | -1.07 | 0.189052 | 0.35707  | 0.552168 | 0.59875  |
| MmugDNA.31173.1.S1_at   | MmugDNA.31173.1 | 5.81  | 5.8   | 0.18 | 0.06 | 1.01  | 0.872348 | 0.931088 | 0.948981 | 0.960841 |
| MmugDNA.31174.1.S1_at   | MmugDNA.31174.1 | 3.52  | 3.48  | 0.39 | 0.25 | 1.03  | 0.941316 | 0.800055 | 0.977675 | 0.885072 |
| MmugDNA.31176.1.S1_at   | MmugDNA.31176.1 | 3.97  | 4.05  | 0.12 | 0.1  | -1.06 | 0.637671 | 0.798473 | 0.836256 | 0.884012 |
| MmugDNA.31178.1.S1_at   | MmugDNA.31178.1 | 8.45  | 8.57  | 0.66 | 0.06 | -1.09 | 0.374215 | 0.474313 | 0.683417 | 0.68135  |
| MmugDNA.31179.1.S1_at   | MmugDNA.31179.1 | 11.6  | 11.2  | 0.06 | 0.18 | 1.32  | 0.009703 | 0.002152 | 0.226235 | 0.068732 |
| MmugDNA.3118.1.S1_at    | MmugDNA.3118.1  | 5.57  | 5.53  | 0.09 | 0.01 | 1.03  | 0.479189 | 0.102118 | 0.747575 | 0.362168 |
| MmugDNA.31180.1.S1_at   | MmugDNA.31180.1 | 10.16 | 10.42 | 0.31 | 0.73 | -1.19 | 0.576157 | 0.77994  | 0.802787 | 0.872422 |
| MmugDNA.31182.1.S1_at   | MmugDNA.31182.1 | 9.37  | 9.5   | 0.18 | 0.54 | -1.09 | 0.56221  | 0.831421 | 0.795196 | 0.903343 |
| MmugDNA.31183.1.S1_at   | MmugDNA.31183.1 | 5.22  | 5.14  | 0.02 | 0.15 | 1.05  | 0.529648 | 0.7361   | 0.77625  | 0.84733  |
| MmugDNA.31184.1.S1_at   | MmugDNA.31184.1 | 5.07  | 5.1   | 0.07 | 0.09 | -1.02 | 0.405224 | 0.254853 | 0.703082 | 0.523051 |

|                         |                 |       |       |      |      |       |          |          |          |          |
|-------------------------|-----------------|-------|-------|------|------|-------|----------|----------|----------|----------|
| MmugDNA.31186.1.S1_at   | MmugDNA.31186.1 | 7.52  | 8.81  | 0.12 | 1.24 | -2.46 | 0.462623 | 0.50121  | 0.738289 | 0.699449 |
| MmugDNA.31187.1.S1_at   | MmugDNA.31187.1 | 6.72  | 6.89  | 0.18 | 0.08 | -1.12 | 0.301227 | 0.527858 | 0.636303 | 0.71629  |
| MmugDNA.31188.1.S1_at   | MmugDNA.31188.1 | 8.88  | 9.63  | 0.18 | 0.65 | -1.67 | 0.047355 | 0.03776  | 0.365901 | 0.238746 |
| MmugDNA.31189.1.S1_at   | MmugDNA.31189.1 | 5.56  | 4.96  | 1.11 | 0.22 | 1.51  | 0.350317 | 0.573877 | 0.668468 | 0.745442 |
| MmugDNA.31190.1.S1_at   | MmugDNA.31190.1 | 5.02  | 4.97  | 0.26 | 0.18 | 1.04  | 0.751388 | 0.917567 | 0.893728 | 0.95389  |
| MmugDNA.31192.1.S1_at   | MmugDNA.31192.1 | 4.31  | 4.25  | 0.41 | 0.21 | 1.04  | 0.544366 | 0.242595 | 0.784363 | 0.51293  |
| MmugDNA.31193.1.S1_at   | MmugDNA.31193.1 | 9.24  | 8.89  | 0.11 | 0.23 | 1.27  | 0.115675 | 0.046189 | 0.479024 | 0.25935  |
| MmugDNA.31194.1.S1_at   | MmugDNA.31194.1 | 6.73  | 6.74  | 0.12 | 0.17 | -1.01 | 0.333343 | 0.361324 | 0.657539 | 0.602112 |
| MmugDNA.31195.1.S1_at   | MmugDNA.31195.1 | 6.33  | 6.7   | 0.13 | 0.14 | -1.29 | 0.055534 | 0.048731 | 0.384158 | 0.265744 |
| MmugDNA.31196.1.S1_at   | MmugDNA.31196.1 | 10.07 | 9.26  | 0.26 | 1.27 | 1.74  | 0.313447 | 0.21527  | 0.645195 | 0.489011 |
| MmugDNA.31197.1.S1_at   | MmugDNA.31197.1 | 3.97  | 3.89  | 0.15 | 0.17 | 1.06  | 0.473243 | 0.470048 | 0.744128 | 0.678572 |
| MmugDNA.31199.1.S1_at   | MmugDNA.31199.1 | 8.21  | 10.25 | 0.76 | 1.15 | -4.12 | 0.083027 | 0.079037 | 0.434921 | 0.326117 |
| MmugDNA.312.1.S1_at     | MmugDNA.312.1   | 3.6   | 3.65  | 0.13 | 0.11 | -1.03 | 0.157191 | 0.309598 | 0.521923 | 0.564987 |
| MmugDNA.3120.1.S1_at    | MmugDNA.3120.1  | 2.73  | 2.87  | 0.03 | 0.01 | -1.1  | 0.001536 | 0.05285  | 0.151506 | 0.275521 |
| MmugDNA.31200.1.S1_at   | MmugDNA.31200.1 | 3.55  | 3.56  | 0.16 | 0.18 | -1    | 0.717102 | 0.70717  | 0.875713 | 0.830195 |
| MmugDNA.31202.1.S1_at   | MmugDNA.31202.1 | 8.78  | 9.12  | 0.25 | 0.52 | -1.27 | 0.633724 | 0.421095 | 0.833934 | 0.644743 |
| MmugDNA.31203.1.S1_at   | MmugDNA.31203.1 | 7.69  | 5.89  | 0.09 | 0.52 | 3.48  | 0.002934 | 0.000419 | 0.170629 | 0.038093 |
| MmugDNA.31204.1.S1_at   | MmugDNA.31204.1 | 6.2   | 5.36  | 0.54 | 0.24 | 1.79  | 0.088155 | 0.099504 | 0.442584 | 0.35789  |
| MmugDNA.31205.1.S1_at   | MmugDNA.31205.1 | 3.38  | 3.39  | 0.01 | 0.09 | -1.01 | 0.259695 | 0.115763 | 0.606733 | 0.382814 |
| MmugDNA.31205.1.S1_s_at | MmugDNA.31205.1 | 6.04  | 6.02  | 0.03 | 0.12 | 1.01  | 0.476681 | 0.881596 | 0.746273 | 0.932407 |
| MmugDNA.31206.1.S1_at   | MmugDNA.31206.1 | 8.42  | 8.51  | 0.15 | 0.43 | -1.06 | 0.909837 | 0.046065 | 0.964287 | 0.258977 |
| MmugDNA.31207.1.S1_at   | MmugDNA.31207.1 | 7.56  | 7.56  | 0.15 | 0.11 | 1     | 0.544182 | 0.720228 | 0.784268 | 0.838202 |
| MmugDNA.31208.1.S1_at   | MmugDNA.31208.1 | 3.23  | 3.29  | 0.08 | 0.2  | -1.04 | 0.711893 | 0.904601 | 0.873744 | 0.945935 |
| MmugDNA.31209.1.S1_at   | MmugDNA.31209.1 | 5.73  | 6.28  | 0.71 | 0.18 | -1.46 | 0.787821 | 0.631272 | 0.911679 | 0.782742 |
| MmugDNA.3121.1.S1_at    | MmugDNA.3121.1  | 5.03  | 5.09  | 0.1  | 0.1  | -1.04 | 0.484078 | 0.48258  | 0.750089 | 0.687366 |
| MmugDNA.31210.1.S1_at   | MmugDNA.31210.1 | 5.54  | 5.62  | 0.2  | 0.04 | -1.05 | 0.540939 | 0.359595 | 0.782272 | 0.600859 |
| MmugDNA.31212.1.S1_at   | MmugDNA.31212.1 | 12.2  | 12.08 | 0.07 | 0.07 | 1.09  | 0.500194 | 0.012901 | 0.759412 | 0.146227 |
| MmugDNA.31213.1.S1_at   | MmugDNA.31213.1 | 4.94  | 4.94  | 0.24 | 0.3  | -1    | 0.328538 | 0.452344 | 0.654375 | 0.667046 |
| MmugDNA.31214.1.S1_at   | MmugDNA.31214.1 | 3.75  | 3.75  | 0.43 | 0.18 | -1    | 0.99338  | 0.990112 | 0.997754 | 0.994344 |
| MmugDNA.31215.1.S1_at   | MmugDNA.31215.1 | 7.06  | 6.96  | 0.01 | 0.1  | 1.07  | 0.197636 | 0.273916 | 0.560636 | 0.538452 |
| MmugDNA.31216.1.S1_at   | MmugDNA.31216.1 | 3.64  | 3.67  | 0.07 | 0.1  | -1.02 | 0.713762 | 0.319147 | 0.874563 | 0.57167  |
| MmugDNA.31217.1.S1_at   | MmugDNA.31217.1 | 2.83  | 2.85  | 0.06 | 0.04 | -1.01 | 0.630325 | 0.710374 | 0.832004 | 0.831943 |
| MmugDNA.31220.1.S1_at   | MmugDNA.31220.1 | 4.42  | 4.92  | 0.9  | 0.04 | -1.41 | 0.984718 | 0.996824 | 0.994574 | 0.998184 |
| MmugDNA.31222.1.S1_at   | MmugDNA.31222.1 | 6.7   | 5.95  | 1.27 | 0.28 | 1.69  | 0.312104 | 0.405635 | 0.643879 | 0.633891 |
| MmugDNA.31224.1.S1_at   | MmugDNA.31224.1 | 9.62  | 8.42  | 0.17 | 0.38 | 2.3   | 0.010741 | 0.008342 | 0.23109  | 0.121147 |
| MmugDNA.31226.1.S1_at   | MmugDNA.31226.1 | 6.45  | 6.39  | 0.08 | 0.17 | 1.04  | 0.232022 | 0.295931 | 0.58772  | 0.555241 |
| MmugDNA.31228.1.S1_at   | MmugDNA.31228.1 | 3.26  | 3.1   | 0.67 | 0.16 | 1.12  | 0.370185 | 0.305731 | 0.681113 | 0.562722 |
| MmugDNA.31229.1.S1_at   | MmugDNA.31229.1 | 5.67  | 5.99  | 0.37 | 0.47 | -1.25 | 0.44104  | 0.494648 | 0.724717 | 0.69497  |
| MmugDNA.3123.1.S1_at    | MmugDNA.3123.1  | 4.98  | 5.43  | 0.26 | 0.28 | -1.37 | 0.306455 | 0.277821 | 0.639593 | 0.541664 |
| MmugDNA.31230.1.S1_at   | MmugDNA.31230.1 | 7     | 6.91  | 0.13 | 0.09 | 1.07  | 0.22561  | 0.31385  | 0.583707 | 0.568091 |
| MmugDNA.31231.1.S1_at   | MmugDNA.31231.1 | 4.25  | 4.35  | 0.21 | 0.06 | -1.07 | 0.530727 | 0.255208 | 0.776919 | 0.523254 |

|                         |                 |       |       |      |      |       |          |          |          |          |
|-------------------------|-----------------|-------|-------|------|------|-------|----------|----------|----------|----------|
| MmugDNA.31233.1.S1_at   | MmugDNA.31233.1 | 3.8   | 3.71  | 0.71 | 0.1  | 1.07  | 0.253213 | 0.222897 | 0.60185  | 0.495791 |
| MmugDNA.31234.1.S1_at   | MmugDNA.31234.1 | 3.72  | 3.69  | 0.2  | 0.02 | 1.01  | 0.644704 | 0.581522 | 0.839787 | 0.750522 |
| MmugDNA.31235.1.S1_at   | MmugDNA.31235.1 | 3.72  | 3.53  | 0.35 | 0.26 | 1.14  | 0.247152 | 0.308627 | 0.598219 | 0.56461  |
| MmugDNA.31236.1.S1_at   | MmugDNA.31236.1 | 5.6   | 5.72  | 0.11 | 0.34 | -1.09 | 0.21593  | 0.383059 | 0.575954 | 0.619089 |
| MmugDNA.31237.1.S1_at   | MmugDNA.31237.1 | 5.6   | 5.14  | 0.37 | 0.34 | 1.38  | 0.167094 | 0.225665 | 0.531268 | 0.498155 |
| MmugDNA.31238.1.S1_at   | MmugDNA.31238.1 | 7.23  | 7.66  | 0.48 | 1.03 | -1.35 | 0.563294 | 0.514416 | 0.795941 | 0.707677 |
| MmugDNA.31239.1.S1_at   | MmugDNA.31239.1 | 6.39  | 6.78  | 0.96 | 0.72 | -1.31 | 0.619185 | 0.758156 | 0.825425 | 0.8593   |
| MmugDNA.3124.1.S1_at    | MmugDNA.3124.1  | 10.76 | 11.14 | 0.53 | 0.49 | -1.3  | 0.697893 | 0.590585 | 0.865835 | 0.756311 |
| MmugDNA.31240.1.S1_at   | MmugDNA.31240.1 | 3.67  | 3.75  | 0.04 | 0.06 | -1.05 | 0.684892 | 0.294479 | 0.858795 | 0.554225 |
| MmugDNA.31241.1.S1_at   | MmugDNA.31241.1 | 5.75  | 5.85  | 0.51 | 0.15 | -1.07 | 0.731259 | 0.778808 | 0.883692 | 0.871617 |
| MmugDNA.31242.1.S1_at   | MmugDNA.31242.1 | 11.47 | 12.14 | 0.41 | 0.35 | -1.58 | 0.2848   | 0.188795 | 0.62445  | 0.464778 |
| MmugDNA.31242.1.S1_s_at | MmugDNA.31242.1 | 11.05 | 11.72 | 0.41 | 0.34 | -1.59 | 0.107652 | 0.115977 | 0.468121 | 0.383164 |
| MmugDNA.31243.1.S1_at   | MmugDNA.31243.1 | 10.04 | 9.86  | 0.21 | 0.24 | 1.14  | 0.63552  | 0.317043 | 0.83497  | 0.570317 |
| MmugDNA.31245.1.S1_at   | MmugDNA.31245.1 | 8.51  | 8.42  | 0.16 | 0.16 | 1.06  | 0.24322  | 0.008877 | 0.594876 | 0.124662 |
| MmugDNA.31246.1.S1_at   | MmugDNA.31246.1 | 6.42  | 6.69  | 0.16 | 0.17 | -1.21 | 0.261244 | 0.355096 | 0.607837 | 0.597508 |
| MmugDNA.31247.1.S1_at   | MmugDNA.31247.1 | 11.55 | 11.08 | 0.19 | 0.15 | 1.38  | 0.049387 | 0.028018 | 0.37138  | 0.208909 |
| MmugDNA.31248.1.S1_at   | MmugDNA.31248.1 | 4.62  | 3.94  | 0.53 | 0.24 | 1.61  | 0.226613 | 0.286615 | 0.584563 | 0.548069 |
| MmugDNA.31249.1.S1_at   | MmugDNA.31249.1 | 11.18 | 11.87 | 0.06 | 0.27 | -1.61 | 0.032027 | 0.022457 | 0.323873 | 0.187518 |
| MmugDNA.3125.1.S1_at    | MmugDNA.3125.1  | 10.53 | 10.44 | 0.3  | 0.04 | 1.07  | 0.71451  | 0.047551 | 0.874932 | 0.262758 |
| MmugDNA.31250.1.S1_at   | MmugDNA.31250.1 | 6.3   | 6.36  | 0.1  | 0.18 | -1.04 | 0.29751  | 0.321046 | 0.633295 | 0.573046 |
| MmugDNA.31251.1.S1_at   | MmugDNA.31251.1 | 5.07  | 6.99  | 0.83 | 2.03 | -3.77 | 0.361615 | 0.083598 | 0.675385 | 0.334194 |
| MmugDNA.31251.1.S1_s_at | MmugDNA.31251.1 | 6.35  | 7.04  | 0.52 | 0.81 | -1.62 | 0.312979 | 0.199369 | 0.644852 | 0.474002 |
| MmugDNA.31252.1.S1_at   | MmugDNA.31252.1 | 8.52  | 8.45  | 0.12 | 0.11 | 1.05  | 0.840823 | 0.973719 | 0.935988 | 0.985652 |
| MmugDNA.31253.1.S1_at   | MmugDNA.31253.1 | 3.87  | 3.6   | 0.28 | 0.4  | 1.21  | 0.498342 | 0.3928   | 0.75837  | 0.625846 |
| MmugDNA.31254.1.S1_at   | MmugDNA.31254.1 | 3.15  | 3.2   | 0.05 | 0.11 | -1.04 | 0.49123  | 0.321598 | 0.754889 | 0.573303 |
| MmugDNA.31255.1.S1_at   | MmugDNA.31255.1 | 8.22  | 8.43  | 0.62 | 0.47 | -1.16 | 0.712093 | 0.817732 | 0.873815 | 0.894815 |
| MmugDNA.31257.1.S1_at   | MmugDNA.31257.1 | 10.19 | 10.25 | 0.22 | 0.42 | -1.04 | 0.853626 | 0.51563  | 0.940909 | 0.708449 |
| MmugDNA.31259.1.S1_at   | MmugDNA.31259.1 | 4.89  | 4.82  | 0.08 | 0.03 | 1.05  | 0.286943 | 0.269735 | 0.625638 | 0.53502  |
| MmugDNA.3126.1.S1_at    | MmugDNA.3126.1  | 3.41  | 3.51  | 0.29 | 0.19 | -1.07 | 0.869058 | 0.658783 | 0.947856 | 0.800473 |
| MmugDNA.31260.1.S1_at   | MmugDNA.31260.1 | 8.53  | 7.81  | 0.12 | 0.41 | 1.65  | 0.063213 | 0.008391 | 0.400486 | 0.12163  |
| MmugDNA.31262.1.S1_at   | MmugDNA.31262.1 | 6.18  | 6.2   | 0.27 | 0.06 | -1.01 | 0.363911 | 0.524797 | 0.677018 | 0.714595 |
| MmugDNA.31264.1.S1_at   | MmugDNA.31264.1 | 4.79  | 4.59  | 0.81 | 0.1  | 1.14  | 0.586213 | 0.711715 | 0.807961 | 0.832794 |
| MmugDNA.31266.1.S1_at   | MmugDNA.31266.1 | 4.58  | 4.31  | 0.26 | 0.09 | 1.2   | 0.258986 | 0.361158 | 0.606181 | 0.60207  |
| MmugDNA.31267.1.S1_at   | MmugDNA.31267.1 | 6.45  | 6.74  | 0.31 | 0.04 | -1.22 | 0.181461 | 0.184555 | 0.546065 | 0.460582 |
| MmugDNA.31268.1.S1_at   | MmugDNA.31268.1 | 4.13  | 5.05  | 0.5  | 1.04 | -1.89 | 0.506761 | 0.664465 | 0.762448 | 0.803396 |
| MmugDNA.31271.1.S1_at   | MmugDNA.31271.1 | 8.52  | 8.52  | 0.35 | 0.78 | 1     | 0.875945 | 0.174693 | 0.950267 | 0.451231 |
| MmugDNA.31273.1.S1_at   | MmugDNA.31273.1 | 10.86 | 10.31 | 0.31 | 0.3  | 1.46  | 0.171478 | 0.047323 | 0.535166 | 0.262262 |
| MmugDNA.31275.1.S1_at   | MmugDNA.31275.1 | 2.81  | 2.71  | 0.11 | 0.05 | 1.07  | 0.135712 | 0.2217   | 0.502621 | 0.494901 |
| MmugDNA.31278.1.S1_at   | MmugDNA.31278.1 | 5.66  | 5.76  | 0.25 | 0.05 | -1.08 | 0.918303 | 0.981901 | 0.96831  | 0.990085 |
| MmugDNA.31279.1.S1_at   | MmugDNA.31279.1 | 6.01  | 6.26  | 0.06 | 0.15 | -1.18 | 0.09434  | 0.012939 | 0.451866 | 0.14641  |
| MmugDNA.3128.1.S1_at    | MmugDNA.3128.1  | 5.57  | 5.64  | 0.18 | 0.14 | -1.05 | 0.435965 | 0.495144 | 0.721547 | 0.695319 |



|                         |                 |       |       |      |      |       |          |          |          |          |
|-------------------------|-----------------|-------|-------|------|------|-------|----------|----------|----------|----------|
| MmugDNA.31280.1.S1_at   | MmugDNA.31280.1 | 5.12  | 5.18  | 0.35 | 0.29 | -1.04 | 0.922078 | 0.98915  | 0.969716 | 0.993825 |
| MmugDNA.31281.1.S1_at   | MmugDNA.31281.1 | 10.43 | 9.99  | 0.1  | 0.2  | 1.35  | 0.078952 | 0.066909 | 0.428609 | 0.304608 |
| MmugDNA.31282.1.S1_at   | MmugDNA.31282.1 | 6.14  | 4.39  | 0.69 | 0.69 | 3.35  | 0.058413 | 0.051745 | 0.39034  | 0.273002 |
| MmugDNA.31283.1.S1_at   | MmugDNA.31283.1 | 9.43  | 8.08  | 0.44 | 0.31 | 2.54  | 0.01957  | 0.006567 | 0.275212 | 0.109895 |
| MmugDNA.31284.1.S1_at   | MmugDNA.31284.1 | 6.87  | 6.64  | 0.16 | 0.29 | 1.18  | 0.253833 | 0.302453 | 0.60233  | 0.56012  |
| MmugDNA.31285.1.S1_at   | MmugDNA.31285.1 | 6.66  | 6.48  | 0.31 | 0.71 | 1.13  | 0.824717 | 0.74828  | 0.928991 | 0.853508 |
| MmugDNA.31286.1.S1_x_at | MmugDNA.31286.1 | 11.44 | 11.46 | 0.62 | 0.24 | -1.01 | 0.336422 | 0.479467 | 0.659444 | 0.685202 |
| MmugDNA.31287.1.S1_at   | MmugDNA.31287.1 | 9.34  | 9.72  | 0.39 | 0.29 | -1.3  | 0.446263 | 0.510438 | 0.72824  | 0.704938 |
| MmugDNA.31290.1.S1_at   | MmugDNA.31290.1 | 4.85  | 4.97  | 0.09 | 0.14 | -1.08 | 0.433014 | 0.094548 | 0.719581 | 0.351301 |
| MmugDNA.31294.1.S1_at   | MmugDNA.31294.1 | 5.89  | 5.62  | 0.17 | 0.13 | 1.21  | 0.212057 | 0.228576 | 0.572526 | 0.500752 |
| MmugDNA.31295.1.S1_at   | MmugDNA.31295.1 | 6.57  | 6.74  | 0.06 | 0.01 | -1.13 | 0.003046 | 0.003105 | 0.172102 | 0.081305 |
| MmugDNA.31296.1.S1_at   | MmugDNA.31296.1 | 7.65  | 8.03  | 0.25 | 0.26 | -1.3  | 0.06653  | 0.04706  | 0.406564 | 0.261469 |
| MmugDNA.31297.1.S1_at   | MmugDNA.31297.1 | 4     | 4.03  | 0.45 | 0.42 | -1.02 | 0.492046 | 0.362814 | 0.755423 | 0.60332  |
| MmugDNA.31298.1.S1_at   | MmugDNA.31298.1 | 7.41  | 7.16  | 1.28 | 0.55 | 1.19  | 0.548399 | 0.753913 | 0.786665 | 0.85676  |
| MmugDNA.31299.1.S1_at   | MmugDNA.31299.1 | 4.55  | 4.54  | 0.15 | 0.11 | 1.01  | 0.833397 | 0.788282 | 0.932336 | 0.877534 |
| MmugDNA.313.1.S1_at     | MmugDNA.313.1   | 6.4   | 6.95  | 0.16 | 0.22 | -1.47 | 0.029269 | 0.036506 | 0.313575 | 0.235526 |
| MmugDNA.31300.1.S1_s_at | MmugDNA.31300.1 | 6.56  | 6.57  | 0.1  | 0.27 | -1    | 0.330026 | 0.321111 | 0.6555   | 0.57309  |
| MmugDNA.31301.1.S1_at   | MmugDNA.31301.1 | 4.05  | 4.29  | 0.06 | 0.04 | -1.18 | 0.005358 | 0.084224 | 0.191107 | 0.33533  |
| MmugDNA.31303.1.S1_at   | MmugDNA.31303.1 | 4.53  | 3.93  | 1.29 | 0.06 | 1.51  | 0.282426 | 0.349335 | 0.622852 | 0.593355 |
| MmugDNA.31304.1.S1_at   | MmugDNA.31304.1 | 3.58  | 3.57  | 0.23 | 0.35 | 1.01  | 0.585485 | 0.823502 | 0.807608 | 0.8986   |
| MmugDNA.31305.1.S1_at   | MmugDNA.31305.1 | 6.16  | 6.16  | 0.11 | 0.1  | -1    | 0.323113 | 0.43663  | 0.651295 | 0.656124 |
| MmugDNA.31307.1.S1_at   | MmugDNA.31307.1 | 4.75  | 5.3   | 0.25 | 0.39 | -1.46 | 0.092161 | 0.061918 | 0.448698 | 0.295717 |
| MmugDNA.31309.1.S1_at   | MmugDNA.31309.1 | 4.49  | 4.86  | 0.65 | 0.39 | -1.29 | 0.395732 | 0.526831 | 0.696561 | 0.715627 |
| MmugDNA.3131.1.S1_at    | MmugDNA.3131.1  | 3.98  | 4.71  | 0.31 | 0.28 | -1.66 | 0.179224 | 0.353373 | 0.543544 | 0.596477 |
| MmugDNA.31310.1.S1_at   | MmugDNA.31310.1 | 9.31  | 9.36  | 0.02 | 0.11 | -1.03 | 0.818784 | 0.006    | 0.926457 | 0.105939 |
| MmugDNA.31311.1.S1_at   | MmugDNA.31311.1 | 10.3  | 9.79  | 0.3  | 0.42 | 1.43  | 0.283993 | 0.266505 | 0.623838 | 0.532235 |
| MmugDNA.31311.1.S1_s_at | MmugDNA.31311.1 | 10.79 | 10.5  | 0.24 | 0.33 | 1.23  | 0.309808 | 0.22756  | 0.641747 | 0.499841 |
| MmugDNA.31314.1.S1_at   | MmugDNA.31314.1 | 8.61  | 8.85  | 0.06 | 0.2  | -1.18 | 0.04573  | 0.052283 | 0.36158  | 0.274146 |
| MmugDNA.31315.1.S1_at   | MmugDNA.31315.1 | 4.92  | 5.04  | 0.12 | 0.06 | -1.09 | 0.125494 | 0.217479 | 0.491333 | 0.491035 |
| MmugDNA.31316.1.S1_at   | MmugDNA.31316.1 | 6.63  | 6.66  | 1.48 | 1.03 | -1.02 | 0.534307 | 0.519956 | 0.778646 | 0.71141  |
| MmugDNA.31316.1.S1_s_at | MmugDNA.31316.1 | 12.01 | 11.86 | 0.13 | 0.24 | 1.11  | 0.322005 | 0.0749   | 0.650719 | 0.318838 |
| MmugDNA.31317.1.S1_at   | MmugDNA.31317.1 | 4.7   | 4.76  | 0.06 | 0.08 | -1.04 | 0.319357 | 0.395218 | 0.648832 | 0.62738  |
| MmugDNA.31318.1.S1_at   | MmugDNA.31318.1 | 3.27  | 3.29  | 0.02 | 0.14 | -1.02 | 0.927254 | 0.958333 | 0.971988 | 0.976396 |
| MmugDNA.31319.1.S1_at   | MmugDNA.31319.1 | 7.03  | 6.59  | 0.5  | 0.13 | 1.35  | 0.461238 | 0.729252 | 0.737488 | 0.843541 |
| MmugDNA.3132.1.S1_at    | MmugDNA.3132.1  | 5.37  | 4.32  | 1.07 | 0.74 | 2.07  | 0.372876 | 0.416065 | 0.683101 | 0.641342 |
| MmugDNA.31320.1.S1_at   | MmugDNA.31320.1 | 3.18  | 3.28  | 0.2  | 0.19 | -1.07 | 0.5725   | 0.662643 | 0.800799 | 0.802461 |
| MmugDNA.31321.1.S1_at   | MmugDNA.31321.1 | 2.92  | 2.9   | 0.06 | 0.2  | 1.02  | 0.671829 | 0.855738 | 0.852716 | 0.917693 |
| MmugDNA.31322.1.S1_at   | MmugDNA.31322.1 | 5.53  | 5.85  | 0.17 | 0.08 | -1.25 | 0.073321 | 0.106859 | 0.418512 | 0.369487 |
| MmugDNA.31323.1.S1_at   | MmugDNA.31323.1 | 3.71  | 3.51  | 0.23 | 0.1  | 1.15  | 0.15365  | 0.189605 | 0.518163 | 0.465297 |
| MmugDNA.31325.1.S1_at   | MmugDNA.31325.1 | 7.13  | 7.08  | 0.2  | 0.73 | 1.03  | 0.937997 | 0.362441 | 0.976203 | 0.603016 |
| MmugDNA.31326.1.S1_at   | MmugDNA.31326.1 | 7.44  | 7.25  | 0.28 | 0.16 | 1.14  | 0.614354 | 0.012024 | 0.823199 | 0.141889 |

|                         |                 |       |       |      |      |       |          |          |          |          |
|-------------------------|-----------------|-------|-------|------|------|-------|----------|----------|----------|----------|
| MmugDNA.31328.1.S1_at   | MmugDNA.31328.1 | 3.58  | 3.57  | 0.44 | 0.19 | 1.01  | 0.317485 | 0.35685  | 0.647924 | 0.598638 |
| MmugDNA.31329.1.S1_at   | MmugDNA.31329.1 | 4.41  | 4.42  | 0.16 | 0.1  | -1.01 | 0.54302  | 0.644806 | 0.783741 | 0.791889 |
| MmugDNA.31332.1.S1_at   | MmugDNA.31332.1 | 3.36  | 3.17  | 0.13 | 0.11 | 1.14  | 0.028139 | 0.013961 | 0.30978  | 0.151509 |
| MmugDNA.31334.1.S1_at   | MmugDNA.31334.1 | 12.9  | 12.9  | 0.01 | 0.09 | -1    | 0.904865 | 0.283067 | 0.962005 | 0.545692 |
| MmugDNA.31338.1.S1_at   | MmugDNA.31338.1 | 5.92  | 5.94  | 0.71 | 0.18 | -1.02 | 0.731573 | 0.645928 | 0.883931 | 0.792659 |
| MmugDNA.31339.1.S1_at   | MmugDNA.31339.1 | 5.62  | 5.67  | 0.73 | 0.26 | -1.04 | 0.460578 | 0.498182 | 0.737051 | 0.697339 |
| MmugDNA.3134.1.S1_at    | MmugDNA.3134.1  | 3.28  | 3.51  | 0.07 | 0.05 | -1.17 | 0.015251 | 0.00711  | 0.257698 | 0.113555 |
| MmugDNA.31340.1.S1_at   | MmugDNA.31340.1 | 6.05  | 6.24  | 0.12 | 0.16 | -1.14 | 0.198428 | 0.222109 | 0.561581 | 0.495113 |
| MmugDNA.31342.1.S1_at   | MmugDNA.31342.1 | 5.87  | 6.11  | 0.04 | 0.27 | -1.19 | 0.236163 | 0.434435 | 0.590172 | 0.654569 |
| MmugDNA.31344.1.S1_at   | MmugDNA.31344.1 | 4.13  | 4.55  | 0.06 | 0.2  | -1.34 | 0.059124 | 0.061675 | 0.391044 | 0.295135 |
| MmugDNA.31345.1.S1_at   | MmugDNA.31345.1 | 2.96  | 3.03  | 0.12 | 0.09 | -1.05 | 0.39828  | 0.135546 | 0.698598 | 0.407655 |
| MmugDNA.31346.1.S1_at   | MmugDNA.31346.1 | 5.39  | 5.62  | 0.11 | 0.02 | -1.17 | 0.015764 | 0.061713 | 0.260828 | 0.295166 |
| MmugDNA.31347.1.S1_at   | MmugDNA.31347.1 | 4.81  | 4.77  | 0.32 | 0.04 | 1.03  | 0.606261 | 0.703076 | 0.818776 | 0.827866 |
| MmugDNA.31348.1.S1_at   | MmugDNA.31348.1 | 11.45 | 11.1  | 0.12 | 0.75 | 1.28  | 0.152507 | 0.173259 | 0.517209 | 0.449791 |
| MmugDNA.31349.1.S1_at   | MmugDNA.31349.1 | 4.58  | 5.33  | 0.78 | 0.46 | -1.67 | 0.589243 | 0.717008 | 0.809218 | 0.836191 |
| MmugDNA.31350.1.S1_at   | MmugDNA.31350.1 | 5.88  | 6.09  | 0.12 | 0.16 | -1.15 | 0.063707 | 0.06568  | 0.401367 | 0.301631 |
| MmugDNA.31352.1.S1_at   | MmugDNA.31352.1 | 5.47  | 5.64  | 0.09 | 0.07 | -1.12 | 0.11468  | 0.146454 | 0.478025 | 0.420523 |
| MmugDNA.31353.1.S1_at   | MmugDNA.31353.1 | 9.64  | 9.38  | 0.24 | 0.18 | 1.19  | 0.106886 | 0.060892 | 0.467551 | 0.293504 |
| MmugDNA.31353.1.S1_s_at | MmugDNA.31353.1 | 8.74  | 8.57  | 0.27 | 0.28 | 1.12  | 0.534904 | 0.245271 | 0.778892 | 0.515052 |
| MmugDNA.31354.1.S1_at   | MmugDNA.31354.1 | 10.15 | 9.43  | 0.23 | 1.09 | 1.65  | 0.326704 | 0.4066   | 0.653192 | 0.634462 |
| MmugDNA.15302.1.S1_s_at | MmugDNA.15302.1 | 11.55 | 11.48 | 0.12 | 0.46 | 1.05  | 0.84986  | 0.069797 | 0.939736 | 0.310331 |
| MmugDNA.31358.1.S1_s_at | MmugDNA.31358.1 | 4.74  | 4.13  | 0.28 | 0.41 | 1.53  | 0.18998  | 0.189425 | 0.552801 | 0.465117 |
| MmugDNA.3136.1.S1_at    | MmugDNA.3136.1  | 3.32  | 3.65  | 0.04 | 0.16 | -1.25 | 0.011798 | 0.036634 | 0.237691 | 0.235943 |
| MmugDNA.31361.1.S1_at   | MmugDNA.31361.1 | 12.23 | 12.63 | 0.04 | 0.07 | -1.32 | 0.00075  | 0.000287 | 0.136818 | 0.034857 |
| MmugDNA.31363.1.S1_at   | MmugDNA.31363.1 | 5.92  | 5.84  | 0.15 | 0.13 | 1.06  | 0.255711 | 0.316933 | 0.603526 | 0.570275 |
| MmugDNA.31364.1.S1_at   | MmugDNA.31364.1 | 6.44  | 6.53  | 0.27 | 0.4  | -1.06 | 0.29183  | 0.34458  | 0.629107 | 0.589942 |
| MmugDNA.31365.1.S1_at   | MmugDNA.31365.1 | 11.51 | 11.6  | 0.07 | 0.15 | -1.07 | 0.131815 | 0.261508 | 0.498041 | 0.527999 |
| MmugDNA.31366.1.S1_at   | MmugDNA.31366.1 | 12.18 | 12.69 | 0.21 | 0.6  | -1.42 | 0.347065 | 0.489299 | 0.666207 | 0.691774 |
| MmugDNA.31367.1.S1_at   | MmugDNA.31367.1 | 4.12  | 4.2   | 0.51 | 0.09 | -1.06 | 0.470215 | 0.661386 | 0.742182 | 0.801746 |
| MmugDNA.31368.1.S1_at   | MmugDNA.31368.1 | 8.88  | 7.68  | 0.53 | 0.37 | 2.3   | 0.030667 | 0.017791 | 0.319646 | 0.168549 |
| MmugDNA.31369.1.S1_at   | MmugDNA.31369.1 | 12.24 | 11.97 | 0.22 | 0.04 | 1.21  | 0.040201 | 0.005527 | 0.349219 | 0.102563 |
| MmugDNA.31370.1.S1_at   | MmugDNA.31370.1 | 4.93  | 4.92  | 0.1  | 0.12 | 1.01  | 0.475566 | 0.399151 | 0.745847 | 0.62969  |
| MmugDNA.31372.1.S1_at   | MmugDNA.31372.1 | 3.35  | 3.39  | 0.18 | 0.08 | -1.03 | 0.800956 | 0.423077 | 0.917935 | 0.646145 |
| MmugDNA.23687.1.S1_at   | MmugDNA.23687.1 | 3.55  | 3.16  | 0.38 | 0.27 | 1.31  | 0.601726 | 0.258775 | 0.816094 | 0.525949 |
| MmugDNA.23687.1.S1_s_at | MmugDNA.23687.1 | 3.71  | 3.62  | 0.2  | 0.16 | 1.06  | 0.65882  | 0.783394 | 0.846726 | 0.874571 |
| MmugDNA.31374.1.S1_at   | MmugDNA.31374.1 | 9.06  | 9.54  | 0.3  | 0.28 | -1.39 | 0.101822 | 0.212842 | 0.461313 | 0.486774 |
| MmugDNA.31375.1.S1_s_at | MmugDNA.31375.1 | 7.29  | 9.94  | 1.28 | 2.6  | -6.27 | 0.482086 | 0.297735 | 0.749398 | 0.556393 |
| MmugDNA.31376.1.S1_at   | MmugDNA.31376.1 | 5.61  | 5.65  | 0.09 | 0.2  | -1.03 | 0.838123 | 0.973058 | 0.934582 | 0.985401 |
| MmugDNA.31377.1.S1_s_at | MmugDNA.31377.1 | 9.15  | 11.4  | 1.19 | 2.6  | -4.74 | 0.490284 | 0.285221 | 0.75438  | 0.547165 |
| MmugDNA.31379.1.S1_at   | MmugDNA.31379.1 | 7.8   | 7.44  | 0.21 | 0.3  | 1.29  | 0.212144 | 0.288916 | 0.572526 | 0.550032 |
| MmugDNA.31380.1.S1_at   | MmugDNA.31380.1 | 9.78  | 10.04 | 0.48 | 0.02 | -1.2  | 0.919769 | 0.866718 | 0.968755 | 0.924237 |

|                         |                 |       |       |      |      |       |          |          |          |          |
|-------------------------|-----------------|-------|-------|------|------|-------|----------|----------|----------|----------|
| MmugDNA.31381.1.S1_at   | MmugDNA.31381.1 | 4.57  | 4.78  | 0.85 | 0.15 | -1.16 | 0.619196 | 0.468832 | 0.825425 | 0.677906 |
| MmugDNA.31382.1.S1_at   | MmugDNA.31382.1 | 5.89  | 5.65  | 0.14 | 0.29 | 1.18  | 0.136561 | 0.185503 | 0.503691 | 0.461566 |
| MmugDNA.31383.1.S1_at   | MmugDNA.31383.1 | 9.2   | 9.55  | 0.08 | 1.02 | -1.28 | 0.610531 | 0.342566 | 0.821056 | 0.588572 |
| MmugDNA.31384.1.S1_at   | MmugDNA.31384.1 | 4.07  | 4.08  | 0.14 | 0.32 | -1.01 | 0.249343 | 0.283958 | 0.60017  | 0.546237 |
| MmugDNA.31386.1.S1_at   | MmugDNA.31386.1 | 4.08  | 4.03  | 0.02 | 0.19 | 1.03  | 0.554267 | 0.705269 | 0.790667 | 0.829122 |
| MmugDNA.31390.1.S1_at   | MmugDNA.31390.1 | 6.18  | 6     | 0.1  | 0.01 | 1.13  | 0.032677 | 0.141818 | 0.325817 | 0.415331 |
| MmugDNA.31392.1.S1_at   | MmugDNA.31392.1 | 3.19  | 3.36  | 0.11 | 0.16 | -1.12 | 0.21957  | 0.19359  | 0.579016 | 0.468785 |
| MmugDNA.31395.1.S1_at   | MmugDNA.31395.1 | 7.07  | 6.79  | 0.4  | 0.68 | 1.22  | 0.381888 | 0.057012 | 0.688284 | 0.284868 |
| MmugDNA.31399.1.S1_at   | MmugDNA.31399.1 | 10.9  | 10.6  | 0.09 | 0.21 | 1.23  | 0.132649 | 0.096794 | 0.49874  | 0.354207 |
| MmugDNA.314.1.S1_at     | MmugDNA.314.1   | 5.04  | 4.78  | 0.97 | 0.27 | 1.2   | 0.237651 | 0.184761 | 0.591151 | 0.460661 |
| MmugDNA.3140.1.S1_at    | MmugDNA.3140.1  | 2.81  | 2.92  | 0.04 | 0.02 | -1.08 | 0.034226 | 0.013883 | 0.332057 | 0.151137 |
| MmugDNA.31400.1.S1_at   | MmugDNA.31400.1 | 9.91  | 10.63 | 0.41 | 0.43 | -1.65 | 0.261175 | 0.183102 | 0.607754 | 0.459493 |
| MmugDNA.31401.1.S1_at   | MmugDNA.31401.1 | 3.59  | 3.52  | 0.07 | 0.1  | 1.05  | 0.150315 | 0.21749  | 0.51508  | 0.491037 |
| MmugDNA.31401.1.S1_s_at | MmugDNA.31401.1 | 2.73  | 2.76  | 0.02 | 0.05 | -1.02 | 0.160024 | 0.225083 | 0.52484  | 0.497741 |
| MmugDNA.31402.1.S1_at   | MmugDNA.31402.1 | 8.21  | 8.83  | 0.31 | 0.74 | -1.54 | 0.248827 | 0.270064 | 0.599636 | 0.535338 |
| MmugDNA.31403.1.S1_at   | MmugDNA.31403.1 | 4.26  | 4.17  | 0.22 | 0.51 | 1.06  | 0.699186 | 0.739941 | 0.866646 | 0.849317 |
| MmugDNA.31404.1.S1_at   | MmugDNA.31404.1 | 7.61  | 7.86  | 0.34 | 1.31 | -1.19 | 0.572579 | 0.763577 | 0.800799 | 0.862495 |
| MmugDNA.31407.1.S1_at   | MmugDNA.31407.1 | 4.79  | 4.87  | 0.24 | 0.05 | -1.05 | 0.209361 | 0.251281 | 0.570957 | 0.519984 |
| MmugDNA.31408.1.S1_at   | MmugDNA.31408.1 | 6.73  | 7.11  | 0.35 | 0.58 | -1.31 | 0.667822 | 0.806421 | 0.851344 | 0.888651 |
| MmugDNA.31409.1.S1_at   | MmugDNA.31409.1 | 6.58  | 6.61  | 0.09 | 0.05 | -1.02 | 0.754752 | 0.073154 | 0.895642 | 0.316064 |
| MmugDNA.3141.1.S1_at    | MmugDNA.3141.1  | 7.32  | 8.09  | 0.23 | 0.6  | -1.7  | 0.317429 | 0.285509 | 0.647902 | 0.547395 |
| MmugDNA.31410.1.S1_at   | MmugDNA.31410.1 | 11.09 | 11.85 | 0.46 | 0.58 | -1.69 | 0.211065 | 0.215675 | 0.571977 | 0.489477 |
| MmugDNA.31413.1.S1_x_at | MmugDNA.31413.1 | 7.53  | 7.23  | 0.71 | 0.22 | 1.23  | 0.24464  | 0.338813 | 0.596278 | 0.585875 |
| MmugDNA.31415.1.S1_at   | MmugDNA.31415.1 | 7.03  | 7.06  | 0.17 | 0.09 | -1.02 | 0.576534 | 0.550795 | 0.803122 | 0.730611 |
| MmugDNA.31416.1.S1_at   | MmugDNA.31416.1 | 3.53  | 3.57  | 0.14 | 0.13 | -1.03 | 0.443414 | 0.059865 | 0.726112 | 0.291305 |
| MmugDNA.31417.1.S1_at   | MmugDNA.31417.1 | 4.42  | 4.41  | 0.27 | 0.27 | 1.01  | 0.997292 | 0.821341 | 0.99892  | 0.897125 |
| MmugDNA.31418.1.S1_at   | MmugDNA.31418.1 | 5.16  | 4.83  | 0.36 | 0.14 | 1.25  | 0.181069 | 0.055527 | 0.54558  | 0.281454 |
| MmugDNA.3142.1.S1_at    | MmugDNA.3142.1  | 10.43 | 10.25 | 0.15 | 0.24 | 1.14  | 0.467118 | 0.116185 | 0.740562 | 0.383524 |
| MmugDNA.31420.1.S1_at   | MmugDNA.31420.1 | 5.45  | 5.08  | 0.73 | 0.25 | 1.3   | 0.548476 | 0.752564 | 0.786665 | 0.855926 |
| MmugDNA.31421.1.S1_at   | MmugDNA.31421.1 | 7.56  | 6.38  | 0.55 | 0.4  | 2.27  | 0.03857  | 0.03071  | 0.344633 | 0.217148 |
| MmugDNA.31422.1.S1_at   | MmugDNA.31422.1 | 5.31  | 5.45  | 0.12 | 0.11 | -1.1  | 0.187927 | 0.222089 | 0.550964 | 0.495113 |
| MmugDNA.31423.1.S1_at   | MmugDNA.31423.1 | 6.32  | 6.57  | 0.07 | 0.11 | -1.19 | 0.031042 | 0.00561  | 0.32048  | 0.103487 |
| MmugDNA.31424.1.S1_at   | MmugDNA.31424.1 | 12.44 | 12.04 | 0.07 | 0.07 | 1.32  | 0.003189 | 0.011861 | 0.174359 | 0.140973 |
| MmugDNA.31426.1.S1_s_at | MmugDNA.31426.1 | 7.72  | 10.21 | 1.51 | 1.86 | -5.6  | 0.208917 | 0.151478 | 0.570476 | 0.426223 |
| MmugDNA.3143.1.S1_at    | MmugDNA.3143.1  | 6.26  | 6.3   | 0.17 | 0.14 | -1.02 | 0.266557 | 0.256928 | 0.611983 | 0.524765 |
| MmugDNA.31430.1.S1_at   | MmugDNA.31430.1 | 6.11  | 6.11  | 0.09 | 0.02 | 1     | 0.330337 | 0.497701 | 0.655613 | 0.697017 |
| MmugDNA.31431.1.S1_at   | MmugDNA.31431.1 | 8.97  | 8.91  | 0.56 | 0.11 | 1.04  | 0.77123  | 0.91997  | 0.903674 | 0.954967 |
| MmugDNA.31432.1.S1_at   | MmugDNA.31432.1 | 4.66  | 4.88  | 0.33 | 0.25 | -1.17 | 0.436257 | 0.452873 | 0.721644 | 0.667359 |
| MmugDNA.31433.1.S1_at   | MmugDNA.31433.1 | 11.12 | 10.02 | 0.13 | 0.98 | 2.15  | 0.457318 | 0.622727 | 0.734836 | 0.777232 |
| MmugDNA.31434.1.S1_at   | MmugDNA.31434.1 | 8.13  | 6.79  | 1.01 | 0.76 | 2.52  | 0.126291 | 0.140424 | 0.492577 | 0.413589 |
| MmugDNA.31435.1.S1_at   | MmugDNA.31435.1 | 6.03  | 6.02  | 0.03 | 0.14 | 1.01  | 0.535951 | 0.172129 | 0.779351 | 0.448529 |

|                         |                 |       |       |      |      |       |          |          |          |          |
|-------------------------|-----------------|-------|-------|------|------|-------|----------|----------|----------|----------|
| MmugDNA.31437.1.S1_at   | MmugDNA.31437.1 | 7.91  | 7.86  | 0.21 | 0.62 | 1.03  | 0.929116 | 0.806698 | 0.972628 | 0.888775 |
| MmugDNA.31438.1.S1_at   | MmugDNA.31438.1 | 5.95  | 5.94  | 0.56 | 0.87 | 1     | 0.555533 | 0.052141 | 0.791454 | 0.273955 |
| MmugDNA.31439.1.S1_at   | MmugDNA.31439.1 | 7.17  | 7.71  | 1.17 | 0.08 | -1.46 | 0.913918 | 0.954397 | 0.965987 | 0.974132 |
| MmugDNA.31440.1.S1_at   | MmugDNA.31440.1 | 3.11  | 3.02  | 0.04 | 0.11 | 1.06  | 0.159109 | 0.235291 | 0.52416  | 0.506336 |
| MmugDNA.31441.1.S1_at   | MmugDNA.31441.1 | 4.97  | 5.84  | 0.14 | 0.76 | -1.82 | 0.480708 | 0.557325 | 0.748582 | 0.735031 |
| MmugDNA.31442.1.S1_at   | MmugDNA.31442.1 | 5.22  | 5.23  | 0.07 | 0.13 | -1.01 | 0.767897 | 0.071951 | 0.902473 | 0.314293 |
| MmugDNA.31443.1.S1_at   | MmugDNA.31443.1 | 6.12  | 6.33  | 0.12 | 0.15 | -1.15 | 0.364509 | 0.099041 | 0.67737  | 0.357183 |
| MmugDNA.31445.1.S1_at   | MmugDNA.31445.1 | 3.81  | 3.83  | 0.12 | 0.27 | -1.01 | 0.272655 | 0.403755 | 0.616295 | 0.632356 |
| MmugDNA.3145.1.S1_at    | MmugDNA.3145.1  | 3.01  | 3.02  | 0.04 | 0.08 | -1    | 0.40144  | 0.533314 | 0.70084  | 0.719556 |
| MmugDNA.31453.1.S1_at   | MmugDNA.31453.1 | 4.06  | 4.25  | 0.06 | 0.08 | -1.14 | 0.024035 | 0.047816 | 0.293987 | 0.263649 |
| MmugDNA.31454.1.S1_at   | MmugDNA.31454.1 | 11.06 | 11.51 | 0.03 | 0.3  | -1.37 | 0.0626   | 0.111173 | 0.398605 | 0.375798 |
| MmugDNA.31454.1.S1_s_at | MmugDNA.31454.1 | 12.02 | 12.4  | 0.02 | 0.3  | -1.3  | 0.092014 | 0.134907 | 0.448698 | 0.406878 |
| MmugDNA.31455.1.S1_at   | MmugDNA.31455.1 | 11.83 | 11.81 | 0.04 | 0.14 | 1.01  | 0.936154 | 0.042427 | 0.975264 | 0.25063  |
| MmugDNA.31455.1.S1_s_at | MmugDNA.31455.1 | 11.82 | 11.7  | 0.07 | 0.18 | 1.09  | 0.496878 | 0.060257 | 0.757692 | 0.29214  |
| MmugDNA.31459.1.S1_at   | MmugDNA.31459.1 | 7.33  | 7.17  | 0.33 | 0.13 | 1.12  | 0.322848 | 0.049401 | 0.651245 | 0.267199 |
| MmugDNA.3146.1.S1_at    | MmugDNA.3146.1  | 4.14  | 4.34  | 0.16 | 0.24 | -1.15 | 0.124309 | 0.309501 | 0.490196 | 0.564987 |
| MmugDNA.31460.1.S1_at   | MmugDNA.31460.1 | 4.8   | 4.97  | 0.16 | 0.06 | -1.13 | 0.444172 | 0.052897 | 0.726813 | 0.27559  |
| MmugDNA.12460.1.S1_s_at | MmugDNA.12460.1 | 11.06 | 11.02 | 0.41 | 0.38 | 1.03  | 0.708347 | 0.766815 | 0.871666 | 0.864582 |
| MmugDNA.31463.1.S1_at   | MmugDNA.31463.1 | 6.87  | 6.84  | 0.38 | 0.11 | 1.03  | 0.833835 | 0.908946 | 0.932451 | 0.948471 |
| MmugDNA.31464.1.S1_at   | MmugDNA.31464.1 | 6.46  | 6.14  | 0.55 | 0.43 | 1.26  | 0.457982 | 0.15132  | 0.735139 | 0.426073 |
| MmugDNA.31465.1.S1_at   | MmugDNA.31465.1 | 3.24  | 3.21  | 0.19 | 0.07 | 1.02  | 0.43683  | 0.633999 | 0.72206  | 0.784594 |
| MmugDNA.31466.1.S1_at   | MmugDNA.31466.1 | 8.87  | 8.3   | 0.2  | 0.22 | 1.48  | 0.028851 | 0.013388 | 0.312166 | 0.14827  |
| MmugDNA.31468.1.S1_at   | MmugDNA.31468.1 | 13.34 | 13.2  | 0.11 | 0.05 | 1.1   | 0.075209 | 0.063768 | 0.422122 | 0.29906  |
| MmugDNA.31469.1.S1_at   | MmugDNA.31469.1 | 7.63  | 7.17  | 0.27 | 0.12 | 1.38  | 0.077789 | 0.076344 | 0.427795 | 0.321368 |
| MmugDNA.3147.1.S1_at    | MmugDNA.3147.1  | 10.26 | 9.61  | 0.17 | 0.39 | 1.57  | 0.152158 | 0.207049 | 0.51689  | 0.481115 |
| MmugDNA.31470.1.S1_at   | MmugDNA.31470.1 | 6.63  | 6.34  | 0.11 | 0.57 | 1.22  | 0.426191 | 0.374105 | 0.715597 | 0.612678 |
| MmugDNA.31471.1.S1_at   | MmugDNA.31471.1 | 7.41  | 7.9   | 0.28 | 0.38 | -1.4  | 0.147738 | 0.06814  | 0.513337 | 0.307227 |
| MmugDNA.31472.1.S1_at   | MmugDNA.31472.1 | 6.66  | 6.84  | 0.03 | 0.22 | -1.14 | 0.18587  | 0.089394 | 0.549376 | 0.343637 |
| MmugDNA.31473.1.S1_at   | MmugDNA.31473.1 | 3.65  | 3.99  | 0.16 | 0.21 | -1.27 | 0.244916 | 0.189129 | 0.59652  | 0.464973 |
| MmugDNA.31474.1.S1_at   | MmugDNA.31474.1 | 11.01 | 10.94 | 0.11 | 0.47 | 1.05  | 0.500416 | 0.139478 | 0.759532 | 0.412743 |
| MmugDNA.31475.1.S1_at   | MmugDNA.31475.1 | 4.14  | 4.16  | 0.12 | 0.17 | -1.01 | 0.391403 | 0.53674  | 0.694044 | 0.722078 |
| MmugDNA.31477.1.S1_at   | MmugDNA.31477.1 | 8.15  | 8.45  | 0.34 | 0.62 | -1.23 | 0.266023 | 0.356522 | 0.611558 | 0.598459 |
| MmugDNA.31479.1.S1_at   | MmugDNA.31479.1 | 9.23  | 9.78  | 0.22 | 0.22 | -1.47 | 0.077999 | 0.07228  | 0.428012 | 0.314934 |
| MmugDNA.3148.1.S1_at    | MmugDNA.3148.1  | 5.02  | 4.31  | 0.14 | 0.26 | 1.63  | 0.010438 | 0.021672 | 0.229855 | 0.184333 |
| MmugDNA.31483.1.S1_s_at | MmugDNA.31483.1 | 8.07  | 9.01  | 0.86 | 0.74 | -1.91 | 0.091656 | 0.03532  | 0.447754 | 0.232207 |
| MmugDNA.31487.1.S1_at   | MmugDNA.31487.1 | 9.68  | 10.45 | 0.23 | 0.51 | -1.71 | 0.189689 | 0.073888 | 0.552563 | 0.31727  |
| MmugDNA.31488.1.S1_at   | MmugDNA.31488.1 | 3.7   | 3.77  | 0.07 | 0.11 | -1.05 | 0.482126 | 0.705765 | 0.749398 | 0.829505 |
| MmugDNA.31489.1.S1_at   | MmugDNA.31489.1 | 9.21  | 9.45  | 0.13 | 0.47 | -1.18 | 0.447165 | 0.190218 | 0.728801 | 0.465854 |
| MmugDNA.3149.1.S1_at    | MmugDNA.3149.1  | 6.45  | 6.15  | 0.54 | 0.34 | 1.23  | 0.544893 | 0.224624 | 0.784663 | 0.497613 |
| MmugDNA.30854.1.S1_s_at | MmugDNA.30854.1 | 11.24 | 11.19 | 0.08 | 0.12 | 1.04  | 0.282785 | 0.291339 | 0.62312  | 0.551803 |
| MmugDNA.31490.1.S1_at   | MmugDNA.31490.1 | 4.11  | 4.13  | 0.41 | 0.84 | -1.01 | 0.710469 | 0.655683 | 0.873052 | 0.7987   |

|                         |                 |       |       |      |      |       |          |          |          |          |
|-------------------------|-----------------|-------|-------|------|------|-------|----------|----------|----------|----------|
| MmugDNA.31491.1.S1_at   | MmugDNA.31491.1 | 7.56  | 7.73  | 0.2  | 0.41 | -1.13 | 0.587308 | 0.182324 | 0.808543 | 0.458787 |
| MmugDNA.31493.1.S1_s_at | MmugDNA.31493.1 | 8.11  | 8.21  | 0.19 | 0.12 | -1.07 | 0.317069 | 0.036376 | 0.647775 | 0.235146 |
| MmugDNA.31494.1.S1_at   | MmugDNA.31494.1 | 3.96  | 4.08  | 0.41 | 0.07 | -1.08 | 0.543406 | 0.722346 | 0.783799 | 0.839197 |
| MmugDNA.31495.1.S1_at   | MmugDNA.31495.1 | 3.9   | 4.01  | 0.05 | 0.09 | -1.08 | 0.098056 | 0.261548 | 0.457356 | 0.52802  |
| MmugDNA.31496.1.S1_at   | MmugDNA.31496.1 | 5.87  | 5.91  | 0.08 | 0.24 | -1.03 | 0.48186  | 0.504913 | 0.749333 | 0.701947 |
| MmugDNA.31497.1.S1_at   | MmugDNA.31497.1 | 4.88  | 5.22  | 0.39 | 0.76 | -1.27 | 0.181254 | 0.241549 | 0.54572  | 0.512152 |
| MmugDNA.31498.1.S1_at   | MmugDNA.31498.1 | 5.92  | 5.93  | 0.39 | 0.37 | -1.01 | 0.436869 | 0.595981 | 0.72207  | 0.759321 |
| MmugDNA.31499.1.S1_at   | MmugDNA.31499.1 | 5.28  | 5.75  | 0.42 | 0.12 | -1.39 | 0.407662 | 0.594121 | 0.704743 | 0.758517 |
| MmugDNA.315.1.S1_at     | MmugDNA.315.1   | 4.08  | 4.13  | 0.19 | 0.13 | -1.04 | 0.960475 | 0.139276 | 0.9849   | 0.412461 |
| MmugDNA.3150.1.S1_at    | MmugDNA.3150.1  | 9.68  | 9.84  | 0.31 | 0.32 | -1.11 | 0.587424 | 0.034949 | 0.808576 | 0.231062 |
| MmugDNA.3150.1.S1_s_at  | MmugDNA.3150.1  | 8.96  | 9.15  | 0.31 | 0.31 | -1.14 | 0.526035 | 0.092583 | 0.773971 | 0.348529 |
| MmugDNA.31500.1.S1_at   | MmugDNA.31500.1 | 3.46  | 3.28  | 0.37 | 0.09 | 1.13  | 0.274033 | 0.356187 | 0.617262 | 0.598158 |
| MmugDNA.31502.1.S1_at   | MmugDNA.31502.1 | 5.62  | 5.77  | 0.14 | 0.12 | -1.11 | 0.631024 | 0.633494 | 0.832437 | 0.784173 |
| MmugDNA.31503.1.S1_at   | MmugDNA.31503.1 | 3.74  | 3.98  | 0.16 | 0.07 | -1.18 | 0.066704 | 0.11089  | 0.406869 | 0.375256 |
| MmugDNA.39643.1.S1_at   | MmugDNA.39643.1 | 12.18 | 11.75 | 0.09 | 0.07 | 1.35  | 0.003263 | 0.000434 | 0.176021 | 0.038359 |
| MmugDNA.39643.1.S1_s_at | MmugDNA.39643.1 | 11.53 | 11.09 | 0.13 | 0.11 | 1.36  | 0.020383 | 0.007444 | 0.277794 | 0.115858 |
| MmugDNA.31507.1.S1_at   | MmugDNA.31507.1 | 4     | 3.94  | 0.07 | 0.01 | 1.04  | 0.077143 | 0.012255 | 0.426641 | 0.143179 |
| MmugDNA.3151.1.S1_at    | MmugDNA.3151.1  | 3.9   | 4.04  | 0.16 | 0.24 | -1.1  | 0.546823 | 0.795967 | 0.785716 | 0.882469 |
| MmugDNA.31510.1.S1_at   | MmugDNA.31510.1 | 2.94  | 2.95  | 0.16 | 0.01 | -1.01 | 0.489465 | 0.662301 | 0.75384  | 0.802245 |
| MmugDNA.31511.1.S1_at   | MmugDNA.31511.1 | 4.02  | 4.09  | 0.05 | 0.06 | -1.05 | 0.041778 | 0.055812 | 0.352614 | 0.2821   |
| MmugDNA.31512.1.S1_at   | MmugDNA.31512.1 | 8.12  | 7.22  | 0.17 | 0.39 | 1.87  | 0.024645 | 0.014765 | 0.295571 | 0.154596 |
| MmugDNA.31514.1.S1_at   | MmugDNA.31514.1 | 5.01  | 5.03  | 0.06 | 0.04 | -1.01 | 0.934146 | 0.03408  | 0.974481 | 0.228514 |
| MmugDNA.31515.1.S1_at   | MmugDNA.31515.1 | 4.54  | 4.68  | 0.71 | 0.27 | -1.1  | 0.384345 | 0.376826 | 0.689908 | 0.614596 |
| MmugDNA.31516.1.S1_at   | MmugDNA.31516.1 | 7.03  | 6.81  | 0.08 | 0.2  | 1.16  | 0.1102   | 0.05693  | 0.471834 | 0.284714 |
| MmugDNA.31517.1.S1_at   | MmugDNA.31517.1 | 5.14  | 4.94  | 0.88 | 0.13 | 1.15  | 0.385562 | 0.515703 | 0.690683 | 0.708451 |
| MmugDNA.31518.1.S1_at   | MmugDNA.31518.1 | 3.94  | 4.21  | 0.25 | 0.15 | -1.21 | 0.786103 | 0.211387 | 0.911069 | 0.48553  |
| MmugDNA.31519.1.S1_at   | MmugDNA.31519.1 | 5.32  | 6.09  | 0.64 | 0.18 | -1.71 | 0.164092 | 0.04539  | 0.528211 | 0.257395 |
| MmugDNA.3152.1.S1_at    | MmugDNA.3152.1  | 5.38  | 5.33  | 0.12 | 0.07 | 1.04  | 0.488827 | 0.096602 | 0.753318 | 0.354126 |
| MmugDNA.31520.1.S1_at   | MmugDNA.31520.1 | 6.16  | 6.04  | 0.28 | 0.52 | 1.09  | 0.743245 | 0.889059 | 0.890118 | 0.936779 |
| MmugDNA.31521.1.S1_at   | MmugDNA.31521.1 | 3.68  | 3.81  | 0.3  | 0.05 | -1.1  | 0.724707 | 0.504407 | 0.879817 | 0.701557 |
| MmugDNA.31522.1.S1_s_at | MmugDNA.31522.1 | 8.51  | 7.93  | 0.09 | 0.34 | 1.49  | 0.037653 | 0.045516 | 0.342385 | 0.257513 |
| MmugDNA.31525.1.S1_s_at | MmugDNA.31525.1 | 14.39 | 14.37 | 0.06 | 0.05 | 1.01  | 0.74302  | 0.722983 | 0.890085 | 0.839513 |
| MmugDNA.31526.1.S1_at   | MmugDNA.31526.1 | 3.18  | 3.02  | 0.17 | 0.08 | 1.12  | 0.060483 | 0.048844 | 0.393715 | 0.265858 |
| MmugDNA.31527.1.S1_at   | MmugDNA.31527.1 | 3.16  | 3.27  | 0.44 | 0.53 | -1.08 | 0.869741 | 0.743059 | 0.947917 | 0.851135 |
| MmugDNA.3153.1.S1_at    | MmugDNA.3153.1  | 7.07  | 6.61  | 0.28 | 0.25 | 1.37  | 0.127488 | 0.100869 | 0.493834 | 0.360398 |
| MmugDNA.31530.1.S1_at   | MmugDNA.31530.1 | 5.79  | 5.83  | 0.98 | 0.31 | -1.03 | 0.361053 | 0.283908 | 0.675048 | 0.546237 |
| MmugDNA.31537.1.S1_at   | MmugDNA.31537.1 | 5.46  | 4.46  | 0.61 | 0.58 | 2     | 0.545181 | 0.320214 | 0.784779 | 0.572561 |
| MmugDNA.31539.1.S1_at   | MmugDNA.31539.1 | 6.92  | 7.49  | 0.18 | 0.54 | -1.48 | 0.236737 | 0.071153 | 0.590504 | 0.313041 |
| MmugDNA.3154.1.S1_at    | MmugDNA.3154.1  | 4.96  | 4.98  | 0.07 | 0.3  | -1.02 | 0.252573 | 0.317197 | 0.601373 | 0.570458 |
| MmugDNA.31541.1.S1_at   | MmugDNA.31541.1 | 7.39  | 6.73  | 1.24 | 0.31 | 1.57  | 0.15229  | 0.109302 | 0.517006 | 0.37308  |
| MmugDNA.31542.1.S1_at   | MmugDNA.31542.1 | 11.82 | 11.53 | 0.14 | 0.49 | 1.22  | 0.767286 | 0.109803 | 0.902212 | 0.373758 |

|                         |                 |       |       |      |      |       |          |          |          |          |
|-------------------------|-----------------|-------|-------|------|------|-------|----------|----------|----------|----------|
| MmugDNA.31543.1.S1_at   | MmugDNA.31543.1 | 2.71  | 2.7   | 0.22 | 0.09 | 1.01  | 0.556176 | 0.418649 | 0.791617 | 0.643031 |
| MmugDNA.31544.1.S1_at   | MmugDNA.31544.1 | 3.61  | 3.39  | 0.17 | 0.05 | 1.17  | 0.127838 | 0.285672 | 0.494071 | 0.547395 |
| MmugDNA.31547.1.S1_at   | MmugDNA.31547.1 | 7.98  | 6.9   | 0.86 | 0.17 | 2.11  | 0.124864 | 0.185805 | 0.490777 | 0.461631 |
| MmugDNA.31548.1.S1_at   | MmugDNA.31548.1 | 3.08  | 2.99  | 0.02 | 0.05 | 1.07  | 0.069806 | 0.315351 | 0.412907 | 0.568939 |
| MmugDNA.31549.1.S1_at   | MmugDNA.31549.1 | 2.74  | 2.87  | 0.09 | 0.62 | -1.09 | 0.249046 | 0.198057 | 0.599743 | 0.473041 |
| MmugDNA.3155.1.S1_at    | MmugDNA.3155.1  | 5.43  | 5.29  | 0.3  | 0.06 | 1.1   | 0.495678 | 0.738904 | 0.757268 | 0.84866  |
| MmugDNA.31550.1.S1_at   | MmugDNA.31550.1 | 5.52  | 5.75  | 0.33 | 0.6  | -1.17 | 0.780793 | 0.395543 | 0.908616 | 0.627563 |
| MmugDNA.31551.1.S1_at   | MmugDNA.31551.1 | 6     | 6.36  | 0.13 | 0.23 | -1.28 | 0.079029 | 0.070506 | 0.428609 | 0.311777 |
| MmugDNA.31552.1.S1_at   | MmugDNA.31552.1 | 10.59 | 10.44 | 0.49 | 0.64 | 1.11  | 0.816737 | 0.483502 | 0.925751 | 0.687943 |
| MmugDNA.3156.1.S1_at    | MmugDNA.3156.1  | 3.61  | 3.61  | 0.07 | 0.13 | 1     | 0.250447 | 0.366966 | 0.600389 | 0.606583 |
| MmugDNA.31561.1.S1_at   | MmugDNA.31561.1 | 3.34  | 3.69  | 0.03 | 0.25 | -1.28 | 0.097271 | 0.067283 | 0.456253 | 0.305408 |
| MmugDNA.31565.1.S1_at   | MmugDNA.31565.1 | 7.54  | 7.9   | 0.26 | 0.06 | -1.29 | 0.20526  | 0.019171 | 0.567726 | 0.1742   |
| MmugDNA.31567.1.S1_s_at | MmugDNA.31567.1 | 10.36 | 10.32 | 0.23 | 0.6  | 1.03  | 0.323109 | 0.348546 | 0.651295 | 0.592609 |
| MmugDNA.42447.1.S1_s_at | MmugDNA.42447.1 | 10.6  | 11.84 | 0.61 | 0.65 | -2.37 | 0.136757 | 0.117442 | 0.503852 | 0.385147 |
| MmugDNA.31569.1.S1_at   | MmugDNA.31569.1 | 4.41  | 4.42  | 0.1  | 0.05 | -1    | 0.638141 | 0.616673 | 0.836489 | 0.772869 |
| MmugDNA.3157.1.S1_at    | MmugDNA.3157.1  | 3.74  | 3.74  | 0.09 | 0.01 | 1     | 0.330875 | 0.114429 | 0.656063 | 0.38101  |
| MmugDNA.31570.1.S1_at   | MmugDNA.31570.1 | 4.31  | 4.47  | 0.1  | 0.5  | -1.11 | 0.215037 | 0.255352 | 0.575507 | 0.523406 |
| MmugDNA.31572.1.S1_at   | MmugDNA.31572.1 | 10.6  | 11.91 | 0.13 | 0.3  | -2.48 | 0.003615 | 0.001255 | 0.179515 | 0.055001 |
| MmugDNA.31573.1.S1_at   | MmugDNA.31573.1 | 4.05  | 3.97  | 0.1  | 0.2  | 1.06  | 0.509341 | 0.525134 | 0.764327 | 0.714766 |
| MmugDNA.31574.1.S1_at   | MmugDNA.31574.1 | 3.82  | 4.04  | 0.16 | 0.3  | -1.17 | 0.790954 | 0.765667 | 0.913202 | 0.863841 |
| MmugDNA.31575.1.S1_at   | MmugDNA.31575.1 | 6.67  | 6.54  | 0.2  | 0.39 | 1.09  | 0.631055 | 0.396437 | 0.832437 | 0.628227 |
| MmugDNA.31576.1.S1_at   | MmugDNA.31576.1 | 3.18  | 3.34  | 0.24 | 0.08 | -1.12 | 0.357812 | 0.47019  | 0.672726 | 0.678572 |
| MmugDNA.31577.1.S1_at   | MmugDNA.31577.1 | 4.33  | 4.52  | 0.41 | 0.33 | -1.14 | 0.577597 | 0.333535 | 0.803559 | 0.581753 |
| MmugDNA.31578.1.S1_at   | MmugDNA.31578.1 | 7.82  | 7.64  | 0.19 | 0.43 | 1.13  | 0.828091 | 0.243079 | 0.930199 | 0.513356 |
| MmugDNA.31579.1.S1_at   | MmugDNA.31579.1 | 5.45  | 5.44  | 0.06 | 0.05 | 1     | 0.963007 | 0.054932 | 0.985684 | 0.279821 |
| MmugDNA.31580.1.S1_at   | MmugDNA.31580.1 | 6.26  | 6.58  | 0.33 | 0.05 | -1.25 | 0.637293 | 0.498639 | 0.836    | 0.697648 |
| MmugDNA.31581.1.S1_at   | MmugDNA.31581.1 | 8     | 6.99  | 0.25 | 0.13 | 2.01  | 0.004276 | 0.000466 | 0.18216  | 0.038572 |
| MmugDNA.31582.1.S1_at   | MmugDNA.31582.1 | 4.44  | 4.44  | 0.04 | 0.13 | -1    | 0.483876 | 0.368585 | 0.749945 | 0.608098 |
| MmugDNA.31584.1.S1_at   | MmugDNA.31584.1 | 4.94  | 5.03  | 0.12 | 0.1  | -1.06 | 0.746342 | 0.026901 | 0.891402 | 0.205158 |
| MmugDNA.31585.1.S1_at   | MmugDNA.31585.1 | 3.48  | 3.45  | 0.22 | 0.17 | 1.02  | 0.888868 | 0.984127 | 0.955505 | 0.991189 |
| MmugDNA.6631.1.S1_s_at  | MmugDNA.6631.1  | 13.29 | 13.03 | 0.04 | 0.18 | 1.2   | 0.211034 | 0.240251 | 0.571977 | 0.510851 |
| MmugDNA.31587.1.S1_at   | MmugDNA.31587.1 | 8.47  | 7.61  | 1.37 | 1.01 | 1.82  | 0.625967 | 0.327223 | 0.829275 | 0.577173 |
| MmugDNA.31589.1.S1_at   | MmugDNA.31589.1 | 4.26  | 4.16  | 0.57 | 0.18 | 1.07  | 0.460938 | 0.657102 | 0.737292 | 0.799439 |
| MmugDNA.3159.1.S1_at    | MmugDNA.3159.1  | 6.65  | 6.55  | 0.35 | 0.13 | 1.07  | 0.214587 | 0.264181 | 0.575095 | 0.530257 |
| MmugDNA.31590.1.S1_at   | MmugDNA.31590.1 | 3.49  | 2.92  | 0.23 | 0.31 | 1.48  | 0.079846 | 0.075272 | 0.430147 | 0.319441 |
| MmugDNA.31592.1.S1_at   | MmugDNA.31592.1 | 4.07  | 4.12  | 0.05 | 0.11 | -1.03 | 0.36685  | 0.460993 | 0.67921  | 0.672825 |
| MmugDNA.31594.1.S1_at   | MmugDNA.31594.1 | 4.49  | 4.67  | 0.07 | 0.22 | -1.13 | 0.24238  | 0.306904 | 0.594377 | 0.563427 |
| MmugDNA.31595.1.S1_at   | MmugDNA.31595.1 | 6.05  | 5.6   | 0.31 | 0.32 | 1.36  | 0.305371 | 0.409652 | 0.639168 | 0.636687 |
| MmugDNA.31596.1.S1_at   | MmugDNA.31596.1 | 8.23  | 8.57  | 0.09 | 0.27 | -1.26 | 0.048572 | 0.038009 | 0.369003 | 0.239495 |
| MmugDNA.31598.1.S1_at   | MmugDNA.31598.1 | 6.09  | 6.24  | 0.19 | 0.09 | -1.11 | 0.211342 | 0.256377 | 0.572137 | 0.524114 |
| MmugDNA.31599.1.S1_at   | MmugDNA.31599.1 | 5.57  | 5.58  | 0.28 | 0.28 | -1.01 | 0.58862  | 0.481866 | 0.809084 | 0.686812 |

|                         |                 |       |       |      |      |       |          |          |          |          |
|-------------------------|-----------------|-------|-------|------|------|-------|----------|----------|----------|----------|
| MmugDNA.31600.1.S1_at   | MmugDNA.31600.1 | 6.09  | 6.32  | 0.02 | 0.06 | -1.17 | 0.00381  | 0.008704 | 0.179914 | 0.123697 |
| MmugDNA.31601.1.S1_at   | MmugDNA.31601.1 | 3.75  | 3.91  | 0.11 | 0.15 | -1.11 | 0.112781 | 0.110623 | 0.475249 | 0.374854 |
| MmugDNA.31602.1.S1_at   | MmugDNA.31602.1 | 5.13  | 5.22  | 0.13 | 0.31 | -1.06 | 0.270367 | 0.33525  | 0.614698 | 0.583031 |
| MmugDNA.31604.1.S1_at   | MmugDNA.31604.1 | 7.08  | 7.15  | 0.11 | 0.5  | -1.05 | 0.287445 | 0.250601 | 0.625987 | 0.51941  |
| MmugDNA.31605.1.S1_at   | MmugDNA.31605.1 | 12.61 | 12.71 | 0.03 | 0.22 | -1.07 | 0.151158 | 0.006033 | 0.515946 | 0.106089 |
| MmugDNA.31606.1.S1_at   | MmugDNA.31606.1 | 8.97  | 9.48  | 0.17 | 0.42 | -1.42 | 0.23101  | 0.346178 | 0.587369 | 0.591195 |
| MmugDNA.31607.1.S1_at   | MmugDNA.31607.1 | 3.15  | 3.2   | 0.1  | 0.08 | -1.03 | 0.458445 | 0.635485 | 0.735484 | 0.785405 |
| MmugDNA.31608.1.S1_at   | MmugDNA.31608.1 | 3.97  | 4.1   | 0.18 | 0.17 | -1.1  | 0.68626  | 0.198734 | 0.859695 | 0.473391 |
| MmugDNA.31609.1.S1_at   | MmugDNA.31609.1 | 3.6   | 3.8   | 0.1  | 0.07 | -1.15 | 0.049556 | 0.359527 | 0.371523 | 0.600802 |
| MmugDNA.3161.1.S1_at    | MmugDNA.3161.1  | 5.13  | 5.1   | 0.2  | 0.32 | 1.02  | 0.836607 | 0.437303 | 0.933911 | 0.656613 |
| MmugDNA.31610.1.S1_at   | MmugDNA.31610.1 | 4.29  | 4.21  | 0.14 | 0.12 | 1.06  | 0.856439 | 0.926405 | 0.942007 | 0.958291 |
| MmugDNA.31611.1.S1_at   | MmugDNA.31611.1 | 9.84  | 9.56  | 0.18 | 0.13 | 1.21  | 0.042527 | 0.008956 | 0.355128 | 0.125084 |
| MmugDNA.31612.1.S1_at   | MmugDNA.31612.1 | 3     | 2.92  | 0.09 | 0.13 | 1.06  | 0.831528 | 0.962514 | 0.931771 | 0.978958 |
| MmugDNA.31614.1.S1_at   | MmugDNA.31614.1 | 4     | 3.77  | 0.15 | 0.34 | 1.17  | 0.967843 | 0.656855 | 0.987919 | 0.799401 |
| MmugDNA.31615.1.S1_at   | MmugDNA.31615.1 | 3.68  | 3.5   | 0.13 | 0.02 | 1.14  | 0.174708 | 0.307368 | 0.538288 | 0.563635 |
| MmugDNA.31616.1.S1_at   | MmugDNA.31616.1 | 4.37  | 5.52  | 0.13 | 0.96 | -2.23 | 0.26994  | 0.182486 | 0.614557 | 0.459065 |
| MmugDNA.31617.1.S1_at   | MmugDNA.31617.1 | 2.97  | 3.02  | 0.12 | 0.09 | -1.03 | 0.5072   | 0.680539 | 0.762788 | 0.813481 |
| MmugDNA.3162.1.S1_at    | MmugDNA.3162.1  | 4.07  | 4.11  | 0.1  | 0.04 | -1.03 | 0.761824 | 0.91246  | 0.899748 | 0.950692 |
| MmugDNA.31620.1.S1_s_at | MmugDNA.31620.1 | 4.43  | 4.38  | 0.66 | 0.18 | 1.03  | 0.680052 | 0.824322 | 0.857026 | 0.899073 |
| MmugDNA.31621.1.S1_at   | MmugDNA.31621.1 | 3.61  | 3.71  | 0.05 | 0.15 | -1.07 | 0.136772 | 0.190886 | 0.503866 | 0.466264 |
| MmugDNA.31622.1.S1_at   | MmugDNA.31622.1 | 4.77  | 4.64  | 0.15 | 0.31 | 1.09  | 0.80553  | 0.951609 | 0.920245 | 0.972522 |
| MmugDNA.31623.1.S1_at   | MmugDNA.31623.1 | 11.59 | 10.84 | 0.05 | 0.61 | 1.68  | 0.085844 | 0.088519 | 0.439933 | 0.341947 |
| MmugDNA.31626.1.S1_at   | MmugDNA.31626.1 | 5.48  | 5.46  | 0.2  | 0.35 | 1.01  | 0.672607 | 0.102428 | 0.853193 | 0.362627 |
| MmugDNA.31627.1.S1_at   | MmugDNA.31627.1 | 6.99  | 7     | 0.05 | 0.1  | -1    | 0.871322 | 0.925452 | 0.948463 | 0.957811 |
| MmugDNA.31628.1.S1_at   | MmugDNA.31628.1 | 7.97  | 7.49  | 0.4  | 0.16 | 1.39  | 0.326422 | 0.376312 | 0.653184 | 0.614156 |
| MmugDNA.31629.1.S1_at   | MmugDNA.31629.1 | 5.36  | 5.89  | 0.53 | 0.61 | -1.44 | 0.373496 | 0.224207 | 0.683245 | 0.497164 |
| MmugDNA.3163.1.S1_x_at  | MmugDNA.3163.1  | 9.8   | 9.48  | 0.73 | 0.3  | 1.25  | 0.177774 | 0.230579 | 0.541903 | 0.502269 |
| MmugDNA.31632.1.S1_at   | MmugDNA.31632.1 | 6.41  | 5.51  | 0.34 | 0.19 | 1.86  | 0.037095 | 0.016917 | 0.340697 | 0.164969 |
| MmugDNA.31634.1.S1_at   | MmugDNA.31634.1 | 4.19  | 4.17  | 0.7  | 0.25 | 1.01  | 0.378786 | 0.339278 | 0.68656  | 0.585968 |
| MmugDNA.31635.1.S1_at   | MmugDNA.31635.1 | 7.93  | 8.81  | 0.41 | 0.55 | -1.83 | 0.108683 | 0.075051 | 0.470135 | 0.31921  |
| MmugDNA.31637.1.S1_s_at | MmugDNA.31637.1 | 11.13 | 10.12 | 0.11 | 0.08 | 2.02  | 0.000278 | 0.000155 | 0.12562  | 0.030109 |
| MmugDNA.31638.1.S1_at   | MmugDNA.31638.1 | 9.4   | 8.47  | 0.23 | 0.23 | 1.91  | 0.007556 | 0.003195 | 0.209396 | 0.08199  |
| MmugDNA.31639.1.S1_at   | MmugDNA.31639.1 | 5.82  | 5.7   | 0.08 | 0.1  | 1.09  | 0.090055 | 0.085088 | 0.445455 | 0.336891 |
| MmugDNA.31640.1.S1_at   | MmugDNA.31640.1 | 9.26  | 9.06  | 0.26 | 0.11 | 1.15  | 0.183639 | 0.246786 | 0.54773  | 0.516126 |
| MmugDNA.31641.1.S1_at   | MmugDNA.31641.1 | 4.5   | 4.32  | 0.21 | 0.25 | 1.13  | 0.441848 | 0.801022 | 0.725191 | 0.885548 |
| MmugDNA.31642.1.S1_at   | MmugDNA.31642.1 | 5.65  | 5.4   | 0.35 | 0.63 | 1.19  | 0.836808 | 0.7268   | 0.934027 | 0.841963 |
| MmugDNA.31643.1.S1_at   | MmugDNA.31643.1 | 5.85  | 5.95  | 0.14 | 0.07 | -1.07 | 0.572243 | 0.024265 | 0.800678 | 0.194952 |
| MmugDNA.31646.1.S1_at   | MmugDNA.31646.1 | 6.56  | 6.57  | 0.14 | 0.33 | -1.01 | 0.30483  | 0.417478 | 0.638843 | 0.64224  |
| MmugDNA.31648.1.S1_at   | MmugDNA.31648.1 | 11.02 | 10.78 | 0.56 | 0.24 | 1.18  | 0.719287 | 0.608296 | 0.876813 | 0.766989 |
| MmugDNA.3165.1.S1_s_at  | MmugDNA.3165.1  | 7.84  | 7.99  | 0.19 | 0.14 | -1.11 | 0.775941 | 0.414035 | 0.906041 | 0.639981 |
| MmugDNA.31650.1.S1_at   | MmugDNA.31650.1 | 9.87  | 9.96  | 0.07 | 0.5  | -1.06 | 0.688739 | 0.024899 | 0.861169 | 0.197685 |

|                         |                 |       |       |      |      |       |          |          |          |          |
|-------------------------|-----------------|-------|-------|------|------|-------|----------|----------|----------|----------|
| MmugDNA.31651.1.S1_at   | MmugDNA.31651.1 | 4.47  | 4.43  | 0.01 | 0.11 | 1.03  | 0.491024 | 0.631771 | 0.754717 | 0.782957 |
| MmugDNA.31653.1.S1_at   | MmugDNA.31653.1 | 9.36  | 8.88  | 0.63 | 0.34 | 1.4   | 0.243045 | 0.312948 | 0.594744 | 0.567546 |
| MmugDNA.31656.1.S1_at   | MmugDNA.31656.1 | 9.8   | 9.78  | 0.13 | 0.18 | 1.01  | 0.731096 | 0.05333  | 0.883536 | 0.276484 |
| MmugDNA.31658.1.S1_at   | MmugDNA.31658.1 | 3.19  | 3.2   | 0.06 | 0    | -1.01 | 0.764776 | 0.747023 | 0.900939 | 0.853124 |
| MmugDNA.3166.1.S1_at    | MmugDNA.3166.1  | 4     | 4.03  | 0.15 | 0.02 | -1.02 | 0.279489 | 0.300423 | 0.621119 | 0.558748 |
| MmugDNA.31661.1.S1_at   | MmugDNA.31661.1 | 9.07  | 9.11  | 0.36 | 0.64 | -1.03 | 0.726628 | 0.892843 | 0.881097 | 0.93888  |
| MmugDNA.31663.1.S1_at   | MmugDNA.31663.1 | 10.76 | 11.72 | 0.37 | 0.78 | -1.95 | 0.120361 | 0.055185 | 0.485308 | 0.280555 |
| MmugDNA.31664.1.S1_at   | MmugDNA.31664.1 | 4.36  | 3.32  | 0.09 | 0.26 | 2.05  | 0.002318 | 0.042927 | 0.161798 | 0.251759 |
| MmugDNA.31665.1.S1_at   | MmugDNA.31665.1 | 4.65  | 4.65  | 0.04 | 0.32 | 1     | 0.894782 | 0.621383 | 0.957917 | 0.775982 |
| MmugDNA.31667.1.S1_at   | MmugDNA.31667.1 | 5.05  | 4.83  | 0.19 | 0.29 | 1.16  | 0.798504 | 0.474605 | 0.916476 | 0.681571 |
| MmugDNA.31668.1.S1_at   | MmugDNA.31668.1 | 8.74  | 8.59  | 0.47 | 0.16 | 1.11  | 0.476952 | 0.347095 | 0.746375 | 0.591815 |
| MmugDNA.31669.1.S1_at   | MmugDNA.31669.1 | 4.83  | 4.85  | 0.2  | 0.14 | -1.02 | 0.898975 | 0.843609 | 0.95966  | 0.910913 |
| MmugDNA.3167.1.S1_at    | MmugDNA.3167.1  | 6.3   | 5.85  | 0.3  | 0.12 | 1.37  | 0.31565  | 0.063183 | 0.646683 | 0.298115 |
| MmugDNA.31670.1.S1_at   | MmugDNA.31670.1 | 4.95  | 7.01  | 0.56 | 0.88 | -4.18 | 0.015104 | 0.013004 | 0.257529 | 0.146803 |
| MmugDNA.31672.1.S1_at   | MmugDNA.31672.1 | 10.88 | 10.59 | 0.14 | 0.31 | 1.23  | 0.332086 | 0.458298 | 0.656667 | 0.671096 |
| MmugDNA.31673.1.S1_at   | MmugDNA.31673.1 | 8.43  | 9.04  | 0.2  | 0.45 | -1.53 | 0.151584 | 0.190211 | 0.516191 | 0.465854 |
| MmugDNA.31673.1.S1_x_at | MmugDNA.31673.1 | 8.34  | 8.73  | 0.26 | 0.43 | -1.31 | 0.226667 | 0.31185  | 0.584603 | 0.56683  |
| MmugDNA.31674.1.S1_at   | MmugDNA.31674.1 | 3.44  | 3.45  | 0.13 | 0.06 | -1.01 | 0.493568 | 0.415352 | 0.756276 | 0.640835 |
| MmugDNA.31675.1.S1_at   | MmugDNA.31675.1 | 4.48  | 4.48  | 0.12 | 0.28 | 1     | 0.804621 | 0.833463 | 0.919644 | 0.904502 |
| MmugDNA.31676.1.S1_at   | MmugDNA.31676.1 | 5.4   | 5.54  | 0.09 | 0.18 | -1.11 | 0.100636 | 0.259236 | 0.461009 | 0.526368 |
| MmugDNA.31678.1.S1_at   | MmugDNA.31678.1 | 5.6   | 5.98  | 0.16 | 0.12 | -1.3  | 0.089073 | 0.084899 | 0.444475 | 0.336494 |
| MmugDNA.3168.1.S1_at    | MmugDNA.3168.1  | 5.96  | 5.52  | 0.5  | 0.58 | 1.36  | 0.874261 | 0.679232 | 0.949565 | 0.81275  |
| MmugDNA.31680.1.S1_at   | MmugDNA.31680.1 | 10.82 | 10.59 | 0.04 | 0.58 | 1.18  | 0.55423  | 0.745129 | 0.790667 | 0.852267 |
| MmugDNA.31681.1.S1_at   | MmugDNA.31681.1 | 4.23  | 4.29  | 0.06 | 0.06 | -1.05 | 0.518082 | 0.669849 | 0.769229 | 0.806933 |
| MmugDNA.31683.1.S1_at   | MmugDNA.31683.1 | 3.21  | 3.29  | 0.04 | 0.17 | -1.06 | 0.154687 | 0.197563 | 0.519298 | 0.472564 |
| MmugDNA.31686.1.S1_at   | MmugDNA.31686.1 | 5.74  | 5.44  | 0.21 | 0.1  | 1.23  | 0.124762 | 0.080329 | 0.49077  | 0.327965 |
| MmugDNA.31687.1.S1_at   | MmugDNA.31687.1 | 7.15  | 6.76  | 0.42 | 0.22 | 1.31  | 0.075005 | 0.072466 | 0.421728 | 0.315294 |
| MmugDNA.31688.1.S1_at   | MmugDNA.31688.1 | 11.2  | 11.52 | 0.33 | 0.29 | -1.25 | 0.888657 | 0.639256 | 0.95536  | 0.788125 |
| MmugDNA.31691.1.S1_at   | MmugDNA.31691.1 | 6.03  | 5.62  | 0.15 | 0.06 | 1.33  | 0.024989 | 0.202711 | 0.297401 | 0.477172 |
| MmugDNA.31691.1.S1_x_at | MmugDNA.31691.1 | 6.89  | 6.67  | 0.11 | 0.2  | 1.17  | 0.311094 | 0.265425 | 0.643066 | 0.531363 |
| MmugDNA.31693.1.S1_at   | MmugDNA.31693.1 | 6.23  | 6.13  | 0.11 | 0.14 | 1.07  | 0.408325 | 0.012806 | 0.705117 | 0.145832 |
| MmugDNA.31694.1.S1_at   | MmugDNA.31694.1 | 11.86 | 11.98 | 0.11 | 0.14 | -1.09 | 0.294697 | 0.354429 | 0.631442 | 0.59721  |
| MmugDNA.31695.1.S1_at   | MmugDNA.31695.1 | 9.57  | 9.58  | 0.07 | 0.36 | -1.01 | 0.952705 | 0.219519 | 0.982319 | 0.493168 |
| MmugDNA.31697.1.S1_at   | MmugDNA.31697.1 | 3.85  | 3.55  | 0.27 | 0.24 | 1.24  | 0.490764 | 0.65597  | 0.754566 | 0.798771 |
| MmugDNA.31698.1.S1_at   | MmugDNA.31698.1 | 7.25  | 6.3   | 0.62 | 0.51 | 1.93  | 0.281579 | 0.375473 | 0.622285 | 0.613412 |
| MmugDNA.317.1.S1_at     | MmugDNA.317.1   | 3.12  | 2.99  | 0.86 | 0.14 | 1.09  | 0.321686 | 0.405034 | 0.650336 | 0.633457 |
| MmugDNA.3170.1.S1_at    | MmugDNA.3170.1  | 7.21  | 8.36  | 0.83 | 0.69 | -2.23 | 0.289143 | 0.397806 | 0.62717  | 0.629114 |
| MmugDNA.31700.1.S1_at   | MmugDNA.31700.1 | 9.98  | 10.58 | 0.08 | 0.73 | -1.52 | 0.204263 | 0.227856 | 0.566752 | 0.500191 |
| MmugDNA.31701.1.S1_at   | MmugDNA.31701.1 | 6.57  | 6.81  | 0.25 | 0.49 | -1.18 | 0.540064 | 0.327795 | 0.781563 | 0.577604 |
| MmugDNA.31702.1.S1_at   | MmugDNA.31702.1 | 5.98  | 6.08  | 0.31 | 0.03 | -1.07 | 0.758687 | 0.866361 | 0.898014 | 0.923996 |
| MmugDNA.31703.1.S1_at   | MmugDNA.31703.1 | 10.42 | 9.37  | 1.11 | 0.49 | 2.08  | 0.59467  | 0.741183 | 0.812108 | 0.850135 |



|                         |                 |       |       |      |      |       |          |          |          |          |
|-------------------------|-----------------|-------|-------|------|------|-------|----------|----------|----------|----------|
| MmugDNA.31705.1.S1_at   | MmugDNA.31705.1 | 4.3   | 4.51  | 0.21 | 0.19 | -1.16 | 0.550126 | 0.754905 | 0.787671 | 0.857334 |
| MmugDNA.31706.1.S1_at   | MmugDNA.31706.1 | 6.95  | 6.65  | 0.08 | 0.11 | 1.24  | 0.021133 | 0.015541 | 0.282335 | 0.158053 |
| MmugDNA.31707.1.S1_at   | MmugDNA.31707.1 | 11.11 | 10.97 | 0.13 | 0.09 | 1.1   | 0.8428   | 0.02289  | 0.936661 | 0.189338 |
| MmugDNA.31708.1.S1_at   | MmugDNA.31708.1 | 6.46  | 6.15  | 0.08 | 0.19 | 1.24  | 0.033743 | 0.026003 | 0.330119 | 0.202179 |
| MmugDNA.3171.1.S1_at    | MmugDNA.3171.1  | 6.7   | 6.52  | 0.09 | 0.11 | 1.13  | 0.169343 | 0.105254 | 0.533669 | 0.366999 |
| MmugDNA.31710.1.S1_at   | MmugDNA.31710.1 | 5.38  | 5.09  | 0.28 | 0.16 | 1.23  | 0.120276 | 0.084105 | 0.485252 | 0.335133 |
| MmugDNA.31711.1.S1_at   | MmugDNA.31711.1 | 3.32  | 3.39  | 0.03 | 0.29 | -1.05 | 0.211066 | 0.274098 | 0.571977 | 0.538565 |
| MmugDNA.31712.1.S1_at   | MmugDNA.31712.1 | 5.62  | 5.78  | 0.24 | 0.52 | -1.12 | 0.493892 | 0.32873  | 0.756383 | 0.578255 |
| MmugDNA.31714.1.S1_at   | MmugDNA.31714.1 | 5.32  | 5.44  | 0.18 | 0.23 | -1.09 | 0.471861 | 0.614453 | 0.743427 | 0.771275 |
| MmugDNA.31715.1.S1_at   | MmugDNA.31715.1 | 4.52  | 4.54  | 0.07 | 0.13 | -1.01 | 0.556165 | 0.113863 | 0.791617 | 0.380084 |
| MmugDNA.31717.1.S1_at   | MmugDNA.31717.1 | 8.73  | 9.24  | 0.51 | 1.48 | -1.43 | 0.927241 | 0.674938 | 0.971988 | 0.810089 |
| MmugDNA.31720.1.S1_at   | MmugDNA.31720.1 | 8.29  | 8     | 0.33 | 0.19 | 1.23  | 0.787869 | 0.241905 | 0.911709 | 0.512489 |
| MmugDNA.31721.1.S1_at   | MmugDNA.31721.1 | 5.7   | 6.03  | 0.2  | 0.28 | -1.26 | 0.209897 | 0.321227 | 0.571144 | 0.573144 |
| MmugDNA.31722.1.S1_at   | MmugDNA.31722.1 | 11.22 | 10.37 | 0.22 | 0.13 | 1.8   | 0.004552 | 0.0021   | 0.184109 | 0.067779 |
| MmugDNA.31722.1.S1_s_at | MmugDNA.31722.1 | 11.44 | 10.66 | 0.09 | 0.13 | 1.71  | 0.000892 | 0.000643 | 0.139813 | 0.042928 |
| MmugDNA.31723.1.S1_at   | MmugDNA.31723.1 | 4.33  | 4.4   | 0.13 | 0.05 | -1.05 | 0.532865 | 0.325376 | 0.777862 | 0.575785 |
| MmugDNA.31724.1.S1_at   | MmugDNA.31724.1 | 6.75  | 7.23  | 0.67 | 1.52 | -1.4  | 0.626941 | 0.810494 | 0.829836 | 0.890812 |
| MmugDNA.31726.1.S1_at   | MmugDNA.31726.1 | 5.81  | 5.55  | 0.27 | 0.38 | 1.2   | 0.227451 | 0.355421 | 0.585103 | 0.597738 |
| MmugDNA.31727.1.S1_at   | MmugDNA.31727.1 | 7.88  | 7.78  | 0.47 | 0.06 | 1.07  | 0.287063 | 0.256788 | 0.625771 | 0.524607 |
| MmugDNA.31729.1.S1_at   | MmugDNA.31729.1 | 3.49  | 3.43  | 0.1  | 0.1  | 1.04  | 0.200646 | 0.175618 | 0.5634   | 0.45218  |
| MmugDNA.3173.1.S1_at    | MmugDNA.3173.1  | 11.08 | 11.2  | 0.12 | 0.32 | -1.09 | 0.760796 | 0.333725 | 0.899135 | 0.581892 |
| MmugDNA.31730.1.S1_at   | MmugDNA.31730.1 | 5.66  | 7.61  | 0.58 | 0.24 | -3.86 | 0.003578 | 0.000797 | 0.179515 | 0.046064 |
| MmugDNA.31731.1.S1_at   | MmugDNA.31731.1 | 12.24 | 11.65 | 0.23 | 0.24 | 1.51  | 0.02002  | 0.011485 | 0.276484 | 0.138627 |
| MmugDNA.31731.1.S1_s_at | MmugDNA.31731.1 | 11.88 | 11.36 | 0.16 | 0.26 | 1.44  | 0.013083 | 0.006093 | 0.245262 | 0.106327 |
| MmugDNA.31732.1.S1_at   | MmugDNA.31732.1 | 4.47  | 4.43  | 0.05 | 0.1  | 1.03  | 0.894257 | 0.067729 | 0.957854 | 0.306339 |
| MmugDNA.31734.1.S1_at   | MmugDNA.31734.1 | 9.8   | 10.82 | 0.58 | 0.44 | -2.03 | 0.048265 | 0.030353 | 0.368148 | 0.216116 |
| MmugDNA.31735.1.S1_at   | MmugDNA.31735.1 | 3.57  | 4.3   | 0.11 | 0.62 | -1.66 | 0.152386 | 0.225687 | 0.51708  | 0.498159 |
| MmugDNA.31736.1.S1_at   | MmugDNA.31736.1 | 8.47  | 8.6   | 0.11 | 1.23 | -1.09 | 0.942325 | 0.771607 | 0.977917 | 0.867303 |
| MmugDNA.31737.1.S1_at   | MmugDNA.31737.1 | 10.33 | 10.07 | 0.04 | 0.24 | 1.19  | 0.148133 | 0.049648 | 0.513475 | 0.267876 |
| MmugDNA.3174.1.S1_at    | MmugDNA.3174.1  | 3.39  | 3.36  | 0.04 | 0.2  | 1.02  | 0.669417 | 0.608955 | 0.852167 | 0.767418 |
| MmugDNA.31740.1.S1_at   | MmugDNA.31740.1 | 4.53  | 4.49  | 0.96 | 0.04 | 1.03  | 0.949005 | 0.163916 | 0.980556 | 0.440105 |
| MmugDNA.31740.1.S1_s_at | MmugDNA.31740.1 | 10.89 | 10.81 | 0.25 | 0.1  | 1.06  | 0.670249 | 0.884711 | 0.852382 | 0.934321 |
| MmugDNA.31741.1.S1_at   | MmugDNA.31741.1 | 7.66  | 7.66  | 0.12 | 0.5  | -1.01 | 0.598216 | 0.59374  | 0.813939 | 0.758418 |
| MmugDNA.31742.1.S1_at   | MmugDNA.31742.1 | 5.77  | 6.02  | 0.09 | 0.24 | -1.18 | 0.087612 | 0.076745 | 0.442009 | 0.322168 |
| MmugDNA.31744.1.S1_at   | MmugDNA.31744.1 | 3.84  | 3.85  | 0.2  | 0.17 | -1    | 0.566171 | 0.151858 | 0.79749  | 0.426512 |
| MmugDNA.31745.1.S1_at   | MmugDNA.31745.1 | 3.11  | 3.35  | 0.2  | 0.09 | -1.18 | 0.23008  | 0.358901 | 0.587112 | 0.600291 |
| MmugDNA.31747.1.S1_at   | MmugDNA.31747.1 | 4.12  | 4.1   | 0.17 | 0.11 | 1.02  | 0.587874 | 0.297973 | 0.808775 | 0.556695 |
| MmugDNA.31748.1.S1_at   | MmugDNA.31748.1 | 4.46  | 4.67  | 0.13 | 0.26 | -1.15 | 0.918633 | 0.582822 | 0.96831  | 0.751399 |
| MmugDNA.3175.1.S1_at    | MmugDNA.3175.1  | 9.91  | 9.63  | 0.09 | 0.7  | 1.22  | 0.571556 | 0.761734 | 0.800236 | 0.861459 |
| MmugDNA.31750.1.S1_at   | MmugDNA.31750.1 | 9.89  | 9.44  | 0.42 | 0.33 | 1.37  | 0.256727 | 0.306133 | 0.604414 | 0.562854 |
| MmugDNA.31751.1.S1_at   | MmugDNA.31751.1 | 7.69  | 7.25  | 0.26 | 0.11 | 1.35  | 0.100932 | 0.087118 | 0.461009 | 0.340073 |

|                         |                 |       |       |      |      |       |          |          |          |          |
|-------------------------|-----------------|-------|-------|------|------|-------|----------|----------|----------|----------|
| MmugDNA.31751.1.S1_s_at | MmugDNA.31751.1 | 7.13  | 6.67  | 0.11 | 0.22 | 1.38  | 0.02203  | 0.009196 | 0.28446  | 0.126573 |
| MmugDNA.31752.1.S1_s_at | MmugDNA.31752.1 | 9.38  | 9.86  | 0.27 | 0.14 | -1.39 | 0.024971 | 0.013636 | 0.297322 | 0.149433 |
| MmugDNA.31755.1.S1_at   | MmugDNA.31755.1 | 6.84  | 6.77  | 0.47 | 0.15 | 1.05  | 0.299673 | 0.290782 | 0.635035 | 0.551399 |
| MmugDNA.31756.1.S1_at   | MmugDNA.31756.1 | 10.14 | 9.83  | 0.74 | 0.71 | 1.24  | 0.611073 | 0.821145 | 0.821498 | 0.897064 |
| MmugDNA.31757.1.S1_at   | MmugDNA.31757.1 | 4.96  | 5.05  | 0.37 | 0.13 | -1.07 | 0.622596 | 0.704869 | 0.827553 | 0.828846 |
| MmugDNA.31759.1.S1_at   | MmugDNA.31759.1 | 6.21  | 6.67  | 0.01 | 0.26 | -1.37 | 0.030972 | 0.023377 | 0.320419 | 0.191629 |
| MmugDNA.31760.1.S1_at   | MmugDNA.31760.1 | 6.26  | 6.31  | 0.12 | 0.35 | -1.03 | 0.836165 | 0.957688 | 0.933665 | 0.976059 |
| MmugDNA.31762.1.S1_at   | MmugDNA.31762.1 | 4.78  | 5.53  | 0.63 | 0.94 | -1.69 | 0.301859 | 0.329756 | 0.636716 | 0.578874 |
| MmugDNA.31763.1.S1_at   | MmugDNA.31763.1 | 10.18 | 10.09 | 0.19 | 0.25 | 1.07  | 0.920129 | 0.819991 | 0.968842 | 0.896303 |
| MmugDNA.31766.1.S1_at   | MmugDNA.31766.1 | 7.01  | 7.02  | 0.22 | 0.32 | -1.01 | 0.416514 | 0.571878 | 0.710014 | 0.744056 |
| MmugDNA.31768.1.S1_at   | MmugDNA.31768.1 | 3.03  | 3.05  | 0.29 | 0.21 | -1.01 | 0.576905 | 0.729969 | 0.8033   | 0.843733 |
| MmugDNA.31769.1.S1_at   | MmugDNA.31769.1 | 3.36  | 3.37  | 0.2  | 0.22 | -1.01 | 0.809835 | 0.835463 | 0.922372 | 0.905836 |
| MmugDNA.3177.1.S1_at    | MmugDNA.3177.1  | 6.73  | 7.48  | 0.33 | 0.35 | -1.67 | 0.100907 | 0.097796 | 0.461009 | 0.355639 |
| MmugDNA.31770.1.S1_at   | MmugDNA.31770.1 | 12.92 | 12.9  | 0.05 | 0.12 | 1.02  | 0.477987 | 0.586888 | 0.747094 | 0.753893 |
| MmugDNA.31771.1.S1_at   | MmugDNA.31771.1 | 12.78 | 13.13 | 0.19 | 0.2  | -1.27 | 0.185342 | 0.148411 | 0.54877  | 0.423003 |
| MmugDNA.31771.1.S1_s_at | MmugDNA.31771.1 | 12.41 | 12.38 | 0.06 | 0.12 | 1.02  | 0.989134 | 0.373972 | 0.99615  | 0.612588 |
| MmugDNA.31773.1.S1_at   | MmugDNA.31773.1 | 5.02  | 4.56  | 0.21 | 0.19 | 1.37  | 0.108929 | 0.104315 | 0.470659 | 0.365519 |
| MmugDNA.31774.1.S1_at   | MmugDNA.31774.1 | 5.64  | 4.44  | 1.04 | 0.63 | 2.31  | 0.144143 | 0.201014 | 0.510652 | 0.475442 |
| MmugDNA.31775.1.S1_at   | MmugDNA.31775.1 | 9.63  | 9.24  | 0.14 | 0.81 | 1.31  | 0.476689 | 0.522934 | 0.746273 | 0.713429 |
| MmugDNA.31776.1.S1_at   | MmugDNA.31776.1 | 6.57  | 6.55  | 0.06 | 0.01 | 1.01  | 0.242628 | 0.294168 | 0.594448 | 0.553974 |
| MmugDNA.31777.1.S1_at   | MmugDNA.31777.1 | 9.87  | 9.86  | 0.25 | 0.45 | 1.01  | 0.933037 | 0.812291 | 0.973979 | 0.891561 |
| MmugDNA.31778.1.S1_at   | MmugDNA.31778.1 | 3.67  | 3.59  | 0.58 | 0.26 | 1.06  | 0.408231 | 0.449439 | 0.705013 | 0.665069 |
| MmugDNA.3178.1.S1_at    | MmugDNA.3178.1  | 4.26  | 4.3   | 0.23 | 0.11 | -1.03 | 0.62492  | 0.502172 | 0.828566 | 0.70006  |
| MmugDNA.31780.1.S1_at   | MmugDNA.31780.1 | 9.7   | 9.4   | 0.19 | 0.31 | 1.23  | 0.597051 | 0.135293 | 0.813377 | 0.407381 |
| MmugDNA.31780.1.S1_s_at | MmugDNA.31780.1 | 11.67 | 12.41 | 0.38 | 0.23 | -1.68 | 0.020238 | 0.013333 | 0.277311 | 0.148042 |
| MmugDNA.31782.1.S1_at   | MmugDNA.31782.1 | 11.05 | 10.65 | 0.27 | 0.08 | 1.32  | 0.056799 | 0.114251 | 0.387092 | 0.380761 |
| MmugDNA.31783.1.S1_at   | MmugDNA.31783.1 | 6.95  | 7.91  | 0.53 | 0.93 | -1.94 | 0.241604 | 0.284838 | 0.593941 | 0.546966 |
| MmugDNA.31785.1.S1_at   | MmugDNA.31785.1 | 10.25 | 9.02  | 0.18 | 0.8  | 2.33  | 0.085283 | 0.08469  | 0.438726 | 0.336196 |
| MmugDNA.31786.1.S1_at   | MmugDNA.31786.1 | 7.44  | 7.47  | 0.28 | 0.31 | -1.02 | 0.855661 | 0.974787 | 0.941621 | 0.986245 |
| MmugDNA.31787.1.S1_at   | MmugDNA.31787.1 | 4.56  | 4.44  | 0.25 | 0.1  | 1.09  | 0.532836 | 0.605892 | 0.777862 | 0.765543 |
| MmugDNA.31788.1.S1_at   | MmugDNA.31788.1 | 6.42  | 6.5   | 0.1  | 0.16 | -1.06 | 0.542245 | 0.674411 | 0.783138 | 0.809775 |
| MmugDNA.3179.1.S1_at    | MmugDNA.3179.1  | 5.6   | 5.59  | 0.15 | 0.14 | 1.01  | 0.714146 | 0.469343 | 0.874661 | 0.678197 |
| MmugDNA.31790.1.S1_at   | MmugDNA.31790.1 | 5.99  | 5.96  | 0.07 | 0.29 | 1.02  | 0.463239 | 0.457919 | 0.738665 | 0.670999 |
| MmugDNA.31792.1.S1_at   | MmugDNA.31792.1 | 11.27 | 10.86 | 0.39 | 0.04 | 1.33  | 0.164351 | 0.032473 | 0.528264 | 0.223254 |
| MmugDNA.31793.1.S1_at   | MmugDNA.31793.1 | 3.8   | 3.85  | 0.27 | 0.13 | -1.04 | 0.8059   | 0.713366 | 0.92039  | 0.833698 |
| MmugDNA.31794.1.S1_at   | MmugDNA.31794.1 | 6.05  | 6.21  | 0.13 | 0.09 | -1.12 | 0.066885 | 0.0561   | 0.406981 | 0.282723 |
| MmugDNA.31795.1.S1_at   | MmugDNA.31795.1 | 13.18 | 12.86 | 0.07 | 0.14 | 1.25  | 0.029253 | 0.01921  | 0.313575 | 0.174431 |
| MmugDNA.31796.1.S1_at   | MmugDNA.31796.1 | 6.23  | 6.01  | 0.48 | 0.37 | 1.16  | 0.464475 | 0.243438 | 0.739281 | 0.513479 |
| MmugDNA.31797.1.S1_at   | MmugDNA.31797.1 | 7.16  | 7.07  | 0.21 | 0.24 | 1.06  | 0.34808  | 0.261682 | 0.666977 | 0.528129 |
| MmugDNA.31798.1.S1_at   | MmugDNA.31798.1 | 8.25  | 7.83  | 0.16 | 0.45 | 1.34  | 0.207982 | 0.275073 | 0.569894 | 0.539482 |
| MmugDNA.31799.1.S1_at   | MmugDNA.31799.1 | 5.58  | 5.56  | 0.32 | 0.04 | 1.02  | 0.682439 | 0.83455  | 0.857938 | 0.905227 |

|                         |                 |       |       |      |      |        |          |          |          |          |
|-------------------------|-----------------|-------|-------|------|------|--------|----------|----------|----------|----------|
| MmugDNA.318.1.S1_at     | MmugDNA.318.1   | 3.34  | 3.33  | 0.08 | 0.15 | 1      | 0.48438  | 0.157301 | 0.750336 | 0.432782 |
| MmugDNA.31800.1.S1_at   | MmugDNA.31800.1 | 12.71 | 12.9  | 0.09 | 0.11 | -1.14  | 0.081731 | 0.015494 | 0.432753 | 0.158044 |
| MmugDNA.31801.1.S1_at   | MmugDNA.31801.1 | 7.99  | 8.5   | 0.4  | 0.46 | -1.43  | 0.71103  | 0.65429  | 0.873387 | 0.797979 |
| MmugDNA.31802.1.S1_at   | MmugDNA.31802.1 | 10.27 | 9.43  | 0.38 | 0.29 | 1.79   | 0.182146 | 0.021764 | 0.546458 | 0.184565 |
| MmugDNA.31803.1.S1_at   | MmugDNA.31803.1 | 8.03  | 8.03  | 0.4  | 0.29 | 1      | 0.606432 | 0.043884 | 0.818834 | 0.254098 |
| MmugDNA.31804.1.S1_at   | MmugDNA.31804.1 | 4.33  | 4.51  | 0.03 | 0.15 | -1.13  | 0.48505  | 0.108872 | 0.750727 | 0.372496 |
| MmugDNA.31805.1.S1_at   | MmugDNA.31805.1 | 6.01  | 5.88  | 0.68 | 0.38 | 1.09   | 0.394264 | 0.198935 | 0.695709 | 0.473521 |
| MmugDNA.31807.1.S1_at   | MmugDNA.31807.1 | 6.2   | 6.07  | 0.66 | 0.71 | 1.09   | 0.303464 | 0.411729 | 0.637699 | 0.638434 |
| MmugDNA.31808.1.S1_at   | MmugDNA.31808.1 | 6.55  | 6.94  | 0.28 | 0.39 | -1.31  | 0.489847 | 0.082361 | 0.754121 | 0.331354 |
| MmugDNA.31809.1.S1_at   | MmugDNA.31809.1 | 6.14  | 6.33  | 0.05 | 0.16 | -1.14  | 0.103034 | 0.146289 | 0.46254  | 0.420301 |
| MmugDNA.3181.1.S1_at    | MmugDNA.3181.1  | 3.99  | 3.38  | 0.22 | 0.19 | 1.53   | 0.086734 | 0.131859 | 0.440475 | 0.403891 |
| MmugDNA.31810.1.S1_at   | MmugDNA.31810.1 | 5.76  | 5.99  | 0.85 | 0.89 | -1.17  | 0.988571 | 0.897129 | 0.995952 | 0.941305 |
| MmugDNA.31811.1.S1_at   | MmugDNA.31811.1 | 3.27  | 3.45  | 0.12 | 0.05 | -1.13  | 0.078242 | 0.144528 | 0.428221 | 0.418408 |
| MmugDNA.31812.1.S1_at   | MmugDNA.31812.1 | 4.73  | 4.94  | 0.21 | 0.06 | -1.16  | 0.388487 | 0.631812 | 0.692586 | 0.78297  |
| MmugDNA.31813.1.S1_at   | MmugDNA.31813.1 | 3.5   | 3.63  | 0    | 0.14 | -1.09  | 0.144644 | 0.103546 | 0.511015 | 0.364346 |
| MmugDNA.31814.1.S1_at   | MmugDNA.31814.1 | 5.58  | 5.04  | 0.27 | 0.24 | 1.45   | 0.057725 | 0.050644 | 0.38894  | 0.270317 |
| MmugDNA.31815.1.S1_at   | MmugDNA.31815.1 | 6.12  | 5.48  | 0.36 | 0.51 | 1.56   | 0.195057 | 0.265326 | 0.558557 | 0.531314 |
| MmugDNA.31817.1.S1_at   | MmugDNA.31817.1 | 8.57  | 8.68  | 0.13 | 0.28 | -1.08  | 0.157649 | 0.051881 | 0.522514 | 0.273151 |
| MmugDNA.31818.1.S1_at   | MmugDNA.31818.1 | 4.28  | 4.43  | 0.19 | 0.04 | -1.11  | 0.585637 | 0.073523 | 0.807608 | 0.316799 |
| MmugDNA.31819.1.S1_at   | MmugDNA.31819.1 | 10.92 | 9.29  | 3.91 | 0.97 | 3.09   | 0.833131 | 0.800257 | 0.932275 | 0.885129 |
| MmugDNA.31820.1.S1_at   | MmugDNA.31820.1 | 5.01  | 5.04  | 0.43 | 0.2  | -1.02  | 0.904998 | 0.494171 | 0.962071 | 0.694704 |
| MmugDNA.31821.1.S1_at   | MmugDNA.31821.1 | 3.77  | 3.77  | 0.06 | 0.03 | 1      | 0.256056 | 0.533143 | 0.603805 | 0.719436 |
| MmugDNA.31822.1.S1_at   | MmugDNA.31822.1 | 6.16  | 6.11  | 0.1  | 0.08 | 1.04   | 0.784229 | 0.166658 | 0.91003  | 0.443133 |
| MmugDNA.31823.1.S1_at   | MmugDNA.31823.1 | 4.12  | 7.63  | 0.69 | 0.4  | -11.42 | 0.003317 | 0.00128  | 0.177442 | 0.055351 |
| MmugDNA.31824.1.S1_at   | MmugDNA.31824.1 | 8.33  | 8.59  | 0.16 | 0.43 | -1.2   | 0.202687 | 0.113555 | 0.565228 | 0.379632 |
| MmugDNA.31825.1.S1_at   | MmugDNA.31825.1 | 4.75  | 6.52  | 1.04 | 1.12 | -3.4   | 0.217534 | 0.131602 | 0.577141 | 0.403716 |
| MmugDNA.31826.1.S1_at   | MmugDNA.31826.1 | 3.17  | 3.22  | 0.1  | 0.05 | -1.03  | 0.472266 | 0.162412 | 0.743607 | 0.438575 |
| MmugDNA.31827.1.S1_at   | MmugDNA.31827.1 | 10.08 | 9.91  | 0.32 | 0.21 | 1.13   | 0.260304 | 0.257641 | 0.607093 | 0.525332 |
| MmugDNA.31828.1.S1_at   | MmugDNA.31828.1 | 9.11  | 9.06  | 0.87 | 0.11 | 1.04   | 0.544287 | 0.606972 | 0.784293 | 0.766178 |
| MmugDNA.31829.1.S1_at   | MmugDNA.31829.1 | 5.4   | 5.25  | 0.62 | 0.16 | 1.11   | 0.326238 | 0.464937 | 0.653184 | 0.675523 |
| MmugDNA.3183.1.S1_at    | MmugDNA.3183.1  | 3.51  | 3.35  | 0.13 | 0.04 | 1.12   | 0.050518 | 0.046529 | 0.374593 | 0.260221 |
| MmugDNA.31830.1.S1_at   | MmugDNA.31830.1 | 10.17 | 9.58  | 0.2  | 0.08 | 1.5    | 0.006557 | 0.002448 | 0.199625 | 0.073228 |
| MmugDNA.31831.1.S1_at   | MmugDNA.31831.1 | 7.42  | 5.25  | 0.41 | 0.47 | 4.48   | 0.003757 | 0.001019 | 0.179914 | 0.050911 |
| MmugDNA.31832.1.S1_at   | MmugDNA.31832.1 | 4.88  | 4.93  | 0.03 | 0.17 | -1.03  | 0.654022 | 0.252649 | 0.844488 | 0.521174 |
| MmugDNA.31833.1.S1_s_at | MmugDNA.31833.1 | 11.79 | 11.94 | 0.23 | 0.44 | -1.11  | 0.81194  | 0.624364 | 0.923457 | 0.778577 |
| MmugDNA.31834.1.S1_at   | MmugDNA.31834.1 | 8.36  | 7.22  | 0.39 | 0.08 | 2.2    | 0.007935 | 0.003714 | 0.214461 | 0.086832 |
| MmugDNA.31835.1.S1_at   | MmugDNA.31835.1 | 4.46  | 4.51  | 0.62 | 0.11 | -1.03  | 0.45019  | 0.57286  | 0.730847 | 0.74478  |
| MmugDNA.31835.1.S1_x_at | MmugDNA.31835.1 | 4.55  | 4.66  | 0.79 | 0.01 | -1.08  | 0.502441 | 0.521303 | 0.760355 | 0.712346 |
| MmugDNA.31836.1.S1_at   | MmugDNA.31836.1 | 3.28  | 3.15  | 0.68 | 0.14 | 1.09   | 0.443094 | 0.506952 | 0.725992 | 0.702692 |
| MmugDNA.31836.1.S1_x_at | MmugDNA.31836.1 | 3.56  | 3.77  | 0.8  | 0.05 | -1.16  | 0.641611 | 0.831071 | 0.838349 | 0.903111 |
| MmugDNA.31838.1.S1_at   | MmugDNA.31838.1 | 5.16  | 5.46  | 0.16 | 0.38 | -1.23  | 0.320464 | 0.333851 | 0.649472 | 0.581995 |

|                         |                 |       |       |      |      |       |          |          |          |          |
|-------------------------|-----------------|-------|-------|------|------|-------|----------|----------|----------|----------|
| MmugDNA.31838.1.S1_s_at | MmugDNA.31838.1 | 8.95  | 10.25 | 0.38 | 1.01 | -2.46 | 0.157849 | 0.076228 | 0.522718 | 0.321127 |
| MmugDNA.31839.1.S1_at   | MmugDNA.31839.1 | 5.58  | 6.1   | 0.59 | 1.24 | -1.43 | 0.860692 | 0.609219 | 0.943788 | 0.767677 |
| MmugDNA.3184.1.S1_at    | MmugDNA.3184.1  | 8.81  | 8.3   | 0.17 | 0.28 | 1.42  | 0.068833 | 0.063068 | 0.410654 | 0.297788 |
| MmugDNA.31840.1.S1_at   | MmugDNA.31840.1 | 5.75  | 5.78  | 0.39 | 0.26 | -1.02 | 0.275503 | 0.363118 | 0.617878 | 0.60356  |
| MmugDNA.31843.1.S1_at   | MmugDNA.31843.1 | 7.78  | 8.95  | 0.32 | 0.57 | -2.26 | 0.074105 | 0.070481 | 0.419667 | 0.311777 |
| MmugDNA.31844.1.S1_at   | MmugDNA.31844.1 | 5.88  | 5.92  | 0.08 | 0.18 | -1.03 | 0.655058 | 0.578565 | 0.84477  | 0.748589 |
| MmugDNA.31845.1.S1_at   | MmugDNA.31845.1 | 6.27  | 7.24  | 0.35 | 0.54 | -1.95 | 0.03484  | 0.02429  | 0.333964 | 0.195066 |
| MmugDNA.31846.1.S1_at   | MmugDNA.31846.1 | 6.55  | 6.08  | 0.1  | 0.71 | 1.39  | 0.495889 | 0.671192 | 0.757336 | 0.807707 |
| MmugDNA.31847.1.S1_at   | MmugDNA.31847.1 | 4.33  | 4.71  | 0.02 | 0.56 | -1.3  | 0.289023 | 0.001721 | 0.627041 | 0.062866 |
| MmugDNA.31848.1.S1_at   | MmugDNA.31848.1 | 4.57  | 4.12  | 0.25 | 0.2  | 1.37  | 0.071331 | 0.225252 | 0.41512  | 0.497892 |
| MmugDNA.31849.1.S1_at   | MmugDNA.31849.1 | 9.87  | 9.64  | 0.31 | 0.23 | 1.17  | 0.290869 | 0.183308 | 0.628624 | 0.459553 |
| MmugDNA.3185.1.S1_at    | MmugDNA.3185.1  | 3.57  | 3.46  | 0.08 | 0.62 | 1.07  | 0.572893 | 0.495377 | 0.801055 | 0.695435 |
| MmugDNA.31851.1.S1_x_at | MmugDNA.31851.1 | 8.79  | 8.34  | 0.33 | 0.16 | 1.37  | 0.115968 | 0.15406  | 0.479444 | 0.428867 |
| MmugDNA.31852.1.S1_at   | MmugDNA.31852.1 | 7.94  | 8.02  | 0.41 | 0.6  | -1.05 | 0.7883   | 0.733383 | 0.912012 | 0.845627 |
| MmugDNA.31854.1.S1_at   | MmugDNA.31854.1 | 6.82  | 6.93  | 0.13 | 0.07 | -1.08 | 0.285156 | 0.375668 | 0.624705 | 0.613577 |
| MmugDNA.31855.1.S1_at   | MmugDNA.31855.1 | 5.34  | 5.32  | 0.69 | 0.67 | 1.02  | 0.716146 | 0.741117 | 0.875313 | 0.850131 |
| MmugDNA.31856.1.S1_at   | MmugDNA.31856.1 | 11.41 | 10.41 | 0.13 | 0.5  | 1.99  | 0.031203 | 0.02051  | 0.32089  | 0.179742 |
| MmugDNA.31857.1.S1_at   | MmugDNA.31857.1 | 4.72  | 4.78  | 0.33 | 0.07 | -1.04 | 0.661397 | 0.742752 | 0.848124 | 0.851023 |
| MmugDNA.31858.1.S1_at   | MmugDNA.31858.1 | 7     | 7.19  | 0.3  | 0.14 | -1.14 | 0.75322  | 0.399128 | 0.894708 | 0.62969  |
| MmugDNA.31859.1.S1_at   | MmugDNA.31859.1 | 3.54  | 3.82  | 0.1  | 0.15 | -1.22 | 0.133419 | 0.271608 | 0.500083 | 0.536577 |
| MmugDNA.3186.1.S1_at    | MmugDNA.3186.1  | 10.7  | 9.83  | 0.18 | 1.62 | 1.82  | 0.114626 | 0.123006 | 0.477912 | 0.392923 |
| MmugDNA.31860.1.S1_at   | MmugDNA.31860.1 | 5.95  | 5.89  | 0.33 | 0.44 | 1.04  | 0.431563 | 0.580389 | 0.718592 | 0.749646 |
| MmugDNA.31862.1.S1_at   | MmugDNA.31862.1 | 3.53  | 3.47  | 0.15 | 0.18 | 1.04  | 0.568841 | 0.525033 | 0.798889 | 0.71475  |
| MmugDNA.31863.1.S1_at   | MmugDNA.31863.1 | 9.01  | 9.38  | 0.32 | 0.32 | -1.29 | 0.159751 | 0.103909 | 0.52471  | 0.364582 |
| MmugDNA.31864.1.S1_at   | MmugDNA.31864.1 | 6.42  | 6.17  | 0.64 | 0.17 | 1.19  | 0.178175 | 0.153366 | 0.542428 | 0.428186 |
| MmugDNA.31864.1.S1_x_at | MmugDNA.31864.1 | 6.04  | 5.89  | 0.63 | 0.28 | 1.11  | 0.266353 | 0.219583 | 0.611888 | 0.493192 |
| MmugDNA.31865.1.S1_at   | MmugDNA.31865.1 | 7.83  | 6.87  | 0.89 | 0.24 | 1.95  | 0.329222 | 0.565831 | 0.654879 | 0.740112 |
| MmugDNA.31866.1.S1_at   | MmugDNA.31866.1 | 5.84  | 6.14  | 0.35 | 0.71 | -1.23 | 0.379548 | 0.435392 | 0.687061 | 0.655194 |
| MmugDNA.31868.1.S1_at   | MmugDNA.31868.1 | 6.82  | 6.82  | 0.34 | 0.04 | -1    | 0.335293 | 0.411881 | 0.659098 | 0.638434 |
| MmugDNA.31869.1.S1_at   | MmugDNA.31869.1 | 5.52  | 4.9   | 1.05 | 0.14 | 1.53  | 0.101567 | 0.095058 | 0.461313 | 0.352124 |
| MmugDNA.3187.1.S1_at    | MmugDNA.3187.1  | 9.61  | 8.71  | 0.43 | 0.42 | 1.86  | 0.051543 | 0.033244 | 0.376072 | 0.225803 |
| MmugDNA.31870.1.S1_at   | MmugDNA.31870.1 | 6.22  | 6.28  | 0.19 | 0.11 | -1.04 | 0.79103  | 0.329287 | 0.913224 | 0.57869  |
| MmugDNA.31871.1.S1_at   | MmugDNA.31871.1 | 3.48  | 3.31  | 0.7  | 0.1  | 1.12  | 0.229465 | 0.1644   | 0.586579 | 0.440678 |
| MmugDNA.31872.1.S1_at   | MmugDNA.31872.1 | 4.4   | 4.09  | 0.29 | 0    | 1.24  | 0.144584 | 0.041364 | 0.511015 | 0.247995 |
| MmugDNA.31873.1.S1_at   | MmugDNA.31873.1 | 2.97  | 7.45  | 2.57 | 2.7  | -22.3 | 0.317515 | 0.157827 | 0.647938 | 0.433475 |
| MmugDNA.31874.1.S1_at   | MmugDNA.31874.1 | 5.35  | 5.4   | 0.97 | 0.37 | -1.03 | 0.386337 | 0.5326   | 0.691258 | 0.719144 |
| MmugDNA.31875.1.S1_at   | MmugDNA.31875.1 | 4.23  | 4.15  | 0.15 | 0    | 1.06  | 0.373537 | 0.408418 | 0.683245 | 0.635685 |
| MmugDNA.31876.1.S1_at   | MmugDNA.31876.1 | 4.95  | 5.15  | 0.14 | 0.29 | -1.14 | 0.224244 | 0.280043 | 0.582619 | 0.543369 |
| MmugDNA.31878.1.S1_at   | MmugDNA.31878.1 | 3.53  | 3.41  | 0.43 | 0.26 | 1.08  | 0.268387 | 0.238722 | 0.613168 | 0.509386 |
| MmugDNA.31879.1.S1_at   | MmugDNA.31879.1 | 6.93  | 7.85  | 0.33 | 0.21 | -1.9  | 0.051434 | 0.046902 | 0.376003 | 0.261281 |
| MmugDNA.3188.1.S1_at    | MmugDNA.3188.1  | 5.01  | 5.12  | 0.08 | 0.13 | -1.08 | 0.496237 | 0.212758 | 0.757473 | 0.486769 |

|                         |                 |       |       |      |      |       |          |          |          |          |
|-------------------------|-----------------|-------|-------|------|------|-------|----------|----------|----------|----------|
| MmugDNA.31880.1.S1_at   | MmugDNA.31880.1 | 7.21  | 8.44  | 0.38 | 0.28 | -2.35 | 0.017665 | 0.017436 | 0.267454 | 0.167111 |
| MmugDNA.31881.1.S1_at   | MmugDNA.31881.1 | 3.07  | 3.23  | 0.11 | 0.1  | -1.12 | 0.390184 | 0.176435 | 0.693438 | 0.45282  |
| MmugDNA.31882.1.S1_at   | MmugDNA.31882.1 | 3.15  | 3.39  | 0.07 | 0.14 | -1.18 | 0.258027 | 0.082748 | 0.60536  | 0.332206 |
| MmugDNA.31883.1.S1_at   | MmugDNA.31883.1 | 8.16  | 8.24  | 0.49 | 0.28 | -1.06 | 0.608782 | 0.796513 | 0.820185 | 0.882705 |
| MmugDNA.31884.1.S1_at   | MmugDNA.31884.1 | 3.42  | 3.43  | 0.01 | 0.18 | -1    | 0.798495 | 0.950678 | 0.916476 | 0.972007 |
| MmugDNA.31885.1.S1_at   | MmugDNA.31885.1 | 11.1  | 10.83 | 0.09 | 0.16 | 1.21  | 0.090363 | 0.062023 | 0.445788 | 0.295897 |
| MmugDNA.31886.1.S1_at   | MmugDNA.31886.1 | 5.85  | 6.06  | 0.19 | 0.05 | -1.15 | 0.428614 | 0.094766 | 0.717023 | 0.35164  |
| MmugDNA.31887.1.S1_at   | MmugDNA.31887.1 | 9.01  | 9.68  | 0.06 | 0.59 | -1.59 | 0.13259  | 0.14107  | 0.49874  | 0.414592 |
| MmugDNA.31888.1.S1_at   | MmugDNA.31888.1 | 5.28  | 4.19  | 0.44 | 0.26 | 2.13  | 0.022162 | 0.014881 | 0.284649 | 0.155055 |
| MmugDNA.31889.1.S1_s_at | MmugDNA.31889.1 | 3.21  | 3.15  | 0.09 | 0.03 | 1.05  | 0.15134  | 0.385203 | 0.516063 | 0.620695 |
| MmugDNA.3189.1.S1_at    | MmugDNA.3189.1  | 5.02  | 4.7   | 0.44 | 0.22 | 1.25  | 0.431959 | 0.505774 | 0.718776 | 0.702218 |
| MmugDNA.31890.1.S1_at   | MmugDNA.31890.1 | 6.56  | 6.69  | 0.32 | 0.18 | -1.1  | 0.736689 | 0.12631  | 0.886769 | 0.396786 |
| MmugDNA.31891.1.S1_at   | MmugDNA.31891.1 | 8.06  | 7.26  | 0.05 | 0.15 | 1.74  | 0.000723 | 0.000511 | 0.136818 | 0.039357 |
| MmugDNA.31892.1.S1_at   | MmugDNA.31892.1 | 4.17  | 4.33  | 0.12 | 0.1  | -1.12 | 0.326914 | 0.70632  | 0.653371 | 0.829634 |
| MmugDNA.31894.1.S1_at   | MmugDNA.31894.1 | 11.15 | 11.53 | 0.42 | 0.61 | -1.3  | 0.969675 | 0.065577 | 0.98841  | 0.301476 |
| MmugDNA.31894.1.S1_s_at | MmugDNA.31894.1 | 10.89 | 11.15 | 0.31 | 0.52 | -1.2  | 0.899205 | 0.043946 | 0.959714 | 0.254098 |
| MmugDNA.31895.1.S1_at   | MmugDNA.31895.1 | 3.84  | 3.56  | 0.42 | 0.27 | 1.22  | 0.209641 | 0.341775 | 0.571003 | 0.587862 |
| MmugDNA.31896.1.S1_at   | MmugDNA.31896.1 | 6.21  | 5.95  | 0.07 | 0.18 | 1.2   | 0.260257 | 0.146767 | 0.607091 | 0.420799 |
| MmugDNA.31897.1.S1_at   | MmugDNA.31897.1 | 11.75 | 11.8  | 0.32 | 0.46 | -1.03 | 0.874397 | 0.068089 | 0.949658 | 0.307142 |
| MmugDNA.31898.1.S1_s_at | MmugDNA.31898.1 | 11.79 | 12.01 | 0.48 | 0.41 | -1.16 | 0.236219 | 0.092834 | 0.590242 | 0.349024 |
| MmugDNA.31900.1.S1_at   | MmugDNA.31900.1 | 5.11  | 5.36  | 0.32 | 0.06 | -1.2  | 0.317339 | 0.427985 | 0.64789  | 0.649602 |
| MmugDNA.31901.1.S1_at   | MmugDNA.31901.1 | 9.6   | 12.54 | 0.58 | 0.78 | -7.7  | 0.017787 | 0.005382 | 0.267882 | 0.101199 |
| MmugDNA.31902.1.S1_at   | MmugDNA.31902.1 | 11.42 | 10.92 | 0.11 | 0.51 | 1.41  | 0.13     | 0.02559  | 0.496135 | 0.200684 |
| MmugDNA.31904.1.S1_x_at | MmugDNA.31904.1 | 13    | 13.12 | 0.18 | 0.25 | -1.09 | 0.878178 | 0.290218 | 0.95108  | 0.551169 |
| MmugDNA.31907.1.S1_at   | MmugDNA.31907.1 | 4.12  | 4.09  | 0.23 | 0.09 | 1.02  | 0.561203 | 0.567279 | 0.794725 | 0.741185 |
| MmugDNA.31908.1.S1_at   | MmugDNA.31908.1 | 6.12  | 7.39  | 0.51 | 0.31 | -2.4  | 0.021527 | 0.012234 | 0.282524 | 0.142996 |
| MmugDNA.31909.1.S1_at   | MmugDNA.31909.1 | 3.4   | 3.44  | 0.14 | 0.16 | -1.03 | 0.328247 | 0.346374 | 0.654312 | 0.59124  |
| MmugDNA.3191.1.S1_at    | MmugDNA.3191.1  | 12.23 | 12.09 | 0.09 | 0.17 | 1.1   | 0.266452 | 0.318078 | 0.611901 | 0.571046 |
| MmugDNA.31910.1.S1_at   | MmugDNA.31910.1 | 6.86  | 7.27  | 0.44 | 0.59 | -1.33 | 0.266363 | 0.380248 | 0.611888 | 0.616941 |
| MmugDNA.31911.1.S1_at   | MmugDNA.31911.1 | 5.7   | 5.17  | 0.29 | 0.84 | 1.45  | 0.887232 | 0.694084 | 0.954863 | 0.82208  |
| MmugDNA.31912.1.S1_at   | MmugDNA.31912.1 | 10.33 | 10.42 | 0.16 | 0.27 | -1.07 | 0.399639 | 0.511861 | 0.69956  | 0.705797 |
| MmugDNA.31914.1.S1_at   | MmugDNA.31914.1 | 5.99  | 5.67  | 0.22 | 0.25 | 1.25  | 0.126595 | 0.044259 | 0.492802 | 0.25493  |
| MmugDNA.31915.1.S1_at   | MmugDNA.31915.1 | 7.08  | 6.9   | 0.05 | 0.1  | 1.13  | 0.058916 | 0.185112 | 0.390921 | 0.460962 |
| MmugDNA.31917.1.S1_at   | MmugDNA.31917.1 | 6.84  | 6.9   | 0.07 | 0.06 | -1.04 | 0.201684 | 0.152468 | 0.563988 | 0.42728  |
| MmugDNA.31919.1.S1_at   | MmugDNA.31919.1 | 7.75  | 7.93  | 0.17 | 0.34 | -1.13 | 0.262764 | 0.307391 | 0.609039 | 0.563638 |
| MmugDNA.3192.1.S1_at    | MmugDNA.3192.1  | 2.8   | 2.87  | 0.35 | 0.02 | -1.05 | 0.546732 | 0.642773 | 0.785685 | 0.790476 |
| MmugDNA.31921.1.S1_at   | MmugDNA.31921.1 | 4.68  | 5.1   | 0.23 | 0.3  | -1.33 | 0.123433 | 0.198426 | 0.489117 | 0.473302 |
| MmugDNA.31922.1.S1_at   | MmugDNA.31922.1 | 4.27  | 4.39  | 0.38 | 0.23 | -1.08 | 0.951702 | 0.427989 | 0.981942 | 0.649602 |
| MmugDNA.31923.1.S1_at   | MmugDNA.31923.1 | 7.73  | 7.08  | 0.16 | 0.32 | 1.58  | 0.078315 | 0.076714 | 0.428302 | 0.322127 |
| MmugDNA.31924.1.S1_at   | MmugDNA.31924.1 | 7.22  | 7.32  | 0.22 | 0.02 | -1.08 | 0.710342 | 0.849961 | 0.873002 | 0.914673 |
| MmugDNA.31925.1.S1_at   | MmugDNA.31925.1 | 10.26 | 10.25 | 0.17 | 0.3  | 1.01  | 0.626436 | 0.401717 | 0.829584 | 0.631068 |

|                         |                 |       |       |      |      |       |          |          |          |          |
|-------------------------|-----------------|-------|-------|------|------|-------|----------|----------|----------|----------|
| MmugDNA.31925.1.S1_s_at | MmugDNA.31925.1 | 11.83 | 11.89 | 0.08 | 0.13 | -1.04 | 0.500144 | 0.32102  | 0.759402 | 0.573025 |
| MmugDNA.31926.1.S1_at   | MmugDNA.31926.1 | 12.53 | 12.63 | 0.09 | 0.17 | -1.07 | 0.92637  | 0.4206   | 0.971724 | 0.644287 |
| MmugDNA.31926.1.S1_x_at | MmugDNA.31926.1 | 12.48 | 12.55 | 0.07 | 0.22 | -1.05 | 0.943653 | 0.451982 | 0.978535 | 0.666724 |
| MmugDNA.31927.1.S1_at   | MmugDNA.31927.1 | 4.01  | 3.93  | 0.08 | 0.07 | 1.05  | 0.172028 | 0.315382 | 0.535422 | 0.568939 |
| MmugDNA.31928.1.S1_at   | MmugDNA.31928.1 | 5.59  | 6.66  | 0.18 | 0.64 | -2.1  | 0.015954 | 0.005803 | 0.262019 | 0.104597 |
| MmugDNA.31929.1.S1_at   | MmugDNA.31929.1 | 6.33  | 6.75  | 0.03 | 0.32 | -1.34 | 0.237258 | 0.273394 | 0.590811 | 0.537845 |
| MmugDNA.31929.1.S1_s_at | MmugDNA.31929.1 | 7.31  | 6.44  | 0.75 | 0.9  | 1.83  | 0.423857 | 0.193669 | 0.714199 | 0.468785 |
| MmugDNA.3193.1.S1_at    | MmugDNA.3193.1  | 4.08  | 4.08  | 0.36 | 0.06 | 1     | 0.460594 | 0.440598 | 0.737054 | 0.659029 |
| MmugDNA.3193.1.S1_x_at  | MmugDNA.3193.1  | 3.99  | 4.01  | 0.29 | 0.1  | -1.02 | 0.845242 | 0.963403 | 0.937902 | 0.979599 |
| MmugDNA.31930.1.S1_at   | MmugDNA.31930.1 | 4.28  | 4.57  | 0.26 | 0.27 | -1.23 | 0.61114  | 0.08651  | 0.821498 | 0.33907  |
| MmugDNA.31932.1.S1_at   | MmugDNA.31932.1 | 3.49  | 3.39  | 0.23 | 0.05 | 1.07  | 0.555784 | 0.726795 | 0.791486 | 0.841963 |
| MmugDNA.31933.1.S1_at   | MmugDNA.31933.1 | 9.2   | 10.33 | 0.33 | 0.9  | -2.18 | 0.163532 | 0.06313  | 0.527992 | 0.29795  |
| MmugDNA.31935.1.S1_at   | MmugDNA.31935.1 | 3.93  | 3.62  | 0.56 | 0.54 | 1.24  | 0.790674 | 0.464239 | 0.913119 | 0.674983 |
| MmugDNA.31937.1.S1_at   | MmugDNA.31937.1 | 12.63 | 12.4  | 0.13 | 0.07 | 1.17  | 0.055212 | 0.074722 | 0.383636 | 0.318465 |
| MmugDNA.31938.1.S1_at   | MmugDNA.31938.1 | 10.4  | 10.27 | 0.39 | 0.22 | 1.09  | 0.79384  | 0.865314 | 0.914508 | 0.923554 |
| MmugDNA.31939.1.S1_at   | MmugDNA.31939.1 | 4.33  | 4.86  | 0.17 | 0.46 | -1.44 | 0.126575 | 0.022284 | 0.492802 | 0.186724 |
| MmugDNA.3194.1.S1_at    | MmugDNA.3194.1  | 7.69  | 7.82  | 0.49 | 0.08 | -1.1  | 0.184527 | 0.235968 | 0.548202 | 0.507056 |
| MmugDNA.31940.1.S1_at   | MmugDNA.31940.1 | 3.7   | 3.65  | 0.3  | 0.1  | 1.03  | 0.432663 | 0.108677 | 0.719191 | 0.372171 |
| MmugDNA.31941.1.S1_at   | MmugDNA.31941.1 | 6.22  | 6.15  | 0.22 | 0.03 | 1.04  | 0.737932 | 0.773884 | 0.887435 | 0.868533 |
| MmugDNA.31942.1.S1_at   | MmugDNA.31942.1 | 6.43  | 6.35  | 0.48 | 0.2  | 1.06  | 0.304983 | 0.237804 | 0.638988 | 0.508309 |
| MmugDNA.31943.1.S1_at   | MmugDNA.31943.1 | 5.2   | 4.6   | 0.53 | 0.39 | 1.51  | 0.042697 | 0.05183  | 0.355382 | 0.273151 |
| MmugDNA.31947.1.S1_at   | MmugDNA.31947.1 | 5.06  | 5.03  | 0.22 | 0.38 | 1.02  | 0.782468 | 0.706882 | 0.909199 | 0.829968 |
| MmugDNA.31949.1.S1_at   | MmugDNA.31949.1 | 9.69  | 8.12  | 0.2  | 0.3  | 2.97  | 0.002746 | 0.00104  | 0.165355 | 0.051426 |
| MmugDNA.3195.1.S1_at    | MmugDNA.3195.1  | 4.88  | 3.94  | 0.43 | 0.38 | 1.91  | 0.043831 | 0.033425 | 0.357051 | 0.226484 |
| MmugDNA.31950.1.S1_at   | MmugDNA.31950.1 | 12.31 | 12.07 | 0.03 | 0.47 | 1.18  | 0.561488 | 0.740079 | 0.794887 | 0.849396 |
| MmugDNA.31951.1.S1_at   | MmugDNA.31951.1 | 10    | 10.21 | 0.09 | 0.13 | -1.15 | 0.09355  | 0.149804 | 0.450945 | 0.424394 |
| MmugDNA.31952.1.S1_s_at | MmugDNA.31952.1 | 10.46 | 10.43 | 0.24 | 0.32 | 1.03  | 0.748653 | 0.010256 | 0.892532 | 0.132655 |
| MmugDNA.31953.1.S1_at   | MmugDNA.31953.1 | 9.52  | 9.57  | 0.6  | 1.14 | -1.04 | 0.751464 | 0.019976 | 0.893762 | 0.177532 |
| MmugDNA.31954.1.S1_at   | MmugDNA.31954.1 | 6.13  | 4.79  | 0.89 | 0.24 | 2.53  | 0.072739 | 0.065214 | 0.41769  | 0.301239 |
| MmugDNA.31956.1.S1_at   | MmugDNA.31956.1 | 7.24  | 6.4   | 0.26 | 0.46 | 1.79  | 0.131761 | 0.164307 | 0.498041 | 0.440539 |
| MmugDNA.31957.1.S1_at   | MmugDNA.31957.1 | 7.21  | 6.88  | 0.1  | 0.45 | 1.25  | 0.112281 | 0.035645 | 0.474794 | 0.233217 |
| MmugDNA.31958.1.S1_at   | MmugDNA.31958.1 | 2.97  | 2.89  | 0.16 | 0.03 | 1.06  | 0.559315 | 0.490355 | 0.793798 | 0.692363 |
| MmugDNA.31959.1.S1_at   | MmugDNA.31959.1 | 12.28 | 11.54 | 0.26 | 0.07 | 1.67  | 0.004087 | 0.000573 | 0.181739 | 0.041171 |
| MmugDNA.3196.1.S1_at    | MmugDNA.3196.1  | 6.92  | 6.27  | 0.48 | 0.57 | 1.57  | 0.394857 | 0.563968 | 0.696162 | 0.738913 |
| MmugDNA.31960.1.S1_at   | MmugDNA.31960.1 | 6.25  | 5.97  | 0.33 | 0.4  | 1.22  | 0.173537 | 0.250927 | 0.537183 | 0.519612 |
| MmugDNA.31961.1.S1_at   | MmugDNA.31961.1 | 7.66  | 8.53  | 0.25 | 0.2  | -1.83 | 0.014601 | 0.008087 | 0.254235 | 0.119519 |
| MmugDNA.31963.1.S1_at   | MmugDNA.31963.1 | 8.32  | 8.22  | 0.97 | 0.5  | 1.08  | 0.50605  | 0.181552 | 0.761997 | 0.458105 |
| MmugDNA.31966.1.S1_at   | MmugDNA.31966.1 | 10.16 | 11.21 | 0.54 | 0.8  | -2.08 | 0.112961 | 0.063953 | 0.475579 | 0.29906  |
| MmugDNA.31967.1.S1_at   | MmugDNA.31967.1 | 12.58 | 12.18 | 0.18 | 0.25 | 1.32  | 0.076865 | 0.027316 | 0.425685 | 0.206625 |
| MmugDNA.31969.1.S1_at   | MmugDNA.31969.1 | 7.55  | 7.39  | 0.64 | 0.17 | 1.11  | 0.250882 | 0.228155 | 0.600476 | 0.500327 |
| MmugDNA.3197.1.S1_at    | MmugDNA.3197.1  | 5.38  | 5.17  | 0.59 | 0.32 | 1.16  | 0.287132 | 0.275898 | 0.625773 | 0.540035 |

|                         |                 |       |       |      |      |       |          |          |          |          |
|-------------------------|-----------------|-------|-------|------|------|-------|----------|----------|----------|----------|
| MmugDNA.31971.1.S1_at   | MmugDNA.31971.1 | 9.11  | 8.71  | 0.22 | 0.35 | 1.32  | 0.261931 | 0.179256 | 0.608552 | 0.45567  |
| MmugDNA.31972.1.S1_at   | MmugDNA.31972.1 | 9.01  | 8.85  | 0.26 | 0.21 | 1.11  | 0.562364 | 0.34271  | 0.795286 | 0.588666 |
| MmugDNA.31973.1.S1_at   | MmugDNA.31973.1 | 6.99  | 6.7   | 0.31 | 0.51 | 1.22  | 0.584592 | 0.132451 | 0.807089 | 0.404483 |
| MmugDNA.31974.1.S1_at   | MmugDNA.31974.1 | 7.33  | 7.47  | 0.06 | 0.07 | -1.1  | 0.053402 | 0.075517 | 0.380257 | 0.319941 |
| MmugDNA.31975.1.S1_at   | MmugDNA.31975.1 | 9.13  | 7.84  | 0.12 | 0.86 | 2.46  | 0.070295 | 0.039488 | 0.413911 | 0.243642 |
| MmugDNA.31976.1.S1_at   | MmugDNA.31976.1 | 4.31  | 4.31  | 0.15 | 0.18 | -1    | 0.482349 | 0.751258 | 0.749404 | 0.855385 |
| MmugDNA.31977.1.S1_at   | MmugDNA.31977.1 | 4.93  | 4.87  | 0.28 | 0.06 | 1.04  | 0.28806  | 0.178889 | 0.626381 | 0.455208 |
| MmugDNA.31978.1.S1_at   | MmugDNA.31978.1 | 3.16  | 3.32  | 0.17 | 0.12 | -1.12 | 0.362065 | 0.355737 | 0.675653 | 0.597864 |
| MmugDNA.3198.1.S1_at    | MmugDNA.3198.1  | 9.02  | 11.85 | 1.23 | 0.61 | -7.14 | 0.02258  | 0.014696 | 0.287361 | 0.154371 |
| MmugDNA.31980.1.S1_at   | MmugDNA.31980.1 | 3.23  | 3.2   | 0.08 | 0.1  | 1.02  | 0.946394 | 0.222036 | 0.979409 | 0.495083 |
| MmugDNA.31981.1.S1_at   | MmugDNA.31981.1 | 11.74 | 11.73 | 0.15 | 0.03 | 1.01  | 0.921801 | 0.944536 | 0.969617 | 0.968614 |
| MmugDNA.31982.1.S1_at   | MmugDNA.31982.1 | 3.88  | 3.51  | 0.96 | 0.2  | 1.29  | 0.175924 | 0.219508 | 0.53945  | 0.493168 |
| MmugDNA.31983.1.S1_at   | MmugDNA.31983.1 | 4.34  | 4.44  | 0.05 | 0.05 | -1.07 | 0.078952 | 0.086221 | 0.428609 | 0.33863  |
| MmugDNA.31984.1.S1_at   | MmugDNA.31984.1 | 4.06  | 3.82  | 0.5  | 0.22 | 1.18  | 0.646938 | 0.473766 | 0.84111  | 0.68101  |
| MmugDNA.31985.1.S1_at   | MmugDNA.31985.1 | 8.81  | 8.85  | 0.28 | 0.78 | -1.03 | 0.786735 | 0.745247 | 0.911324 | 0.852317 |
| MmugDNA.31986.1.S1_s_at | MmugDNA.31986.1 | 9.75  | 8.92  | 0.04 | 0.24 | 1.78  | 0.003489 | 0.000192 | 0.178634 | 0.030888 |
| MmugDNA.31988.1.S1_at   | MmugDNA.31988.1 | 5.85  | 5.91  | 0.16 | 0.04 | -1.04 | 0.675941 | 0.555951 | 0.854832 | 0.734244 |
| MmugDNA.3199.1.S1_at    | MmugDNA.3199.1  | 3.32  | 3.33  | 0.14 | 0.21 | -1.01 | 0.752871 | 0.658118 | 0.894568 | 0.800181 |
| MmugDNA.31990.1.S1_at   | MmugDNA.31990.1 | 6.78  | 6.71  | 0.07 | 0.11 | 1.06  | 0.431017 | 0.254502 | 0.718433 | 0.522829 |
| MmugDNA.31991.1.S1_at   | MmugDNA.31991.1 | 9.93  | 9.78  | 0.06 | 0.12 | 1.11  | 0.171847 | 0.006166 | 0.535401 | 0.106774 |
| MmugDNA.31992.1.S1_at   | MmugDNA.31992.1 | 4.86  | 4.09  | 0.69 | 0.46 | 1.7   | 0.186751 | 0.222515 | 0.550106 | 0.495588 |
| MmugDNA.31994.1.S1_at   | MmugDNA.31994.1 | 3.02  | 3.2   | 0.08 | 0.32 | -1.13 | 0.178429 | 0.295684 | 0.542825 | 0.555113 |
| MmugDNA.31998.1.S1_at   | MmugDNA.31998.1 | 10.69 | 11.14 | 0.26 | 0.18 | -1.36 | 0.048053 | 0.057239 | 0.367582 | 0.285059 |
| MmugDNA.31999.1.S1_at   | MmugDNA.31999.1 | 6.21  | 6.1   | 0.29 | 0.21 | 1.08  | 0.824259 | 0.659081 | 0.928728 | 0.800513 |
| MmugDNA.31999.1.S1_s_at | MmugDNA.31999.1 | 3.85  | 3.94  | 0.09 | 0.32 | -1.06 | 0.313652 | 0.249542 | 0.645233 | 0.518596 |
| MmugDNA.32.1.S1_at      | MmugDNA.32.1    | 3.42  | 3.36  | 0.43 | 0.35 | 1.04  | 0.467732 | 0.60628  | 0.740845 | 0.765727 |
| MmugDNA.320.1.S1_at     | MmugDNA.320.1   | 7.46  | 7.21  | 0.32 | 0.4  | 1.18  | 0.550506 | 0.143314 | 0.787938 | 0.417294 |
| MmugDNA.3200.1.S1_at    | MmugDNA.3200.1  | 5.11  | 5.18  | 0.21 | 0.29 | -1.05 | 0.755347 | 0.064145 | 0.896082 | 0.29954  |
| MmugDNA.32000.1.S1_at   | MmugDNA.32000.1 | 6.88  | 6.71  | 0.29 | 0.26 | 1.13  | 0.492584 | 0.424677 | 0.755881 | 0.647214 |
| MmugDNA.32001.1.S1_at   | MmugDNA.32001.1 | 3.47  | 3.5   | 0.09 | 0.07 | -1.02 | 0.449071 | 0.455149 | 0.730082 | 0.669135 |
| MmugDNA.32003.1.S1_at   | MmugDNA.32003.1 | 5.22  | 5.47  | 0.39 | 0.17 | -1.19 | 0.646721 | 0.458181 | 0.841047 | 0.671077 |
| MmugDNA.32005.1.S1_at   | MmugDNA.32005.1 | 7.81  | 7.52  | 0.07 | 0.27 | 1.22  | 0.430431 | 0.577013 | 0.718048 | 0.747605 |
| MmugDNA.32006.1.S1_at   | MmugDNA.32006.1 | 7.69  | 7.61  | 0.27 | 0.1  | 1.06  | 0.988314 | 0.822607 | 0.995887 | 0.89799  |
| MmugDNA.32006.1.S1_s_at | MmugDNA.32006.1 | 6.53  | 6.59  | 0.3  | 0.23 | -1.05 | 0.770213 | 0.829555 | 0.90333  | 0.902076 |
| MmugDNA.32008.1.S1_at   | MmugDNA.32008.1 | 8.66  | 8.05  | 0.24 | 0.17 | 1.53  | 0.022138 | 0.01786  | 0.284595 | 0.168774 |
| MmugDNA.32009.1.S1_at   | MmugDNA.32009.1 | 8.91  | 7.13  | 0.36 | 0.48 | 3.43  | 0.010399 | 0.004323 | 0.229439 | 0.092241 |
| MmugDNA.3201.1.S1_at    | MmugDNA.3201.1  | 4.27  | 4.55  | 0.39 | 0.25 | -1.22 | 0.609973 | 0.257661 | 0.820785 | 0.525332 |
| MmugDNA.32010.1.S1_at   | MmugDNA.32010.1 | 3.83  | 4.01  | 0.18 | 0.01 | -1.13 | 0.154212 | 0.075596 | 0.518767 | 0.32003  |
| MmugDNA.32011.1.S1_at   | MmugDNA.32011.1 | 6.47  | 6.55  | 0.1  | 0.07 | -1.06 | 0.276189 | 0.419185 | 0.618203 | 0.643394 |
| MmugDNA.32012.1.S1_at   | MmugDNA.32012.1 | 6.05  | 6.22  | 0.19 | 0.37 | -1.13 | 0.807524 | 0.953643 | 0.921249 | 0.973626 |
| MmugDNA.32015.1.S1_at   | MmugDNA.32015.1 | 6.7   | 7.9   | 0.43 | 1.15 | -2.3  | 0.26535  | 0.348208 | 0.610896 | 0.592413 |

|                         |                 |       |       |      |      |       |          |          |          |          |
|-------------------------|-----------------|-------|-------|------|------|-------|----------|----------|----------|----------|
| MmugDNA.32016.1.S1_at   | MmugDNA.32016.1 | 9.57  | 10.78 | 0.57 | 0.98 | -2.31 | 0.129617 | 0.122943 | 0.495744 | 0.392923 |
| MmugDNA.32017.1.S1_at   | MmugDNA.32017.1 | 4.05  | 4.31  | 0.18 | 0.12 | -1.2  | 0.08271  | 0.075828 | 0.43437  | 0.320436 |
| MmugDNA.3202.1.S1_at    | MmugDNA.3202.1  | 8.01  | 7.22  | 0.28 | 0.91 | 1.74  | 0.217565 | 0.266344 | 0.577141 | 0.532114 |
| MmugDNA.32020.1.S1_at   | MmugDNA.32020.1 | 6.23  | 6.09  | 0.12 | 0.31 | 1.1   | 0.844198 | 0.553737 | 0.937436 | 0.732785 |
| MmugDNA.32021.1.S1_at   | MmugDNA.32021.1 | 3.14  | 3.05  | 0.08 | 0.14 | 1.06  | 0.266685 | 0.417309 | 0.612144 | 0.642143 |
| MmugDNA.32023.1.S1_at   | MmugDNA.32023.1 | 10.79 | 10.81 | 0.2  | 0.09 | -1.01 | 0.771313 | 0.405284 | 0.903751 | 0.633642 |
| MmugDNA.32025.1.S1_at   | MmugDNA.32025.1 | 3.59  | 3.5   | 0.21 | 0.07 | 1.07  | 0.981321 | 0.919792 | 0.993278 | 0.954906 |
| MmugDNA.32026.1.S1_at   | MmugDNA.32026.1 | 5.58  | 5.68  | 0.25 | 0.05 | -1.07 | 0.621791 | 0.811858 | 0.827008 | 0.891451 |
| MmugDNA.32027.1.S1_at   | MmugDNA.32027.1 | 7.66  | 6.74  | 0.27 | 0.47 | 1.9   | 0.116958 | 0.222622 | 0.480867 | 0.495617 |
| MmugDNA.32028.1.S1_at   | MmugDNA.32028.1 | 8.1   | 7.4   | 0.49 | 0.66 | 1.62  | 0.223745 | 0.154778 | 0.582123 | 0.42979  |
| MmugDNA.32029.1.S1_at   | MmugDNA.32029.1 | 6.45  | 6.9   | 0.37 | 0.81 | -1.37 | 0.428986 | 0.59196  | 0.717207 | 0.757386 |
| MmugDNA.3203.1.S1_at    | MmugDNA.3203.1  | 11.43 | 11.91 | 0.28 | 0.42 | -1.39 | 0.082469 | 0.023996 | 0.434039 | 0.194183 |
| MmugDNA.32030.1.S1_at   | MmugDNA.32030.1 | 6.54  | 6.52  | 0.08 | 0.12 | 1.02  | 0.959364 | 0.827099 | 0.984581 | 0.900721 |
| MmugDNA.32032.1.S1_at   | MmugDNA.32032.1 | 3.62  | 3.3   | 0.28 | 0.17 | 1.25  | 0.183202 | 0.168724 | 0.547309 | 0.445379 |
| MmugDNA.32033.1.S1_at   | MmugDNA.32033.1 | 6.16  | 6.33  | 0.19 | 0.04 | -1.13 | 0.190864 | 0.140384 | 0.553627 | 0.413586 |
| MmugDNA.32034.1.S1_at   | MmugDNA.32034.1 | 7.55  | 7.5   | 0.27 | 0.3  | 1.04  | 0.654322 | 0.297074 | 0.844578 | 0.555996 |
| MmugDNA.32035.1.S1_at   | MmugDNA.32035.1 | 5.76  | 6.06  | 0.05 | 0.46 | -1.23 | 0.546789 | 0.712776 | 0.785716 | 0.8335   |
| MmugDNA.32036.1.S1_at   | MmugDNA.32036.1 | 3.96  | 3.77  | 0.35 | 0.75 | 1.14  | 0.948271 | 0.71418  | 0.980164 | 0.834155 |
| MmugDNA.32038.1.S1_at   | MmugDNA.32038.1 | 8.96  | 8.61  | 0.08 | 0.21 | 1.27  | 0.232664 | 0.235603 | 0.587814 | 0.506671 |
| MmugDNA.32039.1.S1_at   | MmugDNA.32039.1 | 13.56 | 13.57 | 0.28 | 0.19 | -1.01 | 0.854752 | 0.954455 | 0.941248 | 0.974155 |
| MmugDNA.32039.1.S1_x_at | MmugDNA.32039.1 | 14.08 | 14.06 | 0.14 | 0.13 | 1.02  | 0.595392 | 0.76165  | 0.812365 | 0.861459 |
| MmugDNA.3204.1.S1_at    | MmugDNA.3204.1  | 8.61  | 10.2  | 0.65 | 0.93 | -3.02 | 0.148708 | 0.12359  | 0.51391  | 0.393637 |
| MmugDNA.32040.1.S1_at   | MmugDNA.32040.1 | 12.46 | 11.92 | 0.12 | 0.12 | 1.45  | 0.012193 | 0.005195 | 0.240358 | 0.099895 |
| MmugDNA.32041.1.S1_at   | MmugDNA.32041.1 | 5.64  | 5.4   | 0.28 | 0.1  | 1.18  | 0.579433 | 0.685608 | 0.804265 | 0.816542 |
| MmugDNA.32043.1.S1_at   | MmugDNA.32043.1 | 6.65  | 6.22  | 0.33 | 0.09 | 1.35  | 0.128176 | 0.085004 | 0.494307 | 0.336712 |
| MmugDNA.32044.1.S1_at   | MmugDNA.32044.1 | 5.19  | 5.42  | 0.22 | 0.17 | -1.18 | 0.380931 | 0.333989 | 0.687607 | 0.582063 |
| MmugDNA.32045.1.S1_x_at | MmugDNA.32045.1 | 9.98  | 9.7   | 0.45 | 0.17 | 1.21  | 0.129915 | 0.134062 | 0.495954 | 0.406276 |
| MmugDNA.32046.1.S1_at   | MmugDNA.32046.1 | 4.67  | 5.01  | 0.33 | 0.16 | -1.26 | 0.545941 | 0.588417 | 0.785219 | 0.754907 |
| MmugDNA.32047.1.S1_at   | MmugDNA.32047.1 | 11.53 | 11.4  | 0.04 | 0.26 | 1.09  | 0.146662 | 0.173604 | 0.512668 | 0.449956 |
| MmugDNA.32048.1.S1_at   | MmugDNA.32048.1 | 4.92  | 4.99  | 0.22 | 0.21 | -1.05 | 0.685725 | 0.70028  | 0.85935  | 0.826033 |
| MmugDNA.32049.1.S1_at   | MmugDNA.32049.1 | 11.05 | 11.09 | 0.22 | 0.48 | -1.03 | 0.81064  | 0.780363 | 0.922872 | 0.872597 |
| MmugDNA.3205.1.S1_at    | MmugDNA.3205.1  | 4.21  | 4.01  | 0.1  | 0.21 | 1.15  | 0.121022 | 0.106954 | 0.48574  | 0.369526 |
| MmugDNA.32050.1.S1_at   | MmugDNA.32050.1 | 8.86  | 6.95  | 0.59 | 0.31 | 3.78  | 0.005663 | 0.000975 | 0.191943 | 0.04983  |
| MmugDNA.32052.1.S1_at   | MmugDNA.32052.1 | 4.31  | 4.29  | 0.08 | 0.03 | 1.02  | 0.609408 | 0.940234 | 0.820443 | 0.966105 |
| MmugDNA.32053.1.S1_at   | MmugDNA.32053.1 | 4.16  | 4.15  | 0.11 | 0.06 | 1     | 0.838124 | 0.866047 | 0.934582 | 0.923791 |
| MmugDNA.32055.1.S1_at   | MmugDNA.32055.1 | 5.65  | 6.28  | 0.26 | 0.27 | -1.55 | 0.039414 | 0.082346 | 0.347121 | 0.331322 |
| MmugDNA.32056.1.S1_at   | MmugDNA.32056.1 | 6.76  | 8.97  | 0.22 | 0.27 | -4.64 | 0.000379 | 0.000176 | 0.12978  | 0.030511 |
| MmugDNA.32057.1.S1_at   | MmugDNA.32057.1 | 6.18  | 6.22  | 0.34 | 0.29 | -1.03 | 0.880113 | 0.958265 | 0.951822 | 0.976345 |
| MmugDNA.3206.1.S1_at    | MmugDNA.3206.1  | 3.48  | 3.48  | 0.24 | 0.4  | -1.01 | 0.443491 | 0.308359 | 0.726153 | 0.564428 |
| MmugDNA.32060.1.S1_s_at | MmugDNA.32060.1 | 10.82 | 11.37 | 0.08 | 0.41 | -1.46 | 0.066655 | 0.061866 | 0.406757 | 0.295577 |
| MmugDNA.32061.1.S1_at   | MmugDNA.32061.1 | 4.86  | 4.9   | 0.07 | 0.13 | -1.03 | 0.260215 | 0.463928 | 0.607076 | 0.674716 |



|                         |                 |       |       |      |      |       |          |          |          |          |
|-------------------------|-----------------|-------|-------|------|------|-------|----------|----------|----------|----------|
| MmugDNA.32062.1.S1_at   | MmugDNA.32062.1 | 5.69  | 5.57  | 0.07 | 0.2  | 1.09  | 0.919773 | 0.080398 | 0.968755 | 0.328028 |
| MmugDNA.32066.1.S1_at   | MmugDNA.32066.1 | 9.37  | 8.7   | 0.06 | 0.37 | 1.58  | 0.125826 | 0.052605 | 0.491824 | 0.274853 |
| MmugDNA.32068.1.S1_at   | MmugDNA.32068.1 | 5.91  | 6.55  | 0.49 | 0.68 | -1.56 | 0.204527 | 0.18062  | 0.567039 | 0.457245 |
| MmugDNA.32069.1.S1_at   | MmugDNA.32069.1 | 8.53  | 8.79  | 0.28 | 0.34 | -1.2  | 0.292709 | 0.104212 | 0.630064 | 0.365373 |
| MmugDNA.3207.1.S1_at    | MmugDNA.3207.1  | 5.62  | 5.65  | 0.12 | 0.1  | -1.02 | 0.682912 | 0.213328 | 0.858246 | 0.487225 |
| MmugDNA.32070.1.S1_at   | MmugDNA.32070.1 | 5.18  | 5.21  | 0.26 | 0.13 | -1.02 | 0.209434 | 0.00055  | 0.570957 | 0.040948 |
| MmugDNA.32071.1.S1_at   | MmugDNA.32071.1 | 5.88  | 6.01  | 0.4  | 0.79 | -1.09 | 0.955599 | 0.364909 | 0.983295 | 0.60517  |
| MmugDNA.32072.1.S1_at   | MmugDNA.32072.1 | 10.14 | 9.85  | 0.31 | 0.25 | 1.22  | 0.929545 | 0.411808 | 0.972741 | 0.638434 |
| MmugDNA.32075.1.S1_at   | MmugDNA.32075.1 | 10.16 | 9.47  | 0.26 | 0.28 | 1.61  | 0.099463 | 0.123147 | 0.459387 | 0.393174 |
| MmugDNA.32075.1.S1_x_at | MmugDNA.32075.1 | 10.19 | 9.67  | 0.23 | 0.23 | 1.43  | 0.079487 | 0.081616 | 0.429617 | 0.329824 |
| MmugDNA.32076.1.S1_at   | MmugDNA.32076.1 | 11.11 | 10.74 | 0.15 | 0.16 | 1.29  | 0.207496 | 0.017027 | 0.569624 | 0.165384 |
| MmugDNA.32077.1.S1_at   | MmugDNA.32077.1 | 4.43  | 4.44  | 0.36 | 0.3  | -1.01 | 0.484969 | 0.334689 | 0.750701 | 0.582592 |
| MmugDNA.32078.1.S1_at   | MmugDNA.32078.1 | 8.95  | 7.25  | 0.47 | 0.24 | 3.24  | 0.013884 | 0.004007 | 0.249758 | 0.089969 |
| MmugDNA.32080.1.S1_at   | MmugDNA.32080.1 | 2.96  | 2.87  | 0.13 | 0.06 | 1.07  | 0.2314   | 0.360619 | 0.587372 | 0.601657 |
| MmugDNA.32082.1.S1_at   | MmugDNA.32082.1 | 6.59  | 6.61  | 0.93 | 0.16 | -1.01 | 0.399048 | 0.131627 | 0.699064 | 0.403716 |
| MmugDNA.32083.1.S1_at   | MmugDNA.32083.1 | 3.23  | 3.07  | 0.17 | 0.19 | 1.11  | 0.415569 | 0.712903 | 0.709528 | 0.833557 |
| MmugDNA.32087.1.S1_at   | MmugDNA.32087.1 | 5.65  | 5.63  | 0.12 | 0.03 | 1.01  | 0.291204 | 0.385692 | 0.628725 | 0.621079 |
| MmugDNA.32088.1.S1_at   | MmugDNA.32088.1 | 3.04  | 3.24  | 0.03 | 0.25 | -1.15 | 0.786788 | 0.717885 | 0.911324 | 0.836699 |
| MmugDNA.32092.1.S1_at   | MmugDNA.32092.1 | 6.16  | 6.37  | 0.11 | 0.28 | -1.16 | 0.977977 | 0.477103 | 0.991739 | 0.683209 |
| MmugDNA.32095.1.S1_at   | MmugDNA.32095.1 | 12.47 | 12.18 | 0.05 | 0.11 | 1.22  | 0.014081 | 0.009201 | 0.250983 | 0.126579 |
| MmugDNA.32096.1.S1_at   | MmugDNA.32096.1 | 6.85  | 6.26  | 0.29 | 0.56 | 1.5   | 0.114176 | 0.128863 | 0.47744  | 0.400277 |
| MmugDNA.321.1.S1_at     | MmugDNA.321.1   | 4.01  | 4.79  | 0.62 | 0.88 | -1.72 | 0.33554  | 0.176798 | 0.659165 | 0.45321  |
| MmugDNA.3210.1.S1_at    | MmugDNA.3210.1  | 4.95  | 4.53  | 0.05 | 0.18 | 1.34  | 0.01938  | 0.010014 | 0.273874 | 0.131262 |
| MmugDNA.32100.1.S1_at   | MmugDNA.32100.1 | 7.73  | 6.28  | 0.23 | 0.5  | 2.74  | 0.030037 | 0.012579 | 0.316741 | 0.14463  |
| MmugDNA.32102.1.S1_at   | MmugDNA.32102.1 | 3.52  | 3.51  | 0.14 | 0.07 | 1.01  | 0.564681 | 0.503453 | 0.796772 | 0.700892 |
| MmugDNA.32104.1.S1_at   | MmugDNA.32104.1 | 5.36  | 5.45  | 0.41 | 0.31 | -1.06 | 0.589945 | 0.160943 | 0.809673 | 0.437116 |
| MmugDNA.32105.1.S1_at   | MmugDNA.32105.1 | 13.98 | 14.06 | 0.05 | 0.01 | -1.06 | 0.121312 | 0.041286 | 0.48598  | 0.247995 |
| MmugDNA.32107.1.S1_at   | MmugDNA.32107.1 | 5.79  | 5.8   | 0.15 | 0.03 | -1.01 | 0.446168 | 0.14224  | 0.728173 | 0.415754 |
| MmugDNA.32108.1.S1_at   | MmugDNA.32108.1 | 7.45  | 7.49  | 0.3  | 0.5  | -1.03 | 0.836147 | 0.341387 | 0.933665 | 0.587526 |
| MmugDNA.32109.1.S1_at   | MmugDNA.32109.1 | 5.36  | 5.35  | 0.15 | 0.14 | 1.01  | 0.462054 | 0.632604 | 0.738159 | 0.783658 |
| MmugDNA.3211.1.S1_x_at  | MmugDNA.3211.1  | 6.37  | 5.58  | 0.81 | 0.47 | 1.73  | 0.141308 | 0.108237 | 0.508969 | 0.371557 |
| MmugDNA.32110.1.S1_at   | MmugDNA.32110.1 | 3.83  | 3.85  | 0.81 | 0.12 | -1.02 | 0.344758 | 0.423861 | 0.664781 | 0.646555 |
| MmugDNA.32111.1.S1_at   | MmugDNA.32111.1 | 5.24  | 5.32  | 0.21 | 0.65 | -1.06 | 0.804557 | 0.559904 | 0.919591 | 0.736439 |
| MmugDNA.32112.1.S1_at   | MmugDNA.32112.1 | 4.24  | 4.62  | 0.13 | 0.66 | -1.3  | 0.34128  | 0.456492 | 0.662473 | 0.670197 |
| MmugDNA.32113.1.S1_at   | MmugDNA.32113.1 | 5.39  | 5.4   | 0.13 | 0.02 | -1.01 | 0.564321 | 0.764001 | 0.796477 | 0.86279  |
| MmugDNA.32114.1.S1_at   | MmugDNA.32114.1 | 8.42  | 7.52  | 0.22 | 0.29 | 1.87  | 0.013089 | 0.00357  | 0.245262 | 0.085525 |
| MmugDNA.32115.1.S1_at   | MmugDNA.32115.1 | 9.46  | 10.04 | 0.32 | 0.09 | -1.49 | 0.038166 | 0.017261 | 0.343587 | 0.166393 |
| MmugDNA.32117.1.S1_at   | MmugDNA.32117.1 | 6.08  | 5.47  | 0.4  | 0.37 | 1.52  | 0.1469   | 0.239631 | 0.512971 | 0.510315 |
| MmugDNA.32118.1.S1_at   | MmugDNA.32118.1 | 4.32  | 4.03  | 0.23 | 0.11 | 1.22  | 0.122994 | 0.087846 | 0.488439 | 0.341218 |
| MmugDNA.32119.1.S1_at   | MmugDNA.32119.1 | 9.37  | 8.88  | 0.48 | 0.6  | 1.4   | 0.153181 | 0.135913 | 0.517618 | 0.408103 |
| MmugDNA.32120.1.S1_at   | MmugDNA.32120.1 | 4.43  | 4.76  | 0.84 | 0.32 | -1.26 | 0.834247 | 0.022243 | 0.932619 | 0.18659  |

|                         |                 |       |       |      |      |       |          |          |          |          |
|-------------------------|-----------------|-------|-------|------|------|-------|----------|----------|----------|----------|
| MmugDNA.32121.1.S1_at   | MmugDNA.32121.1 | 4.23  | 4.09  | 0.42 | 0.49 | 1.1   | 0.961272 | 0.998388 | 0.985029 | 0.999091 |
| MmugDNA.32122.1.S1_at   | MmugDNA.32122.1 | 7.19  | 7     | 0.09 | 0.31 | 1.14  | 0.431788 | 0.574192 | 0.718638 | 0.745679 |
| MmugDNA.32123.1.S1_at   | MmugDNA.32123.1 | 7.36  | 6.97  | 0.27 | 0.25 | 1.31  | 0.071895 | 0.119671 | 0.415896 | 0.388324 |
| MmugDNA.32125.1.S1_at   | MmugDNA.32125.1 | 7.44  | 6.62  | 0.21 | 0.33 | 1.76  | 0.028131 | 0.016672 | 0.30978  | 0.163492 |
| MmugDNA.32126.1.S1_at   | MmugDNA.32126.1 | 3.73  | 3.88  | 0.22 | 0.37 | -1.11 | 0.368083 | 0.504429 | 0.679753 | 0.701557 |
| MmugDNA.3213.1.S1_at    | MmugDNA.3213.1  | 6.52  | 6.6   | 0.15 | 0.23 | -1.06 | 0.353752 | 0.482896 | 0.670266 | 0.68765  |
| MmugDNA.32130.1.S1_at   | MmugDNA.32130.1 | 5.41  | 5.99  | 0.23 | 0.34 | -1.5  | 0.105858 | 0.114786 | 0.466636 | 0.381311 |
| MmugDNA.32133.1.S1_at   | MmugDNA.32133.1 | 11.61 | 11.85 | 0.09 | 0.21 | -1.18 | 0.044428 | 0.044955 | 0.358591 | 0.256489 |
| MmugDNA.32134.1.S1_at   | MmugDNA.32134.1 | 3.72  | 3.8   | 0.18 | 0.19 | -1.06 | 0.452993 | 0.242019 | 0.732271 | 0.512573 |
| MmugDNA.32135.1.S1_at   | MmugDNA.32135.1 | 8.67  | 8.26  | 0.22 | 0.29 | 1.32  | 0.130602 | 0.145721 | 0.496961 | 0.419653 |
| MmugDNA.32136.1.S1_at   | MmugDNA.32136.1 | 4.25  | 4.27  | 0.3  | 0.12 | -1.01 | 0.665601 | 0.747312 | 0.850023 | 0.853149 |
| MmugDNA.32137.1.S1_at   | MmugDNA.32137.1 | 4.87  | 4.7   | 0.11 | 0.05 | 1.13  | 0.172031 | 0.214039 | 0.535422 | 0.487633 |
| MmugDNA.32138.1.S1_at   | MmugDNA.32138.1 | 7.85  | 7.86  | 0.11 | 0.42 | -1    | 0.897308 | 0.347185 | 0.959157 | 0.591815 |
| MmugDNA.32139.1.S1_at   | MmugDNA.32139.1 | 3.7   | 3.55  | 0.21 | 0.1  | 1.11  | 0.729617 | 0.214007 | 0.882738 | 0.487633 |
| MmugDNA.32140.1.S1_at   | MmugDNA.32140.1 | 4.69  | 4.81  | 0.09 | 0.2  | -1.09 | 0.287712 | 0.384268 | 0.626103 | 0.619994 |
| MmugDNA.32141.1.S1_at   | MmugDNA.32141.1 | 5.23  | 4.44  | 0.39 | 0.21 | 1.74  | 0.05645  | 0.04438  | 0.386477 | 0.255157 |
| MmugDNA.32142.1.S1_at   | MmugDNA.32142.1 | 5.58  | 5.68  | 0.12 | 0.1  | -1.07 | 0.128255 | 0.1503   | 0.494307 | 0.424877 |
| MmugDNA.32143.1.S1_at   | MmugDNA.32143.1 | 5.75  | 5.97  | 0.1  | 0.13 | -1.17 | 0.366849 | 0.399911 | 0.67921  | 0.63009  |
| MmugDNA.32146.1.S1_at   | MmugDNA.32146.1 | 8.74  | 8.14  | 0.31 | 0.63 | 1.52  | 0.220159 | 0.184222 | 0.579297 | 0.460382 |
| MmugDNA.32147.1.S1_at   | MmugDNA.32147.1 | 5.27  | 5.15  | 0.03 | 0.07 | 1.08  | 0.086302 | 0.124864 | 0.440224 | 0.395219 |
| MmugDNA.32149.1.S1_at   | MmugDNA.32149.1 | 6.65  | 5.76  | 0.39 | 0.07 | 1.84  | 0.017392 | 0.033565 | 0.267445 | 0.226764 |
| MmugDNA.3215.1.S1_at    | MmugDNA.3215.1  | 4.4   | 4.35  | 0.19 | 0.14 | 1.03  | 0.73415  | 0.779446 | 0.885405 | 0.87211  |
| MmugDNA.32151.1.S1_at   | MmugDNA.32151.1 | 3.76  | 3.94  | 0.16 | 0.12 | -1.13 | 0.107946 | 0.158668 | 0.468662 | 0.4347   |
| MmugDNA.17076.1.S1_s_at | MmugDNA.17076.1 | 4.97  | 4.87  | 0.5  | 0.07 | 1.07  | 0.267519 | 0.374836 | 0.612616 | 0.613091 |
| MmugDNA.32153.1.S1_at   | MmugDNA.32153.1 | 5.17  | 5.94  | 0.36 | 0.59 | -1.7  | 0.100673 | 0.215679 | 0.461009 | 0.489477 |
| MmugDNA.32154.1.S1_s_at | MmugDNA.32154.1 | 9.46  | 9.23  | 0.17 | 0.23 | 1.17  | 0.612234 | 0.213103 | 0.822151 | 0.487054 |
| MmugDNA.32155.1.S1_at   | MmugDNA.32155.1 | 9.71  | 8.19  | 0.18 | 0.21 | 2.87  | 0.001233 | 0.0003   | 0.145267 | 0.034892 |
| MmugDNA.32156.1.S1_at   | MmugDNA.32156.1 | 4.6   | 4.45  | 0.1  | 0.1  | 1.11  | 0.448324 | 0.55533  | 0.729572 | 0.733767 |
| MmugDNA.32157.1.S1_at   | MmugDNA.32157.1 | 9.93  | 9.54  | 0.17 | 0.21 | 1.31  | 0.043222 | 0.004277 | 0.356669 | 0.091847 |
| MmugDNA.32157.1.S1_s_at | MmugDNA.32157.1 | 7.95  | 7.54  | 0.33 | 0.37 | 1.33  | 0.106913 | 0.032372 | 0.467551 | 0.222746 |
| MmugDNA.32158.1.S1_at   | MmugDNA.32158.1 | 4.08  | 4.09  | 0.16 | 0    | -1.01 | 0.834002 | 0.617167 | 0.932552 | 0.773242 |
| MmugDNA.32159.1.S1_at   | MmugDNA.32159.1 | 3.62  | 3.39  | 0.5  | 0.04 | 1.17  | 0.234508 | 0.194027 | 0.588776 | 0.469151 |
| MmugDNA.3216.1.S1_at    | MmugDNA.3216.1  | 5.53  | 4.44  | 0.72 | 0.34 | 2.12  | 0.071098 | 0.064764 | 0.414673 | 0.300435 |
| MmugDNA.32160.1.S1_at   | MmugDNA.32160.1 | 3.17  | 2.91  | 0.21 | 0.07 | 1.2   | 0.110869 | 0.170669 | 0.472762 | 0.447252 |
| MmugDNA.32161.1.S1_at   | MmugDNA.32161.1 | 4.59  | 4.57  | 0.15 | 0.16 | 1.01  | 0.339986 | 0.495987 | 0.661611 | 0.695851 |
| MmugDNA.32162.1.S1_at   | MmugDNA.32162.1 | 6.42  | 6.2   | 0.31 | 0.34 | 1.17  | 0.71767  | 0.898568 | 0.876022 | 0.942254 |
| MmugDNA.32164.1.S1_at   | MmugDNA.32164.1 | 2.99  | 3.03  | 0.46 | 0.36 | -1.03 | 0.749555 | 0.885836 | 0.89273  | 0.93508  |
| MmugDNA.32165.1.S1_at   | MmugDNA.32165.1 | 5.28  | 5.03  | 0.19 | 0.78 | 1.19  | 0.39102  | 0.630626 | 0.693889 | 0.782345 |
| MmugDNA.32166.1.S1_at   | MmugDNA.32166.1 | 4.89  | 4.82  | 0.69 | 0.6  | 1.05  | 0.597845 | 0.427453 | 0.813757 | 0.649291 |
| MmugDNA.32168.1.S1_at   | MmugDNA.32168.1 | 3.76  | 3.67  | 0.7  | 0.34 | 1.06  | 0.943223 | 0.966094 | 0.978425 | 0.981014 |
| MmugDNA.3217.1.S1_at    | MmugDNA.3217.1  | 10.65 | 11.66 | 0.35 | 0.27 | -2    | 0.02148  | 0.013563 | 0.282524 | 0.149001 |

|                         |                 |       |       |      |      |       |          |          |          |          |
|-------------------------|-----------------|-------|-------|------|------|-------|----------|----------|----------|----------|
| MmugDNA.32171.1.S1_s_at | MmugDNA.32171.1 | 11.74 | 11.78 | 0.13 | 0.09 | -1.03 | 0.292791 | 0.129359 | 0.630124 | 0.400748 |
| MmugDNA.32173.1.S1_at   | MmugDNA.32173.1 | 5.75  | 5.82  | 0.12 | 0.1  | -1.05 | 0.187804 | 0.100274 | 0.550865 | 0.359318 |
| MmugDNA.32174.1.S1_at   | MmugDNA.32174.1 | 3.59  | 3.12  | 0.33 | 0.13 | 1.39  | 0.089714 | 0.080734 | 0.445334 | 0.328632 |
| MmugDNA.32175.1.S1_at   | MmugDNA.32175.1 | 7.49  | 6.78  | 0.79 | 0.9  | 1.63  | 0.726568 | 0.872307 | 0.881065 | 0.927429 |
| MmugDNA.32176.1.S1_at   | MmugDNA.32176.1 | 10.24 | 10.79 | 0.14 | 0.21 | -1.46 | 0.006613 | 0.002153 | 0.200346 | 0.068739 |
| MmugDNA.32177.1.S1_at   | MmugDNA.32177.1 | 3.98  | 3.95  | 0.25 | 0.04 | 1.02  | 0.861196 | 0.974073 | 0.944018 | 0.985859 |
| MmugDNA.32178.1.S1_at   | MmugDNA.32178.1 | 7.2   | 6.38  | 0.44 | 0.9  | 1.77  | 0.082817 | 0.070154 | 0.434553 | 0.311081 |
| MmugDNA.32179.1.S1_at   | MmugDNA.32179.1 | 4.04  | 3.54  | 0.47 | 0.1  | 1.41  | 0.172302 | 0.17926  | 0.535714 | 0.45567  |
| MmugDNA.3218.1.S1_at    | MmugDNA.3218.1  | 4.59  | 3.63  | 0.77 | 0.04 | 1.94  | 0.300891 | 0.405707 | 0.636012 | 0.633894 |
| MmugDNA.32181.1.S1_at   | MmugDNA.32181.1 | 4.85  | 5.14  | 0.47 | 0.23 | -1.22 | 0.778084 | 0.563739 | 0.907342 | 0.738808 |
| MmugDNA.32183.1.S1_at   | MmugDNA.32183.1 | 5.84  | 5.6   | 0.12 | 0.44 | 1.18  | 0.422388 | 0.018449 | 0.71345  | 0.170868 |
| MmugDNA.32184.1.S1_at   | MmugDNA.32184.1 | 8.63  | 7.68  | 0.22 | 0.67 | 1.93  | 0.03609  | 0.023912 | 0.338781 | 0.193701 |
| MmugDNA.32185.1.S1_s_at | MmugDNA.32185.1 | 6.81  | 6.91  | 0.25 | 0.09 | -1.07 | 0.51049  | 0.583763 | 0.765058 | 0.751983 |
| MmugDNA.32187.1.S1_at   | MmugDNA.32187.1 | 6.62  | 6.24  | 0.14 | 0.5  | 1.3   | 0.272511 | 0.362175 | 0.616153 | 0.602827 |
| MmugDNA.32188.1.S1_at   | MmugDNA.32188.1 | 10.41 | 10.27 | 0.22 | 0.22 | 1.1   | 0.947341 | 0.410571 | 0.979763 | 0.637403 |
| MmugDNA.32189.1.S1_at   | MmugDNA.32189.1 | 10.18 | 11.97 | 0.85 | 1.2  | -3.45 | 0.223988 | 0.285857 | 0.582459 | 0.547484 |
| MmugDNA.3219.1.S1_at    | MmugDNA.3219.1  | 3.42  | 3.53  | 0.16 | 0.22 | -1.08 | 0.89907  | 0.986472 | 0.959684 | 0.992348 |
| MmugDNA.32190.1.S1_at   | MmugDNA.32190.1 | 7.2   | 7.02  | 0.12 | 1.13 | 1.13  | 0.852611 | 0.820057 | 0.940647 | 0.89632  |
| MmugDNA.32192.1.S1_at   | MmugDNA.32192.1 | 5.49  | 5.81  | 0.24 | 0.09 | -1.25 | 0.139633 | 0.020161 | 0.507125 | 0.178414 |
| MmugDNA.32193.1.S1_at   | MmugDNA.32193.1 | 6.38  | 5.9   | 0.18 | 0.34 | 1.4   | 0.029783 | 0.090658 | 0.315397 | 0.345151 |
| MmugDNA.32196.1.S1_at   | MmugDNA.32196.1 | 6.5   | 6.45  | 0.3  | 0.23 | 1.03  | 0.840754 | 0.099099 | 0.935988 | 0.357241 |
| MmugDNA.32197.1.S1_at   | MmugDNA.32197.1 | 5     | 4.99  | 0.65 | 0.26 | 1.01  | 0.698714 | 0.435658 | 0.866324 | 0.655446 |
| MmugDNA.32198.1.S1_at   | MmugDNA.32198.1 | 5.43  | 5.17  | 0.42 | 0.8  | 1.2   | 0.958043 | 0.889689 | 0.984107 | 0.937154 |
| MmugDNA.32199.1.S1_at   | MmugDNA.32199.1 | 3.71  | 3.62  | 0.39 | 0.31 | 1.06  | 0.834221 | 0.882244 | 0.932619 | 0.932845 |
| MmugDNA.32200.1.S1_at   | MmugDNA.32200.1 | 4.21  | 5.05  | 0.32 | 0.76 | -1.8  | 0.091158 | 0.096525 | 0.447111 | 0.354096 |
| MmugDNA.32201.1.S1_at   | MmugDNA.32201.1 | 4.32  | 4.24  | 0.21 | 0.13 | 1.06  | 0.849635 | 0.615013 | 0.939616 | 0.771689 |
| MmugDNA.32202.1.S1_at   | MmugDNA.32202.1 | 3.55  | 3.63  | 0.7  | 0.02 | -1.06 | 0.580816 | 0.445683 | 0.804812 | 0.662478 |
| MmugDNA.32203.1.S1_at   | MmugDNA.32203.1 | 6.3   | 6.25  | 0.05 | 0.06 | 1.03  | 0.316212 | 0.158852 | 0.64705  | 0.43496  |
| MmugDNA.32204.1.S1_at   | MmugDNA.32204.1 | 4.74  | 4.81  | 0.08 | 0.22 | -1.05 | 0.794469 | 0.645545 | 0.914722 | 0.792392 |
| MmugDNA.32205.1.S1_at   | MmugDNA.32205.1 | 6.69  | 6.74  | 0.31 | 0.26 | -1.04 | 0.973562 | 0.550064 | 0.989603 | 0.730241 |
| MmugDNA.32205.1.S1_s_at | MmugDNA.32205.1 | 12.38 | 12.6  | 0.19 | 0.27 | -1.16 | 0.812879 | 0.074936 | 0.923949 | 0.31891  |
| MmugDNA.32205.1.S1_x_at | MmugDNA.32205.1 | 7.95  | 8.18  | 0.24 | 0.27 | -1.17 | 0.774284 | 0.109958 | 0.905118 | 0.374038 |
| MmugDNA.32207.1.S1_at   | MmugDNA.32207.1 | 3.34  | 3.74  | 0.33 | 0.44 | -1.32 | 0.346657 | 0.267549 | 0.666013 | 0.533272 |
| MmugDNA.32208.1.S1_at   | MmugDNA.32208.1 | 8.28  | 7.97  | 0.14 | 0.12 | 1.24  | 0.065934 | 0.105079 | 0.405494 | 0.366755 |
| MmugDNA.32209.1.S1_at   | MmugDNA.32209.1 | 3.83  | 3.71  | 0.28 | 0.4  | 1.09  | 0.379783 | 0.54541  | 0.687063 | 0.727521 |
| MmugDNA.3221.1.S1_at    | MmugDNA.3221.1  | 3.57  | 3.73  | 0.06 | 0.06 | -1.11 | 0.038924 | 0.093928 | 0.345909 | 0.350445 |
| MmugDNA.32210.1.S1_at   | MmugDNA.32210.1 | 6.36  | 6.32  | 0.06 | 0.41 | 1.03  | 0.750378 | 0.31738  | 0.893077 | 0.570613 |
| MmugDNA.32211.1.S1_at   | MmugDNA.32211.1 | 5.65  | 5.05  | 0.69 | 0.94 | 1.51  | 0.326659 | 0.133417 | 0.653184 | 0.405246 |
| MmugDNA.32212.1.S1_at   | MmugDNA.32212.1 | 6.07  | 5.99  | 0.44 | 0.25 | 1.05  | 0.318044 | 0.423638 | 0.64802  | 0.646464 |
| MmugDNA.32213.1.S1_at   | MmugDNA.32213.1 | 7.1   | 6.59  | 0.76 | 0.26 | 1.43  | 0.163014 | 0.195115 | 0.527385 | 0.470241 |
| MmugDNA.32214.1.S1_at   | MmugDNA.32214.1 | 8.97  | 8.3   | 0.12 | 0.68 | 1.6   | 0.14603  | 0.166432 | 0.512064 | 0.442887 |

|                         |                 |       |       |      |      |        |          |          |          |          |
|-------------------------|-----------------|-------|-------|------|------|--------|----------|----------|----------|----------|
| MmugDNA.32214.1.S1_s_at | MmugDNA.32214.1 | 10.68 | 10.1  | 0.13 | 0.55 | 1.49   | 0.13745  | 0.161653 | 0.504538 | 0.437771 |
| MmugDNA.32215.1.S1_at   | MmugDNA.32215.1 | 4.21  | 4.22  | 0.62 | 0.13 | -1     | 0.630198 | 0.587792 | 0.83195  | 0.75454  |
| MmugDNA.32216.1.S1_at   | MmugDNA.32216.1 | 6.88  | 8.5   | 0.58 | 1.75 | -3.08  | 0.345271 | 0.233597 | 0.665128 | 0.50492  |
| MmugDNA.32217.1.S1_at   | MmugDNA.32217.1 | 3.63  | 3.78  | 0.07 | 0.24 | -1.11  | 0.131556 | 0.021626 | 0.498041 | 0.184333 |
| MmugDNA.32218.1.S1_at   | MmugDNA.32218.1 | 9.55  | 10.3  | 0.8  | 0.5  | -1.68  | 0.108836 | 0.138924 | 0.470411 | 0.412037 |
| MmugDNA.29742.1.S1_at   | MmugDNA.29742.1 | 7.74  | 10.53 | 1.35 | 2.23 | -6.94  | 0.322739 | 0.193405 | 0.651245 | 0.468711 |
| MmugDNA.29742.1.S1_s_at | MmugDNA.29742.1 | 7.28  | 12.26 | 1.93 | 2.81 | -31.63 | 0.296102 | 0.203884 | 0.632176 | 0.478102 |
| MmugDNA.3222.1.S1_at    | MmugDNA.3222.1  | 7.36  | 7.54  | 0.72 | 0.67 | -1.13  | 0.675136 | 0.654294 | 0.854421 | 0.797979 |
| MmugDNA.32222.1.S1_at   | MmugDNA.32222.1 | 9.07  | 10.02 | 0.21 | 0.07 | -1.94  | 0.002761 | 0.007595 | 0.165497 | 0.11661  |
| MmugDNA.32224.1.S1_at   | MmugDNA.32224.1 | 9.86  | 9.36  | 0.27 | 1.57 | 1.41   | 0.475735 | 0.647834 | 0.745951 | 0.793789 |
| MmugDNA.32225.1.S1_at   | MmugDNA.32225.1 | 4.17  | 4.71  | 0.25 | 0.25 | -1.45  | 0.08528  | 0.132318 | 0.438726 | 0.404294 |
| MmugDNA.32227.1.S1_at   | MmugDNA.32227.1 | 3.34  | 3.41  | 0.15 | 0    | -1.05  | 0.84704  | 0.855694 | 0.938542 | 0.917683 |
| MmugDNA.32228.1.S1_at   | MmugDNA.32228.1 | 5.08  | 5.1   | 0.15 | 0.23 | -1.01  | 0.369318 | 0.409438 | 0.680609 | 0.636503 |
| MmugDNA.32231.1.S1_at   | MmugDNA.32231.1 | 2.93  | 3.15  | 0.11 | 0.14 | -1.17  | 0.058544 | 0.019862 | 0.390673 | 0.177189 |
| MmugDNA.32232.1.S1_at   | MmugDNA.32232.1 | 4.58  | 4.56  | 0.07 | 0.13 | 1.01   | 0.550428 | 0.648868 | 0.787911 | 0.794491 |
| MmugDNA.32233.1.S1_at   | MmugDNA.32233.1 | 12.21 | 12.32 | 0.09 | 0.42 | -1.07  | 0.507347 | 0.692609 | 0.762788 | 0.821061 |
| MmugDNA.32233.1.S1_s_at | MmugDNA.32233.1 | 11.68 | 12.03 | 0.01 | 0.4  | -1.27  | 0.220364 | 0.206946 | 0.579323 | 0.481058 |
| MmugDNA.32234.1.S1_at   | MmugDNA.32234.1 | 7.14  | 6.32  | 0.21 | 0.48 | 1.77   | 0.022001 | 0.014768 | 0.28446  | 0.154596 |
| MmugDNA.32235.1.S1_at   | MmugDNA.32235.1 | 3.2   | 3.19  | 0.05 | 0.22 | 1      | 0.806238 | 0.747447 | 0.920557 | 0.853149 |
| MmugDNA.32236.1.S1_at   | MmugDNA.32236.1 | 5.22  | 5.48  | 0.41 | 0.14 | -1.2   | 0.85314  | 0.746031 | 0.940708 | 0.852688 |
| MmugDNA.32237.1.S1_at   | MmugDNA.32237.1 | 2.81  | 2.73  | 0.08 | 0.07 | 1.06   | 0.117821 | 0.254574 | 0.481978 | 0.522867 |
| MmugDNA.32238.1.S1_at   | MmugDNA.32238.1 | 6.59  | 7.55  | 0.25 | 0.25 | -1.94  | 0.029715 | 0.046154 | 0.315187 | 0.259257 |
| MmugDNA.3224.1.S1_at    | MmugDNA.3224.1  | 6.98  | 7.83  | 0.3  | 0.97 | -1.81  | 0.30827  | 0.419189 | 0.64064  | 0.643394 |
| MmugDNA.32240.1.S1_at   | MmugDNA.32240.1 | 3.68  | 3.67  | 0.41 | 0.63 | 1.01   | 0.472289 | 0.66996  | 0.743613 | 0.806982 |
| MmugDNA.32241.1.S1_at   | MmugDNA.32241.1 | 4.61  | 5.24  | 0.64 | 0.16 | -1.55  | 0.522193 | 0.578753 | 0.771886 | 0.748611 |
| MmugDNA.32244.1.S1_at   | MmugDNA.32244.1 | 3.59  | 3.59  | 0.18 | 0.22 | 1      | 0.527438 | 0.631038 | 0.774832 | 0.782599 |
| MmugDNA.32246.1.S1_at   | MmugDNA.32246.1 | 4.95  | 5.08  | 0.36 | 0.15 | -1.09  | 0.232361 | 0.305244 | 0.587814 | 0.562255 |
| MmugDNA.32247.1.S1_at   | MmugDNA.32247.1 | 5.12  | 5.12  | 0.17 | 0.13 | -1     | 0.851888 | 0.865011 | 0.940401 | 0.923442 |
| MmugDNA.3225.1.S1_at    | MmugDNA.3225.1  | 9.84  | 10.66 | 0.04 | 0.32 | -1.77  | 0.010361 | 0.015104 | 0.229439 | 0.156008 |
| MmugDNA.32250.1.S1_at   | MmugDNA.32250.1 | 7.93  | 8.06  | 0.27 | 0.14 | -1.09  | 0.575217 | 0.52621  | 0.802187 | 0.715449 |
| MmugDNA.32252.1.S1_at   | MmugDNA.32252.1 | 5.67  | 5.63  | 0.43 | 0.1  | 1.03   | 0.65517  | 0.821723 | 0.844826 | 0.897343 |
| MmugDNA.32253.1.S1_at   | MmugDNA.32253.1 | 4.79  | 4.8   | 0.12 | 0.08 | -1     | 0.55859  | 0.383757 | 0.793302 | 0.619734 |
| MmugDNA.32256.1.S1_at   | MmugDNA.32256.1 | 8.56  | 8.24  | 0.07 | 0.15 | 1.25   | 0.032242 | 0.021667 | 0.3244   | 0.184333 |
| MmugDNA.32257.1.S1_at   | MmugDNA.32257.1 | 5.63  | 5.82  | 0.25 | 0.18 | -1.14  | 0.069378 | 0.071252 | 0.412035 | 0.313293 |
| MmugDNA.32259.1.S1_at   | MmugDNA.32259.1 | 10.34 | 10.3  | 0.05 | 0.17 | 1.03   | 0.781752 | 0.109221 | 0.908921 | 0.37308  |
| MmugDNA.32259.1.S1_s_at | MmugDNA.32259.1 | 11.52 | 11.33 | 0.12 | 0.2  | 1.14   | 0.526522 | 0.452496 | 0.774143 | 0.667111 |
| MmugDNA.32260.1.S1_at   | MmugDNA.32260.1 | 10.82 | 10.63 | 0.59 | 0.9  | 1.14   | 0.511379 | 0.01801  | 0.765295 | 0.169233 |
| MmugDNA.32261.1.S1_at   | MmugDNA.32261.1 | 2.97  | 2.98  | 0.08 | 0.08 | -1.01  | 0.475253 | 0.213185 | 0.745669 | 0.487069 |
| MmugDNA.32262.1.S1_at   | MmugDNA.32262.1 | 8.96  | 8.8   | 0.34 | 0.1  | 1.12   | 0.47054  | 0.366966 | 0.742473 | 0.606583 |
| MmugDNA.32263.1.S1_at   | MmugDNA.32263.1 | 5.43  | 5.4   | 0.71 | 0.16 | 1.02   | 0.276042 | 0.250049 | 0.618111 | 0.519111 |
| MmugDNA.32265.1.S1_at   | MmugDNA.32265.1 | 10.26 | 9.85  | 0.16 | 0.02 | 1.33   | 0.010374 | 0.009852 | 0.229439 | 0.130274 |

|                         |                 |       |       |      |      |       |          |          |          |          |
|-------------------------|-----------------|-------|-------|------|------|-------|----------|----------|----------|----------|
| MmugDNA.32266.1.S1_at   | MmugDNA.32266.1 | 5.75  | 6     | 0.78 | 0.89 | -1.18 | 0.784053 | 0.498894 | 0.909937 | 0.697855 |
| MmugDNA.32267.1.S1_at   | MmugDNA.32267.1 | 6.54  | 6.31  | 0.12 | 0.01 | 1.17  | 0.099076 | 0.037344 | 0.458783 | 0.237683 |
| MmugDNA.32268.1.S1_at   | MmugDNA.32268.1 | 3.16  | 3.06  | 0.07 | 0.05 | 1.07  | 0.088472 | 0.406251 | 0.44331  | 0.634225 |
| MmugDNA.32269.1.S1_at   | MmugDNA.32269.1 | 5.02  | 5.04  | 0.03 | 0.12 | -1.02 | 0.356202 | 0.492314 | 0.671444 | 0.693485 |
| MmugDNA.3227.1.S1_at    | MmugDNA.3227.1  | 5.79  | 5.54  | 0.31 | 0.11 | 1.19  | 0.441699 | 0.288781 | 0.725144 | 0.549936 |
| MmugDNA.32270.1.S1_at   | MmugDNA.32270.1 | 6.89  | 6.62  | 0.54 | 0.1  | 1.21  | 0.453786 | 0.363358 | 0.732887 | 0.60375  |
| MmugDNA.32271.1.S1_at   | MmugDNA.32271.1 | 5.18  | 5.28  | 0.07 | 0.05 | -1.07 | 0.053458 | 0.040182 | 0.380257 | 0.245709 |
| MmugDNA.32272.1.S1_at   | MmugDNA.32272.1 | 5.97  | 5.41  | 0.13 | 0.36 | 1.48  | 0.088724 | 0.073953 | 0.443653 | 0.317462 |
| MmugDNA.32273.1.S1_at   | MmugDNA.32273.1 | 4.24  | 4.3   | 0.14 | 0.07 | -1.05 | 0.468289 | 0.514754 | 0.741049 | 0.707865 |
| MmugDNA.32275.1.S1_at   | MmugDNA.32275.1 | 10.89 | 10.61 | 0.16 | 0.12 | 1.21  | 0.040426 | 0.037186 | 0.349277 | 0.237285 |
| MmugDNA.32279.1.S1_at   | MmugDNA.32279.1 | 5.82  | 5.94  | 0.07 | 0.05 | -1.09 | 0.064457 | 0.035231 | 0.402975 | 0.231941 |
| MmugDNA.3228.1.S1_at    | MmugDNA.3228.1  | 9.8   | 10.57 | 0.07 | 1.52 | -1.7  | 0.889298 | 0.978708 | 0.955714 | 0.988411 |
| MmugDNA.32281.1.S1_at   | MmugDNA.32281.1 | 3.79  | 3.95  | 0.27 | 0.33 | -1.12 | 0.914739 | 0.239925 | 0.966289 | 0.510627 |
| MmugDNA.32282.1.S1_s_at | MmugDNA.32282.1 | 5.95  | 6.1   | 0.32 | 0.06 | -1.1  | 0.982147 | 0.878477 | 0.993449 | 0.930638 |
| MmugDNA.32284.1.S1_at   | MmugDNA.32284.1 | 4.17  | 4.05  | 0.59 | 1.2  | 1.09  | 0.686786 | 0.849969 | 0.859938 | 0.914673 |
| MmugDNA.32285.1.S1_at   | MmugDNA.32285.1 | 4.57  | 4.32  | 0.95 | 0.34 | 1.19  | 0.680326 | 0.85632  | 0.857147 | 0.917926 |
| MmugDNA.32286.1.S1_at   | MmugDNA.32286.1 | 6.43  | 7.71  | 0.13 | 0.28 | -2.43 | 0.001567 | 0.001162 | 0.151907 | 0.053615 |
| MmugDNA.32287.1.S1_at   | MmugDNA.32287.1 | 12.23 | 12.37 | 0.08 | 0.2  | -1.11 | 0.470415 | 0.050701 | 0.742387 | 0.270338 |
| MmugDNA.32288.1.S1_at   | MmugDNA.32288.1 | 6.85  | 7.09  | 0.13 | 0.13 | -1.18 | 0.084987 | 0.131621 | 0.438076 | 0.403716 |
| MmugDNA.3229.1.S1_at    | MmugDNA.3229.1  | 5.92  | 6.12  | 0.15 | 0.12 | -1.15 | 0.139162 | 0.319481 | 0.506613 | 0.571823 |
| MmugDNA.32290.1.S1_at   | MmugDNA.32290.1 | 5.37  | 5.54  | 0.18 | 0.09 | -1.12 | 0.129704 | 0.188529 | 0.495908 | 0.464458 |
| MmugDNA.32291.1.S1_at   | MmugDNA.32291.1 | 4.87  | 4.09  | 0.5  | 0.07 | 1.72  | 0.021344 | 0.005144 | 0.282524 | 0.099496 |
| MmugDNA.32292.1.S1_at   | MmugDNA.32292.1 | 8.04  | 7.78  | 0.05 | 0.08 | 1.2   | 0.005713 | 5.67E-07 | 0.191956 | 0.005999 |
| MmugDNA.32294.1.S1_at   | MmugDNA.32294.1 | 10.04 | 10.13 | 0.27 | 0.18 | -1.07 | 0.252662 | 0.09928  | 0.60145  | 0.357546 |
| MmugDNA.32296.1.S1_at   | MmugDNA.32296.1 | 10.48 | 10.7  | 0.18 | 0.24 | -1.16 | 0.367785 | 0.210232 | 0.67961  | 0.484056 |
| MmugDNA.32297.1.S1_s_at | MmugDNA.32297.1 | 8.64  | 9.07  | 0.42 | 0.25 | -1.35 | 0.30711  | 0.025866 | 0.639868 | 0.201654 |
| MmugDNA.32298.1.S1_at   | MmugDNA.32298.1 | 3.55  | 3.13  | 0.75 | 0.16 | 1.34  | 0.31224  | 0.415002 | 0.644009 | 0.640594 |
| MmugDNA.32299.1.S1_at   | MmugDNA.32299.1 | 8.48  | 8.69  | 0.1  | 0.13 | -1.16 | 0.211522 | 0.273123 | 0.572267 | 0.537732 |
| MmugDNA.3230.1.S1_at    | MmugDNA.3230.1  | 3.97  | 4.22  | 0.12 | 0.25 | -1.19 | 0.327509 | 0.444751 | 0.653892 | 0.662072 |
| MmugDNA.32301.1.S1_at   | MmugDNA.32301.1 | 8.69  | 8.37  | 0.07 | 0.35 | 1.25  | 0.14432  | 0.148671 | 0.510813 | 0.423201 |
| MmugDNA.32303.1.S1_at   | MmugDNA.32303.1 | 11.06 | 10.48 | 0.3  | 0.47 | 1.5   | 0.131178 | 0.099342 | 0.497719 | 0.35761  |
| MmugDNA.32304.1.S1_at   | MmugDNA.32304.1 | 4.83  | 4.3   | 0.3  | 0.05 | 1.44  | 0.083444 | 0.103883 | 0.43582  | 0.364538 |
| MmugDNA.32304.1.S1_x_at | MmugDNA.32304.1 | 4.18  | 3.96  | 0.47 | 0.25 | 1.16  | 0.149431 | 0.164025 | 0.514001 | 0.440161 |
| MmugDNA.32305.1.S1_at   | MmugDNA.32305.1 | 10.38 | 10.01 | 0.24 | 0.48 | 1.29  | 0.32194  | 0.281803 | 0.650611 | 0.544844 |
| MmugDNA.32308.1.S1_at   | MmugDNA.32308.1 | 4.32  | 3.99  | 0.57 | 0.19 | 1.25  | 0.373348 | 0.452365 | 0.683245 | 0.667046 |
| MmugDNA.32310.1.S1_at   | MmugDNA.32310.1 | 4.04  | 3.02  | 0.81 | 0.56 | 2.03  | 0.693481 | 0.73066  | 0.864073 | 0.844055 |
| MmugDNA.32311.1.S1_at   | MmugDNA.32311.1 | 7.02  | 7.11  | 0.07 | 0.19 | -1.06 | 0.356557 | 0.503514 | 0.671656 | 0.700904 |
| MmugDNA.32312.1.S1_at   | MmugDNA.32312.1 | 3.4   | 3.13  | 0.13 | 0.27 | 1.21  | 0.203519 | 0.28939  | 0.566041 | 0.550431 |
| MmugDNA.32313.1.S1_at   | MmugDNA.32313.1 | 8.03  | 8.11  | 0.11 | 0.08 | -1.06 | 0.429924 | 0.345702 | 0.717824 | 0.590854 |
| MmugDNA.32314.1.S1_at   | MmugDNA.32314.1 | 5.91  | 6.31  | 0.16 | 0.18 | -1.32 | 0.207811 | 0.287313 | 0.569822 | 0.548589 |
| MmugDNA.32315.1.S1_at   | MmugDNA.32315.1 | 7.18  | 7.4   | 0.65 | 0.34 | -1.17 | 0.89236  | 0.735511 | 0.957146 | 0.846953 |

|                         |                 |       |       |      |      |       |          |          |          |          |
|-------------------------|-----------------|-------|-------|------|------|-------|----------|----------|----------|----------|
| MmugDNA.32316.1.S1_at   | MmugDNA.32316.1 | 5.72  | 5.73  | 0.17 | 0.27 | -1.01 | 0.439082 | 0.585293 | 0.723488 | 0.752844 |
| MmugDNA.32317.1.S1_at   | MmugDNA.32317.1 | 6.22  | 6.48  | 0.14 | 0.35 | -1.2  | 0.428329 | 0.596009 | 0.716796 | 0.759321 |
| MmugDNA.32319.1.S1_at   | MmugDNA.32319.1 | 8     | 8.11  | 0.2  | 0.29 | -1.08 | 0.600567 | 0.534401 | 0.815309 | 0.720351 |
| MmugDNA.32320.1.S1_at   | MmugDNA.32320.1 | 10.8  | 10.64 | 0.23 | 0.39 | 1.12  | 0.922398 | 0.828202 | 0.969928 | 0.901235 |
| MmugDNA.32322.1.S1_at   | MmugDNA.32322.1 | 3.68  | 3.7   | 0.44 | 0.11 | -1.02 | 0.830342 | 0.940819 | 0.931421 | 0.966506 |
| MmugDNA.32323.1.S1_at   | MmugDNA.32323.1 | 5.6   | 5.55  | 0.05 | 0.03 | 1.04  | 0.348668 | 0.200088 | 0.667173 | 0.474603 |
| MmugDNA.32324.1.S1_at   | MmugDNA.32324.1 | 4.13  | 4.01  | 0.44 | 0.12 | 1.09  | 0.310602 | 0.475444 | 0.642603 | 0.682155 |
| MmugDNA.32325.1.S1_at   | MmugDNA.32325.1 | 7.7   | 7.06  | 0.12 | 0.24 | 1.56  | 0.015225 | 0.009815 | 0.257698 | 0.130205 |
| MmugDNA.32326.1.S1_at   | MmugDNA.32326.1 | 5.47  | 5.78  | 0.26 | 0.15 | -1.24 | 0.156435 | 0.404185 | 0.521176 | 0.632691 |
| MmugDNA.32327.1.S1_at   | MmugDNA.32327.1 | 6.58  | 6.61  | 0.2  | 0.12 | -1.03 | 0.858461 | 0.920839 | 0.942838 | 0.955412 |
| MmugDNA.3233.1.S1_at    | MmugDNA.3233.1  | 4.36  | 4.51  | 0.1  | 0.23 | -1.11 | 0.22595  | 0.273171 | 0.583922 | 0.537787 |
| MmugDNA.32330.1.S1_at   | MmugDNA.32330.1 | 4.43  | 4.9   | 0.16 | 0.32 | -1.39 | 0.103756 | 0.308903 | 0.46354  | 0.564656 |
| MmugDNA.32331.1.S1_at   | MmugDNA.32331.1 | 4.61  | 4.03  | 1.01 | 0.48 | 1.49  | 0.354845 | 0.458954 | 0.670686 | 0.671504 |
| MmugDNA.32332.1.S1_at   | MmugDNA.32332.1 | 10.86 | 10.93 | 0.13 | 0.07 | -1.05 | 0.668059 | 0.17094  | 0.85142  | 0.447561 |
| MmugDNA.32335.1.S1_at   | MmugDNA.32335.1 | 5.64  | 5.66  | 0.24 | 0.18 | -1.01 | 0.535209 | 0.644892 | 0.778933 | 0.791927 |
| MmugDNA.32336.1.S1_at   | MmugDNA.32336.1 | 2.74  | 2.81  | 0.03 | 0.03 | -1.05 | 0.059471 | 0.045199 | 0.392259 | 0.256979 |
| MmugDNA.32337.1.S1_at   | MmugDNA.32337.1 | 6.87  | 6.75  | 0.2  | 0.35 | 1.08  | 0.732475 | 0.830399 | 0.884475 | 0.902659 |
| MmugDNA.32338.1.S1_at   | MmugDNA.32338.1 | 8.73  | 8.83  | 0.42 | 1.33 | -1.07 | 0.910132 | 0.894359 | 0.964423 | 0.939704 |
| MmugDNA.3234.1.S1_at    | MmugDNA.3234.1  | 8.97  | 8.29  | 0.36 | 0.31 | 1.6   | 0.148476 | 0.163381 | 0.513907 | 0.43955  |
| MmugDNA.32340.1.S1_at   | MmugDNA.32340.1 | 7.37  | 7.34  | 0.15 | 1.03 | 1.02  | 0.876012 | 0.976798 | 0.950308 | 0.987389 |
| MmugDNA.32341.1.S1_at   | MmugDNA.32341.1 | 3.74  | 3.57  | 0.66 | 0.27 | 1.12  | 0.40187  | 0.44738  | 0.7011   | 0.66348  |
| MmugDNA.32342.1.S1_at   | MmugDNA.32342.1 | 6.59  | 6.37  | 0.86 | 0.14 | 1.17  | 0.255979 | 0.371334 | 0.603671 | 0.610172 |
| MmugDNA.32343.1.S1_at   | MmugDNA.32343.1 | 7.49  | 6.66  | 0.73 | 0.49 | 1.78  | 0.095697 | 0.0968   | 0.453501 | 0.354207 |
| MmugDNA.32343.1.S1_x_at | MmugDNA.32343.1 | 8.12  | 7.22  | 0.47 | 0.16 | 1.88  | 0.051008 | 0.050664 | 0.375705 | 0.270317 |
| MmugDNA.32348.1.S1_at   | MmugDNA.32348.1 | 4.33  | 4.33  | 0    | 0.07 | 1     | 0.881001 | 0.965789 | 0.952105 | 0.980824 |
| MmugDNA.32349.1.S1_at   | MmugDNA.32349.1 | 4.8   | 5.21  | 0.02 | 0.3  | -1.33 | 0.236114 | 0.355106 | 0.590122 | 0.597508 |
| MmugDNA.22766.1.S1_at   | MmugDNA.22766.1 | 12.35 | 12.42 | 0.11 | 0.11 | -1.05 | 0.432086 | 0.066313 | 0.718823 | 0.303177 |
| MmugDNA.22766.1.S1_s_at | MmugDNA.22766.1 | 11.32 | 11.48 | 0.1  | 0.12 | -1.12 | 0.223951 | 0.161879 | 0.582407 | 0.437979 |
| MmugDNA.32350.1.S1_at   | MmugDNA.32350.1 | 4.93  | 5.54  | 0.86 | 0.24 | -1.53 | 0.980521 | 0.9748   | 0.992974 | 0.986245 |
| MmugDNA.32351.1.S1_at   | MmugDNA.32351.1 | 8.07  | 8.39  | 0.62 | 0.71 | -1.25 | 0.347625 | 0.18391  | 0.6666   | 0.460057 |
| MmugDNA.32352.1.S1_at   | MmugDNA.32352.1 | 5.88  | 5.93  | 0.2  | 0.14 | -1.04 | 0.375444 | 0.294587 | 0.684715 | 0.554282 |
| MmugDNA.32353.1.S1_at   | MmugDNA.32353.1 | 3.3   | 3.14  | 0.13 | 0.08 | 1.11  | 0.210539 | 0.222002 | 0.5718   | 0.49507  |
| MmugDNA.32356.1.S1_at   | MmugDNA.32356.1 | 6.26  | 6.36  | 0.28 | 0.22 | -1.07 | 0.773076 | 0.451302 | 0.904634 | 0.66613  |
| MmugDNA.32357.1.S1_at   | MmugDNA.32357.1 | 6.9   | 6.98  | 0.66 | 0.3  | -1.05 | 0.32363  | 0.315405 | 0.65165  | 0.568939 |
| MmugDNA.32358.1.S1_at   | MmugDNA.32358.1 | 9.65  | 11.2  | 0.25 | 0.38 | -2.94 | 0.005639 | 0.002858 | 0.191943 | 0.078756 |
| MmugDNA.3236.1.S1_at    | MmugDNA.3236.1  | 4.83  | 4.94  | 0.12 | 0.28 | -1.08 | 0.367511 | 0.487984 | 0.679502 | 0.690839 |
| MmugDNA.32360.1.S1_at   | MmugDNA.32360.1 | 4.36  | 4.16  | 0.39 | 0.16 | 1.14  | 0.145997 | 0.021761 | 0.512003 | 0.184563 |
| MmugDNA.32361.1.S1_at   | MmugDNA.32361.1 | 5.87  | 6.39  | 1.08 | 0.28 | -1.44 | 0.718236 | 0.882198 | 0.876373 | 0.932845 |
| MmugDNA.32363.1.S1_at   | MmugDNA.32363.1 | 2.97  | 2.95  | 0.03 | 0.12 | 1.02  | 0.995554 | 0.533212 | 0.99841  | 0.719483 |
| MmugDNA.32365.1.S1_at   | MmugDNA.32365.1 | 4.73  | 4.66  | 0.64 | 0.26 | 1.05  | 0.218212 | 0.262925 | 0.57777  | 0.529325 |
| MmugDNA.32367.1.S1_at   | MmugDNA.32367.1 | 5.41  | 6.13  | 0.12 | 0.35 | -1.64 | 0.038379 | 0.036846 | 0.344115 | 0.236451 |

|                         |                 |       |       |      |      |       |          |          |          |          |
|-------------------------|-----------------|-------|-------|------|------|-------|----------|----------|----------|----------|
| MmugDNA.32368.1.S1_at   | MmugDNA.32368.1 | 5.49  | 4.34  | 0.68 | 0.35 | 2.22  | 0.250353 | 0.20647  | 0.600389 | 0.480571 |
| MmugDNA.32369.1.S1_at   | MmugDNA.32369.1 | 6.51  | 6.84  | 0.22 | 0.17 | -1.26 | 0.548845 | 0.757173 | 0.786988 | 0.858648 |
| MmugDNA.3237.1.S1_at    | MmugDNA.3237.1  | 5.19  | 5.4   | 0.2  | 0.08 | -1.15 | 0.095069 | 0.375541 | 0.452775 | 0.613485 |
| MmugDNA.32370.1.S1_at   | MmugDNA.32370.1 | 4.74  | 4.44  | 0.37 | 0.45 | 1.22  | 0.703416 | 0.584562 | 0.868996 | 0.752462 |
| MmugDNA.32371.1.S1_at   | MmugDNA.32371.1 | 6.56  | 6.6   | 0.41 | 0.35 | -1.03 | 0.914619 | 0.502854 | 0.966289 | 0.700392 |
| MmugDNA.41435.1.S1_s_at | MmugDNA.41435.1 | 10.73 | 10.66 | 0.29 | 0.25 | 1.05  | 0.328475 | 0.329914 | 0.654375 | 0.578874 |
| MmugDNA.32373.1.S1_at   | MmugDNA.32373.1 | 8.33  | 8.97  | 0.36 | 0.88 | -1.56 | 0.619195 | 0.791096 | 0.825425 | 0.879263 |
| MmugDNA.32376.1.S1_at   | MmugDNA.32376.1 | 8.32  | 8.42  | 0.25 | 0.24 | -1.07 | 0.811722 | 0.390704 | 0.923289 | 0.624496 |
| MmugDNA.32378.1.S1_at   | MmugDNA.32378.1 | 3.95  | 3.6   | 0.24 | 0.3  | 1.28  | 0.569094 | 0.176023 | 0.79899  | 0.452526 |
| MmugDNA.32379.1.S1_s_at | MmugDNA.32379.1 | 12.21 | 11.95 | 0.08 | 0.41 | 1.19  | 0.238801 | 0.222892 | 0.592015 | 0.495791 |
| MmugDNA.3238.1.S1_s_at  | MmugDNA.3238.1  | 3.25  | 3.37  | 0.14 | 0.17 | -1.09 | 0.228429 | 0.43384  | 0.585868 | 0.654032 |
| MmugDNA.32380.1.S1_at   | MmugDNA.32380.1 | 9.45  | 8.44  | 0.48 | 0.32 | 2.02  | 0.058052 | 0.035801 | 0.389703 | 0.233625 |
| MmugDNA.32382.1.S1_at   | MmugDNA.32382.1 | 11.04 | 11.62 | 0.33 | 0.3  | -1.5  | 0.095998 | 0.101104 | 0.454092 | 0.360724 |
| MmugDNA.32383.1.S1_at   | MmugDNA.32383.1 | 8.59  | 8.4   | 0.39 | 0.19 | 1.14  | 0.511568 | 0.639601 | 0.765318 | 0.788354 |
| MmugDNA.32389.1.S1_at   | MmugDNA.32389.1 | 8.86  | 9.58  | 0.23 | 0.43 | -1.65 | 0.102441 | 0.010007 | 0.462354 | 0.131262 |
| MmugDNA.3239.1.S1_at    | MmugDNA.3239.1  | 10.25 | 9.95  | 0.01 | 0.37 | 1.24  | 0.22609  | 0.105913 | 0.584142 | 0.368216 |
| MmugDNA.32392.1.S1_at   | MmugDNA.32392.1 | 7.07  | 6.92  | 0.45 | 0.16 | 1.11  | 0.761921 | 0.882978 | 0.899804 | 0.933236 |
| MmugDNA.32396.1.S1_at   | MmugDNA.32396.1 | 5.45  | 5.3   | 0.03 | 0.2  | 1.11  | 0.301855 | 0.539973 | 0.636716 | 0.723995 |
| MmugDNA.32397.1.S1_at   | MmugDNA.32397.1 | 3.89  | 3.81  | 0.09 | 0.26 | 1.06  | 0.57019  | 0.725862 | 0.799401 | 0.841285 |
| MmugDNA.32399.1.S1_at   | MmugDNA.32399.1 | 6.22  | 6.17  | 0.11 | 0.09 | 1.04  | 0.487023 | 0.813589 | 0.751872 | 0.892313 |
| MmugDNA.324.1.S1_at     | MmugDNA.324.1   | 8.02  | 7.97  | 0.19 | 0.12 | 1.04  | 0.431133 | 0.596291 | 0.718464 | 0.75946  |
| MmugDNA.3240.1.S1_at    | MmugDNA.3240.1  | 6.81  | 7.34  | 0.11 | 0.16 | -1.44 | 0.016046 | 0.019022 | 0.262409 | 0.173623 |
| MmugDNA.32401.1.S1_at   | MmugDNA.32401.1 | 3.76  | 3.81  | 0.3  | 0.44 | -1.04 | 0.771461 | 0.944531 | 0.903845 | 0.968614 |
| MmugDNA.32402.1.S1_at   | MmugDNA.32402.1 | 4.2   | 3.69  | 0.47 | 0.12 | 1.43  | 0.274277 | 0.201645 | 0.617262 | 0.476208 |
| MmugDNA.32403.1.S1_at   | MmugDNA.32403.1 | 3.4   | 3.43  | 0.33 | 0.01 | -1.02 | 0.450477 | 0.369926 | 0.73096  | 0.609164 |
| MmugDNA.32404.1.S1_at   | MmugDNA.32404.1 | 3.83  | 4.18  | 0.06 | 0.22 | -1.27 | 0.117879 | 0.153548 | 0.482063 | 0.428309 |
| MmugDNA.32406.1.S1_at   | MmugDNA.32406.1 | 6.9   | 7.38  | 0.04 | 0.29 | -1.4  | 0.043524 | 0.080751 | 0.356798 | 0.328632 |
| MmugDNA.32407.1.S1_at   | MmugDNA.32407.1 | 4.58  | 4.54  | 0.18 | 0.04 | 1.03  | 0.75425  | 0.50672  | 0.895293 | 0.702574 |
| MmugDNA.32409.1.S1_s_at | MmugDNA.32409.1 | 10.14 | 10.23 | 0.21 | 1.35 | -1.07 | 0.941294 | 0.160012 | 0.977671 | 0.436167 |
| MmugDNA.3241.1.S1_at    | MmugDNA.3241.1  | 9.86  | 9.21  | 0.06 | 0.4  | 1.57  | 0.073699 | 0.050243 | 0.419203 | 0.269432 |
| MmugDNA.32411.1.S1_at   | MmugDNA.32411.1 | 6.37  | 5.83  | 0.17 | 0.42 | 1.46  | 0.073022 | 0.06781  | 0.418323 | 0.306548 |
| MmugDNA.32414.1.S1_at   | MmugDNA.32414.1 | 4.45  | 4.51  | 0.49 | 0    | -1.04 | 0.481873 | 0.677782 | 0.749333 | 0.811816 |
| MmugDNA.32416.1.S1_at   | MmugDNA.32416.1 | 7.68  | 7.44  | 0.18 | 0.19 | 1.19  | 0.466086 | 0.188876 | 0.740195 | 0.464789 |
| MmugDNA.32417.1.S1_at   | MmugDNA.32417.1 | 3.18  | 3.23  | 0.05 | 0.05 | -1.04 | 0.378947 | 0.423549 | 0.686586 | 0.646445 |
| MmugDNA.32418.1.S1_at   | MmugDNA.32418.1 | 4.76  | 4.87  | 0.2  | 0.1  | -1.08 | 0.560538 | 0.566537 | 0.794291 | 0.740639 |
| MmugDNA.3242.1.S1_at    | MmugDNA.3242.1  | 5.8   | 6.22  | 0.56 | 0.28 | -1.34 | 0.866424 | 0.475312 | 0.946742 | 0.682031 |
| MmugDNA.32421.1.S1_at   | MmugDNA.32421.1 | 11.34 | 11.73 | 0.02 | 0.38 | -1.31 | 0.470577 | 0.411276 | 0.742485 | 0.637991 |
| MmugDNA.32424.1.S1_at   | MmugDNA.32424.1 | 6.85  | 6.5   | 0.33 | 0.22 | 1.27  | 0.195438 | 0.367443 | 0.558901 | 0.607095 |
| MmugDNA.32425.1.S1_at   | MmugDNA.32425.1 | 7.29  | 7.51  | 0.71 | 0.28 | -1.16 | 0.149322 | 0.172869 | 0.514001 | 0.449431 |
| MmugDNA.32426.1.S1_at   | MmugDNA.32426.1 | 6.06  | 5.94  | 0.13 | 0.22 | 1.09  | 0.098575 | 0.087224 | 0.458486 | 0.340206 |
| MmugDNA.32427.1.S1_at   | MmugDNA.32427.1 | 5.08  | 5.08  | 0.44 | 0.02 | -1    | 0.374008 | 0.529673 | 0.683309 | 0.717463 |

|                         |                 |       |       |      |      |       |          |          |          |          |
|-------------------------|-----------------|-------|-------|------|------|-------|----------|----------|----------|----------|
| MmugDNA.32428.1.S1_at   | MmugDNA.32428.1 | 5.09  | 5.04  | 0.23 | 0.16 | 1.04  | 0.252231 | 0.260086 | 0.601282 | 0.52675  |
| MmugDNA.32429.1.S1_at   | MmugDNA.32429.1 | 8.09  | 7.93  | 0.2  | 0.69 | 1.11  | 0.947405 | 0.191277 | 0.979803 | 0.466553 |
| MmugDNA.3243.1.S1_at    | MmugDNA.3243.1  | 3.34  | 3.75  | 0.47 | 0.12 | -1.33 | 0.548435 | 0.493412 | 0.786665 | 0.694107 |
| MmugDNA.32431.1.S1_at   | MmugDNA.32431.1 | 5.32  | 4.52  | 0.1  | 0.23 | 1.73  | 0.010496 | 0.004375 | 0.229964 | 0.092619 |
| MmugDNA.32434.1.S1_at   | MmugDNA.32434.1 | 7.93  | 8.03  | 0.16 | 0.23 | -1.08 | 0.508421 | 0.326498 | 0.7637   | 0.576576 |
| MmugDNA.32436.1.S1_at   | MmugDNA.32436.1 | 4.29  | 5.07  | 1.05 | 0.37 | -1.72 | 0.746425 | 0.924767 | 0.891424 | 0.957465 |
| MmugDNA.32437.1.S1_at   | MmugDNA.32437.1 | 3.75  | 3.65  | 0.69 | 0.43 | 1.07  | 0.845794 | 0.979978 | 0.93814  | 0.989229 |
| MmugDNA.32438.1.S1_at   | MmugDNA.32438.1 | 8.8   | 8.61  | 0.16 | 0.03 | 1.14  | 0.333796 | 0.059686 | 0.657923 | 0.290919 |
| MmugDNA.32439.1.S1_at   | MmugDNA.32439.1 | 7.14  | 7.38  | 0.1  | 0.14 | -1.18 | 0.105757 | 0.117679 | 0.466526 | 0.385399 |
| MmugDNA.3244.1.S1_s_at  | MmugDNA.3244.1  | 7.1   | 6.98  | 0.16 | 0.48 | 1.08  | 0.507371 | 0.46298  | 0.762788 | 0.674149 |
| MmugDNA.32440.1.S1_at   | MmugDNA.32440.1 | 6.95  | 7.07  | 0.41 | 0.55 | -1.09 | 0.460732 | 0.772651 | 0.737133 | 0.867785 |
| MmugDNA.32441.1.S1_at   | MmugDNA.32441.1 | 3.19  | 3.22  | 0.09 | 0.32 | -1.02 | 0.548413 | 0.759282 | 0.786665 | 0.860036 |
| MmugDNA.32443.1.S1_at   | MmugDNA.32443.1 | 5.08  | 5.44  | 0.13 | 0.06 | -1.28 | 0.027574 | 0.019654 | 0.308386 | 0.176187 |
| MmugDNA.32444.1.S1_at   | MmugDNA.32444.1 | 4.66  | 4.82  | 0.13 | 0.17 | -1.12 | 0.832767 | 0.087179 | 0.932258 | 0.340133 |
| MmugDNA.32445.1.S1_at   | MmugDNA.32445.1 | 3.78  | 3.39  | 0.21 | 0.23 | 1.32  | 0.069836 | 0.095333 | 0.412907 | 0.35236  |
| MmugDNA.32446.1.S1_at   | MmugDNA.32446.1 | 3.48  | 3.76  | 0.23 | 0.24 | -1.21 | 0.298875 | 0.33648  | 0.634411 | 0.583831 |
| MmugDNA.32447.1.S1_at   | MmugDNA.32447.1 | 3.68  | 3.69  | 0.17 | 0.03 | -1.01 | 0.396137 | 0.46523  | 0.696828 | 0.675638 |
| MmugDNA.32448.1.S1_at   | MmugDNA.32448.1 | 5.76  | 6.28  | 0.81 | 0.49 | -1.44 | 0.754043 | 0.825052 | 0.895143 | 0.899488 |
| MmugDNA.32449.1.S1_at   | MmugDNA.32449.1 | 8.96  | 6.71  | 0.49 | 0.71 | 4.78  | 0.010257 | 0.005349 | 0.228507 | 0.101092 |
| MmugDNA.32449.1.S1_s_at | MmugDNA.32449.1 | 11.01 | 8.13  | 2.51 | 1.77 | 7.36  | 0.397164 | 0.527612 | 0.697527 | 0.716154 |
| MmugDNA.32451.1.S1_at   | MmugDNA.32451.1 | 9.87  | 8.87  | 0.17 | 0.1  | 2     | 0.001453 | 0.000235 | 0.149724 | 0.03241  |
| MmugDNA.32455.1.S1_s_at | MmugDNA.32455.1 | 11.43 | 11.11 | 0.2  | 0.2  | 1.25  | 0.099171 | 0.082181 | 0.458925 | 0.331036 |
| MmugDNA.32456.1.S1_at   | MmugDNA.32456.1 | 9.31  | 9.5   | 0.15 | 0.05 | -1.14 | 0.325979 | 0.015538 | 0.653157 | 0.158053 |
| MmugDNA.32457.1.S1_at   | MmugDNA.32457.1 | 3.76  | 3.68  | 0.14 | 0.07 | 1.06  | 0.495772 | 0.675382 | 0.757324 | 0.81026  |
| MmugDNA.3246.1.S1_at    | MmugDNA.3246.1  | 5.51  | 5.15  | 0.17 | 0.15 | 1.28  | 0.088597 | 0.008347 | 0.44348  | 0.121193 |
| MmugDNA.32461.1.S1_at   | MmugDNA.32461.1 | 10.79 | 10.75 | 0.18 | 0.25 | 1.03  | 0.895798 | 0.959191 | 0.958405 | 0.976862 |
| MmugDNA.32462.1.S1_at   | MmugDNA.32462.1 | 4.05  | 4.09  | 0.07 | 0.04 | -1.02 | 0.136218 | 0.483281 | 0.503091 | 0.687887 |
| MmugDNA.32463.1.S1_at   | MmugDNA.32463.1 | 10.81 | 10.93 | 0.14 | 0.15 | -1.08 | 0.991813 | 0.901426 | 0.997132 | 0.943931 |
| MmugDNA.32464.1.S1_at   | MmugDNA.32464.1 | 5.39  | 5.13  | 0.46 | 0.23 | 1.2   | 0.125812 | 0.220005 | 0.491824 | 0.49344  |
| MmugDNA.32465.1.S1_at   | MmugDNA.32465.1 | 8.8   | 8.5   | 0.25 | 0.55 | 1.24  | 0.855644 | 0.611867 | 0.941621 | 0.769622 |
| MmugDNA.32467.1.S1_at   | MmugDNA.32467.1 | 13.15 | 12.97 | 0.04 | 0.36 | 1.13  | 0.340639 | 0.45964  | 0.662103 | 0.671926 |
| MmugDNA.32468.1.S1_at   | MmugDNA.32468.1 | 5.94  | 5.58  | 0.04 | 0.26 | 1.28  | 0.243717 | 0.220845 | 0.595523 | 0.494262 |
| MmugDNA.32469.1.S1_at   | MmugDNA.32469.1 | 8.65  | 8.68  | 0.34 | 0.2  | -1.02 | 0.820874 | 0.233617 | 0.927175 | 0.50492  |
| MmugDNA.32471.1.S1_at   | MmugDNA.32471.1 | 3.21  | 3.31  | 0.11 | 0.36 | -1.07 | 0.736063 | 0.878276 | 0.886439 | 0.930529 |
| MmugDNA.32472.1.S1_at   | MmugDNA.32472.1 | 4.73  | 4.61  | 0.85 | 0.33 | 1.09  | 0.475127 | 0.304439 | 0.745579 | 0.561712 |
| MmugDNA.32473.1.S1_at   | MmugDNA.32473.1 | 4.74  | 4.77  | 0.15 | 0.04 | -1.02 | 0.580313 | 0.107602 | 0.804567 | 0.370497 |
| MmugDNA.32474.1.S1_at   | MmugDNA.32474.1 | 4.11  | 4.15  | 0.05 | 0.04 | -1.03 | 0.335624 | 0.730569 | 0.659165 | 0.844055 |
| MmugDNA.32475.1.S1_at   | MmugDNA.32475.1 | 6.2   | 6.44  | 0.23 | 0.26 | -1.18 | 0.565395 | 0.770891 | 0.79704  | 0.866807 |
| MmugDNA.32476.1.S1_at   | MmugDNA.32476.1 | 4.14  | 3.61  | 0.39 | 0.28 | 1.44  | 0.325637 | 0.286703 | 0.652943 | 0.548077 |
| MmugDNA.32477.1.S1_at   | MmugDNA.32477.1 | 5.53  | 5.22  | 0.6  | 0.5  | 1.25  | 0.941519 | 0.861256 | 0.977713 | 0.921088 |
| MmugDNA.32478.1.S1_at   | MmugDNA.32478.1 | 5.51  | 5.26  | 0.34 | 0.19 | 1.19  | 0.131361 | 0.165477 | 0.497985 | 0.441726 |



|                         |                 |       |       |      |      |       |          |          |          |          |
|-------------------------|-----------------|-------|-------|------|------|-------|----------|----------|----------|----------|
| MmugDNA.32479.1.S1_at   | MmugDNA.32479.1 | 8.78  | 7.65  | 0.22 | 0.41 | 2.19  | 0.014023 | 0.011163 | 0.250785 | 0.137551 |
| MmugDNA.3248.1.S1_at    | MmugDNA.3248.1  | 3.43  | 3.38  | 0.12 | 0.17 | 1.04  | 0.953107 | 0.201929 | 0.982522 | 0.476412 |
| MmugDNA.3248.1.S1_x_at  | MmugDNA.3248.1  | 4.29  | 4.42  | 0.14 | 0.19 | -1.1  | 0.362631 | 0.425659 | 0.676176 | 0.648    |
| MmugDNA.32480.1.S1_at   | MmugDNA.32480.1 | 3.67  | 3.66  | 0.03 | 0.03 | 1     | 0.18241  | 0.572146 | 0.546756 | 0.744268 |
| MmugDNA.32481.1.S1_s_at | MmugDNA.32481.1 | 11.81 | 11.25 | 0.35 | 0.92 | 1.47  | 0.540443 | 0.569424 | 0.781897 | 0.742382 |
| MmugDNA.32482.1.S1_s_at | MmugDNA.32482.1 | 9.61  | 9.72  | 0.32 | 0.15 | -1.08 | 0.600325 | 0.125787 | 0.815194 | 0.396313 |
| MmugDNA.32483.1.S1_at   | MmugDNA.32483.1 | 5.34  | 4.75  | 0.23 | 0.08 | 1.5   | 0.022027 | 0.115846 | 0.28446  | 0.382929 |
| MmugDNA.32484.1.S1_s_at | MmugDNA.32484.1 | 12.21 | 12.15 | 0.09 | 0.09 | 1.04  | 0.926549 | 0.015425 | 0.971724 | 0.157699 |
| MmugDNA.32486.1.S1_at   | MmugDNA.32486.1 | 5.28  | 5.25  | 0.21 | 0.1  | 1.03  | 0.663016 | 0.876827 | 0.848861 | 0.92983  |
| MmugDNA.32488.1.S1_at   | MmugDNA.32488.1 | 7.51  | 7.33  | 0.91 | 0.27 | 1.14  | 0.271472 | 0.459833 | 0.6157   | 0.671989 |
| MmugDNA.32489.1.S1_at   | MmugDNA.32489.1 | 10.8  | 11.08 | 0.04 | 0.25 | -1.22 | 0.142151 | 0.137091 | 0.509437 | 0.409869 |
| MmugDNA.3249.1.S1_at    | MmugDNA.3249.1  | 8.33  | 8.05  | 0.28 | 0.07 | 1.21  | 0.169142 | 0.296969 | 0.533483 | 0.555904 |
| MmugDNA.3249.1.S1_x_at  | MmugDNA.3249.1  | 7.06  | 6.93  | 0.23 | 0.3  | 1.09  | 0.247856 | 0.246465 | 0.599052 | 0.515899 |
| MmugDNA.32490.1.S1_at   | MmugDNA.32490.1 | 4.54  | 4.42  | 0.24 | 0.23 | 1.08  | 0.881208 | 0.451239 | 0.952244 | 0.666095 |
| MmugDNA.32491.1.S1_at   | MmugDNA.32491.1 | 4.61  | 4.3   | 0.18 | 0.17 | 1.24  | 0.040942 | 0.031867 | 0.35051  | 0.220909 |
| MmugDNA.32492.1.S1_at   | MmugDNA.32492.1 | 3.51  | 3.73  | 0.2  | 0.42 | -1.17 | 0.664559 | 0.676833 | 0.849598 | 0.811172 |
| MmugDNA.32494.1.S1_at   | MmugDNA.32494.1 | 6.4   | 7.49  | 0.67 | 1.26 | -2.13 | 0.377488 | 0.296461 | 0.685958 | 0.555528 |
| MmugDNA.32494.1.S1_s_at | MmugDNA.32494.1 | 8.52  | 9.36  | 0.66 | 1.19 | -1.79 | 0.504396 | 0.254098 | 0.761231 | 0.522439 |
| MmugDNA.32497.1.S1_at   | MmugDNA.32497.1 | 4.46  | 4.22  | 0.58 | 0.11 | 1.18  | 0.21272  | 0.254556 | 0.573074 | 0.522863 |
| MmugDNA.32498.1.S1_at   | MmugDNA.32498.1 | 5.65  | 5.68  | 0.27 | 0.17 | -1.02 | 0.521586 | 0.588362 | 0.771406 | 0.754874 |
| MmugDNA.32499.1.S1_at   | MmugDNA.32499.1 | 5.06  | 5.35  | 0.12 | 0.07 | -1.22 | 0.042605 | 0.009852 | 0.355272 | 0.130274 |
| MmugDNA.325.1.S1_at     | MmugDNA.325.1   | 4.67  | 4.84  | 0.05 | 0.14 | -1.13 | 0.100607 | 0.068114 | 0.461009 | 0.307163 |
| MmugDNA.3250.1.S1_at    | MmugDNA.3250.1  | 4.78  | 5.03  | 0.09 | 0.19 | -1.19 | 0.203733 | 0.321421 | 0.5663   | 0.573207 |
| MmugDNA.32500.1.S1_at   | MmugDNA.32500.1 | 7.47  | 7.72  | 0.4  | 0.16 | -1.18 | 0.380506 | 0.183403 | 0.687322 | 0.459553 |
| MmugDNA.32500.1.S1_x_at | MmugDNA.32500.1 | 9.46  | 9.77  | 0.4  | 0.21 | -1.24 | 0.457176 | 0.230879 | 0.734738 | 0.502546 |
| MmugDNA.32502.1.S1_at   | MmugDNA.32502.1 | 6.05  | 6.08  | 0.53 | 0.52 | -1.02 | 0.302806 | 0.057119 | 0.637102 | 0.284945 |
| MmugDNA.32503.1.S1_at   | MmugDNA.32503.1 | 4.69  | 4.7   | 0.28 | 0.19 | -1    | 0.961098 | 0.582984 | 0.984976 | 0.751492 |
| MmugDNA.32505.1.S1_at   | MmugDNA.32505.1 | 10.73 | 11.32 | 0.23 | 0.67 | -1.51 | 0.625625 | 0.820623 | 0.829059 | 0.89668  |
| MmugDNA.32506.1.S1_at   | MmugDNA.32506.1 | 3.25  | 3.18  | 0    | 0.07 | 1.05  | 0.13838  | 0.053558 | 0.505745 | 0.277065 |
| MmugDNA.32507.1.S1_at   | MmugDNA.32507.1 | 6.97  | 7.35  | 0.14 | 0.37 | -1.3  | 0.492453 | 0.007068 | 0.755778 | 0.113284 |
| MmugDNA.32508.1.S1_at   | MmugDNA.32508.1 | 10.86 | 10.88 | 0.27 | 0.22 | -1.02 | 0.267204 | 0.09469  | 0.612326 | 0.351481 |
| MmugDNA.32508.1.S1_s_at | MmugDNA.32508.1 | 10.2  | 10.12 | 0.23 | 0.21 | 1.05  | 0.18874  | 0.24326  | 0.551744 | 0.513356 |
| MmugDNA.32509.1.S1_at   | MmugDNA.32509.1 | 5.73  | 5.7   | 0.06 | 0.15 | 1.02  | 0.753634 | 0.877341 | 0.894938 | 0.930105 |
| MmugDNA.32510.1.S1_at   | MmugDNA.32510.1 | 8.68  | 8.59  | 0.08 | 0.48 | 1.06  | 0.510413 | 0.204663 | 0.765019 | 0.479016 |
| MmugDNA.32512.1.S1_at   | MmugDNA.32512.1 | 7.26  | 7.71  | 0.3  | 0.18 | -1.36 | 0.222804 | 0.227274 | 0.581253 | 0.499589 |
| MmugDNA.32513.1.S1_at   | MmugDNA.32513.1 | 3.64  | 3.4   | 0.38 | 0.22 | 1.18  | 0.632863 | 0.879455 | 0.833387 | 0.931144 |
| MmugDNA.32514.1.S1_at   | MmugDNA.32514.1 | 4.13  | 4.03  | 0.14 | 0.04 | 1.07  | 0.150541 | 0.235122 | 0.515372 | 0.50629  |
| MmugDNA.32517.1.S1_at   | MmugDNA.32517.1 | 4.99  | 5.18  | 0.07 | 0.18 | -1.14 | 0.684846 | 0.653397 | 0.858795 | 0.797435 |
| MmugDNA.32518.1.S1_at   | MmugDNA.32518.1 | 7.69  | 6.42  | 0.43 | 0.42 | 2.42  | 0.042909 | 0.029888 | 0.355546 | 0.214558 |
| MmugDNA.32519.1.S1_at   | MmugDNA.32519.1 | 6.08  | 5.94  | 0.19 | 0.27 | 1.1   | 0.906785 | 0.089573 | 0.963    | 0.343811 |
| MmugDNA.32520.1.S1_at   | MmugDNA.32520.1 | 5.3   | 5.41  | 0.15 | 0.16 | -1.08 | 0.184706 | 0.220376 | 0.548318 | 0.493783 |

|                         |                 |       |       |      |      |       |          |          |          |          |
|-------------------------|-----------------|-------|-------|------|------|-------|----------|----------|----------|----------|
| MmugDNA.32521.1.S1_s_at | MmugDNA.32521.1 | 8.24  | 8.57  | 0.17 | 0.49 | -1.26 | 0.115009 | 0.148252 | 0.478345 | 0.422749 |
| MmugDNA.32523.1.S1_at   | MmugDNA.32523.1 | 4.91  | 4.92  | 0.93 | 0.07 | -1.01 | 0.495546 | 0.684519 | 0.757268 | 0.81598  |
| MmugDNA.32524.1.S1_at   | MmugDNA.32524.1 | 5.73  | 6.04  | 0.1  | 0.29 | -1.24 | 0.14244  | 0.141026 | 0.509648 | 0.414507 |
| MmugDNA.32525.1.S1_at   | MmugDNA.32525.1 | 5.26  | 5.26  | 0.14 | 0.12 | -1    | 0.764322 | 0.630098 | 0.900711 | 0.782148 |
| MmugDNA.32526.1.S1_at   | MmugDNA.32526.1 | 12.02 | 11.46 | 0.1  | 0.4  | 1.47  | 0.092204 | 0.030796 | 0.448698 | 0.217376 |
| MmugDNA.32527.1.S1_at   | MmugDNA.32527.1 | 10.38 | 10.26 | 0.14 | 0.33 | 1.09  | 0.768653 | 0.466175 | 0.902722 | 0.676147 |
| MmugDNA.3253.1.S1_at    | MmugDNA.3253.1  | 9.38  | 8.62  | 0.15 | 0.2  | 1.69  | 0.008296 | 0.005564 | 0.217127 | 0.103062 |
| MmugDNA.32530.1.S1_at   | MmugDNA.32530.1 | 5.12  | 5.17  | 0.21 | 0.57 | -1.03 | 0.376772 | 0.517303 | 0.685294 | 0.709435 |
| MmugDNA.32532.1.S1_at   | MmugDNA.32532.1 | 7.56  | 7.16  | 0.37 | 0.24 | 1.31  | 0.867498 | 0.785416 | 0.947135 | 0.875768 |
| MmugDNA.32533.1.S1_at   | MmugDNA.32533.1 | 9.88  | 8.99  | 0.29 | 0.14 | 1.86  | 0.009954 | 0.003181 | 0.226899 | 0.081921 |
| MmugDNA.32534.1.S1_at   | MmugDNA.32534.1 | 4.16  | 4.15  | 0.32 | 0.11 | 1.01  | 0.51725  | 0.562694 | 0.768684 | 0.7381   |
| MmugDNA.32536.1.S1_at   | MmugDNA.32536.1 | 4.83  | 4.24  | 0.24 | 0.19 | 1.51  | 0.016272 | 0.011242 | 0.263592 | 0.138014 |
| MmugDNA.32537.1.S1_at   | MmugDNA.32537.1 | 3.68  | 3.51  | 0.33 | 0.25 | 1.13  | 0.41554  | 0.554781 | 0.709528 | 0.733501 |
| MmugDNA.32539.1.S1_at   | MmugDNA.32539.1 | 7.8   | 7.61  | 0.18 | 0.27 | 1.14  | 0.144256 | 0.299724 | 0.510664 | 0.558037 |
| MmugDNA.3254.1.S1_at    | MmugDNA.3254.1  | 6.47  | 6.8   | 0.17 | 0.05 | -1.26 | 0.08908  | 0.041676 | 0.444475 | 0.24887  |
| MmugDNA.32543.1.S1_at   | MmugDNA.32543.1 | 4.65  | 4.38  | 0.86 | 0.92 | 1.2   | 0.9042   | 0.22327  | 0.961669 | 0.496078 |
| MmugDNA.32544.1.S1_at   | MmugDNA.32544.1 | 12.17 | 12.29 | 0.11 | 0.32 | -1.09 | 0.704556 | 0.831674 | 0.869713 | 0.903453 |
| MmugDNA.32545.1.S1_at   | MmugDNA.32545.1 | 7.04  | 6.59  | 0.33 | 0.35 | 1.36  | 0.101124 | 0.079447 | 0.461009 | 0.326766 |
| MmugDNA.32547.1.S1_at   | MmugDNA.32547.1 | 5.48  | 5.19  | 1.16 | 0.2  | 1.22  | 0.232248 | 0.250831 | 0.587814 | 0.51956  |
| MmugDNA.32548.1.S1_at   | MmugDNA.32548.1 | 3.37  | 3.33  | 0.16 | 0.21 | 1.03  | 0.635069 | 0.215054 | 0.834812 | 0.488898 |
| MmugDNA.3255.1.S1_at    | MmugDNA.3255.1  | 6.67  | 6.75  | 0.14 | 0.12 | -1.05 | 0.597094 | 0.636709 | 0.813397 | 0.786348 |
| MmugDNA.32550.1.S1_at   | MmugDNA.32550.1 | 4.39  | 4.25  | 0.21 | 0.29 | 1.1   | 0.56099  | 0.838715 | 0.794555 | 0.908041 |
| MmugDNA.32552.1.S1_at   | MmugDNA.32552.1 | 10.8  | 10.55 | 0.04 | 0.07 | 1.19  | 0.011434 | 0.009512 | 0.235747 | 0.128473 |
| MmugDNA.32553.1.S1_at   | MmugDNA.32553.1 | 8.06  | 8.1   | 0.2  | 0.05 | -1.03 | 0.718622 | 0.667945 | 0.876527 | 0.805689 |
| MmugDNA.32554.1.S1_at   | MmugDNA.32554.1 | 3.84  | 4.04  | 0.07 | 0.1  | -1.15 | 0.045641 | 0.086236 | 0.361322 | 0.338635 |
| MmugDNA.32555.1.S1_at   | MmugDNA.32555.1 | 5.11  | 5.21  | 0.74 | 0.43 | -1.07 | 0.602828 | 0.762325 | 0.816768 | 0.861726 |
| MmugDNA.32556.1.S1_at   | MmugDNA.32556.1 | 6.83  | 5.59  | 0.85 | 0.61 | 2.37  | 0.139503 | 0.160251 | 0.506967 | 0.436398 |
| MmugDNA.32557.1.S1_at   | MmugDNA.32557.1 | 6.78  | 6.82  | 0.39 | 0.34 | -1.03 | 0.926535 | 0.476885 | 0.971724 | 0.683011 |
| MmugDNA.32559.1.S1_at   | MmugDNA.32559.1 | 9.56  | 9.89  | 0.23 | 0.45 | -1.26 | 0.303513 | 0.448059 | 0.637706 | 0.663986 |
| MmugDNA.14377.1.S1_s_at | MmugDNA.14377.1 | 9.76  | 9.91  | 0.31 | 0.47 | -1.11 | 0.379668 | 0.536472 | 0.687063 | 0.72179  |
| MmugDNA.3256.1.S1_at    | MmugDNA.3256.1  | 8.07  | 8.57  | 0.22 | 0.49 | -1.41 | 0.127435 | 0.15906  | 0.493834 | 0.435217 |
| MmugDNA.32563.1.S1_at   | MmugDNA.32563.1 | 9.87  | 10.5  | 0.25 | 0.34 | -1.56 | 0.143336 | 0.062898 | 0.510223 | 0.297495 |
| MmugDNA.32564.1.S1_at   | MmugDNA.32564.1 | 4.14  | 4.17  | 0.08 | 0.23 | -1.02 | 0.858336 | 0.715972 | 0.942759 | 0.835339 |
| MmugDNA.32565.1.S1_at   | MmugDNA.32565.1 | 6.13  | 6.37  | 1.47 | 1.08 | -1.19 | 0.741588 | 0.846797 | 0.889293 | 0.912863 |
| MmugDNA.32568.1.S1_at   | MmugDNA.32568.1 | 4.48  | 4.02  | 0.46 | 0.17 | 1.38  | 0.560727 | 0.098588 | 0.794413 | 0.356709 |
| MmugDNA.32569.1.S1_at   | MmugDNA.32569.1 | 5.68  | 5.88  | 0.38 | 0.37 | -1.15 | 0.936597 | 0.90428  | 0.975457 | 0.945683 |
| MmugDNA.3257.1.S1_at    | MmugDNA.3257.1  | 3.82  | 3.97  | 0.18 | 0.13 | -1.1  | 0.766091 | 0.924573 | 0.901664 | 0.957386 |
| MmugDNA.32571.1.S1_at   | MmugDNA.32571.1 | 3.53  | 3.5   | 0.18 | 0.33 | 1.02  | 0.883835 | 0.892356 | 0.953433 | 0.938624 |
| MmugDNA.32572.1.S1_at   | MmugDNA.32572.1 | 9.73  | 8.25  | 0.98 | 0.46 | 2.79  | 0.048562 | 0.027487 | 0.369003 | 0.207144 |
| MmugDNA.22330.1.S1_s_at | MmugDNA.22330.1 | 13.2  | 13.33 | 0.08 | 0.04 | -1.09 | 0.124559 | 0.106342 | 0.490526 | 0.368857 |
| MmugDNA.32575.1.S1_at   | MmugDNA.32575.1 | 5.43  | 5.52  | 0.09 | 0.13 | -1.06 | 0.2044   | 0.176214 | 0.566838 | 0.452716 |

|                         |                 |       |       |      |      |       |          |          |          |          |
|-------------------------|-----------------|-------|-------|------|------|-------|----------|----------|----------|----------|
| MmugDNA.32578.1.S1_at   | MmugDNA.32578.1 | 10.15 | 10.16 | 0.34 | 0.04 | -1.01 | 0.405044 | 0.560789 | 0.703082 | 0.73697  |
| MmugDNA.32579.1.S1_at   | MmugDNA.32579.1 | 8.97  | 8.5   | 0.26 | 0.35 | 1.39  | 0.105433 | 0.149574 | 0.466156 | 0.424095 |
| MmugDNA.32580.1.S1_at   | MmugDNA.32580.1 | 5.24  | 5.17  | 0.16 | 0.05 | 1.05  | 0.247624 | 0.119512 | 0.598821 | 0.388167 |
| MmugDNA.32581.1.S1_at   | MmugDNA.32581.1 | 7.51  | 7.55  | 0.04 | 0.02 | -1.03 | 0.084447 | 0.166202 | 0.437032 | 0.442767 |
| MmugDNA.32587.1.S1_at   | MmugDNA.32587.1 | 7.02  | 7.09  | 0.14 | 0.03 | -1.05 | 0.79381  | 0.667934 | 0.914508 | 0.805689 |
| MmugDNA.32588.1.S1_at   | MmugDNA.32588.1 | 5.88  | 5.92  | 0.12 | 0.16 | -1.03 | 0.66944  | 0.683484 | 0.852167 | 0.815372 |
| MmugDNA.32589.1.S1_at   | MmugDNA.32589.1 | 4.59  | 4.6   | 0.69 | 0.14 | -1.01 | 0.49088  | 0.533689 | 0.754678 | 0.719848 |
| MmugDNA.3259.1.S1_at    | MmugDNA.3259.1  | 4.05  | 4.06  | 0.47 | 0.12 | -1.01 | 0.393246 | 0.373801 | 0.695073 | 0.61244  |
| MmugDNA.32592.1.S1_at   | MmugDNA.32592.1 | 7.62  | 7.74  | 0.09 | 0.12 | -1.08 | 0.994654 | 0.16331  | 0.998128 | 0.439468 |
| MmugDNA.32593.1.S1_at   | MmugDNA.32593.1 | 3.54  | 3.65  | 0.13 | 0.03 | -1.08 | 0.591854 | 0.792962 | 0.810672 | 0.88043  |
| MmugDNA.32595.1.S1_at   | MmugDNA.32595.1 | 11.51 | 10.9  | 0.02 | 0.41 | 1.53  | 0.024084 | 0.011366 | 0.294208 | 0.138214 |
| MmugDNA.32597.1.S1_at   | MmugDNA.32597.1 | 6.02  | 7.19  | 0.52 | 1.13 | -2.24 | 0.246007 | 0.184858 | 0.597361 | 0.460776 |
| MmugDNA.32598.1.S1_at   | MmugDNA.32598.1 | 6.71  | 6.64  | 0.06 | 0.25 | 1.05  | 0.655228 | 0.716176 | 0.844826 | 0.835515 |
| MmugDNA.32599.1.S1_at   | MmugDNA.32599.1 | 5.26  | 5.18  | 0.19 | 0.04 | 1.05  | 0.953891 | 0.075482 | 0.982913 | 0.319868 |
| MmugDNA.3260.1.S1_at    | MmugDNA.3260.1  | 9.78  | 8.38  | 2.27 | 0.24 | 2.63  | 0.981718 | 0.725952 | 0.993374 | 0.841316 |
| MmugDNA.32600.1.S1_at   | MmugDNA.32600.1 | 5     | 5.07  | 0.13 | 0.12 | -1.05 | 0.10653  | 0.151675 | 0.467051 | 0.426383 |
| MmugDNA.32602.1.S1_at   | MmugDNA.32602.1 | 9.59  | 9.85  | 0.19 | 0.14 | -1.2  | 0.273976 | 0.152269 | 0.617262 | 0.42706  |
| MmugDNA.32603.1.S1_at   | MmugDNA.32603.1 | 6.21  | 6.23  | 0.27 | 0.52 | -1.01 | 0.934201 | 0.859911 | 0.974517 | 0.92017  |
| MmugDNA.32604.1.S1_at   | MmugDNA.32604.1 | 7.95  | 7.3   | 0.22 | 0.36 | 1.57  | 0.024373 | 0.015256 | 0.294535 | 0.15693  |
| MmugDNA.32605.1.S1_at   | MmugDNA.32605.1 | 6.64  | 6.55  | 0.41 | 0.27 | 1.06  | 0.936619 | 0.659543 | 0.97546  | 0.800801 |
| MmugDNA.32606.1.S1_s_at | MmugDNA.32606.1 | 11.96 | 11.71 | 0.08 | 0.29 | 1.18  | 0.070051 | 0.166222 | 0.413494 | 0.442775 |
| MmugDNA.32607.1.S1_s_at | MmugDNA.32607.1 | 9.45  | 9.35  | 0.36 | 0.33 | 1.07  | 0.787589 | 0.942756 | 0.911639 | 0.967499 |
| MmugDNA.32609.1.S1_at   | MmugDNA.32609.1 | 9.7   | 10.35 | 0.76 | 0.75 | -1.57 | 0.224488 | 0.1681   | 0.582716 | 0.444698 |
| MmugDNA.3261.1.S1_at    | MmugDNA.3261.1  | 7.39  | 7.57  | 0.31 | 0.25 | -1.14 | 0.432219 | 0.415248 | 0.718847 | 0.640769 |
| MmugDNA.32610.1.S1_at   | MmugDNA.32610.1 | 7.18  | 7.55  | 0.4  | 0.45 | -1.29 | 0.34741  | 0.469338 | 0.666419 | 0.678197 |
| MmugDNA.32611.1.S1_at   | MmugDNA.32611.1 | 4.87  | 5.54  | 0.1  | 0.59 | -1.59 | 0.148644 | 0.131612 | 0.51391  | 0.403716 |
| MmugDNA.32611.1.S1_s_at | MmugDNA.32611.1 | 4.08  | 4.3   | 0.1  | 0.26 | -1.17 | 0.140162 | 0.115357 | 0.508065 | 0.382394 |
| MmugDNA.32614.1.S1_at   | MmugDNA.32614.1 | 4.36  | 4.74  | 0.26 | 0.08 | -1.29 | 0.236393 | 0.219847 | 0.590425 | 0.493388 |
| MmugDNA.32615.1.S1_at   | MmugDNA.32615.1 | 5.65  | 5.64  | 0.08 | 0.08 | 1.01  | 0.384671 | 0.203103 | 0.690114 | 0.477371 |
| MmugDNA.32616.1.S1_at   | MmugDNA.32616.1 | 6.32  | 6.83  | 0.25 | 0.63 | -1.42 | 0.263591 | 0.280783 | 0.609541 | 0.543952 |
| MmugDNA.32617.1.S1_at   | MmugDNA.32617.1 | 4.95  | 5.3   | 0.14 | 0.1  | -1.28 | 0.053967 | 0.043548 | 0.381209 | 0.253261 |
| MmugDNA.32618.1.S1_at   | MmugDNA.32618.1 | 7.77  | 7.65  | 0.69 | 0.37 | 1.09  | 0.943582 | 0.086083 | 0.978535 | 0.33835  |
| MmugDNA.32619.1.S1_at   | MmugDNA.32619.1 | 7.54  | 8.52  | 0.28 | 0.85 | -1.98 | 0.199464 | 0.02878  | 0.562465 | 0.21152  |
| MmugDNA.3262.1.S1_at    | MmugDNA.3262.1  | 6     | 6.04  | 0.38 | 0.02 | -1.03 | 0.476255 | 0.389201 | 0.746149 | 0.623403 |
| MmugDNA.32620.1.S1_at   | MmugDNA.32620.1 | 7.97  | 7.07  | 0.67 | 0.38 | 1.86  | 0.537839 | 0.336717 | 0.780212 | 0.584045 |
| MmugDNA.32621.1.S1_at   | MmugDNA.32621.1 | 3.13  | 3.1   | 0.16 | 0.11 | 1.02  | 0.91897  | 0.990384 | 0.968454 | 0.994548 |
| MmugDNA.32622.1.S1_at   | MmugDNA.32622.1 | 12.58 | 12.5  | 0.07 | 0.31 | 1.06  | 0.816093 | 0.474254 | 0.925314 | 0.68135  |
| MmugDNA.32623.1.S1_at   | MmugDNA.32623.1 | 9.24  | 10.53 | 0.14 | 0.3  | -2.44 | 0.004114 | 0.001628 | 0.181739 | 0.060983 |
| MmugDNA.32625.1.S1_at   | MmugDNA.32625.1 | 9.14  | 8.67  | 0.1  | 1.02 | 1.38  | 0.854029 | 0.928001 | 0.94104  | 0.959116 |
| MmugDNA.32627.1.S1_at   | MmugDNA.32627.1 | 6.36  | 6.34  | 0.21 | 0.75 | 1.01  | 0.554105 | 0.520489 | 0.790657 | 0.711799 |
| MmugDNA.32628.1.S1_at   | MmugDNA.32628.1 | 4.56  | 4.44  | 0.2  | 0.28 | 1.08  | 0.539827 | 0.512821 | 0.781327 | 0.70653  |

|                         |                 |       |       |      |      |       |          |          |          |          |
|-------------------------|-----------------|-------|-------|------|------|-------|----------|----------|----------|----------|
| MmugDNA.32628.1.S1_x_at | MmugDNA.32628.1 | 5.07  | 5.04  | 0.3  | 0.05 | 1.02  | 0.762971 | 0.721368 | 0.900081 | 0.838685 |
| MmugDNA.32629.1.S1_at   | MmugDNA.32629.1 | 9.21  | 8.19  | 0.39 | 1.22 | 2.03  | 0.084233 | 0.083806 | 0.436922 | 0.334647 |
| MmugDNA.3263.1.S1_at    | MmugDNA.3263.1  | 5.35  | 5.65  | 0.2  | 0.17 | -1.23 | 0.585358 | 0.546538 | 0.807548 | 0.728079 |
| MmugDNA.32630.1.S1_at   | MmugDNA.32630.1 | 10.53 | 10.45 | 0.07 | 0.13 | 1.05  | 0.142947 | 0.279919 | 0.509942 | 0.543342 |
| MmugDNA.32631.1.S1_at   | MmugDNA.32631.1 | 12.64 | 12.91 | 0.09 | 0.05 | -1.2  | 0.013335 | 0.006029 | 0.246471 | 0.106089 |
| MmugDNA.32632.1.S1_at   | MmugDNA.32632.1 | 4.47  | 4.53  | 0.21 | 0.08 | -1.04 | 0.675772 | 0.531436 | 0.854801 | 0.718636 |
| MmugDNA.32633.1.S1_at   | MmugDNA.32633.1 | 4.38  | 6.69  | 1.56 | 0.88 | -4.94 | 0.219149 | 0.263951 | 0.578562 | 0.530153 |
| MmugDNA.32634.1.S1_at   | MmugDNA.32634.1 | 8.52  | 8.38  | 0.2  | 0.35 | 1.11  | 0.618266 | 0.532114 | 0.825111 | 0.718995 |
| MmugDNA.32634.1.S1_s_at | MmugDNA.32634.1 | 9.6   | 9.08  | 0.18 | 0.45 | 1.43  | 0.407341 | 0.550318 | 0.70458  | 0.730382 |
| MmugDNA.32635.1.S1_at   | MmugDNA.32635.1 | 3.2   | 3.14  | 0.33 | 0.23 | 1.04  | 0.655618 | 0.867758 | 0.845018 | 0.924861 |
| MmugDNA.32636.1.S1_at   | MmugDNA.32636.1 | 6.5   | 6.24  | 0.41 | 0.15 | 1.2   | 0.486703 | 0.216061 | 0.751702 | 0.489671 |
| MmugDNA.32637.1.S1_at   | MmugDNA.32637.1 | 9.91  | 9.85  | 0.56 | 0.97 | 1.04  | 0.580914 | 0.209914 | 0.804828 | 0.483701 |
| MmugDNA.32638.1.S1_at   | MmugDNA.32638.1 | 10.94 | 11.17 | 0.14 | 0.03 | -1.18 | 0.054244 | 0.061623 | 0.381802 | 0.295095 |
| MmugDNA.32639.1.S1_at   | MmugDNA.32639.1 | 3.39  | 3.4   | 0.03 | 0.06 | -1    | 0.35591  | 0.71872  | 0.671276 | 0.837211 |
| MmugDNA.3264.1.S1_at    | MmugDNA.3264.1  | 6.08  | 6.04  | 0.15 | 0.39 | 1.03  | 0.75815  | 0.383774 | 0.897606 | 0.619734 |
| MmugDNA.5862.1.S1_s_at  | MmugDNA.5862.1  | 6.55  | 6.15  | 0.1  | 0.04 | 1.32  | 0.004809 | 0.138566 | 0.184674 | 0.411557 |
| MmugDNA.32644.1.S1_at   | MmugDNA.32644.1 | 10.82 | 10.82 | 0.1  | 0.03 | -1    | 0.897967 | 0.007075 | 0.959224 | 0.113284 |
| MmugDNA.32646.1.S1_at   | MmugDNA.32646.1 | 12.93 | 12.94 | 0.07 | 0.08 | -1    | 0.364237 | 0.387161 | 0.677295 | 0.621935 |
| MmugDNA.32647.1.S1_at   | MmugDNA.32647.1 | 5.57  | 5.61  | 0.04 | 0.14 | -1.02 | 0.800458 | 0.081793 | 0.917644 | 0.330177 |
| MmugDNA.32647.1.S1_s_at | MmugDNA.32647.1 | 8.58  | 8.29  | 0.08 | 0.25 | 1.22  | 0.065623 | 0.059339 | 0.404757 | 0.29054  |
| MmugDNA.32648.1.S1_at   | MmugDNA.32648.1 | 5.42  | 4.98  | 0.27 | 0.18 | 1.36  | 0.125988 | 0.114238 | 0.492048 | 0.380761 |
| MmugDNA.3265.1.S1_at    | MmugDNA.3265.1  | 8.52  | 8.27  | 0.93 | 0.64 | 1.19  | 0.399341 | 0.107583 | 0.699241 | 0.370497 |
| MmugDNA.32650.1.S1_at   | MmugDNA.32650.1 | 9.85  | 10.2  | 0.25 | 0.12 | -1.27 | 0.170013 | 0.028318 | 0.534161 | 0.21008  |
| MmugDNA.32651.1.S1_at   | MmugDNA.32651.1 | 3.06  | 3.03  | 0.71 | 0.08 | 1.02  | 0.339467 | 0.456355 | 0.661307 | 0.670145 |
| MmugDNA.32652.1.S1_at   | MmugDNA.32652.1 | 8.81  | 8.93  | 0.18 | 0.21 | -1.08 | 0.405451 | 0.223984 | 0.703175 | 0.497025 |
| MmugDNA.32654.1.S1_at   | MmugDNA.32654.1 | 5.17  | 5.39  | 0.1  | 0.25 | -1.16 | 0.221374 | 0.134964 | 0.580216 | 0.406951 |
| MmugDNA.32655.1.S1_at   | MmugDNA.32655.1 | 4.22  | 4.01  | 0.55 | 0.27 | 1.15  | 0.479859 | 0.596776 | 0.747914 | 0.759804 |
| MmugDNA.32657.1.S1_at   | MmugDNA.32657.1 | 5.47  | 5.48  | 0.12 | 0.14 | -1    | 0.471851 | 0.342538 | 0.743427 | 0.588543 |
| MmugDNA.32658.1.S1_at   | MmugDNA.32658.1 | 6.29  | 5.96  | 0.32 | 1.12 | 1.25  | 0.501811 | 0.436658 | 0.760145 | 0.656148 |
| MmugDNA.32659.1.S1_at   | MmugDNA.32659.1 | 4.11  | 4.09  | 0.38 | 0.14 | 1.01  | 0.75208  | 0.839586 | 0.894118 | 0.908582 |
| MmugDNA.3266.1.S1_at    | MmugDNA.3266.1  | 6.02  | 6.06  | 0.13 | 0.05 | -1.03 | 0.214944 | 0.266681 | 0.57547  | 0.53241  |
| MmugDNA.32661.1.S1_at   | MmugDNA.32661.1 | 4.06  | 4.07  | 0.1  | 0.16 | -1.01 | 0.547874 | 0.720671 | 0.786379 | 0.838368 |
| MmugDNA.32662.1.S1_at   | MmugDNA.32662.1 | 3.01  | 3.1   | 0.28 | 0.01 | -1.06 | 0.690769 | 0.766234 | 0.862421 | 0.864167 |
| MmugDNA.32663.1.S1_at   | MmugDNA.32663.1 | 3.31  | 3.09  | 0.17 | 0.08 | 1.17  | 0.059583 | 0.423731 | 0.392653 | 0.646518 |
| MmugDNA.32664.1.S1_at   | MmugDNA.32664.1 | 9.66  | 9.92  | 0.11 | 0.35 | -1.2  | 0.989141 | 0.923958 | 0.99615  | 0.957162 |
| MmugDNA.32665.1.S1_at   | MmugDNA.32665.1 | 6.98  | 6.59  | 0.16 | 0.36 | 1.32  | 0.09027  | 0.114116 | 0.445754 | 0.380543 |
| MmugDNA.32667.1.S1_at   | MmugDNA.32667.1 | 7.62  | 8.98  | 0.21 | 0.19 | -2.57 | 0.001487 | 0.002443 | 0.150888 | 0.073201 |
| MmugDNA.32668.1.S1_at   | MmugDNA.32668.1 | 6.11  | 5.97  | 0.11 | 0.05 | 1.1   | 0.077583 | 0.175738 | 0.427457 | 0.452344 |
| MmugDNA.32669.1.S1_at   | MmugDNA.32669.1 | 9.07  | 9.27  | 0.21 | 0.55 | -1.15 | 0.765933 | 0.92155  | 0.901561 | 0.955761 |
| MmugDNA.3267.1.S1_at    | MmugDNA.3267.1  | 9.59  | 9.99  | 0.19 | 0.26 | -1.32 | 0.181227 | 0.076585 | 0.54572  | 0.321733 |
| MmugDNA.32670.1.S1_at   | MmugDNA.32670.1 | 6.88  | 6.52  | 0.39 | 0.24 | 1.29  | 0.159622 | 0.232643 | 0.524504 | 0.504359 |

|                         |                 |       |       |      |      |        |          |          |          |          |
|-------------------------|-----------------|-------|-------|------|------|--------|----------|----------|----------|----------|
| MmugDNA.32671.1.S1_at   | MmugDNA.32671.1 | 4.15  | 4.22  | 0.09 | 0.19 | -1.05  | 0.858624 | 0.635134 | 0.942899 | 0.785229 |
| MmugDNA.32672.1.S1_at   | MmugDNA.32672.1 | 4.71  | 4.8   | 0.15 | 0.14 | -1.06  | 0.308537 | 0.314609 | 0.640924 | 0.568415 |
| MmugDNA.32674.1.S1_at   | MmugDNA.32674.1 | 5.05  | 5.24  | 0.07 | 0.23 | -1.14  | 0.35142  | 0.440334 | 0.669126 | 0.658899 |
| MmugDNA.32675.1.S1_at   | MmugDNA.32675.1 | 3.8   | 3.78  | 0.24 | 0.04 | 1.02   | 0.374888 | 0.28187  | 0.684103 | 0.544844 |
| MmugDNA.32676.1.S1_at   | MmugDNA.32676.1 | 3.04  | 3.04  | 0.14 | 0.08 | -1     | 0.660086 | 0.559809 | 0.847439 | 0.736394 |
| MmugDNA.32677.1.S1_s_at | MmugDNA.32677.1 | 7.37  | 7.23  | 0.77 | 0.95 | 1.1    | 0.997188 | 0.631546 | 0.99892  | 0.782845 |
| MmugDNA.32679.1.S1_at   | MmugDNA.32679.1 | 3.81  | 3.58  | 0.28 | 0.4  | 1.17   | 0.969356 | 0.663527 | 0.988296 | 0.803016 |
| MmugDNA.3268.1.S1_at    | MmugDNA.3268.1  | 3.38  | 3.4   | 0.09 | 0.13 | -1.01  | 0.907784 | 0.752203 | 0.963403 | 0.855787 |
| MmugDNA.32680.1.S1_at   | MmugDNA.32680.1 | 7.72  | 9.43  | 1.01 | 1.07 | -3.27  | 0.241723 | 0.225785 | 0.593972 | 0.498159 |
| MmugDNA.32681.1.S1_at   | MmugDNA.32681.1 | 5.58  | 5.77  | 0.92 | 0.25 | -1.14  | 0.779381 | 0.578782 | 0.908053 | 0.748614 |
| MmugDNA.32682.1.S1_at   | MmugDNA.32682.1 | 4.54  | 4.18  | 0.45 | 0.08 | 1.29   | 0.28103  | 0.301256 | 0.622033 | 0.559356 |
| MmugDNA.32684.1.S1_at   | MmugDNA.32684.1 | 4.03  | 4.15  | 0.36 | 0.31 | -1.09  | 0.795619 | 0.849944 | 0.915216 | 0.914673 |
| MmugDNA.32685.1.S1_at   | MmugDNA.32685.1 | 9.38  | 9.27  | 0.48 | 0.19 | 1.08   | 0.600285 | 0.81339  | 0.815194 | 0.89215  |
| MmugDNA.32686.1.S1_at   | MmugDNA.32686.1 | 5.09  | 5.08  | 0.07 | 0.18 | 1.01   | 0.289699 | 0.274991 | 0.627583 | 0.539402 |
| MmugDNA.32687.1.S1_at   | MmugDNA.32687.1 | 4.21  | 4.24  | 0.21 | 0.01 | -1.02  | 0.862107 | 0.373472 | 0.944546 | 0.61228  |
| MmugDNA.32688.1.S1_at   | MmugDNA.32688.1 | 9.8   | 9.47  | 0.04 | 0.75 | 1.26   | 0.313163 | 0.073681 | 0.64498  | 0.317014 |
| MmugDNA.32689.1.S1_at   | MmugDNA.32689.1 | 5.25  | 5.89  | 0.22 | 0.11 | -1.56  | 0.011672 | 0.006382 | 0.237051 | 0.108551 |
| MmugDNA.3269.1.S1_at    | MmugDNA.3269.1  | 4.74  | 4.58  | 0.2  | 0.48 | 1.12   | 0.761488 | 0.922723 | 0.899576 | 0.956468 |
| MmugDNA.32691.1.S1_at   | MmugDNA.32691.1 | 9.13  | 8.22  | 0.46 | 0.78 | 1.87   | 0.063382 | 0.053506 | 0.400486 | 0.276963 |
| MmugDNA.32692.1.S1_at   | MmugDNA.32692.1 | 4.42  | 4.14  | 0.17 | 0.07 | 1.21   | 0.156356 | 0.206987 | 0.521042 | 0.481111 |
| MmugDNA.32693.1.S1_at   | MmugDNA.32693.1 | 6.79  | 6.82  | 0.2  | 0.35 | -1.02  | 0.706899 | 0.868616 | 0.870891 | 0.925383 |
| MmugDNA.32694.1.S1_at   | MmugDNA.32694.1 | 8.26  | 9.79  | 0.68 | 1.64 | -2.88  | 0.279886 | 0.237306 | 0.621287 | 0.508027 |
| MmugDNA.32694.1.S1_s_at | MmugDNA.32694.1 | 9.82  | 10.94 | 0.55 | 1.43 | -2.18  | 0.352091 | 0.244307 | 0.669398 | 0.514184 |
| MmugDNA.32695.1.S1_at   | MmugDNA.32695.1 | 5.22  | 5.26  | 0.33 | 0.14 | -1.03  | 0.319921 | 0.347562 | 0.649244 | 0.592019 |
| MmugDNA.32696.1.S1_at   | MmugDNA.32696.1 | 5.35  | 5.2   | 0.12 | 0.19 | 1.11   | 0.23663  | 0.124817 | 0.590504 | 0.395219 |
| MmugDNA.32698.1.S1_at   | MmugDNA.32698.1 | 5.06  | 4.76  | 0.27 | 0.28 | 1.23   | 0.260777 | 0.193657 | 0.607423 | 0.468785 |
| MmugDNA.32699.1.S1_at   | MmugDNA.32699.1 | 4.6   | 9.85  | 1.98 | 3.33 | -38.25 | 0.287438 | 0.263263 | 0.625987 | 0.529531 |
| MmugDNA.3270.1.S1_at    | MmugDNA.3270.1  | 11.26 | 11.5  | 0.1  | 0.19 | -1.18  | 0.132875 | 0.143151 | 0.499003 | 0.417029 |
| MmugDNA.32700.1.S1_at   | MmugDNA.32700.1 | 4.33  | 4.58  | 0.18 | 0.13 | -1.19  | 0.255336 | 0.168287 | 0.603158 | 0.444935 |
| MmugDNA.32701.1.S1_at   | MmugDNA.32701.1 | 4.04  | 3.97  | 0.06 | 0.22 | 1.05   | 0.564951 | 0.635317 | 0.796834 | 0.785344 |
| MmugDNA.32702.1.S1_at   | MmugDNA.32702.1 | 6.31  | 9.06  | 0.28 | 1.44 | -6.76  | 0.03156  | 0.021044 | 0.322068 | 0.181869 |
| MmugDNA.32704.1.S1_at   | MmugDNA.32704.1 | 12.81 | 13.02 | 0.12 | 0.12 | -1.15  | 0.056753 | 0.069575 | 0.386929 | 0.309848 |
| MmugDNA.7703.1.S1_s_at  | MmugDNA.7703.1  | 9.86  | 9.69  | 0.1  | 0.29 | 1.13   | 0.315318 | 0.416413 | 0.64659  | 0.641587 |
| MmugDNA.32706.1.S1_at   | MmugDNA.32706.1 | 6.88  | 6.75  | 0.41 | 0.44 | 1.1    | 0.843608 | 0.811939 | 0.937089 | 0.891493 |
| MmugDNA.32707.1.S1_at   | MmugDNA.32707.1 | 3.95  | 3.96  | 0.13 | 0.16 | -1.01  | 0.926063 | 0.669892 | 0.971587 | 0.806933 |
| MmugDNA.32708.1.S1_at   | MmugDNA.32708.1 | 3.39  | 3.33  | 0.12 | 0.15 | 1.04   | 0.715202 | 0.608883 | 0.875005 | 0.767364 |
| MmugDNA.3271.1.S1_at    | MmugDNA.3271.1  | 4.78  | 4.68  | 0.02 | 0.27 | 1.07   | 0.679631 | 0.86     | 0.856669 | 0.920191 |
| MmugDNA.32710.1.S1_at   | MmugDNA.32710.1 | 3.92  | 4.27  | 0.03 | 0.11 | -1.28  | 0.012617 | 0.009682 | 0.242681 | 0.12945  |
| MmugDNA.32711.1.S1_at   | MmugDNA.32711.1 | 6.13  | 7.6   | 0.43 | 0.35 | -2.78  | 0.018101 | 0.008993 | 0.268798 | 0.125485 |
| MmugDNA.32712.1.S1_at   | MmugDNA.32712.1 | 4.48  | 4.7   | 0.18 | 0.14 | -1.16  | 0.171441 | 0.172281 | 0.535166 | 0.448666 |
| MmugDNA.32713.1.S1_at   | MmugDNA.32713.1 | 5.01  | 4.92  | 0.17 | 0.26 | 1.06   | 0.6474   | 0.538009 | 0.841338 | 0.72281  |

|                         |                 |       |       |      |      |       |          |          |          |          |
|-------------------------|-----------------|-------|-------|------|------|-------|----------|----------|----------|----------|
| MmugDNA.32714.1.S1_at   | MmugDNA.32714.1 | 2.9   | 2.95  | 0.04 | 0.03 | -1.04 | 0.118248 | 0.778594 | 0.482489 | 0.871488 |
| MmugDNA.32717.1.S1_at   | MmugDNA.32717.1 | 11.19 | 11.25 | 0.41 | 0.29 | -1.04 | 0.981103 | 0.965037 | 0.993202 | 0.980558 |
| MmugDNA.32718.1.S1_at   | MmugDNA.32718.1 | 3.14  | 3.47  | 0.18 | 0.14 | -1.26 | 0.055741 | 0.035124 | 0.384612 | 0.231645 |
| MmugDNA.32719.1.S1_at   | MmugDNA.32719.1 | 3.85  | 3.95  | 0.2  | 0.08 | -1.07 | 0.469245 | 0.639414 | 0.741559 | 0.788289 |
| MmugDNA.32720.1.S1_at   | MmugDNA.32720.1 | 10.07 | 10.19 | 0.06 | 0.57 | -1.09 | 0.936951 | 0.960177 | 0.975748 | 0.977425 |
| MmugDNA.32721.1.S1_at   | MmugDNA.32721.1 | 5.61  | 6.16  | 0.43 | 0.15 | -1.46 | 0.28504  | 0.526848 | 0.624634 | 0.715627 |
| MmugDNA.32722.1.S1_at   | MmugDNA.32722.1 | 6.72  | 6.79  | 0.04 | 0.14 | -1.05 | 0.171215 | 0.170199 | 0.535126 | 0.446906 |
| MmugDNA.32723.1.S1_at   | MmugDNA.32723.1 | 7.78  | 7.75  | 0.31 | 0.26 | 1.03  | 0.500135 | 0.505871 | 0.759402 | 0.702226 |
| MmugDNA.32726.1.S1_at   | MmugDNA.32726.1 | 10.06 | 8.55  | 0.12 | 0.32 | 2.83  | 0.001076 | 0.000108 | 0.144025 | 0.028099 |
| MmugDNA.32727.1.S1_at   | MmugDNA.32727.1 | 7.5   | 7.52  | 1.31 | 0.58 | -1.01 | 0.437666 | 0.399587 | 0.722586 | 0.629912 |
| MmugDNA.32729.1.S1_at   | MmugDNA.32729.1 | 10.83 | 8.82  | 0.51 | 0.23 | 4.03  | 0.002062 | 0.00024  | 0.155636 | 0.032579 |
| MmugDNA.32730.1.S1_at   | MmugDNA.32730.1 | 4.95  | 5.1   | 0.07 | 0.05 | -1.11 | 0.025993 | 0.375196 | 0.301367 | 0.613249 |
| MmugDNA.32733.1.S1_at   | MmugDNA.32733.1 | 6.67  | 6.74  | 0.3  | 0.79 | -1.05 | 0.320905 | 0.606444 | 0.649662 | 0.765747 |
| MmugDNA.32736.1.S1_at   | MmugDNA.32736.1 | 7.71  | 5.45  | 0.13 | 0.76 | 4.79  | 0.011941 | 0.002231 | 0.239065 | 0.069565 |
| MmugDNA.32737.1.S1_at   | MmugDNA.32737.1 | 5.7   | 5.48  | 0.13 | 0.08 | 1.16  | 0.078838 | 0.096025 | 0.428609 | 0.353302 |
| MmugDNA.32738.1.S1_at   | MmugDNA.32738.1 | 7.19  | 7.15  | 0.09 | 0.42 | 1.03  | 0.814525 | 0.603994 | 0.924758 | 0.764427 |
| MmugDNA.3274.1.S1_at    | MmugDNA.3274.1  | 3.53  | 3.39  | 0.45 | 0.13 | 1.1   | 0.610317 | 0.842676 | 0.821014 | 0.910333 |
| MmugDNA.32743.1.S1_at   | MmugDNA.32743.1 | 6.9   | 5.49  | 0.38 | 0.18 | 2.66  | 0.004635 | 0.002209 | 0.1844   | 0.069408 |
| MmugDNA.32744.1.S1_at   | MmugDNA.32744.1 | 14.54 | 14.54 | 0.01 | 0.02 | -1    | 0.458761 | 0.384105 | 0.735644 | 0.619926 |
| MmugDNA.32745.1.S1_at   | MmugDNA.32745.1 | 7.19  | 8.03  | 0.7  | 0.56 | -1.78 | 0.15389  | 0.084798 | 0.518542 | 0.336325 |
| MmugDNA.32746.1.S1_at   | MmugDNA.32746.1 | 7.01  | 7.28  | 0.42 | 0.48 | -1.2  | 0.227995 | 0.089078 | 0.585398 | 0.343006 |
| MmugDNA.32747.1.S1_s_at | MmugDNA.32747.1 | 9.87  | 11.13 | 0.34 | 0.2  | -2.4  | 0.007766 | 0.002356 | 0.212166 | 0.071631 |
| MmugDNA.32749.1.S1_at   | MmugDNA.32749.1 | 7.33  | 8.14  | 1.02 | 0.86 | -1.76 | 0.154922 | 0.119028 | 0.519574 | 0.387296 |
| MmugDNA.3275.1.S1_at    | MmugDNA.3275.1  | 7.19  | 6.92  | 0.35 | 0.1  | 1.21  | 0.207016 | 0.154551 | 0.568965 | 0.429429 |
| MmugDNA.32750.1.S1_at   | MmugDNA.32750.1 | 5.91  | 5.83  | 0.2  | 0.25 | 1.06  | 0.307177 | 0.494448 | 0.63988  | 0.694872 |
| MmugDNA.32751.1.S1_at   | MmugDNA.32751.1 | 8.33  | 7.37  | 0.27 | 0.46 | 1.95  | 0.044207 | 0.035976 | 0.358273 | 0.234155 |
| MmugDNA.32752.1.S1_at   | MmugDNA.32752.1 | 5.72  | 6.33  | 0.09 | 0.45 | -1.53 | 0.03109  | 0.01634  | 0.32048  | 0.161886 |
| MmugDNA.32753.1.S1_s_at | MmugDNA.32753.1 | 13.23 | 13.17 | 0.01 | 0.05 | 1.04  | 0.434185 | 0.563638 | 0.720325 | 0.738768 |
| MmugDNA.32754.1.S1_at   | MmugDNA.32754.1 | 3.3   | 3.51  | 0.11 | 0.08 | -1.16 | 0.014209 | 0.094922 | 0.251566 | 0.352044 |
| MmugDNA.32755.1.S1_at   | MmugDNA.32755.1 | 5.15  | 5.15  | 0.05 | 0.15 | 1     | 0.447041 | 0.392682 | 0.72871  | 0.625813 |
| MmugDNA.32757.1.S1_at   | MmugDNA.32757.1 | 5.88  | 5.87  | 0.25 | 0.11 | 1     | 0.247302 | 0.328096 | 0.59839  | 0.577871 |
| MmugDNA.32758.1.S1_at   | MmugDNA.32758.1 | 7.59  | 7.74  | 0.27 | 0.07 | -1.11 | 0.255193 | 0.054502 | 0.603094 | 0.278959 |
| MmugDNA.32759.1.S1_at   | MmugDNA.32759.1 | 5.7   | 5.71  | 0.06 | 0.16 | -1.01 | 0.450664 | 0.377208 | 0.731189 | 0.61484  |
| MmugDNA.32760.1.S1_at   | MmugDNA.32760.1 | 7.14  | 8.09  | 0.4  | 1.15 | -1.93 | 0.236249 | 0.33679  | 0.590289 | 0.584093 |
| MmugDNA.32762.1.S1_at   | MmugDNA.32762.1 | 9.36  | 9.68  | 0.83 | 0.59 | -1.24 | 0.709019 | 0.736799 | 0.872229 | 0.847693 |
| MmugDNA.32764.1.S1_at   | MmugDNA.32764.1 | 3.73  | 3.5   | 0.1  | 0.17 | 1.17  | 0.1456   | 0.137431 | 0.51146  | 0.410368 |
| MmugDNA.32765.1.S1_at   | MmugDNA.32765.1 | 3.36  | 3.77  | 0.07 | 0.23 | -1.33 | 0.047515 | 0.029543 | 0.366588 | 0.213535 |
| MmugDNA.32766.1.S1_at   | MmugDNA.32766.1 | 4.82  | 4.75  | 0.05 | 0.18 | 1.05  | 0.979844 | 0.387526 | 0.992612 | 0.622163 |
| MmugDNA.32767.1.S1_at   | MmugDNA.32767.1 | 6.65  | 6.95  | 0.39 | 0.61 | -1.23 | 0.39511  | 0.424947 | 0.696396 | 0.647439 |
| MmugDNA.32768.1.S1_at   | MmugDNA.32768.1 | 3.48  | 3.34  | 0.51 | 0.07 | 1.11  | 0.37876  | 0.380932 | 0.68656  | 0.617426 |
| MmugDNA.32769.1.S1_at   | MmugDNA.32769.1 | 4.36  | 4.86  | 0.25 | 0.15 | -1.41 | 0.031093 | 0.022354 | 0.32048  | 0.187159 |

|                         |                 |       |       |      |      |       |          |          |          |          |
|-------------------------|-----------------|-------|-------|------|------|-------|----------|----------|----------|----------|
| MmugDNA.3277.1.S1_at    | MmugDNA.3277.1  | 3.97  | 3.9   | 0.32 | 0.02 | 1.05  | 0.585672 | 0.72417  | 0.807612 | 0.840374 |
| MmugDNA.32771.1.S1_at   | MmugDNA.32771.1 | 5.19  | 5.05  | 0    | 0.18 | 1.1   | 0.738327 | 0.846311 | 0.887643 | 0.912526 |
| MmugDNA.32772.1.S1_at   | MmugDNA.32772.1 | 4.31  | 4.3   | 0.16 | 0.11 | 1.01  | 0.484915 | 0.388975 | 0.750701 | 0.623278 |
| MmugDNA.32773.1.S1_at   | MmugDNA.32773.1 | 12.2  | 11.08 | 0.16 | 0.2  | 2.18  | 0.001941 | 0.000402 | 0.155636 | 0.037471 |
| MmugDNA.32774.1.S1_at   | MmugDNA.32774.1 | 7.71  | 7.74  | 0.31 | 0.31 | -1.02 | 0.679838 | 0.688044 | 0.856869 | 0.817896 |
| MmugDNA.32775.1.S1_at   | MmugDNA.32775.1 | 7.14  | 7.22  | 0.02 | 0.08 | -1.06 | 0.286001 | 0.370735 | 0.625381 | 0.609721 |
| MmugDNA.32778.1.S1_at   | MmugDNA.32778.1 | 4.86  | 4.86  | 0.16 | 0.14 | -1    | 0.919605 | 0.755238 | 0.968755 | 0.857509 |
| MmugDNA.32779.1.S1_at   | MmugDNA.32779.1 | 6.36  | 6.14  | 0.32 | 0.2  | 1.17  | 0.616422 | 0.759606 | 0.824178 | 0.860234 |
| MmugDNA.3278.1.S1_at    | MmugDNA.3278.1  | 4.31  | 4.55  | 0    | 0.12 | -1.18 | 0.06471  | 0.014626 | 0.403239 | 0.154176 |
| MmugDNA.32780.1.S1_at   | MmugDNA.32780.1 | 5.32  | 4.24  | 0.61 | 0.26 | 2.12  | 0.047555 | 0.036944 | 0.366705 | 0.236659 |
| MmugDNA.32781.1.S1_at   | MmugDNA.32781.1 | 4.19  | 4.13  | 0.3  | 0.21 | 1.04  | 0.970614 | 0.96304  | 0.988685 | 0.979361 |
| MmugDNA.32782.1.S1_at   | MmugDNA.32782.1 | 6.62  | 6.67  | 0.36 | 0.05 | -1.03 | 0.464988 | 0.346089 | 0.739772 | 0.591166 |
| MmugDNA.32783.1.S1_at   | MmugDNA.32783.1 | 3.39  | 3.04  | 0.37 | 0.03 | 1.28  | 0.488991 | 0.600752 | 0.753417 | 0.76224  |
| MmugDNA.32785.1.S1_at   | MmugDNA.32785.1 | 4.02  | 4     | 0.27 | 0.21 | 1.02  | 0.620555 | 0.454449 | 0.826026 | 0.668603 |
| MmugDNA.32787.1.S1_at   | MmugDNA.32787.1 | 5.4   | 5.34  | 0.16 | 0.06 | 1.04  | 0.294502 | 0.205047 | 0.631245 | 0.47934  |
| MmugDNA.32788.1.S1_at   | MmugDNA.32788.1 | 6.1   | 5.61  | 0.1  | 0.94 | 1.4   | 0.397323 | 0.524454 | 0.69773  | 0.714384 |
| MmugDNA.32789.1.S1_at   | MmugDNA.32789.1 | 3.13  | 3.07  | 0.21 | 0.05 | 1.04  | 0.777735 | 0.882101 | 0.907092 | 0.932794 |
| MmugDNA.32790.1.S1_at   | MmugDNA.32790.1 | 3.61  | 3.46  | 0.15 | 0.03 | 1.11  | 0.198095 | 0.183571 | 0.561111 | 0.459681 |
| MmugDNA.32791.1.S1_at   | MmugDNA.32791.1 | 5.08  | 5.89  | 0.88 | 0.5  | -1.75 | 0.254146 | 0.189103 | 0.602339 | 0.464934 |
| MmugDNA.32792.1.S1_at   | MmugDNA.32792.1 | 6.85  | 6.3   | 0.18 | 0.53 | 1.46  | 0.529249 | 0.291739 | 0.775959 | 0.552054 |
| MmugDNA.32793.1.S1_at   | MmugDNA.32793.1 | 6.88  | 6.86  | 0.18 | 0.11 | 1.01  | 0.56595  | 0.041738 | 0.797434 | 0.24892  |
| MmugDNA.32794.1.S1_at   | MmugDNA.32794.1 | 4.27  | 4.37  | 0.19 | 0.05 | -1.07 | 0.656981 | 0.701599 | 0.845682 | 0.826955 |
| MmugDNA.32795.1.S1_at   | MmugDNA.32795.1 | 5.25  | 5.33  | 0.18 | 0.04 | -1.06 | 0.167165 | 0.016576 | 0.531295 | 0.163023 |
| MmugDNA.32796.1.S1_at   | MmugDNA.32796.1 | 8.24  | 8.42  | 0.29 | 0.15 | -1.14 | 0.275564 | 0.365111 | 0.617878 | 0.605299 |
| MmugDNA.32797.1.S1_at   | MmugDNA.32797.1 | 9.82  | 9.28  | 0.04 | 0.52 | 1.45  | 0.296972 | 0.379801 | 0.632862 | 0.616576 |
| MmugDNA.32798.1.S1_at   | MmugDNA.32798.1 | 4.21  | 4.29  | 0.18 | 0.13 | -1.06 | 0.938994 | 0.502173 | 0.976761 | 0.70006  |
| MmugDNA.3280.1.S1_at    | MmugDNA.3280.1  | 3.39  | 3.26  | 0.22 | 0.02 | 1.09  | 0.412502 | 0.507108 | 0.707935 | 0.70277  |
| MmugDNA.32801.1.S1_at   | MmugDNA.32801.1 | 3.75  | 4     | 0.11 | 0.01 | -1.19 | 0.045256 | 0.060852 | 0.360474 | 0.293437 |
| MmugDNA.32802.1.S1_at   | MmugDNA.32802.1 | 10.25 | 10.61 | 0.13 | 0.21 | -1.29 | 0.02787  | 0.006698 | 0.309125 | 0.110751 |
| MmugDNA.32806.1.S1_at   | MmugDNA.32806.1 | 3.32  | 3.32  | 0.08 | 0.12 | 1     | 0.887863 | 0.368808 | 0.954933 | 0.608313 |
| MmugDNA.32809.1.S1_at   | MmugDNA.32809.1 | 6.1   | 6.12  | 0.18 | 0    | -1.01 | 0.459304 | 0.424603 | 0.736044 | 0.647158 |
| MmugDNA.3281.1.S1_at    | MmugDNA.3281.1  | 4.3   | 4.19  | 0.66 | 0.26 | 1.08  | 0.891336 | 0.658676 | 0.956661 | 0.800473 |
| MmugDNA.32810.1.S1_at   | MmugDNA.32810.1 | 9.27  | 8.52  | 0.61 | 0.46 | 1.68  | 0.618646 | 0.104643 | 0.825259 | 0.365941 |
| MmugDNA.32811.1.S1_at   | MmugDNA.32811.1 | 8.3   | 8.14  | 0.35 | 0.27 | 1.11  | 0.497849 | 0.465419 | 0.758103 | 0.675748 |
| MmugDNA.32813.1.S1_at   | MmugDNA.32813.1 | 5.02  | 5.35  | 0.3  | 0.17 | -1.26 | 0.535942 | 0.43275  | 0.779351 | 0.653101 |
| MmugDNA.32814.1.S1_at   | MmugDNA.32814.1 | 8.09  | 7.82  | 0.57 | 0.61 | 1.21  | 0.385696 | 0.233878 | 0.690853 | 0.505169 |
| MmugDNA.32816.1.S1_s_at | MmugDNA.32816.1 | 4.09  | 4.97  | 0.81 | 1.41 | -1.84 | 0.412066 | 0.246457 | 0.70774  | 0.515899 |
| MmugDNA.32817.1.S1_at   | MmugDNA.32817.1 | 5.92  | 5.81  | 0.26 | 0.08 | 1.08  | 0.352555 | 0.876893 | 0.669669 | 0.929855 |
| MmugDNA.32818.1.S1_at   | MmugDNA.32818.1 | 4.17  | 4.64  | 0.73 | 0.57 | -1.38 | 0.435067 | 0.486236 | 0.720951 | 0.689657 |
| MmugDNA.32819.1.S1_at   | MmugDNA.32819.1 | 4.29  | 4.18  | 0.13 | 0.03 | 1.07  | 0.086354 | 0.266474 | 0.440224 | 0.532234 |
| MmugDNA.32820.1.S1_at   | MmugDNA.32820.1 | 5.65  | 6.13  | 0.19 | 0.35 | -1.39 | 0.043126 | 0.034437 | 0.356343 | 0.229602 |

|                         |                 |       |       |      |      |       |          |          |          |          |
|-------------------------|-----------------|-------|-------|------|------|-------|----------|----------|----------|----------|
| MmugDNA.32822.1.S1_at   | MmugDNA.32822.1 | 5.05  | 6.18  | 1.05 | 1.5  | -2.19 | 0.357241 | 0.336107 | 0.672175 | 0.583652 |
| MmugDNA.32823.1.S1_at   | MmugDNA.32823.1 | 6.92  | 6.49  | 0.21 | 0.13 | 1.35  | 0.0187   | 0.011014 | 0.27122  | 0.13671  |
| MmugDNA.32824.1.S1_at   | MmugDNA.32824.1 | 10.98 | 10.64 | 0.57 | 0.17 | 1.27  | 0.382887 | 0.302585 | 0.688989 | 0.560201 |
| MmugDNA.32825.1.S1_at   | MmugDNA.32825.1 | 5.94  | 5.94  | 0.11 | 0.17 | -1    | 0.982264 | 0.981759 | 0.993449 | 0.989984 |
| MmugDNA.32826.1.S1_at   | MmugDNA.32826.1 | 9.82  | 12.39 | 1.41 | 1.05 | -5.94 | 0.099596 | 0.05338  | 0.459597 | 0.276606 |
| MmugDNA.32829.1.S1_at   | MmugDNA.32829.1 | 5.4   | 4.91  | 0.34 | 0.49 | 1.4   | 0.208556 | 0.335862 | 0.570374 | 0.583533 |
| MmugDNA.3283.1.S1_at    | MmugDNA.3283.1  | 4.6   | 4.06  | 1    | 1.34 | 1.46  | 0.691984 | 0.79521  | 0.863163 | 0.882    |
| MmugDNA.32830.1.S1_at   | MmugDNA.32830.1 | 6.69  | 7.03  | 0.14 | 0.91 | -1.27 | 0.853388 | 0.296564 | 0.940833 | 0.555566 |
| MmugDNA.32831.1.S1_at   | MmugDNA.32831.1 | 5.22  | 5.2   | 0.4  | 0.62 | 1.02  | 0.780864 | 0.926148 | 0.908639 | 0.95813  |
| MmugDNA.32832.1.S1_at   | MmugDNA.32832.1 | 3.46  | 3.73  | 0.17 | 0.13 | -1.21 | 0.040428 | 0.077852 | 0.349277 | 0.324093 |
| MmugDNA.32833.1.S1_at   | MmugDNA.32833.1 | 4.28  | 3.99  | 0.18 | 0.19 | 1.22  | 0.490234 | 0.284311 | 0.754366 | 0.546589 |
| MmugDNA.32834.1.S1_at   | MmugDNA.32834.1 | 3.7   | 3.36  | 0.23 | 0.05 | 1.27  | 0.150515 | 0.180741 | 0.515372 | 0.457294 |
| MmugDNA.32835.1.S1_at   | MmugDNA.32835.1 | 3.94  | 4.06  | 0.09 | 0.13 | -1.09 | 0.981554 | 0.707776 | 0.993316 | 0.830472 |
| MmugDNA.32836.1.S1_at   | MmugDNA.32836.1 | 10.65 | 10.65 | 0.63 | 1.33 | 1     | 0.709514 | 0.771732 | 0.872536 | 0.867344 |
| MmugDNA.32838.1.S1_at   | MmugDNA.32838.1 | 4.04  | 4.1   | 0.01 | 0.08 | -1.04 | 0.25665  | 0.250434 | 0.604411 | 0.519391 |
| MmugDNA.32839.1.S1_at   | MmugDNA.32839.1 | 8.19  | 8.47  | 0.11 | 0.11 | -1.21 | 0.038707 | 0.001166 | 0.345106 | 0.053615 |
| MmugDNA.3284.1.S1_at    | MmugDNA.3284.1  | 5.71  | 5.53  | 0.32 | 0.8  | 1.13  | 0.939492 | 0.225088 | 0.976986 | 0.497741 |
| MmugDNA.32842.1.S1_at   | MmugDNA.32842.1 | 3.06  | 2.99  | 0.32 | 0.15 | 1.05  | 0.440909 | 0.435253 | 0.724569 | 0.655127 |
| MmugDNA.32843.1.S1_at   | MmugDNA.32843.1 | 10.4  | 10.11 | 0.17 | 0.16 | 1.22  | 0.119079 | 0.12199  | 0.483744 | 0.391416 |
| MmugDNA.32844.1.S1_at   | MmugDNA.32844.1 | 4.99  | 5.42  | 0.29 | 0.07 | -1.35 | 0.159227 | 0.168302 | 0.52416  | 0.444942 |
| MmugDNA.32845.1.S1_at   | MmugDNA.32845.1 | 5.56  | 5.37  | 0.19 | 0.17 | 1.14  | 0.188856 | 0.20245  | 0.551869 | 0.476786 |
| MmugDNA.32846.1.S1_at   | MmugDNA.32846.1 | 4.84  | 3.88  | 1.14 | 0.57 | 1.94  | 0.233108 | 0.259017 | 0.587988 | 0.526218 |
| MmugDNA.32847.1.S1_at   | MmugDNA.32847.1 | 5.45  | 4.86  | 0.27 | 0.47 | 1.5   | 0.367553 | 0.135909 | 0.679502 | 0.408103 |
| MmugDNA.32849.1.S1_at   | MmugDNA.32849.1 | 4.53  | 4.35  | 1.24 | 0.25 | 1.13  | 0.282895 | 0.376609 | 0.623131 | 0.614432 |
| MmugDNA.3285.1.S1_at    | MmugDNA.3285.1  | 6.75  | 7.99  | 0.67 | 0.64 | -2.36 | 0.083548 | 0.090377 | 0.43582  | 0.344827 |
| MmugDNA.32850.1.S1_at   | MmugDNA.32850.1 | 4.66  | 4.53  | 0.43 | 0.3  | 1.09  | 0.991576 | 0.848626 | 0.99695  | 0.914061 |
| MmugDNA.32851.1.S1_at   | MmugDNA.32851.1 | 9.95  | 10.65 | 0.12 | 0.31 | -1.63 | 0.072257 | 0.027517 | 0.416651 | 0.207161 |
| MmugDNA.32853.1.S1_at   | MmugDNA.32853.1 | 9.5   | 9.46  | 0.07 | 0.24 | 1.03  | 0.548338 | 0.030935 | 0.786665 | 0.217705 |
| MmugDNA.32854.1.S1_at   | MmugDNA.32854.1 | 6.77  | 6.08  | 0.07 | 0.52 | 1.61  | 0.11406  | 0.073479 | 0.47744  | 0.316769 |
| MmugDNA.32855.1.S1_at   | MmugDNA.32855.1 | 8.94  | 10.16 | 0.19 | 0.91 | -2.33 | 0.093416 | 0.084721 | 0.450649 | 0.336196 |
| MmugDNA.32857.1.S1_at   | MmugDNA.32857.1 | 12.9  | 12.57 | 0.14 | 0.22 | 1.26  | 0.331058 | 0.219118 | 0.656096 | 0.492868 |
| MmugDNA.32858.1.S1_at   | MmugDNA.32858.1 | 6.66  | 5.65  | 0.19 | 0.96 | 2.01  | 0.106193 | 0.109756 | 0.466831 | 0.373701 |
| MmugDNA.32859.1.S1_at   | MmugDNA.32859.1 | 6.72  | 7.42  | 0.36 | 1.02 | -1.62 | 0.678999 | 0.090754 | 0.856302 | 0.345227 |
| MmugDNA.3286.1.S1_at    | MmugDNA.3286.1  | 7.5   | 7.4   | 0.29 | 0.07 | 1.07  | 0.698249 | 0.557834 | 0.866049 | 0.735262 |
| MmugDNA.32860.1.S1_at   | MmugDNA.32860.1 | 5.34  | 5.34  | 0.08 | 0    | 1     | 0.837223 | 0.959374 | 0.934184 | 0.976959 |
| MmugDNA.32861.1.S1_at   | MmugDNA.32861.1 | 9.38  | 9.31  | 0.25 | 0.27 | 1.05  | 0.373814 | 0.18607  | 0.683245 | 0.461931 |
| MmugDNA.32862.1.S1_at   | MmugDNA.32862.1 | 6.49  | 5.73  | 0.12 | 0.44 | 1.7   | 0.05406  | 0.047504 | 0.381408 | 0.262578 |
| MmugDNA.32862.1.S1_s_at | MmugDNA.32862.1 | 8.05  | 7.56  | 0.25 | 0.13 | 1.4   | 0.030467 | 0.023841 | 0.318601 | 0.193392 |
| MmugDNA.32863.1.S1_at   | MmugDNA.32863.1 | 10.14 | 9.97  | 0.29 | 0.43 | 1.12  | 0.869049 | 0.8475   | 0.947856 | 0.913321 |
| MmugDNA.32864.1.S1_at   | MmugDNA.32864.1 | 6     | 5.85  | 0.39 | 0.09 | 1.11  | 0.300038 | 0.304339 | 0.635344 | 0.561645 |
| MmugDNA.32865.1.S1_at   | MmugDNA.32865.1 | 7.3   | 8.28  | 0.45 | 0.69 | -1.96 | 0.081071 | 0.057011 | 0.431818 | 0.284868 |



|                         |                 |       |       |      |      |       |          |          |          |          |
|-------------------------|-----------------|-------|-------|------|------|-------|----------|----------|----------|----------|
| MmugDNA.32867.1.S1_at   | MmugDNA.32867.1 | 4.99  | 5.03  | 0.07 | 0.11 | -1.03 | 0.534592 | 0.792837 | 0.778781 | 0.880387 |
| MmugDNA.32868.1.S1_x_at | MmugDNA.32868.1 | 11.4  | 11.05 | 0.51 | 0.22 | 1.27  | 0.189326 | 0.246292 | 0.55245  | 0.515889 |
| MmugDNA.32869.1.S1_at   | MmugDNA.32869.1 | 5.09  | 5.17  | 0.32 | 0.05 | -1.05 | 0.931816 | 0.941346 | 0.973649 | 0.966765 |
| MmugDNA.3287.1.S1_at    | MmugDNA.3287.1  | 4.36  | 4.37  | 0.09 | 0.03 | -1    | 0.511311 | 0.728909 | 0.765295 | 0.8433   |
| MmugDNA.32871.1.S1_at   | MmugDNA.32871.1 | 4     | 4.21  | 0.17 | 0.07 | -1.16 | 0.140905 | 0.151028 | 0.508448 | 0.425681 |
| MmugDNA.32872.1.S1_at   | MmugDNA.32872.1 | 3.41  | 3.07  | 0.83 | 0.37 | 1.26  | 0.783258 | 0.883613 | 0.909454 | 0.93366  |
| MmugDNA.32874.1.S1_at   | MmugDNA.32874.1 | 3.05  | 3.09  | 0.15 | 0.02 | -1.03 | 0.663123 | 0.299363 | 0.848916 | 0.557857 |
| MmugDNA.32875.1.S1_at   | MmugDNA.32875.1 | 12.08 | 11.78 | 0.08 | 0.12 | 1.24  | 0.007557 | 0.003652 | 0.209396 | 0.086526 |
| MmugDNA.32875.1.S1_x_at | MmugDNA.32875.1 | 12.22 | 11.89 | 0.06 | 0.1  | 1.26  | 0.004722 | 0.002694 | 0.184492 | 0.076455 |
| MmugDNA.32879.1.S1_at   | MmugDNA.32879.1 | 3.66  | 3.55  | 0.07 | 0.11 | 1.08  | 0.966112 | 0.149146 | 0.987096 | 0.423585 |
| MmugDNA.3288.1.S1_at    | MmugDNA.3288.1  | 4.76  | 4.74  | 0.09 | 0.2  | 1.02  | 0.820107 | 0.803846 | 0.92682  | 0.887148 |
| MmugDNA.32880.1.S1_at   | MmugDNA.32880.1 | 8.36  | 9.7   | 0.4  | 0.11 | -2.54 | 0.003849 | 0.001009 | 0.179914 | 0.050657 |
| MmugDNA.32881.1.S1_at   | MmugDNA.32881.1 | 4.3   | 4.35  | 0.02 | 0.06 | -1.04 | 0.233096 | 0.777616 | 0.587988 | 0.870762 |
| MmugDNA.32882.1.S1_at   | MmugDNA.32882.1 | 9.37  | 10.53 | 0.41 | 0.72 | -2.24 | 0.082636 | 0.069354 | 0.434282 | 0.309558 |
| MmugDNA.32884.1.S1_at   | MmugDNA.32884.1 | 6.69  | 6.88  | 0.23 | 0.1  | -1.14 | 0.363142 | 0.250687 | 0.676565 | 0.51941  |
| MmugDNA.32886.1.S1_at   | MmugDNA.32886.1 | 5.68  | 5.73  | 0.28 | 0.23 | -1.03 | 0.481927 | 0.826609 | 0.749333 | 0.900429 |
| MmugDNA.32887.1.S1_at   | MmugDNA.32887.1 | 10.72 | 11.66 | 0.21 | 1.03 | -1.92 | 0.629137 | 0.773537 | 0.831359 | 0.868348 |
| MmugDNA.3289.1.S1_at    | MmugDNA.3289.1  | 11.24 | 11.36 | 0.61 | 0.48 | -1.09 | 0.999683 | 0.985503 | 0.999967 | 0.991808 |
| MmugDNA.32891.1.S1_at   | MmugDNA.32891.1 | 6.02  | 6.49  | 0.38 | 0.07 | -1.38 | 0.357294 | 0.150234 | 0.672207 | 0.42486  |
| MmugDNA.32892.1.S1_at   | MmugDNA.32892.1 | 8.58  | 8.07  | 0.42 | 0.39 | 1.43  | 0.109818 | 0.12596  | 0.470963 | 0.396505 |
| MmugDNA.32893.1.S1_at   | MmugDNA.32893.1 | 3.46  | 3.34  | 0.77 | 0.04 | 1.09  | 0.309419 | 0.482111 | 0.641535 | 0.687016 |
| MmugDNA.32895.1.S1_at   | MmugDNA.32895.1 | 11.93 | 11.99 | 0.14 | 0.21 | -1.04 | 0.586347 | 0.144355 | 0.808062 | 0.418293 |
| MmugDNA.32896.1.S1_at   | MmugDNA.32896.1 | 7.94  | 8.05  | 0.19 | 0.6  | -1.08 | 0.549436 | 0.761083 | 0.787323 | 0.861205 |
| MmugDNA.32897.1.S1_at   | MmugDNA.32897.1 | 4.3   | 4.39  | 1.13 | 0.12 | -1.06 | 0.500369 | 0.681711 | 0.759525 | 0.814123 |
| MmugDNA.32898.1.S1_at   | MmugDNA.32898.1 | 8.26  | 7.48  | 0.24 | 0.61 | 1.72  | 0.120774 | 0.139484 | 0.48574  | 0.412743 |
| MmugDNA.32899.1.S1_at   | MmugDNA.32899.1 | 6.63  | 6.21  | 0.25 | 0.17 | 1.34  | 0.094196 | 0.241619 | 0.451714 | 0.512217 |
| MmugDNA.329.1.S1_at     | MmugDNA.329.1   | 6.84  | 6.5   | 0.11 | 0.05 | 1.27  | 0.01261  | 0.00791  | 0.242681 | 0.118534 |
| MmugDNA.329.1.S1_s_at   | MmugDNA.329.1   | 8.25  | 7     | 0.12 | 0.48 | 2.38  | 0.018918 | 0.007628 | 0.272319 | 0.116869 |
| MmugDNA.3290.1.S1_at    | MmugDNA.3290.1  | 4.06  | 3.8   | 0.09 | 0.03 | 1.19  | 0.020607 | 0.012849 | 0.279056 | 0.145986 |
| MmugDNA.32900.1.S1_at   | MmugDNA.32900.1 | 10.58 | 10.95 | 0.1  | 0.45 | -1.29 | 0.296074 | 0.353083 | 0.632176 | 0.596369 |
| MmugDNA.32901.1.S1_at   | MmugDNA.32901.1 | 4.72  | 4.4   | 0.54 | 0.03 | 1.25  | 0.113233 | 0.134877 | 0.476219 | 0.406878 |
| MmugDNA.32905.1.S1_at   | MmugDNA.32905.1 | 6.74  | 6.69  | 0.24 | 0.15 | 1.03  | 0.813241 | 0.451279 | 0.924167 | 0.666113 |
| MmugDNA.32905.1.S1_s_at | MmugDNA.32905.1 | 5.21  | 5.18  | 0.22 | 0.16 | 1.02  | 0.704031 | 0.714617 | 0.86941  | 0.834436 |
| MmugDNA.32906.1.S1_at   | MmugDNA.32906.1 | 9     | 7.99  | 0.31 | 0.26 | 2.01  | 0.008383 | 0.00355  | 0.217982 | 0.085371 |
| MmugDNA.32909.1.S1_at   | MmugDNA.32909.1 | 4.53  | 4.88  | 0.12 | 0.09 | -1.27 | 0.029268 | 0.029477 | 0.313575 | 0.213368 |
| MmugDNA.3291.1.S1_at    | MmugDNA.3291.1  | 4.44  | 4.49  | 0.89 | 0.12 | -1.03 | 0.467129 | 0.677474 | 0.740562 | 0.81167  |
| MmugDNA.32911.1.S1_at   | MmugDNA.32911.1 | 9.68  | 10.34 | 0.14 | 0.68 | -1.58 | 0.122014 | 0.061111 | 0.486982 | 0.293975 |
| MmugDNA.32912.1.S1_at   | MmugDNA.32912.1 | 4.46  | 4.42  | 0.17 | 0.02 | 1.03  | 0.802325 | 0.826678 | 0.918464 | 0.900485 |
| MmugDNA.32913.1.S1_at   | MmugDNA.32913.1 | 5.82  | 6.04  | 0.16 | 0.12 | -1.17 | 0.098085 | 0.11544  | 0.457356 | 0.382557 |
| MmugDNA.32915.1.S1_at   | MmugDNA.32915.1 | 6.77  | 6.47  | 0.38 | 0.28 | 1.23  | 0.131051 | 0.158261 | 0.497486 | 0.43403  |
| MmugDNA.32916.1.S1_at   | MmugDNA.32916.1 | 5.32  | 5.27  | 1.08 | 0.35 | 1.03  | 0.569225 | 0.551202 | 0.79903  | 0.73084  |

|                         |                 |       |       |      |      |       |          |          |          |          |
|-------------------------|-----------------|-------|-------|------|------|-------|----------|----------|----------|----------|
| MmugDNA.32918.1.S1_at   | MmugDNA.32918.1 | 7.75  | 7.73  | 0.27 | 0.66 | 1.02  | 0.439548 | 0.106277 | 0.723655 | 0.368729 |
| MmugDNA.32919.1.S1_at   | MmugDNA.32919.1 | 4.52  | 4.47  | 0.19 | 0.2  | 1.04  | 0.690804 | 0.84831  | 0.862425 | 0.91389  |
| MmugDNA.3292.1.S1_at    | MmugDNA.3292.1  | 4.83  | 4.78  | 0.29 | 0.26 | 1.04  | 0.755065 | 0.900431 | 0.895855 | 0.94344  |
| MmugDNA.32922.1.S1_at   | MmugDNA.32922.1 | 7.01  | 6.52  | 0.69 | 0.56 | 1.41  | 0.149344 | 0.18492  | 0.514001 | 0.460776 |
| MmugDNA.32923.1.S1_at   | MmugDNA.32923.1 | 9.83  | 10.27 | 0.26 | 0.38 | -1.35 | 0.361906 | 0.196939 | 0.675509 | 0.472072 |
| MmugDNA.32924.1.S1_at   | MmugDNA.32924.1 | 3.39  | 3.25  | 0.22 | 0.14 | 1.1   | 0.777983 | 0.31932  | 0.907263 | 0.571724 |
| MmugDNA.32926.1.S1_at   | MmugDNA.32926.1 | 6.58  | 7.21  | 0.29 | 0.77 | -1.55 | 0.383027 | 0.029954 | 0.689068 | 0.214833 |
| MmugDNA.32927.1.S1_at   | MmugDNA.32927.1 | 4.16  | 4.16  | 0.12 | 0.11 | 1     | 0.60704  | 0.520132 | 0.819156 | 0.711472 |
| MmugDNA.32928.1.S1_at   | MmugDNA.32928.1 | 3.62  | 3.82  | 0.08 | 0.01 | -1.15 | 0.01434  | 0.000727 | 0.251885 | 0.044699 |
| MmugDNA.32929.1.S1_at   | MmugDNA.32929.1 | 3.17  | 3     | 0.07 | 0.07 | 1.12  | 0.14878  | 0.089822 | 0.51391  | 0.34404  |
| MmugDNA.3293.1.S1_at    | MmugDNA.3293.1  | 4.84  | 4.65  | 0.59 | 0.07 | 1.14  | 0.716074 | 0.922037 | 0.87529  | 0.956039 |
| MmugDNA.32930.1.S1_at   | MmugDNA.32930.1 | 4.18  | 3.92  | 0.42 | 0.05 | 1.2   | 0.097039 | 0.018603 | 0.456113 | 0.171539 |
| MmugDNA.32930.1.S1_s_at | MmugDNA.32930.1 | 2.98  | 2.91  | 0.05 | 0.6  | 1.05  | 0.584633 | 0.549271 | 0.807089 | 0.729744 |
| MmugDNA.32931.1.S1_at   | MmugDNA.32931.1 | 7.69  | 6.9   | 0.1  | 0.65 | 1.73  | 0.245513 | 0.320276 | 0.597122 | 0.572606 |
| MmugDNA.32932.1.S1_at   | MmugDNA.32932.1 | 8.17  | 8.06  | 0.05 | 0.41 | 1.07  | 0.64992  | 0.433788 | 0.842541 | 0.653992 |
| MmugDNA.32933.1.S1_at   | MmugDNA.32933.1 | 10.7  | 9.67  | 0.18 | 0.24 | 2.04  | 0.004119 | 0.00127  | 0.181739 | 0.055241 |
| MmugDNA.32933.1.S1_s_at | MmugDNA.32933.1 | 8.36  | 7.52  | 0.11 | 0.15 | 1.79  | 0.001098 | 0.002135 | 0.144223 | 0.068391 |
| MmugDNA.32934.1.S1_at   | MmugDNA.32934.1 | 10.25 | 10.29 | 0.29 | 0.24 | -1.03 | 0.366251 | 0.215088 | 0.679018 | 0.488932 |
| MmugDNA.32935.1.S1_at   | MmugDNA.32935.1 | 4.41  | 5.38  | 0.46 | 0.35 | -1.96 | 0.205172 | 0.48585  | 0.567639 | 0.689442 |
| MmugDNA.32936.1.S1_at   | MmugDNA.32936.1 | 10.91 | 11.24 | 0.17 | 0.81 | -1.26 | 0.702582 | 0.411455 | 0.868798 | 0.638189 |
| MmugDNA.32937.1.S1_at   | MmugDNA.32937.1 | 6.9   | 7.43  | 0.11 | 0.06 | -1.44 | 0.003838 | 0.000984 | 0.179914 | 0.050067 |
| MmugDNA.3294.1.S1_s_at  | MmugDNA.3294.1  | 12.96 | 13.1  | 0.15 | 0.21 | -1.1  | 0.92626  | 0.359855 | 0.971717 | 0.601104 |
| MmugDNA.32941.1.S1_at   | MmugDNA.32941.1 | 10.6  | 9.14  | 0.49 | 0.53 | 2.77  | 0.024451 | 0.016005 | 0.294575 | 0.160458 |
| MmugDNA.32942.1.S1_at   | MmugDNA.32942.1 | 6.87  | 6.67  | 0.23 | 0.16 | 1.15  | 0.091793 | 0.04523  | 0.448191 | 0.257005 |
| MmugDNA.32943.1.S1_at   | MmugDNA.32943.1 | 3.28  | 3.29  | 0.09 | 0.07 | -1.01 | 0.345714 | 0.233867 | 0.665264 | 0.505169 |
| MmugDNA.32945.1.S1_at   | MmugDNA.32945.1 | 5.88  | 5.84  | 0.11 | 0.12 | 1.03  | 0.650379 | 0.777709 | 0.842789 | 0.870845 |
| MmugDNA.32946.1.S1_at   | MmugDNA.32946.1 | 5.59  | 5.67  | 0.13 | 0.17 | -1.06 | 0.974171 | 0.923442 | 0.989862 | 0.956981 |
| MmugDNA.32947.1.S1_at   | MmugDNA.32947.1 | 10.66 | 10.31 | 0.08 | 0.11 | 1.27  | 0.010009 | 0.01044  | 0.226899 | 0.133573 |
| MmugDNA.32948.1.S1_at   | MmugDNA.32948.1 | 8.55  | 9.36  | 0.05 | 0.35 | -1.76 | 0.013967 | 0.006262 | 0.250102 | 0.107376 |
| MmugDNA.32949.1.S1_at   | MmugDNA.32949.1 | 13.11 | 12.98 | 0.04 | 0.19 | 1.09  | 0.580294 | 0.661453 | 0.804567 | 0.801791 |
| MmugDNA.3295.1.S1_at    | MmugDNA.3295.1  | 4.17  | 4.16  | 0.08 | 0.03 | 1.01  | 0.328163 | 0.165759 | 0.654312 | 0.442032 |
| MmugDNA.32951.1.S1_at   | MmugDNA.32951.1 | 10.47 | 9.99  | 0.23 | 0.51 | 1.4   | 0.073749 | 0.037836 | 0.419263 | 0.238912 |
| MmugDNA.32952.1.S1_at   | MmugDNA.32952.1 | 4.53  | 4.45  | 0.13 | 0.06 | 1.06  | 0.216108 | 0.45503  | 0.575954 | 0.66903  |
| MmugDNA.32955.1.S1_at   | MmugDNA.32955.1 | 4.58  | 4.59  | 0.11 | 0.08 | -1.01 | 0.842202 | 0.925087 | 0.93636  | 0.957602 |
| MmugDNA.32956.1.S1_at   | MmugDNA.32956.1 | 8.59  | 9     | 0.18 | 0.29 | -1.34 | 0.141387 | 0.024091 | 0.509067 | 0.194493 |
| MmugDNA.32957.1.S1_at   | MmugDNA.32957.1 | 4.32  | 4.04  | 0.19 | 0.21 | 1.21  | 0.305322 | 0.232932 | 0.639126 | 0.50445  |
| MmugDNA.32959.1.S1_at   | MmugDNA.32959.1 | 8.91  | 8.82  | 0.3  | 0.93 | 1.07  | 0.686236 | 0.873134 | 0.859695 | 0.927823 |
| MmugDNA.3296.1.S1_at    | MmugDNA.3296.1  | 11.86 | 12.14 | 0.15 | 0.04 | -1.21 | 0.031178 | 0.017028 | 0.320865 | 0.165384 |
| MmugDNA.32961.1.S1_at   | MmugDNA.32961.1 | 4.8   | 4.42  | 0.58 | 0.19 | 1.3   | 0.543495 | 0.066425 | 0.783803 | 0.303385 |
| MmugDNA.32963.1.S1_at   | MmugDNA.32963.1 | 8.78  | 8.53  | 0.15 | 0.08 | 1.19  | 0.061715 | 0.051847 | 0.396604 | 0.273151 |
| MmugDNA.32964.1.S1_at   | MmugDNA.32964.1 | 6.8   | 6.3   | 0.03 | 0.71 | 1.42  | 0.825059 | 0.850096 | 0.9291   | 0.914709 |

|                       |                 |       |       |      |      |       |          |          |          |          |
|-----------------------|-----------------|-------|-------|------|------|-------|----------|----------|----------|----------|
| MmugDNA.32965.1.S1_at | MmugDNA.32965.1 | 12.85 | 12.73 | 0.06 | 0.36 | 1.09  | 0.782858 | 0.27168  | 0.909285 | 0.536577 |
| MmugDNA.32967.1.S1_at | MmugDNA.32967.1 | 10.92 | 10.9  | 0.23 | 0.14 | 1.01  | 0.281804 | 0.386763 | 0.62238  | 0.621895 |
| MmugDNA.32969.1.S1_at | MmugDNA.32969.1 | 5.33  | 5.33  | 0.04 | 0    | 1     | 0.373901 | 0.427274 | 0.683245 | 0.649175 |
| MmugDNA.3297.1.S1_at  | MmugDNA.3297.1  | 3.29  | 3.47  | 0.02 | 0.12 | -1.13 | 0.239739 | 0.019253 | 0.59272  | 0.174522 |
| MmugDNA.32970.1.S1_at | MmugDNA.32970.1 | 7.15  | 6.23  | 0.25 | 0.14 | 1.89  | 0.004223 | 0.000553 | 0.181739 | 0.040962 |
| MmugDNA.32971.1.S1_at | MmugDNA.32971.1 | 6.79  | 6.91  | 0.09 | 0.05 | -1.08 | 0.087531 | 0.091936 | 0.441877 | 0.347267 |
| MmugDNA.32972.1.S1_at | MmugDNA.32972.1 | 7.13  | 7.78  | 0.57 | 0.65 | -1.57 | 0.534208 | 0.094515 | 0.77862  | 0.351276 |
| MmugDNA.32973.1.S1_at | MmugDNA.32973.1 | 7.03  | 7.83  | 0.33 | 0.38 | -1.74 | 0.033131 | 0.033022 | 0.327107 | 0.224983 |
| MmugDNA.32974.1.S1_at | MmugDNA.32974.1 | 3.93  | 4.18  | 0.48 | 0.11 | -1.18 | 0.846712 | 0.512999 | 0.938469 | 0.706665 |
| MmugDNA.32975.1.S1_at | MmugDNA.32975.1 | 3.5   | 3.63  | 0.01 | 0.22 | -1.1  | 0.114534 | 0.109146 | 0.477887 | 0.373004 |
| MmugDNA.32976.1.S1_at | MmugDNA.32976.1 | 7.66  | 9.13  | 0.86 | 0.19 | -2.77 | 0.13265  | 0.091311 | 0.49874  | 0.346281 |
| MmugDNA.32978.1.S1_at | MmugDNA.32978.1 | 7.22  | 7.5   | 0.35 | 0.09 | -1.22 | 0.237779 | 0.12483  | 0.591288 | 0.395219 |
| MmugDNA.32979.1.S1_at | MmugDNA.32979.1 | 5.42  | 5.19  | 0.69 | 0.29 | 1.17  | 0.651249 | 0.500307 | 0.843066 | 0.699009 |
| MmugDNA.32980.1.S1_at | MmugDNA.32980.1 | 5.25  | 5.16  | 0.32 | 0.12 | 1.06  | 0.393137 | 0.552628 | 0.695026 | 0.731885 |
| MmugDNA.32981.1.S1_at | MmugDNA.32981.1 | 4.72  | 4.71  | 0.12 | 0.18 | 1.01  | 0.824642 | 0.925059 | 0.92897  | 0.957602 |
| MmugDNA.32982.1.S1_at | MmugDNA.32982.1 | 4.26  | 3.69  | 0.27 | 0.16 | 1.49  | 0.064707 | 0.054836 | 0.403239 | 0.279675 |
| MmugDNA.32983.1.S1_at | MmugDNA.32983.1 | 3.84  | 4     | 0.4  | 0.12 | -1.12 | 0.71561  | 0.548954 | 0.875225 | 0.729505 |
| MmugDNA.32985.1.S1_at | MmugDNA.32985.1 | 6.25  | 6.03  | 0.67 | 0.09 | 1.17  | 0.18711  | 0.282585 | 0.550172 | 0.545292 |
| MmugDNA.32986.1.S1_at | MmugDNA.32986.1 | 3.62  | 3.77  | 0.13 | 0.11 | -1.11 | 0.18374  | 0.213862 | 0.547827 | 0.48758  |
| MmugDNA.32987.1.S1_at | MmugDNA.32987.1 | 3.15  | 3.13  | 0.27 | 0.36 | 1.02  | 0.502194 | 0.737555 | 0.760244 | 0.847993 |
| MmugDNA.32989.1.S1_at | MmugDNA.32989.1 | 6.98  | 7.15  | 0.21 | 0.03 | -1.12 | 0.701987 | 0.239514 | 0.868245 | 0.510191 |
| MmugDNA.3299.1.S1_at  | MmugDNA.3299.1  | 5.37  | 5.24  | 0.17 | 0.23 | 1.1   | 0.497474 | 0.277431 | 0.758004 | 0.541336 |
| MmugDNA.32992.1.S1_at | MmugDNA.32992.1 | 3.03  | 2.8   | 0.12 | 0.14 | 1.17  | 0.212915 | 0.263551 | 0.57334  | 0.529826 |
| MmugDNA.32993.1.S1_at | MmugDNA.32993.1 | 3.53  | 3.47  | 0.26 | 0.04 | 1.04  | 0.266206 | 0.399576 | 0.611749 | 0.629912 |
| MmugDNA.32994.1.S1_at | MmugDNA.32994.1 | 7.03  | 7.77  | 0.33 | 0.05 | -1.68 | 0.018548 | 0.011175 | 0.270581 | 0.137551 |
| MmugDNA.32995.1.S1_at | MmugDNA.32995.1 | 4.39  | 4.34  | 0.51 | 0.18 | 1.04  | 0.858642 | 0.858015 | 0.942899 | 0.919035 |
| MmugDNA.32996.1.S1_at | MmugDNA.32996.1 | 7.55  | 7.47  | 0.28 | 0.25 | 1.06  | 0.80563  | 0.774627 | 0.9203   | 0.868797 |
| MmugDNA.32997.1.S1_at | MmugDNA.32997.1 | 4.16  | 4.13  | 0.04 | 0.08 | 1.02  | 0.762566 | 0.503044 | 0.899996 | 0.700559 |
| MmugDNA.32999.1.S1_at | MmugDNA.32999.1 | 3.51  | 3.44  | 0.26 | 0.93 | 1.05  | 0.573079 | 0.584777 | 0.801055 | 0.752534 |
| MmugDNA.33.1.S1_at    | MmugDNA.33.1    | 3.91  | 4.39  | 0.57 | 0.85 | -1.4  | 0.781083 | 0.937771 | 0.908721 | 0.964687 |
| MmugDNA.330.1.S1_at   | MmugDNA.330.1   | 5.54  | 5.46  | 0.27 | 0.15 | 1.06  | 0.303827 | 0.252422 | 0.638083 | 0.521061 |
| MmugDNA.3300.1.S1_at  | MmugDNA.3300.1  | 4.51  | 4.51  | 0.06 | 0    | 1.01  | 0.522225 | 0.829202 | 0.771912 | 0.901809 |
| MmugDNA.33000.1.S1_at | MmugDNA.33000.1 | 3.54  | 3.52  | 0.18 | 0.34 | 1.02  | 0.578722 | 0.73104  | 0.803945 | 0.844197 |
| MmugDNA.33002.1.S1_at | MmugDNA.33002.1 | 5.61  | 6.35  | 0.02 | 0.16 | -1.67 | 0.002512 | 0.000168 | 0.164187 | 0.030511 |
| MmugDNA.33005.1.S1_at | MmugDNA.33005.1 | 6.82  | 6.68  | 0.37 | 0.34 | 1.11  | 0.51986  | 0.20923  | 0.770398 | 0.48303  |
| MmugDNA.33006.1.S1_at | MmugDNA.33006.1 | 5.31  | 5.56  | 0.37 | 0.17 | -1.19 | 0.191398 | 0.260813 | 0.554364 | 0.52721  |
| MmugDNA.33007.1.S1_at | MmugDNA.33007.1 | 4.4   | 4.2   | 0.17 | 0.11 | 1.14  | 0.101939 | 0.076833 | 0.461337 | 0.322319 |
| MmugDNA.33008.1.S1_at | MmugDNA.33008.1 | 5.97  | 5.98  | 0.04 | 0.12 | -1.01 | 0.31566  | 0.519566 | 0.646683 | 0.711134 |
| MmugDNA.33009.1.S1_at | MmugDNA.33009.1 | 5.99  | 5.82  | 0.46 | 0.24 | 1.13  | 0.296116 | 0.417868 | 0.632176 | 0.642449 |
| MmugDNA.3301.1.S1_at  | MmugDNA.3301.1  | 11.9  | 11.82 | 0.29 | 0.37 | 1.06  | 0.372786 | 0.340032 | 0.68305  | 0.586516 |
| MmugDNA.33012.1.S1_at | MmugDNA.33012.1 | 4.48  | 4.49  | 0.21 | 0.21 | -1.01 | 0.368303 | 0.421385 | 0.679832 | 0.644994 |

|                         |                 |       |       |      |      |       |          |          |          |          |
|-------------------------|-----------------|-------|-------|------|------|-------|----------|----------|----------|----------|
| MmugDNA.33013.1.S1_at   | MmugDNA.33013.1 | 8.36  | 8.49  | 0.14 | 0.66 | -1.09 | 0.719576 | 0.532082 | 0.876991 | 0.718995 |
| MmugDNA.33015.1.S1_at   | MmugDNA.33015.1 | 7.43  | 7.07  | 0.16 | 0.17 | 1.29  | 0.0889   | 0.088467 | 0.443994 | 0.341922 |
| MmugDNA.33016.1.S1_at   | MmugDNA.33016.1 | 12.85 | 12.86 | 0.15 | 0.14 | -1.01 | 0.59711  | 0.099345 | 0.813397 | 0.35761  |
| MmugDNA.33018.1.S1_at   | MmugDNA.33018.1 | 3.7   | 3.82  | 0.12 | 0.03 | -1.09 | 0.1338   | 0.095553 | 0.500334 | 0.352627 |
| MmugDNA.3302.1.S1_at    | MmugDNA.3302.1  | 5.41  | 5.27  | 1.43 | 0.38 | 1.1   | 0.337278 | 0.4759   | 0.659871 | 0.682387 |
| MmugDNA.33020.1.S1_at   | MmugDNA.33020.1 | 4.52  | 4.54  | 0.22 | 0.25 | -1.01 | 0.490828 | 0.745447 | 0.754643 | 0.852398 |
| MmugDNA.33021.1.S1_at   | MmugDNA.33021.1 | 4.87  | 4.86  | 0.59 | 0    | 1.01  | 0.586257 | 0.786358 | 0.808001 | 0.876293 |
| MmugDNA.33022.1.S1_at   | MmugDNA.33022.1 | 3.71  | 3.84  | 0.04 | 0.17 | -1.09 | 0.701166 | 0.943603 | 0.86792  | 0.967955 |
| MmugDNA.33023.1.S1_at   | MmugDNA.33023.1 | 9.53  | 8.97  | 0.13 | 0.25 | 1.48  | 0.025709 | 0.02143  | 0.300275 | 0.183342 |
| MmugDNA.33023.1.S1_s_at | MmugDNA.33023.1 | 9.49  | 8.97  | 0.09 | 0.3  | 1.43  | 0.041733 | 0.042856 | 0.352545 | 0.251591 |
| MmugDNA.33024.1.S1_at   | MmugDNA.33024.1 | 4.15  | 3.97  | 0.77 | 0.34 | 1.13  | 0.208678 | 0.264788 | 0.570402 | 0.530791 |
| MmugDNA.33024.1.S1_s_at | MmugDNA.33024.1 | 5.98  | 6.15  | 0.47 | 0.52 | -1.12 | 0.644345 | 0.731977 | 0.839729 | 0.844751 |
| MmugDNA.33025.1.S1_at   | MmugDNA.33025.1 | 4.12  | 3.61  | 0.62 | 0.19 | 1.43  | 0.318108 | 0.284775 | 0.64802  | 0.546966 |
| MmugDNA.33026.1.S1_at   | MmugDNA.33026.1 | 8.15  | 8.39  | 0.16 | 0.28 | -1.18 | 0.260924 | 0.005328 | 0.607521 | 0.100928 |
| MmugDNA.33027.1.S1_at   | MmugDNA.33027.1 | 3.86  | 3.81  | 0.07 | 0.45 | 1.03  | 0.436505 | 0.606188 | 0.721751 | 0.765727 |
| MmugDNA.33027.1.S1_s_at | MmugDNA.33027.1 | 4.7   | 4.91  | 0.1  | 0.4  | -1.16 | 0.312333 | 0.169225 | 0.644081 | 0.445815 |
| MmugDNA.33028.1.S1_at   | MmugDNA.33028.1 | 11.22 | 10.63 | 0.07 | 0.2  | 1.51  | 0.022663 | 0.002353 | 0.287719 | 0.07161  |
| MmugDNA.33029.1.S1_at   | MmugDNA.33029.1 | 3.84  | 4.28  | 0.06 | 0.57 | -1.36 | 0.218977 | 0.269129 | 0.578377 | 0.534447 |
| MmugDNA.33030.1.S1_at   | MmugDNA.33030.1 | 5.93  | 6.02  | 0.15 | 0.13 | -1.06 | 0.737981 | 0.158991 | 0.88746  | 0.43518  |
| MmugDNA.33033.1.S1_at   | MmugDNA.33033.1 | 4.44  | 4.36  | 0.14 | 0.25 | 1.05  | 0.538976 | 0.593614 | 0.780907 | 0.758334 |
| MmugDNA.33034.1.S1_at   | MmugDNA.33034.1 | 3.01  | 3.24  | 0.07 | 0.11 | -1.17 | 0.058342 | 0.056902 | 0.39029  | 0.284672 |
| MmugDNA.33035.1.S1_at   | MmugDNA.33035.1 | 8.91  | 9.48  | 0.24 | 0.42 | -1.48 | 0.065008 | 0.15333  | 0.403744 | 0.428139 |
| MmugDNA.33038.1.S1_at   | MmugDNA.33038.1 | 6.86  | 6.91  | 0.09 | 0.09 | -1.04 | 0.479917 | 0.772605 | 0.747918 | 0.867785 |
| MmugDNA.33039.1.S1_at   | MmugDNA.33039.1 | 8.54  | 8.58  | 0.19 | 0.11 | -1.03 | 0.521221 | 0.431997 | 0.771142 | 0.652738 |
| MmugDNA.33041.1.S1_at   | MmugDNA.33041.1 | 10.78 | 9.65  | 0.04 | 1.14 | 2.18  | 0.190487 | 0.195074 | 0.55308  | 0.470207 |
| MmugDNA.33043.1.S1_at   | MmugDNA.33043.1 | 7.78  | 7.06  | 1.59 | 0.83 | 1.65  | 0.251432 | 0.295105 | 0.600805 | 0.554551 |
| MmugDNA.33044.1.S1_at   | MmugDNA.33044.1 | 4.5   | 4.44  | 0.02 | 0.34 | 1.04  | 0.537773 | 0.665059 | 0.780212 | 0.803733 |
| MmugDNA.33045.1.S1_at   | MmugDNA.33045.1 | 5.69  | 5.93  | 0.01 | 0.29 | -1.18 | 0.690036 | 0.866328 | 0.861893 | 0.923989 |
| MmugDNA.33046.1.S1_at   | MmugDNA.33046.1 | 5.02  | 4.65  | 0.21 | 0.11 | 1.3   | 0.074106 | 0.165322 | 0.419667 | 0.441514 |
| MmugDNA.33047.1.S1_at   | MmugDNA.33047.1 | 5.16  | 5.26  | 0.2  | 0.08 | -1.07 | 0.238645 | 0.369068 | 0.591937 | 0.608608 |
| MmugDNA.33048.1.S1_at   | MmugDNA.33048.1 | 6.16  | 6.11  | 0.32 | 0.4  | 1.04  | 0.8681   | 0.895332 | 0.947305 | 0.940185 |
| MmugDNA.27649.1.S1_s_at | MmugDNA.27649.1 | 9.51  | 8.97  | 0.37 | 0.47 | 1.45  | 0.19939  | 0.21584  | 0.562384 | 0.489536 |
| MmugDNA.33050.1.S1_at   | MmugDNA.33050.1 | 2.87  | 3.01  | 0.22 | 0.18 | -1.1  | 0.60112  | 0.684835 | 0.815683 | 0.816189 |
| MmugDNA.33050.1.S1_x_at | MmugDNA.33050.1 | 3.3   | 3.12  | 0.13 | 0.18 | 1.13  | 0.950709 | 0.855223 | 0.981376 | 0.917457 |
| MmugDNA.33051.1.S1_at   | MmugDNA.33051.1 | 4.13  | 4.15  | 0.25 | 0.08 | -1.01 | 0.714081 | 0.854528 | 0.874661 | 0.917099 |
| MmugDNA.33052.1.S1_at   | MmugDNA.33052.1 | 6.31  | 6.35  | 0.04 | 0.17 | -1.03 | 0.273855 | 0.056828 | 0.617262 | 0.284531 |
| MmugDNA.33053.1.S1_at   | MmugDNA.33053.1 | 3.19  | 3.3   | 0.13 | 0.3  | -1.08 | 0.87312  | 0.304352 | 0.94924  | 0.561649 |
| MmugDNA.33054.1.S1_at   | MmugDNA.33054.1 | 7.41  | 7.19  | 0.11 | 0.32 | 1.17  | 0.336457 | 0.110336 | 0.659478 | 0.374457 |
| MmugDNA.33055.1.S1_at   | MmugDNA.33055.1 | 6.68  | 6.96  | 0.33 | 0.12 | -1.21 | 0.119844 | 0.064409 | 0.484405 | 0.300001 |
| MmugDNA.33056.1.S1_at   | MmugDNA.33056.1 | 6.64  | 6.09  | 0.74 | 0.34 | 1.46  | 0.393707 | 0.435729 | 0.695488 | 0.655496 |
| MmugDNA.33057.1.S1_at   | MmugDNA.33057.1 | 8.34  | 7.15  | 0.12 | 0.53 | 2.28  | 0.016275 | 0.028353 | 0.263592 | 0.210223 |

|                         |                 |       |       |      |      |       |          |          |          |          |
|-------------------------|-----------------|-------|-------|------|------|-------|----------|----------|----------|----------|
| MmugDNA.33061.1.S1_at   | MmugDNA.33061.1 | 5.44  | 5.45  | 0.08 | 0.32 | -1.01 | 0.868628 | 0.578767 | 0.947624 | 0.748611 |
| MmugDNA.33062.1.S1_at   | MmugDNA.33062.1 | 6.45  | 6.6   | 0.09 | 0.15 | -1.11 | 0.41326  | 0.075837 | 0.70838  | 0.320447 |
| MmugDNA.33063.1.S1_at   | MmugDNA.33063.1 | 5.61  | 5.61  | 0.23 | 0.12 | 1     | 0.739115 | 0.912588 | 0.88809  | 0.950764 |
| MmugDNA.33064.1.S1_at   | MmugDNA.33064.1 | 10.14 | 9.8   | 0.16 | 0.5  | 1.27  | 0.237425 | 0.290728 | 0.590941 | 0.551382 |
| MmugDNA.33064.1.S1_x_at | MmugDNA.33064.1 | 10.1  | 9.6   | 0.12 | 0.5  | 1.41  | 0.182682 | 0.216475 | 0.546887 | 0.490084 |
| MmugDNA.33066.1.S1_at   | MmugDNA.33066.1 | 5.64  | 5.46  | 0.22 | 0.26 | 1.13  | 0.267771 | 0.421272 | 0.612749 | 0.644906 |
| MmugDNA.33068.1.S1_at   | MmugDNA.33068.1 | 3.46  | 3.45  | 0.09 | 0.05 | 1     | 0.429144 | 0.678298 | 0.717334 | 0.812081 |
| MmugDNA.33069.1.S1_at   | MmugDNA.33069.1 | 5.83  | 5.91  | 0.22 | 0.09 | -1.06 | 0.586892 | 0.415638 | 0.808357 | 0.641007 |
| MmugDNA.3307.1.S1_at    | MmugDNA.3307.1  | 5.99  | 5.55  | 1.05 | 0.47 | 1.36  | 0.552027 | 0.746771 | 0.789174 | 0.852952 |
| MmugDNA.33070.1.S1_at   | MmugDNA.33070.1 | 5.51  | 5.61  | 0.1  | 0.26 | -1.08 | 0.626683 | 0.17972  | 0.829774 | 0.456204 |
| MmugDNA.33072.1.S1_at   | MmugDNA.33072.1 | 4.24  | 4.1   | 0.12 | 0.07 | 1.1   | 0.179312 | 0.077193 | 0.543593 | 0.322773 |
| MmugDNA.33073.1.S1_at   | MmugDNA.33073.1 | 2.98  | 3     | 0.2  | 0.15 | -1.02 | 0.665647 | 0.670564 | 0.850027 | 0.80741  |
| MmugDNA.33074.1.S1_at   | MmugDNA.33074.1 | 10.59 | 10.49 | 0.09 | 0.13 | 1.07  | 0.993448 | 0.258146 | 0.997754 | 0.525574 |
| MmugDNA.33075.1.S1_at   | MmugDNA.33075.1 | 3.75  | 3.87  | 0.04 | 0.1  | -1.09 | 0.090419 | 0.057132 | 0.445834 | 0.284945 |
| MmugDNA.33076.1.S1_at   | MmugDNA.33076.1 | 10.34 | 8.74  | 0.02 | 0.51 | 3.03  | 0.005798 | 0.002165 | 0.193191 | 0.068812 |
| MmugDNA.33077.1.S1_at   | MmugDNA.33077.1 | 5.23  | 5.28  | 0.22 | 0.03 | -1.04 | 0.478072 | 0.640159 | 0.747094 | 0.788733 |
| MmugDNA.33078.1.S1_at   | MmugDNA.33078.1 | 5.32  | 5.41  | 0.16 | 0.03 | -1.06 | 0.114541 | 0.097811 | 0.477887 | 0.355639 |
| MmugDNA.3308.1.S1_at    | MmugDNA.3308.1  | 4.58  | 4.61  | 0.08 | 0.36 | -1.02 | 0.979035 | 0.989503 | 0.992315 | 0.994037 |
| MmugDNA.33080.1.S1_at   | MmugDNA.33080.1 | 9.38  | 8.9   | 0.2  | 0.19 | 1.39  | 0.019854 | 0.00855  | 0.275714 | 0.122656 |
| MmugDNA.33081.1.S1_at   | MmugDNA.33081.1 | 4.85  | 4.85  | 0.11 | 0.12 | -1    | 0.509961 | 0.398526 | 0.764623 | 0.629458 |
| MmugDNA.33084.1.S1_at   | MmugDNA.33084.1 | 2.91  | 3.06  | 0.07 | 0.29 | -1.11 | 0.1528   | 0.17708  | 0.517325 | 0.453598 |
| MmugDNA.33086.1.S1_at   | MmugDNA.33086.1 | 7.48  | 8.38  | 0.24 | 0.59 | -1.87 | 0.048146 | 0.017616 | 0.367807 | 0.16783  |
| MmugDNA.33087.1.S1_at   | MmugDNA.33087.1 | 2.7   | 2.71  | 0.05 | 0.12 | -1.01 | 0.459084 | 0.405382 | 0.735918 | 0.633701 |
| MmugDNA.3309.1.S1_at    | MmugDNA.3309.1  | 8.79  | 9.03  | 0.09 | 0.19 | -1.17 | 0.128185 | 0.350371 | 0.494307 | 0.594122 |
| MmugDNA.33090.1.S1_at   | MmugDNA.33090.1 | 6.26  | 5.9   | 0.16 | 0.07 | 1.28  | 0.027718 | 0.00927  | 0.308669 | 0.127091 |
| MmugDNA.33091.1.S1_at   | MmugDNA.33091.1 | 6.31  | 6.16  | 0.03 | 0.03 | 1.11  | 0.002545 | 0.005298 | 0.164386 | 0.100787 |
| MmugDNA.33092.1.S1_s_at | MmugDNA.33092.1 | 5.9   | 5.97  | 0.27 | 0.09 | -1.05 | 0.676418 | 0.643442 | 0.854962 | 0.790931 |
| MmugDNA.33094.1.S1_at   | MmugDNA.33094.1 | 5.56  | 5.65  | 0.27 | 0.09 | -1.07 | 0.428031 | 0.511703 | 0.716548 | 0.705797 |
| MmugDNA.33096.1.S1_s_at | MmugDNA.33096.1 | 10.93 | 11.71 | 0.22 | 0.44 | -1.72 | 0.080053 | 0.0743   | 0.430204 | 0.318046 |
| MmugDNA.30891.1.S1_s_at | MmugDNA.30891.1 | 12.28 | 11.98 | 0.14 | 0.15 | 1.22  | 0.086499 | 0.082823 | 0.440232 | 0.332331 |
| MmugDNA.331.1.S1_at     | MmugDNA.331.1   | 6.27  | 6.34  | 0.18 | 0.09 | -1.06 | 0.19092  | 0.175862 | 0.553708 | 0.452475 |
| MmugDNA.33100.1.S1_at   | MmugDNA.33100.1 | 7.04  | 7.04  | 0.11 | 0.03 | 1     | 0.293229 | 0.464776 | 0.630314 | 0.675419 |
| MmugDNA.33100.1.S1_s_at | MmugDNA.33100.1 | 6.13  | 6.1   | 0.24 | 0.05 | 1.02  | 0.400833 | 0.204109 | 0.700437 | 0.478418 |
| MmugDNA.33101.1.S1_s_at | MmugDNA.33101.1 | 4.5   | 4.51  | 0.05 | 0.33 | -1.01 | 0.88459  | 0.380162 | 0.953771 | 0.616839 |
| MmugDNA.33103.1.S1_at   | MmugDNA.33103.1 | 7.72  | 7.82  | 0.12 | 0.13 | -1.07 | 0.794635 | 0.009759 | 0.914757 | 0.129958 |
| MmugDNA.33104.1.S1_at   | MmugDNA.33104.1 | 3.29  | 3.48  | 0.63 | 0.07 | -1.14 | 0.750799 | 0.852905 | 0.893418 | 0.916372 |
| MmugDNA.33105.1.S1_at   | MmugDNA.33105.1 | 4.38  | 4.18  | 0.93 | 0.21 | 1.15  | 0.257615 | 0.248781 | 0.605093 | 0.517931 |
| MmugDNA.33106.1.S1_at   | MmugDNA.33106.1 | 11.33 | 11.41 | 0.05 | 0.07 | -1.06 | 0.1134   | 0.155726 | 0.476653 | 0.431086 |
| MmugDNA.33107.1.S1_at   | MmugDNA.33107.1 | 8.46  | 9.26  | 0.71 | 2.42 | -1.74 | 0.628513 | 0.369749 | 0.83087  | 0.609048 |
| MmugDNA.33108.1.S1_at   | MmugDNA.33108.1 | 4.99  | 4.99  | 0.09 | 0.13 | -1    | 0.776633 | 0.781407 | 0.906454 | 0.873256 |
| MmugDNA.33109.1.S1_at   | MmugDNA.33109.1 | 5.48  | 5.53  | 0.14 | 0.05 | -1.03 | 0.484521 | 0.459381 | 0.750493 | 0.671741 |

|                         |                 |       |       |      |      |       |          |          |          |          |
|-------------------------|-----------------|-------|-------|------|------|-------|----------|----------|----------|----------|
| MmugDNA.3311.1.S1_at    | MmugDNA.3311.1  | 9.64  | 9.41  | 0.43 | 0.48 | 1.17  | 0.596209 | 0.243083 | 0.812808 | 0.513356 |
| MmugDNA.33110.1.S1_at   | MmugDNA.33110.1 | 8.22  | 8.49  | 0.12 | 0.27 | -1.21 | 0.161117 | 0.258936 | 0.526189 | 0.526162 |
| MmugDNA.33111.1.S1_at   | MmugDNA.33111.1 | 3.39  | 3.7   | 0.05 | 0.21 | -1.24 | 0.09931  | 0.221635 | 0.459226 | 0.494901 |
| MmugDNA.33112.1.S1_at   | MmugDNA.33112.1 | 5.49  | 5.67  | 0.12 | 0.44 | -1.13 | 0.587196 | 0.753969 | 0.808452 | 0.856768 |
| MmugDNA.33113.1.S1_at   | MmugDNA.33113.1 | 12.6  | 12.54 | 0.05 | 0.07 | 1.04  | 0.543324 | 0.701899 | 0.783788 | 0.827167 |
| MmugDNA.33117.1.S1_at   | MmugDNA.33117.1 | 10.14 | 10.7  | 0.1  | 0.34 | -1.48 | 0.017835 | 0.024183 | 0.268088 | 0.194673 |
| MmugDNA.33118.1.S1_s_at | MmugDNA.33118.1 | 8.14  | 8.8   | 0.3  | 0.13 | -1.58 | 0.04456  | 0.036515 | 0.358786 | 0.235526 |
| MmugDNA.3312.1.S1_at    | MmugDNA.3312.1  | 4.53  | 4.54  | 0.31 | 0.09 | -1.01 | 0.78952  | 0.058202 | 0.912605 | 0.287988 |
| MmugDNA.3312.1.S1_s_at  | MmugDNA.3312.1  | 5.63  | 5.86  | 0.2  | 0.22 | -1.17 | 0.260019 | 0.263972 | 0.606878 | 0.530153 |
| MmugDNA.33121.1.S1_at   | MmugDNA.33121.1 | 5.58  | 6.01  | 0.15 | 0.11 | -1.35 | 0.009447 | 0.001439 | 0.225165 | 0.057876 |
| MmugDNA.33124.1.S1_at   | MmugDNA.33124.1 | 12.2  | 12.23 | 0.06 | 0.04 | -1.02 | 0.266919 | 0.032519 | 0.612291 | 0.223323 |
| MmugDNA.33125.1.S1_at   | MmugDNA.33125.1 | 10.6  | 10.75 | 0.08 | 0.23 | -1.11 | 0.121225 | 0.111421 | 0.48598  | 0.376126 |
| MmugDNA.33125.1.S1_s_at | MmugDNA.33125.1 | 10.83 | 11.01 | 0.05 | 0.17 | -1.14 | 0.178021 | 0.136503 | 0.542263 | 0.408969 |
| MmugDNA.33126.1.S1_at   | MmugDNA.33126.1 | 4.99  | 5.41  | 0.38 | 0.26 | -1.34 | 0.078566 | 0.071889 | 0.428609 | 0.314189 |
| MmugDNA.33127.1.S1_at   | MmugDNA.33127.1 | 7.67  | 7     | 0.57 | 0.21 | 1.59  | 0.039391 | 0.036764 | 0.347108 | 0.236291 |
| MmugDNA.33129.1.S1_at   | MmugDNA.33129.1 | 6.68  | 6.91  | 0.05 | 0.18 | -1.18 | 0.404037 | 0.182725 | 0.702538 | 0.459215 |
| MmugDNA.3313.1.S1_at    | MmugDNA.3313.1  | 5.34  | 5.35  | 0.32 | 0.1  | -1.01 | 0.700703 | 0.509427 | 0.86753  | 0.704167 |
| MmugDNA.33131.1.S1_at   | MmugDNA.33131.1 | 6.73  | 6.68  | 0.06 | 0.26 | 1.04  | 0.876633 | 0.66619  | 0.950629 | 0.804415 |
| MmugDNA.33132.1.S1_at   | MmugDNA.33132.1 | 9.59  | 9.65  | 0.13 | 0.21 | -1.04 | 0.472309 | 0.639689 | 0.743622 | 0.788389 |
| MmugDNA.33133.1.S1_at   | MmugDNA.33133.1 | 7.86  | 4.67  | 0.58 | 0.25 | 9.14  | 0.001565 | 0.000292 | 0.151907 | 0.034892 |
| MmugDNA.33138.1.S1_at   | MmugDNA.33138.1 | 6.35  | 6.11  | 0.35 | 0.12 | 1.18  | 0.315818 | 0.157613 | 0.646695 | 0.433131 |
| MmugDNA.3314.1.S1_at    | MmugDNA.3314.1  | 5.01  | 5.24  | 0.73 | 0.39 | -1.17 | 0.819954 | 0.399891 | 0.926819 | 0.63009  |
| MmugDNA.33142.1.S1_at   | MmugDNA.33142.1 | 7.24  | 7.16  | 0.97 | 0.22 | 1.06  | 0.709516 | 0.886169 | 0.872536 | 0.935211 |
| MmugDNA.33144.1.S1_at   | MmugDNA.33144.1 | 4.56  | 4.49  | 0.2  | 0.16 | 1.05  | 0.723589 | 0.47562  | 0.879213 | 0.682288 |
| MmugDNA.33145.1.S1_at   | MmugDNA.33145.1 | 8.7   | 8.42  | 0.1  | 0.1  | 1.21  | 0.119436 | 0.001014 | 0.484134 | 0.050767 |
| MmugDNA.33146.1.S1_s_at | MmugDNA.33146.1 | 11.07 | 10.98 | 0.11 | 0.15 | 1.07  | 0.234143 | 0.015268 | 0.588621 | 0.156987 |
| MmugDNA.33147.1.S1_at   | MmugDNA.33147.1 | 5.22  | 5.34  | 0.43 | 0.12 | -1.09 | 0.772775 | 0.928208 | 0.904402 | 0.959209 |
| MmugDNA.33148.1.S1_at   | MmugDNA.33148.1 | 9.71  | 8.78  | 0.08 | 0.6  | 1.91  | 0.065233 | 0.058938 | 0.404192 | 0.28962  |
| MmugDNA.33150.1.S1_at   | MmugDNA.33150.1 | 9.39  | 9.75  | 0.2  | 0.86 | -1.29 | 0.737571 | 0.864143 | 0.887266 | 0.922925 |
| MmugDNA.33151.1.S1_at   | MmugDNA.33151.1 | 3.12  | 3.26  | 0.16 | 0    | -1.1  | 0.654217 | 0.898476 | 0.844551 | 0.942214 |
| MmugDNA.33152.1.S1_at   | MmugDNA.33152.1 | 7.18  | 7.82  | 0.13 | 0.43 | -1.56 | 0.02237  | 0.010323 | 0.286137 | 0.132968 |
| MmugDNA.33153.1.S1_at   | MmugDNA.33153.1 | 4.58  | 4     | 0.25 | 0.12 | 1.49  | 0.050975 | 0.066781 | 0.375705 | 0.304293 |
| MmugDNA.33154.1.S1_at   | MmugDNA.33154.1 | 4.17  | 4.18  | 0.11 | 0.1  | -1.01 | 0.852737 | 0.770662 | 0.940647 | 0.866801 |
| MmugDNA.33155.1.S1_at   | MmugDNA.33155.1 | 7.87  | 6.71  | 0.37 | 0.14 | 2.23  | 0.017915 | 0.034335 | 0.26813  | 0.229266 |
| MmugDNA.33156.1.S1_at   | MmugDNA.33156.1 | 11.19 | 10.97 | 0.13 | 1.1  | 1.17  | 0.386844 | 0.436803 | 0.691684 | 0.65629  |
| MmugDNA.33156.1.S1_s_at | MmugDNA.33156.1 | 11.88 | 11.88 | 0.09 | 0.65 | -1    | 0.395373 | 0.534006 | 0.696441 | 0.720046 |
| MmugDNA.33157.1.S1_at   | MmugDNA.33157.1 | 10.2  | 10.29 | 0.36 | 0.21 | -1.07 | 0.277743 | 0.160289 | 0.619903 | 0.436406 |
| MmugDNA.33158.1.S1_at   | MmugDNA.33158.1 | 8.2   | 8.34  | 0.16 | 0.3  | -1.1  | 0.471153 | 0.63349  | 0.742919 | 0.784173 |
| MmugDNA.3316.1.S1_at    | MmugDNA.3316.1  | 5.77  | 6.13  | 0.11 | 0.26 | -1.28 | 0.088638 | 0.09367  | 0.443482 | 0.350103 |
| MmugDNA.3316.1.S1_x_at  | MmugDNA.3316.1  | 5.5   | 6.09  | 0.03 | 0.19 | -1.51 | 0.007818 | 0.003469 | 0.21326  | 0.084806 |
| MmugDNA.33160.1.S1_at   | MmugDNA.33160.1 | 5.6   | 5.86  | 0.08 | 0.21 | -1.2  | 0.068453 | 0.013049 | 0.410144 | 0.14696  |

|                         |                 |       |       |      |      |       |          |          |          |          |
|-------------------------|-----------------|-------|-------|------|------|-------|----------|----------|----------|----------|
| MmugDNA.33164.1.S1_at   | MmugDNA.33164.1 | 5.1   | 4.91  | 0.11 | 0.09 | 1.14  | 0.074208 | 0.085476 | 0.419963 | 0.337473 |
| MmugDNA.33165.1.S1_at   | MmugDNA.33165.1 | 6     | 5.3   | 1.33 | 0.28 | 1.62  | 0.419134 | 0.410215 | 0.711691 | 0.637131 |
| MmugDNA.33166.1.S1_x_at | MmugDNA.33166.1 | 14.25 | 14.24 | 0.05 | 0.08 | 1     | 0.903341 | 0.975958 | 0.961429 | 0.986856 |
| MmugDNA.33167.1.S1_at   | MmugDNA.33167.1 | 8.11  | 9.11  | 0.76 | 0.17 | -2    | 0.037092 | 0.037138 | 0.340697 | 0.2372   |
| MmugDNA.33168.1.S1_at   | MmugDNA.33168.1 | 5.67  | 5.77  | 0.17 | 0.09 | -1.07 | 0.296698 | 0.463437 | 0.632686 | 0.674419 |
| MmugDNA.33169.1.S1_at   | MmugDNA.33169.1 | 9.03  | 9.82  | 0.23 | 0.23 | -1.73 | 0.029582 | 0.03008  | 0.314766 | 0.215243 |
| MmugDNA.3317.1.S1_at    | MmugDNA.3317.1  | 4.22  | 4.04  | 0.19 | 0.26 | 1.13  | 0.882554 | 0.496669 | 0.952793 | 0.696119 |
| MmugDNA.33170.1.S1_at   | MmugDNA.33170.1 | 7.07  | 7.43  | 0.29 | 0.13 | -1.29 | 0.326345 | 0.414029 | 0.653184 | 0.639981 |
| MmugDNA.33173.1.S1_at   | MmugDNA.33173.1 | 6.25  | 6.41  | 0.04 | 0.5  | -1.12 | 0.578467 | 0.267514 | 0.803828 | 0.533242 |
| MmugDNA.33174.1.S1_at   | MmugDNA.33174.1 | 8.86  | 9.29  | 0.19 | 0.36 | -1.35 | 0.058021 | 0.007923 | 0.389637 | 0.11857  |
| MmugDNA.33175.1.S1_at   | MmugDNA.33175.1 | 10.62 | 10.73 | 0.08 | 0.15 | -1.08 | 0.209661 | 0.299345 | 0.571003 | 0.557842 |
| MmugDNA.33176.1.S1_at   | MmugDNA.33176.1 | 3.23  | 3.12  | 0.1  | 0.07 | 1.08  | 0.917664 | 0.886018 | 0.968    | 0.935122 |
| MmugDNA.33177.1.S1_at   | MmugDNA.33177.1 | 7.19  | 6.94  | 0.32 | 0.18 | 1.19  | 0.178026 | 0.071569 | 0.542263 | 0.313714 |
| MmugDNA.33178.1.S1_at   | MmugDNA.33178.1 | 8.27  | 7.75  | 0.22 | 0.12 | 1.44  | 0.015893 | 0.015421 | 0.261669 | 0.157699 |
| MmugDNA.33178.1.S1_x_at | MmugDNA.33178.1 | 8.28  | 8.19  | 0.27 | 0.26 | 1.06  | 0.143732 | 0.208496 | 0.510387 | 0.482435 |
| MmugDNA.3318.1.S1_at    | MmugDNA.3318.1  | 6.42  | 6.38  | 0.21 | 0.22 | 1.02  | 0.653241 | 0.112672 | 0.844033 | 0.378255 |
| MmugDNA.33180.1.S1_at   | MmugDNA.33180.1 | 3.84  | 3.08  | 0.81 | 0.12 | 1.69  | 0.189807 | 0.233009 | 0.552692 | 0.50445  |
| MmugDNA.33181.1.S1_at   | MmugDNA.33181.1 | 4.3   | 4.2   | 1.11 | 0.55 | 1.07  | 0.658593 | 0.776095 | 0.846726 | 0.869726 |
| MmugDNA.33182.1.S1_at   | MmugDNA.33182.1 | 5.96  | 6.21  | 0.32 | 0.15 | -1.19 | 0.186931 | 0.241034 | 0.550106 | 0.511657 |
| MmugDNA.33185.1.S1_at   | MmugDNA.33185.1 | 11.18 | 11.32 | 0.06 | 0.64 | -1.1  | 0.770228 | 0.328577 | 0.90333  | 0.578148 |
| MmugDNA.33186.1.S1_at   | MmugDNA.33186.1 | 10.43 | 9.99  | 0.15 | 0.06 | 1.36  | 0.012472 | 0.001107 | 0.241976 | 0.052714 |
| MmugDNA.33186.1.S1_s_at | MmugDNA.33186.1 | 8.41  | 7.8   | 0.36 | 0.07 | 1.53  | 0.129794 | 0.052615 | 0.495916 | 0.27488  |
| MmugDNA.33187.1.S1_at   | MmugDNA.33187.1 | 4.22  | 4.05  | 0.06 | 0.18 | 1.12  | 0.131306 | 0.10692  | 0.497943 | 0.369499 |
| MmugDNA.36880.1.S1_s_at | MmugDNA.36880.1 | 11.09 | 10.59 | 0.24 | 0.05 | 1.41  | 0.018801 | 0.032602 | 0.2715   | 0.223643 |
| MmugDNA.33189.1.S1_at   | MmugDNA.33189.1 | 13    | 13.25 | 0.05 | 0.18 | -1.2  | 0.122715 | 0.125848 | 0.488026 | 0.396315 |
| MmugDNA.3319.1.S1_at    | MmugDNA.3319.1  | 4.6   | 4.98  | 0.07 | 0.53 | -1.3  | 0.18445  | 0.077721 | 0.548146 | 0.323851 |
| MmugDNA.33190.1.S1_at   | MmugDNA.33190.1 | 5.4   | 5.31  | 0.19 | 0.09 | 1.06  | 0.780536 | 0.636443 | 0.90855  | 0.786176 |
| MmugDNA.33192.1.S1_at   | MmugDNA.33192.1 | 8.53  | 9.25  | 0.57 | 1.25 | -1.65 | 0.453681 | 0.374049 | 0.732829 | 0.612676 |
| MmugDNA.33196.1.S1_at   | MmugDNA.33196.1 | 7.08  | 6.83  | 0.57 | 0.38 | 1.19  | 0.164491 | 0.104463 | 0.528397 | 0.365719 |
| MmugDNA.33197.1.S1_at   | MmugDNA.33197.1 | 9.96  | 8.37  | 0.33 | 0.62 | 3     | 0.012342 | 0.003021 | 0.240921 | 0.080204 |
| MmugDNA.33198.1.S1_at   | MmugDNA.33198.1 | 3.51  | 3.3   | 0.38 | 0.19 | 1.15  | 0.505112 | 0.284881 | 0.761548 | 0.54701  |
| MmugDNA.2144.1.S1_s_at  | MmugDNA.2144.1  | 14.04 | 13.71 | 0.04 | 0.1  | 1.26  | 0.003191 | 0.000596 | 0.174359 | 0.041941 |
| MmugDNA.332.1.S1_at     | MmugDNA.332.1   | 4.12  | 4.2   | 0.04 | 0.28 | -1.06 | 0.648368 | 0.800624 | 0.841851 | 0.885312 |
| MmugDNA.3320.1.S1_at    | MmugDNA.3320.1  | 11.96 | 11.55 | 0.07 | 0.11 | 1.33  | 0.004858 | 0.001855 | 0.185146 | 0.064629 |
| MmugDNA.33200.1.S1_at   | MmugDNA.33200.1 | 4.82  | 5     | 0.14 | 0.07 | -1.13 | 0.205534 | 0.068844 | 0.568054 | 0.308714 |
| MmugDNA.33201.1.S1_at   | MmugDNA.33201.1 | 3.93  | 3.94  | 0.26 | 0.08 | -1.01 | 0.715731 | 0.619324 | 0.875251 | 0.774577 |
| MmugDNA.33202.1.S1_at   | MmugDNA.33202.1 | 3.09  | 3.19  | 0.05 | 0.08 | -1.08 | 0.380679 | 0.314929 | 0.68755  | 0.56872  |
| MmugDNA.33203.1.S1_at   | MmugDNA.33203.1 | 5.38  | 5.34  | 0.07 | 0.22 | 1.03  | 0.966523 | 0.918101 | 0.987317 | 0.954068 |
| MmugDNA.33204.1.S1_at   | MmugDNA.33204.1 | 7.64  | 7.52  | 0.02 | 0.33 | 1.09  | 0.701748 | 0.730982 | 0.868193 | 0.844172 |
| MmugDNA.33205.1.S1_at   | MmugDNA.33205.1 | 4.06  | 4.21  | 0.37 | 0.3  | -1.11 | 0.992605 | 0.998763 | 0.997454 | 0.999349 |
| MmugDNA.33207.1.S1_at   | MmugDNA.33207.1 | 5.29  | 5.3   | 0.16 | 0.16 | -1.01 | 0.499447 | 0.685799 | 0.759194 | 0.816612 |

|                         |                 |       |       |      |      |       |          |          |          |          |
|-------------------------|-----------------|-------|-------|------|------|-------|----------|----------|----------|----------|
| MmugDNA.33208.1.S1_at   | MmugDNA.33208.1 | 10.86 | 11.58 | 0.11 | 0.3  | -1.65 | 0.018698 | 0.012333 | 0.27122  | 0.143659 |
| MmugDNA.33209.1.S1_at   | MmugDNA.33209.1 | 6.54  | 6.49  | 0.16 | 0.07 | 1.03  | 0.675067 | 0.502498 | 0.8544   | 0.700192 |
| MmugDNA.3321.1.S1_at    | MmugDNA.3321.1  | 5.51  | 5.55  | 0.18 | 0.06 | -1.02 | 0.234773 | 0.28866  | 0.588895 | 0.549827 |
| MmugDNA.33211.1.S1_s_at | MmugDNA.33211.1 | 13.47 | 13.44 | 0.09 | 0.12 | 1.02  | 0.629291 | 0.17619  | 0.831416 | 0.4527   |
| MmugDNA.33213.1.S1_at   | MmugDNA.33213.1 | 5.21  | 4.9   | 0.19 | 0.29 | 1.24  | 0.812367 | 0.044468 | 0.923648 | 0.255242 |
| MmugDNA.33215.1.S1_at   | MmugDNA.33215.1 | 11.24 | 10.35 | 0.03 | 0.93 | 1.86  | 0.160026 | 0.155609 | 0.52484  | 0.430977 |
| MmugDNA.33217.1.S1_at   | MmugDNA.33217.1 | 3.99  | 3.55  | 0.1  | 0.04 | 1.36  | 0.002766 | 0.000679 | 0.165578 | 0.04413  |
| MmugDNA.33219.1.S1_at   | MmugDNA.33219.1 | 10.12 | 10.05 | 0.28 | 1.02 | 1.05  | 0.91853  | 0.940376 | 0.96831  | 0.966182 |
| MmugDNA.3322.1.S1_at    | MmugDNA.3322.1  | 4     | 3.99  | 0.03 | 0.28 | 1.01  | 0.373103 | 0.465158 | 0.683245 | 0.675621 |
| MmugDNA.33220.1.S1_at   | MmugDNA.33220.1 | 7.01  | 7.52  | 0.14 | 0.14 | -1.42 | 0.042009 | 0.032931 | 0.353803 | 0.22466  |
| MmugDNA.33221.1.S1_at   | MmugDNA.33221.1 | 6.84  | 6.95  | 0.66 | 0.24 | -1.08 | 0.268615 | 0.364349 | 0.613299 | 0.604693 |
| MmugDNA.15044.1.S1_s_at | MmugDNA.15044.1 | 5.27  | 5.49  | 0.25 | 0.11 | -1.17 | 0.417997 | 0.321668 | 0.71107  | 0.573346 |
| MmugDNA.33223.1.S1_at   | MmugDNA.33223.1 | 11.03 | 10.88 | 0.01 | 0.19 | 1.11  | 0.217261 | 0.104844 | 0.576846 | 0.36638  |
| MmugDNA.33224.1.S1_at   | MmugDNA.33224.1 | 11.04 | 11.13 | 0.26 | 0.18 | -1.06 | 0.533081 | 0.661918 | 0.777969 | 0.802024 |
| MmugDNA.33227.1.S1_at   | MmugDNA.33227.1 | 3.5   | 3.58  | 0.05 | 0.15 | -1.06 | 0.339521 | 0.4125   | 0.661307 | 0.638915 |
| MmugDNA.33228.1.S1_at   | MmugDNA.33228.1 | 9.46  | 8.72  | 0.13 | 1.27 | 1.68  | 0.102945 | 0.068851 | 0.46254  | 0.308721 |
| MmugDNA.33229.1.S1_at   | MmugDNA.33229.1 | 7.67  | 6.12  | 0.46 | 0.74 | 2.91  | 0.027148 | 0.011496 | 0.306629 | 0.138685 |
| MmugDNA.3323.1.S1_at    | MmugDNA.3323.1  | 3.11  | 2.78  | 0.18 | 0.07 | 1.25  | 0.055758 | 0.033494 | 0.384612 | 0.226577 |
| MmugDNA.33230.1.S1_at   | MmugDNA.33230.1 | 3.66  | 3.74  | 0.05 | 0.38 | -1.05 | 0.237772 | 0.217366 | 0.591288 | 0.490978 |
| MmugDNA.33231.1.S1_at   | MmugDNA.33231.1 | 3.9   | 3.97  | 0.1  | 0.18 | -1.05 | 0.548559 | 0.6013   | 0.786748 | 0.762661 |
| MmugDNA.33232.1.S1_at   | MmugDNA.33232.1 | 4.33  | 4.16  | 0.99 | 0.16 | 1.13  | 0.33058  | 0.14471  | 0.655863 | 0.418546 |
| MmugDNA.33234.1.S1_at   | MmugDNA.33234.1 | 9.99  | 10.31 | 0.21 | 0.22 | -1.25 | 0.129438 | 0.150642 | 0.495636 | 0.425195 |
| MmugDNA.953.1.S1_s_at   | MmugDNA.953.1   | 6.19  | 6.62  | 0.14 | 0.16 | -1.35 | 0.022162 | 0.013911 | 0.284649 | 0.151286 |
| MmugDNA.33239.1.S1_at   | MmugDNA.33239.1 | 10.89 | 10.62 | 0.27 | 0.43 | 1.2   | 0.792401 | 0.632232 | 0.913837 | 0.783289 |
| MmugDNA.3324.1.S1_at    | MmugDNA.3324.1  | 2.94  | 2.87  | 0.08 | 0.1  | 1.04  | 0.648741 | 0.551961 | 0.842171 | 0.731387 |
| MmugDNA.33241.1.S1_at   | MmugDNA.33241.1 | 11.65 | 11.42 | 0.15 | 0.42 | 1.17  | 0.318591 | 0.107133 | 0.648593 | 0.369808 |
| MmugDNA.33244.1.S1_at   | MmugDNA.33244.1 | 5.76  | 5.47  | 1.07 | 0.46 | 1.22  | 0.918936 | 0.948116 | 0.968454 | 0.970446 |
| MmugDNA.33245.1.S1_at   | MmugDNA.33245.1 | 6.99  | 6.94  | 0.06 | 0.07 | 1.03  | 0.988483 | 0.329619 | 0.995944 | 0.578813 |
| MmugDNA.33246.1.S1_at   | MmugDNA.33246.1 | 10.77 | 10.61 | 0.18 | 0.07 | 1.12  | 0.210925 | 0.211511 | 0.571977 | 0.48563  |
| MmugDNA.33247.1.S1_at   | MmugDNA.33247.1 | 9.21  | 8.66  | 0.1  | 0.34 | 1.47  | 0.048848 | 0.029237 | 0.369844 | 0.212898 |
| MmugDNA.33247.1.S1_s_at | MmugDNA.33247.1 | 9     | 8.68  | 0.09 | 0.43 | 1.24  | 0.138206 | 0.134499 | 0.505618 | 0.406626 |
| MmugDNA.33248.1.S1_at   | MmugDNA.33248.1 | 10.94 | 11.8  | 0.12 | 0.56 | -1.82 | 0.075135 | 0.035979 | 0.42197  | 0.234155 |
| MmugDNA.3325.1.S1_at    | MmugDNA.3325.1  | 7.26  | 7.67  | 0.75 | 0.37 | -1.32 | 0.929004 | 0.570903 | 0.972607 | 0.743422 |
| MmugDNA.33250.1.S1_at   | MmugDNA.33250.1 | 5.97  | 6.09  | 0.13 | 0.02 | -1.08 | 0.749022 | 0.093269 | 0.892627 | 0.349412 |
| MmugDNA.33253.1.S1_at   | MmugDNA.33253.1 | 6.43  | 6.56  | 0.16 | 0.19 | -1.09 | 0.505274 | 0.266206 | 0.761548 | 0.53202  |
| MmugDNA.33254.1.S1_at   | MmugDNA.33254.1 | 6.68  | 5.55  | 0.84 | 0.49 | 2.19  | 0.083961 | 0.078592 | 0.436395 | 0.325343 |
| MmugDNA.33256.1.S1_at   | MmugDNA.33256.1 | 3.25  | 3.24  | 0.07 | 0.09 | 1.01  | 0.37559  | 0.39938  | 0.684803 | 0.629776 |
| MmugDNA.33257.1.S1_at   | MmugDNA.33257.1 | 8.67  | 8.35  | 0.16 | 0.23 | 1.25  | 0.332192 | 0.342621 | 0.656683 | 0.588644 |
| MmugDNA.33258.1.S1_at   | MmugDNA.33258.1 | 13.29 | 12.82 | 0.1  | 0.65 | 1.39  | 0.299746 | 0.323485 | 0.635078 | 0.574473 |
| MmugDNA.33259.1.S1_at   | MmugDNA.33259.1 | 4.99  | 5.08  | 0.17 | 0.19 | -1.06 | 0.294029 | 0.325983 | 0.631095 | 0.576235 |
| MmugDNA.3326.1.S1_at    | MmugDNA.3326.1  | 4.49  | 4.37  | 0.07 | 0.04 | 1.08  | 0.193829 | 0.044573 | 0.557495 | 0.255512 |



|                       |                 |       |       |      |      |       |          |          |          |          |
|-----------------------|-----------------|-------|-------|------|------|-------|----------|----------|----------|----------|
| MmugDNA.33261.1.S1_at | MmugDNA.33261.1 | 5.82  | 5.55  | 0.09 | 0.79 | 1.21  | 0.63443  | 0.830535 | 0.834514 | 0.902753 |
| MmugDNA.33265.1.S1_at | MmugDNA.33265.1 | 4.89  | 4.98  | 0.17 | 0.16 | -1.06 | 0.888271 | 0.035456 | 0.955159 | 0.232564 |
| MmugDNA.33266.1.S1_at | MmugDNA.33266.1 | 10.65 | 10.7  | 0.41 | 0.73 | -1.04 | 0.882524 | 0.504696 | 0.952793 | 0.701774 |
| MmugDNA.33267.1.S1_at | MmugDNA.33267.1 | 3.83  | 3.87  | 0.1  | 0.12 | -1.03 | 0.454437 | 0.348657 | 0.733188 | 0.592661 |
| MmugDNA.33268.1.S1_at | MmugDNA.33268.1 | 5.4   | 5.45  | 0.17 | 0.1  | -1.03 | 0.427174 | 0.324331 | 0.716168 | 0.574924 |
| MmugDNA.33269.1.S1_at | MmugDNA.33269.1 | 4.85  | 5.12  | 0.19 | 0.41 | -1.2  | 0.205062 | 0.519811 | 0.567512 | 0.71135  |
| MmugDNA.3327.1.S1_at  | MmugDNA.3327.1  | 4.59  | 4.73  | 0.18 | 0.8  | -1.1  | 0.924312 | 0.991331 | 0.970608 | 0.995189 |
| MmugDNA.33271.1.S1_at | MmugDNA.33271.1 | 7.66  | 6.77  | 0.85 | 0.18 | 1.85  | 0.156068 | 0.044174 | 0.520741 | 0.254605 |
| MmugDNA.33273.1.S1_at | MmugDNA.33273.1 | 5.24  | 5     | 0.31 | 0.58 | 1.18  | 0.852976 | 0.863158 | 0.940695 | 0.922263 |
| MmugDNA.33275.1.S1_at | MmugDNA.33275.1 | 12.06 | 12.67 | 0.1  | 0.2  | -1.53 | 0.012372 | 0.007004 | 0.240921 | 0.112985 |
| MmugDNA.33277.1.S1_at | MmugDNA.33277.1 | 8.23  | 8.63  | 0.27 | 0.04 | -1.32 | 0.039846 | 0.056921 | 0.34828  | 0.284712 |
| MmugDNA.33278.1.S1_at | MmugDNA.33278.1 | 4.83  | 4.81  | 0.23 | 0.11 | 1.01  | 0.439444 | 0.646661 | 0.723601 | 0.793044 |
| MmugDNA.3328.1.S1_at  | MmugDNA.3328.1  | 3.13  | 3.21  | 0.08 | 0.09 | -1.06 | 0.54809  | 0.01466  | 0.786546 | 0.154231 |
| MmugDNA.33280.1.S1_at | MmugDNA.33280.1 | 6.75  | 7.23  | 0.17 | 0.01 | -1.4  | 0.017518 | 0.014725 | 0.267445 | 0.154415 |
| MmugDNA.33282.1.S1_at | MmugDNA.33282.1 | 11.13 | 11.1  | 0.15 | 0.33 | 1.02  | 0.934139 | 0.945634 | 0.974481 | 0.969098 |
| MmugDNA.33284.1.S1_at | MmugDNA.33284.1 | 6.38  | 6.35  | 0.87 | 0.24 | 1.02  | 0.752963 | 0.806375 | 0.894568 | 0.888642 |
| MmugDNA.33285.1.S1_at | MmugDNA.33285.1 | 6.44  | 6.49  | 0.1  | 0.21 | -1.04 | 0.497237 | 0.778433 | 0.757913 | 0.871327 |
| MmugDNA.33287.1.S1_at | MmugDNA.33287.1 | 3.61  | 3.79  | 0.04 | 0.15 | -1.13 | 0.1269   | 0.164582 | 0.49303  | 0.440829 |
| MmugDNA.33288.1.S1_at | MmugDNA.33288.1 | 8.45  | 9.09  | 0.26 | 0.26 | -1.56 | 0.073316 | 0.030362 | 0.418512 | 0.216116 |
| MmugDNA.33289.1.S1_at | MmugDNA.33289.1 | 6.18  | 6.15  | 0.35 | 0.13 | 1.03  | 0.872538 | 0.968277 | 0.94907  | 0.982549 |
| MmugDNA.3329.1.S1_at  | MmugDNA.3329.1  | 4.15  | 4.1   | 0.37 | 0.45 | 1.04  | 0.46612  | 0.618664 | 0.740195 | 0.774185 |
| MmugDNA.33291.1.S1_at | MmugDNA.33291.1 | 8.85  | 8.99  | 0.07 | 0.34 | -1.11 | 0.833469 | 0.335531 | 0.932338 | 0.583326 |
| MmugDNA.33293.1.S1_at | MmugDNA.33293.1 | 5.91  | 5.45  | 1.49 | 0.33 | 1.38  | 0.531032 | 0.735351 | 0.777    | 0.846916 |
| MmugDNA.33294.1.S1_at | MmugDNA.33294.1 | 5.63  | 7.01  | 0.19 | 0.18 | -2.6  | 0.000869 | 0.002569 | 0.139813 | 0.075084 |
| MmugDNA.33295.1.S1_at | MmugDNA.33295.1 | 8.4   | 8.33  | 0.08 | 0.83 | 1.05  | 0.758259 | 0.909143 | 0.897668 | 0.948564 |
| MmugDNA.33297.1.S1_at | MmugDNA.33297.1 | 9     | 8.79  | 0.05 | 0.18 | 1.16  | 0.248159 | 0.418056 | 0.599118 | 0.642569 |
| MmugDNA.33298.1.S1_at | MmugDNA.33298.1 | 8.7   | 7.86  | 0.19 | 0.52 | 1.79  | 0.063706 | 0.054974 | 0.401367 | 0.279898 |
| MmugDNA.33299.1.S1_at | MmugDNA.33299.1 | 4.86  | 4.64  | 1.17 | 0.15 | 1.17  | 0.264503 | 0.209989 | 0.610188 | 0.483748 |
| MmugDNA.3330.1.S1_at  | MmugDNA.3330.1  | 11.21 | 10.67 | 0.08 | 0.66 | 1.45  | 0.085489 | 0.033384 | 0.439394 | 0.226396 |
| MmugDNA.33300.1.S1_at | MmugDNA.33300.1 | 8.21  | 8.91  | 0.24 | 0.27 | -1.62 | 0.028754 | 0.018052 | 0.312166 | 0.169372 |
| MmugDNA.33301.1.S1_at | MmugDNA.33301.1 | 5.63  | 5.77  | 0.09 | 0.02 | -1.11 | 0.028661 | 0.019688 | 0.312031 | 0.176286 |
| MmugDNA.33304.1.S1_at | MmugDNA.33304.1 | 6.26  | 5.91  | 0.33 | 0.16 | 1.28  | 0.38376  | 0.509525 | 0.689519 | 0.704233 |
| MmugDNA.33305.1.S1_at | MmugDNA.33305.1 | 6.06  | 5.68  | 0.14 | 0.19 | 1.3   | 0.069496 | 0.06415  | 0.412367 | 0.29954  |
| MmugDNA.33306.1.S1_at | MmugDNA.33306.1 | 3.51  | 3.31  | 0.12 | 0.13 | 1.15  | 0.271059 | 0.352886 | 0.615322 | 0.596217 |
| MmugDNA.33309.1.S1_at | MmugDNA.33309.1 | 3.46  | 3.28  | 0.07 | 0.15 | 1.14  | 0.232907 | 0.150353 | 0.587927 | 0.42489  |
| MmugDNA.33310.1.S1_at | MmugDNA.33310.1 | 4.09  | 4.08  | 0.03 | 0.24 | 1.01  | 0.478666 | 0.515849 | 0.747332 | 0.708504 |
| MmugDNA.33313.1.S1_at | MmugDNA.33313.1 | 5.71  | 5.78  | 0.1  | 0.12 | -1.05 | 0.37573  | 0.166033 | 0.684803 | 0.442606 |
| MmugDNA.33314.1.S1_at | MmugDNA.33314.1 | 6.18  | 6.24  | 0.17 | 0.07 | -1.04 | 0.522879 | 0.133345 | 0.772248 | 0.405139 |
| MmugDNA.33315.1.S1_at | MmugDNA.33315.1 | 4.09  | 4.16  | 0.34 | 0.09 | -1.05 | 0.559061 | 0.174114 | 0.793647 | 0.450431 |
| MmugDNA.33316.1.S1_at | MmugDNA.33316.1 | 13.44 | 13.71 | 0.29 | 0.11 | -1.21 | 0.19962  | 0.142373 | 0.562699 | 0.415965 |
| MmugDNA.33317.1.S1_at | MmugDNA.33317.1 | 5.41  | 5.58  | 0.07 | 0.08 | -1.12 | 0.078683 | 0.085367 | 0.428609 | 0.337246 |

|                         |                 |       |       |      |      |       |          |          |          |          |
|-------------------------|-----------------|-------|-------|------|------|-------|----------|----------|----------|----------|
| MmugDNA.33319.1.S1_at   | MmugDNA.33319.1 | 5.64  | 5.75  | 0.25 | 0.2  | -1.07 | 0.635515 | 0.5519   | 0.83497  | 0.731343 |
| MmugDNA.3332.1.S1_at    | MmugDNA.3332.1  | 5.98  | 5.66  | 0.88 | 0    | 1.24  | 0.249807 | 0.229402 | 0.600329 | 0.501527 |
| MmugDNA.33321.1.S1_at   | MmugDNA.33321.1 | 4.61  | 4.56  | 0.24 | 0.47 | 1.03  | 0.727188 | 0.924355 | 0.88121  | 0.957351 |
| MmugDNA.33322.1.S1_at   | MmugDNA.33322.1 | 5.94  | 5.3   | 0.56 | 0.18 | 1.55  | 0.191812 | 0.353292 | 0.554827 | 0.596477 |
| MmugDNA.33324.1.S1_at   | MmugDNA.33324.1 | 6.94  | 7.02  | 0.1  | 0.08 | -1.06 | 0.567438 | 0.102263 | 0.798131 | 0.36236  |
| MmugDNA.33328.1.S1_at   | MmugDNA.33328.1 | 10.37 | 10.36 | 0.29 | 0.17 | 1.01  | 0.537847 | 0.644439 | 0.780212 | 0.791578 |
| MmugDNA.3333.1.S1_s_at  | MmugDNA.3333.1  | 11.12 | 11.15 | 0.23 | 0.11 | -1.02 | 0.652327 | 0.042929 | 0.843636 | 0.251759 |
| MmugDNA.33332.1.S1_at   | MmugDNA.33332.1 | 5.83  | 5.91  | 0.18 | 0.18 | -1.06 | 0.567334 | 0.683614 | 0.798078 | 0.815387 |
| MmugDNA.33334.1.S1_at   | MmugDNA.33334.1 | 4.03  | 3.95  | 0.17 | 0.44 | 1.05  | 0.229851 | 0.410385 | 0.587007 | 0.637245 |
| MmugDNA.33335.1.S1_at   | MmugDNA.33335.1 | 10.34 | 10.66 | 0.25 | 0.21 | -1.25 | 0.338244 | 0.0376   | 0.660678 | 0.238367 |
| MmugDNA.33339.1.S1_at   | MmugDNA.33339.1 | 7.4   | 6.76  | 0.36 | 0.44 | 1.56  | 0.05561  | 0.042971 | 0.384246 | 0.251849 |
| MmugDNA.3334.1.S1_at    | MmugDNA.3334.1  | 10.74 | 10.55 | 0.26 | 1.29 | 1.14  | 0.552946 | 0.727534 | 0.789712 | 0.84241  |
| MmugDNA.33340.1.S1_at   | MmugDNA.33340.1 | 9.1   | 9.37  | 0.38 | 0.62 | -1.21 | 0.898588 | 0.758659 | 0.959492 | 0.859716 |
| MmugDNA.33337.1.S1_at   | MmugDNA.33337.1 | 11.69 | 12.15 | 0.32 | 0.6  | -1.37 | 0.354893 | 0.120427 | 0.670686 | 0.38925  |
| MmugDNA.33337.1.S1_s_at | MmugDNA.33337.1 | 12.09 | 12.49 | 0.3  | 0.52 | -1.32 | 0.360303 | 0.102182 | 0.674341 | 0.362273 |
| MmugDNA.33342.1.S1_at   | MmugDNA.33342.1 | 6.09  | 6.1   | 0.18 | 0.25 | -1.01 | 0.997318 | 0.391748 | 0.99892  | 0.625301 |
| MmugDNA.33344.1.S1_at   | MmugDNA.33344.1 | 6.4   | 6.55  | 0.25 | 0.1  | -1.11 | 0.463325 | 0.630092 | 0.738686 | 0.782148 |
| MmugDNA.33345.1.S1_at   | MmugDNA.33345.1 | 12.53 | 12.35 | 0.05 | 0.39 | 1.13  | 0.316212 | 0.28435  | 0.64705  | 0.54659  |
| MmugDNA.33347.1.S1_at   | MmugDNA.33347.1 | 5.09  | 5.47  | 0.21 | 0.26 | -1.3  | 0.594175 | 0.484395 | 0.811686 | 0.688478 |
| MmugDNA.33348.1.S1_at   | MmugDNA.33348.1 | 2.8   | 2.94  | 0.07 | 0.06 | -1.11 | 0.082231 | 0.691762 | 0.433542 | 0.820691 |
| MmugDNA.33349.1.S1_at   | MmugDNA.33349.1 | 6.82  | 6.79  | 0.27 | 0.07 | 1.02  | 0.708298 | 0.44317  | 0.871646 | 0.661011 |
| MmugDNA.3335.1.S1_s_at  | MmugDNA.3335.1  | 13.78 | 13.73 | 0.04 | 0.11 | 1.04  | 0.709839 | 0.168963 | 0.872725 | 0.445519 |
| MmugDNA.33350.1.S1_at   | MmugDNA.33350.1 | 3.51  | 3.5   | 0.07 | 0.23 | 1.01  | 0.466376 | 0.237697 | 0.740215 | 0.50826  |
| MmugDNA.33351.1.S1_at   | MmugDNA.33351.1 | 12.2  | 12.7  | 0.11 | 0.1  | -1.41 | 0.010674 | 0.005524 | 0.230991 | 0.102531 |
| MmugDNA.33353.1.S1_at   | MmugDNA.33353.1 | 5.19  | 5.19  | 0.18 | 0.26 | 1     | 0.630199 | 0.58374  | 0.83195  | 0.751983 |
| MmugDNA.33354.1.S1_at   | MmugDNA.33354.1 | 9.68  | 9.57  | 0.25 | 0.23 | 1.07  | 0.917689 | 0.132037 | 0.968008 | 0.404043 |
| MmugDNA.33356.1.S1_at   | MmugDNA.33356.1 | 6.06  | 6.73  | 0.52 | 0.15 | -1.6  | 0.180063 | 0.274766 | 0.544225 | 0.539225 |
| MmugDNA.33357.1.S1_at   | MmugDNA.33357.1 | 3.63  | 3.64  | 0.14 | 0.09 | -1.01 | 0.446827 | 0.616899 | 0.72864  | 0.773025 |
| MmugDNA.33358.1.S1_at   | MmugDNA.33358.1 | 3.28  | 3.07  | 0.02 | 0.15 | 1.16  | 0.092691 | 0.309119 | 0.449372 | 0.564788 |
| MmugDNA.33359.1.S1_at   | MmugDNA.33359.1 | 3.28  | 3.33  | 0.07 | 0.03 | -1.04 | 0.898251 | 0.214693 | 0.959278 | 0.48856  |
| MmugDNA.3336.1.S1_at    | MmugDNA.3336.1  | 6.52  | 6.6   | 0.44 | 0.51 | -1.05 | 0.683205 | 0.152728 | 0.858347 | 0.427571 |
| MmugDNA.33361.1.S1_at   | MmugDNA.33361.1 | 4.82  | 5.2   | 0.19 | 0.22 | -1.3  | 0.092466 | 0.114682 | 0.449162 | 0.381227 |
| MmugDNA.33362.1.S1_at   | MmugDNA.33362.1 | 4.94  | 4.94  | 0    | 0.31 | 1     | 0.370786 | 0.49805  | 0.681666 | 0.697228 |
| MmugDNA.33363.1.S1_at   | MmugDNA.33363.1 | 3.97  | 3.8   | 0.31 | 0.06 | 1.13  | 0.351556 | 0.362306 | 0.669126 | 0.602931 |
| MmugDNA.33364.1.S1_at   | MmugDNA.33364.1 | 8.3   | 9.17  | 0.53 | 0.88 | -1.82 | 0.21728  | 0.324125 | 0.576846 | 0.574823 |
| MmugDNA.33365.1.S1_at   | MmugDNA.33365.1 | 5.81  | 5.39  | 1.33 | 0.83 | 1.33  | 0.588397 | 0.516975 | 0.808931 | 0.709346 |
| MmugDNA.33368.1.S1_at   | MmugDNA.33368.1 | 7.14  | 7.21  | 0.15 | 0.07 | -1.05 | 0.77441  | 0.578601 | 0.905213 | 0.748595 |
| MmugDNA.33369.1.S1_at   | MmugDNA.33369.1 | 4.81  | 4.85  | 0.02 | 0.39 | -1.02 | 0.962604 | 0.734929 | 0.985589 | 0.846588 |
| MmugDNA.3337.1.S1_at    | MmugDNA.3337.1  | 8.47  | 7.26  | 0.29 | 0.59 | 2.32  | 0.046448 | 0.042255 | 0.363009 | 0.250023 |
| MmugDNA.33372.1.S1_at   | MmugDNA.33372.1 | 3.94  | 4.42  | 0.04 | 0.54 | -1.4  | 0.21184  | 0.228778 | 0.572347 | 0.501008 |
| MmugDNA.33374.1.S1_at   | MmugDNA.33374.1 | 7.42  | 7.54  | 0.34 | 0.59 | -1.09 | 0.949751 | 0.835717 | 0.980943 | 0.905981 |

|                         |                 |       |       |      |      |       |          |          |          |          |
|-------------------------|-----------------|-------|-------|------|------|-------|----------|----------|----------|----------|
| MmugDNA.33375.1.S1_at   | MmugDNA.33375.1 | 8.99  | 8.98  | 0.12 | 0.31 | 1     | 0.392496 | 0.29786  | 0.694657 | 0.556546 |
| MmugDNA.33377.1.S1_at   | MmugDNA.33377.1 | 3.61  | 3.41  | 0.85 | 0.05 | 1.15  | 0.218147 | 0.223755 | 0.577744 | 0.496696 |
| MmugDNA.33378.1.S1_s_at | MmugDNA.33378.1 | 9.68  | 9.9   | 0.03 | 0.24 | -1.17 | 0.184934 | 0.091439 | 0.548379 | 0.346417 |
| MmugDNA.33379.1.S1_at   | MmugDNA.33379.1 | 10.64 | 9.39  | 0.31 | 0.67 | 2.39  | 0.062507 | 0.055494 | 0.398319 | 0.281404 |
| MmugDNA.3338.1.S1_at    | MmugDNA.3338.1  | 5.86  | 5.08  | 0.49 | 0.4  | 1.71  | 0.352349 | 0.597464 | 0.669556 | 0.760203 |
| MmugDNA.33380.1.S1_at   | MmugDNA.33380.1 | 8.01  | 7.49  | 0.22 | 0.25 | 1.44  | 0.038421 | 0.00542  | 0.344318 | 0.10157  |
| MmugDNA.33381.1.S1_at   | MmugDNA.33381.1 | 10.13 | 10.43 | 0.62 | 0.7  | -1.23 | 0.894702 | 0.725306 | 0.957917 | 0.840954 |
| MmugDNA.33382.1.S1_at   | MmugDNA.33382.1 | 3.2   | 3.2   | 0.03 | 0    | 1     | 0.342254 | 0.605918 | 0.663129 | 0.765543 |
| MmugDNA.33382.1.S1_s_at | MmugDNA.33382.1 | 6.74  | 6.82  | 0.31 | 0.09 | -1.06 | 0.493723 | 0.685632 | 0.756299 | 0.816553 |
| MmugDNA.33383.1.S1_at   | MmugDNA.33383.1 | 6.16  | 8.81  | 0.32 | 0.4  | -6.24 | 0.000794 | 0.000108 | 0.136818 | 0.028099 |
| MmugDNA.33384.1.S1_at   | MmugDNA.33384.1 | 6.38  | 6.87  | 0.43 | 0.37 | -1.41 | 0.12829  | 0.071304 | 0.49431  | 0.31334  |
| MmugDNA.33384.1.S1_s_at | MmugDNA.33384.1 | 7.56  | 7.77  | 0.3  | 0.56 | -1.16 | 0.645879 | 0.491034 | 0.840534 | 0.692751 |
| MmugDNA.33385.1.S1_at   | MmugDNA.33385.1 | 3.4   | 3.46  | 0.5  | 0.13 | -1.04 | 0.637209 | 0.558274 | 0.836    | 0.735506 |
| MmugDNA.33386.1.S1_at   | MmugDNA.33386.1 | 12.78 | 12.67 | 0.07 | 0.1  | 1.08  | 0.201318 | 0.272417 | 0.563941 | 0.537122 |
| MmugDNA.33388.1.S1_at   | MmugDNA.33388.1 | 5.33  | 5.26  | 0.19 | 0.07 | 1.05  | 0.696509 | 0.416339 | 0.865298 | 0.641553 |
| MmugDNA.33389.1.S1_at   | MmugDNA.33389.1 | 4.34  | 5.23  | 0.17 | 0.93 | -1.85 | 0.17519  | 0.221318 | 0.538831 | 0.494644 |
| MmugDNA.3339.1.S1_at    | MmugDNA.3339.1  | 6.75  | 6.85  | 0.18 | 0.03 | -1.07 | 0.393239 | 0.231417 | 0.695073 | 0.503138 |
| MmugDNA.33391.1.S1_at   | MmugDNA.33391.1 | 5.84  | 5.21  | 0.13 | 0.37 | 1.55  | 0.195901 | 0.042146 | 0.558998 | 0.249753 |
| MmugDNA.33393.1.S1_at   | MmugDNA.33393.1 | 5.5   | 5.2   | 0.13 | 0.09 | 1.23  | 0.03857  | 0.081565 | 0.344633 | 0.329764 |
| MmugDNA.33394.1.S1_at   | MmugDNA.33394.1 | 4.75  | 5.41  | 0.02 | 0.57 | -1.58 | 0.116349 | 0.115737 | 0.480041 | 0.382814 |
| MmugDNA.33396.1.S1_at   | MmugDNA.33396.1 | 6.7   | 8.14  | 0.37 | 0.15 | -2.71 | 0.003399 | 0.008128 | 0.177724 | 0.11972  |
| MmugDNA.33397.1.S1_at   | MmugDNA.33397.1 | 7.11  | 6.86  | 0.36 | 0.2  | 1.18  | 0.402498 | 0.503834 | 0.701431 | 0.701184 |
| MmugDNA.33398.1.S1_at   | MmugDNA.33398.1 | 3.16  | 3.08  | 0.05 | 0.05 | 1.05  | 0.102855 | 0.412812 | 0.46254  | 0.639121 |
| MmugDNA.33399.1.S1_at   | MmugDNA.33399.1 | 6.21  | 6.12  | 0.17 | 0.31 | 1.07  | 0.173107 | 0.148155 | 0.536812 | 0.422678 |
| MmugDNA.3340.1.S1_at    | MmugDNA.3340.1  | 10.67 | 10.09 | 0.47 | 0.94 | 1.5   | 0.634651 | 0.660952 | 0.834598 | 0.801643 |
| MmugDNA.33400.1.S1_at   | MmugDNA.33400.1 | 11.89 | 11.79 | 0.07 | 0.15 | 1.07  | 0.211101 | 0.175736 | 0.571977 | 0.452344 |
| MmugDNA.33401.1.S1_at   | MmugDNA.33401.1 | 6.13  | 4.72  | 0.23 | 0.12 | 2.66  | 0.00043  | 0.000076 | 0.131276 | 0.027016 |
| MmugDNA.33402.1.S1_at   | MmugDNA.33402.1 | 6     | 4.53  | 0.51 | 0.05 | 2.78  | 0.007772 | 0.004688 | 0.212235 | 0.095363 |
| MmugDNA.33403.1.S1_at   | MmugDNA.33403.1 | 11.75 | 12.39 | 0.07 | 0.18 | -1.55 | 0.004295 | 0.001523 | 0.18216  | 0.059307 |
| MmugDNA.33404.1.S1_at   | MmugDNA.33404.1 | 12.82 | 11.89 | 0.21 | 0.12 | 1.9   | 0.002687 | 0.000436 | 0.164386 | 0.038359 |
| MmugDNA.33405.1.S1_at   | MmugDNA.33405.1 | 5.34  | 4.57  | 0.54 | 0.16 | 1.7   | 0.094269 | 0.068733 | 0.451807 | 0.308711 |
| MmugDNA.33406.1.S1_at   | MmugDNA.33406.1 | 9.49  | 9.8   | 0.04 | 0.27 | -1.24 | 0.144591 | 0.033159 | 0.511015 | 0.225374 |
| MmugDNA.33407.1.S1_at   | MmugDNA.33407.1 | 6.24  | 6.43  | 0.11 | 0.08 | -1.14 | 0.032535 | 0.050088 | 0.325316 | 0.268916 |
| MmugDNA.3341.1.S1_at    | MmugDNA.3341.1  | 2.96  | 2.98  | 0.01 | 0.13 | -1.01 | 0.295943 | 0.331098 | 0.632176 | 0.579816 |
| MmugDNA.33411.1.S1_at   | MmugDNA.33411.1 | 2.85  | 3.12  | 0.09 | 0.16 | -1.2  | 0.234695 | 0.491498 | 0.588808 | 0.693004 |
| MmugDNA.33412.1.S1_at   | MmugDNA.33412.1 | 4.45  | 4.31  | 0.19 | 0.11 | 1.1   | 0.570578 | 0.251984 | 0.799614 | 0.520646 |
| MmugDNA.33413.1.S1_at   | MmugDNA.33413.1 | 9.08  | 9.69  | 0.54 | 0.5  | -1.52 | 0.499697 | 0.131028 | 0.759313 | 0.403053 |
| MmugDNA.33414.1.S1_at   | MmugDNA.33414.1 | 4.23  | 4.34  | 0.16 | 0.08 | -1.08 | 0.394    | 0.021758 | 0.6956   | 0.184563 |
| MmugDNA.33415.1.S1_at   | MmugDNA.33415.1 | 7.43  | 7.72  | 0.17 | 0.36 | -1.22 | 0.323143 | 0.180585 | 0.651326 | 0.457191 |
| MmugDNA.33416.1.S1_at   | MmugDNA.33416.1 | 7.56  | 7.25  | 0.36 | 0.29 | 1.24  | 0.848042 | 0.946815 | 0.93912  | 0.969783 |
| MmugDNA.33417.1.S1_at   | MmugDNA.33417.1 | 6.1   | 5.77  | 0.31 | 0.11 | 1.26  | 0.35169  | 0.115304 | 0.669126 | 0.382354 |

|                         |                 |       |       |      |      |       |          |          |          |          |
|-------------------------|-----------------|-------|-------|------|------|-------|----------|----------|----------|----------|
| MmugDNA.33418.1.S1_at   | MmugDNA.33418.1 | 8.75  | 7.93  | 0.33 | 0.37 | 1.77  | 0.019002 | 0.003002 | 0.272675 | 0.079958 |
| MmugDNA.33419.1.S1_at   | MmugDNA.33419.1 | 3.48  | 3.21  | 0.05 | 0.03 | 1.2   | 0.004792 | 0.223733 | 0.184674 | 0.496672 |
| MmugDNA.33420.1.S1_at   | MmugDNA.33420.1 | 5.7   | 5.61  | 0.57 | 0.54 | 1.06  | 0.418095 | 0.500532 | 0.711128 | 0.69911  |
| MmugDNA.33421.1.S1_at   | MmugDNA.33421.1 | 12.69 | 12.62 | 0.16 | 0.03 | 1.04  | 0.864567 | 0.312602 | 0.945575 | 0.567268 |
| MmugDNA.33422.1.S1_at   | MmugDNA.33422.1 | 4.76  | 4.64  | 0.46 | 0.43 | 1.09  | 0.165416 | 0.583662 | 0.529362 | 0.751908 |
| MmugDNA.33424.1.S1_at   | MmugDNA.33424.1 | 7.22  | 6.85  | 0.16 | 0.19 | 1.29  | 0.08324  | 0.041854 | 0.435702 | 0.249172 |
| MmugDNA.33425.1.S1_at   | MmugDNA.33425.1 | 11.3  | 11.1  | 0.33 | 0.12 | 1.16  | 0.362789 | 0.48604  | 0.676226 | 0.689563 |
| MmugDNA.33427.1.S1_at   | MmugDNA.33427.1 | 8.45  | 8.67  | 0.29 | 0.79 | -1.17 | 0.919332 | 0.422562 | 0.968622 | 0.645762 |
| MmugDNA.33428.1.S1_at   | MmugDNA.33428.1 | 12.04 | 12.26 | 0.13 | 0.24 | -1.17 | 0.227895 | 0.314758 | 0.585293 | 0.568489 |
| MmugDNA.33431.1.S1_at   | MmugDNA.33431.1 | 4.75  | 5.87  | 0.21 | 0.7  | -2.16 | 0.168044 | 0.205741 | 0.53256  | 0.48007  |
| MmugDNA.33435.1.S1_at   | MmugDNA.33435.1 | 6.24  | 5.78  | 0.97 | 0.81 | 1.38  | 0.263513 | 0.427532 | 0.609415 | 0.649318 |
| MmugDNA.33437.1.S1_at   | MmugDNA.33437.1 | 7.09  | 7.49  | 0.19 | 0.35 | -1.31 | 0.043257 | 0.038324 | 0.3567   | 0.240641 |
| MmugDNA.33437.1.S1_s_at | MmugDNA.33437.1 | 9.14  | 9.37  | 0.19 | 0.45 | -1.17 | 0.102074 | 0.094082 | 0.461443 | 0.350727 |
| MmugDNA.3344.1.S1_at    | MmugDNA.3344.1  | 9.41  | 8.91  | 0.25 | 0.66 | 1.41  | 0.255451 | 0.342927 | 0.603226 | 0.588745 |
| MmugDNA.33440.1.S1_at   | MmugDNA.33440.1 | 4.02  | 4.01  | 0    | 0.08 | 1     | 0.450463 | 0.764915 | 0.73096  | 0.863324 |
| MmugDNA.33441.1.S1_at   | MmugDNA.33441.1 | 3.78  | 3.81  | 0.02 | 0.29 | -1.02 | 0.900895 | 0.988204 | 0.960387 | 0.993428 |
| MmugDNA.33442.1.S1_at   | MmugDNA.33442.1 | 7.61  | 8.08  | 0.25 | 0.53 | -1.39 | 0.250512 | 0.325797 | 0.600389 | 0.576049 |
| MmugDNA.33444.1.S1_at   | MmugDNA.33444.1 | 7.48  | 6.85  | 0.13 | 0.87 | 1.55  | 0.279307 | 0.160445 | 0.62104  | 0.436569 |
| MmugDNA.33445.1.S1_at   | MmugDNA.33445.1 | 8.23  | 7.16  | 0.61 | 1.02 | 2.1   | 0.132679 | 0.148849 | 0.49874  | 0.423218 |
| MmugDNA.33446.1.S1_at   | MmugDNA.33446.1 | 6.08  | 5.21  | 0.17 | 0.45 | 1.83  | 0.087562 | 0.077791 | 0.441949 | 0.323933 |
| MmugDNA.33447.1.S1_at   | MmugDNA.33447.1 | 3.38  | 3.32  | 0.31 | 0.11 | 1.05  | 0.753275 | 0.880819 | 0.894753 | 0.931979 |
| MmugDNA.33448.1.S1_s_at | MmugDNA.33448.1 | 8.93  | 9.46  | 1.75 | 0.32 | -1.44 | 0.668942 | 0.856645 | 0.851986 | 0.918123 |
| MmugDNA.3345.1.S1_at    | MmugDNA.3345.1  | 6.64  | 6.47  | 0.29 | 0.11 | 1.12  | 0.374344 | 0.06996  | 0.683612 | 0.31072  |
| MmugDNA.33450.1.S1_at   | MmugDNA.33450.1 | 5.03  | 4.65  | 0.37 | 0.14 | 1.3   | 0.118302 | 0.085198 | 0.482602 | 0.337096 |
| MmugDNA.33452.1.S1_at   | MmugDNA.33452.1 | 4.13  | 4.14  | 0.24 | 0    | -1.01 | 0.411855 | 0.771993 | 0.707626 | 0.867436 |
| MmugDNA.33453.1.S1_at   | MmugDNA.33453.1 | 6.52  | 7.21  | 0.35 | 0.54 | -1.61 | 0.241519 | 0.016241 | 0.593941 | 0.161591 |
| MmugDNA.33454.1.S1_at   | MmugDNA.33454.1 | 5.31  | 5.4   | 0.07 | 0.18 | -1.06 | 0.973466 | 0.553973 | 0.989603 | 0.732896 |
| MmugDNA.33455.1.S1_at   | MmugDNA.33455.1 | 4.33  | 4.28  | 0.06 | 0.12 | 1.03  | 0.522772 | 0.483887 | 0.772248 | 0.688227 |
| MmugDNA.33456.1.S1_s_at | MmugDNA.33456.1 | 7.54  | 7.56  | 0.1  | 0.2  | -1.02 | 0.555197 | 0.21271  | 0.791288 | 0.486686 |
| MmugDNA.33457.1.S1_at   | MmugDNA.33457.1 | 7.58  | 7.02  | 0.16 | 0.24 | 1.47  | 0.033845 | 0.073924 | 0.330262 | 0.317364 |
| MmugDNA.33458.1.S1_at   | MmugDNA.33458.1 | 5.22  | 5.25  | 0.14 | 0.09 | -1.02 | 0.162168 | 0.235175 | 0.526638 | 0.50629  |
| MmugDNA.33459.1.S1_at   | MmugDNA.33459.1 | 3.89  | 3.96  | 0.33 | 0.18 | -1.05 | 0.765498 | 0.927505 | 0.901309 | 0.958809 |
| MmugDNA.3346.1.S1_at    | MmugDNA.3346.1  | 8.36  | 8.21  | 0.2  | 0.06 | 1.11  | 0.079876 | 0.101634 | 0.430147 | 0.361529 |
| MmugDNA.33461.1.S1_at   | MmugDNA.33461.1 | 6.04  | 6.16  | 0.28 | 0.08 | -1.09 | 0.747261 | 0.163902 | 0.891773 | 0.440105 |
| MmugDNA.33462.1.S1_at   | MmugDNA.33462.1 | 7.98  | 7.5   | 0.16 | 0.08 | 1.39  | 0.011379 | 0.038084 | 0.235384 | 0.239753 |
| MmugDNA.33464.1.S1_at   | MmugDNA.33464.1 | 9.25  | 8.7   | 0.19 | 0.39 | 1.46  | 0.079982 | 0.072905 | 0.430176 | 0.315942 |
| MmugDNA.33468.1.S1_at   | MmugDNA.33468.1 | 4.62  | 4.58  | 0.15 | 0.03 | 1.03  | 0.391659 | 0.796039 | 0.694174 | 0.882493 |
| MmugDNA.33469.1.S1_at   | MmugDNA.33469.1 | 3.01  | 3.1   | 0.08 | 0.03 | -1.06 | 0.135232 | 0.159571 | 0.501995 | 0.435774 |
| MmugDNA.3347.1.S1_at    | MmugDNA.3347.1  | 4.15  | 4.14  | 0.69 | 0.12 | 1.01  | 0.361449 | 0.506602 | 0.675194 | 0.702503 |
| MmugDNA.33470.1.S1_at   | MmugDNA.33470.1 | 4.57  | 4.51  | 0.03 | 0.15 | 1.05  | 0.155547 | 0.182068 | 0.520278 | 0.45857  |
| MmugDNA.33471.1.S1_at   | MmugDNA.33471.1 | 5.14  | 5.06  | 0.09 | 0.36 | 1.06  | 0.584608 | 0.317991 | 0.807089 | 0.571046 |

|                         |                 |       |       |      |      |       |          |          |          |          |
|-------------------------|-----------------|-------|-------|------|------|-------|----------|----------|----------|----------|
| MmugDNA.33473.1.S1_at   | MmugDNA.33473.1 | 4.2   | 4.43  | 0.33 | 0.12 | -1.18 | 0.602088 | 0.801745 | 0.816299 | 0.885903 |
| MmugDNA.33474.1.S1_at   | MmugDNA.33474.1 | 9.34  | 9.13  | 0.27 | 0.25 | 1.16  | 0.614353 | 0.790186 | 0.823199 | 0.878732 |
| MmugDNA.33475.1.S1_at   | MmugDNA.33475.1 | 7.06  | 6.73  | 0.18 | 0.14 | 1.25  | 0.124635 | 0.139097 | 0.49075  | 0.412205 |
| MmugDNA.33476.1.S1_at   | MmugDNA.33476.1 | 8.71  | 8.48  | 0.25 | 0.23 | 1.17  | 0.224743 | 0.25513  | 0.582807 | 0.52317  |
| MmugDNA.33477.1.S1_at   | MmugDNA.33477.1 | 4.9   | 4.78  | 0.1  | 0.15 | 1.09  | 0.781247 | 0.258023 | 0.908721 | 0.52557  |
| MmugDNA.33478.1.S1_at   | MmugDNA.33478.1 | 5.38  | 5.28  | 0.25 | 0.1  | 1.07  | 0.34825  | 0.411617 | 0.667097 | 0.638328 |
| MmugDNA.33479.1.S1_at   | MmugDNA.33479.1 | 2.76  | 2.86  | 0.09 | 0.16 | -1.07 | 0.23019  | 0.401619 | 0.587112 | 0.631068 |
| MmugDNA.3348.1.S1_at    | MmugDNA.3348.1  | 4.89  | 4.89  | 0.14 | 0.07 | 1     | 0.603684 | 0.234526 | 0.817274 | 0.505718 |
| MmugDNA.33480.1.S1_at   | MmugDNA.33480.1 | 3.88  | 3.9   | 0.32 | 0.15 | -1.02 | 0.748528 | 0.6523   | 0.892494 | 0.796682 |
| MmugDNA.33481.1.S1_at   | MmugDNA.33481.1 | 9.28  | 9.12  | 1.13 | 0.39 | 1.12  | 0.968631 | 0.15872  | 0.988176 | 0.434797 |
| MmugDNA.33481.1.S1_x_at | MmugDNA.33481.1 | 9.63  | 9.44  | 1.06 | 0.38 | 1.13  | 0.973177 | 0.177126 | 0.989572 | 0.453611 |
| MmugDNA.33482.1.S1_at   | MmugDNA.33482.1 | 3.86  | 3.65  | 0.24 | 0.35 | 1.15  | 0.210529 | 0.245054 | 0.5718   | 0.514835 |
| MmugDNA.33485.1.S1_at   | MmugDNA.33485.1 | 11.14 | 10.93 | 0.07 | 0.19 | 1.15  | 0.061571 | 0.010433 | 0.396368 | 0.133551 |
| MmugDNA.33486.1.S1_at   | MmugDNA.33486.1 | 11.24 | 11.32 | 0.1  | 0.32 | -1.06 | 0.536373 | 0.119898 | 0.77949  | 0.388593 |
| MmugDNA.32770.1.S1_s_at | MmugDNA.32770.1 | 2.91  | 3.11  | 0.4  | 0.07 | -1.15 | 0.836852 | 0.811164 | 0.934027 | 0.89102  |
| MmugDNA.33488.1.S1_at   | MmugDNA.33488.1 | 6.2   | 6.19  | 0.32 | 0.14 | 1.01  | 0.592172 | 0.340612 | 0.810873 | 0.586796 |
| MmugDNA.33489.1.S1_at   | MmugDNA.33489.1 | 12.88 | 12.74 | 0.11 | 0.08 | 1.11  | 0.326678 | 0.263784 | 0.653184 | 0.530066 |
| MmugDNA.3349.1.S1_at    | MmugDNA.3349.1  | 4.21  | 4.17  | 0.08 | 0.21 | 1.03  | 0.559857 | 0.741881 | 0.794172 | 0.850527 |
| MmugDNA.33490.1.S1_at   | MmugDNA.33490.1 | 6.86  | 6.2   | 0.77 | 0.22 | 1.57  | 0.211946 | 0.081417 | 0.572419 | 0.329613 |
| MmugDNA.33491.1.S1_at   | MmugDNA.33491.1 | 3.1   | 3.07  | 0.05 | 0.11 | 1.02  | 0.969371 | 0.902994 | 0.988296 | 0.944941 |
| MmugDNA.33492.1.S1_at   | MmugDNA.33492.1 | 4.97  | 5.37  | 0.24 | 0.88 | -1.32 | 0.464399 | 0.523606 | 0.739221 | 0.713854 |
| MmugDNA.33493.1.S1_at   | MmugDNA.33493.1 | 7.03  | 6.58  | 0.76 | 1.35 | 1.36  | 0.979483 | 0.832674 | 0.99244  | 0.904017 |
| MmugDNA.33494.1.S1_at   | MmugDNA.33494.1 | 10.95 | 10.18 | 0.46 | 1.15 | 1.7   | 0.170273 | 0.196925 | 0.534249 | 0.472072 |
| MmugDNA.33495.1.S1_at   | MmugDNA.33495.1 | 8.44  | 7.16  | 1.22 | 2.21 | 2.43  | 0.705686 | 0.594036 | 0.870245 | 0.758517 |
| MmugDNA.33496.1.S1_at   | MmugDNA.33496.1 | 3.32  | 3.46  | 0.09 | 0.12 | -1.1  | 0.13118  | 0.077728 | 0.497719 | 0.323851 |
| MmugDNA.33497.1.S1_at   | MmugDNA.33497.1 | 7.45  | 7.67  | 0.21 | 0.31 | -1.17 | 0.673736 | 0.405429 | 0.853751 | 0.633757 |
| MmugDNA.33498.1.S1_at   | MmugDNA.33498.1 | 7.07  | 7.13  | 0.05 | 0.1  | -1.05 | 0.070987 | 0.017948 | 0.414673 | 0.168998 |
| MmugDNA.33498.1.S1_s_at | MmugDNA.33498.1 | 6.09  | 6.45  | 0.1  | 0.07 | -1.29 | 0.011514 | 0.024757 | 0.23613  | 0.197104 |
| MmugDNA.33499.1.S1_at   | MmugDNA.33499.1 | 3.13  | 3.19  | 0.04 | 0.08 | -1.04 | 0.276409 | 0.166219 | 0.618512 | 0.442775 |
| MmugDNA.335.1.S1_at     | MmugDNA.335.1   | 4.88  | 5.01  | 0.17 | 0.18 | -1.1  | 0.81754  | 0.781216 | 0.925948 | 0.873073 |
| MmugDNA.33500.1.S1_at   | MmugDNA.33500.1 | 3.95  | 3.86  | 0.03 | 0.27 | 1.07  | 0.635024 | 0.377915 | 0.834812 | 0.615264 |
| MmugDNA.33501.1.S1_at   | MmugDNA.33501.1 | 7.96  | 7.73  | 0.66 | 0.35 | 1.17  | 0.2779   | 0.377509 | 0.620023 | 0.614989 |
| MmugDNA.33502.1.S1_at   | MmugDNA.33502.1 | 3.99  | 4.02  | 0.33 | 0.11 | -1.02 | 0.513645 | 0.514608 | 0.766429 | 0.707767 |
| MmugDNA.33503.1.S1_at   | MmugDNA.33503.1 | 5.37  | 3.37  | 1.56 | 0.73 | 4     | 0.115523 | 0.080054 | 0.478809 | 0.327429 |
| MmugDNA.33504.1.S1_at   | MmugDNA.33504.1 | 5.29  | 5.59  | 0.09 | 0.12 | -1.23 | 0.10436  | 0.159235 | 0.464351 | 0.435217 |
| MmugDNA.33505.1.S1_at   | MmugDNA.33505.1 | 5.72  | 5.72  | 0.11 | 0.12 | 1     | 0.987676 | 0.975562 | 0.995604 | 0.986686 |
| MmugDNA.33506.1.S1_at   | MmugDNA.33506.1 | 5.17  | 4.51  | 0.34 | 0.77 | 1.58  | 0.71351  | 0.871783 | 0.874503 | 0.927058 |
| MmugDNA.33507.1.S1_at   | MmugDNA.33507.1 | 5.39  | 5.28  | 0.56 | 0.22 | 1.08  | 0.280908 | 0.303512 | 0.621973 | 0.561    |
| MmugDNA.33508.1.S1_at   | MmugDNA.33508.1 | 3.81  | 3.75  | 0.19 | 0.23 | 1.04  | 0.379677 | 0.506387 | 0.687063 | 0.702371 |
| MmugDNA.33509.1.S1_at   | MmugDNA.33509.1 | 6.75  | 6.79  | 0.66 | 0.28 | -1.03 | 0.995049 | 0.901204 | 0.998246 | 0.943829 |
| MmugDNA.3351.1.S1_at    | MmugDNA.3351.1  | 9.91  | 10.42 | 0.19 | 1.12 | -1.43 | 0.407872 | 0.427489 | 0.704899 | 0.649302 |

|                         |                 |       |       |      |      |       |          |          |          |          |
|-------------------------|-----------------|-------|-------|------|------|-------|----------|----------|----------|----------|
| MmugDNA.33510.1.S1_at   | MmugDNA.33510.1 | 7.16  | 7.3   | 0.33 | 0.85 | -1.1  | 0.5857   | 0.776143 | 0.807612 | 0.869726 |
| MmugDNA.33511.1.S1_at   | MmugDNA.33511.1 | 7.39  | 6.55  | 0.16 | 0.54 | 1.8   | 0.149501 | 0.026605 | 0.514055 | 0.204008 |
| MmugDNA.33512.1.S1_at   | MmugDNA.33512.1 | 11.98 | 11.95 | 0.38 | 0.25 | 1.02  | 0.507764 | 0.6601   | 0.763104 | 0.801083 |
| MmugDNA.33514.1.S1_at   | MmugDNA.33514.1 | 3.81  | 3.83  | 1.13 | 0.04 | -1.02 | 0.398162 | 0.458671 | 0.698555 | 0.671276 |
| MmugDNA.33516.1.S1_s_at | MmugDNA.33516.1 | 6.37  | 6.64  | 0.32 | 0.08 | -1.2  | 0.078338 | 0.121906 | 0.428302 | 0.391291 |
| MmugDNA.33517.1.S1_at   | MmugDNA.33517.1 | 3.19  | 3.51  | 0.07 | 0.37 | -1.24 | 0.075533 | 0.144453 | 0.422803 | 0.418323 |
| MmugDNA.33519.1.S1_at   | MmugDNA.33519.1 | 6.2   | 6.06  | 0.32 | 0.82 | 1.1   | 0.460358 | 0.199426 | 0.736877 | 0.47402  |
| MmugDNA.3352.1.S1_at    | MmugDNA.3352.1  | 10.73 | 9.97  | 0.03 | 0.51 | 1.7   | 0.174552 | 0.181767 | 0.538195 | 0.458373 |
| MmugDNA.3352.1.S1_s_at  | MmugDNA.3352.1  | 9.99  | 9.1   | 0.13 | 0.54 | 1.85  | 0.14656  | 0.153439 | 0.512668 | 0.42827  |
| MmugDNA.33520.1.S1_at   | MmugDNA.33520.1 | 5.42  | 5.52  | 0.13 | 0.06 | -1.07 | 0.542975 | 0.41239  | 0.783716 | 0.6388   |
| MmugDNA.33521.1.S1_at   | MmugDNA.33521.1 | 5.93  | 6     | 0.16 | 0.09 | -1.05 | 0.883154 | 0.925409 | 0.952971 | 0.957803 |
| MmugDNA.33522.1.S1_at   | MmugDNA.33522.1 | 10.74 | 11.17 | 0.07 | 0.4  | -1.35 | 0.125449 | 0.132054 | 0.491333 | 0.404043 |
| MmugDNA.33523.1.S1_at   | MmugDNA.33523.1 | 6.87  | 5.69  | 1.12 | 0.51 | 2.26  | 0.166405 | 0.306991 | 0.530062 | 0.563427 |
| MmugDNA.33524.1.S1_at   | MmugDNA.33524.1 | 8.76  | 9.41  | 0.32 | 0.06 | -1.57 | 0.021011 | 0.013234 | 0.281947 | 0.147534 |
| MmugDNA.33525.1.S1_at   | MmugDNA.33525.1 | 5.23  | 5.16  | 0.16 | 0.05 | 1.05  | 0.614458 | 0.563826 | 0.823199 | 0.73888  |
| MmugDNA.33526.1.S1_at   | MmugDNA.33526.1 | 4.38  | 4.81  | 0.12 | 0.26 | -1.34 | 0.07529  | 0.066832 | 0.422217 | 0.304399 |
| MmugDNA.33527.1.S1_s_at | MmugDNA.33527.1 | 8.15  | 8.48  | 0.48 | 0.85 | -1.26 | 0.935019 | 0.245115 | 0.974886 | 0.514861 |
| MmugDNA.33528.1.S1_at   | MmugDNA.33528.1 | 11.3  | 11.12 | 0.31 | 0.12 | 1.13  | 0.23671  | 0.090535 | 0.590504 | 0.345015 |
| MmugDNA.3353.1.S1_at    | MmugDNA.3353.1  | 3.31  | 3.44  | 0.22 | 0.11 | -1.1  | 0.313468 | 0.531601 | 0.645195 | 0.718783 |
| MmugDNA.33530.1.S1_at   | MmugDNA.33530.1 | 6.07  | 5.81  | 0.14 | 0.06 | 1.2   | 0.041743 | 0.080616 | 0.35257  | 0.328427 |
| MmugDNA.33531.1.S1_at   | MmugDNA.33531.1 | 6.73  | 6.74  | 0.06 | 0.08 | -1.01 | 0.770923 | 0.318139 | 0.903515 | 0.571046 |
| MmugDNA.33532.1.S1_at   | MmugDNA.33532.1 | 4.17  | 3.53  | 0.68 | 0.14 | 1.55  | 0.190508 | 0.182753 | 0.55308  | 0.459215 |
| MmugDNA.33533.1.S1_at   | MmugDNA.33533.1 | 9.17  | 9.42  | 0.09 | 0.41 | -1.19 | 0.291033 | 0.422971 | 0.628696 | 0.646141 |
| MmugDNA.33533.1.S1_x_at | MmugDNA.33533.1 | 8.99  | 9.3   | 0.1  | 0.48 | -1.24 | 0.254042 | 0.315445 | 0.602339 | 0.568953 |
| MmugDNA.33534.1.S1_at   | MmugDNA.33534.1 | 4.97  | 5.02  | 0.09 | 0.03 | -1.04 | 0.972582 | 0.134731 | 0.989474 | 0.406772 |
| MmugDNA.33539.1.S1_at   | MmugDNA.33539.1 | 4.93  | 5.39  | 0.78 | 1.45 | -1.38 | 0.984627 | 0.963457 | 0.994541 | 0.979631 |
| MmugDNA.3354.1.S1_at    | MmugDNA.3354.1  | 6.03  | 4.97  | 0.13 | 0.81 | 2.1   | 0.126325 | 0.141807 | 0.4926   | 0.415331 |
| MmugDNA.33542.1.S1_at   | MmugDNA.33542.1 | 3.66  | 3.61  | 0.16 | 0.19 | 1.04  | 0.645516 | 0.719406 | 0.840383 | 0.837629 |
| MmugDNA.33545.1.S1_at   | MmugDNA.33545.1 | 2.85  | 2.8   | 0.02 | 0.07 | 1.03  | 0.62344  | 0.025087 | 0.827977 | 0.19842  |
| MmugDNA.33547.1.S1_at   | MmugDNA.33547.1 | 4.25  | 4.12  | 0.37 | 0.34 | 1.09  | 0.528223 | 0.195053 | 0.775379 | 0.470179 |
| MmugDNA.33548.1.S1_at   | MmugDNA.33548.1 | 8.77  | 9.05  | 0.33 | 0.52 | -1.21 | 0.355039 | 0.143797 | 0.670716 | 0.417593 |
| MmugDNA.33549.1.S1_at   | MmugDNA.33549.1 | 8.67  | 7.67  | 0.3  | 1.05 | 2     | 0.578891 | 0.673882 | 0.804059 | 0.809483 |
| MmugDNA.3355.1.S1_at    | MmugDNA.3355.1  | 5.73  | 6.14  | 0.22 | 0.04 | -1.33 | 0.100853 | 0.151641 | 0.461009 | 0.426383 |
| MmugDNA.33550.1.S1_at   | MmugDNA.33550.1 | 7.03  | 7.43  | 0.24 | 0.09 | -1.33 | 0.068328 | 0.048787 | 0.410012 | 0.26581  |
| MmugDNA.33551.1.S1_at   | MmugDNA.33551.1 | 3.23  | 3.27  | 0.2  | 0.07 | -1.03 | 0.544976 | 0.737071 | 0.784702 | 0.847791 |
| MmugDNA.33552.1.S1_at   | MmugDNA.33552.1 | 4.37  | 4.56  | 0.07 | 0.6  | -1.14 | 0.40665  | 0.553934 | 0.703786 | 0.732896 |
| MmugDNA.33553.1.S1_at   | MmugDNA.33553.1 | 8.78  | 7.86  | 1.42 | 1.06 | 1.89  | 0.18105  | 0.235977 | 0.545554 | 0.507056 |
| MmugDNA.33554.1.S1_at   | MmugDNA.33554.1 | 6.38  | 6.06  | 0.95 | 0.51 | 1.25  | 0.247659 | 0.251572 | 0.598869 | 0.520309 |
| MmugDNA.33555.1.S1_at   | MmugDNA.33555.1 | 3.33  | 3.33  | 0.06 | 0.03 | 1     | 0.6159   | 0.414702 | 0.823833 | 0.640456 |
| MmugDNA.33556.1.S1_at   | MmugDNA.33556.1 | 5.88  | 5.97  | 0.21 | 0.21 | -1.07 | 0.298902 | 0.522445 | 0.634431 | 0.713139 |
| MmugDNA.33557.1.S1_at   | MmugDNA.33557.1 | 3.85  | 4.06  | 0.21 | 0.26 | -1.16 | 0.299159 | 0.310182 | 0.634742 | 0.565379 |

|                       |                 |       |       |      |      |       |          |          |          |          |
|-----------------------|-----------------|-------|-------|------|------|-------|----------|----------|----------|----------|
| MmugDNA.33559.1.S1_at | MmugDNA.33559.1 | 4.08  | 4.15  | 0.08 | 0.07 | -1.05 | 0.343469 | 0.216403 | 0.663676 | 0.489999 |
| MmugDNA.3356.1.S1_at  | MmugDNA.3356.1  | 7.19  | 6.57  | 0.9  | 0.11 | 1.53  | 0.328605 | 0.474668 | 0.654397 | 0.681643 |
| MmugDNA.33560.1.S1_at | MmugDNA.33560.1 | 3.92  | 4.12  | 0.13 | 0.13 | -1.15 | 0.293932 | 0.348632 | 0.631033 | 0.592648 |
| MmugDNA.33561.1.S1_at | MmugDNA.33561.1 | 3.6   | 3.62  | 0.06 | 0.22 | -1.01 | 0.347377 | 0.181573 | 0.666415 | 0.458137 |
| MmugDNA.33564.1.S1_at | MmugDNA.33564.1 | 6.54  | 5.97  | 0.46 | 0.17 | 1.49  | 0.051728 | 0.065061 | 0.376323 | 0.301009 |
| MmugDNA.33565.1.S1_at | MmugDNA.33565.1 | 10.75 | 10.42 | 0.04 | 0.25 | 1.26  | 0.093942 | 0.123397 | 0.451538 | 0.394262 |
| MmugDNA.33566.1.S1_at | MmugDNA.33566.1 | 5.57  | 5.54  | 0.15 | 0.07 | 1.02  | 0.853065 | 0.392829 | 0.940695 | 0.625854 |
| MmugDNA.33567.1.S1_at | MmugDNA.33567.1 | 6.41  | 6.38  | 0.03 | 0.09 | 1.02  | 0.718304 | 0.113336 | 0.876382 | 0.379426 |
| MmugDNA.33568.1.S1_at | MmugDNA.33568.1 | 4.01  | 4.42  | 0.12 | 0.21 | -1.32 | 0.052789 | 0.045298 | 0.378449 | 0.257157 |
| MmugDNA.3357.1.S1_at  | MmugDNA.3357.1  | 5.13  | 5.39  | 0.17 | 0.27 | -1.2  | 0.093682 | 0.091111 | 0.450966 | 0.345945 |
| MmugDNA.33570.1.S1_at | MmugDNA.33570.1 | 4.87  | 4.3   | 0.71 | 0.14 | 1.49  | 0.261027 | 0.396067 | 0.607554 | 0.627885 |
| MmugDNA.33574.1.S1_at | MmugDNA.33574.1 | 4.06  | 3.85  | 0.3  | 0.14 | 1.16  | 0.169898 | 0.04485  | 0.534129 | 0.256375 |
| MmugDNA.33576.1.S1_at | MmugDNA.33576.1 | 6.15  | 5.92  | 0.46 | 0.13 | 1.18  | 0.919345 | 0.263051 | 0.968622 | 0.529402 |
| MmugDNA.33577.1.S1_at | MmugDNA.33577.1 | 5.63  | 5.61  | 0.12 | 0.27 | 1.02  | 0.486343 | 0.310886 | 0.751507 | 0.565881 |
| MmugDNA.33578.1.S1_at | MmugDNA.33578.1 | 11.85 | 11.48 | 0.11 | 0.43 | 1.29  | 0.229012 | 0.164653 | 0.586303 | 0.440952 |
| MmugDNA.33579.1.S1_at | MmugDNA.33579.1 | 4.65  | 4.44  | 0.13 | 0.45 | 1.16  | 0.766226 | 0.849195 | 0.901717 | 0.914405 |
| MmugDNA.3358.1.S1_at  | MmugDNA.3358.1  | 11.04 | 10.31 | 0.09 | 0.11 | 1.66  | 0.000529 | 0.000063 | 0.136818 | 0.025805 |
| MmugDNA.33580.1.S1_at | MmugDNA.33580.1 | 4.12  | 4.24  | 0.8  | 0.04 | -1.09 | 0.474834 | 0.483619 | 0.745419 | 0.688067 |
| MmugDNA.33581.1.S1_at | MmugDNA.33581.1 | 6.48  | 6.59  | 0.14 | 0.07 | -1.08 | 0.153166 | 0.177206 | 0.517618 | 0.453647 |
| MmugDNA.33583.1.S1_at | MmugDNA.33583.1 | 4.6   | 4.35  | 0.99 | 0.2  | 1.19  | 0.282607 | 0.299502 | 0.622967 | 0.557918 |
| MmugDNA.33584.1.S1_at | MmugDNA.33584.1 | 8.3   | 8.46  | 0.81 | 0.67 | -1.12 | 0.759666 | 0.814739 | 0.898488 | 0.893092 |
| MmugDNA.33585.1.S1_at | MmugDNA.33585.1 | 11.32 | 10.59 | 0.08 | 0.36 | 1.66  | 0.055659 | 0.04     | 0.384324 | 0.245193 |
| MmugDNA.33586.1.S1_at | MmugDNA.33586.1 | 10.88 | 10.89 | 0.11 | 0.19 | -1.01 | 0.651751 | 0.462074 | 0.843323 | 0.673537 |
| MmugDNA.33587.1.S1_at | MmugDNA.33587.1 | 5.52  | 6.51  | 0.35 | 1.71 | -1.99 | 0.485167 | 0.55902  | 0.750799 | 0.735981 |
| MmugDNA.33588.1.S1_at | MmugDNA.33588.1 | 5.22  | 5.17  | 0.26 | 0.2  | 1.03  | 0.920638 | 0.7123   | 0.969077 | 0.833332 |
| MmugDNA.3359.1.S1_at  | MmugDNA.3359.1  | 7.25  | 7.16  | 0.16 | 0.3  | 1.06  | 0.52072  | 0.393849 | 0.771023 | 0.626605 |
| MmugDNA.33591.1.S1_at | MmugDNA.33591.1 | 8.02  | 8.09  | 0.21 | 0.04 | -1.05 | 0.50101  | 0.664524 | 0.759772 | 0.803413 |
| MmugDNA.33594.1.S1_at | MmugDNA.33594.1 | 5.52  | 5.42  | 0.19 | 0.09 | 1.07  | 0.936218 | 0.295144 | 0.975274 | 0.554551 |
| MmugDNA.33596.1.S1_at | MmugDNA.33596.1 | 3.45  | 3.53  | 0.13 | 0.04 | -1.05 | 0.247048 | 0.612595 | 0.598082 | 0.770091 |
| MmugDNA.33597.1.S1_at | MmugDNA.33597.1 | 7.2   | 7.38  | 0.07 | 0.23 | -1.13 | 0.106952 | 0.040551 | 0.467551 | 0.246264 |
| MmugDNA.33598.1.S1_at | MmugDNA.33598.1 | 3.57  | 3.47  | 0.27 | 0.01 | 1.07  | 0.553484 | 0.661266 | 0.790169 | 0.801687 |
| MmugDNA.336.1.S1_at   | MmugDNA.336.1   | 4.06  | 4.13  | 0.31 | 0.12 | -1.05 | 0.403304 | 0.092878 | 0.701955 | 0.349024 |
| MmugDNA.336.1.S1_s_at | MmugDNA.336.1   | 5.69  | 5.75  | 0.23 | 0.53 | -1.05 | 0.905699 | 0.075785 | 0.962427 | 0.320354 |
| MmugDNA.3360.1.S1_at  | MmugDNA.3360.1  | 8.09  | 7.86  | 0.11 | 0.21 | 1.18  | 0.417153 | 0.516091 | 0.710385 | 0.708704 |
| MmugDNA.33601.1.S1_at | MmugDNA.33601.1 | 5.96  | 6.2   | 0.35 | 0.28 | -1.18 | 0.159984 | 0.211887 | 0.524824 | 0.485898 |
| MmugDNA.33602.1.S1_at | MmugDNA.33602.1 | 3.2   | 3.16  | 0.11 | 0.29 | 1.02  | 0.543361 | 0.730244 | 0.783788 | 0.843884 |
| MmugDNA.33603.1.S1_at | MmugDNA.33603.1 | 4.8   | 4.84  | 1.07 | 0.22 | -1.03 | 0.737087 | 0.593037 | 0.886925 | 0.758    |
| MmugDNA.33604.1.S1_at | MmugDNA.33604.1 | 10.07 | 9.28  | 0.39 | 0.48 | 1.72  | 0.044301 | 0.040406 | 0.358414 | 0.246134 |
| MmugDNA.33605.1.S1_at | MmugDNA.33605.1 | 3.85  | 3.42  | 0.17 | 0.14 | 1.35  | 0.025549 | 0.021645 | 0.299708 | 0.184333 |
| MmugDNA.33606.1.S1_at | MmugDNA.33606.1 | 3.58  | 3.54  | 0.07 | 0.18 | 1.03  | 0.852925 | 0.329001 | 0.940695 | 0.578482 |
| MmugDNA.33608.1.S1_at | MmugDNA.33608.1 | 9.78  | 9.38  | 0.19 | 0.39 | 1.32  | 0.137602 | 0.140968 | 0.504778 | 0.414474 |

|                         |                 |       |       |      |      |        |          |          |          |          |
|-------------------------|-----------------|-------|-------|------|------|--------|----------|----------|----------|----------|
| MmugDNA.16959.1.S1_s_at | MmugDNA.16959.1 | 11.6  | 11.25 | 0.09 | 0.27 | 1.28   | 0.072196 | 0.06006  | 0.416574 | 0.291744 |
| MmugDNA.3361.1.S1_at    | MmugDNA.3361.1  | 5.63  | 5.93  | 0.15 | 0.12 | -1.24  | 0.120801 | 0.228356 | 0.48574  | 0.50054  |
| MmugDNA.33610.1.S1_at   | MmugDNA.33610.1 | 4.37  | 4.44  | 0.22 | 0.13 | -1.05  | 0.6321   | 0.396761 | 0.833024 | 0.628438 |
| MmugDNA.27790.1.S1_s_at | MmugDNA.27790.1 | 5.99  | 6.07  | 0.16 | 0.15 | -1.06  | 0.233906 | 0.220995 | 0.588354 | 0.494389 |
| MmugDNA.33613.1.S1_at   | MmugDNA.33613.1 | 7.96  | 7.29  | 0.82 | 1.23 | 1.59   | 0.497521 | 0.605661 | 0.758019 | 0.765377 |
| MmugDNA.33613.1.S1_x_at | MmugDNA.33613.1 | 7.81  | 7.28  | 0.75 | 1.26 | 1.44   | 0.511688 | 0.549912 | 0.765318 | 0.730154 |
| MmugDNA.33614.1.S1_at   | MmugDNA.33614.1 | 4.94  | 4.67  | 0.6  | 0.66 | 1.21   | 0.737038 | 0.85498  | 0.886925 | 0.917383 |
| MmugDNA.33615.1.S1_at   | MmugDNA.33615.1 | 8.64  | 8.89  | 0.78 | 0.35 | -1.19  | 0.583915 | 0.637259 | 0.806781 | 0.786769 |
| MmugDNA.33616.1.S1_at   | MmugDNA.33616.1 | 7.34  | 6.55  | 0.88 | 1.66 | 1.73   | 0.470813 | 0.136294 | 0.742728 | 0.408711 |
| MmugDNA.33617.1.S1_at   | MmugDNA.33617.1 | 9.31  | 9.49  | 0.19 | 0.14 | -1.13  | 0.342996 | 0.221729 | 0.663407 | 0.494901 |
| MmugDNA.33617.1.S1_s_at | MmugDNA.33617.1 | 10.25 | 10.38 | 0.24 | 0.14 | -1.1   | 0.304577 | 0.209047 | 0.638617 | 0.482842 |
| MmugDNA.3362.1.S1_at    | MmugDNA.3362.1  | 4.22  | 4.36  | 0.24 | 0.08 | -1.1   | 0.259637 | 0.313118 | 0.606728 | 0.567684 |
| MmugDNA.33620.1.S1_at   | MmugDNA.33620.1 | 6.45  | 6.6   | 0.13 | 0.26 | -1.11  | 0.982872 | 0.634291 | 0.993699 | 0.784742 |
| MmugDNA.33621.1.S1_at   | MmugDNA.33621.1 | 7.51  | 6.87  | 0.36 | 0.34 | 1.56   | 0.118134 | 0.106058 | 0.482221 | 0.368438 |
| MmugDNA.33622.1.S1_at   | MmugDNA.33622.1 | 8.45  | 9.49  | 0.15 | 0.14 | -2.05  | 0.001572 | 0.000426 | 0.151907 | 0.038359 |
| MmugDNA.33623.1.S1_at   | MmugDNA.33623.1 | 3.44  | 3.45  | 0.38 | 0.13 | -1.01  | 0.452357 | 0.440283 | 0.732021 | 0.658899 |
| MmugDNA.33624.1.S1_at   | MmugDNA.33624.1 | 4.67  | 4.78  | 0.02 | 0.17 | -1.08  | 0.343391 | 0.274715 | 0.663597 | 0.53918  |
| MmugDNA.33626.1.S1_at   | MmugDNA.33626.1 | 5.82  | 9.16  | 2    | 2.54 | -10.18 | 0.24424  | 0.152599 | 0.596039 | 0.427435 |
| MmugDNA.33627.1.S1_at   | MmugDNA.33627.1 | 4.99  | 6.13  | 0.33 | 1.09 | -2.2   | 0.152938 | 0.156994 | 0.517325 | 0.432467 |
| MmugDNA.33629.1.S1_at   | MmugDNA.33629.1 | 8.82  | 8.45  | 0.16 | 0.16 | 1.29   | 0.092534 | 0.088011 | 0.449243 | 0.341482 |
| MmugDNA.3363.1.S1_at    | MmugDNA.3363.1  | 3.66  | 3.57  | 0.07 | 0.09 | 1.06   | 0.431726 | 0.24673  | 0.718638 | 0.51609  |
| MmugDNA.33631.1.S1_at   | MmugDNA.33631.1 | 3.49  | 3.45  | 0.15 | 0.06 | 1.03   | 0.17287  | 0.024461 | 0.536501 | 0.195724 |
| MmugDNA.33632.1.S1_at   | MmugDNA.33632.1 | 10.53 | 10.19 | 0.12 | 0.34 | 1.27   | 0.264424 | 0.361986 | 0.610159 | 0.602725 |
| MmugDNA.33634.1.S1_at   | MmugDNA.33634.1 | 6.08  | 6.13  | 0.17 | 0.63 | -1.04  | 0.692071 | 0.865499 | 0.863232 | 0.923598 |
| MmugDNA.33635.1.S1_at   | MmugDNA.33635.1 | 8.25  | 7.95  | 0.05 | 0.42 | 1.23   | 0.33247  | 0.033913 | 0.65685  | 0.227771 |
| MmugDNA.33636.1.S1_at   | MmugDNA.33636.1 | 9.12  | 8.51  | 0.03 | 0.2  | 1.53   | 0.007096 | 0.00049  | 0.20405  | 0.038921 |
| MmugDNA.33638.1.S1_at   | MmugDNA.33638.1 | 5.29  | 4.83  | 0.33 | 0.15 | 1.38   | 0.106746 | 0.066481 | 0.467534 | 0.303576 |
| MmugDNA.33639.1.S1_at   | MmugDNA.33639.1 | 10.27 | 10.13 | 0.1  | 0.42 | 1.1    | 0.552772 | 0.741915 | 0.789705 | 0.850533 |
| MmugDNA.3364.1.S1_at    | MmugDNA.3364.1  | 3.23  | 3.09  | 0.05 | 0.24 | 1.1    | 0.99076  | 0.992466 | 0.996791 | 0.995715 |
| MmugDNA.33641.1.S1_at   | MmugDNA.33641.1 | 6.85  | 6.93  | 0.12 | 0.15 | -1.05  | 0.22571  | 0.449982 | 0.583746 | 0.665414 |
| MmugDNA.33642.1.S1_at   | MmugDNA.33642.1 | 6.24  | 7.38  | 0.22 | 0.67 | -2.2   | 0.046637 | 0.05281  | 0.363511 | 0.275434 |
| MmugDNA.33642.1.S1_s_at | MmugDNA.33642.1 | 7.53  | 8.59  | 0.06 | 0.49 | -2.08  | 0.021236 | 0.013163 | 0.282524 | 0.147338 |
| MmugDNA.33645.1.S1_at   | MmugDNA.33645.1 | 7.92  | 7.16  | 0.29 | 0.22 | 1.69   | 0.088465 | 0.345787 | 0.44331  | 0.590937 |
| MmugDNA.33647.1.S1_at   | MmugDNA.33647.1 | 7.48  | 7.48  | 0.1  | 0.18 | 1.01   | 0.985312 | 0.871541 | 0.99475  | 0.926874 |
| MmugDNA.33647.1.S1_s_at | MmugDNA.33647.1 | 7.72  | 7.56  | 0.18 | 0.48 | 1.12   | 0.502148 | 0.597967 | 0.760244 | 0.760532 |
| MmugDNA.33648.1.S1_at   | MmugDNA.33648.1 | 3.83  | 3.71  | 0.21 | 0.08 | 1.08   | 0.689908 | 0.667498 | 0.861835 | 0.805333 |
| MmugDNA.33649.1.S1_at   | MmugDNA.33649.1 | 4.75  | 4.44  | 0.27 | 0.13 | 1.24   | 0.207383 | 0.220363 | 0.569552 | 0.493783 |
| MmugDNA.3365.1.S1_at    | MmugDNA.3365.1  | 3.6   | 3.64  | 0.11 | 0.06 | -1.03  | 0.285529 | 0.450787 | 0.625034 | 0.665869 |
| MmugDNA.33650.1.S1_at   | MmugDNA.33650.1 | 10.18 | 10.66 | 0.11 | 0.26 | -1.4   | 0.023437 | 0.010025 | 0.291512 | 0.131279 |
| MmugDNA.33651.1.S1_at   | MmugDNA.33651.1 | 4.72  | 4.71  | 0.08 | 0.07 | 1.01   | 0.578393 | 0.702126 | 0.803822 | 0.827304 |
| MmugDNA.33652.1.S1_at   | MmugDNA.33652.1 | 3.36  | 3.71  | 0.15 | 0.25 | -1.27  | 0.274916 | 0.328886 | 0.617642 | 0.578452 |



|                         |                 |       |       |      |      |       |          |          |          |          |
|-------------------------|-----------------|-------|-------|------|------|-------|----------|----------|----------|----------|
| MmugDNA.33654.1.S1_at   | MmugDNA.33654.1 | 10.16 | 9.88  | 0.18 | 0.34 | 1.22  | 0.493245 | 0.646168 | 0.756084 | 0.792676 |
| MmugDNA.33656.1.S1_at   | MmugDNA.33656.1 | 6.27  | 6.35  | 0.1  | 0.05 | -1.06 | 0.489183 | 0.20878  | 0.753582 | 0.482626 |
| MmugDNA.33657.1.S1_at   | MmugDNA.33657.1 | 4.46  | 4.56  | 0.16 | 0.21 | -1.07 | 0.514515 | 0.427632 | 0.76693  | 0.649406 |
| MmugDNA.3366.1.S1_at    | MmugDNA.3366.1  | 7.98  | 9.32  | 0.12 | 0.06 | -2.53 | 0.000059 | 0.000006 | 0.112653 | 0.016421 |
| MmugDNA.33660.1.S1_at   | MmugDNA.33660.1 | 6.28  | 6.34  | 0.23 | 0.16 | -1.04 | 0.703963 | 0.91191  | 0.869387 | 0.950311 |
| MmugDNA.33662.1.S1_at   | MmugDNA.33662.1 | 3.72  | 3.65  | 1.04 | 0.07 | 1.05  | 0.326526 | 0.438896 | 0.653184 | 0.657753 |
| MmugDNA.33664.1.S1_at   | MmugDNA.33664.1 | 6.4   | 6.08  | 0.41 | 0.78 | 1.25  | 0.624227 | 0.690503 | 0.828178 | 0.819604 |
| MmugDNA.33665.1.S1_at   | MmugDNA.33665.1 | 5.99  | 5.69  | 0.24 | 0.41 | 1.23  | 0.242059 | 0.328391 | 0.594277 | 0.578066 |
| MmugDNA.33667.1.S1_at   | MmugDNA.33667.1 | 5.2   | 5.22  | 0.3  | 0.13 | -1.02 | 0.986036 | 0.987173 | 0.994995 | 0.992807 |
| MmugDNA.33668.1.S1_at   | MmugDNA.33668.1 | 6.18  | 6.22  | 0.13 | 0.18 | -1.03 | 0.424599 | 0.36126  | 0.714559 | 0.602104 |
| MmugDNA.3367.1.S1_at    | MmugDNA.3367.1  | 3.62  | 3.42  | 0.09 | 0.29 | 1.15  | 0.89861  | 0.507191 | 0.959492 | 0.702821 |
| MmugDNA.33671.1.S1_at   | MmugDNA.33671.1 | 10.63 | 10.84 | 0.14 | 0.43 | -1.15 | 0.535126 | 0.264016 | 0.778933 | 0.530183 |
| MmugDNA.33672.1.S1_at   | MmugDNA.33672.1 | 5.01  | 4.02  | 0.68 | 1.2  | 2     | 0.64958  | 0.444851 | 0.842493 | 0.662072 |
| MmugDNA.33673.1.S1_at   | MmugDNA.33673.1 | 10.08 | 9.01  | 0.18 | 0.09 | 2.09  | 0.000945 | 0.000123 | 0.139813 | 0.029087 |
| MmugDNA.33674.1.S1_at   | MmugDNA.33674.1 | 4.29  | 4.32  | 0.06 | 0.18 | -1.03 | 0.508348 | 0.04744  | 0.763692 | 0.262486 |
| MmugDNA.33676.1.S1_at   | MmugDNA.33676.1 | 7.73  | 7.44  | 0.21 | 0.11 | 1.22  | 0.234436 | 0.609556 | 0.588668 | 0.767864 |
| MmugDNA.33679.1.S1_at   | MmugDNA.33679.1 | 5.07  | 5.26  | 0.56 | 0.25 | -1.14 | 0.487201 | 0.628685 | 0.752002 | 0.781367 |
| MmugDNA.3368.1.S1_at    | MmugDNA.3368.1  | 5.6   | 5.81  | 0.47 | 0.35 | -1.15 | 0.449662 | 0.555985 | 0.730482 | 0.734254 |
| MmugDNA.33680.1.S1_at   | MmugDNA.33680.1 | 5.87  | 5.94  | 0.2  | 0.46 | -1.05 | 0.193563 | 0.242114 | 0.557166 | 0.512652 |
| MmugDNA.33681.1.S1_at   | MmugDNA.33681.1 | 5.37  | 5.33  | 0.22 | 0.18 | 1.03  | 0.836112 | 0.979278 | 0.933665 | 0.988845 |
| MmugDNA.33682.1.S1_at   | MmugDNA.33682.1 | 11.66 | 11.73 | 0.13 | 0.28 | -1.05 | 0.332693 | 0.446579 | 0.656938 | 0.662862 |
| MmugDNA.33683.1.S1_at   | MmugDNA.33683.1 | 6.97  | 6.95  | 0.75 | 0.16 | 1.01  | 0.366181 | 0.375107 | 0.678947 | 0.613186 |
| MmugDNA.33684.1.S1_at   | MmugDNA.33684.1 | 5.92  | 6.46  | 0.09 | 0.92 | -1.45 | 0.340255 | 0.492559 | 0.661654 | 0.693633 |
| MmugDNA.33686.1.S1_at   | MmugDNA.33686.1 | 10.97 | 10.39 | 0.91 | 1.52 | 1.49  | 0.313835 | 0.374171 | 0.645387 | 0.612678 |
| MmugDNA.33686.1.S1_s_at | MmugDNA.33686.1 | 12.63 | 12.38 | 0.48 | 1.24 | 1.19  | 0.305761 | 0.39873  | 0.639223 | 0.629464 |
| MmugDNA.33688.1.S1_at   | MmugDNA.33688.1 | 8.05  | 7.79  | 1.05 | 0.32 | 1.2   | 0.302501 | 0.416618 | 0.63692  | 0.641647 |
| MmugDNA.33689.1.S1_at   | MmugDNA.33689.1 | 4.83  | 4.9   | 0.09 | 0.07 | -1.05 | 0.81871  | 0.956707 | 0.926433 | 0.975397 |
| MmugDNA.33690.1.S1_at   | MmugDNA.33690.1 | 9.54  | 9.34  | 0.16 | 0.1  | 1.15  | 0.164066 | 0.039893 | 0.528211 | 0.244852 |
| MmugDNA.35062.1.S1_s_at | MmugDNA.35062.1 | 9.91  | 9.76  | 0.07 | 0.11 | 1.11  | 0.101186 | 0.025047 | 0.461009 | 0.198316 |
| MmugDNA.33691.1.S1_at   | MmugDNA.33691.1 | 4.27  | 4.27  | 0.38 | 0.25 | -1.01 | 0.920669 | 0.46813  | 0.969077 | 0.677624 |
| MmugDNA.33692.1.S1_at   | MmugDNA.33692.1 | 4.1   | 4.26  | 0.03 | 0.06 | -1.12 | 0.056065 | 0.240206 | 0.38562  | 0.51084  |
| MmugDNA.33693.1.S1_at   | MmugDNA.33693.1 | 4.86  | 4.67  | 0.33 | 0.23 | 1.14  | 0.795997 | 0.483734 | 0.915368 | 0.688112 |
| MmugDNA.33694.1.S1_at   | MmugDNA.33694.1 | 5.77  | 5.41  | 0.17 | 0.05 | 1.28  | 0.022568 | 0.020457 | 0.287341 | 0.179597 |
| MmugDNA.33696.1.S1_at   | MmugDNA.33696.1 | 7.44  | 9.14  | 0.52 | 0.61 | -3.24 | 0.050962 | 0.048236 | 0.375705 | 0.264686 |
| MmugDNA.33697.1.S1_at   | MmugDNA.33697.1 | 3.34  | 3.34  | 0.13 | 0.17 | 1     | 0.885438 | 0.969894 | 0.954111 | 0.983513 |
| MmugDNA.33698.1.S1_at   | MmugDNA.33698.1 | 3.73  | 3.54  | 0.12 | 0.25 | 1.14  | 0.192831 | 0.350879 | 0.556141 | 0.594584 |
| MmugDNA.33699.1.S1_at   | MmugDNA.33699.1 | 10.46 | 8.93  | 0.05 | 0.57 | 2.9   | 0.011372 | 0.00481  | 0.235384 | 0.096859 |
| MmugDNA.33700.1.S1_at   | MmugDNA.33700.1 | 2.8   | 2.79  | 0.14 | 0.09 | 1.01  | 0.333189 | 0.375334 | 0.657486 | 0.613336 |
| MmugDNA.33701.1.S1_at   | MmugDNA.33701.1 | 2.96  | 2.97  | 0.01 | 0.06 | -1    | 0.880042 | 0.452864 | 0.951789 | 0.667359 |
| MmugDNA.33702.1.S1_at   | MmugDNA.33702.1 | 6.03  | 6.22  | 0.24 | 0.12 | -1.14 | 0.638288 | 0.681583 | 0.83655  | 0.814092 |
| MmugDNA.33704.1.S1_at   | MmugDNA.33704.1 | 3.76  | 3.41  | 0.25 | 0.17 | 1.27  | 0.06414  | 0.080301 | 0.402275 | 0.32796  |

|                         |                 |       |       |      |      |       |          |          |          |          |
|-------------------------|-----------------|-------|-------|------|------|-------|----------|----------|----------|----------|
| MmugDNA.33705.1.S1_at   | MmugDNA.33705.1 | 6.43  | 6.27  | 0.46 | 0.21 | 1.11  | 0.533727 | 0.494577 | 0.778431 | 0.694909 |
| MmugDNA.33706.1.S1_at   | MmugDNA.33706.1 | 3.46  | 2.91  | 0.4  | 0.15 | 1.46  | 0.264815 | 0.357007 | 0.610557 | 0.598736 |
| MmugDNA.33707.1.S1_at   | MmugDNA.33707.1 | 2.96  | 2.95  | 0.2  | 0.19 | 1     | 0.667208 | 0.309708 | 0.850869 | 0.565005 |
| MmugDNA.33708.1.S1_at   | MmugDNA.33708.1 | 3.91  | 3.85  | 0.92 | 0.44 | 1.04  | 0.399648 | 0.604314 | 0.69956  | 0.764558 |
| MmugDNA.33709.1.S1_at   | MmugDNA.33709.1 | 12.53 | 12.54 | 0.08 | 0.18 | -1.01 | 0.715528 | 0.738342 | 0.875145 | 0.848258 |
| MmugDNA.3371.1.S1_at    | MmugDNA.3371.1  | 9.31  | 8.1   | 0.38 | 0.3  | 2.3   | 0.012778 | 0.003753 | 0.243715 | 0.08732  |
| MmugDNA.33710.1.S1_at   | MmugDNA.33710.1 | 6.12  | 6.13  | 0.15 | 0    | -1    | 0.818181 | 0.871482 | 0.926284 | 0.926844 |
| MmugDNA.33711.1.S1_at   | MmugDNA.33711.1 | 5.26  | 5.04  | 0.26 | 0.26 | 1.17  | 0.124674 | 0.154593 | 0.49075  | 0.429489 |
| MmugDNA.33713.1.S1_at   | MmugDNA.33713.1 | 3.87  | 4.18  | 1.09 | 0.07 | -1.24 | 0.696083 | 0.823878 | 0.865113 | 0.898817 |
| MmugDNA.33716.1.S1_at   | MmugDNA.33716.1 | 5.7   | 5.5   | 0.38 | 0.18 | 1.15  | 0.11882  | 0.10677  | 0.48339  | 0.369349 |
| MmugDNA.33717.1.S1_at   | MmugDNA.33717.1 | 3.51  | 3.52  | 0.09 | 0.09 | -1    | 0.416376 | 0.751898 | 0.709936 | 0.855714 |
| MmugDNA.33718.1.S1_at   | MmugDNA.33718.1 | 3.92  | 4     | 0.25 | 0.03 | -1.05 | 0.577155 | 0.79994  | 0.80344  | 0.884981 |
| MmugDNA.33719.1.S1_at   | MmugDNA.33719.1 | 7.22  | 6.53  | 0.28 | 0.23 | 1.61  | 0.035858 | 0.030584 | 0.338023 | 0.216849 |
| MmugDNA.3372.1.S1_at    | MmugDNA.3372.1  | 13.88 | 13.97 | 0.14 | 0.09 | -1.07 | 0.596336 | 0.600251 | 0.812857 | 0.762007 |
| MmugDNA.33720.1.S1_at   | MmugDNA.33720.1 | 7.67  | 8.18  | 0.14 | 0.62 | -1.43 | 0.831273 | 0.475598 | 0.931682 | 0.68228  |
| MmugDNA.33721.1.S1_at   | MmugDNA.33721.1 | 7.62  | 7.35  | 0.11 | 0.15 | 1.21  | 0.033012 | 0.027346 | 0.326925 | 0.206637 |
| MmugDNA.33722.1.S1_at   | MmugDNA.33722.1 | 3.57  | 3.63  | 0.12 | 0.06 | -1.04 | 0.27846  | 0.36548  | 0.620536 | 0.605587 |
| MmugDNA.33724.1.S1_at   | MmugDNA.33724.1 | 4.59  | 4.55  | 0.27 | 0.13 | 1.02  | 0.317279 | 0.50084  | 0.64789  | 0.699296 |
| MmugDNA.33725.1.S1_at   | MmugDNA.33725.1 | 5.96  | 6.1   | 0.08 | 0.02 | -1.1  | 0.020961 | 0.012654 | 0.28167  | 0.145088 |
| MmugDNA.33726.1.S1_at   | MmugDNA.33726.1 | 4.97  | 5.06  | 0.21 | 0.32 | -1.07 | 0.827507 | 0.717316 | 0.930018 | 0.836349 |
| MmugDNA.33728.1.S1_at   | MmugDNA.33728.1 | 6.69  | 6.74  | 0.17 | 0.16 | -1.03 | 0.797771 | 0.817199 | 0.916116 | 0.894546 |
| MmugDNA.3373.1.S1_at    | MmugDNA.3373.1  | 4.23  | 4.49  | 0.48 | 0.55 | -1.2  | 0.987733 | 0.461655 | 0.995628 | 0.673228 |
| MmugDNA.33730.1.S1_at   | MmugDNA.33730.1 | 3.48  | 3.48  | 0.22 | 0.01 | 1     | 0.358642 | 0.354231 | 0.67333  | 0.597105 |
| MmugDNA.33731.1.S1_at   | MmugDNA.33731.1 | 4.94  | 4.48  | 0.23 | 0.17 | 1.37  | 0.040183 | 0.030273 | 0.349219 | 0.215828 |
| MmugDNA.33733.1.S1_at   | MmugDNA.33733.1 | 4.55  | 4.3   | 0.72 | 0.59 | 1.19  | 0.329832 | 0.187913 | 0.655349 | 0.464026 |
| MmugDNA.33734.1.S1_at   | MmugDNA.33734.1 | 5.4   | 4.98  | 0.13 | 0.29 | 1.33  | 0.140572 | 0.367859 | 0.508385 | 0.607469 |
| MmugDNA.33735.1.S1_at   | MmugDNA.33735.1 | 3.64  | 3.66  | 0.13 | 0.24 | -1.02 | 0.378484 | 0.771429 | 0.686493 | 0.867177 |
| MmugDNA.33736.1.S1_at   | MmugDNA.33736.1 | 3.31  | 3.23  | 0.12 | 0.12 | 1.06  | 0.549267 | 0.800256 | 0.78723  | 0.885129 |
| MmugDNA.33739.1.S1_at   | MmugDNA.33739.1 | 4.94  | 5     | 0.14 | 0.6  | -1.05 | 0.475496 | 0.692595 | 0.745779 | 0.821061 |
| MmugDNA.3374.1.S1_at    | MmugDNA.3374.1  | 7.87  | 8.19  | 0.14 | 0.95 | -1.24 | 0.489087 | 0.664365 | 0.753456 | 0.803354 |
| MmugDNA.33740.1.S1_at   | MmugDNA.33740.1 | 5.5   | 4.88  | 0.19 | 0.17 | 1.53  | 0.012041 | 0.014877 | 0.239875 | 0.155055 |
| MmugDNA.33741.1.S1_at   | MmugDNA.33741.1 | 4.8   | 4.8   | 0.04 | 0.09 | 1     | 0.673829 | 0.030894 | 0.853814 | 0.217584 |
| MmugDNA.33742.1.S1_at   | MmugDNA.33742.1 | 6.26  | 6.25  | 0.02 | 0.1  | 1     | 0.992735 | 0.731483 | 0.997528 | 0.844356 |
| MmugDNA.33743.1.S1_at   | MmugDNA.33743.1 | 9.05  | 8.6   | 0.04 | 0.08 | 1.37  | 0.001971 | 0.010148 | 0.155636 | 0.132001 |
| MmugDNA.33744.1.S1_at   | MmugDNA.33744.1 | 6.69  | 6.72  | 0.15 | 0.82 | -1.02 | 0.350606 | 0.086059 | 0.668568 | 0.338305 |
| MmugDNA.33745.1.S1_at   | MmugDNA.33745.1 | 8.4   | 8.85  | 0.37 | 1.35 | -1.37 | 0.723244 | 0.498741 | 0.879091 | 0.697733 |
| MmugDNA.33747.1.S1_at   | MmugDNA.33747.1 | 4.25  | 4.33  | 0.3  | 0.59 | -1.06 | 0.888025 | 0.933776 | 0.955006 | 0.9623   |
| MmugDNA.33748.1.S1_at   | MmugDNA.33748.1 | 4.02  | 3.97  | 0.69 | 0.29 | 1.03  | 0.451629 | 0.463355 | 0.73168  | 0.674373 |
| MmugDNA.33749.1.S1_s_at | MmugDNA.33749.1 | 6.57  | 7.13  | 0.19 | 0.67 | -1.48 | 0.058837 | 0.042671 | 0.390921 | 0.251037 |
| MmugDNA.3375.1.S1_at    | MmugDNA.3375.1  | 6.13  | 6.57  | 0.21 | 0.84 | -1.36 | 0.943457 | 0.927215 | 0.978516 | 0.958627 |
| MmugDNA.33750.1.S1_at   | MmugDNA.33750.1 | 6.64  | 6.79  | 0.14 | 0.15 | -1.11 | 0.473038 | 0.642796 | 0.744128 | 0.790486 |

|                         |                 |       |       |      |      |       |          |          |          |          |
|-------------------------|-----------------|-------|-------|------|------|-------|----------|----------|----------|----------|
| MmugDNA.33752.1.S1_at   | MmugDNA.33752.1 | 6     | 6.18  | 0.11 | 0.02 | -1.13 | 0.100489 | 0.076881 | 0.461009 | 0.322368 |
| MmugDNA.33754.1.S1_at   | MmugDNA.33754.1 | 4.42  | 4.33  | 0.16 | 0.17 | 1.06  | 0.395727 | 0.328352 | 0.696561 | 0.578045 |
| MmugDNA.33755.1.S1_at   | MmugDNA.33755.1 | 5.34  | 5.42  | 0    | 0.15 | -1.05 | 0.242475 | 0.103537 | 0.594448 | 0.364346 |
| MmugDNA.33756.1.S1_at   | MmugDNA.33756.1 | 4.45  | 4.5   | 0.2  | 0.01 | -1.04 | 0.819499 | 0.765037 | 0.926528 | 0.863388 |
| MmugDNA.33757.1.S1_at   | MmugDNA.33757.1 | 3.89  | 4.07  | 0.23 | 1.87 | -1.14 | 0.274767 | 0.351491 | 0.617628 | 0.595087 |
| MmugDNA.37348.1.S1_s_at | MmugDNA.37348.1 | 5.95  | 5.24  | 0.7  | 0.55 | 1.63  | 0.992786 | 0.977099 | 0.997551 | 0.987542 |
| MmugDNA.33759.1.S1_at   | MmugDNA.33759.1 | 11.14 | 11.03 | 0.09 | 0.11 | 1.08  | 0.316612 | 0.650345 | 0.647618 | 0.795586 |
| MmugDNA.33759.1.S1_s_at | MmugDNA.33759.1 | 11.64 | 11.4  | 0.1  | 0.06 | 1.18  | 0.038833 | 0.09774  | 0.345721 | 0.355598 |
| MmugDNA.3376.1.S1_at    | MmugDNA.3376.1  | 2.92  | 2.92  | 0.25 | 0.13 | 1     | 0.975749 | 0.982479 | 0.990667 | 0.99036  |
| MmugDNA.33760.1.S1_at   | MmugDNA.33760.1 | 8.92  | 8.31  | 0.26 | 0.28 | 1.53  | 0.066572 | 0.077436 | 0.406564 | 0.323236 |
| MmugDNA.33761.1.S1_at   | MmugDNA.33761.1 | 11.86 | 11.57 | 0.1  | 0.19 | 1.23  | 0.175738 | 0.167165 | 0.539441 | 0.443636 |
| MmugDNA.33763.1.S1_at   | MmugDNA.33763.1 | 7.34  | 8.12  | 0.26 | 0.33 | -1.71 | 0.03137  | 0.017482 | 0.321573 | 0.167476 |
| MmugDNA.33764.1.S1_at   | MmugDNA.33764.1 | 9.15  | 9.61  | 0.17 | 0.43 | -1.37 | 0.146303 | 0.082395 | 0.51241  | 0.331368 |
| MmugDNA.33764.1.S1_s_at | MmugDNA.33764.1 | 8.52  | 8.95  | 0.09 | 0.33 | -1.35 | 0.10766  | 0.020901 | 0.468121 | 0.181404 |
| MmugDNA.33765.1.S1_at   | MmugDNA.33765.1 | 9.05  | 8.59  | 0.82 | 0.41 | 1.38  | 0.467329 | 0.360573 | 0.74068  | 0.601624 |
| MmugDNA.33766.1.S1_at   | MmugDNA.33766.1 | 10.42 | 9.81  | 0.26 | 0.36 | 1.52  | 0.191787 | 0.252158 | 0.554827 | 0.520837 |
| MmugDNA.33767.1.S1_at   | MmugDNA.33767.1 | 9.77  | 8.93  | 0.22 | 0.92 | 1.79  | 0.214822 | 0.110452 | 0.57537  | 0.374684 |
| MmugDNA.33768.1.S1_at   | MmugDNA.33768.1 | 10.59 | 10.16 | 0.11 | 0.2  | 1.35  | 0.122983 | 0.15492  | 0.488429 | 0.429909 |
| MmugDNA.33769.1.S1_at   | MmugDNA.33769.1 | 5.27  | 5.15  | 0.24 | 0.32 | 1.09  | 0.231292 | 0.397585 | 0.587369 | 0.628973 |
| MmugDNA.3377.1.S1_at    | MmugDNA.3377.1  | 9.03  | 9.18  | 0.93 | 1    | -1.11 | 0.536024 | 0.747507 | 0.779351 | 0.853149 |
| MmugDNA.33770.1.S1_at   | MmugDNA.33770.1 | 2.84  | 2.71  | 0.17 | 0.07 | 1.1   | 0.424252 | 0.341047 | 0.714453 | 0.587164 |
| MmugDNA.33771.1.S1_at   | MmugDNA.33771.1 | 4.86  | 4.99  | 0.2  | 0.08 | -1.09 | 0.681033 | 0.930943 | 0.857465 | 0.960748 |
| MmugDNA.33772.1.S1_at   | MmugDNA.33772.1 | 7.57  | 7.91  | 0.57 | 0.5  | -1.27 | 0.920177 | 0.736938 | 0.968873 | 0.847766 |
| MmugDNA.33774.1.S1_at   | MmugDNA.33774.1 | 3.68  | 3.91  | 0.11 | 0.07 | -1.18 | 0.068876 | 0.108676 | 0.410654 | 0.372171 |
| MmugDNA.33775.1.S1_at   | MmugDNA.33775.1 | 6.08  | 6.01  | 0.29 | 0.18 | 1.05  | 0.661797 | 0.395351 | 0.848225 | 0.627409 |
| MmugDNA.33777.1.S1_at   | MmugDNA.33777.1 | 6.97  | 6.61  | 0.14 | 0.22 | 1.29  | 0.108064 | 0.06626  | 0.468871 | 0.303012 |
| MmugDNA.33778.1.S1_at   | MmugDNA.33778.1 | 5.16  | 4.48  | 0.4  | 0.28 | 1.59  | 0.0238   | 0.007032 | 0.292771 | 0.113112 |
| MmugDNA.3378.1.S1_at    | MmugDNA.3378.1  | 13.73 | 13.99 | 0.06 | 0.06 | -1.19 | 0.00542  | 0.004055 | 0.191107 | 0.090288 |
| MmugDNA.3378.1.S1_s_at  | MmugDNA.3378.1  | 13.69 | 13.88 | 0.08 | 0.04 | -1.13 | 0.024585 | 0.015528 | 0.295214 | 0.158053 |
| MmugDNA.33780.1.S1_at   | MmugDNA.33780.1 | 12.78 | 12.28 | 0.18 | 0.07 | 1.42  | 0.0128   | 0.006117 | 0.24376  | 0.106503 |
| MmugDNA.33781.1.S1_at   | MmugDNA.33781.1 | 6.1   | 6.2   | 0.26 | 0.21 | -1.07 | 0.821774 | 0.692796 | 0.927464 | 0.821217 |
| MmugDNA.33783.1.S1_at   | MmugDNA.33783.1 | 6.08  | 4.76  | 0.9  | 0.18 | 2.49  | 0.056052 | 0.041296 | 0.38562  | 0.247995 |
| MmugDNA.33784.1.S1_s_at | MmugDNA.33784.1 | 9.83  | 9.92  | 0.1  | 0.76 | -1.06 | 0.705771 | 0.162025 | 0.870298 | 0.438108 |
| MmugDNA.33786.1.S1_at   | MmugDNA.33786.1 | 7.83  | 7.46  | 0.44 | 0.44 | 1.29  | 0.132568 | 0.14922  | 0.49874  | 0.423728 |
| MmugDNA.33788.1.S1_at   | MmugDNA.33788.1 | 8.51  | 8.62  | 0.14 | 0.21 | -1.09 | 0.189517 | 0.131861 | 0.552479 | 0.403891 |
| MmugDNA.33789.1.S1_at   | MmugDNA.33789.1 | 6.73  | 7.18  | 0.11 | 0.19 | -1.37 | 0.026289 | 0.014706 | 0.302386 | 0.154379 |
| MmugDNA.33789.1.S1_x_at | MmugDNA.33789.1 | 7.19  | 7.59  | 0.05 | 0.29 | -1.31 | 0.045449 | 0.03723  | 0.361012 | 0.237329 |
| MmugDNA.3379.1.S1_at    | MmugDNA.3379.1  | 4.32  | 4.08  | 0.18 | 0.49 | 1.18  | 0.52733  | 0.582114 | 0.774778 | 0.750784 |
| MmugDNA.33790.1.S1_at   | MmugDNA.33790.1 | 8.87  | 9.75  | 0.25 | 0.36 | -1.84 | 0.107952 | 0.096595 | 0.468662 | 0.354126 |
| MmugDNA.33791.1.S1_at   | MmugDNA.33791.1 | 10.16 | 9.84  | 0.23 | 0.29 | 1.25  | 0.100869 | 0.115228 | 0.461009 | 0.3822   |
| MmugDNA.33792.1.S1_s_at | MmugDNA.33792.1 | 7.98  | 8.39  | 0.3  | 1.1  | -1.33 | 0.679421 | 0.162579 | 0.856588 | 0.43872  |

|                         |                 |       |       |      |      |       |          |          |          |          |
|-------------------------|-----------------|-------|-------|------|------|-------|----------|----------|----------|----------|
| MmugDNA.33793.1.S1_at   | MmugDNA.33793.1 | 9.83  | 8.08  | 0.26 | 0.25 | 3.37  | 0.000815 | 0.000089 | 0.136818 | 0.027016 |
| MmugDNA.33793.1.S1_s_at | MmugDNA.33793.1 | 9.54  | 7.99  | 0.35 | 0.22 | 2.91  | 0.002917 | 0.000253 | 0.170045 | 0.033375 |
| MmugDNA.33796.1.S1_s_at | MmugDNA.33796.1 | 4.15  | 4.06  | 0.24 | 0.38 | 1.07  | 0.887794 | 0.760271 | 0.954933 | 0.86071  |
| MmugDNA.33797.1.S1_at   | MmugDNA.33797.1 | 5.57  | 5.57  | 0.03 | 0.03 | -1    | 0.236626 | 0.792172 | 0.590504 | 0.879905 |
| MmugDNA.33799.1.S1_at   | MmugDNA.33799.1 | 3.91  | 3.75  | 0.18 | 0.12 | 1.12  | 0.136372 | 0.612772 | 0.503488 | 0.770189 |
| MmugDNA.338.1.S1_s_at   | MmugDNA.338.1   | 8.96  | 8.85  | 0.02 | 0.41 | 1.08  | 0.626977 | 0.817715 | 0.829836 | 0.894815 |
| MmugDNA.3380.1.S1_at    | MmugDNA.3380.1  | 12.59 | 12.73 | 0.12 | 0.27 | -1.1  | 0.655221 | 0.609579 | 0.844826 | 0.767875 |
| MmugDNA.33802.1.S1_at   | MmugDNA.33802.1 | 6.04  | 5.53  | 0.4  | 0.06 | 1.42  | 0.32829  | 0.433431 | 0.654312 | 0.653681 |
| MmugDNA.33803.1.S1_at   | MmugDNA.33803.1 | 4.17  | 3.95  | 0.2  | 0.07 | 1.16  | 0.154783 | 0.205895 | 0.519343 | 0.480109 |
| MmugDNA.33804.1.S1_at   | MmugDNA.33804.1 | 4.7   | 3.87  | 0.46 | 0.38 | 1.78  | 0.175872 | 0.140135 | 0.539441 | 0.413394 |
| MmugDNA.33805.1.S1_at   | MmugDNA.33805.1 | 5.68  | 5.68  | 0.07 | 0.12 | 1     | 0.240934 | 0.307179 | 0.593688 | 0.563487 |
| MmugDNA.33807.1.S1_at   | MmugDNA.33807.1 | 8.96  | 7.68  | 0.75 | 0.11 | 2.43  | 0.038171 | 0.015198 | 0.343587 | 0.156676 |
| MmugDNA.33808.1.S1_at   | MmugDNA.33808.1 | 5.54  | 5.53  | 0.16 | 0.16 | 1.01  | 0.575828 | 0.706709 | 0.802583 | 0.829857 |
| MmugDNA.33809.1.S1_at   | MmugDNA.33809.1 | 4.32  | 3.67  | 0.84 | 0.57 | 1.57  | 0.572011 | 0.515692 | 0.800534 | 0.708451 |
| MmugDNA.3381.1.S1_at    | MmugDNA.3381.1  | 6.98  | 7.14  | 0.13 | 0.07 | -1.11 | 0.416655 | 0.444686 | 0.710142 | 0.662072 |
| MmugDNA.33810.1.S1_at   | MmugDNA.33810.1 | 5.37  | 5.57  | 0.41 | 0.17 | -1.15 | 0.983988 | 0.580821 | 0.994302 | 0.749953 |
| MmugDNA.33811.1.S1_at   | MmugDNA.33811.1 | 7.02  | 6.22  | 0.92 | 0.27 | 1.74  | 0.078033 | 0.125585 | 0.428012 | 0.396226 |
| MmugDNA.33812.1.S1_at   | MmugDNA.33812.1 | 4.21  | 3.82  | 1.34 | 0.26 | 1.31  | 0.265355 | 0.346922 | 0.610896 | 0.591728 |
| MmugDNA.33813.1.S1_at   | MmugDNA.33813.1 | 4.43  | 4.44  | 0.14 | 0.35 | -1.01 | 0.684177 | 0.934748 | 0.858637 | 0.963039 |
| MmugDNA.33814.1.S1_at   | MmugDNA.33814.1 | 13.31 | 13.37 | 0.03 | 0.03 | -1.05 | 0.036115 | 0.003122 | 0.338812 | 0.081345 |
| MmugDNA.33815.1.S1_at   | MmugDNA.33815.1 | 7.65  | 6.63  | 0.27 | 0.37 | 2.03  | 0.026073 | 0.015727 | 0.30146  | 0.158912 |
| MmugDNA.33818.1.S1_at   | MmugDNA.33818.1 | 6.37  | 6.3   | 0.49 | 0.08 | 1.05  | 0.230972 | 0.457216 | 0.587369 | 0.670746 |
| MmugDNA.3382.1.S1_at    | MmugDNA.3382.1  | 9.17  | 9.46  | 0.61 | 0.66 | -1.22 | 0.895125 | 0.889247 | 0.95808  | 0.936852 |
| MmugDNA.33821.1.S1_at   | MmugDNA.33821.1 | 5.39  | 5.41  | 0.19 | 0.24 | -1.01 | 0.88963  | 0.982546 | 0.955822 | 0.99036  |
| MmugDNA.33822.1.S1_s_at | MmugDNA.33822.1 | 5.06  | 6.04  | 0.86 | 1.24 | -1.97 | 0.558686 | 0.222328 | 0.793379 | 0.495357 |
| MmugDNA.33823.1.S1_s_at | MmugDNA.33823.1 | 11.61 | 10.49 | 0.14 | 0.29 | 2.17  | 0.005031 | 0.00141  | 0.187868 | 0.057335 |
| MmugDNA.33824.1.S1_at   | MmugDNA.33824.1 | 3.81  | 4.14  | 0.19 | 0.25 | -1.26 | 0.107043 | 0.070518 | 0.467743 | 0.311777 |
| MmugDNA.33825.1.S1_at   | MmugDNA.33825.1 | 4.33  | 4.12  | 0.21 | 0.12 | 1.16  | 0.377592 | 0.300721 | 0.685995 | 0.558959 |
| MmugDNA.33827.1.S1_at   | MmugDNA.33827.1 | 4.5   | 4.37  | 0.57 | 0.05 | 1.1   | 0.239854 | 0.313209 | 0.592795 | 0.567753 |
| MmugDNA.33828.1.S1_at   | MmugDNA.33828.1 | 3.11  | 2.95  | 0.2  | 0.06 | 1.12  | 0.670706 | 0.65267  | 0.852442 | 0.796937 |
| MmugDNA.3383.1.S1_at    | MmugDNA.3383.1  | 5.32  | 5.37  | 0.13 | 0.1  | -1.04 | 0.785671 | 0.338327 | 0.910876 | 0.585417 |
| MmugDNA.33831.1.S1_at   | MmugDNA.33831.1 | 5.73  | 6.06  | 0.12 | 0.1  | -1.26 | 0.035492 | 0.025706 | 0.336631 | 0.200966 |
| MmugDNA.33833.1.S1_at   | MmugDNA.33833.1 | 6.64  | 4.61  | 0.48 | 0.49 | 4.08  | 0.005636 | 0.001253 | 0.191943 | 0.055001 |
| MmugDNA.33834.1.S1_at   | MmugDNA.33834.1 | 4.35  | 4.55  | 0.32 | 0.09 | -1.14 | 0.861402 | 0.869466 | 0.944126 | 0.925991 |
| MmugDNA.33835.1.S1_at   | MmugDNA.33835.1 | 3.51  | 3.54  | 0.05 | 0.19 | -1.02 | 0.954722 | 0.644519 | 0.983073 | 0.791629 |
| MmugDNA.33839.1.S1_at   | MmugDNA.33839.1 | 4.62  | 4.33  | 0.16 | 0.33 | 1.22  | 0.55582  | 0.590034 | 0.7915   | 0.756081 |
| MmugDNA.3384.1.S1_at    | MmugDNA.3384.1  | 8.71  | 9.11  | 0.3  | 0.17 | -1.31 | 0.414042 | 0.563725 | 0.708796 | 0.738808 |
| MmugDNA.33840.1.S1_at   | MmugDNA.33840.1 | 8.67  | 9.16  | 0.02 | 0.59 | -1.41 | 0.454094 | 0.004179 | 0.733133 | 0.091073 |
| MmugDNA.33841.1.S1_at   | MmugDNA.33841.1 | 4.15  | 4.61  | 0.05 | 0.08 | -1.38 | 0.001379 | 0.000764 | 0.146228 | 0.04544  |
| MmugDNA.33842.1.S1_at   | MmugDNA.33842.1 | 6.47  | 6.72  | 0.12 | 0.21 | -1.19 | 0.199034 | 0.122916 | 0.5621   | 0.392923 |
| MmugDNA.33844.1.S1_at   | MmugDNA.33844.1 | 9.58  | 9.31  | 0.63 | 0.3  | 1.21  | 0.619992 | 0.546802 | 0.825901 | 0.728203 |

|                         |                 |       |       |      |      |       |          |          |          |          |
|-------------------------|-----------------|-------|-------|------|------|-------|----------|----------|----------|----------|
| MmugDNA.33847.1.S1_at   | MmugDNA.33847.1 | 4.9   | 5.4   | 0.21 | 0.1  | -1.42 | 0.015272 | 0.007852 | 0.257698 | 0.118059 |
| MmugDNA.33848.1.S1_at   | MmugDNA.33848.1 | 12.48 | 12.51 | 0.02 | 0.09 | -1.02 | 0.172567 | 0.124999 | 0.536174 | 0.395386 |
| MmugDNA.33849.1.S1_at   | MmugDNA.33849.1 | 11.4  | 11.7  | 0.22 | 0.22 | -1.23 | 0.150928 | 0.059524 | 0.515667 | 0.290548 |
| MmugDNA.33849.1.S1_s_at | MmugDNA.33849.1 | 12.57 | 12.74 | 0.17 | 0.23 | -1.13 | 0.20638  | 0.148958 | 0.56868  | 0.423294 |
| MmugDNA.3385.1.S1_at    | MmugDNA.3385.1  | 3.54  | 3.86  | 0.28 | 0.16 | -1.25 | 0.405632 | 0.408772 | 0.703322 | 0.6359   |
| MmugDNA.33852.1.S1_at   | MmugDNA.33852.1 | 8.02  | 7.7   | 0.28 | 0.2  | 1.25  | 0.507674 | 0.527138 | 0.763033 | 0.715861 |
| MmugDNA.33853.1.S1_s_at | MmugDNA.33853.1 | 4.16  | 4.3   | 0.16 | 0.19 | -1.1  | 0.217678 | 0.206229 | 0.577282 | 0.480382 |
| MmugDNA.33854.1.S1_at   | MmugDNA.33854.1 | 5.69  | 5.81  | 0.24 | 0.21 | -1.09 | 0.914687 | 0.299788 | 0.966289 | 0.558081 |
| MmugDNA.33856.1.S1_at   | MmugDNA.33856.1 | 12.4  | 11.99 | 0.06 | 0.39 | 1.33  | 0.0949   | 0.095581 | 0.45242  | 0.352645 |
| MmugDNA.3386.1.S1_at    | MmugDNA.3386.1  | 9.74  | 9.78  | 0.18 | 0.19 | -1.03 | 0.739659 | 0.555602 | 0.888213 | 0.733967 |
| MmugDNA.33860.1.S1_at   | MmugDNA.33860.1 | 7.39  | 7.44  | 0.21 | 0.13 | -1.04 | 0.615141 | 0.801992 | 0.823342 | 0.885995 |
| MmugDNA.33861.1.S1_at   | MmugDNA.33861.1 | 7.68  | 8.11  | 0.54 | 0.41 | -1.35 | 0.324069 | 0.08328  | 0.651849 | 0.333372 |
| MmugDNA.33862.1.S1_at   | MmugDNA.33862.1 | 12.59 | 12.72 | 0.12 | 0.09 | -1.09 | 0.575225 | 0.008609 | 0.802187 | 0.123102 |
| MmugDNA.33863.1.S1_at   | MmugDNA.33863.1 | 8.38  | 8.96  | 0.45 | 0.25 | -1.49 | 0.121884 | 0.07142  | 0.48688  | 0.313555 |
| MmugDNA.33863.1.S1_s_at | MmugDNA.33863.1 | 8.73  | 9.36  | 0.33 | 0.24 | -1.54 | 0.079985 | 0.043928 | 0.430176 | 0.254098 |
| MmugDNA.33864.1.S1_at   | MmugDNA.33864.1 | 5.24  | 5.25  | 0.05 | 0.01 | -1.01 | 0.643242 | 0.560702 | 0.839277 | 0.736921 |
| MmugDNA.33865.1.S1_s_at | MmugDNA.33865.1 | 12.02 | 11.99 | 0.05 | 0.03 | 1.02  | 0.325038 | 0.013343 | 0.652309 | 0.148061 |
| MmugDNA.33866.1.S1_at   | MmugDNA.33866.1 | 8.2   | 8.06  | 0.22 | 0.1  | 1.1   | 0.588105 | 0.519082 | 0.808882 | 0.710813 |
| MmugDNA.33867.1.S1_at   | MmugDNA.33867.1 | 4.7   | 4.15  | 0.43 | 0.29 | 1.47  | 0.480134 | 0.36519  | 0.748124 | 0.605348 |
| MmugDNA.33868.1.S1_at   | MmugDNA.33868.1 | 11.35 | 11.19 | 0.3  | 0.04 | 1.11  | 0.780261 | 0.899506 | 0.908487 | 0.942863 |
| MmugDNA.33869.1.S1_at   | MmugDNA.33869.1 | 5.8   | 5.9   | 0.14 | 0.12 | -1.07 | 0.431407 | 0.639266 | 0.71858  | 0.788125 |
| MmugDNA.3387.1.S1_at    | MmugDNA.3387.1  | 8.26  | 9.1   | 0.27 | 1.44 | -1.79 | 0.352699 | 0.097404 | 0.669719 | 0.355097 |
| MmugDNA.33870.1.S1_at   | MmugDNA.33870.1 | 4.55  | 4.32  | 0.16 | 0.03 | 1.18  | 0.02328  | 0.007181 | 0.290606 | 0.113932 |
| MmugDNA.33871.1.S1_at   | MmugDNA.33871.1 | 4.53  | 4.25  | 0.4  | 0.23 | 1.21  | 0.239567 | 0.586005 | 0.592595 | 0.753172 |
| MmugDNA.33872.1.S1_at   | MmugDNA.33872.1 | 2.84  | 2.99  | 0.08 | 0.15 | -1.11 | 0.371818 | 0.357011 | 0.682509 | 0.598736 |
| MmugDNA.33873.1.S1_at   | MmugDNA.33873.1 | 5.83  | 6.98  | 0.42 | 0.24 | -2.22 | 0.013603 | 0.005144 | 0.24849  | 0.099496 |
| MmugDNA.33874.1.S1_at   | MmugDNA.33874.1 | 6.18  | 6.15  | 0.08 | 0.21 | 1.02  | 0.890389 | 0.305875 | 0.956171 | 0.562731 |
| MmugDNA.33875.1.S1_at   | MmugDNA.33875.1 | 7.06  | 7.04  | 0.48 | 0.5  | 1.01  | 0.25644  | 0.351279 | 0.604103 | 0.594937 |
| MmugDNA.33877.1.S1_at   | MmugDNA.33877.1 | 10    | 10.53 | 0.2  | 0.97 | -1.45 | 0.489453 | 0.371476 | 0.75384  | 0.610204 |
| MmugDNA.33878.1.S1_at   | MmugDNA.33878.1 | 5.73  | 5.81  | 0.81 | 0.69 | -1.06 | 0.855196 | 0.924148 | 0.941454 | 0.957248 |
| MmugDNA.3388.1.S1_at    | MmugDNA.3388.1  | 4.79  | 4.71  | 0.1  | 0.19 | 1.06  | 0.797723 | 0.963491 | 0.916116 | 0.979631 |
| MmugDNA.33880.1.S1_at   | MmugDNA.33880.1 | 5.38  | 5.08  | 0.05 | 0.76 | 1.23  | 0.7633   | 0.584267 | 0.900208 | 0.752357 |
| MmugDNA.33881.1.S1_at   | MmugDNA.33881.1 | 8.84  | 9.34  | 0.22 | 0.2  | -1.42 | 0.01995  | 0.013857 | 0.276365 | 0.150977 |
| MmugDNA.33883.1.S1_at   | MmugDNA.33883.1 | 7.36  | 7.94  | 0.18 | 0.44 | -1.5  | 0.027157 | 0.020535 | 0.306629 | 0.179788 |
| MmugDNA.33883.1.S1_x_at | MmugDNA.33883.1 | 7.22  | 7.77  | 0.13 | 0.43 | -1.47 | 0.049435 | 0.047919 | 0.371383 | 0.26377  |
| MmugDNA.33884.1.S1_at   | MmugDNA.33884.1 | 10.18 | 10.65 | 0.11 | 0.25 | -1.38 | 0.033912 | 0.021696 | 0.33052  | 0.184333 |
| MmugDNA.33886.1.S1_at   | MmugDNA.33886.1 | 8.08  | 7.54  | 0.02 | 0.1  | 1.46  | 0.000967 | 0.0001   | 0.139813 | 0.027996 |
| MmugDNA.33887.1.S1_at   | MmugDNA.33887.1 | 7.05  | 7.05  | 0.05 | 0.02 | 1     | 0.684813 | 0.963169 | 0.858795 | 0.979435 |
| MmugDNA.33888.1.S1_at   | MmugDNA.33888.1 | 7.2   | 7.47  | 0.16 | 0.33 | -1.21 | 0.189235 | 0.308416 | 0.552386 | 0.564479 |
| MmugDNA.33889.1.S1_at   | MmugDNA.33889.1 | 5.51  | 5.58  | 0.12 | 0.13 | -1.06 | 0.555414 | 0.169191 | 0.791378 | 0.445812 |
| MmugDNA.3389.1.S1_at    | MmugDNA.3389.1  | 12.06 | 12.66 | 0.07 | 0.04 | -1.51 | 0.00026  | 0.000055 | 0.12562  | 0.025666 |

|                         |                 |       |       |      |      |       |          |          |          |          |
|-------------------------|-----------------|-------|-------|------|------|-------|----------|----------|----------|----------|
| MmugDNA.33890.1.S1_at   | MmugDNA.33890.1 | 7.98  | 6.3   | 0.56 | 0.46 | 3.18  | 0.019878 | 0.009851 | 0.275812 | 0.130274 |
| MmugDNA.33891.1.S1_at   | MmugDNA.33891.1 | 4.9   | 4.9   | 0.12 | 0.1  | -1    | 0.846007 | 0.176885 | 0.938232 | 0.453303 |
| MmugDNA.33892.1.S1_at   | MmugDNA.33892.1 | 6.3   | 6.06  | 0.46 | 0.02 | 1.18  | 0.329907 | 0.363061 | 0.655349 | 0.603503 |
| MmugDNA.33894.1.S1_at   | MmugDNA.33894.1 | 5.52  | 5.73  | 0.15 | 0.15 | -1.15 | 0.085206 | 0.101103 | 0.438556 | 0.360724 |
| MmugDNA.33895.1.S1_at   | MmugDNA.33895.1 | 5.79  | 5.41  | 0.31 | 0.19 | 1.3   | 0.082537 | 0.019853 | 0.434069 | 0.177189 |
| MmugDNA.33896.1.S1_at   | MmugDNA.33896.1 | 10.74 | 11.33 | 0.45 | 0.52 | -1.51 | 0.412546 | 0.351241 | 0.707935 | 0.594937 |
| MmugDNA.33898.1.S1_at   | MmugDNA.33898.1 | 4.4   | 4.36  | 0.04 | 0.03 | 1.03  | 0.1049   | 0.309231 | 0.46527  | 0.564807 |
| MmugDNA.339.1.S1_at     | MmugDNA.339.1   | 5.51  | 4.1   | 0.63 | 0.83 | 2.66  | 0.158133 | 0.200008 | 0.522944 | 0.474603 |
| MmugDNA.3390.1.S1_at    | MmugDNA.3390.1  | 3.3   | 3.23  | 0.1  | 0.12 | 1.05  | 0.55436  | 0.691706 | 0.790679 | 0.820652 |
| MmugDNA.33901.1.S1_at   | MmugDNA.33901.1 | 11.73 | 11.29 | 0.06 | 0.23 | 1.36  | 0.04836  | 0.030613 | 0.368327 | 0.216906 |
| MmugDNA.33903.1.S1_at   | MmugDNA.33903.1 | 4.09  | 3.89  | 0.14 | 0.07 | 1.15  | 0.264112 | 0.107854 | 0.609857 | 0.370945 |
| MmugDNA.33904.1.S1_at   | MmugDNA.33904.1 | 10.98 | 11.75 | 0.2  | 0.27 | -1.71 | 0.027407 | 0.013787 | 0.307806 | 0.150462 |
| MmugDNA.33906.1.S1_at   | MmugDNA.33906.1 | 11.43 | 10.92 | 0.05 | 0.29 | 1.42  | 0.078795 | 0.054584 | 0.428609 | 0.279153 |
| MmugDNA.33909.1.S1_at   | MmugDNA.33909.1 | 3.85  | 3.86  | 0.04 | 0.23 | -1.01 | 0.944162 | 0.508595 | 0.978677 | 0.703719 |
| MmugDNA.3391.1.S1_at    | MmugDNA.3391.1  | 3.94  | 4.28  | 0.14 | 0.51 | -1.27 | 0.730194 | 0.533405 | 0.882997 | 0.719587 |
| MmugDNA.33910.1.S1_at   | MmugDNA.33910.1 | 11.57 | 11.56 | 0.15 | 0.09 | 1.01  | 0.729924 | 0.851188 | 0.882795 | 0.915364 |
| MmugDNA.33911.1.S1_s_at | MmugDNA.33911.1 | 11.05 | 11.01 | 0.1  | 0.23 | 1.02  | 0.723744 | 0.894781 | 0.879238 | 0.939961 |
| MmugDNA.33912.1.S1_at   | MmugDNA.33912.1 | 3.64  | 3.82  | 0.32 | 0.06 | -1.13 | 0.3604   | 0.492619 | 0.674449 | 0.693666 |
| MmugDNA.33913.1.S1_at   | MmugDNA.33913.1 | 6.53  | 6.84  | 0.37 | 0.19 | -1.23 | 0.272087 | 0.285527 | 0.615959 | 0.547395 |
| MmugDNA.33914.1.S1_at   | MmugDNA.33914.1 | 5.66  | 6.18  | 0.15 | 0.45 | -1.43 | 0.542597 | 0.756289 | 0.783447 | 0.858165 |
| MmugDNA.33915.1.S1_at   | MmugDNA.33915.1 | 11.07 | 11.54 | 0.12 | 0.45 | -1.39 | 0.457475 | 0.679066 | 0.734933 | 0.812614 |
| MmugDNA.33916.1.S1_at   | MmugDNA.33916.1 | 4.79  | 4.65  | 0.05 | 0.12 | 1.1   | 0.227861 | 0.079384 | 0.585266 | 0.32676  |
| MmugDNA.33917.1.S1_at   | MmugDNA.33917.1 | 11.14 | 10.83 | 0.15 | 0.26 | 1.24  | 0.244316 | 0.173416 | 0.596096 | 0.449918 |
| MmugDNA.33919.1.S1_at   | MmugDNA.33919.1 | 8.19  | 8.76  | 0.19 | 0.47 | -1.48 | 0.092851 | 0.16458  | 0.449872 | 0.440829 |
| MmugDNA.3392.1.S1_at    | MmugDNA.3392.1  | 3.36  | 3.38  | 0.34 | 0.08 | -1.01 | 0.553726 | 0.651413 | 0.790364 | 0.796212 |
| MmugDNA.33921.1.S1_s_at | MmugDNA.33921.1 | 7.38  | 7.05  | 0.13 | 0.19 | 1.26  | 0.123912 | 0.027747 | 0.489589 | 0.208003 |
| MmugDNA.33922.1.S1_at   | MmugDNA.33922.1 | 5.79  | 5.81  | 0.11 | 0.3  | -1.01 | 0.533169 | 0.395736 | 0.777978 | 0.627639 |
| MmugDNA.33923.1.S1_at   | MmugDNA.33923.1 | 10.48 | 10.07 | 0.53 | 0.4  | 1.32  | 0.713835 | 0.576292 | 0.874591 | 0.747148 |
| MmugDNA.33924.1.S1_at   | MmugDNA.33924.1 | 4.52  | 3.14  | 1.94 | 1.3  | 2.59  | 0.266515 | 0.320421 | 0.611941 | 0.572648 |
| MmugDNA.33925.1.S1_at   | MmugDNA.33925.1 | 4     | 3.96  | 0.16 | 0.12 | 1.03  | 0.335649 | 0.674696 | 0.659165 | 0.809969 |
| MmugDNA.33925.1.S1_s_at | MmugDNA.33925.1 | 7.05  | 6.88  | 0.2  | 0.03 | 1.13  | 0.191171 | 0.124812 | 0.554103 | 0.395219 |
| MmugDNA.3393.1.S1_at    | MmugDNA.3393.1  | 8.61  | 7.78  | 0.45 | 0.56 | 1.77  | 0.249073 | 0.30722  | 0.599765 | 0.563499 |
| MmugDNA.33930.1.S1_at   | MmugDNA.33930.1 | 6.39  | 7.17  | 1.03 | 2.09 | -1.71 | 0.787104 | 0.040872 | 0.911476 | 0.247049 |
| MmugDNA.33930.1.S1_s_at | MmugDNA.33930.1 | 7.19  | 8.19  | 0.48 | 0.78 | -2    | 0.329238 | 0.021338 | 0.654879 | 0.182856 |
| MmugDNA.33933.1.S1_at   | MmugDNA.33933.1 | 5.34  | 5.28  | 0.29 | 0.06 | 1.05  | 0.878478 | 0.959577 | 0.951226 | 0.977061 |
| MmugDNA.33936.1.S1_at   | MmugDNA.33936.1 | 4.62  | 4.51  | 0.07 | 0.03 | 1.08  | 0.262735 | 0.322867 | 0.609039 | 0.574209 |
| MmugDNA.33937.1.S1_at   | MmugDNA.33937.1 | 3.99  | 3.38  | 0.6  | 0.03 | 1.52  | 0.141414 | 0.161192 | 0.509067 | 0.437378 |
| MmugDNA.33938.1.S1_at   | MmugDNA.33938.1 | 6.68  | 6.64  | 0.13 | 0.13 | 1.03  | 0.703638 | 0.747254 | 0.869108 | 0.853149 |
| MmugDNA.33939.1.S1_at   | MmugDNA.33939.1 | 6.27  | 6.4   | 0.13 | 0.28 | -1.1  | 0.170448 | 0.229948 | 0.534249 | 0.501802 |
| MmugDNA.33940.1.S1_at   | MmugDNA.33940.1 | 7.78  | 7.71  | 0.16 | 0.43 | 1.05  | 0.56316  | 0.561046 | 0.795814 | 0.737088 |
| MmugDNA.33942.1.S1_at   | MmugDNA.33942.1 | 4.14  | 4.28  | 0.08 | 0.17 | -1.1  | 0.121314 | 0.12931  | 0.48598  | 0.400726 |

|                         |                 |       |       |      |      |       |          |          |          |          |
|-------------------------|-----------------|-------|-------|------|------|-------|----------|----------|----------|----------|
| MmugDNA.33943.1.S1_at   | MmugDNA.33943.1 | 3.89  | 3.87  | 0.04 | 0.25 | 1.01  | 0.974396 | 0.744418 | 0.989998 | 0.852014 |
| MmugDNA.33944.1.S1_at   | MmugDNA.33944.1 | 7.49  | 7.44  | 0.29 | 0.69 | 1.04  | 0.805191 | 0.775492 | 0.920016 | 0.86936  |
| MmugDNA.33945.1.S1_at   | MmugDNA.33945.1 | 9.81  | 10.03 | 0.1  | 0.88 | -1.16 | 0.4466   | 0.414588 | 0.728373 | 0.640431 |
| MmugDNA.33946.1.S1_at   | MmugDNA.33946.1 | 3.51  | 3.55  | 0.06 | 0.12 | -1.02 | 0.543534 | 0.535222 | 0.783817 | 0.720824 |
| MmugDNA.33947.1.S1_at   | MmugDNA.33947.1 | 6.37  | 6.37  | 0.07 | 0.07 | 1     | 0.270834 | 0.358723 | 0.615103 | 0.60018  |
| MmugDNA.33948.1.S1_at   | MmugDNA.33948.1 | 8.07  | 7.72  | 0.37 | 0.49 | 1.27  | 0.302867 | 0.412138 | 0.637146 | 0.63856  |
| MmugDNA.3395.1.S1_at    | MmugDNA.3395.1  | 5.7   | 5.74  | 0.16 | 0.13 | -1.03 | 0.532614 | 0.117544 | 0.777808 | 0.38531  |
| MmugDNA.33955.1.S1_at   | MmugDNA.33955.1 | 4.21  | 4.05  | 0.03 | 0.24 | 1.12  | 0.307185 | 0.318361 | 0.63988  | 0.571192 |
| MmugDNA.33956.1.S1_at   | MmugDNA.33956.1 | 3.07  | 3.05  | 0.1  | 0.08 | 1.02  | 0.812028 | 0.965535 | 0.923484 | 0.980739 |
| MmugDNA.33957.1.S1_at   | MmugDNA.33957.1 | 4.05  | 4.33  | 0.22 | 0.9  | -1.22 | 0.563512 | 0.739664 | 0.796058 | 0.849146 |
| MmugDNA.33958.1.S1_at   | MmugDNA.33958.1 | 3.19  | 3.09  | 0.1  | 0.07 | 1.07  | 0.177671 | 0.3524   | 0.541818 | 0.595722 |
| MmugDNA.33959.1.S1_at   | MmugDNA.33959.1 | 5.29  | 4.92  | 0.2  | 0.05 | 1.3   | 0.051121 | 0.037394 | 0.375935 | 0.237776 |
| MmugDNA.3396.1.S1_at    | MmugDNA.3396.1  | 5.98  | 6.53  | 0.19 | 0.18 | -1.46 | 0.016485 | 0.009358 | 0.264215 | 0.127602 |
| MmugDNA.33960.1.S1_at   | MmugDNA.33960.1 | 4.46  | 4.43  | 0.12 | 0.32 | 1.02  | 0.744325 | 0.818802 | 0.890626 | 0.895578 |
| MmugDNA.33961.1.S1_at   | MmugDNA.33961.1 | 12.22 | 11.57 | 0.04 | 0.45 | 1.58  | 0.210025 | 0.121288 | 0.571234 | 0.390351 |
| MmugDNA.33963.1.S1_at   | MmugDNA.33963.1 | 4.09  | 4.22  | 0.08 | 0.25 | -1.1  | 0.465685 | 0.277178 | 0.740048 | 0.541154 |
| MmugDNA.33964.1.S1_at   | MmugDNA.33964.1 | 6.16  | 6.36  | 0.08 | 0.29 | -1.15 | 0.220364 | 0.260576 | 0.579323 | 0.527084 |
| MmugDNA.33968.1.S1_at   | MmugDNA.33968.1 | 4.16  | 4.31  | 0.17 | 0.11 | -1.11 | 0.538949 | 0.493615 | 0.780889 | 0.694288 |
| MmugDNA.33970.1.S1_at   | MmugDNA.33970.1 | 6.92  | 7.41  | 0.35 | 0.36 | -1.4  | 0.199302 | 0.239856 | 0.56224  | 0.510611 |
| MmugDNA.33971.1.S1_at   | MmugDNA.33971.1 | 6.49  | 6.7   | 0.61 | 0.39 | -1.16 | 0.736156 | 0.91452  | 0.886493 | 0.951957 |
| MmugDNA.33972.1.S1_at   | MmugDNA.33972.1 | 5.85  | 5.79  | 0.12 | 0.07 | 1.04  | 0.728028 | 0.902764 | 0.881731 | 0.944798 |
| MmugDNA.33974.1.S1_at   | MmugDNA.33974.1 | 12.57 | 12.49 | 0.05 | 0.02 | 1.06  | 0.022445 | 0.531928 | 0.286819 | 0.718995 |
| MmugDNA.33974.1.S1_s_at | MmugDNA.33974.1 | 10.86 | 10.84 | 0.06 | 0.15 | 1.02  | 0.551316 | 0.098769 | 0.788586 | 0.356875 |
| MmugDNA.33976.1.S1_at   | MmugDNA.33976.1 | 3.59  | 3.73  | 0.16 | 0.08 | -1.11 | 0.227777 | 0.10518  | 0.585222 | 0.366971 |
| MmugDNA.29933.1.S1_s_at | MmugDNA.29933.1 | 7.3   | 7.43  | 0.14 | 0    | -1.09 | 0.637642 | 0.644439 | 0.836256 | 0.791578 |
| MmugDNA.33977.1.S1_at   | MmugDNA.33977.1 | 4.33  | 4.23  | 0.2  | 0.14 | 1.07  | 0.400698 | 0.402232 | 0.700264 | 0.631261 |
| MmugDNA.3398.1.S1_at    | MmugDNA.3398.1  | 11.55 | 11.81 | 0.16 | 0.37 | -1.2  | 0.256296 | 0.170117 | 0.603927 | 0.446868 |
| MmugDNA.33980.1.S1_at   | MmugDNA.33980.1 | 6.93  | 6.78  | 0.71 | 0.19 | 1.11  | 0.900226 | 0.4041   | 0.960239 | 0.632614 |
| MmugDNA.33981.1.S1_at   | MmugDNA.33981.1 | 4.14  | 4.14  | 0.23 | 0.07 | -1    | 0.569666 | 0.369621 | 0.799147 | 0.608957 |
| MmugDNA.33983.1.S1_at   | MmugDNA.33983.1 | 5.72  | 5.34  | 0.22 | 0.63 | 1.3   | 0.459526 | 0.554373 | 0.736281 | 0.733168 |
| MmugDNA.33984.1.S1_at   | MmugDNA.33984.1 | 4.7   | 4.7   | 0.16 | 0.13 | -1    | 0.577365 | 0.898368 | 0.803475 | 0.942175 |
| MmugDNA.33985.1.S1_at   | MmugDNA.33985.1 | 5.58  | 5.11  | 0.16 | 0.24 | 1.39  | 0.215486 | 0.310387 | 0.575924 | 0.56558  |
| MmugDNA.33986.1.S1_at   | MmugDNA.33986.1 | 3.3   | 3.4   | 0.17 | 0.01 | -1.08 | 0.803543 | 0.266307 | 0.919138 | 0.532099 |
| MmugDNA.33988.1.S1_at   | MmugDNA.33988.1 | 5.13  | 4.33  | 0.69 | 0.35 | 1.74  | 0.135138 | 0.267001 | 0.501995 | 0.532541 |
| MmugDNA.3399.1.S1_at    | MmugDNA.3399.1  | 3.56  | 3.67  | 0.04 | 0.11 | -1.08 | 0.128973 | 0.557703 | 0.494981 | 0.735173 |
| MmugDNA.33990.1.S1_at   | MmugDNA.33990.1 | 6.06  | 5.93  | 0.1  | 0.08 | 1.09  | 0.341444 | 0.636525 | 0.662564 | 0.786247 |
| MmugDNA.33991.1.S1_at   | MmugDNA.33991.1 | 8.38  | 7.44  | 0.28 | 1.02 | 1.91  | 0.462333 | 0.548149 | 0.738226 | 0.728911 |
| MmugDNA.33992.1.S1_at   | MmugDNA.33992.1 | 8.5   | 7.69  | 0.14 | 0.41 | 1.75  | 0.035778 | 0.027025 | 0.33757  | 0.205533 |
| MmugDNA.33993.1.S1_at   | MmugDNA.33993.1 | 4.61  | 4.65  | 0.39 | 0.13 | -1.03 | 0.672742 | 0.47785  | 0.853193 | 0.683843 |
| MmugDNA.33995.1.S1_at   | MmugDNA.33995.1 | 6.25  | 6.27  | 0.16 | 0.15 | -1.01 | 0.373154 | 0.548301 | 0.683245 | 0.729053 |
| MmugDNA.33998.1.S1_at   | MmugDNA.33998.1 | 7.33  | 7.17  | 0.13 | 0.36 | 1.12  | 0.469679 | 0.532857 | 0.741854 | 0.71927  |

|                         |                 |       |       |      |      |       |          |          |          |          |
|-------------------------|-----------------|-------|-------|------|------|-------|----------|----------|----------|----------|
| MmugDNA.33999.1.S1_at   | MmugDNA.33999.1 | 3.91  | 4.02  | 0.07 | 0.08 | -1.08 | 0.088138 | 0.180889 | 0.442584 | 0.457394 |
| MmugDNA.340.1.S1_at     | MmugDNA.340.1   | 4.97  | 5.1   | 0.32 | 0.43 | -1.1  | 0.390298 | 0.526852 | 0.69348  | 0.715627 |
| MmugDNA.3400.1.S1_at    | MmugDNA.3400.1  | 7.15  | 7.26  | 0.3  | 0.1  | -1.08 | 0.817779 | 0.899686 | 0.926038 | 0.942903 |
| MmugDNA.34000.1.S1_at   | MmugDNA.34000.1 | 5.25  | 5.49  | 0.69 | 0.2  | -1.18 | 0.734053 | 0.664905 | 0.885333 | 0.803709 |
| MmugDNA.34001.1.S1_at   | MmugDNA.34001.1 | 8.9   | 9.08  | 0.22 | 0.27 | -1.13 | 0.19164  | 0.085231 | 0.554671 | 0.337096 |
| MmugDNA.34002.1.S1_at   | MmugDNA.34002.1 | 7.99  | 8.62  | 0.18 | 0.61 | -1.54 | 0.121584 | 0.153329 | 0.486508 | 0.428139 |
| MmugDNA.34002.1.S1_s_at | MmugDNA.34002.1 | 8.93  | 9.31  | 0.11 | 0.61 | -1.31 | 0.277617 | 0.382806 | 0.619765 | 0.618907 |
| MmugDNA.34005.1.S1_at   | MmugDNA.34005.1 | 10.96 | 11.44 | 0.15 | 0.38 | -1.4  | 0.105861 | 0.142238 | 0.466636 | 0.415754 |
| MmugDNA.34007.1.S1_at   | MmugDNA.34007.1 | 10.11 | 10.8  | 0.27 | 0.78 | -1.61 | 0.452837 | 0.542861 | 0.732217 | 0.725834 |
| MmugDNA.3401.1.S1_at    | MmugDNA.3401.1  | 10.35 | 10.82 | 0.07 | 0.13 | -1.38 | 0.010941 | 0.005423 | 0.233129 | 0.101583 |
| MmugDNA.34010.1.S1_at   | MmugDNA.34010.1 | 5.45  | 5.95  | 0.34 | 0.14 | -1.41 | 0.224661 | 0.529856 | 0.58277  | 0.717526 |
| MmugDNA.34013.1.S1_at   | MmugDNA.34013.1 | 6.87  | 7.02  | 0.22 | 0.57 | -1.11 | 0.929171 | 0.864935 | 0.972667 | 0.923415 |
| MmugDNA.34015.1.S1_at   | MmugDNA.34015.1 | 7.24  | 6.91  | 0.33 | 0.88 | 1.25  | 0.51848  | 0.474284 | 0.769471 | 0.68135  |
| MmugDNA.34017.1.S1_at   | MmugDNA.34017.1 | 3.8   | 3.8   | 0.03 | 0.11 | -1.01 | 0.671791 | 0.873063 | 0.852716 | 0.927822 |
| MmugDNA.34018.1.S1_at   | MmugDNA.34018.1 | 5.15  | 5.16  | 0.07 | 0.09 | -1    | 0.864535 | 0.845987 | 0.94556  | 0.912303 |
| MmugDNA.34019.1.S1_at   | MmugDNA.34019.1 | 4.46  | 4.51  | 0.35 | 0.36 | -1.03 | 0.67788  | 0.537522 | 0.855686 | 0.722606 |
| MmugDNA.34020.1.S1_at   | MmugDNA.34020.1 | 3.07  | 3.07  | 0.2  | 0.13 | 1     | 0.417734 | 0.579485 | 0.710734 | 0.74918  |
| MmugDNA.34021.1.S1_at   | MmugDNA.34021.1 | 8.1   | 8.74  | 0.11 | 0.26 | -1.56 | 0.015421 | 0.028456 | 0.258472 | 0.210487 |
| MmugDNA.34022.1.S1_at   | MmugDNA.34022.1 | 6.89  | 6.81  | 0.09 | 0.08 | 1.06  | 0.524996 | 0.154162 | 0.773363 | 0.428913 |
| MmugDNA.34023.1.S1_s_at | MmugDNA.34023.1 | 12.19 | 12.22 | 0.03 | 0.12 | -1.02 | 0.652248 | 0.002646 | 0.843581 | 0.076027 |
| MmugDNA.34024.1.S1_at   | MmugDNA.34024.1 | 3.9   | 3.78  | 0.08 | 0.12 | 1.09  | 0.180934 | 0.081671 | 0.54536  | 0.329886 |
| MmugDNA.34025.1.S1_at   | MmugDNA.34025.1 | 3.07  | 3.12  | 0.12 | 0.17 | -1.03 | 0.583459 | 0.649565 | 0.8065   | 0.795    |
| MmugDNA.34028.1.S1_at   | MmugDNA.34028.1 | 9.39  | 8.8   | 0.38 | 0.48 | 1.5   | 0.083669 | 0.070833 | 0.435945 | 0.31231  |
| MmugDNA.3403.1.S1_at    | MmugDNA.3403.1  | 5.36  | 4.96  | 0.12 | 0.29 | 1.31  | 0.423876 | 0.113563 | 0.714199 | 0.379632 |
| MmugDNA.34031.1.S1_at   | MmugDNA.34031.1 | 6.33  | 6.62  | 0.22 | 0.13 | -1.22 | 0.372204 | 0.196276 | 0.682724 | 0.471236 |
| MmugDNA.34036.1.S1_at   | MmugDNA.34036.1 | 7.98  | 7.72  | 0.65 | 0.17 | 1.2   | 0.318409 | 0.427059 | 0.648419 | 0.649087 |
| MmugDNA.34037.1.S1_at   | MmugDNA.34037.1 | 6.93  | 7.11  | 0.1  | 0.1  | -1.14 | 0.170461 | 0.11003  | 0.534249 | 0.374163 |
| MmugDNA.34038.1.S1_at   | MmugDNA.34038.1 | 6.04  | 6.26  | 0.22 | 0.06 | -1.16 | 0.517826 | 0.773485 | 0.769065 | 0.868325 |
| MmugDNA.34039.1.S1_at   | MmugDNA.34039.1 | 4.5   | 4.88  | 0.81 | 0.2  | -1.29 | 0.815602 | 0.685606 | 0.925109 | 0.816542 |
| MmugDNA.3404.1.S1_at    | MmugDNA.3404.1  | 7.87  | 7.82  | 0.07 | 0.27 | 1.03  | 0.638082 | 0.55791  | 0.836489 | 0.735292 |
| MmugDNA.34041.1.S1_at   | MmugDNA.34041.1 | 9.47  | 9.29  | 0.11 | 0.1  | 1.13  | 0.247035 | 0.075192 | 0.598082 | 0.319384 |
| MmugDNA.34042.1.S1_at   | MmugDNA.34042.1 | 10.95 | 11.84 | 0.09 | 0.23 | -1.84 | 0.003713 | 0.00174  | 0.179914 | 0.062895 |
| MmugDNA.34043.1.S1_at   | MmugDNA.34043.1 | 3.97  | 3.42  | 0.19 | 0.21 | 1.46  | 0.061272 | 0.15701  | 0.395362 | 0.432467 |
| MmugDNA.34044.1.S1_at   | MmugDNA.34044.1 | 6.9   | 6.97  | 0.31 | 0.11 | -1.05 | 0.939284 | 0.793432 | 0.976927 | 0.880785 |
| MmugDNA.34045.1.S1_at   | MmugDNA.34045.1 | 4.94  | 4.95  | 0.19 | 0.05 | -1.01 | 0.872435 | 0.749415 | 0.948997 | 0.854404 |
| MmugDNA.34046.1.S1_at   | MmugDNA.34046.1 | 7.8   | 8.03  | 0.33 | 0.53 | -1.17 | 0.823443 | 0.93136  | 0.928164 | 0.961034 |
| MmugDNA.34047.1.S1_at   | MmugDNA.34047.1 | 2.65  | 2.66  | 0.44 | 0.13 | -1.01 | 0.423621 | 0.492096 | 0.714199 | 0.693442 |
| MmugDNA.34048.1.S1_at   | MmugDNA.34048.1 | 6.28  | 6.28  | 0.09 | 0.02 | 1     | 0.978414 | 0.829342 | 0.992056 | 0.901879 |
| MmugDNA.34049.1.S1_at   | MmugDNA.34049.1 | 10.23 | 10.07 | 0.44 | 1.07 | 1.12  | 0.902814 | 0.208198 | 0.961281 | 0.482086 |
| MmugDNA.34051.1.S1_at   | MmugDNA.34051.1 | 3.5   | 3.38  | 0.22 | 0.09 | 1.09  | 0.665457 | 0.787094 | 0.850011 | 0.876832 |
| MmugDNA.34052.1.S1_at   | MmugDNA.34052.1 | 4.51  | 4.56  | 0.55 | 0.26 | -1.04 | 0.878607 | 0.83676  | 0.951327 | 0.906703 |



|                         |                 |       |       |      |      |       |          |          |          |          |
|-------------------------|-----------------|-------|-------|------|------|-------|----------|----------|----------|----------|
| MmugDNA.34053.1.S1_at   | MmugDNA.34053.1 | 3.2   | 3.06  | 0.12 | 0.06 | 1.1   | 0.159457 | 0.393791 | 0.524333 | 0.626565 |
| MmugDNA.34054.1.S1_at   | MmugDNA.34054.1 | 3.5   | 3.52  | 0.22 | 0.13 | -1.01 | 0.876044 | 0.96298  | 0.95032  | 0.979319 |
| MmugDNA.34058.1.S1_at   | MmugDNA.34058.1 | 11.7  | 10.59 | 0.1  | 0.07 | 2.16  | 0.000088 | 0.0003   | 0.112653 | 0.034892 |
| MmugDNA.34059.1.S1_at   | MmugDNA.34059.1 | 4.55  | 3.55  | 0.36 | 0.84 | 2     | 0.207019 | 0.472286 | 0.568965 | 0.67994  |
| MmugDNA.34060.1.S1_at   | MmugDNA.34060.1 | 9.71  | 9.9   | 0.45 | 0.13 | -1.15 | 0.843861 | 0.538638 | 0.937239 | 0.723301 |
| MmugDNA.34060.1.S1_s_at | MmugDNA.34060.1 | 11.23 | 11.41 | 0.4  | 0.09 | -1.13 | 0.806755 | 0.509902 | 0.920809 | 0.704492 |
| MmugDNA.34061.1.S1_s_at | MmugDNA.34061.1 | 7.85  | 8.94  | 0.29 | 0.18 | -2.12 | 0.005872 | 0.002646 | 0.19355  | 0.076027 |
| MmugDNA.34062.1.S1_at   | MmugDNA.34062.1 | 5.23  | 5.47  | 0.19 | 0.21 | -1.18 | 0.496353 | 0.633152 | 0.757473 | 0.783969 |
| MmugDNA.34066.1.S1_at   | MmugDNA.34066.1 | 6.65  | 6.56  | 0.15 | 0.07 | 1.06  | 0.715727 | 0.733433 | 0.875251 | 0.845666 |
| MmugDNA.34069.1.S1_at   | MmugDNA.34069.1 | 7.48  | 7.6   | 0.25 | 0.04 | -1.09 | 0.883891 | 0.318597 | 0.953435 | 0.571258 |
| MmugDNA.3407.1.S1_at    | MmugDNA.3407.1  | 8.59  | 8.17  | 0.14 | 0.3  | 1.34  | 0.200715 | 0.22906  | 0.5634   | 0.501378 |
| MmugDNA.34072.1.S1_at   | MmugDNA.34072.1 | 5.25  | 5.21  | 1.01 | 0.27 | 1.03  | 0.358254 | 0.44453  | 0.673123 | 0.662072 |
| MmugDNA.34073.1.S1_at   | MmugDNA.34073.1 | 5.09  | 5.56  | 0.39 | 0.35 | -1.38 | 0.119951 | 0.108067 | 0.48448  | 0.371281 |
| MmugDNA.34074.1.S1_at   | MmugDNA.34074.1 | 3.81  | 3.71  | 0.27 | 0.22 | 1.07  | 0.978579 | 0.917207 | 0.992128 | 0.953758 |
| MmugDNA.34075.1.S1_at   | MmugDNA.34075.1 | 7.68  | 7.27  | 0.32 | 0.16 | 1.32  | 0.049936 | 0.038762 | 0.372556 | 0.241916 |
| MmugDNA.34077.1.S1_at   | MmugDNA.34077.1 | 6.99  | 7.46  | 0.76 | 0.12 | -1.38 | 0.987349 | 0.582077 | 0.995543 | 0.750784 |
| MmugDNA.34078.1.S1_at   | MmugDNA.34078.1 | 3.79  | 3.76  | 0.1  | 0.24 | 1.03  | 0.356121 | 0.496743 | 0.671384 | 0.696173 |
| MmugDNA.34079.1.S1_at   | MmugDNA.34079.1 | 5.5   | 5.76  | 0.08 | 0.06 | -1.2  | 0.01706  | 0.002084 | 0.266622 | 0.067486 |
| MmugDNA.34080.1.S1_at   | MmugDNA.34080.1 | 11.91 | 12.12 | 0.07 | 0.14 | -1.15 | 0.046565 | 0.036982 | 0.363306 | 0.236733 |
| MmugDNA.34081.1.S1_at   | MmugDNA.34081.1 | 8.75  | 7.73  | 0.29 | 0.42 | 2.03  | 0.048242 | 0.048721 | 0.368148 | 0.265744 |
| MmugDNA.34082.1.S1_at   | MmugDNA.34082.1 | 3.37  | 3.08  | 0.23 | 0.44 | 1.22  | 0.765295 | 0.94585  | 0.901251 | 0.969225 |
| MmugDNA.34083.1.S1_at   | MmugDNA.34083.1 | 6.87  | 6.72  | 0.01 | 0.37 | 1.11  | 0.323986 | 0.385746 | 0.651822 | 0.621079 |
| MmugDNA.34083.1.S1_s_at | MmugDNA.34083.1 | 5.82  | 5.68  | 0.34 | 0.43 | 1.1   | 0.603306 | 0.29041  | 0.817111 | 0.551169 |
| MmugDNA.34084.1.S1_at   | MmugDNA.34084.1 | 6.41  | 6.51  | 0.02 | 0.22 | -1.08 | 0.42332  | 0.452448 | 0.714016 | 0.667111 |
| MmugDNA.34084.1.S1_x_at | MmugDNA.34084.1 | 7.31  | 7.43  | 0.16 | 0.11 | -1.08 | 0.513477 | 0.25392  | 0.766396 | 0.522274 |
| MmugDNA.34086.1.S1_at   | MmugDNA.34086.1 | 7.09  | 6.05  | 0.17 | 0.52 | 2.05  | 0.039336 | 0.069832 | 0.346971 | 0.310353 |
| MmugDNA.34087.1.S1_at   | MmugDNA.34087.1 | 3.94  | 4.06  | 0.2  | 0.41 | -1.09 | 0.924751 | 0.859278 | 0.970885 | 0.919791 |
| MmugDNA.34088.1.S1_at   | MmugDNA.34088.1 | 7.61  | 7.72  | 0.22 | 0.46 | -1.08 | 0.694868 | 0.190697 | 0.864696 | 0.466141 |
| MmugDNA.3409.1.S1_at    | MmugDNA.3409.1  | 8.34  | 8.01  | 0.26 | 0.2  | 1.26  | 0.250484 | 0.557143 | 0.600389 | 0.734957 |
| MmugDNA.34090.1.S1_at   | MmugDNA.34090.1 | 3.74  | 3.83  | 0.17 | 0.11 | -1.06 | 0.987566 | 0.613078 | 0.995569 | 0.770391 |
| MmugDNA.34091.1.S1_at   | MmugDNA.34091.1 | 2.59  | 2.71  | 0.2  | 0.11 | -1.08 | 0.62498  | 0.77818  | 0.828566 | 0.871209 |
| MmugDNA.34091.1.S1_s_at | MmugDNA.34091.1 | 6.05  | 5.98  | 0.24 | 0.16 | 1.05  | 0.615701 | 0.108093 | 0.823709 | 0.371281 |
| MmugDNA.34093.1.S1_at   | MmugDNA.34093.1 | 4.23  | 4.33  | 0.07 | 0.1  | -1.07 | 0.476619 | 0.003565 | 0.746273 | 0.085525 |
| MmugDNA.34094.1.S1_at   | MmugDNA.34094.1 | 5.81  | 5.86  | 0.19 | 0.24 | -1.03 | 0.170359 | 0.04529  | 0.534249 | 0.25714  |
| MmugDNA.34096.1.S1_at   | MmugDNA.34096.1 | 4.58  | 4.58  | 0.11 | 0.08 | 1     | 0.736395 | 0.802119 | 0.886656 | 0.886056 |
| MmugDNA.34099.1.S1_at   | MmugDNA.34099.1 | 10    | 10.56 | 0.17 | 0.24 | -1.48 | 0.026332 | 0.001034 | 0.302744 | 0.051305 |
| MmugDNA.34100.1.S1_at   | MmugDNA.34100.1 | 9.89  | 8.77  | 0.21 | 0.31 | 2.18  | 0.016035 | 0.007212 | 0.262409 | 0.11412  |
| MmugDNA.34101.1.S1_at   | MmugDNA.34101.1 | 7.15  | 5.8   | 0.85 | 0.67 | 2.55  | 0.05554  | 0.048001 | 0.384158 | 0.264109 |
| MmugDNA.34102.1.S1_at   | MmugDNA.34102.1 | 9.1   | 9.24  | 0.16 | 0.12 | -1.1  | 0.140223 | 0.020825 | 0.508065 | 0.180995 |
| MmugDNA.34103.1.S1_at   | MmugDNA.34103.1 | 4.69  | 3.68  | 0.76 | 0.47 | 2.01  | 0.145611 | 0.166131 | 0.51146  | 0.442694 |
| MmugDNA.34104.1.S1_at   | MmugDNA.34104.1 | 5.1   | 5.09  | 0.26 | 0.23 | 1.01  | 0.600814 | 0.792841 | 0.815477 | 0.880387 |

|                         |                 |       |       |      |      |       |          |          |          |          |
|-------------------------|-----------------|-------|-------|------|------|-------|----------|----------|----------|----------|
| MmugDNA.34106.1.S1_s_at | MmugDNA.34106.1 | 5.72  | 6.7   | 0.51 | 1.21 | -1.97 | 0.402762 | 0.502216 | 0.701615 | 0.70006  |
| MmugDNA.34109.1.S1_at   | MmugDNA.34109.1 | 3.61  | 3.58  | 0.07 | 0.21 | 1.02  | 0.37199  | 0.61875  | 0.682671 | 0.774185 |
| MmugDNA.3411.1.S1_at    | MmugDNA.3411.1  | 6.18  | 6.14  | 0.12 | 0.08 | 1.03  | 0.591559 | 0.716573 | 0.810512 | 0.835815 |
| MmugDNA.34110.1.S1_at   | MmugDNA.34110.1 | 6.75  | 6.37  | 0.39 | 0.2  | 1.3   | 0.343164 | 0.533358 | 0.663475 | 0.719567 |
| MmugDNA.34111.1.S1_s_at | MmugDNA.34111.1 | 12.11 | 11.28 | 0.28 | 0.11 | 1.77  | 0.009179 | 0.002585 | 0.222493 | 0.075213 |
| MmugDNA.34112.1.S1_at   | MmugDNA.34112.1 | 3.65  | 3.71  | 0.09 | 0.14 | -1.04 | 0.240341 | 0.300058 | 0.593146 | 0.558262 |
| MmugDNA.34113.1.S1_at   | MmugDNA.34113.1 | 9.2   | 9.19  | 0.09 | 0.38 | 1.01  | 0.994297 | 0.460052 | 0.997997 | 0.671989 |
| MmugDNA.34114.1.S1_at   | MmugDNA.34114.1 | 10.04 | 9.97  | 0.82 | 0.38 | 1.05  | 0.360036 | 0.450112 | 0.674197 | 0.665505 |
| MmugDNA.34115.1.S1_at   | MmugDNA.34115.1 | 4.52  | 4.57  | 0.19 | 0.07 | -1.04 | 0.510003 | 0.663189 | 0.764643 | 0.802857 |
| MmugDNA.34117.1.S1_at   | MmugDNA.34117.1 | 5.11  | 5.15  | 0.11 | 0.19 | -1.02 | 0.326375 | 0.198272 | 0.653184 | 0.473234 |
| MmugDNA.34118.1.S1_at   | MmugDNA.34118.1 | 7.69  | 7.77  | 0.29 | 0.57 | -1.05 | 0.31754  | 0.471131 | 0.647954 | 0.679183 |
| MmugDNA.3412.1.S1_at    | MmugDNA.3412.1  | 4.71  | 4.23  | 0.67 | 0.14 | 1.4   | 0.2616   | 0.389682 | 0.608236 | 0.623748 |
| MmugDNA.3412.1.S1_s_at  | MmugDNA.3412.1  | 3.08  | 3.08  | 0.22 | 0.15 | 1     | 0.339603 | 0.32379  | 0.66132  | 0.574609 |
| MmugDNA.34122.1.S1_at   | MmugDNA.34122.1 | 8.12  | 8.04  | 0.54 | 0.51 | 1.06  | 0.831142 | 0.909956 | 0.931682 | 0.949206 |
| MmugDNA.34124.1.S1_at   | MmugDNA.34124.1 | 8.08  | 7.2   | 0.42 | 0.18 | 1.84  | 0.046441 | 0.03026  | 0.363009 | 0.215828 |
| MmugDNA.34125.1.S1_at   | MmugDNA.34125.1 | 7.64  | 5     | 0.23 | 0.88 | 6.24  | 0.014639 | 0.04954  | 0.254381 | 0.267514 |
| MmugDNA.34126.1.S1_at   | MmugDNA.34126.1 | 6.51  | 7.63  | 0.18 | 0.13 | -2.17 | 0.000915 | 0.000364 | 0.139813 | 0.037273 |
| MmugDNA.34127.1.S1_at   | MmugDNA.34127.1 | 5.04  | 5.12  | 0.25 | 0.05 | -1.06 | 0.588951 | 0.075604 | 0.809161 | 0.32003  |
| MmugDNA.34128.1.S1_at   | MmugDNA.34128.1 | 5.21  | 5.71  | 0.29 | 0.12 | -1.41 | 0.0764   | 0.08212  | 0.424965 | 0.330937 |
| MmugDNA.34129.1.S1_at   | MmugDNA.34129.1 | 4.7   | 5.07  | 0.11 | 0.53 | -1.29 | 0.098644 | 0.098908 | 0.458486 | 0.357049 |
| MmugDNA.3413.1.S1_at    | MmugDNA.3413.1  | 6.64  | 6.61  | 0.72 | 0.23 | 1.02  | 0.365358 | 0.458243 | 0.678238 | 0.671091 |
| MmugDNA.34130.1.S1_at   | MmugDNA.34130.1 | 6.56  | 6.52  | 0.03 | 0.17 | 1.03  | 0.783474 | 0.533363 | 0.909533 | 0.719567 |
| MmugDNA.34131.1.S1_at   | MmugDNA.34131.1 | 3.32  | 3.53  | 0.05 | 0.12 | -1.15 | 0.199981 | 0.54768  | 0.56303  | 0.7286   |
| MmugDNA.34132.1.S1_at   | MmugDNA.34132.1 | 5.05  | 4.94  | 0.03 | 0.25 | 1.08  | 0.924527 | 0.962234 | 0.970746 | 0.978768 |
| MmugDNA.34134.1.S1_at   | MmugDNA.34134.1 | 7.61  | 9.26  | 0.44 | 0.67 | -3.14 | 0.01798  | 0.008072 | 0.268362 | 0.119402 |
| MmugDNA.34137.1.S1_at   | MmugDNA.34137.1 | 5.27  | 5.21  | 0.14 | 0.05 | 1.04  | 0.505457 | 0.840791 | 0.761643 | 0.909237 |
| MmugDNA.34138.1.S1_at   | MmugDNA.34138.1 | 3.77  | 3.76  | 0.11 | 0.17 | 1.01  | 0.979034 | 0.426134 | 0.992315 | 0.648331 |
| MmugDNA.34139.1.S1_at   | MmugDNA.34139.1 | 3.64  | 4.13  | 0.17 | 0.52 | -1.41 | 0.121856 | 0.043707 | 0.486805 | 0.253799 |
| MmugDNA.3414.1.S1_at    | MmugDNA.3414.1  | 4.44  | 4.43  | 0.11 | 0.15 | 1.01  | 0.810803 | 0.264144 | 0.922872 | 0.530214 |
| MmugDNA.34140.1.S1_at   | MmugDNA.34140.1 | 4.33  | 4.27  | 0.04 | 0.16 | 1.04  | 0.805447 | 0.642576 | 0.92021  | 0.790343 |
| MmugDNA.34141.1.S1_at   | MmugDNA.34141.1 | 4.43  | 4.27  | 0.11 | 0.03 | 1.12  | 0.21988  | 0.003704 | 0.579133 | 0.086769 |
| MmugDNA.34142.1.S1_at   | MmugDNA.34142.1 | 12.31 | 11.45 | 0.62 | 0.78 | 1.82  | 0.184037 | 0.268862 | 0.547964 | 0.534319 |
| MmugDNA.34146.1.S1_at   | MmugDNA.34146.1 | 6.86  | 7.02  | 0.24 | 0.18 | -1.11 | 0.739219 | 0.844446 | 0.888118 | 0.911482 |
| MmugDNA.34147.1.S1_at   | MmugDNA.34147.1 | 3.38  | 3.41  | 0.72 | 0.63 | -1.01 | 0.722966 | 0.670914 | 0.878935 | 0.807629 |
| MmugDNA.34149.1.S1_at   | MmugDNA.34149.1 | 3.44  | 3.09  | 0.23 | 0.07 | 1.27  | 0.178267 | 0.346978 | 0.542548 | 0.591769 |
| MmugDNA.3415.1.S1_s_at  | MmugDNA.3415.1  | 9.44  | 9.69  | 0.18 | 0.12 | -1.19 | 0.46887  | 0.344253 | 0.741287 | 0.589762 |
| MmugDNA.34150.1.S1_s_at | MmugDNA.34150.1 | 10.53 | 12.09 | 0.22 | 0.33 | -2.95 | 0.002465 | 0.000688 | 0.163555 | 0.044166 |
| MmugDNA.34152.1.S1_at   | MmugDNA.34152.1 | 8.69  | 8.78  | 0.12 | 0.07 | -1.06 | 0.196444 | 0.671823 | 0.559775 | 0.808157 |
| MmugDNA.34154.1.S1_at   | MmugDNA.34154.1 | 2.7   | 2.91  | 0.54 | 0.24 | -1.15 | 0.921149 | 0.769799 | 0.969237 | 0.866339 |
| MmugDNA.34155.1.S1_at   | MmugDNA.34155.1 | 11.71 | 11.81 | 0.37 | 0.53 | -1.07 | 0.876943 | 0.957042 | 0.950709 | 0.975699 |
| MmugDNA.34156.1.S1_at   | MmugDNA.34156.1 | 4.06  | 4.16  | 0.22 | 0.1  | -1.07 | 0.306288 | 0.108701 | 0.639466 | 0.372228 |

|                         |                 |       |       |      |      |       |          |          |          |          |
|-------------------------|-----------------|-------|-------|------|------|-------|----------|----------|----------|----------|
| MmugDNA.34157.1.S1_at   | MmugDNA.34157.1 | 4.3   | 4.4   | 0.1  | 0.2  | -1.07 | 0.577669 | 0.545731 | 0.803559 | 0.727653 |
| MmugDNA.34158.1.S1_at   | MmugDNA.34158.1 | 4.3   | 4.51  | 0.67 | 0.36 | -1.16 | 0.643275 | 0.810633 | 0.839279 | 0.890812 |
| MmugDNA.34159.1.S1_at   | MmugDNA.34159.1 | 3.1   | 3.24  | 0.23 | 0.58 | -1.1  | 0.42672  | 0.265219 | 0.715941 | 0.531172 |
| MmugDNA.34161.1.S1_at   | MmugDNA.34161.1 | 4.29  | 4.34  | 0.02 | 0.19 | -1.04 | 0.229076 | 0.208473 | 0.586388 | 0.482421 |
| MmugDNA.34162.1.S1_at   | MmugDNA.34162.1 | 6.64  | 6.4   | 0.3  | 0.14 | 1.18  | 0.203772 | 0.097048 | 0.5663   | 0.354531 |
| MmugDNA.34163.1.S1_at   | MmugDNA.34163.1 | 6.44  | 6.75  | 0.29 | 0.31 | -1.24 | 0.056549 | 0.037904 | 0.386649 | 0.239203 |
| MmugDNA.34164.1.S1_at   | MmugDNA.34164.1 | 6     | 7.02  | 0.25 | 0.63 | -2.03 | 0.078211 | 0.044515 | 0.428221 | 0.255346 |
| MmugDNA.34166.1.S1_at   | MmugDNA.34166.1 | 6.93  | 6.6   | 0.21 | 0.2  | 1.25  | 0.286346 | 0.406303 | 0.625548 | 0.63426  |
| MmugDNA.34167.1.S1_at   | MmugDNA.34167.1 | 3.21  | 2.93  | 0.13 | 0.03 | 1.21  | 0.065083 | 0.429566 | 0.403867 | 0.650961 |
| MmugDNA.34169.1.S1_at   | MmugDNA.34169.1 | 10.04 | 11.36 | 0.18 | 0.19 | -2.49 | 0.001827 | 0.00031  | 0.155496 | 0.035145 |
| MmugDNA.3417.1.S1_at    | MmugDNA.3417.1  | 9.01  | 9.87  | 0.32 | 0.56 | -1.82 | 0.092087 | 0.081625 | 0.448698 | 0.329824 |
| MmugDNA.34170.1.S1_at   | MmugDNA.34170.1 | 7.87  | 8.02  | 0.03 | 0.21 | -1.11 | 0.690894 | 0.192873 | 0.862496 | 0.468379 |
| MmugDNA.34172.1.S1_at   | MmugDNA.34172.1 | 3.49  | 3.76  | 0.06 | 0.13 | -1.2  | 0.038947 | 0.023491 | 0.345919 | 0.19207  |
| MmugDNA.34173.1.S1_at   | MmugDNA.34173.1 | 5.65  | 5.37  | 0.6  | 0.15 | 1.21  | 0.357042 | 0.393947 | 0.672044 | 0.6267   |
| MmugDNA.34175.1.S1_at   | MmugDNA.34175.1 | 4.74  | 6.62  | 0.75 | 1.54 | -3.68 | 0.218733 | 0.264994 | 0.578251 | 0.530973 |
| MmugDNA.34176.1.S1_at   | MmugDNA.34176.1 | 4.14  | 4.35  | 0.32 | 0.09 | -1.16 | 0.98636  | 0.646875 | 0.995151 | 0.793178 |
| MmugDNA.34177.1.S1_at   | MmugDNA.34177.1 | 7.2   | 7.59  | 0.05 | 0.14 | -1.31 | 0.010556 | 0.004271 | 0.230404 | 0.091847 |
| MmugDNA.34178.1.S1_at   | MmugDNA.34178.1 | 6.43  | 6.32  | 0.96 | 0.2  | 1.07  | 0.996822 | 0.643897 | 0.998693 | 0.791202 |
| MmugDNA.34179.1.S1_at   | MmugDNA.34179.1 | 3.25  | 3.13  | 0.04 | 0.12 | 1.08  | 0.110318 | 0.092132 | 0.471863 | 0.347799 |
| MmugDNA.34180.1.S1_at   | MmugDNA.34180.1 | 4.71  | 4.41  | 0.11 | 0.28 | 1.23  | 0.146471 | 0.069568 | 0.512624 | 0.309848 |
| MmugDNA.34181.1.S1_at   | MmugDNA.34181.1 | 8.65  | 9.48  | 0.42 | 0.77 | -1.77 | 0.07407  | 0.07155  | 0.419667 | 0.313714 |
| MmugDNA.34182.1.S1_at   | MmugDNA.34182.1 | 6.61  | 6.7   | 0.09 | 0.16 | -1.06 | 0.809452 | 0.810692 | 0.922228 | 0.890836 |
| MmugDNA.34183.1.S1_at   | MmugDNA.34183.1 | 3.9   | 3.88  | 0.05 | 0.26 | 1.02  | 0.559525 | 0.779707 | 0.793957 | 0.872303 |
| MmugDNA.34185.1.S1_at   | MmugDNA.34185.1 | 6.09  | 6.48  | 0.22 | 0.14 | -1.31 | 0.155466 | 0.18209  | 0.520199 | 0.45857  |
| MmugDNA.34186.1.S1_at   | MmugDNA.34186.1 | 5.41  | 5.39  | 0.13 | 0.14 | 1.02  | 0.903419 | 0.418237 | 0.961454 | 0.642683 |
| MmugDNA.34187.1.S1_at   | MmugDNA.34187.1 | 9.96  | 10.65 | 0.26 | 0.24 | -1.62 | 0.01925  | 0.043024 | 0.273415 | 0.252067 |
| MmugDNA.34188.1.S1_at   | MmugDNA.34188.1 | 3.68  | 3.74  | 0.12 | 0.32 | -1.04 | 0.894088 | 0.985614 | 0.957854 | 0.991824 |
| MmugDNA.34189.1.S1_at   | MmugDNA.34189.1 | 4.57  | 4.93  | 1.78 | 0.13 | -1.29 | 0.535226 | 0.575081 | 0.778933 | 0.746309 |
| MmugDNA.3419.1.S1_at    | MmugDNA.3419.1  | 6.43  | 6.51  | 0.2  | 0.21 | -1.06 | 0.285388 | 0.259555 | 0.624864 | 0.526469 |
| MmugDNA.34190.1.S1_at   | MmugDNA.34190.1 | 4.26  | 3.97  | 0.03 | 0.23 | 1.23  | 0.287528 | 0.137873 | 0.625987 | 0.410838 |
| MmugDNA.34191.1.S1_at   | MmugDNA.34191.1 | 5.21  | 5.18  | 0.13 | 0.08 | 1.02  | 0.886919 | 0.770685 | 0.954734 | 0.866801 |
| MmugDNA.34192.1.S1_at   | MmugDNA.34192.1 | 6.8   | 6.81  | 0.25 | 0.88 | -1    | 0.956827 | 0.095548 | 0.983787 | 0.352627 |
| MmugDNA.34193.1.S1_at   | MmugDNA.34193.1 | 10.75 | 10.72 | 0.06 | 0.15 | 1.02  | 0.648021 | 0.717429 | 0.841735 | 0.836425 |
| MmugDNA.34194.1.S1_at   | MmugDNA.34194.1 | 7.64  | 8.78  | 0.84 | 0.42 | -2.21 | 0.118549 | 0.096491 | 0.48294  | 0.35409  |
| MmugDNA.34195.1.S1_at   | MmugDNA.34195.1 | 6.25  | 6.02  | 0.42 | 0.07 | 1.18  | 0.338918 | 0.410479 | 0.661042 | 0.637335 |
| MmugDNA.34196.1.S1_at   | MmugDNA.34196.1 | 4.05  | 4.31  | 0.28 | 0.26 | -1.2  | 0.640405 | 0.786344 | 0.837628 | 0.876293 |
| MmugDNA.34198.1.S1_at   | MmugDNA.34198.1 | 5.66  | 5.55  | 0.28 | 0.33 | 1.08  | 0.87937  | 0.737819 | 0.951533 | 0.848096 |
| MmugDNA.34199.1.S1_at   | MmugDNA.34199.1 | 3.84  | 3.95  | 0    | 0.11 | -1.08 | 0.560034 | 0.541389 | 0.79419  | 0.7249   |
| MmugDNA.342.1.S1_at     | MmugDNA.342.1   | 7     | 6.41  | 0.73 | 0.71 | 1.5   | 0.372469 | 0.492477 | 0.682812 | 0.693583 |
| MmugDNA.34200.1.S1_at   | MmugDNA.34200.1 | 5.7   | 8.9   | 1.05 | 1.49 | -9.15 | 0.077892 | 0.064948 | 0.427997 | 0.300855 |
| MmugDNA.34201.1.S1_s_at | MmugDNA.34201.1 | 3.32  | 3.29  | 0.38 | 0.07 | 1.03  | 0.314374 | 0.328594 | 0.645738 | 0.578151 |

|                        |                 |       |       |      |      |        |          |          |          |          |
|------------------------|-----------------|-------|-------|------|------|--------|----------|----------|----------|----------|
| MmugDNA.34202.1.S1_at  | MmugDNA.34202.1 | 6.35  | 5.92  | 1.05 | 0.4  | 1.34   | 0.361584 | 0.483984 | 0.675375 | 0.688262 |
| MmugDNA.34203.1.S1_at  | MmugDNA.34203.1 | 3.43  | 3.57  | 0.15 | 0.21 | -1.1   | 0.883757 | 0.354913 | 0.953368 | 0.597466 |
| MmugDNA.34205.1.S1_at  | MmugDNA.34205.1 | 7.16  | 6.96  | 0.33 | 0.57 | 1.15   | 0.701818 | 0.21504  | 0.868197 | 0.488898 |
| MmugDNA.34206.1.S1_at  | MmugDNA.34206.1 | 5.99  | 6.02  | 0.6  | 0.06 | -1.02  | 0.962391 | 0.998814 | 0.985546 | 0.999367 |
| MmugDNA.34207.1.S1_at  | MmugDNA.34207.1 | 5.9   | 5.2   | 0.29 | 0.42 | 1.63   | 0.370185 | 0.398777 | 0.681113 | 0.629482 |
| MmugDNA.34208.1.S1_at  | MmugDNA.34208.1 | 3.33  | 3.34  | 0.02 | 0.11 | -1.01  | 0.517348 | 0.661658 | 0.768744 | 0.801903 |
| MmugDNA.3421.1.S1_at   | MmugDNA.3421.1  | 5.91  | 6.17  | 0.23 | 0.14 | -1.2   | 0.179962 | 0.229324 | 0.544105 | 0.501527 |
| MmugDNA.34210.1.S1_at  | MmugDNA.34210.1 | 8.4   | 7.2   | 0.97 | 0.92 | 2.3    | 0.172104 | 0.142658 | 0.535422 | 0.416389 |
| MmugDNA.34211.1.S1_at  | MmugDNA.34211.1 | 4.73  | 4.68  | 0.18 | 0.22 | 1.04   | 0.644055 | 0.060828 | 0.839719 | 0.293348 |
| MmugDNA.34212.1.S1_at  | MmugDNA.34212.1 | 5.02  | 4.73  | 0.31 | 0.36 | 1.22   | 0.138405 | 0.17963  | 0.505745 | 0.456062 |
| MmugDNA.34213.1.S1_at  | MmugDNA.34213.1 | 8.23  | 9.04  | 0.1  | 0.64 | -1.76  | 0.090053 | 0.026677 | 0.445455 | 0.204238 |
| MmugDNA.34214.1.S1_at  | MmugDNA.34214.1 | 4.23  | 4.29  | 0.22 | 0.08 | -1.04  | 0.694662 | 0.096318 | 0.864583 | 0.353798 |
| MmugDNA.34215.1.S1_at  | MmugDNA.34215.1 | 5.23  | 4.71  | 0.23 | 0.42 | 1.43   | 0.107935 | 0.127165 | 0.468662 | 0.397922 |
| MmugDNA.34217.1.S1_at  | MmugDNA.34217.1 | 4.01  | 4.03  | 0.04 | 0.05 | -1.01  | 0.313134 | 0.398138 | 0.64497  | 0.629206 |
| MmugDNA.34218.1.S1_at  | MmugDNA.34218.1 | 2.67  | 2.8   | 0.01 | 0.47 | -1.09  | 0.333863 | 0.342969 | 0.657955 | 0.588786 |
| MmugDNA.34219.1.S1_at  | MmugDNA.34219.1 | 5.42  | 5.61  | 0.13 | 0.24 | -1.13  | 0.146697 | 0.110786 | 0.512668 | 0.375046 |
| MmugDNA.3422.1.S1_at   | MmugDNA.3422.1  | 3.82  | 3.65  | 0.17 | 0.12 | 1.13   | 0.945623 | 0.960899 | 0.979224 | 0.977791 |
| MmugDNA.34220.1.S1_at  | MmugDNA.34220.1 | 4.8   | 4.78  | 0.25 | 0.53 | 1.01   | 0.731255 | 0.704338 | 0.883692 | 0.828435 |
| MmugDNA.34221.1.S1_at  | MmugDNA.34221.1 | 3.86  | 3.5   | 0.36 | 0.06 | 1.29   | 0.337204 | 0.317758 | 0.659871 | 0.570922 |
| MmugDNA.34223.1.S1_at  | MmugDNA.34223.1 | 4.96  | 4.61  | 0.29 | 0.21 | 1.27   | 0.324794 | 0.290287 | 0.652117 | 0.551169 |
| MmugDNA.34224.1.S1_at  | MmugDNA.34224.1 | 9.37  | 9.23  | 0.12 | 0.2  | 1.1    | 0.790093 | 0.873241 | 0.912887 | 0.92788  |
| MmugDNA.34225.1.S1_at  | MmugDNA.34225.1 | 6.03  | 5.98  | 0.04 | 0.12 | 1.04   | 0.162497 | 0.260233 | 0.526761 | 0.526807 |
| MmugDNA.34226.1.S1_at  | MmugDNA.34226.1 | 5.16  | 11.64 | 2.51 | 4.05 | -89.37 | 0.375362 | 0.175649 | 0.684699 | 0.452211 |
| MmugDNA.34228.1.S1_at  | MmugDNA.34228.1 | 4.65  | 4.64  | 0.19 | 0.15 | 1.01   | 0.773756 | 0.564813 | 0.90499  | 0.739427 |
| MmugDNA.34229.1.S1_at  | MmugDNA.34229.1 | 2.85  | 2.84  | 1.6  | 0.06 | 1.01   | 0.352986 | 0.517387 | 0.669964 | 0.709493 |
| MmugDNA.34230.1.S1_at  | MmugDNA.34230.1 | 10.22 | 10.92 | 0.2  | 0.64 | -1.62  | 0.476446 | 0.294018 | 0.746232 | 0.553909 |
| MmugDNA.34231.1.S1_at  | MmugDNA.34231.1 | 6.48  | 6.24  | 0.14 | 0.09 | 1.18   | 0.063096 | 0.087179 | 0.40016  | 0.340133 |
| MmugDNA.34232.1.S1_at  | MmugDNA.34232.1 | 5.88  | 6.7   | 0.64 | 1.47 | -1.76  | 0.955157 | 0.944787 | 0.983189 | 0.968794 |
| MmugDNA.34234.1.S1_at  | MmugDNA.34234.1 | 4.16  | 4.97  | 0.17 | 0.09 | -1.75  | 0.002511 | 0.064707 | 0.164187 | 0.300314 |
| MmugDNA.34235.1.S1_at  | MmugDNA.34235.1 | 5.29  | 5.37  | 0.46 | 0.89 | -1.06  | 0.512251 | 0.629959 | 0.765523 | 0.782031 |
| MmugDNA.34236.1.S1_at  | MmugDNA.34236.1 | 4.53  | 4.43  | 0.82 | 0.12 | 1.07   | 0.294349 | 0.425217 | 0.631216 | 0.647647 |
| MmugDNA.34237.1.S1_at  | MmugDNA.34237.1 | 7.25  | 7.07  | 0.17 | 0.23 | 1.13   | 0.259541 | 0.335274 | 0.606665 | 0.58304  |
| MmugDNA.34238.1.S1_at  | MmugDNA.34238.1 | 4.44  | 4.65  | 0.67 | 0.39 | -1.16  | 0.880366 | 0.92245  | 0.951847 | 0.956333 |
| MmugDNA.34239.1.S1_at  | MmugDNA.34239.1 | 4.88  | 4.77  | 0.15 | 0.14 | 1.08   | 0.531008 | 0.521216 | 0.777    | 0.712304 |
| MmugDNA.3424.1.S1_s_at | MmugDNA.3424.1  | 9.36  | 9.3   | 0.27 | 0.23 | 1.04   | 0.581007 | 0.787287 | 0.804832 | 0.876929 |
| MmugDNA.34242.1.S1_at  | MmugDNA.34242.1 | 4.9   | 4.95  | 0.28 | 0.12 | -1.04  | 0.96012  | 0.674032 | 0.98486  | 0.809503 |
| MmugDNA.34244.1.S1_at  | MmugDNA.34244.1 | 3.23  | 3.59  | 0.36 | 0.47 | -1.28  | 0.587562 | 0.76666  | 0.808598 | 0.864438 |
| MmugDNA.34246.1.S1_at  | MmugDNA.34246.1 | 4.95  | 4.89  | 0.25 | 1.12 | 1.04   | 0.817678 | 0.560718 | 0.926022 | 0.736921 |
| MmugDNA.34247.1.S1_at  | MmugDNA.34247.1 | 6.27  | 10.35 | 0.45 | 1.3  | -16.87 | 0.012436 | 0.006813 | 0.241605 | 0.111444 |
| MmugDNA.34248.1.S1_at  | MmugDNA.34248.1 | 7.4   | 7.43  | 0.2  | 0.39 | -1.02  | 0.898246 | 0.264548 | 0.959278 | 0.53051  |
| MmugDNA.34249.1.S1_at  | MmugDNA.34249.1 | 3.85  | 3.86  | 0.33 | 0.05 | -1.01  | 0.346843 | 0.504747 | 0.666049 | 0.701808 |

|                         |                 |       |       |      |      |       |          |          |          |          |
|-------------------------|-----------------|-------|-------|------|------|-------|----------|----------|----------|----------|
| MmugDNA.3425.1.S1_at    | MmugDNA.3425.1  | 9.63  | 9.87  | 0.3  | 0.58 | -1.18 | 0.87947  | 0.499095 | 0.951533 | 0.697988 |
| MmugDNA.34250.1.S1_at   | MmugDNA.34250.1 | 6.13  | 6.14  | 0.22 | 0.26 | -1.01 | 0.225161 | 0.169911 | 0.58306  | 0.446569 |
| MmugDNA.34251.1.S1_at   | MmugDNA.34251.1 | 8.74  | 7.89  | 0.12 | 1.47 | 1.81  | 0.110148 | 0.035519 | 0.471802 | 0.232735 |
| MmugDNA.34252.1.S1_at   | MmugDNA.34252.1 | 5.32  | 5.82  | 1.11 | 0.28 | -1.42 | 0.969733 | 0.934501 | 0.98843  | 0.962878 |
| MmugDNA.34253.1.S1_at   | MmugDNA.34253.1 | 4.4   | 4.22  | 0.3  | 0.21 | 1.14  | 0.311935 | 0.293489 | 0.643771 | 0.553445 |
| MmugDNA.34255.1.S1_at   | MmugDNA.34255.1 | 6.07  | 5.93  | 0.46 | 0.45 | 1.11  | 0.651479 | 0.738184 | 0.843183 | 0.848203 |
| MmugDNA.34257.1.S1_at   | MmugDNA.34257.1 | 5.33  | 5.4   | 0.36 | 0.06 | -1.05 | 0.871905 | 0.365174 | 0.948792 | 0.605348 |
| MmugDNA.34258.1.S1_at   | MmugDNA.34258.1 | 10.08 | 10.18 | 0.62 | 0.41 | -1.07 | 0.91884  | 0.84731  | 0.968436 | 0.913262 |
| MmugDNA.3426.1.S1_at    | MmugDNA.3426.1  | 5.77  | 5.75  | 0.22 | 0.08 | 1.01  | 0.474198 | 0.154591 | 0.744894 | 0.429489 |
| MmugDNA.34261.1.S1_at   | MmugDNA.34261.1 | 3.72  | 4     | 0.27 | 0.17 | -1.21 | 0.436255 | 0.591439 | 0.721644 | 0.756977 |
| MmugDNA.34262.1.S1_at   | MmugDNA.34262.1 | 10.23 | 9.7   | 0.24 | 0.33 | 1.45  | 0.163644 | 0.188647 | 0.527992 | 0.464569 |
| MmugDNA.34263.1.S1_at   | MmugDNA.34263.1 | 8.52  | 8.23  | 0.1  | 0.18 | 1.23  | 0.084289 | 0.00595  | 0.436922 | 0.105513 |
| MmugDNA.34266.1.S1_at   | MmugDNA.34266.1 | 10.87 | 10.65 | 0.28 | 0.22 | 1.16  | 0.325071 | 0.257919 | 0.652338 | 0.525495 |
| MmugDNA.34267.1.S1_at   | MmugDNA.34267.1 | 5.55  | 5.56  | 0.03 | 0.01 | -1    | 0.228029 | 0.126441 | 0.585409 | 0.396995 |
| MmugDNA.34268.1.S1_at   | MmugDNA.34268.1 | 8.58  | 8.53  | 0.33 | 0.77 | 1.03  | 0.420884 | 0.392519 | 0.712776 | 0.625813 |
| MmugDNA.34270.1.S1_at   | MmugDNA.34270.1 | 6.2   | 5.24  | 0.65 | 0.12 | 1.94  | 0.244212 | 0.091138 | 0.596039 | 0.345997 |
| MmugDNA.34271.1.S1_at   | MmugDNA.34271.1 | 4.12  | 4.28  | 0.09 | 0.22 | -1.12 | 0.311455 | 0.303765 | 0.643464 | 0.561174 |
| MmugDNA.34272.1.S1_s_at | MmugDNA.34272.1 | 6.92  | 6.88  | 0.14 | 0.18 | 1.03  | 0.844401 | 0.612005 | 0.937553 | 0.76972  |
| MmugDNA.34273.1.S1_at   | MmugDNA.34273.1 | 5.48  | 4.62  | 0.52 | 0.11 | 1.81  | 0.112431 | 0.10206  | 0.474902 | 0.362122 |
| MmugDNA.34274.1.S1_at   | MmugDNA.34274.1 | 4.12  | 4.16  | 0.59 | 0.1  | -1.03 | 0.386148 | 0.508828 | 0.6911   | 0.703867 |
| MmugDNA.34275.1.S1_at   | MmugDNA.34275.1 | 12.17 | 12.36 | 0.11 | 0.4  | -1.14 | 0.870617 | 0.929091 | 0.948314 | 0.959604 |
| MmugDNA.34276.1.S1_at   | MmugDNA.34276.1 | 3.31  | 3.02  | 0.29 | 0.15 | 1.22  | 0.119834 | 0.299501 | 0.484402 | 0.557918 |
| MmugDNA.34277.1.S1_at   | MmugDNA.34277.1 | 9.44  | 8.11  | 0.25 | 0.95 | 2.52  | 0.060783 | 0.076501 | 0.394325 | 0.321584 |
| MmugDNA.34278.1.S1_at   | MmugDNA.34278.1 | 6.03  | 5.99  | 0.12 | 0.24 | 1.03  | 0.844501 | 0.798759 | 0.937554 | 0.884072 |
| MmugDNA.34279.1.S1_at   | MmugDNA.34279.1 | 10.46 | 10.25 | 0.77 | 1.68 | 1.16  | 0.52709  | 0.553954 | 0.774556 | 0.732896 |
| MmugDNA.34281.1.S1_at   | MmugDNA.34281.1 | 5.28  | 5.63  | 0.18 | 0.36 | -1.27 | 0.139167 | 0.114326 | 0.506613 | 0.380835 |
| MmugDNA.34282.1.S1_at   | MmugDNA.34282.1 | 4.93  | 4.74  | 0.36 | 0.24 | 1.14  | 0.790957 | 0.88277  | 0.913202 | 0.93317  |
| MmugDNA.34284.1.S1_at   | MmugDNA.34284.1 | 5.92  | 6.27  | 0    | 0.34 | -1.28 | 0.325798 | 0.330859 | 0.653033 | 0.57958  |
| MmugDNA.34285.1.S1_at   | MmugDNA.34285.1 | 12.41 | 12.58 | 0.03 | 0.37 | -1.12 | 0.422831 | 0.253602 | 0.713742 | 0.521956 |
| MmugDNA.34286.1.S1_at   | MmugDNA.34286.1 | 7.7   | 7.71  | 0.15 | 0.03 | -1    | 0.411768 | 0.211754 | 0.707561 | 0.485757 |
| MmugDNA.34288.1.S1_at   | MmugDNA.34288.1 | 3.62  | 3.52  | 0.09 | 0.17 | 1.07  | 0.375408 | 0.03096  | 0.684712 | 0.217817 |
| MmugDNA.34289.1.S1_at   | MmugDNA.34289.1 | 5.43  | 5.19  | 0.37 | 0.3  | 1.18  | 0.462387 | 0.358903 | 0.738226 | 0.600291 |
| MmugDNA.3429.1.S1_at    | MmugDNA.3429.1  | 5.27  | 5.43  | 0.16 | 0.25 | -1.12 | 0.281654 | 0.371979 | 0.62238  | 0.6108   |
| MmugDNA.34291.1.S1_at   | MmugDNA.34291.1 | 12.77 | 13.16 | 0.24 | 0.16 | -1.31 | 0.085957 | 0.116373 | 0.440024 | 0.383671 |
| MmugDNA.34294.1.S1_at   | MmugDNA.34294.1 | 5.55  | 5.27  | 0.62 | 0.16 | 1.21  | 0.213711 | 0.255525 | 0.573938 | 0.523538 |
| MmugDNA.34295.1.S1_at   | MmugDNA.34295.1 | 3.25  | 3.23  | 0.29 | 0.09 | 1.01  | 0.484033 | 0.698054 | 0.750051 | 0.824584 |
| MmugDNA.34296.1.S1_at   | MmugDNA.34296.1 | 7.97  | 7.47  | 0.13 | 0.75 | 1.41  | 0.098533 | 0.080456 | 0.458486 | 0.328159 |
| MmugDNA.34297.1.S1_at   | MmugDNA.34297.1 | 3.82  | 4.05  | 0.11 | 0.13 | -1.18 | 0.058908 | 0.04734  | 0.390921 | 0.262303 |
| MmugDNA.34298.1.S1_at   | MmugDNA.34298.1 | 4.43  | 4.67  | 0.1  | 0.04 | -1.18 | 0.010203 | 0.002075 | 0.228247 | 0.067389 |
| MmugDNA.34299.1.S1_at   | MmugDNA.34299.1 | 3.23  | 3.1   | 0.13 | 0.14 | 1.1   | 0.630421 | 0.163673 | 0.832023 | 0.439841 |
| MmugDNA.343.1.S1_at     | MmugDNA.343.1   | 6.43  | 6.46  | 0.13 | 0.21 | -1.02 | 0.555583 | 0.710828 | 0.791454 | 0.832271 |

|                         |                 |       |       |      |      |       |          |          |          |          |
|-------------------------|-----------------|-------|-------|------|------|-------|----------|----------|----------|----------|
| MmugDNA.343.1.S1_s_at   | MmugDNA.343.1   | 6.12  | 6.19  | 0.1  | 0.33 | -1.05 | 0.876998 | 0.70338  | 0.950716 | 0.828007 |
| MmugDNA.3430.1.S1_at    | MmugDNA.3430.1  | 6.96  | 6.99  | 0.21 | 0.12 | -1.02 | 0.867072 | 0.572558 | 0.946953 | 0.744566 |
| MmugDNA.34300.1.S1_at   | MmugDNA.34300.1 | 9.43  | 8.67  | 0.38 | 0.29 | 1.7   | 0.060497 | 0.005839 | 0.393715 | 0.10467  |
| MmugDNA.34301.1.S1_at   | MmugDNA.34301.1 | 4.36  | 4.56  | 0.41 | 0.17 | -1.15 | 0.686953 | 0.212849 | 0.860053 | 0.486774 |
| MmugDNA.34302.1.S1_at   | MmugDNA.34302.1 | 4.75  | 4.51  | 0.18 | 0.35 | 1.18  | 0.948386 | 0.995432 | 0.980183 | 0.997149 |
| MmugDNA.34303.1.S1_at   | MmugDNA.34303.1 | 5.86  | 5.62  | 0.88 | 1.22 | 1.18  | 0.831815 | 0.323283 | 0.931835 | 0.574408 |
| MmugDNA.34304.1.S1_at   | MmugDNA.34304.1 | 3.27  | 3.07  | 0.17 | 0.16 | 1.15  | 0.218488 | 0.195139 | 0.57798  | 0.470241 |
| MmugDNA.34305.1.S1_at   | MmugDNA.34305.1 | 5.94  | 6.26  | 0.14 | 0.19 | -1.25 | 0.093835 | 0.100933 | 0.45129  | 0.360509 |
| MmugDNA.34306.1.S1_at   | MmugDNA.34306.1 | 4.47  | 4.1   | 1.02 | 0.46 | 1.3   | 0.789487 | 0.928165 | 0.912587 | 0.959209 |
| MmugDNA.34307.1.S1_at   | MmugDNA.34307.1 | 6.41  | 5.89  | 0.37 | 0.26 | 1.42  | 0.23638  | 0.323611 | 0.590419 | 0.574525 |
| MmugDNA.34308.1.S1_at   | MmugDNA.34308.1 | 4.44  | 4.98  | 0.23 | 0.86 | -1.46 | 0.463199 | 0.277888 | 0.738637 | 0.541664 |
| MmugDNA.34311.1.S1_at   | MmugDNA.34311.1 | 8.91  | 8.1   | 0.12 | 0.33 | 1.75  | 0.018646 | 0.008727 | 0.270832 | 0.12389  |
| MmugDNA.34312.1.S1_at   | MmugDNA.34312.1 | 3.35  | 3.69  | 0.06 | 0.38 | -1.27 | 0.101211 | 0.105027 | 0.461009 | 0.366726 |
| MmugDNA.34313.1.S1_at   | MmugDNA.34313.1 | 3.51  | 3.32  | 0.14 | 0.03 | 1.14  | 0.066149 | 0.034544 | 0.406291 | 0.229979 |
| MmugDNA.34314.1.S1_at   | MmugDNA.34314.1 | 7.62  | 8.41  | 0.17 | 0.22 | -1.72 | 0.006491 | 0.001757 | 0.199625 | 0.063134 |
| MmugDNA.34315.1.S1_at   | MmugDNA.34315.1 | 9.15  | 9.84  | 0.21 | 0.57 | -1.61 | 0.076251 | 0.037842 | 0.424738 | 0.238912 |
| MmugDNA.34316.1.S1_at   | MmugDNA.34316.1 | 11.08 | 11.65 | 0.28 | 0.4  | -1.49 | 0.033023 | 0.014899 | 0.326925 | 0.155137 |
| MmugDNA.34317.1.S1_at   | MmugDNA.34317.1 | 10.3  | 10.3  | 0.22 | 0.68 | 1     | 0.985571 | 0.927451 | 0.994792 | 0.958791 |
| MmugDNA.34318.1.S1_at   | MmugDNA.34318.1 | 7.05  | 6.71  | 0.06 | 0.24 | 1.27  | 0.296173 | 0.32307  | 0.632176 | 0.574351 |
| MmugDNA.34319.1.S1_at   | MmugDNA.34319.1 | 12.78 | 12.61 | 0.09 | 0.28 | 1.12  | 0.151811 | 0.154927 | 0.516514 | 0.429909 |
| MmugDNA.3432.1.S1_at    | MmugDNA.3432.1  | 13.47 | 12.66 | 0.11 | 0.27 | 1.76  | 0.005434 | 0.001453 | 0.191107 | 0.058079 |
| MmugDNA.34320.1.S1_at   | MmugDNA.34320.1 | 11.75 | 11.64 | 0.06 | 0.07 | 1.08  | 0.095977 | 0.026145 | 0.454074 | 0.202721 |
| MmugDNA.11828.1.S1_at   | MmugDNA.11828.1 | 11.19 | 11.04 | 0.05 | 0.08 | 1.11  | 0.039722 | 0.036512 | 0.347969 | 0.235526 |
| MmugDNA.11828.1.S1_s_at | MmugDNA.11828.1 | 11.06 | 10.93 | 0.08 | 0.04 | 1.1   | 0.057684 | 0.019815 | 0.388916 | 0.177045 |
| MmugDNA.34322.1.S1_at   | MmugDNA.34322.1 | 5.18  | 4.99  | 0.1  | 0.03 | 1.14  | 0.027157 | 0.08931  | 0.306629 | 0.343499 |
| MmugDNA.34323.1.S1_at   | MmugDNA.34323.1 | 5.46  | 5.43  | 0.3  | 0.15 | 1.02  | 0.390667 | 0.50837  | 0.693739 | 0.703589 |
| MmugDNA.34324.1.S1_at   | MmugDNA.34324.1 | 3.74  | 3.76  | 0.63 | 0.11 | -1.01 | 0.420357 | 0.557596 | 0.712386 | 0.735113 |
| MmugDNA.34325.1.S1_at   | MmugDNA.34325.1 | 6.82  | 6.86  | 0.23 | 0.16 | -1.03 | 0.985644 | 0.774261 | 0.994806 | 0.868735 |
| MmugDNA.34327.1.S1_at   | MmugDNA.34327.1 | 4.76  | 4.86  | 0.17 | 0.01 | -1.07 | 0.730055 | 0.891625 | 0.882883 | 0.938242 |
| MmugDNA.34329.1.S1_at   | MmugDNA.34329.1 | 4.75  | 4.54  | 0.19 | 0.05 | 1.15  | 0.122475 | 0.116684 | 0.487649 | 0.383864 |
| MmugDNA.34331.1.S1_at   | MmugDNA.34331.1 | 6.55  | 6.05  | 0.05 | 0.21 | 1.41  | 0.01741  | 0.009849 | 0.267445 | 0.130274 |
| MmugDNA.34334.1.S1_at   | MmugDNA.34334.1 | 6.87  | 7.18  | 0.27 | 0.12 | -1.25 | 0.286397 | 0.377672 | 0.625572 | 0.615086 |
| MmugDNA.34334.1.S1_x_at | MmugDNA.34334.1 | 6.85  | 6.92  | 0.23 | 0.09 | -1.05 | 0.535134 | 0.474037 | 0.778933 | 0.681181 |
| MmugDNA.34335.1.S1_at   | MmugDNA.34335.1 | 4.97  | 5.04  | 0.53 | 0.74 | -1.05 | 0.606777 | 0.783214 | 0.819034 | 0.874547 |
| MmugDNA.34336.1.S1_at   | MmugDNA.34336.1 | 5.47  | 5.72  | 1.25 | 1.25 | -1.18 | 0.731501 | 0.879163 | 0.883863 | 0.931052 |
| MmugDNA.34337.1.S1_at   | MmugDNA.34337.1 | 3.51  | 3.46  | 0.4  | 0.23 | 1.04  | 0.539131 | 0.528458 | 0.780929 | 0.716643 |
| MmugDNA.34339.1.S1_at   | MmugDNA.34339.1 | 3.59  | 3.73  | 0.06 | 0.09 | -1.1  | 0.095393 | 0.121325 | 0.453406 | 0.390351 |
| MmugDNA.34341.1.S1_at   | MmugDNA.34341.1 | 4.93  | 4.84  | 0.21 | 0.29 | 1.07  | 0.435544 | 0.076359 | 0.721273 | 0.321368 |
| MmugDNA.34342.1.S1_at   | MmugDNA.34342.1 | 4.01  | 3.93  | 0.15 | 0.12 | 1.06  | 0.242795 | 0.34432  | 0.59459  | 0.589762 |
| MmugDNA.34343.1.S1_at   | MmugDNA.34343.1 | 7.61  | 8.64  | 0.35 | 1.18 | -2.05 | 0.293344 | 0.278241 | 0.630392 | 0.541916 |
| MmugDNA.34344.1.S1_at   | MmugDNA.34344.1 | 4.81  | 4.7   | 0.32 | 0.12 | 1.08  | 0.381279 | 0.474288 | 0.687811 | 0.68135  |

|                         |                 |       |       |      |      |       |          |          |          |          |
|-------------------------|-----------------|-------|-------|------|------|-------|----------|----------|----------|----------|
| MmugDNA.34345.1.S1_at   | MmugDNA.34345.1 | 5.33  | 5.75  | 0.25 | 0.28 | -1.34 | 0.317207 | 0.23923  | 0.647885 | 0.509935 |
| MmugDNA.34346.1.S1_at   | MmugDNA.34346.1 | 6.13  | 5.96  | 0.35 | 0.18 | 1.13  | 0.578649 | 0.147066 | 0.803905 | 0.421208 |
| MmugDNA.34347.1.S1_at   | MmugDNA.34347.1 | 8.3   | 8.49  | 0.24 | 0.14 | -1.14 | 0.437241 | 0.191597 | 0.72229  | 0.466918 |
| MmugDNA.34347.1.S1_s_at | MmugDNA.34347.1 | 8.35  | 8.29  | 0.16 | 0.15 | 1.05  | 0.853348 | 0.062629 | 0.940818 | 0.297022 |
| MmugDNA.34348.1.S1_at   | MmugDNA.34348.1 | 9.22  | 9.02  | 0.38 | 0.36 | 1.15  | 0.528564 | 0.600693 | 0.775708 | 0.762238 |
| MmugDNA.34349.1.S1_at   | MmugDNA.34349.1 | 4.57  | 3.8   | 0.82 | 0.53 | 1.7   | 0.447425 | 0.38962  | 0.728977 | 0.623668 |
| MmugDNA.34350.1.S1_at   | MmugDNA.34350.1 | 3.72  | 3.9   | 0.11 | 0.04 | -1.13 | 0.087175 | 0.210944 | 0.441153 | 0.484934 |
| MmugDNA.34351.1.S1_at   | MmugDNA.34351.1 | 3.98  | 3.98  | 0.01 | 0.06 | 1     | 0.309032 | 0.560377 | 0.641346 | 0.736645 |
| MmugDNA.34352.1.S1_at   | MmugDNA.34352.1 | 5.01  | 5.19  | 0.24 | 0.14 | -1.13 | 0.348584 | 0.39262  | 0.667173 | 0.625813 |
| MmugDNA.34354.1.S1_at   | MmugDNA.34354.1 | 5.55  | 4.55  | 0.29 | 0.4  | 2     | 0.040781 | 0.013171 | 0.350343 | 0.14735  |
| MmugDNA.34355.1.S1_at   | MmugDNA.34355.1 | 9.13  | 8.11  | 0.96 | 1.22 | 2.02  | 0.278939 | 0.416358 | 0.620884 | 0.641563 |
| MmugDNA.34357.1.S1_s_at | MmugDNA.34357.1 | 11.98 | 11.53 | 0.12 | 0.44 | 1.36  | 0.185636 | 0.215209 | 0.548972 | 0.488977 |
| MmugDNA.34358.1.S1_at   | MmugDNA.34358.1 | 8.31  | 7.77  | 0.54 | 0.82 | 1.45  | 0.361028 | 0.42563  | 0.675029 | 0.647993 |
| MmugDNA.34359.1.S1_at   | MmugDNA.34359.1 | 4.71  | 4.7   | 0.03 | 0.08 | 1.01  | 0.756289 | 0.923806 | 0.89642  | 0.957119 |
| MmugDNA.34360.1.S1_at   | MmugDNA.34360.1 | 7.98  | 8     | 1.06 | 0.63 | -1.02 | 0.627083 | 0.702299 | 0.829873 | 0.827417 |
| MmugDNA.34361.1.S1_at   | MmugDNA.34361.1 | 9.68  | 9.77  | 0.34 | 0.53 | -1.07 | 0.392223 | 0.411973 | 0.694576 | 0.638434 |
| MmugDNA.34362.1.S1_at   | MmugDNA.34362.1 | 6.68  | 6.35  | 0.3  | 0.5  | 1.26  | 0.120961 | 0.145339 | 0.48574  | 0.419365 |
| MmugDNA.34363.1.S1_at   | MmugDNA.34363.1 | 4.9   | 4.92  | 0.07 | 0.13 | -1.01 | 0.195973 | 0.223032 | 0.559131 | 0.495861 |
| MmugDNA.34365.1.S1_at   | MmugDNA.34365.1 | 5.19  | 5.11  | 0.68 | 0.11 | 1.06  | 0.291728 | 0.360465 | 0.629042 | 0.601534 |
| MmugDNA.34366.1.S1_at   | MmugDNA.34366.1 | 7.26  | 7.01  | 0.38 | 0.29 | 1.19  | 0.142544 | 0.214767 | 0.509726 | 0.488624 |
| MmugDNA.34367.1.S1_at   | MmugDNA.34367.1 | 4.58  | 4.74  | 0    | 0.23 | -1.12 | 0.296955 | 0.149069 | 0.632852 | 0.423434 |
| MmugDNA.34368.1.S1_at   | MmugDNA.34368.1 | 4.02  | 4.37  | 0.17 | 0.98 | -1.27 | 0.230438 | 0.213419 | 0.587222 | 0.48728  |
| MmugDNA.34369.1.S1_at   | MmugDNA.34369.1 | 5.95  | 5.98  | 0.13 | 0.17 | -1.02 | 0.408978 | 0.593415 | 0.705703 | 0.758267 |
| MmugDNA.3437.1.S1_at    | MmugDNA.3437.1  | 7.37  | 6.96  | 0.8  | 0.45 | 1.32  | 0.109086 | 0.115071 | 0.470811 | 0.381944 |
| MmugDNA.34370.1.S1_at   | MmugDNA.34370.1 | 5.75  | 5.77  | 0.14 | 0.14 | -1.01 | 0.431807 | 0.576251 | 0.718638 | 0.747148 |
| MmugDNA.34371.1.S1_s_at | MmugDNA.34371.1 | 13.73 | 13.66 | 0.16 | 0.14 | 1.05  | 0.577421 | 0.762021 | 0.803498 | 0.861597 |
| MmugDNA.34372.1.S1_at   | MmugDNA.34372.1 | 6.02  | 5.9   | 0.3  | 0.08 | 1.08  | 0.593784 | 0.133611 | 0.811569 | 0.405565 |
| MmugDNA.34373.1.S1_at   | MmugDNA.34373.1 | 3.92  | 4.07  | 0.04 | 0.22 | -1.11 | 0.376203 | 0.570097 | 0.685066 | 0.742887 |
| MmugDNA.34374.1.S1_at   | MmugDNA.34374.1 | 4.86  | 5.04  | 0.01 | 0.1  | -1.13 | 0.097101 | 0.064981 | 0.456115 | 0.300855 |
| MmugDNA.34375.1.S1_at   | MmugDNA.34375.1 | 10.05 | 9.34  | 0.24 | 0.29 | 1.63  | 0.037736 | 0.02983  | 0.342718 | 0.214378 |
| MmugDNA.11716.1.S1_s_at | MmugDNA.11716.1 | 12.08 | 11.75 | 0.18 | 0.27 | 1.26  | 0.062561 | 0.029512 | 0.398492 | 0.213486 |
| MmugDNA.34377.1.S1_at   | MmugDNA.34377.1 | 6.56  | 6.07  | 0.67 | 0.19 | 1.41  | 0.102327 | 0.080036 | 0.462093 | 0.327429 |
| MmugDNA.34378.1.S1_at   | MmugDNA.34378.1 | 5.58  | 5.6   | 0.23 | 0.18 | -1.01 | 0.979339 | 0.964782 | 0.992385 | 0.980435 |
| MmugDNA.34379.1.S1_at   | MmugDNA.34379.1 | 11.06 | 10.33 | 0.24 | 0.53 | 1.65  | 0.048827 | 0.029398 | 0.369803 | 0.213352 |
| MmugDNA.3438.1.S1_at    | MmugDNA.3438.1  | 5.9   | 4.95  | 0.37 | 1.12 | 1.92  | 0.214824 | 0.230952 | 0.57537  | 0.502584 |
| MmugDNA.34381.1.S1_at   | MmugDNA.34381.1 | 3.1   | 2.79  | 0.28 | 0.3  | 1.24  | 0.283672 | 0.355223 | 0.623679 | 0.597576 |
| MmugDNA.34383.1.S1_at   | MmugDNA.34383.1 | 3.46  | 3.46  | 0.09 | 0.03 | 1     | 0.775626 | 0.321213 | 0.90586  | 0.573137 |
| MmugDNA.34385.1.S1_at   | MmugDNA.34385.1 | 6.34  | 5.9   | 0.4  | 0.58 | 1.36  | 0.291254 | 0.29759  | 0.628739 | 0.556238 |
| MmugDNA.34386.1.S1_at   | MmugDNA.34386.1 | 8.66  | 9.84  | 0.4  | 0.57 | -2.27 | 0.099337 | 0.098667 | 0.459226 | 0.356751 |
| MmugDNA.34387.1.S1_at   | MmugDNA.34387.1 | 5.51  | 5.59  | 0.66 | 0.35 | -1.05 | 0.906544 | 0.749922 | 0.962899 | 0.854631 |
| MmugDNA.34388.1.S1_at   | MmugDNA.34388.1 | 5.35  | 5.35  | 0.27 | 0.03 | -1    | 0.85747  | 0.478041 | 0.942274 | 0.684055 |

|                         |                 |       |       |      |      |       |          |          |          |          |
|-------------------------|-----------------|-------|-------|------|------|-------|----------|----------|----------|----------|
| MmugDNA.3439.1.S1_at    | MmugDNA.3439.1  | 4.03  | 4.02  | 0.56 | 0.29 | 1     | 0.556092 | 0.469664 | 0.791585 | 0.678327 |
| MmugDNA.34390.1.S1_at   | MmugDNA.34390.1 | 3.33  | 3.3   | 0.13 | 0.02 | 1.02  | 0.497944 | 0.807634 | 0.758109 | 0.889237 |
| MmugDNA.34391.1.S1_at   | MmugDNA.34391.1 | 9.02  | 8.65  | 0.45 | 0.48 | 1.29  | 0.929232 | 0.989764 | 0.972671 | 0.994108 |
| MmugDNA.34392.1.S1_at   | MmugDNA.34392.1 | 4.2   | 4.1   | 0.22 | 0.12 | 1.07  | 0.494014 | 0.625156 | 0.756411 | 0.779025 |
| MmugDNA.34393.1.S1_at   | MmugDNA.34393.1 | 5.89  | 6.12  | 0.03 | 0.14 | -1.18 | 0.120982 | 0.043873 | 0.48574  | 0.254088 |
| MmugDNA.34394.1.S1_at   | MmugDNA.34394.1 | 4.4   | 4.24  | 0.41 | 0.09 | 1.12  | 0.282326 | 0.481421 | 0.622739 | 0.686436 |
| MmugDNA.34395.1.S1_at   | MmugDNA.34395.1 | 7.67  | 6.83  | 0.51 | 0.41 | 1.79  | 0.070705 | 0.070444 | 0.414661 | 0.311737 |
| MmugDNA.34396.1.S1_at   | MmugDNA.34396.1 | 5.49  | 5.3   | 0.14 | 0.02 | 1.14  | 0.154868 | 0.071424 | 0.519486 | 0.313555 |
| MmugDNA.34398.1.S1_at   | MmugDNA.34398.1 | 7.05  | 6.42  | 0.26 | 0.2  | 1.55  | 0.02895  | 0.01815  | 0.312556 | 0.169673 |
| MmugDNA.34399.1.S1_at   | MmugDNA.34399.1 | 8.41  | 8.04  | 0.31 | 0.46 | 1.29  | 0.14873  | 0.181306 | 0.51391  | 0.457834 |
| MmugDNA.344.1.S1_at     | MmugDNA.344.1   | 5.63  | 6.14  | 0.14 | 0.28 | -1.43 | 0.07089  | 0.082533 | 0.414673 | 0.33167  |
| MmugDNA.34400.1.S1_at   | MmugDNA.34400.1 | 7.34  | 7.92  | 0.11 | 0.08 | -1.5  | 0.001491 | 0.000755 | 0.150888 | 0.045364 |
| MmugDNA.34401.1.S1_at   | MmugDNA.34401.1 | 7.24  | 7.52  | 0.45 | 0.7  | -1.22 | 0.843044 | 0.142971 | 0.936804 | 0.416854 |
| MmugDNA.34403.1.S1_at   | MmugDNA.34403.1 | 3.87  | 3.93  | 0.52 | 0.17 | -1.05 | 0.526963 | 0.553696 | 0.774459 | 0.732777 |
| MmugDNA.34404.1.S1_at   | MmugDNA.34404.1 | 6.46  | 6.56  | 0.18 | 0.1  | -1.08 | 0.966715 | 0.406752 | 0.987429 | 0.634492 |
| MmugDNA.34404.1.S1_s_at | MmugDNA.34404.1 | 6.76  | 6.61  | 0.35 | 0.09 | 1.11  | 0.791394 | 0.181889 | 0.913371 | 0.45842  |
| MmugDNA.34406.1.S1_at   | MmugDNA.34406.1 | 3.48  | 3.46  | 0.02 | 0.03 | 1.02  | 0.117125 | 0.698702 | 0.481142 | 0.824944 |
| MmugDNA.34408.1.S1_at   | MmugDNA.34408.1 | 8.15  | 8.09  | 0.42 | 0.15 | 1.04  | 0.780847 | 0.513283 | 0.908639 | 0.706881 |
| MmugDNA.3441.1.S1_at    | MmugDNA.3441.1  | 5.15  | 4.31  | 0.42 | 0.13 | 1.79  | 0.050842 | 0.018377 | 0.375644 | 0.170499 |
| MmugDNA.34410.1.S1_at   | MmugDNA.34410.1 | 10.01 | 10.29 | 0.3  | 1.31 | -1.21 | 0.887651 | 0.942936 | 0.954863 | 0.967574 |
| MmugDNA.34411.1.S1_at   | MmugDNA.34411.1 | 8.21  | 7.75  | 0.78 | 0.3  | 1.38  | 0.185997 | 0.171499 | 0.54953  | 0.447895 |
| MmugDNA.34412.1.S1_at   | MmugDNA.34412.1 | 6.9   | 6.72  | 0.41 | 0.33 | 1.14  | 0.927653 | 0.930881 | 0.972034 | 0.960739 |
| MmugDNA.34413.1.S1_at   | MmugDNA.34413.1 | 5.2   | 5.14  | 0.2  | 0.06 | 1.05  | 0.437391 | 0.162117 | 0.722414 | 0.438267 |
| MmugDNA.34414.1.S1_at   | MmugDNA.34414.1 | 3.66  | 3.78  | 0.18 | 0.16 | -1.09 | 0.203101 | 0.251288 | 0.565727 | 0.519984 |
| MmugDNA.34416.1.S1_at   | MmugDNA.34416.1 | 5.16  | 5.27  | 0.08 | 0.18 | -1.08 | 0.14061  | 0.090689 | 0.508385 | 0.345151 |
| MmugDNA.34417.1.S1_at   | MmugDNA.34417.1 | 5.92  | 5.91  | 0    | 0.05 | 1.01  | 0.925205 | 0.81003  | 0.971053 | 0.890518 |
| MmugDNA.34418.1.S1_s_at | MmugDNA.34418.1 | 7.35  | 7.53  | 0.17 | 0.11 | -1.13 | 0.796908 | 0.017808 | 0.915758 | 0.168588 |
| MmugDNA.34419.1.S1_at   | MmugDNA.34419.1 | 7.39  | 7.04  | 0.08 | 0.15 | 1.27  | 0.021161 | 0.011428 | 0.282498 | 0.138437 |
| MmugDNA.3442.1.S1_at    | MmugDNA.3442.1  | 5.26  | 5.12  | 0.37 | 0.06 | 1.1   | 0.602048 | 0.432179 | 0.816272 | 0.652775 |
| MmugDNA.34421.1.S1_at   | MmugDNA.34421.1 | 3.44  | 3.42  | 0.15 | 0.03 | 1.02  | 0.232586 | 0.232304 | 0.587814 | 0.504031 |
| MmugDNA.34422.1.S1_at   | MmugDNA.34422.1 | 3.79  | 4.19  | 0.16 | 0.45 | -1.32 | 0.18325  | 0.408144 | 0.547309 | 0.635482 |
| MmugDNA.34423.1.S1_at   | MmugDNA.34423.1 | 4.68  | 4.73  | 0.29 | 0.08 | -1.04 | 0.582786 | 0.777373 | 0.805928 | 0.87064  |
| MmugDNA.34424.1.S1_at   | MmugDNA.34424.1 | 6.09  | 6.36  | 0.4  | 0.34 | -1.21 | 0.099784 | 0.106573 | 0.459718 | 0.369107 |
| MmugDNA.34425.1.S1_at   | MmugDNA.34425.1 | 3.81  | 3.81  | 0.1  | 0.08 | -1    | 0.798265 | 0.749562 | 0.916421 | 0.854499 |
| MmugDNA.34426.1.S1_at   | MmugDNA.34426.1 | 4.67  | 4.65  | 0.08 | 0.18 | 1.02  | 0.833007 | 0.440327 | 0.93227  | 0.658899 |
| MmugDNA.34427.1.S1_at   | MmugDNA.34427.1 | 4.15  | 4.22  | 0.21 | 0.32 | -1.05 | 0.391875 | 0.188222 | 0.694346 | 0.464251 |
| MmugDNA.34429.1.S1_at   | MmugDNA.34429.1 | 5.83  | 6.14  | 0.28 | 0.03 | -1.24 | 0.140726 | 0.181392 | 0.508448 | 0.457919 |
| MmugDNA.3443.1.S1_at    | MmugDNA.3443.1  | 4.6   | 4.4   | 0.75 | 0.23 | 1.15  | 0.234426 | 0.306348 | 0.588668 | 0.562971 |
| MmugDNA.34430.1.S1_at   | MmugDNA.34430.1 | 4.64  | 4.56  | 0.06 | 0.13 | 1.06  | 0.933507 | 0.980444 | 0.974177 | 0.989333 |
| MmugDNA.34432.1.S1_at   | MmugDNA.34432.1 | 5.96  | 6     | 0.19 | 0.18 | -1.03 | 0.613859 | 0.319408 | 0.822936 | 0.571762 |
| MmugDNA.34433.1.S1_at   | MmugDNA.34433.1 | 10.51 | 10.56 | 0.05 | 0.23 | -1.04 | 0.552994 | 0.657317 | 0.789746 | 0.799638 |



|                         |                 |       |       |      |      |       |          |          |          |          |
|-------------------------|-----------------|-------|-------|------|------|-------|----------|----------|----------|----------|
| MmugDNA.34434.1.S1_at   | MmugDNA.34434.1 | 7.65  | 7.74  | 0.09 | 0.02 | -1.07 | 0.101874 | 0.092889 | 0.461313 | 0.349024 |
| MmugDNA.34435.1.S1_at   | MmugDNA.34435.1 | 5.66  | 5.7   | 0.22 | 0.11 | -1.03 | 0.770309 | 0.610897 | 0.90333  | 0.768948 |
| MmugDNA.34436.1.S1_at   | MmugDNA.34436.1 | 9.88  | 9.92  | 0.21 | 0.79 | -1.03 | 0.84563  | 0.963265 | 0.93812  | 0.979477 |
| MmugDNA.34437.1.S1_at   | MmugDNA.34437.1 | 4.88  | 4.54  | 0.29 | 0.47 | 1.26  | 0.300897 | 0.328678 | 0.636012 | 0.578213 |
| MmugDNA.34438.1.S1_at   | MmugDNA.34438.1 | 4.02  | 4.04  | 0.02 | 0.1  | -1.01 | 0.564296 | 0.773226 | 0.796462 | 0.868163 |
| MmugDNA.34439.1.S1_at   | MmugDNA.34439.1 | 4.45  | 4.54  | 0.26 | 0.1  | -1.07 | 0.848292 | 0.964997 | 0.939211 | 0.980553 |
| MmugDNA.3444.1.S1_at    | MmugDNA.3444.1  | 4.37  | 4.56  | 0.06 | 0.07 | -1.14 | 0.023046 | 0.031167 | 0.289658 | 0.218378 |
| MmugDNA.34441.1.S1_at   | MmugDNA.34441.1 | 4.35  | 4.41  | 0.56 | 0.07 | -1.04 | 0.789395 | 0.94536  | 0.912587 | 0.968942 |
| MmugDNA.34443.1.S1_at   | MmugDNA.34443.1 | 4.5   | 4.61  | 0.05 | 0.1  | -1.08 | 0.093954 | 0.180781 | 0.451538 | 0.457306 |
| MmugDNA.34444.1.S1_at   | MmugDNA.34444.1 | 4.2   | 3.97  | 0.21 | 0    | 1.17  | 0.267191 | 0.217831 | 0.612322 | 0.491385 |
| MmugDNA.34445.1.S1_at   | MmugDNA.34445.1 | 5.97  | 6.16  | 0.13 | 0.05 | -1.14 | 0.318901 | 0.30527  | 0.648688 | 0.562255 |
| MmugDNA.34446.1.S1_at   | MmugDNA.34446.1 | 3.55  | 3.11  | 0.04 | 0.32 | 1.35  | 0.206249 | 0.261976 | 0.568565 | 0.52836  |
| MmugDNA.34447.1.S1_at   | MmugDNA.34447.1 | 4.01  | 4.03  | 0.27 | 0.03 | -1.02 | 0.919781 | 0.503627 | 0.968755 | 0.700988 |
| MmugDNA.34448.1.S1_at   | MmugDNA.34448.1 | 5.77  | 6.39  | 0.67 | 1.39 | -1.54 | 0.563562 | 0.380292 | 0.79607  | 0.616975 |
| MmugDNA.34449.1.S1_at   | MmugDNA.34449.1 | 7.09  | 7.17  | 0.32 | 0.14 | -1.06 | 0.624959 | 0.677429 | 0.828566 | 0.81167  |
| MmugDNA.3445.1.S1_at    | MmugDNA.3445.1  | 3.23  | 3.25  | 0.09 | 0.01 | -1.01 | 0.600296 | 0.57242  | 0.815194 | 0.744497 |
| MmugDNA.34450.1.S1_at   | MmugDNA.34450.1 | 3.57  | 3.58  | 0.14 | 0.13 | -1.01 | 0.899261 | 0.344538 | 0.959714 | 0.589909 |
| MmugDNA.34452.1.S1_s_at | MmugDNA.34452.1 | 8.4   | 7.25  | 0.18 | 0.79 | 2.22  | 0.203824 | 0.252353 | 0.566308 | 0.520998 |
| MmugDNA.34453.1.S1_at   | MmugDNA.34453.1 | 3.65  | 3.62  | 0.16 | 0.11 | 1.03  | 0.774527 | 0.926722 | 0.90527  | 0.958404 |
| MmugDNA.34454.1.S1_at   | MmugDNA.34454.1 | 7.99  | 6.55  | 0.75 | 0.23 | 2.72  | 0.084869 | 0.086808 | 0.437796 | 0.339583 |
| MmugDNA.34455.1.S1_at   | MmugDNA.34455.1 | 4.38  | 5.24  | 0.39 | 0.98 | -1.81 | 0.100569 | 0.089894 | 0.461009 | 0.344073 |
| MmugDNA.34457.1.S1_at   | MmugDNA.34457.1 | 4.2   | 4.1   | 0.25 | 0.13 | 1.07  | 0.511461 | 0.627896 | 0.765318 | 0.780849 |
| MmugDNA.34458.1.S1_at   | MmugDNA.34458.1 | 8.41  | 9.82  | 0.09 | 0.3  | -2.66 | 0.00122  | 0.000183 | 0.145267 | 0.030511 |
| MmugDNA.34459.1.S1_x_at | MmugDNA.34459.1 | 12.04 | 11.74 | 0.46 | 0.28 | 1.23  | 0.142654 | 0.192898 | 0.509765 | 0.468379 |
| MmugDNA.3446.1.S1_at    | MmugDNA.3446.1  | 12.08 | 11.83 | 0.08 | 0.22 | 1.19  | 0.128867 | 0.14153  | 0.494773 | 0.415063 |
| MmugDNA.34460.1.S1_at   | MmugDNA.34460.1 | 5.02  | 5.09  | 0.26 | 0.11 | -1.05 | 0.333855 | 0.688835 | 0.657955 | 0.818338 |
| MmugDNA.34461.1.S1_at   | MmugDNA.34461.1 | 6.76  | 7.69  | 1.29 | 1.36 | -1.91 | 0.409355 | 0.593398 | 0.705878 | 0.758267 |
| MmugDNA.34462.1.S1_at   | MmugDNA.34462.1 | 5.38  | 5.38  | 0.18 | 0.01 | -1    | 0.982305 | 0.919606 | 0.993449 | 0.954848 |
| MmugDNA.34463.1.S1_at   | MmugDNA.34463.1 | 4.51  | 4.25  | 0.07 | 0.18 | 1.2   | 0.034876 | 0.012904 | 0.333988 | 0.146232 |
| MmugDNA.34464.1.S1_at   | MmugDNA.34464.1 | 4.18  | 4.28  | 0.64 | 0.32 | -1.07 | 0.582138 | 0.475648 | 0.805537 | 0.682309 |
| MmugDNA.34465.1.S1_at   | MmugDNA.34465.1 | 3.97  | 3.69  | 0.29 | 0.35 | 1.22  | 0.807469 | 0.755057 | 0.921226 | 0.857434 |
| MmugDNA.34466.1.S1_at   | MmugDNA.34466.1 | 2.96  | 3.05  | 0.05 | 0.14 | -1.06 | 0.86321  | 0.293362 | 0.944982 | 0.553285 |
| MmugDNA.34467.1.S1_at   | MmugDNA.34467.1 | 4.15  | 4.24  | 0.26 | 0.08 | -1.06 | 0.945583 | 0.250631 | 0.979221 | 0.51941  |
| MmugDNA.34469.1.S1_at   | MmugDNA.34469.1 | 3.99  | 4.05  | 0.18 | 0.04 | -1.04 | 0.713058 | 0.877442 | 0.874274 | 0.930156 |
| MmugDNA.3447.1.S1_at    | MmugDNA.3447.1  | 5.6   | 5.9   | 0.21 | 0.36 | -1.23 | 0.235336 | 0.173805 | 0.589342 | 0.450128 |
| MmugDNA.34470.1.S1_at   | MmugDNA.34470.1 | 10.1  | 9.81  | 0.18 | 0.34 | 1.23  | 0.662802 | 0.594231 | 0.848768 | 0.758517 |
| MmugDNA.34470.1.S1_s_at | MmugDNA.34470.1 | 9.03  | 8.8   | 0.22 | 0.33 | 1.17  | 0.832083 | 0.295188 | 0.931955 | 0.554568 |
| MmugDNA.34472.1.S1_at   | MmugDNA.34472.1 | 4.25  | 7.31  | 1.44 | 1.69 | -8.31 | 0.158307 | 0.045235 | 0.523156 | 0.257005 |
| MmugDNA.34473.1.S1_at   | MmugDNA.34473.1 | 10.52 | 10.08 | 0.49 | 0.82 | 1.36  | 0.560805 | 0.559361 | 0.794462 | 0.736242 |
| MmugDNA.34475.1.S1_at   | MmugDNA.34475.1 | 6.05  | 6.37  | 0.2  | 0.04 | -1.25 | 0.073201 | 0.059664 | 0.418452 | 0.290919 |
| MmugDNA.34477.1.S1_at   | MmugDNA.34477.1 | 5.91  | 6.28  | 0.15 | 0.38 | -1.29 | 0.623608 | 0.875508 | 0.828015 | 0.929262 |

|                         |                 |       |       |      |      |       |          |          |          |          |
|-------------------------|-----------------|-------|-------|------|------|-------|----------|----------|----------|----------|
| MmugDNA.34478.1.S1_at   | MmugDNA.34478.1 | 3.89  | 4.04  | 0.12 | 0.27 | -1.11 | 0.954347 | 0.614021 | 0.983073 | 0.771026 |
| MmugDNA.34479.1.S1_at   | MmugDNA.34479.1 | 4.44  | 4.48  | 0.02 | 0.18 | -1.03 | 0.769445 | 0.466653 | 0.903012 | 0.676425 |
| MmugDNA.34480.1.S1_at   | MmugDNA.34480.1 | 10.56 | 11.15 | 0.24 | 0.54 | -1.5  | 0.13274  | 0.008184 | 0.498814 | 0.120053 |
| MmugDNA.34484.1.S1_at   | MmugDNA.34484.1 | 7.07  | 7.11  | 0.12 | 0.14 | -1.03 | 0.28145  | 0.235197 | 0.622236 | 0.50629  |
| MmugDNA.34485.1.S1_at   | MmugDNA.34485.1 | 6.93  | 6.01  | 0.14 | 0.78 | 1.9   | 0.296714 | 0.302524 | 0.632686 | 0.560201 |
| MmugDNA.34486.1.S1_at   | MmugDNA.34486.1 | 6.9   | 7.06  | 0.88 | 0.3  | -1.11 | 0.717048 | 0.870281 | 0.875713 | 0.926392 |
| MmugDNA.34487.1.S1_at   | MmugDNA.34487.1 | 6.7   | 6.67  | 0.17 | 0.09 | 1.02  | 0.717532 | 0.610171 | 0.8759   | 0.768419 |
| MmugDNA.11382.1.S1_at   | MmugDNA.11382.1 | 10.57 | 10.51 | 0.27 | 0.07 | 1.04  | 0.61657  | 0.734782 | 0.824231 | 0.846446 |
| MmugDNA.11382.1.S1_s_at | MmugDNA.11382.1 | 12.36 | 12.42 | 0.3  | 0.08 | -1.04 | 0.845438 | 0.198651 | 0.938022 | 0.473391 |
| MmugDNA.34489.1.S1_at   | MmugDNA.34489.1 | 4.16  | 3.96  | 0.43 | 0.06 | 1.15  | 0.173805 | 0.060329 | 0.53729  | 0.292254 |
| MmugDNA.3449.1.S1_at    | MmugDNA.3449.1  | 6.58  | 6.67  | 0.16 | 0.04 | -1.07 | 0.513391 | 0.644269 | 0.766311 | 0.791506 |
| MmugDNA.34490.1.S1_at   | MmugDNA.34490.1 | 6.87  | 6.31  | 0.3  | 0.2  | 1.48  | 0.043545 | 0.054759 | 0.356798 | 0.279506 |
| MmugDNA.34491.1.S1_at   | MmugDNA.34491.1 | 4.16  | 3.61  | 0.94 | 0.16 | 1.46  | 0.391435 | 0.236453 | 0.694076 | 0.507314 |
| MmugDNA.34492.1.S1_at   | MmugDNA.34492.1 | 3.46  | 3.65  | 0.26 | 0.14 | -1.15 | 0.882033 | 0.234489 | 0.952617 | 0.505674 |
| MmugDNA.34494.1.S1_at   | MmugDNA.34494.1 | 5.42  | 5.5   | 0.17 | 0.2  | -1.05 | 0.514064 | 0.696673 | 0.766736 | 0.823818 |
| MmugDNA.34495.1.S1_at   | MmugDNA.34495.1 | 7.45  | 8.14  | 0.17 | 0.34 | -1.62 | 0.050905 | 0.020725 | 0.37568  | 0.180645 |
| MmugDNA.34497.1.S1_at   | MmugDNA.34497.1 | 9.28  | 9.89  | 0.19 | 0.77 | -1.53 | 0.380309 | 0.545076 | 0.687248 | 0.727313 |
| MmugDNA.34499.1.S1_at   | MmugDNA.34499.1 | 5.57  | 4.86  | 0.07 | 0.3  | 1.64  | 0.016055 | 0.055851 | 0.262409 | 0.282172 |
| MmugDNA.345.1.S1_s_at   | MmugDNA.345.1   | 9.89  | 9.57  | 0.05 | 0.23 | 1.24  | 0.073027 | 0.027061 | 0.418323 | 0.205689 |
| MmugDNA.34502.1.S1_at   | MmugDNA.34502.1 | 7.22  | 6.84  | 1.02 | 1.09 | 1.3   | 0.559416 | 0.747984 | 0.793878 | 0.853341 |
| MmugDNA.34504.1.S1_at   | MmugDNA.34504.1 | 11.48 | 11.35 | 0.19 | 0.13 | 1.09  | 0.496346 | 0.646389 | 0.757473 | 0.792839 |
| MmugDNA.34506.1.S1_at   | MmugDNA.34506.1 | 6.31  | 5.69  | 0.21 | 0.13 | 1.53  | 0.013673 | 0.026555 | 0.248813 | 0.203915 |
| MmugDNA.34507.1.S1_at   | MmugDNA.34507.1 | 5.22  | 5.38  | 0.43 | 0.35 | -1.12 | 0.635346 | 0.135634 | 0.83497  | 0.40775  |
| MmugDNA.34508.1.S1_at   | MmugDNA.34508.1 | 7.93  | 7.87  | 0.11 | 0.13 | 1.04  | 0.499642 | 0.018909 | 0.759273 | 0.173002 |
| MmugDNA.3451.1.S1_at    | MmugDNA.3451.1  | 4.6   | 4.54  | 0.05 | 0.39 | 1.04  | 0.592744 | 0.655152 | 0.811174 | 0.798309 |
| MmugDNA.34511.1.S1_at   | MmugDNA.34511.1 | 7.18  | 5.78  | 0.56 | 0.56 | 2.65  | 0.167861 | 0.202844 | 0.532204 | 0.477312 |
| MmugDNA.34512.1.S1_at   | MmugDNA.34512.1 | 2.92  | 2.79  | 0.15 | 0.11 | 1.09  | 0.804267 | 0.97035  | 0.919498 | 0.983843 |
| MmugDNA.34513.1.S1_at   | MmugDNA.34513.1 | 7.45  | 6.87  | 0.12 | 0.21 | 1.5   | 0.009949 | 0.008021 | 0.226899 | 0.119047 |
| MmugDNA.34514.1.S1_at   | MmugDNA.34514.1 | 3.79  | 3.81  | 0.1  | 0.05 | -1.02 | 0.641103 | 0.624044 | 0.838009 | 0.778361 |
| MmugDNA.34515.1.S1_at   | MmugDNA.34515.1 | 3.42  | 4     | 1.17 | 0.46 | -1.5  | 0.814852 | 0.913732 | 0.92478  | 0.951474 |
| MmugDNA.34516.1.S1_at   | MmugDNA.34516.1 | 3.95  | 4.1   | 0.11 | 0.18 | -1.11 | 0.135887 | 0.132299 | 0.502782 | 0.404294 |
| MmugDNA.34518.1.S1_at   | MmugDNA.34518.1 | 3.3   | 3.25  | 0.05 | 0    | 1.04  | 0.167048 | 0.18472  | 0.531157 | 0.460645 |
| MmugDNA.34519.1.S1_at   | MmugDNA.34519.1 | 3.18  | 4.23  | 0.08 | 0.8  | -2.08 | 0.044849 | 0.118581 | 0.35907  | 0.38654  |
| MmugDNA.3452.1.S1_at    | MmugDNA.3452.1  | 8.05  | 7.84  | 0.32 | 0.2  | 1.16  | 0.649823 | 0.358543 | 0.842533 | 0.600068 |
| MmugDNA.34520.1.S1_at   | MmugDNA.34520.1 | 4.27  | 4.13  | 0.05 | 0.1  | 1.1   | 0.094567 | 0.184513 | 0.452166 | 0.460559 |
| MmugDNA.34521.1.S1_at   | MmugDNA.34521.1 | 6.33  | 7.07  | 0.31 | 0.49 | -1.68 | 0.086227 | 0.095018 | 0.440212 | 0.352124 |
| MmugDNA.34522.1.S1_at   | MmugDNA.34522.1 | 12.25 | 12.31 | 0.02 | 0.02 | -1.04 | 0.013632 | 0.099833 | 0.248684 | 0.358464 |
| MmugDNA.34524.1.S1_at   | MmugDNA.34524.1 | 4.88  | 4.9   | 0.13 | 0.05 | -1.01 | 0.833585 | 0.414929 | 0.932352 | 0.640538 |
| MmugDNA.34525.1.S1_at   | MmugDNA.34525.1 | 11.76 | 11.36 | 0.08 | 0.21 | 1.32  | 0.029399 | 0.02683  | 0.313909 | 0.204912 |
| MmugDNA.34526.1.S1_at   | MmugDNA.34526.1 | 5.27  | 5.25  | 0.1  | 0.18 | 1.01  | 0.23287  | 0.384307 | 0.587927 | 0.619996 |
| MmugDNA.34527.1.S1_at   | MmugDNA.34527.1 | 3.72  | 2.95  | 1.03 | 0.25 | 1.7   | 0.288297 | 0.327971 | 0.626514 | 0.577785 |

|                         |                 |       |       |      |      |       |          |          |          |          |
|-------------------------|-----------------|-------|-------|------|------|-------|----------|----------|----------|----------|
| MmugDNA.34529.1.S1_at   | MmugDNA.34529.1 | 5.5   | 5.56  | 0.12 | 0.12 | -1.04 | 0.717822 | 0.356703 | 0.876127 | 0.598516 |
| MmugDNA.3453.1.S1_at    | MmugDNA.3453.1  | 4.76  | 4.66  | 0.08 | 0.23 | 1.07  | 0.984623 | 0.180477 | 0.994541 | 0.457115 |
| MmugDNA.34530.1.S1_at   | MmugDNA.34530.1 | 4.47  | 3.82  | 0.57 | 0.16 | 1.57  | 0.128281 | 0.090444 | 0.49431  | 0.344925 |
| MmugDNA.34530.1.S1_s_at | MmugDNA.34530.1 | 8.22  | 7.72  | 0.17 | 0.51 | 1.41  | 0.281387 | 0.155836 | 0.622236 | 0.431211 |
| MmugDNA.34531.1.S1_at   | MmugDNA.34531.1 | 10.79 | 10.05 | 0.38 | 0.61 | 1.68  | 0.138152 | 0.04457  | 0.505618 | 0.255512 |
| MmugDNA.34532.1.S1_at   | MmugDNA.34532.1 | 6.55  | 6.68  | 1.03 | 0.3  | -1.09 | 0.469671 | 0.73544  | 0.741854 | 0.846919 |
| MmugDNA.34533.1.S1_at   | MmugDNA.34533.1 | 7.7   | 8.17  | 0.18 | 0.55 | -1.38 | 0.18238  | 0.11391  | 0.546756 | 0.38018  |
| MmugDNA.34535.1.S1_at   | MmugDNA.34535.1 | 5.14  | 5.38  | 0.04 | 0.26 | -1.18 | 0.498436 | 0.649881 | 0.758399 | 0.795273 |
| MmugDNA.34536.1.S1_at   | MmugDNA.34536.1 | 7.15  | 7.22  | 0.25 | 0.15 | -1.05 | 0.219446 | 0.184955 | 0.578836 | 0.460776 |
| MmugDNA.34537.1.S1_at   | MmugDNA.34537.1 | 3.96  | 3.88  | 0.08 | 0.06 | 1.06  | 0.241286 | 0.131103 | 0.593801 | 0.403084 |
| MmugDNA.34539.1.S1_s_at | MmugDNA.34539.1 | 11.4  | 11.41 | 0.16 | 0.33 | -1.01 | 0.897699 | 0.143716 | 0.95917  | 0.417583 |
| MmugDNA.3454.1.S1_at    | MmugDNA.3454.1  | 4.99  | 4.75  | 0.31 | 0.13 | 1.17  | 0.322845 | 0.078841 | 0.651245 | 0.325821 |
| MmugDNA.34540.1.S1_at   | MmugDNA.34540.1 | 3.39  | 3.46  | 0.03 | 0.09 | -1.04 | 0.33403  | 0.207643 | 0.658024 | 0.481906 |
| MmugDNA.34541.1.S1_at   | MmugDNA.34541.1 | 6.97  | 6.42  | 0.33 | 0.18 | 1.47  | 0.290025 | 0.378387 | 0.628003 | 0.615443 |
| MmugDNA.34543.1.S1_at   | MmugDNA.34543.1 | 5.24  | 5.29  | 0.36 | 0.08 | -1.04 | 0.90827  | 0.794116 | 0.96372  | 0.881296 |
| MmugDNA.34544.1.S1_at   | MmugDNA.34544.1 | 4.46  | 4.51  | 0.15 | 0.17 | -1.03 | 0.81489  | 0.960399 | 0.924789 | 0.977488 |
| MmugDNA.34545.1.S1_s_at | MmugDNA.34545.1 | 6.2   | 7.7   | 0.18 | 0.65 | -2.84 | 0.015255 | 0.005673 | 0.257698 | 0.103959 |
| MmugDNA.34547.1.S1_at   | MmugDNA.34547.1 | 6.73  | 4.14  | 0.66 | 1.18 | 5.99  | 0.069643 | 0.059475 | 0.412651 | 0.290548 |
| MmugDNA.34548.1.S1_at   | MmugDNA.34548.1 | 4.21  | 4.18  | 0.25 | 0.21 | 1.02  | 0.579322 | 0.82516  | 0.804245 | 0.899551 |
| MmugDNA.34549.1.S1_at   | MmugDNA.34549.1 | 5.59  | 5.5   | 0.35 | 0.09 | 1.06  | 0.726057 | 0.771183 | 0.880708 | 0.866992 |
| MmugDNA.3455.1.S1_at    | MmugDNA.3455.1  | 5.74  | 5.73  | 0.67 | 0.72 | 1.01  | 0.909454 | 0.562467 | 0.964169 | 0.738025 |
| MmugDNA.34552.1.S1_at   | MmugDNA.34552.1 | 4.88  | 4.63  | 0.09 | 0.14 | 1.19  | 0.062717 | 0.053362 | 0.399119 | 0.27654  |
| MmugDNA.34553.1.S1_at   | MmugDNA.34553.1 | 5.72  | 6.16  | 0.24 | 0.25 | -1.36 | 0.38941  | 0.034702 | 0.692994 | 0.230497 |
| MmugDNA.34555.1.S1_at   | MmugDNA.34555.1 | 4.24  | 4.33  | 0.09 | 0.22 | -1.07 | 0.900762 | 0.635949 | 0.960386 | 0.785795 |
| MmugDNA.34556.1.S1_at   | MmugDNA.34556.1 | 9.7   | 9.11  | 0.27 | 1.17 | 1.51  | 0.51633  | 0.555824 | 0.768009 | 0.734119 |
| MmugDNA.34558.1.S1_at   | MmugDNA.34558.1 | 6.71  | 6.33  | 1.29 | 0.61 | 1.3   | 0.413465 | 0.506203 | 0.708496 | 0.702368 |
| MmugDNA.34559.1.S1_at   | MmugDNA.34559.1 | 7.6   | 7.98  | 0.29 | 0.08 | -1.3  | 0.219079 | 0.265061 | 0.578502 | 0.531    |
| MmugDNA.34560.1.S1_at   | MmugDNA.34560.1 | 10.4  | 9.75  | 0.05 | 0.26 | 1.58  | 0.027466 | 0.000469 | 0.308086 | 0.038572 |
| MmugDNA.34561.1.S1_at   | MmugDNA.34561.1 | 6.38  | 6.31  | 0.23 | 0.27 | 1.05  | 0.547431 | 0.671841 | 0.786218 | 0.808157 |
| MmugDNA.34562.1.S1_at   | MmugDNA.34562.1 | 10.46 | 10.63 | 0.12 | 0.23 | -1.13 | 0.20879  | 0.273322 | 0.570422 | 0.537788 |
| MmugDNA.34563.1.S1_at   | MmugDNA.34563.1 | 5.9   | 6.27  | 0.11 | 0.21 | -1.29 | 0.132619 | 0.145899 | 0.49874  | 0.419889 |
| MmugDNA.34565.1.S1_at   | MmugDNA.34565.1 | 4.53  | 4.26  | 0.3  | 0.37 | 1.21  | 0.408186 | 0.804736 | 0.70497  | 0.887712 |
| MmugDNA.34568.1.S1_at   | MmugDNA.34568.1 | 8.29  | 8.13  | 0.19 | 0.06 | 1.12  | 0.299505 | 0.213918 | 0.634993 | 0.487596 |
| MmugDNA.36272.1.S1_at   | MmugDNA.36272.1 | 11.2  | 10.85 | 0.14 | 0.08 | 1.27  | 0.022527 | 0.013172 | 0.287341 | 0.14735  |
| MmugDNA.36272.1.S1_s_at | MmugDNA.36272.1 | 9.23  | 8.89  | 0.15 | 0.07 | 1.26  | 0.016454 | 0.006097 | 0.264089 | 0.106342 |
| MmugDNA.34569.1.S1_at   | MmugDNA.34569.1 | 4.43  | 4.29  | 0.42 | 0.14 | 1.1   | 0.654986 | 0.860585 | 0.84477  | 0.920573 |
| MmugDNA.3457.1.S1_at    | MmugDNA.3457.1  | 3.67  | 4.09  | 0.13 | 0.1  | -1.33 | 0.004474 | 0.005914 | 0.183586 | 0.105265 |
| MmugDNA.34570.1.S1_at   | MmugDNA.34570.1 | 4.38  | 4.6   | 0.24 | 0.1  | -1.16 | 0.404338 | 0.497605 | 0.702606 | 0.696935 |
| MmugDNA.34571.1.S1_at   | MmugDNA.34571.1 | 6.37  | 6.65  | 0.13 | 0.05 | -1.22 | 0.036006 | 0.111217 | 0.338683 | 0.375856 |
| MmugDNA.34572.1.S1_at   | MmugDNA.34572.1 | 11.03 | 11.83 | 0.21 | 0.23 | -1.74 | 0.00719  | 0.003953 | 0.205355 | 0.089462 |
| MmugDNA.34573.1.S1_at   | MmugDNA.34573.1 | 3.85  | 3.93  | 0.09 | 0.18 | -1.06 | 0.638989 | 0.425924 | 0.836932 | 0.648123 |

|                         |                 |       |       |      |      |       |          |          |          |          |
|-------------------------|-----------------|-------|-------|------|------|-------|----------|----------|----------|----------|
| MmugDNA.34574.1.S1_at   | MmugDNA.34574.1 | 10.55 | 9.99  | 0.05 | 0.27 | 1.47  | 0.039115 | 0.031407 | 0.346539 | 0.219107 |
| MmugDNA.34576.1.S1_at   | MmugDNA.34576.1 | 5.5   | 6.08  | 0.8  | 0.3  | -1.49 | 0.343107 | 0.507484 | 0.66343  | 0.703044 |
| MmugDNA.34577.1.S1_at   | MmugDNA.34577.1 | 3.54  | 3.07  | 0.17 | 0.16 | 1.39  | 0.015496 | 0.019164 | 0.259039 | 0.1742   |
| MmugDNA.34578.1.S1_at   | MmugDNA.34578.1 | 5.12  | 5.17  | 0.09 | 0.15 | -1.04 | 0.968812 | 0.486201 | 0.988196 | 0.689643 |
| MmugDNA.34579.1.S1_at   | MmugDNA.34579.1 | 5.1   | 5.24  | 0.05 | 0.14 | -1.11 | 0.721843 | 0.498272 | 0.878337 | 0.697403 |
| MmugDNA.3458.1.S1_at    | MmugDNA.3458.1  | 9.1   | 10.41 | 1.7  | 0.31 | -2.49 | 0.077506 | 0.074189 | 0.427298 | 0.317933 |
| MmugDNA.34580.1.S1_at   | MmugDNA.34580.1 | 6.35  | 6.6   | 0.22 | 0.06 | -1.19 | 0.232335 | 0.26208  | 0.587814 | 0.528374 |
| MmugDNA.34581.1.S1_at   | MmugDNA.34581.1 | 4.21  | 4.42  | 0.07 | 0.04 | -1.16 | 0.027642 | 0.01654  | 0.308507 | 0.162827 |
| MmugDNA.34584.1.S1_at   | MmugDNA.34584.1 | 6.35  | 5.29  | 0.83 | 0.18 | 2.07  | 0.108997 | 0.111057 | 0.470784 | 0.375588 |
| MmugDNA.34585.1.S1_at   | MmugDNA.34585.1 | 5.3   | 5.24  | 0.18 | 0.34 | 1.04  | 0.88049  | 0.980601 | 0.951934 | 0.989397 |
| MmugDNA.34586.1.S1_at   | MmugDNA.34586.1 | 6.99  | 5.65  | 1.01 | 0.3  | 2.52  | 0.077397 | 0.058613 | 0.427131 | 0.288819 |
| MmugDNA.34586.1.S1_s_at | MmugDNA.34586.1 | 4.88  | 4.65  | 0.92 | 0.07 | 1.17  | 0.221327 | 0.297608 | 0.580161 | 0.55624  |
| MmugDNA.3459.1.S1_at    | MmugDNA.3459.1  | 10.23 | 8.56  | 0.23 | 1.22 | 3.2   | 0.13378  | 0.09561  | 0.500334 | 0.352645 |
| MmugDNA.34590.1.S1_at   | MmugDNA.34590.1 | 9.03  | 8.67  | 0.23 | 0.33 | 1.29  | 0.34602  | 0.281134 | 0.665497 | 0.544261 |
| MmugDNA.34591.1.S1_s_at | MmugDNA.34591.1 | 10.52 | 9.26  | 0.11 | 0.43 | 2.4   | 0.016667 | 0.004077 | 0.26475  | 0.090418 |
| MmugDNA.34592.1.S1_at   | MmugDNA.34592.1 | 7.48  | 7.56  | 0.05 | 0.26 | -1.06 | 0.447991 | 0.627757 | 0.729382 | 0.780727 |
| MmugDNA.34593.1.S1_at   | MmugDNA.34593.1 | 7.55  | 7.98  | 0.83 | 0.6  | -1.35 | 0.649796 | 0.846536 | 0.842533 | 0.912676 |
| MmugDNA.34594.1.S1_at   | MmugDNA.34594.1 | 4.33  | 4.09  | 0.24 | 0.01 | 1.18  | 0.325718 | 0.168856 | 0.652981 | 0.445458 |
| MmugDNA.34595.1.S1_at   | MmugDNA.34595.1 | 8.83  | 8.32  | 0.53 | 0.9  | 1.43  | 0.106271 | 0.118266 | 0.466831 | 0.386244 |
| MmugDNA.34596.1.S1_at   | MmugDNA.34596.1 | 5.41  | 5.53  | 0.23 | 0.75 | -1.09 | 0.883547 | 0.411982 | 0.95322  | 0.638434 |
| MmugDNA.346.1.S1_at     | MmugDNA.346.1   | 3.97  | 3.85  | 0.09 | 0.12 | 1.08  | 0.337203 | 0.190734 | 0.659871 | 0.466168 |
| MmugDNA.3460.1.S1_at    | MmugDNA.3460.1  | 5.28  | 5.22  | 0.56 | 1.04 | 1.04  | 0.736857 | 0.899365 | 0.886909 | 0.942791 |
| MmugDNA.34600.1.S1_at   | MmugDNA.34600.1 | 5.01  | 4.9   | 0.54 | 0.24 | 1.08  | 0.398345 | 0.615683 | 0.698654 | 0.772141 |
| MmugDNA.34601.1.S1_at   | MmugDNA.34601.1 | 7.27  | 6.29  | 0.45 | 1.28 | 1.97  | 0.311878 | 0.431218 | 0.643771 | 0.652219 |
| MmugDNA.34602.1.S1_at   | MmugDNA.34602.1 | 3.21  | 3.14  | 0.14 | 0.19 | 1.05  | 0.900367 | 0.470097 | 0.960269 | 0.678572 |
| MmugDNA.34604.1.S1_at   | MmugDNA.34604.1 | 4.85  | 4.79  | 0.49 | 0.26 | 1.04  | 0.726413 | 0.468515 | 0.880998 | 0.677755 |
| MmugDNA.34605.1.S1_at   | MmugDNA.34605.1 | 13.02 | 13.31 | 0.01 | 0.02 | -1.22 | 0.000019 | 9.87E-07 | 0.112653 | 0.007307 |
| MmugDNA.34606.1.S1_at   | MmugDNA.34606.1 | 5.75  | 6.04  | 0.07 | 0.15 | -1.22 | 0.078912 | 0.070044 | 0.428609 | 0.310932 |
| MmugDNA.34607.1.S1_at   | MmugDNA.34607.1 | 10.07 | 10.02 | 0.13 | 0.27 | 1.03  | 0.260504 | 0.347233 | 0.607292 | 0.591857 |
| MmugDNA.3461.1.S1_at    | MmugDNA.3461.1  | 11.74 | 11.02 | 0.23 | 0.27 | 1.65  | 0.029462 | 0.014752 | 0.314327 | 0.154493 |
| MmugDNA.34610.1.S1_at   | MmugDNA.34610.1 | 3.46  | 3.39  | 0.15 | 0.01 | 1.05  | 0.95334  | 0.991387 | 0.982703 | 0.995189 |
| MmugDNA.34611.1.S1_at   | MmugDNA.34611.1 | 5.96  | 5.87  | 0.36 | 0.99 | 1.06  | 0.583198 | 0.773654 | 0.806265 | 0.868422 |
| MmugDNA.34612.1.S1_at   | MmugDNA.34612.1 | 4.58  | 4.66  | 0    | 0.04 | -1.06 | 0.082683 | 0.068817 | 0.434325 | 0.308714 |
| MmugDNA.34613.1.S1_at   | MmugDNA.34613.1 | 9.26  | 8.99  | 0.25 | 0.32 | 1.21  | 0.119978 | 0.091057 | 0.48448  | 0.345842 |
| MmugDNA.34614.1.S1_at   | MmugDNA.34614.1 | 4.05  | 4.01  | 0.6  | 0.55 | 1.03  | 0.892628 | 0.773398 | 0.957281 | 0.868269 |
| MmugDNA.34615.1.S1_at   | MmugDNA.34615.1 | 3.19  | 3.29  | 0.02 | 0.12 | -1.07 | 0.713024 | 0.639574 | 0.874274 | 0.788351 |
| MmugDNA.34616.1.S1_at   | MmugDNA.34616.1 | 8.22  | 9.75  | 1.02 | 2.33 | -2.88 | 0.709298 | 0.722487 | 0.87243  | 0.839261 |
| MmugDNA.34617.1.S1_at   | MmugDNA.34617.1 | 6.21  | 6.64  | 0.39 | 0.11 | -1.34 | 0.591822 | 0.748244 | 0.810672 | 0.853492 |
| MmugDNA.34618.1.S1_at   | MmugDNA.34618.1 | 3.21  | 3.15  | 0.03 | 0.04 | 1.04  | 0.061883 | 0.009349 | 0.396761 | 0.127602 |
| MmugDNA.34619.1.S1_at   | MmugDNA.34619.1 | 5.46  | 5.54  | 0.19 | 0.03 | -1.06 | 0.743568 | 0.700733 | 0.890194 | 0.82642  |
| MmugDNA.3462.1.S1_at    | MmugDNA.3462.1  | 11.17 | 10.97 | 0.24 | 0.13 | 1.14  | 0.142753 | 0.107504 | 0.50977  | 0.370387 |

|                         |                 |       |       |      |      |       |          |          |          |          |
|-------------------------|-----------------|-------|-------|------|------|-------|----------|----------|----------|----------|
| MmugDNA.34620.1.S1_at   | MmugDNA.34620.1 | 5.98  | 5.99  | 0.34 | 0.11 | -1.01 | 0.604634 | 0.306927 | 0.817891 | 0.563427 |
| MmugDNA.34621.1.S1_at   | MmugDNA.34621.1 | 6.15  | 6.16  | 0.1  | 0.06 | -1.01 | 0.70642  | 0.647126 | 0.870673 | 0.793279 |
| MmugDNA.34624.1.S1_at   | MmugDNA.34624.1 | 4.66  | 4.52  | 0.2  | 0.38 | 1.1   | 0.615305 | 0.23493  | 0.823371 | 0.506136 |
| MmugDNA.34625.1.S1_at   | MmugDNA.34625.1 | 5.34  | 4.96  | 0.26 | 0.13 | 1.3   | 0.080827 | 0.160497 | 0.431352 | 0.436679 |
| MmugDNA.34626.1.S1_at   | MmugDNA.34626.1 | 3.2   | 3.08  | 0.05 | 0.18 | 1.09  | 0.869493 | 0.474823 | 0.947917 | 0.681736 |
| MmugDNA.34628.1.S1_at   | MmugDNA.34628.1 | 6.96  | 6.11  | 1.2  | 0.59 | 1.81  | 0.330983 | 0.47374  | 0.656063 | 0.68101  |
| MmugDNA.34629.1.S1_at   | MmugDNA.34629.1 | 8.21  | 9.9   | 0.09 | 0.35 | -3.23 | 0.00078  | 0.000675 | 0.136818 | 0.04413  |
| MmugDNA.34630.1.S1_at   | MmugDNA.34630.1 | 6.53  | 6.63  | 0.1  | 0.09 | -1.07 | 0.116033 | 0.095597 | 0.479523 | 0.352645 |
| MmugDNA.34631.1.S1_at   | MmugDNA.34631.1 | 8.64  | 8.23  | 0.29 | 0.36 | 1.32  | 0.206196 | 0.234425 | 0.568505 | 0.505674 |
| MmugDNA.34632.1.S1_at   | MmugDNA.34632.1 | 8.64  | 8.7   | 0.55 | 0.19 | -1.04 | 0.478434 | 0.523051 | 0.747214 | 0.713429 |
| MmugDNA.34632.1.S1_s_at | MmugDNA.34632.1 | 9.69  | 9.69  | 0.45 | 0.22 | 1     | 0.398526 | 0.415197 | 0.698752 | 0.640746 |
| MmugDNA.34633.1.S1_at   | MmugDNA.34633.1 | 4.82  | 5.01  | 0.3  | 0.46 | -1.14 | 0.347888 | 0.356335 | 0.666754 | 0.598324 |
| MmugDNA.34634.1.S1_at   | MmugDNA.34634.1 | 8.75  | 7.05  | 0.25 | 0.71 | 3.25  | 0.017912 | 0.009592 | 0.26813  | 0.129058 |
| MmugDNA.34636.1.S1_at   | MmugDNA.34636.1 | 4.47  | 4.19  | 0.45 | 0.19 | 1.22  | 0.389012 | 0.571772 | 0.692848 | 0.743987 |
| MmugDNA.34637.1.S1_at   | MmugDNA.34637.1 | 3.93  | 3.84  | 0.68 | 0.13 | 1.06  | 0.303762 | 0.30428  | 0.63803  | 0.561599 |
| MmugDNA.34638.1.S1_at   | MmugDNA.34638.1 | 4.23  | 4.14  | 0.12 | 0.09 | 1.06  | 0.312705 | 0.221182 | 0.644539 | 0.494511 |
| MmugDNA.3464.1.S1_at    | MmugDNA.3464.1  | 4.17  | 4.24  | 0.36 | 0.16 | -1.05 | 0.96188  | 0.273361 | 0.985387 | 0.5378   |
| MmugDNA.34640.1.S1_at   | MmugDNA.34640.1 | 5.49  | 4.86  | 0.39 | 0.19 | 1.54  | 0.064105 | 0.057017 | 0.402245 | 0.284868 |
| MmugDNA.34641.1.S1_at   | MmugDNA.34641.1 | 5.42  | 6.39  | 0.15 | 0.15 | -1.96 | 0.000972 | 0.000171 | 0.139813 | 0.030511 |
| MmugDNA.34642.1.S1_at   | MmugDNA.34642.1 | 3.08  | 3.08  | 0.03 | 0.05 | 1     | 0.666778 | 0.804802 | 0.850609 | 0.887741 |
| MmugDNA.34643.1.S1_at   | MmugDNA.34643.1 | 10.59 | 11.25 | 0.38 | 1.06 | -1.59 | 0.466501 | 0.049041 | 0.740215 | 0.266367 |
| MmugDNA.34644.1.S1_at   | MmugDNA.34644.1 | 5.59  | 5.32  | 0.44 | 0.19 | 1.21  | 0.598286 | 0.062061 | 0.813939 | 0.29597  |
| MmugDNA.34646.1.S1_at   | MmugDNA.34646.1 | 9.16  | 9.16  | 0.16 | 0.12 | 1     | 0.251974 | 0.394927 | 0.601195 | 0.627216 |
| MmugDNA.34647.1.S1_at   | MmugDNA.34647.1 | 9.52  | 10.33 | 0.25 | 0.14 | -1.75 | 0.016423 | 0.008774 | 0.263969 | 0.124022 |
| MmugDNA.34648.1.S1_at   | MmugDNA.34648.1 | 7.38  | 7.35  | 0.28 | 0.07 | 1.02  | 0.418155 | 0.731774 | 0.711168 | 0.844619 |
| MmugDNA.3465.1.S1_at    | MmugDNA.3465.1  | 4.44  | 4.46  | 0.15 | 0.17 | -1.01 | 0.854891 | 0.934372 | 0.941361 | 0.962766 |
| MmugDNA.34651.1.S1_at   | MmugDNA.34651.1 | 2.75  | 2.84  | 0.07 | 0.06 | -1.06 | 0.105686 | 0.19108  | 0.466525 | 0.466364 |
| MmugDNA.34653.1.S1_at   | MmugDNA.34653.1 | 10.04 | 10.6  | 0.14 | 0.34 | -1.47 | 0.100905 | 0.059192 | 0.461009 | 0.290208 |
| MmugDNA.34654.1.S1_at   | MmugDNA.34654.1 | 8.64  | 9.12  | 0.24 | 0.2  | -1.39 | 0.134222 | 0.145075 | 0.500737 | 0.419047 |
| MmugDNA.34657.1.S1_at   | MmugDNA.34657.1 | 4.6   | 4.77  | 0.09 | 0.12 | -1.13 | 0.307042 | 0.458433 | 0.639861 | 0.671165 |
| MmugDNA.3466.1.S1_at    | MmugDNA.3466.1  | 3.81  | 3.93  | 0.08 | 0.06 | -1.08 | 0.264391 | 0.079049 | 0.610152 | 0.326117 |
| MmugDNA.34660.1.S1_at   | MmugDNA.34660.1 | 8.98  | 7.95  | 0.22 | 0.41 | 2.05  | 0.012191 | 0.002176 | 0.240358 | 0.068956 |
| MmugDNA.34661.1.S1_at   | MmugDNA.34661.1 | 4.69  | 4.35  | 0.29 | 0.12 | 1.26  | 0.581073 | 0.12593  | 0.804843 | 0.396461 |
| MmugDNA.34662.1.S1_at   | MmugDNA.34662.1 | 6.59  | 6.28  | 0.67 | 0.26 | 1.24  | 0.336794 | 0.480065 | 0.659663 | 0.68565  |
| MmugDNA.34664.1.S1_at   | MmugDNA.34664.1 | 10.93 | 11.33 | 0.37 | 0.79 | -1.32 | 0.546815 | 0.677707 | 0.785716 | 0.811777 |
| MmugDNA.69.1.S1_s_at    | MmugDNA.69.1    | 9.25  | 9.19  | 0.25 | 0.62 | 1.04  | 0.897666 | 0.539738 | 0.95917  | 0.723926 |
| MmugDNA.34666.1.S1_at   | MmugDNA.34666.1 | 6.42  | 6.58  | 0.2  | 0.16 | -1.12 | 0.150056 | 0.176872 | 0.514662 | 0.453303 |
| MmugDNA.34667.1.S1_at   | MmugDNA.34667.1 | 5.24  | 4.55  | 0.45 | 0.12 | 1.62  | 0.170319 | 0.19274  | 0.534249 | 0.468231 |
| MmugDNA.34668.1.S1_at   | MmugDNA.34668.1 | 4.92  | 3.98  | 0.4  | 0.18 | 1.91  | 0.058614 | 0.266844 | 0.390844 | 0.53241  |
| MmugDNA.34669.1.S1_at   | MmugDNA.34669.1 | 4.87  | 4.99  | 0.12 | 0.16 | -1.09 | 0.142449 | 0.289267 | 0.509648 | 0.550293 |
| MmugDNA.34670.1.S1_at   | MmugDNA.34670.1 | 4.3   | 4.23  | 0.25 | 0.24 | 1.06  | 0.648769 | 0.743367 | 0.842186 | 0.85129  |

|                         |                 |       |       |      |      |       |          |          |          |          |
|-------------------------|-----------------|-------|-------|------|------|-------|----------|----------|----------|----------|
| MmugDNA.34673.1.S1_at   | MmugDNA.34673.1 | 5.47  | 5.04  | 0.2  | 0.94 | 1.35  | 0.715884 | 0.815209 | 0.875256 | 0.893385 |
| MmugDNA.34675.1.S1_at   | MmugDNA.34675.1 | 5.25  | 5.21  | 0.34 | 0.14 | 1.03  | 0.585594 | 0.744566 | 0.807608 | 0.852091 |
| MmugDNA.34677.1.S1_at   | MmugDNA.34677.1 | 8.05  | 7.72  | 0.34 | 0.17 | 1.26  | 0.478968 | 0.159322 | 0.747575 | 0.43532  |
| MmugDNA.34678.1.S1_at   | MmugDNA.34678.1 | 5     | 5.33  | 0.65 | 0.01 | -1.26 | 0.945197 | 0.963151 | 0.979067 | 0.979435 |
| MmugDNA.34682.1.S1_at   | MmugDNA.34682.1 | 3.09  | 3.26  | 0.13 | 0.06 | -1.13 | 0.09188  | 0.118496 | 0.448335 | 0.386469 |
| MmugDNA.34683.1.S1_at   | MmugDNA.34683.1 | 5.26  | 5.32  | 0.05 | 0.17 | -1.05 | 0.196111 | 0.248768 | 0.559231 | 0.517931 |
| MmugDNA.34684.1.S1_at   | MmugDNA.34684.1 | 4.78  | 4.57  | 0.7  | 0.48 | 1.15  | 0.36564  | 0.401055 | 0.678363 | 0.630667 |
| MmugDNA.34685.1.S1_at   | MmugDNA.34685.1 | 4.34  | 4.82  | 0.14 | 0.42 | -1.39 | 0.155474 | 0.177725 | 0.520199 | 0.454083 |
| MmugDNA.34686.1.S1_at   | MmugDNA.34686.1 | 13.48 | 13.51 | 0.03 | 0.11 | -1.02 | 0.59124  | 0.246353 | 0.810305 | 0.515899 |
| MmugDNA.34687.1.S1_at   | MmugDNA.34687.1 | 3.54  | 3.37  | 0.21 | 0.2  | 1.13  | 0.240675 | 0.231879 | 0.593522 | 0.503594 |
| MmugDNA.34688.1.S1_at   | MmugDNA.34688.1 | 6.18  | 5.67  | 0.21 | 0.48 | 1.43  | 0.188263 | 0.249676 | 0.551265 | 0.518765 |
| MmugDNA.34689.1.S1_at   | MmugDNA.34689.1 | 3.46  | 3.47  | 0.03 | 0.31 | -1.01 | 0.785016 | 0.948688 | 0.910465 | 0.970685 |
| MmugDNA.3469.1.S1_at    | MmugDNA.3469.1  | 3.67  | 3.8   | 0.25 | 0.3  | -1.1  | 0.208173 | 0.166376 | 0.570088 | 0.442884 |
| MmugDNA.34690.1.S1_at   | MmugDNA.34690.1 | 8.43  | 8.19  | 0.17 | 0.21 | 1.18  | 0.227452 | 0.202327 | 0.585103 | 0.476691 |
| MmugDNA.34691.1.S1_at   | MmugDNA.34691.1 | 3.81  | 3.85  | 0.26 | 0.04 | -1.02 | 0.901857 | 0.912974 | 0.960821 | 0.951043 |
| MmugDNA.34693.1.S1_at   | MmugDNA.34693.1 | 6.58  | 6.2   | 0.25 | 0.23 | 1.3   | 0.081144 | 0.037677 | 0.431848 | 0.23859  |
| MmugDNA.34694.1.S1_at   | MmugDNA.34694.1 | 7.76  | 8.14  | 0.5  | 0.1  | -1.31 | 0.087933 | 0.100432 | 0.442256 | 0.359541 |
| MmugDNA.34695.1.S1_at   | MmugDNA.34695.1 | 7.56  | 7.6   | 0.94 | 0.79 | -1.03 | 0.602256 | 0.413924 | 0.816408 | 0.63994  |
| MmugDNA.34698.1.S1_at   | MmugDNA.34698.1 | 5.04  | 5.59  | 0.21 | 0.18 | -1.47 | 0.022974 | 0.042095 | 0.289363 | 0.249638 |
| MmugDNA.347.1.S1_at     | MmugDNA.347.1   | 4.45  | 4.25  | 0.43 | 0.14 | 1.15  | 0.222177 | 0.311223 | 0.580707 | 0.566264 |
| MmugDNA.3470.1.S1_at    | MmugDNA.3470.1  | 6.72  | 6.79  | 0.06 | 0.05 | -1.04 | 0.201537 | 0.203608 | 0.563988 | 0.477879 |
| MmugDNA.34700.1.S1_at   | MmugDNA.34700.1 | 3.41  | 3.44  | 0.25 | 0.1  | -1.02 | 0.662866 | 0.190337 | 0.848771 | 0.465906 |
| MmugDNA.34702.1.S1_at   | MmugDNA.34702.1 | 4.98  | 4.81  | 0.31 | 0.08 | 1.13  | 0.659763 | 0.836981 | 0.847323 | 0.906826 |
| MmugDNA.40729.1.S1_s_at | MmugDNA.40729.1 | 3.29  | 3.44  | 0.14 | 0.28 | -1.11 | 0.219504 | 0.27112  | 0.578953 | 0.536259 |
| MmugDNA.34705.1.S1_at   | MmugDNA.34705.1 | 8.45  | 8.65  | 0.36 | 0.25 | -1.15 | 0.649865 | 0.762837 | 0.842533 | 0.862064 |
| MmugDNA.34706.1.S1_at   | MmugDNA.34706.1 | 7.25  | 7.26  | 0.1  | 0.4  | -1    | 0.501088 | 0.153215 | 0.759788 | 0.428058 |
| MmugDNA.34707.1.S1_at   | MmugDNA.34707.1 | 4.87  | 5.32  | 0.66 | 0.2  | -1.36 | 0.939324 | 0.376664 | 0.97693  | 0.614483 |
| MmugDNA.34708.1.S1_at   | MmugDNA.34708.1 | 4.79  | 4.86  | 0.09 | 0.34 | -1.05 | 0.892496 | 0.906291 | 0.957228 | 0.946953 |
| MmugDNA.34709.1.S1_at   | MmugDNA.34709.1 | 5.29  | 5.09  | 0.3  | 0.29 | 1.15  | 0.088096 | 0.221119 | 0.442489 | 0.494498 |
| MmugDNA.34710.1.S1_at   | MmugDNA.34710.1 | 8.27  | 8.46  | 0.26 | 0.15 | -1.14 | 0.271051 | 0.324335 | 0.615322 | 0.574924 |
| MmugDNA.34711.1.S1_at   | MmugDNA.34711.1 | 4.1   | 4.31  | 0.08 | 0.14 | -1.15 | 0.026457 | 0.016406 | 0.303201 | 0.162188 |
| MmugDNA.34712.1.S1_at   | MmugDNA.34712.1 | 7.01  | 6.9   | 0.18 | 0.14 | 1.08  | 0.193308 | 0.289487 | 0.556786 | 0.550495 |
| MmugDNA.34713.1.S1_at   | MmugDNA.34713.1 | 7.56  | 7     | 0.21 | 0.42 | 1.48  | 0.144042 | 0.154753 | 0.510652 | 0.429764 |
| MmugDNA.34714.1.S1_at   | MmugDNA.34714.1 | 11.47 | 10.72 | 0.23 | 0.4  | 1.68  | 0.060267 | 0.063959 | 0.393081 | 0.29906  |
| MmugDNA.34715.1.S1_at   | MmugDNA.34715.1 | 7.79  | 7.7   | 0.23 | 0.62 | 1.06  | 0.318997 | 0.166462 | 0.648688 | 0.442903 |
| MmugDNA.34716.1.S1_at   | MmugDNA.34716.1 | 4.98  | 5     | 0.14 | 0.17 | -1.02 | 0.4333   | 0.230303 | 0.719896 | 0.502102 |
| MmugDNA.34719.1.S1_at   | MmugDNA.34719.1 | 5.76  | 5.94  | 0.05 | 0.11 | -1.13 | 0.149167 | 0.070619 | 0.514001 | 0.311913 |
| MmugDNA.3472.1.S1_at    | MmugDNA.3472.1  | 4.41  | 3.79  | 1.18 | 1.27 | 1.54  | 0.619413 | 0.778326 | 0.825546 | 0.871276 |
| MmugDNA.34720.1.S1_at   | MmugDNA.34720.1 | 2.9   | 2.91  | 0.02 | 0.11 | -1.01 | 0.998735 | 0.753553 | 0.999529 | 0.856527 |
| MmugDNA.34722.1.S1_at   | MmugDNA.34722.1 | 6.34  | 6.13  | 0.86 | 0.02 | 1.16  | 0.658971 | 0.729765 | 0.846821 | 0.843679 |
| MmugDNA.34723.1.S1_at   | MmugDNA.34723.1 | 3.75  | 3.85  | 0.25 | 0.11 | -1.08 | 0.945435 | 0.533691 | 0.979164 | 0.719848 |

|                         |                 |       |       |      |      |       |          |          |          |          |
|-------------------------|-----------------|-------|-------|------|------|-------|----------|----------|----------|----------|
| MmugDNA.34724.1.S1_at   | MmugDNA.34724.1 | 4.48  | 4.44  | 0.06 | 0.04 | 1.03  | 0.160577 | 0.110064 | 0.525652 | 0.374179 |
| MmugDNA.34725.1.S1_at   | MmugDNA.34725.1 | 7.99  | 8.57  | 0.73 | 1.01 | -1.49 | 0.896742 | 0.826811 | 0.958845 | 0.900529 |
| MmugDNA.34726.1.S1_at   | MmugDNA.34726.1 | 3.95  | 3.57  | 0.03 | 0.27 | 1.3   | 0.203066 | 0.40757  | 0.565661 | 0.63505  |
| MmugDNA.34726.1.S1_s_at | MmugDNA.34726.1 | 4.28  | 4.2   | 0.42 | 0.25 | 1.06  | 0.47944  | 0.721751 | 0.747663 | 0.83882  |
| MmugDNA.34727.1.S1_at   | MmugDNA.34727.1 | 10.26 | 9.39  | 0.17 | 0.9  | 1.82  | 0.048745 | 0.026093 | 0.369504 | 0.20248  |
| MmugDNA.34728.1.S1_at   | MmugDNA.34728.1 | 4.26  | 4.06  | 0.35 | 0.27 | 1.15  | 0.219831 | 0.321777 | 0.579133 | 0.573428 |
| MmugDNA.3473.1.S1_at    | MmugDNA.3473.1  | 5.54  | 5.54  | 0.26 | 0.06 | -1    | 0.915076 | 0.647036 | 0.9664   | 0.793279 |
| MmugDNA.34730.1.S1_at   | MmugDNA.34730.1 | 4.24  | 4.59  | 0.31 | 0.77 | -1.27 | 0.18582  | 0.187649 | 0.549363 | 0.463663 |
| MmugDNA.34731.1.S1_at   | MmugDNA.34731.1 | 5.84  | 6.22  | 0.23 | 0.28 | -1.3  | 0.070843 | 0.100938 | 0.414661 | 0.360509 |
| MmugDNA.34733.1.S1_at   | MmugDNA.34733.1 | 7.93  | 7.01  | 0.59 | 0.38 | 1.89  | 0.04312  | 0.01968  | 0.356343 | 0.176276 |
| MmugDNA.34734.1.S1_at   | MmugDNA.34734.1 | 5.69  | 5.76  | 0.06 | 0.11 | -1.05 | 0.591602 | 0.10929  | 0.810512 | 0.37308  |
| MmugDNA.34734.1.S1_s_at | MmugDNA.34734.1 | 8.49  | 7.95  | 0.36 | 0.1  | 1.46  | 0.089687 | 0.165359 | 0.445334 | 0.441544 |
| MmugDNA.34737.1.S1_at   | MmugDNA.34737.1 | 4.53  | 4.25  | 0.28 | 0.14 | 1.22  | 0.172111 | 0.114711 | 0.535422 | 0.381252 |
| MmugDNA.34738.1.S1_at   | MmugDNA.34738.1 | 10.72 | 11.29 | 0.17 | 0.13 | -1.49 | 0.006163 | 0.002998 | 0.196493 | 0.079958 |
| MmugDNA.3474.1.S1_at    | MmugDNA.3474.1  | 4.69  | 4.82  | 0.07 | 0.07 | -1.09 | 0.037811 | 0.197291 | 0.342982 | 0.472213 |
| MmugDNA.34740.1.S1_at   | MmugDNA.34740.1 | 8.64  | 8.01  | 0.4  | 0.09 | 1.55  | 0.073426 | 0.000475 | 0.41875  | 0.038572 |
| MmugDNA.34741.1.S1_at   | MmugDNA.34741.1 | 6.31  | 6.23  | 0.97 | 0.43 | 1.06  | 0.489756 | 0.097851 | 0.754097 | 0.355646 |
| MmugDNA.34742.1.S1_at   | MmugDNA.34742.1 | 4.49  | 4.32  | 0.42 | 0.27 | 1.13  | 0.465992 | 0.602129 | 0.740195 | 0.763172 |
| MmugDNA.34744.1.S1_at   | MmugDNA.34744.1 | 5.12  | 4.99  | 0.21 | 0.18 | 1.1   | 0.168223 | 0.228444 | 0.53256  | 0.500631 |
| MmugDNA.34745.1.S1_at   | MmugDNA.34745.1 | 7.99  | 6.77  | 0.12 | 0.67 | 2.34  | 0.123488 | 0.047472 | 0.489234 | 0.262486 |
| MmugDNA.34746.1.S1_at   | MmugDNA.34746.1 | 6.6   | 6.61  | 0.32 | 0.71 | -1.01 | 0.421715 | 0.579961 | 0.713215 | 0.749354 |
| MmugDNA.34749.1.S1_at   | MmugDNA.34749.1 | 9.43  | 11.37 | 0.27 | 0.57 | -3.82 | 0.011111 | 0.005928 | 0.234282 | 0.105331 |
| MmugDNA.3475.1.S1_at    | MmugDNA.3475.1  | 5.28  | 5.21  | 0.26 | 0.01 | 1.05  | 0.704689 | 0.262268 | 0.869745 | 0.528586 |
| MmugDNA.34750.1.S1_at   | MmugDNA.34750.1 | 4.71  | 4.48  | 0.34 | 0.12 | 1.17  | 0.184471 | 0.116567 | 0.548177 | 0.383705 |
| MmugDNA.34751.1.S1_at   | MmugDNA.34751.1 | 5.61  | 5.62  | 0.41 | 0.29 | -1.01 | 0.615374 | 0.316927 | 0.823401 | 0.570275 |
| MmugDNA.34752.1.S1_at   | MmugDNA.34752.1 | 4.54  | 4.89  | 0.22 | 0.24 | -1.27 | 0.326984 | 0.350638 | 0.653412 | 0.594384 |
| MmugDNA.34754.1.S1_at   | MmugDNA.34754.1 | 7.52  | 5.32  | 0.31 | 0.38 | 4.58  | 0.000789 | 0.000082 | 0.136818 | 0.027016 |
| MmugDNA.34755.1.S1_at   | MmugDNA.34755.1 | 6.93  | 7.11  | 0.19 | 0.08 | -1.13 | 0.579441 | 0.70178  | 0.804265 | 0.827048 |
| MmugDNA.34756.1.S1_at   | MmugDNA.34756.1 | 5.83  | 5.6   | 0.17 | 0.38 | 1.17  | 0.307966 | 0.13118  | 0.640352 | 0.403211 |
| MmugDNA.34758.1.S1_at   | MmugDNA.34758.1 | 5.64  | 5.79  | 0.04 | 0.12 | -1.11 | 0.107165 | 0.190581 | 0.467913 | 0.465963 |
| MmugDNA.3476.1.S1_at    | MmugDNA.3476.1  | 6.73  | 6.18  | 0.79 | 0.24 | 1.46  | 0.226808 | 0.262746 | 0.584769 | 0.529086 |
| MmugDNA.34760.1.S1_at   | MmugDNA.34760.1 | 10.82 | 11.14 | 0.08 | 0.25 | -1.24 | 0.217967 | 0.309741 | 0.577569 | 0.565044 |
| MmugDNA.34762.1.S1_at   | MmugDNA.34762.1 | 8.21  | 8.64  | 0.13 | 0.63 | -1.34 | 0.247218 | 0.321187 | 0.598312 | 0.573111 |
| MmugDNA.34764.1.S1_s_at | MmugDNA.34764.1 | 3.87  | 3.96  | 0.09 | 0.25 | -1.06 | 0.304884 | 0.489565 | 0.638856 | 0.691824 |
| MmugDNA.34765.1.S1_at   | MmugDNA.34765.1 | 5.18  | 5.31  | 0.18 | 0.11 | -1.1  | 0.128185 | 0.140574 | 0.494307 | 0.413822 |
| MmugDNA.34769.1.S1_at   | MmugDNA.34769.1 | 4.58  | 4.59  | 0.14 | 0.09 | -1.01 | 0.837424 | 0.916147 | 0.934307 | 0.953065 |
| MmugDNA.3477.1.S1_at    | MmugDNA.3477.1  | 3.85  | 3.8   | 0.1  | 0.12 | 1.04  | 0.828814 | 0.290899 | 0.930517 | 0.551473 |
| MmugDNA.34770.1.S1_at   | MmugDNA.34770.1 | 6.69  | 7.22  | 0.72 | 1.6  | -1.44 | 0.425829 | 0.591797 | 0.715354 | 0.757276 |
| MmugDNA.34771.1.S1_at   | MmugDNA.34771.1 | 7.54  | 7.54  | 0.11 | 0.13 | -1    | 0.963937 | 0.99095  | 0.986001 | 0.994921 |
| MmugDNA.34772.1.S1_at   | MmugDNA.34772.1 | 4.19  | 3.77  | 0.33 | 0.36 | 1.34  | 0.21563  | 0.296006 | 0.575924 | 0.555295 |
| MmugDNA.34774.1.S1_at   | MmugDNA.34774.1 | 3.39  | 3.36  | 0.16 | 0.04 | 1.02  | 0.656172 | 0.414316 | 0.845317 | 0.640189 |

|                         |                 |       |       |      |      |        |          |          |          |          |
|-------------------------|-----------------|-------|-------|------|------|--------|----------|----------|----------|----------|
| MmugDNA.34777.1.S1_at   | MmugDNA.34777.1 | 11.09 | 11.22 | 0.19 | 1.02 | -1.09  | 0.850308 | 0.661161 | 0.939917 | 0.801687 |
| MmugDNA.34779.1.S1_at   | MmugDNA.34779.1 | 3.94  | 4.11  | 0.26 | 0.26 | -1.13  | 0.694387 | 0.094242 | 0.864407 | 0.350889 |
| MmugDNA.3478.1.S1_at    | MmugDNA.3478.1  | 5.43  | 4.6   | 0.36 | 0.43 | 1.77   | 0.13015  | 0.114333 | 0.496561 | 0.380835 |
| MmugDNA.34782.1.S1_at   | MmugDNA.34782.1 | 6.24  | 6.31  | 0.29 | 0.28 | -1.05  | 0.338433 | 0.688817 | 0.66086  | 0.818338 |
| MmugDNA.34783.1.S1_at   | MmugDNA.34783.1 | 4.87  | 4.95  | 0.13 | 0.1  | -1.06  | 0.168825 | 0.24561  | 0.533155 | 0.515348 |
| MmugDNA.34784.1.S1_at   | MmugDNA.34784.1 | 6.09  | 6.52  | 0.61 | 0.32 | -1.35  | 0.817495 | 0.956287 | 0.925948 | 0.975137 |
| MmugDNA.34785.1.S1_at   | MmugDNA.34785.1 | 9.34  | 9.08  | 0.34 | 0.26 | 1.2    | 0.394986 | 0.374664 | 0.696287 | 0.613    |
| MmugDNA.34786.1.S1_at   | MmugDNA.34786.1 | 3.51  | 3.52  | 0.1  | 0.07 | -1.01  | 0.248747 | 0.702376 | 0.599608 | 0.827489 |
| MmugDNA.34788.1.S1_at   | MmugDNA.34788.1 | 3.91  | 4.12  | 0.11 | 0.23 | -1.16  | 0.710398 | 0.851975 | 0.873045 | 0.91585  |
| MmugDNA.34789.1.S1_at   | MmugDNA.34789.1 | 3.48  | 7.02  | 1.05 | 0.66 | -11.63 | 0.012813 | 0.006053 | 0.243925 | 0.106152 |
| MmugDNA.3479.1.S1_at    | MmugDNA.3479.1  | 3.44  | 3.38  | 0.27 | 0.07 | 1.04   | 0.308698 | 0.362724 | 0.641054 | 0.603245 |
| MmugDNA.34790.1.S1_at   | MmugDNA.34790.1 | 4.31  | 4.32  | 0.09 | 0.16 | -1.01  | 0.922777 | 0.865603 | 0.970064 | 0.923598 |
| MmugDNA.34791.1.S1_at   | MmugDNA.34791.1 | 6.87  | 6.86  | 0.3  | 0.1  | 1      | 0.989616 | 0.871237 | 0.996307 | 0.926834 |
| MmugDNA.34792.1.S1_at   | MmugDNA.34792.1 | 6.51  | 5.98  | 0.91 | 0.12 | 1.45   | 0.493971 | 0.691454 | 0.756411 | 0.820491 |
| MmugDNA.34793.1.S1_at   | MmugDNA.34793.1 | 8.57  | 10.22 | 0.5  | 0.4  | -3.14  | 0.017873 | 0.007628 | 0.26813  | 0.116869 |
| MmugDNA.34794.1.S1_at   | MmugDNA.34794.1 | 8.59  | 8.53  | 0.07 | 0.22 | 1.05   | 0.91159  | 0.064279 | 0.965046 | 0.299722 |
| MmugDNA.34794.1.S1_s_at | MmugDNA.34794.1 | 8.82  | 8.82  | 0.09 | 0.24 | 1      | 0.933056 | 0.188876 | 0.973979 | 0.464789 |
| MmugDNA.34795.1.S1_at   | MmugDNA.34795.1 | 4.28  | 6.36  | 2.23 | 2.35 | -4.24  | 0.729265 | 0.358398 | 0.882472 | 0.59994  |
| MmugDNA.34797.1.S1_at   | MmugDNA.34797.1 | 3.42  | 3.5   | 0.05 | 0.07 | -1.05  | 0.150207 | 0.229715 | 0.514831 | 0.501729 |
| MmugDNA.34799.1.S1_at   | MmugDNA.34799.1 | 6.43  | 6.6   | 0.18 | 0.22 | -1.12  | 0.466331 | 0.22119  | 0.740215 | 0.494511 |
| MmugDNA.34801.1.S1_at   | MmugDNA.34801.1 | 3.2   | 3.19  | 0.05 | 0.15 | 1.01   | 0.895173 | 0.913232 | 0.95808  | 0.951146 |
| MmugDNA.34802.1.S1_at   | MmugDNA.34802.1 | 5.25  | 3.78  | 0.61 | 0.73 | 2.78   | 0.263833 | 0.364217 | 0.609674 | 0.604513 |
| MmugDNA.34803.1.S1_at   | MmugDNA.34803.1 | 2.9   | 2.91  | 0.05 | 0.11 | -1.01  | 0.359815 | 0.379045 | 0.673991 | 0.616011 |
| MmugDNA.34806.1.S1_at   | MmugDNA.34806.1 | 12.03 | 12.25 | 0.15 | 0.29 | -1.16  | 0.860658 | 0.086948 | 0.94378  | 0.339802 |
| MmugDNA.34808.1.S1_at   | MmugDNA.34808.1 | 3.72  | 3.87  | 0.12 | 0.03 | -1.11  | 0.05117  | 0.146173 | 0.375935 | 0.420124 |
| MmugDNA.34809.1.S1_at   | MmugDNA.34809.1 | 6.39  | 8.35  | 0.17 | 0.56 | -3.89  | 0.006461 | 0.001925 | 0.199625 | 0.065609 |
| MmugDNA.3481.1.S1_at    | MmugDNA.3481.1  | 4.66  | 4.44  | 0.08 | 0.2  | 1.16   | 0.13562  | 0.085044 | 0.502462 | 0.336812 |
| MmugDNA.34810.1.S1_at   | MmugDNA.34810.1 | 12.45 | 12.59 | 0.07 | 0.29 | -1.1   | 0.93316  | 0.185892 | 0.973989 | 0.461752 |
| MmugDNA.34812.1.S1_at   | MmugDNA.34812.1 | 7.76  | 8.61  | 0.21 | 0.12 | -1.81  | 0.006842 | 0.004992 | 0.201708 | 0.098466 |
| MmugDNA.34817.1.S1_at   | MmugDNA.34817.1 | 5.35  | 5.45  | 0.29 | 0.23 | -1.08  | 0.766728 | 0.923438 | 0.901912 | 0.956981 |
| MmugDNA.34817.1.S1_s_at | MmugDNA.34817.1 | 7.05  | 6.82  | 0.05 | 0.39 | 1.17   | 0.404562 | 0.2944   | 0.702809 | 0.554156 |
| MmugDNA.34818.1.S1_at   | MmugDNA.34818.1 | 6.93  | 6.83  | 0.08 | 0.15 | 1.07   | 0.991204 | 0.151201 | 0.996899 | 0.425873 |
| MmugDNA.3482.1.S1_at    | MmugDNA.3482.1  | 7.02  | 7.23  | 0.08 | 0.05 | -1.16  | 0.019233 | 0.035739 | 0.273244 | 0.233422 |
| MmugDNA.34820.1.S1_at   | MmugDNA.34820.1 | 6.94  | 6.47  | 0.9  | 0.53 | 1.38   | 0.41243  | 0.323207 | 0.707892 | 0.574408 |
| MmugDNA.34821.1.S1_at   | MmugDNA.34821.1 | 5.69  | 5.37  | 0.42 | 0.11 | 1.25   | 0.376908 | 0.287611 | 0.68545  | 0.548885 |
| MmugDNA.34822.1.S1_at   | MmugDNA.34822.1 | 5.22  | 5.26  | 0.03 | 0.15 | -1.03  | 0.286764 | 0.221131 | 0.625572 | 0.494498 |
| MmugDNA.34823.1.S1_at   | MmugDNA.34823.1 | 3.09  | 3.03  | 0.02 | 0.17 | 1.04   | 0.649828 | 0.791771 | 0.842533 | 0.879741 |
| MmugDNA.34823.1.S1_x_at | MmugDNA.34823.1 | 3.25  | 3.25  | 0.03 | 0.14 | -1     | 0.856391 | 0.741917 | 0.942006 | 0.850533 |
| MmugDNA.34824.1.S1_at   | MmugDNA.34824.1 | 6.75  | 6.38  | 0.68 | 1.08 | 1.29   | 0.256846 | 0.20855  | 0.60443  | 0.482453 |
| MmugDNA.34825.1.S1_at   | MmugDNA.34825.1 | 7.13  | 6.96  | 0.43 | 0.44 | 1.12   | 0.133641 | 0.147208 | 0.500334 | 0.421455 |
| MmugDNA.34826.1.S1_at   | MmugDNA.34826.1 | 9.35  | 9.72  | 0.29 | 0.25 | -1.29  | 0.190453 | 0.170551 | 0.55308  | 0.447179 |



|                         |                 |       |       |      |      |       |          |          |          |          |
|-------------------------|-----------------|-------|-------|------|------|-------|----------|----------|----------|----------|
| MmugDNA.34827.1.S1_at   | MmugDNA.34827.1 | 3.31  | 3.17  | 0.25 | 0.34 | 1.1   | 0.802332 | 0.938416 | 0.918464 | 0.965059 |
| MmugDNA.34828.1.S1_at   | MmugDNA.34828.1 | 5.78  | 6.57  | 0.24 | 0.6  | -1.73 | 0.100452 | 0.017922 | 0.461009 | 0.168998 |
| MmugDNA.34828.1.S1_s_at | MmugDNA.34828.1 | 9.05  | 10.9  | 0.22 | 0.57 | -3.59 | 0.010573 | 0.005241 | 0.230404 | 0.100307 |
| MmugDNA.34829.1.S1_at   | MmugDNA.34829.1 | 3.67  | 3.54  | 0.02 | 0.12 | 1.1   | 0.308022 | 0.429954 | 0.640424 | 0.65111  |
| MmugDNA.3483.1.S1_at    | MmugDNA.3483.1  | 5.63  | 5.49  | 0.28 | 0.12 | 1.1   | 0.418501 | 0.619664 | 0.711383 | 0.774873 |
| MmugDNA.34830.1.S1_at   | MmugDNA.34830.1 | 11.66 | 12.07 | 0.08 | 0.6  | -1.32 | 0.430411 | 0.249827 | 0.718048 | 0.518876 |
| MmugDNA.34831.1.S1_at   | MmugDNA.34831.1 | 7.66  | 7.16  | 0.42 | 0.2  | 1.42  | 0.594837 | 0.79288  | 0.812182 | 0.880387 |
| MmugDNA.34832.1.S1_at   | MmugDNA.34832.1 | 3.93  | 3.96  | 0.19 | 0.13 | -1.02 | 0.710876 | 0.898839 | 0.873294 | 0.942448 |
| MmugDNA.34833.1.S1_at   | MmugDNA.34833.1 | 7.62  | 7.77  | 0.45 | 0.1  | -1.11 | 0.715331 | 0.278886 | 0.875005 | 0.542633 |
| MmugDNA.34834.1.S1_at   | MmugDNA.34834.1 | 12.95 | 12.34 | 0.08 | 0.12 | 1.52  | 0.001671 | 0.000298 | 0.15365  | 0.034892 |
| MmugDNA.34835.1.S1_at   | MmugDNA.34835.1 | 5.22  | 5.67  | 0.35 | 0.47 | -1.37 | 0.198644 | 0.281791 | 0.561688 | 0.544844 |
| MmugDNA.34836.1.S1_at   | MmugDNA.34836.1 | 7.16  | 7.17  | 0.28 | 0.23 | -1.01 | 0.223797 | 0.347723 | 0.582151 | 0.592083 |
| MmugDNA.34837.1.S1_at   | MmugDNA.34837.1 | 6.3   | 6.37  | 0.06 | 0.28 | -1.04 | 0.860745 | 0.971329 | 0.943817 | 0.984419 |
| MmugDNA.34838.1.S1_at   | MmugDNA.34838.1 | 4.27  | 4.59  | 0.12 | 0.64 | -1.26 | 0.112417 | 0.090921 | 0.474902 | 0.345545 |
| MmugDNA.34839.1.S1_at   | MmugDNA.34839.1 | 6.08  | 6.31  | 0.18 | 0.71 | -1.18 | 0.508228 | 0.296358 | 0.763605 | 0.555492 |
| MmugDNA.3484.1.S1_at    | MmugDNA.3484.1  | 4.99  | 5     | 0.12 | 0.13 | -1    | 0.336323 | 0.462011 | 0.659402 | 0.673527 |
| MmugDNA.34840.1.S1_at   | MmugDNA.34840.1 | 7.3   | 7.8   | 1.1  | 0.72 | -1.41 | 0.645267 | 0.845841 | 0.840239 | 0.912246 |
| MmugDNA.34841.1.S1_at   | MmugDNA.34841.1 | 5.74  | 5.79  | 0.21 | 0.14 | -1.04 | 0.913965 | 0.505681 | 0.965987 | 0.702218 |
| MmugDNA.34842.1.S1_at   | MmugDNA.34842.1 | 4.94  | 4.85  | 0.08 | 0.12 | 1.07  | 0.825623 | 0.204453 | 0.929243 | 0.478821 |
| MmugDNA.34843.1.S1_at   | MmugDNA.34843.1 | 3.84  | 3.69  | 0.71 | 0.21 | 1.11  | 0.631259 | 0.737376 | 0.832608 | 0.847889 |
| MmugDNA.34844.1.S1_at   | MmugDNA.34844.1 | 3.75  | 3.72  | 0.19 | 0.06 | 1.03  | 0.884308 | 0.370072 | 0.953671 | 0.609333 |
| MmugDNA.34845.1.S1_at   | MmugDNA.34845.1 | 4.11  | 4.45  | 1.13 | 0.14 | -1.27 | 0.6387   | 0.711698 | 0.836696 | 0.832794 |
| MmugDNA.34846.1.S1_at   | MmugDNA.34846.1 | 5.75  | 5.9   | 0.26 | 0.45 | -1.11 | 0.526995 | 0.623302 | 0.774479 | 0.777693 |
| MmugDNA.34847.1.S1_at   | MmugDNA.34847.1 | 5.64  | 5.61  | 0.29 | 0.31 | 1.02  | 0.67641  | 0.912601 | 0.854962 | 0.950764 |
| MmugDNA.34849.1.S1_at   | MmugDNA.34849.1 | 4.61  | 4.72  | 0.23 | 0.11 | -1.08 | 0.391141 | 0.548639 | 0.693921 | 0.729318 |
| MmugDNA.3485.1.S1_at    | MmugDNA.3485.1  | 7.56  | 8.75  | 0.69 | 1.08 | -2.27 | 0.101523 | 0.11531  | 0.461313 | 0.382354 |
| MmugDNA.34851.1.S1_at   | MmugDNA.34851.1 | 3.66  | 3.69  | 0.15 | 0.27 | -1.02 | 0.339847 | 0.365816 | 0.661507 | 0.60574  |
| MmugDNA.34852.1.S1_at   | MmugDNA.34852.1 | 10.84 | 11.32 | 0.05 | 0.18 | -1.39 | 0.004814 | 0.001051 | 0.184674 | 0.051467 |
| MmugDNA.34853.1.S1_at   | MmugDNA.34853.1 | 3.45  | 3.56  | 0.06 | 0.09 | -1.08 | 0.130034 | 0.155694 | 0.496209 | 0.431054 |
| MmugDNA.34855.1.S1_at   | MmugDNA.34855.1 | 3.73  | 4.18  | 0.29 | 0.36 | -1.37 | 0.495328 | 0.155432 | 0.75718  | 0.430802 |
| MmugDNA.34856.1.S1_at   | MmugDNA.34856.1 | 5.18  | 3.77  | 0.36 | 0.27 | 2.65  | 0.015569 | 0.017979 | 0.259225 | 0.169137 |
| MmugDNA.34857.1.S1_at   | MmugDNA.34857.1 | 5.47  | 5.76  | 0.12 | 0.53 | -1.22 | 0.173848 | 0.141637 | 0.53736  | 0.415196 |
| MmugDNA.34857.1.S1_s_at | MmugDNA.34857.1 | 6.91  | 7.3   | 0.18 | 0.33 | -1.32 | 0.148617 | 0.09038  | 0.51391  | 0.344827 |
| MmugDNA.34858.1.S1_at   | MmugDNA.34858.1 | 6.64  | 6.25  | 0.77 | 0.61 | 1.31  | 0.295066 | 0.405085 | 0.631503 | 0.633481 |
| MmugDNA.34859.1.S1_at   | MmugDNA.34859.1 | 6.67  | 6.44  | 0.38 | 0.37 | 1.17  | 0.886782 | 0.873126 | 0.954695 | 0.927823 |
| MmugDNA.3486.1.S1_at    | MmugDNA.3486.1  | 3.01  | 3.04  | 0.45 | 0.04 | -1.02 | 0.382979 | 0.505307 | 0.689061 | 0.702073 |
| MmugDNA.34860.1.S1_at   | MmugDNA.34860.1 | 3.37  | 3.38  | 0.25 | 0.07 | -1.01 | 0.789476 | 0.462957 | 0.912587 | 0.674149 |
| MmugDNA.34861.1.S1_at   | MmugDNA.34861.1 | 9.14  | 8.93  | 0.45 | 0.79 | 1.15  | 0.24363  | 0.306357 | 0.595475 | 0.562971 |
| MmugDNA.34863.1.S1_at   | MmugDNA.34863.1 | 11.6  | 10.75 | 0.21 | 0.78 | 1.8   | 0.064358 | 0.036986 | 0.402966 | 0.236733 |
| MmugDNA.34864.1.S1_at   | MmugDNA.34864.1 | 6.21  | 5.43  | 0.77 | 0.86 | 1.72  | 0.236503 | 0.317035 | 0.590476 | 0.570317 |
| MmugDNA.34865.1.S1_at   | MmugDNA.34865.1 | 4.09  | 4.9   | 0.11 | 0.33 | -1.75 | 0.026369 | 0.022959 | 0.302842 | 0.189548 |

|                         |                 |       |       |      |      |       |          |          |          |          |
|-------------------------|-----------------|-------|-------|------|------|-------|----------|----------|----------|----------|
| MmugDNA.34866.1.S1_at   | MmugDNA.34866.1 | 3.93  | 4.01  | 0.12 | 0.12 | -1.06 | 0.52884  | 0.286336 | 0.775764 | 0.547784 |
| MmugDNA.34867.1.S1_at   | MmugDNA.34867.1 | 4.14  | 3.95  | 0.13 | 0.1  | 1.14  | 0.08937  | 0.14666  | 0.445032 | 0.420683 |
| MmugDNA.34868.1.S1_at   | MmugDNA.34868.1 | 10.13 | 10.51 | 0.13 | 0.47 | -1.3  | 0.351294 | 0.443658 | 0.669126 | 0.661364 |
| MmugDNA.34869.1.S1_at   | MmugDNA.34869.1 | 6.23  | 6.16  | 0.1  | 0.13 | 1.05  | 0.420822 | 0.010606 | 0.712776 | 0.134301 |
| MmugDNA.3487.1.S1_at    | MmugDNA.3487.1  | 6.85  | 6.81  | 1.25 | 0.48 | 1.03  | 0.757161 | 0.90107  | 0.897005 | 0.943717 |
| MmugDNA.34870.1.S1_at   | MmugDNA.34870.1 | 7.22  | 7.73  | 0.24 | 0.14 | -1.42 | 0.028377 | 0.018868 | 0.311036 | 0.172782 |
| MmugDNA.34871.1.S1_at   | MmugDNA.34871.1 | 6.85  | 6.42  | 0.28 | 0.27 | 1.34  | 0.057296 | 0.092427 | 0.387873 | 0.348313 |
| MmugDNA.34872.1.S1_at   | MmugDNA.34872.1 | 12.37 | 12.13 | 0.05 | 0.08 | 1.18  | 0.011772 | 0.007193 | 0.237691 | 0.114057 |
| MmugDNA.34875.1.S1_at   | MmugDNA.34875.1 | 5.27  | 5.48  | 0.12 | 0.14 | -1.16 | 0.168089 | 0.127565 | 0.53256  | 0.39847  |
| MmugDNA.34876.1.S1_at   | MmugDNA.34876.1 | 9.37  | 8.18  | 0.4  | 0.12 | 2.28  | 0.017047 | 0.005939 | 0.266622 | 0.105426 |
| MmugDNA.34877.1.S1_at   | MmugDNA.34877.1 | 5.73  | 5.38  | 0.72 | 0.61 | 1.27  | 0.944986 | 0.641377 | 0.97903  | 0.789506 |
| MmugDNA.34878.1.S1_at   | MmugDNA.34878.1 | 6.92  | 5.59  | 0.26 | 0.98 | 2.51  | 0.063399 | 0.055678 | 0.400499 | 0.28179  |
| MmugDNA.3488.1.S1_at    | MmugDNA.3488.1  | 4.92  | 4.82  | 0.73 | 0.13 | 1.07  | 0.361077 | 0.441847 | 0.675048 | 0.659939 |
| MmugDNA.34881.1.S1_at   | MmugDNA.34881.1 | 6.59  | 6.6   | 0.17 | 0.07 | -1.01 | 0.224697 | 0.337962 | 0.58277  | 0.585166 |
| MmugDNA.34883.1.S1_at   | MmugDNA.34883.1 | 3.81  | 3.84  | 0.34 | 0.1  | -1.02 | 0.655023 | 0.828141 | 0.84477  | 0.901214 |
| MmugDNA.34885.1.S1_at   | MmugDNA.34885.1 | 5.14  | 6.9   | 0.91 | 0.75 | -3.39 | 0.135165 | 0.090646 | 0.501995 | 0.345151 |
| MmugDNA.34887.1.S1_at   | MmugDNA.34887.1 | 2.97  | 3.04  | 0.05 | 0.17 | -1.06 | 0.659957 | 0.324076 | 0.847428 | 0.574761 |
| MmugDNA.34888.1.S1_at   | MmugDNA.34888.1 | 7.95  | 8.57  | 0.04 | 0.23 | -1.53 | 0.02187  | 0.01545  | 0.283995 | 0.157803 |
| MmugDNA.3489.1.S1_at    | MmugDNA.3489.1  | 5.84  | 5.79  | 0.15 | 0.25 | 1.04  | 0.813679 | 0.682153 | 0.924368 | 0.814372 |
| MmugDNA.34890.1.S1_at   | MmugDNA.34890.1 | 3.66  | 3.78  | 0.03 | 0.09 | -1.08 | 0.425787 | 0.237506 | 0.715328 | 0.508165 |
| MmugDNA.34891.1.S1_at   | MmugDNA.34891.1 | 3.31  | 3.52  | 0.21 | 0.14 | -1.15 | 0.363048 | 0.362119 | 0.676437 | 0.602821 |
| MmugDNA.34892.1.S1_at   | MmugDNA.34892.1 | 7.35  | 7.45  | 1.23 | 0.61 | -1.07 | 0.93065  | 0.324457 | 0.973196 | 0.575063 |
| MmugDNA.34893.1.S1_at   | MmugDNA.34893.1 | 10.26 | 9.72  | 0.3  | 0.25 | 1.45  | 0.083926 | 0.028812 | 0.436311 | 0.211578 |
| MmugDNA.34894.1.S1_at   | MmugDNA.34894.1 | 2.95  | 2.8   | 0    | 0.08 | 1.11  | 0.038477 | 0.005869 | 0.344376 | 0.104856 |
| MmugDNA.34896.1.S1_at   | MmugDNA.34896.1 | 5.58  | 5.6   | 0.1  | 0.2  | -1.02 | 0.984257 | 0.263687 | 0.994395 | 0.52997  |
| MmugDNA.34897.1.S1_at   | MmugDNA.34897.1 | 3.85  | 3.96  | 0.09 | 0.13 | -1.07 | 0.629572 | 0.163754 | 0.831563 | 0.439924 |
| MmugDNA.34898.1.S1_at   | MmugDNA.34898.1 | 3.5   | 3.6   | 0.77 | 0.28 | -1.08 | 0.417056 | 0.563179 | 0.710321 | 0.738441 |
| MmugDNA.34899.1.S1_at   | MmugDNA.34899.1 | 5.17  | 5.29  | 0.48 | 0.16 | -1.09 | 0.560324 | 0.451185 | 0.79421  | 0.666085 |
| MmugDNA.349.1.S1_at     | MmugDNA.349.1   | 4.59  | 4.47  | 0.2  | 0.03 | 1.09  | 0.358311 | 0.293744 | 0.673123 | 0.553748 |
| MmugDNA.34900.1.S1_at   | MmugDNA.34900.1 | 5.64  | 5.4   | 0.21 | 0.13 | 1.18  | 0.113686 | 0.120745 | 0.476946 | 0.389579 |
| MmugDNA.34902.1.S1_at   | MmugDNA.34902.1 | 3.37  | 3.46  | 0.21 | 0.67 | -1.07 | 0.477967 | 0.573971 | 0.747094 | 0.745491 |
| MmugDNA.34904.1.S1_at   | MmugDNA.34904.1 | 6.78  | 5.77  | 1.1  | 0.33 | 2.01  | 0.203383 | 0.103384 | 0.566041 | 0.3643   |
| MmugDNA.34906.1.S1_at   | MmugDNA.34906.1 | 5.52  | 5.29  | 0.45 | 0.17 | 1.18  | 0.230684 | 0.092649 | 0.587222 | 0.34868  |
| MmugDNA.34907.1.S1_at   | MmugDNA.34907.1 | 7.03  | 7.32  | 0.14 | 0.2  | -1.22 | 0.090181 | 0.048482 | 0.445655 | 0.265407 |
| MmugDNA.34908.1.S1_at   | MmugDNA.34908.1 | 4.69  | 4.8   | 0.35 | 0.16 | -1.08 | 0.884035 | 0.50139  | 0.953512 | 0.69955  |
| MmugDNA.34909.1.S1_s_at | MmugDNA.34909.1 | 4.78  | 5.25  | 0.26 | 0.47 | -1.38 | 0.102744 | 0.1061   | 0.46254  | 0.368498 |
| MmugDNA.34909.1.S1_x_at | MmugDNA.34909.1 | 7.6   | 7.66  | 0.02 | 0.05 | -1.05 | 0.080499 | 0.192733 | 0.430579 | 0.468231 |
| MmugDNA.34910.1.S1_at   | MmugDNA.34910.1 | 5.71  | 5.7   | 0.01 | 0.4  | 1     | 0.38743  | 0.510252 | 0.691966 | 0.704773 |
| MmugDNA.34911.1.S1_at   | MmugDNA.34911.1 | 8.66  | 8.65  | 0.28 | 0.27 | 1.01  | 0.877936 | 0.720599 | 0.951036 | 0.838346 |
| MmugDNA.34912.1.S1_at   | MmugDNA.34912.1 | 6.95  | 9.67  | 0.25 | 1.85 | -6.56 | 0.151923 | 0.173935 | 0.516573 | 0.450247 |
| MmugDNA.34913.1.S1_at   | MmugDNA.34913.1 | 4.4   | 4.36  | 0.17 | 0.17 | 1.03  | 0.89931  | 0.721922 | 0.959747 | 0.838904 |

|                         |                 |       |       |      |      |       |          |          |          |          |
|-------------------------|-----------------|-------|-------|------|------|-------|----------|----------|----------|----------|
| MmugDNA.34914.1.S1_s_at | MmugDNA.34914.1 | 11.75 | 11.63 | 0.28 | 0.26 | 1.09  | 0.994261 | 0.792507 | 0.997997 | 0.880128 |
| MmugDNA.34915.1.S1_at   | MmugDNA.34915.1 | 3.26  | 3.26  | 0.17 | 0.03 | -1    | 0.672244 | 0.953634 | 0.852937 | 0.973626 |
| MmugDNA.34918.1.S1_at   | MmugDNA.34918.1 | 4.11  | 4.25  | 0.21 | 0.09 | -1.1  | 0.56937  | 0.486525 | 0.79903  | 0.689881 |
| MmugDNA.34919.1.S1_at   | MmugDNA.34919.1 | 3.77  | 3.84  | 0.04 | 0.03 | -1.05 | 0.084837 | 0.534535 | 0.437796 | 0.720431 |
| MmugDNA.3492.1.S1_at    | MmugDNA.3492.1  | 2.86  | 2.83  | 0.07 | 0.02 | 1.02  | 0.506643 | 0.093109 | 0.762432 | 0.349292 |
| MmugDNA.34920.1.S1_at   | MmugDNA.34920.1 | 7.73  | 7.16  | 1.05 | 0.18 | 1.49  | 0.402502 | 0.572568 | 0.701431 | 0.744566 |
| MmugDNA.34922.1.S1_at   | MmugDNA.34922.1 | 3.21  | 3.18  | 0.15 | 0.09 | 1.02  | 0.741579 | 0.814196 | 0.889293 | 0.892849 |
| MmugDNA.34923.1.S1_at   | MmugDNA.34923.1 | 7.3   | 7.3   | 0.17 | 0.6  | 1     | 0.99173  | 0.299143 | 0.997086 | 0.557663 |
| MmugDNA.34924.1.S1_at   | MmugDNA.34924.1 | 7.82  | 8.11  | 0.32 | 0.18 | -1.22 | 0.665267 | 0.845957 | 0.849897 | 0.912303 |
| MmugDNA.34927.1.S1_at   | MmugDNA.34927.1 | 3.71  | 3.71  | 0.1  | 0.09 | 1.01  | 0.93119  | 0.957306 | 0.973412 | 0.975838 |
| MmugDNA.34928.1.S1_at   | MmugDNA.34928.1 | 3.08  | 3.12  | 0.46 | 0.08 | -1.02 | 0.363465 | 0.46607  | 0.676737 | 0.67611  |
| MmugDNA.3493.1.S1_at    | MmugDNA.3493.1  | 3.19  | 3.26  | 0.13 | 0.25 | -1.04 | 0.518298 | 0.723208 | 0.769365 | 0.839645 |
| MmugDNA.34931.1.S1_at   | MmugDNA.34931.1 | 5.32  | 5.39  | 0.14 | 0.17 | -1.05 | 0.212816 | 0.253829 | 0.573216 | 0.522173 |
| MmugDNA.34934.1.S1_at   | MmugDNA.34934.1 | 4.62  | 4.87  | 0.21 | 0.44 | -1.19 | 0.248274 | 0.310909 | 0.599152 | 0.565887 |
| MmugDNA.34936.1.S1_at   | MmugDNA.34936.1 | 5.68  | 4.62  | 0.15 | 0.75 | 2.1   | 0.224943 | 0.083017 | 0.582943 | 0.332753 |
| MmugDNA.34937.1.S1_at   | MmugDNA.34937.1 | 6.93  | 7.85  | 0.29 | 0.49 | -1.88 | 0.046546 | 0.03932  | 0.363306 | 0.243401 |
| MmugDNA.34938.1.S1_at   | MmugDNA.34938.1 | 10    | 9.32  | 0.18 | 0.47 | 1.6   | 0.25987  | 0.227    | 0.606878 | 0.499286 |
| MmugDNA.34939.1.S1_at   | MmugDNA.34939.1 | 5.98  | 5.91  | 0.09 | 0.47 | 1.05  | 0.674602 | 0.899666 | 0.854194 | 0.942903 |
| MmugDNA.34941.1.S1_at   | MmugDNA.34941.1 | 5.01  | 5.2   | 0.15 | 0.31 | -1.14 | 0.714609 | 0.817576 | 0.874952 | 0.894755 |
| MmugDNA.34942.1.S1_at   | MmugDNA.34942.1 | 3.12  | 3.06  | 0.1  | 0.19 | 1.04  | 0.592914 | 0.513193 | 0.811221 | 0.706841 |
| MmugDNA.34943.1.S1_at   | MmugDNA.34943.1 | 5.92  | 6.09  | 0.05 | 0.13 | -1.13 | 0.035245 | 0.03647  | 0.335661 | 0.235458 |
| MmugDNA.34944.1.S1_at   | MmugDNA.34944.1 | 5.69  | 5.69  | 0.18 | 0.3  | 1     | 0.739755 | 0.032158 | 0.888213 | 0.222021 |
| MmugDNA.34945.1.S1_at   | MmugDNA.34945.1 | 6.53  | 6.31  | 0.12 | 0.07 | 1.16  | 0.065329 | 0.061094 | 0.404407 | 0.293958 |
| MmugDNA.34946.1.S1_at   | MmugDNA.34946.1 | 5.96  | 6.27  | 0.22 | 0.69 | -1.24 | 0.799975 | 0.952001 | 0.917312 | 0.972758 |
| MmugDNA.34948.1.S1_at   | MmugDNA.34948.1 | 13.39 | 13.45 | 0.04 | 0.05 | -1.04 | 0.097205 | 0.059232 | 0.456142 | 0.290341 |
| MmugDNA.3495.1.S1_at    | MmugDNA.3495.1  | 3.96  | 3.89  | 0.58 | 0.2  | 1.05  | 0.901879 | 0.82048  | 0.960821 | 0.896597 |
| MmugDNA.39745.1.S1_at   | MmugDNA.39745.1 | 11.06 | 11.06 | 0.07 | 0.25 | -1    | 0.894298 | 0.021097 | 0.957878 | 0.181869 |
| MmugDNA.39745.1.S1_s_at | MmugDNA.39745.1 | 10.84 | 10.83 | 0.12 | 0.27 | 1.01  | 0.684523 | 0.189565 | 0.858788 | 0.465286 |
| MmugDNA.34952.1.S1_at   | MmugDNA.34952.1 | 6.62  | 5.77  | 0.16 | 0.79 | 1.8   | 0.441381 | 0.30162  | 0.724804 | 0.55955  |
| MmugDNA.34952.1.S1_s_at | MmugDNA.34952.1 | 9.45  | 8.39  | 0.4  | 0.54 | 2.09  | 0.038982 | 0.020896 | 0.346062 | 0.181404 |
| MmugDNA.34953.1.S1_at   | MmugDNA.34953.1 | 3.9   | 4.03  | 0.08 | 0.06 | -1.1  | 0.046437 | 0.045773 | 0.363009 | 0.258302 |
| MmugDNA.34956.1.S1_x_at | MmugDNA.34956.1 | 7.42  | 7.15  | 1.16 | 0.46 | 1.21  | 0.262717 | 0.305211 | 0.609039 | 0.562255 |
| MmugDNA.34957.1.S1_at   | MmugDNA.34957.1 | 3.47  | 3.39  | 0.11 | 0.21 | 1.05  | 0.637771 | 0.718485 | 0.836256 | 0.837066 |
| MmugDNA.34958.1.S1_at   | MmugDNA.34958.1 | 4.52  | 4.2   | 0.39 | 0.17 | 1.25  | 0.158153 | 0.153174 | 0.522944 | 0.428011 |
| MmugDNA.34959.1.S1_at   | MmugDNA.34959.1 | 4.29  | 4.24  | 0.07 | 0.08 | 1.04  | 0.196285 | 0.074422 | 0.559537 | 0.318058 |
| MmugDNA.3496.1.S1_at    | MmugDNA.3496.1  | 3.24  | 3.09  | 0.13 | 0.14 | 1.11  | 0.533565 | 0.578138 | 0.778294 | 0.748311 |
| MmugDNA.34960.1.S1_at   | MmugDNA.34960.1 | 7.77  | 7.43  | 0.04 | 0.17 | 1.27  | 0.02141  | 0.10577  | 0.282524 | 0.36796  |
| MmugDNA.34962.1.S1_at   | MmugDNA.34962.1 | 6.04  | 5.06  | 0.42 | 0.44 | 1.97  | 0.080985 | 0.15592  | 0.431667 | 0.431329 |
| MmugDNA.34963.1.S1_at   | MmugDNA.34963.1 | 5.25  | 5.24  | 0.09 | 0.12 | 1.01  | 0.273723 | 0.38217  | 0.617179 | 0.618361 |
| MmugDNA.34964.1.S1_at   | MmugDNA.34964.1 | 4.09  | 3.88  | 0.4  | 0.18 | 1.16  | 0.09684  | 0.067153 | 0.455871 | 0.305165 |
| MmugDNA.34965.1.S1_x_at | MmugDNA.34965.1 | 12.29 | 12    | 0.37 | 0.2  | 1.22  | 0.1591   | 0.227369 | 0.52416  | 0.499659 |

|                         |                 |       |       |      |      |       |          |          |          |          |
|-------------------------|-----------------|-------|-------|------|------|-------|----------|----------|----------|----------|
| MmugDNA.28840.1.S1_s_at | MmugDNA.28840.1 | 6.96  | 7     | 0.21 | 0.14 | -1.03 | 0.604527 | 0.61148  | 0.817788 | 0.769353 |
| MmugDNA.34967.1.S1_at   | MmugDNA.34967.1 | 5.8   | 5.88  | 0.08 | 0.22 | -1.06 | 0.590935 | 0.777532 | 0.810139 | 0.870732 |
| MmugDNA.34969.1.S1_at   | MmugDNA.34969.1 | 6.28  | 6.28  | 0.67 | 0.72 | 1     | 0.590474 | 0.815908 | 0.809851 | 0.893781 |
| MmugDNA.3497.1.S1_at    | MmugDNA.3497.1  | 5.51  | 5.47  | 0.59 | 0.12 | 1.03  | 0.347643 | 0.297367 | 0.6666   | 0.556072 |
| MmugDNA.34972.1.S1_at   | MmugDNA.34972.1 | 8.11  | 7.89  | 0.2  | 0.2  | 1.17  | 0.4915   | 0.258527 | 0.755082 | 0.525796 |
| MmugDNA.34973.1.S1_at   | MmugDNA.34973.1 | 6.27  | 6.36  | 0.06 | 0.08 | -1.06 | 0.113255 | 0.221739 | 0.476273 | 0.494901 |
| MmugDNA.34974.1.S1_at   | MmugDNA.34974.1 | 7.25  | 7.29  | 0.52 | 0.83 | -1.03 | 0.769272 | 0.880053 | 0.902994 | 0.931486 |
| MmugDNA.34975.1.S1_s_at | MmugDNA.34975.1 | 9.05  | 7.99  | 0.14 | 0.51 | 2.09  | 0.026117 | 0.013117 | 0.30146  | 0.147286 |
| MmugDNA.34976.1.S1_at   | MmugDNA.34976.1 | 6.61  | 6.73  | 0.19 | 0.21 | -1.08 | 0.102032 | 0.091985 | 0.461412 | 0.347348 |
| MmugDNA.34977.1.S1_at   | MmugDNA.34977.1 | 5.86  | 5.95  | 0.15 | 0.24 | -1.07 | 0.583151 | 0.783438 | 0.806242 | 0.874577 |
| MmugDNA.34979.1.S1_at   | MmugDNA.34979.1 | 8.63  | 9.22  | 0.02 | 0.25 | -1.5  | 0.017375 | 0.013008 | 0.267445 | 0.146803 |
| MmugDNA.3498.1.S1_at    | MmugDNA.3498.1  | 4.63  | 4.69  | 0.6  | 0.38 | -1.04 | 0.858245 | 0.973412 | 0.942698 | 0.985537 |
| MmugDNA.34980.1.S1_at   | MmugDNA.34980.1 | 3.38  | 3.33  | 0.07 | 0    | 1.04  | 0.346206 | 0.562877 | 0.665743 | 0.738191 |
| MmugDNA.34982.1.S1_at   | MmugDNA.34982.1 | 5.89  | 5.88  | 0.09 | 0.09 | 1.01  | 0.618923 | 0.825027 | 0.825395 | 0.899488 |
| MmugDNA.34983.1.S1_at   | MmugDNA.34983.1 | 5.9   | 5.62  | 0.37 | 0.09 | 1.21  | 0.260788 | 0.323653 | 0.607423 | 0.574525 |
| MmugDNA.34984.1.S1_at   | MmugDNA.34984.1 | 5.12  | 5.93  | 0.3  | 0.92 | -1.76 | 0.275228 | 0.290566 | 0.617778 | 0.551297 |
| MmugDNA.34985.1.S1_at   | MmugDNA.34985.1 | 3.91  | 3.88  | 0.26 | 0.08 | 1.02  | 0.382712 | 0.629091 | 0.68893  | 0.781597 |
| MmugDNA.34987.1.S1_at   | MmugDNA.34987.1 | 6.85  | 6.87  | 0.17 | 0.11 | -1.01 | 0.676058 | 0.7932   | 0.854832 | 0.880602 |
| MmugDNA.34988.1.S1_at   | MmugDNA.34988.1 | 8.41  | 8.25  | 0.24 | 0.19 | 1.11  | 0.914723 | 0.597726 | 0.966289 | 0.760358 |
| MmugDNA.34989.1.S1_at   | MmugDNA.34989.1 | 8.2   | 8.81  | 0.33 | 0.48 | -1.52 | 0.077421 | 0.063799 | 0.427131 | 0.29906  |
| MmugDNA.34991.1.S1_at   | MmugDNA.34991.1 | 5.64  | 5.59  | 0.09 | 0.05 | 1.04  | 0.551813 | 0.314176 | 0.788976 | 0.568185 |
| MmugDNA.34993.1.S1_at   | MmugDNA.34993.1 | 11.37 | 11.6  | 0.29 | 0.42 | -1.17 | 0.477998 | 0.498338 | 0.747094 | 0.697442 |
| MmugDNA.34994.1.S1_s_at | MmugDNA.34994.1 | 8.69  | 8.28  | 0.06 | 0.36 | 1.33  | 0.105087 | 0.080503 | 0.465545 | 0.328159 |
| MmugDNA.34995.1.S1_s_at | MmugDNA.34995.1 | 13.93 | 13.71 | 0.09 | 0.23 | 1.16  | 0.123759 | 0.121065 | 0.489534 | 0.390064 |
| MmugDNA.34996.1.S1_at   | MmugDNA.34996.1 | 4.41  | 5.2   | 0.18 | 0.15 | -1.73 | 0.003956 | 0.061948 | 0.181373 | 0.295734 |
| MmugDNA.34997.1.S1_at   | MmugDNA.34997.1 | 6.2   | 6.42  | 0.17 | 0.15 | -1.17 | 0.107479 | 0.160253 | 0.468045 | 0.436398 |
| MmugDNA.350.1.S1_at     | MmugDNA.350.1   | 7.24  | 6.76  | 0.89 | 0.84 | 1.39  | 0.290071 | 0.443039 | 0.628003 | 0.660947 |
| MmugDNA.35002.1.S1_at   | MmugDNA.35002.1 | 12.52 | 12.11 | 0.13 | 0.32 | 1.33  | 0.122689 | 0.10486  | 0.487957 | 0.366397 |
| MmugDNA.35006.1.S1_at   | MmugDNA.35006.1 | 3.53  | 3.44  | 0.24 | 0.11 | 1.06  | 0.206729 | 0.460092 | 0.568816 | 0.671993 |
| MmugDNA.35007.1.S1_at   | MmugDNA.35007.1 | 3.5   | 3.62  | 0.03 | 0.19 | -1.09 | 0.503697 | 0.520024 | 0.760979 | 0.711472 |
| MmugDNA.35008.1.S1_at   | MmugDNA.35008.1 | 10.32 | 10.76 | 0.09 | 0.35 | -1.35 | 0.078184 | 0.055509 | 0.428221 | 0.281404 |
| MmugDNA.3501.1.S1_at    | MmugDNA.3501.1  | 10.1  | 10.63 | 0.77 | 1.08 | -1.44 | 0.981517 | 0.958124 | 0.993316 | 0.976277 |
| MmugDNA.35010.1.S1_at   | MmugDNA.35010.1 | 5.39  | 5.48  | 0.2  | 0.13 | -1.06 | 0.525958 | 0.562693 | 0.773971 | 0.7381   |
| MmugDNA.35012.1.S1_at   | MmugDNA.35012.1 | 11.14 | 11.7  | 0.01 | 0.21 | -1.48 | 0.010578 | 0.002184 | 0.230404 | 0.069035 |
| MmugDNA.35013.1.S1_at   | MmugDNA.35013.1 | 5.31  | 5.31  | 1.49 | 0.1  | -1.01 | 0.398996 | 0.323974 | 0.699064 | 0.574672 |
| MmugDNA.35016.1.S1_at   | MmugDNA.35016.1 | 5.61  | 5.17  | 0.58 | 0.46 | 1.36  | 0.209327 | 0.252709 | 0.570957 | 0.521174 |
| MmugDNA.35018.1.S1_at   | MmugDNA.35018.1 | 3.7   | 3.69  | 0.07 | 0    | 1.01  | 0.707431 | 0.909466 | 0.871104 | 0.948845 |
| MmugDNA.35021.1.S1_at   | MmugDNA.35021.1 | 5.05  | 5.2   | 0.14 | 0.15 | -1.1  | 0.650944 | 0.56191  | 0.84297  | 0.737659 |
| MmugDNA.35023.1.S1_at   | MmugDNA.35023.1 | 6.15  | 5.38  | 0.57 | 1.11 | 1.71  | 0.874265 | 0.913125 | 0.949565 | 0.951134 |
| MmugDNA.35023.1.S1_s_at | MmugDNA.35023.1 | 9.42  | 10.14 | 0.4  | 0.62 | -1.65 | 0.172072 | 0.131018 | 0.535422 | 0.403053 |
| MmugDNA.35024.1.S1_at   | MmugDNA.35024.1 | 7.44  | 7.5   | 0.17 | 0.2  | -1.05 | 0.43098  | 0.251016 | 0.718433 | 0.519638 |

|                         |                 |       |       |      |      |       |          |          |          |          |
|-------------------------|-----------------|-------|-------|------|------|-------|----------|----------|----------|----------|
| MmugDNA.35025.1.S1_at   | MmugDNA.35025.1 | 6.48  | 6.32  | 0.17 | 0.16 | 1.12  | 0.130575 | 0.625886 | 0.496961 | 0.779391 |
| MmugDNA.35026.1.S1_s_at | MmugDNA.35026.1 | 10.7  | 11.02 | 0.23 | 0.24 | -1.25 | 0.079309 | 0.086591 | 0.429268 | 0.33911  |
| MmugDNA.35027.1.S1_at   | MmugDNA.35027.1 | 4.78  | 4.69  | 0.43 | 0.76 | 1.07  | 0.534495 | 0.707873 | 0.778763 | 0.830504 |
| MmugDNA.35028.1.S1_at   | MmugDNA.35028.1 | 7.96  | 8.03  | 0.18 | 0.36 | -1.05 | 0.539271 | 0.125062 | 0.780992 | 0.395506 |
| MmugDNA.35029.1.S1_at   | MmugDNA.35029.1 | 12.53 | 12.43 | 0.06 | 0.22 | 1.07  | 0.774184 | 0.196964 | 0.905065 | 0.472072 |
| MmugDNA.3503.1.S1_at    | MmugDNA.3503.1  | 3.56  | 3.81  | 0.16 | 0.14 | -1.18 | 0.150449 | 0.573829 | 0.515256 | 0.745417 |
| MmugDNA.35030.1.S1_at   | MmugDNA.35030.1 | 8.35  | 8.23  | 0.14 | 0.15 | 1.09  | 0.289813 | 0.092256 | 0.627755 | 0.348042 |
| MmugDNA.35030.1.S1_s_at | MmugDNA.35030.1 | 6.67  | 6.72  | 0.09 | 0.18 | -1.03 | 0.342285 | 0.235079 | 0.663129 | 0.50629  |
| MmugDNA.35031.1.S1_at   | MmugDNA.35031.1 | 9.58  | 9.75  | 0.32 | 0.53 | -1.12 | 0.366914 | 0.020936 | 0.679214 | 0.181465 |
| MmugDNA.35032.1.S1_at   | MmugDNA.35032.1 | 10.77 | 9.64  | 0.34 | 0.19 | 2.19  | 0.014895 | 0.00745  | 0.256179 | 0.115872 |
| MmugDNA.35033.1.S1_at   | MmugDNA.35033.1 | 5.1   | 5.14  | 0.21 | 0.01 | -1.03 | 0.968754 | 0.891471 | 0.988176 | 0.93818  |
| MmugDNA.35034.1.S1_at   | MmugDNA.35034.1 | 8.58  | 7.97  | 0.34 | 0.44 | 1.53  | 0.071877 | 0.043557 | 0.415896 | 0.253261 |
| MmugDNA.35036.1.S1_at   | MmugDNA.35036.1 | 12.01 | 10.98 | 0.47 | 0.55 | 2.03  | 0.13737  | 0.127481 | 0.504518 | 0.398349 |
| MmugDNA.35037.1.S1_at   | MmugDNA.35037.1 | 3.99  | 3.65  | 0.3  | 0.14 | 1.26  | 0.108773 | 0.096545 | 0.470293 | 0.354115 |
| MmugDNA.35038.1.S1_at   | MmugDNA.35038.1 | 3.49  | 3.58  | 0.17 | 0.13 | -1.07 | 0.860844 | 0.343616 | 0.943852 | 0.589322 |
| MmugDNA.3504.1.S1_at    | MmugDNA.3504.1  | 7.53  | 7.46  | 0.06 | 0.14 | 1.05  | 0.577864 | 0.095778 | 0.803619 | 0.352753 |
| MmugDNA.35041.1.S1_at   | MmugDNA.35041.1 | 3.34  | 3.39  | 0.11 | 0.13 | -1.03 | 0.823915 | 0.151779 | 0.928467 | 0.426413 |
| MmugDNA.35042.1.S1_at   | MmugDNA.35042.1 | 5.48  | 5.45  | 0.95 | 0.09 | 1.02  | 0.382869 | 0.530126 | 0.688989 | 0.717729 |
| MmugDNA.35043.1.S1_at   | MmugDNA.35043.1 | 4.28  | 4.28  | 0.07 | 0.06 | 1     | 0.795501 | 0.03919  | 0.915216 | 0.243089 |
| MmugDNA.35044.1.S1_at   | MmugDNA.35044.1 | 9.65  | 9.6   | 0.15 | 0.3  | 1.04  | 0.751109 | 0.706231 | 0.893635 | 0.829634 |
| MmugDNA.35045.1.S1_at   | MmugDNA.35045.1 | 4.61  | 3.73  | 0.8  | 0.15 | 1.84  | 0.164788 | 0.156098 | 0.528675 | 0.431551 |
| MmugDNA.35047.1.S1_at   | MmugDNA.35047.1 | 6.15  | 6.46  | 0.14 | 0.23 | -1.23 | 0.136437 | 0.092301 | 0.503566 | 0.348137 |
| MmugDNA.35048.1.S1_at   | MmugDNA.35048.1 | 3.3   | 3.07  | 0.13 | 0.1  | 1.17  | 0.118539 | 0.122202 | 0.48294  | 0.391921 |
| MmugDNA.35049.1.S1_at   | MmugDNA.35049.1 | 7.48  | 6.89  | 0.32 | 0.58 | 1.5   | 0.071114 | 0.06392  | 0.414673 | 0.29906  |
| MmugDNA.35051.1.S1_at   | MmugDNA.35051.1 | 9.7   | 9.78  | 0.54 | 0.89 | -1.05 | 0.836945 | 0.385859 | 0.934091 | 0.621161 |
| MmugDNA.35055.1.S1_at   | MmugDNA.35055.1 | 6.6   | 6.15  | 0.41 | 0.58 | 1.37  | 0.416163 | 0.077982 | 0.709692 | 0.324306 |
| MmugDNA.35056.1.S1_at   | MmugDNA.35056.1 | 5.96  | 5.89  | 0.21 | 0.1  | 1.05  | 0.306166 | 0.175929 | 0.639463 | 0.452486 |
| MmugDNA.35057.1.S1_at   | MmugDNA.35057.1 | 3.55  | 3.67  | 0.15 | 0.06 | -1.09 | 0.184091 | 0.549731 | 0.547989 | 0.730006 |
| MmugDNA.35058.1.S1_at   | MmugDNA.35058.1 | 6.72  | 6.99  | 0.11 | 0.22 | -1.2  | 0.165332 | 0.130915 | 0.529362 | 0.403037 |
| MmugDNA.3506.1.S1_at    | MmugDNA.3506.1  | 4.16  | 4.52  | 0.2  | 0.34 | -1.28 | 0.348751 | 0.452911 | 0.667224 | 0.667359 |
| MmugDNA.35060.1.S1_at   | MmugDNA.35060.1 | 5.62  | 5.81  | 0.58 | 0.3  | -1.14 | 0.474846 | 0.608444 | 0.745419 | 0.767074 |
| MmugDNA.35065.1.S1_at   | MmugDNA.35065.1 | 11.9  | 11.76 | 0.22 | 0.09 | 1.1   | 0.866292 | 0.241477 | 0.94664  | 0.512148 |
| MmugDNA.35068.1.S1_at   | MmugDNA.35068.1 | 9.18  | 9.76  | 0.19 | 0.95 | -1.49 | 0.817373 | 0.391981 | 0.925944 | 0.625477 |
| MmugDNA.3507.1.S1_at    | MmugDNA.3507.1  | 3.92  | 3.24  | 0.57 | 0.25 | 1.6   | 0.304187 | 0.359431 | 0.638341 | 0.600736 |
| MmugDNA.35070.1.S1_at   | MmugDNA.35070.1 | 4.23  | 4.42  | 0.18 | 0.38 | -1.14 | 0.864101 | 0.931826 | 0.945449 | 0.961265 |
| MmugDNA.35071.1.S1_at   | MmugDNA.35071.1 | 5.19  | 5.25  | 0.09 | 0.13 | -1.04 | 0.17448  | 0.211296 | 0.538141 | 0.485418 |
| MmugDNA.35072.1.S1_at   | MmugDNA.35072.1 | 10.72 | 10.39 | 0.13 | 0.33 | 1.25  | 0.551776 | 0.542172 | 0.788949 | 0.725325 |
| MmugDNA.35073.1.S1_at   | MmugDNA.35073.1 | 5.09  | 4.77  | 0.36 | 0.25 | 1.25  | 0.690803 | 0.884707 | 0.862425 | 0.934321 |
| MmugDNA.35074.1.S1_at   | MmugDNA.35074.1 | 3.27  | 3.21  | 0.03 | 0.13 | 1.04  | 0.53167  | 0.725259 | 0.777341 | 0.840954 |
| MmugDNA.35075.1.S1_at   | MmugDNA.35075.1 | 10.64 | 10.03 | 0.08 | 0.28 | 1.53  | 0.019094 | 0.008153 | 0.273018 | 0.119754 |
| MmugDNA.35076.1.S1_at   | MmugDNA.35076.1 | 6.41  | 6.2   | 0.41 | 0.28 | 1.15  | 0.364399 | 0.490891 | 0.677318 | 0.692666 |

|                         |                 |       |       |      |      |       |          |          |          |          |
|-------------------------|-----------------|-------|-------|------|------|-------|----------|----------|----------|----------|
| MmugDNA.35078.1.S1_at   | MmugDNA.35078.1 | 4.76  | 4.74  | 0.01 | 0.07 | 1.01  | 0.558178 | 0.383889 | 0.793014 | 0.61978  |
| MmugDNA.35079.1.S1_at   | MmugDNA.35079.1 | 3.02  | 3.32  | 0.1  | 0.07 | -1.24 | 0.04926  | 0.064659 | 0.371064 | 0.300314 |
| MmugDNA.3508.1.S1_at    | MmugDNA.3508.1  | 3.73  | 3.69  | 0.19 | 0.02 | 1.03  | 0.722004 | 0.874176 | 0.878473 | 0.928519 |
| MmugDNA.35080.1.S1_at   | MmugDNA.35080.1 | 11.04 | 10.71 | 0.48 | 0.48 | 1.25  | 0.655731 | 0.333246 | 0.845122 | 0.581498 |
| MmugDNA.35082.1.S1_at   | MmugDNA.35082.1 | 3.08  | 3.1   | 0.11 | 0.08 | -1.01 | 0.723614 | 0.859473 | 0.879213 | 0.919962 |
| MmugDNA.35083.1.S1_at   | MmugDNA.35083.1 | 4.01  | 3.64  | 0.1  | 0.08 | 1.29  | 0.012293 | 0.006574 | 0.240706 | 0.10994  |
| MmugDNA.35084.1.S1_at   | MmugDNA.35084.1 | 3.48  | 3.53  | 0.03 | 0.09 | -1.03 | 0.425354 | 0.309707 | 0.715047 | 0.565005 |
| MmugDNA.35085.1.S1_at   | MmugDNA.35085.1 | 8.73  | 10.05 | 0.83 | 1.4  | -2.51 | 0.331598 | 0.378744 | 0.656441 | 0.615748 |
| MmugDNA.35087.1.S1_at   | MmugDNA.35087.1 | 6.53  | 6.73  | 0.12 | 0.03 | -1.14 | 0.051172 | 0.049675 | 0.375935 | 0.267892 |
| MmugDNA.35088.1.S1_at   | MmugDNA.35088.1 | 5.98  | 5.8   | 0.26 | 0.17 | 1.13  | 0.267748 | 0.252749 | 0.612723 | 0.521174 |
| MmugDNA.35089.1.S1_at   | MmugDNA.35089.1 | 5.42  | 5.89  | 0.02 | 0.57 | -1.38 | 0.702977 | 0.758089 | 0.868924 | 0.859252 |
| MmugDNA.3509.1.S1_at    | MmugDNA.3509.1  | 7.77  | 8.25  | 0.08 | 0.7  | -1.4  | 0.193946 | 0.189901 | 0.55756  | 0.465424 |
| MmugDNA.3509.1.S1_s_at  | MmugDNA.3509.1  | 6.92  | 7.87  | 0.37 | 0.77 | -1.94 | 0.173213 | 0.12461  | 0.536894 | 0.394995 |
| MmugDNA.35090.1.S1_at   | MmugDNA.35090.1 | 4.08  | 4.01  | 0.17 | 0.22 | 1.05  | 0.996612 | 0.713135 | 0.998586 | 0.833644 |
| MmugDNA.35091.1.S1_at   | MmugDNA.35091.1 | 4.71  | 3.92  | 0.93 | 0.17 | 1.73  | 0.257572 | 0.404245 | 0.605045 | 0.632691 |
| MmugDNA.35092.1.S1_at   | MmugDNA.35092.1 | 4.82  | 5.04  | 0.51 | 0.58 | -1.17 | 0.562706 | 0.427819 | 0.795483 | 0.649582 |
| MmugDNA.35093.1.S1_at   | MmugDNA.35093.1 | 12.88 | 12.81 | 0.11 | 0.06 | 1.05  | 0.568075 | 0.811167 | 0.798402 | 0.89102  |
| MmugDNA.35094.1.S1_at   | MmugDNA.35094.1 | 4.09  | 3.61  | 0.24 | 0.3  | 1.39  | 0.091101 | 0.164291 | 0.44709  | 0.440539 |
| MmugDNA.35095.1.S1_at   | MmugDNA.35095.1 | 6.54  | 5.72  | 1.31 | 0.23 | 1.76  | 0.282096 | 0.304664 | 0.622553 | 0.561872 |
| MmugDNA.35096.1.S1_at   | MmugDNA.35096.1 | 3.51  | 3.44  | 0.11 | 0.29 | 1.06  | 0.894619 | 0.634406 | 0.957917 | 0.784787 |
| MmugDNA.35097.1.S1_at   | MmugDNA.35097.1 | 3.95  | 3.88  | 0.1  | 0.13 | 1.05  | 0.897302 | 0.461794 | 0.959157 | 0.673361 |
| MmugDNA.35099.1.S1_at   | MmugDNA.35099.1 | 3.95  | 3.9   | 0.43 | 0.03 | 1.03  | 0.752773 | 0.955881 | 0.894478 | 0.975006 |
| MmugDNA.351.1.S1_at     | MmugDNA.351.1   | 3.67  | 3.53  | 0.23 | 0.22 | 1.1   | 0.482473 | 0.348341 | 0.749408 | 0.592504 |
| MmugDNA.3510.1.S1_at    | MmugDNA.3510.1  | 4.88  | 4.66  | 0.28 | 0.11 | 1.16  | 0.346927 | 0.415718 | 0.666097 | 0.641045 |
| MmugDNA.35100.1.S1_at   | MmugDNA.35100.1 | 5.67  | 5.67  | 0.04 | 0.24 | -1    | 0.900507 | 0.174179 | 0.960326 | 0.450479 |
| MmugDNA.35101.1.S1_at   | MmugDNA.35101.1 | 5.94  | 5.97  | 0.11 | 0.14 | -1.02 | 0.556024 | 0.903812 | 0.791585 | 0.945402 |
| MmugDNA.35102.1.S1_at   | MmugDNA.35102.1 | 4.11  | 3.46  | 0.5  | 0.06 | 1.58  | 0.231025 | 0.201005 | 0.587369 | 0.475442 |
| MmugDNA.35104.1.S1_at   | MmugDNA.35104.1 | 5.08  | 6.06  | 0.55 | 0.48 | -1.97 | 0.073409 | 0.084054 | 0.41875  | 0.33503  |
| MmugDNA.35107.1.S1_at   | MmugDNA.35107.1 | 5.22  | 5.2   | 0.23 | 0.12 | 1.01  | 0.223563 | 0.235203 | 0.582017 | 0.50629  |
| MmugDNA.35109.1.S1_at   | MmugDNA.35109.1 | 5.62  | 5.52  | 0.08 | 0.09 | 1.07  | 0.388518 | 0.132556 | 0.692586 | 0.404544 |
| MmugDNA.35110.1.S1_at   | MmugDNA.35110.1 | 11.15 | 11.37 | 0.06 | 0.18 | -1.16 | 0.043978 | 0.089244 | 0.357596 | 0.34333  |
| MmugDNA.35112.1.S1_at   | MmugDNA.35112.1 | 8.46  | 8.39  | 0.14 | 0.17 | 1.05  | 0.919936 | 0.458081 | 0.968811 | 0.671038 |
| MmugDNA.35113.1.S1_at   | MmugDNA.35113.1 | 5.1   | 5.41  | 0.23 | 0.18 | -1.24 | 0.338689 | 0.361875 | 0.660988 | 0.60265  |
| MmugDNA.35115.1.S1_at   | MmugDNA.35115.1 | 13.03 | 11.49 | 0.16 | 0.11 | 2.9   | 0.000179 | 0.000013 | 0.118376 | 0.017532 |
| MmugDNA.35116.1.S1_at   | MmugDNA.35116.1 | 8.45  | 8.26  | 0.18 | 0.14 | 1.15  | 0.42841  | 0.032814 | 0.71683  | 0.22427  |
| MmugDNA.35117.1.S1_at   | MmugDNA.35117.1 | 5.67  | 6.75  | 0.4  | 0.25 | -2.12 | 0.012613 | 0.00989  | 0.242681 | 0.130644 |
| MmugDNA.35118.1.S1_at   | MmugDNA.35118.1 | 10.94 | 10.73 | 0.43 | 0.26 | 1.16  | 0.4971   | 0.607078 | 0.75785  | 0.766185 |
| MmugDNA.35119.1.S1_at   | MmugDNA.35119.1 | 3.43  | 3.44  | 0.09 | 0.18 | -1.01 | 0.996943 | 0.209944 | 0.998775 | 0.48371  |
| MmugDNA.35122.1.S1_at   | MmugDNA.35122.1 | 11.22 | 11.12 | 0.36 | 0.24 | 1.07  | 0.883404 | 0.374358 | 0.953124 | 0.61282  |
| MmugDNA.35123.1.S1_s_at | MmugDNA.35123.1 | 11.36 | 10.85 | 0.26 | 0.24 | 1.42  | 0.087188 | 0.077114 | 0.441158 | 0.322673 |
| MmugDNA.35124.1.S1_at   | MmugDNA.35124.1 | 5.97  | 6.01  | 0.81 | 0.14 | -1.03 | 0.799203 | 0.735023 | 0.9169   | 0.846631 |

|                         |                 |       |       |      |      |        |          |          |          |          |
|-------------------------|-----------------|-------|-------|------|------|--------|----------|----------|----------|----------|
| MmugDNA.35125.1.S1_at   | MmugDNA.35125.1 | 4.51  | 4.14  | 0.19 | 0.24 | 1.29   | 0.082395 | 0.406915 | 0.43386  | 0.634629 |
| MmugDNA.35126.1.S1_at   | MmugDNA.35126.1 | 4.08  | 4.11  | 0.07 | 0.13 | -1.02  | 0.616005 | 0.800993 | 0.823911 | 0.885538 |
| MmugDNA.35127.1.S1_at   | MmugDNA.35127.1 | 4.22  | 4.36  | 0.18 | 0.47 | -1.11  | 0.626867 | 0.34216  | 0.82981  | 0.588332 |
| MmugDNA.35128.1.S1_at   | MmugDNA.35128.1 | 7.22  | 7.25  | 0.37 | 0.47 | -1.02  | 0.212904 | 0.270542 | 0.57334  | 0.535837 |
| MmugDNA.22636.1.S1_s_at | MmugDNA.22636.1 | 9.4   | 9.67  | 0.22 | 0.42 | -1.21  | 0.486947 | 0.657521 | 0.751857 | 0.799757 |
| MmuSTS.2023.1.S1_at     | MmuSTS.2023.1   | 7.23  | 12.34 | 1.94 | 3.73 | -34.62 | 0.477303 | 0.319758 | 0.746589 | 0.572105 |
| MmuSTS.2023.1.S1_s_at   | MmuSTS.2023.1   | 6.94  | 11.52 | 1.68 | 3.4  | -23.82 | 0.435417 | 0.301922 | 0.721224 | 0.55986  |
| MmugDNA.35134.1.S1_at   | MmugDNA.35134.1 | 3.63  | 3.61  | 0.08 | 0.02 | 1.02   | 0.198683 | 0.067539 | 0.561737 | 0.305949 |
| MmugDNA.35135.1.S1_at   | MmugDNA.35135.1 | 11.98 | 11.89 | 0.07 | 0.27 | 1.07   | 0.406373 | 0.285222 | 0.703645 | 0.547165 |
| MmugDNA.35137.1.S1_at   | MmugDNA.35137.1 | 9.61  | 10.8  | 0.23 | 0.37 | -2.29  | 0.00505  | 0.002658 | 0.188092 | 0.076211 |
| MmugDNA.35138.1.S1_at   | MmugDNA.35138.1 | 9.54  | 8.94  | 0.26 | 0.45 | 1.51   | 0.130856 | 0.162874 | 0.497198 | 0.438966 |
| MmugDNA.35139.1.S1_at   | MmugDNA.35139.1 | 5.45  | 5.57  | 0.04 | 0.16 | -1.09  | 0.371637 | 0.80422  | 0.682352 | 0.887395 |
| MmugDNA.3514.1.S1_at    | MmugDNA.3514.1  | 2.95  | 3     | 0.12 | 0.03 | -1.03  | 0.626833 | 0.346046 | 0.82981  | 0.59115  |
| MmugDNA.35140.1.S1_at   | MmugDNA.35140.1 | 9.58  | 10.04 | 0.21 | 0.42 | -1.38  | 0.703042 | 0.568509 | 0.86894  | 0.741988 |
| MmugDNA.35142.1.S1_at   | MmugDNA.35142.1 | 4.61  | 4.59  | 0.58 | 0.33 | 1.01   | 0.259858 | 0.230551 | 0.606878 | 0.50226  |
| MmugDNA.35143.1.S1_at   | MmugDNA.35143.1 | 6.58  | 5.34  | 0.82 | 0.33 | 2.36   | 0.094796 | 0.062153 | 0.452244 | 0.296237 |
| MmugDNA.35144.1.S1_at   | MmugDNA.35144.1 | 5.71  | 5.53  | 0.08 | 0.19 | 1.13   | 0.172072 | 0.058504 | 0.535422 | 0.288585 |
| MmugDNA.35146.1.S1_at   | MmugDNA.35146.1 | 11.19 | 10.98 | 0    | 0.16 | 1.16   | 0.151591 | 0.045337 | 0.516191 | 0.257242 |
| MmugDNA.35147.1.S1_at   | MmugDNA.35147.1 | 7.76  | 7.82  | 0.26 | 0.28 | -1.04  | 0.649605 | 0.3974   | 0.842493 | 0.628812 |
| MmugDNA.35148.1.S1_at   | MmugDNA.35148.1 | 9.18  | 9.15  | 0.28 | 0.33 | 1.02   | 0.4216   | 0.590561 | 0.713163 | 0.756311 |
| MmugDNA.35148.1.S1_s_at | MmugDNA.35148.1 | 8.92  | 8.55  | 0.31 | 0.23 | 1.3    | 0.168193 | 0.202252 | 0.53256  | 0.476665 |
| MmugDNA.3515.1.S1_at    | MmugDNA.3515.1  | 4.73  | 4.32  | 0.21 | 0.27 | 1.33   | 0.110924 | 0.093552 | 0.472762 | 0.349884 |
| MmugDNA.35151.1.S1_at   | MmugDNA.35151.1 | 8.1   | 9.43  | 0.23 | 0.84 | -2.52  | 0.028112 | 0.019399 | 0.309743 | 0.175068 |
| MmugDNA.35152.1.S1_at   | MmugDNA.35152.1 | 4.67  | 4.44  | 0.16 | 0.09 | 1.17   | 0.099258 | 0.133278 | 0.459158 | 0.405049 |
| MmugDNA.35153.1.S1_at   | MmugDNA.35153.1 | 5.18  | 4.91  | 0.39 | 0.14 | 1.2    | 0.356259 | 0.340828 | 0.671447 | 0.586978 |
| MmugDNA.35154.1.S1_at   | MmugDNA.35154.1 | 7.19  | 6.29  | 0.58 | 0.39 | 1.87   | 0.443376 | 0.800107 | 0.726095 | 0.885076 |
| MmugDNA.35155.1.S1_at   | MmugDNA.35155.1 | 4.42  | 4.4   | 0.27 | 0.3  | 1.01   | 0.983445 | 0.331574 | 0.99405  | 0.580188 |
| MmugDNA.35157.1.S1_at   | MmugDNA.35157.1 | 5.49  | 5.3   | 0.29 | 0.23 | 1.15   | 0.539104 | 0.627289 | 0.780929 | 0.780361 |
| MmugDNA.35158.1.S1_at   | MmugDNA.35158.1 | 7.65  | 7.51  | 1.14 | 0.19 | 1.11   | 0.897212 | 0.652652 | 0.959134 | 0.796933 |
| MmugDNA.35159.1.S1_at   | MmugDNA.35159.1 | 5.13  | 5.44  | 0.14 | 0.17 | -1.24  | 0.035585 | 0.018425 | 0.337013 | 0.170755 |
| MmugDNA.35160.1.S1_at   | MmugDNA.35160.1 | 5.62  | 5.75  | 0.17 | 0.17 | -1.09  | 0.41005  | 0.3007   | 0.706179 | 0.558959 |
| MmugDNA.35162.1.S1_at   | MmugDNA.35162.1 | 6.29  | 6.99  | 0.2  | 1.14 | -1.62  | 0.351549 | 0.361105 | 0.669126 | 0.602069 |
| MmugDNA.35163.1.S1_at   | MmugDNA.35163.1 | 4.03  | 4.01  | 0.07 | 0    | 1.01   | 0.78122  | 0.287648 | 0.908721 | 0.548886 |
| MmugDNA.35164.1.S1_at   | MmugDNA.35164.1 | 11.2  | 11.53 | 0.06 | 0.4  | -1.26  | 0.081917 | 0.080819 | 0.433162 | 0.32873  |
| MmugDNA.35166.1.S1_at   | MmugDNA.35166.1 | 3.41  | 3.42  | 0.13 | 0.01 | -1.01  | 0.583191 | 0.829138 | 0.806265 | 0.901771 |
| MmugDNA.35167.1.S1_at   | MmugDNA.35167.1 | 7.01  | 7.28  | 0.3  | 0.14 | -1.2   | 0.224489 | 0.073174 | 0.582716 | 0.316064 |
| MmugDNA.35168.1.S1_at   | MmugDNA.35168.1 | 6.79  | 6.54  | 0.69 | 0.18 | 1.2    | 0.444403 | 0.565612 | 0.726966 | 0.739997 |
| MmugDNA.35170.1.S1_at   | MmugDNA.35170.1 | 8.02  | 7.68  | 0.11 | 0.22 | 1.26   | 0.04856  | 0.05591  | 0.369003 | 0.282221 |
| MmugDNA.35171.1.S1_at   | MmugDNA.35171.1 | 4.76  | 4.36  | 1.16 | 0.2  | 1.31   | 0.238803 | 0.265851 | 0.592015 | 0.531705 |
| MmugDNA.35172.1.S1_at   | MmugDNA.35172.1 | 8.6   | 7.87  | 0.04 | 0.22 | 1.66   | 0.00463  | 0.001262 | 0.1844   | 0.05521  |
| MmugDNA.35173.1.S1_at   | MmugDNA.35173.1 | 7.21  | 7.17  | 0.2  | 0.17 | 1.03   | 0.760207 | 0.561969 | 0.898847 | 0.737666 |

|                         |                 |       |       |      |      |       |          |          |          |          |
|-------------------------|-----------------|-------|-------|------|------|-------|----------|----------|----------|----------|
| MmugDNA.35174.1.S1_at   | MmugDNA.35174.1 | 8     | 7.95  | 0.15 | 0.26 | 1.03  | 0.670052 | 0.436105 | 0.852318 | 0.655802 |
| MmugDNA.35175.1.S1_at   | MmugDNA.35175.1 | 6.93  | 7.17  | 0.04 | 0.07 | -1.18 | 0.013478 | 0.072297 | 0.24708  | 0.314983 |
| MmugDNA.35176.1.S1_at   | MmugDNA.35176.1 | 9.91  | 10.07 | 0.06 | 0.17 | -1.12 | 0.49063  | 0.012751 | 0.754497 | 0.145496 |
| MmugDNA.35177.1.S1_at   | MmugDNA.35177.1 | 7.02  | 7.22  | 1.17 | 0.41 | -1.15 | 0.461989 | 0.40294  | 0.738101 | 0.631696 |
| MmugDNA.35179.1.S1_at   | MmugDNA.35179.1 | 9.38  | 10.28 | 0.29 | 0.6  | -1.88 | 0.244003 | 0.320466 | 0.595699 | 0.572648 |
| MmugDNA.35180.1.S1_at   | MmugDNA.35180.1 | 4.09  | 4.08  | 0.19 | 0.3  | 1.01  | 0.732139 | 0.044952 | 0.884251 | 0.256489 |
| MmugDNA.35181.1.S1_at   | MmugDNA.35181.1 | 11.75 | 11.24 | 0.13 | 0.22 | 1.42  | 0.024259 | 0.014327 | 0.294535 | 0.152764 |
| MmugDNA.35181.1.S1_s_at | MmugDNA.35181.1 | 10.95 | 10.28 | 0.25 | 0.27 | 1.59  | 0.066991 | 0.050087 | 0.407016 | 0.268916 |
| MmugDNA.35183.1.S1_at   | MmugDNA.35183.1 | 4.15  | 4.2   | 0.04 | 0.13 | -1.04 | 0.220585 | 0.375438 | 0.57964  | 0.61341  |
| MmugDNA.35185.1.S1_at   | MmugDNA.35185.1 | 10.16 | 11.12 | 0.06 | 0.15 | -1.95 | 0.000717 | 0.000477 | 0.136818 | 0.038572 |
| MmugDNA.35186.1.S1_at   | MmugDNA.35186.1 | 7.37  | 6.45  | 0.25 | 0.43 | 1.89  | 0.094541 | 0.101505 | 0.452166 | 0.361325 |
| MmugDNA.35187.1.S1_at   | MmugDNA.35187.1 | 6.94  | 6.98  | 0.29 | 0.48 | -1.02 | 0.968774 | 0.921427 | 0.988177 | 0.955761 |
| MmugDNA.35188.1.S1_at   | MmugDNA.35188.1 | 3.79  | 3.44  | 0.44 | 0.37 | 1.27  | 0.373799 | 0.569837 | 0.683245 | 0.742694 |
| MmugDNA.35190.1.S1_at   | MmugDNA.35190.1 | 8.52  | 8.86  | 0.3  | 0.08 | -1.27 | 0.101596 | 0.067436 | 0.461313 | 0.305694 |
| MmugDNA.35191.1.S1_at   | MmugDNA.35191.1 | 4     | 3.95  | 0.07 | 0.12 | 1.03  | 0.402589 | 0.446036 | 0.701503 | 0.662668 |
| MmugDNA.35193.1.S1_at   | MmugDNA.35193.1 | 6.34  | 6.37  | 0.25 | 0.14 | -1.02 | 0.791257 | 0.938209 | 0.9133   | 0.964949 |
| MmugDNA.35195.1.S1_at   | MmugDNA.35195.1 | 4.65  | 4.48  | 0.11 | 0.12 | 1.13  | 0.182181 | 0.010234 | 0.546503 | 0.1326   |
| MmugDNA.35196.1.S1_at   | MmugDNA.35196.1 | 4.28  | 4.73  | 1.19 | 0.82 | -1.37 | 0.820977 | 0.834858 | 0.92718  | 0.905477 |
| MmugDNA.35197.1.S1_at   | MmugDNA.35197.1 | 4.37  | 4.59  | 0.2  | 0.35 | -1.17 | 0.640977 | 0.789957 | 0.837894 | 0.878631 |
| MmugDNA.35198.1.S1_at   | MmugDNA.35198.1 | 6.5   | 6.47  | 0.21 | 0.21 | 1.02  | 0.840487 | 0.601002 | 0.935751 | 0.762462 |
| MmugDNA.35199.1.S1_at   | MmugDNA.35199.1 | 5.23  | 5.21  | 0.37 | 0.03 | 1.02  | 0.394815 | 0.664607 | 0.696148 | 0.803459 |
| MmugDNA.352.1.S1_at     | MmugDNA.352.1   | 6.44  | 6.15  | 0.93 | 0.34 | 1.22  | 0.217892 | 0.299269 | 0.577569 | 0.557769 |
| MmugDNA.3520.1.S1_at    | MmugDNA.3520.1  | 7.1   | 7.13  | 0.1  | 0.04 | -1.02 | 0.975464 | 0.650766 | 0.990509 | 0.795801 |
| MmugDNA.35200.1.S1_at   | MmugDNA.35200.1 | 10.92 | 9.78  | 0.09 | 0.63 | 2.2   | 0.016407 | 0.013898 | 0.263876 | 0.151243 |
| MmugDNA.35201.1.S1_at   | MmugDNA.35201.1 | 8.59  | 9.04  | 0.61 | 0.44 | -1.36 | 0.931172 | 0.198691 | 0.973411 | 0.473391 |
| MmugDNA.35202.1.S1_at   | MmugDNA.35202.1 | 7.49  | 6.92  | 0.37 | 0.07 | 1.48  | 0.035647 | 0.059697 | 0.3373   | 0.290945 |
| MmugDNA.35204.1.S1_at   | MmugDNA.35204.1 | 6.75  | 7.1   | 0.16 | 0.12 | -1.27 | 0.03048  | 0.019794 | 0.318629 | 0.176951 |
| MmugDNA.35205.1.S1_at   | MmugDNA.35205.1 | 5.18  | 5.01  | 0.36 | 1.02 | 1.12  | 0.728943 | 0.886213 | 0.882285 | 0.935235 |
| MmugDNA.3521.1.S1_at    | MmugDNA.3521.1  | 4.74  | 4.39  | 0.47 | 0.4  | 1.28  | 0.483314 | 0.649755 | 0.749882 | 0.79516  |
| MmugDNA.35211.1.S1_at   | MmugDNA.35211.1 | 6.92  | 7.19  | 0.7  | 0.43 | -1.2  | 0.694352 | 0.886487 | 0.864407 | 0.93543  |
| MmugDNA.35212.1.S1_at   | MmugDNA.35212.1 | 6.78  | 7.63  | 0.53 | 0.67 | -1.8  | 0.035737 | 0.026272 | 0.337534 | 0.203033 |
| MmugDNA.35213.1.S1_at   | MmugDNA.35213.1 | 13    | 13.18 | 0.09 | 0.09 | -1.13 | 0.101846 | 0.077335 | 0.461313 | 0.323135 |
| MmugDNA.35215.1.S1_at   | MmugDNA.35215.1 | 3.43  | 3.36  | 0.24 | 0.2  | 1.05  | 0.816347 | 0.782136 | 0.925443 | 0.873787 |
| MmugDNA.35216.1.S1_at   | MmugDNA.35216.1 | 3.32  | 4.43  | 0.3  | 1.19 | -2.15 | 0.222053 | 0.214634 | 0.580642 | 0.488448 |
| MmugDNA.35217.1.S1_at   | MmugDNA.35217.1 | 4.65  | 4.83  | 0.12 | 0.25 | -1.13 | 0.817461 | 0.596131 | 0.925944 | 0.759357 |
| MmugDNA.35218.1.S1_at   | MmugDNA.35218.1 | 6.08  | 6.12  | 0.2  | 0.09 | -1.03 | 0.598302 | 0.68416  | 0.813939 | 0.815791 |
| MmugDNA.35219.1.S1_at   | MmugDNA.35219.1 | 3.51  | 3.3   | 0.06 | 0.32 | 1.15  | 0.926057 | 0.444226 | 0.971587 | 0.661895 |
| MmugDNA.3522.1.S1_at    | MmugDNA.3522.1  | 7.34  | 6.17  | 0.18 | 0.62 | 2.24  | 0.046335 | 0.019657 | 0.363009 | 0.176187 |
| MmugDNA.35220.1.S1_at   | MmugDNA.35220.1 | 5     | 4.52  | 0.1  | 0.08 | 1.39  | 0.004723 | 0.016521 | 0.184492 | 0.16273  |
| MmugDNA.35221.1.S1_at   | MmugDNA.35221.1 | 7.18  | 7.08  | 0.9  | 0.44 | 1.07  | 0.615103 | 0.818292 | 0.823342 | 0.895205 |
| MmugDNA.35222.1.S1_at   | MmugDNA.35222.1 | 4.93  | 4.9   | 0.14 | 0.1  | 1.02  | 0.295082 | 0.27073  | 0.631503 | 0.53602  |



|                         |                 |       |       |      |      |       |          |          |          |          |
|-------------------------|-----------------|-------|-------|------|------|-------|----------|----------|----------|----------|
| MmugDNA.35223.1.S1_at   | MmugDNA.35223.1 | 4.84  | 4.99  | 0.58 | 0.11 | -1.11 | 0.515344 | 0.596604 | 0.767405 | 0.759694 |
| MmugDNA.35224.1.S1_at   | MmugDNA.35224.1 | 6.97  | 6.96  | 0.04 | 0.04 | 1.01  | 0.950649 | 0.098647 | 0.981372 | 0.356743 |
| MmugDNA.35225.1.S1_at   | MmugDNA.35225.1 | 11.73 | 11.76 | 0.08 | 0.33 | -1.02 | 0.678124 | 0.543698 | 0.85579  | 0.726281 |
| MmugDNA.35226.1.S1_at   | MmugDNA.35226.1 | 7.87  | 7.45  | 0.27 | 0.25 | 1.34  | 0.066538 | 0.014972 | 0.406564 | 0.155472 |
| MmugDNA.35227.1.S1_at   | MmugDNA.35227.1 | 4.3   | 4.3   | 0.04 | 0.05 | 1     | 0.50962  | 0.335433 | 0.764465 | 0.583234 |
| MmugDNA.35229.1.S1_at   | MmugDNA.35229.1 | 5.36  | 5.28  | 0.14 | 0.15 | 1.05  | 0.528529 | 0.177376 | 0.775677 | 0.453742 |
| MmugDNA.3523.1.S1_at    | MmugDNA.3523.1  | 9.56  | 9.62  | 0.27 | 0.25 | -1.04 | 0.741663 | 0.250968 | 0.889293 | 0.519638 |
| MmugDNA.35230.1.S1_at   | MmugDNA.35230.1 | 6.64  | 7.57  | 0.18 | 0.2  | -1.9  | 0.002943 | 0.000363 | 0.170703 | 0.037273 |
| MmugDNA.35231.1.S1_at   | MmugDNA.35231.1 | 4.69  | 4.77  | 0.23 | 0.11 | -1.06 | 0.449441 | 0.530404 | 0.730214 | 0.717957 |
| MmugDNA.35233.1.S1_at   | MmugDNA.35233.1 | 4.95  | 4.55  | 0.54 | 0.08 | 1.33  | 0.103576 | 0.227224 | 0.463302 | 0.499572 |
| MmugDNA.35234.1.S1_at   | MmugDNA.35234.1 | 5.35  | 5.17  | 0.34 | 0.24 | 1.13  | 0.250288 | 0.347711 | 0.600389 | 0.592082 |
| MmugDNA.35235.1.S1_at   | MmugDNA.35235.1 | 5.61  | 5.72  | 0.07 | 0.56 | -1.08 | 0.505234 | 0.513996 | 0.761548 | 0.707375 |
| MmugDNA.35237.1.S1_at   | MmugDNA.35237.1 | 7.14  | 7.14  | 0.38 | 0.1  | -1    | 0.382237 | 0.041742 | 0.688577 | 0.24892  |
| MmugDNA.35238.1.S1_x_at | MmugDNA.35238.1 | 7.1   | 6.96  | 0.55 | 0.09 | 1.1   | 0.279641 | 0.279222 | 0.621144 | 0.542886 |
| MmugDNA.39875.1.S1_s_at | MmugDNA.39875.1 | 8.03  | 7.79  | 0.38 | 1.23 | 1.18  | 0.926559 | 0.596311 | 0.971724 | 0.759468 |
| MmugDNA.3524.1.S1_at    | MmugDNA.3524.1  | 6.37  | 6.66  | 0.24 | 0.14 | -1.23 | 0.121102 | 0.132756 | 0.485851 | 0.404544 |
| MmugDNA.35240.1.S1_at   | MmugDNA.35240.1 | 5.87  | 5.67  | 0.42 | 0.27 | 1.15  | 0.369541 | 0.465093 | 0.680782 | 0.67557  |
| MmugDNA.35242.1.S1_at   | MmugDNA.35242.1 | 3.51  | 3.51  | 0.05 | 0.17 | 1     | 0.286797 | 0.30094  | 0.625572 | 0.559178 |
| MmugDNA.35244.1.S1_at   | MmugDNA.35244.1 | 8.28  | 9.01  | 0.35 | 0.46 | -1.66 | 0.047939 | 0.026078 | 0.367582 | 0.202453 |
| MmugDNA.35246.1.S1_at   | MmugDNA.35246.1 | 5.63  | 5.34  | 0.49 | 0.19 | 1.23  | 0.149227 | 0.157775 | 0.514001 | 0.433423 |
| MmugDNA.35247.1.S1_at   | MmugDNA.35247.1 | 6.03  | 5.14  | 0.06 | 0.23 | 1.86  | 0.002443 | 0.000762 | 0.163555 | 0.04544  |
| MmugDNA.35248.1.S1_at   | MmugDNA.35248.1 | 6.96  | 6.67  | 0.22 | 0.44 | 1.22  | 0.500609 | 0.530566 | 0.759592 | 0.718042 |
| MmugDNA.35249.1.S1_at   | MmugDNA.35249.1 | 3.58  | 3.65  | 0.2  | 0.11 | -1.05 | 0.929447 | 0.42957  | 0.972728 | 0.650961 |
| MmugDNA.3525.1.S1_at    | MmugDNA.3525.1  | 5.33  | 5.03  | 0.27 | 0.38 | 1.23  | 0.177114 | 0.109767 | 0.541073 | 0.373701 |
| MmugDNA.35250.1.S1_at   | MmugDNA.35250.1 | 7.28  | 7.45  | 0.07 | 0.14 | -1.13 | 0.106792 | 0.103699 | 0.467551 | 0.364519 |
| MmugDNA.35251.1.S1_at   | MmugDNA.35251.1 | 4.02  | 3.64  | 0.2  | 0.55 | 1.31  | 0.665758 | 0.373738 | 0.850087 | 0.61241  |
| MmugDNA.35252.1.S1_at   | MmugDNA.35252.1 | 8.53  | 8.21  | 0.04 | 0.58 | 1.25  | 0.438442 | 0.602356 | 0.72304  | 0.763342 |
| MmugDNA.35253.1.S1_at   | MmugDNA.35253.1 | 5.66  | 5.54  | 0.2  | 0.28 | 1.09  | 0.319625 | 0.199307 | 0.649068 | 0.474002 |
| MmugDNA.35254.1.S1_at   | MmugDNA.35254.1 | 4.9   | 5.18  | 0.09 | 0.1  | -1.21 | 0.027225 | 0.019656 | 0.307021 | 0.176187 |
| MmugDNA.35255.1.S1_at   | MmugDNA.35255.1 | 5.42  | 5.09  | 0.69 | 0.38 | 1.26  | 0.462202 | 0.607993 | 0.738226 | 0.766717 |
| MmugDNA.35256.1.S1_at   | MmugDNA.35256.1 | 4.95  | 4.84  | 0.18 | 0.27 | 1.08  | 0.887434 | 0.902524 | 0.954863 | 0.944622 |
| MmugDNA.35257.1.S1_at   | MmugDNA.35257.1 | 7.77  | 7.91  | 0.25 | 0.1  | -1.1  | 0.410355 | 0.634541 | 0.706281 | 0.784881 |
| MmugDNA.35258.1.S1_at   | MmugDNA.35258.1 | 4.25  | 4.41  | 0.09 | 0.13 | -1.12 | 0.083538 | 0.132957 | 0.43582  | 0.404626 |
| MmugDNA.35259.1.S1_at   | MmugDNA.35259.1 | 3.1   | 3.34  | 0.28 | 0.3  | -1.18 | 0.959958 | 0.949514 | 0.984847 | 0.971135 |
| MmugDNA.35262.1.S1_at   | MmugDNA.35262.1 | 8.03  | 7.32  | 0.26 | 0.27 | 1.63  | 0.043384 | 0.028541 | 0.356711 | 0.210754 |
| MmugDNA.35264.1.S1_at   | MmugDNA.35264.1 | 6.69  | 6.7   | 0.2  | 0.13 | -1.01 | 0.852869 | 0.475939 | 0.940695 | 0.682387 |
| MmugDNA.35265.1.S1_at   | MmugDNA.35265.1 | 3.4   | 3.39  | 0.09 | 0.05 | 1.01  | 0.900059 | 0.296207 | 0.960159 | 0.555413 |
| MmugDNA.35266.1.S1_at   | MmugDNA.35266.1 | 4.65  | 4.5   | 0.71 | 0.16 | 1.11  | 0.308588 | 0.199683 | 0.640978 | 0.474335 |
| MmugDNA.35268.1.S1_at   | MmugDNA.35268.1 | 11.82 | 11.8  | 0.24 | 0.24 | 1.01  | 0.600122 | 0.029805 | 0.815083 | 0.214318 |
| MmugDNA.35269.1.S1_at   | MmugDNA.35269.1 | 3.46  | 3.45  | 0.22 | 0.46 | 1.01  | 0.66799  | 0.794032 | 0.851395 | 0.881267 |
| MmugDNA.3527.1.S1_at    | MmugDNA.3527.1  | 5.4   | 5.73  | 0.08 | 0.21 | -1.26 | 0.051645 | 0.072417 | 0.376115 | 0.31528  |

|                         |                 |       |       |      |      |       |          |          |          |          |
|-------------------------|-----------------|-------|-------|------|------|-------|----------|----------|----------|----------|
| MmugDNA.35271.1.S1_x_at | MmugDNA.35271.1 | 9.48  | 9.37  | 0.92 | 0.38 | 1.08  | 0.314863 | 0.402729 | 0.646166 | 0.631543 |
| MmugDNA.35272.1.S1_at   | MmugDNA.35272.1 | 3.96  | 3.53  | 0.55 | 0.26 | 1.34  | 0.200316 | 0.105831 | 0.563192 | 0.368111 |
| MmugDNA.35273.1.S1_at   | MmugDNA.35273.1 | 5.56  | 5.68  | 0.28 | 0.06 | -1.08 | 0.483746 | 0.664588 | 0.749945 | 0.803454 |
| MmugDNA.35274.1.S1_at   | MmugDNA.35274.1 | 8.91  | 8.09  | 0.23 | 0.46 | 1.76  | 0.143568 | 0.182957 | 0.510312 | 0.459434 |
| MmugDNA.35275.1.S1_at   | MmugDNA.35275.1 | 6.41  | 6.45  | 0.13 | 0.05 | -1.03 | 0.763272 | 0.312444 | 0.900197 | 0.567197 |
| MmugDNA.35276.1.S1_at   | MmugDNA.35276.1 | 6.13  | 6.41  | 0.09 | 0.1  | -1.22 | 0.01743  | 0.028139 | 0.267445 | 0.209306 |
| MmugDNA.35277.1.S1_s_at | MmugDNA.35277.1 | 10.88 | 11.46 | 0.15 | 0.67 | -1.5  | 0.210442 | 0.199053 | 0.57172  | 0.473621 |
| MmugDNA.35278.1.S1_at   | MmugDNA.35278.1 | 3.89  | 4.04  | 0.23 | 0.11 | -1.11 | 0.840792 | 0.345582 | 0.935988 | 0.590816 |
| MmugDNA.35279.1.S1_at   | MmugDNA.35279.1 | 3.91  | 4.08  | 0.16 | 0.27 | -1.12 | 0.539183 | 0.73348  | 0.780929 | 0.845679 |
| MmugDNA.3528.1.S1_at    | MmugDNA.3528.1  | 6.23  | 6.3   | 0.13 | 0.03 | -1.05 | 0.792945 | 0.286849 | 0.914102 | 0.548162 |
| MmugDNA.35280.1.S1_at   | MmugDNA.35280.1 | 4.45  | 4.48  | 0.3  | 0.05 | -1.03 | 0.439361 | 0.65727  | 0.723551 | 0.799611 |
| MmugDNA.35281.1.S1_at   | MmugDNA.35281.1 | 8     | 8.08  | 0.52 | 0.53 | -1.06 | 0.630056 | 0.711537 | 0.831865 | 0.832752 |
| MmugDNA.35281.1.S1_s_at | MmugDNA.35281.1 | 10.71 | 10.8  | 0.38 | 0.29 | -1.07 | 0.896843 | 0.985642 | 0.958912 | 0.991833 |
| MmugDNA.35282.1.S1_at   | MmugDNA.35282.1 | 6.1   | 6.11  | 0.18 | 0.31 | -1.01 | 0.266436 | 0.336808 | 0.611901 | 0.584093 |
| MmugDNA.35283.1.S1_at   | MmugDNA.35283.1 | 10.34 | 10.22 | 0.03 | 0.14 | 1.09  | 0.524335 | 0.353794 | 0.773171 | 0.596815 |
| MmugDNA.35284.1.S1_at   | MmugDNA.35284.1 | 4.85  | 4.82  | 0.35 | 0.19 | 1.02  | 0.32156  | 0.401023 | 0.650266 | 0.630667 |
| MmugDNA.35285.1.S1_at   | MmugDNA.35285.1 | 7.17  | 7.06  | 0.19 | 0.17 | 1.08  | 0.209435 | 0.087909 | 0.570957 | 0.341312 |
| MmugDNA.35287.1.S1_at   | MmugDNA.35287.1 | 8.01  | 7.69  | 0.29 | 0.51 | 1.24  | 0.489073 | 0.231822 | 0.753456 | 0.503592 |
| MmugDNA.35288.1.S1_at   | MmugDNA.35288.1 | 7.01  | 6.95  | 0.23 | 0.32 | 1.04  | 0.611847 | 0.509242 | 0.821861 | 0.704039 |
| MmugDNA.35288.1.S1_s_at | MmugDNA.35288.1 | 6.2   | 6.36  | 0.12 | 0.22 | -1.11 | 0.252252 | 0.120815 | 0.601282 | 0.389657 |
| MmugDNA.35289.1.S1_at   | MmugDNA.35289.1 | 7.84  | 7.88  | 0.09 | 0.07 | -1.02 | 0.27986  | 0.363289 | 0.621287 | 0.60371  |
| MmugDNA.35290.1.S1_at   | MmugDNA.35290.1 | 8.06  | 7.24  | 0.42 | 0.1  | 1.77  | 0.03288  | 0.018314 | 0.326361 | 0.170178 |
| MmugDNA.35291.1.S1_s_at | MmugDNA.35291.1 | 11.31 | 11.31 | 0.23 | 0.42 | -1    | 0.705391 | 0.731371 | 0.870053 | 0.84431  |
| MmugDNA.35292.1.S1_at   | MmugDNA.35292.1 | 4.1   | 4.02  | 0.07 | 0.1  | 1.06  | 0.169916 | 0.47959  | 0.534129 | 0.685315 |
| MmugDNA.35295.1.S1_at   | MmugDNA.35295.1 | 6.68  | 5.65  | 0.14 | 0.12 | 2.05  | 0.000842 | 0.001011 | 0.138925 | 0.050657 |
| MmugDNA.35296.1.S1_at   | MmugDNA.35296.1 | 5.28  | 4.96  | 0.44 | 0.35 | 1.25  | 0.402891 | 0.592743 | 0.701704 | 0.75786  |
| MmugDNA.35297.1.S1_at   | MmugDNA.35297.1 | 13.97 | 13.95 | 0.1  | 0.11 | 1.02  | 0.914745 | 0.877885 | 0.966289 | 0.93029  |
| MmugDNA.35298.1.S1_at   | MmugDNA.35298.1 | 3.9   | 3.97  | 0.24 | 0.26 | -1.05 | 0.161053 | 0.192642 | 0.526189 | 0.468144 |
| MmugDNA.35299.1.S1_at   | MmugDNA.35299.1 | 4.83  | 5.28  | 0.34 | 0.22 | -1.37 | 0.030248 | 0.014386 | 0.317712 | 0.153115 |
| MmugDNA.353.1.S1_at     | MmugDNA.353.1   | 2.87  | 2.91  | 0.05 | 0.14 | -1.03 | 0.338696 | 0.262803 | 0.660988 | 0.529139 |
| MmugDNA.3530.1.S1_at    | MmugDNA.3530.1  | 6.42  | 6.21  | 0.11 | 0.09 | 1.15  | 0.084268 | 0.198906 | 0.436922 | 0.473506 |
| MmugDNA.35300.1.S1_at   | MmugDNA.35300.1 | 4.86  | 4.87  | 0.09 | 0.13 | -1.01 | 0.208756 | 0.376856 | 0.570418 | 0.614606 |
| MmugDNA.35301.1.S1_at   | MmugDNA.35301.1 | 5.25  | 5.52  | 0.34 | 0.1  | -1.2  | 0.766627 | 0.928093 | 0.901899 | 0.959154 |
| MmugDNA.35303.1.S1_at   | MmugDNA.35303.1 | 6.37  | 6.26  | 0.27 | 0.12 | 1.08  | 0.302565 | 0.133583 | 0.636951 | 0.405542 |
| MmugDNA.35305.1.S1_at   | MmugDNA.35305.1 | 6.18  | 6.45  | 0.09 | 0.16 | -1.2  | 0.168634 | 0.029748 | 0.532849 | 0.214138 |
| MmugDNA.35306.1.S1_at   | MmugDNA.35306.1 | 6.77  | 6.02  | 0.79 | 0.57 | 1.69  | 0.121244 | 0.143603 | 0.48598  | 0.41751  |
| MmugDNA.35308.1.S1_at   | MmugDNA.35308.1 | 7.69  | 7.68  | 0.14 | 0.3  | 1.01  | 0.280501 | 0.074726 | 0.621702 | 0.318465 |
| MmugDNA.35309.1.S1_at   | MmugDNA.35309.1 | 8.88  | 8.63  | 0.37 | 0.27 | 1.19  | 0.42193  | 0.506594 | 0.713215 | 0.702503 |
| MmugDNA.3531.1.S1_at    | MmugDNA.3531.1  | 9.94  | 10.45 | 0.14 | 0.39 | -1.42 | 0.129762 | 0.109269 | 0.495916 | 0.37308  |
| MmugDNA.35310.1.S1_at   | MmugDNA.35310.1 | 9.71  | 9.95  | 0.31 | 0.2  | -1.18 | 0.567751 | 0.746605 | 0.798292 | 0.852873 |
| MmugDNA.35310.1.S1_s_at | MmugDNA.35310.1 | 10.42 | 10.53 | 0.28 | 0.15 | -1.08 | 0.775902 | 0.882935 | 0.906016 | 0.933228 |

|                         |                 |       |       |      |      |       |          |          |          |          |
|-------------------------|-----------------|-------|-------|------|------|-------|----------|----------|----------|----------|
| MmugDNA.35312.1.S1_at   | MmugDNA.35312.1 | 3.36  | 2.85  | 1.17 | 1.37 | 1.43  | 0.720931 | 0.536862 | 0.877853 | 0.722119 |
| MmugDNA.35314.1.S1_at   | MmugDNA.35314.1 | 3.1   | 3.14  | 0.03 | 0.17 | -1.02 | 0.676031 | 0.376377 | 0.854832 | 0.614243 |
| MmugDNA.35315.1.S1_at   | MmugDNA.35315.1 | 8.26  | 8.48  | 0.15 | 0.64 | -1.16 | 0.644114 | 0.242083 | 0.839719 | 0.512652 |
| MmugDNA.35316.1.S1_at   | MmugDNA.35316.1 | 7.59  | 6.55  | 0.66 | 0.49 | 2.05  | 0.476528 | 0.480916 | 0.746246 | 0.686018 |
| MmugDNA.35317.1.S1_at   | MmugDNA.35317.1 | 6.97  | 5.88  | 0.26 | 0.48 | 2.12  | 0.09941  | 0.11682  | 0.459261 | 0.384133 |
| MmugDNA.35319.1.S1_at   | MmugDNA.35319.1 | 7.13  | 5.8   | 1.29 | 0.48 | 2.52  | 0.161707 | 0.24702  | 0.526573 | 0.516238 |
| MmugDNA.3532.1.S1_at    | MmugDNA.3532.1  | 6.94  | 6.67  | 0.23 | 0.63 | 1.2   | 0.271728 | 0.445629 | 0.615789 | 0.662468 |
| MmugDNA.35320.1.S1_at   | MmugDNA.35320.1 | 9.77  | 9.28  | 0.52 | 0.18 | 1.4   | 0.217082 | 0.245793 | 0.576631 | 0.515519 |
| MmugDNA.35322.1.S1_at   | MmugDNA.35322.1 | 6.69  | 6.73  | 0.2  | 0.06 | -1.03 | 0.862703 | 0.584452 | 0.944773 | 0.752435 |
| MmugDNA.35323.1.S1_at   | MmugDNA.35323.1 | 3.86  | 3.43  | 0.48 | 0.59 | 1.34  | 0.264666 | 0.413823 | 0.610398 | 0.639821 |
| MmugDNA.35324.1.S1_at   | MmugDNA.35324.1 | 6.73  | 6.77  | 0.05 | 0.05 | -1.02 | 0.242041 | 0.267842 | 0.594277 | 0.533607 |
| MmugDNA.35325.1.S1_at   | MmugDNA.35325.1 | 10.83 | 10.89 | 0.09 | 0.69 | -1.05 | 0.906265 | 0.575483 | 0.9627   | 0.746538 |
| MmugDNA.35326.1.S1_at   | MmugDNA.35326.1 | 6.86  | 7.07  | 1.12 | 0.42 | -1.16 | 0.78039  | 0.750168 | 0.908495 | 0.854731 |
| MmugDNA.35327.1.S1_at   | MmugDNA.35327.1 | 11.75 | 11.91 | 0.39 | 0.15 | -1.12 | 0.485867 | 0.617503 | 0.751144 | 0.773477 |
| MmugDNA.35329.1.S1_at   | MmugDNA.35329.1 | 6.43  | 6.88  | 0.15 | 0.3  | -1.37 | 0.331256 | 0.36782  | 0.656225 | 0.607466 |
| MmugDNA.3533.1.S1_at    | MmugDNA.3533.1  | 4.78  | 4.71  | 0.37 | 0.09 | 1.05  | 0.358864 | 0.379687 | 0.673592 | 0.616523 |
| MmugDNA.35330.1.S1_at   | MmugDNA.35330.1 | 4.64  | 4.8   | 0.12 | 0.23 | -1.11 | 0.665397 | 0.812794 | 0.850011 | 0.891795 |
| MmugDNA.35332.1.S1_at   | MmugDNA.35332.1 | 3.74  | 3.87  | 0.08 | 0.34 | -1.09 | 0.395415 | 0.555346 | 0.69645  | 0.733767 |
| MmugDNA.35333.1.S1_at   | MmugDNA.35333.1 | 3.85  | 3.94  | 0.06 | 0.17 | -1.07 | 0.504691 | 0.117848 | 0.761366 | 0.38576  |
| MmugDNA.35335.1.S1_at   | MmugDNA.35335.1 | 3.34  | 3.03  | 0.08 | 0.02 | 1.24  | 0.002319 | 0.017737 | 0.161798 | 0.168367 |
| MmugDNA.35336.1.S1_at   | MmugDNA.35336.1 | 4.87  | 4.86  | 0.02 | 0.03 | 1.01  | 0.191725 | 0.480349 | 0.554768 | 0.68574  |
| MmugDNA.35337.1.S1_at   | MmugDNA.35337.1 | 5.95  | 6.27  | 1.14 | 0.59 | -1.25 | 0.716173 | 0.723115 | 0.875326 | 0.839592 |
| MmugDNA.35340.1.S1_at   | MmugDNA.35340.1 | 3.39  | 3.32  | 0.53 | 0.26 | 1.04  | 0.448726 | 0.458615 | 0.729784 | 0.671246 |
| MmugDNA.35342.1.S1_at   | MmugDNA.35342.1 | 4.66  | 4.66  | 0.02 | 0.12 | 1     | 0.405899 | 0.645161 | 0.703489 | 0.792081 |
| MmugDNA.35343.1.S1_at   | MmugDNA.35343.1 | 10.24 | 10.11 | 0.04 | 0.23 | 1.09  | 0.262188 | 0.170327 | 0.608894 | 0.447103 |
| MmugDNA.35343.1.S1_s_at | MmugDNA.35343.1 | 8.37  | 8.25  | 0.03 | 0.07 | 1.09  | 0.102296 | 0.628209 | 0.462013 | 0.781087 |
| MmugDNA.35344.1.S1_at   | MmugDNA.35344.1 | 3.74  | 3.44  | 0.16 | 0.09 | 1.23  | 0.080161 | 0.079206 | 0.430341 | 0.32639  |
| MmugDNA.35345.1.S1_at   | MmugDNA.35345.1 | 3.34  | 3.5   | 0.08 | 0.11 | -1.12 | 0.118585 | 0.152441 | 0.48294  | 0.427274 |
| MmugDNA.35346.1.S1_at   | MmugDNA.35346.1 | 13.18 | 13.33 | 0.15 | 0.19 | -1.11 | 0.806659 | 0.768329 | 0.920793 | 0.865493 |
| MmugDNA.35346.1.S1_s_at | MmugDNA.35346.1 | 13.81 | 13.78 | 0.2  | 0.21 | 1.02  | 0.943802 | 0.750289 | 0.978535 | 0.854766 |
| MmugDNA.35347.1.S1_at   | MmugDNA.35347.1 | 3.59  | 3.52  | 0.21 | 0.2  | 1.04  | 0.712549 | 0.566833 | 0.874083 | 0.740807 |
| MmugDNA.35348.1.S1_at   | MmugDNA.35348.1 | 7.2   | 7.25  | 0.3  | 0.48 | -1.04 | 0.882717 | 0.347924 | 0.952889 | 0.592196 |
| MmugDNA.35349.1.S1_at   | MmugDNA.35349.1 | 7.3   | 7.25  | 0.07 | 0.16 | 1.04  | 0.753864 | 0.11663  | 0.895075 | 0.383829 |
| MmugDNA.3535.1.S1_at    | MmugDNA.3535.1  | 4.94  | 5.03  | 0.95 | 0.19 | -1.07 | 0.465116 | 0.496268 | 0.739804 | 0.695931 |
| MmugDNA.35350.1.S1_at   | MmugDNA.35350.1 | 2.87  | 2.85  | 0.09 | 0.13 | 1.02  | 0.827285 | 0.665052 | 0.929946 | 0.803733 |
| MmugDNA.35351.1.S1_at   | MmugDNA.35351.1 | 9.79  | 9.68  | 0.14 | 0.3  | 1.08  | 0.369571 | 0.104705 | 0.680782 | 0.366086 |
| MmugDNA.35352.1.S1_at   | MmugDNA.35352.1 | 10.43 | 10.17 | 0.17 | 0.28 | 1.19  | 0.268304 | 0.114632 | 0.613118 | 0.381156 |
| MmugDNA.35353.1.S1_at   | MmugDNA.35353.1 | 4.07  | 4.17  | 0.12 | 0.1  | -1.07 | 0.458089 | 0.242881 | 0.735181 | 0.513274 |
| MmugDNA.35354.1.S1_at   | MmugDNA.35354.1 | 10.61 | 10.37 | 0.02 | 0.35 | 1.18  | 0.18699  | 0.036549 | 0.550106 | 0.235649 |
| MmugDNA.35355.1.S1_at   | MmugDNA.35355.1 | 7.34  | 7.28  | 0.32 | 0.11 | 1.04  | 0.200632 | 0.280447 | 0.5634   | 0.543648 |
| MmugDNA.35356.1.S1_at   | MmugDNA.35356.1 | 7.92  | 7.83  | 0.38 | 0.43 | 1.06  | 0.173647 | 0.173524 | 0.53719  | 0.449938 |

|                         |                 |       |       |      |      |       |          |          |          |          |
|-------------------------|-----------------|-------|-------|------|------|-------|----------|----------|----------|----------|
| MmugDNA.35357.1.S1_at   | MmugDNA.35357.1 | 6.48  | 6.69  | 0.1  | 0.18 | -1.16 | 0.134083 | 0.094048 | 0.50068  | 0.350674 |
| MmugDNA.35357.1.S1_s_at | MmugDNA.35357.1 | 12.36 | 12.18 | 0.06 | 0.17 | 1.14  | 0.338719 | 0.444497 | 0.660988 | 0.662072 |
| MmugDNA.35358.1.S1_at   | MmugDNA.35358.1 | 6.55  | 6.61  | 0.21 | 0.17 | -1.04 | 0.633358 | 0.314625 | 0.833644 | 0.568415 |
| MmugDNA.35359.1.S1_at   | MmugDNA.35359.1 | 5.51  | 5.16  | 0.73 | 0.68 | 1.27  | 0.625232 | 0.834267 | 0.82872  | 0.905059 |
| MmugDNA.3536.1.S1_at    | MmugDNA.3536.1  | 7.8   | 7.87  | 0.28 | 0.84 | -1.05 | 0.84144  | 0.565159 | 0.936191 | 0.739748 |
| MmugDNA.35360.1.S1_at   | MmugDNA.35360.1 | 6.35  | 6.67  | 0.25 | 0.11 | -1.25 | 0.16473  | 0.18089  | 0.528656 | 0.457394 |
| MmugDNA.35364.1.S1_at   | MmugDNA.35364.1 | 4.72  | 4.75  | 0.06 | 0.11 | -1.02 | 0.412031 | 0.442338 | 0.707737 | 0.660347 |
| MmugDNA.35365.1.S1_at   | MmugDNA.35365.1 | 4.11  | 3.88  | 0.19 | 0.11 | 1.17  | 0.163585 | 0.214974 | 0.527992 | 0.488898 |
| MmugDNA.35366.1.S1_at   | MmugDNA.35366.1 | 4.36  | 4.89  | 0.24 | 0.33 | -1.45 | 0.038753 | 0.02534  | 0.345351 | 0.199522 |
| MmugDNA.35369.1.S1_at   | MmugDNA.35369.1 | 9.67  | 8.8   | 0.18 | 0.03 | 1.83  | 0.000816 | 0.000066 | 0.136818 | 0.025805 |
| MmugDNA.3537.1.S1_at    | MmugDNA.3537.1  | 3.2   | 3.21  | 0.09 | 0.26 | -1.01 | 0.250036 | 0.29105  | 0.600389 | 0.551574 |
| MmugDNA.35370.1.S1_at   | MmugDNA.35370.1 | 3.11  | 3.17  | 0.11 | 0.02 | -1.04 | 0.157577 | 0.146147 | 0.5225   | 0.420099 |
| MmugDNA.35371.1.S1_at   | MmugDNA.35371.1 | 4.74  | 4.42  | 0.08 | 0.13 | 1.24  | 0.034781 | 0.057912 | 0.333943 | 0.287117 |
| MmugDNA.35372.1.S1_at   | MmugDNA.35372.1 | 4.53  | 4.53  | 0.26 | 0.52 | -1    | 0.778144 | 0.509595 | 0.907387 | 0.704267 |
| MmugDNA.35373.1.S1_at   | MmugDNA.35373.1 | 4.42  | 4.74  | 0.02 | 0.38 | -1.25 | 0.205163 | 0.12898  | 0.567639 | 0.400455 |
| MmugDNA.35374.1.S1_at   | MmugDNA.35374.1 | 8.13  | 7.82  | 0.1  | 0.13 | 1.24  | 0.044318 | 0.022531 | 0.358414 | 0.187928 |
| MmugDNA.35375.1.S1_at   | MmugDNA.35375.1 | 12.65 | 12.28 | 0.13 | 0.03 | 1.3   | 0.007828 | 0.003372 | 0.213391 | 0.083569 |
| MmugDNA.35376.1.S1_at   | MmugDNA.35376.1 | 12.85 | 12.59 | 0.12 | 0.01 | 1.19  | 0.011514 | 0.005733 | 0.23613  | 0.104271 |
| MmugDNA.35377.1.S1_at   | MmugDNA.35377.1 | 4.64  | 4.58  | 0.23 | 0.04 | 1.04  | 0.264471 | 0.347616 | 0.610188 | 0.592039 |
| MmugDNA.35378.1.S1_at   | MmugDNA.35378.1 | 3.91  | 3.91  | 0.01 | 0.14 | -1    | 0.547393 | 0.748056 | 0.786215 | 0.853351 |
| MmugDNA.35379.1.S1_at   | MmugDNA.35379.1 | 3.72  | 3.24  | 0.05 | 0.53 | 1.4   | 0.361709 | 0.522839 | 0.6754   | 0.713416 |
| MmugDNA.3538.1.S1_at    | MmugDNA.3538.1  | 9.79  | 8.77  | 0.67 | 0.29 | 2.03  | 0.080336 | 0.129243 | 0.430418 | 0.400635 |
| MmugDNA.35380.1.S1_at   | MmugDNA.35380.1 | 5.53  | 4.4   | 0.18 | 0.81 | 2.18  | 0.244816 | 0.343886 | 0.596467 | 0.589575 |
| MmugDNA.35381.1.S1_at   | MmugDNA.35381.1 | 4.17  | 4.08  | 0.19 | 0.03 | 1.07  | 0.996009 | 0.933568 | 0.998451 | 0.962229 |
| MmugDNA.35382.1.S1_at   | MmugDNA.35382.1 | 5.22  | 5.1   | 0.21 | 0.04 | 1.09  | 0.836209 | 0.85567  | 0.933665 | 0.917683 |
| MmugDNA.35384.1.S1_at   | MmugDNA.35384.1 | 5.52  | 5.85  | 0.27 | 0.12 | -1.26 | 0.213328 | 0.275798 | 0.573596 | 0.540035 |
| MmugDNA.35385.1.S1_at   | MmugDNA.35385.1 | 7.77  | 7.06  | 0.51 | 0.59 | 1.64  | 0.195547 | 0.039244 | 0.558901 | 0.243274 |
| MmugDNA.35386.1.S1_at   | MmugDNA.35386.1 | 3.71  | 3.07  | 0.68 | 0.05 | 1.56  | 0.207175 | 0.096966 | 0.569274 | 0.354453 |
| MmugDNA.35387.1.S1_at   | MmugDNA.35387.1 | 9.07  | 8.3   | 0.17 | 0.71 | 1.7   | 0.132133 | 0.144871 | 0.498325 | 0.418762 |
| MmugDNA.35388.1.S1_at   | MmugDNA.35388.1 | 4.27  | 4.4   | 0.03 | 0.16 | -1.09 | 0.229324 | 0.088881 | 0.586472 | 0.34272  |
| MmugDNA.3539.1.S1_at    | MmugDNA.3539.1  | 10.53 | 10.63 | 0.11 | 0.36 | -1.07 | 0.696877 | 0.400095 | 0.86551  | 0.630158 |
| MmugDNA.35390.1.S1_at   | MmugDNA.35390.1 | 3.56  | 3.57  | 0.12 | 0    | -1.01 | 0.614895 | 0.695653 | 0.823286 | 0.823091 |
| MmugDNA.35391.1.S1_at   | MmugDNA.35391.1 | 4.06  | 4.94  | 0.54 | 0.28 | -1.84 | 0.305759 | 0.388639 | 0.639223 | 0.622947 |
| MmugDNA.35392.1.S1_at   | MmugDNA.35392.1 | 6.01  | 6.11  | 0.17 | 0.25 | -1.07 | 0.79834  | 0.937055 | 0.916444 | 0.964514 |
| MmugDNA.35393.1.S1_at   | MmugDNA.35393.1 | 4.43  | 4.4   | 0.03 | 0.29 | 1.02  | 0.722265 | 0.893378 | 0.878644 | 0.939163 |
| MmugDNA.35396.1.S1_at   | MmugDNA.35396.1 | 9.43  | 9.55  | 0.11 | 0.17 | -1.09 | 0.38496  | 0.545443 | 0.690208 | 0.727546 |
| MmugDNA.35397.1.S1_at   | MmugDNA.35397.1 | 5.83  | 5.79  | 0.88 | 0.27 | 1.03  | 0.255963 | 0.277728 | 0.603671 | 0.541648 |
| MmugDNA.35398.1.S1_at   | MmugDNA.35398.1 | 7.53  | 7.09  | 0.16 | 0.27 | 1.36  | 0.131607 | 0.158746 | 0.498041 | 0.434824 |
| MmugDNA.35399.1.S1_at   | MmugDNA.35399.1 | 6.36  | 6.54  | 0.06 | 0.06 | -1.14 | 0.050808 | 0.051781 | 0.375491 | 0.273124 |
| MmugDNA.354.1.S1_at     | MmugDNA.354.1   | 5.29  | 5.29  | 0.09 | 0.24 | 1     | 0.4189   | 0.179097 | 0.711627 | 0.455436 |
| MmugDNA.3540.1.S1_at    | MmugDNA.3540.1  | 4.66  | 3.82  | 0.17 | 0.35 | 1.78  | 0.034221 | 0.034307 | 0.332057 | 0.229145 |

|                         |                 |       |       |      |      |       |          |          |          |          |
|-------------------------|-----------------|-------|-------|------|------|-------|----------|----------|----------|----------|
| MmugDNA.35400.1.S1_at   | MmugDNA.35400.1 | 5.31  | 5.38  | 0.07 | 0.11 | -1.05 | 0.300424 | 0.664082 | 0.635857 | 0.803247 |
| MmugDNA.35401.1.S1_at   | MmugDNA.35401.1 | 6.08  | 5.76  | 0.56 | 1.02 | 1.26  | 0.819067 | 0.955378 | 0.926528 | 0.974645 |
| MmugDNA.35403.1.S1_at   | MmugDNA.35403.1 | 4.15  | 4.15  | 0.32 | 0.07 | -1    | 0.393074 | 0.442096 | 0.694956 | 0.660153 |
| MmugDNA.35405.1.S1_at   | MmugDNA.35405.1 | 6.79  | 6.93  | 0.16 | 0.17 | -1.1  | 0.476455 | 0.707858 | 0.746232 | 0.830504 |
| MmugDNA.35406.1.S1_at   | MmugDNA.35406.1 | 4.24  | 4.24  | 0.26 | 0.35 | 1     | 0.930151 | 0.991774 | 0.972992 | 0.995392 |
| MmugDNA.35407.1.S1_at   | MmugDNA.35407.1 | 7.97  | 6.85  | 0.94 | 1.44 | 2.17  | 0.356446 | 0.218527 | 0.671568 | 0.492142 |
| MmugDNA.35408.1.S1_at   | MmugDNA.35408.1 | 5.44  | 5.61  | 0.11 | 0.09 | -1.12 | 0.153617 | 0.281221 | 0.518085 | 0.544374 |
| MmugDNA.35409.1.S1_at   | MmugDNA.35409.1 | 4.11  | 4.13  | 0.19 | 0.07 | -1.02 | 0.483095 | 0.333194 | 0.749775 | 0.581467 |
| MmugDNA.3541.1.S1_at    | MmugDNA.3541.1  | 6.28  | 6.01  | 0.23 | 0.21 | 1.21  | 0.185896 | 0.225177 | 0.549412 | 0.497846 |
| MmugDNA.35410.1.S1_at   | MmugDNA.35410.1 | 4.27  | 4.23  | 0.23 | 0.06 | 1.03  | 0.622573 | 0.800955 | 0.827546 | 0.885538 |
| MmugDNA.35411.1.S1_at   | MmugDNA.35411.1 | 3.54  | 3.45  | 0.15 | 0.03 | 1.06  | 0.372384 | 0.244518 | 0.682812 | 0.51432  |
| MmugDNA.35412.1.S1_at   | MmugDNA.35412.1 | 5.33  | 5.29  | 0.28 | 0.1  | 1.03  | 0.930598 | 0.462213 | 0.973196 | 0.673601 |
| MmugDNA.35413.1.S1_at   | MmugDNA.35413.1 | 5.7   | 5.9   | 0.22 | 0.17 | -1.15 | 0.112482 | 0.461849 | 0.474984 | 0.673368 |
| MmugDNA.35414.1.S1_at   | MmugDNA.35414.1 | 8.17  | 9.36  | 0.18 | 0.11 | -2.29 | 0.000598 | 0.001032 | 0.136818 | 0.051297 |
| MmugDNA.35415.1.S1_at   | MmugDNA.35415.1 | 2.98  | 3.13  | 0.12 | 0.24 | -1.11 | 0.369308 | 0.485947 | 0.680609 | 0.689542 |
| MmugDNA.35416.1.S1_at   | MmugDNA.35416.1 | 8.33  | 8     | 0.79 | 0.19 | 1.25  | 0.664405 | 0.363795 | 0.849532 | 0.604189 |
| MmugDNA.35417.1.S1_at   | MmugDNA.35417.1 | 4.51  | 4.24  | 0.33 | 0    | 1.21  | 0.59645  | 0.426608 | 0.812957 | 0.648739 |
| MmugDNA.35418.1.S1_at   | MmugDNA.35418.1 | 9.45  | 8.38  | 0.25 | 0.14 | 2.09  | 0.00286  | 0.000806 | 0.168913 | 0.04607  |
| MmugDNA.35418.1.S1_s_at | MmugDNA.35418.1 | 9.96  | 8.82  | 0.23 | 0.12 | 2.21  | 0.002623 | 0.000419 | 0.164386 | 0.038093 |
| MmugDNA.35419.1.S1_at   | MmugDNA.35419.1 | 4.71  | 4.88  | 0.09 | 0.11 | -1.12 | 0.047251 | 0.045505 | 0.365679 | 0.2575   |
| MmugDNA.3542.1.S1_at    | MmugDNA.3542.1  | 9.24  | 8.32  | 0.23 | 0.79 | 1.88  | 0.086191 | 0.041143 | 0.440157 | 0.247669 |
| MmugDNA.35420.1.S1_at   | MmugDNA.35420.1 | 5.27  | 5.87  | 0.07 | 0.7  | -1.51 | 0.246267 | 0.302614 | 0.597666 | 0.560201 |
| MmugDNA.35421.1.S1_at   | MmugDNA.35421.1 | 5.65  | 5.62  | 0.22 | 0    | 1.02  | 0.503249 | 0.550748 | 0.760699 | 0.730611 |
| MmugDNA.35422.1.S1_at   | MmugDNA.35422.1 | 5.15  | 5.36  | 0.11 | 0.17 | -1.16 | 0.086514 | 0.147256 | 0.440232 | 0.421464 |
| MmugDNA.35423.1.S1_at   | MmugDNA.35423.1 | 5.73  | 5.76  | 0.17 | 0.03 | -1.02 | 0.825567 | 0.956066 | 0.929243 | 0.975045 |
| MmugDNA.35425.1.S1_at   | MmugDNA.35425.1 | 6.54  | 6.76  | 0.22 | 0.41 | -1.17 | 0.198697 | 0.259326 | 0.561748 | 0.526418 |
| MmugDNA.35428.1.S1_at   | MmugDNA.35428.1 | 5.82  | 5.74  | 0.22 | 0.1  | 1.06  | 0.478348 | 0.33466  | 0.747138 | 0.582581 |
| MmugDNA.35429.1.S1_at   | MmugDNA.35429.1 | 4.86  | 5.92  | 0.1  | 0.16 | -2.09 | 0.000568 | 0.002989 | 0.136818 | 0.079958 |
| MmugDNA.3543.1.S1_at    | MmugDNA.3543.1  | 10.35 | 10.54 | 0.23 | 0.38 | -1.14 | 0.445312 | 0.104542 | 0.727553 | 0.365805 |
| MmugDNA.35433.1.S1_at   | MmugDNA.35433.1 | 6.47  | 6.31  | 0.06 | 0.28 | 1.12  | 0.959567 | 0.623427 | 0.984651 | 0.777776 |
| MmugDNA.35434.1.S1_at   | MmugDNA.35434.1 | 3.49  | 3.69  | 0.29 | 0.11 | -1.15 | 0.946243 | 0.370173 | 0.979359 | 0.609371 |
| MmugDNA.35435.1.S1_at   | MmugDNA.35435.1 | 3.49  | 3.44  | 0.3  | 0.18 | 1.03  | 0.332021 | 0.10072  | 0.656625 | 0.360108 |
| MmugDNA.35436.1.S1_at   | MmugDNA.35436.1 | 5.52  | 4.5   | 0.74 | 0.36 | 2.03  | 0.274757 | 0.435933 | 0.617628 | 0.655636 |
| MmugDNA.35437.1.S1_at   | MmugDNA.35437.1 | 3.39  | 3.39  | 0.16 | 0.1  | 1     | 0.942842 | 0.865139 | 0.97826  | 0.923484 |
| MmugDNA.35438.1.S1_at   | MmugDNA.35438.1 | 4.06  | 4.08  | 0.2  | 0.13 | -1.01 | 0.322209 | 0.317967 | 0.650882 | 0.571046 |
| MmugDNA.35439.1.S1_s_at | MmugDNA.35439.1 | 11.09 | 10.75 | 0.08 | 0.09 | 1.27  | 0.005939 | 0.000134 | 0.193916 | 0.029087 |
| MmugDNA.35440.1.S1_at   | MmugDNA.35440.1 | 4.72  | 4.33  | 0.96 | 0.58 | 1.31  | 0.401337 | 0.582478 | 0.700776 | 0.751115 |
| MmugDNA.35441.1.S1_at   | MmugDNA.35441.1 | 4.46  | 4.58  | 0.17 | 0.07 | -1.09 | 0.503288 | 0.398498 | 0.760699 | 0.629458 |
| MmugDNA.35442.1.S1_at   | MmugDNA.35442.1 | 4.4   | 3.96  | 0.33 | 0.07 | 1.36  | 0.30587  | 0.63953  | 0.639227 | 0.788329 |
| MmugDNA.35443.1.S1_at   | MmugDNA.35443.1 | 5.42  | 5.85  | 0.51 | 0.47 | -1.35 | 0.806713 | 0.708576 | 0.920801 | 0.830979 |
| MmugDNA.35445.1.S1_at   | MmugDNA.35445.1 | 6.57  | 6.61  | 0.13 | 0.22 | -1.03 | 0.728641 | 0.686045 | 0.88208  | 0.81675  |

|                         |                 |       |       |      |      |       |          |          |          |          |
|-------------------------|-----------------|-------|-------|------|------|-------|----------|----------|----------|----------|
| MmugDNA.35445.1.S1_s_at | MmugDNA.35445.1 | 7.23  | 7.48  | 0.2  | 0.17 | -1.19 | 0.168906 | 0.177385 | 0.53321  | 0.453742 |
| MmugDNA.35446.1.S1_at   | MmugDNA.35446.1 | 9.22  | 9.16  | 0.47 | 0.34 | 1.04  | 0.972712 | 0.877407 | 0.989474 | 0.930139 |
| MmugDNA.35449.1.S1_at   | MmugDNA.35449.1 | 10.37 | 10.41 | 0.15 | 0.12 | -1.03 | 0.436263 | 0.08591  | 0.721644 | 0.338068 |
| MmugDNA.3545.1.S1_at    | MmugDNA.3545.1  | 8.2   | 8.4   | 0.32 | 0.24 | -1.15 | 0.425012 | 0.141074 | 0.714956 | 0.414592 |
| MmugDNA.35451.1.S1_at   | MmugDNA.35451.1 | 6.95  | 7.32  | 0.03 | 0.33 | -1.29 | 0.127389 | 0.064445 | 0.493834 | 0.300008 |
| MmugDNA.35452.1.S1_at   | MmugDNA.35452.1 | 3.26  | 3.52  | 0.11 | 0.12 | -1.2  | 0.090028 | 0.084075 | 0.445441 | 0.335065 |
| MmugDNA.35454.1.S1_at   | MmugDNA.35454.1 | 5.56  | 5.01  | 0.14 | 0.08 | 1.47  | 0.004502 | 0.000916 | 0.183787 | 0.048475 |
| MmugDNA.35456.1.S1_at   | MmugDNA.35456.1 | 6.94  | 7.06  | 0.19 | 0.1  | -1.09 | 0.377578 | 0.499819 | 0.685995 | 0.698538 |
| MmugDNA.3546.1.S1_at    | MmugDNA.3546.1  | 3.91  | 3.94  | 0.46 | 0.3  | -1.02 | 0.495397 | 0.51678  | 0.757219 | 0.70925  |
| MmugDNA.35460.1.S1_at   | MmugDNA.35460.1 | 6.11  | 6.06  | 0.17 | 0.19 | 1.04  | 0.829056 | 0.743299 | 0.930604 | 0.851281 |
| MmugDNA.35461.1.S1_at   | MmugDNA.35461.1 | 3.53  | 3.46  | 0.19 | 0.27 | 1.05  | 0.684928 | 0.542972 | 0.85882  | 0.725861 |
| MmugDNA.35462.1.S1_at   | MmugDNA.35462.1 | 4.11  | 3.97  | 0.84 | 0.16 | 1.1   | 0.339651 | 0.361954 | 0.661347 | 0.602725 |
| MmugDNA.35463.1.S1_at   | MmugDNA.35463.1 | 4.86  | 4.82  | 0.12 | 0.07 | 1.03  | 0.333373 | 0.543361 | 0.657553 | 0.72607  |
| MmugDNA.35464.1.S1_at   | MmugDNA.35464.1 | 7.31  | 7.24  | 0.15 | 0.08 | 1.05  | 0.549554 | 0.141418 | 0.787363 | 0.414874 |
| MmugDNA.35465.1.S1_at   | MmugDNA.35465.1 | 5.98  | 6.15  | 0.4  | 0.88 | -1.13 | 0.613654 | 0.306894 | 0.822845 | 0.563427 |
| MmugDNA.35466.1.S1_at   | MmugDNA.35466.1 | 3.62  | 3.49  | 0.19 | 0.05 | 1.09  | 0.92084  | 0.918343 | 0.969095 | 0.954227 |
| MmugDNA.35471.1.S1_at   | MmugDNA.35471.1 | 9.46  | 8.94  | 0.15 | 0.8  | 1.43  | 0.111302 | 0.12364  | 0.473446 | 0.393692 |
| MmugDNA.35472.1.S1_at   | MmugDNA.35472.1 | 3.54  | 4.03  | 0.62 | 0.85 | -1.4  | 0.364724 | 0.449771 | 0.6776   | 0.665263 |
| MmugDNA.35474.1.S1_at   | MmugDNA.35474.1 | 5.62  | 5.41  | 0.46 | 0.14 | 1.16  | 0.466803 | 0.502272 | 0.740411 | 0.70006  |
| MmugDNA.35475.1.S1_at   | MmugDNA.35475.1 | 5.24  | 5.28  | 0.18 | 0.19 | -1.03 | 0.868005 | 0.513935 | 0.947274 | 0.707322 |
| MmugDNA.35476.1.S1_at   | MmugDNA.35476.1 | 8.86  | 9.36  | 0.52 | 0.31 | -1.41 | 0.812051 | 0.14115  | 0.923484 | 0.414665 |
| MmugDNA.35477.1.S1_at   | MmugDNA.35477.1 | 13    | 13.1  | 0.13 | 0.09 | -1.07 | 0.385036 | 0.313552 | 0.690226 | 0.56796  |
| MmugDNA.35478.1.S1_at   | MmugDNA.35478.1 | 7.61  | 6.52  | 0.33 | 0.15 | 2.13  | 0.003323 | 0.001533 | 0.177442 | 0.059437 |
| MmugDNA.35479.1.S1_at   | MmugDNA.35479.1 | 3.59  | 3.58  | 0.15 | 0.05 | 1     | 0.423345 | 0.412756 | 0.714016 | 0.63909  |
| MmugDNA.35481.1.S1_at   | MmugDNA.35481.1 | 4.63  | 4.72  | 0.24 | 0.28 | -1.06 | 0.365509 | 0.10384  | 0.678307 | 0.364519 |
| MmugDNA.35482.1.S1_at   | MmugDNA.35482.1 | 3.42  | 3.82  | 0.17 | 0.16 | -1.32 | 0.081288 | 0.126269 | 0.431975 | 0.39678  |
| MmugDNA.35483.1.S1_at   | MmugDNA.35483.1 | 3.28  | 3     | 1.1  | 0.19 | 1.21  | 0.235136 | 0.406159 | 0.589342 | 0.634211 |
| MmugDNA.35485.1.S1_at   | MmugDNA.35485.1 | 4.03  | 4.52  | 0.05 | 0.26 | -1.41 | 0.089398 | 0.090859 | 0.445032 | 0.345474 |
| MmugDNA.35486.1.S1_at   | MmugDNA.35486.1 | 4.94  | 4.98  | 0.28 | 0.16 | -1.03 | 0.442967 | 0.120999 | 0.725962 | 0.389991 |
| MmugDNA.35487.1.S1_at   | MmugDNA.35487.1 | 7.78  | 7.94  | 0.19 | 0.23 | -1.11 | 0.670952 | 0.771794 | 0.852532 | 0.867347 |
| MmugDNA.35489.1.S1_at   | MmugDNA.35489.1 | 4.53  | 4.5   | 0.29 | 0.09 | 1.02  | 0.571629 | 0.789424 | 0.800296 | 0.878366 |
| MmugDNA.35491.1.S1_at   | MmugDNA.35491.1 | 9.78  | 9.97  | 0.1  | 0.2  | -1.14 | 0.291489 | 0.072663 | 0.628798 | 0.31561  |
| MmugDNA.35492.1.S1_at   | MmugDNA.35492.1 | 8.44  | 8.22  | 0.18 | 0.09 | 1.17  | 0.392408 | 0.001237 | 0.694657 | 0.05478  |
| MmugDNA.35493.1.S1_at   | MmugDNA.35493.1 | 2.86  | 3.71  | 0.25 | 0.59 | -1.81 | 0.080416 | 0.090657 | 0.430491 | 0.345151 |
| MmugDNA.35495.1.S1_at   | MmugDNA.35495.1 | 7.67  | 7.95  | 0.16 | 0.59 | -1.22 | 0.513613 | 0.630466 | 0.766403 | 0.782237 |
| MmugDNA.35497.1.S1_at   | MmugDNA.35497.1 | 4.59  | 5.19  | 0.25 | 0.32 | -1.52 | 0.200336 | 0.209944 | 0.563198 | 0.48371  |
| MmugDNA.35499.1.S1_at   | MmugDNA.35499.1 | 5.15  | 5.12  | 0.22 | 0.14 | 1.02  | 0.493989 | 0.503622 | 0.756411 | 0.700988 |
| MmugDNA.3550.1.S1_at    | MmugDNA.3550.1  | 6.41  | 6.44  | 0.03 | 0.17 | -1.02 | 0.769592 | 0.894287 | 0.903096 | 0.939697 |
| MmugDNA.35500.1.S1_at   | MmugDNA.35500.1 | 5.57  | 7.52  | 0.57 | 2.19 | -3.87 | 0.235627 | 0.252819 | 0.589497 | 0.521174 |
| MmugDNA.35501.1.S1_at   | MmugDNA.35501.1 | 7.61  | 7.95  | 0.25 | 0.17 | -1.27 | 0.280138 | 0.022473 | 0.621417 | 0.187564 |
| MmugDNA.35502.1.S1_at   | MmugDNA.35502.1 | 2.55  | 2.71  | 0.07 | 0.03 | -1.11 | 0.038896 | 0.068183 | 0.345909 | 0.307314 |

|                         |                 |       |       |      |      |        |          |          |          |          |
|-------------------------|-----------------|-------|-------|------|------|--------|----------|----------|----------|----------|
| MmugDNA.35505.1.S1_at   | MmugDNA.35505.1 | 8.34  | 7.68  | 0.38 | 0.4  | 1.58   | 0.48253  | 0.585827 | 0.749408 | 0.753068 |
| MmugDNA.35506.1.S1_at   | MmugDNA.35506.1 | 3.34  | 3.62  | 0.16 | 0.06 | -1.21  | 0.12781  | 0.067469 | 0.494071 | 0.305764 |
| MmugDNA.35507.1.S1_at   | MmugDNA.35507.1 | 5.8   | 5.69  | 0.12 | 0.17 | 1.08   | 0.519311 | 0.142886 | 0.770145 | 0.416846 |
| MmugDNA.35508.1.S1_at   | MmugDNA.35508.1 | 5.6   | 5.79  | 0.09 | 0.05 | -1.14  | 0.027842 | 0.062938 | 0.309107 | 0.297579 |
| MmugDNA.35509.1.S1_at   | MmugDNA.35509.1 | 10.74 | 10.72 | 0.08 | 0.48 | 1.01   | 0.916867 | 0.968909 | 0.967488 | 0.982889 |
| MmugDNA.35510.1.S1_at   | MmugDNA.35510.1 | 5.58  | 5.33  | 0.17 | 0.37 | 1.19   | 0.835497 | 0.342239 | 0.933379 | 0.588375 |
| MmugDNA.35511.1.S1_at   | MmugDNA.35511.1 | 9.64  | 9.09  | 0.06 | 0.15 | 1.46   | 0.00608  | 0.001804 | 0.195337 | 0.063714 |
| MmugDNA.35512.1.S1_at   | MmugDNA.35512.1 | 6.87  | 6.92  | 0.42 | 0.41 | -1.04  | 0.810431 | 0.801735 | 0.922734 | 0.885903 |
| MmugDNA.35513.1.S1_at   | MmugDNA.35513.1 | 5.48  | 5.47  | 0.37 | 0.14 | 1.01   | 0.392598 | 0.217451 | 0.694693 | 0.491035 |
| MmugDNA.35514.1.S1_at   | MmugDNA.35514.1 | 6.35  | 6.37  | 0.09 | 0.21 | -1.01  | 0.67197  | 0.786906 | 0.852746 | 0.876732 |
| MmugDNA.35515.1.S1_at   | MmugDNA.35515.1 | 6.73  | 6.29  | 0.16 | 0.6  | 1.36   | 0.309754 | 0.306468 | 0.641716 | 0.563029 |
| MmugDNA.35517.1.S1_at   | MmugDNA.35517.1 | 10.97 | 12.27 | 0.12 | 0.13 | -2.45  | 0.000204 | 0.00002  | 0.120316 | 0.019635 |
| MmugDNA.35518.1.S1_at   | MmugDNA.35518.1 | 5.06  | 5.11  | 0.09 | 0.07 | -1.04  | 0.52302  | 0.31251  | 0.772266 | 0.56722  |
| MmugDNA.35519.1.S1_at   | MmugDNA.35519.1 | 5.71  | 5.8   | 0.18 | 0.16 | -1.07  | 0.209209 | 0.162968 | 0.570833 | 0.439131 |
| MmugDNA.3552.1.S1_at    | MmugDNA.3552.1  | 4.4   | 4.46  | 0.44 | 0.12 | -1.05  | 0.853046 | 0.752702 | 0.940695 | 0.855968 |
| MmugDNA.35520.1.S1_at   | MmugDNA.35520.1 | 8.02  | 7.92  | 0.25 | 0.32 | 1.07   | 0.729207 | 0.307035 | 0.882443 | 0.563427 |
| MmugDNA.35521.1.S1_at   | MmugDNA.35521.1 | 3.7   | 3.61  | 0.26 | 0.28 | 1.07   | 0.341019 | 0.309796 | 0.662232 | 0.565044 |
| MmugDNA.35523.1.S1_at   | MmugDNA.35523.1 | 7.08  | 7.34  | 0.1  | 0.25 | -1.2   | 0.113989 | 0.148486 | 0.47744  | 0.423016 |
| MmugDNA.35524.1.S1_at   | MmugDNA.35524.1 | 5.03  | 5.04  | 0.18 | 0.08 | -1     | 0.688122 | 0.594712 | 0.860858 | 0.758628 |
| MmugDNA.35527.1.S1_at   | MmugDNA.35527.1 | 4.23  | 4.23  | 0.15 | 0.12 | -1     | 0.887735 | 0.447754 | 0.954902 | 0.66382  |
| MmugDNA.35528.1.S1_at   | MmugDNA.35528.1 | 9.4   | 9.89  | 0.2  | 0.27 | -1.4   | 0.072417 | 0.036805 | 0.416971 | 0.236386 |
| MmugDNA.3553.1.S1_at    | MmugDNA.3553.1  | 9.02  | 8.41  | 0.23 | 1.09 | 1.53   | 0.429431 | 0.582033 | 0.717559 | 0.750784 |
| MmugDNA.35531.1.S1_s_at | MmugDNA.35531.1 | 7.45  | 7.46  | 0.2  | 0.24 | -1.01  | 0.434355 | 0.397423 | 0.720416 | 0.628828 |
| MmugDNA.35533.1.S1_at   | MmugDNA.35533.1 | 7.93  | 8.23  | 0.17 | 0.3  | -1.23  | 0.184641 | 0.29668  | 0.548221 | 0.555697 |
| MmugDNA.35535.1.S1_at   | MmugDNA.35535.1 | 6.06  | 6.52  | 0.19 | 0.08 | -1.38  | 0.012779 | 0.011882 | 0.243715 | 0.141097 |
| MmugDNA.35536.1.S1_at   | MmugDNA.35536.1 | 11.34 | 11.52 | 0.11 | 0.2  | -1.14  | 0.208295 | 0.300475 | 0.570141 | 0.55882  |
| MmugDNA.35538.1.S1_at   | MmugDNA.35538.1 | 4.3   | 4.31  | 0.68 | 0.28 | -1     | 0.992148 | 0.708641 | 0.997321 | 0.831019 |
| MmugDNA.35539.1.S1_at   | MmugDNA.35539.1 | 4.8   | 4.59  | 0.26 | 0.23 | 1.16   | 0.775113 | 0.199954 | 0.905526 | 0.474603 |
| MmugDNA.3554.1.S1_at    | MmugDNA.3554.1  | 6.3   | 7.55  | 0.61 | 0.93 | -2.37  | 0.067288 | 0.030701 | 0.407325 | 0.217148 |
| MmugDNA.35540.1.S1_at   | MmugDNA.35540.1 | 6.31  | 6.13  | 0.4  | 0.02 | 1.13   | 0.391676 | 0.263259 | 0.694178 | 0.529531 |
| MmugDNA.35541.1.S1_at   | MmugDNA.35541.1 | 5.77  | 5.66  | 0.24 | 0.07 | 1.08   | 0.117683 | 0.048618 | 0.48184  | 0.265602 |
| MmugDNA.35542.1.S1_at   | MmugDNA.35542.1 | 8.9   | 9.46  | 0.24 | 0.37 | -1.47  | 0.274982 | 0.228869 | 0.617642 | 0.501124 |
| MmugDNA.35543.1.S1_at   | MmugDNA.35543.1 | 7.36  | 11.34 | 1.91 | 2.86 | -15.83 | 0.311095 | 0.193155 | 0.643066 | 0.468554 |
| MmugDNA.35545.1.S1_at   | MmugDNA.35545.1 | 10.9  | 10.79 | 0.03 | 0.22 | 1.08   | 0.405295 | 0.601317 | 0.703084 | 0.762665 |
| MmugDNA.35546.1.S1_at   | MmugDNA.35546.1 | 4.76  | 4.88  | 0.63 | 0.42 | -1.09  | 0.603375 | 0.403799 | 0.817133 | 0.632386 |
| MmugDNA.35547.1.S1_at   | MmugDNA.35547.1 | 3.67  | 3.8   | 0.15 | 0.23 | -1.1   | 0.78276  | 0.901332 | 0.909285 | 0.943898 |
| MmugDNA.35549.1.S1_at   | MmugDNA.35549.1 | 3.41  | 3.13  | 0.3  | 0.6  | 1.21   | 0.644096 | 0.537947 | 0.839719 | 0.7228   |
| MmugDNA.3555.1.S1_at    | MmugDNA.3555.1  | 9.78  | 10.76 | 1.05 | 1.57 | -1.97  | 0.866562 | 0.924207 | 0.946778 | 0.957283 |
| MmugDNA.35550.1.S1_at   | MmugDNA.35550.1 | 3.65  | 3.65  | 0.16 | 0.18 | 1      | 0.947936 | 0.992358 | 0.980045 | 0.995673 |
| MmugDNA.35551.1.S1_at   | MmugDNA.35551.1 | 6.14  | 6.39  | 0.24 | 0.65 | -1.19  | 0.69763  | 0.3192   | 0.865694 | 0.571688 |
| MmugDNA.35552.1.S1_at   | MmugDNA.35552.1 | 11.1  | 9.61  | 0.16 | 0.03 | 2.81   | 0.000082 | 0.000002 | 0.112653 | 0.011297 |

|                         |                 |       |       |      |      |        |          |          |          |          |
|-------------------------|-----------------|-------|-------|------|------|--------|----------|----------|----------|----------|
| MmugDNA.35553.1.S1_at   | MmugDNA.35553.1 | 6.39  | 6.32  | 0.13 | 0.16 | 1.05   | 0.209899 | 0.277735 | 0.571144 | 0.541648 |
| MmugDNA.35555.1.S1_at   | MmugDNA.35555.1 | 8.37  | 9.01  | 0.05 | 0.05 | -1.55  | 0.000132 | 0.000005 | 0.112653 | 0.016085 |
| MmugDNA.35556.1.S1_at   | MmugDNA.35556.1 | 8.04  | 7.06  | 0.55 | 0.17 | 1.97   | 0.075226 | 0.093012 | 0.422122 | 0.349175 |
| MmugDNA.3556.1.S1_at    | MmugDNA.3556.1  | 9.4   | 9.4   | 0.03 | 0.47 | 1      | 0.378828 | 0.512751 | 0.68656  | 0.7065   |
| MmugDNA.35560.1.S1_at   | MmugDNA.35560.1 | 4.04  | 3.48  | 0.46 | 0.16 | 1.47   | 0.147694 | 0.332543 | 0.513337 | 0.580954 |
| MmugDNA.35561.1.S1_at   | MmugDNA.35561.1 | 4.49  | 4.48  | 0.08 | 0.31 | 1.01   | 0.957601 | 0.973694 | 0.983922 | 0.985648 |
| MmugDNA.35563.1.S1_at   | MmugDNA.35563.1 | 11.16 | 10.59 | 0.2  | 0.3  | 1.49   | 0.184358 | 0.005404 | 0.548138 | 0.101457 |
| MmugDNA.35564.1.S1_at   | MmugDNA.35564.1 | 6.04  | 5.98  | 0.06 | 0.15 | 1.04   | 0.417048 | 0.093736 | 0.710321 | 0.350201 |
| MmugDNA.35565.1.S1_at   | MmugDNA.35565.1 | 6.82  | 10.33 | 2.16 | 2.77 | -11.41 | 0.559551 | 0.360988 | 0.793957 | 0.60201  |
| MmugDNA.35567.1.S1_at   | MmugDNA.35567.1 | 3.75  | 4.34  | 0.59 | 0.36 | -1.51  | 0.745071 | 0.190415 | 0.890933 | 0.465906 |
| MmugDNA.35568.1.S1_at   | MmugDNA.35568.1 | 6.26  | 6     | 0.08 | 0.11 | 1.2    | 0.072273 | 0.083024 | 0.416651 | 0.332758 |
| MmugDNA.35569.1.S1_at   | MmugDNA.35569.1 | 4.83  | 4.9   | 0.03 | 0.05 | -1.05  | 0.150385 | 0.468436 | 0.515202 | 0.677714 |
| MmugDNA.3557.1.S1_at    | MmugDNA.3557.1  | 8.39  | 9     | 0.14 | 0.86 | -1.52  | 0.224444 | 0.217051 | 0.582716 | 0.490668 |
| MmugDNA.3557.1.S1_x_at  | MmugDNA.3557.1  | 8.65  | 9.14  | 0.22 | 0.82 | -1.4   | 0.255021 | 0.258529 | 0.603068 | 0.525796 |
| MmugDNA.35570.1.S1_at   | MmugDNA.35570.1 | 7.54  | 6.71  | 0.75 | 0.22 | 1.78   | 0.097278 | 0.065393 | 0.456253 | 0.301415 |
| MmugDNA.35572.1.S1_at   | MmugDNA.35572.1 | 9.64  | 9.76  | 0.22 | 0.54 | -1.09  | 0.546316 | 0.08416  | 0.785392 | 0.335181 |
| MmugDNA.35574.1.S1_at   | MmugDNA.35574.1 | 6.83  | 6.07  | 0.95 | 0.51 | 1.7    | 0.183129 | 0.270383 | 0.547234 | 0.53571  |
| MmugDNA.35575.1.S1_at   | MmugDNA.35575.1 | 4.07  | 4.16  | 0.11 | 0.45 | -1.06  | 0.241045 | 0.322429 | 0.593741 | 0.573972 |
| MmugDNA.35577.1.S1_at   | MmugDNA.35577.1 | 3.99  | 3.87  | 0.38 | 0.09 | 1.09   | 0.536487 | 0.755515 | 0.77949  | 0.857658 |
| MmugDNA.35578.1.S1_at   | MmugDNA.35578.1 | 9.07  | 9.03  | 0.1  | 0.54 | 1.02   | 0.876286 | 0.977647 | 0.950429 | 0.987833 |
| MmugDNA.35581.1.S1_at   | MmugDNA.35581.1 | 5.26  | 5.13  | 0.25 | 0.11 | 1.09   | 0.629535 | 0.729408 | 0.831551 | 0.843541 |
| MmugDNA.35582.1.S1_at   | MmugDNA.35582.1 | 10.37 | 9.45  | 0.13 | 0.22 | 1.88   | 0.00919  | 0.002884 | 0.222541 | 0.078985 |
| MmugDNA.35584.1.S1_at   | MmugDNA.35584.1 | 4.41  | 4.47  | 0.19 | 0.1  | -1.04  | 0.673682 | 0.7562   | 0.853751 | 0.858123 |
| MmugDNA.35586.1.S1_at   | MmugDNA.35586.1 | 3.27  | 3.35  | 0.36 | 0.7  | -1.05  | 0.346847 | 0.486601 | 0.666049 | 0.689934 |
| MmugDNA.35587.1.S1_at   | MmugDNA.35587.1 | 5.22  | 5.42  | 0.2  | 0.18 | -1.15  | 0.39235  | 0.41405  | 0.694651 | 0.639985 |
| MmugDNA.35590.1.S1_at   | MmugDNA.35590.1 | 10.62 | 10.88 | 0.44 | 0.25 | -1.2   | 0.66929  | 0.163209 | 0.852138 | 0.439324 |
| MmugDNA.35591.1.S1_at   | MmugDNA.35591.1 | 12.34 | 12.19 | 0.18 | 0.33 | 1.11   | 0.610125 | 0.422428 | 0.820908 | 0.645722 |
| MmugDNA.35593.1.S1_at   | MmugDNA.35593.1 | 7.75  | 7.91  | 0.12 | 0.69 | -1.11  | 0.68454  | 0.442046 | 0.858788 | 0.660148 |
| MmugDNA.35593.1.S1_s_at | MmugDNA.35593.1 | 5.81  | 6.23  | 0.19 | 0.78 | -1.33  | 0.546227 | 0.411517 | 0.785344 | 0.638215 |
| MmugDNA.35595.1.S1_at   | MmugDNA.35595.1 | 9.29  | 8.68  | 0.28 | 0.6  | 1.52   | 0.503298 | 0.27056  | 0.760699 | 0.535837 |
| MmugDNA.35596.1.S1_at   | MmugDNA.35596.1 | 5.07  | 5.14  | 0    | 0.08 | -1.06  | 0.165154 | 0.140396 | 0.529172 | 0.413586 |
| MmugDNA.35597.1.S1_at   | MmugDNA.35597.1 | 3.53  | 3.78  | 0.22 | 0.06 | -1.19  | 0.395606 | 0.5444   | 0.696523 | 0.726798 |
| MmugDNA.35599.1.S1_at   | MmugDNA.35599.1 | 3.33  | 3.55  | 0.21 | 0.25 | -1.16  | 0.954144 | 0.599649 | 0.983003 | 0.761524 |
| MmugDNA.35600.1.S1_at   | MmugDNA.35600.1 | 9.51  | 10.3  | 0.55 | 0.5  | -1.73  | 0.308863 | 0.334345 | 0.641235 | 0.582352 |
| MmugDNA.35601.1.S1_at   | MmugDNA.35601.1 | 8.76  | 9.42  | 0.06 | 0.3  | -1.58  | 0.017927 | 0.011308 | 0.26813  | 0.138076 |
| MmugDNA.35602.1.S1_at   | MmugDNA.35602.1 | 4.33  | 4.43  | 0.08 | 0.1  | -1.07  | 0.217235 | 0.306934 | 0.576846 | 0.563427 |
| MmugDNA.35603.1.S1_at   | MmugDNA.35603.1 | 9.54  | 9.46  | 0.13 | 0.09 | 1.05   | 0.550099 | 0.000718 | 0.78767  | 0.044419 |
| MmugDNA.35604.1.S1_at   | MmugDNA.35604.1 | 4.43  | 4.47  | 0.23 | 0.2  | -1.03  | 0.402961 | 0.470121 | 0.701716 | 0.678572 |
| MmugDNA.35606.1.S1_at   | MmugDNA.35606.1 | 4.92  | 5.02  | 0.07 | 0.06 | -1.07  | 0.065842 | 0.040947 | 0.405296 | 0.24719  |
| MmugDNA.35608.1.S1_at   | MmugDNA.35608.1 | 3.71  | 3.99  | 0.07 | 0.11 | -1.21  | 0.015033 | 0.108514 | 0.257013 | 0.37207  |
| MmugDNA.35609.1.S1_at   | MmugDNA.35609.1 | 4.24  | 4.22  | 0.11 | 0.2  | 1.02   | 0.777776 | 0.911151 | 0.907103 | 0.94989  |



|                         |                 |       |       |      |      |       |          |          |          |          |
|-------------------------|-----------------|-------|-------|------|------|-------|----------|----------|----------|----------|
| MmugDNA.3561.1.S1_at    | MmugDNA.3561.1  | 5.88  | 5.38  | 0.51 | 0.1  | 1.42  | 0.170285 | 0.165664 | 0.534249 | 0.441925 |
| MmugDNA.35611.1.S1_at   | MmugDNA.35611.1 | 7.64  | 7.34  | 0.94 | 0.17 | 1.23  | 0.364472 | 0.327527 | 0.677348 | 0.57733  |
| MmugDNA.35612.1.S1_x_at | MmugDNA.35612.1 | 10.72 | 10.3  | 0.59 | 0.21 | 1.34  | 0.242283 | 0.331611 | 0.594307 | 0.580208 |
| MmugDNA.35614.1.S1_at   | MmugDNA.35614.1 | 4.45  | 4.53  | 0.14 | 0.1  | -1.06 | 0.378615 | 0.294351 | 0.68654  | 0.554083 |
| MmugDNA.35615.1.S1_at   | MmugDNA.35615.1 | 5.3   | 4.96  | 0.37 | 0.17 | 1.26  | 0.092097 | 0.162771 | 0.448698 | 0.438913 |
| MmugDNA.35616.1.S1_at   | MmugDNA.35616.1 | 4.49  | 4.55  | 0.31 | 0.08 | -1.04 | 0.628003 | 0.703832 | 0.830492 | 0.828251 |
| MmugDNA.35618.1.S1_at   | MmugDNA.35618.1 | 6.26  | 5.63  | 0.23 | 0.31 | 1.54  | 0.049598 | 0.033787 | 0.371542 | 0.227489 |
| MmugDNA.3562.1.S1_at    | MmugDNA.3562.1  | 11.1  | 10.54 | 0.17 | 0.77 | 1.47  | 0.251457 | 0.237404 | 0.600826 | 0.508117 |
| MmugDNA.35620.1.S1_at   | MmugDNA.35620.1 | 9.23  | 8.12  | 0.26 | 0.09 | 2.15  | 0.00199  | 0.000403 | 0.155636 | 0.037471 |
| MmugDNA.35621.1.S1_s_at | MmugDNA.35621.1 | 11.01 | 11.22 | 0.1  | 0.23 | -1.16 | 0.26274  | 0.132822 | 0.609039 | 0.404544 |
| MmugDNA.35622.1.S1_at   | MmugDNA.35622.1 | 10.49 | 9.47  | 0.52 | 0.19 | 2.03  | 0.011184 | 0.00427  | 0.234598 | 0.091847 |
| MmugDNA.35623.1.S1_at   | MmugDNA.35623.1 | 4.29  | 4.39  | 0.46 | 0.57 | -1.08 | 0.702529 | 0.930937 | 0.868757 | 0.960748 |
| MmugDNA.35624.1.S1_at   | MmugDNA.35624.1 | 6.03  | 6.13  | 0.57 | 0.26 | -1.07 | 0.789879 | 0.798608 | 0.912819 | 0.884032 |
| MmugDNA.35625.1.S1_s_at | MmugDNA.35625.1 | 12.63 | 13.06 | 0.01 | 0.23 | -1.34 | 0.028454 | 0.017452 | 0.311338 | 0.167229 |
| MmugDNA.35626.1.S1_at   | MmugDNA.35626.1 | 3.3   | 4.29  | 0.08 | 0.82 | -1.99 | 0.113748 | 0.082316 | 0.477015 | 0.331257 |
| MmugDNA.35626.1.S1_s_at | MmugDNA.35626.1 | 4.51  | 5.31  | 0.08 | 0.34 | -1.75 | 0.016952 | 0.044894 | 0.266211 | 0.256424 |
| MmugDNA.35627.1.S1_at   | MmugDNA.35627.1 | 11.62 | 11.57 | 0.03 | 0.16 | 1.03  | 0.759879 | 0.766142 | 0.898651 | 0.864118 |
| MmugDNA.35628.1.S1_at   | MmugDNA.35628.1 | 7.21  | 6.88  | 0.08 | 0.04 | 1.25  | 0.002179 | 0.001416 | 0.159615 | 0.057432 |
| MmugDNA.35630.1.S1_at   | MmugDNA.35630.1 | 3.25  | 3.06  | 0.28 | 0.3  | 1.14  | 0.975357 | 0.719752 | 0.990439 | 0.837888 |
| MmugDNA.35631.1.S1_at   | MmugDNA.35631.1 | 3.86  | 2.99  | 0.81 | 0.19 | 1.82  | 0.101094 | 0.108222 | 0.461009 | 0.371557 |
| MmugDNA.35632.1.S1_at   | MmugDNA.35632.1 | 6.32  | 6.46  | 0.26 | 0.09 | -1.11 | 0.52573  | 0.41004  | 0.77389  | 0.637064 |
| MmugDNA.35633.1.S1_at   | MmugDNA.35633.1 | 5.95  | 5.8   | 0.65 | 0.33 | 1.11  | 0.976743 | 0.774614 | 0.991096 | 0.868797 |
| MmugDNA.35634.1.S1_at   | MmugDNA.35634.1 | 3.95  | 3.76  | 1.08 | 0.14 | 1.14  | 0.317298 | 0.352421 | 0.64789  | 0.595722 |
| MmugDNA.35635.1.S1_at   | MmugDNA.35635.1 | 4.28  | 4.31  | 0.09 | 0.11 | -1.02 | 0.310815 | 0.564469 | 0.64275  | 0.739306 |
| MmugDNA.35636.1.S1_at   | MmugDNA.35636.1 | 6.95  | 6.8   | 0.16 | 0.31 | 1.11  | 0.172639 | 0.316084 | 0.536258 | 0.569541 |
| MmugDNA.35639.1.S1_at   | MmugDNA.35639.1 | 5.86  | 5.78  | 0.17 | 0.17 | 1.06  | 0.471973 | 0.140237 | 0.743454 | 0.413405 |
| MmugDNA.3564.1.S1_at    | MmugDNA.3564.1  | 7.86  | 7.89  | 0.7  | 0.3  | -1.02 | 0.662876 | 0.721485 | 0.848771 | 0.838713 |
| MmugDNA.35640.1.S1_at   | MmugDNA.35640.1 | 6.6   | 6.72  | 0.84 | 0.1  | -1.09 | 0.581992 | 0.776148 | 0.805507 | 0.869726 |
| MmugDNA.35641.1.S1_at   | MmugDNA.35641.1 | 4.68  | 4.7   | 0.19 | 0.09 | -1.02 | 0.824766 | 0.980665 | 0.928991 | 0.989424 |
| MmugDNA.35642.1.S1_at   | MmugDNA.35642.1 | 7.97  | 7.63  | 0.28 | 0.75 | 1.27  | 0.686603 | 0.839899 | 0.85983  | 0.908708 |
| MmugDNA.35644.1.S1_at   | MmugDNA.35644.1 | 9.72  | 10.03 | 0.25 | 0.53 | -1.24 | 0.873567 | 0.397942 | 0.949292 | 0.629138 |
| MmugDNA.35646.1.S1_at   | MmugDNA.35646.1 | 4.9   | 5.02  | 0.08 | 0.15 | -1.08 | 0.21076  | 0.277645 | 0.571963 | 0.541633 |
| MmugDNA.35649.1.S1_at   | MmugDNA.35649.1 | 5.26  | 5.48  | 0.23 | 0.11 | -1.17 | 0.595261 | 0.589588 | 0.81235  | 0.755749 |
| MmugDNA.3565.1.S1_at    | MmugDNA.3565.1  | 4.84  | 4.67  | 0.23 | 0.08 | 1.12  | 0.341598 | 0.612687 | 0.662652 | 0.770138 |
| MmugDNA.35650.1.S1_at   | MmugDNA.35650.1 | 11.21 | 10.9  | 0.13 | 0.39 | 1.24  | 0.169517 | 0.016318 | 0.533686 | 0.161818 |
| MmugDNA.35650.1.S1_s_at | MmugDNA.35650.1 | 11.63 | 11.36 | 0.09 | 0.37 | 1.21  | 0.155974 | 0.016562 | 0.520686 | 0.162955 |
| MmugDNA.35652.1.S1_at   | MmugDNA.35652.1 | 4.03  | 3.85  | 0.12 | 0.16 | 1.13  | 0.192141 | 0.188081 | 0.555238 | 0.464169 |
| MmugDNA.35652.1.S1_s_at | MmugDNA.35652.1 | 11.89 | 10.95 | 0.18 | 0.75 | 1.93  | 0.085711 | 0.080352 | 0.439704 | 0.327965 |
| MmugDNA.35653.1.S1_at   | MmugDNA.35653.1 | 6.33  | 6.28  | 0.31 | 0.15 | 1.04  | 0.927544 | 0.268542 | 0.972003 | 0.534123 |
| MmugDNA.35654.1.S1_at   | MmugDNA.35654.1 | 12.35 | 11.31 | 0.01 | 0.23 | 2.05  | 0.00226  | 0.000181 | 0.161206 | 0.030511 |
| MmugDNA.35655.1.S1_at   | MmugDNA.35655.1 | 5.16  | 5.21  | 0.46 | 0.11 | -1.04 | 0.999072 | 0.679283 | 0.999753 | 0.81275  |

|                         |                 |       |       |      |      |       |          |          |          |          |
|-------------------------|-----------------|-------|-------|------|------|-------|----------|----------|----------|----------|
| MmugDNA.35657.1.S1_at   | MmugDNA.35657.1 | 6.05  | 5.82  | 0.36 | 0.25 | 1.17  | 0.245471 | 0.320852 | 0.597102 | 0.572849 |
| MmugDNA.35658.1.S1_at   | MmugDNA.35658.1 | 6.27  | 6.43  | 0.03 | 0.2  | -1.12 | 0.218441 | 0.597533 | 0.577909 | 0.760237 |
| MmugDNA.35659.1.S1_at   | MmugDNA.35659.1 | 4.17  | 3.98  | 0.33 | 0.36 | 1.14  | 0.333326 | 0.744888 | 0.657539 | 0.852201 |
| MmugDNA.35660.1.S1_at   | MmugDNA.35660.1 | 11.6  | 11.33 | 0.08 | 0.22 | 1.2   | 0.289296 | 0.403464 | 0.627311 | 0.632162 |
| MmugDNA.35661.1.S1_at   | MmugDNA.35661.1 | 7.55  | 7.25  | 0.6  | 0.72 | 1.23  | 0.437549 | 0.088439 | 0.722547 | 0.341877 |
| MmugDNA.35662.1.S1_at   | MmugDNA.35662.1 | 4.65  | 4.67  | 0.12 | 0.04 | -1.01 | 0.805719 | 0.942136 | 0.920322 | 0.967154 |
| MmugDNA.35663.1.S1_at   | MmugDNA.35663.1 | 5.8   | 6.13  | 0.18 | 0.4  | -1.25 | 0.304189 | 0.248738 | 0.638341 | 0.517931 |
| MmugDNA.35664.1.S1_s_at | MmugDNA.35664.1 | 11.22 | 11.63 | 0.18 | 0.54 | -1.33 | 0.320736 | 0.363311 | 0.64956  | 0.60371  |
| MmugDNA.35665.1.S1_at   | MmugDNA.35665.1 | 6.3   | 6.37  | 0.17 | 0.03 | -1.05 | 0.581345 | 0.714714 | 0.805072 | 0.8345   |
| MmugDNA.35666.1.S1_at   | MmugDNA.35666.1 | 8.46  | 8.18  | 0.18 | 0.29 | 1.21  | 0.604808 | 0.361673 | 0.817951 | 0.602408 |
| MmugDNA.35667.1.S1_at   | MmugDNA.35667.1 | 7.82  | 6.81  | 0.48 | 0.75 | 2.02  | 0.221724 | 0.026706 | 0.580397 | 0.204345 |
| MmugDNA.35668.1.S1_at   | MmugDNA.35668.1 | 4.3   | 4.34  | 0.12 | 0.04 | -1.03 | 0.627531 | 0.530597 | 0.830191 | 0.718052 |
| MmugDNA.3567.1.S1_at    | MmugDNA.3567.1  | 7.12  | 6.59  | 1.38 | 0.3  | 1.44  | 0.593098 | 0.777309 | 0.811254 | 0.87064  |
| MmugDNA.35670.1.S1_at   | MmugDNA.35670.1 | 5.09  | 5.6   | 0.34 | 0.17 | -1.42 | 0.120975 | 0.150671 | 0.48574  | 0.42522  |
| MmugDNA.35671.1.S1_at   | MmugDNA.35671.1 | 4.73  | 4.78  | 0.13 | 0.17 | -1.03 | 0.306547 | 0.411882 | 0.639593 | 0.638434 |
| MmugDNA.35672.1.S1_at   | MmugDNA.35672.1 | 3.99  | 4     | 0.62 | 0.12 | -1.01 | 0.395086 | 0.432254 | 0.696396 | 0.652778 |
| MmugDNA.35673.1.S1_at   | MmugDNA.35673.1 | 9.94  | 9.97  | 0.32 | 0.39 | -1.02 | 0.58266  | 0.400102 | 0.805834 | 0.630158 |
| MmugDNA.35674.1.S1_at   | MmugDNA.35674.1 | 5.41  | 5.29  | 0.41 | 0.52 | 1.09  | 0.998995 | 0.5154   | 0.999701 | 0.708274 |
| MmugDNA.35675.1.S1_at   | MmugDNA.35675.1 | 5.36  | 5.08  | 0.17 | 0.12 | 1.22  | 0.069898 | 0.046238 | 0.413003 | 0.259397 |
| MmugDNA.35677.1.S1_at   | MmugDNA.35677.1 | 5.32  | 5.22  | 0.59 | 0.19 | 1.07  | 0.406476 | 0.432349 | 0.703713 | 0.652794 |
| MmugDNA.35678.1.S1_at   | MmugDNA.35678.1 | 6.22  | 7.3   | 0.94 | 0.3  | -2.12 | 0.327454 | 0.463858 | 0.65384  | 0.674663 |
| MmugDNA.3568.1.S1_at    | MmugDNA.3568.1  | 10.63 | 10.69 | 0.17 | 0.24 | -1.05 | 0.465473 | 0.536903 | 0.739911 | 0.722119 |
| MmugDNA.35684.1.S1_at   | MmugDNA.35684.1 | 8.75  | 8.91  | 0.2  | 0.56 | -1.12 | 0.624507 | 0.629751 | 0.828305 | 0.781989 |
| MmugDNA.35686.1.S1_at   | MmugDNA.35686.1 | 3.8   | 3.84  | 0.06 | 0.04 | -1.03 | 0.927069 | 0.136147 | 0.971962 | 0.408473 |
| MmugDNA.35688.1.S1_at   | MmugDNA.35688.1 | 5.31  | 5.36  | 0.86 | 0.61 | -1.03 | 0.486917 | 0.56547  | 0.751857 | 0.739886 |
| MmugDNA.35689.1.S1_at   | MmugDNA.35689.1 | 3.3   | 3.2   | 0.06 | 0.08 | 1.08  | 0.138602 | 0.052446 | 0.505839 | 0.274539 |
| MmugDNA.3569.1.S1_at    | MmugDNA.3569.1  | 6.91  | 5.79  | 0.15 | 0.9  | 2.18  | 0.052082 | 0.041438 | 0.376989 | 0.248368 |
| MmugDNA.35690.1.S1_at   | MmugDNA.35690.1 | 4.31  | 4.55  | 0.13 | 0.63 | -1.19 | 0.576926 | 0.621441 | 0.803308 | 0.77603  |
| MmugDNA.35691.1.S1_at   | MmugDNA.35691.1 | 3.68  | 3.56  | 0.16 | 0.08 | 1.08  | 0.484872 | 0.341745 | 0.750701 | 0.587862 |
| MmugDNA.35692.1.S1_s_at | MmugDNA.35692.1 | 6.04  | 5.51  | 0.28 | 0.18 | 1.44  | 0.108729 | 0.113639 | 0.470218 | 0.379775 |
| MmugDNA.35693.1.S1_at   | MmugDNA.35693.1 | 6.63  | 6.96  | 0.01 | 0.19 | -1.26 | 0.116514 | 0.078979 | 0.48034  | 0.325986 |
| MmugDNA.35694.1.S1_at   | MmugDNA.35694.1 | 4.95  | 4.89  | 0.08 | 0.16 | 1.04  | 0.485072 | 0.772274 | 0.750727 | 0.867647 |
| MmugDNA.35696.1.S1_at   | MmugDNA.35696.1 | 11.91 | 11.39 | 0.13 | 0.2  | 1.43  | 0.044634 | 0.007217 | 0.358886 | 0.114121 |
| MmugDNA.35698.1.S1_at   | MmugDNA.35698.1 | 7.37  | 7.13  | 0.44 | 0.62 | 1.18  | 0.828148 | 0.474508 | 0.930243 | 0.681511 |
| MmugDNA.35699.1.S1_at   | MmugDNA.35699.1 | 3.38  | 3.39  | 0.1  | 0    | -1.01 | 0.648008 | 0.840393 | 0.841735 | 0.909015 |
| MmugDNA.357.1.S1_at     | MmugDNA.357.1   | 9     | 7.56  | 0.55 | 1.2  | 2.73  | 0.132999 | 0.143466 | 0.499254 | 0.417442 |
| MmugDNA.3570.1.S1_at    | MmugDNA.3570.1  | 4.71  | 4.69  | 0.2  | 0.14 | 1.01  | 0.491829 | 0.590545 | 0.755302 | 0.756311 |
| MmugDNA.35703.1.S1_at   | MmugDNA.35703.1 | 6.61  | 6.63  | 0.22 | 0.11 | -1.01 | 0.335847 | 0.402163 | 0.65921  | 0.631246 |
| MmugDNA.35705.1.S1_at   | MmugDNA.35705.1 | 2.66  | 2.66  | 0.37 | 0.13 | 1     | 0.656207 | 0.725899 | 0.845317 | 0.84131  |
| MmugDNA.35706.1.S1_at   | MmugDNA.35706.1 | 4.6   | 4.58  | 0.21 | 0.23 | 1.01  | 0.852437 | 0.697143 | 0.940647 | 0.824045 |
| MmugDNA.35707.1.S1_at   | MmugDNA.35707.1 | 9.26  | 10.27 | 0.34 | 0.66 | -2.01 | 0.362418 | 0.358475 | 0.675977 | 0.600011 |

|                         |                 |       |       |      |      |       |          |          |          |          |
|-------------------------|-----------------|-------|-------|------|------|-------|----------|----------|----------|----------|
| MmugDNA.35708.1.S1_at   | MmugDNA.35708.1 | 3.88  | 3.96  | 1.07 | 0.12 | -1.06 | 0.443937 | 0.501973 | 0.726519 | 0.699986 |
| MmugDNA.35710.1.S1_at   | MmugDNA.35710.1 | 13.08 | 12.86 | 0.13 | 0.34 | 1.17  | 0.178118 | 0.161671 | 0.542409 | 0.437771 |
| MmugDNA.35712.1.S1_at   | MmugDNA.35712.1 | 4.89  | 4.57  | 1.04 | 0.44 | 1.25  | 0.353795 | 0.279761 | 0.670266 | 0.543235 |
| MmugDNA.35713.1.S1_at   | MmugDNA.35713.1 | 5.96  | 6.35  | 0.47 | 0.57 | -1.31 | 0.080978 | 0.071551 | 0.431667 | 0.313714 |
| MmugDNA.35714.1.S1_at   | MmugDNA.35714.1 | 7.24  | 6.61  | 0.62 | 0.72 | 1.55  | 0.710737 | 0.794844 | 0.873204 | 0.88178  |
| MmugDNA.35714.1.S1_x_at | MmugDNA.35714.1 | 6.92  | 6.18  | 0.69 | 0.59 | 1.68  | 0.731329 | 0.66813  | 0.883736 | 0.805782 |
| MmugDNA.35715.1.S1_at   | MmugDNA.35715.1 | 5.83  | 6.15  | 0.06 | 0.06 | -1.25 | 0.00203  | 0.009572 | 0.155636 | 0.128995 |
| MmugDNA.35716.1.S1_at   | MmugDNA.35716.1 | 7.09  | 7.3   | 0.08 | 0.33 | -1.16 | 0.347076 | 0.465389 | 0.666207 | 0.675748 |
| MmugDNA.35716.1.S1_s_at | MmugDNA.35716.1 | 5.17  | 5.94  | 0.78 | 0.35 | -1.71 | 0.817446 | 0.781714 | 0.925944 | 0.873463 |
| MmugDNA.35717.1.S1_at   | MmugDNA.35717.1 | 5.62  | 5.08  | 0.74 | 0.53 | 1.46  | 0.203063 | 0.181818 | 0.565661 | 0.458382 |
| MmugDNA.35718.1.S1_at   | MmugDNA.35718.1 | 4.16  | 3.52  | 1.1  | 0.12 | 1.56  | 0.124685 | 0.212174 | 0.49075  | 0.486072 |
| MmugDNA.35719.1.S1_at   | MmugDNA.35719.1 | 7.91  | 9.32  | 0.34 | 0.73 | -2.65 | 0.040395 | 0.00567  | 0.349277 | 0.103959 |
| MmugDNA.35721.1.S1_at   | MmugDNA.35721.1 | 10.19 | 10.05 | 0.13 | 0.29 | 1.1   | 0.203996 | 0.243095 | 0.566518 | 0.513356 |
| MmugDNA.35722.1.S1_at   | MmugDNA.35722.1 | 6.47  | 6.38  | 0.28 | 0.78 | 1.07  | 0.467414 | 0.170125 | 0.74068  | 0.446868 |
| MmugDNA.35723.1.S1_s_at | MmugDNA.35723.1 | 6.65  | 6.71  | 0.29 | 0.14 | -1.04 | 0.975357 | 0.011213 | 0.990439 | 0.137948 |
| MmugDNA.35725.1.S1_at   | MmugDNA.35725.1 | 5.07  | 4.35  | 0.58 | 0.19 | 1.65  | 0.175086 | 0.280687 | 0.538831 | 0.543874 |
| MmugDNA.35726.1.S1_at   | MmugDNA.35726.1 | 4.41  | 3.73  | 0.25 | 0.42 | 1.61  | 0.169507 | 0.129853 | 0.533686 | 0.401509 |
| MmugDNA.35727.1.S1_at   | MmugDNA.35727.1 | 5.42  | 5.62  | 0.18 | 0.5  | -1.15 | 0.747212 | 0.401041 | 0.89177  | 0.630667 |
| MmugDNA.35728.1.S1_at   | MmugDNA.35728.1 | 6.2   | 6.23  | 0.08 | 0.12 | -1.02 | 0.775676 | 0.331855 | 0.905892 | 0.580411 |
| MmugDNA.35729.1.S1_at   | MmugDNA.35729.1 | 6.08  | 6.18  | 0.31 | 0.03 | -1.07 | 0.593927 | 0.674873 | 0.811676 | 0.810065 |
| MmugDNA.3573.1.S1_at    | MmugDNA.3573.1  | 3.51  | 3.38  | 0.07 | 0.2  | 1.1   | 0.841048 | 0.316866 | 0.936081 | 0.570214 |
| MmugDNA.35731.1.S1_a_at | MmugDNA.35731.1 | 5.29  | 5.17  | 0.49 | 0.11 | 1.08  | 0.247191 | 0.1879   | 0.598286 | 0.464023 |
| MmugDNA.35731.1.S1_at   | MmugDNA.35731.1 | 5.02  | 5.1   | 0.24 | 0.15 | -1.06 | 0.911426 | 0.87591  | 0.965013 | 0.929502 |
| MmugDNA.35732.1.S1_at   | MmugDNA.35732.1 | 5.63  | 4.61  | 0.95 | 0.57 | 2.03  | 0.223566 | 0.178201 | 0.582017 | 0.454531 |
| MmugDNA.35735.1.S1_at   | MmugDNA.35735.1 | 8     | 7.15  | 0.38 | 0.82 | 1.81  | 0.307899 | 0.337263 | 0.640326 | 0.584455 |
| MmugDNA.35736.1.S1_at   | MmugDNA.35736.1 | 9.66  | 9.68  | 0.28 | 0.1  | -1.01 | 0.935991 | 0.264995 | 0.975172 | 0.530973 |
| MmugDNA.35737.1.S1_at   | MmugDNA.35737.1 | 7.12  | 6.57  | 0.38 | 0.13 | 1.46  | 0.102637 | 0.066678 | 0.462485 | 0.304031 |
| MmugDNA.35739.1.S1_at   | MmugDNA.35739.1 | 3.08  | 3.09  | 0.07 | 0.07 | -1    | 0.941608 | 0.359275 | 0.977774 | 0.600575 |
| MmugDNA.35739.1.S1_x_at | MmugDNA.35739.1 | 2.83  | 2.76  | 0.1  | 0.02 | 1.05  | 0.203688 | 0.098515 | 0.566259 | 0.356636 |
| MmugDNA.3574.1.S1_at    | MmugDNA.3574.1  | 3.74  | 3.7   | 0.08 | 0.08 | 1.03  | 0.741615 | 0.852485 | 0.889293 | 0.916174 |
| MmugDNA.35740.1.S1_at   | MmugDNA.35740.1 | 8.01  | 8.19  | 0.22 | 0.41 | -1.13 | 0.115959 | 0.129334 | 0.479444 | 0.400748 |
| MmugDNA.35743.1.S1_at   | MmugDNA.35743.1 | 5.2   | 5.3   | 0.16 | 0.08 | -1.07 | 0.496103 | 0.226546 | 0.757444 | 0.499001 |
| MmugDNA.35744.1.S1_at   | MmugDNA.35744.1 | 7.17  | 7.3   | 0.09 | 0.68 | -1.1  | 0.69722  | 0.851243 | 0.865585 | 0.915366 |
| MmugDNA.35746.1.S1_at   | MmugDNA.35746.1 | 8.12  | 8.04  | 0.22 | 0.56 | 1.06  | 0.295503 | 0.395581 | 0.631822 | 0.627566 |
| MmugDNA.35747.1.S1_at   | MmugDNA.35747.1 | 4.49  | 4.7   | 0.11 | 0.2  | -1.16 | 0.268243 | 0.31144  | 0.613105 | 0.566456 |
| MmugDNA.35748.1.S1_at   | MmugDNA.35748.1 | 4.24  | 4.8   | 0.3  | 0.82 | -1.48 | 0.230718 | 0.25252  | 0.587231 | 0.521079 |
| MmugDNA.35749.1.S1_at   | MmugDNA.35749.1 | 5.36  | 5.26  | 0.21 | 0.26 | 1.07  | 0.126681 | 0.239284 | 0.492802 | 0.509995 |
| MmugDNA.35750.1.S1_at   | MmugDNA.35750.1 | 4.56  | 4.49  | 0.07 | 0.25 | 1.05  | 0.715758 | 0.688563 | 0.875256 | 0.818218 |
| MmugDNA.35752.1.S1_at   | MmugDNA.35752.1 | 7.01  | 7.01  | 0.03 | 0.05 | 1     | 0.24956  | 0.699605 | 0.600196 | 0.825531 |
| MmugDNA.35754.1.S1_s_at | MmugDNA.35754.1 | 8.52  | 8.64  | 0.13 | 0.23 | -1.09 | 0.341644 | 0.171791 | 0.6627   | 0.448198 |
| MmugDNA.35755.1.S1_at   | MmugDNA.35755.1 | 4.61  | 3.96  | 0.39 | 0.24 | 1.58  | 0.322629 | 0.41121  | 0.651245 | 0.637945 |

|                         |                 |       |       |      |      |       |          |          |          |          |
|-------------------------|-----------------|-------|-------|------|------|-------|----------|----------|----------|----------|
| MmugDNA.35756.1.S1_at   | MmugDNA.35756.1 | 4.24  | 4.49  | 0.17 | 0.06 | -1.19 | 0.294391 | 0.243426 | 0.631216 | 0.513476 |
| MmugDNA.35757.1.S1_at   | MmugDNA.35757.1 | 5.95  | 6.1   | 0.26 | 0.32 | -1.11 | 0.88115  | 0.147257 | 0.952244 | 0.421464 |
| MmugDNA.35761.1.S1_at   | MmugDNA.35761.1 | 3.38  | 3.42  | 0.09 | 0.13 | -1.03 | 0.620462 | 0.714256 | 0.826026 | 0.834198 |
| MmugDNA.35762.1.S1_at   | MmugDNA.35762.1 | 3.39  | 3.39  | 0.28 | 0.08 | 1.01  | 0.770425 | 0.690821 | 0.90333  | 0.819889 |
| MmugDNA.35764.1.S1_at   | MmugDNA.35764.1 | 8.01  | 9.18  | 0.36 | 1.52 | -2.25 | 0.34773  | 0.474782 | 0.666645 | 0.681695 |
| MmugDNA.35764.1.S1_s_at | MmugDNA.35764.1 | 9.34  | 13.12 | 1.55 | 2.95 | -13.7 | 0.563887 | 0.33876  | 0.796337 | 0.58582  |
| MmugDNA.35765.1.S1_at   | MmugDNA.35765.1 | 5.98  | 5.65  | 0.49 | 0.91 | 1.26  | 0.970675 | 0.34918  | 0.988685 | 0.593225 |
| MmugDNA.35766.1.S1_at   | MmugDNA.35766.1 | 6.34  | 6.4   | 0.13 | 0.09 | -1.05 | 0.184566 | 0.25942  | 0.548202 | 0.526418 |
| MmugDNA.35768.1.S1_at   | MmugDNA.35768.1 | 4.21  | 4.53  | 0.22 | 0.23 | -1.25 | 0.110409 | 0.071351 | 0.471885 | 0.313391 |
| MmugDNA.35769.1.S1_at   | MmugDNA.35769.1 | 7.63  | 6.42  | 0.11 | 0.78 | 2.32  | 0.04991  | 0.040511 | 0.372507 | 0.246264 |
| MmugDNA.3577.1.S1_at    | MmugDNA.3577.1  | 5.09  | 4.95  | 0.18 | 0.29 | 1.1   | 0.966108 | 0.295175 | 0.987096 | 0.554568 |
| MmugDNA.35770.1.S1_at   | MmugDNA.35770.1 | 5.19  | 5.54  | 0.17 | 0.19 | -1.28 | 0.173429 | 0.126309 | 0.537006 | 0.396786 |
| MmugDNA.35772.1.S1_at   | MmugDNA.35772.1 | 8.56  | 8.94  | 0.35 | 0.29 | -1.3  | 0.09343  | 0.034921 | 0.450649 | 0.231062 |
| MmugDNA.35774.1.S1_at   | MmugDNA.35774.1 | 4.38  | 4.29  | 0.27 | 0.13 | 1.06  | 0.428496 | 0.656242 | 0.716885 | 0.798973 |
| MmugDNA.35775.1.S1_at   | MmugDNA.35775.1 | 8.19  | 7.6   | 0.4  | 1.47 | 1.51  | 0.686731 | 0.871188 | 0.859918 | 0.926817 |
| MmugDNA.35777.1.S1_at   | MmugDNA.35777.1 | 3.59  | 3.59  | 0.13 | 0.11 | 1     | 0.598635 | 0.288668 | 0.814021 | 0.549827 |
| MmugDNA.35778.1.S1_at   | MmugDNA.35778.1 | 6.08  | 6.13  | 0.05 | 0.14 | -1.03 | 0.45261  | 0.576763 | 0.732213 | 0.74741  |
| MmugDNA.35780.1.S1_at   | MmugDNA.35780.1 | 7.06  | 7.24  | 0.22 | 0.19 | -1.13 | 0.360624 | 0.193846 | 0.674645 | 0.468894 |
| MmugDNA.35781.1.S1_at   | MmugDNA.35781.1 | 3.16  | 2.86  | 0.1  | 0.3  | 1.23  | 0.508553 | 0.714178 | 0.763834 | 0.834155 |
| MmugDNA.35781.1.S1_s_at | MmugDNA.35781.1 | 6.45  | 6.52  | 0.36 | 0.6  | -1.05 | 0.601538 | 0.538818 | 0.815936 | 0.723368 |
| MmugDNA.35782.1.S1_at   | MmugDNA.35782.1 | 6.82  | 6.62  | 0.09 | 0.2  | 1.15  | 0.764665 | 0.331967 | 0.900894 | 0.58053  |
| MmugDNA.35784.1.S1_at   | MmugDNA.35784.1 | 10.85 | 11.23 | 0.24 | 0.36 | -1.31 | 0.512494 | 0.54165  | 0.76562  | 0.725033 |
| MmugDNA.35785.1.S1_at   | MmugDNA.35785.1 | 10.85 | 10.43 | 0.18 | 0.88 | 1.34  | 0.50145  | 0.09376  | 0.75998  | 0.350241 |
| MmugDNA.35786.1.S1_at   | MmugDNA.35786.1 | 10.39 | 10.83 | 0.27 | 0.22 | -1.36 | 0.093741 | 0.119785 | 0.451056 | 0.388567 |
| MmugDNA.35786.1.S1_s_at | MmugDNA.35786.1 | 10.47 | 10.78 | 0.21 | 0.28 | -1.24 | 0.156254 | 0.28184  | 0.52096  | 0.544844 |
| MmugDNA.35787.1.S1_at   | MmugDNA.35787.1 | 9.84  | 10.09 | 0.2  | 0.32 | -1.19 | 0.286852 | 0.339213 | 0.625572 | 0.585918 |
| MmugDNA.35788.1.S1_at   | MmugDNA.35788.1 | 6.89  | 7.42  | 0.6  | 0.4  | -1.45 | 0.156348 | 0.190848 | 0.521042 | 0.466228 |
| MmugDNA.35789.1.S1_at   | MmugDNA.35789.1 | 7.12  | 7.55  | 0.16 | 0.21 | -1.35 | 0.041279 | 0.038188 | 0.351465 | 0.240129 |
| MmugDNA.35789.1.S1_s_at | MmugDNA.35789.1 | 8.33  | 8.73  | 0.34 | 0.19 | -1.32 | 0.423907 | 0.597426 | 0.714199 | 0.760197 |
| MmugDNA.3579.1.S1_at    | MmugDNA.3579.1  | 4.22  | 3.64  | 0.4  | 0.46 | 1.49  | 0.40257  | 0.47021  | 0.701496 | 0.678572 |
| MmugDNA.35792.1.S1_at   | MmugDNA.35792.1 | 4.19  | 4.07  | 0.11 | 0.09 | 1.08  | 0.4527   | 0.195037 | 0.732217 | 0.470179 |
| MmugDNA.35793.1.S1_at   | MmugDNA.35793.1 | 3.33  | 3.33  | 0.05 | 0.06 | 1     | 0.233195 | 0.460831 | 0.587994 | 0.672749 |
| MmugDNA.35795.1.S1_at   | MmugDNA.35795.1 | 5     | 6.75  | 0.83 | 1.96 | -3.35 | 0.610613 | 0.729495 | 0.821125 | 0.843554 |
| MmugDNA.35797.1.S1_at   | MmugDNA.35797.1 | 5.43  | 6.24  | 0.26 | 0.19 | -1.76 | 0.010007 | 0.000608 | 0.226899 | 0.042176 |
| MmugDNA.35798.1.S1_at   | MmugDNA.35798.1 | 5.02  | 5.29  | 0.13 | 0.35 | -1.2  | 0.393881 | 0.414015 | 0.695522 | 0.639981 |
| MmugDNA.35799.1.S1_at   | MmugDNA.35799.1 | 8.23  | 8.16  | 0.22 | 0.74 | 1.05  | 0.963527 | 0.698529 | 0.985967 | 0.824852 |
| MmugDNA.358.1.S1_at     | MmugDNA.358.1   | 3.62  | 5.78  | 0.16 | 0.95 | -4.46 | 0.051406 | 0.043088 | 0.376003 | 0.252227 |
| MmugDNA.35800.1.S1_at   | MmugDNA.35800.1 | 3.1   | 2.88  | 0.78 | 0.14 | 1.16  | 0.231385 | 0.305962 | 0.587372 | 0.562732 |
| MmugDNA.35801.1.S1_at   | MmugDNA.35801.1 | 9.25  | 9.06  | 0.26 | 0.14 | 1.14  | 0.823741 | 0.462989 | 0.928331 | 0.674149 |
| MmugDNA.35802.1.S1_at   | MmugDNA.35802.1 | 5.04  | 5.19  | 0.03 | 0.09 | -1.1  | 0.09298  | 0.051507 | 0.45021  | 0.272373 |
| MmugDNA.35803.1.S1_at   | MmugDNA.35803.1 | 5.19  | 4.45  | 0.26 | 0.45 | 1.67  | 0.055368 | 0.159222 | 0.383694 | 0.435217 |

|                         |                 |       |       |      |      |        |          |          |          |          |
|-------------------------|-----------------|-------|-------|------|------|--------|----------|----------|----------|----------|
| MmugDNA.35805.1.S1_at   | MmugDNA.35805.1 | 11.46 | 11.39 | 0.22 | 0.22 | 1.05   | 0.344042 | 0.089002 | 0.6642   | 0.342876 |
| MmugDNA.35805.1.S1_s_at | MmugDNA.35805.1 | 12.68 | 12.56 | 0.26 | 0.2  | 1.08   | 0.422932 | 0.041697 | 0.713776 | 0.24887  |
| MmugDNA.35806.1.S1_at   | MmugDNA.35806.1 | 3.73  | 3.69  | 0.12 | 0.2  | 1.03   | 0.349396 | 0.392955 | 0.667703 | 0.625917 |
| MmugDNA.35809.1.S1_at   | MmugDNA.35809.1 | 3.77  | 3.91  | 0.29 | 0.27 | -1.1   | 0.59518  | 0.687078 | 0.812315 | 0.817434 |
| MmugDNA.3581.1.S1_at    | MmugDNA.3581.1  | 4.24  | 4.3   | 0.17 | 0.09 | -1.04  | 0.932828 | 0.396404 | 0.973979 | 0.628193 |
| MmugDNA.35811.1.S1_at   | MmugDNA.35811.1 | 4.31  | 4.37  | 0.25 | 0.14 | -1.04  | 0.246558 | 0.485212 | 0.597787 | 0.688981 |
| MmugDNA.35813.1.S1_at   | MmugDNA.35813.1 | 8.64  | 8.04  | 0.4  | 0.62 | 1.52   | 0.286642 | 0.219455 | 0.625572 | 0.493156 |
| MmugDNA.35815.1.S1_at   | MmugDNA.35815.1 | 4.09  | 4.1   | 1.17 | 0.17 | -1.01  | 0.412695 | 0.403129 | 0.70798  | 0.631937 |
| MmugDNA.35817.1.S1_at   | MmugDNA.35817.1 | 7.5   | 6.89  | 0.35 | 0.79 | 1.52   | 0.463204 | 0.629215 | 0.738637 | 0.781713 |
| MmugDNA.35819.1.S1_at   | MmugDNA.35819.1 | 8.51  | 8.75  | 0.17 | 0.13 | -1.18  | 0.316944 | 0.27257  | 0.647775 | 0.537323 |
| MmugDNA.3582.1.S1_at    | MmugDNA.3582.1  | 4.46  | 4.55  | 0.06 | 0.48 | -1.07  | 0.52691  | 0.630435 | 0.774441 | 0.782237 |
| MmugDNA.35820.1.S1_at   | MmugDNA.35820.1 | 4.69  | 5.47  | 0.22 | 0.66 | -1.72  | 0.044281 | 0.010189 | 0.358336 | 0.132348 |
| MmugDNA.35821.1.S1_at   | MmugDNA.35821.1 | 5.04  | 4.9   | 0.59 | 0.05 | 1.1    | 0.237742 | 0.109763 | 0.591287 | 0.373701 |
| MmugDNA.35822.1.S1_at   | MmugDNA.35822.1 | 4.68  | 4.74  | 0.37 | 0.28 | -1.05  | 0.838628 | 0.506864 | 0.934745 | 0.702627 |
| MmugDNA.35824.1.S1_at   | MmugDNA.35824.1 | 10.75 | 10.23 | 0.18 | 0.19 | 1.43   | 0.026463 | 0.008744 | 0.303201 | 0.123975 |
| MmugDNA.35825.1.S1_at   | MmugDNA.35825.1 | 4.31  | 4.22  | 0.13 | 0    | 1.06   | 0.225201 | 0.088309 | 0.583077 | 0.341721 |
| MmugDNA.35826.1.S1_at   | MmugDNA.35826.1 | 7.57  | 7.7   | 0.12 | 0.12 | -1.09  | 0.182965 | 0.256298 | 0.547134 | 0.524079 |
| MmugDNA.35827.1.S1_at   | MmugDNA.35827.1 | 4.21  | 3.82  | 0.45 | 0.4  | 1.31   | 0.399347 | 0.537679 | 0.699241 | 0.722661 |
| MmugDNA.35827.1.S1_s_at | MmugDNA.35827.1 | 3.45  | 3.33  | 0.45 | 0.4  | 1.08   | 0.712651 | 0.890293 | 0.874175 | 0.937505 |
| MmugDNA.35829.1.S1_at   | MmugDNA.35829.1 | 5.21  | 5.2   | 0.13 | 0.29 | 1.01   | 0.720684 | 0.91989  | 0.877734 | 0.954953 |
| MmugDNA.35830.1.S1_at   | MmugDNA.35830.1 | 8.51  | 8.07  | 0.24 | 0.39 | 1.35   | 0.157672 | 0.109694 | 0.522549 | 0.373675 |
| MmugDNA.35832.1.S1_at   | MmugDNA.35832.1 | 5.35  | 5.82  | 0.8  | 0.27 | -1.38  | 0.790913 | 0.457768 | 0.913202 | 0.670897 |
| MmugDNA.35833.1.S1_at   | MmugDNA.35833.1 | 5.96  | 7.28  | 0.7  | 0.4  | -2.5   | 0.115866 | 0.074135 | 0.479325 | 0.31781  |
| MmugDNA.35834.1.S1_at   | MmugDNA.35834.1 | 6.52  | 11.03 | 1.52 | 3.08 | -22.86 | 0.392859 | 0.216769 | 0.694841 | 0.490311 |
| MmugDNA.35835.1.S1_at   | MmugDNA.35835.1 | 5.38  | 5.53  | 0.14 | 0.14 | -1.11  | 0.453329 | 0.727363 | 0.732546 | 0.842286 |
| MmugDNA.35836.1.S1_at   | MmugDNA.35836.1 | 6.96  | 7.18  | 0.15 | 0.34 | -1.17  | 0.274938 | 0.375697 | 0.617642 | 0.613587 |
| MmugDNA.35838.1.S1_at   | MmugDNA.35838.1 | 4.91  | 4.6   | 0.1  | 0.38 | 1.24   | 0.189311 | 0.151867 | 0.552435 | 0.426512 |
| MmugDNA.35840.1.S1_at   | MmugDNA.35840.1 | 4.1   | 4.15  | 0.08 | 0.17 | -1.03  | 0.461506 | 0.639536 | 0.737671 | 0.788329 |
| MmugDNA.35841.1.S1_at   | MmugDNA.35841.1 | 9.39  | 9.12  | 0.18 | 0.27 | 1.21   | 0.203302 | 0.23723  | 0.566041 | 0.507954 |
| MmugDNA.35842.1.S1_at   | MmugDNA.35842.1 | 11.34 | 10.86 | 0.09 | 0.31 | 1.39   | 0.139012 | 0.175064 | 0.506234 | 0.451724 |
| MmugDNA.35845.1.S1_at   | MmugDNA.35845.1 | 12.15 | 11.74 | 0.21 | 0.29 | 1.33   | 0.283221 | 0.272264 | 0.623314 | 0.537    |
| MmugDNA.35848.1.S1_at   | MmugDNA.35848.1 | 8.72  | 8.52  | 0.4  | 0.17 | 1.15   | 0.16243  | 0.180026 | 0.526706 | 0.456564 |
| MmugDNA.3585.1.S1_at    | MmugDNA.3585.1  | 4.39  | 5.83  | 0.28 | 0.87 | -2.71  | 0.05802  | 0.045482 | 0.389637 | 0.2575   |
| MmugDNA.35855.1.S1_at   | MmugDNA.35855.1 | 11.63 | 11.29 | 0.17 | 0.38 | 1.26   | 0.939451 | 0.207377 | 0.976986 | 0.481594 |
| MmugDNA.35856.1.S1_at   | MmugDNA.35856.1 | 8.96  | 8.09  | 0.11 | 0.46 | 1.82   | 0.028426 | 0.022721 | 0.311219 | 0.188739 |
| MmugDNA.35857.1.S1_at   | MmugDNA.35857.1 | 5.25  | 5.65  | 0.65 | 0.37 | -1.32  | 0.083661 | 0.067882 | 0.435945 | 0.306745 |
| MmugDNA.35858.1.S1_at   | MmugDNA.35858.1 | 2.98  | 2.85  | 0.12 | 0.07 | 1.1    | 0.457627 | 0.693757 | 0.735025 | 0.8219   |
| MmugDNA.35859.1.S1_at   | MmugDNA.35859.1 | 5.31  | 5.15  | 0.07 | 0.24 | 1.12   | 0.188494 | 0.270346 | 0.551451 | 0.535681 |
| MmugDNA.3586.1.S1_at    | MmugDNA.3586.1  | 7.33  | 6.85  | 0.34 | 0.11 | 1.4    | 0.098521 | 0.079503 | 0.458486 | 0.32681  |
| MmugDNA.35860.1.S1_at   | MmugDNA.35860.1 | 8.15  | 7.87  | 0.39 | 0.27 | 1.22   | 0.512423 | 0.607881 | 0.765592 | 0.766631 |
| MmugDNA.35861.1.S1_at   | MmugDNA.35861.1 | 2.86  | 2.99  | 0.15 | 0.22 | -1.1   | 0.974449 | 0.797364 | 0.990031 | 0.883167 |

|                         |                 |       |       |      |      |       |          |          |          |          |
|-------------------------|-----------------|-------|-------|------|------|-------|----------|----------|----------|----------|
| MmugDNA.35862.1.S1_at   | MmugDNA.35862.1 | 6.97  | 6.74  | 0.12 | 0.35 | 1.17  | 0.498662 | 0.203981 | 0.758596 | 0.478265 |
| MmugDNA.35863.1.S1_at   | MmugDNA.35863.1 | 5.71  | 4.91  | 0.28 | 0.11 | 1.74  | 0.005636 | 0.005315 | 0.191943 | 0.100896 |
| MmugDNA.35864.1.S1_at   | MmugDNA.35864.1 | 10.19 | 10.13 | 0.23 | 0.05 | 1.04  | 0.499509 | 0.469512 | 0.759212 | 0.678273 |
| MmugDNA.35865.1.S1_at   | MmugDNA.35865.1 | 3.38  | 3.2   | 0.22 | 0.04 | 1.13  | 0.239248 | 0.561502 | 0.592434 | 0.737449 |
| MmugDNA.35866.1.S1_at   | MmugDNA.35866.1 | 12.59 | 12.1  | 0.07 | 0.26 | 1.4   | 0.031517 | 0.02151  | 0.321992 | 0.18373  |
| MmugDNA.35869.1.S1_at   | MmugDNA.35869.1 | 5.97  | 6.06  | 0.09 | 0.02 | -1.06 | 0.136491 | 0.371246 | 0.503566 | 0.610135 |
| MmugDNA.3587.1.S1_at    | MmugDNA.3587.1  | 7.56  | 7.68  | 0.25 | 0.16 | -1.09 | 0.279487 | 0.312138 | 0.621119 | 0.566904 |
| MmugDNA.35872.1.S1_at   | MmugDNA.35872.1 | 8.77  | 7.92  | 0.25 | 0.65 | 1.8   | 0.057497 | 0.061128 | 0.388505 | 0.293981 |
| MmugDNA.35873.1.S1_at   | MmugDNA.35873.1 | 3.52  | 3.52  | 0.16 | 0.21 | -1    | 0.614979 | 0.802252 | 0.823328 | 0.886115 |
| MmugDNA.35878.1.S1_at   | MmugDNA.35878.1 | 10.34 | 9.83  | 0.23 | 0.07 | 1.43  | 0.025793 | 0.023249 | 0.300646 | 0.191114 |
| MmugDNA.35879.1.S1_at   | MmugDNA.35879.1 | 5.53  | 5.61  | 0.13 | 0.16 | -1.06 | 0.697545 | 0.87259  | 0.865694 | 0.927568 |
| MmugDNA.35880.1.S1_at   | MmugDNA.35880.1 | 4.39  | 4.41  | 0.22 | 0.05 | -1.01 | 0.9448   | 0.719886 | 0.978994 | 0.837941 |
| MmugDNA.35881.1.S1_at   | MmugDNA.35881.1 | 5.6   | 3.62  | 1.73 | 0.53 | 3.95  | 0.174617 | 0.246289 | 0.538249 | 0.515889 |
| MmugDNA.35882.1.S1_at   | MmugDNA.35882.1 | 5.18  | 5.3   | 0.31 | 0.32 | -1.09 | 0.995543 | 0.679611 | 0.99841  | 0.812952 |
| MmugDNA.35883.1.S1_s_at | MmugDNA.35883.1 | 10.54 | 10.48 | 0.07 | 0.07 | 1.04  | 0.160976 | 0.301372 | 0.526153 | 0.559391 |
| MmugDNA.35884.1.S1_at   | MmugDNA.35884.1 | 13.02 | 12.98 | 0.08 | 0.03 | 1.03  | 0.30887  | 0.330388 | 0.641235 | 0.579149 |
| MmugDNA.35884.1.S1_x_at | MmugDNA.35884.1 | 13.1  | 13.08 | 0.08 | 0.02 | 1.02  | 0.226506 | 0.252812 | 0.584429 | 0.521174 |
| MmugDNA.35885.1.S1_at   | MmugDNA.35885.1 | 5.88  | 5.88  | 0.36 | 0.11 | 1     | 0.48491  | 0.480881 | 0.750701 | 0.686    |
| MmugDNA.35886.1.S1_at   | MmugDNA.35886.1 | 3.5   | 3.4   | 0.27 | 0.15 | 1.07  | 0.396784 | 0.4301   | 0.697224 | 0.651143 |
| MmugDNA.35888.1.S1_at   | MmugDNA.35888.1 | 9.25  | 8.67  | 0.43 | 0.5  | 1.49  | 0.462438 | 0.631936 | 0.738248 | 0.783032 |
| MmugDNA.3589.1.S1_at    | MmugDNA.3589.1  | 5.45  | 5.63  | 0.24 | 0.14 | -1.13 | 0.458527 | 0.155362 | 0.735566 | 0.430754 |
| MmugDNA.35892.1.S1_at   | MmugDNA.35892.1 | 6.03  | 4.95  | 0.51 | 0.5  | 2.11  | 0.127145 | 0.097797 | 0.493504 | 0.355639 |
| MmugDNA.35893.1.S1_at   | MmugDNA.35893.1 | 6.68  | 6.6   | 0.12 | 0.07 | 1.06  | 0.473717 | 0.052795 | 0.744526 | 0.275408 |
| MmugDNA.35894.1.S1_at   | MmugDNA.35894.1 | 7.52  | 7.56  | 0.27 | 0.54 | -1.03 | 0.457891 | 0.649859 | 0.735139 | 0.795269 |
| MmugDNA.35895.1.S1_at   | MmugDNA.35895.1 | 3.28  | 3.19  | 0.18 | 0.1  | 1.07  | 0.422891 | 0.57356  | 0.713754 | 0.745213 |
| MmugDNA.35898.1.S1_at   | MmugDNA.35898.1 | 3.51  | 3.54  | 0.04 | 0.09 | -1.02 | 0.874436 | 0.190879 | 0.949658 | 0.466264 |
| MmugDNA.35899.1.S1_at   | MmugDNA.35899.1 | 4.86  | 5.07  | 0.36 | 0.16 | -1.16 | 0.954356 | 0.988549 | 0.983073 | 0.993572 |
| MmugDNA.359.1.S1_at     | MmugDNA.359.1   | 3.4   | 3.64  | 0.33 | 0.06 | -1.19 | 0.830109 | 0.955953 | 0.931298 | 0.975016 |
| MmugDNA.35900.1.S1_at   | MmugDNA.35900.1 | 4.42  | 4.31  | 0.22 | 0.25 | 1.08  | 0.777356 | 0.88663  | 0.906952 | 0.935519 |
| MmugDNA.35901.1.S1_at   | MmugDNA.35901.1 | 4.81  | 4.73  | 0.24 | 0.14 | 1.06  | 0.417181 | 0.14756  | 0.710385 | 0.421872 |
| MmugDNA.35902.1.S1_at   | MmugDNA.35902.1 | 5.39  | 4.81  | 0.2  | 0.44 | 1.49  | 0.267185 | 0.123598 | 0.612322 | 0.393639 |
| MmugDNA.35903.1.S1_at   | MmugDNA.35903.1 | 12.89 | 12.66 | 0.04 | 0.25 | 1.17  | 0.224139 | 0.049129 | 0.582619 | 0.266534 |
| MmugDNA.35904.1.S1_at   | MmugDNA.35904.1 | 3.71  | 3.89  | 0.5  | 0.22 | -1.14 | 0.816798 | 0.539317 | 0.925751 | 0.723689 |
| MmugDNA.35905.1.S1_at   | MmugDNA.35905.1 | 5.89  | 6.06  | 0.18 | 0.21 | -1.12 | 0.294828 | 0.301035 | 0.631442 | 0.559198 |
| MmugDNA.35907.1.S1_at   | MmugDNA.35907.1 | 3.27  | 3.2   | 0.32 | 0.05 | 1.05  | 0.820231 | 0.592817 | 0.92682  | 0.75792  |
| MmugDNA.35908.1.S1_at   | MmugDNA.35908.1 | 6.79  | 7     | 0.08 | 0.03 | -1.15 | 0.020793 | 0.001518 | 0.280587 | 0.059307 |
| MmugDNA.35909.1.S1_at   | MmugDNA.35909.1 | 4.1   | 3.99  | 0.33 | 0.18 | 1.08  | 0.281244 | 0.375077 | 0.622129 | 0.613186 |
| MmugDNA.3591.1.S1_at    | MmugDNA.3591.1  | 9.82  | 9.54  | 0.19 | 0.27 | 1.22  | 0.854597 | 0.196416 | 0.941248 | 0.471423 |
| MmugDNA.35911.1.S1_at   | MmugDNA.35911.1 | 7.72  | 7.61  | 0.25 | 0.17 | 1.08  | 0.116146 | 0.157425 | 0.479765 | 0.432911 |
| MmugDNA.35912.1.S1_at   | MmugDNA.35912.1 | 4.37  | 4.44  | 0.51 | 0.08 | -1.05 | 0.589299 | 0.326446 | 0.809218 | 0.576576 |
| MmugDNA.35913.1.S1_at   | MmugDNA.35913.1 | 5.19  | 5.14  | 0.64 | 0.25 | 1.04  | 0.401055 | 0.672462 | 0.700559 | 0.808572 |

|                         |                 |       |       |      |      |       |          |          |          |          |
|-------------------------|-----------------|-------|-------|------|------|-------|----------|----------|----------|----------|
| MmugDNA.35914.1.S1_at   | MmugDNA.35914.1 | 3.24  | 3.1   | 0.15 | 0.03 | 1.11  | 0.136737 | 0.116273 | 0.503852 | 0.38367  |
| MmugDNA.35915.1.S1_at   | MmugDNA.35915.1 | 10.86 | 11.35 | 0.12 | 0.61 | -1.4  | 0.07901  | 0.050645 | 0.428609 | 0.270317 |
| MmugDNA.35918.1.S1_at   | MmugDNA.35918.1 | 12.02 | 12.14 | 0.14 | 0.25 | -1.09 | 0.290907 | 0.431603 | 0.628646 | 0.652439 |
| MmugDNA.35919.1.S1_at   | MmugDNA.35919.1 | 7.06  | 6.5   | 0.41 | 0.58 | 1.47  | 0.696185 | 0.627399 | 0.865148 | 0.780374 |
| MmugDNA.3592.1.S1_at    | MmugDNA.3592.1  | 9.64  | 9.33  | 0.59 | 0.51 | 1.24  | 0.959466 | 0.984491 | 0.984648 | 0.991297 |
| MmugDNA.35920.1.S1_at   | MmugDNA.35920.1 | 8.29  | 8.47  | 0.38 | 0.52 | -1.13 | 0.627646 | 0.805688 | 0.83025  | 0.888324 |
| MmugDNA.35921.1.S1_at   | MmugDNA.35921.1 | 3.59  | 3.7   | 0.11 | 0.19 | -1.07 | 0.192595 | 0.396668 | 0.555864 | 0.628434 |
| MmugDNA.35922.1.S1_at   | MmugDNA.35922.1 | 4.23  | 4.19  | 0.11 | 0.19 | 1.03  | 0.174402 | 0.218218 | 0.538041 | 0.491764 |
| MmugDNA.35923.1.S1_at   | MmugDNA.35923.1 | 6.36  | 6.63  | 0.3  | 0.27 | -1.21 | 0.86745  | 0.819901 | 0.947135 | 0.896279 |
| MmugDNA.35924.1.S1_at   | MmugDNA.35924.1 | 4.1   | 3.62  | 0.67 | 0.6  | 1.4   | 0.229774 | 0.233101 | 0.587007 | 0.504456 |
| MmugDNA.35925.1.S1_at   | MmugDNA.35925.1 | 12.54 | 12.4  | 0.35 | 0    | 1.1   | 0.786844 | 0.932262 | 0.911324 | 0.961583 |
| MmugDNA.35926.1.S1_at   | MmugDNA.35926.1 | 5.5   | 5.87  | 0.24 | 0.37 | -1.29 | 0.098787 | 0.037386 | 0.458711 | 0.237776 |
| MmugDNA.35927.1.S1_at   | MmugDNA.35927.1 | 5.24  | 5.04  | 0.1  | 0.71 | 1.15  | 0.599462 | 0.459042 | 0.814594 | 0.671535 |
| MmugDNA.35928.1.S1_at   | MmugDNA.35928.1 | 12.91 | 12.62 | 0.05 | 0.07 | 1.22  | 0.014517 | 0.007078 | 0.253413 | 0.113284 |
| MmugDNA.35929.1.S1_s_at | MmugDNA.35929.1 | 12.28 | 12.12 | 0.14 | 0.11 | 1.12  | 0.072151 | 0.061358 | 0.416405 | 0.29448  |
| MmugDNA.3593.1.S1_at    | MmugDNA.3593.1  | 4.65  | 4.82  | 0.27 | 0.32 | -1.12 | 0.980576 | 0.999495 | 0.992987 | 0.999836 |
| MmugDNA.35930.1.S1_at   | MmugDNA.35930.1 | 6.73  | 5.92  | 0.84 | 0.58 | 1.76  | 0.213085 | 0.268622 | 0.573447 | 0.534138 |
| MmugDNA.35931.1.S1_at   | MmugDNA.35931.1 | 5     | 5.02  | 0.18 | 0    | -1.01 | 0.447765 | 0.578115 | 0.729195 | 0.7483   |
| MmugDNA.35932.1.S1_at   | MmugDNA.35932.1 | 4.95  | 5.22  | 0.17 | 0.12 | -1.21 | 0.11123  | 0.1276   | 0.473262 | 0.398533 |
| MmugDNA.35933.1.S1_at   | MmugDNA.35933.1 | 3.89  | 3.86  | 0.24 | 0.08 | 1.02  | 0.342298 | 0.479263 | 0.663129 | 0.68506  |
| MmugDNA.35935.1.S1_at   | MmugDNA.35935.1 | 3.23  | 3.21  | 0.08 | 0.08 | 1.01  | 0.681784 | 0.199301 | 0.857635 | 0.474002 |
| MmugDNA.35936.1.S1_at   | MmugDNA.35936.1 | 7.08  | 10.26 | 1.31 | 0.66 | -9.07 | 0.020595 | 0.011172 | 0.27902  | 0.137551 |
| MmugDNA.35938.1.S1_at   | MmugDNA.35938.1 | 6.37  | 6.54  | 0.35 | 0.15 | -1.12 | 0.881809 | 0.983617 | 0.95255  | 0.990902 |
| MmugDNA.35939.1.S1_at   | MmugDNA.35939.1 | 2.77  | 2.89  | 0.13 | 0.04 | -1.09 | 0.128774 | 0.262718 | 0.494664 | 0.52907  |
| MmugDNA.35941.1.S1_at   | MmugDNA.35941.1 | 9.08  | 12.02 | 1.26 | 1.34 | -7.67 | 0.146675 | 0.124731 | 0.512668 | 0.39513  |
| MmugDNA.35943.1.S1_at   | MmugDNA.35943.1 | 5.04  | 5.17  | 0.17 | 0.07 | -1.1  | 0.106109 | 0.096486 | 0.466831 | 0.35409  |
| MmugDNA.35944.1.S1_at   | MmugDNA.35944.1 | 4.66  | 3.95  | 0.78 | 0.71 | 1.63  | 0.575002 | 0.555054 | 0.802045 | 0.733629 |
| MmugDNA.35945.1.S1_at   | MmugDNA.35945.1 | 3.69  | 3.51  | 0.41 | 0.04 | 1.13  | 0.174131 | 0.107755 | 0.537761 | 0.370816 |
| MmugDNA.35946.1.S1_at   | MmugDNA.35946.1 | 8.98  | 9.09  | 0.43 | 0.4  | -1.08 | 0.163571 | 0.159666 | 0.527992 | 0.435785 |
| MmugDNA.35947.1.S1_at   | MmugDNA.35947.1 | 4.32  | 4.37  | 0.06 | 0.14 | -1.03 | 0.206054 | 0.154075 | 0.568453 | 0.428867 |
| MmugDNA.35948.1.S1_at   | MmugDNA.35948.1 | 3.04  | 3.47  | 0.2  | 0.34 | -1.35 | 0.052107 | 0.052232 | 0.376989 | 0.274065 |
| MmugDNA.3595.1.S1_at    | MmugDNA.3595.1  | 4.19  | 4.65  | 0.41 | 0.26 | -1.38 | 0.31161  | 0.226904 | 0.64356  | 0.499276 |
| MmugDNA.35952.1.S1_at   | MmugDNA.35952.1 | 4.18  | 3.8   | 0.34 | 0.28 | 1.3   | 0.301474 | 0.441141 | 0.636394 | 0.659375 |
| MmugDNA.35953.1.S1_at   | MmugDNA.35953.1 | 8.82  | 8.26  | 0.29 | 0.93 | 1.47  | 0.418172 | 0.573957 | 0.711168 | 0.745491 |
| MmugDNA.35954.1.S1_at   | MmugDNA.35954.1 | 7.13  | 7.92  | 0.27 | 0.58 | -1.72 | 0.048211 | 0.038704 | 0.368092 | 0.24169  |
| MmugDNA.35955.1.S1_at   | MmugDNA.35955.1 | 7.71  | 7.4   | 0.77 | 0.23 | 1.24  | 0.170737 | 0.206596 | 0.534594 | 0.480624 |
| MmugDNA.35956.1.S1_at   | MmugDNA.35956.1 | 4     | 4.26  | 0.12 | 0.11 | -1.2  | 0.123891 | 0.15358  | 0.489589 | 0.428341 |
| MmugDNA.35957.1.S1_at   | MmugDNA.35957.1 | 10.6  | 9.62  | 0.41 | 0.11 | 1.97  | 0.027652 | 0.023492 | 0.308507 | 0.19207  |
| MmugDNA.35958.1.S1_at   | MmugDNA.35958.1 | 7.64  | 6.32  | 0.48 | 0.35 | 2.49  | 0.00647  | 0.001971 | 0.199625 | 0.065871 |
| MmugDNA.35960.1.S1_at   | MmugDNA.35960.1 | 3.69  | 3.69  | 0.75 | 0.47 | -1.01 | 0.928131 | 0.467259 | 0.972328 | 0.677016 |
| MmugDNA.35961.1.S1_at   | MmugDNA.35961.1 | 3.1   | 3.03  | 0.5  | 0.13 | 1.05  | 0.235574 | 0.328822 | 0.589497 | 0.578398 |

|                         |                 |       |       |      |      |       |          |          |          |          |
|-------------------------|-----------------|-------|-------|------|------|-------|----------|----------|----------|----------|
| MmugDNA.35962.1.S1_at   | MmugDNA.35962.1 | 3.1   | 2.96  | 0.27 | 0.07 | 1.11  | 0.262067 | 0.226434 | 0.608753 | 0.498888 |
| MmugDNA.35964.1.S1_at   | MmugDNA.35964.1 | 3.89  | 3.97  | 0.2  | 0.07 | -1.05 | 0.221033 | 0.265928 | 0.579967 | 0.531796 |
| MmugDNA.35966.1.S1_at   | MmugDNA.35966.1 | 4.63  | 4.61  | 0.27 | 0.24 | 1.01  | 0.259937 | 0.296932 | 0.606878 | 0.555895 |
| MmugDNA.35967.1.S1_at   | MmugDNA.35967.1 | 7.35  | 6.92  | 0.2  | 0.23 | 1.35  | 0.039061 | 0.029607 | 0.346242 | 0.213742 |
| MmugDNA.35968.1.S1_at   | MmugDNA.35968.1 | 8.23  | 8.19  | 1.27 | 0.57 | 1.03  | 0.455326 | 0.334916 | 0.733752 | 0.58275  |
| MmugDNA.35969.1.S1_at   | MmugDNA.35969.1 | 5.78  | 5.78  | 0.12 | 0.07 | 1     | 0.250556 | 0.392403 | 0.600389 | 0.625811 |
| MmugDNA.3597.1.S1_at    | MmugDNA.3597.1  | 10.87 | 9.9   | 0.37 | 0.57 | 1.95  | 0.028186 | 0.018206 | 0.310041 | 0.169746 |
| MmugDNA.35970.1.S1_at   | MmugDNA.35970.1 | 3.77  | 3.89  | 0.19 | 0.11 | -1.08 | 0.977149 | 0.525503 | 0.991249 | 0.715076 |
| MmugDNA.35971.1.S1_s_at | MmugDNA.35971.1 | 2.6   | 2.61  | 0.07 | 0.1  | -1    | 0.211259 | 0.262451 | 0.572065 | 0.528713 |
| MmugDNA.35973.1.S1_at   | MmugDNA.35973.1 | 8.82  | 10    | 0.13 | 0.83 | -2.26 | 0.080179 | 0.089489 | 0.430341 | 0.343811 |
| MmugDNA.35974.1.S1_at   | MmugDNA.35974.1 | 11.78 | 11.81 | 0.26 | 0.06 | -1.02 | 0.68711  | 0.453911 | 0.860148 | 0.668338 |
| MmugDNA.35975.1.S1_at   | MmugDNA.35975.1 | 6.77  | 6.46  | 0.18 | 0.1  | 1.24  | 0.082181 | 0.099564 | 0.433463 | 0.35796  |
| MmugDNA.35976.1.S1_at   | MmugDNA.35976.1 | 4.5   | 4.79  | 0.15 | 0.22 | -1.22 | 0.202254 | 0.333665 | 0.564606 | 0.581825 |
| MmugDNA.35978.1.S1_at   | MmugDNA.35978.1 | 4.3   | 4.52  | 0.14 | 0.09 | -1.16 | 0.176109 | 0.215743 | 0.539647 | 0.489503 |
| MmugDNA.35979.1.S1_at   | MmugDNA.35979.1 | 6.96  | 7.04  | 0.11 | 0.17 | -1.06 | 0.419972 | 0.652942 | 0.712178 | 0.797125 |
| MmugDNA.3598.1.S1_at    | MmugDNA.3598.1  | 3.89  | 3.75  | 0.19 | 0.2  | 1.1   | 0.793668 | 0.896624 | 0.9145   | 0.940929 |
| MmugDNA.35980.1.S1_at   | MmugDNA.35980.1 | 3.91  | 3.54  | 0.44 | 0.2  | 1.29  | 0.240687 | 0.205443 | 0.593522 | 0.479764 |
| MmugDNA.35981.1.S1_at   | MmugDNA.35981.1 | 4.32  | 4.46  | 0.14 | 0.33 | -1.1  | 0.295324 | 0.212954 | 0.631605 | 0.4869   |
| MmugDNA.35982.1.S1_at   | MmugDNA.35982.1 | 5.89  | 5.98  | 0.08 | 0.04 | -1.07 | 0.108089 | 0.1476   | 0.468878 | 0.421901 |
| MmugDNA.11019.1.S1_at   | MmugDNA.11019.1 | 6.66  | 6.8   | 0.04 | 0.11 | -1.11 | 0.026272 | 0.015626 | 0.302319 | 0.158433 |
| MmugDNA.11019.1.S1_s_at | MmugDNA.11019.1 | 6.64  | 6.68  | 0.04 | 0.05 | -1.03 | 0.646822 | 0.429847 | 0.84111  | 0.651082 |
| MmugDNA.35985.1.S1_s_at | MmugDNA.35985.1 | 11.67 | 11.69 | 0.12 | 0.29 | -1.01 | 0.878179 | 0.350763 | 0.95108  | 0.594501 |
| MmugDNA.35987.1.S1_at   | MmugDNA.35987.1 | 3.67  | 3.83  | 0.66 | 1.32 | -1.12 | 0.770505 | 0.854098 | 0.90333  | 0.916957 |
| MmugDNA.35988.1.S1_at   | MmugDNA.35988.1 | 4.78  | 4.83  | 0.11 | 0.07 | -1.04 | 0.109116 | 0.037687 | 0.470811 | 0.23859  |
| MmugDNA.35989.1.S1_at   | MmugDNA.35989.1 | 5.44  | 5.25  | 0.84 | 0.05 | 1.14  | 0.228409 | 0.20777  | 0.585843 | 0.482018 |
| MmugDNA.3599.1.S1_at    | MmugDNA.3599.1  | 3.07  | 2.97  | 0.14 | 0.27 | 1.07  | 0.676173 | 0.809006 | 0.854837 | 0.889981 |
| MmugDNA.35990.1.S1_at   | MmugDNA.35990.1 | 6.35  | 6.02  | 0.3  | 0.78 | 1.26  | 0.932947 | 0.611292 | 0.973979 | 0.769207 |
| MmugDNA.35991.1.S1_at   | MmugDNA.35991.1 | 3.39  | 3.38  | 0.16 | 0.14 | 1     | 0.45545  | 0.31919  | 0.733811 | 0.571688 |
| MmugDNA.35991.1.S1_x_at | MmugDNA.35991.1 | 3.28  | 3.33  | 0.21 | 0.08 | -1.03 | 0.64788  | 0.119579 | 0.841735 | 0.388247 |
| MmugDNA.35992.1.S1_at   | MmugDNA.35992.1 | 5.17  | 4.66  | 0.29 | 0.32 | 1.42  | 0.203781 | 0.185795 | 0.5663   | 0.461631 |
| MmugDNA.35994.1.S1_at   | MmugDNA.35994.1 | 5.06  | 5.09  | 0.16 | 0.11 | -1.03 | 0.83342  | 0.19798  | 0.932338 | 0.472936 |
| MmugDNA.35995.1.S1_x_at | MmugDNA.35995.1 | 11.51 | 11.58 | 0.2  | 0.2  | -1.05 | 0.711227 | 0.472299 | 0.873475 | 0.679941 |
| MmugDNA.35996.1.S1_at   | MmugDNA.35996.1 | 7.88  | 7.99  | 0.02 | 0.36 | -1.08 | 0.686945 | 0.614634 | 0.860053 | 0.771375 |
| MmugDNA.35997.1.S1_at   | MmugDNA.35997.1 | 3.86  | 3.83  | 0.26 | 0.13 | 1.02  | 0.552119 | 0.189419 | 0.789264 | 0.465117 |
| MmugDNA.35998.1.S1_at   | MmugDNA.35998.1 | 4.75  | 4.88  | 0.13 | 0.64 | -1.09 | 0.483181 | 0.583894 | 0.749882 | 0.752043 |
| MmugDNA.360.1.S1_at     | MmugDNA.360.1   | 5.92  | 6.11  | 0.15 | 0.22 | -1.14 | 0.457732 | 0.006242 | 0.735054 | 0.107169 |
| MmugDNA.3600.1.S1_at    | MmugDNA.3600.1  | 8.18  | 7.76  | 0.04 | 0.03 | 1.34  | 0.00014  | 0.015567 | 0.112653 | 0.15814  |
| MmugDNA.36000.1.S1_at   | MmugDNA.36000.1 | 8.4   | 7.98  | 0.17 | 0.19 | 1.34  | 0.106737 | 0.13877  | 0.467534 | 0.411885 |
| MmugDNA.36002.1.S1_at   | MmugDNA.36002.1 | 3.55  | 3.55  | 0.32 | 0.24 | -1    | 0.915328 | 0.213524 | 0.966534 | 0.48741  |
| MmugDNA.36003.1.S1_at   | MmugDNA.36003.1 | 5.06  | 5.62  | 0.15 | 0.32 | -1.47 | 0.112978 | 0.079521 | 0.475584 | 0.32682  |
| MmugDNA.36004.1.S1_at   | MmugDNA.36004.1 | 5.47  | 5.44  | 0.06 | 0.06 | 1.02  | 0.597345 | 0.429723 | 0.813526 | 0.651001 |



|                         |                 |       |       |      |      |       |          |          |          |          |
|-------------------------|-----------------|-------|-------|------|------|-------|----------|----------|----------|----------|
| MmugDNA.36006.1.S1_at   | MmugDNA.36006.1 | 5.13  | 5.25  | 0.11 | 0.18 | -1.09 | 0.613111 | 0.777041 | 0.822517 | 0.870487 |
| MmugDNA.36007.1.S1_at   | MmugDNA.36007.1 | 5.47  | 5.02  | 0.84 | 1.67 | 1.37  | 0.683195 | 0.873688 | 0.858347 | 0.928169 |
| MmugDNA.36008.1.S1_at   | MmugDNA.36008.1 | 8.19  | 6.5   | 0.64 | 1.16 | 3.24  | 0.054336 | 0.017752 | 0.381851 | 0.168367 |
| MmugDNA.36009.1.S1_at   | MmugDNA.36009.1 | 9.41  | 9.32  | 0.71 | 1.36 | 1.07  | 0.860598 | 0.957381 | 0.943753 | 0.975878 |
| MmugDNA.36011.1.S1_at   | MmugDNA.36011.1 | 5.05  | 4.95  | 0.21 | 0.08 | 1.07  | 0.790633 | 0.347161 | 0.913092 | 0.591815 |
| MmugDNA.36012.1.S1_at   | MmugDNA.36012.1 | 8.86  | 7.84  | 0.08 | 0.18 | 2.04  | 0.001194 | 0.000263 | 0.145267 | 0.033786 |
| MmugDNA.36014.1.S1_at   | MmugDNA.36014.1 | 2.92  | 2.96  | 0.06 | 0.06 | -1.03 | 0.080015 | 0.088233 | 0.430184 | 0.341721 |
| MmugDNA.36015.1.S1_at   | MmugDNA.36015.1 | 6.15  | 6.4   | 0.22 | 0.25 | -1.19 | 0.125737 | 0.13745  | 0.491824 | 0.41037  |
| MmugDNA.36016.1.S1_at   | MmugDNA.36016.1 | 5.38  | 5.54  | 0.1  | 1.05 | -1.12 | 0.309189 | 0.393879 | 0.641368 | 0.626615 |
| MmugDNA.36019.1.S1_at   | MmugDNA.36019.1 | 5.05  | 6.81  | 0.33 | 0.37 | -3.38 | 0.008783 | 0.011453 | 0.221033 | 0.13846  |
| MmugDNA.3602.1.S1_at    | MmugDNA.3602.1  | 6.39  | 6.45  | 0.14 | 0.15 | -1.04 | 0.602046 | 0.660993 | 0.816272 | 0.801674 |
| MmugDNA.36020.1.S1_at   | MmugDNA.36020.1 | 11.22 | 10.59 | 0.31 | 1.4  | 1.55  | 0.346982 | 0.479451 | 0.666129 | 0.685199 |
| MmugDNA.36021.1.S1_at   | MmugDNA.36021.1 | 8.03  | 8.39  | 0.4  | 0.79 | -1.28 | 0.804509 | 0.831815 | 0.919555 | 0.903511 |
| MmugDNA.36022.1.S1_at   | MmugDNA.36022.1 | 6.65  | 6.58  | 0.37 | 0.1  | 1.05  | 0.82435  | 0.459872 | 0.92874  | 0.671989 |
| MmugDNA.36023.1.S1_at   | MmugDNA.36023.1 | 10.08 | 9.17  | 0.09 | 0.11 | 1.88  | 0.000283 | 0.000198 | 0.12562  | 0.031116 |
| MmugDNA.36024.1.S1_at   | MmugDNA.36024.1 | 7.15  | 7.15  | 0.16 | 0.22 | -1    | 0.527161 | 0.567702 | 0.774581 | 0.741576 |
| MmugDNA.36025.1.S1_at   | MmugDNA.36025.1 | 9.9   | 8.07  | 1.43 | 0.76 | 3.55  | 0.195734 | 0.253354 | 0.558901 | 0.521677 |
| MmugDNA.36027.1.S1_at   | MmugDNA.36027.1 | 5.13  | 4.84  | 0.58 | 0.75 | 1.22  | 0.497265 | 0.309446 | 0.757913 | 0.564979 |
| MmugDNA.36027.1.S1_x_at | MmugDNA.36027.1 | 5.87  | 5.23  | 0.98 | 0.72 | 1.55  | 0.365492 | 0.436338 | 0.678307 | 0.655923 |
| MmugDNA.36028.1.S1_at   | MmugDNA.36028.1 | 11.39 | 10.83 | 0.17 | 0.51 | 1.48  | 0.280369 | 0.207843 | 0.621559 | 0.482049 |
| MmugDNA.36029.1.S1_at   | MmugDNA.36029.1 | 3.6   | 3.22  | 0.4  | 0.11 | 1.3   | 0.224533 | 0.383841 | 0.582716 | 0.61978  |
| MmugDNA.3603.1.S1_at    | MmugDNA.3603.1  | 6.48  | 6.26  | 0.26 | 0.6  | 1.16  | 0.235281 | 0.323099 | 0.589342 | 0.574351 |
| MmugDNA.36030.1.S1_at   | MmugDNA.36030.1 | 4.74  | 4.85  | 0.09 | 0.05 | -1.08 | 0.061771 | 0.063361 | 0.396609 | 0.298403 |
| MmugDNA.36032.1.S1_at   | MmugDNA.36032.1 | 3.1   | 3.14  | 0.15 | 0.17 | -1.02 | 0.183783 | 0.193757 | 0.547918 | 0.468828 |
| MmugDNA.36033.1.S1_at   | MmugDNA.36033.1 | 3.96  | 4.49  | 0.14 | 0.04 | -1.45 | 0.004226 | 0.002138 | 0.181739 | 0.068424 |
| MmugDNA.36036.1.S1_at   | MmugDNA.36036.1 | 5.17  | 5.02  | 0.49 | 0.25 | 1.11  | 0.211812 | 0.106452 | 0.572347 | 0.368999 |
| MmugDNA.3604.1.S1_at    | MmugDNA.3604.1  | 5.52  | 5.92  | 0.2  | 0.17 | -1.32 | 0.063746 | 0.256804 | 0.401553 | 0.524607 |
| MmugDNA.3604.1.S1_x_at  | MmugDNA.3604.1  | 5.63  | 6.02  | 0.08 | 0.18 | -1.31 | 0.06118  | 0.319928 | 0.395197 | 0.572274 |
| MmugDNA.36040.1.S1_at   | MmugDNA.36040.1 | 3.82  | 3.63  | 0.09 | 0.24 | 1.14  | 0.363197 | 0.346488 | 0.676579 | 0.591351 |
| MmugDNA.36043.1.S1_at   | MmugDNA.36043.1 | 5.68  | 5.9   | 0.06 | 0.08 | -1.17 | 0.06591  | 0.059852 | 0.405425 | 0.291297 |
| MmugDNA.36045.1.S1_at   | MmugDNA.36045.1 | 3.84  | 4.07  | 0.3  | 0.21 | -1.17 | 0.074226 | 0.06379  | 0.419963 | 0.29906  |
| MmugDNA.36048.1.S1_at   | MmugDNA.36048.1 | 4.29  | 4.58  | 0.04 | 0.3  | -1.23 | 0.164853 | 0.23955  | 0.528805 | 0.510209 |
| MmugDNA.3605.1.S1_at    | MmugDNA.3605.1  | 4.07  | 4.23  | 0.14 | 0.23 | -1.11 | 0.886739 | 0.920621 | 0.954695 | 0.955258 |
| MmugDNA.3605.1.S1_x_at  | MmugDNA.3605.1  | 4.23  | 4.12  | 0.07 | 0.07 | 1.08  | 0.286357 | 0.079508 | 0.625548 | 0.32681  |
| MmugDNA.36050.1.S1_at   | MmugDNA.36050.1 | 3.83  | 3.8   | 0.21 | 0.12 | 1.02  | 0.596281 | 0.747123 | 0.812857 | 0.853124 |
| MmugDNA.36051.1.S1_at   | MmugDNA.36051.1 | 10.21 | 10.03 | 0.25 | 0.64 | 1.13  | 0.64392  | 0.755744 | 0.8397   | 0.857771 |
| MmugDNA.36052.1.S1_at   | MmugDNA.36052.1 | 6.12  | 6.28  | 0.04 | 0.14 | -1.12 | 0.18652  | 0.046862 | 0.550106 | 0.261272 |
| MmugDNA.36054.1.S1_at   | MmugDNA.36054.1 | 6.97  | 6.88  | 0.11 | 0.05 | 1.06  | 0.964591 | 0.298892 | 0.986288 | 0.557509 |
| MmugDNA.36056.1.S1_at   | MmugDNA.36056.1 | 10.56 | 9.37  | 0.27 | 0.42 | 2.28  | 0.012179 | 0.003056 | 0.240358 | 0.08061  |
| MmugDNA.36057.1.S1_at   | MmugDNA.36057.1 | 5.18  | 5.36  | 0.22 | 0.16 | -1.13 | 0.154301 | 0.197199 | 0.518826 | 0.472213 |
| MmugDNA.3606.1.S1_at    | MmugDNA.3606.1  | 4.52  | 4.67  | 0.13 | 0.15 | -1.11 | 0.50892  | 0.127117 | 0.764146 | 0.397922 |

|                         |                 |       |       |      |      |       |          |          |          |          |
|-------------------------|-----------------|-------|-------|------|------|-------|----------|----------|----------|----------|
| MmugDNA.36060.1.S1_at   | MmugDNA.36060.1 | 4.43  | 4.49  | 0.25 | 0.24 | -1.05 | 0.722312 | 0.763359 | 0.878644 | 0.862471 |
| MmugDNA.36061.1.S1_at   | MmugDNA.36061.1 | 8.89  | 9.16  | 0.21 | 0.16 | -1.21 | 0.205677 | 0.195441 | 0.568157 | 0.470259 |
| MmugDNA.36062.1.S1_at   | MmugDNA.36062.1 | 3.72  | 3.7   | 0.17 | 0.16 | 1.01  | 0.977056 | 0.815727 | 0.99123  | 0.893731 |
| MmugDNA.36063.1.S1_at   | MmugDNA.36063.1 | 7.87  | 7.95  | 0.2  | 0.11 | -1.06 | 0.250072 | 0.249858 | 0.600389 | 0.518876 |
| MmugDNA.36066.1.S1_at   | MmugDNA.36066.1 | 3.71  | 3.75  | 0.07 | 0.07 | -1.03 | 0.430276 | 0.53157  | 0.717986 | 0.718781 |
| MmugDNA.36067.1.S1_at   | MmugDNA.36067.1 | 12.22 | 12.9  | 0.61 | 0.11 | -1.6  | 0.044791 | 0.046584 | 0.359043 | 0.260267 |
| MmugDNA.36068.1.S1_at   | MmugDNA.36068.1 | 6.94  | 6.94  | 0.07 | 0.06 | 1     | 0.511701 | 0.808449 | 0.765318 | 0.889757 |
| MmugDNA.36069.1.S1_at   | MmugDNA.36069.1 | 3.69  | 3.6   | 0.13 | 0.18 | 1.07  | 0.671314 | 0.741648 | 0.852602 | 0.850409 |
| MmugDNA.3607.1.S1_at    | MmugDNA.3607.1  | 4.21  | 4.36  | 0.34 | 0.15 | -1.12 | 0.651431 | 0.745177 | 0.843157 | 0.852292 |
| MmugDNA.36070.1.S1_at   | MmugDNA.36070.1 | 6.21  | 5.94  | 0.1  | 0.19 | 1.2   | 0.077461 | 0.078084 | 0.427142 | 0.324578 |
| MmugDNA.36071.1.S1_at   | MmugDNA.36071.1 | 10.08 | 9.91  | 0.06 | 0.16 | 1.13  | 0.176308 | 0.006771 | 0.539927 | 0.111342 |
| MmugDNA.36072.1.S1_at   | MmugDNA.36072.1 | 9.71  | 9.31  | 0.1  | 0.46 | 1.32  | 0.581011 | 0.786099 | 0.804832 | 0.876104 |
| MmugDNA.36075.1.S1_at   | MmugDNA.36075.1 | 6.39  | 4.57  | 0.61 | 0.58 | 3.53  | 0.032262 | 0.039703 | 0.324427 | 0.244271 |
| MmugDNA.36077.1.S1_at   | MmugDNA.36077.1 | 5.46  | 5.61  | 0.14 | 0.19 | -1.11 | 0.623781 | 0.645045 | 0.828047 | 0.791993 |
| MmugDNA.36078.1.S1_at   | MmugDNA.36078.1 | 3.09  | 3.38  | 0.07 | 0.17 | -1.23 | 0.227711 | 0.081253 | 0.585162 | 0.329351 |
| MmugDNA.36079.1.S1_at   | MmugDNA.36079.1 | 5     | 5.2   | 0.12 | 0.08 | -1.16 | 0.065243 | 0.056291 | 0.404201 | 0.283274 |
| MmugDNA.3608.1.S1_at    | MmugDNA.3608.1  | 7.66  | 7.71  | 0.47 | 0.22 | -1.04 | 0.923709 | 0.874563 | 0.970397 | 0.9288   |
| MmugDNA.36080.1.S1_at   | MmugDNA.36080.1 | 8.57  | 9.28  | 0.14 | 0.61 | -1.63 | 0.045101 | 0.05364  | 0.360107 | 0.277224 |
| MmugDNA.36081.1.S1_s_at | MmugDNA.36081.1 | 9.37  | 9.1   | 0.45 | 0.87 | 1.21  | 0.96899  | 0.438944 | 0.988244 | 0.657787 |
| MmugDNA.36082.1.S1_at   | MmugDNA.36082.1 | 2.81  | 2.76  | 0.07 | 0.15 | 1.04  | 0.198827 | 0.233828 | 0.561936 | 0.505169 |
| MmugDNA.36083.1.S1_at   | MmugDNA.36083.1 | 6.68  | 5.8   | 1.07 | 0.62 | 1.84  | 0.828603 | 0.23298  | 0.930477 | 0.50445  |
| MmugDNA.36083.1.S1_s_at | MmugDNA.36083.1 | 5.76  | 6.32  | 0.84 | 0.56 | -1.47 | 0.421471 | 0.353774 | 0.713049 | 0.596815 |
| MmugDNA.36084.1.S1_at   | MmugDNA.36084.1 | 8.39  | 8.04  | 0.69 | 0.47 | 1.27  | 0.874459 | 0.924106 | 0.949658 | 0.957224 |
| MmugDNA.36087.1.S1_at   | MmugDNA.36087.1 | 5.66  | 5.75  | 0.17 | 0.4  | -1.06 | 0.412805 | 0.551548 | 0.708077 | 0.731027 |
| MmugDNA.36088.1.S1_at   | MmugDNA.36088.1 | 5.81  | 5.75  | 0.1  | 0.32 | 1.04  | 0.515792 | 0.141704 | 0.767629 | 0.415265 |
| MmugDNA.36089.1.S1_at   | MmugDNA.36089.1 | 6.59  | 6.57  | 0.13 | 0.09 | 1.02  | 0.85678  | 0.835193 | 0.942171 | 0.905636 |
| MmugDNA.3609.1.S1_at    | MmugDNA.3609.1  | 9.55  | 9.94  | 0.19 | 0.52 | -1.31 | 0.447484 | 0.26154  | 0.729028 | 0.52802  |
| MmugDNA.36090.1.S1_at   | MmugDNA.36090.1 | 5.73  | 6.14  | 0.41 | 0.09 | -1.33 | 0.197159 | 0.095128 | 0.560096 | 0.352151 |
| MmugDNA.36091.1.S1_at   | MmugDNA.36091.1 | 11.07 | 10.85 | 0.13 | 0.16 | 1.16  | 0.325125 | 0.081825 | 0.652361 | 0.330204 |
| MmugDNA.36092.1.S1_at   | MmugDNA.36092.1 | 4.13  | 3.98  | 0.15 | 0.07 | 1.11  | 0.186945 | 0.502839 | 0.550106 | 0.700392 |
| MmugDNA.36093.1.S1_at   | MmugDNA.36093.1 | 5.21  | 5.55  | 0.1  | 0.44 | -1.27 | 0.577738 | 0.551146 | 0.803559 | 0.730819 |
| MmugDNA.36094.1.S1_at   | MmugDNA.36094.1 | 4.14  | 4.16  | 0.08 | 0.07 | -1.01 | 0.639146 | 0.132944 | 0.837011 | 0.404616 |
| MmugDNA.36096.1.S1_at   | MmugDNA.36096.1 | 4.66  | 4.67  | 0.23 | 0.03 | -1.01 | 0.955556 | 0.885596 | 0.983289 | 0.934982 |
| MmugDNA.36097.1.S1_at   | MmugDNA.36097.1 | 3.77  | 4.32  | 0.18 | 0.57 | -1.46 | 0.26232  | 0.368738 | 0.608902 | 0.608236 |
| MmugDNA.36099.1.S1_at   | MmugDNA.36099.1 | 3.03  | 3.03  | 0.18 | 0.11 | 1     | 0.663946 | 0.69644  | 0.849245 | 0.823672 |
| MmugDNA.361.1.S1_at     | MmugDNA.361.1   | 4.71  | 5.91  | 0.73 | 1.11 | -2.31 | 0.215859 | 0.292714 | 0.575954 | 0.552783 |
| MmugDNA.36104.1.S1_at   | MmugDNA.36104.1 | 5.25  | 5.33  | 0.09 | 0.31 | -1.06 | 0.887122 | 0.628336 | 0.954863 | 0.781112 |
| MmugDNA.11157.1.S1_at   | MmugDNA.11157.1 | 8.36  | 7.97  | 0.26 | 0.21 | 1.32  | 0.169518 | 0.237847 | 0.533686 | 0.508341 |
| MmugDNA.11157.1.S1_s_at | MmugDNA.11157.1 | 8.76  | 8.36  | 0.15 | 0.16 | 1.32  | 0.044418 | 0.031113 | 0.358591 | 0.218175 |
| MmugDNA.36106.1.S1_at   | MmugDNA.36106.1 | 5.3   | 5.55  | 0.08 | 0.29 | -1.19 | 0.240628 | 0.44208  | 0.593487 | 0.660148 |
| MmugDNA.36107.1.S1_at   | MmugDNA.36107.1 | 3.65  | 3.7   | 0.07 | 0.26 | -1.03 | 0.614659 | 0.228507 | 0.823258 | 0.500748 |

|                         |                 |       |       |      |      |       |          |          |          |          |
|-------------------------|-----------------|-------|-------|------|------|-------|----------|----------|----------|----------|
| MmugDNA.36109.1.S1_at   | MmugDNA.36109.1 | 8.92  | 8.76  | 0.23 | 0.08 | 1.12  | 0.439715 | 0.032242 | 0.723754 | 0.222229 |
| MmugDNA.36111.1.S1_at   | MmugDNA.36111.1 | 5.89  | 3.54  | 1.45 | 0.81 | 5.11  | 0.330965 | 0.043438 | 0.656063 | 0.253043 |
| MmugDNA.36111.1.S1_at   | MmugDNA.36111.1 | 3.27  | 3.27  | 0.11 | 0.02 | 1     | 0.496439 | 0.666365 | 0.757501 | 0.804499 |
| MmugDNA.36112.1.S1_at   | MmugDNA.36112.1 | 3.78  | 3.4   | 0.47 | 0.4  | 1.31  | 0.186734 | 0.593378 | 0.550106 | 0.758267 |
| MmugDNA.11166.1.S1_s_at | MmugDNA.11166.1 | 10.82 | 10.85 | 0.16 | 0.27 | -1.02 | 0.925008 | 0.297806 | 0.970923 | 0.556484 |
| MmugDNA.36115.1.S1_at   | MmugDNA.36115.1 | 4.67  | 4.7   | 0.25 | 0.19 | -1.02 | 0.366524 | 0.343647 | 0.679082 | 0.589357 |
| MmugDNA.36117.1.S1_at   | MmugDNA.36117.1 | 6.51  | 6.78  | 0.15 | 0.08 | -1.2  | 0.13551  | 0.161743 | 0.5024   | 0.437816 |
| MmugDNA.36119.1.S1_at   | MmugDNA.36119.1 | 6.78  | 6.01  | 0.43 | 0.4  | 1.71  | 0.161495 | 0.125549 | 0.526444 | 0.396226 |
| MmugDNA.3612.1.S1_at    | MmugDNA.3612.1  | 9.7   | 9.69  | 0.07 | 0.15 | 1     | 0.900713 | 0.088922 | 0.960386 | 0.34275  |
| MmugDNA.36121.1.S1_at   | MmugDNA.36121.1 | 8.59  | 8.23  | 0.6  | 0.92 | 1.28  | 0.752551 | 0.876204 | 0.894395 | 0.929606 |
| MmugDNA.36122.1.S1_at   | MmugDNA.36122.1 | 8.2   | 8.06  | 0.08 | 0.44 | 1.11  | 0.651074 | 0.109948 | 0.842984 | 0.374029 |
| MmugDNA.36123.1.S1_at   | MmugDNA.36123.1 | 5.25  | 4.36  | 0.33 | 0.22 | 1.86  | 0.017834 | 0.024828 | 0.268088 | 0.197402 |
| MmugDNA.36124.1.S1_at   | MmugDNA.36124.1 | 8.53  | 8.35  | 0.5  | 0.46 | 1.14  | 0.259126 | 0.135353 | 0.606268 | 0.40745  |
| MmugDNA.36125.1.S1_at   | MmugDNA.36125.1 | 11.56 | 11.73 | 0.19 | 0.01 | -1.12 | 0.069828 | 0.093324 | 0.412907 | 0.349412 |
| MmugDNA.36125.1.S1_s_at | MmugDNA.36125.1 | 12.42 | 12.64 | 0.17 | 0.14 | -1.16 | 0.063152 | 0.071625 | 0.400282 | 0.313735 |
| MmugDNA.36126.1.S1_at   | MmugDNA.36126.1 | 4.14  | 4.27  | 0.16 | 0.15 | -1.09 | 0.360969 | 0.381621 | 0.674989 | 0.617824 |
| MmugDNA.36128.1.S1_at   | MmugDNA.36128.1 | 3.76  | 3.63  | 0.11 | 0.25 | 1.09  | 0.259995 | 0.346244 | 0.606878 | 0.591201 |
| MmugDNA.26577.1.S1_at   | MmugDNA.26577.1 | 14.28 | 14.26 | 0.03 | 0.08 | 1.01  | 0.393313 | 0.446054 | 0.695146 | 0.662676 |
| MmugDNA.26577.1.S1_s_at | MmugDNA.26577.1 | 14.44 | 14.44 | 0.05 | 0.05 | -1    | 0.587495 | 0.733023 | 0.808576 | 0.845498 |
| MmugDNA.36133.1.S1_at   | MmugDNA.36133.1 | 4.31  | 4.55  | 0.29 | 0.16 | -1.19 | 0.620875 | 0.547797 | 0.826212 | 0.728701 |
| MmugDNA.36134.1.S1_at   | MmugDNA.36134.1 | 4.91  | 4.3   | 0.44 | 0.14 | 1.52  | 0.104327 | 0.0899   | 0.464351 | 0.344073 |
| MmugDNA.36135.1.S1_at   | MmugDNA.36135.1 | 8.6   | 9.74  | 0.51 | 0.81 | -2.2  | 0.047959 | 0.021254 | 0.367582 | 0.182488 |
| MmugDNA.36136.1.S1_at   | MmugDNA.36136.1 | 3.71  | 3.71  | 0.03 | 0.14 | 1.01  | 0.33157  | 0.374665 | 0.656424 | 0.613    |
| MmugDNA.36137.1.S1_at   | MmugDNA.36137.1 | 3.1   | 3.05  | 0.1  | 0.1  | 1.03  | 0.609229 | 0.972586 | 0.82039  | 0.98526  |
| MmugDNA.36138.1.S1_at   | MmugDNA.36138.1 | 6.24  | 6.26  | 0.71 | 0.8  | -1.01 | 0.463956 | 0.394402 | 0.738998 | 0.626982 |
| MmugDNA.36139.1.S1_at   | MmugDNA.36139.1 | 5.46  | 4.97  | 0.34 | 0.3  | 1.4   | 0.255865 | 0.327366 | 0.603662 | 0.577284 |
| MmugDNA.3614.1.S1_at    | MmugDNA.3614.1  | 8.7   | 9.28  | 0.05 | 0.22 | -1.5  | 0.022811 | 0.070471 | 0.288178 | 0.311777 |
| MmugDNA.36141.1.S1_at   | MmugDNA.36141.1 | 6.76  | 7.99  | 1.96 | 0.57 | -2.35 | 0.309509 | 0.39055  | 0.641555 | 0.624329 |
| MmugDNA.36142.1.S1_at   | MmugDNA.36142.1 | 7.42  | 7.52  | 0.3  | 0.08 | -1.07 | 0.725179 | 0.905047 | 0.880066 | 0.946165 |
| MmugDNA.36145.1.S1_at   | MmugDNA.36145.1 | 7.28  | 7.01  | 1.09 | 0.63 | 1.21  | 0.292669 | 0.288101 | 0.630041 | 0.549319 |
| MmugDNA.36146.1.S1_at   | MmugDNA.36146.1 | 3.81  | 4.15  | 0.1  | 0.17 | -1.27 | 0.066484 | 0.06018  | 0.406564 | 0.291882 |
| MmugDNA.36147.1.S1_at   | MmugDNA.36147.1 | 8.52  | 8.91  | 0.79 | 0.49 | -1.31 | 0.497854 | 0.688722 | 0.758103 | 0.818296 |
| MmugDNA.36149.1.S1_at   | MmugDNA.36149.1 | 6.56  | 6.42  | 0.76 | 0.68 | 1.1   | 0.826198 | 0.942505 | 0.929365 | 0.967399 |
| MmugDNA.36150.1.S1_at   | MmugDNA.36150.1 | 3.39  | 3.18  | 0.06 | 0.41 | 1.15  | 0.833099 | 0.914016 | 0.932274 | 0.951658 |
| MmugDNA.36151.1.S1_at   | MmugDNA.36151.1 | 4.3   | 3.78  | 0.59 | 0.12 | 1.44  | 0.148722 | 0.122933 | 0.51391  | 0.392923 |
| MmugDNA.36152.1.S1_at   | MmugDNA.36152.1 | 4.96  | 4.37  | 0.38 | 0.57 | 1.5   | 0.085981 | 0.044317 | 0.440024 | 0.255021 |
| MmugDNA.36153.1.S1_at   | MmugDNA.36153.1 | 3.47  | 3.34  | 0.56 | 0.16 | 1.09  | 0.358877 | 0.316391 | 0.673592 | 0.569809 |
| MmugDNA.36154.1.S1_at   | MmugDNA.36154.1 | 3.8   | 3.72  | 0.01 | 0.14 | 1.06  | 0.279346 | 0.339632 | 0.621062 | 0.586217 |
| MmugDNA.36155.1.S1_at   | MmugDNA.36155.1 | 3.84  | 3.89  | 0.22 | 0.11 | -1.04 | 0.762936 | 0.37376  | 0.900081 | 0.61241  |
| MmugDNA.36156.1.S1_at   | MmugDNA.36156.1 | 4.85  | 5.6   | 0.43 | 0.96 | -1.68 | 0.294848 | 0.398491 | 0.631442 | 0.629458 |
| MmugDNA.36157.1.S1_at   | MmugDNA.36157.1 | 8.34  | 8.98  | 0.12 | 0.2  | -1.56 | 0.014263 | 0.006407 | 0.25187  | 0.108767 |

|                         |                 |       |       |      |      |       |          |          |          |          |
|-------------------------|-----------------|-------|-------|------|------|-------|----------|----------|----------|----------|
| MmugDNA.36158.1.S1_s_at | MmugDNA.36158.1 | 10.21 | 9.62  | 0.29 | 0.33 | 1.5   | 0.042834 | 0.019322 | 0.355382 | 0.174723 |
| MmugDNA.36159.1.S1_at   | MmugDNA.36159.1 | 4.79  | 4.23  | 1.73 | 0.34 | 1.48  | 0.232759 | 0.208168 | 0.587847 | 0.482086 |
| MmugDNA.3616.1.S1_at    | MmugDNA.3616.1  | 4.19  | 4.17  | 0.06 | 0.09 | 1.01  | 0.439018 | 0.361614 | 0.72347  | 0.602374 |
| MmugDNA.36160.1.S1_at   | MmugDNA.36160.1 | 9.34  | 8.68  | 0.24 | 0.45 | 1.58  | 0.087974 | 0.018134 | 0.442256 | 0.16964  |
| MmugDNA.36162.1.S1_at   | MmugDNA.36162.1 | 4.52  | 4.59  | 0.18 | 0.11 | -1.05 | 0.960113 | 0.987063 | 0.98486  | 0.992715 |
| MmugDNA.36163.1.S1_at   | MmugDNA.36163.1 | 3.66  | 3.3   | 0.63 | 0.13 | 1.29  | 0.172708 | 0.245626 | 0.536313 | 0.51536  |
| MmugDNA.36164.1.S1_at   | MmugDNA.36164.1 | 6.64  | 7     | 0.18 | 0.4  | -1.28 | 0.312866 | 0.369079 | 0.64472  | 0.608608 |
| MmugDNA.36165.1.S1_at   | MmugDNA.36165.1 | 5.92  | 4.1   | 2.42 | 0.33 | 3.53  | 0.363717 | 0.277428 | 0.676849 | 0.541336 |
| MmugDNA.36166.1.S1_at   | MmugDNA.36166.1 | 5.68  | 5.9   | 0.07 | 0.05 | -1.16 | 0.01229  | 0.046913 | 0.240706 | 0.261301 |
| MmugDNA.36169.1.S1_at   | MmugDNA.36169.1 | 4.75  | 4.19  | 0.34 | 0.39 | 1.48  | 0.665062 | 0.401714 | 0.849774 | 0.631068 |
| MmugDNA.3617.1.S1_at    | MmugDNA.3617.1  | 5.81  | 5.49  | 0.29 | 0.13 | 1.25  | 0.279242 | 0.114468 | 0.620979 | 0.381021 |
| MmugDNA.36170.1.S1_at   | MmugDNA.36170.1 | 6.01  | 6.22  | 0.15 | 0.53 | -1.16 | 0.574677 | 0.570672 | 0.801824 | 0.743269 |
| MmugDNA.36172.1.S1_at   | MmugDNA.36172.1 | 5.42  | 5.59  | 0.25 | 0.09 | -1.12 | 0.399751 | 0.574414 | 0.699664 | 0.745847 |
| MmugDNA.36173.1.S1_at   | MmugDNA.36173.1 | 3.26  | 3.26  | 0.07 | 0.18 | 1     | 0.705995 | 0.843299 | 0.870392 | 0.910767 |
| MmugDNA.36174.1.S1_at   | MmugDNA.36174.1 | 10.24 | 10.92 | 0.24 | 0.32 | -1.6  | 0.079055 | 0.028439 | 0.428609 | 0.210443 |
| MmugDNA.36174.1.S1_s_at | MmugDNA.36174.1 | 9     | 9.68  | 0.33 | 0.19 | -1.6  | 0.063908 | 0.035717 | 0.401767 | 0.233368 |
| MmugDNA.36176.1.S1_s_at | MmugDNA.36176.1 | 10.86 | 11.16 | 0.47 | 0.47 | -1.23 | 0.622291 | 0.807448 | 0.827345 | 0.889121 |
| MmugDNA.36177.1.S1_at   | MmugDNA.36177.1 | 8.36  | 8.32  | 0.19 | 0.51 | 1.03  | 0.886745 | 0.973341 | 0.954695 | 0.985515 |
| MmugDNA.36178.1.S1_at   | MmugDNA.36178.1 | 5.92  | 6.55  | 1.22 | 0.54 | -1.55 | 0.901819 | 0.973762 | 0.960815 | 0.985656 |
| MmugDNA.36179.1.S1_at   | MmugDNA.36179.1 | 3.22  | 3.23  | 0.02 | 0.17 | -1.01 | 0.927419 | 0.986137 | 0.971995 | 0.992143 |
| MmugDNA.3618.1.S1_at    | MmugDNA.3618.1  | 12.38 | 12.4  | 0.43 | 0.94 | -1.02 | 0.441775 | 0.347893 | 0.725144 | 0.592196 |
| MmugDNA.36180.1.S1_at   | MmugDNA.36180.1 | 9.92  | 10.85 | 0.34 | 0.13 | -1.9  | 0.037168 | 0.026016 | 0.340777 | 0.202179 |
| MmugDNA.36180.1.S1_s_at | MmugDNA.36180.1 | 12.95 | 13.37 | 0.18 | 0.07 | -1.34 | 0.03599  | 0.020238 | 0.338662 | 0.178669 |
| MmugDNA.36181.1.S1_at   | MmugDNA.36181.1 | 4.2   | 4.27  | 0.13 | 0.25 | -1.05 | 0.731912 | 0.910509 | 0.884095 | 0.949465 |
| MmugDNA.36184.1.S1_at   | MmugDNA.36184.1 | 4.03  | 4.28  | 0.19 | 0.52 | -1.19 | 0.642571 | 0.770806 | 0.838763 | 0.866807 |
| MmugDNA.36187.1.S1_at   | MmugDNA.36187.1 | 4.22  | 4.32  | 0.01 | 0.08 | -1.07 | 0.038513 | 0.001626 | 0.344537 | 0.060962 |
| MmugDNA.36189.1.S1_at   | MmugDNA.36189.1 | 6.86  | 6.65  | 0.24 | 0.24 | 1.15  | 0.554261 | 0.759089 | 0.790667 | 0.859979 |
| MmugDNA.3619.1.S1_at    | MmugDNA.3619.1  | 5.66  | 5.74  | 0.2  | 0.24 | -1.05 | 0.448618 | 0.13432  | 0.729722 | 0.406599 |
| MmugDNA.36190.1.S1_at   | MmugDNA.36190.1 | 3.68  | 3.81  | 0.19 | 0.15 | -1.09 | 0.183217 | 0.353397 | 0.547309 | 0.596499 |
| MmugDNA.36191.1.S1_at   | MmugDNA.36191.1 | 4.43  | 4.81  | 0.89 | 0.4  | -1.3  | 0.913959 | 0.987274 | 0.965987 | 0.992852 |
| MmugDNA.36192.1.S1_at   | MmugDNA.36192.1 | 3.24  | 3.03  | 0.07 | 0.11 | 1.16  | 0.059146 | 0.054208 | 0.391135 | 0.278222 |
| MmugDNA.36193.1.S1_at   | MmugDNA.36193.1 | 5.76  | 5.74  | 0.27 | 0.27 | 1.01  | 0.683918 | 0.750456 | 0.858543 | 0.854834 |
| MmugDNA.36194.1.S1_at   | MmugDNA.36194.1 | 6.84  | 9.21  | 0.73 | 0.4  | -5.15 | 0.008186 | 0.002361 | 0.216841 | 0.071732 |
| MmugDNA.36195.1.S1_at   | MmugDNA.36195.1 | 3.39  | 3.39  | 0.03 | 0.03 | 1     | 0.230214 | 0.658157 | 0.587112 | 0.800181 |
| MmugDNA.36198.1.S1_at   | MmugDNA.36198.1 | 3.07  | 3.07  | 0.08 | 0.1  | -1    | 0.326098 | 0.554514 | 0.653184 | 0.733263 |
| MmugDNA.36199.1.S1_at   | MmugDNA.36199.1 | 6.18  | 5.96  | 0.08 | 0.25 | 1.17  | 0.422915 | 0.59019  | 0.713769 | 0.756117 |
| MmugDNA.362.1.S1_at     | MmugDNA.362.1   | 2.94  | 2.99  | 0.11 | 0.08 | -1.03 | 0.977055 | 0.613799 | 0.99123  | 0.770876 |
| MmugDNA.3620.1.S1_at    | MmugDNA.3620.1  | 5.68  | 5.81  | 0.07 | 0.04 | -1.1  | 0.017102 | 0.034416 | 0.266719 | 0.229493 |
| MmugDNA.36200.1.S1_at   | MmugDNA.36200.1 | 7.17  | 7.33  | 0.09 | 0.15 | -1.12 | 0.205628 | 0.098359 | 0.568095 | 0.356466 |
| MmugDNA.36202.1.S1_at   | MmugDNA.36202.1 | 6.14  | 7.06  | 0.72 | 1.13 | -1.9  | 0.115834 | 0.115592 | 0.479325 | 0.382674 |
| MmugDNA.36203.1.S1_at   | MmugDNA.36203.1 | 8.34  | 8.96  | 0.19 | 0.39 | -1.53 | 0.306614 | 0.231148 | 0.639593 | 0.5029   |

|                         |                 |       |       |      |      |       |          |          |          |          |
|-------------------------|-----------------|-------|-------|------|------|-------|----------|----------|----------|----------|
| MmugDNA.36204.1.S1_at   | MmugDNA.36204.1 | 4.56  | 4.59  | 0.29 | 0.12 | -1.02 | 0.72234  | 0.318492 | 0.878651 | 0.571239 |
| MmugDNA.36205.1.S1_at   | MmugDNA.36205.1 | 5.78  | 5.95  | 0.13 | 0.29 | -1.12 | 0.403784 | 0.160987 | 0.702357 | 0.437116 |
| MmugDNA.36206.1.S1_s_at | MmugDNA.36206.1 | 10.48 | 11.13 | 0.16 | 0.31 | -1.57 | 0.046093 | 0.029962 | 0.362442 | 0.214858 |
| MmugDNA.36207.1.S1_at   | MmugDNA.36207.1 | 7.76  | 7.72  | 0.11 | 0.02 | 1.03  | 0.785587 | 0.480798 | 0.910846 | 0.686    |
| MmugDNA.36208.1.S1_at   | MmugDNA.36208.1 | 10.79 | 10.61 | 0.17 | 0.3  | 1.13  | 0.41453  | 0.461438 | 0.709338 | 0.673122 |
| MmugDNA.36208.1.S1_s_at | MmugDNA.36208.1 | 10.13 | 9.9   | 0.14 | 0.35 | 1.17  | 0.644233 | 0.333622 | 0.839719 | 0.581808 |
| MmugDNA.36209.1.S1_at   | MmugDNA.36209.1 | 5.36  | 4.91  | 0.21 | 1.37 | 1.37  | 0.714182 | 0.835263 | 0.874672 | 0.905675 |
| MmugDNA.36210.1.S1_at   | MmugDNA.36210.1 | 8.74  | 6.98  | 0.21 | 0.24 | 3.39  | 0.00065  | 0.000255 | 0.136818 | 0.033475 |
| MmugDNA.36211.1.S1_at   | MmugDNA.36211.1 | 8.3   | 8.4   | 0.05 | 0.12 | -1.07 | 0.59129  | 0.021796 | 0.810332 | 0.184765 |
| MmugDNA.36214.1.S1_at   | MmugDNA.36214.1 | 5.66  | 4.22  | 0.92 | 0.27 | 2.71  | 0.082338 | 0.08604  | 0.433725 | 0.338256 |
| MmugDNA.36215.1.S1_at   | MmugDNA.36215.1 | 5.16  | 5.24  | 0.08 | 0.05 | -1.06 | 0.807727 | 0.072975 | 0.921401 | 0.315986 |
| MmugDNA.36217.1.S1_at   | MmugDNA.36217.1 | 7.89  | 8.14  | 0.12 | 0.23 | -1.19 | 0.223492 | 0.018771 | 0.581963 | 0.172216 |
| MmugDNA.36218.1.S1_at   | MmugDNA.36218.1 | 9.63  | 10.03 | 0.25 | 0.15 | -1.32 | 0.115177 | 0.141916 | 0.478604 | 0.415437 |
| MmugDNA.36220.1.S1_at   | MmugDNA.36220.1 | 3.27  | 3.19  | 0.22 | 0.18 | 1.06  | 0.676231 | 0.803979 | 0.85485  | 0.887203 |
| MmugDNA.36221.1.S1_at   | MmugDNA.36221.1 | 5.58  | 5.64  | 0.04 | 0.06 | -1.05 | 0.380837 | 0.110704 | 0.687597 | 0.374854 |
| MmugDNA.36223.1.S1_at   | MmugDNA.36223.1 | 6.16  | 5.57  | 0.38 | 0.32 | 1.51  | 0.058647 | 0.015513 | 0.390868 | 0.158053 |
| MmugDNA.36224.1.S1_at   | MmugDNA.36224.1 | 3.11  | 3.31  | 0.42 | 0.1  | -1.15 | 0.879319 | 0.805501 | 0.951526 | 0.888234 |
| MmugDNA.36225.1.S1_at   | MmugDNA.36225.1 | 2.95  | 2.92  | 0.15 | 0.02 | 1.02  | 0.675938 | 0.825174 | 0.854832 | 0.899551 |
| MmugDNA.36226.1.S1_at   | MmugDNA.36226.1 | 4.73  | 4.73  | 0.08 | 0.05 | -1    | 0.418953 | 0.502628 | 0.711627 | 0.700236 |
| MmugDNA.36227.1.S1_at   | MmugDNA.36227.1 | 5.68  | 5.71  | 0.29 | 0.27 | -1.02 | 0.768969 | 0.73316  | 0.902867 | 0.845555 |
| MmugDNA.36228.1.S1_at   | MmugDNA.36228.1 | 6.73  | 6.52  | 0.24 | 1.02 | 1.16  | 0.660518 | 0.611079 | 0.847722 | 0.769031 |
| MmugDNA.36229.1.S1_at   | MmugDNA.36229.1 | 6.01  | 6.34  | 0.17 | 0.52 | -1.26 | 0.119186 | 0.127078 | 0.48378  | 0.397913 |
| MmugDNA.36230.1.S1_at   | MmugDNA.36230.1 | 3.32  | 3.32  | 0.39 | 0.02 | -1    | 0.53993  | 0.776563 | 0.781415 | 0.870099 |
| MmugDNA.36231.1.S1_at   | MmugDNA.36231.1 | 4.87  | 4.86  | 0.1  | 0.09 | 1.01  | 0.707539 | 0.830351 | 0.871138 | 0.902644 |
| MmugDNA.36232.1.S1_at   | MmugDNA.36232.1 | 9.23  | 9.9   | 0.42 | 0.46 | -1.59 | 0.277055 | 0.144777 | 0.619197 | 0.41862  |
| MmugDNA.36235.1.S1_at   | MmugDNA.36235.1 | 3.2   | 3.2   | 0.06 | 0.34 | 1     | 0.467016 | 0.4029   | 0.740525 | 0.631652 |
| MmugDNA.21227.1.S1_s_at | MmugDNA.21227.1 | 9.96  | 9.97  | 0.14 | 0.03 | -1.01 | 0.6727   | 0.726069 | 0.853193 | 0.841415 |
| MmugDNA.36237.1.S1_at   | MmugDNA.36237.1 | 6.2   | 6.81  | 0.75 | 0.55 | -1.52 | 0.625857 | 0.844678 | 0.82918  | 0.911602 |
| MmugDNA.36238.1.S1_at   | MmugDNA.36238.1 | 3.23  | 3.19  | 0.32 | 0.06 | 1.03  | 0.665198 | 0.878469 | 0.849897 | 0.930638 |
| MmugDNA.36239.1.S1_at   | MmugDNA.36239.1 | 4.41  | 4.3   | 0.1  | 0.03 | 1.08  | 0.109748 | 0.201933 | 0.470963 | 0.476412 |
| MmugDNA.36240.1.S1_at   | MmugDNA.36240.1 | 2.99  | 2.85  | 0.12 | 0.03 | 1.11  | 0.130249 | 0.033948 | 0.496613 | 0.227893 |
| MmugDNA.36242.1.S1_at   | MmugDNA.36242.1 | 4.27  | 3.98  | 0.22 | 0.18 | 1.22  | 0.149771 | 0.127748 | 0.514353 | 0.398596 |
| MmugDNA.36243.1.S1_at   | MmugDNA.36243.1 | 5.71  | 5.64  | 0.64 | 0.27 | 1.05  | 0.624161 | 0.148146 | 0.828178 | 0.422673 |
| MmugDNA.36244.1.S1_at   | MmugDNA.36244.1 | 6.33  | 6.51  | 0.14 | 0.15 | -1.13 | 0.088387 | 0.092023 | 0.443193 | 0.34746  |
| MmugDNA.36245.1.S1_at   | MmugDNA.36245.1 | 4.6   | 4.53  | 0.11 | 0.22 | 1.05  | 0.146485 | 0.169014 | 0.512638 | 0.445589 |
| MmugDNA.36246.1.S1_at   | MmugDNA.36246.1 | 9.14  | 10.08 | 0.27 | 0.09 | -1.91 | 0.004155 | 0.000922 | 0.181739 | 0.048692 |
| MmugDNA.36247.1.S1_at   | MmugDNA.36247.1 | 6.5   | 6.72  | 0.21 | 0.13 | -1.16 | 0.185292 | 0.249507 | 0.548759 | 0.518544 |
| MmugDNA.36248.1.S1_at   | MmugDNA.36248.1 | 5.65  | 4.84  | 0.36 | 0.13 | 1.76  | 0.010144 | 0.007588 | 0.228247 | 0.11658  |
| MmugDNA.36249.1.S1_at   | MmugDNA.36249.1 | 3.81  | 3.88  | 0.17 | 0.17 | -1.05 | 0.759419 | 0.578016 | 0.898381 | 0.748226 |
| MmugDNA.3625.1.S1_at    | MmugDNA.3625.1  | 11.84 | 11.9  | 0.1  | 0.09 | -1.04 | 0.741641 | 0.629334 | 0.889293 | 0.781818 |
| MmugDNA.36252.1.S1_at   | MmugDNA.36252.1 | 6.78  | 7.32  | 0.55 | 0.3  | -1.46 | 0.393845 | 0.515634 | 0.695522 | 0.708449 |

|                         |                 |       |       |      |      |       |          |          |          |          |
|-------------------------|-----------------|-------|-------|------|------|-------|----------|----------|----------|----------|
| MmugDNA.36253.1.S1_at   | MmugDNA.36253.1 | 4.75  | 4.85  | 0.14 | 0.07 | -1.07 | 0.211812 | 0.25157  | 0.572347 | 0.520309 |
| MmugDNA.36255.1.S1_at   | MmugDNA.36255.1 | 6.4   | 6.19  | 0.38 | 0.17 | 1.15  | 0.723844 | 0.890213 | 0.879238 | 0.937473 |
| MmugDNA.36258.1.S1_at   | MmugDNA.36258.1 | 4.11  | 4.53  | 1.09 | 0.71 | -1.33 | 0.452581 | 0.276159 | 0.732213 | 0.540169 |
| MmugDNA.36259.1.S1_at   | MmugDNA.36259.1 | 5.97  | 4.92  | 0.41 | 0.15 | 2.08  | 0.034439 | 0.259989 | 0.333081 | 0.52675  |
| MmugDNA.3626.1.S1_at    | MmugDNA.3626.1  | 10.01 | 9.85  | 0.2  | 0.54 | 1.12  | 0.465191 | 0.233064 | 0.739822 | 0.50445  |
| MmugDNA.36260.1.S1_at   | MmugDNA.36260.1 | 10.24 | 10.98 | 0.11 | 0.96 | -1.67 | 0.24662  | 0.173553 | 0.597806 | 0.449947 |
| MmugDNA.36261.1.S1_at   | MmugDNA.36261.1 | 6.48  | 6.62  | 0.23 | 0.07 | -1.1  | 0.844052 | 0.976141 | 0.937392 | 0.98697  |
| MmugDNA.36262.1.S1_at   | MmugDNA.36262.1 | 4.2   | 3.75  | 0.78 | 0.1  | 1.37  | 0.353084 | 0.31813  | 0.669964 | 0.571046 |
| MmugDNA.36264.1.S1_at   | MmugDNA.36264.1 | 5.91  | 8.41  | 1.21 | 1.92 | -5.68 | 0.270848 | 0.206227 | 0.615103 | 0.480382 |
| MmugDNA.36265.1.S1_at   | MmugDNA.36265.1 | 5.44  | 5.31  | 0.16 | 0.26 | 1.09  | 0.335328 | 0.533141 | 0.659098 | 0.719436 |
| MmugDNA.36267.1.S1_at   | MmugDNA.36267.1 | 8.66  | 8.43  | 0.36 | 0.12 | 1.17  | 0.337388 | 0.458296 | 0.659935 | 0.671096 |
| MmugDNA.36268.1.S1_at   | MmugDNA.36268.1 | 5.74  | 5.78  | 0.19 | 0.14 | -1.02 | 0.592424 | 0.176492 | 0.810913 | 0.452836 |
| MmugDNA.36269.1.S1_s_at | MmugDNA.36269.1 | 13    | 13.03 | 0.04 | 0.16 | -1.02 | 0.560488 | 0.150238 | 0.794285 | 0.42486  |
| MmugDNA.3627.1.S1_s_at  | MmugDNA.3627.1  | 11.54 | 11.83 | 0.12 | 0.23 | -1.23 | 0.182446 | 0.203861 | 0.546756 | 0.478102 |
| MmugDNA.36270.1.S1_at   | MmugDNA.36270.1 | 7.07  | 6.94  | 0.1  | 0.18 | 1.09  | 0.210032 | 0.01924  | 0.571234 | 0.174494 |
| MmugDNA.36273.1.S1_at   | MmugDNA.36273.1 | 6.79  | 7.63  | 0.47 | 0.38 | -1.78 | 0.068852 | 0.041301 | 0.410654 | 0.247995 |
| MmugDNA.36274.1.S1_at   | MmugDNA.36274.1 | 13.96 | 14.3  | 0.26 | 0.3  | -1.27 | 0.20294  | 0.187303 | 0.565548 | 0.463323 |
| MmugDNA.36275.1.S1_at   | MmugDNA.36275.1 | 6.36  | 6.46  | 0.12 | 0.13 | -1.07 | 0.712464 | 0.138953 | 0.874062 | 0.412048 |
| MmugDNA.36277.1.S1_at   | MmugDNA.36277.1 | 10.48 | 9.3   | 0.48 | 0.09 | 2.26  | 0.011755 | 0.002508 | 0.237691 | 0.074142 |
| MmugDNA.3628.1.S1_at    | MmugDNA.3628.1  | 7.24  | 7.06  | 0.35 | 0.04 | 1.14  | 0.991487 | 0.395758 | 0.99695  | 0.627639 |
| MmugDNA.36287.1.S1_at   | MmugDNA.36287.1 | 4.26  | 4.25  | 0.75 | 0.21 | 1.01  | 0.387263 | 0.36459  | 0.691895 | 0.604917 |
| MmugDNA.36288.1.S1_at   | MmugDNA.36288.1 | 3.28  | 3.05  | 0.11 | 0.19 | 1.17  | 0.33724  | 0.317011 | 0.659871 | 0.570298 |
| MmugDNA.3629.1.S1_at    | MmugDNA.3629.1  | 7.52  | 6.43  | 0.2  | 0.25 | 2.12  | 0.004356 | 0.027463 | 0.183061 | 0.20705  |
| MmugDNA.36290.1.S1_at   | MmugDNA.36290.1 | 6.13  | 7.93  | 0.52 | 0.56 | -3.48 | 0.031859 | 0.014512 | 0.32312  | 0.153682 |
| MmugDNA.36291.1.S1_at   | MmugDNA.36291.1 | 5.69  | 4.11  | 0.6  | 0.5  | 3     | 0.031606 | 0.028798 | 0.322374 | 0.211552 |
| MmugDNA.36292.1.S1_at   | MmugDNA.36292.1 | 4.71  | 5.66  | 1.59 | 0.64 | -1.93 | 0.680044 | 0.595092 | 0.857026 | 0.758939 |
| MmugDNA.36295.1.S1_at   | MmugDNA.36295.1 | 5.43  | 5.58  | 0.14 | 0.25 | -1.11 | 0.944301 | 0.267469 | 0.978764 | 0.533212 |
| MmugDNA.36296.1.S1_at   | MmugDNA.36296.1 | 6.55  | 6.62  | 0.34 | 0.3  | -1.05 | 0.595042 | 0.741563 | 0.812273 | 0.850329 |
| MmugDNA.363.1.S1_at     | MmugDNA.363.1   | 3.99  | 3.81  | 0.13 | 0.1  | 1.13  | 0.526004 | 0.324359 | 0.773971 | 0.574948 |
| MmugDNA.3630.1.S1_at    | MmugDNA.3630.1  | 4.51  | 4.79  | 0.2  | 0.08 | -1.21 | 0.107797 | 0.135536 | 0.468449 | 0.407655 |
| MmugDNA.36300.1.S1_at   | MmugDNA.36300.1 | 3.77  | 3.85  | 0.12 | 0.13 | -1.06 | 0.790602 | 0.954857 | 0.91308  | 0.974414 |
| MmugDNA.36302.1.S1_at   | MmugDNA.36302.1 | 5.35  | 5.34  | 0.06 | 0.16 | 1     | 0.969354 | 0.726766 | 0.988296 | 0.841963 |
| MmugDNA.36304.1.S1_at   | MmugDNA.36304.1 | 10.97 | 10.65 | 0.21 | 0.74 | 1.24  | 0.746746 | 0.518809 | 0.891546 | 0.710724 |
| MmugDNA.36305.1.S1_at   | MmugDNA.36305.1 | 4.91  | 5     | 0.04 | 0.07 | -1.06 | 0.102356 | 0.091862 | 0.462127 | 0.34715  |
| MmugDNA.36306.1.S1_at   | MmugDNA.36306.1 | 10.07 | 9.93  | 0.26 | 0.6  | 1.1   | 0.655477 | 0.846593 | 0.844995 | 0.912699 |
| MmugDNA.36307.1.S1_at   | MmugDNA.36307.1 | 6.66  | 5.42  | 0.31 | 0.36 | 2.36  | 0.02876  | 0.018604 | 0.312166 | 0.171539 |
| MmugDNA.36309.1.S1_at   | MmugDNA.36309.1 | 6.49  | 6.96  | 0.47 | 0.31 | -1.38 | 0.866942 | 0.874932 | 0.94691  | 0.929042 |
| MmugDNA.36310.1.S1_at   | MmugDNA.36310.1 | 3.23  | 3.25  | 0.18 | 0.04 | -1.01 | 0.568157 | 0.822763 | 0.798451 | 0.898071 |
| MmugDNA.36311.1.S1_at   | MmugDNA.36311.1 | 5.6   | 5.54  | 0.23 | 0.12 | 1.04  | 0.26939  | 0.276286 | 0.614131 | 0.540277 |
| MmugDNA.36312.1.S1_s_at | MmugDNA.36312.1 | 8.59  | 8.62  | 0.2  | 0.06 | -1.02 | 0.846442 | 0.680283 | 0.93835  | 0.813346 |
| MmugDNA.36313.1.S1_at   | MmugDNA.36313.1 | 5.95  | 6.19  | 0.1  | 0.02 | -1.19 | 0.037057 | 0.023557 | 0.340693 | 0.192238 |

|                         |                 |       |       |      |      |       |          |          |          |          |
|-------------------------|-----------------|-------|-------|------|------|-------|----------|----------|----------|----------|
| MmugDNA.36314.1.S1_at   | MmugDNA.36314.1 | 7.34  | 6.62  | 0.32 | 0.77 | 1.66  | 0.199047 | 0.152393 | 0.5621   | 0.427184 |
| MmugDNA.36315.1.S1_at   | MmugDNA.36315.1 | 7.43  | 7.81  | 0.19 | 0.25 | -1.3  | 0.194829 | 0.095398 | 0.558366 | 0.352428 |
| MmugDNA.36316.1.S1_at   | MmugDNA.36316.1 | 11.9  | 12.13 | 0.13 | 0.29 | -1.17 | 0.083243 | 0.052786 | 0.435702 | 0.27539  |
| MmugDNA.36317.1.S1_at   | MmugDNA.36317.1 | 3.78  | 4.02  | 0.05 | 0.12 | -1.18 | 0.069635 | 0.036552 | 0.412649 | 0.235649 |
| MmugDNA.3632.1.S1_at    | MmugDNA.3632.1  | 4.19  | 4.2   | 0.08 | 0.14 | -1.01 | 0.204263 | 0.264573 | 0.566752 | 0.530541 |
| MmugDNA.36320.1.S1_at   | MmugDNA.36320.1 | 3.84  | 3.81  | 0.24 | 0.1  | 1.02  | 0.89937  | 0.529821 | 0.959773 | 0.717498 |
| MmugDNA.36321.1.S1_at   | MmugDNA.36321.1 | 11.21 | 10.94 | 0.23 | 0.15 | 1.21  | 0.172836 | 0.204822 | 0.536501 | 0.479209 |
| MmugDNA.36322.1.S1_at   | MmugDNA.36322.1 | 4.43  | 4.43  | 0.02 | 0.18 | -1    | 0.32001  | 0.307234 | 0.649268 | 0.563506 |
| MmugDNA.36323.1.S1_at   | MmugDNA.36323.1 | 6.89  | 6.54  | 1.12 | 0.19 | 1.28  | 0.473229 | 0.502551 | 0.744128 | 0.700192 |
| MmugDNA.36324.1.S1_at   | MmugDNA.36324.1 | 10.09 | 10.26 | 0.11 | 0.23 | -1.12 | 0.303915 | 0.420204 | 0.638091 | 0.644036 |
| MmugDNA.36325.1.S1_at   | MmugDNA.36325.1 | 4.42  | 4.2   | 0.16 | 0.12 | 1.17  | 0.092997 | 0.064498 | 0.450223 | 0.300147 |
| MmugDNA.36326.1.S1_at   | MmugDNA.36326.1 | 5.34  | 5.48  | 0.2  | 0.16 | -1.1  | 0.642225 | 0.719314 | 0.838696 | 0.837566 |
| MmugDNA.36327.1.S1_at   | MmugDNA.36327.1 | 10.78 | 10.5  | 0.09 | 0.19 | 1.21  | 0.032621 | 0.030935 | 0.32573  | 0.217705 |
| MmugDNA.36328.1.S1_at   | MmugDNA.36328.1 | 11.07 | 11.05 | 0.06 | 0.22 | 1.02  | 0.579838 | 0.75242  | 0.804451 | 0.855873 |
| MmugDNA.36329.1.S1_at   | MmugDNA.36329.1 | 8.97  | 8.12  | 0.11 | 0.56 | 1.8   | 0.088033 | 0.08982  | 0.442351 | 0.34404  |
| MmugDNA.36330.1.S1_at   | MmugDNA.36330.1 | 3.82  | 3.88  | 0.04 | 0.07 | -1.04 | 0.146212 | 0.178118 | 0.512262 | 0.454504 |
| MmugDNA.36331.1.S1_at   | MmugDNA.36331.1 | 10.2  | 9.61  | 0.21 | 0.44 | 1.5   | 0.104893 | 0.034112 | 0.46527  | 0.228618 |
| MmugDNA.36331.1.S1_s_at | MmugDNA.36331.1 | 8.88  | 8.36  | 0.12 | 0.33 | 1.44  | 0.114839 | 0.102242 | 0.478048 | 0.36236  |
| MmugDNA.36332.1.S1_at   | MmugDNA.36332.1 | 4.69  | 4.31  | 0.45 | 0.3  | 1.29  | 0.893405 | 0.692227 | 0.957601 | 0.820929 |
| MmugDNA.36333.1.S1_at   | MmugDNA.36333.1 | 6.4   | 6.22  | 0.25 | 0.63 | 1.13  | 0.790836 | 0.942121 | 0.913193 | 0.967154 |
| MmugDNA.36334.1.S1_at   | MmugDNA.36334.1 | 4.85  | 4.5   | 0.54 | 0.36 | 1.27  | 0.494616 | 0.489622 | 0.756791 | 0.691862 |
| MmugDNA.36335.1.S1_at   | MmugDNA.36335.1 | 3.22  | 3.3   | 0.17 | 0.08 | -1.06 | 0.746872 | 0.188148 | 0.891554 | 0.464251 |
| MmugDNA.36336.1.S1_at   | MmugDNA.36336.1 | 3.68  | 3.88  | 0.18 | 0.06 | -1.14 | 0.280291 | 0.229945 | 0.621522 | 0.501802 |
| MmugDNA.36337.1.S1_at   | MmugDNA.36337.1 | 5.53  | 5.4   | 0.15 | 0.16 | 1.09  | 0.718011 | 0.489749 | 0.876254 | 0.69191  |
| MmugDNA.36338.1.S1_at   | MmugDNA.36338.1 | 5.21  | 5     | 0.24 | 0.02 | 1.16  | 0.221992 | 0.169455 | 0.580625 | 0.446075 |
| MmugDNA.36339.1.S1_at   | MmugDNA.36339.1 | 4.36  | 4.83  | 0.98 | 0.69 | -1.39 | 0.836506 | 0.597282 | 0.933838 | 0.76013  |
| MmugDNA.36340.1.S1_at   | MmugDNA.36340.1 | 7.07  | 6.98  | 0.61 | 0.33 | 1.06  | 0.432459 | 0.598283 | 0.719043 | 0.760715 |
| MmugDNA.36341.1.S1_at   | MmugDNA.36341.1 | 4.58  | 4.55  | 0.13 | 0.25 | 1.02  | 0.515078 | 0.736459 | 0.767272 | 0.84751  |
| MmugDNA.36344.1.S1_at   | MmugDNA.36344.1 | 8.34  | 7.38  | 0.58 | 0.95 | 1.95  | 0.14203  | 0.151399 | 0.509354 | 0.426104 |
| MmugDNA.36346.1.S1_at   | MmugDNA.36346.1 | 5.33  | 5.78  | 1.04 | 1.1  | -1.37 | 0.417412 | 0.573188 | 0.710512 | 0.744964 |
| MmugDNA.36347.1.S1_at   | MmugDNA.36347.1 | 4.58  | 4.8   | 0.2  | 0.47 | -1.16 | 0.442314 | 0.406479 | 0.725502 | 0.634352 |
| MmugDNA.36348.1.S1_at   | MmugDNA.36348.1 | 4.88  | 5.36  | 0.18 | 0.41 | -1.39 | 0.04522  | 0.036794 | 0.360405 | 0.236372 |
| MmugDNA.36349.1.S1_at   | MmugDNA.36349.1 | 6.68  | 7.15  | 0.03 | 0.41 | -1.39 | 0.105387 | 0.11096  | 0.466022 | 0.375392 |
| MmugDNA.36350.1.S1_at   | MmugDNA.36350.1 | 3.96  | 4.07  | 0.15 | 0.26 | -1.08 | 0.576887 | 0.435307 | 0.8033   | 0.655142 |
| MmugDNA.36351.1.S1_at   | MmugDNA.36351.1 | 3.22  | 3.25  | 0.33 | 0.1  | -1.02 | 0.613076 | 0.398572 | 0.822517 | 0.629458 |
| MmugDNA.36352.1.S1_at   | MmugDNA.36352.1 | 9.92  | 10.76 | 0.19 | 0.16 | -1.79 | 0.004978 | 0.00093  | 0.187037 | 0.048945 |
| MmugDNA.36353.1.S1_at   | MmugDNA.36353.1 | 6.61  | 6.62  | 0.92 | 1.19 | -1.01 | 0.995496 | 0.99274  | 0.99841  | 0.995715 |
| MmugDNA.36357.1.S1_at   | MmugDNA.36357.1 | 3.55  | 3.77  | 0.11 | 0.22 | -1.16 | 0.328259 | 0.118448 | 0.654312 | 0.386431 |
| MmugDNA.36358.1.S1_at   | MmugDNA.36358.1 | 4.42  | 4.56  | 0.16 | 0.18 | -1.1  | 0.692791 | 0.053415 | 0.863644 | 0.276707 |
| MmugDNA.36359.1.S1_at   | MmugDNA.36359.1 | 6.97  | 7.77  | 0.36 | 0.84 | -1.74 | 0.134642 | 0.151057 | 0.501538 | 0.425718 |
| MmugDNA.36360.1.S1_at   | MmugDNA.36360.1 | 3.76  | 4.19  | 0.15 | 0.18 | -1.35 | 0.059703 | 0.140793 | 0.39273  | 0.414168 |

|                         |                 |       |       |      |      |       |          |          |          |          |
|-------------------------|-----------------|-------|-------|------|------|-------|----------|----------|----------|----------|
| MmugDNA.36361.1.S1_at   | MmugDNA.36361.1 | 4.86  | 4.77  | 0.23 | 0.2  | 1.07  | 0.84427  | 0.700096 | 0.937477 | 0.825946 |
| MmugDNA.36362.1.S1_at   | MmugDNA.36362.1 | 3.69  | 3.81  | 0.02 | 0.19 | -1.09 | 0.347573 | 0.418299 | 0.666562 | 0.642707 |
| MmugDNA.36363.1.S1_at   | MmugDNA.36363.1 | 11.56 | 11.44 | 0.1  | 0.11 | 1.09  | 0.263816 | 0.001199 | 0.609674 | 0.054315 |
| MmugDNA.36365.1.S1_at   | MmugDNA.36365.1 | 4.71  | 3.66  | 0.58 | 0.11 | 2.07  | 0.037063 | 0.088736 | 0.340693 | 0.34241  |
| MmugDNA.36366.1.S1_at   | MmugDNA.36366.1 | 9.47  | 9.71  | 0.11 | 0.14 | -1.18 | 0.195762 | 0.002019 | 0.558925 | 0.06682  |
| MmugDNA.36367.1.S1_at   | MmugDNA.36367.1 | 10.41 | 10.02 | 0.06 | 0.26 | 1.31  | 0.026551 | 0.00604  | 0.303505 | 0.106089 |
| MmugDNA.3637.1.S1_at    | MmugDNA.3637.1  | 6.19  | 6.25  | 0.28 | 0.06 | -1.04 | 0.774888 | 0.841279 | 0.905462 | 0.909576 |
| MmugDNA.36370.1.S1_a_at | MmugDNA.36370.1 | 4.31  | 4.51  | 1.33 | 0.25 | -1.15 | 0.415242 | 0.438212 | 0.709433 | 0.657196 |
| MmugDNA.36373.1.S1_at   | MmugDNA.36373.1 | 3.47  | 3.43  | 0.25 | 0.41 | 1.03  | 0.514838 | 0.599174 | 0.767192 | 0.761359 |
| MmugDNA.36374.1.S1_at   | MmugDNA.36374.1 | 5.08  | 5.08  | 0.14 | 0.08 | -1    | 0.412611 | 0.441526 | 0.707935 | 0.659675 |
| MmugDNA.36376.1.S1_at   | MmugDNA.36376.1 | 3.56  | 3.5   | 0.01 | 0.39 | 1.04  | 0.503712 | 0.246524 | 0.760979 | 0.515917 |
| MmugDNA.36377.1.S1_at   | MmugDNA.36377.1 | 9.43  | 9.29  | 0.18 | 0.6  | 1.1   | 0.391607 | 0.481438 | 0.694126 | 0.686442 |
| MmugDNA.36379.1.S1_at   | MmugDNA.36379.1 | 7.91  | 8.67  | 0.42 | 0.05 | -1.69 | 0.01618  | 0.005628 | 0.26311  | 0.103694 |
| MmugDNA.3638.1.S1_at    | MmugDNA.3638.1  | 8.02  | 7.47  | 0.1  | 0.34 | 1.46  | 0.061133 | 0.029996 | 0.395039 | 0.214956 |
| MmugDNA.36380.1.S1_at   | MmugDNA.36380.1 | 3.38  | 3.15  | 0.13 | 0.03 | 1.17  | 0.096622 | 0.080358 | 0.455424 | 0.327965 |
| MmugDNA.36381.1.S1_at   | MmugDNA.36381.1 | 5.31  | 5.33  | 0.09 | 0.09 | -1.02 | 0.423692 | 0.146471 | 0.714199 | 0.420523 |
| MmugDNA.36384.1.S1_at   | MmugDNA.36384.1 | 3.34  | 3.46  | 0.07 | 0.03 | -1.08 | 0.093423 | 0.089544 | 0.450649 | 0.343811 |
| MmugDNA.36385.1.S1_at   | MmugDNA.36385.1 | 2.98  | 3.25  | 0.03 | 0.16 | -1.21 | 0.081319 | 0.043328 | 0.432095 | 0.252847 |
| MmugDNA.36386.1.S1_at   | MmugDNA.36386.1 | 8.51  | 8.97  | 0.17 | 0.29 | -1.37 | 0.114567 | 0.114567 | 0.477887 | 0.38111  |
| MmugDNA.36387.1.S1_at   | MmugDNA.36387.1 | 6.93  | 6.48  | 0.28 | 0.12 | 1.36  | 0.240247 | 0.341132 | 0.593098 | 0.587233 |
| MmugDNA.36388.1.S1_at   | MmugDNA.36388.1 | 7.4   | 7.06  | 0.14 | 0.11 | 1.26  | 0.052398 | 0.064585 | 0.377577 | 0.300314 |
| MmugDNA.3639.1.S1_at    | MmugDNA.3639.1  | 2.97  | 2.98  | 0.08 | 0.18 | -1.01 | 0.676303 | 0.583525 | 0.854899 | 0.751822 |
| MmugDNA.36390.1.S1_at   | MmugDNA.36390.1 | 2.76  | 2.75  | 0.03 | 0.2  | 1     | 0.329195 | 0.546711 | 0.654879 | 0.728136 |
| MmugDNA.36393.1.S1_at   | MmugDNA.36393.1 | 3.54  | 3.54  | 0.01 | 0.08 | 1     | 0.443325 | 0.090487 | 0.726034 | 0.345002 |
| MmugDNA.36396.1.S1_at   | MmugDNA.36396.1 | 4.36  | 3.97  | 0.09 | 0.06 | 1.32  | 0.002257 | 0.000551 | 0.161206 | 0.040948 |
| MmugDNA.36397.1.S1_at   | MmugDNA.36397.1 | 8.25  | 7.18  | 0.14 | 0.4  | 2.1   | 0.030822 | 0.007573 | 0.320053 | 0.116509 |
| MmugDNA.36398.1.S1_at   | MmugDNA.36398.1 | 5.58  | 5.63  | 0.07 | 0.1  | -1.04 | 0.565671 | 0.601844 | 0.797275 | 0.763113 |
| MmugDNA.36399.1.S1_at   | MmugDNA.36399.1 | 8.17  | 8.05  | 0.33 | 0.2  | 1.09  | 0.25188  | 0.232672 | 0.601195 | 0.504359 |
| MmugDNA.3640.1.S1_at    | MmugDNA.3640.1  | 7.45  | 7.32  | 0.11 | 0.35 | 1.09  | 0.572774 | 0.55087  | 0.800974 | 0.730625 |
| MmugDNA.36400.1.S1_at   | MmugDNA.36400.1 | 6.56  | 6.31  | 0.12 | 0.23 | 1.19  | 0.172827 | 0.164201 | 0.536501 | 0.440466 |
| MmugDNA.36401.1.S1_at   | MmugDNA.36401.1 | 3.58  | 3.9   | 0.02 | 0.26 | -1.25 | 0.092218 | 0.095222 | 0.448698 | 0.35218  |
| MmugDNA.36402.1.S1_at   | MmugDNA.36402.1 | 6.73  | 7.82  | 0.2  | 0.49 | -2.13 | 0.032782 | 0.053684 | 0.326108 | 0.277304 |
| MmugDNA.36403.1.S1_at   | MmugDNA.36403.1 | 6.26  | 6.9   | 0.3  | 0.14 | -1.56 | 0.079829 | 0.079571 | 0.430147 | 0.326922 |
| MmugDNA.36407.1.S1_at   | MmugDNA.36407.1 | 4.2   | 4.19  | 0.11 | 0.08 | 1.01  | 0.732705 | 0.544591 | 0.88457  | 0.72696  |
| MmugDNA.3641.1.S1_at    | MmugDNA.3641.1  | 4.46  | 4.33  | 0.37 | 0.32 | 1.1   | 0.472719 | 0.569525 | 0.743935 | 0.742452 |
| MmugDNA.36410.1.S1_at   | MmugDNA.36410.1 | 7.47  | 7.14  | 0.13 | 0.46 | 1.26  | 0.237102 | 0.141374 | 0.590811 | 0.414874 |
| MmugDNA.36412.1.S1_at   | MmugDNA.36412.1 | 2.89  | 2.88  | 0.1  | 0.22 | 1.01  | 0.622121 | 0.799257 | 0.827278 | 0.884448 |
| MmugDNA.36414.1.S1_at   | MmugDNA.36414.1 | 3.47  | 3.43  | 0.19 | 0.04 | 1.03  | 0.200911 | 0.264676 | 0.563757 | 0.530686 |
| MmugDNA.36415.1.S1_at   | MmugDNA.36415.1 | 7.49  | 7.57  | 0.28 | 0.08 | -1.06 | 0.966137 | 0.933571 | 0.987096 | 0.962229 |
| MmugDNA.36416.1.S1_at   | MmugDNA.36416.1 | 12.78 | 12.52 | 0.09 | 1.28 | 1.2   | 0.254819 | 0.325443 | 0.602784 | 0.575807 |
| MmugDNA.36417.1.S1_at   | MmugDNA.36417.1 | 4.09  | 4.2   | 0.17 | 0.15 | -1.08 | 0.487049 | 0.45144  | 0.751872 | 0.666221 |



|                         |                 |       |       |      |      |       |          |          |          |          |
|-------------------------|-----------------|-------|-------|------|------|-------|----------|----------|----------|----------|
| MmugDNA.36419.1.S1_at   | MmugDNA.36419.1 | 3.72  | 4.12  | 0.83 | 0.77 | -1.32 | 0.829621 | 0.182246 | 0.930889 | 0.458762 |
| MmugDNA.3642.1.S1_at    | MmugDNA.3642.1  | 4.17  | 4.33  | 0.17 | 0.11 | -1.12 | 0.23294  | 0.096599 | 0.587938 | 0.354126 |
| MmugDNA.36420.1.S1_at   | MmugDNA.36420.1 | 3.98  | 3.96  | 0.26 | 0.08 | 1.02  | 0.520624 | 0.466142 | 0.770924 | 0.676144 |
| MmugDNA.36422.1.S1_at   | MmugDNA.36422.1 | 7.37  | 8.65  | 0.09 | 0.36 | -2.43 | 0.002213 | 0.000225 | 0.159628 | 0.032385 |
| MmugDNA.36423.1.S1_at   | MmugDNA.36423.1 | 11.46 | 12.34 | 0.25 | 0.31 | -1.85 | 0.010343 | 0.004566 | 0.229439 | 0.094375 |
| MmugDNA.36424.1.S1_at   | MmugDNA.36424.1 | 6.74  | 6.62  | 0.1  | 0.21 | 1.09  | 0.143569 | 0.152321 | 0.510312 | 0.427072 |
| MmugDNA.36426.1.S1_at   | MmugDNA.36426.1 | 7.07  | 7.19  | 0.11 | 0.02 | -1.09 | 0.385866 | 0.477081 | 0.690905 | 0.683196 |
| MmugDNA.36427.1.S1_at   | MmugDNA.36427.1 | 5.45  | 5.82  | 0.47 | 0.31 | -1.29 | 0.14166  | 0.108281 | 0.509159 | 0.371557 |
| MmugDNA.36428.1.S1_at   | MmugDNA.36428.1 | 5.14  | 4.65  | 0.29 | 0.56 | 1.4   | 0.201724 | 0.297113 | 0.563988 | 0.555996 |
| MmugDNA.36429.1.S1_at   | MmugDNA.36429.1 | 6.67  | 6.18  | 1.08 | 0.65 | 1.4   | 0.897872 | 0.884087 | 0.959181 | 0.933904 |
| MmugDNA.3643.1.S1_at    | MmugDNA.3643.1  | 6.27  | 7.22  | 0.97 | 0.76 | -1.93 | 0.569889 | 0.427972 | 0.79921  | 0.649602 |
| MmugDNA.36431.1.S1_s_at | MmugDNA.36431.1 | 10.2  | 10    | 0.15 | 0.19 | 1.15  | 0.184053 | 0.139401 | 0.547972 | 0.412691 |
| MmugDNA.36432.1.S1_at   | MmugDNA.36432.1 | 7.72  | 7.16  | 0.14 | 0.34 | 1.48  | 0.183988 | 0.225479 | 0.547964 | 0.498129 |
| MmugDNA.36436.1.S1_at   | MmugDNA.36436.1 | 3.66  | 3.72  | 0.34 | 0.27 | -1.04 | 0.570643 | 0.659145 | 0.799614 | 0.800572 |
| MmugDNA.36437.1.S1_at   | MmugDNA.36437.1 | 3.92  | 3.96  | 0.13 | 0.11 | -1.03 | 0.86438  | 0.863735 | 0.945529 | 0.922638 |
| MmugDNA.36438.1.S1_at   | MmugDNA.36438.1 | 4.28  | 4.17  | 0.06 | 0.05 | 1.08  | 0.079764 | 0.249909 | 0.430147 | 0.518889 |
| MmugDNA.36439.1.S1_at   | MmugDNA.36439.1 | 6.95  | 6.29  | 0.72 | 0.42 | 1.59  | 0.144575 | 0.168487 | 0.511015 | 0.445108 |
| MmugDNA.36440.1.S1_at   | MmugDNA.36440.1 | 4.18  | 3.95  | 0.23 | 0.04 | 1.18  | 0.18891  | 0.109916 | 0.551906 | 0.37398  |
| MmugDNA.36441.1.S1_at   | MmugDNA.36441.1 | 4.09  | 3.98  | 0.12 | 0.18 | 1.08  | 0.509344 | 0.420286 | 0.764327 | 0.644084 |
| MmugDNA.5017.1.S1_at    | MmugDNA.5017.1  | 6.32  | 6.72  | 0.89 | 0.74 | -1.33 | 0.53369  | 0.736799 | 0.778431 | 0.847693 |
| MmugDNA.5017.1.S1_s_at  | MmugDNA.5017.1  | 4.92  | 4.95  | 1.22 | 0.51 | -1.03 | 0.946564 | 0.975293 | 0.979457 | 0.986527 |
| MmugDNA.36446.1.S1_s_at | MmugDNA.36446.1 | 10.34 | 10.01 | 0.23 | 0.22 | 1.26  | 0.058993 | 0.049716 | 0.390921 | 0.267995 |
| MmugDNA.36447.1.S1_at   | MmugDNA.36447.1 | 6.81  | 6.83  | 0.02 | 0.09 | -1.01 | 0.884531 | 0.487438 | 0.953771 | 0.690508 |
| MmugDNA.36449.1.S1_at   | MmugDNA.36449.1 | 5.61  | 6.47  | 0.38 | 0.28 | -1.82 | 0.107889 | 0.027092 | 0.468553 | 0.205797 |
| MmugDNA.36450.1.S1_at   | MmugDNA.36450.1 | 9.31  | 8.77  | 0.3  | 0.29 | 1.45  | 0.04459  | 0.052761 | 0.358786 | 0.275315 |
| MmugDNA.36452.1.S1_at   | MmugDNA.36452.1 | 11.55 | 11.4  | 0.2  | 0.44 | 1.11  | 0.350696 | 0.150424 | 0.668574 | 0.424955 |
| MmugDNA.36453.1.S1_at   | MmugDNA.36453.1 | 5.9   | 5.99  | 0.23 | 0.6  | -1.07 | 0.63982  | 0.191449 | 0.837375 | 0.466812 |
| MmugDNA.36455.1.S1_at   | MmugDNA.36455.1 | 7.25  | 6.7   | 0.48 | 0.41 | 1.46  | 0.307202 | 0.241812 | 0.639883 | 0.51238  |
| MmugDNA.36457.1.S1_at   | MmugDNA.36457.1 | 7.34  | 7.53  | 1    | 1.35 | -1.14 | 0.985403 | 0.61619  | 0.99475  | 0.772513 |
| MmugDNA.3646.1.S1_at    | MmugDNA.3646.1  | 4.19  | 4.32  | 0.36 | 0.35 | -1.1  | 0.508644 | 0.666615 | 0.763905 | 0.804709 |
| MmugDNA.36460.1.S1_at   | MmugDNA.36460.1 | 5.88  | 5.99  | 0.02 | 0.09 | -1.08 | 0.101129 | 0.143594 | 0.461009 | 0.41751  |
| MmugDNA.36461.1.S1_at   | MmugDNA.36461.1 | 3.32  | 3.38  | 0.1  | 0.07 | -1.04 | 0.36544  | 0.365187 | 0.678264 | 0.605348 |
| MmugDNA.36462.1.S1_at   | MmugDNA.36462.1 | 5.11  | 5.23  | 0.11 | 0.23 | -1.09 | 0.477219 | 0.658889 | 0.74655  | 0.800473 |
| MmugDNA.36464.1.S1_at   | MmugDNA.36464.1 | 4.25  | 4.07  | 0.23 | 0.21 | 1.13  | 0.727134 | 0.45644  | 0.88121  | 0.670188 |
| MmugDNA.36465.1.S1_at   | MmugDNA.36465.1 | 8.81  | 7.61  | 0.38 | 0.37 | 2.3   | 0.014199 | 0.010508 | 0.251566 | 0.133936 |
| MmugDNA.36465.1.S1_s_at | MmugDNA.36465.1 | 10.03 | 9.02  | 0.24 | 0.37 | 2.01  | 0.009098 | 0.011418 | 0.222023 | 0.138384 |
| MmugDNA.36466.1.S1_at   | MmugDNA.36466.1 | 4.53  | 4.5   | 0.23 | 0.08 | 1.02  | 0.507365 | 0.697523 | 0.762788 | 0.824234 |
| MmugDNA.36467.1.S1_s_at | MmugDNA.36467.1 | 10.93 | 10.85 | 0.37 | 1.01 | 1.06  | 0.584837 | 0.500977 | 0.807159 | 0.699362 |
| MmugDNA.3647.1.S1_at    | MmugDNA.3647.1  | 5.25  | 5.54  | 0.29 | 0.45 | -1.22 | 0.674614 | 0.28331  | 0.854194 | 0.545836 |
| MmugDNA.36472.1.S1_at   | MmugDNA.36472.1 | 6.56  | 7.84  | 0.08 | 0.39 | -2.42 | 0.003381 | 0.001249 | 0.177513 | 0.054879 |
| MmugDNA.36473.1.S1_at   | MmugDNA.36473.1 | 5.29  | 5.36  | 1.19 | 0.45 | -1.05 | 0.806027 | 0.894643 | 0.920435 | 0.939853 |

|                         |                 |       |       |      |      |        |          |          |          |          |
|-------------------------|-----------------|-------|-------|------|------|--------|----------|----------|----------|----------|
| MmugDNA.36476.1.S1_at   | MmugDNA.36476.1 | 7.86  | 7.67  | 0.09 | 0.21 | 1.15   | 0.311739 | 0.012558 | 0.643627 | 0.144501 |
| MmugDNA.36478.1.S1_at   | MmugDNA.36478.1 | 9.56  | 8.84  | 0.12 | 0.35 | 1.64   | 0.104203 | 0.126772 | 0.464201 | 0.397446 |
| MmugDNA.36478.1.S1_s_at | MmugDNA.36478.1 | 7.69  | 7.33  | 0.09 | 0.23 | 1.28   | 0.10927  | 0.126413 | 0.470811 | 0.396936 |
| MmugDNA.36479.1.S1_at   | MmugDNA.36479.1 | 7.27  | 6.14  | 0.86 | 0.57 | 2.2    | 0.071369 | 0.094319 | 0.415198 | 0.350889 |
| MmugDNA.3648.1.S1_at    | MmugDNA.3648.1  | 4.54  | 4.6   | 0.2  | 0.1  | -1.04  | 0.988668 | 0.349736 | 0.995952 | 0.593566 |
| MmugDNA.36480.1.S1_at   | MmugDNA.36480.1 | 4.19  | 3.88  | 0.41 | 0.16 | 1.24   | 0.697001 | 0.763105 | 0.865546 | 0.862257 |
| MmugDNA.36484.1.S1_at   | MmugDNA.36484.1 | 4.8   | 5.11  | 0.22 | 0.26 | -1.24  | 0.206191 | 0.260081 | 0.568505 | 0.52675  |
| MmugDNA.36485.1.S1_at   | MmugDNA.36485.1 | 3.08  | 3.3   | 0.06 | 0.13 | -1.17  | 0.138519 | 0.223676 | 0.505769 | 0.496603 |
| MmugDNA.36486.1.S1_at   | MmugDNA.36486.1 | 2.75  | 2.71  | 0.13 | 0.12 | 1.03   | 0.290796 | 0.378079 | 0.628544 | 0.615387 |
| MmugDNA.36487.1.S1_at   | MmugDNA.36487.1 | 7.81  | 7.57  | 0.42 | 0.6  | 1.19   | 0.685202 | 0.663469 | 0.858887 | 0.803016 |
| MmugDNA.36488.1.S1_at   | MmugDNA.36488.1 | 5.64  | 6.41  | 0.73 | 0.64 | -1.72  | 0.774374 | 0.909309 | 0.905192 | 0.948719 |
| MmugDNA.3649.1.S1_at    | MmugDNA.3649.1  | 3.68  | 3.51  | 0.56 | 0.09 | 1.12   | 0.36403  | 0.297502 | 0.677121 | 0.556122 |
| MmugDNA.36490.1.S1_at   | MmugDNA.36490.1 | 3.09  | 3.4   | 0.1  | 0.2  | -1.24  | 0.329867 | 0.400182 | 0.655349 | 0.630158 |
| MmugDNA.36491.1.S1_s_at | MmugDNA.36491.1 | 9.85  | 10.1  | 0.79 | 0.95 | -1.2   | 0.911968 | 0.29408  | 0.965176 | 0.553929 |
| MmugDNA.36493.1.S1_at   | MmugDNA.36493.1 | 6.24  | 6     | 0.21 | 0.26 | 1.18   | 0.236181 | 0.154089 | 0.590172 | 0.428867 |
| MmugDNA.36494.1.S1_at   | MmugDNA.36494.1 | 5.48  | 5.37  | 0.26 | 0.24 | 1.08   | 0.745539 | 0.564001 | 0.891131 | 0.738932 |
| MmugDNA.36498.1.S1_at   | MmugDNA.36498.1 | 4.54  | 4.52  | 0.34 | 0.26 | 1.01   | 0.914461 | 0.980462 | 0.966289 | 0.989333 |
| MmugDNA.36499.1.S1_at   | MmugDNA.36499.1 | 4.26  | 4.93  | 0.09 | 0.32 | -1.59  | 0.026507 | 0.05758  | 0.303372 | 0.286115 |
| MmugDNA.365.1.S1_at     | MmugDNA.365.1   | 5.55  | 5.66  | 0.55 | 0.24 | -1.08  | 0.849986 | 0.591398 | 0.939817 | 0.756977 |
| MmugDNA.3650.1.S1_at    | MmugDNA.3650.1  | 7.53  | 7.18  | 0.1  | 1    | 1.28   | 0.195868 | 0.266807 | 0.558998 | 0.53241  |
| MmugDNA.36500.1.S1_at   | MmugDNA.36500.1 | 12.53 | 12.81 | 0.11 | 0.28 | -1.21  | 0.406037 | 0.437516 | 0.7035   | 0.656769 |
| MmugDNA.36504.1.S1_at   | MmugDNA.36504.1 | 6.38  | 6.43  | 0.1  | 0.09 | -1.03  | 0.253583 | 0.269477 | 0.60216  | 0.534777 |
| MmugDNA.36506.1.S1_at   | MmugDNA.36506.1 | 9.59  | 9.26  | 0.23 | 0.22 | 1.26   | 0.335034 | 0.226327 | 0.65879  | 0.498781 |
| MmugDNA.36508.1.S1_at   | MmugDNA.36508.1 | 12.04 | 12.31 | 0.1  | 0.1  | -1.21  | 0.075475 | 0.041726 | 0.422712 | 0.248911 |
| MmugDNA.36509.1.S1_at   | MmugDNA.36509.1 | 4.83  | 4.82  | 0.71 | 0.36 | 1.01   | 0.358296 | 0.50971  | 0.673123 | 0.704318 |
| MmugDNA.3651.1.S1_s_at  | MmugDNA.3651.1  | 7.03  | 6.93  | 0.11 | 0.32 | 1.07   | 0.228534 | 0.366894 | 0.585965 | 0.606566 |
| MmugDNA.36510.1.S1_at   | MmugDNA.36510.1 | 5.38  | 4.9   | 0.89 | 0.39 | 1.39   | 0.43421  | 0.117556 | 0.720345 | 0.38531  |
| MmugDNA.36512.1.S1_at   | MmugDNA.36512.1 | 4.89  | 8.61  | 0.56 | 2.84 | -13.15 | 0.161347 | 0.150639 | 0.526364 | 0.425195 |
| MmugDNA.36513.1.S1_at   | MmugDNA.36513.1 | 6.61  | 6.48  | 0.07 | 0.19 | 1.09   | 0.863338 | 0.287267 | 0.945072 | 0.548526 |
| MmugDNA.36514.1.S1_at   | MmugDNA.36514.1 | 9.2   | 8.44  | 0.53 | 0.67 | 1.69   | 0.246326 | 0.274604 | 0.597666 | 0.539059 |
| MmugDNA.36515.1.S1_s_at | MmugDNA.36515.1 | 4.69  | 4.8   | 0.53 | 0.34 | -1.07  | 0.84761  | 0.80304  | 0.938996 | 0.886557 |
| MmugDNA.36519.1.S1_at   | MmugDNA.36519.1 | 6.15  | 6.71  | 0.71 | 1.09 | -1.48  | 0.848633 | 0.520129 | 0.939211 | 0.711472 |
| MmugDNA.36520.1.S1_at   | MmugDNA.36520.1 | 10.27 | 9.95  | 0.02 | 1.08 | 1.24   | 0.544831 | 0.721398 | 0.784637 | 0.838685 |
| MmugDNA.36522.1.S1_at   | MmugDNA.36522.1 | 5.05  | 5.14  | 0.07 | 0.03 | -1.07  | 0.04002  | 0.299119 | 0.348657 | 0.557663 |
| MmugDNA.36524.1.S1_at   | MmugDNA.36524.1 | 7.31  | 7.32  | 0.07 | 0.16 | -1.01  | 0.306265 | 0.574611 | 0.639466 | 0.74601  |
| MmugDNA.36526.1.S1_at   | MmugDNA.36526.1 | 6.36  | 6.57  | 0.76 | 0.25 | -1.16  | 0.875772 | 0.979726 | 0.950257 | 0.989119 |
| MmugDNA.36527.1.S1_at   | MmugDNA.36527.1 | 2.8   | 2.79  | 0.03 | 0.11 | 1.01   | 0.454916 | 0.699032 | 0.733541 | 0.825113 |
| MmugDNA.36528.1.S1_at   | MmugDNA.36528.1 | 4.8   | 4.94  | 0.22 | 0.08 | -1.1   | 0.38833  | 0.556167 | 0.692426 | 0.73442  |
| MmugDNA.3653.1.S1_at    | MmugDNA.3653.1  | 4.2   | 4.16  | 0.32 | 0.19 | 1.03   | 0.976453 | 0.458982 | 0.990905 | 0.671504 |
| MmugDNA.36530.1.S1_at   | MmugDNA.36530.1 | 6.18  | 6.24  | 0.5  | 0.19 | -1.04  | 0.829657 | 0.391967 | 0.93091  | 0.625473 |
| MmugDNA.36531.1.S1_at   | MmugDNA.36531.1 | 6.81  | 5.97  | 0.44 | 0.17 | 1.79   | 0.098723 | 0.051945 | 0.458569 | 0.273349 |

|                         |                 |       |       |      |      |       |          |          |          |          |
|-------------------------|-----------------|-------|-------|------|------|-------|----------|----------|----------|----------|
| MmugDNA.36532.1.S1_at   | MmugDNA.36532.1 | 6.04  | 5.36  | 0.39 | 0.34 | 1.61  | 0.168084 | 0.169423 | 0.53256  | 0.446067 |
| MmugDNA.36533.1.S1_at   | MmugDNA.36533.1 | 5.18  | 6.03  | 0.59 | 1.27 | -1.8  | 0.262994 | 0.249492 | 0.609142 | 0.518532 |
| MmugDNA.36534.1.S1_at   | MmugDNA.36534.1 | 5.55  | 5.6   | 0.12 | 0.07 | -1.03 | 0.864643 | 0.086277 | 0.945589 | 0.338734 |
| MmugDNA.36535.1.S1_at   | MmugDNA.36535.1 | 11.88 | 12.11 | 0.4  | 0.54 | -1.17 | 0.838354 | 0.921943 | 0.934652 | 0.955975 |
| MmugDNA.36536.1.S1_at   | MmugDNA.36536.1 | 2.83  | 2.85  | 0    | 0.17 | -1.02 | 0.274517 | 0.252007 | 0.617491 | 0.520646 |
| MmugDNA.36537.1.S1_at   | MmugDNA.36537.1 | 3.35  | 3.29  | 0.3  | 0.12 | 1.04  | 0.191341 | 0.233063 | 0.554259 | 0.50445  |
| MmugDNA.36538.1.S1_at   | MmugDNA.36538.1 | 7.47  | 6.95  | 0.04 | 0.58 | 1.43  | 0.059517 | 0.050665 | 0.392411 | 0.270317 |
| MmugDNA.36539.1.S1_at   | MmugDNA.36539.1 | 8.7   | 8.66  | 0.6  | 0.45 | 1.02  | 0.523333 | 0.60606  | 0.772491 | 0.765632 |
| MmugDNA.36540.1.S1_at   | MmugDNA.36540.1 | 3.43  | 3.52  | 0.08 | 0.03 | -1.06 | 0.12401  | 0.461289 | 0.489711 | 0.672971 |
| MmugDNA.36541.1.S1_at   | MmugDNA.36541.1 | 4.56  | 4.7   | 1.09 | 0.05 | -1.1  | 0.482317 | 0.624834 | 0.749404 | 0.778924 |
| MmugDNA.36542.1.S1_at   | MmugDNA.36542.1 | 9.07  | 8.43  | 0.28 | 0.45 | 1.56  | 0.318547 | 0.409523 | 0.648564 | 0.636543 |
| MmugDNA.36543.1.S1_at   | MmugDNA.36543.1 | 8.13  | 8.96  | 0.46 | 1.15 | -1.77 | 0.341031 | 0.48444  | 0.662232 | 0.688478 |
| MmugDNA.36543.1.S1_s_at | MmugDNA.36543.1 | 6.74  | 7.73  | 0.44 | 1.03 | -1.99 | 0.228476 | 0.317218 | 0.585917 | 0.570458 |
| MmugDNA.36549.1.S1_at   | MmugDNA.36549.1 | 5.75  | 5.62  | 0.41 | 0.49 | 1.1   | 0.401987 | 0.584347 | 0.701106 | 0.752414 |
| MmugDNA.3655.1.S1_at    | MmugDNA.3655.1  | 6.75  | 6.15  | 0.47 | 0.12 | 1.52  | 0.278879 | 0.633184 | 0.620854 | 0.783991 |
| MmugDNA.36551.1.S1_at   | MmugDNA.36551.1 | 6     | 7.43  | 0.58 | 0.91 | -2.69 | 0.115874 | 0.122253 | 0.479325 | 0.39196  |
| MmugDNA.36552.1.S1_at   | MmugDNA.36552.1 | 3.49  | 3.54  | 0.15 | 0.15 | -1.04 | 0.688379 | 0.545337 | 0.860962 | 0.727505 |
| MmugDNA.36553.1.S1_at   | MmugDNA.36553.1 | 4.12  | 4.41  | 0.13 | 0.15 | -1.22 | 0.278888 | 0.220193 | 0.620854 | 0.493655 |
| MmugDNA.36557.1.S1_at   | MmugDNA.36557.1 | 7.33  | 7.02  | 0.27 | 0.32 | 1.23  | 0.543297 | 0.216198 | 0.783788 | 0.489765 |
| MmugDNA.36558.1.S1_at   | MmugDNA.36558.1 | 5.55  | 5.38  | 0.11 | 0    | 1.12  | 0.065433 | 0.033119 | 0.404567 | 0.225287 |
| MmugDNA.3656.1.S1_at    | MmugDNA.3656.1  | 4.86  | 4.99  | 0.58 | 0.21 | -1.09 | 0.734546 | 0.888928 | 0.88571  | 0.936725 |
| MmugDNA.36560.1.S1_at   | MmugDNA.36560.1 | 4.8   | 4.85  | 0.05 | 0.11 | -1.03 | 0.569223 | 0.699383 | 0.79903  | 0.825344 |
| MmugDNA.36561.1.S1_at   | MmugDNA.36561.1 | 3.25  | 3.41  | 0.05 | 0.22 | -1.12 | 0.918439 | 0.569387 | 0.96831  | 0.742382 |
| MmugDNA.36562.1.S1_at   | MmugDNA.36562.1 | 5.1   | 5.12  | 0.44 | 0.29 | -1.02 | 0.899194 | 0.370625 | 0.959714 | 0.609664 |
| MmugDNA.36564.1.S1_at   | MmugDNA.36564.1 | 5.31  | 5.47  | 0.15 | 0.15 | -1.11 | 0.359687 | 0.533131 | 0.673991 | 0.719436 |
| MmugDNA.36565.1.S1_at   | MmugDNA.36565.1 | 4.05  | 3.89  | 0.73 | 0.97 | 1.12  | 0.865736 | 0.741288 | 0.946266 | 0.850236 |
| MmugDNA.36568.1.S1_at   | MmugDNA.36568.1 | 7.16  | 7.02  | 0.08 | 0.22 | 1.1   | 0.873279 | 0.014635 | 0.94924  | 0.154176 |
| MmugDNA.36569.1.S1_at   | MmugDNA.36569.1 | 5.04  | 5.06  | 0.41 | 0.22 | -1.02 | 0.75189  | 0.602104 | 0.894019 | 0.763172 |
| MmugDNA.3657.1.S1_at    | MmugDNA.3657.1  | 6.07  | 5.72  | 1.66 | 0.18 | 1.27  | 0.264806 | 0.317764 | 0.610557 | 0.570922 |
| MmugDNA.36571.1.S1_at   | MmugDNA.36571.1 | 6.62  | 6.7   | 0.06 | 0.04 | -1.06 | 0.159637 | 0.098147 | 0.524504 | 0.356253 |
| MmugDNA.36572.1.S1_at   | MmugDNA.36572.1 | 3.51  | 3.58  | 0.08 | 0.13 | -1.05 | 0.580383 | 0.526538 | 0.804571 | 0.715583 |
| MmugDNA.36575.1.S1_at   | MmugDNA.36575.1 | 4.35  | 3.59  | 0.38 | 0.47 | 1.69  | 0.235783 | 0.301709 | 0.589652 | 0.559643 |
| MmugDNA.36577.1.S1_at   | MmugDNA.36577.1 | 8.55  | 7.91  | 0.52 | 0.27 | 1.56  | 0.080189 | 0.071882 | 0.430341 | 0.314181 |
| MmugDNA.36577.1.S1_s_at | MmugDNA.36577.1 | 8.19  | 7.68  | 0.4  | 0.19 | 1.43  | 0.043433 | 0.025288 | 0.356711 | 0.199502 |
| MmugDNA.36579.1.S1_at   | MmugDNA.36579.1 | 3.45  | 3.66  | 0.03 | 0.12 | -1.16 | 0.071409 | 0.000149 | 0.415249 | 0.029832 |
| MmugDNA.3658.1.S1_at    | MmugDNA.3658.1  | 10.66 | 10.45 | 0.19 | 0.08 | 1.15  | 0.158771 | 0.113726 | 0.523965 | 0.379889 |
| MmugDNA.36581.1.S1_at   | MmugDNA.36581.1 | 3.55  | 4.47  | 0.36 | 0.75 | -1.9  | 0.197949 | 0.196061 | 0.561022 | 0.471082 |
| MmugDNA.36582.1.S1_at   | MmugDNA.36582.1 | 4.91  | 5.05  | 0.43 | 0.1  | -1.1  | 0.752073 | 0.453087 | 0.894118 | 0.667533 |
| MmugDNA.36583.1.S1_at   | MmugDNA.36583.1 | 12.19 | 11.91 | 0.42 | 0.13 | 1.22  | 0.900539 | 0.385264 | 0.960341 | 0.620718 |
| MmugDNA.36584.1.S1_at   | MmugDNA.36584.1 | 5.38  | 5.9   | 0.17 | 0.4  | -1.43 | 0.110381 | 0.059406 | 0.471863 | 0.290548 |
| MmugDNA.36585.1.S1_at   | MmugDNA.36585.1 | 5.1   | 5.38  | 0.07 | 0.26 | -1.22 | 0.177678 | 0.233473 | 0.541818 | 0.504828 |

|                         |                 |       |      |      |      |       |          |          |          |          |
|-------------------------|-----------------|-------|------|------|------|-------|----------|----------|----------|----------|
| MmugDNA.36586.1.S1_at   | MmugDNA.36586.1 | 3.42  | 3.39 | 0.19 | 0.14 | 1.02  | 0.524695 | 0.79044  | 0.773227 | 0.878867 |
| MmugDNA.36587.1.S1_at   | MmugDNA.36587.1 | 3.03  | 3.1  | 0.06 | 0.14 | -1.05 | 0.430265 | 0.568776 | 0.717986 | 0.74211  |
| MmugDNA.36589.1.S1_at   | MmugDNA.36589.1 | 5.52  | 5.75 | 0.13 | 0.22 | -1.17 | 0.10953  | 0.123761 | 0.470811 | 0.393908 |
| MmugDNA.36590.1.S1_at   | MmugDNA.36590.1 | 6.7   | 6.37 | 0.16 | 0.27 | 1.25  | 0.203947 | 0.242389 | 0.566443 | 0.51282  |
| MmugDNA.36591.1.S1_at   | MmugDNA.36591.1 | 5.84  | 6.57 | 0.9  | 0.83 | -1.66 | 0.398716 | 0.452908 | 0.698864 | 0.667359 |
| MmugDNA.36592.1.S1_at   | MmugDNA.36592.1 | 5.26  | 5.17 | 0.3  | 0.1  | 1.06  | 0.769771 | 0.619712 | 0.903186 | 0.774893 |
| MmugDNA.36594.1.S1_at   | MmugDNA.36594.1 | 6.61  | 6.68 | 0.24 | 0.13 | -1.06 | 0.695396 | 0.670661 | 0.864936 | 0.807454 |
| MmugDNA.36595.1.S1_at   | MmugDNA.36595.1 | 5.17  | 5.47 | 0.29 | 0.51 | -1.23 | 0.884731 | 0.971318 | 0.95382  | 0.984419 |
| MmugDNA.36596.1.S1_at   | MmugDNA.36596.1 | 5.69  | 5.71 | 0.11 | 0.07 | -1.01 | 0.945777 | 0.182494 | 0.979288 | 0.459065 |
| MmugDNA.36598.1.S1_at   | MmugDNA.36598.1 | 6.92  | 6.08 | 0.7  | 0.27 | 1.79  | 0.14214  | 0.117465 | 0.509437 | 0.385175 |
| MmugDNA.7570.1.S1_s_at  | MmugDNA.7570.1  | 11.97 | 11.6 | 0.09 | 0.2  | 1.3   | 0.078239 | 0.073826 | 0.428221 | 0.317146 |
| MmugDNA.36600.1.S1_at   | MmugDNA.36600.1 | 3.46  | 3.51 | 0.22 | 0.26 | -1.03 | 0.49138  | 0.380403 | 0.755052 | 0.617061 |
| MmugDNA.36602.1.S1_at   | MmugDNA.36602.1 | 8.08  | 7.99 | 0.28 | 0.16 | 1.06  | 0.995294 | 0.943482 | 0.998318 | 0.967907 |
| MmugDNA.36603.1.S1_at   | MmugDNA.36603.1 | 5.46  | 5.82 | 0.15 | 0.18 | -1.28 | 0.131344 | 0.008539 | 0.497985 | 0.122564 |
| MmugDNA.36604.1.S1_at   | MmugDNA.36604.1 | 6.55  | 5.6  | 0.2  | 0.62 | 1.94  | 0.034409 | 0.035269 | 0.33303  | 0.232016 |
| MmugDNA.36605.1.S1_at   | MmugDNA.36605.1 | 7.45  | 7.67 | 0.11 | 0.15 | -1.16 | 0.198139 | 0.134637 | 0.561111 | 0.406629 |
| MmugDNA.36606.1.S1_at   | MmugDNA.36606.1 | 4.29  | 4.45 | 0.1  | 0.19 | -1.12 | 0.552932 | 0.883491 | 0.789712 | 0.933594 |
| MmugDNA.36607.1.S1_at   | MmugDNA.36607.1 | 7.08  | 5.95 | 0.31 | 1.13 | 2.18  | 0.456054 | 0.157146 | 0.734235 | 0.432616 |
| MmugDNA.36611.1.S1_at   | MmugDNA.36611.1 | 7.09  | 6.71 | 0.23 | 0.11 | 1.3   | 0.109402 | 0.046652 | 0.470811 | 0.260512 |
| MmugDNA.36614.1.S1_s_at | MmugDNA.36614.1 | 7.9   | 8.02 | 0.05 | 0.16 | -1.09 | 0.253889 | 0.353371 | 0.602339 | 0.596477 |
| MmugDNA.36615.1.S1_at   | MmugDNA.36615.1 | 5.39  | 5.05 | 0.81 | 0.23 | 1.27  | 0.229383 | 0.277678 | 0.586549 | 0.541636 |
| MmugDNA.36616.1.S1_at   | MmugDNA.36616.1 | 10.15 | 9.83 | 0.65 | 1.21 | 1.24  | 0.392086 | 0.449189 | 0.694439 | 0.664892 |
| MmugDNA.36619.1.S1_at   | MmugDNA.36619.1 | 3.44  | 3.6  | 0.06 | 0.05 | -1.11 | 0.026709 | 0.21224  | 0.304103 | 0.486137 |
| MmugDNA.3662.1.S1_at    | MmugDNA.3662.1  | 11.91 | 12.6 | 0.04 | 0.21 | -1.61 | 0.011643 | 0.004883 | 0.237051 | 0.097564 |
| MmugDNA.36622.1.S1_s_at | MmugDNA.36622.1 | 4.78  | 4.81 | 0.04 | 0.08 | -1.02 | 0.128582 | 0.343396 | 0.494653 | 0.589163 |
| MmugDNA.36624.1.S1_at   | MmugDNA.36624.1 | 5.91  | 5.86 | 0.24 | 0.06 | 1.04  | 0.697005 | 0.325067 | 0.865546 | 0.575545 |
| MmugDNA.36625.1.S1_at   | MmugDNA.36625.1 | 4.17  | 4.16 | 0.16 | 0.35 | 1.01  | 0.463922 | 0.525756 | 0.738998 | 0.715217 |
| MmugDNA.36627.1.S1_at   | MmugDNA.36627.1 | 5.65  | 5.73 | 0.02 | 0.03 | -1.06 | 0.035001 | 0.146656 | 0.334481 | 0.420683 |
| MmugDNA.36628.1.S1_at   | MmugDNA.36628.1 | 6.99  | 7.63 | 0.12 | 1.37 | -1.56 | 0.555166 | 0.277197 | 0.79128  | 0.541157 |
| MmugDNA.3663.1.S1_at    | MmugDNA.3663.1  | 7.07  | 7.04 | 0.91 | 0.48 | 1.02  | 0.237802 | 0.31048  | 0.591288 | 0.565691 |
| MmugDNA.36635.1.S1_at   | MmugDNA.36635.1 | 3.9   | 3.7  | 0.27 | 0.09 | 1.15  | 0.380166 | 0.565214 | 0.68724  | 0.739754 |
| MmugDNA.36637.1.S1_at   | MmugDNA.36637.1 | 5.87  | 5.95 | 1.1  | 0.13 | -1.05 | 0.50011  | 0.402735 | 0.759402 | 0.631543 |
| MmugDNA.36638.1.S1_at   | MmugDNA.36638.1 | 4.86  | 5.15 | 0.37 | 0.15 | -1.23 | 0.398226 | 0.352453 | 0.698574 | 0.595723 |
| MmugDNA.36641.1.S1_at   | MmugDNA.36641.1 | 4.13  | 3.78 | 0.84 | 0.28 | 1.28  | 0.310371 | 0.390385 | 0.642359 | 0.624156 |
| MmugDNA.36646.1.S1_at   | MmugDNA.36646.1 | 7.27  | 7.2  | 0.22 | 0.07 | 1.05  | 0.654953 | 0.382002 | 0.84477  | 0.618258 |
| MmugDNA.3665.1.S1_at    | MmugDNA.3665.1  | 3.84  | 3.84 | 0.01 | 0.05 | 1     | 0.548213 | 0.736291 | 0.786664 | 0.847409 |
| MmugDNA.36651.1.S1_at   | MmugDNA.36651.1 | 4.25  | 4.3  | 0.18 | 0.04 | -1.03 | 0.248112 | 0.441139 | 0.599076 | 0.659375 |
| MmugDNA.36652.1.S1_at   | MmugDNA.36652.1 | 7.01  | 6.51 | 0.14 | 0.53 | 1.41  | 0.15447  | 0.185535 | 0.51902  | 0.461566 |
| MmugDNA.36653.1.S1_at   | MmugDNA.36653.1 | 6.21  | 5.76 | 0.23 | 0.35 | 1.37  | 0.416673 | 0.265915 | 0.71015  | 0.531796 |
| MmugDNA.36654.1.S1_at   | MmugDNA.36654.1 | 9.02  | 8.76 | 0.2  | 0.27 | 1.2   | 0.289513 | 0.170945 | 0.627563 | 0.447561 |
| MmugDNA.36656.1.S1_at   | MmugDNA.36656.1 | 9.61  | 9.3  | 0.02 | 0.36 | 1.24  | 0.075192 | 0.008799 | 0.422122 | 0.124117 |

|                         |                 |       |       |      |      |       |          |          |          |          |
|-------------------------|-----------------|-------|-------|------|------|-------|----------|----------|----------|----------|
| MmugDNA.36658.1.S1_at   | MmugDNA.36658.1 | 5.06  | 8.24  | 0.7  | 1.6  | -9.05 | 0.070762 | 0.276377 | 0.414661 | 0.540334 |
| MmugDNA.36659.1.S1_at   | MmugDNA.36659.1 | 5.18  | 4.92  | 0.25 | 0.22 | 1.2   | 0.938816 | 0.993803 | 0.976723 | 0.996274 |
| MmugDNA.36661.1.S1_at   | MmugDNA.36661.1 | 5.29  | 5.49  | 0.29 | 0.52 | -1.15 | 0.723872 | 0.592241 | 0.879238 | 0.757642 |
| MmugDNA.36663.1.S1_at   | MmugDNA.36663.1 | 9.81  | 9.49  | 0.06 | 0.15 | 1.25  | 0.025047 | 0.009519 | 0.297733 | 0.1285   |
| MmugDNA.36665.1.S1_at   | MmugDNA.36665.1 | 3.73  | 3.71  | 0.05 | 0.23 | 1.01  | 0.886842 | 0.946442 | 0.954728 | 0.969629 |
| MmugDNA.36666.1.S1_at   | MmugDNA.36666.1 | 6.78  | 5.6   | 0.17 | 0.27 | 2.26  | 0.003561 | 0.000701 | 0.179515 | 0.04424  |
| MmugDNA.24328.1.S1_s_at | MmugDNA.24328.1 | 9.54  | 9.41  | 0.19 | 0.34 | 1.09  | 0.766185 | 0.248964 | 0.901717 | 0.518026 |
| MmugDNA.36669.1.S1_at   | MmugDNA.36669.1 | 3.71  | 3.81  | 0.03 | 0.09 | -1.07 | 0.104344 | 0.020036 | 0.464351 | 0.177812 |
| MmugDNA.3667.1.S1_at    | MmugDNA.3667.1  | 3.76  | 3.88  | 0.18 | 0.1  | -1.09 | 0.441746 | 0.328679 | 0.725144 | 0.578213 |
| MmugDNA.36670.1.S1_at   | MmugDNA.36670.1 | 5.84  | 7.56  | 0.14 | 1.31 | -3.28 | 0.107479 | 0.104323 | 0.468045 | 0.365523 |
| MmugDNA.36671.1.S1_at   | MmugDNA.36671.1 | 3.91  | 3.61  | 0.35 | 0.09 | 1.23  | 0.372308 | 0.140237 | 0.682741 | 0.413405 |
| MmugDNA.36674.1.S1_at   | MmugDNA.36674.1 | 11.66 | 10.8  | 0.06 | 0.02 | 1.81  | 0.000022 | 4.43E-07 | 0.112653 | 0.005999 |
| MmugDNA.36675.1.S1_at   | MmugDNA.36675.1 | 12.46 | 12.43 | 0.14 | 0.28 | 1.02  | 0.951243 | 0.992729 | 0.981679 | 0.995715 |
| MmugDNA.36677.1.S1_at   | MmugDNA.36677.1 | 9.11  | 8.45  | 0.45 | 0.54 | 1.58  | 0.187484 | 0.175317 | 0.550517 | 0.45207  |
| MmugDNA.36679.1.S1_at   | MmugDNA.36679.1 | 5.96  | 6.54  | 0.11 | 0.83 | -1.49 | 0.334023 | 0.455934 | 0.658024 | 0.669712 |
| MmugDNA.3668.1.S1_at    | MmugDNA.3668.1  | 6.78  | 6.47  | 0.29 | 0.46 | 1.24  | 0.907598 | 0.211301 | 0.963338 | 0.485418 |
| MmugDNA.36681.1.S1_at   | MmugDNA.36681.1 | 7.8   | 6.58  | 0.16 | 1.28 | 2.33  | 0.520958 | 0.436961 | 0.77105  | 0.656361 |
| MmugDNA.36682.1.S1_at   | MmugDNA.36682.1 | 4.2   | 4.83  | 0.1  | 0.4  | -1.54 | 0.157118 | 0.138056 | 0.521923 | 0.410919 |
| MmugDNA.36683.1.S1_at   | MmugDNA.36683.1 | 3.35  | 3.54  | 0.11 | 0.13 | -1.14 | 0.135687 | 0.096914 | 0.502564 | 0.354311 |
| MmugDNA.36683.1.S1_x_at | MmugDNA.36683.1 | 3.87  | 4     | 0.2  | 0.22 | -1.1  | 0.519495 | 0.73944  | 0.770186 | 0.848995 |
| MmugDNA.36684.1.S1_at   | MmugDNA.36684.1 | 3.91  | 3.93  | 0.12 | 0.14 | -1.01 | 0.787435 | 0.534046 | 0.91159  | 0.720066 |
| MmugDNA.36685.1.S1_at   | MmugDNA.36685.1 | 10.49 | 10.62 | 0.18 | 0.92 | -1.1  | 0.982566 | 0.760444 | 0.993516 | 0.860814 |
| MmugDNA.36686.1.S1_at   | MmugDNA.36686.1 | 3.72  | 3.6   | 0.13 | 0.42 | 1.08  | 0.671577 | 0.855394 | 0.852716 | 0.917566 |
| MmugDNA.36687.1.S1_at   | MmugDNA.36687.1 | 10.42 | 10.17 | 0.21 | 0.2  | 1.19  | 0.209552 | 0.071806 | 0.570957 | 0.314082 |
| MmugDNA.36688.1.S1_at   | MmugDNA.36688.1 | 5.07  | 4.88  | 0.4  | 0.6  | 1.14  | 0.857508 | 0.659845 | 0.942274 | 0.800897 |
| MmugDNA.36688.1.S1_s_at | MmugDNA.36688.1 | 6.39  | 6.06  | 0.3  | 0.14 | 1.26  | 0.138267 | 0.079664 | 0.505671 | 0.326981 |
| MmugDNA.36689.1.S1_at   | MmugDNA.36689.1 | 5.77  | 5.44  | 0.93 | 0.5  | 1.26  | 0.403898 | 0.56824  | 0.702465 | 0.741866 |
| MmugDNA.3669.1.S1_at    | MmugDNA.3669.1  | 5.86  | 5.32  | 0.72 | 1.09 | 1.45  | 0.38743  | 0.595474 | 0.691966 | 0.759091 |
| MmugDNA.36690.1.S1_at   | MmugDNA.36690.1 | 7.61  | 7.57  | 0.08 | 0.05 | 1.03  | 0.336888 | 0.080523 | 0.659663 | 0.328189 |
| MmugDNA.36691.1.S1_at   | MmugDNA.36691.1 | 10.74 | 10.4  | 0.07 | 0.26 | 1.27  | 0.232901 | 0.340104 | 0.587927 | 0.586572 |
| MmugDNA.36692.1.S1_at   | MmugDNA.36692.1 | 5.79  | 5.76  | 0.24 | 0.14 | 1.02  | 0.776593 | 0.943354 | 0.906442 | 0.967832 |
| MmugDNA.36694.1.S1_at   | MmugDNA.36694.1 | 4.61  | 4.52  | 0.14 | 0.12 | 1.06  | 0.352106 | 0.568723 | 0.669402 | 0.742084 |
| MmugDNA.36695.1.S1_at   | MmugDNA.36695.1 | 8.54  | 9.14  | 1.04 | 0.23 | -1.52 | 0.099836 | 0.094941 | 0.45978  | 0.352054 |
| MmugDNA.36695.1.S1_s_at | MmugDNA.36695.1 | 9.54  | 10.17 | 0.15 | 0.12 | -1.54 | 0.006119 | 0.003661 | 0.195826 | 0.086526 |
| MmugDNA.36696.1.S1_at   | MmugDNA.36696.1 | 6.16  | 5.75  | 0.29 | 0.2  | 1.33  | 0.065508 | 0.073159 | 0.404593 | 0.316064 |
| MmugDNA.36697.1.S1_at   | MmugDNA.36697.1 | 5.41  | 5.17  | 0.29 | 0.09 | 1.18  | 0.294396 | 0.202073 | 0.631216 | 0.476539 |
| MmugDNA.36698.1.S1_at   | MmugDNA.36698.1 | 5.97  | 6.02  | 0.22 | 0.29 | -1.04 | 0.386932 | 0.450874 | 0.691724 | 0.665869 |
| MmugDNA.367.1.S1_at     | MmugDNA.367.1   | 3.39  | 3.48  | 0.07 | 0.06 | -1.06 | 0.689591 | 0.356385 | 0.861642 | 0.59839  |
| MmugDNA.3670.1.S1_at    | MmugDNA.3670.1  | 4.87  | 5.21  | 0.35 | 0.36 | -1.27 | 0.438483 | 0.519083 | 0.72304  | 0.710813 |
| MmugDNA.36700.1.S1_at   | MmugDNA.36700.1 | 6.41  | 6.55  | 0.11 | 0.06 | -1.11 | 0.054436 | 0.040311 | 0.381851 | 0.245936 |
| MmugDNA.36702.1.S1_at   | MmugDNA.36702.1 | 5.65  | 5.85  | 0.24 | 0.19 | -1.15 | 0.390681 | 0.564075 | 0.693741 | 0.738956 |

|                         |                 |       |       |      |      |       |          |          |          |          |
|-------------------------|-----------------|-------|-------|------|------|-------|----------|----------|----------|----------|
| MmugDNA.36703.1.S1_at   | MmugDNA.36703.1 | 3.97  | 4.3   | 0.24 | 0.09 | -1.26 | 0.287464 | 0.384598 | 0.625987 | 0.62023  |
| MmugDNA.36706.1.S1_at   | MmugDNA.36706.1 | 4.9   | 5.8   | 0.51 | 0.89 | -1.87 | 0.357548 | 0.121793 | 0.672471 | 0.391074 |
| MmugDNA.36708.1.S1_at   | MmugDNA.36708.1 | 4.56  | 4.77  | 0.08 | 0.1  | -1.16 | 0.059614 | 0.205805 | 0.39273  | 0.480072 |
| MmugDNA.36709.1.S1_at   | MmugDNA.36709.1 | 10.61 | 10.77 | 0.07 | 0.41 | -1.12 | 0.300879 | 0.398254 | 0.636012 | 0.629296 |
| MmugDNA.3671.1.S1_at    | MmugDNA.3671.1  | 11.37 | 11.04 | 0.06 | 0.05 | 1.25  | 0.001282 | 0.000176 | 0.145565 | 0.030511 |
| MmugDNA.36710.1.S1_at   | MmugDNA.36710.1 | 3.83  | 3.85  | 0.17 | 0.15 | -1.02 | 0.59031  | 0.772842 | 0.809851 | 0.867917 |
| MmugDNA.36712.1.S1_at   | MmugDNA.36712.1 | 5.62  | 5.98  | 0.07 | 0.05 | -1.28 | 0.001772 | 0.000899 | 0.154452 | 0.047964 |
| MmugDNA.36713.1.S1_at   | MmugDNA.36713.1 | 2.89  | 2.9   | 0.07 | 0.1  | -1.01 | 0.58936  | 0.556679 | 0.80924  | 0.734714 |
| MmugDNA.36715.1.S1_at   | MmugDNA.36715.1 | 5.06  | 5.05  | 0.17 | 0.34 | 1.01  | 0.363836 | 0.250142 | 0.676981 | 0.519168 |
| MmugDNA.36716.1.S1_at   | MmugDNA.36716.1 | 5.68  | 6.18  | 1    | 0.38 | -1.41 | 0.989022 | 0.940944 | 0.996125 | 0.966553 |
| MmugDNA.36717.1.S1_at   | MmugDNA.36717.1 | 6.1   | 6.26  | 0.19 | 0.13 | -1.12 | 0.431659 | 0.21531  | 0.718606 | 0.489058 |
| MmugDNA.3672.1.S1_x_at  | MmugDNA.3672.1  | 7.56  | 6.97  | 0.16 | 0.3  | 1.51  | 0.021781 | 0.020926 | 0.283753 | 0.181439 |
| MmugDNA.36722.1.S1_at   | MmugDNA.36722.1 | 6.39  | 5.89  | 0.61 | 0.16 | 1.41  | 0.255224 | 0.194467 | 0.603094 | 0.469557 |
| MmugDNA.36723.1.S1_at   | MmugDNA.36723.1 | 3.48  | 3.46  | 0.08 | 0.22 | 1.01  | 0.518681 | 0.262083 | 0.769592 | 0.528374 |
| MmugDNA.36724.1.S1_at   | MmugDNA.36724.1 | 5.75  | 5.47  | 0.08 | 0.06 | 1.22  | 0.006558 | 0.00177  | 0.199625 | 0.063359 |
| MmugDNA.36728.1.S1_at   | MmugDNA.36728.1 | 5.68  | 5.76  | 0.04 | 0.12 | -1.06 | 0.528921 | 0.521314 | 0.775764 | 0.712346 |
| MmugDNA.36729.1.S1_s_at | MmugDNA.36729.1 | 7.86  | 8.06  | 0.22 | 0.09 | -1.15 | 0.08166  | 0.145891 | 0.432665 | 0.419889 |
| MmugDNA.36734.1.S1_at   | MmugDNA.36734.1 | 5.15  | 5.26  | 1.23 | 0.87 | -1.08 | 0.638665 | 0.817689 | 0.836696 | 0.894805 |
| MmugDNA.36735.1.S1_at   | MmugDNA.36735.1 | 8.72  | 8.64  | 0.19 | 0.08 | 1.06  | 0.313857 | 0.144286 | 0.645387 | 0.418196 |
| MmugDNA.36738.1.S1_at   | MmugDNA.36738.1 | 9.66  | 9.4   | 0.13 | 0.25 | 1.2   | 0.239247 | 0.110259 | 0.592434 | 0.374403 |
| MmugDNA.36739.1.S1_at   | MmugDNA.36739.1 | 6.71  | 8.98  | 0.75 | 2.12 | -4.83 | 0.341811 | 0.250913 | 0.662882 | 0.519606 |
| MmugDNA.3674.1.S1_s_at  | MmugDNA.3674.1  | 12.91 | 12.97 | 0.03 | 0.08 | -1.04 | 0.112101 | 0.236884 | 0.474628 | 0.507595 |
| MmugDNA.36741.1.S1_at   | MmugDNA.36741.1 | 6.57  | 6.7   | 0.74 | 0.24 | -1.09 | 0.516811 | 0.44686  | 0.768274 | 0.663053 |
| MmugDNA.36742.1.S1_at   | MmugDNA.36742.1 | 8.38  | 5.44  | 0.43 | 0.59 | 7.71  | 0.0019   | 0.000466 | 0.155636 | 0.038572 |
| MmugDNA.36745.1.S1_at   | MmugDNA.36745.1 | 9.18  | 9.34  | 0.37 | 0.64 | -1.12 | 0.589604 | 0.210713 | 0.80952  | 0.48478  |
| MmugDNA.36746.1.S1_at   | MmugDNA.36746.1 | 7.59  | 7.96  | 0.33 | 0.71 | -1.29 | 0.230103 | 0.040711 | 0.587112 | 0.246709 |
| MmugDNA.3675.1.S1_at    | MmugDNA.3675.1  | 3.28  | 3.32  | 0.07 | 0.02 | -1.03 | 0.818549 | 0.439279 | 0.92631  | 0.658029 |
| MmugDNA.36750.1.S1_at   | MmugDNA.36750.1 | 5.86  | 6.2   | 0.29 | 0.56 | -1.27 | 0.314097 | 0.302496 | 0.645522 | 0.56018  |
| MmugDNA.36751.1.S1_at   | MmugDNA.36751.1 | 6.2   | 6.21  | 0.87 | 0.53 | -1    | 0.981027 | 0.861831 | 0.993163 | 0.92146  |
| MmugDNA.36755.1.S1_at   | MmugDNA.36755.1 | 9.35  | 8.43  | 0.4  | 0.22 | 1.89  | 0.043745 | 0.029867 | 0.357051 | 0.214498 |
| MmugDNA.36757.1.S1_at   | MmugDNA.36757.1 | 4.24  | 4.33  | 0.15 | 0.13 | -1.06 | 0.140005 | 0.288372 | 0.507892 | 0.549656 |
| MmugDNA.36758.1.S1_s_at | MmugDNA.36758.1 | 2.96  | 2.97  | 0.16 | 0.08 | -1    | 0.710279 | 0.502079 | 0.872981 | 0.700051 |
| MmugDNA.36759.1.S1_at   | MmugDNA.36759.1 | 5.81  | 5.83  | 0.45 | 0.95 | -1.01 | 0.92882  | 0.993779 | 0.972607 | 0.996274 |
| MmugDNA.3676.1.S1_at    | MmugDNA.3676.1  | 4.08  | 3.68  | 0.49 | 0.2  | 1.31  | 0.274129 | 0.462403 | 0.617262 | 0.673748 |
| MmugDNA.36760.1.S1_s_at | MmugDNA.36760.1 | 11.32 | 11.45 | 0.26 | 0.08 | -1.09 | 0.452219 | 0.501211 | 0.731949 | 0.699449 |
| MmugDNA.36761.1.S1_at   | MmugDNA.36761.1 | 4.23  | 4.28  | 0.34 | 0.07 | -1.04 | 0.846135 | 0.275378 | 0.938247 | 0.539663 |
| MmugDNA.36762.1.S1_at   | MmugDNA.36762.1 | 5.75  | 5.98  | 0.11 | 0.18 | -1.18 | 0.189449 | 0.231931 | 0.552479 | 0.503616 |
| MmugDNA.36763.1.S1_at   | MmugDNA.36763.1 | 4.95  | 4.76  | 0.2  | 0.42 | 1.14  | 0.510854 | 0.456544 | 0.765151 | 0.67024  |
| MmugDNA.36764.1.S1_at   | MmugDNA.36764.1 | 5.09  | 5.03  | 0.04 | 0.09 | 1.04  | 0.155859 | 0.423034 | 0.520508 | 0.646145 |
| MmugDNA.36765.1.S1_at   | MmugDNA.36765.1 | 10.83 | 9.84  | 0.1  | 0.21 | 2     | 0.002102 | 0.000185 | 0.156952 | 0.030511 |
| MmugDNA.36768.1.S1_at   | MmugDNA.36768.1 | 7.14  | 7.06  | 0.19 | 0.22 | 1.05  | 0.839015 | 0.824996 | 0.934987 | 0.899487 |

|                         |                 |       |       |      |      |        |          |          |          |          |
|-------------------------|-----------------|-------|-------|------|------|--------|----------|----------|----------|----------|
| MmugDNA.36769.1.S1_at   | MmugDNA.36769.1 | 4.62  | 4.58  | 0.25 | 0.12 | 1.03   | 0.567336 | 0.257795 | 0.798078 | 0.52542  |
| MmugDNA.3677.1.S1_at    | MmugDNA.3677.1  | 4.92  | 5.33  | 0.03 | 0.23 | -1.33  | 0.045416 | 0.033687 | 0.361012 | 0.227152 |
| MmugDNA.36770.1.S1_at   | MmugDNA.36770.1 | 5.01  | 3.9   | 0.48 | 0.29 | 2.16   | 0.008713 | 0.006509 | 0.220503 | 0.109521 |
| MmugDNA.36771.1.S1_at   | MmugDNA.36771.1 | 4.14  | 4.19  | 0.16 | 0.08 | -1.04  | 0.598244 | 0.49715  | 0.813939 | 0.696484 |
| MmugDNA.36772.1.S1_at   | MmugDNA.36772.1 | 4.88  | 5.01  | 0.11 | 0.16 | -1.1   | 0.11424  | 0.265829 | 0.477528 | 0.531695 |
| MmugDNA.36773.1.S1_at   | MmugDNA.36773.1 | 5.97  | 6     | 0.2  | 0.14 | -1.02  | 0.964275 | 0.932952 | 0.986194 | 0.961911 |
| MmugDNA.36774.1.S1_at   | MmugDNA.36774.1 | 6.66  | 6.66  | 0.07 | 0.09 | -1     | 0.888925 | 0.113905 | 0.955531 | 0.38018  |
| MmugDNA.36775.1.S1_at   | MmugDNA.36775.1 | 11.96 | 11.96 | 0.02 | 0.04 | 1      | 0.87731  | 0.179068 | 0.950869 | 0.455436 |
| MmugDNA.36777.1.S1_at   | MmugDNA.36777.1 | 5.15  | 5.21  | 0.23 | 0.31 | -1.05  | 0.837698 | 0.567978 | 0.934458 | 0.74176  |
| MmugDNA.36778.1.S1_at   | MmugDNA.36778.1 | 6.58  | 6.67  | 0.26 | 0.53 | -1.06  | 0.505145 | 0.531866 | 0.761548 | 0.71896  |
| MmugDNA.3678.1.S1_at    | MmugDNA.3678.1  | 2.7   | 2.57  | 0.09 | 0.15 | 1.09   | 0.401749 | 0.577948 | 0.701003 | 0.748185 |
| MmugDNA.36780.1.S1_at   | MmugDNA.36780.1 | 5.41  | 6.09  | 0.77 | 0.3  | -1.61  | 0.345265 | 0.212596 | 0.665128 | 0.486531 |
| MmugDNA.36781.1.S1_at   | MmugDNA.36781.1 | 5.27  | 5.02  | 0.62 | 0.16 | 1.18   | 0.186925 | 0.27699  | 0.550106 | 0.540995 |
| MmugDNA.36782.1.S1_at   | MmugDNA.36782.1 | 8.69  | 8.18  | 0.28 | 0.25 | 1.43   | 0.065505 | 0.053303 | 0.404593 | 0.276463 |
| MmugDNA.36785.1.S1_a_at | MmugDNA.36785.1 | 7.98  | 6.61  | 0.53 | 1    | 2.59   | 0.062166 | 0.054088 | 0.397336 | 0.277914 |
| MmugDNA.36786.1.S1_at   | MmugDNA.36786.1 | 4.45  | 3.43  | 0.7  | 0.27 | 2.02   | 0.099898 | 0.071881 | 0.459906 | 0.314181 |
| MmugDNA.36787.1.S1_at   | MmugDNA.36787.1 | 5.1   | 5.04  | 0.29 | 0.13 | 1.04   | 0.44899  | 0.295402 | 0.729998 | 0.554855 |
| MmugDNA.36788.1.S1_at   | MmugDNA.36788.1 | 4.29  | 4.16  | 0.23 | 0.22 | 1.09   | 0.317648 | 0.354346 | 0.648004 | 0.597166 |
| MmugDNA.3679.1.S1_at    | MmugDNA.3679.1  | 10.78 | 10.42 | 0.09 | 0.12 | 1.28   | 0.009875 | 0.000365 | 0.226668 | 0.037273 |
| MmugDNA.36790.1.S1_at   | MmugDNA.36790.1 | 6.51  | 6.41  | 0.17 | 0.35 | 1.07   | 0.81678  | 0.820745 | 0.925751 | 0.896776 |
| MmugDNA.36791.1.S1_at   | MmugDNA.36791.1 | 4.22  | 4.18  | 0.07 | 0.17 | 1.03   | 0.85055  | 0.679969 | 0.939993 | 0.813105 |
| MmugDNA.36792.1.S1_at   | MmugDNA.36792.1 | 10.43 | 10.37 | 0.32 | 0.15 | 1.04   | 0.263438 | 0.323493 | 0.609348 | 0.574473 |
| MmugDNA.36798.1.S1_at   | MmugDNA.36798.1 | 8.1   | 7.6   | 1.15 | 1.08 | 1.41   | 0.262801 | 0.376942 | 0.609073 | 0.614678 |
| MmugDNA.36799.1.S1_at   | MmugDNA.36799.1 | 9.43  | 8.47  | 0.32 | 0.65 | 1.95   | 0.027931 | 0.027821 | 0.309162 | 0.208337 |
| MmugDNA.368.1.S1_at     | MmugDNA.368.1   | 6.19  | 6.24  | 0.25 | 0.04 | -1.03  | 0.634958 | 0.852369 | 0.834794 | 0.916105 |
| MmugDNA.3680.1.S1_at    | MmugDNA.3680.1  | 5.14  | 8.75  | 1.34 | 0.78 | -12.22 | 0.01977  | 0.008874 | 0.275549 | 0.124662 |
| MmugDNA.36800.1.S1_at   | MmugDNA.36800.1 | 3.34  | 3.37  | 0.19 | 0.19 | -1.02  | 0.851351 | 0.350655 | 0.940204 | 0.594394 |
| MmugDNA.36801.1.S1_at   | MmugDNA.36801.1 | 11.09 | 11.08 | 0.21 | 0.15 | 1.01   | 0.482352 | 0.671079 | 0.749404 | 0.80765  |
| MmugDNA.36802.1.S1_at   | MmugDNA.36802.1 | 5.95  | 6.01  | 0.14 | 0.02 | -1.04  | 0.466332 | 0.603984 | 0.740215 | 0.764427 |
| MmugDNA.36803.1.S1_at   | MmugDNA.36803.1 | 5.38  | 5.53  | 0.15 | 0.12 | -1.1   | 0.277857 | 0.306674 | 0.619995 | 0.563241 |
| MmugDNA.36804.1.S1_at   | MmugDNA.36804.1 | 3.42  | 3.37  | 0.55 | 0.37 | 1.04   | 0.957171 | 0.975171 | 0.983802 | 0.986441 |
| MmugDNA.36805.1.S1_at   | MmugDNA.36805.1 | 7.43  | 6.34  | 0.06 | 0.38 | 2.12   | 0.007701 | 0.000568 | 0.211276 | 0.041092 |
| MmugDNA.36807.1.S1_at   | MmugDNA.36807.1 | 6.61  | 6.18  | 0.26 | 0.18 | 1.35   | 0.033102 | 0.026437 | 0.327101 | 0.203765 |
| MmugDNA.36808.1.S1_at   | MmugDNA.36808.1 | 6.65  | 6.44  | 0.68 | 0.63 | 1.16   | 0.755297 | 0.834805 | 0.896047 | 0.905439 |
| MmugDNA.36809.1.S1_at   | MmugDNA.36809.1 | 4.19  | 4.2   | 0.12 | 0.16 | -1     | 0.552025 | 0.606323 | 0.789174 | 0.765746 |
| MmugDNA.3681.1.S1_at    | MmugDNA.3681.1  | 10.87 | 10.9  | 0.29 | 0.1  | -1.02  | 0.842439 | 0.841287 | 0.936474 | 0.909576 |
| MmugDNA.3681.1.S1_s_at  | MmugDNA.3681.1  | 10.55 | 10.75 | 0.25 | 0.06 | -1.14  | 0.704695 | 0.750287 | 0.869745 | 0.854766 |
| MmugDNA.36810.1.S1_at   | MmugDNA.36810.1 | 7.81  | 7.54  | 0.48 | 1.07 | 1.21   | 0.683889 | 0.508065 | 0.858543 | 0.703358 |
| MmugDNA.36810.1.S1_s_at | MmugDNA.36810.1 | 9.75  | 10.11 | 0.17 | 1.04 | -1.28  | 0.455682 | 0.45935  | 0.733926 | 0.671726 |
| MmugDNA.36812.1.S1_at   | MmugDNA.36812.1 | 7.26  | 7.05  | 0.31 | 0.59 | 1.16   | 0.545691 | 0.379684 | 0.785149 | 0.616523 |
| MmugDNA.36813.1.S1_at   | MmugDNA.36813.1 | 3.5   | 3.62  | 0.38 | 0.07 | -1.08  | 0.697439 | 0.637912 | 0.865678 | 0.787226 |

|                         |                 |       |       |      |      |       |          |          |          |          |
|-------------------------|-----------------|-------|-------|------|------|-------|----------|----------|----------|----------|
| MmugDNA.36814.1.S1_at   | MmugDNA.36814.1 | 5.58  | 5.54  | 0.46 | 0.05 | 1.03  | 0.28333  | 0.198389 | 0.623353 | 0.473292 |
| MmugDNA.36815.1.S1_at   | MmugDNA.36815.1 | 6.55  | 5.25  | 0.86 | 0.29 | 2.48  | 0.092039 | 0.095068 | 0.448698 | 0.352124 |
| MmugDNA.36816.1.S1_at   | MmugDNA.36816.1 | 4.17  | 4.36  | 0.32 | 0.18 | -1.14 | 0.897089 | 0.763966 | 0.959096 | 0.862769 |
| MmugDNA.36817.1.S1_at   | MmugDNA.36817.1 | 4.63  | 4.49  | 0.27 | 0.06 | 1.1   | 0.49556  | 0.215724 | 0.757268 | 0.489503 |
| MmugDNA.36818.1.S1_at   | MmugDNA.36818.1 | 5.38  | 4.8   | 0.45 | 0.04 | 1.5   | 0.255556 | 0.221576 | 0.603393 | 0.494901 |
| MmugDNA.36819.1.S1_at   | MmugDNA.36819.1 | 7.54  | 7.27  | 0.61 | 0.04 | 1.21  | 0.472901 | 0.444598 | 0.744067 | 0.662072 |
| MmugDNA.3682.1.S1_at    | MmugDNA.3682.1  | 8.24  | 8.47  | 0.79 | 0.45 | -1.17 | 0.696048 | 0.36931  | 0.865113 | 0.6087   |
| MmugDNA.3682.1.S1_s_at  | MmugDNA.3682.1  | 7.47  | 7.7   | 0.84 | 0.53 | -1.17 | 0.993125 | 0.633114 | 0.997652 | 0.78396  |
| MmugDNA.36820.1.S1_at   | MmugDNA.36820.1 | 7.71  | 6.69  | 0.37 | 0.43 | 2.02  | 0.073758 | 0.048471 | 0.419269 | 0.265396 |
| MmugDNA.36821.1.S1_at   | MmugDNA.36821.1 | 3.08  | 3.27  | 0.12 | 0.08 | -1.14 | 0.386004 | 0.545638 | 0.690975 | 0.727579 |
| MmugDNA.36822.1.S1_at   | MmugDNA.36822.1 | 10.35 | 9.93  | 0.06 | 0.17 | 1.33  | 0.039665 | 0.019445 | 0.347812 | 0.175136 |
| MmugDNA.36823.1.S1_at   | MmugDNA.36823.1 | 6.82  | 6.83  | 0.33 | 0.06 | -1    | 0.373514 | 0.523212 | 0.683245 | 0.713594 |
| MmugDNA.36824.1.S1_at   | MmugDNA.36824.1 | 7.38  | 6.65  | 0.21 | 0.24 | 1.65  | 0.031393 | 0.022333 | 0.321628 | 0.187046 |
| MmugDNA.36825.1.S1_at   | MmugDNA.36825.1 | 4.04  | 4.01  | 0.17 | 0.02 | 1.02  | 0.290301 | 0.506131 | 0.62809  | 0.702359 |
| MmugDNA.36826.1.S1_at   | MmugDNA.36826.1 | 11.35 | 11.45 | 0.11 | 0.28 | -1.08 | 0.282698 | 0.171346 | 0.62304  | 0.447813 |
| MmugDNA.36829.1.S1_at   | MmugDNA.36829.1 | 3.48  | 3.51  | 0.33 | 0.37 | -1.02 | 0.869798 | 0.559101 | 0.947917 | 0.736046 |
| MmugDNA.3683.1.S1_at    | MmugDNA.3683.1  | 9     | 9.56  | 0.48 | 0.29 | -1.47 | 0.208005 | 0.223073 | 0.569897 | 0.49588  |
| MmugDNA.36830.1.S1_at   | MmugDNA.36830.1 | 4.06  | 3.82  | 0.24 | 0.7  | 1.18  | 0.903082 | 0.558476 | 0.961412 | 0.735631 |
| MmugDNA.36831.1.S1_at   | MmugDNA.36831.1 | 3.36  | 3.37  | 0.09 | 0.18 | -1    | 0.971534 | 0.423791 | 0.989102 | 0.646542 |
| MmugDNA.36832.1.S1_at   | MmugDNA.36832.1 | 6.73  | 6.7   | 0.67 | 0.53 | 1.02  | 0.511269 | 0.479237 | 0.765295 | 0.68504  |
| MmugDNA.36833.1.S1_at   | MmugDNA.36833.1 | 8.01  | 8.31  | 0.16 | 0.12 | -1.23 | 0.056667 | 0.04331  | 0.386838 | 0.252847 |
| MmugDNA.36835.1.S1_at   | MmugDNA.36835.1 | 5.48  | 5.81  | 0.12 | 0.13 | -1.26 | 0.147651 | 0.124014 | 0.513287 | 0.394273 |
| MmugDNA.36836.1.S1_at   | MmugDNA.36836.1 | 3.84  | 3.86  | 0.04 | 0.23 | -1.01 | 0.765664 | 0.917645 | 0.901388 | 0.953933 |
| MmugDNA.36837.1.S1_at   | MmugDNA.36837.1 | 6.87  | 7.01  | 0.79 | 0.19 | -1.1  | 0.477373 | 0.609376 | 0.746589 | 0.767746 |
| MmugDNA.36839.1.S1_at   | MmugDNA.36839.1 | 7.15  | 7     | 0.99 | 0.98 | 1.11  | 0.680146 | 0.423104 | 0.857053 | 0.646145 |
| MmugDNA.3684.1.S1_at    | MmugDNA.3684.1  | 7.03  | 8.22  | 0.56 | 0.9  | -2.28 | 0.059874 | 0.0401   | 0.392969 | 0.245388 |
| MmugDNA.36840.1.S1_at   | MmugDNA.36840.1 | 6     | 6.04  | 0.19 | 0.46 | -1.03 | 0.639274 | 0.216598 | 0.837074 | 0.490237 |
| MmugDNA.36841.1.S1_at   | MmugDNA.36841.1 | 5.99  | 5.94  | 0.47 | 0    | 1.04  | 0.774473 | 0.890725 | 0.905235 | 0.937712 |
| MmugDNA.36842.1.S1_at   | MmugDNA.36842.1 | 5.94  | 5.85  | 0.04 | 0.35 | 1.06  | 0.236836 | 0.387195 | 0.590574 | 0.621953 |
| MmugDNA.36843.1.S1_at   | MmugDNA.36843.1 | 8.43  | 8.91  | 0.13 | 0.18 | -1.39 | 0.046444 | 0.076925 | 0.363009 | 0.322421 |
| MmugDNA.36844.1.S1_at   | MmugDNA.36844.1 | 4.99  | 6.15  | 0.15 | 0.84 | -2.25 | 0.030188 | 0.027662 | 0.317274 | 0.207691 |
| MmugDNA.36846.1.S1_at   | MmugDNA.36846.1 | 5.63  | 5.74  | 0.18 | 0.29 | -1.08 | 0.353523 | 0.512848 | 0.670178 | 0.706549 |
| MmugDNA.36848.1.S1_at   | MmugDNA.36848.1 | 7.79  | 10.92 | 0.59 | 0.04 | -8.76 | 0.001266 | 0.000664 | 0.145267 | 0.0439   |
| MmugDNA.36849.1.S1_at   | MmugDNA.36849.1 | 4.64  | 4.54  | 0.22 | 0.2  | 1.07  | 0.120629 | 0.155384 | 0.485724 | 0.430771 |
| MmugDNA.36850.1.S1_at   | MmugDNA.36850.1 | 6.46  | 8.49  | 0.67 | 0.26 | -4.08 | 0.006463 | 0.005306 | 0.199625 | 0.10082  |
| MmugDNA.36851.1.S1_at   | MmugDNA.36851.1 | 3.57  | 3.82  | 0.17 | 0.19 | -1.19 | 0.2183   | 0.222376 | 0.577874 | 0.495444 |
| MmugDNA.36852.1.S1_at   | MmugDNA.36852.1 | 8.69  | 9.67  | 0.15 | 0.64 | -1.98 | 0.068453 | 0.028677 | 0.410144 | 0.211053 |
| MmugDNA.36853.1.S1_at   | MmugDNA.36853.1 | 5.34  | 5.6   | 0.3  | 0.22 | -1.19 | 0.753473 | 0.928721 | 0.894888 | 0.959449 |
| MmugDNA.36855.1.S1_at   | MmugDNA.36855.1 | 4.89  | 5.43  | 0.25 | 1.03 | -1.45 | 0.404272 | 0.219998 | 0.702606 | 0.49344  |
| MmugDNA.36856.1.S1_at   | MmugDNA.36856.1 | 12.84 | 12.51 | 0.05 | 0.31 | 1.25  | 0.118612 | 0.006548 | 0.48294  | 0.109707 |
| MmugDNA.36856.1.S1_s_at | MmugDNA.36856.1 | 13.12 | 12.86 | 0.08 | 0.23 | 1.19  | 0.097696 | 0.003222 | 0.456776 | 0.082115 |



|                         |                 |       |       |      |      |       |          |          |          |          |
|-------------------------|-----------------|-------|-------|------|------|-------|----------|----------|----------|----------|
| MmugDNA.36857.1.S1_at   | MmugDNA.36857.1 | 12.03 | 11.75 | 0.13 | 0.19 | 1.21  | 0.034632 | 0.018709 | 0.333297 | 0.171763 |
| MmugDNA.36859.1.S1_at   | MmugDNA.36859.1 | 8.36  | 7.54  | 0.57 | 0.24 | 1.76  | 0.071377 | 0.033866 | 0.415198 | 0.227662 |
| MmugDNA.3686.1.S1_at    | MmugDNA.3686.1  | 11.38 | 11.14 | 0.09 | 0.24 | 1.18  | 0.166525 | 0.087406 | 0.530253 | 0.340589 |
| MmugDNA.36860.1.S1_at   | MmugDNA.36860.1 | 4.6   | 4.53  | 0.47 | 0.31 | 1.05  | 0.654657 | 0.919734 | 0.844665 | 0.954884 |
| MmugDNA.17452.1.S1_s_at | MmugDNA.17452.1 | 9.87  | 9.6   | 0.4  | 0.28 | 1.2   | 0.334709 | 0.409002 | 0.658461 | 0.636073 |
| MmugDNA.36862.1.S1_at   | MmugDNA.36862.1 | 6.3   | 6.49  | 0.31 | 0.16 | -1.14 | 0.25345  | 0.257922 | 0.602055 | 0.525495 |
| MmugDNA.36865.1.S1_at   | MmugDNA.36865.1 | 5.19  | 5.19  | 0.03 | 0.21 | -1    | 0.878407 | 0.965235 | 0.951188 | 0.980613 |
| MmugDNA.36866.1.S1_at   | MmugDNA.36866.1 | 3.36  | 3.36  | 0.7  | 0.06 | -1    | 0.439159 | 0.590834 | 0.723488 | 0.756484 |
| MmugDNA.36868.1.S1_at   | MmugDNA.36868.1 | 5.02  | 4.32  | 0.73 | 0.08 | 1.63  | 0.090164 | 0.19201  | 0.445655 | 0.467382 |
| MmugDNA.36869.1.S1_at   | MmugDNA.36869.1 | 9.48  | 8.4   | 0.08 | 0.07 | 2.11  | 0.000082 | 0.000004 | 0.112653 | 0.014484 |
| MmugDNA.36870.1.S1_at   | MmugDNA.36870.1 | 3.8   | 3.96  | 0.37 | 0.05 | -1.11 | 0.923878 | 0.957842 | 0.970527 | 0.976177 |
| MmugDNA.36871.1.S1_at   | MmugDNA.36871.1 | 3.05  | 2.96  | 0.21 | 0.06 | 1.07  | 0.73026  | 0.300727 | 0.88305  | 0.558959 |
| MmugDNA.36872.1.S1_at   | MmugDNA.36872.1 | 6.34  | 7.27  | 0.26 | 1.03 | -1.9  | 0.06274  | 0.053578 | 0.399176 | 0.277127 |
| MmugDNA.36873.1.S1_at   | MmugDNA.36873.1 | 4.36  | 4.28  | 0.19 | 0.09 | 1.06  | 0.53033  | 0.38174  | 0.77679  | 0.617941 |
| MmugDNA.36874.1.S1_at   | MmugDNA.36874.1 | 8.02  | 7.71  | 0.2  | 0.16 | 1.24  | 0.042002 | 0.021942 | 0.353803 | 0.185351 |
| MmugDNA.36876.1.S1_at   | MmugDNA.36876.1 | 6.43  | 6.46  | 0.52 | 0.33 | -1.02 | 0.459309 | 0.271375 | 0.736044 | 0.536507 |
| MmugDNA.36877.1.S1_at   | MmugDNA.36877.1 | 9.19  | 8.23  | 0.24 | 0.7  | 1.95  | 0.150408 | 0.010425 | 0.515215 | 0.133525 |
| MmugDNA.36879.1.S1_at   | MmugDNA.36879.1 | 6.89  | 8.76  | 0.62 | 0.49 | -3.67 | 0.01226  | 0.008054 | 0.240588 | 0.119277 |
| MmugDNA.3688.1.S1_at    | MmugDNA.3688.1  | 7.18  | 8.37  | 0.16 | 0.66 | -2.28 | 0.037737 | 0.026452 | 0.342718 | 0.203779 |
| MmugDNA.36881.1.S1_at   | MmugDNA.36881.1 | 5.62  | 5.77  | 0.14 | 0.16 | -1.11 | 0.409433 | 0.153787 | 0.705878 | 0.428488 |
| MmugDNA.36882.1.S1_at   | MmugDNA.36882.1 | 6.09  | 6.43  | 0.28 | 0.13 | -1.26 | 0.220584 | 0.254862 | 0.57964  | 0.523051 |
| MmugDNA.36884.1.S1_at   | MmugDNA.36884.1 | 3.01  | 2.94  | 0.05 | 0.09 | 1.05  | 0.828474 | 0.96759  | 0.930352 | 0.982093 |
| MmugDNA.36885.1.S1_at   | MmugDNA.36885.1 | 6.03  | 6.29  | 0.07 | 0.11 | -1.19 | 0.027916 | 0.027869 | 0.309162 | 0.208453 |
| MmugDNA.36888.1.S1_at   | MmugDNA.36888.1 | 6.85  | 7     | 0.09 | 0.12 | -1.11 | 0.209031 | 0.238717 | 0.570648 | 0.509386 |
| MmugDNA.36889.1.S1_at   | MmugDNA.36889.1 | 5.32  | 5.37  | 0.2  | 0.28 | -1.04 | 0.427287 | 0.585597 | 0.716187 | 0.752934 |
| MmugDNA.36890.1.S1_at   | MmugDNA.36890.1 | 4.6   | 4.48  | 0.21 | 0.09 | 1.09  | 0.623944 | 0.899804 | 0.828158 | 0.942989 |
| MmugDNA.36891.1.S1_at   | MmugDNA.36891.1 | 3.08  | 3.19  | 0.06 | 0.26 | -1.07 | 0.461002 | 0.718266 | 0.737327 | 0.83694  |
| MmugDNA.36892.1.S1_at   | MmugDNA.36892.1 | 6.41  | 6.35  | 0.13 | 0.2  | 1.04  | 0.89934  | 0.394715 | 0.959759 | 0.627208 |
| MmugDNA.36893.1.S1_at   | MmugDNA.36893.1 | 4.17  | 4.4   | 0.15 | 0.2  | -1.17 | 0.603911 | 0.279476 | 0.817352 | 0.543055 |
| MmugDNA.36895.1.S1_at   | MmugDNA.36895.1 | 6.44  | 6.17  | 0.53 | 0.63 | 1.21  | 0.283134 | 0.419396 | 0.623246 | 0.643466 |
| MmugDNA.36896.1.S1_at   | MmugDNA.36896.1 | 3.58  | 3.64  | 0.06 | 0.26 | -1.05 | 0.29892  | 0.316411 | 0.634431 | 0.569809 |
| MmugDNA.36898.1.S1_s_at | MmugDNA.36898.1 | 9.32  | 8.64  | 0.17 | 0.26 | 1.6   | 0.01844  | 0.016181 | 0.270416 | 0.161214 |
| MmugDNA.369.1.S1_at     | MmugDNA.369.1   | 9.93  | 9.55  | 0.16 | 0.34 | 1.3   | 0.143526 | 0.051429 | 0.510312 | 0.272204 |
| MmugDNA.36900.1.S1_at   | MmugDNA.36900.1 | 5.4   | 5.44  | 0.13 | 0.02 | -1.03 | 0.730824 | 0.339584 | 0.883369 | 0.586188 |
| MmugDNA.36901.1.S1_at   | MmugDNA.36901.1 | 6.99  | 6.51  | 0.35 | 0.19 | 1.4   | 0.066869 | 0.021706 | 0.406981 | 0.184333 |
| MmugDNA.36902.1.S1_at   | MmugDNA.36902.1 | 3.78  | 3.61  | 0.19 | 0.08 | 1.13  | 0.40939  | 0.295316 | 0.705878 | 0.554734 |
| MmugDNA.36903.1.S1_at   | MmugDNA.36903.1 | 6.36  | 5.76  | 0.18 | 0.37 | 1.52  | 0.107296 | 0.052344 | 0.467965 | 0.274277 |
| MmugDNA.36904.1.S1_at   | MmugDNA.36904.1 | 4.99  | 4.95  | 0.29 | 0.34 | 1.03  | 0.419799 | 0.460049 | 0.712083 | 0.671989 |
| MmugDNA.36908.1.S1_at   | MmugDNA.36908.1 | 4.15  | 4.71  | 0.29 | 0.19 | -1.48 | 0.196311 | 0.252822 | 0.559558 | 0.521174 |
| MmugDNA.27229.1.S1_s_at | MmugDNA.27229.1 | 7.93  | 8.12  | 0.53 | 0.68 | -1.14 | 0.669862 | 0.391782 | 0.852318 | 0.625301 |
| MmugDNA.3691.1.S1_at    | MmugDNA.3691.1  | 5.1   | 5.43  | 0.09 | 0.34 | -1.26 | 0.522984 | 0.686327 | 0.772257 | 0.816939 |

|                         |                 |       |       |      |      |       |          |          |          |          |
|-------------------------|-----------------|-------|-------|------|------|-------|----------|----------|----------|----------|
| MmugDNA.36910.1.S1_at   | MmugDNA.36910.1 | 12.4  | 12.19 | 0.13 | 0.06 | 1.15  | 0.101259 | 0.02429  | 0.461009 | 0.195066 |
| MmugDNA.36911.1.S1_at   | MmugDNA.36911.1 | 5.53  | 5.6   | 0.08 | 0.42 | -1.05 | 0.343048 | 0.328263 | 0.663407 | 0.577992 |
| MmugDNA.36913.1.S1_at   | MmugDNA.36913.1 | 4.92  | 4.91  | 0.45 | 0.46 | 1.01  | 0.962143 | 0.956163 | 0.985456 | 0.975058 |
| MmugDNA.36914.1.S1_at   | MmugDNA.36914.1 | 9.48  | 8.87  | 1.09 | 0.6  | 1.52  | 0.876805 | 0.930742 | 0.950675 | 0.960672 |
| MmugDNA.36915.1.S1_at   | MmugDNA.36915.1 | 6.04  | 6.01  | 0.07 | 0.17 | 1.02  | 0.752451 | 0.33072  | 0.894361 | 0.579519 |
| MmugDNA.36916.1.S1_at   | MmugDNA.36916.1 | 10.86 | 11.17 | 0.1  | 0.82 | -1.24 | 0.546142 | 0.402458 | 0.785337 | 0.631481 |
| MmugDNA.36917.1.S1_at   | MmugDNA.36917.1 | 4.33  | 4.36  | 0.15 | 0.24 | -1.02 | 0.29023  | 0.380885 | 0.628072 | 0.617426 |
| MmugDNA.36919.1.S1_s_at | MmugDNA.36919.1 | 5.99  | 8.54  | 0.75 | 2.31 | -5.86 | 0.242861 | 0.318593 | 0.594639 | 0.571258 |
| MmugDNA.3692.1.S1_at    | MmugDNA.3692.1  | 5.4   | 5.53  | 0.15 | 0.02 | -1.09 | 0.245368 | 0.09723  | 0.597013 | 0.3549   |
| MmugDNA.36920.1.S1_at   | MmugDNA.36920.1 | 3.62  | 3.62  | 0.02 | 0.03 | 1     | 0.494304 | 0.977516 | 0.756685 | 0.987792 |
| MmugDNA.36921.1.S1_at   | MmugDNA.36921.1 | 5.78  | 5.89  | 0.18 | 0.25 | -1.08 | 0.629103 | 0.311907 | 0.831334 | 0.566833 |
| MmugDNA.36922.1.S1_at   | MmugDNA.36922.1 | 6.76  | 6.7   | 0.05 | 0.72 | 1.04  | 0.303527 | 0.337751 | 0.637706 | 0.584925 |
| MmugDNA.30873.1.S1_s_at | MmugDNA.30873.1 | 11.78 | 11.55 | 0.21 | 0.05 | 1.17  | 0.078957 | 0.094347 | 0.428609 | 0.350889 |
| MmugDNA.36925.1.S1_at   | MmugDNA.36925.1 | 5.98  | 5.87  | 0.33 | 0.13 | 1.08  | 0.621015 | 0.761997 | 0.826295 | 0.861597 |
| MmugDNA.36926.1.S1_at   | MmugDNA.36926.1 | 3.52  | 3.44  | 0.22 | 0.31 | 1.06  | 0.746064 | 0.922713 | 0.891243 | 0.956468 |
| MmugDNA.36927.1.S1_at   | MmugDNA.36927.1 | 8.64  | 8.89  | 0.07 | 0.73 | -1.19 | 0.712862 | 0.879947 | 0.874271 | 0.931461 |
| MmugDNA.36928.1.S1_at   | MmugDNA.36928.1 | 4.81  | 4.93  | 0.13 | 0.21 | -1.09 | 0.184165 | 0.180497 | 0.548032 | 0.457128 |
| MmugDNA.36929.1.S1_at   | MmugDNA.36929.1 | 9.06  | 8.86  | 0.18 | 0.35 | 1.15  | 0.450205 | 0.178882 | 0.730849 | 0.455208 |
| MmugDNA.3693.1.S1_at    | MmugDNA.3693.1  | 11.1  | 10.84 | 0.1  | 0.28 | 1.2   | 0.232925 | 0.307784 | 0.587927 | 0.56397  |
| MmugDNA.36930.1.S1_s_at | MmugDNA.36930.1 | 2.98  | 3.02  | 0.16 | 0.11 | -1.03 | 0.710895 | 0.714213 | 0.873297 | 0.834167 |
| MmugDNA.36931.1.S1_at   | MmugDNA.36931.1 | 3.42  | 3.55  | 0.06 | 0.1  | -1.09 | 0.099121 | 0.123306 | 0.458807 | 0.393386 |
| MmugDNA.36932.1.S1_at   | MmugDNA.36932.1 | 7.07  | 7.46  | 0.18 | 0.19 | -1.31 | 0.31475  | 0.243295 | 0.64608  | 0.513356 |
| MmugDNA.36933.1.S1_at   | MmugDNA.36933.1 | 5.15  | 4.63  | 0.37 | 0.21 | 1.44  | 0.494632 | 0.233318 | 0.756791 | 0.50468  |
| MmugDNA.36935.1.S1_at   | MmugDNA.36935.1 | 5.35  | 4.25  | 0.8  | 0.38 | 2.15  | 0.269396 | 0.295015 | 0.614131 | 0.554551 |
| MmugDNA.36936.1.S1_at   | MmugDNA.36936.1 | 8.52  | 8.21  | 0.14 | 0.23 | 1.23  | 0.209459 | 0.188823 | 0.570957 | 0.464789 |
| MmugDNA.36937.1.S1_at   | MmugDNA.36937.1 | 7.69  | 7.58  | 0.17 | 0.35 | 1.08  | 0.533552 | 0.268938 | 0.778294 | 0.534369 |
| MmugDNA.36938.1.S1_at   | MmugDNA.36938.1 | 7.3   | 7.44  | 0.28 | 0.04 | -1.1  | 0.601247 | 0.211821 | 0.815685 | 0.485788 |
| MmugDNA.36938.1.S1_s_at | MmugDNA.36938.1 | 5.23  | 5.23  | 0.03 | 0.12 | -1    | 0.47419  | 0.178539 | 0.744894 | 0.454778 |
| MmugDNA.3694.1.S1_s_at  | MmugDNA.3694.1  | 13.14 | 12.97 | 0.15 | 0.19 | 1.12  | 0.140808 | 0.162276 | 0.508448 | 0.438447 |
| MmugDNA.36941.1.S1_at   | MmugDNA.36941.1 | 5.16  | 5.33  | 0.07 | 0.08 | -1.12 | 0.048735 | 0.052639 | 0.369504 | 0.274934 |
| MmugDNA.36942.1.S1_at   | MmugDNA.36942.1 | 4.91  | 4.78  | 0.19 | 0.13 | 1.09  | 0.386006 | 0.43485  | 0.690975 | 0.654846 |
| MmugDNA.36943.1.S1_at   | MmugDNA.36943.1 | 3.75  | 3.85  | 0.39 | 0.19 | -1.07 | 0.398264 | 0.380501 | 0.698594 | 0.617165 |
| MmugDNA.36945.1.S1_at   | MmugDNA.36945.1 | 5.7   | 6.19  | 0.2  | 0.65 | -1.39 | 0.347066 | 0.460086 | 0.666207 | 0.671993 |
| MmugDNA.36949.1.S1_at   | MmugDNA.36949.1 | 9.91  | 9.16  | 0.25 | 0.63 | 1.69  | 0.041005 | 0.032775 | 0.35051  | 0.224149 |
| MmugDNA.36950.1.S1_at   | MmugDNA.36950.1 | 4.6   | 4.43  | 0.09 | 0.11 | 1.13  | 0.029652 | 0.361094 | 0.315023 | 0.602069 |
| MmugDNA.36951.1.S1_at   | MmugDNA.36951.1 | 5.94  | 6.36  | 1.12 | 0.46 | -1.34 | 0.642486 | 0.845544 | 0.838763 | 0.912145 |
| MmugDNA.36952.1.S1_at   | MmugDNA.36952.1 | 5.21  | 5.19  | 0.26 | 0.39 | 1.01  | 0.742539 | 0.411944 | 0.889888 | 0.638434 |
| MmugDNA.36953.1.S1_at   | MmugDNA.36953.1 | 4.4   | 5.3   | 0.96 | 0.15 | -1.88 | 0.57271  | 0.698293 | 0.800918 | 0.824756 |
| MmugDNA.36955.1.S1_at   | MmugDNA.36955.1 | 5.06  | 5     | 0.05 | 0.32 | 1.04  | 0.876925 | 0.383813 | 0.950709 | 0.619759 |
| MmugDNA.36956.1.S1_at   | MmugDNA.36956.1 | 3.05  | 3.25  | 0.61 | 0.07 | -1.15 | 0.684347 | 0.795157 | 0.858719 | 0.88196  |
| MmugDNA.36957.1.S1_at   | MmugDNA.36957.1 | 6.69  | 6.75  | 0.52 | 0.05 | -1.04 | 0.539105 | 0.658143 | 0.780929 | 0.800181 |

|                         |                 |       |       |      |      |       |          |          |          |          |
|-------------------------|-----------------|-------|-------|------|------|-------|----------|----------|----------|----------|
| MmugDNA.36957.1.S1_x_at | MmugDNA.36957.1 | 7.2   | 6.92  | 0.72 | 0.27 | 1.21  | 0.294968 | 0.394145 | 0.631503 | 0.62675  |
| MmugDNA.36958.1.S1_at   | MmugDNA.36958.1 | 3.45  | 3.36  | 0.06 | 0.04 | 1.06  | 0.270305 | 0.816531 | 0.614663 | 0.894202 |
| MmugDNA.36959.1.S1_at   | MmugDNA.36959.1 | 4.13  | 4.15  | 0.14 | 0.11 | -1.01 | 0.32663  | 0.40759  | 0.653184 | 0.63505  |
| MmugDNA.3696.1.S1_at    | MmugDNA.3696.1  | 7.19  | 6.99  | 0.05 | 0.25 | 1.15  | 0.206614 | 0.413587 | 0.568816 | 0.639662 |
| MmugDNA.36960.1.S1_at   | MmugDNA.36960.1 | 7.43  | 8.11  | 0.37 | 0.77 | -1.6  | 0.23965  | 0.255543 | 0.592634 | 0.523538 |
| MmugDNA.36961.1.S1_at   | MmugDNA.36961.1 | 6.97  | 6.98  | 0.17 | 0.32 | -1.01 | 0.862016 | 0.974411 | 0.944505 | 0.986069 |
| MmugDNA.36962.1.S1_at   | MmugDNA.36962.1 | 10.31 | 11.11 | 0.13 | 0.38 | -1.74 | 0.020639 | 0.017747 | 0.279122 | 0.168367 |
| MmugDNA.36964.1.S1_at   | MmugDNA.36964.1 | 5.6   | 6.3   | 0.28 | 0.43 | -1.63 | 0.068879 | 0.078906 | 0.410654 | 0.325912 |
| MmugDNA.36969.1.S1_s_at | MmugDNA.36969.1 | 11.67 | 11.16 | 0.08 | 0.3  | 1.42  | 0.102105 | 0.115996 | 0.461507 | 0.383164 |
| MmugDNA.3697.1.S1_at    | MmugDNA.3697.1  | 3.54  | 3.56  | 0.56 | 0.16 | -1.01 | 0.450316 | 0.623041 | 0.730917 | 0.777477 |
| MmugDNA.36970.1.S1_at   | MmugDNA.36970.1 | 6.31  | 6.38  | 0.09 | 0.22 | -1.05 | 0.984959 | 0.762103 | 0.994692 | 0.86164  |
| MmugDNA.36972.1.S1_at   | MmugDNA.36972.1 | 6.43  | 6.8   | 0.11 | 0.23 | -1.29 | 0.066347 | 0.057288 | 0.406394 | 0.285198 |
| MmugDNA.36973.1.S1_at   | MmugDNA.36973.1 | 10.76 | 9.68  | 0.16 | 0.26 | 2.12  | 0.005487 | 0.001848 | 0.191209 | 0.064494 |
| MmugDNA.36974.1.S1_at   | MmugDNA.36974.1 | 11.2  | 11.03 | 0.08 | 0.13 | 1.13  | 0.214742 | 0.179868 | 0.575346 | 0.456425 |
| MmugDNA.36975.1.S1_at   | MmugDNA.36975.1 | 8.05  | 7.72  | 0.32 | 0.16 | 1.26  | 0.502825 | 0.152064 | 0.760545 | 0.42682  |
| MmugDNA.36976.1.S1_at   | MmugDNA.36976.1 | 5.34  | 5.37  | 0.24 | 0.05 | -1.02 | 0.74084  | 0.928566 | 0.88885  | 0.959399 |
| MmugDNA.36978.1.S1_at   | MmugDNA.36978.1 | 5.41  | 6.5   | 0.18 | 0.23 | -2.13 | 0.002213 | 0.000271 | 0.159628 | 0.033839 |
| MmugDNA.3698.1.S1_at    | MmugDNA.3698.1  | 9.61  | 8.37  | 0.16 | 0.43 | 2.37  | 0.013476 | 0.005777 | 0.24708  | 0.104378 |
| MmugDNA.36980.1.S1_at   | MmugDNA.36980.1 | 6.12  | 6.09  | 0.28 | 0.04 | 1.02  | 0.917898 | 0.666524 | 0.968034 | 0.804636 |
| MmugDNA.36981.1.S1_at   | MmugDNA.36981.1 | 11.64 | 11.15 | 0.24 | 0.52 | 1.4   | 0.443056 | 0.177566 | 0.725992 | 0.453962 |
| MmugDNA.36984.1.S1_at   | MmugDNA.36984.1 | 3.79  | 3.43  | 0.37 | 0.19 | 1.28  | 0.588891 | 0.499253 | 0.809161 | 0.698117 |
| MmugDNA.36987.1.S1_at   | MmugDNA.36987.1 | 2.96  | 2.84  | 0.1  | 0.06 | 1.09  | 0.224166 | 0.598339 | 0.582619 | 0.76075  |
| MmugDNA.36988.1.S1_x_at | MmugDNA.36988.1 | 10.71 | 10.25 | 0.5  | 0.23 | 1.38  | 0.199814 | 0.285632 | 0.562888 | 0.547395 |
| MmugDNA.3699.1.S1_at    | MmugDNA.3699.1  | 4.79  | 4.88  | 0.41 | 0.08 | -1.06 | 0.550653 | 0.718501 | 0.787978 | 0.837066 |
| MmugDNA.36993.1.S1_at   | MmugDNA.36993.1 | 5.39  | 5.41  | 0.11 | 0.09 | -1.01 | 0.940795 | 0.314119 | 0.977466 | 0.568185 |
| MmugDNA.36995.1.S1_at   | MmugDNA.36995.1 | 4.78  | 4.48  | 0.42 | 0.08 | 1.24  | 0.201647 | 0.197825 | 0.563988 | 0.472721 |
| MmugDNA.36996.1.S1_at   | MmugDNA.36996.1 | 4.68  | 4.68  | 0.19 | 0.29 | 1     | 0.24505  | 0.231836 | 0.596709 | 0.503592 |
| MmugDNA.36997.1.S1_at   | MmugDNA.36997.1 | 7.13  | 8.6   | 0.59 | 0.65 | -2.78 | 0.083163 | 0.079914 | 0.435503 | 0.327213 |
| MmugDNA.36998.1.S1_at   | MmugDNA.36998.1 | 3.45  | 3.6   | 0.12 | 0.1  | -1.11 | 0.351048 | 0.151152 | 0.668943 | 0.425805 |
| MmugDNA.36999.1.S1_at   | MmugDNA.36999.1 | 5.67  | 5.26  | 0.31 | 0.81 | 1.32  | 0.817205 | 0.901301 | 0.9259   | 0.943884 |
| MmugDNA.37.1.S1_at      | MmugDNA.37.1    | 10.34 | 9.97  | 0.19 | 0.42 | 1.29  | 0.518174 | 0.286342 | 0.769301 | 0.547784 |
| MmugDNA.370.1.S1_at     | MmugDNA.370.1   | 3.67  | 3.67  | 0.09 | 0.08 | 1     | 0.440261 | 0.632745 | 0.724158 | 0.783777 |
| MmugDNA.3700.1.S1_at    | MmugDNA.3700.1  | 10.84 | 10.48 | 0.24 | 0.22 | 1.28  | 0.237657 | 0.265973 | 0.591151 | 0.531796 |
| MmugDNA.37000.1.S1_at   | MmugDNA.37000.1 | 4.69  | 5.04  | 0.18 | 0.08 | -1.27 | 0.039417 | 0.086253 | 0.347121 | 0.338664 |
| MmugDNA.37001.1.S1_at   | MmugDNA.37001.1 | 4.95  | 4.94  | 0.32 | 0.08 | 1.01  | 0.352446 | 0.332012 | 0.669616 | 0.580557 |
| MmugDNA.37005.1.S1_at   | MmugDNA.37005.1 | 8.11  | 8.56  | 0.33 | 0.32 | -1.37 | 0.274321 | 0.278859 | 0.617262 | 0.542599 |
| MmugDNA.37006.1.S1_at   | MmugDNA.37006.1 | 10.61 | 10.87 | 0.53 | 0.21 | -1.2  | 0.207855 | 0.266662 | 0.569854 | 0.532407 |
| MmugDNA.37007.1.S1_at   | MmugDNA.37007.1 | 3.51  | 3.38  | 0.13 | 0.03 | 1.09  | 0.230625 | 0.339087 | 0.587222 | 0.585891 |
| MmugDNA.37008.1.S1_at   | MmugDNA.37008.1 | 6.12  | 6.16  | 0.8  | 1.4  | -1.03 | 0.60916  | 0.801181 | 0.82039  | 0.885679 |
| MmugDNA.37009.1.S1_at   | MmugDNA.37009.1 | 5.73  | 5.72  | 0.02 | 0.2  | 1.01  | 0.585106 | 0.634879 | 0.807319 | 0.785042 |
| MmugDNA.3701.1.S1_at    | MmugDNA.3701.1  | 8.68  | 8.11  | 0.8  | 0.67 | 1.49  | 0.43215  | 0.467906 | 0.718823 | 0.677398 |

|                         |                 |       |       |      |      |       |          |          |          |          |
|-------------------------|-----------------|-------|-------|------|------|-------|----------|----------|----------|----------|
| MmugDNA.20818.1.S1_s_at | MmugDNA.20818.1 | 8.93  | 8.55  | 0.69 | 0.59 | 1.3   | 0.528186 | 0.609979 | 0.775373 | 0.768269 |
| MmugDNA.37010.1.S1_at   | MmugDNA.37010.1 | 6.97  | 6.81  | 0.17 | 0.2  | 1.11  | 0.685977 | 0.20577  | 0.859586 | 0.48007  |
| MmugDNA.37011.1.S1_at   | MmugDNA.37011.1 | 6.42  | 6.8   | 0.21 | 0.12 | -1.3  | 0.112335 | 0.037481 | 0.474794 | 0.237853 |
| MmugDNA.37012.1.S1_at   | MmugDNA.37012.1 | 2.84  | 2.75  | 0.09 | 0.09 | 1.06  | 0.629377 | 0.717546 | 0.831446 | 0.836463 |
| MmugDNA.37013.1.S1_at   | MmugDNA.37013.1 | 5.21  | 5.15  | 0.15 | 0.08 | 1.04  | 0.479157 | 0.373152 | 0.747575 | 0.612003 |
| MmugDNA.37014.1.S1_at   | MmugDNA.37014.1 | 3.62  | 4.23  | 0.26 | 0.19 | -1.53 | 0.041611 | 0.062636 | 0.352305 | 0.297022 |
| MmugDNA.37015.1.S1_at   | MmugDNA.37015.1 | 6.65  | 7.02  | 0.68 | 0.39 | -1.29 | 0.981201 | 0.989349 | 0.993225 | 0.993956 |
| MmugDNA.37018.1.S1_at   | MmugDNA.37018.1 | 6.85  | 6.28  | 0.4  | 0.5  | 1.49  | 0.163168 | 0.143418 | 0.527489 | 0.41743  |
| MmugDNA.37019.1.S1_at   | MmugDNA.37019.1 | 5.04  | 5.16  | 0.14 | 0.11 | -1.08 | 0.767861 | 0.587874 | 0.902473 | 0.754542 |
| MmugDNA.3702.1.S1_at    | MmugDNA.3702.1  | 6.61  | 7.98  | 0.85 | 0.76 | -2.58 | 0.081806 | 0.082054 | 0.432853 | 0.330802 |
| MmugDNA.37021.1.S1_at   | MmugDNA.37021.1 | 12.15 | 12.32 | 0.28 | 0.74 | -1.12 | 0.642163 | 0.675912 | 0.838696 | 0.810619 |
| MmugDNA.37023.1.S1_at   | MmugDNA.37023.1 | 10.01 | 9.45  | 0.16 | 0.66 | 1.47  | 0.170654 | 0.138073 | 0.534458 | 0.410924 |
| MmugDNA.37024.1.S1_at   | MmugDNA.37024.1 | 3.42  | 3.3   | 0.27 | 0.02 | 1.08  | 0.167602 | 0.190735 | 0.531893 | 0.466168 |
| MmugDNA.37025.1.S1_at   | MmugDNA.37025.1 | 5.19  | 5.55  | 0.17 | 0.2  | -1.28 | 0.360603 | 0.008656 | 0.674645 | 0.12341  |
| MmugDNA.37026.1.S1_at   | MmugDNA.37026.1 | 7.36  | 7.17  | 1.01 | 1    | 1.14  | 0.512382 | 0.701782 | 0.765592 | 0.827048 |
| MmugDNA.37029.1.S1_at   | MmugDNA.37029.1 | 3.31  | 3.34  | 0.19 | 0.13 | -1.03 | 0.321187 | 0.434755 | 0.649887 | 0.654819 |
| MmugDNA.37030.1.S1_at   | MmugDNA.37030.1 | 4.82  | 4.55  | 0.83 | 0.37 | 1.21  | 0.307147 | 0.251016 | 0.63988  | 0.519638 |
| MmugDNA.37033.1.S1_at   | MmugDNA.37033.1 | 5.36  | 5.18  | 0.52 | 0.09 | 1.13  | 0.617782 | 0.492173 | 0.82487  | 0.693477 |
| MmugDNA.37036.1.S1_at   | MmugDNA.37036.1 | 3.88  | 4     | 0.08 | 0.05 | -1.08 | 0.150739 | 0.18731  | 0.515411 | 0.463323 |
| MmugDNA.37037.1.S1_at   | MmugDNA.37037.1 | 5.53  | 5.55  | 0.18 | 0.11 | -1.01 | 0.835764 | 0.963598 | 0.933507 | 0.979721 |
| MmugDNA.37038.1.S1_at   | MmugDNA.37038.1 | 12.68 | 13.09 | 0.16 | 0.32 | -1.33 | 0.083307 | 0.073605 | 0.435702 | 0.316945 |
| MmugDNA.37039.1.S1_at   | MmugDNA.37039.1 | 3.29  | 3.43  | 0.4  | 0.08 | -1.11 | 0.88255  | 0.913143 | 0.952793 | 0.951134 |
| MmugDNA.3704.1.S1_at    | MmugDNA.3704.1  | 8.15  | 9.21  | 0.26 | 0.11 | -2.09 | 0.004196 | 0.00834  | 0.181739 | 0.121147 |
| MmugDNA.37040.1.S1_at   | MmugDNA.37040.1 | 3.52  | 3.64  | 0.14 | 0.03 | -1.09 | 0.17468  | 0.132685 | 0.538288 | 0.404544 |
| MmugDNA.37041.1.S1_at   | MmugDNA.37041.1 | 4.36  | 4.36  | 0.11 | 0.08 | -1    | 0.543026 | 0.38694  | 0.783741 | 0.621935 |
| MmugDNA.37043.1.S1_at   | MmugDNA.37043.1 | 6.37  | 6.67  | 0.12 | 0.08 | -1.24 | 0.034692 | 0.073512 | 0.333612 | 0.316778 |
| MmugDNA.37046.1.S1_at   | MmugDNA.37046.1 | 3.68  | 3.6   | 0.19 | 0.3  | 1.06  | 0.716453 | 0.315337 | 0.875462 | 0.568939 |
| MmugDNA.37047.1.S1_at   | MmugDNA.37047.1 | 6.08  | 6.22  | 0.74 | 0.56 | -1.1  | 0.877578 | 0.485241 | 0.950953 | 0.689003 |
| MmugDNA.37048.1.S1_at   | MmugDNA.37048.1 | 4.79  | 3.92  | 1.18 | 0.25 | 1.82  | 0.271771 | 0.365072 | 0.615797 | 0.605267 |
| MmugDNA.37049.1.S1_at   | MmugDNA.37049.1 | 3.65  | 3.74  | 0.31 | 0.2  | -1.06 | 0.813703 | 0.129615 | 0.924368 | 0.401223 |
| MmugDNA.3705.1.S1_at    | MmugDNA.3705.1  | 2.71  | 2.71  | 0.06 | 0.17 | -1    | 0.555624 | 0.441375 | 0.791454 | 0.659552 |
| MmugDNA.37051.1.S1_at   | MmugDNA.37051.1 | 7.04  | 7.03  | 0.06 | 0.04 | 1.01  | 0.836444 | 0.79235  | 0.933827 | 0.880015 |
| MmugDNA.37052.1.S1_at   | MmugDNA.37052.1 | 4.26  | 4.21  | 0.15 | 0.07 | 1.03  | 0.705318 | 0.753534 | 0.870004 | 0.856527 |
| MmugDNA.37056.1.S1_at   | MmugDNA.37056.1 | 8.69  | 8.68  | 0.2  | 1.65 | 1.01  | 0.99521  | 0.422872 | 0.998288 | 0.646054 |
| MmugDNA.37057.1.S1_at   | MmugDNA.37057.1 | 6.04  | 6.32  | 0.32 | 0.22 | -1.22 | 0.183113 | 0.298982 | 0.547234 | 0.557628 |
| MmugDNA.37058.1.S1_at   | MmugDNA.37058.1 | 3.69  | 3.71  | 0.11 | 0.1  | -1.01 | 0.313248 | 0.395953 | 0.645054 | 0.627798 |
| MmugDNA.37059.1.S1_at   | MmugDNA.37059.1 | 6.1   | 6.07  | 0.61 | 0.08 | 1.02  | 0.338199 | 0.405566 | 0.660664 | 0.633804 |
| MmugDNA.3706.1.S1_at    | MmugDNA.3706.1  | 6.98  | 6.77  | 0.2  | 0.42 | 1.15  | 0.527402 | 0.3002   | 0.774819 | 0.558413 |
| MmugDNA.37060.1.S1_at   | MmugDNA.37060.1 | 13.6  | 13.93 | 0.2  | 0.18 | -1.25 | 0.519555 | 0.41995  | 0.770205 | 0.643765 |
| MmugDNA.37062.1.S1_at   | MmugDNA.37062.1 | 6.66  | 6.7   | 0.3  | 0.09 | -1.03 | 0.434255 | 0.339785 | 0.720352 | 0.586394 |
| MmugDNA.37063.1.S1_at   | MmugDNA.37063.1 | 8.26  | 8.36  | 1.11 | 0.29 | -1.07 | 0.604796 | 0.618303 | 0.817951 | 0.774002 |

|                         |                 |       |       |      |      |        |          |          |          |          |
|-------------------------|-----------------|-------|-------|------|------|--------|----------|----------|----------|----------|
| MmugDNA.37065.1.S1_at   | MmugDNA.37065.1 | 5.42  | 5.44  | 0.02 | 0.18 | -1.02  | 0.993643 | 0.925216 | 0.997754 | 0.957716 |
| MmugDNA.37066.1.S1_at   | MmugDNA.37066.1 | 6.1   | 6.45  | 0.06 | 0.12 | -1.27  | 0.007179 | 0.00198  | 0.205355 | 0.066005 |
| MmugDNA.37067.1.S1_at   | MmugDNA.37067.1 | 6.6   | 7.13  | 0.25 | 0.22 | -1.44  | 0.032829 | 0.003744 | 0.326221 | 0.087219 |
| MmugDNA.37070.1.S1_at   | MmugDNA.37070.1 | 11.77 | 11.7  | 0.23 | 0.29 | 1.05   | 0.324298 | 0.163938 | 0.651927 | 0.440105 |
| MmugDNA.37071.1.S1_at   | MmugDNA.37071.1 | 4.18  | 3.79  | 0.23 | 0.13 | 1.31   | 0.123792 | 0.073621 | 0.489534 | 0.316952 |
| MmugDNA.37073.1.S1_at   | MmugDNA.37073.1 | 3.84  | 3.87  | 0.15 | 0.02 | -1.02  | 0.252731 | 0.478198 | 0.60151  | 0.684221 |
| MmugDNA.37075.1.S1_at   | MmugDNA.37075.1 | 5.22  | 5.07  | 0.27 | 0.22 | 1.11   | 0.534289 | 0.524881 | 0.778641 | 0.714635 |
| MmugDNA.37079.1.S1_at   | MmugDNA.37079.1 | 6.67  | 6.5   | 0.17 | 0.25 | 1.13   | 0.184568 | 0.325072 | 0.548202 | 0.575545 |
| MmugDNA.37079.1.S1_x_at | MmugDNA.37079.1 | 6.61  | 6.44  | 0.17 | 0.3  | 1.13   | 0.172616 | 0.344208 | 0.536248 | 0.589762 |
| MmugDNA.3708.1.S1_at    | MmugDNA.3708.1  | 11.27 | 11.38 | 0.19 | 0.39 | -1.08  | 0.670507 | 0.246623 | 0.852391 | 0.515957 |
| MmugDNA.37080.1.S1_at   | MmugDNA.37080.1 | 9.01  | 10.11 | 0.15 | 0.49 | -2.15  | 0.031252 | 0.025257 | 0.321051 | 0.199403 |
| MmugDNA.37081.1.S1_at   | MmugDNA.37081.1 | 6.54  | 6.71  | 0.06 | 0.07 | -1.12  | 0.028444 | 0.01515  | 0.311319 | 0.156391 |
| MmugDNA.29930.1.S1_s_at | MmugDNA.29930.1 | 9.42  | 9.41  | 0.46 | 0.05 | 1.01   | 0.967633 | 0.97247  | 0.987896 | 0.985179 |
| MmugDNA.37084.1.S1_at   | MmugDNA.37084.1 | 3.95  | 3.84  | 0.08 | 0.39 | 1.08   | 0.821835 | 0.82895  | 0.927464 | 0.901678 |
| MmugDNA.37085.1.S1_at   | MmugDNA.37085.1 | 8.56  | 9.17  | 0.06 | 0.98 | -1.54  | 0.331629 | 0.260776 | 0.656441 | 0.52721  |
| MmugDNA.37086.1.S1_at   | MmugDNA.37086.1 | 11.64 | 10.93 | 0.52 | 0.98 | 1.64   | 0.24527  | 0.160141 | 0.596967 | 0.436296 |
| MmugDNA.37087.1.S1_at   | MmugDNA.37087.1 | 10.08 | 9.5   | 0.18 | 1.3  | 1.5    | 0.223332 | 0.285075 | 0.581813 | 0.547096 |
| MmugDNA.37088.1.S1_at   | MmugDNA.37088.1 | 5.75  | 5.74  | 0.19 | 0.1  | 1.01   | 0.786818 | 0.881753 | 0.911324 | 0.932538 |
| MmugDNA.3709.1.S1_at    | MmugDNA.3709.1  | 3.93  | 3.89  | 0.18 | 0    | 1.03   | 0.716483 | 0.795482 | 0.875462 | 0.882189 |
| MmugDNA.37090.1.S1_at   | MmugDNA.37090.1 | 7.47  | 7.77  | 0.03 | 0.02 | -1.23  | 0.000058 | 0.00002  | 0.112653 | 0.019635 |
| MmugDNA.37091.1.S1_at   | MmugDNA.37091.1 | 5.84  | 6.04  | 1.05 | 0.13 | -1.15  | 0.860894 | 0.837912 | 0.943882 | 0.907449 |
| MmugDNA.37092.1.S1_at   | MmugDNA.37092.1 | 10.4  | 10.63 | 0.43 | 0.43 | -1.17  | 0.556361 | 0.131792 | 0.79173  | 0.403891 |
| MmugDNA.37093.1.S1_at   | MmugDNA.37093.1 | 3.11  | 2.96  | 0.2  | 0.2  | 1.11   | 0.162224 | 0.224861 | 0.526638 | 0.497653 |
| MmugDNA.37095.1.S1_at   | MmugDNA.37095.1 | 5.18  | 5     | 0.16 | 0.32 | 1.13   | 0.21089  | 0.326842 | 0.571977 | 0.576848 |
| MmugDNA.37096.1.S1_at   | MmugDNA.37096.1 | 6.57  | 5.81  | 0.32 | 0.69 | 1.7    | 0.162113 | 0.263651 | 0.526638 | 0.529938 |
| MmugDNA.37098.1.S1_at   | MmugDNA.37098.1 | 4.62  | 4.93  | 0.34 | 0.07 | -1.24  | 0.707533 | 0.355744 | 0.871138 | 0.597864 |
| MmugDNA.37099.1.S1_at   | MmugDNA.37099.1 | 4.71  | 4.86  | 0.05 | 0.06 | -1.11  | 0.05665  | 0.138367 | 0.386838 | 0.411244 |
| MmugDNA.3710.1.S1_at    | MmugDNA.3710.1  | 3.82  | 3.53  | 0.42 | 0.14 | 1.22   | 0.813281 | 0.86953  | 0.924167 | 0.925994 |
| MmugDNA.37100.1.S1_at   | MmugDNA.37100.1 | 4.03  | 3.75  | 0.47 | 0.11 | 1.22   | 0.27709  | 0.269584 | 0.619225 | 0.534868 |
| MmugDNA.6900.1.S1_s_at  | MmugDNA.6900.1  | 5.35  | 5.52  | 0.12 | 0.17 | -1.13  | 0.182561 | 0.147851 | 0.546812 | 0.422197 |
| MmugDNA.37102.1.S1_at   | MmugDNA.37102.1 | 5.88  | 6.03  | 0.49 | 0.03 | -1.11  | 0.978717 | 0.994727 | 0.992175 | 0.996726 |
| MmugDNA.37103.1.S1_at   | MmugDNA.37103.1 | 3.48  | 3.64  | 0.22 | 0.29 | -1.11  | 0.919689 | 0.93241  | 0.968755 | 0.961699 |
| MmugDNA.37105.1.S1_at   | MmugDNA.37105.1 | 4.18  | 4.01  | 0.14 | 0.17 | 1.12   | 0.09137  | 0.08873  | 0.447175 | 0.34241  |
| MmugDNA.37107.1.S1_at   | MmugDNA.37107.1 | 5.28  | 5.29  | 0.2  | 0.09 | -1     | 0.94513  | 0.743718 | 0.979067 | 0.851465 |
| MmugDNA.37108.1.S1_at   | MmugDNA.37108.1 | 11.55 | 11.01 | 0.45 | 0.14 | 1.45   | 0.326294 | 0.140917 | 0.653184 | 0.414394 |
| MmugDNA.37108.1.S1_s_at | MmugDNA.37108.1 | 12.76 | 12.64 | 0.06 | 0.2  | 1.09   | 0.39095  | 0.510026 | 0.693845 | 0.704549 |
| MmugDNA.37109.1.S1_at   | MmugDNA.37109.1 | 3.87  | 7.65  | 1.53 | 2.65 | -13.71 | 0.267743 | 0.292723 | 0.612723 | 0.552783 |
| MmugDNA.3711.1.S1_at    | MmugDNA.3711.1  | 3.66  | 3.69  | 0.12 | 0.03 | -1.02  | 0.763759 | 0.282383 | 0.900448 | 0.545076 |
| MmugDNA.37111.1.S1_at   | MmugDNA.37111.1 | 6.81  | 6.24  | 0.22 | 0.15 | 1.49   | 0.043457 | 0.030552 | 0.356741 | 0.216711 |
| MmugDNA.37112.1.S1_at   | MmugDNA.37112.1 | 6.68  | 8.45  | 0.33 | 0.46 | -3.41  | 0.002713 | 0.000686 | 0.164857 | 0.044166 |
| MmugDNA.37112.1.S1_s_at | MmugDNA.37112.1 | 6.62  | 7.87  | 0.38 | 0.49 | -2.38  | 0.012521 | 0.004174 | 0.24203  | 0.091064 |

|                         |                 |       |       |      |      |       |          |          |          |          |
|-------------------------|-----------------|-------|-------|------|------|-------|----------|----------|----------|----------|
| MmugDNA.37113.1.S1_at   | MmugDNA.37113.1 | 5.62  | 5.53  | 0.34 | 0.46 | 1.06  | 0.350975 | 0.279411 | 0.668889 | 0.543033 |
| MmugDNA.37115.1.S1_x_at | MmugDNA.37115.1 | 5.11  | 5.2   | 0.08 | 0.23 | -1.06 | 0.985717 | 0.399271 | 0.994806 | 0.629735 |
| MmugDNA.37117.1.S1_at   | MmugDNA.37117.1 | 9.98  | 10.43 | 0.32 | 0.61 | -1.37 | 0.306768 | 0.362304 | 0.639665 | 0.602931 |
| MmugDNA.37119.1.S1_at   | MmugDNA.37119.1 | 9.56  | 9.31  | 0.17 | 0.25 | 1.18  | 0.389492 | 0.221969 | 0.692994 | 0.495044 |
| MmugDNA.37122.1.S1_at   | MmugDNA.37122.1 | 3.03  | 3.09  | 0.15 | 0.03 | -1.04 | 0.406009 | 0.475266 | 0.7035   | 0.682031 |
| MmugDNA.37123.1.S1_at   | MmugDNA.37123.1 | 3.63  | 3.59  | 0.05 | 0.26 | 1.03  | 0.926829 | 0.833851 | 0.971851 | 0.904774 |
| MmugDNA.37124.1.S1_at   | MmugDNA.37124.1 | 3.47  | 3.5   | 0.01 | 0.16 | -1.03 | 0.942295 | 0.191348 | 0.977917 | 0.466673 |
| MmugDNA.37125.1.S1_at   | MmugDNA.37125.1 | 7.67  | 7.24  | 0.34 | 0.02 | 1.34  | 0.085683 | 0.01464  | 0.439704 | 0.154176 |
| MmugDNA.37126.1.S1_at   | MmugDNA.37126.1 | 4.54  | 4.54  | 0.08 | 0.01 | -1.01 | 0.573032 | 0.042487 | 0.801055 | 0.25075  |
| MmugDNA.37129.1.S1_at   | MmugDNA.37129.1 | 3.85  | 3.76  | 0.05 | 0.24 | 1.06  | 0.86795  | 0.608583 | 0.947274 | 0.767142 |
| MmugDNA.3713.1.S1_at    | MmugDNA.3713.1  | 4.94  | 5.06  | 0.08 | 0.2  | -1.09 | 0.11939  | 0.121782 | 0.484088 | 0.391074 |
| MmugDNA.37130.1.S1_at   | MmugDNA.37130.1 | 6.17  | 7.15  | 0.52 | 0.61 | -1.96 | 0.075026 | 0.063663 | 0.421745 | 0.298817 |
| MmugDNA.37131.1.S1_at   | MmugDNA.37131.1 | 6.42  | 6     | 1.31 | 0.88 | 1.33  | 0.6084   | 0.741411 | 0.819942 | 0.850285 |
| MmugDNA.37132.1.S1_at   | MmugDNA.37132.1 | 4     | 4.02  | 0.24 | 0.1  | -1.02 | 0.990733 | 0.827761 | 0.996791 | 0.901144 |
| MmugDNA.37133.1.S1_at   | MmugDNA.37133.1 | 10.18 | 9.23  | 0.28 | 1.56 | 1.94  | 0.280359 | 0.253319 | 0.621559 | 0.521662 |
| MmugDNA.37134.1.S1_at   | MmugDNA.37134.1 | 10.25 | 10.15 | 0.18 | 0.39 | 1.07  | 0.721338 | 0.749056 | 0.878074 | 0.854105 |
| MmugDNA.37136.1.S1_at   | MmugDNA.37136.1 | 9.57  | 9.72  | 0.27 | 1.1  | -1.11 | 0.781378 | 0.916252 | 0.908775 | 0.953103 |
| MmugDNA.37139.1.S1_at   | MmugDNA.37139.1 | 4.08  | 3.61  | 0.55 | 0.25 | 1.39  | 0.106105 | 0.21369  | 0.466831 | 0.487473 |
| MmugDNA.37139.1.S1_x_at | MmugDNA.37139.1 | 5.16  | 4.93  | 0.42 | 0.18 | 1.18  | 0.141316 | 0.200038 | 0.508969 | 0.474603 |
| MmugDNA.3714.1.S1_at    | MmugDNA.3714.1  | 3.53  | 3.52  | 0.06 | 0.07 | 1.01  | 0.960772 | 0.334075 | 0.984947 | 0.582104 |
| MmugDNA.37140.1.S1_at   | MmugDNA.37140.1 | 5.9   | 6.23  | 0.34 | 0.15 | -1.25 | 0.852641 | 0.438202 | 0.940647 | 0.657196 |
| MmugDNA.37141.1.S1_at   | MmugDNA.37141.1 | 8.1   | 8.6   | 0.14 | 0.27 | -1.41 | 0.031453 | 0.021699 | 0.321864 | 0.184333 |
| MmugDNA.37142.1.S1_at   | MmugDNA.37142.1 | 8.65  | 6.73  | 0.05 | 0.73 | 3.79  | 0.012733 | 0.00583  | 0.243533 | 0.104661 |
| MmugDNA.37143.1.S1_at   | MmugDNA.37143.1 | 6.17  | 7.01  | 0.47 | 0.91 | -1.79 | 0.617463 | 0.810835 | 0.824714 | 0.890845 |
| MmugDNA.37145.1.S1_at   | MmugDNA.37145.1 | 5.4   | 5.6   | 0.13 | 0.3  | -1.15 | 0.38749  | 0.271706 | 0.691999 | 0.536577 |
| MmugDNA.37146.1.S1_at   | MmugDNA.37146.1 | 3.63  | 3.65  | 0.07 | 0.18 | -1.01 | 0.855489 | 0.968967 | 0.941542 | 0.982912 |
| MmugDNA.37148.1.S1_at   | MmugDNA.37148.1 | 2.67  | 2.64  | 0.48 | 0.2  | 1.02  | 0.528862 | 0.441257 | 0.775764 | 0.659477 |
| MmugDNA.3715.1.S1_at    | MmugDNA.3715.1  | 6.9   | 7.29  | 0.08 | 0.11 | -1.31 | 0.010986 | 0.02803  | 0.233531 | 0.208941 |
| MmugDNA.37150.1.S1_at   | MmugDNA.37150.1 | 2.77  | 2.6   | 0.07 | 0.17 | 1.12  | 0.177203 | 0.221433 | 0.541244 | 0.49472  |
| MmugDNA.37151.1.S1_at   | MmugDNA.37151.1 | 9.88  | 11.31 | 0.08 | 0.43 | -2.69 | 0.005198 | 0.002791 | 0.190431 | 0.077966 |
| MmugDNA.37152.1.S1_at   | MmugDNA.37152.1 | 6.95  | 6.88  | 0.14 | 0.18 | 1.05  | 0.607485 | 0.664217 | 0.819336 | 0.803247 |
| MmugDNA.37155.1.S1_at   | MmugDNA.37155.1 | 11.34 | 10.88 | 0.06 | 0.4  | 1.37  | 0.117072 | 0.043741 | 0.481132 | 0.253863 |
| MmugDNA.37157.1.S1_at   | MmugDNA.37157.1 | 7.36  | 7.1   | 0.42 | 0.46 | 1.2   | 0.638592 | 0.127577 | 0.836645 | 0.398486 |
| MmugDNA.37158.1.S1_at   | MmugDNA.37158.1 | 9.2   | 9.13  | 0.18 | 0.4  | 1.05  | 0.679543 | 0.357621 | 0.856669 | 0.599228 |
| MmugDNA.37159.1.S1_at   | MmugDNA.37159.1 | 3.92  | 4.08  | 0.61 | 0.16 | -1.12 | 0.635736 | 0.327444 | 0.835152 | 0.577284 |
| MmugDNA.3716.1.S1_at    | MmugDNA.3716.1  | 11.45 | 11.16 | 0.16 | 0.62 | 1.22  | 0.1299   | 0.129182 | 0.495954 | 0.400611 |
| MmugDNA.37160.1.S1_at   | MmugDNA.37160.1 | 5.51  | 5.59  | 0.12 | 0.05 | -1.05 | 0.934394 | 0.113478 | 0.974602 | 0.379588 |
| MmugDNA.37161.1.S1_at   | MmugDNA.37161.1 | 5.2   | 5.18  | 0.17 | 0.15 | 1.02  | 0.441772 | 0.419059 | 0.725144 | 0.643266 |
| MmugDNA.37162.1.S1_at   | MmugDNA.37162.1 | 5.57  | 5.93  | 0.72 | 0.36 | -1.29 | 0.927604 | 0.71357  | 0.972015 | 0.83382  |
| MmugDNA.37163.1.S1_at   | MmugDNA.37163.1 | 6.21  | 6.27  | 0.16 | 0.08 | -1.04 | 0.979549 | 0.434758 | 0.99244  | 0.654819 |
| MmugDNA.37164.1.S1_at   | MmugDNA.37164.1 | 11.36 | 10.63 | 0.09 | 0.3  | 1.65  | 0.015301 | 0.009846 | 0.257846 | 0.130274 |

|                         |                 |       |       |      |      |       |          |          |          |          |
|-------------------------|-----------------|-------|-------|------|------|-------|----------|----------|----------|----------|
| MmugDNA.37165.1.S1_at   | MmugDNA.37165.1 | 2.79  | 2.81  | 0.09 | 0.13 | -1.01 | 0.718026 | 0.874134 | 0.876254 | 0.928493 |
| MmugDNA.37166.1.S1_at   | MmugDNA.37166.1 | 6.19  | 6.16  | 0.28 | 0.21 | 1.02  | 0.814748 | 0.747602 | 0.924758 | 0.853201 |
| MmugDNA.37169.1.S1_at   | MmugDNA.37169.1 | 3.93  | 4.02  | 0.02 | 0.24 | -1.06 | 0.178561 | 0.426197 | 0.54288  | 0.648388 |
| MmugDNA.37170.1.S1_at   | MmugDNA.37170.1 | 12.48 | 12.29 | 0.11 | 0.15 | 1.14  | 0.210302 | 0.291405 | 0.571482 | 0.551823 |
| MmugDNA.37172.1.S1_at   | MmugDNA.37172.1 | 5.9   | 5.61  | 0.09 | 0.14 | 1.22  | 0.088727 | 0.092371 | 0.443653 | 0.348294 |
| MmugDNA.37174.1.S1_at   | MmugDNA.37174.1 | 6.91  | 7.06  | 0.09 | 0.1  | -1.11 | 0.223201 | 0.408217 | 0.581723 | 0.635527 |
| MmugDNA.37177.1.S1_at   | MmugDNA.37177.1 | 5.75  | 5.62  | 0.03 | 0.23 | 1.1   | 0.987829 | 0.997452 | 0.995664 | 0.998661 |
| MmugDNA.3718.1.S1_at    | MmugDNA.3718.1  | 3.73  | 3.69  | 0.31 | 0.07 | 1.03  | 0.860588 | 0.39477  | 0.943753 | 0.627208 |
| MmugDNA.37180.1.S1_at   | MmugDNA.37180.1 | 10.69 | 10.19 | 0.05 | 0.18 | 1.42  | 0.011634 | 0.00828  | 0.237051 | 0.12078  |
| MmugDNA.37181.1.S1_at   | MmugDNA.37181.1 | 4.44  | 4.53  | 0.09 | 0.09 | -1.06 | 0.144816 | 0.454099 | 0.511163 | 0.668398 |
| MmugDNA.37182.1.S1_at   | MmugDNA.37182.1 | 3.71  | 3.78  | 0.08 | 0.28 | -1.05 | 0.631965 | 0.600278 | 0.832951 | 0.762019 |
| MmugDNA.37183.1.S1_at   | MmugDNA.37183.1 | 6.22  | 6.21  | 1.08 | 0.71 | 1     | 0.403273 | 0.548933 | 0.701955 | 0.729496 |
| MmugDNA.37184.1.S1_at   | MmugDNA.37184.1 | 4.36  | 5.18  | 0.25 | 0.14 | -1.76 | 0.008261 | 0.017484 | 0.216948 | 0.167476 |
| MmugDNA.37185.1.S1_at   | MmugDNA.37185.1 | 6.12  | 6.13  | 0.4  | 0.05 | -1    | 0.450481 | 0.418708 | 0.73096  | 0.643066 |
| MmugDNA.37186.1.S1_at   | MmugDNA.37186.1 | 3.76  | 3.83  | 0.05 | 0.21 | -1.05 | 0.413872 | 0.606456 | 0.708711 | 0.765747 |
| MmugDNA.37187.1.S1_at   | MmugDNA.37187.1 | 4.11  | 4.15  | 0.03 | 0.13 | -1.03 | 0.218858 | 0.306085 | 0.578257 | 0.562804 |
| MmugDNA.3719.1.S1_at    | MmugDNA.3719.1  | 5.68  | 5.96  | 0.08 | 0.18 | -1.21 | 0.050277 | 0.032306 | 0.373929 | 0.222524 |
| MmugDNA.37190.1.S1_at   | MmugDNA.37190.1 | 11.57 | 11.58 | 0.24 | 0.27 | -1.01 | 0.579823 | 0.651054 | 0.804451 | 0.795994 |
| MmugDNA.37191.1.S1_at   | MmugDNA.37191.1 | 8.47  | 9.1   | 0.22 | 0.27 | -1.55 | 0.048123 | 0.038683 | 0.367807 | 0.24169  |
| MmugDNA.37192.1.S1_at   | MmugDNA.37192.1 | 5.19  | 5.24  | 0.18 | 0.45 | -1.03 | 0.465664 | 0.526788 | 0.740048 | 0.715627 |
| MmugDNA.37193.1.S1_at   | MmugDNA.37193.1 | 5.77  | 5.56  | 0.3  | 0.1  | 1.16  | 0.433367 | 0.570912 | 0.719919 | 0.743422 |
| MmugDNA.37194.1.S1_at   | MmugDNA.37194.1 | 8.33  | 7.15  | 0.08 | 0.49 | 2.26  | 0.015678 | 0.00925  | 0.260208 | 0.126966 |
| MmugDNA.37195.1.S1_at   | MmugDNA.37195.1 | 6.42  | 6.47  | 0.12 | 0.04 | -1.04 | 0.920105 | 0.116908 | 0.968842 | 0.384277 |
| MmugDNA.37196.1.S1_at   | MmugDNA.37196.1 | 4.23  | 3.99  | 0.35 | 0.14 | 1.18  | 0.179889 | 0.334375 | 0.544019 | 0.582372 |
| MmugDNA.37197.1.S1_at   | MmugDNA.37197.1 | 9.02  | 8.81  | 0.19 | 0.28 | 1.16  | 0.403438 | 0.037444 | 0.70203  | 0.237777 |
| MmugDNA.37198.1.S1_at   | MmugDNA.37198.1 | 5.8   | 5.8   | 0.2  | 0.24 | 1     | 0.424089 | 0.561941 | 0.714336 | 0.737659 |
| MmugDNA.37199.1.S1_at   | MmugDNA.37199.1 | 4.86  | 4.1   | 0.48 | 0.08 | 1.69  | 0.054715 | 0.034364 | 0.382151 | 0.229289 |
| MmugDNA.372.1.S1_at     | MmugDNA.372.1   | 7.7   | 6.94  | 0.41 | 0.09 | 1.7   | 0.092203 | 0.180225 | 0.448698 | 0.456784 |
| MmugDNA.3720.1.S1_at    | MmugDNA.3720.1  | 11.37 | 10.61 | 0.22 | 1.52 | 1.69  | 0.141792 | 0.149407 | 0.509159 | 0.423825 |
| MmugDNA.37202.1.S1_at   | MmugDNA.37202.1 | 5.52  | 4.65  | 0.62 | 0.45 | 1.83  | 0.104143 | 0.15803  | 0.464201 | 0.433785 |
| MmugDNA.37203.1.S1_at   | MmugDNA.37203.1 | 4.73  | 4.67  | 0.15 | 0.21 | 1.04  | 0.840405 | 0.685088 | 0.935681 | 0.816309 |
| MmugDNA.37204.1.S1_at   | MmugDNA.37204.1 | 7.42  | 7.39  | 0.06 | 0.19 | 1.02  | 0.883927 | 0.072432 | 0.953435 | 0.315282 |
| MmugDNA.43000.1.S1_at   | MmugDNA.43000.1 | 7.36  | 7.64  | 0.17 | 0.99 | -1.22 | 0.581261 | 0.388013 | 0.805019 | 0.622548 |
| MmugDNA.43000.1.S1_s_at | MmugDNA.43000.1 | 7.64  | 7.9   | 0.16 | 1.2  | -1.2  | 0.778585 | 0.565853 | 0.90756  | 0.740112 |
| MmugDNA.37208.1.S1_at   | MmugDNA.37208.1 | 4.73  | 5.18  | 0.58 | 0.17 | -1.36 | 0.448541 | 0.435382 | 0.729722 | 0.655194 |
| MmugDNA.3721.1.S1_at    | MmugDNA.3721.1  | 6.88  | 6.92  | 0.37 | 0.1  | -1.03 | 0.893854 | 0.698323 | 0.957772 | 0.824773 |
| MmugDNA.37210.1.S1_at   | MmugDNA.37210.1 | 3.36  | 3.37  | 0.01 | 0.15 | -1.01 | 0.749622 | 0.939009 | 0.89273  | 0.965397 |
| MmugDNA.37211.1.S1_at   | MmugDNA.37211.1 | 2.89  | 2.74  | 0.34 | 0.14 | 1.11  | 0.776425 | 0.725628 | 0.90634  | 0.84112  |
| MmugDNA.37213.1.S1_at   | MmugDNA.37213.1 | 10.28 | 11.04 | 0.27 | 0.14 | -1.69 | 0.009092 | 0.013009 | 0.222023 | 0.146803 |
| MmugDNA.37214.1.S1_at   | MmugDNA.37214.1 | 4.16  | 3.9   | 0.17 | 0.09 | 1.2   | 0.042857 | 0.032285 | 0.355391 | 0.222435 |
| MmugDNA.37215.1.S1_at   | MmugDNA.37215.1 | 6.08  | 6.55  | 0.97 | 0.84 | -1.39 | 0.351664 | 0.421521 | 0.669126 | 0.645138 |

|                         |                 |       |       |      |      |       |          |          |          |          |
|-------------------------|-----------------|-------|-------|------|------|-------|----------|----------|----------|----------|
| MmugDNA.37216.1.S1_at   | MmugDNA.37216.1 | 3.35  | 3.65  | 0.18 | 0.14 | -1.23 | 0.297442 | 0.482549 | 0.633201 | 0.68734  |
| MmugDNA.37217.1.S1_at   | MmugDNA.37217.1 | 4.54  | 4.78  | 0.11 | 0.19 | -1.19 | 0.162886 | 0.545783 | 0.527277 | 0.727653 |
| MmugDNA.37218.1.S1_at   | MmugDNA.37218.1 | 7.04  | 6.51  | 0.52 | 0.53 | 1.45  | 0.274284 | 0.038764 | 0.617262 | 0.241916 |
| MmugDNA.3722.1.S1_at    | MmugDNA.3722.1  | 10.34 | 9.86  | 0.12 | 0.29 | 1.4   | 0.080465 | 0.078459 | 0.430491 | 0.325212 |
| MmugDNA.37220.1.S1_at   | MmugDNA.37220.1 | 3.62  | 3.61  | 0.03 | 0.17 | 1.01  | 0.575966 | 0.746591 | 0.802626 | 0.852873 |
| MmugDNA.37221.1.S1_at   | MmugDNA.37221.1 | 11.71 | 11.56 | 0.16 | 0.34 | 1.11  | 0.654528 | 0.116223 | 0.844601 | 0.38353  |
| MmugDNA.37222.1.S1_s_at | MmugDNA.37222.1 | 12.82 | 12.53 | 0.1  | 0.54 | 1.22  | 0.404462 | 0.560412 | 0.702746 | 0.736658 |
| MmugDNA.37223.1.S1_at   | MmugDNA.37223.1 | 9.92  | 10.48 | 0.16 | 0.31 | -1.48 | 0.073091 | 0.098952 | 0.418452 | 0.357049 |
| MmugDNA.37224.1.S1_at   | MmugDNA.37224.1 | 4.64  | 4.54  | 0.13 | 0.16 | 1.07  | 0.180578 | 0.311796 | 0.544908 | 0.56678  |
| MmugDNA.37226.1.S1_at   | MmugDNA.37226.1 | 6.74  | 6.69  | 0.14 | 0.05 | 1.03  | 0.68865  | 0.175215 | 0.861108 | 0.452011 |
| MmugDNA.34006.1.S1_at   | MmugDNA.34006.1 | 7.79  | 7.41  | 0.23 | 0.17 | 1.3   | 0.041732 | 0.168237 | 0.352545 | 0.444893 |
| MmugDNA.34006.1.S1_s_at | MmugDNA.34006.1 | 7.7   | 7.57  | 0.11 | 0.04 | 1.09  | 0.164082 | 0.039171 | 0.528211 | 0.243072 |
| MmugDNA.37227.1.S1_at   | MmugDNA.37227.1 | 9.58  | 10.52 | 0.38 | 0.27 | -1.92 | 0.037317 | 0.013416 | 0.341306 | 0.148424 |
| MmugDNA.37229.1.S1_at   | MmugDNA.37229.1 | 5.26  | 4.71  | 0.7  | 0.27 | 1.46  | 0.242569 | 0.146546 | 0.594448 | 0.420583 |
| MmugDNA.3723.1.S1_at    | MmugDNA.3723.1  | 3.57  | 3.57  | 0.05 | 0.04 | 1     | 0.230286 | 0.334595 | 0.587222 | 0.582581 |
| MmugDNA.37230.1.S1_at   | MmugDNA.37230.1 | 8.22  | 7.2   | 0.38 | 0.61 | 2.03  | 0.102473 | 0.089165 | 0.46236  | 0.343188 |
| MmugDNA.37231.1.S1_at   | MmugDNA.37231.1 | 7.2   | 7.3   | 0.23 | 0.08 | -1.08 | 0.112606 | 0.106539 | 0.475092 | 0.369099 |
| MmugDNA.37232.1.S1_at   | MmugDNA.37232.1 | 5.74  | 6.52  | 0.52 | 0.77 | -1.71 | 0.415554 | 0.464846 | 0.709528 | 0.675463 |
| MmugDNA.37233.1.S1_at   | MmugDNA.37233.1 | 6.14  | 6.66  | 0.33 | 0.5  | -1.44 | 0.176558 | 0.116443 | 0.540178 | 0.383671 |
| MmugDNA.37234.1.S1_at   | MmugDNA.37234.1 | 5.04  | 5.22  | 0.11 | 0.33 | -1.13 | 0.637794 | 0.845578 | 0.836256 | 0.912145 |
| MmugDNA.37235.1.S1_at   | MmugDNA.37235.1 | 4.55  | 4.67  | 0.05 | 0.18 | -1.08 | 0.158608 | 0.164528 | 0.52369  | 0.44076  |
| MmugDNA.37236.1.S1_at   | MmugDNA.37236.1 | 4.76  | 4.34  | 0.91 | 0.49 | 1.34  | 0.177949 | 0.265461 | 0.542205 | 0.531363 |
| MmugDNA.37238.1.S1_at   | MmugDNA.37238.1 | 5.95  | 6.18  | 0.12 | 0.04 | -1.18 | 0.084499 | 0.069373 | 0.437167 | 0.309591 |
| MmugDNA.37239.1.S1_at   | MmugDNA.37239.1 | 9.88  | 10.09 | 0.19 | 0.38 | -1.16 | 0.140215 | 0.150084 | 0.508065 | 0.424698 |
| MmugDNA.3724.1.S1_at    | MmugDNA.3724.1  | 4.21  | 4.69  | 0.11 | 0.26 | -1.4  | 0.062253 | 0.057938 | 0.397675 | 0.287157 |
| MmugDNA.37240.1.S1_at   | MmugDNA.37240.1 | 10.02 | 10.48 | 0.13 | 0.61 | -1.38 | 0.360618 | 0.481971 | 0.674645 | 0.686909 |
| MmugDNA.37241.1.S1_at   | MmugDNA.37241.1 | 6.93  | 7.15  | 0.09 | 0.71 | -1.16 | 0.589714 | 0.689995 | 0.809598 | 0.819235 |
| MmugDNA.37242.1.S1_at   | MmugDNA.37242.1 | 3.9   | 3.84  | 0    | 0.83 | 1.04  | 0.829536 | 0.894388 | 0.930814 | 0.939717 |
| MmugDNA.37244.1.S1_at   | MmugDNA.37244.1 | 4.38  | 4.4   | 0.14 | 0.07 | -1.01 | 0.378852 | 0.451904 | 0.686571 | 0.666683 |
| MmugDNA.37245.1.S1_at   | MmugDNA.37245.1 | 4.34  | 4.28  | 0.12 | 0.3  | 1.05  | 0.72016  | 0.502393 | 0.87732  | 0.700138 |
| MmugDNA.37247.1.S1_at   | MmugDNA.37247.1 | 4.57  | 4.57  | 0.02 | 0.26 | 1     | 0.726728 | 0.777724 | 0.881115 | 0.870845 |
| MmugDNA.37249.1.S1_at   | MmugDNA.37249.1 | 3.49  | 3.61  | 0.23 | 0.48 | -1.09 | 0.602099 | 0.795531 | 0.816299 | 0.882189 |
| MmugDNA.3725.1.S1_at    | MmugDNA.3725.1  | 4.32  | 4.24  | 0.37 | 0.05 | 1.06  | 0.757425 | 0.893693 | 0.897103 | 0.939323 |
| MmugDNA.37250.1.S1_at   | MmugDNA.37250.1 | 4.24  | 4.34  | 0.86 | 0.16 | -1.07 | 0.389088 | 0.394542 | 0.692937 | 0.627068 |
| MmugDNA.37252.1.S1_at   | MmugDNA.37252.1 | 3.27  | 3.32  | 0.01 | 0.15 | -1.04 | 0.455378 | 0.65815  | 0.733761 | 0.800181 |
| MmugDNA.37254.1.S1_at   | MmugDNA.37254.1 | 6.25  | 5.08  | 0.43 | 0.39 | 2.24  | 0.018629 | 0.010212 | 0.270832 | 0.132485 |
| MmugDNA.37255.1.S1_at   | MmugDNA.37255.1 | 5.75  | 5.76  | 0.16 | 0.15 | -1    | 0.936201 | 0.547737 | 0.975274 | 0.728658 |
| MmugDNA.37256.1.S1_at   | MmugDNA.37256.1 | 5.97  | 5.78  | 0.1  | 1.24 | 1.14  | 0.819085 | 0.89213  | 0.926528 | 0.938526 |
| MmugDNA.37258.1.S1_at   | MmugDNA.37258.1 | 6.42  | 5.11  | 0.24 | 0.33 | 2.48  | 0.00581  | 0.002605 | 0.193191 | 0.075487 |
| MmugDNA.37259.1.S1_at   | MmugDNA.37259.1 | 8.47  | 8.4   | 0.22 | 0.1  | 1.05  | 0.319098 | 0.318345 | 0.648688 | 0.571192 |
| MmugDNA.3726.1.S1_at    | MmugDNA.3726.1  | 7.44  | 6.48  | 0.07 | 0.89 | 1.94  | 0.134363 | 0.103235 | 0.500923 | 0.364143 |



|                         |                 |       |       |      |      |       |          |          |          |          |
|-------------------------|-----------------|-------|-------|------|------|-------|----------|----------|----------|----------|
| MmugDNA.37260.1.S1_at   | MmugDNA.37260.1 | 6.48  | 5.61  | 0.28 | 0.84 | 1.83  | 0.464161 | 0.645172 | 0.739138 | 0.792081 |
| MmugDNA.37263.1.S1_at   | MmugDNA.37263.1 | 6.05  | 5.79  | 0.48 | 0.07 | 1.2   | 0.406766 | 0.391329 | 0.703885 | 0.625003 |
| MmugDNA.37264.1.S1_at   | MmugDNA.37264.1 | 7.66  | 7.68  | 0.09 | 0.12 | -1.01 | 0.648424 | 0.656955 | 0.841883 | 0.799401 |
| MmugDNA.37266.1.S1_at   | MmugDNA.37266.1 | 5.13  | 5.13  | 0.03 | 0.12 | -1    | 0.514021 | 0.387023 | 0.766736 | 0.621935 |
| MmugDNA.37267.1.S1_at   | MmugDNA.37267.1 | 3.42  | 3.42  | 0.37 | 0.24 | -1    | 0.799416 | 0.556233 | 0.916962 | 0.734449 |
| MmugDNA.3727.1.S1_at    | MmugDNA.3727.1  | 3.92  | 3.92  | 0.04 | 0.07 | 1     | 0.972495 | 0.354542 | 0.989473 | 0.59726  |
| MmugDNA.37273.1.S1_at   | MmugDNA.37273.1 | 6.52  | 6.59  | 0.35 | 0.08 | -1.05 | 0.52851  | 0.738169 | 0.775671 | 0.848203 |
| MmugDNA.37275.1.S1_at   | MmugDNA.37275.1 | 9.06  | 8.49  | 0.64 | 0.13 | 1.48  | 0.290736 | 0.431692 | 0.628456 | 0.652516 |
| MmugDNA.37278.1.S1_at   | MmugDNA.37278.1 | 9.36  | 9.23  | 0.11 | 0.1  | 1.1   | 0.093486 | 0.033623 | 0.450781 | 0.227006 |
| MmugDNA.37279.1.S1_at   | MmugDNA.37279.1 | 6.3   | 6.48  | 0.16 | 0.2  | -1.13 | 0.680686 | 0.138728 | 0.857284 | 0.411807 |
| MmugDNA.3728.1.S1_at    | MmugDNA.3728.1  | 3.08  | 3.14  | 0.16 | 0.08 | -1.04 | 0.937436 | 0.334668 | 0.975858 | 0.582581 |
| MmugDNA.37280.1.S1_at   | MmugDNA.37280.1 | 3.04  | 3.35  | 0.2  | 0.25 | -1.25 | 0.28463  | 0.348932 | 0.624327 | 0.592945 |
| MmugDNA.37282.1.S1_at   | MmugDNA.37282.1 | 4.83  | 4.82  | 0.08 | 0.05 | 1     | 0.363679 | 0.745537 | 0.676829 | 0.852445 |
| MmugDNA.37283.1.S1_at   | MmugDNA.37283.1 | 7.36  | 7.31  | 0.92 | 0.24 | 1.04  | 0.911397 | 0.655802 | 0.965013 | 0.798709 |
| MmugDNA.37284.1.S1_at   | MmugDNA.37284.1 | 4.44  | 4.53  | 0.45 | 0.33 | -1.06 | 0.318414 | 0.464078 | 0.648419 | 0.67485  |
| MmugDNA.37285.1.S1_at   | MmugDNA.37285.1 | 8.78  | 8.4   | 0.2  | 0.1  | 1.3   | 0.044827 | 0.033542 | 0.359043 | 0.226764 |
| MmugDNA.37287.1.S1_at   | MmugDNA.37287.1 | 5.91  | 6.03  | 0.52 | 0.65 | -1.08 | 0.526426 | 0.474537 | 0.774086 | 0.681511 |
| MmugDNA.37287.1.S1_s_at | MmugDNA.37287.1 | 5.98  | 6.5   | 0.58 | 0.85 | -1.43 | 0.565773 | 0.610037 | 0.797313 | 0.768323 |
| MmugDNA.37288.1.S1_at   | MmugDNA.37288.1 | 7.76  | 6     | 0.3  | 0.99 | 3.38  | 0.056521 | 0.074915 | 0.386649 | 0.318845 |
| MmugDNA.3729.1.S1_at    | MmugDNA.3729.1  | 7.32  | 6.71  | 0.42 | 0.31 | 1.52  | 0.29122  | 0.239306 | 0.628725 | 0.509995 |
| MmugDNA.37291.1.S1_at   | MmugDNA.37291.1 | 2.81  | 2.9   | 1.01 | 0.04 | -1.07 | 0.435484 | 0.551775 | 0.721236 | 0.73122  |
| MmugDNA.37291.1.S1_x_at | MmugDNA.37291.1 | 3.09  | 2.92  | 0.68 | 0.13 | 1.13  | 0.23544  | 0.304776 | 0.589353 | 0.561922 |
| MmugDNA.37293.1.S1_at   | MmugDNA.37293.1 | 8.48  | 9.36  | 0.24 | 0.16 | -1.84 | 0.010023 | 0.004452 | 0.226901 | 0.092997 |
| MmugDNA.37294.1.S1_at   | MmugDNA.37294.1 | 6.15  | 6.27  | 0.2  | 0.13 | -1.08 | 0.282449 | 0.287624 | 0.622852 | 0.548885 |
| MmugDNA.37295.1.S1_at   | MmugDNA.37295.1 | 4.61  | 4.36  | 0.3  | 0.49 | 1.19  | 0.33461  | 0.35499  | 0.658444 | 0.597466 |
| MmugDNA.37296.1.S1_at   | MmugDNA.37296.1 | 11.83 | 11.23 | 0.11 | 0.5  | 1.51  | 0.12788  | 0.122713 | 0.494071 | 0.392719 |
| MmugDNA.37298.1.S1_at   | MmugDNA.37298.1 | 4.37  | 4.37  | 0.91 | 0.18 | 1     | 0.707222 | 0.713295 | 0.871007 | 0.833666 |
| MmugDNA.37299.1.S1_at   | MmugDNA.37299.1 | 4.49  | 4.24  | 0.28 | 0    | 1.19  | 0.15809  | 0.064877 | 0.522944 | 0.300746 |
| MmugDNA.373.1.S1_at     | MmugDNA.373.1   | 7.05  | 6.96  | 0.17 | 0.49 | 1.07  | 0.255654 | 0.345152 | 0.603468 | 0.590424 |
| MmugDNA.3730.1.S1_at    | MmugDNA.3730.1  | 5.58  | 5.62  | 0.34 | 0.21 | -1.03 | 0.880463 | 0.712526 | 0.951933 | 0.833383 |
| MmugDNA.37300.1.S1_at   | MmugDNA.37300.1 | 4.84  | 5.03  | 0.26 | 0.03 | -1.15 | 0.233452 | 0.202006 | 0.588137 | 0.476444 |
| MmugDNA.37301.1.S1_at   | MmugDNA.37301.1 | 4.8   | 4.78  | 0.2  | 0.08 | 1.02  | 0.370645 | 0.193954 | 0.681582 | 0.469068 |
| MmugDNA.37302.1.S1_at   | MmugDNA.37302.1 | 5.19  | 5.15  | 0.1  | 0.1  | 1.03  | 0.947878 | 0.973565 | 0.980005 | 0.985645 |
| MmugDNA.37303.1.S1_at   | MmugDNA.37303.1 | 10.35 | 10.03 | 0.2  | 1.9  | 1.25  | 0.270058 | 0.356909 | 0.614629 | 0.598699 |
| MmugDNA.37305.1.S1_at   | MmugDNA.37305.1 | 3.86  | 3.59  | 0.54 | 0.39 | 1.2   | 0.532717 | 0.512623 | 0.777862 | 0.706442 |
| MmugDNA.37309.1.S1_at   | MmugDNA.37309.1 | 3.81  | 3.87  | 0.19 | 0.05 | -1.04 | 0.85702  | 0.212048 | 0.942171 | 0.486013 |
| MmugDNA.3731.1.S1_at    | MmugDNA.3731.1  | 11.87 | 11.39 | 0.03 | 0.15 | 1.4   | 0.011024 | 0.005302 | 0.233671 | 0.100817 |
| MmugDNA.37311.1.S1_at   | MmugDNA.37311.1 | 7.95  | 7.51  | 0.12 | 0.22 | 1.36  | 0.055616 | 0.062156 | 0.384246 | 0.296237 |
| MmugDNA.37312.1.S1_at   | MmugDNA.37312.1 | 3.97  | 3.9   | 0.03 | 0.12 | 1.05  | 0.122445 | 0.2522   | 0.487622 | 0.520864 |
| MmugDNA.37313.1.S1_at   | MmugDNA.37313.1 | 9.92  | 9.89  | 0.08 | 0.33 | 1.02  | 0.335133 | 0.081529 | 0.658936 | 0.329764 |
| MmugDNA.37314.1.S1_at   | MmugDNA.37314.1 | 7.45  | 8.63  | 0.35 | 0.76 | -2.26 | 0.178906 | 0.156214 | 0.543331 | 0.43161  |

|                         |                 |       |       |      |      |       |          |          |          |          |
|-------------------------|-----------------|-------|-------|------|------|-------|----------|----------|----------|----------|
| MmugDNA.37315.1.S1_at   | MmugDNA.37315.1 | 6.77  | 7.04  | 0.75 | 0.46 | -1.2  | 0.764816 | 0.914644 | 0.900939 | 0.952011 |
| MmugDNA.37318.1.S1_at   | MmugDNA.37318.1 | 11.32 | 12.08 | 0.26 | 0.33 | -1.69 | 0.04208  | 0.02635  | 0.353974 | 0.203321 |
| MmugDNA.37319.1.S1_at   | MmugDNA.37319.1 | 4.69  | 4.66  | 0.02 | 0.15 | 1.02  | 0.589493 | 0.306456 | 0.809401 | 0.563029 |
| MmugDNA.3732.1.S1_at    | MmugDNA.3732.1  | 9.69  | 9.33  | 0.18 | 0.24 | 1.28  | 0.093148 | 0.080654 | 0.450362 | 0.328444 |
| MmugDNA.37320.1.S1_at   | MmugDNA.37320.1 | 4.96  | 4.94  | 0.06 | 0.05 | 1.01  | 0.812093 | 0.747821 | 0.923512 | 0.853252 |
| MmugDNA.37323.1.S1_at   | MmugDNA.37323.1 | 3.33  | 3.52  | 0.59 | 0.29 | -1.14 | 0.454364 | 0.411843 | 0.733188 | 0.638434 |
| MmugDNA.37324.1.S1_at   | MmugDNA.37324.1 | 4.09  | 4.22  | 0.08 | 0.08 | -1.09 | 0.404398 | 0.687424 | 0.702662 | 0.817583 |
| MmugDNA.37325.1.S1_at   | MmugDNA.37325.1 | 6.47  | 6.63  | 0.38 | 0.04 | -1.12 | 0.653425 | 0.839309 | 0.844125 | 0.908404 |
| MmugDNA.37326.1.S1_at   | MmugDNA.37326.1 | 4.57  | 4.74  | 0.27 | 0.8  | -1.12 | 0.241639 | 0.314156 | 0.593941 | 0.568185 |
| MmugDNA.37328.1.S1_at   | MmugDNA.37328.1 | 5.68  | 6.18  | 0.56 | 0.08 | -1.42 | 0.704869 | 0.529272 | 0.869834 | 0.717233 |
| MmugDNA.37329.1.S1_at   | MmugDNA.37329.1 | 3.86  | 3.98  | 0.77 | 0.16 | -1.09 | 0.996977 | 0.322683 | 0.998791 | 0.574036 |
| MmugDNA.37330.1.S1_at   | MmugDNA.37330.1 | 4.92  | 4.94  | 0.29 | 0.16 | -1.01 | 0.346898 | 0.505624 | 0.666065 | 0.702218 |
| MmugDNA.37331.1.S1_at   | MmugDNA.37331.1 | 3.42  | 3.04  | 0.13 | 0.15 | 1.3   | 0.090649 | 0.103582 | 0.446193 | 0.364346 |
| MmugDNA.37333.1.S1_at   | MmugDNA.37333.1 | 4.82  | 4.87  | 0.29 | 0.05 | -1.04 | 0.968182 | 0.517314 | 0.98805  | 0.709435 |
| MmugDNA.37334.1.S1_at   | MmugDNA.37334.1 | 8.98  | 8.33  | 0.11 | 0.73 | 1.57  | 0.181342 | 0.202025 | 0.545837 | 0.476448 |
| MmugDNA.37335.1.S1_at   | MmugDNA.37335.1 | 4.73  | 4.57  | 0.54 | 0.21 | 1.12  | 0.554588 | 0.675034 | 0.790867 | 0.810141 |
| MmugDNA.37338.1.S1_at   | MmugDNA.37338.1 | 7.81  | 7.93  | 0.08 | 0.1  | -1.08 | 0.434411 | 0.682096 | 0.720416 | 0.814349 |
| MmugDNA.37339.1.S1_at   | MmugDNA.37339.1 | 13.91 | 14    | 0.04 | 0.05 | -1.07 | 0.290131 | 0.015934 | 0.628012 | 0.160235 |
| MmugDNA.3734.1.S1_at    | MmugDNA.3734.1  | 9.06  | 10.29 | 0.32 | 0.15 | -2.35 | 0.005972 | 0.002185 | 0.194485 | 0.069035 |
| MmugDNA.37340.1.S1_at   | MmugDNA.37340.1 | 10.66 | 11.43 | 0.17 | 0.45 | -1.7  | 0.097728 | 0.095706 | 0.456878 | 0.352725 |
| MmugDNA.37342.1.S1_at   | MmugDNA.37342.1 | 5.17  | 5.22  | 0.26 | 0.22 | -1.04 | 0.424591 | 0.482779 | 0.714559 | 0.687556 |
| MmugDNA.37344.1.S1_at   | MmugDNA.37344.1 | 4.02  | 3.84  | 0.07 | 0.13 | 1.13  | 0.152371 | 0.039478 | 0.51708  | 0.243642 |
| MmugDNA.37347.1.S1_at   | MmugDNA.37347.1 | 5.57  | 5.64  | 0.39 | 0.4  | -1.05 | 0.399321 | 0.517542 | 0.699241 | 0.709668 |
| MmugDNA.37349.1.S1_at   | MmugDNA.37349.1 | 8.87  | 7.98  | 0.07 | 0.34 | 1.86  | 0.012622 | 0.007508 | 0.242681 | 0.116291 |
| MmugDNA.3735.1.S1_at    | MmugDNA.3735.1  | 8.69  | 9.06  | 0.05 | 0.5  | -1.29 | 0.7686   | 0.539469 | 0.902719 | 0.723763 |
| MmugDNA.37350.1.S1_at   | MmugDNA.37350.1 | 8.01  | 6.92  | 0.55 | 0.08 | 2.14  | 0.02885  | 0.009418 | 0.312166 | 0.127871 |
| MmugDNA.37351.1.S1_at   | MmugDNA.37351.1 | 3.74  | 3.63  | 0.25 | 0.25 | 1.08  | 0.593712 | 0.369644 | 0.811568 | 0.608957 |
| MmugDNA.37352.1.S1_at   | MmugDNA.37352.1 | 11.61 | 11.27 | 0.22 | 0.33 | 1.27  | 0.075774 | 0.073072 | 0.423493 | 0.316017 |
| MmugDNA.37353.1.S1_at   | MmugDNA.37353.1 | 6.98  | 6.89  | 0.12 | 0.07 | 1.06  | 0.327634 | 0.156297 | 0.654044 | 0.43161  |
| MmugDNA.37354.1.S1_at   | MmugDNA.37354.1 | 4.94  | 4.87  | 0.18 | 0.04 | 1.05  | 0.701338 | 0.53434  | 0.868032 | 0.720334 |
| MmugDNA.37355.1.S1_at   | MmugDNA.37355.1 | 2.98  | 3.01  | 0.01 | 0.43 | -1.02 | 0.323928 | 0.231531 | 0.651789 | 0.503325 |
| MmugDNA.37356.1.S1_at   | MmugDNA.37356.1 | 5.26  | 4.99  | 0.14 | 0.4  | 1.21  | 0.972409 | 0.828582 | 0.989473 | 0.901537 |
| MmugDNA.37357.1.S1_at   | MmugDNA.37357.1 | 3.84  | 3.79  | 0.23 | 0.17 | 1.03  | 0.839387 | 0.6598   | 0.935102 | 0.800871 |
| MmugDNA.37358.1.S1_at   | MmugDNA.37358.1 | 3.85  | 3.48  | 0.35 | 0.07 | 1.29  | 0.179    | 0.357341 | 0.543331 | 0.598949 |
| MmugDNA.37359.1.S1_at   | MmugDNA.37359.1 | 5.98  | 6.01  | 0.12 | 0.1  | -1.03 | 0.369324 | 0.774552 | 0.680609 | 0.868769 |
| MmugDNA.37360.1.S1_at   | MmugDNA.37360.1 | 8.28  | 8.31  | 0.07 | 0.44 | -1.02 | 0.99771  | 0.108599 | 0.999071 | 0.372171 |
| MmugDNA.37361.1.S1_at   | MmugDNA.37361.1 | 11.2  | 11.64 | 0.18 | 0.24 | -1.36 | 0.115456 | 0.063692 | 0.478788 | 0.298842 |
| MmugDNA.37363.1.S1_s_at | MmugDNA.37363.1 | 7.08  | 7.19  | 0.11 | 0.1  | -1.08 | 0.142208 | 0.027147 | 0.509437 | 0.205893 |
| MmugDNA.37365.1.S1_at   | MmugDNA.37365.1 | 5.2   | 5.78  | 0.29 | 0.11 | -1.49 | 0.02715  | 0.111217 | 0.306629 | 0.375856 |
| MmugDNA.37367.1.S1_at   | MmugDNA.37367.1 | 6.65  | 7.01  | 0.24 | 0.15 | -1.29 | 0.139204 | 0.154106 | 0.506681 | 0.42887  |
| MmugDNA.37368.1.S1_at   | MmugDNA.37368.1 | 8.22  | 9.41  | 0.41 | 0.33 | -2.28 | 0.015467 | 0.011017 | 0.258858 | 0.136715 |

|                         |                 |       |       |      |      |       |          |          |          |          |
|-------------------------|-----------------|-------|-------|------|------|-------|----------|----------|----------|----------|
| MmugDNA.37369.1.S1_x_at | MmugDNA.37369.1 | 8.16  | 8.11  | 0.36 | 0.29 | 1.03  | 0.768916 | 0.913411 | 0.902867 | 0.951233 |
| MmugDNA.3737.1.S1_at    | MmugDNA.3737.1  | 10.79 | 10.9  | 0.05 | 0.19 | -1.08 | 0.872786 | 0.153233 | 0.949183 | 0.428062 |
| MmugDNA.37370.1.S1_at   | MmugDNA.37370.1 | 5.68  | 5.89  | 0.11 | 0.1  | -1.15 | 0.104958 | 0.024718 | 0.465332 | 0.19685  |
| MmugDNA.37371.1.S1_at   | MmugDNA.37371.1 | 6.81  | 6.67  | 0.24 | 0.12 | 1.1   | 0.427652 | 0.50729  | 0.716368 | 0.702917 |
| MmugDNA.37372.1.S1_at   | MmugDNA.37372.1 | 6.34  | 7.44  | 0.62 | 0.46 | -2.15 | 0.134454 | 0.160876 | 0.501121 | 0.437116 |
| MmugDNA.37373.1.S1_at   | MmugDNA.37373.1 | 5.65  | 5.69  | 0.14 | 0.07 | -1.03 | 0.608228 | 0.812729 | 0.819872 | 0.891794 |
| MmugDNA.37375.1.S1_at   | MmugDNA.37375.1 | 6.45  | 5.51  | 0.53 | 0.39 | 1.92  | 0.068724 | 0.030968 | 0.410593 | 0.217844 |
| MmugDNA.37376.1.S1_at   | MmugDNA.37376.1 | 3.68  | 3.78  | 0.06 | 0.11 | -1.07 | 0.343027 | 0.800973 | 0.663407 | 0.885538 |
| MmugDNA.37377.1.S1_at   | MmugDNA.37377.1 | 4.17  | 3.89  | 0.29 | 0.33 | 1.22  | 0.793876 | 0.6315   | 0.914508 | 0.782845 |
| MmugDNA.37378.1.S1_at   | MmugDNA.37378.1 | 7.05  | 7.81  | 0.36 | 1.16 | -1.7  | 0.15497  | 0.161895 | 0.51961  | 0.437979 |
| MmugDNA.37379.1.S1_at   | MmugDNA.37379.1 | 4.32  | 3.9   | 0.2  | 0.16 | 1.33  | 0.037985 | 0.043105 | 0.343341 | 0.25227  |
| MmugDNA.3738.1.S1_at    | MmugDNA.3738.1  | 4.5   | 4.87  | 0.21 | 0.35 | -1.29 | 0.133431 | 0.154326 | 0.500093 | 0.429188 |
| MmugDNA.37380.1.S1_at   | MmugDNA.37380.1 | 4.98  | 5.12  | 0.16 | 0.14 | -1.11 | 0.183887 | 0.210794 | 0.547947 | 0.484883 |
| MmugDNA.37381.1.S1_at   | MmugDNA.37381.1 | 6.28  | 7.03  | 0.25 | 0.32 | -1.68 | 0.044597 | 0.051783 | 0.358786 | 0.273124 |
| MmugDNA.37382.1.S1_s_at | MmugDNA.37382.1 | 11.83 | 12.23 | 0.16 | 0.59 | -1.32 | 0.289721 | 0.250421 | 0.627607 | 0.519391 |
| MmugDNA.37383.1.S1_at   | MmugDNA.37383.1 | 6.75  | 6.55  | 0.47 | 0.34 | 1.15  | 0.667778 | 0.846836 | 0.851329 | 0.912887 |
| MmugDNA.37384.1.S1_at   | MmugDNA.37384.1 | 3.29  | 3.04  | 0.09 | 0.11 | 1.19  | 0.054207 | 0.319914 | 0.381696 | 0.572268 |
| MmugDNA.37386.1.S1_at   | MmugDNA.37386.1 | 8.45  | 8.71  | 0.9  | 0.69 | -1.2  | 0.487652 | 0.124443 | 0.752231 | 0.394865 |
| MmugDNA.37387.1.S1_at   | MmugDNA.37387.1 | 9.08  | 8.53  | 0.54 | 0.14 | 1.46  | 0.111218 | 0.120393 | 0.473262 | 0.38925  |
| MmugDNA.37387.1.S1_x_at | MmugDNA.37387.1 | 10.83 | 10.62 | 0.51 | 0.21 | 1.16  | 0.121214 | 0.13288  | 0.48598  | 0.404544 |
| MmugDNA.37388.1.S1_at   | MmugDNA.37388.1 | 10.52 | 9.86  | 0.35 | 0.24 | 1.58  | 0.126506 | 0.101493 | 0.492798 | 0.361307 |
| MmugDNA.3739.1.S1_at    | MmugDNA.3739.1  | 9.59  | 9.59  | 0.05 | 0.82 | 1     | 0.509764 | 0.642605 | 0.764501 | 0.790344 |
| MmugDNA.37390.1.S1_at   | MmugDNA.37390.1 | 9.76  | 8.31  | 0.18 | 0.23 | 2.73  | 0.00096  | 0.000134 | 0.139813 | 0.029087 |
| MmugDNA.37392.1.S1_at   | MmugDNA.37392.1 | 3.12  | 3.25  | 0.27 | 0.22 | -1.1  | 0.889008 | 0.979325 | 0.955543 | 0.988846 |
| MmugDNA.37394.1.S1_at   | MmugDNA.37394.1 | 4.79  | 5.09  | 0.06 | 0.19 | -1.23 | 0.086656 | 0.118139 | 0.440475 | 0.386045 |
| MmugDNA.37395.1.S1_at   | MmugDNA.37395.1 | 4.42  | 4.45  | 0.22 | 0.19 | -1.02 | 0.602927 | 0.798614 | 0.81682  | 0.884032 |
| MmugDNA.37396.1.S1_at   | MmugDNA.37396.1 | 2.9   | 2.9   | 0    | 0.09 | 1     | 0.388369 | 0.652534 | 0.692437 | 0.796827 |
| MmugDNA.37397.1.S1_at   | MmugDNA.37397.1 | 6.32  | 6.39  | 0.09 | 0.04 | -1.04 | 0.203795 | 0.306642 | 0.5663   | 0.563221 |
| MmugDNA.37398.1.S1_at   | MmugDNA.37398.1 | 8.97  | 9.01  | 0.08 | 0.22 | -1.03 | 0.213727 | 0.251967 | 0.573944 | 0.520646 |
| MmugDNA.37399.1.S1_at   | MmugDNA.37399.1 | 8.34  | 8.11  | 0.38 | 0.25 | 1.17  | 0.229788 | 0.268478 | 0.587007 | 0.534123 |
| MmugDNA.374.1.S1_at     | MmugDNA.374.1   | 5.3   | 5.25  | 0.08 | 0.04 | 1.04  | 0.080226 | 0.116431 | 0.430341 | 0.383671 |
| MmugDNA.3740.1.S1_at    | MmugDNA.3740.1  | 4.87  | 4.81  | 0.19 | 0.12 | 1.04  | 0.674778 | 0.804344 | 0.854234 | 0.887476 |
| MmugDNA.37400.1.S1_at   | MmugDNA.37400.1 | 9.69  | 9.65  | 0.26 | 0.37 | 1.03  | 0.827001 | 0.960134 | 0.929706 | 0.977408 |
| MmugDNA.37401.1.S1_at   | MmugDNA.37401.1 | 4.16  | 4.07  | 0.22 | 0.49 | 1.06  | 0.784254 | 0.942511 | 0.91004  | 0.967399 |
| MmugDNA.37402.1.S1_at   | MmugDNA.37402.1 | 7     | 6.41  | 0.34 | 0.54 | 1.51  | 0.196643 | 0.215469 | 0.559808 | 0.489168 |
| MmugDNA.37405.1.S1_at   | MmugDNA.37405.1 | 9.46  | 9.69  | 0.14 | 0.21 | -1.18 | 0.137168 | 0.261726 | 0.504356 | 0.528157 |
| MmugDNA.37409.1.S1_at   | MmugDNA.37409.1 | 4.12  | 4.16  | 0.1  | 0.33 | -1.02 | 0.485311 | 0.599354 | 0.750894 | 0.761418 |
| MmugDNA.37411.1.S1_at   | MmugDNA.37411.1 | 7.17  | 7.43  | 0.07 | 0.07 | -1.2  | 0.012222 | 0.002246 | 0.240418 | 0.069739 |
| MmugDNA.37412.1.S1_at   | MmugDNA.37412.1 | 9.37  | 8.59  | 0.21 | 0.37 | 1.71  | 0.140993 | 0.173451 | 0.508604 | 0.449938 |
| MmugDNA.37413.1.S1_at   | MmugDNA.37413.1 | 4.84  | 4.95  | 0.21 | 0.07 | -1.08 | 0.879223 | 0.312584 | 0.951507 | 0.567268 |
| MmugDNA.37415.1.S1_at   | MmugDNA.37415.1 | 7.99  | 7.91  | 0.17 | 0.21 | 1.05  | 0.678704 | 0.828293 | 0.856195 | 0.901315 |

|                         |                 |       |       |      |      |       |          |          |          |          |
|-------------------------|-----------------|-------|-------|------|------|-------|----------|----------|----------|----------|
| MmugDNA.37416.1.S1_at   | MmugDNA.37416.1 | 6.37  | 7.43  | 0.66 | 1.03 | -2.08 | 0.120336 | 0.155698 | 0.485252 | 0.431054 |
| MmugDNA.37417.1.S1_s_at | MmugDNA.37417.1 | 8.5   | 8.24  | 0.27 | 0.21 | 1.2   | 0.567827 | 0.694354 | 0.798292 | 0.822254 |
| MmugDNA.37418.1.S1_at   | MmugDNA.37418.1 | 10.63 | 10.47 | 0.26 | 0.08 | 1.11  | 0.897323 | 0.180214 | 0.959157 | 0.456777 |
| MmugDNA.37419.1.S1_at   | MmugDNA.37419.1 | 3.12  | 2.99  | 0.28 | 0.24 | 1.09  | 0.817166 | 0.408819 | 0.9259   | 0.6359   |
| MmugDNA.3742.1.S1_at    | MmugDNA.3742.1  | 12.51 | 12.56 | 0.05 | 0.03 | -1.04 | 0.379403 | 0.071304 | 0.686924 | 0.31334  |
| MmugDNA.37421.1.S1_at   | MmugDNA.37421.1 | 4.99  | 5.13  | 0.4  | 0.11 | -1.1  | 0.749202 | 0.284339 | 0.892627 | 0.54659  |
| MmugDNA.37423.1.S1_at   | MmugDNA.37423.1 | 3.24  | 3.37  | 0.04 | 0.27 | -1.09 | 0.456728 | 0.537027 | 0.734529 | 0.722236 |
| MmugDNA.37424.1.S1_at   | MmugDNA.37424.1 | 5.3   | 4.6   | 0.19 | 0.13 | 1.63  | 0.009527 | 0.000804 | 0.225965 | 0.04607  |
| MmugDNA.37425.1.S1_at   | MmugDNA.37425.1 | 5.23  | 5.27  | 0.04 | 0.15 | -1.03 | 0.452306 | 0.591264 | 0.731986 | 0.75685  |
| MmugDNA.37427.1.S1_at   | MmugDNA.37427.1 | 6.76  | 6.73  | 0.36 | 0.01 | 1.03  | 0.806882 | 0.889698 | 0.920895 | 0.937154 |
| MmugDNA.37428.1.S1_at   | MmugDNA.37428.1 | 8.62  | 8.59  | 0.22 | 0.57 | 1.02  | 0.909856 | 0.988727 | 0.964287 | 0.993595 |
| MmugDNA.37429.1.S1_at   | MmugDNA.37429.1 | 3.05  | 3.14  | 0.12 | 0.14 | -1.06 | 0.371066 | 0.394048 | 0.681811 | 0.626734 |
| MmugDNA.37432.1.S1_at   | MmugDNA.37432.1 | 4.18  | 4.11  | 0.08 | 0    | 1.05  | 0.452831 | 0.342861 | 0.732217 | 0.588712 |
| MmugDNA.37433.1.S1_at   | MmugDNA.37433.1 | 4.51  | 4.55  | 0.18 | 0.06 | -1.03 | 0.227604 | 0.337258 | 0.585103 | 0.584455 |
| MmugDNA.37434.1.S1_at   | MmugDNA.37434.1 | 11.38 | 11.51 | 0.18 | 0.21 | -1.1  | 0.526125 | 0.733836 | 0.773971 | 0.845891 |
| MmugDNA.37435.1.S1_s_at | MmugDNA.37435.1 | 2.5   | 2.45  | 0    | 0.03 | 1.03  | 0.216739 | 0.711125 | 0.576352 | 0.832417 |
| MmugDNA.37436.1.S1_at   | MmugDNA.37436.1 | 10.83 | 10.96 | 0.33 | 0.43 | -1.1  | 0.545369 | 0.70464  | 0.784919 | 0.828661 |
| MmugDNA.37437.1.S1_at   | MmugDNA.37437.1 | 3.25  | 3.05  | 0.28 | 0.12 | 1.14  | 0.925676 | 0.992643 | 0.971452 | 0.995715 |
| MmugDNA.37438.1.S1_at   | MmugDNA.37438.1 | 4.39  | 4.27  | 0.76 | 0.32 | 1.09  | 0.852225 | 0.694082 | 0.940581 | 0.82208  |
| MmugDNA.37439.1.S1_at   | MmugDNA.37439.1 | 10.03 | 9.94  | 0.27 | 0.39 | 1.06  | 0.166236 | 0.192793 | 0.529929 | 0.468274 |
| MmugDNA.3744.1.S1_at    | MmugDNA.3744.1  | 5.57  | 5.83  | 0.84 | 0.51 | -1.2  | 0.694243 | 0.802945 | 0.864407 | 0.886524 |
| MmugDNA.37440.1.S1_at   | MmugDNA.37440.1 | 8.77  | 9.54  | 0.15 | 0.53 | -1.7  | 0.066598 | 0.055622 | 0.406564 | 0.281649 |
| MmugDNA.37441.1.S1_s_at | MmugDNA.37441.1 | 7.74  | 7.66  | 0.14 | 0.19 | 1.06  | 0.581538 | 0.800143 | 0.805227 | 0.885076 |
| MmugDNA.37442.1.S1_at   | MmugDNA.37442.1 | 7.45  | 6.87  | 0.35 | 0.76 | 1.5   | 0.377679 | 0.32408  | 0.686023 | 0.574761 |
| MmugDNA.37443.1.S1_at   | MmugDNA.37443.1 | 6.06  | 7.16  | 0.57 | 1.6  | -2.15 | 0.792611 | 0.887298 | 0.913959 | 0.93582  |
| MmugDNA.37445.1.S1_at   | MmugDNA.37445.1 | 6.68  | 6.98  | 0.17 | 0.01 | -1.23 | 0.0305   | 0.019458 | 0.318715 | 0.175136 |
| MmugDNA.37446.1.S1_at   | MmugDNA.37446.1 | 5.86  | 7.03  | 0.44 | 1.41 | -2.24 | 0.221673 | 0.252767 | 0.580395 | 0.521174 |
| MmugDNA.37447.1.S1_at   | MmugDNA.37447.1 | 12.24 | 11.88 | 0.03 | 0.12 | 1.28  | 0.010562 | 0.004563 | 0.230404 | 0.094373 |
| MmugDNA.37449.1.S1_s_at | MmugDNA.37449.1 | 7.8   | 7.3   | 0.01 | 0.17 | 1.41  | 0.017095 | 0.001316 | 0.266719 | 0.055939 |
| MmugDNA.3745.1.S1_at    | MmugDNA.3745.1  | 6.68  | 6.67  | 0.16 | 0.14 | 1.01  | 0.567547 | 0.304223 | 0.798174 | 0.561558 |
| MmugDNA.37452.1.S1_at   | MmugDNA.37452.1 | 3.06  | 3.14  | 0.05 | 0.1  | -1.06 | 0.159133 | 0.27088  | 0.52416  | 0.536026 |
| MmugDNA.37453.1.S1_at   | MmugDNA.37453.1 | 11.27 | 11.24 | 0.05 | 0.22 | 1.02  | 0.851491 | 0.350085 | 0.940262 | 0.593862 |
| MmugDNA.37453.1.S1_s_at | MmugDNA.37453.1 | 5.7   | 5.7   | 0.16 | 0.09 | 1     | 0.96373  | 0.969791 | 0.985982 | 0.983498 |
| MmugDNA.37454.1.S1_at   | MmugDNA.37454.1 | 6.08  | 6     | 0.53 | 0.86 | 1.05  | 0.858154 | 0.188212 | 0.942696 | 0.464251 |
| MmugDNA.37455.1.S1_at   | MmugDNA.37455.1 | 8.3   | 7.85  | 0.36 | 1.24 | 1.37  | 0.558329 | 0.546917 | 0.793134 | 0.728281 |
| MmugDNA.37456.1.S1_at   | MmugDNA.37456.1 | 2.92  | 3.02  | 0.08 | 0.01 | -1.07 | 0.19665  | 0.162009 | 0.559808 | 0.438108 |
| MmugDNA.37457.1.S1_at   | MmugDNA.37457.1 | 5.08  | 5.15  | 0.1  | 0.15 | -1.05 | 0.373592 | 0.398411 | 0.683245 | 0.629374 |
| MmugDNA.37458.1.S1_at   | MmugDNA.37458.1 | 6.52  | 6.61  | 0.2  | 0.04 | -1.07 | 0.687036 | 0.549686 | 0.860097 | 0.730002 |
| MmugDNA.37459.1.S1_at   | MmugDNA.37459.1 | 4.71  | 4.77  | 0.14 | 0.13 | -1.05 | 0.378332 | 0.418833 | 0.686434 | 0.643118 |
| MmugDNA.37460.1.S1_at   | MmugDNA.37460.1 | 6.95  | 7.12  | 0.11 | 0.07 | -1.13 | 0.050745 | 0.036262 | 0.375332 | 0.235    |
| MmugDNA.37462.1.S1_at   | MmugDNA.37462.1 | 9.66  | 10.37 | 0.28 | 0.99 | -1.64 | 0.772015 | 0.296401 | 0.903991 | 0.555509 |

|                         |                 |       |       |      |      |       |          |          |          |          |
|-------------------------|-----------------|-------|-------|------|------|-------|----------|----------|----------|----------|
| MmugDNA.37463.1.S1_at   | MmugDNA.37463.1 | 8.42  | 9.24  | 0.13 | 0.19 | -1.77 | 0.002319 | 0.000644 | 0.161798 | 0.042928 |
| MmugDNA.37464.1.S1_at   | MmugDNA.37464.1 | 5.8   | 5.87  | 0.12 | 0.26 | -1.05 | 0.899499 | 0.986901 | 0.959832 | 0.992589 |
| MmugDNA.37465.1.S1_at   | MmugDNA.37465.1 | 4.16  | 4.02  | 0.29 | 0.15 | 1.1   | 0.634938 | 0.49529  | 0.834793 | 0.695411 |
| MmugDNA.37466.1.S1_at   | MmugDNA.37466.1 | 5.6   | 5.18  | 0.18 | 0.29 | 1.34  | 0.145673 | 0.156308 | 0.511525 | 0.43161  |
| MmugDNA.37468.1.S1_at   | MmugDNA.37468.1 | 3.76  | 3.35  | 0.19 | 0.13 | 1.33  | 0.042527 | 0.088215 | 0.355128 | 0.341721 |
| MmugDNA.37469.1.S1_at   | MmugDNA.37469.1 | 8.02  | 7.26  | 0.47 | 0.08 | 1.7   | 0.119338 | 0.171937 | 0.484049 | 0.448352 |
| MmugDNA.37469.1.S1_x_at | MmugDNA.37469.1 | 7.57  | 7.3   | 0.27 | 0.07 | 1.21  | 0.178834 | 0.430999 | 0.543211 | 0.651988 |
| MmugDNA.3747.1.S1_at    | MmugDNA.3747.1  | 9.43  | 10.48 | 0.23 | 0.13 | -2.06 | 0.001881 | 0.000941 | 0.155636 | 0.049026 |
| MmugDNA.37471.1.S1_at   | MmugDNA.37471.1 | 4.68  | 4.52  | 0.14 | 0.15 | 1.12  | 0.323887 | 0.301496 | 0.651789 | 0.559542 |
| MmugDNA.37473.1.S1_at   | MmugDNA.37473.1 | 4.22  | 3.69  | 0.56 | 0.04 | 1.44  | 0.161733 | 0.195646 | 0.526573 | 0.470491 |
| MmugDNA.37476.1.S1_at   | MmugDNA.37476.1 | 5.34  | 5.39  | 0.39 | 0.11 | -1.03 | 0.825163 | 0.872597 | 0.929141 | 0.927568 |
| MmugDNA.37477.1.S1_at   | MmugDNA.37477.1 | 4.4   | 4.23  | 0.1  | 0.33 | 1.12  | 0.297271 | 0.405126 | 0.633143 | 0.633482 |
| MmugDNA.37478.1.S1_at   | MmugDNA.37478.1 | 4.48  | 4.4   | 0.34 | 0.18 | 1.06  | 0.161106 | 0.152601 | 0.526189 | 0.427435 |
| MmugDNA.37479.1.S1_at   | MmugDNA.37479.1 | 7.76  | 8.66  | 0.61 | 1.23 | -1.86 | 0.309512 | 0.396647 | 0.641555 | 0.628434 |
| MmugDNA.3748.1.S1_at    | MmugDNA.3748.1  | 9.55  | 9.95  | 0.26 | 1.64 | -1.32 | 0.511485 | 0.550316 | 0.765318 | 0.730382 |
| MmugDNA.37480.1.S1_at   | MmugDNA.37480.1 | 6.29  | 6.25  | 0.29 | 0.23 | 1.03  | 0.872285 | 0.870344 | 0.948981 | 0.92644  |
| MmugDNA.37481.1.S1_at   | MmugDNA.37481.1 | 3.99  | 4.18  | 0.22 | 0.31 | -1.14 | 0.906854 | 0.76208  | 0.963023 | 0.861632 |
| MmugDNA.37482.1.S1_at   | MmugDNA.37482.1 | 6.29  | 6.3   | 0.21 | 0.01 | -1    | 0.381243 | 0.395784 | 0.68781  | 0.627643 |
| MmugDNA.37483.1.S1_at   | MmugDNA.37483.1 | 7.35  | 6.49  | 0.07 | 0.18 | 1.81  | 0.002545 | 0.000164 | 0.164386 | 0.030506 |
| MmugDNA.37484.1.S1_at   | MmugDNA.37484.1 | 5.44  | 5.48  | 0.21 | 0.36 | -1.03 | 0.467493 | 0.628992 | 0.740695 | 0.781575 |
| MmugDNA.37485.1.S1_at   | MmugDNA.37485.1 | 7.58  | 6.74  | 0.69 | 0.14 | 1.79  | 0.196056 | 0.246396 | 0.559231 | 0.515899 |
| MmugDNA.37486.1.S1_at   | MmugDNA.37486.1 | 8.9   | 10.01 | 0.09 | 0.28 | -2.17 | 0.00242  | 0.000718 | 0.163555 | 0.044419 |
| MmugDNA.37487.1.S1_at   | MmugDNA.37487.1 | 5.1   | 5.14  | 0.92 | 0.58 | -1.03 | 0.817999 | 0.929445 | 0.926184 | 0.959707 |
| MmugDNA.37489.1.S1_at   | MmugDNA.37489.1 | 11.3  | 12.29 | 0.43 | 0.83 | -1.99 | 0.191726 | 0.179108 | 0.554768 | 0.455436 |
| MmugDNA.37490.1.S1_at   | MmugDNA.37490.1 | 4.23  | 4.15  | 0.18 | 0.09 | 1.06  | 0.471633 | 0.58583  | 0.743311 | 0.753068 |
| MmugDNA.37491.1.S1_at   | MmugDNA.37491.1 | 2.91  | 3.12  | 0.04 | 0.34 | -1.15 | 0.141604 | 0.190254 | 0.509159 | 0.465897 |
| MmugDNA.37492.1.S1_at   | MmugDNA.37492.1 | 4.32  | 4.41  | 0.08 | 0.18 | -1.07 | 0.946745 | 0.860157 | 0.979465 | 0.920266 |
| MmugDNA.37493.1.S1_at   | MmugDNA.37493.1 | 3.81  | 3.52  | 0.24 | 0.06 | 1.21  | 0.1162   | 0.202303 | 0.479802 | 0.476691 |
| MmugDNA.37495.1.S1_at   | MmugDNA.37495.1 | 4.69  | 4.75  | 0.08 | 0.58 | -1.04 | 0.418439 | 0.39314  | 0.711351 | 0.626102 |
| MmugDNA.37496.1.S1_at   | MmugDNA.37496.1 | 7.39  | 8.11  | 0.18 | 0.47 | -1.64 | 0.135905 | 0.120768 | 0.502782 | 0.389579 |
| MmugDNA.3750.1.S1_at    | MmugDNA.3750.1  | 8.24  | 8.76  | 0.15 | 0.5  | -1.43 | 0.079437 | 0.044916 | 0.429521 | 0.256424 |
| MmugDNA.37501.1.S1_at   | MmugDNA.37501.1 | 4.59  | 4.59  | 0.08 | 0.17 | 1     | 0.668994 | 0.041348 | 0.851986 | 0.247995 |
| MmugDNA.37506.1.S1_at   | MmugDNA.37506.1 | 6.81  | 6.59  | 0.15 | 0.15 | 1.16  | 0.088274 | 0.085314 | 0.44292  | 0.337155 |
| MmugDNA.37507.1.S1_at   | MmugDNA.37507.1 | 7.42  | 7.81  | 0.33 | 0.36 | -1.31 | 0.092212 | 0.088658 | 0.448698 | 0.342186 |
| MmugDNA.37508.1.S1_at   | MmugDNA.37508.1 | 3.19  | 3.16  | 0.07 | 0.18 | 1.01  | 0.749078 | 0.823175 | 0.892627 | 0.898361 |
| MmugDNA.37509.1.S1_at   | MmugDNA.37509.1 | 5.45  | 5.51  | 0.06 | 0.27 | -1.04 | 0.940541 | 0.858044 | 0.97745  | 0.919048 |
| MmugDNA.3751.1.S1_at    | MmugDNA.3751.1  | 8.66  | 8.73  | 0.1  | 1.52 | -1.04 | 0.411843 | 0.455559 | 0.707626 | 0.669553 |
| MmugDNA.37510.1.S1_at   | MmugDNA.37510.1 | 4.5   | 4.2   | 0.8  | 1.09 | 1.24  | 0.715473 | 0.468768 | 0.875098 | 0.677885 |
| MmugDNA.37511.1.S1_at   | MmugDNA.37511.1 | 9.81  | 8.65  | 0.62 | 0.44 | 2.23  | 0.233751 | 0.245285 | 0.588317 | 0.515054 |
| MmugDNA.37514.1.S1_at   | MmugDNA.37514.1 | 5.76  | 5.88  | 0.09 | 0.14 | -1.09 | 0.619825 | 0.551959 | 0.825824 | 0.731387 |
| MmugDNA.37515.1.S1_at   | MmugDNA.37515.1 | 11.82 | 12.27 | 0.1  | 0.1  | -1.36 | 0.003655 | 0.001044 | 0.179515 | 0.051426 |

|                         |                 |       |       |      |      |       |          |          |          |          |
|-------------------------|-----------------|-------|-------|------|------|-------|----------|----------|----------|----------|
| MmugDNA.37518.1.S1_s_at | MmugDNA.37518.1 | 11.93 | 11.79 | 0.15 | 0.14 | 1.1   | 0.410256 | 0.237007 | 0.706234 | 0.507675 |
| MmugDNA.37519.1.S1_at   | MmugDNA.37519.1 | 8.73  | 8.72  | 0.27 | 0.25 | 1.01  | 0.972133 | 0.819794 | 0.98937  | 0.896181 |
| MmugDNA.3752.1.S1_at    | MmugDNA.3752.1  | 7     | 6.2   | 0.31 | 0.42 | 1.75  | 0.027769 | 0.047607 | 0.308973 | 0.262982 |
| MmugDNA.37521.1.S1_at   | MmugDNA.37521.1 | 4.26  | 4.3   | 0.3  | 0.2  | -1.03 | 0.70091  | 0.672983 | 0.867746 | 0.808905 |
| MmugDNA.37523.1.S1_at   | MmugDNA.37523.1 | 5.56  | 5.88  | 0.58 | 0.71 | -1.25 | 0.595971 | 0.622122 | 0.812742 | 0.77667  |
| MmugDNA.37524.1.S1_at   | MmugDNA.37524.1 | 5.39  | 4.22  | 0.73 | 0.5  | 2.24  | 0.154714 | 0.183877 | 0.519298 | 0.460019 |
| MmugDNA.37525.1.S1_at   | MmugDNA.37525.1 | 3.56  | 3.65  | 0.05 | 0.25 | -1.06 | 0.459404 | 0.421686 | 0.73613  | 0.645222 |
| MmugDNA.37526.1.S1_at   | MmugDNA.37526.1 | 5.87  | 5.66  | 0.14 | 0.34 | 1.16  | 0.771784 | 0.750814 | 0.903983 | 0.855074 |
| MmugDNA.37527.1.S1_at   | MmugDNA.37527.1 | 6.45  | 6.6   | 0.33 | 0.77 | -1.11 | 0.821656 | 0.955333 | 0.927464 | 0.974645 |
| MmugDNA.37528.1.S1_at   | MmugDNA.37528.1 | 7.59  | 6.57  | 1.01 | 0.2  | 2.03  | 0.19062  | 0.316099 | 0.553203 | 0.569548 |
| MmugDNA.3753.1.S1_at    | MmugDNA.3753.1  | 9.71  | 9.86  | 0.06 | 0.21 | -1.11 | 0.141325 | 0.14111  | 0.508969 | 0.414602 |
| MmugDNA.37530.1.S1_at   | MmugDNA.37530.1 | 4.91  | 4.25  | 0.43 | 0.1  | 1.58  | 0.055232 | 0.146011 | 0.383636 | 0.420006 |
| MmugDNA.37531.1.S1_at   | MmugDNA.37531.1 | 5.68  | 5.68  | 0.07 | 0.22 | 1     | 0.403303 | 0.317367 | 0.701955 | 0.570608 |
| MmugDNA.37532.1.S1_at   | MmugDNA.37532.1 | 3.11  | 3.11  | 0.09 | 0.14 | -1    | 0.975843 | 0.638562 | 0.990673 | 0.787698 |
| MmugDNA.37533.1.S1_at   | MmugDNA.37533.1 | 3.62  | 3.62  | 0.09 | 0.17 | -1    | 0.450975 | 0.386795 | 0.731469 | 0.621895 |
| MmugDNA.37534.1.S1_at   | MmugDNA.37534.1 | 10.27 | 10    | 0.32 | 0.34 | 1.2   | 0.322633 | 0.427037 | 0.651245 | 0.649087 |
| MmugDNA.37535.1.S1_at   | MmugDNA.37535.1 | 5.34  | 5.42  | 0.67 | 0.25 | -1.06 | 0.611643 | 0.832191 | 0.821755 | 0.903715 |
| MmugDNA.37536.1.S1_at   | MmugDNA.37536.1 | 9.96  | 10.08 | 0.56 | 0.21 | -1.09 | 0.928194 | 0.984817 | 0.972337 | 0.991445 |
| MmugDNA.37538.1.S1_at   | MmugDNA.37538.1 | 4.55  | 4.34  | 0.38 | 0.26 | 1.16  | 0.333129 | 0.410517 | 0.657441 | 0.637357 |
| MmugDNA.37539.1.S1_at   | MmugDNA.37539.1 | 4.32  | 4.59  | 0.16 | 0.05 | -1.21 | 0.025358 | 0.093847 | 0.299142 | 0.350298 |
| MmugDNA.37540.1.S1_at   | MmugDNA.37540.1 | 6.81  | 6.92  | 0.07 | 0.07 | -1.09 | 0.108371 | 0.077983 | 0.469594 | 0.324306 |
| MmugDNA.37541.1.S1_at   | MmugDNA.37541.1 | 4.79  | 3.94  | 0.82 | 0.09 | 1.8   | 0.223222 | 0.171158 | 0.581723 | 0.447735 |
| MmugDNA.37545.1.S1_at   | MmugDNA.37545.1 | 5.32  | 5.46  | 0.02 | 0.11 | -1.1  | 0.234224 | 0.067571 | 0.588649 | 0.306045 |
| MmugDNA.37547.1.S1_at   | MmugDNA.37547.1 | 7.38  | 7.57  | 0.49 | 0.34 | -1.14 | 0.563174 | 0.328399 | 0.795814 | 0.578066 |
| MmugDNA.37548.1.S1_at   | MmugDNA.37548.1 | 6.09  | 5.95  | 0.11 | 0.06 | 1.1   | 0.078324 | 0.446251 | 0.428302 | 0.662743 |
| MmugDNA.37549.1.S1_at   | MmugDNA.37549.1 | 4.99  | 4.51  | 0.33 | 0.78 | 1.4   | 0.701544 | 0.570059 | 0.868043 | 0.742855 |
| MmugDNA.3755.1.S1_at    | MmugDNA.3755.1  | 4.89  | 4.67  | 0.16 | 0.32 | 1.17  | 0.218037 | 0.370717 | 0.577569 | 0.609721 |
| MmugDNA.37550.1.S1_at   | MmugDNA.37550.1 | 4.64  | 4.56  | 0.15 | 0.06 | 1.06  | 0.592192 | 0.377904 | 0.810873 | 0.615264 |
| MmugDNA.37551.1.S1_at   | MmugDNA.37551.1 | 7.5   | 8.29  | 0.24 | 0.45 | -1.72 | 0.020942 | 0.01822  | 0.28163  | 0.169777 |
| MmugDNA.37551.1.S1_s_at | MmugDNA.37551.1 | 7.48  | 8.23  | 0.18 | 0.39 | -1.68 | 0.015519 | 0.005759 | 0.259093 | 0.104378 |
| MmugDNA.37552.1.S1_at   | MmugDNA.37552.1 | 5.52  | 5.6   | 0.57 | 0.22 | -1.06 | 0.606781 | 0.381385 | 0.819034 | 0.617681 |
| MmugDNA.37555.1.S1_at   | MmugDNA.37555.1 | 5.37  | 5.91  | 1.2  | 0.67 | -1.45 | 0.539669 | 0.683325 | 0.781247 | 0.815238 |
| MmugDNA.37556.1.S1_at   | MmugDNA.37556.1 | 5.18  | 5.39  | 0.3  | 0.15 | -1.15 | 0.133664 | 0.132853 | 0.500334 | 0.404544 |
| MmugDNA.37559.1.S1_at   | MmugDNA.37559.1 | 4.35  | 4.37  | 0    | 0.16 | -1.01 | 0.77919  | 0.46436  | 0.90795  | 0.67504  |
| MmugDNA.3756.1.S1_at    | MmugDNA.3756.1  | 11.88 | 11.15 | 0.07 | 0.29 | 1.66  | 0.00889  | 0.002591 | 0.221598 | 0.075326 |
| MmugDNA.37560.1.S1_at   | MmugDNA.37560.1 | 4.47  | 4.54  | 0.02 | 0.1  | -1.05 | 0.353713 | 0.870491 | 0.670266 | 0.926446 |
| MmugDNA.37562.1.S1_at   | MmugDNA.37562.1 | 3.69  | 3.97  | 0.18 | 0.14 | -1.22 | 0.270964 | 0.453962 | 0.615289 | 0.668338 |
| MmugDNA.37565.1.S1_at   | MmugDNA.37565.1 | 4.98  | 5.68  | 1.17 | 0.78 | -1.62 | 0.984244 | 0.545559 | 0.994395 | 0.727579 |
| MmugDNA.37567.1.S1_at   | MmugDNA.37567.1 | 3.49  | 3.66  | 0.06 | 0.23 | -1.12 | 0.496067 | 0.718162 | 0.75741  | 0.836893 |
| MmugDNA.37568.1.S1_at   | MmugDNA.37568.1 | 5.36  | 4.34  | 0.53 | 0.17 | 2.02  | 0.018958 | 0.022003 | 0.272319 | 0.18564  |
| MmugDNA.37569.1.S1_at   | MmugDNA.37569.1 | 5.63  | 5.34  | 0.29 | 0.15 | 1.22  | 0.403353 | 0.580739 | 0.701956 | 0.749903 |

|                         |                 |       |       |      |      |       |          |          |          |          |
|-------------------------|-----------------|-------|-------|------|------|-------|----------|----------|----------|----------|
| MmugDNA.3757.1.S1_at    | MmugDNA.3757.1  | 6.89  | 7.39  | 0.65 | 1.65 | -1.41 | 0.906242 | 0.059735 | 0.9627   | 0.29107  |
| MmugDNA.37570.1.S1_at   | MmugDNA.37570.1 | 5.71  | 5.71  | 0.12 | 0.01 | 1     | 0.341831 | 0.450627 | 0.662882 | 0.665844 |
| MmugDNA.37571.1.S1_at   | MmugDNA.37571.1 | 3.53  | 3.1   | 0.41 | 0.33 | 1.35  | 0.211446 | 0.339933 | 0.572216 | 0.586449 |
| MmugDNA.37573.1.S1_at   | MmugDNA.37573.1 | 4.16  | 4     | 0.17 | 0.11 | 1.12  | 0.454232 | 0.071767 | 0.733184 | 0.314019 |
| MmugDNA.37574.1.S1_at   | MmugDNA.37574.1 | 3.88  | 3.99  | 0.14 | 0.3  | -1.08 | 0.374524 | 0.137744 | 0.683722 | 0.410738 |
| MmugDNA.37576.1.S1_at   | MmugDNA.37576.1 | 7.36  | 6.99  | 0.69 | 0.25 | 1.3   | 0.191962 | 0.283469 | 0.554963 | 0.545959 |
| MmugDNA.37577.1.S1_at   | MmugDNA.37577.1 | 7.73  | 6.32  | 0.74 | 0.24 | 2.66  | 0.045878 | 0.033974 | 0.361884 | 0.227969 |
| MmugDNA.38737.1.S1_s_at | MmugDNA.38737.1 | 10.48 | 9.69  | 0.11 | 0.32 | 1.73  | 0.016447 | 0.00352  | 0.264089 | 0.085137 |
| MmugDNA.37579.1.S1_at   | MmugDNA.37579.1 | 4.15  | 4.14  | 0.09 | 0.14 | 1     | 0.387384 | 0.523    | 0.691953 | 0.713429 |
| MmugDNA.3758.1.S1_at    | MmugDNA.3758.1  | 5.07  | 5.19  | 0.06 | 0.02 | -1.09 | 0.02142  | 0.084946 | 0.282524 | 0.336556 |
| MmugDNA.37580.1.S1_at   | MmugDNA.37580.1 | 4.23  | 3.75  | 0.69 | 0.18 | 1.4   | 0.229928 | 0.124468 | 0.587007 | 0.394865 |
| MmugDNA.37581.1.S1_at   | MmugDNA.37581.1 | 4.44  | 4.62  | 0.09 | 0.08 | -1.13 | 0.048052 | 0.040596 | 0.367582 | 0.246342 |
| MmugDNA.37582.1.S1_at   | MmugDNA.37582.1 | 3.7   | 3.45  | 0.44 | 0.04 | 1.19  | 0.334716 | 0.28386  | 0.658461 | 0.546237 |
| MmugDNA.37583.1.S1_at   | MmugDNA.37583.1 | 7.45  | 7.12  | 0.63 | 0.03 | 1.25  | 0.270862 | 0.21677  | 0.615109 | 0.490311 |
| MmugDNA.37585.1.S1_at   | MmugDNA.37585.1 | 4.72  | 3.84  | 0.82 | 0.29 | 1.84  | 0.199256 | 0.378428 | 0.562215 | 0.615443 |
| MmugDNA.37586.1.S1_at   | MmugDNA.37586.1 | 4.21  | 4.39  | 0.13 | 0.11 | -1.14 | 0.132849 | 0.065769 | 0.498975 | 0.301767 |
| MmugDNA.37588.1.S1_at   | MmugDNA.37588.1 | 4.28  | 5.04  | 0.1  | 0.23 | -1.69 | 0.00458  | 0.001536 | 0.1844   | 0.059437 |
| MmugDNA.37589.1.S1_at   | MmugDNA.37589.1 | 9.42  | 9.19  | 0.16 | 0.31 | 1.17  | 0.544295 | 0.758898 | 0.784293 | 0.859892 |
| MmugDNA.37590.1.S1_at   | MmugDNA.37590.1 | 8.45  | 9.07  | 0.39 | 0.18 | -1.54 | 0.041282 | 0.030538 | 0.351465 | 0.216711 |
| MmugDNA.37592.1.S1_at   | MmugDNA.37592.1 | 4.58  | 4.31  | 0.61 | 0.45 | 1.2   | 0.483914 | 0.413155 | 0.749945 | 0.639461 |
| MmugDNA.37594.1.S1_at   | MmugDNA.37594.1 | 7.79  | 7.8   | 0.02 | 0.11 | -1.01 | 0.57984  | 0.760316 | 0.804451 | 0.860743 |
| MmugDNA.37595.1.S1_at   | MmugDNA.37595.1 | 10.38 | 10.55 | 0.2  | 0.09 | -1.12 | 0.270328 | 0.034217 | 0.614689 | 0.228795 |
| MmugDNA.37595.1.S1_s_at | MmugDNA.37595.1 | 10.68 | 10.98 | 0.16 | 0.03 | -1.24 | 0.026111 | 0.000484 | 0.30146  | 0.038753 |
| MmugDNA.37596.1.S1_at   | MmugDNA.37596.1 | 5.52  | 5.5   | 0.29 | 0.22 | 1.01  | 0.378798 | 0.054151 | 0.68656  | 0.278068 |
| MmugDNA.37597.1.S1_at   | MmugDNA.37597.1 | 5.72  | 5.71  | 0.18 | 0.2  | 1     | 0.573981 | 0.161889 | 0.801437 | 0.437979 |
| MmugDNA.37598.1.S1_at   | MmugDNA.37598.1 | 4.95  | 3.72  | 0.47 | 0.16 | 2.35  | 0.013681 | 0.015378 | 0.248874 | 0.157432 |
| MmugDNA.376.1.S1_at     | MmugDNA.376.1   | 3.19  | 3.28  | 0.08 | 0.1  | -1.06 | 0.58671  | 0.756419 | 0.80826  | 0.858223 |
| MmugDNA.3760.1.S1_at    | MmugDNA.3760.1  | 5.05  | 6.65  | 0.78 | 1.98 | -3.04 | 0.322048 | 0.299019 | 0.650781 | 0.557628 |
| MmugDNA.37600.1.S1_at   | MmugDNA.37600.1 | 3.42  | 3.49  | 0.11 | 0.05 | -1.05 | 0.272055 | 0.278536 | 0.615959 | 0.542311 |
| MmugDNA.37602.1.S1_at   | MmugDNA.37602.1 | 2.82  | 2.9   | 0.17 | 0.08 | -1.05 | 0.556692 | 0.475711 | 0.792031 | 0.682332 |
| MmugDNA.37603.1.S1_at   | MmugDNA.37603.1 | 3.51  | 3.45  | 0.18 | 0.19 | 1.04  | 0.932479 | 0.959196 | 0.973873 | 0.976862 |
| MmugDNA.37604.1.S1_at   | MmugDNA.37604.1 | 9.92  | 9.05  | 0.31 | 0.52 | 1.83  | 0.325633 | 0.464973 | 0.652943 | 0.675534 |
| MmugDNA.37606.1.S1_at   | MmugDNA.37606.1 | 7.96  | 8.63  | 0.15 | 0.41 | -1.59 | 0.02456  | 0.017014 | 0.295214 | 0.165348 |
| MmugDNA.37607.1.S1_at   | MmugDNA.37607.1 | 3.92  | 4.22  | 0.25 | 0.12 | -1.23 | 0.418018 | 0.604263 | 0.71107  | 0.764558 |
| MmugDNA.37609.1.S1_at   | MmugDNA.37609.1 | 9.92  | 9.66  | 0.21 | 0.59 | 1.2   | 0.167292 | 0.197804 | 0.531441 | 0.472721 |
| MmugDNA.3761.1.S1_at    | MmugDNA.3761.1  | 5.2   | 6.66  | 0.82 | 0.64 | -2.75 | 0.183742 | 0.155828 | 0.547827 | 0.431211 |
| MmugDNA.37610.1.S1_at   | MmugDNA.37610.1 | 11.15 | 10.71 | 0.1  | 0.49 | 1.35  | 0.150529 | 0.179583 | 0.515372 | 0.45603  |
| MmugDNA.37611.1.S1_at   | MmugDNA.37611.1 | 3.43  | 3.2   | 0.27 | 0.05 | 1.17  | 0.195475 | 0.131864 | 0.558901 | 0.403891 |
| MmugDNA.37612.1.S1_at   | MmugDNA.37612.1 | 5.03  | 6.1   | 0.33 | 0.88 | -2.09 | 0.172676 | 0.236289 | 0.536277 | 0.507287 |
| MmugDNA.37613.1.S1_at   | MmugDNA.37613.1 | 4.57  | 4.46  | 0.26 | 0.24 | 1.08  | 0.786071 | 0.802859 | 0.911069 | 0.886465 |
| MmugDNA.37614.1.S1_at   | MmugDNA.37614.1 | 9.22  | 9.4   | 0.44 | 0.55 | -1.13 | 0.394846 | 0.441381 | 0.696162 | 0.659552 |

|                         |                 |       |       |      |      |       |          |          |          |          |
|-------------------------|-----------------|-------|-------|------|------|-------|----------|----------|----------|----------|
| MmugDNA.37615.1.S1_at   | MmugDNA.37615.1 | 6.05  | 6.28  | 0.23 | 0.19 | -1.17 | 0.973174 | 0.407558 | 0.989572 | 0.63505  |
| MmugDNA.37616.1.S1_at   | MmugDNA.37616.1 | 5.9   | 6.57  | 0.16 | 0.59 | -1.59 | 0.040693 | 0.017045 | 0.350025 | 0.165455 |
| MmugDNA.37616.1.S1_s_at | MmugDNA.37616.1 | 5.66  | 6.57  | 0.17 | 0.85 | -1.87 | 0.060746 | 0.026203 | 0.394325 | 0.202874 |
| MmugDNA.37617.1.S1_at   | MmugDNA.37617.1 | 4.7   | 4.43  | 0.42 | 0.12 | 1.2   | 0.329041 | 0.118698 | 0.654811 | 0.38672  |
| MmugDNA.37618.1.S1_at   | MmugDNA.37618.1 | 11.59 | 11.98 | 0.13 | 0.23 | -1.31 | 0.074806 | 0.03938  | 0.42102  | 0.243406 |
| MmugDNA.37619.1.S1_at   | MmugDNA.37619.1 | 9.77  | 9.95  | 0.1  | 0.22 | -1.13 | 0.344875 | 0.480579 | 0.664827 | 0.685902 |
| MmugDNA.3762.1.S1_at    | MmugDNA.3762.1  | 11.2  | 11.51 | 0.27 | 0.22 | -1.24 | 0.35354  | 0.548162 | 0.670178 | 0.728911 |
| MmugDNA.37620.1.S1_at   | MmugDNA.37620.1 | 4.31  | 4.45  | 0.01 | 0.41 | -1.1  | 0.590763 | 0.309613 | 0.810008 | 0.564987 |
| MmugDNA.37623.1.S1_at   | MmugDNA.37623.1 | 9.95  | 8.76  | 0.37 | 0.71 | 2.28  | 0.281278 | 0.363152 | 0.622129 | 0.60356  |
| MmugDNA.37625.1.S1_at   | MmugDNA.37625.1 | 6.39  | 6.39  | 0.27 | 0.02 | 1     | 0.957881 | 0.996148 | 0.984034 | 0.997658 |
| MmugDNA.37626.1.S1_at   | MmugDNA.37626.1 | 6.61  | 6.88  | 0.36 | 0.08 | -1.21 | 0.402926 | 0.490709 | 0.701716 | 0.692666 |
| MmugDNA.37628.1.S1_at   | MmugDNA.37628.1 | 10.13 | 10.63 | 0.46 | 0.52 | -1.42 | 0.083402 | 0.057725 | 0.43582  | 0.2866   |
| MmugDNA.37629.1.S1_at   | MmugDNA.37629.1 | 13.11 | 13.25 | 0.17 | 0.18 | -1.1  | 0.405204 | 0.458461 | 0.703082 | 0.671168 |
| MmugDNA.37630.1.S1_at   | MmugDNA.37630.1 | 11.71 | 11.19 | 0.1  | 0.13 | 1.43  | 0.010151 | 0.00573  | 0.228247 | 0.104271 |
| MmugDNA.37631.1.S1_at   | MmugDNA.37631.1 | 6.37  | 5.15  | 0.07 | 0.81 | 2.32  | 0.186325 | 0.192652 | 0.549928 | 0.468148 |
| MmugDNA.37632.1.S1_at   | MmugDNA.37632.1 | 11.69 | 10.87 | 0.09 | 0.54 | 1.76  | 0.156357 | 0.073872 | 0.521042 | 0.317241 |
| MmugDNA.37633.1.S1_at   | MmugDNA.37633.1 | 6.05  | 6.2   | 0.23 | 0.68 | -1.11 | 0.698387 | 0.707089 | 0.866082 | 0.830137 |
| MmugDNA.37634.1.S1_at   | MmugDNA.37634.1 | 8.33  | 8.07  | 0.42 | 0.21 | 1.2   | 0.653619 | 0.360158 | 0.844253 | 0.601268 |
| MmugDNA.37635.1.S1_at   | MmugDNA.37635.1 | 4.66  | 4.84  | 0.12 | 0.14 | -1.14 | 0.338529 | 0.361665 | 0.660967 | 0.602408 |
| MmugDNA.37636.1.S1_at   | MmugDNA.37636.1 | 10.42 | 10.85 | 0.04 | 0.06 | -1.34 | 0.000493 | 0.000792 | 0.135112 | 0.046023 |
| MmugDNA.37637.1.S1_at   | MmugDNA.37637.1 | 4.8   | 4.76  | 0.12 | 0.03 | 1.03  | 0.843982 | 0.90062  | 0.937335 | 0.943473 |
| MmugDNA.37638.1.S1_at   | MmugDNA.37638.1 | 9.27  | 9.6   | 0.58 | 0.86 | -1.25 | 0.88806  | 0.924356 | 0.955009 | 0.957351 |
| MmugDNA.37639.1.S1_at   | MmugDNA.37639.1 | 7.19  | 7.27  | 0.11 | 0.47 | -1.06 | 0.270282 | 0.54073  | 0.614663 | 0.724514 |
| MmugDNA.37641.1.S1_at   | MmugDNA.37641.1 | 6.15  | 5.46  | 0.42 | 0.41 | 1.62  | 0.039803 | 0.043292 | 0.3482   | 0.252847 |
| MmugDNA.37642.1.S1_at   | MmugDNA.37642.1 | 7.95  | 7.32  | 0.48 | 0.34 | 1.55  | 0.109521 | 0.147484 | 0.470811 | 0.421765 |
| MmugDNA.37643.1.S1_at   | MmugDNA.37643.1 | 5.32  | 5.51  | 0.09 | 0.19 | -1.14 | 0.136625 | 0.206047 | 0.503755 | 0.480273 |
| MmugDNA.37644.1.S1_at   | MmugDNA.37644.1 | 4.68  | 4.63  | 0.35 | 0.24 | 1.04  | 0.243814 | 0.325087 | 0.595593 | 0.575545 |
| MmugDNA.37645.1.S1_at   | MmugDNA.37645.1 | 6.81  | 6.85  | 0.23 | 0.15 | -1.03 | 0.602442 | 0.696562 | 0.816555 | 0.823774 |
| MmugDNA.37646.1.S1_at   | MmugDNA.37646.1 | 7.83  | 7.72  | 0.26 | 0.17 | 1.07  | 0.353451 | 0.556786 | 0.67013  | 0.734796 |
| MmugDNA.37647.1.S1_at   | MmugDNA.37647.1 | 7.31  | 7.56  | 0.16 | 0.2  | -1.18 | 0.177095 | 0.145344 | 0.541073 | 0.419365 |
| MmugDNA.37649.1.S1_at   | MmugDNA.37649.1 | 3.2   | 3.18  | 0.12 | 0.25 | 1.01  | 0.91138  | 0.832007 | 0.965013 | 0.903589 |
| MmugDNA.37650.1.S1_at   | MmugDNA.37650.1 | 4.45  | 4.15  | 0.36 | 0.17 | 1.24  | 0.222278 | 0.125799 | 0.58082  | 0.396313 |
| MmugDNA.37651.1.S1_at   | MmugDNA.37651.1 | 3.96  | 3.72  | 0.27 | 0.52 | 1.18  | 0.76752  | 0.386456 | 0.902376 | 0.621593 |
| MmugDNA.37652.1.S1_at   | MmugDNA.37652.1 | 3.74  | 3.73  | 0.24 | 0.1  | 1     | 0.981458 | 0.978201 | 0.993316 | 0.98807  |
| MmugDNA.37653.1.S1_at   | MmugDNA.37653.1 | 4.67  | 4.8   | 0.05 | 0.08 | -1.09 | 0.058779 | 0.050004 | 0.390921 | 0.268843 |
| MmugDNA.37654.1.S1_at   | MmugDNA.37654.1 | 12.11 | 12.03 | 0.17 | 0.33 | 1.06  | 0.658695 | 0.563751 | 0.846726 | 0.738808 |
| MmugDNA.37657.1.S1_at   | MmugDNA.37657.1 | 3.16  | 3.07  | 0.31 | 0.14 | 1.07  | 0.248933 | 0.197047 | 0.599669 | 0.472208 |
| MmugDNA.37658.1.S1_at   | MmugDNA.37658.1 | 3.63  | 3.68  | 0.23 | 0.21 | -1.03 | 0.662794 | 0.632479 | 0.848768 | 0.783558 |
| MmugDNA.37659.1.S1_at   | MmugDNA.37659.1 | 8.08  | 7.74  | 0.91 | 1.44 | 1.27  | 0.927532 | 0.959839 | 0.972003 | 0.977272 |
| MmugDNA.37660.1.S1_at   | MmugDNA.37660.1 | 7.49  | 6.87  | 0.25 | 0.96 | 1.54  | 0.116744 | 0.089247 | 0.480612 | 0.34333  |
| MmugDNA.37661.1.S1_at   | MmugDNA.37661.1 | 5.57  | 5.67  | 0.13 | 0.15 | -1.07 | 0.402997 | 0.650122 | 0.701726 | 0.795406 |



|                         |                 |       |       |      |      |       |          |          |          |          |
|-------------------------|-----------------|-------|-------|------|------|-------|----------|----------|----------|----------|
| MmugDNA.37662.1.S1_at   | MmugDNA.37662.1 | 4.92  | 4.93  | 0.17 | 0.4  | -1.01 | 0.372453 | 0.499132 | 0.682812 | 0.698006 |
| MmugDNA.37664.1.S1_at   | MmugDNA.37664.1 | 6.46  | 6.03  | 0.6  | 0.1  | 1.35  | 0.713563 | 0.719793 | 0.874503 | 0.837888 |
| MmugDNA.37665.1.S1_at   | MmugDNA.37665.1 | 3.31  | 3.38  | 0.16 | 0.16 | -1.05 | 0.589965 | 0.361301 | 0.809673 | 0.602104 |
| MmugDNA.37666.1.S1_at   | MmugDNA.37666.1 | 6.56  | 6.67  | 0.12 | 0.06 | -1.08 | 0.079676 | 0.067041 | 0.430109 | 0.304872 |
| MmugDNA.37668.1.S1_at   | MmugDNA.37668.1 | 10.31 | 10.28 | 0.13 | 0.13 | 1.02  | 0.658819 | 0.84857  | 0.846726 | 0.91405  |
| MmugDNA.37669.1.S1_at   | MmugDNA.37669.1 | 9.55  | 9.06  | 0.2  | 0.56 | 1.41  | 0.654162 | 0.843567 | 0.844551 | 0.910905 |
| MmugDNA.3767.1.S1_at    | MmugDNA.3767.1  | 4.16  | 4.02  | 0.57 | 0.08 | 1.1   | 0.748605 | 0.863127 | 0.89251  | 0.922249 |
| MmugDNA.37673.1.S1_at   | MmugDNA.37673.1 | 6.52  | 8.38  | 0.28 | 0.84 | -3.65 | 0.023144 | 0.014417 | 0.290295 | 0.15326  |
| MmugDNA.37675.1.S1_at   | MmugDNA.37675.1 | 3.86  | 3.84  | 0.07 | 0.16 | 1.01  | 0.983893 | 0.605995 | 0.994301 | 0.765567 |
| MmugDNA.37676.1.S1_at   | MmugDNA.37676.1 | 6.2   | 6.03  | 0.31 | 0.19 | 1.12  | 0.977946 | 0.90123  | 0.991734 | 0.943829 |
| MmugDNA.37677.1.S1_at   | MmugDNA.37677.1 | 10.58 | 10.85 | 0.05 | 0.62 | -1.21 | 0.388873 | 0.521543 | 0.692804 | 0.712483 |
| MmugDNA.37679.1.S1_at   | MmugDNA.37679.1 | 3.51  | 3.57  | 0.1  | 0.1  | -1.05 | 0.398773 | 0.413562 | 0.698907 | 0.639648 |
| MmugDNA.37681.1.S1_at   | MmugDNA.37681.1 | 4.64  | 4.55  | 0.18 | 0.58 | 1.06  | 0.697217 | 0.397084 | 0.865585 | 0.628611 |
| MmugDNA.37682.1.S1_at   | MmugDNA.37682.1 | 4.75  | 4.52  | 0.35 | 0.1  | 1.17  | 0.928747 | 0.992773 | 0.972607 | 0.995715 |
| MmugDNA.37683.1.S1_at   | MmugDNA.37683.1 | 9.7   | 10.63 | 0.65 | 0.4  | -1.9  | 0.105355 | 0.08581  | 0.465957 | 0.337901 |
| MmugDNA.37684.1.S1_at   | MmugDNA.37684.1 | 6.24  | 7.2   | 0.27 | 0.19 | -1.95 | 0.012725 | 0.00195  | 0.243533 | 0.065813 |
| MmugDNA.37685.1.S1_at   | MmugDNA.37685.1 | 9.02  | 9.13  | 0.58 | 0.39 | -1.08 | 0.57344  | 0.482    | 0.801219 | 0.686928 |
| MmugDNA.37686.1.S1_at   | MmugDNA.37686.1 | 6.09  | 6.31  | 0.03 | 0.07 | -1.16 | 0.018815 | 0.025672 | 0.271536 | 0.200834 |
| MmugDNA.37687.1.S1_at   | MmugDNA.37687.1 | 4.7   | 4.63  | 0.83 | 0.03 | 1.05  | 0.331561 | 0.287242 | 0.656424 | 0.548526 |
| MmugDNA.37688.1.S1_at   | MmugDNA.37688.1 | 5.06  | 5.13  | 0.25 | 0.08 | -1.05 | 0.61098  | 0.803806 | 0.82143  | 0.887124 |
| MmugDNA.37689.1.S1_at   | MmugDNA.37689.1 | 11.54 | 10.86 | 0.07 | 0.31 | 1.6   | 0.051261 | 0.004027 | 0.376001 | 0.090171 |
| MmugDNA.3769.1.S1_at    | MmugDNA.3769.1  | 8.26  | 7.11  | 0.11 | 0.08 | 2.22  | 0.000145 | 0.000009 | 0.112653 | 0.016421 |
| MmugDNA.37691.1.S1_at   | MmugDNA.37691.1 | 5.25  | 5.63  | 0.08 | 0.17 | -1.3  | 0.06111  | 0.048598 | 0.394935 | 0.265572 |
| MmugDNA.37692.1.S1_at   | MmugDNA.37692.1 | 4.76  | 5.08  | 0.1  | 0.18 | -1.25 | 0.232457 | 0.310078 | 0.587814 | 0.565307 |
| MmugDNA.37693.1.S1_at   | MmugDNA.37693.1 | 7.16  | 7.56  | 0.52 | 0.29 | -1.32 | 0.232455 | 0.301753 | 0.587814 | 0.559687 |
| MmugDNA.37694.1.S1_at   | MmugDNA.37694.1 | 8.58  | 8.22  | 0.29 | 0.27 | 1.28  | 0.474874 | 0.13351  | 0.745441 | 0.405422 |
| MmugDNA.37695.1.S1_at   | MmugDNA.37695.1 | 7.66  | 6.59  | 0.19 | 0.62 | 2.1   | 0.09441  | 0.066006 | 0.451998 | 0.302324 |
| MmugDNA.37697.1.S1_at   | MmugDNA.37697.1 | 3.14  | 3.2   | 0.03 | 0.17 | -1.04 | 0.67169  | 0.196861 | 0.852716 | 0.471976 |
| MmugDNA.37699.1.S1_at   | MmugDNA.37699.1 | 11.23 | 11.29 | 0.23 | 0.37 | -1.04 | 0.974852 | 0.171246 | 0.990192 | 0.447792 |
| MmugDNA.3770.1.S1_at    | MmugDNA.3770.1  | 12.24 | 11.66 | 0.34 | 0.51 | 1.49  | 0.144714 | 0.160286 | 0.511058 | 0.436406 |
| MmugDNA.37700.1.S1_at   | MmugDNA.37700.1 | 2.77  | 2.73  | 0.05 | 0.03 | 1.02  | 0.990475 | 0.091181 | 0.996659 | 0.346097 |
| MmugDNA.37701.1.S1_at   | MmugDNA.37701.1 | 4.63  | 4.51  | 0.11 | 0.14 | 1.09  | 0.349049 | 0.414773 | 0.667394 | 0.640456 |
| MmugDNA.37702.1.S1_at   | MmugDNA.37702.1 | 6.14  | 6.22  | 0.09 | 0.31 | -1.06 | 0.605409 | 0.447869 | 0.818248 | 0.663881 |
| MmugDNA.37703.1.S1_at   | MmugDNA.37703.1 | 3.85  | 4.13  | 0.09 | 0.21 | -1.22 | 0.430641 | 0.750481 | 0.718201 | 0.854844 |
| MmugDNA.37704.1.S1_at   | MmugDNA.37704.1 | 7.06  | 7.38  | 0.29 | 0.08 | -1.25 | 0.38078  | 0.041282 | 0.687592 | 0.247995 |
| MmugDNA.37705.1.S1_at   | MmugDNA.37705.1 | 7.64  | 8.2   | 0.07 | 0.22 | -1.47 | 0.006895 | 0.003963 | 0.202181 | 0.089522 |
| MmugDNA.37706.1.S1_at   | MmugDNA.37706.1 | 3.99  | 3.84  | 0.2  | 0.16 | 1.11  | 0.311733 | 0.268349 | 0.643627 | 0.534041 |
| MmugDNA.37707.1.S1_at   | MmugDNA.37707.1 | 8.6   | 9.22  | 0.12 | 0.6  | -1.53 | 0.293096 | 0.344802 | 0.630264 | 0.590142 |
| MmugDNA.37707.1.S1_s_at | MmugDNA.37707.1 | 8.31  | 9.11  | 0.09 | 0.69 | -1.75 | 0.425696 | 0.55771  | 0.715281 | 0.735173 |
| MmugDNA.37709.1.S1_at   | MmugDNA.37709.1 | 4.8   | 3.6   | 0.57 | 0.13 | 2.29  | 0.02712  | 0.018281 | 0.306613 | 0.170051 |
| MmugDNA.3771.1.S1_at    | MmugDNA.3771.1  | 3.88  | 3.88  | 0.03 | 0.02 | 1     | 0.782616 | 0.230069 | 0.909285 | 0.50194  |

|                         |                 |       |       |      |      |       |          |          |          |          |
|-------------------------|-----------------|-------|-------|------|------|-------|----------|----------|----------|----------|
| MmugDNA.37711.1.S1_at   | MmugDNA.37711.1 | 10.1  | 9.77  | 0.24 | 0.1  | 1.26  | 0.17012  | 0.071369 | 0.534249 | 0.313445 |
| MmugDNA.37712.1.S1_at   | MmugDNA.37712.1 | 6.2   | 6.34  | 0.35 | 0.58 | -1.1  | 0.755474 | 0.137169 | 0.896094 | 0.410045 |
| MmugDNA.37713.1.S1_s_at | MmugDNA.37713.1 | 6.2   | 5.37  | 0.09 | 0.41 | 1.79  | 0.055593 | 0.057791 | 0.384246 | 0.286756 |
| MmugDNA.37714.1.S1_at   | MmugDNA.37714.1 | 6.12  | 6.02  | 0.34 | 0.03 | 1.07  | 0.598339 | 0.780378 | 0.813939 | 0.872597 |
| MmugDNA.37716.1.S1_at   | MmugDNA.37716.1 | 3.32  | 3.27  | 0.06 | 0    | 1.04  | 0.166316 | 0.099536 | 0.529929 | 0.357957 |
| MmugDNA.37717.1.S1_at   | MmugDNA.37717.1 | 4.14  | 4.15  | 0.2  | 0.15 | -1.01 | 0.255982 | 0.337609 | 0.603671 | 0.584788 |
| MmugDNA.37718.1.S1_at   | MmugDNA.37718.1 | 4.83  | 4.58  | 1.31 | 0.48 | 1.19  | 0.268438 | 0.350094 | 0.613168 | 0.593862 |
| MmugDNA.37719.1.S1_at   | MmugDNA.37719.1 | 4.48  | 4.48  | 0.01 | 0.03 | 1.01  | 0.207871 | 0.940064 | 0.569854 | 0.965955 |
| MmugDNA.3772.1.S1_at    | MmugDNA.3772.1  | 5.27  | 6.39  | 0.13 | 1.12 | -2.18 | 0.161097 | 0.218065 | 0.526189 | 0.491683 |
| MmugDNA.37720.1.S1_at   | MmugDNA.37720.1 | 5.32  | 5.31  | 0.54 | 0.46 | 1.01  | 0.451206 | 0.323557 | 0.731503 | 0.574497 |
| MmugDNA.37721.1.S1_at   | MmugDNA.37721.1 | 5.65  | 5.62  | 0.14 | 0.07 | 1.02  | 0.606649 | 0.808755 | 0.818943 | 0.889895 |
| MmugDNA.37722.1.S1_at   | MmugDNA.37722.1 | 5.81  | 5.89  | 0.03 | 0.32 | -1.06 | 0.213391 | 0.294106 | 0.573596 | 0.553936 |
| MmugDNA.37723.1.S1_at   | MmugDNA.37723.1 | 5.27  | 5.1   | 0.43 | 0.45 | 1.12  | 0.986603 | 0.926905 | 0.995263 | 0.958424 |
| MmugDNA.37724.1.S1_at   | MmugDNA.37724.1 | 6.81  | 6.83  | 0.19 | 0.03 | -1.01 | 0.973226 | 0.029428 | 0.989575 | 0.213368 |
| MmugDNA.37725.1.S1_at   | MmugDNA.37725.1 | 7.96  | 7.19  | 0.12 | 0.42 | 1.7   | 0.139011 | 0.003101 | 0.506234 | 0.081277 |
| MmugDNA.37726.1.S1_at   | MmugDNA.37726.1 | 4.36  | 4.08  | 0.14 | 0.12 | 1.21  | 0.039717 | 0.083577 | 0.347969 | 0.334152 |
| MmugDNA.37727.1.S1_at   | MmugDNA.37727.1 | 3.99  | 4.2   | 0.06 | 0.12 | -1.16 | 0.145713 | 0.016043 | 0.511596 | 0.160532 |
| MmugDNA.37729.1.S1_at   | MmugDNA.37729.1 | 4.82  | 4.73  | 0.06 | 0.12 | 1.07  | 0.126775 | 0.147743 | 0.492863 | 0.42203  |
| MmugDNA.3773.1.S1_at    | MmugDNA.3773.1  | 4.45  | 4.95  | 0.14 | 0.43 | -1.41 | 0.107715 | 0.117395 | 0.468203 | 0.38505  |
| MmugDNA.37730.1.S1_at   | MmugDNA.37730.1 | 6.22  | 7.11  | 0.11 | 0.38 | -1.85 | 0.015485 | 0.052317 | 0.258971 | 0.274201 |
| MmugDNA.37731.1.S1_at   | MmugDNA.37731.1 | 3.23  | 3.18  | 0.32 | 0.13 | 1.03  | 0.315553 | 0.454986 | 0.646683 | 0.669026 |
| MmugDNA.37734.1.S1_at   | MmugDNA.37734.1 | 3.84  | 3.98  | 0.09 | 0.06 | -1.11 | 0.111056 | 0.048961 | 0.473009 | 0.26607  |
| MmugDNA.37735.1.S1_at   | MmugDNA.37735.1 | 9.15  | 9.53  | 0.1  | 0.24 | -1.3  | 0.075886 | 0.074368 | 0.423849 | 0.318053 |
| MmugDNA.37736.1.S1_at   | MmugDNA.37736.1 | 4     | 4.05  | 0.07 | 0.05 | -1.03 | 0.146384 | 0.310728 | 0.512522 | 0.565809 |
| MmugDNA.37738.1.S1_at   | MmugDNA.37738.1 | 6.14  | 5.83  | 0.92 | 0.28 | 1.24  | 0.285967 | 0.263664 | 0.625381 | 0.529945 |
| MmugDNA.37739.1.S1_at   | MmugDNA.37739.1 | 6.87  | 6.83  | 0.84 | 0.32 | 1.03  | 0.882958 | 0.982403 | 0.952961 | 0.99036  |
| MmugDNA.3774.1.S1_at    | MmugDNA.3774.1  | 5.7   | 5.78  | 0.28 | 1.42 | -1.06 | 0.924095 | 0.871124 | 0.970594 | 0.926785 |
| MmugDNA.37740.1.S1_at   | MmugDNA.37740.1 | 6.92  | 5.99  | 0.4  | 0.15 | 1.9   | 0.029772 | 0.07402  | 0.315397 | 0.317579 |
| MmugDNA.37742.1.S1_at   | MmugDNA.37742.1 | 11.82 | 12.77 | 0.17 | 0.28 | -1.93 | 0.010356 | 0.010374 | 0.229439 | 0.133236 |
| MmugDNA.37743.1.S1_at   | MmugDNA.37743.1 | 9.86  | 9.78  | 0.16 | 0.59 | 1.06  | 0.226483 | 0.276861 | 0.584429 | 0.540761 |
| MmugDNA.37745.1.S1_at   | MmugDNA.37745.1 | 7.18  | 6.8   | 1.22 | 1.04 | 1.3   | 0.634735 | 0.845481 | 0.834667 | 0.912096 |
| MmugDNA.37746.1.S1_at   | MmugDNA.37746.1 | 5.46  | 5.37  | 0.11 | 0.05 | 1.06  | 0.149019 | 0.038811 | 0.513987 | 0.241916 |
| MmugDNA.37747.1.S1_at   | MmugDNA.37747.1 | 3.76  | 3.72  | 0.68 | 0.08 | 1.03  | 0.382665 | 0.323226 | 0.688877 | 0.574408 |
| MmugDNA.37749.1.S1_at   | MmugDNA.37749.1 | 7.86  | 7.97  | 0.28 | 0.37 | -1.08 | 0.97237  | 0.097284 | 0.989473 | 0.354959 |
| MmugDNA.37750.1.S1_x_at | MmugDNA.37750.1 | 10.91 | 10.56 | 0.52 | 0.15 | 1.28  | 0.167372 | 0.219855 | 0.531513 | 0.493388 |
| MmugDNA.37751.1.S1_at   | MmugDNA.37751.1 | 4.44  | 4.01  | 0.32 | 0.54 | 1.34  | 0.376233 | 0.50667  | 0.685066 | 0.702542 |
| MmugDNA.37752.1.S1_at   | MmugDNA.37752.1 | 8.34  | 7.77  | 0.11 | 0.16 | 1.48  | 0.010628 | 0.003558 | 0.230991 | 0.085459 |
| MmugDNA.37753.1.S1_at   | MmugDNA.37753.1 | 6.47  | 6.11  | 0.24 | 0.46 | 1.28  | 0.660772 | 0.788939 | 0.847898 | 0.878011 |
| MmugDNA.37754.1.S1_at   | MmugDNA.37754.1 | 12.38 | 11.8  | 0.11 | 0.24 | 1.5   | 0.053692 | 0.036756 | 0.38074  | 0.236291 |
| MmugDNA.37755.1.S1_at   | MmugDNA.37755.1 | 3.74  | 3.76  | 0.14 | 0.16 | -1.02 | 0.707002 | 0.467312 | 0.8709   | 0.677035 |
| MmugDNA.37757.1.S1_at   | MmugDNA.37757.1 | 3.31  | 3.22  | 0.04 | 0.22 | 1.06  | 0.656787 | 0.396221 | 0.845614 | 0.628068 |

|                         |                 |       |       |      |      |       |          |          |          |          |
|-------------------------|-----------------|-------|-------|------|------|-------|----------|----------|----------|----------|
| MmugDNA.37758.1.S1_at   | MmugDNA.37758.1 | 7.02  | 7.19  | 0.86 | 0.7  | -1.12 | 0.483707 | 0.413358 | 0.749945 | 0.639626 |
| MmugDNA.37760.1.S1_at   | MmugDNA.37760.1 | 4.76  | 4.63  | 0.33 | 0.16 | 1.1   | 0.204984 | 0.406264 | 0.567457 | 0.634225 |
| MmugDNA.37761.1.S1_x_at | MmugDNA.37761.1 | 7.3   | 6.62  | 0.68 | 0.42 | 1.6   | 0.166628 | 0.25668  | 0.530266 | 0.524502 |
| MmugDNA.37764.1.S1_at   | MmugDNA.37764.1 | 9.2   | 8.8   | 0.29 | 0.19 | 1.32  | 0.091041 | 0.087902 | 0.446877 | 0.341309 |
| MmugDNA.37767.1.S1_at   | MmugDNA.37767.1 | 5.21  | 5.05  | 0.4  | 0.05 | 1.12  | 0.700845 | 0.618886 | 0.867685 | 0.774212 |
| MmugDNA.37768.1.S1_at   | MmugDNA.37768.1 | 6.48  | 6.66  | 0.1  | 0.27 | -1.13 | 0.880358 | 0.797733 | 0.951847 | 0.883466 |
| MmugDNA.37769.1.S1_at   | MmugDNA.37769.1 | 3.24  | 3.25  | 0.1  | 0.13 | -1.01 | 0.409    | 0.514993 | 0.705716 | 0.708004 |
| MmugDNA.3777.1.S1_at    | MmugDNA.3777.1  | 5.56  | 5.86  | 0.08 | 0.27 | -1.23 | 0.126379 | 0.138245 | 0.492722 | 0.411198 |
| MmugDNA.37770.1.S1_at   | MmugDNA.37770.1 | 4.32  | 4.29  | 0.2  | 0.23 | 1.03  | 0.681416 | 0.826873 | 0.857631 | 0.900568 |
| MmugDNA.37771.1.S1_at   | MmugDNA.37771.1 | 4.55  | 4.55  | 1.52 | 0.3  | 1     | 0.382179 | 0.304906 | 0.688543 | 0.562044 |
| MmugDNA.37772.1.S1_at   | MmugDNA.37772.1 | 10.43 | 11.09 | 0.06 | 0.31 | -1.58 | 0.022227 | 0.010256 | 0.284988 | 0.132655 |
| MmugDNA.37773.1.S1_at   | MmugDNA.37773.1 | 8.2   | 8.42  | 0.35 | 0.59 | -1.16 | 0.395967 | 0.468898 | 0.696669 | 0.677924 |
| MmugDNA.37774.1.S1_at   | MmugDNA.37774.1 | 4.9   | 4.96  | 0.18 | 0.04 | -1.04 | 0.898375 | 0.468426 | 0.959388 | 0.677714 |
| MmugDNA.37775.1.S1_at   | MmugDNA.37775.1 | 6.77  | 7.72  | 1.13 | 1.07 | -1.93 | 0.734564 | 0.078516 | 0.88571  | 0.325285 |
| MmugDNA.37776.1.S1_at   | MmugDNA.37776.1 | 4.58  | 4.55  | 0.03 | 0.14 | 1.02  | 0.250052 | 0.303479 | 0.600389 | 0.560979 |
| MmugDNA.37777.1.S1_at   | MmugDNA.37777.1 | 8.05  | 8.45  | 0.56 | 0.84 | -1.32 | 0.669174 | 0.612542 | 0.852122 | 0.770077 |
| MmugDNA.37777.1.S1_s_at | MmugDNA.37777.1 | 7.82  | 8.74  | 0.49 | 0.94 | -1.89 | 0.32394  | 0.397774 | 0.651789 | 0.629114 |
| MmugDNA.37778.1.S1_at   | MmugDNA.37778.1 | 10.49 | 10.61 | 0.13 | 0.07 | -1.09 | 0.049031 | 0.046792 | 0.370523 | 0.261042 |
| MmugDNA.3778.1.S1_at    | MmugDNA.3778.1  | 5.87  | 5.95  | 0.1  | 0.07 | -1.06 | 0.419426 | 0.608865 | 0.711796 | 0.76736  |
| MmugDNA.37780.1.S1_at   | MmugDNA.37780.1 | 7.76  | 8.05  | 0.19 | 1.07 | -1.22 | 0.520986 | 0.287479 | 0.77105  | 0.548718 |
| MmugDNA.37781.1.S1_at   | MmugDNA.37781.1 | 3.59  | 3.15  | 0.19 | 0.13 | 1.35  | 0.07841  | 0.11196  | 0.428471 | 0.377063 |
| MmugDNA.37782.1.S1_at   | MmugDNA.37782.1 | 3.45  | 3.16  | 0.07 | 0.16 | 1.22  | 0.078832 | 0.070503 | 0.428609 | 0.311777 |
| MmugDNA.37782.1.S1_s_at | MmugDNA.37782.1 | 5.3   | 5.12  | 0.07 | 0.4  | 1.13  | 0.162142 | 0.191786 | 0.526638 | 0.467133 |
| MmugDNA.37785.1.S1_at   | MmugDNA.37785.1 | 3.19  | 3.17  | 0.05 | 0.2  | 1.01  | 0.354095 | 0.541736 | 0.67034  | 0.725057 |
| MmugDNA.37787.1.S1_at   | MmugDNA.37787.1 | 7.52  | 8.15  | 0.18 | 0.64 | -1.55 | 0.153777 | 0.155826 | 0.518459 | 0.431211 |
| MmugDNA.37788.1.S1_at   | MmugDNA.37788.1 | 3.02  | 2.97  | 0.11 | 0.06 | 1.04  | 0.322199 | 0.175999 | 0.650882 | 0.452526 |
| MmugDNA.37789.1.S1_at   | MmugDNA.37789.1 | 4.83  | 5.22  | 0.18 | 0.2  | -1.31 | 0.070469 | 0.089064 | 0.414297 | 0.342977 |
| MmugDNA.3779.1.S1_at    | MmugDNA.3779.1  | 4.92  | 4.96  | 0.01 | 0.2  | -1.03 | 0.53426  | 0.205181 | 0.77862  | 0.47957  |
| MmugDNA.37790.1.S1_at   | MmugDNA.37790.1 | 3.92  | 4.03  | 0.07 | 0.06 | -1.08 | 0.069781 | 0.063636 | 0.412907 | 0.298815 |
| MmugDNA.37791.1.S1_at   | MmugDNA.37791.1 | 4.89  | 4.57  | 0.1  | 1.09 | 1.26  | 0.726736 | 0.903961 | 0.881115 | 0.945472 |
| MmugDNA.37792.1.S1_at   | MmugDNA.37792.1 | 3.86  | 3.89  | 0.03 | 0.16 | -1.02 | 0.997494 | 0.683178 | 0.998986 | 0.815172 |
| MmugDNA.37793.1.S1_x_at | MmugDNA.37793.1 | 13.09 | 13.11 | 0.06 | 0.09 | -1.01 | 0.653023 | 0.291831 | 0.843896 | 0.552086 |
| MmugDNA.37794.1.S1_at   | MmugDNA.37794.1 | 6.42  | 6.12  | 0.7  | 0.45 | 1.23  | 0.656538 | 0.103408 | 0.8454   | 0.3643   |
| MmugDNA.37796.1.S1_at   | MmugDNA.37796.1 | 10.07 | 10.89 | 0.05 | 0.32 | -1.76 | 0.027164 | 0.017769 | 0.306629 | 0.168461 |
| MmugDNA.37799.1.S1_at   | MmugDNA.37799.1 | 4.26  | 4.35  | 0.67 | 0.3  | -1.07 | 0.698235 | 0.767529 | 0.866049 | 0.865037 |
| MmugDNA.378.1.S1_at     | MmugDNA.378.1   | 4.52  | 4.29  | 0.64 | 0.13 | 1.17  | 0.490402 | 0.685277 | 0.754405 | 0.816424 |
| MmugDNA.3780.1.S1_at    | MmugDNA.3780.1  | 4.75  | 4.63  | 0.56 | 0.08 | 1.09  | 0.707235 | 0.764486 | 0.871007 | 0.863128 |
| MmugDNA.37800.1.S1_at   | MmugDNA.37800.1 | 2.92  | 2.96  | 0.25 | 0.11 | -1.03 | 0.755924 | 0.908014 | 0.896248 | 0.947889 |
| MmugDNA.37801.1.S1_at   | MmugDNA.37801.1 | 3.11  | 2.88  | 0.14 | 0.07 | 1.17  | 0.298699 | 0.11919  | 0.634211 | 0.387634 |
| MmugDNA.37804.1.S1_at   | MmugDNA.37804.1 | 3.74  | 3.95  | 0.15 | 0.38 | -1.15 | 0.231036 | 0.275162 | 0.587369 | 0.539576 |
| MmugDNA.37805.1.S1_at   | MmugDNA.37805.1 | 6.86  | 6.77  | 0.25 | 0.06 | 1.06  | 0.64026  | 0.448986 | 0.837612 | 0.664771 |

|                         |                 |       |       |      |      |       |          |          |          |          |
|-------------------------|-----------------|-------|-------|------|------|-------|----------|----------|----------|----------|
| MmugDNA.37806.1.S1_at   | MmugDNA.37806.1 | 3.95  | 3.95  | 0.23 | 0.06 | -1    | 0.817201 | 0.956115 | 0.9259   | 0.975053 |
| MmugDNA.37808.1.S1_at   | MmugDNA.37808.1 | 4.33  | 4.47  | 0.12 | 0.11 | -1.1  | 0.195664 | 0.232874 | 0.558901 | 0.50445  |
| MmugDNA.37809.1.S1_at   | MmugDNA.37809.1 | 3.25  | 3.25  | 0    | 0.13 | -1    | 0.575309 | 0.703063 | 0.802218 | 0.827866 |
| MmugDNA.3781.1.S1_at    | MmugDNA.3781.1  | 5.54  | 5.37  | 0.39 | 0.02 | 1.12  | 0.406008 | 0.226608 | 0.7035   | 0.499067 |
| MmugDNA.37810.1.S1_at   | MmugDNA.37810.1 | 6.79  | 6.36  | 0.46 | 0.29 | 1.35  | 0.219753 | 0.132874 | 0.579133 | 0.404544 |
| MmugDNA.37812.1.S1_at   | MmugDNA.37812.1 | 6.94  | 6.72  | 0.46 | 0.25 | 1.16  | 0.155353 | 0.152809 | 0.520164 | 0.427601 |
| MmugDNA.37815.1.S1_at   | MmugDNA.37815.1 | 4.03  | 3.92  | 0.13 | 0.26 | 1.08  | 0.808017 | 0.879021 | 0.921553 | 0.93099  |
| MmugDNA.37816.1.S1_at   | MmugDNA.37816.1 | 3.05  | 3.13  | 0.08 | 0.01 | -1.06 | 0.139328 | 0.155722 | 0.506801 | 0.431086 |
| MmugDNA.37817.1.S1_at   | MmugDNA.37817.1 | 4.72  | 4.7   | 0.27 | 0.08 | 1.01  | 0.762494 | 0.919609 | 0.899996 | 0.954848 |
| MmugDNA.37818.1.S1_at   | MmugDNA.37818.1 | 12.18 | 12.16 | 0.17 | 0.45 | 1.02  | 0.918461 | 0.853191 | 0.96831  | 0.916521 |
| MmugDNA.37821.1.S1_at   | MmugDNA.37821.1 | 5.58  | 5.85  | 0.01 | 0.39 | -1.21 | 0.818437 | 0.895975 | 0.926289 | 0.940569 |
| MmugDNA.37822.1.S1_at   | MmugDNA.37822.1 | 5.02  | 3.88  | 1.27 | 0.81 | 2.2   | 0.186963 | 0.160413 | 0.550106 | 0.436528 |
| MmugDNA.37824.1.S1_at   | MmugDNA.37824.1 | 6.53  | 6.37  | 0.72 | 0.39 | 1.11  | 0.414491 | 0.553449 | 0.709335 | 0.732588 |
| MmugDNA.37825.1.S1_at   | MmugDNA.37825.1 | 4.07  | 4.18  | 0.13 | 0.02 | -1.07 | 0.264002 | 0.098205 | 0.609826 | 0.356253 |
| MmugDNA.37826.1.S1_at   | MmugDNA.37826.1 | 8.99  | 8.52  | 0.19 | 0.47 | 1.39  | 0.159638 | 0.013137 | 0.524504 | 0.147338 |
| MmugDNA.37827.1.S1_at   | MmugDNA.37827.1 | 7.24  | 7.24  | 0.13 | 0.05 | -1    | 0.805179 | 0.703559 | 0.920016 | 0.828139 |
| MmugDNA.37828.1.S1_at   | MmugDNA.37828.1 | 9.24  | 9.08  | 0.48 | 0.22 | 1.12  | 0.512139 | 0.695592 | 0.765453 | 0.823073 |
| MmugDNA.3783.1.S1_at    | MmugDNA.3783.1  | 7.44  | 7.52  | 0.11 | 0.29 | -1.05 | 0.440073 | 0.081271 | 0.724095 | 0.329351 |
| MmugDNA.37830.1.S1_at   | MmugDNA.37830.1 | 6.41  | 6.28  | 0.08 | 0.09 | 1.1   | 0.04647  | 0.052007 | 0.363009 | 0.273539 |
| MmugDNA.37831.1.S1_at   | MmugDNA.37831.1 | 11.26 | 11.24 | 0.54 | 0.04 | 1.01  | 0.787639 | 0.430215 | 0.911639 | 0.651279 |
| MmugDNA.37832.1.S1_at   | MmugDNA.37832.1 | 6.18  | 5.74  | 0.18 | 0.46 | 1.36  | 0.281266 | 0.329992 | 0.622129 | 0.578915 |
| MmugDNA.37833.1.S1_at   | MmugDNA.37833.1 | 9.2   | 8.96  | 1.17 | 1.57 | 1.18  | 0.732211 | 0.642082 | 0.884296 | 0.789995 |
| MmugDNA.37836.1.S1_at   | MmugDNA.37836.1 | 5.53  | 4.04  | 0.98 | 1.01 | 2.81  | 0.287653 | 0.334883 | 0.626102 | 0.58275  |
| MmugDNA.37838.1.S1_at   | MmugDNA.37838.1 | 7.02  | 7.31  | 0.96 | 0.33 | -1.22 | 0.250399 | 0.284687 | 0.600389 | 0.5469   |
| MmugDNA.37839.1.S1_s_at | MmugDNA.37839.1 | 11.56 | 11.54 | 0.13 | 0.25 | 1.01  | 0.59343  | 0.757961 | 0.811443 | 0.859199 |
| MmugDNA.37841.1.S1_at   | MmugDNA.37841.1 | 5.53  | 5.73  | 0.15 | 0.22 | -1.14 | 0.105575 | 0.106517 | 0.46647  | 0.369078 |
| MmugDNA.37842.1.S1_at   | MmugDNA.37842.1 | 8.83  | 7.81  | 0.14 | 0.41 | 2.03  | 0.043081 | 0.039037 | 0.356248 | 0.242786 |
| MmugDNA.37843.1.S1_at   | MmugDNA.37843.1 | 2.94  | 2.79  | 0.14 | 0.39 | 1.11  | 0.827587 | 0.878734 | 0.930048 | 0.930817 |
| MmugDNA.37844.1.S1_at   | MmugDNA.37844.1 | 11.47 | 10.9  | 0.28 | 1.1  | 1.48  | 0.183045 | 0.139595 | 0.547134 | 0.41286  |
| MmugDNA.37846.1.S1_at   | MmugDNA.37846.1 | 3.48  | 3.4   | 0.22 | 0    | 1.05  | 0.426403 | 0.246459 | 0.715792 | 0.515899 |
| MmugDNA.37847.1.S1_at   | MmugDNA.37847.1 | 12.52 | 12.62 | 0.03 | 0.08 | -1.07 | 0.171631 | 0.00083  | 0.535232 | 0.046851 |
| MmugDNA.37848.1.S1_at   | MmugDNA.37848.1 | 3.65  | 3.7   | 0.32 | 0.24 | -1.04 | 0.803009 | 0.597729 | 0.918874 | 0.760358 |
| MmugDNA.37849.1.S1_at   | MmugDNA.37849.1 | 9.83  | 9.68  | 0.22 | 1.09 | 1.1   | 0.579388 | 0.245601 | 0.804265 | 0.515348 |
| MmugDNA.3785.1.S1_at    | MmugDNA.3785.1  | 5.43  | 5.49  | 0.06 | 0.19 | -1.04 | 0.198566 | 0.193148 | 0.561652 | 0.468554 |
| MmugDNA.37850.1.S1_at   | MmugDNA.37850.1 | 4.76  | 4.92  | 0.1  | 0.16 | -1.12 | 0.51568  | 0.671093 | 0.767629 | 0.80765  |
| MmugDNA.37851.1.S1_at   | MmugDNA.37851.1 | 4.72  | 4.95  | 0.09 | 0.21 | -1.18 | 0.27498  | 0.331401 | 0.617642 | 0.580076 |
| MmugDNA.37852.1.S1_at   | MmugDNA.37852.1 | 4.99  | 5.02  | 0    | 0.07 | -1.02 | 0.562874 | 0.720447 | 0.79556  | 0.838261 |
| MmugDNA.37854.1.S1_at   | MmugDNA.37854.1 | 5.54  | 4.68  | 0.58 | 0.43 | 1.82  | 0.532993 | 0.528186 | 0.777926 | 0.716462 |
| MmugDNA.37855.1.S1_at   | MmugDNA.37855.1 | 5.55  | 5.66  | 0.09 | 0.2  | -1.08 | 0.222759 | 0.177378 | 0.581166 | 0.453742 |
| MmugDNA.37856.1.S1_at   | MmugDNA.37856.1 | 3.87  | 3.94  | 0.16 | 0.06 | -1.05 | 0.593693 | 0.503826 | 0.811568 | 0.701184 |
| MmugDNA.37857.1.S1_at   | MmugDNA.37857.1 | 4.49  | 4.43  | 0.24 | 0.16 | 1.04  | 0.331204 | 0.171603 | 0.656225 | 0.448034 |

|                         |                 |       |       |      |      |       |          |          |          |          |
|-------------------------|-----------------|-------|-------|------|------|-------|----------|----------|----------|----------|
| MmugDNA.37858.1.S1_at   | MmugDNA.37858.1 | 6.45  | 6.55  | 0.56 | 0.56 | -1.07 | 0.304777 | 0.439028 | 0.638784 | 0.657802 |
| MmugDNA.37859.1.S1_at   | MmugDNA.37859.1 | 12.41 | 12.35 | 0.17 | 0.13 | 1.04  | 0.724509 | 0.875392 | 0.879724 | 0.929245 |
| MmugDNA.37860.1.S1_at   | MmugDNA.37860.1 | 7.01  | 6.79  | 0.16 | 0.38 | 1.16  | 0.35861  | 0.23263  | 0.67333  | 0.504359 |
| MmugDNA.37862.1.S1_at   | MmugDNA.37862.1 | 5.26  | 4.93  | 0.61 | 0.52 | 1.26  | 0.566216 | 0.803352 | 0.79749  | 0.886825 |
| MmugDNA.37863.1.S1_at   | MmugDNA.37863.1 | 4.42  | 3.32  | 0.63 | 0.19 | 2.14  | 0.087521 | 0.214385 | 0.441877 | 0.48807  |
| MmugDNA.37864.1.S1_at   | MmugDNA.37864.1 | 9.36  | 9.51  | 0.05 | 0.68 | -1.11 | 0.773533 | 0.748797 | 0.904884 | 0.853901 |
| MmugDNA.37866.1.S1_at   | MmugDNA.37866.1 | 9.12  | 8.95  | 0.19 | 0.08 | 1.13  | 0.171377 | 0.14319  | 0.535166 | 0.417088 |
| MmugDNA.37867.1.S1_at   | MmugDNA.37867.1 | 9.99  | 9.72  | 0.15 | 0.05 | 1.21  | 0.101824 | 0.135489 | 0.461313 | 0.407591 |
| MmugDNA.37868.1.S1_at   | MmugDNA.37868.1 | 4.4   | 4.4   | 0.19 | 0.1  | -1    | 0.481716 | 0.438213 | 0.749268 | 0.657196 |
| MmugDNA.37870.1.S1_at   | MmugDNA.37870.1 | 4.57  | 4.57  | 0.38 | 0.13 | -1.01 | 0.539626 | 0.580388 | 0.781206 | 0.749646 |
| MmugDNA.37872.1.S1_at   | MmugDNA.37872.1 | 6.68  | 6.48  | 0.09 | 0.23 | 1.15  | 0.381425 | 0.179245 | 0.687881 | 0.45567  |
| MmugDNA.37873.1.S1_at   | MmugDNA.37873.1 | 12.43 | 12.18 | 0.42 | 0.62 | 1.19  | 0.678901 | 0.177101 | 0.8563   | 0.453611 |
| MmugDNA.37874.1.S1_at   | MmugDNA.37874.1 | 4.75  | 4.28  | 1.19 | 0.32 | 1.38  | 0.235358 | 0.274188 | 0.589342 | 0.538685 |
| MmugDNA.37875.1.S1_at   | MmugDNA.37875.1 | 6.21  | 7.04  | 0.28 | 0.56 | -1.77 | 0.05877  | 0.075317 | 0.390921 | 0.319475 |
| MmugDNA.37876.1.S1_at   | MmugDNA.37876.1 | 10.08 | 10.4  | 0.09 | 0.28 | -1.25 | 0.176793 | 0.218906 | 0.540521 | 0.492675 |
| MmugDNA.37877.1.S1_at   | MmugDNA.37877.1 | 8.96  | 8.26  | 0.32 | 0.49 | 1.63  | 0.052366 | 0.042718 | 0.377519 | 0.251141 |
| MmugDNA.12574.1.S1_s_at | MmugDNA.12574.1 | 5.79  | 5.83  | 0.62 | 0.67 | -1.03 | 0.523068 | 0.68362  | 0.77227  | 0.815387 |
| MmugDNA.37879.1.S1_at   | MmugDNA.37879.1 | 4.74  | 4.83  | 0.19 | 0.24 | -1.07 | 0.262268 | 0.401796 | 0.608902 | 0.631068 |
| MmugDNA.3788.1.S1_at    | MmugDNA.3788.1  | 7.47  | 7.7   | 0.69 | 0.65 | -1.17 | 0.802616 | 0.56356  | 0.918643 | 0.738718 |
| MmugDNA.37881.1.S1_at   | MmugDNA.37881.1 | 3.5   | 3.25  | 0.29 | 0.12 | 1.19  | 0.222017 | 0.379642 | 0.580625 | 0.616523 |
| MmugDNA.37882.1.S1_at   | MmugDNA.37882.1 | 7.8   | 7.15  | 0.28 | 0.61 | 1.56  | 0.096582 | 0.233866 | 0.455338 | 0.505169 |
| MmugDNA.37882.1.S1_s_at | MmugDNA.37882.1 | 13.09 | 13.38 | 0.07 | 0.33 | -1.22 | 0.757981 | 0.388292 | 0.89752  | 0.62274  |
| MmugDNA.37883.1.S1_at   | MmugDNA.37883.1 | 6.08  | 6.13  | 0.22 | 0.06 | -1.03 | 0.737555 | 0.334933 | 0.887266 | 0.58275  |
| MmugDNA.37884.1.S1_at   | MmugDNA.37884.1 | 3.6   | 3.67  | 0.17 | 0.04 | -1.05 | 0.490519 | 0.252993 | 0.754474 | 0.521279 |
| MmugDNA.37885.1.S1_at   | MmugDNA.37885.1 | 11.02 | 11.95 | 0.15 | 0.42 | -1.91 | 0.057304 | 0.049115 | 0.387873 | 0.266522 |
| MmugDNA.37886.1.S1_at   | MmugDNA.37886.1 | 2.7   | 2.65  | 0.12 | 0.07 | 1.03  | 0.364457 | 0.392659 | 0.677343 | 0.625813 |
| MmugDNA.37887.1.S1_at   | MmugDNA.37887.1 | 4.16  | 4.25  | 0.63 | 0.27 | -1.07 | 0.45999  | 0.737398 | 0.736644 | 0.847889 |
| MmugDNA.37888.1.S1_at   | MmugDNA.37888.1 | 9.87  | 9.34  | 0.24 | 0.25 | 1.44  | 0.156779 | 0.17778  | 0.521541 | 0.454111 |
| MmugDNA.37889.1.S1_at   | MmugDNA.37889.1 | 5.79  | 5.31  | 0.94 | 0.4  | 1.39  | 0.803986 | 0.59537  | 0.919355 | 0.759091 |
| MmugDNA.3789.1.S1_at    | MmugDNA.3789.1  | 10.41 | 10.32 | 0.15 | 0.43 | 1.07  | 0.798361 | 0.318709 | 0.916444 | 0.57133  |
| MmugDNA.37890.1.S1_at   | MmugDNA.37890.1 | 5.84  | 5.81  | 0.31 | 0.16 | 1.02  | 0.481791 | 0.335705 | 0.749333 | 0.583458 |
| MmugDNA.37892.1.S1_at   | MmugDNA.37892.1 | 5.25  | 5.46  | 0.31 | 0.22 | -1.16 | 0.216787 | 0.321631 | 0.576413 | 0.573342 |
| MmugDNA.37893.1.S1_at   | MmugDNA.37893.1 | 9.85  | 9.96  | 0.09 | 0.08 | -1.07 | 0.101912 | 0.197149 | 0.461313 | 0.472213 |
| MmugDNA.37894.1.S1_at   | MmugDNA.37894.1 | 4.32  | 4.45  | 0.21 | 0.25 | -1.09 | 0.612024 | 0.313813 | 0.821956 | 0.568083 |
| MmugDNA.37895.1.S1_at   | MmugDNA.37895.1 | 7.92  | 7.21  | 0.13 | 0.02 | 1.63  | 0.000727 | 0.00061  | 0.136818 | 0.042176 |
| MmugDNA.37896.1.S1_at   | MmugDNA.37896.1 | 6.32  | 6.33  | 0.1  | 0.11 | -1.01 | 0.907335 | 0.563076 | 0.9632   | 0.738345 |
| MmugDNA.37897.1.S1_at   | MmugDNA.37897.1 | 7.04  | 6.87  | 0.1  | 0.22 | 1.12  | 0.590895 | 0.599781 | 0.810127 | 0.761575 |
| MmugDNA.37898.1.S1_at   | MmugDNA.37898.1 | 3.95  | 4.04  | 0.04 | 0.08 | -1.06 | 0.106363 | 0.087917 | 0.466831 | 0.341318 |
| MmugDNA.379.1.S1_at     | MmugDNA.379.1   | 3.24  | 3.22  | 0.03 | 0.06 | 1.01  | 0.533225 | 0.749659 | 0.777978 | 0.854534 |
| MmugDNA.3790.1.S1_at    | MmugDNA.3790.1  | 6.11  | 5.77  | 0.29 | 0.25 | 1.27  | 0.335368 | 0.007032 | 0.659127 | 0.113112 |
| MmugDNA.37901.1.S1_at   | MmugDNA.37901.1 | 8.6   | 8.57  | 0.16 | 0.23 | 1.02  | 0.65681  | 0.269663 | 0.845614 | 0.534924 |

|                         |                 |       |       |      |      |       |          |          |          |          |
|-------------------------|-----------------|-------|-------|------|------|-------|----------|----------|----------|----------|
| MmugDNA.37902.1.S1_at   | MmugDNA.37902.1 | 8.71  | 9.2   | 0.36 | 0.47 | -1.41 | 0.511983 | 0.24704  | 0.765422 | 0.516238 |
| MmugDNA.37903.1.S1_at   | MmugDNA.37903.1 | 4.9   | 4.61  | 0.23 | 0.42 | 1.22  | 0.293616 | 0.386454 | 0.630735 | 0.621593 |
| MmugDNA.37905.1.S1_at   | MmugDNA.37905.1 | 4.07  | 4.09  | 0.24 | 0.2  | -1.02 | 0.374027 | 0.443737 | 0.683309 | 0.661427 |
| MmugDNA.37906.1.S1_at   | MmugDNA.37906.1 | 6.17  | 6.37  | 0.1  | 0.1  | -1.15 | 0.103373 | 0.255666 | 0.462888 | 0.523619 |
| MmugDNA.37907.1.S1_at   | MmugDNA.37907.1 | 6.08  | 6.14  | 0.1  | 0.2  | -1.04 | 0.448236 | 0.582095 | 0.729512 | 0.750784 |
| MmugDNA.37908.1.S1_at   | MmugDNA.37908.1 | 5.76  | 5.97  | 0.05 | 0.11 | -1.16 | 0.057558 | 0.036297 | 0.38863  | 0.235094 |
| MmugDNA.37910.1.S1_at   | MmugDNA.37910.1 | 3.94  | 3.98  | 0.71 | 0.16 | -1.03 | 0.749411 | 0.928287 | 0.892711 | 0.959243 |
| MmugDNA.37911.1.S1_at   | MmugDNA.37911.1 | 3.65  | 3.61  | 0.07 | 0.32 | 1.03  | 0.387791 | 0.49529  | 0.69212  | 0.695411 |
| MmugDNA.37912.1.S1_at   | MmugDNA.37912.1 | 5.36  | 5.39  | 0.22 | 0.1  | -1.02 | 0.843611 | 0.788965 | 0.937089 | 0.878011 |
| MmugDNA.37913.1.S1_at   | MmugDNA.37913.1 | 5.32  | 4.77  | 0.99 | 0.67 | 1.46  | 0.140502 | 0.142242 | 0.508385 | 0.415754 |
| MmugDNA.37914.1.S1_at   | MmugDNA.37914.1 | 6.45  | 6.87  | 0.1  | 0.14 | -1.34 | 0.012927 | 0.007612 | 0.244769 | 0.116745 |
| MmugDNA.37915.1.S1_at   | MmugDNA.37915.1 | 3.6   | 3.59  | 0.11 | 0.03 | 1.01  | 0.679552 | 0.423587 | 0.856669 | 0.646459 |
| MmugDNA.37916.1.S1_at   | MmugDNA.37916.1 | 5.13  | 5.56  | 0.57 | 0.33 | -1.35 | 0.578785 | 0.618523 | 0.803991 | 0.774147 |
| MmugDNA.37917.1.S1_at   | MmugDNA.37917.1 | 12.46 | 12.25 | 0.38 | 0.11 | 1.16  | 0.257953 | 0.377074 | 0.605348 | 0.614793 |
| MmugDNA.37918.1.S1_at   | MmugDNA.37918.1 | 5.37  | 5.34  | 0.06 | 0.13 | 1.02  | 0.678453 | 0.60719  | 0.856021 | 0.766271 |
| MmugDNA.37919.1.S1_at   | MmugDNA.37919.1 | 5.69  | 5.59  | 0.12 | 0.31 | 1.07  | 0.652654 | 0.807069 | 0.843828 | 0.888946 |
| MmugDNA.3792.1.S1_at    | MmugDNA.3792.1  | 5.52  | 5.5   | 0.14 | 0.11 | 1.01  | 0.685231 | 0.552333 | 0.858887 | 0.73166  |
| MmugDNA.37920.1.S1_at   | MmugDNA.37920.1 | 6.57  | 7.41  | 0.31 | 0.26 | -1.79 | 0.038776 | 0.027971 | 0.345445 | 0.208777 |
| MmugDNA.37924.1.S1_at   | MmugDNA.37924.1 | 3.72  | 3.77  | 0.05 | 0.03 | -1.03 | 0.110835 | 0.627073 | 0.472715 | 0.780185 |
| MmugDNA.37926.1.S1_at   | MmugDNA.37926.1 | 10.64 | 10.12 | 0.17 | 0.33 | 1.44  | 0.079035 | 0.064692 | 0.428609 | 0.300314 |
| MmugDNA.37928.1.S1_at   | MmugDNA.37928.1 | 4.68  | 4.13  | 0.08 | 0.3  | 1.47  | 0.108585 | 0.510598 | 0.470004 | 0.70503  |
| MmugDNA.37929.1.S1_at   | MmugDNA.37929.1 | 3.23  | 3.54  | 0.24 | 0.25 | -1.23 | 0.154745 | 0.190385 | 0.519305 | 0.465906 |
| MmugDNA.3793.1.S1_at    | MmugDNA.3793.1  | 5.37  | 5.56  | 0.39 | 0.27 | -1.15 | 0.812245 | 0.593856 | 0.923605 | 0.758418 |
| MmugDNA.37930.1.S1_at   | MmugDNA.37930.1 | 3.77  | 3.65  | 0.35 | 0.15 | 1.08  | 0.47999  | 0.707798 | 0.747985 | 0.830472 |
| MmugDNA.37931.1.S1_at   | MmugDNA.37931.1 | 3.5   | 3.55  | 0.39 | 0.2  | -1.03 | 0.932648 | 0.614838 | 0.973934 | 0.771576 |
| MmugDNA.37932.1.S1_at   | MmugDNA.37932.1 | 3.28  | 3.17  | 0.18 | 0.25 | 1.08  | 0.716474 | 0.388609 | 0.875462 | 0.622917 |
| MmugDNA.37933.1.S1_at   | MmugDNA.37933.1 | 3.7   | 3.53  | 0.24 | 0.11 | 1.12  | 0.738137 | 0.768276 | 0.88754  | 0.865456 |
| MmugDNA.37934.1.S1_at   | MmugDNA.37934.1 | 6.67  | 6.6   | 0.13 | 0.27 | 1.05  | 0.793637 | 0.6607   | 0.914488 | 0.80151  |
| MmugDNA.37937.1.S1_at   | MmugDNA.37937.1 | 4     | 3.58  | 0.64 | 0.09 | 1.34  | 0.162159 | 0.13663  | 0.526638 | 0.409162 |
| MmugDNA.37938.1.S1_at   | MmugDNA.37938.1 | 9.21  | 9.55  | 0.02 | 0.47 | -1.26 | 0.089517 | 0.07118  | 0.445161 | 0.31311  |
| MmugDNA.37939.1.S1_at   | MmugDNA.37939.1 | 11.35 | 11.73 | 0.25 | 0.62 | -1.3  | 0.512597 | 0.551159 | 0.765694 | 0.730819 |
| MmugDNA.3794.1.S1_at    | MmugDNA.3794.1  | 6.32  | 6.37  | 0.13 | 0.12 | -1.04 | 0.130426 | 0.128515 | 0.496851 | 0.399854 |
| MmugDNA.37940.1.S1_at   | MmugDNA.37940.1 | 10.62 | 8.14  | 0.23 | 0.46 | 5.57  | 0.001079 | 0.000203 | 0.144025 | 0.031734 |
| MmugDNA.37941.1.S1_at   | MmugDNA.37941.1 | 10.63 | 10.14 | 0.28 | 0.29 | 1.4   | 0.165684 | 0.046923 | 0.529716 | 0.261301 |
| MmugDNA.37942.1.S1_at   | MmugDNA.37942.1 | 6.79  | 6.91  | 0.1  | 0.31 | -1.09 | 0.469426 | 0.230014 | 0.741712 | 0.501865 |
| MmugDNA.37943.1.S1_at   | MmugDNA.37943.1 | 5.25  | 4.78  | 0.48 | 0.11 | 1.38  | 0.165946 | 0.207346 | 0.529851 | 0.481563 |
| MmugDNA.37944.1.S1_at   | MmugDNA.37944.1 | 9.95  | 9.57  | 0.27 | 0.5  | 1.3   | 0.711129 | 0.534223 | 0.873412 | 0.720204 |
| MmugDNA.37945.1.S1_at   | MmugDNA.37945.1 | 3.92  | 6.51  | 1.37 | 2.21 | -6.02 | 0.327299 | 0.41612  | 0.653682 | 0.64135  |
| MmugDNA.37946.1.S1_s_at | MmugDNA.37946.1 | 4.69  | 4.73  | 0.32 | 0.05 | -1.03 | 0.497786 | 0.196836 | 0.758068 | 0.471968 |
| MmugDNA.37948.1.S1_at   | MmugDNA.37948.1 | 4.06  | 4.42  | 0.22 | 0.06 | -1.28 | 0.213635 | 0.255176 | 0.573872 | 0.523228 |
| MmugDNA.37949.1.S1_at   | MmugDNA.37949.1 | 6.56  | 6.43  | 0.01 | 0.22 | 1.09  | 0.286836 | 0.265788 | 0.625572 | 0.531667 |

|                         |                 |       |       |      |      |        |          |          |          |          |
|-------------------------|-----------------|-------|-------|------|------|--------|----------|----------|----------|----------|
| MmugDNA.3795.1.S1_at    | MmugDNA.3795.1  | 12.18 | 12.04 | 0.1  | 0.06 | 1.1    | 0.216444 | 0.266808 | 0.576078 | 0.53241  |
| MmugDNA.37950.1.S1_at   | MmugDNA.37950.1 | 3.77  | 3.73  | 0.12 | 0.01 | 1.03   | 0.951116 | 0.553045 | 0.981611 | 0.732309 |
| MmugDNA.37951.1.S1_at   | MmugDNA.37951.1 | 5.4   | 5.08  | 0.52 | 0.21 | 1.25   | 0.245233 | 0.382119 | 0.596934 | 0.618346 |
| MmugDNA.37952.1.S1_at   | MmugDNA.37952.1 | 4.67  | 4.53  | 0.21 | 0.15 | 1.1    | 0.319943 | 0.252848 | 0.649244 | 0.521174 |
| MmugDNA.37953.1.S1_at   | MmugDNA.37953.1 | 8.98  | 7.73  | 0.14 | 0.92 | 2.37   | 0.077719 | 0.079502 | 0.427714 | 0.32681  |
| MmugDNA.37955.1.S1_at   | MmugDNA.37955.1 | 3.19  | 3.12  | 1.05 | 0.29 | 1.05   | 0.398738 | 0.49692  | 0.698869 | 0.696273 |
| MmugDNA.37956.1.S1_at   | MmugDNA.37956.1 | 3.96  | 3.82  | 0.25 | 0.39 | 1.1    | 0.640205 | 0.766387 | 0.837608 | 0.864265 |
| MmugDNA.37958.1.S1_at   | MmugDNA.37958.1 | 6.68  | 5.89  | 0.34 | 0.75 | 1.74   | 0.301674 | 0.270323 | 0.636545 | 0.535676 |
| MmugDNA.3796.1.S1_at    | MmugDNA.3796.1  | 6.29  | 6.21  | 0.33 | 0.39 | 1.06   | 0.397776 | 0.408475 | 0.698272 | 0.635694 |
| MmugDNA.37964.1.S1_at   | MmugDNA.37964.1 | 3.95  | 3.93  | 0.08 | 0.23 | 1.01   | 0.892686 | 0.721319 | 0.957283 | 0.838685 |
| MmugDNA.37966.1.S1_at   | MmugDNA.37966.1 | 8.01  | 7.73  | 0.28 | 0.09 | 1.21   | 0.043639 | 0.025727 | 0.356892 | 0.201029 |
| MmugDNA.37967.1.S1_at   | MmugDNA.37967.1 | 6.56  | 6.15  | 0.33 | 0.07 | 1.32   | 0.256095 | 0.181487 | 0.603805 | 0.458028 |
| MmugDNA.37968.1.S1_at   | MmugDNA.37968.1 | 10.69 | 10.23 | 0.31 | 0.2  | 1.37   | 0.101533 | 0.073073 | 0.461313 | 0.316017 |
| MmugDNA.37969.1.S1_at   | MmugDNA.37969.1 | 4.74  | 4.62  | 0.08 | 0.04 | 1.08   | 0.090351 | 0.076978 | 0.445788 | 0.322421 |
| MmugDNA.3797.1.S1_at    | MmugDNA.3797.1  | 11.25 | 10.32 | 0.64 | 0.68 | 1.9    | 0.135111 | 0.202203 | 0.501995 | 0.476613 |
| MmugDNA.3797.1.S1_x_at  | MmugDNA.3797.1  | 11.18 | 10.53 | 0.66 | 0.63 | 1.57   | 0.13265  | 0.189062 | 0.49874  | 0.464897 |
| MmugDNA.37970.1.S1_at   | MmugDNA.37970.1 | 5.16  | 5.03  | 0.17 | 0.11 | 1.09   | 0.729769 | 0.084115 | 0.88278  | 0.335147 |
| MmugDNA.37971.1.S1_at   | MmugDNA.37971.1 | 11.8  | 11.16 | 0.04 | 0.7  | 1.56   | 0.208181 | 0.259934 | 0.570088 | 0.52675  |
| MmugDNA.37972.1.S1_at   | MmugDNA.37972.1 | 11.09 | 11.98 | 0.4  | 0.21 | -1.86  | 0.011544 | 0.005481 | 0.236456 | 0.102081 |
| MmugDNA.37975.1.S1_at   | MmugDNA.37975.1 | 7.17  | 7.2   | 0.07 | 0.15 | -1.02  | 0.210777 | 0.242394 | 0.571971 | 0.51282  |
| MmugDNA.37976.1.S1_at   | MmugDNA.37976.1 | 3.59  | 3.12  | 0.25 | 0.06 | 1.39   | 0.064423 | 0.040485 | 0.402975 | 0.246264 |
| MmugDNA.37977.1.S1_at   | MmugDNA.37977.1 | 4.27  | 4.24  | 0.34 | 0.1  | 1.02   | 0.995707 | 0.705573 | 0.998446 | 0.829315 |
| MmugDNA.37978.1.S1_at   | MmugDNA.37978.1 | 6.11  | 5.42  | 1.02 | 1.2  | 1.61   | 0.510756 | 0.717105 | 0.765151 | 0.836232 |
| MmugDNA.37979.1.S1_at   | MmugDNA.37979.1 | 8.67  | 8.86  | 0.3  | 0.4  | -1.14  | 0.513508 | 0.347164 | 0.766403 | 0.591815 |
| MmugDNA.37979.1.S1_s_at | MmugDNA.37979.1 | 10.22 | 10.29 | 0.27 | 0.71 | -1.05  | 0.954875 | 0.841063 | 0.983073 | 0.909427 |
| MmugDNA.3798.1.S1_at    | MmugDNA.3798.1  | 4.16  | 3.8   | 0.36 | 0.09 | 1.29   | 0.471904 | 0.402056 | 0.743454 | 0.631153 |
| MmugDNA.37981.1.S1_at   | MmugDNA.37981.1 | 4.32  | 5.07  | 0.22 | 0.49 | -1.68  | 0.210204 | 0.117289 | 0.571368 | 0.38486  |
| MmugDNA.37983.1.S1_at   | MmugDNA.37983.1 | 6     | 5.86  | 0.14 | 0.23 | 1.1    | 0.931097 | 0.610344 | 0.97337  | 0.768564 |
| MmugDNA.37984.1.S1_at   | MmugDNA.37984.1 | 8.89  | 8.64  | 0.1  | 0.13 | 1.19   | 0.043589 | 0.020913 | 0.35682  | 0.181415 |
| MmugDNA.37985.1.S1_at   | MmugDNA.37985.1 | 9.26  | 8.6   | 0.77 | 0.9  | 1.58   | 0.932957 | 0.881543 | 0.973979 | 0.932407 |
| MmugDNA.37985.1.S1_s_at | MmugDNA.37985.1 | 10.35 | 9.71  | 0.56 | 0.81 | 1.56   | 0.851371 | 0.809325 | 0.940204 | 0.890103 |
| MmugDNA.37986.1.S1_at   | MmugDNA.37986.1 | 3.85  | 8.25  | 1.21 | 1.83 | -21.09 | 0.037292 | 0.011369 | 0.341194 | 0.138214 |
| MmugDNA.37987.1.S1_at   | MmugDNA.37987.1 | 7.91  | 7.7   | 0.33 | 0.55 | 1.15   | 0.856135 | 0.860398 | 0.941848 | 0.920449 |
| MmugDNA.37988.1.S1_x_at | MmugDNA.37988.1 | 11.44 | 11.42 | 0.58 | 0.23 | 1.02   | 0.392429 | 0.563556 | 0.694657 | 0.738718 |
| MmugDNA.37989.1.S1_at   | MmugDNA.37989.1 | 4     | 4.02  | 0.64 | 0.2  | -1.01  | 0.839301 | 0.435092 | 0.935098 | 0.655005 |
| MmugDNA.3799.1.S1_at    | MmugDNA.3799.1  | 7.66  | 7.13  | 1.02 | 0.53 | 1.44   | 0.37653  | 0.59646  | 0.685245 | 0.759592 |
| MmugDNA.37990.1.S1_at   | MmugDNA.37990.1 | 4.05  | 4.3   | 0.11 | 0.06 | -1.19  | 0.012707 | 0.041181 | 0.243533 | 0.247733 |
| MmugDNA.37991.1.S1_at   | MmugDNA.37991.1 | 6.75  | 7.21  | 0.39 | 0.33 | -1.38  | 0.125078 | 0.133232 | 0.491138 | 0.404999 |
| MmugDNA.37994.1.S1_at   | MmugDNA.37994.1 | 3.92  | 4.41  | 0.13 | 0.51 | -1.41  | 0.170808 | 0.201533 | 0.534664 | 0.476036 |
| MmugDNA.37997.1.S1_at   | MmugDNA.37997.1 | 3.58  | 3.45  | 0.5  | 0.07 | 1.1    | 0.225545 | 0.261989 | 0.583651 | 0.52836  |
| MmugDNA.380.1.S1_at     | MmugDNA.380.1   | 4.85  | 5.07  | 0.23 | 0.39 | -1.17  | 0.160234 | 0.088248 | 0.525221 | 0.341721 |

|                         |                 |       |       |      |      |       |          |          |          |          |
|-------------------------|-----------------|-------|-------|------|------|-------|----------|----------|----------|----------|
| MmugDNA.3800.1.S1_at    | MmugDNA.3800.1  | 5.98  | 6.12  | 0.06 | 0.14 | -1.1  | 0.111996 | 0.283296 | 0.474449 | 0.545836 |
| MmugDNA.38002.1.S1_at   | MmugDNA.38002.1 | 4.29  | 4.28  | 0.05 | 0.15 | 1.01  | 0.973597 | 0.969848 | 0.989603 | 0.983503 |
| MmugDNA.38004.1.S1_at   | MmugDNA.38004.1 | 5.85  | 5.22  | 1.01 | 0.42 | 1.55  | 0.1168   | 0.143722 | 0.48074  | 0.417583 |
| MmugDNA.38005.1.S1_at   | MmugDNA.38005.1 | 6.68  | 7.37  | 1.32 | 0.45 | -1.61 | 0.72045  | 0.851117 | 0.877531 | 0.915337 |
| MmugDNA.38007.1.S1_at   | MmugDNA.38007.1 | 2.98  | 2.99  | 0.04 | 0.08 | -1.01 | 0.453077 | 0.232712 | 0.732285 | 0.504359 |
| MmugDNA.38009.1.S1_at   | MmugDNA.38009.1 | 4.57  | 4.72  | 0.23 | 0.14 | -1.11 | 0.813829 | 0.802278 | 0.924404 | 0.886115 |
| MmugDNA.3801.1.S1_at    | MmugDNA.3801.1  | 4.93  | 5.06  | 0.57 | 0.4  | -1.1  | 0.969995 | 0.071841 | 0.988483 | 0.314082 |
| MmugDNA.38011.1.S1_at   | MmugDNA.38011.1 | 4.57  | 4.06  | 0.2  | 0.14 | 1.42  | 0.018195 | 0.006873 | 0.269588 | 0.111996 |
| MmugDNA.38012.1.S1_at   | MmugDNA.38012.1 | 4.63  | 5.33  | 0.4  | 0.13 | -1.63 | 0.135605 | 0.095072 | 0.502462 | 0.352124 |
| MmugDNA.38015.1.S1_at   | MmugDNA.38015.1 | 3.33  | 3.39  | 0.01 | 0.04 | -1.04 | 0.14108  | 0.129066 | 0.50864  | 0.400548 |
| MmugDNA.38015.1.S1_x_at | MmugDNA.38015.1 | 4.03  | 4.09  | 0.11 | 0.25 | -1.04 | 0.969147 | 0.955254 | 0.988253 | 0.974611 |
| MmugDNA.38016.1.S1_at   | MmugDNA.38016.1 | 4.6   | 4.68  | 0.18 | 0.15 | -1.06 | 0.706186 | 0.483818 | 0.870547 | 0.688165 |
| MmugDNA.38017.1.S1_at   | MmugDNA.38017.1 | 3.93  | 4.08  | 0.2  | 0.27 | -1.11 | 0.175765 | 0.15259  | 0.539441 | 0.427435 |
| MmugDNA.38018.1.S1_at   | MmugDNA.38018.1 | 3.77  | 3.69  | 0.11 | 0.18 | 1.06  | 0.931864 | 0.584065 | 0.973673 | 0.752189 |
| MmugDNA.38019.1.S1_at   | MmugDNA.38019.1 | 10.06 | 9.59  | 0.12 | 0.76 | 1.39  | 0.807004 | 0.908567 | 0.920954 | 0.948227 |
| MmugDNA.3802.1.S1_at    | MmugDNA.3802.1  | 10.21 | 10.22 | 0.08 | 0.31 | -1.01 | 0.879111 | 0.08526  | 0.951481 | 0.337096 |
| MmugDNA.38020.1.S1_at   | MmugDNA.38020.1 | 10.84 | 9.9   | 0.48 | 0.59 | 1.92  | 0.487191 | 0.082815 | 0.752002 | 0.332331 |
| MmugDNA.38021.1.S1_at   | MmugDNA.38021.1 | 5.8   | 5.83  | 0.15 | 0.08 | -1.02 | 0.860192 | 0.947956 | 0.943524 | 0.970406 |
| MmugDNA.38022.1.S1_at   | MmugDNA.38022.1 | 7.76  | 7.64  | 0.19 | 0.19 | 1.09  | 0.178949 | 0.206661 | 0.543331 | 0.480711 |
| MmugDNA.38023.1.S1_at   | MmugDNA.38023.1 | 7.26  | 8.1   | 0.21 | 0.49 | -1.8  | 0.022135 | 0.013224 | 0.284595 | 0.147534 |
| MmugDNA.38024.1.S1_at   | MmugDNA.38024.1 | 12.3  | 11.5  | 0.2  | 0.37 | 1.74  | 0.016687 | 0.006193 | 0.264879 | 0.106774 |
| MmugDNA.38025.1.S1_at   | MmugDNA.38025.1 | 7.4   | 8.06  | 0.18 | 0.66 | -1.58 | 0.083357 | 0.06128  | 0.43582  | 0.294247 |
| MmugDNA.38025.1.S1_s_at | MmugDNA.38025.1 | 7.64  | 8.45  | 0.35 | 0.71 | -1.74 | 0.09362  | 0.084673 | 0.450966 | 0.33618  |
| MmugDNA.38027.1.S1_at   | MmugDNA.38027.1 | 4.72  | 3.57  | 0.12 | 0.66 | 2.22  | 0.144407 | 0.12565  | 0.510982 | 0.396249 |
| MmugDNA.38028.1.S1_at   | MmugDNA.38028.1 | 2.92  | 2.9   | 0.35 | 0.04 | 1.02  | 0.960275 | 0.875256 | 0.98486  | 0.929211 |
| MmugDNA.38028.1.S1_x_at | MmugDNA.38028.1 | 2.85  | 2.92  | 0.24 | 0.06 | -1.05 | 0.694038 | 0.911863 | 0.864359 | 0.950295 |
| MmugDNA.3803.1.S1_at    | MmugDNA.3803.1  | 9.56  | 9.96  | 0.2  | 0.64 | -1.31 | 0.425397 | 0.382175 | 0.715082 | 0.618361 |
| MmugDNA.38030.1.S1_at   | MmugDNA.38030.1 | 10.86 | 11.11 | 0.12 | 0.51 | -1.19 | 0.433464 | 0.600746 | 0.72     | 0.76224  |
| MmugDNA.38031.1.S1_at   | MmugDNA.38031.1 | 4.3   | 4.3   | 0.08 | 0    | 1     | 0.373901 | 0.198343 | 0.683245 | 0.473267 |
| MmugDNA.38032.1.S1_at   | MmugDNA.38032.1 | 5.25  | 5.42  | 0.26 | 0.26 | -1.12 | 0.867353 | 0.981413 | 0.947133 | 0.989775 |
| MmugDNA.38033.1.S1_at   | MmugDNA.38033.1 | 4.22  | 4.22  | 0.07 | 0.03 | 1     | 0.948259 | 0.937397 | 0.980164 | 0.964687 |
| MmugDNA.38034.1.S1_at   | MmugDNA.38034.1 | 3.93  | 3.68  | 0.09 | 0.15 | 1.19  | 0.03836  | 0.12438  | 0.343999 | 0.394857 |
| MmugDNA.38035.1.S1_at   | MmugDNA.38035.1 | 5.46  | 5.02  | 1.6  | 0.42 | 1.36  | 0.319736 | 0.208837 | 0.649072 | 0.482717 |
| MmugDNA.38036.1.S1_at   | MmugDNA.38036.1 | 3.52  | 3.24  | 0.3  | 0.06 | 1.22  | 0.701658 | 0.654767 | 0.868123 | 0.798154 |
| MmugDNA.38037.1.S1_at   | MmugDNA.38037.1 | 10.53 | 10.08 | 0.05 | 0.25 | 1.37  | 0.032647 | 0.005805 | 0.32573  | 0.104597 |
| MmugDNA.38038.1.S1_at   | MmugDNA.38038.1 | 5.29  | 5.37  | 0.1  | 0.24 | -1.06 | 0.692401 | 0.892659 | 0.863378 | 0.938777 |
| MmugDNA.38039.1.S1_at   | MmugDNA.38039.1 | 6.96  | 6.98  | 0.16 | 0.15 | -1.02 | 0.727642 | 0.036079 | 0.881457 | 0.234413 |
| MmugDNA.3804.1.S1_at    | MmugDNA.3804.1  | 6.1   | 6     | 0.06 | 0.13 | 1.07  | 0.217385 | 0.253711 | 0.57694  | 0.522067 |
| MmugDNA.38040.1.S1_at   | MmugDNA.38040.1 | 4.03  | 4.01  | 0.03 | 0.07 | 1.01  | 0.636586 | 0.71929  | 0.835667 | 0.837561 |
| MmugDNA.38041.1.S1_at   | MmugDNA.38041.1 | 11.88 | 11.71 | 0.04 | 0.08 | 1.12  | 0.02471  | 0.00028  | 0.296144 | 0.03453  |
| MmugDNA.38042.1.S1_at   | MmugDNA.38042.1 | 8.72  | 8.71  | 0.32 | 0.2  | 1.01  | 0.658741 | 0.741944 | 0.846726 | 0.850545 |



|                         |                 |       |       |      |      |       |          |          |          |          |
|-------------------------|-----------------|-------|-------|------|------|-------|----------|----------|----------|----------|
| MmugDNA.38043.1.S1_at   | MmugDNA.38043.1 | 10.47 | 10.27 | 0.16 | 0.55 | 1.14  | 0.830501 | 0.961443 | 0.931462 | 0.978245 |
| MmugDNA.38044.1.S1_at   | MmugDNA.38044.1 | 5.01  | 4.29  | 0.65 | 1.52 | 1.64  | 0.838919 | 0.481638 | 0.934952 | 0.686561 |
| MmugDNA.38045.1.S1_at   | MmugDNA.38045.1 | 7.05  | 6.95  | 1.07 | 0.52 | 1.07  | 0.688356 | 0.656017 | 0.860959 | 0.79881  |
| MmugDNA.38046.1.S1_at   | MmugDNA.38046.1 | 5.96  | 6.02  | 0.06 | 0.19 | -1.04 | 0.215991 | 0.306998 | 0.575954 | 0.563427 |
| MmugDNA.38048.1.S1_at   | MmugDNA.38048.1 | 6.32  | 6.29  | 0.35 | 0.12 | 1.02  | 0.985868 | 0.411082 | 0.994863 | 0.637877 |
| MmugDNA.3805.1.S1_at    | MmugDNA.3805.1  | 3.73  | 3.58  | 0.2  | 0.09 | 1.11  | 0.277032 | 0.476378 | 0.619197 | 0.682695 |
| MmugDNA.38050.1.S1_s_at | MmugDNA.38050.1 | 10.89 | 10.28 | 0.08 | 0.24 | 1.53  | 0.016595 | 0.008542 | 0.26475  | 0.122583 |
| MmugDNA.38051.1.S1_at   | MmugDNA.38051.1 | 4.55  | 4.49  | 0.14 | 0.24 | 1.04  | 0.741433 | 0.838184 | 0.889293 | 0.907595 |
| MmugDNA.38055.1.S1_at   | MmugDNA.38055.1 | 7.67  | 7.33  | 0.11 | 0.14 | 1.26  | 0.070857 | 0.084318 | 0.414661 | 0.335576 |
| MmugDNA.38056.1.S1_at   | MmugDNA.38056.1 | 7     | 6.49  | 0.66 | 0.48 | 1.43  | 0.941288 | 0.455183 | 0.977671 | 0.669157 |
| MmugDNA.38057.1.S1_at   | MmugDNA.38057.1 | 5.86  | 5.87  | 0.16 | 0.09 | -1.01 | 0.378973 | 0.735807 | 0.686586 | 0.847147 |
| MmugDNA.38058.1.S1_at   | MmugDNA.38058.1 | 9.86  | 10.36 | 0.26 | 0.29 | -1.41 | 0.151121 | 0.098711 | 0.515886 | 0.356809 |
| MmugDNA.38059.1.S1_at   | MmugDNA.38059.1 | 6.25  | 6.47  | 0.01 | 0.11 | -1.17 | 0.021805 | 0.01343  | 0.28382  | 0.148471 |
| MmugDNA.3806.1.S1_at    | MmugDNA.3806.1  | 6.08  | 6.15  | 0.18 | 0.17 | -1.05 | 0.554923 | 0.715975 | 0.791099 | 0.835339 |
| MmugDNA.38060.1.S1_at   | MmugDNA.38060.1 | 4.24  | 4.12  | 0.1  | 0.08 | 1.09  | 0.374364 | 0.255115 | 0.683612 | 0.52317  |
| MmugDNA.38061.1.S1_at   | MmugDNA.38061.1 | 7.06  | 7.48  | 0.25 | 0.16 | -1.34 | 0.090441 | 0.050738 | 0.445834 | 0.270387 |
| MmugDNA.38064.1.S1_s_at | MmugDNA.38064.1 | 7.11  | 7.12  | 0.11 | 0.05 | -1.01 | 0.737583 | 0.471013 | 0.887266 | 0.679162 |
| MmugDNA.38065.1.S1_at   | MmugDNA.38065.1 | 5.15  | 4.86  | 0.12 | 0.06 | 1.23  | 0.014395 | 0.007293 | 0.252071 | 0.114639 |
| MmugDNA.38066.1.S1_at   | MmugDNA.38066.1 | 4.36  | 4     | 0.21 | 0.15 | 1.29  | 0.095599 | 0.088254 | 0.453501 | 0.341721 |
| MmugDNA.38067.1.S1_at   | MmugDNA.38067.1 | 5.58  | 5.31  | 0.28 | 0.15 | 1.21  | 0.199239 | 0.230282 | 0.562215 | 0.502102 |
| MmugDNA.38068.1.S1_at   | MmugDNA.38068.1 | 6.41  | 6.43  | 0.08 | 0.21 | -1.02 | 0.354479 | 0.464841 | 0.670587 | 0.675463 |
| MmugDNA.3807.1.S1_at    | MmugDNA.3807.1  | 11.36 | 11.16 | 0.69 | 0.45 | 1.15  | 0.566984 | 0.640038 | 0.797892 | 0.788671 |
| MmugDNA.38071.1.S1_s_at | MmugDNA.38071.1 | 12.08 | 12.05 | 0.13 | 0.13 | 1.02  | 0.425803 | 0.014008 | 0.715332 | 0.151595 |
| MmugDNA.38073.1.S1_at   | MmugDNA.38073.1 | 3.35  | 3.45  | 0.4  | 0.17 | -1.07 | 0.618288 | 0.745223 | 0.825111 | 0.852308 |
| MmugDNA.38074.1.S1_at   | MmugDNA.38074.1 | 4.43  | 5.13  | 0.41 | 0.67 | -1.62 | 0.378393 | 0.107896 | 0.686437 | 0.370945 |
| MmugDNA.38075.1.S1_at   | MmugDNA.38075.1 | 10.38 | 10.3  | 0.29 | 0.2  | 1.06  | 0.669914 | 0.277161 | 0.852318 | 0.541154 |
| MmugDNA.38076.1.S1_at   | MmugDNA.38076.1 | 4.48  | 4.57  | 0.05 | 0.08 | -1.07 | 0.351415 | 0.017382 | 0.669126 | 0.166949 |
| MmugDNA.38077.1.S1_at   | MmugDNA.38077.1 | 4.93  | 4.8   | 0.66 | 0.29 | 1.1   | 0.598785 | 0.314047 | 0.814103 | 0.568178 |
| MmugDNA.38078.1.S1_at   | MmugDNA.38078.1 | 9.18  | 9.24  | 0.17 | 0.25 | -1.04 | 0.416798 | 0.661777 | 0.710179 | 0.801943 |
| MmugDNA.38079.1.S1_at   | MmugDNA.38079.1 | 6.91  | 7.09  | 0.42 | 0.11 | -1.13 | 0.760207 | 0.050721 | 0.898847 | 0.270355 |
| MmugDNA.3808.1.S1_at    | MmugDNA.3808.1  | 6.15  | 6.06  | 0.02 | 0.1  | 1.06  | 0.424459 | 0.811026 | 0.714528 | 0.890966 |
| MmugDNA.38080.1.S1_at   | MmugDNA.38080.1 | 7.7   | 7.39  | 0.32 | 0.23 | 1.23  | 0.290257 | 0.004378 | 0.628072 | 0.092619 |
| MmugDNA.38082.1.S1_at   | MmugDNA.38082.1 | 8.19  | 8.2   | 0.03 | 0.26 | -1.01 | 0.68379  | 0.77239  | 0.858512 | 0.867685 |
| MmugDNA.38083.1.S1_at   | MmugDNA.38083.1 | 3.44  | 3.41  | 0.17 | 0.11 | 1.02  | 0.783251 | 0.155969 | 0.909454 | 0.431376 |
| MmugDNA.38084.1.S1_at   | MmugDNA.38084.1 | 5.8   | 6.84  | 0.41 | 1.15 | -2.06 | 0.478218 | 0.634806 | 0.747114 | 0.785036 |
| MmugDNA.38084.1.S1_s_at | MmugDNA.38084.1 | 4.81  | 4.91  | 0.03 | 0.76 | -1.07 | 0.784996 | 0.90641  | 0.910465 | 0.94704  |
| MmugDNA.38085.1.S1_at   | MmugDNA.38085.1 | 6.34  | 6.44  | 0.18 | 0.15 | -1.08 | 0.385857 | 0.411414 | 0.690905 | 0.638149 |
| MmugDNA.38087.1.S1_at   | MmugDNA.38087.1 | 6.66  | 6.01  | 1.09 | 0.15 | 1.57  | 0.26306  | 0.345139 | 0.609142 | 0.590422 |
| MmugDNA.38088.1.S1_at   | MmugDNA.38088.1 | 6.09  | 6.24  | 0.18 | 0.08 | -1.11 | 0.386475 | 0.44316  | 0.691428 | 0.661011 |
| MmugDNA.38089.1.S1_at   | MmugDNA.38089.1 | 7.01  | 6.99  | 0.02 | 0.19 | 1.01  | 0.663281 | 0.717424 | 0.848941 | 0.836425 |
| MmugDNA.3809.1.S1_at    | MmugDNA.3809.1  | 3.62  | 3.69  | 0.03 | 0.09 | -1.05 | 0.329203 | 0.166361 | 0.654879 | 0.442884 |

|                         |                 |       |       |      |      |       |          |          |          |          |
|-------------------------|-----------------|-------|-------|------|------|-------|----------|----------|----------|----------|
| MmugDNA.38090.1.S1_at   | MmugDNA.38090.1 | 2.96  | 3.18  | 0.43 | 0.3  | -1.17 | 0.962122 | 0.003801 | 0.985456 | 0.087835 |
| MmugDNA.38091.1.S1_at   | MmugDNA.38091.1 | 8.43  | 8.72  | 0.75 | 0.52 | -1.22 | 0.955448 | 0.83837  | 0.983289 | 0.907759 |
| MmugDNA.38092.1.S1_at   | MmugDNA.38092.1 | 5.34  | 6.21  | 0.11 | 0.87 | -1.83 | 0.13426  | 0.148447 | 0.500788 | 0.423007 |
| MmugDNA.38093.1.S1_at   | MmugDNA.38093.1 | 3.59  | 3.57  | 0.22 | 0    | 1.02  | 0.7982   | 0.594704 | 0.916399 | 0.758628 |
| MmugDNA.38094.1.S1_at   | MmugDNA.38094.1 | 6.73  | 6.66  | 1.29 | 0.35 | 1.05  | 0.352576 | 0.513847 | 0.669669 | 0.707281 |
| MmugDNA.38095.1.S1_at   | MmugDNA.38095.1 | 11.48 | 11.67 | 0.02 | 0.25 | -1.14 | 0.084626 | 0.015245 | 0.437402 | 0.156859 |
| MmugDNA.38096.1.S1_s_at | MmugDNA.38096.1 | 11.9  | 11.81 | 0.05 | 0.3  | 1.06  | 0.635833 | 0.277899 | 0.835187 | 0.541664 |
| MmugDNA.38097.1.S1_at   | MmugDNA.38097.1 | 10.88 | 10.68 | 0.15 | 0.91 | 1.15  | 0.514175 | 0.601871 | 0.766766 | 0.763115 |
| MmugDNA.38098.1.S1_at   | MmugDNA.38098.1 | 2.96  | 2.96  | 0.15 | 0.04 | -1    | 0.28154  | 0.423642 | 0.622236 | 0.646464 |
| MmugDNA.381.1.S1_at     | MmugDNA.381.1   | 6.46  | 6.53  | 0.2  | 0.07 | -1.05 | 0.808665 | 0.456017 | 0.922013 | 0.669779 |
| MmugDNA.3810.1.S1_at    | MmugDNA.3810.1  | 9.47  | 9.49  | 0.17 | 0.35 | -1.01 | 0.87681  | 0.808989 | 0.950675 | 0.889981 |
| MmugDNA.38100.1.S1_at   | MmugDNA.38100.1 | 5     | 5.05  | 0.79 | 0.39 | -1.03 | 0.999776 | 0.812313 | 0.999967 | 0.891561 |
| MmugDNA.38101.1.S1_at   | MmugDNA.38101.1 | 12.09 | 12.01 | 0.08 | 0.13 | 1.06  | 0.728379 | 0.038431 | 0.881936 | 0.240918 |
| MmugDNA.38104.1.S1_at   | MmugDNA.38104.1 | 6.81  | 7.7   | 0.42 | 0.49 | -1.86 | 0.370205 | 0.241658 | 0.681113 | 0.512225 |
| MmugDNA.38105.1.S1_at   | MmugDNA.38105.1 | 7.9   | 7.99  | 0.21 | 0.25 | -1.06 | 0.619198 | 0.805137 | 0.825425 | 0.887962 |
| MmugDNA.38106.1.S1_at   | MmugDNA.38106.1 | 3.95  | 3.68  | 0.23 | 0.15 | 1.21  | 0.2335   | 0.11012  | 0.588199 | 0.374244 |
| MmugDNA.38108.1.S1_at   | MmugDNA.38108.1 | 4.48  | 4.43  | 1.57 | 0.09 | 1.03  | 0.335672 | 0.51373  | 0.659165 | 0.707217 |
| MmugDNA.38109.1.S1_at   | MmugDNA.38109.1 | 3.1   | 3.04  | 0.32 | 0.18 | 1.05  | 0.454332 | 0.659762 | 0.733184 | 0.800854 |
| MmugDNA.38110.1.S1_at   | MmugDNA.38110.1 | 6.12  | 6.2   | 0.2  | 0.31 | -1.06 | 0.870873 | 0.984221 | 0.948399 | 0.991233 |
| MmugDNA.38111.1.S1_at   | MmugDNA.38111.1 | 4.14  | 4.13  | 0.79 | 0.24 | 1     | 0.277299 | 0.272975 | 0.619436 | 0.53761  |
| MmugDNA.38112.1.S1_at   | MmugDNA.38112.1 | 3.27  | 3.27  | 0.08 | 0.05 | 1     | 0.991518 | 0.981114 | 0.99695  | 0.989575 |
| MmugDNA.38114.1.S1_at   | MmugDNA.38114.1 | 4.62  | 4.75  | 0.23 | 0.2  | -1.1  | 0.616165 | 0.717038 | 0.824059 | 0.836191 |
| MmugDNA.38116.1.S1_at   | MmugDNA.38116.1 | 7.84  | 7.43  | 0.17 | 0.23 | 1.33  | 0.047803 | 0.143599 | 0.367233 | 0.41751  |
| MmugDNA.38118.1.S1_at   | MmugDNA.38118.1 | 3.36  | 3.31  | 0.1  | 0.12 | 1.04  | 0.669002 | 0.267265 | 0.851986 | 0.532909 |
| MmugDNA.38119.1.S1_s_at | MmugDNA.38119.1 | 11.43 | 11.71 | 0.15 | 0.17 | -1.21 | 0.039579 | 0.028953 | 0.347567 | 0.212051 |
| MmugDNA.3812.1.S1_at    | MmugDNA.3812.1  | 3.63  | 3.92  | 0.15 | 0.27 | -1.22 | 0.356984 | 0.267684 | 0.67203  | 0.533467 |
| MmugDNA.38120.1.S1_at   | MmugDNA.38120.1 | 4.72  | 5.34  | 0.11 | 0.24 | -1.54 | 0.020124 | 0.039113 | 0.27674  | 0.24303  |
| MmugDNA.38122.1.S1_at   | MmugDNA.38122.1 | 6.12  | 5.9   | 0.36 | 0.12 | 1.16  | 0.127577 | 0.115969 | 0.493876 | 0.383164 |
| MmugDNA.38123.1.S1_at   | MmugDNA.38123.1 | 3.71  | 3.56  | 0.21 | 0.17 | 1.12  | 0.434799 | 0.340828 | 0.720824 | 0.586978 |
| MmugDNA.38125.1.S1_at   | MmugDNA.38125.1 | 3.39  | 3.45  | 0.18 | 0.27 | -1.04 | 0.335308 | 0.484219 | 0.659098 | 0.688408 |
| MmugDNA.38126.1.S1_at   | MmugDNA.38126.1 | 6.21  | 6.11  | 0.68 | 0.36 | 1.07  | 0.451367 | 0.524622 | 0.731557 | 0.714463 |
| MmugDNA.38127.1.S1_at   | MmugDNA.38127.1 | 4.84  | 4.96  | 0.18 | 0.33 | -1.09 | 0.435993 | 0.10682  | 0.721547 | 0.369425 |
| MmugDNA.38128.1.S1_at   | MmugDNA.38128.1 | 4.59  | 5.17  | 0.93 | 0.37 | -1.49 | 0.669706 | 0.809835 | 0.852287 | 0.890412 |
| MmugDNA.38129.1.S1_at   | MmugDNA.38129.1 | 7.99  | 8.19  | 0.64 | 0.4  | -1.14 | 0.143328 | 0.199392 | 0.510223 | 0.474002 |
| MmugDNA.3813.1.S1_at    | MmugDNA.3813.1  | 7.17  | 7.59  | 0.11 | 0.19 | -1.35 | 0.030095 | 0.014962 | 0.316926 | 0.155453 |
| MmugDNA.38130.1.S1_at   | MmugDNA.38130.1 | 3.27  | 3.22  | 0.09 | 0.08 | 1.04  | 0.726004 | 0.898564 | 0.880705 | 0.942254 |
| MmugDNA.38131.1.S1_at   | MmugDNA.38131.1 | 10.99 | 10.81 | 0.24 | 0.32 | 1.13  | 0.409774 | 0.550097 | 0.70606  | 0.730241 |
| MmugDNA.38131.1.S1_s_at | MmugDNA.38131.1 | 10.35 | 10.44 | 0.12 | 0.32 | -1.06 | 0.629835 | 0.795659 | 0.831779 | 0.882258 |
| MmugDNA.38133.1.S1_at   | MmugDNA.38133.1 | 4.01  | 3.95  | 0.35 | 0.23 | 1.05  | 0.966315 | 0.989235 | 0.987212 | 0.993878 |
| MmugDNA.38134.1.S1_at   | MmugDNA.38134.1 | 3.27  | 3.13  | 0.07 | 0.36 | 1.1   | 0.734841 | 0.661583 | 0.885892 | 0.801876 |
| MmugDNA.38139.1.S1_at   | MmugDNA.38139.1 | 5.44  | 5.68  | 0.06 | 0.16 | -1.18 | 0.134127 | 0.086572 | 0.500681 | 0.33911  |

|                         |                 |       |       |      |      |       |          |          |          |          |
|-------------------------|-----------------|-------|-------|------|------|-------|----------|----------|----------|----------|
| MmugDNA.3814.1.S1_at    | MmugDNA.3814.1  | 8.19  | 8.79  | 0.26 | 0.96 | -1.51 | 0.335445 | 0.302207 | 0.659165 | 0.560092 |
| MmugDNA.38140.1.S1_at   | MmugDNA.38140.1 | 6.33  | 6.37  | 0.02 | 0.08 | -1.03 | 0.548406 | 0.463368 | 0.786665 | 0.674373 |
| MmugDNA.38141.1.S1_at   | MmugDNA.38141.1 | 8.22  | 9.27  | 0.44 | 0.44 | -2.07 | 0.105041 | 0.084524 | 0.465471 | 0.335916 |
| MmugDNA.38141.1.S1_x_at | MmugDNA.38141.1 | 8.53  | 9.49  | 0.33 | 0.41 | -1.95 | 0.06898  | 0.048022 | 0.411002 | 0.264118 |
| MmugDNA.38142.1.S1_at   | MmugDNA.38142.1 | 4.87  | 4.93  | 0.11 | 0.11 | -1.04 | 0.148691 | 0.251292 | 0.51391  | 0.519984 |
| MmugDNA.3247.1.S1_at    | MmugDNA.3247.1  | 13.01 | 12.8  | 0.07 | 0.14 | 1.16  | 0.040963 | 0.21677  | 0.35051  | 0.490311 |
| MmugDNA.3247.1.S1_s_at  | MmugDNA.3247.1  | 11.4  | 11.16 | 0.19 | 0.15 | 1.18  | 0.126689 | 0.443591 | 0.492802 | 0.661336 |
| MmugDNA.38144.1.S1_at   | MmugDNA.38144.1 | 6.46  | 6.45  | 0.16 | 0.05 | 1     | 0.737088 | 0.733554 | 0.886925 | 0.845731 |
| MmugDNA.38145.1.S1_at   | MmugDNA.38145.1 | 3.66  | 3.67  | 0.1  | 0.21 | -1.01 | 0.563939 | 0.553953 | 0.796337 | 0.732896 |
| MmugDNA.38146.1.S1_at   | MmugDNA.38146.1 | 11.36 | 11.82 | 0.1  | 0.19 | -1.37 | 0.010226 | 0.002423 | 0.228247 | 0.073058 |
| MmugDNA.38146.1.S1_s_at | MmugDNA.38146.1 | 10.17 | 10.9  | 0.09 | 0.28 | -1.67 | 0.009881 | 0.001164 | 0.226668 | 0.053615 |
| MmugDNA.38147.1.S1_at   | MmugDNA.38147.1 | 8.52  | 7.76  | 0.21 | 0.98 | 1.69  | 0.297663 | 0.397983 | 0.633391 | 0.629138 |
| MmugDNA.38149.1.S1_at   | MmugDNA.38149.1 | 4.33  | 4.54  | 0.36 | 0.16 | -1.16 | 0.995172 | 0.343841 | 0.998269 | 0.589516 |
| MmugDNA.38149.1.S1_x_at | MmugDNA.38149.1 | 4.26  | 4.47  | 0.52 | 0.19 | -1.16 | 0.882882 | 0.677786 | 0.952961 | 0.811816 |
| MmugDNA.38150.1.S1_at   | MmugDNA.38150.1 | 7.32  | 7.25  | 0.02 | 0.05 | 1.05  | 0.345697 | 0.62963  | 0.665264 | 0.781989 |
| MmugDNA.38151.1.S1_at   | MmugDNA.38151.1 | 7.6   | 5.98  | 0.57 | 1    | 3.07  | 0.038558 | 0.025033 | 0.344633 | 0.198273 |
| MmugDNA.38152.1.S1_at   | MmugDNA.38152.1 | 12.45 | 12.11 | 0.01 | 0.25 | 1.26  | 0.262351 | 0.189043 | 0.608902 | 0.464897 |
| MmugDNA.38154.1.S1_at   | MmugDNA.38154.1 | 8.5   | 8.26  | 0.45 | 0.31 | 1.18  | 0.591722 | 0.060472 | 0.810588 | 0.292553 |
| MmugDNA.3343.1.S1_at    | MmugDNA.3343.1  | 12.97 | 12.56 | 0.49 | 0.34 | 1.33  | 0.651644 | 0.08024  | 0.843273 | 0.327838 |
| MmugDNA.3343.1.S1_s_at  | MmugDNA.3343.1  | 11.53 | 11.31 | 0.46 | 0.48 | 1.16  | 0.740778 | 0.03207  | 0.888796 | 0.22165  |
| MmugDNA.38155.1.S1_at   | MmugDNA.38155.1 | 4.53  | 4.5   | 0.23 | 0.16 | 1.02  | 0.980808 | 0.547453 | 0.993056 | 0.728464 |
| MmugDNA.38156.1.S1_at   | MmugDNA.38156.1 | 5.77  | 5.86  | 0.11 | 0.16 | -1.06 | 0.361306 | 0.019118 | 0.675166 | 0.17401  |
| MmugDNA.38157.1.S1_at   | MmugDNA.38157.1 | 9.98  | 11.42 | 0.41 | 0.27 | -2.72 | 0.010966 | 0.00586  | 0.233379 | 0.104856 |
| MmugDNA.38159.1.S1_at   | MmugDNA.38159.1 | 3.66  | 3.71  | 0.14 | 0.16 | -1.03 | 0.847349 | 0.526365 | 0.938786 | 0.71555  |
| MmugDNA.38160.1.S1_at   | MmugDNA.38160.1 | 4.46  | 4.48  | 0.22 | 0.12 | -1.01 | 0.332682 | 0.464368 | 0.656938 | 0.67504  |
| MmugDNA.38162.1.S1_at   | MmugDNA.38162.1 | 8.52  | 10.85 | 0.87 | 1.36 | -5.05 | 0.074461 | 0.065657 | 0.42023  | 0.301631 |
| MmugDNA.38163.1.S1_at   | MmugDNA.38163.1 | 6.67  | 6.3   | 0.21 | 0.3  | 1.29  | 0.093172 | 0.103853 | 0.450408 | 0.364519 |
| MmugDNA.38164.1.S1_at   | MmugDNA.38164.1 | 5.87  | 5.58  | 0.29 | 0.15 | 1.22  | 0.113661 | 0.558407 | 0.476946 | 0.735596 |
| MmugDNA.38166.1.S1_at   | MmugDNA.38166.1 | 3.88  | 3.93  | 0.09 | 0.14 | -1.04 | 0.439207 | 0.541695 | 0.723488 | 0.725057 |
| MmugDNA.38168.1.S1_at   | MmugDNA.38168.1 | 7.43  | 7.81  | 0.14 | 0.49 | -1.3  | 0.968561 | 0.996676 | 0.988176 | 0.998092 |
| MmugDNA.38169.1.S1_at   | MmugDNA.38169.1 | 8.25  | 8.5   | 0.13 | 0.18 | -1.19 | 0.122228 | 0.021202 | 0.487436 | 0.182326 |
| MmugDNA.3817.1.S1_at    | MmugDNA.3817.1  | 7.46  | 8.18  | 0.21 | 0.59 | -1.65 | 0.058351 | 0.050662 | 0.39029  | 0.270317 |
| MmugDNA.38171.1.S1_at   | MmugDNA.38171.1 | 5.19  | 5.11  | 0.14 | 0.13 | 1.06  | 0.244141 | 0.311516 | 0.595924 | 0.566505 |
| MmugDNA.38172.1.S1_at   | MmugDNA.38172.1 | 5.75  | 5.87  | 0.03 | 0.17 | -1.09 | 0.096377 | 0.121518 | 0.454868 | 0.39064  |
| MmugDNA.38173.1.S1_at   | MmugDNA.38173.1 | 7.21  | 7.32  | 0.1  | 0.03 | -1.08 | 0.535199 | 0.309156 | 0.778933 | 0.564807 |
| MmugDNA.38174.1.S1_at   | MmugDNA.38174.1 | 5.33  | 5.34  | 0.24 | 0.13 | -1.01 | 0.543339 | 0.417942 | 0.783788 | 0.642499 |
| MmugDNA.38175.1.S1_at   | MmugDNA.38175.1 | 3.92  | 3.9   | 0.16 | 0.27 | 1.01  | 0.79044  | 0.471013 | 0.913046 | 0.679162 |
| MmugDNA.38176.1.S1_at   | MmugDNA.38176.1 | 8.32  | 8.63  | 0.6  | 0.53 | -1.24 | 0.489377 | 0.597011 | 0.753748 | 0.759993 |
| MmugDNA.38176.1.S1_s_at | MmugDNA.38176.1 | 8.07  | 8.54  | 0.41 | 0.29 | -1.39 | 0.159833 | 0.077966 | 0.524737 | 0.324306 |
| MmugDNA.38177.1.S1_at   | MmugDNA.38177.1 | 8     | 8.11  | 0.34 | 0.31 | -1.08 | 0.391592 | 0.260175 | 0.694126 | 0.526807 |
| MmugDNA.38178.1.S1_at   | MmugDNA.38178.1 | 5.31  | 4.86  | 0.38 | 0.26 | 1.37  | 0.412284 | 0.514985 | 0.70788  | 0.708004 |

|                         |                 |       |       |      |      |       |          |          |          |          |
|-------------------------|-----------------|-------|-------|------|------|-------|----------|----------|----------|----------|
| MmugDNA.38179.1.S1_at   | MmugDNA.38179.1 | 6.53  | 6.12  | 0.39 | 0.2  | 1.32  | 0.066827 | 0.085723 | 0.406981 | 0.337761 |
| MmugDNA.3818.1.S1_s_at  | MmugDNA.3818.1  | 11.64 | 11.89 | 0.24 | 0.17 | -1.19 | 0.210599 | 0.175363 | 0.571849 | 0.452114 |
| MmugDNA.38180.1.S1_at   | MmugDNA.38180.1 | 9.98  | 10.01 | 0.47 | 0.29 | -1.02 | 0.647945 | 0.474895 | 0.841735 | 0.681784 |
| MmugDNA.38184.1.S1_at   | MmugDNA.38184.1 | 10.88 | 10.47 | 0.22 | 0.65 | 1.33  | 0.254244 | 0.259813 | 0.602339 | 0.52669  |
| MmugDNA.38185.1.S1_at   | MmugDNA.38185.1 | 10.7  | 10.06 | 0.24 | 0.78 | 1.55  | 0.171846 | 0.143028 | 0.535401 | 0.416892 |
| MmugDNA.38187.1.S1_at   | MmugDNA.38187.1 | 5.56  | 5.28  | 0.47 | 0.08 | 1.22  | 0.111133 | 0.186224 | 0.473191 | 0.462108 |
| MmugDNA.38188.1.S1_at   | MmugDNA.38188.1 | 3.57  | 3.3   | 0.52 | 0.56 | 1.21  | 0.512515 | 0.279438 | 0.765629 | 0.543049 |
| MmugDNA.38189.1.S1_at   | MmugDNA.38189.1 | 6.08  | 5.88  | 0.65 | 0.67 | 1.15  | 0.435208 | 0.413653 | 0.721118 | 0.639688 |
| MmugDNA.3819.1.S1_at    | MmugDNA.3819.1  | 6.89  | 7.89  | 0.38 | 0.91 | -2    | 0.130248 | 0.137057 | 0.496613 | 0.409836 |
| MmugDNA.38190.1.S1_at   | MmugDNA.38190.1 | 5.92  | 6.28  | 0.16 | 0.25 | -1.28 | 0.110369 | 0.098445 | 0.471863 | 0.356564 |
| MmugDNA.38191.1.S1_at   | MmugDNA.38191.1 | 4.96  | 5.1   | 0.07 | 0.03 | -1.1  | 0.036682 | 0.021058 | 0.340048 | 0.181869 |
| MmugDNA.38192.1.S1_at   | MmugDNA.38192.1 | 4.84  | 4.9   | 0.42 | 0.14 | -1.04 | 0.973772 | 0.387671 | 0.989685 | 0.622281 |
| MmugDNA.38193.1.S1_at   | MmugDNA.38193.1 | 12.25 | 12.59 | 0.14 | 0.27 | -1.26 | 0.137026 | 0.098613 | 0.504271 | 0.356743 |
| MmugDNA.38194.1.S1_at   | MmugDNA.38194.1 | 7.11  | 6.71  | 0.14 | 0.29 | 1.32  | 0.266634 | 0.193156 | 0.612081 | 0.468554 |
| MmugDNA.38197.1.S1_at   | MmugDNA.38197.1 | 6.32  | 6.55  | 0.22 | 0.28 | -1.17 | 0.128557 | 0.136454 | 0.494653 | 0.408866 |
| MmugDNA.38198.1.S1_at   | MmugDNA.38198.1 | 5.36  | 4.71  | 0.55 | 0.23 | 1.57  | 0.273074 | 0.229243 | 0.616536 | 0.501527 |
| MmugDNA.38199.1.S1_at   | MmugDNA.38199.1 | 3.11  | 3.36  | 0.35 | 0.54 | -1.19 | 0.78992  | 0.599397 | 0.912848 | 0.76144  |
| MmugDNA.3820.1.S1_at    | MmugDNA.3820.1  | 5.68  | 5.45  | 0.15 | 0.12 | 1.18  | 0.52744  | 0.156892 | 0.774832 | 0.432372 |
| MmugDNA.38200.1.S1_at   | MmugDNA.38200.1 | 4.52  | 4.55  | 0.35 | 0.19 | -1.02 | 0.598406 | 0.26491  | 0.813939 | 0.530909 |
| MmugDNA.38201.1.S1_at   | MmugDNA.38201.1 | 11.64 | 11.36 | 0.14 | 0.14 | 1.21  | 0.077524 | 0.072492 | 0.427315 | 0.315339 |
| MmugDNA.8357.1.S1_at    | MmugDNA.8357.1  | 7.55  | 7.72  | 0.33 | 0.4  | -1.12 | 0.771909 | 0.648465 | 0.903991 | 0.79428  |
| MmugDNA.8357.1.S1_s_at  | MmugDNA.8357.1  | 7.58  | 7.46  | 0.11 | 0.5  | 1.09  | 0.973851 | 0.774326 | 0.989689 | 0.868752 |
| MmugDNA.38204.1.S1_at   | MmugDNA.38204.1 | 6.93  | 6.34  | 0.64 | 0.48 | 1.51  | 0.195457 | 0.274488 | 0.558901 | 0.538987 |
| MmugDNA.38205.1.S1_at   | MmugDNA.38205.1 | 4.42  | 4.47  | 0.44 | 0.16 | -1.03 | 0.854327 | 0.741554 | 0.941105 | 0.850329 |
| MmugDNA.38206.1.S1_at   | MmugDNA.38206.1 | 9.73  | 10.04 | 0.03 | 0.31 | -1.24 | 0.522836 | 0.178953 | 0.772248 | 0.455243 |
| MmugDNA.38207.1.S1_at   | MmugDNA.38207.1 | 6.07  | 6.03  | 0.25 | 0.41 | 1.03  | 0.863918 | 0.761738 | 0.945408 | 0.861459 |
| MmugDNA.38208.1.S1_at   | MmugDNA.38208.1 | 7.91  | 9.67  | 0.77 | 0.47 | -3.39 | 0.018087 | 0.01441  | 0.268759 | 0.153215 |
| MmugDNA.38209.1.S1_at   | MmugDNA.38209.1 | 4.61  | 5.09  | 0.24 | 0.17 | -1.39 | 0.106829 | 0.085726 | 0.467551 | 0.337761 |
| MmugDNA.38210.1.S1_at   | MmugDNA.38210.1 | 7.67  | 7.79  | 0.08 | 0.48 | -1.08 | 0.608958 | 0.767965 | 0.820226 | 0.865284 |
| MmugDNA.38211.1.S1_at   | MmugDNA.38211.1 | 2.61  | 2.65  | 0.08 | 0.16 | -1.03 | 0.662741 | 0.816786 | 0.848768 | 0.894329 |
| MmugDNA.38211.1.S1_s_at | MmugDNA.38211.1 | 6.59  | 6.95  | 0.06 | 0.01 | -1.29 | 0.00064  | 0.262685 | 0.136818 | 0.529054 |
| MmugDNA.38212.1.S1_at   | MmugDNA.38212.1 | 6.26  | 6.48  | 0.2  | 0.52 | -1.17 | 0.172857 | 0.444435 | 0.536501 | 0.662056 |
| MmugDNA.38213.1.S1_at   | MmugDNA.38213.1 | 5.35  | 5.21  | 0.84 | 0.24 | 1.1   | 0.28602  | 0.351479 | 0.625381 | 0.595084 |
| MmugDNA.38214.1.S1_at   | MmugDNA.38214.1 | 5.99  | 6.06  | 0.47 | 0.25 | -1.05 | 0.56522  | 0.862412 | 0.796922 | 0.921765 |
| MmugDNA.38215.1.S1_at   | MmugDNA.38215.1 | 6.06  | 8.54  | 1.24 | 1.84 | -5.59 | 0.268608 | 0.267897 | 0.613299 | 0.533607 |
| MmugDNA.38218.1.S1_at   | MmugDNA.38218.1 | 5.81  | 4.1   | 0.95 | 0.4  | 3.28  | 0.07281  | 0.035675 | 0.417929 | 0.233296 |
| MmugDNA.38219.1.S1_at   | MmugDNA.38219.1 | 3.03  | 6.14  | 0.35 | 2.18 | -8.68 | 0.107976 | 0.079452 | 0.46872  | 0.326766 |
| MmugDNA.38220.1.S1_at   | MmugDNA.38220.1 | 4.47  | 4.27  | 0.25 | 0.1  | 1.15  | 0.208556 | 0.296624 | 0.570374 | 0.555612 |
| MmugDNA.38221.1.S1_at   | MmugDNA.38221.1 | 3.15  | 3.35  | 0.06 | 0.2  | -1.15 | 0.666248 | 0.510555 | 0.850305 | 0.705007 |
| MmugDNA.38222.1.S1_at   | MmugDNA.38222.1 | 4.14  | 4.64  | 0.14 | 0.45 | -1.41 | 0.186054 | 0.303159 | 0.549597 | 0.56066  |
| MmugDNA.38225.1.S1_at   | MmugDNA.38225.1 | 4.17  | 4.53  | 0.15 | 0.16 | -1.29 | 0.040986 | 0.066312 | 0.35051  | 0.303177 |

|                         |                 |       |       |      |      |       |          |          |          |          |
|-------------------------|-----------------|-------|-------|------|------|-------|----------|----------|----------|----------|
| MmugDNA.38226.1.S1_at   | MmugDNA.38226.1 | 3.1   | 3.09  | 0.12 | 0    | 1.01  | 0.800695 | 0.695433 | 0.917816 | 0.822978 |
| MmugDNA.38227.1.S1_at   | MmugDNA.38227.1 | 4.07  | 4.16  | 0.37 | 0.31 | -1.06 | 0.727071 | 0.475734 | 0.88121  | 0.682332 |
| MmugDNA.38228.1.S1_at   | MmugDNA.38228.1 | 6.59  | 6.78  | 0.05 | 0.14 | -1.14 | 0.101174 | 0.073043 | 0.461009 | 0.316017 |
| MmugDNA.38229.1.S1_at   | MmugDNA.38229.1 | 5.79  | 5.88  | 0.1  | 0.08 | -1.06 | 0.471553 | 0.27239  | 0.743268 | 0.537122 |
| MmugDNA.38229.1.S1_x_at | MmugDNA.38229.1 | 6.15  | 6.04  | 0.18 | 0.07 | 1.08  | 0.473455 | 0.209074 | 0.744256 | 0.482861 |
| MmugDNA.38230.1.S1_at   | MmugDNA.38230.1 | 4.03  | 4.28  | 0.33 | 0.2  | -1.19 | 0.167322 | 0.258392 | 0.531441 | 0.525642 |
| MmugDNA.38231.1.S1_s_at | MmugDNA.38231.1 | 10.26 | 10.58 | 0.06 | 0.7  | -1.25 | 0.588363 | 0.417988 | 0.808931 | 0.642531 |
| MmugDNA.38232.1.S1_at   | MmugDNA.38232.1 | 4.68  | 4.69  | 0.04 | 0.28 | -1    | 0.660839 | 0.881194 | 0.847904 | 0.93219  |
| MmugDNA.38233.1.S1_at   | MmugDNA.38233.1 | 7.77  | 6.87  | 0.26 | 1.1  | 1.87  | 0.204441 | 0.081653 | 0.56692  | 0.329836 |
| MmugDNA.38234.1.S1_at   | MmugDNA.38234.1 | 7.78  | 8.06  | 0.15 | 0.15 | -1.21 | 0.174632 | 0.193472 | 0.538249 | 0.468739 |
| MmugDNA.38235.1.S1_at   | MmugDNA.38235.1 | 11.61 | 11.37 | 0.1  | 0.14 | 1.18  | 0.041346 | 0.029714 | 0.35158  | 0.214029 |
| MmugDNA.38236.1.S1_at   | MmugDNA.38236.1 | 8.2   | 7.89  | 0.06 | 0.54 | 1.24  | 0.313111 | 0.302222 | 0.64497  | 0.560092 |
| MmugDNA.38237.1.S1_at   | MmugDNA.38237.1 | 3.25  | 3.33  | 0    | 0.07 | -1.06 | 0.132226 | 0.093003 | 0.498475 | 0.349174 |
| MmugDNA.38238.1.S1_at   | MmugDNA.38238.1 | 13.04 | 12.59 | 0.38 | 0.32 | 1.37  | 0.466743 | 0.540401 | 0.740411 | 0.724366 |
| MmugDNA.3824.1.S1_at    | MmugDNA.3824.1  | 5.77  | 4.85  | 0.59 | 0.4  | 1.89  | 0.129017 | 0.254831 | 0.495099 | 0.523051 |
| MmugDNA.38241.1.S1_at   | MmugDNA.38241.1 | 4     | 3.3   | 0.44 | 0.06 | 1.63  | 0.039363 | 0.01916  | 0.346992 | 0.1742   |
| MmugDNA.38242.1.S1_at   | MmugDNA.38242.1 | 6.15  | 6.22  | 0.17 | 0.11 | -1.05 | 0.580585 | 0.721945 | 0.804747 | 0.838904 |
| MmugDNA.38243.1.S1_at   | MmugDNA.38243.1 | 3.47  | 3.82  | 0.12 | 0.42 | -1.28 | 0.115415 | 0.147169 | 0.478773 | 0.421389 |
| MmugDNA.38245.1.S1_at   | MmugDNA.38245.1 | 5.53  | 6.12  | 0.26 | 0.67 | -1.51 | 0.215396 | 0.08312  | 0.575857 | 0.332999 |
| MmugDNA.38246.1.S1_at   | MmugDNA.38246.1 | 8.16  | 8.71  | 0.25 | 0.08 | -1.47 | 0.044348 | 0.022074 | 0.358476 | 0.185927 |
| MmugDNA.38247.1.S1_s_at | MmugDNA.38247.1 | 8.14  | 9.23  | 0.36 | 0.96 | -2.12 | 0.106132 | 0.042024 | 0.466831 | 0.249463 |
| MmugDNA.38248.1.S1_at   | MmugDNA.38248.1 | 9.11  | 9.15  | 0.56 | 1.38 | -1.03 | 0.381001 | 0.524318 | 0.68761  | 0.714254 |
| MmugDNA.38249.1.S1_at   | MmugDNA.38249.1 | 3.04  | 3.1   | 0.11 | 0    | -1.04 | 0.433828 | 0.256798 | 0.720251 | 0.524607 |
| MmugDNA.38250.1.S1_at   | MmugDNA.38250.1 | 6.37  | 5.83  | 0.25 | 0.25 | 1.45  | 0.282275 | 0.069577 | 0.622707 | 0.309848 |
| MmugDNA.38251.1.S1_at   | MmugDNA.38251.1 | 5.91  | 5.89  | 1.39 | 0.47 | 1.02  | 0.348495 | 0.50962  | 0.667173 | 0.704267 |
| MmugDNA.38253.1.S1_at   | MmugDNA.38253.1 | 3.25  | 3.28  | 0.04 | 0.1  | -1.02 | 0.485918 | 0.077974 | 0.751179 | 0.324306 |
| MmugDNA.38259.1.S1_at   | MmugDNA.38259.1 | 5.99  | 6.02  | 0.25 | 0.16 | -1.02 | 0.887229 | 0.221641 | 0.954863 | 0.494901 |
| MmugDNA.38261.1.S1_at   | MmugDNA.38261.1 | 3.83  | 3.81  | 0.15 | 0.07 | 1.02  | 0.722305 | 0.912557 | 0.878644 | 0.950757 |
| MmugDNA.38262.1.S1_at   | MmugDNA.38262.1 | 4.94  | 4.87  | 0.18 | 0.08 | 1.05  | 0.628295 | 0.716918 | 0.830703 | 0.836147 |
| MmugDNA.38263.1.S1_at   | MmugDNA.38263.1 | 6.09  | 6.05  | 0.16 | 0.27 | 1.03  | 0.728034 | 0.17047  | 0.881731 | 0.447103 |
| MmugDNA.38264.1.S1_at   | MmugDNA.38264.1 | 7.88  | 8     | 0.39 | 0.26 | -1.08 | 0.97731  | 0.594227 | 0.991326 | 0.758517 |
| MmugDNA.38265.1.S1_at   | MmugDNA.38265.1 | 7.46  | 7.55  | 0.14 | 0.02 | -1.06 | 0.106238 | 0.134843 | 0.466831 | 0.406878 |
| MmugDNA.38267.1.S1_at   | MmugDNA.38267.1 | 5.82  | 5.9   | 0.63 | 0.28 | -1.06 | 0.860701 | 0.663782 | 0.943788 | 0.80314  |
| MmugDNA.38268.1.S1_at   | MmugDNA.38268.1 | 8.49  | 8.63  | 0.5  | 0.47 | -1.11 | 0.310035 | 0.344287 | 0.642042 | 0.589762 |
| MmugDNA.38269.1.S1_at   | MmugDNA.38269.1 | 4.7   | 4.74  | 0.19 | 0.65 | -1.02 | 0.428317 | 0.505288 | 0.716796 | 0.702073 |
| MmugDNA.3827.1.S1_at    | MmugDNA.3827.1  | 7.35  | 7.35  | 0.08 | 0.09 | -1    | 0.544586 | 0.760736 | 0.784452 | 0.860996 |
| MmugDNA.38271.1.S1_at   | MmugDNA.38271.1 | 9.33  | 9.94  | 0.41 | 0.19 | -1.53 | 0.085791 | 0.11226  | 0.439856 | 0.37755  |
| MmugDNA.38272.1.S1_at   | MmugDNA.38272.1 | 7.71  | 7.42  | 0.14 | 0.11 | 1.22  | 0.072435 | 0.184534 | 0.416971 | 0.460574 |
| MmugDNA.38273.1.S1_at   | MmugDNA.38273.1 | 11.63 | 12.16 | 0.44 | 0.52 | -1.44 | 0.524245 | 0.066821 | 0.773104 | 0.304395 |
| MmugDNA.38274.1.S1_s_at | MmugDNA.38274.1 | 9.78  | 9.57  | 0.08 | 0.19 | 1.16  | 0.127808 | 0.108889 | 0.494071 | 0.372511 |
| MmugDNA.38275.1.S1_at   | MmugDNA.38275.1 | 9.05  | 8.76  | 0.14 | 0.11 | 1.23  | 0.040388 | 0.039108 | 0.349277 | 0.24303  |

|                         |                 |       |       |      |      |       |          |          |          |          |
|-------------------------|-----------------|-------|-------|------|------|-------|----------|----------|----------|----------|
| MmugDNA.38276.1.S1_at   | MmugDNA.38276.1 | 4.78  | 4.96  | 0.25 | 0.26 | -1.13 | 0.51279  | 0.412679 | 0.765738 | 0.639042 |
| MmugDNA.38278.1.S1_at   | MmugDNA.38278.1 | 6.5   | 8.43  | 0.97 | 0.75 | -3.83 | 0.171487 | 0.169469 | 0.535166 | 0.446075 |
| MmugDNA.19568.1.S1_s_at | MmugDNA.19568.1 | 7.23  | 7.07  | 0.15 | 0.31 | 1.11  | 0.8228   | 0.685404 | 0.927904 | 0.816513 |
| MmugDNA.3828.1.S1_at    | MmugDNA.3828.1  | 3.15  | 3.05  | 0.3  | 0.23 | 1.07  | 0.620648 | 0.661824 | 0.826084 | 0.801965 |
| MmugDNA.38280.1.S1_at   | MmugDNA.38280.1 | 4.98  | 5.49  | 0.13 | 0.66 | -1.43 | 0.139293 | 0.119898 | 0.506801 | 0.388593 |
| MmugDNA.38285.1.S1_at   | MmugDNA.38285.1 | 6.89  | 6.96  | 0.14 | 0.21 | -1.05 | 0.923277 | 0.07282  | 0.970199 | 0.315699 |
| MmugDNA.38286.1.S1_at   | MmugDNA.38286.1 | 10.57 | 10.56 | 0.09 | 0.14 | 1.01  | 0.687414 | 0.072619 | 0.860396 | 0.315578 |
| MmugDNA.38287.1.S1_x_at | MmugDNA.38287.1 | 8.94  | 8.37  | 0.72 | 0.22 | 1.49  | 0.196916 | 0.244826 | 0.559926 | 0.514655 |
| MmugDNA.38288.1.S1_at   | MmugDNA.38288.1 | 4.83  | 4.9   | 0.07 | 0.14 | -1.05 | 0.170485 | 0.161237 | 0.534249 | 0.437386 |
| MmugDNA.38289.1.S1_at   | MmugDNA.38289.1 | 4.79  | 4.8   | 0.62 | 0.05 | -1.01 | 0.357193 | 0.580139 | 0.67213  | 0.749506 |
| MmugDNA.12789.1.S1_s_at | MmugDNA.12789.1 | 6.01  | 6.01  | 0.1  | 0.37 | -1    | 0.38394  | 0.50975  | 0.689646 | 0.704356 |
| MmugDNA.38291.1.S1_at   | MmugDNA.38291.1 | 3.05  | 3.09  | 0.03 | 0.14 | -1.03 | 0.713023 | 0.367377 | 0.874274 | 0.607012 |
| MmugDNA.38292.1.S1_at   | MmugDNA.38292.1 | 4.97  | 4.59  | 0.13 | 0.26 | 1.31  | 0.096947 | 0.016039 | 0.455899 | 0.160532 |
| MmugDNA.38294.1.S1_at   | MmugDNA.38294.1 | 8.75  | 8.91  | 0.35 | 0.15 | -1.12 | 0.890574 | 0.972954 | 0.956235 | 0.985389 |
| MmugDNA.38295.1.S1_at   | MmugDNA.38295.1 | 3.66  | 3.81  | 0.18 | 0.16 | -1.11 | 0.344695 | 0.43051  | 0.664708 | 0.65152  |
| MmugDNA.38296.1.S1_at   | MmugDNA.38296.1 | 7.33  | 6.73  | 0.64 | 0.66 | 1.51  | 0.934254 | 0.206317 | 0.974552 | 0.480524 |
| MmugDNA.38297.1.S1_at   | MmugDNA.38297.1 | 9.22  | 9.04  | 0.3  | 0.61 | 1.13  | 0.897169 | 0.073869 | 0.959127 | 0.317241 |
| MmugDNA.38299.1.S1_at   | MmugDNA.38299.1 | 4.85  | 5.05  | 0.19 | 0.28 | -1.14 | 0.281694 | 0.30476  | 0.62238  | 0.561921 |
| MmugDNA.3830.1.S1_at    | MmugDNA.3830.1  | 6.09  | 6.15  | 0.28 | 0.36 | -1.04 | 0.926286 | 0.879497 | 0.971724 | 0.931158 |
| MmugDNA.38300.1.S1_at   | MmugDNA.38300.1 | 10.69 | 10.28 | 0.71 | 0.27 | 1.33  | 0.431461 | 0.644448 | 0.718589 | 0.791578 |
| MmugDNA.38302.1.S1_at   | MmugDNA.38302.1 | 3.65  | 3.62  | 0.13 | 0.02 | 1.02  | 0.829734 | 0.74373  | 0.930976 | 0.851465 |
| MmugDNA.38303.1.S1_at   | MmugDNA.38303.1 | 6.41  | 6.36  | 0.04 | 0.26 | 1.03  | 0.47171  | 0.147962 | 0.743333 | 0.422364 |
| MmugDNA.38304.1.S1_at   | MmugDNA.38304.1 | 6.08  | 6.3   | 0.27 | 0.81 | -1.16 | 0.666804 | 0.078735 | 0.850621 | 0.325689 |
| MmugDNA.38305.1.S1_at   | MmugDNA.38305.1 | 3.46  | 3.36  | 0.16 | 0.27 | 1.07  | 0.704258 | 0.889591 | 0.869569 | 0.937097 |
| MmugDNA.38306.1.S1_at   | MmugDNA.38306.1 | 3.13  | 3.15  | 0.09 | 0.24 | -1.02 | 0.717538 | 0.899022 | 0.8759   | 0.942524 |
| MmugDNA.38307.1.S1_x_at | MmugDNA.38307.1 | 10.92 | 10.43 | 0.58 | 0.26 | 1.41  | 0.123582 | 0.152452 | 0.489327 | 0.42728  |
| MmugDNA.38308.1.S1_at   | MmugDNA.38308.1 | 5.3   | 5.44  | 0.08 | 0.13 | -1.1  | 0.307182 | 0.17548  | 0.63988  | 0.452157 |
| MmugDNA.38310.1.S1_at   | MmugDNA.38310.1 | 3.42  | 3.38  | 0.35 | 0.17 | 1.03  | 0.7227   | 0.70417  | 0.878819 | 0.828349 |
| MmugDNA.38311.1.S1_at   | MmugDNA.38311.1 | 5.21  | 5.51  | 0.12 | 0.14 | -1.24 | 0.020576 | 0.018157 | 0.278917 | 0.169673 |
| MmugDNA.38312.1.S1_at   | MmugDNA.38312.1 | 6.3   | 6.66  | 0.28 | 0.14 | -1.28 | 0.101256 | 0.097218 | 0.461009 | 0.354886 |
| MmugDNA.38314.1.S1_at   | MmugDNA.38314.1 | 5.24  | 5.25  | 0.02 | 0.07 | -1.01 | 0.898253 | 0.953601 | 0.959278 | 0.973621 |
| MmugDNA.38315.1.S1_at   | MmugDNA.38315.1 | 8.69  | 8.54  | 0.45 | 0.49 | 1.11  | 0.646926 | 0.09035  | 0.84111  | 0.34479  |
| MmugDNA.38316.1.S1_at   | MmugDNA.38316.1 | 6.53  | 6.53  | 0.65 | 0.44 | -1    | 0.48202  | 0.491485 | 0.749398 | 0.693004 |
| MmugDNA.38317.1.S1_at   | MmugDNA.38317.1 | 9.65  | 9.69  | 0.31 | 0.27 | -1.03 | 0.460788 | 0.019405 | 0.737133 | 0.17509  |
| MmugDNA.38318.1.S1_at   | MmugDNA.38318.1 | 8.76  | 8.31  | 0.16 | 0.11 | 1.37  | 0.005764 | 0.002958 | 0.192738 | 0.079945 |
| MmugDNA.38319.1.S1_at   | MmugDNA.38319.1 | 6.56  | 6.8   | 0.05 | 0.29 | -1.17 | 0.256893 | 0.467868 | 0.60443  | 0.677386 |
| MmugDNA.3832.1.S1_at    | MmugDNA.3832.1  | 3.25  | 3.25  | 0.32 | 0.19 | 1     | 0.308031 | 0.382018 | 0.640424 | 0.618258 |
| MmugDNA.38320.1.S1_at   | MmugDNA.38320.1 | 6.5   | 5.75  | 0.34 | 0.18 | 1.68  | 0.033792 | 0.03113  | 0.330218 | 0.218175 |
| MmugDNA.38321.1.S1_at   | MmugDNA.38321.1 | 4.2   | 4.78  | 0.14 | 0.43 | -1.49 | 0.084852 | 0.091357 | 0.437796 | 0.346281 |
| MmugDNA.38322.1.S1_at   | MmugDNA.38322.1 | 11.71 | 11.64 | 0.05 | 0.15 | 1.05  | 0.495825 | 0.019557 | 0.757324 | 0.175563 |
| MmugDNA.38324.1.S1_at   | MmugDNA.38324.1 | 5.86  | 5.85  | 0.02 | 0.1  | 1     | 0.510813 | 0.216519 | 0.765151 | 0.490141 |

|                         |                 |       |       |      |      |       |          |          |          |          |
|-------------------------|-----------------|-------|-------|------|------|-------|----------|----------|----------|----------|
| MmugDNA.38325.1.S1_at   | MmugDNA.38325.1 | 5.97  | 6.14  | 0.13 | 0.18 | -1.13 | 0.104136 | 0.12781  | 0.464201 | 0.398694 |
| MmugDNA.38325.1.S1_s_at | MmugDNA.38325.1 | 7.03  | 7.04  | 0.19 | 0.18 | -1.01 | 0.915359 | 0.31442  | 0.966534 | 0.568319 |
| MmugDNA.38326.1.S1_at   | MmugDNA.38326.1 | 4.64  | 4.64  | 0.7  | 1.33 | -1    | 0.703372 | 0.541424 | 0.868993 | 0.724911 |
| MmugDNA.38329.1.S1_at   | MmugDNA.38329.1 | 11.71 | 10.69 | 0.18 | 0.44 | 2.03  | 0.013216 | 0.004577 | 0.245924 | 0.094474 |
| MmugDNA.3833.1.S1_at    | MmugDNA.3833.1  | 9.67  | 10.4  | 0.59 | 0.8  | -1.65 | 0.25071  | 0.312479 | 0.600389 | 0.567211 |
| MmugDNA.38330.1.S1_at   | MmugDNA.38330.1 | 8.46  | 8.52  | 0.21 | 0.4  | -1.04 | 0.468331 | 0.568141 | 0.741049 | 0.741855 |
| MmugDNA.38331.1.S1_at   | MmugDNA.38331.1 | 4.08  | 4.16  | 0.09 | 0.23 | -1.05 | 0.570009 | 0.574825 | 0.79932  | 0.746142 |
| MmugDNA.38333.1.S1_at   | MmugDNA.38333.1 | 3.05  | 2.93  | 0.17 | 0.06 | 1.08  | 0.291791 | 0.222994 | 0.629048 | 0.495821 |
| MmugDNA.38335.1.S1_at   | MmugDNA.38335.1 | 8.36  | 8.15  | 0.33 | 0.42 | 1.15  | 0.981573 | 0.549602 | 0.993317 | 0.729956 |
| MmugDNA.38336.1.S1_at   | MmugDNA.38336.1 | 8.2   | 7.81  | 0.05 | 0.14 | 1.31  | 0.018694 | 0.017359 | 0.27122  | 0.166764 |
| MmugDNA.38337.1.S1_at   | MmugDNA.38337.1 | 7.38  | 7.29  | 0.36 | 0.22 | 1.07  | 0.293106 | 0.40686  | 0.630264 | 0.634579 |
| MmugDNA.38338.1.S1_at   | MmugDNA.38338.1 | 3.33  | 3.45  | 0.24 | 0.11 | -1.09 | 0.781858 | 0.766043 | 0.908945 | 0.864085 |
| MmugDNA.3834.1.S1_at    | MmugDNA.3834.1  | 8.99  | 8.59  | 0.37 | 0.45 | 1.32  | 0.444324 | 0.023441 | 0.726942 | 0.191956 |
| MmugDNA.38340.1.S1_at   | MmugDNA.38340.1 | 5.27  | 5.37  | 0.28 | 0.21 | -1.07 | 0.355391 | 0.395932 | 0.671033 | 0.627788 |
| MmugDNA.38341.1.S1_at   | MmugDNA.38341.1 | 10.52 | 10.24 | 0.1  | 0.23 | 1.22  | 0.24826  | 0.24583  | 0.599152 | 0.515519 |
| MmugDNA.38342.1.S1_at   | MmugDNA.38342.1 | 6.52  | 6.82  | 0.49 | 0.53 | -1.23 | 0.337737 | 0.505825 | 0.660209 | 0.702218 |
| MmugDNA.38344.1.S1_at   | MmugDNA.38344.1 | 11.47 | 11.46 | 0.15 | 0.17 | 1.01  | 0.649986 | 0.527731 | 0.842575 | 0.716246 |
| MmugDNA.38345.1.S1_at   | MmugDNA.38345.1 | 10    | 10.2  | 0.06 | 0.11 | -1.15 | 0.031913 | 0.069091 | 0.323433 | 0.309061 |
| MmugDNA.38347.1.S1_at   | MmugDNA.38347.1 | 4.3   | 4.58  | 0.77 | 0.98 | -1.22 | 0.954544 | 0.641686 | 0.983073 | 0.789672 |
| MmugDNA.38348.1.S1_at   | MmugDNA.38348.1 | 12.6  | 12.59 | 0.13 | 0.11 | 1.01  | 0.255443 | 0.248428 | 0.603226 | 0.517725 |
| MmugDNA.38349.1.S1_at   | MmugDNA.38349.1 | 7.69  | 6.85  | 0.26 | 0.26 | 1.78  | 0.00863  | 0.00437  | 0.219657 | 0.092586 |
| MmugDNA.3835.1.S1_at    | MmugDNA.3835.1  | 7.58  | 7.8   | 0.26 | 0.05 | -1.16 | 0.240594 | 0.320423 | 0.593462 | 0.572648 |
| MmugDNA.38350.1.S1_s_at | MmugDNA.38350.1 | 7.4   | 10.23 | 1.5  | 1.2  | -7.1  | 0.147362 | 0.09716  | 0.513141 | 0.354796 |
| MmugDNA.38351.1.S1_at   | MmugDNA.38351.1 | 6.69  | 6.7   | 0.22 | 0.03 | -1.01 | 0.347112 | 0.357008 | 0.666209 | 0.598736 |
| MmugDNA.38352.1.S1_at   | MmugDNA.38352.1 | 5.84  | 5.44  | 0.5  | 0.08 | 1.32  | 0.247003 | 0.150623 | 0.598082 | 0.425195 |
| MmugDNA.38353.1.S1_at   | MmugDNA.38353.1 | 8.71  | 9.01  | 0.07 | 0.2  | -1.23 | 0.057187 | 0.053233 | 0.387542 | 0.276445 |
| MmugDNA.38354.1.S1_at   | MmugDNA.38354.1 | 9.22  | 8.16  | 0.03 | 0.24 | 2.1   | 0.002741 | 0.000552 | 0.165355 | 0.040948 |
| MmugDNA.38355.1.S1_at   | MmugDNA.38355.1 | 6.87  | 6.45  | 0.51 | 0.26 | 1.34  | 0.097116 | 0.098327 | 0.456115 | 0.356397 |
| MmugDNA.38356.1.S1_at   | MmugDNA.38356.1 | 6.47  | 6.55  | 0.04 | 0.35 | -1.05 | 0.661299 | 0.862468 | 0.848124 | 0.921787 |
| MmugDNA.38359.1.S1_at   | MmugDNA.38359.1 | 8.35  | 8.59  | 0.87 | 0.33 | -1.18 | 0.89425  | 0.685815 | 0.957854 | 0.816612 |
| MmugDNA.3836.1.S1_at    | MmugDNA.3836.1  | 11.09 | 11.07 | 0.18 | 0.64 | 1.02  | 0.544681 | 0.659008 | 0.784507 | 0.800479 |
| MmugDNA.38360.1.S1_s_at | MmugDNA.38360.1 | 11.17 | 11.56 | 0.21 | 0.22 | -1.32 | 0.421432 | 0.070893 | 0.713042 | 0.312417 |
| MmugDNA.38362.1.S1_at   | MmugDNA.38362.1 | 8.03  | 7.42  | 0.42 | 0.25 | 1.52  | 0.067029 | 0.049199 | 0.407016 | 0.266627 |
| MmugDNA.38363.1.S1_at   | MmugDNA.38363.1 | 6.01  | 6.23  | 0.2  | 0.11 | -1.16 | 0.240558 | 0.323441 | 0.593462 | 0.574466 |
| MmugDNA.38364.1.S1_at   | MmugDNA.38364.1 | 7     | 7.1   | 0.16 | 0.11 | -1.07 | 0.279964 | 0.36472  | 0.621313 | 0.605044 |
| MmugDNA.38365.1.S1_at   | MmugDNA.38365.1 | 5.99  | 5.14  | 0.56 | 0.47 | 1.81  | 0.241294 | 0.134237 | 0.593801 | 0.406457 |
| MmugDNA.38369.1.S1_at   | MmugDNA.38369.1 | 3.55  | 3.59  | 0.31 | 0.16 | -1.03 | 0.931113 | 0.61294  | 0.97337  | 0.770327 |
| MmugDNA.38372.1.S1_at   | MmugDNA.38372.1 | 4.15  | 4.21  | 0.21 | 0.02 | -1.04 | 0.635365 | 0.822687 | 0.83497  | 0.898006 |
| MmugDNA.38373.1.S1_at   | MmugDNA.38373.1 | 6     | 5.74  | 0.31 | 0.09 | 1.2   | 0.104432 | 0.109819 | 0.464351 | 0.373758 |
| MmugDNA.38376.1.S1_at   | MmugDNA.38376.1 | 8.57  | 8.13  | 0.18 | 0.25 | 1.35  | 0.318983 | 0.439723 | 0.648688 | 0.65842  |
| MmugDNA.38377.1.S1_s_at | MmugDNA.38377.1 | 11.96 | 11.57 | 0.21 | 0.38 | 1.31  | 0.152209 | 0.178141 | 0.51689  | 0.454508 |

|                         |                 |       |       |      |      |       |          |          |          |          |
|-------------------------|-----------------|-------|-------|------|------|-------|----------|----------|----------|----------|
| MmugDNA.38378.1.S1_at   | MmugDNA.38378.1 | 6.59  | 6.76  | 0.07 | 0.13 | -1.13 | 0.090219 | 0.136396 | 0.445665 | 0.408839 |
| MmugDNA.3838.1.S1_at    | MmugDNA.3838.1  | 6.4   | 6.06  | 0.36 | 0.56 | 1.27  | 0.947081 | 0.283401 | 0.979602 | 0.545936 |
| MmugDNA.38380.1.S1_at   | MmugDNA.38380.1 | 4.41  | 4.12  | 0.2  | 0.21 | 1.22  | 0.484241 | 0.532804 | 0.750235 | 0.719235 |
| MmugDNA.38381.1.S1_at   | MmugDNA.38381.1 | 4.29  | 4.28  | 0.04 | 0.29 | 1.01  | 0.843078 | 0.934293 | 0.936822 | 0.96272  |
| MmugDNA.38382.1.S1_at   | MmugDNA.38382.1 | 4.57  | 4.85  | 0.18 | 0.23 | -1.21 | 0.069511 | 0.08474  | 0.412367 | 0.336218 |
| MmugDNA.38383.1.S1_at   | MmugDNA.38383.1 | 12.2  | 12.19 | 0.47 | 0.8  | 1.01  | 0.737129 | 0.847744 | 0.886954 | 0.913501 |
| MmugDNA.38384.1.S1_at   | MmugDNA.38384.1 | 9.66  | 9.56  | 0.08 | 0.45 | 1.07  | 0.568064 | 0.741716 | 0.798402 | 0.850468 |
| MmugDNA.5137.1.S1_s_at  | MmugDNA.5137.1  | 11.14 | 11    | 0.09 | 0.31 | 1.1   | 0.962164 | 0.975731 | 0.985456 | 0.98677  |
| MmugDNA.38385.1.S1_at   | MmugDNA.38385.1 | 8.59  | 8.91  | 0.17 | 0.66 | -1.25 | 0.147972 | 0.177491 | 0.513442 | 0.453881 |
| MmugDNA.38389.1.S1_at   | MmugDNA.38389.1 | 5.78  | 6.05  | 0.47 | 0.2  | -1.21 | 0.884269 | 0.040713 | 0.953655 | 0.246709 |
| MmugDNA.3839.1.S1_at    | MmugDNA.3839.1  | 3.51  | 3.51  | 0.09 | 0.1  | 1     | 0.878986 | 0.587513 | 0.951455 | 0.754278 |
| MmugDNA.40036.1.S1_s_at | MmugDNA.40036.1 | 13.2  | 13.18 | 0.12 | 0.1  | 1.01  | 0.54529  | 0.486798 | 0.784851 | 0.690091 |
| MmugDNA.38391.1.S1_at   | MmugDNA.38391.1 | 5.11  | 4.68  | 1.32 | 0.33 | 1.35  | 0.636619 | 0.548896 | 0.83569  | 0.729483 |
| MmugDNA.38392.1.S1_at   | MmugDNA.38392.1 | 13.08 | 13.33 | 0.09 | 0.09 | -1.18 | 0.016814 | 0.01236  | 0.265645 | 0.143761 |
| MmugDNA.8080.1.S1_s_at  | MmugDNA.8080.1  | 13.3  | 13.58 | 0.1  | 0.06 | -1.21 | 0.010732 | 0.008448 | 0.23109  | 0.121922 |
| MmugDNA.38393.1.S1_at   | MmugDNA.38393.1 | 12.22 | 12.41 | 0.13 | 0.28 | -1.14 | 0.340856 | 0.149975 | 0.662186 | 0.424616 |
| MmugDNA.38394.1.S1_at   | MmugDNA.38394.1 | 5.49  | 4.77  | 0.25 | 0.43 | 1.65  | 0.1696   | 0.213666 | 0.533686 | 0.487441 |
| MmugDNA.38395.1.S1_at   | MmugDNA.38395.1 | 5.41  | 5.4   | 0.11 | 0.1  | 1.01  | 0.53696  | 0.261548 | 0.779739 | 0.52802  |
| MmugDNA.38398.1.S1_at   | MmugDNA.38398.1 | 6.36  | 5.66  | 0.55 | 0.13 | 1.63  | 0.045624 | 0.034876 | 0.361322 | 0.230985 |
| MmugDNA.38399.1.S1_at   | MmugDNA.38399.1 | 3.9   | 3.91  | 0.04 | 0.09 | -1.01 | 0.774963 | 0.544341 | 0.905462 | 0.726752 |
| MmugDNA.384.1.S1_at     | MmugDNA.384.1   | 6.31  | 6.32  | 0.13 | 0.06 | -1.01 | 0.744501 | 0.913158 | 0.890646 | 0.951134 |
| MmugDNA.3840.1.S1_at    | MmugDNA.3840.1  | 3.25  | 3.2   | 0.03 | 0.01 | 1.03  | 0.176842 | 0.738378 | 0.540639 | 0.848278 |
| MmugDNA.38400.1.S1_at   | MmugDNA.38400.1 | 8.44  | 8.82  | 0.13 | 0.03 | -1.3  | 0.006218 | 0.040663 | 0.197039 | 0.246578 |
| MmugDNA.38402.1.S1_at   | MmugDNA.38402.1 | 9.57  | 9.37  | 0.07 | 0.61 | 1.15  | 0.581571 | 0.762892 | 0.805237 | 0.862108 |
| MmugDNA.38403.1.S1_at   | MmugDNA.38403.1 | 4.72  | 4.6   | 0.23 | 0.22 | 1.08  | 0.300548 | 0.441717 | 0.635955 | 0.659854 |
| MmugDNA.38405.1.S1_at   | MmugDNA.38405.1 | 6.17  | 5.68  | 0.52 | 0.35 | 1.4   | 0.237853 | 0.133922 | 0.591294 | 0.406043 |
| MmugDNA.38406.1.S1_at   | MmugDNA.38406.1 | 3.97  | 4.23  | 0.16 | 0.59 | -1.2  | 0.346278 | 0.489455 | 0.665754 | 0.691824 |
| MmugDNA.38407.1.S1_at   | MmugDNA.38407.1 | 8.76  | 8.17  | 0.39 | 0.22 | 1.51  | 0.052232 | 0.044269 | 0.377218 | 0.254932 |
| MmugDNA.38408.1.S1_at   | MmugDNA.38408.1 | 3.69  | 3.81  | 0.42 | 0.11 | -1.08 | 0.649107 | 0.787077 | 0.84237  | 0.876832 |
| MmugDNA.38409.1.S1_at   | MmugDNA.38409.1 | 6.91  | 6.69  | 0.17 | 0.02 | 1.16  | 0.361159 | 0.127945 | 0.675116 | 0.398894 |
| MmugDNA.3841.1.S1_at    | MmugDNA.3841.1  | 5.51  | 5.8   | 0.28 | 0.21 | -1.22 | 0.393848 | 0.543024 | 0.695522 | 0.725879 |
| MmugDNA.38410.1.S1_at   | MmugDNA.38410.1 | 4.64  | 4.81  | 0.42 | 0.31 | -1.12 | 0.51431  | 0.320321 | 0.766859 | 0.572648 |
| MmugDNA.38413.1.S1_at   | MmugDNA.38413.1 | 3.88  | 3.88  | 0.12 | 0.13 | 1     | 0.563566 | 0.628074 | 0.79607  | 0.780937 |
| MmugDNA.38414.1.S1_at   | MmugDNA.38414.1 | 7.93  | 8.58  | 0.25 | 0.96 | -1.57 | 0.31201  | 0.265361 | 0.643774 | 0.531336 |
| MmugDNA.38415.1.S1_at   | MmugDNA.38415.1 | 6.49  | 6.69  | 0.19 | 0.13 | -1.15 | 0.238048 | 0.315584 | 0.591399 | 0.569053 |
| MmugDNA.38418.1.S1_at   | MmugDNA.38418.1 | 11.66 | 10.97 | 0.19 | 0.16 | 1.61  | 0.007056 | 0.002956 | 0.20404  | 0.079945 |
| MmugDNA.38419.1.S1_at   | MmugDNA.38419.1 | 5.41  | 5.2   | 0.11 | 0.37 | 1.16  | 0.777497 | 0.715665 | 0.907006 | 0.835159 |
| MmugDNA.38420.1.S1_s_at | MmugDNA.38420.1 | 11.44 | 12.2  | 0.27 | 0.55 | -1.69 | 0.130929 | 0.158878 | 0.497248 | 0.434982 |
| MmugDNA.38421.1.S1_at   | MmugDNA.38421.1 | 5.29  | 6.92  | 0.63 | 0.88 | -3.1  | 0.096715 | 0.043407 | 0.455647 | 0.253    |
| MmugDNA.38422.1.S1_at   | MmugDNA.38422.1 | 12.06 | 12.33 | 0.05 | 0.2  | -1.2  | 0.117391 | 0.018074 | 0.481484 | 0.169379 |
| MmugDNA.38423.1.S1_at   | MmugDNA.38423.1 | 6.89  | 6.46  | 0.4  | 1.11 | 1.34  | 0.550615 | 0.732561 | 0.787967 | 0.845084 |



|                         |                 |       |       |      |      |       |          |          |          |          |
|-------------------------|-----------------|-------|-------|------|------|-------|----------|----------|----------|----------|
| MmugDNA.38424.1.S1_at   | MmugDNA.38424.1 | 10.86 | 10.12 | 0.04 | 0.12 | 1.67  | 0.000353 | 0.000026 | 0.128842 | 0.020518 |
| MmugDNA.38425.1.S1_at   | MmugDNA.38425.1 | 3.12  | 3.15  | 0.49 | 0.08 | -1.02 | 0.459061 | 0.581139 | 0.735918 | 0.75023  |
| MmugDNA.38427.1.S1_at   | MmugDNA.38427.1 | 4.35  | 4.1   | 0.09 | 0.17 | 1.19  | 0.27874  | 0.436313 | 0.620785 | 0.655923 |
| MmugDNA.38428.1.S1_at   | MmugDNA.38428.1 | 10.8  | 10.66 | 0.08 | 0.75 | 1.11  | 0.25753  | 0.180007 | 0.604974 | 0.456552 |
| MmugDNA.38429.1.S1_at   | MmugDNA.38429.1 | 8.06  | 9.22  | 0.74 | 0.79 | -2.23 | 0.06214  | 0.04053  | 0.397269 | 0.246264 |
| MmugDNA.3843.1.S1_s_at  | MmugDNA.3843.1  | 8.85  | 9.09  | 0.11 | 0.45 | -1.17 | 0.52951  | 0.630796 | 0.776234 | 0.782446 |
| MmugDNA.38430.1.S1_at   | MmugDNA.38430.1 | 6.08  | 6.14  | 0.13 | 0.28 | -1.04 | 0.620701 | 0.439244 | 0.826096 | 0.658013 |
| MmugDNA.38431.1.S1_at   | MmugDNA.38431.1 | 7.96  | 7.83  | 0.68 | 0.71 | 1.09  | 0.979671 | 0.98467  | 0.992474 | 0.991346 |
| MmugDNA.38432.1.S1_at   | MmugDNA.38432.1 | 10.09 | 10.2  | 0.19 | 0.47 | -1.08 | 0.474133 | 0.397311 | 0.744875 | 0.628781 |
| MmugDNA.38434.1.S1_at   | MmugDNA.38434.1 | 5.2   | 4     | 0.22 | 0.34 | 2.29  | 0.007528 | 0.007693 | 0.209134 | 0.117169 |
| MmugDNA.38435.1.S1_at   | MmugDNA.38435.1 | 6.72  | 6.95  | 0    | 0.08 | -1.17 | 0.004485 | 0.001599 | 0.183586 | 0.060468 |
| MmugDNA.38436.1.S1_at   | MmugDNA.38436.1 | 7.43  | 7.53  | 0.27 | 0.52 | -1.07 | 0.592046 | 0.743921 | 0.810758 | 0.851592 |
| MmugDNA.38437.1.S1_at   | MmugDNA.38437.1 | 5.77  | 5.73  | 0.16 | 0.08 | 1.03  | 0.24861  | 0.505808 | 0.599428 | 0.702218 |
| MmugDNA.38438.1.S1_at   | MmugDNA.38438.1 | 3.59  | 4.14  | 0.11 | 0.83 | -1.46 | 0.282124 | 0.45069  | 0.622553 | 0.665844 |
| MmugDNA.3844.1.S1_at    | MmugDNA.3844.1  | 6.56  | 6.67  | 0.3  | 0.22 | -1.07 | 0.302034 | 0.098355 | 0.636822 | 0.356466 |
| MmugDNA.38440.1.S1_at   | MmugDNA.38440.1 | 7.4   | 6.15  | 0.53 | 0.36 | 2.38  | 0.046892 | 0.031386 | 0.364195 | 0.219065 |
| MmugDNA.38441.1.S1_at   | MmugDNA.38441.1 | 10.67 | 9.94  | 0.17 | 0.51 | 1.66  | 0.039313 | 0.011238 | 0.346898 | 0.138014 |
| MmugDNA.38442.1.S1_at   | MmugDNA.38442.1 | 10.51 | 10.8  | 0.12 | 0.18 | -1.22 | 0.126384 | 0.007127 | 0.492722 | 0.113654 |
| MmugDNA.38442.1.S1_s_at | MmugDNA.38442.1 | 11.32 | 11.57 | 0.11 | 0.16 | -1.19 | 0.213885 | 0.041683 | 0.574137 | 0.24887  |
| MmugDNA.38443.1.S1_at   | MmugDNA.38443.1 | 3.31  | 3.4   | 0.17 | 0.05 | -1.06 | 0.946881 | 0.9956   | 0.979482 | 0.997264 |
| MmugDNA.38444.1.S1_at   | MmugDNA.38444.1 | 5.64  | 5.7   | 0.45 | 0.14 | -1.04 | 0.820317 | 0.768236 | 0.926871 | 0.865447 |
| MmugDNA.38445.1.S1_at   | MmugDNA.38445.1 | 3.64  | 3.59  | 0.48 | 0.23 | 1.03  | 0.323457 | 0.245409 | 0.651635 | 0.515213 |
| MmugDNA.38446.1.S1_at   | MmugDNA.38446.1 | 7.93  | 9.06  | 0.47 | 0.55 | -2.2  | 0.05811  | 0.007445 | 0.389848 | 0.115858 |
| MmugDNA.38447.1.S1_at   | MmugDNA.38447.1 | 10.45 | 10.07 | 0.27 | 0.06 | 1.3   | 0.075067 | 0.088266 | 0.421811 | 0.341721 |
| MmugDNA.38449.1.S1_at   | MmugDNA.38449.1 | 3.1   | 3.19  | 0.05 | 0.15 | -1.06 | 0.643078 | 0.870489 | 0.839146 | 0.926446 |
| MmugDNA.3845.1.S1_at    | MmugDNA.3845.1  | 8.91  | 8.69  | 0.11 | 0.18 | 1.17  | 0.127299 | 0.123794 | 0.493787 | 0.393929 |
| MmugDNA.38451.1.S1_at   | MmugDNA.38451.1 | 10.15 | 10.11 | 0.15 | 1.29 | 1.03  | 0.903217 | 0.520804 | 0.961415 | 0.711942 |
| MmugDNA.38452.1.S1_at   | MmugDNA.38452.1 | 5.08  | 5.96  | 0.36 | 0.23 | -1.84 | 0.02109  | 0.013146 | 0.282181 | 0.147338 |
| MmugDNA.38453.1.S1_at   | MmugDNA.38453.1 | 7.96  | 8.16  | 0.28 | 0.07 | -1.15 | 0.100978 | 0.004175 | 0.461009 | 0.091064 |
| MmugDNA.38456.1.S1_at   | MmugDNA.38456.1 | 5.55  | 5.45  | 0.24 | 0.16 | 1.08  | 0.946099 | 0.213883 | 0.979359 | 0.48758  |
| MmugDNA.38457.1.S1_at   | MmugDNA.38457.1 | 3.61  | 3.6   | 0.09 | 0.11 | 1.01  | 0.990852 | 0.502723 | 0.99683  | 0.700289 |
| MmugDNA.38458.1.S1_at   | MmugDNA.38458.1 | 4.89  | 4.92  | 0.06 | 0.16 | -1.02 | 0.28398  | 0.296447 | 0.623838 | 0.555528 |
| MmugDNA.3846.1.S1_at    | MmugDNA.3846.1  | 12.52 | 12.72 | 0.05 | 0.12 | -1.15 | 0.080438 | 0.079794 | 0.430491 | 0.327113 |
| MmugDNA.38461.1.S1_at   | MmugDNA.38461.1 | 4.17  | 3.74  | 0.15 | 0.37 | 1.35  | 0.609222 | 0.695607 | 0.82039  | 0.823073 |
| MmugDNA.38462.1.S1_at   | MmugDNA.38462.1 | 3.66  | 3.75  | 0.17 | 0.1  | -1.06 | 0.341867 | 0.574786 | 0.662882 | 0.746142 |
| MmugDNA.38463.1.S1_at   | MmugDNA.38463.1 | 9.42  | 10.3  | 0.5  | 0.35 | -1.84 | 0.087756 | 0.093378 | 0.442117 | 0.34958  |
| MmugDNA.38464.1.S1_at   | MmugDNA.38464.1 | 6.74  | 5.96  | 0.36 | 0.38 | 1.72  | 0.030614 | 0.021077 | 0.31944  | 0.181869 |
| MmugDNA.38465.1.S1_at   | MmugDNA.38465.1 | 13.32 | 13.28 | 0.1  | 0.34 | 1.03  | 0.912407 | 0.382342 | 0.965274 | 0.618498 |
| MmugDNA.2707.1.S1_at    | MmugDNA.2707.1  | 10.76 | 10.92 | 0.25 | 0.59 | -1.12 | 0.51193  | 0.561621 | 0.765383 | 0.73751  |
| MmugDNA.2707.1.S1_s_at  | MmugDNA.2707.1  | 10.94 | 11.05 | 0.25 | 0.58 | -1.07 | 0.531424 | 0.676526 | 0.777199 | 0.81095  |
| MmugDNA.38466.1.S1_at   | MmugDNA.38466.1 | 5.84  | 6.08  | 0.02 | 0.1  | -1.19 | 0.030143 | 0.020438 | 0.317113 | 0.179564 |

|                         |                 |       |       |      |      |       |          |          |          |          |
|-------------------------|-----------------|-------|-------|------|------|-------|----------|----------|----------|----------|
| MmugDNA.38467.1.S1_at   | MmugDNA.38467.1 | 5.44  | 5.35  | 0.21 | 0.18 | 1.06  | 0.64721  | 0.603319 | 0.841246 | 0.764049 |
| MmugDNA.38468.1.S1_at   | MmugDNA.38468.1 | 8.6   | 8.64  | 0.13 | 0.25 | -1.03 | 0.697273 | 0.397948 | 0.865592 | 0.629138 |
| MmugDNA.3847.1.S1_at    | MmugDNA.3847.1  | 10.61 | 9.77  | 0.26 | 0.26 | 1.79  | 0.058225 | 0.04517  | 0.390133 | 0.256979 |
| MmugDNA.38470.1.S1_at   | MmugDNA.38470.1 | 6.87  | 7.31  | 0.51 | 0.79 | -1.36 | 0.426089 | 0.443605 | 0.715524 | 0.661336 |
| MmugDNA.38471.1.S1_at   | MmugDNA.38471.1 | 12.49 | 12.22 | 0.09 | 0.28 | 1.2   | 0.215046 | 0.249001 | 0.575507 | 0.518083 |
| MmugDNA.38472.1.S1_at   | MmugDNA.38472.1 | 10.29 | 10.4  | 0.03 | 0.21 | -1.08 | 0.140177 | 0.00583  | 0.508065 | 0.104661 |
| MmugDNA.38473.1.S1_at   | MmugDNA.38473.1 | 9.5   | 9.13  | 0.13 | 0.65 | 1.29  | 0.100984 | 0.103533 | 0.461009 | 0.364346 |
| MmugDNA.38476.1.S1_at   | MmugDNA.38476.1 | 3.5   | 3.44  | 0.04 | 0.3  | 1.05  | 0.743313 | 0.862634 | 0.89014  | 0.92189  |
| MmugDNA.38477.1.S1_at   | MmugDNA.38477.1 | 8.18  | 8.56  | 0.18 | 0.12 | -1.3  | 0.029812 | 0.020363 | 0.315451 | 0.17912  |
| MmugDNA.38478.1.S1_s_at | MmugDNA.38478.1 | 13.67 | 13.57 | 0.34 | 0.17 | 1.08  | 0.759137 | 0.512618 | 0.898249 | 0.706442 |
| MmugDNA.3848.1.S1_at    | MmugDNA.3848.1  | 5.67  | 5.06  | 0.4  | 1.55 | 1.52  | 0.678636 | 0.864688 | 0.856129 | 0.923276 |
| MmugDNA.38480.1.S1_at   | MmugDNA.38480.1 | 3.36  | 3.26  | 0.12 | 0.08 | 1.08  | 0.237641 | 0.120094 | 0.591151 | 0.388803 |
| MmugDNA.38482.1.S1_at   | MmugDNA.38482.1 | 6.35  | 6.53  | 0.86 | 0.54 | -1.13 | 0.478885 | 0.656065 | 0.747575 | 0.798847 |
| MmugDNA.38483.1.S1_at   | MmugDNA.38483.1 | 7.15  | 6.97  | 0.05 | 0.1  | 1.14  | 0.121718 | 0.049076 | 0.486508 | 0.266501 |
| MmugDNA.38485.1.S1_at   | MmugDNA.38485.1 | 6.34  | 6.41  | 0    | 0.2  | -1.06 | 0.789373 | 0.308582 | 0.912587 | 0.564575 |
| MmugDNA.38486.1.S1_at   | MmugDNA.38486.1 | 5.86  | 5.43  | 0.14 | 0.14 | 1.35  | 0.050791 | 0.03027  | 0.375432 | 0.215828 |
| MmugDNA.38487.1.S1_at   | MmugDNA.38487.1 | 10.66 | 11.01 | 0.15 | 0.25 | -1.28 | 0.047332 | 0.037983 | 0.365873 | 0.239357 |
| MmugDNA.3849.1.S1_at    | MmugDNA.3849.1  | 5.63  | 5.74  | 0.06 | 0.09 | -1.08 | 0.100312 | 0.208093 | 0.460878 | 0.482082 |
| MmugDNA.38490.1.S1_at   | MmugDNA.38490.1 | 7.04  | 7.09  | 0.07 | 0.03 | -1.03 | 0.420922 | 0.643735 | 0.712792 | 0.791112 |
| MmugDNA.38491.1.S1_at   | MmugDNA.38491.1 | 5.36  | 4.89  | 0.42 | 0.06 | 1.39  | 0.185977 | 0.094142 | 0.549502 | 0.350851 |
| MmugDNA.38493.1.S1_at   | MmugDNA.38493.1 | 10.61 | 10.72 | 0.34 | 1.05 | -1.08 | 0.903323 | 0.780191 | 0.961429 | 0.872539 |
| MmugDNA.38494.1.S1_at   | MmugDNA.38494.1 | 5.47  | 5.74  | 0.29 | 0.1  | -1.21 | 0.409039 | 0.470894 | 0.705716 | 0.679128 |
| MmugDNA.38495.1.S1_at   | MmugDNA.38495.1 | 5.94  | 6.47  | 0.71 | 0.31 | -1.45 | 0.833387 | 0.254048 | 0.932336 | 0.522387 |
| MmugDNA.38496.1.S1_at   | MmugDNA.38496.1 | 3.54  | 3.82  | 0.07 | 0.17 | -1.21 | 0.276209 | 0.382998 | 0.618221 | 0.61904  |
| MmugDNA.38497.1.S1_at   | MmugDNA.38497.1 | 5.91  | 6.01  | 0.28 | 0.02 | -1.07 | 0.695824 | 0.390086 | 0.865035 | 0.624002 |
| MmugDNA.38499.1.S1_at   | MmugDNA.38499.1 | 7.2   | 9.01  | 0.47 | 0.68 | -3.5  | 0.045799 | 0.037769 | 0.361834 | 0.238746 |
| MmugDNA.385.1.S1_at     | MmugDNA.385.1   | 11.7  | 11.44 | 0.13 | 0.57 | 1.2   | 0.154934 | 0.187934 | 0.519574 | 0.464041 |
| MmugDNA.3850.1.S1_at    | MmugDNA.3850.1  | 6.44  | 7.32  | 0.27 | 0.38 | -1.84 | 0.02822  | 0.012046 | 0.310087 | 0.142044 |
| MmugDNA.38500.1.S1_at   | MmugDNA.38500.1 | 4.56  | 4.18  | 0.14 | 0.09 | 1.3   | 0.023165 | 0.009525 | 0.290295 | 0.128521 |
| MmugDNA.38502.1.S1_at   | MmugDNA.38502.1 | 2.83  | 2.91  | 0.09 | 0.06 | -1.06 | 0.232366 | 0.257446 | 0.587814 | 0.52521  |
| MmugDNA.38503.1.S1_at   | MmugDNA.38503.1 | 8.65  | 8.68  | 0.28 | 0.15 | -1.02 | 0.556368 | 0.647354 | 0.79173  | 0.793415 |
| MmugDNA.38504.1.S1_at   | MmugDNA.38504.1 | 6.62  | 7.17  | 0.16 | 0.43 | -1.46 | 0.125944 | 0.13746  | 0.492046 | 0.41037  |
| MmugDNA.38505.1.S1_at   | MmugDNA.38505.1 | 4.21  | 4.26  | 0.04 | 0.26 | -1.03 | 0.783651 | 0.559983 | 0.909657 | 0.736439 |
| MmugDNA.38507.1.S1_at   | MmugDNA.38507.1 | 7.04  | 6.74  | 0.85 | 0.73 | 1.23  | 0.511989 | 0.70816  | 0.765422 | 0.830731 |
| MmugDNA.38509.1.S1_at   | MmugDNA.38509.1 | 3.45  | 3.47  | 0.06 | 0.14 | -1.02 | 0.351259 | 0.461285 | 0.669117 | 0.672971 |
| MmugDNA.38511.1.S1_at   | MmugDNA.38511.1 | 3.09  | 3.18  | 0.09 | 0.25 | -1.07 | 0.384876 | 0.437288 | 0.690118 | 0.656613 |
| MmugDNA.38511.1.S1_x_at | MmugDNA.38511.1 | 2.82  | 2.86  | 0.1  | 0.2  | -1.03 | 0.23344  | 0.334503 | 0.588137 | 0.582498 |
| MmugDNA.38512.1.S1_at   | MmugDNA.38512.1 | 5.18  | 5.34  | 0.04 | 0.16 | -1.12 | 0.21794  | 0.046183 | 0.577569 | 0.259345 |
| MmugDNA.38514.1.S1_at   | MmugDNA.38514.1 | 5.53  | 5.62  | 0.22 | 0.13 | -1.07 | 0.364546 | 0.471928 | 0.677389 | 0.679793 |
| MmugDNA.38517.1.S1_at   | MmugDNA.38517.1 | 9.36  | 8.78  | 0.22 | 0.34 | 1.49  | 0.127816 | 0.128671 | 0.494071 | 0.400083 |
| MmugDNA.38519.1.S1_at   | MmugDNA.38519.1 | 5.31  | 5.42  | 0.15 | 0.05 | -1.08 | 0.766103 | 0.160113 | 0.901664 | 0.436296 |

|                         |                 |       |       |      |      |       |          |          |          |          |
|-------------------------|-----------------|-------|-------|------|------|-------|----------|----------|----------|----------|
| MmugDNA.3852.1.S1_at    | MmugDNA.3852.1  | 6.95  | 6.49  | 0.09 | 0.17 | 1.38  | 0.018298 | 0.013231 | 0.269791 | 0.147534 |
| MmugDNA.38520.1.S1_at   | MmugDNA.38520.1 | 5.2   | 5.39  | 0.22 | 0.16 | -1.14 | 0.709136 | 0.260798 | 0.872332 | 0.52721  |
| MmugDNA.38521.1.S1_at   | MmugDNA.38521.1 | 6.4   | 6.6   | 0.08 | 0.09 | -1.15 | 0.075117 | 0.17994  | 0.421924 | 0.456476 |
| MmugDNA.38523.1.S1_at   | MmugDNA.38523.1 | 3.81  | 3.8   | 0.08 | 0.13 | 1     | 0.485482 | 0.542767 | 0.750946 | 0.725734 |
| MmugDNA.38529.1.S1_at   | MmugDNA.38529.1 | 6.84  | 6.59  | 0.45 | 0.92 | 1.19  | 0.543301 | 0.751002 | 0.783788 | 0.855235 |
| MmugDNA.38531.1.S1_at   | MmugDNA.38531.1 | 6.44  | 6.53  | 0.24 | 0.12 | -1.06 | 0.443302 | 0.620655 | 0.726034 | 0.775525 |
| MmugDNA.38532.1.S1_at   | MmugDNA.38532.1 | 4.69  | 4.6   | 0.21 | 0.16 | 1.06  | 0.39975  | 0.363011 | 0.699664 | 0.603478 |
| MmugDNA.38533.1.S1_at   | MmugDNA.38533.1 | 7.13  | 6.98  | 0.25 | 0.5  | 1.12  | 0.851389 | 0.891253 | 0.940204 | 0.938045 |
| MmugDNA.38536.1.S1_at   | MmugDNA.38536.1 | 4.31  | 4.33  | 0.06 | 0.11 | -1.01 | 0.83305  | 0.946652 | 0.93227  | 0.969766 |
| MmugDNA.38537.1.S1_at   | MmugDNA.38537.1 | 4.02  | 4.06  | 0.22 | 0.36 | -1.03 | 0.794506 | 0.83719  | 0.914727 | 0.906927 |
| MmugDNA.38538.1.S1_at   | MmugDNA.38538.1 | 6.63  | 6.7   | 0.12 | 0.6  | -1.05 | 0.522416 | 0.715214 | 0.772025 | 0.834912 |
| MmugDNA.3854.1.S1_at    | MmugDNA.3854.1  | 6.88  | 7.76  | 0.53 | 0.32 | -1.84 | 0.093251 | 0.158423 | 0.450461 | 0.434313 |
| MmugDNA.38540.1.S1_at   | MmugDNA.38540.1 | 6.17  | 6.47  | 0.17 | 0.15 | -1.24 | 0.162216 | 0.012427 | 0.526638 | 0.144095 |
| MmugDNA.38541.1.S1_at   | MmugDNA.38541.1 | 7.26  | 7.14  | 0.18 | 0.3  | 1.08  | 0.716822 | 0.308941 | 0.875634 | 0.564656 |
| MmugDNA.38542.1.S1_at   | MmugDNA.38542.1 | 7.42  | 7.33  | 0.65 | 0.41 | 1.06  | 0.613846 | 0.768635 | 0.822936 | 0.865637 |
| MmugDNA.38543.1.S1_x_at | MmugDNA.38543.1 | 4.4   | 3.63  | 0.6  | 0.25 | 1.71  | 0.316803 | 0.238578 | 0.647759 | 0.509192 |
| MmugDNA.38544.1.S1_at   | MmugDNA.38544.1 | 5.52  | 5.73  | 0.15 | 0.13 | -1.15 | 0.077928 | 0.069281 | 0.428012 | 0.309468 |
| MmugDNA.38545.1.S1_at   | MmugDNA.38545.1 | 4.51  | 4.62  | 0.2  | 0.21 | -1.09 | 0.735313 | 0.707917 | 0.886196 | 0.830538 |
| MmugDNA.38546.1.S1_s_at | MmugDNA.38546.1 | 4.01  | 3.41  | 0.21 | 0.06 | 1.51  | 0.009771 | 0.005225 | 0.22625  | 0.10016  |
| MmugDNA.38547.1.S1_at   | MmugDNA.38547.1 | 11.78 | 11.49 | 0.39 | 0.49 | 1.22  | 0.890786 | 0.568406 | 0.956312 | 0.741962 |
| MmugDNA.3855.1.S1_at    | MmugDNA.3855.1  | 3.73  | 3.69  | 0.09 | 0.07 | 1.03  | 0.313616 | 0.341553 | 0.645195 | 0.587748 |
| MmugDNA.38550.1.S1_s_at | MmugDNA.38550.1 | 12.24 | 11.98 | 0.24 | 0.15 | 1.2   | 0.124846 | 0.226909 | 0.490774 | 0.499276 |
| MmugDNA.38551.1.S1_at   | MmugDNA.38551.1 | 6.66  | 6.78  | 0.26 | 0.12 | -1.09 | 0.726123 | 0.736179 | 0.880754 | 0.847335 |
| MmugDNA.38552.1.S1_at   | MmugDNA.38552.1 | 12.07 | 11.78 | 0.24 | 0.22 | 1.22  | 0.468197 | 0.001778 | 0.741049 | 0.06341  |
| MmugDNA.38553.1.S1_at   | MmugDNA.38553.1 | 10.58 | 10.21 | 0.05 | 0.1  | 1.29  | 0.006001 | 0.001962 | 0.194862 | 0.065832 |
| MmugDNA.38555.1.S1_at   | MmugDNA.38555.1 | 5.53  | 5.13  | 0.33 | 0.2  | 1.32  | 0.114559 | 0.126379 | 0.477887 | 0.396902 |
| MmugDNA.38557.1.S1_at   | MmugDNA.38557.1 | 11.43 | 11.41 | 0.22 | 0.16 | 1.01  | 0.422605 | 0.376752 | 0.713606 | 0.614541 |
| MmugDNA.38559.1.S1_at   | MmugDNA.38559.1 | 3.59  | 3.56  | 0.16 | 0.2  | 1.02  | 0.859866 | 0.802066 | 0.943454 | 0.886016 |
| MmugDNA.3856.1.S1_at    | MmugDNA.3856.1  | 6.49  | 6.63  | 0.18 | 0.26 | -1.11 | 0.607536 | 0.680042 | 0.819363 | 0.813156 |
| MmugDNA.38560.1.S1_at   | MmugDNA.38560.1 | 6.91  | 6.48  | 0.55 | 0.78 | 1.35  | 0.431047 | 0.555144 | 0.718438 | 0.733715 |
| MmugDNA.38561.1.S1_at   | MmugDNA.38561.1 | 7.47  | 7.38  | 0.02 | 0.22 | 1.07  | 0.940095 | 0.456473 | 0.977194 | 0.670188 |
| MmugDNA.38566.1.S1_at   | MmugDNA.38566.1 | 6.95  | 6.22  | 1.51 | 1.17 | 1.65  | 0.399277 | 0.591374 | 0.699211 | 0.756973 |
| MmugDNA.38567.1.S1_at   | MmugDNA.38567.1 | 3.48  | 3.2   | 0.37 | 0.18 | 1.22  | 0.439116 | 0.600029 | 0.723488 | 0.761762 |
| MmugDNA.38568.1.S1_at   | MmugDNA.38568.1 | 10.38 | 9.95  | 0.37 | 1.34 | 1.34  | 0.4664   | 0.594506 | 0.740215 | 0.758623 |
| MmugDNA.38569.1.S1_at   | MmugDNA.38569.1 | 8.23  | 7.57  | 0.14 | 0.33 | 1.58  | 0.116024 | 0.125412 | 0.479523 | 0.396075 |
| MmugDNA.3857.1.S1_at    | MmugDNA.3857.1  | 4.66  | 4.96  | 0.08 | 0.27 | -1.23 | 0.134119 | 0.116398 | 0.500681 | 0.383671 |
| MmugDNA.38570.1.S1_s_at | MmugDNA.38570.1 | 6.89  | 7.97  | 1.16 | 0.45 | -2.11 | 0.12225  | 0.07638  | 0.487436 | 0.321368 |
| MmugDNA.38571.1.S1_at   | MmugDNA.38571.1 | 3.41  | 3.89  | 0.35 | 0.2  | -1.39 | 0.442097 | 0.543499 | 0.725371 | 0.726175 |
| MmugDNA.38572.1.S1_at   | MmugDNA.38572.1 | 6.31  | 6.38  | 0.06 | 0.08 | -1.05 | 0.114187 | 0.14977  | 0.47744  | 0.424394 |
| MmugDNA.38574.1.S1_at   | MmugDNA.38574.1 | 4.38  | 4.35  | 0.17 | 0.15 | 1.02  | 0.800319 | 0.959384 | 0.917544 | 0.976959 |
| MmugDNA.38575.1.S1_at   | MmugDNA.38575.1 | 10.59 | 10.43 | 0.12 | 0.35 | 1.12  | 0.99997  | 0.999206 | 1        | 0.99966  |

|                         |                 |       |       |      |      |       |          |          |          |          |
|-------------------------|-----------------|-------|-------|------|------|-------|----------|----------|----------|----------|
| MmugDNA.38576.1.S1_s_at | MmugDNA.38576.1 | 12.64 | 12.55 | 0.19 | 0.06 | 1.07  | 0.522669 | 0.365792 | 0.772201 | 0.60572  |
| MmugDNA.38577.1.S1_at   | MmugDNA.38577.1 | 4.97  | 4.98  | 0.7  | 0.14 | -1    | 0.452158 | 0.614332 | 0.731944 | 0.771206 |
| MmugDNA.38578.1.S1_at   | MmugDNA.38578.1 | 8.94  | 8.95  | 0.22 | 0.17 | -1.01 | 0.555286 | 0.197225 | 0.791316 | 0.472213 |
| MmugDNA.3858.1.S1_at    | MmugDNA.3858.1  | 3.64  | 3.67  | 0.11 | 0.23 | -1.02 | 0.400078 | 0.444965 | 0.699692 | 0.662174 |
| MmugDNA.38580.1.S1_at   | MmugDNA.38580.1 | 8.86  | 9.11  | 0.24 | 0.55 | -1.19 | 0.841725 | 0.154524 | 0.936215 | 0.429405 |
| MmugDNA.38582.1.S1_at   | MmugDNA.38582.1 | 4.64  | 4.72  | 0.04 | 0.5  | -1.06 | 0.750448 | 0.844005 | 0.893141 | 0.911155 |
| MmugDNA.38583.1.S1_s_at | MmugDNA.38583.1 | 10.56 | 10.62 | 0.17 | 0.2  | -1.04 | 0.343986 | 0.038072 | 0.664188 | 0.239748 |
| MmugDNA.18685.1.S1_at   | MmugDNA.18685.1 | 8.45  | 6.83  | 0.68 | 1    | 3.06  | 0.109306 | 0.111239 | 0.470811 | 0.375882 |
| MmugDNA.18685.1.S1_s_at | MmugDNA.18685.1 | 10.6  | 9.38  | 0.42 | 0.67 | 2.33  | 0.077927 | 0.071699 | 0.428012 | 0.313904 |
| MmugDNA.38585.1.S1_at   | MmugDNA.38585.1 | 6.26  | 6.34  | 0.13 | 0.1  | -1.06 | 0.434058 | 0.504428 | 0.720304 | 0.701557 |
| MmugDNA.38586.1.S1_at   | MmugDNA.38586.1 | 8.55  | 8.16  | 0.15 | 0.46 | 1.31  | 0.223909 | 0.192191 | 0.582336 | 0.467651 |
| MmugDNA.38588.1.S1_at   | MmugDNA.38588.1 | 11.87 | 12.51 | 0.07 | 0.24 | -1.55 | 0.011725 | 0.010676 | 0.237595 | 0.134919 |
| MmugDNA.38588.1.S1_s_at | MmugDNA.38588.1 | 10.79 | 11.42 | 0.18 | 0.26 | -1.55 | 0.014372 | 0.012152 | 0.251885 | 0.142648 |
| MmugDNA.38589.1.S1_at   | MmugDNA.38589.1 | 11.28 | 12.04 | 0.14 | 0.26 | -1.69 | 0.011623 | 0.00353  | 0.236956 | 0.085242 |
| MmugDNA.3859.1.S1_at    | MmugDNA.3859.1  | 10.57 | 10.28 | 0.1  | 0.32 | 1.22  | 0.097898 | 0.097838 | 0.457184 | 0.355639 |
| MmugDNA.38590.1.S1_at   | MmugDNA.38590.1 | 7.26  | 7.24  | 0.04 | 0.18 | 1.01  | 0.902129 | 0.479632 | 0.960932 | 0.685331 |
| MmugDNA.38591.1.S1_at   | MmugDNA.38591.1 | 5.17  | 5.44  | 0.59 | 0.35 | -1.2  | 0.456768 | 0.114289 | 0.734534 | 0.38083  |
| MmugDNA.38592.1.S1_at   | MmugDNA.38592.1 | 6.36  | 6.92  | 1.05 | 0.23 | -1.48 | 0.954945 | 0.976975 | 0.983073 | 0.987472 |
| MmugDNA.38593.1.S1_at   | MmugDNA.38593.1 | 8.43  | 8.66  | 0.13 | 0.13 | -1.18 | 0.080351 | 0.451079 | 0.430456 | 0.666023 |
| MmugDNA.38594.1.S1_at   | MmugDNA.38594.1 | 6.61  | 6.66  | 0.4  | 1.14 | -1.04 | 0.84863  | 0.478911 | 0.939211 | 0.684779 |
| MmugDNA.38596.1.S1_at   | MmugDNA.38596.1 | 5.47  | 5.53  | 0.05 | 0.21 | -1.04 | 0.218434 | 0.268388 | 0.577909 | 0.534086 |
| MmugDNA.38597.1.S1_at   | MmugDNA.38597.1 | 3.46  | 3.37  | 0.59 | 0.31 | 1.06  | 0.550579 | 0.746726 | 0.787958 | 0.852931 |
| MmugDNA.38598.1.S1_at   | MmugDNA.38598.1 | 6.15  | 5.76  | 0.58 | 0.46 | 1.31  | 0.937319 | 0.710089 | 0.975858 | 0.831904 |
| MmugDNA.3860.1.S1_at    | MmugDNA.3860.1  | 6.87  | 6.16  | 0.37 | 0.13 | 1.63  | 0.046466 | 0.145083 | 0.363009 | 0.419047 |
| MmugDNA.13629.1.S1_at   | MmugDNA.13629.1 | 4.94  | 4.36  | 0.95 | 0.4  | 1.5   | 0.111734 | 0.131496 | 0.474019 | 0.403658 |
| MmugDNA.13629.1.S1_s_at | MmugDNA.13629.1 | 11.23 | 11.03 | 0.24 | 0.37 | 1.15  | 0.163692 | 0.20532  | 0.527992 | 0.479639 |
| MmugDNA.38604.1.S1_at   | MmugDNA.38604.1 | 4.28  | 4.09  | 0.25 | 0.12 | 1.14  | 0.313575 | 0.160677 | 0.645195 | 0.436758 |
| MmugDNA.38605.1.S1_at   | MmugDNA.38605.1 | 6.46  | 6.37  | 0.14 | 0.11 | 1.07  | 0.985704 | 0.574889 | 0.994806 | 0.746177 |
| MmugDNA.38607.1.S1_at   | MmugDNA.38607.1 | 5.41  | 4.9   | 0.87 | 0.28 | 1.43  | 0.18314  | 0.267762 | 0.547237 | 0.533553 |
| MmugDNA.38608.1.S1_at   | MmugDNA.38608.1 | 4.29  | 3.86  | 1    | 0.43 | 1.35  | 0.490294 | 0.688787 | 0.75438  | 0.818337 |
| MmugDNA.38609.1.S1_at   | MmugDNA.38609.1 | 6.09  | 6.09  | 0.19 | 0.2  | -1    | 0.996244 | 0.998412 | 0.99849  | 0.999092 |
| MmugDNA.3861.1.S1_at    | MmugDNA.3861.1  | 5.37  | 6.31  | 0.1  | 0.59 | -1.91 | 0.193735 | 0.222313 | 0.557435 | 0.495346 |
| MmugDNA.38610.1.S1_at   | MmugDNA.38610.1 | 4.82  | 4.71  | 0.31 | 0.26 | 1.08  | 0.751195 | 0.493858 | 0.893648 | 0.694433 |
| MmugDNA.38612.1.S1_at   | MmugDNA.38612.1 | 3.04  | 3.15  | 0.13 | 0.02 | -1.08 | 0.70894  | 0.614858 | 0.872172 | 0.771583 |
| MmugDNA.38613.1.S1_at   | MmugDNA.38613.1 | 3.94  | 4.28  | 0.36 | 0.03 | -1.26 | 0.499049 | 0.667409 | 0.758833 | 0.805333 |
| MmugDNA.38614.1.S1_at   | MmugDNA.38614.1 | 6.61  | 5.1   | 0.42 | 0.38 | 2.85  | 0.028243 | 0.038352 | 0.310211 | 0.240736 |
| MmugDNA.38616.1.S1_at   | MmugDNA.38616.1 | 4.44  | 4.55  | 0.09 | 0.36 | -1.08 | 0.338838 | 0.23745  | 0.660988 | 0.508127 |
| MmugDNA.38617.1.S1_at   | MmugDNA.38617.1 | 4.1   | 4.38  | 0.22 | 0.12 | -1.22 | 0.090291 | 0.15473  | 0.445754 | 0.429723 |
| MmugDNA.38619.1.S1_at   | MmugDNA.38619.1 | 6.01  | 6.08  | 0.19 | 0.23 | -1.06 | 0.905487 | 0.978119 | 0.962318 | 0.988066 |
| MmugDNA.3862.1.S1_at    | MmugDNA.3862.1  | 5.02  | 5.2   | 0.14 | 0.2  | -1.13 | 0.14175  | 0.15763  | 0.509159 | 0.433131 |
| MmugDNA.38620.1.S1_at   | MmugDNA.38620.1 | 11.97 | 12.1  | 0.15 | 0.15 | -1.09 | 0.537235 | 0.15708  | 0.779902 | 0.432547 |

|                        |                 |       |       |      |      |       |          |          |          |          |
|------------------------|-----------------|-------|-------|------|------|-------|----------|----------|----------|----------|
| MmugDNA.38622.1.S1_at  | MmugDNA.38622.1 | 8.39  | 8.27  | 0.31 | 0.13 | 1.09  | 0.561788 | 0.616261 | 0.794981 | 0.772555 |
| MmugDNA.38623.1.S1_at  | MmugDNA.38623.1 | 4.18  | 4.18  | 0.17 | 0.08 | -1    | 0.436925 | 0.491554 | 0.722107 | 0.693034 |
| MmugDNA.38624.1.S1_at  | MmugDNA.38624.1 | 5.11  | 4.84  | 1.21 | 0.25 | 1.2   | 0.258317 | 0.098659 | 0.605637 | 0.356743 |
| MmugDNA.38625.1.S1_at  | MmugDNA.38625.1 | 6.59  | 6.49  | 0.12 | 0.24 | 1.08  | 0.113015 | 0.112226 | 0.475614 | 0.377537 |
| MmugDNA.38627.1.S1_at  | MmugDNA.38627.1 | 9.3   | 9.77  | 0.28 | 0.56 | -1.38 | 0.980427 | 0.544924 | 0.992955 | 0.727184 |
| MmugDNA.38629.1.S1_at  | MmugDNA.38629.1 | 11.93 | 11.34 | 0.07 | 0.61 | 1.5   | 0.174487 | 0.176053 | 0.538141 | 0.452526 |
| MmugDNA.3863.1.S1_at   | MmugDNA.3863.1  | 5.96  | 8.8   | 0.48 | 0.88 | -7.15 | 0.006984 | 0.003217 | 0.202858 | 0.082088 |
| MmugDNA.38631.1.S1_at  | MmugDNA.38631.1 | 4.04  | 4.46  | 0.42 | 0.54 | -1.33 | 0.753139 | 0.476034 | 0.894632 | 0.682473 |
| MmugDNA.38632.1.S1_at  | MmugDNA.38632.1 | 7.06  | 7.07  | 0.1  | 0.12 | -1    | 0.45596  | 0.440323 | 0.734216 | 0.658899 |
| MmugDNA.38633.1.S1_at  | MmugDNA.38633.1 | 11.08 | 11    | 0.35 | 0.17 | 1.06  | 0.172588 | 0.120396 | 0.536193 | 0.38925  |
| MmugDNA.38634.1.S1_at  | MmugDNA.38634.1 | 6.54  | 6.54  | 0.17 | 0.13 | 1     | 0.578395 | 0.460499 | 0.803822 | 0.672364 |
| MmugDNA.38635.1.S1_at  | MmugDNA.38635.1 | 3.4   | 3.51  | 0.09 | 0.06 | -1.08 | 0.177117 | 0.028026 | 0.541073 | 0.208941 |
| MmugDNA.38636.1.S1_at  | MmugDNA.38636.1 | 9.68  | 9.35  | 0.16 | 0.95 | 1.25  | 0.185872 | 0.234025 | 0.549376 | 0.505312 |
| MmugDNA.38637.1.S1_at  | MmugDNA.38637.1 | 3.25  | 3.16  | 0.02 | 0.19 | 1.07  | 0.509104 | 0.615315 | 0.764172 | 0.771918 |
| MmugDNA.38639.1.S1_at  | MmugDNA.38639.1 | 4.11  | 4.04  | 0.18 | 0.19 | 1.06  | 0.290429 | 0.351909 | 0.628091 | 0.595331 |
| MmugDNA.3864.1.S1_at   | MmugDNA.3864.1  | 3.92  | 3.7   | 0.16 | 0.23 | 1.16  | 0.420575 | 0.756516 | 0.712569 | 0.858223 |
| MmugDNA.38642.1.S1_at  | MmugDNA.38642.1 | 9.04  | 10.39 | 0.37 | 0.35 | -2.54 | 0.006948 | 0.003433 | 0.202482 | 0.084252 |
| MmugDNA.38643.1.S1_at  | MmugDNA.38643.1 | 5.56  | 5.9   | 0.22 | 0.08 | -1.26 | 0.092576 | 0.151844 | 0.449245 | 0.42651  |
| MmugDNA.38645.1.S1_at  | MmugDNA.38645.1 | 5.65  | 5.82  | 1.27 | 0.32 | -1.13 | 0.464072 | 0.70885  | 0.739049 | 0.831167 |
| MmugDNA.38646.1.S1_at  | MmugDNA.38646.1 | 6.34  | 6.81  | 0.18 | 0.24 | -1.39 | 0.050103 | 0.026888 | 0.37332  | 0.205141 |
| MmugDNA.38647.1.S1_at  | MmugDNA.38647.1 | 3.1   | 2.89  | 0.55 | 0.07 | 1.16  | 0.15239  | 0.167519 | 0.51708  | 0.443968 |
| MmugDNA.38648.1.S1_at  | MmugDNA.38648.1 | 10.63 | 9.98  | 0.23 | 0.21 | 1.57  | 0.019204 | 0.008704 | 0.273146 | 0.123697 |
| MmugDNA.38649.1.S1_at  | MmugDNA.38649.1 | 7.17  | 6.38  | 0.53 | 0.38 | 1.73  | 0.18946  | 0.229538 | 0.552479 | 0.501534 |
| MmugDNA.3865.1.S1_at   | MmugDNA.3865.1  | 10.43 | 10.71 | 0.05 | 0.4  | -1.22 | 0.303847 | 0.467396 | 0.638083 | 0.677085 |
| MmugDNA.38650.1.S1_at  | MmugDNA.38650.1 | 7.15  | 7.12  | 0.3  | 1.37 | 1.02  | 0.756015 | 0.692089 | 0.896298 | 0.82091  |
| MmugDNA.38651.1.S1_at  | MmugDNA.38651.1 | 9.07  | 8.75  | 0.23 | 0.24 | 1.24  | 0.823135 | 0.369208 | 0.928109 | 0.608669 |
| MmugDNA.38652.1.S1_at  | MmugDNA.38652.1 | 6.42  | 6.01  | 0.18 | 0.18 | 1.32  | 0.060541 | 0.138356 | 0.393743 | 0.411244 |
| MmugDNA.38653.1.S1_at  | MmugDNA.38653.1 | 7.13  | 6.65  | 0.42 | 0.63 | 1.39  | 0.076844 | 0.041613 | 0.425685 | 0.24887  |
| MmugDNA.38655.1.S1_at  | MmugDNA.38655.1 | 6.27  | 6.3   | 0.1  | 0.01 | -1.02 | 0.716311 | 0.933169 | 0.875374 | 0.962032 |
| MmugDNA.38656.1.S1_at  | MmugDNA.38656.1 | 2.54  | 2.54  | 0.07 | 0.08 | -1    | 0.918914 | 0.82801  | 0.968454 | 0.901214 |
| MmugDNA.38657.1.S1_at  | MmugDNA.38657.1 | 7.67  | 7.64  | 0.01 | 0.02 | 1.02  | 0.028092 | 0.504271 | 0.309743 | 0.701474 |
| MmugDNA.38659.1.S1_at  | MmugDNA.38659.1 | 12.37 | 12.68 | 0.32 | 0.19 | -1.23 | 0.355594 | 0.322675 | 0.671135 | 0.574036 |
| MmugDNA.3866.1.S1_s_at | MmugDNA.3866.1  | 11.28 | 11.39 | 0.25 | 0.2  | -1.07 | 0.690225 | 0.104876 | 0.861946 | 0.366419 |
| MmugDNA.38665.1.S1_at  | MmugDNA.38665.1 | 9.42  | 9.45  | 0.16 | 0.22 | -1.02 | 0.871617 | 0.9816   | 0.948635 | 0.989914 |
| MmugDNA.38667.1.S1_at  | MmugDNA.38667.1 | 7.35  | 8.26  | 1.37 | 0.42 | -1.88 | 0.362613 | 0.506158 | 0.676176 | 0.702359 |
| MmugDNA.38668.1.S1_at  | MmugDNA.38668.1 | 3.52  | 3.38  | 0.13 | 0.17 | 1.1   | 0.313569 | 0.343092 | 0.645195 | 0.588883 |
| MmugDNA.38669.1.S1_at  | MmugDNA.38669.1 | 5.95  | 5.94  | 0.17 | 0.03 | 1.01  | 0.285283 | 0.172302 | 0.624811 | 0.448666 |
| MmugDNA.3867.1.S1_at   | MmugDNA.3867.1  | 9.92  | 10.16 | 0.17 | 0.25 | -1.18 | 0.323632 | 0.026503 | 0.65165  | 0.203897 |
| MmugDNA.38670.1.S1_at  | MmugDNA.38670.1 | 10.76 | 10.71 | 0.11 | 0.49 | 1.03  | 0.31155  | 0.397251 | 0.643539 | 0.628763 |
| MmugDNA.38671.1.S1_at  | MmugDNA.38671.1 | 4.12  | 3.84  | 0.16 | 0.27 | 1.22  | 0.251921 | 0.327622 | 0.601195 | 0.577448 |
| MmugDNA.38672.1.S1_at  | MmugDNA.38672.1 | 11.9  | 11.86 | 0.18 | 0.42 | 1.02  | 0.399865 | 0.54937  | 0.699692 | 0.72982  |

|                         |                 |       |       |      |      |       |          |          |          |          |
|-------------------------|-----------------|-------|-------|------|------|-------|----------|----------|----------|----------|
| MmugDNA.38673.1.S1_s_at | MmugDNA.38673.1 | 8.85  | 8.75  | 0.16 | 0.28 | 1.07  | 0.761778 | 0.788144 | 0.899718 | 0.877471 |
| MmugDNA.38674.1.S1_at   | MmugDNA.38674.1 | 9.75  | 9.48  | 0.08 | 0.3  | 1.21  | 0.14067  | 0.153172 | 0.508385 | 0.428011 |
| MmugDNA.38676.1.S1_at   | MmugDNA.38676.1 | 11.75 | 12.03 | 0.28 | 0.71 | -1.21 | 0.811418 | 0.109815 | 0.923201 | 0.373758 |
| MmugDNA.38677.1.S1_at   | MmugDNA.38677.1 | 5.21  | 5.34  | 0.14 | 0.02 | -1.09 | 0.745866 | 0.432056 | 0.891243 | 0.652775 |
| MmugDNA.38678.1.S1_at   | MmugDNA.38678.1 | 4.19  | 4.34  | 0.16 | 0.34 | -1.11 | 0.432031 | 0.492333 | 0.718823 | 0.693485 |
| MmugDNA.3868.1.S1_at    | MmugDNA.3868.1  | 8.85  | 8.53  | 0.24 | 0.28 | 1.25  | 0.458962 | 0.663297 | 0.735823 | 0.802921 |
| MmugDNA.38680.1.S1_at   | MmugDNA.38680.1 | 6.98  | 6.46  | 0.69 | 0.74 | 1.44  | 0.507284 | 0.686361 | 0.762788 | 0.816948 |
| MmugDNA.38681.1.S1_at   | MmugDNA.38681.1 | 6.56  | 6.99  | 0.25 | 0.56 | -1.35 | 0.515266 | 0.186092 | 0.767346 | 0.461931 |
| MmugDNA.38682.1.S1_at   | MmugDNA.38682.1 | 6.44  | 6.46  | 0.39 | 0.2  | -1.02 | 0.390252 | 0.532666 | 0.69348  | 0.719186 |
| MmugDNA.38683.1.S1_at   | MmugDNA.38683.1 | 9.73  | 10.66 | 0.19 | 0.38 | -1.91 | 0.026868 | 0.013019 | 0.304933 | 0.146821 |
| MmugDNA.38684.1.S1_at   | MmugDNA.38684.1 | 6.65  | 6.6   | 1.12 | 0.12 | 1.04  | 0.498987 | 0.692116 | 0.758823 | 0.82091  |
| MmugDNA.38685.1.S1_at   | MmugDNA.38685.1 | 3.87  | 3.93  | 0.17 | 0.28 | -1.04 | 0.32034  | 0.226436 | 0.649463 | 0.498888 |
| MmugDNA.38687.1.S1_at   | MmugDNA.38687.1 | 5.94  | 5.29  | 0.06 | 0.33 | 1.58  | 0.086863 | 0.060291 | 0.440524 | 0.292225 |
| MmugDNA.38689.1.S1_at   | MmugDNA.38689.1 | 7.18  | 7.28  | 0.15 | 0.14 | -1.07 | 0.811806 | 0.427351 | 0.923344 | 0.649175 |
| MmugDNA.3869.1.S1_at    | MmugDNA.3869.1  | 5.76  | 6.45  | 0.39 | 0.29 | -1.61 | 0.032383 | 0.019378 | 0.324784 | 0.174992 |
| MmugDNA.38691.1.S1_at   | MmugDNA.38691.1 | 8.23  | 7.9   | 0.05 | 0.57 | 1.26  | 0.39246  | 0.258258 | 0.694657 | 0.52558  |
| MmugDNA.38695.1.S1_at   | MmugDNA.38695.1 | 11.96 | 11.88 | 0.2  | 0.12 | 1.06  | 0.370642 | 0.498961 | 0.681582 | 0.697912 |
| MmugDNA.38696.1.S1_at   | MmugDNA.38696.1 | 7.56  | 7.54  | 0.2  | 0.07 | 1.02  | 0.808448 | 0.932218 | 0.921914 | 0.961557 |
| MmugDNA.387.1.S1_at     | MmugDNA.387.1   | 8.22  | 7.6   | 0.22 | 0.28 | 1.54  | 0.079839 | 0.045509 | 0.430147 | 0.2575   |
| MmugDNA.3870.1.S1_at    | MmugDNA.3870.1  | 3.28  | 3.06  | 0.45 | 0.4  | 1.17  | 0.525817 | 0.491382 | 0.773937 | 0.692976 |
| MmugDNA.38702.1.S1_at   | MmugDNA.38702.1 | 11.1  | 11.8  | 0.15 | 1.98 | -1.63 | 0.7309   | 0.895044 | 0.88338  | 0.940055 |
| MmugDNA.38703.1.S1_at   | MmugDNA.38703.1 | 3.27  | 3.32  | 0.16 | 0.11 | -1.03 | 0.726129 | 0.119268 | 0.880754 | 0.387769 |
| MmugDNA.38704.1.S1_at   | MmugDNA.38704.1 | 5.24  | 3.75  | 0.54 | 0.31 | 2.81  | 0.009292 | 0.003193 | 0.223832 | 0.08199  |
| MmugDNA.38705.1.S1_at   | MmugDNA.38705.1 | 7.28  | 7.3   | 0.13 | 0.09 | -1.01 | 0.727144 | 0.769588 | 0.88121  | 0.866212 |
| MmugDNA.29620.1.S1_s_at | MmugDNA.29620.1 | 6.76  | 6.84  | 0.17 | 0.08 | -1.05 | 0.71662  | 0.888104 | 0.875506 | 0.936183 |
| MmugDNA.38707.1.S1_at   | MmugDNA.38707.1 | 4.12  | 4.22  | 0.15 | 0.12 | -1.07 | 0.501429 | 0.65824  | 0.759978 | 0.800244 |
| MmugDNA.38708.1.S1_at   | MmugDNA.38708.1 | 11.63 | 11.11 | 0.16 | 0.13 | 1.44  | 0.019544 | 0.016113 | 0.27501  | 0.160891 |
| MmugDNA.38708.1.S1_s_at | MmugDNA.38708.1 | 12.83 | 12.54 | 0.11 | 0.16 | 1.23  | 0.073588 | 0.048837 | 0.419024 | 0.265858 |
| MmugDNA.38709.1.S1_at   | MmugDNA.38709.1 | 4.21  | 4.28  | 0.07 | 0.12 | -1.05 | 0.66787  | 0.892511 | 0.851379 | 0.938696 |
| MmugDNA.38711.1.S1_at   | MmugDNA.38711.1 | 4.97  | 5.4   | 0.22 | 1.14 | -1.34 | 0.182854 | 0.134169 | 0.547133 | 0.406421 |
| MmugDNA.38713.1.S1_at   | MmugDNA.38713.1 | 3.87  | 3.81  | 0.06 | 0.15 | 1.04  | 0.33948  | 0.352236 | 0.661307 | 0.595568 |
| MmugDNA.38716.1.S1_at   | MmugDNA.38716.1 | 6.45  | 6.65  | 0.7  | 0.74 | -1.14 | 0.368506 | 0.523024 | 0.67994  | 0.713429 |
| MmugDNA.38717.1.S1_at   | MmugDNA.38717.1 | 4.76  | 5.02  | 0.18 | 0.33 | -1.2  | 0.262259 | 0.277159 | 0.608902 | 0.541154 |
| MmugDNA.38718.1.S1_at   | MmugDNA.38718.1 | 4.59  | 4.56  | 0.19 | 0.92 | 1.02  | 0.422533 | 0.297267 | 0.713604 | 0.556067 |
| MmugDNA.3872.1.S1_at    | MmugDNA.3872.1  | 11.83 | 10.89 | 0.23 | 0.53 | 1.92  | 0.074338 | 0.064186 | 0.419963 | 0.299592 |
| MmugDNA.38720.1.S1_at   | MmugDNA.38720.1 | 3.7   | 3.69  | 0.08 | 0.85 | 1.01  | 0.387776 | 0.367947 | 0.692117 | 0.607537 |
| MmugDNA.38721.1.S1_at   | MmugDNA.38721.1 | 5.41  | 5.36  | 0.05 | 0.1  | 1.03  | 0.5584   | 0.376855 | 0.793181 | 0.614606 |
| MmugDNA.38724.1.S1_at   | MmugDNA.38724.1 | 4.35  | 4.26  | 0.35 | 0.22 | 1.06  | 0.289072 | 0.368364 | 0.627048 | 0.607917 |
| MmugDNA.38726.1.S1_at   | MmugDNA.38726.1 | 3.94  | 3.88  | 0.08 | 0.1  | 1.04  | 0.651483 | 0.029862 | 0.843183 | 0.214491 |
| MmugDNA.38727.1.S1_at   | MmugDNA.38727.1 | 5.41  | 5.63  | 0.17 | 0.22 | -1.16 | 0.246856 | 0.177922 | 0.597999 | 0.454259 |
| MmugDNA.38728.1.S1_at   | MmugDNA.38728.1 | 10.01 | 9.36  | 0.09 | 1.14 | 1.57  | 0.349053 | 0.414963 | 0.667394 | 0.640553 |

|                         |                 |       |       |      |      |       |          |          |          |          |
|-------------------------|-----------------|-------|-------|------|------|-------|----------|----------|----------|----------|
| MmugDNA.38730.1.S1_at   | MmugDNA.38730.1 | 5.63  | 5.76  | 0.3  | 0.47 | -1.1  | 0.506668 | 0.318917 | 0.762432 | 0.571531 |
| MmugDNA.38731.1.S1_at   | MmugDNA.38731.1 | 6.5   | 5.83  | 0.92 | 0.72 | 1.59  | 0.307805 | 0.397396 | 0.640207 | 0.628812 |
| MmugDNA.38732.1.S1_at   | MmugDNA.38732.1 | 3.89  | 3.74  | 0.27 | 0.06 | 1.11  | 0.309766 | 0.463695 | 0.641716 | 0.674615 |
| MmugDNA.38734.1.S1_at   | MmugDNA.38734.1 | 5.88  | 5.04  | 0.38 | 0.4  | 1.78  | 0.086341 | 0.028318 | 0.440224 | 0.21008  |
| MmugDNA.38738.1.S1_at   | MmugDNA.38738.1 | 5.35  | 5.61  | 0.1  | 0.1  | -1.2  | 0.02539  | 0.034359 | 0.299142 | 0.229283 |
| MmugDNA.38739.1.S1_at   | MmugDNA.38739.1 | 8.41  | 8.07  | 1.09 | 0.57 | 1.26  | 0.822117 | 0.278351 | 0.927568 | 0.542089 |
| MmugDNA.3874.1.S1_at    | MmugDNA.3874.1  | 12.7  | 12.78 | 0.14 | 0.1  | -1.06 | 0.285111 | 0.116437 | 0.624705 | 0.383671 |
| MmugDNA.38740.1.S1_at   | MmugDNA.38740.1 | 12.89 | 13.41 | 0.22 | 0.52 | -1.44 | 0.29394  | 0.354602 | 0.631033 | 0.597297 |
| MmugDNA.38741.1.S1_at   | MmugDNA.38741.1 | 4.21  | 4     | 0.32 | 0.15 | 1.16  | 0.093833 | 0.468391 | 0.45129  | 0.677714 |
| MmugDNA.38742.1.S1_at   | MmugDNA.38742.1 | 5.3   | 5.45  | 0.18 | 0.1  | -1.11 | 0.471717 | 0.481973 | 0.743333 | 0.686909 |
| MmugDNA.38743.1.S1_at   | MmugDNA.38743.1 | 10.17 | 10.38 | 0.29 | 0.43 | -1.16 | 0.799922 | 0.863328 | 0.917308 | 0.922371 |
| MmugDNA.38744.1.S1_at   | MmugDNA.38744.1 | 5.5   | 5.56  | 0.55 | 0.06 | -1.05 | 0.428116 | 0.524307 | 0.716622 | 0.714254 |
| MmugDNA.38745.1.S1_at   | MmugDNA.38745.1 | 11.29 | 11.33 | 0.16 | 0.35 | -1.03 | 0.863175 | 0.072559 | 0.944982 | 0.315511 |
| MmugDNA.38746.1.S1_at   | MmugDNA.38746.1 | 7.83  | 7.81  | 0.09 | 0.21 | 1.02  | 0.284994 | 0.486851 | 0.624632 | 0.690091 |
| MmugDNA.38748.1.S1_at   | MmugDNA.38748.1 | 4.44  | 4.21  | 0.4  | 0.45 | 1.17  | 0.770176 | 0.918963 | 0.90333  | 0.954477 |
| MmugDNA.38749.1.S1_at   | MmugDNA.38749.1 | 7.98  | 7.53  | 0.14 | 0.32 | 1.37  | 0.109297 | 0.119312 | 0.470811 | 0.387834 |
| MmugDNA.3875.1.S1_at    | MmugDNA.3875.1  | 5.36  | 5.38  | 0.25 | 0.78 | -1.01 | 0.716111 | 0.742932 | 0.87529  | 0.851083 |
| MmugDNA.38750.1.S1_at   | MmugDNA.38750.1 | 7.24  | 7.81  | 0.23 | 0.36 | -1.49 | 0.062027 | 0.05231  | 0.39693  | 0.274201 |
| MmugDNA.38751.1.S1_at   | MmugDNA.38751.1 | 10.69 | 10.23 | 0.04 | 0.3  | 1.38  | 0.049581 | 0.019816 | 0.371523 | 0.177045 |
| MmugDNA.38753.1.S1_s_at | MmugDNA.38753.1 | 12.1  | 12.92 | 0.53 | 0.51 | -1.77 | 0.116939 | 0.051011 | 0.480867 | 0.271158 |
| MmugDNA.38754.1.S1_at   | MmugDNA.38754.1 | 4.61  | 4.09  | 1.13 | 0.13 | 1.43  | 0.497768 | 0.023229 | 0.758068 | 0.191039 |
| MmugDNA.38755.1.S1_at   | MmugDNA.38755.1 | 7.5   | 7.2   | 0.64 | 0.17 | 1.23  | 0.161679 | 0.216666 | 0.526573 | 0.490307 |
| MmugDNA.38755.1.S1_x_at | MmugDNA.38755.1 | 7.11  | 6.7   | 0.72 | 0.32 | 1.33  | 0.282408 | 0.329079 | 0.622852 | 0.578482 |
| MmugDNA.38757.1.S1_at   | MmugDNA.38757.1 | 6.75  | 7.93  | 0.57 | 0.75 | -2.25 | 0.054087 | 0.050654 | 0.381447 | 0.270317 |
| MmugDNA.38758.1.S1_at   | MmugDNA.38758.1 | 3.99  | 4.23  | 0.21 | 0.13 | -1.18 | 0.413266 | 0.518901 | 0.70838  | 0.710789 |
| MmugDNA.38759.1.S1_at   | MmugDNA.38759.1 | 4.77  | 4.38  | 0.28 | 0.2  | 1.31  | 0.11777  | 0.019892 | 0.481956 | 0.177357 |
| MmugDNA.3876.1.S1_at    | MmugDNA.3876.1  | 5.63  | 5.61  | 0.34 | 0.15 | 1.01  | 0.389834 | 0.351829 | 0.693291 | 0.595274 |
| MmugDNA.38760.1.S1_at   | MmugDNA.38760.1 | 4.11  | 4.09  | 0.16 | 0.04 | 1.01  | 0.606046 | 0.668396 | 0.818704 | 0.805938 |
| MmugDNA.38762.1.S1_s_at | MmugDNA.38762.1 | 10.13 | 10.37 | 0.12 | 0.33 | -1.18 | 0.724573 | 0.816151 | 0.879724 | 0.893955 |
| MmugDNA.38763.1.S1_at   | MmugDNA.38763.1 | 3.4   | 3.69  | 0.15 | 0.05 | -1.22 | 0.026863 | 0.053022 | 0.304933 | 0.27592  |
| MmugDNA.38764.1.S1_at   | MmugDNA.38764.1 | 6.83  | 6.33  | 0.46 | 0.43 | 1.42  | 0.501573 | 0.676919 | 0.760088 | 0.811237 |
| MmugDNA.38765.1.S1_at   | MmugDNA.38765.1 | 7.08  | 6.94  | 0.94 | 0.23 | 1.1   | 0.382809 | 0.557422 | 0.688989 | 0.735031 |
| MmugDNA.38766.1.S1_at   | MmugDNA.38766.1 | 6.76  | 6.64  | 1.2  | 0.94 | 1.08  | 0.991008 | 0.984296 | 0.996869 | 0.991271 |
| MmugDNA.38767.1.S1_at   | MmugDNA.38767.1 | 5.5   | 5.52  | 0.36 | 0.08 | -1.01 | 0.895669 | 0.064598 | 0.958318 | 0.300314 |
| MmugDNA.38768.1.S1_at   | MmugDNA.38768.1 | 9.07  | 8.71  | 0.02 | 0.18 | 1.29  | 0.025091 | 0.014639 | 0.297733 | 0.154176 |
| MmugDNA.38769.1.S1_at   | MmugDNA.38769.1 | 7.67  | 7.57  | 0.1  | 0.15 | 1.07  | 0.184023 | 0.129115 | 0.547964 | 0.400611 |
| MmugDNA.3877.1.S1_at    | MmugDNA.3877.1  | 10.73 | 10.68 | 0.48 | 0.88 | 1.04  | 0.737986 | 0.478548 | 0.88746  | 0.684556 |
| MmugDNA.38771.1.S1_at   | MmugDNA.38771.1 | 7.9   | 8.03  | 0.13 | 0.08 | -1.09 | 0.522935 | 0.189495 | 0.772257 | 0.465237 |
| MmugDNA.38772.1.S1_at   | MmugDNA.38772.1 | 3.69  | 4.12  | 0.05 | 0.23 | -1.35 | 0.028394 | 0.050267 | 0.311103 | 0.269509 |
| MmugDNA.38773.1.S1_at   | MmugDNA.38773.1 | 6.06  | 6.08  | 0.75 | 0.84 | -1.01 | 0.552493 | 0.529419 | 0.789564 | 0.717276 |
| MmugDNA.38774.1.S1_at   | MmugDNA.38774.1 | 5.58  | 5.76  | 0.14 | 0.17 | -1.13 | 0.117455 | 0.125149 | 0.481525 | 0.395577 |

|                         |                 |       |       |      |      |       |          |          |          |          |
|-------------------------|-----------------|-------|-------|------|------|-------|----------|----------|----------|----------|
| MmugDNA.38775.1.S1_at   | MmugDNA.38775.1 | 6.48  | 6.49  | 0.12 | 0.13 | -1.01 | 0.913407 | 0.088364 | 0.965707 | 0.341824 |
| MmugDNA.38776.1.S1_at   | MmugDNA.38776.1 | 9.82  | 9.7   | 0.38 | 0.03 | 1.09  | 0.726327 | 0.050195 | 0.880953 | 0.269263 |
| MmugDNA.38777.1.S1_at   | MmugDNA.38777.1 | 11.51 | 11.65 | 0.1  | 0.27 | -1.1  | 0.153597 | 0.201951 | 0.518051 | 0.476412 |
| MmugDNA.3878.1.S1_at    | MmugDNA.3878.1  | 6.79  | 6.86  | 0.05 | 0.1  | -1.05 | 0.319048 | 0.031403 | 0.648688 | 0.219107 |
| MmugDNA.38781.1.S1_at   | MmugDNA.38781.1 | 4.08  | 4.04  | 0.11 | 0.03 | 1.03  | 0.743103 | 0.529266 | 0.89009  | 0.717233 |
| MmugDNA.38782.1.S1_at   | MmugDNA.38782.1 | 6.84  | 7.04  | 0.29 | 0.17 | -1.15 | 0.179007 | 0.220267 | 0.543331 | 0.493701 |
| MmugDNA.38783.1.S1_at   | MmugDNA.38783.1 | 4.57  | 4.4   | 0.16 | 0.19 | 1.13  | 0.369147 | 0.237435 | 0.680581 | 0.508117 |
| MmugDNA.38784.1.S1_at   | MmugDNA.38784.1 | 4.08  | 4.17  | 0.11 | 0.1  | -1.06 | 0.226837 | 0.354643 | 0.584769 | 0.597326 |
| MmugDNA.38785.1.S1_at   | MmugDNA.38785.1 | 8.24  | 7     | 0.86 | 0.34 | 2.37  | 0.079228 | 0.076382 | 0.429096 | 0.321368 |
| MmugDNA.38787.1.S1_at   | MmugDNA.38787.1 | 11.6  | 11.11 | 0.31 | 0.33 | 1.41  | 0.054573 | 0.044768 | 0.381936 | 0.256021 |
| MmugDNA.38788.1.S1_at   | MmugDNA.38788.1 | 6.5   | 6.62  | 0.03 | 0.03 | -1.09 | 0.017457 | 0.003663 | 0.267445 | 0.086527 |
| MmugDNA.38789.1.S1_at   | MmugDNA.38789.1 | 12.27 | 12.4  | 0.1  | 0.11 | -1.1  | 0.196705 | 0.019566 | 0.559808 | 0.175612 |
| MmugDNA.38790.1.S1_at   | MmugDNA.38790.1 | 7.42  | 7.5   | 0.31 | 0.55 | -1.05 | 0.864215 | 0.273879 | 0.945492 | 0.538438 |
| MmugDNA.38792.1.S1_at   | MmugDNA.38792.1 | 3.34  | 3.34  | 0.16 | 0.1  | 1     | 0.468159 | 0.761513 | 0.741017 | 0.861416 |
| MmugDNA.38794.1.S1_s_at | MmugDNA.38794.1 | 4.37  | 4.25  | 0.22 | 0.09 | 1.08  | 0.16845  | 0.195316 | 0.532662 | 0.470253 |
| MmugDNA.38795.1.S1_at   | MmugDNA.38795.1 | 4.02  | 3.92  | 0.3  | 0.08 | 1.07  | 0.479169 | 0.649672 | 0.747575 | 0.795076 |
| MmugDNA.38796.1.S1_s_at | MmugDNA.38796.1 | 8.49  | 8.59  | 0.3  | 0.73 | -1.07 | 0.495675 | 0.236705 | 0.757268 | 0.507459 |
| MmugDNA.38797.1.S1_at   | MmugDNA.38797.1 | 3.31  | 3.72  | 0.14 | 0.71 | -1.33 | 0.240081 | 0.297327 | 0.592907 | 0.556071 |
| MmugDNA.38798.1.S1_at   | MmugDNA.38798.1 | 7.6   | 9.44  | 0.94 | 0.65 | -3.58 | 0.046868 | 0.030596 | 0.364195 | 0.216887 |
| MmugDNA.388.1.S1_at     | MmugDNA.388.1   | 10.37 | 10.03 | 0.04 | 0.15 | 1.27  | 0.006815 | 0.000552 | 0.201708 | 0.040948 |
| MmugDNA.3880.1.S1_at    | MmugDNA.3880.1  | 4.54  | 4.71  | 0.24 | 0.11 | -1.12 | 0.299014 | 0.538903 | 0.634566 | 0.723368 |
| MmugDNA.38802.1.S1_at   | MmugDNA.38802.1 | 5.74  | 5.8   | 1.15 | 0.59 | -1.05 | 0.499976 | 0.585492 | 0.759402 | 0.752852 |
| MmugDNA.38803.1.S1_at   | MmugDNA.38803.1 | 7.95  | 7.18  | 0.31 | 0.4  | 1.71  | 0.277014 | 0.421602 | 0.619197 | 0.645173 |
| MmugDNA.38804.1.S1_at   | MmugDNA.38804.1 | 5.38  | 6.64  | 0.4  | 0.59 | -2.39 | 0.166912 | 0.224888 | 0.530917 | 0.497657 |
| MmugDNA.38805.1.S1_at   | MmugDNA.38805.1 | 3.69  | 3.4   | 0.27 | 0.11 | 1.22  | 0.258173 | 0.469157 | 0.605515 | 0.67815  |
| MmugDNA.38806.1.S1_at   | MmugDNA.38806.1 | 11.21 | 12.12 | 0.14 | 0.09 | -1.88 | 0.000671 | 0.000092 | 0.136818 | 0.027225 |
| MmugDNA.38807.1.S1_at   | MmugDNA.38807.1 | 4.36  | 4.51  | 0.41 | 0.03 | -1.11 | 0.95475  | 0.866073 | 0.983073 | 0.923791 |
| MmugDNA.38808.1.S1_at   | MmugDNA.38808.1 | 6.03  | 6.03  | 0.08 | 0.01 | 1     | 0.415495 | 0.18133  | 0.709528 | 0.457834 |
| MmugDNA.38809.1.S1_at   | MmugDNA.38809.1 | 6.86  | 6.71  | 0.23 | 0.19 | 1.11  | 0.788923 | 0.490854 | 0.912329 | 0.692666 |
| MmugDNA.3881.1.S1_at    | MmugDNA.3881.1  | 3.27  | 3.4   | 0.2  | 0.43 | -1.1  | 0.38326  | 0.364146 | 0.689198 | 0.604488 |
| MmugDNA.38811.1.S1_at   | MmugDNA.38811.1 | 7.06  | 7.04  | 0.19 | 0.1  | 1.02  | 0.57733  | 0.450442 | 0.803468 | 0.665643 |
| MmugDNA.38812.1.S1_at   | MmugDNA.38812.1 | 10.82 | 9.96  | 0.16 | 0.23 | 1.83  | 0.004614 | 0.000835 | 0.1844   | 0.046851 |
| MmugDNA.38814.1.S1_at   | MmugDNA.38814.1 | 5.01  | 5.15  | 0.53 | 0.14 | -1.1  | 0.64155  | 0.824051 | 0.838311 | 0.898901 |
| MmugDNA.38815.1.S1_at   | MmugDNA.38815.1 | 6.07  | 5.99  | 0.21 | 0.13 | 1.06  | 0.587078 | 0.729468 | 0.808416 | 0.843541 |
| MmugDNA.38817.1.S1_at   | MmugDNA.38817.1 | 10.33 | 9.68  | 0.03 | 0.84 | 1.58  | 0.269186 | 0.264348 | 0.613833 | 0.530385 |
| MmugDNA.38819.1.S1_at   | MmugDNA.38819.1 | 6.68  | 7.23  | 0.35 | 1.2  | -1.46 | 0.844979 | 0.774469 | 0.937773 | 0.868766 |
| MmugDNA.38820.1.S1_at   | MmugDNA.38820.1 | 5.47  | 7.31  | 0.49 | 1.24 | -3.59 | 0.068278 | 0.060007 | 0.409933 | 0.291649 |
| MmugDNA.38822.1.S1_at   | MmugDNA.38822.1 | 5.2   | 5.19  | 0.14 | 0.14 | 1.01  | 0.833668 | 0.785914 | 0.932356 | 0.87599  |
| MmugDNA.38823.1.S1_at   | MmugDNA.38823.1 | 4.89  | 4.39  | 0.11 | 1.2  | 1.42  | 0.807219 | 0.559467 | 0.92102  | 0.736301 |
| MmugDNA.38824.1.S1_at   | MmugDNA.38824.1 | 6.74  | 6.61  | 0.85 | 0.76 | 1.09  | 0.561625 | 0.547356 | 0.79493  | 0.728426 |
| MmugDNA.38827.1.S1_at   | MmugDNA.38827.1 | 5.01  | 5.17  | 0.04 | 0.11 | -1.11 | 0.125551 | 0.189867 | 0.491392 | 0.465403 |



|                         |                 |       |       |      |      |       |          |          |          |          |
|-------------------------|-----------------|-------|-------|------|------|-------|----------|----------|----------|----------|
| MmugDNA.38828.1.S1_at   | MmugDNA.38828.1 | 6.06  | 6.22  | 0.1  | 0.25 | -1.11 | 0.167196 | 0.225752 | 0.531306 | 0.498159 |
| MmugDNA.38829.1.S1_at   | MmugDNA.38829.1 | 4.15  | 4.32  | 0.02 | 0.18 | -1.12 | 0.147919 | 0.604521 | 0.513442 | 0.764655 |
| MmugDNA.38832.1.S1_at   | MmugDNA.38832.1 | 5.97  | 4.97  | 0.34 | 0.22 | 2     | 0.021957 | 0.018589 | 0.28441  | 0.171539 |
| MmugDNA.38834.1.S1_at   | MmugDNA.38834.1 | 4.38  | 4.44  | 0.08 | 0.24 | -1.05 | 0.666978 | 0.587671 | 0.850752 | 0.754425 |
| MmugDNA.38835.1.S1_at   | MmugDNA.38835.1 | 11.95 | 11.28 | 0.21 | 0.18 | 1.59  | 0.007919 | 0.001652 | 0.214294 | 0.061436 |
| MmugDNA.38836.1.S1_at   | MmugDNA.38836.1 | 7.15  | 7.19  | 0.13 | 0.07 | -1.03 | 0.952636 | 0.171639 | 0.982319 | 0.448044 |
| MmugDNA.38837.1.S1_at   | MmugDNA.38837.1 | 9.55  | 10.43 | 0.36 | 0.51 | -1.83 | 0.045398 | 0.027024 | 0.361012 | 0.205533 |
| MmugDNA.38838.1.S1_at   | MmugDNA.38838.1 | 4.82  | 4.82  | 0.04 | 0.07 | 1     | 0.692685 | 0.132811 | 0.863569 | 0.404544 |
| MmugDNA.3884.1.S1_at    | MmugDNA.3884.1  | 12.22 | 12.16 | 0.08 | 0.16 | 1.05  | 0.780015 | 0.171256 | 0.908431 | 0.447792 |
| MmugDNA.38842.1.S1_at   | MmugDNA.38842.1 | 4.05  | 3.94  | 0.07 | 0    | 1.08  | 0.120452 | 0.125804 | 0.485479 | 0.396313 |
| MmugDNA.38843.1.S1_at   | MmugDNA.38843.1 | 4.76  | 5.22  | 0.13 | 0.15 | -1.37 | 0.021226 | 0.012463 | 0.282524 | 0.14417  |
| MmugDNA.38844.1.S1_at   | MmugDNA.38844.1 | 3.52  | 3.58  | 0.55 | 0.18 | -1.05 | 0.915141 | 0.315014 | 0.9664   | 0.568759 |
| MmugDNA.38846.1.S1_at   | MmugDNA.38846.1 | 5.57  | 5.75  | 0.27 | 0.14 | -1.13 | 0.41188  | 0.507822 | 0.707639 | 0.703346 |
| MmugDNA.38847.1.S1_at   | MmugDNA.38847.1 | 5.83  | 5.96  | 0.42 | 0.07 | -1.09 | 0.579912 | 0.700182 | 0.804451 | 0.825987 |
| MmugDNA.38848.1.S1_at   | MmugDNA.38848.1 | 4.74  | 4.95  | 0.16 | 0.12 | -1.16 | 0.107723 | 0.106621 | 0.468203 | 0.36916  |
| MmugDNA.38849.1.S1_at   | MmugDNA.38849.1 | 7.34  | 6.89  | 0.14 | 0.33 | 1.36  | 0.278964 | 0.366552 | 0.620884 | 0.606293 |
| MmugDNA.3885.1.S1_at    | MmugDNA.3885.1  | 5.39  | 5.24  | 0.22 | 0.22 | 1.12  | 0.644051 | 0.2913   | 0.839719 | 0.551803 |
| MmugDNA.38850.1.S1_s_at | MmugDNA.38850.1 | 12.07 | 12.59 | 0.21 | 0.28 | -1.43 | 0.046596 | 0.060151 | 0.363346 | 0.291882 |
| MmugDNA.38852.1.S1_at   | MmugDNA.38852.1 | 4.11  | 3.89  | 0.24 | 0.07 | 1.16  | 0.326882 | 0.437844 | 0.653341 | 0.656977 |
| MmugDNA.38854.1.S1_at   | MmugDNA.38854.1 | 6.82  | 6.64  | 1.2  | 0.35 | 1.13  | 0.761031 | 0.922486 | 0.899218 | 0.956333 |
| MmugDNA.38855.1.S1_at   | MmugDNA.38855.1 | 4.78  | 4.77  | 0.04 | 0.06 | 1     | 0.677486 | 0.514572 | 0.855526 | 0.707767 |
| MmugDNA.38857.1.S1_at   | MmugDNA.38857.1 | 4.71  | 4.89  | 0.09 | 0.23 | -1.14 | 0.234336 | 0.067787 | 0.588656 | 0.306471 |
| MmugDNA.38858.1.S1_at   | MmugDNA.38858.1 | 8.95  | 8.61  | 0.32 | 0.89 | 1.27  | 0.565071 | 0.758996 | 0.796922 | 0.859948 |
| MmugDNA.38859.1.S1_at   | MmugDNA.38859.1 | 4.39  | 4.35  | 0.15 | 0.1  | 1.03  | 0.825859 | 0.868235 | 0.929311 | 0.925234 |
| MmugDNA.3886.1.S1_at    | MmugDNA.3886.1  | 8.93  | 8.78  | 0.18 | 0.17 | 1.11  | 0.067684 | 0.047588 | 0.408357 | 0.262934 |
| MmugDNA.38860.1.S1_at   | MmugDNA.38860.1 | 5.29  | 5.3   | 0.04 | 0.14 | -1    | 0.92856  | 0.163963 | 0.972527 | 0.440107 |
| MmugDNA.38861.1.S1_at   | MmugDNA.38861.1 | 12.41 | 12.15 | 0.19 | 0.09 | 1.2   | 0.053167 | 0.011313 | 0.379513 | 0.138076 |
| MmugDNA.38862.1.S1_at   | MmugDNA.38862.1 | 6.21  | 5.99  | 0.11 | 0.12 | 1.16  | 0.141422 | 0.079684 | 0.509067 | 0.326981 |
| MmugDNA.38864.1.S1_at   | MmugDNA.38864.1 | 3.4   | 3.41  | 0.17 | 0.16 | -1.01 | 0.20351  | 0.288683 | 0.566041 | 0.549835 |
| MmugDNA.38865.1.S1_at   | MmugDNA.38865.1 | 5.45  | 5.03  | 0.49 | 0.09 | 1.35  | 0.541512 | 0.747127 | 0.782715 | 0.853124 |
| MmugDNA.38866.1.S1_at   | MmugDNA.38866.1 | 9.1   | 7.67  | 0.07 | 0.52 | 2.68  | 0.010124 | 0.003674 | 0.228232 | 0.086568 |
| MmugDNA.38867.1.S1_at   | MmugDNA.38867.1 | 5.42  | 5.8   | 0.3  | 0.14 | -1.3  | 0.373126 | 0.669469 | 0.683245 | 0.806626 |
| MmugDNA.38868.1.S1_at   | MmugDNA.38868.1 | 3.57  | 3.6   | 0.14 | 0.1  | -1.02 | 0.347175 | 0.373501 | 0.666259 | 0.612309 |
| MmugDNA.38869.1.S1_at   | MmugDNA.38869.1 | 4.54  | 4.65  | 0.1  | 0.1  | -1.08 | 0.204097 | 0.49339  | 0.566605 | 0.694105 |
| MmugDNA.3887.1.S1_at    | MmugDNA.3887.1  | 4.84  | 5.64  | 0.03 | 0.36 | -1.74 | 0.017333 | 0.009003 | 0.267196 | 0.125499 |
| MmugDNA.38871.1.S1_at   | MmugDNA.38871.1 | 8.85  | 8.4   | 0.16 | 0.37 | 1.37  | 0.147569 | 0.197698 | 0.513287 | 0.472633 |
| MmugDNA.38872.1.S1_at   | MmugDNA.38872.1 | 11.77 | 11.33 | 0.09 | 0.31 | 1.35  | 0.080697 | 0.05983  | 0.431219 | 0.291286 |
| MmugDNA.38873.1.S1_at   | MmugDNA.38873.1 | 4.14  | 4.16  | 0.09 | 0.1  | -1.01 | 0.857536 | 0.466162 | 0.942274 | 0.676147 |
| MmugDNA.38874.1.S1_at   | MmugDNA.38874.1 | 4.26  | 4.46  | 0.02 | 0.14 | -1.15 | 0.25709  | 0.382336 | 0.60448  | 0.618498 |
| MmugDNA.38876.1.S1_at   | MmugDNA.38876.1 | 4.67  | 4.26  | 0.18 | 0.05 | 1.33  | 0.015195 | 0.006023 | 0.257698 | 0.106089 |
| MmugDNA.38877.1.S1_at   | MmugDNA.38877.1 | 6.94  | 6.97  | 0.18 | 0.17 | -1.02 | 0.992863 | 0.800752 | 0.997561 | 0.885417 |

|                         |                 |       |       |      |      |       |          |          |          |          |
|-------------------------|-----------------|-------|-------|------|------|-------|----------|----------|----------|----------|
| MmugDNA.38878.1.S1_at   | MmugDNA.38878.1 | 7.11  | 6.82  | 0.25 | 0.46 | 1.23  | 0.18135  | 0.264092 | 0.545837 | 0.530214 |
| MmugDNA.3888.1.S1_at    | MmugDNA.3888.1  | 4.95  | 4.94  | 0.31 | 0.19 | 1     | 0.360928 | 0.340533 | 0.674936 | 0.586776 |
| MmugDNA.38880.1.S1_at   | MmugDNA.38880.1 | 2.93  | 2.98  | 0.04 | 0.05 | -1.03 | 0.262373 | 0.653075 | 0.60891  | 0.79718  |
| MmugDNA.38881.1.S1_at   | MmugDNA.38881.1 | 7.15  | 7.05  | 0.09 | 0.24 | 1.07  | 0.679227 | 0.717034 | 0.856507 | 0.836191 |
| MmugDNA.38882.1.S1_at   | MmugDNA.38882.1 | 7.9   | 7.47  | 0.11 | 0.27 | 1.35  | 0.024444 | 0.014666 | 0.294575 | 0.154231 |
| MmugDNA.38883.1.S1_at   | MmugDNA.38883.1 | 9.08  | 8.88  | 0.08 | 0.43 | 1.15  | 0.885162 | 0.913437 | 0.953988 | 0.951242 |
| MmugDNA.38884.1.S1_at   | MmugDNA.38884.1 | 7.38  | 5.99  | 0.53 | 2.23 | 2.62  | 0.27466  | 0.405897 | 0.617579 | 0.634037 |
| MmugDNA.38888.1.S1_at   | MmugDNA.38888.1 | 8.74  | 9.73  | 0.41 | 0.27 | -1.99 | 0.027795 | 0.018681 | 0.309019 | 0.171717 |
| MmugDNA.3889.1.S1_at    | MmugDNA.3889.1  | 5.88  | 5.7   | 0.77 | 0.34 | 1.13  | 0.27039  | 0.339326 | 0.614698 | 0.585984 |
| MmugDNA.38890.1.S1_at   | MmugDNA.38890.1 | 5.26  | 5.26  | 0.01 | 0.18 | 1     | 0.462382 | 0.533176 | 0.738226 | 0.719462 |
| MmugDNA.38891.1.S1_at   | MmugDNA.38891.1 | 10.61 | 10.42 | 0.13 | 0.18 | 1.14  | 0.247904 | 0.297401 | 0.599052 | 0.556078 |
| MmugDNA.38893.1.S1_at   | MmugDNA.38893.1 | 4.86  | 4.67  | 0.41 | 0.11 | 1.14  | 0.429122 | 0.35693  | 0.717334 | 0.5987   |
| MmugDNA.38894.1.S1_at   | MmugDNA.38894.1 | 7.49  | 7.4   | 0.34 | 0.07 | 1.06  | 0.52165  | 0.151728 | 0.771464 | 0.426383 |
| MmugDNA.38895.1.S1_at   | MmugDNA.38895.1 | 6.63  | 6.37  | 0.4  | 0.45 | 1.2   | 0.988694 | 0.291332 | 0.995952 | 0.551803 |
| MmugDNA.38896.1.S1_at   | MmugDNA.38896.1 | 4.99  | 5.28  | 0.12 | 0.12 | -1.22 | 0.051837 | 0.143566 | 0.376487 | 0.417492 |
| MmugDNA.38897.1.S1_at   | MmugDNA.38897.1 | 8.38  | 8.64  | 0.16 | 0.08 | -1.2  | 0.20954  | 0.017542 | 0.570957 | 0.167632 |
| MmugDNA.38898.1.S1_at   | MmugDNA.38898.1 | 3.01  | 2.96  | 0.08 | 0.08 | 1.04  | 0.517452 | 0.384334 | 0.76879  | 0.620012 |
| MmugDNA.389.1.S1_at     | MmugDNA.389.1   | 9.52  | 8.88  | 0.19 | 0.29 | 1.55  | 0.026453 | 0.020321 | 0.303201 | 0.178954 |
| MmugDNA.3890.1.S1_at    | MmugDNA.3890.1  | 4.35  | 4.42  | 0.19 | 0.2  | -1.05 | 0.394277 | 0.605102 | 0.695709 | 0.764917 |
| MmugDNA.38901.1.S1_at   | MmugDNA.38901.1 | 6.41  | 6.35  | 0.06 | 0    | 1.04  | 0.511497 | 0.630219 | 0.765318 | 0.782181 |
| MmugDNA.38902.1.S1_at   | MmugDNA.38902.1 | 3.2   | 3.2   | 0.08 | 0.21 | 1     | 0.587516 | 0.750952 | 0.808576 | 0.855196 |
| MmugDNA.38903.1.S1_at   | MmugDNA.38903.1 | 4.17  | 4.17  | 0.06 | 0.13 | 1     | 0.881684 | 0.803778 | 0.952505 | 0.887124 |
| MmugDNA.38904.1.S1_at   | MmugDNA.38904.1 | 6.13  | 6.14  | 0.25 | 0.22 | -1.01 | 0.517777 | 0.573243 | 0.769043 | 0.744985 |
| MmugDNA.38905.1.S1_at   | MmugDNA.38905.1 | 4.39  | 4.18  | 0.21 | 0.14 | 1.16  | 0.366758 | 0.438053 | 0.679209 | 0.657068 |
| MmugDNA.38906.1.S1_at   | MmugDNA.38906.1 | 6.62  | 6.68  | 0.2  | 0.11 | -1.04 | 0.776395 | 0.858245 | 0.90634  | 0.919151 |
| MmugDNA.38907.1.S1_at   | MmugDNA.38907.1 | 5.82  | 5.85  | 0.32 | 0.01 | -1.02 | 0.425982 | 0.587757 | 0.715452 | 0.754518 |
| MmugDNA.38908.1.S1_at   | MmugDNA.38908.1 | 3.74  | 3.85  | 0    | 0.12 | -1.08 | 0.502397 | 0.497171 | 0.760355 | 0.696495 |
| MmugDNA.38909.1.S1_at   | MmugDNA.38909.1 | 9.28  | 9.4   | 0.14 | 0.66 | -1.09 | 0.77918  | 0.899644 | 0.90795  | 0.942903 |
| MmugDNA.38912.1.S1_at   | MmugDNA.38912.1 | 5.98  | 6.18  | 0.17 | 0.16 | -1.15 | 0.549413 | 0.171016 | 0.787312 | 0.447561 |
| MmugDNA.38913.1.S1_at   | MmugDNA.38913.1 | 5.68  | 5.98  | 0.61 | 0.22 | -1.23 | 0.700989 | 0.776921 | 0.867793 | 0.870408 |
| MmugDNA.38915.1.S1_s_at | MmugDNA.38915.1 | 6.87  | 7.95  | 0.3  | 0.51 | -2.11 | 0.029053 | 0.029414 | 0.312556 | 0.213368 |
| MmugDNA.38916.1.S1_at   | MmugDNA.38916.1 | 7.51  | 7.07  | 1.1  | 1.69 | 1.35  | 0.318803 | 0.226173 | 0.648688 | 0.49867  |
| MmugDNA.38917.1.S1_at   | MmugDNA.38917.1 | 12.07 | 12.15 | 0.05 | 0.67 | -1.06 | 0.959772 | 0.67833  | 0.984771 | 0.8121   |
| MmugDNA.38918.1.S1_at   | MmugDNA.38918.1 | 3.7   | 3.56  | 0.06 | 0.11 | 1.1   | 0.55177  | 0.443933 | 0.788949 | 0.661553 |
| MmugDNA.38921.1.S1_at   | MmugDNA.38921.1 | 3.95  | 4.16  | 0.05 | 0.11 | -1.16 | 0.068368 | 0.081078 | 0.410012 | 0.329249 |
| MmugDNA.38922.1.S1_at   | MmugDNA.38922.1 | 6.45  | 7     | 0.23 | 0.59 | -1.46 | 0.122497 | 0.108815 | 0.487672 | 0.372379 |
| MmugDNA.38924.1.S1_at   | MmugDNA.38924.1 | 12.6  | 13.12 | 0.4  | 0.06 | -1.43 | 0.332248 | 0.19895  | 0.656683 | 0.473526 |
| MmugDNA.38925.1.S1_at   | MmugDNA.38925.1 | 9.42  | 8.23  | 0.27 | 0.7  | 2.28  | 0.031311 | 0.022717 | 0.321349 | 0.188736 |
| MmugDNA.38926.1.S1_at   | MmugDNA.38926.1 | 6.97  | 6.97  | 0.33 | 0.24 | -1    | 0.241627 | 0.381294 | 0.593941 | 0.617616 |
| MmugDNA.38927.1.S1_at   | MmugDNA.38927.1 | 5.36  | 5.49  | 0.11 | 0.14 | -1.09 | 0.10614  | 0.145132 | 0.466831 | 0.419097 |
| MmugDNA.38928.1.S1_at   | MmugDNA.38928.1 | 8     | 8.71  | 0.24 | 1.04 | -1.64 | 0.204315 | 0.063478 | 0.566752 | 0.298441 |

|                         |                 |       |       |      |      |       |          |          |          |          |
|-------------------------|-----------------|-------|-------|------|------|-------|----------|----------|----------|----------|
| MmugDNA.38929.1.S1_at   | MmugDNA.38929.1 | 11.07 | 10.55 | 0.15 | 0.92 | 1.43  | 0.148978 | 0.075728 | 0.513987 | 0.320322 |
| MmugDNA.38931.1.S1_at   | MmugDNA.38931.1 | 4.68  | 4.7   | 0.11 | 0.14 | -1.02 | 0.861347 | 0.938064 | 0.944107 | 0.964913 |
| MmugDNA.38932.1.S1_at   | MmugDNA.38932.1 | 7.39  | 7.5   | 0.24 | 0.06 | -1.08 | 0.758989 | 0.923146 | 0.898179 | 0.956773 |
| MmugDNA.38933.1.S1_at   | MmugDNA.38933.1 | 6.39  | 6.47  | 0.09 | 0.09 | -1.05 | 0.143766 | 0.222305 | 0.510387 | 0.495346 |
| MmugDNA.38934.1.S1_at   | MmugDNA.38934.1 | 7.19  | 7.15  | 0.46 | 0.14 | 1.03  | 0.384628 | 0.182701 | 0.690108 | 0.459186 |
| MmugDNA.38935.1.S1_at   | MmugDNA.38935.1 | 7.41  | 7.63  | 0.15 | 0.15 | -1.16 | 0.169286 | 0.174483 | 0.533619 | 0.450952 |
| MmugDNA.38936.1.S1_at   | MmugDNA.38936.1 | 4.87  | 4.63  | 0.33 | 0.21 | 1.18  | 0.345434 | 0.426507 | 0.665175 | 0.648694 |
| MmugDNA.38937.1.S1_at   | MmugDNA.38937.1 | 6.29  | 6.49  | 0.41 | 0.74 | -1.15 | 0.59938  | 0.170148 | 0.814562 | 0.446906 |
| MmugDNA.38938.1.S1_at   | MmugDNA.38938.1 | 7.7   | 8.58  | 0.43 | 0.22 | -1.85 | 0.067569 | 0.067712 | 0.408063 | 0.30629  |
| MmugDNA.3894.1.S1_at    | MmugDNA.3894.1  | 3.63  | 3.66  | 0.29 | 0.32 | -1.02 | 0.930183 | 0.928    | 0.972992 | 0.959116 |
| MmugDNA.38941.1.S1_at   | MmugDNA.38941.1 | 4.35  | 4.35  | 0.06 | 0.09 | 1     | 0.614773 | 0.838565 | 0.823258 | 0.907933 |
| MmugDNA.38943.1.S1_at   | MmugDNA.38943.1 | 3.99  | 4     | 0.01 | 0    | -1.01 | 0.163171 | 0.482609 | 0.527489 | 0.687368 |
| MmugDNA.38944.1.S1_at   | MmugDNA.38944.1 | 6.73  | 5.62  | 0.74 | 0.19 | 2.16  | 0.144957 | 0.117174 | 0.511188 | 0.384627 |
| MmugDNA.38946.1.S1_at   | MmugDNA.38946.1 | 11.85 | 10.9  | 0.16 | 0.37 | 1.93  | 0.024269 | 0.015278 | 0.294535 | 0.156987 |
| MmugDNA.38947.1.S1_at   | MmugDNA.38947.1 | 6.52  | 6.49  | 0.2  | 0.19 | 1.02  | 0.816811 | 0.958752 | 0.925751 | 0.976654 |
| MmugDNA.38948.1.S1_at   | MmugDNA.38948.1 | 13.28 | 13.21 | 0.09 | 0.03 | 1.05  | 0.278115 | 0.15013  | 0.620214 | 0.424714 |
| MmugDNA.38948.1.S1_s_at | MmugDNA.38948.1 | 13.39 | 13.32 | 0.08 | 0.01 | 1.05  | 0.135933 | 0.098175 | 0.502782 | 0.356253 |
| MmugDNA.38949.1.S1_at   | MmugDNA.38949.1 | 5.51  | 5.44  | 0.34 | 0.03 | 1.05  | 0.293294 | 0.305158 | 0.630358 | 0.562255 |
| MmugDNA.3895.1.S1_at    | MmugDNA.3895.1  | 8.66  | 8.57  | 0.37 | 0.12 | 1.06  | 0.279379 | 0.338307 | 0.621084 | 0.585417 |
| MmugDNA.38951.1.S1_at   | MmugDNA.38951.1 | 10.6  | 11.19 | 0.1  | 0.2  | -1.51 | 0.01839  | 0.040749 | 0.270121 | 0.246735 |
| MmugDNA.38952.1.S1_at   | MmugDNA.38952.1 | 4.13  | 4.16  | 0.14 | 0.11 | -1.02 | 0.252549 | 0.441517 | 0.601373 | 0.659675 |
| MmugDNA.38954.1.S1_at   | MmugDNA.38954.1 | 4.91  | 4.82  | 0.13 | 0.08 | 1.06  | 0.943606 | 0.340959 | 0.978535 | 0.587051 |
| MmugDNA.38955.1.S1_at   | MmugDNA.38955.1 | 4.09  | 4.2   | 0.11 | 0.15 | -1.08 | 0.566324 | 0.186802 | 0.797591 | 0.46263  |
| MmugDNA.38957.1.S1_at   | MmugDNA.38957.1 | 8.3   | 7.38  | 0.97 | 0.78 | 1.9   | 0.178479 | 0.15422  | 0.542847 | 0.428967 |
| MmugDNA.38958.1.S1_at   | MmugDNA.38958.1 | 5.34  | 5.38  | 0.21 | 0.13 | -1.03 | 0.485756 | 0.803042 | 0.751144 | 0.886557 |
| MmugDNA.3896.1.S1_at    | MmugDNA.3896.1  | 3.75  | 3.51  | 1.02 | 0.05 | 1.18  | 0.380974 | 0.605539 | 0.68761  | 0.765302 |
| MmugDNA.38961.1.S1_at   | MmugDNA.38961.1 | 10.66 | 10.39 | 0.18 | 0.19 | 1.2   | 0.070325 | 0.026242 | 0.413958 | 0.202991 |
| MmugDNA.38964.1.S1_at   | MmugDNA.38964.1 | 7.98  | 6.59  | 0.2  | 1.08 | 2.62  | 0.235627 | 0.329852 | 0.589497 | 0.578874 |
| MmugDNA.38965.1.S1_at   | MmugDNA.38965.1 | 5.18  | 5.13  | 0.73 | 0.7  | 1.04  | 0.663282 | 0.849886 | 0.848941 | 0.914673 |
| MmugDNA.38967.1.S1_at   | MmugDNA.38967.1 | 3.97  | 3.91  | 0.14 | 0.17 | 1.04  | 0.446697 | 0.722446 | 0.728509 | 0.839239 |
| MmugDNA.38969.1.S1_at   | MmugDNA.38969.1 | 5.48  | 5.47  | 0.17 | 0.08 | 1.01  | 0.717206 | 0.898071 | 0.87574  | 0.941957 |
| MmugDNA.3897.1.S1_at    | MmugDNA.3897.1  | 6.03  | 4.58  | 0.39 | 0.93 | 2.72  | 0.095508 | 0.101091 | 0.453501 | 0.360724 |
| MmugDNA.38970.1.S1_at   | MmugDNA.38970.1 | 10.31 | 11.19 | 0.37 | 0.09 | -1.84 | 0.011333 | 0.010913 | 0.235384 | 0.136002 |
| MmugDNA.38970.1.S1_x_at | MmugDNA.38970.1 | 10.26 | 11.14 | 0.37 | 0.07 | -1.83 | 0.011943 | 0.011451 | 0.239065 | 0.13846  |
| MmugDNA.38973.1.S1_at   | MmugDNA.38973.1 | 5.07  | 4.92  | 0.32 | 0.17 | 1.11  | 0.269161 | 0.624574 | 0.613808 | 0.778729 |
| MmugDNA.38974.1.S1_at   | MmugDNA.38974.1 | 5.59  | 4.68  | 0.75 | 0.19 | 1.88  | 0.342063 | 0.161706 | 0.663038 | 0.437771 |
| MmugDNA.38975.1.S1_at   | MmugDNA.38975.1 | 3.05  | 3.05  | 0.1  | 0.06 | 1     | 0.217839 | 0.595564 | 0.577564 | 0.759091 |
| MmugDNA.38976.1.S1_at   | MmugDNA.38976.1 | 5.64  | 5.78  | 0.4  | 0.65 | -1.1  | 0.414672 | 0.2824   | 0.709338 | 0.545076 |
| MmugDNA.38977.1.S1_at   | MmugDNA.38977.1 | 5.45  | 5.87  | 0.27 | 0.66 | -1.33 | 0.248367 | 0.216114 | 0.599239 | 0.489686 |
| MmugDNA.38978.1.S1_at   | MmugDNA.38978.1 | 3.14  | 2.99  | 0.3  | 0.2  | 1.11  | 0.322737 | 0.29083  | 0.651245 | 0.551431 |
| MmugDNA.38979.1.S1_at   | MmugDNA.38979.1 | 11.86 | 11.73 | 0.09 | 0.19 | 1.1   | 0.848004 | 0.597943 | 0.939103 | 0.760521 |

|                         |                 |       |       |      |      |       |          |          |          |          |
|-------------------------|-----------------|-------|-------|------|------|-------|----------|----------|----------|----------|
| MmugDNA.3898.1.S1_at    | MmugDNA.3898.1  | 6.03  | 6.12  | 0.9  | 0.9  | -1.06 | 0.545169 | 0.730339 | 0.784779 | 0.843976 |
| MmugDNA.38980.1.S1_at   | MmugDNA.38980.1 | 10.61 | 10.61 | 0.12 | 0.24 | -1    | 0.876653 | 0.620123 | 0.950631 | 0.775227 |
| MmugDNA.38982.1.S1_at   | MmugDNA.38982.1 | 10.96 | 10.25 | 0.14 | 0.83 | 1.64  | 0.145236 | 0.116077 | 0.511329 | 0.383336 |
| MmugDNA.38983.1.S1_at   | MmugDNA.38983.1 | 6.44  | 6.01  | 0.32 | 1.29 | 1.34  | 0.880501 | 0.935413 | 0.951934 | 0.963536 |
| MmugDNA.38985.1.S1_at   | MmugDNA.38985.1 | 4.25  | 4.35  | 0.2  | 0.06 | -1.07 | 0.741514 | 0.709705 | 0.889293 | 0.831749 |
| MmugDNA.38986.1.S1_at   | MmugDNA.38986.1 | 6.41  | 6.11  | 0.34 | 0.29 | 1.23  | 0.274253 | 0.071522 | 0.617262 | 0.313706 |
| MmugDNA.38988.1.S1_at   | MmugDNA.38988.1 | 8.1   | 8.74  | 0.2  | 0.3  | -1.56 | 0.068696 | 0.038406 | 0.410488 | 0.240877 |
| MmugDNA.38988.1.S1_s_at | MmugDNA.38988.1 | 9.1   | 9.64  | 0.27 | 0.24 | -1.46 | 0.08119  | 0.033386 | 0.431848 | 0.226396 |
| MmugDNA.38989.1.S1_at   | MmugDNA.38989.1 | 3.24  | 2.97  | 0.17 | 0.05 | 1.2   | 0.11679  | 0.122434 | 0.480735 | 0.392278 |
| MmugDNA.38990.1.S1_at   | MmugDNA.38990.1 | 3.33  | 3.47  | 0.19 | 0.12 | -1.1  | 0.922725 | 0.091671 | 0.970061 | 0.346875 |
| MmugDNA.38991.1.S1_at   | MmugDNA.38991.1 | 6.24  | 6.85  | 1.34 | 0.47 | -1.53 | 0.635027 | 0.685236 | 0.834812 | 0.816411 |
| MmugDNA.38992.1.S1_at   | MmugDNA.38992.1 | 3.66  | 3.75  | 0    | 0.08 | -1.06 | 0.144778 | 0.081136 | 0.511163 | 0.32931  |
| MmugDNA.38993.1.S1_at   | MmugDNA.38993.1 | 6.2   | 6.65  | 0.55 | 0.91 | -1.36 | 0.23933  | 0.335277 | 0.592443 | 0.58304  |
| MmugDNA.38994.1.S1_at   | MmugDNA.38994.1 | 4.41  | 4.08  | 0.62 | 0.54 | 1.26  | 0.536827 | 0.596547 | 0.779659 | 0.759659 |
| MmugDNA.38995.1.S1_at   | MmugDNA.38995.1 | 3.39  | 3.31  | 0.19 | 0.17 | 1.06  | 0.23214  | 0.303598 | 0.587814 | 0.561061 |
| MmugDNA.38996.1.S1_at   | MmugDNA.38996.1 | 3     | 3.04  | 0.02 | 0.06 | -1.03 | 0.344925 | 0.284532 | 0.66486  | 0.546715 |
| MmugDNA.38997.1.S1_at   | MmugDNA.38997.1 | 11.6  | 11.57 | 0.17 | 0.34 | 1.02  | 0.739407 | 0.864262 | 0.888141 | 0.922977 |
| MmugDNA.38998.1.S1_at   | MmugDNA.38998.1 | 10.22 | 8.93  | 0.29 | 0.68 | 2.44  | 0.014289 | 0.00548  | 0.251885 | 0.102081 |
| MmugDNA.38999.1.S1_at   | MmugDNA.38999.1 | 10.65 | 11.21 | 0.13 | 0.05 | -1.47 | 0.002482 | 0.00329  | 0.163555 | 0.082553 |
| MmugDNA.39.1.S1_at      | MmugDNA.39.1    | 6.42  | 6.44  | 0.01 | 0.09 | -1.01 | 0.208224 | 0.362152 | 0.570088 | 0.602827 |
| MmugDNA.390.1.S1_at     | MmugDNA.390.1   | 5.66  | 6.98  | 0.5  | 0.81 | -2.5  | 0.071898 | 0.049112 | 0.415896 | 0.266522 |
| MmugDNA.3900.1.S1_at    | MmugDNA.3900.1  | 3.89  | 3.89  | 0.14 | 0.22 | 1     | 0.93808  | 0.340591 | 0.976251 | 0.586789 |
| MmugDNA.39001.1.S1_at   | MmugDNA.39001.1 | 4.68  | 4.88  | 0.2  | 0.1  | -1.15 | 0.133544 | 0.251759 | 0.5002   | 0.520444 |
| MmugDNA.39002.1.S1_at   | MmugDNA.39002.1 | 2.97  | 3.08  | 0.17 | 0.04 | -1.07 | 0.148506 | 0.170656 | 0.513907 | 0.44724  |
| MmugDNA.39003.1.S1_at   | MmugDNA.39003.1 | 6.18  | 6.17  | 0.06 | 0.1  | 1.01  | 0.871893 | 0.749531 | 0.948792 | 0.854499 |
| MmugDNA.39005.1.S1_at   | MmugDNA.39005.1 | 5.34  | 5.46  | 0.11 | 0.09 | -1.08 | 0.388867 | 0.458924 | 0.692804 | 0.671504 |
| MmugDNA.39006.1.S1_at   | MmugDNA.39006.1 | 5.88  | 5.85  | 0.18 | 0.15 | 1.02  | 0.391702 | 0.06442  | 0.694178 | 0.300001 |
| MmugDNA.39007.1.S1_at   | MmugDNA.39007.1 | 5.25  | 5.13  | 0.91 | 0.04 | 1.09  | 0.495395 | 0.061445 | 0.757219 | 0.294704 |
| MmugDNA.39008.1.S1_at   | MmugDNA.39008.1 | 5.71  | 5.54  | 0.18 | 0.34 | 1.12  | 0.826839 | 0.379917 | 0.929656 | 0.616659 |
| MmugDNA.3901.1.S1_at    | MmugDNA.3901.1  | 8.23  | 7.85  | 0.1  | 0.49 | 1.31  | 0.080412 | 0.064986 | 0.430491 | 0.300855 |
| MmugDNA.39010.1.S1_at   | MmugDNA.39010.1 | 4.21  | 4.24  | 0.35 | 0.03 | -1.02 | 0.485211 | 0.366377 | 0.750811 | 0.606087 |
| MmugDNA.39011.1.S1_at   | MmugDNA.39011.1 | 4.79  | 5     | 0.24 | 0.14 | -1.15 | 0.098588 | 0.09578  | 0.458486 | 0.352753 |
| MmugDNA.39013.1.S1_at   | MmugDNA.39013.1 | 4.05  | 4.22  | 0.34 | 0.16 | -1.13 | 0.999213 | 0.92262  | 0.999761 | 0.956416 |
| MmugDNA.39017.1.S1_at   | MmugDNA.39017.1 | 10.79 | 11.17 | 0.13 | 0.05 | -1.3  | 0.008885 | 0.024911 | 0.221598 | 0.19771  |
| MmugDNA.39019.1.S1_at   | MmugDNA.39019.1 | 3.75  | 3.74  | 0.11 | 0.01 | 1.01  | 0.709536 | 0.891005 | 0.872538 | 0.937877 |
| MmugDNA.39020.1.S1_at   | MmugDNA.39020.1 | 5.33  | 4.83  | 0.1  | 0.34 | 1.41  | 0.132333 | 0.200954 | 0.498572 | 0.475426 |
| MmugDNA.39021.1.S1_at   | MmugDNA.39021.1 | 8.96  | 7.98  | 0.14 | 0.21 | 1.98  | 0.002964 | 0.00425  | 0.170703 | 0.091707 |
| MmugDNA.39023.1.S1_at   | MmugDNA.39023.1 | 6.29  | 5.51  | 0.4  | 0.8  | 1.71  | 0.161431 | 0.220129 | 0.526444 | 0.493578 |
| MmugDNA.39024.1.S1_at   | MmugDNA.39024.1 | 4.34  | 4.34  | 0.24 | 0.32 | -1    | 0.578994 | 0.861637 | 0.80407  | 0.921365 |
| MmugDNA.39026.1.S1_at   | MmugDNA.39026.1 | 3.98  | 3.34  | 0.34 | 0.2  | 1.55  | 0.073959 | 0.059533 | 0.41959  | 0.290548 |
| MmugDNA.39027.1.S1_at   | MmugDNA.39027.1 | 4.67  | 4.63  | 0.33 | 0    | 1.03  | 0.305886 | 0.220059 | 0.639227 | 0.493485 |

|                         |                 |       |       |      |      |       |          |          |          |          |
|-------------------------|-----------------|-------|-------|------|------|-------|----------|----------|----------|----------|
| MmugDNA.39028.1.S1_at   | MmugDNA.39028.1 | 3.79  | 3.62  | 0.14 | 0.03 | 1.13  | 0.433982 | 0.369476 | 0.720302 | 0.608861 |
| MmugDNA.39028.1.S1_x_at | MmugDNA.39028.1 | 3.39  | 3.33  | 0.06 | 0.05 | 1.04  | 0.723097 | 0.23046  | 0.878988 | 0.502232 |
| MmugDNA.3903.1.S1_at    | MmugDNA.3903.1  | 5.91  | 5.89  | 0.09 | 0.03 | 1.01  | 0.416754 | 0.393175 | 0.710179 | 0.626117 |
| MmugDNA.39030.1.S1_at   | MmugDNA.39030.1 | 4.19  | 4.25  | 0.25 | 0.13 | -1.05 | 0.633989 | 0.277967 | 0.834155 | 0.541664 |
| MmugDNA.39032.1.S1_at   | MmugDNA.39032.1 | 3.27  | 3.51  | 0.24 | 0.2  | -1.18 | 0.518763 | 0.592903 | 0.769592 | 0.757939 |
| MmugDNA.39033.1.S1_at   | MmugDNA.39033.1 | 8.52  | 8.37  | 0.35 | 0.16 | 1.11  | 0.512782 | 0.696594 | 0.765738 | 0.823774 |
| MmugDNA.39035.1.S1_at   | MmugDNA.39035.1 | 6.43  | 6.63  | 0.11 | 0.17 | -1.15 | 0.069765 | 0.078091 | 0.412907 | 0.324578 |
| MmugDNA.39037.1.S1_at   | MmugDNA.39037.1 | 8.47  | 8.6   | 0.13 | 0.4  | -1.09 | 0.896201 | 0.132879 | 0.958615 | 0.404544 |
| MmugDNA.39037.1.S1_s_at | MmugDNA.39037.1 | 8.8   | 8.85  | 0.05 | 0.29 | -1.03 | 0.753318 | 0.142822 | 0.894784 | 0.416786 |
| MmugDNA.39038.1.S1_at   | MmugDNA.39038.1 | 4.12  | 4.1   | 0.27 | 0.21 | 1.01  | 0.965308 | 0.956584 | 0.986736 | 0.975329 |
| MmugDNA.3904.1.S1_at    | MmugDNA.3904.1  | 9.67  | 8.64  | 0.33 | 0.16 | 2.05  | 0.006764 | 0.001526 | 0.20158  | 0.059327 |
| MmugDNA.39040.1.S1_at   | MmugDNA.39040.1 | 9.58  | 10.32 | 0.13 | 0.41 | -1.67 | 0.037836 | 0.031434 | 0.343109 | 0.219107 |
| MmugDNA.39040.1.S1_x_at | MmugDNA.39040.1 | 9.83  | 10.39 | 0.21 | 0.43 | -1.48 | 0.06948  | 0.062989 | 0.412367 | 0.297633 |
| MmugDNA.39041.1.S1_at   | MmugDNA.39041.1 | 6.01  | 6.04  | 0.04 | 0.18 | -1.02 | 0.607856 | 0.213768 | 0.819586 | 0.487564 |
| MmugDNA.39042.1.S1_at   | MmugDNA.39042.1 | 3.3   | 3.31  | 0.14 | 0.21 | -1    | 0.644459 | 0.390626 | 0.839767 | 0.624409 |
| MmugDNA.39043.1.S1_at   | MmugDNA.39043.1 | 5.25  | 5.56  | 0.13 | 0.19 | -1.24 | 0.239652 | 0.178178 | 0.592634 | 0.454531 |
| MmugDNA.39044.1.S1_x_at | MmugDNA.39044.1 | 5.72  | 6.55  | 0.19 | 0.4  | -1.78 | 0.079396 | 0.075557 | 0.429386 | 0.319982 |
| MmugDNA.39045.1.S1_at   | MmugDNA.39045.1 | 6.59  | 6.87  | 0.16 | 0.12 | -1.21 | 0.185247 | 0.233502 | 0.54874  | 0.504835 |
| MmugDNA.39046.1.S1_at   | MmugDNA.39046.1 | 3.59  | 3.47  | 0.1  | 0.04 | 1.09  | 0.262266 | 0.097112 | 0.608902 | 0.35467  |
| MmugDNA.39047.1.S1_at   | MmugDNA.39047.1 | 4.98  | 4.64  | 0.31 | 0.2  | 1.27  | 0.831168 | 0.533677 | 0.931682 | 0.719848 |
| MmugDNA.39048.1.S1_at   | MmugDNA.39048.1 | 11.15 | 10.84 | 0.14 | 0.26 | 1.24  | 0.28376  | 0.376733 | 0.623741 | 0.614539 |
| MmugDNA.3905.1.S1_at    | MmugDNA.3905.1  | 3.25  | 3.18  | 0.07 | 0.19 | 1.05  | 0.983255 | 0.889927 | 0.993951 | 0.937302 |
| MmugDNA.39050.1.S1_at   | MmugDNA.39050.1 | 4.24  | 4.43  | 0.46 | 0.11 | -1.15 | 0.81744  | 0.208314 | 0.925944 | 0.482199 |
| MmugDNA.39051.1.S1_at   | MmugDNA.39051.1 | 3.42  | 3.4   | 0.38 | 0.07 | 1.02  | 0.525073 | 0.206326 | 0.773375 | 0.480524 |
| MmugDNA.39052.1.S1_at   | MmugDNA.39052.1 | 3.8   | 3.83  | 0.1  | 0.11 | -1.02 | 0.900388 | 0.016248 | 0.960269 | 0.161608 |
| MmugDNA.39053.1.S1_at   | MmugDNA.39053.1 | 5.42  | 5.35  | 0    | 0.51 | 1.05  | 0.500128 | 0.613276 | 0.759402 | 0.770491 |
| MmugDNA.39054.1.S1_at   | MmugDNA.39054.1 | 7.21  | 7.09  | 0.44 | 0.26 | 1.09  | 0.51892  | 0.103559 | 0.769739 | 0.364346 |
| MmugDNA.39055.1.S1_at   | MmugDNA.39055.1 | 9.5   | 9.56  | 0.22 | 0.12 | -1.04 | 0.625838 | 0.508054 | 0.829176 | 0.703358 |
| MmugDNA.39056.1.S1_at   | MmugDNA.39056.1 | 9.41  | 9.41  | 0.4  | 0.19 | -1    | 0.524105 | 0.675983 | 0.773005 | 0.810632 |
| MmugDNA.39056.1.S1_s_at | MmugDNA.39056.1 | 10.2  | 10.06 | 0.33 | 0.08 | 1.1   | 0.826022 | 0.707457 | 0.929365 | 0.830361 |
| MmugDNA.39058.1.S1_at   | MmugDNA.39058.1 | 3.71  | 3.61  | 0.18 | 0.11 | 1.07  | 0.555701 | 0.07379  | 0.791477 | 0.317146 |
| MmugDNA.39059.1.S1_at   | MmugDNA.39059.1 | 6.76  | 8.04  | 0.53 | 0.66 | -2.43 | 0.027042 | 0.011687 | 0.305915 | 0.140104 |
| MmugDNA.39060.1.S1_at   | MmugDNA.39060.1 | 9.75  | 9.63  | 0.21 | 0.14 | 1.09  | 0.459274 | 0.13516  | 0.736044 | 0.407181 |
| MmugDNA.39063.1.S1_at   | MmugDNA.39063.1 | 7.18  | 7.44  | 0.18 | 0.11 | -1.2  | 0.259555 | 0.222021 | 0.606665 | 0.495071 |
| MmugDNA.39064.1.S1_at   | MmugDNA.39064.1 | 5.44  | 5.46  | 0.11 | 0.2  | -1.01 | 0.378092 | 0.244808 | 0.686315 | 0.514644 |
| MmugDNA.39065.1.S1_at   | MmugDNA.39065.1 | 5.83  | 6.27  | 0.12 | 0.39 | -1.35 | 0.097423 | 0.085069 | 0.45638  | 0.336843 |
| MmugDNA.39066.1.S1_at   | MmugDNA.39066.1 | 6.4   | 6.48  | 0.59 | 0.4  | -1.06 | 0.928175 | 0.853091 | 0.972337 | 0.916487 |
| MmugDNA.39067.1.S1_at   | MmugDNA.39067.1 | 4.45  | 4.54  | 0.07 | 0.24 | -1.07 | 0.3628   | 0.579131 | 0.676226 | 0.748917 |
| MmugDNA.39069.1.S1_at   | MmugDNA.39069.1 | 4.33  | 4.18  | 0.33 | 0.2  | 1.1   | 0.850189 | 0.48855  | 0.939853 | 0.691222 |
| MmugDNA.3907.1.S1_at    | MmugDNA.3907.1  | 7.33  | 5.78  | 0.27 | 0.47 | 2.93  | 0.017618 | 0.01108  | 0.267454 | 0.137013 |
| MmugDNA.39071.1.S1_at   | MmugDNA.39071.1 | 7.53  | 7.15  | 0.27 | 0.31 | 1.3   | 0.121319 | 0.137848 | 0.48598  | 0.410832 |

|                         |                 |       |       |      |      |       |          |          |          |          |
|-------------------------|-----------------|-------|-------|------|------|-------|----------|----------|----------|----------|
| MmugDNA.39072.1.S1_at   | MmugDNA.39072.1 | 3.7   | 3.96  | 0.12 | 0.07 | -1.19 | 0.038318 | 0.183921 | 0.34385  | 0.460064 |
| MmugDNA.39073.1.S1_at   | MmugDNA.39073.1 | 4.71  | 5.04  | 0.17 | 0.22 | -1.26 | 0.05705  | 0.083497 | 0.387418 | 0.33402  |
| MmugDNA.39075.1.S1_at   | MmugDNA.39075.1 | 4.21  | 4.22  | 0.18 | 0.07 | -1.01 | 0.452168 | 0.664979 | 0.731944 | 0.803726 |
| MmugDNA.39076.1.S1_at   | MmugDNA.39076.1 | 5.69  | 5.68  | 0.12 | 0.13 | 1.01  | 0.500616 | 0.41076  | 0.759592 | 0.637584 |
| MmugDNA.39077.1.S1_at   | MmugDNA.39077.1 | 7.07  | 7.42  | 0.11 | 0.06 | -1.27 | 0.011409 | 0.096256 | 0.235684 | 0.353644 |
| MmugDNA.39078.1.S1_at   | MmugDNA.39078.1 | 5.19  | 5.37  | 0.04 | 0.17 | -1.13 | 0.147611 | 0.176742 | 0.513287 | 0.453171 |
| MmugDNA.39079.1.S1_at   | MmugDNA.39079.1 | 5.25  | 4.87  | 0.43 | 0.23 | 1.3   | 0.619366 | 0.861868 | 0.825506 | 0.921482 |
| MmugDNA.3908.1.S1_at    | MmugDNA.3908.1  | 3.32  | 3.7   | 0.12 | 0.11 | -1.3  | 0.016808 | 0.02088  | 0.265631 | 0.181338 |
| MmugDNA.39080.1.S1_at   | MmugDNA.39080.1 | 2.81  | 2.74  | 0.16 | 0.24 | 1.05  | 0.890121 | 0.714492 | 0.956039 | 0.834363 |
| MmugDNA.39081.1.S1_at   | MmugDNA.39081.1 | 3.32  | 2.94  | 0.22 | 0.1  | 1.31  | 0.23365  | 0.247086 | 0.588317 | 0.516259 |
| MmugDNA.39082.1.S1_at   | MmugDNA.39082.1 | 6.13  | 6.29  | 0.06 | 0.07 | -1.11 | 0.056458 | 0.133062 | 0.386477 | 0.404726 |
| MmugDNA.39083.1.S1_at   | MmugDNA.39083.1 | 4.57  | 4.54  | 0.02 | 0.44 | 1.02  | 0.589177 | 0.107601 | 0.809218 | 0.370497 |
| MmugDNA.39084.1.S1_at   | MmugDNA.39084.1 | 9     | 8.88  | 0.15 | 0.35 | 1.09  | 0.208023 | 0.292834 | 0.569917 | 0.552832 |
| MmugDNA.39086.1.S1_at   | MmugDNA.39086.1 | 4.24  | 4.34  | 0.14 | 0.14 | -1.07 | 0.171013 | 0.096102 | 0.534989 | 0.353322 |
| MmugDNA.39087.1.S1_at   | MmugDNA.39087.1 | 9.19  | 9.07  | 0.05 | 0.73 | 1.09  | 0.735814 | 0.885921 | 0.886439 | 0.935113 |
| MmugDNA.39088.1.S1_at   | MmugDNA.39088.1 | 4.41  | 6     | 0.43 | 2.45 | -3.02 | 0.296219 | 0.398245 | 0.632176 | 0.629296 |
| MmugDNA.39089.1.S1_at   | MmugDNA.39089.1 | 11.74 | 11.6  | 0.21 | 0.59 | 1.1   | 0.556517 | 0.5686   | 0.791846 | 0.742052 |
| MmugDNA.3909.1.S1_at    | MmugDNA.3909.1  | 9.11  | 9.42  | 0.33 | 0.11 | -1.24 | 0.415966 | 0.495554 | 0.709585 | 0.695538 |
| MmugDNA.14177.1.S1_at   | MmugDNA.14177.1 | 5.58  | 5.66  | 0.11 | 0.04 | -1.06 | 0.108072 | 0.208711 | 0.468871 | 0.482595 |
| MmugDNA.14177.1.S1_s_at | MmugDNA.14177.1 | 3.56  | 3.84  | 0.32 | 0.21 | -1.22 | 0.695775 | 0.170467 | 0.865007 | 0.447103 |
| MmugDNA.39096.1.S1_at   | MmugDNA.39096.1 | 3.22  | 3.22  | 0.43 | 0.17 | 1     | 0.599485 | 0.391397 | 0.814594 | 0.625086 |
| MmugDNA.39097.1.S1_at   | MmugDNA.39097.1 | 9.28  | 10.16 | 0.05 | 0.82 | -1.84 | 0.126775 | 0.14003  | 0.492863 | 0.413372 |
| MmugDNA.39098.1.S1_at   | MmugDNA.39098.1 | 4.26  | 3.83  | 0.79 | 0.08 | 1.34  | 0.353034 | 0.394082 | 0.669964 | 0.626734 |
| MmugDNA.39099.1.S1_at   | MmugDNA.39099.1 | 5.79  | 6.03  | 0.92 | 0.32 | -1.18 | 0.808786 | 0.827602 | 0.922032 | 0.901081 |
| MmugDNA.3910.1.S1_at    | MmugDNA.3910.1  | 3.67  | 3.26  | 0.02 | 0.2  | 1.33  | 0.036677 | 0.030502 | 0.340048 | 0.216644 |
| MmugDNA.39101.1.S1_at   | MmugDNA.39101.1 | 7.61  | 7.28  | 0.57 | 0.28 | 1.26  | 0.105554 | 0.103044 | 0.46647  | 0.363891 |
| MmugDNA.39102.1.S1_at   | MmugDNA.39102.1 | 4.42  | 4.4   | 0.07 | 0.18 | 1.02  | 0.647659 | 0.638426 | 0.841572 | 0.787641 |
| MmugDNA.39103.1.S1_at   | MmugDNA.39103.1 | 7.88  | 7.82  | 0.36 | 0.35 | 1.04  | 0.274349 | 0.462567 | 0.617273 | 0.673876 |
| MmugDNA.39104.1.S1_at   | MmugDNA.39104.1 | 3.48  | 3.37  | 0.41 | 0.12 | 1.08  | 0.397026 | 0.480329 | 0.697473 | 0.68574  |
| MmugDNA.39105.1.S1_at   | MmugDNA.39105.1 | 11.74 | 11.62 | 0.29 | 0.09 | 1.09  | 0.586596 | 0.100567 | 0.808193 | 0.359845 |
| MmugDNA.39106.1.S1_at   | MmugDNA.39106.1 | 7.1   | 7.74  | 0.31 | 0.36 | -1.56 | 0.05527  | 0.035938 | 0.383689 | 0.234032 |
| MmugDNA.39107.1.S1_at   | MmugDNA.39107.1 | 12.86 | 12.42 | 0.21 | 0.31 | 1.35  | 0.052981 | 0.047468 | 0.378925 | 0.262486 |
| MmugDNA.39108.1.S1_at   | MmugDNA.39108.1 | 3.9   | 3.9   | 0.36 | 0    | 1     | 0.969072 | 0.974622 | 0.988244 | 0.986197 |
| MmugDNA.39109.1.S1_at   | MmugDNA.39109.1 | 6.27  | 5.4   | 0.51 | 1.48 | 1.82  | 0.746025 | 0.842599 | 0.891243 | 0.910315 |
| MmugDNA.3911.1.S1_at    | MmugDNA.3911.1  | 10.11 | 9.82  | 0.27 | 0.62 | 1.22  | 0.565398 | 0.50202  | 0.79704  | 0.700006 |
| MmugDNA.39110.1.S1_at   | MmugDNA.39110.1 | 10.62 | 10.66 | 0.02 | 0.14 | -1.03 | 0.467193 | 0.172838 | 0.740642 | 0.449424 |
| MmugDNA.39111.1.S1_at   | MmugDNA.39111.1 | 7.15  | 7.44  | 0.7  | 0.39 | -1.22 | 0.526065 | 0.4636   | 0.773971 | 0.674537 |
| MmugDNA.39113.1.S1_at   | MmugDNA.39113.1 | 7.02  | 7.33  | 0.11 | 0.54 | -1.24 | 0.985054 | 0.148026 | 0.994745 | 0.422418 |
| MmugDNA.39114.1.S1_at   | MmugDNA.39114.1 | 7.08  | 6.85  | 0.29 | 0.35 | 1.18  | 0.639209 | 0.563161 | 0.837052 | 0.738435 |
| MmugDNA.39115.1.S1_at   | MmugDNA.39115.1 | 6.36  | 5.88  | 0.25 | 0.75 | 1.39  | 0.497715 | 0.14519  | 0.758068 | 0.41919  |
| MmugDNA.39116.1.S1_at   | MmugDNA.39116.1 | 7.21  | 8.33  | 0.33 | 1    | -2.17 | 0.093648 | 0.078906 | 0.450966 | 0.325912 |

|                         |                 |       |       |      |      |       |          |          |          |          |
|-------------------------|-----------------|-------|-------|------|------|-------|----------|----------|----------|----------|
| MmugDNA.39117.1.S1_at   | MmugDNA.39117.1 | 4.82  | 4.77  | 0.15 | 0.05 | 1.04  | 0.60682  | 0.153986 | 0.819045 | 0.428739 |
| MmugDNA.39118.1.S1_at   | MmugDNA.39118.1 | 5.56  | 6.22  | 0.51 | 0.23 | -1.58 | 0.381405 | 0.401399 | 0.687881 | 0.631018 |
| MmugDNA.39119.1.S1_at   | MmugDNA.39119.1 | 9.58  | 8.96  | 0.18 | 0.09 | 1.53  | 0.009704 | 0.003143 | 0.226235 | 0.081652 |
| MmugDNA.3912.1.S1_at    | MmugDNA.3912.1  | 3.9   | 3.92  | 0.06 | 0.15 | -1.01 | 0.95799  | 0.062614 | 0.984088 | 0.297022 |
| MmugDNA.39120.1.S1_s_at | MmugDNA.39120.1 | 5.67  | 8.22  | 1.62 | 1.66 | -5.85 | 0.13432  | 0.087181 | 0.500903 | 0.340133 |
| MmugDNA.39123.1.S1_at   | MmugDNA.39123.1 | 5.61  | 5.62  | 0.11 | 0.02 | -1.01 | 0.443155 | 0.485656 | 0.725992 | 0.68924  |
| MmugDNA.20100.1.S1_s_at | MmugDNA.20100.1 | 8.72  | 8.7   | 0.21 | 0.36 | 1.01  | 0.435473 | 0.133421 | 0.721236 | 0.405246 |
| MmugDNA.39125.1.S1_at   | MmugDNA.39125.1 | 8.02  | 7.71  | 0.18 | 0.57 | 1.24  | 0.495215 | 0.313839 | 0.757115 | 0.568091 |
| MmugDNA.39126.1.S1_at   | MmugDNA.39126.1 | 2.9   | 2.86  | 0.02 | 0.1  | 1.03  | 0.910379 | 0.217086 | 0.96453  | 0.490668 |
| MmugDNA.39127.1.S1_at   | MmugDNA.39127.1 | 6.35  | 6.34  | 0.19 | 0.06 | 1.01  | 0.784811 | 0.275825 | 0.910346 | 0.540035 |
| MmugDNA.39128.1.S1_at   | MmugDNA.39128.1 | 12.38 | 12.57 | 0.23 | 0.26 | -1.14 | 0.408365 | 0.031118 | 0.705152 | 0.218175 |
| MmugDNA.39129.1.S1_at   | MmugDNA.39129.1 | 11.53 | 11.98 | 0.22 | 0.17 | -1.36 | 0.212218 | 0.078749 | 0.572539 | 0.325716 |
| MmugDNA.3913.1.S1_at    | MmugDNA.3913.1  | 6.54  | 6.57  | 0.23 | 0.6  | -1.02 | 0.919901 | 0.915316 | 0.968811 | 0.952467 |
| MmugDNA.39130.1.S1_at   | MmugDNA.39130.1 | 3.28  | 3.41  | 0.11 | 0.31 | -1.09 | 0.28014  | 0.338185 | 0.621417 | 0.58536  |
| MmugDNA.39134.1.S1_at   | MmugDNA.39134.1 | 4.42  | 4.51  | 0.27 | 0.14 | -1.07 | 0.739092 | 0.873555 | 0.888088 | 0.928102 |
| MmugDNA.39135.1.S1_at   | MmugDNA.39135.1 | 5     | 4.93  | 0.24 | 0.07 | 1.05  | 0.192456 | 0.020101 | 0.555663 | 0.178084 |
| MmugDNA.39137.1.S1_at   | MmugDNA.39137.1 | 6.59  | 6.15  | 0.46 | 0.29 | 1.36  | 0.050552 | 0.048122 | 0.374657 | 0.264417 |
| MmugDNA.3914.1.S1_at    | MmugDNA.3914.1  | 10.3  | 9.46  | 0.28 | 0.8  | 1.8   | 0.051665 | 0.042414 | 0.376177 | 0.25061  |
| MmugDNA.39140.1.S1_at   | MmugDNA.39140.1 | 5.63  | 5.38  | 0.3  | 0    | 1.19  | 0.672201 | 0.672636 | 0.852917 | 0.808671 |
| MmugDNA.39142.1.S1_at   | MmugDNA.39142.1 | 5.42  | 5.47  | 0.24 | 0.08 | -1.04 | 0.956306 | 0.961125 | 0.983483 | 0.977997 |
| MmugDNA.39143.1.S1_at   | MmugDNA.39143.1 | 5.09  | 5.12  | 0.79 | 0.53 | -1.02 | 0.975148 | 0.991101 | 0.990346 | 0.994997 |
| MmugDNA.39144.1.S1_at   | MmugDNA.39144.1 | 7.11  | 6.62  | 0.52 | 0.4  | 1.4   | 0.243737 | 0.196413 | 0.595541 | 0.471423 |
| MmugDNA.39145.1.S1_at   | MmugDNA.39145.1 | 6.46  | 6.7   | 0.3  | 0.31 | -1.18 | 0.328314 | 0.322229 | 0.654312 | 0.573807 |
| MmugDNA.39146.1.S1_at   | MmugDNA.39146.1 | 9.12  | 9.68  | 0.2  | 0.18 | -1.48 | 0.024415 | 0.009409 | 0.294575 | 0.127841 |
| MmugDNA.39147.1.S1_at   | MmugDNA.39147.1 | 2.81  | 2.86  | 0.04 | 0.16 | -1.04 | 0.81242  | 0.93594  | 0.923648 | 0.963892 |
| MmugDNA.39148.1.S1_at   | MmugDNA.39148.1 | 5.89  | 6.02  | 0.72 | 0.81 | -1.09 | 0.604798 | 0.624631 | 0.817951 | 0.778781 |
| MmugDNA.3915.1.S1_at    | MmugDNA.3915.1  | 5.03  | 5.65  | 0.95 | 0.38 | -1.54 | 0.868014 | 0.924816 | 0.947274 | 0.957467 |
| MmugDNA.39150.1.S1_at   | MmugDNA.39150.1 | 8.08  | 8.42  | 0.26 | 0.46 | -1.27 | 0.486223 | 0.627941 | 0.751452 | 0.780883 |
| MmugDNA.39151.1.S1_at   | MmugDNA.39151.1 | 5.23  | 5.26  | 0.24 | 0.17 | -1.02 | 0.852787 | 0.960055 | 0.940658 | 0.977408 |
| MmugDNA.39153.1.S1_at   | MmugDNA.39153.1 | 7.48  | 7.41  | 0.27 | 0.39 | 1.04  | 0.892963 | 0.74032  | 0.957322 | 0.849596 |
| MmugDNA.39155.1.S1_at   | MmugDNA.39155.1 | 9.96  | 10.7  | 0.15 | 0.21 | -1.67 | 0.006379 | 0.001407 | 0.198947 | 0.057264 |
| MmugDNA.39156.1.S1_at   | MmugDNA.39156.1 | 8.71  | 9.27  | 0.34 | 0.65 | -1.48 | 0.202356 | 0.169438 | 0.564633 | 0.446075 |
| MmugDNA.3916.1.S1_at    | MmugDNA.3916.1  | 6.71  | 6.77  | 0.21 | 0.06 | -1.04 | 0.933003 | 0.543645 | 0.973979 | 0.726239 |
| MmugDNA.39161.1.S1_at   | MmugDNA.39161.1 | 5.66  | 5.69  | 0.33 | 0.14 | -1.02 | 0.547638 | 0.459863 | 0.786269 | 0.671989 |
| MmugDNA.39162.1.S1_at   | MmugDNA.39162.1 | 4.71  | 4.78  | 0.1  | 0.13 | -1.05 | 0.90908  | 0.189187 | 0.963975 | 0.464997 |
| MmugDNA.39164.1.S1_at   | MmugDNA.39164.1 | 6.16  | 6.05  | 0    | 0.15 | 1.08  | 0.706069 | 0.917386 | 0.870423 | 0.953814 |
| MmugDNA.39165.1.S1_s_at | MmugDNA.39165.1 | 7.44  | 6.48  | 0.67 | 0.56 | 1.95  | 0.263427 | 0.275085 | 0.609348 | 0.539485 |
| MmugDNA.3917.1.S1_at    | MmugDNA.3917.1  | 4.05  | 4.06  | 0.29 | 0.09 | -1.01 | 0.601937 | 0.556245 | 0.816272 | 0.734449 |
| MmugDNA.16397.1.S1_s_at | MmugDNA.16397.1 | 9.85  | 10.88 | 0.43 | 1.33 | -2.04 | 0.285393 | 0.328404 | 0.624864 | 0.578066 |
| MmugDNA.39173.1.S1_at   | MmugDNA.39173.1 | 11.11 | 11.5  | 0.11 | 0.2  | -1.31 | 0.076204 | 0.018163 | 0.424738 | 0.169673 |
| MmugDNA.39174.1.S1_at   | MmugDNA.39174.1 | 9.02  | 9.06  | 0.05 | 0.17 | -1.03 | 0.843323 | 0.22496  | 0.936956 | 0.49773  |

|                         |                 |       |       |      |      |       |          |          |          |          |
|-------------------------|-----------------|-------|-------|------|------|-------|----------|----------|----------|----------|
| MmugDNA.39174.1.S1_s_at | MmugDNA.39174.1 | 8.08  | 7.92  | 0.18 | 0.34 | 1.11  | 0.881279 | 0.692585 | 0.95225  | 0.821061 |
| MmugDNA.39175.1.S1_at   | MmugDNA.39175.1 | 10.26 | 10.05 | 0.14 | 0.23 | 1.16  | 0.159451 | 0.214208 | 0.524333 | 0.487856 |
| MmugDNA.39176.1.S1_at   | MmugDNA.39176.1 | 6.2   | 7.21  | 0.35 | 1.33 | -2.01 | 0.202489 | 0.287617 | 0.564885 | 0.548885 |
| MmugDNA.39177.1.S1_at   | MmugDNA.39177.1 | 3.62  | 3.67  | 0.85 | 0.17 | -1.04 | 0.34768  | 0.432616 | 0.666622 | 0.653025 |
| MmugDNA.39178.1.S1_at   | MmugDNA.39178.1 | 3.2   | 3.34  | 0.06 | 0.06 | -1.1  | 0.116649 | 0.653649 | 0.480342 | 0.797546 |
| MmugDNA.39179.1.S1_at   | MmugDNA.39179.1 | 3.69  | 3.66  | 0.08 | 0.11 | 1.02  | 0.438728 | 0.676465 | 0.723277 | 0.81095  |
| MmugDNA.39183.1.S1_at   | MmugDNA.39183.1 | 5.62  | 4.47  | 0.78 | 0.69 | 2.22  | 0.127901 | 0.186687 | 0.494071 | 0.462471 |
| MmugDNA.39184.1.S1_at   | MmugDNA.39184.1 | 5.49  | 5.49  | 0.05 | 0.17 | 1     | 0.939307 | 0.655649 | 0.97693  | 0.7987   |
| MmugDNA.39185.1.S1_at   | MmugDNA.39185.1 | 8.67  | 8.45  | 0.2  | 0.49 | 1.16  | 0.429165 | 0.554026 | 0.717334 | 0.73293  |
| MmugDNA.39186.1.S1_at   | MmugDNA.39186.1 | 7.39  | 8.47  | 0.4  | 0.09 | -2.12 | 0.005306 | 0.002684 | 0.191107 | 0.076408 |
| MmugDNA.3919.1.S1_at    | MmugDNA.3919.1  | 7.08  | 7.26  | 0.22 | 0.17 | -1.13 | 0.354843 | 0.079614 | 0.670686 | 0.326981 |
| MmugDNA.39190.1.S1_at   | MmugDNA.39190.1 | 3.1   | 3.1   | 0.08 | 0.03 | 1     | 0.26796  | 0.333415 | 0.612874 | 0.581677 |
| MmugDNA.39191.1.S1_at   | MmugDNA.39191.1 | 6.87  | 6.72  | 0.22 | 0.82 | 1.11  | 0.559697 | 0.403944 | 0.793999 | 0.632538 |
| MmugDNA.39193.1.S1_at   | MmugDNA.39193.1 | 3.87  | 3.65  | 0.17 | 0.11 | 1.17  | 0.222127 | 0.34268  | 0.580674 | 0.588666 |
| MmugDNA.39194.1.S1_at   | MmugDNA.39194.1 | 9.69  | 10.25 | 0.42 | 0.64 | -1.48 | 0.254107 | 0.345246 | 0.602339 | 0.590546 |
| MmugDNA.39195.1.S1_at   | MmugDNA.39195.1 | 4.89  | 5.07  | 0.08 | 0.15 | -1.14 | 0.045625 | 0.058861 | 0.361322 | 0.289381 |
| MmugDNA.39196.1.S1_at   | MmugDNA.39196.1 | 4.63  | 4.52  | 0.09 | 0.06 | 1.08  | 0.245    | 0.040303 | 0.596643 | 0.245928 |
| MmugDNA.39197.1.S1_at   | MmugDNA.39197.1 | 10.79 | 10.84 | 0.21 | 0.34 | -1.03 | 0.645881 | 0.108238 | 0.840534 | 0.371557 |
| MmugDNA.39198.1.S1_at   | MmugDNA.39198.1 | 5.02  | 4.65  | 0.23 | 0.22 | 1.29  | 0.15894  | 0.092142 | 0.52416  | 0.34781  |
| MmugDNA.39199.1.S1_at   | MmugDNA.39199.1 | 6.85  | 6.77  | 0.12 | 0.24 | 1.05  | 0.489073 | 0.675605 | 0.753456 | 0.810429 |
| MmugDNA.392.1.S1_at     | MmugDNA.392.1   | 5.2   | 5.2   | 0.25 | 0.27 | 1     | 0.44535  | 0.571492 | 0.727593 | 0.743807 |
| MmugDNA.3920.1.S1_at    | MmugDNA.3920.1  | 6.17  | 5.99  | 0.11 | 0.07 | 1.13  | 0.090884 | 0.00826  | 0.446466 | 0.12078  |
| MmugDNA.39200.1.S1_at   | MmugDNA.39200.1 | 12.8  | 12.12 | 0.12 | 0.1  | 1.6   | 0.001106 | 0.000021 | 0.144223 | 0.019635 |
| MmugDNA.39201.1.S1_at   | MmugDNA.39201.1 | 6.29  | 5.64  | 0.47 | 0.31 | 1.57  | 0.321631 | 0.191996 | 0.650336 | 0.467382 |
| MmugDNA.39202.1.S1_at   | MmugDNA.39202.1 | 4.22  | 4.21  | 0.06 | 0.21 | 1.01  | 0.575649 | 0.654661 | 0.802439 | 0.798114 |
| MmugDNA.39204.1.S1_at   | MmugDNA.39204.1 | 6.58  | 5.59  | 0.57 | 0.36 | 1.98  | 0.029627 | 0.017189 | 0.314964 | 0.166089 |
| MmugDNA.39205.1.S1_at   | MmugDNA.39205.1 | 10.54 | 10.84 | 0.09 | 0.61 | -1.23 | 0.241588 | 0.373112 | 0.593941 | 0.61196  |
| MmugDNA.39206.1.S1_at   | MmugDNA.39206.1 | 3.59  | 3.46  | 0.26 | 0.11 | 1.09  | 0.227645 | 0.327153 | 0.585103 | 0.577136 |
| MmugDNA.39207.1.S1_at   | MmugDNA.39207.1 | 4.41  | 4.32  | 0.15 | 0.11 | 1.07  | 0.792192 | 0.300826 | 0.913716 | 0.559046 |
| MmugDNA.39209.1.S1_at   | MmugDNA.39209.1 | 6.99  | 6.98  | 0.25 | 0.34 | 1.01  | 0.390783 | 0.646277 | 0.693829 | 0.792738 |
| MmugDNA.39210.1.S1_at   | MmugDNA.39210.1 | 11.41 | 10.99 | 0.11 | 0.21 | 1.34  | 0.056665 | 0.0106   | 0.386838 | 0.134272 |
| MmugDNA.39212.1.S1_at   | MmugDNA.39212.1 | 7.25  | 8.46  | 0.53 | 0.72 | -2.32 | 0.198383 | 0.143745 | 0.561522 | 0.417583 |
| MmugDNA.39213.1.S1_at   | MmugDNA.39213.1 | 10.54 | 9.66  | 0.35 | 0.31 | 1.83  | 0.023682 | 0.009734 | 0.292613 | 0.129786 |
| MmugDNA.39214.1.S1_at   | MmugDNA.39214.1 | 3.96  | 4.12  | 0.36 | 0.12 | -1.12 | 0.84714  | 0.938377 | 0.938613 | 0.965059 |
| MmugDNA.39215.1.S1_at   | MmugDNA.39215.1 | 9.4   | 9.05  | 0.24 | 0.31 | 1.28  | 0.079572 | 0.07543  | 0.429902 | 0.319774 |
| MmugDNA.39218.1.S1_at   | MmugDNA.39218.1 | 8.26  | 8.23  | 0.06 | 0.03 | 1.01  | 0.606408 | 0.000737 | 0.818834 | 0.044855 |
| MmugDNA.39219.1.S1_at   | MmugDNA.39219.1 | 6.53  | 6.56  | 0.18 | 0.05 | -1.02 | 0.865117 | 0.809113 | 0.945844 | 0.889995 |
| MmugDNA.3922.1.S1_at    | MmugDNA.3922.1  | 7.26  | 7.1   | 0.35 | 0.46 | 1.12  | 0.872231 | 0.980283 | 0.948971 | 0.989317 |
| MmugDNA.39220.1.S1_at   | MmugDNA.39220.1 | 11.42 | 10.27 | 0.14 | 0.47 | 2.23  | 0.011759 | 0.005009 | 0.237691 | 0.098626 |
| MmugDNA.39222.1.S1_at   | MmugDNA.39222.1 | 12.18 | 12.15 | 0.21 | 0.11 | 1.02  | 0.72242  | 0.820095 | 0.878695 | 0.896336 |
| MmugDNA.39224.1.S1_at   | MmugDNA.39224.1 | 4.61  | 4.42  | 0.15 | 0.05 | 1.14  | 0.299844 | 0.447554 | 0.63522  | 0.663579 |



|                         |                 |       |       |      |      |       |          |          |          |          |
|-------------------------|-----------------|-------|-------|------|------|-------|----------|----------|----------|----------|
| MmugDNA.39225.1.S1_at   | MmugDNA.39225.1 | 3.7   | 3.69  | 0.34 | 0.05 | 1.01  | 0.365559 | 0.059414 | 0.678307 | 0.290548 |
| MmugDNA.39226.1.S1_at   | MmugDNA.39226.1 | 9.51  | 9.35  | 0.05 | 0.21 | 1.12  | 0.19969  | 0.048337 | 0.562758 | 0.265024 |
| MmugDNA.39228.1.S1_at   | MmugDNA.39228.1 | 7.59  | 7.09  | 1.22 | 0.68 | 1.41  | 0.282818 | 0.251735 | 0.62312  | 0.520444 |
| MmugDNA.39229.1.S1_at   | MmugDNA.39229.1 | 11.22 | 12    | 0.14 | 0.29 | -1.71 | 0.044205 | 0.035705 | 0.358273 | 0.233368 |
| MmugDNA.3923.1.S1_at    | MmugDNA.3923.1  | 3.6   | 3.74  | 0.1  | 0.24 | -1.11 | 0.726776 | 0.588294 | 0.881115 | 0.754859 |
| MmugDNA.39230.1.S1_at   | MmugDNA.39230.1 | 5.07  | 4.54  | 0.35 | 0.13 | 1.45  | 0.203281 | 0.165279 | 0.566019 | 0.441488 |
| MmugDNA.39231.1.S1_at   | MmugDNA.39231.1 | 9.98  | 10.08 | 0.14 | 0.61 | -1.07 | 0.574592 | 0.62112  | 0.801789 | 0.775813 |
| MmugDNA.39232.1.S1_at   | MmugDNA.39232.1 | 4.34  | 4.48  | 0.11 | 0.18 | -1.11 | 0.764491 | 0.935192 | 0.900789 | 0.963346 |
| MmugDNA.39233.1.S1_at   | MmugDNA.39233.1 | 4.67  | 4.65  | 0.13 | 0.05 | 1.02  | 0.845243 | 0.954577 | 0.937902 | 0.974203 |
| MmugDNA.39234.1.S1_at   | MmugDNA.39234.1 | 8.16  | 7.83  | 0.44 | 0.31 | 1.25  | 0.825905 | 0.174302 | 0.929343 | 0.450696 |
| MmugDNA.39235.1.S1_at   | MmugDNA.39235.1 | 9.17  | 9.19  | 0.08 | 0.28 | -1.01 | 0.348366 | 0.39275  | 0.667163 | 0.625846 |
| MmugDNA.39236.1.S1_at   | MmugDNA.39236.1 | 7.77  | 7.67  | 0.05 | 0.22 | 1.07  | 0.859209 | 0.988368 | 0.943112 | 0.993461 |
| MmugDNA.39237.1.S1_at   | MmugDNA.39237.1 | 4.87  | 4.8   | 0.66 | 0.33 | 1.05  | 0.910985 | 0.634423 | 0.964858 | 0.784787 |
| MmugDNA.39238.1.S1_at   | MmugDNA.39238.1 | 6.26  | 6.28  | 0.21 | 0.07 | -1.01 | 0.52331  | 0.708892 | 0.772491 | 0.831167 |
| MmugDNA.39239.1.S1_at   | MmugDNA.39239.1 | 8.68  | 8.91  | 0.26 | 0.83 | -1.17 | 0.509431 | 0.63342  | 0.764331 | 0.784154 |
| MmugDNA.3924.1.S1_at    | MmugDNA.3924.1  | 6.8   | 8.37  | 1.16 | 0.29 | -2.99 | 0.342565 | 0.473963 | 0.663287 | 0.681148 |
| MmugDNA.39240.1.S1_at   | MmugDNA.39240.1 | 7.49  | 9.12  | 0.47 | 1.23 | -3.09 | 0.110469 | 0.128159 | 0.471953 | 0.399148 |
| MmugDNA.39242.1.S1_at   | MmugDNA.39242.1 | 9.99  | 9.94  | 0.2  | 0.13 | 1.04  | 0.350188 | 0.255239 | 0.668409 | 0.523284 |
| MmugDNA.39242.1.S1_s_at | MmugDNA.39242.1 | 8.43  | 8.37  | 0.28 | 0.12 | 1.04  | 0.65299  | 0.356412 | 0.843896 | 0.598396 |
| MmugDNA.39245.1.S1_at   | MmugDNA.39245.1 | 4.52  | 4.64  | 0.27 | 0.49 | -1.09 | 0.887631 | 0.973929 | 0.954863 | 0.985754 |
| MmugDNA.39246.1.S1_at   | MmugDNA.39246.1 | 3.26  | 3.07  | 0.07 | 0.2  | 1.14  | 0.214461 | 0.179591 | 0.57498  | 0.45603  |
| MmugDNA.39248.1.S1_at   | MmugDNA.39248.1 | 2.9   | 2.72  | 0.12 | 0.1  | 1.13  | 0.260712 | 0.504848 | 0.607375 | 0.701897 |
| MmugDNA.39249.1.S1_at   | MmugDNA.39249.1 | 5.06  | 5.48  | 0.14 | 0.12 | -1.34 | 0.015379 | 0.006768 | 0.258258 | 0.111322 |
| MmugDNA.3925.1.S1_at    | MmugDNA.3925.1  | 4.66  | 4.59  | 0.63 | 0.31 | 1.05  | 0.885202 | 0.803082 | 0.954012 | 0.886577 |
| MmugDNA.39250.1.S1_at   | MmugDNA.39250.1 | 4.29  | 4.2   | 0.08 | 0.07 | 1.07  | 0.223274 | 0.465689 | 0.581734 | 0.675863 |
| MmugDNA.39252.1.S1_at   | MmugDNA.39252.1 | 4.81  | 4.95  | 0.24 | 0.48 | -1.1  | 0.989171 | 0.804253 | 0.99615  | 0.887401 |
| MmugDNA.39254.1.S1_at   | MmugDNA.39254.1 | 3.77  | 3.83  | 0.14 | 0.08 | -1.05 | 0.438113 | 0.185528 | 0.722782 | 0.461566 |
| MmugDNA.39255.1.S1_at   | MmugDNA.39255.1 | 3.24  | 3.27  | 0.02 | 0.04 | -1.03 | 0.221019 | 0.431841 | 0.579967 | 0.6526   |
| MmugDNA.39256.1.S1_at   | MmugDNA.39256.1 | 7.96  | 7.24  | 0.77 | 0.43 | 1.65  | 0.249258 | 0.239377 | 0.600102 | 0.510039 |
| MmugDNA.39259.1.S1_at   | MmugDNA.39259.1 | 9.43  | 8.73  | 0.45 | 0.07 | 1.62  | 0.061173 | 0.023869 | 0.395197 | 0.193495 |
| MmugDNA.3926.1.S1_at    | MmugDNA.3926.1  | 2.72  | 2.8   | 0.07 | 0.07 | -1.05 | 0.108988 | 0.06598  | 0.470784 | 0.302282 |
| MmugDNA.39260.1.S1_at   | MmugDNA.39260.1 | 9.53  | 8.9   | 0.21 | 1    | 1.55  | 0.379731 | 0.285649 | 0.687063 | 0.547395 |
| MmugDNA.39261.1.S1_at   | MmugDNA.39261.1 | 5.75  | 6.05  | 1.31 | 0.27 | -1.23 | 0.580685 | 0.752789 | 0.804783 | 0.855968 |
| MmugDNA.7381.1.S1_at    | MmugDNA.7381.1  | 6.26  | 6.51  | 0.13 | 0.18 | -1.19 | 0.091216 | 0.100888 | 0.447111 | 0.360442 |
| MmugDNA.7381.1.S1_s_at  | MmugDNA.7381.1  | 8.2   | 11.26 | 1.34 | 2.58 | -8.31 | 0.37679  | 0.198263 | 0.685302 | 0.473234 |
| MmugDNA.39264.1.S1_at   | MmugDNA.39264.1 | 4.28  | 4.58  | 0.1  | 0.28 | -1.23 | 0.059417 | 0.005496 | 0.392153 | 0.102081 |
| MmugDNA.39266.1.S1_at   | MmugDNA.39266.1 | 3.83  | 4.12  | 0.17 | 0.21 | -1.23 | 0.342134 | 0.496164 | 0.663078 | 0.695877 |
| MmugDNA.39267.1.S1_at   | MmugDNA.39267.1 | 9.51  | 8.08  | 0.29 | 0.24 | 2.68  | 0.003795 | 0.000891 | 0.179914 | 0.047789 |
| MmugDNA.39268.1.S1_at   | MmugDNA.39268.1 | 6.29  | 6.86  | 0.69 | 0.52 | -1.48 | 0.800409 | 0.936098 | 0.917607 | 0.96396  |
| MmugDNA.39269.1.S1_at   | MmugDNA.39269.1 | 4.64  | 5.62  | 0.31 | 0.69 | -1.96 | 0.145526 | 0.109041 | 0.51146  | 0.372838 |
| MmugDNA.3927.1.S1_at    | MmugDNA.3927.1  | 6.23  | 4.97  | 1.08 | 0.43 | 2.39  | 0.081448 | 0.054503 | 0.432432 | 0.278959 |

|                       |                 |       |       |      |      |       |          |          |          |          |
|-----------------------|-----------------|-------|-------|------|------|-------|----------|----------|----------|----------|
| MmugDNA.39270.1.S1_at | MmugDNA.39270.1 | 3.78  | 3.44  | 0.31 | 0.49 | 1.27  | 0.405215 | 0.236829 | 0.703082 | 0.507559 |
| MmugDNA.39271.1.S1_at | MmugDNA.39271.1 | 4.31  | 4.35  | 0.12 | 0.23 | -1.02 | 0.76936  | 0.779431 | 0.903004 | 0.87211  |
| MmugDNA.39272.1.S1_at | MmugDNA.39272.1 | 3.58  | 3.54  | 0.24 | 0.03 | 1.03  | 0.283198 | 0.288842 | 0.623314 | 0.549981 |
| MmugDNA.39274.1.S1_at | MmugDNA.39274.1 | 5.05  | 5.12  | 0.2  | 0.16 | -1.05 | 0.28372  | 0.366816 | 0.623679 | 0.606522 |
| MmugDNA.39275.1.S1_at | MmugDNA.39275.1 | 3.32  | 3.34  | 0.48 | 0.16 | -1.01 | 0.300662 | 0.356103 | 0.635955 | 0.598107 |
| MmugDNA.39276.1.S1_at | MmugDNA.39276.1 | 4.78  | 4.81  | 0.18 | 0.16 | -1.02 | 0.881371 | 0.930301 | 0.95231  | 0.960385 |
| MmugDNA.39277.1.S1_at | MmugDNA.39277.1 | 6.76  | 6.53  | 0.48 | 0.19 | 1.18  | 0.435046 | 0.68725  | 0.72094  | 0.817523 |
| MmugDNA.39279.1.S1_at | MmugDNA.39279.1 | 6.75  | 6.66  | 0.25 | 0.09 | 1.07  | 0.181795 | 0.32247  | 0.546445 | 0.573991 |
| MmugDNA.3928.1.S1_at  | MmugDNA.3928.1  | 3.57  | 3.65  | 0.12 | 0.17 | -1.05 | 0.543937 | 0.238069 | 0.784183 | 0.508649 |
| MmugDNA.39280.1.S1_at | MmugDNA.39280.1 | 5.55  | 5.49  | 0.23 | 0.32 | 1.04  | 0.62424  | 0.316543 | 0.828178 | 0.569938 |
| MmugDNA.39284.1.S1_at | MmugDNA.39284.1 | 3.78  | 4.11  | 0.46 | 0.18 | -1.26 | 0.971353 | 0.825944 | 0.989052 | 0.900001 |
| MmugDNA.39286.1.S1_at | MmugDNA.39286.1 | 5.97  | 6.41  | 0.47 | 0.36 | -1.36 | 0.170185 | 0.131225 | 0.534249 | 0.403252 |
| MmugDNA.39287.1.S1_at | MmugDNA.39287.1 | 7.68  | 9.05  | 0.19 | 0.2  | -2.58 | 0.00139  | 0.000393 | 0.146228 | 0.037471 |
| MmugDNA.39288.1.S1_at | MmugDNA.39288.1 | 3.73  | 3.84  | 0.11 | 0.09 | -1.08 | 0.616722 | 0.679964 | 0.824287 | 0.813105 |
| MmugDNA.39289.1.S1_at | MmugDNA.39289.1 | 7.42  | 7.74  | 0.86 | 0.5  | -1.25 | 0.787384 | 0.877699 | 0.91159  | 0.930219 |
| MmugDNA.3929.1.S1_at  | MmugDNA.3929.1  | 7.19  | 7.19  | 0.05 | 0.09 | 1     | 0.245805 | 0.310601 | 0.597234 | 0.565787 |
| MmugDNA.39290.1.S1_at | MmugDNA.39290.1 | 6.64  | 8.14  | 0.17 | 0.63 | -2.83 | 0.031361 | 0.030768 | 0.321546 | 0.217307 |
| MmugDNA.39292.1.S1_at | MmugDNA.39292.1 | 5.33  | 5.99  | 0.11 | 0.25 | -1.58 | 0.009895 | 0.07019  | 0.22684  | 0.311186 |
| MmugDNA.39293.1.S1_at | MmugDNA.39293.1 | 5.78  | 6.83  | 0.84 | 1.07 | -2.07 | 0.276187 | 0.155635 | 0.618203 | 0.430993 |
| MmugDNA.39294.1.S1_at | MmugDNA.39294.1 | 4.52  | 4.37  | 0.28 | 0    | 1.12  | 0.432121 | 0.303824 | 0.718823 | 0.561225 |
| MmugDNA.39295.1.S1_at | MmugDNA.39295.1 | 7.64  | 8.49  | 0.22 | 0.31 | -1.8  | 0.010556 | 0.005492 | 0.230404 | 0.102081 |
| MmugDNA.39296.1.S1_at | MmugDNA.39296.1 | 5.06  | 5.07  | 0.13 | 0.12 | -1.01 | 0.873261 | 0.052383 | 0.94924  | 0.274345 |
| MmugDNA.39299.1.S1_at | MmugDNA.39299.1 | 5.49  | 4.43  | 0.36 | 0.28 | 2.09  | 0.025456 | 0.036173 | 0.29944  | 0.234778 |
| MmugDNA.393.1.S1_at   | MmugDNA.393.1   | 6.09  | 7.47  | 0.71 | 0.49 | -2.61 | 0.051754 | 0.041599 | 0.376339 | 0.248852 |
| MmugDNA.3930.1.S1_at  | MmugDNA.3930.1  | 6.48  | 6.62  | 0.17 | 0.08 | -1.1  | 0.495329 | 0.340527 | 0.75718  | 0.586776 |
| MmugDNA.39301.1.S1_at | MmugDNA.39301.1 | 4.81  | 4.65  | 0.25 | 0.1  | 1.12  | 0.85122  | 0.354296 | 0.940204 | 0.597158 |
| MmugDNA.39302.1.S1_at | MmugDNA.39302.1 | 3.93  | 3.93  | 0.11 | 0.05 | 1     | 0.825393 | 0.948223 | 0.929221 | 0.970472 |
| MmugDNA.39303.1.S1_at | MmugDNA.39303.1 | 7.68  | 7.74  | 0.29 | 0.95 | -1.05 | 0.357984 | 0.500548 | 0.672935 | 0.699114 |
| MmugDNA.39304.1.S1_at | MmugDNA.39304.1 | 6.24  | 6.62  | 0.21 | 0.18 | -1.3  | 0.328077 | 0.397583 | 0.654237 | 0.628973 |
| MmugDNA.39308.1.S1_at | MmugDNA.39308.1 | 9.51  | 8.67  | 0.37 | 0.7  | 1.79  | 0.083824 | 0.066151 | 0.436242 | 0.302699 |
| MmugDNA.3931.1.S1_at  | MmugDNA.3931.1  | 7.08  | 7.39  | 0.23 | 0.66 | -1.24 | 0.886547 | 0.983001 | 0.954601 | 0.990691 |
| MmugDNA.39311.1.S1_at | MmugDNA.39311.1 | 6.98  | 7.81  | 1.01 | 0.54 | -1.77 | 0.266389 | 0.365603 | 0.61189  | 0.605617 |
| MmugDNA.39313.1.S1_at | MmugDNA.39313.1 | 6.53  | 6.63  | 0.27 | 0.19 | -1.08 | 0.999704 | 0.349987 | 0.999967 | 0.593743 |
| MmugDNA.39314.1.S1_at | MmugDNA.39314.1 | 9.94  | 10.68 | 0.55 | 0.14 | -1.67 | 0.25503  | 0.268332 | 0.603068 | 0.534041 |
| MmugDNA.39315.1.S1_at | MmugDNA.39315.1 | 12.75 | 12.75 | 0.12 | 0.08 | -1.01 | 0.818451 | 0.013153 | 0.926289 | 0.147338 |
| MmugDNA.39318.1.S1_at | MmugDNA.39318.1 | 6.35  | 6.56  | 0.11 | 0.1  | -1.16 | 0.057246 | 0.046574 | 0.387792 | 0.260267 |
| MmugDNA.39319.1.S1_at | MmugDNA.39319.1 | 8.22  | 7.88  | 0.21 | 0.4  | 1.27  | 0.138467 | 0.089991 | 0.505745 | 0.34429  |
| MmugDNA.3932.1.S1_at  | MmugDNA.3932.1  | 5.87  | 5.77  | 0.21 | 0.08 | 1.07  | 0.391385 | 0.018284 | 0.69404  | 0.170051 |
| MmugDNA.39321.1.S1_at | MmugDNA.39321.1 | 7.58  | 7.62  | 0.5  | 0.14 | -1.03 | 0.462665 | 0.455794 | 0.738289 | 0.669659 |
| MmugDNA.39323.1.S1_at | MmugDNA.39323.1 | 7.67  | 7.24  | 0.14 | 0.02 | 1.34  | 0.011482 | 0.012023 | 0.23613  | 0.141889 |
| MmugDNA.39324.1.S1_at | MmugDNA.39324.1 | 8.9   | 7.91  | 0.28 | 0.14 | 1.99  | 0.003236 | 0.000848 | 0.175612 | 0.047089 |

|                         |                 |       |       |      |      |       |          |          |          |          |
|-------------------------|-----------------|-------|-------|------|------|-------|----------|----------|----------|----------|
| MmugDNA.39326.1.S1_at   | MmugDNA.39326.1 | 3.61  | 3.61  | 0.08 | 0.17 | 1     | 0.77187  | 0.488996 | 0.903991 | 0.691529 |
| MmugDNA.39327.1.S1_at   | MmugDNA.39327.1 | 3.47  | 3.18  | 0.2  | 0.13 | 1.23  | 0.092385 | 0.059914 | 0.449015 | 0.291408 |
| MmugDNA.39329.1.S1_at   | MmugDNA.39329.1 | 3.44  | 3.37  | 0.04 | 0.19 | 1.05  | 0.525062 | 0.841532 | 0.773375 | 0.909663 |
| MmugDNA.39330.1.S1_at   | MmugDNA.39330.1 | 9.86  | 9.2   | 0.25 | 0.14 | 1.58  | 0.016423 | 0.00478  | 0.263969 | 0.096453 |
| MmugDNA.39332.1.S1_at   | MmugDNA.39332.1 | 7.17  | 7.6   | 0.32 | 0.44 | -1.35 | 0.223248 | 0.343401 | 0.581723 | 0.589163 |
| MmugDNA.39333.1.S1_at   | MmugDNA.39333.1 | 6.18  | 5.14  | 0.08 | 1.04 | 2.05  | 0.431391 | 0.471059 | 0.71858  | 0.679172 |
| MmugDNA.39334.1.S1_at   | MmugDNA.39334.1 | 3.18  | 3.25  | 0.01 | 0.04 | -1.05 | 0.074273 | 0.518092 | 0.419963 | 0.710138 |
| MmugDNA.39335.1.S1_at   | MmugDNA.39335.1 | 3.9   | 3.96  | 0    | 0.15 | -1.04 | 0.319968 | 0.482259 | 0.649257 | 0.687144 |
| MmugDNA.39338.1.S1_at   | MmugDNA.39338.1 | 10.1  | 9.34  | 0.45 | 0.66 | 1.7   | 0.207326 | 0.229131 | 0.569475 | 0.501438 |
| MmugDNA.39339.1.S1_at   | MmugDNA.39339.1 | 5.42  | 5.49  | 0.07 | 0.08 | -1.05 | 0.138682 | 0.212821 | 0.505884 | 0.486772 |
| MmugDNA.3934.1.S1_at    | MmugDNA.3934.1  | 9.78  | 9.52  | 0.16 | 0.23 | 1.2   | 0.544521 | 0.686542 | 0.784442 | 0.817066 |
| MmugDNA.39340.1.S1_at   | MmugDNA.39340.1 | 6.3   | 5.51  | 1.32 | 0.62 | 1.73  | 0.609667 | 0.633701 | 0.820621 | 0.784372 |
| MmugDNA.39341.1.S1_at   | MmugDNA.39341.1 | 4.24  | 4.28  | 0.03 | 0.15 | -1.03 | 0.494748 | 0.696093 | 0.756882 | 0.823446 |
| MmugDNA.39342.1.S1_s_at | MmugDNA.39342.1 | 11.33 | 12.16 | 0.38 | 0.33 | -1.78 | 0.054748 | 0.033002 | 0.382284 | 0.224908 |
| MmugDNA.39343.1.S1_at   | MmugDNA.39343.1 | 4.5   | 4.28  | 0.65 | 0.41 | 1.16  | 0.910561 | 0.072945 | 0.964646 | 0.315986 |
| MmugDNA.39344.1.S1_at   | MmugDNA.39344.1 | 10.96 | 10.04 | 0.29 | 0.35 | 1.89  | 0.049537 | 0.007998 | 0.371515 | 0.118865 |
| MmugDNA.39346.1.S1_at   | MmugDNA.39346.1 | 7.14  | 7.25  | 0.16 | 0.31 | -1.08 | 0.294394 | 0.241218 | 0.631216 | 0.511821 |
| MmugDNA.39347.1.S1_at   | MmugDNA.39347.1 | 6.71  | 6.55  | 0    | 0.57 | 1.12  | 0.585222 | 0.713811 | 0.807415 | 0.833937 |
| MmugDNA.39348.1.S1_at   | MmugDNA.39348.1 | 6.94  | 6.98  | 0.21 | 0.09 | -1.03 | 0.302449 | 0.337847 | 0.63692  | 0.585027 |
| MmugDNA.39349.1.S1_at   | MmugDNA.39349.1 | 9.35  | 9.17  | 0.29 | 0.33 | 1.13  | 0.788395 | 0.195114 | 0.912102 | 0.470241 |
| MmugDNA.3935.1.S1_at    | MmugDNA.3935.1  | 5.8   | 5.73  | 0.22 | 0.33 | 1.05  | 0.818482 | 0.595706 | 0.926289 | 0.759191 |
| MmugDNA.39350.1.S1_at   | MmugDNA.39350.1 | 4.29  | 4.21  | 0.17 | 0.29 | 1.06  | 0.922956 | 0.98836  | 0.970084 | 0.993461 |
| MmugDNA.39351.1.S1_at   | MmugDNA.39351.1 | 3.5   | 3.44  | 0.2  | 0.08 | 1.04  | 0.534448 | 0.56867  | 0.77876  | 0.742052 |
| MmugDNA.39353.1.S1_at   | MmugDNA.39353.1 | 11.02 | 11.13 | 0.08 | 0.45 | -1.08 | 0.594463 | 0.790906 | 0.811923 | 0.879071 |
| MmugDNA.39355.1.S1_at   | MmugDNA.39355.1 | 5.01  | 4.86  | 0.12 | 0.09 | 1.11  | 0.776823 | 0.342863 | 0.90655  | 0.588712 |
| MmugDNA.39357.1.S1_at   | MmugDNA.39357.1 | 6.48  | 6.21  | 0.16 | 0.07 | 1.21  | 0.030163 | 0.10366  | 0.317217 | 0.364465 |
| MmugDNA.39358.1.S1_at   | MmugDNA.39358.1 | 5.42  | 5.51  | 0.17 | 0.18 | -1.06 | 0.39252  | 0.467779 | 0.694657 | 0.677307 |
| MmugDNA.39359.1.S1_at   | MmugDNA.39359.1 | 6.56  | 6.59  | 0.14 | 0.13 | -1.02 | 0.393765 | 0.746547 | 0.695522 | 0.852872 |
| MmugDNA.39360.1.S1_at   | MmugDNA.39360.1 | 3.7   | 3.69  | 0.11 | 0.02 | 1     | 0.466055 | 0.081504 | 0.740195 | 0.329764 |
| MmugDNA.39361.1.S1_at   | MmugDNA.39361.1 | 6.65  | 6.45  | 0.22 | 0.62 | 1.15  | 0.507543 | 0.7631   | 0.76294  | 0.862257 |
| MmugDNA.39362.1.S1_at   | MmugDNA.39362.1 | 3.76  | 3.77  | 0.23 | 0.16 | -1.01 | 0.41221  | 0.585451 | 0.707873 | 0.752852 |
| MmugDNA.39363.1.S1_at   | MmugDNA.39363.1 | 11.26 | 11.18 | 0.11 | 0.08 | 1.05  | 0.37661  | 0.013318 | 0.685249 | 0.148042 |
| MmugDNA.39364.1.S1_at   | MmugDNA.39364.1 | 5.83  | 5.83  | 0.02 | 0.05 | -1    | 0.240448 | 0.530078 | 0.593293 | 0.717729 |
| MmugDNA.39365.1.S1_at   | MmugDNA.39365.1 | 5.92  | 6.01  | 0.15 | 0.16 | -1.07 | 0.662112 | 0.459738 | 0.848422 | 0.671948 |
| MmugDNA.39368.1.S1_at   | MmugDNA.39368.1 | 6.91  | 6.35  | 0.93 | 0.17 | 1.48  | 0.376215 | 0.504983 | 0.685066 | 0.70197  |
| MmugDNA.3937.1.S1_at    | MmugDNA.3937.1  | 5.95  | 6.44  | 0.83 | 0.62 | -1.4  | 0.583869 | 0.731418 | 0.806781 | 0.84431  |
| MmugDNA.39370.1.S1_at   | MmugDNA.39370.1 | 5.26  | 4.33  | 0.14 | 0.17 | 1.92  | 0.001294 | 0.002482 | 0.145684 | 0.073652 |
| MmugDNA.39372.1.S1_at   | MmugDNA.39372.1 | 9.12  | 9.05  | 0.17 | 0.14 | 1.05  | 0.210561 | 0.306738 | 0.5718   | 0.5633   |
| MmugDNA.39373.1.S1_at   | MmugDNA.39373.1 | 12.96 | 12.57 | 0.15 | 0.52 | 1.3   | 0.096415 | 0.055364 | 0.454966 | 0.281125 |
| MmugDNA.39374.1.S1_at   | MmugDNA.39374.1 | 5.69  | 5.68  | 0.06 | 0.22 | 1.01  | 0.821877 | 0.419614 | 0.927464 | 0.643568 |
| MmugDNA.39376.1.S1_at   | MmugDNA.39376.1 | 12.68 | 12.44 | 0.14 | 0.22 | 1.18  | 0.164948 | 0.194624 | 0.528821 | 0.469744 |

|                         |                 |       |       |      |      |       |          |          |          |          |
|-------------------------|-----------------|-------|-------|------|------|-------|----------|----------|----------|----------|
| MmugDNA.10262.1.S1_at   | MmugDNA.10262.1 | 6.87  | 7.14  | 0.14 | 0.19 | -1.2  | 0.129205 | 0.161821 | 0.495175 | 0.437937 |
| MmugDNA.10262.1.S1_s_at | MmugDNA.10262.1 | 4.82  | 5.48  | 0.16 | 0.37 | -1.58 | 0.046156 | 0.039271 | 0.362577 | 0.243338 |
| MmugDNA.39380.1.S1_at   | MmugDNA.39380.1 | 3.77  | 4     | 0.21 | 0.11 | -1.17 | 0.743735 | 0.452732 | 0.890194 | 0.66729  |
| MmugDNA.39381.1.S1_at   | MmugDNA.39381.1 | 9.98  | 9.99  | 0.3  | 0.52 | -1.01 | 0.664758 | 0.737301 | 0.849707 | 0.847869 |
| MmugDNA.39383.1.S1_at   | MmugDNA.39383.1 | 6.85  | 6.58  | 0.19 | 0.45 | 1.2   | 0.47475  | 0.655882 | 0.74537  | 0.798739 |
| MmugDNA.39384.1.S1_at   | MmugDNA.39384.1 | 6.69  | 6.8   | 0.19 | 0.25 | -1.08 | 0.91025  | 0.336182 | 0.964495 | 0.583712 |
| MmugDNA.39385.1.S1_at   | MmugDNA.39385.1 | 4.34  | 4.29  | 0.27 | 0.16 | 1.03  | 0.546201 | 0.498692 | 0.785343 | 0.697702 |
| MmugDNA.39386.1.S1_at   | MmugDNA.39386.1 | 6.62  | 6.88  | 0.18 | 0.05 | -1.19 | 0.251146 | 0.308056 | 0.600625 | 0.56421  |
| MmugDNA.39387.1.S1_at   | MmugDNA.39387.1 | 6.65  | 5.83  | 0.63 | 0.49 | 1.76  | 0.149033 | 0.118567 | 0.514001 | 0.38654  |
| MmugDNA.39387.1.S1_x_at | MmugDNA.39387.1 | 6.39  | 6.03  | 0.4  | 0.58 | 1.29  | 0.202065 | 0.202868 | 0.56434  | 0.477312 |
| MmugDNA.39388.1.S1_at   | MmugDNA.39388.1 | 3.9   | 3.91  | 0.02 | 0.13 | -1.01 | 0.611195 | 0.728536 | 0.821532 | 0.843072 |
| MmugDNA.39389.1.S1_at   | MmugDNA.39389.1 | 5.71  | 5.28  | 0.92 | 0.48 | 1.35  | 0.316633 | 0.155743 | 0.647624 | 0.431111 |
| MmugDNA.3939.1.S1_at    | MmugDNA.3939.1  | 6.84  | 7.22  | 0.14 | 0.13 | -1.31 | 0.047479 | 0.042098 | 0.366522 | 0.249638 |
| MmugDNA.39390.1.S1_at   | MmugDNA.39390.1 | 5.3   | 5.42  | 0.11 | 0.04 | -1.09 | 0.132353 | 0.189782 | 0.498572 | 0.465403 |
| MmugDNA.39391.1.S1_at   | MmugDNA.39391.1 | 4.89  | 5     | 0.16 | 0.45 | -1.08 | 0.164892 | 0.176715 | 0.528816 | 0.453168 |
| MmugDNA.39393.1.S1_at   | MmugDNA.39393.1 | 8.62  | 7.78  | 0.1  | 0.21 | 1.78  | 0.004166 | 0.007413 | 0.181739 | 0.115758 |
| MmugDNA.39394.1.S1_at   | MmugDNA.39394.1 | 4.16  | 4.17  | 0.23 | 0.16 | -1.01 | 0.289575 | 0.334525 | 0.627563 | 0.582498 |
| MmugDNA.39395.1.S1_s_at | MmugDNA.39395.1 | 11.98 | 12.07 | 0.09 | 0.03 | -1.06 | 0.478358 | 0.110054 | 0.747138 | 0.374179 |
| MmugDNA.39398.1.S1_at   | MmugDNA.39398.1 | 11.37 | 11.78 | 0.48 | 0.11 | -1.33 | 0.169748 | 0.009583 | 0.533943 | 0.129001 |
| MmugDNA.39399.1.S1_at   | MmugDNA.39399.1 | 6.13  | 6.1   | 0.18 | 0.06 | 1.02  | 0.459943 | 0.293273 | 0.736616 | 0.553216 |
| MmugDNA.394.1.S1_at     | MmugDNA.394.1   | 9.85  | 10.8  | 0.09 | 0.33 | -1.93 | 0.005848 | 0.004162 | 0.193477 | 0.091036 |
| MmugDNA.3940.1.S1_at    | MmugDNA.3940.1  | 6.26  | 6.32  | 0.2  | 0.15 | -1.04 | 0.810664 | 0.650584 | 0.922872 | 0.795663 |
| MmugDNA.39400.1.S1_at   | MmugDNA.39400.1 | 5.53  | 6.24  | 0.62 | 0.44 | -1.63 | 0.531244 | 0.545205 | 0.777117 | 0.727441 |
| MmugDNA.39402.1.S1_at   | MmugDNA.39402.1 | 11.59 | 11.4  | 0.1  | 0.12 | 1.14  | 0.068361 | 0.124218 | 0.410012 | 0.394521 |
| MmugDNA.39406.1.S1_at   | MmugDNA.39406.1 | 4.88  | 4.87  | 0.11 | 0.01 | 1.01  | 0.581998 | 0.387809 | 0.805507 | 0.622484 |
| MmugDNA.39407.1.S1_at   | MmugDNA.39407.1 | 3.66  | 4.43  | 0.12 | 1.22 | -1.71 | 0.295986 | 0.323218 | 0.632176 | 0.574408 |
| MmugDNA.39408.1.S1_at   | MmugDNA.39408.1 | 3.3   | 3.36  | 0.63 | 0.14 | -1.04 | 0.453777 | 0.430022 | 0.732887 | 0.65111  |
| MmugDNA.39409.1.S1_at   | MmugDNA.39409.1 | 3.89  | 3.9   | 0.14 | 0.14 | -1.01 | 0.929566 | 0.330865 | 0.972741 | 0.57958  |
| MmugDNA.3941.1.S1_at    | MmugDNA.3941.1  | 2.82  | 2.95  | 0.18 | 0.14 | -1.1  | 0.236466 | 0.290736 | 0.590476 | 0.551382 |
| MmugDNA.39410.1.S1_at   | MmugDNA.39410.1 | 4.05  | 4.28  | 0.03 | 0.13 | -1.17 | 0.144259 | 0.070784 | 0.510664 | 0.312275 |
| MmugDNA.39411.1.S1_at   | MmugDNA.39411.1 | 4.53  | 4.94  | 0.22 | 0.2  | -1.33 | 0.144182 | 0.176919 | 0.510652 | 0.453317 |
| MmugDNA.39413.1.S1_at   | MmugDNA.39413.1 | 7.1   | 7.33  | 0.28 | 0.2  | -1.17 | 0.226841 | 0.24987  | 0.584769 | 0.518876 |
| MmugDNA.39417.1.S1_at   | MmugDNA.39417.1 | 5.12  | 5.25  | 0.19 | 0.14 | -1.09 | 0.150394 | 0.163808 | 0.515202 | 0.440049 |
| MmugDNA.39418.1.S1_at   | MmugDNA.39418.1 | 5.81  | 6.05  | 0.03 | 0.2  | -1.18 | 0.335356 | 0.208943 | 0.659127 | 0.482751 |
| MmugDNA.3942.1.S1_at    | MmugDNA.3942.1  | 6.47  | 5.58  | 0.41 | 0.61 | 1.86  | 0.276428 | 0.379388 | 0.618529 | 0.61636  |
| MmugDNA.39420.1.S1_at   | MmugDNA.39420.1 | 3.72  | 3.98  | 0.07 | 0.29 | -1.19 | 0.638345 | 0.720845 | 0.836591 | 0.838368 |
| MmugDNA.39421.1.S1_at   | MmugDNA.39421.1 | 3.54  | 3.41  | 0.08 | 0.22 | 1.1   | 0.886793 | 0.931869 | 0.954695 | 0.96129  |
| MmugDNA.39423.1.S1_at   | MmugDNA.39423.1 | 5.67  | 5.7   | 0.18 | 0.14 | -1.02 | 0.735989 | 0.484081 | 0.886439 | 0.688318 |
| MmugDNA.39426.1.S1_at   | MmugDNA.39426.1 | 7.09  | 7.51  | 0.24 | 0.39 | -1.34 | 0.135745 | 0.170217 | 0.502654 | 0.44691  |
| MmugDNA.39428.1.S1_at   | MmugDNA.39428.1 | 6.79  | 6.78  | 1    | 0.52 | 1.01  | 0.833309 | 0.28999  | 0.932336 | 0.550995 |
| MmugDNA.39429.1.S1_at   | MmugDNA.39429.1 | 5.66  | 5.57  | 0.41 | 0.26 | 1.06  | 0.555937 | 0.540562 | 0.791585 | 0.724459 |

|                         |                 |       |       |      |      |       |          |          |          |          |
|-------------------------|-----------------|-------|-------|------|------|-------|----------|----------|----------|----------|
| MmugDNA.3943.1.S1_at    | MmugDNA.3943.1  | 6.82  | 6.9   | 0.22 | 0.05 | -1.05 | 0.747568 | 0.836212 | 0.891945 | 0.906332 |
| MmugDNA.39431.1.S1_at   | MmugDNA.39431.1 | 2.96  | 3.02  | 0.25 | 0.05 | -1.04 | 0.942899 | 0.948025 | 0.978281 | 0.970439 |
| MmugDNA.39432.1.S1_at   | MmugDNA.39432.1 | 5.59  | 5.52  | 0.51 | 0.54 | 1.05  | 0.768693 | 0.552931 | 0.902722 | 0.732201 |
| MmugDNA.39433.1.S1_at   | MmugDNA.39433.1 | 3.08  | 3.27  | 0.06 | 0.2  | -1.14 | 0.191529 | 0.124551 | 0.554531 | 0.394987 |
| MmugDNA.39434.1.S1_at   | MmugDNA.39434.1 | 7.02  | 7.32  | 0.38 | 0.22 | -1.23 | 0.347707 | 0.304746 | 0.666645 | 0.561921 |
| MmugDNA.39435.1.S1_at   | MmugDNA.39435.1 | 4.44  | 4.6   | 0.12 | 0.15 | -1.12 | 0.283912 | 0.516053 | 0.623838 | 0.708694 |
| MmugDNA.39436.1.S1_at   | MmugDNA.39436.1 | 6.85  | 6.36  | 0.08 | 0.42 | 1.4   | 0.123035 | 0.166445 | 0.488452 | 0.4429   |
| MmugDNA.39437.1.S1_at   | MmugDNA.39437.1 | 10.47 | 9.98  | 0.11 | 0.07 | 1.4   | 0.003098 | 0.000992 | 0.172102 | 0.050398 |
| MmugDNA.39437.1.S1_s_at | MmugDNA.39437.1 | 11.07 | 10.78 | 0.14 | 0.01 | 1.23  | 0.021666 | 0.00606  | 0.283263 | 0.106152 |
| MmugDNA.39438.1.S1_at   | MmugDNA.39438.1 | 5.67  | 5.65  | 0.02 | 0.02 | 1.02  | 0.168244 | 0.393244 | 0.53256  | 0.626174 |
| MmugDNA.39438.1.S1_x_at | MmugDNA.39438.1 | 4.05  | 3.93  | 0.05 | 0.29 | 1.08  | 0.785841 | 0.938462 | 0.910907 | 0.965059 |
| MmugDNA.39439.1.S1_at   | MmugDNA.39439.1 | 8.52  | 7.52  | 0.2  | 0.18 | 2.01  | 0.002881 | 0.005598 | 0.169151 | 0.10339  |
| MmugDNA.39441.1.S1_at   | MmugDNA.39441.1 | 6.82  | 6.93  | 0.1  | 0.1  | -1.08 | 0.167501 | 0.150093 | 0.531668 | 0.424698 |
| MmugDNA.39441.1.S1_s_at | MmugDNA.39441.1 | 5.62  | 5.66  | 0.09 | 0.08 | -1.03 | 0.263624 | 0.595069 | 0.609554 | 0.758928 |
| MmugDNA.39442.1.S1_at   | MmugDNA.39442.1 | 4.45  | 4.47  | 0.1  | 0.06 | -1.02 | 0.768017 | 0.042647 | 0.902473 | 0.251037 |
| MmugDNA.39444.1.S1_at   | MmugDNA.39444.1 | 3.45  | 3.47  | 0.05 | 0.03 | -1.01 | 0.429578 | 0.595421 | 0.717637 | 0.759091 |
| MmugDNA.39445.1.S1_at   | MmugDNA.39445.1 | 4.21  | 4.23  | 0.12 | 0.32 | -1.02 | 0.816828 | 0.631709 | 0.925751 | 0.782953 |
| MmugDNA.39447.1.S1_at   | MmugDNA.39447.1 | 8.4   | 8.35  | 0.07 | 0.16 | 1.04  | 0.686505 | 0.910371 | 0.859818 | 0.949414 |
| MmugDNA.39448.1.S1_at   | MmugDNA.39448.1 | 6.55  | 6.06  | 0.42 | 0.47 | 1.41  | 0.562507 | 0.705039 | 0.79536  | 0.828945 |
| MmugDNA.39449.1.S1_at   | MmugDNA.39449.1 | 8.55  | 8.42  | 0.2  | 0.75 | 1.1   | 0.350906 | 0.353483 | 0.66887  | 0.596547 |
| MmugDNA.3945.1.S1_at    | MmugDNA.3945.1  | 8.41  | 8.23  | 0.54 | 0.98 | 1.14  | 0.651155 | 0.721482 | 0.843066 | 0.838713 |
| MmugDNA.39451.1.S1_at   | MmugDNA.39451.1 | 5.1   | 5.26  | 0.06 | 0.12 | -1.12 | 0.167723 | 0.311683 | 0.532022 | 0.566653 |
| MmugDNA.39452.1.S1_at   | MmugDNA.39452.1 | 5.89  | 6.05  | 0    | 0.14 | -1.12 | 0.136813 | 0.254115 | 0.503945 | 0.522439 |
| MmugDNA.39453.1.S1_s_at | MmugDNA.39453.1 | 13.8  | 13.68 | 0.07 | 0.09 | 1.09  | 0.029393 | 0.012866 | 0.313907 | 0.146025 |
| MmugDNA.39454.1.S1_at   | MmugDNA.39454.1 | 3.86  | 3.87  | 0.34 | 0.27 | -1    | 0.580803 | 0.552774 | 0.804812 | 0.732052 |
| MmugDNA.39456.1.S1_at   | MmugDNA.39456.1 | 3.73  | 3.67  | 0.08 | 0.19 | 1.04  | 0.84509  | 0.456957 | 0.937836 | 0.670592 |
| MmugDNA.39458.1.S1_at   | MmugDNA.39458.1 | 9.33  | 9.15  | 0.22 | 0.45 | 1.13  | 0.908384 | 0.079513 | 0.963748 | 0.32681  |
| MmugDNA.39459.1.S1_at   | MmugDNA.39459.1 | 10.78 | 11.13 | 0.09 | 0.35 | -1.28 | 0.11382  | 0.177712 | 0.477131 | 0.454073 |
| MmugDNA.3946.1.S1_at    | MmugDNA.3946.1  | 4.9   | 4.81  | 0.24 | 0.03 | 1.07  | 0.792937 | 0.200975 | 0.914102 | 0.475434 |
| MmugDNA.39461.1.S1_at   | MmugDNA.39461.1 | 6.86  | 7.56  | 0.16 | 0.68 | -1.62 | 0.134346 | 0.03662  | 0.500923 | 0.235943 |
| MmugDNA.39462.1.S1_at   | MmugDNA.39462.1 | 6.06  | 6     | 0.21 | 0.08 | 1.04  | 0.227766 | 0.156164 | 0.585222 | 0.43161  |
| MmugDNA.39463.1.S1_at   | MmugDNA.39463.1 | 7.07  | 7.09  | 0.05 | 0.1  | -1.01 | 0.522059 | 0.052567 | 0.771756 | 0.274848 |
| MmugDNA.39464.1.S1_at   | MmugDNA.39464.1 | 3.4   | 3.6   | 0.07 | 0.24 | -1.15 | 0.703128 | 0.444551 | 0.868993 | 0.662072 |
| MmugDNA.39466.1.S1_at   | MmugDNA.39466.1 | 3.05  | 2.86  | 0.13 | 0.14 | 1.14  | 0.298124 | 0.148904 | 0.633823 | 0.423284 |
| MmugDNA.39467.1.S1_at   | MmugDNA.39467.1 | 10.1  | 10.3  | 0.07 | 0.42 | -1.15 | 0.327723 | 0.221699 | 0.654072 | 0.494901 |
| MmugDNA.39468.1.S1_at   | MmugDNA.39468.1 | 10.72 | 10.53 | 0.13 | 0.48 | 1.15  | 0.496803 | 0.484236 | 0.757692 | 0.688408 |
| MmugDNA.39469.1.S1_at   | MmugDNA.39469.1 | 9.09  | 8.68  | 0.27 | 0.47 | 1.32  | 0.635617 | 0.44466  | 0.835058 | 0.662072 |
| MmugDNA.3947.1.S1_at    | MmugDNA.3947.1  | 4.44  | 4.36  | 0.1  | 0.1  | 1.06  | 0.2245   | 0.107195 | 0.582716 | 0.36989  |
| MmugDNA.39470.1.S1_at   | MmugDNA.39470.1 | 5.42  | 5.68  | 0.31 | 0.12 | -1.2  | 0.477071 | 0.654585 | 0.746452 | 0.798087 |
| MmugDNA.39471.1.S1_s_at | MmugDNA.39471.1 | 12.33 | 12.46 | 0.1  | 0.24 | -1.09 | 0.833807 | 0.02659  | 0.932439 | 0.204008 |
| MmugDNA.39472.1.S1_at   | MmugDNA.39472.1 | 11.72 | 10.83 | 0.53 | 1.14 | 1.85  | 0.732411 | 0.809532 | 0.884417 | 0.890191 |

|                         |                 |       |       |      |      |       |          |          |          |          |
|-------------------------|-----------------|-------|-------|------|------|-------|----------|----------|----------|----------|
| MmugDNA.39473.1.S1_at   | MmugDNA.39473.1 | 4.78  | 4.18  | 0.42 | 0.25 | 1.51  | 0.075486 | 0.068768 | 0.422732 | 0.308711 |
| MmugDNA.39474.1.S1_at   | MmugDNA.39474.1 | 11.18 | 11.07 | 0.19 | 0.15 | 1.08  | 0.164045 | 0.125549 | 0.528211 | 0.396226 |
| MmugDNA.39475.1.S1_at   | MmugDNA.39475.1 | 5.85  | 5.64  | 0.13 | 0.35 | 1.15  | 0.813543 | 0.391674 | 0.924326 | 0.62529  |
| MmugDNA.39478.1.S1_at   | MmugDNA.39478.1 | 2.93  | 2.85  | 0.21 | 0.21 | 1.06  | 0.709315 | 0.526995 | 0.87243  | 0.715759 |
| MmugDNA.39479.1.S1_at   | MmugDNA.39479.1 | 11.3  | 11.65 | 0.2  | 0.03 | -1.28 | 0.118912 | 0.097348 | 0.483449 | 0.355066 |
| MmugDNA.3948.1.S1_at    | MmugDNA.3948.1  | 7.32  | 7.81  | 0.93 | 0.22 | -1.41 | 0.123609 | 0.147701 | 0.489371 | 0.422007 |
| MmugDNA.39480.1.S1_at   | MmugDNA.39480.1 | 6.02  | 6.08  | 0.19 | 0.24 | -1.04 | 0.7719   | 0.554793 | 0.903991 | 0.733501 |
| MmugDNA.39481.1.S1_at   | MmugDNA.39481.1 | 11.55 | 12.01 | 0.18 | 0.33 | -1.37 | 0.1619   | 0.20383  | 0.526573 | 0.478081 |
| MmugDNA.39482.1.S1_at   | MmugDNA.39482.1 | 4.07  | 4.02  | 0.25 | 0.17 | 1.03  | 0.223423 | 0.312627 | 0.581912 | 0.567268 |
| MmugDNA.39483.1.S1_at   | MmugDNA.39483.1 | 11.95 | 11.82 | 0.23 | 0.13 | 1.09  | 0.667307 | 0.76963  | 0.850935 | 0.866223 |
| MmugDNA.39484.1.S1_at   | MmugDNA.39484.1 | 7.79  | 6.77  | 0.12 | 0.6  | 2.02  | 0.102998 | 0.06937  | 0.46254  | 0.309591 |
| MmugDNA.39485.1.S1_s_at | MmugDNA.39485.1 | 13.03 | 12.58 | 0.08 | 0.05 | 1.37  | 0.002402 | 0.000604 | 0.163555 | 0.042002 |
| MmugDNA.39486.1.S1_at   | MmugDNA.39486.1 | 8.86  | 8.81  | 0.14 | 0.4  | 1.03  | 0.804081 | 0.911584 | 0.919385 | 0.950173 |
| MmugDNA.39488.1.S1_at   | MmugDNA.39488.1 | 5.01  | 5.36  | 0.25 | 0.09 | -1.27 | 0.059648 | 0.057985 | 0.39273  | 0.287289 |
| MmugDNA.39489.1.S1_at   | MmugDNA.39489.1 | 3.57  | 3.56  | 0.08 | 0.06 | 1.01  | 0.386784 | 0.259127 | 0.691653 | 0.526264 |
| MmugDNA.3949.1.S1_at    | MmugDNA.3949.1  | 5.47  | 6.02  | 0.15 | 0.29 | -1.46 | 0.036314 | 0.054176 | 0.339201 | 0.278114 |
| MmugDNA.39491.1.S1_at   | MmugDNA.39491.1 | 3.8   | 4.88  | 0.01 | 0.49 | -2.12 | 0.02137  | 0.01186  | 0.282524 | 0.140973 |
| MmugDNA.39492.1.S1_at   | MmugDNA.39492.1 | 3.24  | 4.13  | 0.61 | 1.31 | -1.85 | 0.27961  | 0.341813 | 0.621136 | 0.587908 |
| MmugDNA.39493.1.S1_at   | MmugDNA.39493.1 | 3.62  | 3.63  | 0.26 | 0.1  | -1.01 | 0.636882 | 0.764513 | 0.83591  | 0.863128 |
| MmugDNA.39495.1.S1_x_at | MmugDNA.39495.1 | 6.61  | 5.99  | 0.43 | 0.23 | 1.54  | 0.093242 | 0.073718 | 0.450461 | 0.317068 |
| MmugDNA.39496.1.S1_at   | MmugDNA.39496.1 | 5.66  | 5.08  | 0.37 | 1.08 | 1.5   | 0.483722 | 0.585483 | 0.749945 | 0.752852 |
| MmugDNA.39497.1.S1_at   | MmugDNA.39497.1 | 9.6   | 9.49  | 0.11 | 0.1  | 1.08  | 0.622888 | 0.040268 | 0.82774  | 0.245902 |
| MmugDNA.39498.1.S1_at   | MmugDNA.39498.1 | 3.67  | 3.49  | 0.15 | 0.3  | 1.13  | 0.395606 | 0.407004 | 0.696523 | 0.63468  |
| MmugDNA.39499.1.S1_at   | MmugDNA.39499.1 | 2.63  | 2.63  | 0.01 | 0.03 | 1     | 0.843643 | 0.832403 | 0.937096 | 0.90389  |
| MmugDNA.3950.1.S1_at    | MmugDNA.3950.1  | 5.34  | 5.16  | 1.46 | 0.46 | 1.13  | 0.591272 | 0.629795 | 0.810328 | 0.781989 |
| MmugDNA.39500.1.S1_at   | MmugDNA.39500.1 | 4.52  | 4.66  | 0.35 | 0.26 | -1.1  | 0.561054 | 0.713757 | 0.794603 | 0.833937 |
| MmugDNA.39502.1.S1_at   | MmugDNA.39502.1 | 7.56  | 9.75  | 1.3  | 1.97 | -4.57 | 0.336788 | 0.246418 | 0.659663 | 0.515899 |
| MmugDNA.39505.1.S1_at   | MmugDNA.39505.1 | 5.34  | 5.04  | 0.4  | 0.15 | 1.23  | 0.187511 | 0.223864 | 0.550527 | 0.496812 |
| MmugDNA.39506.1.S1_at   | MmugDNA.39506.1 | 4.24  | 4.52  | 0.05 | 0.24 | -1.21 | 0.106903 | 0.123935 | 0.467551 | 0.394212 |
| MmugDNA.39508.1.S1_x_at | MmugDNA.39508.1 | 7.68  | 7.61  | 0.27 | 0.06 | 1.05  | 0.85933  | 0.628726 | 0.943196 | 0.781399 |
| MmugDNA.39511.1.S1_at   | MmugDNA.39511.1 | 12.6  | 12.4  | 0.08 | 0.29 | 1.15  | 0.958743 | 0.091616 | 0.984371 | 0.346715 |
| MmugDNA.39512.1.S1_at   | MmugDNA.39512.1 | 4.74  | 4.8   | 0.67 | 0.07 | -1.04 | 0.461576 | 0.638057 | 0.737724 | 0.787332 |
| MmugDNA.39513.1.S1_at   | MmugDNA.39513.1 | 4.57  | 4.69  | 0.02 | 0.1  | -1.09 | 0.085216 | 0.19186  | 0.438568 | 0.467233 |
| MmugDNA.39514.1.S1_at   | MmugDNA.39514.1 | 11.37 | 11.06 | 0.06 | 0.31 | 1.24  | 0.181019 | 0.155332 | 0.545522 | 0.430693 |
| MmugDNA.39515.1.S1_at   | MmugDNA.39515.1 | 10.64 | 11.09 | 0.04 | 0.36 | -1.37 | 0.332604 | 0.473865 | 0.65692  | 0.681082 |
| MmugDNA.39516.1.S1_at   | MmugDNA.39516.1 | 5.96  | 6.14  | 0.1  | 0.09 | -1.13 | 0.06675  | 0.177712 | 0.406981 | 0.454073 |
| MmugDNA.39517.1.S1_at   | MmugDNA.39517.1 | 9.63  | 9.64  | 0.18 | 0.34 | -1.01 | 0.844445 | 0.967602 | 0.937553 | 0.982093 |
| MmugDNA.39518.1.S1_at   | MmugDNA.39518.1 | 3.96  | 3.62  | 0.19 | 0.17 | 1.27  | 0.177256 | 0.537227 | 0.541333 | 0.72233  |
| MmugDNA.39519.1.S1_at   | MmugDNA.39519.1 | 4.45  | 4.6   | 0.13 | 0.07 | -1.11 | 0.106888 | 0.137041 | 0.467551 | 0.409836 |
| MmugDNA.3952.1.S1_at    | MmugDNA.3952.1  | 9.56  | 9.69  | 0.2  | 0.45 | -1.1  | 0.485053 | 0.323004 | 0.750727 | 0.574313 |
| MmugDNA.39520.1.S1_at   | MmugDNA.39520.1 | 9.26  | 11.82 | 1.31 | 2.39 | -5.92 | 0.561231 | 0.363518 | 0.794725 | 0.603941 |

|                         |                 |       |       |      |      |       |          |          |          |          |
|-------------------------|-----------------|-------|-------|------|------|-------|----------|----------|----------|----------|
| MmugDNA.39521.1.S1_at   | MmugDNA.39521.1 | 3.6   | 3.62  | 0.1  | 0.14 | -1.01 | 0.781538 | 0.922821 | 0.908863 | 0.956549 |
| MmugDNA.39522.1.S1_s_at | MmugDNA.39522.1 | 11.29 | 11.65 | 0.23 | 0.51 | -1.28 | 0.22682  | 0.066427 | 0.584769 | 0.303385 |
| MmugDNA.39523.1.S1_at   | MmugDNA.39523.1 | 5.73  | 6.04  | 0.1  | 0.05 | -1.24 | 0.006316 | 0.006973 | 0.197861 | 0.112743 |
| MmugDNA.39524.1.S1_at   | MmugDNA.39524.1 | 9.56  | 9.86  | 0.3  | 0.13 | -1.23 | 0.239297 | 0.215176 | 0.592443 | 0.488943 |
| MmugDNA.39526.1.S1_at   | MmugDNA.39526.1 | 6     | 5.26  | 0.54 | 0.44 | 1.66  | 0.19294  | 0.182878 | 0.556235 | 0.459362 |
| MmugDNA.39527.1.S1_at   | MmugDNA.39527.1 | 5.87  | 5.14  | 0.41 | 0.22 | 1.66  | 0.137217 | 0.144046 | 0.504356 | 0.417912 |
| MmugDNA.39528.1.S1_at   | MmugDNA.39528.1 | 4.56  | 4.56  | 0.16 | 0.12 | 1     | 0.916685 | 0.933764 | 0.967373 | 0.9623   |
| MmugDNA.3953.1.S1_at    | MmugDNA.3953.1  | 3.21  | 3.36  | 0.1  | 0.14 | -1.11 | 0.247114 | 0.110134 | 0.598177 | 0.374244 |
| MmugDNA.3953.1.S1_x_at  | MmugDNA.3953.1  | 11.5  | 11.53 | 0.1  | 0.13 | -1.02 | 0.933321 | 0.539927 | 0.974045 | 0.723995 |
| MmugDNA.39531.1.S1_at   | MmugDNA.39531.1 | 4.37  | 3.8   | 0.47 | 0.45 | 1.48  | 0.458218 | 0.616703 | 0.735299 | 0.77288  |
| MmugDNA.39533.1.S1_at   | MmugDNA.39533.1 | 5.09  | 5.35  | 0.04 | 0.08 | -1.2  | 0.007364 | 0.00079  | 0.207414 | 0.045969 |
| MmugDNA.39535.1.S1_at   | MmugDNA.39535.1 | 2.62  | 2.75  | 0.04 | 0.06 | -1.1  | 0.025094 | 0.056074 | 0.297733 | 0.282697 |
| MmugDNA.39537.1.S1_at   | MmugDNA.39537.1 | 8.85  | 8.46  | 0.12 | 1.1  | 1.31  | 0.551546 | 0.738042 | 0.788807 | 0.848158 |
| MmugDNA.39538.1.S1_at   | MmugDNA.39538.1 | 5.25  | 5.52  | 0.19 | 0.13 | -1.21 | 0.522529 | 0.266197 | 0.772116 | 0.53202  |
| MmugDNA.3954.1.S1_s_at  | MmugDNA.3954.1  | 7.22  | 6.85  | 0.31 | 0.47 | 1.29  | 0.789402 | 0.804052 | 0.912587 | 0.887265 |
| MmugDNA.39541.1.S1_at   | MmugDNA.39541.1 | 6.31  | 6.14  | 0.15 | 0.09 | 1.12  | 0.31642  | 0.054886 | 0.647373 | 0.279748 |
| MmugDNA.39543.1.S1_at   | MmugDNA.39543.1 | 5.65  | 5.5   | 0.07 | 0.07 | 1.11  | 0.051615 | 0.045471 | 0.376072 | 0.2575   |
| MmugDNA.39544.1.S1_at   | MmugDNA.39544.1 | 4.96  | 5.26  | 0.28 | 0.6  | -1.23 | 0.211867 | 0.214819 | 0.572347 | 0.4887   |
| MmugDNA.39546.1.S1_at   | MmugDNA.39546.1 | 2.74  | 2.64  | 0.12 | 0.06 | 1.07  | 0.41578  | 0.532427 | 0.709528 | 0.719057 |
| MmugDNA.39549.1.S1_at   | MmugDNA.39549.1 | 6.28  | 5.96  | 0.16 | 0.66 | 1.25  | 0.634474 | 0.584308 | 0.834529 | 0.752392 |
| MmugDNA.3955.1.S1_at    | MmugDNA.3955.1  | 9.86  | 9.75  | 0.22 | 0.35 | 1.08  | 0.410071 | 0.32911  | 0.706179 | 0.578482 |
| MmugDNA.39550.1.S1_at   | MmugDNA.39550.1 | 3.88  | 3.87  | 0.08 | 0.22 | 1.01  | 0.714156 | 0.762606 | 0.874661 | 0.861896 |
| MmugDNA.39551.1.S1_at   | MmugDNA.39551.1 | 4.64  | 4.45  | 0.39 | 0.07 | 1.14  | 0.196689 | 0.200731 | 0.559808 | 0.47524  |
| MmugDNA.39552.1.S1_at   | MmugDNA.39552.1 | 8.73  | 9.37  | 0.2  | 0.49 | -1.55 | 0.081168 | 0.027566 | 0.431848 | 0.20732  |
| MmugDNA.39553.1.S1_at   | MmugDNA.39553.1 | 3.81  | 3.64  | 0.47 | 0.11 | 1.13  | 0.241125 | 0.284471 | 0.593741 | 0.546637 |
| MmugDNA.39556.1.S1_at   | MmugDNA.39556.1 | 5.05  | 5.25  | 0.14 | 0.2  | -1.15 | 0.286832 | 0.091804 | 0.625572 | 0.346977 |
| MmugDNA.39557.1.S1_at   | MmugDNA.39557.1 | 5.52  | 5.66  | 0.23 | 0.12 | -1.1  | 0.221066 | 0.336629 | 0.580013 | 0.583988 |
| MmugDNA.39558.1.S1_s_at | MmugDNA.39558.1 | 11.66 | 11.92 | 0.09 | 0.23 | -1.2  | 0.110239 | 0.041921 | 0.471863 | 0.249343 |
| MmugDNA.39561.1.S1_at   | MmugDNA.39561.1 | 6.28  | 5.8   | 0.67 | 0.31 | 1.39  | 0.24428  | 0.225164 | 0.596068 | 0.497837 |
| MmugDNA.39562.1.S1_at   | MmugDNA.39562.1 | 4.82  | 3.54  | 1.35 | 0.36 | 2.44  | 0.145003 | 0.153823 | 0.511188 | 0.428488 |
| MmugDNA.39563.1.S1_at   | MmugDNA.39563.1 | 3     | 3.08  | 0.05 | 0.22 | -1.06 | 0.179106 | 0.215382 | 0.543414 | 0.489067 |
| MmugDNA.39564.1.S1_at   | MmugDNA.39564.1 | 2.88  | 3.05  | 0.18 | 0.2  | -1.13 | 0.300059 | 0.39526  | 0.635344 | 0.62738  |
| MmugDNA.39565.1.S1_at   | MmugDNA.39565.1 | 6.68  | 6.22  | 1.03 | 0.16 | 1.38  | 0.413708 | 0.583429 | 0.708614 | 0.751772 |
| MmugDNA.39565.1.S1_s_at | MmugDNA.39565.1 | 12.91 | 12.74 | 0.06 | 0.07 | 1.12  | 0.036949 | 0.056596 | 0.340513 | 0.283947 |
| MmugDNA.39566.1.S1_at   | MmugDNA.39566.1 | 8.21  | 9.16  | 0.29 | 0.29 | -1.92 | 0.009512 | 0.003314 | 0.225957 | 0.082825 |
| MmugDNA.39567.1.S1_at   | MmugDNA.39567.1 | 4.07  | 5.18  | 0.77 | 0.79 | -2.16 | 0.155294 | 0.144418 | 0.520164 | 0.418323 |
| MmugDNA.39568.1.S1_at   | MmugDNA.39568.1 | 4.36  | 4.26  | 0.85 | 0.17 | 1.07  | 0.303178 | 0.485004 | 0.637386 | 0.688893 |
| MmugDNA.39569.1.S1_at   | MmugDNA.39569.1 | 8.17  | 8.08  | 0.06 | 0.54 | 1.06  | 0.297872 | 0.392611 | 0.633555 | 0.625813 |
| MmugDNA.3957.1.S1_at    | MmugDNA.3957.1  | 12.52 | 12.29 | 0.1  | 0.12 | 1.18  | 0.028509 | 0.003944 | 0.311509 | 0.089335 |
| MmugDNA.39570.1.S1_at   | MmugDNA.39570.1 | 5.91  | 6.33  | 0.17 | 0.05 | -1.34 | 0.017668 | 0.028633 | 0.267454 | 0.210901 |
| MmugDNA.39572.1.S1_at   | MmugDNA.39572.1 | 5.89  | 5.77  | 0.23 | 0.25 | 1.09  | 0.81032  | 0.526169 | 0.922692 | 0.715411 |

|                         |                 |       |       |      |      |       |          |          |          |          |
|-------------------------|-----------------|-------|-------|------|------|-------|----------|----------|----------|----------|
| MmugDNA.39573.1.S1_s_at | MmugDNA.39573.1 | 9.87  | 8.72  | 0.33 | 1.46 | 2.22  | 0.212636 | 0.173449 | 0.572926 | 0.449938 |
| MmugDNA.39575.1.S1_at   | MmugDNA.39575.1 | 5.28  | 5.51  | 0.06 | 0.23 | -1.17 | 0.083724 | 0.067666 | 0.43598  | 0.306199 |
| MmugDNA.39576.1.S1_at   | MmugDNA.39576.1 | 10.05 | 9.32  | 0.19 | 0.47 | 1.66  | 0.089629 | 0.059853 | 0.44528  | 0.291297 |
| MmugDNA.39577.1.S1_s_at | MmugDNA.39577.1 | 6.75  | 6.61  | 0.21 | 0.09 | 1.1   | 0.493578 | 0.605011 | 0.756276 | 0.764917 |
| MmugDNA.39578.1.S1_at   | MmugDNA.39578.1 | 6.07  | 6.29  | 0.22 | 0.09 | -1.17 | 0.23895  | 0.340153 | 0.592082 | 0.58661  |
| MmugDNA.39579.1.S1_at   | MmugDNA.39579.1 | 4.64  | 5.03  | 0.16 | 0.59 | -1.31 | 0.363027 | 0.181137 | 0.676437 | 0.457582 |
| MmugDNA.3958.1.S1_at    | MmugDNA.3958.1  | 4.78  | 4.67  | 0.33 | 0.04 | 1.08  | 0.517214 | 0.714601 | 0.768653 | 0.834435 |
| MmugDNA.39581.1.S1_at   | MmugDNA.39581.1 | 4.8   | 4.73  | 0.09 | 0.19 | 1.05  | 0.604493 | 0.941777 | 0.817786 | 0.96702  |
| MmugDNA.39583.1.S1_at   | MmugDNA.39583.1 | 3.47  | 3.4   | 0.31 | 0.03 | 1.05  | 0.540985 | 0.684264 | 0.782317 | 0.815842 |
| MmugDNA.39585.1.S1_at   | MmugDNA.39585.1 | 11.91 | 12.3  | 0.12 | 0.07 | -1.31 | 0.007492 | 0.003658 | 0.209047 | 0.086526 |
| MmugDNA.39587.1.S1_at   | MmugDNA.39587.1 | 8.42  | 8.34  | 0.22 | 0.16 | 1.06  | 0.387162 | 0.208035 | 0.691895 | 0.482049 |
| MmugDNA.39589.1.S1_at   | MmugDNA.39589.1 | 5.35  | 5.58  | 0.6  | 0.37 | -1.17 | 0.465838 | 0.53209  | 0.740135 | 0.718995 |
| MmugDNA.3959.1.S1_at    | MmugDNA.3959.1  | 8.85  | 7.44  | 0.51 | 0.4  | 2.65  | 0.029337 | 0.015036 | 0.313768 | 0.155766 |
| MmugDNA.39590.1.S1_at   | MmugDNA.39590.1 | 2.86  | 2.85  | 0.3  | 0.08 | 1.01  | 0.265309 | 0.364079 | 0.610859 | 0.604449 |
| MmugDNA.39591.1.S1_at   | MmugDNA.39591.1 | 3.21  | 3.25  | 0.26 | 0.03 | -1.03 | 0.487257 | 0.665082 | 0.752017 | 0.803733 |
| MmugDNA.39592.1.S1_at   | MmugDNA.39592.1 | 3.87  | 3.53  | 0.2  | 0.83 | 1.26  | 0.802901 | 0.671586 | 0.918811 | 0.807997 |
| MmugDNA.39593.1.S1_x_at | MmugDNA.39593.1 | 8.85  | 8.3   | 0.55 | 0.26 | 1.46  | 0.206024 | 0.201218 | 0.568449 | 0.475667 |
| MmugDNA.39594.1.S1_at   | MmugDNA.39594.1 | 6.96  | 6.63  | 0.13 | 0.2  | 1.26  | 0.030344 | 0.078436 | 0.318157 | 0.325193 |
| MmugDNA.39595.1.S1_at   | MmugDNA.39595.1 | 4.09  | 3.98  | 0.09 | 0.25 | 1.08  | 0.387764 | 0.496025 | 0.692117 | 0.695877 |
| MmugDNA.39596.1.S1_at   | MmugDNA.39596.1 | 4.12  | 4.28  | 0.34 | 0.12 | -1.12 | 0.890931 | 0.07171  | 0.956404 | 0.313925 |
| MmugDNA.39597.1.S1_at   | MmugDNA.39597.1 | 11.52 | 11.13 | 0.06 | 0.17 | 1.32  | 0.010879 | 0.006685 | 0.232373 | 0.110612 |
| MmugDNA.39598.1.S1_at   | MmugDNA.39598.1 | 11.73 | 11.31 | 0.1  | 0.15 | 1.34  | 0.01913  | 0.012067 | 0.273043 | 0.14211  |
| MmugDNA.39599.1.S1_at   | MmugDNA.39599.1 | 3.3   | 3.26  | 0.26 | 0.1  | 1.03  | 0.728927 | 0.851939 | 0.882285 | 0.915848 |
| MmugDNA.3960.1.S1_at    | MmugDNA.3960.1  | 4.54  | 4.44  | 0.11 | 0.17 | 1.07  | 0.880651 | 0.936989 | 0.952019 | 0.964492 |
| MmugDNA.39600.1.S1_at   | MmugDNA.39600.1 | 5.09  | 5.23  | 0.18 | 0.06 | -1.1  | 0.707462 | 0.446455 | 0.871104 | 0.662842 |
| MmugDNA.16141.1.S1_at   | MmugDNA.16141.1 | 9.65  | 9.47  | 0.1  | 0.19 | 1.13  | 0.272922 | 0.148963 | 0.616391 | 0.423294 |
| MmugDNA.16141.1.S1_s_at | MmugDNA.16141.1 | 11.78 | 11.54 | 0.08 | 0.07 | 1.17  | 0.025414 | 0.022135 | 0.299157 | 0.186245 |
| MmugDNA.39602.1.S1_at   | MmugDNA.39602.1 | 5.46  | 5.6   | 0.24 | 0.66 | -1.11 | 0.989752 | 0.996395 | 0.996368 | 0.997887 |
| MmugDNA.39603.1.S1_at   | MmugDNA.39603.1 | 5.49  | 5.1   | 0.16 | 0.07 | 1.31  | 0.015258 | 0.007161 | 0.257698 | 0.113794 |
| MmugDNA.39604.1.S1_at   | MmugDNA.39604.1 | 7.4   | 7.88  | 0.12 | 0.78 | -1.4  | 0.94525  | 0.329449 | 0.979068 | 0.578781 |
| MmugDNA.39605.1.S1_at   | MmugDNA.39605.1 | 11.08 | 11.33 | 0.23 | 0.2  | -1.19 | 0.112502 | 0.077562 | 0.474984 | 0.323421 |
| MmugDNA.39608.1.S1_at   | MmugDNA.39608.1 | 11.53 | 11.34 | 0.08 | 0.38 | 1.15  | 0.964274 | 0.931898 | 0.986194 | 0.9613   |
| MmugDNA.3961.1.S1_at    | MmugDNA.3961.1  | 5.04  | 4.24  | 0.33 | 0.06 | 1.74  | 0.031055 | 0.014619 | 0.32048  | 0.154176 |
| MmugDNA.39610.1.S1_at   | MmugDNA.39610.1 | 5.66  | 5.84  | 0.34 | 0.43 | -1.14 | 0.58739  | 0.060335 | 0.808571 | 0.292254 |
| MmugDNA.39611.1.S1_at   | MmugDNA.39611.1 | 4.25  | 4.61  | 0.39 | 0.3  | -1.28 | 0.558014 | 0.003649 | 0.792892 | 0.086526 |
| MmugDNA.39612.1.S1_at   | MmugDNA.39612.1 | 3.35  | 3.96  | 0.21 | 0.35 | -1.52 | 0.066812 | 0.182211 | 0.406981 | 0.458739 |
| MmugDNA.39613.1.S1_at   | MmugDNA.39613.1 | 5.02  | 5.33  | 0.07 | 0.15 | -1.24 | 0.013804 | 0.196241 | 0.249758 | 0.471236 |
| MmugDNA.39614.1.S1_at   | MmugDNA.39614.1 | 5.15  | 4.9   | 0.65 | 0.16 | 1.18  | 0.59827  | 0.785831 | 0.813939 | 0.875982 |
| MmugDNA.39615.1.S1_at   | MmugDNA.39615.1 | 11.68 | 11.73 | 0.25 | 0.41 | -1.04 | 0.762084 | 0.911971 | 0.899896 | 0.950333 |
| MmugDNA.39617.1.S1_at   | MmugDNA.39617.1 | 6.19  | 6.03  | 0.11 | 0.22 | 1.12  | 0.853716 | 0.410645 | 0.940936 | 0.637463 |
| MmugDNA.39620.1.S1_at   | MmugDNA.39620.1 | 5.24  | 4.94  | 0.77 | 0.26 | 1.23  | 0.277181 | 0.365966 | 0.619342 | 0.605818 |



|                         |                 |       |       |      |      |       |          |          |          |          |
|-------------------------|-----------------|-------|-------|------|------|-------|----------|----------|----------|----------|
| MmugDNA.39622.1.S1_at   | MmugDNA.39622.1 | 8.8   | 8.99  | 1.52 | 0.26 | -1.14 | 0.451551 | 0.261013 | 0.731625 | 0.527371 |
| MmugDNA.39623.1.S1_at   | MmugDNA.39623.1 | 5.11  | 5.41  | 0.08 | 0.11 | -1.24 | 0.010941 | 0.018504 | 0.233129 | 0.171136 |
| MmugDNA.39624.1.S1_at   | MmugDNA.39624.1 | 8.17  | 8.16  | 0.68 | 1.24 | 1     | 0.721742 | 0.887682 | 0.878287 | 0.93601  |
| MmugDNA.39625.1.S1_at   | MmugDNA.39625.1 | 7.52  | 7.54  | 0.16 | 0.27 | -1.01 | 0.763547 | 0.847419 | 0.900359 | 0.913316 |
| MmugDNA.39628.1.S1_at   | MmugDNA.39628.1 | 6.06  | 5.73  | 0.25 | 0.24 | 1.26  | 0.377392 | 0.210882 | 0.685831 | 0.484934 |
| MmugDNA.39629.1.S1_at   | MmugDNA.39629.1 | 3.6   | 3.22  | 0.27 | 0.14 | 1.3   | 0.449759 | 0.4378   | 0.730493 | 0.656968 |
| MmugDNA.39630.1.S1_at   | MmugDNA.39630.1 | 6.66  | 5.77  | 0.49 | 0.18 | 1.84  | 0.034937 | 0.019716 | 0.334102 | 0.176461 |
| MmugDNA.39633.1.S1_at   | MmugDNA.39633.1 | 5.66  | 6.06  | 0.47 | 0.62 | -1.32 | 0.281147 | 0.094972 | 0.622118 | 0.352056 |
| MmugDNA.39633.1.S1_s_at | MmugDNA.39633.1 | 5.38  | 5.95  | 0.17 | 0.64 | -1.48 | 0.207006 | 0.004526 | 0.568965 | 0.093974 |
| MmugDNA.39635.1.S1_at   | MmugDNA.39635.1 | 9.88  | 10.36 | 0.34 | 0.54 | -1.39 | 0.166046 | 0.01402  | 0.529882 | 0.151595 |
| MmugDNA.39636.1.S1_at   | MmugDNA.39636.1 | 10.25 | 10.07 | 0.15 | 0.25 | 1.14  | 0.868993 | 0.722855 | 0.947848 | 0.839464 |
| MmugDNA.39638.1.S1_at   | MmugDNA.39638.1 | 5.46  | 6.26  | 0.31 | 0.48 | -1.74 | 0.188964 | 0.08651  | 0.552006 | 0.33907  |
| MmugDNA.39639.1.S1_at   | MmugDNA.39639.1 | 9.9   | 11    | 0.48 | 0.27 | -2.14 | 0.103391 | 0.054466 | 0.462888 | 0.278959 |
| MmugDNA.3964.1.S1_at    | MmugDNA.3964.1  | 10.49 | 10.45 | 0.05 | 0.22 | 1.03  | 0.926698 | 0.261412 | 0.971811 | 0.527887 |
| MmugDNA.39640.1.S1_at   | MmugDNA.39640.1 | 4.61  | 4.65  | 0.13 | 0.14 | -1.03 | 0.626741 | 0.251554 | 0.829789 | 0.520309 |
| MmugDNA.39641.1.S1_at   | MmugDNA.39641.1 | 3.1   | 3.32  | 0.23 | 0.08 | -1.16 | 0.37405  | 0.505748 | 0.683329 | 0.702218 |
| MmugDNA.39642.1.S1_at   | MmugDNA.39642.1 | 8.32  | 8.37  | 0.99 | 0.72 | -1.04 | 0.488687 | 0.645957 | 0.753254 | 0.792676 |
| MmugDNA.39644.1.S1_at   | MmugDNA.39644.1 | 7.76  | 7.91  | 1.46 | 0.85 | -1.11 | 0.641544 | 0.768977 | 0.838311 | 0.865764 |
| MmugDNA.39646.1.S1_s_at | MmugDNA.39646.1 | 9.95  | 10.28 | 0.37 | 0.11 | -1.25 | 0.26945  | 0.13856  | 0.614156 | 0.411557 |
| MmugDNA.39647.1.S1_at   | MmugDNA.39647.1 | 4.53  | 4.5   | 0.15 | 0.1  | 1.02  | 0.320034 | 0.514863 | 0.649292 | 0.707923 |
| MmugDNA.39648.1.S1_at   | MmugDNA.39648.1 | 3.57  | 3.55  | 0.71 | 0.11 | 1.01  | 0.374467 | 0.303969 | 0.683647 | 0.561344 |
| MmugDNA.39649.1.S1_at   | MmugDNA.39649.1 | 3.2   | 3.23  | 0.31 | 0.16 | -1.01 | 0.391295 | 0.315474 | 0.693992 | 0.568985 |
| MmugDNA.39650.1.S1_at   | MmugDNA.39650.1 | 10.23 | 11.13 | 0.2  | 0.19 | -1.87 | 0.008534 | 0.002356 | 0.219376 | 0.071631 |
| MmugDNA.39651.1.S1_at   | MmugDNA.39651.1 | 3.58  | 3.59  | 0.02 | 0.05 | -1    | 0.905476 | 0.982857 | 0.962318 | 0.990596 |
| MmugDNA.39654.1.S1_at   | MmugDNA.39654.1 | 6.34  | 5.53  | 0.63 | 0.51 | 1.75  | 0.088371 | 0.09759  | 0.443155 | 0.355456 |
| MmugDNA.39655.1.S1_at   | MmugDNA.39655.1 | 8.02  | 7.55  | 0.6  | 0.69 | 1.38  | 0.245542 | 0.292572 | 0.597165 | 0.552628 |
| MmugDNA.39656.1.S1_at   | MmugDNA.39656.1 | 7.37  | 7.1   | 0.06 | 0.16 | 1.21  | 0.049545 | 0.051551 | 0.371515 | 0.272469 |
| MmugDNA.39657.1.S1_at   | MmugDNA.39657.1 | 6.15  | 6.44  | 0.13 | 0.17 | -1.22 | 0.117001 | 0.173297 | 0.481005 | 0.449791 |
| MmugDNA.39658.1.S1_at   | MmugDNA.39658.1 | 5.48  | 5.35  | 0.08 | 0.28 | 1.09  | 0.515149 | 0.544653 | 0.767288 | 0.727006 |
| MmugDNA.39659.1.S1_at   | MmugDNA.39659.1 | 3.71  | 3.81  | 0.09 | 0.16 | -1.07 | 0.38736  | 0.32737  | 0.691934 | 0.577284 |
| MmugDNA.39660.1.S1_at   | MmugDNA.39660.1 | 3.27  | 3.38  | 0.22 | 0.27 | -1.08 | 0.912143 | 0.980103 | 0.96522  | 0.989236 |
| MmugDNA.39661.1.S1_at   | MmugDNA.39661.1 | 10.63 | 9.72  | 0.16 | 0.29 | 1.88  | 0.007547 | 0.002408 | 0.209329 | 0.07278  |
| MmugDNA.39662.1.S1_at   | MmugDNA.39662.1 | 11.8  | 11.13 | 0.14 | 0.1  | 1.59  | 0.003009 | 0.000429 | 0.171022 | 0.038359 |
| MmugDNA.39665.1.S1_at   | MmugDNA.39665.1 | 5.23  | 4.93  | 0.37 | 0.38 | 1.22  | 0.426933 | 0.299109 | 0.716003 | 0.557663 |
| MmugDNA.39666.1.S1_at   | MmugDNA.39666.1 | 11.02 | 11.01 | 0.18 | 0.16 | 1.01  | 0.570077 | 0.625053 | 0.799365 | 0.778973 |
| MmugDNA.39667.1.S1_at   | MmugDNA.39667.1 | 5.73  | 5.96  | 0.27 | 0.23 | -1.17 | 0.709694 | 0.880133 | 0.872633 | 0.931533 |
| MmugDNA.39668.1.S1_at   | MmugDNA.39668.1 | 5.49  | 5.64  | 0.03 | 0.19 | -1.12 | 0.609668 | 0.39337  | 0.820621 | 0.626258 |
| MmugDNA.3967.1.S1_at    | MmugDNA.3967.1  | 12.95 | 13.12 | 0.05 | 0.15 | -1.12 | 0.138185 | 0.088102 | 0.505618 | 0.341641 |
| MmugDNA.3967.1.S1_s_at  | MmugDNA.3967.1  | 11.74 | 12.3  | 0.13 | 0.21 | -1.48 | 0.016797 | 0.007528 | 0.26556  | 0.1163   |
| MmugDNA.39670.1.S1_at   | MmugDNA.39670.1 | 10.23 | 10.57 | 0.15 | 0.28 | -1.26 | 0.089483 | 0.10226  | 0.445142 | 0.36236  |
| MmugDNA.39671.1.S1_at   | MmugDNA.39671.1 | 10.6  | 10.43 | 0.19 | 0.56 | 1.12  | 0.704149 | 0.898234 | 0.869454 | 0.942072 |

|                         |                 |      |       |      |      |       |          |          |          |          |
|-------------------------|-----------------|------|-------|------|------|-------|----------|----------|----------|----------|
| MmugDNA.39672.1.S1_at   | MmugDNA.39672.1 | 11.3 | 11.59 | 0.05 | 0.06 | -1.22 | 0.007086 | 0.002972 | 0.20404  | 0.079958 |
| MmugDNA.39673.1.S1_at   | MmugDNA.39673.1 | 7.58 | 7.2   | 0.41 | 0.53 | 1.3   | 0.425335 | 0.592468 | 0.715047 | 0.757832 |
| MmugDNA.39674.1.S1_at   | MmugDNA.39674.1 | 5.35 | 6.41  | 0.4  | 0.36 | -2.09 | 0.047225 | 0.140478 | 0.365679 | 0.413679 |
| MmugDNA.39675.1.S1_at   | MmugDNA.39675.1 | 5.42 | 5.33  | 0.04 | 0.05 | 1.06  | 0.045448 | 0.209282 | 0.361012 | 0.48303  |
| MmugDNA.39676.1.S1_at   | MmugDNA.39676.1 | 4.23 | 4.69  | 0.14 | 0.07 | -1.37 | 0.019028 | 0.012432 | 0.272726 | 0.144098 |
| MmugDNA.39677.1.S1_at   | MmugDNA.39677.1 | 3.73 | 3.66  | 0.22 | 0.3  | 1.05  | 0.530929 | 0.619952 | 0.776935 | 0.775141 |
| MmugDNA.39680.1.S1_at   | MmugDNA.39680.1 | 4.89 | 5.12  | 0.18 | 0.07 | -1.17 | 0.328228 | 0.017783 | 0.654312 | 0.168549 |
| MmugDNA.39681.1.S1_at   | MmugDNA.39681.1 | 6.44 | 6.04  | 0.65 | 0.25 | 1.32  | 0.206107 | 0.260703 | 0.568474 | 0.527199 |
| MmugDNA.39682.1.S1_at   | MmugDNA.39682.1 | 3.11 | 3.22  | 0.11 | 0.03 | -1.08 | 0.087128 | 0.185574 | 0.441151 | 0.461566 |
| MmugDNA.39683.1.S1_at   | MmugDNA.39683.1 | 3.3  | 3.29  | 0.04 | 0.11 | 1.01  | 0.919765 | 0.577171 | 0.968755 | 0.747682 |
| MmugDNA.39684.1.S1_at   | MmugDNA.39684.1 | 5.96 | 6.1   | 0.2  | 0.06 | -1.1  | 0.896218 | 0.456842 | 0.958615 | 0.670521 |
| MmugDNA.39685.1.S1_at   | MmugDNA.39685.1 | 5.84 | 6.26  | 0.56 | 0.71 | -1.34 | 0.298179 | 0.191262 | 0.633823 | 0.466553 |
| MmugDNA.39686.1.S1_at   | MmugDNA.39686.1 | 8.86 | 9.11  | 0.35 | 0.21 | -1.19 | 0.231956 | 0.267494 | 0.587671 | 0.533223 |
| MmugDNA.39688.1.S1_at   | MmugDNA.39688.1 | 7.07 | 6.96  | 0.05 | 0.17 | 1.08  | 0.431593 | 0.059898 | 0.718606 | 0.291387 |
| MmugDNA.39689.1.S1_at   | MmugDNA.39689.1 | 3.9  | 4.25  | 0.11 | 0.25 | -1.27 | 0.173977 | 0.269518 | 0.537538 | 0.534806 |
| MmugDNA.3969.1.S1_at    | MmugDNA.3969.1  | 6.51 | 6.62  | 0.1  | 0.41 | -1.08 | 0.193883 | 0.196536 | 0.55753  | 0.471582 |
| MmugDNA.39690.1.S1_at   | MmugDNA.39690.1 | 3.73 | 3.69  | 0.3  | 0.07 | 1.03  | 0.304568 | 0.34263  | 0.638617 | 0.588644 |
| MmugDNA.39691.1.S1_at   | MmugDNA.39691.1 | 9.59 | 9.57  | 0.13 | 0.25 | 1.02  | 0.302389 | 0.424982 | 0.63692  | 0.647458 |
| MmugDNA.39691.1.S1_s_at | MmugDNA.39691.1 | 8.97 | 9.06  | 0.2  | 0.26 | -1.06 | 0.504262 | 0.662598 | 0.761197 | 0.802443 |
| MmugDNA.39692.1.S1_at   | MmugDNA.39692.1 | 4.15 | 4.15  | 0.92 | 0.69 | -1    | 0.681644 | 0.722515 | 0.857635 | 0.839261 |
| MmugDNA.39693.1.S1_at   | MmugDNA.39693.1 | 3.13 | 3.34  | 0.14 | 0.23 | -1.15 | 0.224765 | 0.291319 | 0.582807 | 0.551803 |
| MmugDNA.39694.1.S1_at   | MmugDNA.39694.1 | 7.76 | 8.07  | 0.09 | 0.46 | -1.24 | 0.129495 | 0.157656 | 0.495744 | 0.433137 |
| MmugDNA.39695.1.S1_at   | MmugDNA.39695.1 | 9.17 | 9.33  | 0.09 | 0.08 | -1.11 | 0.121726 | 0.041779 | 0.486508 | 0.248981 |
| MmugDNA.39695.1.S1_s_at | MmugDNA.39695.1 | 7.64 | 7.9   | 0.13 | 0.12 | -1.2  | 0.059092 | 0.061066 | 0.390977 | 0.293952 |
| MmugDNA.39696.1.S1_at   | MmugDNA.39696.1 | 8.6  | 8.12  | 0.6  | 0.51 | 1.39  | 0.783632 | 0.675462 | 0.909657 | 0.810337 |
| MmugDNA.39697.1.S1_at   | MmugDNA.39697.1 | 7.1  | 7.26  | 0.21 | 0.45 | -1.12 | 0.410975 | 0.404713 | 0.706795 | 0.633217 |
| MmugDNA.39698.1.S1_at   | MmugDNA.39698.1 | 5.25 | 5.32  | 0.05 | 0.16 | -1.05 | 0.152031 | 0.224053 | 0.516757 | 0.497048 |
| MmugDNA.397.1.S1_at     | MmugDNA.397.1   | 5.07 | 5.03  | 0.3  | 0.15 | 1.03  | 0.195384 | 0.680022 | 0.558901 | 0.81315  |
| MmugDNA.3970.1.S1_at    | MmugDNA.3970.1  | 9.07 | 9.07  | 0.25 | 0.3  | 1     | 0.549783 | 0.736677 | 0.787481 | 0.847687 |
| MmugDNA.39700.1.S1_at   | MmugDNA.39700.1 | 5.32 | 5.38  | 0.03 | 0.1  | -1.04 | 0.299965 | 0.05509  | 0.635282 | 0.280248 |
| MmugDNA.39702.1.S1_at   | MmugDNA.39702.1 | 3.83 | 3.72  | 0.66 | 0.14 | 1.08  | 0.323436 | 0.283776 | 0.651635 | 0.546196 |
| MmugDNA.39703.1.S1_at   | MmugDNA.39703.1 | 10.9 | 10.42 | 0.15 | 0.03 | 1.39  | 0.005664 | 0.000309 | 0.191943 | 0.035119 |
| MmugDNA.39704.1.S1_at   | MmugDNA.39704.1 | 5.64 | 5.89  | 0.2  | 0.25 | -1.19 | 0.252208 | 0.23556  | 0.601282 | 0.506633 |
| MmugDNA.39705.1.S1_at   | MmugDNA.39705.1 | 4.81 | 4.62  | 0.28 | 0.42 | 1.15  | 0.503227 | 0.210912 | 0.760699 | 0.484934 |
| MmugDNA.39706.1.S1_at   | MmugDNA.39706.1 | 4.81 | 4.97  | 0.56 | 0.73 | -1.12 | 0.973312 | 0.621189 | 0.989597 | 0.775813 |
| MmugDNA.39707.1.S1_at   | MmugDNA.39707.1 | 7.86 | 8.4   | 0.09 | 0.89 | -1.45 | 0.679619 | 0.491067 | 0.856669 | 0.692753 |
| MmugDNA.39710.1.S1_at   | MmugDNA.39710.1 | 7.95 | 7.66  | 0.04 | 0.58 | 1.22  | 0.351019 | 0.415485 | 0.668924 | 0.64091  |
| MmugDNA.39711.1.S1_at   | MmugDNA.39711.1 | 5.17 | 5.27  | 0.16 | 0.15 | -1.07 | 0.794164 | 0.447491 | 0.914561 | 0.663561 |
| MmugDNA.39712.1.S1_at   | MmugDNA.39712.1 | 4.73 | 4.6   | 0.05 | 0.26 | 1.1   | 0.577239 | 0.767483 | 0.803447 | 0.865004 |
| MmugDNA.39715.1.S1_at   | MmugDNA.39715.1 | 7.85 | 7.84  | 0.15 | 0.13 | 1.01  | 0.720994 | 0.113425 | 0.87787  | 0.379509 |
| MmugDNA.39716.1.S1_at   | MmugDNA.39716.1 | 6.95 | 7.23  | 0.28 | 0.41 | -1.21 | 0.409569 | 0.050646 | 0.70588  | 0.270317 |

|                         |                 |       |       |      |      |       |          |          |          |          |
|-------------------------|-----------------|-------|-------|------|------|-------|----------|----------|----------|----------|
| MmugDNA.39717.1.S1_at   | MmugDNA.39717.1 | 4.91  | 4.36  | 0.78 | 0.32 | 1.46  | 0.566396 | 0.743823 | 0.797591 | 0.851535 |
| MmugDNA.39718.1.S1_at   | MmugDNA.39718.1 | 10.91 | 10.28 | 0.28 | 0.42 | 1.55  | 0.217548 | 0.185697 | 0.577141 | 0.46163  |
| MmugDNA.39720.1.S1_at   | MmugDNA.39720.1 | 4.01  | 4.05  | 0.19 | 0.12 | -1.03 | 0.685099 | 0.447318 | 0.858887 | 0.663434 |
| MmugDNA.39721.1.S1_at   | MmugDNA.39721.1 | 11.33 | 11.41 | 0.07 | 0.38 | -1.06 | 0.468542 | 0.186769 | 0.741077 | 0.46257  |
| MmugDNA.39722.1.S1_at   | MmugDNA.39722.1 | 9.59  | 9.58  | 0.16 | 1.18 | 1     | 0.346642 | 0.505903 | 0.666013 | 0.702252 |
| MmugDNA.39723.1.S1_at   | MmugDNA.39723.1 | 2.96  | 2.81  | 0.1  | 0.12 | 1.11  | 0.138185 | 0.362024 | 0.505618 | 0.602727 |
| MmugDNA.39724.1.S1_at   | MmugDNA.39724.1 | 6.19  | 6.12  | 0.18 | 0.13 | 1.05  | 0.400344 | 0.187582 | 0.699898 | 0.463628 |
| MmugDNA.39725.1.S1_at   | MmugDNA.39725.1 | 11.63 | 11.03 | 0.06 | 0.3  | 1.51  | 0.074368 | 0.059672 | 0.419963 | 0.290919 |
| MmugDNA.39726.1.S1_at   | MmugDNA.39726.1 | 10.1  | 9.36  | 0.3  | 0.1  | 1.67  | 0.039536 | 0.030405 | 0.347318 | 0.216319 |
| MmugDNA.39727.1.S1_at   | MmugDNA.39727.1 | 6.21  | 6.04  | 0.13 | 0.22 | 1.12  | 0.507611 | 0.002232 | 0.762983 | 0.069565 |
| MmugDNA.39728.1.S1_at   | MmugDNA.39728.1 | 4.2   | 4.23  | 0.26 | 0.35 | -1.02 | 0.824996 | 0.951593 | 0.929089 | 0.972522 |
| MmugDNA.39729.1.S1_at   | MmugDNA.39729.1 | 4.33  | 3.96  | 0.38 | 0.27 | 1.29  | 0.273692 | 0.153341 | 0.617179 | 0.428139 |
| MmugDNA.39730.1.S1_at   | MmugDNA.39730.1 | 6.79  | 6.8   | 0.2  | 0.09 | -1.01 | 0.48061  | 0.322328 | 0.74851  | 0.57392  |
| MmugDNA.39731.1.S1_at   | MmugDNA.39731.1 | 6.22  | 6.24  | 0.5  | 0.15 | -1.01 | 0.550569 | 0.445258 | 0.787958 | 0.662338 |
| MmugDNA.39732.1.S1_at   | MmugDNA.39732.1 | 4.97  | 4.7   | 0.28 | 0.03 | 1.2   | 0.633212 | 0.632774 | 0.833556 | 0.783788 |
| MmugDNA.39733.1.S1_at   | MmugDNA.39733.1 | 10.29 | 10.1  | 0.26 | 0.92 | 1.14  | 0.358584 | 0.478291 | 0.673315 | 0.684289 |
| MmugDNA.39734.1.S1_at   | MmugDNA.39734.1 | 3.58  | 3.51  | 0.07 | 0.22 | 1.05  | 0.685041 | 0.909748 | 0.858887 | 0.949083 |
| MmugDNA.39735.1.S1_at   | MmugDNA.39735.1 | 6.81  | 6.96  | 0.23 | 0.19 | -1.11 | 0.76101  | 0.299559 | 0.899213 | 0.557945 |
| MmugDNA.39736.1.S1_at   | MmugDNA.39736.1 | 4.18  | 4.27  | 0.24 | 0.12 | -1.06 | 0.763273 | 0.883551 | 0.900197 | 0.933618 |
| MmugDNA.39737.1.S1_at   | MmugDNA.39737.1 | 5.69  | 5.98  | 0.24 | 0.15 | -1.22 | 0.213713 | 0.262553 | 0.573938 | 0.528878 |
| MmugDNA.39738.1.S1_at   | MmugDNA.39738.1 | 6.76  | 8.75  | 0.5  | 1.95 | -3.96 | 0.228343 | 0.1776   | 0.585843 | 0.453962 |
| MmugDNA.39739.1.S1_at   | MmugDNA.39739.1 | 6.01  | 5.12  | 0.66 | 0.49 | 1.86  | 0.240731 | 0.306248 | 0.593541 | 0.562907 |
| MmugDNA.3974.1.S1_at    | MmugDNA.3974.1  | 11.13 | 10.88 | 0.2  | 0.14 | 1.18  | 0.53478  | 0.73434  | 0.778804 | 0.846084 |
| MmugDNA.39740.1.S1_at   | MmugDNA.39740.1 | 7.44  | 7.22  | 0.26 | 0.2  | 1.17  | 0.666509 | 0.730412 | 0.850466 | 0.844017 |
| MmugDNA.39741.1.S1_at   | MmugDNA.39741.1 | 7.08  | 7.03  | 0.24 | 0.21 | 1.04  | 0.516744 | 0.465619 | 0.768274 | 0.675863 |
| MmugDNA.39742.1.S1_at   | MmugDNA.39742.1 | 3.22  | 3.25  | 0.28 | 0.05 | -1.02 | 0.461522 | 0.487365 | 0.737671 | 0.690461 |
| MmugDNA.39743.1.S1_at   | MmugDNA.39743.1 | 10.89 | 10.58 | 0.11 | 0.34 | 1.24  | 0.25908  | 0.302277 | 0.606191 | 0.560092 |
| MmugDNA.39746.1.S1_at   | MmugDNA.39746.1 | 5.04  | 5.03  | 0.58 | 0.28 | 1.01  | 0.637299 | 0.853361 | 0.836    | 0.916579 |
| MmugDNA.39747.1.S1_at   | MmugDNA.39747.1 | 3.53  | 3.59  | 0.1  | 0.44 | -1.04 | 0.62767  | 0.662489 | 0.83025  | 0.802356 |
| MmugDNA.39748.1.S1_at   | MmugDNA.39748.1 | 3.03  | 2.94  | 0.06 | 0.3  | 1.07  | 0.556317 | 0.76792  | 0.79173  | 0.865256 |
| MmugDNA.39749.1.S1_at   | MmugDNA.39749.1 | 11.26 | 11.73 | 0.18 | 0.39 | -1.39 | 0.177166 | 0.132478 | 0.541193 | 0.404534 |
| MmugDNA.3975.1.S1_at    | MmugDNA.3975.1  | 5.32  | 5.6   | 0.18 | 0.06 | -1.22 | 0.060753 | 0.150017 | 0.394325 | 0.424621 |
| MmugDNA.39750.1.S1_at   | MmugDNA.39750.1 | 3.52  | 3.53  | 0.22 | 0.16 | -1    | 0.962614 | 0.322477 | 0.985589 | 0.573991 |
| MmugDNA.39751.1.S1_at   | MmugDNA.39751.1 | 8.57  | 7.98  | 0.34 | 0.17 | 1.51  | 0.072959 | 0.090819 | 0.418323 | 0.345355 |
| MmugDNA.39752.1.S1_at   | MmugDNA.39752.1 | 5.56  | 5.5   | 0.35 | 0.14 | 1.04  | 0.842731 | 0.685494 | 0.936614 | 0.816536 |
| MmugDNA.39753.1.S1_s_at | MmugDNA.39753.1 | 12.98 | 12.65 | 0.04 | 0.17 | 1.25  | 0.029589 | 0.035582 | 0.314766 | 0.232862 |
| MmugDNA.39754.1.S1_s_at | MmugDNA.39754.1 | 3.13  | 2.82  | 0.4  | 0.2  | 1.24  | 0.135557 | 0.098289 | 0.502421 | 0.356337 |
| MmugDNA.39755.1.S1_at   | MmugDNA.39755.1 | 5.51  | 5.54  | 0.27 | 0.08 | -1.02 | 0.543418 | 0.746142 | 0.783799 | 0.852688 |
| MmugDNA.39756.1.S1_at   | MmugDNA.39756.1 | 3.86  | 3.5   | 0.69 | 0.37 | 1.28  | 0.664912 | 0.706024 | 0.849746 | 0.829633 |
| MmugDNA.39757.1.S1_at   | MmugDNA.39757.1 | 9.15  | 9.21  | 0.63 | 0.38 | -1.04 | 0.812523 | 0.830121 | 0.923683 | 0.902487 |
| MmugDNA.39758.1.S1_at   | MmugDNA.39758.1 | 4.31  | 3.81  | 0.1  | 0.26 | 1.42  | 0.030518 | 0.010298 | 0.318776 | 0.132854 |

|                       |                 |       |       |      |      |       |          |          |          |          |
|-----------------------|-----------------|-------|-------|------|------|-------|----------|----------|----------|----------|
| MmugDNA.39759.1.S1_at | MmugDNA.39759.1 | 3.96  | 4.14  | 0.03 | 0.15 | -1.14 | 0.106026 | 0.084396 | 0.466831 | 0.335713 |
| MmugDNA.3976.1.S1_at  | MmugDNA.3976.1  | 8.29  | 8.61  | 0.4  | 0.23 | -1.25 | 0.743101 | 0.026518 | 0.89009  | 0.203899 |
| MmugDNA.39760.1.S1_at | MmugDNA.39760.1 | 5.98  | 5.97  | 0.1  | 0.33 | 1.01  | 0.32295  | 0.17691  | 0.651259 | 0.453317 |
| MmugDNA.39761.1.S1_at | MmugDNA.39761.1 | 6.32  | 6.56  | 0.22 | 0.1  | -1.17 | 0.486433 | 0.347212 | 0.751602 | 0.591841 |
| MmugDNA.39762.1.S1_at | MmugDNA.39762.1 | 7.87  | 9.7   | 0.22 | 1.12 | -3.55 | 0.05454  | 0.024061 | 0.381851 | 0.194434 |
| MmugDNA.39764.1.S1_at | MmugDNA.39764.1 | 3.63  | 3.66  | 0.27 | 0.01 | -1.02 | 0.744917 | 0.753647 | 0.89091  | 0.856589 |
| MmugDNA.39765.1.S1_at | MmugDNA.39765.1 | 8.04  | 7.2   | 0.63 | 0.62 | 1.78  | 0.20777  | 0.274044 | 0.569822 | 0.538527 |
| MmugDNA.39766.1.S1_at | MmugDNA.39766.1 | 6.35  | 6.81  | 1.02 | 1.27 | -1.37 | 0.548627 | 0.730932 | 0.786804 | 0.844163 |
| MmugDNA.39767.1.S1_at | MmugDNA.39767.1 | 4.17  | 4.61  | 0.12 | 0.08 | -1.35 | 0.01972  | 0.025899 | 0.275549 | 0.201714 |
| MmugDNA.39768.1.S1_at | MmugDNA.39768.1 | 10.73 | 10.94 | 0.17 | 0.18 | -1.15 | 0.994613 | 0.322547 | 0.998128 | 0.573991 |
| MmugDNA.39769.1.S1_at | MmugDNA.39769.1 | 5.94  | 5.94  | 0.13 | 0.15 | 1     | 0.500858 | 0.725515 | 0.759735 | 0.841043 |
| MmugDNA.3977.1.S1_at  | MmugDNA.3977.1  | 5.48  | 5.48  | 0.32 | 0.47 | -1    | 0.2485   | 0.122282 | 0.599309 | 0.391973 |
| MmugDNA.39770.1.S1_at | MmugDNA.39770.1 | 9.14  | 9.79  | 0.11 | 0.18 | -1.57 | 0.004656 | 0.001805 | 0.1844   | 0.063714 |
| MmugDNA.39771.1.S1_at | MmugDNA.39771.1 | 7.29  | 7.14  | 1.34 | 0.49 | 1.11  | 0.373945 | 0.530692 | 0.683278 | 0.718104 |
| MmugDNA.39773.1.S1_at | MmugDNA.39773.1 | 3.76  | 3.8   | 0.09 | 0.28 | -1.03 | 0.461679 | 0.633314 | 0.737811 | 0.784071 |
| MmugDNA.39775.1.S1_at | MmugDNA.39775.1 | 6.62  | 7.09  | 0.05 | 0.21 | -1.39 | 0.049268 | 0.039487 | 0.371075 | 0.243642 |
| MmugDNA.39777.1.S1_at | MmugDNA.39777.1 | 9.37  | 9.35  | 0.61 | 0.39 | 1.02  | 0.462611 | 0.118653 | 0.738289 | 0.386673 |
| MmugDNA.39778.1.S1_at | MmugDNA.39778.1 | 5.47  | 4.35  | 0.39 | 0.88 | 2.18  | 0.104188 | 0.059839 | 0.464201 | 0.291286 |
| MmugDNA.3978.1.S1_at  | MmugDNA.3978.1  | 4.42  | 4.63  | 0.09 | 0.27 | -1.15 | 0.271415 | 0.080059 | 0.61568  | 0.327429 |
| MmugDNA.39780.1.S1_at | MmugDNA.39780.1 | 4.79  | 5.02  | 0.19 | 0.13 | -1.18 | 0.301418 | 0.173295 | 0.636366 | 0.449791 |
| MmugDNA.39781.1.S1_at | MmugDNA.39781.1 | 6.93  | 5.34  | 0.66 | 0.59 | 3     | 0.158021 | 0.238473 | 0.522944 | 0.509084 |
| MmugDNA.39783.1.S1_at | MmugDNA.39783.1 | 3.18  | 3.1   | 0.11 | 0.04 | 1.06  | 0.227345 | 0.424584 | 0.585103 | 0.647146 |
| MmugDNA.39784.1.S1_at | MmugDNA.39784.1 | 11.4  | 11.25 | 0.03 | 0.27 | 1.11  | 0.642117 | 0.836415 | 0.838696 | 0.906441 |
| MmugDNA.39785.1.S1_at | MmugDNA.39785.1 | 4.8   | 4.79  | 0.07 | 0.28 | 1.01  | 0.352986 | 0.434687 | 0.669964 | 0.654756 |
| MmugDNA.39786.1.S1_at | MmugDNA.39786.1 | 2.84  | 2.94  | 0.06 | 0.07 | -1.07 | 0.091011 | 0.087694 | 0.446856 | 0.340941 |
| MmugDNA.39787.1.S1_at | MmugDNA.39787.1 | 6.76  | 7.02  | 0.16 | 0.35 | -1.2  | 0.343579 | 0.47269  | 0.663694 | 0.68007  |
| MmugDNA.39788.1.S1_at | MmugDNA.39788.1 | 8.46  | 9.33  | 0.17 | 0.5  | -1.82 | 0.090948 | 0.085645 | 0.446712 | 0.337706 |
| MmugDNA.3979.1.S1_at  | MmugDNA.3979.1  | 4.41  | 5.1   | 0.2  | 0.41 | -1.61 | 0.186248 | 0.239113 | 0.549871 | 0.509827 |
| MmugDNA.39790.1.S1_at | MmugDNA.39790.1 | 5.29  | 5.54  | 0.26 | 0.08 | -1.19 | 0.126047 | 0.144501 | 0.492096 | 0.418394 |
| MmugDNA.39792.1.S1_at | MmugDNA.39792.1 | 4.01  | 3.49  | 1.44 | 0.13 | 1.43  | 0.371866 | 0.513734 | 0.682547 | 0.707217 |
| MmugDNA.39793.1.S1_at | MmugDNA.39793.1 | 4.87  | 5.1   | 0.29 | 0.23 | -1.18 | 0.41258  | 0.54307  | 0.707935 | 0.72592  |
| MmugDNA.39795.1.S1_at | MmugDNA.39795.1 | 5.78  | 5.79  | 0.12 | 0.11 | -1    | 0.988303 | 0.063808 | 0.995887 | 0.29906  |
| MmugDNA.39797.1.S1_at | MmugDNA.39797.1 | 4.47  | 3.91  | 1.4  | 1.08 | 1.47  | 0.512105 | 0.506334 | 0.765453 | 0.702371 |
| MmugDNA.39798.1.S1_at | MmugDNA.39798.1 | 5.38  | 6.44  | 0.4  | 0.74 | -2.08 | 0.055248 | 0.044964 | 0.383689 | 0.256489 |
| MmugDNA.39799.1.S1_at | MmugDNA.39799.1 | 4     | 4.07  | 0.22 | 0.03 | -1.05 | 0.567696 | 0.627516 | 0.798278 | 0.780488 |
| MmugDNA.398.1.S1_at   | MmugDNA.398.1   | 3.83  | 3.87  | 0.07 | 0.23 | -1.03 | 0.427466 | 0.612488 | 0.716255 | 0.770071 |
| MmugDNA.3980.1.S1_at  | MmugDNA.3980.1  | 2.98  | 2.98  | 0.02 | 0.04 | 1     | 0.68365  | 0.109852 | 0.85844  | 0.373823 |
| MmugDNA.39800.1.S1_at | MmugDNA.39800.1 | 9.89  | 10.84 | 0.17 | 0.38 | -1.93 | 0.016058 | 0.00777  | 0.262409 | 0.117732 |
| MmugDNA.39801.1.S1_at | MmugDNA.39801.1 | 10.85 | 10.72 | 0.22 | 0.07 | 1.09  | 0.331765 | 0.361398 | 0.656468 | 0.602196 |
| MmugDNA.39802.1.S1_at | MmugDNA.39802.1 | 3.45  | 3.48  | 0.22 | 0.29 | -1.02 | 0.794245 | 0.727976 | 0.914561 | 0.842711 |
| MmugDNA.39803.1.S1_at | MmugDNA.39803.1 | 7.09  | 6.93  | 0.24 | 0.29 | 1.12  | 0.615839 | 0.680735 | 0.823815 | 0.813572 |

|                         |                 |       |       |      |      |       |          |          |          |          |
|-------------------------|-----------------|-------|-------|------|------|-------|----------|----------|----------|----------|
| MmugDNA.39804.1.S1_at   | MmugDNA.39804.1 | 10.59 | 10.33 | 0.13 | 0.2  | 1.2   | 0.0674   | 0.009633 | 0.407664 | 0.129267 |
| MmugDNA.39805.1.S1_at   | MmugDNA.39805.1 | 8.87  | 7.68  | 0.31 | 0.32 | 2.28  | 0.003944 | 0.000466 | 0.181    | 0.038572 |
| MmugDNA.39806.1.S1_at   | MmugDNA.39806.1 | 4.05  | 4.03  | 0.28 | 0.05 | 1.01  | 0.652428 | 0.825643 | 0.843704 | 0.899784 |
| MmugDNA.39808.1.S1_at   | MmugDNA.39808.1 | 8.86  | 8.2   | 0.24 | 0.73 | 1.58  | 0.380453 | 0.512301 | 0.687282 | 0.706182 |
| MmugDNA.39809.1.S1_at   | MmugDNA.39809.1 | 4.02  | 3.65  | 0.25 | 0.21 | 1.3   | 0.188104 | 0.016305 | 0.551073 | 0.161818 |
| MmugDNA.3981.1.S1_at    | MmugDNA.3981.1  | 5.65  | 5.57  | 0.03 | 0.11 | 1.06  | 0.586084 | 0.032492 | 0.807867 | 0.223254 |
| MmugDNA.39810.1.S1_s_at | MmugDNA.39810.1 | 8.39  | 8.28  | 0.2  | 0.27 | 1.08  | 0.124121 | 0.006085 | 0.489857 | 0.106308 |
| MmugDNA.39812.1.S1_at   | MmugDNA.39812.1 | 8.05  | 7.62  | 0.41 | 0.71 | 1.35  | 0.194325 | 0.132821 | 0.557805 | 0.404544 |
| MmugDNA.39814.1.S1_at   | MmugDNA.39814.1 | 4.3   | 4.43  | 0.25 | 0.15 | -1.1  | 0.617402 | 0.543508 | 0.824674 | 0.726175 |
| MmugDNA.39815.1.S1_at   | MmugDNA.39815.1 | 11.03 | 11.24 | 0.01 | 0.23 | -1.16 | 0.558986 | 0.196389 | 0.793628 | 0.471418 |
| MmugDNA.39816.1.S1_at   | MmugDNA.39816.1 | 7.57  | 7.52  | 0.27 | 0.49 | 1.04  | 0.854971 | 0.375455 | 0.941387 | 0.613412 |
| MmugDNA.39817.1.S1_at   | MmugDNA.39817.1 | 6.55  | 6.56  | 0.09 | 0.2  | -1.01 | 0.396687 | 0.662643 | 0.697146 | 0.802461 |
| MmugDNA.39818.1.S1_at   | MmugDNA.39818.1 | 6.42  | 6.63  | 0.53 | 0.28 | -1.16 | 0.354477 | 0.519372 | 0.670587 | 0.710998 |
| MmugDNA.39819.1.S1_at   | MmugDNA.39819.1 | 3.8   | 3.66  | 0.12 | 0.12 | 1.1   | 0.597047 | 0.134204 | 0.813377 | 0.406453 |
| MmugDNA.3982.1.S1_at    | MmugDNA.3982.1  | 6     | 5.38  | 1.2  | 0.98 | 1.54  | 0.335695 | 0.387324 | 0.659165 | 0.622027 |
| MmugDNA.39820.1.S1_at   | MmugDNA.39820.1 | 6.19  | 6.25  | 0.08 | 0.05 | -1.04 | 0.258129 | 0.361715 | 0.605455 | 0.602422 |
| MmugDNA.39824.1.S1_at   | MmugDNA.39824.1 | 4.8   | 4.9   | 0.11 | 0.03 | -1.08 | 0.315717 | 0.219242 | 0.646695 | 0.493013 |
| MmugDNA.39825.1.S1_at   | MmugDNA.39825.1 | 10.16 | 10.05 | 0.37 | 0.46 | 1.08  | 0.67291  | 0.512284 | 0.853295 | 0.706182 |
| MmugDNA.22347.1.S1_at   | MmugDNA.22347.1 | 13.12 | 12.92 | 0.13 | 0.05 | 1.15  | 0.086004 | 0.0994   | 0.440041 | 0.357686 |
| MmugDNA.22347.1.S1_s_at | MmugDNA.22347.1 | 12.83 | 12.66 | 0.11 | 0.14 | 1.12  | 0.43905  | 0.281266 | 0.72347  | 0.544385 |
| MmugDNA.39827.1.S1_at   | MmugDNA.39827.1 | 5.25  | 5.15  | 0.27 | 0.09 | 1.07  | 0.536351 | 0.720575 | 0.77949  | 0.838346 |
| MmugDNA.39829.1.S1_at   | MmugDNA.39829.1 | 4.16  | 4.16  | 0.29 | 0.6  | 1     | 0.723897 | 0.387899 | 0.879238 | 0.622509 |
| MmugDNA.39830.1.S1_at   | MmugDNA.39830.1 | 5.76  | 5.39  | 0.69 | 0.18 | 1.29  | 0.409138 | 0.503662 | 0.705771 | 0.701018 |
| MmugDNA.39831.1.S1_at   | MmugDNA.39831.1 | 5.55  | 5.78  | 0.12 | 0.06 | -1.17 | 0.036155 | 0.035936 | 0.339036 | 0.234032 |
| MmugDNA.39833.1.S1_at   | MmugDNA.39833.1 | 10.08 | 9.44  | 0.12 | 0.59 | 1.56  | 0.129124 | 0.187585 | 0.495114 | 0.463628 |
| MmugDNA.39835.1.S1_at   | MmugDNA.39835.1 | 3.08  | 2.97  | 0.04 | 0.47 | 1.08  | 0.65588  | 0.731089 | 0.845225 | 0.844197 |
| MmugDNA.39836.1.S1_at   | MmugDNA.39836.1 | 9.85  | 9.5   | 0.01 | 0.48 | 1.27  | 0.826539 | 0.956648 | 0.929552 | 0.975375 |
| MmugDNA.39837.1.S1_s_at | MmugDNA.39837.1 | 6.93  | 7.35  | 0.45 | 0.16 | -1.34 | 0.410235 | 0.276695 | 0.706234 | 0.540617 |
| MmugDNA.3984.1.S1_at    | MmugDNA.3984.1  | 4.17  | 4.14  | 0.39 | 0.29 | 1.02  | 0.364634 | 0.607273 | 0.6775   | 0.766339 |
| MmugDNA.39840.1.S1_at   | MmugDNA.39840.1 | 12.57 | 12.95 | 0.2  | 0.39 | -1.3  | 0.254446 | 0.159901 | 0.602414 | 0.435987 |
| MmugDNA.17139.1.S1_s_at | MmugDNA.17139.1 | 13.04 | 13.28 | 0.07 | 0.34 | -1.18 | 0.251788 | 0.139993 | 0.6011   | 0.413309 |
| MmugDNA.39841.1.S1_at   | MmugDNA.39841.1 | 10.69 | 11.09 | 0.31 | 0.32 | -1.32 | 0.201788 | 0.043431 | 0.564031 | 0.253043 |
| MmugDNA.39843.1.S1_at   | MmugDNA.39843.1 | 4.35  | 4.39  | 0.09 | 0.17 | -1.03 | 0.676107 | 0.754599 | 0.854832 | 0.857244 |
| MmugDNA.39844.1.S1_at   | MmugDNA.39844.1 | 5.77  | 5.89  | 0.21 | 0.24 | -1.09 | 0.715899 | 0.893988 | 0.875256 | 0.939464 |
| MmugDNA.39845.1.S1_at   | MmugDNA.39845.1 | 4.37  | 4.37  | 0.4  | 0.15 | 1     | 0.966855 | 0.894201 | 0.987535 | 0.939665 |
| MmugDNA.39846.1.S1_at   | MmugDNA.39846.1 | 3     | 2.9   | 0.18 | 0.16 | 1.08  | 0.539141 | 0.709392 | 0.780929 | 0.831622 |
| MmugDNA.39848.1.S1_at   | MmugDNA.39848.1 | 9.65  | 8.95  | 0.14 | 0.46 | 1.62  | 0.078353 | 0.075254 | 0.428302 | 0.319434 |
| MmugDNA.3985.1.S1_at    | MmugDNA.3985.1  | 8.11  | 8.32  | 0.1  | 0.3  | -1.16 | 0.141938 | 0.165005 | 0.509233 | 0.44123  |
| MmugDNA.39850.1.S1_at   | MmugDNA.39850.1 | 6.16  | 5.04  | 1.03 | 0.11 | 2.17  | 0.12427  | 0.107014 | 0.490118 | 0.369588 |
| MmugDNA.39852.1.S1_at   | MmugDNA.39852.1 | 6.96  | 6.98  | 0.1  | 0.05 | -1.02 | 0.916797 | 0.175465 | 0.967434 | 0.452157 |
| MmugDNA.39853.1.S1_at   | MmugDNA.39853.1 | 7.25  | 8.2   | 0.95 | 0.36 | -1.93 | 0.75162  | 0.837374 | 0.893893 | 0.907089 |

|                         |                 |       |       |      |      |       |          |          |          |          |
|-------------------------|-----------------|-------|-------|------|------|-------|----------|----------|----------|----------|
| MmugDNA.39854.1.S1_at   | MmugDNA.39854.1 | 6.65  | 6.29  | 0.33 | 0.36 | 1.28  | 0.274058 | 0.230139 | 0.617262 | 0.502007 |
| MmugDNA.39855.1.S1_at   | MmugDNA.39855.1 | 10.07 | 8.81  | 0.17 | 0.32 | 2.4   | 0.005226 | 0.003791 | 0.190798 | 0.087708 |
| MmugDNA.39856.1.S1_at   | MmugDNA.39856.1 | 3.73  | 3.83  | 0.24 | 0.2  | -1.07 | 0.757281 | 0.125581 | 0.897006 | 0.396226 |
| MmugDNA.39857.1.S1_at   | MmugDNA.39857.1 | 6.6   | 6.93  | 0.22 | 0.22 | -1.26 | 0.110385 | 0.047814 | 0.471863 | 0.263649 |
| MmugDNA.39860.1.S1_at   | MmugDNA.39860.1 | 4.8   | 4.91  | 0.44 | 0.13 | -1.08 | 0.850556 | 0.417317 | 0.939993 | 0.642143 |
| MmugDNA.39862.1.S1_at   | MmugDNA.39862.1 | 9.88  | 9.16  | 0.81 | 0.32 | 1.65  | 0.13297  | 0.050626 | 0.499251 | 0.270317 |
| MmugDNA.39863.1.S1_at   | MmugDNA.39863.1 | 10.18 | 8.7   | 0.21 | 0.62 | 2.77  | 0.008447 | 0.002685 | 0.218339 | 0.076408 |
| MmugDNA.39865.1.S1_at   | MmugDNA.39865.1 | 3.57  | 3.51  | 0.09 | 0.05 | 1.04  | 0.155367 | 0.200316 | 0.520164 | 0.474705 |
| MmugDNA.39866.1.S1_at   | MmugDNA.39866.1 | 7.88  | 8.51  | 0.33 | 0.52 | -1.54 | 0.143032 | 0.120475 | 0.509977 | 0.38925  |
| MmugDNA.39867.1.S1_at   | MmugDNA.39867.1 | 8.05  | 8.48  | 0.05 | 0.45 | -1.35 | 0.138705 | 0.074409 | 0.505884 | 0.318058 |
| MmugDNA.39868.1.S1_at   | MmugDNA.39868.1 | 5.39  | 5.22  | 0.36 | 0.13 | 1.12  | 0.140847 | 0.222016 | 0.508448 | 0.495071 |
| MmugDNA.39869.1.S1_at   | MmugDNA.39869.1 | 3.38  | 3.18  | 0.16 | 0.17 | 1.15  | 0.277531 | 0.228575 | 0.619738 | 0.500752 |
| MmugDNA.3987.1.S1_at    | MmugDNA.3987.1  | 4.27  | 4.56  | 0.14 | 0.11 | -1.22 | 0.080765 | 0.078459 | 0.431323 | 0.325212 |
| MmugDNA.39870.1.S1_x_at | MmugDNA.39870.1 | 8.83  | 8.62  | 0.73 | 0.05 | 1.15  | 0.237167 | 0.281642 | 0.590811 | 0.544706 |
| MmugDNA.39872.1.S1_at   | MmugDNA.39872.1 | 9.04  | 9.55  | 0.44 | 0.46 | -1.43 | 0.562356 | 0.753837 | 0.795286 | 0.856692 |
| MmugDNA.39872.1.S1_s_at | MmugDNA.39872.1 | 9.08  | 9.36  | 0.29 | 0.44 | -1.22 | 0.8151   | 0.930899 | 0.924824 | 0.96074  |
| MmugDNA.39873.1.S1_at   | MmugDNA.39873.1 | 11.76 | 12.03 | 0.16 | 0.13 | -1.2  | 0.094353 | 0.028851 | 0.451866 | 0.211661 |
| MmugDNA.39873.1.S1_s_at | MmugDNA.39873.1 | 12.38 | 12.63 | 0.17 | 0.09 | -1.19 | 0.154487 | 0.050906 | 0.51902  | 0.270955 |
| MmugDNA.39877.1.S1_at   | MmugDNA.39877.1 | 4.46  | 4.54  | 0.08 | 0.19 | -1.06 | 0.11556  | 0.264427 | 0.478809 | 0.530385 |
| MmugDNA.39877.1.S1_s_at | MmugDNA.39877.1 | 6.86  | 7.02  | 0.19 | 0.2  | -1.12 | 0.279055 | 0.373332 | 0.620921 | 0.612164 |
| MmugDNA.39878.1.S1_at   | MmugDNA.39878.1 | 9.17  | 8.3   | 0.08 | 0.23 | 1.83  | 0.003053 | 0.000701 | 0.172102 | 0.04424  |
| MmugDNA.39879.1.S1_at   | MmugDNA.39879.1 | 4.19  | 4.27  | 0.21 | 0.06 | -1.05 | 0.437262 | 0.577599 | 0.722303 | 0.748013 |
| MmugDNA.3988.1.S1_at    | MmugDNA.3988.1  | 4.07  | 5.48  | 0.16 | 1.02 | -2.66 | 0.072087 | 0.010723 | 0.416191 | 0.135271 |
| MmugDNA.39880.1.S1_at   | MmugDNA.39880.1 | 4.73  | 4.88  | 0.18 | 0.06 | -1.11 | 0.281799 | 0.147377 | 0.62238  | 0.421554 |
| MmugDNA.39882.1.S1_at   | MmugDNA.39882.1 | 4.51  | 3.5   | 1.02 | 0.37 | 2     | 0.290915 | 0.372313 | 0.628646 | 0.611225 |
| MmugDNA.39883.1.S1_at   | MmugDNA.39883.1 | 4.25  | 4.39  | 0.19 | 0.24 | -1.1  | 0.828979 | 0.961678 | 0.930604 | 0.978408 |
| MmugDNA.39884.1.S1_at   | MmugDNA.39884.1 | 6.27  | 6.26  | 0.08 | 0.26 | 1.01  | 0.433353 | 0.007982 | 0.719917 | 0.118766 |
| MmugDNA.39885.1.S1_at   | MmugDNA.39885.1 | 8.48  | 9.11  | 0.45 | 0.53 | -1.55 | 0.199304 | 0.245093 | 0.56224  | 0.514861 |
| MmugDNA.39886.1.S1_at   | MmugDNA.39886.1 | 10.83 | 10.33 | 0.33 | 0.34 | 1.42  | 0.30251  | 0.488046 | 0.63692  | 0.69087  |
| MmugDNA.39887.1.S1_s_at | MmugDNA.39887.1 | 13.22 | 13.23 | 0.14 | 0.05 | -1.01 | 0.886497 | 0.903081 | 0.954601 | 0.944962 |
| MmugDNA.39888.1.S1_at   | MmugDNA.39888.1 | 3.94  | 3.94  | 0.13 | 0.06 | -1    | 0.931384 | 0.69875  | 0.97346  | 0.824973 |
| MmugDNA.39889.1.S1_at   | MmugDNA.39889.1 | 3.15  | 3.15  | 0.02 | 0.07 | 1     | 0.541654 | 0.725918 | 0.782793 | 0.841313 |
| MmugDNA.3989.1.S1_at    | MmugDNA.3989.1  | 3.97  | 4.29  | 0.41 | 0.65 | -1.25 | 0.572266 | 0.657854 | 0.800678 | 0.800051 |
| MmugDNA.39891.1.S1_at   | MmugDNA.39891.1 | 3.62  | 3.82  | 0.17 | 0.03 | -1.15 | 0.04557  | 0.287088 | 0.36126  | 0.548379 |
| MmugDNA.39892.1.S1_at   | MmugDNA.39892.1 | 4.45  | 3.67  | 0.69 | 0.28 | 1.72  | 0.225038 | 0.146047 | 0.583047 | 0.420064 |
| MmugDNA.39893.1.S1_at   | MmugDNA.39893.1 | 10.36 | 10.26 | 0.16 | 0.28 | 1.07  | 0.719143 | 0.197883 | 0.876813 | 0.472818 |
| MmugDNA.39894.1.S1_at   | MmugDNA.39894.1 | 6.64  | 6.82  | 0.18 | 0.44 | -1.14 | 0.161749 | 0.180706 | 0.526573 | 0.457258 |
| MmugDNA.39895.1.S1_at   | MmugDNA.39895.1 | 9.68  | 10.23 | 0.45 | 0.86 | -1.46 | 0.287086 | 0.385131 | 0.625773 | 0.620662 |
| MmugDNA.39896.1.S1_at   | MmugDNA.39896.1 | 3.89  | 4.05  | 0.88 | 0.28 | -1.12 | 0.932067 | 0.473981 | 0.973719 | 0.681155 |
| MmugDNA.39899.1.S1_at   | MmugDNA.39899.1 | 6.17  | 6.09  | 1.41 | 0.9  | 1.05  | 0.505187 | 0.444198 | 0.761548 | 0.661871 |
| MmugDNA.39901.1.S1_at   | MmugDNA.39901.1 | 6.54  | 6.76  | 0.09 | 0.03 | -1.17 | 0.027332 | 0.29115  | 0.307332 | 0.551652 |

|                         |                 |      |       |      |      |        |          |          |          |          |
|-------------------------|-----------------|------|-------|------|------|--------|----------|----------|----------|----------|
| MmugDNA.39902.1.S1_at   | MmugDNA.39902.1 | 7.01 | 8.04  | 0.5  | 1.21 | -2.04  | 0.383275 | 0.399295 | 0.689201 | 0.629737 |
| MmugDNA.39903.1.S1_at   | MmugDNA.39903.1 | 5.6  | 5.61  | 0.02 | 0.02 | -1.01  | 0.694948 | 0.789135 | 0.864696 | 0.878136 |
| MmugDNA.39904.1.S1_at   | MmugDNA.39904.1 | 5.5  | 5.7   | 0.92 | 0.34 | -1.15  | 0.572209 | 0.702622 | 0.800678 | 0.827641 |
| MmugDNA.39906.1.S1_at   | MmugDNA.39906.1 | 2.95 | 3.11  | 0.1  | 0.12 | -1.12  | 0.24565  | 0.231193 | 0.597182 | 0.5029   |
| MmugDNA.39908.1.S1_at   | MmugDNA.39908.1 | 5.32 | 5     | 0.44 | 0.21 | 1.25   | 0.343066 | 0.811603 | 0.663407 | 0.891244 |
| MmugDNA.39909.1.S1_at   | MmugDNA.39909.1 | 7.34 | 7.17  | 0.35 | 0.14 | 1.13   | 0.564601 | 0.491039 | 0.796681 | 0.692751 |
| MmugDNA.3991.1.S1_at    | MmugDNA.3991.1  | 5.09 | 5.13  | 0.1  | 0.1  | -1.03  | 0.188324 | 0.181679 | 0.551322 | 0.458271 |
| MmugDNA.39910.1.S1_at   | MmugDNA.39910.1 | 4.9  | 4.85  | 0.09 | 0.18 | 1.03   | 0.649212 | 0.610928 | 0.84237  | 0.768948 |
| MmugDNA.39911.1.S1_at   | MmugDNA.39911.1 | 7.25 | 6.86  | 0.8  | 0.07 | 1.31   | 0.772499 | 0.922564 | 0.904254 | 0.956376 |
| MmugDNA.39912.1.S1_at   | MmugDNA.39912.1 | 5.77 | 5.5   | 0.6  | 0.42 | 1.21   | 0.566137 | 0.353799 | 0.797485 | 0.596815 |
| MmugDNA.39915.1.S1_at   | MmugDNA.39915.1 | 7.7  | 7.54  | 0.23 | 0.42 | 1.12   | 0.364117 | 0.191628 | 0.677212 | 0.466918 |
| MmugDNA.39916.1.S1_at   | MmugDNA.39916.1 | 3.39 | 3.32  | 0.44 | 0.12 | 1.05   | 0.423044 | 0.566685 | 0.713793 | 0.740723 |
| MmugDNA.39917.1.S1_at   | MmugDNA.39917.1 | 4.31 | 4.61  | 0.02 | 0.2  | -1.23  | 0.204347 | 0.199577 | 0.566774 | 0.474208 |
| MmugDNA.21083.1.S1_at   | MmugDNA.21083.1 | 5.92 | 5.91  | 0.02 | 0.18 | 1.01   | 0.417231 | 0.514377 | 0.710413 | 0.707675 |
| MmugDNA.21083.1.S1_s_at | MmugDNA.21083.1 | 6.41 | 6.6   | 0.13 | 0.13 | -1.14  | 0.374573 | 0.673089 | 0.683788 | 0.808977 |
| MmugDNA.3992.1.S1_at    | MmugDNA.3992.1  | 4.64 | 4.97  | 0.41 | 0.39 | -1.26  | 0.541508 | 0.688835 | 0.782715 | 0.818338 |
| MmugDNA.39921.1.S1_at   | MmugDNA.39921.1 | 7.48 | 7.63  | 0.13 | 0.19 | -1.11  | 0.09911  | 0.069148 | 0.458807 | 0.30917  |
| MmugDNA.39922.1.S1_at   | MmugDNA.39922.1 | 6.47 | 6.04  | 0.2  | 0.45 | 1.35   | 0.636023 | 0.431422 | 0.835239 | 0.652359 |
| MmugDNA.39923.1.S1_at   | MmugDNA.39923.1 | 5.09 | 5.69  | 0.38 | 0.64 | -1.51  | 0.158977 | 0.163433 | 0.52416  | 0.439629 |
| MmugDNA.39926.1.S1_at   | MmugDNA.39926.1 | 3.54 | 3.54  | 0.06 | 0.19 | 1      | 0.670783 | 0.657862 | 0.852478 | 0.800051 |
| MmugDNA.39928.1.S1_at   | MmugDNA.39928.1 | 7.56 | 7.65  | 0.46 | 0.46 | -1.06  | 0.900862 | 0.605503 | 0.960387 | 0.765274 |
| MmugDNA.3993.1.S1_at    | MmugDNA.3993.1  | 5.58 | 6.1   | 0.16 | 0.49 | -1.44  | 0.285627 | 0.312768 | 0.625066 | 0.567314 |
| MmugDNA.39930.1.S1_at   | MmugDNA.39930.1 | 4.72 | 6.26  | 0.42 | 1.24 | -2.9   | 0.075539 | 0.074768 | 0.422803 | 0.318526 |
| MmugDNA.39931.1.S1_at   | MmugDNA.39931.1 | 7.8  | 7.24  | 0.18 | 0.45 | 1.48   | 0.077414 | 0.024564 | 0.427131 | 0.196128 |
| MmugDNA.39932.1.S1_at   | MmugDNA.39932.1 | 9.76 | 10.49 | 0.39 | 0.21 | -1.66  | 0.031271 | 0.016986 | 0.321126 | 0.165245 |
| MmugDNA.39933.1.S1_at   | MmugDNA.39933.1 | 6.26 | 6     | 0.18 | 0.12 | 1.2    | 0.056523 | 0.046744 | 0.386649 | 0.260886 |
| MmugDNA.39934.1.S1_at   | MmugDNA.39934.1 | 5.32 | 5.33  | 0.38 | 0.05 | -1     | 0.378165 | 0.557898 | 0.686315 | 0.735292 |
| MmugDNA.39936.1.S1_at   | MmugDNA.39936.1 | 3.2  | 3.2   | 0.28 | 0.07 | -1     | 0.404622 | 0.556144 | 0.702853 | 0.734408 |
| MmugDNA.39937.1.S1_at   | MmugDNA.39937.1 | 4.48 | 4.9   | 0.31 | 0.21 | -1.33  | 0.15567  | 0.297242 | 0.520357 | 0.556067 |
| MmugDNA.39938.1.S1_at   | MmugDNA.39938.1 | 4.4  | 4.61  | 0.15 | 0.17 | -1.16  | 0.79775  | 0.209286 | 0.916116 | 0.48303  |
| MmugDNA.39940.1.S1_at   | MmugDNA.39940.1 | 9.29 | 9.47  | 0.33 | 0.24 | -1.13  | 0.486939 | 0.092909 | 0.751857 | 0.349024 |
| MmugDNA.39941.1.S1_at   | MmugDNA.39941.1 | 5.52 | 5.66  | 0.06 | 0.1  | -1.1   | 0.149011 | 0.114711 | 0.513987 | 0.381252 |
| MmugDNA.39942.1.S1_at   | MmugDNA.39942.1 | 5.96 | 6.27  | 0.09 | 0.26 | -1.24  | 0.144521 | 0.108295 | 0.511015 | 0.371557 |
| MmugDNA.39943.1.S1_at   | MmugDNA.39943.1 | 9.55 | 8.79  | 0.49 | 0.47 | 1.69   | 0.056475 | 0.049598 | 0.386516 | 0.267713 |
| MmugDNA.39944.1.S1_at   | MmugDNA.39944.1 | 5.1  | 5.49  | 0.47 | 0.2  | -1.31  | 0.662143 | 0.81754  | 0.848422 | 0.894746 |
| MmugDNA.39945.1.S1_at   | MmugDNA.39945.1 | 4.64 | 8.83  | 1.57 | 3.18 | -18.18 | 0.287928 | 0.18841  | 0.626313 | 0.464416 |
| MmugDNA.39946.1.S1_at   | MmugDNA.39946.1 | 4.3  | 3.77  | 0.34 | 0.14 | 1.45   | 0.052426 | 0.043532 | 0.377579 | 0.253227 |
| MmugDNA.39947.1.S1_at   | MmugDNA.39947.1 | 5.47 | 5.72  | 0.17 | 0.22 | -1.19  | 0.481672 | 0.567504 | 0.749268 | 0.74139  |
| MmugDNA.39949.1.S1_at   | MmugDNA.39949.1 | 4.49 | 4.5   | 0.17 | 0.08 | -1.01  | 0.545744 | 0.725295 | 0.785204 | 0.840954 |
| MmugDNA.3995.1.S1_s_at  | MmugDNA.3995.1  | 8.87 | 8.76  | 0.35 | 0.25 | 1.08   | 0.920124 | 0.056387 | 0.968842 | 0.283382 |
| MmugDNA.39950.1.S1_at   | MmugDNA.39950.1 | 3.35 | 3.21  | 0.39 | 0.11 | 1.1    | 0.462319 | 0.646022 | 0.738226 | 0.792676 |

|                         |                 |       |       |      |      |       |          |          |          |          |
|-------------------------|-----------------|-------|-------|------|------|-------|----------|----------|----------|----------|
| MmugDNA.39951.1.S1_at   | MmugDNA.39951.1 | 5.73  | 5.94  | 0.4  | 0.12 | -1.16 | 0.591037 | 0.67601  | 0.810224 | 0.810632 |
| MmugDNA.39951.1.S1_s_at | MmugDNA.39951.1 | 7.81  | 8.05  | 0.2  | 0.15 | -1.18 | 0.802362 | 0.587643 | 0.918464 | 0.754408 |
| MmugDNA.39952.1.S1_at   | MmugDNA.39952.1 | 3.33  | 3.59  | 0.3  | 0.54 | -1.2  | 0.704295 | 0.403422 | 0.869588 | 0.632114 |
| MmugDNA.39953.1.S1_at   | MmugDNA.39953.1 | 5.34  | 5.49  | 0.42 | 0.25 | -1.11 | 0.614117 | 0.814076 | 0.823094 | 0.892736 |
| MmugDNA.39954.1.S1_at   | MmugDNA.39954.1 | 8.39  | 8.84  | 0.15 | 0.56 | -1.37 | 0.272342 | 0.431962 | 0.616016 | 0.652723 |
| MmugDNA.39954.1.S1_s_at | MmugDNA.39954.1 | 9.02  | 9.06  | 0.16 | 0.6  | -1.02 | 0.585056 | 0.651714 | 0.807271 | 0.796356 |
| MmugDNA.39955.1.S1_at   | MmugDNA.39955.1 | 9.74  | 10.29 | 0.21 | 1.39 | -1.46 | 0.892034 | 0.814902 | 0.957027 | 0.893213 |
| MmugDNA.39956.1.S1_at   | MmugDNA.39956.1 | 4.88  | 5.04  | 0.09 | 0.19 | -1.12 | 0.219405 | 0.276661 | 0.578771 | 0.540596 |
| MmugDNA.39959.1.S1_at   | MmugDNA.39959.1 | 3.65  | 3.77  | 0.08 | 0.3  | -1.09 | 0.634026 | 0.895558 | 0.83417  | 0.94031  |
| MmugDNA.39960.1.S1_at   | MmugDNA.39960.1 | 6.66  | 6.9   | 0.24 | 0.22 | -1.18 | 0.214521 | 0.166402 | 0.575054 | 0.442884 |
| MmugDNA.39961.1.S1_at   | MmugDNA.39961.1 | 9.17  | 9.15  | 0.3  | 0.46 | 1.01  | 0.279669 | 0.376392 | 0.621154 | 0.614243 |
| MmugDNA.39962.1.S1_at   | MmugDNA.39962.1 | 5.13  | 4.39  | 0.33 | 0.31 | 1.68  | 0.099224 | 0.137546 | 0.459116 | 0.410509 |
| MmugDNA.39963.1.S1_at   | MmugDNA.39963.1 | 11.81 | 11.15 | 0.36 | 0.17 | 1.58  | 0.026805 | 0.02091  | 0.304808 | 0.181415 |
| MmugDNA.39964.1.S1_at   | MmugDNA.39964.1 | 4.19  | 4.19  | 0.03 | 0.1  | 1     | 0.279694 | 0.571895 | 0.621165 | 0.744056 |
| MmugDNA.39965.1.S1_at   | MmugDNA.39965.1 | 7.56  | 7.55  | 0.03 | 0.07 | 1.01  | 0.654225 | 0.055863 | 0.844551 | 0.282172 |
| MmugDNA.39966.1.S1_at   | MmugDNA.39966.1 | 3.44  | 3.72  | 0.07 | 0.15 | -1.21 | 0.029431 | 0.143753 | 0.31418  | 0.417583 |
| MmugDNA.39968.1.S1_at   | MmugDNA.39968.1 | 11.57 | 11.32 | 0.23 | 0.07 | 1.19  | 0.064257 | 0.069583 | 0.402624 | 0.309848 |
| MmugDNA.3997.1.S1_at    | MmugDNA.3997.1  | 4.19  | 4.35  | 0.05 | 0.19 | -1.12 | 0.098747 | 0.078221 | 0.458602 | 0.324765 |
| MmugDNA.39970.1.S1_at   | MmugDNA.39970.1 | 7.86  | 8.99  | 0.33 | 0.87 | -2.19 | 0.315021 | 0.05064  | 0.646263 | 0.270317 |
| MmugDNA.39971.1.S1_at   | MmugDNA.39971.1 | 5.01  | 4.83  | 0.42 | 0.07 | 1.14  | 0.251654 | 0.331667 | 0.601007 | 0.580237 |
| MmugDNA.39972.1.S1_at   | MmugDNA.39972.1 | 9.92  | 9.96  | 0.22 | 0.39 | -1.02 | 0.793882 | 0.730777 | 0.914508 | 0.844057 |
| MmugDNA.39973.1.S1_at   | MmugDNA.39973.1 | 11.67 | 11.67 | 0.13 | 0.38 | -1    | 0.428687 | 0.551058 | 0.717033 | 0.730772 |
| MmugDNA.39976.1.S1_at   | MmugDNA.39976.1 | 3.06  | 3.21  | 0.39 | 0.09 | -1.11 | 0.657534 | 0.691662 | 0.846035 | 0.820652 |
| MmugDNA.39977.1.S1_at   | MmugDNA.39977.1 | 5.17  | 5.13  | 0.03 | 0.03 | 1.03  | 0.099732 | 0.505681 | 0.459718 | 0.702218 |
| MmugDNA.39978.1.S1_at   | MmugDNA.39978.1 | 4.24  | 3.92  | 0.39 | 0.35 | 1.25  | 0.539982 | 0.309783 | 0.781466 | 0.565044 |
| MmugDNA.39979.1.S1_at   | MmugDNA.39979.1 | 5.91  | 6.05  | 0.04 | 0.19 | -1.11 | 0.338739 | 0.3466   | 0.660988 | 0.591427 |
| MmugDNA.39980.1.S1_at   | MmugDNA.39980.1 | 3.77  | 4.15  | 0.27 | 0.07 | -1.29 | 0.238156 | 0.226559 | 0.591555 | 0.499001 |
| MmugDNA.39981.1.S1_at   | MmugDNA.39981.1 | 9.53  | 10.22 | 0.16 | 0.6  | -1.62 | 0.408486 | 0.572533 | 0.705199 | 0.744566 |
| MmugDNA.39982.1.S1_at   | MmugDNA.39982.1 | 6.83  | 9.06  | 0.97 | 1.86 | -4.69 | 0.284237 | 0.186571 | 0.62409  | 0.462364 |
| MmugDNA.39983.1.S1_at   | MmugDNA.39983.1 | 7.05  | 6.75  | 0.34 | 0.7  | 1.23  | 0.575503 | 0.452273 | 0.802341 | 0.667023 |
| MmugDNA.39984.1.S1_at   | MmugDNA.39984.1 | 3.86  | 3.76  | 0.15 | 0.09 | 1.07  | 0.244745 | 0.206367 | 0.596374 | 0.480546 |
| MmugDNA.39986.1.S1_at   | MmugDNA.39986.1 | 4.78  | 4.82  | 0.02 | 0.21 | -1.03 | 0.599238 | 0.418328 | 0.814552 | 0.642707 |
| MmugDNA.39987.1.S1_at   | MmugDNA.39987.1 | 4.14  | 4.25  | 0.26 | 0.13 | -1.08 | 0.499866 | 0.700873 | 0.759402 | 0.826529 |
| MmugDNA.39988.1.S1_at   | MmugDNA.39988.1 | 7.47  | 7.33  | 0.61 | 2.38 | 1.1   | 0.351623 | 0.35967  | 0.669126 | 0.600946 |
| MmugDNA.39989.1.S1_at   | MmugDNA.39989.1 | 3.27  | 3.14  | 0.13 | 0.14 | 1.09  | 0.357582 | 0.478483 | 0.672471 | 0.684481 |
| MmugDNA.3999.1.S1_at    | MmugDNA.3999.1  | 3.82  | 4.07  | 0.09 | 0.23 | -1.19 | 0.227386 | 0.341291 | 0.585103 | 0.587393 |
| MmugDNA.39990.1.S1_at   | MmugDNA.39990.1 | 7.35  | 6.92  | 1.01 | 0.23 | 1.34  | 0.447324 | 0.357076 | 0.728917 | 0.59875  |
| MmugDNA.39991.1.S1_at   | MmugDNA.39991.1 | 4.41  | 4.49  | 0.11 | 0.16 | -1.06 | 0.148267 | 0.120702 | 0.513707 | 0.389556 |
| MmugDNA.39992.1.S1_at   | MmugDNA.39992.1 | 8.28  | 8.88  | 0.38 | 0.83 | -1.51 | 0.295649 | 0.200097 | 0.631979 | 0.474603 |
| MmugDNA.39993.1.S1_at   | MmugDNA.39993.1 | 6.28  | 6.23  | 0.19 | 0.11 | 1.04  | 0.851414 | 0.398572 | 0.940204 | 0.629458 |
| MmugDNA.39995.1.S1_at   | MmugDNA.39995.1 | 7.82  | 7.23  | 0.62 | 0.08 | 1.5   | 0.497544 | 0.074735 | 0.758019 | 0.318465 |



|                         |                 |       |       |      |      |       |          |          |          |          |
|-------------------------|-----------------|-------|-------|------|------|-------|----------|----------|----------|----------|
| MmugDNA.39997.1.S1_at   | MmugDNA.39997.1 | 4.78  | 4.54  | 0.53 | 0.13 | 1.18  | 0.374689 | 0.480057 | 0.683908 | 0.68565  |
| MmugDNA.39998.1.S1_at   | MmugDNA.39998.1 | 10.23 | 10.13 | 0.45 | 0.49 | 1.07  | 0.833637 | 0.87111  | 0.932356 | 0.926785 |
| MmugDNA.39999.1.S1_at   | MmugDNA.39999.1 | 4.61  | 4.58  | 0.28 | 0.05 | 1.03  | 0.74356  | 0.453317 | 0.890194 | 0.667688 |
| MmugDNA.4.1.S1_at       | MmugDNA.4.1     | 7.84  | 8.05  | 0.9  | 0.25 | -1.15 | 0.861376 | 0.97663  | 0.944116 | 0.987237 |
| MmugDNA.40.1.S1_at      | MmugDNA.40.1    | 4.81  | 4.95  | 0.34 | 0.12 | -1.1  | 0.533187 | 0.706522 | 0.777978 | 0.829711 |
| MmugDNA.400.1.S1_at     | MmugDNA.400.1   | 3.5   | 3.71  | 0.05 | 0.13 | -1.15 | 0.072733 | 0.018462 | 0.41769  | 0.170923 |
| MmugDNA.4000.1.S1_at    | MmugDNA.4000.1  | 6.1   | 6.09  | 0.11 | 0.41 | 1     | 0.885702 | 0.382168 | 0.954177 | 0.618361 |
| MmugDNA.40000.1.S1_at   | MmugDNA.40000.1 | 9.12  | 8.91  | 0.19 | 0.62 | 1.15  | 0.6499   | 0.48031  | 0.842537 | 0.68574  |
| MmugDNA.40002.1.S1_at   | MmugDNA.40002.1 | 4.02  | 3.86  | 0.2  | 0.16 | 1.11  | 0.687973 | 0.754103 | 0.860841 | 0.856848 |
| MmugDNA.40003.1.S1_at   | MmugDNA.40003.1 | 6.11  | 6.2   | 0.07 | 0.06 | -1.06 | 0.39038  | 0.097068 | 0.693578 | 0.354556 |
| MmugDNA.40004.1.S1_at   | MmugDNA.40004.1 | 11.7  | 11.67 | 0.22 | 0.69 | 1.02  | 0.382825 | 0.50628  | 0.688989 | 0.702368 |
| MmugDNA.40005.1.S1_at   | MmugDNA.40005.1 | 4.09  | 4.07  | 0    | 0.31 | 1.01  | 0.423633 | 0.451766 | 0.714199 | 0.66661  |
| MmugDNA.40006.1.S1_at   | MmugDNA.40006.1 | 3.11  | 3.1   | 0.15 | 0.04 | 1     | 0.846082 | 0.784023 | 0.938232 | 0.874963 |
| MmugDNA.40007.1.S1_at   | MmugDNA.40007.1 | 3.61  | 3.6   | 0.24 | 0.05 | 1.01  | 0.81633  | 0.459087 | 0.925443 | 0.671544 |
| MmugDNA.40008.1.S1_at   | MmugDNA.40008.1 | 5.91  | 5.87  | 0.29 | 0.02 | 1.02  | 0.873536 | 0.827669 | 0.94929  | 0.901081 |
| MmugDNA.40009.1.S1_at   | MmugDNA.40009.1 | 5.94  | 6.87  | 0.42 | 0.66 | -1.9  | 0.282481 | 0.4384   | 0.622872 | 0.657383 |
| MmugDNA.4001.1.S1_at    | MmugDNA.4001.1  | 5.71  | 5.32  | 0.31 | 0.41 | 1.32  | 0.27925  | 0.37449  | 0.620979 | 0.6129   |
| MmugDNA.40010.1.S1_at   | MmugDNA.40010.1 | 6.05  | 6.02  | 0.25 | 0.2  | 1.01  | 0.216794 | 0.056891 | 0.576413 | 0.284642 |
| MmugDNA.40011.1.S1_s_at | MmugDNA.40011.1 | 12.76 | 12.63 | 0.21 | 0.35 | 1.09  | 0.967421 | 0.196808 | 0.987826 | 0.471956 |
| MmugDNA.40012.1.S1_at   | MmugDNA.40012.1 | 6.99  | 6.91  | 0.2  | 0.21 | 1.05  | 0.594788 | 0.166723 | 0.812178 | 0.443215 |
| MmugDNA.40013.1.S1_at   | MmugDNA.40013.1 | 3.25  | 3.28  | 0.13 | 0.1  | -1.02 | 0.233862 | 0.282977 | 0.588317 | 0.545692 |
| MmugDNA.40014.1.S1_at   | MmugDNA.40014.1 | 4.93  | 5.2   | 0.19 | 0.39 | -1.2  | 0.351996 | 0.256523 | 0.66934  | 0.524275 |
| MmugDNA.40015.1.S1_at   | MmugDNA.40015.1 | 3.69  | 3.49  | 0.56 | 0.19 | 1.15  | 0.655493 | 0.72715  | 0.844995 | 0.842187 |
| MmugDNA.40016.1.S1_at   | MmugDNA.40016.1 | 6.67  | 6.24  | 0.26 | 0.62 | 1.35  | 0.87094  | 0.958258 | 0.948399 | 0.976345 |
| MmugDNA.40018.1.S1_at   | MmugDNA.40018.1 | 11.03 | 11.21 | 0.12 | 0.07 | -1.14 | 0.276661 | 0.481563 | 0.618815 | 0.686528 |
| MmugDNA.40019.1.S1_at   | MmugDNA.40019.1 | 11.59 | 11.9  | 0.04 | 0.21 | -1.24 | 0.083489 | 0.113581 | 0.43582  | 0.379668 |
| MmugDNA.40020.1.S1_at   | MmugDNA.40020.1 | 8.25  | 8.47  | 0.13 | 0.13 | -1.17 | 0.048145 | 0.037324 | 0.367807 | 0.237622 |
| MmugDNA.20053.1.S1_at   | MmugDNA.20053.1 | 9.45  | 9.62  | 0.24 | 0.13 | -1.12 | 0.161371 | 0.15955  | 0.526364 | 0.435763 |
| MmugDNA.20053.1.S1_s_at | MmugDNA.20053.1 | 9.68  | 9.89  | 0.3  | 0.13 | -1.15 | 0.201188 | 0.188041 | 0.563821 | 0.464144 |
| MmugDNA.40021.1.S1_at   | MmugDNA.40021.1 | 3.67  | 3.39  | 0.32 | 0.05 | 1.22  | 0.227959 | 0.029552 | 0.585346 | 0.213572 |
| MmugDNA.40022.1.S1_at   | MmugDNA.40022.1 | 13.31 | 13.25 | 0.06 | 0.16 | 1.04  | 0.305968 | 0.373211 | 0.639227 | 0.612042 |
| MmugDNA.40023.1.S1_at   | MmugDNA.40023.1 | 4.8   | 4.68  | 0.12 | 0.16 | 1.09  | 0.488714 | 0.657108 | 0.753254 | 0.799439 |
| MmugDNA.40025.1.S1_at   | MmugDNA.40025.1 | 6.22  | 6.78  | 0.18 | 0.77 | -1.48 | 0.245808 | 0.33681  | 0.597234 | 0.584093 |
| MmugDNA.40027.1.S1_at   | MmugDNA.40027.1 | 6.97  | 6.58  | 0.73 | 1.12 | 1.31  | 0.545386 | 0.29703  | 0.784919 | 0.555979 |
| MmugDNA.40028.1.S1_at   | MmugDNA.40028.1 | 7.09  | 7.34  | 0.2  | 0.52 | -1.19 | 0.529393 | 0.367198 | 0.776127 | 0.606851 |
| MmugDNA.40029.1.S1_at   | MmugDNA.40029.1 | 4.51  | 4.77  | 0.15 | 0.17 | -1.2  | 0.114532 | 0.210574 | 0.477887 | 0.484527 |
| MmugDNA.4003.1.S1_at    | MmugDNA.4003.1  | 4.34  | 4.39  | 0.76 | 0.61 | -1.03 | 0.94476  | 0.703073 | 0.978994 | 0.827866 |
| MmugDNA.40030.1.S1_at   | MmugDNA.40030.1 | 6.15  | 8.75  | 1.36 | 2.2  | -6.1  | 0.278516 | 0.36568  | 0.620548 | 0.605684 |
| MmugDNA.40031.1.S1_at   | MmugDNA.40031.1 | 5.01  | 4.76  | 0.21 | 0.36 | 1.18  | 0.49975  | 0.579912 | 0.759349 | 0.749335 |
| MmugDNA.40032.1.S1_x_at | MmugDNA.40032.1 | 9.27  | 8.18  | 0.75 | 0.36 | 2.13  | 0.082023 | 0.077332 | 0.433268 | 0.323135 |
| MmugDNA.40033.1.S1_at   | MmugDNA.40033.1 | 8.1   | 8.29  | 0.4  | 0.96 | -1.14 | 0.394018 | 0.429636 | 0.6956   | 0.650973 |

|                         |                 |       |       |      |      |       |          |          |          |          |
|-------------------------|-----------------|-------|-------|------|------|-------|----------|----------|----------|----------|
| MmugDNA.40034.1.S1_at   | MmugDNA.40034.1 | 9     | 9.19  | 0.49 | 0.67 | -1.14 | 0.876854 | 0.201253 | 0.950675 | 0.47571  |
| MmugDNA.40035.1.S1_at   | MmugDNA.40035.1 | 3.98  | 4.25  | 0.04 | 0.36 | -1.21 | 0.140171 | 0.146476 | 0.508065 | 0.420523 |
| MmugDNA.40037.1.S1_at   | MmugDNA.40037.1 | 4.47  | 4.77  | 0.21 | 0.08 | -1.24 | 0.129789 | 0.142966 | 0.495916 | 0.416854 |
| MmugDNA.40038.1.S1_at   | MmugDNA.40038.1 | 7.31  | 7.34  | 0.16 | 0.11 | -1.02 | 0.949653 | 0.604687 | 0.980873 | 0.764769 |
| MmugDNA.40039.1.S1_at   | MmugDNA.40039.1 | 4.72  | 4.86  | 0.29 | 0.2  | -1.11 | 0.387453 | 0.474213 | 0.691984 | 0.68135  |
| MmugDNA.4004.1.S1_at    | MmugDNA.4004.1  | 4.26  | 4.09  | 0.27 | 0.26 | 1.12  | 0.632423 | 0.350408 | 0.833214 | 0.594161 |
| MmugDNA.40040.1.S1_at   | MmugDNA.40040.1 | 5.78  | 5.9   | 0.21 | 0.03 | -1.09 | 0.422049 | 0.341895 | 0.71333  | 0.587972 |
| MmugDNA.40041.1.S1_at   | MmugDNA.40041.1 | 5.13  | 5.03  | 0.15 | 0.19 | 1.07  | 0.698158 | 0.540279 | 0.866049 | 0.724221 |
| MmugDNA.40042.1.S1_at   | MmugDNA.40042.1 | 7.04  | 6.64  | 1.26 | 0.07 | 1.32  | 0.550843 | 0.455816 | 0.788186 | 0.669659 |
| MmugDNA.40043.1.S1_at   | MmugDNA.40043.1 | 8.87  | 10.34 | 0.59 | 0.02 | -2.77 | 0.029615 | 0.018197 | 0.314949 | 0.169696 |
| MmugDNA.40044.1.S1_at   | MmugDNA.40044.1 | 3.19  | 3.2   | 0.17 | 0.23 | -1.01 | 0.81204  | 0.777007 | 0.923484 | 0.870467 |
| MmugDNA.40046.1.S1_at   | MmugDNA.40046.1 | 3.11  | 3.01  | 0.06 | 0.11 | 1.07  | 0.985083 | 0.591978 | 0.99475  | 0.757386 |
| MmugDNA.40048.1.S1_at   | MmugDNA.40048.1 | 8.93  | 7.38  | 0.25 | 0.74 | 2.94  | 0.024458 | 0.005677 | 0.294595 | 0.103959 |
| MmugDNA.40049.1.S1_at   | MmugDNA.40049.1 | 10.35 | 10.05 | 0.11 | 1.05 | 1.23  | 0.20608  | 0.24196  | 0.568474 | 0.512489 |
| MmugDNA.4005.1.S1_at    | MmugDNA.4005.1  | 7.7   | 7.8   | 0.04 | 0.34 | -1.07 | 0.920373 | 0.991715 | 0.968963 | 0.995392 |
| MmugDNA.4005.1.S1_x_at  | MmugDNA.4005.1  | 7.77  | 7.88  | 0.09 | 0.19 | -1.08 | 0.324497 | 0.224864 | 0.651941 | 0.497653 |
| MmugDNA.40050.1.S1_at   | MmugDNA.40050.1 | 5.21  | 4.68  | 0.35 | 0.36 | 1.44  | 0.178622 | 0.261412 | 0.542944 | 0.527887 |
| MmugDNA.40051.1.S1_at   | MmugDNA.40051.1 | 12.27 | 12.64 | 0.3  | 0.09 | -1.29 | 0.310389 | 0.483489 | 0.642372 | 0.687943 |
| MmugDNA.40052.1.S1_at   | MmugDNA.40052.1 | 3.79  | 3.76  | 0.07 | 0.23 | 1.02  | 0.869576 | 0.352501 | 0.947917 | 0.595747 |
| MmugDNA.40053.1.S1_at   | MmugDNA.40053.1 | 8.46  | 8.18  | 0.26 | 0.49 | 1.21  | 0.457655 | 0.532343 | 0.735025 | 0.719017 |
| MmugDNA.40053.1.S1_x_at | MmugDNA.40053.1 | 8.63  | 8.32  | 0.28 | 0.48 | 1.24  | 0.461924 | 0.608444 | 0.738043 | 0.767074 |
| MmugDNA.40054.1.S1_at   | MmugDNA.40054.1 | 4.34  | 3.43  | 1.04 | 0.35 | 1.88  | 0.254175 | 0.244978 | 0.602339 | 0.514782 |
| MmugDNA.40055.1.S1_at   | MmugDNA.40055.1 | 4.05  | 4.08  | 0.37 | 0.3  | -1.02 | 0.363227 | 0.675629 | 0.676579 | 0.810429 |
| MmugDNA.40056.1.S1_at   | MmugDNA.40056.1 | 5.69  | 5.65  | 0.52 | 0.15 | 1.03  | 0.245767 | 0.274505 | 0.597234 | 0.538987 |
| MmugDNA.40057.1.S1_at   | MmugDNA.40057.1 | 10.96 | 10.77 | 0.1  | 0.39 | 1.14  | 0.576725 | 0.12052  | 0.803224 | 0.38929  |
| MmugDNA.40062.1.S1_at   | MmugDNA.40062.1 | 5.45  | 5.69  | 0.29 | 0.12 | -1.17 | 0.73669  | 0.71415  | 0.886769 | 0.834155 |
| MmugDNA.40063.1.S1_at   | MmugDNA.40063.1 | 5.48  | 6.04  | 0.52 | 0.74 | -1.48 | 0.693758 | 0.253811 | 0.864214 | 0.52217  |
| MmugDNA.40064.1.S1_at   | MmugDNA.40064.1 | 2.77  | 2.87  | 0.05 | 0.16 | -1.08 | 0.252083 | 0.242202 | 0.601234 | 0.51267  |
| MmugDNA.40065.1.S1_at   | MmugDNA.40065.1 | 3.27  | 3.31  | 0.01 | 0.08 | -1.03 | 0.751705 | 0.900896 | 0.893893 | 0.943591 |
| MmugDNA.40067.1.S1_at   | MmugDNA.40067.1 | 7.07  | 5.58  | 0.61 | 0.24 | 2.81  | 0.040441 | 0.029747 | 0.349277 | 0.214138 |
| MmugDNA.40068.1.S1_at   | MmugDNA.40068.1 | 10.85 | 11.17 | 0.34 | 0.04 | -1.25 | 0.502725 | 0.280883 | 0.760493 | 0.544054 |
| MmugDNA.40069.1.S1_at   | MmugDNA.40069.1 | 8.91  | 9.36  | 0.11 | 0.38 | -1.36 | 0.091128 | 0.050844 | 0.4471   | 0.27076  |
| MmugDNA.4007.1.S1_at    | MmugDNA.4007.1  | 3.82  | 3.8   | 0.09 | 0.05 | 1.01  | 0.29839  | 0.00938  | 0.63393  | 0.127634 |
| MmugDNA.40070.1.S1_at   | MmugDNA.40070.1 | 4.85  | 4.83  | 0.17 | 0.14 | 1.02  | 0.864072 | 0.829207 | 0.945445 | 0.901809 |
| MmugDNA.40071.1.S1_at   | MmugDNA.40071.1 | 5.1   | 5.31  | 0.2  | 0.12 | -1.16 | 0.370555 | 0.451002 | 0.68157  | 0.665965 |
| MmugDNA.40072.1.S1_at   | MmugDNA.40072.1 | 8.02  | 8.19  | 0.29 | 0.66 | -1.13 | 0.317043 | 0.432302 | 0.647775 | 0.652778 |
| MmugDNA.40073.1.S1_at   | MmugDNA.40073.1 | 8.44  | 7.72  | 0.24 | 0.57 | 1.65  | 0.036912 | 0.015786 | 0.340493 | 0.159295 |
| MmugDNA.40074.1.S1_at   | MmugDNA.40074.1 | 6.64  | 6.27  | 0.65 | 0.63 | 1.29  | 0.234699 | 0.358249 | 0.588808 | 0.599765 |
| MmugDNA.40075.1.S1_at   | MmugDNA.40075.1 | 3.4   | 3.4   | 0.26 | 0.09 | -1    | 0.281526 | 0.333462 | 0.622236 | 0.581683 |
| MmugDNA.40076.1.S1_at   | MmugDNA.40076.1 | 3.75  | 3.57  | 0.39 | 0.07 | 1.13  | 0.161051 | 0.063709 | 0.526189 | 0.298899 |
| MmugDNA.40079.1.S1_at   | MmugDNA.40079.1 | 3.14  | 3.13  | 0.25 | 0.07 | 1.01  | 0.588331 | 0.258321 | 0.808931 | 0.5256   |

|                         |                 |       |       |      |      |       |          |          |          |          |
|-------------------------|-----------------|-------|-------|------|------|-------|----------|----------|----------|----------|
| MmugDNA.4008.1.S1_at    | MmugDNA.4008.1  | 4.07  | 4.29  | 0.24 | 0.17 | -1.17 | 0.169902 | 0.303702 | 0.534129 | 0.561115 |
| MmugDNA.40081.1.S1_at   | MmugDNA.40081.1 | 5.75  | 5.77  | 0.01 | 0.01 | -1.01 | 0.020804 | 0.124533 | 0.280629 | 0.394987 |
| MmugDNA.26770.1.S1_s_at | MmugDNA.26770.1 | 12.96 | 12.96 | 0.04 | 0.07 | 1     | 0.479057 | 0.003263 | 0.747575 | 0.082278 |
| MmugDNA.40082.1.S1_s_at | MmugDNA.40082.1 | 5.32  | 5.58  | 0.2  | 0.22 | -1.2  | 0.082075 | 0.052242 | 0.433268 | 0.274065 |
| MmugDNA.40083.1.S1_at   | MmugDNA.40083.1 | 3.2   | 3.21  | 0.03 | 0.08 | -1.01 | 0.629367 | 0.810491 | 0.831446 | 0.890812 |
| MmugDNA.40084.1.S1_at   | MmugDNA.40084.1 | 3.44  | 3.44  | 0.18 | 0.18 | -1    | 0.237283 | 0.432241 | 0.590811 | 0.652776 |
| MmugDNA.40087.1.S1_at   | MmugDNA.40087.1 | 3.58  | 3.58  | 0.05 | 0.13 | 1     | 0.398031 | 0.494167 | 0.698523 | 0.694704 |
| MmugDNA.40089.1.S1_at   | MmugDNA.40089.1 | 12.07 | 11.78 | 0.2  | 0.22 | 1.22  | 0.125353 | 0.152345 | 0.49131  | 0.427072 |
| MmugDNA.4009.1.S1_at    | MmugDNA.4009.1  | 5.6   | 4.56  | 1.34 | 0.52 | 2.06  | 0.341016 | 0.295645 | 0.662232 | 0.555108 |
| MmugDNA.40092.1.S1_at   | MmugDNA.40092.1 | 7.25  | 6.92  | 0.23 | 0.43 | 1.26  | 0.277752 | 0.398883 | 0.619903 | 0.629593 |
| MmugDNA.40093.1.S1_at   | MmugDNA.40093.1 | 5.79  | 5.89  | 0.32 | 0.3  | -1.07 | 0.611129 | 0.714375 | 0.821498 | 0.834282 |
| MmugDNA.40094.1.S1_at   | MmugDNA.40094.1 | 8.67  | 8.21  | 0.16 | 0.13 | 1.38  | 0.011361 | 0.012876 | 0.235384 | 0.146098 |
| MmugDNA.40095.1.S1_at   | MmugDNA.40095.1 | 9.59  | 9.93  | 0.09 | 0.34 | -1.27 | 0.055423 | 0.029151 | 0.383716 | 0.212767 |
| MmugDNA.40096.1.S1_at   | MmugDNA.40096.1 | 7.72  | 6.48  | 0.04 | 0.78 | 2.36  | 0.025939 | 0.011303 | 0.301229 | 0.138076 |
| MmugDNA.40098.1.S1_at   | MmugDNA.40098.1 | 8.02  | 8.27  | 0.13 | 0.09 | -1.19 | 0.05507  | 0.107335 | 0.383261 | 0.370219 |
| MmugDNA.40099.1.S1_at   | MmugDNA.40099.1 | 9.28  | 10.17 | 0.45 | 0.46 | -1.86 | 0.037007 | 0.033917 | 0.340567 | 0.227775 |
| MmugDNA.401.1.S1_at     | MmugDNA.401.1   | 3.69  | 4.01  | 0.24 | 0.5  | -1.25 | 0.132176 | 0.164942 | 0.49836  | 0.44123  |
| MmugDNA.4010.1.S1_at    | MmugDNA.4010.1  | 3.13  | 3.21  | 0.02 | 0.13 | -1.06 | 0.182605 | 0.305587 | 0.546812 | 0.562504 |
| MmugDNA.40100.1.S1_at   | MmugDNA.40100.1 | 9.4   | 9.44  | 0.13 | 0.08 | -1.03 | 0.981901 | 0.487201 | 0.993439 | 0.690322 |
| MmugDNA.40101.1.S1_at   | MmugDNA.40101.1 | 4.86  | 4.85  | 0.18 | 0.08 | 1.01  | 0.227565 | 0.334143 | 0.585103 | 0.582198 |
| MmugDNA.40102.1.S1_at   | MmugDNA.40102.1 | 8.19  | 9.1   | 0.59 | 0.35 | -1.88 | 0.107563 | 0.010405 | 0.468045 | 0.133414 |
| MmugDNA.40103.1.S1_at   | MmugDNA.40103.1 | 3.24  | 3.34  | 0    | 0.29 | -1.08 | 0.255124 | 0.193677 | 0.603094 | 0.468785 |
| MmugDNA.40104.1.S1_at   | MmugDNA.40104.1 | 3.84  | 3.75  | 0.04 | 0.06 | 1.06  | 0.043803 | 0.067125 | 0.357051 | 0.305093 |
| MmugDNA.40106.1.S1_at   | MmugDNA.40106.1 | 4.52  | 4.09  | 0.48 | 0.77 | 1.35  | 0.988713 | 0.949094 | 0.995952 | 0.970837 |
| MmugDNA.40107.1.S1_at   | MmugDNA.40107.1 | 5.02  | 4.84  | 0.79 | 0.46 | 1.13  | 0.521763 | 0.680744 | 0.771533 | 0.813572 |
| MmugDNA.40108.1.S1_at   | MmugDNA.40108.1 | 4.03  | 4.19  | 0.06 | 0.28 | -1.12 | 0.42232  | 0.532227 | 0.71345  | 0.718999 |
| MmugDNA.4011.1.S1_at    | MmugDNA.4011.1  | 4.45  | 4.37  | 0.67 | 0.17 | 1.06  | 0.56934  | 0.759121 | 0.79903  | 0.859979 |
| MmugDNA.40110.1.S1_at   | MmugDNA.40110.1 | 6.54  | 6.45  | 0.21 | 0.18 | 1.07  | 0.845868 | 0.810561 | 0.938187 | 0.890812 |
| MmugDNA.40111.1.S1_at   | MmugDNA.40111.1 | 5.27  | 5.52  | 0.9  | 0.24 | -1.19 | 0.914545 | 0.263008 | 0.966289 | 0.529397 |
| MmugDNA.40112.1.S1_at   | MmugDNA.40112.1 | 4.08  | 4.12  | 0.33 | 0.09 | -1.03 | 0.308273 | 0.467515 | 0.64064  | 0.677091 |
| MmugDNA.40114.1.S1_at   | MmugDNA.40114.1 | 10.98 | 11.23 | 0.07 | 0.21 | -1.19 | 0.100517 | 0.013882 | 0.461009 | 0.151137 |
| MmugDNA.40115.1.S1_at   | MmugDNA.40115.1 | 8.42  | 7.73  | 0.23 | 0.61 | 1.6   | 0.131929 | 0.137316 | 0.498114 | 0.41024  |
| MmugDNA.40116.1.S1_at   | MmugDNA.40116.1 | 6.66  | 6.82  | 0.19 | 0.19 | -1.11 | 0.439306 | 0.04592  | 0.723526 | 0.258722 |
| MmugDNA.40117.1.S1_at   | MmugDNA.40117.1 | 5.6   | 5.34  | 0.05 | 0.25 | 1.19  | 0.391257 | 0.295038 | 0.693992 | 0.554551 |
| MmugDNA.40119.1.S1_s_at | MmugDNA.40119.1 | 10.25 | 10.4  | 0.18 | 0.14 | -1.11 | 0.272375 | 0.282356 | 0.616016 | 0.545076 |
| MmugDNA.4012.1.S1_at    | MmugDNA.4012.1  | 7.61  | 8.1   | 0.25 | 0.23 | -1.41 | 0.040434 | 0.024763 | 0.349277 | 0.197124 |
| MmugDNA.40120.1.S1_at   | MmugDNA.40120.1 | 3.72  | 3.76  | 0.07 | 0.32 | -1.03 | 0.716398 | 0.890621 | 0.87544  | 0.937649 |
| MmugDNA.40121.1.S1_at   | MmugDNA.40121.1 | 11.91 | 12.3  | 0.08 | 0.12 | -1.32 | 0.02974  | 0.009285 | 0.315271 | 0.127101 |
| MmugDNA.40122.1.S1_at   | MmugDNA.40122.1 | 3.73  | 3.77  | 0.07 | 0.04 | -1.03 | 0.807468 | 0.634466 | 0.921226 | 0.784807 |
| MmugDNA.40123.1.S1_at   | MmugDNA.40123.1 | 11.5  | 10.78 | 0.27 | 0.64 | 1.65  | 0.141253 | 0.04404  | 0.508853 | 0.254195 |
| MmugDNA.40125.1.S1_at   | MmugDNA.40125.1 | 5.3   | 5.09  | 0.26 | 0.12 | 1.15  | 0.136098 | 0.050569 | 0.502944 | 0.27025  |

|                         |                 |       |       |      |      |       |          |          |          |          |
|-------------------------|-----------------|-------|-------|------|------|-------|----------|----------|----------|----------|
| MmugDNA.40126.1.S1_at   | MmugDNA.40126.1 | 3.51  | 3.54  | 0.07 | 0.08 | -1.02 | 0.59327  | 0.683606 | 0.811362 | 0.815387 |
| MmugDNA.40127.1.S1_at   | MmugDNA.40127.1 | 2.96  | 2.99  | 0.1  | 0.02 | -1.02 | 0.62804  | 0.810636 | 0.830492 | 0.890812 |
| MmugDNA.40128.1.S1_at   | MmugDNA.40128.1 | 4.11  | 3.97  | 0.15 | 0.11 | 1.1   | 0.694951 | 0.48852  | 0.864696 | 0.691222 |
| MmugDNA.40129.1.S1_at   | MmugDNA.40129.1 | 4.65  | 4.82  | 0.21 | 0.04 | -1.13 | 0.164021 | 0.119373 | 0.528211 | 0.387887 |
| MmugDNA.4013.1.S1_at    | MmugDNA.4013.1  | 4.09  | 4.15  | 0.19 | 0.2  | -1.04 | 0.370561 | 0.277781 | 0.68157  | 0.541664 |
| MmugDNA.40130.1.S1_at   | MmugDNA.40130.1 | 2.95  | 2.91  | 0.37 | 0.04 | 1.02  | 0.317437 | 0.315001 | 0.647902 | 0.568759 |
| MmugDNA.40131.1.S1_at   | MmugDNA.40131.1 | 4.75  | 4.96  | 0.27 | 0.08 | -1.16 | 0.226516 | 0.246591 | 0.584429 | 0.515917 |
| MmugDNA.40132.1.S1_at   | MmugDNA.40132.1 | 4.54  | 4.49  | 0.44 | 0.26 | 1.03  | 0.6376   | 0.609408 | 0.836256 | 0.767768 |
| MmugDNA.40133.1.S1_at   | MmugDNA.40133.1 | 11.82 | 10.79 | 0.04 | 0.48 | 2.03  | 0.04339  | 0.029184 | 0.356711 | 0.212861 |
| MmugDNA.40133.1.S1_s_at | MmugDNA.40133.1 | 12.11 | 11.29 | 0.06 | 0.44 | 1.77  | 0.061664 | 0.045188 | 0.396574 | 0.256979 |
| MmugDNA.40135.1.S1_at   | MmugDNA.40135.1 | 3.92  | 3.74  | 1.37 | 0.58 | 1.13  | 0.322926 | 0.514113 | 0.651259 | 0.707434 |
| MmugDNA.40136.1.S1_at   | MmugDNA.40136.1 | 8.25  | 9.85  | 0.81 | 1    | -3.05 | 0.119109 | 0.108301 | 0.483766 | 0.371557 |
| MmugDNA.4014.1.S1_at    | MmugDNA.4014.1  | 10.57 | 10.54 | 0.45 | 0.23 | 1.02  | 0.442176 | 0.296129 | 0.725394 | 0.555339 |
| MmugDNA.40140.1.S1_at   | MmugDNA.40140.1 | 3.03  | 3.02  | 0.04 | 0.08 | 1     | 0.279406 | 0.749775 | 0.621094 | 0.854593 |
| MmugDNA.40141.1.S1_at   | MmugDNA.40141.1 | 4.73  | 5.17  | 0.22 | 0.35 | -1.35 | 0.155451 | 0.209017 | 0.520186 | 0.482814 |
| MmugDNA.40142.1.S1_at   | MmugDNA.40142.1 | 7.95  | 6.79  | 0.06 | 0.27 | 2.25  | 0.002032 | 0.000369 | 0.155636 | 0.037273 |
| MmugDNA.40143.1.S1_at   | MmugDNA.40143.1 | 8.71  | 8.17  | 0.1  | 0.34 | 1.45  | 0.152823 | 0.132219 | 0.517325 | 0.404274 |
| MmugDNA.40145.1.S1_at   | MmugDNA.40145.1 | 11.97 | 11.99 | 0.03 | 0.15 | -1.02 | 0.71156  | 0.882145 | 0.873642 | 0.932822 |
| MmugDNA.40148.1.S1_at   | MmugDNA.40148.1 | 6.78  | 6.76  | 0.15 | 0.07 | 1.02  | 0.545941 | 0.296516 | 0.785219 | 0.555528 |
| MmugDNA.40149.1.S1_at   | MmugDNA.40149.1 | 5.26  | 5.29  | 0.3  | 0.02 | -1.02 | 0.9284   | 0.856051 | 0.972486 | 0.917823 |
| MmugDNA.4015.1.S1_at    | MmugDNA.4015.1  | 4.19  | 4.13  | 0.15 | 0.19 | 1.04  | 0.607451 | 0.654776 | 0.819336 | 0.798154 |
| MmugDNA.40150.1.S1_at   | MmugDNA.40150.1 | 6.22  | 6.45  | 0.09 | 0.12 | -1.17 | 0.043302 | 0.070064 | 0.3567   | 0.310966 |
| MmugDNA.40151.1.S1_at   | MmugDNA.40151.1 | 11.51 | 11.46 | 0.17 | 0.11 | 1.03  | 0.751902 | 0.818724 | 0.894019 | 0.895529 |
| MmugDNA.40152.1.S1_at   | MmugDNA.40152.1 | 4.89  | 4.91  | 0.08 | 0.04 | -1.01 | 0.556325 | 0.750065 | 0.79173  | 0.854684 |
| MmugDNA.40154.1.S1_at   | MmugDNA.40154.1 | 7.55  | 7.52  | 0.11 | 0.06 | 1.02  | 0.364006 | 0.647798 | 0.677121 | 0.793775 |
| MmugDNA.40155.1.S1_at   | MmugDNA.40155.1 | 10.41 | 9.91  | 0.07 | 0.34 | 1.42  | 0.101539 | 0.111954 | 0.461313 | 0.377063 |
| MmugDNA.40156.1.S1_at   | MmugDNA.40156.1 | 13.25 | 13.46 | 0.16 | 0.12 | -1.16 | 0.143331 | 0.133381 | 0.510223 | 0.405193 |
| MmugDNA.40157.1.S1_at   | MmugDNA.40157.1 | 7.24  | 7.31  | 0.18 | 0.1  | -1.05 | 0.780598 | 0.299274 | 0.90855  | 0.557769 |
| MmugDNA.40158.1.S1_at   | MmugDNA.40158.1 | 4.87  | 4.56  | 0.85 | 0.34 | 1.23  | 0.337946 | 0.212038 | 0.660462 | 0.486013 |
| MmugDNA.40159.1.S1_s_at | MmugDNA.40159.1 | 7.85  | 7.58  | 0.05 | 0.17 | 1.21  | 0.062551 | 0.059517 | 0.398492 | 0.290548 |
| MmugDNA.4016.1.S1_at    | MmugDNA.4016.1  | 9.79  | 10.63 | 0.23 | 0.06 | -1.79 | 0.004397 | 0.002968 | 0.183061 | 0.079958 |
| MmugDNA.40160.1.S1_at   | MmugDNA.40160.1 | 5.86  | 5.19  | 0.35 | 0.56 | 1.59  | 0.324159 | 0.056697 | 0.651856 | 0.284213 |
| MmugDNA.40161.1.S1_at   | MmugDNA.40161.1 | 4.25  | 4.12  | 0.22 | 0.25 | 1.09  | 0.960529 | 0.560024 | 0.9849   | 0.736441 |
| MmugDNA.40162.1.S1_at   | MmugDNA.40162.1 | 6.12  | 5.94  | 0.1  | 0.18 | 1.13  | 0.121954 | 0.166313 | 0.486957 | 0.442861 |
| MmugDNA.40163.1.S1_at   | MmugDNA.40163.1 | 7.01  | 7.07  | 0.09 | 0.11 | -1.04 | 0.309781 | 0.334796 | 0.641716 | 0.582702 |
| MmugDNA.40165.1.S1_at   | MmugDNA.40165.1 | 12.19 | 12.26 | 0.16 | 0.93 | -1.05 | 0.395374 | 0.42482  | 0.696441 | 0.64729  |
| MmugDNA.40166.1.S1_at   | MmugDNA.40166.1 | 8.26  | 7.99  | 1.21 | 0.7  | 1.2   | 0.182038 | 0.225724 | 0.546458 | 0.498159 |
| MmugDNA.40167.1.S1_at   | MmugDNA.40167.1 | 6.88  | 7.6   | 0.57 | 0.84 | -1.64 | 0.910269 | 0.547998 | 0.964495 | 0.72884  |
| MmugDNA.40168.1.S1_at   | MmugDNA.40168.1 | 4.06  | 4.2   | 0.11 | 0.06 | -1.1  | 0.081813 | 0.076949 | 0.432853 | 0.322421 |
| MmugDNA.40169.1.S1_at   | MmugDNA.40169.1 | 8.09  | 8.09  | 0.26 | 0.32 | -1    | 0.852196 | 0.756022 | 0.940569 | 0.857974 |
| MmugDNA.4017.1.S1_at    | MmugDNA.4017.1  | 3.6   | 3.83  | 0.2  | 0.09 | -1.18 | 0.243072 | 0.410331 | 0.594744 | 0.637216 |

|                         |                 |       |       |      |      |       |          |          |          |          |
|-------------------------|-----------------|-------|-------|------|------|-------|----------|----------|----------|----------|
| MmugDNA.40171.1.S1_at   | MmugDNA.40171.1 | 7.04  | 6.48  | 0.69 | 0.66 | 1.48  | 0.400568 | 0.230155 | 0.70015  | 0.502007 |
| MmugDNA.40172.1.S1_at   | MmugDNA.40172.1 | 4.71  | 4.87  | 0.1  | 0.16 | -1.11 | 0.981253 | 0.152934 | 0.993259 | 0.42777  |
| MmugDNA.40173.1.S1_at   | MmugDNA.40173.1 | 3.36  | 3.19  | 0.27 | 0.14 | 1.12  | 0.390928 | 0.226022 | 0.693845 | 0.498465 |
| MmugDNA.40174.1.S1_at   | MmugDNA.40174.1 | 5.51  | 5.39  | 0.13 | 0.09 | 1.09  | 0.618222 | 0.62176  | 0.825111 | 0.776338 |
| MmugDNA.40175.1.S1_at   | MmugDNA.40175.1 | 5.65  | 6.73  | 0.77 | 1    | -2.11 | 0.452796 | 0.555841 | 0.732217 | 0.734119 |
| MmugDNA.40176.1.S1_at   | MmugDNA.40176.1 | 9.29  | 8.36  | 0.29 | 1.06 | 1.9   | 0.074275 | 0.044433 | 0.419963 | 0.25521  |
| MmugDNA.40177.1.S1_at   | MmugDNA.40177.1 | 5.61  | 4.94  | 0.49 | 0.2  | 1.59  | 0.273063 | 0.014196 | 0.616536 | 0.152173 |
| MmugDNA.40179.1.S1_at   | MmugDNA.40179.1 | 3.83  | 3.89  | 0.45 | 0.29 | -1.04 | 0.749249 | 0.929325 | 0.892627 | 0.959675 |
| MmugDNA.4018.1.S1_at    | MmugDNA.4018.1  | 4.49  | 4.26  | 1.05 | 0.77 | 1.17  | 0.630997 | 0.652852 | 0.832434 | 0.797104 |
| MmugDNA.40180.1.S1_at   | MmugDNA.40180.1 | 4.51  | 5.15  | 0.72 | 0.29 | -1.57 | 0.64536  | 0.740585 | 0.840339 | 0.849805 |
| MmugDNA.40181.1.S1_at   | MmugDNA.40181.1 | 7.09  | 7.14  | 0.05 | 0.09 | -1.04 | 0.295354 | 0.41757  | 0.631605 | 0.642252 |
| MmugDNA.40181.1.S1_s_at | MmugDNA.40181.1 | 5.38  | 4.98  | 0.22 | 0.42 | 1.31  | 0.90739  | 0.486073 | 0.963236 | 0.689573 |
| MmugDNA.40182.1.S1_at   | MmugDNA.40182.1 | 4.27  | 4.1   | 0.17 | 0.1  | 1.12  | 0.231511 | 0.118781 | 0.587406 | 0.386875 |
| MmugDNA.40183.1.S1_at   | MmugDNA.40183.1 | 7.72  | 7.61  | 0.13 | 0.12 | 1.08  | 0.379146 | 0.398988 | 0.686752 | 0.629665 |
| MmugDNA.40184.1.S1_at   | MmugDNA.40184.1 | 3.24  | 3.11  | 0.03 | 0.1  | 1.1   | 0.115361 | 0.266125 | 0.478773 | 0.531957 |
| MmugDNA.40185.1.S1_at   | MmugDNA.40185.1 | 4.75  | 5.25  | 0.42 | 0.29 | -1.42 | 0.470395 | 0.304238 | 0.742378 | 0.561558 |
| MmugDNA.40186.1.S1_at   | MmugDNA.40186.1 | 7.03  | 6.94  | 0.19 | 0.08 | 1.06  | 0.629212 | 0.58333  | 0.831363 | 0.751719 |
| MmugDNA.40187.1.S1_at   | MmugDNA.40187.1 | 3.37  | 3.14  | 0.23 | 0.01 | 1.18  | 0.152227 | 0.055965 | 0.51689  | 0.28236  |
| MmugDNA.40188.1.S1_at   | MmugDNA.40188.1 | 11.58 | 11.02 | 0.45 | 1.83 | 1.48  | 0.215225 | 0.267876 | 0.575623 | 0.533607 |
| MmugDNA.40189.1.S1_at   | MmugDNA.40189.1 | 11.55 | 12    | 0.13 | 0.52 | -1.37 | 0.175124 | 0.085477 | 0.538831 | 0.337473 |
| MmugDNA.40191.1.S1_at   | MmugDNA.40191.1 | 5.78  | 5.77  | 0.09 | 0.04 | 1.01  | 0.867879 | 0.584482 | 0.947272 | 0.752435 |
| MmugDNA.40191.1.S1_x_at | MmugDNA.40191.1 | 6.22  | 6.22  | 0.04 | 0.06 | -1    | 0.511149 | 0.103098 | 0.765254 | 0.364006 |
| MmugDNA.40194.1.S1_at   | MmugDNA.40194.1 | 11.62 | 12.16 | 0.12 | 0.17 | -1.45 | 0.021927 | 0.006317 | 0.284384 | 0.107907 |
| MmugDNA.36623.1.S1_s_at | MmugDNA.36623.1 | 11.07 | 11.62 | 0.1  | 0.15 | -1.46 | 0.010747 | 0.00171  | 0.23109  | 0.062657 |
| MmugDNA.40195.1.S1_at   | MmugDNA.40195.1 | 7.03  | 6.18  | 0.55 | 0.69 | 1.8   | 0.353165 | 0.520641 | 0.670068 | 0.711831 |
| MmugDNA.40196.1.S1_at   | MmugDNA.40196.1 | 3.56  | 3.12  | 0.29 | 0.18 | 1.35  | 0.086777 | 0.008289 | 0.440475 | 0.120788 |
| MmugDNA.40197.1.S1_at   | MmugDNA.40197.1 | 7.47  | 8.22  | 0.32 | 0.55 | -1.67 | 0.027954 | 0.017043 | 0.309162 | 0.165455 |
| MmugDNA.40199.1.S1_at   | MmugDNA.40199.1 | 7.14  | 6.88  | 0.23 | 0.45 | 1.2   | 0.425523 | 0.52175  | 0.715135 | 0.712623 |
| MmugDNA.402.1.S1_at     | MmugDNA.402.1   | 6.03  | 5.95  | 0.46 | 0.07 | 1.06  | 0.262927 | 0.326893 | 0.609125 | 0.576848 |
| MmugDNA.4020.1.S1_at    | MmugDNA.4020.1  | 3.27  | 3.28  | 0.21 | 0.1  | -1.01 | 0.647189 | 0.81963  | 0.841246 | 0.896113 |
| MmugDNA.40200.1.S1_at   | MmugDNA.40200.1 | 9.15  | 8.71  | 0.68 | 0.14 | 1.36  | 0.576206 | 0.744787 | 0.802812 | 0.852198 |
| MmugDNA.21349.1.S1_s_at | MmugDNA.21349.1 | 3.21  | 3.55  | 0.05 | 0.26 | -1.26 | 0.104407 | 0.160148 | 0.464351 | 0.436296 |
| MmugDNA.40202.1.S1_at   | MmugDNA.40202.1 | 4.28  | 4.55  | 0.15 | 0.13 | -1.2  | 0.431466 | 0.169918 | 0.718589 | 0.446569 |
| MmugDNA.40203.1.S1_at   | MmugDNA.40203.1 | 10.74 | 11.06 | 0.25 | 0.13 | -1.25 | 0.094972 | 0.056137 | 0.452531 | 0.282825 |
| MmugDNA.40205.1.S1_at   | MmugDNA.40205.1 | 4.84  | 4.91  | 0.12 | 0.09 | -1.05 | 0.274153 | 0.396752 | 0.617262 | 0.628438 |
| MmugDNA.40207.1.S1_at   | MmugDNA.40207.1 | 13    | 12.82 | 0.11 | 0.1  | 1.14  | 0.086168 | 0.080747 | 0.440123 | 0.328632 |
| MmugDNA.40207.1.S1_s_at | MmugDNA.40207.1 | 12.87 | 12.74 | 0.18 | 0.13 | 1.1   | 0.284749 | 0.379167 | 0.624417 | 0.616153 |
| MmugDNA.40209.1.S1_at   | MmugDNA.40209.1 | 4.6   | 4.68  | 0.02 | 0.24 | -1.06 | 0.170267 | 0.101315 | 0.534249 | 0.361094 |
| MmugDNA.4021.1.S1_at    | MmugDNA.4021.1  | 4.58  | 4.7   | 0.15 | 0.18 | -1.08 | 0.696801 | 0.557663 | 0.865498 | 0.735165 |
| MmugDNA.40210.1.S1_at   | MmugDNA.40210.1 | 5.74  | 5.77  | 0.23 | 0.92 | -1.03 | 0.431011 | 0.418164 | 0.718433 | 0.642638 |
| MmugDNA.40211.1.S1_at   | MmugDNA.40211.1 | 5.98  | 6.1   | 0.23 | 0.19 | -1.08 | 0.932674 | 0.505672 | 0.973942 | 0.702218 |

|                         |                 |      |       |      |      |       |          |          |          |          |
|-------------------------|-----------------|------|-------|------|------|-------|----------|----------|----------|----------|
| MmugDNA.40212.1.S1_at   | MmugDNA.40212.1 | 6.03 | 6.04  | 0.12 | 0.04 | -1    | 0.517374 | 0.658392 | 0.76876  | 0.800319 |
| MmugDNA.40214.1.S1_at   | MmugDNA.40214.1 | 3.12 | 3.24  | 0.31 | 0.25 | -1.09 | 0.855596 | 0.018016 | 0.941588 | 0.169255 |
| MmugDNA.40215.1.S1_at   | MmugDNA.40215.1 | 3.41 | 3.56  | 0.25 | 0.09 | -1.11 | 0.982096 | 0.999321 | 0.993449 | 0.999756 |
| MmugDNA.40216.1.S1_at   | MmugDNA.40216.1 | 6.27 | 6.34  | 0.19 | 0.24 | -1.05 | 0.866168 | 0.69288  | 0.946582 | 0.82128  |
| MmugDNA.40217.1.S1_at   | MmugDNA.40217.1 | 5.79 | 5.69  | 0.13 | 0.05 | 1.07  | 0.414834 | 0.504851 | 0.709338 | 0.701897 |
| MmugDNA.4022.1.S1_at    | MmugDNA.4022.1  | 3.44 | 3.44  | 0.08 | 0.02 | 1     | 0.347085 | 0.118306 | 0.666207 | 0.386327 |
| MmugDNA.40220.1.S1_at   | MmugDNA.40220.1 | 4.28 | 4.21  | 0.12 | 0.18 | 1.05  | 0.316567 | 0.581807 | 0.647551 | 0.750781 |
| MmugDNA.40221.1.S1_at   | MmugDNA.40221.1 | 4.52 | 3.3   | 0.39 | 0.16 | 2.34  | 0.01437  | 0.003888 | 0.251885 | 0.088775 |
| MmugDNA.40222.1.S1_at   | MmugDNA.40222.1 | 6.1  | 6.52  | 0.76 | 0.1  | -1.34 | 0.954271 | 0.640685 | 0.983073 | 0.789053 |
| MmugDNA.40223.1.S1_at   | MmugDNA.40223.1 | 4.26 | 4.27  | 0.27 | 0.05 | -1.01 | 0.429272 | 0.453318 | 0.717422 | 0.667688 |
| MmugDNA.40224.1.S1_at   | MmugDNA.40224.1 | 7.15 | 7.09  | 0.32 | 0.43 | 1.04  | 0.974743 | 0.484538 | 0.990134 | 0.688536 |
| MmugDNA.40226.1.S1_at   | MmugDNA.40226.1 | 4.09 | 4.65  | 0.08 | 0.19 | -1.48 | 0.008562 | 0.005752 | 0.21941  | 0.104378 |
| MmugDNA.40229.1.S1_s_at | MmugDNA.40229.1 | 8.94 | 8.9   | 0.22 | 0.11 | 1.03  | 0.984968 | 0.66863  | 0.994692 | 0.806111 |
| MmugDNA.4023.1.S1_at    | MmugDNA.4023.1  | 4.18 | 5.33  | 0.36 | 1.56 | -2.22 | 0.366469 | 0.55966  | 0.679053 | 0.736365 |
| MmugDNA.40231.1.S1_at   | MmugDNA.40231.1 | 3.5  | 3.63  | 0.15 | 0.02 | -1.1  | 0.161911 | 0.169366 | 0.526573 | 0.445983 |
| MmugDNA.40234.1.S1_at   | MmugDNA.40234.1 | 5.82 | 5.87  | 0.14 | 0.14 | -1.04 | 0.532072 | 0.117577 | 0.777626 | 0.38531  |
| MmugDNA.40235.1.S1_at   | MmugDNA.40235.1 | 7.93 | 7.47  | 0.15 | 0.54 | 1.37  | 0.102425 | 0.141549 | 0.462321 | 0.415063 |
| MmugDNA.40237.1.S1_at   | MmugDNA.40237.1 | 5    | 5.65  | 1.45 | 1.09 | -1.57 | 0.490191 | 0.664624 | 0.754364 | 0.803461 |
| MmugDNA.40238.1.S1_at   | MmugDNA.40238.1 | 5.75 | 5.82  | 0.14 | 0.23 | -1.05 | 0.296635 | 0.471305 | 0.632686 | 0.679323 |
| MmugDNA.40239.1.S1_at   | MmugDNA.40239.1 | 4.24 | 4.44  | 0.31 | 0.06 | -1.15 | 0.794778 | 0.917004 | 0.914801 | 0.953623 |
| MmugDNA.21359.1.S1_s_at | MmugDNA.21359.1 | 6.13 | 6.2   | 0.01 | 0.17 | -1.05 | 0.281326 | 0.262073 | 0.622193 | 0.528374 |
| MmugDNA.40240.1.S1_at   | MmugDNA.40240.1 | 5.69 | 5.68  | 0.1  | 0.3  | 1.01  | 0.767003 | 0.737317 | 0.902061 | 0.847869 |
| MmugDNA.40241.1.S1_at   | MmugDNA.40241.1 | 9.75 | 10.95 | 0.12 | 0.31 | -2.3  | 0.003278 | 0.000765 | 0.176636 | 0.04544  |
| MmugDNA.40242.1.S1_at   | MmugDNA.40242.1 | 5.18 | 6.21  | 0.03 | 0.82 | -2.03 | 0.299289 | 0.136666 | 0.634833 | 0.409207 |
| MmugDNA.40243.1.S1_at   | MmugDNA.40243.1 | 4.53 | 3.92  | 1.11 | 1.79 | 1.53  | 0.831807 | 0.849919 | 0.931835 | 0.914673 |
| MmugDNA.40244.1.S1_at   | MmugDNA.40244.1 | 5.44 | 5.72  | 0.4  | 0.1  | -1.22 | 0.235182 | 0.250719 | 0.589342 | 0.51941  |
| MmugDNA.40245.1.S1_at   | MmugDNA.40245.1 | 4.05 | 3.55  | 1.19 | 0.47 | 1.41  | 0.282635 | 0.305387 | 0.623004 | 0.562397 |
| MmugDNA.40247.1.S1_at   | MmugDNA.40247.1 | 2.88 | 3.02  | 0.03 | 0.27 | -1.1  | 0.367135 | 0.340332 | 0.679287 | 0.586725 |
| MmugDNA.40248.1.S1_at   | MmugDNA.40248.1 | 6.38 | 6.14  | 0.2  | 0.16 | 1.18  | 0.363633 | 0.60245  | 0.676829 | 0.763411 |
| MmugDNA.40249.1.S1_at   | MmugDNA.40249.1 | 8.51 | 6.69  | 0.56 | 0.71 | 3.53  | 0.013298 | 0.004441 | 0.246471 | 0.092958 |
| MmugDNA.4025.1.S1_at    | MmugDNA.4025.1  | 3.61 | 3.41  | 0.1  | 0.25 | 1.15  | 0.274068 | 0.136068 | 0.617262 | 0.408363 |
| MmugDNA.40250.1.S1_at   | MmugDNA.40250.1 | 5.27 | 5.14  | 0.12 | 0.13 | 1.09  | 0.326272 | 0.485544 | 0.653184 | 0.689192 |
| MmugDNA.40251.1.S1_at   | MmugDNA.40251.1 | 9.47 | 10.02 | 0.11 | 0.25 | -1.46 | 0.025681 | 0.016786 | 0.300275 | 0.164091 |
| MmugDNA.40252.1.S1_at   | MmugDNA.40252.1 | 7.32 | 7.18  | 0.17 | 0.19 | 1.1   | 0.536089 | 0.699591 | 0.779351 | 0.825531 |
| MmugDNA.40253.1.S1_at   | MmugDNA.40253.1 | 5.42 | 5.68  | 0.08 | 0.13 | -1.2  | 0.026428 | 0.01325  | 0.303192 | 0.147683 |
| MmugDNA.40255.1.S1_at   | MmugDNA.40255.1 | 3.35 | 3.27  | 0.13 | 0.19 | 1.06  | 0.770975 | 0.507362 | 0.903556 | 0.702917 |
| MmugDNA.40256.1.S1_at   | MmugDNA.40256.1 | 5.97 | 6.08  | 0.12 | 0.02 | -1.08 | 0.206217 | 0.098964 | 0.568505 | 0.357049 |
| MmugDNA.40257.1.S1_at   | MmugDNA.40257.1 | 8.1  | 8.31  | 0.32 | 1.01 | -1.16 | 0.62582  | 0.803972 | 0.829172 | 0.887203 |
| MmugDNA.40260.1.S1_at   | MmugDNA.40260.1 | 4.56 | 4.38  | 0.27 | 0.17 | 1.14  | 0.136045 | 0.534367 | 0.502868 | 0.720341 |
| MmugDNA.40262.1.S1_at   | MmugDNA.40262.1 | 3.18 | 3.14  | 0.07 | 0.12 | 1.03  | 0.94619  | 0.483745 | 0.979359 | 0.688112 |
| MmugDNA.40263.1.S1_at   | MmugDNA.40263.1 | 4.08 | 4.23  | 0.04 | 0.08 | -1.11 | 0.11895  | 0.167739 | 0.483567 | 0.444282 |

|                         |                 |       |       |      |      |       |          |          |          |          |
|-------------------------|-----------------|-------|-------|------|------|-------|----------|----------|----------|----------|
| MmugDNA.40265.1.S1_at   | MmugDNA.40265.1 | 9.29  | 9.1   | 0.03 | 0.05 | 1.14  | 0.002615 | 0.004047 | 0.164386 | 0.090281 |
| MmugDNA.40266.1.S1_at   | MmugDNA.40266.1 | 3.91  | 4.32  | 0.14 | 0.04 | -1.33 | 0.009173 | 0.009969 | 0.222493 | 0.131094 |
| MmugDNA.40267.1.S1_at   | MmugDNA.40267.1 | 4.2   | 4.76  | 0.18 | 0.2  | -1.48 | 0.040855 | 0.029942 | 0.350506 | 0.214776 |
| MmugDNA.40268.1.S1_at   | MmugDNA.40268.1 | 6.28  | 5.92  | 0.41 | 0.1  | 1.29  | 0.14858  | 0.117908 | 0.51391  | 0.385837 |
| MmugDNA.40268.1.S1_x_at | MmugDNA.40268.1 | 6.19  | 5.82  | 0.45 | 0.21 | 1.29  | 0.153864 | 0.157343 | 0.518485 | 0.432821 |
| MmugDNA.40269.1.S1_at   | MmugDNA.40269.1 | 4.57  | 4.52  | 0.16 | 0.3  | 1.03  | 0.789202 | 0.941591 | 0.912479 | 0.966886 |
| MmugDNA.4027.1.S1_at    | MmugDNA.4027.1  | 5.48  | 5.33  | 0.13 | 0.1  | 1.11  | 0.248249 | 0.122012 | 0.599152 | 0.391465 |
| MmugDNA.40270.1.S1_at   | MmugDNA.40270.1 | 5.34  | 5.33  | 0.5  | 0.19 | 1.01  | 0.569052 | 0.355841 | 0.798952 | 0.597864 |
| MmugDNA.40270.1.S1_x_at | MmugDNA.40270.1 | 5.15  | 5.03  | 0.51 | 0.04 | 1.09  | 0.235341 | 0.237663 | 0.589342 | 0.50826  |
| MmugDNA.40271.1.S1_at   | MmugDNA.40271.1 | 8.5   | 8.46  | 0.22 | 0.23 | 1.03  | 0.316673 | 0.547089 | 0.647624 | 0.728283 |
| MmugDNA.40272.1.S1_at   | MmugDNA.40272.1 | 3.95  | 3.71  | 0.06 | 0.08 | 1.19  | 0.049147 | 0.102888 | 0.370772 | 0.363508 |
| MmugDNA.40273.1.S1_at   | MmugDNA.40273.1 | 7.44  | 8.23  | 0.55 | 0.16 | -1.73 | 0.089961 | 0.093793 | 0.445437 | 0.350281 |
| MmugDNA.40275.1.S1_at   | MmugDNA.40275.1 | 8.76  | 8.44  | 0.7  | 0.18 | 1.25  | 0.832444 | 0.925914 | 0.932134 | 0.958059 |
| MmugDNA.40276.1.S1_at   | MmugDNA.40276.1 | 9.2   | 9.28  | 0.13 | 0.16 | -1.06 | 0.373009 | 0.418937 | 0.683198 | 0.643157 |
| MmugDNA.40277.1.S1_at   | MmugDNA.40277.1 | 4.47  | 4.22  | 0.57 | 0.26 | 1.19  | 0.522616 | 0.414856 | 0.772166 | 0.640481 |
| MmugDNA.40278.1.S1_at   | MmugDNA.40278.1 | 3.97  | 4.23  | 0.18 | 0.16 | -1.2  | 0.56415  | 0.240817 | 0.796418 | 0.511521 |
| MmugDNA.40279.1.S1_at   | MmugDNA.40279.1 | 7.44  | 7.49  | 0.14 | 0.05 | -1.04 | 0.757267 | 0.071057 | 0.897006 | 0.312724 |
| MmugDNA.4028.1.S1_at    | MmugDNA.4028.1  | 6.29  | 6.3   | 0.1  | 0.12 | -1.01 | 0.500035 | 0.634653 | 0.759402 | 0.784964 |
| MmugDNA.4028.1.S1_s_at  | MmugDNA.4028.1  | 9.03  | 10.32 | 0.92 | 1.73 | -2.44 | 0.729715 | 0.889252 | 0.88278  | 0.936852 |
| MmugDNA.40280.1.S1_at   | MmugDNA.40280.1 | 5.24  | 5.39  | 0.11 | 0.08 | -1.11 | 0.607031 | 0.029316 | 0.819156 | 0.21321  |
| MmugDNA.40281.1.S1_at   | MmugDNA.40281.1 | 4.43  | 4.29  | 0.31 | 0.08 | 1.1   | 0.632083 | 0.249867 | 0.833024 | 0.518876 |
| MmugDNA.40282.1.S1_at   | MmugDNA.40282.1 | 5.98  | 4.77  | 0.82 | 0.24 | 2.32  | 0.073856 | 0.083146 | 0.419443 | 0.332999 |
| MmugDNA.40284.1.S1_at   | MmugDNA.40284.1 | 4.6   | 4.7   | 0.03 | 0.16 | -1.07 | 0.959998 | 0.857297 | 0.98486  | 0.918526 |
| MmugDNA.40285.1.S1_at   | MmugDNA.40285.1 | 10.41 | 10.75 | 0.08 | 0.18 | -1.26 | 0.025992 | 0.021389 | 0.301367 | 0.183143 |
| MmugDNA.40286.1.S1_at   | MmugDNA.40286.1 | 7.37  | 7.03  | 0.85 | 0.83 | 1.27  | 0.640318 | 0.390115 | 0.837613 | 0.624002 |
| MmugDNA.40287.1.S1_at   | MmugDNA.40287.1 | 5.15  | 5.13  | 0.13 | 0.14 | 1.01  | 0.656123 | 0.806455 | 0.845317 | 0.888651 |
| MmugDNA.40289.1.S1_at   | MmugDNA.40289.1 | 7.19  | 6.53  | 0.82 | 0.52 | 1.58  | 0.123686 | 0.122216 | 0.489492 | 0.391921 |
| MmugDNA.40290.1.S1_at   | MmugDNA.40290.1 | 5.64  | 6.13  | 0.51 | 0.31 | -1.41 | 0.121075 | 0.073141 | 0.485798 | 0.316064 |
| MmugDNA.40293.1.S1_x_at | MmugDNA.40293.1 | 6.62  | 6.46  | 0.58 | 0.25 | 1.11  | 0.207816 | 0.257865 | 0.569822 | 0.525467 |
| MmugDNA.40295.1.S1_at   | MmugDNA.40295.1 | 4.8   | 4.88  | 0.13 | 0.1  | -1.06 | 0.791316 | 0.36771  | 0.913323 | 0.607374 |
| MmugDNA.40296.1.S1_at   | MmugDNA.40296.1 | 7.88  | 7.44  | 1.22 | 0.25 | 1.36  | 0.227261 | 0.309379 | 0.585089 | 0.564912 |
| MmugDNA.40298.1.S1_at   | MmugDNA.40298.1 | 3.72  | 3.77  | 0.06 | 0.08 | -1.04 | 0.14186  | 0.287655 | 0.509205 | 0.548886 |
| MmugDNA.40299.1.S1_at   | MmugDNA.40299.1 | 7.64  | 7.64  | 0.24 | 0.19 | -1    | 0.951533 | 0.587867 | 0.981848 | 0.754542 |
| MmugDNA.4030.1.S1_at    | MmugDNA.4030.1  | 5.44  | 5.21  | 0.32 | 0.06 | 1.17  | 0.229581 | 0.29425  | 0.586715 | 0.55405  |
| MmugDNA.40300.1.S1_at   | MmugDNA.40300.1 | 4.01  | 3.96  | 0.09 | 0.06 | 1.04  | 0.705919 | 0.862794 | 0.87036  | 0.922006 |
| MmugDNA.40301.1.S1_at   | MmugDNA.40301.1 | 10.03 | 9.73  | 0.49 | 0.35 | 1.23  | 0.389141 | 0.449823 | 0.692939 | 0.665284 |
| MmugDNA.40301.1.S1_s_at | MmugDNA.40301.1 | 9.41  | 9.29  | 0.53 | 0.28 | 1.08  | 0.497448 | 0.330423 | 0.757987 | 0.579191 |
| MmugDNA.40302.1.S1_s_at | MmugDNA.40302.1 | 4.88  | 6.32  | 0.43 | 1.1  | -2.73 | 0.144534 | 0.150343 | 0.511015 | 0.42489  |
| MmugDNA.40303.1.S1_at   | MmugDNA.40303.1 | 8.01  | 7.53  | 0.26 | 0.31 | 1.4   | 0.329268 | 0.45466  | 0.654905 | 0.668763 |
| MmugDNA.40304.1.S1_at   | MmugDNA.40304.1 | 4.21  | 4.94  | 0.85 | 0.43 | -1.66 | 0.690135 | 0.698896 | 0.861921 | 0.825026 |
| MmugDNA.40306.1.S1_at   | MmugDNA.40306.1 | 6.5   | 6.68  | 0.17 | 0.14 | -1.13 | 0.175455 | 0.400139 | 0.539219 | 0.630158 |

|                         |                 |       |       |      |      |       |          |          |          |          |
|-------------------------|-----------------|-------|-------|------|------|-------|----------|----------|----------|----------|
| MmugDNA.40308.1.S1_at   | MmugDNA.40308.1 | 4.59  | 4.56  | 0.2  | 0.01 | 1.02  | 0.636694 | 0.717035 | 0.835714 | 0.836191 |
| MmugDNA.40312.1.S1_at   | MmugDNA.40312.1 | 4.57  | 4.75  | 0.33 | 0.77 | -1.13 | 0.368417 | 0.472891 | 0.679933 | 0.680219 |
| MmugDNA.40313.1.S1_at   | MmugDNA.40313.1 | 8.13  | 8.52  | 0.66 | 1.35 | -1.31 | 0.643805 | 0.705434 | 0.839659 | 0.829222 |
| MmugDNA.40316.1.S1_at   | MmugDNA.40316.1 | 3.99  | 3.8   | 0.4  | 0.2  | 1.14  | 0.67925  | 0.36246  | 0.856515 | 0.603016 |
| MmugDNA.40317.1.S1_at   | MmugDNA.40317.1 | 10.99 | 10.73 | 0.04 | 0.05 | 1.2   | 0.002151 | 0.00083  | 0.15882  | 0.046851 |
| MmugDNA.40318.1.S1_at   | MmugDNA.40318.1 | 4.55  | 4.82  | 0.55 | 0.59 | -1.21 | 0.570786 | 0.663911 | 0.799645 | 0.803242 |
| MmugDNA.40320.1.S1_at   | MmugDNA.40320.1 | 3.97  | 3.23  | 1.26 | 0.23 | 1.67  | 0.240165 | 0.241719 | 0.593037 | 0.512306 |
| MmugDNA.40321.1.S1_at   | MmugDNA.40321.1 | 4.04  | 4.29  | 0.15 | 0.1  | -1.19 | 0.145763 | 0.16447  | 0.511603 | 0.440679 |
| MmugDNA.40322.1.S1_at   | MmugDNA.40322.1 | 5.87  | 9.08  | 1.02 | 3.06 | -9.24 | 0.358722 | 0.351983 | 0.673432 | 0.595366 |
| MmugDNA.40323.1.S1_at   | MmugDNA.40323.1 | 6.81  | 6.02  | 0.99 | 0.34 | 1.73  | 0.30893  | 0.482988 | 0.641271 | 0.687687 |
| MmugDNA.40324.1.S1_at   | MmugDNA.40324.1 | 4.47  | 3.99  | 0.57 | 0.09 | 1.4   | 0.408408 | 0.409882 | 0.705161 | 0.636913 |
| MmugDNA.40325.1.S1_at   | MmugDNA.40325.1 | 6.44  | 6.78  | 0.08 | 0.25 | -1.27 | 0.09126  | 0.072936 | 0.447137 | 0.315986 |
| MmugDNA.40326.1.S1_at   | MmugDNA.40326.1 | 4.27  | 4.26  | 0.41 | 0.39 | 1     | 0.492795 | 0.360995 | 0.755881 | 0.60201  |
| MmugDNA.40327.1.S1_at   | MmugDNA.40327.1 | 4.31  | 4.25  | 0.03 | 0.07 | 1.04  | 0.575407 | 0.728738 | 0.80225  | 0.843195 |
| MmugDNA.40328.1.S1_at   | MmugDNA.40328.1 | 6.36  | 6.44  | 0.28 | 0.12 | -1.06 | 0.929091 | 0.528258 | 0.972621 | 0.716462 |
| MmugDNA.4033.1.S1_at    | MmugDNA.4033.1  | 7.07  | 8.08  | 0.29 | 0.07 | -2.01 | 0.009029 | 0.008803 | 0.222023 | 0.124117 |
| MmugDNA.40330.1.S1_at   | MmugDNA.40330.1 | 5.13  | 5.2   | 0.65 | 0.06 | -1.05 | 0.605084 | 0.459773 | 0.818102 | 0.671958 |
| MmugDNA.40332.1.S1_at   | MmugDNA.40332.1 | 10.69 | 10.45 | 0.23 | 0.05 | 1.18  | 0.475499 | 0.622307 | 0.745779 | 0.776819 |
| MmugDNA.40335.1.S1_at   | MmugDNA.40335.1 | 5.47  | 4.88  | 0.64 | 0.97 | 1.51  | 0.849468 | 0.484726 | 0.939578 | 0.688659 |
| MmugDNA.40336.1.S1_at   | MmugDNA.40336.1 | 11.97 | 11.78 | 0.08 | 0.54 | 1.14  | 0.634497 | 0.745826 | 0.834529 | 0.852591 |
| MmugDNA.40339.1.S1_at   | MmugDNA.40339.1 | 10.44 | 9.84  | 0.23 | 0.15 | 1.53  | 0.018653 | 0.015652 | 0.270832 | 0.158576 |
| MmugDNA.4034.1.S1_at    | MmugDNA.4034.1  | 3.19  | 3.6   | 0.17 | 0.42 | -1.33 | 0.353868 | 0.490161 | 0.670266 | 0.692233 |
| MmugDNA.40340.1.S1_at   | MmugDNA.40340.1 | 5.73  | 5.7   | 0.09 | 0.21 | 1.02  | 0.20921  | 0.281031 | 0.570833 | 0.544179 |
| MmugDNA.40341.1.S1_at   | MmugDNA.40341.1 | 5.22  | 4.96  | 0.13 | 0.2  | 1.2   | 0.33124  | 0.479862 | 0.656225 | 0.68549  |
| MmugDNA.40342.1.S1_at   | MmugDNA.40342.1 | 13.4  | 13.42 | 0.23 | 0.16 | -1.01 | 0.609658 | 0.712891 | 0.820621 | 0.833557 |
| MmugDNA.40343.1.S1_at   | MmugDNA.40343.1 | 4.13  | 4.15  | 0.21 | 0.01 | -1.02 | 0.721759 | 0.803368 | 0.878287 | 0.886825 |
| MmugDNA.40344.1.S1_at   | MmugDNA.40344.1 | 6.07  | 5.94  | 0.12 | 0.05 | 1.1   | 0.353332 | 0.283838 | 0.670121 | 0.546237 |
| MmugDNA.40345.1.S1_at   | MmugDNA.40345.1 | 5.75  | 5.52  | 0.31 | 0.2  | 1.17  | 0.392624 | 0.373682 | 0.694693 | 0.612403 |
| MmugDNA.40346.1.S1_at   | MmugDNA.40346.1 | 8.07  | 7.94  | 0.15 | 0.19 | 1.09  | 0.081376 | 0.021248 | 0.432224 | 0.182465 |
| MmugDNA.40347.1.S1_at   | MmugDNA.40347.1 | 5.41  | 5.54  | 0.13 | 0.14 | -1.09 | 0.370156 | 0.301282 | 0.681113 | 0.559356 |
| MmugDNA.40348.1.S1_at   | MmugDNA.40348.1 | 5.73  | 5.82  | 0.3  | 0.4  | -1.07 | 0.862504 | 0.915162 | 0.944715 | 0.952344 |
| MmugDNA.40349.1.S1_at   | MmugDNA.40349.1 | 6.26  | 6.44  | 0.01 | 0.15 | -1.13 | 0.133557 | 0.036194 | 0.50021  | 0.234827 |
| MmugDNA.4035.1.S1_at    | MmugDNA.4035.1  | 10.53 | 10.85 | 0.05 | 0.62 | -1.25 | 0.423073 | 0.58408  | 0.713797 | 0.752189 |
| MmugDNA.40350.1.S1_s_at | MmugDNA.40350.1 | 9.83  | 10.35 | 0.13 | 0.27 | -1.44 | 0.033924 | 0.013117 | 0.330541 | 0.147286 |
| MmugDNA.40351.1.S1_at   | MmugDNA.40351.1 | 3.51  | 3.54  | 0.13 | 0.06 | -1.02 | 0.929252 | 0.198936 | 0.972671 | 0.473521 |
| MmugDNA.40352.1.S1_at   | MmugDNA.40352.1 | 5.86  | 6.4   | 0.06 | 0.75 | -1.46 | 0.292164 | 0.488826 | 0.629464 | 0.6914   |
| MmugDNA.40353.1.S1_at   | MmugDNA.40353.1 | 3.9   | 3.93  | 0.13 | 0.25 | -1.02 | 0.903511 | 0.475928 | 0.961533 | 0.682387 |
| MmugDNA.40355.1.S1_at   | MmugDNA.40355.1 | 6.16  | 6.18  | 0.15 | 0.13 | -1.01 | 0.238459 | 0.124729 | 0.591782 | 0.39513  |
| MmugDNA.40356.1.S1_at   | MmugDNA.40356.1 | 8.44  | 8.62  | 0.18 | 0.2  | -1.13 | 0.776171 | 0.24103  | 0.906231 | 0.511657 |
| MmugDNA.40358.1.S1_at   | MmugDNA.40358.1 | 5.11  | 5.35  | 0.24 | 0.18 | -1.18 | 0.436006 | 0.575546 | 0.721547 | 0.746587 |
| MmugDNA.4036.1.S1_at    | MmugDNA.4036.1  | 9.82  | 9.48  | 0.1  | 0.25 | 1.27  | 0.183023 | 0.173087 | 0.547134 | 0.449765 |



|                         |                 |       |       |      |      |       |          |          |          |          |
|-------------------------|-----------------|-------|-------|------|------|-------|----------|----------|----------|----------|
| MmugDNA.40360.1.S1_at   | MmugDNA.40360.1 | 5.87  | 5.73  | 0.36 | 0.28 | 1.1   | 0.595121 | 0.235565 | 0.812276 | 0.506633 |
| MmugDNA.40362.1.S1_at   | MmugDNA.40362.1 | 6.35  | 6.52  | 0.35 | 0.13 | -1.12 | 0.303443 | 0.350149 | 0.637681 | 0.593918 |
| MmugDNA.40363.1.S1_at   | MmugDNA.40363.1 | 5.82  | 5.92  | 0.3  | 0.06 | -1.07 | 0.451932 | 0.633323 | 0.731787 | 0.784071 |
| MmugDNA.40367.1.S1_at   | MmugDNA.40367.1 | 3.77  | 3.74  | 0.11 | 0.02 | 1.03  | 0.857358 | 0.984866 | 0.942256 | 0.991449 |
| MmugDNA.40368.1.S1_at   | MmugDNA.40368.1 | 6.15  | 5.49  | 0.22 | 0.67 | 1.58  | 0.376203 | 0.450756 | 0.685066 | 0.665844 |
| MmugDNA.40369.1.S1_at   | MmugDNA.40369.1 | 12.37 | 12.02 | 0.11 | 0.29 | 1.27  | 0.165422 | 0.182806 | 0.529362 | 0.459317 |
| MmugDNA.4037.1.S1_at    | MmugDNA.4037.1  | 7.31  | 7.28  | 0.1  | 0.06 | 1.03  | 0.970017 | 0.000232 | 0.988483 | 0.03241  |
| MmugDNA.40370.1.S1_at   | MmugDNA.40370.1 | 3.65  | 3.46  | 0.29 | 0.08 | 1.14  | 0.400906 | 0.763308 | 0.700469 | 0.86245  |
| MmugDNA.40372.1.S1_at   | MmugDNA.40372.1 | 4.99  | 5.14  | 0.08 | 0.09 | -1.11 | 0.036837 | 0.028708 | 0.34044  | 0.211165 |
| MmugDNA.40373.1.S1_at   | MmugDNA.40373.1 | 3     | 3.03  | 0.07 | 0.09 | -1.02 | 0.916716 | 0.529476 | 0.967379 | 0.717289 |
| MmugDNA.40374.1.S1_at   | MmugDNA.40374.1 | 4.67  | 4.45  | 0.23 | 0.52 | 1.16  | 0.575942 | 0.49533  | 0.802615 | 0.695427 |
| MmugDNA.40375.1.S1_at   | MmugDNA.40375.1 | 4.57  | 5.77  | 1.08 | 0.68 | -2.31 | 0.700421 | 0.158187 | 0.867446 | 0.433986 |
| MmugDNA.40376.1.S1_at   | MmugDNA.40376.1 | 5.1   | 4.33  | 0.58 | 0.24 | 1.71  | 0.080322 | 0.04202  | 0.430418 | 0.249463 |
| MmugDNA.40377.1.S1_at   | MmugDNA.40377.1 | 6.65  | 6.19  | 0.62 | 0.2  | 1.37  | 0.156153 | 0.189227 | 0.520803 | 0.464997 |
| MmugDNA.40378.1.S1_at   | MmugDNA.40378.1 | 3.28  | 3.27  | 0.1  | 0.06 | 1.01  | 0.877481 | 0.782116 | 0.950926 | 0.873783 |
| MmugDNA.40379.1.S1_at   | MmugDNA.40379.1 | 12.46 | 11.92 | 0.06 | 0.14 | 1.45  | 0.004674 | 0.003093 | 0.1844   | 0.081194 |
| MmugDNA.4038.1.S1_at    | MmugDNA.4038.1  | 6.08  | 6.19  | 0.24 | 0.09 | -1.08 | 0.111691 | 0.233505 | 0.474019 | 0.504835 |
| MmugDNA.40380.1.S1_at   | MmugDNA.40380.1 | 6.5   | 6.31  | 0.26 | 0.02 | 1.14  | 0.241618 | 0.311378 | 0.593941 | 0.566448 |
| MmugDNA.40382.1.S1_at   | MmugDNA.40382.1 | 4.29  | 4.51  | 0.43 | 0.2  | -1.16 | 0.605024 | 0.392527 | 0.818083 | 0.625813 |
| MmugDNA.40385.1.S1_at   | MmugDNA.40385.1 | 10.63 | 10.92 | 0.16 | 0.06 | -1.22 | 0.047565 | 0.069125 | 0.366705 | 0.309162 |
| MmugDNA.40387.1.S1_at   | MmugDNA.40387.1 | 10.83 | 10.15 | 0.21 | 0.9  | 1.6   | 0.096657 | 0.054058 | 0.455496 | 0.277914 |
| MmugDNA.40389.1.S1_at   | MmugDNA.40389.1 | 6.69  | 6.23  | 0.56 | 0.18 | 1.37  | 0.293194 | 0.188854 | 0.630314 | 0.464789 |
| MmugDNA.40390.1.S1_at   | MmugDNA.40390.1 | 2.78  | 2.82  | 0.14 | 0.12 | -1.03 | 0.312119 | 0.421132 | 0.643883 | 0.644766 |
| MmugDNA.40393.1.S1_at   | MmugDNA.40393.1 | 8.98  | 8.82  | 0.15 | 0.11 | 1.12  | 0.170334 | 0.083795 | 0.534249 | 0.334647 |
| MmugDNA.40395.1.S1_at   | MmugDNA.40395.1 | 11.81 | 11.92 | 0.18 | 0.8  | -1.08 | 0.551724 | 0.455378 | 0.788933 | 0.669361 |
| MmugDNA.40396.1.S1_at   | MmugDNA.40396.1 | 4.18  | 4.18  | 0.31 | 0.15 | 1     | 0.914796 | 0.975346 | 0.966289 | 0.986553 |
| MmugDNA.40398.1.S1_at   | MmugDNA.40398.1 | 5.64  | 5.82  | 0.16 | 0.12 | -1.14 | 0.146678 | 0.127067 | 0.512668 | 0.397902 |
| MmugDNA.40399.1.S1_at   | MmugDNA.40399.1 | 3.53  | 3.66  | 0.38 | 0.14 | -1.1  | 0.735901 | 0.743659 | 0.886439 | 0.851456 |
| MmugDNA.404.1.S1_at     | MmugDNA.404.1   | 5.25  | 5.39  | 0.05 | 0.08 | -1.1  | 0.298608 | 0.123638 | 0.63411  | 0.393692 |
| MmugDNA.40401.1.S1_at   | MmugDNA.40401.1 | 11.66 | 11.95 | 0.08 | 0.06 | -1.22 | 0.008225 | 0.000159 | 0.216948 | 0.030319 |
| MmugDNA.40402.1.S1_at   | MmugDNA.40402.1 | 3.66  | 3.76  | 0    | 0.07 | -1.07 | 0.147079 | 0.112483 | 0.51306  | 0.377815 |
| MmugDNA.40404.1.S1_x_at | MmugDNA.40404.1 | 10.54 | 9.84  | 0.56 | 0.3  | 1.62  | 0.144236 | 0.153501 | 0.510664 | 0.42827  |
| MmugDNA.40409.1.S1_at   | MmugDNA.40409.1 | 7.13  | 6.76  | 0.6  | 0.75 | 1.29  | 0.539166 | 0.171976 | 0.780929 | 0.448364 |
| MmugDNA.4041.1.S1_at    | MmugDNA.4041.1  | 6.27  | 6.06  | 0.3  | 0.58 | 1.16  | 0.699426 | 0.571533 | 0.866851 | 0.743824 |
| MmugDNA.40411.1.S1_at   | MmugDNA.40411.1 | 6.98  | 7.04  | 0.9  | 1.3  | -1.04 | 0.37882  | 0.385291 | 0.68656  | 0.620743 |
| MmugDNA.40412.1.S1_at   | MmugDNA.40412.1 | 3.95  | 4.21  | 0.17 | 0.06 | -1.2  | 0.068937 | 0.135387 | 0.410861 | 0.407478 |
| MmugDNA.40413.1.S1_at   | MmugDNA.40413.1 | 4.45  | 4.68  | 0.96 | 0.28 | -1.17 | 0.543307 | 0.406641 | 0.783788 | 0.634468 |
| MmugDNA.40414.1.S1_at   | MmugDNA.40414.1 | 6.67  | 6.59  | 0.18 | 0.18 | 1.06  | 0.864636 | 0.505466 | 0.945589 | 0.702161 |
| MmugDNA.40415.1.S1_at   | MmugDNA.40415.1 | 5     | 4.48  | 0.49 | 0.09 | 1.43  | 0.138677 | 0.087697 | 0.505884 | 0.340941 |
| MmugDNA.40416.1.S1_at   | MmugDNA.40416.1 | 3.47  | 3.26  | 0.51 | 0.07 | 1.16  | 0.265272 | 0.299962 | 0.610859 | 0.558262 |
| MmugDNA.40418.1.S1_at   | MmugDNA.40418.1 | 4.82  | 4.49  | 0.36 | 0.19 | 1.25  | 0.405732 | 0.658009 | 0.703322 | 0.80013  |

|                         |                 |       |       |      |      |       |          |          |          |          |
|-------------------------|-----------------|-------|-------|------|------|-------|----------|----------|----------|----------|
| MmugDNA.40419.1.S1_at   | MmugDNA.40419.1 | 10.21 | 8.07  | 0.4  | 0.97 | 4.42  | 0.055625 | 0.04035  | 0.384246 | 0.245984 |
| MmugDNA.40420.1.S1_at   | MmugDNA.40420.1 | 9.47  | 9.7   | 0.48 | 0.17 | -1.17 | 0.87777  | 0.129027 | 0.951009 | 0.400513 |
| MmugDNA.40420.1.S1_s_at | MmugDNA.40420.1 | 10.24 | 10.35 | 0.34 | 0.22 | -1.07 | 0.729853 | 0.115467 | 0.88278  | 0.382611 |
| MmugDNA.40422.1.S1_at   | MmugDNA.40422.1 | 8.17  | 7.92  | 0.46 | 0.53 | 1.19  | 0.602976 | 0.521789 | 0.81686  | 0.712646 |
| MmugDNA.40423.1.S1_at   | MmugDNA.40423.1 | 4.85  | 4.53  | 0.16 | 0.4  | 1.24  | 0.277322 | 0.253639 | 0.619454 | 0.52198  |
| MmugDNA.40425.1.S1_at   | MmugDNA.40425.1 | 4.25  | 4.2   | 0.19 | 0.1  | 1.03  | 0.279155 | 0.429986 | 0.620979 | 0.65111  |
| MmugDNA.40426.1.S1_at   | MmugDNA.40426.1 | 4.55  | 4.71  | 0.47 | 0.48 | -1.12 | 0.726476 | 0.562012 | 0.881034 | 0.737679 |
| MmugDNA.40428.1.S1_at   | MmugDNA.40428.1 | 5.78  | 6.17  | 0.23 | 0.08 | -1.31 | 0.103313 | 0.136887 | 0.462888 | 0.409583 |
| MmugDNA.4043.1.S1_at    | MmugDNA.4043.1  | 3.53  | 3.51  | 0.34 | 0.07 | 1.02  | 0.262509 | 0.222068 | 0.609006 | 0.495112 |
| MmugDNA.4043.1.S1_s_at  | MmugDNA.4043.1  | 9.08  | 8.74  | 0.27 | 0.12 | 1.26  | 0.059944 | 0.032039 | 0.393068 | 0.221576 |
| MmugDNA.32666.1.S1_s_at | MmugDNA.32666.1 | 13.46 | 13.57 | 0.01 | 0.07 | -1.08 | 0.062389 | 0.038641 | 0.397995 | 0.241683 |
| MmugDNA.40432.1.S1_at   | MmugDNA.40432.1 | 7.19  | 7.44  | 0.07 | 0.11 | -1.19 | 0.071529 | 0.054117 | 0.415505 | 0.277968 |
| MmugDNA.40433.1.S1_at   | MmugDNA.40433.1 | 4.54  | 4.95  | 0.58 | 0.64 | -1.33 | 0.631319 | 0.771986 | 0.832618 | 0.867436 |
| MmugDNA.40434.1.S1_at   | MmugDNA.40434.1 | 7.07  | 7.49  | 0.57 | 0.95 | -1.34 | 0.814562 | 0.897315 | 0.924758 | 0.941407 |
| MmugDNA.40435.1.S1_at   | MmugDNA.40435.1 | 7.25  | 6.21  | 0.59 | 0.57 | 2.06  | 0.332033 | 0.284083 | 0.656625 | 0.546309 |
| MmugDNA.40436.1.S1_at   | MmugDNA.40436.1 | 6.43  | 6.4   | 0.2  | 0.08 | 1.02  | 0.971956 | 0.798505 | 0.989291 | 0.884012 |
| MmugDNA.40436.1.S1_s_at | MmugDNA.40436.1 | 8.56  | 8.47  | 0.08 | 0.15 | 1.07  | 0.240587 | 0.327824 | 0.593462 | 0.577604 |
| MmugDNA.40437.1.S1_at   | MmugDNA.40437.1 | 3.83  | 3.44  | 0.31 | 0.1  | 1.31  | 0.182777 | 0.088877 | 0.547079 | 0.34272  |
| MmugDNA.40439.1.S1_at   | MmugDNA.40439.1 | 4.91  | 4.91  | 0.19 | 0.22 | 1     | 0.843525 | 0.207898 | 0.937058 | 0.482049 |
| MmugDNA.4044.1.S1_at    | MmugDNA.4044.1  | 8.07  | 9.14  | 0.27 | 0.17 | -2.1  | 0.002538 | 0.002529 | 0.164386 | 0.074291 |
| MmugDNA.40440.1.S1_at   | MmugDNA.40440.1 | 5.73  | 5.94  | 0.27 | 0.31 | -1.16 | 0.85921  | 0.973648 | 0.943112 | 0.985648 |
| MmugDNA.40441.1.S1_at   | MmugDNA.40441.1 | 7.83  | 8.42  | 0.25 | 0.54 | -1.51 | 0.101671 | 0.040844 | 0.461313 | 0.246991 |
| MmugDNA.40443.1.S1_at   | MmugDNA.40443.1 | 5.86  | 5.88  | 0.07 | 0.12 | -1.01 | 0.503819 | 0.173146 | 0.761026 | 0.449765 |
| MmugDNA.40444.1.S1_at   | MmugDNA.40444.1 | 4.47  | 4.19  | 0.85 | 0.17 | 1.21  | 0.64     | 0.832535 | 0.837507 | 0.903934 |
| MmugDNA.40445.1.S1_at   | MmugDNA.40445.1 | 3.93  | 4.07  | 1.32 | 0.53 | -1.1  | 0.544981 | 0.67991  | 0.784702 | 0.8131   |
| MmugDNA.40446.1.S1_at   | MmugDNA.40446.1 | 3.87  | 3.71  | 0.07 | 0.06 | 1.12  | 0.021387 | 0.018064 | 0.282524 | 0.169379 |
| MmugDNA.40447.1.S1_at   | MmugDNA.40447.1 | 13.09 | 13.35 | 0.1  | 0.24 | -1.2  | 0.166575 | 0.00797  | 0.530266 | 0.118702 |
| MmugDNA.40448.1.S1_at   | MmugDNA.40448.1 | 6.93  | 5.99  | 1.09 | 0.69 | 1.92  | 0.379274 | 0.545964 | 0.68682  | 0.727708 |
| MmugDNA.4045.1.S1_at    | MmugDNA.4045.1  | 9.65  | 11.24 | 0.27 | 0.18 | -3    | 0.000954 | 0.000691 | 0.139813 | 0.044166 |
| MmugDNA.40450.1.S1_at   | MmugDNA.40450.1 | 6.58  | 6.71  | 0.05 | 0.26 | -1.09 | 0.143081 | 0.126095 | 0.510004 | 0.39672  |
| MmugDNA.40450.1.S1_s_at | MmugDNA.40450.1 | 5.67  | 5.84  | 0.24 | 0.21 | -1.13 | 0.844857 | 0.77717  | 0.937755 | 0.870539 |
| MmugDNA.40452.1.S1_at   | MmugDNA.40452.1 | 6.26  | 6.25  | 0.06 | 0.19 | 1     | 0.476492 | 0.375623 | 0.746246 | 0.613562 |
| MmugDNA.40453.1.S1_at   | MmugDNA.40453.1 | 5.13  | 5.19  | 0.04 | 0.44 | -1.05 | 0.776203 | 0.926398 | 0.906244 | 0.958291 |
| MmugDNA.40454.1.S1_at   | MmugDNA.40454.1 | 3.74  | 3.62  | 0.11 | 0.08 | 1.09  | 0.181249 | 0.15694  | 0.54572  | 0.432372 |
| MmugDNA.40455.1.S1_at   | MmugDNA.40455.1 | 7.55  | 7.87  | 0.14 | 0.07 | -1.25 | 0.03554  | 0.006812 | 0.336769 | 0.111444 |
| MmugDNA.40458.1.S1_at   | MmugDNA.40458.1 | 6.65  | 6.82  | 0.45 | 0.04 | -1.12 | 0.753029 | 0.573233 | 0.894568 | 0.744985 |
| MmugDNA.4046.1.S1_at    | MmugDNA.4046.1  | 11.99 | 12.85 | 0.14 | 0.17 | -1.82 | 0.004048 | 0.000798 | 0.181739 | 0.046064 |
| MmugDNA.40460.1.S1_at   | MmugDNA.40460.1 | 10.79 | 10.99 | 0.12 | 0.25 | -1.15 | 0.337054 | 0.136748 | 0.659858 | 0.409308 |
| MmugDNA.40461.1.S1_at   | MmugDNA.40461.1 | 12.39 | 12.38 | 0.15 | 0.16 | 1.01  | 0.716887 | 0.273612 | 0.875662 | 0.538053 |
| MmugDNA.40463.1.S1_at   | MmugDNA.40463.1 | 6.34  | 6.68  | 1.48 | 0.8  | -1.26 | 0.781812 | 0.943301 | 0.908942 | 0.967814 |
| MmugDNA.40464.1.S1_at   | MmugDNA.40464.1 | 6.29  | 6.4   | 0.05 | 0.05 | -1.07 | 0.016387 | 0.079851 | 0.263839 | 0.327179 |

|                         |                 |       |       |      |      |       |          |          |          |          |
|-------------------------|-----------------|-------|-------|------|------|-------|----------|----------|----------|----------|
| MmugDNA.40465.1.S1_at   | MmugDNA.40465.1 | 3.32  | 3.48  | 0.1  | 0.34 | -1.12 | 0.461808 | 0.462533 | 0.737901 | 0.673854 |
| MmugDNA.40466.1.S1_at   | MmugDNA.40466.1 | 6.68  | 8.1   | 0.32 | 0.51 | -2.67 | 0.014407 | 0.014521 | 0.252198 | 0.153711 |
| MmugDNA.40467.1.S1_at   | MmugDNA.40467.1 | 6.77  | 7.92  | 0.33 | 0.59 | -2.22 | 0.050457 | 0.053965 | 0.374363 | 0.27777  |
| MmugDNA.40468.1.S1_at   | MmugDNA.40468.1 | 6.71  | 7.65  | 0.29 | 0.4  | -1.92 | 0.012921 | 0.007214 | 0.244747 | 0.11412  |
| MmugDNA.40469.1.S1_at   | MmugDNA.40469.1 | 5.13  | 4.56  | 1.11 | 0.24 | 1.49  | 0.40484  | 0.564513 | 0.703075 | 0.739347 |
| MmugDNA.4047.1.S1_at    | MmugDNA.4047.1  | 6.61  | 7.52  | 0.76 | 0.48 | -1.88 | 0.058716 | 0.052878 | 0.390921 | 0.275541 |
| MmugDNA.40471.1.S1_at   | MmugDNA.40471.1 | 6.13  | 6.09  | 0.13 | 0.06 | 1.03  | 0.210301 | 0.669459 | 0.571482 | 0.806626 |
| MmugDNA.40472.1.S1_at   | MmugDNA.40472.1 | 7.74  | 7.41  | 0.76 | 0.29 | 1.25  | 0.181033 | 0.193431 | 0.545535 | 0.468711 |
| MmugDNA.40473.1.S1_at   | MmugDNA.40473.1 | 8.6   | 7.39  | 0.23 | 0.55 | 2.31  | 0.033253 | 0.026857 | 0.327665 | 0.205049 |
| MmugDNA.40474.1.S1_at   | MmugDNA.40474.1 | 4.15  | 4.17  | 0.11 | 0.11 | -1.01 | 0.681912 | 0.42031  | 0.857635 | 0.644086 |
| MmugDNA.40475.1.S1_at   | MmugDNA.40475.1 | 6.99  | 7.11  | 0.06 | 0.14 | -1.08 | 0.731724 | 0.89463  | 0.884008 | 0.939853 |
| MmugDNA.40476.1.S1_at   | MmugDNA.40476.1 | 7.78  | 7.95  | 0.27 | 0.74 | -1.12 | 0.671028 | 0.385151 | 0.852532 | 0.620662 |
| MmugDNA.40478.1.S1_at   | MmugDNA.40478.1 | 8.09  | 8.36  | 0.42 | 0.26 | -1.21 | 0.193287 | 0.222688 | 0.556755 | 0.495617 |
| MmugDNA.40479.1.S1_at   | MmugDNA.40479.1 | 4.05  | 3.86  | 0.23 | 0.4  | 1.14  | 0.742488 | 0.923941 | 0.889888 | 0.957162 |
| MmugDNA.4048.1.S1_at    | MmugDNA.4048.1  | 8.11  | 7.81  | 0.27 | 0.27 | 1.23  | 0.101019 | 0.116959 | 0.461009 | 0.384343 |
| MmugDNA.40483.1.S1_at   | MmugDNA.40483.1 | 4.42  | 5.32  | 0.06 | 0.6  | -1.86 | 0.069875 | 0.122585 | 0.412914 | 0.39249  |
| MmugDNA.40484.1.S1_at   | MmugDNA.40484.1 | 6.05  | 5.67  | 1.05 | 0.07 | 1.3   | 0.334785 | 0.392775 | 0.658496 | 0.625846 |
| MmugDNA.4049.1.S1_at    | MmugDNA.4049.1  | 8.94  | 9.22  | 0.58 | 0.17 | -1.21 | 0.421175 | 0.574912 | 0.712907 | 0.746181 |
| MmugDNA.40490.1.S1_at   | MmugDNA.40490.1 | 3.24  | 3.1   | 0.05 | 0.07 | 1.1   | 0.120458 | 0.381117 | 0.485479 | 0.617478 |
| MmugDNA.40491.1.S1_at   | MmugDNA.40491.1 | 3.74  | 3.94  | 0.08 | 0.2  | -1.15 | 0.125104 | 0.126214 | 0.491138 | 0.396751 |
| MmugDNA.40494.1.S1_x_at | MmugDNA.40494.1 | 7.77  | 7.79  | 0.7  | 0.32 | -1.01 | 0.298308 | 0.384385 | 0.633851 | 0.620058 |
| MmugDNA.40496.1.S1_at   | MmugDNA.40496.1 | 3.98  | 3.94  | 0.21 | 0.1  | 1.03  | 0.936459 | 0.896001 | 0.975425 | 0.940569 |
| MmugDNA.40497.1.S1_at   | MmugDNA.40497.1 | 13.25 | 13.19 | 0.14 | 0.23 | 1.05  | 0.656269 | 0.534577 | 0.845321 | 0.720452 |
| MmugDNA.40498.1.S1_at   | MmugDNA.40498.1 | 8.48  | 9.36  | 0.69 | 0.67 | -1.84 | 0.215841 | 0.150191 | 0.575954 | 0.424841 |
| MmugDNA.40499.1.S1_at   | MmugDNA.40499.1 | 4.39  | 4.22  | 0.13 | 0.12 | 1.13  | 0.393353 | 0.037944 | 0.695146 | 0.239302 |
| MmugDNA.4050.1.S1_at    | MmugDNA.4050.1  | 3.32  | 3.22  | 0.27 | 0.07 | 1.07  | 0.221148 | 0.218963 | 0.580053 | 0.492722 |
| MmugDNA.40500.1.S1_at   | MmugDNA.40500.1 | 9.52  | 8.43  | 0.91 | 0.7  | 2.12  | 0.351635 | 0.37449  | 0.669126 | 0.6129   |
| MmugDNA.40501.1.S1_at   | MmugDNA.40501.1 | 5.18  | 5.26  | 0.1  | 0.11 | -1.06 | 0.357516 | 0.20014  | 0.672471 | 0.474603 |
| MmugDNA.40501.1.S1_s_at | MmugDNA.40501.1 | 8.03  | 8.21  | 0.06 | 0.2  | -1.13 | 0.427385 | 0.502234 | 0.716187 | 0.70006  |
| MmugDNA.40502.1.S1_at   | MmugDNA.40502.1 | 7.85  | 7.73  | 0.34 | 0.18 | 1.09  | 0.23537  | 0.252443 | 0.589346 | 0.521061 |
| MmugDNA.40503.1.S1_at   | MmugDNA.40503.1 | 11.86 | 11.58 | 0.24 | 0.28 | 1.22  | 0.120963 | 0.19047  | 0.48574  | 0.465906 |
| MmugDNA.40505.1.S1_at   | MmugDNA.40505.1 | 4.25  | 4.33  | 0.05 | 0.41 | -1.06 | 0.729769 | 0.719118 | 0.88278  | 0.837453 |
| MmugDNA.40507.1.S1_at   | MmugDNA.40507.1 | 6.18  | 5.38  | 0.29 | 0.34 | 1.74  | 0.039834 | 0.028838 | 0.34828  | 0.211661 |
| MmugDNA.40508.1.S1_at   | MmugDNA.40508.1 | 5.25  | 5.31  | 0.03 | 0.02 | -1.05 | 0.063099 | 0.469359 | 0.40016  | 0.678201 |
| MmugDNA.4051.1.S1_s_at  | MmugDNA.4051.1  | 4.67  | 5.25  | 0.28 | 0.25 | -1.49 | 0.19441  | 0.107855 | 0.557827 | 0.370945 |
| MmugDNA.40510.1.S1_at   | MmugDNA.40510.1 | 4.8   | 4.71  | 0    | 0.13 | 1.06  | 0.846888 | 0.698831 | 0.938511 | 0.825022 |
| MmugDNA.40511.1.S1_at   | MmugDNA.40511.1 | 5.33  | 5.17  | 0.1  | 0.07 | 1.12  | 0.217949 | 0.224713 | 0.577569 | 0.497614 |
| MmugDNA.40514.1.S1_at   | MmugDNA.40514.1 | 6.16  | 8.87  | 0.37 | 0.1  | -6.54 | 0.000316 | 0.000104 | 0.12562  | 0.028099 |
| MmugDNA.40515.1.S1_at   | MmugDNA.40515.1 | 10.04 | 11.02 | 0.18 | 0.39 | -1.96 | 0.008404 | 0.002957 | 0.218319 | 0.079945 |
| MmugDNA.40516.1.S1_at   | MmugDNA.40516.1 | 2.82  | 3.08  | 0    | 0.11 | -1.2  | 0.036876 | 0.025375 | 0.340458 | 0.199677 |
| MmugDNA.40517.1.S1_at   | MmugDNA.40517.1 | 4.27  | 4.57  | 0.3  | 0.16 | -1.23 | 0.161759 | 0.118996 | 0.526573 | 0.387269 |

|                         |                 |       |       |      |      |       |          |          |          |          |
|-------------------------|-----------------|-------|-------|------|------|-------|----------|----------|----------|----------|
| MmugDNA.40518.1.S1_at   | MmugDNA.40518.1 | 6.74  | 5.96  | 0.19 | 0.46 | 1.72  | 0.154108 | 0.103096 | 0.518614 | 0.364006 |
| MmugDNA.40519.1.S1_at   | MmugDNA.40519.1 | 12.2  | 11.99 | 0.25 | 0.16 | 1.15  | 0.424493 | 0.537737 | 0.714559 | 0.722664 |
| MmugDNA.40521.1.S1_at   | MmugDNA.40521.1 | 6.6   | 6.56  | 0.03 | 0.07 | 1.03  | 0.487806 | 0.088649 | 0.752381 | 0.342176 |
| MmugDNA.40522.1.S1_at   | MmugDNA.40522.1 | 5.99  | 5.98  | 0.02 | 0.14 | 1.01  | 0.506765 | 0.848754 | 0.762448 | 0.914116 |
| MmugDNA.40523.1.S1_s_at | MmugDNA.40523.1 | 12.53 | 12.45 | 0.13 | 0.23 | 1.06  | 0.793105 | 0.740825 | 0.91421  | 0.849962 |
| MmugDNA.40524.1.S1_at   | MmugDNA.40524.1 | 3.29  | 3.12  | 0.33 | 0.31 | 1.13  | 0.253225 | 0.05137  | 0.60185  | 0.272083 |
| MmugDNA.40525.1.S1_at   | MmugDNA.40525.1 | 4     | 3.73  | 0.28 | 0.07 | 1.2   | 0.145613 | 0.185547 | 0.51146  | 0.461566 |
| MmugDNA.40526.1.S1_at   | MmugDNA.40526.1 | 2.99  | 3.01  | 0.05 | 0.12 | -1.01 | 0.349645 | 0.497876 | 0.667907 | 0.697077 |
| MmugDNA.40528.1.S1_at   | MmugDNA.40528.1 | 6.38  | 6.16  | 0.3  | 0.09 | 1.16  | 0.121531 | 0.124846 | 0.486438 | 0.395219 |
| MmugDNA.40529.1.S1_at   | MmugDNA.40529.1 | 5.82  | 6.09  | 0.19 | 0.16 | -1.2  | 0.523789 | 0.320975 | 0.772798 | 0.572964 |
| MmugDNA.4053.1.S1_at    | MmugDNA.4053.1  | 4.14  | 4.32  | 0.54 | 0.17 | -1.13 | 0.742275 | 0.685599 | 0.889744 | 0.816542 |
| MmugDNA.40530.1.S1_at   | MmugDNA.40530.1 | 5.7   | 5.62  | 0.16 | 0.05 | 1.06  | 0.134709 | 0.084131 | 0.501649 | 0.335181 |
| MmugDNA.40533.1.S1_at   | MmugDNA.40533.1 | 3.18  | 3.32  | 0.11 | 0.08 | -1.11 | 0.373316 | 0.491772 | 0.683245 | 0.693268 |
| MmugDNA.40534.1.S1_s_at | MmugDNA.40534.1 | 11.64 | 10.59 | 0.17 | 0.43 | 2.08  | 0.011667 | 0.005219 | 0.237051 | 0.100105 |
| MmugDNA.40535.1.S1_at   | MmugDNA.40535.1 | 7.16  | 7.92  | 0.11 | 0.11 | -1.7  | 0.000979 | 0.000151 | 0.139813 | 0.029832 |
| MmugDNA.40537.1.S1_at   | MmugDNA.40537.1 | 11.64 | 11.69 | 0.15 | 0.18 | -1.04 | 0.740976 | 0.118036 | 0.888933 | 0.385881 |
| MmugDNA.40538.1.S1_at   | MmugDNA.40538.1 | 4.59  | 4.61  | 0.02 | 0.17 | -1.01 | 0.795103 | 0.5413   | 0.914996 | 0.724837 |
| MmugDNA.40539.1.S1_at   | MmugDNA.40539.1 | 9.49  | 10.46 | 0.18 | 0.87 | -1.96 | 0.137275 | 0.173607 | 0.504356 | 0.449956 |
| MmugDNA.4054.1.S1_at    | MmugDNA.4054.1  | 8.76  | 8.96  | 0.22 | 0.22 | -1.15 | 0.20167  | 0.220632 | 0.563988 | 0.494069 |
| MmugDNA.40540.1.S1_at   | MmugDNA.40540.1 | 4.82  | 4.66  | 0.14 | 0.29 | 1.12  | 0.389579 | 0.534952 | 0.693065 | 0.720644 |
| MmugDNA.40541.1.S1_at   | MmugDNA.40541.1 | 9.99  | 9.75  | 0.21 | 0.49 | 1.18  | 0.467543 | 0.524072 | 0.740707 | 0.714177 |
| MmugDNA.40542.1.S1_at   | MmugDNA.40542.1 | 5.45  | 6.08  | 0.38 | 1.06 | -1.55 | 0.343606 | 0.389346 | 0.663721 | 0.62342  |
| MmugDNA.40543.1.S1_at   | MmugDNA.40543.1 | 6.26  | 6.13  | 0.56 | 0.46 | 1.09  | 0.748803 | 0.107214 | 0.89259  | 0.369902 |
| MmugDNA.40544.1.S1_at   | MmugDNA.40544.1 | 7.13  | 6.62  | 0.5  | 0.42 | 1.42  | 0.214612 | 0.262115 | 0.575095 | 0.528397 |
| MmugDNA.40545.1.S1_at   | MmugDNA.40545.1 | 3.32  | 3.28  | 0.44 | 0.21 | 1.03  | 0.660173 | 0.686142 | 0.847439 | 0.81681  |
| MmugDNA.40546.1.S1_at   | MmugDNA.40546.1 | 5.22  | 5.03  | 0.13 | 0.2  | 1.14  | 0.302514 | 0.408773 | 0.63692  | 0.6359   |
| MmugDNA.40547.1.S1_at   | MmugDNA.40547.1 | 3.64  | 3.63  | 0.13 | 0.2  | 1.01  | 0.623555 | 0.149378 | 0.827977 | 0.423811 |
| MmugDNA.40548.1.S1_at   | MmugDNA.40548.1 | 5.93  | 5.99  | 0.16 | 0.02 | -1.04 | 0.819193 | 0.913464 | 0.926528 | 0.951252 |
| MmugDNA.40549.1.S1_at   | MmugDNA.40549.1 | 4.45  | 4.09  | 0.36 | 0.27 | 1.28  | 0.100797 | 0.087113 | 0.461009 | 0.340073 |
| MmugDNA.4055.1.S1_at    | MmugDNA.4055.1  | 4.01  | 4.38  | 0.33 | 0.08 | -1.3  | 0.473571 | 0.283127 | 0.74439  | 0.545694 |
| MmugDNA.40550.1.S1_at   | MmugDNA.40550.1 | 6.7   | 6.78  | 0.09 | 0.09 | -1.06 | 0.135912 | 0.152344 | 0.502782 | 0.427072 |
| MmugDNA.40553.1.S1_at   | MmugDNA.40553.1 | 6.02  | 6.1   | 0.13 | 0.11 | -1.05 | 0.472126 | 0.554483 | 0.743515 | 0.733245 |
| MmugDNA.40555.1.S1_at   | MmugDNA.40555.1 | 7.83  | 8.07  | 0.09 | 0.23 | -1.18 | 0.262628 | 0.26342  | 0.609039 | 0.529715 |
| MmugDNA.40556.1.S1_at   | MmugDNA.40556.1 | 5.98  | 5.98  | 0    | 0.19 | -1    | 0.400104 | 0.529387 | 0.699692 | 0.71726  |
| MmugDNA.40557.1.S1_at   | MmugDNA.40557.1 | 6.4   | 6.78  | 0.06 | 0.12 | -1.31 | 0.010002 | 0.017437 | 0.226899 | 0.167111 |
| MmugDNA.40558.1.S1_at   | MmugDNA.40558.1 | 5.51  | 5.24  | 0.17 | 0.53 | 1.21  | 0.955532 | 0.470225 | 0.983289 | 0.678572 |
| MmugDNA.40559.1.S1_at   | MmugDNA.40559.1 | 6.08  | 6.18  | 0.24 | 0.13 | -1.07 | 0.914636 | 0.063566 | 0.966289 | 0.298653 |
| MmugDNA.4056.1.S1_at    | MmugDNA.4056.1  | 9.99  | 10.19 | 0.04 | 0.33 | -1.15 | 0.239293 | 0.292412 | 0.592443 | 0.552498 |
| MmugDNA.40560.1.S1_at   | MmugDNA.40560.1 | 3.54  | 3.57  | 0.21 | 0.11 | -1.02 | 0.423338 | 0.393692 | 0.714016 | 0.626522 |
| MmugDNA.40561.1.S1_at   | MmugDNA.40561.1 | 9.17  | 9.28  | 0.18 | 0.26 | -1.08 | 0.913884 | 0.540598 | 0.965979 | 0.724459 |
| MmugDNA.40562.1.S1_at   | MmugDNA.40562.1 | 4.73  | 4.41  | 0.18 | 0.22 | 1.25  | 0.286838 | 0.323013 | 0.625572 | 0.574313 |

|                         |                 |       |       |      |      |       |          |          |          |          |
|-------------------------|-----------------|-------|-------|------|------|-------|----------|----------|----------|----------|
| MmugDNA.40563.1.S1_at   | MmugDNA.40563.1 | 13.43 | 13.35 | 0.1  | 0.3  | 1.05  | 0.439617 | 0.61813  | 0.723686 | 0.773929 |
| MmugDNA.40564.1.S1_at   | MmugDNA.40564.1 | 3.98  | 3.99  | 0.1  | 0.12 | -1    | 0.922547 | 0.096751 | 0.969996 | 0.354171 |
| MmugDNA.40565.1.S1_at   | MmugDNA.40565.1 | 4.21  | 4.61  | 1.21 | 0.39 | -1.33 | 0.532244 | 0.72168  | 0.777626 | 0.838808 |
| MmugDNA.40566.1.S1_at   | MmugDNA.40566.1 | 3.72  | 3.74  | 0.29 | 0.33 | -1.02 | 0.225158 | 0.193724 | 0.58306  | 0.468818 |
| MmugDNA.40567.1.S1_at   | MmugDNA.40567.1 | 9.49  | 9.42  | 0.23 | 0.3  | 1.05  | 0.657738 | 0.62624  | 0.8461   | 0.779684 |
| MmugDNA.40567.1.S1_s_at | MmugDNA.40567.1 | 10.01 | 9.83  | 0.19 | 0.31 | 1.13  | 0.417441 | 0.512508 | 0.710512 | 0.706375 |
| MmugDNA.40568.1.S1_at   | MmugDNA.40568.1 | 4.56  | 4.4   | 0.23 | 0.78 | 1.12  | 0.547885 | 0.363355 | 0.786379 | 0.60375  |
| MmugDNA.4057.1.S1_at    | MmugDNA.4057.1  | 9.55  | 9.05  | 0.11 | 0.67 | 1.41  | 0.488074 | 0.230693 | 0.752663 | 0.502381 |
| MmugDNA.40570.1.S1_at   | MmugDNA.40570.1 | 3.86  | 3.9   | 0.04 | 0.06 | -1.03 | 0.132756 | 0.046492 | 0.498816 | 0.260164 |
| MmugDNA.40571.1.S1_at   | MmugDNA.40571.1 | 10.94 | 11.05 | 0.26 | 0.23 | -1.08 | 0.646554 | 0.854543 | 0.840949 | 0.917099 |
| MmugDNA.40573.1.S1_at   | MmugDNA.40573.1 | 6.41  | 6.44  | 0.34 | 0.18 | -1.02 | 0.590466 | 0.424516 | 0.809851 | 0.647118 |
| MmugDNA.40574.1.S1_at   | MmugDNA.40574.1 | 5.18  | 5.44  | 0.24 | 0.15 | -1.2  | 0.103725 | 0.109459 | 0.463477 | 0.373326 |
| MmugDNA.40575.1.S1_at   | MmugDNA.40575.1 | 5.53  | 5.93  | 0.03 | 0.32 | -1.32 | 0.297696 | 0.208125 | 0.633436 | 0.482082 |
| MmugDNA.40576.1.S1_at   | MmugDNA.40576.1 | 5.25  | 4.46  | 0.24 | 0.34 | 1.73  | 0.024322 | 0.013529 | 0.294535 | 0.148875 |
| MmugDNA.40577.1.S1_at   | MmugDNA.40577.1 | 2.94  | 2.97  | 0.23 | 0.06 | -1.02 | 0.512042 | 0.629807 | 0.765453 | 0.781989 |
| MmugDNA.40578.1.S1_at   | MmugDNA.40578.1 | 10.31 | 10.39 | 0.17 | 0.5  | -1.06 | 0.569785 | 0.425103 | 0.79921  | 0.647579 |
| MmugDNA.40579.1.S1_at   | MmugDNA.40579.1 | 8.14  | 7.61  | 0.1  | 0.59 | 1.44  | 0.174635 | 0.175366 | 0.538249 | 0.452114 |
| MmugDNA.4058.1.S1_at    | MmugDNA.4058.1  | 10.22 | 9.81  | 0.41 | 0.17 | 1.33  | 0.068035 | 0.047076 | 0.409262 | 0.261469 |
| MmugDNA.4058.1.S1_s_at  | MmugDNA.4058.1  | 4.77  | 4.96  | 0.6  | 0.01 | -1.14 | 0.694561 | 0.791892 | 0.864502 | 0.87976  |
| MmugDNA.40580.1.S1_at   | MmugDNA.40580.1 | 5.11  | 5.1   | 0.2  | 0.18 | 1.01  | 0.995951 | 0.16643  | 0.998451 | 0.442887 |
| MmugDNA.40582.1.S1_at   | MmugDNA.40582.1 | 8.89  | 8.73  | 0.33 | 0.68 | 1.12  | 0.770586 | 0.882766 | 0.903345 | 0.93317  |
| MmugDNA.40583.1.S1_at   | MmugDNA.40583.1 | 3.86  | 3.72  | 0.74 | 0.05 | 1.1   | 0.287168 | 0.181131 | 0.625794 | 0.457582 |
| MmugDNA.40585.1.S1_at   | MmugDNA.40585.1 | 4.15  | 4.16  | 0    | 0.05 | -1    | 0.542084 | 0.701046 | 0.783075 | 0.826613 |
| MmugDNA.40587.1.S1_at   | MmugDNA.40587.1 | 5.58  | 5.79  | 0.24 | 0.02 | -1.16 | 0.563948 | 0.743103 | 0.796337 | 0.851135 |
| MmugDNA.40588.1.S1_at   | MmugDNA.40588.1 | 11.32 | 11.11 | 0.08 | 1.15 | 1.15  | 0.277804 | 0.344808 | 0.619929 | 0.590142 |
| MmugDNA.19545.1.S1_s_at | MmugDNA.19545.1 | 2.88  | 2.96  | 0.14 | 0.08 | -1.06 | 0.492362 | 0.405151 | 0.755683 | 0.633491 |
| MmugDNA.40590.1.S1_at   | MmugDNA.40590.1 | 9.05  | 8.99  | 0.18 | 0.3  | 1.04  | 0.806224 | 0.360352 | 0.920557 | 0.601402 |
| MmugDNA.40591.1.S1_s_at | MmugDNA.40591.1 | 6.17  | 9.2   | 0.96 | 0.75 | -8.17 | 0.013053 | 0.00439  | 0.245262 | 0.092744 |
| MmugDNA.40593.1.S1_at   | MmugDNA.40593.1 | 8.37  | 8.16  | 0.06 | 0.38 | 1.15  | 0.516048 | 0.012942 | 0.76772  | 0.146416 |
| MmugDNA.40594.1.S1_at   | MmugDNA.40594.1 | 3.11  | 3.03  | 0.18 | 0.09 | 1.06  | 0.976307 | 0.490518 | 0.990814 | 0.692497 |
| MmugDNA.40595.1.S1_at   | MmugDNA.40595.1 | 9.74  | 10.05 | 0.12 | 0.36 | -1.25 | 0.194191 | 0.032829 | 0.557777 | 0.22434  |
| MmugDNA.40596.1.S1_at   | MmugDNA.40596.1 | 4.8   | 4.78  | 0.13 | 0.26 | 1.02  | 0.93031  | 0.040852 | 0.973068 | 0.247004 |
| MmugDNA.40597.1.S1_at   | MmugDNA.40597.1 | 4.27  | 4.3   | 0.15 | 0.14 | -1.02 | 0.437072 | 0.380734 | 0.722208 | 0.61739  |
| MmugDNA.40599.1.S1_at   | MmugDNA.40599.1 | 4.57  | 4.57  | 0.13 | 0.08 | 1     | 0.767183 | 0.267152 | 0.902172 | 0.532773 |
| MmugDNA.4060.1.S1_at    | MmugDNA.4060.1  | 12.79 | 12.86 | 0.11 | 0.19 | -1.05 | 0.274031 | 0.395161 | 0.617262 | 0.627379 |
| MmugDNA.40601.1.S1_at   | MmugDNA.40601.1 | 4.09  | 3.88  | 0.45 | 0.2  | 1.16  | 0.620554 | 0.695633 | 0.826026 | 0.823085 |
| MmugDNA.40602.1.S1_at   | MmugDNA.40602.1 | 5.61  | 7.93  | 0.82 | 1.89 | -5.01 | 0.229892 | 0.098928 | 0.587007 | 0.357049 |
| MmugDNA.40604.1.S1_at   | MmugDNA.40604.1 | 3.94  | 3.65  | 0.36 | 0.28 | 1.22  | 0.560097 | 0.573199 | 0.79419  | 0.744964 |
| MmugDNA.40606.1.S1_at   | MmugDNA.40606.1 | 7.68  | 8.7   | 0.75 | 2.25 | -2.03 | 0.819407 | 0.608709 | 0.926528 | 0.767217 |
| MmugDNA.40608.1.S1_at   | MmugDNA.40608.1 | 4.75  | 4.96  | 0.05 | 0.16 | -1.15 | 0.094669 | 0.097545 | 0.452166 | 0.355398 |
| MmugDNA.40609.1.S1_at   | MmugDNA.40609.1 | 8.76  | 7.37  | 0.85 | 0.82 | 2.61  | 0.129138 | 0.142046 | 0.495114 | 0.415633 |

|                         |                 |       |       |      |      |       |          |          |          |          |
|-------------------------|-----------------|-------|-------|------|------|-------|----------|----------|----------|----------|
| MmugDNA.4061.1.S1_at    | MmugDNA.4061.1  | 10.81 | 11.56 | 0.73 | 0.95 | -1.68 | 0.256796 | 0.233499 | 0.604419 | 0.504835 |
| MmugDNA.40611.1.S1_at   | MmugDNA.40611.1 | 3.46  | 3.21  | 0.31 | 0.11 | 1.19  | 0.250488 | 0.163223 | 0.600389 | 0.439324 |
| MmugDNA.40612.1.S1_at   | MmugDNA.40612.1 | 4.97  | 5.1   | 0.06 | 0.06 | -1.09 | 0.036992 | 0.022449 | 0.340567 | 0.187515 |
| MmugDNA.40613.1.S1_x_at | MmugDNA.40613.1 | 11.66 | 11.65 | 0.56 | 0.29 | 1     | 0.411179 | 0.577129 | 0.707032 | 0.747646 |
| MmugDNA.40617.1.S1_at   | MmugDNA.40617.1 | 9.61  | 9.66  | 0.19 | 0.55 | -1.04 | 0.398493 | 0.553961 | 0.698752 | 0.732896 |
| MmugDNA.40618.1.S1_at   | MmugDNA.40618.1 | 4.72  | 4.96  | 0.39 | 0.12 | -1.18 | 0.267142 | 0.275819 | 0.612309 | 0.540035 |
| MmugDNA.40619.1.S1_at   | MmugDNA.40619.1 | 12.11 | 11.99 | 0.17 | 0.22 | 1.09  | 0.553392 | 0.560388 | 0.7901   | 0.736645 |
| MmugDNA.4062.1.S1_at    | MmugDNA.4062.1  | 4.31  | 4.48  | 0.16 | 0.33 | -1.12 | 0.23368  | 0.318695 | 0.588317 | 0.571326 |
| MmugDNA.40620.1.S1_at   | MmugDNA.40620.1 | 3.52  | 3.6   | 0.13 | 0.14 | -1.06 | 0.241697 | 0.400245 | 0.593941 | 0.630158 |
| MmugDNA.40621.1.S1_at   | MmugDNA.40621.1 | 4.46  | 4.47  | 0.12 | 0.37 | -1    | 0.842418 | 0.830918 | 0.936474 | 0.903001 |
| MmugDNA.40622.1.S1_at   | MmugDNA.40622.1 | 4.96  | 4.96  | 0.19 | 0.16 | -1    | 0.385857 | 0.865134 | 0.690905 | 0.923484 |
| MmugDNA.40624.1.S1_at   | MmugDNA.40624.1 | 4.05  | 4.33  | 0.1  | 0.17 | -1.21 | 0.171973 | 0.146405 | 0.535422 | 0.420454 |
| MmugDNA.40627.1.S1_at   | MmugDNA.40627.1 | 4.9   | 4.95  | 0.18 | 0.17 | -1.04 | 0.315991 | 0.464645 | 0.646799 | 0.675303 |
| MmugDNA.40627.1.S1_s_at | MmugDNA.40627.1 | 5.43  | 6.56  | 0.16 | 0.75 | -2.18 | 0.235186 | 0.204065 | 0.589342 | 0.478386 |
| MmugDNA.40629.1.S1_at   | MmugDNA.40629.1 | 4.2   | 4.29  | 0.42 | 0.18 | -1.06 | 0.658768 | 0.836259 | 0.846726 | 0.906346 |
| MmugDNA.4063.1.S1_at    | MmugDNA.4063.1  | 6.63  | 6.54  | 0.03 | 0.05 | 1.06  | 0.046149 | 0.111312 | 0.362577 | 0.375989 |
| MmugDNA.40631.1.S1_at   | MmugDNA.40631.1 | 8.56  | 8.74  | 0.39 | 1.12 | -1.14 | 0.772582 | 0.86715  | 0.904267 | 0.924511 |
| MmugDNA.40632.1.S1_at   | MmugDNA.40632.1 | 7.02  | 6.95  | 0.09 | 0.27 | 1.05  | 0.563746 | 0.120485 | 0.796217 | 0.38925  |
| MmugDNA.40634.1.S1_at   | MmugDNA.40634.1 | 6.27  | 6.31  | 0.07 | 0.13 | -1.03 | 0.272483 | 0.277015 | 0.616131 | 0.541023 |
| MmugDNA.40635.1.S1_at   | MmugDNA.40635.1 | 6.07  | 5.95  | 0.11 | 0.22 | 1.09  | 0.246498 | 0.343969 | 0.597777 | 0.58962  |
| MmugDNA.40636.1.S1_at   | MmugDNA.40636.1 | 5.6   | 5.84  | 0.71 | 0.29 | -1.19 | 0.907295 | 0.93592  | 0.963196 | 0.96389  |
| MmugDNA.40637.1.S1_at   | MmugDNA.40637.1 | 6.93  | 6.67  | 0.59 | 0.52 | 1.2   | 0.884767 | 0.097586 | 0.95382  | 0.355456 |
| MmugDNA.40638.1.S1_at   | MmugDNA.40638.1 | 4.09  | 4.14  | 0.38 | 0.07 | -1.04 | 0.507128 | 0.440541 | 0.762788 | 0.65901  |
| MmugDNA.40639.1.S1_at   | MmugDNA.40639.1 | 4.91  | 4.98  | 0.18 | 0.18 | -1.05 | 0.165284 | 0.201006 | 0.529353 | 0.475442 |
| MmugDNA.4064.1.S1_at    | MmugDNA.4064.1  | 5.94  | 5.94  | 0.05 | 0.28 | -1    | 0.482042 | 0.658875 | 0.749398 | 0.800473 |
| MmugDNA.40641.1.S1_at   | MmugDNA.40641.1 | 4.18  | 4.1   | 0.2  | 0.16 | 1.06  | 0.261226 | 0.044477 | 0.607822 | 0.255242 |
| MmugDNA.40642.1.S1_at   | MmugDNA.40642.1 | 5.1   | 5.28  | 0.07 | 0.19 | -1.13 | 0.834144 | 0.691492 | 0.932599 | 0.820518 |
| MmugDNA.40643.1.S1_at   | MmugDNA.40643.1 | 4.25  | 4.26  | 0.15 | 0.15 | -1.01 | 0.433533 | 0.668218 | 0.720057 | 0.805834 |
| MmugDNA.40646.1.S1_at   | MmugDNA.40646.1 | 6.08  | 6.08  | 0.25 | 0.15 | -1    | 0.359098 | 0.491123 | 0.673851 | 0.692777 |
| MmugDNA.4065.1.S1_at    | MmugDNA.4065.1  | 3.08  | 3.09  | 0.1  | 0.06 | -1.01 | 0.6651   | 0.899659 | 0.849801 | 0.942903 |
| MmugDNA.40650.1.S1_at   | MmugDNA.40650.1 | 4.77  | 4.77  | 0.12 | 0.11 | 1     | 0.613403 | 0.621029 | 0.8227   | 0.775754 |
| MmugDNA.40651.1.S1_at   | MmugDNA.40651.1 | 3.28  | 3.28  | 0.02 | 0.09 | -1    | 0.773417 | 0.749011 | 0.904813 | 0.854072 |
| MmugDNA.40652.1.S1_at   | MmugDNA.40652.1 | 8.44  | 6.77  | 0.8  | 0.32 | 3.19  | 0.028575 | 0.022989 | 0.311783 | 0.189624 |
| MmugDNA.40653.1.S1_at   | MmugDNA.40653.1 | 7.67  | 7.87  | 0.23 | 0.65 | -1.15 | 0.68027  | 0.774719 | 0.857131 | 0.868833 |
| MmugDNA.40654.1.S1_at   | MmugDNA.40654.1 | 6.41  | 6.06  | 0.51 | 0.35 | 1.27  | 0.480194 | 0.573641 | 0.748127 | 0.745229 |
| MmugDNA.40655.1.S1_at   | MmugDNA.40655.1 | 9.12  | 8.73  | 0.13 | 0.22 | 1.31  | 0.029051 | 0.003765 | 0.312556 | 0.087403 |
| MmugDNA.40656.1.S1_s_at | MmugDNA.40656.1 | 6.5   | 6.63  | 0.05 | 0.05 | -1.09 | 0.025042 | 0.046578 | 0.297733 | 0.260267 |
| MmugDNA.40657.1.S1_at   | MmugDNA.40657.1 | 12.86 | 12.75 | 0.04 | 0.21 | 1.08  | 0.280875 | 0.328992 | 0.621926 | 0.578482 |
| MmugDNA.40658.1.S1_at   | MmugDNA.40658.1 | 4.77  | 4.58  | 0.23 | 0.25 | 1.14  | 0.437853 | 0.604953 | 0.722586 | 0.764917 |
| MmugDNA.40659.1.S1_at   | MmugDNA.40659.1 | 3.9   | 4.11  | 0.27 | 0.58 | -1.16 | 0.923404 | 0.11007  | 0.970261 | 0.374179 |
| MmugDNA.4066.1.S1_at    | MmugDNA.4066.1  | 9     | 8.44  | 0.07 | 0.57 | 1.47  | 0.18286  | 0.178635 | 0.547133 | 0.454847 |

|                         |                 |       |       |      |      |       |          |          |          |          |
|-------------------------|-----------------|-------|-------|------|------|-------|----------|----------|----------|----------|
| MmugDNA.40660.1.S1_at   | MmugDNA.40660.1 | 5.08  | 5.29  | 0.13 | 0.05 | -1.16 | 0.074658 | 0.063282 | 0.420589 | 0.298244 |
| MmugDNA.40664.1.S1_at   | MmugDNA.40664.1 | 5.7   | 5.7   | 0.24 | 0.03 | -1    | 0.636135 | 0.553124 | 0.835343 | 0.73239  |
| MmugDNA.40665.1.S1_at   | MmugDNA.40665.1 | 12.12 | 11.53 | 0.1  | 0.13 | 1.51  | 0.00445  | 0.001218 | 0.18357  | 0.054583 |
| MmugDNA.40666.1.S1_at   | MmugDNA.40666.1 | 3.49  | 3.42  | 0.15 | 0.14 | 1.05  | 0.231209 | 0.131875 | 0.587369 | 0.403891 |
| MmugDNA.40667.1.S1_at   | MmugDNA.40667.1 | 6.82  | 7.46  | 0.44 | 0.37 | -1.56 | 0.186593 | 0.258748 | 0.550106 | 0.525949 |
| MmugDNA.40674.1.S1_s_at | MmugDNA.40674.1 | 11.43 | 11.19 | 0.17 | 0.11 | 1.18  | 0.105469 | 0.047721 | 0.466265 | 0.263325 |
| MmugDNA.40675.1.S1_at   | MmugDNA.40675.1 | 5.38  | 5.5   | 0.18 | 0.04 | -1.08 | 0.172858 | 0.176475 | 0.536501 | 0.452836 |
| MmugDNA.40676.1.S1_at   | MmugDNA.40676.1 | 5.25  | 5.54  | 0.1  | 0.07 | -1.22 | 0.0085   | 0.004683 | 0.219031 | 0.095363 |
| MmugDNA.40677.1.S1_s_at | MmugDNA.40677.1 | 10.39 | 10.74 | 0.22 | 0.12 | -1.27 | 0.053453 | 0.041627 | 0.380257 | 0.24887  |
| MmugDNA.40678.1.S1_at   | MmugDNA.40678.1 | 13.01 | 12.7  | 0.07 | 0.25 | 1.24  | 0.114758 | 0.116928 | 0.478025 | 0.384297 |
| MmugDNA.40679.1.S1_at   | MmugDNA.40679.1 | 4.23  | 3.88  | 0.33 | 0.31 | 1.27  | 0.51848  | 0.588309 | 0.769471 | 0.754859 |
| MmugDNA.4068.1.S1_at    | MmugDNA.4068.1  | 4.26  | 4.26  | 0.31 | 0.03 | 1     | 0.979164 | 0.97421  | 0.992334 | 0.985922 |
| MmugDNA.40680.1.S1_at   | MmugDNA.40680.1 | 3.94  | 3.92  | 0.06 | 0.1  | 1.01  | 0.403194 | 0.238426 | 0.701936 | 0.50907  |
| MmugDNA.40681.1.S1_at   | MmugDNA.40681.1 | 5.18  | 5.07  | 0.06 | 0.1  | 1.08  | 0.782819 | 0.909853 | 0.909285 | 0.949148 |
| MmugDNA.40682.1.S1_at   | MmugDNA.40682.1 | 3.51  | 3.12  | 0.47 | 0.13 | 1.31  | 0.205592 | 0.496808 | 0.568057 | 0.696208 |
| MmugDNA.40683.1.S1_at   | MmugDNA.40683.1 | 7.3   | 8.36  | 0.44 | 0.54 | -2.09 | 0.07669  | 0.034158 | 0.425374 | 0.228708 |
| MmugDNA.40684.1.S1_at   | MmugDNA.40684.1 | 3.58  | 3.54  | 0.19 | 0.25 | 1.03  | 0.622937 | 0.757265 | 0.82774  | 0.858672 |
| MmugDNA.40685.1.S1_at   | MmugDNA.40685.1 | 3.83  | 3.57  | 0.22 | 0.09 | 1.2   | 0.451629 | 0.425017 | 0.73168  | 0.647471 |
| MmugDNA.40687.1.S1_at   | MmugDNA.40687.1 | 3.82  | 3.77  | 0.14 | 0.15 | 1.04  | 0.778338 | 0.883746 | 0.907414 | 0.933691 |
| MmugDNA.40689.1.S1_at   | MmugDNA.40689.1 | 5.48  | 5.72  | 0.08 | 0.16 | -1.18 | 0.052069 | 0.004159 | 0.376989 | 0.091036 |
| MmugDNA.4069.1.S1_at    | MmugDNA.4069.1  | 7.21  | 7.31  | 0.02 | 0.12 | -1.07 | 0.218564 | 0.242769 | 0.578123 | 0.513112 |
| MmugDNA.40691.1.S1_at   | MmugDNA.40691.1 | 6.77  | 6.81  | 0.25 | 0.08 | -1.03 | 0.995367 | 0.258789 | 0.998331 | 0.525949 |
| MmugDNA.2735.1.S1_s_at  | MmugDNA.2735.1  | 12.42 | 12.25 | 0.23 | 0.02 | 1.13  | 0.229837 | 0.302302 | 0.587007 | 0.560092 |
| MmugDNA.40694.1.S1_at   | MmugDNA.40694.1 | 4.18  | 3.84  | 0.19 | 0.07 | 1.27  | 0.072787 | 0.303239 | 0.417839 | 0.560731 |
| MmugDNA.40695.1.S1_at   | MmugDNA.40695.1 | 3.29  | 3.32  | 0.07 | 0.06 | -1.02 | 0.624106 | 0.168076 | 0.828178 | 0.444666 |
| MmugDNA.40696.1.S1_at   | MmugDNA.40696.1 | 11.62 | 11.65 | 0.03 | 0.19 | -1.02 | 0.767336 | 0.88673  | 0.902231 | 0.935519 |
| MmugDNA.40697.1.S1_at   | MmugDNA.40697.1 | 6.03  | 5.89  | 0.66 | 0.27 | 1.1   | 0.329241 | 0.424818 | 0.654879 | 0.64729  |
| MmugDNA.22260.1.S1_s_at | MmugDNA.22260.1 | 8.62  | 8.52  | 0.24 | 0.12 | 1.07  | 0.40573  | 0.451836 | 0.703322 | 0.66662  |
| MmugDNA.40699.1.S1_at   | MmugDNA.40699.1 | 4.91  | 5.24  | 0.39 | 0.48 | -1.25 | 0.15747  | 0.233544 | 0.522379 | 0.504878 |
| MmugDNA.407.1.S1_at     | MmugDNA.407.1   | 9.27  | 9.71  | 1.25 | 2.5  | -1.35 | 0.435422 | 0.255326 | 0.721224 | 0.523394 |
| MmugDNA.4070.1.S1_at    | MmugDNA.4070.1  | 4.64  | 4.65  | 0.13 | 0.1  | -1.01 | 0.846945 | 0.859963 | 0.938535 | 0.920188 |
| MmugDNA.40700.1.S1_at   | MmugDNA.40700.1 | 4.77  | 5.28  | 0.4  | 0.45 | -1.43 | 0.08733  | 0.20075  | 0.441578 | 0.475264 |
| MmugDNA.40701.1.S1_at   | MmugDNA.40701.1 | 7.34  | 8.09  | 0.22 | 0.52 | -1.68 | 0.078025 | 0.073606 | 0.428012 | 0.316945 |
| MmugDNA.40702.1.S1_at   | MmugDNA.40702.1 | 12.64 | 12.08 | 0.1  | 0.09 | 1.47  | 0.00163  | 0.000123 | 0.152812 | 0.029087 |
| MmugDNA.40705.1.S1_at   | MmugDNA.40705.1 | 3.26  | 3.41  | 0.07 | 0.17 | -1.11 | 0.7975   | 0.953832 | 0.916098 | 0.973705 |
| MmugDNA.4071.1.S1_at    | MmugDNA.4071.1  | 5.84  | 5.94  | 0.17 | 0.22 | -1.06 | 0.941742 | 0.92311  | 0.977821 | 0.956754 |
| MmugDNA.4071.1.S1_s_at  | MmugDNA.4071.1  | 5.81  | 5.74  | 0.1  | 0.25 | 1.05  | 0.448686 | 0.58203  | 0.729784 | 0.750784 |
| MmugDNA.40710.1.S1_at   | MmugDNA.40710.1 | 3.72  | 3.82  | 0.16 | 0.22 | -1.07 | 0.924934 | 0.255921 | 0.97091  | 0.523862 |
| MmugDNA.40712.1.S1_at   | MmugDNA.40712.1 | 6.13  | 6.32  | 0.1  | 0.1  | -1.14 | 0.16648  | 0.185539 | 0.530211 | 0.461566 |
| MmugDNA.40713.1.S1_at   | MmugDNA.40713.1 | 4.9   | 6.52  | 1.18 | 0.07 | -3.07 | 0.078579 | 0.077866 | 0.428609 | 0.324099 |
| MmugDNA.40715.1.S1_at   | MmugDNA.40715.1 | 4.2   | 4.22  | 0.04 | 0.22 | -1.01 | 0.391144 | 0.137864 | 0.693921 | 0.410833 |

|                         |                 |       |       |      |      |        |          |          |          |          |
|-------------------------|-----------------|-------|-------|------|------|--------|----------|----------|----------|----------|
| MmugDNA.40716.1.S1_at   | MmugDNA.40716.1 | 5.86  | 5.93  | 0.16 | 0.06 | -1.05  | 0.525354 | 0.661083 | 0.773633 | 0.801683 |
| MmugDNA.4072.1.S1_at    | MmugDNA.4072.1  | 4.17  | 4.42  | 0.7  | 0.22 | -1.19  | 0.740521 | 0.801788 | 0.888669 | 0.885932 |
| MmugDNA.40721.1.S1_at   | MmugDNA.40721.1 | 9.04  | 8.16  | 0.09 | 0.36 | 1.85   | 0.043741 | 0.040113 | 0.357051 | 0.245438 |
| MmugDNA.40721.1.S1_s_at | MmugDNA.40721.1 | 9.5   | 8.76  | 0.16 | 0.4  | 1.66   | 0.074098 | 0.068785 | 0.419667 | 0.308711 |
| MmugDNA.40723.1.S1_at   | MmugDNA.40723.1 | 3.66  | 3.7   | 0.15 | 0.05 | -1.03  | 0.542236 | 0.645326 | 0.783138 | 0.792179 |
| MmugDNA.40706.1.S1_s_at | MmugDNA.40706.1 | 7.41  | 6.54  | 0.36 | 0.78 | 1.83   | 0.23633  | 0.421904 | 0.590377 | 0.645369 |
| MmugDNA.40726.1.S1_at   | MmugDNA.40726.1 | 7.64  | 8.89  | 0.27 | 0.51 | -2.37  | 0.037779 | 0.021827 | 0.342866 | 0.184799 |
| MmugDNA.40727.1.S1_at   | MmugDNA.40727.1 | 4.28  | 4.41  | 0.42 | 0.52 | -1.1   | 0.868866 | 0.000352 | 0.947767 | 0.037121 |
| MmugDNA.40730.1.S1_at   | MmugDNA.40730.1 | 4.33  | 4.85  | 0.19 | 0.14 | -1.43  | 0.013239 | 0.007525 | 0.246167 | 0.1163   |
| MmugDNA.40731.1.S1_at   | MmugDNA.40731.1 | 3.73  | 3.84  | 0.14 | 0.02 | -1.08  | 0.78674  | 0.896416 | 0.911324 | 0.940875 |
| MmugDNA.40732.1.S1_at   | MmugDNA.40732.1 | 6.18  | 6.61  | 0.14 | 0.27 | -1.35  | 0.328704 | 0.01928  | 0.654467 | 0.174698 |
| MmugDNA.40733.1.S1_at   | MmugDNA.40733.1 | 4.66  | 4.9   | 0.08 | 0.2  | -1.19  | 0.250169 | 0.354253 | 0.600389 | 0.597105 |
| MmugDNA.40735.1.S1_at   | MmugDNA.40735.1 | 8.53  | 9.13  | 0.44 | 1.65 | -1.51  | 0.923078 | 0.926883 | 0.970098 | 0.958424 |
| MmugDNA.40736.1.S1_at   | MmugDNA.40736.1 | 7.59  | 7.48  | 0.2  | 0.42 | 1.08   | 0.656518 | 0.671813 | 0.845394 | 0.808157 |
| MmugDNA.40738.1.S1_at   | MmugDNA.40738.1 | 8.48  | 7.97  | 0.34 | 0.27 | 1.42   | 0.109444 | 0.068649 | 0.470811 | 0.308548 |
| MmugDNA.40740.1.S1_at   | MmugDNA.40740.1 | 5.12  | 5.29  | 0.1  | 0.01 | -1.12  | 0.105992 | 0.068716 | 0.466831 | 0.308711 |
| MmugDNA.40741.1.S1_at   | MmugDNA.40741.1 | 5.63  | 5.64  | 0.1  | 0.14 | -1     | 0.803838 | 0.50807  | 0.919339 | 0.703358 |
| MmugDNA.40746.1.S1_at   | MmugDNA.40746.1 | 7.98  | 7.66  | 0.14 | 0.37 | 1.25   | 0.272286 | 0.229056 | 0.616016 | 0.501378 |
| MmugDNA.40747.1.S1_at   | MmugDNA.40747.1 | 4.39  | 4.53  | 0.14 | 0.21 | -1.11  | 0.173725 | 0.28586  | 0.537255 | 0.547484 |
| MmugDNA.40748.1.S1_at   | MmugDNA.40748.1 | 5.7   | 5.44  | 0.73 | 0.35 | 1.19   | 0.211294 | 0.243193 | 0.57209  | 0.513356 |
| MmugDNA.40749.1.S1_at   | MmugDNA.40749.1 | 11.84 | 11.84 | 0.09 | 0.18 | 1      | 0.955273 | 0.967486 | 0.983247 | 0.982071 |
| MmugDNA.4075.1.S1_at    | MmugDNA.4075.1  | 6.63  | 6.5   | 0.29 | 0.36 | 1.09   | 0.570662 | 0.747943 | 0.799619 | 0.853333 |
| MmugDNA.40750.1.S1_at   | MmugDNA.40750.1 | 3.08  | 3.07  | 0.09 | 0.21 | 1      | 0.268592 | 0.341252 | 0.613299 | 0.587344 |
| MmugDNA.40750.1.S1_s_at | MmugDNA.40750.1 | 10.31 | 10.52 | 0.14 | 0.28 | -1.16  | 0.153976 | 0.12715  | 0.518553 | 0.397922 |
| MmugDNA.40750.1.S1_x_at | MmugDNA.40750.1 | 3.27  | 3.33  | 0.12 | 0.15 | -1.04  | 0.163644 | 0.21677  | 0.527992 | 0.490311 |
| MmugDNA.40751.1.S1_at   | MmugDNA.40751.1 | 3.29  | 3.52  | 0.1  | 0.08 | -1.17  | 0.022819 | 0.030762 | 0.288178 | 0.217296 |
| MmugDNA.40754.1.S1_at   | MmugDNA.40754.1 | 6.76  | 6.34  | 0.34 | 0.37 | 1.34   | 0.208781 | 0.183999 | 0.570422 | 0.460195 |
| MmugDNA.40755.1.S1_at   | MmugDNA.40755.1 | 3.91  | 4.04  | 0.08 | 0.09 | -1.09  | 0.171198 | 0.233589 | 0.535126 | 0.50492  |
| MmugDNA.40756.1.S1_at   | MmugDNA.40756.1 | 4.96  | 5.27  | 0.15 | 0.19 | -1.24  | 0.197119 | 0.248271 | 0.560096 | 0.517596 |
| MmugDNA.40757.1.S1_x_at | MmugDNA.40757.1 | 12.12 | 12.14 | 0.39 | 0.18 | -1.01  | 0.324551 | 0.431783 | 0.651941 | 0.652556 |
| MmugDNA.40758.1.S1_at   | MmugDNA.40758.1 | 9.62  | 9.27  | 0.26 | 0.86 | 1.28   | 0.553824 | 0.711994 | 0.790417 | 0.833066 |
| MmugDNA.40759.1.S1_at   | MmugDNA.40759.1 | 11.18 | 12.27 | 0.26 | 0.37 | -2.13  | 0.008686 | 0.002077 | 0.220233 | 0.067404 |
| MmugDNA.4076.1.S1_at    | MmugDNA.4076.1  | 7.14  | 6.21  | 0.5  | 1.02 | 1.9    | 0.42281  | 0.418489 | 0.713742 | 0.642898 |
| MmugDNA.40761.1.S1_at   | MmugDNA.40761.1 | 6.44  | 6.55  | 0.08 | 0.08 | -1.08  | 0.088809 | 0.108301 | 0.443684 | 0.371557 |
| MmugDNA.40762.1.S1_at   | MmugDNA.40762.1 | 5.95  | 5     | 1.29 | 0.28 | 1.94   | 0.208396 | 0.282566 | 0.570275 | 0.545292 |
| MmugDNA.40766.1.S1_at   | MmugDNA.40766.1 | 6.64  | 6.03  | 0.64 | 0.13 | 1.53   | 0.074536 | 0.071439 | 0.420428 | 0.313597 |
| MmugDNA.40767.1.S1_at   | MmugDNA.40767.1 | 10.95 | 10.57 | 0.02 | 0.27 | 1.3    | 0.024616 | 0.014604 | 0.295416 | 0.15408  |
| MmugDNA.40768.1.S1_at   | MmugDNA.40768.1 | 6.25  | 10.27 | 1.57 | 2.86 | -16.22 | 0.440943 | 0.339173 | 0.724601 | 0.585918 |
| MmugDNA.40769.1.S1_s_at | MmugDNA.40769.1 | 12.59 | 11.64 | 0.56 | 0.46 | 1.93   | 0.208615 | 0.174156 | 0.570384 | 0.450451 |
| MmugDNA.40771.1.S1_at   | MmugDNA.40771.1 | 6.52  | 6.76  | 0.13 | 0.7  | -1.18  | 0.368733 | 0.496066 | 0.68022  | 0.695877 |
| MmugDNA.40772.1.S1_at   | MmugDNA.40772.1 | 4.64  | 4.85  | 0.25 | 0.32 | -1.16  | 0.681898 | 0.354156 | 0.857635 | 0.597059 |



|                         |                 |       |       |      |      |       |          |          |          |          |
|-------------------------|-----------------|-------|-------|------|------|-------|----------|----------|----------|----------|
| MmugDNA.40773.1.S1_at   | MmugDNA.40773.1 | 7.74  | 7.2   | 0.48 | 0.55 | 1.46  | 0.153074 | 0.179006 | 0.517474 | 0.455354 |
| MmugDNA.40774.1.S1_at   | MmugDNA.40774.1 | 5.97  | 5.57  | 0.34 | 0.06 | 1.32  | 0.101094 | 0.249209 | 0.461009 | 0.518313 |
| MmugDNA.40775.1.S1_at   | MmugDNA.40775.1 | 3.49  | 3.46  | 0.22 | 0.34 | 1.03  | 0.473262 | 0.603592 | 0.744128 | 0.764204 |
| MmugDNA.40776.1.S1_at   | MmugDNA.40776.1 | 6.98  | 6.98  | 0.17 | 0.07 | 1     | 0.271908 | 0.519005 | 0.615834 | 0.710813 |
| MmugDNA.40777.1.S1_at   | MmugDNA.40777.1 | 4.72  | 4.17  | 0.66 | 0.25 | 1.47  | 0.276352 | 0.495522 | 0.618437 | 0.695527 |
| MmugDNA.40777.1.S1_x_at | MmugDNA.40777.1 | 7.29  | 6.53  | 0.79 | 0.46 | 1.69  | 0.234201 | 0.385385 | 0.588621 | 0.620818 |
| MmugDNA.40778.1.S1_at   | MmugDNA.40778.1 | 6.68  | 7.04  | 0.15 | 0.17 | -1.29 | 0.013781 | 0.008944 | 0.249758 | 0.12502  |
| MmugDNA.40779.1.S1_at   | MmugDNA.40779.1 | 6.29  | 5.45  | 0.25 | 0.29 | 1.79  | 0.069848 | 0.217607 | 0.412907 | 0.491216 |
| MmugDNA.4078.1.S1_at    | MmugDNA.4078.1  | 7.07  | 7.7   | 0.33 | 0.3  | -1.55 | 0.149697 | 0.097772 | 0.514291 | 0.355638 |
| MmugDNA.40780.1.S1_at   | MmugDNA.40780.1 | 6.37  | 6.33  | 0.05 | 0.13 | 1.02  | 0.721213 | 0.432193 | 0.878012 | 0.652775 |
| MmugDNA.40781.1.S1_at   | MmugDNA.40781.1 | 5.83  | 6.24  | 1.3  | 0.21 | -1.34 | 0.640215 | 0.839045 | 0.837608 | 0.908268 |
| MmugDNA.40782.1.S1_at   | MmugDNA.40782.1 | 10.07 | 9.12  | 0.26 | 1.03 | 1.93  | 0.744211 | 0.750408 | 0.890539 | 0.854798 |
| MmugDNA.40783.1.S1_at   | MmugDNA.40783.1 | 3.51  | 3.67  | 0.08 | 0.29 | -1.12 | 0.67096  | 0.658721 | 0.852532 | 0.800473 |
| MmugDNA.40784.1.S1_at   | MmugDNA.40784.1 | 6.67  | 6.83  | 0.33 | 0.49 | -1.12 | 0.611573 | 0.785665 | 0.821747 | 0.875916 |
| MmugDNA.40785.1.S1_at   | MmugDNA.40785.1 | 3.53  | 3.76  | 0.03 | 0.08 | -1.18 | 0.015236 | 0.02027  | 0.257698 | 0.17872  |
| MmugDNA.40786.1.S1_at   | MmugDNA.40786.1 | 7.27  | 6.51  | 0.42 | 0.18 | 1.7   | 0.058981 | 0.056365 | 0.390921 | 0.283382 |
| MmugDNA.40787.1.S1_at   | MmugDNA.40787.1 | 6.72  | 6.72  | 0.03 | 0.08 | 1     | 0.263336 | 0.384915 | 0.609348 | 0.620515 |
| MmugDNA.40788.1.S1_at   | MmugDNA.40788.1 | 5.55  | 5.2   | 0.72 | 0.16 | 1.28  | 0.137511 | 0.187542 | 0.504619 | 0.463628 |
| MmugDNA.40789.1.S1_at   | MmugDNA.40789.1 | 4.08  | 4.18  | 0.13 | 0.04 | -1.07 | 0.096144 | 0.215813 | 0.454327 | 0.489536 |
| MmugDNA.4079.1.S1_at    | MmugDNA.4079.1  | 3.68  | 3.54  | 0.32 | 0.08 | 1.1   | 0.99465  | 0.916753 | 0.998128 | 0.9534   |
| MmugDNA.40790.1.S1_at   | MmugDNA.40790.1 | 12.23 | 12.16 | 0.06 | 0.25 | 1.05  | 0.599851 | 0.091002 | 0.814882 | 0.345755 |
| MmugDNA.40790.1.S1_s_at | MmugDNA.40790.1 | 13.03 | 12.98 | 0.03 | 0.14 | 1.04  | 0.641339 | 0.569339 | 0.838155 | 0.742375 |
| MmugDNA.40791.1.S1_at   | MmugDNA.40791.1 | 3.78  | 3.68  | 0.24 | 0.11 | 1.08  | 0.18363  | 0.340583 | 0.54773  | 0.586789 |
| MmugDNA.40792.1.S1_at   | MmugDNA.40792.1 | 3.56  | 3.69  | 0.01 | 0.08 | -1.1  | 0.048037 | 0.205257 | 0.367582 | 0.479599 |
| MmugDNA.40793.1.S1_at   | MmugDNA.40793.1 | 3.91  | 4.06  | 0.4  | 0.35 | -1.11 | 0.967964 | 0.843137 | 0.98795  | 0.910701 |
| MmugDNA.40794.1.S1_at   | MmugDNA.40794.1 | 4.71  | 4.64  | 0.3  | 0.06 | 1.05  | 0.323357 | 0.166413 | 0.651559 | 0.442884 |
| MmugDNA.40795.1.S1_at   | MmugDNA.40795.1 | 5.52  | 5.82  | 0.17 | 0.24 | -1.23 | 0.165706 | 0.490928 | 0.529716 | 0.692666 |
| MmugDNA.40796.1.S1_at   | MmugDNA.40796.1 | 5.15  | 4.97  | 0.13 | 0.07 | 1.14  | 0.291903 | 0.44393  | 0.629223 | 0.661553 |
| MmugDNA.40797.1.S1_at   | MmugDNA.40797.1 | 6.15  | 6.87  | 0.51 | 0.26 | -1.65 | 0.064045 | 0.108807 | 0.402086 | 0.372374 |
| MmugDNA.40799.1.S1_at   | MmugDNA.40799.1 | 8.55  | 10    | 0.29 | 0.23 | -2.73 | 0.002413 | 0.001613 | 0.163555 | 0.060683 |
| MmugDNA.408.1.S1_at     | MmugDNA.408.1   | 4.38  | 4.46  | 0.04 | 0.14 | -1.06 | 0.257149 | 0.217795 | 0.604509 | 0.491368 |
| MmugDNA.40801.1.S1_at   | MmugDNA.40801.1 | 4.47  | 4.16  | 0.21 | 0.22 | 1.24  | 0.156526 | 0.161222 | 0.521342 | 0.437386 |
| MmugDNA.40804.1.S1_at   | MmugDNA.40804.1 | 3.28  | 3.29  | 0.09 | 0.08 | -1.01 | 0.977988 | 0.086864 | 0.991739 | 0.339651 |
| MmugDNA.40805.1.S1_at   | MmugDNA.40805.1 | 3.63  | 3.64  | 0.1  | 0.08 | -1    | 0.946566 | 0.371274 | 0.979457 | 0.610135 |
| MmugDNA.40807.1.S1_at   | MmugDNA.40807.1 | 4.22  | 4.14  | 0.1  | 0.27 | 1.05  | 0.598521 | 0.055146 | 0.81395  | 0.280451 |
| MmugDNA.40808.1.S1_at   | MmugDNA.40808.1 | 5.14  | 5.04  | 0.04 | 0.04 | 1.07  | 0.100123 | 0.250474 | 0.460668 | 0.519391 |
| MmugDNA.40809.1.S1_at   | MmugDNA.40809.1 | 3.82  | 3.81  | 0.08 | 0.29 | 1.01  | 0.49718  | 0.236241 | 0.757896 | 0.507252 |
| MmugDNA.4081.1.S1_at    | MmugDNA.4081.1  | 5.45  | 5.47  | 0.18 | 0.04 | -1.01 | 0.676368 | 0.532498 | 0.854961 | 0.719065 |
| MmugDNA.40810.1.S1_at   | MmugDNA.40810.1 | 6.74  | 6.84  | 0.16 | 0.33 | -1.07 | 0.621462 | 0.268392 | 0.826693 | 0.534086 |
| MmugDNA.40812.1.S1_at   | MmugDNA.40812.1 | 12.09 | 11.96 | 0.06 | 0.11 | 1.09  | 0.036183 | 0.024069 | 0.339036 | 0.194468 |
| MmugDNA.40813.1.S1_at   | MmugDNA.40813.1 | 5.22  | 5.29  | 0.18 | 0.02 | -1.05 | 0.560839 | 0.890206 | 0.794468 | 0.937473 |

|                         |                 |       |       |      |      |       |          |          |          |          |
|-------------------------|-----------------|-------|-------|------|------|-------|----------|----------|----------|----------|
| MmugDNA.40815.1.S1_at   | MmugDNA.40815.1 | 2.99  | 3.11  | 0.1  | 0.04 | -1.09 | 0.207939 | 0.101762 | 0.569864 | 0.361632 |
| MmugDNA.40817.1.S1_at   | MmugDNA.40817.1 | 5.65  | 5.55  | 0.54 | 0.23 | 1.07  | 0.186905 | 0.252729 | 0.550106 | 0.521174 |
| MmugDNA.40818.1.S1_at   | MmugDNA.40818.1 | 6.77  | 6.7   | 0.31 | 0.73 | 1.05  | 0.548171 | 0.721457 | 0.786641 | 0.838713 |
| MmugDNA.4082.1.S1_at    | MmugDNA.4082.1  | 9.45  | 9.57  | 0.24 | 0.31 | -1.08 | 0.804774 | 0.951355 | 0.919759 | 0.972417 |
| MmugDNA.40820.1.S1_at   | MmugDNA.40820.1 | 4.74  | 4.88  | 0.13 | 0.09 | -1.1  | 0.110209 | 0.369497 | 0.471834 | 0.608861 |
| MmugDNA.40821.1.S1_at   | MmugDNA.40821.1 | 8.79  | 9.24  | 0.25 | 0.34 | -1.37 | 0.032162 | 0.0155   | 0.3244   | 0.158044 |
| MmugDNA.40822.1.S1_at   | MmugDNA.40822.1 | 3.33  | 3.41  | 0.15 | 0.33 | -1.05 | 0.552928 | 0.755585 | 0.789712 | 0.857719 |
| MmugDNA.40823.1.S1_at   | MmugDNA.40823.1 | 2.63  | 2.63  | 0.29 | 0.19 | -1    | 0.68156  | 0.44479  | 0.857635 | 0.662072 |
| MmugDNA.40824.1.S1_at   | MmugDNA.40824.1 | 3.54  | 3.84  | 0.23 | 0.33 | -1.23 | 0.656122 | 0.646792 | 0.845317 | 0.793117 |
| MmugDNA.40825.1.S1_at   | MmugDNA.40825.1 | 7.82  | 8.95  | 0.47 | 0.42 | -2.18 | 0.097953 | 0.10651  | 0.457244 | 0.369078 |
| MmugDNA.40826.1.S1_at   | MmugDNA.40826.1 | 3.47  | 3.4   | 0.08 | 0.01 | 1.05  | 0.200156 | 0.213965 | 0.56313  | 0.487596 |
| MmugDNA.40827.1.S1_at   | MmugDNA.40827.1 | 11.21 | 11.2  | 0.17 | 0.07 | 1.01  | 0.957081 | 0.046226 | 0.983802 | 0.259397 |
| MmugDNA.40828.1.S1_at   | MmugDNA.40828.1 | 5.89  | 6     | 0.22 | 0.04 | -1.08 | 0.893729 | 0.819173 | 0.957735 | 0.895796 |
| MmugDNA.40829.1.S1_at   | MmugDNA.40829.1 | 5.48  | 5.53  | 0.13 | 0.16 | -1.04 | 0.483366 | 0.65999  | 0.749882 | 0.80101  |
| MmugDNA.4083.1.S1_s_at  | MmugDNA.4083.1  | 11.43 | 11.9  | 0.34 | 0.03 | -1.39 | 0.052908 | 0.079674 | 0.378593 | 0.326981 |
| MmugDNA.40830.1.S1_at   | MmugDNA.40830.1 | 8.7   | 9.5   | 0.18 | 0.19 | -1.74 | 0.006481 | 0.002005 | 0.199625 | 0.066428 |
| MmugDNA.40831.1.S1_at   | MmugDNA.40831.1 | 5.1   | 4.98  | 0.02 | 0.13 | 1.09  | 0.163622 | 0.563078 | 0.527992 | 0.738345 |
| MmugDNA.40832.1.S1_at   | MmugDNA.40832.1 | 5.5   | 5.81  | 0.13 | 0.16 | -1.24 | 0.068099 | 0.062233 | 0.409262 | 0.296307 |
| MmugDNA.40833.1.S1_at   | MmugDNA.40833.1 | 4.26  | 4.38  | 0.13 | 0.15 | -1.08 | 0.148456 | 0.185782 | 0.513907 | 0.461631 |
| MmugDNA.40834.1.S1_at   | MmugDNA.40834.1 | 7.94  | 7.5   | 0.18 | 0.31 | 1.36  | 0.290059 | 0.321436 | 0.628003 | 0.573207 |
| MmugDNA.40835.1.S1_at   | MmugDNA.40835.1 | 5.93  | 6.11  | 0.56 | 0.21 | -1.13 | 0.704884 | 0.882865 | 0.869834 | 0.933206 |
| MmugDNA.40836.1.S1_at   | MmugDNA.40836.1 | 8.83  | 7.96  | 0.28 | 1.03 | 1.83  | 0.55483  | 0.744649 | 0.791099 | 0.852121 |
| MmugDNA.40837.1.S1_at   | MmugDNA.40837.1 | 6.56  | 6.97  | 0.25 | 0.31 | -1.33 | 0.067522 | 0.059094 | 0.407949 | 0.289985 |
| MmugDNA.40838.1.S1_at   | MmugDNA.40838.1 | 4.13  | 5.13  | 0.9  | 0.45 | -2    | 0.460106 | 0.40119  | 0.736719 | 0.630823 |
| MmugDNA.40838.1.S1_s_at | MmugDNA.40838.1 | 12.47 | 12.58 | 0.02 | 0.14 | -1.08 | 0.455756 | 0.050058 | 0.733977 | 0.268916 |
| MmugDNA.40839.1.S1_at   | MmugDNA.40839.1 | 5.16  | 5.04  | 0.1  | 0.07 | 1.09  | 0.204875 | 0.138345 | 0.567457 | 0.411244 |
| MmugDNA.40840.1.S1_at   | MmugDNA.40840.1 | 9.42  | 9.67  | 0.15 | 1.14 | -1.19 | 0.923976 | 0.597598 | 0.970588 | 0.760265 |
| MmugDNA.40841.1.S1_at   | MmugDNA.40841.1 | 11.49 | 12.33 | 0.19 | 0.29 | -1.79 | 0.018792 | 0.003967 | 0.2715   | 0.089593 |
| MmugDNA.40842.1.S1_at   | MmugDNA.40842.1 | 12.51 | 13.03 | 0.06 | 0.25 | -1.43 | 0.036769 | 0.014078 | 0.340337 | 0.151885 |
| MmugDNA.40843.1.S1_at   | MmugDNA.40843.1 | 3.8   | 3.71  | 0.53 | 0.34 | 1.06  | 0.621137 | 0.33624  | 0.826405 | 0.583736 |
| MmugDNA.40844.1.S1_at   | MmugDNA.40844.1 | 6.64  | 6.26  | 0.28 | 0.39 | 1.3   | 0.103621 | 0.203065 | 0.463383 | 0.477343 |
| MmugDNA.40845.1.S1_at   | MmugDNA.40845.1 | 4.82  | 4.64  | 0.17 | 0.05 | 1.14  | 0.110295 | 0.149803 | 0.471863 | 0.424394 |
| MmugDNA.40847.1.S1_at   | MmugDNA.40847.1 | 6.99  | 7.05  | 0.11 | 0.09 | -1.04 | 0.254083 | 0.606423 | 0.602339 | 0.765747 |
| MmugDNA.40848.1.S1_at   | MmugDNA.40848.1 | 6.07  | 6.19  | 0.12 | 0.12 | -1.08 | 0.663543 | 0.076883 | 0.849018 | 0.322368 |
| MmugDNA.40849.1.S1_at   | MmugDNA.40849.1 | 8.17  | 7.39  | 0.18 | 0.59 | 1.72  | 0.128707 | 0.010454 | 0.494664 | 0.133648 |
| MmugDNA.40850.1.S1_at   | MmugDNA.40850.1 | 9.78  | 10.18 | 0.07 | 0.53 | -1.32 | 0.212643 | 0.240013 | 0.572926 | 0.510717 |
| MmugDNA.40851.1.S1_at   | MmugDNA.40851.1 | 10.05 | 10.24 | 0.27 | 0.44 | -1.14 | 0.467369 | 0.518922 | 0.74068  | 0.710789 |
| MmugDNA.40852.1.S1_at   | MmugDNA.40852.1 | 4.57  | 5.49  | 0.27 | 0.45 | -1.89 | 0.02339  | 0.031966 | 0.291303 | 0.221191 |
| MmugDNA.40853.1.S1_at   | MmugDNA.40853.1 | 3.67  | 3.6   | 0.19 | 0.22 | 1.05  | 0.594121 | 0.633592 | 0.811686 | 0.784275 |
| MmugDNA.40854.1.S1_at   | MmugDNA.40854.1 | 5.69  | 5.35  | 0.24 | 0.12 | 1.27  | 0.125572 | 0.108669 | 0.491438 | 0.372171 |
| MmugDNA.40854.1.S1_s_at | MmugDNA.40854.1 | 7.82  | 8.39  | 0.38 | 0.43 | -1.48 | 0.251918 | 0.274597 | 0.601195 | 0.539059 |

|                         |                 |       |       |      |      |       |          |          |          |          |
|-------------------------|-----------------|-------|-------|------|------|-------|----------|----------|----------|----------|
| MmugDNA.40856.1.S1_at   | MmugDNA.40856.1 | 3.39  | 3.5   | 1.02 | 0.12 | -1.08 | 0.504278 | 0.608363 | 0.761197 | 0.767055 |
| MmugDNA.40857.1.S1_at   | MmugDNA.40857.1 | 10.75 | 9.68  | 0.18 | 0.38 | 2.11  | 0.036956 | 0.026607 | 0.340513 | 0.204008 |
| MmugDNA.40859.1.S1_at   | MmugDNA.40859.1 | 6.91  | 6.9   | 0.1  | 0.17 | 1     | 0.279473 | 0.325522 | 0.621119 | 0.575827 |
| MmugDNA.40860.1.S1_at   | MmugDNA.40860.1 | 8.04  | 8.24  | 0.02 | 0.16 | -1.15 | 0.111282 | 0.044202 | 0.4734   | 0.254711 |
| MmugDNA.40861.1.S1_at   | MmugDNA.40861.1 | 3.76  | 3.72  | 0.28 | 0.21 | 1.03  | 0.769416 | 0.607952 | 0.903012 | 0.766684 |
| MmugDNA.40862.1.S1_at   | MmugDNA.40862.1 | 7.7   | 8.16  | 0.48 | 0.23 | -1.38 | 0.257239 | 0.082024 | 0.60459  | 0.330729 |
| MmugDNA.40863.1.S1_at   | MmugDNA.40863.1 | 4.43  | 4.34  | 0.11 | 0.06 | 1.06  | 0.307972 | 0.238768 | 0.640352 | 0.509442 |
| MmugDNA.40864.1.S1_at   | MmugDNA.40864.1 | 3.69  | 3.57  | 0.38 | 0.06 | 1.09  | 0.224416 | 0.184946 | 0.582716 | 0.460776 |
| MmugDNA.40865.1.S1_at   | MmugDNA.40865.1 | 2.66  | 2.81  | 0.08 | 0.04 | -1.1  | 0.066184 | 0.294142 | 0.40632  | 0.553962 |
| MmugDNA.8441.1.S1_at    | MmugDNA.8441.1  | 3.87  | 3.74  | 0.22 | 0.21 | 1.1   | 0.568884 | 0.799006 | 0.798907 | 0.884263 |
| MmugDNA.8441.1.S1_s_at  | MmugDNA.8441.1  | 3.81  | 3.75  | 0.1  | 0.43 | 1.04  | 0.725051 | 0.566397 | 0.880012 | 0.740513 |
| MmugDNA.40866.1.S1_at   | MmugDNA.40866.1 | 4.93  | 4.92  | 0.12 | 0.17 | 1.01  | 0.41968  | 0.628655 | 0.71205  | 0.781348 |
| MmugDNA.40867.1.S1_at   | MmugDNA.40867.1 | 7.55  | 7.02  | 0.53 | 0.18 | 1.44  | 0.153828 | 0.096634 | 0.518485 | 0.354145 |
| MmugDNA.40869.1.S1_at   | MmugDNA.40869.1 | 8.12  | 9.2   | 0.12 | 0.53 | -2.11 | 0.057061 | 0.071147 | 0.387418 | 0.313041 |
| MmugDNA.4087.1.S1_at    | MmugDNA.4087.1  | 2.9   | 3.04  | 0.23 | 0.02 | -1.1  | 0.989781 | 0.77256  | 0.996368 | 0.867784 |
| MmugDNA.40870.1.S1_at   | MmugDNA.40870.1 | 2.93  | 2.77  | 0.23 | 0.41 | 1.12  | 0.835162 | 0.680952 | 0.93317  | 0.813691 |
| MmugDNA.40873.1.S1_at   | MmugDNA.40873.1 | 8.95  | 8.8   | 0.24 | 0.71 | 1.11  | 0.744582 | 0.457648 | 0.890671 | 0.670889 |
| MmugDNA.40874.1.S1_at   | MmugDNA.40874.1 | 5.32  | 5.32  | 0.35 | 0.01 | 1     | 0.388524 | 0.405568 | 0.692586 | 0.633804 |
| MmugDNA.40875.1.S1_at   | MmugDNA.40875.1 | 6.83  | 7.08  | 0.15 | 0.45 | -1.19 | 0.135239 | 0.006791 | 0.501995 | 0.111388 |
| MmugDNA.40877.1.S1_at   | MmugDNA.40877.1 | 4.98  | 4.91  | 0.6  | 0.8  | 1.05  | 0.855426 | 0.915337 | 0.941542 | 0.952467 |
| MmugDNA.40878.1.S1_at   | MmugDNA.40878.1 | 8.52  | 9.35  | 0.29 | 0.09 | -1.77 | 0.007638 | 0.001975 | 0.210743 | 0.065871 |
| MmugDNA.40878.1.S1_s_at | MmugDNA.40878.1 | 8.58  | 9.66  | 0.19 | 0.15 | -2.12 | 0.001231 | 0.000349 | 0.145267 | 0.037097 |
| MmugDNA.40879.1.S1_at   | MmugDNA.40879.1 | 7.27  | 7.33  | 0.27 | 0.06 | -1.04 | 0.60016  | 0.497606 | 0.815113 | 0.696935 |
| MmugDNA.40880.1.S1_at   | MmugDNA.40880.1 | 11.39 | 11.2  | 0.29 | 0.23 | 1.14  | 0.529601 | 0.730466 | 0.77625  | 0.844017 |
| MmugDNA.40881.1.S1_at   | MmugDNA.40881.1 | 3.04  | 3.02  | 0.08 | 0.05 | 1.01  | 0.180201 | 0.466988 | 0.544371 | 0.676755 |
| MmugDNA.40883.1.S1_at   | MmugDNA.40883.1 | 4.12  | 4.01  | 0.09 | 0.24 | 1.08  | 0.584785 | 0.48729  | 0.807143 | 0.690391 |
| MmugDNA.40884.1.S1_at   | MmugDNA.40884.1 | 4.28  | 4.21  | 0.3  | 0.25 | 1.05  | 0.861973 | 0.790828 | 0.944477 | 0.87902  |
| MmugDNA.40887.1.S1_at   | MmugDNA.40887.1 | 8.94  | 11.45 | 0.56 | 0.84 | -5.68 | 0.025461 | 0.016324 | 0.29944  | 0.16183  |
| MmugDNA.40888.1.S1_at   | MmugDNA.40888.1 | 10.87 | 10.64 | 0.16 | 0.58 | 1.18  | 0.427924 | 0.569908 | 0.716519 | 0.742739 |
| MmugDNA.40889.1.S1_at   | MmugDNA.40889.1 | 4.41  | 4.17  | 0.87 | 0.14 | 1.18  | 0.206641 | 0.210921 | 0.568816 | 0.484934 |
| MmugDNA.40890.1.S1_at   | MmugDNA.40890.1 | 7.37  | 8.99  | 0.55 | 0.28 | -3.08 | 0.014313 | 0.004871 | 0.251885 | 0.097453 |
| MmugDNA.40891.1.S1_at   | MmugDNA.40891.1 | 5.18  | 4.43  | 1.52 | 0.53 | 1.68  | 0.228532 | 0.306049 | 0.585965 | 0.562782 |
| MmugDNA.40892.1.S1_at   | MmugDNA.40892.1 | 5.77  | 6.21  | 0.62 | 0.62 | -1.36 | 0.789283 | 0.643823 | 0.91253  | 0.791142 |
| MmugDNA.40894.1.S1_at   | MmugDNA.40894.1 | 6.99  | 8.5   | 1.06 | 1.36 | -2.83 | 0.219919 | 0.073183 | 0.579133 | 0.316064 |
| MmugDNA.40895.1.S1_at   | MmugDNA.40895.1 | 5.93  | 6.53  | 0.06 | 0.04 | -1.51 | 0.000146 | 0.000434 | 0.112653 | 0.038359 |
| MmugDNA.40896.1.S1_at   | MmugDNA.40896.1 | 2.76  | 2.8   | 0.05 | 0.09 | -1.03 | 0.169228 | 0.187    | 0.533594 | 0.462938 |
| MmugDNA.40897.1.S1_at   | MmugDNA.40897.1 | 5.04  | 4.72  | 0.49 | 0.13 | 1.25  | 0.22577  | 0.205777 | 0.583854 | 0.48007  |
| MmugDNA.40898.1.S1_at   | MmugDNA.40898.1 | 5.28  | 5.05  | 0.32 | 0.03 | 1.17  | 0.245294 | 0.091203 | 0.596967 | 0.346119 |
| MmugDNA.409.1.S1_at     | MmugDNA.409.1   | 5.45  | 5.71  | 0.03 | 0.36 | -1.2  | 0.391829 | 0.56702  | 0.694286 | 0.740959 |
| MmugDNA.40900.1.S1_at   | MmugDNA.40900.1 | 5.44  | 5.53  | 0.25 | 0.4  | -1.07 | 0.743712 | 0.695005 | 0.890194 | 0.822711 |
| MmugDNA.40901.1.S1_at   | MmugDNA.40901.1 | 9.18  | 9.9   | 0.01 | 0.15 | -1.64 | 0.001013 | 0.001431 | 0.140956 | 0.057607 |

|                         |                 |       |       |      |      |       |          |          |          |          |
|-------------------------|-----------------|-------|-------|------|------|-------|----------|----------|----------|----------|
| MmugDNA.40902.1.S1_at   | MmugDNA.40902.1 | 8.42  | 8.41  | 0.25 | 0.19 | 1.01  | 0.66592  | 0.469617 | 0.85015  | 0.678314 |
| MmugDNA.40903.1.S1_at   | MmugDNA.40903.1 | 5.93  | 6.83  | 0.39 | 0.4  | -1.87 | 0.046364 | 0.035976 | 0.363009 | 0.234155 |
| MmugDNA.40904.1.S1_at   | MmugDNA.40904.1 | 4.47  | 4.46  | 0.17 | 0.09 | 1.01  | 0.432685 | 0.59699  | 0.719191 | 0.759993 |
| MmugDNA.40905.1.S1_at   | MmugDNA.40905.1 | 4.33  | 4.3   | 0.16 | 0.11 | 1.02  | 0.637785 | 0.517186 | 0.836256 | 0.709435 |
| MmugDNA.40906.1.S1_at   | MmugDNA.40906.1 | 10.1  | 9.22  | 0.18 | 0.32 | 1.84  | 0.005431 | 0.003313 | 0.191107 | 0.082825 |
| MmugDNA.40907.1.S1_at   | MmugDNA.40907.1 | 7.52  | 7.25  | 0.86 | 0.47 | 1.21  | 0.527977 | 0.479783 | 0.775293 | 0.68541  |
| MmugDNA.40908.1.S1_s_at | MmugDNA.40908.1 | 8.54  | 8.78  | 0.04 | 0.13 | -1.18 | 0.032018 | 0.014773 | 0.323873 | 0.154616 |
| MmugDNA.40910.1.S1_at   | MmugDNA.40910.1 | 8.02  | 7.65  | 0.13 | 0.16 | 1.29  | 0.07906  | 0.0039   | 0.428609 | 0.088806 |
| MmugDNA.40911.1.S1_at   | MmugDNA.40911.1 | 5.57  | 5.47  | 0.16 | 0.32 | 1.07  | 0.56778  | 0.778028 | 0.798292 | 0.871075 |
| MmugDNA.40912.1.S1_at   | MmugDNA.40912.1 | 4     | 4.15  | 0.17 | 0.2  | -1.11 | 0.676441 | 0.289665 | 0.854962 | 0.550733 |
| MmugDNA.40913.1.S1_at   | MmugDNA.40913.1 | 3.3   | 3.46  | 0.03 | 0.13 | -1.12 | 0.108964 | 0.068407 | 0.470733 | 0.307955 |
| MmugDNA.40914.1.S1_at   | MmugDNA.40914.1 | 5.43  | 5.33  | 0.4  | 0.13 | 1.07  | 0.522288 | 0.633032 | 0.771962 | 0.783894 |
| MmugDNA.40915.1.S1_at   | MmugDNA.40915.1 | 5.75  | 5.74  | 0.03 | 0.16 | 1.01  | 0.627732 | 0.36927  | 0.830307 | 0.608695 |
| MmugDNA.40916.1.S1_at   | MmugDNA.40916.1 | 5.59  | 5.52  | 0.19 | 0.35 | 1.05  | 0.815427 | 0.794179 | 0.924995 | 0.881296 |
| MmugDNA.40918.1.S1_at   | MmugDNA.40918.1 | 6.93  | 6.93  | 0.13 | 0.13 | 1.01  | 0.873096 | 0.182971 | 0.94924  | 0.459449 |
| MmugDNA.40919.1.S1_at   | MmugDNA.40919.1 | 4.28  | 4.2   | 0.03 | 0.04 | 1.06  | 0.2823   | 0.440826 | 0.622732 | 0.659138 |
| MmugDNA.40920.1.S1_at   | MmugDNA.40920.1 | 8.99  | 9.47  | 0.63 | 0.34 | -1.4  | 0.176906 | 0.254375 | 0.540792 | 0.522681 |
| MmugDNA.40921.1.S1_at   | MmugDNA.40921.1 | 3.41  | 3.32  | 0.35 | 0.13 | 1.06  | 0.749691 | 0.630411 | 0.892743 | 0.782237 |
| MmugDNA.40923.1.S1_at   | MmugDNA.40923.1 | 3.27  | 3.38  | 0.31 | 0.28 | -1.07 | 0.750496 | 0.651445 | 0.893172 | 0.796213 |
| MmugDNA.40924.1.S1_at   | MmugDNA.40924.1 | 5.19  | 4.85  | 0.24 | 0.09 | 1.26  | 0.365997 | 0.004929 | 0.678773 | 0.097846 |
| MmugDNA.40925.1.S1_at   | MmugDNA.40925.1 | 5.08  | 5.71  | 0.21 | 0.45 | -1.54 | 0.216142 | 0.13829  | 0.575954 | 0.411198 |
| MmugDNA.40927.1.S1_at   | MmugDNA.40927.1 | 3.05  | 2.85  | 0.18 | 0.15 | 1.15  | 0.295587 | 0.295038 | 0.631933 | 0.554551 |
| MmugDNA.40928.1.S1_at   | MmugDNA.40928.1 | 10.16 | 10.38 | 0.13 | 0.1  | -1.16 | 0.086499 | 0.046731 | 0.440232 | 0.260843 |
| MmugDNA.40928.1.S1_s_at | MmugDNA.40928.1 | 10.58 | 10.74 | 0.14 | 0.04 | -1.12 | 0.115552 | 0.084686 | 0.478809 | 0.336196 |
| MmugDNA.40929.1.S1_at   | MmugDNA.40929.1 | 10.52 | 10.22 | 0.14 | 0.17 | 1.23  | 0.097647 | 0.140375 | 0.456709 | 0.413583 |
| MmugDNA.40930.1.S1_at   | MmugDNA.40930.1 | 4.7   | 4.97  | 0.19 | 0.1  | -1.21 | 0.098505 | 0.224199 | 0.458486 | 0.497164 |
| MmugDNA.40931.1.S1_at   | MmugDNA.40931.1 | 5.82  | 6.21  | 0.06 | 0.08 | -1.31 | 0.002611 | 0.001358 | 0.164386 | 0.056687 |
| MmugDNA.40932.1.S1_at   | MmugDNA.40932.1 | 9.17  | 8.11  | 0.08 | 0.17 | 2.08  | 0.000667 | 0.000162 | 0.136818 | 0.030478 |
| MmugDNA.40933.1.S1_at   | MmugDNA.40933.1 | 5.95  | 5.64  | 0.53 | 0.35 | 1.24  | 0.770717 | 0.874654 | 0.903354 | 0.928837 |
| MmugDNA.40934.1.S1_at   | MmugDNA.40934.1 | 7.44  | 7.23  | 0.22 | 0.29 | 1.16  | 0.803503 | 0.963232 | 0.919138 | 0.979462 |
| MmugDNA.40935.1.S1_at   | MmugDNA.40935.1 | 5.76  | 6.48  | 0.06 | 0.94 | -1.66 | 0.276038 | 0.073476 | 0.618111 | 0.316769 |
| MmugDNA.40936.1.S1_at   | MmugDNA.40936.1 | 5.14  | 4.85  | 0.1  | 0.47 | 1.22  | 0.536283 | 0.850407 | 0.779483 | 0.914927 |
| MmugDNA.40938.1.S1_at   | MmugDNA.40938.1 | 3.03  | 2.98  | 0.07 | 0.1  | 1.04  | 0.622987 | 0.852464 | 0.82774  | 0.916174 |
| MmugDNA.40939.1.S1_at   | MmugDNA.40939.1 | 3.95  | 4.07  | 0.19 | 0.28 | -1.09 | 0.927108 | 0.379349 | 0.971962 | 0.616334 |
| MmugDNA.4094.1.S1_at    | MmugDNA.4094.1  | 5.54  | 5.79  | 0.15 | 0.11 | -1.19 | 0.079282 | 0.141705 | 0.429178 | 0.415265 |
| MmugDNA.40940.1.S1_at   | MmugDNA.40940.1 | 6.96  | 7     | 0.2  | 0.06 | -1.03 | 0.760857 | 0.306269 | 0.899135 | 0.562907 |
| MmugDNA.40941.1.S1_at   | MmugDNA.40941.1 | 3.83  | 3.49  | 0.8  | 0.06 | 1.26  | 0.179424 | 0.194329 | 0.543593 | 0.46946  |
| MmugDNA.40942.1.S1_at   | MmugDNA.40942.1 | 8.14  | 10.79 | 0.25 | 0.58 | -6.28 | 0.002081 | 0.000473 | 0.155636 | 0.038572 |
| MmugDNA.40944.1.S1_at   | MmugDNA.40944.1 | 5.01  | 4.74  | 0.36 | 0.04 | 1.21  | 0.353532 | 0.409756 | 0.670178 | 0.636811 |
| MmugDNA.40946.1.S1_at   | MmugDNA.40946.1 | 6.9   | 6.82  | 0.14 | 0.16 | 1.06  | 0.81449  | 0.911754 | 0.924758 | 0.950257 |
| MmugDNA.40947.1.S1_at   | MmugDNA.40947.1 | 4.61  | 5.12  | 0.13 | 0.21 | -1.42 | 0.094451 | 0.145714 | 0.452059 | 0.419653 |

|                        |                 |       |       |      |      |       |          |          |          |          |
|------------------------|-----------------|-------|-------|------|------|-------|----------|----------|----------|----------|
| MmugDNA.40948.1.S1_at  | MmugDNA.40948.1 | 2.76  | 2.76  | 0.03 | 0.06 | 1     | 0.252934 | 0.22024  | 0.60168  | 0.493681 |
| MmugDNA.40949.1.S1_at  | MmugDNA.40949.1 | 6.64  | 5.84  | 0.68 | 0.21 | 1.74  | 0.117167 | 0.132807 | 0.481176 | 0.404544 |
| MmugDNA.4095.1.S1_at   | MmugDNA.4095.1  | 6.03  | 6.04  | 0.07 | 0.2  | -1    | 0.739132 | 0.668939 | 0.88809  | 0.806317 |
| MmugDNA.40950.1.S1_at  | MmugDNA.40950.1 | 6.42  | 6.31  | 0.12 | 0.2  | 1.08  | 0.669321 | 0.230268 | 0.852138 | 0.502102 |
| MmugDNA.40951.1.S1_at  | MmugDNA.40951.1 | 5.26  | 4.9   | 0.75 | 0.47 | 1.28  | 0.606118 | 0.602997 | 0.818728 | 0.763857 |
| MmugDNA.40952.1.S1_at  | MmugDNA.40952.1 | 4.82  | 4.48  | 0.07 | 0.41 | 1.26  | 0.256294 | 0.06408  | 0.603927 | 0.299311 |
| MmugDNA.40953.1.S1_at  | MmugDNA.40953.1 | 6.41  | 6.58  | 0.14 | 0.28 | -1.12 | 0.247832 | 0.326327 | 0.599052 | 0.576503 |
| MmugDNA.40955.1.S1_at  | MmugDNA.40955.1 | 5     | 3.75  | 0.83 | 0.82 | 2.39  | 0.347586 | 0.258051 | 0.666563 | 0.525574 |
| MmugDNA.40956.1.S1_at  | MmugDNA.40956.1 | 11.71 | 11.03 | 0.22 | 0.1  | 1.6   | 0.010242 | 0.002785 | 0.228255 | 0.077966 |
| MmugDNA.40958.1.S1_at  | MmugDNA.40958.1 | 3.45  | 3.66  | 0.24 | 0.37 | -1.16 | 0.166288 | 0.186462 | 0.529929 | 0.462306 |
| MmugDNA.40959.1.S1_at  | MmugDNA.40959.1 | 4.57  | 4.63  | 0.01 | 0.13 | -1.04 | 0.16229  | 0.335101 | 0.526638 | 0.582853 |
| MmugDNA.4096.1.S1_at   | MmugDNA.4096.1  | 4.94  | 5.02  | 0.06 | 0.12 | -1.05 | 0.230178 | 0.007272 | 0.587112 | 0.114408 |
| MmugDNA.40960.1.S1_at  | MmugDNA.40960.1 | 3.17  | 3.15  | 0.37 | 0.11 | 1.02  | 0.248521 | 0.388702 | 0.599309 | 0.622991 |
| MmugDNA.40961.1.S1_at  | MmugDNA.40961.1 | 8.47  | 8.45  | 0.79 | 0.29 | 1.01  | 0.660579 | 0.034531 | 0.847774 | 0.229979 |
| MmugDNA.40963.1.S1_at  | MmugDNA.40963.1 | 10.87 | 11.16 | 0.3  | 0.91 | -1.22 | 0.617875 | 0.378889 | 0.824923 | 0.615852 |
| MmugDNA.40964.1.S1_at  | MmugDNA.40964.1 | 4.84  | 5     | 0.1  | 0.04 | -1.11 | 0.168935 | 0.791383 | 0.53321  | 0.879472 |
| MmugDNA.40965.1.S1_at  | MmugDNA.40965.1 | 9.32  | 9.88  | 0.26 | 0.5  | -1.48 | 0.200978 | 0.093931 | 0.563821 | 0.350445 |
| MmugDNA.40966.1.S1_at  | MmugDNA.40966.1 | 5.92  | 5.94  | 0.02 | 0.02 | -1.01 | 0.134689 | 0.253243 | 0.501644 | 0.521614 |
| MmugDNA.40967.1.S1_at  | MmugDNA.40967.1 | 4.77  | 4.79  | 0.02 | 0.21 | -1.02 | 0.615802 | 0.512759 | 0.823786 | 0.7065   |
| MmugDNA.40968.1.S1_at  | MmugDNA.40968.1 | 4.34  | 4.58  | 0.05 | 0.25 | -1.18 | 0.291997 | 0.262336 | 0.629318 | 0.528633 |
| MmugDNA.40969.1.S1_at  | MmugDNA.40969.1 | 9.53  | 9.95  | 0.27 | 0.3  | -1.34 | 0.103767 | 0.038926 | 0.463549 | 0.242297 |
| MmugDNA.4097.1.S1_at   | MmugDNA.4097.1  | 10.12 | 10.14 | 0.37 | 1.43 | -1.02 | 0.375821 | 0.510955 | 0.684803 | 0.705302 |
| MmugDNA.40970.1.S1_at  | MmugDNA.40970.1 | 7.37  | 7.39  | 0.07 | 0.1  | -1.02 | 0.809501 | 0.072107 | 0.922228 | 0.314595 |
| MmugDNA.40971.1.S1_at  | MmugDNA.40971.1 | 8.04  | 8.95  | 0.19 | 0.27 | -1.88 | 0.014432 | 0.005841 | 0.252393 | 0.10467  |
| MmugDNA.40972.1.S1_at  | MmugDNA.40972.1 | 5.49  | 5.67  | 0.3  | 0.55 | -1.13 | 0.609825 | 0.513627 | 0.820713 | 0.707143 |
| MmugDNA.40974.1.S1_at  | MmugDNA.40974.1 | 5.56  | 5.7   | 0.31 | 0.35 | -1.11 | 0.633626 | 0.333243 | 0.833851 | 0.581498 |
| MmugDNA.40976.1.S1_at  | MmugDNA.40976.1 | 6.16  | 5.84  | 0.14 | 0.95 | 1.25  | 0.51691  | 0.700956 | 0.768352 | 0.826604 |
| MmugDNA.40978.1.S1_at  | MmugDNA.40978.1 | 4.16  | 3.96  | 0.19 | 0.14 | 1.15  | 0.542675 | 0.737925 | 0.783518 | 0.848145 |
| MmugDNA.4098.1.S1_s_at | MmugDNA.4098.1  | 11.81 | 11.06 | 0.21 | 0.06 | 1.68  | 0.005902 | 0.001853 | 0.19355  | 0.064616 |
| MmugDNA.40980.1.S1_at  | MmugDNA.40980.1 | 4.14  | 3.59  | 0.43 | 0.24 | 1.46  | 0.057547 | 0.033806 | 0.38863  | 0.227489 |
| MmugDNA.40982.1.S1_at  | MmugDNA.40982.1 | 4.54  | 4.65  | 0.17 | 0.08 | -1.08 | 0.321778 | 0.059084 | 0.650384 | 0.289985 |
| MmugDNA.40983.1.S1_at  | MmugDNA.40983.1 | 3.99  | 3.61  | 0.41 | 0.26 | 1.3   | 0.400108 | 0.215566 | 0.699692 | 0.489304 |
| MmugDNA.40985.1.S1_at  | MmugDNA.40985.1 | 7.42  | 7.37  | 0.16 | 1.04 | 1.03  | 0.79257  | 0.461183 | 0.913959 | 0.67288  |
| MmugDNA.40986.1.S1_at  | MmugDNA.40986.1 | 9.89  | 9.17  | 0.06 | 0.08 | 1.65  | 0.000152 | 0.000175 | 0.112653 | 0.030511 |
| MmugDNA.40988.1.S1_at  | MmugDNA.40988.1 | 3.28  | 3.38  | 0.29 | 0.15 | -1.07 | 0.664649 | 0.724558 | 0.849614 | 0.840552 |
| MmugDNA.40989.1.S1_at  | MmugDNA.40989.1 | 8.09  | 7.74  | 0.31 | 0.18 | 1.28  | 0.17778  | 0.211496 | 0.541903 | 0.48563  |
| MmugDNA.4099.1.S1_at   | MmugDNA.4099.1  | 6.26  | 6.41  | 0.11 | 0.33 | -1.11 | 0.162357 | 0.194501 | 0.526658 | 0.469597 |
| MmugDNA.40990.1.S1_at  | MmugDNA.40990.1 | 4.71  | 4.81  | 0.1  | 0.15 | -1.07 | 0.496933 | 0.68444  | 0.757692 | 0.815943 |
| MmugDNA.40991.1.S1_at  | MmugDNA.40991.1 | 7.37  | 6.73  | 0.14 | 0.37 | 1.55  | 0.111522 | 0.14663  | 0.47371  | 0.420664 |
| MmugDNA.40992.1.S1_at  | MmugDNA.40992.1 | 4.16  | 4.34  | 0.1  | 0.03 | -1.13 | 0.087169 | 0.039289 | 0.441153 | 0.243338 |
| MmugDNA.40993.1.S1_at  | MmugDNA.40993.1 | 6.84  | 6.95  | 0.25 | 0.36 | -1.07 | 0.731304 | 0.583282 | 0.883727 | 0.751682 |

|                         |                 |      |       |      |      |        |          |          |          |          |
|-------------------------|-----------------|------|-------|------|------|--------|----------|----------|----------|----------|
| MmugDNA.40994.1.S1_at   | MmugDNA.40994.1 | 4.51 | 3.63  | 0.46 | 0.12 | 1.84   | 0.039853 | 0.043333 | 0.34828  | 0.252847 |
| MmugDNA.40995.1.S1_at   | MmugDNA.40995.1 | 6.65 | 6.66  | 0.16 | 0.22 | -1.01  | 0.297596 | 0.444784 | 0.633375 | 0.662072 |
| MmugDNA.40996.1.S1_at   | MmugDNA.40996.1 | 4.61 | 4.79  | 0.09 | 0.08 | -1.14  | 0.029232 | 0.016614 | 0.313575 | 0.163117 |
| MmugDNA.40997.1.S1_at   | MmugDNA.40997.1 | 6.32 | 5.89  | 0.72 | 0.37 | 1.35   | 0.347391 | 0.42259  | 0.666415 | 0.645764 |
| MmugDNA.40998.1.S1_at   | MmugDNA.40998.1 | 2.48 | 2.48  | 0.02 | 0.04 | 1      | 0.813058 | 0.952866 | 0.924072 | 0.973271 |
| MmugDNA.41.1.S1_at      | MmugDNA.41.1    | 5.73 | 6.06  | 1.04 | 0.99 | -1.26  | 0.229026 | 0.252766 | 0.586303 | 0.521174 |
| MmugDNA.410.1.S1_s_at   | MmugDNA.410.1   | 9.05 | 11.8  | 0.82 | 2.74 | -6.73  | 0.587273 | 0.660725 | 0.808516 | 0.801516 |
| MmugDNA.4100.1.S1_at    | MmugDNA.4100.1  | 5.98 | 5.33  | 0.49 | 0.41 | 1.57   | 0.134573 | 0.186153 | 0.501355 | 0.461995 |
| MmugDNA.4100.1.S1_x_at  | MmugDNA.4100.1  | 6.48 | 5.62  | 0.56 | 0.6  | 1.82   | 0.1394   | 0.215789 | 0.506801 | 0.489536 |
| MmugDNA.41002.1.S1_at   | MmugDNA.41002.1 | 3.66 | 3.66  | 0.02 | 0.03 | -1     | 0.664156 | 0.367805 | 0.849375 | 0.607466 |
| MmugDNA.41004.1.S1_at   | MmugDNA.41004.1 | 3.27 | 3.18  | 0.07 | 0.07 | 1.06   | 0.530642 | 0.310274 | 0.776893 | 0.565461 |
| MmugDNA.29165.1.S1_s_at | MmugDNA.29165.1 | 7.28 | 12.35 | 1.8  | 3.45 | -33.69 | 0.408086 | 0.201342 | 0.70497  | 0.47589  |
| MmugDNA.41006.1.S1_at   | MmugDNA.41006.1 | 6.18 | 6.03  | 0.14 | 0.25 | 1.11   | 0.148253 | 0.189562 | 0.513702 | 0.465286 |
| MmugDNA.41007.1.S1_at   | MmugDNA.41007.1 | 4.85 | 4.84  | 0.09 | 0.06 | 1.01   | 0.910315 | 0.08279  | 0.964521 | 0.332323 |
| MmugDNA.41008.1.S1_at   | MmugDNA.41008.1 | 5.59 | 5.03  | 0.63 | 0.24 | 1.47   | 0.262232 | 0.141887 | 0.608902 | 0.415403 |
| MmugDNA.41009.1.S1_at   | MmugDNA.41009.1 | 5.16 | 5.59  | 0.29 | 0.37 | -1.34  | 0.350518 | 0.378372 | 0.668568 | 0.615443 |
| MmugDNA.41010.1.S1_at   | MmugDNA.41010.1 | 5.9  | 5.6   | 0.96 | 0.1  | 1.23   | 0.529074 | 0.303647 | 0.775832 | 0.561088 |
| MmugDNA.41011.1.S1_at   | MmugDNA.41011.1 | 4.98 | 4.37  | 1    | 0.04 | 1.53   | 0.338607 | 0.365934 | 0.660988 | 0.605798 |
| MmugDNA.41013.1.S1_at   | MmugDNA.41013.1 | 5.06 | 5.15  | 0.08 | 0.25 | -1.06  | 0.623535 | 0.806449 | 0.827977 | 0.888651 |
| MmugDNA.41015.1.S1_at   | MmugDNA.41015.1 | 7.24 | 6.13  | 0.44 | 0.02 | 2.16   | 0.005891 | 0.00152  | 0.19355  | 0.059307 |
| MmugDNA.41016.1.S1_at   | MmugDNA.41016.1 | 3.86 | 3.99  | 0.36 | 0.05 | -1.1   | 0.851578 | 0.939539 | 0.940264 | 0.965642 |
| MmugDNA.41017.1.S1_at   | MmugDNA.41017.1 | 5.98 | 5.23  | 0.51 | 0.3  | 1.68   | 0.111375 | 0.041299 | 0.473544 | 0.247995 |
| MmugDNA.41019.1.S1_at   | MmugDNA.41019.1 | 7.65 | 7.7   | 0.54 | 0.2  | -1.03  | 0.880623 | 0.225523 | 0.952008 | 0.498153 |
| MmugDNA.4102.1.S1_at    | MmugDNA.4102.1  | 8.98 | 10.01 | 0.39 | 0.26 | -2.04  | 0.033958 | 0.029253 | 0.330623 | 0.212978 |
| MmugDNA.4102.1.S1_s_at  | MmugDNA.4102.1  | 9.58 | 10.2  | 0.32 | 0.2  | -1.53  | 0.028457 | 0.019932 | 0.311338 | 0.177448 |
| MmugDNA.41020.1.S1_at   | MmugDNA.41020.1 | 4.26 | 4.31  | 0.53 | 0.09 | -1.04  | 0.380197 | 0.559786 | 0.68724  | 0.736394 |
| MmugDNA.41021.1.S1_at   | MmugDNA.41021.1 | 2.92 | 2.84  | 0.06 | 0.19 | 1.05   | 0.981478 | 0.80741  | 0.993316 | 0.889121 |
| MmugDNA.41022.1.S1_at   | MmugDNA.41022.1 | 6.04 | 6.19  | 0.5  | 0.86 | -1.11  | 0.671669 | 0.729621 | 0.852716 | 0.843613 |
| MmugDNA.41023.1.S1_at   | MmugDNA.41023.1 | 4.37 | 4.37  | 0.1  | 0.07 | -1     | 0.216953 | 0.32726  | 0.576546 | 0.577173 |
| MmugDNA.41025.1.S1_at   | MmugDNA.41025.1 | 3.85 | 3.6   | 0.36 | 0.19 | 1.19   | 0.342064 | 0.575743 | 0.663038 | 0.746758 |
| MmugDNA.41027.1.S1_at   | MmugDNA.41027.1 | 4.46 | 4.39  | 0.44 | 0.13 | 1.05   | 0.337673 | 0.423964 | 0.660198 | 0.646612 |
| MmugDNA.41028.1.S1_s_at | MmugDNA.41028.1 | 7.93 | 8     | 0.21 | 0.05 | -1.05  | 0.615167 | 0.550358 | 0.823342 | 0.730398 |
| MmugDNA.41029.1.S1_at   | MmugDNA.41029.1 | 6.3  | 6.32  | 0.26 | 0.09 | -1.01  | 0.431882 | 0.501566 | 0.718681 | 0.699719 |
| MmugDNA.4103.1.S1_at    | MmugDNA.4103.1  | 5.02 | 4.81  | 0.14 | 0.02 | 1.15   | 0.103873 | 0.051863 | 0.463825 | 0.273151 |
| MmugDNA.41030.1.S1_at   | MmugDNA.41030.1 | 10   | 9.78  | 0.12 | 0.32 | 1.16   | 0.841194 | 0.816806 | 0.936191 | 0.894329 |
| MmugDNA.41031.1.S1_at   | MmugDNA.41031.1 | 3.59 | 3.21  | 0.15 | 0.44 | 1.3    | 0.65954  | 0.646728 | 0.847196 | 0.793089 |
| MmugDNA.41032.1.S1_at   | MmugDNA.41032.1 | 4.19 | 3.99  | 0.25 | 0.12 | 1.15   | 0.496941 | 0.701703 | 0.757692 | 0.826991 |
| MmugDNA.41033.1.S1_at   | MmugDNA.41033.1 | 3.64 | 3.52  | 0.11 | 0.15 | 1.09   | 0.275035 | 0.308404 | 0.617642 | 0.564476 |
| MmugDNA.41034.1.S1_at   | MmugDNA.41034.1 | 6.54 | 6.15  | 0.3  | 0.18 | 1.31   | 0.07229  | 0.078348 | 0.416651 | 0.325007 |
| MmugDNA.41035.1.S1_at   | MmugDNA.41035.1 | 9.19 | 8.92  | 0.01 | 0.19 | 1.21   | 0.082211 | 0.097569 | 0.43352  | 0.355455 |
| MmugDNA.41036.1.S1_at   | MmugDNA.41036.1 | 7.68 | 8.15  | 0.9  | 1.29 | -1.39  | 0.59196  | 0.653926 | 0.810725 | 0.797715 |

|                         |                 |       |       |      |      |       |          |          |          |          |
|-------------------------|-----------------|-------|-------|------|------|-------|----------|----------|----------|----------|
| MmugDNA.41037.1.S1_at   | MmugDNA.41037.1 | 12.16 | 11.86 | 0.09 | 0.31 | 1.23  | 0.249991 | 0.311861 | 0.600389 | 0.56683  |
| MmugDNA.41038.1.S1_at   | MmugDNA.41038.1 | 8.95  | 8.91  | 0.26 | 0.3  | 1.03  | 0.932393 | 0.046069 | 0.973802 | 0.258977 |
| MmugDNA.41039.1.S1_at   | MmugDNA.41039.1 | 5.05  | 5.05  | 0.13 | 0.29 | 1     | 0.727442 | 0.66434  | 0.881336 | 0.803354 |
| MmugDNA.4104.1.S1_at    | MmugDNA.4104.1  | 9.6   | 8.76  | 0.17 | 0.49 | 1.79  | 0.035186 | 0.016354 | 0.335371 | 0.161943 |
| MmugDNA.41040.1.S1_at   | MmugDNA.41040.1 | 7.2   | 7.25  | 0.07 | 0.07 | -1.03 | 0.526787 | 0.00955  | 0.774374 | 0.128764 |
| MmugDNA.41041.1.S1_at   | MmugDNA.41041.1 | 6.81  | 7.07  | 0.29 | 0.05 | -1.19 | 0.698338 | 0.868294 | 0.866063 | 0.925241 |
| MmugDNA.41043.1.S1_at   | MmugDNA.41043.1 | 10.11 | 10.17 | 0.17 | 0.25 | -1.04 | 0.945579 | 0.426366 | 0.979221 | 0.648535 |
| MmugDNA.41044.1.S1_at   | MmugDNA.41044.1 | 10.96 | 10.81 | 0.08 | 0.25 | 1.11  | 0.326479 | 0.236971 | 0.653184 | 0.507675 |
| MmugDNA.41045.1.S1_at   | MmugDNA.41045.1 | 3.72  | 3.82  | 0.73 | 0.14 | -1.07 | 0.953013 | 0.9888   | 0.982492 | 0.993611 |
| MmugDNA.41047.1.S1_at   | MmugDNA.41047.1 | 5.81  | 5.71  | 0.53 | 0.3  | 1.07  | 0.938955 | 0.717754 | 0.976761 | 0.836602 |
| MmugDNA.41048.1.S1_at   | MmugDNA.41048.1 | 6.42  | 6.39  | 0.5  | 0.21 | 1.03  | 0.358161 | 0.539425 | 0.673071 | 0.723763 |
| MmugDNA.41049.1.S1_at   | MmugDNA.41049.1 | 5.31  | 4.68  | 1.22 | 0.35 | 1.55  | 0.555424 | 0.334735 | 0.791378 | 0.582615 |
| MmugDNA.41049.1.S1_s_at | MmugDNA.41049.1 | 6.82  | 6.46  | 0.7  | 0.36 | 1.29  | 0.365925 | 0.22445  | 0.678686 | 0.497444 |
| MmugDNA.4105.1.S1_at    | MmugDNA.4105.1  | 5.56  | 5.93  | 0.48 | 0.68 | -1.29 | 0.941999 | 0.553575 | 0.977822 | 0.732717 |
| MmugDNA.41050.1.S1_at   | MmugDNA.41050.1 | 3.24  | 3.23  | 0.19 | 0.16 | 1.01  | 0.547615 | 0.609922 | 0.786269 | 0.768216 |
| MmugDNA.41052.1.S1_at   | MmugDNA.41052.1 | 6.17  | 6.1   | 0.23 | 0.09 | 1.05  | 0.826063 | 0.540277 | 0.929365 | 0.724221 |
| MmugDNA.41053.1.S1_at   | MmugDNA.41053.1 | 4.78  | 4.73  | 0.41 | 0.15 | 1.04  | 0.861119 | 0.402615 | 0.944011 | 0.631505 |
| MmugDNA.41054.1.S1_at   | MmugDNA.41054.1 | 3.66  | 3.64  | 0.11 | 0.07 | 1.01  | 0.584007 | 0.451177 | 0.806835 | 0.666085 |
| MmugDNA.41057.1.S1_at   | MmugDNA.41057.1 | 5.96  | 6.03  | 0.65 | 0.75 | -1.05 | 0.825838 | 0.71077  | 0.929311 | 0.832259 |
| MmugDNA.41058.1.S1_at   | MmugDNA.41058.1 | 4.03  | 4.21  | 0.21 | 0.32 | -1.14 | 0.78887  | 0.94352  | 0.912312 | 0.967926 |
| MmugDNA.41059.1.S1_at   | MmugDNA.41059.1 | 7.13  | 7.32  | 0.04 | 0.09 | -1.14 | 0.027301 | 0.032929 | 0.307317 | 0.22466  |
| MmugDNA.41059.1.S1_s_at | MmugDNA.41059.1 | 7.56  | 7.57  | 0.11 | 0.06 | -1.01 | 0.856924 | 0.002415 | 0.942171 | 0.072905 |
| MmugDNA.4106.1.S1_at    | MmugDNA.4106.1  | 4.15  | 4.26  | 0.44 | 0.05 | -1.08 | 0.551293 | 0.698018 | 0.788586 | 0.82456  |
| MmugDNA.41060.1.S1_at   | MmugDNA.41060.1 | 4.53  | 5.09  | 0.05 | 0.05 | -1.48 | 0.000189 | 0.018946 | 0.120316 | 0.17317  |
| MmugDNA.41061.1.S1_at   | MmugDNA.41061.1 | 5.25  | 5.24  | 0.18 | 0.19 | 1.01  | 0.600298 | 0.1877   | 0.815194 | 0.46368  |
| MmugDNA.41062.1.S1_at   | MmugDNA.41062.1 | 5.37  | 5.52  | 0.08 | 0.19 | -1.11 | 0.417671 | 0.625074 | 0.710728 | 0.778973 |
| MmugDNA.41063.1.S1_at   | MmugDNA.41063.1 | 10.13 | 9.51  | 0.11 | 0.37 | 1.55  | 0.044575 | 0.037214 | 0.358786 | 0.237285 |
| MmugDNA.41064.1.S1_at   | MmugDNA.41064.1 | 3.68  | 3.8   | 0.16 | 0.14 | -1.09 | 0.352871 | 0.31985  | 0.669942 | 0.572213 |
| MmugDNA.41065.1.S1_at   | MmugDNA.41065.1 | 7.56  | 8.32  | 0.49 | 1.03 | -1.69 | 0.400956 | 0.336681 | 0.700493 | 0.584037 |
| MmugDNA.41068.1.S1_at   | MmugDNA.41068.1 | 4.66  | 6     | 0.14 | 0.55 | -2.53 | 0.03656  | 0.027429 | 0.339916 | 0.206851 |
| MmugDNA.41069.1.S1_at   | MmugDNA.41069.1 | 4.94  | 4.92  | 0.25 | 0.03 | 1.01  | 0.890103 | 0.634347 | 0.956039 | 0.784758 |
| MmugDNA.4107.1.S1_at    | MmugDNA.4107.1  | 3.38  | 3.44  | 0.16 | 0.38 | -1.04 | 0.293746 | 0.479522 | 0.630897 | 0.685262 |
| MmugDNA.41070.1.S1_at   | MmugDNA.41070.1 | 3.05  | 3.12  | 0.17 | 0.27 | -1.04 | 0.860352 | 0.628056 | 0.943655 | 0.780934 |
| MmugDNA.7061.1.S1_at    | MmugDNA.7061.1  | 9.9   | 10.01 | 0.08 | 0.22 | -1.08 | 0.499305 | 0.281322 | 0.759088 | 0.544391 |
| MmugDNA.7061.1.S1_s_at  | MmugDNA.7061.1  | 11.96 | 12    | 0.08 | 0.11 | -1.03 | 0.819187 | 0.860096 | 0.926528 | 0.920245 |
| MmugDNA.41072.1.S1_at   | MmugDNA.41072.1 | 6.47  | 5.3   | 0.46 | 0.5  | 2.25  | 0.181855 | 0.235134 | 0.546458 | 0.50629  |
| MmugDNA.41073.1.S1_at   | MmugDNA.41073.1 | 11.5  | 11.33 | 0.12 | 0.51 | 1.12  | 0.780304 | 0.91339  | 0.908487 | 0.951231 |
| MmugDNA.41074.1.S1_at   | MmugDNA.41074.1 | 4.05  | 4.32  | 0.1  | 0.31 | -1.2  | 0.477083 | 0.663563 | 0.746452 | 0.803017 |
| MmugDNA.41075.1.S1_at   | MmugDNA.41075.1 | 6.13  | 6.46  | 0.2  | 0.8  | -1.26 | 0.975376 | 0.36662  | 0.990439 | 0.606387 |
| MmugDNA.41077.1.S1_at   | MmugDNA.41077.1 | 10.84 | 10.64 | 0.2  | 0.16 | 1.15  | 0.205562 | 0.262639 | 0.568054 | 0.52899  |
| MmugDNA.14249.1.S1_s_at | MmugDNA.14249.1 | 11.95 | 11.67 | 0.12 | 0.16 | 1.21  | 0.106861 | 0.101192 | 0.467551 | 0.36084  |

|                         |                 |       |       |      |      |       |          |          |          |          |
|-------------------------|-----------------|-------|-------|------|------|-------|----------|----------|----------|----------|
| MmugDNA.41078.1.S1_at   | MmugDNA.41078.1 | 3.66  | 3.83  | 0.2  | 0.31 | -1.12 | 0.660497 | 0.164777 | 0.847722 | 0.441105 |
| MmugDNA.4108.1.S1_at    | MmugDNA.4108.1  | 9.16  | 9.95  | 0.21 | 0.04 | -1.73 | 0.001912 | 0.000757 | 0.155636 | 0.045403 |
| MmugDNA.41080.1.S1_at   | MmugDNA.41080.1 | 3.72  | 3.72  | 0.04 | 0.12 | -1    | 0.430374 | 0.595446 | 0.718042 | 0.759091 |
| MmugDNA.41081.1.S1_at   | MmugDNA.41081.1 | 4.26  | 4.36  | 0.23 | 0.22 | -1.07 | 0.696763 | 0.431699 | 0.86549  | 0.652516 |
| MmugDNA.41083.1.S1_at   | MmugDNA.41083.1 | 5.73  | 5.93  | 0.06 | 0.08 | -1.15 | 0.062148 | 0.076028 | 0.397272 | 0.320716 |
| MmugDNA.41084.1.S1_at   | MmugDNA.41084.1 | 5.47  | 5.22  | 0.01 | 0.27 | 1.2   | 0.552321 | 0.496631 | 0.789403 | 0.696119 |
| MmugDNA.41085.1.S1_at   | MmugDNA.41085.1 | 5.85  | 5.87  | 0.05 | 0.29 | -1.01 | 0.97077  | 0.977591 | 0.988706 | 0.987812 |
| MmugDNA.41086.1.S1_at   | MmugDNA.41086.1 | 8.61  | 8.53  | 0.12 | 0.27 | 1.05  | 0.477062 | 0.704998 | 0.746452 | 0.828934 |
| MmugDNA.41088.1.S1_at   | MmugDNA.41088.1 | 6.15  | 6.29  | 0.07 | 0.13 | -1.1  | 0.344726 | 0.445042 | 0.664743 | 0.66224  |
| MmugDNA.41089.1.S1_at   | MmugDNA.41089.1 | 4.25  | 4.32  | 0.33 | 0.32 | -1.05 | 0.698601 | 0.884351 | 0.866226 | 0.9341   |
| MmugDNA.4109.1.S1_at    | MmugDNA.4109.1  | 5.64  | 5.01  | 0.74 | 0.35 | 1.54  | 0.330859 | 0.417339 | 0.656063 | 0.642147 |
| MmugDNA.41092.1.S1_at   | MmugDNA.41092.1 | 3.79  | 3.79  | 0.32 | 0.3  | 1     | 0.771671 | 0.494498 | 0.90393  | 0.694905 |
| MmugDNA.41095.1.S1_at   | MmugDNA.41095.1 | 8.89  | 9.75  | 0.29 | 0.57 | -1.82 | 0.048767 | 0.036224 | 0.369576 | 0.234909 |
| MmugDNA.41096.1.S1_at   | MmugDNA.41096.1 | 8.7   | 8.89  | 0.22 | 0.37 | -1.14 | 0.705874 | 0.030809 | 0.870325 | 0.217376 |
| MmugDNA.41098.1.S1_at   | MmugDNA.41098.1 | 4.55  | 4.61  | 0.12 | 0.16 | -1.05 | 0.458647 | 0.715066 | 0.7356   | 0.834794 |
| MmugDNA.41099.1.S1_at   | MmugDNA.41099.1 | 4.95  | 5.06  | 0.03 | 0.09 | -1.08 | 0.11172  | 0.111067 | 0.474019 | 0.375588 |
| MmugDNA.411.1.S1_at     | MmugDNA.411.1   | 4.85  | 5.1   | 0.03 | 0.16 | -1.19 | 0.150025 | 0.325716 | 0.514636 | 0.57602  |
| MmugDNA.4110.1.S1_at    | MmugDNA.4110.1  | 6.78  | 6.78  | 0.23 | 0.2  | 1     | 0.997519 | 0.377187 | 0.998986 | 0.614825 |
| MmugDNA.41103.1.S1_at   | MmugDNA.41103.1 | 3.08  | 3.2   | 0.12 | 0.16 | -1.09 | 0.123798 | 0.147358 | 0.489534 | 0.421554 |
| MmugDNA.41107.1.S1_at   | MmugDNA.41107.1 | 6.26  | 8.31  | 0.25 | 0.45 | -4.13 | 0.002491 | 0.000711 | 0.163618 | 0.044419 |
| MmugDNA.41108.1.S1_at   | MmugDNA.41108.1 | 5.81  | 5.93  | 0.05 | 0.08 | -1.09 | 0.116577 | 0.031864 | 0.48034  | 0.220909 |
| MmugDNA.41109.1.S1_at   | MmugDNA.41109.1 | 4.99  | 5.27  | 0.13 | 0.19 | -1.21 | 0.161905 | 0.083911 | 0.526573 | 0.334814 |
| MmugDNA.4111.1.S1_at    | MmugDNA.4111.1  | 6.21  | 5.83  | 0.2  | 0.06 | 1.3   | 0.065281 | 0.034991 | 0.404346 | 0.231175 |
| MmugDNA.41112.1.S1_at   | MmugDNA.41112.1 | 3.74  | 3.72  | 0.15 | 0.04 | 1.02  | 0.770078 | 0.357593 | 0.90333  | 0.599221 |
| MmugDNA.41113.1.S1_at   | MmugDNA.41113.1 | 6.54  | 6.3   | 0.3  | 0.28 | 1.18  | 0.130318 | 0.009157 | 0.496686 | 0.126264 |
| MmugDNA.41115.1.S1_at   | MmugDNA.41115.1 | 12.67 | 12.69 | 0.18 | 0.06 | -1.02 | 0.66161  | 0.646109 | 0.848148 | 0.792676 |
| MmugDNA.41116.1.S1_at   | MmugDNA.41116.1 | 6.11  | 5.1   | 0.52 | 0.36 | 2.01  | 0.039484 | 0.019283 | 0.347288 | 0.174698 |
| MmugDNA.41117.1.S1_at   | MmugDNA.41117.1 | 4.68  | 4.44  | 0.67 | 0.1  | 1.18  | 0.222663 | 0.227361 | 0.581088 | 0.499659 |
| MmugDNA.41118.1.S1_at   | MmugDNA.41118.1 | 4.67  | 4.77  | 0.21 | 0.11 | -1.07 | 0.549735 | 0.224639 | 0.787481 | 0.497613 |
| MmugDNA.4112.1.S1_at    | MmugDNA.4112.1  | 3.96  | 3.81  | 0.3  | 2.46 | 1.11  | 0.45585  | 0.487855 | 0.734107 | 0.69073  |
| MmugDNA.4112.1.S1_s_at  | MmugDNA.4112.1  | 6.91  | 7.34  | 0.37 | 1.05 | -1.35 | 0.487607 | 0.39724  | 0.752228 | 0.628763 |
| MmugDNA.4112.1.S1_x_at  | MmugDNA.4112.1  | 6.44  | 6.08  | 0.11 | 1.72 | 1.28  | 0.603875 | 0.624916 | 0.817352 | 0.778939 |
| MmugDNA.41121.1.S1_at   | MmugDNA.41121.1 | 5.56  | 5.73  | 0.08 | 0.5  | -1.13 | 0.520463 | 0.576528 | 0.770806 | 0.747267 |
| MmugDNA.41123.1.S1_at   | MmugDNA.41123.1 | 4.28  | 4.56  | 0.16 | 0.34 | -1.21 | 0.13501  | 0.151279 | 0.501995 | 0.426026 |
| MmugDNA.41124.1.S1_at   | MmugDNA.41124.1 | 4.5   | 4.76  | 0.11 | 0.12 | -1.19 | 0.047349 | 0.036454 | 0.365901 | 0.235423 |
| MmugDNA.41125.1.S1_at   | MmugDNA.41125.1 | 10.76 | 11.42 | 0.14 | 0.23 | -1.58 | 0.027238 | 0.017198 | 0.30707  | 0.166145 |
| MmugDNA.41126.1.S1_at   | MmugDNA.41126.1 | 3.93  | 3.88  | 0.13 | 0.28 | 1.03  | 0.345718 | 0.361304 | 0.665264 | 0.602104 |
| MmugDNA.41127.1.S1_at   | MmugDNA.41127.1 | 8.84  | 8.6   | 0.12 | 0.16 | 1.19  | 0.094193 | 0.037378 | 0.451714 | 0.237776 |
| MmugDNA.38950.1.S1_s_at | MmugDNA.38950.1 | 9.41  | 9.68  | 0.17 | 0.24 | -1.2  | 0.366231 | 0.486252 | 0.679017 | 0.689661 |
| MmugDNA.41130.1.S1_at   | MmugDNA.41130.1 | 7.42  | 6.81  | 0.45 | 0.29 | 1.53  | 0.324722 | 0.303992 | 0.652056 | 0.561344 |
| MmugDNA.41131.1.S1_at   | MmugDNA.41131.1 | 5.17  | 5.2   | 0.44 | 0.12 | -1.02 | 0.438998 | 0.595879 | 0.72347  | 0.759258 |



|                         |                 |       |       |      |      |       |          |          |          |          |
|-------------------------|-----------------|-------|-------|------|------|-------|----------|----------|----------|----------|
| MmugDNA.41132.1.S1_at   | MmugDNA.41132.1 | 3.57  | 3.58  | 0.06 | 0.13 | -1.01 | 0.962359 | 0.213421 | 0.985546 | 0.48728  |
| MmugDNA.41133.1.S1_at   | MmugDNA.41133.1 | 6.53  | 6.63  | 0.53 | 0.47 | -1.07 | 0.739672 | 0.429106 | 0.888213 | 0.65062  |
| MmugDNA.41135.1.S1_at   | MmugDNA.41135.1 | 6.29  | 6.27  | 0.3  | 0.13 | 1.01  | 0.644187 | 0.800131 | 0.839719 | 0.885076 |
| MmugDNA.41137.1.S1_at   | MmugDNA.41137.1 | 7.95  | 8.2   | 0.48 | 0.63 | -1.19 | 0.359742 | 0.383901 | 0.673991 | 0.61978  |
| MmugDNA.41139.1.S1_at   | MmugDNA.41139.1 | 12.13 | 12.17 | 0.13 | 0.07 | -1.03 | 0.71723  | 0.890491 | 0.87574  | 0.937597 |
| MmugDNA.4114.1.S1_at    | MmugDNA.4114.1  | 12.95 | 12.75 | 0.09 | 0.15 | 1.15  | 0.177193 | 0.048113 | 0.541243 | 0.264398 |
| MmugDNA.41140.1.S1_at   | MmugDNA.41140.1 | 4.68  | 4.6   | 0.22 | 0.12 | 1.06  | 0.843905 | 0.72634  | 0.937269 | 0.841617 |
| MmugDNA.41141.1.S1_at   | MmugDNA.41141.1 | 4.86  | 5.39  | 0.17 | 0.32 | -1.44 | 0.192427 | 0.090538 | 0.555663 | 0.345015 |
| MmugDNA.41142.1.S1_at   | MmugDNA.41142.1 | 5.37  | 5.51  | 0.2  | 0.11 | -1.11 | 0.530094 | 0.669245 | 0.776552 | 0.806502 |
| MmugDNA.41143.1.S1_at   | MmugDNA.41143.1 | 5.62  | 5.86  | 0.09 | 0.11 | -1.18 | 0.071836 | 0.15351  | 0.415886 | 0.42827  |
| MmugDNA.41143.1.S1_s_at | MmugDNA.41143.1 | 5.64  | 5.71  | 0.05 | 0.13 | -1.05 | 0.183429 | 0.251992 | 0.547598 | 0.520646 |
| MmugDNA.41144.1.S1_at   | MmugDNA.41144.1 | 7.39  | 7.12  | 0.55 | 0.67 | 1.21  | 0.626193 | 0.030796 | 0.829417 | 0.217376 |
| MmugDNA.41145.1.S1_at   | MmugDNA.41145.1 | 3.04  | 3.23  | 0.04 | 0.32 | -1.14 | 0.879068 | 0.434968 | 0.951455 | 0.654901 |
| MmugDNA.41146.1.S1_at   | MmugDNA.41146.1 | 8.95  | 8.57  | 0.11 | 0.51 | 1.31  | 0.241648 | 0.005255 | 0.593941 | 0.100401 |
| MmugDNA.41147.1.S1_at   | MmugDNA.41147.1 | 4.69  | 4.65  | 0.22 | 0.14 | 1.03  | 0.523878 | 0.65247  | 0.772859 | 0.796793 |
| MmugDNA.4115.1.S1_at    | MmugDNA.4115.1  | 3.51  | 3.59  | 0.48 | 0.16 | -1.05 | 0.940745 | 0.588132 | 0.977466 | 0.754761 |
| MmugDNA.41150.1.S1_a_at | MmugDNA.41150.1 | 3.53  | 2.97  | 0.49 | 0.15 | 1.48  | 0.123159 | 0.060795 | 0.488745 | 0.293295 |
| MmugDNA.41150.1.S1_at   | MmugDNA.41150.1 | 6.36  | 7.65  | 0.27 | 1.27 | -2.45 | 0.156949 | 0.170203 | 0.521736 | 0.446906 |
| MmugDNA.41151.1.S1_at   | MmugDNA.41151.1 | 6.49  | 6.8   | 0.14 | 0.21 | -1.24 | 0.111906 | 0.163898 | 0.474378 | 0.440105 |
| MmugDNA.41152.1.S1_at   | MmugDNA.41152.1 | 4.5   | 4.52  | 0.23 | 0.12 | -1.02 | 0.952172 | 0.918647 | 0.982156 | 0.954356 |
| MmugDNA.41153.1.S1_at   | MmugDNA.41153.1 | 12.71 | 12.42 | 0.12 | 0.14 | 1.23  | 0.09858  | 0.154973 | 0.458486 | 0.429973 |
| MmugDNA.41154.1.S1_at   | MmugDNA.41154.1 | 4.83  | 5.29  | 0.18 | 0.22 | -1.37 | 0.049969 | 0.003233 | 0.372721 | 0.08214  |
| MmugDNA.41158.1.S1_at   | MmugDNA.41158.1 | 5.94  | 5.84  | 0.18 | 0.17 | 1.07  | 0.529572 | 0.678173 | 0.77625  | 0.812022 |
| MmugDNA.41159.1.S1_at   | MmugDNA.41159.1 | 5.2   | 5.63  | 0.3  | 0.27 | -1.35 | 0.201887 | 0.243299 | 0.564129 | 0.513356 |
| MmugDNA.4116.1.S1_at    | MmugDNA.4116.1  | 14.3  | 14.34 | 0.06 | 0.02 | -1.03 | 0.399685 | 0.432724 | 0.699601 | 0.653094 |
| MmugDNA.41160.1.S1_at   | MmugDNA.41160.1 | 9.76  | 9.08  | 0.18 | 0.08 | 1.61  | 0.003997 | 0.001096 | 0.181739 | 0.052317 |
| MmugDNA.41162.1.S1_at   | MmugDNA.41162.1 | 7.53  | 7.23  | 0.58 | 0.04 | 1.23  | 0.32046  | 0.417283 | 0.649472 | 0.642141 |
| MmugDNA.41163.1.S1_at   | MmugDNA.41163.1 | 6.56  | 5.77  | 1.15 | 0.92 | 1.73  | 0.225689 | 0.332113 | 0.583746 | 0.580584 |
| MmugDNA.41165.1.S1_at   | MmugDNA.41165.1 | 3.72  | 3.73  | 0.06 | 0.12 | -1.01 | 0.665278 | 0.810569 | 0.849897 | 0.890812 |
| MmugDNA.41166.1.S1_x_at | MmugDNA.41166.1 | 8.12  | 7.72  | 0.51 | 0.35 | 1.31  | 0.187227 | 0.208763 | 0.550364 | 0.482608 |
| MmugDNA.41167.1.S1_at   | MmugDNA.41167.1 | 5.89  | 5.85  | 0.04 | 0.43 | 1.02  | 0.711596 | 0.661791 | 0.873646 | 0.801943 |
| MmugDNA.41168.1.S1_at   | MmugDNA.41168.1 | 9.57  | 9.57  | 0.34 | 0.33 | 1     | 0.512767 | 0.438968 | 0.765738 | 0.657787 |
| MmugDNA.41169.1.S1_at   | MmugDNA.41169.1 | 8.78  | 8.58  | 0.23 | 0.15 | 1.14  | 0.259637 | 0.591983 | 0.606728 | 0.757386 |
| MmugDNA.4117.1.S1_at    | MmugDNA.4117.1  | 7.28  | 7.32  | 0.18 | 0.26 | -1.03 | 0.760128 | 0.915352 | 0.898845 | 0.952467 |
| MmugDNA.41171.1.S1_s_at | MmugDNA.41171.1 | 12.29 | 12.44 | 0.12 | 0.23 | -1.11 | 0.437111 | 0.684441 | 0.722208 | 0.815943 |
| MmugDNA.41176.1.S1_at   | MmugDNA.41176.1 | 10.26 | 9.66  | 0.14 | 0.26 | 1.52  | 0.00884  | 0.001025 | 0.221368 | 0.051079 |
| MmugDNA.41177.1.S1_at   | MmugDNA.41177.1 | 10.61 | 10.64 | 0.07 | 0.08 | -1.02 | 0.935947 | 0.003173 | 0.975172 | 0.081873 |
| MmugDNA.41178.1.S1_at   | MmugDNA.41178.1 | 9.88  | 9.69  | 0.14 | 0.28 | 1.14  | 0.435607 | 0.366288 | 0.721273 | 0.606048 |
| MmugDNA.41179.1.S1_at   | MmugDNA.41179.1 | 11.27 | 11.46 | 0.13 | 0.07 | -1.14 | 0.18056  | 0.065746 | 0.544908 | 0.301766 |
| MmugDNA.4118.1.S1_at    | MmugDNA.4118.1  | 5.19  | 5.53  | 0.19 | 0.18 | -1.26 | 0.054531 | 0.010113 | 0.381851 | 0.131859 |
| MmugDNA.41180.1.S1_at   | MmugDNA.41180.1 | 5.32  | 5.21  | 0.29 | 0.09 | 1.08  | 0.805588 | 0.641993 | 0.920271 | 0.78994  |

|                       |                 |       |       |      |      |       |          |          |          |          |
|-----------------------|-----------------|-------|-------|------|------|-------|----------|----------|----------|----------|
| MmugDNA.41181.1.S1_at | MmugDNA.41181.1 | 7.11  | 7.47  | 0.16 | 0.23 | -1.28 | 0.176711 | 0.111823 | 0.540348 | 0.376856 |
| MmugDNA.41182.1.S1_at | MmugDNA.41182.1 | 2.97  | 3.05  | 0.1  | 0.23 | -1.06 | 0.139274 | 0.177923 | 0.506801 | 0.454259 |
| MmugDNA.41183.1.S1_at | MmugDNA.41183.1 | 4.36  | 4.27  | 0.02 | 0.21 | 1.07  | 0.960663 | 0.895066 | 0.9849   | 0.940055 |
| MmugDNA.41184.1.S1_at | MmugDNA.41184.1 | 3.66  | 3.65  | 0.16 | 0.12 | 1.01  | 0.918502 | 0.295679 | 0.96831  | 0.555113 |
| MmugDNA.41185.1.S1_at | MmugDNA.41185.1 | 5.3   | 5.28  | 0    | 0.1  | 1.01  | 0.597579 | 0.285332 | 0.813537 | 0.547198 |
| MmugDNA.41186.1.S1_at | MmugDNA.41186.1 | 3.16  | 3.08  | 0.06 | 0.11 | 1.05  | 0.987501 | 0.999575 | 0.995562 | 0.999859 |
| MmugDNA.41187.1.S1_at | MmugDNA.41187.1 | 10.04 | 9.47  | 0.09 | 0.15 | 1.49  | 0.006168 | 0.001196 | 0.196493 | 0.05421  |
| MmugDNA.4119.1.S1_at  | MmugDNA.4119.1  | 13.73 | 13.63 | 0.04 | 0.06 | 1.07  | 0.023761 | 0.018319 | 0.292771 | 0.170201 |
| MmugDNA.41190.1.S1_at | MmugDNA.41190.1 | 3.94  | 3.69  | 0.07 | 0.12 | 1.19  | 0.077738 | 0.085906 | 0.427756 | 0.338068 |
| MmugDNA.41191.1.S1_at | MmugDNA.41191.1 | 3.69  | 3.6   | 0.16 | 0.17 | 1.06  | 0.282239 | 0.328287 | 0.622703 | 0.578012 |
| MmugDNA.41193.1.S1_at | MmugDNA.41193.1 | 7.99  | 7.72  | 0.35 | 0.24 | 1.21  | 0.689889 | 0.618633 | 0.861835 | 0.774185 |
| MmugDNA.41195.1.S1_at | MmugDNA.41195.1 | 5.16  | 5.38  | 0.24 | 0.06 | -1.17 | 0.570908 | 0.799516 | 0.799794 | 0.884661 |
| MmugDNA.41196.1.S1_at | MmugDNA.41196.1 | 8.06  | 8.71  | 0.1  | 1.12 | -1.57 | 0.24735  | 0.322053 | 0.598451 | 0.57365  |
| MmugDNA.41199.1.S1_at | MmugDNA.41199.1 | 3.71  | 2.98  | 1.01 | 0.23 | 1.65  | 0.364536 | 0.524306 | 0.677389 | 0.714254 |
| MmugDNA.412.1.S1_at   | MmugDNA.412.1   | 5.59  | 5.59  | 0.1  | 0.06 | -1    | 0.931089 | 0.324032 | 0.97337  | 0.57473  |
| MmugDNA.41200.1.S1_at | MmugDNA.41200.1 | 4.04  | 3.78  | 0.49 | 0.16 | 1.2   | 0.183659 | 0.105848 | 0.54773  | 0.368111 |
| MmugDNA.41201.1.S1_at | MmugDNA.41201.1 | 9.04  | 9.48  | 0.25 | 0.26 | -1.35 | 0.271638 | 0.138827 | 0.615767 | 0.412015 |
| MmugDNA.41202.1.S1_at | MmugDNA.41202.1 | 6.59  | 6.57  | 1.07 | 0.62 | 1.01  | 0.437727 | 0.579993 | 0.722586 | 0.749373 |
| MmugDNA.41204.1.S1_at | MmugDNA.41204.1 | 5.53  | 5.27  | 0.2  | 0.11 | 1.2   | 0.539557 | 0.632838 | 0.78115  | 0.783788 |
| MmugDNA.41206.1.S1_at | MmugDNA.41206.1 | 7.36  | 7.08  | 0.71 | 0.38 | 1.22  | 0.515382 | 0.533011 | 0.767423 | 0.719367 |
| MmugDNA.41207.1.S1_at | MmugDNA.41207.1 | 6.72  | 6.91  | 0.07 | 0.07 | -1.14 | 0.008712 | 0.000306 | 0.220503 | 0.034907 |
| MmugDNA.41208.1.S1_at | MmugDNA.41208.1 | 6.18  | 6.17  | 0.09 | 0.18 | 1     | 0.696294 | 0.502108 | 0.86516  | 0.700054 |
| MmugDNA.41209.1.S1_at | MmugDNA.41209.1 | 6.54  | 6.24  | 0.18 | 0.06 | 1.23  | 0.058267 | 0.260817 | 0.390177 | 0.52721  |
| MmugDNA.4121.1.S1_at  | MmugDNA.4121.1  | 4.61  | 4.64  | 0.06 | 0.02 | -1.02 | 0.184695 | 0.686175 | 0.548318 | 0.816831 |
| MmugDNA.41210.1.S1_at | MmugDNA.41210.1 | 5.49  | 5.34  | 0.21 | 0.5  | 1.11  | 0.455399 | 0.577064 | 0.733761 | 0.747635 |
| MmugDNA.41212.1.S1_at | MmugDNA.41212.1 | 3.66  | 3.68  | 0.05 | 0.22 | -1.02 | 0.786442 | 0.918166 | 0.911179 | 0.954096 |
| MmugDNA.41213.1.S1_at | MmugDNA.41213.1 | 3.98  | 3.9   | 0.07 | 0    | 1.05  | 0.157724 | 0.106555 | 0.522564 | 0.369099 |
| MmugDNA.41214.1.S1_at | MmugDNA.41214.1 | 6.54  | 6.82  | 0.21 | 0.12 | -1.21 | 0.127405 | 0.238177 | 0.493834 | 0.508818 |
| MmugDNA.41215.1.S1_at | MmugDNA.41215.1 | 10.67 | 10.67 | 0.01 | 0.36 | 1     | 0.373689 | 0.269407 | 0.683245 | 0.534737 |
| MmugDNA.41216.1.S1_at | MmugDNA.41216.1 | 9.58  | 9.51  | 0.24 | 0.42 | 1.05  | 0.434096 | 0.33626  | 0.720313 | 0.583736 |
| MmugDNA.41218.1.S1_at | MmugDNA.41218.1 | 6.01  | 5.3   | 0.88 | 0.58 | 1.64  | 0.250119 | 0.218569 | 0.600389 | 0.492172 |
| MmugDNA.41219.1.S1_at | MmugDNA.41219.1 | 4.38  | 3.93  | 0.56 | 0.19 | 1.37  | 0.244927 | 0.447905 | 0.59652  | 0.663881 |
| MmugDNA.4122.1.S1_at  | MmugDNA.4122.1  | 5.93  | 5.94  | 0.1  | 0    | -1.01 | 0.847689 | 0.952834 | 0.939033 | 0.97327  |
| MmugDNA.41221.1.S1_at | MmugDNA.41221.1 | 5.12  | 5.13  | 0.02 | 0.19 | -1    | 0.92283  | 0.421403 | 0.970065 | 0.644994 |
| MmugDNA.41223.1.S1_at | MmugDNA.41223.1 | 9.1   | 8.13  | 0.44 | 0.33 | 1.96  | 0.055105 | 0.031251 | 0.383458 | 0.218668 |
| MmugDNA.41224.1.S1_at | MmugDNA.41224.1 | 3.62  | 3.96  | 0.24 | 0.03 | -1.27 | 0.071558 | 0.231814 | 0.415505 | 0.503592 |
| MmugDNA.41225.1.S1_at | MmugDNA.41225.1 | 4.45  | 4.29  | 0.07 | 0.05 | 1.12  | 0.052335 | 0.309777 | 0.377516 | 0.565044 |
| MmugDNA.41226.1.S1_at | MmugDNA.41226.1 | 6.72  | 7.69  | 0.4  | 0.9  | -1.97 | 0.183437 | 0.220925 | 0.547598 | 0.494337 |
| MmugDNA.41227.1.S1_at | MmugDNA.41227.1 | 5.95  | 5.33  | 0.8  | 0.1  | 1.53  | 0.093922 | 0.089613 | 0.451538 | 0.343811 |
| MmugDNA.41228.1.S1_at | MmugDNA.41228.1 | 4.41  | 4.33  | 1.1  | 0.8  | 1.06  | 0.752443 | 0.495176 | 0.894361 | 0.69534  |
| MmugDNA.41229.1.S1_at | MmugDNA.41229.1 | 4.7   | 5.48  | 0.31 | 0.78 | -1.72 | 0.250488 | 0.311787 | 0.600389 | 0.56678  |

|                         |                 |       |       |      |      |       |          |          |          |          |
|-------------------------|-----------------|-------|-------|------|------|-------|----------|----------|----------|----------|
| MmugDNA.4123.1.S1_at    | MmugDNA.4123.1  | 6.7   | 6.73  | 0.2  | 0.13 | -1.02 | 0.820342 | 0.896869 | 0.926871 | 0.941126 |
| MmugDNA.41230.1.S1_at   | MmugDNA.41230.1 | 5.25  | 6.29  | 0.52 | 0.54 | -2.06 | 0.369464 | 0.094341 | 0.680716 | 0.350889 |
| MmugDNA.41231.1.S1_at   | MmugDNA.41231.1 | 5.18  | 5.14  | 0.23 | 0.03 | 1.03  | 0.504306 | 0.683575 | 0.761197 | 0.815387 |
| MmugDNA.41232.1.S1_at   | MmugDNA.41232.1 | 3.37  | 3.25  | 0.22 | 0    | 1.09  | 0.240344 | 0.189196 | 0.593146 | 0.464997 |
| MmugDNA.41233.1.S1_at   | MmugDNA.41233.1 | 10.99 | 10.61 | 0.11 | 0.63 | 1.3   | 0.183927 | 0.16737  | 0.547947 | 0.443785 |
| MmuSTS.2204.1.S1_at     | MmuSTS.2204.1   | 13.05 | 12.78 | 0.08 | 0.43 | 1.2   | 0.152853 | 0.177249 | 0.517325 | 0.453679 |
| MmuSTS.2204.1.S1_s_at   | MmuSTS.2204.1   | 12    | 11.62 | 0.1  | 0.59 | 1.3   | 0.16957  | 0.189051 | 0.533686 | 0.464897 |
| MmugDNA.41234.1.S1_at   | MmugDNA.41234.1 | 5.74  | 5.78  | 0.3  | 0.08 | -1.03 | 0.837344 | 0.661304 | 0.93428  | 0.801687 |
| MmugDNA.41235.1.S1_at   | MmugDNA.41235.1 | 6.67  | 6.86  | 0.2  | 0.18 | -1.14 | 0.117896 | 0.127382 | 0.482063 | 0.398205 |
| MmugDNA.41236.1.S1_at   | MmugDNA.41236.1 | 5.02  | 4.56  | 0.87 | 0.38 | 1.38  | 0.21933  | 0.285159 | 0.57872  | 0.547098 |
| MmugDNA.41237.1.S1_at   | MmugDNA.41237.1 | 3.19  | 3.21  | 0.2  | 0.06 | -1.02 | 0.559126 | 0.685852 | 0.793647 | 0.816612 |
| MmugDNA.41238.1.S1_at   | MmugDNA.41238.1 | 5.48  | 5.46  | 0.07 | 0.1  | 1.01  | 0.497187 | 0.314025 | 0.757896 | 0.568178 |
| MmugDNA.41239.1.S1_at   | MmugDNA.41239.1 | 3.32  | 3.65  | 0.19 | 0.16 | -1.26 | 0.421477 | 0.191256 | 0.713049 | 0.466553 |
| MmugDNA.41240.1.S1_at   | MmugDNA.41240.1 | 11.83 | 11.17 | 0.25 | 0.07 | 1.58  | 0.025776 | 0.011939 | 0.300606 | 0.141357 |
| MmugDNA.41241.1.S1_at   | MmugDNA.41241.1 | 3.33  | 3.37  | 0.04 | 0.09 | -1.03 | 0.461357 | 0.37994  | 0.737557 | 0.616659 |
| MmugDNA.41242.1.S1_at   | MmugDNA.41242.1 | 8.8   | 8.64  | 0.26 | 0.78 | 1.12  | 0.741873 | 0.466806 | 0.889478 | 0.676543 |
| MmugDNA.41243.1.S1_at   | MmugDNA.41243.1 | 5.75  | 5.38  | 0.61 | 0.74 | 1.3   | 0.228013 | 0.181162 | 0.585398 | 0.457601 |
| MmugDNA.41246.1.S1_at   | MmugDNA.41246.1 | 5.52  | 6.03  | 0.67 | 1.36 | -1.43 | 0.948051 | 0.842866 | 0.980091 | 0.910483 |
| MmugDNA.41247.1.S1_at   | MmugDNA.41247.1 | 3.67  | 3.88  | 0.24 | 0.12 | -1.15 | 0.305752 | 0.275058 | 0.639223 | 0.539481 |
| MmugDNA.41249.1.S1_at   | MmugDNA.41249.1 | 3.2   | 3.21  | 0.22 | 0.09 | -1.01 | 0.562828 | 0.61763  | 0.795558 | 0.773538 |
| MmugDNA.4125.1.S1_at    | MmugDNA.4125.1  | 6.11  | 6.58  | 0.95 | 0.5  | -1.38 | 0.755139 | 0.751285 | 0.8959   | 0.855391 |
| MmugDNA.41251.1.S1_at   | MmugDNA.41251.1 | 9.55  | 8.7   | 0.11 | 0.64 | 1.8   | 0.088436 | 0.017115 | 0.44331  | 0.165769 |
| MmugDNA.41253.1.S1_at   | MmugDNA.41253.1 | 8.29  | 8.27  | 0.24 | 0.1  | 1.01  | 0.928858 | 0.040454 | 0.972607 | 0.246241 |
| MmugDNA.41255.1.S1_at   | MmugDNA.41255.1 | 8.33  | 8.97  | 0.55 | 0.37 | -1.56 | 0.079751 | 0.060102 | 0.430147 | 0.291829 |
| MmugDNA.41256.1.S1_at   | MmugDNA.41256.1 | 6.84  | 6.53  | 0.38 | 0.29 | 1.24  | 0.817298 | 0.937614 | 0.925925 | 0.964687 |
| MmugDNA.41259.1.S1_at   | MmugDNA.41259.1 | 3.99  | 4     | 0.18 | 0.02 | -1.01 | 0.876732 | 0.940371 | 0.950675 | 0.966182 |
| MmugDNA.4126.1.S1_at    | MmugDNA.4126.1  | 4.47  | 4.53  | 0.2  | 0.33 | -1.04 | 0.559378 | 0.720244 | 0.793845 | 0.838202 |
| MmugDNA.41260.1.S1_at   | MmugDNA.41260.1 | 4.69  | 4.52  | 0.33 | 0    | 1.12  | 0.981714 | 0.932731 | 0.993374 | 0.961786 |
| MmugDNA.41261.1.S1_at   | MmugDNA.41261.1 | 6.88  | 7.03  | 0.38 | 0.12 | -1.11 | 0.420133 | 0.567792 | 0.712259 | 0.741656 |
| MmugDNA.41262.1.S1_at   | MmugDNA.41262.1 | 5.58  | 6.18  | 0.4  | 0.81 | -1.51 | 0.390401 | 0.544191 | 0.693592 | 0.726643 |
| MmugDNA.41263.1.S1_at   | MmugDNA.41263.1 | 7.46  | 7.55  | 0.04 | 0.17 | -1.06 | 0.17986  | 0.302423 | 0.544019 | 0.560109 |
| MmugDNA.41266.1.S1_at   | MmugDNA.41266.1 | 6.6   | 5.48  | 0.26 | 0.51 | 2.17  | 0.075808 | 0.131644 | 0.423622 | 0.403746 |
| MmugDNA.41268.1.S1_at   | MmugDNA.41268.1 | 12.96 | 12.01 | 0.15 | 0.25 | 1.93  | 0.003589 | 0.000464 | 0.179515 | 0.038572 |
| MmugDNA.41269.1.S1_at   | MmugDNA.41269.1 | 6.52  | 6.92  | 0.84 | 0.82 | -1.32 | 0.899253 | 0.42372  | 0.959714 | 0.646518 |
| MmugDNA.41270.1.S1_at   | MmugDNA.41270.1 | 5.71  | 5.88  | 0.11 | 0.13 | -1.13 | 0.331312 | 0.396458 | 0.656268 | 0.628241 |
| MmugDNA.41271.1.S1_at   | MmugDNA.41271.1 | 7.98  | 7.59  | 0.2  | 0.14 | 1.32  | 0.05987  | 0.067691 | 0.392969 | 0.306219 |
| MmugDNA.41271.1.S1_s_at | MmugDNA.41271.1 | 6.41  | 6.52  | 0.05 | 0.29 | -1.08 | 0.903746 | 0.98093  | 0.961578 | 0.989478 |
| MmugDNA.41271.1.S1_x_at | MmugDNA.41271.1 | 7.39  | 7.35  | 0.11 | 0.08 | 1.03  | 0.192746 | 0.308367 | 0.556046 | 0.564428 |
| MmugDNA.41272.1.S1_at   | MmugDNA.41272.1 | 3.51  | 3.52  | 0.02 | 0.1  | -1    | 0.943809 | 0.923533 | 0.978535 | 0.956997 |
| MmugDNA.41273.1.S1_at   | MmugDNA.41273.1 | 4.97  | 6.75  | 0.52 | 0.54 | -3.45 | 0.049495 | 0.015277 | 0.371515 | 0.156987 |
| MmugDNA.41274.1.S1_at   | MmugDNA.41274.1 | 4.95  | 5.13  | 0.18 | 0.08 | -1.14 | 0.268405 | 0.646752 | 0.613168 | 0.7931   |

|                         |                 |       |       |      |      |       |          |          |          |          |
|-------------------------|-----------------|-------|-------|------|------|-------|----------|----------|----------|----------|
| MmugDNA.41276.1.S1_at   | MmugDNA.41276.1 | 6.13  | 6.26  | 0.12 | 0.06 | -1.09 | 0.18679  | 0.074259 | 0.550106 | 0.318046 |
| MmugDNA.41277.1.S1_at   | MmugDNA.41277.1 | 5.13  | 5.02  | 0.16 | 0.06 | 1.08  | 0.894554 | 0.342935 | 0.957917 | 0.588745 |
| MmugDNA.41278.1.S1_at   | MmugDNA.41278.1 | 6.56  | 8.46  | 1.81 | 2.75 | -3.76 | 0.56406  | 0.572542 | 0.796391 | 0.744566 |
| MmugDNA.41279.1.S1_at   | MmugDNA.41279.1 | 12.65 | 12.5  | 0.05 | 0.07 | 1.11  | 0.044116 | 0.039419 | 0.35797  | 0.243529 |
| MmugDNA.4128.1.S1_at    | MmugDNA.4128.1  | 4.35  | 4.46  | 0.28 | 0.43 | -1.08 | 0.530681 | 0.683323 | 0.776893 | 0.815238 |
| MmugDNA.41280.1.S1_at   | MmugDNA.41280.1 | 11.38 | 11.29 | 0.12 | 0.17 | 1.06  | 0.589127 | 0.345778 | 0.809193 | 0.590937 |
| MmugDNA.41281.1.S1_at   | MmugDNA.41281.1 | 3.33  | 3.03  | 0.08 | 0.47 | 1.23  | 0.978455 | 0.954457 | 0.992061 | 0.974155 |
| MmugDNA.41282.1.S1_at   | MmugDNA.41282.1 | 4.17  | 4.32  | 0.16 | 0.21 | -1.11 | 0.477622 | 0.549902 | 0.746849 | 0.730154 |
| MmugDNA.41283.1.S1_at   | MmugDNA.41283.1 | 6.25  | 6.91  | 0.28 | 0.66 | -1.58 | 0.335747 | 0.470315 | 0.659165 | 0.678599 |
| MmugDNA.41284.1.S1_at   | MmugDNA.41284.1 | 5.71  | 5.68  | 0.44 | 0.03 | 1.02  | 0.890791 | 0.837456 | 0.956312 | 0.907122 |
| MmugDNA.41285.1.S1_at   | MmugDNA.41285.1 | 4.26  | 4.93  | 0.17 | 0.08 | -1.59 | 0.003693 | 0.001593 | 0.179515 | 0.06044  |
| MmugDNA.41285.1.S1_s_at | MmugDNA.41285.1 | 5.36  | 5.82  | 0.1  | 0.07 | -1.37 | 0.002609 | 0.000866 | 0.164386 | 0.047425 |
| MmugDNA.41287.1.S1_at   | MmugDNA.41287.1 | 4.4   | 4.36  | 0.29 | 0.07 | 1.03  | 0.69022  | 0.827981 | 0.861946 | 0.901214 |
| MmugDNA.41289.1.S1_at   | MmugDNA.41289.1 | 7.72  | 7.82  | 0.11 | 0.45 | -1.07 | 0.24391  | 0.351724 | 0.595691 | 0.595164 |
| MmugDNA.4129.1.S1_at    | MmugDNA.4129.1  | 3.3   | 3.04  | 0.26 | 0.01 | 1.2   | 0.246268 | 0.142655 | 0.597666 | 0.416389 |
| MmugDNA.41290.1.S1_at   | MmugDNA.41290.1 | 4.08  | 3.77  | 0.45 | 0.05 | 1.24  | 0.339579 | 0.091891 | 0.661307 | 0.347237 |
| MmugDNA.41291.1.S1_at   | MmugDNA.41291.1 | 3.85  | 3.81  | 0.07 | 0.03 | 1.03  | 0.476799 | 0.097426 | 0.746293 | 0.355097 |
| MmugDNA.41292.1.S1_at   | MmugDNA.41292.1 | 3.84  | 3.84  | 0.03 | 0.09 | 1.01  | 0.895345 | 0.653042 | 0.958088 | 0.79718  |
| MmugDNA.41294.1.S1_at   | MmugDNA.41294.1 | 5.61  | 5.8   | 0.2  | 0.16 | -1.15 | 0.268474 | 0.197243 | 0.613189 | 0.472213 |
| MmugDNA.41295.1.S1_at   | MmugDNA.41295.1 | 3.78  | 3.74  | 0.07 | 0.11 | 1.03  | 0.63036  | 0.806047 | 0.832004 | 0.888465 |
| MmugDNA.41298.1.S1_at   | MmugDNA.41298.1 | 6.49  | 6.36  | 0.57 | 0.15 | 1.1   | 0.256197 | 0.352416 | 0.603894 | 0.595722 |
| MmugDNA.413.1.S1_at     | MmugDNA.413.1   | 8.65  | 7.77  | 0.57 | 0.49 | 1.84  | 0.151495 | 0.11984  | 0.516161 | 0.388577 |
| MmugDNA.41300.1.S1_at   | MmugDNA.41300.1 | 4.53  | 3.47  | 0.59 | 0.13 | 2.09  | 0.094757 | 0.101198 | 0.452166 | 0.36084  |
| MmugDNA.41301.1.S1_at   | MmugDNA.41301.1 | 3.58  | 3.56  | 0.06 | 0.03 | 1.01  | 0.511707 | 0.167461 | 0.765318 | 0.443861 |
| MmugDNA.41302.1.S1_at   | MmugDNA.41302.1 | 4.84  | 4.58  | 0.22 | 0.06 | 1.2   | 0.251847 | 0.26534  | 0.601188 | 0.531314 |
| MmugDNA.41303.1.S1_at   | MmugDNA.41303.1 | 6.17  | 6.13  | 0.09 | 0.15 | 1.03  | 0.996273 | 0.494532 | 0.99849  | 0.694909 |
| MmugDNA.14800.1.S1_s_at | MmugDNA.14800.1 | 9.14  | 8.63  | 0.25 | 0.12 | 1.43  | 0.040153 | 0.020792 | 0.3492   | 0.1809   |
| MmugDNA.41304.1.S1_at   | MmugDNA.41304.1 | 6.64  | 7.62  | 0.14 | 0.28 | -1.97 | 0.007523 | 0.003759 | 0.209134 | 0.087393 |
| MmugDNA.41305.1.S1_at   | MmugDNA.41305.1 | 5.38  | 4.49  | 0.15 | 0.19 | 1.86  | 0.002671 | 0.000382 | 0.164386 | 0.037273 |
| MmugDNA.41306.1.S1_at   | MmugDNA.41306.1 | 10.21 | 9.49  | 0.22 | 0.08 | 1.65  | 0.004153 | 0.001222 | 0.181739 | 0.054593 |
| MmugDNA.41307.1.S1_at   | MmugDNA.41307.1 | 11.9  | 11.35 | 0.16 | 0.07 | 1.46  | 0.005659 | 0.003222 | 0.191943 | 0.082115 |
| MmugDNA.41309.1.S1_at   | MmugDNA.41309.1 | 5.89  | 6.14  | 0.66 | 0.13 | -1.2  | 0.77213  | 0.878211 | 0.904039 | 0.93052  |
| MmugDNA.4131.1.S1_at    | MmugDNA.4131.1  | 3.75  | 3.87  | 0.15 | 0.18 | -1.09 | 0.327873 | 0.456752 | 0.65415  | 0.67043  |
| MmugDNA.41316.1.S1_at   | MmugDNA.41316.1 | 7.51  | 6.95  | 0.11 | 0.2  | 1.48  | 0.017382 | 0.009419 | 0.267445 | 0.127871 |
| MmugDNA.41317.1.S1_s_at | MmugDNA.41317.1 | 9.05  | 9.48  | 0.34 | 0.19 | -1.35 | 0.122787 | 0.064679 | 0.48812  | 0.300314 |
| MmugDNA.41319.1.S1_at   | MmugDNA.41319.1 | 6.16  | 6.18  | 0.17 | 0.15 | -1.01 | 0.713135 | 0.897372 | 0.874301 | 0.94143  |
| MmugDNA.4132.1.S1_at    | MmugDNA.4132.1  | 5.9   | 5.91  | 0.14 | 0.14 | -1.01 | 0.965308 | 0.743507 | 0.986736 | 0.851395 |
| MmugDNA.41320.1.S1_at   | MmugDNA.41320.1 | 8.93  | 8.33  | 0.65 | 0.52 | 1.51  | 0.126754 | 0.147979 | 0.492863 | 0.42238  |
| MmugDNA.41321.1.S1_at   | MmugDNA.41321.1 | 3.96  | 5.99  | 0.74 | 1.8  | -4.09 | 0.196678 | 0.208876 | 0.559808 | 0.482717 |
| MmugDNA.41322.1.S1_at   | MmugDNA.41322.1 | 4.37  | 4.68  | 0.26 | 0.34 | -1.24 | 0.468417 | 0.162616 | 0.741049 | 0.43872  |
| MmugDNA.41323.1.S1_at   | MmugDNA.41323.1 | 11.48 | 10.88 | 0.11 | 0.44 | 1.51  | 0.269467 | 0.1523   | 0.614156 | 0.427072 |

|                         |                 |       |       |      |      |       |          |          |          |          |
|-------------------------|-----------------|-------|-------|------|------|-------|----------|----------|----------|----------|
| MmugDNA.41324.1.S1_at   | MmugDNA.41324.1 | 4.13  | 3.89  | 0.19 | 0.17 | 1.18  | 0.098951 | 0.100302 | 0.458711 | 0.359368 |
| MmugDNA.41325.1.S1_at   | MmugDNA.41325.1 | 7.94  | 7.53  | 0.55 | 0.71 | 1.33  | 0.262393 | 0.30591  | 0.60891  | 0.562732 |
| MmugDNA.41326.1.S1_at   | MmugDNA.41326.1 | 4.96  | 4.87  | 0.33 | 0.13 | 1.06  | 0.671383 | 0.851793 | 0.852656 | 0.915766 |
| MmugDNA.41327.1.S1_at   | MmugDNA.41327.1 | 4.58  | 4.55  | 0.18 | 0.32 | 1.02  | 0.501757 | 0.485313 | 0.760131 | 0.689049 |
| MmugDNA.41328.1.S1_at   | MmugDNA.41328.1 | 9.04  | 9.27  | 0.79 | 0.31 | -1.18 | 0.462703 | 0.174944 | 0.738306 | 0.451599 |
| MmugDNA.4133.1.S1_at    | MmugDNA.4133.1  | 5.17  | 5.19  | 0.1  | 0.09 | -1.02 | 0.366423 | 0.546685 | 0.67904  | 0.728135 |
| MmugDNA.41330.1.S1_at   | MmugDNA.41330.1 | 3.37  | 3.3   | 0.22 | 0.18 | 1.05  | 0.294081 | 0.260932 | 0.631118 | 0.527351 |
| MmugDNA.41331.1.S1_at   | MmugDNA.41331.1 | 4.96  | 4.92  | 0.14 | 0.35 | 1.03  | 0.350537 | 0.326502 | 0.668568 | 0.576576 |
| MmugDNA.41332.1.S1_at   | MmugDNA.41332.1 | 4.23  | 3.82  | 0.38 | 0.25 | 1.32  | 0.106306 | 0.102215 | 0.466831 | 0.362343 |
| MmugDNA.41333.1.S1_at   | MmugDNA.41333.1 | 3.36  | 3.3   | 0.1  | 0.13 | 1.04  | 0.331197 | 0.455856 | 0.656225 | 0.669664 |
| MmugDNA.41335.1.S1_at   | MmugDNA.41335.1 | 3.89  | 4.99  | 0.29 | 1.31 | -2.14 | 0.213426 | 0.207732 | 0.573606 | 0.481994 |
| MmugDNA.41337.1.S1_at   | MmugDNA.41337.1 | 8.9   | 9.51  | 0.27 | 0.11 | -1.53 | 0.028983 | 0.018327 | 0.312556 | 0.170218 |
| MmugDNA.41338.1.S1_at   | MmugDNA.41338.1 | 6.92  | 7.34  | 1.16 | 0.55 | -1.33 | 0.778864 | 0.786723 | 0.90775  | 0.876633 |
| MmugDNA.4134.1.S1_at    | MmugDNA.4134.1  | 7.8   | 7.24  | 0.08 | 0.4  | 1.47  | 0.06833  | 0.085721 | 0.410012 | 0.337761 |
| MmugDNA.41340.1.S1_at   | MmugDNA.41340.1 | 3.2   | 3.2   | 0.05 | 0.06 | 1     | 0.247837 | 0.346242 | 0.599052 | 0.591201 |
| MmugDNA.41341.1.S1_at   | MmugDNA.41341.1 | 4.96  | 4.92  | 0.17 | 0.34 | 1.03  | 0.796358 | 0.537621 | 0.91548  | 0.722616 |
| MmugDNA.41343.1.S1_at   | MmugDNA.41343.1 | 5.41  | 5.19  | 0.24 | 0.2  | 1.17  | 0.27156  | 0.143679 | 0.615716 | 0.417555 |
| MmugDNA.41344.1.S1_at   | MmugDNA.41344.1 | 5.81  | 6.03  | 0.21 | 0.16 | -1.17 | 0.355731 | 0.203224 | 0.671194 | 0.477415 |
| MmugDNA.41346.1.S1_at   | MmugDNA.41346.1 | 6.11  | 6.66  | 0.08 | 0.37 | -1.46 | 0.084365 | 0.062016 | 0.436943 | 0.295892 |
| MmugDNA.41348.1.S1_at   | MmugDNA.41348.1 | 10.08 | 9.62  | 0.17 | 0.32 | 1.38  | 0.10755  | 0.100572 | 0.468045 | 0.359845 |
| MmugDNA.41349.1.S1_at   | MmugDNA.41349.1 | 4.19  | 4.28  | 0.23 | 0.34 | -1.06 | 0.560121 | 0.737725 | 0.79419  | 0.848062 |
| MmugDNA.4135.1.S1_at    | MmugDNA.4135.1  | 5.23  | 5.04  | 0.76 | 0.29 | 1.14  | 0.258476 | 0.326736 | 0.605689 | 0.576725 |
| MmugDNA.41350.1.S1_at   | MmugDNA.41350.1 | 5.47  | 5.46  | 0.03 | 0.16 | 1     | 0.7135   | 0.931237 | 0.874503 | 0.96095  |
| MmugDNA.41351.1.S1_at   | MmugDNA.41351.1 | 6.62  | 6.34  | 0.41 | 0.49 | 1.21  | 0.393    | 0.407813 | 0.694941 | 0.63521  |
| MmugDNA.41352.1.S1_at   | MmugDNA.41352.1 | 5.9   | 6.1   | 0.54 | 0.13 | -1.15 | 0.684885 | 0.434787 | 0.858795 | 0.654826 |
| MmugDNA.41353.1.S1_at   | MmugDNA.41353.1 | 10.75 | 10.12 | 0.24 | 0.16 | 1.54  | 0.020845 | 0.01759  | 0.281033 | 0.167721 |
| MmugDNA.41354.1.S1_at   | MmugDNA.41354.1 | 3.34  | 3.69  | 0.3  | 0.28 | -1.27 | 0.499926 | 0.631442 | 0.759402 | 0.782839 |
| MmugDNA.41355.1.S1_at   | MmugDNA.41355.1 | 7.97  | 9.12  | 0.3  | 0.85 | -2.23 | 0.174473 | 0.223292 | 0.538141 | 0.496105 |
| MmugDNA.4136.1.S1_at    | MmugDNA.4136.1  | 9.26  | 9.41  | 0.14 | 0.84 | -1.11 | 0.496347 | 0.527007 | 0.757473 | 0.715759 |
| MmugDNA.41362.1.S1_at   | MmugDNA.41362.1 | 3.38  | 3.42  | 0.19 | 0.01 | -1.03 | 0.556422 | 0.581195 | 0.791776 | 0.750266 |
| MmugDNA.41363.1.S1_at   | MmugDNA.41363.1 | 6.65  | 7.31  | 1.03 | 0.49 | -1.58 | 0.826441 | 0.941848 | 0.929529 | 0.967075 |
| MmugDNA.41365.1.S1_at   | MmugDNA.41365.1 | 11.42 | 11.28 | 0.22 | 0.07 | 1.1   | 0.367428 | 0.562199 | 0.679502 | 0.737871 |
| MmugDNA.41366.1.S1_at   | MmugDNA.41366.1 | 6.44  | 6.22  | 0.22 | 0.11 | 1.16  | 0.729098 | 0.879633 | 0.882395 | 0.931253 |
| MmugDNA.41367.1.S1_at   | MmugDNA.41367.1 | 4.34  | 4.73  | 0.3  | 0.36 | -1.32 | 0.106202 | 0.016617 | 0.466831 | 0.163117 |
| MmugDNA.41368.1.S1_at   | MmugDNA.41368.1 | 9.77  | 9.2   | 0.14 | 0.91 | 1.49  | 0.814781 | 0.918756 | 0.924758 | 0.954387 |
| MmugDNA.41369.1.S1_at   | MmugDNA.41369.1 | 6.37  | 6.31  | 0.09 | 0.17 | 1.04  | 0.58367  | 0.271916 | 0.806728 | 0.536655 |
| MmugDNA.4137.1.S1_at    | MmugDNA.4137.1  | 6.3   | 6.66  | 0.16 | 0.04 | -1.28 | 0.052605 | 0.096541 | 0.378269 | 0.354115 |
| MmugDNA.41370.1.S1_at   | MmugDNA.41370.1 | 4.37  | 4.29  | 0.15 | 0.47 | 1.06  | 0.564215 | 0.648879 | 0.796455 | 0.794491 |
| MmugDNA.41370.1.S1_x_at | MmugDNA.41370.1 | 5.36  | 5.26  | 0.14 | 0.31 | 1.07  | 0.861699 | 0.200623 | 0.944314 | 0.475176 |
| MmugDNA.41372.1.S1_at   | MmugDNA.41372.1 | 7.4   | 6.65  | 0.92 | 1.68 | 1.69  | 0.324113 | 0.349509 | 0.651854 | 0.593484 |
| MmugDNA.41373.1.S1_at   | MmugDNA.41373.1 | 4.83  | 4.85  | 0.08 | 0.14 | -1.02 | 0.248261 | 0.335883 | 0.599152 | 0.583537 |

|                         |                 |       |       |      |      |       |          |          |          |          |
|-------------------------|-----------------|-------|-------|------|------|-------|----------|----------|----------|----------|
| MmugDNA.41375.1.S1_at   | MmugDNA.41375.1 | 5.38  | 5.1   | 0.7  | 0.48 | 1.21  | 0.307638 | 0.507335 | 0.640082 | 0.702917 |
| MmugDNA.41377.1.S1_at   | MmugDNA.41377.1 | 5.39  | 5.57  | 0.08 | 0.16 | -1.13 | 0.278971 | 0.570152 | 0.620884 | 0.742922 |
| MmugDNA.41378.1.S1_at   | MmugDNA.41378.1 | 5.72  | 5.92  | 0.26 | 0.12 | -1.15 | 0.140634 | 0.173236 | 0.508385 | 0.449791 |
| MmugDNA.41380.1.S1_at   | MmugDNA.41380.1 | 7.67  | 7.54  | 0.3  | 0.15 | 1.1   | 0.87243  | 0.607137 | 0.948997 | 0.766223 |
| MmugDNA.41381.1.S1_at   | MmugDNA.41381.1 | 4.66  | 5.09  | 1.47 | 0.47 | -1.35 | 0.608823 | 0.299716 | 0.820185 | 0.558037 |
| MmugDNA.41382.1.S1_at   | MmugDNA.41382.1 | 5.9   | 6.02  | 0.09 | 0.02 | -1.08 | 0.148453 | 0.076179 | 0.513907 | 0.321047 |
| MmugDNA.41385.1.S1_at   | MmugDNA.41385.1 | 8.63  | 8.97  | 0.12 | 0.19 | -1.27 | 0.058064 | 0.017399 | 0.389735 | 0.16699  |
| MmugDNA.41386.1.S1_at   | MmugDNA.41386.1 | 5.55  | 5.91  | 0.12 | 0.16 | -1.28 | 0.076189 | 0.039732 | 0.424738 | 0.244323 |
| MmugDNA.41387.1.S1_at   | MmugDNA.41387.1 | 11.56 | 11.86 | 0.1  | 0.12 | -1.23 | 0.033389 | 0.023596 | 0.328667 | 0.192397 |
| MmugDNA.41388.1.S1_at   | MmugDNA.41388.1 | 3.76  | 3.87  | 0.12 | 0.07 | -1.08 | 0.079954 | 0.125091 | 0.430176 | 0.395506 |
| MmugDNA.41389.1.S1_at   | MmugDNA.41389.1 | 12.04 | 11.27 | 0.35 | 0.24 | 1.72  | 0.089892 | 0.074118 | 0.44539  | 0.317794 |
| MmugDNA.41390.1.S1_at   | MmugDNA.41390.1 | 7.84  | 9.7   | 0.59 | 0.7  | -3.64 | 0.025704 | 0.012808 | 0.300275 | 0.145832 |
| MmugDNA.41392.1.S1_at   | MmugDNA.41392.1 | 8.61  | 7.84  | 0.75 | 0.41 | 1.71  | 0.07658  | 0.060891 | 0.425098 | 0.293504 |
| MmugDNA.41393.1.S1_at   | MmugDNA.41393.1 | 6.26  | 6.57  | 0.1  | 0.05 | -1.24 | 0.016455 | 0.007562 | 0.264089 | 0.116437 |
| MmugDNA.41394.1.S1_at   | MmugDNA.41394.1 | 5.51  | 5.66  | 0.1  | 0.23 | -1.11 | 0.782353 | 0.444033 | 0.909165 | 0.661644 |
| MmugDNA.41396.1.S1_at   | MmugDNA.41396.1 | 7.54  | 7.85  | 0.27 | 0.47 | -1.24 | 0.372711 | 0.274661 | 0.682983 | 0.539133 |
| MmugDNA.41398.1.S1_at   | MmugDNA.41398.1 | 10.48 | 9.85  | 0.08 | 0.42 | 1.55  | 0.074707 | 0.09231  | 0.420684 | 0.348147 |
| MmugDNA.41399.1.S1_s_at | MmugDNA.41399.1 | 11.12 | 11.34 | 0.03 | 0.48 | -1.16 | 0.548482 | 0.665966 | 0.786665 | 0.80431  |
| MmugDNA.414.1.S1_at     | MmugDNA.414.1   | 8.44  | 8.45  | 0.21 | 0.57 | -1.01 | 0.989147 | 0.075473 | 0.99615  | 0.319857 |
| MmugDNA.4140.1.S1_at    | MmugDNA.4140.1  | 4.25  | 4.13  | 1.18 | 0.19 | 1.09  | 0.518847 | 0.63105  | 0.769673 | 0.782599 |
| MmugDNA.41400.1.S1_at   | MmugDNA.41400.1 | 3.33  | 3.38  | 0.27 | 0.19 | -1.03 | 0.638478 | 0.261859 | 0.836621 | 0.528265 |
| MmugDNA.41401.1.S1_at   | MmugDNA.41401.1 | 3.39  | 3.32  | 0.18 | 0.03 | 1.05  | 0.44464  | 0.604225 | 0.72708  | 0.764555 |
| MmugDNA.41403.1.S1_at   | MmugDNA.41403.1 | 5.43  | 5.37  | 0.26 | 0.39 | 1.04  | 0.66858  | 0.124955 | 0.851962 | 0.395386 |
| MmugDNA.41404.1.S1_at   | MmugDNA.41404.1 | 5.56  | 5.23  | 0.82 | 0.41 | 1.26  | 0.791125 | 0.465483 | 0.913241 | 0.675774 |
| MmugDNA.41406.1.S1_at   | MmugDNA.41406.1 | 6.74  | 6.97  | 0.16 | 0.16 | -1.17 | 0.197023 | 0.213342 | 0.560025 | 0.487225 |
| MmugDNA.41408.1.S1_at   | MmugDNA.41408.1 | 4.93  | 5.04  | 0.26 | 0.06 | -1.08 | 0.829077 | 0.252664 | 0.930604 | 0.521174 |
| MmugDNA.41409.1.S1_at   | MmugDNA.41409.1 | 3.44  | 3.59  | 0.67 | 0.06 | -1.11 | 0.635217 | 0.827437 | 0.834926 | 0.900959 |
| MmugDNA.4141.1.S1_at    | MmugDNA.4141.1  | 4.18  | 3.9   | 0.63 | 0.2  | 1.21  | 0.238609 | 0.218707 | 0.591896 | 0.492438 |
| MmugDNA.41410.1.S1_at   | MmugDNA.41410.1 | 6.28  | 7.55  | 1    | 0.94 | -2.42 | 0.394002 | 0.372866 | 0.6956   | 0.611735 |
| MmugDNA.41411.1.S1_at   | MmugDNA.41411.1 | 4.79  | 4.89  | 0.49 | 0.39 | -1.07 | 0.43776  | 0.6179   | 0.722586 | 0.773765 |
| MmugDNA.41415.1.S1_at   | MmugDNA.41415.1 | 5.27  | 4.92  | 0.38 | 0.22 | 1.27  | 0.238563 | 0.207632 | 0.591896 | 0.481906 |
| MmugDNA.4142.1.S1_at    | MmugDNA.4142.1  | 7.16  | 7.16  | 0.18 | 0.07 | -1.01 | 0.927112 | 0.968294 | 0.971962 | 0.982549 |
| MmugDNA.41421.1.S1_at   | MmugDNA.41421.1 | 10.59 | 9.76  | 0.23 | 0.31 | 1.78  | 0.072578 | 0.080495 | 0.417185 | 0.328159 |
| MmugDNA.41423.1.S1_at   | MmugDNA.41423.1 | 3.79  | 3.69  | 0.43 | 0.12 | 1.07  | 0.190316 | 0.198134 | 0.553031 | 0.473135 |
| MmugDNA.41425.1.S1_at   | MmugDNA.41425.1 | 7.06  | 7.02  | 0.23 | 0.32 | 1.03  | 0.736164 | 0.005478 | 0.886493 | 0.102081 |
| MmugDNA.41426.1.S1_s_at | MmugDNA.41426.1 | 12    | 11.97 | 0.07 | 0.24 | 1.02  | 0.879052 | 0.661239 | 0.951455 | 0.801687 |
| MmugDNA.41427.1.S1_at   | MmugDNA.41427.1 | 4.94  | 5     | 0.11 | 0.11 | -1.05 | 0.414817 | 0.35871  | 0.709338 | 0.600178 |
| MmugDNA.41428.1.S1_at   | MmugDNA.41428.1 | 5.34  | 5.31  | 0.05 | 0.28 | 1.02  | 0.404866 | 0.659973 | 0.703075 | 0.801008 |
| MmugDNA.41429.1.S1_at   | MmugDNA.41429.1 | 4.11  | 5     | 0.1  | 1.07 | -1.85 | 0.065856 | 0.048213 | 0.405296 | 0.264671 |
| MmugDNA.4143.1.S1_at    | MmugDNA.4143.1  | 4.59  | 4.65  | 0.12 | 0.05 | -1.05 | 0.71597  | 0.79511  | 0.875256 | 0.881926 |
| MmugDNA.41431.1.S1_at   | MmugDNA.41431.1 | 6.67  | 7.34  | 0.75 | 1.2  | -1.6  | 0.241848 | 0.156844 | 0.594001 | 0.432372 |

|                         |                 |       |       |      |      |       |          |          |          |          |
|-------------------------|-----------------|-------|-------|------|------|-------|----------|----------|----------|----------|
| MmugDNA.41432.1.S1_s_at | MmugDNA.41432.1 | 10.3  | 9.69  | 0.35 | 0.34 | 1.53  | 0.204935 | 0.238756 | 0.567457 | 0.509438 |
| MmugDNA.41437.1.S1_at   | MmugDNA.41437.1 | 12.17 | 12.15 | 0.04 | 0.11 | 1.01  | 0.471043 | 0.049529 | 0.742883 | 0.267481 |
| MmugDNA.41438.1.S1_at   | MmugDNA.41438.1 | 3.76  | 3.82  | 0.72 | 0.15 | -1.04 | 0.550939 | 0.742971 | 0.78828  | 0.851094 |
| MmugDNA.41439.1.S1_at   | MmugDNA.41439.1 | 11.11 | 12.32 | 0.39 | 0.23 | -2.32 | 0.008024 | 0.00321  | 0.215137 | 0.082023 |
| MmugDNA.4144.1.S1_s_at  | MmugDNA.4144.1  | 6.47  | 6.36  | 0.27 | 0.24 | 1.08  | 0.414934 | 0.487484 | 0.709338 | 0.690556 |
| MmugDNA.41440.1.S1_at   | MmugDNA.41440.1 | 6.32  | 5.47  | 0.63 | 0.45 | 1.8   | 0.120838 | 0.208585 | 0.48574  | 0.482512 |
| MmugDNA.41441.1.S1_at   | MmugDNA.41441.1 | 4.1   | 4.11  | 0.29 | 0.04 | -1.01 | 0.855    | 0.671232 | 0.941387 | 0.807737 |
| MmugDNA.41442.1.S1_at   | MmugDNA.41442.1 | 4.84  | 4.76  | 0.05 | 0.26 | 1.06  | 0.246688 | 0.4661   | 0.597836 | 0.676117 |
| MmugDNA.6164.1.S1_s_at  | MmugDNA.6164.1  | 11.13 | 10.95 | 0.07 | 0.28 | 1.13  | 0.370169 | 0.525782 | 0.681113 | 0.715217 |
| MmugDNA.41444.1.S1_at   | MmugDNA.41444.1 | 8.06  | 7.45  | 0.09 | 0.36 | 1.52  | 0.060901 | 0.038129 | 0.394645 | 0.239923 |
| MmugDNA.41445.1.S1_at   | MmugDNA.41445.1 | 5.85  | 6.1   | 0.06 | 0.09 | -1.19 | 0.028823 | 0.018433 | 0.312166 | 0.170756 |
| MmugDNA.41446.1.S1_at   | MmugDNA.41446.1 | 5.67  | 6.2   | 0.57 | 1.17 | -1.45 | 0.490457 | 0.679341 | 0.754439 | 0.812775 |
| MmugDNA.41449.1.S1_at   | MmugDNA.41449.1 | 5.09  | 5.34  | 0.04 | 0.26 | -1.19 | 0.562482 | 0.675383 | 0.795358 | 0.81026  |
| MmugDNA.4145.1.S1_at    | MmugDNA.4145.1  | 3.98  | 3.93  | 0.25 | 0.16 | 1.04  | 0.926411 | 0.599954 | 0.971724 | 0.761722 |
| MmugDNA.41450.1.S1_at   | MmugDNA.41450.1 | 3.62  | 3.6   | 0.19 | 0.14 | 1.01  | 0.739039 | 0.367488 | 0.888088 | 0.607139 |
| MmugDNA.41451.1.S1_at   | MmugDNA.41451.1 | 8.08  | 8.71  | 0.29 | 0.28 | -1.54 | 0.059384 | 0.054122 | 0.39211  | 0.277968 |
| MmugDNA.41451.1.S1_s_at | MmugDNA.41451.1 | 7.85  | 8.23  | 0.45 | 0.26 | -1.3  | 0.100799 | 0.086744 | 0.461009 | 0.339484 |
| MmugDNA.41455.1.S1_at   | MmugDNA.41455.1 | 3.28  | 3.17  | 0.06 | 0.32 | 1.08  | 0.608938 | 0.800337 | 0.820226 | 0.885129 |
| MmugDNA.41456.1.S1_at   | MmugDNA.41456.1 | 9.44  | 8.84  | 0.47 | 0.89 | 1.52  | 0.213076 | 0.2328   | 0.573447 | 0.504426 |
| MmugDNA.41458.1.S1_at   | MmugDNA.41458.1 | 9.42  | 9.34  | 0.12 | 0.33 | 1.06  | 0.314888 | 0.007756 | 0.646191 | 0.117622 |
| MmugDNA.41460.1.S1_at   | MmugDNA.41460.1 | 3.09  | 3.2   | 0.03 | 0.13 | -1.08 | 0.330171 | 0.115394 | 0.655613 | 0.382441 |
| MmugDNA.41463.1.S1_at   | MmugDNA.41463.1 | 3.53  | 3.28  | 0.05 | 0.79 | 1.19  | 0.649979 | 0.512652 | 0.842575 | 0.706448 |
| MmugDNA.41464.1.S1_at   | MmugDNA.41464.1 | 7.25  | 7.27  | 0.19 | 0.22 | -1.01 | 0.629172 | 0.59862  | 0.831363 | 0.760996 |
| MmugDNA.41465.1.S1_at   | MmugDNA.41465.1 | 3.8   | 3.44  | 0.03 | 0.05 | 1.29  | 0.000411 | 0.00022  | 0.130717 | 0.032385 |
| MmugDNA.41466.1.S1_at   | MmugDNA.41466.1 | 7.81  | 7.06  | 0.76 | 0.08 | 1.68  | 0.186864 | 0.121499 | 0.550106 | 0.39064  |
| MmugDNA.41467.1.S1_at   | MmugDNA.41467.1 | 6.35  | 5.44  | 0.71 | 0.32 | 1.88  | 0.074032 | 0.048197 | 0.419667 | 0.264665 |
| MmugDNA.4147.1.S1_at    | MmugDNA.4147.1  | 9.64  | 10.61 | 1.01 | 1.03 | -1.95 | 0.126624 | 0.143542 | 0.492802 | 0.41747  |
| MmugDNA.41470.1.S1_at   | MmugDNA.41470.1 | 4.15  | 3.79  | 0.55 | 0.4  | 1.29  | 0.562565 | 0.610478 | 0.795395 | 0.768677 |
| MmugDNA.41471.1.S1_at   | MmugDNA.41471.1 | 4.51  | 4.56  | 0.14 | 0.14 | -1.03 | 0.238321 | 0.256376 | 0.591578 | 0.524114 |
| MmugDNA.41473.1.S1_at   | MmugDNA.41473.1 | 5.14  | 4.12  | 0.8  | 0.83 | 2.03  | 0.209561 | 0.2974   | 0.570957 | 0.556078 |
| MmugDNA.41474.1.S1_at   | MmugDNA.41474.1 | 3.62  | 3.56  | 0.24 | 0.32 | 1.04  | 0.95462  | 0.590122 | 0.983073 | 0.756117 |
| MmugDNA.41476.1.S1_at   | MmugDNA.41476.1 | 6.04  | 6.08  | 0.14 | 0.1  | -1.03 | 0.319544 | 0.6215   | 0.649068 | 0.776067 |
| MmugDNA.41477.1.S1_at   | MmugDNA.41477.1 | 3.19  | 3.18  | 0.23 | 0.18 | 1.01  | 0.870223 | 0.500725 | 0.948113 | 0.699242 |
| MmugDNA.41477.1.S1_s_at | MmugDNA.41477.1 | 3.74  | 3.66  | 0.09 | 0.1  | 1.06  | 0.365752 | 0.171668 | 0.678485 | 0.448048 |
| MmugDNA.41478.1.S1_at   | MmugDNA.41478.1 | 6.2   | 6.14  | 0.71 | 0.32 | 1.04  | 0.311201 | 0.196765 | 0.643196 | 0.471873 |
| MmugDNA.41479.1.S1_at   | MmugDNA.41479.1 | 3.6   | 3.22  | 0.23 | 0.12 | 1.3   | 0.100322 | 0.069803 | 0.460878 | 0.310331 |
| MmugDNA.4148.1.S1_at    | MmugDNA.4148.1  | 4.88  | 4.91  | 0.26 | 0.37 | -1.02 | 0.959895 | 0.132617 | 0.98484  | 0.404544 |
| MmugDNA.41480.1.S1_at   | MmugDNA.41480.1 | 7.45  | 7.39  | 1.09 | 0.41 | 1.04  | 0.692593 | 0.721218 | 0.86351  | 0.838628 |
| MmugDNA.41482.1.S1_at   | MmugDNA.41482.1 | 4.16  | 4.18  | 0.03 | 0.36 | -1.01 | 0.601967 | 0.79715  | 0.816272 | 0.883004 |
| MmugDNA.41483.1.S1_at   | MmugDNA.41483.1 | 5.91  | 6.91  | 0.39 | 0.17 | -2    | 0.045017 | 0.085575 | 0.359653 | 0.337567 |
| MmugDNA.41483.1.S1_x_at | MmugDNA.41483.1 | 5.99  | 6.86  | 0.37 | 0.13 | -1.83 | 0.022039 | 0.09536  | 0.28446  | 0.35239  |

|                         |                 |       |       |      |      |       |          |          |          |          |
|-------------------------|-----------------|-------|-------|------|------|-------|----------|----------|----------|----------|
| MmugDNA.41484.1.S1_at   | MmugDNA.41484.1 | 10.5  | 10.79 | 0.43 | 0.76 | -1.23 | 0.717516 | 0.688088 | 0.8759   | 0.817914 |
| MmugDNA.41485.1.S1_at   | MmugDNA.41485.1 | 7.02  | 7.01  | 0.14 | 0.24 | 1.01  | 0.675263 | 0.772885 | 0.854473 | 0.867946 |
| MmugDNA.41489.1.S1_at   | MmugDNA.41489.1 | 7.33  | 6.95  | 0.13 | 0.39 | 1.3   | 0.15066  | 0.00106  | 0.515411 | 0.05171  |
| MmugDNA.4149.1.S1_at    | MmugDNA.4149.1  | 5.48  | 5.65  | 0.12 | 0.07 | -1.12 | 0.16168  | 0.460207 | 0.526573 | 0.672105 |
| MmugDNA.41490.1.S1_at   | MmugDNA.41490.1 | 4.93  | 5.24  | 0.19 | 0.21 | -1.24 | 0.300733 | 0.489647 | 0.635955 | 0.691862 |
| MmugDNA.41492.1.S1_at   | MmugDNA.41492.1 | 3.82  | 3.99  | 0.15 | 0.17 | -1.12 | 0.89042  | 0.343599 | 0.956183 | 0.589322 |
| MmugDNA.41493.1.S1_at   | MmugDNA.41493.1 | 7.36  | 7.03  | 0.29 | 0.33 | 1.26  | 0.317561 | 0.192157 | 0.647954 | 0.467632 |
| MmugDNA.41494.1.S1_at   | MmugDNA.41494.1 | 5.62  | 5.85  | 0.83 | 0.03 | -1.18 | 0.664998 | 0.884961 | 0.849774 | 0.934455 |
| MmugDNA.41495.1.S1_at   | MmugDNA.41495.1 | 6.26  | 5.74  | 0.18 | 0.48 | 1.44  | 0.10081  | 0.184894 | 0.461009 | 0.460776 |
| MmugDNA.41496.1.S1_at   | MmugDNA.41496.1 | 3.04  | 2.94  | 0.07 | 0.04 | 1.07  | 0.204924 | 0.865061 | 0.567457 | 0.923476 |
| MmugDNA.41497.1.S1_at   | MmugDNA.41497.1 | 6.56  | 6.47  | 0.16 | 0.08 | 1.07  | 0.976813 | 0.992701 | 0.991117 | 0.995715 |
| MmugDNA.41499.1.S1_at   | MmugDNA.41499.1 | 10.21 | 10.27 | 0.1  | 0.28 | -1.04 | 0.505156 | 0.706226 | 0.761548 | 0.829634 |
| MmugDNA.415.1.S1_at     | MmugDNA.415.1   | 5.34  | 4.66  | 0.56 | 0.29 | 1.61  | 0.189953 | 0.218732 | 0.55279  | 0.492438 |
| MmugDNA.4150.1.S1_at    | MmugDNA.4150.1  | 7.6   | 6.21  | 0.27 | 0.73 | 2.62  | 0.036183 | 0.089231 | 0.339036 | 0.34333  |
| MmugDNA.41500.1.S1_at   | MmugDNA.41500.1 | 3.81  | 3.67  | 0.22 | 0.05 | 1.1   | 0.090607 | 0.064647 | 0.446117 | 0.300314 |
| MmugDNA.41501.1.S1_at   | MmugDNA.41501.1 | 7.45  | 8.3   | 0.3  | 0.25 | -1.81 | 0.0355   | 0.028525 | 0.336631 | 0.210754 |
| MmugDNA.41503.1.S1_at   | MmugDNA.41503.1 | 5.72  | 5.67  | 0.63 | 0.21 | 1.03  | 0.495244 | 0.13669  | 0.757116 | 0.409226 |
| MmugDNA.41504.1.S1_at   | MmugDNA.41504.1 | 12.17 | 12.32 | 0.17 | 0.17 | -1.11 | 0.891312 | 0.928073 | 0.956658 | 0.959154 |
| MmugDNA.41505.1.S1_at   | MmugDNA.41505.1 | 4.89  | 4.92  | 0.37 | 0.32 | -1.03 | 0.480883 | 0.307206 | 0.748782 | 0.563499 |
| MmugDNA.41508.1.S1_at   | MmugDNA.41508.1 | 3.52  | 3.33  | 0.14 | 0.08 | 1.14  | 0.198585 | 0.089718 | 0.56166  | 0.34398  |
| MmugDNA.4151.1.S1_at    | MmugDNA.4151.1  | 4.76  | 4.75  | 0.02 | 0.1  | 1     | 0.372909 | 0.527967 | 0.683108 | 0.716382 |
| MmugDNA.41511.1.S1_at   | MmugDNA.41511.1 | 3.17  | 3     | 0.03 | 0.23 | 1.12  | 0.789048 | 0.717082 | 0.912379 | 0.836224 |
| MmugDNA.41512.1.S1_at   | MmugDNA.41512.1 | 8.3   | 8.12  | 0.03 | 0.17 | 1.13  | 0.04689  | 0.000711 | 0.364195 | 0.044419 |
| MmugDNA.41513.1.S1_at   | MmugDNA.41513.1 | 5.93  | 6.15  | 0.07 | 0.17 | -1.17 | 0.132238 | 0.065238 | 0.498475 | 0.301239 |
| MmugDNA.41360.1.S1_s_at | MmugDNA.41360.1 | 9.81  | 9     | 0.05 | 0.23 | 1.76  | 0.003751 | 0.003955 | 0.179914 | 0.089462 |
| MmugDNA.41516.1.S1_at   | MmugDNA.41516.1 | 3.59  | 3.44  | 0.23 | 0.38 | 1.11  | 0.788052 | 0.913887 | 0.911806 | 0.951561 |
| MmugDNA.41517.1.S1_at   | MmugDNA.41517.1 | 3.63  | 3.47  | 0.06 | 0.29 | 1.12  | 0.400852 | 0.354449 | 0.700437 | 0.597225 |
| MmugDNA.41519.1.S1_at   | MmugDNA.41519.1 | 4.31  | 4.43  | 0.04 | 0.06 | -1.09 | 0.020376 | 0.006189 | 0.277761 | 0.106774 |
| MmugDNA.41520.1.S1_at   | MmugDNA.41520.1 | 5.75  | 6.07  | 0.55 | 1.33 | -1.25 | 0.264249 | 0.19312  | 0.610049 | 0.468554 |
| MmugDNA.41521.1.S1_at   | MmugDNA.41521.1 | 4.75  | 4.51  | 0.45 | 0.03 | 1.18  | 0.124806 | 0.135787 | 0.49077  | 0.407979 |
| MmugDNA.41523.1.S1_at   | MmugDNA.41523.1 | 5.84  | 5.43  | 0.82 | 0.17 | 1.32  | 0.211386 | 0.272663 | 0.572162 | 0.537433 |
| MmugDNA.41524.1.S1_at   | MmugDNA.41524.1 | 4.85  | 4.89  | 0.27 | 0.05 | -1.03 | 0.286098 | 0.428215 | 0.625392 | 0.649721 |
| MmugDNA.41525.1.S1_at   | MmugDNA.41525.1 | 6.8   | 6.62  | 0.62 | 0.85 | 1.13  | 0.82822  | 0.190008 | 0.930243 | 0.465619 |
| MmugDNA.41526.1.S1_at   | MmugDNA.41526.1 | 6.64  | 6.15  | 1.42 | 1.47 | 1.4   | 0.379955 | 0.152252 | 0.68708  | 0.427045 |
| MmugDNA.41527.1.S1_at   | MmugDNA.41527.1 | 5.35  | 6.22  | 1.04 | 0.17 | -1.83 | 0.258084 | 0.329077 | 0.605415 | 0.578482 |
| MmugDNA.41528.1.S1_at   | MmugDNA.41528.1 | 4.56  | 4.58  | 0.55 | 0.43 | -1.02 | 0.921951 | 0.987526 | 0.969683 | 0.993022 |
| MmugDNA.41529.1.S1_at   | MmugDNA.41529.1 | 4.2   | 4.21  | 0.44 | 0.5  | -1.01 | 0.890231 | 0.795857 | 0.956099 | 0.882403 |
| MmugDNA.4153.1.S1_at    | MmugDNA.4153.1  | 4.4   | 4.68  | 0.34 | 0.45 | -1.22 | 0.865446 | 0.485171 | 0.946047 | 0.688969 |
| MmugDNA.41530.1.S1_at   | MmugDNA.41530.1 | 10.46 | 10.8  | 0.69 | 0.79 | -1.27 | 0.609329 | 0.553598 | 0.82044  | 0.73273  |
| MmugDNA.41531.1.S1_at   | MmugDNA.41531.1 | 9.49  | 8.86  | 0.61 | 1.2  | 1.55  | 0.359852 | 0.329958 | 0.674022 | 0.578874 |
| MmugDNA.41533.1.S1_at   | MmugDNA.41533.1 | 6.53  | 6.37  | 0.21 | 0.37 | 1.12  | 0.800612 | 0.947864 | 0.917761 | 0.970378 |



|                         |                 |       |       |      |      |       |          |          |          |          |
|-------------------------|-----------------|-------|-------|------|------|-------|----------|----------|----------|----------|
| MmugDNA.41534.1.S1_at   | MmugDNA.41534.1 | 5.61  | 5.45  | 0.19 | 0.07 | 1.12  | 0.310625 | 0.489515 | 0.642603 | 0.691824 |
| MmugDNA.41535.1.S1_at   | MmugDNA.41535.1 | 6.52  | 6.68  | 0.26 | 0.15 | -1.12 | 0.960498 | 0.934218 | 0.9849   | 0.962662 |
| MmugDNA.41536.1.S1_at   | MmugDNA.41536.1 | 4.93  | 4.48  | 0.28 | 0.33 | 1.36  | 0.201354 | 0.197607 | 0.563974 | 0.472564 |
| MmugDNA.41537.1.S1_at   | MmugDNA.41537.1 | 6.56  | 6.81  | 0.22 | 0.42 | -1.19 | 0.846774 | 0.316505 | 0.938469 | 0.569913 |
| MmugDNA.41538.1.S1_at   | MmugDNA.41538.1 | 6.51  | 6.2   | 0.28 | 0.34 | 1.24  | 0.257946 | 0.396576 | 0.605348 | 0.628409 |
| MmugDNA.41539.1.S1_at   | MmugDNA.41539.1 | 7.06  | 7.58  | 0.26 | 0.52 | -1.44 | 0.208754 | 0.149902 | 0.570418 | 0.424522 |
| MmugDNA.41541.1.S1_at   | MmugDNA.41541.1 | 5.85  | 5.55  | 0.12 | 0.25 | 1.23  | 0.103371 | 0.09008  | 0.462888 | 0.344402 |
| MmugDNA.41542.1.S1_at   | MmugDNA.41542.1 | 5.23  | 5.24  | 0.06 | 0.17 | -1.01 | 0.509472 | 0.156739 | 0.764368 | 0.432216 |
| MmugDNA.41543.1.S1_at   | MmugDNA.41543.1 | 3.75  | 3.74  | 0.49 | 0.15 | 1.01  | 0.396266 | 0.335684 | 0.69693  | 0.583441 |
| MmugDNA.13982.1.S1_s_at | MmugDNA.13982.1 | 10.78 | 10.34 | 0.18 | 0.25 | 1.36  | 0.095616 | 0.065199 | 0.453501 | 0.301239 |
| MmugDNA.41545.1.S1_at   | MmugDNA.41545.1 | 8.86  | 7.75  | 1.41 | 0.94 | 2.15  | 0.291314 | 0.362592 | 0.628798 | 0.603141 |
| MmugDNA.41549.1.S1_at   | MmugDNA.41549.1 | 4.02  | 4.13  | 0.15 | 0.16 | -1.07 | 0.462485 | 0.749617 | 0.738248 | 0.854505 |
| MmugDNA.4155.1.S1_at    | MmugDNA.4155.1  | 4.16  | 4.05  | 0.23 | 0.64 | 1.08  | 0.945658 | 0.983281 | 0.979241 | 0.990726 |
| MmugDNA.41550.1.S1_at   | MmugDNA.41550.1 | 7.61  | 7.39  | 0.28 | 0.64 | 1.17  | 0.663998 | 0.771958 | 0.849245 | 0.867436 |
| MmugDNA.41551.1.S1_at   | MmugDNA.41551.1 | 8.09  | 8.18  | 0.16 | 0.08 | -1.06 | 0.981948 | 0.32143  | 0.993449 | 0.573207 |
| MmugDNA.41552.1.S1_at   | MmugDNA.41552.1 | 5.28  | 5.34  | 0.18 | 0.07 | -1.04 | 0.403366 | 0.425409 | 0.701956 | 0.647807 |
| MmugDNA.41553.1.S1_at   | MmugDNA.41553.1 | 6.11  | 6.05  | 0.09 | 0.08 | 1.04  | 0.616205 | 0.73308  | 0.824075 | 0.845503 |
| MmugDNA.41555.1.S1_at   | MmugDNA.41555.1 | 10.29 | 9.54  | 0.27 | 0.76 | 1.68  | 0.20402  | 0.130784 | 0.566526 | 0.402959 |
| MmugDNA.41556.1.S1_at   | MmugDNA.41556.1 | 5.28  | 5.66  | 0.23 | 0.18 | -1.3  | 0.190357 | 0.161054 | 0.553031 | 0.437227 |
| MmugDNA.41557.1.S1_at   | MmugDNA.41557.1 | 3.32  | 3.22  | 0.11 | 0.22 | 1.07  | 0.86238  | 0.544873 | 0.944681 | 0.727183 |
| MmugDNA.22773.1.S1_s_at | MmugDNA.22773.1 | 5.8   | 5.87  | 0.05 | 0.06 | -1.05 | 0.186061 | 0.23323  | 0.549597 | 0.504591 |
| MmugDNA.41558.1.S1_at   | MmugDNA.41558.1 | 3.26  | 3.28  | 0.16 | 0.15 | -1.01 | 0.617899 | 0.423607 | 0.824923 | 0.646459 |
| MmugDNA.41558.1.S1_s_at | MmugDNA.41558.1 | 11.12 | 10.67 | 0.12 | 0.56 | 1.37  | 0.112814 | 0.051916 | 0.475249 | 0.273306 |
| MmugDNA.41560.1.S1_at   | MmugDNA.41560.1 | 8.34  | 8.31  | 0.06 | 0.34 | 1.02  | 0.879293 | 0.591442 | 0.951526 | 0.756977 |
| MmugDNA.41561.1.S1_at   | MmugDNA.41561.1 | 7.28  | 7.5   | 0.55 | 0.18 | -1.17 | 0.807784 | 0.208414 | 0.921426 | 0.482316 |
| MmugDNA.41563.1.S1_at   | MmugDNA.41563.1 | 3.97  | 4.03  | 0.1  | 0.07 | -1.04 | 0.762682 | 0.730952 | 0.900005 | 0.844168 |
| MmugDNA.41564.1.S1_at   | MmugDNA.41564.1 | 3.58  | 3.61  | 0.05 | 0.23 | -1.02 | 0.57363  | 0.822055 | 0.801314 | 0.89765  |
| MmugDNA.41565.1.S1_at   | MmugDNA.41565.1 | 13.25 | 12.93 | 0.07 | 0.09 | 1.25  | 0.008161 | 0.003002 | 0.216841 | 0.079958 |
| MmugDNA.41566.1.S1_at   | MmugDNA.41566.1 | 11.78 | 11.56 | 0.08 | 0.17 | 1.16  | 0.239359 | 0.268534 | 0.592443 | 0.534123 |
| MmugDNA.41567.1.S1_at   | MmugDNA.41567.1 | 3.26  | 2.98  | 0.13 | 0.11 | 1.22  | 0.028691 | 0.20584  | 0.312031 | 0.480094 |
| MmugDNA.41569.1.S1_at   | MmugDNA.41569.1 | 12.7  | 12.83 | 0.14 | 0.06 | -1.1  | 0.781398 | 0.774501 | 0.908775 | 0.868769 |
| MmugDNA.41569.1.S1_s_at | MmugDNA.41569.1 | 12.86 | 12.91 | 0.04 | 0.09 | -1.04 | 0.767638 | 0.475895 | 0.902446 | 0.682387 |
| MmugDNA.41571.1.S1_s_at | MmugDNA.41571.1 | 11.02 | 10.83 | 0.16 | 0.46 | 1.14  | 0.8517   | 0.482229 | 0.940352 | 0.687128 |
| MmugDNA.41573.1.S1_at   | MmugDNA.41573.1 | 3.72  | 3.86  | 0.01 | 0.11 | -1.1  | 0.050909 | 0.04029  | 0.37568  | 0.245902 |
| MmugDNA.41574.1.S1_at   | MmugDNA.41574.1 | 8.43  | 7.86  | 0.34 | 0.09 | 1.49  | 0.177083 | 0.014099 | 0.541073 | 0.15195  |
| MmugDNA.41575.1.S1_at   | MmugDNA.41575.1 | 3.87  | 3.86  | 0.13 | 0.1  | 1.01  | 0.209568 | 0.30998  | 0.570957 | 0.565227 |
| MmugDNA.41577.1.S1_at   | MmugDNA.41577.1 | 7.99  | 6.59  | 0.4  | 0.58 | 2.65  | 0.033223 | 0.011694 | 0.327577 | 0.140155 |
| MmugDNA.41578.1.S1_at   | MmugDNA.41578.1 | 6.24  | 6.45  | 0.32 | 0.18 | -1.16 | 0.547734 | 0.466701 | 0.786269 | 0.676431 |
| MmugDNA.41580.1.S1_x_at | MmugDNA.41580.1 | 7.56  | 7.18  | 0.79 | 0.28 | 1.3   | 0.183859 | 0.197324 | 0.547947 | 0.472251 |
| MmugDNA.41583.1.S1_at   | MmugDNA.41583.1 | 3.88  | 3.8   | 0.13 | 0.04 | 1.06  | 0.261739 | 0.028056 | 0.608373 | 0.20903  |
| MmugDNA.41584.1.S1_at   | MmugDNA.41584.1 | 7.02  | 6.99  | 0.12 | 0.13 | 1.02  | 0.400976 | 0.569079 | 0.700493 | 0.742239 |

|                         |                 |       |       |      |      |       |          |          |          |          |
|-------------------------|-----------------|-------|-------|------|------|-------|----------|----------|----------|----------|
| MmugDNA.41585.1.S1_at   | MmugDNA.41585.1 | 5.05  | 5.83  | 0.1  | 0.6  | -1.71 | 0.070412 | 0.097842 | 0.414212 | 0.355639 |
| MmugDNA.41586.1.S1_at   | MmugDNA.41586.1 | 3.57  | 3.52  | 0    | 0.21 | 1.03  | 0.743496 | 0.745194 | 0.890194 | 0.852293 |
| MmugDNA.41587.1.S1_at   | MmugDNA.41587.1 | 5.99  | 5.88  | 0.06 | 0.29 | 1.08  | 0.749721 | 0.505694 | 0.892759 | 0.702218 |
| MmugDNA.41589.1.S1_at   | MmugDNA.41589.1 | 6.14  | 6.04  | 0.17 | 0.11 | 1.07  | 0.956126 | 0.389018 | 0.983483 | 0.623288 |
| MmugDNA.4159.1.S1_at    | MmugDNA.4159.1  | 4.7   | 5.02  | 0.04 | 0.25 | -1.25 | 0.087698 | 0.073809 | 0.442017 | 0.317146 |
| MmugDNA.41590.1.S1_at   | MmugDNA.41590.1 | 3.01  | 2.76  | 0.08 | 0.08 | 1.19  | 0.021532 | 0.067185 | 0.282526 | 0.305204 |
| MmugDNA.41591.1.S1_at   | MmugDNA.41591.1 | 3.45  | 3.26  | 0.12 | 0.08 | 1.14  | 0.261298 | 0.131218 | 0.60791  | 0.403252 |
| MmugDNA.41592.1.S1_at   | MmugDNA.41592.1 | 11.58 | 11.33 | 0.33 | 0.32 | 1.19  | 0.67193  | 0.621148 | 0.852716 | 0.775813 |
| MmugDNA.41593.1.S1_at   | MmugDNA.41593.1 | 3.87  | 3.95  | 0.55 | 0.08 | -1.06 | 0.604232 | 0.624828 | 0.817597 | 0.778924 |
| MmugDNA.41596.1.S1_at   | MmugDNA.41596.1 | 6.44  | 6.52  | 0.62 | 0.2  | -1.06 | 0.866472 | 0.124924 | 0.946758 | 0.395313 |
| MmugDNA.41597.1.S1_at   | MmugDNA.41597.1 | 4.55  | 4.37  | 0.36 | 0.26 | 1.13  | 0.860951 | 0.642586 | 0.943906 | 0.790343 |
| MmugDNA.41598.1.S1_at   | MmugDNA.41598.1 | 5.2   | 5.43  | 0.17 | 0.13 | -1.17 | 0.233869 | 0.138965 | 0.588317 | 0.412048 |
| MmugDNA.41599.1.S1_at   | MmugDNA.41599.1 | 7.32  | 7.41  | 0.2  | 0.12 | -1.07 | 0.244382 | 0.317566 | 0.596151 | 0.570774 |
| MmugDNA.4160.1.S1_at    | MmugDNA.4160.1  | 11.67 | 11.65 | 0.03 | 0.42 | 1.01  | 0.470628 | 0.650872 | 0.742524 | 0.795849 |
| MmugDNA.41600.1.S1_at   | MmugDNA.41600.1 | 5.13  | 5.1   | 0.41 | 0.14 | 1.03  | 0.485096 | 0.388563 | 0.750742 | 0.622897 |
| MmugDNA.41602.1.S1_at   | MmugDNA.41602.1 | 4.61  | 4.65  | 0.03 | 0.08 | -1.02 | 0.770511 | 0.512192 | 0.90333  | 0.706087 |
| MmugDNA.41603.1.S1_at   | MmugDNA.41603.1 | 8.34  | 8.02  | 0.22 | 1.33 | 1.25  | 0.706311 | 0.861568 | 0.870604 | 0.921322 |
| MmugDNA.41604.1.S1_at   | MmugDNA.41604.1 | 5.55  | 5.28  | 0.15 | 0.11 | 1.2   | 0.159789 | 0.133695 | 0.52471  | 0.405647 |
| MmugDNA.41605.1.S1_at   | MmugDNA.41605.1 | 3.48  | 3.55  | 0.32 | 0.04 | -1.06 | 0.790356 | 0.855204 | 0.913012 | 0.917457 |
| MmugDNA.41605.1.S1_s_at | MmugDNA.41605.1 | 10.07 | 10.27 | 0.11 | 0.23 | -1.14 | 0.409339 | 0.187849 | 0.705878 | 0.46394  |
| MmugDNA.41607.1.S1_at   | MmugDNA.41607.1 | 10.44 | 10.38 | 0.06 | 0.36 | 1.05  | 0.952079 | 0.936564 | 0.982156 | 0.964214 |
| MmugDNA.41608.1.S1_at   | MmugDNA.41608.1 | 6.36  | 7.15  | 0.36 | 1.17 | -1.72 | 0.890682 | 0.31135  | 0.956292 | 0.566418 |
| MmugDNA.41609.1.S1_at   | MmugDNA.41609.1 | 11.73 | 11.29 | 0.17 | 0.13 | 1.36  | 0.027543 | 0.01758  | 0.308386 | 0.167721 |
| MmugDNA.4161.1.S1_at    | MmugDNA.4161.1  | 5.44  | 5.68  | 0.1  | 0.16 | -1.18 | 0.07113  | 0.04569  | 0.414673 | 0.258049 |
| MmugDNA.41610.1.S1_at   | MmugDNA.41610.1 | 4.75  | 4.82  | 0.03 | 0.07 | -1.04 | 0.948457 | 0.99308  | 0.98022  | 0.995925 |
| MmugDNA.41611.1.S1_at   | MmugDNA.41611.1 | 3.13  | 3.11  | 0.15 | 0.09 | 1.01  | 0.396998 | 0.537848 | 0.697462 | 0.722758 |
| MmugDNA.41612.1.S1_at   | MmugDNA.41612.1 | 6.92  | 6.47  | 0.5  | 0.7  | 1.37  | 0.405115 | 0.091611 | 0.703082 | 0.346715 |
| MmugDNA.41613.1.S1_at   | MmugDNA.41613.1 | 3.01  | 2.84  | 0.23 | 0.01 | 1.13  | 0.256713 | 0.510508 | 0.604414 | 0.704979 |
| MmugDNA.41614.1.S1_at   | MmugDNA.41614.1 | 7.15  | 5.86  | 0.17 | 0.65 | 2.44  | 0.039055 | 0.025007 | 0.346242 | 0.198121 |
| MmugDNA.41615.1.S1_at   | MmugDNA.41615.1 | 5.03  | 5.11  | 0.14 | 0.18 | -1.06 | 0.456974 | 0.169929 | 0.734619 | 0.446574 |
| MmugDNA.41616.1.S1_at   | MmugDNA.41616.1 | 4.88  | 4.96  | 0.13 | 0.27 | -1.06 | 0.149202 | 0.18571  | 0.514001 | 0.46163  |
| MmugDNA.41617.1.S1_at   | MmugDNA.41617.1 | 3.91  | 3.89  | 0.13 | 0.11 | 1.01  | 0.763002 | 0.178488 | 0.900081 | 0.454778 |
| MmugDNA.41618.1.S1_at   | MmugDNA.41618.1 | 3.52  | 3.46  | 0.22 | 0.13 | 1.04  | 0.54125  | 0.500412 | 0.78255  | 0.699036 |
| MmugDNA.41619.1.S1_at   | MmugDNA.41619.1 | 3.76  | 3.69  | 0.06 | 0.05 | 1.05  | 0.331322 | 0.109789 | 0.656268 | 0.373751 |
| MmugDNA.41620.1.S1_at   | MmugDNA.41620.1 | 6.66  | 6.34  | 0.94 | 0.24 | 1.25  | 0.65713  | 0.227246 | 0.84573  | 0.499574 |
| MmugDNA.41621.1.S1_at   | MmugDNA.41621.1 | 6.45  | 5.32  | 0.24 | 0.06 | 2.2   | 0.001683 | 0.00062  | 0.15365  | 0.042444 |
| MmugDNA.41622.1.S1_at   | MmugDNA.41622.1 | 3.1   | 3.13  | 0.1  | 0.28 | -1.02 | 0.929311 | 0.971464 | 0.972689 | 0.984481 |
| MmugDNA.41623.1.S1_at   | MmugDNA.41623.1 | 10.85 | 9.61  | 0.63 | 0.35 | 2.36  | 0.079095 | 0.087608 | 0.428688 | 0.340846 |
| MmugDNA.41624.1.S1_at   | MmugDNA.41624.1 | 7.76  | 7.84  | 0.24 | 0.36 | -1.05 | 0.413733 | 0.417751 | 0.708634 | 0.642391 |
| MmugDNA.41627.1.S1_at   | MmugDNA.41627.1 | 6.56  | 6.33  | 0.3  | 0.02 | 1.17  | 0.093063 | 0.167562 | 0.450362 | 0.443998 |
| MmugDNA.41628.1.S1_at   | MmugDNA.41628.1 | 8     | 7.87  | 0.77 | 0.35 | 1.1   | 0.659952 | 0.751107 | 0.847428 | 0.855317 |

|                         |                 |       |      |      |      |       |          |          |          |          |
|-------------------------|-----------------|-------|------|------|------|-------|----------|----------|----------|----------|
| MmugDNA.41629.1.S1_at   | MmugDNA.41629.1 | 8.51  | 8.22 | 0.15 | 0.48 | 1.23  | 0.10182  | 0.102928 | 0.461313 | 0.363601 |
| MmugDNA.4163.1.S1_at    | MmugDNA.4163.1  | 7.61  | 8.05 | 0.16 | 0.26 | -1.36 | 0.044636 | 0.018814 | 0.358886 | 0.172431 |
| MmugDNA.41630.1.S1_at   | MmugDNA.41630.1 | 4.09  | 4.64 | 0.47 | 0.48 | -1.47 | 0.132911 | 0.211647 | 0.4991   | 0.485681 |
| MmugDNA.41631.1.S1_at   | MmugDNA.41631.1 | 4.48  | 3.56 | 0.04 | 0.76 | 1.89  | 0.322436 | 0.404007 | 0.651095 | 0.632558 |
| MmugDNA.41634.1.S1_at   | MmugDNA.41634.1 | 3.51  | 3.6  | 0    | 0.03 | -1.06 | 0.011042 | 0.007348 | 0.233671 | 0.115137 |
| MmugDNA.41635.1.S1_at   | MmugDNA.41635.1 | 6.13  | 6.13 | 0.08 | 0.05 | 1     | 0.981867 | 0.655093 | 0.993423 | 0.798291 |
| MmugDNA.41637.1.S1_at   | MmugDNA.41637.1 | 4.48  | 4.36 | 0.36 | 0.26 | 1.09  | 0.301265 | 0.503465 | 0.636303 | 0.700892 |
| MmugDNA.41638.1.S1_at   | MmugDNA.41638.1 | 4.84  | 4.82 | 0.43 | 0.31 | 1.02  | 0.215582 | 0.285958 | 0.575924 | 0.547505 |
| MmugDNA.41639.1.S1_at   | MmugDNA.41639.1 | 5.97  | 5.87 | 0.2  | 0.39 | 1.07  | 0.688486 | 0.852065 | 0.860974 | 0.915854 |
| MmugDNA.4164.1.S1_at    | MmugDNA.4164.1  | 8.02  | 8.03 | 0.72 | 0.39 | -1.01 | 0.661228 | 0.843699 | 0.848083 | 0.910955 |
| MmugDNA.4164.1.S1_s_at  | MmugDNA.4164.1  | 7.27  | 7.36 | 0.45 | 0.64 | -1.06 | 0.773723 | 0.628589 | 0.90499  | 0.781302 |
| MmugDNA.41642.1.S1_at   | MmugDNA.41642.1 | 9.41  | 9.29 | 0.21 | 0.6  | 1.09  | 0.720723 | 0.222895 | 0.877762 | 0.495791 |
| MmugDNA.41643.1.S1_at   | MmugDNA.41643.1 | 7.02  | 6.39 | 0.48 | 0.55 | 1.55  | 0.315084 | 0.209715 | 0.646342 | 0.483433 |
| MmugDNA.41644.1.S1_at   | MmugDNA.41644.1 | 9.99  | 8.77 | 0.07 | 0.69 | 2.32  | 0.072368 | 0.062763 | 0.416928 | 0.297193 |
| MmugDNA.19802.1.S1_at   | MmugDNA.19802.1 | 10.82 | 9.48 | 0.24 | 0.68 | 2.53  | 0.058458 | 0.068017 | 0.390399 | 0.307083 |
| MmugDNA.19802.1.S1_s_at | MmugDNA.19802.1 | 10.79 | 9.54 | 0.2  | 0.53 | 2.37  | 0.03173  | 0.024132 | 0.322685 | 0.1945   |
| MmugDNA.41645.1.S1_at   | MmugDNA.41645.1 | 5.1   | 5.1  | 0.04 | 0.31 | 1     | 0.73674  | 0.072419 | 0.886789 | 0.31528  |
| MmugDNA.41649.1.S1_at   | MmugDNA.41649.1 | 5.73  | 5.77 | 0.13 | 0.06 | -1.03 | 0.749055 | 0.328472 | 0.892627 | 0.57809  |
| MmugDNA.4165.1.S1_at    | MmugDNA.4165.1  | 6.65  | 6.84 | 0.39 | 0.74 | -1.14 | 0.667031 | 0.326506 | 0.850767 | 0.576576 |
| MmugDNA.41650.1.S1_at   | MmugDNA.41650.1 | 4.39  | 3.95 | 0.54 | 0.04 | 1.36  | 0.205956 | 0.244946 | 0.568403 | 0.514752 |
| MmugDNA.41651.1.S1_at   | MmugDNA.41651.1 | 5.03  | 5.04 | 0.2  | 0.07 | -1    | 0.787642 | 0.925442 | 0.911639 | 0.957811 |
| MmugDNA.41653.1.S1_at   | MmugDNA.41653.1 | 6.81  | 6.24 | 0.28 | 0.18 | 1.48  | 0.089779 | 0.02484  | 0.445334 | 0.19744  |
| MmugDNA.41654.1.S1_at   | MmugDNA.41654.1 | 5.2   | 5.11 | 0.3  | 0.17 | 1.07  | 0.666383 | 0.300532 | 0.850412 | 0.558852 |
| MmugDNA.41655.1.S1_at   | MmugDNA.41655.1 | 9.04  | 8.85 | 0.05 | 0.19 | 1.15  | 0.609859 | 0.727144 | 0.820716 | 0.842187 |
| MmugDNA.41656.1.S1_at   | MmugDNA.41656.1 | 6.85  | 7.47 | 0.46 | 0.12 | -1.54 | 0.034612 | 0.05211  | 0.333297 | 0.273866 |
| MmugDNA.41657.1.S1_at   | MmugDNA.41657.1 | 9.75  | 9.05 | 0.34 | 0.56 | 1.62  | 0.262119 | 0.340381 | 0.608828 | 0.586725 |
| MmugDNA.41658.1.S1_at   | MmugDNA.41658.1 | 9.91  | 9.86 | 0.11 | 0.73 | 1.04  | 0.821896 | 0.835543 | 0.927464 | 0.905864 |
| MmugDNA.41659.1.S1_at   | MmugDNA.41659.1 | 2.92  | 2.92 | 0.24 | 0.11 | 1     | 0.470863 | 0.347465 | 0.74274  | 0.592019 |
| MmugDNA.4166.1.S1_at    | MmugDNA.4166.1  | 7.33  | 7.21 | 0.48 | 0.72 | 1.09  | 0.671033 | 0.295686 | 0.852532 | 0.555113 |
| MmugDNA.41660.1.S1_at   | MmugDNA.41660.1 | 5.36  | 5.35 | 0.21 | 0.42 | 1.01  | 0.270469 | 0.354088 | 0.614788 | 0.597048 |
| MmugDNA.41662.1.S1_at   | MmugDNA.41662.1 | 3.05  | 3.11 | 0.04 | 0.14 | -1.04 | 0.649559 | 0.766307 | 0.842493 | 0.864212 |
| MmugDNA.41663.1.S1_at   | MmugDNA.41663.1 | 5.19  | 5.14 | 0.12 | 0.07 | 1.04  | 0.2382   | 0.303525 | 0.591555 | 0.561004 |
| MmugDNA.41664.1.S1_at   | MmugDNA.41664.1 | 6.96  | 6.49 | 0.17 | 0.29 | 1.39  | 0.055384 | 0.066149 | 0.383694 | 0.302699 |
| MmugDNA.41665.1.S1_at   | MmugDNA.41665.1 | 8.28  | 8.67 | 0.2  | 0.03 | -1.31 | 0.08595  | 0.083635 | 0.440024 | 0.334255 |
| MmugDNA.41666.1.S1_at   | MmugDNA.41666.1 | 5.02  | 5.58 | 0.05 | 0.25 | -1.48 | 0.042456 | 0.183649 | 0.355049 | 0.459681 |
| MmugDNA.41667.1.S1_at   | MmugDNA.41667.1 | 6.94  | 9.85 | 0.91 | 2.21 | -7.55 | 0.143612 | 0.165332 | 0.510312 | 0.441518 |
| MmugDNA.41668.1.S1_at   | MmugDNA.41668.1 | 3.8   | 3.74 | 0.29 | 0.14 | 1.05  | 0.735734 | 0.790103 | 0.886425 | 0.878677 |
| MmugDNA.41669.1.S1_at   | MmugDNA.41669.1 | 3.54  | 3.24 | 0.01 | 0.05 | 1.23  | 0.00076  | 0.000061 | 0.136818 | 0.025666 |
| MmugDNA.41670.1.S1_at   | MmugDNA.41670.1 | 7.43  | 7.23 | 0.32 | 0.46 | 1.15  | 0.301971 | 0.081231 | 0.6368   | 0.329351 |
| MmugDNA.41671.1.S1_at   | MmugDNA.41671.1 | 3.94  | 3.79 | 0.26 | 0.23 | 1.11  | 0.580812 | 0.711433 | 0.804812 | 0.832667 |
| MmugDNA.41673.1.S1_at   | MmugDNA.41673.1 | 4.51  | 4.56 | 0.22 | 0.11 | -1.04 | 0.502869 | 0.72857  | 0.760569 | 0.843093 |

|                         |                 |       |       |      |      |        |          |          |          |          |
|-------------------------|-----------------|-------|-------|------|------|--------|----------|----------|----------|----------|
| MmugDNA.41675.1.S1_at   | MmugDNA.41675.1 | 8.43  | 8.3   | 0.73 | 1.21 | 1.1    | 0.610584 | 0.56995  | 0.821106 | 0.742751 |
| MmugDNA.41676.1.S1_at   | MmugDNA.41676.1 | 3.13  | 3.39  | 0.13 | 0.14 | -1.2   | 0.153159 | 0.138847 | 0.517618 | 0.412022 |
| MmugDNA.41677.1.S1_at   | MmugDNA.41677.1 | 3.47  | 3.72  | 0.24 | 0.57 | -1.19  | 0.28218  | 0.509999 | 0.622598 | 0.704549 |
| MmugDNA.41678.1.S1_at   | MmugDNA.41678.1 | 5.74  | 5.84  | 0.72 | 0.12 | -1.08  | 0.804807 | 0.92302  | 0.919777 | 0.956698 |
| MmugDNA.41679.1.S1_at   | MmugDNA.41679.1 | 9.07  | 8.09  | 0.14 | 0.77 | 1.97   | 0.361423 | 0.48502  | 0.67519  | 0.688893 |
| MmugDNA.4168.1.S1_at    | MmugDNA.4168.1  | 5.68  | 5.08  | 0.56 | 0.2  | 1.52   | 0.297771 | 0.343039 | 0.63352  | 0.588868 |
| MmugDNA.4168.1.S1_s_at  | MmugDNA.4168.1  | 6.54  | 6.33  | 0.08 | 0.14 | 1.16   | 0.082019 | 0.162438 | 0.433268 | 0.438575 |
| MmugDNA.41680.1.S1_at   | MmugDNA.41680.1 | 6.54  | 6.36  | 0.76 | 0.65 | 1.13   | 0.724758 | 0.594565 | 0.879818 | 0.758623 |
| MmugDNA.41681.1.S1_at   | MmugDNA.41681.1 | 11.1  | 10.41 | 0.01 | 0.5  | 1.61   | 0.222556 | 0.190007 | 0.580951 | 0.465619 |
| MmugDNA.41682.1.S1_at   | MmugDNA.41682.1 | 5.15  | 5.13  | 0.11 | 0.21 | 1.01   | 0.345017 | 0.593672 | 0.66494  | 0.758391 |
| MmugDNA.41684.1.S1_at   | MmugDNA.41684.1 | 4.37  | 4.12  | 0.17 | 0.28 | 1.19   | 0.531383 | 0.806172 | 0.777191 | 0.88857  |
| MmugDNA.41686.1.S1_at   | MmugDNA.41686.1 | 9.8   | 9.54  | 0.5  | 0.41 | 1.2    | 0.701306 | 0.6748   | 0.868012 | 0.810039 |
| MmugDNA.41687.1.S1_at   | MmugDNA.41687.1 | 5.76  | 6.29  | 1.97 | 0.33 | -1.44  | 0.950388 | 0.916232 | 0.981318 | 0.953102 |
| MmugDNA.41688.1.S1_at   | MmugDNA.41688.1 | 8.97  | 8.48  | 0.2  | 0.39 | 1.4    | 0.153185 | 0.079725 | 0.517618 | 0.326982 |
| MmugDNA.41690.1.S1_at   | MmugDNA.41690.1 | 5.51  | 6.37  | 0.12 | 0.33 | -1.82  | 0.013376 | 0.004011 | 0.246471 | 0.089969 |
| MmugDNA.41692.1.S1_at   | MmugDNA.41692.1 | 6.05  | 5.04  | 0.08 | 0.4  | 2.01   | 0.021392 | 0.034539 | 0.282524 | 0.229979 |
| MmugDNA.41693.1.S1_at   | MmugDNA.41693.1 | 4.94  | 5.02  | 0.35 | 0.07 | -1.06  | 0.728903 | 0.884427 | 0.882277 | 0.934152 |
| MmugDNA.41694.1.S1_at   | MmugDNA.41694.1 | 11.06 | 10.41 | 0.61 | 0.44 | 1.57   | 0.081998 | 0.083881 | 0.433268 | 0.334771 |
| MmugDNA.41694.1.S1_s_at | MmugDNA.41694.1 | 13.72 | 13.69 | 0.12 | 0.12 | 1.02   | 0.809867 | 0.11936  | 0.922375 | 0.387887 |
| MmugDNA.41695.1.S1_at   | MmugDNA.41695.1 | 4     | 4.13  | 0.02 | 0.05 | -1.1   | 0.020189 | 0.02285  | 0.277239 | 0.189246 |
| MmugDNA.41696.1.S1_at   | MmugDNA.41696.1 | 4.73  | 4.58  | 0.12 | 0.16 | 1.11   | 0.314635 | 0.405989 | 0.646024 | 0.634136 |
| MmugDNA.41697.1.S1_at   | MmugDNA.41697.1 | 5.31  | 5.09  | 0.49 | 0.05 | 1.16   | 0.154358 | 0.1593   | 0.518928 | 0.43531  |
| MmugDNA.41698.1.S1_at   | MmugDNA.41698.1 | 6.19  | 8.79  | 1.07 | 1.77 | -6.06  | 0.21338  | 0.201143 | 0.573596 | 0.475534 |
| MmugDNA.41699.1.S1_at   | MmugDNA.41699.1 | 4.2   | 4.22  | 0.21 | 0.13 | -1.01  | 0.286715 | 0.423102 | 0.625572 | 0.646145 |
| MmugDNA.417.1.S1_at     | MmugDNA.417.1   | 5.87  | 6.66  | 0.29 | 0.34 | -1.72  | 0.171267 | 0.213042 | 0.535163 | 0.487005 |
| MmugDNA.4170.1.S1_at    | MmugDNA.4170.1  | 5.36  | 5.54  | 0.09 | 0.31 | -1.13  | 0.385266 | 0.530121 | 0.690421 | 0.717729 |
| MmugDNA.41700.1.S1_at   | MmugDNA.41700.1 | 8.37  | 8.01  | 0.35 | 0.81 | 1.28   | 0.75451  | 0.847788 | 0.895475 | 0.913522 |
| MmugDNA.41702.1.S1_at   | MmugDNA.41702.1 | 4.92  | 4.9   | 0.05 | 0.17 | 1.01   | 0.354518 | 0.58593  | 0.670587 | 0.753141 |
| MmugDNA.41703.1.S1_at   | MmugDNA.41703.1 | 11.36 | 11.33 | 0.36 | 1.17 | 1.02   | 0.325236 | 0.433434 | 0.652558 | 0.653681 |
| MmugDNA.41704.1.S1_at   | MmugDNA.41704.1 | 4.09  | 3.14  | 1.24 | 0.24 | 1.94   | 0.218017 | 0.203273 | 0.577569 | 0.477494 |
| MmugDNA.41705.1.S1_at   | MmugDNA.41705.1 | 5.4   | 5.72  | 0.07 | 0.2  | -1.25  | 0.056912 | 0.048589 | 0.387418 | 0.265572 |
| MmugDNA.41706.1.S1_at   | MmugDNA.41706.1 | 8.21  | 8.33  | 0.62 | 0.38 | -1.08  | 0.778588 | 0.659312 | 0.90756  | 0.800647 |
| MmugDNA.41707.1.S1_at   | MmugDNA.41707.1 | 4.9   | 4.88  | 0.07 | 0.14 | 1.02   | 0.38501  | 0.605351 | 0.690208 | 0.765119 |
| MmugDNA.41708.1.S1_at   | MmugDNA.41708.1 | 8.19  | 7.81  | 0.34 | 0.32 | 1.3    | 0.224223 | 0.213281 | 0.582619 | 0.487179 |
| MmugDNA.41709.1.S1_at   | MmugDNA.41709.1 | 4.3   | 4.54  | 0.15 | 0.68 | -1.18  | 0.376739 | 0.392781 | 0.68528  | 0.625846 |
| MmugDNA.4171.1.S1_at    | MmugDNA.4171.1  | 4.82  | 4.43  | 0.25 | 0.08 | 1.31   | 0.096415 | 0.116683 | 0.454966 | 0.383864 |
| MmugDNA.41711.1.S1_at   | MmugDNA.41711.1 | 6.06  | 9.55  | 0.38 | 0.45 | -11.23 | 0.000624 | 0.000539 | 0.136818 | 0.040469 |
| MmugDNA.41712.1.S1_at   | MmugDNA.41712.1 | 4.37  | 4.28  | 0.15 | 0.07 | 1.06   | 0.154699 | 0.183486 | 0.519298 | 0.459627 |
| MmugDNA.41713.1.S1_at   | MmugDNA.41713.1 | 10.55 | 9.92  | 1.19 | 0.53 | 1.55   | 0.925413 | 0.324743 | 0.971233 | 0.575287 |
| MmugDNA.41714.1.S1_at   | MmugDNA.41714.1 | 3.63  | 3.64  | 0.04 | 0.07 | -1.01  | 0.74115  | 0.184993 | 0.889101 | 0.460814 |
| MmugDNA.41714.1.S1_s_at | MmugDNA.41714.1 | 3.39  | 3.2   | 0.74 | 0.31 | 1.14   | 0.581888 | 0.865385 | 0.805507 | 0.923579 |

|                         |                 |       |       |      |      |       |          |          |          |          |
|-------------------------|-----------------|-------|-------|------|------|-------|----------|----------|----------|----------|
| MmugDNA.41715.1.S1_at   | MmugDNA.41715.1 | 8.63  | 8.84  | 0.33 | 0.85 | -1.15 | 0.619597 | 0.368467 | 0.825708 | 0.60798  |
| MmugDNA.41716.1.S1_at   | MmugDNA.41716.1 | 6.58  | 6.65  | 0.15 | 0.2  | -1.06 | 0.125929 | 0.131761 | 0.492035 | 0.403891 |
| MmugDNA.41718.1.S1_at   | MmugDNA.41718.1 | 8.25  | 7.13  | 0.34 | 0.93 | 2.18  | 0.371805 | 0.402769 | 0.682509 | 0.63156  |
| MmugDNA.41719.1.S1_at   | MmugDNA.41719.1 | 7.65  | 6.74  | 0.09 | 0.41 | 1.88  | 0.039338 | 0.029439 | 0.346971 | 0.213368 |
| MmugDNA.41720.1.S1_at   | MmugDNA.41720.1 | 6.56  | 5.7   | 0.21 | 1.03 | 1.82  | 0.580093 | 0.773932 | 0.804451 | 0.868568 |
| MmugDNA.41721.1.S1_at   | MmugDNA.41721.1 | 3.26  | 3.29  | 0.1  | 0.25 | -1.02 | 0.853004 | 0.965564 | 0.940695 | 0.980739 |
| MmugDNA.41722.1.S1_at   | MmugDNA.41722.1 | 3.24  | 3.04  | 0.36 | 0.24 | 1.15  | 0.283009 | 0.333918 | 0.623159 | 0.582056 |
| MmugDNA.41723.1.S1_at   | MmugDNA.41723.1 | 5.81  | 6.76  | 0.24 | 0.26 | -1.94 | 0.004228 | 0.001103 | 0.181739 | 0.052576 |
| MmugDNA.41724.1.S1_at   | MmugDNA.41724.1 | 3.82  | 3.7   | 0.13 | 0.14 | 1.08  | 0.173667 | 0.040446 | 0.537208 | 0.246223 |
| MmugDNA.41725.1.S1_at   | MmugDNA.41725.1 | 4.33  | 4.42  | 0.02 | 0.08 | -1.07 | 0.214972 | 0.002463 | 0.575476 | 0.073515 |
| MmugDNA.41727.1.S1_at   | MmugDNA.41727.1 | 3.93  | 4.01  | 0.21 | 0.08 | -1.06 | 0.463819 | 0.647741 | 0.738994 | 0.793723 |
| MmugDNA.41729.1.S1_at   | MmugDNA.41729.1 | 7.14  | 7.54  | 0.16 | 0.64 | -1.32 | 0.125223 | 0.119292 | 0.49131  | 0.387799 |
| MmugDNA.4173.1.S1_at    | MmugDNA.4173.1  | 6.57  | 6.22  | 1.19 | 0.15 | 1.27  | 0.448724 | 0.467253 | 0.729784 | 0.677016 |
| MmugDNA.41730.1.S1_at   | MmugDNA.41730.1 | 3.58  | 3.77  | 0.12 | 0.22 | -1.14 | 0.985838 | 0.486921 | 0.994853 | 0.690118 |
| MmugDNA.41733.1.S1_s_at | MmugDNA.41733.1 | 10.39 | 10.47 | 0.07 | 0.17 | -1.06 | 0.87994  | 0.133801 | 0.951737 | 0.405793 |
| MmugDNA.41735.1.S1_at   | MmugDNA.41735.1 | 5.25  | 4.85  | 0.35 | 0.11 | 1.32  | 0.137979 | 0.179491 | 0.505467 | 0.455951 |
| MmugDNA.41736.1.S1_at   | MmugDNA.41736.1 | 4.56  | 4.73  | 0.03 | 0.18 | -1.12 | 0.147305 | 0.224608 | 0.513097 | 0.497613 |
| MmugDNA.41737.1.S1_at   | MmugDNA.41737.1 | 3.75  | 3.15  | 0.57 | 0.06 | 1.52  | 0.120935 | 0.11752  | 0.48574  | 0.385295 |
| MmugDNA.41739.1.S1_at   | MmugDNA.41739.1 | 6.22  | 6.71  | 0.75 | 0.8  | -1.4  | 0.391947 | 0.48036  | 0.694373 | 0.68574  |
| MmugDNA.4174.1.S1_at    | MmugDNA.4174.1  | 7.74  | 7.63  | 0.3  | 1.69 | 1.08  | 0.835566 | 0.954171 | 0.9334   | 0.973959 |
| MmugDNA.41740.1.S1_at   | MmugDNA.41740.1 | 12.61 | 11.46 | 0.1  | 0.36 | 2.22  | 0.008035 | 0.003688 | 0.215189 | 0.086591 |
| MmugDNA.41742.1.S1_at   | MmugDNA.41742.1 | 6.12  | 6.27  | 0.15 | 0.15 | -1.11 | 0.242384 | 0.148361 | 0.594377 | 0.422945 |
| MmugDNA.41743.1.S1_at   | MmugDNA.41743.1 | 8.28  | 8.46  | 0.3  | 0.51 | -1.13 | 0.534642 | 0.579768 | 0.778804 | 0.749284 |
| MmugDNA.41744.1.S1_at   | MmugDNA.41744.1 | 12.12 | 12.47 | 0.05 | 0.23 | -1.27 | 0.099379 | 0.089619 | 0.459235 | 0.343811 |
| MmugDNA.41745.1.S1_at   | MmugDNA.41745.1 | 3.72  | 3.78  | 0.15 | 0.05 | -1.04 | 0.176333 | 0.101557 | 0.539927 | 0.361407 |
| MmugDNA.41746.1.S1_at   | MmugDNA.41746.1 | 5.96  | 6.3   | 0.14 | 0.12 | -1.27 | 0.043563 | 0.160161 | 0.356798 | 0.436296 |
| MmugDNA.41747.1.S1_at   | MmugDNA.41747.1 | 2.62  | 2.58  | 0.21 | 0.04 | 1.02  | 0.822117 | 0.535235 | 0.927568 | 0.720824 |
| MmugDNA.41748.1.S1_at   | MmugDNA.41748.1 | 5.93  | 5.87  | 0.17 | 0.12 | 1.04  | 0.933077 | 0.385159 | 0.973979 | 0.620662 |
| MmugDNA.41749.1.S1_at   | MmugDNA.41749.1 | 3.16  | 3.25  | 0.25 | 0.09 | -1.07 | 0.743655 | 0.907955 | 0.890194 | 0.947889 |
| MmugDNA.4175.1.S1_at    | MmugDNA.4175.1  | 5.37  | 5.54  | 0.03 | 0.22 | -1.13 | 0.636676 | 0.502261 | 0.835714 | 0.70006  |
| MmugDNA.41751.1.S1_at   | MmugDNA.41751.1 | 5.38  | 5.38  | 0.06 | 0.03 | 1     | 0.282901 | 0.406268 | 0.623131 | 0.634225 |
| MmugDNA.41753.1.S1_at   | MmugDNA.41753.1 | 3.67  | 3.65  | 0.04 | 0.14 | 1.01  | 0.471681 | 0.548085 | 0.743333 | 0.728874 |
| MmugDNA.41754.1.S1_at   | MmugDNA.41754.1 | 4.91  | 4.82  | 0.21 | 0.06 | 1.07  | 0.334493 | 0.642824 | 0.658444 | 0.790502 |
| MmugDNA.41755.1.S1_at   | MmugDNA.41755.1 | 6.48  | 5.94  | 0.42 | 0.09 | 1.45  | 0.118416 | 0.248869 | 0.482826 | 0.517951 |
| MmugDNA.41757.1.S1_at   | MmugDNA.41757.1 | 4.97  | 5.34  | 0.26 | 0.15 | -1.29 | 0.473223 | 0.429906 | 0.744128 | 0.651109 |
| MmugDNA.41758.1.S1_at   | MmugDNA.41758.1 | 3.3   | 3.31  | 0.05 | 0.08 | -1    | 0.319527 | 0.179444 | 0.649068 | 0.455929 |
| MmugDNA.41759.1.S1_at   | MmugDNA.41759.1 | 8.74  | 8.95  | 0.4  | 0.22 | -1.16 | 0.817467 | 0.404028 | 0.925944 | 0.632558 |
| MmugDNA.4176.1.S1_at    | MmugDNA.4176.1  | 5.42  | 5.58  | 0.3  | 0.05 | -1.12 | 0.566665 | 0.690823 | 0.797697 | 0.819889 |
| MmugDNA.41760.1.S1_at   | MmugDNA.41760.1 | 6.07  | 6.2   | 0.1  | 0.1  | -1.09 | 0.456752 | 0.360055 | 0.734529 | 0.601204 |
| MmugDNA.41761.1.S1_at   | MmugDNA.41761.1 | 3.8   | 3.83  | 0.14 | 0.12 | -1.02 | 0.885607 | 0.953881 | 0.954118 | 0.973725 |
| MmugDNA.41762.1.S1_at   | MmugDNA.41762.1 | 9.97  | 9.34  | 0.24 | 0.62 | 1.55  | 0.255417 | 0.251436 | 0.60322  | 0.520175 |

|                         |                 |       |       |      |      |       |          |          |          |          |
|-------------------------|-----------------|-------|-------|------|------|-------|----------|----------|----------|----------|
| MmugDNA.41763.1.S1_at   | MmugDNA.41763.1 | 6.94  | 7.1   | 0.28 | 0.35 | -1.12 | 0.770708 | 0.930855 | 0.903354 | 0.960732 |
| MmugDNA.41765.1.S1_at   | MmugDNA.41765.1 | 8.77  | 7.36  | 0.24 | 0.23 | 2.65  | 0.001738 | 0.000131 | 0.154452 | 0.029087 |
| MmugDNA.41766.1.S1_at   | MmugDNA.41766.1 | 5.79  | 5.94  | 0.11 | 0.18 | -1.11 | 0.128117 | 0.353944 | 0.494307 | 0.596907 |
| MmugDNA.41767.1.S1_at   | MmugDNA.41767.1 | 6.1   | 5.45  | 0.58 | 0.28 | 1.57  | 0.136219 | 0.194923 | 0.503091 | 0.470059 |
| MmugDNA.41769.1.S1_at   | MmugDNA.41769.1 | 2.85  | 2.85  | 0.21 | 0.01 | 1     | 0.603203 | 0.874617 | 0.817066 | 0.928837 |
| MmugDNA.4177.1.S1_at    | MmugDNA.4177.1  | 4.7   | 4.63  | 0.08 | 0.15 | 1.05  | 0.723808 | 0.76698  | 0.879238 | 0.864663 |
| MmugDNA.41770.1.S1_at   | MmugDNA.41770.1 | 5.76  | 5.9   | 0.14 | 0.05 | -1.11 | 0.299709 | 0.206929 | 0.63506  | 0.481052 |
| MmugDNA.41771.1.S1_at   | MmugDNA.41771.1 | 7.12  | 7.16  | 0.05 | 0.31 | -1.03 | 0.532532 | 0.423261 | 0.777757 | 0.646277 |
| MmugDNA.41772.1.S1_s_at | MmugDNA.41772.1 | 10.13 | 9.76  | 0.43 | 0.49 | 1.29  | 0.703287 | 0.884361 | 0.868993 | 0.9341   |
| MmugDNA.41775.1.S1_at   | MmugDNA.41775.1 | 8.29  | 8.78  | 0.45 | 0.65 | -1.4  | 0.180835 | 0.22275  | 0.545309 | 0.49569  |
| MmugDNA.41777.1.S1_at   | MmugDNA.41777.1 | 3.29  | 3.44  | 0.37 | 0.18 | -1.11 | 0.663314 | 0.856309 | 0.848955 | 0.917926 |
| MmugDNA.41778.1.S1_at   | MmugDNA.41778.1 | 6.24  | 6.18  | 0.13 | 0.01 | 1.04  | 0.472172 | 0.323805 | 0.74354  | 0.574609 |
| MmugDNA.41779.1.S1_at   | MmugDNA.41779.1 | 4.86  | 4.03  | 0.37 | 0.28 | 1.78  | 0.091227 | 0.202393 | 0.447111 | 0.476763 |
| MmugDNA.41779.1.S1_s_at | MmugDNA.41779.1 | 5.5   | 5.44  | 0.31 | 0.19 | 1.04  | 0.184642 | 0.064402 | 0.548221 | 0.300001 |
| MmugDNA.4178.1.S1_at    | MmugDNA.4178.1  | 3.46  | 3.49  | 0.13 | 0.32 | -1.03 | 0.979269 | 0.981761 | 0.992353 | 0.989984 |
| MmugDNA.41780.1.S1_at   | MmugDNA.41780.1 | 10.41 | 11.65 | 0.22 | 0.06 | -2.37 | 0.000674 | 0.000272 | 0.136818 | 0.033875 |
| MmugDNA.41781.1.S1_at   | MmugDNA.41781.1 | 3.97  | 4.13  | 0.55 | 0.2  | -1.11 | 0.96335  | 0.403089 | 0.985897 | 0.631893 |
| MmugDNA.41784.1.S1_at   | MmugDNA.41784.1 | 3.37  | 3.53  | 0.47 | 0.64 | -1.12 | 0.980833 | 0.930985 | 0.993062 | 0.960769 |
| MmugDNA.41785.1.S1_at   | MmugDNA.41785.1 | 5.07  | 5.3   | 0.2  | 0.28 | -1.18 | 0.567203 | 0.821644 | 0.798031 | 0.897303 |
| MmugDNA.41787.1.S1_at   | MmugDNA.41787.1 | 5.08  | 5.94  | 0.49 | 0.75 | -1.82 | 0.122532 | 0.126055 | 0.487739 | 0.39672  |
| MmugDNA.41788.1.S1_at   | MmugDNA.41788.1 | 4.57  | 4.17  | 0.05 | 0.04 | 1.32  | 0.000451 | 0.030535 | 0.133116 | 0.216711 |
| MmugDNA.41789.1.S1_at   | MmugDNA.41789.1 | 7.95  | 8.71  | 0.14 | 0.66 | -1.69 | 0.298834 | 0.034687 | 0.634349 | 0.230454 |
| MmugDNA.4179.1.S1_at    | MmugDNA.4179.1  | 3.42  | 3.4   | 0.25 | 0.04 | 1.02  | 0.728511 | 0.551127 | 0.881985 | 0.730813 |
| MmugDNA.41790.1.S1_at   | MmugDNA.41790.1 | 12.16 | 12.69 | 0.18 | 0.07 | -1.45 | 0.010696 | 0.005077 | 0.23109  | 0.099077 |
| MmugDNA.41793.1.S1_at   | MmugDNA.41793.1 | 4.48  | 4.64  | 0.44 | 0.52 | -1.12 | 0.422238 | 0.467621 | 0.71345  | 0.677203 |
| MmugDNA.41795.1.S1_at   | MmugDNA.41795.1 | 4.36  | 4.43  | 0.11 | 0.07 | -1.04 | 0.605338 | 0.386046 | 0.81824  | 0.621296 |
| MmugDNA.41796.1.S1_at   | MmugDNA.41796.1 | 5.14  | 5.17  | 0.35 | 0.21 | -1.02 | 0.849947 | 0.509223 | 0.939794 | 0.704032 |
| MmugDNA.41797.1.S1_at   | MmugDNA.41797.1 | 5.16  | 6.07  | 0.94 | 1.17 | -1.87 | 0.377663 | 0.486824 | 0.686017 | 0.690091 |
| MmugDNA.41798.1.S1_at   | MmugDNA.41798.1 | 5.84  | 5.44  | 0.22 | 0.27 | 1.32  | 0.580147 | 0.142857 | 0.804451 | 0.416786 |
| MmugDNA.4180.1.S1_at    | MmugDNA.4180.1  | 4.16  | 4.12  | 0.06 | 0.44 | 1.03  | 0.969229 | 0.854605 | 0.988281 | 0.917148 |
| MmugDNA.41800.1.S1_at   | MmugDNA.41800.1 | 3.93  | 3.39  | 0.28 | 0.34 | 1.45  | 0.21094  | 0.185572 | 0.571977 | 0.461566 |
| MmugDNA.41801.1.S1_at   | MmugDNA.41801.1 | 3.25  | 3.37  | 0.09 | 0.15 | -1.09 | 0.439693 | 0.57301  | 0.723752 | 0.74492  |
| MmugDNA.41802.1.S1_at   | MmugDNA.41802.1 | 11.26 | 11.26 | 0.06 | 0.22 | 1     | 0.383619 | 0.568882 | 0.689442 | 0.742129 |
| MmugDNA.41803.1.S1_at   | MmugDNA.41803.1 | 5.01  | 4.88  | 0.33 | 0.09 | 1.1   | 0.578972 | 0.770713 | 0.80407  | 0.866807 |
| MmugDNA.41804.1.S1_at   | MmugDNA.41804.1 | 7.78  | 7.75  | 0.34 | 0.2  | 1.02  | 0.646753 | 0.794303 | 0.841055 | 0.881364 |
| MmugDNA.41805.1.S1_at   | MmugDNA.41805.1 | 7.05  | 7.54  | 0.31 | 0.39 | -1.41 | 0.086286 | 0.074777 | 0.440224 | 0.318527 |
| MmugDNA.41806.1.S1_s_at | MmugDNA.41806.1 | 12.27 | 12.26 | 0.06 | 0.02 | 1.01  | 0.531737 | 0.148032 | 0.777404 | 0.422418 |
| MmugDNA.41807.1.S1_at   | MmugDNA.41807.1 | 12.94 | 13.06 | 0.05 | 0.14 | -1.09 | 0.213787 | 0.343944 | 0.573977 | 0.589617 |
| MmugDNA.41808.1.S1_at   | MmugDNA.41808.1 | 2.88  | 3.07  | 0.1  | 0.13 | -1.14 | 0.090725 | 0.131017 | 0.446279 | 0.403053 |
| MmugDNA.4181.1.S1_at    | MmugDNA.4181.1  | 7.9   | 7.12  | 0.37 | 0.35 | 1.71  | 0.07551  | 0.074304 | 0.422774 | 0.318046 |
| MmugDNA.41810.1.S1_at   | MmugDNA.41810.1 | 9.41  | 8.67  | 0.35 | 0.29 | 1.67  | 0.030901 | 0.020244 | 0.320207 | 0.178671 |

|                         |                 |       |       |      |      |       |          |          |          |          |
|-------------------------|-----------------|-------|-------|------|------|-------|----------|----------|----------|----------|
| MmugDNA.41813.1.S1_at   | MmugDNA.41813.1 | 10.34 | 9.89  | 0.11 | 0.26 | 1.36  | 0.046662 | 0.070831 | 0.363595 | 0.31231  |
| MmugDNA.41814.1.S1_at   | MmugDNA.41814.1 | 7.34  | 7.03  | 0.27 | 0.46 | 1.24  | 0.541932 | 0.289442 | 0.783022 | 0.55046  |
| MmugDNA.41815.1.S1_at   | MmugDNA.41815.1 | 4.1   | 3.87  | 0.22 | 0.14 | 1.17  | 0.50386  | 0.676862 | 0.761034 | 0.811188 |
| MmugDNA.41816.1.S1_at   | MmugDNA.41816.1 | 6.57  | 6.61  | 0.27 | 0.1  | -1.03 | 0.531174 | 0.263026 | 0.777112 | 0.529397 |
| MmugDNA.41817.1.S1_at   | MmugDNA.41817.1 | 7.15  | 8.26  | 0.44 | 0.09 | -2.16 | 0.022253 | 0.006134 | 0.285183 | 0.106665 |
| MmugDNA.4182.1.S1_at    | MmugDNA.4182.1  | 13.54 | 13.73 | 0    | 0.07 | -1.14 | 0.013771 | 0.023618 | 0.249758 | 0.19253  |
| MmugDNA.41820.1.S1_at   | MmugDNA.41820.1 | 6.17  | 6.34  | 0.07 | 0.06 | -1.12 | 0.050411 | 0.079005 | 0.374295 | 0.326018 |
| MmugDNA.41822.1.S1_at   | MmugDNA.41822.1 | 8.88  | 8.96  | 0.19 | 0.01 | -1.06 | 0.745648 | 0.091126 | 0.89118  | 0.345977 |
| MmugDNA.41824.1.S1_s_at | MmugDNA.41824.1 | 5.97  | 6.22  | 0.11 | 0.12 | -1.19 | 0.026622 | 0.018645 | 0.303736 | 0.171648 |
| MmugDNA.41825.1.S1_at   | MmugDNA.41825.1 | 6.33  | 6.43  | 0.04 | 0.23 | -1.07 | 0.137161 | 0.116512 | 0.504356 | 0.383671 |
| MmugDNA.41826.1.S1_at   | MmugDNA.41826.1 | 3.66  | 3.67  | 0.13 | 0.06 | -1.01 | 0.828184 | 0.864822 | 0.930243 | 0.923333 |
| MmugDNA.41827.1.S1_at   | MmugDNA.41827.1 | 8.53  | 8.53  | 0.18 | 0.3  | -1    | 0.266313 | 0.379947 | 0.611875 | 0.616659 |
| MmugDNA.41828.1.S1_at   | MmugDNA.41828.1 | 6.33  | 6.39  | 0.25 | 0.25 | -1.04 | 0.370988 | 0.517224 | 0.681748 | 0.709435 |
| MmugDNA.41829.1.S1_at   | MmugDNA.41829.1 | 12.71 | 12.64 | 0.03 | 0.11 | 1.05  | 0.334501 | 0.376477 | 0.658444 | 0.614293 |
| MmugDNA.41830.1.S1_at   | MmugDNA.41830.1 | 4.51  | 3.92  | 0.27 | 0.23 | 1.5   | 0.046694 | 0.101422 | 0.363705 | 0.361202 |
| MmugDNA.41831.1.S1_at   | MmugDNA.41831.1 | 6.32  | 6.45  | 0.25 | 0.42 | -1.09 | 0.867142 | 0.720879 | 0.946979 | 0.838368 |
| MmugDNA.41834.1.S1_at   | MmugDNA.41834.1 | 11.18 | 11.36 | 0.16 | 0.47 | -1.14 | 0.230436 | 0.329293 | 0.587222 | 0.57869  |
| MmugDNA.41836.1.S1_at   | MmugDNA.41836.1 | 8.71  | 7.34  | 0.28 | 0.5  | 2.58  | 0.011761 | 0.004952 | 0.237691 | 0.098015 |
| MmugDNA.41839.1.S1_at   | MmugDNA.41839.1 | 4.66  | 4.79  | 0.2  | 0.42 | -1.09 | 0.96068  | 0.623357 | 0.9849   | 0.777726 |
| MmugDNA.4184.1.S1_at    | MmugDNA.4184.1  | 11.75 | 11.54 | 0.11 | 0.2  | 1.16  | 0.490903 | 0.275601 | 0.754691 | 0.539837 |
| MmugDNA.41841.1.S1_at   | MmugDNA.41841.1 | 4.09  | 4.31  | 0.08 | 0.09 | -1.16 | 0.033758 | 0.025397 | 0.330119 | 0.199747 |
| MmugDNA.41845.1.S1_at   | MmugDNA.41845.1 | 11.98 | 12.13 | 0.06 | 0.25 | -1.11 | 0.460458 | 0.377683 | 0.736944 | 0.615086 |
| MmugDNA.41845.1.S1_s_at | MmugDNA.41845.1 | 12.2  | 12.38 | 0.04 | 0.23 | -1.13 | 0.427666 | 0.511309 | 0.716368 | 0.705495 |
| MmugDNA.41846.1.S1_at   | MmugDNA.41846.1 | 6.67  | 6.83  | 0.14 | 0.14 | -1.11 | 0.158003 | 0.081437 | 0.522944 | 0.329632 |
| MmugDNA.41847.1.S1_at   | MmugDNA.41847.1 | 5.37  | 5.49  | 0.15 | 0.12 | -1.08 | 0.130549 | 0.245866 | 0.496902 | 0.51552  |
| MmugDNA.41850.1.S1_at   | MmugDNA.41850.1 | 4.93  | 4.64  | 0.21 | 0.05 | 1.22  | 0.108203 | 0.027733 | 0.469248 | 0.207987 |
| MmugDNA.41851.1.S1_at   | MmugDNA.41851.1 | 3.91  | 3.89  | 0.04 | 0.18 | 1.01  | 0.879554 | 0.945075 | 0.951553 | 0.968834 |
| MmugDNA.41852.1.S1_at   | MmugDNA.41852.1 | 4.59  | 4.56  | 0.1  | 0.17 | 1.03  | 0.676754 | 0.524908 | 0.855219 | 0.714646 |
| MmugDNA.41853.1.S1_at   | MmugDNA.41853.1 | 4.21  | 4.15  | 0.05 | 0.07 | 1.05  | 0.336758 | 0.402868 | 0.659663 | 0.631631 |
| MmugDNA.41854.1.S1_at   | MmugDNA.41854.1 | 3.78  | 3.63  | 0.12 | 0.15 | 1.11  | 0.946891 | 0.085827 | 0.979482 | 0.337901 |
| MmugDNA.41854.1.S1_s_at | MmugDNA.41854.1 | 5.99  | 4.57  | 0.38 | 0.7  | 2.68  | 0.153019 | 0.080473 | 0.517464 | 0.328159 |
| MmugDNA.41855.1.S1_at   | MmugDNA.41855.1 | 9.64  | 10.92 | 0.34 | 0.63 | -2.42 | 0.035011 | 0.026234 | 0.334513 | 0.202965 |
| MmugDNA.41856.1.S1_at   | MmugDNA.41856.1 | 5.83  | 5.7   | 0.48 | 0.26 | 1.1   | 0.973699 | 0.93742  | 0.989649 | 0.964687 |
| MmugDNA.41857.1.S1_at   | MmugDNA.41857.1 | 6.65  | 6.88  | 0.17 | 0.3  | -1.17 | 0.276008 | 0.150264 | 0.618086 | 0.424877 |
| MmugDNA.41859.1.S1_at   | MmugDNA.41859.1 | 11.18 | 11.66 | 0.1  | 0.1  | -1.39 | 0.005579 | 0.003811 | 0.191807 | 0.08794  |
| MmugDNA.4186.1.S1_at    | MmugDNA.4186.1  | 9     | 8.65  | 0.23 | 0.21 | 1.28  | 0.075399 | 0.040021 | 0.422333 | 0.245241 |
| MmugDNA.41860.1.S1_at   | MmugDNA.41860.1 | 7.33  | 8.02  | 0.38 | 0.91 | -1.61 | 0.294629 | 0.38075  | 0.631382 | 0.617396 |
| MmugDNA.41861.1.S1_at   | MmugDNA.41861.1 | 5.22  | 5.25  | 0.28 | 0.09 | -1.02 | 0.622756 | 0.150273 | 0.827643 | 0.424877 |
| MmugDNA.41862.1.S1_at   | MmugDNA.41862.1 | 4.9   | 4.99  | 0.13 | 0.11 | -1.06 | 0.615094 | 0.131027 | 0.823342 | 0.403053 |
| MmugDNA.41864.1.S1_at   | MmugDNA.41864.1 | 3.45  | 3.46  | 0.32 | 0.01 | -1    | 0.366127 | 0.413778 | 0.678919 | 0.639771 |
| MmugDNA.41867.1.S1_at   | MmugDNA.41867.1 | 5.18  | 5.15  | 0.27 | 0.19 | 1.02  | 0.192453 | 0.221619 | 0.555663 | 0.494901 |

|                         |                 |       |       |      |      |       |          |          |          |          |
|-------------------------|-----------------|-------|-------|------|------|-------|----------|----------|----------|----------|
| MmugDNA.41869.1.S1_at   | MmugDNA.41869.1 | 5.65  | 6.36  | 0.36 | 0.15 | -1.63 | 0.086537 | 0.198615 | 0.440286 | 0.473391 |
| MmugDNA.4187.1.S1_at    | MmugDNA.4187.1  | 5.54  | 5.65  | 0.16 | 0.15 | -1.08 | 0.340128 | 0.36477  | 0.661621 | 0.605071 |
| MmugDNA.41871.1.S1_at   | MmugDNA.41871.1 | 3.51  | 3.41  | 0.13 | 0.08 | 1.07  | 0.23713  | 0.204285 | 0.590811 | 0.478541 |
| MmugDNA.41872.1.S1_at   | MmugDNA.41872.1 | 10.86 | 9.93  | 0.62 | 0.29 | 1.91  | 0.093343 | 0.070249 | 0.450557 | 0.311287 |
| MmugDNA.41873.1.S1_at   | MmugDNA.41873.1 | 5.18  | 4.44  | 0.39 | 0.28 | 1.66  | 0.02339  | 0.01422  | 0.291303 | 0.152283 |
| MmugDNA.41874.1.S1_at   | MmugDNA.41874.1 | 4.15  | 4.11  | 0.02 | 0.33 | 1.03  | 0.45136  | 0.48856  | 0.731557 | 0.691222 |
| MmugDNA.41875.1.S1_at   | MmugDNA.41875.1 | 8.77  | 10.25 | 0.2  | 0.24 | -2.79 | 0.002364 | 0.000671 | 0.162333 | 0.04413  |
| MmugDNA.41876.1.S1_at   | MmugDNA.41876.1 | 10.05 | 8.74  | 0.36 | 0.46 | 2.48  | 0.02478  | 0.019455 | 0.296399 | 0.175136 |
| MmugDNA.41877.1.S1_at   | MmugDNA.41877.1 | 3.63  | 3.75  | 0.11 | 0.03 | -1.08 | 0.16492  | 0.373394 | 0.528821 | 0.61221  |
| MmugDNA.41878.1.S1_at   | MmugDNA.41878.1 | 3.86  | 3.95  | 0.1  | 0.06 | -1.06 | 0.490329 | 0.60855  | 0.75438  | 0.767127 |
| MmugDNA.41879.1.S1_at   | MmugDNA.41879.1 | 12.74 | 12.75 | 0.01 | 0.07 | -1.01 | 0.423916 | 0.637608 | 0.714199 | 0.787067 |
| MmugDNA.41880.1.S1_at   | MmugDNA.41880.1 | 7.6   | 7.86  | 0.29 | 0.16 | -1.2  | 0.375743 | 0.191417 | 0.684803 | 0.466776 |
| MmugDNA.41881.1.S1_at   | MmugDNA.41881.1 | 4.49  | 4.75  | 0.35 | 0.19 | -1.2  | 0.782478 | 0.327031 | 0.909199 | 0.577033 |
| MmugDNA.41883.1.S1_at   | MmugDNA.41883.1 | 7.2   | 5.93  | 0.2  | 1.01 | 2.41  | 0.382733 | 0.27159  | 0.68893  | 0.536577 |
| MmugDNA.29591.1.S1_s_at | MmugDNA.29591.1 | 3.61  | 3.58  | 0.12 | 0.02 | 1.02  | 0.966714 | 0.744806 | 0.987429 | 0.852198 |
| MmugDNA.41885.1.S1_at   | MmugDNA.41885.1 | 5.57  | 5.54  | 0.27 | 0.11 | 1.02  | 0.874258 | 0.926509 | 0.949565 | 0.958312 |
| MmugDNA.41886.1.S1_at   | MmugDNA.41886.1 | 7     | 6.52  | 0.54 | 0.34 | 1.39  | 0.094154 | 0.077558 | 0.451714 | 0.323421 |
| MmugDNA.41888.1.S1_at   | MmugDNA.41888.1 | 4.1   | 5.17  | 0.37 | 0.61 | -2.09 | 0.062862 | 0.003721 | 0.399468 | 0.086946 |
| MmugDNA.41889.1.S1_at   | MmugDNA.41889.1 | 7.68  | 7.38  | 0.31 | 0.06 | 1.24  | 0.144352 | 0.089653 | 0.51089  | 0.343842 |
| MmugDNA.4189.1.S1_at    | MmugDNA.4189.1  | 10.59 | 10.78 | 0.12 | 0.23 | -1.15 | 0.358299 | 0.225722 | 0.673123 | 0.498159 |
| MmugDNA.41891.1.S1_at   | MmugDNA.41891.1 | 4.82  | 5.12  | 0.15 | 0.26 | -1.23 | 0.218766 | 0.18207  | 0.578251 | 0.45857  |
| MmugDNA.41892.1.S1_at   | MmugDNA.41892.1 | 8.48  | 7.59  | 0.16 | 0.83 | 1.84  | 0.557977 | 0.373718 | 0.792892 | 0.612403 |
| MmugDNA.41893.1.S1_at   | MmugDNA.41893.1 | 4.15  | 4.13  | 0.1  | 0.23 | 1.01  | 0.486637 | 0.773732 | 0.751702 | 0.868448 |
| MmugDNA.41894.1.S1_at   | MmugDNA.41894.1 | 3.86  | 3.84  | 0.02 | 0.04 | 1.02  | 0.958722 | 0.069041 | 0.984371 | 0.309017 |
| MmugDNA.41895.1.S1_at   | MmugDNA.41895.1 | 11.7  | 11.48 | 0.17 | 0.2  | 1.17  | 0.469595 | 0.190035 | 0.74181  | 0.465661 |
| MmugDNA.41896.1.S1_at   | MmugDNA.41896.1 | 12.5  | 12.37 | 0.19 | 0.07 | 1.09  | 0.159056 | 0.199569 | 0.52416  | 0.474208 |
| MmugDNA.41896.1.S1_s_at | MmugDNA.41896.1 | 11.71 | 11.28 | 0.2  | 0.16 | 1.34  | 0.183668 | 0.057225 | 0.54773  | 0.285059 |
| MmugDNA.41897.1.S1_at   | MmugDNA.41897.1 | 3.19  | 3.06  | 0.09 | 0.11 | 1.09  | 0.229997 | 0.260507 | 0.587112 | 0.527026 |
| MmugDNA.41898.1.S1_at   | MmugDNA.41898.1 | 4.49  | 4.24  | 0.54 | 0.18 | 1.19  | 0.171648 | 0.168812 | 0.535232 | 0.445458 |
| MmugDNA.41899.1.S1_at   | MmugDNA.41899.1 | 9.14  | 8.78  | 0.65 | 0.24 | 1.28  | 0.368788 | 0.048574 | 0.680234 | 0.265572 |
| MmugDNA.419.1.S1_at     | MmugDNA.419.1   | 3.75  | 3.97  | 0.06 | 0.18 | -1.16 | 0.276111 | 0.252668 | 0.618148 | 0.521174 |
| MmugDNA.37696.1.S1_s_at | MmugDNA.37696.1 | 7.99  | 9.67  | 0.51 | 1.5  | -3.21 | 0.160912 | 0.153254 | 0.526009 | 0.428077 |
| MmugDNA.41901.1.S1_at   | MmugDNA.41901.1 | 5     | 5.59  | 0.31 | 0.58 | -1.51 | 0.145562 | 0.172855 | 0.51146  | 0.449424 |
| MmugDNA.41902.1.S1_at   | MmugDNA.41902.1 | 6.79  | 7.1   | 0.3  | 0.22 | -1.24 | 0.488749 | 0.652345 | 0.753263 | 0.796688 |
| MmugDNA.41903.1.S1_at   | MmugDNA.41903.1 | 9.51  | 8.58  | 0.39 | 0.24 | 1.91  | 0.027785 | 0.01316  | 0.308973 | 0.147338 |
| MmugDNA.41904.1.S1_at   | MmugDNA.41904.1 | 5.24  | 5.45  | 0.26 | 0.37 | -1.16 | 0.184411 | 0.073698 | 0.548138 | 0.317051 |
| MmugDNA.41905.1.S1_at   | MmugDNA.41905.1 | 6.81  | 6.34  | 0.3  | 0.28 | 1.38  | 0.115284 | 0.097667 | 0.478767 | 0.355554 |
| MmugDNA.41906.1.S1_at   | MmugDNA.41906.1 | 7.59  | 7.23  | 0.29 | 0.31 | 1.28  | 0.122085 | 0.150828 | 0.487099 | 0.425346 |
| MmugDNA.41907.1.S1_at   | MmugDNA.41907.1 | 7.33  | 8.13  | 0.34 | 0.42 | -1.74 | 0.031323 | 0.021398 | 0.321361 | 0.183193 |
| MmugDNA.41908.1.S1_at   | MmugDNA.41908.1 | 4.76  | 4.72  | 0.03 | 0    | 1.03  | 0.122963 | 0.311552 | 0.488424 | 0.566532 |
| MmugDNA.4191.1.S1_at    | MmugDNA.4191.1  | 4.56  | 4.49  | 0.25 | 0.14 | 1.05  | 0.644707 | 0.772994 | 0.839787 | 0.867995 |



|                         |                 |       |       |      |      |       |          |          |          |          |
|-------------------------|-----------------|-------|-------|------|------|-------|----------|----------|----------|----------|
| MmugDNA.41910.1.S1_at   | MmugDNA.41910.1 | 3.88  | 3.84  | 0.16 | 0.19 | 1.03  | 0.819007 | 0.559371 | 0.926528 | 0.736242 |
| MmugDNA.41911.1.S1_at   | MmugDNA.41911.1 | 6.52  | 5.82  | 0.57 | 0.51 | 1.62  | 0.195003 | 0.216469 | 0.558557 | 0.490084 |
| MmugDNA.41915.1.S1_at   | MmugDNA.41915.1 | 6.39  | 6.49  | 0.27 | 0.48 | -1.07 | 0.173965 | 0.214078 | 0.537538 | 0.487645 |
| MmugDNA.41916.1.S1_at   | MmugDNA.41916.1 | 2.93  | 2.9   | 0.07 | 0.02 | 1.02  | 0.504461 | 0.420392 | 0.76127  | 0.644099 |
| MmugDNA.41916.1.S1_s_at | MmugDNA.41916.1 | 3.16  | 3.17  | 0.17 | 0.06 | -1    | 0.379238 | 0.541153 | 0.68682  | 0.724768 |
| MmugDNA.41917.1.S1_at   | MmugDNA.41917.1 | 4.06  | 4.11  | 0.07 | 0.02 | -1.04 | 0.114724 | 0.729778 | 0.478025 | 0.843679 |
| MmugDNA.41918.1.S1_at   | MmugDNA.41918.1 | 7.83  | 6.7   | 1.04 | 0.67 | 2.19  | 0.120986 | 0.141236 | 0.48574  | 0.414749 |
| MmugDNA.41919.1.S1_at   | MmugDNA.41919.1 | 7.51  | 7.43  | 0.11 | 0.25 | 1.06  | 0.493563 | 0.54538  | 0.756276 | 0.727517 |
| MmugDNA.41920.1.S1_at   | MmugDNA.41920.1 | 4.13  | 3.99  | 0.4  | 0.47 | 1.1   | 0.258683 | 0.321243 | 0.605879 | 0.573152 |
| MmugDNA.41921.1.S1_at   | MmugDNA.41921.1 | 6.71  | 6.82  | 0.1  | 0.09 | -1.08 | 0.240003 | 0.313897 | 0.592883 | 0.568094 |
| MmugDNA.41923.1.S1_at   | MmugDNA.41923.1 | 9.39  | 8.81  | 0.13 | 0.24 | 1.5   | 0.013667 | 0.008008 | 0.248813 | 0.118976 |
| MmugDNA.41924.1.S1_at   | MmugDNA.41924.1 | 3.39  | 3.51  | 0.02 | 0.13 | -1.09 | 0.146634 | 0.112309 | 0.512668 | 0.377592 |
| MmugDNA.41925.1.S1_at   | MmugDNA.41925.1 | 5.06  | 4.43  | 0.31 | 0.07 | 1.55  | 0.026462 | 0.080054 | 0.303201 | 0.327429 |
| MmugDNA.41927.1.S1_at   | MmugDNA.41927.1 | 5.55  | 5.75  | 0.12 | 0.17 | -1.15 | 0.249015 | 0.329862 | 0.599743 | 0.578874 |
| MmugDNA.41928.1.S1_at   | MmugDNA.41928.1 | 9.4   | 8.8   | 0.17 | 0.03 | 1.51  | 0.007081 | 0.00467  | 0.20404  | 0.095314 |
| MmugDNA.41929.1.S1_at   | MmugDNA.41929.1 | 7.22  | 4.6   | 1.11 | 0.38 | 6.13  | 0.018959 | 0.007219 | 0.272319 | 0.114121 |
| MmugDNA.4193.1.S1_at    | MmugDNA.4193.1  | 3.75  | 3.37  | 0.72 | 0.22 | 1.3   | 0.304063 | 0.502475 | 0.638248 | 0.700192 |
| MmugDNA.41930.1.S1_at   | MmugDNA.41930.1 | 6.97  | 6.58  | 0.2  | 0.37 | 1.31  | 0.176021 | 0.240522 | 0.539472 | 0.511144 |
| MmugDNA.41931.1.S1_at   | MmugDNA.41931.1 | 8.36  | 8.08  | 0.39 | 0.22 | 1.21  | 0.120814 | 0.131227 | 0.48574  | 0.403252 |
| MmugDNA.41932.1.S1_s_at | MmugDNA.41932.1 | 6.67  | 6.87  | 0.41 | 0.07 | -1.15 | 0.481858 | 0.296362 | 0.749333 | 0.555492 |
| MmugDNA.41933.1.S1_at   | MmugDNA.41933.1 | 3.56  | 3.62  | 0.1  | 0.07 | -1.04 | 0.596705 | 0.442532 | 0.813157 | 0.660487 |
| MmugDNA.41935.1.S1_at   | MmugDNA.41935.1 | 6.67  | 6.56  | 0.36 | 0.47 | 1.08  | 0.702604 | 0.647094 | 0.868805 | 0.793279 |
| MmugDNA.41936.1.S1_at   | MmugDNA.41936.1 | 5.34  | 5.69  | 0.19 | 0.17 | -1.27 | 0.302793 | 0.347141 | 0.6371   | 0.591815 |
| MmugDNA.41937.1.S1_at   | MmugDNA.41937.1 | 8.57  | 8.29  | 0.67 | 0.53 | 1.21  | 0.279836 | 0.344278 | 0.621287 | 0.589762 |
| MmugDNA.41938.1.S1_at   | MmugDNA.41938.1 | 6.79  | 5.34  | 0.15 | 0.29 | 2.73  | 0.002206 | 0.000365 | 0.159615 | 0.037273 |
| MmugDNA.41939.1.S1_at   | MmugDNA.41939.1 | 7.33  | 6.94  | 0.53 | 0.8  | 1.31  | 0.647947 | 0.53565  | 0.841735 | 0.721199 |
| MmugDNA.4194.1.S1_at    | MmugDNA.4194.1  | 4.93  | 5.11  | 0.37 | 0.87 | -1.14 | 0.802016 | 0.106113 | 0.918334 | 0.368498 |
| MmugDNA.41940.1.S1_at   | MmugDNA.41940.1 | 6.67  | 6.87  | 0.17 | 0.02 | -1.15 | 0.105923 | 0.112121 | 0.466753 | 0.377398 |
| MmugDNA.41941.1.S1_at   | MmugDNA.41941.1 | 7.01  | 7     | 0.11 | 0.19 | 1     | 0.416554 | 0.660758 | 0.710038 | 0.801537 |
| MmugDNA.41942.1.S1_at   | MmugDNA.41942.1 | 3.35  | 3.37  | 1.29 | 0.17 | -1.01 | 0.389184 | 0.590331 | 0.692956 | 0.756166 |
| MmugDNA.41943.1.S1_at   | MmugDNA.41943.1 | 7.99  | 8.03  | 0.21 | 0.51 | -1.03 | 0.579097 | 0.59191  | 0.804078 | 0.757386 |
| MmugDNA.41944.1.S1_at   | MmugDNA.41944.1 | 5.85  | 5.52  | 0.31 | 0.25 | 1.26  | 0.295936 | 0.0697   | 0.632176 | 0.310164 |
| MmugDNA.41945.1.S1_at   | MmugDNA.41945.1 | 5.92  | 6.02  | 0.03 | 0.4  | -1.08 | 0.584773 | 0.784193 | 0.807143 | 0.875049 |
| MmugDNA.41945.1.S1_s_at | MmugDNA.41945.1 | 9.9   | 9.92  | 0.21 | 0.56 | -1.01 | 0.510108 | 0.697418 | 0.764729 | 0.824183 |
| MmugDNA.41947.1.S1_at   | MmugDNA.41947.1 | 3.05  | 3.11  | 0.07 | 0.23 | -1.04 | 0.760733 | 0.908234 | 0.899135 | 0.948008 |
| MmugDNA.41948.1.S1_at   | MmugDNA.41948.1 | 8.25  | 8.72  | 0.43 | 0.66 | -1.39 | 0.804736 | 0.924218 | 0.919736 | 0.957283 |
| MmugDNA.4195.1.S1_at    | MmugDNA.4195.1  | 10.16 | 9.67  | 0.37 | 0.19 | 1.4   | 0.19825  | 0.143046 | 0.561264 | 0.416922 |
| MmugDNA.41950.1.S1_at   | MmugDNA.41950.1 | 6.17  | 5.72  | 0.4  | 0.61 | 1.37  | 0.261055 | 0.277207 | 0.607554 | 0.541157 |
| MmugDNA.41951.1.S1_at   | MmugDNA.41951.1 | 10.16 | 10.1  | 0.41 | 0.42 | 1.04  | 0.810853 | 0.450111 | 0.922872 | 0.665505 |
| MmugDNA.41951.1.S1_s_at | MmugDNA.41951.1 | 12.41 | 12.13 | 0.37 | 0.26 | 1.22  | 0.593509 | 0.447411 | 0.811496 | 0.66348  |
| MmugDNA.41952.1.S1_at   | MmugDNA.41952.1 | 5.7   | 5.73  | 0.23 | 0.25 | -1.02 | 0.530882 | 0.321677 | 0.776921 | 0.573346 |

|                         |                 |       |       |      |      |       |          |          |          |          |
|-------------------------|-----------------|-------|-------|------|------|-------|----------|----------|----------|----------|
| MmugDNA.41954.1.S1_at   | MmugDNA.41954.1 | 6.75  | 6.86  | 0.4  | 0.03 | -1.08 | 0.627386 | 0.400914 | 0.830103 | 0.630658 |
| MmugDNA.41955.1.S1_at   | MmugDNA.41955.1 | 4.61  | 3.11  | 0.75 | 0.05 | 2.83  | 0.062173 | 0.138287 | 0.397336 | 0.411198 |
| MmugDNA.41956.1.S1_at   | MmugDNA.41956.1 | 3.8   | 3.94  | 0.08 | 0.11 | -1.1  | 0.10152  | 0.070346 | 0.461313 | 0.311541 |
| MmugDNA.41957.1.S1_at   | MmugDNA.41957.1 | 12.07 | 11.18 | 0.31 | 0.19 | 1.85  | 0.016384 | 0.009096 | 0.263839 | 0.125944 |
| MmugDNA.41958.1.S1_at   | MmugDNA.41958.1 | 8.51  | 8.17  | 0.19 | 0.33 | 1.26  | 0.196686 | 0.342511 | 0.559808 | 0.588539 |
| MmugDNA.41959.1.S1_at   | MmugDNA.41959.1 | 9.08  | 8.43  | 0.08 | 0.44 | 1.57  | 0.175372 | 0.146477 | 0.539136 | 0.420523 |
| MmugDNA.4196.1.S1_at    | MmugDNA.4196.1  | 4.68  | 4.62  | 0.19 | 0.28 | 1.04  | 0.578417 | 0.502311 | 0.803822 | 0.700078 |
| MmugDNA.41960.1.S1_at   | MmugDNA.41960.1 | 4.64  | 4.64  | 0.09 | 0.1  | 1     | 0.230209 | 0.46459  | 0.587112 | 0.675241 |
| MmugDNA.41961.1.S1_at   | MmugDNA.41961.1 | 4.85  | 4.84  | 0.12 | 0    | 1.01  | 0.675704 | 0.901863 | 0.854755 | 0.944154 |
| MmugDNA.41962.1.S1_at   | MmugDNA.41962.1 | 6.5   | 6.43  | 0.36 | 0.17 | 1.05  | 0.562873 | 0.363816 | 0.79556  | 0.604189 |
| MmugDNA.41964.1.S1_at   | MmugDNA.41964.1 | 6.76  | 7.35  | 0.41 | 0.52 | -1.51 | 0.181528 | 0.225642 | 0.546185 | 0.498155 |
| MmugDNA.41965.1.S1_at   | MmugDNA.41965.1 | 9.86  | 9.85  | 0.13 | 0.2  | 1.01  | 0.793389 | 0.367239 | 0.914377 | 0.606869 |
| MmugDNA.41967.1.S1_at   | MmugDNA.41967.1 | 4.92  | 6.47  | 0.15 | 0.72 | -2.92 | 0.048279 | 0.053453 | 0.368148 | 0.27685  |
| MmugDNA.41968.1.S1_at   | MmugDNA.41968.1 | 6.87  | 6.96  | 0.12 | 0.13 | -1.06 | 0.55603  | 0.162186 | 0.791585 | 0.43834  |
| MmugDNA.41969.1.S1_at   | MmugDNA.41969.1 | 3.34  | 3.45  | 0.17 | 0.03 | -1.08 | 0.502058 | 0.635046 | 0.760244 | 0.785156 |
| MmugDNA.41970.1.S1_at   | MmugDNA.41970.1 | 3.23  | 3.36  | 0.54 | 0.15 | -1.09 | 0.620175 | 0.618335 | 0.826026 | 0.774009 |
| MmugDNA.41971.1.S1_at   | MmugDNA.41971.1 | 3.18  | 3.14  | 0.55 | 0.34 | 1.03  | 0.681514 | 0.305968 | 0.857635 | 0.562732 |
| MmugDNA.41972.1.S1_at   | MmugDNA.41972.1 | 4.35  | 4.45  | 0.13 | 0.26 | -1.07 | 0.239761 | 0.39701  | 0.592731 | 0.62857  |
| MmugDNA.41973.1.S1_s_at | MmugDNA.41973.1 | 4.78  | 4.5   | 0.06 | 0.37 | 1.21  | 0.756674 | 0.759485 | 0.896628 | 0.860133 |
| MmugDNA.41974.1.S1_at   | MmugDNA.41974.1 | 6.41  | 6.31  | 0.24 | 0.08 | 1.07  | 0.794843 | 0.609274 | 0.914837 | 0.76771  |
| MmugDNA.41975.1.S1_at   | MmugDNA.41975.1 | 6.39  | 6.47  | 0.34 | 0.08 | -1.05 | 0.633049 | 0.790518 | 0.833487 | 0.878895 |
| MmugDNA.41976.1.S1_s_at | MmugDNA.41976.1 | 10.99 | 10.06 | 0.31 | 0.41 | 1.91  | 0.043016 | 0.008262 | 0.355958 | 0.12078  |
| MmugDNA.41977.1.S1_at   | MmugDNA.41977.1 | 5.26  | 5.06  | 0.24 | 0.18 | 1.15  | 0.803099 | 0.879177 | 0.918917 | 0.931052 |
| MmugDNA.41978.1.S1_at   | MmugDNA.41978.1 | 4.31  | 3.95  | 0.22 | 0.21 | 1.28  | 0.18776  | 0.173988 | 0.550802 | 0.450247 |
| MmugDNA.41979.1.S1_at   | MmugDNA.41979.1 | 10.36 | 9.73  | 0.05 | 0.64 | 1.55  | 0.551982 | 0.737839 | 0.789154 | 0.848101 |
| MmugDNA.4198.1.S1_at    | MmugDNA.4198.1  | 6.44  | 6.45  | 0.29 | 0.06 | -1    | 0.976615 | 0.548912 | 0.991012 | 0.729486 |
| MmugDNA.41980.1.S1_at   | MmugDNA.41980.1 | 3.01  | 3.04  | 0.21 | 0.2  | -1.02 | 0.677675 | 0.790465 | 0.855562 | 0.878876 |
| MmugDNA.41981.1.S1_at   | MmugDNA.41981.1 | 7.22  | 7.47  | 0.14 | 0.08 | -1.19 | 0.137591 | 0.092177 | 0.50477  | 0.347894 |
| MmugDNA.41982.1.S1_at   | MmugDNA.41982.1 | 5.48  | 5.48  | 0.12 | 0.21 | 1     | 0.245329 | 0.331061 | 0.597004 | 0.579791 |
| MmugDNA.41983.1.S1_at   | MmugDNA.41983.1 | 5.14  | 5.19  | 0.11 | 0.25 | -1.03 | 0.774078 | 0.935504 | 0.905025 | 0.96359  |
| MmugDNA.41985.1.S1_at   | MmugDNA.41985.1 | 5.63  | 5.2   | 0.43 | 0.28 | 1.35  | 0.55144  | 0.247756 | 0.788742 | 0.517199 |
| MmugDNA.41987.1.S1_at   | MmugDNA.41987.1 | 3.64  | 3.74  | 0.04 | 0.2  | -1.07 | 0.928841 | 0.759949 | 0.972607 | 0.860511 |
| MmugDNA.41988.1.S1_at   | MmugDNA.41988.1 | 9.25  | 8.95  | 0.23 | 0.26 | 1.23  | 0.395242 | 0.181417 | 0.696396 | 0.457923 |
| MmugDNA.41989.1.S1_at   | MmugDNA.41989.1 | 4.24  | 3.7   | 1.01 | 0.29 | 1.45  | 0.365301 | 0.233385 | 0.67821  | 0.504741 |
| MmugDNA.4199.1.S1_at    | MmugDNA.4199.1  | 4.18  | 3.86  | 0.35 | 0.17 | 1.24  | 0.210632 | 0.110831 | 0.57188  | 0.375126 |
| MmugDNA.41990.1.S1_at   | MmugDNA.41990.1 | 6.41  | 5.92  | 0.41 | 0.19 | 1.41  | 0.324572 | 0.422218 | 0.651941 | 0.645588 |
| MmugDNA.41991.1.S1_at   | MmugDNA.41991.1 | 8.42  | 8.51  | 0.21 | 0.1  | -1.06 | 0.457055 | 0.294529 | 0.734661 | 0.554265 |
| MmugDNA.41992.1.S1_at   | MmugDNA.41992.1 | 5.01  | 7.15  | 0.62 | 1.3  | -4.41 | 0.081273 | 0.079077 | 0.431938 | 0.326161 |
| MmugDNA.41993.1.S1_at   | MmugDNA.41993.1 | 10.77 | 10.55 | 0.15 | 0.62 | 1.17  | 0.150801 | 0.043271 | 0.515443 | 0.252793 |
| MmugDNA.41995.1.S1_s_at | MmugDNA.41995.1 | 8.1   | 7.98  | 0.22 | 0.05 | 1.08  | 0.677971 | 0.767126 | 0.855721 | 0.864712 |
| MmugDNA.41996.1.S1_at   | MmugDNA.41996.1 | 3.18  | 3.33  | 0.07 | 0.16 | -1.11 | 0.490395 | 0.624745 | 0.754405 | 0.77888  |

|                         |                 |       |       |      |      |       |          |          |          |          |
|-------------------------|-----------------|-------|-------|------|------|-------|----------|----------|----------|----------|
| MmugDNA.41997.1.S1_at   | MmugDNA.41997.1 | 3.29  | 3.18  | 0.32 | 0.23 | 1.08  | 0.622323 | 0.82993  | 0.827345 | 0.902299 |
| MmugDNA.41998.1.S1_at   | MmugDNA.41998.1 | 4.4   | 4.47  | 0.45 | 0.28 | -1.05 | 0.98101  | 0.545487 | 0.993163 | 0.727564 |
| MmugDNA.41999.1.S1_at   | MmugDNA.41999.1 | 4.82  | 4.74  | 0.34 | 0.31 | 1.06  | 0.650737 | 0.812444 | 0.842847 | 0.891649 |
| MmugDNA.42.1.S1_at      | MmugDNA.42.1    | 9.28  | 9.55  | 0.21 | 0.12 | -1.2  | 0.067799 | 0.057691 | 0.408536 | 0.286531 |
| MmugDNA.420.1.S1_at     | MmugDNA.420.1   | 3.42  | 3.34  | 0.1  | 0.13 | 1.06  | 0.690367 | 0.336404 | 0.862061 | 0.583831 |
| MmugDNA.4200.1.S1_at    | MmugDNA.4200.1  | 8.43  | 8.36  | 0.27 | 0.05 | 1.05  | 0.650977 | 0.60062  | 0.84297  | 0.762183 |
| MmugDNA.42000.1.S1_at   | MmugDNA.42000.1 | 8.3   | 8.24  | 0.17 | 0.43 | 1.04  | 0.969884 | 0.872456 | 0.98846  | 0.927474 |
| MmugDNA.42001.1.S1_at   | MmugDNA.42001.1 | 10.9  | 10.82 | 0.12 | 0.1  | 1.06  | 0.677972 | 0.911666 | 0.855721 | 0.950222 |
| MmugDNA.42002.1.S1_at   | MmugDNA.42002.1 | 6.36  | 6.36  | 0.41 | 0.17 | 1     | 0.50855  | 0.364846 | 0.763834 | 0.605139 |
| MmugDNA.42002.1.S1_x_at | MmugDNA.42002.1 | 7.06  | 6.87  | 0.16 | 0.1  | 1.15  | 0.211544 | 0.028486 | 0.572299 | 0.21056  |
| MmugDNA.42003.1.S1_at   | MmugDNA.42003.1 | 7.83  | 6.51  | 0.13 | 0.19 | 2.5   | 0.000755 | 0.000169 | 0.136818 | 0.030511 |
| MmugDNA.42004.1.S1_at   | MmugDNA.42004.1 | 3.72  | 3.79  | 0.14 | 0.26 | -1.05 | 0.328038 | 0.417042 | 0.654207 | 0.641944 |
| MmugDNA.42005.1.S1_at   | MmugDNA.42005.1 | 9.34  | 9.72  | 0.18 | 0.33 | -1.3  | 0.061837 | 0.056081 | 0.396761 | 0.282707 |
| MmugDNA.42007.1.S1_at   | MmugDNA.42007.1 | 6.98  | 7.56  | 0.09 | 0.33 | -1.49 | 0.050724 | 0.041678 | 0.375294 | 0.24887  |
| MmugDNA.42010.1.S1_at   | MmugDNA.42010.1 | 5.66  | 6.51  | 0.6  | 0.56 | -1.81 | 0.380155 | 0.156374 | 0.68724  | 0.431659 |
| MmugDNA.42011.1.S1_at   | MmugDNA.42011.1 | 3.96  | 3.99  | 0.27 | 0.2  | -1.02 | 0.676027 | 0.846492 | 0.854832 | 0.912665 |
| MmugDNA.42012.1.S1_at   | MmugDNA.42012.1 | 6.2   | 6.9   | 0.28 | 0.39 | -1.63 | 0.043589 | 0.017728 | 0.35682  | 0.168367 |
| MmugDNA.42013.1.S1_at   | MmugDNA.42013.1 | 6.05  | 5.48  | 0.15 | 0.42 | 1.49  | 0.260501 | 0.267274 | 0.607292 | 0.532909 |
| MmugDNA.42014.1.S1_at   | MmugDNA.42014.1 | 3.87  | 3.18  | 0.52 | 0.34 | 1.61  | 0.366365 | 0.415099 | 0.67904  | 0.640707 |
| MmugDNA.42017.1.S1_at   | MmugDNA.42017.1 | 3.51  | 3.45  | 0.13 | 0.15 | 1.04  | 0.61359  | 0.663573 | 0.822845 | 0.803017 |
| MmugDNA.4202.1.S1_at    | MmugDNA.4202.1  | 5.98  | 6.04  | 0.3  | 0.17 | -1.04 | 0.577158 | 0.398101 | 0.80344  | 0.629185 |
| MmugDNA.42020.1.S1_at   | MmugDNA.42020.1 | 12.16 | 12.5  | 0.19 | 0.31 | -1.27 | 0.180209 | 0.204251 | 0.544371 | 0.478541 |
| MmugDNA.42021.1.S1_at   | MmugDNA.42021.1 | 12.8  | 12.93 | 0.12 | 0.25 | -1.09 | 0.450678 | 0.619681 | 0.731189 | 0.774876 |
| MmugDNA.42022.1.S1_at   | MmugDNA.42022.1 | 3.82  | 3.8   | 0.32 | 0.25 | 1.02  | 0.937104 | 0.403249 | 0.975769 | 0.631996 |
| MmugDNA.42023.1.S1_at   | MmugDNA.42023.1 | 4.09  | 4.08  | 0.49 | 0.09 | 1     | 0.303211 | 0.356506 | 0.637386 | 0.598459 |
| MmugDNA.42024.1.S1_at   | MmugDNA.42024.1 | 12.12 | 12.13 | 0.16 | 0.22 | -1.01 | 0.415264 | 0.48713  | 0.709433 | 0.690277 |
| MmugDNA.42025.1.S1_at   | MmugDNA.42025.1 | 10.87 | 11.37 | 0.13 | 0.24 | -1.41 | 0.055803 | 0.046369 | 0.384768 | 0.259844 |
| MmugDNA.42028.1.S1_at   | MmugDNA.42028.1 | 10.79 | 10.75 | 0.15 | 0.47 | 1.02  | 0.45655  | 0.382705 | 0.734518 | 0.618858 |
| MmugDNA.42029.1.S1_at   | MmugDNA.42029.1 | 3.65  | 3.77  | 0.17 | 0.24 | -1.09 | 0.411258 | 0.71854  | 0.707075 | 0.837072 |
| MmugDNA.42030.1.S1_at   | MmugDNA.42030.1 | 3.91  | 3.91  | 0.07 | 0.11 | -1    | 0.431639 | 0.30383  | 0.718606 | 0.561225 |
| MmugDNA.42031.1.S1_at   | MmugDNA.42031.1 | 5     | 5.06  | 0.19 | 0.13 | -1.04 | 0.642166 | 0.832739 | 0.838696 | 0.904032 |
| MmugDNA.42032.1.S1_at   | MmugDNA.42032.1 | 6.92  | 7.78  | 0.34 | 0.17 | -1.82 | 0.014804 | 0.00894  | 0.255423 | 0.125013 |
| MmugDNA.42033.1.S1_at   | MmugDNA.42033.1 | 4.77  | 4.09  | 0.71 | 0.3  | 1.6   | 0.203671 | 0.258293 | 0.566259 | 0.525596 |
| MmugDNA.42034.1.S1_at   | MmugDNA.42034.1 | 5.59  | 5.75  | 0.26 | 0.11 | -1.12 | 0.822381 | 0.747337 | 0.927702 | 0.853149 |
| MmugDNA.42035.1.S1_at   | MmugDNA.42035.1 | 4.13  | 2.97  | 0.76 | 0.52 | 2.24  | 0.46111  | 0.463053 | 0.737432 | 0.674193 |
| MmugDNA.42037.1.S1_at   | MmugDNA.42037.1 | 6.42  | 4.84  | 1.29 | 1.09 | 2.99  | 0.349104 | 0.489063 | 0.667416 | 0.691588 |
| MmugDNA.42038.1.S1_at   | MmugDNA.42038.1 | 4.61  | 4.58  | 0.18 | 0.09 | 1.02  | 0.780372 | 0.865612 | 0.908495 | 0.923598 |
| MmugDNA.42039.1.S1_at   | MmugDNA.42039.1 | 4.16  | 3.68  | 0.47 | 0.02 | 1.39  | 0.134632 | 0.183412 | 0.501537 | 0.459553 |
| MmugDNA.4204.1.S1_at    | MmugDNA.4204.1  | 5.87  | 6.01  | 0.55 | 0.11 | -1.1  | 0.737679 | 0.476074 | 0.887273 | 0.682475 |
| MmugDNA.42040.1.S1_at   | MmugDNA.42040.1 | 4.61  | 5.7   | 0.81 | 0.24 | -2.12 | 0.273972 | 0.033618 | 0.617262 | 0.227006 |
| MmugDNA.42041.1.S1_at   | MmugDNA.42041.1 | 6.81  | 6.86  | 0.7  | 0.71 | -1.03 | 0.919639 | 0.774543 | 0.968755 | 0.868769 |

|                         |                 |       |       |      |      |       |          |          |          |          |
|-------------------------|-----------------|-------|-------|------|------|-------|----------|----------|----------|----------|
| MmugDNA.42042.1.S1_at   | MmugDNA.42042.1 | 3.67  | 3.83  | 0.06 | 0.1  | -1.12 | 0.164223 | 0.11252  | 0.528238 | 0.377914 |
| MmugDNA.42043.1.S1_at   | MmugDNA.42043.1 | 5.32  | 5.42  | 0.16 | 0.13 | -1.07 | 0.436807 | 0.47883  | 0.722049 | 0.684739 |
| MmugDNA.42045.1.S1_at   | MmugDNA.42045.1 | 12.29 | 11.96 | 0.31 | 0.21 | 1.25  | 0.115604 | 0.067057 | 0.478912 | 0.304872 |
| MmugDNA.42047.1.S1_at   | MmugDNA.42047.1 | 6.2   | 5.98  | 0.29 | 0.24 | 1.16  | 0.353895 | 0.520836 | 0.670266 | 0.711942 |
| MmugDNA.42048.1.S1_at   | MmugDNA.42048.1 | 3.3   | 3.21  | 0.13 | 0.05 | 1.06  | 0.393604 | 0.299137 | 0.695396 | 0.557663 |
| MmugDNA.4205.1.S1_at    | MmugDNA.4205.1  | 6.36  | 6.43  | 0.15 | 0.03 | -1.05 | 0.455152 | 0.46648  | 0.733701 | 0.676333 |
| MmugDNA.42050.1.S1_at   | MmugDNA.42050.1 | 9.69  | 8.39  | 0.28 | 0.47 | 2.46  | 0.023217 | 0.013384 | 0.290295 | 0.14827  |
| MmugDNA.42052.1.S1_at   | MmugDNA.42052.1 | 5.08  | 5.16  | 0.52 | 0.24 | -1.06 | 0.346418 | 0.448308 | 0.66582  | 0.664195 |
| MmugDNA.42052.1.S1_s_at | MmugDNA.42052.1 | 6.56  | 6.54  | 0.38 | 0.1  | 1.01  | 0.479517 | 0.250555 | 0.747667 | 0.519395 |
| MmugDNA.42053.1.S1_at   | MmugDNA.42053.1 | 5.88  | 5.2   | 0.69 | 0.63 | 1.6   | 0.252431 | 0.331629 | 0.601373 | 0.580208 |
| MmugDNA.42054.1.S1_at   | MmugDNA.42054.1 | 4.86  | 5.03  | 0.18 | 0.12 | -1.13 | 0.07675  | 0.074283 | 0.42557  | 0.318046 |
| MmugDNA.42055.1.S1_at   | MmugDNA.42055.1 | 6.38  | 6.66  | 0.16 | 0.19 | -1.22 | 0.272127 | 0.05927  | 0.615997 | 0.29047  |
| MmugDNA.42056.1.S1_at   | MmugDNA.42056.1 | 3.06  | 2.96  | 0.07 | 0.09 | 1.07  | 0.188607 | 0.306835 | 0.551601 | 0.563399 |
| MmugDNA.42057.1.S1_at   | MmugDNA.42057.1 | 6.99  | 8.43  | 0.58 | 0.15 | -2.71 | 0.02213  | 0.030816 | 0.284595 | 0.217376 |
| MmugDNA.42059.1.S1_at   | MmugDNA.42059.1 | 6.66  | 7.41  | 0.07 | 0.6  | -1.69 | 0.306278 | 0.079698 | 0.639466 | 0.326981 |
| MmugDNA.4206.1.S1_at    | MmugDNA.4206.1  | 9     | 8.67  | 0.07 | 0.82 | 1.26  | 0.45346  | 0.552178 | 0.732623 | 0.73155  |
| MmugDNA.42060.1.S1_at   | MmugDNA.42060.1 | 5.93  | 6.2   | 0.2  | 0.36 | -1.21 | 0.2378   | 0.399742 | 0.591288 | 0.629951 |
| MmugDNA.42061.1.S1_at   | MmugDNA.42061.1 | 3.56  | 3.38  | 0.82 | 0.1  | 1.14  | 0.23272  | 0.220873 | 0.587827 | 0.494262 |
| MmugDNA.42062.1.S1_at   | MmugDNA.42062.1 | 10.44 | 9.08  | 0.17 | 0.45 | 2.57  | 0.007286 | 0.004872 | 0.206649 | 0.097453 |
| MmugDNA.42063.1.S1_at   | MmugDNA.42063.1 | 3.28  | 3.33  | 0.17 | 0.08 | -1.03 | 0.935639 | 0.900171 | 0.975112 | 0.943311 |
| MmugDNA.42066.1.S1_at   | MmugDNA.42066.1 | 4.88  | 4.96  | 0.08 | 0.29 | -1.05 | 0.83135  | 0.620538 | 0.931682 | 0.77547  |
| MmugDNA.42067.1.S1_at   | MmugDNA.42067.1 | 8.14  | 9.1   | 0.2  | 0.33 | -1.94 | 0.00476  | 0.00311  | 0.184674 | 0.081305 |
| MmugDNA.42068.1.S1_at   | MmugDNA.42068.1 | 9.79  | 8.98  | 0.15 | 0.57 | 1.76  | 0.068543 | 0.049859 | 0.410201 | 0.268413 |
| MmugDNA.4207.1.S1_at    | MmugDNA.4207.1  | 11.4  | 11.69 | 0.06 | 0.41 | -1.21 | 0.200192 | 0.212698 | 0.563139 | 0.486681 |
| MmugDNA.42072.1.S1_at   | MmugDNA.42072.1 | 5.89  | 5.91  | 0.03 | 0.03 | -1.01 | 0.446431 | 0.027408 | 0.7283   | 0.206752 |
| MmugDNA.42073.1.S1_at   | MmugDNA.42073.1 | 6.13  | 6.68  | 0.55 | 0.6  | -1.46 | 0.832378 | 0.216735 | 0.932116 | 0.490311 |
| MmugDNA.42074.1.S1_at   | MmugDNA.42074.1 | 5.18  | 5.39  | 0.18 | 0.08 | -1.16 | 0.126102 | 0.116953 | 0.492228 | 0.384343 |
| MmugDNA.42075.1.S1_at   | MmugDNA.42075.1 | 3.01  | 3.13  | 0.01 | 0.1  | -1.09 | 0.119094 | 0.091784 | 0.483744 | 0.346977 |
| MmugDNA.42076.1.S1_at   | MmugDNA.42076.1 | 3.15  | 2.91  | 0.13 | 0.32 | 1.18  | 0.766793 | 0.653493 | 0.901914 | 0.797464 |
| MmugDNA.42077.1.S1_at   | MmugDNA.42077.1 | 4.55  | 4.67  | 0.14 | 0.14 | -1.08 | 0.280963 | 0.433833 | 0.622015 | 0.654032 |
| MmugDNA.42078.1.S1_at   | MmugDNA.42078.1 | 8.13  | 8.04  | 0.51 | 0.44 | 1.06  | 0.770349 | 0.846138 | 0.90333  | 0.912395 |
| MmugDNA.42079.1.S1_at   | MmugDNA.42079.1 | 3.36  | 3.71  | 0.48 | 0.23 | -1.27 | 0.852014 | 0.640366 | 0.940437 | 0.788874 |
| MmugDNA.42080.1.S1_at   | MmugDNA.42080.1 | 4.3   | 4.3   | 0.11 | 0.07 | 1     | 0.244434 | 0.445632 | 0.596199 | 0.662468 |
| MmugDNA.42081.1.S1_at   | MmugDNA.42081.1 | 3.38  | 3.45  | 0.12 | 0.11 | -1.05 | 0.985253 | 0.877722 | 0.99475  | 0.930219 |
| MmugDNA.42082.1.S1_at   | MmugDNA.42082.1 | 4.23  | 4.19  | 0.08 | 0.39 | 1.03  | 0.386701 | 0.630189 | 0.691563 | 0.782181 |
| MmugDNA.42083.1.S1_at   | MmugDNA.42083.1 | 4.91  | 5.53  | 0.36 | 0.23 | -1.55 | 0.153342 | 0.145236 | 0.517783 | 0.419256 |
| MmugDNA.42084.1.S1_at   | MmugDNA.42084.1 | 6.08  | 6.05  | 0.1  | 0.33 | 1.02  | 0.87521  | 0.801312 | 0.949924 | 0.885696 |
| MmugDNA.42085.1.S1_at   | MmugDNA.42085.1 | 4.71  | 5.56  | 0.32 | 0.89 | -1.81 | 0.764429 | 0.888607 | 0.900777 | 0.936492 |
| MmugDNA.42086.1.S1_at   | MmugDNA.42086.1 | 5.94  | 6.5   | 0.52 | 0.57 | -1.47 | 0.304758 | 0.238264 | 0.638784 | 0.508825 |
| MmugDNA.42087.1.S1_at   | MmugDNA.42087.1 | 7.01  | 6.8   | 0.49 | 1.38 | 1.16  | 0.703305 | 0.854931 | 0.868993 | 0.917368 |
| MmugDNA.42089.1.S1_at   | MmugDNA.42089.1 | 3.26  | 3.06  | 0.18 | 0.02 | 1.14  | 0.173255 | 0.071212 | 0.536945 | 0.31317  |

|                         |                 |       |       |      |      |       |          |          |          |          |
|-------------------------|-----------------|-------|-------|------|------|-------|----------|----------|----------|----------|
| MmugDNA.42090.1.S1_at   | MmugDNA.42090.1 | 5.22  | 5.53  | 0.18 | 0.36 | -1.24 | 0.205127 | 0.198976 | 0.567639 | 0.473566 |
| MmugDNA.42091.1.S1_at   | MmugDNA.42091.1 | 8.88  | 7.97  | 0.22 | 0.18 | 1.88  | 0.008789 | 0.003567 | 0.221033 | 0.085525 |
| MmugDNA.42092.1.S1_at   | MmugDNA.42092.1 | 11.78 | 11.01 | 0.21 | 0.24 | 1.71  | 0.008779 | 0.003066 | 0.221033 | 0.080758 |
| MmugDNA.42093.1.S1_at   | MmugDNA.42093.1 | 4.71  | 4.59  | 0.07 | 0.1  | 1.08  | 0.797915 | 0.24462  | 0.916178 | 0.514435 |
| MmugDNA.42094.1.S1_at   | MmugDNA.42094.1 | 4.68  | 4.77  | 0.05 | 0    | -1.06 | 0.086432 | 0.07297  | 0.440232 | 0.315986 |
| MmugDNA.42096.1.S1_s_at | MmugDNA.42096.1 | 13.52 | 13.55 | 0.06 | 0.01 | -1.02 | 0.937098 | 0.748867 | 0.975769 | 0.853944 |
| MmugDNA.42097.1.S1_at   | MmugDNA.42097.1 | 8.05  | 7.3   | 0.67 | 0.25 | 1.68  | 0.227411 | 0.215789 | 0.585103 | 0.489536 |
| MmugDNA.42098.1.S1_at   | MmugDNA.42098.1 | 9.77  | 11.36 | 0.35 | 0.1  | -3    | 0.001792 | 0.000442 | 0.154452 | 0.038359 |
| MmugDNA.42099.1.S1_at   | MmugDNA.42099.1 | 4.48  | 4.57  | 0.09 | 0.06 | -1.06 | 0.182585 | 0.0902   | 0.546812 | 0.344588 |
| MmugDNA.4210.1.S1_at    | MmugDNA.4210.1  | 3.31  | 2.93  | 0.22 | 0.28 | 1.3   | 0.336391 | 0.611924 | 0.659444 | 0.769636 |
| MmugDNA.42101.1.S1_at   | MmugDNA.42101.1 | 4.37  | 5.5   | 0.4  | 1.47 | -2.2  | 0.348386 | 0.404586 | 0.667173 | 0.633075 |
| MmugDNA.42102.1.S1_at   | MmugDNA.42102.1 | 10.49 | 11.23 | 0.14 | 0.31 | -1.66 | 0.038517 | 0.011133 | 0.344537 | 0.137297 |
| MmugDNA.42103.1.S1_at   | MmugDNA.42103.1 | 10.69 | 10.98 | 0.17 | 0.25 | -1.22 | 0.101073 | 0.183132 | 0.461009 | 0.459531 |
| MmugDNA.42104.1.S1_at   | MmugDNA.42104.1 | 7.18  | 7.14  | 0.28 | 0.08 | 1.03  | 0.455866 | 0.000683 | 0.73411  | 0.044166 |
| MmugDNA.42105.1.S1_at   | MmugDNA.42105.1 | 11.24 | 11.63 | 0.3  | 0.27 | -1.31 | 0.324219 | 0.358129 | 0.651856 | 0.59966  |
| MmugDNA.42106.1.S1_at   | MmugDNA.42106.1 | 11.17 | 11.23 | 0.21 | 0.19 | -1.04 | 0.751163 | 0.074024 | 0.893648 | 0.317579 |
| MmugDNA.42109.1.S1_at   | MmugDNA.42109.1 | 10.78 | 10.52 | 0.12 | 0.4  | 1.19  | 0.284297 | 0.39761  | 0.62413  | 0.628973 |
| MmugDNA.42110.1.S1_at   | MmugDNA.42110.1 | 6.14  | 6.62  | 0.77 | 0.61 | -1.4  | 0.445915 | 0.50111  | 0.728042 | 0.699443 |
| MmugDNA.42111.1.S1_at   | MmugDNA.42111.1 | 6.92  | 6.34  | 0.2  | 0.08 | 1.49  | 0.008807 | 0.004011 | 0.221171 | 0.089969 |
| MmugDNA.42112.1.S1_at   | MmugDNA.42112.1 | 6.53  | 6.75  | 0.08 | 0.16 | -1.17 | 0.135867 | 0.110132 | 0.502782 | 0.374244 |
| MmugDNA.42113.1.S1_at   | MmugDNA.42113.1 | 3.22  | 3.21  | 0.13 | 0.06 | 1.01  | 0.95372  | 0.871459 | 0.982865 | 0.926844 |
| MmugDNA.42114.1.S1_s_at | MmugDNA.42114.1 | 3.23  | 3.27  | 0.17 | 0.11 | -1.02 | 0.760487 | 0.526557 | 0.899008 | 0.71559  |
| MmugDNA.42115.1.S1_at   | MmugDNA.42115.1 | 5.72  | 5.64  | 0.11 | 0.11 | 1.06  | 0.271814 | 0.331622 | 0.615816 | 0.580208 |
| MmugDNA.42116.1.S1_at   | MmugDNA.42116.1 | 5.92  | 8.24  | 0.88 | 2.12 | -4.99 | 0.305312 | 0.250671 | 0.639126 | 0.51941  |
| MmugDNA.42118.1.S1_at   | MmugDNA.42118.1 | 6.62  | 7.11  | 0.31 | 0.25 | -1.4  | 0.047722 | 0.03459  | 0.367063 | 0.230072 |
| MmugDNA.42119.1.S1_at   | MmugDNA.42119.1 | 8.3   | 8.02  | 0.09 | 0.45 | 1.21  | 0.139613 | 0.037712 | 0.507122 | 0.23859  |
| MmugDNA.4212.1.S1_at    | MmugDNA.4212.1  | 2.76  | 2.77  | 0.04 | 0.06 | -1    | 0.913934 | 0.789631 | 0.965987 | 0.87847  |
| MmugDNA.42120.1.S1_at   | MmugDNA.42120.1 | 8.11  | 8.52  | 0.2  | 0.24 | -1.33 | 0.038783 | 0.015669 | 0.345457 | 0.158598 |
| MmugDNA.42121.1.S1_at   | MmugDNA.42121.1 | 7.9   | 7.7   | 0.27 | 0.16 | 1.15  | 0.199338 | 0.264615 | 0.562297 | 0.530605 |
| MmugDNA.42121.1.S1_x_at | MmugDNA.42121.1 | 7.51  | 7.37  | 0.85 | 0.18 | 1.11  | 0.33729  | 0.401769 | 0.659871 | 0.631068 |
| MmugDNA.42122.1.S1_at   | MmugDNA.42122.1 | 3.66  | 3.49  | 0.47 | 0.12 | 1.12  | 0.406313 | 0.590817 | 0.703645 | 0.75648  |
| MmugDNA.42123.1.S1_at   | MmugDNA.42123.1 | 4.33  | 3.95  | 0.46 | 0.18 | 1.31  | 0.711903 | 0.61422  | 0.873744 | 0.771166 |
| MmugDNA.42124.1.S1_at   | MmugDNA.42124.1 | 8.07  | 7.93  | 0.46 | 0.44 | 1.1   | 0.943765 | 0.842593 | 0.978535 | 0.910315 |
| MmugDNA.42125.1.S1_at   | MmugDNA.42125.1 | 4.55  | 4.49  | 0.16 | 0.06 | 1.04  | 0.82661  | 0.548051 | 0.929552 | 0.728874 |
| MmugDNA.42126.1.S1_at   | MmugDNA.42126.1 | 3.53  | 3.63  | 0.27 | 0.08 | -1.07 | 0.671613 | 0.865612 | 0.852716 | 0.923598 |
| MmugDNA.42127.1.S1_at   | MmugDNA.42127.1 | 6.57  | 6.65  | 0.15 | 0.66 | -1.06 | 0.494039 | 0.684403 | 0.756411 | 0.815943 |
| MmugDNA.4213.1.S1_at    | MmugDNA.4213.1  | 2.64  | 2.75  | 0.05 | 0.19 | -1.08 | 0.633964 | 0.715415 | 0.83415  | 0.835033 |
| MmugDNA.42131.1.S1_at   | MmugDNA.42131.1 | 8.66  | 8.23  | 0.19 | 0.34 | 1.35  | 0.18656  | 0.151502 | 0.550106 | 0.426223 |
| MmugDNA.42132.1.S1_at   | MmugDNA.42132.1 | 5.06  | 5.18  | 0.11 | 0.2  | -1.09 | 0.449382 | 0.05505  | 0.73019  | 0.280138 |
| MmugDNA.42133.1.S1_at   | MmugDNA.42133.1 | 4.84  | 4.81  | 0.13 | 0.23 | 1.01  | 0.291329 | 0.429209 | 0.628798 | 0.650726 |
| MmugDNA.42134.1.S1_at   | MmugDNA.42134.1 | 3.72  | 3.69  | 0.06 | 0.25 | 1.02  | 0.359277 | 0.465533 | 0.673869 | 0.675802 |

|                         |                 |       |       |      |      |       |          |          |          |          |
|-------------------------|-----------------|-------|-------|------|------|-------|----------|----------|----------|----------|
| MmugDNA.42135.1.S1_at   | MmugDNA.42135.1 | 10.27 | 9.22  | 0.1  | 0.4  | 2.08  | 0.024572 | 0.005661 | 0.295214 | 0.103959 |
| MmugDNA.42136.1.S1_at   | MmugDNA.42136.1 | 3.05  | 3.06  | 0.1  | 0.06 | -1    | 0.52965  | 0.664    | 0.77625  | 0.803247 |
| MmugDNA.42137.1.S1_at   | MmugDNA.42137.1 | 7.29  | 7.05  | 0.06 | 0.17 | 1.18  | 0.102288 | 0.152    | 0.462013 | 0.426741 |
| MmugDNA.42138.1.S1_at   | MmugDNA.42138.1 | 7.67  | 7.76  | 0.22 | 0.18 | -1.07 | 0.235676 | 0.424856 | 0.589553 | 0.647319 |
| MmugDNA.4214.1.S1_at    | MmugDNA.4214.1  | 3.69  | 3.56  | 0.36 | 0.08 | 1.1   | 0.79585  | 0.910734 | 0.915319 | 0.949643 |
| MmugDNA.42140.1.S1_at   | MmugDNA.42140.1 | 4.88  | 4.95  | 0.13 | 0.11 | -1.05 | 0.121654 | 0.153846 | 0.486508 | 0.428506 |
| MmugDNA.42142.1.S1_at   | MmugDNA.42142.1 | 6.9   | 7.01  | 0.04 | 0.08 | -1.08 | 0.094687 | 0.051341 | 0.452166 | 0.272052 |
| MmugDNA.42144.1.S1_s_at | MmugDNA.42144.1 | 10.83 | 11.73 | 0.15 | 0.45 | -1.86 | 0.058209 | 0.014281 | 0.390133 | 0.152609 |
| MmugDNA.42145.1.S1_at   | MmugDNA.42145.1 | 6.73  | 6.85  | 0.62 | 0.39 | -1.09 | 0.598165 | 0.450866 | 0.813939 | 0.665869 |
| MmugDNA.42146.1.S1_at   | MmugDNA.42146.1 | 5.15  | 5.24  | 0.17 | 0.11 | -1.06 | 0.565921 | 0.388934 | 0.797414 | 0.623249 |
| MmugDNA.42148.1.S1_at   | MmugDNA.42148.1 | 6.56  | 7.96  | 0.52 | 0.47 | -2.64 | 0.040832 | 0.020722 | 0.350478 | 0.180645 |
| MmugDNA.30407.1.S1_s_at | MmugDNA.30407.1 | 6.86  | 5.96  | 0.55 | 0.25 | 1.87  | 0.105218 | 0.114618 | 0.465675 | 0.381156 |
| MmugDNA.42152.1.S1_at   | MmugDNA.42152.1 | 11.8  | 11.58 | 0.07 | 0.19 | 1.17  | 0.092307 | 0.026438 | 0.448803 | 0.203765 |
| MmugDNA.42154.1.S1_at   | MmugDNA.42154.1 | 6.73  | 6.48  | 0.19 | 0.45 | 1.19  | 0.64273  | 0.576906 | 0.838858 | 0.747521 |
| MmugDNA.42155.1.S1_at   | MmugDNA.42155.1 | 5.08  | 4.99  | 0.12 | 0.13 | 1.06  | 0.600418 | 0.748588 | 0.815205 | 0.853719 |
| MmugDNA.42156.1.S1_at   | MmugDNA.42156.1 | 4.04  | 3.84  | 0.19 | 0.06 | 1.14  | 0.478025 | 0.881497 | 0.747094 | 0.932382 |
| MmugDNA.42157.1.S1_at   | MmugDNA.42157.1 | 4.89  | 5.71  | 0.13 | 0.81 | -1.76 | 0.11954  | 0.080662 | 0.484145 | 0.328444 |
| MmugDNA.42158.1.S1_at   | MmugDNA.42158.1 | 8.58  | 7.86  | 0.1  | 0.56 | 1.65  | 0.083977 | 0.081883 | 0.436439 | 0.330339 |
| MmugDNA.42159.1.S1_at   | MmugDNA.42159.1 | 6.65  | 6.65  | 0.08 | 0.14 | 1     | 0.603867 | 0.459967 | 0.817352 | 0.671989 |
| MmugDNA.4216.1.S1_at    | MmugDNA.4216.1  | 5.89  | 5.8   | 0.23 | 0.24 | 1.06  | 0.801583 | 0.650579 | 0.918156 | 0.795663 |
| MmugDNA.42160.1.S1_at   | MmugDNA.42160.1 | 8.62  | 8.84  | 0.34 | 0.79 | -1.16 | 0.937048 | 0.955684 | 0.975769 | 0.974899 |
| MmugDNA.42161.1.S1_at   | MmugDNA.42161.1 | 3.79  | 3.82  | 0.21 | 0.13 | -1.02 | 0.768539 | 0.835929 | 0.902719 | 0.906135 |
| MmugDNA.42163.1.S1_at   | MmugDNA.42163.1 | 5.17  | 5.21  | 0.25 | 0.09 | -1.03 | 0.875881 | 0.668472 | 0.950267 | 0.805975 |
| MmugDNA.42164.1.S1_s_at | MmugDNA.42164.1 | 4.89  | 5.17  | 0.11 | 0.14 | -1.21 | 0.126745 | 0.034084 | 0.492863 | 0.228514 |
| MmugDNA.42165.1.S1_at   | MmugDNA.42165.1 | 4.51  | 4.39  | 0.21 | 0.04 | 1.08  | 0.857359 | 0.778781 | 0.942256 | 0.871617 |
| MmugDNA.42166.1.S1_at   | MmugDNA.42166.1 | 7.57  | 7.14  | 0.32 | 0.19 | 1.35  | 0.168866 | 0.041153 | 0.533155 | 0.247702 |
| MmugDNA.42167.1.S1_at   | MmugDNA.42167.1 | 4.72  | 4.78  | 0    | 0.16 | -1.04 | 0.608242 | 0.409311 | 0.819872 | 0.636437 |
| MmugDNA.42168.1.S1_at   | MmugDNA.42168.1 | 3.57  | 3.55  | 0.16 | 0.12 | 1.02  | 0.326288 | 0.508014 | 0.653184 | 0.703358 |
| MmugDNA.42169.1.S1_at   | MmugDNA.42169.1 | 7.12  | 7.31  | 0.09 | 0.13 | -1.14 | 0.070233 | 0.013142 | 0.413849 | 0.147338 |
| MmugDNA.4217.1.S1_at    | MmugDNA.4217.1  | 3.58  | 3.74  | 0.01 | 0.38 | -1.12 | 0.598648 | 0.713418 | 0.814021 | 0.833698 |
| MmugDNA.42170.1.S1_at   | MmugDNA.42170.1 | 4.57  | 4.73  | 1.09 | 0.42 | -1.12 | 0.50085  | 0.706191 | 0.759735 | 0.829634 |
| MmugDNA.42171.1.S1_at   | MmugDNA.42171.1 | 5.23  | 5.4   | 0.39 | 0.06 | -1.13 | 0.864064 | 0.677801 | 0.945445 | 0.811816 |
| MmugDNA.42172.1.S1_at   | MmugDNA.42172.1 | 5.42  | 5.45  | 0.24 | 0.12 | -1.02 | 0.712451 | 0.659578 | 0.874062 | 0.800802 |
| MmugDNA.42173.1.S1_at   | MmugDNA.42173.1 | 5.19  | 5.13  | 0.18 | 0.19 | 1.04  | 0.768576 | 0.484429 | 0.902719 | 0.688478 |
| MmugDNA.42176.1.S1_at   | MmugDNA.42176.1 | 3.66  | 3.35  | 0.35 | 0.47 | 1.24  | 0.420274 | 0.51411  | 0.712292 | 0.707434 |
| MmugDNA.42178.1.S1_at   | MmugDNA.42178.1 | 6.18  | 6.31  | 0.17 | 0.12 | -1.1  | 0.479465 | 0.439802 | 0.747663 | 0.658439 |
| MmugDNA.42179.1.S1_at   | MmugDNA.42179.1 | 5.54  | 5.54  | 0.08 | 0.09 | 1     | 0.507563 | 0.217858 | 0.76294  | 0.491406 |
| MmugDNA.4218.1.S1_at    | MmugDNA.4218.1  | 9.37  | 9.7   | 0.25 | 0.77 | -1.26 | 0.947692 | 0.965664 | 0.979946 | 0.980751 |
| MmugDNA.42180.1.S1_at   | MmugDNA.42180.1 | 7.11  | 7.02  | 0.18 | 0.1  | 1.07  | 0.310096 | 0.421478 | 0.642066 | 0.64509  |
| MmugDNA.42182.1.S1_at   | MmugDNA.42182.1 | 11.04 | 10.19 | 0.16 | 0.76 | 1.8   | 0.303856 | 0.095927 | 0.638083 | 0.353204 |
| MmugDNA.42183.1.S1_at   | MmugDNA.42183.1 | 6.18  | 6.18  | 0.23 | 0.2  | -1.01 | 0.223177 | 0.312736 | 0.581723 | 0.567299 |

|                         |                 |       |       |      |      |       |          |          |          |          |
|-------------------------|-----------------|-------|-------|------|------|-------|----------|----------|----------|----------|
| MmugDNA.42184.1.S1_at   | MmugDNA.42184.1 | 9.1   | 9.7   | 0.19 | 0.6  | -1.52 | 0.364816 | 0.545981 | 0.677653 | 0.727708 |
| MmugDNA.42185.1.S1_at   | MmugDNA.42185.1 | 6.11  | 5.3   | 1.08 | 0.03 | 1.75  | 0.24586  | 0.290967 | 0.597278 | 0.551525 |
| MmugDNA.42187.1.S1_at   | MmugDNA.42187.1 | 7.54  | 8.12  | 0.1  | 1.19 | -1.5  | 0.502414 | 0.596081 | 0.760355 | 0.759339 |
| MmugDNA.42188.1.S1_at   | MmugDNA.42188.1 | 3.86  | 3.93  | 0.28 | 0.09 | -1.05 | 0.442597 | 0.610364 | 0.725706 | 0.768571 |
| MmugDNA.42192.1.S1_at   | MmugDNA.42192.1 | 6.28  | 6.31  | 0.07 | 0.12 | -1.02 | 0.706953 | 0.895843 | 0.870899 | 0.940479 |
| MmugDNA.42193.1.S1_at   | MmugDNA.42193.1 | 9.16  | 10.25 | 0.16 | 0.46 | -2.13 | 0.01138  | 0.004047 | 0.235384 | 0.090281 |
| MmugDNA.42194.1.S1_at   | MmugDNA.42194.1 | 6.35  | 6.51  | 0.16 | 0.34 | -1.12 | 0.74012  | 0.905286 | 0.888432 | 0.946296 |
| MmugDNA.42195.1.S1_at   | MmugDNA.42195.1 | 9.3   | 9.3   | 0.14 | 0.26 | 1     | 0.483486 | 0.368372 | 0.749892 | 0.607917 |
| MmugDNA.42197.1.S1_s_at | MmugDNA.42197.1 | 11.77 | 11.94 | 0.19 | 0.11 | -1.12 | 0.237207 | 0.213963 | 0.590811 | 0.487596 |
| MmugDNA.42199.1.S1_at   | MmugDNA.42199.1 | 4.62  | 4.61  | 0.33 | 0.19 | 1.01  | 0.472815 | 0.676015 | 0.744016 | 0.810632 |
| MmugDNA.4220.1.S1_at    | MmugDNA.4220.1  | 4.32  | 4.46  | 0.09 | 0.51 | -1.1  | 0.223104 | 0.259093 | 0.58172  | 0.526263 |
| MmugDNA.42200.1.S1_at   | MmugDNA.42200.1 | 7.78  | 7.03  | 0.29 | 0.72 | 1.67  | 0.47116  | 0.667294 | 0.742919 | 0.805297 |
| MmugDNA.42201.1.S1_at   | MmugDNA.42201.1 | 11.47 | 10.98 | 0.19 | 0.18 | 1.4   | 0.049662 | 0.04503  | 0.371712 | 0.256697 |
| MmugDNA.42204.1.S1_at   | MmugDNA.42204.1 | 5.65  | 5.07  | 1.17 | 0.89 | 1.5   | 0.998454 | 0.118844 | 0.99939  | 0.387009 |
| MmugDNA.42208.1.S1_at   | MmugDNA.42208.1 | 3.25  | 3.26  | 0.12 | 0.06 | -1.01 | 0.774215 | 0.754024 | 0.905065 | 0.856812 |
| MmugDNA.42209.1.S1_at   | MmugDNA.42209.1 | 6.16  | 6.76  | 0.15 | 0.22 | -1.51 | 0.02316  | 0.013846 | 0.290295 | 0.150924 |
| MmugDNA.4221.1.S1_at    | MmugDNA.4221.1  | 2.69  | 2.79  | 0.1  | 0.28 | -1.07 | 0.227442 | 0.292508 | 0.585103 | 0.55258  |
| MmugDNA.42210.1.S1_at   | MmugDNA.42210.1 | 6.02  | 6.14  | 0.14 | 0.09 | -1.09 | 0.658425 | 0.302206 | 0.846592 | 0.560092 |
| MmugDNA.42211.1.S1_at   | MmugDNA.42211.1 | 10.76 | 10.05 | 0.25 | 0.54 | 1.65  | 0.158069 | 0.160643 | 0.522944 | 0.436745 |
| MmugDNA.42212.1.S1_at   | MmugDNA.42212.1 | 4.53  | 4.48  | 0.11 | 0.15 | 1.03  | 0.592889 | 0.33002  | 0.811221 | 0.578915 |
| MmugDNA.42213.1.S1_at   | MmugDNA.42213.1 | 3.45  | 3.26  | 0.11 | 0.04 | 1.14  | 0.106234 | 0.499366 | 0.466831 | 0.698219 |
| MmugDNA.42214.1.S1_at   | MmugDNA.42214.1 | 3.07  | 3.06  | 0.07 | 0.06 | 1.01  | 0.763718 | 0.74778  | 0.900421 | 0.853252 |
| MmugDNA.42216.1.S1_at   | MmugDNA.42216.1 | 4.41  | 4.51  | 0.08 | 0.09 | -1.07 | 0.308696 | 0.230565 | 0.641054 | 0.50226  |
| MmugDNA.42217.1.S1_at   | MmugDNA.42217.1 | 5.35  | 5.29  | 0.3  | 0.07 | 1.05  | 0.97885  | 0.949173 | 0.992232 | 0.970886 |
| MmugDNA.42218.1.S1_at   | MmugDNA.42218.1 | 4.14  | 4.39  | 0.11 | 0.7  | -1.19 | 0.240885 | 0.06529  | 0.593628 | 0.301249 |
| MmugDNA.42219.1.S1_at   | MmugDNA.42219.1 | 4.52  | 3.79  | 0.51 | 0.1  | 1.65  | 0.208734 | 0.270775 | 0.570418 | 0.536026 |
| MmugDNA.4222.1.S1_at    | MmugDNA.4222.1  | 4.31  | 4.29  | 0.12 | 0.05 | 1.01  | 0.683268 | 0.677321 | 0.858347 | 0.811609 |
| MmugDNA.42220.1.S1_at   | MmugDNA.42220.1 | 5.86  | 5.74  | 0.48 | 0.3  | 1.09  | 0.917382 | 0.940956 | 0.967843 | 0.966553 |
| MmugDNA.42221.1.S1_at   | MmugDNA.42221.1 | 10.93 | 11.27 | 0.1  | 0.47 | -1.27 | 0.461337 | 0.244483 | 0.737551 | 0.514295 |
| MmugDNA.42223.1.S1_at   | MmugDNA.42223.1 | 4.84  | 5.27  | 0.24 | 1.11 | -1.35 | 0.619158 | 0.651004 | 0.825425 | 0.795969 |
| MmugDNA.42224.1.S1_at   | MmugDNA.42224.1 | 6.26  | 5.97  | 1.09 | 0.39 | 1.22  | 0.248823 | 0.328107 | 0.599636 | 0.577872 |
| MmugDNA.42225.1.S1_at   | MmugDNA.42225.1 | 7.09  | 10.22 | 1.11 | 0.74 | -8.73 | 0.029509 | 0.017404 | 0.314644 | 0.166995 |
| MmugDNA.42226.1.S1_at   | MmugDNA.42226.1 | 10.16 | 9.82  | 0.23 | 0.32 | 1.26  | 0.146136 | 0.190843 | 0.512187 | 0.466228 |
| MmugDNA.42227.1.S1_at   | MmugDNA.42227.1 | 8.66  | 9.07  | 0.5  | 0.24 | -1.33 | 0.158151 | 0.202457 | 0.522944 | 0.476786 |
| MmugDNA.42228.1.S1_at   | MmugDNA.42228.1 | 13.42 | 13.15 | 0.09 | 0.08 | 1.21  | 0.02028  | 0.009346 | 0.277443 | 0.127602 |
| MmugDNA.42229.1.S1_at   | MmugDNA.42229.1 | 3.09  | 3.1   | 0.08 | 0.11 | -1.01 | 0.794143 | 0.664199 | 0.914561 | 0.803247 |
| MmugDNA.4223.1.S1_at    | MmugDNA.4223.1  | 4.44  | 4.58  | 0.06 | 0.18 | -1.11 | 0.175686 | 0.22623  | 0.539412 | 0.498692 |
| MmugDNA.42231.1.S1_at   | MmugDNA.42231.1 | 4.82  | 4.74  | 0.1  | 0.3  | 1.06  | 0.64038  | 0.618042 | 0.837628 | 0.773852 |
| MmugDNA.42232.1.S1_at   | MmugDNA.42232.1 | 5.77  | 5.74  | 0.14 | 0.04 | 1.02  | 0.447066 | 0.391646 | 0.72871  | 0.625282 |
| MmugDNA.42234.1.S1_at   | MmugDNA.42234.1 | 3.33  | 3.32  | 0.07 | 0    | 1.01  | 0.778158 | 0.864699 | 0.907387 | 0.923276 |
| MmugDNA.42235.1.S1_at   | MmugDNA.42235.1 | 7.84  | 7.88  | 0.21 | 0.26 | -1.03 | 0.264118 | 0.285953 | 0.609857 | 0.547505 |

|                         |                 |       |       |      |      |        |          |          |          |          |
|-------------------------|-----------------|-------|-------|------|------|--------|----------|----------|----------|----------|
| MmugDNA.42236.1.S1_at   | MmugDNA.42236.1 | 5.55  | 5.79  | 1.86 | 0.92 | -1.18  | 0.532877 | 0.68954  | 0.777862 | 0.818901 |
| MmugDNA.42237.1.S1_at   | MmugDNA.42237.1 | 5     | 5.05  | 0.83 | 0.41 | -1.04  | 0.967791 | 0.853123 | 0.987919 | 0.916487 |
| MmugDNA.42238.1.S1_at   | MmugDNA.42238.1 | 5.51  | 4.73  | 0.28 | 0.55 | 1.71   | 0.156998 | 0.119084 | 0.521736 | 0.387386 |
| MmugDNA.42239.1.S1_at   | MmugDNA.42239.1 | 6.21  | 5.8   | 1.24 | 0.18 | 1.33   | 0.193251 | 0.172304 | 0.556738 | 0.448666 |
| MmugDNA.42242.1.S1_at   | MmugDNA.42242.1 | 4.5   | 4.51  | 0.38 | 0.22 | -1     | 0.354932 | 0.320038 | 0.6707   | 0.572412 |
| MmugDNA.42244.1.S1_at   | MmugDNA.42244.1 | 4.2   | 5.01  | 0.86 | 0.6  | -1.76  | 0.669317 | 0.745025 | 0.852138 | 0.852262 |
| MmugDNA.42246.1.S1_at   | MmugDNA.42246.1 | 4.79  | 4.39  | 0.34 | 0.21 | 1.32   | 0.16195  | 0.151681 | 0.526638 | 0.426383 |
| MmugDNA.42248.1.S1_at   | MmugDNA.42248.1 | 3.91  | 3.8   | 0.04 | 0.15 | 1.08   | 0.309723 | 0.050329 | 0.641716 | 0.269595 |
| MmugDNA.4225.1.S1_at    | MmugDNA.4225.1  | 4.44  | 4.44  | 0.12 | 0.05 | -1.01  | 0.704078 | 0.90803  | 0.869428 | 0.947889 |
| MmugDNA.42252.1.S1_at   | MmugDNA.42252.1 | 11.28 | 11.24 | 0.34 | 0.38 | 1.03   | 0.74909  | 0.848812 | 0.892627 | 0.914141 |
| MmugDNA.42253.1.S1_at   | MmugDNA.42253.1 | 5.53  | 5.73  | 0.22 | 0.12 | -1.15  | 0.553348 | 0.164298 | 0.79008  | 0.440539 |
| MmugDNA.42254.1.S1_at   | MmugDNA.42254.1 | 4.25  | 4.38  | 0.23 | 0.24 | -1.09  | 0.788469 | 0.618733 | 0.912168 | 0.774185 |
| MmugDNA.42256.1.S1_at   | MmugDNA.42256.1 | 4.66  | 4.75  | 0.65 | 0.34 | -1.06  | 0.632017 | 0.652194 | 0.832958 | 0.796592 |
| MmugDNA.42258.1.S1_at   | MmugDNA.42258.1 | 4.71  | 4.77  | 0.44 | 0.06 | -1.04  | 0.762534 | 0.921883 | 0.899996 | 0.955951 |
| MmugDNA.42259.1.S1_at   | MmugDNA.42259.1 | 3.89  | 3.57  | 0.75 | 0.38 | 1.25   | 0.463736 | 0.169026 | 0.738963 | 0.445593 |
| MmugDNA.4226.1.S1_at    | MmugDNA.4226.1  | 9.6   | 7.96  | 0.19 | 0.05 | 3.13   | 0.000099 | 0.00051  | 0.112653 | 0.039357 |
| MmugDNA.42260.1.S1_at   | MmugDNA.42260.1 | 10.28 | 10.41 | 0.16 | 0.19 | -1.09  | 0.179642 | 0.021139 | 0.543821 | 0.182036 |
| MmugDNA.42261.1.S1_at   | MmugDNA.42261.1 | 4.06  | 4.09  | 0.14 | 0.06 | -1.02  | 0.263425 | 0.39772  | 0.609348 | 0.62909  |
| MmugDNA.42262.1.S1_at   | MmugDNA.42262.1 | 4.53  | 4.53  | 0.08 | 0.03 | 1      | 0.264816 | 0.556279 | 0.610557 | 0.734476 |
| MmugDNA.42263.1.S1_at   | MmugDNA.42263.1 | 4.63  | 4.7   | 0    | 0.13 | -1.05  | 0.929403 | 0.790034 | 0.972716 | 0.878637 |
| MmugDNA.42264.1.S1_s_at | MmugDNA.42264.1 | 5.15  | 9.48  | 2.71 | 3.19 | -20.11 | 0.552908 | 0.400289 | 0.789712 | 0.630158 |
| MmugDNA.42264.1.S1_x_at | MmugDNA.42264.1 | 4.36  | 5.14  | 0.45 | 0.81 | -1.71  | 0.376693 | 0.308937 | 0.685249 | 0.564656 |
| MmugDNA.42266.1.S1_at   | MmugDNA.42266.1 | 3.58  | 3.57  | 0.11 | 0    | 1.01   | 0.802995 | 0.860482 | 0.918874 | 0.920521 |
| MmugDNA.42267.1.S1_at   | MmugDNA.42267.1 | 4.49  | 4.47  | 0.62 | 0.31 | 1.02   | 0.940593 | 0.683357 | 0.97745  | 0.815239 |
| MmugDNA.42268.1.S1_at   | MmugDNA.42268.1 | 4.04  | 4.09  | 0.19 | 0.07 | -1.04  | 0.454216 | 0.505273 | 0.733184 | 0.702073 |
| MmugDNA.42271.1.S1_at   | MmugDNA.42271.1 | 4.15  | 4.06  | 1.33 | 0.09 | 1.06   | 0.343074 | 0.55782  | 0.663407 | 0.735261 |
| MmugDNA.42272.1.S1_at   | MmugDNA.42272.1 | 7.76  | 7.54  | 0.67 | 0.41 | 1.16   | 0.755555 | 0.486922 | 0.896094 | 0.690118 |
| MmugDNA.42273.1.S1_at   | MmugDNA.42273.1 | 6.78  | 6.88  | 0.07 | 0.12 | -1.07  | 0.186855 | 0.314094 | 0.550106 | 0.568185 |
| MmugDNA.42274.1.S1_at   | MmugDNA.42274.1 | 6.67  | 7.18  | 0.23 | 0.4  | -1.42  | 0.137314 | 0.110621 | 0.504453 | 0.374854 |
| MmugDNA.42275.1.S1_at   | MmugDNA.42275.1 | 9.09  | 7.58  | 0.27 | 0.25 | 2.85   | 0.002448 | 0.000418 | 0.163555 | 0.038093 |
| MmugDNA.42276.1.S1_at   | MmugDNA.42276.1 | 5.63  | 5.57  | 0.12 | 0.06 | 1.04   | 0.713273 | 0.556387 | 0.87439  | 0.734507 |
| MmugDNA.42277.1.S1_at   | MmugDNA.42277.1 | 3.83  | 3.66  | 0.18 | 0.13 | 1.12   | 0.696237 | 0.628947 | 0.86516  | 0.781556 |
| MmugDNA.42278.1.S1_at   | MmugDNA.42278.1 | 11.56 | 11.95 | 0.1  | 0.02 | -1.31  | 0.002853 | 0.000059 | 0.168911 | 0.025666 |
| MmugDNA.42278.1.S1_s_at | MmugDNA.42278.1 | 11.18 | 11.53 | 0.02 | 0.07 | -1.27  | 0.001783 | 0.000018 | 0.154452 | 0.019635 |
| MmugDNA.42279.1.S1_at   | MmugDNA.42279.1 | 4.94  | 5.36  | 0.35 | 0.96 | -1.34  | 0.561748 | 0.690327 | 0.794946 | 0.819503 |
| MmugDNA.4228.1.S1_at    | MmugDNA.4228.1  | 6.25  | 7.07  | 1.17 | 0.48 | -1.76  | 0.890057 | 0.985026 | 0.956021 | 0.991497 |
| MmugDNA.42280.1.S1_at   | MmugDNA.42280.1 | 5.71  | 5.99  | 0.49 | 0.17 | -1.21  | 0.790406 | 0.603483 | 0.91303  | 0.764189 |
| MmugDNA.42282.1.S1_at   | MmugDNA.42282.1 | 5.66  | 5.66  | 0.27 | 0.09 | 1      | 0.703812 | 0.197271 | 0.869262 | 0.472213 |
| MmugDNA.42285.1.S1_at   | MmugDNA.42285.1 | 3.47  | 3.39  | 0.36 | 0.06 | 1.05   | 0.225932 | 0.251644 | 0.583922 | 0.520387 |
| MmugDNA.42286.1.S1_at   | MmugDNA.42286.1 | 3.79  | 3.68  | 1.3  | 0.11 | 1.08   | 0.560268 | 0.759266 | 0.794209 | 0.860036 |
| MmugDNA.42286.1.S1_s_at | MmugDNA.42286.1 | 12.92 | 12.81 | 0.09 | 0.07 | 1.08   | 0.107745 | 0.061076 | 0.468261 | 0.293952 |



|                         |                 |       |       |      |      |       |          |          |          |          |
|-------------------------|-----------------|-------|-------|------|------|-------|----------|----------|----------|----------|
| MmugDNA.42288.1.S1_at   | MmugDNA.42288.1 | 3.02  | 2.97  | 0.12 | 0.03 | 1.03  | 0.684753 | 0.630445 | 0.858795 | 0.782237 |
| MmugDNA.42289.1.S1_at   | MmugDNA.42289.1 | 6.82  | 6.91  | 0.89 | 0.14 | -1.06 | 0.479472 | 0.672682 | 0.747663 | 0.808708 |
| MmugDNA.4229.1.S1_at    | MmugDNA.4229.1  | 7.08  | 6.86  | 0.13 | 0.36 | 1.16  | 0.105316 | 0.129835 | 0.465877 | 0.401506 |
| MmugDNA.42290.1.S1_at   | MmugDNA.42290.1 | 3.46  | 3.55  | 0    | 0.08 | -1.07 | 0.326279 | 0.514188 | 0.653184 | 0.70751  |
| MmugDNA.42291.1.S1_at   | MmugDNA.42291.1 | 6.87  | 7.25  | 0.18 | 0.17 | -1.31 | 0.051626 | 0.074712 | 0.376076 | 0.318465 |
| MmugDNA.42292.1.S1_at   | MmugDNA.42292.1 | 6.37  | 6.35  | 0.07 | 0.03 | 1.02  | 0.147324 | 0.224334 | 0.513118 | 0.497249 |
| MmugDNA.42293.1.S1_at   | MmugDNA.42293.1 | 5.42  | 5.3   | 0.49 | 0.16 | 1.08  | 0.239943 | 0.302881 | 0.592852 | 0.560356 |
| MmugDNA.42294.1.S1_at   | MmugDNA.42294.1 | 3.21  | 3.33  | 0.3  | 0.15 | -1.09 | 0.642605 | 0.737538 | 0.838763 | 0.847993 |
| MmugDNA.42296.1.S1_at   | MmugDNA.42296.1 | 4.9   | 4.38  | 0.06 | 0.54 | 1.44  | 0.220119 | 0.204505 | 0.579297 | 0.478845 |
| MmugDNA.42297.1.S1_at   | MmugDNA.42297.1 | 4.96  | 4.87  | 0.21 | 0.04 | 1.07  | 0.868946 | 0.946105 | 0.947822 | 0.969374 |
| MmugDNA.42298.1.S1_at   | MmugDNA.42298.1 | 5.86  | 6.44  | 0.61 | 0.23 | -1.49 | 0.397136 | 0.404268 | 0.697519 | 0.632709 |
| MmugDNA.42299.1.S1_at   | MmugDNA.42299.1 | 5.13  | 4.66  | 0.1  | 0.45 | 1.38  | 0.042214 | 0.187197 | 0.354539 | 0.463153 |
| MmugDNA.423.1.S1_at     | MmugDNA.423.1   | 5.37  | 5.28  | 0.24 | 0.22 | 1.07  | 0.736552 | 0.812653 | 0.886692 | 0.891778 |
| MmugDNA.4230.1.S1_at    | MmugDNA.4230.1  | 4.43  | 4.2   | 0.41 | 0    | 1.17  | 0.958288 | 0.992715 | 0.984261 | 0.995715 |
| MmugDNA.42300.1.S1_at   | MmugDNA.42300.1 | 11.64 | 11.38 | 0.2  | 0.46 | 1.2   | 0.409814 | 0.471571 | 0.706063 | 0.679522 |
| MmugDNA.42303.1.S1_at   | MmugDNA.42303.1 | 11.65 | 11.92 | 0.04 | 0.03 | -1.2  | 0.000799 | 0.001059 | 0.136818 | 0.05171  |
| MmugDNA.42305.1.S1_at   | MmugDNA.42305.1 | 6.86  | 6.94  | 0.74 | 0.28 | -1.06 | 0.471281 | 0.449471 | 0.742955 | 0.665087 |
| MmugDNA.42306.1.S1_at   | MmugDNA.42306.1 | 8.77  | 8.75  | 0.16 | 0.39 | 1.01  | 0.843539 | 0.291449 | 0.937058 | 0.551823 |
| MmugDNA.42307.1.S1_s_at | MmugDNA.42307.1 | 4.1   | 4.6   | 0.23 | 0.39 | -1.42 | 0.193813 | 0.143324 | 0.557488 | 0.417294 |
| MmugDNA.42310.1.S1_at   | MmugDNA.42310.1 | 10.53 | 10.29 | 0.14 | 0.35 | 1.18  | 0.286708 | 0.324245 | 0.625572 | 0.57488  |
| MmugDNA.42312.1.S1_at   | MmugDNA.42312.1 | 12.6  | 12.02 | 0.06 | 0.42 | 1.49  | 0.072559 | 0.04201  | 0.417185 | 0.249463 |
| MmugDNA.42315.1.S1_at   | MmugDNA.42315.1 | 5.74  | 4.99  | 0.43 | 0.67 | 1.68  | 0.126873 | 0.241954 | 0.493029 | 0.512489 |
| MmugDNA.42316.1.S1_at   | MmugDNA.42316.1 | 3.9   | 4.14  | 0    | 0.17 | -1.18 | 0.235088 | 0.189834 | 0.589325 | 0.465403 |
| MmugDNA.42317.1.S1_at   | MmugDNA.42317.1 | 5.6   | 5.35  | 0.17 | 0.16 | 1.19  | 0.665594 | 0.836696 | 0.850023 | 0.906689 |
| MmugDNA.42318.1.S1_at   | MmugDNA.42318.1 | 4.72  | 4.8   | 0.22 | 0.17 | -1.06 | 0.703537 | 0.451753 | 0.869081 | 0.666609 |
| MmugDNA.42319.1.S1_at   | MmugDNA.42319.1 | 4.44  | 4.54  | 0.24 | 0.04 | -1.07 | 0.944837 | 0.927475 | 0.979001 | 0.958797 |
| MmugDNA.4232.1.S1_at    | MmugDNA.4232.1  | 6.35  | 6.18  | 0.2  | 0.2  | 1.13  | 0.798737 | 0.525912 | 0.916658 | 0.715246 |
| MmugDNA.42320.1.S1_at   | MmugDNA.42320.1 | 7.49  | 6.95  | 0.38 | 0.25 | 1.45  | 0.125148 | 0.117498 | 0.491199 | 0.38526  |
| MmugDNA.42322.1.S1_at   | MmugDNA.42322.1 | 5.84  | 5.95  | 0.06 | 0.11 | -1.08 | 0.263304 | 0.301931 | 0.609348 | 0.55986  |
| MmugDNA.42324.1.S1_at   | MmugDNA.42324.1 | 6.33  | 6.31  | 0.44 | 0.27 | 1.01  | 0.996138 | 0.683884 | 0.998461 | 0.815591 |
| MmugDNA.42325.1.S1_at   | MmugDNA.42325.1 | 7.4   | 7.2   | 0.11 | 0.16 | 1.15  | 0.261042 | 0.589825 | 0.607554 | 0.755973 |
| MmugDNA.4233.1.S1_at    | MmugDNA.4233.1  | 6.07  | 6.16  | 0.13 | 0.07 | -1.06 | 0.503249 | 0.540809 | 0.760699 | 0.724565 |
| MmugDNA.42330.1.S1_at   | MmugDNA.42330.1 | 3.82  | 4     | 0.22 | 0.37 | -1.13 | 0.84202  | 0.453994 | 0.93631  | 0.668362 |
| MmugDNA.42331.1.S1_at   | MmugDNA.42331.1 | 2.92  | 2.93  | 0.1  | 0.15 | -1.01 | 0.988652 | 0.993202 | 0.995952 | 0.995946 |
| MmugDNA.42332.1.S1_at   | MmugDNA.42332.1 | 4.09  | 4.1   | 0.1  | 0.1  | -1.01 | 0.631411 | 0.247021 | 0.83269  | 0.516238 |
| MmugDNA.42333.1.S1_at   | MmugDNA.42333.1 | 6     | 6.1   | 0.15 | 0.17 | -1.07 | 0.161908 | 0.200301 | 0.526573 | 0.474689 |
| MmugDNA.42334.1.S1_at   | MmugDNA.42334.1 | 3.22  | 3.14  | 0.15 | 0.13 | 1.06  | 0.523936 | 0.791845 | 0.772859 | 0.87976  |
| MmugDNA.42335.1.S1_at   | MmugDNA.42335.1 | 8.68  | 8.89  | 0.36 | 0.16 | -1.16 | 0.293237 | 0.177143 | 0.630314 | 0.453611 |
| MmugDNA.42338.1.S1_at   | MmugDNA.42338.1 | 8.45  | 9.45  | 0.25 | 0.6  | -2.01 | 0.127924 | 0.040556 | 0.494075 | 0.246268 |
| MmugDNA.42339.1.S1_at   | MmugDNA.42339.1 | 4.58  | 4.59  | 0.11 | 0.08 | -1.01 | 0.84862  | 0.969305 | 0.939211 | 0.983179 |
| MmugDNA.42340.1.S1_at   | MmugDNA.42340.1 | 6.2   | 6.25  | 0.37 | 0.79 | -1.04 | 0.991192 | 0.867576 | 0.996899 | 0.924742 |

|                         |                 |       |       |      |      |       |          |          |          |          |
|-------------------------|-----------------|-------|-------|------|------|-------|----------|----------|----------|----------|
| MmugDNA.42342.1.S1_at   | MmugDNA.42342.1 | 7.69  | 8.18  | 0.76 | 1.23 | -1.41 | 0.564729 | 0.77314  | 0.796798 | 0.868084 |
| MmugDNA.42342.1.S1_s_at | MmugDNA.42342.1 | 9.3   | 9.74  | 0.78 | 0.96 | -1.35 | 0.495144 | 0.676326 | 0.75708  | 0.810904 |
| MmugDNA.42343.1.S1_at   | MmugDNA.42343.1 | 9.34  | 9.73  | 0.79 | 1.14 | -1.32 | 0.563408 | 0.75624  | 0.79597  | 0.85815  |
| MmugDNA.42344.1.S1_at   | MmugDNA.42344.1 | 8.22  | 8.6   | 0.16 | 1.25 | -1.3  | 0.739745 | 0.862116 | 0.888213 | 0.921635 |
| MmugDNA.42346.1.S1_at   | MmugDNA.42346.1 | 3     | 3.11  | 0.39 | 0.12 | -1.08 | 0.850547 | 0.111454 | 0.939993 | 0.376126 |
| MmugDNA.42347.1.S1_at   | MmugDNA.42347.1 | 4.63  | 4.69  | 0.81 | 0.84 | -1.04 | 0.92586  | 0.650056 | 0.97147  | 0.795399 |
| MmugDNA.42348.1.S1_at   | MmugDNA.42348.1 | 10.51 | 10.84 | 0.22 | 0.17 | -1.26 | 0.142831 | 0.135375 | 0.509783 | 0.407478 |
| MmugDNA.42349.1.S1_at   | MmugDNA.42349.1 | 3.6   | 3.69  | 0.06 | 0.27 | -1.07 | 0.199497 | 0.338814 | 0.562475 | 0.585875 |
| MmugDNA.4235.1.S1_at    | MmugDNA.4235.1  | 3.19  | 3.55  | 0.21 | 0.47 | -1.29 | 0.279112 | 0.201535 | 0.620933 | 0.476036 |
| MmugDNA.42350.1.S1_at   | MmugDNA.42350.1 | 7.09  | 6.43  | 0.1  | 0.18 | 1.58  | 0.00651  | 0.006984 | 0.199625 | 0.112771 |
| MmugDNA.42351.1.S1_at   | MmugDNA.42351.1 | 4.81  | 5.4   | 0.82 | 0.71 | -1.5  | 0.507928 | 0.42586  | 0.763241 | 0.6481   |
| MmugDNA.42352.1.S1_at   | MmugDNA.42352.1 | 5.55  | 5.3   | 0.84 | 0.49 | 1.19  | 0.257736 | 0.357419 | 0.605259 | 0.599041 |
| MmugDNA.42353.1.S1_at   | MmugDNA.42353.1 | 7.11  | 7.18  | 0.23 | 0.18 | -1.05 | 0.393167 | 0.399189 | 0.695026 | 0.629699 |
| MmugDNA.42354.1.S1_at   | MmugDNA.42354.1 | 5.08  | 5.09  | 0.1  | 0.09 | -1.01 | 0.944871 | 0.407586 | 0.979001 | 0.63505  |
| MmugDNA.42356.1.S1_at   | MmugDNA.42356.1 | 4.7   | 4.65  | 0.38 | 0.06 | 1.03  | 0.476028 | 0.68195  | 0.746101 | 0.81424  |
| MmugDNA.42357.1.S1_at   | MmugDNA.42357.1 | 5.17  | 5.06  | 0.12 | 0.16 | 1.08  | 0.127557 | 0.144757 | 0.493834 | 0.418609 |
| MmugDNA.42358.1.S1_s_at | MmugDNA.42358.1 | 6.09  | 6.23  | 0.3  | 0.1  | -1.1  | 0.803143 | 0.943383 | 0.918948 | 0.967843 |
| MmugDNA.42359.1.S1_at   | MmugDNA.42359.1 | 4.68  | 4.87  | 0.08 | 0.12 | -1.14 | 0.230496 | 0.311896 | 0.587222 | 0.566833 |
| MmugDNA.4236.1.S1_at    | MmugDNA.4236.1  | 4.49  | 4.28  | 0.19 | 0.13 | 1.16  | 0.823242 | 0.322142 | 0.928128 | 0.573743 |
| MmugDNA.42360.1.S1_at   | MmugDNA.42360.1 | 3.52  | 3.5   | 0.13 | 0.12 | 1.01  | 0.764317 | 0.444768 | 0.900711 | 0.662072 |
| MmugDNA.42362.1.S1_at   | MmugDNA.42362.1 | 10.22 | 10.31 | 0.29 | 0.08 | -1.06 | 0.358263 | 0.492421 | 0.673123 | 0.693534 |
| MmugDNA.42363.1.S1_at   | MmugDNA.42363.1 | 3.8   | 3.82  | 0.14 | 0.18 | -1.01 | 0.208299 | 0.189347 | 0.570141 | 0.465092 |
| MmugDNA.42364.1.S1_at   | MmugDNA.42364.1 | 6.06  | 5.97  | 0.19 | 0.06 | 1.06  | 0.409114 | 0.264782 | 0.705753 | 0.530791 |
| MmugDNA.42365.1.S1_s_at | MmugDNA.42365.1 | 3.72  | 3.78  | 0.28 | 0.11 | -1.05 | 0.8543   | 0.592707 | 0.941105 | 0.757854 |
| MmugDNA.42366.1.S1_at   | MmugDNA.42366.1 | 13.32 | 13.31 | 0.04 | 0.05 | 1     | 0.717078 | 0.113439 | 0.875713 | 0.379509 |
| MmugDNA.42367.1.S1_at   | MmugDNA.42367.1 | 8.12  | 7.56  | 0.24 | 0.29 | 1.47  | 0.107425 | 0.118343 | 0.468045 | 0.386395 |
| MmugDNA.42368.1.S1_at   | MmugDNA.42368.1 | 4.71  | 4.85  | 0.09 | 0.11 | -1.1  | 0.413463 | 0.230288 | 0.708496 | 0.502102 |
| MmugDNA.42369.1.S1_s_at | MmugDNA.42369.1 | 11.69 | 11.48 | 0.19 | 0.29 | 1.16  | 0.070868 | 0.062591 | 0.414661 | 0.297022 |
| MmugDNA.4237.1.S1_at    | MmugDNA.4237.1  | 3.88  | 3.45  | 0.43 | 0.27 | 1.34  | 0.145856 | 0.134426 | 0.511704 | 0.406603 |
| MmugDNA.42370.1.S1_at   | MmugDNA.42370.1 | 5.99  | 5.94  | 0.32 | 0.1  | 1.03  | 0.557194 | 0.53662  | 0.792388 | 0.721934 |
| MmugDNA.42372.1.S1_at   | MmugDNA.42372.1 | 6.36  | 4.26  | 0.9  | 0.31 | 4.31  | 0.039868 | 0.023064 | 0.34828  | 0.190066 |
| MmugDNA.42373.1.S1_at   | MmugDNA.42373.1 | 8.09  | 8.09  | 0.14 | 0.29 | -1    | 0.844931 | 0.893378 | 0.937773 | 0.939163 |
| MmugDNA.42374.1.S1_at   | MmugDNA.42374.1 | 3.51  | 3.7   | 0.05 | 0.23 | -1.14 | 0.251353 | 0.232973 | 0.600793 | 0.50445  |
| MmugDNA.42377.1.S1_at   | MmugDNA.42377.1 | 10.07 | 9.64  | 0.2  | 0.2  | 1.35  | 0.102454 | 0.091324 | 0.46236  | 0.346281 |
| MmugDNA.42379.1.S1_at   | MmugDNA.42379.1 | 4.11  | 4.42  | 0.09 | 0.21 | -1.24 | 0.134951 | 0.42427  | 0.501995 | 0.646855 |
| MmugDNA.4238.1.S1_at    | MmugDNA.4238.1  | 3.7   | 3.84  | 0.2  | 0.04 | -1.1  | 0.23226  | 0.495852 | 0.587814 | 0.695754 |
| MmugDNA.42384.1.S1_at   | MmugDNA.42384.1 | 5.53  | 5.51  | 0.15 | 0.09 | 1.02  | 0.620332 | 0.550129 | 0.826026 | 0.730241 |
| MmugDNA.42386.1.S1_at   | MmugDNA.42386.1 | 6.2   | 5.78  | 0.2  | 0.3  | 1.34  | 0.178305 | 0.214579 | 0.542633 | 0.488385 |
| MmugDNA.42387.1.S1_at   | MmugDNA.42387.1 | 4.68  | 5.14  | 0.29 | 0.09 | -1.37 | 0.044703 | 0.03889  | 0.359043 | 0.242159 |
| MmugDNA.42388.1.S1_at   | MmugDNA.42388.1 | 5.73  | 5.74  | 0.05 | 0.09 | -1    | 0.455472 | 0.49646  | 0.733811 | 0.696071 |
| MmugDNA.42389.1.S1_at   | MmugDNA.42389.1 | 4.12  | 4     | 0.08 | 0.15 | 1.08  | 0.193715 | 0.236377 | 0.557435 | 0.507308 |

|                         |                 |       |       |      |      |       |          |          |          |          |
|-------------------------|-----------------|-------|-------|------|------|-------|----------|----------|----------|----------|
| MmugDNA.4239.1.S1_at    | MmugDNA.4239.1  | 5.96  | 5.93  | 0.18 | 0.14 | 1.02  | 0.607461 | 0.803968 | 0.819336 | 0.887203 |
| MmugDNA.42390.1.S1_at   | MmugDNA.42390.1 | 4.64  | 4.68  | 0.2  | 0.57 | -1.03 | 0.643463 | 0.381109 | 0.839402 | 0.617478 |
| MmugDNA.42391.1.S1_at   | MmugDNA.42391.1 | 8.77  | 9.05  | 0.28 | 0.19 | -1.21 | 0.255342 | 0.132777 | 0.603158 | 0.404544 |
| MmugDNA.42392.1.S1_at   | MmugDNA.42392.1 | 4.19  | 4.01  | 0.35 | 0.15 | 1.14  | 0.292194 | 0.262708 | 0.629464 | 0.529069 |
| MmugDNA.42393.1.S1_at   | MmugDNA.42393.1 | 5.85  | 6.11  | 0.19 | 0.25 | -1.2  | 0.262349 | 0.29881  | 0.608902 | 0.557415 |
| MmugDNA.42394.1.S1_at   | MmugDNA.42394.1 | 5.85  | 6.82  | 0.8  | 0.63 | -1.95 | 0.210214 | 0.329018 | 0.571368 | 0.578482 |
| MmugDNA.42395.1.S1_at   | MmugDNA.42395.1 | 10.79 | 10.55 | 0.09 | 0.19 | 1.18  | 0.336383 | 0.398763 | 0.659444 | 0.629478 |
| MmugDNA.42396.1.S1_at   | MmugDNA.42396.1 | 9.31  | 9.03  | 0.15 | 0.11 | 1.21  | 0.045488 | 0.046445 | 0.361126 | 0.260042 |
| MmugDNA.42397.1.S1_at   | MmugDNA.42397.1 | 4.09  | 4.11  | 0.08 | 0.25 | -1.01 | 0.852793 | 0.97731  | 0.940658 | 0.987656 |
| MmugDNA.42398.1.S1_at   | MmugDNA.42398.1 | 6.16  | 6.46  | 0.26 | 0.21 | -1.24 | 0.840503 | 0.964152 | 0.935751 | 0.980052 |
| MmugDNA.424.1.S1_at     | MmugDNA.424.1   | 10.04 | 10.47 | 0.25 | 0.83 | -1.34 | 0.410621 | 0.193207 | 0.706531 | 0.468578 |
| MmugDNA.9557.1.S1_at    | MmugDNA.9557.1  | 12.31 | 12.69 | 0.2  | 0.2  | -1.3  | 0.055231 | 0.041942 | 0.383636 | 0.249397 |
| MmugDNA.9557.1.S1_s_at  | MmugDNA.9557.1  | 11.72 | 12.28 | 0.22 | 0.24 | -1.48 | 0.030113 | 0.020435 | 0.316939 | 0.179564 |
| MmugDNA.42400.1.S1_at   | MmugDNA.42400.1 | 4.96  | 4.48  | 0.65 | 0.55 | 1.4   | 0.270709 | 0.141349 | 0.614998 | 0.414874 |
| MmugDNA.42402.1.S1_at   | MmugDNA.42402.1 | 9.55  | 9.77  | 0.22 | 0.25 | -1.16 | 0.144001 | 0.0876   | 0.510652 | 0.340846 |
| MmugDNA.27577.1.S1_s_at | MmugDNA.27577.1 | 9.75  | 9.87  | 0.14 | 0.23 | -1.09 | 0.175033 | 0.1401   | 0.538786 | 0.413394 |
| MmugDNA.42403.1.S1_at   | MmugDNA.42403.1 | 9.51  | 9.93  | 0.16 | 0.06 | -1.34 | 0.039622 | 0.004386 | 0.347789 | 0.092719 |
| MmugDNA.42404.1.S1_at   | MmugDNA.42404.1 | 8.47  | 8.32  | 0.45 | 0.42 | 1.12  | 0.825074 | 0.542964 | 0.9291   | 0.725861 |
| MmugDNA.42406.1.S1_at   | MmugDNA.42406.1 | 10.35 | 10.91 | 0.46 | 0.68 | -1.47 | 0.283716 | 0.372873 | 0.623679 | 0.611735 |
| MmugDNA.42407.1.S1_at   | MmugDNA.42407.1 | 10.94 | 10.85 | 0.1  | 0.46 | 1.06  | 0.95555  | 0.944555 | 0.983289 | 0.968614 |
| MmugDNA.42408.1.S1_at   | MmugDNA.42408.1 | 7.86  | 7.78  | 0.48 | 0.63 | 1.06  | 0.503932 | 0.693197 | 0.761056 | 0.821545 |
| MmugDNA.42409.1.S1_at   | MmugDNA.42409.1 | 6.7   | 6.72  | 0.26 | 0.14 | -1.01 | 0.788699 | 0.49541  | 0.912195 | 0.695448 |
| MmugDNA.4241.1.S1_at    | MmugDNA.4241.1  | 4.32  | 4.52  | 0.13 | 0.19 | -1.15 | 0.380286 | 0.537972 | 0.68724  | 0.72281  |
| MmugDNA.42413.1.S1_at   | MmugDNA.42413.1 | 3.86  | 3.62  | 0.49 | 0.3  | 1.18  | 0.515081 | 0.186508 | 0.767272 | 0.462364 |
| MmugDNA.42414.1.S1_at   | MmugDNA.42414.1 | 9.47  | 9.34  | 0.29 | 0.23 | 1.09  | 0.36816  | 0.163123 | 0.679759 | 0.43928  |
| MmugDNA.42415.1.S1_at   | MmugDNA.42415.1 | 6.37  | 6.64  | 0.19 | 0.05 | -1.2  | 0.232328 | 0.064969 | 0.587814 | 0.300855 |
| MmugDNA.42416.1.S1_at   | MmugDNA.42416.1 | 12.8  | 12.49 | 0.13 | 0.17 | 1.24  | 0.064667 | 0.058745 | 0.403239 | 0.289049 |
| MmugDNA.42416.1.S1_s_at | MmugDNA.42416.1 | 12.15 | 11.77 | 0.14 | 0.2  | 1.3   | 0.054163 | 0.050761 | 0.381696 | 0.270455 |
| MmugDNA.42417.1.S1_at   | MmugDNA.42417.1 | 3.47  | 3.51  | 0.31 | 0.05 | -1.03 | 0.649197 | 0.704395 | 0.84237  | 0.828446 |
| MmugDNA.42419.1.S1_at   | MmugDNA.42419.1 | 4.25  | 4.33  | 0.18 | 0.19 | -1.06 | 0.283236 | 0.268099 | 0.623314 | 0.533862 |
| MmugDNA.4242.1.S1_at    | MmugDNA.4242.1  | 8.66  | 9.26  | 0.07 | 0.25 | -1.51 | 0.04898  | 0.037968 | 0.370381 | 0.239302 |
| MmugDNA.42420.1.S1_at   | MmugDNA.42420.1 | 4.63  | 5     | 0.11 | 0.18 | -1.29 | 0.053431 | 0.053898 | 0.380257 | 0.277685 |
| MmugDNA.42421.1.S1_at   | MmugDNA.42421.1 | 11.05 | 10.6  | 0.18 | 0.09 | 1.36  | 0.028211 | 0.038596 | 0.310087 | 0.241492 |
| MmugDNA.42422.1.S1_at   | MmugDNA.42422.1 | 5.91  | 5.78  | 0.12 | 0.15 | 1.09  | 0.26098  | 0.150574 | 0.607554 | 0.425106 |
| MmugDNA.42424.1.S1_x_at | MmugDNA.42424.1 | 8.33  | 7.77  | 1.06 | 0.28 | 1.48  | 0.171704 | 0.20292  | 0.535284 | 0.477343 |
| MmugDNA.42425.1.S1_at   | MmugDNA.42425.1 | 5.15  | 5.11  | 0.09 | 0.14 | 1.03  | 0.813147 | 0.549714 | 0.924154 | 0.730002 |
| MmugDNA.42426.1.S1_at   | MmugDNA.42426.1 | 5.77  | 5.13  | 0.17 | 1.39 | 1.56  | 0.415839 | 0.344064 | 0.70957  | 0.58962  |
| MmugDNA.42427.1.S1_at   | MmugDNA.42427.1 | 5.15  | 4.95  | 0.16 | 0.29 | 1.14  | 0.267356 | 0.074149 | 0.612462 | 0.31781  |
| MmugDNA.42428.1.S1_at   | MmugDNA.42428.1 | 9.63  | 10.86 | 0.14 | 0.06 | -2.35 | 0.000158 | 0.000456 | 0.114209 | 0.038572 |
| MmugDNA.42429.1.S1_at   | MmugDNA.42429.1 | 6.33  | 6.92  | 0.25 | 0.19 | -1.51 | 0.059595 | 0.08848  | 0.392681 | 0.341946 |
| MmugDNA.42430.1.S1_at   | MmugDNA.42430.1 | 7.36  | 6.03  | 0.24 | 0.95 | 2.51  | 0.037371 | 0.015992 | 0.341309 | 0.160458 |

|                         |                 |       |       |      |      |       |          |          |          |          |
|-------------------------|-----------------|-------|-------|------|------|-------|----------|----------|----------|----------|
| MmugDNA.42431.1.S1_at   | MmugDNA.42431.1 | 3.25  | 3.1   | 0.15 | 0.05 | 1.11  | 0.50201  | 0.425218 | 0.760244 | 0.647647 |
| MmugDNA.42432.1.S1_at   | MmugDNA.42432.1 | 10.91 | 10.32 | 0.19 | 0.34 | 1.5   | 0.112491 | 0.101687 | 0.474984 | 0.361562 |
| MmugDNA.42433.1.S1_at   | MmugDNA.42433.1 | 3.26  | 3.05  | 0.18 | 0.21 | 1.15  | 0.36825  | 0.766933 | 0.679803 | 0.864661 |
| MmugDNA.42434.1.S1_at   | MmugDNA.42434.1 | 8.27  | 8.47  | 0.13 | 0.27 | -1.14 | 0.304526 | 0.39484  | 0.638589 | 0.627216 |
| MmugDNA.42435.1.S1_at   | MmugDNA.42435.1 | 5.02  | 4.12  | 0.48 | 0.43 | 1.87  | 0.0466   | 0.039845 | 0.363346 | 0.244732 |
| MmugDNA.42436.1.S1_at   | MmugDNA.42436.1 | 3.1   | 3.09  | 0.06 | 0.27 | 1.01  | 0.882328 | 0.867601 | 0.952793 | 0.924749 |
| MmugDNA.42437.1.S1_at   | MmugDNA.42437.1 | 8.86  | 9.29  | 0.11 | 0.25 | -1.34 | 0.041948 | 0.031126 | 0.353567 | 0.218175 |
| MmugDNA.42438.1.S1_at   | MmugDNA.42438.1 | 7.33  | 7.26  | 0.47 | 0.53 | 1.05  | 0.40758  | 0.732491 | 0.70471  | 0.84504  |
| MmugDNA.42439.1.S1_at   | MmugDNA.42439.1 | 4.59  | 4.37  | 0.17 | 0.11 | 1.17  | 0.308922 | 0.438775 | 0.641271 | 0.657683 |
| MmugDNA.4244.1.S1_at    | MmugDNA.4244.1  | 3.63  | 3.77  | 0.16 | 0.18 | -1.1  | 0.743029 | 0.855117 | 0.890085 | 0.917418 |
| MmugDNA.42440.1.S1_at   | MmugDNA.42440.1 | 13.03 | 13    | 0.08 | 0.1  | 1.02  | 0.175848 | 0.041273 | 0.539441 | 0.247995 |
| MmugDNA.42441.1.S1_at   | MmugDNA.42441.1 | 4.07  | 4.08  | 0.1  | 0.19 | -1    | 0.687589 | 0.314082 | 0.860565 | 0.568185 |
| MmugDNA.42443.1.S1_at   | MmugDNA.42443.1 | 4.35  | 4.34  | 0.08 | 0.04 | 1     | 0.80193  | 0.636223 | 0.918289 | 0.785986 |
| MmugDNA.42444.1.S1_at   | MmugDNA.42444.1 | 5.82  | 5.61  | 0.31 | 0.24 | 1.15  | 0.420137 | 0.608227 | 0.712259 | 0.766957 |
| MmugDNA.42445.1.S1_at   | MmugDNA.42445.1 | 3.53  | 3.33  | 0.12 | 0.19 | 1.15  | 0.348109 | 0.447853 | 0.666985 | 0.663881 |
| MmugDNA.42448.1.S1_at   | MmugDNA.42448.1 | 5.92  | 5.47  | 0.78 | 0.69 | 1.37  | 0.240662 | 0.305261 | 0.593522 | 0.562255 |
| MmugDNA.42449.1.S1_at   | MmugDNA.42449.1 | 7.32  | 7.51  | 0.46 | 0.67 | -1.15 | 0.863627 | 0.85282  | 0.945247 | 0.91634  |
| MmugDNA.42450.1.S1_at   | MmugDNA.42450.1 | 5.02  | 5     | 1.03 | 0.21 | 1.01  | 0.374691 | 0.294322 | 0.683908 | 0.55407  |
| MmugDNA.42451.1.S1_at   | MmugDNA.42451.1 | 3.92  | 4.17  | 0.31 | 0.41 | -1.19 | 0.572322 | 0.703656 | 0.800678 | 0.828186 |
| MmugDNA.42452.1.S1_at   | MmugDNA.42452.1 | 8.71  | 8.47  | 0.42 | 0.24 | 1.18  | 0.287612 | 0.375965 | 0.626102 | 0.613797 |
| MmugDNA.42453.1.S1_at   | MmugDNA.42453.1 | 11.09 | 11.09 | 0.15 | 0.11 | 1     | 0.976189 | 0.983843 | 0.990751 | 0.991004 |
| MmugDNA.42455.1.S1_at   | MmugDNA.42455.1 | 6.22  | 6.85  | 0.43 | 0.13 | -1.55 | 0.093993 | 0.123477 | 0.451612 | 0.393518 |
| MmugDNA.42456.1.S1_at   | MmugDNA.42456.1 | 6.79  | 7.17  | 0.14 | 0.1  | -1.3  | 0.043357 | 0.020681 | 0.356711 | 0.1805   |
| MmugDNA.42457.1.S1_at   | MmugDNA.42457.1 | 10.92 | 10.69 | 0.05 | 0.13 | 1.17  | 0.030406 | 0.004663 | 0.318297 | 0.095301 |
| MmugDNA.42457.1.S1_x_at | MmugDNA.42457.1 | 11.44 | 11.22 | 0.05 | 0.15 | 1.16  | 0.041421 | 0.023789 | 0.351726 | 0.193119 |
| MmugDNA.42459.1.S1_at   | MmugDNA.42459.1 | 10.5  | 10.25 | 0.17 | 0.2  | 1.19  | 0.546705 | 0.571607 | 0.785667 | 0.743847 |
| MmugDNA.4246.1.S1_at    | MmugDNA.4246.1  | 6.44  | 6.47  | 0.04 | 0.24 | -1.02 | 0.448041 | 0.660302 | 0.729421 | 0.801241 |
| MmugDNA.42460.1.S1_at   | MmugDNA.42460.1 | 8.44  | 8.45  | 0.18 | 0.68 | -1.01 | 0.791461 | 0.575588 | 0.91338  | 0.746619 |
| MmugDNA.42461.1.S1_at   | MmugDNA.42461.1 | 5.3   | 5.64  | 0.66 | 0.25 | -1.27 | 0.326798 | 0.286012 | 0.653239 | 0.547512 |
| MmugDNA.42462.1.S1_at   | MmugDNA.42462.1 | 4.83  | 4.87  | 0.33 | 0.06 | -1.03 | 0.584692 | 0.472159 | 0.807089 | 0.679874 |
| MmugDNA.42463.1.S1_at   | MmugDNA.42463.1 | 5.27  | 5.88  | 0.25 | 0.19 | -1.52 | 0.05009  | 0.018053 | 0.373272 | 0.169372 |
| MmugDNA.42464.1.S1_at   | MmugDNA.42464.1 | 4.55  | 4.29  | 0.7  | 0.21 | 1.19  | 0.519227 | 0.405778 | 0.770085 | 0.633964 |
| MmugDNA.42465.1.S1_at   | MmugDNA.42465.1 | 4.89  | 5.23  | 0.56 | 0.14 | -1.27 | 0.842812 | 0.893969 | 0.936661 | 0.939462 |
| MmugDNA.42466.1.S1_at   | MmugDNA.42466.1 | 6.13  | 5.58  | 0.56 | 0.46 | 1.46  | 0.237233 | 0.266874 | 0.590811 | 0.53244  |
| MmugDNA.42467.1.S1_at   | MmugDNA.42467.1 | 6.52  | 7.45  | 0.42 | 0.13 | -1.9  | 0.009743 | 0.005281 | 0.226235 | 0.10068  |
| MmugDNA.4247.1.S1_at    | MmugDNA.4247.1  | 11.28 | 10.41 | 0.45 | 0.26 | 1.82  | 0.105835 | 0.031942 | 0.466636 | 0.221125 |
| MmugDNA.4247.1.S1_s_at  | MmugDNA.4247.1  | 10.77 | 10.17 | 0.52 | 0.27 | 1.52  | 0.176332 | 0.08714  | 0.539927 | 0.340123 |
| MmugDNA.42470.1.S1_at   | MmugDNA.42470.1 | 5.41  | 5.32  | 0.32 | 0.2  | 1.06  | 0.970977 | 0.997931 | 0.988802 | 0.998971 |
| MmugDNA.42471.1.S1_at   | MmugDNA.42471.1 | 5.08  | 8.2   | 1.59 | 1.96 | -8.69 | 0.21312  | 0.149375 | 0.573477 | 0.423811 |
| MmugDNA.42472.1.S1_at   | MmugDNA.42472.1 | 4.76  | 4.65  | 0.15 | 0.11 | 1.08  | 0.362911 | 0.490854 | 0.676252 | 0.692666 |
| MmugDNA.42473.1.S1_at   | MmugDNA.42473.1 | 5.85  | 6.22  | 0.24 | 0.81 | -1.3  | 0.317946 | 0.449551 | 0.64802  | 0.665113 |

|                         |                 |       |       |      |      |       |          |          |          |          |
|-------------------------|-----------------|-------|-------|------|------|-------|----------|----------|----------|----------|
| MmugDNA.42474.1.S1_at   | MmugDNA.42474.1 | 4.71  | 4.83  | 0.05 | 0.07 | -1.09 | 0.071104 | 0.25647  | 0.414673 | 0.524234 |
| MmugDNA.42475.1.S1_at   | MmugDNA.42475.1 | 7.56  | 7.05  | 0.35 | 0.49 | 1.43  | 0.12719  | 0.210441 | 0.493553 | 0.484317 |
| MmugDNA.42477.1.S1_at   | MmugDNA.42477.1 | 5.58  | 5.66  | 0.95 | 0.22 | -1.05 | 0.447913 | 0.214495 | 0.729368 | 0.488257 |
| MmugDNA.42478.1.S1_at   | MmugDNA.42478.1 | 4.95  | 4.87  | 0.47 | 0.24 | 1.06  | 0.909205 | 0.777335 | 0.964021 | 0.87064  |
| MmugDNA.42479.1.S1_at   | MmugDNA.42479.1 | 9.23  | 8.69  | 0.12 | 0.32 | 1.45  | 0.019806 | 0.025664 | 0.275549 | 0.200834 |
| MmugDNA.4248.1.S1_at    | MmugDNA.4248.1  | 7.92  | 8.49  | 0.2  | 0.38 | -1.49 | 0.09349  | 0.054061 | 0.450781 | 0.277914 |
| MmugDNA.42483.1.S1_at   | MmugDNA.42483.1 | 6.45  | 6.49  | 0.12 | 0.41 | -1.03 | 0.716895 | 0.572834 | 0.875662 | 0.744765 |
| MmugDNA.42486.1.S1_at   | MmugDNA.42486.1 | 5.71  | 5.69  | 0.31 | 0.15 | 1.01  | 0.616629 | 0.819739 | 0.824231 | 0.896139 |
| MmugDNA.42487.1.S1_at   | MmugDNA.42487.1 | 4.02  | 3.43  | 0.63 | 0.15 | 1.51  | 0.234897 | 0.292277 | 0.589108 | 0.552389 |
| MmugDNA.42488.1.S1_at   | MmugDNA.42488.1 | 10.02 | 10.06 | 0.29 | 0.2  | -1.03 | 0.882434 | 0.695363 | 0.952793 | 0.82295  |
| MmugDNA.42490.1.S1_at   | MmugDNA.42490.1 | 6.69  | 6.6   | 0.21 | 0.17 | 1.07  | 0.977409 | 0.701361 | 0.99138  | 0.826814 |
| MmugDNA.42491.1.S1_at   | MmugDNA.42491.1 | 5.54  | 5.79  | 0.21 | 0.2  | -1.19 | 0.342747 | 0.448793 | 0.663407 | 0.664615 |
| MmugDNA.42492.1.S1_at   | MmugDNA.42492.1 | 10.72 | 9.95  | 0.11 | 1.26 | 1.71  | 0.238285 | 0.305233 | 0.591578 | 0.562255 |
| MmugDNA.42493.1.S1_at   | MmugDNA.42493.1 | 3.4   | 3.39  | 0.16 | 0.12 | 1     | 0.662771 | 0.601874 | 0.848768 | 0.763115 |
| MmugDNA.42494.1.S1_at   | MmugDNA.42494.1 | 9.44  | 8.36  | 0.31 | 0.87 | 2.1   | 0.328175 | 0.362458 | 0.654312 | 0.603016 |
| MmugDNA.42495.1.S1_at   | MmugDNA.42495.1 | 4.73  | 4.62  | 0.47 | 0.36 | 1.08  | 0.285135 | 0.25534  | 0.624705 | 0.523403 |
| MmugDNA.42495.1.S1_x_at | MmugDNA.42495.1 | 4.75  | 4.62  | 0.53 | 0.18 | 1.09  | 0.501025 | 0.637628 | 0.759772 | 0.787067 |
| MmugDNA.42496.1.S1_at   | MmugDNA.42496.1 | 4.92  | 4.49  | 0.28 | 0.22 | 1.35  | 0.500017 | 0.513332 | 0.759402 | 0.706881 |
| MmugDNA.17880.1.S1_at   | MmugDNA.17880.1 | 11.53 | 11.9  | 0.7  | 0.45 | -1.29 | 0.792744 | 0.892573 | 0.914033 | 0.938742 |
| MmugDNA.17880.1.S1_s_at | MmugDNA.17880.1 | 11.98 | 12.21 | 0.58 | 0.42 | -1.17 | 0.831955 | 0.903014 | 0.931926 | 0.944941 |
| MmugDNA.42498.1.S1_at   | MmugDNA.42498.1 | 13.49 | 13.36 | 0.02 | 0.06 | 1.09  | 0.025774 | 0.027406 | 0.300606 | 0.206752 |
| MmugDNA.425.1.S1_at     | MmugDNA.425.1   | 5.48  | 5.87  | 0.5  | 0.06 | -1.31 | 0.185562 | 0.20605  | 0.548924 | 0.480273 |
| MmugDNA.4250.1.S1_at    | MmugDNA.4250.1  | 9.59  | 9.2   | 0.38 | 0.26 | 1.31  | 0.412329 | 0.573151 | 0.707888 | 0.744941 |
| MmugDNA.42500.1.S1_at   | MmugDNA.42500.1 | 6.76  | 6.72  | 0.58 | 0.14 | 1.03  | 0.4278   | 0.57867  | 0.716428 | 0.748603 |
| MmugDNA.42501.1.S1_at   | MmugDNA.42501.1 | 10.1  | 9.86  | 0.57 | 0.94 | 1.18  | 0.879231 | 0.819063 | 0.951507 | 0.895738 |
| MmugDNA.42502.1.S1_at   | MmugDNA.42502.1 | 8.09  | 7.56  | 0.69 | 0.54 | 1.44  | 0.251267 | 0.381134 | 0.600775 | 0.617478 |
| MmugDNA.42503.1.S1_at   | MmugDNA.42503.1 | 6.13  | 4.58  | 0.39 | 0.35 | 2.92  | 0.008983 | 0.011916 | 0.222023 | 0.141283 |
| MmugDNA.42504.1.S1_at   | MmugDNA.42504.1 | 6.25  | 6.39  | 0.21 | 0.23 | -1.1  | 0.283058 | 0.237958 | 0.623159 | 0.508495 |
| MmugDNA.42508.1.S1_at   | MmugDNA.42508.1 | 6.6   | 6.28  | 0.13 | 0.28 | 1.25  | 0.163404 | 0.051231 | 0.527758 | 0.271799 |
| MmugDNA.42509.1.S1_at   | MmugDNA.42509.1 | 11.65 | 11.45 | 0.18 | 0.12 | 1.14  | 0.144453 | 0.193941 | 0.511015 | 0.469058 |
| MmugDNA.42509.1.S1_s_at | MmugDNA.42509.1 | 12.47 | 12.24 | 0.12 | 0.04 | 1.17  | 0.017214 | 0.02408  | 0.266942 | 0.194487 |
| MmugDNA.4251.1.S1_at    | MmugDNA.4251.1  | 7.59  | 7.45  | 0.34 | 0.09 | 1.1   | 0.536301 | 0.286851 | 0.779488 | 0.548162 |
| MmugDNA.42510.1.S1_at   | MmugDNA.42510.1 | 4.17  | 4.26  | 0.2  | 0.06 | -1.06 | 0.577427 | 0.251238 | 0.803498 | 0.519984 |
| MmugDNA.42512.1.S1_at   | MmugDNA.42512.1 | 6.52  | 5.22  | 0.22 | 0.77 | 2.46  | 0.110751 | 0.144018 | 0.472623 | 0.417912 |
| MmugDNA.42513.1.S1_at   | MmugDNA.42513.1 | 8.29  | 7.81  | 0.13 | 0.18 | 1.39  | 0.024644 | 0.01386  | 0.295571 | 0.15098  |
| MmugDNA.42514.1.S1_at   | MmugDNA.42514.1 | 11.63 | 11.05 | 0.12 | 0.13 | 1.5   | 0.006988 | 0.001921 | 0.202858 | 0.06556  |
| MmugDNA.42515.1.S1_at   | MmugDNA.42515.1 | 3.04  | 3.73  | 0.06 | 0.8  | -1.61 | 0.063275 | 0.048107 | 0.400486 | 0.264394 |
| MmugDNA.42515.1.S1_s_at | MmugDNA.42515.1 | 4.79  | 5.39  | 0.17 | 0.23 | -1.52 | 0.021761 | 0.024943 | 0.283634 | 0.197799 |
| MmugDNA.42516.1.S1_at   | MmugDNA.42516.1 | 3.31  | 3.53  | 0.07 | 0.35 | -1.17 | 0.279431 | 0.317119 | 0.621094 | 0.570377 |
| MmugDNA.42518.1.S1_at   | MmugDNA.42518.1 | 4.93  | 7.67  | 0.79 | 1.97 | -6.65 | 0.117818 | 0.09885  | 0.481978 | 0.357002 |
| MmugDNA.4252.1.S1_at    | MmugDNA.4252.1  | 6.56  | 6.24  | 0.24 | 0.14 | 1.25  | 0.064572 | 0.021173 | 0.402975 | 0.182268 |

|                         |                 |       |       |      |      |       |          |          |          |          |
|-------------------------|-----------------|-------|-------|------|------|-------|----------|----------|----------|----------|
| MmugDNA.42520.1.S1_at   | MmugDNA.42520.1 | 5.36  | 5.76  | 0.84 | 0.45 | -1.32 | 0.578589 | 0.660156 | 0.803888 | 0.801083 |
| MmugDNA.42523.1.S1_at   | MmugDNA.42523.1 | 2.81  | 2.85  | 0.12 | 0.06 | -1.03 | 0.952365 | 0.635472 | 0.982165 | 0.785405 |
| MmugDNA.42524.1.S1_at   | MmugDNA.42524.1 | 7.55  | 7.56  | 0.07 | 0.23 | -1.01 | 0.344846 | 0.545234 | 0.664827 | 0.727441 |
| MmugDNA.42526.1.S1_at   | MmugDNA.42526.1 | 4.28  | 3.65  | 0.26 | 0.68 | 1.55  | 0.274609 | 0.349258 | 0.617554 | 0.593267 |
| MmugDNA.42527.1.S1_at   | MmugDNA.42527.1 | 6.08  | 5.99  | 0.75 | 0.47 | 1.07  | 0.640639 | 0.838637 | 0.837755 | 0.907993 |
| MmugDNA.42529.1.S1_at   | MmugDNA.42529.1 | 5.21  | 5.29  | 0.13 | 0.04 | -1.05 | 0.29168  | 0.831548 | 0.629039 | 0.903407 |
| MmugDNA.4253.1.S1_at    | MmugDNA.4253.1  | 4.58  | 4.58  | 0.01 | 0.05 | 1     | 0.319487 | 0.654145 | 0.649055 | 0.79789  |
| MmugDNA.42531.1.S1_at   | MmugDNA.42531.1 | 6.46  | 6.51  | 0.29 | 0.18 | -1.04 | 0.530658 | 0.805045 | 0.776893 | 0.887934 |
| MmugDNA.42532.1.S1_at   | MmugDNA.42532.1 | 4.61  | 4.66  | 0.14 | 0.04 | -1.03 | 0.869094 | 0.760252 | 0.947856 | 0.86071  |
| MmugDNA.42533.1.S1_at   | MmugDNA.42533.1 | 5.88  | 5.7   | 0.29 | 0.36 | 1.14  | 0.939785 | 0.994225 | 0.977013 | 0.99645  |
| MmugDNA.42534.1.S1_at   | MmugDNA.42534.1 | 4.77  | 4.67  | 1.23 | 0.27 | 1.08  | 0.297142 | 0.40029  | 0.632996 | 0.630158 |
| MmugDNA.42535.1.S1_at   | MmugDNA.42535.1 | 5.02  | 4.8   | 0.25 | 0.38 | 1.16  | 0.729949 | 0.665958 | 0.882795 | 0.80431  |
| MmugDNA.29047.1.S1_s_at | MmugDNA.29047.1 | 7.2   | 6.81  | 0.45 | 0.2  | 1.31  | 0.196719 | 0.173156 | 0.559808 | 0.449765 |
| MmugDNA.42537.1.S1_at   | MmugDNA.42537.1 | 3.46  | 3.45  | 0.18 | 0.09 | 1     | 0.875193 | 0.911335 | 0.949924 | 0.950008 |
| MmugDNA.42538.1.S1_at   | MmugDNA.42538.1 | 3.74  | 3.78  | 0.08 | 0.12 | -1.03 | 0.593005 | 0.096149 | 0.811221 | 0.353422 |
| MmugDNA.42539.1.S1_at   | MmugDNA.42539.1 | 3.68  | 3.6   | 0.19 | 0.06 | 1.05  | 0.470664 | 0.008336 | 0.742537 | 0.121147 |
| MmugDNA.4254.1.S1_at    | MmugDNA.4254.1  | 11.82 | 11.01 | 0.14 | 0.29 | 1.75  | 0.008377 | 0.001296 | 0.217946 | 0.055585 |
| MmugDNA.42540.1.S1_at   | MmugDNA.42540.1 | 3.93  | 3.9   | 0.03 | 0.24 | 1.02  | 0.767699 | 0.809025 | 0.902457 | 0.889981 |
| MmugDNA.42541.1.S1_at   | MmugDNA.42541.1 | 3.73  | 3.55  | 0.25 | 0    | 1.14  | 0.534709 | 0.479576 | 0.778804 | 0.685315 |
| MmugDNA.42542.1.S1_at   | MmugDNA.42542.1 | 4.43  | 4.48  | 0.05 | 0.05 | -1.03 | 0.895797 | 0.728124 | 0.958405 | 0.842779 |
| MmugDNA.42543.1.S1_at   | MmugDNA.42543.1 | 5.9   | 6.15  | 0.34 | 1.21 | -1.18 | 0.414727 | 0.328176 | 0.709338 | 0.577935 |
| MmugDNA.42545.1.S1_at   | MmugDNA.42545.1 | 5.79  | 5.93  | 0.12 | 0.11 | -1.1  | 0.470661 | 0.384117 | 0.742537 | 0.619926 |
| MmugDNA.42546.1.S1_at   | MmugDNA.42546.1 | 3.44  | 3.61  | 0.17 | 0.2  | -1.13 | 0.670547 | 0.880951 | 0.852414 | 0.932026 |
| MmugDNA.30294.1.S1_s_at | MmugDNA.30294.1 | 12.69 | 12.22 | 0.03 | 0.1  | 1.38  | 0.001354 | 0.000348 | 0.146228 | 0.037097 |
| MmugDNA.42550.1.S1_at   | MmugDNA.42550.1 | 4.5   | 4.37  | 0.17 | 0.12 | 1.09  | 0.889357 | 0.977729 | 0.955717 | 0.98787  |
| MmugDNA.42551.1.S1_at   | MmugDNA.42551.1 | 6.77  | 6.55  | 0.17 | 0.23 | 1.17  | 0.312846 | 0.161936 | 0.64472  | 0.438029 |
| MmugDNA.42552.1.S1_x_at | MmugDNA.42552.1 | 7.96  | 7.58  | 0.23 | 0.16 | 1.3   | 0.061089 | 0.050589 | 0.394935 | 0.270301 |
| MmugDNA.42554.1.S1_at   | MmugDNA.42554.1 | 5.27  | 5.3   | 0.17 | 0.04 | -1.02 | 0.649246 | 0.037299 | 0.84237  | 0.237622 |
| MmugDNA.42556.1.S1_at   | MmugDNA.42556.1 | 4.7   | 5.18  | 0.17 | 0.43 | -1.39 | 0.217475 | 0.279958 | 0.577095 | 0.543359 |
| MmugDNA.42557.1.S1_at   | MmugDNA.42557.1 | 5.19  | 5.45  | 0.3  | 0.13 | -1.2  | 0.700309 | 0.298015 | 0.867396 | 0.556695 |
| MmugDNA.42558.1.S1_at   | MmugDNA.42558.1 | 5.05  | 5.28  | 0.21 | 0.18 | -1.17 | 0.553136 | 0.362746 | 0.789884 | 0.603246 |
| MmugDNA.42559.1.S1_at   | MmugDNA.42559.1 | 5.92  | 5.65  | 0.11 | 0.21 | 1.21  | 0.317428 | 0.19412  | 0.647902 | 0.469266 |
| MmugDNA.4256.1.S1_at    | MmugDNA.4256.1  | 9.21  | 9.25  | 0.23 | 0.27 | -1.03 | 0.377739 | 0.319189 | 0.686056 | 0.571688 |
| MmugDNA.42560.1.S1_at   | MmugDNA.42560.1 | 3.62  | 4.17  | 0.19 | 0.21 | -1.46 | 0.059548 | 0.058696 | 0.392565 | 0.288956 |
| MmugDNA.42561.1.S1_at   | MmugDNA.42561.1 | 5.55  | 5.6   | 0.13 | 0.16 | -1.04 | 0.250221 | 0.422036 | 0.600389 | 0.645422 |
| MmugDNA.42563.1.S1_at   | MmugDNA.42563.1 | 5.59  | 5.64  | 0.07 | 0.06 | -1.03 | 0.377116 | 0.458983 | 0.685542 | 0.671504 |
| MmugDNA.42564.1.S1_at   | MmugDNA.42564.1 | 6.93  | 6.03  | 0.47 | 0.45 | 1.87  | 0.162541 | 0.035023 | 0.526806 | 0.231264 |
| MmugDNA.42565.1.S1_at   | MmugDNA.42565.1 | 7.67  | 7.68  | 0.52 | 0.38 | -1.01 | 0.282079 | 0.361101 | 0.622553 | 0.602069 |
| MmugDNA.42566.1.S1_at   | MmugDNA.42566.1 | 5.42  | 6.05  | 0.27 | 0.13 | -1.56 | 0.036086 | 0.027169 | 0.338781 | 0.205893 |
| MmugDNA.42567.1.S1_at   | MmugDNA.42567.1 | 13.04 | 12.77 | 0.06 | 0.28 | 1.21  | 0.191831 | 0.193204 | 0.554827 | 0.468578 |
| MmugDNA.42567.1.S1_s_at | MmugDNA.42567.1 | 12.16 | 11.84 | 0.14 | 0.52 | 1.24  | 0.372484 | 0.459483 | 0.682812 | 0.671789 |

|                         |                 |       |       |      |      |       |          |          |          |          |
|-------------------------|-----------------|-------|-------|------|------|-------|----------|----------|----------|----------|
| MmugDNA.42568.1.S1_at   | MmugDNA.42568.1 | 9.57  | 8.63  | 0.35 | 0.44 | 1.91  | 0.085826 | 0.088834 | 0.439933 | 0.342662 |
| MmugDNA.42569.1.S1_at   | MmugDNA.42569.1 | 6     | 5.86  | 0.52 | 0.04 | 1.1   | 0.84103  | 0.4739   | 0.936081 | 0.681111 |
| MmugDNA.4257.1.S1_at    | MmugDNA.4257.1  | 4.65  | 5.04  | 0.17 | 0.27 | -1.31 | 0.192039 | 0.118563 | 0.555096 | 0.38654  |
| MmugDNA.42570.1.S1_at   | MmugDNA.42570.1 | 10.19 | 9.59  | 0.1  | 0.17 | 1.52  | 0.009175 | 0.004802 | 0.222493 | 0.096745 |
| MmugDNA.42572.1.S1_at   | MmugDNA.42572.1 | 8.38  | 8.37  | 0.23 | 0.61 | 1     | 0.583634 | 0.790219 | 0.806699 | 0.878751 |
| MmugDNA.42573.1.S1_at   | MmugDNA.42573.1 | 6.47  | 5.67  | 0.13 | 0.18 | 1.74  | 0.005606 | 0.002222 | 0.191807 | 0.069434 |
| MmugDNA.42574.1.S1_at   | MmugDNA.42574.1 | 5.12  | 5.28  | 0.4  | 1.13 | -1.12 | 0.571081 | 0.742775 | 0.7999   | 0.851023 |
| MmugDNA.42576.1.S1_at   | MmugDNA.42576.1 | 4.63  | 4.71  | 0.01 | 0.27 | -1.06 | 0.683107 | 0.938536 | 0.858329 | 0.965059 |
| MmugDNA.42577.1.S1_at   | MmugDNA.42577.1 | 5.15  | 5.78  | 0.27 | 0.23 | -1.55 | 0.01823  | 0.041718 | 0.269591 | 0.248893 |
| MmugDNA.42578.1.S1_at   | MmugDNA.42578.1 | 13.74 | 13.77 | 0.02 | 0.14 | -1.02 | 0.795688 | 0.303045 | 0.915229 | 0.56049  |
| MmugDNA.42579.1.S1_at   | MmugDNA.42579.1 | 3.92  | 4.11  | 1.13 | 0.17 | -1.14 | 0.818358 | 0.811153 | 0.926289 | 0.89102  |
| MmugDNA.42580.1.S1_at   | MmugDNA.42580.1 | 6.92  | 6.71  | 0.3  | 0.51 | 1.15  | 0.681669 | 0.841211 | 0.857635 | 0.909568 |
| MmugDNA.42580.1.S1_x_at | MmugDNA.42580.1 | 8.09  | 7.69  | 0.14 | 0.28 | 1.32  | 0.177113 | 0.063532 | 0.541073 | 0.298571 |
| MmugDNA.42582.1.S1_at   | MmugDNA.42582.1 | 5.34  | 5.23  | 0.43 | 0.25 | 1.08  | 0.683594 | 0.670044 | 0.85844  | 0.807023 |
| MmugDNA.42583.1.S1_at   | MmugDNA.42583.1 | 5.42  | 5.48  | 0.1  | 0.11 | -1.04 | 0.991412 | 0.315    | 0.99695  | 0.568759 |
| MmugDNA.42584.1.S1_at   | MmugDNA.42584.1 | 5.78  | 5.84  | 0.02 | 0.04 | -1.04 | 0.102236 | 0.044761 | 0.46186  | 0.256009 |
| MmugDNA.42585.1.S1_at   | MmugDNA.42585.1 | 4.07  | 3.96  | 0.58 | 0.19 | 1.08  | 0.388071 | 0.364865 | 0.692266 | 0.605148 |
| MmugDNA.42586.1.S1_at   | MmugDNA.42586.1 | 3.4   | 2.89  | 0.85 | 0.17 | 1.43  | 0.327979 | 0.399261 | 0.654202 | 0.629735 |
| MmugDNA.42587.1.S1_at   | MmugDNA.42587.1 | 6.89  | 7.07  | 0.24 | 0.32 | -1.13 | 0.300451 | 0.377401 | 0.635867 | 0.6149   |
| MmugDNA.42589.1.S1_at   | MmugDNA.42589.1 | 3.03  | 2.98  | 0.15 | 0.13 | 1.03  | 0.249561 | 0.513401 | 0.600196 | 0.706881 |
| MmugDNA.4259.1.S1_at    | MmugDNA.4259.1  | 10.18 | 9.29  | 0.23 | 0.27 | 1.85  | 0.010855 | 0.004113 | 0.232239 | 0.090887 |
| MmugDNA.10392.1.S1_at   | MmugDNA.10392.1 | 12.71 | 12.26 | 0.04 | 0.28 | 1.37  | 0.017682 | 0.011817 | 0.267454 | 0.140829 |
| MmugDNA.10392.1.S1_s_at | MmugDNA.10392.1 | 11.74 | 10.9  | 0.1  | 0.38 | 1.78  | 0.015576 | 0.006992 | 0.259266 | 0.112858 |
| MmugDNA.42590.1.S1_at   | MmugDNA.42590.1 | 5.46  | 3.46  | 0.34 | 0.26 | 3.98  | 0.0016   | 0.000296 | 0.152612 | 0.034892 |
| MmugDNA.42591.1.S1_at   | MmugDNA.42591.1 | 10.98 | 10.21 | 0.12 | 0.61 | 1.7   | 0.097517 | 0.08017  | 0.456537 | 0.327755 |
| MmugDNA.42592.1.S1_at   | MmugDNA.42592.1 | 8.07  | 9.87  | 1.03 | 0.79 | -3.5  | 0.070061 | 0.048541 | 0.413504 | 0.265534 |
| MmugDNA.42592.1.S1_s_at | MmugDNA.42592.1 | 6.23  | 7.66  | 0.29 | 0.78 | -2.7  | 0.030991 | 0.014701 | 0.32048  | 0.154371 |
| MmugDNA.42593.1.S1_at   | MmugDNA.42593.1 | 9.66  | 11.54 | 0.57 | 0.7  | -3.67 | 0.038877 | 0.020352 | 0.345909 | 0.179112 |
| MmugDNA.42594.1.S1_at   | MmugDNA.42594.1 | 3.16  | 3     | 0.19 | 0.1  | 1.12  | 0.115902 | 0.170201 | 0.479358 | 0.446906 |
| MmugDNA.42595.1.S1_at   | MmugDNA.42595.1 | 5.89  | 5.9   | 0.14 | 0.13 | -1.01 | 0.285635 | 0.49386  | 0.625066 | 0.694433 |
| MmugDNA.42596.1.S1_at   | MmugDNA.42596.1 | 13.46 | 13.43 | 0.18 | 0.07 | 1.02  | 0.702872 | 0.292402 | 0.868924 | 0.552498 |
| MmugDNA.42597.1.S1_at   | MmugDNA.42597.1 | 3.64  | 3.46  | 0.07 | 0.16 | 1.13  | 0.171788 | 0.283878 | 0.535344 | 0.546237 |
| MmugDNA.42598.1.S1_at   | MmugDNA.42598.1 | 4.36  | 4.07  | 0.37 | 0.28 | 1.22  | 0.429873 | 0.084768 | 0.717788 | 0.336278 |
| MmugDNA.42599.1.S1_at   | MmugDNA.42599.1 | 8.04  | 9.61  | 0.7  | 1.37 | -2.98 | 0.204156 | 0.209159 | 0.566605 | 0.482953 |
| MmugDNA.426.1.S1_at     | MmugDNA.426.1   | 6.86  | 5.95  | 0.32 | 0.24 | 1.88  | 0.018744 | 0.011116 | 0.2715   | 0.137241 |
| MmugDNA.42600.1.S1_at   | MmugDNA.42600.1 | 5.02  | 4.91  | 0.48 | 0.12 | 1.08  | 0.580593 | 0.625515 | 0.804747 | 0.779204 |
| MmugDNA.42601.1.S1_at   | MmugDNA.42601.1 | 4.25  | 4.09  | 0.68 | 0.14 | 1.11  | 0.254497 | 0.219883 | 0.602425 | 0.493401 |
| MmugDNA.42602.1.S1_at   | MmugDNA.42602.1 | 4.61  | 4.57  | 0.18 | 0.07 | 1.02  | 0.542061 | 0.273014 | 0.783075 | 0.537638 |
| MmugDNA.42603.1.S1_at   | MmugDNA.42603.1 | 7.64  | 7.86  | 0.49 | 0.93 | -1.16 | 0.688469 | 0.858715 | 0.860974 | 0.919548 |
| MmugDNA.42604.1.S1_at   | MmugDNA.42604.1 | 4.81  | 4.75  | 0.38 | 0.38 | 1.04  | 0.470162 | 0.559736 | 0.742165 | 0.736365 |
| MmugDNA.42605.1.S1_at   | MmugDNA.42605.1 | 5.71  | 5.73  | 0.19 | 0.07 | -1.02 | 0.981427 | 0.94829  | 0.993316 | 0.970522 |

|                       |                 |       |       |      |      |       |          |          |          |          |
|-----------------------|-----------------|-------|-------|------|------|-------|----------|----------|----------|----------|
| MmugDNA.42606.1.S1_at | MmugDNA.42606.1 | 6.78  | 6.92  | 0.14 | 0.19 | -1.1  | 0.337287 | 0.00961  | 0.659871 | 0.129157 |
| MmugDNA.42609.1.S1_at | MmugDNA.42609.1 | 10.1  | 9.06  | 0.14 | 0.75 | 2.06  | 0.074732 | 0.065502 | 0.420734 | 0.301415 |
| MmugDNA.4261.1.S1_at  | MmugDNA.4261.1  | 6.91  | 7.65  | 0.24 | 0.37 | -1.67 | 0.020223 | 0.004144 | 0.277311 | 0.091027 |
| MmugDNA.42610.1.S1_at | MmugDNA.42610.1 | 4.24  | 4.29  | 0.09 | 0.24 | -1.04 | 0.204231 | 0.028673 | 0.566726 | 0.211053 |
| MmugDNA.42611.1.S1_at | MmugDNA.42611.1 | 6.89  | 6.45  | 0.86 | 0.2  | 1.35  | 0.325675 | 0.419653 | 0.652943 | 0.643583 |
| MmugDNA.42612.1.S1_at | MmugDNA.42612.1 | 6     | 5.36  | 0.35 | 0.65 | 1.56  | 0.333286 | 0.518389 | 0.657525 | 0.71038  |
| MmugDNA.42614.1.S1_at | MmugDNA.42614.1 | 4.8   | 4.84  | 0.1  | 0.09 | -1.03 | 0.809772 | 0.575315 | 0.922372 | 0.74643  |
| MmugDNA.42616.1.S1_at | MmugDNA.42616.1 | 4.55  | 4.55  | 0.07 | 0.03 | 1.01  | 0.547719 | 0.573149 | 0.786269 | 0.744941 |
| MmugDNA.42617.1.S1_at | MmugDNA.42617.1 | 3.29  | 3.39  | 0.28 | 0.14 | -1.07 | 0.479097 | 0.411626 | 0.747575 | 0.638328 |
| MmugDNA.42618.1.S1_at | MmugDNA.42618.1 | 4.85  | 4.79  | 0.09 | 0.29 | 1.04  | 0.56416  | 0.812166 | 0.796418 | 0.89155  |
| MmugDNA.42619.1.S1_at | MmugDNA.42619.1 | 6.24  | 6.23  | 0.81 | 0.28 | 1     | 0.473008 | 0.625843 | 0.744128 | 0.779355 |
| MmugDNA.4262.1.S1_at  | MmugDNA.4262.1  | 4.96  | 5.17  | 0.2  | 0.08 | -1.15 | 0.52582  | 0.687611 | 0.773937 | 0.817624 |
| MmugDNA.42620.1.S1_at | MmugDNA.42620.1 | 3.78  | 3.7   | 0.03 | 0.13 | 1.06  | 0.493895 | 0.511123 | 0.756383 | 0.705399 |
| MmugDNA.42621.1.S1_at | MmugDNA.42621.1 | 4.96  | 5.16  | 0.15 | 0.2  | -1.15 | 0.480907 | 0.697379 | 0.748797 | 0.824174 |
| MmugDNA.42622.1.S1_at | MmugDNA.42622.1 | 2.81  | 2.9   | 0.08 | 0    | -1.06 | 0.445177 | 0.855882 | 0.727485 | 0.917744 |
| MmugDNA.42623.1.S1_at | MmugDNA.42623.1 | 5.64  | 5.51  | 0.67 | 0.53 | 1.1   | 0.359784 | 0.266763 | 0.673991 | 0.53241  |
| MmugDNA.42625.1.S1_at | MmugDNA.42625.1 | 5.89  | 5.09  | 0.32 | 0.07 | 1.74  | 0.007736 | 0.014235 | 0.211795 | 0.152364 |
| MmugDNA.42626.1.S1_at | MmugDNA.42626.1 | 12.89 | 12.79 | 0.25 | 0.2  | 1.07  | 0.247225 | 0.29955  | 0.598312 | 0.557945 |
| MmugDNA.42627.1.S1_at | MmugDNA.42627.1 | 4.49  | 4.43  | 0.16 | 0.07 | 1.05  | 0.670381 | 0.773319 | 0.852386 | 0.868249 |
| MmugDNA.42628.1.S1_at | MmugDNA.42628.1 | 6.62  | 6.65  | 0.11 | 0.08 | -1.02 | 0.777592 | 0.178566 | 0.907048 | 0.454803 |
| MmugDNA.42629.1.S1_at | MmugDNA.42629.1 | 3.18  | 3.21  | 0.07 | 0.1  | -1.02 | 0.998611 | 0.227647 | 0.9995   | 0.499898 |
| MmugDNA.4263.1.S1_at  | MmugDNA.4263.1  | 4.77  | 4.75  | 0.08 | 0.29 | 1.01  | 0.985492 | 0.301318 | 0.99475  | 0.559356 |
| MmugDNA.42630.1.S1_at | MmugDNA.42630.1 | 7     | 6.07  | 0.68 | 0.57 | 1.91  | 0.308492 | 0.419223 | 0.640904 | 0.643398 |
| MmugDNA.42631.1.S1_at | MmugDNA.42631.1 | 7.46  | 6.48  | 0.95 | 0.75 | 1.97  | 0.192969 | 0.238175 | 0.556235 | 0.508818 |
| MmugDNA.42632.1.S1_at | MmugDNA.42632.1 | 9.93  | 9.35  | 0.06 | 0.26 | 1.49  | 0.018209 | 0.013472 | 0.269591 | 0.148627 |
| MmugDNA.42633.1.S1_at | MmugDNA.42633.1 | 6.19  | 6.23  | 0.06 | 0.04 | -1.03 | 0.884149 | 0.191935 | 0.953597 | 0.467295 |
| MmugDNA.42636.1.S1_at | MmugDNA.42636.1 | 13.48 | 13.32 | 0.05 | 0.35 | 1.12  | 0.151271 | 0.170748 | 0.516026 | 0.447316 |
| MmugDNA.42637.1.S1_at | MmugDNA.42637.1 | 5.3   | 4.95  | 0.28 | 0.08 | 1.27  | 0.241124 | 0.259709 | 0.593741 | 0.5266   |
| MmugDNA.42640.1.S1_at | MmugDNA.42640.1 | 7.82  | 6.47  | 0.08 | 0.79 | 2.55  | 0.107474 | 0.075119 | 0.468045 | 0.319301 |
| MmugDNA.42641.1.S1_at | MmugDNA.42641.1 | 6.52  | 6.56  | 0.06 | 0.09 | -1.03 | 0.678062 | 0.330577 | 0.855759 | 0.579307 |
| MmugDNA.42642.1.S1_at | MmugDNA.42642.1 | 5.49  | 5.44  | 0.18 | 0.06 | 1.03  | 0.825124 | 0.798406 | 0.92912  | 0.883979 |
| MmugDNA.42643.1.S1_at | MmugDNA.42643.1 | 3.79  | 4.03  | 0.2  | 0.15 | -1.18 | 0.52032  | 0.168228 | 0.770712 | 0.44489  |
| MmugDNA.42644.1.S1_at | MmugDNA.42644.1 | 3.5   | 3.76  | 0.2  | 0.12 | -1.2  | 0.065167 | 0.062225 | 0.404019 | 0.296307 |
| MmugDNA.42645.1.S1_at | MmugDNA.42645.1 | 10.52 | 9.54  | 0.22 | 1.74 | 1.97  | 0.295566 | 0.071805 | 0.63193  | 0.314082 |
| MmugDNA.42646.1.S1_at | MmugDNA.42646.1 | 7.51  | 6.74  | 0.24 | 0.31 | 1.7   | 0.041258 | 0.063413 | 0.351447 | 0.298441 |
| MmugDNA.42648.1.S1_at | MmugDNA.42648.1 | 6.63  | 6.97  | 0.2  | 0.2  | -1.27 | 0.140708 | 0.129869 | 0.508444 | 0.401509 |
| MmugDNA.42649.1.S1_at | MmugDNA.42649.1 | 4.01  | 4.17  | 0.58 | 0.1  | -1.12 | 0.63391  | 0.637454 | 0.834101 | 0.786937 |
| MmugDNA.4265.1.S1_at  | MmugDNA.4265.1  | 5     | 5.11  | 0.12 | 0.03 | -1.08 | 0.092656 | 0.120344 | 0.4493   | 0.38925  |
| MmugDNA.42650.1.S1_at | MmugDNA.42650.1 | 6.42  | 6.43  | 0.04 | 0.18 | -1.01 | 0.911887 | 0.888929 | 0.965151 | 0.936725 |
| MmugDNA.42651.1.S1_at | MmugDNA.42651.1 | 3.9   | 3.92  | 0.17 | 0.05 | -1.02 | 0.447738 | 0.196522 | 0.729195 | 0.471577 |
| MmugDNA.42652.1.S1_at | MmugDNA.42652.1 | 12.55 | 12.51 | 0.04 | 0.28 | 1.03  | 0.894029 | 0.124453 | 0.957854 | 0.394865 |



|                         |                 |       |       |      |      |       |          |          |          |          |
|-------------------------|-----------------|-------|-------|------|------|-------|----------|----------|----------|----------|
| MmugDNA.42653.1.S1_at   | MmugDNA.42653.1 | 4.29  | 3.84  | 1    | 0.31 | 1.36  | 0.374926 | 0.346163 | 0.684147 | 0.591195 |
| MmugDNA.42654.1.S1_at   | MmugDNA.42654.1 | 3.88  | 3.7   | 0.13 | 0.09 | 1.13  | 0.157972 | 0.419744 | 0.522944 | 0.643666 |
| MmugDNA.42655.1.S1_at   | MmugDNA.42655.1 | 6.37  | 6.39  | 0.2  | 0.29 | -1.02 | 0.710553 | 0.842487 | 0.87308  | 0.910315 |
| MmugDNA.42656.1.S1_at   | MmugDNA.42656.1 | 5.24  | 5.87  | 0.29 | 1.08 | -1.55 | 0.274548 | 0.176361 | 0.617491 | 0.45282  |
| MmugDNA.42658.1.S1_at   | MmugDNA.42658.1 | 3.26  | 3.27  | 0.1  | 0.03 | -1.01 | 0.344529 | 0.613239 | 0.664605 | 0.770484 |
| MmugDNA.42659.1.S1_at   | MmugDNA.42659.1 | 8.11  | 7.3   | 0.11 | 0.37 | 1.75  | 0.025726 | 0.013467 | 0.300355 | 0.148626 |
| MmugDNA.4266.1.S1_at    | MmugDNA.4266.1  | 4.5   | 4.6   | 0.05 | 0.1  | -1.07 | 0.04999  | 0.206798 | 0.372793 | 0.480945 |
| MmugDNA.42660.1.S1_at   | MmugDNA.42660.1 | 7.74  | 8.03  | 0.54 | 0.9  | -1.23 | 0.562567 | 0.740682 | 0.795395 | 0.849853 |
| MmugDNA.42661.1.S1_at   | MmugDNA.42661.1 | 3.67  | 3.81  | 0.02 | 0.12 | -1.1  | 0.162036 | 0.106422 | 0.526638 | 0.368978 |
| MmugDNA.42662.1.S1_at   | MmugDNA.42662.1 | 7.12  | 8.29  | 0.61 | 0.66 | -2.25 | 0.073213 | 0.077271 | 0.418452 | 0.322945 |
| MmugDNA.42665.1.S1_at   | MmugDNA.42665.1 | 6.84  | 7.21  | 0.58 | 0.84 | -1.29 | 0.28422  | 0.377454 | 0.62409  | 0.614937 |
| MmugDNA.42666.1.S1_at   | MmugDNA.42666.1 | 8.37  | 7.52  | 1.07 | 1    | 1.81  | 0.339132 | 0.475087 | 0.661168 | 0.681892 |
| MmugDNA.42667.1.S1_at   | MmugDNA.42667.1 | 3.33  | 3.52  | 0.07 | 0.04 | -1.14 | 0.009167 | 0.110135 | 0.222493 | 0.374244 |
| MmugDNA.42669.1.S1_at   | MmugDNA.42669.1 | 5.62  | 5.65  | 0.3  | 0.1  | -1.02 | 0.614893 | 0.558929 | 0.823286 | 0.735944 |
| MmugDNA.42670.1.S1_s_at | MmugDNA.42670.1 | 3.77  | 3.86  | 0.1  | 0.04 | -1.06 | 0.140527 | 0.457874 | 0.508385 | 0.670996 |
| MmugDNA.42671.1.S1_at   | MmugDNA.42671.1 | 6.95  | 6.31  | 0.72 | 0.48 | 1.56  | 0.374635 | 0.148754 | 0.683854 | 0.423201 |
| MmugDNA.42672.1.S1_at   | MmugDNA.42672.1 | 6.48  | 6.3   | 0.1  | 0.42 | 1.14  | 0.210873 | 0.327809 | 0.571977 | 0.577604 |
| MmugDNA.42673.1.S1_at   | MmugDNA.42673.1 | 3.92  | 4.23  | 0.54 | 0.23 | -1.24 | 0.686068 | 0.219318 | 0.859618 | 0.493094 |
| MmugDNA.42674.1.S1_at   | MmugDNA.42674.1 | 9.97  | 10.12 | 0.06 | 0.49 | -1.11 | 0.646145 | 0.359901 | 0.840741 | 0.601142 |
| MmugDNA.15704.1.S1_at   | MmugDNA.15704.1 | 11.52 | 11.8  | 0.06 | 0.45 | -1.22 | 0.709656 | 0.168441 | 0.872606 | 0.445092 |
| MmugDNA.15704.1.S1_s_at | MmugDNA.15704.1 | 10.3  | 10.59 | 0.13 | 0.48 | -1.22 | 0.605437 | 0.39038  | 0.818264 | 0.624156 |
| MmugDNA.42675.1.S1_at   | MmugDNA.42675.1 | 8.05  | 7.89  | 0.45 | 0.48 | 1.11  | 0.499283 | 0.478084 | 0.759076 | 0.684096 |
| MmugDNA.42676.1.S1_at   | MmugDNA.42676.1 | 3.05  | 3.26  | 0.08 | 0.23 | -1.16 | 0.09409  | 0.04513  | 0.451714 | 0.256979 |
| MmugDNA.42677.1.S1_at   | MmugDNA.42677.1 | 4.25  | 3.95  | 0.57 | 0.18 | 1.23  | 0.364105 | 0.433692 | 0.677212 | 0.65392  |
| MmugDNA.42678.1.S1_at   | MmugDNA.42678.1 | 3.42  | 3.34  | 0.05 | 0.07 | 1.06  | 0.227677 | 0.1876   | 0.585103 | 0.463628 |
| MmugDNA.42679.1.S1_at   | MmugDNA.42679.1 | 9.93  | 9.64  | 0.32 | 0.26 | 1.22  | 0.314392 | 0.384902 | 0.645738 | 0.620513 |
| MmugDNA.4268.1.S1_at    | MmugDNA.4268.1  | 5.46  | 5.51  | 0.35 | 0.08 | -1.04 | 0.600387 | 0.629424 | 0.815205 | 0.781862 |
| MmugDNA.42680.1.S1_at   | MmugDNA.42680.1 | 10.35 | 10.71 | 0.04 | 0.04 | -1.29 | 0.000396 | 0.000049 | 0.12978  | 0.025273 |
| MmugDNA.42681.1.S1_at   | MmugDNA.42681.1 | 10.48 | 10.3  | 0.02 | 0.31 | 1.14  | 0.342858 | 0.523019 | 0.663407 | 0.713429 |
| MmugDNA.42681.1.S1_s_at | MmugDNA.42681.1 | 10.87 | 10.5  | 0.03 | 0.28 | 1.29  | 0.253978 | 0.367889 | 0.602339 | 0.607469 |
| MmugDNA.42685.1.S1_at   | MmugDNA.42685.1 | 4.84  | 5.37  | 0.54 | 0.84 | -1.44 | 0.628118 | 0.25573  | 0.830531 | 0.523675 |
| MmugDNA.42686.1.S1_at   | MmugDNA.42686.1 | 6.92  | 6.45  | 0.38 | 0.51 | 1.38  | 0.663248 | 0.744806 | 0.848941 | 0.852198 |
| MmugDNA.42687.1.S1_at   | MmugDNA.42687.1 | 13.86 | 13.84 | 0.03 | 0.14 | 1.01  | 0.244994 | 0.186085 | 0.596643 | 0.461931 |
| MmugDNA.42688.1.S1_at   | MmugDNA.42688.1 | 3.8   | 3.72  | 0.13 | 0.09 | 1.06  | 0.224872 | 0.096741 | 0.58291  | 0.354171 |
| MmugDNA.42689.1.S1_at   | MmugDNA.42689.1 | 5.87  | 5.62  | 1    | 0.28 | 1.19  | 0.239468 | 0.32404  | 0.592534 | 0.57473  |
| MmugDNA.4269.1.S1_at    | MmugDNA.4269.1  | 12.77 | 12.79 | 0.01 | 0.1  | -1.01 | 0.321052 | 0.005185 | 0.649764 | 0.099739 |
| MmugDNA.42690.1.S1_s_at | MmugDNA.42690.1 | 7.31  | 7.67  | 0.26 | 0.45 | -1.28 | 0.168764 | 0.193367 | 0.533113 | 0.468698 |
| MmugDNA.42691.1.S1_at   | MmugDNA.42691.1 | 4.96  | 4.71  | 0.37 | 0.29 | 1.19  | 0.189876 | 0.262959 | 0.552746 | 0.529372 |
| MmugDNA.42692.1.S1_at   | MmugDNA.42692.1 | 3.39  | 3.62  | 0.74 | 0.37 | -1.18 | 0.730852 | 0.702995 | 0.88338  | 0.827866 |
| MmugDNA.42693.1.S1_at   | MmugDNA.42693.1 | 2.97  | 2.94  | 0.42 | 0.11 | 1.02  | 0.264271 | 0.278716 | 0.610059 | 0.542421 |
| MmugDNA.42695.1.S1_at   | MmugDNA.42695.1 | 3.48  | 3.51  | 0.31 | 0.06 | -1.02 | 0.806934 | 0.695422 | 0.920933 | 0.822978 |

|                         |                 |       |       |      |      |       |          |          |          |          |
|-------------------------|-----------------|-------|-------|------|------|-------|----------|----------|----------|----------|
| MmugDNA.42696.1.S1_at   | MmugDNA.42696.1 | 3.34  | 3.85  | 0.62 | 0.64 | -1.43 | 0.705499 | 0.897936 | 0.870099 | 0.941871 |
| MmugDNA.42697.1.S1_at   | MmugDNA.42697.1 | 3.33  | 3.44  | 0.13 | 0.08 | -1.08 | 0.412387 | 0.520598 | 0.707889 | 0.711831 |
| MmugDNA.4270.1.S1_at    | MmugDNA.4270.1  | 10.5  | 10.58 | 0.25 | 0.36 | -1.06 | 0.739924 | 0.163946 | 0.888334 | 0.440105 |
| MmugDNA.42700.1.S1_at   | MmugDNA.42700.1 | 4.85  | 6.55  | 0.62 | 1.25 | -3.23 | 0.213914 | 0.281305 | 0.574184 | 0.544391 |
| MmugDNA.42701.1.S1_at   | MmugDNA.42701.1 | 5.31  | 5.52  | 0.13 | 0.01 | -1.16 | 0.059674 | 0.047456 | 0.39273  | 0.262486 |
| MmugDNA.42702.1.S1_at   | MmugDNA.42702.1 | 3.72  | 3.7   | 0.12 | 0.12 | 1.01  | 0.928552 | 0.83987  | 0.972527 | 0.908703 |
| MmugDNA.42703.1.S1_at   | MmugDNA.42703.1 | 11.66 | 11.84 | 0.02 | 0.27 | -1.13 | 0.2866   | 0.229805 | 0.625572 | 0.501802 |
| MmugDNA.42704.1.S1_at   | MmugDNA.42704.1 | 5.62  | 5.85  | 0.11 | 0.05 | -1.17 | 0.03102  | 0.052235 | 0.32048  | 0.274065 |
| MmugDNA.42707.1.S1_at   | MmugDNA.42707.1 | 9.53  | 8.84  | 0.37 | 0.49 | 1.61  | 0.159494 | 0.189377 | 0.524351 | 0.465117 |
| MmugDNA.42708.1.S1_at   | MmugDNA.42708.1 | 5.76  | 5.78  | 0.3  | 0.22 | -1.01 | 0.645466 | 0.735903 | 0.840383 | 0.847202 |
| MmugDNA.42709.1.S1_at   | MmugDNA.42709.1 | 9.34  | 9.19  | 0.07 | 0.14 | 1.11  | 0.476703 | 0.616843 | 0.746273 | 0.772992 |
| MmugDNA.42709.1.S1_s_at | MmugDNA.42709.1 | 10.91 | 10.58 | 0.07 | 0.25 | 1.26  | 0.273721 | 0.301403 | 0.617179 | 0.55943  |
| MmugDNA.42710.1.S1_at   | MmugDNA.42710.1 | 3.84  | 3.72  | 0.26 | 0.05 | 1.09  | 0.56823  | 0.735802 | 0.798498 | 0.847147 |
| MmugDNA.42711.1.S1_at   | MmugDNA.42711.1 | 3.51  | 3.52  | 0.05 | 0.11 | -1.01 | 0.357989 | 0.583905 | 0.672935 | 0.752043 |
| MmugDNA.42712.1.S1_at   | MmugDNA.42712.1 | 8.58  | 7.7   | 0.47 | 0.34 | 1.84  | 0.060136 | 0.052283 | 0.393081 | 0.274146 |
| MmugDNA.42713.1.S1_at   | MmugDNA.42713.1 | 4.35  | 4.38  | 0.32 | 0.1  | -1.02 | 0.644713 | 0.730988 | 0.839787 | 0.844172 |
| MmugDNA.42714.1.S1_at   | MmugDNA.42714.1 | 3.82  | 3.42  | 0.68 | 0.15 | 1.31  | 0.363568 | 0.290691 | 0.676763 | 0.551382 |
| MmugDNA.42715.1.S1_at   | MmugDNA.42715.1 | 2.85  | 2.86  | 0    | 0.09 | -1.01 | 0.500627 | 0.673443 | 0.759592 | 0.8092   |
| MmugDNA.42716.1.S1_at   | MmugDNA.42716.1 | 4.91  | 5.45  | 0.66 | 0.07 | -1.46 | 0.618015 | 0.631347 | 0.825035 | 0.78278  |
| MmugDNA.42718.1.S1_at   | MmugDNA.42718.1 | 10.59 | 9.94  | 0.14 | 0.5  | 1.57  | 0.063806 | 0.064865 | 0.401654 | 0.300719 |
| MmugDNA.42719.1.S1_at   | MmugDNA.42719.1 | 5.86  | 5.81  | 0.09 | 0.23 | 1.04  | 0.425105 | 0.517232 | 0.714956 | 0.709435 |
| MmugDNA.4272.1.S1_at    | MmugDNA.4272.1  | 11.85 | 11.78 | 0.25 | 0.37 | 1.05  | 0.522823 | 0.179808 | 0.772248 | 0.456339 |
| MmugDNA.42720.1.S1_at   | MmugDNA.42720.1 | 8.3   | 7.7   | 0.23 | 0.26 | 1.51  | 0.04188  | 0.041961 | 0.353216 | 0.24943  |
| MmugDNA.42721.1.S1_at   | MmugDNA.42721.1 | 5.52  | 5.67  | 0.26 | 0.06 | -1.11 | 0.953695 | 0.888072 | 0.982865 | 0.936183 |
| MmugDNA.42722.1.S1_at   | MmugDNA.42722.1 | 12.14 | 12.22 | 0.19 | 0.23 | -1.06 | 0.823399 | 0.534448 | 0.928164 | 0.720369 |
| MmugDNA.42723.1.S1_at   | MmugDNA.42723.1 | 3.52  | 3.52  | 0.07 | 0    | 1     | 0.373901 | 0.653493 | 0.683245 | 0.797464 |
| MmugDNA.42725.1.S1_at   | MmugDNA.42725.1 | 8.63  | 9.01  | 0.35 | 1    | -1.3  | 0.531593 | 0.163658 | 0.777305 | 0.439841 |
| MmugDNA.42727.1.S1_at   | MmugDNA.42727.1 | 5.93  | 5.46  | 1.17 | 0.66 | 1.39  | 0.714644 | 0.197709 | 0.874968 | 0.472633 |
| MmugDNA.42728.1.S1_at   | MmugDNA.42728.1 | 3.82  | 3.66  | 0.17 | 0.08 | 1.12  | 0.327046 | 0.12791  | 0.653512 | 0.398865 |
| MmugDNA.42729.1.S1_at   | MmugDNA.42729.1 | 4.09  | 4.09  | 0.05 | 0.03 | 1     | 0.244336 | 0.385689 | 0.596096 | 0.621079 |
| MmugDNA.4273.1.S1_at    | MmugDNA.4273.1  | 4.35  | 4.42  | 0.38 | 0.17 | -1.05 | 0.616276 | 0.526424 | 0.824107 | 0.715557 |
| MmugDNA.26826.1.S1_s_at | MmugDNA.26826.1 | 8.25  | 9.11  | 0.43 | 1.37 | -1.82 | 0.524481 | 0.577359 | 0.773192 | 0.747871 |
| MmugDNA.16686.1.S1_at   | MmugDNA.16686.1 | 10.91 | 11.6  | 0.22 | 0.14 | -1.62 | 0.008796 | 0.003561 | 0.221033 | 0.085503 |
| MmugDNA.16686.1.S1_s_at | MmugDNA.16686.1 | 10.9  | 11.49 | 0.24 | 0.15 | -1.51 | 0.013877 | 0.005726 | 0.249758 | 0.104271 |
| MmugDNA.42732.1.S1_at   | MmugDNA.42732.1 | 4.27  | 4.1   | 0.07 | 0.08 | 1.13  | 0.058824 | 0.068596 | 0.390921 | 0.308466 |
| MmugDNA.42733.1.S1_at   | MmugDNA.42733.1 | 9.89  | 8.82  | 0.17 | 0.13 | 2.11  | 0.000791 | 0.000182 | 0.136818 | 0.030511 |
| MmugDNA.42734.1.S1_at   | MmugDNA.42734.1 | 8.14  | 7.97  | 0.12 | 0.23 | 1.12  | 0.523199 | 0.683227 | 0.77238  | 0.81521  |
| MmugDNA.42735.1.S1_at   | MmugDNA.42735.1 | 8.49  | 7.5   | 0.29 | 0.62 | 2     | 0.073473 | 0.057412 | 0.418778 | 0.285608 |
| MmugDNA.42736.1.S1_at   | MmugDNA.42736.1 | 8.23  | 6.82  | 0.54 | 0.74 | 2.66  | 0.037941 | 0.032207 | 0.343341 | 0.222139 |
| MmugDNA.42737.1.S1_at   | MmugDNA.42737.1 | 2.78  | 2.77  | 0.1  | 0.12 | 1     | 0.940556 | 0.830665 | 0.97745  | 0.902855 |
| MmugDNA.42738.1.S1_at   | MmugDNA.42738.1 | 3.39  | 3.37  | 0    | 0.18 | 1.01  | 0.773805 | 0.720051 | 0.90499  | 0.838096 |

|                         |                 |       |       |      |      |       |          |          |          |          |
|-------------------------|-----------------|-------|-------|------|------|-------|----------|----------|----------|----------|
| MmugDNA.42738.1.S1_s_at | MmugDNA.42738.1 | 6.6   | 6.61  | 0.15 | 0.35 | -1.01 | 0.737337 | 0.881611 | 0.887063 | 0.932407 |
| MmugDNA.42740.1.S1_at   | MmugDNA.42740.1 | 4.39  | 4.3   | 0.14 | 0.28 | 1.06  | 0.520615 | 0.708435 | 0.770924 | 0.830919 |
| MmugDNA.25790.1.S1_at   | MmugDNA.25790.1 | 14.07 | 14.05 | 0.02 | 0.1  | 1.01  | 0.282116 | 0.21942  | 0.622553 | 0.493156 |
| MmugDNA.25790.1.S1_s_at | MmugDNA.25790.1 | 14.61 | 14.57 | 0.02 | 0.03 | 1.03  | 0.047984 | 0.034288 | 0.367582 | 0.229072 |
| MmugDNA.42743.1.S1_at   | MmugDNA.42743.1 | 3.68  | 3.87  | 0.14 | 0.18 | -1.14 | 0.418441 | 0.189287 | 0.711351 | 0.465059 |
| MmugDNA.42744.1.S1_at   | MmugDNA.42744.1 | 5.93  | 4.55  | 1.5  | 0.9  | 2.61  | 0.408429 | 0.369823 | 0.70517  | 0.609132 |
| MmugDNA.42745.1.S1_at   | MmugDNA.42745.1 | 8.39  | 8.44  | 0.13 | 0.04 | -1.04 | 0.233606 | 0.386983 | 0.588317 | 0.621935 |
| MmugDNA.42746.1.S1_at   | MmugDNA.42746.1 | 3.74  | 3.74  | 0.09 | 0.02 | -1    | 0.283169 | 0.550511 | 0.623298 | 0.730509 |
| MmugDNA.42747.1.S1_at   | MmugDNA.42747.1 | 5.98  | 5.7   | 0.3  | 0.29 | 1.21  | 0.701577 | 0.844186 | 0.868063 | 0.911295 |
| MmugDNA.42750.1.S1_at   | MmugDNA.42750.1 | 4.96  | 5.39  | 0.3  | 0.7  | -1.35 | 0.230296 | 0.347994 | 0.587222 | 0.592215 |
| MmugDNA.42751.1.S1_at   | MmugDNA.42751.1 | 7.42  | 6.9   | 0.28 | 0.59 | 1.43  | 0.408714 | 0.550874 | 0.705477 | 0.730625 |
| MmugDNA.42753.1.S1_at   | MmugDNA.42753.1 | 4.81  | 4.87  | 0.01 | 0.07 | -1.05 | 0.152198 | 0.205877 | 0.51689  | 0.480109 |
| MmugDNA.42756.1.S1_at   | MmugDNA.42756.1 | 7.83  | 7.57  | 0.78 | 0.52 | 1.19  | 0.814776 | 0.017396 | 0.924758 | 0.16699  |
| MmugDNA.42757.1.S1_at   | MmugDNA.42757.1 | 5.06  | 5.47  | 0.06 | 0.2  | -1.33 | 0.070862 | 0.004583 | 0.414661 | 0.094484 |
| MmugDNA.42758.1.S1_at   | MmugDNA.42758.1 | 3.06  | 2.95  | 0.12 | 0.22 | 1.08  | 0.720949 | 0.747221 | 0.877855 | 0.853149 |
| MmugDNA.42759.1.S1_at   | MmugDNA.42759.1 | 8.8   | 8.19  | 0.64 | 0.04 | 1.53  | 0.508576 | 0.280926 | 0.763847 | 0.544097 |
| MmugDNA.4276.1.S1_at    | MmugDNA.4276.1  | 4.78  | 4.66  | 0.54 | 0.18 | 1.09  | 0.244826 | 0.327302 | 0.596467 | 0.577222 |
| MmugDNA.42760.1.S1_at   | MmugDNA.42760.1 | 5.57  | 5.73  | 0.06 | 0.02 | -1.11 | 0.006705 | 0.088303 | 0.20158  | 0.341721 |
| MmugDNA.42761.1.S1_at   | MmugDNA.42761.1 | 5.02  | 4.66  | 0.72 | 0.18 | 1.28  | 0.352859 | 0.512545 | 0.669942 | 0.706408 |
| MmugDNA.42763.1.S1_at   | MmugDNA.42763.1 | 6.65  | 6.74  | 0.57 | 0.56 | -1.07 | 0.69158  | 0.537382 | 0.862864 | 0.722499 |
| MmugDNA.42764.1.S1_at   | MmugDNA.42764.1 | 5.07  | 5.58  | 0.26 | 0.44 | -1.42 | 0.107259 | 0.323612 | 0.467913 | 0.574525 |
| MmugDNA.42764.1.S1_s_at | MmugDNA.42764.1 | 6.62  | 6.9   | 0.28 | 0.21 | -1.22 | 0.208881 | 0.22412  | 0.570476 | 0.497109 |
| MmugDNA.42765.1.S1_at   | MmugDNA.42765.1 | 4.53  | 4.69  | 0.44 | 0.1  | -1.12 | 0.709901 | 0.470418 | 0.872725 | 0.678729 |
| MmugDNA.42766.1.S1_at   | MmugDNA.42766.1 | 3.64  | 4.16  | 1.18 | 0.28 | -1.44 | 0.678367 | 0.789346 | 0.855994 | 0.878316 |
| MmugDNA.42767.1.S1_at   | MmugDNA.42767.1 | 4.52  | 4.04  | 0.25 | 0.3  | 1.39  | 0.140093 | 0.269741 | 0.508065 | 0.53502  |
| MmugDNA.4277.1.S1_at    | MmugDNA.4277.1  | 5.87  | 6.55  | 0.59 | 0.22 | -1.59 | 0.192015 | 0.220871 | 0.555086 | 0.494262 |
| MmugDNA.42771.1.S1_at   | MmugDNA.42771.1 | 2.86  | 2.85  | 0.11 | 0.18 | 1     | 0.503333 | 0.471111 | 0.760727 | 0.679173 |
| MmugDNA.42773.1.S1_at   | MmugDNA.42773.1 | 6.26  | 6.27  | 0.09 | 0.13 | -1    | 0.375441 | 0.2917   | 0.684715 | 0.552054 |
| MmugDNA.42774.1.S1_s_at | MmugDNA.42774.1 | 9.03  | 9.31  | 0.21 | 0.61 | -1.22 | 0.637269 | 0.502673 | 0.836    | 0.700251 |
| MmugDNA.42777.1.S1_s_at | MmugDNA.42777.1 | 8.01  | 8.23  | 0.19 | 0.79 | -1.17 | 0.867766 | 0.429984 | 0.947272 | 0.65111  |
| MmugDNA.4278.1.S1_at    | MmugDNA.4278.1  | 7.15  | 6.03  | 0.94 | 0.88 | 2.18  | 0.394417 | 0.423064 | 0.69577  | 0.646145 |
| MmugDNA.42781.1.S1_at   | MmugDNA.42781.1 | 4.85  | 5.28  | 0.16 | 0.26 | -1.35 | 0.26618  | 0.370557 | 0.611749 | 0.609618 |
| MmugDNA.42782.1.S1_at   | MmugDNA.42782.1 | 4.51  | 4.74  | 0.18 | 0.11 | -1.17 | 0.324343 | 0.071488 | 0.651941 | 0.313706 |
| MmugDNA.42782.1.S1_s_at | MmugDNA.42782.1 | 6.22  | 7.08  | 0.35 | 0.44 | -1.82 | 0.175955 | 0.159792 | 0.53945  | 0.435871 |
| MmugDNA.42784.1.S1_at   | MmugDNA.42784.1 | 4.28  | 4.44  | 0.95 | 0.48 | -1.12 | 0.520581 | 0.438345 | 0.770924 | 0.657341 |
| MmugDNA.42785.1.S1_at   | MmugDNA.42785.1 | 6.58  | 5.94  | 0.52 | 0.65 | 1.56  | 0.242595 | 0.449096 | 0.594448 | 0.664892 |
| MmugDNA.42786.1.S1_at   | MmugDNA.42786.1 | 4.89  | 4.55  | 0.7  | 0.15 | 1.26  | 0.200105 | 0.227184 | 0.563056 | 0.499529 |
| MmugDNA.42787.1.S1_at   | MmugDNA.42787.1 | 3.14  | 3.18  | 0.05 | 0.18 | -1.03 | 0.760661 | 0.774444 | 0.899102 | 0.868766 |
| MmugDNA.42788.1.S1_at   | MmugDNA.42788.1 | 11.22 | 11.1  | 0.24 | 0.33 | 1.09  | 0.68273  | 0.10006  | 0.858083 | 0.358961 |
| MmugDNA.4279.1.S1_at    | MmugDNA.4279.1  | 5.65  | 5.58  | 0.36 | 0.32 | 1.05  | 0.597262 | 0.696283 | 0.813434 | 0.823545 |
| MmugDNA.42790.1.S1_at   | MmugDNA.42790.1 | 4.02  | 3.92  | 0.06 | 0.79 | 1.07  | 0.502659 | 0.677898 | 0.760491 | 0.811841 |

|                         |                 |       |       |      |      |       |          |          |          |          |
|-------------------------|-----------------|-------|-------|------|------|-------|----------|----------|----------|----------|
| MmugDNA.42791.1.S1_at   | MmugDNA.42791.1 | 4.48  | 4.49  | 0.03 | 0.25 | -1    | 0.350637 | 0.328612 | 0.668568 | 0.578163 |
| MmugDNA.42792.1.S1_at   | MmugDNA.42792.1 | 9.88  | 9.41  | 0.23 | 0.32 | 1.39  | 0.036424 | 0.055629 | 0.339201 | 0.281649 |
| MmugDNA.42797.1.S1_at   | MmugDNA.42797.1 | 5.41  | 5.28  | 0.45 | 0.3  | 1.1   | 0.270381 | 0.236561 | 0.614698 | 0.507364 |
| MmugDNA.42798.1.S1_at   | MmugDNA.42798.1 | 10.58 | 10.58 | 0.1  | 0.12 | 1     | 0.911642 | 0.589519 | 0.965075 | 0.755696 |
| MmugDNA.4280.1.S1_at    | MmugDNA.4280.1  | 11.53 | 11.32 | 0.07 | 0.09 | 1.15  | 0.015386 | 0.000343 | 0.258258 | 0.036856 |
| MmugDNA.42800.1.S1_at   | MmugDNA.42800.1 | 8.75  | 9.22  | 0.14 | 1.77 | -1.39 | 0.57649  | 0.765469 | 0.803082 | 0.863679 |
| MmugDNA.42802.1.S1_at   | MmugDNA.42802.1 | 7.79  | 8.94  | 0.32 | 0.08 | -2.21 | 0.004173 | 0.003141 | 0.181739 | 0.081652 |
| MmugDNA.42803.1.S1_at   | MmugDNA.42803.1 | 4.09  | 4.16  | 0.06 | 0.08 | -1.05 | 0.486709 | 0.081809 | 0.751702 | 0.330192 |
| MmugDNA.42804.1.S1_at   | MmugDNA.42804.1 | 5.64  | 5.71  | 0.21 | 0.01 | -1.05 | 0.693348 | 0.873362 | 0.863948 | 0.927953 |
| MmugDNA.42805.1.S1_at   | MmugDNA.42805.1 | 9.24  | 8.85  | 0.11 | 0.41 | 1.3   | 0.292957 | 0.402349 | 0.630264 | 0.631387 |
| MmugDNA.42806.1.S1_at   | MmugDNA.42806.1 | 8.21  | 6.42  | 0.89 | 0.13 | 3.46  | 0.067315 | 0.065889 | 0.407394 | 0.302126 |
| MmugDNA.42807.1.S1_at   | MmugDNA.42807.1 | 8.09  | 8.12  | 0.25 | 0.47 | -1.02 | 0.846842 | 0.832769 | 0.93848  | 0.904046 |
| MmugDNA.42808.1.S1_at   | MmugDNA.42808.1 | 12.16 | 11.92 | 0.15 | 0.31 | 1.17  | 0.201327 | 0.222758 | 0.563941 | 0.49569  |
| MmugDNA.42809.1.S1_at   | MmugDNA.42809.1 | 7.34  | 7.04  | 0    | 0.39 | 1.23  | 0.757542 | 0.917521 | 0.897181 | 0.953879 |
| MmugDNA.4281.1.S1_at    | MmugDNA.4281.1  | 6.81  | 6.91  | 0.03 | 0.59 | -1.07 | 0.811873 | 0.953289 | 0.923401 | 0.973509 |
| MmugDNA.42812.1.S1_at   | MmugDNA.42812.1 | 3.85  | 3.95  | 0.29 | 0.57 | -1.07 | 0.439309 | 0.588064 | 0.723526 | 0.754719 |
| MmugDNA.42813.1.S1_at   | MmugDNA.42813.1 | 12.76 | 12.64 | 0.07 | 0.14 | 1.09  | 0.466436 | 0.00588  | 0.740215 | 0.104899 |
| MmugDNA.42814.1.S1_at   | MmugDNA.42814.1 | 3.68  | 3.85  | 0.12 | 0.18 | -1.13 | 0.12062  | 0.12281  | 0.485724 | 0.392786 |
| MmugDNA.42817.1.S1_at   | MmugDNA.42817.1 | 4.23  | 4.61  | 0.77 | 0.42 | -1.3  | 0.779523 | 0.340826 | 0.90816  | 0.586978 |
| MmugDNA.42818.1.S1_at   | MmugDNA.42818.1 | 8.73  | 9.07  | 0.15 | 0.17 | -1.27 | 0.037956 | 0.048825 | 0.343341 | 0.265858 |
| MmugDNA.42819.1.S1_at   | MmugDNA.42819.1 | 9.31  | 9.3   | 0.03 | 0.07 | 1     | 0.224249 | 0.1149   | 0.582619 | 0.381615 |
| MmugDNA.42820.1.S1_s_at | MmugDNA.42820.1 | 10.39 | 10.63 | 0.19 | 0.19 | -1.19 | 0.24688  | 0.123982 | 0.597999 | 0.394262 |
| MmugDNA.42821.1.S1_at   | MmugDNA.42821.1 | 7.51  | 7.5   | 0.08 | 0.08 | 1.01  | 0.644224 | 0.071573 | 0.839719 | 0.313714 |
| MmugDNA.42822.1.S1_s_at | MmugDNA.42822.1 | 7.83  | 7.52  | 0.28 | 0.14 | 1.24  | 0.113984 | 0.067158 | 0.47744  | 0.305165 |
| MmugDNA.42824.1.S1_at   | MmugDNA.42824.1 | 5.07  | 4.94  | 0.14 | 0.13 | 1.09  | 0.859208 | 0.264917 | 0.943112 | 0.530909 |
| MmugDNA.42825.1.S1_at   | MmugDNA.42825.1 | 4.1   | 4.26  | 0.11 | 0.02 | -1.11 | 0.058932 | 0.090444 | 0.390921 | 0.344925 |
| MmugDNA.42826.1.S1_at   | MmugDNA.42826.1 | 8.23  | 8.72  | 0.22 | 0.39 | -1.41 | 0.376188 | 0.227944 | 0.685066 | 0.500211 |
| MmugDNA.42827.1.S1_at   | MmugDNA.42827.1 | 7.38  | 7.21  | 0.66 | 0.04 | 1.12  | 0.363681 | 0.385557 | 0.676829 | 0.621027 |
| MmugDNA.4283.1.S1_at    | MmugDNA.4283.1  | 7.89  | 7.55  | 0.05 | 0.4  | 1.26  | 0.223625 | 0.257003 | 0.582102 | 0.524781 |
| MmugDNA.42830.1.S1_at   | MmugDNA.42830.1 | 3.71  | 3.72  | 0.04 | 0.02 | -1    | 0.864439 | 0.97479  | 0.945537 | 0.986245 |
| MmugDNA.42831.1.S1_at   | MmugDNA.42831.1 | 5.38  | 5.55  | 0.09 | 0.2  | -1.13 | 0.142449 | 0.249386 | 0.509648 | 0.518496 |
| MmugDNA.42833.1.S1_at   | MmugDNA.42833.1 | 8.12  | 7.89  | 0.17 | 0.36 | 1.18  | 0.458559 | 0.40698  | 0.735566 | 0.634661 |
| MmugDNA.42834.1.S1_at   | MmugDNA.42834.1 | 5.97  | 6.63  | 0.35 | 0.41 | -1.58 | 0.242974 | 0.019786 | 0.594744 | 0.176951 |
| MmugDNA.42835.1.S1_at   | MmugDNA.42835.1 | 6.57  | 6.8   | 0.1  | 0.16 | -1.17 | 0.114268 | 0.143237 | 0.477533 | 0.417179 |
| MmugDNA.42836.1.S1_at   | MmugDNA.42836.1 | 4.43  | 4.2   | 0.18 | 0.41 | 1.18  | 0.227451 | 0.371467 | 0.585103 | 0.610204 |
| MmugDNA.42837.1.S1_at   | MmugDNA.42837.1 | 7.37  | 6.81  | 0.58 | 0.59 | 1.48  | 0.654152 | 0.505069 | 0.844551 | 0.70197  |
| MmugDNA.76.1.S1_at      | MmugDNA.76.1    | 3.22  | 3.18  | 0.18 | 0.2  | 1.03  | 0.920847 | 0.652513 | 0.969095 | 0.796819 |
| MmugDNA.76.1.S1_s_at    | MmugDNA.76.1    | 7.9   | 7.32  | 0.75 | 0.51 | 1.5   | 0.799294 | 0.456547 | 0.916945 | 0.67024  |
| MmugDNA.42839.1.S1_at   | MmugDNA.42839.1 | 8.34  | 8.05  | 0.14 | 0.1  | 1.23  | 0.030653 | 0.13181  | 0.319618 | 0.403891 |
| MmugDNA.4284.1.S1_at    | MmugDNA.4284.1  | 4.13  | 3.68  | 0.26 | 0.02 | 1.37  | 0.11172  | 0.46028  | 0.474019 | 0.672148 |
| MmugDNA.42840.1.S1_at   | MmugDNA.42840.1 | 9     | 8.87  | 0.22 | 0.24 | 1.09  | 0.994942 | 0.466458 | 0.998227 | 0.67632  |

|                         |                 |       |       |      |      |       |          |          |          |          |
|-------------------------|-----------------|-------|-------|------|------|-------|----------|----------|----------|----------|
| MmugDNA.42841.1.S1_at   | MmugDNA.42841.1 | 5.1   | 5.08  | 0.14 | 0.05 | 1.01  | 0.990929 | 0.561666 | 0.996858 | 0.73751  |
| MmugDNA.42842.1.S1_at   | MmugDNA.42842.1 | 5.86  | 5.78  | 0.06 | 0.15 | 1.06  | 0.946216 | 0.897503 | 0.979359 | 0.941525 |
| MmugDNA.42844.1.S1_at   | MmugDNA.42844.1 | 7.57  | 7.38  | 0.29 | 0.63 | 1.14  | 0.514958 | 0.19468  | 0.767243 | 0.469765 |
| MmugDNA.42844.1.S1_s_at | MmugDNA.42844.1 | 10.17 | 10.03 | 0.27 | 0.48 | 1.1   | 0.463522 | 0.116392 | 0.738846 | 0.383671 |
| MmugDNA.42845.1.S1_at   | MmugDNA.42845.1 | 6.11  | 6.25  | 0.18 | 0.09 | -1.1  | 0.406448 | 0.536802 | 0.703713 | 0.722119 |
| MmugDNA.42846.1.S1_at   | MmugDNA.42846.1 | 9.27  | 8.95  | 0.42 | 0.71 | 1.25  | 0.934313 | 0.261581 | 0.974571 | 0.528047 |
| MmugDNA.42848.1.S1_at   | MmugDNA.42848.1 | 7.06  | 7.15  | 0.2  | 0.25 | -1.07 | 0.328878 | 0.430443 | 0.654722 | 0.651438 |
| MmugDNA.42849.1.S1_at   | MmugDNA.42849.1 | 10.02 | 10.32 | 0.05 | 0.41 | -1.23 | 0.180664 | 0.195392 | 0.545044 | 0.470253 |
| MmugDNA.4285.1.S1_at    | MmugDNA.4285.1  | 7.46  | 7.54  | 0.88 | 1.07 | -1.06 | 0.787453 | 0.66006  | 0.91159  | 0.801057 |
| MmugDNA.42850.1.S1_at   | MmugDNA.42850.1 | 11.14 | 12.24 | 0.17 | 0.14 | -2.15 | 0.001977 | 0.000463 | 0.155636 | 0.038572 |
| MmugDNA.42853.1.S1_at   | MmugDNA.42853.1 | 4.26  | 4.96  | 0.67 | 0.33 | -1.62 | 0.525561 | 0.289218 | 0.773771 | 0.550293 |
| MmugDNA.42854.1.S1_at   | MmugDNA.42854.1 | 12.44 | 12.21 | 0.08 | 0.23 | 1.17  | 0.753587 | 0.556904 | 0.894902 | 0.734847 |
| MmugDNA.42855.1.S1_at   | MmugDNA.42855.1 | 9.53  | 8.65  | 0.18 | 0.36 | 1.84  | 0.013299 | 0.00253  | 0.246471 | 0.074291 |
| MmugDNA.42856.1.S1_at   | MmugDNA.42856.1 | 6.08  | 6.53  | 0.14 | 0.46 | -1.37 | 0.18126  | 0.036338 | 0.54572  | 0.235105 |
| MmugDNA.42857.1.S1_at   | MmugDNA.42857.1 | 6.84  | 7     | 0.03 | 0.69 | -1.12 | 0.625247 | 0.530698 | 0.82872  | 0.718104 |
| MmugDNA.42858.1.S1_at   | MmugDNA.42858.1 | 5.08  | 5.67  | 0.75 | 0.46 | -1.51 | 0.745307 | 0.857035 | 0.891054 | 0.91832  |
| MmugDNA.4286.1.S1_at    | MmugDNA.4286.1  | 5.95  | 5.82  | 0.2  | 0.17 | 1.09  | 0.271741 | 0.092903 | 0.615789 | 0.349024 |
| MmugDNA.42861.1.S1_at   | MmugDNA.42861.1 | 10.51 | 10.28 | 0.15 | 0.12 | 1.17  | 0.127672 | 0.129751 | 0.493958 | 0.401362 |
| MmugDNA.42862.1.S1_s_at | MmugDNA.42862.1 | 9.2   | 9.64  | 0.08 | 0.25 | -1.35 | 0.123782 | 0.068169 | 0.489534 | 0.307314 |
| MmugDNA.42863.1.S1_at   | MmugDNA.42863.1 | 6.59  | 7.47  | 1.04 | 0.33 | -1.84 | 0.288729 | 0.393709 | 0.626793 | 0.626522 |
| MmugDNA.42864.1.S1_at   | MmugDNA.42864.1 | 3.69  | 3.66  | 0.22 | 0.43 | 1.02  | 0.874202 | 0.989696 | 0.949565 | 0.994108 |
| MmugDNA.42865.1.S1_at   | MmugDNA.42865.1 | 11.08 | 10.08 | 0.99 | 0.8  | 2     | 0.412052 | 0.565169 | 0.70774  | 0.739748 |
| MmugDNA.42866.1.S1_at   | MmugDNA.42866.1 | 8.08  | 8.73  | 0.18 | 0.39 | -1.58 | 0.089759 | 0.091489 | 0.445334 | 0.346533 |
| MmugDNA.42867.1.S1_at   | MmugDNA.42867.1 | 4.73  | 4.41  | 0.2  | 0.04 | 1.25  | 0.042287 | 0.027235 | 0.354563 | 0.206279 |
| MmugDNA.42868.1.S1_at   | MmugDNA.42868.1 | 4.22  | 4.28  | 0.15 | 0.3  | -1.04 | 0.552072 | 0.743096 | 0.789218 | 0.851135 |
| MmugDNA.42869.1.S1_at   | MmugDNA.42869.1 | 8.01  | 7.99  | 0.22 | 0.11 | 1.01  | 0.88972  | 0.897641 | 0.955822 | 0.941618 |
| MmugDNA.4287.1.S1_at    | MmugDNA.4287.1  | 4.18  | 4.29  | 0.11 | 0.38 | -1.08 | 0.203871 | 0.232249 | 0.56638  | 0.503975 |
| MmugDNA.42871.1.S1_at   | MmugDNA.42871.1 | 4.83  | 4.98  | 0.13 | 0.15 | -1.11 | 0.482443 | 0.757269 | 0.749408 | 0.858672 |
| MmugDNA.42874.1.S1_at   | MmugDNA.42874.1 | 6.13  | 6.24  | 0.25 | 0.14 | -1.08 | 0.188008 | 0.244213 | 0.551017 | 0.514167 |
| MmugDNA.42875.1.S1_at   | MmugDNA.42875.1 | 4.35  | 3.77  | 0.79 | 0.11 | 1.5   | 0.226791 | 0.261358 | 0.584769 | 0.527858 |
| MmugDNA.42878.1.S1_at   | MmugDNA.42878.1 | 7.8   | 8.15  | 0.12 | 0.09 | -1.27 | 0.031459 | 0.021875 | 0.321864 | 0.185121 |
| MmugDNA.42879.1.S1_at   | MmugDNA.42879.1 | 7.69  | 7.81  | 1.57 | 0.25 | -1.09 | 0.885423 | 0.883438 | 0.954111 | 0.933594 |
| MmugDNA.4288.1.S1_at    | MmugDNA.4288.1  | 3.89  | 3.95  | 0.12 | 0.03 | -1.04 | 0.195137 | 0.334406 | 0.558582 | 0.582387 |
| MmugDNA.42882.1.S1_at   | MmugDNA.42882.1 | 5.05  | 5.35  | 0.17 | 0.16 | -1.23 | 0.07268  | 0.092827 | 0.417542 | 0.349024 |
| MmugDNA.42882.1.S1_x_at | MmugDNA.42882.1 | 5.16  | 5.3   | 0.07 | 0.25 | -1.1  | 0.35053  | 0.477079 | 0.668568 | 0.683196 |
| MmugDNA.42884.1.S1_at   | MmugDNA.42884.1 | 7.9   | 7.38  | 0.06 | 0.44 | 1.43  | 0.065112 | 0.036509 | 0.40393  | 0.235526 |
| MmugDNA.42886.1.S1_at   | MmugDNA.42886.1 | 6.69  | 5.58  | 0.17 | 0.01 | 2.16  | 0.00042  | 0.000057 | 0.130717 | 0.025666 |
| MmugDNA.42887.1.S1_at   | MmugDNA.42887.1 | 5.25  | 7.52  | 0.7  | 1.08 | -4.82 | 0.164332 | 0.156554 | 0.528238 | 0.43196  |
| MmugDNA.42888.1.S1_at   | MmugDNA.42888.1 | 10.53 | 11.05 | 0.38 | 0.49 | -1.43 | 0.172514 | 0.010782 | 0.536116 | 0.135512 |
| MmugDNA.4289.1.S1_at    | MmugDNA.4289.1  | 8.25  | 8.35  | 0.1  | 0.28 | -1.07 | 0.907734 | 0.952824 | 0.963369 | 0.97327  |
| MmugDNA.42892.1.S1_at   | MmugDNA.42892.1 | 5.87  | 5.69  | 0.22 | 0.17 | 1.13  | 0.406167 | 0.656494 | 0.703608 | 0.799097 |

|                        |                 |       |       |      |      |       |          |          |          |          |
|------------------------|-----------------|-------|-------|------|------|-------|----------|----------|----------|----------|
| MmugDNA.42893.1.S1_at  | MmugDNA.42893.1 | 5.42  | 5.08  | 1.03 | 0.47 | 1.27  | 0.692205 | 0.849841 | 0.86333  | 0.914673 |
| MmugDNA.42894.1.S1_at  | MmugDNA.42894.1 | 4.6   | 4.57  | 0.11 | 0.24 | 1.02  | 0.425024 | 0.509414 | 0.714956 | 0.704167 |
| MmugDNA.42895.1.S1_at  | MmugDNA.42895.1 | 3.9   | 4.53  | 0.08 | 0.8  | -1.56 | 0.208815 | 0.242301 | 0.570463 | 0.512739 |
| MmugDNA.42896.1.S1_at  | MmugDNA.42896.1 | 3.99  | 3.84  | 0.12 | 0.22 | 1.11  | 0.148769 | 0.314401 | 0.51391  | 0.56831  |
| MmugDNA.42898.1.S1_at  | MmugDNA.42898.1 | 9.64  | 9.53  | 0.49 | 0.65 | 1.08  | 0.46231  | 0.394835 | 0.738226 | 0.627216 |
| MmugDNA.429.1.S1_at    | MmugDNA.429.1   | 2.9   | 2.9   | 0.02 | 0.08 | -1    | 0.942593 | 0.954501 | 0.978078 | 0.974181 |
| MmugDNA.4290.1.S1_at   | MmugDNA.4290.1  | 9.74  | 9.71  | 0.36 | 0.18 | 1.02  | 0.922021 | 0.213579 | 0.969683 | 0.48741  |
| MmugDNA.42900.1.S1_at  | MmugDNA.42900.1 | 5.47  | 5.71  | 0.18 | 0.2  | -1.17 | 0.413226 | 0.344363 | 0.70838  | 0.589762 |
| MmugDNA.42904.1.S1_at  | MmugDNA.42904.1 | 7.34  | 6.04  | 0.21 | 0.2  | 2.48  | 0.00199  | 0.000419 | 0.155636 | 0.038093 |
| MmugDNA.42906.1.S1_at  | MmugDNA.42906.1 | 6.31  | 7.53  | 0.11 | 0.72 | -2.32 | 0.043126 | 0.013941 | 0.356343 | 0.151391 |
| MmugDNA.42907.1.S1_at  | MmugDNA.42907.1 | 3.92  | 3.96  | 0.21 | 0.04 | -1.03 | 0.473786 | 0.577483 | 0.744573 | 0.747923 |
| MmugDNA.42908.1.S1_at  | MmugDNA.42908.1 | 6.8   | 6.14  | 0.21 | 0.83 | 1.58  | 0.132985 | 0.129608 | 0.499254 | 0.401223 |
| MmugDNA.42909.1.S1_at  | MmugDNA.42909.1 | 4.63  | 4.7   | 0.2  | 0.09 | -1.05 | 0.828007 | 0.141381 | 0.930199 | 0.414874 |
| MmugDNA.4291.1.S1_at   | MmugDNA.4291.1  | 9.54  | 9.89  | 0.08 | 0.14 | -1.27 | 0.014311 | 0.002346 | 0.251885 | 0.07161  |
| MmugDNA.42911.1.S1_at  | MmugDNA.42911.1 | 5.55  | 5.66  | 0.14 | 0.17 | -1.07 | 0.995808 | 0.853071 | 0.998446 | 0.916487 |
| MmugDNA.42912.1.S1_at  | MmugDNA.42912.1 | 8.41  | 8.98  | 0.45 | 0.19 | -1.49 | 0.043277 | 0.027073 | 0.3567   | 0.205754 |
| MmugDNA.42914.1.S1_at  | MmugDNA.42914.1 | 7.24  | 7.07  | 0.2  | 0.2  | 1.12  | 0.760878 | 0.439301 | 0.899137 | 0.658043 |
| MmugDNA.42915.1.S1_at  | MmugDNA.42915.1 | 6.16  | 6.29  | 0.04 | 0.15 | -1.09 | 0.251233 | 0.08452  | 0.600724 | 0.335916 |
| MmugDNA.42916.1.S1_at  | MmugDNA.42916.1 | 8.8   | 8.8   | 0.07 | 0.46 | 1     | 0.929609 | 0.9082   | 0.972741 | 0.947992 |
| MmugDNA.42917.1.S1_at  | MmugDNA.42917.1 | 4.53  | 4.51  | 0.29 | 0.24 | 1.02  | 0.859706 | 0.77422  | 0.943382 | 0.868735 |
| MmugDNA.42918.1.S1_at  | MmugDNA.42918.1 | 4.73  | 4.75  | 0.06 | 0.1  | -1.01 | 0.708084 | 0.450976 | 0.871565 | 0.665946 |
| MmugDNA.42919.1.S1_at  | MmugDNA.42919.1 | 12.87 | 13.11 | 0.27 | 0.07 | -1.18 | 0.07166  | 0.070873 | 0.415639 | 0.312373 |
| MmugDNA.4292.1.S1_at   | MmugDNA.4292.1  | 7.86  | 7.54  | 0.14 | 0.23 | 1.25  | 0.28921  | 0.449674 | 0.627218 | 0.665156 |
| MmugDNA.42920.1.S1_at  | MmugDNA.42920.1 | 13.73 | 13.76 | 0.06 | 0.03 | -1.03 | 0.929739 | 0.439728 | 0.972813 | 0.65842  |
| MmugDNA.42922.1.S1_at  | MmugDNA.42922.1 | 7.63  | 6.92  | 0.4  | 0.4  | 1.64  | 0.280712 | 0.298518 | 0.62183  | 0.557175 |
| MmugDNA.42923.1.S1_at  | MmugDNA.42923.1 | 10.97 | 11.19 | 0.12 | 0.14 | -1.16 | 0.395537 | 0.145671 | 0.696523 | 0.419644 |
| MmugDNA.42927.1.S1_at  | MmugDNA.42927.1 | 3.32  | 3.22  | 0.27 | 0.43 | 1.08  | 0.964405 | 0.761439 | 0.986213 | 0.861416 |
| MmugDNA.42929.1.S1_at  | MmugDNA.42929.1 | 3.45  | 3.47  | 0.1  | 0.11 | -1.02 | 0.666278 | 0.539496 | 0.850305 | 0.723763 |
| MmugDNA.42930.1.S1_at  | MmugDNA.42930.1 | 10.59 | 13.67 | 0.47 | 1.6  | -8.45 | 0.108661 | 0.090758 | 0.470118 | 0.345227 |
| MmugDNA.5636.1.S1_s_at | MmugDNA.5636.1  | 5.9   | 5.8   | 0.26 | 0.22 | 1.07  | 0.804953 | 0.553221 | 0.919904 | 0.73239  |
| MmugDNA.42932.1.S1_at  | MmugDNA.42932.1 | 4.08  | 4.43  | 0.74 | 0.18 | -1.28 | 0.765329 | 0.151001 | 0.901255 | 0.425628 |
| MmugDNA.42933.1.S1_at  | MmugDNA.42933.1 | 7.25  | 5.6   | 0.66 | 0.49 | 3.15  | 0.101247 | 0.047023 | 0.461009 | 0.261469 |
| MmugDNA.42935.1.S1_at  | MmugDNA.42935.1 | 3.56  | 3.53  | 0.07 | 0.11 | 1.02  | 0.87788  | 0.534018 | 0.951027 | 0.720046 |
| MmugDNA.42936.1.S1_at  | MmugDNA.42936.1 | 4.43  | 4.53  | 0.07 | 0.08 | -1.07 | 0.228265 | 0.496157 | 0.585703 | 0.695877 |
| MmugDNA.42937.1.S1_at  | MmugDNA.42937.1 | 8.02  | 7.54  | 0.3  | 0.37 | 1.4   | 0.515705 | 0.373631 | 0.767629 | 0.612389 |
| MmugDNA.4294.1.S1_at   | MmugDNA.4294.1  | 2.96  | 3.07  | 0.11 | 0.49 | -1.08 | 0.686358 | 0.777361 | 0.859743 | 0.87064  |
| MmugDNA.42940.1.S1_at  | MmugDNA.42940.1 | 11.53 | 10.96 | 0.33 | 0.15 | 1.48  | 0.151526 | 0.068401 | 0.516168 | 0.307955 |
| MmugDNA.42941.1.S1_at  | MmugDNA.42941.1 | 10.83 | 10.57 | 0.26 | 0.27 | 1.2   | 0.402679 | 0.328304 | 0.701544 | 0.578012 |
| MmugDNA.42943.1.S1_at  | MmugDNA.42943.1 | 6.93  | 6.41  | 0.76 | 0.28 | 1.44  | 0.479346 | 0.543973 | 0.747644 | 0.72652  |
| MmugDNA.42944.1.S1_at  | MmugDNA.42944.1 | 3.33  | 3.33  | 0.27 | 0.03 | -1    | 0.896339 | 0.613831 | 0.958686 | 0.77088  |
| MmugDNA.42945.1.S1_at  | MmugDNA.42945.1 | 9.8   | 8.58  | 0.59 | 1.84 | 2.33  | 0.490733 | 0.565538 | 0.75454  | 0.739956 |

|                         |                 |       |       |      |      |       |          |          |          |          |
|-------------------------|-----------------|-------|-------|------|------|-------|----------|----------|----------|----------|
| MmugDNA.42946.1.S1_at   | MmugDNA.42946.1 | 7.44  | 7.42  | 0.18 | 0.36 | 1.02  | 0.232636 | 0.357758 | 0.587814 | 0.599382 |
| MmugDNA.42947.1.S1_at   | MmugDNA.42947.1 | 3.39  | 3.12  | 0.36 | 0.04 | 1.2   | 0.805297 | 0.23445  | 0.920058 | 0.505674 |
| MmugDNA.42948.1.S1_x_at | MmugDNA.42948.1 | 7.59  | 7.17  | 0.49 | 0.2  | 1.34  | 0.199158 | 0.200291 | 0.562139 | 0.474689 |
| MmugDNA.42949.1.S1_at   | MmugDNA.42949.1 | 7.36  | 7.75  | 1.29 | 0.6  | -1.31 | 0.835264 | 0.957642 | 0.933181 | 0.976031 |
| MmugDNA.4295.1.S1_at    | MmugDNA.4295.1  | 5.32  | 5.32  | 0.25 | 0.42 | -1    | 0.912342 | 0.987799 | 0.965274 | 0.993191 |
| MmugDNA.42950.1.S1_at   | MmugDNA.42950.1 | 3.86  | 3.77  | 0.14 | 0.1  | 1.06  | 0.294396 | 0.76627  | 0.631216 | 0.864189 |
| MmugDNA.42951.1.S1_at   | MmugDNA.42951.1 | 8.82  | 8.67  | 0.49 | 0.12 | 1.11  | 0.384678 | 0.096698 | 0.690114 | 0.35417  |
| MmugDNA.42952.1.S1_at   | MmugDNA.42952.1 | 12.94 | 12.9  | 0.16 | 0.15 | 1.03  | 0.219244 | 0.280762 | 0.578716 | 0.543952 |
| MmugDNA.42953.1.S1_at   | MmugDNA.42953.1 | 10.31 | 9.16  | 0.25 | 0.7  | 2.21  | 0.146103 | 0.101262 | 0.512187 | 0.360998 |
| MmugDNA.42954.1.S1_at   | MmugDNA.42954.1 | 10.06 | 9.13  | 0.18 | 0.18 | 1.91  | 0.002452 | 0.000568 | 0.163555 | 0.041092 |
| MmugDNA.42955.1.S1_at   | MmugDNA.42955.1 | 4.34  | 4.27  | 0.41 | 0.42 | 1.05  | 0.413142 | 0.590965 | 0.708379 | 0.75656  |
| MmugDNA.42956.1.S1_at   | MmugDNA.42956.1 | 3.47  | 3.54  | 0.13 | 0.14 | -1.05 | 0.95496  | 0.436957 | 0.983073 | 0.656361 |
| MmugDNA.42958.1.S1_at   | MmugDNA.42958.1 | 4.89  | 4.74  | 0.25 | 0.03 | 1.11  | 0.431533 | 0.648492 | 0.718592 | 0.794294 |
| MmugDNA.42959.1.S1_at   | MmugDNA.42959.1 | 6.17  | 6.09  | 0.21 | 0.11 | 1.06  | 0.78398  | 0.755939 | 0.909881 | 0.8579   |
| MmugDNA.4296.1.S1_at    | MmugDNA.4296.1  | 3.34  | 3.34  | 0.11 | 0.14 | -1    | 0.474097 | 0.476669 | 0.744851 | 0.682847 |
| MmugDNA.42961.1.S1_at   | MmugDNA.42961.1 | 10.05 | 9.95  | 0.23 | 0.72 | 1.07  | 0.972307 | 0.685839 | 0.989473 | 0.816612 |
| MmugDNA.42962.1.S1_at   | MmugDNA.42962.1 | 8.38  | 8.49  | 0.12 | 0.73 | -1.07 | 0.747218 | 0.92483  | 0.89177  | 0.957467 |
| MmugDNA.42963.1.S1_at   | MmugDNA.42963.1 | 4.89  | 4.93  | 0.09 | 0.24 | -1.02 | 0.277238 | 0.390473 | 0.619397 | 0.624267 |
| MmugDNA.42964.1.S1_at   | MmugDNA.42964.1 | 6.68  | 6.22  | 0.28 | 0.12 | 1.37  | 0.024225 | 0.013528 | 0.294535 | 0.148875 |
| MmugDNA.42965.1.S1_at   | MmugDNA.42965.1 | 4.06  | 4.68  | 0.28 | 0.41 | -1.53 | 0.124854 | 0.200151 | 0.490774 | 0.474603 |
| MmugDNA.42966.1.S1_at   | MmugDNA.42966.1 | 5.5   | 5.48  | 0.15 | 0.24 | 1.02  | 0.910341 | 0.967621 | 0.964529 | 0.982093 |
| MmugDNA.42967.1.S1_at   | MmugDNA.42967.1 | 8.77  | 8.78  | 0.33 | 0.05 | -1.01 | 0.375626 | 0.524862 | 0.684803 | 0.714635 |
| MmugDNA.42967.1.S1_s_at | MmugDNA.42967.1 | 9.77  | 9.62  | 0.24 | 0.09 | 1.11  | 0.922869 | 0.979794 | 0.970065 | 0.989168 |
| MmugDNA.42969.1.S1_at   | MmugDNA.42969.1 | 3.84  | 3.72  | 0.21 | 0.11 | 1.08  | 0.33176  | 0.340009 | 0.656468 | 0.586516 |
| MmugDNA.42970.1.S1_at   | MmugDNA.42970.1 | 5.99  | 5.91  | 0.03 | 0.17 | 1.06  | 0.911992 | 0.817907 | 0.965176 | 0.894951 |
| MmugDNA.42971.1.S1_at   | MmugDNA.42971.1 | 5.91  | 5.89  | 0.21 | 0.07 | 1.02  | 0.573686 | 0.490248 | 0.801332 | 0.692301 |
| MmugDNA.42972.1.S1_at   | MmugDNA.42972.1 | 7.5   | 8.25  | 0.2  | 0.34 | -1.67 | 0.029271 | 0.017964 | 0.313575 | 0.169043 |
| MmugDNA.42973.1.S1_at   | MmugDNA.42973.1 | 8.98  | 9.1   | 0.08 | 0.12 | -1.09 | 0.127015 | 0.03988  | 0.493251 | 0.244852 |
| MmugDNA.42974.1.S1_at   | MmugDNA.42974.1 | 3.25  | 3.34  | 0.9  | 0.4  | -1.07 | 0.587658 | 0.672329 | 0.808643 | 0.808488 |
| MmugDNA.42975.1.S1_at   | MmugDNA.42975.1 | 5.05  | 5.58  | 0.09 | 0.04 | -1.44 | 0.000866 | 0.001109 | 0.139813 | 0.052745 |
| MmugDNA.42976.1.S1_at   | MmugDNA.42976.1 | 4.96  | 4.93  | 0.12 | 0.25 | 1.02  | 0.32373  | 0.378341 | 0.651695 | 0.615443 |
| MmugDNA.42978.1.S1_at   | MmugDNA.42978.1 | 5.16  | 5.26  | 0.1  | 0.42 | -1.07 | 0.331119 | 0.260313 | 0.656127 | 0.526876 |
| MmugDNA.42981.1.S1_at   | MmugDNA.42981.1 | 9.39  | 9.85  | 0.22 | 0.54 | -1.37 | 0.0879   | 0.098608 | 0.442238 | 0.356743 |
| MmugDNA.42982.1.S1_at   | MmugDNA.42982.1 | 13.64 | 13.44 | 0.1  | 0.16 | 1.14  | 0.084313 | 0.062361 | 0.436922 | 0.296504 |
| MmugDNA.42983.1.S1_s_at | MmugDNA.42983.1 | 10.87 | 11.66 | 0.32 | 1    | -1.73 | 0.287998 | 0.277632 | 0.626381 | 0.541628 |
| MmugDNA.42984.1.S1_at   | MmugDNA.42984.1 | 6.26  | 6.27  | 0.32 | 0.15 | -1.01 | 0.956771 | 0.594133 | 0.983754 | 0.758517 |
| MmugDNA.42985.1.S1_at   | MmugDNA.42985.1 | 4.18  | 4.04  | 0.21 | 0.07 | 1.1   | 0.080256 | 0.041316 | 0.430341 | 0.247995 |
| MmugDNA.42986.1.S1_at   | MmugDNA.42986.1 | 3.9   | 3.82  | 0.07 | 0.11 | 1.06  | 0.22824  | 0.480111 | 0.585696 | 0.685659 |
| MmugDNA.42987.1.S1_at   | MmugDNA.42987.1 | 5.21  | 5.7   | 0.04 | 0.37 | -1.41 | 0.061959 | 0.079655 | 0.396857 | 0.326981 |
| MmugDNA.42988.1.S1_at   | MmugDNA.42988.1 | 5.7   | 5.74  | 0.16 | 0.28 | -1.03 | 0.500475 | 0.380138 | 0.759571 | 0.616819 |
| MmugDNA.42989.1.S1_at   | MmugDNA.42989.1 | 3.88  | 3.74  | 0.22 | 0.14 | 1.1   | 0.155361 | 0.288132 | 0.520164 | 0.54936  |

|                       |                 |       |       |      |      |       |          |          |          |          |
|-----------------------|-----------------|-------|-------|------|------|-------|----------|----------|----------|----------|
| MmugDNA.4299.1.S1_at  | MmugDNA.4299.1  | 5.55  | 5.83  | 1.05 | 0.28 | -1.21 | 0.481799 | 0.585658 | 0.749333 | 0.752957 |
| MmugDNA.42991.1.S1_at | MmugDNA.42991.1 | 6.36  | 7.56  | 0.55 | 0.14 | -2.31 | 0.019656 | 0.010537 | 0.275549 | 0.134072 |
| MmugDNA.42992.1.S1_at | MmugDNA.42992.1 | 5.17  | 4.96  | 0.59 | 0.63 | 1.15  | 0.622719 | 0.385692 | 0.827633 | 0.621079 |
| MmugDNA.42993.1.S1_at | MmugDNA.42993.1 | 9.18  | 9.51  | 0.22 | 0.33 | -1.26 | 0.212065 | 0.277674 | 0.572526 | 0.541636 |
| MmugDNA.42994.1.S1_at | MmugDNA.42994.1 | 7.44  | 6.68  | 0.28 | 0.15 | 1.7   | 0.008155 | 0.001867 | 0.216841 | 0.06479  |
| MmugDNA.42995.1.S1_at | MmugDNA.42995.1 | 5.44  | 5.45  | 0.55 | 0.77 | -1.01 | 0.774861 | 0.591642 | 0.905462 | 0.75717  |
| MmugDNA.42996.1.S1_at | MmugDNA.42996.1 | 3.45  | 3.24  | 0.43 | 0.08 | 1.16  | 0.410316 | 0.319557 | 0.706259 | 0.571875 |
| MmugDNA.42997.1.S1_at | MmugDNA.42997.1 | 6.91  | 6.19  | 0.64 | 0.35 | 1.64  | 0.431381 | 0.024087 | 0.71858  | 0.194493 |
| MmugDNA.42998.1.S1_at | MmugDNA.42998.1 | 5.47  | 5.49  | 0.18 | 0.14 | -1.01 | 0.862409 | 0.820042 | 0.944681 | 0.89632  |
| MmugDNA.42999.1.S1_at | MmugDNA.42999.1 | 5.33  | 5.34  | 0.16 | 0.06 | -1.01 | 0.920504 | 0.903445 | 0.969043 | 0.945185 |
| MmugDNA.430.1.S1_at   | MmugDNA.430.1   | 5.3   | 5.17  | 0.13 | 0.1  | 1.09  | 0.120281 | 0.319372 | 0.485252 | 0.571724 |
| MmugDNA.4300.1.S1_at  | MmugDNA.4300.1  | 5.65  | 4.76  | 0.09 | 0.46 | 1.86  | 0.030301 | 0.025147 | 0.31783  | 0.198717 |
| MmugDNA.43002.1.S1_at | MmugDNA.43002.1 | 9.45  | 9.79  | 0.25 | 0.35 | -1.26 | 0.215369 | 0.028078 | 0.575838 | 0.209118 |
| MmugDNA.43003.1.S1_at | MmugDNA.43003.1 | 3.99  | 3.84  | 0.17 | 0.08 | 1.11  | 0.262821 | 0.72062  | 0.609088 | 0.838352 |
| MmugDNA.43004.1.S1_at | MmugDNA.43004.1 | 2.79  | 2.75  | 0.14 | 0.31 | 1.02  | 0.761995 | 0.844621 | 0.899852 | 0.91156  |
| MmugDNA.43005.1.S1_at | MmugDNA.43005.1 | 6.17  | 5.58  | 0.26 | 1.06 | 1.51  | 0.808911 | 0.633908 | 0.922095 | 0.784538 |
| MmugDNA.43006.1.S1_at | MmugDNA.43006.1 | 4.57  | 4.25  | 0.22 | 0.16 | 1.25  | 0.394248 | 0.02735  | 0.695705 | 0.206637 |
| MmugDNA.43007.1.S1_at | MmugDNA.43007.1 | 7.91  | 7.82  | 0.29 | 0.42 | 1.06  | 0.978719 | 0.452766 | 0.992175 | 0.667321 |
| MmugDNA.43008.1.S1_at | MmugDNA.43008.1 | 3.25  | 3.25  | 0.16 | 0.05 | 1     | 0.791695 | 0.945905 | 0.913461 | 0.969245 |
| MmugDNA.4301.1.S1_at  | MmugDNA.4301.1  | 8.51  | 8.41  | 0.03 | 0.58 | 1.08  | 0.510644 | 0.425186 | 0.765151 | 0.647647 |
| MmugDNA.43011.1.S1_at | MmugDNA.43011.1 | 6.63  | 6.43  | 0.59 | 0.29 | 1.15  | 0.277007 | 0.373384 | 0.619197 | 0.61221  |
| MmugDNA.43013.1.S1_at | MmugDNA.43013.1 | 5.68  | 5.69  | 0.16 | 0.13 | -1    | 0.86812  | 0.195259 | 0.947305 | 0.470253 |
| MmugDNA.43014.1.S1_at | MmugDNA.43014.1 | 6.82  | 6.35  | 0.69 | 0.32 | 1.38  | 0.243573 | 0.306818 | 0.595361 | 0.563387 |
| MmugDNA.43015.1.S1_at | MmugDNA.43015.1 | 10.48 | 10.18 | 0.09 | 0.64 | 1.23  | 0.414198 | 0.523632 | 0.708972 | 0.713871 |
| MmugDNA.43016.1.S1_at | MmugDNA.43016.1 | 4.73  | 5.77  | 0.53 | 0.37 | -2.05 | 0.020011 | 0.014168 | 0.276484 | 0.152143 |
| MmugDNA.43017.1.S1_at | MmugDNA.43017.1 | 11.7  | 11.71 | 0.09 | 0.26 | -1    | 0.592845 | 0.307164 | 0.811221 | 0.563487 |
| MmugDNA.43018.1.S1_at | MmugDNA.43018.1 | 6.03  | 5.94  | 0.08 | 0.06 | 1.07  | 0.210163 | 0.167745 | 0.571368 | 0.444282 |
| MmugDNA.4302.1.S1_at  | MmugDNA.4302.1  | 3.2   | 4.3   | 0.1  | 0.35 | -2.14 | 0.005044 | 0.010364 | 0.188046 | 0.133236 |
| MmugDNA.43020.1.S1_at | MmugDNA.43020.1 | 5.66  | 6.84  | 0.44 | 0.33 | -2.26 | 0.048561 | 0.063034 | 0.369003 | 0.297739 |
| MmugDNA.43021.1.S1_at | MmugDNA.43021.1 | 9.13  | 9.95  | 0.16 | 0.41 | -1.78 | 0.030525 | 0.01373  | 0.318785 | 0.150093 |
| MmugDNA.43022.1.S1_at | MmugDNA.43022.1 | 10.01 | 10.24 | 0.16 | 0.46 | -1.17 | 0.96058  | 0.647032 | 0.9849   | 0.793279 |
| MmugDNA.43023.1.S1_at | MmugDNA.43023.1 | 8.85  | 8.43  | 0.13 | 0.13 | 1.34  | 0.011555 | 0.015958 | 0.236469 | 0.16035  |
| MmugDNA.43025.1.S1_at | MmugDNA.43025.1 | 8.91  | 8.69  | 0.3  | 1.41 | 1.17  | 0.277148 | 0.193551 | 0.619302 | 0.468785 |
| MmugDNA.43026.1.S1_at | MmugDNA.43026.1 | 4.36  | 4.37  | 0.24 | 0.07 | -1.01 | 0.868259 | 0.738345 | 0.947379 | 0.848258 |
| MmugDNA.43028.1.S1_at | MmugDNA.43028.1 | 8.09  | 7.73  | 0.33 | 0.18 | 1.28  | 0.280641 | 0.093718 | 0.621742 | 0.350192 |
| MmugDNA.43029.1.S1_at | MmugDNA.43029.1 | 4.22  | 4.32  | 0.14 | 0.17 | -1.07 | 0.219065 | 0.517906 | 0.578493 | 0.710027 |
| MmugDNA.4303.1.S1_at  | MmugDNA.4303.1  | 10.77 | 10.03 | 0.02 | 0.05 | 1.67  | 0.000021 | 0.000059 | 0.112653 | 0.025666 |
| MmugDNA.43030.1.S1_at | MmugDNA.43030.1 | 8.88  | 9.29  | 0.07 | 0.35 | -1.33 | 0.127443 | 0.17577  | 0.493834 | 0.452344 |
| MmugDNA.43031.1.S1_at | MmugDNA.43031.1 | 3.17  | 3.24  | 0.15 | 0.09 | -1.05 | 0.973476 | 0.160354 | 0.989603 | 0.436528 |
| MmugDNA.43032.1.S1_at | MmugDNA.43032.1 | 9.64  | 9.54  | 0.03 | 0.42 | 1.07  | 0.721768 | 0.521846 | 0.878287 | 0.712654 |
| MmugDNA.43034.1.S1_at | MmugDNA.43034.1 | 8.99  | 9.17  | 0.11 | 0.32 | -1.13 | 0.143491 | 0.156938 | 0.510312 | 0.432372 |



|                         |                 |       |       |      |      |       |          |          |          |          |
|-------------------------|-----------------|-------|-------|------|------|-------|----------|----------|----------|----------|
| MmugDNA.43036.1.S1_s_at | MmugDNA.43036.1 | 9.26  | 8.64  | 0.31 | 0.17 | 1.54  | 0.02927  | 0.029752 | 0.313575 | 0.21414  |
| MmugDNA.43039.1.S1_at   | MmugDNA.43039.1 | 8.25  | 8.27  | 0.26 | 0.47 | -1.02 | 0.502086 | 0.682439 | 0.760244 | 0.814526 |
| MmugDNA.4304.1.S1_at    | MmugDNA.4304.1  | 5.71  | 5.8   | 0.07 | 0.55 | -1.07 | 0.593018 | 0.217191 | 0.811221 | 0.490843 |
| MmugDNA.43042.1.S1_at   | MmugDNA.43042.1 | 7.84  | 7.75  | 0.12 | 0.25 | 1.07  | 0.129407 | 0.030241 | 0.495588 | 0.215784 |
| MmugDNA.43043.1.S1_at   | MmugDNA.43043.1 | 6.16  | 5.56  | 0.25 | 0.1  | 1.52  | 0.038122 | 0.012403 | 0.343587 | 0.144058 |
| MmugDNA.43044.1.S1_at   | MmugDNA.43044.1 | 3.31  | 3.41  | 0.1  | 0.19 | -1.07 | 0.327295 | 0.38183  | 0.653682 | 0.618047 |
| MmugDNA.43045.1.S1_at   | MmugDNA.43045.1 | 6.02  | 6.07  | 0.09 | 0.1  | -1.04 | 0.248939 | 0.078651 | 0.599669 | 0.325522 |
| MmugDNA.43046.1.S1_at   | MmugDNA.43046.1 | 4.09  | 4.08  | 0.05 | 0.12 | 1.01  | 0.72502  | 0.859179 | 0.879995 | 0.919754 |
| MmugDNA.43047.1.S1_at   | MmugDNA.43047.1 | 6.13  | 6.13  | 0.04 | 0.18 | 1     | 0.607399 | 0.809997 | 0.819336 | 0.890518 |
| MmugDNA.43048.1.S1_at   | MmugDNA.43048.1 | 6.34  | 6.53  | 0.29 | 0.1  | -1.14 | 0.959175 | 0.053531 | 0.9845   | 0.277016 |
| MmugDNA.43049.1.S1_at   | MmugDNA.43049.1 | 6.01  | 6.47  | 0.57 | 0.39 | -1.38 | 0.596185 | 0.361713 | 0.812808 | 0.602422 |
| MmugDNA.4305.1.S1_at    | MmugDNA.4305.1  | 11.88 | 11.92 | 0.14 | 0.7  | -1.03 | 0.47172  | 0.595902 | 0.743333 | 0.759258 |
| MmugDNA.4305.1.S1_s_at  | MmugDNA.4305.1  | 12.46 | 12.49 | 0.08 | 0.49 | -1.02 | 0.392685 | 0.500948 | 0.694732 | 0.69936  |
| MmugDNA.43051.1.S1_at   | MmugDNA.43051.1 | 10.13 | 9.84  | 0.31 | 0.38 | 1.22  | 0.221454 | 0.070768 | 0.580261 | 0.312257 |
| MmugDNA.43051.1.S1_s_at | MmugDNA.43051.1 | 13.14 | 12.88 | 0.1  | 0.21 | 1.19  | 0.067347 | 0.090129 | 0.407499 | 0.344432 |
| MmugDNA.43052.1.S1_at   | MmugDNA.43052.1 | 6.05  | 6.35  | 0.75 | 0.31 | -1.23 | 0.904297 | 0.532006 | 0.961691 | 0.718995 |
| MmugDNA.43053.1.S1_at   | MmugDNA.43053.1 | 9.11  | 8.36  | 0.18 | 0.11 | 1.69  | 0.008504 | 0.000917 | 0.219031 | 0.048499 |
| MmugDNA.43056.1.S1_at   | MmugDNA.43056.1 | 6.16  | 6.19  | 0.07 | 0.24 | -1.02 | 0.41945  | 0.523042 | 0.711808 | 0.713429 |
| MmugDNA.43057.1.S1_at   | MmugDNA.43057.1 | 5.31  | 5.16  | 0.09 | 0.19 | 1.11  | 0.446567 | 0.268955 | 0.728373 | 0.534369 |
| MmugDNA.43058.1.S1_at   | MmugDNA.43058.1 | 6.97  | 7.45  | 0.18 | 0.26 | -1.4  | 0.046964 | 0.095077 | 0.36447  | 0.352124 |
| MmugDNA.43059.1.S1_at   | MmugDNA.43059.1 | 4.58  | 4.6   | 0.16 | 0.1  | -1.01 | 0.859961 | 0.458326 | 0.943486 | 0.671119 |
| MmugDNA.4306.1.S1_at    | MmugDNA.4306.1  | 6.41  | 7.09  | 0.67 | 0.56 | -1.59 | 0.140845 | 0.099631 | 0.508448 | 0.358128 |
| MmugDNA.43061.1.S1_at   | MmugDNA.43061.1 | 3.47  | 3.44  | 0.1  | 0.04 | 1.02  | 0.681161 | 0.193742 | 0.85748  | 0.468828 |
| MmugDNA.43062.1.S1_at   | MmugDNA.43062.1 | 5.97  | 5.78  | 0.44 | 0.08 | 1.14  | 0.354045 | 0.347568 | 0.670317 | 0.592019 |
| MmugDNA.43063.1.S1_s_at | MmugDNA.43063.1 | 9.09  | 10.03 | 0.38 | 0.31 | -1.92 | 0.037348 | 0.014511 | 0.341309 | 0.153682 |
| MmugDNA.43064.1.S1_at   | MmugDNA.43064.1 | 3.83  | 4.14  | 0.05 | 0.04 | -1.24 | 0.0012   | 0.00049  | 0.145267 | 0.038921 |
| MmugDNA.43066.1.S1_at   | MmugDNA.43066.1 | 5.09  | 5.2   | 1.17 | 0.55 | -1.08 | 0.834623 | 0.925065 | 0.932931 | 0.957602 |
| MmugDNA.43068.1.S1_at   | MmugDNA.43068.1 | 8.23  | 8.25  | 0.19 | 0.08 | -1.01 | 0.988234 | 0.342859 | 0.995887 | 0.588712 |
| MmugDNA.43069.1.S1_at   | MmugDNA.43069.1 | 5.3   | 5.44  | 0.14 | 0.18 | -1.1  | 0.181406 | 0.244009 | 0.545967 | 0.514069 |
| MmugDNA.4307.1.S1_at    | MmugDNA.4307.1  | 11.07 | 10.83 | 0.42 | 0.64 | 1.18  | 0.814826 | 0.288798 | 0.92477  | 0.549936 |
| MmugDNA.43071.1.S1_at   | MmugDNA.43071.1 | 8.33  | 7.62  | 0.23 | 0.1  | 1.63  | 0.016176 | 0.012548 | 0.26311  | 0.144487 |
| MmugDNA.43072.1.S1_at   | MmugDNA.43072.1 | 8.66  | 8.82  | 0.1  | 0.07 | -1.12 | 0.130486 | 0.339485 | 0.496851 | 0.586095 |
| MmugDNA.43073.1.S1_at   | MmugDNA.43073.1 | 6.09  | 6.11  | 0.18 | 0.12 | -1.01 | 0.989074 | 0.936715 | 0.99615  | 0.964332 |
| MmugDNA.43074.1.S1_at   | MmugDNA.43074.1 | 8.29  | 7.81  | 0.22 | 0.29 | 1.4   | 0.092298 | 0.135803 | 0.448803 | 0.407979 |
| MmugDNA.43075.1.S1_at   | MmugDNA.43075.1 | 6.85  | 6.88  | 0.24 | 0.19 | -1.02 | 0.79987  | 0.903824 | 0.917271 | 0.945402 |
| MmugDNA.43076.1.S1_at   | MmugDNA.43076.1 | 7.77  | 6.68  | 0.48 | 0.31 | 2.13  | 0.05618  | 0.029434 | 0.386006 | 0.213368 |
| MmugDNA.43077.1.S1_at   | MmugDNA.43077.1 | 6.29  | 6.29  | 0.77 | 0.57 | -1    | 0.762657 | 0.468859 | 0.900005 | 0.677906 |
| MmugDNA.43078.1.S1_at   | MmugDNA.43078.1 | 7.48  | 7.69  | 0.4  | 0.57 | -1.15 | 0.33458  | 0.098917 | 0.658444 | 0.357049 |
| MmugDNA.43079.1.S1_at   | MmugDNA.43079.1 | 6     | 5.99  | 0.12 | 0.1  | 1     | 0.530046 | 0.59455  | 0.776526 | 0.758623 |
| MmugDNA.43080.1.S1_at   | MmugDNA.43080.1 | 5.26  | 5.13  | 0.1  | 0.17 | 1.09  | 0.795994 | 0.332443 | 0.915368 | 0.58087  |
| MmugDNA.43081.1.S1_at   | MmugDNA.43081.1 | 3.99  | 3.69  | 0.31 | 0.71 | 1.23  | 0.599468 | 0.763094 | 0.814594 | 0.862257 |

|                       |                 |       |       |      |      |       |          |          |          |          |
|-----------------------|-----------------|-------|-------|------|------|-------|----------|----------|----------|----------|
| MmugDNA.43082.1.S1_at | MmugDNA.43082.1 | 4.09  | 4.21  | 0.34 | 0.08 | -1.09 | 0.181905 | 0.040436 | 0.546458 | 0.24621  |
| MmugDNA.43083.1.S1_at | MmugDNA.43083.1 | 8.86  | 7.8   | 0.3  | 0.21 | 2.08  | 0.008917 | 0.011525 | 0.221598 | 0.138822 |
| MmugDNA.43084.1.S1_at | MmugDNA.43084.1 | 3.71  | 3.55  | 0.4  | 0.36 | 1.12  | 0.38774  | 0.217077 | 0.692117 | 0.490668 |
| MmugDNA.43086.1.S1_at | MmugDNA.43086.1 | 5.85  | 5.99  | 0.16 | 0.17 | -1.1  | 0.439138 | 0.07942  | 0.723488 | 0.326766 |
| MmugDNA.43087.1.S1_at | MmugDNA.43087.1 | 10.78 | 10.62 | 0.19 | 0.27 | 1.12  | 0.876139 | 0.538139 | 0.950328 | 0.722911 |
| MmugDNA.43088.1.S1_at | MmugDNA.43088.1 | 5.66  | 5.76  | 0.11 | 0.12 | -1.07 | 0.104396 | 0.134417 | 0.464351 | 0.406603 |
| MmugDNA.4309.1.S1_at  | MmugDNA.4309.1  | 8.19  | 6.62  | 0.68 | 0.76 | 2.97  | 0.061981 | 0.061162 | 0.396905 | 0.293981 |
| MmugDNA.43090.1.S1_at | MmugDNA.43090.1 | 6.81  | 6.12  | 0.31 | 0.56 | 1.62  | 0.552423 | 0.08153  | 0.789494 | 0.329764 |
| MmugDNA.43091.1.S1_at | MmugDNA.43091.1 | 11.84 | 11.96 | 0.03 | 0.31 | -1.09 | 0.597233 | 0.455952 | 0.813431 | 0.66972  |
| MmugDNA.43092.1.S1_at | MmugDNA.43092.1 | 5.87  | 6.1   | 0.18 | 0.19 | -1.18 | 0.330815 | 0.280477 | 0.656063 | 0.543671 |
| MmugDNA.43093.1.S1_at | MmugDNA.43093.1 | 6.27  | 5.75  | 0.57 | 0.7  | 1.44  | 0.833649 | 0.751625 | 0.932356 | 0.855539 |
| MmugDNA.43095.1.S1_at | MmugDNA.43095.1 | 9.02  | 8.59  | 0.27 | 0.12 | 1.34  | 0.060093 | 0.079819 | 0.393081 | 0.327154 |
| MmugDNA.43097.1.S1_at | MmugDNA.43097.1 | 8.03  | 7.66  | 0.21 | 0.37 | 1.3   | 0.079033 | 0.066532 | 0.428609 | 0.303705 |
| MmugDNA.431.1.S1_at   | MmugDNA.431.1   | 9.95  | 10.37 | 0.18 | 0.1  | -1.35 | 0.014198 | 0.002215 | 0.251566 | 0.069424 |
| MmugDNA.431.1.S1_s_at | MmugDNA.431.1   | 11.07 | 11.37 | 0.23 | 0.14 | -1.23 | 0.136204 | 0.057888 | 0.503091 | 0.287025 |
| MmugDNA.43100.1.S1_at | MmugDNA.43100.1 | 4.48  | 4.61  | 0.33 | 0.28 | -1.1  | 0.724005 | 0.129233 | 0.879329 | 0.400635 |
| MmugDNA.43101.1.S1_at | MmugDNA.43101.1 | 7.84  | 8.29  | 0.3  | 0.23 | -1.37 | 0.174728 | 0.1412   | 0.538298 | 0.414709 |
| MmugDNA.43102.1.S1_at | MmugDNA.43102.1 | 4.55  | 4.63  | 0.17 | 0.46 | -1.06 | 0.800234 | 0.313327 | 0.917467 | 0.567787 |
| MmugDNA.43103.1.S1_at | MmugDNA.43103.1 | 6.11  | 6.12  | 0.7  | 0.69 | -1.01 | 0.239495 | 0.311614 | 0.592545 | 0.566586 |
| MmugDNA.43104.1.S1_at | MmugDNA.43104.1 | 5.04  | 4.35  | 0.56 | 0.14 | 1.61  | 0.124227 | 0.057834 | 0.489984 | 0.286866 |
| MmugDNA.43105.1.S1_at | MmugDNA.43105.1 | 4.58  | 4.71  | 0.14 | 0.15 | -1.1  | 0.319169 | 0.259866 | 0.648688 | 0.526737 |
| MmugDNA.43106.1.S1_at | MmugDNA.43106.1 | 3.22  | 3.3   | 0.11 | 0.08 | -1.06 | 0.182405 | 0.216043 | 0.546756 | 0.48965  |
| MmugDNA.43108.1.S1_at | MmugDNA.43108.1 | 2.97  | 2.96  | 0.1  | 0.06 | 1     | 0.743254 | 0.444023 | 0.890118 | 0.661644 |
| MmugDNA.4311.1.S1_at  | MmugDNA.4311.1  | 4.6   | 4.68  | 0.32 | 0.15 | -1.06 | 0.413922 | 0.555986 | 0.708746 | 0.734254 |
| MmugDNA.43110.1.S1_at | MmugDNA.43110.1 | 4.56  | 4.82  | 0.29 | 0.84 | -1.19 | 0.573874 | 0.784401 | 0.801395 | 0.87518  |
| MmugDNA.43111.1.S1_at | MmugDNA.43111.1 | 3.27  | 3.29  | 0.18 | 0.15 | -1.02 | 0.738537 | 0.767741 | 0.887739 | 0.865182 |
| MmugDNA.43114.1.S1_at | MmugDNA.43114.1 | 8.83  | 8.24  | 0.21 | 0.7  | 1.5   | 0.079876 | 0.077544 | 0.430147 | 0.323421 |
| MmugDNA.43115.1.S1_at | MmugDNA.43115.1 | 7.92  | 7.2   | 0.03 | 0.22 | 1.66  | 0.009109 | 0.001676 | 0.222023 | 0.061986 |
| MmugDNA.43118.1.S1_at | MmugDNA.43118.1 | 5.29  | 4.62  | 0.49 | 0.67 | 1.59  | 0.279243 | 0.275601 | 0.620979 | 0.539837 |
| MmugDNA.43119.1.S1_at | MmugDNA.43119.1 | 4.18  | 4.18  | 0.08 | 0.26 | 1     | 0.477619 | 0.662496 | 0.746849 | 0.802356 |
| MmugDNA.4312.1.S1_at  | MmugDNA.4312.1  | 8.2   | 9.37  | 0.4  | 1.13 | -2.25 | 0.234332 | 0.173982 | 0.588656 | 0.450247 |
| MmugDNA.43122.1.S1_at | MmugDNA.43122.1 | 5.62  | 5.61  | 0.22 | 0.25 | 1.01  | 0.944321 | 0.091507 | 0.978764 | 0.346552 |
| MmugDNA.43123.1.S1_at | MmugDNA.43123.1 | 8.43  | 8.83  | 0.11 | 1.8  | -1.32 | 0.914731 | 0.906713 | 0.966289 | 0.947216 |
| MmugDNA.43124.1.S1_at | MmugDNA.43124.1 | 3.77  | 3.94  | 0.55 | 0.72 | -1.12 | 0.640066 | 0.785069 | 0.837532 | 0.875577 |
| MmugDNA.43125.1.S1_at | MmugDNA.43125.1 | 4.6   | 4.87  | 0.86 | 0.2  | -1.2  | 0.649127 | 0.831928 | 0.84237  | 0.90356  |
| MmugDNA.43127.1.S1_at | MmugDNA.43127.1 | 3.19  | 3.3   | 0.34 | 0.11 | -1.08 | 0.696921 | 0.118334 | 0.865517 | 0.386393 |
| MmugDNA.43129.1.S1_at | MmugDNA.43129.1 | 7.86  | 7.12  | 0.2  | 0.28 | 1.66  | 0.02138  | 0.01104  | 0.282524 | 0.136821 |
| MmugDNA.43130.1.S1_at | MmugDNA.43130.1 | 6.77  | 7.83  | 1.7  | 1.02 | -2.07 | 0.94112  | 0.971451 | 0.97764  | 0.984481 |
| MmugDNA.43134.1.S1_at | MmugDNA.43134.1 | 11.14 | 11.14 | 0.34 | 0.52 | -1    | 0.857679 | 0.917776 | 0.94237  | 0.954011 |
| MmugDNA.43135.1.S1_at | MmugDNA.43135.1 | 4.35  | 4.08  | 0.3  | 0.23 | 1.21  | 0.335957 | 0.305044 | 0.65921  | 0.562201 |
| MmugDNA.43136.1.S1_at | MmugDNA.43136.1 | 8.49  | 8.66  | 0.36 | 0.61 | -1.13 | 0.305213 | 0.415267 | 0.639039 | 0.640769 |

|                         |                 |       |       |      |      |       |          |          |          |          |
|-------------------------|-----------------|-------|-------|------|------|-------|----------|----------|----------|----------|
| MmugDNA.43137.1.S1_at   | MmugDNA.43137.1 | 7.37  | 7.39  | 0.26 | 0.17 | -1.01 | 0.475133 | 0.762489 | 0.745579 | 0.861855 |
| MmugDNA.43139.1.S1_at   | MmugDNA.43139.1 | 10.82 | 9.59  | 0.1  | 0.34 | 2.35  | 0.003849 | 0.000542 | 0.179914 | 0.040617 |
| MmugDNA.4314.1.S1_s_at  | MmugDNA.4314.1  | 4.84  | 7.16  | 1.33 | 2.21 | -5.01 | 0.381567 | 0.485021 | 0.688005 | 0.688893 |
| MmugDNA.43140.1.S1_at   | MmugDNA.43140.1 | 4.7   | 4.43  | 0.88 | 0.22 | 1.21  | 0.159696 | 0.097303 | 0.524581 | 0.354999 |
| MmugDNA.43141.1.S1_at   | MmugDNA.43141.1 | 5.29  | 5.25  | 0.14 | 0.15 | 1.03  | 0.657332 | 0.69792  | 0.845886 | 0.824518 |
| MmugDNA.43142.1.S1_at   | MmugDNA.43142.1 | 7.05  | 7.21  | 0.25 | 0.3  | -1.11 | 0.401502 | 0.63555  | 0.700872 | 0.785437 |
| MmugDNA.43143.1.S1_s_at | MmugDNA.43143.1 | 7.35  | 7.11  | 0.2  | 1.47 | 1.18  | 0.456068 | 0.62827  | 0.734235 | 0.781109 |
| MmugDNA.43144.1.S1_at   | MmugDNA.43144.1 | 10.97 | 11.32 | 0.2  | 0.28 | -1.27 | 0.317032 | 0.436191 | 0.647775 | 0.655879 |
| MmugDNA.43145.1.S1_at   | MmugDNA.43145.1 | 5.21  | 5.64  | 0.15 | 0.15 | -1.34 | 0.015262 | 0.00924  | 0.257698 | 0.126946 |
| MmugDNA.43146.1.S1_at   | MmugDNA.43146.1 | 6.47  | 6.51  | 0.27 | 0.13 | -1.03 | 0.592399 | 0.687504 | 0.810906 | 0.817606 |
| MmugDNA.43147.1.S1_at   | MmugDNA.43147.1 | 5.45  | 5.46  | 0.14 | 0.06 | -1.01 | 0.620802 | 0.42919  | 0.826147 | 0.650715 |
| MmugDNA.43148.1.S1_at   | MmugDNA.43148.1 | 7.43  | 7.45  | 0.14 | 0.06 | -1.02 | 0.190058 | 0.285592 | 0.552832 | 0.547395 |
| MmugDNA.43149.1.S1_at   | MmugDNA.43149.1 | 5.12  | 5.2   | 0.07 | 0.14 | -1.06 | 0.578303 | 0.518924 | 0.803807 | 0.710789 |
| MmugDNA.4315.1.S1_at    | MmugDNA.4315.1  | 5.92  | 6.02  | 0.07 | 0.01 | -1.07 | 0.117188 | 0.622948 | 0.481176 | 0.777422 |
| MmugDNA.43150.1.S1_at   | MmugDNA.43150.1 | 10.86 | 8.3   | 0.86 | 0.92 | 5.88  | 0.04332  | 0.065072 | 0.3567   | 0.301017 |
| MmugDNA.43151.1.S1_at   | MmugDNA.43151.1 | 4.27  | 4.32  | 0.26 | 0.42 | -1.04 | 0.819347 | 0.635585 | 0.926528 | 0.785437 |
| MmugDNA.43152.1.S1_at   | MmugDNA.43152.1 | 11.94 | 11.85 | 0.07 | 0.08 | 1.06  | 0.293278 | 0.147538 | 0.630351 | 0.421872 |
| MmugDNA.43153.1.S1_at   | MmugDNA.43153.1 | 6.21  | 5.25  | 0.11 | 0.54 | 1.95  | 0.086541 | 0.049378 | 0.440286 | 0.267126 |
| MmugDNA.43154.1.S1_at   | MmugDNA.43154.1 | 2.99  | 3.06  | 0.18 | 0.16 | -1.05 | 0.758109 | 0.65305  | 0.897606 | 0.79718  |
| MmugDNA.24978.1.S1_at   | MmugDNA.24978.1 | 7.5   | 7.66  | 0.2  | 0.17 | -1.12 | 0.362762 | 0.376593 | 0.676226 | 0.614425 |
| MmugDNA.24978.1.S1_s_at | MmugDNA.24978.1 | 6.57  | 6.86  | 0.09 | 0.12 | -1.22 | 0.117027 | 0.161557 | 0.481075 | 0.43767  |
| MmugDNA.43156.1.S1_at   | MmugDNA.43156.1 | 4.04  | 4.15  | 0.04 | 0.23 | -1.08 | 0.318048 | 0.320241 | 0.64802  | 0.572583 |
| MmugDNA.43157.1.S1_at   | MmugDNA.43157.1 | 6.03  | 5.94  | 0.19 | 0.09 | 1.06  | 0.58204  | 0.633792 | 0.805507 | 0.784449 |
| MmugDNA.43159.1.S1_at   | MmugDNA.43159.1 | 6.19  | 6.41  | 0.11 | 0.11 | -1.16 | 0.14733  | 0.047853 | 0.513118 | 0.263679 |
| MmugDNA.4316.1.S1_at    | MmugDNA.4316.1  | 3.69  | 3.98  | 0.51 | 0.16 | -1.23 | 0.991105 | 0.971161 | 0.996895 | 0.984325 |
| MmugDNA.43160.1.S1_at   | MmugDNA.43160.1 | 4.31  | 4.16  | 0.21 | 0.13 | 1.11  | 0.291364 | 0.03868  | 0.628798 | 0.24169  |
| MmugDNA.43161.1.S1_at   | MmugDNA.43161.1 | 4.45  | 5.24  | 0.27 | 0.03 | -1.73 | 0.007163 | 0.001469 | 0.205112 | 0.058429 |
| MmugDNA.43162.1.S1_at   | MmugDNA.43162.1 | 4.29  | 3.87  | 0.39 | 0.71 | 1.34  | 0.868255 | 0.751582 | 0.947379 | 0.855508 |
| MmugDNA.43163.1.S1_at   | MmugDNA.43163.1 | 7.23  | 7.98  | 0.1  | 0.28 | -1.68 | 0.007962 | 0.004058 | 0.214639 | 0.090288 |
| MmugDNA.43164.1.S1_at   | MmugDNA.43164.1 | 3.28  | 3.27  | 0.02 | 0.09 | 1.01  | 0.407129 | 0.300621 | 0.704352 | 0.558921 |
| MmugDNA.43165.1.S1_at   | MmugDNA.43165.1 | 4.78  | 4.56  | 0.95 | 0.67 | 1.16  | 0.420043 | 0.595573 | 0.712178 | 0.759091 |
| MmugDNA.43166.1.S1_at   | MmugDNA.43166.1 | 12.95 | 12.44 | 0.21 | 0.37 | 1.43  | 0.092835 | 0.075753 | 0.449857 | 0.320347 |
| MmugDNA.43168.1.S1_at   | MmugDNA.43168.1 | 7.11  | 5.6   | 0.88 | 0.27 | 2.84  | 0.130323 | 0.062517 | 0.496686 | 0.29687  |
| MmugDNA.4317.1.S1_at    | MmugDNA.4317.1  | 5.4   | 5.59  | 0.18 | 0.2  | -1.14 | 0.251355 | 0.286323 | 0.600793 | 0.547784 |
| MmugDNA.43170.1.S1_at   | MmugDNA.43170.1 | 3.61  | 3.64  | 0    | 0.16 | -1.02 | 0.618205 | 0.752085 | 0.825111 | 0.855744 |
| MmugDNA.43171.1.S1_at   | MmugDNA.43171.1 | 3.33  | 3.47  | 0.07 | 0.18 | -1.1  | 0.51088  | 0.757143 | 0.765151 | 0.858648 |
| MmugDNA.43173.1.S1_at   | MmugDNA.43173.1 | 5.4   | 5.65  | 0.34 | 0.1  | -1.18 | 0.318023 | 0.472729 | 0.64802  | 0.680077 |
| MmugDNA.43174.1.S1_at   | MmugDNA.43174.1 | 4.59  | 4.54  | 0    | 0.09 | 1.03  | 0.245384 | 0.184212 | 0.597013 | 0.460382 |
| MmugDNA.43175.1.S1_at   | MmugDNA.43175.1 | 9.06  | 8.85  | 0.44 | 0.18 | 1.16  | 0.401115 | 0.28104  | 0.700619 | 0.544179 |
| MmugDNA.43176.1.S1_at   | MmugDNA.43176.1 | 5.2   | 5.05  | 0.16 | 0.31 | 1.11  | 0.813951 | 0.908944 | 0.924472 | 0.948471 |
| MmugDNA.43177.1.S1_at   | MmugDNA.43177.1 | 4.5   | 4.88  | 0.35 | 0.1  | -1.3  | 0.502976 | 0.488447 | 0.760601 | 0.691147 |

|                         |                 |       |       |      |      |        |          |          |          |          |
|-------------------------|-----------------|-------|-------|------|------|--------|----------|----------|----------|----------|
| MmugDNA.43178.1.S1_at   | MmugDNA.43178.1 | 4.1   | 4.08  | 0.25 | 0.09 | 1.01   | 0.46006  | 0.439704 | 0.736688 | 0.65842  |
| MmugDNA.43179.1.S1_at   | MmugDNA.43179.1 | 7.03  | 7.15  | 0.01 | 0.09 | -1.08  | 0.339408 | 0.226668 | 0.661307 | 0.499139 |
| MmugDNA.43180.1.S1_at   | MmugDNA.43180.1 | 3.83  | 4     | 0.17 | 0.1  | -1.12  | 0.366882 | 0.243053 | 0.67921  | 0.513356 |
| MmugDNA.43181.1.S1_at   | MmugDNA.43181.1 | 6.12  | 6.29  | 0.08 | 0.05 | -1.12  | 0.0566   | 0.064444 | 0.386736 | 0.300008 |
| MmugDNA.43182.1.S1_at   | MmugDNA.43182.1 | 4.46  | 4.24  | 0.3  | 0.2  | 1.16   | 0.936269 | 0.242894 | 0.975288 | 0.513274 |
| MmugDNA.43183.1.S1_at   | MmugDNA.43183.1 | 5.06  | 5.16  | 0.13 | 0.4  | -1.08  | 0.221645 | 0.192224 | 0.58035  | 0.467665 |
| MmugDNA.43185.1.S1_at   | MmugDNA.43185.1 | 10.62 | 10.13 | 0.04 | 0.28 | 1.4    | 0.038071 | 0.011553 | 0.343458 | 0.139091 |
| MmugDNA.43186.1.S1_at   | MmugDNA.43186.1 | 5.13  | 5.21  | 0.21 | 0.09 | -1.06  | 0.747291 | 0.886371 | 0.891773 | 0.935364 |
| MmugDNA.43188.1.S1_at   | MmugDNA.43188.1 | 3.87  | 3.96  | 0.42 | 0.06 | -1.06  | 0.710409 | 0.517123 | 0.873045 | 0.709435 |
| MmugDNA.43189.1.S1_at   | MmugDNA.43189.1 | 3.84  | 3.71  | 0.4  | 0.06 | 1.1    | 0.497265 | 0.58052  | 0.757913 | 0.74976  |
| MmugDNA.43191.1.S1_at   | MmugDNA.43191.1 | 9.28  | 9     | 0.44 | 1.31 | 1.22   | 0.663361 | 0.667877 | 0.84899  | 0.80568  |
| MmugDNA.43192.1.S1_at   | MmugDNA.43192.1 | 11.32 | 11.66 | 0.14 | 0.07 | -1.26  | 0.025401 | 0.0048   | 0.299142 | 0.096735 |
| MmugDNA.43194.1.S1_at   | MmugDNA.43194.1 | 6.51  | 7.45  | 0.47 | 0.62 | -1.91  | 0.079826 | 0.073794 | 0.430147 | 0.317146 |
| MmugDNA.43196.1.S1_at   | MmugDNA.43196.1 | 6.99  | 7.01  | 0.23 | 0.05 | -1.01  | 0.800968 | 0.37014  | 0.917935 | 0.609369 |
| MmugDNA.43197.1.S1_at   | MmugDNA.43197.1 | 7.2   | 7.09  | 0.18 | 0.08 | 1.08   | 0.448413 | 0.147294 | 0.729651 | 0.421493 |
| MmugDNA.43198.1.S1_at   | MmugDNA.43198.1 | 8.02  | 8.1   | 0.18 | 0.31 | -1.05  | 0.337063 | 0.317599 | 0.659858 | 0.570787 |
| MmugDNA.43199.1.S1_at   | MmugDNA.43199.1 | 3.76  | 3.81  | 0.06 | 0.25 | -1.04  | 0.723521 | 0.453951 | 0.879208 | 0.668338 |
| MmugDNA.432.1.S1_at     | MmugDNA.432.1   | 4.44  | 4.42  | 0.22 | 0.2  | 1.01   | 0.811401 | 0.767642 | 0.923201 | 0.865109 |
| MmugDNA.39419.1.S1_s_at | MmugDNA.39419.1 | 12.22 | 12.47 | 0.2  | 0.04 | -1.19  | 0.089791 | 0.066006 | 0.445334 | 0.302324 |
| MmugDNA.43202.1.S1_at   | MmugDNA.43202.1 | 5.53  | 5.43  | 0.04 | 0.33 | 1.07   | 0.610493 | 0.805944 | 0.821046 | 0.888397 |
| MmugDNA.43203.1.S1_at   | MmugDNA.43203.1 | 11.87 | 11.27 | 0.09 | 0.19 | 1.52   | 0.015529 | 0.00845  | 0.259093 | 0.121922 |
| MmugDNA.43204.1.S1_at   | MmugDNA.43204.1 | 4.59  | 4.47  | 0.21 | 0.19 | 1.09   | 0.741197 | 0.907269 | 0.889116 | 0.947562 |
| MmugDNA.43205.1.S1_at   | MmugDNA.43205.1 | 3.8   | 4.02  | 0.04 | 0.27 | -1.16  | 0.235643 | 0.273467 | 0.589497 | 0.537868 |
| MmugDNA.43207.1.S1_at   | MmugDNA.43207.1 | 9.77  | 8.95  | 0.16 | 0.2  | 1.77   | 0.005337 | 0.001818 | 0.191107 | 0.063958 |
| MmugDNA.43208.1.S1_at   | MmugDNA.43208.1 | 5.61  | 5.78  | 0.61 | 0.46 | -1.13  | 0.680801 | 0.854159 | 0.857325 | 0.916964 |
| MmugDNA.26435.1.S1_s_at | MmugDNA.26435.1 | 7.13  | 6.79  | 0.1  | 0.28 | 1.27   | 0.511804 | 0.384637 | 0.765318 | 0.620255 |
| MmugDNA.43212.1.S1_at   | MmugDNA.43212.1 | 5.31  | 4.98  | 0.41 | 0.68 | 1.26   | 0.483904 | 0.542712 | 0.749945 | 0.725698 |
| MmugDNA.43214.1.S1_at   | MmugDNA.43214.1 | 5.22  | 5.19  | 0.28 | 0.1  | 1.02   | 0.808    | 0.631054 | 0.921553 | 0.782599 |
| MmugDNA.43215.1.S1_at   | MmugDNA.43215.1 | 3.94  | 4.24  | 0.27 | 0.14 | -1.23  | 0.329853 | 0.471528 | 0.655349 | 0.6795   |
| MmugDNA.43216.1.S1_at   | MmugDNA.43216.1 | 6.33  | 9.83  | 1.01 | 0.11 | -11.32 | 0.007542 | 0.00304  | 0.209283 | 0.080419 |
| MmugDNA.43218.1.S1_at   | MmugDNA.43218.1 | 10.71 | 10.09 | 0.1  | 0.31 | 1.53   | 0.013692 | 0.014554 | 0.248874 | 0.153907 |
| MmugDNA.4322.1.S1_at    | MmugDNA.4322.1  | 12.63 | 12.57 | 0.07 | 0.25 | 1.05   | 0.820182 | 0.94159  | 0.92682  | 0.966886 |
| MmugDNA.4322.1.S1_s_at  | MmugDNA.4322.1  | 12.6  | 12.51 | 0.08 | 0.21 | 1.07   | 0.841458 | 0.965535 | 0.936191 | 0.980739 |
| MmugDNA.43220.1.S1_at   | MmugDNA.43220.1 | 5.38  | 5.49  | 0.41 | 0.18 | -1.07  | 0.682691 | 0.824027 | 0.858083 | 0.898894 |
| MmugDNA.43221.1.S1_at   | MmugDNA.43221.1 | 6.86  | 7.36  | 0.23 | 0.37 | -1.42  | 0.543322 | 0.126985 | 0.783788 | 0.397741 |
| MmugDNA.43222.1.S1_at   | MmugDNA.43222.1 | 4.13  | 4.22  | 0.18 | 0.17 | -1.07  | 0.437533 | 0.415682 | 0.722547 | 0.641027 |
| MmugDNA.43223.1.S1_at   | MmugDNA.43223.1 | 4.61  | 4.8   | 0.08 | 0.16 | -1.14  | 0.099575 | 0.085908 | 0.459579 | 0.338068 |
| MmugDNA.43224.1.S1_at   | MmugDNA.43224.1 | 3.8   | 3.59  | 0.38 | 0.2  | 1.16   | 0.565226 | 0.439099 | 0.796922 | 0.657854 |
| MmugDNA.43226.1.S1_at   | MmugDNA.43226.1 | 2.94  | 2.94  | 0.1  | 0.21 | -1     | 0.706926 | 0.853716 | 0.870891 | 0.916773 |
| MmugDNA.43227.1.S1_at   | MmugDNA.43227.1 | 4.18  | 4.17  | 0.28 | 0.03 | 1.01   | 0.305714 | 0.170431 | 0.639223 | 0.447103 |
| MmugDNA.43228.1.S1_at   | MmugDNA.43228.1 | 5.22  | 5.19  | 0.14 | 0.26 | 1.02   | 0.444987 | 0.604401 | 0.72736  | 0.764613 |

|                         |                 |       |       |      |      |       |          |          |          |          |
|-------------------------|-----------------|-------|-------|------|------|-------|----------|----------|----------|----------|
| MmugDNA.43229.1.S1_at   | MmugDNA.43229.1 | 4.22  | 4.87  | 0.17 | 0.27 | -1.57 | 0.025554 | 0.087694 | 0.299708 | 0.340941 |
| MmugDNA.4323.1.S1_at    | MmugDNA.4323.1  | 3.25  | 3.19  | 0.07 | 0.04 | 1.04  | 0.653346 | 0.741557 | 0.844065 | 0.850329 |
| MmugDNA.43230.1.S1_at   | MmugDNA.43230.1 | 3.84  | 4.26  | 0.24 | 0.13 | -1.34 | 0.026458 | 0.029462 | 0.303201 | 0.213368 |
| MmugDNA.43231.1.S1_at   | MmugDNA.43231.1 | 2.74  | 3.01  | 0.12 | 0.13 | -1.21 | 0.105922 | 0.180808 | 0.466753 | 0.457306 |
| MmugDNA.43232.1.S1_at   | MmugDNA.43232.1 | 4.24  | 4.22  | 0.17 | 0.05 | 1.01  | 0.423768 | 0.693813 | 0.714199 | 0.821925 |
| MmugDNA.43234.1.S1_at   | MmugDNA.43234.1 | 5.25  | 5.37  | 0.11 | 0.16 | -1.08 | 0.196085 | 0.273276 | 0.559231 | 0.537788 |
| MmugDNA.43235.1.S1_at   | MmugDNA.43235.1 | 2.72  | 2.76  | 0.03 | 0.23 | -1.03 | 0.292219 | 0.399737 | 0.629464 | 0.629951 |
| MmugDNA.43236.1.S1_at   | MmugDNA.43236.1 | 4.3   | 4.3   | 0.87 | 0.28 | 1     | 0.401581 | 0.270527 | 0.700924 | 0.535835 |
| MmugDNA.43240.1.S1_s_at | MmugDNA.43240.1 | 6.03  | 5.91  | 0.4  | 0.77 | 1.09  | 0.767897 | 0.81445  | 0.902473 | 0.892923 |
| MmugDNA.43241.1.S1_at   | MmugDNA.43241.1 | 10.39 | 10.26 | 0.08 | 0.21 | 1.09  | 0.3748   | 0.403377 | 0.684013 | 0.632083 |
| MmugDNA.43243.1.S1_at   | MmugDNA.43243.1 | 11.73 | 11.49 | 0.06 | 0.22 | 1.18  | 0.101004 | 0.075458 | 0.461009 | 0.319857 |
| MmugDNA.43245.1.S1_at   | MmugDNA.43245.1 | 4.04  | 4.45  | 0.25 | 0.09 | -1.32 | 0.204969 | 0.429237 | 0.567457 | 0.650729 |
| MmugDNA.43247.1.S1_at   | MmugDNA.43247.1 | 6.44  | 6.52  | 0.05 | 0.13 | -1.06 | 0.14375  | 0.338003 | 0.510387 | 0.5852   |
| MmugDNA.4325.1.S1_at    | MmugDNA.4325.1  | 4.77  | 4.62  | 0.08 | 0.23 | 1.11  | 0.848179 | 0.60845  | 0.939186 | 0.767074 |
| MmugDNA.43250.1.S1_at   | MmugDNA.43250.1 | 7.9   | 7.98  | 0.18 | 0.72 | -1.06 | 0.824698 | 0.952047 | 0.928991 | 0.972785 |
| MmugDNA.43252.1.S1_at   | MmugDNA.43252.1 | 8.99  | 8.95  | 0.01 | 0.47 | 1.03  | 0.876827 | 0.98001  | 0.950675 | 0.989229 |
| MmugDNA.43256.1.S1_at   | MmugDNA.43256.1 | 3.9   | 3.41  | 0.21 | 0.18 | 1.4   | 0.082049 | 0.086319 | 0.433268 | 0.338771 |
| MmugDNA.43257.1.S1_at   | MmugDNA.43257.1 | 7.47  | 7.46  | 0.14 | 0.07 | 1.01  | 0.221615 | 0.288477 | 0.580348 | 0.54977  |
| MmugDNA.43258.1.S1_at   | MmugDNA.43258.1 | 4.06  | 3.73  | 0.16 | 0.25 | 1.26  | 0.223692 | 0.298613 | 0.582123 | 0.557225 |
| MmugDNA.43259.1.S1_at   | MmugDNA.43259.1 | 10.52 | 10.03 | 0.31 | 0.32 | 1.4   | 0.244245 | 0.392161 | 0.596039 | 0.625652 |
| MmugDNA.4326.1.S1_at    | MmugDNA.4326.1  | 7.91  | 8.7   | 0.38 | 0.42 | -1.73 | 0.133275 | 0.037745 | 0.499721 | 0.238716 |
| MmugDNA.43261.1.S1_at   | MmugDNA.43261.1 | 7.3   | 7.45  | 0.37 | 0.15 | -1.11 | 0.654366 | 0.007973 | 0.844578 | 0.118702 |
| MmugDNA.43262.1.S1_at   | MmugDNA.43262.1 | 8.1   | 8.2   | 0.08 | 0.14 | -1.08 | 0.770703 | 0.849825 | 0.903354 | 0.914673 |
| MmugDNA.43264.1.S1_at   | MmugDNA.43264.1 | 5.39  | 5.47  | 0.2  | 0.21 | -1.06 | 0.605458 | 0.752768 | 0.818272 | 0.855968 |
| MmugDNA.43268.1.S1_at   | MmugDNA.43268.1 | 8.65  | 8.73  | 0.21 | 0.32 | -1.06 | 0.157166 | 0.224013 | 0.521923 | 0.497045 |
| MmugDNA.43269.1.S1_at   | MmugDNA.43269.1 | 12.91 | 12.72 | 0.01 | 0.11 | 1.14  | 0.016307 | 0.005702 | 0.263592 | 0.104102 |
| MmugDNA.43270.1.S1_at   | MmugDNA.43270.1 | 8.07  | 7.52  | 0.37 | 0.23 | 1.47  | 0.045172 | 0.022437 | 0.360276 | 0.187441 |
| MmugDNA.43271.1.S1_at   | MmugDNA.43271.1 | 5.04  | 4.35  | 1.15 | 0.15 | 1.62  | 0.329459 | 0.306052 | 0.655089 | 0.562782 |
| MmugDNA.43272.1.S1_at   | MmugDNA.43272.1 | 5.83  | 5.77  | 0.1  | 0.06 | 1.05  | 0.280223 | 0.372836 | 0.621476 | 0.611735 |
| MmugDNA.43274.1.S1_at   | MmugDNA.43274.1 | 7.58  | 7.33  | 0.43 | 0.31 | 1.19  | 0.653658 | 0.081694 | 0.844257 | 0.329928 |
| MmugDNA.43275.1.S1_at   | MmugDNA.43275.1 | 12.11 | 11.86 | 0.16 | 0.66 | 1.19  | 0.572865 | 0.567673 | 0.801051 | 0.74156  |
| MmugDNA.43276.1.S1_at   | MmugDNA.43276.1 | 4.63  | 4.72  | 0.23 | 0.3  | -1.06 | 0.605001 | 0.515171 | 0.818073 | 0.708145 |
| MmugDNA.43277.1.S1_at   | MmugDNA.43277.1 | 6.33  | 7.38  | 0.25 | 0.57 | -2.08 | 0.022751 | 0.020533 | 0.288168 | 0.179788 |
| MmugDNA.43278.1.S1_at   | MmugDNA.43278.1 | 3.79  | 3.66  | 0.15 | 0.14 | 1.09  | 0.144851 | 0.281878 | 0.511188 | 0.544844 |
| MmugDNA.43279.1.S1_at   | MmugDNA.43279.1 | 3.63  | 3.74  | 0.14 | 0.15 | -1.08 | 0.923011 | 0.571001 | 0.970098 | 0.743479 |
| MmugDNA.43280.1.S1_at   | MmugDNA.43280.1 | 4     | 4     | 0    | 0.15 | 1     | 0.386981 | 0.44115  | 0.691724 | 0.659375 |
| MmugDNA.43281.1.S1_at   | MmugDNA.43281.1 | 5.07  | 3.99  | 0.29 | 1.06 | 2.12  | 0.51224  | 0.774521 | 0.765523 | 0.868769 |
| MmugDNA.43282.1.S1_at   | MmugDNA.43282.1 | 3.84  | 3.78  | 0.05 | 0.19 | 1.04  | 0.941124 | 0.394124 | 0.97764  | 0.62675  |
| MmugDNA.43284.1.S1_at   | MmugDNA.43284.1 | 6.31  | 5.98  | 0.24 | 0.2  | 1.26  | 0.114548 | 0.171497 | 0.477887 | 0.447895 |
| MmugDNA.43285.1.S1_at   | MmugDNA.43285.1 | 3.72  | 3.75  | 0.22 | 0.07 | -1.02 | 0.836045 | 0.908288 | 0.933638 | 0.948047 |
| MmugDNA.43287.1.S1_at   | MmugDNA.43287.1 | 3.55  | 3.36  | 0.19 | 0.09 | 1.15  | 0.277302 | 0.377281 | 0.619436 | 0.614869 |

|                       |                 |       |       |      |      |        |          |          |          |          |
|-----------------------|-----------------|-------|-------|------|------|--------|----------|----------|----------|----------|
| MmugDNA.43289.1.S1_at | MmugDNA.43289.1 | 9.41  | 9.23  | 0.13 | 0.64 | 1.13   | 0.66263  | 0.154315 | 0.848737 | 0.429188 |
| MmugDNA.4329.1.S1_at  | MmugDNA.4329.1  | 6.25  | 6.25  | 0.18 | 0.03 | 1      | 0.894636 | 0.71608  | 0.957917 | 0.835424 |
| MmugDNA.43292.1.S1_at | MmugDNA.43292.1 | 4.95  | 4.99  | 0.28 | 0.18 | -1.03  | 0.557988 | 0.82968  | 0.792892 | 0.902187 |
| MmugDNA.43293.1.S1_at | MmugDNA.43293.1 | 6.92  | 6.21  | 0.13 | 0.34 | 1.64   | 0.059301 | 0.063559 | 0.391821 | 0.298646 |
| MmugDNA.43294.1.S1_at | MmugDNA.43294.1 | 3.57  | 3.45  | 0.16 | 0.12 | 1.09   | 0.352703 | 0.193442 | 0.669719 | 0.468711 |
| MmugDNA.43295.1.S1_at | MmugDNA.43295.1 | 5.97  | 3.83  | 0.87 | 0.7  | 4.39   | 0.05361  | 0.040465 | 0.380565 | 0.246264 |
| MmugDNA.43296.1.S1_at | MmugDNA.43296.1 | 7.9   | 7.3   | 1.07 | 0.56 | 1.51   | 0.269658 | 0.310874 | 0.614221 | 0.565881 |
| MmugDNA.43298.1.S1_at | MmugDNA.43298.1 | 6.56  | 6.64  | 0.19 | 0.15 | -1.06  | 0.847785 | 0.575004 | 0.939063 | 0.746227 |
| MmugDNA.43299.1.S1_at | MmugDNA.43299.1 | 4.16  | 4.35  | 0.44 | 0.16 | -1.14  | 0.788088 | 0.362857 | 0.911826 | 0.603373 |
| MmugDNA.433.1.S1_at   | MmugDNA.433.1   | 9.77  | 9.6   | 0.19 | 1.22 | 1.12   | 0.293057 | 0.388334 | 0.630264 | 0.62274  |
| MmugDNA.4330.1.S1_at  | MmugDNA.4330.1  | 8.01  | 7.8   | 0.09 | 0.21 | 1.15   | 0.109176 | 0.112229 | 0.470811 | 0.377537 |
| MmugDNA.43300.1.S1_at | MmugDNA.43300.1 | 6.15  | 5.68  | 0.52 | 0.17 | 1.39   | 0.165676 | 0.154441 | 0.529716 | 0.429327 |
| MmugDNA.43301.1.S1_at | MmugDNA.43301.1 | 9.28  | 10.56 | 0.35 | 0.61 | -2.44  | 0.0334   | 0.005068 | 0.328682 | 0.09907  |
| MmugDNA.43302.1.S1_at | MmugDNA.43302.1 | 4.71  | 4.44  | 0.06 | 0.07 | 1.21   | 0.00421  | 0.019702 | 0.181739 | 0.176386 |
| MmugDNA.43303.1.S1_at | MmugDNA.43303.1 | 9.34  | 12.01 | 0.88 | 0.69 | -6.38  | 0.025531 | 0.011897 | 0.299597 | 0.141211 |
| MmugDNA.43304.1.S1_at | MmugDNA.43304.1 | 4.46  | 3.57  | 1.26 | 0.16 | 1.85   | 0.277769 | 0.239243 | 0.619903 | 0.509941 |
| MmugDNA.43305.1.S1_at | MmugDNA.43305.1 | 5.18  | 5.35  | 0.52 | 1.08 | -1.12  | 0.889288 | 0.440632 | 0.955714 | 0.659029 |
| MmugDNA.43306.1.S1_at | MmugDNA.43306.1 | 7.74  | 8.25  | 0.12 | 0.73 | -1.43  | 0.384881 | 0.068968 | 0.690118 | 0.308954 |
| MmugDNA.43307.1.S1_at | MmugDNA.43307.1 | 3.83  | 3.94  | 0.68 | 0.05 | -1.08  | 0.476226 | 0.661968 | 0.746145 | 0.802047 |
| MmugDNA.43309.1.S1_at | MmugDNA.43309.1 | 9.1   | 9.48  | 0.12 | 0.49 | -1.3   | 0.302343 | 0.197172 | 0.63692  | 0.472213 |
| MmugDNA.4331.1.S1_at  | MmugDNA.4331.1  | 3.16  | 3.33  | 0.18 | 0.01 | -1.13  | 0.495664 | 0.698192 | 0.757268 | 0.824655 |
| MmugDNA.43311.1.S1_at | MmugDNA.43311.1 | 7.26  | 7.48  | 0.24 | 0.27 | -1.17  | 0.387697 | 0.527602 | 0.692115 | 0.716154 |
| MmugDNA.43312.1.S1_at | MmugDNA.43312.1 | 3.47  | 3.71  | 0.07 | 0.02 | -1.18  | 0.007065 | 0.028828 | 0.20404  | 0.211661 |
| MmugDNA.43314.1.S1_at | MmugDNA.43314.1 | 5.53  | 5.72  | 0.03 | 0.03 | -1.14  | 0.001413 | 0.00045  | 0.147606 | 0.038539 |
| MmugDNA.43315.1.S1_at | MmugDNA.43315.1 | 6.76  | 7     | 0.52 | 0.47 | -1.18  | 0.676928 | 0.023866 | 0.85524  | 0.193495 |
| MmugDNA.43317.1.S1_at | MmugDNA.43317.1 | 5.45  | 9.87  | 1.97 | 0.26 | -21.54 | 0.028768 | 0.018474 | 0.312166 | 0.170946 |
| MmugDNA.43319.1.S1_at | MmugDNA.43319.1 | 5.18  | 4.64  | 0.31 | 0.23 | 1.45   | 0.057113 | 0.06161  | 0.387418 | 0.295094 |
| MmugDNA.4332.1.S1_at  | MmugDNA.4332.1  | 10.4  | 10.11 | 0.11 | 0.09 | 1.22   | 0.013815 | 0.013143 | 0.249758 | 0.147338 |
| MmugDNA.43320.1.S1_at | MmugDNA.43320.1 | 6.85  | 8.08  | 0.3  | 0.31 | -2.34  | 0.021866 | 0.045059 | 0.283995 | 0.256789 |
| MmugDNA.43321.1.S1_at | MmugDNA.43321.1 | 3.12  | 2.98  | 0.09 | 0.04 | 1.1    | 0.253229 | 0.102725 | 0.60185  | 0.363175 |
| MmugDNA.43322.1.S1_at | MmugDNA.43322.1 | 11.11 | 11.83 | 0.37 | 1.08 | -1.65  | 0.398109 | 0.338922 | 0.698541 | 0.585891 |
| MmugDNA.43323.1.S1_at | MmugDNA.43323.1 | 4.08  | 4.14  | 0.14 | 0.23 | -1.04  | 0.302507 | 0.515737 | 0.63692  | 0.708479 |
| MmugDNA.43324.1.S1_at | MmugDNA.43324.1 | 3.46  | 3.6   | 0.42 | 0.44 | -1.1   | 0.413423 | 0.302854 | 0.708471 | 0.560356 |
| MmugDNA.43325.1.S1_at | MmugDNA.43325.1 | 5.28  | 5.52  | 0.14 | 0.14 | -1.18  | 0.101954 | 0.207213 | 0.461337 | 0.48136  |
| MmugDNA.43326.1.S1_at | MmugDNA.43326.1 | 3.96  | 3.51  | 0.27 | 0.07 | 1.36   | 0.13871  | 0.144463 | 0.505884 | 0.418323 |
| MmugDNA.43328.1.S1_at | MmugDNA.43328.1 | 6.32  | 6.36  | 0.07 | 0.25 | -1.03  | 0.226222 | 0.602352 | 0.58429  | 0.763342 |
| MmugDNA.43329.1.S1_at | MmugDNA.43329.1 | 5.17  | 5.54  | 0.2  | 0.29 | -1.3   | 0.349612 | 0.08229  | 0.667907 | 0.331223 |
| MmugDNA.4333.1.S1_at  | MmugDNA.4333.1  | 9.09  | 8.76  | 0.3  | 0.2  | 1.26   | 0.158915 | 0.174899 | 0.524147 | 0.451576 |
| MmugDNA.43330.1.S1_at | MmugDNA.43330.1 | 9.71  | 9.45  | 0.09 | 0.17 | 1.2    | 0.192717 | 0.237317 | 0.556023 | 0.508029 |
| MmugDNA.43331.1.S1_at | MmugDNA.43331.1 | 7.69  | 7.72  | 0.9  | 0.46 | -1.02  | 0.686612 | 0.882211 | 0.85983  | 0.932845 |
| MmugDNA.43332.1.S1_at | MmugDNA.43332.1 | 7.04  | 6.39  | 0.18 | 0.12 | 1.57   | 0.00566  | 0.003118 | 0.191943 | 0.081345 |

|                         |                 |       |       |      |      |       |          |          |          |          |
|-------------------------|-----------------|-------|-------|------|------|-------|----------|----------|----------|----------|
| MmugDNA.43333.1.S1_at   | MmugDNA.43333.1 | 5     | 5.35  | 0.43 | 0.18 | -1.28 | 0.275492 | 0.115118 | 0.617878 | 0.382004 |
| MmugDNA.43334.1.S1_at   | MmugDNA.43334.1 | 8.58  | 7.8   | 0.33 | 0.16 | 1.72  | 0.030003 | 0.012426 | 0.316643 | 0.144095 |
| MmugDNA.43335.1.S1_at   | MmugDNA.43335.1 | 4.38  | 4.3   | 0.16 | 0.04 | 1.06  | 0.896266 | 0.519167 | 0.958647 | 0.710878 |
| MmugDNA.43336.1.S1_at   | MmugDNA.43336.1 | 7.08  | 8.6   | 0.24 | 0.3  | -2.86 | 0.005101 | 0.001553 | 0.189099 | 0.059606 |
| MmugDNA.43337.1.S1_at   | MmugDNA.43337.1 | 6.3   | 6.79  | 0.17 | 0.13 | -1.41 | 0.025526 | 0.01164  | 0.299597 | 0.139789 |
| MmugDNA.43338.1.S1_at   | MmugDNA.43338.1 | 9.29  | 9.72  | 0.34 | 0.31 | -1.35 | 0.437666 | 0.50861  | 0.722586 | 0.703719 |
| MmugDNA.43341.1.S1_s_at | MmugDNA.43341.1 | 9.38  | 9.95  | 0.21 | 0.23 | -1.49 | 0.033004 | 0.011723 | 0.326925 | 0.140206 |
| MmugDNA.43342.1.S1_at   | MmugDNA.43342.1 | 6.49  | 6.45  | 0.2  | 0.22 | 1.03  | 0.718409 | 0.638131 | 0.876426 | 0.787396 |
| MmugDNA.43344.1.S1_at   | MmugDNA.43344.1 | 8.47  | 7.15  | 0.07 | 0.42 | 2.49  | 0.006752 | 0.003971 | 0.20158  | 0.089595 |
| MmugDNA.43344.1.S1_s_at | MmugDNA.43344.1 | 8.24  | 6.63  | 0.14 | 0.56 | 3.06  | 0.008432 | 0.003974 | 0.218339 | 0.089634 |
| MmugDNA.43345.1.S1_at   | MmugDNA.43345.1 | 12.24 | 11.77 | 0.09 | 0.5  | 1.38  | 0.063347 | 0.062519 | 0.400486 | 0.29687  |
| MmugDNA.43346.1.S1_at   | MmugDNA.43346.1 | 4.19  | 4.25  | 0.09 | 0.14 | -1.04 | 0.451056 | 0.6355   | 0.731469 | 0.785405 |
| MmugDNA.43347.1.S1_at   | MmugDNA.43347.1 | 7.46  | 8.22  | 0.32 | 0.35 | -1.69 | 0.057811 | 0.066234 | 0.38911  | 0.302921 |
| MmugDNA.43348.1.S1_at   | MmugDNA.43348.1 | 9.81  | 8.57  | 0.31 | 0.39 | 2.35  | 0.005665 | 0.008745 | 0.191943 | 0.123975 |
| MmugDNA.43349.1.S1_at   | MmugDNA.43349.1 | 5.2   | 9.24  | 0.66 | 1.36 | -16.4 | 0.020508 | 0.011341 | 0.278319 | 0.138148 |
| MmugDNA.4335.1.S1_at    | MmugDNA.4335.1  | 6.42  | 6.43  | 0.31 | 0.36 | -1.01 | 0.845929 | 0.385713 | 0.938188 | 0.621079 |
| MmugDNA.43350.1.S1_at   | MmugDNA.43350.1 | 7.7   | 8.16  | 0.2  | 0.93 | -1.37 | 0.356551 | 0.400428 | 0.671656 | 0.630206 |
| MmugDNA.43351.1.S1_at   | MmugDNA.43351.1 | 6.25  | 6.53  | 0.21 | 0.19 | -1.21 | 0.188709 | 0.226653 | 0.551683 | 0.499139 |
| MmugDNA.43352.1.S1_at   | MmugDNA.43352.1 | 6.7   | 6.64  | 0.2  | 0.34 | 1.05  | 0.346214 | 0.264382 | 0.665743 | 0.530385 |
| MmugDNA.43353.1.S1_at   | MmugDNA.43353.1 | 3.97  | 3.98  | 0.11 | 0.26 | -1.01 | 0.807432 | 0.670977 | 0.921223 | 0.807635 |
| MmugDNA.43355.1.S1_at   | MmugDNA.43355.1 | 4.55  | 4.82  | 0.03 | 0.1  | -1.2  | 0.009936 | 0.003609 | 0.226899 | 0.085933 |
| MmugDNA.43356.1.S1_at   | MmugDNA.43356.1 | 7.67  | 7.2   | 0.08 | 1    | 1.39  | 0.25643  | 0.297505 | 0.604103 | 0.556122 |
| MmugDNA.43357.1.S1_at   | MmugDNA.43357.1 | 5.38  | 5.41  | 0.37 | 0.12 | -1.02 | 0.740589 | 0.808862 | 0.88871  | 0.889935 |
| MmugDNA.43358.1.S1_at   | MmugDNA.43358.1 | 7.56  | 6.17  | 0.32 | 0.62 | 2.63  | 0.01767  | 0.020073 | 0.267454 | 0.177957 |
| MmugDNA.43359.1.S1_at   | MmugDNA.43359.1 | 6.76  | 6.96  | 0.32 | 0.96 | -1.15 | 0.278484 | 0.116513 | 0.620536 | 0.383671 |
| MmugDNA.4336.1.S1_at    | MmugDNA.4336.1  | 9.87  | 9.05  | 1.16 | 1.29 | 1.76  | 0.985425 | 0.709175 | 0.99475  | 0.831405 |
| MmugDNA.43360.1.S1_at   | MmugDNA.43360.1 | 7.02  | 6.24  | 0.27 | 0.51 | 1.71  | 0.161577 | 0.216938 | 0.526481 | 0.490566 |
| MmugDNA.43361.1.S1_at   | MmugDNA.43361.1 | 8.29  | 8.28  | 0.52 | 0.2  | 1.01  | 0.93596  | 0.902093 | 0.975172 | 0.944306 |
| MmugDNA.43362.1.S1_at   | MmugDNA.43362.1 | 3.54  | 3.46  | 0.48 | 0.08 | 1.06  | 0.275391 | 0.1002   | 0.617833 | 0.359195 |
| MmugDNA.43363.1.S1_at   | MmugDNA.43363.1 | 12.38 | 10.23 | 0.77 | 0.73 | 4.44  | 0.02263  | 0.005162 | 0.287448 | 0.0997   |
| MmugDNA.43364.1.S1_at   | MmugDNA.43364.1 | 6.03  | 7.02  | 0.45 | 1.12 | -1.99 | 0.338606 | 0.2786   | 0.660988 | 0.542329 |
| MmugDNA.43365.1.S1_at   | MmugDNA.43365.1 | 11.83 | 11.18 | 0.69 | 0.05 | 1.57  | 0.549073 | 0.080132 | 0.787104 | 0.327639 |
| MmugDNA.43366.1.S1_at   | MmugDNA.43366.1 | 4.69  | 4.44  | 0.29 | 0.12 | 1.19  | 0.292511 | 0.108944 | 0.629859 | 0.372637 |
| MmugDNA.43367.1.S1_at   | MmugDNA.43367.1 | 11.5  | 11.03 | 0.13 | 0.31 | 1.38  | 0.051899 | 0.000713 | 0.376668 | 0.044419 |
| MmugDNA.43369.1.S1_at   | MmugDNA.43369.1 | 11.12 | 11.07 | 0.08 | 0.88 | 1.04  | 0.801909 | 0.885913 | 0.918289 | 0.935113 |
| MmugDNA.43370.1.S1_at   | MmugDNA.43370.1 | 5.97  | 5.74  | 0.23 | 0.06 | 1.18  | 0.204306 | 0.241424 | 0.566752 | 0.512072 |
| MmugDNA.43371.1.S1_at   | MmugDNA.43371.1 | 6.09  | 6.67  | 0.23 | 0.73 | -1.49 | 0.24427  | 0.354837 | 0.596068 | 0.59746  |
| MmugDNA.43372.1.S1_at   | MmugDNA.43372.1 | 3.15  | 3.25  | 0.06 | 0.19 | -1.07 | 0.279709 | 0.188928 | 0.621165 | 0.464854 |
| MmugDNA.43375.1.S1_at   | MmugDNA.43375.1 | 3.25  | 3.27  | 0.08 | 0.01 | -1.01 | 0.79074  | 0.058122 | 0.913156 | 0.287755 |
| MmugDNA.43376.1.S1_s_at | MmugDNA.43376.1 | 5.92  | 6.84  | 0.5  | 0.93 | -1.9  | 0.186488 | 0.157133 | 0.550106 | 0.432616 |
| MmugDNA.43377.1.S1_at   | MmugDNA.43377.1 | 6.37  | 5     | 0.52 | 0.49 | 2.58  | 0.051241 | 0.020623 | 0.376001 | 0.180141 |

|                         |                 |       |       |      |      |       |          |          |          |          |
|-------------------------|-----------------|-------|-------|------|------|-------|----------|----------|----------|----------|
| MmugDNA.43378.1.S1_at   | MmugDNA.43378.1 | 3.39  | 3.3   | 0.38 | 0.16 | 1.06  | 0.425695 | 0.25822  | 0.715281 | 0.52558  |
| MmugDNA.43379.1.S1_at   | MmugDNA.43379.1 | 6.8   | 6.89  | 0.26 | 0.12 | -1.06 | 0.763378 | 0.116853 | 0.90026  | 0.384192 |
| MmugDNA.4338.1.S1_at    | MmugDNA.4338.1  | 4.12  | 3.62  | 0.4  | 0.06 | 1.42  | 0.267106 | 0.105462 | 0.612309 | 0.367324 |
| MmugDNA.43380.1.S1_at   | MmugDNA.43380.1 | 8.89  | 7.9   | 0.08 | 1.73 | 1.99  | 0.999818 | 0.999672 | 0.999967 | 0.99988  |
| MmugDNA.43381.1.S1_at   | MmugDNA.43381.1 | 5.29  | 5.67  | 0.15 | 0.16 | -1.3  | 0.06399  | 0.061902 | 0.401945 | 0.295668 |
| MmugDNA.43382.1.S1_at   | MmugDNA.43382.1 | 4.37  | 4.44  | 0.32 | 0.25 | -1.05 | 0.763056 | 0.879637 | 0.900081 | 0.931253 |
| MmugDNA.43383.1.S1_at   | MmugDNA.43383.1 | 4.68  | 4.64  | 0.14 | 0.05 | 1.02  | 0.737812 | 0.3181   | 0.887357 | 0.571046 |
| MmugDNA.43384.1.S1_at   | MmugDNA.43384.1 | 8.14  | 8.16  | 0.25 | 0.15 | -1.02 | 0.422744 | 0.525239 | 0.713675 | 0.714809 |
| MmugDNA.43385.1.S1_at   | MmugDNA.43385.1 | 9.92  | 9.6   | 0.16 | 0.24 | 1.25  | 0.08633  | 0.048849 | 0.440224 | 0.265858 |
| MmugDNA.43386.1.S1_at   | MmugDNA.43386.1 | 6.58  | 9.2   | 0.77 | 0.22 | -6.15 | 0.005633 | 0.001991 | 0.191943 | 0.066247 |
| MmugDNA.43387.1.S1_at   | MmugDNA.43387.1 | 5.03  | 5.09  | 0.06 | 0.08 | -1.04 | 0.498374 | 0.23499  | 0.75837  | 0.506162 |
| MmugDNA.43388.1.S1_at   | MmugDNA.43388.1 | 5.96  | 6.55  | 0.07 | 0.21 | -1.51 | 0.012823 | 0.006672 | 0.244024 | 0.110605 |
| MmugDNA.43389.1.S1_at   | MmugDNA.43389.1 | 9.18  | 9.33  | 0.05 | 0.26 | -1.11 | 0.846221 | 0.043632 | 0.938303 | 0.253531 |
| MmugDNA.4339.1.S1_at    | MmugDNA.4339.1  | 3.62  | 3.66  | 0.21 | 0.06 | -1.03 | 0.279621 | 0.229838 | 0.621136 | 0.501802 |
| MmugDNA.43390.1.S1_at   | MmugDNA.43390.1 | 3.93  | 3.94  | 0.2  | 0.14 | -1.01 | 0.846495 | 0.949689 | 0.93835  | 0.97122  |
| MmugDNA.43391.1.S1_at   | MmugDNA.43391.1 | 4.17  | 4.24  | 0.15 | 0.23 | -1.05 | 0.301434 | 0.459252 | 0.636369 | 0.671675 |
| MmugDNA.43392.1.S1_at   | MmugDNA.43392.1 | 4.43  | 4.98  | 0.07 | 0.57 | -1.47 | 0.531216 | 0.710248 | 0.777112 | 0.831904 |
| MmugDNA.43393.1.S1_at   | MmugDNA.43393.1 | 3.05  | 3.12  | 0.05 | 0.13 | -1.05 | 0.262656 | 0.356104 | 0.609039 | 0.598107 |
| MmugDNA.43394.1.S1_at   | MmugDNA.43394.1 | 7.56  | 7.52  | 0.51 | 0.32 | 1.03  | 0.975506 | 0.723287 | 0.990533 | 0.839718 |
| MmugDNA.43395.1.S1_at   | MmugDNA.43395.1 | 4.76  | 4.74  | 0.23 | 0.05 | 1.01  | 0.682969 | 0.895417 | 0.858255 | 0.940218 |
| MmugDNA.43396.1.S1_at   | MmugDNA.43396.1 | 5.11  | 5.09  | 0.28 | 0.17 | 1.01  | 0.569417 | 0.5882   | 0.79904  | 0.754811 |
| MmugDNA.43397.1.S1_at   | MmugDNA.43397.1 | 4.42  | 4.48  | 0.07 | 0.06 | -1.04 | 0.696597 | 0.923186 | 0.865345 | 0.956796 |
| MmugDNA.43398.1.S1_at   | MmugDNA.43398.1 | 3.51  | 3.56  | 0.18 | 0.08 | -1.03 | 0.639691 | 0.496194 | 0.837309 | 0.695883 |
| MmugDNA.43399.1.S1_at   | MmugDNA.43399.1 | 8.72  | 7.98  | 1.04 | 0.79 | 1.68  | 0.329289 | 0.417867 | 0.654923 | 0.642449 |
| MmugDNA.434.1.S1_at     | MmugDNA.434.1   | 5.31  | 5.31  | 0.18 | 0.24 | 1     | 0.957337 | 0.953365 | 0.983882 | 0.97351  |
| MmugDNA.4340.1.S1_at    | MmugDNA.4340.1  | 8.2   | 7.45  | 0.2  | 0.1  | 1.68  | 0.0048   | 0.006189 | 0.184674 | 0.106774 |
| MmugDNA.43400.1.S1_at   | MmugDNA.43400.1 | 3.2   | 3.12  | 0.15 | 0.02 | 1.06  | 0.380821 | 0.439779 | 0.687597 | 0.658439 |
| MmugDNA.43401.1.S1_at   | MmugDNA.43401.1 | 5.21  | 5.55  | 0.21 | 0.22 | -1.27 | 0.146177 | 0.095316 | 0.512187 | 0.35236  |
| MmugDNA.43403.1.S1_at   | MmugDNA.43403.1 | 4.52  | 4.35  | 0.21 | 0.16 | 1.13  | 0.400167 | 0.117231 | 0.699704 | 0.384766 |
| MmugDNA.43405.1.S1_at   | MmugDNA.43405.1 | 2.97  | 3.04  | 0.1  | 0.29 | -1.06 | 0.168565 | 0.116218 | 0.532849 | 0.38353  |
| MmugDNA.43406.1.S1_at   | MmugDNA.43406.1 | 7.58  | 6.67  | 0.38 | 0.54 | 1.87  | 0.367266 | 0.202422 | 0.67941  | 0.476768 |
| MmugDNA.43408.1.S1_at   | MmugDNA.43408.1 | 7.34  | 7.61  | 0.18 | 0.06 | -1.2  | 0.26068  | 0.343161 | 0.607375 | 0.588905 |
| MmugDNA.43408.1.S1_s_at | MmugDNA.43408.1 | 5.28  | 5.43  | 0.03 | 0.07 | -1.11 | 0.029023 | 0.00576  | 0.312556 | 0.104378 |
| MmugDNA.4341.1.S1_at    | MmugDNA.4341.1  | 8.07  | 8.24  | 0.7  | 0.14 | -1.12 | 0.801084 | 0.819424 | 0.917983 | 0.89598  |
| MmugDNA.43410.1.S1_at   | MmugDNA.43410.1 | 3.72  | 3.82  | 0.24 | 0.29 | -1.07 | 0.832752 | 0.488657 | 0.932258 | 0.691273 |
| MmugDNA.43411.1.S1_at   | MmugDNA.43411.1 | 4.11  | 4.25  | 0.16 | 0.06 | -1.1  | 0.237977 | 0.757998 | 0.59139  | 0.859223 |
| MmugDNA.43413.1.S1_at   | MmugDNA.43413.1 | 6.02  | 6.3   | 0.12 | 0.06 | -1.22 | 0.028659 | 0.032352 | 0.312031 | 0.222667 |
| MmugDNA.43414.1.S1_at   | MmugDNA.43414.1 | 3.9   | 3.86  | 0.07 | 0.11 | 1.03  | 0.680986 | 0.446962 | 0.857436 | 0.663167 |
| MmugDNA.43415.1.S1_at   | MmugDNA.43415.1 | 11.42 | 11.65 | 0.12 | 0.14 | -1.18 | 0.310955 | 0.383154 | 0.642914 | 0.619153 |
| MmugDNA.43416.1.S1_at   | MmugDNA.43416.1 | 6.67  | 6.46  | 0.56 | 0.36 | 1.16  | 0.135631 | 0.153817 | 0.502462 | 0.428488 |
| MmugDNA.43417.1.S1_at   | MmugDNA.43417.1 | 6.71  | 6.53  | 0.38 | 0.14 | 1.13  | 0.551638 | 0.591449 | 0.788895 | 0.756977 |



|                         |                 |       |       |      |      |       |          |          |          |          |
|-------------------------|-----------------|-------|-------|------|------|-------|----------|----------|----------|----------|
| MmugDNA.43418.1.S1_at   | MmugDNA.43418.1 | 4.38  | 4.25  | 0.84 | 0.16 | 1.09  | 0.360645 | 0.525854 | 0.674645 | 0.715222 |
| MmugDNA.43419.1.S1_at   | MmugDNA.43419.1 | 11.77 | 11.16 | 0.22 | 0.15 | 1.52  | 0.035652 | 0.010011 | 0.3373   | 0.131262 |
| MmugDNA.4342.1.S1_at    | MmugDNA.4342.1  | 6.21  | 5.93  | 0.12 | 0.32 | 1.21  | 0.228574 | 0.141649 | 0.58604  | 0.415207 |
| MmugDNA.43420.1.S1_at   | MmugDNA.43420.1 | 5.11  | 5.37  | 0.13 | 0.32 | -1.19 | 0.09473  | 0.069987 | 0.452166 | 0.310754 |
| MmugDNA.18976.1.S1_s_at | MmugDNA.18976.1 | 6.07  | 6.41  | 0.09 | 0.26 | -1.27 | 0.299915 | 0.382536 | 0.635282 | 0.618735 |
| MmugDNA.43421.1.S1_at   | MmugDNA.43421.1 | 8.85  | 8.37  | 0.22 | 0.11 | 1.39  | 0.039237 | 0.049795 | 0.346898 | 0.268228 |
| MmugDNA.43422.1.S1_at   | MmugDNA.43422.1 | 11.12 | 11.23 | 0.22 | 0.12 | -1.08 | 0.960551 | 0.744542 | 0.9849   | 0.852091 |
| MmugDNA.43422.1.S1_s_at | MmugDNA.43422.1 | 10.46 | 10.8  | 0.35 | 0.05 | -1.26 | 0.460797 | 0.16957  | 0.737133 | 0.446186 |
| MmugDNA.43423.1.S1_at   | MmugDNA.43423.1 | 5.88  | 5.92  | 0.17 | 0.03 | -1.03 | 0.250021 | 0.426208 | 0.600389 | 0.648388 |
| MmugDNA.43423.1.S1_s_at | MmugDNA.43423.1 | 4.7   | 4.91  | 0.43 | 0.01 | -1.16 | 0.908707 | 0.445719 | 0.963816 | 0.662489 |
| MmugDNA.43425.1.S1_at   | MmugDNA.43425.1 | 5.23  | 5.42  | 0.31 | 0.21 | -1.14 | 0.713607 | 0.741175 | 0.874503 | 0.850135 |
| MmugDNA.43426.1.S1_at   | MmugDNA.43426.1 | 4.65  | 4.66  | 0.17 | 0.03 | -1.01 | 0.914774 | 0.949585 | 0.966289 | 0.97117  |
| MmugDNA.43427.1.S1_at   | MmugDNA.43427.1 | 3.46  | 3.46  | 0.29 | 0.02 | 1     | 0.410229 | 0.369314 | 0.706234 | 0.6087   |
| MmugDNA.43428.1.S1_at   | MmugDNA.43428.1 | 4.03  | 4.01  | 0.04 | 0.08 | 1.01  | 0.396426 | 0.03856  | 0.696942 | 0.241357 |
| MmugDNA.4343.1.S1_at    | MmugDNA.4343.1  | 10.83 | 10.71 | 0.09 | 0.12 | 1.08  | 0.246567 | 0.073818 | 0.597787 | 0.317146 |
| MmugDNA.43430.1.S1_at   | MmugDNA.43430.1 | 5.87  | 5.97  | 0.09 | 0.11 | -1.07 | 0.277052 | 0.348528 | 0.619197 | 0.592609 |
| MmugDNA.43432.1.S1_at   | MmugDNA.43432.1 | 6.05  | 5.83  | 0.05 | 0.19 | 1.16  | 0.420977 | 0.485046 | 0.71282  | 0.688908 |
| MmugDNA.43434.1.S1_at   | MmugDNA.43434.1 | 6.06  | 6.13  | 0.07 | 0.14 | -1.04 | 0.198763 | 0.288639 | 0.561812 | 0.549827 |
| MmugDNA.43435.1.S1_at   | MmugDNA.43435.1 | 5.76  | 6.48  | 0.41 | 0.86 | -1.64 | 0.455153 | 0.574394 | 0.733701 | 0.745847 |
| MmugDNA.43437.1.S1_at   | MmugDNA.43437.1 | 6.24  | 6.2   | 0.2  | 0.11 | 1.03  | 0.584655 | 0.794224 | 0.807089 | 0.881314 |
| MmugDNA.43438.1.S1_at   | MmugDNA.43438.1 | 5.53  | 5.57  | 0.14 | 0.11 | -1.03 | 0.672428 | 0.900431 | 0.853061 | 0.94344  |
| MmugDNA.43439.1.S1_at   | MmugDNA.43439.1 | 11.7  | 11.94 | 0.18 | 0.17 | -1.18 | 0.414884 | 0.559338 | 0.709338 | 0.736241 |
| MmugDNA.4344.1.S1_at    | MmugDNA.4344.1  | 3.67  | 3.46  | 0.3  | 0.03 | 1.16  | 0.296384 | 0.270887 | 0.632368 | 0.536026 |
| MmugDNA.43440.1.S1_at   | MmugDNA.43440.1 | 11.47 | 12.08 | 0.26 | 0.07 | -1.53 | 0.031623 | 0.021662 | 0.322463 | 0.184333 |
| MmugDNA.43441.1.S1_at   | MmugDNA.43441.1 | 6.93  | 7.14  | 0.14 | 0.2  | -1.16 | 0.179038 | 0.202477 | 0.543331 | 0.476811 |
| MmugDNA.43442.1.S1_at   | MmugDNA.43442.1 | 8.59  | 9.41  | 0.32 | 0.42 | -1.76 | 0.025479 | 0.016496 | 0.299515 | 0.162577 |
| MmugDNA.43443.1.S1_at   | MmugDNA.43443.1 | 6.92  | 6.06  | 0.78 | 0.12 | 1.82  | 0.153857 | 0.075591 | 0.518485 | 0.32003  |
| MmugDNA.43444.1.S1_at   | MmugDNA.43444.1 | 3.73  | 3.71  | 0.04 | 0.18 | 1.02  | 0.584236 | 0.811318 | 0.806949 | 0.891133 |
| MmugDNA.43445.1.S1_at   | MmugDNA.43445.1 | 8.08  | 7.34  | 0.49 | 0.38 | 1.67  | 0.107015 | 0.021346 | 0.467698 | 0.182894 |
| MmugDNA.43446.1.S1_at   | MmugDNA.43446.1 | 2.99  | 3.1   | 0.12 | 0.3  | -1.07 | 0.202839 | 0.32241  | 0.565472 | 0.573972 |
| MmugDNA.43447.1.S1_at   | MmugDNA.43447.1 | 4     | 3.96  | 0.09 | 0.03 | 1.03  | 0.618631 | 0.594636 | 0.825259 | 0.758623 |
| MmugDNA.43448.1.S1_at   | MmugDNA.43448.1 | 4.78  | 4.16  | 1.03 | 1.14 | 1.54  | 0.781777 | 0.728456 | 0.908921 | 0.843019 |
| MmugDNA.43449.1.S1_at   | MmugDNA.43449.1 | 3.6   | 3.57  | 0.04 | 0.15 | 1.02  | 0.684814 | 0.417778 | 0.858795 | 0.642404 |
| MmugDNA.4345.1.S1_at    | MmugDNA.4345.1  | 9.16  | 9.12  | 0.45 | 0.41 | 1.02  | 0.877161 | 0.839869 | 0.950754 | 0.908703 |
| MmugDNA.43450.1.S1_at   | MmugDNA.43450.1 | 7.02  | 7.09  | 0.1  | 0.02 | -1.05 | 0.272744 | 0.311213 | 0.616391 | 0.566264 |
| MmugDNA.43451.1.S1_at   | MmugDNA.43451.1 | 4.17  | 4.16  | 0.08 | 0.07 | 1.01  | 0.406617 | 0.446268 | 0.703786 | 0.662743 |
| MmugDNA.43452.1.S1_at   | MmugDNA.43452.1 | 5.71  | 5.69  | 0    | 0.24 | 1.01  | 0.432418 | 0.314641 | 0.719041 | 0.568415 |
| MmugDNA.43453.1.S1_at   | MmugDNA.43453.1 | 5.77  | 5.99  | 0.02 | 0.16 | -1.17 | 0.06707  | 0.033976 | 0.407071 | 0.227969 |
| MmugDNA.43454.1.S1_at   | MmugDNA.43454.1 | 3.09  | 2.86  | 0.01 | 0.23 | 1.17  | 0.497751 | 0.778348 | 0.758068 | 0.871276 |
| MmugDNA.43455.1.S1_at   | MmugDNA.43455.1 | 2.93  | 3.02  | 0.19 | 0.12 | -1.07 | 0.928509 | 0.981162 | 0.972527 | 0.989586 |
| MmugDNA.43456.1.S1_at   | MmugDNA.43456.1 | 6.45  | 6.33  | 0.04 | 0.06 | 1.09  | 0.038866 | 0.000794 | 0.345902 | 0.046064 |

|                         |                 |       |       |      |      |       |          |          |          |          |
|-------------------------|-----------------|-------|-------|------|------|-------|----------|----------|----------|----------|
| MmugDNA.43457.1.S1_at   | MmugDNA.43457.1 | 4.24  | 4.3   | 0.53 | 0.11 | -1.05 | 0.596305 | 0.784032 | 0.812857 | 0.874963 |
| MmugDNA.43459.1.S1_at   | MmugDNA.43459.1 | 4.75  | 4.71  | 0.15 | 0.16 | 1.03  | 0.759551 | 0.272829 | 0.898447 | 0.537554 |
| MmugDNA.4346.1.S1_at    | MmugDNA.4346.1  | 5.55  | 5.39  | 0.8  | 0.64 | 1.12  | 0.981775 | 0.585132 | 0.993402 | 0.752755 |
| MmugDNA.43460.1.S1_at   | MmugDNA.43460.1 | 7.59  | 7.54  | 0.36 | 0.26 | 1.04  | 0.40944  | 0.124409 | 0.705878 | 0.394857 |
| MmugDNA.43462.1.S1_at   | MmugDNA.43462.1 | 11.5  | 11.25 | 0.08 | 0.06 | 1.18  | 0.007884 | 0.004872 | 0.214199 | 0.097453 |
| MmugDNA.43463.1.S1_x_at | MmugDNA.43463.1 | 12.16 | 12.17 | 0.07 | 0.29 | -1    | 0.775034 | 0.722366 | 0.905462 | 0.839202 |
| MmugDNA.43465.1.S1_at   | MmugDNA.43465.1 | 10.25 | 10.43 | 0.07 | 0.12 | -1.13 | 0.124977 | 0.006305 | 0.491    | 0.107813 |
| MmugDNA.43467.1.S1_at   | MmugDNA.43467.1 | 5.73  | 5.85  | 0.5  | 1.08 | -1.09 | 0.591203 | 0.482398 | 0.810276 | 0.687259 |
| MmugDNA.43470.1.S1_at   | MmugDNA.43470.1 | 4.63  | 4.86  | 0.14 | 0.34 | -1.18 | 0.110463 | 0.049682 | 0.471953 | 0.267892 |
| MmugDNA.43471.1.S1_s_at | MmugDNA.43471.1 | 4.16  | 4.23  | 0.05 | 0.14 | -1.05 | 0.490057 | 0.721055 | 0.754288 | 0.838489 |
| MmugDNA.43472.1.S1_at   | MmugDNA.43472.1 | 8.38  | 9.09  | 0.28 | 0.33 | -1.64 | 0.079065 | 0.077947 | 0.428609 | 0.324283 |
| MmugDNA.43473.1.S1_at   | MmugDNA.43473.1 | 4.01  | 4.16  | 0.32 | 0.31 | -1.11 | 0.799232 | 0.751263 | 0.91691  | 0.855385 |
| MmugDNA.43474.1.S1_at   | MmugDNA.43474.1 | 10.01 | 9.26  | 0.06 | 0.26 | 1.68  | 0.011812 | 0.005959 | 0.237696 | 0.105573 |
| MmugDNA.43475.1.S1_at   | MmugDNA.43475.1 | 8.08  | 7.99  | 0.32 | 0.25 | 1.07  | 0.455175 | 0.424298 | 0.733701 | 0.646878 |
| MmugDNA.43476.1.S1_at   | MmugDNA.43476.1 | 10.15 | 10.32 | 0.07 | 0.33 | -1.13 | 0.106904 | 0.118037 | 0.467551 | 0.385881 |
| MmugDNA.43479.1.S1_at   | MmugDNA.43479.1 | 10.77 | 12.09 | 0.97 | 0.74 | -2.5  | 0.057588 | 0.047075 | 0.38863  | 0.261469 |
| MmugDNA.4348.1.S1_at    | MmugDNA.4348.1  | 5.8   | 5.3   | 0.82 | 0.17 | 1.42  | 0.250677 | 0.282801 | 0.600389 | 0.545524 |
| MmugDNA.43480.1.S1_at   | MmugDNA.43480.1 | 6.51  | 7.69  | 0.3  | 0.79 | -2.27 | 0.074653 | 0.074559 | 0.420589 | 0.318185 |
| MmugDNA.43481.1.S1_at   | MmugDNA.43481.1 | 10.96 | 10.98 | 0.15 | 0.21 | -1.01 | 0.201259 | 0.074145 | 0.563894 | 0.31781  |
| MmugDNA.43482.1.S1_at   | MmugDNA.43482.1 | 3.72  | 3.86  | 0.06 | 0.17 | -1.11 | 0.463665 | 0.281973 | 0.738895 | 0.544868 |
| MmugDNA.43483.1.S1_at   | MmugDNA.43483.1 | 10.88 | 10.4  | 0.06 | 0.35 | 1.39  | 0.098822 | 0.104433 | 0.458711 | 0.365719 |
| MmugDNA.43484.1.S1_at   | MmugDNA.43484.1 | 9.59  | 9.61  | 0.24 | 0.3  | -1.01 | 0.513356 | 0.225499 | 0.76628  | 0.498141 |
| MmugDNA.43485.1.S1_at   | MmugDNA.43485.1 | 5.03  | 4.43  | 0.64 | 0.45 | 1.52  | 0.264149 | 0.271739 | 0.609897 | 0.536577 |
| MmugDNA.43488.1.S1_at   | MmugDNA.43488.1 | 2.91  | 2.71  | 0.11 | 0.15 | 1.16  | 0.169473 | 0.266807 | 0.533686 | 0.53241  |
| MmugDNA.43489.1.S1_at   | MmugDNA.43489.1 | 7.42  | 7.73  | 0.11 | 0.11 | -1.24 | 0.023415 | 0.013389 | 0.29136  | 0.14827  |
| MmugDNA.4349.1.S1_at    | MmugDNA.4349.1  | 3.05  | 3.01  | 0.13 | 0.14 | 1.03  | 0.873895 | 0.846757 | 0.949472 | 0.91284  |
| MmugDNA.43490.1.S1_at   | MmugDNA.43490.1 | 5.12  | 5.09  | 0.19 | 0.51 | 1.02  | 0.971256 | 0.638495 | 0.989025 | 0.78765  |
| MmugDNA.43491.1.S1_at   | MmugDNA.43491.1 | 3.11  | 3.01  | 0.25 | 0.03 | 1.07  | 0.537931 | 0.474314 | 0.780269 | 0.68135  |
| MmugDNA.43492.1.S1_at   | MmugDNA.43492.1 | 3.02  | 3.02  | 0.19 | 0.07 | 1     | 0.647676 | 0.680589 | 0.841573 | 0.813515 |
| MmugDNA.43493.1.S1_at   | MmugDNA.43493.1 | 4     | 4.1   | 0.02 | 0.25 | -1.07 | 0.449287 | 0.54755  | 0.730188 | 0.728511 |
| MmugDNA.43494.1.S1_at   | MmugDNA.43494.1 | 12.16 | 12.77 | 0.06 | 0.11 | -1.53 | 0.001102 | 0.00045  | 0.144223 | 0.038539 |
| MmugDNA.43494.1.S1_x_at | MmugDNA.43494.1 | 12.23 | 12.87 | 0.06 | 0.12 | -1.56 | 0.000989 | 0.000221 | 0.139813 | 0.032385 |
| MmugDNA.43495.1.S1_at   | MmugDNA.43495.1 | 5.98  | 6.06  | 0.06 | 0.08 | -1.06 | 0.981272 | 0.190842 | 0.993259 | 0.466228 |
| MmugDNA.43496.1.S1_at   | MmugDNA.43496.1 | 5.12  | 5.68  | 0.09 | 0.07 | -1.47 | 0.000625 | 0.000146 | 0.136818 | 0.029509 |
| MmugDNA.43497.1.S1_at   | MmugDNA.43497.1 | 11.36 | 11.07 | 0.06 | 0.17 | 1.22  | 0.115561 | 0.038847 | 0.478809 | 0.242022 |
| MmugDNA.43499.1.S1_at   | MmugDNA.43499.1 | 5.71  | 5.11  | 0.63 | 0.84 | 1.51  | 0.127678 | 0.134653 | 0.493958 | 0.406629 |
| MmugDNA.435.1.S1_at     | MmugDNA.435.1   | 4.2   | 4.29  | 0.23 | 0.46 | -1.07 | 0.838064 | 0.966015 | 0.934582 | 0.98099  |
| MmugDNA.4350.1.S1_at    | MmugDNA.4350.1  | 7.88  | 7.99  | 0.08 | 0.17 | -1.08 | 0.612659 | 0.340281 | 0.822286 | 0.586666 |
| MmugDNA.43501.1.S1_at   | MmugDNA.43501.1 | 4.6   | 4.55  | 0.12 | 0.18 | 1.03  | 0.690991 | 0.115765 | 0.862535 | 0.382814 |
| MmugDNA.43502.1.S1_at   | MmugDNA.43502.1 | 5.52  | 5.8   | 0.07 | 0.11 | -1.21 | 0.017203 | 0.008843 | 0.266942 | 0.124493 |
| MmugDNA.43503.1.S1_at   | MmugDNA.43503.1 | 3.52  | 3.33  | 0.11 | 0.05 | 1.14  | 0.107595 | 0.095219 | 0.468045 | 0.35218  |

|                       |                 |       |       |      |      |       |          |          |          |          |
|-----------------------|-----------------|-------|-------|------|------|-------|----------|----------|----------|----------|
| MmugDNA.43504.1.S1_at | MmugDNA.43504.1 | 4.55  | 4.67  | 0.03 | 0.18 | -1.09 | 0.2479   | 0.434384 | 0.599052 | 0.654536 |
| MmugDNA.43505.1.S1_at | MmugDNA.43505.1 | 3.57  | 3.64  | 0.1  | 0.05 | -1.06 | 0.459081 | 0.773825 | 0.735918 | 0.868485 |
| MmugDNA.43506.1.S1_at | MmugDNA.43506.1 | 5.87  | 5.53  | 0.2  | 0.53 | 1.27  | 0.392333 | 0.436922 | 0.694651 | 0.656357 |
| MmugDNA.43507.1.S1_at | MmugDNA.43507.1 | 6.09  | 6.1   | 0.1  | 0.17 | -1.01 | 0.220646 | 0.300542 | 0.579701 | 0.558852 |
| MmugDNA.43508.1.S1_at | MmugDNA.43508.1 | 6.18  | 5.99  | 0.47 | 0.26 | 1.14  | 0.563126 | 0.495834 | 0.7958   | 0.695746 |
| MmugDNA.43509.1.S1_at | MmugDNA.43509.1 | 6.06  | 6.03  | 0.25 | 0.21 | 1.03  | 0.293956 | 0.419321 | 0.631039 | 0.643447 |
| MmugDNA.4351.1.S1_at  | MmugDNA.4351.1  | 5.88  | 5.46  | 0.14 | 0.12 | 1.34  | 0.018206 | 0.00997  | 0.269591 | 0.131094 |
| MmugDNA.43512.1.S1_at | MmugDNA.43512.1 | 9.1   | 9.25  | 0.3  | 0.43 | -1.1  | 0.739043 | 0.382665 | 0.888088 | 0.618843 |
| MmugDNA.43515.1.S1_at | MmugDNA.43515.1 | 4.92  | 5.06  | 0.15 | 0.26 | -1.1  | 0.514061 | 0.660398 | 0.766736 | 0.801302 |
| MmugDNA.43516.1.S1_at | MmugDNA.43516.1 | 4.86  | 5.08  | 0.23 | 0.06 | -1.16 | 0.71362  | 0.414147 | 0.874503 | 0.640063 |
| MmugDNA.43517.1.S1_at | MmugDNA.43517.1 | 5.67  | 5.88  | 0.12 | 0.2  | -1.16 | 0.235064 | 0.276184 | 0.589325 | 0.540179 |
| MmugDNA.43520.1.S1_at | MmugDNA.43520.1 | 6.51  | 6.5   | 0.34 | 0.22 | 1.01  | 0.968894 | 0.817065 | 0.988242 | 0.894492 |
| MmugDNA.43522.1.S1_at | MmugDNA.43522.1 | 8.97  | 9.69  | 0.46 | 0.38 | -1.65 | 0.180409 | 0.059476 | 0.544726 | 0.290548 |
| MmugDNA.43523.1.S1_at | MmugDNA.43523.1 | 6.03  | 5.92  | 0.13 | 0.1  | 1.08  | 0.369176 | 0.025929 | 0.680589 | 0.201872 |
| MmugDNA.43524.1.S1_at | MmugDNA.43524.1 | 3.77  | 3.49  | 0.16 | 0.16 | 1.21  | 0.04342  | 0.47138  | 0.356711 | 0.679413 |
| MmugDNA.43525.1.S1_at | MmugDNA.43525.1 | 4.96  | 5.66  | 0.07 | 0.25 | -1.62 | 0.018921 | 0.014659 | 0.272319 | 0.154231 |
| MmugDNA.43527.1.S1_at | MmugDNA.43527.1 | 7.73  | 7.96  | 0.06 | 0.41 | -1.17 | 0.695033 | 0.20144  | 0.864725 | 0.475963 |
| MmugDNA.43528.1.S1_at | MmugDNA.43528.1 | 3.17  | 3.21  | 0.03 | 0.09 | -1.03 | 0.389489 | 0.333889 | 0.692994 | 0.582024 |
| MmugDNA.43530.1.S1_at | MmugDNA.43530.1 | 5.63  | 6.91  | 0.28 | 0.63 | -2.42 | 0.04737  | 0.042459 | 0.365901 | 0.250702 |
| MmugDNA.43531.1.S1_at | MmugDNA.43531.1 | 4.92  | 4.81  | 0.16 | 0.1  | 1.08  | 0.260946 | 0.054245 | 0.607545 | 0.278331 |
| MmugDNA.43534.1.S1_at | MmugDNA.43534.1 | 12.43 | 12.52 | 0.01 | 0.17 | -1.06 | 0.418244 | 0.565216 | 0.711206 | 0.739754 |
| MmugDNA.43535.1.S1_at | MmugDNA.43535.1 | 3.82  | 3.84  | 0.21 | 0.03 | -1.01 | 0.501743 | 0.525585 | 0.760131 | 0.715132 |
| MmugDNA.43538.1.S1_at | MmugDNA.43538.1 | 4.96  | 7.61  | 1.19 | 2.48 | -6.24 | 0.383899 | 0.342491 | 0.689646 | 0.588539 |
| MmugDNA.43539.1.S1_at | MmugDNA.43539.1 | 5.8   | 5.83  | 0.12 | 0.33 | -1.02 | 0.616918 | 0.37255  | 0.824363 | 0.61149  |
| MmugDNA.4354.1.S1_at  | MmugDNA.4354.1  | 4.51  | 4.56  | 0.23 | 0.08 | -1.04 | 0.467331 | 0.673884 | 0.74068  | 0.809483 |
| MmugDNA.43540.1.S1_at | MmugDNA.43540.1 | 4.47  | 4.46  | 0.27 | 0.14 | 1.01  | 0.697148 | 0.106729 | 0.865585 | 0.369337 |
| MmugDNA.43541.1.S1_at | MmugDNA.43541.1 | 4.53  | 4.5   | 0.1  | 0.22 | 1.02  | 0.969646 | 0.357247 | 0.98841  | 0.598867 |
| MmugDNA.43542.1.S1_at | MmugDNA.43542.1 | 5.17  | 5.24  | 0.02 | 0.18 | -1.05 | 0.811133 | 0.035921 | 0.922996 | 0.234021 |
| MmugDNA.43543.1.S1_at | MmugDNA.43543.1 | 8.75  | 6.95  | 0.89 | 0.7  | 3.48  | 0.19802  | 0.288037 | 0.561022 | 0.54928  |
| MmugDNA.43544.1.S1_at | MmugDNA.43544.1 | 9.34  | 9.1   | 0.25 | 0.25 | 1.18  | 0.451698 | 0.622953 | 0.73168  | 0.777422 |
| MmugDNA.43545.1.S1_at | MmugDNA.43545.1 | 12.01 | 11.12 | 0.16 | 0.91 | 1.85  | 0.172737 | 0.206088 | 0.536342 | 0.480306 |
| MmugDNA.43547.1.S1_at | MmugDNA.43547.1 | 4     | 3.65  | 0.15 | 0.1  | 1.28  | 0.054199 | 0.402688 | 0.381696 | 0.631543 |
| MmugDNA.43548.1.S1_at | MmugDNA.43548.1 | 3.29  | 3.33  | 0.16 | 0.11 | -1.03 | 0.495068 | 0.619367 | 0.757044 | 0.774611 |
| MmugDNA.43549.1.S1_at | MmugDNA.43549.1 | 3.33  | 3.2   | 0.12 | 0.06 | 1.09  | 0.154676 | 0.398676 | 0.519298 | 0.629458 |
| MmugDNA.4355.1.S1_at  | MmugDNA.4355.1  | 3.87  | 3.4   | 0.31 | 0.09 | 1.38  | 0.214342 | 0.340923 | 0.574854 | 0.587035 |
| MmugDNA.43550.1.S1_at | MmugDNA.43550.1 | 5.12  | 4.99  | 0.28 | 0.07 | 1.09  | 0.207612 | 0.144973 | 0.569822 | 0.418913 |
| MmugDNA.43552.1.S1_at | MmugDNA.43552.1 | 5.83  | 5.8   | 0.13 | 0.05 | 1.02  | 0.177323 | 0.208672 | 0.54139  | 0.482544 |
| MmugDNA.43553.1.S1_at | MmugDNA.43553.1 | 7.02  | 6.65  | 0.63 | 0.43 | 1.28  | 0.635893 | 0.488322 | 0.835193 | 0.691058 |
| MmugDNA.43554.1.S1_at | MmugDNA.43554.1 | 4.72  | 4.6   | 0.09 | 0.05 | 1.09  | 0.182133 | 0.064961 | 0.546458 | 0.300855 |
| MmugDNA.43555.1.S1_at | MmugDNA.43555.1 | 4.57  | 4.82  | 0.15 | 0.29 | -1.19 | 0.306517 | 0.493598 | 0.639593 | 0.694286 |
| MmugDNA.43558.1.S1_at | MmugDNA.43558.1 | 5     | 4.68  | 0.35 | 0.77 | 1.25  | 0.861723 | 0.190567 | 0.944321 | 0.46595  |

|                         |                 |       |       |      |      |       |          |          |          |          |
|-------------------------|-----------------|-------|-------|------|------|-------|----------|----------|----------|----------|
| MmugDNA.43559.1.S1_at   | MmugDNA.43559.1 | 6.28  | 6.27  | 0.12 | 0.06 | 1.01  | 0.790778 | 0.766884 | 0.91318  | 0.864635 |
| MmugDNA.4356.1.S1_x_at  | MmugDNA.4356.1  | 9.84  | 9.47  | 0.97 | 0.26 | 1.29  | 0.216082 | 0.285847 | 0.575954 | 0.547484 |
| MmugDNA.43561.1.S1_at   | MmugDNA.43561.1 | 5.05  | 4.96  | 0.42 | 0.29 | 1.06  | 0.272946 | 0.39265  | 0.616399 | 0.625813 |
| MmugDNA.43562.1.S1_at   | MmugDNA.43562.1 | 4.43  | 4.09  | 0.05 | 0.22 | 1.26  | 0.255132 | 0.18924  | 0.603094 | 0.465007 |
| MmugDNA.43563.1.S1_at   | MmugDNA.43563.1 | 4.35  | 4.57  | 0.17 | 0.04 | -1.16 | 0.033197 | 0.020056 | 0.327417 | 0.177898 |
| MmugDNA.43564.1.S1_at   | MmugDNA.43564.1 | 5.67  | 5.78  | 0.18 | 0.1  | -1.08 | 0.745765 | 0.21281  | 0.891243 | 0.486769 |
| MmugDNA.43565.1.S1_at   | MmugDNA.43565.1 | 4.65  | 4.49  | 0.09 | 0.09 | 1.11  | 0.255599 | 0.711398 | 0.603413 | 0.832662 |
| MmugDNA.43566.1.S1_x_at | MmugDNA.43566.1 | 5.9   | 5.63  | 0.27 | 0.03 | 1.21  | 0.170811 | 0.215866 | 0.534664 | 0.489536 |
| MmugDNA.43567.1.S1_at   | MmugDNA.43567.1 | 3.17  | 2.9   | 0.2  | 0.12 | 1.21  | 0.526334 | 0.193483 | 0.77404  | 0.468745 |
| MmugDNA.43568.1.S1_at   | MmugDNA.43568.1 | 5.69  | 6.03  | 0.74 | 0.61 | -1.27 | 0.995562 | 0.731277 | 0.99841  | 0.84425  |
| MmugDNA.43569.1.S1_at   | MmugDNA.43569.1 | 3.93  | 3.93  | 0.22 | 0.21 | -1    | 0.933108 | 0.543182 | 0.973979 | 0.725996 |
| MmugDNA.4721.1.S1_s_at  | MmugDNA.4721.1  | 4.16  | 4.02  | 0.22 | 0.18 | 1.1   | 0.17556  | 0.254722 | 0.539311 | 0.522987 |
| MmugDNA.4357.1.S1_at    | MmugDNA.4357.1  | 5.29  | 5.45  | 0.61 | 0.2  | -1.12 | 0.649315 | 0.721774 | 0.842398 | 0.838827 |
| MmugDNA.43570.1.S1_at   | MmugDNA.43570.1 | 4.51  | 4.5   | 0.21 | 0.09 | 1     | 0.251125 | 0.332065 | 0.60062  | 0.580584 |
| MmugDNA.43571.1.S1_at   | MmugDNA.43571.1 | 6.27  | 5.7   | 0.62 | 0.15 | 1.49  | 0.394711 | 0.350453 | 0.69601  | 0.594161 |
| MmugDNA.43572.1.S1_at   | MmugDNA.43572.1 | 10.16 | 9.39  | 0.13 | 0.12 | 1.7   | 0.003115 | 0.004767 | 0.172335 | 0.096325 |
| MmugDNA.43573.1.S1_at   | MmugDNA.43573.1 | 4.15  | 3.39  | 1.13 | 0.07 | 1.69  | 0.256549 | 0.332151 | 0.604278 | 0.580584 |
| MmugDNA.43574.1.S1_at   | MmugDNA.43574.1 | 5.15  | 4.87  | 0.23 | 0.13 | 1.22  | 0.10404  | 0.081285 | 0.46414  | 0.329351 |
| MmugDNA.43575.1.S1_at   | MmugDNA.43575.1 | 7.23  | 7.05  | 0.06 | 0.13 | 1.13  | 0.108318 | 0.432543 | 0.469518 | 0.65297  |
| MmugDNA.43576.1.S1_at   | MmugDNA.43576.1 | 4.5   | 4.38  | 0.2  | 0.13 | 1.09  | 0.61281  | 0.558036 | 0.822443 | 0.735346 |
| MmugDNA.43577.1.S1_at   | MmugDNA.43577.1 | 3.43  | 3.33  | 0.06 | 0.03 | 1.07  | 0.068072 | 0.038043 | 0.409262 | 0.239624 |
| MmugDNA.43578.1.S1_at   | MmugDNA.43578.1 | 3.66  | 3.62  | 0.04 | 0.08 | 1.03  | 0.32046  | 0.009674 | 0.649472 | 0.129405 |
| MmugDNA.4358.1.S1_at    | MmugDNA.4358.1  | 4.35  | 3.75  | 0.77 | 0.56 | 1.52  | 0.229098 | 0.273068 | 0.586417 | 0.537644 |
| MmugDNA.43580.1.S1_at   | MmugDNA.43580.1 | 5.48  | 5.52  | 0.19 | 0.22 | -1.03 | 0.969072 | 0.00378  | 0.988244 | 0.08754  |
| MmugDNA.43581.1.S1_at   | MmugDNA.43581.1 | 10.55 | 10.9  | 0.21 | 0.25 | -1.27 | 0.296624 | 0.24437  | 0.632686 | 0.514215 |
| MmugDNA.43583.1.S1_at   | MmugDNA.43583.1 | 4.42  | 4.48  | 0.06 | 0.04 | -1.04 | 0.1821   | 0.07197  | 0.546458 | 0.314305 |
| MmugDNA.43583.1.S1_x_at | MmugDNA.43583.1 | 5.46  | 5.52  | 0.36 | 0.06 | -1.04 | 0.561521 | 0.547445 | 0.794887 | 0.728464 |
| MmugDNA.43584.1.S1_at   | MmugDNA.43584.1 | 5.25  | 4.88  | 0.64 | 0.15 | 1.29  | 0.105234 | 0.143635 | 0.465694 | 0.417555 |
| MmugDNA.43586.1.S1_at   | MmugDNA.43586.1 | 3.72  | 3.72  | 0.01 | 0.04 | 1     | 0.979926 | 0.098213 | 0.992671 | 0.356253 |
| MmugDNA.43587.1.S1_at   | MmugDNA.43587.1 | 4.81  | 5.14  | 0.42 | 0.28 | -1.26 | 0.444789 | 0.334261 | 0.727192 | 0.582308 |
| MmugDNA.43590.1.S1_at   | MmugDNA.43590.1 | 4.43  | 4.4   | 0.06 | 0.18 | 1.02  | 0.545535 | 0.175999 | 0.785008 | 0.452526 |
| MmugDNA.43592.1.S1_at   | MmugDNA.43592.1 | 7.39  | 7.08  | 1.1  | 1.01 | 1.24  | 0.796954 | 0.860573 | 0.915791 | 0.920573 |
| MmugDNA.43593.1.S1_at   | MmugDNA.43593.1 | 5.85  | 5.51  | 0.14 | 0.3  | 1.26  | 0.277947 | 0.332561 | 0.620065 | 0.580954 |
| MmugDNA.43594.1.S1_at   | MmugDNA.43594.1 | 6.46  | 6.57  | 0.42 | 0.52 | -1.08 | 0.781279 | 0.903116 | 0.908722 | 0.94497  |
| MmugDNA.43595.1.S1_at   | MmugDNA.43595.1 | 7.29  | 7.37  | 0.09 | 0.06 | -1.05 | 0.164585 | 0.088509 | 0.528546 | 0.341947 |
| MmugDNA.43596.1.S1_at   | MmugDNA.43596.1 | 5.25  | 5.38  | 0.16 | 0.15 | -1.1  | 0.680329 | 0.550857 | 0.857147 | 0.730625 |
| MmugDNA.43598.1.S1_at   | MmugDNA.43598.1 | 11.1  | 11.24 | 0.37 | 1.01 | -1.11 | 0.58163  | 0.208236 | 0.805297 | 0.482126 |
| MmugDNA.43599.1.S1_at   | MmugDNA.43599.1 | 3.45  | 3.4   | 0.07 | 0.08 | 1.04  | 0.535241 | 0.710176 | 0.778933 | 0.831904 |
| MmugDNA.436.1.S1_at     | MmugDNA.436.1   | 4.43  | 4.4   | 0.08 | 0.12 | 1.02  | 0.307726 | 0.222681 | 0.640092 | 0.495617 |
| MmugDNA.43600.1.S1_at   | MmugDNA.43600.1 | 4.37  | 4.09  | 0.29 | 0.11 | 1.21  | 0.202325 | 0.333709 | 0.564612 | 0.581882 |
| MmugDNA.43602.1.S1_at   | MmugDNA.43602.1 | 11.11 | 11.02 | 0.08 | 0.43 | 1.07  | 0.370722 | 0.505267 | 0.681582 | 0.702073 |

|                         |                 |       |       |      |      |       |          |          |          |          |
|-------------------------|-----------------|-------|-------|------|------|-------|----------|----------|----------|----------|
| MmugDNA.43603.1.S1_at   | MmugDNA.43603.1 | 5.11  | 5.27  | 0.33 | 0.14 | -1.11 | 0.818146 | 0.906185 | 0.926284 | 0.94693  |
| MmugDNA.43605.1.S1_at   | MmugDNA.43605.1 | 3     | 2.85  | 0.03 | 0.03 | 1.11  | 0.003889 | 0.000244 | 0.180184 | 0.032798 |
| MmugDNA.43606.1.S1_at   | MmugDNA.43606.1 | 5.78  | 6.39  | 0.35 | 0.36 | -1.53 | 0.13742  | 0.036993 | 0.504538 | 0.236733 |
| MmugDNA.43607.1.S1_at   | MmugDNA.43607.1 | 5.97  | 6     | 0.12 | 0.08 | -1.02 | 0.770428 | 0.48578  | 0.90333  | 0.689398 |
| MmugDNA.43608.1.S1_at   | MmugDNA.43608.1 | 5.13  | 5.36  | 0.19 | 0.11 | -1.18 | 0.361832 | 0.176428 | 0.675478 | 0.45282  |
| MmugDNA.43609.1.S1_at   | MmugDNA.43609.1 | 5.24  | 5.08  | 0.23 | 0.28 | 1.12  | 0.51168  | 0.706434 | 0.765318 | 0.829634 |
| MmugDNA.4361.1.S1_at    | MmugDNA.4361.1  | 4.25  | 4.24  | 0.91 | 1.11 | 1.01  | 0.924147 | 0.966046 | 0.970594 | 0.980991 |
| MmugDNA.43610.1.S1_at   | MmugDNA.43610.1 | 4     | 3.98  | 0.25 | 0.08 | 1.01  | 0.604191 | 0.712988 | 0.817563 | 0.833583 |
| MmugDNA.43611.1.S1_at   | MmugDNA.43611.1 | 4.03  | 3.89  | 0.16 | 0.11 | 1.1   | 0.907427 | 0.366649 | 0.963251 | 0.606417 |
| MmugDNA.43612.1.S1_at   | MmugDNA.43612.1 | 3.64  | 3.36  | 0.53 | 0.09 | 1.21  | 0.352275 | 0.423169 | 0.669556 | 0.646183 |
| MmugDNA.43614.1.S1_at   | MmugDNA.43614.1 | 3.5   | 3.94  | 0.46 | 1.72 | -1.35 | 0.390597 | 0.501515 | 0.693739 | 0.699688 |
| MmugDNA.43615.1.S1_at   | MmugDNA.43615.1 | 5.71  | 5.56  | 0.26 | 0.45 | 1.11  | 0.422232 | 0.346336 | 0.71345  | 0.59124  |
| MmugDNA.43616.1.S1_at   | MmugDNA.43616.1 | 4.65  | 4.75  | 0.09 | 0.14 | -1.08 | 0.225172 | 0.535702 | 0.58306  | 0.721232 |
| MmugDNA.43617.1.S1_at   | MmugDNA.43617.1 | 11.67 | 11.28 | 0.12 | 0.83 | 1.31  | 0.493673 | 0.614381 | 0.756299 | 0.771226 |
| MmugDNA.43618.1.S1_at   | MmugDNA.43618.1 | 4.52  | 3.49  | 0.8  | 0.77 | 2.04  | 0.840164 | 0.876598 | 0.93556  | 0.929709 |
| MmugDNA.43619.1.S1_at   | MmugDNA.43619.1 | 8.71  | 8.17  | 0.18 | 0.51 | 1.45  | 0.110343 | 0.117834 | 0.471863 | 0.38576  |
| MmugDNA.4362.1.S1_at    | MmugDNA.4362.1  | 7.44  | 7.41  | 0.25 | 0.85 | 1.02  | 0.914112 | 0.948941 | 0.966066 | 0.97078  |
| MmugDNA.43620.1.S1_at   | MmugDNA.43620.1 | 12.13 | 11.66 | 0.07 | 0.13 | 1.38  | 0.003872 | 0.001005 | 0.180184 | 0.050657 |
| MmugDNA.43621.1.S1_at   | MmugDNA.43621.1 | 3.15  | 3.15  | 0.18 | 0.03 | 1     | 0.380627 | 0.594342 | 0.687504 | 0.758587 |
| MmugDNA.43622.1.S1_at   | MmugDNA.43622.1 | 5.44  | 5.71  | 0.24 | 0.59 | -1.21 | 0.204149 | 0.258407 | 0.566605 | 0.525654 |
| MmugDNA.43623.1.S1_s_at | MmugDNA.43623.1 | 10.23 | 10.69 | 0.34 | 1.03 | -1.38 | 0.699683 | 0.516305 | 0.867018 | 0.708836 |
| MmugDNA.4363.1.S1_at    | MmugDNA.4363.1  | 5.17  | 5.21  | 0.59 | 0.31 | -1.03 | 0.490112 | 0.641141 | 0.754288 | 0.789442 |
| MmugDNA.4365.1.S1_s_at  | MmugDNA.4365.1  | 8.03  | 7.43  | 0.81 | 0.42 | 1.51  | 0.505651 | 0.412577 | 0.761704 | 0.638941 |
| MmugDNA.4366.1.S1_at    | MmugDNA.4366.1  | 5.68  | 5.22  | 0.55 | 0.63 | 1.37  | 0.41365  | 0.703859 | 0.708538 | 0.828259 |
| MmugDNA.4367.1.S1_at    | MmugDNA.4367.1  | 4.74  | 5.28  | 0.61 | 1.4  | -1.45 | 0.321226 | 0.278017 | 0.649889 | 0.541699 |
| MmugDNA.4369.1.S1_at    | MmugDNA.4369.1  | 5.66  | 5.94  | 0.31 | 0.66 | -1.21 | 0.58528  | 0.066052 | 0.807475 | 0.302401 |
| MmugDNA.437.1.S1_at     | MmugDNA.437.1   | 8.98  | 8.74  | 0.38 | 0.6  | 1.18  | 0.600845 | 0.65153  | 0.815498 | 0.796245 |
| MmugDNA.4371.1.S1_at    | MmugDNA.4371.1  | 4.75  | 4.75  | 0.06 | 0.32 | 1.01  | 0.743986 | 0.797968 | 0.890339 | 0.883669 |
| MmugDNA.4372.1.S1_at    | MmugDNA.4372.1  | 5.19  | 5.62  | 1.25 | 0.06 | -1.34 | 0.727728 | 0.816911 | 0.88152  | 0.894398 |
| MmugDNA.4373.1.S1_at    | MmugDNA.4373.1  | 5.35  | 5.73  | 0.32 | 0.18 | -1.3  | 0.096681 | 0.101867 | 0.455568 | 0.361836 |
| MmugDNA.4376.1.S1_at    | MmugDNA.4376.1  | 6.48  | 6.72  | 0.04 | 0.2  | -1.19 | 0.109148 | 0.067195 | 0.470811 | 0.305204 |
| MmugDNA.4377.1.S1_at    | MmugDNA.4377.1  | 3.76  | 4.1   | 0.11 | 0.17 | -1.27 | 0.0122   | 0.005177 | 0.240358 | 0.099727 |
| MmugDNA.438.1.S1_at     | MmugDNA.438.1   | 6.07  | 5.47  | 0.47 | 0.63 | 1.51  | 0.321554 | 0.291767 | 0.650266 | 0.552054 |
| MmugDNA.4380.1.S1_at    | MmugDNA.4380.1  | 4.56  | 4.51  | 0.43 | 0.11 | 1.03  | 0.552605 | 0.566664 | 0.78961  | 0.740723 |
| MmugDNA.4381.1.S1_at    | MmugDNA.4381.1  | 9.69  | 9.93  | 0.05 | 0.35 | -1.18 | 0.946609 | 0.924009 | 0.979457 | 0.957162 |
| MmugDNA.4382.1.S1_at    | MmugDNA.4382.1  | 3.3   | 3.08  | 0.58 | 0.21 | 1.17  | 0.253249 | 0.305584 | 0.60187  | 0.562504 |
| MmugDNA.4383.1.S1_at    | MmugDNA.4383.1  | 5.53  | 5.85  | 0.15 | 0.18 | -1.25 | 0.073737 | 0.067385 | 0.419243 | 0.305618 |
| MmugDNA.4384.1.S1_at    | MmugDNA.4384.1  | 8.67  | 7.95  | 0.83 | 0.61 | 1.65  | 0.378279 | 0.051444 | 0.686429 | 0.272231 |
| MmugDNA.4386.1.S1_at    | MmugDNA.4386.1  | 3.2   | 3.17  | 0.79 | 0.17 | 1.02  | 0.370963 | 0.374086 | 0.681748 | 0.612678 |
| MmugDNA.4387.1.S1_at    | MmugDNA.4387.1  | 5.06  | 5.45  | 0.12 | 0.08 | -1.31 | 0.010412 | 0.017386 | 0.229535 | 0.166963 |
| MmugDNA.4388.1.S1_at    | MmugDNA.4388.1  | 5.17  | 5.08  | 0.13 | 0.19 | 1.07  | 0.909398 | 0.351526 | 0.964148 | 0.595094 |

|                        |                |       |       |      |      |       |          |          |          |          |
|------------------------|----------------|-------|-------|------|------|-------|----------|----------|----------|----------|
| MmugDNA.439.1.S1_at    | MmugDNA.439.1  | 6.74  | 6.29  | 0.78 | 0.68 | 1.37  | 0.183643 | 0.226996 | 0.54773  | 0.499286 |
| MmugDNA.4391.1.S1_at   | MmugDNA.4391.1 | 6.79  | 6.2   | 0.15 | 0.24 | 1.5   | 0.023493 | 0.016525 | 0.291638 | 0.162738 |
| MmugDNA.4392.1.S1_at   | MmugDNA.4392.1 | 5.03  | 5     | 1.55 | 0.62 | 1.02  | 0.594811 | 0.52827  | 0.812182 | 0.716462 |
| MmugDNA.4393.1.S1_at   | MmugDNA.4393.1 | 4.33  | 4.31  | 0.08 | 0.16 | 1.01  | 0.916912 | 0.893358 | 0.967497 | 0.939163 |
| MmugDNA.4396.1.S1_at   | MmugDNA.4396.1 | 12.46 | 12.58 | 0.19 | 0.34 | -1.08 | 0.697113 | 0.476249 | 0.865585 | 0.682616 |
| MmugDNA.4397.1.S1_at   | MmugDNA.4397.1 | 4.55  | 4.56  | 0.11 | 0.17 | -1.01 | 0.997254 | 0.951112 | 0.99892  | 0.972319 |
| MmugDNA.4399.1.S1_at   | MmugDNA.4399.1 | 4.55  | 4.48  | 0.1  | 0.13 | 1.05  | 0.629258 | 0.851032 | 0.831394 | 0.915265 |
| MmugDNA.44.1.S1_at     | MmugDNA.44.1   | 5.3   | 5.31  | 0.1  | 0.01 | -1    | 0.31137  | 0.466272 | 0.643368 | 0.676227 |
| MmugDNA.4400.1.S1_at   | MmugDNA.4400.1 | 5.71  | 4.61  | 1.17 | 0.94 | 2.14  | 0.569827 | 0.211167 | 0.79921  | 0.485195 |
| MmugDNA.4401.1.S1_at   | MmugDNA.4401.1 | 5.9   | 5.83  | 0.11 | 0.23 | 1.05  | 0.483316 | 0.701027 | 0.749882 | 0.826613 |
| MmugDNA.4402.1.S1_at   | MmugDNA.4402.1 | 11.86 | 11.2  | 0.22 | 0.31 | 1.58  | 0.046281 | 0.036376 | 0.362953 | 0.235146 |
| MmugDNA.4402.1.S1_s_at | MmugDNA.4402.1 | 11.52 | 10.78 | 0.18 | 0.41 | 1.67  | 0.054651 | 0.041851 | 0.382059 | 0.249172 |
| MmugDNA.4403.1.S1_at   | MmugDNA.4403.1 | 6.79  | 6.49  | 0.3  | 0.73 | 1.23  | 0.867838 | 0.881874 | 0.947272 | 0.93263  |
| MmugDNA.4407.1.S1_s_at | MmugDNA.4407.1 | 8.99  | 9.04  | 0.08 | 0.14 | -1.04 | 0.763509 | 0.909008 | 0.900335 | 0.948484 |
| MmugDNA.4408.1.S1_at   | MmugDNA.4408.1 | 5.6   | 5.82  | 0.1  | 0.15 | -1.16 | 0.211761 | 0.11142  | 0.572347 | 0.376126 |
| MmugDNA.4410.1.S1_at   | MmugDNA.4410.1 | 2.98  | 2.95  | 0.26 | 0.11 | 1.02  | 0.725712 | 0.347888 | 0.880491 | 0.592196 |
| MmugDNA.4411.1.S1_at   | MmugDNA.4411.1 | 3.99  | 3.84  | 0.11 | 0    | 1.11  | 0.124818 | 0.482537 | 0.49077  | 0.68734  |
| MmugDNA.4412.1.S1_at   | MmugDNA.4412.1 | 8.19  | 7.42  | 0.3  | 0.2  | 1.7   | 0.012244 | 0.009965 | 0.240448 | 0.131094 |
| MmugDNA.4413.1.S1_at   | MmugDNA.4413.1 | 3.95  | 4.02  | 0.2  | 0.26 | -1.05 | 0.450409 | 0.604018 | 0.730948 | 0.764427 |
| MmugDNA.4414.1.S1_at   | MmugDNA.4414.1 | 3.64  | 3.81  | 0.1  | 0.2  | -1.12 | 0.940686 | 0.512439 | 0.977466 | 0.706299 |
| MmugDNA.4415.1.S1_at   | MmugDNA.4415.1 | 5.06  | 4.42  | 0.54 | 0.11 | 1.56  | 0.101206 | 0.094735 | 0.461009 | 0.351549 |
| MmugDNA.4417.1.S1_at   | MmugDNA.4417.1 | 4.94  | 5.18  | 0.14 | 0.03 | -1.18 | 0.052129 | 0.02132  | 0.376989 | 0.182772 |
| MmugDNA.4418.1.S1_at   | MmugDNA.4418.1 | 10.22 | 10.46 | 0.37 | 0.19 | -1.18 | 0.754566 | 0.578107 | 0.895522 | 0.7483   |
| MmugDNA.4421.1.S1_at   | MmugDNA.4421.1 | 5.18  | 7.83  | 1.09 | 1.65 | -6.26 | 0.189552 | 0.172282 | 0.552481 | 0.448666 |
| MmugDNA.4423.1.S1_at   | MmugDNA.4423.1 | 5.29  | 5.19  | 0.39 | 0.23 | 1.07  | 0.808988 | 0.937723 | 0.922125 | 0.964687 |
| MmugDNA.4424.1.S1_at   | MmugDNA.4424.1 | 7.18  | 7.35  | 0.25 | 0.14 | -1.13 | 0.307663 | 0.07198  | 0.640082 | 0.314305 |
| MmugDNA.4425.1.S1_at   | MmugDNA.4425.1 | 4.73  | 4.53  | 0.35 | 0.27 | 1.15  | 0.094759 | 0.169054 | 0.452166 | 0.445593 |
| MmugDNA.4426.1.S1_at   | MmugDNA.4426.1 | 3.45  | 3.8   | 1.17 | 0.28 | -1.28 | 0.560046 | 0.587876 | 0.79419  | 0.754542 |
| MmugDNA.4428.1.S1_at   | MmugDNA.4428.1 | 7.44  | 7.11  | 0.17 | 0.73 | 1.25  | 0.186996 | 0.194041 | 0.550106 | 0.469151 |
| MmugDNA.4429.1.S1_at   | MmugDNA.4429.1 | 3.65  | 3.64  | 0.29 | 0.23 | 1     | 0.862844 | 0.241479 | 0.944863 | 0.512148 |
| MmugDNA.443.1.S1_at    | MmugDNA.443.1  | 12.91 | 12.79 | 0.13 | 0.27 | 1.09  | 0.138752 | 0.160245 | 0.505884 | 0.436398 |
| MmugDNA.4431.1.S1_at   | MmugDNA.4431.1 | 6.23  | 6.19  | 0.31 | 0.44 | 1.03  | 0.9727   | 0.991689 | 0.989474 | 0.995392 |
| MmugDNA.4432.1.S1_at   | MmugDNA.4432.1 | 8.24  | 7.32  | 0.33 | 0.55 | 1.89  | 0.19255  | 0.156335 | 0.555814 | 0.43161  |
| MmugDNA.4435.1.S1_at   | MmugDNA.4435.1 | 3.44  | 3.45  | 0.21 | 0.23 | -1    | 0.867386 | 0.874043 | 0.947135 | 0.928462 |
| MmugDNA.4436.1.S1_at   | MmugDNA.4436.1 | 3.56  | 3.58  | 0.03 | 0.17 | -1.02 | 0.437793 | 0.476382 | 0.722586 | 0.682695 |
| MmugDNA.4437.1.S1_at   | MmugDNA.4437.1 | 6.05  | 5.85  | 0.15 | 0.16 | 1.15  | 0.579574 | 0.132287 | 0.804347 | 0.404294 |
| MmugDNA.4439.1.S1_at   | MmugDNA.4439.1 | 4.36  | 4.35  | 0.08 | 0.04 | 1.01  | 0.688546 | 0.030119 | 0.861029 | 0.215399 |
| MmugDNA.444.1.S1_s_at  | MmugDNA.444.1  | 11.67 | 11.55 | 0.15 | 0.19 | 1.09  | 0.83084  | 0.394268 | 0.93155  | 0.626868 |
| MmugDNA.4440.1.S1_at   | MmugDNA.4440.1 | 5.17  | 5.15  | 0.31 | 0.14 | 1.01  | 0.841863 | 0.707728 | 0.936271 | 0.830472 |
| MmugDNA.4441.1.S1_at   | MmugDNA.4441.1 | 2.89  | 3.1   | 0.03 | 0.11 | -1.16 | 0.037506 | 0.075658 | 0.3415   | 0.320125 |
| MmugDNA.4442.1.S1_at   | MmugDNA.4442.1 | 3.31  | 3.28  | 0.16 | 0.06 | 1.02  | 0.67058  | 0.837026 | 0.852435 | 0.906826 |

|                        |                |       |       |      |      |       |          |          |          |          |
|------------------------|----------------|-------|-------|------|------|-------|----------|----------|----------|----------|
| MmugDNA.4443.1.S1_at   | MmugDNA.4443.1 | 7.26  | 8.35  | 0.36 | 1.04 | -2.14 | 0.149285 | 0.149802 | 0.514001 | 0.424394 |
| MmugDNA.4444.1.S1_at   | MmugDNA.4444.1 | 7.46  | 6.75  | 0.19 | 0.86 | 1.63  | 0.252308 | 0.316358 | 0.601282 | 0.569809 |
| MmugDNA.4445.1.S1_at   | MmugDNA.4445.1 | 9.92  | 10.43 | 0.2  | 0.15 | -1.42 | 0.012353 | 0.006082 | 0.240921 | 0.106306 |
| MmugDNA.4446.1.S1_s_at | MmugDNA.4446.1 | 7.88  | 7.19  | 0.2  | 0.24 | 1.61  | 0.010076 | 0.002843 | 0.227625 | 0.078566 |
| MmugDNA.4447.1.S1_at   | MmugDNA.4447.1 | 3.41  | 3.35  | 0.28 | 0.26 | 1.04  | 0.936493 | 0.993989 | 0.975425 | 0.996372 |
| MmugDNA.445.1.S1_at    | MmugDNA.445.1  | 2.9   | 2.9   | 0    | 0.1  | 1     | 0.979232 | 0.780923 | 0.992334 | 0.872893 |
| MmugDNA.4450.1.S1_at   | MmugDNA.4450.1 | 3.38  | 3.96  | 0.21 | 0.53 | -1.49 | 0.302198 | 0.418125 | 0.636913 | 0.642619 |
| MmugDNA.4451.1.S1_at   | MmugDNA.4451.1 | 3.68  | 3.82  | 0.4  | 0.14 | -1.1  | 0.804402 | 0.681611 | 0.919555 | 0.814092 |
| MmugDNA.4452.1.S1_at   | MmugDNA.4452.1 | 8.77  | 8.03  | 0.06 | 0.43 | 1.67  | 0.044696 | 0.029351 | 0.359043 | 0.213228 |
| MmugDNA.4453.1.S1_at   | MmugDNA.4453.1 | 3.43  | 3.39  | 0.08 | 0.09 | 1.03  | 0.620661 | 0.736722 | 0.826084 | 0.847693 |
| MmugDNA.4454.1.S1_at   | MmugDNA.4454.1 | 10.5  | 9.24  | 0.06 | 0.97 | 2.39  | 0.078729 | 0.075812 | 0.428609 | 0.320402 |
| MmugDNA.4455.1.S1_at   | MmugDNA.4455.1 | 13.33 | 13.36 | 0    | 0.08 | -1.02 | 0.49981  | 0.075589 | 0.759397 | 0.32003  |
| MmugDNA.4456.1.S1_at   | MmugDNA.4456.1 | 9.3   | 9.07  | 0.12 | 0.42 | 1.18  | 0.133179 | 0.096593 | 0.499568 | 0.354126 |
| MmugDNA.4457.1.S1_at   | MmugDNA.4457.1 | 3.99  | 4.35  | 0.38 | 0.24 | -1.28 | 0.617762 | 0.605013 | 0.82487  | 0.764917 |
| MmugDNA.4458.1.S1_at   | MmugDNA.4458.1 | 6.66  | 7     | 0.42 | 0.17 | -1.26 | 0.739649 | 0.603234 | 0.888213 | 0.764033 |
| MmugDNA.4459.1.S1_at   | MmugDNA.4459.1 | 6.14  | 5.67  | 0.36 | 0.43 | 1.38  | 0.218991 | 0.55558  | 0.578385 | 0.733957 |
| MmugDNA.446.1.S1_at    | MmugDNA.446.1  | 3.42  | 3.62  | 0.17 | 0.17 | -1.15 | 0.486332 | 0.127536 | 0.751507 | 0.398407 |
| MmugDNA.4460.1.S1_at   | MmugDNA.4460.1 | 6.32  | 5.95  | 0.55 | 0.36 | 1.29  | 0.299536 | 0.398057 | 0.634993 | 0.629148 |
| MmugDNA.4462.1.S1_at   | MmugDNA.4462.1 | 4.96  | 5.53  | 0.41 | 0.72 | -1.48 | 0.41536  | 0.348548 | 0.709495 | 0.592609 |
| MmugDNA.4464.1.S1_at   | MmugDNA.4464.1 | 3.46  | 3.3   | 0.98 | 0.28 | 1.11  | 0.312325 | 0.395887 | 0.644081 | 0.627749 |
| MmugDNA.4465.1.S1_at   | MmugDNA.4465.1 | 4.49  | 4.81  | 0.13 | 0.47 | -1.25 | 0.118552 | 0.124599 | 0.48294  | 0.394995 |
| MmugDNA.4466.1.S1_at   | MmugDNA.4466.1 | 2.74  | 2.76  | 0.25 | 0.15 | -1.02 | 0.851073 | 0.428851 | 0.940172 | 0.650408 |
| MmugDNA.4467.1.S1_at   | MmugDNA.4467.1 | 5.17  | 4.93  | 0.43 | 0.14 | 1.18  | 0.242974 | 0.3814   | 0.594744 | 0.617681 |
| MmugDNA.4468.1.S1_at   | MmugDNA.4468.1 | 4.99  | 4.75  | 0.3  | 0.03 | 1.18  | 0.222545 | 0.015629 | 0.580951 | 0.158437 |
| MmugDNA.4469.1.S1_at   | MmugDNA.4469.1 | 4.17  | 3.96  | 0.22 | 0.1  | 1.16  | 0.62531  | 0.640535 | 0.828732 | 0.78899  |
| MmugDNA.447.1.S1_at    | MmugDNA.447.1  | 10.98 | 11.64 | 0.1  | 0.22 | -1.57 | 0.011782 | 0.003683 | 0.237691 | 0.086591 |
| MmugDNA.4470.1.S1_at   | MmugDNA.4470.1 | 3.5   | 3.53  | 0.03 | 0.15 | -1.02 | 0.905214 | 0.650601 | 0.962162 | 0.795663 |
| MmugDNA.4471.1.S1_at   | MmugDNA.4471.1 | 4.07  | 3.99  | 0.03 | 0    | 1.06  | 0.007525 | 0.248128 | 0.209134 | 0.517567 |
| MmugDNA.4472.1.S1_at   | MmugDNA.4472.1 | 4.78  | 4.77  | 0.11 | 0.13 | 1.01  | 0.283654 | 0.39967  | 0.623679 | 0.629933 |
| MmugDNA.4474.1.S1_at   | MmugDNA.4474.1 | 4.09  | 5.11  | 1.09 | 0.34 | -2.03 | 0.591344 | 0.488125 | 0.810384 | 0.690902 |
| MmugDNA.4475.1.S1_at   | MmugDNA.4475.1 | 5.49  | 5.6   | 0.54 | 0.13 | -1.08 | 0.715166 | 0.832087 | 0.875005 | 0.903658 |
| MmugDNA.4476.1.S1_at   | MmugDNA.4476.1 | 6.07  | 7.04  | 0.43 | 0.24 | -1.96 | 0.041045 | 0.011704 | 0.350537 | 0.140174 |
| MmugDNA.4477.1.S1_at   | MmugDNA.4477.1 | 11.22 | 9.27  | 1.75 | 0.88 | 3.85  | 0.435539 | 0.606214 | 0.721273 | 0.765727 |
| MmugDNA.448.1.S1_at    | MmugDNA.448.1  | 7.24  | 7.44  | 0.21 | 0.2  | -1.16 | 0.398609 | 0.000722 | 0.698762 | 0.044531 |
| MmugDNA.4480.1.S1_at   | MmugDNA.4480.1 | 4.66  | 4.58  | 0.14 | 0.14 | 1.06  | 0.997251 | 0.939821 | 0.99892  | 0.965805 |
| MmugDNA.4481.1.S1_at   | MmugDNA.4481.1 | 11.37 | 12.45 | 0.8  | 1.39 | -2.12 | 0.556726 | 0.222526 | 0.792039 | 0.495591 |
| MmugDNA.4482.1.S1_at   | MmugDNA.4482.1 | 7.92  | 6.16  | 0.29 | 0.55 | 3.39  | 0.010497 | 0.003275 | 0.229964 | 0.082366 |
| MmugDNA.4483.1.S1_at   | MmugDNA.4483.1 | 4.31  | 4.67  | 0.14 | 0.2  | -1.29 | 0.211791 | 0.170117 | 0.572347 | 0.446868 |
| MmugDNA.4484.1.S1_at   | MmugDNA.4484.1 | 8.96  | 8.09  | 0.33 | 0.26 | 1.83  | 0.021374 | 0.021666 | 0.282524 | 0.184333 |
| MmugDNA.4485.1.S1_at   | MmugDNA.4485.1 | 9.88  | 10.19 | 0.13 | 0.35 | -1.25 | 0.213086 | 0.307828 | 0.573447 | 0.56397  |
| MmugDNA.4486.1.S1_at   | MmugDNA.4486.1 | 4.42  | 4.62  | 0.09 | 0.12 | -1.15 | 0.309105 | 0.118155 | 0.641346 | 0.386071 |

|                         |                 |       |       |      |      |       |          |          |          |          |
|-------------------------|-----------------|-------|-------|------|------|-------|----------|----------|----------|----------|
| MmugDNA.4488.1.S1_at    | MmugDNA.4488.1  | 10.23 | 11.03 | 0.17 | 0.33 | -1.74 | 0.031148 | 0.024152 | 0.32069  | 0.194572 |
| MmugDNA.4489.1.S1_at    | MmugDNA.4489.1  | 5.31  | 5.3   | 0.13 | 0.04 | 1.01  | 0.727327 | 0.232054 | 0.881258 | 0.503781 |
| MmugDNA.449.1.S1_at     | MmugDNA.449.1   | 5.98  | 6.04  | 0.09 | 0.09 | -1.05 | 0.735847 | 0.07176  | 0.886439 | 0.314014 |
| MmugDNA.4490.1.S1_at    | MmugDNA.4490.1  | 3.91  | 4.24  | 0.15 | 0.14 | -1.26 | 0.02818  | 0.020207 | 0.310041 | 0.178561 |
| MmugDNA.4490.1.S1_x_at  | MmugDNA.4490.1  | 3.71  | 3.87  | 0.14 | 0.1  | -1.12 | 0.082094 | 0.04545  | 0.433268 | 0.2575   |
| MmugDNA.4491.1.S1_s_at  | MmugDNA.4491.1  | 11.35 | 11.2  | 0.18 | 0.25 | 1.11  | 0.410814 | 0.214785 | 0.70666  | 0.488643 |
| MmugDNA.4492.1.S1_at    | MmugDNA.4492.1  | 5.25  | 5.3   | 0.05 | 0.07 | -1.04 | 0.136217 | 0.144444 | 0.503091 | 0.418323 |
| MmugDNA.4493.1.S1_at    | MmugDNA.4493.1  | 2.84  | 3.03  | 0.05 | 0.13 | -1.15 | 0.077249 | 0.223109 | 0.426761 | 0.49588  |
| MmugDNA.4494.1.S1_at    | MmugDNA.4494.1  | 5.31  | 7.71  | 1.81 | 0.15 | -5.3  | 0.282439 | 0.32338  | 0.622852 | 0.574453 |
| MmugDNA.4495.1.S1_at    | MmugDNA.4495.1  | 3.26  | 3.25  | 0.06 | 0.22 | 1.01  | 0.847941 | 0.788405 | 0.939068 | 0.877619 |
| MmugDNA.4497.1.S1_at    | MmugDNA.4497.1  | 3.75  | 3.5   | 0.7  | 0.33 | 1.19  | 0.621793 | 0.662061 | 0.827008 | 0.802105 |
| MmugDNA.4498.1.S1_at    | MmugDNA.4498.1  | 3.58  | 3.46  | 0.48 | 0.04 | 1.09  | 0.524482 | 0.615388 | 0.773192 | 0.771962 |
| MmugDNA.4499.1.S1_at    | MmugDNA.4499.1  | 7.73  | 7.49  | 0.19 | 0.86 | 1.17  | 0.589849 | 0.189354 | 0.809648 | 0.465092 |
| MmugDNA.450.1.S1_at     | MmugDNA.450.1   | 6.96  | 7.03  | 0.11 | 0.07 | -1.05 | 0.933089 | 0.313905 | 0.973979 | 0.568094 |
| MmugDNA.4500.1.S1_at    | MmugDNA.4500.1  | 4.25  | 4.43  | 0.32 | 0.11 | -1.13 | 0.722285 | 0.070544 | 0.878644 | 0.311777 |
| MmugDNA.4502.1.S1_at    | MmugDNA.4502.1  | 3.93  | 3.88  | 0.26 | 0.15 | 1.03  | 0.25726  | 0.386903 | 0.60459  | 0.621935 |
| MmugDNA.4503.1.S1_at    | MmugDNA.4503.1  | 5.92  | 5.87  | 0.12 | 0.1  | 1.03  | 0.500233 | 0.032532 | 0.75945  | 0.223378 |
| MmugDNA.4504.1.S1_at    | MmugDNA.4504.1  | 8.06  | 9.67  | 0.52 | 0.33 | -3.04 | 0.017472 | 0.009251 | 0.267445 | 0.126966 |
| MmugDNA.4505.1.S1_at    | MmugDNA.4505.1  | 6.61  | 6.54  | 0.48 | 0.8  | 1.05  | 0.515275 | 0.455697 | 0.767346 | 0.669654 |
| MmugDNA.4506.1.S1_at    | MmugDNA.4506.1  | 6.16  | 6.27  | 0.19 | 0.1  | -1.07 | 0.981789 | 0.288094 | 0.993402 | 0.549319 |
| MmugDNA.4507.1.S1_at    | MmugDNA.4507.1  | 8.93  | 8.67  | 0.06 | 0.35 | 1.19  | 0.934844 | 0.788237 | 0.974802 | 0.877514 |
| MmugDNA.4508.1.S1_at    | MmugDNA.4508.1  | 12.56 | 12.02 | 0.04 | 0.31 | 1.45  | 0.048517 | 0.022965 | 0.368992 | 0.189548 |
| MmugDNA.4509.1.S1_at    | MmugDNA.4509.1  | 8.47  | 8.08  | 0.25 | 0.54 | 1.31  | 0.440832 | 0.455776 | 0.724535 | 0.669659 |
| MmugDNA.451.1.S1_at     | MmugDNA.451.1   | 4.55  | 3.94  | 1.1  | 0.18 | 1.53  | 0.328565 | 0.297348 | 0.654375 | 0.556071 |
| MmugDNA.4511.1.S1_at    | MmugDNA.4511.1  | 10.03 | 10.65 | 0.37 | 0.07 | -1.53 | 0.080733 | 0.118653 | 0.431239 | 0.386673 |
| MmugDNA.4512.1.S1_at    | MmugDNA.4512.1  | 7.67  | 8.3   | 0.11 | 0.36 | -1.55 | 0.053246 | 0.036099 | 0.379848 | 0.234417 |
| MmugDNA.4513.1.S1_at    | MmugDNA.4513.1  | 7.21  | 7.38  | 0.03 | 0.12 | -1.13 | 0.045675 | 0.013418 | 0.361416 | 0.148424 |
| MmugDNA.4514.1.S1_at    | MmugDNA.4514.1  | 4.54  | 4.47  | 0.03 | 0.06 | 1.05  | 0.114003 | 0.150113 | 0.47744  | 0.42471  |
| MmugDNA.4516.1.S1_at    | MmugDNA.4516.1  | 7.17  | 7.1   | 0.36 | 0.03 | 1.05  | 0.433327 | 0.024679 | 0.719904 | 0.196662 |
| MmugDNA.4517.1.S1_s_at  | MmugDNA.4517.1  | 9.55  | 9.83  | 0.51 | 0.41 | -1.21 | 0.589289 | 0.732959 | 0.809218 | 0.84547  |
| MmugDNA.4518.1.S1_at    | MmugDNA.4518.1  | 3.79  | 3.8   | 0.34 | 0.03 | -1.01 | 0.952454 | 0.967663 | 0.982218 | 0.982117 |
| MmugDNA.4519.1.S1_at    | MmugDNA.4519.1  | 8.29  | 8.15  | 0.05 | 0.18 | 1.1   | 0.180766 | 0.160541 | 0.545228 | 0.436708 |
| MmugDNA.4520.1.S1_at    | MmugDNA.4520.1  | 5.06  | 5.06  | 0.51 | 0.24 | -1    | 0.769091 | 0.753721 | 0.902929 | 0.856634 |
| MmugDNA.4521.1.S1_at    | MmugDNA.4521.1  | 8.22  | 8.14  | 0.14 | 0.54 | 1.06  | 0.566737 | 0.658913 | 0.797715 | 0.800473 |
| MmugDNA.4522.1.S1_at    | MmugDNA.4522.1  | 3.03  | 3.12  | 0.14 | 0.09 | -1.06 | 0.447988 | 0.743616 | 0.729382 | 0.851428 |
| MmugDNA.4523.1.S1_at    | MmugDNA.4523.1  | 10.12 | 9.73  | 0.26 | 0.3  | 1.3   | 0.077902 | 0.040986 | 0.42801  | 0.247202 |
| MmugDNA.29813.1.S1_at   | MmugDNA.29813.1 | 11.41 | 10.84 | 0.32 | 0.2  | 1.49  | 0.052048 | 0.107745 | 0.376952 | 0.370816 |
| MmugDNA.29813.1.S1_s_at | MmugDNA.29813.1 | 11.07 | 10.71 | 0.24 | 0.29 | 1.29  | 0.071105 | 0.090047 | 0.414673 | 0.344402 |
| MmugDNA.4524.1.S1_at    | MmugDNA.4524.1  | 8.05  | 7.57  | 0.03 | 0.42 | 1.4   | 0.390353 | 0.23022  | 0.693554 | 0.502084 |
| MmugDNA.4525.1.S1_at    | MmugDNA.4525.1  | 12.09 | 11.9  | 0.02 | 0.23 | 1.14  | 0.224308 | 0.082022 | 0.582647 | 0.330729 |
| MmugDNA.4526.1.S1_at    | MmugDNA.4526.1  | 7.96  | 7.81  | 0.11 | 0.41 | 1.11  | 0.654773 | 0.021803 | 0.844752 | 0.184765 |



|                      |                |       |       |      |      |       |          |          |          |          |
|----------------------|----------------|-------|-------|------|------|-------|----------|----------|----------|----------|
| MmugDNA.4527.1.S1_at | MmugDNA.4527.1 | 5.96  | 6.33  | 0.19 | 0.48 | -1.29 | 0.4927   | 0.653493 | 0.755881 | 0.797464 |
| MmugDNA.4528.1.S1_at | MmugDNA.4528.1 | 5.06  | 4.88  | 0.15 | 0.37 | 1.13  | 0.536122 | 0.353671 | 0.779378 | 0.596752 |
| MmugDNA.4529.1.S1_at | MmugDNA.4529.1 | 4.1   | 3.83  | 0.29 | 0.22 | 1.21  | 0.130875 | 0.103918 | 0.497198 | 0.36459  |
| MmugDNA.453.1.S1_at  | MmugDNA.453.1  | 11.27 | 10.61 | 0.7  | 0.92 | 1.58  | 0.33928  | 0.516835 | 0.661232 | 0.709251 |
| MmugDNA.4530.1.S1_at | MmugDNA.4530.1 | 4.21  | 4.18  | 0.07 | 0.23 | 1.02  | 0.685426 | 0.263293 | 0.859099 | 0.529561 |
| MmugDNA.4532.1.S1_at | MmugDNA.4532.1 | 12.06 | 11.74 | 0.18 | 0.42 | 1.25  | 0.321693 | 0.392294 | 0.650336 | 0.625694 |
| MmugDNA.4533.1.S1_at | MmugDNA.4533.1 | 7.17  | 6.67  | 0.08 | 0.45 | 1.42  | 0.222622 | 0.291345 | 0.581065 | 0.551803 |
| MmugDNA.4534.1.S1_at | MmugDNA.4534.1 | 10.61 | 10.15 | 0.11 | 0.58 | 1.37  | 0.399225 | 0.339308 | 0.699189 | 0.585982 |
| MmugDNA.4535.1.S1_at | MmugDNA.4535.1 | 5.72  | 5.89  | 0.7  | 0.79 | -1.12 | 0.48224  | 0.652722 | 0.749398 | 0.796982 |
| MmugDNA.4536.1.S1_at | MmugDNA.4536.1 | 6.59  | 6.69  | 0.06 | 0.13 | -1.07 | 0.901751 | 0.41425  | 0.960796 | 0.640163 |
| MmugDNA.4537.1.S1_at | MmugDNA.4537.1 | 7.96  | 7.39  | 0.24 | 0.67 | 1.48  | 0.26492  | 0.240894 | 0.610692 | 0.511584 |
| MmugDNA.4538.1.S1_at | MmugDNA.4538.1 | 10.15 | 9.72  | 0.32 | 0.23 | 1.35  | 0.421091 | 0.61858  | 0.712872 | 0.774158 |
| MmugDNA.4539.1.S1_at | MmugDNA.4539.1 | 6.94  | 6.78  | 0.3  | 0.02 | 1.12  | 0.932237 | 0.989561 | 0.973774 | 0.994055 |
| MmugDNA.454.1.S1_at  | MmugDNA.454.1  | 10.21 | 11.44 | 0.3  | 0.35 | -2.35 | 0.005697 | 0.002455 | 0.191943 | 0.073314 |
| MmugDNA.4540.1.S1_at | MmugDNA.4540.1 | 11.85 | 11.3  | 0.18 | 0.02 | 1.47  | 0.003545 | 0.001151 | 0.179515 | 0.053529 |
| MmugDNA.4541.1.S1_at | MmugDNA.4541.1 | 4.34  | 3.99  | 0.6  | 1.2  | 1.28  | 0.999001 | 0.859518 | 0.999701 | 0.919992 |
| MmugDNA.4542.1.S1_at | MmugDNA.4542.1 | 2.93  | 3.08  | 0.11 | 0.03 | -1.11 | 0.140812 | 0.060241 | 0.508448 | 0.292091 |
| MmugDNA.4543.1.S1_at | MmugDNA.4543.1 | 9.86  | 9.31  | 0.14 | 0.21 | 1.46  | 0.019023 | 0.012898 | 0.272726 | 0.146225 |
| MmugDNA.4544.1.S1_at | MmugDNA.4544.1 | 5.76  | 5.62  | 0.14 | 0.35 | 1.11  | 0.745525 | 0.379734 | 0.891131 | 0.616543 |
| MmugDNA.4545.1.S1_at | MmugDNA.4545.1 | 9.83  | 9.15  | 0.04 | 0.18 | 1.6   | 0.004841 | 0.000592 | 0.185076 | 0.041912 |
| MmugDNA.4546.1.S1_at | MmugDNA.4546.1 | 6.13  | 6.21  | 0.12 | 0.1  | -1.06 | 0.153974 | 0.185711 | 0.518553 | 0.46163  |
| MmugDNA.4548.1.S1_at | MmugDNA.4548.1 | 5.31  | 4.99  | 0.33 | 0.17 | 1.25  | 0.2162   | 0.311457 | 0.575962 | 0.566456 |
| MmugDNA.4549.1.S1_at | MmugDNA.4549.1 | 3.17  | 3.2   | 0.23 | 0.22 | -1.02 | 0.994088 | 0.605045 | 0.997979 | 0.764917 |
| MmugDNA.455.1.S1_at  | MmugDNA.455.1  | 6.11  | 5.94  | 0.17 | 0.26 | 1.13  | 0.398141 | 0.645879 | 0.698541 | 0.792632 |
| MmugDNA.4550.1.S1_at | MmugDNA.4550.1 | 5.5   | 4.92  | 0.34 | 0.04 | 1.49  | 0.150606 | 0.103868 | 0.515411 | 0.364519 |
| MmugDNA.4551.1.S1_at | MmugDNA.4551.1 | 2.7   | 2.75  | 0.06 | 0.11 | -1.04 | 0.787147 | 0.272249 | 0.911476 | 0.536992 |
| MmugDNA.4553.1.S1_at | MmugDNA.4553.1 | 6.13  | 5.94  | 0.21 | 0.28 | 1.14  | 0.301198 | 0.395678 | 0.636299 | 0.627623 |
| MmugDNA.4555.1.S1_at | MmugDNA.4555.1 | 4.64  | 4.71  | 0.01 | 0.06 | -1.05 | 0.076814 | 0.004622 | 0.425685 | 0.094974 |
| MmugDNA.4556.1.S1_at | MmugDNA.4556.1 | 7.49  | 6.62  | 0.6  | 1.12 | 1.82  | 0.177484 | 0.12973  | 0.541506 | 0.401362 |
| MmugDNA.4557.1.S1_at | MmugDNA.4557.1 | 8.28  | 7.66  | 0.41 | 0.22 | 1.53  | 0.076303 | 0.219511 | 0.42474  | 0.493168 |
| MmugDNA.4558.1.S1_at | MmugDNA.4558.1 | 8.71  | 8.49  | 0.16 | 0.81 | 1.16  | 0.709043 | 0.449898 | 0.872239 | 0.665343 |
| MmugDNA.4559.1.S1_at | MmugDNA.4559.1 | 5.21  | 7.46  | 1.53 | 1.06 | -4.76 | 0.238913 | 0.29107  | 0.59202  | 0.551574 |
| MmugDNA.4560.1.S1_at | MmugDNA.4560.1 | 4.42  | 4.95  | 0.02 | 0.15 | -1.44 | 0.004137 | 0.004065 | 0.181739 | 0.090288 |
| MmugDNA.4561.1.S1_at | MmugDNA.4561.1 | 4.42  | 4.39  | 0.23 | 0.17 | 1.02  | 0.538226 | 0.395336 | 0.780442 | 0.627404 |
| MmugDNA.4563.1.S1_at | MmugDNA.4563.1 | 6.15  | 6.33  | 0.09 | 0.04 | -1.13 | 0.009818 | 0.00733  | 0.226445 | 0.115015 |
| MmugDNA.4564.1.S1_at | MmugDNA.4564.1 | 8.15  | 7.25  | 0.41 | 0.35 | 1.87  | 0.052903 | 0.136325 | 0.378593 | 0.408746 |
| MmugDNA.4565.1.S1_at | MmugDNA.4565.1 | 5.5   | 5.49  | 0.33 | 0.18 | 1.01  | 0.725546 | 0.67964  | 0.88033  | 0.812969 |
| MmugDNA.4566.1.S1_at | MmugDNA.4566.1 | 7.25  | 8.17  | 0.72 | 0.75 | -1.9  | 0.528904 | 0.676453 | 0.775764 | 0.81095  |
| MmugDNA.4568.1.S1_at | MmugDNA.4568.1 | 3.43  | 3.24  | 1.03 | 0.43 | 1.14  | 0.451253 | 0.432652 | 0.731538 | 0.653054 |
| MmugDNA.4569.1.S1_at | MmugDNA.4569.1 | 11.15 | 10.57 | 0.05 | 0.24 | 1.5   | 0.016144 | 0.008567 | 0.262921 | 0.122809 |
| MmugDNA.4570.1.S1_at | MmugDNA.4570.1 | 4.8   | 4.79  | 0.17 | 0.05 | 1.01  | 0.889608 | 0.745038 | 0.955822 | 0.852262 |

|                         |                 |       |       |      |      |       |          |          |          |          |
|-------------------------|-----------------|-------|-------|------|------|-------|----------|----------|----------|----------|
| MmugDNA.4571.1.S1_at    | MmugDNA.4571.1  | 6.11  | 5.97  | 0.06 | 0.14 | 1.1   | 0.770388 | 0.028939 | 0.90333  | 0.21198  |
| MmugDNA.4572.1.S1_at    | MmugDNA.4572.1  | 6.85  | 5.88  | 0.34 | 0.09 | 1.96  | 0.008885 | 0.002997 | 0.221598 | 0.079958 |
| MmugDNA.4575.1.S1_at    | MmugDNA.4575.1  | 4.04  | 4.61  | 0.49 | 0.54 | -1.48 | 0.188678 | 0.124922 | 0.551623 | 0.395313 |
| MmugDNA.4577.1.S1_at    | MmugDNA.4577.1  | 5.97  | 5.96  | 0.02 | 0.23 | 1.01  | 0.464176 | 0.206928 | 0.739138 | 0.481052 |
| MmugDNA.4579.1.S1_at    | MmugDNA.4579.1  | 3.77  | 3.76  | 0.11 | 0.15 | 1.01  | 0.341595 | 0.42026  | 0.662652 | 0.64407  |
| MmugDNA.458.1.S1_at     | MmugDNA.458.1   | 5.77  | 7.35  | 0.59 | 0.75 | -2.99 | 0.017053 | 0.00885  | 0.266622 | 0.124493 |
| MmugDNA.4580.1.S1_at    | MmugDNA.4580.1  | 6.45  | 6.53  | 0.32 | 0.57 | -1.06 | 0.792366 | 0.883849 | 0.913837 | 0.933709 |
| MmugDNA.4582.1.S1_at    | MmugDNA.4582.1  | 5.18  | 5.18  | 1.08 | 0.62 | -1    | 0.956519 | 0.993607 | 0.98359  | 0.996218 |
| MmugDNA.4585.1.S1_at    | MmugDNA.4585.1  | 6.05  | 5.29  | 0.92 | 0.46 | 1.7   | 0.251437 | 0.360203 | 0.600805 | 0.601275 |
| MmugDNA.4586.1.S1_at    | MmugDNA.4586.1  | 12.52 | 12.01 | 0.08 | 0.18 | 1.43  | 0.016053 | 0.008044 | 0.262409 | 0.119181 |
| MmugDNA.4587.1.S1_at    | MmugDNA.4587.1  | 5.62  | 5.84  | 0.08 | 0.18 | -1.16 | 0.385467 | 0.186852 | 0.69063  | 0.462707 |
| MmugDNA.4588.1.S1_at    | MmugDNA.4588.1  | 8.34  | 7.78  | 0.21 | 0.14 | 1.48  | 0.015513 | 0.01796  | 0.259093 | 0.169043 |
| MmugDNA.459.1.S1_at     | MmugDNA.459.1   | 3.92  | 3.87  | 0.21 | 0.18 | 1.04  | 0.648385 | 0.81755  | 0.841852 | 0.894746 |
| MmugDNA.4590.1.S1_at    | MmugDNA.4590.1  | 3.94  | 4.04  | 0.05 | 0.11 | -1.08 | 0.117884 | 0.484453 | 0.482063 | 0.688478 |
| MmugDNA.4591.1.S1_at    | MmugDNA.4591.1  | 5.45  | 5.41  | 0.4  | 0.54 | 1.03  | 0.80975  | 0.207096 | 0.922372 | 0.481189 |
| MmugDNA.4593.1.S1_at    | MmugDNA.4593.1  | 8.68  | 8.16  | 0.7  | 0.4  | 1.44  | 0.363349 | 0.444685 | 0.676615 | 0.662072 |
| MmugDNA.29515.1.S1_at   | MmugDNA.29515.1 | 8.83  | 7.98  | 0.11 | 0.39 | 1.8   | 0.016619 | 0.008769 | 0.26475  | 0.124009 |
| MmugDNA.29515.1.S1_s_at | MmugDNA.29515.1 | 10.19 | 9.35  | 0.18 | 0.33 | 1.79  | 0.008522 | 0.003643 | 0.219225 | 0.086518 |
| MmugDNA.4595.1.S1_at    | MmugDNA.4595.1  | 6.47  | 6.5   | 0.21 | 0.19 | -1.02 | 0.918536 | 0.971559 | 0.96831  | 0.984558 |
| MmugDNA.4596.1.S1_at    | MmugDNA.4596.1  | 3.26  | 3.41  | 0.04 | 0.18 | -1.11 | 0.255058 | 0.200117 | 0.603072 | 0.474603 |
| MmugDNA.4597.1.S1_at    | MmugDNA.4597.1  | 12.34 | 12.14 | 0.18 | 0.06 | 1.15  | 0.054362 | 0.002653 | 0.381851 | 0.076147 |
| MmugDNA.4598.1.S1_at    | MmugDNA.4598.1  | 4.69  | 4.71  | 0.13 | 0.1  | -1.01 | 0.742791 | 0.242156 | 0.89004  | 0.512652 |
| MmugDNA.4599.1.S1_at    | MmugDNA.4599.1  | 6.26  | 5.2   | 0.26 | 1.16 | 2.09  | 0.169923 | 0.240389 | 0.534129 | 0.510966 |
| MmugDNA.46.1.S1_at      | MmugDNA.46.1    | 9.92  | 10    | 0.29 | 0.32 | -1.05 | 0.616844 | 0.028423 | 0.824344 | 0.210385 |
| MmugDNA.460.1.S1_at     | MmugDNA.460.1   | 5.98  | 6.37  | 0.16 | 0.1  | -1.31 | 0.038558 | 0.07529  | 0.344633 | 0.319441 |
| MmugDNA.4600.1.S1_at    | MmugDNA.4600.1  | 3.64  | 3.96  | 0.14 | 0.13 | -1.24 | 0.154826 | 0.2259   | 0.51941  | 0.498298 |
| MmugDNA.4601.1.S1_at    | MmugDNA.4601.1  | 6.06  | 5.35  | 0.14 | 1.11 | 1.64  | 0.81917  | 0.936016 | 0.926528 | 0.963932 |
| MmugDNA.4602.1.S1_at    | MmugDNA.4602.1  | 5.76  | 6.1   | 0.23 | 0.56 | -1.26 | 0.356722 | 0.168827 | 0.671706 | 0.445458 |
| MmugDNA.4603.1.S1_at    | MmugDNA.4603.1  | 7.45  | 5.75  | 0.41 | 0.59 | 3.25  | 0.017761 | 0.01212  | 0.267882 | 0.142442 |
| MmugDNA.4604.1.S1_at    | MmugDNA.4604.1  | 6.01  | 6.05  | 0.03 | 0.37 | -1.03 | 0.334983 | 0.38983  | 0.658715 | 0.623878 |
| MmugDNA.4605.1.S1_at    | MmugDNA.4605.1  | 4.43  | 5.66  | 0.2  | 0.71 | -2.34 | 0.049545 | 0.075112 | 0.371515 | 0.319301 |
| MmugDNA.4606.1.S1_at    | MmugDNA.4606.1  | 6.07  | 5.74  | 0.15 | 0.47 | 1.26  | 0.944317 | 0.799633 | 0.978764 | 0.884762 |
| MmugDNA.4607.1.S1_at    | MmugDNA.4607.1  | 9.09  | 8.75  | 0.26 | 0.4  | 1.26  | 0.525803 | 0.732152 | 0.773937 | 0.844852 |
| MmugDNA.4608.1.S1_at    | MmugDNA.4608.1  | 5.49  | 5.06  | 0.3  | 0.03 | 1.35  | 0.063022 | 0.025606 | 0.399858 | 0.200784 |
| MmugDNA.461.1.S1_at     | MmugDNA.461.1   | 9.96  | 10.94 | 0.58 | 0.48 | -1.98 | 0.077458 | 0.080627 | 0.427142 | 0.328427 |
| MmugDNA.4610.1.S1_at    | MmugDNA.4610.1  | 3.13  | 3.13  | 0.06 | 0.24 | 1     | 0.375906 | 0.2609   | 0.684819 | 0.527351 |
| MmugDNA.4611.1.S1_at    | MmugDNA.4611.1  | 5.87  | 5.77  | 0.59 | 0.23 | 1.07  | 0.299643 | 0.269915 | 0.635021 | 0.535204 |
| MmugDNA.4612.1.S1_at    | MmugDNA.4612.1  | 8.35  | 6.51  | 0.64 | 0.43 | 3.58  | 0.029381 | 0.017725 | 0.313903 | 0.168367 |
| MmugDNA.4613.1.S1_at    | MmugDNA.4613.1  | 12.88 | 12.88 | 0.08 | 0.02 | 1     | 0.806297 | 0.738397 | 0.920604 | 0.848281 |
| MmugDNA.4614.1.S1_at    | MmugDNA.4614.1  | 11.88 | 11.98 | 0.1  | 0.29 | -1.07 | 0.199433 | 0.175302 | 0.562446 | 0.452064 |
| MmugDNA.4616.1.S1_at    | MmugDNA.4616.1  | 10.38 | 10.7  | 0.23 | 0.39 | -1.24 | 0.211346 | 0.129979 | 0.572137 | 0.401549 |

|                      |                |       |       |      |      |       |          |          |          |          |
|----------------------|----------------|-------|-------|------|------|-------|----------|----------|----------|----------|
| MmugDNA.4617.1.S1_at | MmugDNA.4617.1 | 3.95  | 3.91  | 0.05 | 0.18 | 1.03  | 0.266881 | 0.332862 | 0.612291 | 0.581266 |
| MmugDNA.4619.1.S1_at | MmugDNA.4619.1 | 3.54  | 3.21  | 0.45 | 0.11 | 1.26  | 0.112165 | 0.126109 | 0.474673 | 0.39672  |
| MmugDNA.462.1.S1_at  | MmugDNA.462.1  | 7.29  | 7.91  | 1.11 | 0.52 | -1.54 | 0.837484 | 0.936075 | 0.934307 | 0.963958 |
| MmugDNA.4620.1.S1_at | MmugDNA.4620.1 | 4.05  | 4.14  | 0.09 | 0.14 | -1.07 | 0.148854 | 0.132972 | 0.51391  | 0.404626 |
| MmugDNA.4621.1.S1_at | MmugDNA.4621.1 | 11.84 | 12.04 | 0.26 | 0.27 | -1.14 | 0.49619  | 0.469109 | 0.757473 | 0.678117 |
| MmugDNA.4623.1.S1_at | MmugDNA.4623.1 | 4.04  | 3.94  | 0.24 | 0.13 | 1.07  | 0.749273 | 0.907684 | 0.892627 | 0.947753 |
| MmugDNA.4624.1.S1_at | MmugDNA.4624.1 | 6.01  | 6.1   | 0.17 | 0.15 | -1.07 | 0.339463 | 0.514339 | 0.661307 | 0.707645 |
| MmugDNA.4625.1.S1_at | MmugDNA.4625.1 | 4.69  | 4.48  | 0.13 | 0.1  | 1.16  | 0.260007 | 0.115751 | 0.606878 | 0.382814 |
| MmugDNA.4626.1.S1_at | MmugDNA.4626.1 | 7.96  | 7.75  | 0.07 | 0.46 | 1.16  | 0.52217  | 0.630916 | 0.771874 | 0.782539 |
| MmugDNA.4627.1.S1_at | MmugDNA.4627.1 | 5.31  | 5.14  | 0.28 | 0.17 | 1.12  | 0.172667 | 0.34149  | 0.536277 | 0.587676 |
| MmugDNA.4628.1.S1_at | MmugDNA.4628.1 | 4.73  | 3.92  | 0.67 | 1.37 | 1.75  | 0.99415  | 0.647922 | 0.997982 | 0.793872 |
| MmugDNA.4629.1.S1_at | MmugDNA.4629.1 | 4.33  | 4.49  | 0.11 | 0.17 | -1.11 | 0.10127  | 0.019174 | 0.461009 | 0.1742   |
| MmugDNA.4631.1.S1_at | MmugDNA.4631.1 | 5.58  | 4.53  | 1.03 | 0.1  | 2.07  | 0.078342 | 0.038581 | 0.428302 | 0.241429 |
| MmugDNA.4632.1.S1_at | MmugDNA.4632.1 | 9.58  | 9.92  | 0.06 | 0.2  | -1.26 | 0.05245  | 0.041704 | 0.377659 | 0.24887  |
| MmugDNA.4633.1.S1_at | MmugDNA.4633.1 | 7.55  | 6.79  | 0.39 | 0.18 | 1.69  | 0.089791 | 0.097137 | 0.445334 | 0.354735 |
| MmugDNA.4634.1.S1_at | MmugDNA.4634.1 | 3.24  | 3.36  | 0.07 | 0.04 | -1.09 | 0.069827 | 0.16636  | 0.412907 | 0.442884 |
| MmugDNA.4635.1.S1_at | MmugDNA.4635.1 | 4.95  | 4.41  | 1.07 | 0.18 | 1.45  | 0.288867 | 0.195508 | 0.626809 | 0.470351 |
| MmugDNA.4638.1.S1_at | MmugDNA.4638.1 | 6.27  | 7.04  | 0.82 | 1.14 | -1.7  | 0.701265 | 0.672443 | 0.868002 | 0.808568 |
| MmugDNA.4639.1.S1_at | MmugDNA.4639.1 | 2.78  | 2.81  | 0.09 | 0.12 | -1.02 | 0.993356 | 0.132328 | 0.997754 | 0.404294 |
| MmugDNA.464.1.S1_at  | MmugDNA.464.1  | 9.21  | 8.85  | 0.23 | 0.22 | 1.28  | 0.123914 | 0.162656 | 0.489589 | 0.43876  |
| MmugDNA.4640.1.S1_at | MmugDNA.4640.1 | 6.5   | 7     | 0.17 | 0.61 | -1.42 | 0.328594 | 0.400832 | 0.654397 | 0.630658 |
| MmugDNA.4641.1.S1_at | MmugDNA.4641.1 | 5.08  | 5.07  | 0.06 | 0.29 | 1     | 0.774004 | 0.770194 | 0.904999 | 0.86656  |
| MmugDNA.4642.1.S1_at | MmugDNA.4642.1 | 5.47  | 5.92  | 0.07 | 0.05 | -1.37 | 0.000999 | 0.000505 | 0.139813 | 0.039158 |
| MmugDNA.4643.1.S1_at | MmugDNA.4643.1 | 7.65  | 6.97  | 0.62 | 0.37 | 1.6   | 0.458378 | 0.49352  | 0.735428 | 0.694195 |
| MmugDNA.4644.1.S1_at | MmugDNA.4644.1 | 3.33  | 3.47  | 0.05 | 0.04 | -1.1  | 0.01123  | 0.059515 | 0.234875 | 0.290548 |
| MmugDNA.4648.1.S1_at | MmugDNA.4648.1 | 4.12  | 3.22  | 0.69 | 0.3  | 1.87  | 0.299756 | 0.3759   | 0.635078 | 0.613749 |
| MmugDNA.4649.1.S1_at | MmugDNA.4649.1 | 9.05  | 7.44  | 1.44 | 1.05 | 3.06  | 0.414731 | 0.138675 | 0.709338 | 0.411742 |
| MmugDNA.465.1.S1_at  | MmugDNA.465.1  | 4.54  | 5.1   | 0.35 | 0.58 | -1.48 | 0.221918 | 0.161613 | 0.580625 | 0.437771 |
| MmugDNA.4650.1.S1_at | MmugDNA.4650.1 | 8.79  | 7.87  | 0.87 | 2.02 | 1.89  | 0.795901 | 0.848649 | 0.915338 | 0.914061 |
| MmugDNA.4652.1.S1_at | MmugDNA.4652.1 | 10.51 | 9.62  | 0.17 | 0.78 | 1.86  | 0.30907  | 0.386399 | 0.641346 | 0.621593 |
| MmugDNA.4653.1.S1_at | MmugDNA.4653.1 | 4.16  | 3.92  | 0.42 | 0.04 | 1.18  | 0.380207 | 0.522493 | 0.68724  | 0.713164 |
| MmugDNA.4654.1.S1_at | MmugDNA.4654.1 | 7.13  | 7.49  | 0.37 | 0.4  | -1.28 | 0.33955  | 0.42412  | 0.661307 | 0.646737 |
| MmugDNA.4655.1.S1_at | MmugDNA.4655.1 | 11.46 | 10.43 | 0.44 | 0.25 | 2.03  | 0.019663 | 0.00714  | 0.275549 | 0.113735 |
| MmugDNA.4656.1.S1_at | MmugDNA.4656.1 | 6.69  | 6.74  | 0.92 | 0.86 | -1.03 | 0.620553 | 0.429894 | 0.826026 | 0.651109 |
| MmugDNA.4658.1.S1_at | MmugDNA.4658.1 | 7.06  | 6.28  | 0.35 | 0.19 | 1.71  | 0.008903 | 0.004183 | 0.221598 | 0.091084 |
| MmugDNA.4659.1.S1_at | MmugDNA.4659.1 | 4.42  | 4.63  | 0.07 | 0.17 | -1.16 | 0.115195 | 0.053793 | 0.478607 | 0.277457 |
| MmugDNA.466.1.S1_at  | MmugDNA.466.1  | 6.85  | 6.64  | 0.44 | 0.3  | 1.16  | 0.455184 | 0.444676 | 0.733701 | 0.662072 |
| MmugDNA.4660.1.S1_at | MmugDNA.4660.1 | 7.48  | 6.82  | 0.79 | 0.81 | 1.58  | 0.341474 | 0.41468  | 0.662575 | 0.640456 |
| MmugDNA.4661.1.S1_at | MmugDNA.4661.1 | 6.94  | 6.36  | 0.91 | 0.36 | 1.49  | 0.130239 | 0.192425 | 0.496613 | 0.467919 |
| MmugDNA.4662.1.S1_at | MmugDNA.4662.1 | 3.42  | 3.39  | 0.03 | 0.08 | 1.02  | 0.18324  | 0.302322 | 0.547309 | 0.560092 |
| MmugDNA.4663.1.S1_at | MmugDNA.4663.1 | 4.44  | 4.44  | 0.12 | 0.04 | -1    | 0.575052 | 0.145582 | 0.80205  | 0.419456 |

|                        |                |       |       |      |      |       |          |          |          |          |
|------------------------|----------------|-------|-------|------|------|-------|----------|----------|----------|----------|
| MmugDNA.4665.1.S1_at   | MmugDNA.4665.1 | 7.2   | 6.56  | 1.37 | 0.55 | 1.56  | 0.618416 | 0.69052  | 0.825194 | 0.819604 |
| MmugDNA.4666.1.S1_at   | MmugDNA.4666.1 | 2.88  | 2.88  | 0.11 | 0.17 | 1     | 0.965929 | 0.941101 | 0.987096 | 0.96664  |
| MmugDNA.4668.1.S1_at   | MmugDNA.4668.1 | 9.7   | 8.9   | 0.15 | 0.14 | 1.74  | 0.003451 | 0.001193 | 0.17833  | 0.054172 |
| MmugDNA.4669.1.S1_at   | MmugDNA.4669.1 | 11.3  | 11.21 | 0.28 | 0.09 | 1.07  | 0.801328 | 0.498502 | 0.918069 | 0.697582 |
| MmugDNA.4672.1.S1_at   | MmugDNA.4672.1 | 6.84  | 6.86  | 0.39 | 0.36 | -1.01 | 0.249959 | 0.32662  | 0.600389 | 0.576649 |
| MmugDNA.4673.1.S1_at   | MmugDNA.4673.1 | 3.58  | 3.31  | 0.27 | 0.09 | 1.21  | 0.243247 | 0.322648 | 0.594896 | 0.574024 |
| MmugDNA.4674.1.S1_at   | MmugDNA.4674.1 | 8.71  | 8.68  | 0.28 | 0.09 | 1.02  | 0.466181 | 0.561009 | 0.740214 | 0.737076 |
| MmugDNA.4675.1.S1_at   | MmugDNA.4675.1 | 8.27  | 8.68  | 0.15 | 0.4  | -1.33 | 0.176578 | 0.259436 | 0.540208 | 0.526418 |
| MmugDNA.4675.1.S1_s_at | MmugDNA.4675.1 | 8.87  | 9.11  | 0.42 | 0.53 | -1.18 | 0.290712 | 0.397653 | 0.628456 | 0.629023 |
| MmugDNA.4676.1.S1_at   | MmugDNA.4676.1 | 6.75  | 6.48  | 0.18 | 0.29 | 1.21  | 0.346376 | 0.50607  | 0.665788 | 0.702355 |
| MmugDNA.4677.1.S1_at   | MmugDNA.4677.1 | 4.91  | 4.68  | 0.27 | 0.14 | 1.17  | 0.136466 | 0.139329 | 0.503566 | 0.412525 |
| MmugDNA.4678.1.S1_at   | MmugDNA.4678.1 | 4.01  | 4.03  | 0.08 | 0.17 | -1.01 | 0.586182 | 0.427321 | 0.807949 | 0.649175 |
| MmugDNA.4680.1.S1_s_at | MmugDNA.4680.1 | 9.81  | 9.97  | 0.1  | 0.11 | -1.12 | 0.286052 | 0.362097 | 0.625392 | 0.602821 |
| MmugDNA.4682.1.S1_at   | MmugDNA.4682.1 | 5.6   | 5.94  | 0.18 | 0.05 | -1.26 | 0.03387  | 0.069007 | 0.330262 | 0.309017 |
| MmugDNA.4683.1.S1_at   | MmugDNA.4683.1 | 3.59  | 3.56  | 0.22 | 0.05 | 1.02  | 0.288298 | 0.189821 | 0.626514 | 0.465403 |
| MmugDNA.4684.1.S1_at   | MmugDNA.4684.1 | 9.75  | 9.48  | 0.07 | 0.36 | 1.21  | 0.693337 | 0.586603 | 0.863948 | 0.753603 |
| MmugDNA.4685.1.S1_at   | MmugDNA.4685.1 | 3.59  | 3.51  | 0.12 | 0.24 | 1.06  | 0.494968 | 0.665826 | 0.756991 | 0.804196 |
| MmugDNA.4687.1.S1_at   | MmugDNA.4687.1 | 11.48 | 11    | 0.23 | 0.08 | 1.4   | 0.033115 | 0.036678 | 0.327101 | 0.235973 |
| MmugDNA.4688.1.S1_at   | MmugDNA.4688.1 | 10.46 | 9.24  | 0.14 | 0.29 | 2.33  | 0.003636 | 0.001298 | 0.179515 | 0.055585 |
| MmugDNA.4689.1.S1_at   | MmugDNA.4689.1 | 6.71  | 6     | 0.7  | 0.61 | 1.62  | 0.49996  | 0.681338 | 0.759402 | 0.813957 |
| MmugDNA.469.1.S1_at    | MmugDNA.469.1  | 10.83 | 10.94 | 0.12 | 0.09 | -1.08 | 0.505481 | 0.110292 | 0.761643 | 0.374403 |
| MmugDNA.4690.1.S1_at   | MmugDNA.4690.1 | 4     | 4     | 0.48 | 0.03 | 1     | 0.407621 | 0.322336 | 0.704719 | 0.57392  |
| MmugDNA.4691.1.S1_at   | MmugDNA.4691.1 | 4.33  | 4.27  | 0.13 | 0.2  | 1.04  | 0.852536 | 0.125911 | 0.940647 | 0.396452 |
| MmugDNA.4692.1.S1_at   | MmugDNA.4692.1 | 11.45 | 11.69 | 0.12 | 0.14 | -1.18 | 0.218707 | 0.122755 | 0.578242 | 0.39274  |
| MmugDNA.4694.1.S1_at   | MmugDNA.4694.1 | 7.9   | 7.67  | 0.28 | 0.29 | 1.17  | 0.415363 | 0.496046 | 0.709495 | 0.695877 |
| MmugDNA.4695.1.S1_at   | MmugDNA.4695.1 | 7.43  | 7.37  | 0.13 | 0.72 | 1.04  | 0.787136 | 0.520496 | 0.911476 | 0.711799 |
| MmugDNA.4697.1.S1_at   | MmugDNA.4697.1 | 3.15  | 3.05  | 0.02 | 0.2  | 1.07  | 0.424171 | 0.601125 | 0.714406 | 0.762531 |
| MmugDNA.4699.1.S1_at   | MmugDNA.4699.1 | 4.04  | 3.59  | 0.37 | 0.23 | 1.37  | 0.315348 | 0.27938  | 0.646592 | 0.543014 |
| MmugDNA.47.1.S1_at     | MmugDNA.47.1   | 12.38 | 11.8  | 0.01 | 0.24 | 1.49  | 0.017242 | 0.010369 | 0.26697  | 0.133236 |
| MmugDNA.470.1.S1_at    | MmugDNA.470.1  | 4.39  | 4.4   | 0.27 | 0.23 | -1    | 0.908632 | 0.852989 | 0.963816 | 0.916437 |
| MmugDNA.4700.1.S1_at   | MmugDNA.4700.1 | 4.13  | 4     | 0.18 | 0.63 | 1.09  | 0.928969 | 0.348764 | 0.972607 | 0.592786 |
| MmugDNA.4701.1.S1_at   | MmugDNA.4701.1 | 7.73  | 7.81  | 0.1  | 0.03 | -1.06 | 0.084581 | 0.070923 | 0.437266 | 0.312444 |
| MmugDNA.4702.1.S1_at   | MmugDNA.4702.1 | 6.47  | 6.35  | 0.17 | 0.17 | 1.08  | 0.463286 | 0.568704 | 0.738678 | 0.742078 |
| MmugDNA.4704.1.S1_at   | MmugDNA.4704.1 | 3.61  | 3.9   | 0.35 | 0.03 | -1.22 | 0.683616 | 0.354467 | 0.85844  | 0.597237 |
| MmugDNA.4705.1.S1_s_at | MmugDNA.4705.1 | 6.48  | 6.5   | 0.31 | 0.38 | -1.02 | 0.877824 | 0.987395 | 0.951009 | 0.992936 |
| MmugDNA.4706.1.S1_at   | MmugDNA.4706.1 | 5.8   | 5.7   | 0.18 | 0.2  | 1.07  | 0.598243 | 0.4722   | 0.813939 | 0.679876 |
| MmugDNA.4708.1.S1_at   | MmugDNA.4708.1 | 4.86  | 4.82  | 0.3  | 0.75 | 1.03  | 0.675434 | 0.71578  | 0.854537 | 0.835258 |
| MmugDNA.4709.1.S1_at   | MmugDNA.4709.1 | 3.45  | 3.35  | 0.14 | 0.13 | 1.06  | 0.212569 | 0.476734 | 0.572842 | 0.682885 |
| MmugDNA.471.1.S1_at    | MmugDNA.471.1  | 3.76  | 3.74  | 0.35 | 0.11 | 1.01  | 0.492881 | 0.228401 | 0.755888 | 0.500587 |
| MmugDNA.4710.1.S1_at   | MmugDNA.4710.1 | 9.37  | 9.8   | 0.22 | 0.03 | -1.34 | 0.012008 | 0.004209 | 0.239636 | 0.091368 |
| MmugDNA.4711.1.S1_at   | MmugDNA.4711.1 | 2.86  | 2.85  | 0.11 | 0.05 | 1.01  | 0.567825 | 0.715662 | 0.798292 | 0.835159 |

|                        |                |       |       |      |      |       |          |          |          |          |
|------------------------|----------------|-------|-------|------|------|-------|----------|----------|----------|----------|
| MmugDNA.4712.1.S1_at   | MmugDNA.4712.1 | 3.52  | 3.53  | 0.15 | 0.24 | -1.01 | 0.488238 | 0.687507 | 0.752806 | 0.817606 |
| MmugDNA.4713.1.S1_at   | MmugDNA.4713.1 | 3.33  | 3.04  | 0    | 0.25 | 1.22  | 0.363784 | 0.547855 | 0.676949 | 0.728723 |
| MmugDNA.4714.1.S1_at   | MmugDNA.4714.1 | 11.62 | 11.41 | 0.23 | 0.13 | 1.16  | 0.377829 | 0.116812 | 0.686106 | 0.384133 |
| MmugDNA.4715.1.S1_at   | MmugDNA.4715.1 | 3.38  | 3.38  | 0    | 0.09 | -1    | 0.358297 | 0.281341 | 0.673123 | 0.544391 |
| MmugDNA.4716.1.S1_at   | MmugDNA.4716.1 | 4.05  | 3.93  | 0.15 | 0.06 | 1.09  | 0.076278 | 0.059745 | 0.424738 | 0.29107  |
| MmugDNA.4717.1.S1_at   | MmugDNA.4717.1 | 5.83  | 4.83  | 1.26 | 0.52 | 2     | 0.425623 | 0.467973 | 0.715213 | 0.677457 |
| MmugDNA.4718.1.S1_s_at | MmugDNA.4718.1 | 10.09 | 10.65 | 0.32 | 0.43 | -1.47 | 0.191956 | 0.236817 | 0.554963 | 0.507555 |
| MmugDNA.472.1.S1_at    | MmugDNA.472.1  | 5.61  | 5.82  | 0.39 | 0.23 | -1.15 | 0.980449 | 0.970915 | 0.992958 | 0.984133 |
| MmugDNA.4720.1.S1_s_at | MmugDNA.4720.1 | 3.54  | 3.54  | 0.05 | 0.06 | 1     | 0.23369  | 0.194286 | 0.588317 | 0.469384 |
| MmugDNA.4722.1.S1_at   | MmugDNA.4722.1 | 10.99 | 9.49  | 0.43 | 0.53 | 2.83  | 0.018282 | 0.004636 | 0.269791 | 0.094988 |
| MmugDNA.4723.1.S1_at   | MmugDNA.4723.1 | 3.98  | 3.99  | 0.15 | 0.03 | -1.01 | 0.412629 | 0.530904 | 0.707935 | 0.718247 |
| MmugDNA.4724.1.S1_at   | MmugDNA.4724.1 | 6.53  | 6.55  | 0.1  | 0.07 | -1.02 | 0.802124 | 0.047199 | 0.918358 | 0.261823 |
| MmugDNA.4726.1.S1_at   | MmugDNA.4726.1 | 9.14  | 8.62  | 0.54 | 0.27 | 1.44  | 0.118541 | 0.044606 | 0.48294  | 0.255589 |
| MmugDNA.4727.1.S1_at   | MmugDNA.4727.1 | 4.61  | 4.4   | 0.68 | 0.23 | 1.16  | 0.204993 | 0.27638  | 0.567457 | 0.540334 |
| MmugDNA.4729.1.S1_at   | MmugDNA.4729.1 | 4.66  | 4.78  | 0.1  | 0.12 | -1.09 | 0.438893 | 0.235487 | 0.723391 | 0.506551 |
| MmugDNA.473.1.S1_at    | MmugDNA.473.1  | 5.74  | 5.81  | 0.21 | 0.09 | -1.05 | 0.230066 | 0.320432 | 0.587112 | 0.572648 |
| MmugDNA.4730.1.S1_at   | MmugDNA.4730.1 | 11.79 | 12.11 | 0.17 | 0.02 | -1.25 | 0.048301 | 0.057172 | 0.368148 | 0.284974 |
| MmugDNA.4733.1.S1_at   | MmugDNA.4733.1 | 9.72  | 8.91  | 0.09 | 0.4  | 1.75  | 0.03847  | 0.015357 | 0.344376 | 0.157392 |
| MmugDNA.4734.1.S1_at   | MmugDNA.4734.1 | 4.92  | 4.55  | 0.42 | 0.04 | 1.29  | 0.230083 | 0.321406 | 0.587112 | 0.573207 |
| MmugDNA.4735.1.S1_at   | MmugDNA.4735.1 | 3.41  | 3.55  | 0.16 | 0.08 | -1.11 | 0.558927 | 0.734412 | 0.793598 | 0.846131 |
| MmugDNA.4736.1.S1_at   | MmugDNA.4736.1 | 6.05  | 5.38  | 0.27 | 0.32 | 1.6   | 0.028652 | 0.042063 | 0.312031 | 0.249599 |
| MmugDNA.4737.1.S1_at   | MmugDNA.4737.1 | 5.62  | 5.74  | 0.62 | 0.05 | -1.08 | 0.852366 | 0.875184 | 0.940647 | 0.929179 |
| MmugDNA.4738.1.S1_at   | MmugDNA.4738.1 | 4.98  | 5.02  | 0.26 | 0.06 | -1.03 | 0.84881  | 0.297481 | 0.939223 | 0.556122 |
| MmugDNA.4739.1.S1_at   | MmugDNA.4739.1 | 4.85  | 4.81  | 0.27 | 0.16 | 1.03  | 0.394915 | 0.624913 | 0.696207 | 0.778939 |
| MmugDNA.4741.1.S1_at   | MmugDNA.4741.1 | 3.13  | 3.09  | 0.03 | 0.43 | 1.03  | 0.427582 | 0.502898 | 0.716341 | 0.700417 |
| MmugDNA.4743.1.S1_at   | MmugDNA.4743.1 | 8.48  | 9.04  | 0.44 | 0.56 | -1.47 | 0.179644 | 0.125185 | 0.543821 | 0.395666 |
| MmugDNA.4744.1.S1_at   | MmugDNA.4744.1 | 3.62  | 3.61  | 0.13 | 0.2  | 1     | 0.864405 | 0.714295 | 0.945536 | 0.834226 |
| MmugDNA.4746.1.S1_at   | MmugDNA.4746.1 | 7.56  | 6.87  | 0.28 | 0.11 | 1.61  | 0.015007 | 0.009539 | 0.256989 | 0.12867  |
| MmugDNA.4747.1.S1_at   | MmugDNA.4747.1 | 8.13  | 8.69  | 0.08 | 0.29 | -1.47 | 0.028201 | 0.026347 | 0.310079 | 0.203321 |
| MmugDNA.4748.1.S1_at   | MmugDNA.4748.1 | 7.12  | 7.04  | 0.22 | 0.35 | 1.06  | 0.674311 | 0.201822 | 0.854077 | 0.476367 |
| MmugDNA.475.1.S1_at    | MmugDNA.475.1  | 6.91  | 7.6   | 0.21 | 0.44 | -1.61 | 0.058712 | 0.052095 | 0.390921 | 0.273841 |
| MmugDNA.4751.1.S1_at   | MmugDNA.4751.1 | 11.33 | 10.8  | 0.11 | 0.93 | 1.44  | 0.375121 | 0.142388 | 0.684409 | 0.415965 |
| MmugDNA.4753.1.S1_at   | MmugDNA.4753.1 | 4.89  | 4.67  | 0.25 | 0.35 | 1.16  | 0.355416 | 0.487571 | 0.671033 | 0.690565 |
| MmugDNA.4754.1.S1_at   | MmugDNA.4754.1 | 7.62  | 7.91  | 0.2  | 0.07 | -1.22 | 0.340919 | 0.19663  | 0.662203 | 0.471656 |
| MmugDNA.4755.1.S1_at   | MmugDNA.4755.1 | 3.1   | 3.04  | 0.08 | 0.08 | 1.04  | 0.831552 | 0.169253 | 0.931771 | 0.445863 |
| MmugDNA.4756.1.S1_at   | MmugDNA.4756.1 | 3.98  | 3.92  | 0.05 | 0.24 | 1.04  | 0.742312 | 0.865587 | 0.889767 | 0.923598 |
| MmugDNA.4758.1.S1_at   | MmugDNA.4758.1 | 5.91  | 6.37  | 0.41 | 0.57 | -1.38 | 0.623044 | 0.351733 | 0.827763 | 0.595164 |
| MmugDNA.4759.1.S1_at   | MmugDNA.4759.1 | 6.63  | 6.48  | 0.2  | 0.05 | 1.11  | 0.941993 | 0.578958 | 0.977822 | 0.748786 |
| MmugDNA.4763.1.S1_at   | MmugDNA.4763.1 | 4.67  | 4.78  | 0.16 | 0.21 | -1.08 | 0.211287 | 0.024245 | 0.57209  | 0.194936 |
| MmugDNA.4764.1.S1_at   | MmugDNA.4764.1 | 4.89  | 4.89  | 0.15 | 0.05 | -1    | 0.33784  | 0.42437  | 0.660312 | 0.646933 |
| MmugDNA.4765.1.S1_at   | MmugDNA.4765.1 | 10.92 | 10.88 | 0.16 | 0.55 | 1.03  | 0.897122 | 0.899653 | 0.959096 | 0.942903 |

|                        |                |       |       |      |      |       |          |          |          |          |
|------------------------|----------------|-------|-------|------|------|-------|----------|----------|----------|----------|
| MmugDNA.4767.1.S1_at   | MmugDNA.4767.1 | 5.67  | 5.79  | 0.71 | 0.47 | -1.08 | 0.897461 | 0.938448 | 0.95917  | 0.965059 |
| MmugDNA.4768.1.S1_at   | MmugDNA.4768.1 | 3.1   | 3.21  | 0.11 | 0.07 | -1.08 | 0.933209 | 0.148764 | 0.974019 | 0.423201 |
| MmugDNA.4769.1.S1_at   | MmugDNA.4769.1 | 6.05  | 6.42  | 0.11 | 0.16 | -1.29 | 0.069944 | 0.051227 | 0.413138 | 0.271799 |
| MmugDNA.4770.1.S1_at   | MmugDNA.4770.1 | 6.44  | 6.68  | 0.1  | 0.05 | -1.18 | 0.03994  | 0.04019  | 0.3483   | 0.245709 |
| MmugDNA.4771.1.S1_at   | MmugDNA.4771.1 | 9.91  | 9.69  | 0.29 | 0.17 | 1.16  | 0.475034 | 0.649287 | 0.745537 | 0.794734 |
| MmugDNA.4772.1.S1_at   | MmugDNA.4772.1 | 6.48  | 6.85  | 0.06 | 0.14 | -1.29 | 0.018564 | 0.128863 | 0.270581 | 0.400277 |
| MmugDNA.4774.1.S1_at   | MmugDNA.4774.1 | 8.7   | 9.14  | 0.06 | 0.11 | -1.36 | 0.005338 | 0.000834 | 0.191107 | 0.046851 |
| MmugDNA.4775.1.S1_at   | MmugDNA.4775.1 | 6.78  | 6.96  | 0.03 | 0.11 | -1.13 | 0.171455 | 0.15931  | 0.535166 | 0.43531  |
| MmugDNA.4776.1.S1_at   | MmugDNA.4776.1 | 5.33  | 5.51  | 0.32 | 0.11 | -1.14 | 0.188056 | 0.278097 | 0.551056 | 0.541754 |
| MmugDNA.4777.1.S1_at   | MmugDNA.4777.1 | 5.74  | 5.21  | 0.51 | 0.69 | 1.44  | 0.452932 | 0.684582 | 0.732217 | 0.816019 |
| MmugDNA.4779.1.S1_at   | MmugDNA.4779.1 | 3.52  | 3.57  | 0.54 | 0.06 | -1.04 | 0.40392  | 0.313266 | 0.702465 | 0.567753 |
| MmugDNA.478.1.S1_at    | MmugDNA.478.1  | 8.14  | 8.5   | 0.25 | 0.66 | -1.28 | 0.834181 | 0.799841 | 0.932602 | 0.884906 |
| MmugDNA.4780.1.S1_at   | MmugDNA.4780.1 | 3.63  | 3.64  | 0.37 | 0.09 | -1    | 0.302321 | 0.194242 | 0.63692  | 0.469357 |
| MmugDNA.4781.1.S1_at   | MmugDNA.4781.1 | 9.23  | 9.51  | 0.55 | 0.2  | -1.22 | 0.330856 | 0.382152 | 0.656063 | 0.618361 |
| MmugDNA.4782.1.S1_at   | MmugDNA.4782.1 | 4.63  | 4.07  | 0.84 | 0.44 | 1.47  | 0.122337 | 0.140681 | 0.48746  | 0.413978 |
| MmugDNA.4783.1.S1_at   | MmugDNA.4783.1 | 7.13  | 6.87  | 0.36 | 0.03 | 1.2   | 0.194252 | 0.110857 | 0.557805 | 0.375187 |
| MmugDNA.4785.1.S1_at   | MmugDNA.4785.1 | 5.62  | 5.73  | 0.56 | 0.03 | -1.08 | 0.584194 | 0.67233  | 0.806925 | 0.808488 |
| MmugDNA.4786.1.S1_at   | MmugDNA.4786.1 | 7.11  | 7.07  | 0.18 | 0.04 | 1.02  | 0.822969 | 0.869464 | 0.927994 | 0.925991 |
| MmugDNA.4787.1.S1_at   | MmugDNA.4787.1 | 7.57  | 7.75  | 0.15 | 0.3  | -1.13 | 0.356602 | 0.153173 | 0.671685 | 0.428011 |
| MmugDNA.4788.1.S1_at   | MmugDNA.4788.1 | 4.48  | 4.44  | 0.09 | 0.05 | 1.03  | 0.175878 | 0.343483 | 0.539441 | 0.589246 |
| MmugDNA.479.1.S1_at    | MmugDNA.479.1  | 11.06 | 11.37 | 0.18 | 0.3  | -1.25 | 0.185369 | 0.150325 | 0.548793 | 0.424878 |
| MmugDNA.4790.1.S1_at   | MmugDNA.4790.1 | 3.76  | 3.77  | 0.06 | 0.28 | -1.01 | 0.333502 | 0.52938  | 0.657597 | 0.71726  |
| MmugDNA.4792.1.S1_at   | MmugDNA.4792.1 | 8.26  | 8.89  | 0.53 | 0.12 | -1.54 | 0.31411  | 0.32356  | 0.645522 | 0.574497 |
| MmugDNA.4793.1.S1_at   | MmugDNA.4793.1 | 9.75  | 9.22  | 0.33 | 0.48 | 1.45  | 0.477399 | 0.293074 | 0.746589 | 0.552978 |
| MmugDNA.4794.1.S1_at   | MmugDNA.4794.1 | 4.06  | 3.91  | 0.79 | 0.39 | 1.11  | 0.49155  | 0.618766 | 0.7551   | 0.774185 |
| MmugDNA.4795.1.S1_at   | MmugDNA.4795.1 | 3.99  | 3.98  | 0.06 | 0.4  | 1.01  | 0.38871  | 0.456473 | 0.692777 | 0.670188 |
| MmugDNA.4796.1.S1_at   | MmugDNA.4796.1 | 8.04  | 7.9   | 0.25 | 0.17 | 1.1   | 0.240828 | 0.3532   | 0.593592 | 0.596432 |
| MmugDNA.4797.1.S1_at   | MmugDNA.4797.1 | 3.4   | 3.4   | 0.03 | 0.02 | 1     | 0.831821 | 0.171928 | 0.931835 | 0.448352 |
| MmugDNA.4798.1.S1_at   | MmugDNA.4798.1 | 8.07  | 8.21  | 0.18 | 0.55 | -1.1  | 0.83048  | 0.88903  | 0.931462 | 0.936779 |
| MmugDNA.48.1.S1_at     | MmugDNA.48.1   | 4.22  | 4.07  | 0.52 | 0.07 | 1.11  | 0.250269 | 0.323076 | 0.600389 | 0.574351 |
| MmugDNA.4800.1.S1_at   | MmugDNA.4800.1 | 4.02  | 4.22  | 0.36 | 0.05 | -1.16 | 0.986396 | 0.895156 | 0.995168 | 0.940131 |
| MmugDNA.4802.1.S1_at   | MmugDNA.4802.1 | 5.68  | 6.05  | 0.11 | 0.37 | -1.29 | 0.133892 | 0.168035 | 0.500439 | 0.444641 |
| MmugDNA.4802.1.S1_s_at | MmugDNA.4802.1 | 3.33  | 3.35  | 0.04 | 0.15 | -1.02 | 0.96866  | 0.625276 | 0.988176 | 0.779099 |
| MmugDNA.4803.1.S1_at   | MmugDNA.4803.1 | 3.73  | 3.73  | 0.11 | 0.06 | -1    | 0.428995 | 0.309484 | 0.717207 | 0.564987 |
| MmugDNA.4805.1.S1_at   | MmugDNA.4805.1 | 4.45  | 4.44  | 1.17 | 0.17 | 1     | 0.362639 | 0.420861 | 0.676176 | 0.644535 |
| MmugDNA.4807.1.S1_at   | MmugDNA.4807.1 | 8.74  | 8.18  | 0.41 | 1.19 | 1.47  | 0.320067 | 0.239297 | 0.649308 | 0.509995 |
| MmugDNA.4808.1.S1_at   | MmugDNA.4808.1 | 3.04  | 2.85  | 0.1  | 0.07 | 1.14  | 0.04366  | 0.214495 | 0.357014 | 0.488257 |
| MmugDNA.4809.1.S1_s_at | MmugDNA.4809.1 | 12.69 | 12.72 | 0.13 | 0.05 | -1.02 | 0.970673 | 0.177211 | 0.988685 | 0.453647 |
| MmugDNA.481.1.S1_at    | MmugDNA.481.1  | 6.19  | 6.27  | 0.19 | 0.36 | -1.06 | 0.716266 | 0.910945 | 0.875374 | 0.94975  |
| MmugDNA.4810.1.S1_at   | MmugDNA.4810.1 | 12.62 | 12.4  | 0.12 | 0.47 | 1.17  | 0.478208 | 0.250353 | 0.747114 | 0.519362 |
| MmugDNA.4811.1.S1_at   | MmugDNA.4811.1 | 5.83  | 5.75  | 0.32 | 0.14 | 1.06  | 0.960967 | 0.491804 | 0.984976 | 0.693275 |

|                         |                 |       |       |      |      |       |          |          |          |          |
|-------------------------|-----------------|-------|-------|------|------|-------|----------|----------|----------|----------|
| MmugDNA.4812.1.S1_at    | MmugDNA.4812.1  | 7.8   | 6.58  | 0.74 | 0.5  | 2.33  | 0.150069 | 0.123779 | 0.514662 | 0.393908 |
| MmugDNA.4813.1.S1_at    | MmugDNA.4813.1  | 4.46  | 4.65  | 0.09 | 0.21 | -1.14 | 0.292719 | 0.325267 | 0.630064 | 0.575648 |
| MmugDNA.4814.1.S1_at    | MmugDNA.4814.1  | 9.6   | 10.02 | 0.43 | 0.73 | -1.33 | 0.361246 | 0.203142 | 0.675122 | 0.477415 |
| MmugDNA.4816.1.S1_at    | MmugDNA.4816.1  | 10.76 | 10.8  | 0.07 | 0.16 | -1.03 | 0.6895   | 0.000443 | 0.861555 | 0.038359 |
| MmugDNA.4817.1.S1_at    | MmugDNA.4817.1  | 4.41  | 4.72  | 0.18 | 0.37 | -1.24 | 0.235588 | 0.192401 | 0.589497 | 0.467881 |
| MmugDNA.4819.1.S1_at    | MmugDNA.4819.1  | 3.84  | 3.81  | 0.29 | 0.21 | 1.02  | 0.841413 | 0.904526 | 0.936191 | 0.945875 |
| MmugDNA.482.1.S1_at     | MmugDNA.482.1   | 2.82  | 2.78  | 0.11 | 0.05 | 1.03  | 0.371988 | 0.399359 | 0.682671 | 0.629776 |
| MmugDNA.4821.1.S1_at    | MmugDNA.4821.1  | 4.47  | 4.33  | 0.86 | 0.58 | 1.1   | 0.681647 | 0.859192 | 0.857635 | 0.919754 |
| MmugDNA.4824.1.S1_at    | MmugDNA.4824.1  | 10.89 | 10.47 | 0.07 | 0.1  | 1.34  | 0.001903 | 0.000265 | 0.155636 | 0.033786 |
| MmugDNA.4825.1.S1_at    | MmugDNA.4825.1  | 7.89  | 7.77  | 0.15 | 0.09 | 1.08  | 0.063982 | 0.040998 | 0.401945 | 0.247202 |
| MmugDNA.4826.1.S1_at    | MmugDNA.4826.1  | 4.15  | 4.13  | 0.06 | 0.61 | 1.01  | 0.401432 | 0.525376 | 0.70084  | 0.714977 |
| MmugDNA.4829.1.S1_at    | MmugDNA.4829.1  | 9.12  | 8.75  | 0.19 | 1.12 | 1.29  | 0.9408   | 0.786927 | 0.977466 | 0.876732 |
| MmugDNA.4831.1.S1_at    | MmugDNA.4831.1  | 4.69  | 4.55  | 0.06 | 0.1  | 1.1   | 0.290867 | 0.559835 | 0.628624 | 0.736394 |
| MmugDNA.4832.1.S1_at    | MmugDNA.4832.1  | 7.31  | 8.91  | 0.49 | 1.29 | -3.04 | 0.10296  | 0.107071 | 0.46254  | 0.369728 |
| MmugDNA.4833.1.S1_at    | MmugDNA.4833.1  | 6.53  | 5.95  | 0.2  | 0.17 | 1.49  | 0.024754 | 0.015998 | 0.296308 | 0.160458 |
| MmugDNA.4835.1.S1_at    | MmugDNA.4835.1  | 3.56  | 3.82  | 0.14 | 0.57 | -1.2  | 0.427795 | 0.592697 | 0.716428 | 0.757854 |
| MmugDNA.4835.1.S1_s_at  | MmugDNA.4835.1  | 10.51 | 10.21 | 0.18 | 0.3  | 1.24  | 0.203424 | 0.269009 | 0.566041 | 0.53441  |
| MmugDNA.4838.1.S1_at    | MmugDNA.4838.1  | 12.38 | 12.42 | 0.33 | 0.15 | -1.03 | 0.916166 | 0.986607 | 0.967057 | 0.992446 |
| MmugDNA.4840.1.S1_at    | MmugDNA.4840.1  | 12.43 | 11.97 | 0.06 | 0.18 | 1.38  | 0.01057  | 0.003399 | 0.230404 | 0.083992 |
| MmugDNA.4841.1.S1_at    | MmugDNA.4841.1  | 3.74  | 3.53  | 0.29 | 0.02 | 1.16  | 0.235893 | 0.098948 | 0.589815 | 0.357049 |
| MmugDNA.4842.1.S1_at    | MmugDNA.4842.1  | 3.66  | 3.54  | 0.3  | 0.12 | 1.09  | 0.370793 | 0.184717 | 0.681666 | 0.460645 |
| MmugDNA.25793.1.S1_x_at | MmugDNA.25793.1 | 14.3  | 14.28 | 0.03 | 0.07 | 1.01  | 0.251934 | 0.351402 | 0.601195 | 0.595054 |
| MmugDNA.4844.1.S1_at    | MmugDNA.4844.1  | 9.71  | 6.86  | 0.62 | 1.07 | 7.18  | 0.02424  | 0.013755 | 0.294535 | 0.150235 |
| MmugDNA.4845.1.S1_at    | MmugDNA.4845.1  | 12.61 | 12.45 | 0.05 | 0.12 | 1.12  | 0.077199 | 0.046868 | 0.426681 | 0.261272 |
| MmugDNA.4845.1.S1_s_at  | MmugDNA.4845.1  | 12.01 | 11.98 | 0.11 | 0.13 | 1.02  | 0.173497 | 0.079727 | 0.537172 | 0.326982 |
| MmugDNA.4846.1.S1_at    | MmugDNA.4846.1  | 4.42  | 4.44  | 0.15 | 0.2  | -1.01 | 0.327285 | 0.48582  | 0.653682 | 0.689436 |
| MmugDNA.4847.1.S1_at    | MmugDNA.4847.1  | 4.57  | 4.62  | 0.32 | 0.12 | -1.04 | 0.949192 | 0.480664 | 0.980673 | 0.68595  |
| MmugDNA.4848.1.S1_s_at  | MmugDNA.4848.1  | 3.68  | 3.68  | 0.02 | 0.15 | -1    | 0.867552 | 0.364584 | 0.947135 | 0.604917 |
| MmugDNA.485.1.S1_at     | MmugDNA.485.1   | 3.65  | 3.34  | 0.48 | 0.04 | 1.24  | 0.250775 | 0.217371 | 0.600389 | 0.490978 |
| MmugDNA.4851.1.S1_at    | MmugDNA.4851.1  | 6.97  | 7.23  | 0.96 | 0.88 | -1.19 | 0.368506 | 0.377438 | 0.67994  | 0.61493  |
| MmugDNA.4852.1.S1_at    | MmugDNA.4852.1  | 4.61  | 4.65  | 0.98 | 0.18 | -1.03 | 0.407459 | 0.528545 | 0.704692 | 0.716664 |
| MmugDNA.4853.1.S1_at    | MmugDNA.4853.1  | 9.5   | 10    | 0.3  | 0.9  | -1.42 | 0.286731 | 0.220315 | 0.625572 | 0.493766 |
| MmugDNA.4854.1.S1_at    | MmugDNA.4854.1  | 6.11  | 5.85  | 0.25 | 0.19 | 1.2   | 0.725009 | 0.290281 | 0.879995 | 0.551169 |
| MmugDNA.4855.1.S1_at    | MmugDNA.4855.1  | 5.97  | 5.68  | 0.21 | 0.42 | 1.22  | 0.400339 | 0.559927 | 0.699898 | 0.736439 |
| MmugDNA.4856.1.S1_at    | MmugDNA.4856.1  | 4.08  | 4.01  | 0.25 | 0.06 | 1.05  | 0.266148 | 0.213624 | 0.611736 | 0.487441 |
| MmugDNA.4858.1.S1_at    | MmugDNA.4858.1  | 4.04  | 3.37  | 0.72 | 0.25 | 1.59  | 0.19509  | 0.128055 | 0.558557 | 0.399035 |
| MmugDNA.4860.1.S1_at    | MmugDNA.4860.1  | 5.07  | 4.97  | 0.45 | 0.15 | 1.07  | 0.506689 | 0.331479 | 0.762443 | 0.580121 |
| MmugDNA.4861.1.S1_at    | MmugDNA.4861.1  | 4.4   | 4.2   | 0.2  | 0.4  | 1.15  | 0.496841 | 0.323624 | 0.757692 | 0.574525 |
| MmugDNA.4862.1.S1_at    | MmugDNA.4862.1  | 4.74  | 4.67  | 0.25 | 0.17 | 1.05  | 0.282113 | 0.357511 | 0.622553 | 0.599157 |
| MmugDNA.4863.1.S1_at    | MmugDNA.4863.1  | 8.37  | 8.08  | 0.31 | 0.64 | 1.23  | 0.846601 | 0.959685 | 0.938406 | 0.977152 |
| MmugDNA.4864.1.S1_at    | MmugDNA.4864.1  | 11.23 | 10.73 | 0.25 | 0.18 | 1.41  | 0.061991 | 0.043072 | 0.396905 | 0.252157 |

|                        |                |       |       |      |      |       |          |          |          |          |
|------------------------|----------------|-------|-------|------|------|-------|----------|----------|----------|----------|
| MmugDNA.4865.1.S1_at   | MmugDNA.4865.1 | 3.61  | 3.49  | 0.1  | 0.1  | 1.08  | 0.218013 | 0.150484 | 0.577569 | 0.42501  |
| MmugDNA.4867.1.S1_at   | MmugDNA.4867.1 | 4.92  | 5.11  | 0.11 | 0.18 | -1.14 | 0.19655  | 0.238032 | 0.559808 | 0.50861  |
| MmugDNA.4868.1.S1_at   | MmugDNA.4868.1 | 7.37  | 8.37  | 0.72 | 1.55 | -2    | 0.361568 | 0.152995 | 0.675369 | 0.427805 |
| MmugDNA.4869.1.S1_at   | MmugDNA.4869.1 | 5.38  | 5.9   | 0.08 | 0.25 | -1.43 | 0.014971 | 0.00763  | 0.256634 | 0.116869 |
| MmugDNA.4869.1.S1_s_at | MmugDNA.4869.1 | 7.77  | 10.37 | 0.88 | 2.14 | -6.07 | 0.252873 | 0.179558 | 0.601608 | 0.456011 |
| MmugDNA.487.1.S1_at    | MmugDNA.487.1  | 6.67  | 7.12  | 0.18 | 0.02 | -1.36 | 0.006025 | 0.005313 | 0.195046 | 0.100896 |
| MmugDNA.4870.1.S1_at   | MmugDNA.4870.1 | 7.17  | 6.1   | 0.34 | 0.12 | 2.11  | 0.005268 | 0.006181 | 0.191107 | 0.106774 |
| MmugDNA.4873.1.S1_at   | MmugDNA.4873.1 | 5.09  | 6     | 0.61 | 1.09 | -1.88 | 0.472782 | 0.689444 | 0.74399  | 0.818841 |
| MmugDNA.4875.1.S1_at   | MmugDNA.4875.1 | 4.02  | 4.14  | 0.08 | 0.1  | -1.09 | 0.101374 | 0.09768  | 0.461313 | 0.355554 |
| MmugDNA.4876.1.S1_at   | MmugDNA.4876.1 | 3.41  | 3.17  | 0.51 | 0.34 | 1.18  | 0.207654 | 0.228208 | 0.569822 | 0.500383 |
| MmugDNA.4877.1.S1_at   | MmugDNA.4877.1 | 4.17  | 4.15  | 0.1  | 0.1  | 1.01  | 0.283938 | 0.312546 | 0.623838 | 0.567265 |
| MmugDNA.4879.1.S1_at   | MmugDNA.4879.1 | 8.27  | 9.2   | 0.47 | 0.75 | -1.9  | 0.113199 | 0.11244  | 0.476115 | 0.377784 |
| MmugDNA.4880.1.S1_at   | MmugDNA.4880.1 | 12.03 | 12.39 | 0.09 | 0.36 | -1.29 | 0.174332 | 0.196297 | 0.537982 | 0.471264 |
| MmugDNA.4881.1.S1_at   | MmugDNA.4881.1 | 5.23  | 5.05  | 0.2  | 0.15 | 1.13  | 0.111712 | 0.373721 | 0.474019 | 0.612403 |
| MmugDNA.4882.1.S1_at   | MmugDNA.4882.1 | 2.83  | 2.81  | 0.27 | 0.08 | 1.01  | 0.360044 | 0.397999 | 0.674197 | 0.629138 |
| MmugDNA.4883.1.S1_at   | MmugDNA.4883.1 | 6.56  | 6.19  | 0.09 | 0.17 | 1.29  | 0.042182 | 0.019509 | 0.35448  | 0.175439 |
| MmugDNA.4884.1.S1_at   | MmugDNA.4884.1 | 5.51  | 4.92  | 0.18 | 0.56 | 1.5   | 0.476682 | 0.635612 | 0.746273 | 0.785452 |
| MmugDNA.4885.1.S1_at   | MmugDNA.4885.1 | 7.53  | 8.52  | 0.47 | 1.74 | -1.99 | 0.28584  | 0.381977 | 0.625246 | 0.618252 |
| MmugDNA.4886.1.S1_at   | MmugDNA.4886.1 | 7.67  | 8.14  | 0.91 | 1.37 | -1.38 | 0.272168 | 0.177152 | 0.616016 | 0.453611 |
| MmugDNA.4887.1.S1_at   | MmugDNA.4887.1 | 4.7   | 4.09  | 0.36 | 0.13 | 1.53  | 0.071996 | 0.094964 | 0.416143 | 0.352054 |
| MmugDNA.4889.1.S1_s_at | MmugDNA.4889.1 | 9.4   | 9.23  | 0.19 | 0.15 | 1.12  | 0.281753 | 0.184257 | 0.62238  | 0.460382 |
| MmugDNA.489.1.S1_at    | MmugDNA.489.1  | 5.03  | 4.7   | 0.23 | 0.54 | 1.26  | 0.33531  | 0.26615  | 0.659098 | 0.531988 |
| MmugDNA.4890.1.S1_at   | MmugDNA.4890.1 | 5.04  | 5.92  | 0.54 | 1.52 | -1.84 | 0.450155 | 0.642645 | 0.730835 | 0.790374 |
| MmugDNA.4891.1.S1_at   | MmugDNA.4891.1 | 6.02  | 5.01  | 0.62 | 0.77 | 2.01  | 0.12871  | 0.143379 | 0.494664 | 0.417386 |
| MmugDNA.4892.1.S1_at   | MmugDNA.4892.1 | 11.85 | 11.59 | 0.13 | 0.21 | 1.2   | 0.097061 | 0.074297 | 0.456113 | 0.318046 |
| MmugDNA.4893.1.S1_at   | MmugDNA.4893.1 | 7.79  | 7.91  | 0.11 | 0.6  | -1.09 | 0.470308 | 0.620417 | 0.742283 | 0.775393 |
| MmugDNA.4894.1.S1_at   | MmugDNA.4894.1 | 11.06 | 10.51 | 0.13 | 0.41 | 1.46  | 0.107461 | 0.026495 | 0.468045 | 0.203897 |
| MmugDNA.4897.1.S1_s_at | MmugDNA.4897.1 | 11.97 | 11.89 | 0.03 | 0.05 | 1.06  | 0.196453 | 0.004377 | 0.559775 | 0.092619 |
| MmugDNA.4898.1.S1_at   | MmugDNA.4898.1 | 5.78  | 5.95  | 0.12 | 0.46 | -1.12 | 0.44798  | 0.253445 | 0.729382 | 0.521742 |
| MmugDNA.4901.1.S1_at   | MmugDNA.4901.1 | 7.12  | 6.94  | 0.24 | 0.53 | 1.13  | 0.220669 | 0.17252  | 0.579701 | 0.448864 |
| MmugDNA.4902.1.S1_at   | MmugDNA.4902.1 | 4.38  | 4.24  | 0.4  | 0.16 | 1.1   | 0.326748 | 0.131853 | 0.653212 | 0.403891 |
| MmugDNA.4903.1.S1_at   | MmugDNA.4903.1 | 3.39  | 3.39  | 0.09 | 0.1  | -1    | 0.517099 | 0.909885 | 0.768525 | 0.94915  |
| MmugDNA.4903.1.S1_x_at | MmugDNA.4903.1 | 5.31  | 5.39  | 0.1  | 0.11 | -1.06 | 0.132245 | 0.301156 | 0.498475 | 0.559356 |
| MmugDNA.4904.1.S1_at   | MmugDNA.4904.1 | 8.91  | 8.87  | 0.07 | 0.25 | 1.03  | 0.276133 | 0.107054 | 0.618148 | 0.369702 |
| MmugDNA.4905.1.S1_at   | MmugDNA.4905.1 | 3.08  | 2.97  | 0.19 | 0.07 | 1.07  | 0.347231 | 0.442121 | 0.666341 | 0.660171 |
| MmugDNA.4906.1.S1_at   | MmugDNA.4906.1 | 11.83 | 11.65 | 0.15 | 0.14 | 1.13  | 0.095765 | 0.053729 | 0.45362  | 0.277384 |
| MmugDNA.4907.1.S1_at   | MmugDNA.4907.1 | 9.87  | 9.29  | 0.18 | 0.61 | 1.5   | 0.147727 | 0.196163 | 0.513337 | 0.471236 |
| MmugDNA.4908.1.S1_at   | MmugDNA.4908.1 | 6.69  | 6.63  | 0.38 | 0.07 | 1.04  | 0.76412  | 0.920154 | 0.900674 | 0.955094 |
| MmugDNA.491.1.S1_at    | MmugDNA.491.1  | 5.64  | 5.3   | 1.02 | 0.8  | 1.26  | 0.661237 | 0.853108 | 0.848083 | 0.916487 |
| MmugDNA.4910.1.S1_at   | MmugDNA.4910.1 | 4.91  | 4.64  | 0.27 | 0.33 | 1.2   | 0.708206 | 0.126146 | 0.871594 | 0.396734 |
| MmugDNA.4911.1.S1_at   | MmugDNA.4911.1 | 5.68  | 5.82  | 0.29 | 0.35 | -1.1  | 0.543633 | 0.083564 | 0.783916 | 0.334152 |



|                         |                 |       |       |      |      |       |          |          |          |          |
|-------------------------|-----------------|-------|-------|------|------|-------|----------|----------|----------|----------|
| MmugDNA.4914.1.S1_s_at  | MmugDNA.4914.1  | 12.81 | 13.74 | 0.6  | 0.39 | -1.9  | 0.089467 | 0.065455 | 0.445142 | 0.301415 |
| MmugDNA.4915.1.S1_at    | MmugDNA.4915.1  | 6.39  | 7.12  | 0.59 | 0.44 | -1.66 | 0.475468 | 0.630346 | 0.745779 | 0.782217 |
| MmugDNA.4917.1.S1_at    | MmugDNA.4917.1  | 11.19 | 11.8  | 0.13 | 0.04 | -1.53 | 0.002061 | 0.000397 | 0.155636 | 0.037471 |
| MmugDNA.492.1.S1_at     | MmugDNA.492.1   | 6.97  | 7.77  | 0.31 | 0.26 | -1.74 | 0.090753 | 0.0844   | 0.446311 | 0.335713 |
| MmugDNA.4920.1.S1_at    | MmugDNA.4920.1  | 7.08  | 7.55  | 0.16 | 0.08 | -1.39 | 0.007895 | 0.017984 | 0.214199 | 0.169137 |
| MmugDNA.4921.1.S1_at    | MmugDNA.4921.1  | 3.03  | 3.11  | 0.09 | 0.18 | -1.06 | 0.965896 | 0.821992 | 0.987096 | 0.8976   |
| MmugDNA.4922.1.S1_at    | MmugDNA.4922.1  | 4.6   | 4.96  | 0.5  | 0.29 | -1.29 | 0.823169 | 0.892606 | 0.928109 | 0.938758 |
| MmugDNA.4923.1.S1_at    | MmugDNA.4923.1  | 7.89  | 7.79  | 0.2  | 0.89 | 1.08  | 0.324123 | 0.441794 | 0.651854 | 0.659938 |
| MmugDNA.4924.1.S1_at    | MmugDNA.4924.1  | 10.92 | 10.68 | 0.1  | 0.13 | 1.18  | 0.024118 | 0.011462 | 0.294319 | 0.138495 |
| MmugDNA.4925.1.S1_at    | MmugDNA.4925.1  | 9.44  | 9.18  | 0.18 | 0.59 | 1.2   | 0.168793 | 0.211685 | 0.533146 | 0.485708 |
| MmugDNA.4928.1.S1_at    | MmugDNA.4928.1  | 9.06  | 8.69  | 0.12 | 0.39 | 1.29  | 0.587979 | 0.556374 | 0.808837 | 0.734507 |
| MmugDNA.4929.1.S1_at    | MmugDNA.4929.1  | 8.2   | 7.86  | 0.52 | 0.18 | 1.27  | 0.295044 | 0.413327 | 0.631503 | 0.639596 |
| MmugDNA.493.1.S1_at     | MmugDNA.493.1   | 5.68  | 5.8   | 0.05 | 0.13 | -1.09 | 0.073556 | 0.293924 | 0.418979 | 0.553891 |
| MmugDNA.4931.1.S1_at    | MmugDNA.4931.1  | 7.3   | 6.7   | 0.22 | 0.19 | 1.52  | 0.091781 | 0.021709 | 0.448181 | 0.184333 |
| MmugDNA.4932.1.S1_at    | MmugDNA.4932.1  | 10.01 | 10.54 | 0.07 | 0.22 | -1.45 | 0.026172 | 0.022588 | 0.301676 | 0.188092 |
| MmugDNA.4932.1.S1_s_at  | MmugDNA.4932.1  | 8.8   | 9.26  | 0.08 | 0.01 | -1.38 | 0.000707 | 0.005677 | 0.136818 | 0.103959 |
| MmugDNA.4933.1.S1_at    | MmugDNA.4933.1  | 6.67  | 6.62  | 0.11 | 0.68 | 1.03  | 0.40284  | 0.173517 | 0.701662 | 0.449938 |
| MmugDNA.4934.1.S1_at    | MmugDNA.4934.1  | 9.65  | 10.09 | 0.13 | 0.34 | -1.36 | 0.191316 | 0.100386 | 0.554259 | 0.359541 |
| MmugDNA.4935.1.S1_at    | MmugDNA.4935.1  | 5.38  | 4.99  | 0.75 | 0.5  | 1.31  | 0.10103  | 0.161296 | 0.461009 | 0.437434 |
| MmugDNA.4936.1.S1_at    | MmugDNA.4936.1  | 9.19  | 9.47  | 0.36 | 0.25 | -1.21 | 0.265258 | 0.188193 | 0.610859 | 0.464251 |
| MmugDNA.4937.1.S1_at    | MmugDNA.4937.1  | 5.83  | 5.63  | 0.14 | 0.47 | 1.15  | 0.660745 | 0.815582 | 0.847885 | 0.893609 |
| MmugDNA.4941.1.S1_at    | MmugDNA.4941.1  | 8.8   | 7.91  | 0.11 | 0.23 | 1.86  | 0.003005 | 0.001346 | 0.171022 | 0.056466 |
| MmugDNA.4942.1.S1_at    | MmugDNA.4942.1  | 11.09 | 10.57 | 0.23 | 0.28 | 1.44  | 0.020538 | 0.016139 | 0.278552 | 0.161012 |
| MmugDNA.4942.1.S1_x_at  | MmugDNA.4942.1  | 10.99 | 10.57 | 0.26 | 0.24 | 1.34  | 0.026033 | 0.020497 | 0.30146  | 0.179723 |
| MmugDNA.30842.1.S1_s_at | MmugDNA.30842.1 | 10.9  | 11.45 | 0.1  | 0.59 | -1.46 | 0.063684 | 0.02291  | 0.401367 | 0.189395 |
| MmugDNA.30976.1.S1_s_at | MmugDNA.30976.1 | 10.5  | 10.97 | 0.17 | 0.18 | -1.39 | 0.01473  | 0.007783 | 0.254893 | 0.117732 |
| MmugDNA.19803.1.S1_s_at | MmugDNA.19803.1 | 10.19 | 9.21  | 0.21 | 0.37 | 1.98  | 0.016377 | 0.009421 | 0.263839 | 0.127871 |
| MmugDNA.4947.1.S1_at    | MmugDNA.4947.1  | 3.99  | 3.71  | 0.14 | 0.25 | 1.22  | 0.288151 | 0.215097 | 0.626439 | 0.488932 |
| MmugDNA.4949.1.S1_at    | MmugDNA.4949.1  | 5.82  | 5.65  | 0.3  | 0.17 | 1.12  | 0.157332 | 0.155444 | 0.522148 | 0.430802 |
| MmugDNA.495.1.S1_at     | MmugDNA.495.1   | 11.81 | 10.95 | 0.24 | 0.14 | 1.81  | 0.007961 | 0.001213 | 0.214639 | 0.054455 |
| MmugDNA.495.1.S1_s_at   | MmugDNA.495.1   | 12.37 | 11.9  | 0.24 | 0.08 | 1.38  | 0.030404 | 0.004934 | 0.318297 | 0.097875 |
| MmugDNA.4950.1.S1_at    | MmugDNA.4950.1  | 2.93  | 2.82  | 0.17 | 0.09 | 1.08  | 0.135011 | 0.24683  | 0.501995 | 0.516186 |
| MmugDNA.4951.1.S1_at    | MmugDNA.4951.1  | 4.65  | 4.71  | 0.28 | 0.03 | -1.04 | 0.66106  | 0.891754 | 0.84802  | 0.938272 |
| MmugDNA.4952.1.S1_at    | MmugDNA.4952.1  | 7.96  | 8.83  | 0.68 | 0.95 | -1.83 | 0.439865 | 0.330589 | 0.723896 | 0.579309 |
| MmugDNA.4953.1.S1_at    | MmugDNA.4953.1  | 3.21  | 3.31  | 0.03 | 0.17 | -1.07 | 0.125179 | 0.142279 | 0.491247 | 0.41579  |
| MmugDNA.4955.1.S1_at    | MmugDNA.4955.1  | 4.3   | 4.56  | 0.87 | 0.1  | -1.2  | 0.672969 | 0.851367 | 0.853338 | 0.915439 |
| MmugDNA.4956.1.S1_at    | MmugDNA.4956.1  | 11.69 | 11.82 | 0.13 | 0.21 | -1.09 | 0.71817  | 0.265447 | 0.87637  | 0.531363 |
| MmugDNA.4957.1.S1_at    | MmugDNA.4957.1  | 5.7   | 5.39  | 0.48 | 0.29 | 1.24  | 0.318635 | 0.338422 | 0.648593 | 0.585432 |
| MmugDNA.4958.1.S1_at    | MmugDNA.4958.1  | 7.2   | 7.13  | 0.12 | 0.05 | 1.05  | 0.146059 | 0.182416 | 0.51213  | 0.45897  |
| MmugDNA.4959.1.S1_at    | MmugDNA.4959.1  | 4.38  | 4.46  | 0.03 | 0.04 | -1.06 | 0.012272 | 0.010748 | 0.240706 | 0.135385 |
| MmugDNA.496.1.S1_at     | MmugDNA.496.1   | 3.27  | 3.12  | 0.08 | 0.12 | 1.1   | 0.23861  | 0.561324 | 0.591896 | 0.737326 |

|                         |                 |       |       |      |      |       |          |          |          |          |
|-------------------------|-----------------|-------|-------|------|------|-------|----------|----------|----------|----------|
| MmugDNA.4960.1.S1_at    | MmugDNA.4960.1  | 3.62  | 3.7   | 0.09 | 0.17 | -1.06 | 0.309606 | 0.151197 | 0.641653 | 0.425873 |
| MmugDNA.4961.1.S1_at    | MmugDNA.4961.1  | 12.09 | 11.68 | 0.13 | 0.22 | 1.33  | 0.034693 | 0.008441 | 0.333612 | 0.121922 |
| MmugDNA.4963.1.S1_at    | MmugDNA.4963.1  | 4.66  | 4.62  | 0.01 | 0.04 | 1.03  | 0.120338 | 0.105082 | 0.485252 | 0.366755 |
| MmugDNA.4964.1.S1_at    | MmugDNA.4964.1  | 8.98  | 9.32  | 0.3  | 0.39 | -1.26 | 0.152948 | 0.081196 | 0.517325 | 0.329351 |
| MmugDNA.4965.1.S1_at    | MmugDNA.4965.1  | 4.56  | 4.55  | 0.05 | 0.07 | 1.01  | 0.617427 | 0.755733 | 0.824687 | 0.857771 |
| MmugDNA.4966.1.S1_at    | MmugDNA.4966.1  | 6.98  | 7.28  | 0.24 | 0.16 | -1.23 | 0.204181 | 0.355844 | 0.566614 | 0.597864 |
| MmugDNA.4968.1.S1_at    | MmugDNA.4968.1  | 5.96  | 5.67  | 0.26 | 0.2  | 1.23  | 0.183    | 0.203547 | 0.547134 | 0.477767 |
| MmugDNA.4970.1.S1_at    | MmugDNA.4970.1  | 6.18  | 6.7   | 0.57 | 0.85 | -1.43 | 0.38898  | 0.307038 | 0.692814 | 0.563427 |
| MmugDNA.4971.1.S1_at    | MmugDNA.4971.1  | 3.18  | 3.17  | 0.36 | 0.3  | 1.01  | 0.867699 | 0.973652 | 0.947237 | 0.985648 |
| MmugDNA.4972.1.S1_at    | MmugDNA.4972.1  | 4.18  | 4.02  | 0.33 | 0.17 | 1.12  | 0.174994 | 0.225931 | 0.53876  | 0.498344 |
| MmugDNA.4975.1.S1_at    | MmugDNA.4975.1  | 7.04  | 7.59  | 0.1  | 0.33 | -1.47 | 0.053267 | 0.036317 | 0.379848 | 0.235105 |
| MmugDNA.4976.1.S1_at    | MmugDNA.4976.1  | 6.09  | 5.31  | 0.8  | 0.54 | 1.72  | 0.577209 | 0.651039 | 0.803447 | 0.795993 |
| MmugDNA.4977.1.S1_at    | MmugDNA.4977.1  | 5.36  | 5.55  | 0.68 | 1.38 | -1.14 | 0.520304 | 0.231137 | 0.77071  | 0.5029   |
| MmugDNA.4978.1.S1_at    | MmugDNA.4978.1  | 4.51  | 4.29  | 0.63 | 0.22 | 1.17  | 0.520944 | 0.687963 | 0.77105  | 0.817831 |
| MmugDNA.4979.1.S1_at    | MmugDNA.4979.1  | 4.12  | 4.12  | 0.17 | 0.04 | 1     | 0.374162 | 0.0738   | 0.683345 | 0.317146 |
| MmugDNA.498.1.S1_at     | MmugDNA.498.1   | 3.01  | 2.84  | 0.21 | 0.1  | 1.13  | 0.211946 | 0.258176 | 0.572419 | 0.525574 |
| MmugDNA.4980.1.S1_at    | MmugDNA.4980.1  | 7.2   | 7.04  | 0.09 | 0.11 | 1.12  | 0.37225  | 0.212802 | 0.682724 | 0.486769 |
| MmugDNA.4981.1.S1_at    | MmugDNA.4981.1  | 3.33  | 3.4   | 0.48 | 0    | -1.05 | 0.496022 | 0.735643 | 0.757394 | 0.847031 |
| MmugDNA.4982.1.S1_at    | MmugDNA.4982.1  | 11.53 | 10.69 | 0.05 | 0.35 | 1.79  | 0.029523 | 0.010282 | 0.31466  | 0.132774 |
| MmugDNA.4984.1.S1_at    | MmugDNA.4984.1  | 3.7   | 3.7   | 0.09 | 0.13 | -1    | 0.648685 | 0.761112 | 0.842124 | 0.861205 |
| MmugDNA.4985.1.S1_at    | MmugDNA.4985.1  | 8.45  | 7.87  | 0.26 | 0.37 | 1.5   | 0.044811 | 0.039591 | 0.359043 | 0.244002 |
| MmugDNA.4987.1.S1_at    | MmugDNA.4987.1  | 5.6   | 5.6   | 0.86 | 0.17 | 1     | 0.478283 | 0.621812 | 0.747114 | 0.776383 |
| MmugDNA.4988.1.S1_at    | MmugDNA.4988.1  | 4.79  | 4.13  | 0.57 | 0.17 | 1.57  | 0.08518  | 0.08023  | 0.438507 | 0.32783  |
| MmugDNA.4989.1.S1_at    | MmugDNA.4989.1  | 4.08  | 5     | 0.21 | 0.42 | -1.89 | 0.033746 | 0.016677 | 0.330119 | 0.163509 |
| MmugDNA.499.1.S1_at     | MmugDNA.499.1   | 3.09  | 3.07  | 0.08 | 0.1  | 1.01  | 0.739273 | 0.593457 | 0.888118 | 0.758299 |
| MmugDNA.4990.1.S1_at    | MmugDNA.4990.1  | 4.33  | 4.15  | 0.06 | 0.39 | 1.13  | 0.806378 | 0.942583 | 0.920614 | 0.967453 |
| MmugDNA.4991.1.S1_at    | MmugDNA.4991.1  | 7.52  | 8.02  | 0.48 | 0.92 | -1.42 | 0.509251 | 0.704844 | 0.764295 | 0.828846 |
| MmugDNA.23460.1.S1_s_at | MmugDNA.23460.1 | 9.57  | 10.03 | 0.38 | 1.1  | -1.38 | 0.664619 | 0.816596 | 0.849598 | 0.894202 |
| MmugDNA.4992.1.S1_at    | MmugDNA.4992.1  | 6.96  | 6.87  | 0.26 | 1.3  | 1.06  | 0.938573 | 0.94816  | 0.976565 | 0.97046  |
| MmugDNA.4994.1.S1_at    | MmugDNA.4994.1  | 5.21  | 5.15  | 0.18 | 0.08 | 1.04  | 0.204473 | 0.260134 | 0.56696  | 0.526776 |
| MmugDNA.4995.1.S1_at    | MmugDNA.4995.1  | 7.77  | 7.81  | 0.08 | 0.26 | -1.02 | 0.800354 | 0.4357   | 0.917564 | 0.655471 |
| MmugDNA.5.1.S1_at       | MmugDNA.5.1     | 5.2   | 4.89  | 1.36 | 0.38 | 1.24  | 0.630171 | 0.742177 | 0.83195  | 0.850645 |
| MmugDNA.500.1.S1_at     | MmugDNA.500.1   | 3.74  | 3.78  | 0.08 | 0.21 | -1.03 | 0.176082 | 0.120129 | 0.539627 | 0.388869 |
| MmugDNA.5000.1.S1_at    | MmugDNA.5000.1  | 3.31  | 3.27  | 1.7  | 0.62 | 1.03  | 0.552806 | 0.710224 | 0.789705 | 0.831904 |
| MmugDNA.5001.1.S1_at    | MmugDNA.5001.1  | 5.71  | 5.76  | 0.16 | 0.08 | -1.03 | 0.493489 | 0.675039 | 0.756226 | 0.810141 |
| MmugDNA.5002.1.S1_at    | MmugDNA.5002.1  | 3.25  | 3.38  | 0.29 | 0.24 | -1.09 | 0.986776 | 0.898117 | 0.99532  | 0.941987 |
| MmugDNA.5003.1.S1_at    | MmugDNA.5003.1  | 12.25 | 10.84 | 0.05 | 0.75 | 2.67  | 0.033235 | 0.019858 | 0.327577 | 0.177189 |
| MmugDNA.5004.1.S1_at    | MmugDNA.5004.1  | 10.82 | 9.87  | 0.07 | 1.13 | 1.94  | 0.662939 | 0.406703 | 0.848783 | 0.634487 |
| MmugDNA.5005.1.S1_at    | MmugDNA.5005.1  | 11.91 | 11.76 | 0.11 | 0.11 | 1.1   | 0.078643 | 0.134443 | 0.428609 | 0.406605 |
| MmugDNA.5006.1.S1_x_at  | MmugDNA.5006.1  | 7.33  | 7.33  | 0.79 | 0.2  | -1    | 0.291301 | 0.374733 | 0.628798 | 0.613037 |
| MmugDNA.5007.1.S1_at    | MmugDNA.5007.1  | 4.95  | 5.71  | 0.09 | 0.49 | -1.7  | 0.061244 | 0.056685 | 0.395362 | 0.284204 |

|                        |                |       |       |      |      |       |          |          |          |          |
|------------------------|----------------|-------|-------|------|------|-------|----------|----------|----------|----------|
| MmugDNA.5008.1.S1_at   | MmugDNA.5008.1 | 3.38  | 3.42  | 0.2  | 0.11 | -1.03 | 0.87756  | 0.224766 | 0.950953 | 0.497617 |
| MmugDNA.5009.1.S1_at   | MmugDNA.5009.1 | 11.55 | 10.82 | 0.26 | 0.35 | 1.66  | 0.074541 | 0.078431 | 0.420428 | 0.325193 |
| MmugDNA.501.1.S1_at    | MmugDNA.501.1  | 4.08  | 4.27  | 0.03 | 0.35 | -1.14 | 0.443244 | 0.410156 | 0.726011 | 0.637086 |
| MmugDNA.5010.1.S1_s_at | MmugDNA.5010.1 | 8.91  | 8.31  | 0.09 | 0.78 | 1.51  | 0.260878 | 0.290754 | 0.60749  | 0.551395 |
| MmugDNA.5011.1.S1_at   | MmugDNA.5011.1 | 6.03  | 5.7   | 0.58 | 0.64 | 1.26  | 0.473085 | 0.157984 | 0.744128 | 0.433725 |
| MmugDNA.5013.1.S1_at   | MmugDNA.5013.1 | 9.76  | 8.81  | 0.39 | 0.75 | 1.93  | 0.45107  | 0.459977 | 0.731469 | 0.671989 |
| MmugDNA.1879.1.S1_s_at | MmugDNA.1879.1 | 4.55  | 5.74  | 1.3  | 0.22 | -2.29 | 0.266039 | 0.082141 | 0.611558 | 0.330937 |
| MmugDNA.5015.1.S1_s_at | MmugDNA.5015.1 | 3.15  | 3.06  | 0.06 | 0.05 | 1.06  | 0.106585 | 0.292723 | 0.467176 | 0.552783 |
| MmugDNA.5016.1.S1_at   | MmugDNA.5016.1 | 5.47  | 5.47  | 0.06 | 0.04 | 1     | 0.232424 | 0.165434 | 0.587814 | 0.441634 |
| MmugDNA.5019.1.S1_at   | MmugDNA.5019.1 | 4.46  | 4.28  | 0.04 | 0.52 | 1.13  | 0.753499 | 0.269767 | 0.894899 | 0.53503  |
| MmugDNA.502.1.S1_at    | MmugDNA.502.1  | 6.03  | 6.06  | 0.01 | 0.19 | -1.02 | 0.840144 | 0.507735 | 0.93556  | 0.703317 |
| MmugDNA.5020.1.S1_at   | MmugDNA.5020.1 | 8.23  | 6.7   | 0.63 | 0.72 | 2.88  | 0.045704 | 0.243969 | 0.361537 | 0.514069 |
| MmugDNA.5021.1.S1_at   | MmugDNA.5021.1 | 6.75  | 6.45  | 0.24 | 0.23 | 1.23  | 0.459001 | 0.088375 | 0.735862 | 0.341842 |
| MmugDNA.5022.1.S1_at   | MmugDNA.5022.1 | 4.76  | 4.9   | 0.41 | 0.33 | -1.1  | 0.769533 | 0.091329 | 0.903086 | 0.346281 |
| MmugDNA.5025.1.S1_at   | MmugDNA.5025.1 | 6.02  | 6.13  | 0.82 | 0.22 | -1.08 | 0.500332 | 0.526331 | 0.759491 | 0.71554  |
| MmugDNA.5026.1.S1_at   | MmugDNA.5026.1 | 8.91  | 7.64  | 0.68 | 0.12 | 2.41  | 0.087421 | 0.064027 | 0.441776 | 0.299168 |
| MmugDNA.5027.1.S1_at   | MmugDNA.5027.1 | 4.6   | 4     | 0.31 | 0.43 | 1.51  | 0.157194 | 0.187019 | 0.521923 | 0.462938 |
| MmugDNA.5029.1.S1_at   | MmugDNA.5029.1 | 3.38  | 3.71  | 0.25 | 0.2  | -1.26 | 0.450391 | 0.446216 | 0.730948 | 0.662743 |
| MmugDNA.5030.1.S1_at   | MmugDNA.5030.1 | 5.5   | 5.52  | 0.3  | 0.41 | -1.02 | 0.805665 | 0.790519 | 0.92032  | 0.878895 |
| MmugDNA.5031.1.S1_at   | MmugDNA.5031.1 | 4.01  | 4.23  | 0.19 | 0.07 | -1.17 | 0.24283  | 0.302383 | 0.594618 | 0.560109 |
| MmugDNA.5032.1.S1_at   | MmugDNA.5032.1 | 4.12  | 3.68  | 0.35 | 0.06 | 1.36  | 0.048534 | 0.034074 | 0.369003 | 0.228505 |
| MmugDNA.5033.1.S1_at   | MmugDNA.5033.1 | 5.66  | 6.08  | 0.1  | 0.37 | -1.34 | 0.162335 | 0.302434 | 0.526658 | 0.560109 |
| MmugDNA.5034.1.S1_at   | MmugDNA.5034.1 | 10    | 8.97  | 0.44 | 0.8  | 2.04  | 0.109179 | 0.110207 | 0.470811 | 0.374349 |
| MmugDNA.5035.1.S1_at   | MmugDNA.5035.1 | 6.55  | 6.6   | 0.02 | 0.13 | -1.04 | 0.177482 | 0.170606 | 0.541506 | 0.447204 |
| MmugDNA.5036.1.S1_at   | MmugDNA.5036.1 | 4.81  | 4.5   | 0.15 | 0.78 | 1.23  | 0.850133 | 0.444859 | 0.939853 | 0.662072 |
| MmugDNA.5038.1.S1_at   | MmugDNA.5038.1 | 4.43  | 4.57  | 0.32 | 0.18 | -1.11 | 0.783158 | 0.920616 | 0.909454 | 0.955258 |
| MmugDNA.5039.1.S1_at   | MmugDNA.5039.1 | 6.72  | 6.89  | 0.14 | 0.46 | -1.13 | 0.900575 | 0.342665 | 0.96036  | 0.588666 |
| MmugDNA.504.1.S1_at    | MmugDNA.504.1  | 5.51  | 5.54  | 0.22 | 0.17 | -1.02 | 0.485866 | 0.419446 | 0.751144 | 0.643474 |
| MmugDNA.5040.1.S1_at   | MmugDNA.5040.1 | 7.07  | 8.3   | 0.59 | 0.53 | -2.35 | 0.052785 | 0.046578 | 0.378449 | 0.260267 |
| MmugDNA.5041.1.S1_at   | MmugDNA.5041.1 | 6.14  | 6.45  | 0.26 | 0.3  | -1.24 | 0.555688 | 0.762189 | 0.791477 | 0.861664 |
| MmugDNA.5042.1.S1_at   | MmugDNA.5042.1 | 4.28  | 4.2   | 0.98 | 0.23 | 1.05  | 0.360225 | 0.445715 | 0.674277 | 0.662489 |
| MmugDNA.5044.1.S1_at   | MmugDNA.5044.1 | 8.6   | 7.35  | 0.1  | 0.8  | 2.37  | 0.162328 | 0.190142 | 0.526658 | 0.465796 |
| MmugDNA.5046.1.S1_at   | MmugDNA.5046.1 | 6.07  | 6.23  | 0.18 | 0.34 | -1.12 | 0.73196  | 0.062227 | 0.884095 | 0.296307 |
| MmugDNA.5047.1.S1_at   | MmugDNA.5047.1 | 8.32  | 7.87  | 0.34 | 0.13 | 1.36  | 0.078516 | 0.140042 | 0.428609 | 0.413386 |
| MmugDNA.5048.1.S1_at   | MmugDNA.5048.1 | 4.79  | 4.7   | 0.1  | 0.05 | 1.06  | 0.505347 | 0.286024 | 0.761594 | 0.547512 |
| MmugDNA.5049.1.S1_at   | MmugDNA.5049.1 | 5.11  | 5.08  | 0.19 | 0.1  | 1.02  | 0.958486 | 0.558816 | 0.984324 | 0.735887 |
| MmugDNA.5050.1.S1_at   | MmugDNA.5050.1 | 7.07  | 7.28  | 0.25 | 0.15 | -1.15 | 0.695971 | 0.871284 | 0.865073 | 0.926843 |
| MmugDNA.5053.1.S1_at   | MmugDNA.5053.1 | 5.9   | 5.88  | 0.51 | 0.22 | 1.01  | 0.860369 | 0.811998 | 0.943655 | 0.891493 |
| MmugDNA.5054.1.S1_at   | MmugDNA.5054.1 | 7.57  | 7.75  | 0.56 | 0.44 | -1.14 | 0.561097 | 0.661785 | 0.79462  | 0.801943 |
| MmugDNA.5055.1.S1_at   | MmugDNA.5055.1 | 4.73  | 4.57  | 0.11 | 0.11 | 1.11  | 0.762514 | 0.078979 | 0.899996 | 0.325986 |
| MmugDNA.5056.1.S1_at   | MmugDNA.5056.1 | 6.03  | 6.82  | 0.16 | 0.79 | -1.72 | 0.127643 | 0.126399 | 0.493916 | 0.396917 |

|                         |                 |       |       |      |      |       |          |          |          |          |
|-------------------------|-----------------|-------|-------|------|------|-------|----------|----------|----------|----------|
| MmugDNA.5057.1.S1_s_at  | MmugDNA.5057.1  | 10.42 | 10.4  | 0.19 | 0.36 | 1.02  | 0.834885 | 0.449392 | 0.933073 | 0.665037 |
| MmugDNA.5060.1.S1_at    | MmugDNA.5060.1  | 9.94  | 9.75  | 0.18 | 0.16 | 1.14  | 0.049853 | 0.072765 | 0.372242 | 0.315651 |
| MmugDNA.5061.1.S1_at    | MmugDNA.5061.1  | 9.79  | 9.86  | 0.23 | 0.65 | -1.05 | 0.814669 | 0.955154 | 0.924758 | 0.9746   |
| MmugDNA.5062.1.S1_at    | MmugDNA.5062.1  | 5.02  | 4.94  | 0.04 | 0.25 | 1.06  | 0.795489 | 0.508421 | 0.915216 | 0.703604 |
| MmugDNA.5065.1.S1_at    | MmugDNA.5065.1  | 2.6   | 2.59  | 0.08 | 0.09 | 1     | 0.943925 | 0.924338 | 0.97854  | 0.957351 |
| MmugDNA.5065.1.S1_s_at  | MmugDNA.5065.1  | 6.77  | 7.14  | 0.4  | 0.55 | -1.3  | 0.383789 | 0.425694 | 0.689539 | 0.648009 |
| MmugDNA.5066.1.S1_at    | MmugDNA.5066.1  | 5.31  | 5.57  | 0.29 | 0.61 | -1.2  | 0.186821 | 0.246188 | 0.550106 | 0.515883 |
| MmugDNA.5067.1.S1_at    | MmugDNA.5067.1  | 4.94  | 4.95  | 0.11 | 0.26 | -1.01 | 0.908131 | 0.68954  | 0.963616 | 0.818901 |
| MmugDNA.5068.1.S1_at    | MmugDNA.5068.1  | 7.2   | 7.48  | 0.28 | 0.5  | -1.21 | 0.412243 | 0.452629 | 0.707873 | 0.66723  |
| MmugDNA.5069.1.S1_at    | MmugDNA.5069.1  | 6.1   | 6.5   | 0.18 | 0.18 | -1.32 | 0.285917 | 0.327155 | 0.625351 | 0.577136 |
| MmugDNA.507.1.S1_at     | MmugDNA.507.1   | 8.67  | 8.38  | 0.04 | 0.11 | 1.23  | 0.006721 | 0.017265 | 0.20158  | 0.166406 |
| MmugDNA.5070.1.S1_at    | MmugDNA.5070.1  | 9.58  | 8.39  | 0.7  | 1.48 | 2.27  | 0.803879 | 0.889164 | 0.919349 | 0.936796 |
| MmugDNA.5071.1.S1_s_at  | MmugDNA.5071.1  | 6.54  | 6.59  | 0.23 | 0.04 | -1.04 | 0.848618 | 0.663506 | 0.939211 | 0.803016 |
| MmugDNA.5072.1.S1_at    | MmugDNA.5072.1  | 7.25  | 7.06  | 0.6  | 0.49 | 1.14  | 0.746681 | 0.008284 | 0.891546 | 0.12078  |
| MmugDNA.5073.1.S1_at    | MmugDNA.5073.1  | 4.93  | 5.01  | 0.42 | 0.07 | -1.05 | 0.664252 | 0.594534 | 0.84947  | 0.758623 |
| MmugDNA.19262.1.S1_at   | MmugDNA.19262.1 | 2.73  | 2.69  | 0.01 | 0.01 | 1.03  | 0.006398 | 0.000048 | 0.199157 | 0.025273 |
| MmugDNA.19262.1.S1_s_at | MmugDNA.19262.1 | 2.93  | 2.95  | 0.12 | 0.09 | -1.01 | 0.940647 | 0.758661 | 0.97746  | 0.859716 |
| MmugDNA.5074.1.S1_at    | MmugDNA.5074.1  | 9.23  | 8.94  | 0.01 | 0.42 | 1.22  | 0.286561 | 0.23413  | 0.625572 | 0.505319 |
| MmugDNA.5076.1.S1_at    | MmugDNA.5076.1  | 7.9   | 7.89  | 0.2  | 0.28 | 1.01  | 0.560043 | 0.774227 | 0.79419  | 0.868735 |
| MmugDNA.5078.1.S1_at    | MmugDNA.5078.1  | 6.81  | 7.69  | 0.37 | 0.41 | -1.83 | 0.059112 | 0.065494 | 0.391013 | 0.301415 |
| MmugDNA.5079.1.S1_at    | MmugDNA.5079.1  | 6.92  | 7     | 0.18 | 0.18 | -1.06 | 0.877701 | 0.508132 | 0.950993 | 0.70337  |
| MmugDNA.508.1.S1_at     | MmugDNA.508.1   | 3.61  | 4     | 0.1  | 0.3  | -1.31 | 0.1823   | 0.138553 | 0.546703 | 0.411557 |
| MmugDNA.5080.1.S1_s_at  | MmugDNA.5080.1  | 10.91 | 11.51 | 0.3  | 0.29 | -1.51 | 0.034909 | 0.016254 | 0.334018 | 0.161612 |
| MmugDNA.5081.1.S1_at    | MmugDNA.5081.1  | 2.76  | 2.87  | 0.05 | 0.1  | -1.08 | 0.104341 | 0.185734 | 0.464351 | 0.461631 |
| MmugDNA.5082.1.S1_at    | MmugDNA.5082.1  | 3.57  | 3.26  | 0.06 | 0.16 | 1.24  | 0.020762 | 0.182517 | 0.280352 | 0.459065 |
| MmugDNA.5083.1.S1_at    | MmugDNA.5083.1  | 3.24  | 3.3   | 0.16 | 0.15 | -1.04 | 0.3783   | 0.325111 | 0.686432 | 0.575547 |
| MmugDNA.5084.1.S1_at    | MmugDNA.5084.1  | 5.85  | 5.91  | 0.02 | 0.05 | -1.04 | 0.107887 | 0.226991 | 0.468553 | 0.499286 |
| MmugDNA.5085.1.S1_at    | MmugDNA.5085.1  | 9.26  | 8.68  | 0.17 | 1.21 | 1.5   | 0.784363 | 0.868605 | 0.910126 | 0.925383 |
| MmugDNA.5088.1.S1_at    | MmugDNA.5088.1  | 6.32  | 6.35  | 0.24 | 0.2  | -1.02 | 0.685681 | 0.675637 | 0.859316 | 0.810429 |
| MmugDNA.5089.1.S1_at    | MmugDNA.5089.1  | 7.86  | 8.5   | 0.3  | 0.69 | -1.55 | 0.125503 | 0.144619 | 0.491333 | 0.418466 |
| MmugDNA.509.1.S1_at     | MmugDNA.509.1   | 7.1   | 7     | 0.21 | 0.06 | 1.07  | 0.666096 | 0.820371 | 0.850262 | 0.896496 |
| MmugDNA.5092.1.S1_at    | MmugDNA.5092.1  | 8.49  | 8.88  | 0.18 | 0.59 | -1.31 | 0.319055 | 0.493431 | 0.648688 | 0.694107 |
| MmugDNA.5093.1.S1_at    | MmugDNA.5093.1  | 6.93  | 6.89  | 0.16 | 0.23 | 1.03  | 0.655552 | 0.86601  | 0.845005 | 0.923791 |
| MmugDNA.5096.1.S1_at    | MmugDNA.5096.1  | 4.91  | 4.9   | 0.31 | 0.16 | 1     | 0.984126 | 0.857579 | 0.99433  | 0.918698 |
| MmugDNA.5097.1.S1_at    | MmugDNA.5097.1  | 5.12  | 5.23  | 0.24 | 0.18 | -1.08 | 0.499013 | 0.12125  | 0.758833 | 0.390351 |
| MmugDNA.5099.1.S1_at    | MmugDNA.5099.1  | 4.67  | 4.19  | 1.2  | 0.42 | 1.4   | 0.267306 | 0.231422 | 0.612416 | 0.503138 |
| MmugDNA.51.1.S1_at      | MmugDNA.51.1    | 11.14 | 11.48 | 0.04 | 0.34 | -1.27 | 0.519422 | 0.615508 | 0.770186 | 0.772025 |
| MmugDNA.5100.1.S1_at    | MmugDNA.5100.1  | 7.5   | 7.92  | 0.64 | 0.64 | -1.34 | 0.590049 | 0.694784 | 0.809722 | 0.822578 |
| MmugDNA.5102.1.S1_at    | MmugDNA.5102.1  | 7.55  | 7.45  | 0.48 | 1.26 | 1.07  | 0.511293 | 0.681074 | 0.765295 | 0.813783 |
| MmugDNA.5104.1.S1_at    | MmugDNA.5104.1  | 3.62  | 3.57  | 0.03 | 0.15 | 1.03  | 0.216499 | 0.588446 | 0.576121 | 0.754925 |
| MmugDNA.5105.1.S1_at    | MmugDNA.5105.1  | 12.92 | 12.78 | 0.07 | 0.09 | 1.1   | 0.103371 | 0.088785 | 0.462888 | 0.342524 |

|                        |                |       |       |      |      |       |          |          |          |          |
|------------------------|----------------|-------|-------|------|------|-------|----------|----------|----------|----------|
| MmugDNA.5106.1.S1_at   | MmugDNA.5106.1 | 3.49  | 3.71  | 0.06 | 0.26 | -1.16 | 0.138292 | 0.125836 | 0.505691 | 0.396315 |
| MmugDNA.5107.1.S1_at   | MmugDNA.5107.1 | 11.5  | 11.51 | 0.05 | 0.19 | -1.01 | 0.735004 | 0.752474 | 0.88601  | 0.855897 |
| MmugDNA.5108.1.S1_at   | MmugDNA.5108.1 | 4.95  | 4.67  | 0.16 | 0.1  | 1.21  | 0.301272 | 0.03717  | 0.636303 | 0.237285 |
| MmugDNA.5109.1.S1_at   | MmugDNA.5109.1 | 11.11 | 11.85 | 0.26 | 0.28 | -1.66 | 0.039359 | 0.008199 | 0.346992 | 0.12024  |
| MmugDNA.5110.1.S1_at   | MmugDNA.5110.1 | 12.64 | 12.41 | 0.15 | 0.14 | 1.17  | 0.106388 | 0.256784 | 0.466831 | 0.524607 |
| MmugDNA.5111.1.S1_at   | MmugDNA.5111.1 | 5     | 5     | 0.31 | 0.17 | 1.01  | 0.804047 | 0.945314 | 0.919371 | 0.968942 |
| MmugDNA.5113.1.S1_at   | MmugDNA.5113.1 | 4.09  | 4.2   | 0.15 | 0.34 | -1.08 | 0.362634 | 0.555391 | 0.676176 | 0.733767 |
| MmugDNA.5114.1.S1_at   | MmugDNA.5114.1 | 4.25  | 4.26  | 0.18 | 0    | -1.01 | 0.447246 | 0.678572 | 0.728865 | 0.812261 |
| MmugDNA.5115.1.S1_at   | MmugDNA.5115.1 | 3.22  | 3.34  | 0.07 | 0.16 | -1.09 | 0.456674 | 0.635349 | 0.734529 | 0.785362 |
| MmugDNA.5116.1.S1_at   | MmugDNA.5116.1 | 4.29  | 4.31  | 0.11 | 0.11 | -1.01 | 0.814901 | 0.112453 | 0.924789 | 0.377784 |
| MmugDNA.5117.1.S1_at   | MmugDNA.5117.1 | 10.26 | 10.03 | 0.1  | 0.33 | 1.17  | 0.304762 | 0.40609  | 0.638784 | 0.634197 |
| MmugDNA.5117.1.S1_s_at | MmugDNA.5117.1 | 10.53 | 10.26 | 0.06 | 0.23 | 1.21  | 0.172208 | 0.257879 | 0.535575 | 0.525467 |
| MmugDNA.5118.1.S1_at   | MmugDNA.5118.1 | 5.12  | 5.3   | 0.36 | 0.35 | -1.13 | 0.797116 | 0.595366 | 0.915858 | 0.759091 |
| MmugDNA.5119.1.S1_at   | MmugDNA.5119.1 | 7.98  | 8.93  | 0.21 | 0.7  | -1.93 | 0.256102 | 0.323012 | 0.603805 | 0.574313 |
| MmugDNA.5120.1.S1_at   | MmugDNA.5120.1 | 5.42  | 5.65  | 0.34 | 0.22 | -1.18 | 0.17961  | 0.298084 | 0.543818 | 0.556726 |
| MmugDNA.5121.1.S1_at   | MmugDNA.5121.1 | 9.71  | 9.21  | 0.41 | 0.26 | 1.41  | 0.230321 | 0.201658 | 0.587222 | 0.476208 |
| MmugDNA.5122.1.S1_at   | MmugDNA.5122.1 | 6.83  | 6.36  | 0.23 | 0.12 | 1.38  | 0.034472 | 0.037375 | 0.333215 | 0.237776 |
| MmugDNA.5123.1.S1_at   | MmugDNA.5123.1 | 5.74  | 5.77  | 0.11 | 0.14 | -1.02 | 0.851075 | 0.720269 | 0.940172 | 0.838202 |
| MmugDNA.5124.1.S1_at   | MmugDNA.5124.1 | 4.1   | 4.18  | 0.07 | 0.14 | -1.06 | 0.258382 | 0.21589  | 0.60566  | 0.489536 |
| MmugDNA.5127.1.S1_at   | MmugDNA.5127.1 | 5.29  | 5.44  | 0.23 | 0.19 | -1.11 | 0.343356 | 0.460852 | 0.663554 | 0.672749 |
| MmugDNA.5128.1.S1_at   | MmugDNA.5128.1 | 8.53  | 8.17  | 0.17 | 0.14 | 1.29  | 0.073137 | 0.149027 | 0.418452 | 0.423337 |
| MmugDNA.513.1.S1_at    | MmugDNA.513.1  | 4.76  | 4.53  | 0.42 | 0.25 | 1.17  | 0.17201  | 0.021443 | 0.535422 | 0.183342 |
| MmugDNA.5131.1.S1_at   | MmugDNA.5131.1 | 6.2   | 6.52  | 0.23 | 0.07 | -1.24 | 0.361898 | 0.333848 | 0.675509 | 0.581995 |
| MmugDNA.5132.1.S1_at   | MmugDNA.5132.1 | 12.42 | 12.25 | 0.28 | 0.31 | 1.13  | 0.246643 | 0.257492 | 0.597806 | 0.525247 |
| MmugDNA.5133.1.S1_at   | MmugDNA.5133.1 | 8.47  | 8.06  | 0.24 | 0.98 | 1.33  | 0.791291 | 0.364771 | 0.913313 | 0.605071 |
| MmugDNA.5135.1.S1_at   | MmugDNA.5135.1 | 4.03  | 3.78  | 0.77 | 0.1  | 1.19  | 0.538564 | 0.358039 | 0.780674 | 0.599604 |
| MmugDNA.5136.1.S1_at   | MmugDNA.5136.1 | 5.02  | 5.06  | 0.11 | 0.13 | -1.03 | 0.420947 | 0.291161 | 0.712792 | 0.551652 |
| MmugDNA.5138.1.S1_at   | MmugDNA.5138.1 | 4.48  | 4.96  | 0.12 | 0.11 | -1.4  | 0.00882  | 0.021332 | 0.221301 | 0.182834 |
| MmugDNA.5140.1.S1_at   | MmugDNA.5140.1 | 6.39  | 5.78  | 0.2  | 0.16 | 1.53  | 0.024329 | 0.065546 | 0.294535 | 0.301415 |
| MmugDNA.5141.1.S1_at   | MmugDNA.5141.1 | 11.37 | 10.97 | 0.04 | 0.2  | 1.32  | 0.043982 | 0.110683 | 0.357596 | 0.374854 |
| MmugDNA.5142.1.S1_at   | MmugDNA.5142.1 | 3.01  | 2.79  | 0.55 | 0.37 | 1.17  | 0.440835 | 0.533755 | 0.724535 | 0.719857 |
| MmugDNA.5143.1.S1_at   | MmugDNA.5143.1 | 10.67 | 10.88 | 0.29 | 0.36 | -1.16 | 0.44899  | 0.554079 | 0.729998 | 0.732953 |
| MmugDNA.5143.1.S1_s_at | MmugDNA.5143.1 | 11.22 | 11.46 | 0.3  | 0.4  | -1.18 | 0.465354 | 0.478798 | 0.739873 | 0.684733 |
| MmugDNA.5144.1.S1_at   | MmugDNA.5144.1 | 3.3   | 3.19  | 0.06 | 0.03 | 1.08  | 0.069661 | 0.068406 | 0.412699 | 0.307955 |
| MmugDNA.5145.1.S1_at   | MmugDNA.5145.1 | 3.07  | 3.28  | 0.12 | 0.11 | -1.15 | 0.10016  | 0.119834 | 0.460749 | 0.388577 |
| MmugDNA.5147.1.S1_at   | MmugDNA.5147.1 | 9.63  | 9.61  | 0.04 | 0.25 | 1.01  | 0.302426 | 0.415627 | 0.63692  | 0.641007 |
| MmugDNA.5147.1.S1_s_at | MmugDNA.5147.1 | 9.61  | 9.5   | 0.01 | 0.26 | 1.08  | 0.155118 | 0.144648 | 0.519871 | 0.418477 |
| MmugDNA.5148.1.S1_at   | MmugDNA.5148.1 | 9.86  | 9.98  | 0.32 | 0.45 | -1.08 | 0.840093 | 0.774309 | 0.935531 | 0.868751 |
| MmugDNA.5149.1.S1_at   | MmugDNA.5149.1 | 3.96  | 4     | 0.24 | 0.2  | -1.03 | 0.636701 | 0.170895 | 0.835714 | 0.447556 |
| MmugDNA.5150.1.S1_at   | MmugDNA.5150.1 | 6.26  | 5.5   | 0.96 | 0.88 | 1.69  | 0.372294 | 0.401896 | 0.68274  | 0.63109  |
| MmugDNA.5151.1.S1_at   | MmugDNA.5151.1 | 9.43  | 9.48  | 0.36 | 0.28 | -1.04 | 0.534474 | 0.140319 | 0.77876  | 0.413498 |

|                        |                |       |       |      |      |       |          |          |          |          |
|------------------------|----------------|-------|-------|------|------|-------|----------|----------|----------|----------|
| MmugDNA.5151.1.S1_x_at | MmugDNA.5151.1 | 9.07  | 9.2   | 0.37 | 0.18 | -1.09 | 0.477733 | 0.119085 | 0.746913 | 0.387386 |
| MmugDNA.5152.1.S1_at   | MmugDNA.5152.1 | 4.59  | 4.47  | 0.58 | 0.22 | 1.08  | 0.2214   | 0.283957 | 0.580218 | 0.546237 |
| MmugDNA.5154.1.S1_at   | MmugDNA.5154.1 | 6.38  | 6.26  | 0.49 | 0.36 | 1.09  | 0.855119 | 0.965183 | 0.941454 | 0.98061  |
| MmugDNA.5156.1.S1_at   | MmugDNA.5156.1 | 10.76 | 10.58 | 0.16 | 0.77 | 1.13  | 0.216155 | 0.205818 | 0.575959 | 0.480083 |
| MmugDNA.5158.1.S1_at   | MmugDNA.5158.1 | 4.45  | 4.68  | 0.88 | 0.22 | -1.17 | 0.645495 | 0.819929 | 0.840383 | 0.896291 |
| MmugDNA.5159.1.S1_x_at | MmugDNA.5159.1 | 7.13  | 6.89  | 0.63 | 0.37 | 1.18  | 0.409033 | 0.395308 | 0.705716 | 0.627396 |
| MmugDNA.516.1.S1_at    | MmugDNA.516.1  | 3.5   | 3.44  | 0.09 | 0.02 | 1.04  | 0.321277 | 0.566626 | 0.649967 | 0.740707 |
| MmugDNA.5161.1.S1_at   | MmugDNA.5161.1 | 6.95  | 7.22  | 0.11 | 0.08 | -1.21 | 0.015545 | 0.049491 | 0.259136 | 0.267375 |
| MmugDNA.5161.1.S1_x_at | MmugDNA.5161.1 | 6.81  | 7.12  | 0.12 | 0.11 | -1.24 | 0.017562 | 0.018915 | 0.267454 | 0.173025 |
| MmugDNA.5162.1.S1_at   | MmugDNA.5162.1 | 3.46  | 3.61  | 0.07 | 0.1  | -1.11 | 0.110824 | 0.443489 | 0.472704 | 0.661262 |
| MmugDNA.5163.1.S1_at   | MmugDNA.5163.1 | 7.3   | 8.01  | 0.4  | 0.41 | -1.63 | 0.068639 | 0.037326 | 0.410319 | 0.237622 |
| MmugDNA.5164.1.S1_at   | MmugDNA.5164.1 | 6     | 6.41  | 0.14 | 0.28 | -1.33 | 0.053399 | 0.067286 | 0.380257 | 0.305408 |
| MmugDNA.5166.1.S1_at   | MmugDNA.5166.1 | 3.51  | 3.51  | 0.12 | 0.08 | 1     | 0.785217 | 0.134633 | 0.910578 | 0.406629 |
| MmugDNA.5168.1.S1_at   | MmugDNA.5168.1 | 4.04  | 3.9   | 0.26 | 0.08 | 1.11  | 0.20501  | 0.265609 | 0.567457 | 0.531449 |
| MmugDNA.5171.1.S1_at   | MmugDNA.5171.1 | 5.63  | 5.1   | 0.43 | 0.12 | 1.45  | 0.087763 | 0.050558 | 0.442117 | 0.270222 |
| MmugDNA.5172.1.S1_at   | MmugDNA.5172.1 | 5.92  | 5.22  | 1.16 | 0.03 | 1.62  | 0.111357 | 0.120497 | 0.473544 | 0.38925  |
| MmugDNA.5173.1.S1_at   | MmugDNA.5173.1 | 3.76  | 3.81  | 0.17 | 0.13 | -1.03 | 0.624373 | 0.28567  | 0.828251 | 0.547395 |
| MmugDNA.5175.1.S1_at   | MmugDNA.5175.1 | 5.46  | 5.46  | 0.39 | 0.05 | -1    | 0.446532 | 0.400284 | 0.728373 | 0.630158 |
| MmugDNA.5176.1.S1_at   | MmugDNA.5176.1 | 5.05  | 5.26  | 0.19 | 0.35 | -1.16 | 0.617111 | 0.814916 | 0.824514 | 0.893213 |
| MmugDNA.5178.1.S1_at   | MmugDNA.5178.1 | 4.22  | 4.14  | 0.08 | 0.18 | 1.06  | 0.501534 | 0.745674 | 0.760071 | 0.85256  |
| MmugDNA.5180.1.S1_at   | MmugDNA.5180.1 | 4.08  | 3.7   | 0.18 | 0.09 | 1.3   | 0.054288 | 0.17148  | 0.38184  | 0.447895 |
| MmugDNA.5181.1.S1_at   | MmugDNA.5181.1 | 2.97  | 2.84  | 0.21 | 0.11 | 1.1   | 0.595205 | 0.30872  | 0.812327 | 0.564619 |
| MmugDNA.5182.1.S1_at   | MmugDNA.5182.1 | 8.56  | 8.33  | 0.07 | 0.36 | 1.18  | 0.410519 | 0.598712 | 0.706382 | 0.761089 |
| MmugDNA.5185.1.S1_at   | MmugDNA.5185.1 | 9.78  | 9.27  | 0.14 | 0.46 | 1.43  | 0.140157 | 0.120892 | 0.508065 | 0.389788 |
| MmugDNA.5185.1.S1_s_at | MmugDNA.5185.1 | 9.43  | 8.98  | 0.1  | 0.39 | 1.37  | 0.151877 | 0.140399 | 0.516547 | 0.413586 |
| MmugDNA.5187.1.S1_at   | MmugDNA.5187.1 | 4.88  | 5.6   | 0.14 | 0.29 | -1.65 | 0.049357 | 0.078446 | 0.371317 | 0.325206 |
| MmugDNA.5188.1.S1_at   | MmugDNA.5188.1 | 5.32  | 5.48  | 0.2  | 0.09 | -1.12 | 0.738257 | 0.39014  | 0.887624 | 0.624002 |
| MmugDNA.5189.1.S1_at   | MmugDNA.5189.1 | 3.25  | 3.37  | 0.03 | 0.02 | -1.08 | 0.003752 | 0.012892 | 0.179914 | 0.14622  |
| MmugDNA.519.1.S1_at    | MmugDNA.519.1  | 5.49  | 5.29  | 0.08 | 0.14 | 1.14  | 0.112441 | 0.086124 | 0.474902 | 0.338459 |
| MmugDNA.5190.1.S1_at   | MmugDNA.5190.1 | 4.55  | 4.42  | 0.1  | 0.03 | 1.09  | 0.150959 | 0.125673 | 0.515667 | 0.396249 |
| MmugDNA.5191.1.S1_at   | MmugDNA.5191.1 | 5.73  | 6.52  | 0.54 | 1.74 | -1.73 | 0.351184 | 0.475077 | 0.66911  | 0.681892 |
| MmugDNA.5192.1.S1_at   | MmugDNA.5192.1 | 3.49  | 3.32  | 0.25 | 0.08 | 1.12  | 0.431244 | 0.257385 | 0.718513 | 0.525191 |
| MmugDNA.5193.1.S1_at   | MmugDNA.5193.1 | 10.59 | 10.49 | 0.25 | 0.12 | 1.08  | 0.192539 | 0.075525 | 0.555811 | 0.31995  |
| MmugDNA.5194.1.S1_at   | MmugDNA.5194.1 | 9.35  | 8.88  | 0.29 | 1.36 | 1.38  | 0.433229 | 0.59421  | 0.719869 | 0.758517 |
| MmugDNA.5198.1.S1_at   | MmugDNA.5198.1 | 9.46  | 9.58  | 0.06 | 0.52 | -1.09 | 0.520832 | 0.372963 | 0.771038 | 0.611806 |
| MmugDNA.5199.1.S1_at   | MmugDNA.5199.1 | 9.56  | 9.49  | 0.94 | 0.23 | 1.05  | 0.700342 | 0.811738 | 0.867408 | 0.891337 |
| MmugDNA.52.1.S1_at     | MmugDNA.52.1   | 5.34  | 5.62  | 0.17 | 0.26 | -1.22 | 0.101509 | 0.087774 | 0.461313 | 0.341037 |
| MmugDNA.520.1.S1_at    | MmugDNA.520.1  | 6.92  | 7.22  | 0.35 | 0.24 | -1.23 | 0.522891 | 0.50568  | 0.772248 | 0.702218 |
| MmugDNA.5200.1.S1_at   | MmugDNA.5200.1 | 5.23  | 5.28  | 0.32 | 0.09 | -1.03 | 0.393014 | 0.205482 | 0.694942 | 0.479764 |
| MmugDNA.5202.1.S1_at   | MmugDNA.5202.1 | 3.94  | 3.95  | 0.55 | 0.12 | -1    | 0.900011 | 0.967575 | 0.960127 | 0.982093 |
| MmugDNA.5203.1.S1_at   | MmugDNA.5203.1 | 3.49  | 3.48  | 0.09 | 0.19 | 1.01  | 0.881653 | 0.981089 | 0.952505 | 0.989568 |

|                        |                |       |       |      |      |       |          |          |          |          |
|------------------------|----------------|-------|-------|------|------|-------|----------|----------|----------|----------|
| MmugDNA.5204.1.S1_at   | MmugDNA.5204.1 | 11.01 | 10.17 | 0.3  | 0.38 | 1.79  | 0.012298 | 0.004134 | 0.240706 | 0.090937 |
| MmugDNA.5205.1.S1_at   | MmugDNA.5205.1 | 8.11  | 8.2   | 0.06 | 0.38 | -1.06 | 0.961085 | 0.873122 | 0.984976 | 0.927823 |
| MmugDNA.5206.1.S1_at   | MmugDNA.5206.1 | 6.27  | 6.18  | 0.11 | 0.2  | 1.07  | 0.493695 | 0.612835 | 0.756299 | 0.770233 |
| MmugDNA.5207.1.S1_at   | MmugDNA.5207.1 | 4.81  | 4.64  | 0.08 | 0.06 | 1.12  | 0.109475 | 0.306296 | 0.470811 | 0.562919 |
| MmugDNA.5208.1.S1_at   | MmugDNA.5208.1 | 8.63  | 8.15  | 0.52 | 1.33 | 1.39  | 0.213391 | 0.148227 | 0.573596 | 0.422745 |
| MmugDNA.5210.1.S1_at   | MmugDNA.5210.1 | 9.66  | 9.61  | 0.1  | 0.29 | 1.03  | 0.942326 | 0.466337 | 0.977917 | 0.67624  |
| MmugDNA.5211.1.S1_at   | MmugDNA.5211.1 | 11.89 | 11.92 | 0.2  | 0.11 | -1.02 | 0.81675  | 0.595413 | 0.925751 | 0.759091 |
| MmugDNA.5212.1.S1_at   | MmugDNA.5212.1 | 6.47  | 6.44  | 0.11 | 0.12 | 1.02  | 0.792924 | 0.310182 | 0.914102 | 0.565379 |
| MmugDNA.5213.1.S1_at   | MmugDNA.5213.1 | 5.78  | 8.38  | 0.75 | 1.8  | -6.05 | 0.154865 | 0.146566 | 0.519486 | 0.420583 |
| MmugDNA.5214.1.S1_at   | MmugDNA.5214.1 | 5.31  | 5.43  | 0.05 | 0.07 | -1.09 | 0.086752 | 0.058692 | 0.440475 | 0.288956 |
| MmugDNA.5215.1.S1_at   | MmugDNA.5215.1 | 6.77  | 7.21  | 0.52 | 0.76 | -1.35 | 0.235968 | 0.35886  | 0.589893 | 0.600291 |
| MmugDNA.5216.1.S1_at   | MmugDNA.5216.1 | 4.54  | 4.63  | 0.11 | 0.06 | -1.07 | 0.311518 | 0.336085 | 0.643522 | 0.583652 |
| MmugDNA.5217.1.S1_at   | MmugDNA.5217.1 | 10.14 | 9.58  | 0.26 | 0.49 | 1.47  | 0.287894 | 0.1737   | 0.626292 | 0.450043 |
| MmugDNA.5219.1.S1_at   | MmugDNA.5219.1 | 5.8   | 5.01  | 0.97 | 0.57 | 1.73  | 0.352983 | 0.288988 | 0.669964 | 0.550099 |
| MmugDNA.5220.1.S1_at   | MmugDNA.5220.1 | 4.76  | 4.75  | 0.03 | 0.19 | 1.01  | 0.775018 | 0.875322 | 0.905462 | 0.929211 |
| MmugDNA.5221.1.S1_at   | MmugDNA.5221.1 | 8.35  | 8.1   | 0.56 | 0.43 | 1.19  | 0.500293 | 0.660502 | 0.759454 | 0.801373 |
| MmugDNA.5223.1.S1_at   | MmugDNA.5223.1 | 6.32  | 6.12  | 0.07 | 0.36 | 1.15  | 0.455543 | 0.650791 | 0.733844 | 0.795801 |
| MmugDNA.5224.1.S1_at   | MmugDNA.5224.1 | 4.67  | 4.64  | 0.33 | 0.08 | 1.02  | 0.392481 | 0.489554 | 0.694657 | 0.691824 |
| MmugDNA.5225.1.S1_at   | MmugDNA.5225.1 | 4.76  | 4.74  | 0.07 | 0.16 | 1.02  | 0.37334  | 0.465494 | 0.683245 | 0.675774 |
| MmugDNA.5226.1.S1_at   | MmugDNA.5226.1 | 5.57  | 5.96  | 0.25 | 0.53 | -1.31 | 0.878733 | 0.72551  | 0.95133  | 0.841043 |
| MmugDNA.5227.1.S1_at   | MmugDNA.5227.1 | 12.05 | 11.2  | 0.17 | 0.11 | 1.8   | 0.003247 | 0.001267 | 0.175695 | 0.055241 |
| MmugDNA.5228.1.S1_at   | MmugDNA.5228.1 | 6.14  | 5.97  | 0.06 | 0.14 | 1.12  | 0.200669 | 0.25592  | 0.5634   | 0.523862 |
| MmugDNA.5229.1.S1_at   | MmugDNA.5229.1 | 11.22 | 10.92 | 0.1  | 0.09 | 1.24  | 0.015683 | 0.024112 | 0.260208 | 0.1945   |
| MmugDNA.523.1.S1_at    | MmugDNA.523.1  | 4.63  | 4.5   | 0.32 | 0.2  | 1.09  | 0.210952 | 0.26231  | 0.571977 | 0.52863  |
| MmugDNA.5230.1.S1_at   | MmugDNA.5230.1 | 6.58  | 5.51  | 1.07 | 0.56 | 2.1   | 0.316075 | 0.265939 | 0.64687  | 0.531796 |
| MmugDNA.5232.1.S1_at   | MmugDNA.5232.1 | 4.02  | 3.6   | 0.64 | 0.08 | 1.33  | 0.303872 | 0.411179 | 0.638083 | 0.637937 |
| MmugDNA.5233.1.S1_at   | MmugDNA.5233.1 | 3.09  | 3.15  | 0.13 | 0.12 | -1.04 | 0.892383 | 0.875458 | 0.957146 | 0.929259 |
| MmugDNA.5234.1.S1_at   | MmugDNA.5234.1 | 3.84  | 4.14  | 0.08 | 0.1  | -1.23 | 0.058328 | 0.043618 | 0.39029  | 0.253501 |
| MmugDNA.5235.1.S1_at   | MmugDNA.5235.1 | 9.7   | 9.71  | 0.45 | 0.8  | -1    | 0.959338 | 0.990976 | 0.984581 | 0.994928 |
| MmugDNA.5236.1.S1_at   | MmugDNA.5236.1 | 5.06  | 5.08  | 0.5  | 0.14 | -1.01 | 0.60719  | 0.655775 | 0.819255 | 0.798709 |
| MmugDNA.5237.1.S1_at   | MmugDNA.5237.1 | 3.27  | 3.29  | 0.11 | 0.16 | -1.02 | 0.958642 | 0.783572 | 0.984337 | 0.874671 |
| MmugDNA.524.1.S1_at    | MmugDNA.524.1  | 8.51  | 8.8   | 0.83 | 1.06 | -1.22 | 0.773791 | 0.598091 | 0.90499  | 0.760598 |
| MmugDNA.5240.1.S1_at   | MmugDNA.5240.1 | 5.36  | 5.48  | 0.01 | 0.17 | -1.09 | 0.835166 | 0.964465 | 0.93317  | 0.980225 |
| MmugDNA.5241.1.S1_at   | MmugDNA.5241.1 | 6     | 5.58  | 0.25 | 0.12 | 1.34  | 0.053675 | 0.096108 | 0.38074  | 0.353322 |
| MmugDNA.5242.1.S1_at   | MmugDNA.5242.1 | 9.66  | 9.6   | 0.34 | 0.28 | 1.05  | 0.406341 | 0.541763 | 0.703645 | 0.725057 |
| MmugDNA.5242.1.S1_s_at | MmugDNA.5242.1 | 10.15 | 10.25 | 0.24 | 0.3  | -1.07 | 0.673747 | 0.874748 | 0.853751 | 0.928902 |
| MmugDNA.5243.1.S1_at   | MmugDNA.5243.1 | 6.34  | 6.42  | 0.17 | 0.11 | -1.06 | 0.196558 | 0.059514 | 0.559808 | 0.290548 |
| MmugDNA.5244.1.S1_at   | MmugDNA.5244.1 | 5.21  | 5.02  | 0.23 | 0.16 | 1.13  | 0.305234 | 0.211711 | 0.639056 | 0.485746 |
| MmugDNA.5245.1.S1_at   | MmugDNA.5245.1 | 5.31  | 5.37  | 0.08 | 0.07 | -1.05 | 0.566084 | 0.696409 | 0.797485 | 0.823653 |
| MmugDNA.5246.1.S1_at   | MmugDNA.5246.1 | 3.59  | 3.6   | 0.02 | 0.09 | -1.01 | 0.987622 | 0.998372 | 0.995588 | 0.999091 |
| MmugDNA.5247.1.S1_at   | MmugDNA.5247.1 | 4.02  | 3.42  | 1.09 | 1.1  | 1.52  | 0.883923 | 0.625408 | 0.953435 | 0.779175 |

|                        |                |       |       |      |      |       |          |          |          |          |
|------------------------|----------------|-------|-------|------|------|-------|----------|----------|----------|----------|
| MmugDNA.5248.1.S1_at   | MmugDNA.5248.1 | 3.29  | 3.2   | 0.75 | 0.18 | 1.07  | 0.235458 | 0.245753 | 0.589371 | 0.515519 |
| MmugDNA.5249.1.S1_at   | MmugDNA.5249.1 | 2.91  | 3.09  | 0.1  | 0.28 | -1.13 | 0.178775 | 0.294151 | 0.543095 | 0.553962 |
| MmugDNA.525.1.S1_at    | MmugDNA.525.1  | 4.86  | 4.89  | 0.12 | 0.09 | -1.02 | 0.747221 | 0.063128 | 0.89177  | 0.29795  |
| MmugDNA.5251.1.S1_at   | MmugDNA.5251.1 | 7.06  | 7.21  | 0.03 | 0.19 | -1.11 | 0.275622 | 0.093034 | 0.617878 | 0.3492   |
| MmugDNA.5252.1.S1_at   | MmugDNA.5252.1 | 7.19  | 6.22  | 0.36 | 0.63 | 1.96  | 0.068869 | 0.056188 | 0.410654 | 0.282948 |
| MmugDNA.5254.1.S1_at   | MmugDNA.5254.1 | 7.13  | 7.12  | 0.24 | 0.11 | 1.01  | 0.897518 | 0.680217 | 0.95917  | 0.813309 |
| MmugDNA.5255.1.S1_at   | MmugDNA.5255.1 | 5.59  | 5.34  | 1.13 | 0.68 | 1.2   | 0.806155 | 0.74007  | 0.920521 | 0.849396 |
| MmugDNA.5256.1.S1_at   | MmugDNA.5256.1 | 3.65  | 3.67  | 0.09 | 0.06 | -1.01 | 0.429573 | 0.326891 | 0.717637 | 0.576848 |
| MmugDNA.5257.1.S1_at   | MmugDNA.5257.1 | 4.47  | 4.42  | 0.38 | 0.13 | 1.03  | 0.960941 | 0.788392 | 0.984976 | 0.877619 |
| MmugDNA.5258.1.S1_at   | MmugDNA.5258.1 | 5.04  | 5.01  | 0.2  | 0.38 | 1.02  | 0.994493 | 0.703601 | 0.998117 | 0.828139 |
| MmugDNA.5259.1.S1_at   | MmugDNA.5259.1 | 7.88  | 8.01  | 0.63 | 0.75 | -1.09 | 0.701905 | 0.371672 | 0.868197 | 0.610466 |
| MmugDNA.5260.1.S1_at   | MmugDNA.5260.1 | 6.04  | 6.06  | 0.23 | 0.06 | -1.02 | 0.96847  | 0.443607 | 0.988134 | 0.661336 |
| MmugDNA.5262.1.S1_at   | MmugDNA.5262.1 | 4.18  | 3.65  | 0.58 | 0.65 | 1.44  | 0.834832 | 0.798671 | 0.933053 | 0.884059 |
| MmugDNA.5263.1.S1_at   | MmugDNA.5263.1 | 3.73  | 3.67  | 0.1  | 0.14 | 1.04  | 0.218888 | 0.275349 | 0.578257 | 0.539663 |
| MmugDNA.5266.1.S1_at   | MmugDNA.5266.1 | 3.67  | 3.62  | 0.3  | 0.24 | 1.03  | 0.951179 | 0.618772 | 0.981651 | 0.774185 |
| MmugDNA.5267.1.S1_s_at | MmugDNA.5267.1 | 6.89  | 5.5   | 0.32 | 0.9  | 2.62  | 0.128816 | 0.169317 | 0.494686 | 0.445925 |
| MmugDNA.5268.1.S1_at   | MmugDNA.5268.1 | 4.77  | 5     | 0.41 | 0.35 | -1.18 | 0.81773  | 0.677919 | 0.926038 | 0.811843 |
| MmugDNA.5268.1.S1_s_at | MmugDNA.5268.1 | 8.92  | 8.81  | 0.25 | 0.21 | 1.08  | 0.978616 | 0.769926 | 0.992128 | 0.866376 |
| MmugDNA.527.1.S1_at    | MmugDNA.527.1  | 11.43 | 11.1  | 0.46 | 0.41 | 1.26  | 0.853076 | 0.953456 | 0.940695 | 0.97351  |
| MmugDNA.5270.1.S1_at   | MmugDNA.5270.1 | 6.67  | 7.15  | 0.35 | 0.28 | -1.39 | 0.163078 | 0.167228 | 0.52748  | 0.443684 |
| MmugDNA.5271.1.S1_at   | MmugDNA.5271.1 | 3.58  | 3.72  | 0.16 | 0.14 | -1.1  | 0.142736 | 0.217661 | 0.509765 | 0.491255 |
| MmugDNA.5272.1.S1_at   | MmugDNA.5272.1 | 6.56  | 6.73  | 0.66 | 0.71 | -1.12 | 0.536567 | 0.322737 | 0.77949  | 0.574043 |
| MmugDNA.5273.1.S1_at   | MmugDNA.5273.1 | 9     | 9.08  | 0.41 | 0.35 | -1.05 | 0.339943 | 0.030287 | 0.661577 | 0.215899 |
| MmugDNA.5274.1.S1_at   | MmugDNA.5274.1 | 4.48  | 4.5   | 0.02 | 0.07 | -1.01 | 0.738881 | 0.093854 | 0.888032 | 0.350298 |
| MmugDNA.5275.1.S1_at   | MmugDNA.5275.1 | 5.68  | 5.73  | 0.01 | 0.6  | -1.03 | 0.895251 | 0.989726 | 0.958083 | 0.994108 |
| MmugDNA.5276.1.S1_at   | MmugDNA.5276.1 | 11.21 | 10.15 | 0.22 | 0.46 | 2.09  | 0.01995  | 0.016908 | 0.276365 | 0.164917 |
| MmugDNA.528.1.S1_at    | MmugDNA.528.1  | 9.92  | 9.55  | 0.24 | 0.17 | 1.29  | 0.035547 | 0.019229 | 0.336769 | 0.174494 |
| MmugDNA.5280.1.S1_at   | MmugDNA.5280.1 | 3.74  | 3.51  | 0.15 | 0.05 | 1.17  | 0.145445 | 0.472059 | 0.511449 | 0.679854 |
| MmugDNA.5282.1.S1_at   | MmugDNA.5282.1 | 3.94  | 3.95  | 0.11 | 0.06 | -1.01 | 0.847109 | 0.988374 | 0.938599 | 0.993461 |
| MmugDNA.5283.1.S1_at   | MmugDNA.5283.1 | 10.93 | 11.07 | 0.08 | 0.1  | -1.11 | 0.028733 | 0.018418 | 0.312166 | 0.170755 |
| MmugDNA.5284.1.S1_at   | MmugDNA.5284.1 | 9.93  | 10.14 | 0.1  | 0.18 | -1.15 | 0.092705 | 0.002179 | 0.449373 | 0.06901  |
| MmugDNA.5285.1.S1_at   | MmugDNA.5285.1 | 10.89 | 11.46 | 0.14 | 0.1  | -1.48 | 0.005327 | 0.010567 | 0.191107 | 0.134182 |
| MmugDNA.5287.1.S1_at   | MmugDNA.5287.1 | 8.35  | 8.63  | 0.29 | 0.45 | -1.22 | 0.152289 | 0.071691 | 0.517006 | 0.313904 |
| MmugDNA.5289.1.S1_at   | MmugDNA.5289.1 | 8.49  | 8.93  | 0.34 | 0.14 | -1.35 | 0.104365 | 0.212285 | 0.464351 | 0.486197 |
| MmugDNA.529.1.S1_at    | MmugDNA.529.1  | 4.73  | 4.89  | 0.1  | 0.17 | -1.11 | 0.216823 | 0.404512 | 0.576422 | 0.633004 |
| MmugDNA.5291.1.S1_at   | MmugDNA.5291.1 | 12.88 | 12.29 | 0.13 | 0.18 | 1.5   | 0.01056  | 0.002771 | 0.230404 | 0.077863 |
| MmugDNA.5292.1.S1_at   | MmugDNA.5292.1 | 4.42  | 4.25  | 0.41 | 0.31 | 1.12  | 0.869598 | 0.807894 | 0.947917 | 0.889413 |
| MmugDNA.5295.1.S1_s_at | MmugDNA.5295.1 | 5.17  | 5.43  | 0.3  | 0.49 | -1.2  | 0.824555 | 0.49486  | 0.928895 | 0.695137 |
| MmugDNA.5297.1.S1_at   | MmugDNA.5297.1 | 4.09  | 4.08  | 0.11 | 0.44 | 1.01  | 0.579334 | 0.761955 | 0.804245 | 0.861597 |
| MmugDNA.5298.1.S1_at   | MmugDNA.5298.1 | 3.71  | 3.58  | 0.07 | 0.09 | 1.09  | 0.103033 | 0.086589 | 0.46254  | 0.33911  |
| MmugDNA.5300.1.S1_at   | MmugDNA.5300.1 | 4.21  | 4.28  | 0.23 | 0    | -1.05 | 0.680723 | 0.869838 | 0.857307 | 0.926148 |



|                        |                |       |       |      |      |       |          |          |          |          |
|------------------------|----------------|-------|-------|------|------|-------|----------|----------|----------|----------|
| MmugDNA.5301.1.S1_at   | MmugDNA.5301.1 | 4.9   | 5.15  | 0.09 | 0.18 | -1.19 | 0.084292 | 0.176429 | 0.436922 | 0.45282  |
| MmugDNA.5302.1.S1_at   | MmugDNA.5302.1 | 8.83  | 9.14  | 0.25 | 0.35 | -1.24 | 0.367678 | 0.411996 | 0.679512 | 0.638434 |
| MmugDNA.5303.1.S1_at   | MmugDNA.5303.1 | 8.69  | 6.86  | 0.29 | 0.65 | 3.55  | 0.009051 | 0.003544 | 0.222023 | 0.085371 |
| MmugDNA.5304.1.S1_at   | MmugDNA.5304.1 | 4.89  | 4.81  | 0.16 | 0.2  | 1.06  | 0.845696 | 0.720728 | 0.93814  | 0.838368 |
| MmugDNA.5305.1.S1_at   | MmugDNA.5305.1 | 9.34  | 8.96  | 0.05 | 0.28 | 1.3   | 0.074982 | 0.076642 | 0.421695 | 0.321918 |
| MmugDNA.5305.1.S1_s_at | MmugDNA.5305.1 | 8.14  | 7.95  | 0.07 | 0.21 | 1.14  | 0.072493 | 0.040539 | 0.417055 | 0.246264 |
| MmugDNA.5306.1.S1_at   | MmugDNA.5306.1 | 5.35  | 5.31  | 0.11 | 0.03 | 1.02  | 0.227251 | 0.273434 | 0.585089 | 0.537863 |
| MmugDNA.5308.1.S1_at   | MmugDNA.5308.1 | 7.35  | 7.96  | 0.4  | 0.48 | -1.52 | 0.237101 | 0.091396 | 0.590811 | 0.34639  |
| MmugDNA.5309.1.S1_at   | MmugDNA.5309.1 | 2.83  | 2.92  | 0.17 | 0.07 | -1.06 | 0.810489 | 0.428216 | 0.92278  | 0.649721 |
| MmugDNA.5310.1.S1_at   | MmugDNA.5310.1 | 4.99  | 5.59  | 0.84 | 0.35 | -1.52 | 0.880801 | 0.869679 | 0.952044 | 0.926106 |
| MmugDNA.5312.1.S1_at   | MmugDNA.5312.1 | 3.54  | 3.65  | 0.1  | 0.15 | -1.09 | 0.665019 | 0.773032 | 0.849774 | 0.868019 |
| MmugDNA.5313.1.S1_at   | MmugDNA.5313.1 | 3.01  | 3.03  | 0.11 | 0.03 | -1.02 | 0.25187  | 0.527623 | 0.601195 | 0.716154 |
| MmugDNA.5314.1.S1_at   | MmugDNA.5314.1 | 7.64  | 7.84  | 0.11 | 0.16 | -1.15 | 0.305962 | 0.140601 | 0.639227 | 0.413833 |
| MmugDNA.5314.1.S1_s_at | MmugDNA.5314.1 | 9.94  | 10.28 | 0.14 | 0.08 | -1.26 | 0.014188 | 0.014951 | 0.251566 | 0.155437 |
| MmugDNA.5315.1.S1_at   | MmugDNA.5315.1 | 4.94  | 5.22  | 0.17 | 0.07 | -1.21 | 0.0604   | 0.053544 | 0.393524 | 0.277021 |
| MmugDNA.5317.1.S1_at   | MmugDNA.5317.1 | 6.52  | 6.55  | 0.07 | 0.08 | -1.02 | 0.970384 | 0.164122 | 0.988617 | 0.440346 |
| MmugDNA.5319.1.S1_at   | MmugDNA.5319.1 | 6.41  | 6.43  | 0.18 | 0.1  | -1.02 | 0.192763 | 0.246132 | 0.556064 | 0.51585  |
| MmugDNA.532.1.S1_at    | MmugDNA.532.1  | 4.24  | 4.57  | 0.03 | 0.26 | -1.26 | 0.126455 | 0.143019 | 0.492783 | 0.41689  |
| MmugDNA.5320.1.S1_at   | MmugDNA.5320.1 | 9.97  | 9.81  | 0.05 | 0.31 | 1.11  | 0.330927 | 0.635216 | 0.656063 | 0.785279 |
| MmugDNA.5321.1.S1_at   | MmugDNA.5321.1 | 7.52  | 8.59  | 0.13 | 0.38 | -2.1  | 0.009542 | 0.005089 | 0.226076 | 0.099108 |
| MmugDNA.5322.1.S1_at   | MmugDNA.5322.1 | 4.89  | 4.91  | 0.06 | 0.12 | -1.02 | 0.926716 | 0.886003 | 0.971811 | 0.935122 |
| MmugDNA.5323.1.S1_at   | MmugDNA.5323.1 | 4.41  | 3.72  | 0.81 | 0.17 | 1.61  | 0.242524 | 0.139424 | 0.594448 | 0.412714 |
| MmugDNA.5324.1.S1_at   | MmugDNA.5324.1 | 4.32  | 5.23  | 1.06 | 0.57 | -1.88 | 0.6777   | 0.826766 | 0.855562 | 0.900506 |
| MmugDNA.5325.1.S1_at   | MmugDNA.5325.1 | 2.79  | 2.85  | 0.06 | 0.21 | -1.04 | 0.236607 | 0.285916 | 0.590504 | 0.547484 |
| MmugDNA.5328.1.S1_at   | MmugDNA.5328.1 | 5.07  | 4.96  | 0.08 | 0.14 | 1.08  | 0.741611 | 0.88021  | 0.889293 | 0.931571 |
| MmugDNA.533.1.S1_at    | MmugDNA.533.1  | 5.84  | 5.91  | 0.08 | 0.07 | -1.05 | 0.536032 | 0.056055 | 0.779351 | 0.282647 |
| MmugDNA.5330.1.S1_at   | MmugDNA.5330.1 | 4.36  | 4.6   | 0.29 | 0.08 | -1.19 | 0.664278 | 0.845743 | 0.84947  | 0.912241 |
| MmugDNA.5332.1.S1_at   | MmugDNA.5332.1 | 5.69  | 5.61  | 0.99 | 0.44 | 1.06  | 0.799056 | 0.849001 | 0.916832 | 0.914252 |
| MmugDNA.5333.1.S1_at   | MmugDNA.5333.1 | 7.12  | 8.59  | 0.42 | 0.67 | -2.77 | 0.052042 | 0.050848 | 0.376952 | 0.27076  |
| MmugDNA.5334.1.S1_at   | MmugDNA.5334.1 | 4.88  | 4.74  | 0.47 | 0.14 | 1.1   | 0.701022 | 0.252829 | 0.867793 | 0.521174 |
| MmugDNA.5335.1.S1_at   | MmugDNA.5335.1 | 9.32  | 9.1   | 0.18 | 0.42 | 1.17  | 0.761283 | 0.66549  | 0.899431 | 0.804009 |
| MmugDNA.5336.1.S1_at   | MmugDNA.5336.1 | 3.89  | 4.46  | 0.19 | 0.2  | -1.49 | 0.085805 | 0.043329 | 0.439885 | 0.252847 |
| MmugDNA.5336.1.S1_x_at | MmugDNA.5336.1 | 9.13  | 9.64  | 0.18 | 0.16 | -1.42 | 0.060955 | 0.033634 | 0.394705 | 0.227006 |
| MmugDNA.5337.1.S1_at   | MmugDNA.5337.1 | 5     | 5.43  | 0.05 | 0.13 | -1.35 | 0.01197  | 0.046122 | 0.239065 | 0.259154 |
| MmugDNA.5339.1.S1_at   | MmugDNA.5339.1 | 11.08 | 11.11 | 0.03 | 0.09 | -1.02 | 0.187295 | 0.007855 | 0.550374 | 0.118059 |
| MmugDNA.534.1.S1_at    | MmugDNA.534.1  | 6.14  | 5.71  | 0.49 | 0.32 | 1.36  | 0.306728 | 0.41756  | 0.639665 | 0.642252 |
| MmugDNA.5340.1.S1_at   | MmugDNA.5340.1 | 4.33  | 4.46  | 0.15 | 0.15 | -1.09 | 0.173421 | 0.124126 | 0.537006 | 0.394389 |
| MmugDNA.5342.1.S1_at   | MmugDNA.5342.1 | 5.02  | 4.8   | 0.11 | 0.1  | 1.17  | 0.070761 | 0.072562 | 0.414661 | 0.315511 |
| MmugDNA.5346.1.S1_at   | MmugDNA.5346.1 | 5.33  | 5.79  | 0.65 | 0.86 | -1.37 | 0.411703 | 0.338932 | 0.707523 | 0.585891 |
| MmugDNA.5348.1.S1_at   | MmugDNA.5348.1 | 4.23  | 4.07  | 0.31 | 0.12 | 1.12  | 0.136759 | 0.179355 | 0.503852 | 0.455824 |
| MmugDNA.5349.1.S1_at   | MmugDNA.5349.1 | 3.27  | 2.97  | 0.18 | 0.28 | 1.23  | 0.474646 | 0.244119 | 0.745326 | 0.514121 |

|                         |                 |       |       |      |      |       |          |          |          |          |
|-------------------------|-----------------|-------|-------|------|------|-------|----------|----------|----------|----------|
| MmugDNA.535.1.S1_at     | MmugDNA.535.1   | 8.97  | 8.8   | 0.16 | 0.25 | 1.12  | 0.218877 | 0.227967 | 0.578257 | 0.500211 |
| MmugDNA.5350.1.S1_at    | MmugDNA.5350.1  | 6.43  | 6.67  | 0.76 | 0.54 | -1.19 | 0.536047 | 0.558109 | 0.779351 | 0.735404 |
| MmugDNA.5351.1.S1_at    | MmugDNA.5351.1  | 10.37 | 10.56 | 0.67 | 0.36 | -1.13 | 0.819337 | 0.859693 | 0.926528 | 0.920049 |
| MmugDNA.5352.1.S1_at    | MmugDNA.5352.1  | 5.42  | 5.42  | 0.02 | 0.06 | 1     | 0.261663 | 0.75498  | 0.608304 | 0.857383 |
| MmugDNA.5354.1.S1_at    | MmugDNA.5354.1  | 3.69  | 3.73  | 0.41 | 0.06 | -1.03 | 0.398137 | 0.4439   | 0.698541 | 0.661553 |
| MmugDNA.5354.1.S1_x_at  | MmugDNA.5354.1  | 7.4   | 7.34  | 0.56 | 0.11 | 1.05  | 0.302349 | 0.337675 | 0.63692  | 0.584863 |
| MmugDNA.5355.1.S1_at    | MmugDNA.5355.1  | 8.68  | 9.22  | 0.19 | 0.35 | -1.46 | 0.124801 | 0.124113 | 0.49077  | 0.394389 |
| MmugDNA.5356.1.S1_at    | MmugDNA.5356.1  | 4.88  | 5.13  | 0.1  | 0.43 | -1.2  | 0.367124 | 0.549484 | 0.679287 | 0.729879 |
| MmugDNA.5358.1.S1_at    | MmugDNA.5358.1  | 4.09  | 4.05  | 0.43 | 0.02 | 1.03  | 0.669087 | 0.895306 | 0.852054 | 0.940185 |
| MmugDNA.5359.1.S1_at    | MmugDNA.5359.1  | 5.34  | 5.56  | 0.01 | 0.19 | -1.17 | 0.275143 | 0.344955 | 0.617694 | 0.590239 |
| MmugDNA.536.1.S1_at     | MmugDNA.536.1   | 2.92  | 2.98  | 0.56 | 0.03 | -1.04 | 0.486555 | 0.563055 | 0.751689 | 0.738345 |
| MmugDNA.35111.1.S1_s_at | MmugDNA.35111.1 | 14.57 | 14.59 | 0.03 | 0.02 | -1.01 | 0.478113 | 0.169067 | 0.74711  | 0.445593 |
| MmugDNA.5361.1.S1_at    | MmugDNA.5361.1  | 8.09  | 6.69  | 0.76 | 1.31 | 2.64  | 0.299558 | 0.30877  | 0.634993 | 0.56463  |
| MmugDNA.5363.1.S1_at    | MmugDNA.5363.1  | 5.12  | 5.11  | 0.03 | 0.16 | 1.01  | 0.921851 | 0.68512  | 0.969631 | 0.816328 |
| MmugDNA.5364.1.S1_at    | MmugDNA.5364.1  | 3.16  | 3.18  | 0.26 | 0.03 | -1.02 | 0.403877 | 0.551375 | 0.702465 | 0.730922 |
| MmugDNA.5365.1.S1_at    | MmugDNA.5365.1  | 4.57  | 4.44  | 0.31 | 0.5  | 1.09  | 0.78506  | 0.605058 | 0.910495 | 0.764917 |
| MmugDNA.5367.1.S1_at    | MmugDNA.5367.1  | 6.18  | 6.02  | 0.21 | 0.07 | 1.12  | 0.33885  | 0.051624 | 0.660988 | 0.272664 |
| MmugDNA.5368.1.S1_at    | MmugDNA.5368.1  | 5.38  | 6.37  | 0.48 | 1.26 | -1.98 | 0.141853 | 0.170034 | 0.509205 | 0.446784 |
| MmugDNA.5369.1.S1_at    | MmugDNA.5369.1  | 4.93  | 5.98  | 0.96 | 0.96 | -2.07 | 0.374102 | 0.193818 | 0.683335 | 0.468847 |
| MmugDNA.537.1.S1_at     | MmugDNA.537.1   | 4.01  | 4.31  | 0.35 | 0.73 | -1.23 | 0.548943 | 0.757765 | 0.787065 | 0.859014 |
| MmugDNA.537.1.S1_x_at   | MmugDNA.537.1   | 4.52  | 4.48  | 0.45 | 0.72 | 1.03  | 0.855266 | 0.821366 | 0.94148  | 0.897125 |
| MmugDNA.5370.1.S1_at    | MmugDNA.5370.1  | 7.13  | 7.22  | 0.19 | 0.05 | -1.07 | 0.889697 | 0.267347 | 0.955822 | 0.53301  |
| MmugDNA.5371.1.S1_at    | MmugDNA.5371.1  | 6.26  | 6.4   | 0.07 | 0.08 | -1.1  | 0.098613 | 0.098171 | 0.458486 | 0.356253 |
| MmugDNA.5373.1.S1_at    | MmugDNA.5373.1  | 6.55  | 5.88  | 0.5  | 0.46 | 1.59  | 0.147432 | 0.148806 | 0.513235 | 0.423201 |
| MmugDNA.5374.1.S1_at    | MmugDNA.5374.1  | 6.57  | 6.64  | 0.03 | 0.07 | -1.05 | 0.215106 | 0.000723 | 0.575523 | 0.044531 |
| MmugDNA.5375.1.S1_at    | MmugDNA.5375.1  | 2.9   | 2.9   | 0.13 | 0.15 | 1     | 0.483356 | 0.51988  | 0.749882 | 0.711367 |
| MmugDNA.5376.1.S1_at    | MmugDNA.5376.1  | 4.78  | 5.02  | 0.12 | 0.06 | -1.18 | 0.033261 | 0.01462  | 0.327682 | 0.154176 |
| MmugDNA.5377.1.S1_at    | MmugDNA.5377.1  | 3.15  | 3.44  | 0.13 | 0.41 | -1.22 | 0.121709 | 0.320526 | 0.486508 | 0.572648 |
| MmugDNA.5378.1.S1_at    | MmugDNA.5378.1  | 4.21  | 4     | 0.08 | 0.33 | 1.15  | 0.87899  | 0.836443 | 0.951455 | 0.906453 |
| MmugDNA.5379.1.S1_at    | MmugDNA.5379.1  | 4.73  | 5.44  | 0.34 | 0.31 | -1.63 | 0.074366 | 0.072723 | 0.419963 | 0.31565  |
| MmugDNA.538.1.S1_at     | MmugDNA.538.1   | 3.45  | 3.37  | 0.07 | 0.07 | 1.06  | 0.647972 | 0.673291 | 0.841735 | 0.809091 |
| MmugDNA.5380.1.S1_at    | MmugDNA.5380.1  | 10.38 | 10.6  | 0.41 | 0.4  | -1.16 | 0.656876 | 0.129532 | 0.845614 | 0.401036 |
| MmugDNA.5381.1.S1_at    | MmugDNA.5381.1  | 7.31  | 6.01  | 0.31 | 0.36 | 2.46  | 0.010749 | 0.007169 | 0.23109  | 0.113839 |
| MmugDNA.5383.1.S1_at    | MmugDNA.5383.1  | 2.95  | 3.01  | 0.15 | 0.05 | -1.04 | 0.1296   | 0.080761 | 0.495744 | 0.328634 |
| MmugDNA.5384.1.S1_at    | MmugDNA.5384.1  | 3.53  | 3.54  | 0.07 | 0.53 | -1    | 0.480965 | 0.648741 | 0.7488   | 0.794433 |
| MmugDNA.5385.1.S1_at    | MmugDNA.5385.1  | 6.01  | 5.91  | 0.26 | 0.11 | 1.08  | 0.182241 | 0.210446 | 0.546588 | 0.484317 |
| MmugDNA.5387.1.S1_at    | MmugDNA.5387.1  | 3.32  | 3.43  | 0.07 | 0.22 | -1.08 | 0.552534 | 0.723649 | 0.789601 | 0.840028 |
| MmugDNA.5390.1.S1_at    | MmugDNA.5390.1  | 3.23  | 3.15  | 0.04 | 0.05 | 1.06  | 0.084506 | 0.099264 | 0.437167 | 0.357513 |
| MmugDNA.5392.1.S1_at    | MmugDNA.5392.1  | 4.56  | 4.43  | 0.19 | 0.02 | 1.1   | 0.361856 | 0.443458 | 0.675478 | 0.661234 |
| MmugDNA.5393.1.S1_at    | MmugDNA.5393.1  | 7.97  | 7.56  | 0.39 | 0.32 | 1.33  | 0.086736 | 0.08224  | 0.440475 | 0.331091 |
| MmugDNA.5394.1.S1_at    | MmugDNA.5394.1  | 7.32  | 6.81  | 1.14 | 0.26 | 1.42  | 0.485212 | 0.657462 | 0.750811 | 0.799704 |

|                        |                |       |       |      |      |       |          |          |          |          |
|------------------------|----------------|-------|-------|------|------|-------|----------|----------|----------|----------|
| MmugDNA.5395.1.S1_at   | MmugDNA.5395.1 | 4.68  | 4.64  | 0.05 | 0.15 | 1.03  | 0.76466  | 0.802306 | 0.900894 | 0.886115 |
| MmugDNA.5396.1.S1_at   | MmugDNA.5396.1 | 5.14  | 4.93  | 0.2  | 0.07 | 1.16  | 0.194416 | 0.150324 | 0.557827 | 0.424878 |
| MmugDNA.5397.1.S1_at   | MmugDNA.5397.1 | 4.5   | 4.26  | 0.17 | 0.06 | 1.18  | 0.105435 | 0.037033 | 0.466156 | 0.236886 |
| MmugDNA.5398.1.S1_at   | MmugDNA.5398.1 | 6.31  | 5.35  | 0.39 | 0.07 | 1.94  | 0.037412 | 0.013399 | 0.341439 | 0.148308 |
| MmugDNA.5399.1.S1_at   | MmugDNA.5399.1 | 8.28  | 7.05  | 0.08 | 0.9  | 2.35  | 0.064129 | 0.021921 | 0.402252 | 0.185265 |
| MmugDNA.540.1.S1_at    | MmugDNA.540.1  | 6.39  | 6.25  | 0.21 | 0.07 | 1.1   | 0.199253 | 0.162712 | 0.562215 | 0.43882  |
| MmugDNA.5400.1.S1_at   | MmugDNA.5400.1 | 5.62  | 5.65  | 0.17 | 0.04 | -1.02 | 0.654794 | 0.425175 | 0.844759 | 0.647647 |
| MmugDNA.5401.1.S1_at   | MmugDNA.5401.1 | 3.78  | 3.84  | 0.15 | 0.23 | -1.05 | 0.434135 | 0.154126 | 0.720325 | 0.42887  |
| MmugDNA.5402.1.S1_at   | MmugDNA.5402.1 | 7.53  | 7.69  | 0.11 | 0.08 | -1.11 | 0.191395 | 0.130891 | 0.554364 | 0.403037 |
| MmugDNA.5403.1.S1_at   | MmugDNA.5403.1 | 5.19  | 4.74  | 0.71 | 0.31 | 1.37  | 0.187772 | 0.252853 | 0.550802 | 0.521174 |
| MmugDNA.5405.1.S1_at   | MmugDNA.5405.1 | 4.58  | 4.66  | 0.11 | 0.05 | -1.06 | 0.479687 | 0.614893 | 0.747778 | 0.771609 |
| MmugDNA.5407.1.S1_at   | MmugDNA.5407.1 | 4.1   | 3.85  | 0.12 | 0.11 | 1.19  | 0.079662 | 0.016858 | 0.430109 | 0.16458  |
| MmugDNA.541.1.S1_at    | MmugDNA.541.1  | 6.65  | 6.41  | 0.05 | 0.22 | 1.18  | 0.051216 | 0.338205 | 0.376001 | 0.58536  |
| MmugDNA.5411.1.S1_at   | MmugDNA.5411.1 | 7.19  | 5.77  | 0.19 | 0.8  | 2.67  | 0.148837 | 0.157627 | 0.51391  | 0.433131 |
| MmugDNA.5412.1.S1_at   | MmugDNA.5412.1 | 9.33  | 10.28 | 0.54 | 0.23 | -1.93 | 0.03497  | 0.03544  | 0.3343   | 0.232561 |
| MmugDNA.5412.1.S1_s_at | MmugDNA.5412.1 | 11    | 11.49 | 0.47 | 0.3  | -1.4  | 0.104991 | 0.126242 | 0.4654   | 0.396778 |
| MmugDNA.5414.1.S1_at   | MmugDNA.5414.1 | 7.1   | 6.85  | 1.24 | 0.29 | 1.19  | 0.628435 | 0.546462 | 0.830805 | 0.728061 |
| MmugDNA.5416.1.S1_at   | MmugDNA.5416.1 | 10.86 | 9.89  | 0.24 | 0.3  | 1.96  | 0.013958 | 0.003874 | 0.250102 | 0.088587 |
| MmugDNA.5417.1.S1_at   | MmugDNA.5417.1 | 7.96  | 7.11  | 0.42 | 0.24 | 1.8   | 0.036852 | 0.014972 | 0.34044  | 0.155472 |
| MmugDNA.5418.1.S1_at   | MmugDNA.5418.1 | 10.06 | 10.12 | 0.29 | 0.13 | -1.04 | 0.478069 | 0.171944 | 0.747094 | 0.448352 |
| MmugDNA.5419.1.S1_at   | MmugDNA.5419.1 | 7.46  | 7.35  | 0.2  | 0.6  | 1.08  | 0.857582 | 0.212564 | 0.942303 | 0.486502 |
| MmugDNA.542.1.S1_at    | MmugDNA.542.1  | 4.94  | 4.78  | 0.14 | 0.16 | 1.12  | 0.930653 | 0.335649 | 0.973196 | 0.583418 |
| MmugDNA.5420.1.S1_at   | MmugDNA.5420.1 | 9.95  | 10.19 | 0.51 | 1.39 | -1.18 | 0.742612 | 0.884755 | 0.889932 | 0.93433  |
| MmugDNA.5421.1.S1_at   | MmugDNA.5421.1 | 4.27  | 4.37  | 0.1  | 0.11 | -1.07 | 0.12796  | 0.144822 | 0.494126 | 0.418704 |
| MmugDNA.5422.1.S1_at   | MmugDNA.5422.1 | 6.04  | 6.63  | 0.9  | 0.93 | -1.51 | 0.576729 | 0.538953 | 0.803224 | 0.723398 |
| MmugDNA.5423.1.S1_at   | MmugDNA.5423.1 | 2.65  | 2.78  | 0.05 | 0.08 | -1.09 | 0.103902 | 0.353879 | 0.463917 | 0.596873 |
| MmugDNA.5424.1.S1_at   | MmugDNA.5424.1 | 5.88  | 5.9   | 0.83 | 0.08 | -1.02 | 0.601426 | 0.777525 | 0.815826 | 0.870732 |
| MmugDNA.5425.1.S1_at   | MmugDNA.5425.1 | 8.19  | 7.76  | 0.34 | 0.25 | 1.34  | 0.081158 | 0.04368  | 0.431848 | 0.253711 |
| MmugDNA.5426.1.S1_at   | MmugDNA.5426.1 | 7.15  | 6.72  | 0.52 | 0.44 | 1.34  | 0.144164 | 0.131114 | 0.510652 | 0.403084 |
| MmugDNA.5427.1.S1_at   | MmugDNA.5427.1 | 6.18  | 6.62  | 0.05 | 0.38 | -1.36 | 0.036683 | 0.02092  | 0.340048 | 0.181419 |
| MmugDNA.5428.1.S1_at   | MmugDNA.5428.1 | 4.33  | 4.32  | 0.14 | 0.1  | 1.01  | 0.850572 | 0.951977 | 0.939993 | 0.972752 |
| MmugDNA.5431.1.S1_at   | MmugDNA.5431.1 | 4.55  | 4.52  | 0.23 | 0.16 | 1.02  | 0.497339 | 0.274898 | 0.757933 | 0.53934  |
| MmugDNA.5433.1.S1_at   | MmugDNA.5433.1 | 8.15  | 8.12  | 0.06 | 0.32 | 1.02  | 0.980967 | 0.710213 | 0.993141 | 0.831904 |
| MmugDNA.5434.1.S1_at   | MmugDNA.5434.1 | 11.24 | 10.94 | 0.09 | 0.11 | 1.23  | 0.024159 | 0.026224 | 0.294535 | 0.202916 |
| MmugDNA.5434.1.S1_s_at | MmugDNA.5434.1 | 10.17 | 9.93  | 0.11 | 0.29 | 1.18  | 0.121905 | 0.148843 | 0.48693  | 0.423218 |
| MmugDNA.5437.1.S1_at   | MmugDNA.5437.1 | 4.81  | 4.73  | 0.34 | 0.04 | 1.05  | 0.657886 | 0.450866 | 0.846208 | 0.665869 |
| MmugDNA.5439.1.S1_at   | MmugDNA.5439.1 | 10.44 | 10.76 | 0.22 | 0.1  | -1.24 | 0.258452 | 0.223378 | 0.60566  | 0.496172 |
| MmugDNA.544.1.S1_at    | MmugDNA.544.1  | 2.73  | 3.04  | 0.14 | 0.11 | -1.24 | 0.021545 | 0.010829 | 0.282629 | 0.135705 |
| MmugDNA.5440.1.S1_at   | MmugDNA.5440.1 | 12.11 | 12.34 | 0.01 | 0.25 | -1.17 | 0.155823 | 0.087636 | 0.520476 | 0.340903 |
| MmugDNA.5441.1.S1_at   | MmugDNA.5441.1 | 7.68  | 7.29  | 0.18 | 0.1  | 1.31  | 0.047125 | 0.038281 | 0.365284 | 0.24046  |
| MmugDNA.5442.1.S1_at   | MmugDNA.5442.1 | 3.58  | 3.61  | 0.04 | 0.02 | -1.02 | 0.158651 | 0.713099 | 0.523734 | 0.833638 |

|                        |                |       |       |      |      |       |          |          |          |          |
|------------------------|----------------|-------|-------|------|------|-------|----------|----------|----------|----------|
| MmugDNA.5443.1.S1_at   | MmugDNA.5443.1 | 6.76  | 6.58  | 0.12 | 0.21 | 1.13  | 0.549568 | 0.655938 | 0.787363 | 0.798758 |
| MmugDNA.5444.1.S1_s_at | MmugDNA.5444.1 | 9.21  | 9.69  | 0.12 | 0.36 | -1.39 | 0.156243 | 0.070729 | 0.520959 | 0.31213  |
| MmugDNA.5446.1.S1_at   | MmugDNA.5446.1 | 6.98  | 6.92  | 0.18 | 0.18 | 1.04  | 0.589118 | 0.697207 | 0.809193 | 0.824045 |
| MmugDNA.5449.1.S1_at   | MmugDNA.5449.1 | 5.39  | 5.39  | 0.29 | 0.43 | 1     | 0.620213 | 0.673574 | 0.826026 | 0.809284 |
| MmugDNA.545.1.S1_at    | MmugDNA.545.1  | 3.89  | 4.12  | 0.1  | 0.22 | -1.17 | 0.516595 | 0.555696 | 0.768145 | 0.734    |
| MmugDNA.5450.1.S1_at   | MmugDNA.5450.1 | 4.79  | 4.42  | 0.38 | 0.24 | 1.29  | 0.281726 | 0.369634 | 0.62238  | 0.608957 |
| MmugDNA.5451.1.S1_at   | MmugDNA.5451.1 | 6.75  | 6.64  | 0.11 | 0.05 | 1.08  | 0.129573 | 0.142039 | 0.495744 | 0.415633 |
| MmugDNA.5452.1.S1_at   | MmugDNA.5452.1 | 4.31  | 4.27  | 0.16 | 0.68 | 1.02  | 0.336734 | 0.095398 | 0.659663 | 0.352428 |
| MmugDNA.5454.1.S1_s_at | MmugDNA.5454.1 | 8.14  | 9.01  | 0.38 | 0.9  | -1.83 | 0.185211 | 0.196844 | 0.54869  | 0.471968 |
| MmugDNA.5455.1.S1_at   | MmugDNA.5455.1 | 3.76  | 3.77  | 0.15 | 0.13 | -1.01 | 0.661693 | 0.48371  | 0.848161 | 0.688112 |
| MmugDNA.5456.1.S1_at   | MmugDNA.5456.1 | 4.98  | 5.36  | 0.12 | 0.86 | -1.3  | 0.185653 | 0.003361 | 0.548972 | 0.083405 |
| MmugDNA.5458.1.S1_at   | MmugDNA.5458.1 | 3.86  | 4.13  | 0.09 | 0.16 | -1.21 | 0.169539 | 0.05472  | 0.533686 | 0.279389 |
| MmugDNA.546.1.S1_at    | MmugDNA.546.1  | 11.35 | 11.1  | 0.14 | 0.13 | 1.18  | 0.063626 | 0.016516 | 0.401144 | 0.162717 |
| MmugDNA.5462.1.S1_at   | MmugDNA.5462.1 | 4.48  | 4.29  | 0.56 | 0.28 | 1.14  | 0.321412 | 0.328964 | 0.650166 | 0.578482 |
| MmugDNA.5463.1.S1_at   | MmugDNA.5463.1 | 4.19  | 4.59  | 0.14 | 0.4  | -1.32 | 0.171967 | 0.658886 | 0.535422 | 0.800473 |
| MmugDNA.5465.1.S1_at   | MmugDNA.5465.1 | 8.01  | 7.44  | 0.22 | 0.7  | 1.48  | 0.91479  | 0.99155  | 0.966289 | 0.995297 |
| MmugDNA.5468.1.S1_at   | MmugDNA.5468.1 | 5.02  | 6.07  | 0.88 | 0.25 | -2.08 | 0.486753 | 0.178115 | 0.751736 | 0.454504 |
| MmugDNA.5469.1.S1_at   | MmugDNA.5469.1 | 6.33  | 6.08  | 0.41 | 0.53 | 1.18  | 0.154212 | 0.367985 | 0.518767 | 0.60758  |
| MmugDNA.547.1.S1_at    | MmugDNA.547.1  | 6.05  | 6.17  | 0.26 | 0.66 | -1.09 | 0.664605 | 0.340404 | 0.849598 | 0.586725 |
| MmugDNA.5470.1.S1_at   | MmugDNA.5470.1 | 7.2   | 7.29  | 0.1  | 0.09 | -1.06 | 0.279455 | 0.183169 | 0.621119 | 0.459531 |
| MmugDNA.5471.1.S1_at   | MmugDNA.5471.1 | 9.82  | 9.2   | 0.21 | 0.7  | 1.53  | 0.1018   | 0.088294 | 0.461313 | 0.341721 |
| MmugDNA.5474.1.S1_at   | MmugDNA.5474.1 | 7.54  | 7.39  | 0.06 | 0.13 | 1.11  | 0.392494 | 0.080393 | 0.694657 | 0.328028 |
| MmugDNA.5475.1.S1_at   | MmugDNA.5475.1 | 8.84  | 7.97  | 0.36 | 0.86 | 1.83  | 0.343718 | 0.112419 | 0.663889 | 0.377784 |
| MmugDNA.5476.1.S1_at   | MmugDNA.5476.1 | 3.23  | 3.33  | 0.49 | 0.16 | -1.07 | 0.766947 | 0.424131 | 0.902014 | 0.646737 |
| MmugDNA.5477.1.S1_at   | MmugDNA.5477.1 | 5.12  | 4.33  | 0.59 | 0.84 | 1.73  | 0.238841 | 0.295808 | 0.592015 | 0.555199 |
| MmugDNA.5478.1.S1_at   | MmugDNA.5478.1 | 12.04 | 12.41 | 0.06 | 0.17 | -1.29 | 0.036288 | 0.023277 | 0.339201 | 0.191258 |
| MmugDNA.5479.1.S1_at   | MmugDNA.5479.1 | 4.87  | 4.8   | 0.17 | 0.61 | 1.05  | 0.535957 | 0.543256 | 0.779351 | 0.726012 |
| MmugDNA.548.1.S1_at    | MmugDNA.548.1  | 4.49  | 4.51  | 0.11 | 0.15 | -1.02 | 0.478145 | 0.720892 | 0.747114 | 0.838368 |
| MmugDNA.5480.1.S1_at   | MmugDNA.5480.1 | 6.53  | 6.96  | 1.08 | 2.04 | -1.35 | 0.937198 | 0.54058  | 0.975794 | 0.724459 |
| MmugDNA.5481.1.S1_at   | MmugDNA.5481.1 | 8.85  | 8.8   | 0.25 | 0.19 | 1.03  | 0.76793  | 0.824533 | 0.902473 | 0.89925  |
| MmugDNA.5483.1.S1_at   | MmugDNA.5483.1 | 11.06 | 10.57 | 0.15 | 0.27 | 1.41  | 0.028909 | 0.015772 | 0.3124   | 0.159179 |
| MmugDNA.5484.1.S1_at   | MmugDNA.5484.1 | 4.45  | 4.61  | 0.05 | 0.13 | -1.11 | 0.219851 | 0.38098  | 0.579133 | 0.617476 |
| MmugDNA.5487.1.S1_at   | MmugDNA.5487.1 | 4.3   | 3.66  | 0.39 | 0.59 | 1.56  | 0.275449 | 0.289343 | 0.617878 | 0.550378 |
| MmugDNA.5489.1.S1_at   | MmugDNA.5489.1 | 4.08  | 4.24  | 0.12 | 0.25 | -1.12 | 0.945609 | 0.844713 | 0.979224 | 0.911602 |
| MmugDNA.5490.1.S1_at   | MmugDNA.5490.1 | 5.1   | 5.36  | 1.01 | 0.6  | -1.2  | 0.388855 | 0.572184 | 0.692804 | 0.744268 |
| MmugDNA.5491.1.S1_at   | MmugDNA.5491.1 | 12.24 | 12.53 | 0.2  | 0.31 | -1.23 | 0.370889 | 0.103149 | 0.681748 | 0.364041 |
| MmugDNA.5493.1.S1_at   | MmugDNA.5493.1 | 3.68  | 3.75  | 0.15 | 0.27 | -1.05 | 0.298396 | 0.400666 | 0.63393  | 0.630467 |
| MmugDNA.5494.1.S1_at   | MmugDNA.5494.1 | 7.53  | 7.12  | 0.36 | 0.11 | 1.32  | 0.196023 | 0.226376 | 0.559231 | 0.498806 |
| MmugDNA.5495.1.S1_at   | MmugDNA.5495.1 | 6.48  | 6.49  | 0.07 | 0.16 | -1.01 | 0.227603 | 0.208121 | 0.585103 | 0.482082 |
| MmugDNA.5496.1.S1_at   | MmugDNA.5496.1 | 3.73  | 3.7   | 0.35 | 0.04 | 1.02  | 0.281486 | 0.372535 | 0.622236 | 0.611484 |
| MmugDNA.5497.1.S1_at   | MmugDNA.5497.1 | 4.68  | 4.79  | 0    | 0.2  | -1.08 | 0.958635 | 0.998083 | 0.984337 | 0.999009 |

|                      |                |       |       |      |      |       |          |          |          |          |
|----------------------|----------------|-------|-------|------|------|-------|----------|----------|----------|----------|
| MmugDNA.5498.1.S1_at | MmugDNA.5498.1 | 3.49  | 3.7   | 0.23 | 0.26 | -1.16 | 0.320868 | 0.483451 | 0.649662 | 0.687931 |
| MmugDNA.55.1.S1_at   | MmugDNA.55.1   | 6.49  | 6.36  | 0.14 | 0.27 | 1.1   | 0.7285   | 0.8512   | 0.881985 | 0.915364 |
| MmugDNA.550.1.S1_at  | MmugDNA.550.1  | 3.19  | 3.15  | 0.31 | 0.09 | 1.03  | 0.266221 | 0.35042  | 0.611749 | 0.594161 |
| MmugDNA.5500.1.S1_at | MmugDNA.5500.1 | 3.74  | 4.16  | 0.2  | 0.24 | -1.33 | 0.041499 | 0.037643 | 0.351839 | 0.238465 |
| MmugDNA.5501.1.S1_at | MmugDNA.5501.1 | 5.42  | 4.32  | 0.57 | 0.24 | 2.13  | 0.043434 | 0.033695 | 0.356711 | 0.227173 |
| MmugDNA.5502.1.S1_at | MmugDNA.5502.1 | 8.72  | 9.3   | 0.59 | 1.04 | -1.49 | 0.822434 | 0.354911 | 0.927728 | 0.597466 |
| MmugDNA.5503.1.S1_at | MmugDNA.5503.1 | 5.76  | 5.9   | 0.11 | 0.28 | -1.1  | 0.480466 | 0.470083 | 0.748397 | 0.678572 |
| MmugDNA.5504.1.S1_at | MmugDNA.5504.1 | 6.66  | 7.39  | 0.22 | 0.61 | -1.66 | 0.070938 | 0.065689 | 0.414673 | 0.301631 |
| MmugDNA.5505.1.S1_at | MmugDNA.5505.1 | 6.71  | 6.83  | 0.08 | 0.02 | -1.09 | 0.060829 | 0.041051 | 0.394325 | 0.247372 |
| MmugDNA.5507.1.S1_at | MmugDNA.5507.1 | 5.74  | 5.69  | 0.18 | 0.1  | 1.03  | 0.899592 | 0.988271 | 0.959901 | 0.993458 |
| MmugDNA.5509.1.S1_at | MmugDNA.5509.1 | 12.18 | 12.05 | 0.12 | 0.43 | 1.09  | 0.282578 | 0.374575 | 0.62293  | 0.61291  |
| MmugDNA.551.1.S1_at  | MmugDNA.551.1  | 10.13 | 11.04 | 0.3  | 0.72 | -1.89 | 0.128154 | 0.141616 | 0.494307 | 0.415157 |
| MmugDNA.5511.1.S1_at | MmugDNA.5511.1 | 4.33  | 4.38  | 0.55 | 0.31 | -1.03 | 0.339678 | 0.281082 | 0.661347 | 0.54422  |
| MmugDNA.5512.1.S1_at | MmugDNA.5512.1 | 4     | 3.95  | 0.1  | 0.2  | 1.04  | 0.709559 | 0.955744 | 0.872538 | 0.974924 |
| MmugDNA.5513.1.S1_at | MmugDNA.5513.1 | 4.51  | 4.45  | 0.38 | 0.1  | 1.04  | 0.292728 | 0.213137 | 0.630064 | 0.487054 |
| MmugDNA.5515.1.S1_at | MmugDNA.5515.1 | 2.77  | 2.84  | 0.07 | 0.03 | -1.05 | 0.283868 | 0.286682 | 0.623797 | 0.548077 |
| MmugDNA.5516.1.S1_at | MmugDNA.5516.1 | 4.8   | 4.69  | 0.15 | 0.31 | 1.08  | 0.500895 | 0.141746 | 0.759735 | 0.415331 |
| MmugDNA.552.1.S1_at  | MmugDNA.552.1  | 5.46  | 5.5   | 0.08 | 0.15 | -1.03 | 0.485844 | 0.677547 | 0.751144 | 0.811678 |
| MmugDNA.5520.1.S1_at | MmugDNA.5520.1 | 4.31  | 4.22  | 0.13 | 0.15 | 1.07  | 0.633601 | 0.721238 | 0.833849 | 0.838629 |
| MmugDNA.5521.1.S1_at | MmugDNA.5521.1 | 11.89 | 12.33 | 0.19 | 0.27 | -1.36 | 0.10182  | 0.306979 | 0.461313 | 0.563427 |
| MmugDNA.5523.1.S1_at | MmugDNA.5523.1 | 4.25  | 4.29  | 0.17 | 0.2  | -1.03 | 0.436117 | 0.570328 | 0.721633 | 0.743056 |
| MmugDNA.5524.1.S1_at | MmugDNA.5524.1 | 7.36  | 6.35  | 1.61 | 1.06 | 2.01  | 0.160231 | 0.05953  | 0.525221 | 0.290548 |
| MmugDNA.5525.1.S1_at | MmugDNA.5525.1 | 4.15  | 4.15  | 0.33 | 0.31 | 1     | 0.97827  | 0.553919 | 0.99193  | 0.732896 |
| MmugDNA.5526.1.S1_at | MmugDNA.5526.1 | 3.63  | 3.72  | 0.21 | 0.12 | -1.06 | 0.945197 | 0.911831 | 0.979067 | 0.950281 |
| MmugDNA.5527.1.S1_at | MmugDNA.5527.1 | 5.14  | 5.09  | 0.29 | 0.04 | 1.03  | 0.804413 | 0.547246 | 0.919555 | 0.728342 |
| MmugDNA.5528.1.S1_at | MmugDNA.5528.1 | 3.55  | 3.52  | 0.25 | 0.32 | 1.02  | 0.853021 | 0.691436 | 0.940695 | 0.820488 |
| MmugDNA.5529.1.S1_at | MmugDNA.5529.1 | 11.93 | 12.13 | 0.1  | 0.09 | -1.15 | 0.042785 | 0.035423 | 0.355382 | 0.232539 |
| MmugDNA.5530.1.S1_at | MmugDNA.5530.1 | 8.8   | 7.87  | 0.62 | 0.29 | 1.9   | 0.251698 | 0.318528 | 0.601014 | 0.571239 |
| MmugDNA.5531.1.S1_at | MmugDNA.5531.1 | 4.06  | 4.36  | 0.47 | 0.09 | -1.23 | 0.797909 | 0.944808 | 0.916178 | 0.968794 |
| MmugDNA.5532.1.S1_at | MmugDNA.5532.1 | 3.65  | 3.77  | 0.2  | 0.1  | -1.09 | 0.387081 | 0.564618 | 0.691856 | 0.739393 |
| MmugDNA.5533.1.S1_at | MmugDNA.5533.1 | 10.19 | 9.15  | 0.63 | 0.48 | 2.05  | 0.195242 | 0.037774 | 0.558702 | 0.238746 |
| MmugDNA.5535.1.S1_at | MmugDNA.5535.1 | 4.82  | 4.58  | 0.07 | 0.07 | 1.18  | 0.025714 | 0.038575 | 0.300275 | 0.241417 |
| MmugDNA.5538.1.S1_at | MmugDNA.5538.1 | 5.27  | 5.28  | 0.07 | 0.25 | -1.01 | 0.664959 | 0.822685 | 0.849774 | 0.898006 |
| MmugDNA.554.1.S1_at  | MmugDNA.554.1  | 4.49  | 4.31  | 0.1  | 0.05 | 1.13  | 0.035733 | 0.015169 | 0.337534 | 0.156504 |
| MmugDNA.5540.1.S1_at | MmugDNA.5540.1 | 4.31  | 4.32  | 0.04 | 0.23 | -1.01 | 0.89415  | 0.54714  | 0.957854 | 0.728314 |
| MmugDNA.5541.1.S1_at | MmugDNA.5541.1 | 7.9   | 10.62 | 1.35 | 2.43 | -6.57 | 0.324094 | 0.199422 | 0.651854 | 0.47402  |
| MmugDNA.5543.1.S1_at | MmugDNA.5543.1 | 10.82 | 11.06 | 0.12 | 0.28 | -1.18 | 0.496641 | 0.404027 | 0.757609 | 0.632558 |
| MmugDNA.5544.1.S1_at | MmugDNA.5544.1 | 3.7   | 3.62  | 0.23 | 0.15 | 1.06  | 0.531948 | 0.436795 | 0.777565 | 0.65629  |
| MmugDNA.5545.1.S1_at | MmugDNA.5545.1 | 7.26  | 6.56  | 0.15 | 0.25 | 1.62  | 0.014206 | 0.017496 | 0.251566 | 0.167516 |
| MmugDNA.5546.1.S1_at | MmugDNA.5546.1 | 3.31  | 3.26  | 0.93 | 0.12 | 1.03  | 0.407982 | 0.568898 | 0.70497  | 0.742129 |
| MmugDNA.5547.1.S1_at | MmugDNA.5547.1 | 5.17  | 5.17  | 0    | 0.02 | 1     | 0.373901 | 0.117038 | 0.683245 | 0.384465 |

|                        |                |       |       |      |      |       |          |          |          |          |
|------------------------|----------------|-------|-------|------|------|-------|----------|----------|----------|----------|
| MmugDNA.5548.1.S1_at   | MmugDNA.5548.1 | 6.44  | 6.21  | 0.2  | 0.08 | 1.17  | 0.109972 | 0.107134 | 0.471202 | 0.369808 |
| MmugDNA.5549.1.S1_at   | MmugDNA.5549.1 | 6.38  | 6.44  | 0.17 | 0.05 | -1.04 | 0.874955 | 0.775563 | 0.949827 | 0.869402 |
| MmugDNA.555.1.S1_at    | MmugDNA.555.1  | 4.27  | 4.16  | 0.34 | 0.82 | 1.08  | 0.529751 | 0.71329  | 0.776285 | 0.833666 |
| MmugDNA.5550.1.S1_at   | MmugDNA.5550.1 | 10.65 | 10.63 | 0.11 | 1.4  | 1.02  | 0.372002 | 0.510374 | 0.682671 | 0.704868 |
| MmugDNA.5551.1.S1_at   | MmugDNA.5551.1 | 4.82  | 4.71  | 0.23 | 1.06 | 1.08  | 0.497649 | 0.649026 | 0.758068 | 0.794525 |
| MmugDNA.5554.1.S1_at   | MmugDNA.5554.1 | 3.79  | 3.77  | 0.12 | 0.01 | 1.01  | 0.516791 | 0.871869 | 0.768274 | 0.927098 |
| MmugDNA.5555.1.S1_at   | MmugDNA.5555.1 | 5.87  | 6.27  | 0.32 | 0.43 | -1.32 | 0.304223 | 0.361514 | 0.638381 | 0.602238 |
| MmugDNA.5556.1.S1_at   | MmugDNA.5556.1 | 6.32  | 6.12  | 0.12 | 0.2  | 1.15  | 0.485176 | 0.292426 | 0.750799 | 0.552506 |
| MmugDNA.5557.1.S1_at   | MmugDNA.5557.1 | 10.64 | 10.42 | 0.11 | 0.11 | 1.16  | 0.060574 | 0.014875 | 0.393743 | 0.155055 |
| MmugDNA.5559.1.S1_at   | MmugDNA.5559.1 | 6.01  | 6.06  | 0.4  | 0.07 | -1.04 | 0.288498 | 0.406355 | 0.626713 | 0.634297 |
| MmugDNA.5560.1.S1_at   | MmugDNA.5560.1 | 5.19  | 6.64  | 0.52 | 1.27 | -2.72 | 0.148974 | 0.059468 | 0.513987 | 0.290548 |
| MmugDNA.5560.1.S1_s_at | MmugDNA.5560.1 | 4.25  | 5.47  | 0.44 | 1.19 | -2.33 | 0.184789 | 0.079709 | 0.548357 | 0.326981 |
| MmugDNA.5561.1.S1_at   | MmugDNA.5561.1 | 5.37  | 5.29  | 0.24 | 0.02 | 1.06  | 0.457201 | 0.493419 | 0.734738 | 0.694107 |
| MmugDNA.5562.1.S1_at   | MmugDNA.5562.1 | 7.07  | 8.68  | 0.68 | 1.31 | -3.05 | 0.145491 | 0.091404 | 0.51146  | 0.34639  |
| MmugDNA.5563.1.S1_at   | MmugDNA.5563.1 | 7.69  | 7.34  | 0.22 | 0.29 | 1.28  | 0.215629 | 0.277949 | 0.575924 | 0.541664 |
| MmugDNA.5564.1.S1_at   | MmugDNA.5564.1 | 9.57  | 9.24  | 0.11 | 0.19 | 1.26  | 0.154138 | 0.118464 | 0.518659 | 0.386457 |
| MmugDNA.5566.1.S1_at   | MmugDNA.5566.1 | 4.67  | 4.57  | 0.2  | 0.06 | 1.07  | 0.873309 | 0.83119  | 0.94924  | 0.903172 |
| MmugDNA.5568.1.S1_at   | MmugDNA.5568.1 | 11.57 | 11.93 | 0.31 | 0.11 | -1.29 | 0.210785 | 0.082432 | 0.571971 | 0.331415 |
| MmugDNA.5569.1.S1_at   | MmugDNA.5569.1 | 6.4   | 6.73  | 0.11 | 0.46 | -1.26 | 0.090854 | 0.031172 | 0.446466 | 0.21838  |
| MmugDNA.557.1.S1_at    | MmugDNA.557.1  | 4.01  | 3.87  | 0.1  | 0.23 | 1.1   | 0.805275 | 0.61094  | 0.920053 | 0.768948 |
| MmugDNA.5570.1.S1_at   | MmugDNA.5570.1 | 5     | 4.99  | 0.06 | 0.02 | 1.01  | 0.389847 | 0.354725 | 0.693291 | 0.597422 |
| MmugDNA.5571.1.S1_at   | MmugDNA.5571.1 | 12.15 | 11.67 | 0.03 | 0.19 | 1.4   | 0.011236 | 0.004479 | 0.234875 | 0.093435 |
| MmugDNA.5572.1.S1_at   | MmugDNA.5572.1 | 10.68 | 10.17 | 0.13 | 0.17 | 1.42  | 0.015023 | 0.008085 | 0.257013 | 0.119519 |
| MmugDNA.5573.1.S1_at   | MmugDNA.5573.1 | 4.65  | 4.36  | 0.16 | 0.07 | 1.22  | 0.046672 | 0.069037 | 0.363595 | 0.309017 |
| MmugDNA.5574.1.S1_s_at | MmugDNA.5574.1 | 9.72  | 7.92  | 0.28 | 0.46 | 3.49  | 0.003943 | 0.00165  | 0.181    | 0.061436 |
| MmugDNA.5575.1.S1_at   | MmugDNA.5575.1 | 3.57  | 3.54  | 0.53 | 0.32 | 1.02  | 0.368123 | 0.451367 | 0.679753 | 0.66617  |
| MmugDNA.5576.1.S1_at   | MmugDNA.5576.1 | 9.55  | 9.54  | 0.1  | 0.09 | 1.01  | 0.286514 | 0.111442 | 0.625572 | 0.376126 |
| MmugDNA.5577.1.S1_at   | MmugDNA.5577.1 | 6.8   | 6.45  | 0.4  | 0.16 | 1.28  | 0.307149 | 0.318918 | 0.63988  | 0.571531 |
| MmugDNA.5578.1.S1_at   | MmugDNA.5578.1 | 3.84  | 3.85  | 0.15 | 0.15 | -1    | 0.544412 | 0.296258 | 0.784363 | 0.555423 |
| MmugDNA.5579.1.S1_at   | MmugDNA.5579.1 | 4.89  | 5.02  | 0.85 | 0.31 | -1.09 | 0.598446 | 0.794156 | 0.813939 | 0.881296 |
| MmugDNA.558.1.S1_at    | MmugDNA.558.1  | 7.26  | 5.99  | 0.88 | 0.26 | 2.42  | 0.078273 | 0.045841 | 0.428221 | 0.258382 |
| MmugDNA.5582.1.S1_s_at | MmugDNA.5582.1 | 10.09 | 9.93  | 0.16 | 0.13 | 1.12  | 0.230995 | 0.362437 | 0.587369 | 0.603016 |
| MmugDNA.5585.1.S1_at   | MmugDNA.5585.1 | 8.79  | 8.62  | 0.34 | 0.27 | 1.12  | 0.250835 | 0.124786 | 0.600424 | 0.395219 |
| MmugDNA.5587.1.S1_at   | MmugDNA.5587.1 | 5.14  | 5.15  | 0.07 | 0.28 | -1.01 | 0.865864 | 0.887628 | 0.946348 | 0.936    |
| MmugDNA.5588.1.S1_x_at | MmugDNA.5588.1 | 6.91  | 6.49  | 0.63 | 0.1  | 1.33  | 0.409551 | 0.589117 | 0.70588  | 0.755393 |
| MmugDNA.5589.1.S1_at   | MmugDNA.5589.1 | 10.35 | 11.05 | 0.02 | 0.32 | -1.62 | 0.049528 | 0.047354 | 0.371515 | 0.262352 |
| MmugDNA.559.1.S1_at    | MmugDNA.559.1  | 8.39  | 7.85  | 0.76 | 1.09 | 1.46  | 0.376735 | 0.356677 | 0.68528  | 0.598516 |
| MmugDNA.5590.1.S1_at   | MmugDNA.5590.1 | 6     | 5.52  | 0.37 | 0.42 | 1.39  | 0.082279 | 0.091759 | 0.433666 | 0.346977 |
| MmugDNA.5591.1.S1_at   | MmugDNA.5591.1 | 3.59  | 3.11  | 0.42 | 0.12 | 1.39  | 0.258742 | 0.23041  | 0.605954 | 0.502199 |
| MmugDNA.5592.1.S1_at   | MmugDNA.5592.1 | 10.95 | 10.63 | 0.17 | 0.11 | 1.25  | 0.046858 | 0.055875 | 0.364195 | 0.282172 |
| MmugDNA.5593.1.S1_at   | MmugDNA.5593.1 | 12.29 | 12.12 | 0.06 | 0.17 | 1.12  | 0.111453 | 0.005494 | 0.473657 | 0.102081 |

|                         |                 |       |       |      |      |       |          |          |          |          |
|-------------------------|-----------------|-------|-------|------|------|-------|----------|----------|----------|----------|
| MmugDNA.5595.1.S1_at    | MmugDNA.5595.1  | 5.85  | 5.63  | 0.2  | 0.17 | 1.17  | 0.167172 | 0.078913 | 0.531295 | 0.325912 |
| MmugDNA.5596.1.S1_at    | MmugDNA.5596.1  | 11.64 | 10.83 | 0.09 | 0.41 | 1.75  | 0.093187 | 0.083892 | 0.450408 | 0.334776 |
| MmugDNA.5597.1.S1_at    | MmugDNA.5597.1  | 5.16  | 5.08  | 0.11 | 0.03 | 1.05  | 0.967485 | 0.540568 | 0.98784  | 0.724459 |
| MmugDNA.5598.1.S1_at    | MmugDNA.5598.1  | 8.95  | 9.07  | 0.02 | 0.2  | -1.09 | 0.958852 | 0.437972 | 0.984371 | 0.657057 |
| MmugDNA.5599.1.S1_s_at  | MmugDNA.5599.1  | 12.2  | 12.64 | 0.13 | 0.76 | -1.35 | 0.455925 | 0.595514 | 0.734183 | 0.759091 |
| MmugDNA.56.1.S1_at      | MmugDNA.56.1    | 3.85  | 3.8   | 0.31 | 0.14 | 1.04  | 0.457981 | 0.354831 | 0.735139 | 0.59746  |
| MmugDNA.560.1.S1_at     | MmugDNA.560.1   | 4.02  | 3.68  | 0.5  | 0.15 | 1.27  | 0.616608 | 0.808942 | 0.824231 | 0.889968 |
| MmugDNA.5602.1.S1_at    | MmugDNA.5602.1  | 8.12  | 7.34  | 0.89 | 0.35 | 1.72  | 0.132799 | 0.162323 | 0.498856 | 0.438466 |
| MmugDNA.5603.1.S1_at    | MmugDNA.5603.1  | 6.16  | 6.87  | 0.13 | 0.59 | -1.64 | 0.123789 | 0.093509 | 0.489534 | 0.349846 |
| MmugDNA.5604.1.S1_at    | MmugDNA.5604.1  | 6.5   | 7.17  | 0.33 | 0.18 | -1.59 | 0.036239 | 0.035159 | 0.339194 | 0.231667 |
| MmugDNA.5605.1.S1_at    | MmugDNA.5605.1  | 12.75 | 12.58 | 0.28 | 0.07 | 1.13  | 0.205566 | 0.133699 | 0.568054 | 0.405647 |
| MmugDNA.20021.1.S1_at   | MmugDNA.20021.1 | 12.79 | 12.62 | 0.18 | 0.05 | 1.12  | 0.194201 | 0.105698 | 0.557777 | 0.3678   |
| MmugDNA.20021.1.S1_s_at | MmugDNA.20021.1 | 13.5  | 13.4  | 0.13 | 0.04 | 1.07  | 0.221896 | 0.150646 | 0.580625 | 0.425195 |
| MmugDNA.20021.1.S1_x_at | MmugDNA.20021.1 | 13.14 | 13    | 0.19 | 0.03 | 1.1   | 0.197154 | 0.08984  | 0.560096 | 0.344058 |
| MmugDNA.5606.1.S1_at    | MmugDNA.5606.1  | 9.52  | 9.6   | 0.14 | 0.55 | -1.05 | 0.991163 | 0.947979 | 0.996899 | 0.970411 |
| MmugDNA.5607.1.S1_at    | MmugDNA.5607.1  | 4.96  | 4.99  | 0.09 | 0.13 | -1.02 | 0.978695 | 0.519217 | 0.992175 | 0.710878 |
| MmugDNA.5608.1.S1_at    | MmugDNA.5608.1  | 9.66  | 10.89 | 0.7  | 0.55 | -2.34 | 0.149833 | 0.146899 | 0.514409 | 0.420934 |
| MmugDNA.5609.1.S1_at    | MmugDNA.5609.1  | 9.37  | 9.95  | 0.25 | 0.55 | -1.49 | 0.097582 | 0.064159 | 0.456683 | 0.299548 |
| MmugDNA.561.1.S1_at     | MmugDNA.561.1   | 5.32  | 5.33  | 0.26 | 0.02 | -1    | 0.87057  | 0.74146  | 0.948314 | 0.850285 |
| MmugDNA.5611.1.S1_at    | MmugDNA.5611.1  | 6.89  | 7.06  | 0.11 | 0.08 | -1.12 | 0.48325  | 0.695812 | 0.749882 | 0.823223 |
| MmugDNA.5613.1.S1_at    | MmugDNA.5613.1  | 5.44  | 5.37  | 0.14 | 0.46 | 1.05  | 0.56707  | 0.643543 | 0.797949 | 0.790981 |
| MmugDNA.5615.1.S1_at    | MmugDNA.5615.1  | 6.41  | 6.62  | 0.11 | 0.11 | -1.16 | 0.205826 | 0.162532 | 0.568377 | 0.438649 |
| MmugDNA.5616.1.S1_at    | MmugDNA.5616.1  | 7.43  | 7.44  | 0.13 | 0.69 | -1.01 | 0.876097 | 0.620743 | 0.95032  | 0.775593 |
| MmugDNA.5617.1.S1_at    | MmugDNA.5617.1  | 9.45  | 8.1   | 0.61 | 0.7  | 2.55  | 0.116162 | 0.096367 | 0.479775 | 0.353905 |
| MmugDNA.5619.1.S1_at    | MmugDNA.5619.1  | 10.81 | 11.44 | 0.17 | 1.95 | -1.55 | 0.691013 | 0.536056 | 0.862542 | 0.721454 |
| MmugDNA.5621.1.S1_at    | MmugDNA.5621.1  | 11.09 | 11.48 | 0.1  | 0.53 | -1.31 | 0.929858 | 0.887006 | 0.972875 | 0.93566  |
| MmugDNA.5622.1.S1_at    | MmugDNA.5622.1  | 8.94  | 8.13  | 0.14 | 0.46 | 1.76  | 0.040073 | 0.02341  | 0.348787 | 0.191786 |
| MmugDNA.5623.1.S1_at    | MmugDNA.5623.1  | 4.42  | 4.42  | 0.2  | 0.09 | 1     | 0.251975 | 0.445481 | 0.601195 | 0.662401 |
| MmugDNA.5624.1.S1_at    | MmugDNA.5624.1  | 5.91  | 6.56  | 0.17 | 0.3  | -1.57 | 0.077177 | 0.128683 | 0.426681 | 0.400096 |
| MmugDNA.5625.1.S1_at    | MmugDNA.5625.1  | 4.23  | 4.25  | 0.11 | 0.3  | -1.01 | 0.236842 | 0.311441 | 0.590574 | 0.566456 |
| MmugDNA.5626.1.S1_at    | MmugDNA.5626.1  | 5.09  | 5.03  | 0.2  | 0.15 | 1.04  | 0.8874   | 0.250126 | 0.954863 | 0.519168 |
| MmugDNA.5627.1.S1_at    | MmugDNA.5627.1  | 7.26  | 6.76  | 0.18 | 0.37 | 1.42  | 0.181222 | 0.251443 | 0.54572  | 0.520175 |
| MmugDNA.5629.1.S1_at    | MmugDNA.5629.1  | 2.85  | 2.86  | 0.05 | 0.09 | -1.01 | 0.829355 | 0.545891 | 0.930749 | 0.727697 |
| MmugDNA.5630.1.S1_at    | MmugDNA.5630.1  | 4.84  | 4.93  | 0.15 | 0.3  | -1.06 | 0.622998 | 0.654634 | 0.82774  | 0.798101 |
| MmugDNA.5632.1.S1_at    | MmugDNA.5632.1  | 7.88  | 8.54  | 0.24 | 0.48 | -1.58 | 0.039387 | 0.030042 | 0.347108 | 0.21514  |
| MmugDNA.11172.1.S1_s_at | MmugDNA.11172.1 | 12.78 | 12.21 | 0.26 | 0.21 | 1.49  | 0.022819 | 0.004258 | 0.288178 | 0.091808 |
| MmugDNA.5634.1.S1_at    | MmugDNA.5634.1  | 3.92  | 4.01  | 0.1  | 0.47 | -1.06 | 0.668731 | 0.594244 | 0.851986 | 0.758517 |
| MmugDNA.5635.1.S1_at    | MmugDNA.5635.1  | 6.27  | 6.24  | 0.16 | 0.16 | 1.03  | 0.399438 | 0.569171 | 0.699354 | 0.742303 |
| MmugDNA.5637.1.S1_at    | MmugDNA.5637.1  | 5.95  | 6     | 0.21 | 0.16 | -1.04 | 0.512563 | 0.410646 | 0.76568  | 0.637463 |
| MmugDNA.5638.1.S1_at    | MmugDNA.5638.1  | 3.58  | 3.5   | 0.23 | 0.5  | 1.06  | 0.89467  | 0.678259 | 0.957917 | 0.812064 |
| MmugDNA.5640.1.S1_at    | MmugDNA.5640.1  | 4.1   | 4.94  | 0.04 | 1.75 | -1.79 | 0.404288 | 0.415277 | 0.702606 | 0.640769 |

|                        |                |       |       |      |      |       |          |          |          |          |
|------------------------|----------------|-------|-------|------|------|-------|----------|----------|----------|----------|
| MmugDNA.5641.1.S1_at   | MmugDNA.5641.1 | 9.31  | 9.4   | 0.14 | 0.06 | -1.07 | 0.184928 | 0.317648 | 0.548379 | 0.570802 |
| MmugDNA.5644.1.S1_at   | MmugDNA.5644.1 | 6.43  | 6.3   | 0.46 | 0.63 | 1.09  | 0.404064 | 0.56256  | 0.702538 | 0.738069 |
| MmugDNA.5647.1.S1_at   | MmugDNA.5647.1 | 6.68  | 6.32  | 0.37 | 0.57 | 1.28  | 0.988118 | 0.995062 | 0.995841 | 0.996929 |
| MmugDNA.5648.1.S1_at   | MmugDNA.5648.1 | 3.78  | 3.72  | 0.05 | 0.21 | 1.04  | 0.786469 | 0.78485  | 0.911182 | 0.875432 |
| MmugDNA.5649.1.S1_at   | MmugDNA.5649.1 | 9.96  | 10.52 | 0.3  | 0.45 | -1.47 | 0.474522 | 0.415636 | 0.745215 | 0.641007 |
| MmugDNA.565.1.S1_at    | MmugDNA.565.1  | 7.11  | 5.91  | 0.44 | 0.33 | 2.3   | 0.057105 | 0.097443 | 0.387418 | 0.355118 |
| MmugDNA.5650.1.S1_at   | MmugDNA.5650.1 | 5.74  | 5.81  | 0.06 | 0.31 | -1.05 | 0.25521  | 0.219065 | 0.603094 | 0.49285  |
| MmugDNA.5651.1.S1_at   | MmugDNA.5651.1 | 10.09 | 9.36  | 0.21 | 0.36 | 1.66  | 0.02795  | 0.009714 | 0.309162 | 0.129718 |
| MmugDNA.5652.1.S1_at   | MmugDNA.5652.1 | 4.36  | 4.2   | 0.15 | 0.03 | 1.11  | 0.121666 | 0.169654 | 0.486508 | 0.446229 |
| MmugDNA.5653.1.S1_at   | MmugDNA.5653.1 | 4.72  | 4.36  | 0.18 | 0.13 | 1.28  | 0.0918   | 0.193594 | 0.448191 | 0.468785 |
| MmugDNA.5659.1.S1_at   | MmugDNA.5659.1 | 3.92  | 4.16  | 0.21 | 0.1  | -1.18 | 0.131819 | 0.194434 | 0.498041 | 0.469521 |
| MmugDNA.566.1.S1_at    | MmugDNA.566.1  | 6.77  | 6.45  | 0.37 | 0.43 | 1.25  | 0.157924 | 0.215214 | 0.52291  | 0.488977 |
| MmugDNA.5660.1.S1_at   | MmugDNA.5660.1 | 8.9   | 7.91  | 0.39 | 0.23 | 1.98  | 0.042764 | 0.031125 | 0.355382 | 0.218175 |
| MmugDNA.5664.1.S1_at   | MmugDNA.5664.1 | 5.69  | 5.31  | 0.11 | 0.41 | 1.3   | 0.29479  | 0.490827 | 0.631442 | 0.692666 |
| MmugDNA.5666.1.S1_at   | MmugDNA.5666.1 | 3.66  | 3.43  | 0.7  | 0.11 | 1.17  | 0.197657 | 0.19389  | 0.560636 | 0.468979 |
| MmugDNA.5667.1.S1_at   | MmugDNA.5667.1 | 4.67  | 4.33  | 0.4  | 0.41 | 1.26  | 0.806672 | 0.511564 | 0.920793 | 0.705677 |
| MmugDNA.5668.1.S1_at   | MmugDNA.5668.1 | 6.85  | 6.58  | 0.3  | 0.18 | 1.2   | 0.388047 | 0.532367 | 0.692266 | 0.719017 |
| MmugDNA.5670.1.S1_at   | MmugDNA.5670.1 | 5.45  | 5.51  | 0.91 | 0.34 | -1.04 | 0.465975 | 0.520843 | 0.740195 | 0.711942 |
| MmugDNA.5672.1.S1_at   | MmugDNA.5672.1 | 5.82  | 5.81  | 0.14 | 0.15 | 1     | 0.717426 | 0.770371 | 0.875865 | 0.866595 |
| MmugDNA.5673.1.S1_at   | MmugDNA.5673.1 | 4.95  | 4.72  | 0.1  | 0.48 | 1.18  | 0.433802 | 0.00015  | 0.720251 | 0.029832 |
| MmugDNA.5674.1.S1_at   | MmugDNA.5674.1 | 4.83  | 4.78  | 0.13 | 0.08 | 1.04  | 0.232831 | 0.374815 | 0.587927 | 0.613091 |
| MmugDNA.5675.1.S1_at   | MmugDNA.5675.1 | 7.92  | 8.4   | 0.16 | 0.25 | -1.39 | 0.061963 | 0.058976 | 0.396857 | 0.289669 |
| MmugDNA.5676.1.S1_at   | MmugDNA.5676.1 | 3.45  | 3.46  | 0.16 | 0.05 | -1.01 | 0.642344 | 0.505123 | 0.838763 | 0.70197  |
| MmugDNA.5677.1.S1_at   | MmugDNA.5677.1 | 2.85  | 3.07  | 0.25 | 0.09 | -1.16 | 0.517751 | 0.572412 | 0.76904  | 0.744497 |
| MmugDNA.5679.1.S1_at   | MmugDNA.5679.1 | 4.88  | 4.72  | 0.23 | 0.15 | 1.12  | 0.484751 | 0.316867 | 0.750669 | 0.570214 |
| MmugDNA.568.1.S1_at    | MmugDNA.568.1  | 5.97  | 6.3   | 0.15 | 0.22 | -1.26 | 0.029583 | 0.045385 | 0.314766 | 0.257395 |
| MmugDNA.5680.1.S1_s_at | MmugDNA.5680.1 | 10.7  | 10.39 | 0.47 | 0.6  | 1.24  | 0.905642 | 0.984452 | 0.96239  | 0.991287 |
| MmugDNA.5681.1.S1_at   | MmugDNA.5681.1 | 6.91  | 6.99  | 0.12 | 0.18 | -1.06 | 0.782116 | 0.938527 | 0.909135 | 0.965059 |
| MmugDNA.5682.1.S1_at   | MmugDNA.5682.1 | 4.04  | 4     | 0.82 | 0.3  | 1.03  | 0.382174 | 0.379388 | 0.688543 | 0.61636  |
| MmugDNA.5682.1.S1_x_at | MmugDNA.5682.1 | 6.06  | 5.41  | 0.89 | 0.36 | 1.57  | 0.311842 | 0.147325 | 0.643765 | 0.421537 |
| MmugDNA.5684.1.S1_at   | MmugDNA.5684.1 | 6.68  | 6.74  | 0.23 | 0.13 | -1.04 | 0.841225 | 0.85576  | 0.936191 | 0.917698 |
| MmugDNA.5686.1.S1_at   | MmugDNA.5686.1 | 3.58  | 3.68  | 0.11 | 0.3  | -1.07 | 0.614112 | 0.387128 | 0.823094 | 0.621935 |
| MmugDNA.5687.1.S1_at   | MmugDNA.5687.1 | 9.68  | 9.88  | 0.07 | 0.32 | -1.15 | 0.381418 | 0.641384 | 0.687881 | 0.789506 |
| MmugDNA.5689.1.S1_at   | MmugDNA.5689.1 | 3.98  | 3.96  | 0.13 | 0.24 | 1.02  | 0.680649 | 0.806966 | 0.857257 | 0.888903 |
| MmugDNA.5690.1.S1_at   | MmugDNA.5690.1 | 9.89  | 9.6   | 0.23 | 1.23 | 1.22  | 0.285251 | 0.297214 | 0.624811 | 0.556067 |
| MmugDNA.5690.1.S1_s_at | MmugDNA.5690.1 | 10.08 | 9.83  | 0.29 | 1.31 | 1.19  | 0.243971 | 0.228872 | 0.595699 | 0.501124 |
| MmugDNA.5691.1.S1_at   | MmugDNA.5691.1 | 10.17 | 10.12 | 0.15 | 0.08 | 1.04  | 0.309864 | 0.165175 | 0.641793 | 0.441389 |
| MmugDNA.5692.1.S1_at   | MmugDNA.5692.1 | 6.21  | 6.65  | 0.23 | 0.31 | -1.35 | 0.141154 | 0.165229 | 0.508699 | 0.441399 |
| MmugDNA.5693.1.S1_at   | MmugDNA.5693.1 | 6.25  | 6.32  | 0.16 | 0.05 | -1.05 | 0.745764 | 0.270823 | 0.891243 | 0.536026 |
| MmugDNA.5695.1.S1_at   | MmugDNA.5695.1 | 6.94  | 6.98  | 0.33 | 0.13 | -1.02 | 0.711249 | 0.715033 | 0.873475 | 0.834792 |
| MmugDNA.5696.1.S1_at   | MmugDNA.5696.1 | 8.23  | 8.85  | 0.1  | 0.7  | -1.54 | 0.235766 | 0.287713 | 0.589652 | 0.548977 |



|                        |                |       |       |      |      |       |          |          |          |          |
|------------------------|----------------|-------|-------|------|------|-------|----------|----------|----------|----------|
| MmugDNA.5698.1.S1_x_at | MmugDNA.5698.1 | 6.25  | 6.19  | 0.76 | 0.43 | 1.04  | 0.239916 | 0.243393 | 0.592837 | 0.513425 |
| MmugDNA.5699.1.S1_at   | MmugDNA.5699.1 | 7.47  | 7.13  | 0.09 | 0.75 | 1.27  | 0.171222 | 0.234588 | 0.535126 | 0.505792 |
| MmugDNA.57.1.S1_at     | MmugDNA.57.1   | 6.25  | 6.48  | 0.36 | 0.22 | -1.17 | 0.171857 | 0.137946 | 0.535401 | 0.410912 |
| MmugDNA.570.1.S1_at    | MmugDNA.570.1  | 5.39  | 5.14  | 0.39 | 0.42 | 1.19  | 0.620972 | 0.076184 | 0.82629  | 0.321047 |
| MmugDNA.5700.1.S1_at   | MmugDNA.5700.1 | 2.67  | 2.88  | 0.12 | 0.15 | -1.15 | 0.065369 | 0.058697 | 0.404513 | 0.288956 |
| MmugDNA.5701.1.S1_at   | MmugDNA.5701.1 | 5.15  | 5.22  | 0.07 | 0.14 | -1.05 | 0.147058 | 0.133588 | 0.51306  | 0.405542 |
| MmugDNA.5703.1.S1_at   | MmugDNA.5703.1 | 5.13  | 5.37  | 0.07 | 0.14 | -1.18 | 0.13234  | 0.024522 | 0.498572 | 0.196001 |
| MmugDNA.5706.1.S1_s_at | MmugDNA.5706.1 | 11.41 | 10.91 | 0.24 | 0.74 | 1.42  | 0.32642  | 0.384261 | 0.653184 | 0.619994 |
| MmugDNA.5706.1.S1_x_at | MmugDNA.5706.1 | 4.16  | 4.32  | 0.12 | 0.32 | -1.12 | 0.879515 | 0.374657 | 0.951533 | 0.613    |
| MmugDNA.5707.1.S1_at   | MmugDNA.5707.1 | 11.43 | 11.19 | 0.1  | 0.21 | 1.18  | 0.037465 | 0.01419  | 0.3415   | 0.152173 |
| MmugDNA.5708.1.S1_at   | MmugDNA.5708.1 | 8.89  | 9.1   | 0.15 | 0.28 | -1.16 | 0.332484 | 0.046547 | 0.656855 | 0.260267 |
| MmugDNA.5708.1.S1_s_at | MmugDNA.5708.1 | 11.3  | 11.28 | 0.01 | 0.12 | 1.01  | 0.772015 | 0.614184 | 0.903991 | 0.771143 |
| MmugDNA.5709.1.S1_at   | MmugDNA.5709.1 | 3.46  | 3.47  | 0.12 | 0.16 | -1.01 | 0.698029 | 0.390731 | 0.865944 | 0.624501 |
| MmugDNA.5710.1.S1_at   | MmugDNA.5710.1 | 10.34 | 10.63 | 0.29 | 0.49 | -1.22 | 0.681926 | 0.359164 | 0.857635 | 0.600528 |
| MmugDNA.5712.1.S1_at   | MmugDNA.5712.1 | 10.25 | 8.63  | 0.25 | 0.49 | 3.07  | 0.011457 | 0.003552 | 0.235947 | 0.085398 |
| MmugDNA.5713.1.S1_at   | MmugDNA.5713.1 | 5     | 4.79  | 0.4  | 0.39 | 1.16  | 0.928907 | 0.506594 | 0.972607 | 0.702503 |
| MmugDNA.5717.1.S1_at   | MmugDNA.5717.1 | 5.93  | 6.52  | 0.02 | 0.33 | -1.51 | 0.049062 | 0.021683 | 0.370631 | 0.184333 |
| MmugDNA.5718.1.S1_at   | MmugDNA.5718.1 | 7.83  | 7.37  | 0.04 | 0.37 | 1.38  | 0.089908 | 0.051239 | 0.44539  | 0.271799 |
| MmugDNA.5719.1.S1_at   | MmugDNA.5719.1 | 7     | 6.98  | 0.17 | 0.04 | 1.01  | 0.387856 | 0.487013 | 0.692145 | 0.690176 |
| MmugDNA.572.1.S1_at    | MmugDNA.572.1  | 3.68  | 3.72  | 0.07 | 0    | -1.03 | 0.62841  | 0.72508  | 0.830792 | 0.840867 |
| MmugDNA.5721.1.S1_at   | MmugDNA.5721.1 | 3.91  | 3.77  | 0.11 | 0.01 | 1.1   | 0.304046 | 0.271184 | 0.638248 | 0.536264 |
| MmugDNA.5722.1.S1_at   | MmugDNA.5722.1 | 11.56 | 11.26 | 0.15 | 0.24 | 1.23  | 0.141431 | 0.111419 | 0.509067 | 0.376126 |
| MmugDNA.5723.1.S1_at   | MmugDNA.5723.1 | 7.13  | 6.86  | 0.29 | 0.07 | 1.21  | 0.140839 | 0.160753 | 0.508448 | 0.436897 |
| MmugDNA.5724.1.S1_at   | MmugDNA.5724.1 | 6.29  | 6.29  | 0.22 | 0.04 | 1     | 0.400294 | 0.582684 | 0.699879 | 0.751307 |
| MmugDNA.5726.1.S1_at   | MmugDNA.5726.1 | 7.33  | 7.44  | 0.51 | 0.13 | -1.08 | 0.765132 | 0.486018 | 0.901149 | 0.689551 |
| MmugDNA.5727.1.S1_at   | MmugDNA.5727.1 | 4.25  | 4.4   | 0.21 | 0.05 | -1.11 | 0.242537 | 0.283586 | 0.594448 | 0.546021 |
| MmugDNA.5728.1.S1_s_at | MmugDNA.5728.1 | 8.37  | 8.41  | 0.16 | 0.08 | -1.03 | 0.207777 | 0.180005 | 0.569822 | 0.456552 |
| MmugDNA.5730.1.S1_at   | MmugDNA.5730.1 | 5.8   | 5.14  | 0.61 | 0.15 | 1.57  | 0.155329 | 0.226505 | 0.520164 | 0.498987 |
| MmugDNA.5732.1.S1_at   | MmugDNA.5732.1 | 4.66  | 5.21  | 1.2  | 1.33 | -1.47 | 0.857119 | 0.9603   | 0.942171 | 0.977459 |
| MmugDNA.5735.1.S1_at   | MmugDNA.5735.1 | 7.13  | 6.33  | 0.18 | 0.26 | 1.74  | 0.021184 | 0.01673  | 0.282524 | 0.163819 |
| MmugDNA.5737.1.S1_at   | MmugDNA.5737.1 | 8.97  | 9.01  | 0.19 | 0.22 | -1.03 | 0.463772 | 0.28298  | 0.738963 | 0.545692 |
| MmugDNA.5737.1.S1_x_at | MmugDNA.5737.1 | 9.13  | 9.1   | 0.16 | 0.2  | 1.02  | 0.577091 | 0.248212 | 0.803432 | 0.517574 |
| MmugDNA.5739.1.S1_at   | MmugDNA.5739.1 | 6.09  | 6.22  | 0.14 | 0.28 | -1.09 | 0.498243 | 0.273226 | 0.758367 | 0.537788 |
| MmugDNA.574.1.S1_at    | MmugDNA.574.1  | 7.67  | 7.66  | 0.06 | 0.16 | 1     | 0.375953 | 0.130439 | 0.684829 | 0.402268 |
| MmugDNA.5740.1.S1_s_at | MmugDNA.5740.1 | 4.82  | 7.59  | 0.6  | 0.36 | -6.82 | 0.003817 | 0.000863 | 0.179914 | 0.047401 |
| MmugDNA.5741.1.S1_at   | MmugDNA.5741.1 | 4.96  | 5.88  | 0.24 | 0.43 | -1.89 | 0.131433 | 0.074667 | 0.498041 | 0.318404 |
| MmugDNA.5743.1.S1_at   | MmugDNA.5743.1 | 3.19  | 3.73  | 0.24 | 0.29 | -1.45 | 0.16248  | 0.344149 | 0.526743 | 0.589739 |
| MmugDNA.5744.1.S1_at   | MmugDNA.5744.1 | 5.66  | 5.95  | 0.15 | 0.67 | -1.22 | 0.665288 | 0.79632  | 0.849897 | 0.882625 |
| MmugDNA.5745.1.S1_at   | MmugDNA.5745.1 | 3.88  | 3.89  | 0.11 | 0.31 | -1.01 | 0.850051 | 0.938292 | 0.939853 | 0.965016 |
| MmugDNA.5748.1.S1_at   | MmugDNA.5748.1 | 5.51  | 6.18  | 0.32 | 0.56 | -1.6  | 0.130842 | 0.139829 | 0.497198 | 0.413131 |
| MmugDNA.5749.1.S1_at   | MmugDNA.5749.1 | 7.96  | 7.1   | 0.66 | 0.69 | 1.81  | 0.24962  | 0.274231 | 0.600196 | 0.538709 |

|                      |                |       |       |      |      |       |          |          |          |          |
|----------------------|----------------|-------|-------|------|------|-------|----------|----------|----------|----------|
| MmugDNA.5750.1.S1_at | MmugDNA.5750.1 | 7.81  | 7.62  | 0.28 | 0.33 | 1.14  | 0.320239 | 0.222687 | 0.649433 | 0.495617 |
| MmugDNA.5751.1.S1_at | MmugDNA.5751.1 | 8.55  | 8.58  | 0.33 | 0.8  | -1.02 | 0.750122 | 0.930444 | 0.89292  | 0.960476 |
| MmugDNA.5752.1.S1_at | MmugDNA.5752.1 | 3.74  | 3.71  | 0    | 0.21 | 1.02  | 0.474592 | 0.261328 | 0.745264 | 0.527838 |
| MmugDNA.5753.1.S1_at | MmugDNA.5753.1 | 5.56  | 5.67  | 0.26 | 0.21 | -1.07 | 0.847924 | 0.629915 | 0.939068 | 0.782013 |
| MmugDNA.5756.1.S1_at | MmugDNA.5756.1 | 6.83  | 6.16  | 0.97 | 0.51 | 1.59  | 0.315147 | 0.280546 | 0.646362 | 0.543725 |
| MmugDNA.5758.1.S1_at | MmugDNA.5758.1 | 3.52  | 3.36  | 0.08 | 0.24 | 1.12  | 0.18037  | 0.39337  | 0.544672 | 0.626258 |
| MmugDNA.576.1.S1_at  | MmugDNA.576.1  | 3.48  | 3.29  | 0.27 | 0.14 | 1.14  | 0.319943 | 0.348307 | 0.649244 | 0.592478 |
| MmugDNA.5760.1.S1_at | MmugDNA.5760.1 | 5.56  | 5.49  | 0.67 | 0.22 | 1.05  | 0.915482 | 0.987966 | 0.966566 | 0.993283 |
| MmugDNA.5762.1.S1_at | MmugDNA.5762.1 | 11.65 | 11.3  | 0.25 | 0.21 | 1.28  | 0.276548 | 0.364193 | 0.618718 | 0.604513 |
| MmugDNA.5763.1.S1_at | MmugDNA.5763.1 | 6     | 4.82  | 0.75 | 0.05 | 2.27  | 0.156847 | 0.148342 | 0.521591 | 0.422915 |
| MmugDNA.5764.1.S1_at | MmugDNA.5764.1 | 5.37  | 5.54  | 0.21 | 0.15 | -1.13 | 0.846774 | 0.753816 | 0.938469 | 0.856687 |
| MmugDNA.5765.1.S1_at | MmugDNA.5765.1 | 4.19  | 4.46  | 0.06 | 0.1  | -1.21 | 0.0259   | 0.075994 | 0.301128 | 0.320676 |
| MmugDNA.5766.1.S1_at | MmugDNA.5766.1 | 9.96  | 10.57 | 0.18 | 0.72 | -1.53 | 0.214959 | 0.220301 | 0.57547  | 0.493756 |
| MmugDNA.5767.1.S1_at | MmugDNA.5767.1 | 4.41  | 7.69  | 0.94 | 1.25 | -9.67 | 0.059428 | 0.042135 | 0.392153 | 0.249753 |
| MmugDNA.577.1.S1_at  | MmugDNA.577.1  | 3.78  | 3.71  | 0.09 | 0.12 | 1.05  | 0.187444 | 0.378225 | 0.550505 | 0.615438 |
| MmugDNA.5770.1.S1_at | MmugDNA.5770.1 | 7.06  | 6.87  | 0.18 | 0.32 | 1.14  | 0.744601 | 0.648794 | 0.890674 | 0.794478 |
| MmugDNA.5771.1.S1_at | MmugDNA.5771.1 | 4.62  | 4.85  | 0.26 | 0.1  | -1.17 | 0.764793 | 0.550621 | 0.900939 | 0.730605 |
| MmugDNA.5772.1.S1_at | MmugDNA.5772.1 | 6.21  | 6.19  | 0.12 | 0.19 | 1.01  | 0.701894 | 0.412442 | 0.868197 | 0.638862 |
| MmugDNA.5773.1.S1_at | MmugDNA.5773.1 | 5.17  | 5.18  | 0.2  | 0.04 | -1.01 | 0.784952 | 0.729729 | 0.910465 | 0.843658 |
| MmugDNA.5774.1.S1_at | MmugDNA.5774.1 | 2.9   | 2.98  | 0.14 | 0.13 | -1.05 | 0.981973 | 0.893566 | 0.993449 | 0.939277 |
| MmugDNA.5775.1.S1_at | MmugDNA.5775.1 | 6.73  | 7.75  | 0.21 | 0.84 | -2.02 | 0.041282 | 0.034914 | 0.351465 | 0.231062 |
| MmugDNA.5776.1.S1_at | MmugDNA.5776.1 | 3.87  | 3.37  | 0.46 | 0.14 | 1.42  | 0.437992 | 0.554365 | 0.722696 | 0.733168 |
| MmugDNA.5777.1.S1_at | MmugDNA.5777.1 | 7.79  | 7.61  | 0.19 | 0.2  | 1.13  | 0.147149 | 0.206352 | 0.51306  | 0.480544 |
| MmugDNA.5779.1.S1_at | MmugDNA.5779.1 | 5.48  | 5.26  | 0.68 | 0.03 | 1.16  | 0.540822 | 0.622999 | 0.782193 | 0.777444 |
| MmugDNA.578.1.S1_at  | MmugDNA.578.1  | 3.66  | 3.6   | 0.14 | 0.13 | 1.04  | 0.177821 | 0.206096 | 0.541973 | 0.480306 |
| MmugDNA.5782.1.S1_at | MmugDNA.5782.1 | 5.13  | 5.32  | 0.36 | 0.07 | -1.14 | 0.924304 | 0.951251 | 0.970608 | 0.972381 |
| MmugDNA.5785.1.S1_at | MmugDNA.5785.1 | 5.59  | 5.66  | 0.18 | 0.01 | -1.05 | 0.845471 | 0.200688 | 0.938022 | 0.47524  |
| MmugDNA.5786.1.S1_at | MmugDNA.5786.1 | 3.95  | 3.93  | 0.11 | 0.19 | 1.01  | 0.787194 | 0.667475 | 0.911485 | 0.805333 |
| MmugDNA.5787.1.S1_at | MmugDNA.5787.1 | 3.42  | 3.74  | 0.11 | 0.13 | -1.24 | 0.039459 | 0.105389 | 0.347288 | 0.367262 |
| MmugDNA.5789.1.S1_at | MmugDNA.5789.1 | 10.43 | 10.6  | 0.03 | 0.19 | -1.12 | 0.082713 | 0.07317  | 0.43437  | 0.316064 |
| MmugDNA.5790.1.S1_at | MmugDNA.5790.1 | 4.94  | 4.92  | 0.16 | 0.2  | 1.01  | 0.683703 | 0.538891 | 0.858476 | 0.723368 |
| MmugDNA.5791.1.S1_at | MmugDNA.5791.1 | 6.54  | 6.35  | 0.24 | 0.2  | 1.14  | 0.121467 | 0.183167 | 0.486282 | 0.459531 |
| MmugDNA.5792.1.S1_at | MmugDNA.5792.1 | 5.82  | 6.1   | 0.1  | 0.15 | -1.22 | 0.062609 | 0.063947 | 0.398605 | 0.29906  |
| MmugDNA.5795.1.S1_at | MmugDNA.5795.1 | 4.73  | 4.62  | 0.47 | 0.59 | 1.08  | 0.935424 | 0.596006 | 0.975061 | 0.759321 |
| MmugDNA.5797.1.S1_at | MmugDNA.5797.1 | 7.34  | 7.36  | 0.33 | 0.25 | -1.01 | 0.310728 | 0.419848 | 0.642654 | 0.643733 |
| MmugDNA.5798.1.S1_at | MmugDNA.5798.1 | 4.69  | 4.72  | 0.29 | 0    | -1.02 | 0.45344  | 0.427654 | 0.732613 | 0.649406 |
| MmugDNA.5799.1.S1_at | MmugDNA.5799.1 | 5.91  | 6.02  | 0.02 | 0.1  | -1.08 | 0.045163 | 0.215948 | 0.360276 | 0.489582 |
| MmugDNA.58.1.S1_at   | MmugDNA.58.1   | 5.01  | 4.93  | 0.08 | 0.03 | 1.06  | 0.308771 | 0.05377  | 0.641129 | 0.27744  |
| MmugDNA.580.1.S1_at  | MmugDNA.580.1  | 6.16  | 4.85  | 0.77 | 1.13 | 2.47  | 0.782862 | 0.947381 | 0.909285 | 0.970137 |
| MmugDNA.5800.1.S1_at | MmugDNA.5800.1 | 5.86  | 6.02  | 0.1  | 0.11 | -1.11 | 0.338732 | 0.660135 | 0.660988 | 0.801083 |
| MmugDNA.5801.1.S1_at | MmugDNA.5801.1 | 3.64  | 3.58  | 0.12 | 0.2  | 1.04  | 0.600414 | 0.415812 | 0.815205 | 0.641133 |

|                         |                 |       |       |      |      |       |          |          |          |          |
|-------------------------|-----------------|-------|-------|------|------|-------|----------|----------|----------|----------|
| MmugDNA.5802.1.S1_at    | MmugDNA.5802.1  | 3.01  | 3     | 0.09 | 0.11 | 1     | 0.492669 | 0.610725 | 0.755881 | 0.768842 |
| MmugDNA.5804.1.S1_at    | MmugDNA.5804.1  | 4.58  | 5.52  | 0.11 | 0.49 | -1.92 | 0.089672 | 0.279497 | 0.445334 | 0.543055 |
| MmugDNA.5804.1.S1_s_at  | MmugDNA.5804.1  | 9.91  | 10.13 | 0.15 | 0.46 | -1.16 | 0.404219 | 0.005889 | 0.7026   | 0.104899 |
| MmugDNA.5805.1.S1_at    | MmugDNA.5805.1  | 6.23  | 6.5   | 0.08 | 0.12 | -1.2  | 0.057709 | 0.144127 | 0.388935 | 0.418024 |
| MmugDNA.5806.1.S1_at    | MmugDNA.5806.1  | 4.56  | 4.83  | 0.45 | 0.16 | -1.2  | 0.769283 | 0.936249 | 0.902994 | 0.964059 |
| MmugDNA.5808.1.S1_at    | MmugDNA.5808.1  | 6.01  | 5.83  | 0.33 | 0.76 | 1.13  | 0.962947 | 0.972189 | 0.985684 | 0.985008 |
| MmugDNA.581.1.S1_at     | MmugDNA.581.1   | 6.47  | 7.05  | 0.26 | 1.48 | -1.5  | 0.523612 | 0.426406 | 0.772643 | 0.648578 |
| MmugDNA.5810.1.S1_at    | MmugDNA.5810.1  | 4.47  | 4.5   | 0.4  | 0.05 | -1.02 | 0.988718 | 0.849342 | 0.995952 | 0.914489 |
| MmugDNA.5811.1.S1_at    | MmugDNA.5811.1  | 8.11  | 7.32  | 0.3  | 0.46 | 1.73  | 0.183929 | 0.184686 | 0.547947 | 0.460645 |
| MmugDNA.5811.1.S1_s_at  | MmugDNA.5811.1  | 10    | 9.47  | 0.21 | 0.46 | 1.44  | 0.229491 | 0.291371 | 0.586579 | 0.551823 |
| MmugDNA.5813.1.S1_at    | MmugDNA.5813.1  | 4.86  | 4.83  | 0.21 | 0.05 | 1.02  | 0.554929 | 0.074318 | 0.791099 | 0.318046 |
| MmugDNA.5814.1.S1_at    | MmugDNA.5814.1  | 4.24  | 4.22  | 0.18 | 0.07 | 1.01  | 0.492278 | 0.702819 | 0.75563  | 0.827716 |
| MmugDNA.5815.1.S1_at    | MmugDNA.5815.1  | 3.72  | 3.82  | 0.06 | 0.32 | -1.07 | 0.523715 | 0.744438 | 0.77271  | 0.852018 |
| MmugDNA.27859.1.S1_s_at | MmugDNA.27859.1 | 3.56  | 3.57  | 0.03 | 0.16 | -1    | 0.441498 | 0.302758 | 0.72495  | 0.560307 |
| MmugDNA.5817.1.S1_at    | MmugDNA.5817.1  | 5.35  | 5     | 0.92 | 0.23 | 1.28  | 0.185581 | 0.182092 | 0.548924 | 0.45857  |
| MmugDNA.5818.1.S1_at    | MmugDNA.5818.1  | 3.04  | 3.27  | 0.14 | 0.04 | -1.17 | 0.105645 | 0.123544 | 0.466487 | 0.393629 |
| MmugDNA.5818.1.S1_s_at  | MmugDNA.5818.1  | 6.46  | 6.79  | 0.15 | 0.17 | -1.26 | 0.291479 | 0.399261 | 0.628798 | 0.629735 |
| MmugDNA.582.1.S1_at     | MmugDNA.582.1   | 9.21  | 7.91  | 0.32 | 1.14 | 2.45  | 0.154797 | 0.157382 | 0.519345 | 0.432859 |
| MmugDNA.5820.1.S1_at    | MmugDNA.5820.1  | 10.74 | 11.56 | 0.18 | 0.34 | -1.76 | 0.020334 | 0.010114 | 0.277448 | 0.131859 |
| MmugDNA.5821.1.S1_at    | MmugDNA.5821.1  | 2.85  | 2.87  | 0.2  | 0.03 | -1.01 | 0.956144 | 0.934201 | 0.983483 | 0.962662 |
| MmugDNA.5822.1.S1_at    | MmugDNA.5822.1  | 8.46  | 8.33  | 0.16 | 0.52 | 1.1   | 0.34416  | 0.067063 | 0.664241 | 0.304872 |
| MmugDNA.5823.1.S1_at    | MmugDNA.5823.1  | 4.32  | 4.4   | 0.19 | 0.03 | -1.06 | 0.945456 | 0.925403 | 0.979166 | 0.957803 |
| MmugDNA.5824.1.S1_at    | MmugDNA.5824.1  | 6.53  | 6.55  | 0.16 | 0.47 | -1.01 | 0.318716 | 0.161064 | 0.648659 | 0.437232 |
| MmugDNA.5826.1.S1_at    | MmugDNA.5826.1  | 7.27  | 6.84  | 0.27 | 0.93 | 1.35  | 0.163147 | 0.138064 | 0.527489 | 0.410919 |
| MmugDNA.5828.1.S1_at    | MmugDNA.5828.1  | 10.18 | 10.34 | 0.22 | 0.02 | -1.12 | 0.084686 | 0.127028 | 0.43753  | 0.397828 |
| MmugDNA.5829.1.S1_at    | MmugDNA.5829.1  | 5.41  | 5.05  | 0.21 | 0.2  | 1.28  | 0.217359 | 0.278854 | 0.57694  | 0.542599 |
| MmugDNA.583.1.S1_at     | MmugDNA.583.1   | 8.46  | 7.9   | 0.48 | 0.3  | 1.48  | 0.531909 | 0.469224 | 0.777551 | 0.678155 |
| MmugDNA.5831.1.S1_at    | MmugDNA.5831.1  | 2.95  | 2.94  | 0.04 | 0.11 | 1.01  | 0.537818 | 0.731427 | 0.780212 | 0.84431  |
| MmugDNA.5832.1.S1_at    | MmugDNA.5832.1  | 5.13  | 5.13  | 0.78 | 0.05 | -1    | 0.404021 | 0.280282 | 0.702538 | 0.543528 |
| MmugDNA.5834.1.S1_at    | MmugDNA.5834.1  | 4.43  | 4.43  | 0.21 | 0.02 | 1     | 0.420013 | 0.369554 | 0.712178 | 0.608927 |
| MmugDNA.5835.1.S1_at    | MmugDNA.5835.1  | 12.84 | 12.94 | 0.11 | 0.24 | -1.07 | 0.535316 | 0.388664 | 0.778956 | 0.622949 |
| MmugDNA.5836.1.S1_at    | MmugDNA.5836.1  | 10.35 | 8.58  | 0.87 | 0.61 | 3.41  | 0.045815 | 0.017118 | 0.361834 | 0.16577  |
| MmugDNA.5838.1.S1_at    | MmugDNA.5838.1  | 5.22  | 5.63  | 0.07 | 0.17 | -1.33 | 0.028959 | 0.014148 | 0.312556 | 0.15208  |
| MmugDNA.5839.1.S1_at    | MmugDNA.5839.1  | 6.87  | 6.92  | 0.1  | 0.31 | -1.04 | 0.299323 | 0.400968 | 0.634854 | 0.630658 |
| MmugDNA.5840.1.S1_at    | MmugDNA.5840.1  | 3.23  | 3.32  | 0.06 | 0.13 | -1.06 | 0.199808 | 0.294637 | 0.562888 | 0.554306 |
| MmugDNA.30580.1.S1_s_at | MmugDNA.30580.1 | 7.13  | 7.22  | 0.08 | 0.09 | -1.07 | 0.171147 | 0.169463 | 0.535105 | 0.446075 |
| MmugDNA.5846.1.S1_at    | MmugDNA.5846.1  | 10.7  | 9.98  | 0.05 | 0.38 | 1.65  | 0.026734 | 0.018474 | 0.304266 | 0.170946 |
| MmugDNA.5847.1.S1_at    | MmugDNA.5847.1  | 7.98  | 8.37  | 0.56 | 0.62 | -1.3  | 0.364302 | 0.39895  | 0.677295 | 0.629665 |
| MmugDNA.5848.1.S1_at    | MmugDNA.5848.1  | 6.02  | 5.8   | 0.13 | 0.54 | 1.16  | 0.601659 | 0.751315 | 0.816038 | 0.855408 |
| MmugDNA.5849.1.S1_at    | MmugDNA.5849.1  | 4.75  | 4.74  | 0.09 | 0.21 | 1.01  | 0.592435 | 0.093287 | 0.810913 | 0.349412 |
| MmugDNA.5850.1.S1_at    | MmugDNA.5850.1  | 4.58  | 4.68  | 0.24 | 0.19 | -1.07 | 0.941205 | 0.556455 | 0.977671 | 0.734507 |

|                        |                |       |       |      |      |       |          |          |          |          |
|------------------------|----------------|-------|-------|------|------|-------|----------|----------|----------|----------|
| MmugDNA.5851.1.S1_at   | MmugDNA.5851.1 | 5.14  | 5.36  | 0    | 0.14 | -1.16 | 0.051694 | 0.018685 | 0.376214 | 0.171717 |
| MmugDNA.5851.1.S1_s_at | MmugDNA.5851.1 | 4.51  | 4.74  | 0.15 | 0.19 | -1.18 | 0.206707 | 0.154012 | 0.568816 | 0.428788 |
| MmugDNA.5852.1.S1_at   | MmugDNA.5852.1 | 7.58  | 7.8   | 0.14 | 0.02 | -1.17 | 0.066338 | 0.145872 | 0.406394 | 0.419888 |
| MmugDNA.5853.1.S1_at   | MmugDNA.5853.1 | 2.68  | 2.63  | 0.11 | 0.02 | 1.04  | 0.326685 | 0.536822 | 0.653184 | 0.722119 |
| MmugDNA.5854.1.S1_at   | MmugDNA.5854.1 | 3.98  | 3.99  | 0.13 | 0.02 | -1.01 | 0.306849 | 0.538646 | 0.639777 | 0.723301 |
| MmugDNA.5855.1.S1_at   | MmugDNA.5855.1 | 11.41 | 11.6  | 0.21 | 0.26 | -1.14 | 0.224424 | 0.287542 | 0.582716 | 0.54881  |
| MmugDNA.5858.1.S1_at   | MmugDNA.5858.1 | 4.09  | 4.18  | 0.36 | 0.15 | -1.06 | 0.422548 | 0.07192  | 0.713604 | 0.314293 |
| MmugDNA.5859.1.S1_at   | MmugDNA.5859.1 | 9.48  | 9.23  | 0.12 | 0.69 | 1.19  | 0.450754 | 0.528306 | 0.731278 | 0.716493 |
| MmugDNA.586.1.S1_at    | MmugDNA.586.1  | 4.72  | 4.66  | 0.52 | 0.35 | 1.04  | 0.305262 | 0.396319 | 0.639091 | 0.628097 |
| MmugDNA.5860.1.S1_at   | MmugDNA.5860.1 | 7.15  | 8.05  | 0.8  | 1.19 | -1.87 | 0.176506 | 0.032271 | 0.540136 | 0.222395 |
| MmugDNA.5861.1.S1_at   | MmugDNA.5861.1 | 7.73  | 7.8   | 0.14 | 0.16 | -1.05 | 0.282958 | 0.216638 | 0.623159 | 0.490285 |
| MmugDNA.5863.1.S1_at   | MmugDNA.5863.1 | 8.01  | 8.23  | 0.03 | 0.28 | -1.16 | 0.231202 | 0.135658 | 0.587369 | 0.407798 |
| MmugDNA.5864.1.S1_at   | MmugDNA.5864.1 | 5.51  | 5.78  | 0.3  | 0.15 | -1.21 | 0.46253  | 0.377111 | 0.738252 | 0.614795 |
| MmugDNA.5865.1.S1_at   | MmugDNA.5865.1 | 5.86  | 5.97  | 0.17 | 0.05 | -1.08 | 0.613303 | 0.587844 | 0.822642 | 0.754542 |
| MmugDNA.5866.1.S1_at   | MmugDNA.5866.1 | 5.13  | 5.46  | 0.27 | 0.43 | -1.26 | 0.735547 | 0.123424 | 0.886321 | 0.393441 |
| MmugDNA.5869.1.S1_s_at | MmugDNA.5869.1 | 10.18 | 10.2  | 0.05 | 0.14 | -1.02 | 0.967611 | 0.61445  | 0.987896 | 0.771275 |
| MmugDNA.587.1.S1_at    | MmugDNA.587.1  | 4.87  | 5.33  | 0.52 | 0.49 | -1.37 | 0.328365 | 0.210519 | 0.654375 | 0.484463 |
| MmugDNA.5870.1.S1_at   | MmugDNA.5870.1 | 4.2   | 4.03  | 0.19 | 0.03 | 1.12  | 0.209841 | 0.365871 | 0.571081 | 0.605774 |
| MmugDNA.5871.1.S1_at   | MmugDNA.5871.1 | 5.95  | 5.72  | 0.13 | 0.14 | 1.18  | 0.15978  | 0.074349 | 0.52471  | 0.318046 |
| MmugDNA.5874.1.S1_at   | MmugDNA.5874.1 | 8.49  | 9.14  | 0.35 | 0.05 | -1.57 | 0.031218 | 0.015667 | 0.32089  | 0.158598 |
| MmugDNA.5878.1.S1_at   | MmugDNA.5878.1 | 3.23  | 3.19  | 0.37 | 0.66 | 1.03  | 0.573095 | 0.747493 | 0.801055 | 0.853149 |
| MmugDNA.5882.1.S1_at   | MmugDNA.5882.1 | 3.39  | 3.39  | 0.08 | 0    | 1     | 0.39304  | 0.188514 | 0.694954 | 0.464458 |
| MmugDNA.5883.1.S1_at   | MmugDNA.5883.1 | 4.66  | 4.77  | 0.08 | 0.08 | -1.07 | 0.202761 | 0.125097 | 0.565368 | 0.395506 |
| MmugDNA.5884.1.S1_at   | MmugDNA.5884.1 | 3.57  | 3.4   | 0.09 | 0.13 | 1.12  | 0.169278 | 0.318574 | 0.533619 | 0.571258 |
| MmugDNA.5886.1.S1_at   | MmugDNA.5886.1 | 10.08 | 10.8  | 0.13 | 0.25 | -1.64 | 0.017037 | 0.023519 | 0.266551 | 0.192225 |
| MmugDNA.5887.1.S1_at   | MmugDNA.5887.1 | 4.56  | 4.35  | 0.34 | 0.04 | 1.16  | 0.381312 | 0.293475 | 0.68784  | 0.55344  |
| MmugDNA.5889.1.S1_at   | MmugDNA.5889.1 | 7.61  | 5.48  | 0.74 | 0.89 | 4.37  | 0.112303 | 0.121884 | 0.474794 | 0.391245 |
| MmugDNA.589.1.S1_at    | MmugDNA.589.1  | 5.33  | 5.43  | 0.17 | 0.03 | -1.07 | 0.426608 | 0.528243 | 0.715846 | 0.716462 |
| MmugDNA.5890.1.S1_at   | MmugDNA.5890.1 | 3.98  | 4.2   | 0.15 | 0.08 | -1.16 | 0.101056 | 0.145415 | 0.461009 | 0.419421 |
| MmugDNA.5891.1.S1_at   | MmugDNA.5891.1 | 5.99  | 6     | 0.28 | 0.07 | -1    | 0.405278 | 0.443363 | 0.703082 | 0.661168 |
| MmugDNA.5892.1.S1_at   | MmugDNA.5892.1 | 6.31  | 6.54  | 0.41 | 0.25 | -1.18 | 0.447068 | 0.325555 | 0.72871  | 0.575831 |
| MmugDNA.5893.1.S1_at   | MmugDNA.5893.1 | 4.3   | 4.3   | 0.01 | 0.22 | -1.01 | 0.607345 | 0.807467 | 0.819317 | 0.889121 |
| MmugDNA.5894.1.S1_at   | MmugDNA.5894.1 | 4.75  | 4.62  | 0.2  | 0.19 | 1.09  | 0.463746 | 0.100405 | 0.738963 | 0.359541 |
| MmugDNA.5895.1.S1_at   | MmugDNA.5895.1 | 6.21  | 6.49  | 0.44 | 0.44 | -1.21 | 0.687948 | 0.458675 | 0.86083  | 0.671276 |
| MmugDNA.5896.1.S1_at   | MmugDNA.5896.1 | 10.33 | 10.17 | 0.32 | 0.08 | 1.12  | 0.453785 | 0.460841 | 0.732887 | 0.672749 |
| MmugDNA.5897.1.S1_at   | MmugDNA.5897.1 | 4.57  | 4.96  | 0.26 | 0.33 | -1.31 | 0.134823 | 0.0422   | 0.501826 | 0.24989  |
| MmugDNA.5898.1.S1_at   | MmugDNA.5898.1 | 5.42  | 5.6   | 0.41 | 0.23 | -1.13 | 0.824843 | 0.765695 | 0.929018 | 0.863854 |
| MmugDNA.5899.1.S1_at   | MmugDNA.5899.1 | 8.34  | 7.97  | 0.18 | 1.1  | 1.28  | 0.575388 | 0.286219 | 0.80225  | 0.547725 |
| MmugDNA.5899.1.S1_s_at | MmugDNA.5899.1 | 9.86  | 9.73  | 0.15 | 0.99 | 1.09  | 0.546151 | 0.281587 | 0.785337 | 0.544655 |
| MmugDNA.59.1.S1_at     | MmugDNA.59.1   | 8.04  | 9.09  | 0.31 | 0.28 | -2.08 | 0.006679 | 0.003709 | 0.201532 | 0.0868   |
| MmugDNA.590.1.S1_at    | MmugDNA.590.1  | 6.56  | 6.29  | 0.26 | 0.47 | 1.21  | 0.155403 | 0.222637 | 0.520164 | 0.495617 |

|                        |                |       |       |      |      |       |          |          |          |          |
|------------------------|----------------|-------|-------|------|------|-------|----------|----------|----------|----------|
| MmugDNA.5900.1.S1_s_at | MmugDNA.5900.1 | 7.88  | 8.91  | 0.29 | 0.36 | -2.04 | 0.01515  | 0.005599 | 0.257529 | 0.10339  |
| MmugDNA.5902.1.S1_at   | MmugDNA.5902.1 | 3.24  | 3.27  | 0.21 | 0.06 | -1.02 | 0.658708 | 0.847462 | 0.846726 | 0.913316 |
| MmugDNA.5903.1.S1_at   | MmugDNA.5903.1 | 10.31 | 9.15  | 0.16 | 0.1  | 2.23  | 0.000488 | 0.000141 | 0.134999 | 0.029307 |
| MmugDNA.5906.1.S1_at   | MmugDNA.5906.1 | 3.45  | 3.45  | 0.05 | 0.08 | 1     | 0.470071 | 0.55889  | 0.742132 | 0.735939 |
| MmugDNA.5907.1.S1_at   | MmugDNA.5907.1 | 3.62  | 3.58  | 0.04 | 0.03 | 1.02  | 0.15574  | 0.003008 | 0.520384 | 0.080074 |
| MmugDNA.5908.1.S1_at   | MmugDNA.5908.1 | 5.75  | 5.96  | 0.9  | 1.12 | -1.15 | 0.572221 | 0.483751 | 0.800678 | 0.688112 |
| MmugDNA.5909.1.S1_at   | MmugDNA.5909.1 | 5.05  | 5.26  | 0.11 | 0.1  | -1.16 | 0.048285 | 0.038809 | 0.368148 | 0.241916 |
| MmugDNA.591.1.S1_at    | MmugDNA.591.1  | 3.84  | 3.97  | 0.08 | 0.23 | -1.09 | 0.280397 | 0.364945 | 0.621595 | 0.60517  |
| MmugDNA.5910.1.S1_at   | MmugDNA.5910.1 | 6.66  | 6.74  | 0.1  | 0.1  | -1.06 | 0.33954  | 0.319131 | 0.661307 | 0.57167  |
| MmugDNA.5911.1.S1_at   | MmugDNA.5911.1 | 5.95  | 6.31  | 0.1  | 0.13 | -1.28 | 0.05164  | 0.085299 | 0.376115 | 0.337139 |
| MmugDNA.5913.1.S1_at   | MmugDNA.5913.1 | 3.81  | 3.79  | 0.14 | 0.08 | 1.02  | 0.946626 | 0.719529 | 0.979457 | 0.83771  |
| MmugDNA.5914.1.S1_at   | MmugDNA.5914.1 | 8.14  | 7.11  | 0.14 | 0.18 | 2.05  | 0.002264 | 0.002736 | 0.161307 | 0.077112 |
| MmugDNA.5915.1.S1_at   | MmugDNA.5915.1 | 4.72  | 4.7   | 0.2  | 0.11 | 1.01  | 0.36555  | 0.233029 | 0.678307 | 0.50445  |
| MmugDNA.5916.1.S1_at   | MmugDNA.5916.1 | 3.07  | 3.17  | 0.19 | 0.14 | -1.07 | 0.233785 | 0.190436 | 0.588317 | 0.465906 |
| MmugDNA.5917.1.S1_at   | MmugDNA.5917.1 | 5.54  | 5.59  | 0.03 | 0.16 | -1.04 | 0.602166 | 0.786916 | 0.816348 | 0.876732 |
| MmugDNA.5918.1.S1_at   | MmugDNA.5918.1 | 5.69  | 6.29  | 1.12 | 0.62 | -1.52 | 0.962069 | 0.96049  | 0.985456 | 0.97752  |
| MmugDNA.5919.1.S1_at   | MmugDNA.5919.1 | 7.07  | 5.68  | 0.57 | 0.63 | 2.62  | 0.125004 | 0.0098   | 0.491016 | 0.130166 |
| MmugDNA.592.1.S1_at    | MmugDNA.592.1  | 8.95  | 7.77  | 0.18 | 0.97 | 2.27  | 0.063034 | 0.054417 | 0.399858 | 0.278812 |
| MmugDNA.5920.1.S1_at   | MmugDNA.5920.1 | 8.42  | 7.31  | 0.84 | 0.88 | 2.16  | 0.08595  | 0.083527 | 0.440024 | 0.334076 |
| MmugDNA.5921.1.S1_s_at | MmugDNA.5921.1 | 5.76  | 5.88  | 0.14 | 0.18 | -1.09 | 0.872419 | 0.480843 | 0.948997 | 0.686    |
| MmugDNA.5922.1.S1_at   | MmugDNA.5922.1 | 5.47  | 4.91  | 0.7  | 0.14 | 1.48  | 0.280936 | 0.185666 | 0.622007 | 0.46163  |
| MmugDNA.5923.1.S1_at   | MmugDNA.5923.1 | 4.44  | 4.42  | 0.06 | 0.07 | 1.01  | 0.521559 | 0.169042 | 0.771406 | 0.445593 |
| MmugDNA.5923.1.S1_s_at | MmugDNA.5923.1 | 7.55  | 7.75  | 0.17 | 0.09 | -1.15 | 0.189306 | 0.264853 | 0.552435 | 0.530861 |
| MmugDNA.5924.1.S1_at   | MmugDNA.5924.1 | 2.99  | 3.04  | 0.21 | 0.14 | -1.04 | 0.563634 | 0.661103 | 0.796102 | 0.801683 |
| MmugDNA.5925.1.S1_at   | MmugDNA.5925.1 | 8.77  | 7.97  | 0.22 | 0.19 | 1.74  | 0.009535 | 0.002821 | 0.226046 | 0.078275 |
| MmugDNA.5925.1.S1_s_at | MmugDNA.5925.1 | 9.56  | 8.97  | 0.4  | 0.32 | 1.51  | 0.059755 | 0.042231 | 0.39273  | 0.249977 |
| MmugDNA.5926.1.S1_at   | MmugDNA.5926.1 | 5.83  | 6.15  | 0.31 | 0.92 | -1.25 | 0.37182  | 0.444554 | 0.682509 | 0.662072 |
| MmugDNA.5927.1.S1_at   | MmugDNA.5927.1 | 9.06  | 9.21  | 0.11 | 0.3  | -1.11 | 0.357179 | 0.378694 | 0.67213  | 0.615706 |
| MmugDNA.5928.1.S1_at   | MmugDNA.5928.1 | 11.11 | 11.43 | 0.13 | 0.13 | -1.25 | 0.117737 | 0.171248 | 0.481889 | 0.447792 |
| MmugDNA.593.1.S1_at    | MmugDNA.593.1  | 3.41  | 3.51  | 0.11 | 0.02 | -1.07 | 0.387727 | 0.545928 | 0.692117 | 0.727697 |
| MmugDNA.5931.1.S1_at   | MmugDNA.5931.1 | 9.06  | 8.27  | 0.31 | 0.13 | 1.73  | 0.042809 | 0.019217 | 0.355382 | 0.174465 |
| MmugDNA.5932.1.S1_at   | MmugDNA.5932.1 | 4.91  | 4.71  | 0.38 | 0.18 | 1.15  | 0.241952 | 0.166852 | 0.594146 | 0.443311 |
| MmugDNA.5934.1.S1_at   | MmugDNA.5934.1 | 11.21 | 11.94 | 0.16 | 0.25 | -1.66 | 0.04342  | 0.035373 | 0.356711 | 0.232358 |
| MmugDNA.5935.1.S1_at   | MmugDNA.5935.1 | 10.2  | 10.23 | 0.12 | 0.33 | -1.02 | 0.503585 | 0.592047 | 0.760979 | 0.757449 |
| MmugDNA.5937.1.S1_at   | MmugDNA.5937.1 | 5.16  | 4.98  | 0.14 | 0.24 | 1.13  | 0.539108 | 0.40357  | 0.780929 | 0.632215 |
| MmugDNA.5938.1.S1_at   | MmugDNA.5938.1 | 6.7   | 6.5   | 0.53 | 0.58 | 1.14  | 0.996636 | 0.264233 | 0.998586 | 0.530301 |
| MmugDNA.594.1.S1_at    | MmugDNA.594.1  | 7.71  | 7.18  | 0.3  | 0.57 | 1.44  | 0.240056 | 0.115154 | 0.592883 | 0.382052 |
| MmugDNA.5941.1.S1_at   | MmugDNA.5941.1 | 6.52  | 6.57  | 0.11 | 0.07 | -1.04 | 0.895822 | 0.972034 | 0.958405 | 0.984889 |
| MmugDNA.5942.1.S1_at   | MmugDNA.5942.1 | 4     | 4.05  | 0.29 | 0.04 | -1.03 | 0.79364  | 0.93744  | 0.914488 | 0.964687 |
| MmugDNA.5944.1.S1_at   | MmugDNA.5944.1 | 6.57  | 7.33  | 0.33 | 0.61 | -1.69 | 0.345333 | 0.496157 | 0.665135 | 0.695877 |
| MmugDNA.5945.1.S1_at   | MmugDNA.5945.1 | 10.34 | 10.02 | 0.1  | 0.08 | 1.24  | 0.008728 | 0.002661 | 0.220556 | 0.076254 |

|                      |                |       |       |      |      |       |          |          |          |          |
|----------------------|----------------|-------|-------|------|------|-------|----------|----------|----------|----------|
| MmugDNA.5946.1.S1_at | MmugDNA.5946.1 | 5.27  | 5.08  | 0.84 | 0.26 | 1.14  | 0.391349 | 0.538204 | 0.69404  | 0.72298  |
| MmugDNA.5947.1.S1_at | MmugDNA.5947.1 | 7.85  | 7.46  | 0.48 | 0.33 | 1.31  | 0.198878 | 0.25089  | 0.561939 | 0.51958  |
| MmugDNA.5948.1.S1_at | MmugDNA.5948.1 | 4.32  | 4.34  | 0.21 | 0.56 | -1.02 | 0.280069 | 0.323267 | 0.621337 | 0.574408 |
| MmugDNA.5949.1.S1_at | MmugDNA.5949.1 | 11.51 | 11.41 | 0.06 | 0.4  | 1.07  | 0.695571 | 0.489499 | 0.864996 | 0.691824 |
| MmugDNA.595.1.S1_at  | MmugDNA.595.1  | 3.27  | 3.05  | 0.15 | 0.21 | 1.17  | 0.498166 | 0.720587 | 0.758309 | 0.838346 |
| MmugDNA.5951.1.S1_at | MmugDNA.5951.1 | 3.53  | 3.72  | 0.28 | 0.65 | -1.14 | 0.245992 | 0.331751 | 0.597361 | 0.580344 |
| MmugDNA.5952.1.S1_at | MmugDNA.5952.1 | 5.59  | 5.52  | 0.1  | 0.22 | 1.05  | 0.580934 | 0.638822 | 0.804828 | 0.78789  |
| MmugDNA.5953.1.S1_at | MmugDNA.5953.1 | 3.11  | 3.15  | 0.15 | 0.12 | -1.02 | 0.705637 | 0.916161 | 0.870235 | 0.953065 |
| MmugDNA.5955.1.S1_at | MmugDNA.5955.1 | 5.8   | 5.61  | 0.31 | 0.17 | 1.13  | 0.307094 | 0.441505 | 0.639861 | 0.659675 |
| MmugDNA.5956.1.S1_at | MmugDNA.5956.1 | 2.88  | 2.85  | 0.07 | 0.05 | 1.02  | 0.942867 | 0.357922 | 0.978267 | 0.599532 |
| MmugDNA.5957.1.S1_at | MmugDNA.5957.1 | 4.04  | 3.91  | 0.05 | 0.11 | 1.1   | 0.266976 | 0.086864 | 0.612291 | 0.339651 |
| MmugDNA.5958.1.S1_at | MmugDNA.5958.1 | 5.45  | 5.42  | 0.24 | 0.03 | 1.02  | 0.247698 | 0.242134 | 0.59891  | 0.512652 |
| MmugDNA.5959.1.S1_at | MmugDNA.5959.1 | 4.85  | 4.69  | 0.09 | 0.25 | 1.12  | 0.740451 | 0.849596 | 0.888634 | 0.914595 |
| MmugDNA.596.1.S1_at  | MmugDNA.596.1  | 5.73  | 5.67  | 0.04 | 0.01 | 1.05  | 0.051592 | 0.106108 | 0.376072 | 0.368498 |
| MmugDNA.5960.1.S1_at | MmugDNA.5960.1 | 8.83  | 8.65  | 0.3  | 0.66 | 1.13  | 0.767651 | 0.200292 | 0.902446 | 0.474689 |
| MmugDNA.5961.1.S1_at | MmugDNA.5961.1 | 3.94  | 3.87  | 0.15 | 0.06 | 1.05  | 0.568442 | 0.604778 | 0.798666 | 0.764797 |
| MmugDNA.5962.1.S1_at | MmugDNA.5962.1 | 3.55  | 3.54  | 0.05 | 0.25 | 1.01  | 0.624205 | 0.216825 | 0.828178 | 0.490393 |
| MmugDNA.5964.1.S1_at | MmugDNA.5964.1 | 7.6   | 7.09  | 0.73 | 1.19 | 1.42  | 0.609711 | 0.492414 | 0.820621 | 0.693534 |
| MmugDNA.5965.1.S1_at | MmugDNA.5965.1 | 9.23  | 8.68  | 0.09 | 0.27 | 1.46  | 0.020013 | 0.013338 | 0.276484 | 0.148042 |
| MmugDNA.5966.1.S1_at | MmugDNA.5966.1 | 4.14  | 4.15  | 0.11 | 0.12 | -1.01 | 0.206576 | 0.329208 | 0.568816 | 0.578615 |
| MmugDNA.5967.1.S1_at | MmugDNA.5967.1 | 9.15  | 7.92  | 0.1  | 0.41 | 2.34  | 0.016644 | 0.012555 | 0.26475  | 0.144501 |
| MmugDNA.5969.1.S1_at | MmugDNA.5969.1 | 11.86 | 11.82 | 0.21 | 0.11 | 1.03  | 0.793935 | 0.28912  | 0.914508 | 0.55027  |
| MmugDNA.597.1.S1_at  | MmugDNA.597.1  | 4.51  | 4.06  | 0.2  | 0.17 | 1.37  | 0.040195 | 0.052178 | 0.349219 | 0.274032 |
| MmugDNA.5970.1.S1_at | MmugDNA.5970.1 | 7.16  | 7.18  | 0.93 | 0.45 | -1.02 | 0.694963 | 0.753545 | 0.864696 | 0.856527 |
| MmugDNA.5972.1.S1_at | MmugDNA.5972.1 | 9.11  | 10.38 | 0.32 | 0.05 | -2.41 | 0.001524 | 0.000398 | 0.151506 | 0.037471 |
| MmugDNA.5973.1.S1_at | MmugDNA.5973.1 | 12.73 | 13.3  | 0.19 | 0.03 | -1.48 | 0.004136 | 0.001214 | 0.181739 | 0.054455 |
| MmugDNA.5974.1.S1_at | MmugDNA.5974.1 | 5.82  | 5.88  | 0    | 0.24 | -1.04 | 0.720003 | 0.692471 | 0.877229 | 0.821053 |
| MmugDNA.5975.1.S1_at | MmugDNA.5975.1 | 4.25  | 4.36  | 0.25 | 0.25 | -1.08 | 0.690735 | 0.87937  | 0.862399 | 0.931144 |
| MmugDNA.5977.1.S1_at | MmugDNA.5977.1 | 3.34  | 3.71  | 1.02 | 0.05 | -1.29 | 0.69658  | 0.80753  | 0.865344 | 0.889173 |
| MmugDNA.5978.1.S1_at | MmugDNA.5978.1 | 3.51  | 3.58  | 0.25 | 0.29 | -1.05 | 0.727821 | 0.810783 | 0.881594 | 0.890845 |
| MmugDNA.5979.1.S1_at | MmugDNA.5979.1 | 6.26  | 5.84  | 0.24 | 0.39 | 1.34  | 0.129745 | 0.112706 | 0.495916 | 0.378322 |
| MmugDNA.598.1.S1_at  | MmugDNA.598.1  | 7.88  | 7.49  | 0.22 | 0.6  | 1.31  | 0.339296 | 0.314239 | 0.661232 | 0.568211 |
| MmugDNA.5980.1.S1_at | MmugDNA.5980.1 | 5.43  | 5.43  | 0.16 | 0.01 | 1     | 0.390759 | 0.765369 | 0.693809 | 0.863627 |
| MmugDNA.5981.1.S1_at | MmugDNA.5981.1 | 3.88  | 3.71  | 0.78 | 0.13 | 1.13  | 0.206588 | 0.232927 | 0.568816 | 0.50445  |
| MmugDNA.5982.1.S1_at | MmugDNA.5982.1 | 6.59  | 6.61  | 0.18 | 0.18 | -1.01 | 0.590347 | 0.396822 | 0.809851 | 0.628452 |
| MmugDNA.5983.1.S1_at | MmugDNA.5983.1 | 3.65  | 3.99  | 0.17 | 0.06 | -1.26 | 0.109521 | 0.114455 | 0.470811 | 0.381021 |
| MmugDNA.5984.1.S1_at | MmugDNA.5984.1 | 3.78  | 3.78  | 0.13 | 0.05 | 1     | 0.951352 | 0.984562 | 0.981734 | 0.991313 |
| MmugDNA.5985.1.S1_at | MmugDNA.5985.1 | 9.99  | 9.95  | 0.28 | 0.18 | 1.03  | 0.828297 | 0.001763 | 0.930272 | 0.063202 |
| MmugDNA.5987.1.S1_at | MmugDNA.5987.1 | 4.76  | 5.2   | 0.26 | 0.31 | -1.36 | 0.06588  | 0.032485 | 0.405342 | 0.223254 |
| MmugDNA.5989.1.S1_at | MmugDNA.5989.1 | 3.6   | 3.66  | 0.15 | 0.2  | -1.04 | 0.302085 | 0.42076  | 0.636849 | 0.64442  |
| MmugDNA.599.1.S1_at  | MmugDNA.599.1  | 10.96 | 10.93 | 0.22 | 0.51 | 1.03  | 0.26136  | 0.356678 | 0.607972 | 0.598516 |

|                        |                |       |       |      |      |       |          |          |          |          |
|------------------------|----------------|-------|-------|------|------|-------|----------|----------|----------|----------|
| MmugDNA.5991.1.S1_at   | MmugDNA.5991.1 | 3.61  | 3.61  | 0.04 | 0.03 | 1     | 0.213511 | 0.379846 | 0.573715 | 0.616611 |
| MmugDNA.5993.1.S1_at   | MmugDNA.5993.1 | 3.71  | 3.93  | 0.05 | 0.32 | -1.16 | 0.334398 | 0.218794 | 0.658376 | 0.492507 |
| MmugDNA.5994.1.S1_at   | MmugDNA.5994.1 | 5.81  | 5.84  | 0.32 | 0.23 | -1.02 | 0.356598 | 0.668182 | 0.671685 | 0.805827 |
| MmugDNA.5995.1.S1_at   | MmugDNA.5995.1 | 9.32  | 8.8   | 0.22 | 0.18 | 1.44  | 0.068037 | 0.05381  | 0.409262 | 0.2775   |
| MmugDNA.5995.1.S1_s_at | MmugDNA.5995.1 | 9.88  | 9.57  | 0.3  | 0.18 | 1.24  | 0.0639   | 0.063804 | 0.401767 | 0.29906  |
| MmugDNA.5998.1.S1_at   | MmugDNA.5998.1 | 4.55  | 4.41  | 0.44 | 0.2  | 1.11  | 0.256137 | 0.157161 | 0.603822 | 0.432616 |
| MmugDNA.5999.1.S1_at   | MmugDNA.5999.1 | 5.48  | 5.09  | 0.35 | 0.03 | 1.31  | 0.153265 | 0.035877 | 0.517764 | 0.233893 |
| MmugDNA.60.1.S1_at     | MmugDNA.60.1   | 9.62  | 10.35 | 0.19 | 0.57 | -1.67 | 0.141055 | 0.109259 | 0.50864  | 0.37308  |
| MmugDNA.600.1.S1_at    | MmugDNA.600.1  | 7.27  | 7.49  | 0.03 | 0.4  | -1.16 | 0.434375 | 0.258804 | 0.720416 | 0.525954 |
| MmugDNA.6000.1.S1_at   | MmugDNA.6000.1 | 7.11  | 7.08  | 0.46 | 0.61 | 1.02  | 0.3492   | 0.422688 | 0.667502 | 0.645876 |
| MmugDNA.6001.1.S1_at   | MmugDNA.6001.1 | 7.19  | 6.54  | 0.99 | 0.47 | 1.57  | 0.206279 | 0.195496 | 0.568587 | 0.470351 |
| MmugDNA.6003.1.S1_at   | MmugDNA.6003.1 | 8.09  | 7.42  | 0.68 | 0.46 | 1.59  | 0.111953 | 0.150092 | 0.474382 | 0.424698 |
| MmugDNA.6004.1.S1_at   | MmugDNA.6004.1 | 4.4   | 4.35  | 0.1  | 0.22 | 1.04  | 0.513668 | 0.184221 | 0.766429 | 0.460382 |
| MmugDNA.6005.1.S1_at   | MmugDNA.6005.1 | 4.76  | 4.91  | 0.5  | 0.07 | -1.12 | 0.708036 | 0.593928 | 0.871547 | 0.758442 |
| MmugDNA.6006.1.S1_at   | MmugDNA.6006.1 | 3.38  | 3.4   | 0.04 | 0.17 | -1.01 | 0.893768 | 0.69392  | 0.957757 | 0.821989 |
| MmugDNA.6008.1.S1_at   | MmugDNA.6008.1 | 4.57  | 4.62  | 0.45 | 0.1  | -1.04 | 0.994209 | 0.928886 | 0.997987 | 0.959449 |
| MmugDNA.6009.1.S1_at   | MmugDNA.6009.1 | 3.14  | 3.16  | 0.01 | 0.19 | -1.01 | 0.308343 | 0.291313 | 0.640711 | 0.551803 |
| MmugDNA.6011.1.S1_at   | MmugDNA.6011.1 | 9.17  | 8.79  | 0.33 | 0.5  | 1.3   | 0.314672 | 0.312175 | 0.646066 | 0.566915 |
| MmugDNA.6012.1.S1_at   | MmugDNA.6012.1 | 7.39  | 6.29  | 0.44 | 0.74 | 2.15  | 0.115893 | 0.121181 | 0.479358 | 0.390244 |
| MmugDNA.6013.1.S1_at   | MmugDNA.6013.1 | 10.62 | 9.61  | 0.14 | 0.81 | 2.02  | 0.203596 | 0.23608  | 0.566152 | 0.507179 |
| MmugDNA.6014.1.S1_at   | MmugDNA.6014.1 | 3.46  | 3.71  | 0.61 | 0.16 | -1.19 | 0.665627 | 0.429792 | 0.850023 | 0.651036 |
| MmugDNA.6016.1.S1_at   | MmugDNA.6016.1 | 3.31  | 3.43  | 0.11 | 0.01 | -1.08 | 0.150991 | 0.214073 | 0.51572  | 0.487645 |
| MmugDNA.6019.1.S1_at   | MmugDNA.6019.1 | 5.61  | 5.38  | 0.5  | 0.56 | 1.18  | 0.618593 | 0.713865 | 0.825259 | 0.833976 |
| MmugDNA.6020.1.S1_at   | MmugDNA.6020.1 | 9.39  | 9.55  | 0.15 | 0.68 | -1.12 | 0.747363 | 0.43741  | 0.89179  | 0.656699 |
| MmugDNA.6022.1.S1_at   | MmugDNA.6022.1 | 10.95 | 10.82 | 0.19 | 0.08 | 1.09  | 0.220329 | 0.030124 | 0.579323 | 0.215406 |
| MmugDNA.6023.1.S1_at   | MmugDNA.6023.1 | 6.77  | 6.93  | 0.17 | 0.23 | -1.12 | 0.152227 | 0.129308 | 0.51689  | 0.400726 |
| MmugDNA.6024.1.S1_at   | MmugDNA.6024.1 | 5.03  | 4.86  | 0.25 | 0.11 | 1.13  | 0.89006  | 0.23529  | 0.956021 | 0.506336 |
| MmugDNA.6025.1.S1_s_at | MmugDNA.6025.1 | 8.07  | 8.57  | 0.25 | 0.21 | -1.42 | 0.149927 | 0.116136 | 0.514522 | 0.383482 |
| MmugDNA.6026.1.S1_at   | MmugDNA.6026.1 | 8.23  | 7.88  | 0.51 | 0.57 | 1.27  | 0.501812 | 0.03742  | 0.760145 | 0.237777 |
| MmugDNA.6027.1.S1_at   | MmugDNA.6027.1 | 5.77  | 6.07  | 0.4  | 0.3  | -1.23 | 0.51076  | 0.693513 | 0.765151 | 0.82172  |
| MmugDNA.6028.1.S1_at   | MmugDNA.6028.1 | 4.21  | 4.32  | 0.06 | 0.13 | -1.08 | 0.068147 | 0.224629 | 0.409384 | 0.497613 |
| MmugDNA.6029.1.S1_at   | MmugDNA.6029.1 | 4.95  | 4.95  | 0.09 | 0.14 | 1     | 0.452226 | 0.642968 | 0.731949 | 0.79055  |
| MmugDNA.6030.1.S1_at   | MmugDNA.6030.1 | 6.73  | 6.29  | 0.21 | 0.07 | 1.36  | 0.027335 | 0.017733 | 0.307332 | 0.168367 |
| MmugDNA.6031.1.S1_at   | MmugDNA.6031.1 | 3.48  | 3.46  | 0.33 | 0.18 | 1.02  | 0.557369 | 0.754508 | 0.792405 | 0.857221 |
| MmugDNA.6033.1.S1_at   | MmugDNA.6033.1 | 3.91  | 4.34  | 0.95 | 0.31 | -1.35 | 0.648329 | 0.371254 | 0.841821 | 0.610135 |
| MmugDNA.6034.1.S1_at   | MmugDNA.6034.1 | 4.4   | 4.51  | 0.33 | 0.29 | -1.08 | 0.463113 | 0.526702 | 0.738603 | 0.715627 |
| MmugDNA.6035.1.S1_at   | MmugDNA.6035.1 | 3.29  | 3.22  | 0.13 | 0.07 | 1.05  | 0.449399 | 0.515002 | 0.73019  | 0.708004 |
| MmugDNA.6037.1.S1_at   | MmugDNA.6037.1 | 11.28 | 11.55 | 0.21 | 0.15 | -1.2  | 0.194337 | 0.31562  | 0.557805 | 0.569053 |
| MmugDNA.6038.1.S1_at   | MmugDNA.6038.1 | 2.81  | 2.99  | 0.16 | 0.21 | -1.13 | 0.255213 | 0.370132 | 0.603094 | 0.609369 |
| MmugDNA.6039.1.S1_at   | MmugDNA.6039.1 | 10.14 | 9.45  | 0.22 | 0.09 | 1.61  | 0.013051 | 0.003507 | 0.245262 | 0.08503  |
| MmugDNA.604.1.S1_at    | MmugDNA.604.1  | 12.88 | 12.75 | 0.03 | 0.04 | 1.09  | 0.014992 | 0.042609 | 0.256911 | 0.251035 |

|                        |                |       |       |      |      |       |          |          |          |          |
|------------------------|----------------|-------|-------|------|------|-------|----------|----------|----------|----------|
| MmugDNA.6040.1.S1_at   | MmugDNA.6040.1 | 7.4   | 7.08  | 0.14 | 0.63 | 1.25  | 0.109054 | 0.111822 | 0.470811 | 0.376856 |
| MmugDNA.6040.1.S1_s_at | MmugDNA.6040.1 | 8.23  | 7.93  | 0.12 | 0.6  | 1.24  | 0.110282 | 0.142103 | 0.471863 | 0.415685 |
| MmugDNA.6041.1.S1_at   | MmugDNA.6041.1 | 2.96  | 2.94  | 0.19 | 0.13 | 1.01  | 0.79024  | 0.859761 | 0.912958 | 0.920085 |
| MmugDNA.6043.1.S1_at   | MmugDNA.6043.1 | 3.22  | 3.39  | 0.16 | 0.2  | -1.13 | 0.465039 | 0.378525 | 0.739772 | 0.615564 |
| MmugDNA.6044.1.S1_at   | MmugDNA.6044.1 | 8.33  | 8.55  | 0.05 | 0.25 | -1.16 | 0.61841  | 0.274963 | 0.825194 | 0.539402 |
| MmugDNA.6045.1.S1_at   | MmugDNA.6045.1 | 4.03  | 4.02  | 0.25 | 0.04 | 1.01  | 0.57179  | 0.513231 | 0.800374 | 0.706851 |
| MmugDNA.6046.1.S1_at   | MmugDNA.6046.1 | 5.67  | 5.69  | 0.27 | 0.01 | -1.01 | 0.809111 | 0.553226 | 0.922185 | 0.73239  |
| MmugDNA.6047.1.S1_at   | MmugDNA.6047.1 | 11.01 | 10.47 | 0.26 | 0.51 | 1.46  | 0.510938 | 0.637422 | 0.765151 | 0.786916 |
| MmugDNA.6049.1.S1_at   | MmugDNA.6049.1 | 6.75  | 6.64  | 0.02 | 0.17 | 1.07  | 0.839691 | 0.631514 | 0.93528  | 0.782845 |
| MmugDNA.605.1.S1_at    | MmugDNA.605.1  | 6.64  | 5.81  | 0.47 | 0.22 | 1.79  | 0.057106 | 0.051085 | 0.387418 | 0.271309 |
| MmugDNA.6050.1.S1_at   | MmugDNA.6050.1 | 4.72  | 4.84  | 0.17 | 0.18 | -1.09 | 0.252322 | 0.288192 | 0.601282 | 0.549454 |
| MmugDNA.6052.1.S1_at   | MmugDNA.6052.1 | 3.71  | 3.79  | 0.08 | 0.08 | -1.06 | 0.253461 | 0.270116 | 0.602055 | 0.535401 |
| MmugDNA.6053.1.S1_at   | MmugDNA.6053.1 | 2.71  | 2.71  | 0.1  | 0    | -1    | 0.42612  | 0.127968 | 0.715524 | 0.398904 |
| MmugDNA.6054.1.S1_at   | MmugDNA.6054.1 | 4.7   | 4.74  | 0.03 | 0.13 | -1.03 | 0.3392   | 0.522114 | 0.661202 | 0.712887 |
| MmugDNA.6055.1.S1_at   | MmugDNA.6055.1 | 5.65  | 5.35  | 0.22 | 0.15 | 1.23  | 0.24429  | 0.291775 | 0.596068 | 0.552054 |
| MmugDNA.6056.1.S1_at   | MmugDNA.6056.1 | 6.11  | 6.14  | 0.07 | 0.09 | -1.02 | 0.849573 | 0.786816 | 0.939616 | 0.876684 |
| MmugDNA.6057.1.S1_at   | MmugDNA.6057.1 | 5.26  | 5.4   | 0.28 | 0.2  | -1.1  | 0.930022 | 0.837706 | 0.972958 | 0.907263 |
| MmugDNA.6058.1.S1_at   | MmugDNA.6058.1 | 5.42  | 7.29  | 0.97 | 0.87 | -3.66 | 0.081935 | 0.085109 | 0.433191 | 0.336936 |
| MmugDNA.6059.1.S1_at   | MmugDNA.6059.1 | 2.97  | 3.06  | 0.05 | 0.07 | -1.06 | 0.171646 | 0.331195 | 0.535232 | 0.579947 |
| MmugDNA.606.1.S1_at    | MmugDNA.606.1  | 10.5  | 11.85 | 0.09 | 0.22 | -2.56 | 0.000417 | 0.000043 | 0.130717 | 0.025273 |
| MmugDNA.6060.1.S1_at   | MmugDNA.6060.1 | 4.73  | 4.2   | 0.21 | 0.18 | 1.45  | 0.123588 | 0.099042 | 0.489327 | 0.357183 |
| MmugDNA.6061.1.S1_at   | MmugDNA.6061.1 | 6.39  | 6.39  | 0.11 | 0.2  | -1    | 0.237722 | 0.327471 | 0.591285 | 0.577308 |
| MmugDNA.6062.1.S1_at   | MmugDNA.6062.1 | 4.63  | 4.65  | 0.2  | 0.17 | -1.01 | 0.865776 | 0.860102 | 0.946291 | 0.920245 |
| MmugDNA.6064.1.S1_at   | MmugDNA.6064.1 | 4.42  | 4.5   | 0.27 | 0.07 | -1.05 | 0.631304 | 0.215852 | 0.832618 | 0.489536 |
| MmugDNA.6065.1.S1_at   | MmugDNA.6065.1 | 5.78  | 5.43  | 0.18 | 0.09 | 1.28  | 0.047591 | 0.259319 | 0.366805 | 0.526418 |
| MmugDNA.6066.1.S1_at   | MmugDNA.6066.1 | 5.56  | 5.64  | 0.18 | 0.05 | -1.06 | 0.382944 | 0.41718  | 0.689029 | 0.642062 |
| MmugDNA.6067.1.S1_at   | MmugDNA.6067.1 | 8.3   | 5.6   | 0.74 | 0.51 | 6.49  | 0.011497 | 0.022811 | 0.23613  | 0.189214 |
| MmugDNA.6068.1.S1_at   | MmugDNA.6068.1 | 10.32 | 10.62 | 0.17 | 0.16 | -1.24 | 0.125447 | 0.085148 | 0.491333 | 0.336978 |
| MmugDNA.6069.1.S1_at   | MmugDNA.6069.1 | 4.89  | 5.97  | 1.24 | 0.59 | -2.11 | 0.381339 | 0.467885 | 0.687849 | 0.677386 |
| MmugDNA.6071.1.S1_at   | MmugDNA.6071.1 | 2.91  | 2.96  | 0.39 | 0.1  | -1.03 | 0.954912 | 0.768529 | 0.983073 | 0.86561  |
| MmugDNA.6072.1.S1_at   | MmugDNA.6072.1 | 9.38  | 9.37  | 0.18 | 0.58 | 1.01  | 0.958662 | 0.052883 | 0.984338 | 0.275541 |
| MmugDNA.6075.1.S1_at   | MmugDNA.6075.1 | 4.31  | 5.79  | 0.78 | 0.46 | -2.8  | 0.114975 | 0.138289 | 0.478345 | 0.411198 |
| MmugDNA.6076.1.S1_at   | MmugDNA.6076.1 | 10.92 | 11    | 0.15 | 1.2  | -1.06 | 0.381252 | 0.403015 | 0.68781  | 0.631795 |
| MmugDNA.6077.1.S1_at   | MmugDNA.6077.1 | 4.59  | 5.47  | 0.69 | 0.84 | -1.85 | 0.570111 | 0.340783 | 0.799365 | 0.586977 |
| MmugDNA.6078.1.S1_at   | MmugDNA.6078.1 | 8.72  | 8.15  | 0.32 | 0.12 | 1.49  | 0.034943 | 0.047721 | 0.334102 | 0.263325 |
| MmugDNA.6079.1.S1_at   | MmugDNA.6079.1 | 4.72  | 4.59  | 0.17 | 0.22 | 1.09  | 0.454557 | 0.723536 | 0.733275 | 0.839934 |
| MmugDNA.608.1.S1_at    | MmugDNA.608.1  | 8.85  | 10.94 | 0.47 | 0.09 | -4.24 | 0.002999 | 0.000767 | 0.171022 | 0.04544  |
| MmugDNA.6081.1.S1_at   | MmugDNA.6081.1 | 4.89  | 4.84  | 0.21 | 0.17 | 1.04  | 0.627144 | 0.449793 | 0.829907 | 0.665276 |
| MmugDNA.6082.1.S1_at   | MmugDNA.6082.1 | 4.73  | 4.73  | 0.68 | 0.24 | 1     | 0.454129 | 0.398746 | 0.733167 | 0.62947  |
| MmugDNA.6084.1.S1_at   | MmugDNA.6084.1 | 3.39  | 3.38  | 0.13 | 0.18 | 1.01  | 0.870742 | 0.371304 | 0.948346 | 0.610165 |
| MmugDNA.6085.1.S1_at   | MmugDNA.6085.1 | 5.73  | 5.65  | 0.11 | 0.14 | 1.06  | 0.266887 | 0.51984  | 0.612291 | 0.71135  |



|                         |                 |       |       |      |      |       |          |          |          |          |
|-------------------------|-----------------|-------|-------|------|------|-------|----------|----------|----------|----------|
| MmugDNA.6086.1.S1_at    | MmugDNA.6086.1  | 4.99  | 5.09  | 0.39 | 0.44 | -1.07 | 0.692802 | 0.280911 | 0.863644 | 0.544089 |
| MmugDNA.36838.1.S1_at   | MmugDNA.36838.1 | 5.31  | 4.71  | 0.37 | 0.52 | 1.51  | 0.425739 | 0.698891 | 0.715292 | 0.825026 |
| MmugDNA.36838.1.S1_s_at | MmugDNA.36838.1 | 5.78  | 5.67  | 0.12 | 0.04 | 1.08  | 0.596736 | 0.238495 | 0.813172 | 0.5091   |
| MmugDNA.6087.1.S1_at    | MmugDNA.6087.1  | 4.6   | 4.47  | 0.24 | 0.09 | 1.1   | 0.297062 | 0.088521 | 0.632927 | 0.341947 |
| MmugDNA.6088.1.S1_at    | MmugDNA.6088.1  | 7.5   | 7.73  | 0.85 | 0.4  | -1.18 | 0.523011 | 0.645024 | 0.772266 | 0.791993 |
| MmugDNA.6089.1.S1_at    | MmugDNA.6089.1  | 6.88  | 6.06  | 0.37 | 0.15 | 1.76  | 0.014341 | 0.005671 | 0.251885 | 0.103959 |
| MmugDNA.609.1.S1_at     | MmugDNA.609.1   | 7.79  | 8.02  | 0.2  | 0.24 | -1.17 | 0.115485 | 0.091049 | 0.478809 | 0.345842 |
| MmugDNA.6090.1.S1_at    | MmugDNA.6090.1  | 11.66 | 11.54 | 0.08 | 0.13 | 1.09  | 0.145176 | 0.005446 | 0.511322 | 0.101885 |
| MmugDNA.9974.1.S1_s_at  | MmugDNA.9974.1  | 12.21 | 11.96 | 0.16 | 0.27 | 1.19  | 0.056545 | 0.040536 | 0.386649 | 0.246264 |
| MmugDNA.6093.1.S1_at    | MmugDNA.6093.1  | 10.03 | 8.62  | 0.11 | 0.39 | 2.66  | 0.004547 | 0.000873 | 0.184109 | 0.047471 |
| MmugDNA.6094.1.S1_at    | MmugDNA.6094.1  | 4.34  | 4.32  | 0.01 | 0.05 | 1.02  | 0.337317 | 0.053264 | 0.659871 | 0.276463 |
| MmugDNA.6096.1.S1_at    | MmugDNA.6096.1  | 5.41  | 5.54  | 0.83 | 0.11 | -1.1  | 0.444169 | 0.625691 | 0.726813 | 0.779265 |
| MmugDNA.6098.1.S1_at    | MmugDNA.6098.1  | 6.71  | 5.69  | 1.88 | 0.46 | 2.03  | 0.343573 | 0.358486 | 0.663694 | 0.600011 |
| MmugDNA.6099.1.S1_at    | MmugDNA.6099.1  | 4.18  | 4.11  | 0.22 | 0.3  | 1.05  | 0.939023 | 0.388537 | 0.976764 | 0.622897 |
| MmugDNA.61.1.S1_at      | MmugDNA.61.1    | 3.35  | 3.38  | 0.05 | 0.18 | -1.02 | 0.329397 | 0.566068 | 0.65504  | 0.740228 |
| MmugDNA.610.1.S1_at     | MmugDNA.610.1   | 3.59  | 3.64  | 0.12 | 0.05 | -1.04 | 0.500756 | 0.266326 | 0.759677 | 0.532099 |
| MmugDNA.6101.1.S1_at    | MmugDNA.6101.1  | 4.22  | 4.23  | 0.11 | 0.07 | -1    | 0.968319 | 0.905344 | 0.988076 | 0.946338 |
| MmugDNA.6103.1.S1_at    | MmugDNA.6103.1  | 6.3   | 6.32  | 0.18 | 0.02 | -1.01 | 0.966757 | 0.181612 | 0.987453 | 0.458213 |
| MmugDNA.6105.1.S1_at    | MmugDNA.6105.1  | 7.25  | 7.28  | 0.2  | 0.09 | -1.02 | 0.905178 | 0.807954 | 0.962144 | 0.889436 |
| MmugDNA.6106.1.S1_at    | MmugDNA.6106.1  | 7.97  | 7.84  | 0.16 | 0.59 | 1.1   | 0.669331 | 0.684258 | 0.852138 | 0.815842 |
| MmugDNA.6109.1.S1_s_at  | MmugDNA.6109.1  | 9.37  | 9.05  | 0.18 | 0.28 | 1.24  | 0.079878 | 0.109757 | 0.430147 | 0.373701 |
| MmugDNA.611.1.S1_at     | MmugDNA.611.1   | 7.21  | 6.68  | 0.6  | 0.02 | 1.44  | 0.22198  | 0.247329 | 0.580625 | 0.516535 |
| MmugDNA.6112.1.S1_at    | MmugDNA.6112.1  | 3.21  | 3.2   | 0.08 | 0.06 | 1.01  | 0.457561 | 0.561781 | 0.735003 | 0.737614 |
| MmugDNA.6113.1.S1_at    | MmugDNA.6113.1  | 6.59  | 6.58  | 0.04 | 0.1  | 1.01  | 0.761228 | 0.392535 | 0.899411 | 0.625813 |
| MmugDNA.6114.1.S1_s_at  | MmugDNA.6114.1  | 10.75 | 10.16 | 0.16 | 0.11 | 1.51  | 0.005422 | 0.005873 | 0.191107 | 0.10486  |
| MmugDNA.6117.1.S1_at    | MmugDNA.6117.1  | 5.31  | 5.88  | 0.33 | 1.75 | -1.48 | 0.199404 | 0.172424 | 0.562394 | 0.448837 |
| MmugDNA.6118.1.S1_at    | MmugDNA.6118.1  | 4.03  | 4.04  | 0.1  | 0.21 | -1.01 | 0.498861 | 0.54784  | 0.75874  | 0.728723 |
| MmugDNA.6119.1.S1_at    | MmugDNA.6119.1  | 5.04  | 5.34  | 0.09 | 0.12 | -1.23 | 0.061271 | 0.141113 | 0.395362 | 0.414602 |
| MmugDNA.6121.1.S1_at    | MmugDNA.6121.1  | 3.15  | 3.07  | 0.16 | 0.06 | 1.05  | 0.330312 | 0.404229 | 0.655613 | 0.632691 |
| MmugDNA.6122.1.S1_at    | MmugDNA.6122.1  | 10.41 | 10.27 | 0.14 | 0.13 | 1.11  | 0.466902 | 0.118206 | 0.740422 | 0.386168 |
| MmugDNA.6123.1.S1_at    | MmugDNA.6123.1  | 7.26  | 7.58  | 0.98 | 0.97 | -1.25 | 0.541433 | 0.720183 | 0.782715 | 0.838202 |
| MmugDNA.6124.1.S1_at    | MmugDNA.6124.1  | 5.78  | 7.29  | 0.55 | 0.16 | -2.84 | 0.007717 | 0.003986 | 0.211496 | 0.089791 |
| MmugDNA.6126.1.S1_at    | MmugDNA.6126.1  | 3.42  | 3.41  | 0.21 | 0.12 | 1.01  | 0.526793 | 0.252511 | 0.774374 | 0.521079 |
| MmugDNA.6127.1.S1_s_at  | MmugDNA.6127.1  | 9.67  | 9.89  | 0.16 | 0.07 | -1.17 | 0.204135 | 0.249598 | 0.566605 | 0.51865  |
| MmugDNA.6128.1.S1_at    | MmugDNA.6128.1  | 4.42  | 4.61  | 0.12 | 0.22 | -1.14 | 0.177783 | 0.320394 | 0.541903 | 0.572648 |
| MmugDNA.6129.1.S1_at    | MmugDNA.6129.1  | 4.13  | 3.91  | 0.04 | 0.65 | 1.17  | 0.695269 | 0.892103 | 0.864865 | 0.938526 |
| MmugDNA.6130.1.S1_at    | MmugDNA.6130.1  | 5.76  | 5.73  | 0.47 | 0.24 | 1.02  | 0.610786 | 0.398206 | 0.821274 | 0.629257 |
| MmugDNA.6131.1.S1_at    | MmugDNA.6131.1  | 9.12  | 8.37  | 0.18 | 0.14 | 1.69  | 0.004166 | 0.001278 | 0.181739 | 0.055351 |
| MmugDNA.6132.1.S1_at    | MmugDNA.6132.1  | 12.74 | 12.07 | 0.21 | 0.29 | 1.59  | 0.030876 | 0.019518 | 0.32011  | 0.175453 |
| MmugDNA.6134.1.S1_at    | MmugDNA.6134.1  | 4.3   | 4.18  | 0.11 | 0.09 | 1.08  | 0.051422 | 0.013163 | 0.376003 | 0.147338 |
| MmugDNA.6135.1.S1_at    | MmugDNA.6135.1  | 6.06  | 6.26  | 0.36 | 0.39 | -1.15 | 0.808823 | 0.733945 | 0.922035 | 0.845896 |

|                        |                |       |       |      |      |        |          |          |          |          |
|------------------------|----------------|-------|-------|------|------|--------|----------|----------|----------|----------|
| MmugDNA.6136.1.S1_at   | MmugDNA.6136.1 | 4.63  | 6.66  | 0.09 | 1.81 | -4.07  | 0.131789 | 0.121294 | 0.498041 | 0.390351 |
| MmugDNA.6137.1.S1_at   | MmugDNA.6137.1 | 7.16  | 5     | 1.17 | 1.3  | 4.49   | 0.283698 | 0.302363 | 0.623679 | 0.560109 |
| MmugDNA.6139.1.S1_at   | MmugDNA.6139.1 | 7.2   | 7.35  | 0.24 | 0.09 | -1.11  | 0.251391 | 0.329737 | 0.600793 | 0.578874 |
| MmugDNA.614.1.S1_at    | MmugDNA.614.1  | 12.16 | 12.26 | 0.11 | 0.35 | -1.07  | 0.822173 | 0.152069 | 0.927592 | 0.42682  |
| MmugDNA.6140.1.S1_at   | MmugDNA.6140.1 | 7     | 6.6   | 0.23 | 0.3  | 1.31   | 0.311837 | 0.170053 | 0.643765 | 0.446789 |
| MmugDNA.6141.1.S1_at   | MmugDNA.6141.1 | 6.98  | 8.33  | 0.55 | 0.47 | -2.55  | 0.029587 | 0.01786  | 0.314766 | 0.168774 |
| MmugDNA.6142.1.S1_at   | MmugDNA.6142.1 | 9.63  | 13.41 | 1.68 | 2.76 | -13.74 | 0.541915 | 0.474274 | 0.783019 | 0.68135  |
| MmugDNA.6147.1.S1_at   | MmugDNA.6147.1 | 11.9  | 11.5  | 0.1  | 0.14 | 1.32   | 0.020467 | 0.01251  | 0.278215 | 0.144302 |
| MmugDNA.6147.1.S1_s_at | MmugDNA.6147.1 | 7.94  | 7.66  | 0.07 | 0.15 | 1.21   | 0.025504 | 0.00938  | 0.299597 | 0.127634 |
| MmugDNA.6149.1.S1_at   | MmugDNA.6149.1 | 6.09  | 6.03  | 0.52 | 0.17 | 1.04   | 0.635458 | 0.504198 | 0.83497  | 0.701451 |
| MmugDNA.6153.1.S1_at   | MmugDNA.6153.1 | 4.26  | 3.49  | 0.31 | 0.35 | 1.71   | 0.112603 | 0.069276 | 0.475092 | 0.309468 |
| MmugDNA.6154.1.S1_at   | MmugDNA.6154.1 | 6.31  | 6.4   | 0.05 | 0.09 | -1.07  | 0.118615 | 0.060874 | 0.48294  | 0.293488 |
| MmugDNA.6155.1.S1_at   | MmugDNA.6155.1 | 6.3   | 6.05  | 0.12 | 0.48 | 1.19   | 0.915982 | 0.184427 | 0.966921 | 0.460468 |
| MmugDNA.6156.1.S1_at   | MmugDNA.6156.1 | 2.81  | 2.75  | 0.53 | 0.06 | 1.04   | 0.421812 | 0.443754 | 0.713215 | 0.661433 |
| MmugDNA.6157.1.S1_at   | MmugDNA.6157.1 | 5.48  | 6.12  | 0.25 | 0.82 | -1.55  | 0.276141 | 0.326572 | 0.618148 | 0.576612 |
| MmugDNA.6158.1.S1_at   | MmugDNA.6158.1 | 6.42  | 6.49  | 0.19 | 0.16 | -1.05  | 0.719045 | 0.540646 | 0.876813 | 0.724475 |
| MmugDNA.6160.1.S1_at   | MmugDNA.6160.1 | 4.45  | 4.59  | 0.04 | 0.11 | -1.11  | 0.097468 | 0.381415 | 0.456473 | 0.617681 |
| MmugDNA.6162.1.S1_at   | MmugDNA.6162.1 | 5.53  | 5.41  | 0.07 | 0.12 | 1.09   | 0.300116 | 0.686289 | 0.635415 | 0.816911 |
| MmugDNA.6163.1.S1_at   | MmugDNA.6163.1 | 5.78  | 6.34  | 0.56 | 0.88 | -1.48  | 0.136104 | 0.153871 | 0.502944 | 0.428509 |
| MmugDNA.6165.1.S1_at   | MmugDNA.6165.1 | 6.09  | 6.31  | 0.39 | 0.13 | -1.16  | 0.970525 | 0.538885 | 0.988658 | 0.723368 |
| MmugDNA.6166.1.S1_at   | MmugDNA.6166.1 | 9.73  | 9.68  | 0.11 | 0.37 | 1.03   | 0.968451 | 0.787371 | 0.988134 | 0.876986 |
| MmugDNA.6168.1.S1_at   | MmugDNA.6168.1 | 10.32 | 9.97  | 0.28 | 0.32 | 1.28   | 0.21877  | 0.190946 | 0.578251 | 0.46629  |
| MmugDNA.6169.1.S1_at   | MmugDNA.6169.1 | 4.52  | 4.08  | 1.35 | 0.47 | 1.36   | 0.313204 | 0.402755 | 0.645039 | 0.631555 |
| MmugDNA.6171.1.S1_at   | MmugDNA.6171.1 | 6.74  | 8.21  | 0.46 | 0.25 | -2.77  | 0.005575 | 0.006607 | 0.191807 | 0.110146 |
| MmugDNA.6172.1.S1_at   | MmugDNA.6172.1 | 4.97  | 4.54  | 0.9  | 0.38 | 1.35   | 0.829032 | 0.466534 | 0.930604 | 0.676374 |
| MmugDNA.6173.1.S1_at   | MmugDNA.6173.1 | 6.96  | 7     | 0.23 | 0.26 | -1.03  | 0.682279 | 0.5602   | 0.85785  | 0.736544 |
| MmugDNA.6174.1.S1_at   | MmugDNA.6174.1 | 12.04 | 12.36 | 0.1  | 0.08 | -1.25  | 0.012403 | 0.010747 | 0.241324 | 0.135385 |
| MmugDNA.6175.1.S1_at   | MmugDNA.6175.1 | 6.65  | 7.65  | 0.4  | 0.8  | -2     | 0.320152 | 0.073551 | 0.649407 | 0.316874 |
| MmugDNA.6177.1.S1_at   | MmugDNA.6177.1 | 5.8   | 6.22  | 0.22 | 0.64 | -1.34  | 0.219317 | 0.457661 | 0.57872  | 0.670889 |
| MmugDNA.618.1.S1_at    | MmugDNA.618.1  | 4.72  | 4.93  | 0.39 | 0.55 | -1.15  | 0.592193 | 0.717522 | 0.810873 | 0.836463 |
| MmugDNA.6180.1.S1_at   | MmugDNA.6180.1 | 3.9   | 3.88  | 0.05 | 0.14 | 1.01   | 0.502261 | 0.796531 | 0.760275 | 0.882707 |
| MmugDNA.6181.1.S1_at   | MmugDNA.6181.1 | 8.55  | 9.58  | 0.46 | 0.22 | -2.04  | 0.027416 | 0.016813 | 0.307806 | 0.164291 |
| MmugDNA.6183.1.S1_at   | MmugDNA.6183.1 | 3.53  | 3.51  | 0.14 | 0.1  | 1.01   | 0.481255 | 0.674771 | 0.749052 | 0.810023 |
| MmugDNA.6184.1.S1_at   | MmugDNA.6184.1 | 3.35  | 3.4   | 0.73 | 0.1  | -1.03  | 0.368922 | 0.328575 | 0.680355 | 0.578148 |
| MmugDNA.6185.1.S1_at   | MmugDNA.6185.1 | 9.88  | 9.43  | 0.18 | 0.43 | 1.36   | 0.213206 | 0.10862  | 0.573477 | 0.372171 |
| MmugDNA.6186.1.S1_at   | MmugDNA.6186.1 | 4.7   | 4.5   | 0.33 | 0.11 | 1.15   | 0.368408 | 0.397604 | 0.679933 | 0.628973 |
| MmugDNA.6189.1.S1_at   | MmugDNA.6189.1 | 4.23  | 4.31  | 0.02 | 0.08 | -1.06  | 0.163577 | 0.077129 | 0.527992 | 0.322675 |
| MmugDNA.619.1.S1_at    | MmugDNA.619.1  | 5.25  | 5.1   | 0.27 | 0.29 | 1.11   | 0.223047 | 0.540262 | 0.581681 | 0.724221 |
| MmugDNA.6190.1.S1_at   | MmugDNA.6190.1 | 4     | 4.06  | 0.03 | 0.08 | -1.04  | 0.310591 | 0.112118 | 0.642603 | 0.377398 |
| MmugDNA.6191.1.S1_at   | MmugDNA.6191.1 | 6.17  | 6.16  | 0.16 | 0.05 | 1.01   | 0.757153 | 0.824882 | 0.897005 | 0.899427 |
| MmugDNA.6192.1.S1_at   | MmugDNA.6192.1 | 7.29  | 7.99  | 1.17 | 0.63 | -1.63  | 0.922025 | 0.990265 | 0.969683 | 0.99446  |

|                        |                |       |       |      |      |       |          |          |          |          |
|------------------------|----------------|-------|-------|------|------|-------|----------|----------|----------|----------|
| MmugDNA.6193.1.S1_at   | MmugDNA.6193.1 | 3.48  | 4.81  | 1.1  | 0.62 | -2.51 | 0.421813 | 0.302101 | 0.713215 | 0.560071 |
| MmugDNA.6194.1.S1_s_at | MmugDNA.6194.1 | 7.21  | 6.69  | 0.23 | 0.33 | 1.44  | 0.022293 | 0.021083 | 0.285424 | 0.181869 |
| MmugDNA.6195.1.S1_at   | MmugDNA.6195.1 | 5.59  | 5.73  | 0.13 | 0.06 | -1.11 | 0.163006 | 0.168339 | 0.527385 | 0.444985 |
| MmugDNA.6196.1.S1_at   | MmugDNA.6196.1 | 8.54  | 8.94  | 0.12 | 0.45 | -1.32 | 0.255967 | 0.126974 | 0.603671 | 0.397729 |
| MmugDNA.6197.1.S1_at   | MmugDNA.6197.1 | 7.85  | 7.63  | 1    | 0.47 | 1.16  | 0.625991 | 0.151118 | 0.829275 | 0.425795 |
| MmugDNA.6198.1.S1_at   | MmugDNA.6198.1 | 8.29  | 7.47  | 0.15 | 0.19 | 1.77  | 0.004013 | 0.001133 | 0.181739 | 0.053052 |
| MmugDNA.62.1.S1_at     | MmugDNA.62.1   | 5.21  | 7.12  | 0.97 | 1.84 | -3.76 | 0.299054 | 0.321185 | 0.634614 | 0.573111 |
| MmugDNA.620.1.S1_at    | MmugDNA.620.1  | 4.62  | 4.52  | 0.11 | 1.05 | 1.07  | 0.623554 | 0.732348 | 0.827977 | 0.844986 |
| MmugDNA.6200.1.S1_at   | MmugDNA.6200.1 | 5.1   | 4.49  | 1.01 | 0.2  | 1.52  | 0.267258 | 0.242469 | 0.612397 | 0.512835 |
| MmugDNA.6201.1.S1_at   | MmugDNA.6201.1 | 5.9   | 5.65  | 0.58 | 0.64 | 1.19  | 0.513885 | 0.725483 | 0.766614 | 0.841043 |
| MmugDNA.6204.1.S1_at   | MmugDNA.6204.1 | 6.72  | 6.87  | 0.26 | 0.13 | -1.11 | 0.679617 | 0.336213 | 0.856669 | 0.583736 |
| MmugDNA.6207.1.S1_at   | MmugDNA.6207.1 | 4.69  | 4.66  | 0.23 | 0.04 | 1.02  | 0.498176 | 0.589888 | 0.758309 | 0.755987 |
| MmugDNA.6208.1.S1_at   | MmugDNA.6208.1 | 6.38  | 6.11  | 0.25 | 0.17 | 1.2   | 0.406248 | 0.003388 | 0.703645 | 0.083859 |
| MmugDNA.6208.1.S1_s_at | MmugDNA.6208.1 | 9.51  | 9.19  | 0.19 | 0.36 | 1.25  | 0.34855  | 0.007797 | 0.667173 | 0.117765 |
| MmugDNA.6209.1.S1_at   | MmugDNA.6209.1 | 5.86  | 5.88  | 0.27 | 0.1  | -1.01 | 0.401293 | 0.093826 | 0.700768 | 0.350281 |
| MmugDNA.621.1.S1_at    | MmugDNA.621.1  | 10.94 | 11.04 | 0.06 | 0.2  | -1.07 | 0.586002 | 0.769914 | 0.807817 | 0.866376 |
| MmugDNA.6211.1.S1_at   | MmugDNA.6211.1 | 6.19  | 6.44  | 0.32 | 0.14 | -1.19 | 0.465385 | 0.107942 | 0.739873 | 0.371008 |
| MmugDNA.6213.1.S1_at   | MmugDNA.6213.1 | 10.3  | 9.52  | 0.51 | 0.21 | 1.72  | 0.20165  | 0.248132 | 0.563988 | 0.517567 |
| MmugDNA.6214.1.S1_at   | MmugDNA.6214.1 | 4.68  | 4.79  | 0.23 | 0.24 | -1.08 | 0.89207  | 0.384588 | 0.957027 | 0.62023  |
| MmugDNA.6215.1.S1_at   | MmugDNA.6215.1 | 6.9   | 7.04  | 0.35 | 0.39 | -1.1  | 0.853067 | 0.514449 | 0.940695 | 0.707693 |
| MmugDNA.6216.1.S1_at   | MmugDNA.6216.1 | 6.25  | 5.87  | 1.02 | 0.12 | 1.3   | 0.38685  | 0.536239 | 0.691684 | 0.721587 |
| MmugDNA.6217.1.S1_at   | MmugDNA.6217.1 | 4.54  | 4.8   | 0.12 | 0.19 | -1.19 | 0.083845 | 0.066328 | 0.436266 | 0.303194 |
| MmugDNA.6218.1.S1_at   | MmugDNA.6218.1 | 8.22  | 7.89  | 0.2  | 0.34 | 1.26  | 0.267061 | 0.018697 | 0.612309 | 0.171742 |
| MmugDNA.6219.1.S1_at   | MmugDNA.6219.1 | 7.35  | 7.65  | 0.15 | 0.03 | -1.23 | 0.0129   | 0.017109 | 0.244747 | 0.165744 |
| MmugDNA.622.1.S1_at    | MmugDNA.622.1  | 5.16  | 5.06  | 0.53 | 0.1  | 1.08  | 0.252327 | 0.293643 | 0.601282 | 0.553638 |
| MmugDNA.6220.1.S1_at   | MmugDNA.6220.1 | 5.38  | 4.38  | 0.73 | 0.41 | 2     | 0.267425 | 0.350438 | 0.612568 | 0.594161 |
| MmugDNA.6222.1.S1_at   | MmugDNA.6222.1 | 6.79  | 6.87  | 0.12 | 0.04 | -1.06 | 0.669311 | 0.886801 | 0.852138 | 0.935553 |
| MmugDNA.6225.1.S1_at   | MmugDNA.6225.1 | 4.48  | 4.5   | 0.07 | 0.16 | -1.01 | 0.910631 | 0.949634 | 0.964681 | 0.971202 |
| MmugDNA.6226.1.S1_at   | MmugDNA.6226.1 | 5.8   | 5.31  | 0.48 | 0.63 | 1.4   | 0.658052 | 0.257714 | 0.846303 | 0.525343 |
| MmugDNA.6227.1.S1_at   | MmugDNA.6227.1 | 8.63  | 11.88 | 0.37 | 0.52 | -9.52 | 0.001179 | 0.000688 | 0.145267 | 0.044166 |
| MmugDNA.6228.1.S1_at   | MmugDNA.6228.1 | 9.97  | 10.28 | 0.28 | 0.23 | -1.24 | 0.391163 | 0.390031 | 0.693921 | 0.624002 |
| MmugDNA.623.1.S1_at    | MmugDNA.623.1  | 12.9  | 12.79 | 0.12 | 0.19 | 1.08  | 0.562022 | 0.38372  | 0.795109 | 0.619703 |
| MmugDNA.6231.1.S1_at   | MmugDNA.6231.1 | 4.05  | 4.69  | 0.07 | 0.37 | -1.56 | 0.081351 | 0.063647 | 0.432224 | 0.298815 |
| MmugDNA.6232.1.S1_at   | MmugDNA.6232.1 | 11.55 | 11.52 | 0.1  | 0.21 | 1.02  | 0.86922  | 0.913182 | 0.947917 | 0.951134 |
| MmugDNA.6233.1.S1_at   | MmugDNA.6233.1 | 6.53  | 5.12  | 1.07 | 0.27 | 2.65  | 0.274792 | 0.444546 | 0.617628 | 0.662072 |
| MmugDNA.6234.1.S1_at   | MmugDNA.6234.1 | 5.16  | 5.04  | 0.22 | 0.23 | 1.08  | 0.93741  | 0.023401 | 0.975858 | 0.191765 |
| MmugDNA.6236.1.S1_at   | MmugDNA.6236.1 | 4.66  | 6.29  | 0.26 | 0.77 | -3.09 | 0.08104  | 0.050689 | 0.431775 | 0.270317 |
| MmugDNA.6237.1.S1_at   | MmugDNA.6237.1 | 7.62  | 7.53  | 0.5  | 1.12 | 1.06  | 0.481163 | 0.553421 | 0.748975 | 0.732583 |
| MmugDNA.6238.1.S1_at   | MmugDNA.6238.1 | 8.77  | 8.37  | 0.24 | 0.47 | 1.33  | 0.209505 | 0.07563  | 0.570957 | 0.320061 |
| MmugDNA.624.1.S1_at    | MmugDNA.624.1  | 5.55  | 5.4   | 0.7  | 0.17 | 1.11  | 0.602593 | 0.781818 | 0.816617 | 0.873524 |
| MmugDNA.6240.1.S1_at   | MmugDNA.6240.1 | 3.39  | 3.37  | 0.14 | 0.18 | 1.01  | 0.969126 | 0.232973 | 0.98825  | 0.50445  |

|                      |                |       |       |      |      |        |          |          |          |          |
|----------------------|----------------|-------|-------|------|------|--------|----------|----------|----------|----------|
| MmugDNA.6244.1.S1_at | MmugDNA.6244.1 | 8.12  | 8.21  | 0.33 | 0.2  | -1.07  | 0.877866 | 0.796089 | 0.951027 | 0.882495 |
| MmugDNA.6246.1.S1_at | MmugDNA.6246.1 | 5.11  | 3.69  | 1.13 | 0.54 | 2.68   | 0.154086 | 0.151828 | 0.518614 | 0.426505 |
| MmugDNA.6248.1.S1_at | MmugDNA.6248.1 | 4.27  | 4.66  | 0.29 | 0.23 | -1.31  | 0.171161 | 0.247513 | 0.535105 | 0.516858 |
| MmugDNA.6249.1.S1_at | MmugDNA.6249.1 | 9.2   | 9.35  | 0.28 | 0.06 | -1.11  | 0.195001 | 0.386201 | 0.558557 | 0.621435 |
| MmugDNA.625.1.S1_at  | MmugDNA.625.1  | 4.81  | 4.79  | 0.09 | 0.04 | 1.01   | 0.755559 | 0.477333 | 0.896094 | 0.683422 |
| MmugDNA.6251.1.S1_at | MmugDNA.6251.1 | 6.06  | 6.04  | 0.14 | 0.19 | 1.01   | 0.538    | 0.867457 | 0.780308 | 0.924699 |
| MmugDNA.6253.1.S1_at | MmugDNA.6253.1 | 4.35  | 4.2   | 0.2  | 0.05 | 1.11   | 0.181948 | 0.216151 | 0.546458 | 0.489701 |
| MmugDNA.6254.1.S1_at | MmugDNA.6254.1 | 3.54  | 3.56  | 0.18 | 0.09 | -1.01  | 0.988893 | 0.960459 | 0.996043 | 0.977507 |
| MmugDNA.6255.1.S1_at | MmugDNA.6255.1 | 4.32  | 4     | 0.66 | 0.34 | 1.25   | 0.182296 | 0.153321 | 0.546703 | 0.428139 |
| MmugDNA.6257.1.S1_at | MmugDNA.6257.1 | 10.65 | 9.5   | 0.63 | 0.98 | 2.23   | 0.24407  | 0.310826 | 0.595777 | 0.565854 |
| MmugDNA.6258.1.S1_at | MmugDNA.6258.1 | 7.77  | 7.34  | 0.24 | 0.36 | 1.35   | 0.116639 | 0.08845  | 0.48034  | 0.341881 |
| MmugDNA.6259.1.S1_at | MmugDNA.6259.1 | 7.92  | 8.09  | 0.37 | 0.2  | -1.12  | 0.235908 | 0.557767 | 0.589827 | 0.735229 |
| MmugDNA.626.1.S1_at  | MmugDNA.626.1  | 4.39  | 4.37  | 0.18 | 0.2  | 1.02   | 0.452668 | 0.285849 | 0.732216 | 0.547484 |
| MmugDNA.6261.1.S1_at | MmugDNA.6261.1 | 5.37  | 5.28  | 0.09 | 0.07 | 1.07   | 0.348871 | 0.525805 | 0.667271 | 0.715217 |
| MmugDNA.6262.1.S1_at | MmugDNA.6262.1 | 3.44  | 3.32  | 0.14 | 0.12 | 1.08   | 0.714579 | 0.864678 | 0.874952 | 0.923276 |
| MmugDNA.6265.1.S1_at | MmugDNA.6265.1 | 5.16  | 5.24  | 0    | 0.19 | -1.06  | 0.795345 | 0.493135 | 0.915136 | 0.694001 |
| MmugDNA.6266.1.S1_at | MmugDNA.6266.1 | 3.26  | 3.33  | 0.18 | 0.25 | -1.05  | 0.567144 | 0.441016 | 0.797989 | 0.659267 |
| MmugDNA.6268.1.S1_at | MmugDNA.6268.1 | 6.21  | 7.02  | 0.94 | 0.91 | -1.75  | 0.760831 | 0.921648 | 0.899135 | 0.955801 |
| MmugDNA.627.1.S1_at  | MmugDNA.627.1  | 5.32  | 4.83  | 0.38 | 0.13 | 1.41   | 0.123127 | 0.123268 | 0.488707 | 0.393358 |
| MmugDNA.6271.1.S1_at | MmugDNA.6271.1 | 3.12  | 3.18  | 0.16 | 0.11 | -1.04  | 0.739393 | 0.57923  | 0.888141 | 0.748973 |
| MmugDNA.6272.1.S1_at | MmugDNA.6272.1 | 5.26  | 9.06  | 1.54 | 3.39 | -13.94 | 0.387915 | 0.33675  | 0.692145 | 0.584083 |
| MmugDNA.6273.1.S1_at | MmugDNA.6273.1 | 6.88  | 6.77  | 0.23 | 0.2  | 1.08   | 0.850091 | 0.090996 | 0.939853 | 0.345755 |
| MmugDNA.6274.1.S1_at | MmugDNA.6274.1 | 5.66  | 5.89  | 0.12 | 0.11 | -1.18  | 0.043491 | 0.034863 | 0.356765 | 0.230926 |
| MmugDNA.6275.1.S1_at | MmugDNA.6275.1 | 9.21  | 8.91  | 0.11 | 0.73 | 1.24   | 0.614733 | 0.761179 | 0.823258 | 0.86123  |
| MmugDNA.6276.1.S1_at | MmugDNA.6276.1 | 4.59  | 4.54  | 0.42 | 0.08 | 1.03   | 0.94313  | 0.93962  | 0.978387 | 0.965668 |
| MmugDNA.6278.1.S1_at | MmugDNA.6278.1 | 5.26  | 5.5   | 0.18 | 0.07 | -1.18  | 0.026142 | 0.020916 | 0.301461 | 0.181415 |
| MmugDNA.6279.1.S1_at | MmugDNA.6279.1 | 3.98  | 3.94  | 0.14 | 0.1  | 1.03   | 0.825842 | 0.480332 | 0.929311 | 0.68574  |
| MmugDNA.628.1.S1_at  | MmugDNA.628.1  | 5.67  | 5.57  | 0.13 | 0.25 | 1.07   | 0.135403 | 0.176988 | 0.502243 | 0.453416 |
| MmugDNA.6280.1.S1_at | MmugDNA.6280.1 | 4.95  | 4.15  | 0.96 | 0.29 | 1.74   | 0.24542  | 0.324522 | 0.597032 | 0.57507  |
| MmugDNA.6281.1.S1_at | MmugDNA.6281.1 | 5.33  | 5.41  | 0.12 | 0.11 | -1.06  | 0.629492 | 0.273653 | 0.831515 | 0.538093 |
| MmugDNA.6283.1.S1_at | MmugDNA.6283.1 | 10.69 | 10.45 | 0.09 | 0.14 | 1.18   | 0.077288 | 0.134358 | 0.426851 | 0.406603 |
| MmugDNA.6285.1.S1_at | MmugDNA.6285.1 | 6.51  | 6.6   | 0.04 | 0.17 | -1.06  | 0.16315  | 0.166803 | 0.527489 | 0.443274 |
| MmugDNA.6288.1.S1_at | MmugDNA.6288.1 | 6.2   | 5.45  | 0.32 | 1.05 | 1.68   | 0.363379 | 0.222979 | 0.676648 | 0.495821 |
| MmugDNA.6289.1.S1_at | MmugDNA.6289.1 | 12.03 | 12.39 | 0.06 | 0.17 | -1.28  | 0.075814 | 0.055338 | 0.423622 | 0.281048 |
| MmugDNA.629.1.S1_at  | MmugDNA.629.1  | 4.45  | 4.42  | 0.48 | 0.1  | 1.02   | 0.442655 | 0.166141 | 0.725706 | 0.442694 |
| MmugDNA.6290.1.S1_at | MmugDNA.6290.1 | 6.66  | 6.75  | 0.08 | 0.15 | -1.06  | 0.367996 | 0.478945 | 0.679739 | 0.684806 |
| MmugDNA.6291.1.S1_at | MmugDNA.6291.1 | 7.32  | 7.31  | 1.04 | 0.42 | 1.01   | 0.856479 | 0.827843 | 0.94203  | 0.90116  |
| MmugDNA.6292.1.S1_at | MmugDNA.6292.1 | 6.4   | 5.06  | 0.78 | 1.12 | 2.53   | 0.30424  | 0.450686 | 0.638391 | 0.665844 |
| MmugDNA.6293.1.S1_at | MmugDNA.6293.1 | 3.15  | 3.23  | 0.02 | 0.1  | -1.06  | 0.639427 | 0.10584  | 0.837212 | 0.368111 |
| MmugDNA.6294.1.S1_at | MmugDNA.6294.1 | 5.19  | 5.47  | 0.16 | 0.12 | -1.21  | 0.163365 | 0.146087 | 0.527696 | 0.420092 |
| MmugDNA.6296.1.S1_at | MmugDNA.6296.1 | 10.41 | 10.47 | 0.17 | 0.2  | -1.04  | 0.652842 | 0.557553 | 0.843896 | 0.73509  |

|                         |                 |       |       |      |      |       |          |          |          |          |
|-------------------------|-----------------|-------|-------|------|------|-------|----------|----------|----------|----------|
| MmugDNA.6297.1.S1_at    | MmugDNA.6297.1  | 3.41  | 3.39  | 0.57 | 0.05 | 1.02  | 0.315665 | 0.31263  | 0.646683 | 0.567268 |
| MmugDNA.6298.1.S1_at    | MmugDNA.6298.1  | 3.9   | 3.93  | 0.11 | 0.1  | -1.02 | 0.50692  | 0.165026 | 0.762591 | 0.44123  |
| MmugDNA.6299.1.S1_at    | MmugDNA.6299.1  | 11.11 | 9.62  | 0.24 | 0.53 | 2.82  | 0.022547 | 0.009611 | 0.287341 | 0.129157 |
| MmugDNA.63.1.S1_at      | MmugDNA.63.1    | 4.23  | 4.11  | 0.07 | 0.13 | 1.08  | 0.896106 | 0.334635 | 0.958573 | 0.582581 |
| MmugDNA.630.1.S1_at     | MmugDNA.630.1   | 5.67  | 5.67  | 0.11 | 0.13 | 1     | 0.576266 | 0.598722 | 0.802833 | 0.761089 |
| MmugDNA.6300.1.S1_at    | MmugDNA.6300.1  | 7.87  | 7.22  | 0.42 | 0.64 | 1.57  | 0.320209 | 0.422528 | 0.64942  | 0.645745 |
| MmugDNA.6301.1.S1_at    | MmugDNA.6301.1  | 6.57  | 6.44  | 0.13 | 0.36 | 1.1   | 0.817684 | 0.687973 | 0.926022 | 0.817831 |
| MmugDNA.6301.1.S1_s_at  | MmugDNA.6301.1  | 9.88  | 9.67  | 0.35 | 0.35 | 1.16  | 0.430163 | 0.414668 | 0.717956 | 0.640456 |
| MmugDNA.6303.1.S1_at    | MmugDNA.6303.1  | 4.41  | 4.43  | 0.15 | 0.03 | -1.02 | 0.892566 | 0.743971 | 0.957245 | 0.851613 |
| MmugDNA.6304.1.S1_at    | MmugDNA.6304.1  | 3.08  | 3.25  | 0.09 | 0.22 | -1.12 | 0.328303 | 0.443417 | 0.654312 | 0.661211 |
| MmugDNA.6305.1.S1_at    | MmugDNA.6305.1  | 4.07  | 4.32  | 0.1  | 0.1  | -1.19 | 0.069622 | 0.081296 | 0.412649 | 0.329351 |
| MmugDNA.6307.1.S1_at    | MmugDNA.6307.1  | 5.93  | 5.87  | 0.04 | 0.1  | 1.04  | 0.386492 | 0.576091 | 0.691435 | 0.74698  |
| MmugDNA.6308.1.S1_at    | MmugDNA.6308.1  | 4.61  | 4.44  | 0.15 | 0.16 | 1.13  | 0.188191 | 0.161555 | 0.551146 | 0.43767  |
| MmugDNA.6309.1.S1_at    | MmugDNA.6309.1  | 4.91  | 4.69  | 0.14 | 0.25 | 1.16  | 0.53435  | 0.710127 | 0.778687 | 0.831904 |
| MmugDNA.631.1.S1_at     | MmugDNA.631.1   | 3.51  | 3.52  | 0.09 | 0.14 | -1    | 0.619194 | 0.89306  | 0.825425 | 0.939012 |
| MmugDNA.6311.1.S1_at    | MmugDNA.6311.1  | 9.68  | 10.15 | 0.1  | 0.62 | -1.38 | 0.674468 | 0.77866  | 0.854194 | 0.871528 |
| MmugDNA.6312.1.S1_at    | MmugDNA.6312.1  | 4.13  | 4.01  | 0.04 | 0.29 | 1.09  | 0.792601 | 0.94162  | 0.913959 | 0.966897 |
| MmugDNA.6315.1.S1_at    | MmugDNA.6315.1  | 4.07  | 3.76  | 0.39 | 0.09 | 1.25  | 0.158806 | 0.104906 | 0.524015 | 0.366451 |
| MmugDNA.632.1.S1_at     | MmugDNA.632.1   | 7.26  | 7.31  | 0.07 | 0.18 | -1.04 | 0.260244 | 0.366747 | 0.607086 | 0.6065   |
| MmugDNA.6320.1.S1_at    | MmugDNA.6320.1  | 6.85  | 6.06  | 0.08 | 0.47 | 1.72  | 0.163946 | 0.059059 | 0.528211 | 0.289927 |
| MmugDNA.6321.1.S1_at    | MmugDNA.6321.1  | 6.37  | 6.6   | 0.16 | 0.09 | -1.17 | 0.076601 | 0.111499 | 0.425098 | 0.376205 |
| MmugDNA.6322.1.S1_at    | MmugDNA.6322.1  | 4.15  | 4.01  | 0.06 | 0.05 | 1.1   | 0.044328 | 0.068894 | 0.358414 | 0.308835 |
| MmugDNA.6323.1.S1_at    | MmugDNA.6323.1  | 5.03  | 5.1   | 0.2  | 0.06 | -1.05 | 0.50942  | 0.583357 | 0.764331 | 0.751729 |
| MmugDNA.6324.1.S1_s_at  | MmugDNA.6324.1  | 3.47  | 3.51  | 0.22 | 0.16 | -1.02 | 0.677381 | 0.841526 | 0.855485 | 0.909663 |
| MmugDNA.6325.1.S1_at    | MmugDNA.6325.1  | 7.73  | 6.79  | 0.24 | 0.43 | 1.91  | 0.127683 | 0.123009 | 0.493958 | 0.392923 |
| MmugDNA.6326.1.S1_at    | MmugDNA.6326.1  | 7.11  | 7.86  | 1.02 | 0.99 | -1.68 | 0.266541 | 0.229597 | 0.611973 | 0.501574 |
| MmugDNA.6327.1.S1_at    | MmugDNA.6327.1  | 4.19  | 4.21  | 0.04 | 0.11 | -1.02 | 0.672914 | 0.577532 | 0.853295 | 0.747966 |
| MmugDNA.20311.1.S1_s_at | MmugDNA.20311.1 | 10.66 | 10.62 | 0.13 | 0.09 | 1.03  | 0.820688 | 0.077933 | 0.927084 | 0.324277 |
| MmugDNA.6330.1.S1_at    | MmugDNA.6330.1  | 3.77  | 3.83  | 0.2  | 0.06 | -1.05 | 0.607536 | 0.802004 | 0.819363 | 0.885995 |
| MmugDNA.6331.1.S1_at    | MmugDNA.6331.1  | 7.05  | 6.57  | 0.4  | 0.47 | 1.4   | 0.114197 | 0.12424  | 0.47744  | 0.394547 |
| MmugDNA.6333.1.S1_at    | MmugDNA.6333.1  | 6.25  | 5.99  | 1.74 | 0.66 | 1.2   | 0.821096 | 0.465437 | 0.927208 | 0.675748 |
| MmugDNA.6334.1.S1_at    | MmugDNA.6334.1  | 4.63  | 4.8   | 0.33 | 1.46 | -1.13 | 0.33905  | 0.277068 | 0.66113  | 0.541087 |
| MmugDNA.6335.1.S1_at    | MmugDNA.6335.1  | 6.4   | 6.17  | 0.29 | 0.11 | 1.17  | 0.99098  | 0.769777 | 0.996869 | 0.866333 |
| MmugDNA.6336.1.S1_at    | MmugDNA.6336.1  | 8.26  | 8.49  | 0.14 | 0.25 | -1.18 | 0.342532 | 0.495388 | 0.663271 | 0.695435 |
| MmugDNA.6337.1.S1_at    | MmugDNA.6337.1  | 3.79  | 3.77  | 0.02 | 0.05 | 1.02  | 0.173369 | 0.508859 | 0.537006 | 0.703878 |
| MmugDNA.6338.1.S1_at    | MmugDNA.6338.1  | 8.3   | 8.17  | 0.52 | 0.99 | 1.09  | 0.792519 | 0.440826 | 0.913933 | 0.659138 |
| MmugDNA.6339.1.S1_at    | MmugDNA.6339.1  | 5.76  | 5.76  | 0.09 | 0.05 | 1     | 0.251277 | 0.219579 | 0.600775 | 0.493192 |
| MmugDNA.634.1.S1_at     | MmugDNA.634.1   | 5.77  | 5.85  | 0.17 | 0.15 | -1.06 | 0.56893  | 0.678735 | 0.798907 | 0.812378 |
| MmugDNA.6340.1.S1_at    | MmugDNA.6340.1  | 9.01  | 8.57  | 0.69 | 0.57 | 1.36  | 0.425963 | 0.562425 | 0.715442 | 0.738025 |
| MmugDNA.6341.1.S1_at    | MmugDNA.6341.1  | 3.48  | 3.44  | 0.22 | 0.31 | 1.02  | 0.581317 | 0.645097 | 0.805072 | 0.792025 |
| MmugDNA.6348.1.S1_at    | MmugDNA.6348.1  | 3.91  | 3.94  | 0.03 | 0.09 | -1.02 | 0.937814 | 0.947654 | 0.976051 | 0.970284 |

|                         |                 |       |       |      |      |        |          |          |          |          |
|-------------------------|-----------------|-------|-------|------|------|--------|----------|----------|----------|----------|
| MmugDNA.635.1.S1_at     | MmugDNA.635.1   | 5.55  | 10.57 | 1.47 | 3.54 | -32.39 | 0.362858 | 0.225807 | 0.676226 | 0.498175 |
| MmugDNA.6351.1.S1_at    | MmugDNA.6351.1  | 4.21  | 4.52  | 0.15 | 0.31 | -1.23  | 0.073484 | 0.070484 | 0.418788 | 0.311777 |
| MmugDNA.6352.1.S1_at    | MmugDNA.6352.1  | 3.65  | 3.48  | 0.19 | 0.18 | 1.12   | 0.34546  | 0.233146 | 0.665175 | 0.504458 |
| MmugDNA.6353.1.S1_at    | MmugDNA.6353.1  | 9.05  | 8.22  | 0.38 | 0.41 | 1.78   | 0.114479 | 0.049221 | 0.477887 | 0.266697 |
| MmugDNA.6354.1.S1_at    | MmugDNA.6354.1  | 10.05 | 9.81  | 0.41 | 0.38 | 1.18   | 0.347888 | 0.337076 | 0.666754 | 0.584337 |
| MmugDNA.6356.1.S1_at    | MmugDNA.6356.1  | 9.93  | 10.2  | 0.12 | 0.23 | -1.21  | 0.04863  | 0.035355 | 0.3691   | 0.232348 |
| MmugDNA.6357.1.S1_at    | MmugDNA.6357.1  | 6.75  | 7.01  | 0.19 | 0.17 | -1.19  | 0.346539 | 0.177353 | 0.66598  | 0.453742 |
| MmugDNA.6358.1.S1_at    | MmugDNA.6358.1  | 7.34  | 7.33  | 0.06 | 0.3  | 1.01   | 0.851121 | 0.83679  | 0.940186 | 0.906717 |
| MmugDNA.6359.1.S1_at    | MmugDNA.6359.1  | 6.65  | 6.47  | 0.25 | 0.01 | 1.13   | 0.890769 | 0.538433 | 0.956312 | 0.723141 |
| MmugDNA.636.1.S1_at     | MmugDNA.636.1   | 3.9   | 3.68  | 0.39 | 0.08 | 1.16   | 0.240058 | 0.335174 | 0.592883 | 0.582938 |
| MmugDNA.6361.1.S1_at    | MmugDNA.6361.1  | 7.44  | 7.54  | 0.29 | 0.48 | -1.08  | 0.801145 | 0.079362 | 0.918013 | 0.3267   |
| MmugDNA.6362.1.S1_at    | MmugDNA.6362.1  | 5.45  | 5.86  | 0.16 | 0.12 | -1.34  | 0.077265 | 0.126182 | 0.426772 | 0.396748 |
| MmugDNA.6363.1.S1_at    | MmugDNA.6363.1  | 3.66  | 3.67  | 0.06 | 0.01 | -1.01  | 0.485062 | 0.091719 | 0.750727 | 0.346977 |
| MmugDNA.6364.1.S1_at    | MmugDNA.6364.1  | 7.05  | 7.08  | 0.98 | 0.74 | -1.02  | 0.69477  | 0.733117 | 0.864642 | 0.845523 |
| MmugDNA.6365.1.S1_at    | MmugDNA.6365.1  | 6.1   | 6.16  | 0.19 | 0.08 | -1.04  | 0.207247 | 0.217653 | 0.569386 | 0.491255 |
| MmugDNA.6366.1.S1_at    | MmugDNA.6366.1  | 4.67  | 4.44  | 0.11 | 0.35 | 1.18   | 0.893812 | 0.968544 | 0.957768 | 0.982645 |
| MmugDNA.6367.1.S1_at    | MmugDNA.6367.1  | 10.59 | 10.18 | 0.17 | 0.17 | 1.33   | 0.01422  | 0.005918 | 0.25167  | 0.105276 |
| MmugDNA.6369.1.S1_at    | MmugDNA.6369.1  | 2.84  | 2.98  | 0.14 | 0.1  | -1.1   | 0.377976 | 0.390364 | 0.686232 | 0.624156 |
| MmugDNA.637.1.S1_at     | MmugDNA.637.1   | 2.73  | 2.86  | 0.04 | 0.14 | -1.09  | 0.214227 | 0.075886 | 0.574647 | 0.320523 |
| MmugDNA.6370.1.S1_at    | MmugDNA.6370.1  | 4.97  | 6.94  | 0.3  | 0.13 | -3.93  | 0.000366 | 0.000896 | 0.12893  | 0.047868 |
| MmugDNA.6371.1.S1_at    | MmugDNA.6371.1  | 12.16 | 11.48 | 0.17 | 0.3  | 1.6    | 0.04848  | 0.037115 | 0.368878 | 0.237165 |
| MmugDNA.6373.1.S1_at    | MmugDNA.6373.1  | 5.34  | 5.45  | 0.35 | 0.25 | -1.08  | 0.97394  | 0.544555 | 0.989761 | 0.726948 |
| MmugDNA.6374.1.S1_at    | MmugDNA.6374.1  | 5.88  | 5.77  | 0.2  | 0.07 | 1.08   | 0.614545 | 0.162424 | 0.823236 | 0.438575 |
| MmugDNA.6375.1.S1_at    | MmugDNA.6375.1  | 7.68  | 7.15  | 0.37 | 0.75 | 1.45   | 0.071559 | 0.043309 | 0.415505 | 0.252847 |
| MmugDNA.6377.1.S1_at    | MmugDNA.6377.1  | 2.95  | 2.97  | 0.03 | 0.02 | -1.02  | 0.095181 | 0.060367 | 0.452984 | 0.292291 |
| MmugDNA.6378.1.S1_at    | MmugDNA.6378.1  | 11.73 | 11.68 | 0.39 | 0.46 | 1.04   | 0.842077 | 0.511274 | 0.93631  | 0.705465 |
| MmugDNA.40297.1.S1_s_at | MmugDNA.40297.1 | 5.82  | 6.09  | 0.28 | 0.12 | -1.21  | 0.781261 | 0.423313 | 0.908721 | 0.646277 |
| MmugDNA.638.1.S1_at     | MmugDNA.638.1   | 8.25  | 8.18  | 0.15 | 0.25 | 1.05   | 0.272191 | 0.314449 | 0.616016 | 0.568319 |
| MmugDNA.6383.1.S1_at    | MmugDNA.6383.1  | 7.08  | 7.13  | 0.04 | 0.44 | -1.04  | 0.544661 | 0.689194 | 0.784499 | 0.818618 |
| MmugDNA.6383.1.S1_s_at  | MmugDNA.6383.1  | 7.89  | 8.26  | 0.78 | 0.91 | -1.29  | 0.524645 | 0.719829 | 0.773218 | 0.837893 |
| MmugDNA.6384.1.S1_at    | MmugDNA.6384.1  | 10.2  | 10.06 | 0.14 | 0.56 | 1.1    | 0.575206 | 0.544128 | 0.802187 | 0.726618 |
| MmugDNA.6386.1.S1_at    | MmugDNA.6386.1  | 11.09 | 10.84 | 0.28 | 0.27 | 1.19   | 0.748292 | 0.602936 | 0.892364 | 0.76382  |
| MmugDNA.6387.1.S1_at    | MmugDNA.6387.1  | 6.73  | 6.63  | 0.09 | 0.06 | 1.07   | 0.271753 | 0.572828 | 0.615789 | 0.744765 |
| MmugDNA.6387.1.S1_x_at  | MmugDNA.6387.1  | 7.84  | 7.67  | 0.11 | 0.11 | 1.13   | 0.624118 | 0.401438 | 0.828178 | 0.631018 |
| MmugDNA.639.1.S1_at     | MmugDNA.639.1   | 7.99  | 7.83  | 0.05 | 0.33 | 1.11   | 0.903237 | 0.436296 | 0.961415 | 0.655923 |
| MmugDNA.6390.1.S1_at    | MmugDNA.6390.1  | 6.86  | 6.56  | 0.21 | 0.24 | 1.24   | 0.121644 | 0.104228 | 0.486508 | 0.365373 |
| MmugDNA.6391.1.S1_at    | MmugDNA.6391.1  | 3.01  | 6.27  | 0.07 | 1.6  | -9.61  | 0.010433 | 0.001898 | 0.229855 | 0.065035 |
| MmugDNA.6392.1.S1_at    | MmugDNA.6392.1  | 8.21  | 7.97  | 0.11 | 0.2  | 1.18   | 0.462699 | 0.115595 | 0.738306 | 0.382674 |
| MmugDNA.6394.1.S1_at    | MmugDNA.6394.1  | 6.88  | 5.96  | 0.44 | 0.61 | 1.89   | 0.354918 | 0.229745 | 0.670697 | 0.501761 |
| MmugDNA.6395.1.S1_at    | MmugDNA.6395.1  | 6.37  | 6.48  | 0.17 | 0.03 | -1.08  | 0.695432 | 0.74626  | 0.864936 | 0.85272  |
| MmugDNA.6396.1.S1_at    | MmugDNA.6396.1  | 4.99  | 4.96  | 0.22 | 0.11 | 1.02   | 0.331423 | 0.186439 | 0.656353 | 0.462293 |

|                        |                |       |       |      |      |       |          |          |          |          |
|------------------------|----------------|-------|-------|------|------|-------|----------|----------|----------|----------|
| MmugDNA.6397.1.S1_at   | MmugDNA.6397.1 | 4.22  | 4.33  | 0.11 | 0.09 | -1.08 | 0.098607 | 0.076869 | 0.458486 | 0.322368 |
| MmugDNA.6399.1.S1_at   | MmugDNA.6399.1 | 4.96  | 5.62  | 0.29 | 0.57 | -1.58 | 0.165235 | 0.221812 | 0.529291 | 0.494948 |
| MmugDNA.64.1.S1_at     | MmugDNA.64.1   | 3.93  | 4.09  | 0.27 | 0.19 | -1.11 | 0.50422  | 0.686083 | 0.761176 | 0.816777 |
| MmugDNA.640.1.S1_at    | MmugDNA.640.1  | 4.05  | 4.03  | 0.05 | 0.04 | 1.01  | 0.877827 | 0.702443 | 0.951009 | 0.827532 |
| MmugDNA.6400.1.S1_at   | MmugDNA.6400.1 | 7.42  | 7.04  | 0.15 | 0.15 | 1.3   | 0.054    | 0.049139 | 0.381237 | 0.266534 |
| MmugDNA.6401.1.S1_at   | MmugDNA.6401.1 | 8.32  | 8.52  | 0.44 | 0.34 | -1.15 | 0.408383 | 0.354644 | 0.705159 | 0.597326 |
| MmugDNA.6403.1.S1_at   | MmugDNA.6403.1 | 4.46  | 4.43  | 0.3  | 0.05 | 1.02  | 0.757474 | 0.918078 | 0.897137 | 0.954068 |
| MmugDNA.6404.1.S1_at   | MmugDNA.6404.1 | 3.07  | 2.84  | 0.09 | 0.22 | 1.17  | 0.554909 | 0.283052 | 0.791099 | 0.545692 |
| MmugDNA.6405.1.S1_at   | MmugDNA.6405.1 | 3.89  | 4.55  | 0.2  | 0.44 | -1.58 | 0.050623 | 0.045582 | 0.374816 | 0.257666 |
| MmugDNA.6406.1.S1_at   | MmugDNA.6406.1 | 4.95  | 4.92  | 0.09 | 0.09 | 1.02  | 0.435355 | 0.484095 | 0.721218 | 0.688318 |
| MmugDNA.6407.1.S1_at   | MmugDNA.6407.1 | 6     | 6.04  | 0.69 | 0.55 | -1.03 | 0.411931 | 0.558161 | 0.707648 | 0.735437 |
| MmugDNA.6409.1.S1_at   | MmugDNA.6409.1 | 6.81  | 6.41  | 0.44 | 0.41 | 1.32  | 0.332719 | 0.488591 | 0.656938 | 0.691222 |
| MmugDNA.6410.1.S1_at   | MmugDNA.6410.1 | 6.26  | 6.18  | 0.1  | 0.06 | 1.05  | 0.60124  | 0.274733 | 0.815685 | 0.539195 |
| MmugDNA.6411.1.S1_at   | MmugDNA.6411.1 | 6.26  | 5.78  | 0.94 | 0.69 | 1.4   | 0.313599 | 0.250994 | 0.645195 | 0.519638 |
| MmugDNA.6414.1.S1_at   | MmugDNA.6414.1 | 6.38  | 6.48  | 0.13 | 0.19 | -1.08 | 0.738363 | 0.907653 | 0.887651 | 0.947753 |
| MmugDNA.6415.1.S1_at   | MmugDNA.6415.1 | 7.77  | 8.35  | 0.11 | 0.41 | -1.5  | 0.037036 | 0.062595 | 0.340567 | 0.297022 |
| MmugDNA.6417.1.S1_at   | MmugDNA.6417.1 | 5.94  | 6.67  | 0.32 | 1.15 | -1.66 | 0.315008 | 0.375915 | 0.646263 | 0.61375  |
| MmugDNA.6419.1.S1_at   | MmugDNA.6419.1 | 10.28 | 11.35 | 0.3  | 0.61 | -2.1  | 0.070753 | 0.032801 | 0.414661 | 0.22427  |
| MmugDNA.642.1.S1_at    | MmugDNA.642.1  | 4.73  | 4.8   | 0.09 | 0.05 | -1.05 | 0.705267 | 0.611871 | 0.870004 | 0.769622 |
| MmugDNA.6420.1.S1_at   | MmugDNA.6420.1 | 8.65  | 7.98  | 0.34 | 0.13 | 1.59  | 0.050258 | 0.04275  | 0.373901 | 0.251238 |
| MmugDNA.6421.1.S1_at   | MmugDNA.6421.1 | 3.69  | 3.37  | 0.2  | 0.37 | 1.25  | 0.77031  | 0.558807 | 0.90333  | 0.735887 |
| MmugDNA.6422.1.S1_at   | MmugDNA.6422.1 | 7.27  | 7.17  | 0.08 | 0.15 | 1.07  | 0.440573 | 0.366146 | 0.724399 | 0.605941 |
| MmugDNA.6423.1.S1_at   | MmugDNA.6423.1 | 6.05  | 6.09  | 0.18 | 0.28 | -1.02 | 0.534991 | 0.800366 | 0.778933 | 0.885129 |
| MmugDNA.6424.1.S1_at   | MmugDNA.6424.1 | 6.55  | 6.87  | 0.75 | 0.23 | -1.25 | 0.6286   | 0.060642 | 0.830903 | 0.292849 |
| MmugDNA.6425.1.S1_at   | MmugDNA.6425.1 | 2.95  | 3.01  | 0.4  | 0.07 | -1.04 | 0.795738 | 0.646498 | 0.915229 | 0.792953 |
| MmugDNA.6427.1.S1_at   | MmugDNA.6427.1 | 4.2   | 3.48  | 1.45 | 0.62 | 1.64  | 0.362305 | 0.327199 | 0.675921 | 0.577156 |
| MmugDNA.643.1.S1_at    | MmugDNA.643.1  | 4.95  | 5     | 0.12 | 0.03 | -1.04 | 0.467387 | 0.206064 | 0.74068  | 0.480273 |
| MmugDNA.6432.1.S1_at   | MmugDNA.6432.1 | 8.37  | 9.55  | 0.51 | 0.25 | -2.26 | 0.050522 | 0.018536 | 0.374593 | 0.171256 |
| MmugDNA.6433.1.S1_at   | MmugDNA.6433.1 | 7.62  | 6.74  | 0.15 | 0.31 | 1.85  | 0.012722 | 0.006069 | 0.243533 | 0.106175 |
| MmugDNA.6433.1.S1_x_at | MmugDNA.6433.1 | 7.55  | 7.07  | 0.1  | 0.36 | 1.39  | 0.03833  | 0.01932  | 0.34385  | 0.174723 |
| MmugDNA.6434.1.S1_at   | MmugDNA.6434.1 | 6.35  | 5.95  | 0.21 | 0.08 | 1.32  | 0.040412 | 0.036457 | 0.349277 | 0.235423 |
| MmugDNA.6437.1.S1_at   | MmugDNA.6437.1 | 3.87  | 3.73  | 0.17 | 0.29 | 1.1   | 0.533831 | 0.651757 | 0.778436 | 0.796356 |
| MmugDNA.6438.1.S1_at   | MmugDNA.6438.1 | 10.69 | 10.57 | 0.15 | 0.03 | 1.09  | 0.287428 | 0.317516 | 0.625987 | 0.57076  |
| MmugDNA.6441.1.S1_at   | MmugDNA.6441.1 | 6.92  | 5.52  | 0.22 | 1.13 | 2.64  | 0.098252 | 0.07533  | 0.457816 | 0.319507 |
| MmugDNA.6442.1.S1_at   | MmugDNA.6442.1 | 6.78  | 6.55  | 0.11 | 0.09 | 1.18  | 0.197785 | 0.023445 | 0.560816 | 0.191956 |
| MmugDNA.6444.1.S1_at   | MmugDNA.6444.1 | 4.45  | 4.7   | 0.3  | 1    | -1.19 | 0.265262 | 0.366967 | 0.610859 | 0.606583 |
| MmugDNA.6445.1.S1_at   | MmugDNA.6445.1 | 6.36  | 5.61  | 0.76 | 0.35 | 1.68  | 0.148106 | 0.166854 | 0.513463 | 0.443311 |
| MmugDNA.6446.1.S1_at   | MmugDNA.6446.1 | 3.56  | 3.46  | 0.03 | 0.07 | 1.07  | 0.031645 | 0.35544  | 0.32249  | 0.597738 |
| MmugDNA.6447.1.S1_at   | MmugDNA.6447.1 | 6.31  | 6.88  | 0.78 | 0.42 | -1.49 | 0.512676 | 0.696622 | 0.765738 | 0.823776 |
| MmugDNA.6448.1.S1_at   | MmugDNA.6448.1 | 2.85  | 2.81  | 0.21 | 0.07 | 1.03  | 0.999548 | 0.553625 | 0.999907 | 0.732748 |
| MmugDNA.6449.1.S1_at   | MmugDNA.6449.1 | 3.21  | 3.06  | 0.22 | 0.16 | 1.11  | 0.488634 | 0.318195 | 0.753196 | 0.571069 |

|                         |                 |       |       |      |      |       |          |          |          |          |
|-------------------------|-----------------|-------|-------|------|------|-------|----------|----------|----------|----------|
| MmugDNA.645.1.S1_at     | MmugDNA.645.1   | 4.93  | 4.95  | 0.08 | 0.03 | -1.01 | 0.391151 | 0.545403 | 0.693921 | 0.727521 |
| MmugDNA.6451.1.S1_at    | MmugDNA.6451.1  | 7.49  | 7.2   | 0.18 | 0.24 | 1.22  | 0.342968 | 0.467416 | 0.663407 | 0.677085 |
| MmugDNA.6454.1.S1_at    | MmugDNA.6454.1  | 8.38  | 8.07  | 0.33 | 0.27 | 1.24  | 0.173405 | 0.205495 | 0.537006 | 0.479772 |
| MmugDNA.6454.1.S1_x_at  | MmugDNA.6454.1  | 8.08  | 7.58  | 0.28 | 0.38 | 1.41  | 0.231478 | 0.288715 | 0.587406 | 0.549856 |
| MmugDNA.6455.1.S1_at    | MmugDNA.6455.1  | 4.04  | 3.93  | 0.06 | 0.76 | 1.08  | 0.492966 | 0.110714 | 0.755892 | 0.374854 |
| MmugDNA.6459.1.S1_at    | MmugDNA.6459.1  | 3.45  | 3.27  | 0.22 | 0.17 | 1.13  | 0.78926  | 0.826455 | 0.912524 | 0.900317 |
| MmugDNA.6460.1.S1_at    | MmugDNA.6460.1  | 3.1   | 3.15  | 0.05 | 0.06 | -1.04 | 0.284605 | 0.288056 | 0.624327 | 0.549294 |
| MmugDNA.6461.1.S1_at    | MmugDNA.6461.1  | 3.24  | 3.31  | 0.05 | 0    | -1.05 | 0.058246 | 0.022712 | 0.390133 | 0.188723 |
| MmugDNA.6462.1.S1_at    | MmugDNA.6462.1  | 5.57  | 5.28  | 0.77 | 0.14 | 1.22  | 0.193357 | 0.17379  | 0.556834 | 0.450128 |
| MmugDNA.6463.1.S1_at    | MmugDNA.6463.1  | 10.6  | 10.69 | 0.15 | 0.13 | -1.07 | 0.420589 | 0.393863 | 0.712569 | 0.626608 |
| MmugDNA.6464.1.S1_at    | MmugDNA.6464.1  | 6.43  | 6.46  | 1.8  | 0.08 | -1.02 | 0.971811 | 0.986056 | 0.989264 | 0.992099 |
| MmugDNA.6465.1.S1_at    | MmugDNA.6465.1  | 3.63  | 3.74  | 0.1  | 0.23 | -1.08 | 0.27079  | 0.259764 | 0.615052 | 0.526648 |
| MmugDNA.6466.1.S1_at    | MmugDNA.6466.1  | 7.85  | 6.45  | 0.19 | 0.35 | 2.63  | 0.005345 | 0.010457 | 0.191107 | 0.133651 |
| MmugDNA.6467.1.S1_at    | MmugDNA.6467.1  | 3.72  | 3.47  | 1.71 | 0.15 | 1.19  | 0.280292 | 0.340069 | 0.621522 | 0.58653  |
| MmugDNA.6469.1.S1_at    | MmugDNA.6469.1  | 2.92  | 3.08  | 0.04 | 0.15 | -1.12 | 0.109466 | 0.08196  | 0.470811 | 0.330572 |
| MmugDNA.647.1.S1_at     | MmugDNA.647.1   | 2.9   | 2.75  | 0.1  | 0.13 | 1.11  | 0.184324 | 0.153838 | 0.548138 | 0.428506 |
| MmugDNA.6470.1.S1_at    | MmugDNA.6470.1  | 8.35  | 8.06  | 0.04 | 0.21 | 1.22  | 0.121327 | 0.181894 | 0.48598  | 0.45842  |
| MmugDNA.6471.1.S1_at    | MmugDNA.6471.1  | 7.66  | 8.3   | 0.41 | 0.17 | -1.56 | 0.054033 | 0.009758 | 0.381315 | 0.129958 |
| MmugDNA.36463.1.S1_s_at | MmugDNA.36463.1 | 6.37  | 6.24  | 0.13 | 0.34 | 1.09  | 0.535979 | 0.347683 | 0.779351 | 0.592071 |
| MmugDNA.6474.1.S1_at    | MmugDNA.6474.1  | 3.94  | 3.95  | 0.1  | 0.13 | -1.01 | 0.394929 | 0.159224 | 0.696208 | 0.435217 |
| MmugDNA.6475.1.S1_at    | MmugDNA.6475.1  | 4.78  | 5     | 0.29 | 0.09 | -1.16 | 0.321023 | 0.168863 | 0.649764 | 0.445458 |
| MmugDNA.6476.1.S1_at    | MmugDNA.6476.1  | 3.74  | 3.29  | 1.17 | 0.91 | 1.36  | 0.529371 | 0.790397 | 0.776116 | 0.878857 |
| MmugDNA.6479.1.S1_at    | MmugDNA.6479.1  | 5.27  | 5.12  | 0.23 | 0.12 | 1.11  | 0.383091 | 0.232644 | 0.689068 | 0.504359 |
| MmugDNA.648.1.S1_at     | MmugDNA.648.1   | 3.73  | 3.62  | 0.35 | 0.21 | 1.08  | 0.458034 | 0.648639 | 0.735139 | 0.794382 |
| MmugDNA.6480.1.S1_at    | MmugDNA.6480.1  | 5.96  | 6.03  | 0.23 | 0.22 | -1.05 | 0.321043 | 0.198697 | 0.649764 | 0.473391 |
| MmugDNA.6481.1.S1_at    | MmugDNA.6481.1  | 11.87 | 11.65 | 0.17 | 0.15 | 1.16  | 0.301545 | 0.00919  | 0.636476 | 0.126573 |
| MmugDNA.6483.1.S1_at    | MmugDNA.6483.1  | 10.61 | 10.61 | 0.14 | 1.26 | 1     | 0.466484 | 0.615919 | 0.740215 | 0.772359 |
| MmugDNA.6484.1.S1_at    | MmugDNA.6484.1  | 11.49 | 10.95 | 0.28 | 0.27 | 1.45  | 0.070988 | 0.092515 | 0.414673 | 0.348471 |
| MmugDNA.6485.1.S1_at    | MmugDNA.6485.1  | 9.6   | 10.5  | 0.4  | 0.53 | -1.86 | 0.161966 | 0.143106 | 0.526638 | 0.417006 |
| MmugDNA.6486.1.S1_at    | MmugDNA.6486.1  | 5.29  | 4.96  | 0.61 | 0.27 | 1.26  | 0.244193 | 0.278402 | 0.596024 | 0.542169 |
| MmugDNA.6487.1.S1_at    | MmugDNA.6487.1  | 4.81  | 4.95  | 0.02 | 0.23 | -1.1  | 0.922029 | 0.834958 | 0.969683 | 0.90553  |
| MmugDNA.6488.1.S1_at    | MmugDNA.6488.1  | 6.3   | 6.97  | 0.36 | 0.15 | -1.59 | 0.112147 | 0.113262 | 0.474673 | 0.379297 |
| MmugDNA.6489.1.S1_at    | MmugDNA.6489.1  | 8.51  | 8.11  | 0.07 | 0.74 | 1.32  | 0.719843 | 0.046942 | 0.87715  | 0.261301 |
| MmugDNA.649.1.S1_at     | MmugDNA.649.1   | 5.67  | 6.08  | 0.08 | 0.19 | -1.32 | 0.033428 | 0.029277 | 0.328832 | 0.213122 |
| MmugDNA.6490.1.S1_at    | MmugDNA.6490.1  | 11.08 | 11.37 | 0.19 | 0.71 | -1.22 | 0.79504  | 0.568492 | 0.914955 | 0.741984 |
| MmugDNA.6491.1.S1_at    | MmugDNA.6491.1  | 4.04  | 4.22  | 0.09 | 0.16 | -1.13 | 0.039733 | 0.029714 | 0.347969 | 0.214029 |
| MmugDNA.6492.1.S1_at    | MmugDNA.6492.1  | 9.63  | 9.76  | 0.5  | 0.89 | -1.1  | 0.8884   | 0.883761 | 0.955254 | 0.933691 |
| MmugDNA.6493.1.S1_at    | MmugDNA.6493.1  | 8     | 7.46  | 0.26 | 0.25 | 1.46  | 0.049766 | 0.009804 | 0.372013 | 0.130166 |
| MmugDNA.6495.1.S1_at    | MmugDNA.6495.1  | 7.49  | 7.93  | 0.44 | 0.36 | -1.36 | 0.094315 | 0.082068 | 0.451834 | 0.33083  |
| MmugDNA.6496.1.S1_at    | MmugDNA.6496.1  | 5.31  | 4.53  | 0.73 | 0.07 | 1.71  | 0.491433 | 0.610889 | 0.755082 | 0.768948 |
| MmugDNA.6497.1.S1_at    | MmugDNA.6497.1  | 5.12  | 5.16  | 0.87 | 0.29 | -1.02 | 0.958985 | 0.406325 | 0.984402 | 0.634276 |



|                         |                 |       |       |      |      |       |          |          |          |          |
|-------------------------|-----------------|-------|-------|------|------|-------|----------|----------|----------|----------|
| MmugDNA.6499.1.S1_at    | MmugDNA.6499.1  | 4     | 4.12  | 0.05 | 0.18 | -1.09 | 0.205995 | 0.22464  | 0.568449 | 0.497613 |
| MmugDNA.65.1.S1_at      | MmugDNA.65.1    | 3.82  | 3.51  | 0.58 | 0.07 | 1.24  | 0.147958 | 0.089234 | 0.513442 | 0.34333  |
| MmugDNA.650.1.S1_at     | MmugDNA.650.1   | 7.24  | 7.31  | 0.23 | 0.37 | -1.05 | 0.546638 | 0.558454 | 0.785646 | 0.735631 |
| MmugDNA.6500.1.S1_at    | MmugDNA.6500.1  | 11.27 | 11.51 | 0.48 | 0.47 | -1.18 | 0.868006 | 0.812007 | 0.947274 | 0.891493 |
| MmugDNA.6501.1.S1_at    | MmugDNA.6501.1  | 7.14  | 6.64  | 0.32 | 0.19 | 1.41  | 0.125432 | 0.133372 | 0.491333 | 0.405191 |
| MmugDNA.6502.1.S1_at    | MmugDNA.6502.1  | 6.53  | 6.13  | 0.44 | 0.21 | 1.33  | 0.1663   | 0.146207 | 0.529929 | 0.420181 |
| MmugDNA.6503.1.S1_at    | MmugDNA.6503.1  | 5.01  | 4.98  | 0.09 | 0.2  | 1.02  | 0.500485 | 0.347514 | 0.759571 | 0.592019 |
| MmugDNA.6504.1.S1_at    | MmugDNA.6504.1  | 4.95  | 3.18  | 0.87 | 0.24 | 3.41  | 0.095832 | 0.093517 | 0.453861 | 0.349846 |
| MmugDNA.6507.1.S1_at    | MmugDNA.6507.1  | 3.13  | 3.16  | 0.15 | 0.18 | -1.02 | 0.385168 | 0.484412 | 0.690351 | 0.688478 |
| MmugDNA.6508.1.S1_at    | MmugDNA.6508.1  | 4.1   | 4.36  | 0.08 | 0.07 | -1.2  | 0.021974 | 0.018631 | 0.284443 | 0.171647 |
| MmugDNA.6509.1.S1_at    | MmugDNA.6509.1  | 6.09  | 6.23  | 0.22 | 0.04 | -1.1  | 0.311627 | 0.447302 | 0.64356  | 0.663434 |
| MmugDNA.651.1.S1_at     | MmugDNA.651.1   | 2.92  | 2.9   | 0.06 | 0.04 | 1.02  | 0.351404 | 0.469138 | 0.669126 | 0.678141 |
| MmugDNA.6511.1.S1_at    | MmugDNA.6511.1  | 3.9   | 4.13  | 0.07 | 0.16 | -1.17 | 0.093952 | 0.064176 | 0.451538 | 0.299592 |
| MmugDNA.19287.1.S1_at   | MmugDNA.19287.1 | 5.47  | 5.49  | 0.07 | 0.21 | -1.01 | 0.27582  | 0.240053 | 0.61793  | 0.510742 |
| MmugDNA.19287.1.S1_s_at | MmugDNA.19287.1 | 7.03  | 7.16  | 0.18 | 0.07 | -1.1  | 0.101116 | 0.034828 | 0.461009 | 0.230811 |
| MmugDNA.6513.1.S1_at    | MmugDNA.6513.1  | 7.55  | 8.47  | 0.19 | 0.43 | -1.89 | 0.024588 | 0.006442 | 0.295214 | 0.109051 |
| MmugDNA.6514.1.S1_at    | MmugDNA.6514.1  | 3.14  | 3.17  | 0.25 | 0.03 | -1.02 | 0.920683 | 0.991815 | 0.969077 | 0.995392 |
| MmugDNA.6515.1.S1_at    | MmugDNA.6515.1  | 5.15  | 5.25  | 1.58 | 0.24 | -1.07 | 0.365462 | 0.419954 | 0.678281 | 0.643765 |
| MmugDNA.6516.1.S1_at    | MmugDNA.6516.1  | 6.07  | 7.22  | 0.55 | 0.19 | -2.21 | 0.025999 | 0.004246 | 0.301367 | 0.091685 |
| MmugDNA.6518.1.S1_at    | MmugDNA.6518.1  | 3.62  | 3.68  | 0.04 | 0.03 | -1.05 | 0.097225 | 0.115154 | 0.456142 | 0.382052 |
| MmugDNA.6519.1.S1_at    | MmugDNA.6519.1  | 9.9   | 9.57  | 0.19 | 0.09 | 1.25  | 0.062225 | 0.075463 | 0.397572 | 0.319857 |
| MmugDNA.652.1.S1_at     | MmugDNA.652.1   | 2.92  | 3     | 0.04 | 0.12 | -1.06 | 0.937786 | 0.248829 | 0.976051 | 0.517951 |
| MmugDNA.6521.1.S1_at    | MmugDNA.6521.1  | 7.15  | 7.36  | 0.2  | 0.11 | -1.16 | 0.223834 | 0.166405 | 0.582217 | 0.442884 |
| MmugDNA.6523.1.S1_at    | MmugDNA.6523.1  | 5.28  | 5.32  | 0.28 | 0.35 | -1.03 | 0.919645 | 0.24755  | 0.968755 | 0.516895 |
| MmugDNA.6524.1.S1_at    | MmugDNA.6524.1  | 10.18 | 9.74  | 0.24 | 1.24 | 1.35  | 0.354252 | 0.29305  | 0.670421 | 0.552978 |
| MmugDNA.6525.1.S1_at    | MmugDNA.6525.1  | 3.14  | 3.25  | 0.12 | 0.19 | -1.08 | 0.19387  | 0.305717 | 0.55753  | 0.562714 |
| MmugDNA.6526.1.S1_at    | MmugDNA.6526.1  | 7.39  | 8.78  | 0.41 | 0.79 | -2.6  | 0.037934 | 0.043212 | 0.343341 | 0.252647 |
| MmugDNA.6527.1.S1_at    | MmugDNA.6527.1  | 7.36  | 7.1   | 0.32 | 0.5  | 1.2   | 0.188142 | 0.211771 | 0.551088 | 0.485757 |
| MmugDNA.6528.1.S1_at    | MmugDNA.6528.1  | 9.17  | 8.95  | 0.29 | 0.32 | 1.17  | 0.968707 | 0.605592 | 0.988176 | 0.76535  |
| MmugDNA.6529.1.S1_at    | MmugDNA.6529.1  | 4.07  | 3.62  | 0.76 | 0.61 | 1.36  | 0.912413 | 0.983283 | 0.965274 | 0.990726 |
| MmugDNA.653.1.S1_at     | MmugDNA.653.1   | 7.21  | 7.22  | 0.03 | 0.1  | -1.01 | 0.69369  | 0.144889 | 0.86419  | 0.418784 |
| MmugDNA.6530.1.S1_s_at  | MmugDNA.6530.1  | 7.95  | 8.53  | 0.07 | 0.44 | -1.5  | 0.112652 | 0.007263 | 0.475099 | 0.114334 |
| MmugDNA.6531.1.S1_at    | MmugDNA.6531.1  | 3.61  | 3.71  | 0.35 | 0.1  | -1.07 | 0.874516 | 0.534407 | 0.949695 | 0.720351 |
| MmugDNA.6532.1.S1_at    | MmugDNA.6532.1  | 6.2   | 6.1   | 0.18 | 0.27 | 1.07  | 0.706472 | 0.879688 | 0.870694 | 0.931267 |
| MmugDNA.6533.1.S1_at    | MmugDNA.6533.1  | 6.95  | 6.97  | 0.4  | 0.62 | -1.01 | 0.752933 | 0.417791 | 0.894568 | 0.642404 |
| MmugDNA.6534.1.S1_at    | MmugDNA.6534.1  | 6.28  | 6.31  | 0.25 | 0.06 | -1.02 | 0.922191 | 0.985919 | 0.969815 | 0.99201  |
| MmugDNA.6535.1.S1_at    | MmugDNA.6535.1  | 3.42  | 3.38  | 0.52 | 0.08 | 1.03  | 0.345251 | 0.27576  | 0.665128 | 0.540028 |
| MmugDNA.6536.1.S1_at    | MmugDNA.6536.1  | 4.82  | 4.83  | 0.02 | 0.1  | -1.01 | 0.504415 | 0.717527 | 0.761231 | 0.836463 |
| MmugDNA.6537.1.S1_at    | MmugDNA.6537.1  | 3.14  | 3.17  | 0.28 | 0.03 | -1.03 | 0.476196 | 0.651745 | 0.746145 | 0.796356 |
| MmugDNA.6538.1.S1_at    | MmugDNA.6538.1  | 12.59 | 12.45 | 0.1  | 0.09 | 1.1   | 0.216399 | 0.194091 | 0.576029 | 0.46925  |
| MmugDNA.654.1.S1_at     | MmugDNA.654.1   | 5.64  | 5.58  | 0.23 | 0.17 | 1.05  | 0.394089 | 0.52979  | 0.695679 | 0.717498 |

|                      |                |       |       |      |      |       |          |          |          |          |
|----------------------|----------------|-------|-------|------|------|-------|----------|----------|----------|----------|
| MmugDNA.6541.1.S1_at | MmugDNA.6541.1 | 7.32  | 6.38  | 1.72 | 0.41 | 1.92  | 0.134099 | 0.17182  | 0.50068  | 0.448224 |
| MmugDNA.6543.1.S1_at | MmugDNA.6543.1 | 6.37  | 6.37  | 0.14 | 0.27 | 1     | 0.879021 | 0.611344 | 0.951455 | 0.769255 |
| MmugDNA.6544.1.S1_at | MmugDNA.6544.1 | 3.05  | 3.01  | 0.25 | 0.11 | 1.03  | 0.992633 | 0.947909 | 0.997463 | 0.970378 |
| MmugDNA.6545.1.S1_at | MmugDNA.6545.1 | 11.21 | 10.94 | 0.52 | 0.9  | 1.21  | 0.97581  | 0.774434 | 0.990673 | 0.868766 |
| MmugDNA.6546.1.S1_at | MmugDNA.6546.1 | 4.58  | 4.47  | 1.15 | 0.12 | 1.09  | 0.353749 | 0.493089 | 0.670266 | 0.693996 |
| MmugDNA.6547.1.S1_at | MmugDNA.6547.1 | 5.8   | 6.25  | 1.07 | 0.47 | -1.37 | 0.832258 | 0.792803 | 0.932037 | 0.880383 |
| MmugDNA.6548.1.S1_at | MmugDNA.6548.1 | 4.05  | 4.25  | 0.1  | 0.13 | -1.15 | 0.229908 | 0.235434 | 0.587007 | 0.506489 |
| MmugDNA.6549.1.S1_at | MmugDNA.6549.1 | 12.54 | 12.79 | 0.18 | 0.52 | -1.19 | 0.471787 | 0.581594 | 0.743377 | 0.750589 |
| MmugDNA.655.1.S1_at  | MmugDNA.655.1  | 6.61  | 6.36  | 0.42 | 0.12 | 1.19  | 0.474784 | 0.243873 | 0.74537  | 0.514048 |
| MmugDNA.6550.1.S1_at | MmugDNA.6550.1 | 4.03  | 3.01  | 0.1  | 0.6  | 2.03  | 0.116051 | 0.089284 | 0.479523 | 0.343423 |
| MmugDNA.6551.1.S1_at | MmugDNA.6551.1 | 3.56  | 3.47  | 0.13 | 0.13 | 1.07  | 0.437834 | 0.489259 | 0.722586 | 0.691754 |
| MmugDNA.6552.1.S1_at | MmugDNA.6552.1 | 9.18  | 8.21  | 0.14 | 0.11 | 1.96  | 0.000606 | 0.000382 | 0.136818 | 0.037273 |
| MmugDNA.6555.1.S1_at | MmugDNA.6555.1 | 3.87  | 3.46  | 0.21 | 0.21 | 1.33  | 0.064721 | 0.0682   | 0.403239 | 0.307338 |
| MmugDNA.6556.1.S1_at | MmugDNA.6556.1 | 7.34  | 7.59  | 0.41 | 0.82 | -1.19 | 0.224504 | 0.115222 | 0.582716 | 0.3822   |
| MmugDNA.6557.1.S1_at | MmugDNA.6557.1 | 11.26 | 11.52 | 0.09 | 0.1  | -1.19 | 0.056117 | 0.045064 | 0.385775 | 0.256789 |
| MmugDNA.6558.1.S1_at | MmugDNA.6558.1 | 6.82  | 5.82  | 0.54 | 0.23 | 2.01  | 0.117626 | 0.068887 | 0.48184  | 0.308829 |
| MmugDNA.6562.1.S1_at | MmugDNA.6562.1 | 4.11  | 4.02  | 0.17 | 0.09 | 1.07  | 0.747725 | 0.205235 | 0.892029 | 0.479596 |
| MmugDNA.6563.1.S1_at | MmugDNA.6563.1 | 6.76  | 6.79  | 0.38 | 0.57 | -1.02 | 0.261698 | 0.298534 | 0.608352 | 0.557175 |
| MmugDNA.6564.1.S1_at | MmugDNA.6564.1 | 6.23  | 7.48  | 0.37 | 0.41 | -2.38 | 0.026868 | 0.016157 | 0.304933 | 0.161102 |
| MmugDNA.6565.1.S1_at | MmugDNA.6565.1 | 5.54  | 5.22  | 0.08 | 0.18 | 1.25  | 0.037475 | 0.044781 | 0.3415   | 0.256066 |
| MmugDNA.6566.1.S1_at | MmugDNA.6566.1 | 6.4   | 6.08  | 0.2  | 0.49 | 1.25  | 0.231847 | 0.243922 | 0.587568 | 0.514069 |
| MmugDNA.6567.1.S1_at | MmugDNA.6567.1 | 5.71  | 5.82  | 0.26 | 0.14 | -1.08 | 0.586751 | 0.776339 | 0.80826  | 0.869885 |
| MmugDNA.6569.1.S1_at | MmugDNA.6569.1 | 11    | 11.07 | 0.07 | 0.55 | -1.05 | 0.796242 | 0.903238 | 0.91548  | 0.945015 |
| MmugDNA.657.1.S1_at  | MmugDNA.657.1  | 6.75  | 6.49  | 0.54 | 0.44 | 1.19  | 0.659447 | 0.411909 | 0.847196 | 0.638434 |
| MmugDNA.6570.1.S1_at | MmugDNA.6570.1 | 11.61 | 11.12 | 0.36 | 0.15 | 1.4   | 0.265199 | 0.282045 | 0.610859 | 0.544937 |
| MmugDNA.6573.1.S1_at | MmugDNA.6573.1 | 3.44  | 3.03  | 0.23 | 0.55 | 1.32  | 0.815775 | 0.269462 | 0.925151 | 0.534767 |
| MmugDNA.6574.1.S1_at | MmugDNA.6574.1 | 8.68  | 7.87  | 0.15 | 0.88 | 1.76  | 0.232837 | 0.233606 | 0.587927 | 0.50492  |
| MmugDNA.6575.1.S1_at | MmugDNA.6575.1 | 3.7   | 3.46  | 0.14 | 0.1  | 1.18  | 0.047831 | 0.029333 | 0.367233 | 0.213228 |
| MmugDNA.6576.1.S1_at | MmugDNA.6576.1 | 7.22  | 6.26  | 0.34 | 0.98 | 1.95  | 0.188789 | 0.260979 | 0.551826 | 0.527354 |
| MmugDNA.6577.1.S1_at | MmugDNA.6577.1 | 4     | 4.37  | 0.19 | 0.26 | -1.29 | 0.582833 | 0.066528 | 0.805971 | 0.303705 |
| MmugDNA.6578.1.S1_at | MmugDNA.6578.1 | 8.22  | 7.68  | 0.19 | 1.16 | 1.45  | 0.778898 | 0.513747 | 0.90777  | 0.707217 |
| MmugDNA.6579.1.S1_at | MmugDNA.6579.1 | 5.52  | 5.63  | 0.22 | 0.11 | -1.08 | 0.941994 | 0.747155 | 0.977822 | 0.853124 |
| MmugDNA.6581.1.S1_at | MmugDNA.6581.1 | 5.61  | 5.5   | 0.16 | 0.08 | 1.08  | 0.691692 | 0.563012 | 0.862982 | 0.738314 |
| MmugDNA.6582.1.S1_at | MmugDNA.6582.1 | 6.24  | 4.55  | 0.53 | 0.98 | 3.22  | 0.127819 | 0.167216 | 0.494071 | 0.443684 |
| MmugDNA.6584.1.S1_at | MmugDNA.6584.1 | 8.7   | 8.77  | 0.23 | 0.18 | -1.05 | 0.379918 | 0.249987 | 0.68708  | 0.519009 |
| MmugDNA.6585.1.S1_at | MmugDNA.6585.1 | 10.63 | 10.33 | 0.16 | 0.93 | 1.23  | 0.698298 | 0.283873 | 0.866049 | 0.546237 |
| MmugDNA.6587.1.S1_at | MmugDNA.6587.1 | 3.6   | 3.66  | 0.14 | 0.03 | -1.04 | 0.845765 | 0.921877 | 0.93814  | 0.955951 |
| MmugDNA.6588.1.S1_at | MmugDNA.6588.1 | 4.51  | 4.45  | 0.03 | 0.09 | 1.04  | 0.506341 | 0.671435 | 0.762265 | 0.807907 |
| MmugDNA.6589.1.S1_at | MmugDNA.6589.1 | 10.33 | 9.61  | 0.39 | 0.15 | 1.64  | 0.032094 | 0.037267 | 0.324157 | 0.237506 |
| MmugDNA.6592.1.S1_at | MmugDNA.6592.1 | 3.95  | 4.05  | 0.24 | 0.13 | -1.07 | 0.843421 | 0.475257 | 0.937046 | 0.682031 |
| MmugDNA.6593.1.S1_at | MmugDNA.6593.1 | 7.29  | 7.3   | 0.12 | 0.09 | -1.01 | 0.200629 | 0.237008 | 0.5634   | 0.507675 |

|                        |                |       |       |      |      |       |          |          |          |          |
|------------------------|----------------|-------|-------|------|------|-------|----------|----------|----------|----------|
| MmugDNA.6594.1.S1_s_at | MmugDNA.6594.1 | 8.48  | 7.64  | 0.25 | 0.1  | 1.79  | 0.005531 | 0.001111 | 0.191802 | 0.052745 |
| MmugDNA.6595.1.S1_at   | MmugDNA.6595.1 | 4.26  | 4.48  | 0.14 | 0.09 | -1.16 | 0.059806 | 0.036823 | 0.392895 | 0.236413 |
| MmugDNA.6596.1.S1_at   | MmugDNA.6596.1 | 4.55  | 4.43  | 0.16 | 0.07 | 1.09  | 0.309364 | 0.058874 | 0.641455 | 0.289391 |
| MmugDNA.6597.1.S1_at   | MmugDNA.6597.1 | 10.64 | 10.68 | 0.21 | 0.67 | -1.03 | 0.71256  | 0.671932 | 0.874083 | 0.808177 |
| MmugDNA.6598.1.S1_at   | MmugDNA.6598.1 | 8.27  | 7.78  | 0.38 | 0.73 | 1.4   | 0.315123 | 0.419068 | 0.646362 | 0.643266 |
| MmugDNA.6599.1.S1_at   | MmugDNA.6599.1 | 3.78  | 3.79  | 0.02 | 0.15 | -1    | 0.853744 | 0.747115 | 0.940936 | 0.853124 |
| MmugDNA.660.1.S1_s_at  | MmugDNA.660.1  | 8.89  | 8.67  | 0.16 | 0.24 | 1.16  | 0.662699 | 0.016    | 0.848768 | 0.160458 |
| MmugDNA.6600.1.S1_at   | MmugDNA.6600.1 | 7.16  | 6.68  | 0.6  | 1.02 | 1.39  | 0.679519 | 0.213215 | 0.856669 | 0.487098 |
| MmugDNA.6602.1.S1_at   | MmugDNA.6602.1 | 5.37  | 5.37  | 0.17 | 0.14 | 1     | 0.590889 | 0.201881 | 0.810127 | 0.476373 |
| MmugDNA.6603.1.S1_at   | MmugDNA.6603.1 | 5.49  | 5.43  | 0.21 | 0.14 | 1.05  | 0.646274 | 0.529428 | 0.840806 | 0.717276 |
| MmugDNA.6604.1.S1_at   | MmugDNA.6604.1 | 4.65  | 4.71  | 1.02 | 0.12 | -1.04 | 0.421717 | 0.472115 | 0.713215 | 0.679861 |
| MmugDNA.6606.1.S1_at   | MmugDNA.6606.1 | 6.91  | 6.15  | 0.26 | 0.44 | 1.69  | 0.165531 | 0.01742  | 0.529547 | 0.167044 |
| MmugDNA.6609.1.S1_at   | MmugDNA.6609.1 | 7.23  | 6.43  | 0.34 | 0.38 | 1.75  | 0.04889  | 0.034762 | 0.369994 | 0.230665 |
| MmugDNA.661.1.S1_at    | MmugDNA.661.1  | 4.72  | 4.74  | 0.04 | 0.17 | -1.01 | 0.880269 | 0.345016 | 0.951822 | 0.590268 |
| MmugDNA.6610.1.S1_at   | MmugDNA.6610.1 | 4.98  | 5.15  | 0.3  | 0.15 | -1.13 | 0.15418  | 0.260776 | 0.518748 | 0.52721  |
| MmugDNA.6611.1.S1_at   | MmugDNA.6611.1 | 10.8  | 9.53  | 0.11 | 0.22 | 2.41  | 0.000641 | 0.001163 | 0.136818 | 0.053615 |
| MmugDNA.6612.1.S1_at   | MmugDNA.6612.1 | 4.08  | 4.08  | 0.1  | 0.06 | -1    | 0.685134 | 0.240723 | 0.858887 | 0.511447 |
| MmugDNA.6613.1.S1_s_at | MmugDNA.6613.1 | 11.04 | 10.88 | 0.23 | 0.2  | 1.12  | 0.895863 | 0.541969 | 0.958429 | 0.725169 |
| MmugDNA.6615.1.S1_at   | MmugDNA.6615.1 | 7.29  | 7.24  | 0.51 | 0.13 | 1.03  | 0.311979 | 0.444336 | 0.643771 | 0.66198  |
| MmugDNA.6615.1.S1_x_at | MmugDNA.6615.1 | 5.71  | 5.6   | 0.66 | 0.06 | 1.08  | 0.29428  | 0.455871 | 0.631216 | 0.669664 |
| MmugDNA.6617.1.S1_at   | MmugDNA.6617.1 | 5.74  | 5.61  | 0.15 | 0.08 | 1.1   | 0.378055 | 0.328898 | 0.686315 | 0.578456 |
| MmugDNA.5157.1.S1_s_at | MmugDNA.5157.1 | 8.17  | 7.84  | 0.29 | 0.37 | 1.26  | 0.45289  | 0.529789 | 0.732217 | 0.717498 |
| MmugDNA.6619.1.S1_at   | MmugDNA.6619.1 | 4.99  | 4.82  | 0.03 | 0.52 | 1.12  | 0.688978 | 0.827576 | 0.861244 | 0.901078 |
| MmugDNA.662.1.S1_at    | MmugDNA.662.1  | 5.61  | 5.83  | 0.25 | 0.15 | -1.16 | 0.179791 | 0.192373 | 0.544019 | 0.467835 |
| MmugDNA.6620.1.S1_at   | MmugDNA.6620.1 | 7.11  | 7.61  | 0.74 | 0.89 | -1.42 | 0.446127 | 0.179818 | 0.728161 | 0.456342 |
| MmugDNA.6622.1.S1_at   | MmugDNA.6622.1 | 7     | 7.89  | 1.29 | 0.78 | -1.85 | 0.929979 | 0.992681 | 0.972953 | 0.995715 |
| MmugDNA.6624.1.S1_at   | MmugDNA.6624.1 | 7.2   | 7.47  | 1.3  | 0.5  | -1.2  | 0.402679 | 0.594318 | 0.701544 | 0.758574 |
| MmugDNA.6625.1.S1_at   | MmugDNA.6625.1 | 6.73  | 6.77  | 0.09 | 0.15 | -1.02 | 0.450781 | 0.111656 | 0.73129  | 0.376592 |
| MmugDNA.6628.1.S1_at   | MmugDNA.6628.1 | 6.97  | 5.58  | 0.87 | 0.48 | 2.62  | 0.088257 | 0.082089 | 0.44292  | 0.330892 |
| MmugDNA.6629.1.S1_at   | MmugDNA.6629.1 | 3.35  | 3.07  | 0.26 | 0.09 | 1.22  | 0.072451 | 0.099959 | 0.416971 | 0.358768 |
| MmugDNA.663.1.S1_at    | MmugDNA.663.1  | 3.45  | 3.49  | 0.12 | 0.04 | -1.03 | 0.209731 | 0.301616 | 0.571042 | 0.55955  |
| MmugDNA.6630.1.S1_at   | MmugDNA.6630.1 | 9.5   | 9.2   | 0.01 | 0.27 | 1.23  | 0.235208 | 0.241316 | 0.589342 | 0.511952 |
| MmugDNA.6630.1.S1_s_at | MmugDNA.6630.1 | 9.86  | 9.5   | 0.07 | 0.17 | 1.28  | 0.046439 | 0.03221  | 0.363009 | 0.222139 |
| MmugDNA.6632.1.S1_at   | MmugDNA.6632.1 | 7.86  | 6.82  | 0.35 | 0.46 | 2.06  | 0.041286 | 0.044101 | 0.351465 | 0.254323 |
| MmugDNA.6633.1.S1_at   | MmugDNA.6633.1 | 7.14  | 7.16  | 0.22 | 0.05 | -1.01 | 0.884834 | 0.30783  | 0.953839 | 0.56397  |
| MmugDNA.6636.1.S1_at   | MmugDNA.6636.1 | 6.29  | 6.2   | 0.09 | 0.09 | 1.07  | 0.546578 | 0.370116 | 0.785591 | 0.609369 |
| MmugDNA.6637.1.S1_s_at | MmugDNA.6637.1 | 11.74 | 10.78 | 0.12 | 0.23 | 1.95  | 0.003629 | 0.000475 | 0.179515 | 0.038572 |
| MmugDNA.6638.1.S1_at   | MmugDNA.6638.1 | 4.92  | 4.8   | 0.65 | 0.58 | 1.09  | 0.709362 | 0.680294 | 0.872467 | 0.813346 |
| MmugDNA.6639.1.S1_at   | MmugDNA.6639.1 | 10.92 | 10.77 | 0.12 | 0.04 | 1.11  | 0.229446 | 0.255071 | 0.586579 | 0.52317  |
| MmugDNA.664.1.S1_at    | MmugDNA.664.1  | 8.5   | 8.41  | 0.29 | 0.16 | 1.06  | 0.715165 | 0.008428 | 0.875005 | 0.121867 |
| MmugDNA.6643.1.S1_at   | MmugDNA.6643.1 | 3.97  | 3.86  | 0.15 | 0.25 | 1.08  | 0.360205 | 0.365871 | 0.674277 | 0.605774 |

|                        |                |       |       |      |      |       |          |          |          |          |
|------------------------|----------------|-------|-------|------|------|-------|----------|----------|----------|----------|
| MmugDNA.6644.1.S1_at   | MmugDNA.6644.1 | 4.57  | 4.53  | 0.25 | 0.17 | 1.03  | 0.981851 | 0.99859  | 0.993423 | 0.999247 |
| MmugDNA.6645.1.S1_at   | MmugDNA.6645.1 | 4.02  | 3.96  | 0.02 | 0.15 | 1.05  | 0.462918 | 0.313298 | 0.738484 | 0.567753 |
| MmugDNA.6646.1.S1_at   | MmugDNA.6646.1 | 7.31  | 6.98  | 0.7  | 0.3  | 1.26  | 0.330438 | 0.413535 | 0.655696 | 0.639648 |
| MmugDNA.6647.1.S1_at   | MmugDNA.6647.1 | 4.25  | 4.39  | 0.21 | 0.18 | -1.1  | 0.179401 | 0.265103 | 0.543593 | 0.531    |
| MmugDNA.6648.1.S1_at   | MmugDNA.6648.1 | 9.58  | 8.71  | 0.09 | 0.74 | 1.83  | 0.125091 | 0.075946 | 0.491138 | 0.320634 |
| MmugDNA.6649.1.S1_at   | MmugDNA.6649.1 | 7.31  | 7     | 0.09 | 0.2  | 1.24  | 0.093642 | 0.103789 | 0.450966 | 0.364519 |
| MmugDNA.665.1.S1_at    | MmugDNA.665.1  | 6.67  | 6.59  | 0.12 | 0    | 1.06  | 0.326026 | 0.667696 | 0.653176 | 0.80548  |
| MmugDNA.6651.1.S1_at   | MmugDNA.6651.1 | 4.43  | 4.48  | 0.15 | 0.06 | -1.04 | 0.563417 | 0.336433 | 0.79597  | 0.583831 |
| MmugDNA.6652.1.S1_at   | MmugDNA.6652.1 | 7.91  | 7.75  | 0.05 | 0.19 | 1.12  | 0.247783 | 0.059313 | 0.599052 | 0.29054  |
| MmugDNA.6654.1.S1_at   | MmugDNA.6654.1 | 3.42  | 3.43  | 0.62 | 0.13 | -1.01 | 0.410056 | 0.382758 | 0.706179 | 0.618887 |
| MmugDNA.6658.1.S1_at   | MmugDNA.6658.1 | 10.04 | 10.67 | 0.47 | 0.37 | -1.55 | 0.139162 | 0.273061 | 0.506613 | 0.537644 |
| MmugDNA.666.1.S1_at    | MmugDNA.666.1  | 5.26  | 5.31  | 0.13 | 0.11 | -1.04 | 0.465419 | 0.339342 | 0.739873 | 0.585984 |
| MmugDNA.6661.1.S1_at   | MmugDNA.6661.1 | 4.03  | 4.25  | 0.21 | 0.27 | -1.16 | 0.337844 | 0.09782  | 0.660312 | 0.355639 |
| MmugDNA.6663.1.S1_at   | MmugDNA.6663.1 | 4.31  | 4.35  | 0.11 | 0.25 | -1.03 | 0.933063 | 0.890457 | 0.973979 | 0.93758  |
| MmugDNA.6665.1.S1_at   | MmugDNA.6665.1 | 5.62  | 6.55  | 0.48 | 0.7  | -1.91 | 0.189634 | 0.239203 | 0.552487 | 0.509902 |
| MmugDNA.6666.1.S1_at   | MmugDNA.6666.1 | 6.07  | 5.9   | 0.24 | 0.19 | 1.12  | 0.145526 | 0.279953 | 0.51146  | 0.543359 |
| MmugDNA.6667.1.S1_at   | MmugDNA.6667.1 | 5.15  | 5.2   | 0.45 | 0.5  | -1.04 | 0.537411 | 0.606896 | 0.780008 | 0.76612  |
| MmugDNA.667.1.S1_at    | MmugDNA.667.1  | 6.24  | 6.19  | 0.17 | 0.19 | 1.04  | 0.155417 | 0.17668  | 0.520164 | 0.453142 |
| MmugDNA.6670.1.S1_at   | MmugDNA.6670.1 | 4.22  | 4.47  | 0.2  | 0.1  | -1.18 | 0.520009 | 0.107533 | 0.770575 | 0.370389 |
| MmugDNA.6671.1.S1_at   | MmugDNA.6671.1 | 6.36  | 6.27  | 0.23 | 0.15 | 1.07  | 0.36755  | 0.370336 | 0.679502 | 0.609407 |
| MmugDNA.6672.1.S1_at   | MmugDNA.6672.1 | 7.91  | 7.2   | 0.27 | 0.25 | 1.64  | 0.053968 | 0.052602 | 0.381209 | 0.274853 |
| MmugDNA.6673.1.S1_at   | MmugDNA.6673.1 | 11.73 | 11.85 | 0.14 | 0.27 | -1.09 | 0.331767 | 0.473392 | 0.656468 | 0.68068  |
| MmugDNA.6676.1.S1_at   | MmugDNA.6676.1 | 5.14  | 5.13  | 0.07 | 0.25 | 1.01  | 0.569675 | 0.300812 | 0.799147 | 0.559039 |
| MmugDNA.668.1.S1_at    | MmugDNA.668.1  | 3.73  | 3.66  | 0.22 | 0.3  | 1.05  | 0.361679 | 0.51005  | 0.6754   | 0.704549 |
| MmugDNA.6680.1.S1_at   | MmugDNA.6680.1 | 4.22  | 4.83  | 0.85 | 0.31 | -1.52 | 0.908583 | 0.809638 | 0.963816 | 0.89027  |
| MmugDNA.6682.1.S1_at   | MmugDNA.6682.1 | 8.2   | 8.1   | 0.22 | 0.12 | 1.07  | 0.516061 | 0.033032 | 0.76772  | 0.225    |
| MmugDNA.6682.1.S1_s_at | MmugDNA.6682.1 | 7.1   | 7.04  | 0.23 | 0.06 | 1.04  | 0.230851 | 0.23756  | 0.587369 | 0.508196 |
| MmugDNA.6684.1.S1_at   | MmugDNA.6684.1 | 5.63  | 5.61  | 0.26 | 0.41 | 1.01  | 0.887576 | 0.973232 | 0.954863 | 0.98548  |
| MmugDNA.6686.1.S1_at   | MmugDNA.6686.1 | 10.26 | 11.01 | 0.14 | 0.22 | -1.68 | 0.009597 | 0.010027 | 0.226235 | 0.131279 |
| MmugDNA.6688.1.S1_at   | MmugDNA.6688.1 | 10.4  | 9.27  | 0.27 | 0.69 | 2.19  | 0.204807 | 0.251505 | 0.567387 | 0.520261 |
| MmugDNA.6689.1.S1_at   | MmugDNA.6689.1 | 3.7   | 3.72  | 0.12 | 0.15 | -1.01 | 0.557077 | 0.762283 | 0.792324 | 0.861726 |
| MmugDNA.669.1.S1_at    | MmugDNA.669.1  | 4.14  | 4.07  | 0.09 | 0.09 | 1.05  | 0.118364 | 0.057234 | 0.482673 | 0.285059 |
| MmugDNA.6690.1.S1_at   | MmugDNA.6690.1 | 8.92  | 8.68  | 0.06 | 0.17 | 1.19  | 0.112292 | 0.033938 | 0.474794 | 0.227853 |
| MmugDNA.6691.1.S1_at   | MmugDNA.6691.1 | 3.85  | 3.84  | 0.01 | 0.09 | 1.01  | 0.80881  | 0.767677 | 0.922035 | 0.86513  |
| MmugDNA.6692.1.S1_at   | MmugDNA.6692.1 | 4.36  | 4.37  | 0.43 | 0.21 | -1    | 0.68436  | 0.50049  | 0.858719 | 0.69907  |
| MmugDNA.6693.1.S1_at   | MmugDNA.6693.1 | 10.09 | 9.8   | 0.15 | 0.57 | 1.22  | 0.351192 | 0.109284 | 0.66911  | 0.37308  |
| MmugDNA.6694.1.S1_at   | MmugDNA.6694.1 | 3.37  | 3.46  | 0.1  | 0.45 | -1.06 | 0.336876 | 0.469888 | 0.659663 | 0.678572 |
| MmugDNA.6696.1.S1_at   | MmugDNA.6696.1 | 8.54  | 7.76  | 0.26 | 0.59 | 1.72  | 0.104024 | 0.068482 | 0.464135 | 0.308214 |
| MmugDNA.6697.1.S1_at   | MmugDNA.6697.1 | 3.43  | 3.72  | 0.17 | 0.25 | -1.22 | 0.124716 | 0.133698 | 0.49077  | 0.405647 |
| MmugDNA.6698.1.S1_at   | MmugDNA.6698.1 | 8.05  | 9.42  | 1.22 | 0.92 | -2.58 | 0.462217 | 0.563942 | 0.738226 | 0.738913 |
| MmugDNA.6699.1.S1_at   | MmugDNA.6699.1 | 11.01 | 10.37 | 0.06 | 0.38 | 1.56  | 0.036656 | 0.025643 | 0.340048 | 0.200834 |

|                        |                |       |       |      |      |       |          |          |          |          |
|------------------------|----------------|-------|-------|------|------|-------|----------|----------|----------|----------|
| MmugDNA.67.1.S1_at     | MmugDNA.67.1   | 5.97  | 6.31  | 0.25 | 0.11 | -1.27 | 0.0755   | 0.10192  | 0.422764 | 0.361927 |
| MmugDNA.670.1.S1_at    | MmugDNA.670.1  | 5.77  | 5.86  | 0.13 | 0.42 | -1.07 | 0.467112 | 0.644483 | 0.740562 | 0.791603 |
| MmugDNA.6700.1.S1_at   | MmugDNA.6700.1 | 10.62 | 10.76 | 0.12 | 0.28 | -1.1  | 0.809554 | 0.755172 | 0.922244 | 0.857488 |
| MmugDNA.6701.1.S1_at   | MmugDNA.6701.1 | 5.99  | 6.01  | 0.17 | 0.5  | -1.01 | 0.383537 | 0.366029 | 0.689416 | 0.605891 |
| MmugDNA.6703.1.S1_s_at | MmugDNA.6703.1 | 13.51 | 13.53 | 0.13 | 0.09 | -1.01 | 0.74658  | 0.893541 | 0.891508 | 0.939277 |
| MmugDNA.6704.1.S1_at   | MmugDNA.6704.1 | 8.09  | 11.09 | 1.57 | 1.38 | -7.99 | 0.087174 | 0.070209 | 0.441153 | 0.311194 |
| MmugDNA.6705.1.S1_at   | MmugDNA.6705.1 | 4.63  | 4.32  | 0.92 | 0.47 | 1.24  | 0.238829 | 0.304205 | 0.592015 | 0.561558 |
| MmugDNA.6707.1.S1_at   | MmugDNA.6707.1 | 3.92  | 4.07  | 0.28 | 0.17 | -1.11 | 0.939999 | 0.202733 | 0.977171 | 0.477174 |
| MmugDNA.6708.1.S1_at   | MmugDNA.6708.1 | 7.71  | 7.7   | 0.15 | 0.19 | 1.01  | 0.499034 | 0.591507 | 0.758833 | 0.757033 |
| MmugDNA.6710.1.S1_at   | MmugDNA.6710.1 | 3.56  | 3.44  | 0.32 | 0.02 | 1.09  | 0.590541 | 0.685265 | 0.809851 | 0.816424 |
| MmugDNA.6711.1.S1_at   | MmugDNA.6711.1 | 11.34 | 10.88 | 0.13 | 0.16 | 1.37  | 0.01313  | 0.004428 | 0.245277 | 0.092934 |
| MmugDNA.6712.1.S1_at   | MmugDNA.6712.1 | 4.36  | 4.78  | 0.2  | 0.04 | -1.33 | 0.070394 | 0.117108 | 0.414177 | 0.384552 |
| MmugDNA.6713.1.S1_at   | MmugDNA.6713.1 | 6.28  | 5.89  | 0.26 | 0.37 | 1.3   | 0.272283 | 0.216287 | 0.616016 | 0.489844 |
| MmugDNA.6715.1.S1_at   | MmugDNA.6715.1 | 6.62  | 6.72  | 0.09 | 0.31 | -1.08 | 0.740709 | 0.921439 | 0.888749 | 0.955761 |
| MmugDNA.6716.1.S1_at   | MmugDNA.6716.1 | 5     | 5.03  | 0.45 | 0.4  | -1.02 | 0.683077 | 0.755085 | 0.858329 | 0.857447 |
| MmugDNA.6718.1.S1_at   | MmugDNA.6718.1 | 4.28  | 4.53  | 0.03 | 0.26 | -1.19 | 0.180154 | 0.1286   | 0.544371 | 0.400027 |
| MmugDNA.6719.1.S1_at   | MmugDNA.6719.1 | 4.9   | 4.78  | 0.67 | 0.83 | 1.08  | 0.498701 | 0.544093 | 0.758605 | 0.726614 |
| MmugDNA.672.1.S1_at    | MmugDNA.672.1  | 4.03  | 4.29  | 0.25 | 0.09 | -1.2  | 0.140862 | 0.149373 | 0.508448 | 0.423811 |
| MmugDNA.6720.1.S1_at   | MmugDNA.6720.1 | 12.93 | 12.7  | 0.07 | 0.16 | 1.17  | 0.031377 | 0.018947 | 0.321585 | 0.17317  |
| MmugDNA.6721.1.S1_at   | MmugDNA.6721.1 | 5.96  | 6.22  | 0.3  | 0.46 | -1.2  | 0.217964 | 0.240393 | 0.577569 | 0.510966 |
| MmugDNA.6722.1.S1_at   | MmugDNA.6722.1 | 4.07  | 4.69  | 0.41 | 0.31 | -1.54 | 0.328976 | 0.688527 | 0.654754 | 0.818201 |
| MmugDNA.6723.1.S1_at   | MmugDNA.6723.1 | 3.68  | 3.72  | 0.14 | 0.21 | -1.03 | 0.95571  | 0.897335 | 0.983351 | 0.941409 |
| MmugDNA.6725.1.S1_at   | MmugDNA.6725.1 | 7.13  | 7.47  | 1.14 | 0.99 | -1.26 | 0.31565  | 0.156257 | 0.646683 | 0.43161  |
| MmugDNA.6726.1.S1_at   | MmugDNA.6726.1 | 5.36  | 5.45  | 0.04 | 0.13 | -1.07 | 0.26147  | 0.251816 | 0.608041 | 0.520478 |
| MmugDNA.6727.1.S1_at   | MmugDNA.6727.1 | 8.84  | 8.99  | 0.22 | 0.5  | -1.11 | 0.826201 | 0.859165 | 0.929365 | 0.919754 |
| MmugDNA.6729.1.S1_at   | MmugDNA.6729.1 | 5.57  | 5.88  | 0.18 | 0.08 | -1.24 | 0.221818 | 0.11995  | 0.580544 | 0.388671 |
| MmugDNA.673.1.S1_at    | MmugDNA.673.1  | 3.66  | 3.72  | 0.05 | 0.4  | -1.04 | 0.288204 | 0.492578 | 0.626502 | 0.693633 |
| MmugDNA.6732.1.S1_at   | MmugDNA.6732.1 | 9.39  | 8.69  | 1.39 | 0.24 | 1.62  | 0.223204 | 0.18209  | 0.581723 | 0.45857  |
| MmugDNA.6733.1.S1_at   | MmugDNA.6733.1 | 4.75  | 4.73  | 0.14 | 0.34 | 1.01  | 0.677287 | 0.195416 | 0.855438 | 0.470253 |
| MmugDNA.6736.1.S1_at   | MmugDNA.6736.1 | 3.6   | 3.59  | 0.68 | 0.2  | 1.01  | 0.451702 | 0.618815 | 0.73168  | 0.774185 |
| MmugDNA.6737.1.S1_at   | MmugDNA.6737.1 | 3.26  | 3.27  | 0.07 | 0.23 | -1    | 0.274306 | 0.356656 | 0.617262 | 0.598516 |
| MmugDNA.6738.1.S1_s_at | MmugDNA.6738.1 | 10.55 | 10.31 | 0.21 | 0.73 | 1.19  | 0.511919 | 0.661085 | 0.765383 | 0.801683 |
| MmugDNA.6740.1.S1_at   | MmugDNA.6740.1 | 6.76  | 6.78  | 0.07 | 0.23 | -1.02 | 0.643911 | 0.714528 | 0.8397   | 0.834386 |
| MmugDNA.6741.1.S1_at   | MmugDNA.6741.1 | 3.83  | 3.93  | 0.11 | 0.09 | -1.08 | 0.056577 | 0.264033 | 0.386709 | 0.530183 |
| MmugDNA.6742.1.S1_at   | MmugDNA.6742.1 | 11.99 | 11.74 | 0.09 | 0.32 | 1.19  | 0.750169 | 0.675168 | 0.89292  | 0.810205 |
| MmugDNA.6743.1.S1_at   | MmugDNA.6743.1 | 7.45  | 8.2   | 0.12 | 0.28 | -1.69 | 0.008285 | 0.003254 | 0.217127 | 0.082277 |
| MmugDNA.6744.1.S1_at   | MmugDNA.6744.1 | 8.4   | 8.01  | 0.4  | 1.02 | 1.31  | 0.565849 | 0.248576 | 0.797377 | 0.51787  |
| MmugDNA.6746.1.S1_at   | MmugDNA.6746.1 | 10.63 | 10.68 | 0.06 | 0.62 | -1.04 | 0.501354 | 0.430087 | 0.759966 | 0.651143 |
| MmugDNA.6747.1.S1_at   | MmugDNA.6747.1 | 5.06  | 5.11  | 0.79 | 0.36 | -1.04 | 0.903308 | 0.805908 | 0.961429 | 0.888395 |
| MmugDNA.6748.1.S1_at   | MmugDNA.6748.1 | 3.83  | 4     | 0.06 | 0.13 | -1.12 | 0.198021 | 0.266318 | 0.561022 | 0.532099 |
| MmugDNA.6749.1.S1_at   | MmugDNA.6749.1 | 4.53  | 4.59  | 0.22 | 0.2  | -1.04 | 0.396022 | 0.382043 | 0.696719 | 0.618279 |

|                        |                |       |       |      |      |       |          |          |          |          |
|------------------------|----------------|-------|-------|------|------|-------|----------|----------|----------|----------|
| MmugDNA.675.1.S1_at    | MmugDNA.675.1  | 5.81  | 4.93  | 0.22 | 0.52 | 1.84  | 0.054266 | 0.043027 | 0.38184  | 0.252067 |
| MmugDNA.6750.1.S1_at   | MmugDNA.6750.1 | 9.28  | 8.44  | 0.99 | 0.49 | 1.79  | 0.060812 | 0.039909 | 0.394325 | 0.244852 |
| MmugDNA.6751.1.S1_at   | MmugDNA.6751.1 | 5.54  | 5.82  | 0.25 | 0.31 | -1.21 | 0.525307 | 0.59554  | 0.77363  | 0.759091 |
| MmugDNA.6752.1.S1_at   | MmugDNA.6752.1 | 8.66  | 7.98  | 0.1  | 0.25 | 1.6   | 0.018022 | 0.005486 | 0.268422 | 0.102081 |
| MmugDNA.6754.1.S1_at   | MmugDNA.6754.1 | 3.95  | 4.01  | 0.46 | 0.28 | -1.04 | 0.96621  | 0.621007 | 0.987142 | 0.775745 |
| MmugDNA.6755.1.S1_at   | MmugDNA.6755.1 | 7.54  | 7.61  | 0.38 | 0.08 | -1.04 | 0.815812 | 0.40165  | 0.925154 | 0.631068 |
| MmugDNA.6758.1.S1_at   | MmugDNA.6758.1 | 4     | 3.94  | 0.37 | 0.03 | 1.05  | 0.728247 | 0.900509 | 0.881826 | 0.943447 |
| MmugDNA.6759.1.S1_at   | MmugDNA.6759.1 | 12.45 | 12    | 0.06 | 0.24 | 1.36  | 0.060221 | 0.039871 | 0.393081 | 0.244835 |
| MmugDNA.676.1.S1_at    | MmugDNA.676.1  | 4.32  | 4.19  | 0.11 | 0.07 | 1.1   | 0.529416 | 0.771697 | 0.776139 | 0.867344 |
| MmugDNA.6762.1.S1_at   | MmugDNA.6762.1 | 10.08 | 10.21 | 0.34 | 0.13 | -1.1  | 0.534443 | 0.604335 | 0.77876  | 0.764566 |
| MmugDNA.6763.1.S1_at   | MmugDNA.6763.1 | 9.34  | 9.49  | 0.23 | 0.14 | -1.11 | 0.258418 | 0.079656 | 0.60566  | 0.326981 |
| MmugDNA.6765.1.S1_at   | MmugDNA.6765.1 | 7.24  | 8.24  | 0.23 | 0.37 | -1.99 | 0.024573 | 0.01819  | 0.295214 | 0.169695 |
| MmugDNA.6767.1.S1_at   | MmugDNA.6767.1 | 3.6   | 3.56  | 0.32 | 0.12 | 1.03  | 0.49095  | 0.142167 | 0.754698 | 0.415754 |
| MmugDNA.6769.1.S1_at   | MmugDNA.6769.1 | 3.54  | 3.55  | 0.01 | 0.19 | -1.01 | 0.646582 | 0.568663 | 0.840949 | 0.742052 |
| MmugDNA.677.1.S1_at    | MmugDNA.677.1  | 5.31  | 5.03  | 0.42 | 0.24 | 1.22  | 0.327178 | 0.266569 | 0.653651 | 0.532301 |
| MmugDNA.6770.1.S1_at   | MmugDNA.6770.1 | 12.66 | 11.35 | 0.12 | 0.8  | 2.49  | 0.050188 | 0.036986 | 0.373586 | 0.236733 |
| MmugDNA.6771.1.S1_at   | MmugDNA.6771.1 | 4.71  | 4.85  | 0.2  | 0.04 | -1.1  | 0.348268 | 0.340226 | 0.667097 | 0.586637 |
| MmugDNA.6773.1.S1_at   | MmugDNA.6773.1 | 7.33  | 6.88  | 0.74 | 0.9  | 1.37  | 0.44737  | 0.656165 | 0.728917 | 0.798919 |
| MmugDNA.6774.1.S1_at   | MmugDNA.6774.1 | 3.72  | 3.64  | 0.14 | 0.04 | 1.06  | 0.111777 | 0.588683 | 0.474019 | 0.755137 |
| MmugDNA.6774.1.S1_s_at | MmugDNA.6774.1 | 5.36  | 5.55  | 0.23 | 0.12 | -1.14 | 0.434244 | 0.389027 | 0.720352 | 0.623288 |
| MmugDNA.6775.1.S1_at   | MmugDNA.6775.1 | 4.48  | 3.73  | 0.77 | 0.32 | 1.69  | 0.322787 | 0.402511 | 0.651245 | 0.631481 |
| MmugDNA.6776.1.S1_at   | MmugDNA.6776.1 | 4.91  | 4.79  | 0.5  | 0.36 | 1.09  | 0.52664  | 0.541915 | 0.774238 | 0.725146 |
| MmugDNA.6777.1.S1_at   | MmugDNA.6777.1 | 3.02  | 3.01  | 0.03 | 0.04 | 1.01  | 0.436842 | 0.305136 | 0.72206  | 0.562255 |
| MmugDNA.678.1.S1_at    | MmugDNA.678.1  | 11.18 | 10.87 | 0.05 | 0.43 | 1.24  | 0.100794 | 0.124248 | 0.461009 | 0.394547 |
| MmugDNA.6780.1.S1_at   | MmugDNA.6780.1 | 9.85  | 9.76  | 0.18 | 0.47 | 1.07  | 0.922393 | 0.986822 | 0.969928 | 0.992556 |
| MmugDNA.6784.1.S1_at   | MmugDNA.6784.1 | 5.14  | 5.02  | 0.79 | 0.51 | 1.09  | 0.492928 | 0.326119 | 0.755892 | 0.576315 |
| MmugDNA.6785.1.S1_at   | MmugDNA.6785.1 | 5.38  | 5.4   | 0.2  | 0.15 | -1.01 | 0.664408 | 0.855152 | 0.849532 | 0.917436 |
| MmugDNA.6787.1.S1_at   | MmugDNA.6787.1 | 9.03  | 8.37  | 0.18 | 0.44 | 1.58  | 0.036694 | 0.027875 | 0.340048 | 0.208455 |
| MmugDNA.6788.1.S1_at   | MmugDNA.6788.1 | 10.26 | 10.88 | 0.25 | 0.07 | -1.54 | 0.014693 | 0.02065  | 0.254832 | 0.180347 |
| MmugDNA.6789.1.S1_at   | MmugDNA.6789.1 | 8.87  | 8.57  | 0.64 | 0.19 | 1.23  | 0.362437 | 0.51211  | 0.675989 | 0.706076 |
| MmugDNA.679.1.S1_at    | MmugDNA.679.1  | 5.13  | 4.69  | 0.9  | 0.46 | 1.36  | 0.927587 | 0.338018 | 0.972015 | 0.585208 |
| MmugDNA.6791.1.S1_at   | MmugDNA.6791.1 | 3.16  | 3.2   | 0.16 | 0.19 | -1.03 | 0.960349 | 0.947242 | 0.984866 | 0.970103 |
| MmugDNA.6792.1.S1_at   | MmugDNA.6792.1 | 4.54  | 4.65  | 0.13 | 0.08 | -1.08 | 0.398406 | 0.700207 | 0.698693 | 0.825987 |
| MmugDNA.6794.1.S1_at   | MmugDNA.6794.1 | 6.44  | 6.84  | 0.3  | 0.69 | -1.32 | 0.985332 | 0.453221 | 0.99475  | 0.66762  |
| MmugDNA.6795.1.S1_at   | MmugDNA.6795.1 | 6.53  | 6.92  | 1.43 | 0.77 | -1.31 | 0.970471 | 0.59616  | 0.988651 | 0.759367 |
| MmugDNA.6796.1.S1_at   | MmugDNA.6796.1 | 7.25  | 6.5   | 0.04 | 0.29 | 1.69  | 0.005898 | 0.002185 | 0.19355  | 0.069035 |
| MmugDNA.6797.1.S1_at   | MmugDNA.6797.1 | 3.13  | 3.25  | 0.05 | 0.12 | -1.09 | 0.110947 | 0.370688 | 0.472762 | 0.609702 |
| MmugDNA.6798.1.S1_at   | MmugDNA.6798.1 | 8.73  | 9.67  | 0.41 | 0.85 | -1.93 | 0.694247 | 0.074342 | 0.864407 | 0.318046 |
| MmugDNA.6799.1.S1_at   | MmugDNA.6799.1 | 4.7   | 4.7   | 0.31 | 0.24 | -1    | 0.946483 | 0.607401 | 0.979443 | 0.766391 |
| MmugDNA.680.1.S1_at    | MmugDNA.680.1  | 4.9   | 4.84  | 0.11 | 0.23 | 1.04  | 0.982215 | 0.5977   | 0.993449 | 0.760358 |
| MmugDNA.6800.1.S1_at   | MmugDNA.6800.1 | 7.79  | 7.86  | 0.33 | 0.28 | -1.06 | 0.901343 | 0.641602 | 0.960579 | 0.789624 |

|                       |                |       |       |      |      |       |          |          |          |          |
|-----------------------|----------------|-------|-------|------|------|-------|----------|----------|----------|----------|
| MmugDNA.6801.1.S1_at  | MmugDNA.6801.1 | 4.66  | 5.02  | 0.18 | 0.26 | -1.28 | 0.047722 | 0.040937 | 0.367063 | 0.247161 |
| MmugDNA.6802.1.S1_at  | MmugDNA.6802.1 | 11.82 | 11.81 | 0.08 | 0.13 | 1.01  | 0.293169 | 0.060371 | 0.630314 | 0.292291 |
| MmugDNA.6803.1.S1_at  | MmugDNA.6803.1 | 5.88  | 5.87  | 0.18 | 0.3  | 1.01  | 0.803299 | 0.333938 | 0.919051 | 0.582063 |
| MmugDNA.6804.1.S1_at  | MmugDNA.6804.1 | 6.94  | 7.26  | 0.26 | 0.14 | -1.25 | 0.385537 | 0.598777 | 0.690683 | 0.761123 |
| MmugDNA.6806.1.S1_at  | MmugDNA.6806.1 | 6.8   | 5.63  | 1.21 | 0.91 | 2.26  | 0.22839  | 0.289433 | 0.585843 | 0.55046  |
| MmugDNA.6807.1.S1_at  | MmugDNA.6807.1 | 11.37 | 11.61 | 0.19 | 0.53 | -1.18 | 0.668497 | 0.770905 | 0.851876 | 0.866807 |
| MmugDNA.681.1.S1_s_at | MmugDNA.681.1  | 4.02  | 3.91  | 0.31 | 0.06 | 1.08  | 0.182413 | 0.385551 | 0.546756 | 0.621027 |
| MmugDNA.6810.1.S1_at  | MmugDNA.6810.1 | 4.28  | 4.13  | 0.49 | 0.57 | 1.11  | 0.913276 | 0.580838 | 0.965645 | 0.749953 |
| MmugDNA.6813.1.S1_at  | MmugDNA.6813.1 | 3.95  | 3.97  | 0.25 | 0.17 | -1.01 | 0.547398 | 0.424655 | 0.786215 | 0.647214 |
| MmugDNA.6814.1.S1_at  | MmugDNA.6814.1 | 5.3   | 5.14  | 0.18 | 0.3  | 1.12  | 0.607654 | 0.685058 | 0.819497 | 0.816309 |
| MmugDNA.6816.1.S1_at  | MmugDNA.6816.1 | 5.85  | 4.35  | 0.94 | 0.37 | 2.83  | 0.055568 | 0.046999 | 0.384224 | 0.261469 |
| MmugDNA.6817.1.S1_at  | MmugDNA.6817.1 | 2.89  | 2.86  | 0.12 | 0.06 | 1.02  | 0.805855 | 0.540758 | 0.92039  | 0.724533 |
| MmugDNA.682.1.S1_at   | MmugDNA.682.1  | 9.68  | 9.21  | 0.36 | 0.57 | 1.38  | 0.133415 | 0.09732  | 0.500083 | 0.355034 |
| MmugDNA.6821.1.S1_at  | MmugDNA.6821.1 | 5.18  | 5.17  | 0.15 | 0.06 | 1.01  | 0.547684 | 0.895398 | 0.786269 | 0.940218 |
| MmugDNA.6822.1.S1_at  | MmugDNA.6822.1 | 4.83  | 4.9   | 0.8  | 0.15 | -1.05 | 0.465584 | 0.609898 | 0.739981 | 0.768204 |
| MmugDNA.6824.1.S1_at  | MmugDNA.6824.1 | 10.72 | 11.3  | 0.11 | 0.25 | -1.49 | 0.019865 | 0.010811 | 0.275714 | 0.135636 |
| MmugDNA.6825.1.S1_at  | MmugDNA.6825.1 | 5.84  | 6.09  | 0.1  | 1.43 | -1.2  | 0.687077 | 0.133091 | 0.860128 | 0.404734 |
| MmugDNA.6826.1.S1_at  | MmugDNA.6826.1 | 5.16  | 5.31  | 0.18 | 0.27 | -1.11 | 0.955392 | 0.993559 | 0.983289 | 0.996218 |
| MmugDNA.6827.1.S1_at  | MmugDNA.6827.1 | 3.32  | 3.38  | 0.12 | 0.07 | -1.04 | 0.274427 | 0.066834 | 0.617423 | 0.304399 |
| MmugDNA.6829.1.S1_at  | MmugDNA.6829.1 | 7.81  | 7.16  | 0.27 | 0.51 | 1.57  | 0.332859 | 0.514717 | 0.657109 | 0.707852 |
| MmugDNA.6830.1.S1_at  | MmugDNA.6830.1 | 6.95  | 5.84  | 0.28 | 0.84 | 2.16  | 0.097398 | 0.03067  | 0.45638  | 0.217148 |
| MmugDNA.6831.1.S1_at  | MmugDNA.6831.1 | 5.18  | 4.87  | 0.27 | 0.15 | 1.24  | 0.127722 | 0.154917 | 0.494001 | 0.429909 |
| MmugDNA.6833.1.S1_at  | MmugDNA.6833.1 | 8.78  | 9.38  | 0.23 | 1.2  | -1.52 | 0.747091 | 0.629374 | 0.891702 | 0.781837 |
| MmugDNA.6834.1.S1_at  | MmugDNA.6834.1 | 5.25  | 5.33  | 0.07 | 0.22 | -1.05 | 0.426406 | 0.13969  | 0.715792 | 0.413029 |
| MmugDNA.6835.1.S1_at  | MmugDNA.6835.1 | 6.35  | 6.35  | 1.03 | 0.61 | 1     | 0.664611 | 0.85477  | 0.849598 | 0.917232 |
| MmugDNA.6837.1.S1_at  | MmugDNA.6837.1 | 9.44  | 9.09  | 0.23 | 0.17 | 1.27  | 0.053786 | 0.039605 | 0.380879 | 0.24402  |
| MmugDNA.6838.1.S1_at  | MmugDNA.6838.1 | 8.13  | 8.26  | 0.02 | 0.04 | -1.09 | 0.003207 | 0.002796 | 0.174606 | 0.077966 |
| MmugDNA.6839.1.S1_at  | MmugDNA.6839.1 | 6.5   | 6.44  | 0.41 | 0.31 | 1.04  | 0.510669 | 0.344003 | 0.765151 | 0.58962  |
| MmugDNA.6841.1.S1_at  | MmugDNA.6841.1 | 7.33  | 8.67  | 0.17 | 0.2  | -2.52 | 0.001181 | 0.001049 | 0.145267 | 0.051466 |
| MmugDNA.6843.1.S1_at  | MmugDNA.6843.1 | 7.48  | 6.98  | 0.79 | 0.34 | 1.42  | 0.157619 | 0.1895   | 0.522514 | 0.465237 |
| MmugDNA.6844.1.S1_at  | MmugDNA.6844.1 | 4.91  | 4.94  | 0.21 | 0.12 | -1.02 | 0.527945 | 0.668423 | 0.775293 | 0.805952 |
| MmugDNA.6847.1.S1_at  | MmugDNA.6847.1 | 7.11  | 6.37  | 0.48 | 0.08 | 1.67  | 0.048846 | 0.04282  | 0.369844 | 0.251467 |
| MmugDNA.6848.1.S1_at  | MmugDNA.6848.1 | 14.34 | 14.29 | 0.04 | 0.1  | 1.03  | 0.411568 | 0.574584 | 0.707473 | 0.745995 |
| MmugDNA.685.1.S1_at   | MmugDNA.685.1  | 6.86  | 6.96  | 0.2  | 0.64 | -1.07 | 0.932057 | 0.489906 | 0.973719 | 0.692002 |
| MmugDNA.6850.1.S1_at  | MmugDNA.6850.1 | 9.18  | 9.52  | 0.1  | 0.27 | -1.27 | 0.277554 | 0.27568  | 0.619758 | 0.539923 |
| MmugDNA.6851.1.S1_at  | MmugDNA.6851.1 | 6.64  | 6.72  | 0.16 | 0.08 | -1.06 | 0.930481 | 0.284466 | 0.973189 | 0.546637 |
| MmugDNA.6853.1.S1_at  | MmugDNA.6853.1 | 12.5  | 12.2  | 0.05 | 0.26 | 1.23  | 0.145642 | 0.163749 | 0.51146  | 0.439924 |
| MmugDNA.6855.1.S1_at  | MmugDNA.6855.1 | 4.75  | 4.99  | 0.11 | 0.26 | -1.18 | 0.120765 | 0.129876 | 0.48574  | 0.401509 |
| MmugDNA.6856.1.S1_at  | MmugDNA.6856.1 | 2.62  | 2.5   | 0.25 | 0.03 | 1.08  | 0.424356 | 0.587082 | 0.714453 | 0.753998 |
| MmugDNA.6857.1.S1_at  | MmugDNA.6857.1 | 3.53  | 3.54  | 0.15 | 0.15 | -1.01 | 0.5455   | 0.841933 | 0.785008 | 0.909939 |
| MmugDNA.686.1.S1_at   | MmugDNA.686.1  | 4.45  | 4.5   | 0.17 | 0.57 | -1.04 | 0.928185 | 0.778942 | 0.972337 | 0.871711 |

|                         |                 |       |       |      |      |       |          |          |          |          |
|-------------------------|-----------------|-------|-------|------|------|-------|----------|----------|----------|----------|
| MmugDNA.6860.1.S1_at    | MmugDNA.6860.1  | 6.06  | 6.45  | 0.21 | 0.16 | -1.31 | 0.308685 | 0.472574 | 0.641054 | 0.68007  |
| MmugDNA.6861.1.S1_at    | MmugDNA.6861.1  | 6.32  | 7.24  | 0.72 | 0.32 | -1.88 | 0.301993 | 0.423133 | 0.636808 | 0.646165 |
| MmugDNA.6862.1.S1_at    | MmugDNA.6862.1  | 3.63  | 3.5   | 0.28 | 0.17 | 1.09  | 0.443413 | 0.406737 | 0.726112 | 0.634487 |
| MmugDNA.6863.1.S1_at    | MmugDNA.6863.1  | 12.05 | 11.62 | 0.17 | 0.16 | 1.35  | 0.051913 | 0.041979 | 0.376668 | 0.249461 |
| MmugDNA.6865.1.S1_at    | MmugDNA.6865.1  | 9.65  | 8.99  | 0.25 | 0.86 | 1.58  | 0.35625  | 0.256083 | 0.671447 | 0.524052 |
| MmugDNA.6868.1.S1_at    | MmugDNA.6868.1  | 5.28  | 4.24  | 0.37 | 0.39 | 2.05  | 0.096947 | 0.065512 | 0.455899 | 0.301415 |
| MmugDNA.687.1.S1_at     | MmugDNA.687.1   | 5.1   | 5.02  | 0.03 | 0.1  | 1.05  | 0.212316 | 0.006973 | 0.57259  | 0.112743 |
| MmugDNA.6870.1.S1_at    | MmugDNA.6870.1  | 8.47  | 8.03  | 0.22 | 0.2  | 1.35  | 0.019424 | 0.009638 | 0.274115 | 0.129267 |
| MmugDNA.6871.1.S1_at    | MmugDNA.6871.1  | 9.09  | 8.66  | 0.2  | 0.37 | 1.35  | 0.234576 | 0.301012 | 0.588808 | 0.559198 |
| MmugDNA.6872.1.S1_at    | MmugDNA.6872.1  | 6.85  | 6.89  | 0.19 | 0.07 | -1.03 | 0.277905 | 0.399119 | 0.620023 | 0.62969  |
| MmugDNA.6874.1.S1_at    | MmugDNA.6874.1  | 8.47  | 8.52  | 0.14 | 0.28 | -1.04 | 0.807104 | 0.411477 | 0.920973 | 0.638191 |
| MmugDNA.6877.1.S1_at    | MmugDNA.6877.1  | 4.57  | 4.68  | 1.11 | 0.62 | -1.07 | 0.832207 | 0.964947 | 0.932011 | 0.980546 |
| MmugDNA.6878.1.S1_at    | MmugDNA.6878.1  | 6.87  | 7.08  | 0.24 | 0.16 | -1.15 | 0.67022  | 0.841505 | 0.852382 | 0.909663 |
| MmugDNA.6879.1.S1_at    | MmugDNA.6879.1  | 9.42  | 10.37 | 0.09 | 0.47 | -1.94 | 0.019822 | 0.003136 | 0.275549 | 0.081639 |
| MmugDNA.688.1.S1_at     | MmugDNA.688.1   | 10.02 | 9.78  | 1    | 0.56 | 1.18  | 0.731947 | 0.910146 | 0.884095 | 0.949342 |
| MmugDNA.6881.1.S1_at    | MmugDNA.6881.1  | 5.2   | 5.13  | 0.11 | 0.13 | 1.05  | 0.415684 | 0.721301 | 0.709528 | 0.838683 |
| MmugDNA.6882.1.S1_at    | MmugDNA.6882.1  | 4.24  | 4.31  | 0.39 | 0.13 | -1.05 | 0.640749 | 0.761042 | 0.83776  | 0.861185 |
| MmugDNA.6883.1.S1_at    | MmugDNA.6883.1  | 7.55  | 8.14  | 1.23 | 0.41 | -1.51 | 0.870791 | 0.946484 | 0.948379 | 0.96965  |
| MmugDNA.6885.1.S1_at    | MmugDNA.6885.1  | 5.62  | 4.47  | 0.39 | 0.64 | 2.22  | 0.268272 | 0.195283 | 0.613105 | 0.470253 |
| MmugDNA.6886.1.S1_at    | MmugDNA.6886.1  | 5.31  | 5.14  | 1.28 | 0.59 | 1.12  | 0.941615 | 0.827998 | 0.977774 | 0.901214 |
| MmugDNA.6888.1.S1_at    | MmugDNA.6888.1  | 5.06  | 4.6   | 0.18 | 0.08 | 1.37  | 0.022567 | 0.03435  | 0.287341 | 0.229283 |
| MmugDNA.6889.1.S1_at    | MmugDNA.6889.1  | 5.63  | 4.88  | 0.63 | 0.26 | 1.69  | 0.120305 | 0.151494 | 0.485252 | 0.426223 |
| MmugDNA.689.1.S1_at     | MmugDNA.689.1   | 5.31  | 5.35  | 0.42 | 0.07 | -1.03 | 0.776524 | 0.432316 | 0.906402 | 0.652778 |
| MmugDNA.6893.1.S1_at    | MmugDNA.6893.1  | 13.27 | 13.35 | 0.04 | 0.03 | -1.06 | 0.038574 | 0.113921 | 0.344633 | 0.38018  |
| MmugDNA.6894.1.S1_at    | MmugDNA.6894.1  | 5.91  | 5.84  | 0.35 | 0.16 | 1.05  | 0.859091 | 0.495641 | 0.943112 | 0.695576 |
| MmugDNA.6895.1.S1_at    | MmugDNA.6895.1  | 2.78  | 2.95  | 0.18 | 0.15 | -1.13 | 0.147838 | 0.15746  | 0.513385 | 0.432984 |
| MmugDNA.6895.1.S1_s_at  | MmugDNA.6895.1  | 11.1  | 11.69 | 0.18 | 0.44 | -1.51 | 0.157773 | 0.133301 | 0.522564 | 0.405049 |
| MmugDNA.6895.1.S1_x_at  | MmugDNA.6895.1  | 8.61  | 9.38  | 0.29 | 0.45 | -1.72 | 0.138501 | 0.132382 | 0.505769 | 0.404344 |
| MmugDNA.6896.1.S1_at    | MmugDNA.6896.1  | 7.63  | 7.68  | 0.09 | 0.16 | -1.03 | 0.354511 | 0.241348 | 0.670587 | 0.511952 |
| MmugDNA.6897.1.S1_at    | MmugDNA.6897.1  | 6.76  | 6.67  | 0.16 | 0.17 | 1.06  | 0.749861 | 0.91504  | 0.892776 | 0.952293 |
| MmugDNA.6897.1.S1_x_at  | MmugDNA.6897.1  | 6.46  | 6.58  | 0.06 | 0.16 | -1.09 | 0.216309 | 0.227505 | 0.575963 | 0.499805 |
| MmugDNA.690.1.S1_at     | MmugDNA.690.1   | 10.54 | 9.68  | 0.17 | 0.36 | 1.82  | 0.01857  | 0.010277 | 0.270581 | 0.132736 |
| MmugDNA.6902.1.S1_at    | MmugDNA.6902.1  | 11.07 | 9.46  | 0.24 | 0.36 | 3.05  | 0.001974 | 0.000357 | 0.155636 | 0.037247 |
| MmugDNA.6903.1.S1_at    | MmugDNA.6903.1  | 2.87  | 3.02  | 0.2  | 0.23 | -1.11 | 0.484901 | 0.437628 | 0.750701 | 0.656821 |
| MmugDNA.6904.1.S1_at    | MmugDNA.6904.1  | 4.95  | 4.66  | 0.73 | 0.38 | 1.23  | 0.292223 | 0.093958 | 0.629464 | 0.350467 |
| MmugDNA.21735.1.S1_s_at | MmugDNA.21735.1 | 4.87  | 4.57  | 0.35 | 0.54 | 1.24  | 0.911401 | 0.220408 | 0.965013 | 0.493818 |
| MmugDNA.6906.1.S1_at    | MmugDNA.6906.1  | 5.4   | 5.42  | 0.23 | 0.16 | -1.01 | 0.395635 | 0.546102 | 0.696523 | 0.727769 |
| MmugDNA.6907.1.S1_at    | MmugDNA.6907.1  | 3.72  | 3.77  | 0.12 | 0.04 | -1.04 | 0.730305 | 0.295126 | 0.883085 | 0.554551 |
| MmugDNA.6909.1.S1_at    | MmugDNA.6909.1  | 3.92  | 4.73  | 0.19 | 0.33 | -1.75 | 0.049155 | 0.068837 | 0.370772 | 0.308714 |
| MmugDNA.691.1.S1_at     | MmugDNA.691.1   | 3.23  | 3.36  | 0.11 | 0.24 | -1.1  | 0.314372 | 0.47582  | 0.645738 | 0.682387 |
| MmugDNA.6913.1.S1_at    | MmugDNA.6913.1  | 4.82  | 4.43  | 0.35 | 0.37 | 1.32  | 0.374457 | 0.595447 | 0.683647 | 0.759091 |



|                        |                |       |       |      |      |       |          |          |          |          |
|------------------------|----------------|-------|-------|------|------|-------|----------|----------|----------|----------|
| MmugDNA.6914.1.S1_at   | MmugDNA.6914.1 | 10.24 | 9.98  | 0.35 | 0.13 | 1.2   | 0.491827 | 0.621087 | 0.755302 | 0.77579  |
| MmugDNA.6916.1.S1_at   | MmugDNA.6916.1 | 5.2   | 5.27  | 0.14 | 0.07 | -1.05 | 0.317859 | 0.166013 | 0.64802  | 0.442579 |
| MmugDNA.6917.1.S1_at   | MmugDNA.6917.1 | 7.33  | 7.29  | 0.18 | 0.02 | 1.03  | 0.558337 | 0.735417 | 0.793134 | 0.846919 |
| MmugDNA.6918.1.S1_at   | MmugDNA.6918.1 | 2.68  | 2.6   | 0.04 | 0.11 | 1.05  | 0.310048 | 0.176691 | 0.642042 | 0.453142 |
| MmugDNA.692.1.S1_at    | MmugDNA.692.1  | 3.34  | 3.42  | 0.11 | 0.08 | -1.06 | 0.114319 | 0.329564 | 0.477594 | 0.578781 |
| MmugDNA.6920.1.S1_at   | MmugDNA.6920.1 | 3.65  | 3.6   | 0.01 | 0.09 | 1.03  | 0.994018 | 0.815152 | 0.997945 | 0.89336  |
| MmugDNA.6921.1.S1_at   | MmugDNA.6921.1 | 5.94  | 6.18  | 0.07 | 0.1  | -1.18 | 0.071586 | 0.045971 | 0.415549 | 0.258818 |
| MmugDNA.6922.1.S1_at   | MmugDNA.6922.1 | 12.21 | 11.82 | 0.19 | 0.3  | 1.31  | 0.066696 | 0.060859 | 0.406869 | 0.293442 |
| MmugDNA.6923.1.S1_at   | MmugDNA.6923.1 | 5.25  | 5.23  | 0.15 | 0.16 | 1.01  | 0.410075 | 0.532774 | 0.706179 | 0.719235 |
| MmugDNA.6924.1.S1_at   | MmugDNA.6924.1 | 7.62  | 7.12  | 0.28 | 0.37 | 1.41  | 0.143475 | 0.113163 | 0.510312 | 0.379184 |
| MmugDNA.6925.1.S1_at   | MmugDNA.6925.1 | 3.36  | 3.19  | 0.24 | 0.2  | 1.12  | 0.355426 | 0.08918  | 0.671033 | 0.343222 |
| MmugDNA.6926.1.S1_at   | MmugDNA.6926.1 | 5.63  | 4.73  | 0.25 | 0.29 | 1.86  | 0.058945 | 0.04473  | 0.390921 | 0.255998 |
| MmugDNA.6927.1.S1_at   | MmugDNA.6927.1 | 7.14  | 8.01  | 0.23 | 1.33 | -1.82 | 0.344665 | 0.077342 | 0.664708 | 0.323141 |
| MmugDNA.6928.1.S1_at   | MmugDNA.6928.1 | 5.02  | 5.05  | 0.15 | 0.14 | -1.02 | 0.380951 | 0.163073 | 0.68761  | 0.439235 |
| MmugDNA.693.1.S1_at    | MmugDNA.693.1  | 2.86  | 2.96  | 0.16 | 0.13 | -1.07 | 0.526136 | 0.713804 | 0.773971 | 0.833937 |
| MmugDNA.6930.1.S1_at   | MmugDNA.6930.1 | 6.41  | 6.42  | 0.11 | 0.06 | -1.01 | 0.774983 | 0.309217 | 0.905462 | 0.564807 |
| MmugDNA.6933.1.S1_at   | MmugDNA.6933.1 | 3.21  | 3.23  | 0.08 | 0.16 | -1.02 | 0.589249 | 0.757486 | 0.809218 | 0.858849 |
| MmugDNA.6934.1.S1_at   | MmugDNA.6934.1 | 6.67  | 5.88  | 0.55 | 0.75 | 1.72  | 0.617299 | 0.725088 | 0.824662 | 0.840867 |
| MmugDNA.6935.1.S1_at   | MmugDNA.6935.1 | 11.7  | 11.21 | 0.31 | 0.21 | 1.41  | 0.059433 | 0.043322 | 0.392153 | 0.252847 |
| MmugDNA.6935.1.S1_s_at | MmugDNA.6935.1 | 11.94 | 11.45 | 0.26 | 0.23 | 1.4   | 0.071874 | 0.072629 | 0.415896 | 0.315579 |
| MmugDNA.6936.1.S1_at   | MmugDNA.6936.1 | 4.87  | 4.84  | 0.09 | 0.65 | 1.02  | 0.651839 | 0.486368 | 0.84335  | 0.689764 |
| MmugDNA.6937.1.S1_at   | MmugDNA.6937.1 | 4.65  | 4.05  | 0.75 | 0.5  | 1.51  | 0.330194 | 0.397401 | 0.655613 | 0.628812 |
| MmugDNA.6938.1.S1_at   | MmugDNA.6938.1 | 3.66  | 3.62  | 0.05 | 0.18 | 1.03  | 0.5033   | 0.713781 | 0.760699 | 0.833937 |
| MmugDNA.694.1.S1_at    | MmugDNA.694.1  | 3.95  | 3.69  | 0.4  | 0.08 | 1.19  | 0.435401 | 0.308353 | 0.721224 | 0.564428 |
| MmugDNA.6940.1.S1_at   | MmugDNA.6940.1 | 9.29  | 9.09  | 0.6  | 0.66 | 1.15  | 0.780855 | 0.876315 | 0.908639 | 0.92967  |
| MmugDNA.6942.1.S1_at   | MmugDNA.6942.1 | 3.56  | 3.57  | 0.23 | 0.13 | -1.01 | 0.749216 | 0.697125 | 0.892627 | 0.824045 |
| MmugDNA.6943.1.S1_at   | MmugDNA.6943.1 | 3.72  | 3.59  | 0.03 | 0.11 | 1.09  | 0.1178   | 0.207389 | 0.481968 | 0.481599 |
| MmugDNA.6945.1.S1_at   | MmugDNA.6945.1 | 3.99  | 3.94  | 0.11 | 0.32 | 1.03  | 0.438424 | 0.662253 | 0.72304  | 0.802209 |
| MmugDNA.6946.1.S1_at   | MmugDNA.6946.1 | 6.3   | 6.5   | 0.01 | 0.08 | -1.15 | 0.03102  | 0.014113 | 0.32048  | 0.15195  |
| MmugDNA.6947.1.S1_at   | MmugDNA.6947.1 | 7.88  | 8.96  | 0.52 | 0.9  | -2.1  | 0.69394  | 0.213572 | 0.864299 | 0.48741  |
| MmugDNA.6949.1.S1_at   | MmugDNA.6949.1 | 2.75  | 2.83  | 0.92 | 0.03 | -1.06 | 0.437523 | 0.523283 | 0.722547 | 0.713635 |
| MmugDNA.695.1.S1_at    | MmugDNA.695.1  | 4.84  | 4.65  | 0.17 | 0.06 | 1.14  | 0.116699 | 0.174635 | 0.480473 | 0.45116  |
| MmugDNA.6950.1.S1_s_at | MmugDNA.6950.1 | 11.21 | 11.13 | 0.13 | 0.22 | 1.06  | 0.29997  | 0.45913  | 0.635282 | 0.671589 |
| MmugDNA.6951.1.S1_at   | MmugDNA.6951.1 | 9.7   | 10.76 | 0.25 | 0.7  | -2.08 | 0.065464 | 0.060426 | 0.404567 | 0.292478 |
| MmugDNA.6952.1.S1_at   | MmugDNA.6952.1 | 6.3   | 5.49  | 0.7  | 1.36 | 1.76  | 0.470445 | 0.654799 | 0.742413 | 0.798154 |
| MmugDNA.6953.1.S1_at   | MmugDNA.6953.1 | 5.51  | 4.98  | 0.37 | 0.13 | 1.45  | 0.214771 | 0.113558 | 0.575346 | 0.379632 |
| MmugDNA.6955.1.S1_at   | MmugDNA.6955.1 | 5.27  | 5.36  | 0.09 | 0.27 | -1.07 | 0.796901 | 0.318455 | 0.915758 | 0.571239 |
| MmugDNA.6957.1.S1_at   | MmugDNA.6957.1 | 7.66  | 7.39  | 0.53 | 0.26 | 1.21  | 0.408534 | 0.054698 | 0.705235 | 0.279343 |
| MmugDNA.6958.1.S1_at   | MmugDNA.6958.1 | 4.23  | 4.64  | 0.42 | 0.53 | -1.33 | 0.350105 | 0.594642 | 0.668338 | 0.758623 |
| MmugDNA.696.1.S1_at    | MmugDNA.696.1  | 4.32  | 4.29  | 0.1  | 0.19 | 1.02  | 0.783821 | 0.86602  | 0.909797 | 0.923791 |
| MmugDNA.6960.1.S1_at   | MmugDNA.6960.1 | 5.86  | 5.99  | 0.1  | 0.24 | -1.1  | 0.750089 | 0.721563 | 0.89292  | 0.838748 |

|                        |                |       |       |      |      |       |          |          |          |          |
|------------------------|----------------|-------|-------|------|------|-------|----------|----------|----------|----------|
| MmugDNA.6961.1.S1_s_at | MmugDNA.6961.1 | 9.29  | 9.45  | 0.17 | 0.26 | -1.12 | 0.315352 | 0.237983 | 0.646592 | 0.508528 |
| MmugDNA.6964.1.S1_at   | MmugDNA.6964.1 | 5.38  | 5.35  | 0.11 | 0.07 | 1.03  | 0.889655 | 0.017872 | 0.955822 | 0.168774 |
| MmugDNA.6965.1.S1_at   | MmugDNA.6965.1 | 4.8   | 4.86  | 0.23 | 0.16 | -1.04 | 0.785499 | 0.917543 | 0.910784 | 0.953883 |
| MmugDNA.6966.1.S1_at   | MmugDNA.6966.1 | 4.37  | 4.53  | 0.01 | 0.23 | -1.12 | 0.222446 | 0.447838 | 0.580951 | 0.663881 |
| MmugDNA.6967.1.S1_at   | MmugDNA.6967.1 | 7.25  | 6.51  | 0.37 | 0.65 | 1.67  | 0.134512 | 0.152101 | 0.501232 | 0.426864 |
| MmugDNA.6968.1.S1_at   | MmugDNA.6968.1 | 5.23  | 5.22  | 0.45 | 0.27 | 1     | 0.43064  | 0.309679 | 0.718201 | 0.565005 |
| MmugDNA.697.1.S1_at    | MmugDNA.697.1  | 4.17  | 4.38  | 0.77 | 0.28 | -1.16 | 0.876068 | 0.906748 | 0.95032  | 0.947216 |
| MmugDNA.6970.1.S1_at   | MmugDNA.6970.1 | 8.15  | 7.6   | 0.42 | 0.92 | 1.47  | 0.398446 | 0.271799 | 0.698704 | 0.536577 |
| MmugDNA.6972.1.S1_at   | MmugDNA.6972.1 | 3.55  | 3.36  | 0.21 | 0.23 | 1.14  | 0.372892 | 0.228551 | 0.683101 | 0.500752 |
| MmugDNA.6973.1.S1_at   | MmugDNA.6973.1 | 3.66  | 3.82  | 0.34 | 0.22 | -1.11 | 0.735047 | 0.564801 | 0.886019 | 0.739427 |
| MmugDNA.6977.1.S1_at   | MmugDNA.6977.1 | 5.59  | 5.73  | 0.15 | 0.05 | -1.1  | 0.140257 | 0.329294 | 0.508065 | 0.57869  |
| MmugDNA.698.1.S1_at    | MmugDNA.698.1  | 2.8   | 2.79  | 0    | 0.11 | 1.01  | 0.428282 | 0.665604 | 0.716796 | 0.804075 |
| MmugDNA.6981.1.S1_at   | MmugDNA.6981.1 | 9.29  | 8.63  | 0.18 | 0.41 | 1.59  | 0.109542 | 0.113416 | 0.470811 | 0.379509 |
| MmugDNA.6982.1.S1_at   | MmugDNA.6982.1 | 3.51  | 3.6   | 0.03 | 0.08 | -1.07 | 0.093752 | 0.174634 | 0.451056 | 0.45116  |
| MmugDNA.6984.1.S1_at   | MmugDNA.6984.1 | 5.2   | 5.48  | 0.27 | 0.46 | -1.22 | 0.436369 | 0.406945 | 0.721684 | 0.634629 |
| MmugDNA.6985.1.S1_at   | MmugDNA.6985.1 | 9.27  | 10.4  | 0.56 | 2.63 | -2.2  | 0.828933 | 0.784811 | 0.930604 | 0.875426 |
| MmugDNA.6986.1.S1_at   | MmugDNA.6986.1 | 7.94  | 8.16  | 0.06 | 0.14 | -1.16 | 0.032607 | 0.057303 | 0.325667 | 0.285248 |
| MmugDNA.6987.1.S1_at   | MmugDNA.6987.1 | 4.99  | 4.58  | 0.62 | 0.09 | 1.33  | 0.882987 | 0.828149 | 0.952961 | 0.901214 |
| MmugDNA.6988.1.S1_at   | MmugDNA.6988.1 | 5.12  | 4.66  | 0.4  | 0.4  | 1.38  | 0.497765 | 0.440739 | 0.758068 | 0.659113 |
| MmugDNA.6989.1.S1_at   | MmugDNA.6989.1 | 6.41  | 6.32  | 0.29 | 0.19 | 1.07  | 0.472199 | 0.423792 | 0.74356  | 0.646542 |
| MmugDNA.6991.1.S1_at   | MmugDNA.6991.1 | 6.39  | 7.48  | 0.23 | 0.62 | -2.13 | 0.042281 | 0.03119  | 0.354563 | 0.218392 |
| MmugDNA.6992.1.S1_at   | MmugDNA.6992.1 | 9.48  | 9.08  | 0.15 | 0.23 | 1.32  | 0.115269 | 0.187919 | 0.478767 | 0.464026 |
| MmugDNA.6993.1.S1_at   | MmugDNA.6993.1 | 5.61  | 8.25  | 1.29 | 2.48 | -6.24 | 0.23257  | 0.196221 | 0.587814 | 0.471236 |
| MmugDNA.6994.1.S1_at   | MmugDNA.6994.1 | 9.21  | 9.89  | 0.22 | 1.49 | -1.6  | 0.501659 | 0.53587  | 0.760109 | 0.721366 |
| MmugDNA.6995.1.S1_at   | MmugDNA.6995.1 | 10.13 | 10.67 | 0.49 | 0.83 | -1.46 | 0.626423 | 0.659239 | 0.829584 | 0.80063  |
| MmugDNA.6996.1.S1_at   | MmugDNA.6996.1 | 11.69 | 11.1  | 0.26 | 0.25 | 1.5   | 0.058385 | 0.033983 | 0.390304 | 0.227981 |
| MmugDNA.6999.1.S1_at   | MmugDNA.6999.1 | 7.5   | 7.9   | 1.22 | 0.28 | -1.32 | 0.939507 | 0.560306 | 0.976986 | 0.736628 |
| MmugDNA.7.1.S1_at      | MmugDNA.7.1    | 5.5   | 7.59  | 1.72 | 1.55 | -4.26 | 0.213073 | 0.161718 | 0.573447 | 0.437771 |
| MmugDNA.700.1.S1_at    | MmugDNA.700.1  | 4.91  | 4.88  | 0.35 | 0.02 | 1.02  | 0.323648 | 0.346907 | 0.65165  | 0.591725 |
| MmugDNA.7000.1.S1_at   | MmugDNA.7000.1 | 10.23 | 8.62  | 0.35 | 0.33 | 3.04  | 0.004306 | 0.000839 | 0.182381 | 0.046968 |
| MmugDNA.7003.1.S1_at   | MmugDNA.7003.1 | 10.09 | 9.92  | 0.24 | 0.33 | 1.13  | 0.189465 | 0.154534 | 0.552479 | 0.429405 |
| MmugDNA.7004.1.S1_at   | MmugDNA.7004.1 | 3.09  | 3.3   | 0.05 | 0.26 | -1.15 | 0.23288  | 0.351895 | 0.587927 | 0.595331 |
| MmugDNA.7005.1.S1_at   | MmugDNA.7005.1 | 10.15 | 10.63 | 0.08 | 0.3  | -1.4  | 0.054951 | 0.052966 | 0.382788 | 0.275787 |
| MmugDNA.7006.1.S1_at   | MmugDNA.7006.1 | 4.57  | 4.72  | 0.55 | 0.81 | -1.11 | 0.801588 | 0.758331 | 0.918156 | 0.859416 |
| MmugDNA.7008.1.S1_at   | MmugDNA.7008.1 | 5.58  | 5.66  | 0.53 | 0.52 | -1.06 | 0.528997 | 0.098245 | 0.775783 | 0.356289 |
| MmugDNA.7009.1.S1_at   | MmugDNA.7009.1 | 3.23  | 3.4   | 0.09 | 0.13 | -1.12 | 0.143115 | 0.114341 | 0.510004 | 0.380835 |
| MmugDNA.7010.1.S1_at   | MmugDNA.7010.1 | 2.87  | 2.75  | 0.22 | 0.12 | 1.08  | 0.646586 | 0.849453 | 0.840949 | 0.914533 |
| MmugDNA.7011.1.S1_at   | MmugDNA.7011.1 | 3.1   | 3.21  | 0.15 | 0.1  | -1.08 | 0.874927 | 0.343097 | 0.949827 | 0.588883 |
| MmugDNA.7012.1.S1_at   | MmugDNA.7012.1 | 3.7   | 3.77  | 0.1  | 0.09 | -1.05 | 0.473542 | 0.597445 | 0.744367 | 0.760197 |
| MmugDNA.7013.1.S1_at   | MmugDNA.7013.1 | 5.62  | 5.35  | 0.23 | 0.37 | 1.2   | 0.324749 | 0.334175 | 0.652076 | 0.582235 |
| MmugDNA.7013.1.S1_s_at | MmugDNA.7013.1 | 6.55  | 7.21  | 0.49 | 0.59 | -1.58 | 0.919928 | 0.991356 | 0.968811 | 0.995189 |

|                         |                 |       |       |      |      |       |          |          |          |          |
|-------------------------|-----------------|-------|-------|------|------|-------|----------|----------|----------|----------|
| MmugDNA.7014.1.S1_at    | MmugDNA.7014.1  | 6.07  | 5.92  | 0.14 | 0.06 | 1.11  | 0.140614 | 0.074532 | 0.508385 | 0.318173 |
| MmugDNA.7016.1.S1_at    | MmugDNA.7016.1  | 9.54  | 9.4   | 0.14 | 0.34 | 1.1   | 0.502435 | 0.701266 | 0.760355 | 0.826775 |
| MmugDNA.7017.1.S1_at    | MmugDNA.7017.1  | 5.77  | 5.02  | 0.83 | 0.9  | 1.67  | 0.761837 | 0.292223 | 0.899748 | 0.552363 |
| MmugDNA.7019.1.S1_at    | MmugDNA.7019.1  | 2.94  | 2.82  | 0.38 | 0.13 | 1.09  | 0.317983 | 0.521024 | 0.64802  | 0.712115 |
| MmugDNA.702.1.S1_at     | MmugDNA.702.1   | 4.87  | 5.34  | 0.3  | 0.17 | -1.38 | 0.094541 | 0.200173 | 0.452166 | 0.474603 |
| MmugDNA.7020.1.S1_at    | MmugDNA.7020.1  | 6.12  | 5.83  | 0.47 | 0.65 | 1.23  | 0.697165 | 0.557374 | 0.865585 | 0.735031 |
| MmugDNA.7022.1.S1_at    | MmugDNA.7022.1  | 5.16  | 4.72  | 0.18 | 0.2  | 1.36  | 0.053501 | 0.014721 | 0.380257 | 0.154415 |
| MmugDNA.7025.1.S1_at    | MmugDNA.7025.1  | 3.03  | 3.03  | 0.01 | 0.07 | -1    | 0.533774 | 0.675707 | 0.778434 | 0.810429 |
| MmugDNA.7026.1.S1_at    | MmugDNA.7026.1  | 4.22  | 4.09  | 0.15 | 0.04 | 1.09  | 0.152484 | 0.26488  | 0.517166 | 0.530874 |
| MmugDNA.7028.1.S1_at    | MmugDNA.7028.1  | 3.64  | 3.75  | 0.17 | 0.28 | -1.08 | 0.475631 | 0.593409 | 0.745899 | 0.758267 |
| MmugDNA.7030.1.S1_at    | MmugDNA.7030.1  | 4.88  | 4.67  | 0.45 | 0.11 | 1.16  | 0.364316 | 0.343808 | 0.677295 | 0.589508 |
| MmugDNA.7031.1.S1_at    | MmugDNA.7031.1  | 7.76  | 6.58  | 0.62 | 1.12 | 2.25  | 0.297649 | 0.397926 | 0.63339  | 0.629138 |
| MmugDNA.7032.1.S1_at    | MmugDNA.7032.1  | 7.4   | 7.7   | 0.14 | 0.11 | -1.23 | 0.021435 | 0.001163 | 0.282524 | 0.053615 |
| MmugDNA.7033.1.S1_at    | MmugDNA.7033.1  | 10.12 | 9.29  | 0.18 | 0.43 | 1.78  | 0.065737 | 0.056658 | 0.40503  | 0.284094 |
| MmugDNA.7035.1.S1_at    | MmugDNA.7035.1  | 4.15  | 4.07  | 0.24 | 0.17 | 1.06  | 0.506557 | 0.579846 | 0.762432 | 0.74931  |
| MmugDNA.7036.1.S1_at    | MmugDNA.7036.1  | 3.56  | 3.46  | 0.1  | 0.12 | 1.07  | 0.813343 | 0.904652 | 0.924218 | 0.945969 |
| MmugDNA.7039.1.S1_at    | MmugDNA.7039.1  | 4.95  | 4.9   | 0.38 | 0.32 | 1.03  | 0.946194 | 0.531308 | 0.979359 | 0.718555 |
| MmugDNA.704.1.S1_at     | MmugDNA.704.1   | 10.88 | 10.07 | 0.23 | 0.47 | 1.75  | 0.038348 | 0.026632 | 0.343956 | 0.204075 |
| MmugDNA.39687.1.S1_s_at | MmugDNA.39687.1 | 12.85 | 12.81 | 0.15 | 0.21 | 1.03  | 0.89214  | 0.98288  | 0.957041 | 0.990601 |
| MmugDNA.7041.1.S1_at    | MmugDNA.7041.1  | 6.23  | 6.79  | 0.07 | 1.07 | -1.47 | 0.40206  | 0.500071 | 0.701135 | 0.698818 |
| MmugDNA.7042.1.S1_at    | MmugDNA.7042.1  | 5.88  | 5.97  | 0.19 | 0.1  | -1.07 | 0.913813 | 0.272983 | 0.965942 | 0.53761  |
| MmugDNA.7043.1.S1_at    | MmugDNA.7043.1  | 6.19  | 6.53  | 0.09 | 0.19 | -1.27 | 0.029332 | 0.022541 | 0.313768 | 0.187965 |
| MmugDNA.7047.1.S1_at    | MmugDNA.7047.1  | 4.75  | 4.89  | 0.15 | 0.16 | -1.1  | 0.211449 | 0.092189 | 0.572216 | 0.347912 |
| MmugDNA.7048.1.S1_s_at  | MmugDNA.7048.1  | 5.65  | 4.6   | 0.47 | 0.52 | 2.07  | 0.129823 | 0.05323  | 0.495916 | 0.276445 |
| MmugDNA.7049.1.S1_at    | MmugDNA.7049.1  | 8.17  | 6.11  | 1.56 | 0.83 | 4.16  | 0.514578 | 0.418173 | 0.766978 | 0.642638 |
| MmugDNA.7050.1.S1_at    | MmugDNA.7050.1  | 6.31  | 5.82  | 0.27 | 0.23 | 1.41  | 0.04023  | 0.099715 | 0.349219 | 0.358259 |
| MmugDNA.7051.1.S1_at    | MmugDNA.7051.1  | 2.98  | 3.08  | 0.09 | 0.1  | -1.07 | 0.257093 | 0.22296  | 0.60448  | 0.495821 |
| MmugDNA.7053.1.S1_at    | MmugDNA.7053.1  | 4.02  | 4.18  | 0.23 | 0.11 | -1.12 | 0.180425 | 0.26816  | 0.544726 | 0.533876 |
| MmugDNA.7055.1.S1_at    | MmugDNA.7055.1  | 10.84 | 9.63  | 0.09 | 0.41 | 2.31  | 0.00722  | 0.004164 | 0.205885 | 0.091036 |
| MmugDNA.7056.1.S1_at    | MmugDNA.7056.1  | 10.57 | 10.95 | 0.4  | 0.38 | -1.29 | 0.166231 | 0.046716 | 0.529929 | 0.260831 |
| MmugDNA.7056.1.S1_s_at  | MmugDNA.7056.1  | 10.53 | 11.16 | 0.42 | 0.4  | -1.55 | 0.219795 | 0.071037 | 0.579133 | 0.312704 |
| MmugDNA.706.1.S1_at     | MmugDNA.706.1   | 5.83  | 5.85  | 0.18 | 0.18 | -1.02 | 0.966146 | 0.721354 | 0.987096 | 0.838685 |
| MmugDNA.7062.1.S1_at    | MmugDNA.7062.1  | 6.37  | 6.38  | 0.48 | 0.24 | -1.01 | 0.262775 | 0.33746  | 0.609039 | 0.584663 |
| MmugDNA.7063.1.S1_at    | MmugDNA.7063.1  | 4.82  | 4.78  | 0.17 | 0.04 | 1.03  | 0.68251  | 0.442922 | 0.857945 | 0.660827 |
| MmugDNA.7064.1.S1_at    | MmugDNA.7064.1  | 5.87  | 5.81  | 1.11 | 0.53 | 1.05  | 0.598137 | 0.790843 | 0.813939 | 0.87902  |
| MmugDNA.7065.1.S1_at    | MmugDNA.7065.1  | 4.97  | 5.1   | 0.36 | 0.03 | -1.09 | 0.740921 | 0.502269 | 0.888924 | 0.70006  |
| MmugDNA.7067.1.S1_at    | MmugDNA.7067.1  | 9.46  | 10.32 | 0.1  | 0.33 | -1.81 | 0.027875 | 0.017798 | 0.309125 | 0.168575 |
| MmugDNA.7068.1.S1_at    | MmugDNA.7068.1  | 4.15  | 3.91  | 0.15 | 0.11 | 1.18  | 0.153368 | 0.218326 | 0.517785 | 0.491872 |
| MmugDNA.7069.1.S1_at    | MmugDNA.7069.1  | 7.53  | 7.01  | 0.15 | 0.25 | 1.43  | 0.022192 | 0.013539 | 0.284758 | 0.148928 |
| MmugDNA.707.1.S1_at     | MmugDNA.707.1   | 5.89  | 6.2   | 0    | 0.35 | -1.24 | 0.63824  | 0.625772 | 0.836529 | 0.779322 |
| MmugDNA.7070.1.S1_at    | MmugDNA.7070.1  | 5.98  | 5.98  | 0.07 | 0.21 | -1    | 0.804933 | 0.869553 | 0.919901 | 0.925994 |

|                        |                |       |      |      |      |       |          |          |          |          |
|------------------------|----------------|-------|------|------|------|-------|----------|----------|----------|----------|
| MmugDNA.7073.1.S1_at   | MmugDNA.7073.1 | 4.37  | 4.39 | 0.17 | 0    | -1.01 | 0.461257 | 0.216631 | 0.737488 | 0.490285 |
| MmugDNA.7074.1.S1_at   | MmugDNA.7074.1 | 5.22  | 5.14 | 0.13 | 0.07 | 1.06  | 0.404191 | 0.021009 | 0.7026   | 0.181715 |
| MmugDNA.7075.1.S1_at   | MmugDNA.7075.1 | 4.16  | 4.35 | 0.21 | 0.02 | -1.14 | 0.593428 | 0.509221 | 0.811443 | 0.704032 |
| MmugDNA.7076.1.S1_at   | MmugDNA.7076.1 | 3.92  | 3.36 | 0.29 | 0.16 | 1.48  | 0.028839 | 0.01307  | 0.312166 | 0.14707  |
| MmugDNA.7077.1.S1_x_at | MmugDNA.7077.1 | 5.65  | 5.98 | 0.03 | 0.25 | -1.26 | 0.152951 | 0.031802 | 0.517325 | 0.220774 |
| MmugDNA.7078.1.S1_at   | MmugDNA.7078.1 | 5.66  | 6.22 | 0.29 | 0.5  | -1.47 | 0.387149 | 0.194761 | 0.691895 | 0.469774 |
| MmugDNA.7079.1.S1_at   | MmugDNA.7079.1 | 7.52  | 7.08 | 0.22 | 0.24 | 1.36  | 0.101852 | 0.106682 | 0.461313 | 0.369237 |
| MmugDNA.708.1.S1_at    | MmugDNA.708.1  | 5.34  | 5.48 | 0.07 | 0.07 | -1.1  | 0.185478 | 0.150735 | 0.548887 | 0.4253   |
| MmugDNA.7080.1.S1_at   | MmugDNA.7080.1 | 5.02  | 4.99 | 0.19 | 0.02 | 1.02  | 0.658918 | 0.720365 | 0.846773 | 0.838259 |
| MmugDNA.7081.1.S1_at   | MmugDNA.7081.1 | 3.35  | 3.1  | 0.12 | 0.09 | 1.19  | 0.079791 | 0.080396 | 0.430147 | 0.328028 |
| MmugDNA.7082.1.S1_at   | MmugDNA.7082.1 | 5.23  | 5.19 | 0.2  | 0.12 | 1.03  | 0.863933 | 0.951102 | 0.945408 | 0.972319 |
| MmugDNA.7084.1.S1_at   | MmugDNA.7084.1 | 5.97  | 6.57 | 0.42 | 0.15 | -1.52 | 0.057977 | 0.09949  | 0.389599 | 0.357866 |
| MmugDNA.7085.1.S1_at   | MmugDNA.7085.1 | 5.7   | 5.79 | 0.54 | 0.12 | -1.06 | 0.405276 | 0.186718 | 0.703082 | 0.462497 |
| MmugDNA.7086.1.S1_at   | MmugDNA.7086.1 | 6.77  | 6.46 | 0.27 | 0.02 | 1.24  | 0.393996 | 0.089951 | 0.6956   | 0.344184 |
| MmugDNA.7086.1.S1_s_at | MmugDNA.7086.1 | 7.01  | 7.08 | 0.48 | 0.7  | -1.05 | 0.783393 | 0.319595 | 0.909519 | 0.571885 |
| MmugDNA.7087.1.S1_at   | MmugDNA.7087.1 | 3.2   | 3.21 | 0.19 | 0.05 | -1.01 | 0.930916 | 0.956329 | 0.973359 | 0.975138 |
| MmugDNA.7089.1.S1_at   | MmugDNA.7089.1 | 4.36  | 4.39 | 0.03 | 0.21 | -1.02 | 0.674494 | 0.860681 | 0.854194 | 0.920641 |
| MmugDNA.709.1.S1_at    | MmugDNA.709.1  | 4.51  | 4.43 | 0.19 | 0.1  | 1.05  | 0.617639 | 0.760907 | 0.824845 | 0.86108  |
| MmugDNA.7090.1.S1_at   | MmugDNA.7090.1 | 2.79  | 2.78 | 0.08 | 0.11 | 1.01  | 0.366422 | 0.188199 | 0.67904  | 0.464251 |
| MmugDNA.7091.1.S1_at   | MmugDNA.7091.1 | 6.51  | 6.75 | 0.14 | 0.17 | -1.18 | 0.163957 | 0.239372 | 0.528211 | 0.510039 |
| MmugDNA.7092.1.S1_at   | MmugDNA.7092.1 | 3.36  | 3.47 | 0.48 | 0.28 | -1.07 | 0.965202 | 0.387079 | 0.986723 | 0.621935 |
| MmugDNA.7093.1.S1_at   | MmugDNA.7093.1 | 3.41  | 3.14 | 0.27 | 0.09 | 1.2   | 0.60771  | 0.540144 | 0.819497 | 0.724169 |
| MmugDNA.7094.1.S1_at   | MmugDNA.7094.1 | 3.79  | 3.87 | 0.09 | 0.11 | -1.06 | 0.545004 | 0.67609  | 0.784702 | 0.810704 |
| MmugDNA.7095.1.S1_at   | MmugDNA.7095.1 | 9.86  | 9.68 | 0.04 | 0.29 | 1.13  | 0.756654 | 0.914371 | 0.896628 | 0.951844 |
| MmugDNA.7096.1.S1_at   | MmugDNA.7096.1 | 9.15  | 8.24 | 0.13 | 0.58 | 1.87  | 0.025807 | 0.007553 | 0.300687 | 0.116437 |
| MmugDNA.7097.1.S1_at   | MmugDNA.7097.1 | 3.94  | 4.01 | 0.12 | 0.12 | -1.05 | 0.471541 | 0.582972 | 0.743268 | 0.751492 |
| MmugDNA.710.1.S1_at    | MmugDNA.710.1  | 3.81  | 3.83 | 0.19 | 0.11 | -1.02 | 0.36772  | 0.500431 | 0.679561 | 0.699043 |
| MmugDNA.7100.1.S1_at   | MmugDNA.7100.1 | 8.56  | 9.57 | 0.31 | 0.98 | -2.01 | 0.115115 | 0.118093 | 0.478463 | 0.385973 |
| MmugDNA.7101.1.S1_at   | MmugDNA.7101.1 | 5.03  | 4.52 | 0.7  | 0.21 | 1.42  | 0.209545 | 0.224805 | 0.570957 | 0.497617 |
| MmugDNA.7102.1.S1_at   | MmugDNA.7102.1 | 5.64  | 5.57 | 0.71 | 0.24 | 1.05  | 0.804171 | 0.599037 | 0.919448 | 0.761257 |
| MmugDNA.7104.1.S1_at   | MmugDNA.7104.1 | 3.59  | 3.65 | 0.19 | 0.21 | -1.04 | 0.877421 | 0.679866 | 0.95088  | 0.8131   |
| MmugDNA.7105.1.S1_at   | MmugDNA.7105.1 | 10.09 | 9.51 | 0.19 | 0.34 | 1.49  | 0.052344 | 0.025744 | 0.377516 | 0.201029 |
| MmugDNA.711.1.S1_at    | MmugDNA.711.1  | 6.9   | 6.57 | 0.13 | 0.18 | 1.25  | 0.056616 | 0.032501 | 0.386792 | 0.223265 |
| MmugDNA.7110.1.S1_at   | MmugDNA.7110.1 | 3.81  | 3.65 | 0.22 | 0.07 | 1.12  | 0.319888 | 0.306174 | 0.649219 | 0.562889 |
| MmugDNA.7111.1.S1_at   | MmugDNA.7111.1 | 4.85  | 4.93 | 0.32 | 0.04 | -1.06 | 0.69611  | 0.855641 | 0.865126 | 0.917681 |
| MmugDNA.7112.1.S1_at   | MmugDNA.7112.1 | 3.87  | 3.93 | 0.24 | 0.06 | -1.04 | 0.739939 | 0.440773 | 0.888334 | 0.659136 |
| MmugDNA.7113.1.S1_at   | MmugDNA.7113.1 | 3.42  | 3.69 | 0.37 | 0.54 | -1.21 | 0.668681 | 0.580573 | 0.851986 | 0.749782 |
| MmugDNA.7114.1.S1_at   | MmugDNA.7114.1 | 7.56  | 6.68 | 0.57 | 0.46 | 1.83  | 0.057136 | 0.028484 | 0.387418 | 0.21056  |
| MmugDNA.7116.1.S1_at   | MmugDNA.7116.1 | 3.72  | 3.8  | 0.21 | 0.29 | -1.06 | 0.371055 | 0.538062 | 0.681811 | 0.722826 |
| MmugDNA.7119.1.S1_at   | MmugDNA.7119.1 | 3.97  | 3.97 | 0.05 | 0.2  | 1     | 0.531304 | 0.666259 | 0.777132 | 0.804419 |
| MmugDNA.7120.1.S1_at   | MmugDNA.7120.1 | 5.83  | 5.82 | 0.14 | 0.07 | 1.01  | 0.527628 | 0.712379 | 0.775008 | 0.833369 |

|                        |                |       |       |      |      |       |          |          |          |          |
|------------------------|----------------|-------|-------|------|------|-------|----------|----------|----------|----------|
| MmugDNA.7122.1.S1_at   | MmugDNA.7122.1 | 3.62  | 3.6   | 0.46 | 0.07 | 1.01  | 0.30593  | 0.418149 | 0.639227 | 0.642638 |
| MmugDNA.7123.1.S1_at   | MmugDNA.7123.1 | 4.15  | 3.64  | 0.36 | 0.11 | 1.42  | 0.078132 | 0.151705 | 0.428221 | 0.426383 |
| MmugDNA.7124.1.S1_at   | MmugDNA.7124.1 | 3.88  | 3.66  | 0.18 | 0.04 | 1.16  | 0.064126 | 0.023144 | 0.402252 | 0.190519 |
| MmugDNA.7125.1.S1_at   | MmugDNA.7125.1 | 9.91  | 9.25  | 0.46 | 0.21 | 1.58  | 0.082464 | 0.058478 | 0.434039 | 0.288549 |
| MmugDNA.7126.1.S1_at   | MmugDNA.7126.1 | 5.61  | 5.03  | 0.29 | 0.08 | 1.49  | 0.099359 | 0.102019 | 0.459226 | 0.362082 |
| MmugDNA.713.1.S1_at    | MmugDNA.713.1  | 6.7   | 7.25  | 0.38 | 0.12 | -1.46 | 0.155489 | 0.144416 | 0.520211 | 0.418323 |
| MmugDNA.7130.1.S1_at   | MmugDNA.7130.1 | 3.53  | 3.65  | 0.43 | 0.32 | -1.08 | 0.681224 | 0.794973 | 0.85748  | 0.881864 |
| MmugDNA.7131.1.S1_at   | MmugDNA.7131.1 | 10.5  | 10.66 | 0.1  | 0.14 | -1.11 | 0.331002 | 0.013603 | 0.656063 | 0.149283 |
| MmugDNA.7132.1.S1_at   | MmugDNA.7132.1 | 4.86  | 5.66  | 0.24 | 0.26 | -1.74 | 0.026801 | 0.020544 | 0.304808 | 0.179837 |
| MmugDNA.7133.1.S1_at   | MmugDNA.7133.1 | 5.83  | 5.86  | 0.25 | 0.23 | -1.02 | 0.534738 | 0.51868  | 0.778804 | 0.710613 |
| MmugDNA.7134.1.S1_at   | MmugDNA.7134.1 | 4.69  | 4.77  | 1.03 | 0.09 | -1.05 | 0.398798 | 0.525087 | 0.698927 | 0.714766 |
| MmugDNA.7135.1.S1_at   | MmugDNA.7135.1 | 5.29  | 5.61  | 0.1  | 0.27 | -1.25 | 0.481048 | 0.631966 | 0.748906 | 0.783052 |
| MmugDNA.7137.1.S1_s_at | MmugDNA.7137.1 | 6.8   | 7.31  | 0.27 | 0.13 | -1.42 | 0.021142 | 0.061842 | 0.282389 | 0.295514 |
| MmugDNA.7138.1.S1_at   | MmugDNA.7138.1 | 4.65  | 4.54  | 0.07 | 0.03 | 1.08  | 0.212566 | 0.102118 | 0.572842 | 0.362168 |
| MmugDNA.714.1.S1_at    | MmugDNA.714.1  | 6.18  | 6.69  | 1.1  | 0.36 | -1.43 | 0.903642 | 0.89155  | 0.961578 | 0.938242 |
| MmugDNA.7141.1.S1_at   | MmugDNA.7141.1 | 4.41  | 4.55  | 0.25 | 0.14 | -1.1  | 0.267726 | 0.338934 | 0.612723 | 0.585891 |
| MmugDNA.7142.1.S1_at   | MmugDNA.7142.1 | 6.81  | 6.67  | 0.09 | 0.24 | 1.1   | 0.576866 | 0.158429 | 0.8033   | 0.434313 |
| MmugDNA.7143.1.S1_at   | MmugDNA.7143.1 | 5.96  | 5.95  | 0.23 | 0.11 | 1     | 0.391594 | 0.593487 | 0.694126 | 0.758318 |
| MmugDNA.7144.1.S1_at   | MmugDNA.7144.1 | 5.12  | 4.91  | 0.09 | 0.66 | 1.16  | 0.727141 | 0.517969 | 0.88121  | 0.710053 |
| MmugDNA.7145.1.S1_at   | MmugDNA.7145.1 | 10.5  | 11.2  | 0.29 | 0.33 | -1.62 | 0.032308 | 0.019052 | 0.324641 | 0.173688 |
| MmugDNA.7148.1.S1_at   | MmugDNA.7148.1 | 3.88  | 4.29  | 0.14 | 0.74 | -1.33 | 0.392749 | 0.511264 | 0.694775 | 0.705465 |
| MmugDNA.7149.1.S1_at   | MmugDNA.7149.1 | 11.09 | 11.3  | 0.26 | 0.49 | -1.15 | 0.573176 | 0.046775 | 0.801055 | 0.261005 |
| MmugDNA.7149.1.S1_x_at | MmugDNA.7149.1 | 10.51 | 10.62 | 0.3  | 0.5  | -1.08 | 0.556795 | 0.06659  | 0.792093 | 0.303814 |
| MmugDNA.715.1.S1_at    | MmugDNA.715.1  | 4.08  | 4.16  | 0.24 | 0.36 | -1.06 | 0.520602 | 0.692169 | 0.770924 | 0.82091  |
| MmugDNA.7150.1.S1_at   | MmugDNA.7150.1 | 4.17  | 4.49  | 0.28 | 0.35 | -1.25 | 0.28562  | 0.196156 | 0.625066 | 0.471236 |
| MmugDNA.7151.1.S1_at   | MmugDNA.7151.1 | 6.05  | 6     | 0.36 | 0.1  | 1.04  | 0.995059 | 0.999793 | 0.998246 | 0.999948 |
| MmugDNA.7152.1.S1_at   | MmugDNA.7152.1 | 4.05  | 4.05  | 0.07 | 0.21 | -1    | 0.947471 | 0.983262 | 0.979852 | 0.990726 |
| MmugDNA.7153.1.S1_at   | MmugDNA.7153.1 | 5.45  | 5.39  | 0.13 | 0.16 | 1.04  | 0.3428   | 0.514751 | 0.663407 | 0.707865 |
| MmugDNA.7154.1.S1_at   | MmugDNA.7154.1 | 7.74  | 9.05  | 0.23 | 0.52 | -2.48 | 0.009614 | 0.007714 | 0.226235 | 0.117387 |
| MmugDNA.7155.1.S1_at   | MmugDNA.7155.1 | 8.09  | 8.56  | 0.31 | 0.13 | -1.39 | 0.047364 | 0.037264 | 0.365901 | 0.237506 |
| MmugDNA.7156.1.S1_at   | MmugDNA.7156.1 | 4.18  | 3.8   | 0.18 | 0.38 | 1.3   | 0.806844 | 0.921092 | 0.92087  | 0.955543 |
| MmugDNA.7158.1.S1_at   | MmugDNA.7158.1 | 6.47  | 5.94  | 0.73 | 0.23 | 1.45  | 0.996422 | 0.978691 | 0.998557 | 0.988411 |
| MmugDNA.716.1.S1_at    | MmugDNA.716.1  | 5.72  | 5.65  | 0.08 | 0.78 | 1.06  | 0.733593 | 0.492879 | 0.88516  | 0.693817 |
| MmugDNA.7160.1.S1_at   | MmugDNA.7160.1 | 3.77  | 3.96  | 0.25 | 0.09 | -1.15 | 0.302465 | 0.181423 | 0.63692  | 0.457923 |
| MmugDNA.7161.1.S1_at   | MmugDNA.7161.1 | 5.12  | 5.1   | 0.1  | 0.17 | 1.02  | 0.563409 | 0.502543 | 0.79597  | 0.700192 |
| MmugDNA.7162.1.S1_at   | MmugDNA.7162.1 | 4.64  | 4.54  | 0.06 | 0.14 | 1.07  | 0.412853 | 0.446002 | 0.708123 | 0.662635 |
| MmugDNA.7163.1.S1_at   | MmugDNA.7163.1 | 4.05  | 4.75  | 0.44 | 0.45 | -1.63 | 0.512126 | 0.411192 | 0.765453 | 0.637937 |
| MmugDNA.7164.1.S1_at   | MmugDNA.7164.1 | 5.82  | 5.13  | 0.68 | 0.7  | 1.61  | 0.080244 | 0.1297   | 0.430341 | 0.401344 |
| MmugDNA.7165.1.S1_at   | MmugDNA.7165.1 | 13.24 | 13.4  | 0.08 | 0.19 | -1.11 | 0.545161 | 0.551356 | 0.784779 | 0.730922 |
| MmugDNA.7166.1.S1_at   | MmugDNA.7166.1 | 3.22  | 3.31  | 0.13 | 0.15 | -1.07 | 0.430272 | 0.176241 | 0.717986 | 0.452718 |
| MmugDNA.7168.1.S1_at   | MmugDNA.7168.1 | 5.4   | 5.76  | 0.15 | 0.13 | -1.28 | 0.019053 | 0.01958  | 0.272963 | 0.17571  |

|                      |                |       |       |      |      |       |          |          |          |          |
|----------------------|----------------|-------|-------|------|------|-------|----------|----------|----------|----------|
| MmugDNA.7169.1.S1_at | MmugDNA.7169.1 | 4.82  | 4.93  | 0.16 | 0.2  | -1.08 | 0.208882 | 0.335745 | 0.570476 | 0.583489 |
| MmugDNA.717.1.S1_at  | MmugDNA.717.1  | 6.25  | 6.33  | 0.18 | 0.06 | -1.06 | 0.825978 | 0.509528 | 0.929365 | 0.704233 |
| MmugDNA.7173.1.S1_at | MmugDNA.7173.1 | 8.48  | 8.43  | 0.15 | 0.35 | 1.03  | 0.773574 | 0.426589 | 0.904897 | 0.648739 |
| MmugDNA.7174.1.S1_at | MmugDNA.7174.1 | 3.96  | 3.95  | 0.1  | 0.06 | 1.01  | 0.526966 | 0.856695 | 0.774459 | 0.918126 |
| MmugDNA.7175.1.S1_at | MmugDNA.7175.1 | 5.09  | 5.26  | 0.11 | 0.13 | -1.13 | 0.359769 | 0.092395 | 0.673991 | 0.348294 |
| MmugDNA.7176.1.S1_at | MmugDNA.7176.1 | 8.51  | 9.04  | 0.12 | 0.24 | -1.45 | 0.045052 | 0.004764 | 0.359878 | 0.096313 |
| MmugDNA.7179.1.S1_at | MmugDNA.7179.1 | 4.26  | 4.1   | 0.25 | 0.16 | 1.12  | 0.135011 | 0.177304 | 0.501995 | 0.453742 |
| MmugDNA.718.1.S1_at  | MmugDNA.718.1  | 6.86  | 5.96  | 0.23 | 0.34 | 1.87  | 0.028692 | 0.029648 | 0.312031 | 0.213852 |
| MmugDNA.7180.1.S1_at | MmugDNA.7180.1 | 6.66  | 6.9   | 0.06 | 0.36 | -1.18 | 0.10149  | 0.102537 | 0.461313 | 0.362875 |
| MmugDNA.7182.1.S1_at | MmugDNA.7182.1 | 5.9   | 6.33  | 0.24 | 0.45 | -1.35 | 0.23186  | 0.248218 | 0.587568 | 0.517574 |
| MmugDNA.7185.1.S1_at | MmugDNA.7185.1 | 4.7   | 4.64  | 0.53 | 0.36 | 1.04  | 0.695631 | 0.531428 | 0.864996 | 0.718636 |
| MmugDNA.7186.1.S1_at | MmugDNA.7186.1 | 10.48 | 10.12 | 0.15 | 0.2  | 1.29  | 0.151591 | 0.150016 | 0.516191 | 0.424621 |
| MmugDNA.7188.1.S1_at | MmugDNA.7188.1 | 5.63  | 5.62  | 0.24 | 0.24 | 1.01  | 0.956718 | 0.543026 | 0.983719 | 0.725879 |
| MmugDNA.7189.1.S1_at | MmugDNA.7189.1 | 10.83 | 10.8  | 0.21 | 0.38 | 1.02  | 0.531614 | 0.475937 | 0.777313 | 0.682387 |
| MmugDNA.719.1.S1_at  | MmugDNA.719.1  | 5.01  | 5.01  | 0.24 | 0.04 | 1     | 0.686369 | 0.885658 | 0.859743 | 0.934982 |
| MmugDNA.7191.1.S1_at | MmugDNA.7191.1 | 6.71  | 6.64  | 0.35 | 0.31 | 1.05  | 0.380269 | 0.507024 | 0.68724  | 0.702701 |
| MmugDNA.7192.1.S1_at | MmugDNA.7192.1 | 4.55  | 4.35  | 0.49 | 0.54 | 1.15  | 0.683868 | 0.600542 | 0.858543 | 0.76217  |
| MmugDNA.7193.1.S1_at | MmugDNA.7193.1 | 8.8   | 7.77  | 0.28 | 0.21 | 2.05  | 0.013029 | 0.003547 | 0.245262 | 0.085371 |
| MmugDNA.7194.1.S1_at | MmugDNA.7194.1 | 3.41  | 3.47  | 0.1  | 0.08 | -1.04 | 0.953935 | 0.307086 | 0.982918 | 0.563432 |
| MmugDNA.7195.1.S1_at | MmugDNA.7195.1 | 6.61  | 6.38  | 0.07 | 0.45 | 1.17  | 0.982144 | 0.70033  | 0.993449 | 0.826073 |
| MmugDNA.7197.1.S1_at | MmugDNA.7197.1 | 6.47  | 6.63  | 0.31 | 0.11 | -1.11 | 0.65601  | 0.765803 | 0.845296 | 0.86393  |
| MmugDNA.7198.1.S1_at | MmugDNA.7198.1 | 4.3   | 4.35  | 0.14 | 0.03 | -1.04 | 0.907012 | 0.224781 | 0.963023 | 0.497617 |
| MmugDNA.7199.1.S1_at | MmugDNA.7199.1 | 3.85  | 3.59  | 0.45 | 0.14 | 1.2   | 0.597795 | 0.366731 | 0.81374  | 0.606498 |
| MmugDNA.72.1.S1_at   | MmugDNA.72.1   | 7.7   | 7.64  | 0.51 | 0.12 | 1.04  | 0.86247  | 0.939048 | 0.944715 | 0.9654   |
| MmugDNA.720.1.S1_at  | MmugDNA.720.1  | 7.36  | 7.16  | 0.23 | 0.35 | 1.15  | 0.858277 | 0.662165 | 0.942714 | 0.802157 |
| MmugDNA.7200.1.S1_at | MmugDNA.7200.1 | 6.5   | 6.53  | 0.18 | 0.09 | -1.02 | 0.599384 | 0.715887 | 0.814562 | 0.83531  |
| MmugDNA.7201.1.S1_at | MmugDNA.7201.1 | 7.08  | 6.96  | 0.22 | 0.24 | 1.08  | 0.656264 | 0.202145 | 0.845321 | 0.476559 |
| MmugDNA.7202.1.S1_at | MmugDNA.7202.1 | 6.22  | 6.38  | 0.09 | 0.15 | -1.12 | 0.288285 | 0.328531 | 0.626514 | 0.578137 |
| MmugDNA.7203.1.S1_at | MmugDNA.7203.1 | 6.28  | 6.93  | 0.48 | 1.38 | -1.57 | 0.560594 | 0.578612 | 0.794291 | 0.748595 |
| MmugDNA.7207.1.S1_at | MmugDNA.7207.1 | 3.24  | 3.3   | 0.31 | 0.2  | -1.04 | 0.540153 | 0.286432 | 0.781606 | 0.547829 |
| MmugDNA.7209.1.S1_at | MmugDNA.7209.1 | 10.22 | 9.75  | 0.14 | 0.42 | 1.38  | 0.438092 | 0.599597 | 0.722782 | 0.761524 |
| MmugDNA.721.1.S1_at  | MmugDNA.721.1  | 3.62  | 3.68  | 0.21 | 0.13 | -1.05 | 0.511376 | 0.661105 | 0.765295 | 0.801683 |
| MmugDNA.7210.1.S1_at | MmugDNA.7210.1 | 9.25  | 8.99  | 0.44 | 0.34 | 1.2   | 0.55411  | 0.739315 | 0.790657 | 0.848911 |
| MmugDNA.7211.1.S1_at | MmugDNA.7211.1 | 4.15  | 4.16  | 0.13 | 0.04 | -1    | 0.454696 | 0.699225 | 0.733343 | 0.825277 |
| MmugDNA.7212.1.S1_at | MmugDNA.7212.1 | 4.81  | 4.93  | 0.22 | 0.1  | -1.09 | 0.664327 | 0.108717 | 0.849511 | 0.372257 |
| MmugDNA.7213.1.S1_at | MmugDNA.7213.1 | 11.36 | 11.37 | 0.19 | 0.39 | -1.01 | 0.404644 | 0.555688 | 0.702858 | 0.734    |
| MmugDNA.7214.1.S1_at | MmugDNA.7214.1 | 3.99  | 4.06  | 0.16 | 0.47 | -1.05 | 0.304434 | 0.224785 | 0.638542 | 0.497617 |
| MmugDNA.7215.1.S1_at | MmugDNA.7215.1 | 6.8   | 6.84  | 0.45 | 0.16 | -1.03 | 0.516773 | 0.689227 | 0.768274 | 0.818639 |
| MmugDNA.7216.1.S1_at | MmugDNA.7216.1 | 6.57  | 6.81  | 0.38 | 0.21 | -1.18 | 0.649493 | 0.103453 | 0.842493 | 0.364346 |
| MmugDNA.7217.1.S1_at | MmugDNA.7217.1 | 6.5   | 5.46  | 0.37 | 0.48 | 2.06  | 0.090688 | 0.092921 | 0.446221 | 0.349024 |
| MmugDNA.7218.1.S1_at | MmugDNA.7218.1 | 3.82  | 3.02  | 0.12 | 0.11 | 1.74  | 0.001358 | 0.000501 | 0.146228 | 0.038996 |

|                        |                |       |       |      |      |       |          |          |          |          |
|------------------------|----------------|-------|-------|------|------|-------|----------|----------|----------|----------|
| MmugDNA.7219.1.S1_at   | MmugDNA.7219.1 | 3     | 2.81  | 0.06 | 0.07 | 1.14  | 0.051165 | 0.058642 | 0.375935 | 0.288894 |
| MmugDNA.722.1.S1_at    | MmugDNA.722.1  | 7.53  | 7.37  | 0.4  | 0.7  | 1.12  | 0.604494 | 0.788295 | 0.817786 | 0.877534 |
| MmugDNA.7221.1.S1_at   | MmugDNA.7221.1 | 11.35 | 10.34 | 0.17 | 0.08 | 2.01  | 0.000929 | 0.000143 | 0.139813 | 0.029387 |
| MmugDNA.7223.1.S1_at   | MmugDNA.7223.1 | 6.73  | 6.9   | 0    | 0.14 | -1.12 | 0.132331 | 0.070715 | 0.498572 | 0.312128 |
| MmugDNA.7224.1.S1_at   | MmugDNA.7224.1 | 5.22  | 5.58  | 0.28 | 0.18 | -1.29 | 0.233492 | 0.303284 | 0.588199 | 0.560748 |
| MmugDNA.7225.1.S1_at   | MmugDNA.7225.1 | 4.45  | 3.66  | 0.8  | 0.21 | 1.72  | 0.172934 | 0.28469  | 0.536607 | 0.5469   |
| MmugDNA.7226.1.S1_at   | MmugDNA.7226.1 | 7.66  | 7.75  | 0.04 | 0.37 | -1.06 | 0.644429 | 0.526074 | 0.839758 | 0.715374 |
| MmugDNA.7227.1.S1_at   | MmugDNA.7227.1 | 3.49  | 3.5   | 0.2  | 0.23 | -1.01 | 0.86253  | 0.78435  | 0.944715 | 0.87518  |
| MmugDNA.7228.1.S1_at   | MmugDNA.7228.1 | 6.08  | 7.19  | 1.35 | 0.41 | -2.16 | 0.163804 | 0.016666 | 0.528049 | 0.163458 |
| MmugDNA.7229.1.S1_at   | MmugDNA.7229.1 | 7.25  | 9.1   | 0.23 | 0.2  | -3.61 | 0.000485 | 0.000416 | 0.134999 | 0.038093 |
| MmugDNA.723.1.S1_at    | MmugDNA.723.1  | 6.64  | 6.71  | 0.2  | 0.12 | -1.05 | 0.831239 | 0.405473 | 0.931682 | 0.633774 |
| MmugDNA.7230.1.S1_at   | MmugDNA.7230.1 | 12.56 | 12.56 | 0.13 | 0.04 | -1    | 0.877238 | 0.991063 | 0.950817 | 0.994978 |
| MmugDNA.7231.1.S1_at   | MmugDNA.7231.1 | 5.46  | 5.93  | 0.31 | 0.54 | -1.39 | 0.195205 | 0.194111 | 0.558687 | 0.469266 |
| MmugDNA.7233.1.S1_at   | MmugDNA.7233.1 | 5.14  | 5.16  | 0.08 | 0.05 | -1.01 | 0.797642 | 0.072963 | 0.916116 | 0.315986 |
| MmugDNA.7234.1.S1_at   | MmugDNA.7234.1 | 5.04  | 4.75  | 0.16 | 0.16 | 1.22  | 0.09956  | 0.178557 | 0.459552 | 0.454802 |
| MmugDNA.7235.1.S1_s_at | MmugDNA.7235.1 | 10.71 | 10.21 | 0.3  | 0.37 | 1.42  | 0.168248 | 0.101175 | 0.53256  | 0.360831 |
| MmugDNA.7236.1.S1_at   | MmugDNA.7236.1 | 3.56  | 3.83  | 0.19 | 0.25 | -1.21 | 0.146801 | 0.172524 | 0.512761 | 0.448864 |
| MmugDNA.7237.1.S1_at   | MmugDNA.7237.1 | 3.05  | 3.16  | 0.06 | 0.1  | -1.08 | 0.155709 | 0.127243 | 0.520357 | 0.397935 |
| MmugDNA.7240.1.S1_at   | MmugDNA.7240.1 | 2.96  | 2.97  | 0.03 | 0.04 | -1    | 0.416527 | 0.672326 | 0.710014 | 0.808488 |
| MmugDNA.7241.1.S1_at   | MmugDNA.7241.1 | 5.65  | 5.9   | 0.16 | 0.19 | -1.19 | 0.172111 | 0.213632 | 0.535422 | 0.487441 |
| MmugDNA.7242.1.S1_at   | MmugDNA.7242.1 | 5.27  | 5.85  | 0.08 | 0.42 | -1.5  | 0.229324 | 0.255937 | 0.586472 | 0.523874 |
| MmugDNA.7243.1.S1_at   | MmugDNA.7243.1 | 6.63  | 6.91  | 0.25 | 0.11 | -1.21 | 0.424976 | 0.370727 | 0.714956 | 0.609721 |
| MmugDNA.7244.1.S1_at   | MmugDNA.7244.1 | 3.2   | 3.5   | 0.08 | 0.18 | -1.24 | 0.179532 | 0.039385 | 0.543676 | 0.243406 |
| MmugDNA.7245.1.S1_at   | MmugDNA.7245.1 | 8.17  | 9.31  | 0.1  | 1.08 | -2.2  | 0.144198 | 0.140009 | 0.510652 | 0.413333 |
| MmugDNA.7247.1.S1_at   | MmugDNA.7247.1 | 7.96  | 7.35  | 0.17 | 0.1  | 1.53  | 0.005353 | 0.002469 | 0.191107 | 0.073576 |
| MmugDNA.7248.1.S1_s_at | MmugDNA.7248.1 | 9.63  | 9.63  | 0.1  | 0.07 | -1    | 0.960167 | 0.170393 | 0.98486  | 0.447103 |
| MmugDNA.7249.1.S1_at   | MmugDNA.7249.1 | 9.04  | 10.29 | 0.25 | 0.06 | -2.38 | 0.000654 | 0.000481 | 0.136818 | 0.038665 |
| MmugDNA.7251.1.S1_at   | MmugDNA.7251.1 | 8.39  | 8.88  | 0.3  | 1.35 | -1.41 | 0.742698 | 0.921623 | 0.890001 | 0.955794 |
| MmugDNA.7252.1.S1_at   | MmugDNA.7252.1 | 3.27  | 3.36  | 0.07 | 0.03 | -1.06 | 0.152802 | 0.011587 | 0.517325 | 0.139311 |
| MmugDNA.7253.1.S1_at   | MmugDNA.7253.1 | 3.09  | 3.42  | 1.79 | 0.23 | -1.26 | 0.614565 | 0.720343 | 0.823236 | 0.838252 |
| MmugDNA.7255.1.S1_at   | MmugDNA.7255.1 | 3.99  | 4.03  | 0.16 | 0.08 | -1.03 | 0.826213 | 0.664437 | 0.929365 | 0.803396 |
| MmugDNA.7256.1.S1_at   | MmugDNA.7256.1 | 4.13  | 4.12  | 0.33 | 0.04 | 1.01  | 0.347471 | 0.520101 | 0.666487 | 0.711472 |
| MmugDNA.7257.1.S1_at   | MmugDNA.7257.1 | 9.37  | 9.72  | 0.25 | 0.04 | -1.27 | 0.268593 | 0.12837  | 0.613299 | 0.39964  |
| MmugDNA.7258.1.S1_at   | MmugDNA.7258.1 | 3.51  | 3.23  | 0.45 | 0.31 | 1.21  | 0.727234 | 0.869557 | 0.881213 | 0.925994 |
| MmugDNA.7259.1.S1_at   | MmugDNA.7259.1 | 3.28  | 3.37  | 0.17 | 0.13 | -1.06 | 0.794253 | 0.755683 | 0.914561 | 0.85776  |
| MmugDNA.7260.1.S1_at   | MmugDNA.7260.1 | 6.96  | 7.11  | 0.2  | 0.22 | -1.11 | 0.693706 | 0.34705  | 0.864191 | 0.591813 |
| MmugDNA.7261.1.S1_at   | MmugDNA.7261.1 | 12.51 | 12.6  | 0.1  | 0.24 | -1.07 | 0.436555 | 0.387344 | 0.721789 | 0.622027 |
| MmugDNA.7263.1.S1_at   | MmugDNA.7263.1 | 4.29  | 3.27  | 0.56 | 0.29 | 2.02  | 0.070765 | 0.064554 | 0.414661 | 0.300255 |
| MmugDNA.7264.1.S1_at   | MmugDNA.7264.1 | 6.82  | 6.47  | 0.38 | 0.03 | 1.27  | 0.162879 | 0.084805 | 0.527277 | 0.336325 |
| MmugDNA.7265.1.S1_at   | MmugDNA.7265.1 | 3.87  | 3.85  | 0.19 | 0    | 1.01  | 0.771704 | 0.923788 | 0.90393  | 0.957119 |
| MmugDNA.7266.1.S1_at   | MmugDNA.7266.1 | 3.85  | 3.98  | 0.05 | 0.06 | -1.1  | 0.042527 | 0.051875 | 0.355128 | 0.273151 |

|                         |                 |       |       |      |      |       |          |          |          |          |
|-------------------------|-----------------|-------|-------|------|------|-------|----------|----------|----------|----------|
| MmugDNA.7267.1.S1_at    | MmugDNA.7267.1  | 4.93  | 5.07  | 0.21 | 0.1  | -1.1  | 0.523968 | 0.495532 | 0.772859 | 0.695527 |
| MmugDNA.7268.1.S1_at    | MmugDNA.7268.1  | 5.89  | 6     | 0.19 | 0.04 | -1.08 | 0.380927 | 0.33266  | 0.687607 | 0.581046 |
| MmugDNA.7269.1.S1_at    | MmugDNA.7269.1  | 3.97  | 4.01  | 0.05 | 0.14 | -1.03 | 0.5101   | 0.406095 | 0.764729 | 0.634197 |
| MmugDNA.727.1.S1_at     | MmugDNA.727.1   | 4.56  | 4.56  | 0.24 | 0.11 | 1     | 0.716083 | 0.902894 | 0.87529  | 0.944897 |
| MmugDNA.7270.1.S1_at    | MmugDNA.7270.1  | 10.74 | 10.25 | 0.14 | 0.12 | 1.41  | 0.004396 | 0.002216 | 0.183061 | 0.069424 |
| MmugDNA.7271.1.S1_at    | MmugDNA.7271.1  | 7.99  | 6.88  | 0.36 | 0.74 | 2.16  | 0.202942 | 0.250213 | 0.565548 | 0.519235 |
| MmugDNA.7272.1.S1_at    | MmugDNA.7272.1  | 4.62  | 4.63  | 0.13 | 0.05 | -1.01 | 0.340111 | 0.405134 | 0.661621 | 0.633482 |
| MmugDNA.7273.1.S1_at    | MmugDNA.7273.1  | 3.22  | 3.28  | 0.16 | 0.09 | -1.04 | 0.779558 | 0.630171 | 0.90816  | 0.782181 |
| MmugDNA.16291.1.S1_at   | MmugDNA.16291.1 | 3.77  | 4.28  | 0.57 | 0.34 | -1.43 | 0.644521 | 0.486939 | 0.839786 | 0.690118 |
| MmugDNA.16291.1.S1_s_at | MmugDNA.16291.1 | 4.93  | 4.87  | 0.23 | 0.11 | 1.04  | 0.659246 | 0.802797 | 0.847039 | 0.886441 |
| MmugDNA.7276.1.S1_at    | MmugDNA.7276.1  | 8.74  | 8.88  | 0.08 | 0.19 | -1.1  | 0.266967 | 0.322998 | 0.612291 | 0.574313 |
| MmugDNA.7277.1.S1_at    | MmugDNA.7277.1  | 11.64 | 11.69 | 0.07 | 0.12 | -1.03 | 0.347098 | 0.016855 | 0.666208 | 0.16458  |
| MmugDNA.728.1.S1_at     | MmugDNA.728.1   | 5.61  | 5.87  | 0.46 | 0.18 | -1.2  | 0.439619 | 0.503718 | 0.723686 | 0.701079 |
| MmugDNA.7281.1.S1_at    | MmugDNA.7281.1  | 3.76  | 3.9   | 0.1  | 0.21 | -1.1  | 0.649665 | 0.843282 | 0.842495 | 0.910767 |
| MmugDNA.7282.1.S1_at    | MmugDNA.7282.1  | 8.36  | 8.72  | 0.08 | 0.49 | -1.28 | 0.079507 | 0.089396 | 0.429636 | 0.343637 |
| MmugDNA.7283.1.S1_at    | MmugDNA.7283.1  | 10.91 | 11.49 | 0.12 | 0.12 | -1.5  | 0.003889 | 0.000867 | 0.180184 | 0.047463 |
| MmugDNA.7284.1.S1_at    | MmugDNA.7284.1  | 9.16  | 8.02  | 0.36 | 0.57 | 2.21  | 0.025788 | 0.016781 | 0.300646 | 0.164091 |
| MmugDNA.7285.1.S1_at    | MmugDNA.7285.1  | 3.72  | 3.92  | 0.14 | 0.12 | -1.15 | 0.604982 | 0.195575 | 0.818068 | 0.470441 |
| MmugDNA.7286.1.S1_s_at  | MmugDNA.7286.1  | 9.63  | 9.92  | 0.13 | 0.21 | -1.22 | 0.064975 | 0.07478  | 0.403744 | 0.318527 |
| MmugDNA.7288.1.S1_s_at  | MmugDNA.7288.1  | 10.07 | 9.53  | 0.09 | 0.32 | 1.45  | 0.019662 | 0.010859 | 0.275549 | 0.13586  |
| MmugDNA.7289.1.S1_at    | MmugDNA.7289.1  | 4.34  | 4.22  | 0.78 | 0.25 | 1.09  | 0.461219 | 0.639878 | 0.737488 | 0.788512 |
| MmugDNA.7290.1.S1_s_at  | MmugDNA.7290.1  | 6.35  | 7.27  | 0.24 | 0.95 | -1.89 | 0.179253 | 0.25802  | 0.543549 | 0.52557  |
| MmugDNA.7292.1.S1_at    | MmugDNA.7292.1  | 4.85  | 6.27  | 0.15 | 1.24 | -2.68 | 0.188298 | 0.088632 | 0.551276 | 0.342167 |
| MmugDNA.7293.1.S1_at    | MmugDNA.7293.1  | 11.27 | 12.23 | 0.17 | 0.83 | -1.95 | 0.107077 | 0.097547 | 0.467743 | 0.355398 |
| MmugDNA.7294.1.S1_at    | MmugDNA.7294.1  | 4.13  | 3.81  | 0.3  | 0.11 | 1.24  | 0.18905  | 0.155549 | 0.552168 | 0.430888 |
| MmugDNA.7295.1.S1_at    | MmugDNA.7295.1  | 6.34  | 6.6   | 0.09 | 0.24 | -1.2  | 0.160761 | 0.206506 | 0.525884 | 0.480571 |
| MmugDNA.7296.1.S1_at    | MmugDNA.7296.1  | 9.53  | 8.56  | 0.13 | 0.3  | 1.95  | 0.006995 | 0.003484 | 0.202858 | 0.084834 |
| MmugDNA.7298.1.S1_s_at  | MmugDNA.7298.1  | 3.56  | 3.44  | 0.1  | 0.15 | 1.09  | 0.757311 | 0.709624 | 0.897007 | 0.831691 |
| MmugDNA.7299.1.S1_at    | MmugDNA.7299.1  | 3.84  | 3.98  | 0.09 | 0.18 | -1.1  | 0.921337 | 0.66624  | 0.969303 | 0.804419 |
| MmugDNA.73.1.S1_s_at    | MmugDNA.73.1    | 11.15 | 11.3  | 0.17 | 0.86 | -1.11 | 0.821139 | 0.927765 | 0.927232 | 0.958984 |
| MmugDNA.730.1.S1_at     | MmugDNA.730.1   | 10.23 | 10.2  | 0.03 | 0.16 | 1.02  | 0.630152 | 0.141813 | 0.83195  | 0.415331 |
| MmugDNA.7300.1.S1_at    | MmugDNA.7300.1  | 11.59 | 11.72 | 0.91 | 0.96 | -1.09 | 0.66793  | 0.855693 | 0.851379 | 0.917683 |
| MmugDNA.7302.1.S1_at    | MmugDNA.7302.1  | 5.25  | 4.84  | 0.23 | 0.47 | 1.33  | 0.147574 | 0.177361 | 0.513287 | 0.453742 |
| MmugDNA.7303.1.S1_at    | MmugDNA.7303.1  | 12.29 | 12.4  | 0.08 | 0.1  | -1.08 | 0.083095 | 0.018631 | 0.435235 | 0.171647 |
| MmugDNA.7304.1.S1_at    | MmugDNA.7304.1  | 10.39 | 10.27 | 0.23 | 0.6  | 1.09  | 0.573782 | 0.425825 | 0.801346 | 0.6481   |
| MmugDNA.7304.1.S1_s_at  | MmugDNA.7304.1  | 10.23 | 10.36 | 0.1  | 0.6  | -1.09 | 0.446288 | 0.098009 | 0.72824  | 0.355954 |
| MmugDNA.7305.1.S1_at    | MmugDNA.7305.1  | 11.47 | 11.62 | 0.13 | 0.11 | -1.11 | 0.079922 | 0.087177 | 0.430176 | 0.340133 |
| MmugDNA.7306.1.S1_at    | MmugDNA.7306.1  | 8.06  | 8.05  | 0.17 | 0.57 | 1.01  | 0.820807 | 0.939298 | 0.927159 | 0.965543 |
| MmugDNA.7307.1.S1_at    | MmugDNA.7307.1  | 3.79  | 3.76  | 0.26 | 0.24 | 1.02  | 0.853029 | 0.260007 | 0.940695 | 0.52675  |
| MmugDNA.7308.1.S1_at    | MmugDNA.7308.1  | 6.57  | 6.79  | 0.19 | 0.03 | -1.16 | 0.108091 | 0.053951 | 0.468878 | 0.277769 |
| MmugDNA.7309.1.S1_at    | MmugDNA.7309.1  | 5.38  | 4.51  | 0.93 | 0.04 | 1.84  | 0.057578 | 0.062694 | 0.38863  | 0.297113 |



|                        |                |       |       |      |      |       |          |          |          |          |
|------------------------|----------------|-------|-------|------|------|-------|----------|----------|----------|----------|
| MmugDNA.7310.1.S1_at   | MmugDNA.7310.1 | 7.32  | 7.41  | 0.37 | 0.03 | -1.06 | 0.237834 | 0.268958 | 0.591288 | 0.534369 |
| MmugDNA.7311.1.S1_at   | MmugDNA.7311.1 | 3.55  | 3.52  | 0.04 | 0.08 | 1.02  | 0.535267 | 0.497797 | 0.778933 | 0.697071 |
| MmugDNA.7312.1.S1_at   | MmugDNA.7312.1 | 8.11  | 7.68  | 0.15 | 0.04 | 1.35  | 0.00907  | 0.064195 | 0.222023 | 0.299611 |
| MmugDNA.7313.1.S1_at   | MmugDNA.7313.1 | 9.73  | 9.5   | 0.28 | 0.23 | 1.17  | 0.732073 | 0.92169  | 0.884212 | 0.955826 |
| MmugDNA.7314.1.S1_at   | MmugDNA.7314.1 | 6.9   | 7.06  | 0.07 | 0.09 | -1.12 | 0.042211 | 0.039986 | 0.354539 | 0.245173 |
| MmugDNA.7315.1.S1_at   | MmugDNA.7315.1 | 10.13 | 9.66  | 0.06 | 0.12 | 1.38  | 0.003695 | 0.000714 | 0.179515 | 0.044419 |
| MmugDNA.7317.1.S1_at   | MmugDNA.7317.1 | 4.39  | 4.27  | 0.32 | 0.21 | 1.09  | 0.772834 | 0.425277 | 0.904452 | 0.647679 |
| MmugDNA.7318.1.S1_at   | MmugDNA.7318.1 | 6     | 5.34  | 0.76 | 0.23 | 1.58  | 0.291999 | 0.514835 | 0.629318 | 0.707919 |
| MmugDNA.7321.1.S1_at   | MmugDNA.7321.1 | 6.09  | 6.14  | 0.19 | 0.06 | -1.04 | 0.289277 | 0.483374 | 0.627311 | 0.687904 |
| MmugDNA.7323.1.S1_at   | MmugDNA.7323.1 | 7.22  | 5.14  | 0.58 | 0.91 | 4.25  | 0.026919 | 0.039782 | 0.305225 | 0.244453 |
| MmugDNA.7324.1.S1_at   | MmugDNA.7324.1 | 5.19  | 5.22  | 0.21 | 0.05 | -1.02 | 0.515854 | 0.732534 | 0.767629 | 0.845072 |
| MmugDNA.7326.1.S1_at   | MmugDNA.7326.1 | 5.82  | 6.13  | 0.52 | 0.3  | -1.24 | 0.980706 | 0.561434 | 0.993028 | 0.737397 |
| MmugDNA.7327.1.S1_at   | MmugDNA.7327.1 | 4.11  | 4.33  | 0.13 | 0.1  | -1.17 | 0.037655 | 0.031282 | 0.342385 | 0.218752 |
| MmugDNA.7328.1.S1_at   | MmugDNA.7328.1 | 6.06  | 5.93  | 0.81 | 0.69 | 1.09  | 0.805052 | 0.726409 | 0.919928 | 0.84168  |
| MmugDNA.733.1.S1_at    | MmugDNA.733.1  | 4.2   | 4.18  | 0.04 | 0.21 | 1.01  | 0.33985  | 0.397081 | 0.661507 | 0.628611 |
| MmugDNA.7331.1.S1_at   | MmugDNA.7331.1 | 3.15  | 3.18  | 0.07 | 0.05 | -1.02 | 0.97661  | 0.947503 | 0.991012 | 0.970206 |
| MmugDNA.7333.1.S1_at   | MmugDNA.7333.1 | 5.63  | 5.79  | 0.18 | 0.15 | -1.12 | 0.916645 | 0.916754 | 0.96735  | 0.9534   |
| MmugDNA.7335.1.S1_at   | MmugDNA.7335.1 | 3.37  | 3.6   | 0.04 | 0.18 | -1.17 | 0.086437 | 0.149995 | 0.440232 | 0.424621 |
| MmugDNA.7336.1.S1_at   | MmugDNA.7336.1 | 5.92  | 5.55  | 0.92 | 0.93 | 1.3   | 0.976502 | 0.041652 | 0.990935 | 0.24887  |
| MmugDNA.7338.1.S1_at   | MmugDNA.7338.1 | 8.04  | 8.23  | 0.87 | 1.03 | -1.14 | 0.546661 | 0.600467 | 0.785646 | 0.762128 |
| MmugDNA.734.1.S1_x_at  | MmugDNA.734.1  | 12.39 | 12.1  | 0.41 | 0.2  | 1.22  | 0.12535  | 0.171705 | 0.49131  | 0.448079 |
| MmugDNA.7340.1.S1_at   | MmugDNA.7340.1 | 8.08  | 8.5   | 0.95 | 0.35 | -1.34 | 0.864245 | 0.93766  | 0.945492 | 0.964687 |
| MmugDNA.7342.1.S1_at   | MmugDNA.7342.1 | 5.18  | 5.18  | 0.2  | 0.16 | 1     | 0.941134 | 0.532235 | 0.97764  | 0.718999 |
| MmugDNA.7343.1.S1_at   | MmugDNA.7343.1 | 6.77  | 6.62  | 0.14 | 0.16 | 1.12  | 0.549096 | 0.231797 | 0.787104 | 0.503592 |
| MmugDNA.7344.1.S1_x_at | MmugDNA.7344.1 | 9.55  | 9.19  | 1.08 | 0.88 | 1.28  | 0.295238 | 0.389309 | 0.631561 | 0.623403 |
| MmugDNA.7345.1.S1_at   | MmugDNA.7345.1 | 8.26  | 8.14  | 0.22 | 0.44 | 1.09  | 0.683153 | 0.354249 | 0.858347 | 0.597105 |
| MmugDNA.7347.1.S1_at   | MmugDNA.7347.1 | 8.73  | 7     | 0.68 | 0.43 | 3.31  | 0.079015 | 0.139479 | 0.428609 | 0.412743 |
| MmugDNA.735.1.S1_at    | MmugDNA.735.1  | 7.93  | 7.03  | 0.03 | 0.48 | 1.86  | 0.032625 | 0.035728 | 0.32573  | 0.233412 |
| MmugDNA.7351.1.S1_at   | MmugDNA.7351.1 | 12.14 | 12.31 | 0.32 | 0.55 | -1.12 | 0.784551 | 0.767627 | 0.910258 | 0.865109 |
| MmugDNA.7352.1.S1_at   | MmugDNA.7352.1 | 5.88  | 5.8   | 0.29 | 0.23 | 1.06  | 0.788637 | 0.949044 | 0.912183 | 0.970812 |
| MmugDNA.7353.1.S1_s_at | MmugDNA.7353.1 | 11.62 | 11.71 | 0.2  | 0.08 | -1.07 | 0.439783 | 0.422131 | 0.723798 | 0.645492 |
| MmugDNA.7354.1.S1_at   | MmugDNA.7354.1 | 4.53  | 4.6   | 0.28 | 0.15 | -1.05 | 0.844152 | 0.8348   | 0.937436 | 0.905439 |
| MmugDNA.7355.1.S1_at   | MmugDNA.7355.1 | 7.37  | 5.83  | 0.27 | 0.52 | 2.92  | 0.025606 | 0.015595 | 0.300013 | 0.158262 |
| MmugDNA.7356.1.S1_at   | MmugDNA.7356.1 | 5.82  | 4.51  | 0.24 | 0.6  | 2.47  | 0.027242 | 0.021652 | 0.30707  | 0.184333 |
| MmugDNA.7358.1.S1_at   | MmugDNA.7358.1 | 6.05  | 6.84  | 0.36 | 0.4  | -1.72 | 0.126013 | 0.131354 | 0.492065 | 0.403466 |
| MmugDNA.736.1.S1_at    | MmugDNA.736.1  | 9.73  | 9.34  | 0.19 | 0.4  | 1.31  | 0.224207 | 0.286191 | 0.582619 | 0.547713 |
| MmugDNA.7360.1.S1_at   | MmugDNA.7360.1 | 11.32 | 11.58 | 0.03 | 0.14 | -1.2  | 0.032554 | 0.021197 | 0.325445 | 0.182325 |
| MmugDNA.7362.1.S1_at   | MmugDNA.7362.1 | 13.4  | 13.59 | 0.13 | 0.42 | -1.14 | 0.978597 | 0.358631 | 0.992128 | 0.600139 |
| MmugDNA.7364.1.S1_at   | MmugDNA.7364.1 | 6.64  | 7.15  | 1.47 | 0.15 | -1.42 | 0.716808 | 0.903646 | 0.875634 | 0.945292 |
| MmugDNA.7366.1.S1_at   | MmugDNA.7366.1 | 6.5   | 7.07  | 0.3  | 0.59 | -1.49 | 0.271466 | 0.280789 | 0.6157   | 0.543952 |
| MmugDNA.7367.1.S1_at   | MmugDNA.7367.1 | 5.16  | 4.92  | 0.32 | 0.13 | 1.18  | 0.897755 | 0.193726 | 0.959172 | 0.468818 |

|                         |                 |       |       |      |      |       |          |          |          |          |
|-------------------------|-----------------|-------|-------|------|------|-------|----------|----------|----------|----------|
| MmugDNA.7368.1.S1_at    | MmugDNA.7368.1  | 3.37  | 3.32  | 0.03 | 0.06 | 1.03  | 0.780793 | 0.015103 | 0.908616 | 0.156008 |
| MmugDNA.7369.1.S1_at    | MmugDNA.7369.1  | 3.07  | 3.9   | 0.22 | 0.28 | -1.78 | 0.02996  | 0.034635 | 0.316329 | 0.230247 |
| MmugDNA.737.1.S1_at     | MmugDNA.737.1   | 5.22  | 5.3   | 0    | 0.02 | -1.06 | 0.005412 | 0.145006 | 0.191107 | 0.418938 |
| MmugDNA.7370.1.S1_at    | MmugDNA.7370.1  | 6.68  | 6.7   | 0.44 | 0.5  | -1.01 | 0.711515 | 0.865673 | 0.873642 | 0.923638 |
| MmugDNA.7373.1.S1_at    | MmugDNA.7373.1  | 3.31  | 3.27  | 0.17 | 0.33 | 1.03  | 0.496042 | 0.665122 | 0.757394 | 0.803733 |
| MmugDNA.7374.1.S1_at    | MmugDNA.7374.1  | 3.99  | 3.99  | 0.06 | 0.01 | 1     | 0.93034  | 0.984655 | 0.973081 | 0.991346 |
| MmugDNA.7375.1.S1_x_at  | MmugDNA.7375.1  | 9.28  | 8.76  | 0.98 | 0.29 | 1.43  | 0.140793 | 0.159088 | 0.508448 | 0.435217 |
| MmugDNA.7378.1.S1_at    | MmugDNA.7378.1  | 5.06  | 5.04  | 0.14 | 0.08 | 1.02  | 0.494511 | 0.005052 | 0.756791 | 0.099022 |
| MmugDNA.7379.1.S1_at    | MmugDNA.7379.1  | 8.43  | 7.61  | 0.38 | 0.2  | 1.76  | 0.022086 | 0.022176 | 0.28446  | 0.186409 |
| MmugDNA.738.1.S1_at     | MmugDNA.738.1   | 9.87  | 10.33 | 0.41 | 1.74 | -1.38 | 0.653241 | 0.477856 | 0.844033 | 0.683843 |
| MmugDNA.7380.1.S1_at    | MmugDNA.7380.1  | 4.21  | 4.19  | 0.03 | 0.13 | 1.01  | 0.630381 | 0.783031 | 0.832004 | 0.874447 |
| MmugDNA.7387.1.S1_at    | MmugDNA.7387.1  | 8.39  | 9.66  | 0.38 | 0.26 | -2.41 | 0.011968 | 0.001973 | 0.239065 | 0.065871 |
| MmugDNA.7388.1.S1_at    | MmugDNA.7388.1  | 6.81  | 7.35  | 0.11 | 0.31 | -1.45 | 0.027783 | 0.078246 | 0.308973 | 0.324785 |
| MmugDNA.7388.1.S1_s_at  | MmugDNA.7388.1  | 5.81  | 6.05  | 0.17 | 0.23 | -1.18 | 0.087179 | 0.202486 | 0.441153 | 0.476812 |
| MmugDNA.7389.1.S1_at    | MmugDNA.7389.1  | 11.28 | 10.97 | 0.2  | 0.34 | 1.24  | 0.205671 | 0.211396 | 0.568157 | 0.48553  |
| MmugDNA.739.1.S1_at     | MmugDNA.739.1   | 5.26  | 4.84  | 1.01 | 0.2  | 1.34  | 0.590019 | 0.175936 | 0.809704 | 0.452486 |
| MmugDNA.7391.1.S1_at    | MmugDNA.7391.1  | 5.22  | 5.21  | 0.22 | 0.27 | 1.01  | 0.903708 | 0.063072 | 0.961578 | 0.297788 |
| MmugDNA.7392.1.S1_at    | MmugDNA.7392.1  | 5.27  | 4.68  | 0.18 | 0.38 | 1.5   | 0.193396 | 0.116901 | 0.556856 | 0.384277 |
| MmugDNA.7394.1.S1_s_at  | MmugDNA.7394.1  | 7.98  | 9.46  | 0.67 | 0.83 | -2.8  | 0.193567 | 0.245026 | 0.557166 | 0.514813 |
| MmugDNA.7396.1.S1_at    | MmugDNA.7396.1  | 5.98  | 5.16  | 0.26 | 0.33 | 1.76  | 0.042849 | 0.016095 | 0.355382 | 0.160775 |
| MmugDNA.7398.1.S1_at    | MmugDNA.7398.1  | 5.07  | 4.94  | 0.11 | 0.06 | 1.09  | 0.05185  | 0.105883 | 0.376519 | 0.368175 |
| MmugDNA.7399.1.S1_at    | MmugDNA.7399.1  | 5.32  | 6.13  | 0.44 | 0.3  | -1.76 | 0.106947 | 0.139521 | 0.467551 | 0.412743 |
| MmugDNA.74.1.S1_at      | MmugDNA.74.1    | 6.27  | 5.54  | 0.74 | 0.29 | 1.66  | 0.159314 | 0.192885 | 0.524174 | 0.468379 |
| MmugDNA.740.1.S1_at     | MmugDNA.740.1   | 6.18  | 6.26  | 0.17 | 0.2  | -1.06 | 0.293204 | 0.432393 | 0.630314 | 0.652819 |
| MmugDNA.7400.1.S1_at    | MmugDNA.7400.1  | 12.57 | 12.92 | 0.16 | 0.36 | -1.27 | 0.509507 | 0.698165 | 0.764387 | 0.824649 |
| MmugDNA.7401.1.S1_at    | MmugDNA.7401.1  | 3.24  | 3.15  | 0.2  | 0.13 | 1.07  | 0.561283 | 0.344313 | 0.794756 | 0.589762 |
| MmugDNA.7402.1.S1_at    | MmugDNA.7402.1  | 13.21 | 12.56 | 0.56 | 0.44 | 1.57  | 0.455731 | 0.10277  | 0.733977 | 0.363305 |
| MmugDNA.7404.1.S1_at    | MmugDNA.7404.1  | 6.05  | 6.03  | 0.32 | 0.12 | 1.02  | 0.867863 | 0.68246  | 0.947272 | 0.814526 |
| MmugDNA.7406.1.S1_at    | MmugDNA.7406.1  | 4.22  | 4.3   | 0.1  | 0.09 | -1.06 | 0.617985 | 0.825724 | 0.825015 | 0.899816 |
| MmugDNA.7409.1.S1_at    | MmugDNA.7409.1  | 6.54  | 6.89  | 0.13 | 0.1  | -1.28 | 0.029374 | 0.017304 | 0.313903 | 0.166509 |
| MmugDNA.741.1.S1_at     | MmugDNA.741.1   | 5.97  | 6.17  | 0.03 | 0.19 | -1.15 | 0.194195 | 0.180884 | 0.557777 | 0.457394 |
| MmugDNA.7410.1.S1_at    | MmugDNA.7410.1  | 10.55 | 10.95 | 0.1  | 0.13 | -1.32 | 0.021413 | 0.014938 | 0.282524 | 0.155342 |
| MmugDNA.7411.1.S1_at    | MmugDNA.7411.1  | 10.64 | 11.91 | 0.19 | 2.06 | -2.42 | 0.683106 | 0.584119 | 0.858329 | 0.752204 |
| MmugDNA.7412.1.S1_at    | MmugDNA.7412.1  | 3.5   | 3.51  | 0.22 | 0.15 | -1    | 0.596746 | 0.712073 | 0.813172 | 0.833139 |
| MmugDNA.7414.1.S1_at    | MmugDNA.7414.1  | 7.27  | 7.37  | 0.29 | 0.4  | -1.07 | 0.680565 | 0.863707 | 0.857233 | 0.922638 |
| MmugDNA.7416.1.S1_at    | MmugDNA.7416.1  | 7.79  | 8.5   | 0.23 | 0.26 | -1.64 | 0.04318  | 0.004785 | 0.356616 | 0.096484 |
| MmugDNA.7417.1.S1_at    | MmugDNA.7417.1  | 5.57  | 5.58  | 0.1  | 0.49 | -1.01 | 0.341416 | 0.128412 | 0.662564 | 0.399676 |
| MmugDNA.7419.1.S1_at    | MmugDNA.7419.1  | 7.34  | 7.55  | 0.23 | 0.02 | -1.15 | 0.166664 | 0.092376 | 0.530318 | 0.348294 |
| MmugDNA.35554.1.S1_s_at | MmugDNA.35554.1 | 4.84  | 4.97  | 0.08 | 0.16 | -1.09 | 0.165539 | 0.197691 | 0.529547 | 0.472633 |
| MmugDNA.7420.1.S1_at    | MmugDNA.7420.1  | 4.41  | 4.51  | 0.43 | 0.1  | -1.08 | 0.531827 | 0.533879 | 0.777475 | 0.719914 |
| MmugDNA.7421.1.S1_at    | MmugDNA.7421.1  | 4.26  | 4.55  | 0.32 | 0.21 | -1.22 | 0.258953 | 0.305855 | 0.606157 | 0.562731 |

|                        |                |       |       |      |      |       |          |          |          |          |
|------------------------|----------------|-------|-------|------|------|-------|----------|----------|----------|----------|
| MmugDNA.7422.1.S1_at   | MmugDNA.7422.1 | 5.24  | 3.79  | 1.12 | 1.41 | 2.74  | 0.577486 | 0.770813 | 0.803534 | 0.866807 |
| MmugDNA.7424.1.S1_at   | MmugDNA.7424.1 | 5.45  | 5.6   | 0.2  | 0.53 | -1.11 | 0.394444 | 0.584664 | 0.695795 | 0.752482 |
| MmugDNA.7425.1.S1_at   | MmugDNA.7425.1 | 4.01  | 3.69  | 0.17 | 0.09 | 1.25  | 0.051301 | 0.040802 | 0.376001 | 0.246935 |
| MmugDNA.7426.1.S1_at   | MmugDNA.7426.1 | 7.48  | 7.21  | 0.21 | 0.46 | 1.21  | 0.227669 | 0.038865 | 0.585103 | 0.242062 |
| MmugDNA.7427.1.S1_at   | MmugDNA.7427.1 | 11.96 | 11.43 | 0.22 | 0.2  | 1.44  | 0.036904 | 0.000949 | 0.34048  | 0.049129 |
| MmugDNA.7428.1.S1_at   | MmugDNA.7428.1 | 11.66 | 11.08 | 0.33 | 0.36 | 1.5   | 0.083842 | 0.031032 | 0.436266 | 0.218074 |
| MmugDNA.7431.1.S1_at   | MmugDNA.7431.1 | 3.73  | 3.86  | 0.13 | 0.25 | -1.09 | 0.161022 | 0.21514  | 0.526189 | 0.488943 |
| MmugDNA.7433.1.S1_at   | MmugDNA.7433.1 | 9.98  | 10.4  | 0.11 | 0.15 | -1.34 | 0.019176 | 0.002289 | 0.273043 | 0.07045  |
| MmugDNA.7434.1.S1_at   | MmugDNA.7434.1 | 9.71  | 9.1   | 0.06 | 0.42 | 1.54  | 0.238034 | 0.153244 | 0.591399 | 0.428072 |
| MmugDNA.7435.1.S1_at   | MmugDNA.7435.1 | 10.91 | 11.08 | 0.38 | 0.1  | -1.12 | 0.123392 | 0.206985 | 0.489063 | 0.481111 |
| MmugDNA.7436.1.S1_at   | MmugDNA.7436.1 | 6.5   | 5.84  | 0.24 | 0.33 | 1.58  | 0.038098 | 0.033143 | 0.343554 | 0.225324 |
| MmugDNA.7437.1.S1_at   | MmugDNA.7437.1 | 4.28  | 4.29  | 0.05 | 0.07 | -1.01 | 0.777188 | 0.087726 | 0.906837 | 0.340979 |
| MmugDNA.7438.1.S1_at   | MmugDNA.7438.1 | 4.54  | 4.89  | 0.17 | 0.05 | -1.27 | 0.028504 | 0.020458 | 0.311509 | 0.179597 |
| MmugDNA.7439.1.S1_at   | MmugDNA.7439.1 | 7.2   | 7.68  | 0.45 | 0.21 | -1.4  | 0.182069 | 0.101434 | 0.546458 | 0.361205 |
| MmugDNA.744.1.S1_at    | MmugDNA.744.1  | 3.73  | 3.96  | 0.08 | 0.22 | -1.17 | 0.326599 | 0.171635 | 0.653184 | 0.448044 |
| MmugDNA.7440.1.S1_at   | MmugDNA.7440.1 | 5.75  | 4.78  | 0.6  | 0.07 | 1.96  | 0.046803 | 0.043811 | 0.364126 | 0.25387  |
| MmugDNA.7441.1.S1_at   | MmugDNA.7441.1 | 5.18  | 4.98  | 0.14 | 0.15 | 1.14  | 0.154432 | 0.103009 | 0.51902  | 0.363812 |
| MmugDNA.7442.1.S1_at   | MmugDNA.7442.1 | 8.07  | 6.25  | 0.39 | 1.01 | 3.54  | 0.116601 | 0.132345 | 0.48034  | 0.404294 |
| MmugDNA.7443.1.S1_at   | MmugDNA.7443.1 | 11.52 | 11.4  | 0.02 | 0.01 | 1.08  | 0.000779 | 0.000269 | 0.136818 | 0.033826 |
| MmugDNA.7444.1.S1_at   | MmugDNA.7444.1 | 10.13 | 10.01 | 0.38 | 0.49 | 1.09  | 0.769452 | 0.446841 | 0.903012 | 0.663044 |
| MmugDNA.7445.1.S1_at   | MmugDNA.7445.1 | 6.29  | 6.43  | 0.09 | 0.14 | -1.11 | 0.210994 | 0.110643 | 0.571977 | 0.374854 |
| MmugDNA.7446.1.S1_at   | MmugDNA.7446.1 | 11.77 | 11.98 | 0.18 | 0.48 | -1.16 | 0.572128 | 0.568403 | 0.800676 | 0.741962 |
| MmugDNA.7447.1.S1_at   | MmugDNA.7447.1 | 12.65 | 12.84 | 0.07 | 0.16 | -1.14 | 0.070798 | 0.032711 | 0.414661 | 0.223942 |
| MmugDNA.7449.1.S1_at   | MmugDNA.7449.1 | 6.31  | 6.45  | 0.64 | 0.2  | -1.1  | 0.772278 | 0.55726  | 0.904121 | 0.735031 |
| MmugDNA.745.1.S1_at    | MmugDNA.745.1  | 8.81  | 9.91  | 0.36 | 0.4  | -2.15 | 0.044598 | 0.014872 | 0.358786 | 0.155055 |
| MmugDNA.7450.1.S1_at   | MmugDNA.7450.1 | 5.41  | 5.57  | 0.28 | 0.24 | -1.12 | 0.185374 | 0.190211 | 0.548793 | 0.465854 |
| MmugDNA.7452.1.S1_at   | MmugDNA.7452.1 | 9.42  | 8.85  | 0.24 | 0.27 | 1.48  | 0.068814 | 0.013154 | 0.410654 | 0.147338 |
| MmugDNA.7453.1.S1_at   | MmugDNA.7453.1 | 10.12 | 9.54  | 0.12 | 0.17 | 1.49  | 0.011181 | 0.004281 | 0.234598 | 0.091887 |
| MmugDNA.5796.1.S1_s_at | MmugDNA.5796.1 | 13.31 | 13.32 | 0.06 | 0.08 | -1.01 | 0.857106 | 0.871327 | 0.942171 | 0.926844 |
| MmugDNA.7455.1.S1_at   | MmugDNA.7455.1 | 5.13  | 5.72  | 0.18 | 0.57 | -1.5  | 0.23467  | 0.162999 | 0.588808 | 0.439145 |
| MmugDNA.7456.1.S1_at   | MmugDNA.7456.1 | 4.22  | 3.77  | 0.03 | 0.3  | 1.36  | 0.148041 | 0.176767 | 0.513451 | 0.45319  |
| MmugDNA.7457.1.S1_at   | MmugDNA.7457.1 | 5.58  | 5.04  | 0.28 | 0.38 | 1.46  | 0.084118 | 0.081631 | 0.436782 | 0.329824 |
| MmugDNA.7458.1.S1_at   | MmugDNA.7458.1 | 4.8   | 4.3   | 0.27 | 0.07 | 1.42  | 0.045872 | 0.04282  | 0.361884 | 0.251467 |
| MmugDNA.7459.1.S1_at   | MmugDNA.7459.1 | 6.25  | 5.46  | 0.16 | 0.32 | 1.73  | 0.029222 | 0.034634 | 0.313575 | 0.230247 |
| MmugDNA.7460.1.S1_at   | MmugDNA.7460.1 | 5.73  | 5.87  | 0.76 | 0.18 | -1.1  | 0.959191 | 0.534825 | 0.9845   | 0.720557 |
| MmugDNA.7461.1.S1_at   | MmugDNA.7461.1 | 7.18  | 6.93  | 0.46 | 0.13 | 1.19  | 0.339459 | 0.178239 | 0.661307 | 0.45458  |
| MmugDNA.7464.1.S1_at   | MmugDNA.7464.1 | 8.92  | 10.54 | 0.06 | 0.37 | -3.07 | 0.001359 | 0.000296 | 0.146228 | 0.034892 |
| MmugDNA.7465.1.S1_at   | MmugDNA.7465.1 | 6.28  | 6.23  | 0.21 | 0.11 | 1.03  | 0.884771 | 0.413994 | 0.95382  | 0.639979 |
| MmugDNA.7466.1.S1_at   | MmugDNA.7466.1 | 9.2   | 9.45  | 0.11 | 0.35 | -1.2  | 0.294177 | 0.090434 | 0.631154 | 0.344925 |
| MmugDNA.7467.1.S1_at   | MmugDNA.7467.1 | 5.1   | 5.06  | 0.64 | 0.52 | 1.03  | 0.58397  | 0.5667   | 0.806804 | 0.740724 |
| MmugDNA.7469.1.S1_at   | MmugDNA.7469.1 | 9.82  | 9.77  | 0.03 | 0.11 | 1.04  | 0.911914 | 0.360547 | 0.965151 | 0.601613 |

|                        |                |       |       |      |      |       |          |          |          |          |
|------------------------|----------------|-------|-------|------|------|-------|----------|----------|----------|----------|
| MmugDNA.747.1.S1_at    | MmugDNA.747.1  | 5.95  | 7.13  | 0.86 | 0.24 | -2.27 | 0.28612  | 0.283939 | 0.625392 | 0.546237 |
| MmugDNA.7470.1.S1_at   | MmugDNA.7470.1 | 7.13  | 6.91  | 0.27 | 0.29 | 1.17  | 0.175551 | 0.119087 | 0.539311 | 0.387386 |
| MmugDNA.7473.1.S1_at   | MmugDNA.7473.1 | 4.31  | 4.12  | 0.28 | 0.25 | 1.14  | 0.672136 | 0.852583 | 0.852854 | 0.916218 |
| MmugDNA.7474.1.S1_at   | MmugDNA.7474.1 | 6.86  | 6.63  | 0.68 | 0.21 | 1.17  | 0.271983 | 0.344224 | 0.615882 | 0.589762 |
| MmugDNA.7475.1.S1_at   | MmugDNA.7475.1 | 3.69  | 3.78  | 0.18 | 0.27 | -1.06 | 0.971823 | 0.863098 | 0.989264 | 0.922237 |
| MmugDNA.7476.1.S1_at   | MmugDNA.7476.1 | 6.06  | 6.12  | 0.04 | 0.11 | -1.05 | 0.524839 | 0.396829 | 0.773313 | 0.628452 |
| MmugDNA.7477.1.S1_at   | MmugDNA.7477.1 | 4.05  | 3.77  | 0.03 | 0.13 | 1.21  | 0.00996  | 0.093317 | 0.226899 | 0.349412 |
| MmugDNA.748.1.S1_at    | MmugDNA.748.1  | 3.85  | 4.65  | 1.81 | 1.2  | -1.73 | 0.861011 | 0.91043  | 0.943939 | 0.949439 |
| MmugDNA.7480.1.S1_at   | MmugDNA.7480.1 | 8.78  | 10.05 | 0.57 | 1    | -2.4  | 0.10787  | 0.106919 | 0.468553 | 0.369499 |
| MmugDNA.7481.1.S1_at   | MmugDNA.7481.1 | 12.52 | 11.63 | 0.09 | 0.22 | 1.86  | 0.004943 | 0.001446 | 0.185837 | 0.05795  |
| MmugDNA.7482.1.S1_at   | MmugDNA.7482.1 | 11.44 | 10.89 | 0.03 | 0.41 | 1.47  | 0.226697 | 0.244103 | 0.58463  | 0.514121 |
| MmugDNA.7484.1.S1_at   | MmugDNA.7484.1 | 5.22  | 5.37  | 0.08 | 0.09 | -1.11 | 0.100352 | 0.279489 | 0.460878 | 0.543055 |
| MmugDNA.7485.1.S1_at   | MmugDNA.7485.1 | 4.37  | 4.12  | 0.19 | 0.28 | 1.19  | 0.686031 | 0.195797 | 0.859592 | 0.470661 |
| MmugDNA.7487.1.S1_at   | MmugDNA.7487.1 | 6.92  | 7.47  | 0.44 | 0.78 | -1.46 | 0.138724 | 0.163894 | 0.505884 | 0.440105 |
| MmugDNA.7488.1.S1_at   | MmugDNA.7488.1 | 7.45  | 8.04  | 0.32 | 0.39 | -1.51 | 0.051404 | 0.045456 | 0.376003 | 0.2575   |
| MmugDNA.7489.1.S1_at   | MmugDNA.7489.1 | 2.77  | 2.79  | 0.07 | 0.1  | -1.01 | 0.958498 | 0.918707 | 0.984324 | 0.954387 |
| MmugDNA.749.1.S1_at    | MmugDNA.749.1  | 11.66 | 11.3  | 0.06 | 0.66 | 1.28  | 0.113721 | 0.037191 | 0.476981 | 0.237285 |
| MmugDNA.7490.1.S1_at   | MmugDNA.7490.1 | 6.46  | 6.16  | 0.36 | 0.21 | 1.23  | 0.751047 | 0.433273 | 0.893593 | 0.653606 |
| MmugDNA.7491.1.S1_at   | MmugDNA.7491.1 | 3.46  | 3.31  | 0.03 | 0.11 | 1.1   | 0.195699 | 0.724826 | 0.558901 | 0.840693 |
| MmugDNA.7492.1.S1_at   | MmugDNA.7492.1 | 8.45  | 8.36  | 0.47 | 0.79 | 1.07  | 0.473925 | 0.55079  | 0.744703 | 0.730611 |
| MmugDNA.7496.1.S1_at   | MmugDNA.7496.1 | 5.75  | 6.06  | 0.25 | 0.1  | -1.24 | 0.334115 | 0.372752 | 0.658035 | 0.611661 |
| MmugDNA.7498.1.S1_at   | MmugDNA.7498.1 | 7.51  | 7.72  | 0.27 | 0.14 | -1.16 | 0.491609 | 0.647584 | 0.755132 | 0.793568 |
| MmugDNA.75.1.S1_at     | MmugDNA.75.1   | 6.31  | 6.5   | 0.22 | 0.14 | -1.14 | 0.473628 | 0.242704 | 0.744444 | 0.513077 |
| MmugDNA.75.1.S1_x_at   | MmugDNA.75.1   | 6.53  | 6.95  | 0.11 | 0.13 | -1.33 | 0.008868 | 0.002676 | 0.221598 | 0.076408 |
| MmugDNA.750.1.S1_at    | MmugDNA.750.1  | 9.42  | 9.65  | 0.27 | 0.37 | -1.18 | 0.221468 | 0.207578 | 0.580261 | 0.481898 |
| MmugDNA.750.1.S1_s_at  | MmugDNA.750.1  | 8.61  | 9.17  | 0.21 | 0.29 | -1.47 | 0.07077  | 0.030606 | 0.414661 | 0.216887 |
| MmugDNA.7500.1.S1_at   | MmugDNA.7500.1 | 3.44  | 3.54  | 0.66 | 0    | -1.07 | 0.519246 | 0.631758 | 0.770092 | 0.782957 |
| MmugDNA.7501.1.S1_at   | MmugDNA.7501.1 | 8.84  | 9.03  | 0.29 | 0.66 | -1.14 | 0.972635 | 0.083581 | 0.989474 | 0.334152 |
| MmugDNA.7505.1.S1_at   | MmugDNA.7505.1 | 10.57 | 10.27 | 0.08 | 0.29 | 1.23  | 0.111943 | 0.069052 | 0.474378 | 0.309017 |
| MmugDNA.7507.1.S1_at   | MmugDNA.7507.1 | 4.92  | 4.46  | 0.39 | 0.34 | 1.37  | 0.334265 | 0.344011 | 0.658282 | 0.58962  |
| MmugDNA.7509.1.S1_at   | MmugDNA.7509.1 | 6.73  | 6.71  | 0.28 | 0.8  | 1.02  | 0.441373 | 0.259233 | 0.724804 | 0.526368 |
| MmugDNA.7510.1.S1_at   | MmugDNA.7510.1 | 9.92  | 8.81  | 0.63 | 0.4  | 2.16  | 0.047878 | 0.035464 | 0.367407 | 0.232564 |
| MmugDNA.7511.1.S1_at   | MmugDNA.7511.1 | 8.42  | 7.28  | 0.16 | 0.74 | 2.22  | 0.066258 | 0.056576 | 0.406371 | 0.283871 |
| MmugDNA.7513.1.S1_at   | MmugDNA.7513.1 | 2.9   | 2.92  | 0.07 | 0.2  | -1.01 | 0.876887 | 0.90584  | 0.950691 | 0.946727 |
| MmugDNA.7514.1.S1_at   | MmugDNA.7514.1 | 5.14  | 4.9   | 0.35 | 1.04 | 1.18  | 0.758103 | 0.919583 | 0.897606 | 0.954848 |
| MmugDNA.7515.1.S1_at   | MmugDNA.7515.1 | 13.06 | 12.89 | 0.09 | 0.06 | 1.12  | 0.074051 | 0.019937 | 0.419667 | 0.177457 |
| MmugDNA.7517.1.S1_at   | MmugDNA.7517.1 | 11.63 | 11.71 | 0.05 | 0.45 | -1.05 | 0.656242 | 0.560045 | 0.845321 | 0.73645  |
| MmugDNA.7518.1.S1_at   | MmugDNA.7518.1 | 4.92  | 4.95  | 0.17 | 0.08 | -1.02 | 0.8384   | 0.100178 | 0.934652 | 0.359191 |
| MmugDNA.7519.1.S1_at   | MmugDNA.7519.1 | 11.98 | 11.71 | 0.13 | 0.08 | 1.21  | 0.019156 | 0.01723  | 0.273043 | 0.166331 |
| MmugDNA.752.1.S1_at    | MmugDNA.752.1  | 11.17 | 11.64 | 0.12 | 0.04 | -1.38 | 0.003498 | 0.00106  | 0.178634 | 0.05171  |
| MmugDNA.7520.1.S1_s_at | MmugDNA.7520.1 | 7.35  | 7.2   | 0.1  | 0.28 | 1.11  | 0.614899 | 0.793291 | 0.823286 | 0.880679 |

|                      |                |      |      |      |      |       |          |          |          |          |
|----------------------|----------------|------|------|------|------|-------|----------|----------|----------|----------|
| MmugDNA.7523.1.S1_at | MmugDNA.7523.1 | 3.21 | 3.21 | 0.06 | 0.05 | -1    | 0.207711 | 0.144729 | 0.569822 | 0.418549 |
| MmugDNA.7525.1.S1_at | MmugDNA.7525.1 | 9.03 | 8.72 | 0.37 | 0.18 | 1.24  | 0.769331 | 0.929413 | 0.903004 | 0.959707 |
| MmugDNA.7529.1.S1_at | MmugDNA.7529.1 | 9.81 | 10.4 | 0.22 | 0.15 | -1.51 | 0.006248 | 0.010078 | 0.197349 | 0.13168  |
| MmugDNA.753.1.S1_at  | MmugDNA.753.1  | 6.37 | 6.03 | 0.1  | 0.32 | 1.27  | 0.125795 | 0.148537 | 0.491824 | 0.423074 |
| MmugDNA.7530.1.S1_at | MmugDNA.7530.1 | 6.92 | 6.92 | 0.03 | 0    | 1     | 0.429706 | 0.494961 | 0.71769  | 0.695223 |
| MmugDNA.7531.1.S1_at | MmugDNA.7531.1 | 3.72 | 3.68 | 0.76 | 0.35 | 1.03  | 0.528586 | 0.753345 | 0.775718 | 0.856483 |
| MmugDNA.7532.1.S1_at | MmugDNA.7532.1 | 8.17 | 7.9  | 0.22 | 0.56 | 1.21  | 0.312234 | 0.427048 | 0.644009 | 0.649087 |
| MmugDNA.7537.1.S1_at | MmugDNA.7537.1 | 7.41 | 7.39 | 0.45 | 0.33 | 1.01  | 0.666495 | 0.341602 | 0.850466 | 0.587795 |
| MmugDNA.7538.1.S1_at | MmugDNA.7538.1 | 3.93 | 4.15 | 0.27 | 0.17 | -1.17 | 0.521747 | 0.684902 | 0.771533 | 0.816234 |
| MmugDNA.7539.1.S1_at | MmugDNA.7539.1 | 4.35 | 4.5  | 0.08 | 0.08 | -1.11 | 0.091437 | 0.028962 | 0.447175 | 0.212061 |
| MmugDNA.7541.1.S1_at | MmugDNA.7541.1 | 7.05 | 7.16 | 0.26 | 0.08 | -1.08 | 0.444507 | 0.590282 | 0.727001 | 0.756124 |
| MmugDNA.7543.1.S1_at | MmugDNA.7543.1 | 6.51 | 6.33 | 0.08 | 0.77 | 1.13  | 0.74761  | 0.168072 | 0.891952 | 0.444666 |
| MmugDNA.7545.1.S1_at | MmugDNA.7545.1 | 6.85 | 6.78 | 0.69 | 1.25 | 1.06  | 0.437066 | 0.49882  | 0.722208 | 0.697807 |
| MmugDNA.7546.1.S1_at | MmugDNA.7546.1 | 5.47 | 5.4  | 0.18 | 0.05 | 1.05  | 0.426105 | 0.154821 | 0.715524 | 0.429842 |
| MmugDNA.7547.1.S1_at | MmugDNA.7547.1 | 3.21 | 3.2  | 0.21 | 0.13 | 1.01  | 0.92047  | 0.983685 | 0.969026 | 0.990902 |
| MmugDNA.755.1.S1_at  | MmugDNA.755.1  | 3.38 | 3.28 | 0.07 | 0.09 | 1.07  | 0.147281 | 0.151341 | 0.513087 | 0.426087 |
| MmugDNA.7552.1.S1_at | MmugDNA.7552.1 | 6.04 | 5.77 | 0.83 | 0.1  | 1.21  | 0.171356 | 0.275247 | 0.535166 | 0.53963  |
| MmugDNA.7553.1.S1_at | MmugDNA.7553.1 | 4.02 | 4.08 | 0.12 | 0.07 | -1.04 | 0.605388 | 0.094202 | 0.81824  | 0.350889 |
| MmugDNA.7554.1.S1_at | MmugDNA.7554.1 | 2.93 | 3.14 | 0.08 | 0.15 | -1.16 | 0.189445 | 0.37485  | 0.552479 | 0.613091 |
| MmugDNA.7555.1.S1_at | MmugDNA.7555.1 | 4.11 | 3.99 | 0.11 | 0.19 | 1.08  | 0.139191 | 0.383594 | 0.506669 | 0.619556 |
| MmugDNA.7556.1.S1_at | MmugDNA.7556.1 | 7.5  | 7.42 | 0.23 | 0.59 | 1.06  | 0.414552 | 0.520831 | 0.709338 | 0.711942 |
| MmugDNA.7557.1.S1_at | MmugDNA.7557.1 | 7.09 | 6.67 | 0.12 | 0.23 | 1.34  | 0.03408  | 0.020963 | 0.331188 | 0.181584 |
| MmugDNA.7558.1.S1_at | MmugDNA.7558.1 | 5.1  | 4.94 | 0.2  | 0.13 | 1.12  | 0.267478 | 0.352217 | 0.612607 | 0.595568 |
| MmugDNA.7559.1.S1_at | MmugDNA.7559.1 | 5.11 | 4.83 | 0.5  | 0.08 | 1.22  | 0.235619 | 0.281849 | 0.589497 | 0.544844 |
| MmugDNA.756.1.S1_at  | MmugDNA.756.1  | 6.51 | 6.54 | 0.43 | 0.92 | -1.02 | 0.683996 | 0.703778 | 0.858543 | 0.828234 |
| MmugDNA.7560.1.S1_at | MmugDNA.7560.1 | 4.72 | 4.65 | 0.27 | 0.35 | 1.05  | 0.443809 | 0.418887 | 0.726422 | 0.643141 |
| MmugDNA.7561.1.S1_at | MmugDNA.7561.1 | 3.09 | 3.12 | 0.05 | 0.16 | -1.02 | 0.870385 | 0.936373 | 0.948231 | 0.964131 |
| MmugDNA.7563.1.S1_at | MmugDNA.7563.1 | 5.07 | 4.95 | 0.17 | 0.1  | 1.09  | 0.328515 | 0.5153   | 0.654375 | 0.70823  |
| MmugDNA.7564.1.S1_at | MmugDNA.7564.1 | 3.41 | 3.42 | 0.06 | 0.08 | -1.01 | 0.699443 | 0.823152 | 0.866851 | 0.898361 |
| MmugDNA.7565.1.S1_at | MmugDNA.7565.1 | 4.28 | 4.31 | 0.21 | 0.24 | -1.02 | 0.680128 | 0.785988 | 0.85705  | 0.876026 |
| MmugDNA.7567.1.S1_at | MmugDNA.7567.1 | 9.69 | 9.88 | 0.08 | 0.25 | -1.14 | 0.30585  | 0.345407 | 0.639227 | 0.590726 |
| MmugDNA.7568.1.S1_at | MmugDNA.7568.1 | 7.69 | 8.63 | 0.63 | 0.81 | -1.92 | 0.374793 | 0.503422 | 0.684013 | 0.700888 |
| MmugDNA.757.1.S1_at  | MmugDNA.757.1  | 5.12 | 5.38 | 0.12 | 0.12 | -1.2  | 0.101774 | 0.227279 | 0.461313 | 0.499589 |
| MmugDNA.7571.1.S1_at | MmugDNA.7571.1 | 5.46 | 4.48 | 0.58 | 0.09 | 1.98  | 0.055928 | 0.042081 | 0.385179 | 0.249638 |
| MmugDNA.7572.1.S1_at | MmugDNA.7572.1 | 5.82 | 5.62 | 0.22 | 0.04 | 1.16  | 0.173997 | 0.101163 | 0.537538 | 0.360831 |
| MmugDNA.7574.1.S1_at | MmugDNA.7574.1 | 5.13 | 5    | 0.1  | 0.3  | 1.1   | 0.821694 | 0.853777 | 0.927464 | 0.916781 |
| MmugDNA.7575.1.S1_at | MmugDNA.7575.1 | 4.54 | 4.59 | 0.13 | 0.07 | -1.04 | 0.37537  | 0.724456 | 0.684699 | 0.840485 |
| MmugDNA.7576.1.S1_at | MmugDNA.7576.1 | 5.64 | 4.15 | 0.68 | 0.26 | 2.81  | 0.032187 | 0.020939 | 0.3244   | 0.181465 |
| MmugDNA.7577.1.S1_at | MmugDNA.7577.1 | 6.03 | 5.89 | 0.24 | 0.55 | 1.1   | 0.266223 | 0.57046  | 0.611749 | 0.743121 |
| MmugDNA.7578.1.S1_at | MmugDNA.7578.1 | 5.82 | 6.01 | 0.16 | 0.17 | -1.14 | 0.469684 | 0.462991 | 0.741854 | 0.674149 |
| MmugDNA.7579.1.S1_at | MmugDNA.7579.1 | 6.29 | 6.42 | 0.23 | 0.31 | -1.09 | 0.187487 | 0.302262 | 0.550517 | 0.560092 |

|                        |                |       |       |      |      |       |          |          |          |          |
|------------------------|----------------|-------|-------|------|------|-------|----------|----------|----------|----------|
| MmugDNA.758.1.S1_at    | MmugDNA.758.1  | 6.73  | 6.84  | 0.2  | 0.32 | -1.08 | 0.672732 | 0.829729 | 0.853193 | 0.902191 |
| MmugDNA.7580.1.S1_at   | MmugDNA.7580.1 | 5.61  | 4.82  | 0.48 | 0.17 | 1.72  | 0.110466 | 0.14613  | 0.471953 | 0.420099 |
| MmugDNA.7581.1.S1_at   | MmugDNA.7581.1 | 3.52  | 3.45  | 0.09 | 0.13 | 1.05  | 0.686987 | 0.069191 | 0.860056 | 0.309298 |
| MmugDNA.7583.1.S1_at   | MmugDNA.7583.1 | 5.14  | 5.56  | 0.12 | 0.29 | -1.34 | 0.106249 | 0.035035 | 0.466831 | 0.231314 |
| MmugDNA.7585.1.S1_at   | MmugDNA.7585.1 | 3.37  | 3.58  | 0.02 | 0.26 | -1.16 | 0.148866 | 0.166337 | 0.51391  | 0.442884 |
| MmugDNA.7586.1.S1_at   | MmugDNA.7586.1 | 10.47 | 9.16  | 0.77 | 0.47 | 2.48  | 0.10625  | 0.093942 | 0.466831 | 0.350453 |
| MmugDNA.7587.1.S1_at   | MmugDNA.7587.1 | 8.14  | 7.41  | 1.16 | 0.34 | 1.66  | 0.424085 | 0.533262 | 0.714336 | 0.719522 |
| MmugDNA.7588.1.S1_at   | MmugDNA.7588.1 | 12.55 | 12.1  | 0.14 | 0.31 | 1.37  | 0.037938 | 0.026796 | 0.343341 | 0.204733 |
| MmugDNA.759.1.S1_at    | MmugDNA.759.1  | 5.42  | 5.42  | 0.16 | 0.24 | -1    | 0.34938  | 0.565692 | 0.667703 | 0.740066 |
| MmugDNA.7591.1.S1_at   | MmugDNA.7591.1 | 4     | 4.14  | 0.08 | 0.07 | -1.1  | 0.147283 | 0.184419 | 0.513087 | 0.460468 |
| MmugDNA.7592.1.S1_at   | MmugDNA.7592.1 | 4.47  | 4.1   | 0.53 | 0.14 | 1.28  | 0.324727 | 0.409102 | 0.652056 | 0.63615  |
| MmugDNA.7593.1.S1_at   | MmugDNA.7593.1 | 7.92  | 9.15  | 0.44 | 0.47 | -2.35 | 0.077547 | 0.049679 | 0.427344 | 0.267892 |
| MmugDNA.7594.1.S1_at   | MmugDNA.7594.1 | 12.42 | 12.19 | 0.11 | 0.13 | 1.17  | 0.352637 | 0.022372 | 0.669719 | 0.187176 |
| MmugDNA.7595.1.S1_at   | MmugDNA.7595.1 | 7.77  | 7.83  | 0.23 | 0.37 | -1.04 | 0.327998 | 0.516207 | 0.654202 | 0.708757 |
| MmugDNA.7596.1.S1_at   | MmugDNA.7596.1 | 5.04  | 4.44  | 0.16 | 0.59 | 1.51  | 0.487649 | 0.651202 | 0.752231 | 0.796082 |
| MmugDNA.7597.1.S1_at   | MmugDNA.7597.1 | 7     | 7.05  | 0.03 | 0.27 | -1.04 | 0.770186 | 0.907022 | 0.90333  | 0.947344 |
| MmugDNA.7598.1.S1_at   | MmugDNA.7598.1 | 3.01  | 3.05  | 0.12 | 0.12 | -1.03 | 0.909721 | 0.745761 | 0.964238 | 0.852562 |
| MmugDNA.760.1.S1_at    | MmugDNA.760.1  | 2.85  | 2.85  | 0.08 | 0.03 | -1    | 0.690983 | 0.852021 | 0.862535 | 0.915853 |
| MmugDNA.7600.1.S1_at   | MmugDNA.7600.1 | 12.05 | 11.86 | 0.18 | 0.26 | 1.14  | 0.841702 | 0.867316 | 0.936215 | 0.924651 |
| MmugDNA.7601.1.S1_s_at | MmugDNA.7601.1 | 8.51  | 10.17 | 1.34 | 0.57 | -3.15 | 0.465331 | 0.642435 | 0.739873 | 0.790222 |
| MmugDNA.7603.1.S1_at   | MmugDNA.7603.1 | 4.42  | 4.12  | 0.98 | 1.04 | 1.23  | 0.749151 | 0.838282 | 0.892627 | 0.907682 |
| MmugDNA.7604.1.S1_at   | MmugDNA.7604.1 | 10.27 | 9.28  | 0.13 | 0.3  | 1.99  | 0.008602 | 0.002765 | 0.219461 | 0.077756 |
| MmugDNA.7605.1.S1_at   | MmugDNA.7605.1 | 6.01  | 6.14  | 0.09 | 0.22 | -1.09 | 0.219927 | 0.302556 | 0.579133 | 0.560201 |
| MmugDNA.7606.1.S1_at   | MmugDNA.7606.1 | 4.23  | 3.83  | 0.58 | 0.07 | 1.32  | 0.366861 | 0.481605 | 0.67921  | 0.686557 |
| MmugDNA.7609.1.S1_at   | MmugDNA.7609.1 | 3.81  | 4.32  | 0.1  | 0.48 | -1.42 | 0.360157 | 0.24198  | 0.674235 | 0.512512 |
| MmugDNA.761.1.S1_at    | MmugDNA.761.1  | 6.88  | 6.03  | 0.37 | 0.45 | 1.8   | 0.149291 | 0.220799 | 0.514001 | 0.494262 |
| MmugDNA.7610.1.S1_at   | MmugDNA.7610.1 | 9.32  | 8.66  | 0.11 | 0.69 | 1.58  | 0.209529 | 0.236475 | 0.570957 | 0.507336 |
| MmugDNA.7611.1.S1_at   | MmugDNA.7611.1 | 3.92  | 3.85  | 0.11 | 0.09 | 1.06  | 0.690324 | 0.275463 | 0.862049 | 0.539697 |
| MmugDNA.7612.1.S1_at   | MmugDNA.7612.1 | 4.57  | 4.15  | 1.28 | 0.55 | 1.34  | 0.282117 | 0.354783 | 0.622553 | 0.597445 |
| MmugDNA.7615.1.S1_at   | MmugDNA.7615.1 | 3.77  | 4     | 0.2  | 0.03 | -1.17 | 0.114524 | 0.13915  | 0.477887 | 0.412266 |
| MmugDNA.7616.1.S1_x_at | MmugDNA.7616.1 | 7.76  | 7.82  | 0.17 | 0.19 | -1.04 | 0.527726 | 0.653557 | 0.775076 | 0.797506 |
| MmugDNA.7617.1.S1_at   | MmugDNA.7617.1 | 5.77  | 5.84  | 0.32 | 0.27 | -1.05 | 0.254918 | 0.37139  | 0.602963 | 0.610177 |
| MmugDNA.7618.1.S1_at   | MmugDNA.7618.1 | 7.12  | 7.4   | 0.15 | 0.46 | -1.22 | 0.918639 | 0.821402 | 0.96831  | 0.897141 |
| MmugDNA.762.1.S1_at    | MmugDNA.762.1  | 5.99  | 5.92  | 0.17 | 0.11 | 1.05  | 0.421042 | 0.290835 | 0.712858 | 0.551431 |
| MmugDNA.7620.1.S1_at   | MmugDNA.7620.1 | 4.87  | 4.86  | 0.13 | 0.05 | 1     | 0.36232  | 0.329051 | 0.675921 | 0.578482 |
| MmugDNA.7621.1.S1_at   | MmugDNA.7621.1 | 8.47  | 7.97  | 0.48 | 0.76 | 1.42  | 0.250521 | 0.283141 | 0.600389 | 0.545694 |
| MmugDNA.7622.1.S1_at   | MmugDNA.7622.1 | 11.67 | 11.35 | 0.14 | 0.43 | 1.24  | 0.36631  | 0.402603 | 0.679033 | 0.631505 |
| MmugDNA.7623.1.S1_at   | MmugDNA.7623.1 | 9.18  | 8.84  | 0.44 | 1.01 | 1.27  | 0.352658 | 0.37757  | 0.669719 | 0.615012 |
| MmugDNA.7624.1.S1_at   | MmugDNA.7624.1 | 8.3   | 8.52  | 0.71 | 0.2  | -1.16 | 0.585628 | 0.523496 | 0.807608 | 0.71376  |
| MmugDNA.7626.1.S1_at   | MmugDNA.7626.1 | 9.55  | 9.7   | 0.11 | 0.2  | -1.11 | 0.215834 | 0.073657 | 0.575954 | 0.316988 |
| MmugDNA.7627.1.S1_at   | MmugDNA.7627.1 | 4.17  | 3.7   | 0.52 | 0.08 | 1.38  | 0.200792 | 0.125112 | 0.56354  | 0.395531 |

|                        |                |       |       |      |      |       |          |          |          |          |
|------------------------|----------------|-------|-------|------|------|-------|----------|----------|----------|----------|
| MmugDNA.7628.1.S1_at   | MmugDNA.7628.1 | 4.54  | 4.53  | 0.1  | 0.15 | 1.01  | 0.315636 | 0.441538 | 0.646683 | 0.659675 |
| MmugDNA.763.1.S1_at    | MmugDNA.763.1  | 2.81  | 2.81  | 0.03 | 0.05 | 1     | 0.268881 | 0.525611 | 0.613528 | 0.715149 |
| MmugDNA.7630.1.S1_at   | MmugDNA.7630.1 | 5.56  | 5.54  | 0.18 | 0    | 1.01  | 0.470057 | 0.812508 | 0.742132 | 0.891682 |
| MmugDNA.7631.1.S1_at   | MmugDNA.7631.1 | 7.67  | 6.56  | 0.18 | 0.82 | 2.16  | 0.088785 | 0.029126 | 0.443684 | 0.212733 |
| MmugDNA.7632.1.S1_at   | MmugDNA.7632.1 | 8.53  | 6.8   | 0.46 | 0.33 | 3.32  | 0.013858 | 0.015208 | 0.249758 | 0.156717 |
| MmugDNA.7633.1.S1_at   | MmugDNA.7633.1 | 5.93  | 5.66  | 0.2  | 0.22 | 1.21  | 0.171424 | 0.220258 | 0.535166 | 0.493701 |
| MmugDNA.7634.1.S1_at   | MmugDNA.7634.1 | 6.95  | 8.68  | 0.22 | 0.65 | -3.32 | 0.027157 | 0.026609 | 0.306629 | 0.204008 |
| MmugDNA.7637.1.S1_at   | MmugDNA.7637.1 | 3.32  | 3.08  | 0.12 | 0.17 | 1.18  | 0.228236 | 0.485619 | 0.585696 | 0.68924  |
| MmugDNA.7638.1.S1_at   | MmugDNA.7638.1 | 3.79  | 4.28  | 0.45 | 0.21 | -1.4  | 0.613881 | 0.701521 | 0.822945 | 0.826888 |
| MmugDNA.7640.1.S1_at   | MmugDNA.7640.1 | 5.99  | 6.42  | 0.03 | 0.27 | -1.35 | 0.04543  | 0.058224 | 0.361012 | 0.287988 |
| MmugDNA.7641.1.S1_at   | MmugDNA.7641.1 | 9.31  | 7.73  | 0.75 | 0.72 | 2.99  | 0.079932 | 0.005441 | 0.430176 | 0.101848 |
| MmugDNA.7643.1.S1_at   | MmugDNA.7643.1 | 8.71  | 9.09  | 0.28 | 0.34 | -1.31 | 0.054241 | 0.035825 | 0.381802 | 0.233727 |
| MmugDNA.7644.1.S1_at   | MmugDNA.7644.1 | 9.43  | 10.82 | 0.46 | 0.82 | -2.61 | 0.102831 | 0.121596 | 0.46254  | 0.390723 |
| MmugDNA.7644.1.S1_s_at | MmugDNA.7644.1 | 9.92  | 11.07 | 0.46 | 0.72 | -2.22 | 0.086954 | 0.103863 | 0.440725 | 0.364519 |
| MmugDNA.7645.1.S1_at   | MmugDNA.7645.1 | 3.27  | 3.26  | 0.36 | 0.03 | 1     | 0.402495 | 0.504986 | 0.701431 | 0.70197  |
| MmugDNA.7647.1.S1_at   | MmugDNA.7647.1 | 8.22  | 7.6   | 0.48 | 0.45 | 1.53  | 0.748914 | 0.225947 | 0.892627 | 0.49836  |
| MmugDNA.7648.1.S1_at   | MmugDNA.7648.1 | 9.03  | 9.64  | 0.28 | 0.08 | -1.52 | 0.022187 | 0.016374 | 0.284758 | 0.16199  |
| MmugDNA.765.1.S1_at    | MmugDNA.765.1  | 12.85 | 12.44 | 0.05 | 0.26 | 1.32  | 0.033861 | 0.017511 | 0.330262 | 0.167516 |
| MmugDNA.765.1.S1_x_at  | MmugDNA.765.1  | 12.98 | 12.52 | 0.04 | 0.26 | 1.38  | 0.036575 | 0.016646 | 0.33999  | 0.163321 |
| MmugDNA.7650.1.S1_at   | MmugDNA.7650.1 | 3.64  | 4.37  | 0.78 | 0.52 | -1.65 | 0.703027 | 0.122948 | 0.86894  | 0.392923 |
| MmugDNA.7651.1.S1_at   | MmugDNA.7651.1 | 6.96  | 6.97  | 0.14 | 0.15 | -1    | 0.492178 | 0.175609 | 0.755532 | 0.45218  |
| MmugDNA.7652.1.S1_at   | MmugDNA.7652.1 | 5.36  | 5.41  | 0.16 | 0.24 | -1.03 | 0.824554 | 0.967846 | 0.928895 | 0.982208 |
| MmugDNA.7653.1.S1_at   | MmugDNA.7653.1 | 4.49  | 4.1   | 0.21 | 0.24 | 1.31  | 0.225822 | 0.260685 | 0.583854 | 0.527199 |
| MmugDNA.7654.1.S1_at   | MmugDNA.7654.1 | 5.34  | 4.98  | 0.2  | 0.15 | 1.28  | 0.153387 | 0.070403 | 0.517785 | 0.311676 |
| MmugDNA.7658.1.S1_at   | MmugDNA.7658.1 | 6.44  | 6.54  | 0.09 | 0.08 | -1.07 | 0.118838 | 0.106168 | 0.483393 | 0.36856  |
| MmugDNA.7659.1.S1_at   | MmugDNA.7659.1 | 3.84  | 3.84  | 0.1  | 0.26 | 1     | 0.591112 | 0.879721 | 0.810224 | 0.93128  |
| MmugDNA.766.1.S1_at    | MmugDNA.766.1  | 4.59  | 4.58  | 0.4  | 0.18 | 1     | 0.982851 | 0.708325 | 0.993697 | 0.830869 |
| MmugDNA.7660.1.S1_at   | MmugDNA.7660.1 | 9.6   | 9.75  | 0.2  | 0.19 | -1.11 | 0.410487 | 0.013281 | 0.706382 | 0.147922 |
| MmugDNA.7661.1.S1_at   | MmugDNA.7661.1 | 7.08  | 7.35  | 0.26 | 0.08 | -1.21 | 0.149118 | 0.333605 | 0.514001 | 0.581808 |
| MmugDNA.7662.1.S1_s_at | MmugDNA.7662.1 | 6.68  | 6.97  | 0.1  | 0.13 | -1.22 | 0.020243 | 0.007528 | 0.277313 | 0.1163   |
| MmugDNA.7663.1.S1_at   | MmugDNA.7663.1 | 3.55  | 3.67  | 0.47 | 0.12 | -1.09 | 0.53607  | 0.755923 | 0.779351 | 0.8579   |
| MmugDNA.7665.1.S1_at   | MmugDNA.7665.1 | 4.76  | 4.55  | 0.03 | 0.14 | 1.16  | 0.049146 | 0.060368 | 0.370772 | 0.292291 |
| MmugDNA.7666.1.S1_at   | MmugDNA.7666.1 | 6.1   | 6.52  | 0.66 | 0.38 | -1.34 | 0.631642 | 0.697618 | 0.832775 | 0.82429  |
| MmugDNA.7667.1.S1_at   | MmugDNA.7667.1 | 4.03  | 4.33  | 0.07 | 0.14 | -1.24 | 0.058607 | 0.096478 | 0.390844 | 0.35409  |
| MmugDNA.7668.1.S1_at   | MmugDNA.7668.1 | 4.83  | 4.95  | 0.22 | 0.07 | -1.08 | 0.715684 | 0.411464 | 0.875251 | 0.638189 |
| MmugDNA.767.1.S1_at    | MmugDNA.767.1  | 6.73  | 5.66  | 0.46 | 1.02 | 2.09  | 0.212479 | 0.321968 | 0.572775 | 0.573575 |
| MmugDNA.7670.1.S1_at   | MmugDNA.7670.1 | 11.22 | 11.71 | 0.17 | 0.15 | -1.41 | 0.02189  | 0.00962  | 0.284118 | 0.12918  |
| MmugDNA.7671.1.S1_at   | MmugDNA.7671.1 | 10.83 | 10.86 | 0.13 | 0.56 | -1.02 | 0.917216 | 0.48767  | 0.967721 | 0.690634 |
| MmugDNA.7672.1.S1_at   | MmugDNA.7672.1 | 9.7   | 9.18  | 0.16 | 0.12 | 1.43  | 0.02172  | 0.001303 | 0.283391 | 0.055624 |
| MmugDNA.7673.1.S1_at   | MmugDNA.7673.1 | 10.38 | 9.97  | 0.35 | 0.19 | 1.33  | 0.207422 | 0.017088 | 0.56957  | 0.165617 |
| MmugDNA.7674.1.S1_at   | MmugDNA.7674.1 | 4.09  | 4.09  | 0.22 | 0.16 | 1     | 0.48113  | 0.509792 | 0.748945 | 0.704385 |

|                        |                |       |       |      |      |       |          |          |          |          |
|------------------------|----------------|-------|-------|------|------|-------|----------|----------|----------|----------|
| MmugDNA.7675.1.S1_at   | MmugDNA.7675.1 | 6.15  | 6.11  | 0.2  | 0.23 | 1.02  | 0.836847 | 0.922202 | 0.934027 | 0.956169 |
| MmugDNA.7676.1.S1_at   | MmugDNA.7676.1 | 3.48  | 3.55  | 0.19 | 0.28 | -1.05 | 0.710451 | 0.851588 | 0.873052 | 0.915583 |
| MmugDNA.7677.1.S1_at   | MmugDNA.7677.1 | 8.46  | 8.72  | 0.02 | 0.31 | -1.2  | 0.203535 | 0.021004 | 0.566041 | 0.181715 |
| MmugDNA.7678.1.S1_at   | MmugDNA.7678.1 | 4.59  | 4.64  | 0.06 | 0.07 | -1.04 | 0.400365 | 0.718335 | 0.699911 | 0.837002 |
| MmugDNA.7679.1.S1_at   | MmugDNA.7679.1 | 3.86  | 4.15  | 0.56 | 0.96 | -1.22 | 0.449511 | 0.361118 | 0.730283 | 0.60207  |
| MmugDNA.768.1.S1_at    | MmugDNA.768.1  | 4.68  | 4.64  | 0.09 | 0.15 | 1.03  | 0.857189 | 0.166788 | 0.942204 | 0.443274 |
| MmugDNA.7680.1.S1_at   | MmugDNA.7680.1 | 8.02  | 8.05  | 0.09 | 0.08 | -1.02 | 0.681571 | 0.902948 | 0.857635 | 0.944917 |
| MmugDNA.7681.1.S1_at   | MmugDNA.7681.1 | 12.06 | 12.18 | 0.16 | 0.51 | -1.09 | 0.995335 | 0.748414 | 0.998318 | 0.853611 |
| MmugDNA.7682.1.S1_at   | MmugDNA.7682.1 | 4.18  | 4.32  | 0.57 | 0.78 | -1.1  | 0.615713 | 0.808809 | 0.823709 | 0.889895 |
| MmugDNA.7684.1.S1_at   | MmugDNA.7684.1 | 5.71  | 6.02  | 0.11 | 0.09 | -1.23 | 0.013999 | 0.07184  | 0.250445 | 0.314082 |
| MmugDNA.7685.1.S1_at   | MmugDNA.7685.1 | 7.11  | 7.47  | 0.24 | 0.34 | -1.28 | 0.19788  | 0.170413 | 0.560908 | 0.447103 |
| MmugDNA.7685.1.S1_s_at | MmugDNA.7685.1 | 7.67  | 8.39  | 0.3  | 0.57 | -1.65 | 0.126435 | 0.110948 | 0.492774 | 0.375376 |
| MmugDNA.7686.1.S1_at   | MmugDNA.7686.1 | 8.28  | 9.03  | 0.39 | 0.33 | -1.68 | 0.076581 | 0.197776 | 0.425098 | 0.472721 |
| MmugDNA.7687.1.S1_at   | MmugDNA.7687.1 | 8.45  | 8.62  | 0.16 | 0.06 | -1.12 | 0.144898 | 0.633202 | 0.511188 | 0.783995 |
| MmugDNA.7688.1.S1_s_at | MmugDNA.7688.1 | 11.27 | 11.31 | 0.23 | 0.19 | -1.03 | 0.632653 | 0.704237 | 0.833252 | 0.828375 |
| MmugDNA.7689.1.S1_at   | MmugDNA.7689.1 | 6.64  | 6.65  | 0.07 | 0.09 | -1    | 0.782864 | 0.531821 | 0.909285 | 0.718955 |
| MmugDNA.769.1.S1_x_at  | MmugDNA.769.1  | 9.24  | 8.66  | 0.34 | 0.34 | 1.5   | 0.100717 | 0.08852  | 0.461009 | 0.341947 |
| MmugDNA.7690.1.S1_at   | MmugDNA.7690.1 | 7.38  | 8.5   | 0.71 | 1.93 | -2.17 | 0.594257 | 0.537996 | 0.811746 | 0.72281  |
| MmugDNA.7692.1.S1_at   | MmugDNA.7692.1 | 5.57  | 5.55  | 0.29 | 0.06 | 1.01  | 0.771832 | 0.932775 | 0.903991 | 0.961812 |
| MmugDNA.7693.1.S1_at   | MmugDNA.7693.1 | 4.91  | 4.96  | 0.64 | 0.1  | -1.03 | 0.471921 | 0.397498 | 0.743454 | 0.628923 |
| MmugDNA.7695.1.S1_at   | MmugDNA.7695.1 | 10.12 | 10.11 | 0.32 | 0.78 | 1     | 0.265553 | 0.335491 | 0.611167 | 0.583317 |
| MmugDNA.7696.1.S1_at   | MmugDNA.7696.1 | 10.08 | 9.6   | 0.1  | 1    | 1.4   | 0.141444 | 0.163542 | 0.509067 | 0.439765 |
| MmugDNA.7697.1.S1_at   | MmugDNA.7697.1 | 4.16  | 4.16  | 0.09 | 0.03 | -1    | 0.39093  | 0.641228 | 0.693845 | 0.789506 |
| MmugDNA.77.1.S1_at     | MmugDNA.77.1   | 6.31  | 6.14  | 0.42 | 0.48 | 1.13  | 0.152888 | 0.249173 | 0.517325 | 0.518302 |
| MmugDNA.770.1.S1_at    | MmugDNA.770.1  | 11.07 | 11.06 | 0.14 | 0.21 | 1.01  | 0.862595 | 0.212107 | 0.944723 | 0.486036 |
| MmugDNA.770.1.S1_s_at  | MmugDNA.770.1  | 11.79 | 11.62 | 0.02 | 0.19 | 1.12  | 0.185147 | 0.081727 | 0.548644 | 0.330011 |
| MmugDNA.7700.1.S1_at   | MmugDNA.7700.1 | 6.24  | 6.37  | 0.2  | 0.1  | -1.09 | 0.355905 | 0.239198 | 0.671276 | 0.509902 |
| MmugDNA.7701.1.S1_at   | MmugDNA.7701.1 | 4.7   | 4.94  | 0.09 | 0.21 | -1.18 | 0.212217 | 0.279721 | 0.572539 | 0.543228 |
| MmugDNA.7704.1.S1_at   | MmugDNA.7704.1 | 7.95  | 7.98  | 0.23 | 0.32 | -1.02 | 0.592386 | 0.010451 | 0.810906 | 0.133645 |
| MmugDNA.7705.1.S1_at   | MmugDNA.7705.1 | 3.55  | 3.53  | 0.04 | 0.38 | 1.01  | 0.469064 | 0.571572 | 0.741428 | 0.743837 |
| MmugDNA.7707.1.S1_at   | MmugDNA.7707.1 | 8.4   | 8.56  | 0.35 | 1.18 | -1.12 | 0.84543  | 0.47574  | 0.938022 | 0.682332 |
| MmugDNA.7708.1.S1_at   | MmugDNA.7708.1 | 3.96  | 4.2   | 0.08 | 0.33 | -1.18 | 0.408109 | 0.562852 | 0.70497  | 0.738191 |
| MmugDNA.7709.1.S1_at   | MmugDNA.7709.1 | 4.78  | 4.64  | 0.1  | 0.06 | 1.1   | 0.086942 | 0.105333 | 0.440712 | 0.367168 |
| MmugDNA.771.1.S1_at    | MmugDNA.771.1  | 8.5   | 8.41  | 0.26 | 0.51 | 1.06  | 0.781656 | 0.906586 | 0.908921 | 0.947167 |
| MmugDNA.7710.1.S1_at   | MmugDNA.7710.1 | 3.96  | 4.05  | 0.07 | 0.22 | -1.07 | 0.779865 | 0.667995 | 0.908316 | 0.8057   |
| MmugDNA.7711.1.S1_at   | MmugDNA.7711.1 | 11.74 | 12.42 | 0.19 | 0.07 | -1.6  | 0.002558 | 0.000603 | 0.164386 | 0.042002 |
| MmugDNA.7712.1.S1_at   | MmugDNA.7712.1 | 3.76  | 3.38  | 0.5  | 0.84 | 1.3   | 0.823245 | 0.336455 | 0.928128 | 0.583831 |
| MmugDNA.7714.1.S1_at   | MmugDNA.7714.1 | 6.99  | 6.42  | 0.62 | 0.22 | 1.49  | 0.141908 | 0.115577 | 0.50923  | 0.382674 |
| MmugDNA.7715.1.S1_at   | MmugDNA.7715.1 | 6.99  | 6.62  | 0.08 | 0.06 | 1.29  | 0.005451 | 0.006875 | 0.191107 | 0.111996 |
| MmugDNA.7716.1.S1_at   | MmugDNA.7716.1 | 4.61  | 3.96  | 0.62 | 0.11 | 1.57  | 0.272042 | 0.369248 | 0.615959 | 0.608691 |
| MmugDNA.7718.1.S1_at   | MmugDNA.7718.1 | 6.71  | 6.58  | 0.15 | 0.17 | 1.09  | 0.077092 | 0.111879 | 0.426438 | 0.376982 |



|                        |                |       |       |      |      |       |          |          |          |          |
|------------------------|----------------|-------|-------|------|------|-------|----------|----------|----------|----------|
| MmugDNA.7719.1.S1_at   | MmugDNA.7719.1 | 6.83  | 7.11  | 0.15 | 0.22 | -1.21 | 0.099333 | 0.102085 | 0.459226 | 0.362122 |
| MmugDNA.772.1.S1_at    | MmugDNA.772.1  | 5.25  | 5.27  | 0.09 | 0.14 | -1.01 | 0.379832 | 0.565839 | 0.68708  | 0.740112 |
| MmugDNA.7722.1.S1_at   | MmugDNA.7722.1 | 5.94  | 6.22  | 0.1  | 0.16 | -1.21 | 0.188188 | 0.390283 | 0.551146 | 0.624128 |
| MmugDNA.7723.1.S1_at   | MmugDNA.7723.1 | 9.3   | 7.39  | 0.24 | 0.92 | 3.75  | 0.018383 | 0.00786  | 0.270103 | 0.118059 |
| MmugDNA.7724.1.S1_at   | MmugDNA.7724.1 | 5.84  | 5.83  | 0.09 | 0.17 | 1.01  | 0.497355 | 0.528046 | 0.757933 | 0.716428 |
| MmugDNA.7725.1.S1_at   | MmugDNA.7725.1 | 4.62  | 4.6   | 0.05 | 0.07 | 1.01  | 0.960787 | 0.955049 | 0.984947 | 0.974534 |
| MmugDNA.7727.1.S1_at   | MmugDNA.7727.1 | 4.44  | 4.2   | 0.15 | 0.2  | 1.19  | 0.215401 | 0.327627 | 0.575857 | 0.577448 |
| MmugDNA.7728.1.S1_at   | MmugDNA.7728.1 | 2.58  | 2.69  | 0.84 | 0.21 | -1.08 | 0.525901 | 0.666278 | 0.773971 | 0.804419 |
| MmugDNA.7730.1.S1_at   | MmugDNA.7730.1 | 4.25  | 4.25  | 0.16 | 0.17 | 1     | 0.520206 | 0.630328 | 0.770651 | 0.782213 |
| MmugDNA.7731.1.S1_at   | MmugDNA.7731.1 | 4.83  | 3.45  | 0.57 | 0.5  | 2.6   | 0.105716 | 0.132018 | 0.466526 | 0.404043 |
| MmugDNA.7732.1.S1_at   | MmugDNA.7732.1 | 5.74  | 5.83  | 0.54 | 0.76 | -1.07 | 0.709891 | 0.91971  | 0.872725 | 0.954878 |
| MmugDNA.7733.1.S1_at   | MmugDNA.7733.1 | 8.2   | 9.46  | 1.06 | 1.09 | -2.39 | 0.145259 | 0.148593 | 0.511329 | 0.423175 |
| MmugDNA.7734.1.S1_at   | MmugDNA.7734.1 | 4.01  | 4.09  | 0.83 | 0.28 | -1.05 | 0.54959  | 0.629001 | 0.787374 | 0.781575 |
| MmugDNA.7735.1.S1_at   | MmugDNA.7735.1 | 7.31  | 8.5   | 1.3  | 1.44 | -2.28 | 0.390067 | 0.344427 | 0.693398 | 0.589813 |
| MmugDNA.7736.1.S1_at   | MmugDNA.7736.1 | 6.28  | 6.46  | 0.25 | 0.38 | -1.13 | 0.231123 | 0.321177 | 0.587369 | 0.573111 |
| MmugDNA.7738.1.S1_at   | MmugDNA.7738.1 | 3.48  | 3.33  | 0.24 | 0.17 | 1.11  | 0.228904 | 0.258983 | 0.586256 | 0.5262   |
| MmugDNA.774.1.S1_at    | MmugDNA.774.1  | 5.36  | 5.39  | 0.1  | 0    | -1.02 | 0.692345 | 0.692754 | 0.863369 | 0.821186 |
| MmugDNA.7740.1.S1_at   | MmugDNA.7740.1 | 7.23  | 7.88  | 0.21 | 0.19 | -1.57 | 0.032462 | 0.041564 | 0.324971 | 0.248812 |
| MmugDNA.7741.1.S1_at   | MmugDNA.7741.1 | 3.36  | 3.25  | 0.05 | 0.2  | 1.08  | 0.579562 | 0.467247 | 0.804347 | 0.677016 |
| MmugDNA.7742.1.S1_at   | MmugDNA.7742.1 | 4.04  | 4.15  | 0.74 | 0.45 | -1.08 | 0.527615 | 0.277357 | 0.775008 | 0.541302 |
| MmugDNA.7744.1.S1_at   | MmugDNA.7744.1 | 12.94 | 13.16 | 0.11 | 0.14 | -1.17 | 0.115279 | 0.111827 | 0.478767 | 0.376856 |
| MmugDNA.7747.1.S1_at   | MmugDNA.7747.1 | 3.07  | 3.03  | 0.63 | 0.18 | 1.03  | 0.373764 | 0.304839 | 0.683245 | 0.561994 |
| MmugDNA.775.1.S1_at    | MmugDNA.775.1  | 4.12  | 4.04  | 0.18 | 0.32 | 1.06  | 0.985428 | 0.539473 | 0.99475  | 0.723763 |
| MmugDNA.7750.1.S1_at   | MmugDNA.7750.1 | 13.38 | 13.29 | 0.12 | 0.07 | 1.06  | 0.216626 | 0.270579 | 0.576256 | 0.535837 |
| MmugDNA.7751.1.S1_at   | MmugDNA.7751.1 | 3.56  | 3.56  | 0    | 0.05 | 1     | 0.373901 | 0.700464 | 0.683245 | 0.826162 |
| MmugDNA.7753.1.S1_at   | MmugDNA.7753.1 | 6.31  | 6.31  | 0.24 | 0.1  | -1    | 0.405041 | 0.563328 | 0.703082 | 0.738544 |
| MmugDNA.7755.1.S1_at   | MmugDNA.7755.1 | 10.31 | 10.75 | 0.99 | 1.74 | -1.36 | 0.387669 | 0.494397 | 0.692111 | 0.694859 |
| MmugDNA.7757.1.S1_at   | MmugDNA.7757.1 | 3.73  | 3.46  | 0.4  | 0.68 | 1.2   | 0.717366 | 0.624382 | 0.875812 | 0.778581 |
| MmugDNA.7758.1.S1_at   | MmugDNA.7758.1 | 9.73  | 10.16 | 0.17 | 0.2  | -1.35 | 0.033926 | 0.011041 | 0.330541 | 0.136821 |
| MmugDNA.7759.1.S1_at   | MmugDNA.7759.1 | 4.17  | 4.13  | 0.23 | 0.32 | 1.03  | 0.594697 | 0.751545 | 0.812117 | 0.855508 |
| MmugDNA.7760.1.S1_at   | MmugDNA.7760.1 | 5.77  | 5.4   | 0.09 | 0.5  | 1.29  | 0.530619 | 0.466502 | 0.776893 | 0.676346 |
| MmugDNA.7761.1.S1_at   | MmugDNA.7761.1 | 5.96  | 6.87  | 0.48 | 0.64 | -1.88 | 0.207206 | 0.272554 | 0.569301 | 0.537323 |
| MmugDNA.7762.1.S1_at   | MmugDNA.7762.1 | 10.3  | 10.7  | 0.12 | 0.34 | -1.32 | 0.048557 | 0.021852 | 0.369003 | 0.184952 |
| MmugDNA.7763.1.S1_at   | MmugDNA.7763.1 | 11.31 | 11.36 | 0.37 | 0.62 | -1.04 | 0.842534 | 0.118757 | 0.936474 | 0.386819 |
| MmugDNA.7766.1.S1_x_at | MmugDNA.7766.1 | 12.87 | 12.81 | 0.06 | 0.16 | 1.04  | 0.194894 | 0.205399 | 0.558493 | 0.479751 |
| MmugDNA.7767.1.S1_at   | MmugDNA.7767.1 | 4.26  | 4.18  | 0.12 | 0.13 | 1.06  | 0.84575  | 0.974809 | 0.93814  | 0.986245 |
| MmugDNA.7770.1.S1_s_at | MmugDNA.7770.1 | 5.62  | 5.66  | 0.19 | 0.15 | -1.03 | 0.497441 | 0.268989 | 0.757987 | 0.534389 |
| MmugDNA.7771.1.S1_at   | MmugDNA.7771.1 | 5.57  | 5.75  | 0.18 | 0.17 | -1.14 | 0.326458 | 0.606496 | 0.653184 | 0.765779 |
| MmugDNA.7773.1.S1_at   | MmugDNA.7773.1 | 4.8   | 4.82  | 0.3  | 0.3  | -1.02 | 0.497341 | 0.689702 | 0.757933 | 0.819038 |
| MmugDNA.7774.1.S1_at   | MmugDNA.7774.1 | 5.52  | 5.63  | 0.07 | 0.52 | -1.08 | 0.445455 | 0.500994 | 0.727674 | 0.699368 |
| MmugDNA.7775.1.S1_at   | MmugDNA.7775.1 | 8.69  | 8.32  | 0.1  | 0.32 | 1.29  | 0.20691  | 0.283868 | 0.56893  | 0.546237 |

|                        |                |       |       |      |      |        |          |          |          |          |
|------------------------|----------------|-------|-------|------|------|--------|----------|----------|----------|----------|
| MmugDNA.7778.1.S1_at   | MmugDNA.7778.1 | 9.16  | 8.8   | 0.06 | 0.58 | 1.29   | 0.876787 | 0.781204 | 0.950675 | 0.873073 |
| MmugDNA.778.1.S1_at    | MmugDNA.778.1  | 6.77  | 5.43  | 0.38 | 0.24 | 2.53   | 0.005043 | 0.000561 | 0.188046 | 0.041049 |
| MmugDNA.7780.1.S1_at   | MmugDNA.7780.1 | 5.2   | 3.69  | 0.32 | 0.19 | 2.85   | 0.001517 | 0.000769 | 0.151506 | 0.04544  |
| MmugDNA.7781.1.S1_at   | MmugDNA.7781.1 | 3.96  | 4.19  | 0.03 | 0.14 | -1.17  | 0.041188 | 0.017929 | 0.351025 | 0.168998 |
| MmugDNA.7781.1.S1_x_at | MmugDNA.7781.1 | 6.22  | 6.36  | 0.05 | 0.21 | -1.11  | 0.398052 | 0.107862 | 0.698523 | 0.370945 |
| MmugDNA.7783.1.S1_at   | MmugDNA.7783.1 | 7.97  | 7.92  | 0.66 | 0.49 | 1.03   | 0.432679 | 0.38957  | 0.719191 | 0.623668 |
| MmugDNA.7785.1.S1_at   | MmugDNA.7785.1 | 11.97 | 11.86 | 0.29 | 0.38 | 1.08   | 0.359459 | 0.276018 | 0.673869 | 0.540071 |
| MmugDNA.7786.1.S1_at   | MmugDNA.7786.1 | 4.25  | 3.48  | 0.46 | 0.16 | 1.7    | 0.029741 | 0.01928  | 0.315271 | 0.174698 |
| MmugDNA.7787.1.S1_at   | MmugDNA.7787.1 | 10.68 | 10.71 | 0.34 | 0.14 | -1.02  | 0.627063 | 0.450756 | 0.829873 | 0.665844 |
| MmugDNA.7788.1.S1_at   | MmugDNA.7788.1 | 4.33  | 4.63  | 0.23 | 0.26 | -1.23  | 0.196585 | 0.262023 | 0.559808 | 0.528374 |
| MmugDNA.7789.1.S1_at   | MmugDNA.7789.1 | 3.62  | 3.87  | 0.21 | 0.18 | -1.19  | 0.224768 | 0.291429 | 0.582807 | 0.551823 |
| MmugDNA.779.1.S1_at    | MmugDNA.779.1  | 5.13  | 5.34  | 0.03 | 0.34 | -1.15  | 0.342958 | 0.205482 | 0.663407 | 0.479764 |
| MmugDNA.7791.1.S1_at   | MmugDNA.7791.1 | 3.51  | 3.64  | 0.13 | 0.09 | -1.09  | 0.326766 | 0.221827 | 0.653212 | 0.49495  |
| MmugDNA.7792.1.S1_at   | MmugDNA.7792.1 | 8.45  | 8.43  | 0.21 | 0.32 | 1.01   | 0.49263  | 0.159917 | 0.755881 | 0.435987 |
| MmugDNA.7793.1.S1_at   | MmugDNA.7793.1 | 6.77  | 6.52  | 0.18 | 0.32 | 1.19   | 0.92418  | 0.532548 | 0.970594 | 0.719092 |
| MmugDNA.7794.1.S1_at   | MmugDNA.7794.1 | 4.75  | 4.49  | 0.05 | 0.1  | 1.19   | 0.010132 | 0.014106 | 0.228247 | 0.15195  |
| MmugDNA.7795.1.S1_at   | MmugDNA.7795.1 | 10.85 | 10.72 | 0.13 | 0.17 | 1.1    | 0.144126 | 0.173342 | 0.510652 | 0.449791 |
| MmugDNA.7796.1.S1_at   | MmugDNA.7796.1 | 6.43  | 7.47  | 0.93 | 0.99 | -2.05  | 0.532506 | 0.458058 | 0.777757 | 0.671038 |
| MmugDNA.7798.1.S1_at   | MmugDNA.7798.1 | 7.98  | 7.83  | 0.61 | 0.35 | 1.11   | 0.640922 | 0.830966 | 0.837843 | 0.903034 |
| MmugDNA.7799.1.S1_at   | MmugDNA.7799.1 | 3.8   | 3.82  | 0.11 | 0.12 | -1.02  | 0.749436 | 0.779163 | 0.892716 | 0.871904 |
| MmugDNA.78.1.S1_at     | MmugDNA.78.1   | 9.1   | 7.39  | 0.22 | 0.18 | 3.28   | 0.000487 | 0.000229 | 0.134999 | 0.032385 |
| MmugDNA.780.1.S1_at    | MmugDNA.780.1  | 5.39  | 4.92  | 0.91 | 0.97 | 1.39   | 0.591484 | 0.158731 | 0.810451 | 0.434807 |
| MmugDNA.7800.1.S1_at   | MmugDNA.7800.1 | 4.83  | 4.84  | 0.24 | 0.33 | -1     | 0.435023 | 0.311714 | 0.72094  | 0.566689 |
| MmugDNA.7801.1.S1_at   | MmugDNA.7801.1 | 6.07  | 6.34  | 0.23 | 0.17 | -1.21  | 0.404035 | 0.604446 | 0.702538 | 0.76464  |
| MmugDNA.7802.1.S1_at   | MmugDNA.7802.1 | 4.84  | 4.85  | 0.2  | 0.04 | -1.01  | 0.779379 | 0.923942 | 0.908053 | 0.957162 |
| MmugDNA.7802.1.S1_s_at | MmugDNA.7802.1 | 5.31  | 5.68  | 0.25 | 0.35 | -1.29  | 0.073597 | 0.009101 | 0.419031 | 0.125983 |
| MmugDNA.7803.1.S1_at   | MmugDNA.7803.1 | 4.73  | 4.77  | 0.26 | 0.03 | -1.03  | 0.730505 | 0.904375 | 0.88321  | 0.945736 |
| MmugDNA.7804.1.S1_at   | MmugDNA.7804.1 | 2.66  | 2.83  | 0.11 | 0.11 | -1.13  | 0.172989 | 0.171802 | 0.536655 | 0.448198 |
| MmugDNA.7804.1.S1_s_at | MmugDNA.7804.1 | 2.83  | 2.78  | 0.04 | 0.06 | 1.03   | 0.174009 | 0.158805 | 0.537543 | 0.434896 |
| MmugDNA.7809.1.S1_at   | MmugDNA.7809.1 | 4.53  | 4.5   | 0.68 | 0.91 | 1.02   | 0.928036 | 0.592565 | 0.972249 | 0.757844 |
| MmugDNA.781.1.S1_at    | MmugDNA.781.1  | 3.07  | 3.08  | 0.21 | 0.13 | -1.01  | 0.505186 | 0.575343 | 0.761548 | 0.746448 |
| MmugDNA.7814.1.S1_at   | MmugDNA.7814.1 | 8.07  | 7.56  | 0.14 | 0.3  | 1.42   | 0.06652  | 0.064293 | 0.406564 | 0.299748 |
| MmugDNA.7816.1.S1_at   | MmugDNA.7816.1 | 6.78  | 11.3  | 2.15 | 4.33 | -22.97 | 0.560837 | 0.430572 | 0.794468 | 0.651577 |
| MmugDNA.7816.1.S1_s_at | MmugDNA.7816.1 | 5.9   | 10.54 | 1.92 | 3.34 | -24.81 | 0.417257 | 0.328427 | 0.710434 | 0.578066 |
| MmugDNA.7817.1.S1_at   | MmugDNA.7817.1 | 3.52  | 3.48  | 0.78 | 0.02 | 1.03   | 0.335957 | 0.412254 | 0.65921  | 0.638664 |
| MmugDNA.7818.1.S1_at   | MmugDNA.7818.1 | 5.12  | 5.04  | 0.04 | 0.11 | 1.05   | 0.853194 | 0.496111 | 0.940741 | 0.695877 |
| MmugDNA.7819.1.S1_at   | MmugDNA.7819.1 | 12.17 | 12.07 | 0.04 | 0.15 | 1.07   | 0.271855 | 0.233707 | 0.615834 | 0.505032 |
| MmugDNA.782.1.S1_s_at  | MmugDNA.782.1  | 10.84 | 10.35 | 0.29 | 0.15 | 1.4    | 0.087596 | 0.092455 | 0.442009 | 0.348346 |
| MmugDNA.7822.1.S1_at   | MmugDNA.7822.1 | 6.75  | 7.5   | 0.61 | 0.79 | -1.68  | 0.283452 | 0.253732 | 0.623508 | 0.522091 |
| MmugDNA.7823.1.S1_at   | MmugDNA.7823.1 | 3.69  | 3.71  | 0.16 | 0    | -1.01  | 0.937601 | 0.953072 | 0.975964 | 0.973379 |
| MmugDNA.7824.1.S1_at   | MmugDNA.7824.1 | 9.86  | 10.7  | 0.01 | 0.33 | -1.78  | 0.009292 | 0.000933 | 0.223832 | 0.048962 |

|                         |                 |       |       |      |      |       |          |          |          |          |
|-------------------------|-----------------|-------|-------|------|------|-------|----------|----------|----------|----------|
| MmugDNA.7825.1.S1_at    | MmugDNA.7825.1  | 3.03  | 3.1   | 0.18 | 0    | -1.05 | 0.60046  | 0.55986  | 0.815209 | 0.736409 |
| MmugDNA.7827.1.S1_at    | MmugDNA.7827.1  | 5.52  | 5.45  | 0.18 | 0.04 | 1.05  | 0.80059  | 0.271315 | 0.917755 | 0.53644  |
| MmugDNA.7829.1.S1_at    | MmugDNA.7829.1  | 5.67  | 6.12  | 0.27 | 0.19 | -1.37 | 0.074257 | 0.068377 | 0.419963 | 0.307955 |
| MmugDNA.7835.1.S1_at    | MmugDNA.7835.1  | 7.66  | 7.61  | 0.48 | 0.87 | 1.04  | 0.856803 | 0.977742 | 0.942171 | 0.98787  |
| MmugDNA.7835.1.S1_s_at  | MmugDNA.7835.1  | 10.69 | 10.13 | 0.08 | 0.81 | 1.47  | 0.496041 | 0.645848 | 0.757394 | 0.792616 |
| MmugDNA.7836.1.S1_at    | MmugDNA.7836.1  | 4.66  | 4.88  | 0.33 | 0.15 | -1.17 | 0.250216 | 0.320833 | 0.600389 | 0.572849 |
| MmugDNA.7837.1.S1_at    | MmugDNA.7837.1  | 10.14 | 9.25  | 0.08 | 0.07 | 1.85  | 0.000207 | 0.000026 | 0.120316 | 0.020518 |
| MmugDNA.7838.1.S1_at    | MmugDNA.7838.1  | 3.38  | 3.44  | 0.07 | 0.08 | -1.04 | 0.526052 | 0.730698 | 0.773971 | 0.844055 |
| MmugDNA.784.1.S1_at     | MmugDNA.784.1   | 4.5   | 4.43  | 0.39 | 0.06 | 1.04  | 0.330815 | 0.233748 | 0.656063 | 0.50505  |
| MmugDNA.7842.1.S1_at    | MmugDNA.7842.1  | 4.4   | 3.56  | 0.82 | 0.23 | 1.79  | 0.385868 | 0.52683  | 0.690905 | 0.715627 |
| MmugDNA.11210.1.S1_s_at | MmugDNA.11210.1 | 8.38  | 9.28  | 0.72 | 0.48 | -1.86 | 0.163662 | 0.177952 | 0.527992 | 0.45429  |
| MmugDNA.7844.1.S1_at    | MmugDNA.7844.1  | 6.86  | 8.14  | 0.4  | 0.71 | -2.44 | 0.036035 | 0.043619 | 0.338744 | 0.253501 |
| MmugDNA.7845.1.S1_at    | MmugDNA.7845.1  | 4.05  | 3.97  | 0.23 | 0.11 | 1.06  | 0.684472 | 0.327787 | 0.858788 | 0.577604 |
| MmugDNA.7846.1.S1_at    | MmugDNA.7846.1  | 4     | 4.03  | 0.08 | 0.7  | -1.02 | 0.535462 | 0.671434 | 0.779125 | 0.807907 |
| MmugDNA.7847.1.S1_at    | MmugDNA.7847.1  | 4.76  | 4.15  | 0.24 | 0.21 | 1.54  | 0.025991 | 0.021373 | 0.301367 | 0.18304  |
| MmugDNA.7848.1.S1_at    | MmugDNA.7848.1  | 3.03  | 2.98  | 0    | 0.1  | 1.03  | 0.503449 | 0.951374 | 0.76088  | 0.972418 |
| MmugDNA.785.1.S1_at     | MmugDNA.785.1   | 5.05  | 5.07  | 0.14 | 0.14 | -1.01 | 0.886985 | 0.385581 | 0.954777 | 0.621038 |
| MmugDNA.7850.1.S1_at    | MmugDNA.7850.1  | 2.96  | 3.13  | 0.02 | 0    | -1.13 | 0.000056 | 4.32E-07 | 0.112653 | 0.005999 |
| MmugDNA.7851.1.S1_at    | MmugDNA.7851.1  | 3.79  | 3.93  | 0.06 | 0.05 | -1.11 | 0.061744 | 0.326704 | 0.396609 | 0.576725 |
| MmugDNA.7853.1.S1_at    | MmugDNA.7853.1  | 4.73  | 4.96  | 0.2  | 0.13 | -1.17 | 0.060277 | 0.04715  | 0.393081 | 0.261745 |
| MmugDNA.7854.1.S1_at    | MmugDNA.7854.1  | 6.69  | 6.72  | 0.06 | 0.12 | -1.02 | 0.479587 | 0.047802 | 0.74773  | 0.263649 |
| MmugDNA.7855.1.S1_at    | MmugDNA.7855.1  | 4.2   | 4     | 0.42 | 0.26 | 1.15  | 0.192252 | 0.219828 | 0.555316 | 0.493388 |
| MmugDNA.7859.1.S1_at    | MmugDNA.7859.1  | 4.59  | 4.41  | 0.1  | 0.21 | 1.13  | 0.143109 | 0.054792 | 0.510004 | 0.279594 |
| MmugDNA.786.1.S1_at     | MmugDNA.786.1   | 6.67  | 7.55  | 0.82 | 0.24 | -1.84 | 0.137038 | 0.167387 | 0.504283 | 0.443785 |
| MmugDNA.7863.1.S1_at    | MmugDNA.7863.1  | 7.57  | 7.4   | 0.13 | 0.13 | 1.13  | 0.295406 | 0.222839 | 0.63169  | 0.495765 |
| MmugDNA.7865.1.S1_at    | MmugDNA.7865.1  | 8.86  | 9.12  | 0.1  | 0.11 | -1.19 | 0.02857  | 0.019505 | 0.311783 | 0.175439 |
| MmugDNA.7867.1.S1_at    | MmugDNA.7867.1  | 4.21  | 4.15  | 0.19 | 0.12 | 1.04  | 0.639479 | 0.536841 | 0.837212 | 0.722119 |
| MmugDNA.7868.1.S1_at    | MmugDNA.7868.1  | 2.64  | 2.71  | 0.14 | 0.16 | -1.04 | 0.619115 | 0.599355 | 0.825425 | 0.761418 |
| MmugDNA.7869.1.S1_at    | MmugDNA.7869.1  | 6.96  | 6.33  | 0.16 | 0.39 | 1.55  | 0.061793 | 0.062527 | 0.396609 | 0.296884 |
| MmugDNA.787.1.S1_at     | MmugDNA.787.1   | 3.02  | 2.96  | 0.04 | 0.09 | 1.04  | 0.422734 | 0.671841 | 0.713675 | 0.808157 |
| MmugDNA.7870.1.S1_at    | MmugDNA.7870.1  | 5.08  | 5.41  | 0.59 | 0.12 | -1.25 | 0.515857 | 0.40178  | 0.767629 | 0.631068 |
| MmugDNA.7871.1.S1_at    | MmugDNA.7871.1  | 5.25  | 3.95  | 1.02 | 0.11 | 2.46  | 0.13876  | 0.100131 | 0.505884 | 0.359064 |
| MmugDNA.7872.1.S1_at    | MmugDNA.7872.1  | 5.16  | 5.25  | 0.07 | 0.23 | -1.07 | 0.636962 | 0.830379 | 0.83591  | 0.902656 |
| MmugDNA.7873.1.S1_at    | MmugDNA.7873.1  | 8.23  | 7.6   | 1.57 | 1.14 | 1.54  | 0.249676 | 0.396749 | 0.600196 | 0.628438 |
| MmugDNA.7876.1.S1_at    | MmugDNA.7876.1  | 9.87  | 9.7   | 0.21 | 0.3  | 1.12  | 0.223046 | 0.191814 | 0.581681 | 0.467164 |
| MmugDNA.7877.1.S1_at    | MmugDNA.7877.1  | 8.72  | 8.5   | 0.15 | 0.12 | 1.16  | 0.239827 | 0.148731 | 0.592786 | 0.423201 |
| MmugDNA.7879.1.S1_at    | MmugDNA.7879.1  | 7.96  | 7.81  | 0.05 | 0.35 | 1.12  | 0.620132 | 0.110217 | 0.826025 | 0.374349 |
| MmugDNA.788.1.S1_at     | MmugDNA.788.1   | 6.06  | 6.1   | 0.24 | 0.18 | -1.03 | 0.680965 | 0.641981 | 0.857436 | 0.78994  |
| MmugDNA.7882.1.S1_at    | MmugDNA.7882.1  | 4.36  | 3.84  | 0.06 | 0.83 | 1.44  | 0.732531 | 0.925912 | 0.884502 | 0.958059 |
| MmugDNA.7884.1.S1_at    | MmugDNA.7884.1  | 9.37  | 9.53  | 0.05 | 0.28 | -1.11 | 0.399477 | 0.604516 | 0.6994   | 0.764655 |
| MmugDNA.7884.1.S1_s_at  | MmugDNA.7884.1  | 11.95 | 12.04 | 0.1  | 0.2  | -1.06 | 0.597447 | 0.734528 | 0.813537 | 0.84619  |

|                        |                |       |       |      |      |       |          |          |          |          |
|------------------------|----------------|-------|-------|------|------|-------|----------|----------|----------|----------|
| MmugDNA.7885.1.S1_at   | MmugDNA.7885.1 | 4.53  | 4.36  | 0.15 | 0.03 | 1.13  | 0.207787 | 0.104901 | 0.569822 | 0.366451 |
| MmugDNA.7886.1.S1_at   | MmugDNA.7886.1 | 9.54  | 8.19  | 0.17 | 0.13 | 2.54  | 0.000492 | 0.000011 | 0.135112 | 0.016526 |
| MmugDNA.7887.1.S1_at   | MmugDNA.7887.1 | 8.57  | 8.79  | 0.34 | 0.19 | -1.17 | 0.859371 | 0.625038 | 0.943196 | 0.778973 |
| MmugDNA.7888.1.S1_at   | MmugDNA.7888.1 | 4.91  | 5.19  | 0.12 | 0.21 | -1.21 | 0.052779 | 0.02334  | 0.378449 | 0.191537 |
| MmugDNA.789.1.S1_at    | MmugDNA.789.1  | 7.17  | 9.14  | 0.39 | 0.76 | -3.91 | 0.010185 | 0.0039   | 0.228247 | 0.088806 |
| MmugDNA.7892.1.S1_at   | MmugDNA.7892.1 | 5.4   | 5.54  | 0.36 | 0.33 | -1.1  | 0.372703 | 0.539388 | 0.682983 | 0.723743 |
| MmugDNA.7894.1.S1_at   | MmugDNA.7894.1 | 8.15  | 7.55  | 0.71 | 0.39 | 1.52  | 0.184024 | 0.087477 | 0.547964 | 0.340617 |
| MmugDNA.7895.1.S1_at   | MmugDNA.7895.1 | 6.9   | 6.9   | 0.21 | 0.18 | -1.01 | 0.720876 | 0.845441 | 0.877828 | 0.912071 |
| MmugDNA.7896.1.S1_at   | MmugDNA.7896.1 | 7.1   | 7.37  | 0.32 | 0.22 | -1.21 | 0.547715 | 0.738138 | 0.786269 | 0.848203 |
| MmugDNA.7898.1.S1_s_at | MmugDNA.7898.1 | 11.97 | 12.03 | 0.15 | 0.14 | -1.05 | 0.943857 | 0.268957 | 0.978535 | 0.534369 |
| MmugDNA.7899.1.S1_at   | MmugDNA.7899.1 | 7.79  | 7.64  | 0.41 | 0.34 | 1.11  | 0.580711 | 0.352787 | 0.804783 | 0.596115 |
| MmugDNA.79.1.S1_at     | MmugDNA.79.1   | 6.58  | 6.85  | 0.08 | 0.11 | -1.21 | 0.076172 | 0.046994 | 0.424738 | 0.261469 |
| MmugDNA.7900.1.S1_at   | MmugDNA.7900.1 | 5.75  | 5.75  | 0.2  | 0.18 | 1     | 0.756066 | 0.78676  | 0.896323 | 0.876656 |
| MmugDNA.7901.1.S1_at   | MmugDNA.7901.1 | 4.2   | 4.34  | 0.13 | 0.24 | -1.1  | 0.228747 | 0.686476 | 0.586121 | 0.817043 |
| MmugDNA.7904.1.S1_at   | MmugDNA.7904.1 | 3.32  | 3.3   | 0.78 | 0.35 | 1.02  | 0.632276 | 0.566873 | 0.833133 | 0.74084  |
| MmugDNA.7905.1.S1_at   | MmugDNA.7905.1 | 6.49  | 6.04  | 0.75 | 0.18 | 1.36  | 0.127449 | 0.138929 | 0.493834 | 0.412037 |
| MmugDNA.7906.1.S1_at   | MmugDNA.7906.1 | 12.93 | 13.02 | 0.13 | 0.15 | -1.06 | 0.917825 | 0.075916 | 0.968032 | 0.320576 |
| MmugDNA.7908.1.S1_at   | MmugDNA.7908.1 | 12.88 | 12.82 | 0.06 | 0.02 | 1.04  | 0.183817 | 0.427853 | 0.547947 | 0.649582 |
| MmugDNA.7909.1.S1_at   | MmugDNA.7909.1 | 6.76  | 6.76  | 0.12 | 0.16 | -1    | 0.68365  | 0.631786 | 0.85844  | 0.782957 |
| MmugDNA.791.1.S1_at    | MmugDNA.791.1  | 5.44  | 5.39  | 0.24 | 0.36 | 1.03  | 0.358005 | 0.501117 | 0.672935 | 0.699443 |
| MmugDNA.7911.1.S1_at   | MmugDNA.7911.1 | 10.28 | 10.93 | 0.09 | 0.4  | -1.56 | 0.068971 | 0.06896  | 0.411002 | 0.308954 |
| MmugDNA.7912.1.S1_at   | MmugDNA.7912.1 | 4.83  | 4.44  | 0.37 | 0.22 | 1.31  | 0.100501 | 0.106512 | 0.461009 | 0.369078 |
| MmugDNA.7914.1.S1_at   | MmugDNA.7914.1 | 3.72  | 3.52  | 0.26 | 0.36 | 1.14  | 0.416913 | 0.751436 | 0.71026  | 0.85549  |
| MmugDNA.7915.1.S1_at   | MmugDNA.7915.1 | 6.32  | 6.75  | 0.94 | 1.26 | -1.35 | 0.889387 | 0.973088 | 0.955717 | 0.98541  |
| MmugDNA.7918.1.S1_at   | MmugDNA.7918.1 | 3.81  | 3.74  | 0.06 | 0.2  | 1.05  | 0.935976 | 0.427331 | 0.975172 | 0.649175 |
| MmugDNA.7919.1.S1_at   | MmugDNA.7919.1 | 4.63  | 4.65  | 0.22 | 0.05 | -1.02 | 0.76285  | 0.923285 | 0.900046 | 0.95686  |
| MmugDNA.7920.1.S1_at   | MmugDNA.7920.1 | 10.35 | 9.99  | 0.18 | 0.29 | 1.28  | 0.538443 | 0.72569  | 0.780609 | 0.841142 |
| MmugDNA.7921.1.S1_at   | MmugDNA.7921.1 | 3.57  | 3.57  | 0.34 | 0.2  | -1    | 0.572351 | 0.70631  | 0.800678 | 0.829634 |
| MmugDNA.7922.1.S1_at   | MmugDNA.7922.1 | 3.34  | 3.4   | 0.15 | 0.51 | -1.04 | 0.231633 | 0.313592 | 0.587487 | 0.567977 |
| MmugDNA.7923.1.S1_at   | MmugDNA.7923.1 | 8.15  | 8.78  | 0.17 | 0.34 | -1.55 | 0.181778 | 0.219547 | 0.54644  | 0.493192 |
| MmugDNA.7925.1.S1_at   | MmugDNA.7925.1 | 9.29  | 9.08  | 0.1  | 0.56 | 1.16  | 0.671829 | 0.78712  | 0.852716 | 0.876835 |
| MmugDNA.7926.1.S1_at   | MmugDNA.7926.1 | 5.04  | 4.57  | 0.29 | 0.79 | 1.38  | 0.582519 | 0.55691  | 0.805828 | 0.734847 |
| MmugDNA.7927.1.S1_at   | MmugDNA.7927.1 | 7.52  | 7.03  | 0.32 | 0.44 | 1.41  | 0.186192 | 0.249111 | 0.549799 | 0.51821  |
| MmugDNA.7928.1.S1_at   | MmugDNA.7928.1 | 2.79  | 2.78  | 0.3  | 0.06 | 1     | 0.592392 | 0.468391 | 0.810906 | 0.677714 |
| MmugDNA.7929.1.S1_at   | MmugDNA.7929.1 | 5.17  | 5.03  | 0.19 | 0.22 | 1.1   | 0.608775 | 0.437693 | 0.820185 | 0.656881 |
| MmugDNA.7931.1.S1_at   | MmugDNA.7931.1 | 3.47  | 3.53  | 0.14 | 0.08 | -1.04 | 0.474946 | 0.6194   | 0.745455 | 0.774634 |
| MmugDNA.7934.1.S1_at   | MmugDNA.7934.1 | 8.1   | 7.14  | 0.44 | 0.75 | 1.95  | 0.189935 | 0.239385 | 0.55279  | 0.510039 |
| MmugDNA.7935.1.S1_at   | MmugDNA.7935.1 | 3.27  | 3.15  | 0.1  | 0.08 | 1.09  | 0.774893 | 0.292761 | 0.905462 | 0.552783 |
| MmugDNA.7936.1.S1_at   | MmugDNA.7936.1 | 11.83 | 11.83 | 0.13 | 0.42 | -1    | 0.405556 | 0.46862  | 0.70327  | 0.677755 |
| MmugDNA.7937.1.S1_at   | MmugDNA.7937.1 | 6.87  | 6.64  | 0.16 | 0.13 | 1.17  | 0.297438 | 0.386447 | 0.633201 | 0.621593 |
| MmugDNA.7938.1.S1_at   | MmugDNA.7938.1 | 5.04  | 5.07  | 0.55 | 0.3  | -1.02 | 0.873648 | 0.546146 | 0.949321 | 0.727787 |

|                        |                |       |       |      |      |       |          |          |          |          |
|------------------------|----------------|-------|-------|------|------|-------|----------|----------|----------|----------|
| MmugDNA.7939.1.S1_at   | MmugDNA.7939.1 | 5.65  | 5.58  | 0.37 | 0.37 | 1.05  | 0.577229 | 0.116341 | 0.803447 | 0.383671 |
| MmugDNA.7941.1.S1_at   | MmugDNA.7941.1 | 8.68  | 7.97  | 0.18 | 0.08 | 1.63  | 0.004663 | 0.037704 | 0.1844   | 0.23859  |
| MmugDNA.7942.1.S1_at   | MmugDNA.7942.1 | 4.78  | 4.71  | 0.24 | 0.25 | 1.04  | 0.789719 | 0.923456 | 0.912715 | 0.956981 |
| MmugDNA.7943.1.S1_at   | MmugDNA.7943.1 | 4.11  | 4.03  | 0.15 | 0.06 | 1.06  | 0.247044 | 0.457021 | 0.598082 | 0.670619 |
| MmugDNA.7944.1.S1_at   | MmugDNA.7944.1 | 4.9   | 4.83  | 0.19 | 0.07 | 1.06  | 0.792843 | 0.44546  | 0.914102 | 0.662388 |
| MmugDNA.7945.1.S1_at   | MmugDNA.7945.1 | 11.41 | 10.83 | 0.09 | 0.09 | 1.49  | 0.00097  | 0.000585 | 0.139813 | 0.041486 |
| MmugDNA.7946.1.S1_at   | MmugDNA.7946.1 | 3.93  | 4.17  | 0.21 | 0.37 | -1.18 | 0.902023 | 0.899447 | 0.960872 | 0.942858 |
| MmugDNA.7947.1.S1_at   | MmugDNA.7947.1 | 3.99  | 4.01  | 0.18 | 0.2  | -1.02 | 0.532254 | 0.697245 | 0.777626 | 0.824057 |
| MmugDNA.7949.1.S1_at   | MmugDNA.7949.1 | 4.7   | 4.65  | 0.21 | 0.37 | 1.04  | 0.906966 | 0.750188 | 0.963023 | 0.854731 |
| MmugDNA.795.1.S1_at    | MmugDNA.795.1  | 3.76  | 3.65  | 0.56 | 0.09 | 1.08  | 0.316162 | 0.612978 | 0.646998 | 0.770331 |
| MmugDNA.7952.1.S1_at   | MmugDNA.7952.1 | 6.99  | 7.15  | 0.11 | 0.15 | -1.12 | 0.171724 | 0.186379 | 0.535284 | 0.46221  |
| MmugDNA.7953.1.S1_at   | MmugDNA.7953.1 | 4.36  | 4.68  | 0.15 | 0.26 | -1.25 | 0.137417 | 0.159151 | 0.504538 | 0.435217 |
| MmugDNA.7954.1.S1_at   | MmugDNA.7954.1 | 4.87  | 4.7   | 0.07 | 0    | 1.12  | 0.034134 | 0.001148 | 0.331644 | 0.05344  |
| MmugDNA.7956.1.S1_at   | MmugDNA.7956.1 | 6.09  | 6.67  | 0.05 | 0.6  | -1.5  | 0.128525 | 0.103739 | 0.494653 | 0.364519 |
| MmugDNA.7957.1.S1_at   | MmugDNA.7957.1 | 10.13 | 9.03  | 0.2  | 0.61 | 2.15  | 0.032272 | 0.015523 | 0.324472 | 0.158053 |
| MmugDNA.7958.1.S1_at   | MmugDNA.7958.1 | 5.7   | 5.24  | 0.57 | 0.15 | 1.37  | 0.078036 | 0.052266 | 0.428012 | 0.274146 |
| MmugDNA.796.1.S1_at    | MmugDNA.796.1  | 3.47  | 3.67  | 0.21 | 0.07 | -1.15 | 0.61102  | 0.852047 | 0.821464 | 0.915853 |
| MmugDNA.7960.1.S1_at   | MmugDNA.7960.1 | 4.45  | 4.65  | 0.14 | 0.67 | -1.15 | 0.242144 | 0.150748 | 0.594305 | 0.4253   |
| MmugDNA.7961.1.S1_at   | MmugDNA.7961.1 | 6.89  | 7.16  | 0.35 | 0.71 | -1.21 | 0.352033 | 0.390035 | 0.669358 | 0.624002 |
| MmugDNA.7963.1.S1_at   | MmugDNA.7963.1 | 4.64  | 4.56  | 0.12 | 0.19 | 1.06  | 0.250026 | 0.339133 | 0.600389 | 0.585891 |
| MmugDNA.7966.1.S1_at   | MmugDNA.7966.1 | 3.89  | 3.7   | 0.2  | 0.32 | 1.14  | 0.405664 | 0.174697 | 0.703322 | 0.451231 |
| MmugDNA.7967.1.S1_at   | MmugDNA.7967.1 | 5.79  | 5.81  | 0.2  | 0.14 | -1.02 | 0.415162 | 0.585863 | 0.709381 | 0.753074 |
| MmugDNA.7968.1.S1_at   | MmugDNA.7968.1 | 3.8   | 3.98  | 0.17 | 0.26 | -1.13 | 0.473742 | 0.264191 | 0.744526 | 0.530258 |
| MmugDNA.7969.1.S1_at   | MmugDNA.7969.1 | 6.24  | 6.32  | 0.07 | 0.21 | -1.06 | 0.185958 | 0.234886 | 0.549502 | 0.506125 |
| MmugDNA.7970.1.S1_at   | MmugDNA.7970.1 | 4.57  | 4.57  | 0.04 | 0.08 | -1    | 0.219731 | 0.292503 | 0.579133 | 0.55258  |
| MmugDNA.7971.1.S1_at   | MmugDNA.7971.1 | 8.38  | 7.3   | 0.62 | 0.98 | 2.11  | 0.059671 | 0.034725 | 0.39273  | 0.230506 |
| MmugDNA.7972.1.S1_at   | MmugDNA.7972.1 | 4.78  | 4.66  | 0.14 | 0.07 | 1.09  | 0.726854 | 0.870228 | 0.881189 | 0.926373 |
| MmugDNA.7973.1.S1_at   | MmugDNA.7973.1 | 7.56  | 8.24  | 0.49 | 0.27 | -1.61 | 0.10927  | 0.114549 | 0.470811 | 0.381098 |
| MmugDNA.7975.1.S1_at   | MmugDNA.7975.1 | 3.17  | 3.17  | 0.07 | 0.04 | 1     | 0.696143 | 0.572724 | 0.86514  | 0.744687 |
| MmugDNA.7976.1.S1_at   | MmugDNA.7976.1 | 5.53  | 4.14  | 0.86 | 0.49 | 2.62  | 0.17671  | 0.233454 | 0.540348 | 0.504809 |
| MmugDNA.7977.1.S1_at   | MmugDNA.7977.1 | 3.61  | 3.46  | 0.08 | 0.01 | 1.11  | 0.086892 | 0.135159 | 0.440541 | 0.407181 |
| MmugDNA.7978.1.S1_at   | MmugDNA.7978.1 | 12.43 | 12.43 | 0.11 | 0.13 | -1    | 0.726701 | 0.555395 | 0.881115 | 0.733767 |
| MmugDNA.7979.1.S1_at   | MmugDNA.7979.1 | 7.3   | 7.13  | 1.21 | 1.15 | 1.13  | 0.783159 | 0.940551 | 0.909454 | 0.966314 |
| MmugDNA.798.1.S1_at    | MmugDNA.798.1  | 6.25  | 5.59  | 0.21 | 0.71 | 1.58  | 0.176352 | 0.193322 | 0.539953 | 0.468656 |
| MmugDNA.7980.1.S1_at   | MmugDNA.7980.1 | 8.5   | 10.43 | 0.24 | 0.26 | -3.83 | 0.001309 | 0.000401 | 0.146024 | 0.037471 |
| MmugDNA.7982.1.S1_at   | MmugDNA.7982.1 | 3.83  | 3.87  | 0.26 | 0.07 | -1.02 | 0.774848 | 0.594244 | 0.905462 | 0.758517 |
| MmugDNA.7983.1.S1_at   | MmugDNA.7983.1 | 11.58 | 11.37 | 0.13 | 0.16 | 1.16  | 0.35161  | 0.0517   | 0.669126 | 0.272905 |
| MmugDNA.7983.1.S1_s_at | MmugDNA.7983.1 | 11.4  | 11.22 | 0.06 | 0.16 | 1.14  | 0.392501 | 0.034105 | 0.694657 | 0.2286   |
| MmugDNA.7985.1.S1_at   | MmugDNA.7985.1 | 6.29  | 6.63  | 0.18 | 0.57 | -1.26 | 0.288502 | 0.401925 | 0.626713 | 0.631097 |
| MmugDNA.7986.1.S1_at   | MmugDNA.7986.1 | 8.17  | 7.74  | 0.11 | 0.69 | 1.35  | 0.848579 | 0.913113 | 0.939211 | 0.951134 |
| MmugDNA.7987.1.S1_at   | MmugDNA.7987.1 | 7.46  | 7.81  | 0.19 | 0.36 | -1.28 | 0.348572 | 0.058315 | 0.667173 | 0.288276 |

|                        |                |       |       |      |      |        |          |          |          |          |
|------------------------|----------------|-------|-------|------|------|--------|----------|----------|----------|----------|
| MmugDNA.7989.1.S1_at   | MmugDNA.7989.1 | 8.13  | 8.36  | 1.69 | 0.32 | -1.17  | 0.79005  | 0.338517 | 0.912878 | 0.585516 |
| MmugDNA.7990.1.S1_at   | MmugDNA.7990.1 | 10.38 | 10.52 | 0.6  | 0.17 | -1.1   | 0.900988 | 0.192187 | 0.960391 | 0.467651 |
| MmugDNA.7990.1.S1_s_at | MmugDNA.7990.1 | 12.27 | 12.55 | 0.3  | 0.12 | -1.22  | 0.302981 | 0.063932 | 0.637233 | 0.29906  |
| MmugDNA.7991.1.S1_at   | MmugDNA.7991.1 | 4     | 4.06  | 0.1  | 0.25 | -1.04  | 0.882688 | 0.773395 | 0.952889 | 0.868269 |
| MmugDNA.7992.1.S1_at   | MmugDNA.7992.1 | 4.72  | 4.65  | 0.12 | 0.16 | 1.05   | 0.651247 | 0.006798 | 0.843066 | 0.111432 |
| MmugDNA.7994.1.S1_at   | MmugDNA.7994.1 | 3.9   | 3.58  | 0.34 | 0.06 | 1.25   | 0.147224 | 0.145894 | 0.513087 | 0.419889 |
| MmugDNA.7995.1.S1_at   | MmugDNA.7995.1 | 8.84  | 8.93  | 0.3  | 0.7  | -1.06  | 0.966136 | 0.455632 | 0.987096 | 0.669614 |
| MmugDNA.7997.1.S1_at   | MmugDNA.7997.1 | 5.72  | 5.56  | 0.52 | 0.13 | 1.12   | 0.482504 | 0.475001 | 0.749408 | 0.681843 |
| MmugDNA.7998.1.S1_at   | MmugDNA.7998.1 | 5.69  | 4.8   | 0.9  | 0.4  | 1.86   | 0.218674 | 0.090055 | 0.578242 | 0.344402 |
| MmugDNA.7999.1.S1_at   | MmugDNA.7999.1 | 2.85  | 2.74  | 0.02 | 0.13 | 1.08   | 0.222461 | 0.136207 | 0.580951 | 0.408542 |
| MmugDNA.8.1.S1_at      | MmugDNA.8.1    | 4.41  | 4.68  | 0.15 | 1.19 | -1.2   | 0.59657  | 0.710798 | 0.813077 | 0.832265 |
| MmugDNA.80.1.S1_at     | MmugDNA.80.1   | 10.84 | 10.99 | 0.03 | 0.17 | -1.11  | 0.092297 | 0.026147 | 0.448803 | 0.202721 |
| MmugDNA.8001.1.S1_at   | MmugDNA.8001.1 | 10.16 | 10.63 | 0.09 | 0.31 | -1.39  | 0.137461 | 0.060263 | 0.504538 | 0.292143 |
| MmugDNA.8003.1.S1_at   | MmugDNA.8003.1 | 4.78  | 5.25  | 0.74 | 0.24 | -1.39  | 0.988139 | 0.728966 | 0.995844 | 0.84333  |
| MmugDNA.8004.1.S1_at   | MmugDNA.8004.1 | 10.25 | 10.52 | 0.21 | 0.4  | -1.21  | 0.776672 | 0.939097 | 0.906454 | 0.965412 |
| MmugDNA.8005.1.S1_at   | MmugDNA.8005.1 | 7.08  | 7.37  | 0.1  | 0.2  | -1.23  | 0.25591  | 0.489356 | 0.603662 | 0.691792 |
| MmugDNA.8006.1.S1_at   | MmugDNA.8006.1 | 8.3   | 8.53  | 0.13 | 0.2  | -1.17  | 0.145059 | 0.134219 | 0.511204 | 0.406454 |
| MmugDNA.8007.1.S1_at   | MmugDNA.8007.1 | 8.44  | 7.93  | 0.09 | 1.01 | 1.42   | 0.93337  | 0.521625 | 0.974072 | 0.712514 |
| MmugDNA.8008.1.S1_at   | MmugDNA.8008.1 | 4.2   | 4.83  | 0.27 | 0.72 | -1.55  | 0.146649 | 0.060621 | 0.512668 | 0.292801 |
| MmugDNA.8009.1.S1_at   | MmugDNA.8009.1 | 9.45  | 7.96  | 0.41 | 0.55 | 2.8    | 0.040648 | 0.033337 | 0.34998  | 0.22626  |
| MmugDNA.801.1.S1_at    | MmugDNA.801.1  | 11.96 | 12.13 | 0.14 | 0.12 | -1.12  | 0.102351 | 0.140238 | 0.462127 | 0.413405 |
| MmugDNA.8010.1.S1_at   | MmugDNA.8010.1 | 5.8   | 9.46  | 2.15 | 2.19 | -12.65 | 0.229152 | 0.251749 | 0.586439 | 0.520444 |
| MmugDNA.8011.1.S1_at   | MmugDNA.8011.1 | 4.49  | 4.46  | 0.22 | 0.15 | 1.02   | 0.657216 | 0.831151 | 0.845778 | 0.903172 |
| MmugDNA.8012.1.S1_at   | MmugDNA.8012.1 | 9.73  | 11.01 | 0.18 | 0.12 | -2.42  | 0.000668 | 0.000475 | 0.136818 | 0.038572 |
| MmugDNA.8013.1.S1_at   | MmugDNA.8013.1 | 4.4   | 4.62  | 0.24 | 0.09 | -1.16  | 0.657688 | 0.321311 | 0.846091 | 0.57319  |
| MmugDNA.8014.1.S1_at   | MmugDNA.8014.1 | 3.92  | 3.82  | 0.24 | 0.11 | 1.07   | 0.230551 | 0.256178 | 0.587222 | 0.524069 |
| MmugDNA.8015.1.S1_at   | MmugDNA.8015.1 | 5.76  | 5.81  | 0.41 | 0.14 | -1.04  | 0.365897 | 0.469583 | 0.678686 | 0.67829  |
| MmugDNA.8016.1.S1_at   | MmugDNA.8016.1 | 5.18  | 5.67  | 0.18 | 0.29 | -1.4   | 0.098231 | 0.22083  | 0.457815 | 0.494262 |
| MmugDNA.8017.1.S1_at   | MmugDNA.8017.1 | 6.76  | 6.62  | 0.15 | 0.26 | 1.1    | 0.654639 | 0.819962 | 0.844665 | 0.896303 |
| MmugDNA.8018.1.S1_at   | MmugDNA.8018.1 | 5.9   | 5.89  | 0.13 | 0.16 | 1.01   | 0.673201 | 0.093934 | 0.853359 | 0.350445 |
| MmugDNA.8019.1.S1_at   | MmugDNA.8019.1 | 7.66  | 6.71  | 0.79 | 1.03 | 1.93   | 0.276852 | 0.31715  | 0.619007 | 0.570412 |
| MmugDNA.802.1.S1_at    | MmugDNA.802.1  | 10.3  | 9.63  | 0.03 | 0.18 | 1.59   | 0.005719 | 0.001958 | 0.191956 | 0.065832 |
| MmugDNA.8021.1.S1_at   | MmugDNA.8021.1 | 4.84  | 5.45  | 0.46 | 0.57 | -1.52  | 0.272821 | 0.355069 | 0.616391 | 0.59749  |
| MmugDNA.8023.1.S1_at   | MmugDNA.8023.1 | 4.51  | 4.69  | 0.23 | 0.13 | -1.13  | 0.436684 | 0.47528  | 0.721926 | 0.682031 |
| MmugDNA.8024.1.S1_at   | MmugDNA.8024.1 | 3.75  | 3.72  | 0.3  | 0.18 | 1.02   | 0.424312 | 0.396699 | 0.714453 | 0.628434 |
| MmugDNA.8025.1.S1_at   | MmugDNA.8025.1 | 4.38  | 4.28  | 0.23 | 0.09 | 1.07   | 0.549454 | 0.355511 | 0.787327 | 0.597777 |
| MmugDNA.8026.1.S1_at   | MmugDNA.8026.1 | 5.74  | 5.58  | 0.15 | 0.06 | 1.12   | 0.247903 | 0.150699 | 0.599052 | 0.425277 |
| MmugDNA.8027.1.S1_at   | MmugDNA.8027.1 | 4.81  | 5.02  | 0.31 | 0.13 | -1.16  | 0.918973 | 0.353475 | 0.968454 | 0.596547 |
| MmugDNA.8028.1.S1_at   | MmugDNA.8028.1 | 6.81  | 6.77  | 0.19 | 0.1  | 1.03   | 0.82169  | 0.746736 | 0.927464 | 0.852931 |
| MmugDNA.8029.1.S1_at   | MmugDNA.8029.1 | 7.86  | 6.04  | 1.1  | 0.24 | 3.55   | 0.131019 | 0.141689 | 0.497436 | 0.415265 |
| MmugDNA.8030.1.S1_at   | MmugDNA.8030.1 | 3.05  | 3.16  | 0.07 | 0.08 | -1.08  | 0.413993 | 0.328467 | 0.708765 | 0.57809  |

|                        |                |       |       |      |      |       |          |          |          |          |
|------------------------|----------------|-------|-------|------|------|-------|----------|----------|----------|----------|
| MmugDNA.8031.1.S1_at   | MmugDNA.8031.1 | 6.62  | 6.74  | 0.32 | 0.48 | -1.09 | 0.50903  | 0.722528 | 0.764172 | 0.839261 |
| MmugDNA.8032.1.S1_at   | MmugDNA.8032.1 | 6.54  | 7.26  | 0.34 | 0.92 | -1.66 | 0.254557 | 0.342424 | 0.602465 | 0.58848  |
| MmugDNA.8033.1.S1_at   | MmugDNA.8033.1 | 6.77  | 7.07  | 0.25 | 0.08 | -1.23 | 0.142973 | 0.160027 | 0.509942 | 0.436186 |
| MmugDNA.8034.1.S1_at   | MmugDNA.8034.1 | 5.17  | 5.19  | 0.17 | 0.14 | -1.01 | 0.847573 | 0.542029 | 0.938975 | 0.725188 |
| MmugDNA.8035.1.S1_at   | MmugDNA.8035.1 | 6.61  | 6.8   | 0.73 | 0.78 | -1.14 | 0.95431  | 0.98556  | 0.983073 | 0.991808 |
| MmugDNA.8036.1.S1_at   | MmugDNA.8036.1 | 11.37 | 11.47 | 0.1  | 0.34 | -1.07 | 0.977864 | 0.841737 | 0.99169  | 0.909796 |
| MmugDNA.8037.1.S1_at   | MmugDNA.8037.1 | 6.51  | 6.09  | 0.77 | 0.42 | 1.33  | 0.431305 | 0.182296 | 0.718569 | 0.458768 |
| MmugDNA.8039.1.S1_at   | MmugDNA.8039.1 | 7.1   | 6.65  | 0.27 | 0.33 | 1.37  | 0.145581 | 0.063239 | 0.51146  | 0.298202 |
| MmugDNA.8040.1.S1_at   | MmugDNA.8040.1 | 10.26 | 10.79 | 0.13 | 0.16 | -1.44 | 0.009518 | 0.010109 | 0.225957 | 0.131859 |
| MmugDNA.8041.1.S1_at   | MmugDNA.8041.1 | 10.98 | 10.61 | 0.11 | 0.2  | 1.29  | 0.068577 | 0.064699 | 0.410201 | 0.300314 |
| MmugDNA.8042.1.S1_at   | MmugDNA.8042.1 | 4.96  | 5.07  | 0.51 | 0.27 | -1.08 | 0.866839 | 0.775638 | 0.946846 | 0.869465 |
| MmugDNA.8045.1.S1_at   | MmugDNA.8045.1 | 7.27  | 7.15  | 0.24 | 0.26 | 1.09  | 0.25353  | 0.209804 | 0.602121 | 0.483538 |
| MmugDNA.8046.1.S1_at   | MmugDNA.8046.1 | 13.22 | 13.05 | 0.14 | 0.15 | 1.12  | 0.407015 | 0.010493 | 0.704177 | 0.133872 |
| MmugDNA.8047.1.S1_at   | MmugDNA.8047.1 | 4.64  | 4.42  | 0.11 | 0.33 | 1.16  | 0.655101 | 0.897286 | 0.844804 | 0.941396 |
| MmugDNA.805.1.S1_at    | MmugDNA.805.1  | 6.56  | 6.36  | 0.17 | 0.1  | 1.15  | 0.152645 | 0.138314 | 0.517325 | 0.411244 |
| MmugDNA.8050.1.S1_at   | MmugDNA.8050.1 | 10.38 | 11.65 | 0.35 | 0.27 | -2.41 | 0.006937 | 0.002327 | 0.202482 | 0.071272 |
| MmugDNA.8050.1.S1_s_at | MmugDNA.8050.1 | 9.52  | 10.57 | 0.31 | 0.18 | -2.07 | 0.003466 | 0.001936 | 0.178436 | 0.065795 |
| MmugDNA.8051.1.S1_at   | MmugDNA.8051.1 | 3.18  | 3.15  | 0.1  | 0.16 | 1.02  | 0.714427 | 0.915653 | 0.874851 | 0.952724 |
| MmugDNA.8052.1.S1_at   | MmugDNA.8052.1 | 5.54  | 5.47  | 0.43 | 0.65 | 1.05  | 0.522924 | 0.392329 | 0.772257 | 0.625731 |
| MmugDNA.8053.1.S1_at   | MmugDNA.8053.1 | 4.91  | 5.28  | 0.18 | 0.15 | -1.29 | 0.029308 | 0.04414  | 0.313768 | 0.254496 |
| MmugDNA.8054.1.S1_at   | MmugDNA.8054.1 | 4.35  | 4.19  | 1.02 | 0.19 | 1.11  | 0.603205 | 0.71626  | 0.817066 | 0.835531 |
| MmugDNA.8055.1.S1_at   | MmugDNA.8055.1 | 5.5   | 4.86  | 0.72 | 0.08 | 1.56  | 0.664363 | 0.904943 | 0.849532 | 0.946143 |
| MmugDNA.806.1.S1_at    | MmugDNA.806.1  | 5.66  | 6.56  | 0.29 | 0.55 | -1.87 | 0.053979 | 0.026156 | 0.381209 | 0.202721 |
| MmugDNA.8060.1.S1_at   | MmugDNA.8060.1 | 9.65  | 8.71  | 0.19 | 0.26 | 1.91  | 0.004181 | 0.001189 | 0.181739 | 0.054071 |
| MmugDNA.8061.1.S1_at   | MmugDNA.8061.1 | 6.17  | 6.91  | 0.27 | 0.14 | -1.67 | 0.007763 | 0.009916 | 0.212166 | 0.130767 |
| MmugDNA.8063.1.S1_at   | MmugDNA.8063.1 | 5.89  | 5.83  | 0.09 | 0.12 | 1.04  | 0.973816 | 0.198549 | 0.989688 | 0.473391 |
| MmugDNA.8065.1.S1_at   | MmugDNA.8065.1 | 3.53  | 3.46  | 0.16 | 0.14 | 1.06  | 0.235399 | 0.340528 | 0.589352 | 0.586776 |
| MmugDNA.8066.1.S1_at   | MmugDNA.8066.1 | 3.32  | 3.26  | 0.11 | 0.08 | 1.05  | 0.271206 | 0.098189 | 0.615378 | 0.356253 |
| MmugDNA.8067.1.S1_at   | MmugDNA.8067.1 | 3.75  | 3.45  | 0.3  | 0.53 | 1.23  | 0.791636 | 0.865868 | 0.913459 | 0.923757 |
| MmugDNA.8068.1.S1_at   | MmugDNA.8068.1 | 3.81  | 3.96  | 1.14 | 0.12 | -1.11 | 0.500837 | 0.427675 | 0.759735 | 0.649406 |
| MmugDNA.8069.1.S1_at   | MmugDNA.8069.1 | 6.69  | 6.7   | 0.2  | 0.18 | -1.01 | 0.474737 | 0.06746  | 0.74537  | 0.305749 |
| MmugDNA.8071.1.S1_at   | MmugDNA.8071.1 | 5.96  | 5.99  | 0.04 | 0.24 | -1.02 | 0.862518 | 0.758054 | 0.944715 | 0.859249 |
| MmugDNA.8073.1.S1_at   | MmugDNA.8073.1 | 8.24  | 7.51  | 0.06 | 0.53 | 1.65  | 0.041387 | 0.003428 | 0.351626 | 0.084173 |
| MmugDNA.8074.1.S1_at   | MmugDNA.8074.1 | 8.07  | 9.16  | 0.1  | 0.32 | -2.14 | 0.003582 | 0.001003 | 0.179515 | 0.050657 |
| MmugDNA.8078.1.S1_at   | MmugDNA.8078.1 | 5.24  | 6.41  | 0.2  | 0.81 | -2.25 | 0.078424 | 0.04909  | 0.428471 | 0.266518 |
| MmugDNA.8079.1.S1_at   | MmugDNA.8079.1 | 5.84  | 6.02  | 0.1  | 0.19 | -1.14 | 0.236652 | 0.213959 | 0.590504 | 0.487596 |
| MmugDNA.808.1.S1_at    | MmugDNA.808.1  | 4.7   | 4.81  | 0.13 | 0.21 | -1.08 | 0.830845 | 0.310895 | 0.93155  | 0.565881 |
| MmugDNA.8081.1.S1_at   | MmugDNA.8081.1 | 11.71 | 11.23 | 0.36 | 0.51 | 1.4   | 0.52985  | 0.707068 | 0.776323 | 0.830132 |
| MmugDNA.8082.1.S1_at   | MmugDNA.8082.1 | 4.79  | 4.91  | 0.67 | 0.6  | -1.08 | 0.841011 | 0.972087 | 0.93608  | 0.984924 |
| MmugDNA.8085.1.S1_at   | MmugDNA.8085.1 | 8.33  | 8.52  | 0.64 | 0.27 | -1.14 | 0.715944 | 0.682119 | 0.875256 | 0.814349 |
| MmugDNA.8086.1.S1_at   | MmugDNA.8086.1 | 9.52  | 8.96  | 0.14 | 0.55 | 1.47  | 0.151268 | 0.170979 | 0.516026 | 0.447561 |

|                         |                 |       |       |      |      |       |          |          |          |          |
|-------------------------|-----------------|-------|-------|------|------|-------|----------|----------|----------|----------|
| MmugDNA.16345.1.S1_at   | MmugDNA.16345.1 | 8.56  | 8.64  | 0.13 | 0.09 | -1.06 | 0.826894 | 0.428723 | 0.929656 | 0.650287 |
| MmugDNA.16345.1.S1_s_at | MmugDNA.16345.1 | 10.92 | 10.45 | 0.03 | 0.42 | 1.39  | 0.128245 | 0.193676 | 0.494307 | 0.468785 |
| MmugDNA.8087.1.S1_at    | MmugDNA.8087.1  | 3.82  | 3.57  | 0.26 | 0.07 | 1.18  | 0.250436 | 0.254683 | 0.600389 | 0.522987 |
| MmugDNA.8089.1.S1_at    | MmugDNA.8089.1  | 3.37  | 3.31  | 0.1  | 0.12 | 1.04  | 0.142132 | 0.15969  | 0.509437 | 0.435785 |
| MmugDNA.809.1.S1_at     | MmugDNA.809.1   | 9.83  | 7.86  | 0.29 | 0.97 | 3.94  | 0.071177 | 0.106817 | 0.414813 | 0.369425 |
| MmugDNA.8090.1.S1_at    | MmugDNA.8090.1  | 3.27  | 3.64  | 0.73 | 0.48 | -1.29 | 0.853514 | 0.891161 | 0.940884 | 0.937985 |
| MmugDNA.8091.1.S1_at    | MmugDNA.8091.1  | 10.71 | 9.76  | 0.17 | 0.18 | 1.94  | 0.003845 | 0.003894 | 0.179914 | 0.088806 |
| MmugDNA.8092.1.S1_at    | MmugDNA.8092.1  | 5.1   | 4.81  | 0.31 | 0.84 | 1.23  | 0.734522 | 0.353438 | 0.88571  | 0.596547 |
| MmugDNA.8094.1.S1_at    | MmugDNA.8094.1  | 10.37 | 10.15 | 0.17 | 0.2  | 1.17  | 0.379935 | 0.75453  | 0.68708  | 0.857221 |
| MmugDNA.8095.1.S1_at    | MmugDNA.8095.1  | 9.58  | 9.1   | 0.05 | 0.31 | 1.39  | 0.070788 | 0.114508 | 0.414661 | 0.381056 |
| MmugDNA.8096.1.S1_at    | MmugDNA.8096.1  | 5.42  | 5.42  | 0.06 | 0.41 | -1    | 0.314168 | 0.520762 | 0.645549 | 0.711942 |
| MmugDNA.8097.1.S1_at    | MmugDNA.8097.1  | 5.19  | 5.28  | 0.24 | 0.13 | -1.07 | 0.823177 | 0.926132 | 0.928109 | 0.95813  |
| MmugDNA.8098.1.S1_at    | MmugDNA.8098.1  | 6.37  | 6.34  | 0.17 | 0.13 | 1.02  | 0.910063 | 0.648851 | 0.96439  | 0.794491 |
| MmugDNA.8099.1.S1_at    | MmugDNA.8099.1  | 4.47  | 4.89  | 0.27 | 0.21 | -1.34 | 0.092759 | 0.565594 | 0.449549 | 0.739997 |
| MmugDNA.81.1.S1_at      | MmugDNA.81.1    | 12.42 | 12.53 | 0.04 | 0.07 | -1.08 | 0.024504 | 0.040535 | 0.29501  | 0.246264 |
| MmugDNA.81.1.S1_s_at    | MmugDNA.81.1    | 12.72 | 12.81 | 0.02 | 0.11 | -1.07 | 0.074186 | 0.066578 | 0.419944 | 0.303784 |
| MmugDNA.810.1.S1_at     | MmugDNA.810.1   | 4.79  | 4.78  | 0.15 | 0.08 | 1.01  | 0.606959 | 0.748577 | 0.81915  | 0.853719 |
| MmugDNA.8101.1.S1_at    | MmugDNA.8101.1  | 4.58  | 6.07  | 0.31 | 0.34 | -2.8  | 0.013003 | 0.034934 | 0.245262 | 0.231062 |
| MmugDNA.8103.1.S1_at    | MmugDNA.8103.1  | 7     | 6.99  | 0.05 | 0.05 | 1.01  | 0.820132 | 0.405369 | 0.92682  | 0.6337   |
| MmugDNA.8104.1.S1_at    | MmugDNA.8104.1  | 6.57  | 6.68  | 0.07 | 0.27 | -1.08 | 0.441237 | 0.54717  | 0.724743 | 0.728314 |
| MmugDNA.8105.1.S1_at    | MmugDNA.8105.1  | 8.36  | 7.6   | 0.41 | 0.9  | 1.69  | 0.307596 | 0.211992 | 0.64008  | 0.485975 |
| MmugDNA.8108.1.S1_at    | MmugDNA.8108.1  | 4.8   | 4.7   | 0.44 | 0.06 | 1.07  | 0.242562 | 0.296107 | 0.594448 | 0.555339 |
| MmugDNA.8109.1.S1_at    | MmugDNA.8109.1  | 7.52  | 7.55  | 0.39 | 0.12 | -1.02 | 0.331057 | 0.476442 | 0.656096 | 0.682725 |
| MmugDNA.811.1.S1_at     | MmugDNA.811.1   | 6.59  | 5.04  | 0.13 | 0.36 | 2.93  | 0.00246  | 0.000549 | 0.163555 | 0.040948 |
| MmugDNA.8110.1.S1_at    | MmugDNA.8110.1  | 3.64  | 3.45  | 0.2  | 0.05 | 1.14  | 0.241402 | 0.257635 | 0.593941 | 0.525332 |
| MmugDNA.8112.1.S1_at    | MmugDNA.8112.1  | 10.56 | 10.35 | 0.21 | 0.41 | 1.16  | 0.515757 | 0.399563 | 0.767629 | 0.629912 |
| MmugDNA.8113.1.S1_at    | MmugDNA.8113.1  | 4.16  | 4.11  | 0.07 | 0.17 | 1.03  | 0.975991 | 0.747423 | 0.990704 | 0.853149 |
| MmugDNA.8114.1.S1_at    | MmugDNA.8114.1  | 9.73  | 9.28  | 0.19 | 0.11 | 1.36  | 0.016258 | 0.064563 | 0.263592 | 0.300266 |
| MmugDNA.8115.1.S1_at    | MmugDNA.8115.1  | 8.91  | 8.51  | 0.38 | 0.41 | 1.32  | 0.887624 | 0.325524 | 0.954863 | 0.575827 |
| MmugDNA.8116.1.S1_at    | MmugDNA.8116.1  | 4.64  | 4.65  | 0.02 | 0.07 | -1.01 | 0.348046 | 0.45729  | 0.666977 | 0.670746 |
| MmugDNA.8117.1.S1_at    | MmugDNA.8117.1  | 11.93 | 11.92 | 0.12 | 0.1  | 1.01  | 0.726373 | 0.78633  | 0.880969 | 0.876293 |
| MmugDNA.8118.1.S1_at    | MmugDNA.8118.1  | 6.38  | 6.01  | 0.6  | 0.27 | 1.29  | 0.667974 | 0.81269  | 0.851394 | 0.891789 |
| MmugDNA.8119.1.S1_at    | MmugDNA.8119.1  | 5.39  | 5.38  | 0.17 | 0.1  | 1.01  | 0.207109 | 0.293327 | 0.569153 | 0.553239 |
| MmugDNA.812.1.S1_at     | MmugDNA.812.1   | 3.02  | 2.91  | 0.07 | 0.31 | 1.08  | 0.840059 | 0.904888 | 0.935512 | 0.946143 |
| MmugDNA.8120.1.S1_at    | MmugDNA.8120.1  | 3.97  | 4.14  | 0.23 | 0.09 | -1.12 | 0.328667 | 0.326392 | 0.65445  | 0.57656  |
| MmugDNA.8121.1.S1_at    | MmugDNA.8121.1  | 9.51  | 8.12  | 0.21 | 0.13 | 2.61  | 0.000702 | 0.000118 | 0.136818 | 0.028664 |
| MmugDNA.8122.1.S1_at    | MmugDNA.8122.1  | 3.47  | 3.43  | 0.09 | 0.13 | 1.03  | 0.650299 | 0.094414 | 0.842789 | 0.351036 |
| MmugDNA.8124.1.S1_at    | MmugDNA.8124.1  | 6.63  | 6.09  | 0.54 | 0.23 | 1.46  | 0.194223 | 0.30404  | 0.557805 | 0.561388 |
| MmugDNA.8125.1.S1_at    | MmugDNA.8125.1  | 3.82  | 3.9   | 1.01 | 0.13 | -1.06 | 0.486956 | 0.545853 | 0.751857 | 0.72769  |
| MmugDNA.8126.1.S1_at    | MmugDNA.8126.1  | 5.64  | 3.6   | 1.33 | 1.51 | 4.13  | 0.215945 | 0.290634 | 0.575954 | 0.551363 |
| MmugDNA.8127.1.S1_at    | MmugDNA.8127.1  | 7.67  | 8.24  | 0.96 | 0.16 | -1.48 | 0.610938 | 0.774359 | 0.821394 | 0.868766 |



|                        |                |       |       |      |      |       |          |          |          |          |
|------------------------|----------------|-------|-------|------|------|-------|----------|----------|----------|----------|
| MmugDNA.8128.1.S1_at   | MmugDNA.8128.1 | 4.46  | 4.79  | 0.32 | 0.26 | -1.26 | 0.132176 | 0.160631 | 0.49836  | 0.436745 |
| MmugDNA.8129.1.S1_at   | MmugDNA.8129.1 | 4.66  | 4.77  | 0.3  | 0.04 | -1.08 | 0.485633 | 0.48694  | 0.751068 | 0.690118 |
| MmugDNA.8130.1.S1_at   | MmugDNA.8130.1 | 2.91  | 2.9   | 0.1  | 0.11 | 1.01  | 0.332318 | 0.440303 | 0.656742 | 0.658899 |
| MmugDNA.8131.1.S1_at   | MmugDNA.8131.1 | 12.41 | 12.47 | 0.03 | 0.38 | -1.04 | 0.891098 | 0.289303 | 0.956554 | 0.550342 |
| MmugDNA.8135.1.S1_at   | MmugDNA.8135.1 | 3.23  | 3.48  | 0.79 | 0.14 | -1.19 | 0.680983 | 0.423094 | 0.857436 | 0.646145 |
| MmugDNA.8136.1.S1_at   | MmugDNA.8136.1 | 5.04  | 4.92  | 0.23 | 0.25 | 1.08  | 0.544943 | 0.184544 | 0.784702 | 0.460576 |
| MmugDNA.8137.1.S1_at   | MmugDNA.8137.1 | 4.42  | 4.71  | 0.08 | 0.32 | -1.22 | 0.623973 | 0.630318 | 0.828158 | 0.782213 |
| MmugDNA.8138.1.S1_at   | MmugDNA.8138.1 | 6.67  | 6.74  | 0.52 | 0.47 | -1.05 | 0.672716 | 0.853753 | 0.853193 | 0.916773 |
| MmugDNA.8139.1.S1_at   | MmugDNA.8139.1 | 7.86  | 7.22  | 0.11 | 0.36 | 1.57  | 0.068102 | 0.079587 | 0.409262 | 0.326963 |
| MmugDNA.814.1.S1_at    | MmugDNA.814.1  | 5.62  | 5.6   | 0.35 | 0.11 | 1.02  | 0.698833 | 0.506031 | 0.866432 | 0.702337 |
| MmugDNA.8142.1.S1_at   | MmugDNA.8142.1 | 5.79  | 5.79  | 0.18 | 0.01 | -1    | 0.37111  | 0.463271 | 0.681832 | 0.674323 |
| MmugDNA.8143.1.S1_at   | MmugDNA.8143.1 | 2.76  | 2.91  | 0.06 | 0.23 | -1.11 | 0.196952 | 0.26182  | 0.559957 | 0.528265 |
| MmugDNA.8144.1.S1_at   | MmugDNA.8144.1 | 10.49 | 10.96 | 0.06 | 0.14 | -1.38 | 0.006065 | 0.002961 | 0.195337 | 0.079958 |
| MmugDNA.8147.1.S1_at   | MmugDNA.8147.1 | 4.7   | 4.76  | 0.04 | 0.1  | -1.04 | 0.642225 | 0.634841 | 0.838696 | 0.785041 |
| MmugDNA.8148.1.S1_at   | MmugDNA.8148.1 | 4.26  | 4.26  | 0.07 | 0.04 | 1     | 0.618779 | 0.621084 | 0.825304 | 0.77579  |
| MmugDNA.8149.1.S1_at   | MmugDNA.8149.1 | 7.05  | 4.9   | 0.18 | 0.99 | 4.42  | 0.022137 | 0.009352 | 0.284595 | 0.127602 |
| MmugDNA.815.1.S1_at    | MmugDNA.815.1  | 5.93  | 5.69  | 0.35 | 0.09 | 1.18  | 0.770496 | 0.928837 | 0.90333  | 0.959449 |
| MmugDNA.8150.1.S1_at   | MmugDNA.8150.1 | 9.87  | 9.77  | 0.06 | 0.45 | 1.07  | 0.586189 | 0.750333 | 0.807949 | 0.854768 |
| MmugDNA.8151.1.S1_at   | MmugDNA.8151.1 | 3.6   | 3.6   | 0.02 | 0.04 | 1     | 0.245608 | 0.163941 | 0.597182 | 0.440105 |
| MmugDNA.8152.1.S1_at   | MmugDNA.8152.1 | 4.55  | 4.56  | 0.09 | 0.1  | -1.01 | 0.833575 | 0.85702  | 0.932352 | 0.91832  |
| MmugDNA.8152.1.S1_x_at | MmugDNA.8152.1 | 4.99  | 5.01  | 0.29 | 0    | -1.01 | 0.425318 | 0.356698 | 0.715047 | 0.598516 |
| MmugDNA.8153.1.S1_at   | MmugDNA.8153.1 | 5.55  | 4.77  | 0.91 | 0.1  | 1.72  | 0.135778 | 0.197811 | 0.502654 | 0.472721 |
| MmugDNA.8154.1.S1_at   | MmugDNA.8154.1 | 4.15  | 3.92  | 0.53 | 0.1  | 1.17  | 0.131511 | 0.072053 | 0.498041 | 0.314519 |
| MmugDNA.8155.1.S1_at   | MmugDNA.8155.1 | 11.31 | 11.97 | 0.33 | 0.46 | -1.58 | 0.068908 | 0.050928 | 0.410783 | 0.270955 |
| MmugDNA.8156.1.S1_at   | MmugDNA.8156.1 | 6.55  | 6     | 1.15 | 0.14 | 1.47  | 0.468097 | 0.487689 | 0.740986 | 0.690642 |
| MmugDNA.8157.1.S1_at   | MmugDNA.8157.1 | 10.41 | 10.64 | 0.1  | 0.36 | -1.17 | 0.369271 | 0.461061 | 0.680609 | 0.672831 |
| MmugDNA.8158.1.S1_at   | MmugDNA.8158.1 | 7.89  | 8.16  | 0.04 | 0.08 | -1.21 | 0.004425 | 0.019943 | 0.183441 | 0.177463 |
| MmugDNA.8159.1.S1_at   | MmugDNA.8159.1 | 5.46  | 5.49  | 0.05 | 0.07 | -1.02 | 0.197196 | 0.180186 | 0.56011  | 0.456751 |
| MmugDNA.816.1.S1_at    | MmugDNA.816.1  | 5.73  | 5.76  | 0.22 | 0.07 | -1.02 | 0.468409 | 0.29684  | 0.741049 | 0.5558   |
| MmugDNA.8161.1.S1_at   | MmugDNA.8161.1 | 4.87  | 4.9   | 0.4  | 0.03 | -1.02 | 0.403612 | 0.441551 | 0.702178 | 0.659675 |
| MmugDNA.8162.1.S1_at   | MmugDNA.8162.1 | 10.59 | 10.5  | 0.13 | 0.09 | 1.06  | 0.196686 | 0.04942  | 0.559808 | 0.267237 |
| MmugDNA.8163.1.S1_at   | MmugDNA.8163.1 | 4.06  | 4.11  | 0.08 | 0.16 | -1.04 | 0.251132 | 0.337143 | 0.60062  | 0.584348 |
| MmugDNA.8164.1.S1_at   | MmugDNA.8164.1 | 3.53  | 3.54  | 0.14 | 0.05 | -1    | 0.916237 | 0.721927 | 0.967094 | 0.838904 |
| MmugDNA.8168.1.S1_at   | MmugDNA.8168.1 | 6.46  | 7.16  | 0.28 | 0.81 | -1.63 | 0.654242 | 0.903515 | 0.844551 | 0.945192 |
| MmugDNA.817.1.S1_at    | MmugDNA.817.1  | 8.83  | 8.89  | 0.14 | 0.18 | -1.04 | 0.801344 | 0.121954 | 0.918069 | 0.391384 |
| MmugDNA.8173.1.S1_at   | MmugDNA.8173.1 | 8.18  | 8.31  | 0.02 | 0.09 | -1.1  | 0.10191  | 0.05773  | 0.461313 | 0.2866   |
| MmugDNA.8175.1.S1_at   | MmugDNA.8175.1 | 10.8  | 9.69  | 0.14 | 0.16 | 2.16  | 0.001432 | 0.000143 | 0.147916 | 0.029387 |
| MmugDNA.8176.1.S1_at   | MmugDNA.8176.1 | 5.23  | 5.35  | 0.14 | 0.37 | -1.08 | 0.837148 | 0.232679 | 0.93416  | 0.504359 |
| MmugDNA.8177.1.S1_at   | MmugDNA.8177.1 | 4.75  | 4.73  | 0.21 | 0.09 | 1.02  | 0.534664 | 0.60152  | 0.778804 | 0.762867 |
| MmugDNA.8178.1.S1_at   | MmugDNA.8178.1 | 6.05  | 5.36  | 0.7  | 0.34 | 1.61  | 0.151381 | 0.146357 | 0.516064 | 0.420368 |
| MmugDNA.8179.1.S1_at   | MmugDNA.8179.1 | 2.85  | 2.91  | 0.19 | 0.03 | -1.04 | 0.782434 | 0.785234 | 0.909199 | 0.875672 |

|                        |                |       |       |      |      |        |          |          |          |          |
|------------------------|----------------|-------|-------|------|------|--------|----------|----------|----------|----------|
| MmugDNA.818.1.S1_at    | MmugDNA.818.1  | 9.4   | 7.67  | 0.52 | 0.63 | 3.32   | 0.03989  | 0.026044 | 0.34828  | 0.202256 |
| MmugDNA.8180.1.S1_at   | MmugDNA.8180.1 | 6.18  | 7.21  | 0.38 | 0.12 | -2.05  | 0.009177 | 0.003421 | 0.222493 | 0.084124 |
| MmugDNA.8181.1.S1_at   | MmugDNA.8181.1 | 4.1   | 3.8   | 0.31 | 0.31 | 1.23   | 0.281742 | 0.072799 | 0.62238  | 0.315651 |
| MmugDNA.8182.1.S1_at   | MmugDNA.8182.1 | 5.32  | 6.4   | 0.42 | 0.24 | -2.11  | 0.02905  | 0.016318 | 0.312556 | 0.161818 |
| MmugDNA.8185.1.S1_at   | MmugDNA.8185.1 | 11.38 | 11.27 | 0.11 | 0.16 | 1.07   | 0.421318 | 0.588936 | 0.712917 | 0.755275 |
| MmugDNA.8185.1.S1_s_at | MmugDNA.8185.1 | 11.26 | 11.17 | 0.16 | 0.2  | 1.07   | 0.778956 | 0.919374 | 0.907818 | 0.954737 |
| MmugDNA.8186.1.S1_s_at | MmugDNA.8186.1 | 5.86  | 7.77  | 0.97 | 1.74 | -3.76  | 0.302781 | 0.339022 | 0.6371   | 0.585891 |
| MmugDNA.8187.1.S1_at   | MmugDNA.8187.1 | 5.22  | 5.32  | 0.25 | 0.8  | -1.07  | 0.836472 | 0.906718 | 0.933827 | 0.947216 |
| MmugDNA.8188.1.S1_at   | MmugDNA.8188.1 | 7.38  | 8.34  | 0.11 | 0.32 | -1.95  | 0.004126 | 0.002515 | 0.181739 | 0.074158 |
| MmugDNA.8189.1.S1_at   | MmugDNA.8189.1 | 8.33  | 7.58  | 0.33 | 0.13 | 1.68   | 0.078809 | 0.082587 | 0.428609 | 0.331785 |
| MmugDNA.8192.1.S1_at   | MmugDNA.8192.1 | 4.53  | 4.6   | 1.56 | 0.55 | -1.05  | 0.410275 | 0.459204 | 0.706234 | 0.671642 |
| MmugDNA.8193.1.S1_at   | MmugDNA.8193.1 | 3.34  | 3.34  | 0.13 | 0.08 | -1     | 0.764301 | 0.660844 | 0.900711 | 0.801604 |
| MmugDNA.8194.1.S1_at   | MmugDNA.8194.1 | 4.66  | 4.65  | 0.08 | 0.14 | 1.01   | 0.699752 | 0.377526 | 0.867067 | 0.614997 |
| MmugDNA.8196.1.S1_at   | MmugDNA.8196.1 | 8.46  | 8.45  | 0.72 | 0.56 | 1.01   | 0.735953 | 0.157078 | 0.886439 | 0.432547 |
| MmugDNA.82.1.S1_at     | MmugDNA.82.1   | 4.41  | 8.49  | 2.45 | 3.41 | -17.01 | 0.54401  | 0.549796 | 0.784219 | 0.730055 |
| MmugDNA.820.1.S1_at    | MmugDNA.820.1  | 8.51  | 7.55  | 0.57 | 0.74 | 1.94   | 0.429308 | 0.468639 | 0.717448 | 0.677755 |
| MmugDNA.8203.1.S1_at   | MmugDNA.8203.1 | 4.78  | 5.02  | 0.18 | 0.06 | -1.18  | 0.037453 | 0.044966 | 0.3415   | 0.256489 |
| MmugDNA.8204.1.S1_at   | MmugDNA.8204.1 | 4.43  | 4.64  | 0.16 | 0.16 | -1.16  | 0.138259 | 0.125349 | 0.505671 | 0.395994 |
| MmugDNA.8206.1.S1_at   | MmugDNA.8206.1 | 4.01  | 3.48  | 0.29 | 0.28 | 1.45   | 0.126467 | 0.058931 | 0.492789 | 0.289617 |
| MmugDNA.8207.1.S1_at   | MmugDNA.8207.1 | 4.51  | 3.92  | 0.68 | 0.45 | 1.5    | 0.294891 | 0.411044 | 0.631455 | 0.637874 |
| MmugDNA.8212.1.S1_at   | MmugDNA.8212.1 | 8.81  | 9.61  | 0.11 | 0.56 | -1.74  | 0.064934 | 0.043426 | 0.403744 | 0.253043 |
| MmugDNA.8213.1.S1_at   | MmugDNA.8213.1 | 5.59  | 5.77  | 0.16 | 0.11 | -1.13  | 0.190018 | 0.234305 | 0.552832 | 0.505553 |
| MmugDNA.8214.1.S1_at   | MmugDNA.8214.1 | 7.11  | 7.35  | 0.13 | 0.11 | -1.18  | 0.160794 | 0.201722 | 0.525884 | 0.476242 |
| MmugDNA.8215.1.S1_at   | MmugDNA.8215.1 | 10.53 | 11.29 | 0.58 | 0.42 | -1.69  | 0.1075   | 0.058685 | 0.468045 | 0.288956 |
| MmugDNA.8216.1.S1_at   | MmugDNA.8216.1 | 9.41  | 8.89  | 0.21 | 0.32 | 1.43   | 0.042493 | 0.064075 | 0.355111 | 0.299311 |
| MmugDNA.8218.1.S1_at   | MmugDNA.8218.1 | 4.27  | 4.92  | 1.14 | 0.55 | -1.57  | 0.690024 | 0.405924 | 0.861893 | 0.634062 |
| MmugDNA.8219.1.S1_at   | MmugDNA.8219.1 | 11    | 10.34 | 0.06 | 0.23 | 1.57   | 0.017706 | 0.005666 | 0.267594 | 0.103959 |
| MmugDNA.822.1.S1_at    | MmugDNA.822.1  | 7.39  | 6.63  | 0.39 | 1    | 1.69   | 0.372997 | 0.437324 | 0.683198 | 0.656613 |
| MmugDNA.8220.1.S1_at   | MmugDNA.8220.1 | 2.97  | 2.98  | 0.06 | 0.15 | -1.01  | 0.573436 | 0.868581 | 0.801219 | 0.925383 |
| MmugDNA.8222.1.S1_at   | MmugDNA.8222.1 | 5.88  | 7.07  | 0.61 | 0.68 | -2.28  | 0.080056 | 0.07654  | 0.430204 | 0.321619 |
| MmugDNA.8223.1.S1_at   | MmugDNA.8223.1 | 5.38  | 5.4   | 0.18 | 0.24 | -1.02  | 0.992086 | 0.981015 | 0.997293 | 0.989532 |
| MmugDNA.8224.1.S1_at   | MmugDNA.8224.1 | 6.5   | 6.51  | 0.02 | 0.17 | -1.01  | 0.4332   | 0.650758 | 0.719866 | 0.795801 |
| MmugDNA.8225.1.S1_at   | MmugDNA.8225.1 | 3.44  | 3.83  | 0.17 | 0.24 | -1.31  | 0.106888 | 0.102573 | 0.467551 | 0.362929 |
| MmugDNA.8226.1.S1_s_at | MmugDNA.8226.1 | 7.8   | 7.64  | 0.15 | 0.67 | 1.12   | 0.788859 | 0.590603 | 0.912312 | 0.756315 |
| MmugDNA.8227.1.S1_at   | MmugDNA.8227.1 | 6.5   | 7.96  | 0.7  | 1.11 | -2.75  | 0.107704 | 0.153819 | 0.468203 | 0.428488 |
| MmugDNA.8228.1.S1_at   | MmugDNA.8228.1 | 6.17  | 6.34  | 0.08 | 0.16 | -1.12  | 0.207093 | 0.256381 | 0.569139 | 0.524114 |
| MmugDNA.8229.1.S1_at   | MmugDNA.8229.1 | 7.56  | 7     | 0.58 | 0.32 | 1.48   | 0.893184 | 0.980841 | 0.95752  | 0.989478 |
| MmugDNA.823.1.S1_at    | MmugDNA.823.1  | 4.99  | 5.14  | 0.19 | 0.1  | -1.11  | 0.221212 | 0.182091 | 0.580161 | 0.45857  |
| MmugDNA.8232.1.S1_at   | MmugDNA.8232.1 | 11.74 | 11.57 | 0.23 | 0.18 | 1.13   | 0.143465 | 0.034627 | 0.510312 | 0.230247 |
| MmugDNA.8233.1.S1_at   | MmugDNA.8233.1 | 4.09  | 4.14  | 0.01 | 0.05 | -1.04  | 0.274885 | 0.004118 | 0.617642 | 0.090887 |
| MmugDNA.8234.1.S1_at   | MmugDNA.8234.1 | 8.34  | 8.79  | 0.26 | 0.37 | -1.37  | 0.195726 | 0.214927 | 0.558901 | 0.48886  |

|                         |                 |       |       |      |      |       |          |          |          |          |
|-------------------------|-----------------|-------|-------|------|------|-------|----------|----------|----------|----------|
| MmugDNA.8236.1.S1_at    | MmugDNA.8236.1  | 11.4  | 11.37 | 0.17 | 0.12 | 1.02  | 0.733355 | 0.212191 | 0.884989 | 0.486081 |
| MmugDNA.8237.1.S1_at    | MmugDNA.8237.1  | 10.3  | 10.1  | 0.06 | 0.3  | 1.15  | 0.419034 | 0.543214 | 0.711691 | 0.726012 |
| MmugDNA.8237.1.S1_s_at  | MmugDNA.8237.1  | 9.94  | 9.84  | 0.04 | 0.22 | 1.08  | 0.379364 | 0.079273 | 0.686918 | 0.326444 |
| MmugDNA.8238.1.S1_at    | MmugDNA.8238.1  | 12.14 | 12.2  | 0.15 | 0.09 | -1.04 | 0.844467 | 0.204507 | 0.937554 | 0.478845 |
| MmugDNA.8238.1.S1_s_at  | MmugDNA.8238.1  | 11.86 | 11.89 | 0.13 | 0.12 | -1.02 | 0.679292 | 0.115855 | 0.856528 | 0.382936 |
| MmugDNA.8239.1.S1_at    | MmugDNA.8239.1  | 3.56  | 3.08  | 0.19 | 0.11 | 1.39  | 0.020098 | 0.032417 | 0.27674  | 0.223023 |
| MmugDNA.824.1.S1_at     | MmugDNA.824.1   | 3.87  | 4.06  | 0.21 | 0.3  | -1.14 | 0.746822 | 0.323139 | 0.89155  | 0.574351 |
| MmugDNA.8240.1.S1_at    | MmugDNA.8240.1  | 5.48  | 5.6   | 0.09 | 0.09 | -1.09 | 0.158662 | 0.007444 | 0.523738 | 0.115858 |
| MmugDNA.8241.1.S1_at    | MmugDNA.8241.1  | 3.02  | 2.82  | 0.31 | 0.17 | 1.15  | 0.580103 | 0.775388 | 0.804451 | 0.86928  |
| MmugDNA.8243.1.S1_at    | MmugDNA.8243.1  | 6.69  | 6.86  | 0.71 | 0.41 | -1.12 | 0.692985 | 0.845101 | 0.86374  | 0.911854 |
| MmugDNA.8244.1.S1_at    | MmugDNA.8244.1  | 5.7   | 5.92  | 0.21 | 0.15 | -1.16 | 0.238589 | 0.241668 | 0.591896 | 0.512225 |
| MmugDNA.8246.1.S1_at    | MmugDNA.8246.1  | 5.32  | 5.3   | 0.1  | 0.08 | 1.01  | 0.995139 | 0.171402 | 0.998262 | 0.447862 |
| MmugDNA.8248.1.S1_at    | MmugDNA.8248.1  | 9.38  | 9.61  | 0.33 | 0.21 | -1.17 | 0.323894 | 0.33187  | 0.651789 | 0.580419 |
| MmugDNA.8249.1.S1_at    | MmugDNA.8249.1  | 4.21  | 4.02  | 0.2  | 0.63 | 1.14  | 0.92961  | 0.965103 | 0.972741 | 0.980591 |
| MmugDNA.8249.1.S1_s_at  | MmugDNA.8249.1  | 8.27  | 8.45  | 0.05 | 0.79 | -1.13 | 0.697393 | 0.794685 | 0.865678 | 0.881658 |
| MmugDNA.825.1.S1_at     | MmugDNA.825.1   | 5.05  | 5.17  | 0.07 | 0.07 | -1.09 | 0.03758  | 0.07529  | 0.341887 | 0.319441 |
| MmugDNA.8250.1.S1_at    | MmugDNA.8250.1  | 6.29  | 6.32  | 0.14 | 0.08 | -1.02 | 0.719124 | 0.748035 | 0.876813 | 0.853351 |
| MmugDNA.29772.1.S1_s_at | MmugDNA.29772.1 | 6.94  | 6.48  | 0.24 | 0.08 | 1.38  | 0.026513 | 0.050079 | 0.303379 | 0.268916 |
| MmugDNA.8251.1.S1_at    | MmugDNA.8251.1  | 7.92  | 9.56  | 0.54 | 1.04 | -3.11 | 0.045878 | 0.035529 | 0.361884 | 0.232768 |
| MmugDNA.8252.1.S1_at    | MmugDNA.8252.1  | 7.7   | 6.85  | 0.62 | 0.94 | 1.8   | 0.128062 | 0.1735   | 0.49425  | 0.449938 |
| MmugDNA.8252.1.S1_x_at  | MmugDNA.8252.1  | 7.61  | 6.52  | 0.62 | 0.92 | 2.13  | 0.131993 | 0.182879 | 0.498128 | 0.459362 |
| MmugDNA.8255.1.S1_at    | MmugDNA.8255.1  | 8.46  | 9.03  | 0.44 | 0.45 | -1.48 | 0.163211 | 0.194034 | 0.527521 | 0.469151 |
| MmugDNA.8258.1.S1_at    | MmugDNA.8258.1  | 3.86  | 4.11  | 0.17 | 0.46 | -1.18 | 0.239407 | 0.236358 | 0.592443 | 0.507308 |
| MmugDNA.826.1.S1_at     | MmugDNA.826.1   | 6.27  | 5.88  | 0.32 | 0.31 | 1.31  | 0.442487 | 0.508273 | 0.72561  | 0.703492 |
| MmugDNA.8260.1.S1_at    | MmugDNA.8260.1  | 9.95  | 10.16 | 0.47 | 0.19 | -1.15 | 0.504797 | 0.269436 | 0.76146  | 0.534742 |
| MmugDNA.8262.1.S1_at    | MmugDNA.8262.1  | 6.09  | 6.25  | 0.08 | 0.11 | -1.11 | 0.139782 | 0.06532  | 0.507376 | 0.301295 |
| MmugDNA.8264.1.S1_at    | MmugDNA.8264.1  | 5.71  | 5.72  | 0.21 | 0.05 | -1.01 | 0.642324 | 0.910082 | 0.838763 | 0.949319 |
| MmugDNA.8266.1.S1_at    | MmugDNA.8266.1  | 4.01  | 3.93  | 0.06 | 0.31 | 1.06  | 0.654017 | 0.753553 | 0.844488 | 0.856527 |
| MmugDNA.8267.1.S1_at    | MmugDNA.8267.1  | 6.3   | 6.28  | 0.2  | 0.27 | 1.01  | 0.925775 | 0.063896 | 0.97147  | 0.29906  |
| MmugDNA.8269.1.S1_at    | MmugDNA.8269.1  | 6.6   | 6.92  | 0.18 | 0.12 | -1.25 | 0.139927 | 0.078924 | 0.507703 | 0.325912 |
| MmugDNA.827.1.S1_at     | MmugDNA.827.1   | 5.49  | 5.59  | 0.09 | 0.09 | -1.07 | 0.248532 | 0.342217 | 0.599309 | 0.588375 |
| MmugDNA.8270.1.S1_at    | MmugDNA.8270.1  | 4.59  | 4.48  | 0.08 | 0.15 | 1.07  | 0.407388 | 0.16271  | 0.704624 | 0.43882  |
| MmugDNA.8271.1.S1_at    | MmugDNA.8271.1  | 5.7   | 5.7   | 0.01 | 0.04 | 1     | 0.281025 | 0.394142 | 0.622033 | 0.62675  |
| MmugDNA.8272.1.S1_at    | MmugDNA.8272.1  | 9.4   | 9.66  | 0.07 | 0.13 | -1.2  | 0.017282 | 0.010496 | 0.267101 | 0.133872 |
| MmugDNA.8273.1.S1_at    | MmugDNA.8273.1  | 5.14  | 4.61  | 0.53 | 0.08 | 1.44  | 0.133499 | 0.101838 | 0.50015  | 0.361805 |
| MmugDNA.8274.1.S1_at    | MmugDNA.8274.1  | 8.67  | 8.4   | 0.11 | 0.07 | 1.2   | 0.014425 | 0.018176 | 0.252393 | 0.169673 |
| MmugDNA.8276.1.S1_at    | MmugDNA.8276.1  | 7.03  | 6.35  | 0.6  | 1.41 | 1.6   | 0.780504 | 0.657877 | 0.90855  | 0.800051 |
| MmugDNA.8277.1.S1_s_at  | MmugDNA.8277.1  | 8.3   | 7.89  | 0.29 | 0.4  | 1.33  | 0.080545 | 0.075871 | 0.430665 | 0.320523 |
| MmugDNA.8278.1.S1_at    | MmugDNA.8278.1  | 9.99  | 9.77  | 0.17 | 0.22 | 1.16  | 0.10686  | 0.10902  | 0.467551 | 0.372792 |
| MmugDNA.828.1.S1_at     | MmugDNA.828.1   | 6.53  | 5.95  | 0.91 | 0.27 | 1.49  | 0.288723 | 0.448248 | 0.626793 | 0.664162 |
| MmugDNA.8280.1.S1_at    | MmugDNA.8280.1  | 11.16 | 10.33 | 0.22 | 0.66 | 1.77  | 0.104682 | 0.110719 | 0.465045 | 0.374854 |

|                        |                |       |       |      |      |       |          |          |          |          |
|------------------------|----------------|-------|-------|------|------|-------|----------|----------|----------|----------|
| MmugDNA.8281.1.S1_at   | MmugDNA.8281.1 | 5.83  | 5.92  | 0.08 | 0.14 | -1.06 | 0.316985 | 0.418972 | 0.647775 | 0.643191 |
| MmugDNA.8282.1.S1_at   | MmugDNA.8282.1 | 5.26  | 5.46  | 0.1  | 0.18 | -1.15 | 0.104857 | 0.159447 | 0.46527  | 0.435568 |
| MmugDNA.8284.1.S1_at   | MmugDNA.8284.1 | 5.03  | 4.59  | 0.1  | 0.24 | 1.36  | 0.051986 | 0.032751 | 0.376949 | 0.224042 |
| MmugDNA.8286.1.S1_at   | MmugDNA.8286.1 | 4.33  | 3.81  | 0.36 | 0.31 | 1.44  | 0.063033 | 0.118381 | 0.399858 | 0.3864   |
| MmugDNA.8288.1.S1_at   | MmugDNA.8288.1 | 5.15  | 4.79  | 0.12 | 0.16 | 1.28  | 0.078227 | 0.009775 | 0.428221 | 0.130028 |
| MmugDNA.8289.1.S1_at   | MmugDNA.8289.1 | 6.53  | 6.65  | 0.11 | 0.15 | -1.09 | 0.613371 | 0.129702 | 0.822699 | 0.401344 |
| MmugDNA.829.1.S1_at    | MmugDNA.829.1  | 3.45  | 3.45  | 0.12 | 0.14 | 1     | 0.34884  | 0.446212 | 0.667271 | 0.662743 |
| MmugDNA.8290.1.S1_at   | MmugDNA.8290.1 | 6.33  | 6.9   | 0.8  | 0.66 | -1.49 | 0.610478 | 0.746998 | 0.821046 | 0.853119 |
| MmugDNA.8291.1.S1_at   | MmugDNA.8291.1 | 5.69  | 5.79  | 0.18 | 0.19 | -1.07 | 0.366422 | 0.459416 | 0.67904  | 0.671741 |
| MmugDNA.8292.1.S1_at   | MmugDNA.8292.1 | 3.2   | 3.17  | 0.12 | 0.06 | 1.02  | 0.761423 | 0.422465 | 0.899543 | 0.645729 |
| MmugDNA.8293.1.S1_s_at | MmugDNA.8293.1 | 3.86  | 3.78  | 0.17 | 0.27 | 1.05  | 0.380428 | 0.333231 | 0.687269 | 0.581498 |
| MmugDNA.8294.1.S1_at   | MmugDNA.8294.1 | 5.3   | 5.25  | 0.12 | 0.04 | 1.03  | 0.559017 | 0.258791 | 0.793628 | 0.525949 |
| MmugDNA.8295.1.S1_at   | MmugDNA.8295.1 | 9.15  | 10.33 | 0.04 | 0.18 | -2.27 | 0.000452 | 0.000078 | 0.133116 | 0.027016 |
| MmugDNA.8297.1.S1_at   | MmugDNA.8297.1 | 6.48  | 6.6   | 0.2  | 0.03 | -1.09 | 0.529172 | 0.63602  | 0.775933 | 0.78583  |
| MmugDNA.8298.1.S1_at   | MmugDNA.8298.1 | 8.08  | 7.28  | 0.78 | 0.26 | 1.74  | 0.206058 | 0.099832 | 0.568453 | 0.358464 |
| MmugDNA.830.1.S1_at    | MmugDNA.830.1  | 7.8   | 7.53  | 0.39 | 0.83 | 1.2   | 0.219942 | 0.256046 | 0.579133 | 0.524016 |
| MmugDNA.8301.1.S1_at   | MmugDNA.8301.1 | 11.82 | 11.03 | 0.05 | 0.21 | 1.74  | 0.0057   | 0.00199  | 0.191943 | 0.066247 |
| MmugDNA.8302.1.S1_at   | MmugDNA.8302.1 | 7.21  | 7.16  | 0.06 | 0.07 | 1.04  | 0.751913 | 0.038208 | 0.894019 | 0.240171 |
| MmugDNA.8302.1.S1_s_at | MmugDNA.8302.1 | 5.57  | 5.88  | 0.17 | 0.06 | -1.23 | 0.077693 | 0.063393 | 0.427714 | 0.298441 |
| MmugDNA.8304.1.S1_at   | MmugDNA.8304.1 | 10.25 | 9.57  | 0.18 | 0.47 | 1.61  | 0.030715 | 0.014446 | 0.319646 | 0.153383 |
| MmugDNA.8306.1.S1_at   | MmugDNA.8306.1 | 7.2   | 6.48  | 1.32 | 0.05 | 1.64  | 0.161816 | 0.222129 | 0.526573 | 0.495124 |
| MmugDNA.8307.1.S1_at   | MmugDNA.8307.1 | 5.86  | 5.91  | 0.13 | 0.08 | -1.03 | 0.230478 | 0.284374 | 0.587222 | 0.54661  |
| MmugDNA.8309.1.S1_at   | MmugDNA.8309.1 | 7.32  | 7.06  | 0.22 | 0.31 | 1.19  | 0.562925 | 0.853903 | 0.795601 | 0.91686  |
| MmugDNA.831.1.S1_at    | MmugDNA.831.1  | 3.01  | 3.01  | 0.02 | 0.07 | 1     | 0.719034 | 0.061198 | 0.876813 | 0.294033 |
| MmugDNA.8310.1.S1_at   | MmugDNA.8310.1 | 6.19  | 6.11  | 0.14 | 0.03 | 1.05  | 0.711555 | 0.296292 | 0.873642 | 0.555423 |
| MmugDNA.8311.1.S1_x_at | MmugDNA.8311.1 | 8.43  | 8.1   | 0.38 | 0.28 | 1.25  | 0.302652 | 0.357505 | 0.637025 | 0.599157 |
| MmugDNA.8312.1.S1_at   | MmugDNA.8312.1 | 10.95 | 10.42 | 0.2  | 0.04 | 1.44  | 0.012548 | 0.052144 | 0.242281 | 0.273955 |
| MmugDNA.8313.1.S1_at   | MmugDNA.8313.1 | 6.93  | 6.87  | 0.06 | 0.06 | 1.04  | 0.462777 | 0.026032 | 0.738356 | 0.202231 |
| MmugDNA.8314.1.S1_at   | MmugDNA.8314.1 | 3.01  | 3.24  | 0.64 | 0.45 | -1.17 | 0.845464 | 0.908975 | 0.938022 | 0.948482 |
| MmugDNA.8315.1.S1_at   | MmugDNA.8315.1 | 4.85  | 5.12  | 0.19 | 0.71 | -1.21 | 0.173509 | 0.179311 | 0.537172 | 0.455755 |
| MmugDNA.8317.1.S1_s_at | MmugDNA.8317.1 | 10.23 | 9.4   | 0.49 | 0.32 | 1.78  | 0.139917 | 0.161134 | 0.507701 | 0.437288 |
| MmugDNA.8319.1.S1_at   | MmugDNA.8319.1 | 3.62  | 3.81  | 0.21 | 0.18 | -1.15 | 0.331538 | 0.277059 | 0.656424 | 0.541087 |
| MmugDNA.832.1.S1_at    | MmugDNA.832.1  | 8.21  | 8.95  | 0.31 | 0.51 | -1.67 | 0.065076 | 0.026738 | 0.403867 | 0.204493 |
| MmugDNA.8320.1.S1_at   | MmugDNA.8320.1 | 3.93  | 4.59  | 0.24 | 0.68 | -1.58 | 0.147591 | 0.136015 | 0.513287 | 0.40834  |
| MmugDNA.8322.1.S1_at   | MmugDNA.8322.1 | 8.38  | 8.15  | 0.21 | 0.4  | 1.18  | 0.365308 | 0.243311 | 0.67821  | 0.513356 |
| MmugDNA.8323.1.S1_at   | MmugDNA.8323.1 | 5.99  | 5.82  | 0.2  | 0.83 | 1.13  | 0.739286 | 0.894332 | 0.888118 | 0.939697 |
| MmugDNA.8325.1.S1_at   | MmugDNA.8325.1 | 6.19  | 5.54  | 0.44 | 0.12 | 1.57  | 0.027702 | 0.025652 | 0.308669 | 0.200834 |
| MmugDNA.8328.1.S1_at   | MmugDNA.8328.1 | 7.2   | 7.49  | 0.32 | 0.1  | -1.23 | 0.354392 | 0.461034 | 0.670566 | 0.672829 |
| MmugDNA.8329.1.S1_at   | MmugDNA.8329.1 | 9.25  | 8.79  | 0.27 | 0.51 | 1.37  | 0.206757 | 0.170161 | 0.568816 | 0.446906 |
| MmugDNA.833.1.S1_at    | MmugDNA.833.1  | 4.38  | 4.49  | 0.1  | 1.2  | -1.08 | 0.28434  | 0.333447 | 0.624161 | 0.581683 |
| MmugDNA.8330.1.S1_at   | MmugDNA.8330.1 | 4.51  | 4.68  | 0.01 | 0.12 | -1.13 | 0.120996 | 0.179159 | 0.48574  | 0.455496 |

|                        |                |       |       |      |      |       |          |          |          |          |
|------------------------|----------------|-------|-------|------|------|-------|----------|----------|----------|----------|
| MmugDNA.8331.1.S1_at   | MmugDNA.8331.1 | 5.12  | 4.49  | 0.61 | 0.29 | 1.54  | 0.129799 | 0.108493 | 0.495916 | 0.372066 |
| MmugDNA.8332.1.S1_at   | MmugDNA.8332.1 | 3.49  | 3.76  | 0.25 | 0.58 | -1.21 | 0.910842 | 0.80134  | 0.96477  | 0.885696 |
| MmugDNA.8333.1.S1_at   | MmugDNA.8333.1 | 3.62  | 3.62  | 0.3  | 0.35 | 1     | 0.680383 | 0.290208 | 0.857147 | 0.551169 |
| MmugDNA.8334.1.S1_at   | MmugDNA.8334.1 | 5.45  | 5.59  | 0.62 | 0.81 | -1.1  | 0.734053 | 0.757501 | 0.885333 | 0.858849 |
| MmugDNA.8335.1.S1_at   | MmugDNA.8335.1 | 4.3   | 4.1   | 0.17 | 0.19 | 1.15  | 0.460662 | 0.240292 | 0.737117 | 0.510871 |
| MmugDNA.8336.1.S1_at   | MmugDNA.8336.1 | 7.68  | 5.7   | 0.87 | 0.86 | 3.95  | 0.224922 | 0.242517 | 0.582943 | 0.512846 |
| MmugDNA.8337.1.S1_at   | MmugDNA.8337.1 | 4.55  | 4.8   | 0.14 | 0.08 | -1.19 | 0.154308 | 0.261353 | 0.518826 | 0.527858 |
| MmugDNA.8338.1.S1_at   | MmugDNA.8338.1 | 6.45  | 6.36  | 0.15 | 0.79 | 1.06  | 0.38554  | 0.515799 | 0.690683 | 0.708492 |
| MmugDNA.8339.1.S1_at   | MmugDNA.8339.1 | 6.59  | 6.62  | 0.35 | 0.21 | -1.02 | 0.994925 | 0.862247 | 0.998227 | 0.921663 |
| MmugDNA.834.1.S1_at    | MmugDNA.834.1  | 8.11  | 8.77  | 0.27 | 0.29 | -1.57 | 0.042849 | 0.018307 | 0.355382 | 0.170154 |
| MmugDNA.8340.1.S1_at   | MmugDNA.8340.1 | 13.27 | 12.79 | 0.16 | 0.99 | 1.39  | 0.143712 | 0.170761 | 0.510387 | 0.447316 |
| MmugDNA.8341.1.S1_at   | MmugDNA.8341.1 | 4.05  | 4.22  | 0.14 | 0.17 | -1.12 | 0.289495 | 0.243311 | 0.627563 | 0.513356 |
| MmugDNA.8342.1.S1_at   | MmugDNA.8342.1 | 6.38  | 6.77  | 0.33 | 0.08 | -1.32 | 0.128259 | 0.029351 | 0.494307 | 0.213228 |
| MmugDNA.8343.1.S1_at   | MmugDNA.8343.1 | 5.35  | 5.52  | 0.14 | 0.04 | -1.12 | 0.15189  | 0.220633 | 0.516547 | 0.494069 |
| MmugDNA.8344.1.S1_at   | MmugDNA.8344.1 | 9.57  | 9.67  | 0.3  | 0.29 | -1.07 | 0.340532 | 0.065273 | 0.661993 | 0.301239 |
| MmugDNA.8345.1.S1_at   | MmugDNA.8345.1 | 8.79  | 8.86  | 0.21 | 0.55 | -1.05 | 0.582602 | 0.339959 | 0.805828 | 0.586474 |
| MmugDNA.8346.1.S1_at   | MmugDNA.8346.1 | 7.33  | 7.27  | 0.06 | 0.57 | 1.04  | 0.96899  | 0.992042 | 0.988244 | 0.995515 |
| MmugDNA.835.1.S1_at    | MmugDNA.835.1  | 8.08  | 8.19  | 0.2  | 0.2  | -1.08 | 0.58246  | 0.702612 | 0.805787 | 0.827641 |
| MmugDNA.8350.1.S1_at   | MmugDNA.8350.1 | 10.78 | 10.7  | 0.04 | 0.24 | 1.05  | 0.589626 | 0.801259 | 0.80952  | 0.88568  |
| MmugDNA.8351.1.S1_at   | MmugDNA.8351.1 | 5.51  | 5.02  | 0.48 | 0.33 | 1.4   | 0.949989 | 0.891393 | 0.981093 | 0.938135 |
| MmugDNA.8352.1.S1_at   | MmugDNA.8352.1 | 5.5   | 5.74  | 0.18 | 0.31 | -1.18 | 0.175391 | 0.170096 | 0.539136 | 0.446868 |
| MmugDNA.8353.1.S1_at   | MmugDNA.8353.1 | 7.89  | 7.68  | 0.86 | 0.94 | 1.16  | 0.863209 | 0.837529 | 0.944982 | 0.907127 |
| MmugDNA.8355.1.S1_at   | MmugDNA.8355.1 | 10.55 | 10.27 | 0.12 | 0.41 | 1.22  | 0.101902 | 0.035977 | 0.461313 | 0.234155 |
| MmugDNA.8356.1.S1_at   | MmugDNA.8356.1 | 5.21  | 5.64  | 0.4  | 0.23 | -1.35 | 0.702882 | 0.617105 | 0.868924 | 0.77321  |
| MmugDNA.8359.1.S1_at   | MmugDNA.8359.1 | 8.04  | 8.15  | 0.14 | 0.12 | -1.08 | 0.825315 | 0.363914 | 0.929174 | 0.604293 |
| MmugDNA.8359.1.S1_x_at | MmugDNA.8359.1 | 7.03  | 7.1   | 0.18 | 0.17 | -1.05 | 0.510868 | 0.629896 | 0.765151 | 0.782009 |
| MmugDNA.836.1.S1_at    | MmugDNA.836.1  | 6.41  | 6.36  | 0.03 | 0.09 | 1.04  | 0.107189 | 0.014321 | 0.467913 | 0.152764 |
| MmugDNA.8360.1.S1_at   | MmugDNA.8360.1 | 3.66  | 3.6   | 0.14 | 0.14 | 1.04  | 0.332993 | 0.471962 | 0.657222 | 0.679799 |
| MmugDNA.8360.1.S1_x_at | MmugDNA.8360.1 | 3.79  | 3.67  | 0.34 | 0.22 | 1.09  | 0.815862 | 0.713114 | 0.925191 | 0.833638 |
| MmugDNA.8361.1.S1_at   | MmugDNA.8361.1 | 11.18 | 10.79 | 0.12 | 0.74 | 1.32  | 0.419834 | 0.387441 | 0.712083 | 0.62212  |
| MmugDNA.8362.1.S1_at   | MmugDNA.8362.1 | 4.6   | 4.63  | 0.39 | 0.39 | -1.02 | 0.891867 | 0.468938 | 0.956942 | 0.67794  |
| MmugDNA.8363.1.S1_at   | MmugDNA.8363.1 | 10.43 | 9.72  | 0.21 | 0.29 | 1.63  | 0.028829 | 0.016058 | 0.312166 | 0.160565 |
| MmugDNA.8365.1.S1_at   | MmugDNA.8365.1 | 8.74  | 8.29  | 0.25 | 0.16 | 1.37  | 0.049411 | 0.031924 | 0.371383 | 0.221104 |
| MmugDNA.8366.1.S1_at   | MmugDNA.8366.1 | 2.83  | 2.66  | 0.07 | 0.04 | 1.12  | 0.055571 | 0.055742 | 0.384224 | 0.282006 |
| MmugDNA.8367.1.S1_at   | MmugDNA.8367.1 | 4.26  | 3.91  | 0.58 | 0.41 | 1.28  | 0.490544 | 0.737239 | 0.754483 | 0.847869 |
| MmugDNA.8368.1.S1_at   | MmugDNA.8368.1 | 4.08  | 4.25  | 0.09 | 0.18 | -1.12 | 0.193764 | 0.54708  | 0.557435 | 0.728283 |
| MmugDNA.8369.1.S1_at   | MmugDNA.8369.1 | 6.48  | 6.47  | 0.42 | 0.17 | 1.01  | 0.265601 | 0.342752 | 0.611247 | 0.588712 |
| MmugDNA.837.1.S1_at    | MmugDNA.837.1  | 4.29  | 3.79  | 0.81 | 0.53 | 1.42  | 0.303218 | 0.406403 | 0.637386 | 0.634305 |
| MmugDNA.8370.1.S1_at   | MmugDNA.8370.1 | 5.61  | 5.47  | 0.05 | 0.11 | 1.1   | 0.353226 | 0.582612 | 0.670093 | 0.751269 |
| MmugDNA.8371.1.S1_at   | MmugDNA.8371.1 | 5.63  | 5.79  | 0.04 | 0.09 | -1.12 | 0.067821 | 0.081873 | 0.408558 | 0.330339 |
| MmugDNA.8373.1.S1_at   | MmugDNA.8373.1 | 3.82  | 3.74  | 0.16 | 0.17 | 1.06  | 0.527083 | 0.626316 | 0.774556 | 0.779698 |

|                        |                |       |       |      |      |       |          |          |          |          |
|------------------------|----------------|-------|-------|------|------|-------|----------|----------|----------|----------|
| MmugDNA.8374.1.S1_at   | MmugDNA.8374.1 | 6.99  | 7.02  | 0.23 | 0.58 | -1.02 | 0.355164 | 0.47746  | 0.670851 | 0.683498 |
| MmugDNA.8375.1.S1_at   | MmugDNA.8375.1 | 4.91  | 4.78  | 0.24 | 0.15 | 1.09  | 0.363271 | 0.204712 | 0.676613 | 0.479067 |
| MmugDNA.8376.1.S1_at   | MmugDNA.8376.1 | 5.19  | 5.31  | 0.23 | 0.13 | -1.09 | 0.648054 | 0.438462 | 0.841735 | 0.65742  |
| MmugDNA.8377.1.S1_at   | MmugDNA.8377.1 | 5.59  | 5.51  | 0.19 | 0.12 | 1.05  | 0.928342 | 0.222312 | 0.972453 | 0.495346 |
| MmugDNA.8378.1.S1_at   | MmugDNA.8378.1 | 10.76 | 9.86  | 0.22 | 0.36 | 1.87  | 0.074071 | 0.069047 | 0.419667 | 0.309017 |
| MmugDNA.8379.1.S1_at   | MmugDNA.8379.1 | 5.28  | 6.97  | 0.4  | 1.02 | -3.22 | 0.078147 | 0.110171 | 0.428221 | 0.374314 |
| MmugDNA.8381.1.S1_at   | MmugDNA.8381.1 | 3.03  | 3.15  | 0.11 | 0.13 | -1.09 | 0.116145 | 0.120632 | 0.479765 | 0.389476 |
| MmugDNA.8382.1.S1_s_at | MmugDNA.8382.1 | 4.76  | 4.73  | 0.2  | 0.24 | 1.02  | 0.662733 | 0.825192 | 0.848768 | 0.899552 |
| MmugDNA.8383.1.S1_at   | MmugDNA.8383.1 | 7.04  | 6.95  | 0.08 | 0.25 | 1.06  | 0.626445 | 0.159918 | 0.829584 | 0.435987 |
| MmugDNA.8385.1.S1_at   | MmugDNA.8385.1 | 4.63  | 4.35  | 0.08 | 0.14 | 1.22  | 0.034653 | 0.035298 | 0.333385 | 0.23215  |
| MmugDNA.8386.1.S1_at   | MmugDNA.8386.1 | 4.4   | 4.35  | 0.12 | 0.13 | 1.04  | 0.663051 | 0.900543 | 0.848865 | 0.943464 |
| MmugDNA.8388.1.S1_at   | MmugDNA.8388.1 | 3.98  | 3.89  | 0.08 | 0.08 | 1.06  | 0.256807 | 0.211994 | 0.604419 | 0.485975 |
| MmugDNA.839.1.S1_at    | MmugDNA.839.1  | 13.18 | 13.33 | 0.14 | 0.06 | -1.11 | 0.164888 | 0.258748 | 0.528816 | 0.525949 |
| MmugDNA.8390.1.S1_at   | MmugDNA.8390.1 | 4.14  | 4.24  | 0.35 | 0.04 | -1.07 | 0.960439 | 0.409776 | 0.9849   | 0.636816 |
| MmugDNA.8394.1.S1_at   | MmugDNA.8394.1 | 8.82  | 8     | 0.1  | 0.39 | 1.77  | 0.022285 | 0.015592 | 0.285394 | 0.158262 |
| MmugDNA.8395.1.S1_at   | MmugDNA.8395.1 | 5.92  | 6.21  | 0.63 | 0.11 | -1.23 | 0.41611  | 0.624261 | 0.709692 | 0.778523 |
| MmugDNA.8396.1.S1_at   | MmugDNA.8396.1 | 5.29  | 5.4   | 0.15 | 0.06 | -1.07 | 0.393894 | 0.360074 | 0.695522 | 0.601204 |
| MmugDNA.8398.1.S1_at   | MmugDNA.8398.1 | 4.28  | 4.39  | 0.23 | 0.24 | -1.08 | 0.735796 | 0.541114 | 0.886439 | 0.72475  |
| MmugDNA.8399.1.S1_at   | MmugDNA.8399.1 | 6.18  | 6.12  | 1.03 | 0.39 | 1.04  | 0.271676 | 0.19416  | 0.615767 | 0.469266 |
| MmugDNA.84.1.S1_at     | MmugDNA.84.1   | 5.99  | 6.17  | 0.3  | 0.13 | -1.13 | 0.627557 | 0.82137  | 0.830191 | 0.897125 |
| MmugDNA.8400.1.S1_at   | MmugDNA.8400.1 | 8.99  | 8.94  | 0.11 | 0.26 | 1.03  | 0.993668 | 0.616311 | 0.997754 | 0.772571 |
| MmugDNA.8401.1.S1_at   | MmugDNA.8401.1 | 5.45  | 5.42  | 0.15 | 0.22 | 1.02  | 0.431227 | 0.551085 | 0.718513 | 0.730776 |
| MmugDNA.8402.1.S1_at   | MmugDNA.8402.1 | 6.67  | 6.28  | 0.31 | 0.2  | 1.32  | 0.140598 | 0.184513 | 0.508385 | 0.460559 |
| MmugDNA.8404.1.S1_at   | MmugDNA.8404.1 | 3.04  | 3.15  | 0.01 | 0.26 | -1.09 | 0.523396 | 0.583263 | 0.77253  | 0.751682 |
| MmugDNA.8409.1.S1_at   | MmugDNA.8409.1 | 6.45  | 6.69  | 0.02 | 0.13 | -1.18 | 0.041799 | 0.01025  | 0.352703 | 0.132655 |
| MmugDNA.841.1.S1_at    | MmugDNA.841.1  | 5.92  | 7.45  | 0.31 | 0.72 | -2.89 | 0.01286  | 0.006657 | 0.244372 | 0.110505 |
| MmugDNA.8410.1.S1_at   | MmugDNA.8410.1 | 5.09  | 5.25  | 0.13 | 0.17 | -1.11 | 0.31701  | 0.110018 | 0.647775 | 0.374145 |
| MmugDNA.8411.1.S1_at   | MmugDNA.8411.1 | 7.47  | 6.9   | 0.21 | 1.31 | 1.48  | 0.500628 | 0.528852 | 0.759592 | 0.71692  |
| MmugDNA.8412.1.S1_at   | MmugDNA.8412.1 | 7.98  | 8.31  | 0.41 | 0.14 | -1.26 | 0.24802  | 0.325422 | 0.599059 | 0.575807 |
| MmugDNA.8415.1.S1_at   | MmugDNA.8415.1 | 6.6   | 6.51  | 0.24 | 0.07 | 1.07  | 0.46216  | 0.313767 | 0.738226 | 0.568083 |
| MmugDNA.8416.1.S1_at   | MmugDNA.8416.1 | 3.45  | 3.51  | 0.12 | 0.09 | -1.05 | 0.165851 | 0.257055 | 0.529848 | 0.524781 |
| MmugDNA.8417.1.S1_at   | MmugDNA.8417.1 | 4.32  | 4     | 0.14 | 0.04 | 1.24  | 0.056873 | 0.107834 | 0.387323 | 0.370945 |
| MmugDNA.8419.1.S1_at   | MmugDNA.8419.1 | 5.39  | 5     | 0.45 | 0.22 | 1.31  | 0.313328 | 0.120769 | 0.645086 | 0.389579 |
| MmugDNA.842.1.S1_at    | MmugDNA.842.1  | 5.32  | 5.05  | 0.14 | 0.41 | 1.2   | 0.901305 | 0.258618 | 0.960577 | 0.52584  |
| MmugDNA.8424.1.S1_at   | MmugDNA.8424.1 | 4.26  | 4.27  | 0.91 | 0.14 | -1.01 | 0.462665 | 0.400242 | 0.738289 | 0.630158 |
| MmugDNA.8425.1.S1_at   | MmugDNA.8425.1 | 8.86  | 8.96  | 0.16 | 0.59 | -1.07 | 0.844419 | 0.596466 | 0.937553 | 0.759592 |
| MmugDNA.8426.1.S1_at   | MmugDNA.8426.1 | 7.9   | 8.33  | 0.28 | 0.51 | -1.35 | 0.281545 | 0.416703 | 0.622236 | 0.64167  |
| MmugDNA.8427.1.S1_at   | MmugDNA.8427.1 | 5.71  | 6.05  | 0.1  | 0.18 | -1.27 | 0.021049 | 0.011373 | 0.281947 | 0.138214 |
| MmugDNA.843.1.S1_at    | MmugDNA.843.1  | 7.33  | 7.27  | 0.05 | 0.3  | 1.04  | 0.467963 | 0.164277 | 0.740884 | 0.440539 |
| MmugDNA.8430.1.S1_at   | MmugDNA.8430.1 | 4.9   | 4.16  | 0.49 | 0.37 | 1.67  | 0.079356 | 0.111807 | 0.429376 | 0.376856 |
| MmugDNA.8432.1.S1_at   | MmugDNA.8432.1 | 11.24 | 11.75 | 0.22 | 0.18 | -1.43 | 0.080601 | 0.044625 | 0.43088  | 0.255589 |

|                        |                |       |       |      |      |       |          |          |          |          |
|------------------------|----------------|-------|-------|------|------|-------|----------|----------|----------|----------|
| MmugDNA.8433.1.S1_at   | MmugDNA.8433.1 | 4.61  | 3.9   | 0.73 | 0.27 | 1.63  | 0.186262 | 0.24736  | 0.549871 | 0.516579 |
| MmugDNA.8434.1.S1_at   | MmugDNA.8434.1 | 3.9   | 3.93  | 0.14 | 0.18 | -1.02 | 0.360139 | 0.508709 | 0.674235 | 0.703792 |
| MmugDNA.8436.1.S1_at   | MmugDNA.8436.1 | 4.08  | 4.11  | 0.27 | 0.08 | -1.02 | 0.359164 | 0.426677 | 0.673869 | 0.648796 |
| MmugDNA.8437.1.S1_at   | MmugDNA.8437.1 | 4.24  | 3.77  | 0.57 | 0.15 | 1.39  | 0.149667 | 0.198272 | 0.514278 | 0.473234 |
| MmugDNA.8438.1.S1_at   | MmugDNA.8438.1 | 5.58  | 5.43  | 0.16 | 0.23 | 1.11  | 0.221313 | 0.180694 | 0.580161 | 0.457249 |
| MmugDNA.8439.1.S1_at   | MmugDNA.8439.1 | 8.94  | 8.86  | 0.11 | 0.47 | 1.06  | 0.844688 | 0.937395 | 0.937622 | 0.964687 |
| MmugDNA.8440.1.S1_at   | MmugDNA.8440.1 | 3.68  | 3.91  | 0.16 | 0.06 | -1.17 | 0.287951 | 0.147678 | 0.626313 | 0.421999 |
| MmugDNA.8442.1.S1_at   | MmugDNA.8442.1 | 5.17  | 5     | 0.26 | 0.14 | 1.13  | 0.223411 | 0.173118 | 0.581912 | 0.449765 |
| MmugDNA.8443.1.S1_at   | MmugDNA.8443.1 | 5.75  | 5.58  | 0.69 | 0.91 | 1.13  | 0.943473 | 0.891847 | 0.978516 | 0.938333 |
| MmugDNA.8444.1.S1_at   | MmugDNA.8444.1 | 3.32  | 3.15  | 0.21 | 0.03 | 1.13  | 0.175132 | 0.139209 | 0.538831 | 0.412358 |
| MmugDNA.8445.1.S1_at   | MmugDNA.8445.1 | 3.69  | 3.49  | 0.66 | 0.06 | 1.15  | 0.501046 | 0.590553 | 0.759772 | 0.756311 |
| MmugDNA.8446.1.S1_at   | MmugDNA.8446.1 | 6.49  | 6.43  | 0.2  | 0.09 | 1.04  | 0.924737 | 0.945394 | 0.970885 | 0.968942 |
| MmugDNA.8448.1.S1_at   | MmugDNA.8448.1 | 2.54  | 2.54  | 0.02 | 0.06 | -1.01 | 0.255134 | 0.399357 | 0.603094 | 0.629776 |
| MmugDNA.845.1.S1_at    | MmugDNA.845.1  | 10.87 | 10.95 | 0.2  | 0.19 | -1.06 | 0.543482 | 0.149623 | 0.783803 | 0.424172 |
| MmugDNA.8451.1.S1_at   | MmugDNA.8451.1 | 5.8   | 5.85  | 0.1  | 0.06 | -1.03 | 0.783336 | 0.28999  | 0.909482 | 0.550995 |
| MmugDNA.8452.1.S1_at   | MmugDNA.8452.1 | 5.99  | 6.24  | 0.09 | 0.16 | -1.19 | 0.119627 | 0.074442 | 0.484149 | 0.318062 |
| MmugDNA.8453.1.S1_at   | MmugDNA.8453.1 | 8.1   | 8.17  | 0.05 | 0.1  | -1.05 | 0.114806 | 0.101134 | 0.478043 | 0.360785 |
| MmugDNA.8454.1.S1_at   | MmugDNA.8454.1 | 8.79  | 8.31  | 0.12 | 0.09 | 1.39  | 0.005447 | 0.000351 | 0.191107 | 0.037121 |
| MmugDNA.8457.1.S1_at   | MmugDNA.8457.1 | 10.94 | 11.01 | 0.31 | 0.24 | -1.05 | 0.337194 | 0.019851 | 0.659871 | 0.177189 |
| MmugDNA.8459.1.S1_s_at | MmugDNA.8459.1 | 8.77  | 8.17  | 0.19 | 0.53 | 1.51  | 0.578077 | 0.362961 | 0.803619 | 0.603471 |
| MmugDNA.846.1.S1_at    | MmugDNA.846.1  | 8.13  | 7.98  | 0.28 | 0.09 | 1.11  | 0.985769 | 0.731331 | 0.994839 | 0.844291 |
| MmugDNA.8464.1.S1_at   | MmugDNA.8464.1 | 5.02  | 4.48  | 0.58 | 0.45 | 1.46  | 0.418935 | 0.358102 | 0.711627 | 0.599654 |
| MmugDNA.8464.1.S1_x_at | MmugDNA.8464.1 | 5.59  | 5.11  | 0.52 | 0.08 | 1.39  | 0.594059 | 0.258723 | 0.811686 | 0.525949 |
| MmugDNA.8465.1.S1_at   | MmugDNA.8465.1 | 3.61  | 3.38  | 0.25 | 0.16 | 1.17  | 0.382865 | 0.535365 | 0.688989 | 0.720907 |
| MmugDNA.8466.1.S1_at   | MmugDNA.8466.1 | 3.95  | 3.76  | 0.14 | 0.08 | 1.14  | 0.095117 | 0.092854 | 0.452923 | 0.349024 |
| MmugDNA.8467.1.S1_at   | MmugDNA.8467.1 | 6.03  | 6.01  | 0.18 | 0.04 | 1.01  | 0.744519 | 0.529815 | 0.890646 | 0.717498 |
| MmugDNA.8469.1.S1_at   | MmugDNA.8469.1 | 5.29  | 5.31  | 0.18 | 0.15 | -1.01 | 0.594601 | 0.748291 | 0.812049 | 0.853508 |
| MmugDNA.847.1.S1_at    | MmugDNA.847.1  | 11.91 | 11.41 | 0.19 | 0.35 | 1.42  | 0.090306 | 0.087948 | 0.445754 | 0.341363 |
| MmugDNA.8470.1.S1_at   | MmugDNA.8470.1 | 3.45  | 3.51  | 0.05 | 0.13 | -1.04 | 0.490481 | 0.458543 | 0.754439 | 0.671232 |
| MmugDNA.8471.1.S1_at   | MmugDNA.8471.1 | 6.21  | 6.38  | 0.16 | 0.11 | -1.12 | 0.216415 | 0.174932 | 0.576042 | 0.451595 |
| MmugDNA.8472.1.S1_at   | MmugDNA.8472.1 | 6.28  | 5.81  | 0.14 | 0.27 | 1.38  | 0.062501 | 0.065478 | 0.398319 | 0.301415 |
| MmugDNA.8473.1.S1_at   | MmugDNA.8473.1 | 5.92  | 6     | 0.11 | 0.06 | -1.06 | 0.354267 | 0.187681 | 0.670425 | 0.46368  |
| MmugDNA.8474.1.S1_s_at | MmugDNA.8474.1 | 3.98  | 4.19  | 0.2  | 0.13 | -1.16 | 0.22895  | 0.285415 | 0.586264 | 0.547278 |
| MmugDNA.8476.1.S1_at   | MmugDNA.8476.1 | 5.89  | 6.27  | 0.14 | 0.13 | -1.3  | 0.033686 | 0.030367 | 0.330119 | 0.216116 |
| MmugDNA.8477.1.S1_at   | MmugDNA.8477.1 | 6.32  | 6.5   | 0.04 | 0.07 | -1.13 | 0.006214 | 0.006339 | 0.197039 | 0.108136 |
| MmugDNA.8478.1.S1_at   | MmugDNA.8478.1 | 9.14  | 8.38  | 0.19 | 0.6  | 1.7   | 0.16893  | 0.18801  | 0.53321  | 0.4641   |
| MmugDNA.8479.1.S1_at   | MmugDNA.8479.1 | 6     | 5.88  | 0.14 | 0.29 | 1.09  | 0.856011 | 0.565008 | 0.94183  | 0.739639 |
| MmugDNA.848.1.S1_at    | MmugDNA.848.1  | 9.47  | 9.74  | 0.14 | 0.25 | -1.21 | 0.108245 | 0.076847 | 0.469353 | 0.322345 |
| MmugDNA.8480.1.S1_at   | MmugDNA.8480.1 | 11.4  | 11.87 | 0.24 | 0.37 | -1.38 | 0.270845 | 0.361073 | 0.615103 | 0.602069 |
| MmugDNA.8482.1.S1_at   | MmugDNA.8482.1 | 3.93  | 3.98  | 0.1  | 0.13 | -1.04 | 0.739863 | 0.136654 | 0.888303 | 0.409207 |
| MmugDNA.8483.1.S1_at   | MmugDNA.8483.1 | 5.34  | 4.97  | 0.08 | 0.59 | 1.3   | 0.964398 | 0.756902 | 0.986213 | 0.858495 |

|                        |                |       |       |      |      |       |          |          |          |          |
|------------------------|----------------|-------|-------|------|------|-------|----------|----------|----------|----------|
| MmugDNA.8484.1.S1_at   | MmugDNA.8484.1 | 9.55  | 9.37  | 0.06 | 0.14 | 1.13  | 0.125009 | 0.012399 | 0.491016 | 0.144058 |
| MmugDNA.8485.1.S1_at   | MmugDNA.8485.1 | 4.02  | 3.73  | 0.45 | 0.56 | 1.22  | 0.549701 | 0.630257 | 0.787481 | 0.782195 |
| MmugDNA.8486.1.S1_at   | MmugDNA.8486.1 | 7.25  | 7.34  | 0.51 | 1.85 | -1.07 | 0.836659 | 0.65335  | 0.933929 | 0.7974   |
| MmugDNA.8487.1.S1_at   | MmugDNA.8487.1 | 7.55  | 7.15  | 0.39 | 0.29 | 1.33  | 0.525966 | 0.108084 | 0.773971 | 0.371281 |
| MmugDNA.8489.1.S1_at   | MmugDNA.8489.1 | 11.33 | 10.78 | 0.05 | 0.23 | 1.47  | 0.025701 | 0.003492 | 0.300275 | 0.084984 |
| MmugDNA.849.1.S1_at    | MmugDNA.849.1  | 10.36 | 9.92  | 0.11 | 0.41 | 1.35  | 0.127038 | 0.148754 | 0.493251 | 0.423201 |
| MmugDNA.8490.1.S1_at   | MmugDNA.8490.1 | 5.45  | 5.75  | 0.76 | 0.17 | -1.23 | 0.676913 | 0.863437 | 0.85524  | 0.92245  |
| MmugDNA.8491.1.S1_at   | MmugDNA.8491.1 | 5.1   | 5.15  | 0.09 | 0.07 | -1.03 | 0.324983 | 0.021496 | 0.652259 | 0.183673 |
| MmugDNA.8492.1.S1_at   | MmugDNA.8492.1 | 9.08  | 9.43  | 0.4  | 0.19 | -1.28 | 0.278781 | 0.280192 | 0.620824 | 0.543487 |
| MmugDNA.8493.1.S1_x_at | MmugDNA.8493.1 | 7.23  | 7.24  | 0.57 | 0.24 | -1.01 | 0.281961 | 0.33006  | 0.622505 | 0.578938 |
| MmugDNA.8494.1.S1_at   | MmugDNA.8494.1 | 4.3   | 4.05  | 0.27 | 0.29 | 1.19  | 0.762707 | 0.271911 | 0.900005 | 0.536655 |
| MmugDNA.8495.1.S1_at   | MmugDNA.8495.1 | 4.21  | 4.32  | 0.06 | 0.05 | -1.08 | 0.072837 | 0.1519   | 0.417993 | 0.426547 |
| MmugDNA.85.1.S1_at     | MmugDNA.85.1   | 7.43  | 7     | 0.32 | 0.16 | 1.35  | 0.161432 | 0.292904 | 0.526444 | 0.552857 |
| MmugDNA.850.1.S1_at    | MmugDNA.850.1  | 5.35  | 5.17  | 0.12 | 0.22 | 1.13  | 0.431732 | 0.37999  | 0.718638 | 0.616674 |
| MmugDNA.8500.1.S1_at   | MmugDNA.8500.1 | 5.07  | 5.17  | 0.01 | 0.05 | -1.07 | 0.055402 | 0.116983 | 0.383716 | 0.384379 |
| MmugDNA.8501.1.S1_at   | MmugDNA.8501.1 | 3.54  | 3.5   | 0.44 | 0.21 | 1.03  | 0.563907 | 0.399154 | 0.796337 | 0.62969  |
| MmugDNA.8504.1.S1_at   | MmugDNA.8504.1 | 3.25  | 3.14  | 0.12 | 0.04 | 1.08  | 0.215205 | 0.328205 | 0.575623 | 0.577947 |
| MmugDNA.8505.1.S1_at   | MmugDNA.8505.1 | 4.35  | 4.23  | 0.45 | 0.13 | 1.09  | 0.37941  | 0.165655 | 0.686924 | 0.441925 |
| MmugDNA.8507.1.S1_at   | MmugDNA.8507.1 | 3.93  | 4.84  | 1.08 | 0.88 | -1.88 | 0.775631 | 0.397992 | 0.90586  | 0.629138 |
| MmugDNA.8508.1.S1_at   | MmugDNA.8508.1 | 5.79  | 6.74  | 0.29 | 1.4  | -1.94 | 0.320686 | 0.38489  | 0.64956  | 0.620513 |
| MmugDNA.8512.1.S1_at   | MmugDNA.8512.1 | 11.29 | 11.39 | 0.05 | 0.2  | -1.07 | 0.882701 | 0.941162 | 0.952889 | 0.966652 |
| MmugDNA.8513.1.S1_at   | MmugDNA.8513.1 | 3.93  | 4.5   | 0.3  | 0.05 | -1.48 | 0.047624 | 0.020294 | 0.366897 | 0.178808 |
| MmugDNA.8514.1.S1_at   | MmugDNA.8514.1 | 2.96  | 2.95  | 0.08 | 0.16 | 1.01  | 0.90299  | 0.919375 | 0.961391 | 0.954737 |
| MmugDNA.8516.1.S1_at   | MmugDNA.8516.1 | 6.21  | 6.22  | 0.07 | 0.12 | -1.01 | 0.860612 | 0.279894 | 0.943753 | 0.543342 |
| MmugDNA.8517.1.S1_at   | MmugDNA.8517.1 | 3.18  | 3.15  | 0.12 | 0.12 | 1.02  | 0.829329 | 0.695142 | 0.930749 | 0.822797 |
| MmugDNA.8518.1.S1_at   | MmugDNA.8518.1 | 3.35  | 3.51  | 0.13 | 0.12 | -1.12 | 0.273436 | 0.154428 | 0.616872 | 0.429313 |
| MmugDNA.8519.1.S1_at   | MmugDNA.8519.1 | 5.29  | 5.3   | 0.09 | 0.1  | -1.01 | 0.6608   | 0.313205 | 0.847904 | 0.567753 |
| MmugDNA.852.1.S1_at    | MmugDNA.852.1  | 4.7   | 4.75  | 0.09 | 0.14 | -1.03 | 0.875097 | 0.507114 | 0.949887 | 0.70277  |
| MmugDNA.8520.1.S1_at   | MmugDNA.8520.1 | 4.81  | 5.45  | 0.1  | 0.39 | -1.56 | 0.052991 | 0.109981 | 0.378925 | 0.374067 |
| MmugDNA.8521.1.S1_at   | MmugDNA.8521.1 | 6.87  | 7.01  | 0.56 | 1.08 | -1.1  | 0.995327 | 0.649893 | 0.998318 | 0.795273 |
| MmugDNA.8522.1.S1_at   | MmugDNA.8522.1 | 5.08  | 4.72  | 0.21 | 0.06 | 1.28  | 0.05905  | 0.050142 | 0.390921 | 0.269087 |
| MmugDNA.8523.1.S1_at   | MmugDNA.8523.1 | 6.05  | 6.07  | 0.17 | 0.12 | -1.01 | 0.922717 | 0.286759 | 0.970061 | 0.548125 |
| MmugDNA.8525.1.S1_at   | MmugDNA.8525.1 | 12.97 | 12.99 | 0.19 | 0.1  | -1.01 | 0.606457 | 0.494545 | 0.818848 | 0.694909 |
| MmugDNA.8526.1.S1_at   | MmugDNA.8526.1 | 5.89  | 5.83  | 0.05 | 0.08 | 1.04  | 0.188896 | 0.215793 | 0.551906 | 0.489536 |
| MmugDNA.8528.1.S1_at   | MmugDNA.8528.1 | 4.46  | 4.41  | 0.56 | 0.07 | 1.04  | 0.335761 | 0.349904 | 0.659165 | 0.593668 |
| MmugDNA.8529.1.S1_at   | MmugDNA.8529.1 | 10.98 | 13.24 | 1.09 | 1.63 | -4.8  | 0.390107 | 0.239917 | 0.693398 | 0.510627 |
| MmugDNA.853.1.S1_at    | MmugDNA.853.1  | 6.54  | 6.35  | 0.16 | 0.22 | 1.14  | 0.169592 | 0.136873 | 0.533686 | 0.409568 |
| MmugDNA.8531.1.S1_at   | MmugDNA.8531.1 | 3.69  | 3.69  | 0.06 | 0.04 | 1     | 0.834949 | 0.173155 | 0.933081 | 0.449765 |
| MmugDNA.8532.1.S1_at   | MmugDNA.8532.1 | 3.25  | 3.46  | 0.32 | 0.13 | -1.15 | 0.743717 | 0.309216 | 0.890194 | 0.564807 |
| MmugDNA.8533.1.S1_at   | MmugDNA.8533.1 | 2.81  | 2.73  | 0.1  | 0.07 | 1.05  | 0.221563 | 0.170477 | 0.580303 | 0.447103 |
| MmugDNA.8535.1.S1_at   | MmugDNA.8535.1 | 4.52  | 4.63  | 0.12 | 0.02 | -1.08 | 0.716421 | 0.582385 | 0.875447 | 0.751018 |



|                        |                |       |       |      |      |       |          |          |          |          |
|------------------------|----------------|-------|-------|------|------|-------|----------|----------|----------|----------|
| MmugDNA.8536.1.S1_s_at | MmugDNA.8536.1 | 12.33 | 12.62 | 0.25 | 0.04 | -1.22 | 0.111684 | 0.02205  | 0.474019 | 0.185911 |
| MmugDNA.8537.1.S1_at   | MmugDNA.8537.1 | 13.18 | 13.21 | 0.08 | 0.12 | -1.02 | 0.4427   | 0.166403 | 0.72573  | 0.442884 |
| MmugDNA.8539.1.S1_at   | MmugDNA.8539.1 | 3.85  | 3.85  | 0.41 | 0.05 | -1.01 | 0.336773 | 0.342874 | 0.659663 | 0.588712 |
| MmugDNA.854.1.S1_at    | MmugDNA.854.1  | 8.21  | 8.08  | 0.06 | 0.04 | 1.09  | 0.020933 | 0.019251 | 0.281582 | 0.174522 |
| MmugDNA.8541.1.S1_at   | MmugDNA.8541.1 | 5.59  | 5.16  | 0.27 | 0.16 | 1.35  | 0.325449 | 0.326723 | 0.65274  | 0.576725 |
| MmugDNA.8542.1.S1_at   | MmugDNA.8542.1 | 6.66  | 6.72  | 0.1  | 0.1  | -1.04 | 0.556355 | 0.089585 | 0.79173  | 0.343811 |
| MmugDNA.8544.1.S1_at   | MmugDNA.8544.1 | 5.12  | 5.48  | 0.43 | 0.49 | -1.28 | 0.536862 | 0.008878 | 0.779661 | 0.124662 |
| MmugDNA.8546.1.S1_at   | MmugDNA.8546.1 | 5.14  | 4.91  | 0.23 | 0.35 | 1.17  | 0.28611  | 0.360219 | 0.625392 | 0.601275 |
| MmugDNA.8547.1.S1_at   | MmugDNA.8547.1 | 5.97  | 6.07  | 0.04 | 0.16 | -1.08 | 0.341074 | 0.318075 | 0.662243 | 0.571046 |
| MmugDNA.8549.1.S1_s_at | MmugDNA.8549.1 | 7.33  | 7.92  | 0.18 | 0.43 | -1.5  | 0.095062 | 0.090064 | 0.452775 | 0.344402 |
| MmugDNA.855.1.S1_at    | MmugDNA.855.1  | 5.26  | 5.18  | 0.09 | 0.23 | 1.06  | 0.206647 | 0.271149 | 0.568816 | 0.536259 |
| MmugDNA.8551.1.S1_at   | MmugDNA.8551.1 | 8.81  | 8.26  | 0.25 | 1.17 | 1.47  | 0.412891 | 0.546696 | 0.708133 | 0.728135 |
| MmugDNA.8553.1.S1_at   | MmugDNA.8553.1 | 9.36  | 8.3   | 0.23 | 0.75 | 2.09  | 0.072298 | 0.058972 | 0.416651 | 0.289669 |
| MmugDNA.8554.1.S1_at   | MmugDNA.8554.1 | 4.97  | 5.06  | 0.22 | 0.09 | -1.06 | 0.942109 | 0.551419 | 0.977865 | 0.730925 |
| MmugDNA.8555.1.S1_at   | MmugDNA.8555.1 | 5.27  | 4.95  | 0.19 | 0.06 | 1.25  | 0.03427  | 0.03526  | 0.332352 | 0.231988 |
| MmugDNA.8556.1.S1_at   | MmugDNA.8556.1 | 8.08  | 10.02 | 0.98 | 2.2  | -3.83 | 0.334535 | 0.159587 | 0.658444 | 0.435785 |
| MmugDNA.8557.1.S1_at   | MmugDNA.8557.1 | 4.98  | 5.13  | 0.11 | 0.09 | -1.11 | 0.147102 | 0.183892 | 0.51306  | 0.460033 |
| MmugDNA.8558.1.S1_at   | MmugDNA.8558.1 | 4.68  | 4.94  | 0.13 | 0.19 | -1.2  | 0.393477 | 0.500338 | 0.695249 | 0.699009 |
| MmugDNA.8559.1.S1_at   | MmugDNA.8559.1 | 8.76  | 8.39  | 0.3  | 0.2  | 1.3   | 0.092447 | 0.018248 | 0.449152 | 0.1699   |
| MmugDNA.856.1.S1_at    | MmugDNA.856.1  | 4.03  | 4.02  | 0.08 | 0.15 | 1.01  | 0.478191 | 0.652554 | 0.747114 | 0.796833 |
| MmugDNA.8560.1.S1_at   | MmugDNA.8560.1 | 3.6   | 3.47  | 0.1  | 0.05 | 1.09  | 0.175819 | 0.072905 | 0.539441 | 0.315942 |
| MmugDNA.8561.1.S1_at   | MmugDNA.8561.1 | 3.84  | 3.9   | 0.06 | 0.06 | -1.04 | 0.62698  | 0.071776 | 0.829836 | 0.314031 |
| MmugDNA.8562.1.S1_at   | MmugDNA.8562.1 | 8.81  | 7.9   | 0.24 | 0.21 | 1.87  | 0.01067  | 0.004015 | 0.230991 | 0.089976 |
| MmugDNA.8563.1.S1_at   | MmugDNA.8563.1 | 7.44  | 7.57  | 0.44 | 1.04 | -1.1  | 0.990074 | 0.296827 | 0.996483 | 0.5558   |
| MmugDNA.8564.1.S1_at   | MmugDNA.8564.1 | 6.98  | 6.03  | 0.97 | 0.4  | 1.93  | 0.067213 | 0.046066 | 0.407232 | 0.258977 |
| MmugDNA.8565.1.S1_at   | MmugDNA.8565.1 | 4.24  | 4.39  | 0.05 | 0.16 | -1.11 | 0.271207 | 0.039364 | 0.615378 | 0.243406 |
| MmugDNA.8566.1.S1_at   | MmugDNA.8566.1 | 3.46  | 3.45  | 0.16 | 0.04 | 1.01  | 0.705818 | 0.83805  | 0.870316 | 0.907543 |
| MmugDNA.8567.1.S1_at   | MmugDNA.8567.1 | 11.83 | 11.67 | 0.06 | 0.44 | 1.12  | 0.612618 | 0.339727 | 0.822286 | 0.586323 |
| MmugDNA.8568.1.S1_at   | MmugDNA.8568.1 | 3.85  | 3.85  | 0.06 | 0.14 | -1    | 0.780414 | 0.91019  | 0.908495 | 0.949342 |
| MmugDNA.8569.1.S1_at   | MmugDNA.8569.1 | 6.68  | 6.97  | 0.73 | 0.77 | -1.22 | 0.634367 | 0.646832 | 0.834486 | 0.793143 |
| MmugDNA.857.1.S1_at    | MmugDNA.857.1  | 2.94  | 2.96  | 0    | 0.09 | -1.01 | 0.261321 | 0.206111 | 0.607936 | 0.480319 |
| MmugDNA.8570.1.S1_at   | MmugDNA.8570.1 | 4.91  | 5     | 0.33 | 0.1  | -1.06 | 0.803303 | 0.654396 | 0.919051 | 0.798021 |
| MmugDNA.8571.1.S1_at   | MmugDNA.8571.1 | 10.97 | 10.58 | 0.02 | 0.32 | 1.31  | 0.099113 | 0.126131 | 0.458807 | 0.396734 |
| MmugDNA.8573.1.S1_at   | MmugDNA.8573.1 | 9.81  | 9.62  | 0.25 | 0.41 | 1.14  | 0.373884 | 0.292905 | 0.683245 | 0.552857 |
| MmugDNA.8575.1.S1_at   | MmugDNA.8575.1 | 4.73  | 4.91  | 0.19 | 0.14 | -1.13 | 0.120615 | 0.137365 | 0.485724 | 0.41029  |
| MmugDNA.8576.1.S1_at   | MmugDNA.8576.1 | 3.84  | 3.84  | 0.05 | 0    | 1     | 0.345077 | 0.446448 | 0.664959 | 0.662842 |
| MmugDNA.8577.1.S1_at   | MmugDNA.8577.1 | 6.25  | 6     | 0.21 | 1.07 | 1.19  | 0.799515 | 0.946778 | 0.91698  | 0.96978  |
| MmugDNA.8579.1.S1_at   | MmugDNA.8579.1 | 3.73  | 3.41  | 0.18 | 0.16 | 1.25  | 0.081181 | 0.071753 | 0.431848 | 0.31401  |
| MmugDNA.858.1.S1_at    | MmugDNA.858.1  | 6.21  | 6.33  | 0.13 | 0.28 | -1.09 | 0.192608 | 0.222182 | 0.555864 | 0.495178 |
| MmugDNA.8581.1.S1_at   | MmugDNA.8581.1 | 9.67  | 10.25 | 0.09 | 0.89 | -1.49 | 0.409481 | 0.187162 | 0.70588  | 0.46313  |
| MmugDNA.8582.1.S1_at   | MmugDNA.8582.1 | 3.4   | 3.36  | 0.28 | 0.22 | 1.03  | 0.693212 | 0.070661 | 0.863846 | 0.312011 |

|                        |                |       |       |      |      |       |          |          |          |          |
|------------------------|----------------|-------|-------|------|------|-------|----------|----------|----------|----------|
| MmugDNA.8583.1.S1_at   | MmugDNA.8583.1 | 5.36  | 5.07  | 0.37 | 0.33 | 1.22  | 0.334484 | 0.747755 | 0.658444 | 0.853252 |
| MmugDNA.8584.1.S1_at   | MmugDNA.8584.1 | 3.06  | 3.13  | 0.37 | 0.17 | -1.05 | 0.397961 | 0.522407 | 0.698458 | 0.713139 |
| MmugDNA.8585.1.S1_at   | MmugDNA.8585.1 | 6.69  | 7.68  | 1.14 | 1.2  | -1.98 | 0.26389  | 0.093435 | 0.609706 | 0.349695 |
| MmugDNA.8586.1.S1_at   | MmugDNA.8586.1 | 4.44  | 4.17  | 0.34 | 0.15 | 1.2   | 0.520154 | 0.138102 | 0.770623 | 0.410985 |
| MmugDNA.8587.1.S1_at   | MmugDNA.8587.1 | 4.45  | 4.48  | 0.16 | 0.09 | -1.02 | 0.849416 | 0.526537 | 0.939567 | 0.715583 |
| MmugDNA.8588.1.S1_at   | MmugDNA.8588.1 | 3.35  | 3.02  | 0.14 | 0.04 | 1.25  | 0.042493 | 0.307842 | 0.355111 | 0.56397  |
| MmugDNA.859.1.S1_at    | MmugDNA.859.1  | 4.42  | 4.44  | 0.43 | 0.33 | -1.02 | 0.538392 | 0.583029 | 0.780589 | 0.751513 |
| MmugDNA.8590.1.S1_at   | MmugDNA.8590.1 | 8.33  | 7.88  | 0.13 | 0.45 | 1.37  | 0.68253  | 0.302682 | 0.85795  | 0.560269 |
| MmugDNA.8594.1.S1_at   | MmugDNA.8594.1 | 8.57  | 8.22  | 0.08 | 0.58 | 1.28  | 0.848601 | 0.149129 | 0.939211 | 0.423572 |
| MmugDNA.8596.1.S1_at   | MmugDNA.8596.1 | 7.02  | 6.58  | 0.1  | 0.37 | 1.35  | 0.132627 | 0.210357 | 0.49874  | 0.484237 |
| MmugDNA.860.1.S1_at    | MmugDNA.860.1  | 5.19  | 5.31  | 0.61 | 0.23 | -1.09 | 0.572383 | 0.604357 | 0.800695 | 0.764576 |
| MmugDNA.8600.1.S1_at   | MmugDNA.8600.1 | 4.99  | 4.78  | 0.28 | 0.02 | 1.16  | 0.757859 | 0.48186  | 0.897395 | 0.686812 |
| MmugDNA.8601.1.S1_at   | MmugDNA.8601.1 | 12.83 | 12.89 | 0.05 | 0.04 | -1.05 | 0.086795 | 0.093174 | 0.440475 | 0.34931  |
| MmugDNA.8606.1.S1_at   | MmugDNA.8606.1 | 3.67  | 3.91  | 0.36 | 0.23 | -1.18 | 0.541494 | 0.448277 | 0.782715 | 0.664167 |
| MmugDNA.8607.1.S1_at   | MmugDNA.8607.1 | 4.08  | 3.95  | 0.27 | 0.12 | 1.1   | 0.547731 | 0.529735 | 0.786269 | 0.717498 |
| MmugDNA.8608.1.S1_at   | MmugDNA.8608.1 | 3.33  | 3.33  | 0.01 | 0.04 | -1    | 0.762575 | 0.895291 | 0.899996 | 0.940185 |
| MmugDNA.8609.1.S1_at   | MmugDNA.8609.1 | 3.13  | 3.22  | 0.09 | 0.23 | -1.07 | 0.228112 | 0.277969 | 0.585454 | 0.541664 |
| MmugDNA.861.1.S1_at    | MmugDNA.861.1  | 2.92  | 2.87  | 0.31 | 0.33 | 1.03  | 0.385216 | 0.571112 | 0.690372 | 0.74355  |
| MmugDNA.8610.1.S1_at   | MmugDNA.8610.1 | 4.78  | 4.72  | 0.04 | 0.06 | 1.04  | 0.114446 | 0.14734  | 0.477887 | 0.421554 |
| MmugDNA.8611.1.S1_at   | MmugDNA.8611.1 | 5.06  | 5.02  | 0.18 | 0.38 | 1.03  | 0.316942 | 0.416122 | 0.647775 | 0.64135  |
| MmugDNA.8613.1.S1_at   | MmugDNA.8613.1 | 8.95  | 8.71  | 0.1  | 0.22 | 1.18  | 0.060229 | 0.063657 | 0.393081 | 0.298815 |
| MmugDNA.8614.1.S1_at   | MmugDNA.8614.1 | 6.2   | 6.48  | 0.22 | 0.19 | -1.21 | 0.429739 | 0.540208 | 0.717703 | 0.724218 |
| MmugDNA.8615.1.S1_at   | MmugDNA.8615.1 | 10.28 | 9.22  | 0.38 | 0.5  | 2.08  | 0.042357 | 0.00898  | 0.354659 | 0.125353 |
| MmugDNA.8616.1.S1_at   | MmugDNA.8616.1 | 10.81 | 9.69  | 0.16 | 0.56 | 2.17  | 0.031033 | 0.005889 | 0.32048  | 0.104899 |
| MmugDNA.862.1.S1_at    | MmugDNA.862.1  | 8     | 8.18  | 0.23 | 0.09 | -1.13 | 0.113552 | 0.1294   | 0.476938 | 0.4008   |
| MmugDNA.8620.1.S1_at   | MmugDNA.8620.1 | 6.23  | 5.92  | 0.49 | 0.1  | 1.24  | 0.295097 | 0.414312 | 0.631503 | 0.640189 |
| MmugDNA.8623.1.S1_at   | MmugDNA.8623.1 | 12.6  | 12.74 | 0.04 | 0.17 | -1.11 | 0.079272 | 0.069016 | 0.429178 | 0.309017 |
| MmugDNA.8624.1.S1_at   | MmugDNA.8624.1 | 8.1   | 9.53  | 0.89 | 0.7  | -2.69 | 0.469871 | 0.297747 | 0.741958 | 0.556395 |
| MmugDNA.8627.1.S1_at   | MmugDNA.8627.1 | 6.26  | 6.27  | 0.07 | 0.28 | -1.01 | 0.409184 | 0.525447 | 0.705781 | 0.715025 |
| MmugDNA.8628.1.S1_at   | MmugDNA.8628.1 | 5.54  | 5.52  | 0.18 | 0.24 | 1.01  | 0.911555 | 0.813141 | 0.965046 | 0.891951 |
| MmugDNA.8629.1.S1_at   | MmugDNA.8629.1 | 7.65  | 7.52  | 0.1  | 0.94 | 1.09  | 0.508302 | 0.729708 | 0.763674 | 0.843652 |
| MmugDNA.8631.1.S1_at   | MmugDNA.8631.1 | 5.18  | 4.86  | 0.07 | 0.06 | 1.25  | 0.004186 | 0.009786 | 0.181739 | 0.130114 |
| MmugDNA.8632.1.S1_at   | MmugDNA.8632.1 | 8.32  | 8.44  | 0.44 | 0.05 | -1.09 | 0.246374 | 0.300993 | 0.597681 | 0.559198 |
| MmugDNA.8633.1.S1_at   | MmugDNA.8633.1 | 5.13  | 5.02  | 0.06 | 0.11 | 1.08  | 0.134799 | 0.14083  | 0.501805 | 0.414207 |
| MmugDNA.8635.1.S1_s_at | MmugDNA.8635.1 | 10.48 | 9.91  | 0.12 | 0.49 | 1.48  | 0.171036 | 0.209834 | 0.534989 | 0.483581 |
| MmugDNA.8636.1.S1_at   | MmugDNA.8636.1 | 4.44  | 4.58  | 0.06 | 0.07 | -1.1  | 0.074623 | 0.237757 | 0.420587 | 0.50826  |
| MmugDNA.8637.1.S1_at   | MmugDNA.8637.1 | 4.49  | 4.68  | 0.19 | 0.52 | -1.15 | 0.509624 | 0.18085  | 0.764465 | 0.457381 |
| MmugDNA.8638.1.S1_at   | MmugDNA.8638.1 | 3.23  | 3.15  | 0.1  | 0.14 | 1.06  | 0.870579 | 0.982583 | 0.948314 | 0.990376 |
| MmugDNA.864.1.S1_at    | MmugDNA.864.1  | 9.66  | 9.59  | 0.4  | 0.51 | 1.05  | 0.31714  | 0.454805 | 0.647872 | 0.668859 |
| MmugDNA.8641.1.S1_at   | MmugDNA.8641.1 | 5.47  | 5.43  | 0.44 | 0.15 | 1.03  | 0.970012 | 0.798868 | 0.988483 | 0.884147 |
| MmugDNA.8642.1.S1_at   | MmugDNA.8642.1 | 6.63  | 6.2   | 0.36 | 0.54 | 1.35  | 0.661374 | 0.772489 | 0.848124 | 0.867741 |

|                        |                |       |       |      |      |       |          |          |          |          |
|------------------------|----------------|-------|-------|------|------|-------|----------|----------|----------|----------|
| MmugDNA.8643.1.S1_at   | MmugDNA.8643.1 | 3.69  | 3.37  | 0.14 | 0.13 | 1.24  | 0.10189  | 0.454231 | 0.461313 | 0.668474 |
| MmugDNA.8644.1.S1_at   | MmugDNA.8644.1 | 4.71  | 3.94  | 0.79 | 0.95 | 1.71  | 0.878199 | 0.595862 | 0.95108  | 0.759258 |
| MmugDNA.8647.1.S1_at   | MmugDNA.8647.1 | 4.42  | 4.45  | 0.07 | 0.09 | -1.02 | 0.175167 | 0.175086 | 0.538831 | 0.45175  |
| MmugDNA.8647.1.S1_x_at | MmugDNA.8647.1 | 3.66  | 4.02  | 0.09 | 0.21 | -1.28 | 0.110307 | 0.068908 | 0.471863 | 0.308844 |
| MmugDNA.8651.1.S1_at   | MmugDNA.8651.1 | 8.01  | 8.6   | 0.15 | 0.22 | -1.5  | 0.029009 | 0.01216  | 0.312556 | 0.142648 |
| MmugDNA.8654.1.S1_at   | MmugDNA.8654.1 | 3.75  | 3.65  | 0.17 | 0.27 | 1.07  | 0.131244 | 0.145412 | 0.497792 | 0.419421 |
| MmugDNA.8655.1.S1_at   | MmugDNA.8655.1 | 6.13  | 6.04  | 0.11 | 0.2  | 1.07  | 0.572553 | 0.641826 | 0.800799 | 0.789771 |
| MmugDNA.8657.1.S1_at   | MmugDNA.8657.1 | 4.79  | 4.77  | 0.06 | 0.08 | 1.02  | 0.685092 | 0.690021 | 0.858887 | 0.819235 |
| MmugDNA.8659.1.S1_at   | MmugDNA.8659.1 | 3.26  | 3.3   | 0.5  | 0.19 | -1.03 | 0.465921 | 0.618027 | 0.740195 | 0.773852 |
| MmugDNA.866.1.S1_at    | MmugDNA.866.1  | 5.85  | 5.98  | 0.67 | 0.09 | -1.1  | 0.549113 | 0.738765 | 0.787104 | 0.848575 |
| MmugDNA.8661.1.S1_at   | MmugDNA.8661.1 | 2.89  | 2.96  | 0.09 | 0.08 | -1.06 | 0.372455 | 0.542292 | 0.682812 | 0.725385 |
| MmugDNA.8662.1.S1_at   | MmugDNA.8662.1 | 7.07  | 7.19  | 0.38 | 0.1  | -1.09 | 0.580667 | 0.760375 | 0.804783 | 0.860754 |
| MmugDNA.8664.1.S1_at   | MmugDNA.8664.1 | 8.85  | 7.76  | 0.03 | 0.11 | 2.13  | 0.000089 | 0.000004 | 0.112653 | 0.014484 |
| MmugDNA.8665.1.S1_at   | MmugDNA.8665.1 | 5.75  | 5.68  | 0.15 | 0    | 1.05  | 0.656897 | 0.854205 | 0.845614 | 0.916964 |
| MmugDNA.8666.1.S1_at   | MmugDNA.8666.1 | 3.91  | 3.85  | 0.11 | 0.09 | 1.04  | 0.722002 | 0.502234 | 0.878473 | 0.70006  |
| MmugDNA.8669.1.S1_at   | MmugDNA.8669.1 | 4.9   | 4.88  | 0.12 | 0.25 | 1.01  | 0.671535 | 0.871926 | 0.852716 | 0.927098 |
| MmugDNA.867.1.S1_at    | MmugDNA.867.1  | 3.98  | 4.09  | 0.22 | 0.23 | -1.08 | 0.885064 | 0.720719 | 0.953961 | 0.838368 |
| MmugDNA.8672.1.S1_at   | MmugDNA.8672.1 | 11.02 | 10.84 | 0.36 | 0.35 | 1.14  | 0.47577  | 0.416985 | 0.745964 | 0.641875 |
| MmugDNA.8673.1.S1_at   | MmugDNA.8673.1 | 4.55  | 4.54  | 0.07 | 0.15 | 1     | 0.532733 | 0.453888 | 0.777862 | 0.668329 |
| MmugDNA.8674.1.S1_at   | MmugDNA.8674.1 | 4.72  | 4.85  | 0    | 0.21 | -1.1  | 0.107196 | 0.05239  | 0.467913 | 0.274351 |
| MmugDNA.8675.1.S1_at   | MmugDNA.8675.1 | 5.23  | 7.31  | 1.37 | 2.05 | -4.22 | 0.302601 | 0.186572 | 0.636976 | 0.462364 |
| MmugDNA.8678.1.S1_x_at | MmugDNA.8678.1 | 3.9   | 4.09  | 0.22 | 0.36 | -1.14 | 0.133316 | 0.072395 | 0.499806 | 0.315251 |
| MmugDNA.8679.1.S1_at   | MmugDNA.8679.1 | 10.96 | 12.26 | 0.63 | 0.57 | -2.47 | 0.067084 | 0.059185 | 0.407071 | 0.290208 |
| MmugDNA.868.1.S1_at    | MmugDNA.868.1  | 5.79  | 5.81  | 0.07 | 0.24 | -1.01 | 0.481626 | 0.105942 | 0.749268 | 0.36826  |
| MmugDNA.8680.1.S1_at   | MmugDNA.8680.1 | 7.41  | 8.99  | 0.24 | 0.53 | -2.99 | 0.019177 | 0.009015 | 0.273043 | 0.125499 |
| MmugDNA.8681.1.S1_at   | MmugDNA.8681.1 | 9.18  | 9.24  | 0.2  | 0.16 | -1.04 | 0.99359  | 0.947139 | 0.997754 | 0.97002  |
| MmugDNA.8681.1.S1_s_at | MmugDNA.8681.1 | 9.28  | 9.32  | 0.16 | 0.15 | -1.03 | 0.467833 | 0.631254 | 0.740845 | 0.782738 |
| MmugDNA.8682.1.S1_at   | MmugDNA.8682.1 | 6.15  | 6.44  | 0.05 | 0.19 | -1.22 | 0.072101 | 0.030048 | 0.416206 | 0.215155 |
| MmugDNA.8683.1.S1_at   | MmugDNA.8683.1 | 6.43  | 6.49  | 0.16 | 0.14 | -1.04 | 0.972996 | 0.461542 | 0.989561 | 0.673162 |
| MmugDNA.8684.1.S1_at   | MmugDNA.8684.1 | 8.79  | 9.6   | 0.25 | 0.63 | -1.76 | 0.197349 | 0.249228 | 0.560377 | 0.518313 |
| MmugDNA.8685.1.S1_at   | MmugDNA.8685.1 | 4.81  | 4.83  | 0.05 | 0.09 | -1.01 | 0.652223 | 0.401454 | 0.843581 | 0.631018 |
| MmugDNA.8686.1.S1_at   | MmugDNA.8686.1 | 3.78  | 3.91  | 0.18 | 0.12 | -1.09 | 0.417497 | 0.300098 | 0.710553 | 0.558262 |
| MmugDNA.8687.1.S1_at   | MmugDNA.8687.1 | 3.84  | 3.85  | 0.11 | 0.1  | -1.01 | 0.43155  | 0.664652 | 0.718592 | 0.803476 |
| MmugDNA.8688.1.S1_s_at | MmugDNA.8688.1 | 9.76  | 9.19  | 0.26 | 0.13 | 1.49  | 0.054411 | 0.008125 | 0.381851 | 0.11972  |
| MmugDNA.8689.1.S1_at   | MmugDNA.8689.1 | 6.07  | 5.67  | 0.26 | 0.32 | 1.32  | 0.538125 | 0.02787  | 0.780401 | 0.208453 |
| MmugDNA.869.1.S1_at    | MmugDNA.869.1  | 5.42  | 5.41  | 0.06 | 0.26 | 1.01  | 0.331091 | 0.415509 | 0.656117 | 0.64091  |
| MmugDNA.8690.1.S1_at   | MmugDNA.8690.1 | 2.98  | 3.04  | 0.46 | 0.03 | -1.04 | 0.522555 | 0.561913 | 0.772119 | 0.737659 |
| MmugDNA.8692.1.S1_at   | MmugDNA.8692.1 | 3.71  | 3.56  | 0.33 | 0.29 | 1.11  | 0.969083 | 0.788155 | 0.988244 | 0.877471 |
| MmugDNA.8693.1.S1_at   | MmugDNA.8693.1 | 2.85  | 2.85  | 0.14 | 0.07 | -1    | 0.647981 | 0.479793 | 0.841735 | 0.68541  |
| MmugDNA.8694.1.S1_at   | MmugDNA.8694.1 | 5.89  | 5.98  | 0.14 | 0.08 | -1.07 | 0.082295 | 0.077881 | 0.433666 | 0.324135 |
| MmugDNA.8696.1.S1_at   | MmugDNA.8696.1 | 10.02 | 10.69 | 0.41 | 0.55 | -1.6  | 0.108607 | 0.037414 | 0.470004 | 0.237777 |

|                         |                 |       |       |      |      |       |          |          |          |          |
|-------------------------|-----------------|-------|-------|------|------|-------|----------|----------|----------|----------|
| MmugDNA.8698.1.S1_at    | MmugDNA.8698.1  | 6.73  | 6.77  | 0.24 | 0.07 | -1.03 | 0.9749   | 0.814289 | 0.990211 | 0.892914 |
| MmugDNA.8699.1.S1_at    | MmugDNA.8699.1  | 5.2   | 5.87  | 0.13 | 0.1  | -1.6  | 0.001864 | 0.020718 | 0.155636 | 0.180645 |
| MmugDNA.870.1.S1_at     | MmugDNA.870.1   | 4.6   | 5.08  | 0.25 | 0.43 | -1.4  | 0.439957 | 0.365481 | 0.724018 | 0.605587 |
| MmugDNA.8701.1.S1_at    | MmugDNA.8701.1  | 8.87  | 7.21  | 0.03 | 0.69 | 3.16  | 0.010357 | 0.00696  | 0.229439 | 0.112719 |
| MmugDNA.34107.1.S1_s_at | MmugDNA.34107.1 | 12.5  | 12.52 | 0.12 | 0.37 | -1.02 | 0.948168 | 0.988238 | 0.980164 | 0.993443 |
| MmugDNA.8705.1.S1_at    | MmugDNA.8705.1  | 3.25  | 3.47  | 1.01 | 0.49 | -1.17 | 0.74689  | 0.815434 | 0.891556 | 0.893558 |
| MmugDNA.8706.1.S1_at    | MmugDNA.8706.1  | 6.51  | 6.95  | 0.13 | 0.35 | -1.36 | 0.128977 | 0.065301 | 0.494981 | 0.301249 |
| MmugDNA.8707.1.S1_at    | MmugDNA.8707.1  | 7.05  | 7.27  | 0.18 | 0    | -1.17 | 0.320643 | 0.259447 | 0.64953  | 0.526418 |
| MmugDNA.8708.1.S1_at    | MmugDNA.8708.1  | 9.28  | 9.24  | 0.16 | 0.41 | 1.02  | 0.516414 | 0.308724 | 0.768067 | 0.564619 |
| MmugDNA.8709.1.S1_s_at  | MmugDNA.8709.1  | 11.26 | 11.64 | 0.02 | 0.27 | -1.31 | 0.033911 | 0.016792 | 0.33052  | 0.164118 |
| MmugDNA.8710.1.S1_at    | MmugDNA.8710.1  | 6.47  | 6.27  | 0.03 | 0.1  | 1.15  | 0.044221 | 0.000362 | 0.358276 | 0.037273 |
| MmugDNA.14508.1.S1_s_at | MmugDNA.14508.1 | 12.75 | 12.78 | 0.17 | 0.09 | -1.02 | 0.557355 | 0.686745 | 0.792405 | 0.817214 |
| MmugDNA.8713.1.S1_at    | MmugDNA.8713.1  | 5.06  | 5.04  | 0.07 | 0.15 | 1.01  | 0.546989 | 0.0898   | 0.785876 | 0.34404  |
| MmugDNA.8715.1.S1_at    | MmugDNA.8715.1  | 12.65 | 12.17 | 0.06 | 0.25 | 1.4   | 0.016327 | 0.006974 | 0.263592 | 0.112743 |
| MmugDNA.8716.1.S1_at    | MmugDNA.8716.1  | 6.6   | 6.72  | 0.06 | 0.17 | -1.09 | 0.149003 | 0.168483 | 0.513987 | 0.445108 |
| MmugDNA.8717.1.S1_at    | MmugDNA.8717.1  | 4.52  | 4.5   | 0.12 | 0.15 | 1.01  | 0.370927 | 0.652476 | 0.681748 | 0.796793 |
| MmugDNA.8718.1.S1_at    | MmugDNA.8718.1  | 4.16  | 3.92  | 0.18 | 0.18 | 1.18  | 0.160189 | 0.06899  | 0.525137 | 0.309017 |
| MmugDNA.872.1.S1_at     | MmugDNA.872.1   | 4.36  | 3.71  | 0.46 | 0.25 | 1.57  | 0.164631 | 0.213654 | 0.52862  | 0.487441 |
| MmugDNA.8720.1.S1_at    | MmugDNA.8720.1  | 9.99  | 8.72  | 0.4  | 0.47 | 2.41  | 0.012736 | 0.004009 | 0.243533 | 0.089969 |
| MmugDNA.8724.1.S1_at    | MmugDNA.8724.1  | 12.7  | 12.49 | 0.09 | 0.05 | 1.15  | 0.021502 | 0.006727 | 0.282524 | 0.110963 |
| MmugDNA.8726.1.S1_at    | MmugDNA.8726.1  | 6.95  | 7.3   | 0.78 | 0.38 | -1.28 | 0.200549 | 0.094576 | 0.5634   | 0.351353 |
| MmugDNA.8727.1.S1_at    | MmugDNA.8727.1  | 12.03 | 12.04 | 0.13 | 0.22 | -1.01 | 0.784131 | 0.9446   | 0.909937 | 0.968621 |
| MmugDNA.8728.1.S1_at    | MmugDNA.8728.1  | 3.67  | 4.81  | 1.27 | 0.11 | -2.2  | 0.5968   | 0.58533  | 0.813202 | 0.752844 |
| MmugDNA.8729.1.S1_at    | MmugDNA.8729.1  | 4.91  | 5.42  | 0.16 | 0.42 | -1.43 | 0.1221   | 0.120819 | 0.487116 | 0.389657 |
| MmugDNA.873.1.S1_at     | MmugDNA.873.1   | 8.94  | 8.19  | 0.08 | 0.35 | 1.68  | 0.020795 | 0.010359 | 0.280587 | 0.133236 |
| MmugDNA.8730.1.S1_at    | MmugDNA.8730.1  | 4.44  | 4.45  | 0.15 | 0.13 | -1.01 | 0.543562 | 0.52266  | 0.783835 | 0.713295 |
| MmugDNA.8731.1.S1_at    | MmugDNA.8731.1  | 7.06  | 8.87  | 0.89 | 0.61 | -3.5  | 0.057566 | 0.028989 | 0.38863  | 0.212154 |
| MmugDNA.8733.1.S1_at    | MmugDNA.8733.1  | 3.04  | 3.04  | 0.07 | 0.1  | 1     | 0.458029 | 0.479739 | 0.735139 | 0.685409 |
| MmugDNA.8736.1.S1_at    | MmugDNA.8736.1  | 3.27  | 3.15  | 0.18 | 0.12 | 1.08  | 0.420656 | 0.337484 | 0.712622 | 0.584686 |
| MmugDNA.8737.1.S1_s_at  | MmugDNA.8737.1  | 5.39  | 6.28  | 0.81 | 0.28 | -1.86 | 0.514653 | 0.705902 | 0.76706  | 0.829555 |
| MmugDNA.8738.1.S1_at    | MmugDNA.8738.1  | 2.96  | 2.95  | 0.11 | 0    | 1.01  | 0.809329 | 0.810128 | 0.922228 | 0.890539 |
| MmugDNA.8739.1.S1_at    | MmugDNA.8739.1  | 6.74  | 6.35  | 0.27 | 0.38 | 1.31  | 0.106946 | 0.292461 | 0.467551 | 0.552545 |
| MmugDNA.874.1.S1_at     | MmugDNA.874.1   | 5.18  | 5.42  | 0.32 | 0.38 | -1.19 | 0.964339 | 0.914583 | 0.986203 | 0.951966 |
| MmugDNA.8740.1.S1_at    | MmugDNA.8740.1  | 4.28  | 3.77  | 0.37 | 0.09 | 1.42  | 0.091436 | 0.242999 | 0.447175 | 0.513356 |
| MmugDNA.8742.1.S1_at    | MmugDNA.8742.1  | 3.87  | 3.87  | 0.11 | 0.13 | -1    | 0.826728 | 0.139525 | 0.9296   | 0.412743 |
| MmugDNA.8744.1.S1_at    | MmugDNA.8744.1  | 4.31  | 4.5   | 0.08 | 0.06 | -1.14 | 0.017291 | 0.01475  | 0.267101 | 0.154493 |
| MmugDNA.8745.1.S1_at    | MmugDNA.8745.1  | 3.17  | 2.84  | 0.19 | 0.09 | 1.26  | 0.178554 | 0.298657 | 0.54288  | 0.557252 |
| MmugDNA.8746.1.S1_at    | MmugDNA.8746.1  | 8.63  | 8.42  | 0.16 | 0.24 | 1.16  | 0.269622 | 0.050308 | 0.614187 | 0.269573 |
| MmugDNA.8747.1.S1_at    | MmugDNA.8747.1  | 4.18  | 4.26  | 0.37 | 0.29 | -1.05 | 0.729116 | 0.746676 | 0.882395 | 0.852899 |
| MmugDNA.8748.1.S1_at    | MmugDNA.8748.1  | 9.86  | 10.08 | 0.27 | 1.18 | -1.16 | 0.534067 | 0.691633 | 0.778544 | 0.820648 |
| MmugDNA.8749.1.S1_at    | MmugDNA.8749.1  | 6.24  | 6.27  | 1.35 | 0.29 | -1.02 | 0.946272 | 0.98336  | 0.979359 | 0.990744 |

|                        |                |       |       |      |      |       |          |          |          |          |
|------------------------|----------------|-------|-------|------|------|-------|----------|----------|----------|----------|
| MmugDNA.8750.1.S1_at   | MmugDNA.8750.1 | 7.81  | 7.59  | 0.04 | 0.45 | 1.17  | 0.904088 | 0.310026 | 0.96166  | 0.565253 |
| MmugDNA.8751.1.S1_at   | MmugDNA.8751.1 | 7.22  | 7     | 0.23 | 0.28 | 1.16  | 0.65818  | 0.183403 | 0.84638  | 0.459553 |
| MmugDNA.8752.1.S1_at   | MmugDNA.8752.1 | 10.89 | 10.14 | 0.45 | 0.74 | 1.68  | 0.222392 | 0.239778 | 0.580951 | 0.510505 |
| MmugDNA.8753.1.S1_x_at | MmugDNA.8753.1 | 8.5   | 8.45  | 0.8  | 0.26 | 1.04  | 0.243837 | 0.268195 | 0.595594 | 0.533915 |
| MmugDNA.8754.1.S1_at   | MmugDNA.8754.1 | 4.54  | 4.57  | 0.05 | 0.17 | -1.02 | 0.560224 | 0.484593 | 0.794209 | 0.688576 |
| MmugDNA.8755.1.S1_at   | MmugDNA.8755.1 | 11.55 | 10.54 | 0.05 | 0.15 | 2.01  | 0.00029  | 0.000028 | 0.12562  | 0.02122  |
| MmugDNA.8757.1.S1_at   | MmugDNA.8757.1 | 6.15  | 6.19  | 0.33 | 0.27 | -1.03 | 0.294505 | 0.420231 | 0.631245 | 0.644059 |
| MmugDNA.8759.1.S1_at   | MmugDNA.8759.1 | 7.27  | 7.27  | 0.78 | 0.55 | -1    | 0.301876 | 0.466678 | 0.636716 | 0.676425 |
| MmugDNA.8760.1.S1_at   | MmugDNA.8760.1 | 5.45  | 5.79  | 0.08 | 0.29 | -1.26 | 0.127158 | 0.041522 | 0.493519 | 0.24862  |
| MmugDNA.8762.1.S1_at   | MmugDNA.8762.1 | 3.21  | 3.16  | 0.05 | 0.18 | 1.04  | 0.61818  | 0.295883 | 0.825111 | 0.555241 |
| MmugDNA.8763.1.S1_at   | MmugDNA.8763.1 | 5.39  | 5.49  | 0.2  | 0.2  | -1.07 | 0.893255 | 0.47298  | 0.957557 | 0.680272 |
| MmugDNA.8763.1.S1_s_at | MmugDNA.8763.1 | 5.44  | 5.44  | 0.23 | 0.18 | -1    | 0.511182 | 0.739247 | 0.765282 | 0.848883 |
| MmugDNA.8764.1.S1_at   | MmugDNA.8764.1 | 3.47  | 3.4   | 0.13 | 0.2  | 1.05  | 0.714074 | 0.651099 | 0.874661 | 0.796031 |
| MmugDNA.8766.1.S1_at   | MmugDNA.8766.1 | 5.78  | 5.62  | 0.77 | 0.4  | 1.12  | 0.290743 | 0.224902 | 0.628456 | 0.497657 |
| MmugDNA.8768.1.S1_at   | MmugDNA.8768.1 | 11.25 | 11.43 | 0.04 | 0.56 | -1.13 | 0.670056 | 0.818656 | 0.852318 | 0.895512 |
| MmugDNA.8769.1.S1_at   | MmugDNA.8769.1 | 9.12  | 8.68  | 0.22 | 0.4  | 1.35  | 0.766483 | 0.932389 | 0.901843 | 0.961695 |
| MmugDNA.8770.1.S1_at   | MmugDNA.8770.1 | 10.48 | 10.64 | 0.12 | 0.23 | -1.12 | 0.509111 | 0.711473 | 0.764172 | 0.832695 |
| MmugDNA.8771.1.S1_at   | MmugDNA.8771.1 | 8.65  | 7.41  | 0.27 | 0.73 | 2.36  | 0.04622  | 0.026442 | 0.362622 | 0.203765 |
| MmugDNA.8773.1.S1_at   | MmugDNA.8773.1 | 7.65  | 7.44  | 1.17 | 1.45 | 1.16  | 0.832389 | 0.595466 | 0.932116 | 0.759091 |
| MmugDNA.8774.1.S1_at   | MmugDNA.8774.1 | 3.7   | 3.2   | 0.38 | 0.18 | 1.42  | 0.313334 | 0.418832 | 0.645086 | 0.643118 |
| MmugDNA.8775.1.S1_at   | MmugDNA.8775.1 | 7.42  | 7.68  | 0.32 | 1.35 | -1.2  | 0.265003 | 0.363956 | 0.61074  | 0.604326 |
| MmugDNA.8776.1.S1_at   | MmugDNA.8776.1 | 10.48 | 10.12 | 0.46 | 0.12 | 1.29  | 0.69873  | 0.553312 | 0.866324 | 0.73248  |
| MmugDNA.8777.1.S1_at   | MmugDNA.8777.1 | 7.37  | 8.16  | 0.33 | 0.2  | -1.72 | 0.056877 | 0.050883 | 0.387323 | 0.270882 |
| MmugDNA.8779.1.S1_at   | MmugDNA.8779.1 | 7.56  | 8.61  | 0.59 | 1.16 | -2.07 | 0.265179 | 0.350296 | 0.610859 | 0.594034 |
| MmugDNA.878.1.S1_x_at  | MmugDNA.878.1  | 4.06  | 4.07  | 0.27 | 0.16 | -1.01 | 0.449745 | 0.253288 | 0.730493 | 0.521662 |
| MmugDNA.8780.1.S1_at   | MmugDNA.8780.1 | 10.71 | 10.85 | 0.21 | 0.39 | -1.1  | 0.63066  | 0.774629 | 0.832248 | 0.868797 |
| MmugDNA.8782.1.S1_at   | MmugDNA.8782.1 | 4.99  | 4.99  | 0.21 | 0.32 | -1    | 0.865032 | 0.680835 | 0.945844 | 0.813597 |
| MmugDNA.8783.1.S1_at   | MmugDNA.8783.1 | 6.04  | 5.68  | 1.12 | 0.13 | 1.28  | 0.533804 | 0.738876 | 0.778434 | 0.848647 |
| MmugDNA.8784.1.S1_at   | MmugDNA.8784.1 | 3.97  | 3.97  | 0.04 | 0.02 | -1    | 0.224156 | 0.750529 | 0.582619 | 0.854881 |
| MmugDNA.8785.1.S1_at   | MmugDNA.8785.1 | 4.29  | 5.61  | 0.26 | 0.7  | -2.49 | 0.04888  | 0.032154 | 0.369994 | 0.222021 |
| MmugDNA.8786.1.S1_at   | MmugDNA.8786.1 | 7.24  | 6.96  | 0.47 | 0.19 | 1.22  | 0.404875 | 0.521735 | 0.703075 | 0.712623 |
| MmugDNA.8787.1.S1_at   | MmugDNA.8787.1 | 10.21 | 10.53 | 0.04 | 0.14 | -1.24 | 0.009216 | 0.013687 | 0.222983 | 0.149772 |
| MmugDNA.8788.1.S1_at   | MmugDNA.8788.1 | 5.45  | 5.48  | 1.29 | 0.01 | -1.02 | 0.394472 | 0.458192 | 0.695821 | 0.671077 |
| MmugDNA.8792.1.S1_at   | MmugDNA.8792.1 | 8.38  | 7.5   | 0.44 | 0.29 | 1.84  | 0.041765 | 0.029328 | 0.352614 | 0.213228 |
| MmugDNA.8795.1.S1_at   | MmugDNA.8795.1 | 6.03  | 7.94  | 0.99 | 1.09 | -3.75 | 0.089174 | 0.018267 | 0.444775 | 0.169975 |
| MmugDNA.8796.1.S1_at   | MmugDNA.8796.1 | 6.68  | 6.41  | 0.21 | 0.06 | 1.21  | 0.054941 | 0.018496 | 0.382788 | 0.171093 |
| MmugDNA.8798.1.S1_at   | MmugDNA.8798.1 | 3.06  | 3.27  | 0.1  | 0.25 | -1.15 | 0.140139 | 0.170416 | 0.508065 | 0.447103 |
| MmugDNA.8799.1.S1_at   | MmugDNA.8799.1 | 5.54  | 5.7   | 0.33 | 0.11 | -1.12 | 0.371657 | 0.216337 | 0.682352 | 0.489898 |
| MmugDNA.88.1.S1_at     | MmugDNA.88.1   | 6.47  | 6.52  | 0.85 | 0.51 | -1.04 | 0.78095  | 0.909864 | 0.908679 | 0.949148 |
| MmugDNA.880.1.S1_at    | MmugDNA.880.1  | 7.61  | 7.49  | 0.89 | 0.47 | 1.08  | 0.821972 | 0.853485 | 0.927484 | 0.916634 |
| MmugDNA.8800.1.S1_at   | MmugDNA.8800.1 | 4.1   | 4.02  | 0.14 | 0.06 | 1.06  | 0.247938 | 0.21641  | 0.599052 | 0.489999 |

|                      |                |       |       |      |      |       |          |          |          |          |
|----------------------|----------------|-------|-------|------|------|-------|----------|----------|----------|----------|
| MmugDNA.8801.1.S1_at | MmugDNA.8801.1 | 4     | 3.86  | 0.5  | 0.16 | 1.11  | 0.46387  | 0.392865 | 0.738998 | 0.625868 |
| MmugDNA.8802.1.S1_at | MmugDNA.8802.1 | 7.19  | 7.21  | 0.23 | 0.38 | -1.02 | 0.725627 | 0.742779 | 0.880409 | 0.851023 |
| MmugDNA.8803.1.S1_at | MmugDNA.8803.1 | 5.17  | 5.21  | 0.03 | 0.07 | -1.02 | 0.152815 | 0.422095 | 0.517325 | 0.645462 |
| MmugDNA.8805.1.S1_at | MmugDNA.8805.1 | 5.99  | 6.31  | 0.06 | 0.17 | -1.25 | 0.018713 | 0.006357 | 0.271334 | 0.108372 |
| MmugDNA.8806.1.S1_at | MmugDNA.8806.1 | 11.9  | 11.43 | 0.03 | 0.12 | 1.38  | 0.003093 | 0.000675 | 0.172102 | 0.04413  |
| MmugDNA.8807.1.S1_at | MmugDNA.8807.1 | 7.03  | 6.83  | 0.23 | 0.14 | 1.15  | 0.388601 | 0.54812  | 0.692653 | 0.728892 |
| MmugDNA.8808.1.S1_at | MmugDNA.8808.1 | 5.38  | 5.44  | 0.15 | 0.08 | -1.04 | 0.297417 | 0.395688 | 0.633201 | 0.627623 |
| MmugDNA.8809.1.S1_at | MmugDNA.8809.1 | 10.22 | 10.38 | 0.16 | 0.18 | -1.11 | 0.780711 | 0.134334 | 0.9086   | 0.406603 |
| MmugDNA.881.1.S1_at  | MmugDNA.881.1  | 10.96 | 9.59  | 0.41 | 0.48 | 2.59  | 0.038301 | 0.024942 | 0.34385  | 0.197799 |
| MmugDNA.8810.1.S1_at | MmugDNA.8810.1 | 6.57  | 6.64  | 0.22 | 0.62 | -1.05 | 0.848955 | 0.711881 | 0.939266 | 0.832951 |
| MmugDNA.8813.1.S1_at | MmugDNA.8813.1 | 3.64  | 3.91  | 0.09 | 0.33 | -1.21 | 0.168363 | 0.095108 | 0.532644 | 0.352151 |
| MmugDNA.8814.1.S1_at | MmugDNA.8814.1 | 11.24 | 10.68 | 0.17 | 0.73 | 1.47  | 0.127398 | 0.104601 | 0.493834 | 0.365891 |
| MmugDNA.8815.1.S1_at | MmugDNA.8815.1 | 6     | 6.25  | 0.03 | 0.15 | -1.19 | 0.111765 | 0.05947  | 0.474019 | 0.290548 |
| MmugDNA.8816.1.S1_at | MmugDNA.8816.1 | 3.52  | 3.61  | 0.06 | 0.01 | -1.06 | 0.071829 | 0.131075 | 0.415886 | 0.403084 |
| MmugDNA.8818.1.S1_at | MmugDNA.8818.1 | 5.2   | 5.41  | 0.25 | 0.36 | -1.16 | 0.272908 | 0.312367 | 0.616391 | 0.567115 |
| MmugDNA.882.1.S1_at  | MmugDNA.882.1  | 5.24  | 4.99  | 0.3  | 0.36 | 1.18  | 0.77538  | 0.359978 | 0.905707 | 0.601195 |
| MmugDNA.8821.1.S1_at | MmugDNA.8821.1 | 5.49  | 5.49  | 0.17 | 0.88 | 1     | 0.383907 | 0.366315 | 0.689646 | 0.606072 |
| MmugDNA.8822.1.S1_at | MmugDNA.8822.1 | 6.01  | 7.21  | 0.38 | 0.92 | -2.3  | 0.10934  | 0.095463 | 0.470811 | 0.352482 |
| MmugDNA.8825.1.S1_at | MmugDNA.8825.1 | 9.24  | 9.79  | 0.13 | 0.24 | -1.47 | 0.016878 | 0.013074 | 0.266107 | 0.147079 |
| MmugDNA.8828.1.S1_at | MmugDNA.8828.1 | 6.52  | 5.13  | 1.12 | 0.51 | 2.62  | 0.315571 | 0.41553  | 0.646683 | 0.640923 |
| MmugDNA.8829.1.S1_at | MmugDNA.8829.1 | 11.02 | 10.95 | 0.2  | 0.3  | 1.05  | 0.833148 | 0.35923  | 0.932275 | 0.600537 |
| MmugDNA.883.1.S1_at  | MmugDNA.883.1  | 3.59  | 3.55  | 0.25 | 0.1  | 1.03  | 0.504991 | 0.699091 | 0.761548 | 0.825164 |
| MmugDNA.8830.1.S1_at | MmugDNA.8830.1 | 5.1   | 5.09  | 0.14 | 0.17 | 1.01  | 0.464346 | 0.174926 | 0.739187 | 0.451595 |
| MmugDNA.8831.1.S1_at | MmugDNA.8831.1 | 6.24  | 6.03  | 0.87 | 0    | 1.16  | 0.676911 | 0.561434 | 0.85524  | 0.737397 |
| MmugDNA.8833.1.S1_at | MmugDNA.8833.1 | 12.38 | 12.46 | 0.07 | 0.19 | -1.06 | 0.417318 | 0.571311 | 0.710494 | 0.743642 |
| MmugDNA.8834.1.S1_at | MmugDNA.8834.1 | 7.09  | 8.64  | 0.75 | 0.72 | -2.94 | 0.128195 | 0.152982 | 0.494307 | 0.427792 |
| MmugDNA.8835.1.S1_at | MmugDNA.8835.1 | 2.98  | 2.86  | 0.1  | 0.19 | 1.09  | 0.672638 | 0.829822 | 0.853193 | 0.902225 |
| MmugDNA.8836.1.S1_at | MmugDNA.8836.1 | 9.67  | 8.22  | 0.4  | 0.16 | 2.74  | 0.003686 | 0.001169 | 0.179515 | 0.053679 |
| MmugDNA.8837.1.S1_at | MmugDNA.8837.1 | 7.87  | 8.04  | 0.15 | 0.28 | -1.13 | 0.148457 | 0.301884 | 0.513907 | 0.559811 |
| MmugDNA.8838.1.S1_at | MmugDNA.8838.1 | 4.61  | 4.72  | 0.18 | 0.03 | -1.07 | 0.654647 | 0.354744 | 0.844665 | 0.597422 |
| MmugDNA.8839.1.S1_at | MmugDNA.8839.1 | 4.87  | 4.87  | 0.1  | 0.17 | -1    | 0.425753 | 0.530744 | 0.715294 | 0.718104 |
| MmugDNA.884.1.S1_at  | MmugDNA.884.1  | 3.53  | 3.64  | 0.04 | 0.16 | -1.09 | 0.167765 | 0.227357 | 0.532027 | 0.499659 |
| MmugDNA.8840.1.S1_at | MmugDNA.8840.1 | 2.95  | 2.99  | 0.03 | 0.17 | -1.03 | 0.747239 | 0.899297 | 0.891772 | 0.942757 |
| MmugDNA.8841.1.S1_at | MmugDNA.8841.1 | 3.46  | 3.53  | 0.06 | 0.13 | -1.05 | 0.286114 | 0.529774 | 0.625392 | 0.717498 |
| MmugDNA.8842.1.S1_at | MmugDNA.8842.1 | 4.23  | 4.13  | 0.18 | 0.01 | 1.07  | 0.142338 | 0.048824 | 0.509631 | 0.265858 |
| MmugDNA.8843.1.S1_at | MmugDNA.8843.1 | 3.32  | 3.16  | 0.28 | 0.38 | 1.11  | 0.923718 | 0.872077 | 0.970397 | 0.927221 |
| MmugDNA.8844.1.S1_at | MmugDNA.8844.1 | 10.46 | 9.98  | 0.25 | 0.49 | 1.4   | 0.072251 | 0.058616 | 0.416651 | 0.288819 |
| MmugDNA.8846.1.S1_at | MmugDNA.8846.1 | 4.47  | 4.3   | 0.14 | 0.08 | 1.13  | 0.290719 | 0.018925 | 0.628456 | 0.173058 |
| MmugDNA.8847.1.S1_at | MmugDNA.8847.1 | 5.85  | 6.88  | 0.37 | 0.72 | -2.05 | 0.117198 | 0.103808 | 0.481179 | 0.364519 |
| MmugDNA.8848.1.S1_at | MmugDNA.8848.1 | 6.48  | 8.44  | 1.05 | 1.86 | -3.89 | 0.361698 | 0.20797  | 0.6754   | 0.482049 |
| MmugDNA.8849.1.S1_at | MmugDNA.8849.1 | 8.24  | 8.25  | 0.07 | 0.09 | -1    | 0.523663 | 0.816024 | 0.772676 | 0.893871 |

|                        |                |       |       |      |      |       |          |          |          |          |
|------------------------|----------------|-------|-------|------|------|-------|----------|----------|----------|----------|
| MmugDNA.885.1.S1_at    | MmugDNA.885.1  | 3.65  | 3.61  | 0.01 | 0.3  | 1.03  | 0.783091 | 0.84353  | 0.909454 | 0.910896 |
| MmugDNA.8852.1.S1_at   | MmugDNA.8852.1 | 9.57  | 8.3   | 0.06 | 0.56 | 2.42  | 0.008827 | 0.006254 | 0.221301 | 0.10728  |
| MmugDNA.8853.1.S1_at   | MmugDNA.8853.1 | 5.37  | 5.43  | 0.05 | 0.07 | -1.04 | 0.481642 | 0.001889 | 0.749268 | 0.065004 |
| MmugDNA.8854.1.S1_at   | MmugDNA.8854.1 | 7.27  | 6.21  | 0.24 | 0.52 | 2.08  | 0.025818 | 0.023542 | 0.300702 | 0.192231 |
| MmugDNA.8856.1.S1_at   | MmugDNA.8856.1 | 4.67  | 5.64  | 0.2  | 0.42 | -1.96 | 0.019762 | 0.011093 | 0.275549 | 0.137051 |
| MmugDNA.8857.1.S1_at   | MmugDNA.8857.1 | 3.92  | 3.99  | 0.08 | 0.27 | -1.05 | 0.241082 | 0.393797 | 0.593741 | 0.626565 |
| MmugDNA.8858.1.S1_at   | MmugDNA.8858.1 | 9.13  | 8.83  | 0.15 | 0.95 | 1.23  | 0.270294 | 0.188596 | 0.614663 | 0.464557 |
| MmugDNA.8859.1.S1_at   | MmugDNA.8859.1 | 3.33  | 3.27  | 0.16 | 0.08 | 1.05  | 0.119533 | 0.219335 | 0.484145 | 0.493095 |
| MmugDNA.886.1.S1_at    | MmugDNA.886.1  | 7.92  | 6.13  | 1    | 0.56 | 3.46  | 0.075031 | 0.11037  | 0.421745 | 0.374541 |
| MmugDNA.8860.1.S1_at   | MmugDNA.8860.1 | 6.86  | 6.86  | 0.19 | 0.16 | -1    | 0.588918 | 0.223838 | 0.809161 | 0.496802 |
| MmugDNA.8861.1.S1_at   | MmugDNA.8861.1 | 13.15 | 13.23 | 0.16 | 0.17 | -1.06 | 0.752964 | 0.077712 | 0.894568 | 0.323851 |
| MmugDNA.8862.1.S1_at   | MmugDNA.8862.1 | 6.43  | 7.05  | 0.69 | 0.47 | -1.55 | 0.666773 | 0.636221 | 0.850609 | 0.785986 |
| MmugDNA.8864.1.S1_at   | MmugDNA.8864.1 | 6.26  | 6.37  | 0.14 | 0.1  | -1.08 | 0.212916 | 0.053068 | 0.57334  | 0.27607  |
| MmugDNA.8865.1.S1_at   | MmugDNA.8865.1 | 7.39  | 7.5   | 0.74 | 0.94 | -1.08 | 0.652699 | 0.70266  | 0.843828 | 0.827658 |
| MmugDNA.8867.1.S1_at   | MmugDNA.8867.1 | 5.13  | 6.55  | 0.41 | 0.4  | -2.67 | 0.016346 | 0.009128 | 0.263616 | 0.125994 |
| MmugDNA.8869.1.S1_at   | MmugDNA.8869.1 | 6.68  | 6.84  | 0.06 | 0.03 | -1.11 | 0.037581 | 0.060105 | 0.341887 | 0.291829 |
| MmugDNA.887.1.S1_at    | MmugDNA.887.1  | 11.87 | 11.51 | 0.11 | 0.17 | 1.28  | 0.040994 | 0.069153 | 0.35051  | 0.30917  |
| MmugDNA.8871.1.S1_at   | MmugDNA.8871.1 | 6.6   | 6.71  | 0.2  | 0.54 | -1.07 | 0.54201  | 0.720207 | 0.783072 | 0.838202 |
| MmugDNA.8873.1.S1_s_at | MmugDNA.8873.1 | 14.42 | 14.4  | 0.04 | 0.01 | 1.02  | 0.410642 | 0.290408 | 0.706544 | 0.551169 |
| MmugDNA.8874.1.S1_at   | MmugDNA.8874.1 | 6.61  | 6.83  | 0.18 | 0.05 | -1.16 | 0.039347 | 0.035551 | 0.346971 | 0.232812 |
| MmugDNA.8875.1.S1_at   | MmugDNA.8875.1 | 6.12  | 6.5   | 0.13 | 0.26 | -1.3  | 0.221564 | 0.249724 | 0.580303 | 0.518832 |
| MmugDNA.8876.1.S1_at   | MmugDNA.8876.1 | 5.91  | 6.26  | 0.14 | 0.25 | -1.27 | 0.078864 | 0.095076 | 0.428609 | 0.352124 |
| MmugDNA.8877.1.S1_at   | MmugDNA.8877.1 | 11.72 | 10.85 | 0.17 | 1.5  | 1.82  | 0.119946 | 0.132606 | 0.48448  | 0.404544 |
| MmugDNA.8878.1.S1_at   | MmugDNA.8878.1 | 5.58  | 5.69  | 0.02 | 0.22 | -1.08 | 0.22774  | 0.315309 | 0.585207 | 0.568939 |
| MmugDNA.888.1.S1_at    | MmugDNA.888.1  | 8.02  | 7.17  | 0.57 | 0.16 | 1.81  | 0.065031 | 0.072999 | 0.403791 | 0.31601  |
| MmugDNA.8880.1.S1_at   | MmugDNA.8880.1 | 5.64  | 5.44  | 0.43 | 0.48 | 1.15  | 0.317304 | 0.357612 | 0.64789  | 0.599228 |
| MmugDNA.8881.1.S1_at   | MmugDNA.8881.1 | 3.37  | 3.25  | 0.03 | 0.14 | 1.08  | 0.654225 | 0.413709 | 0.844551 | 0.639742 |
| MmugDNA.8884.1.S1_at   | MmugDNA.8884.1 | 3.15  | 3.15  | 0    | 0.03 | 1     | 0.373901 | 0.939904 | 0.683245 | 0.96581  |
| MmugDNA.8885.1.S1_at   | MmugDNA.8885.1 | 12.53 | 12.28 | 0.14 | 0.28 | 1.19  | 0.291478 | 0.367558 | 0.628798 | 0.607217 |
| MmugDNA.8889.1.S1_at   | MmugDNA.8889.1 | 3.92  | 3.81  | 0.31 | 0.08 | 1.08  | 0.59396  | 0.558283 | 0.811676 | 0.735506 |
| MmugDNA.889.1.S1_at    | MmugDNA.889.1  | 4.57  | 5.06  | 0.18 | 0.28 | -1.41 | 0.082772 | 0.057257 | 0.434442 | 0.285098 |
| MmugDNA.8890.1.S1_at   | MmugDNA.8890.1 | 7.01  | 7.04  | 0.03 | 0.18 | -1.02 | 0.50545  | 0.189217 | 0.761643 | 0.464997 |
| MmugDNA.8891.1.S1_at   | MmugDNA.8891.1 | 3.71  | 3.74  | 0.32 | 0.3  | -1.02 | 0.8094   | 0.893596 | 0.922228 | 0.939277 |
| MmugDNA.8892.1.S1_at   | MmugDNA.8892.1 | 4.46  | 4.38  | 0.48 | 0.14 | 1.06  | 0.725095 | 0.85876  | 0.880046 | 0.919572 |
| MmugDNA.8893.1.S1_at   | MmugDNA.8893.1 | 9.47  | 7.58  | 0.59 | 0.47 | 3.7   | 0.010279 | 0.00366  | 0.228514 | 0.086526 |
| MmugDNA.8894.1.S1_at   | MmugDNA.8894.1 | 8.26  | 8.04  | 0.13 | 0.43 | 1.16  | 0.543468 | 0.673412 | 0.783803 | 0.809182 |
| MmugDNA.8897.1.S1_at   | MmugDNA.8897.1 | 4.59  | 5.22  | 0.62 | 0.35 | -1.54 | 0.870848 | 0.96671  | 0.948399 | 0.981489 |
| MmugDNA.8898.1.S1_at   | MmugDNA.8898.1 | 8.62  | 8.8   | 0.08 | 0.12 | -1.14 | 0.109303 | 0.040979 | 0.470811 | 0.247202 |
| MmugDNA.8899.1.S1_at   | MmugDNA.8899.1 | 6.75  | 6.51  | 0.1  | 0.2  | 1.18  | 0.311493 | 0.341938 | 0.643497 | 0.588008 |
| MmugDNA.89.1.S1_at     | MmugDNA.89.1   | 9.84  | 9.81  | 0.17 | 0.54 | 1.02  | 0.304863 | 0.264265 | 0.638856 | 0.530329 |
| MmugDNA.890.1.S1_at    | MmugDNA.890.1  | 9.42  | 9.67  | 0.1  | 0.22 | -1.19 | 0.267143 | 0.31148  | 0.612309 | 0.566468 |

|                        |                |       |       |      |      |       |          |          |          |          |
|------------------------|----------------|-------|-------|------|------|-------|----------|----------|----------|----------|
| MmugDNA.8900.1.S1_at   | MmugDNA.8900.1 | 5.95  | 6.74  | 1.25 | 0.62 | -1.73 | 0.931378 | 0.868891 | 0.97346  | 0.925527 |
| MmugDNA.8901.1.S1_at   | MmugDNA.8901.1 | 6.11  | 6.29  | 0.21 | 0.2  | -1.13 | 0.724869 | 0.872627 | 0.879893 | 0.927581 |
| MmugDNA.8901.1.S1_x_at | MmugDNA.8901.1 | 6.76  | 6.6   | 0.11 | 0.08 | 1.12  | 0.14916  | 0.208288 | 0.514001 | 0.48217  |
| MmugDNA.8902.1.S1_at   | MmugDNA.8902.1 | 9.81  | 10.48 | 0.2  | 0.75 | -1.59 | 0.154974 | 0.198104 | 0.51961  | 0.473108 |
| MmugDNA.8902.1.S1_s_at | MmugDNA.8902.1 | 9.37  | 10.09 | 0.04 | 0.77 | -1.65 | 0.164762 | 0.201199 | 0.528656 | 0.475646 |
| MmugDNA.8904.1.S1_at   | MmugDNA.8904.1 | 5.02  | 5.02  | 0.01 | 0.09 | -1    | 0.282526 | 0.2761   | 0.622911 | 0.540133 |
| MmugDNA.8905.1.S1_at   | MmugDNA.8905.1 | 8.2   | 8.62  | 0.42 | 0.91 | -1.34 | 0.586786 | 0.597998 | 0.808287 | 0.760536 |
| MmugDNA.8907.1.S1_at   | MmugDNA.8907.1 | 5.11  | 5.16  | 0.23 | 0.22 | -1.04 | 0.694772 | 0.587499 | 0.864642 | 0.754278 |
| MmugDNA.8908.1.S1_at   | MmugDNA.8908.1 | 4.28  | 4.45  | 0.34 | 0.1  | -1.13 | 0.607276 | 0.808274 | 0.819305 | 0.889645 |
| MmugDNA.8909.1.S1_at   | MmugDNA.8909.1 | 11.77 | 11.22 | 0.1  | 0.16 | 1.46  | 0.008888 | 0.002984 | 0.221598 | 0.079958 |
| MmugDNA.8910.1.S1_at   | MmugDNA.8910.1 | 5.08  | 5.07  | 0.15 | 0.09 | 1.01  | 0.695152 | 0.090249 | 0.864809 | 0.344664 |
| MmugDNA.8911.1.S1_at   | MmugDNA.8911.1 | 5.68  | 5.53  | 0.51 | 0.26 | 1.11  | 0.616707 | 0.332075 | 0.824287 | 0.580584 |
| MmugDNA.8912.1.S1_at   | MmugDNA.8912.1 | 3.6   | 3.59  | 0.04 | 0.14 | 1.01  | 0.49205  | 0.245999 | 0.755423 | 0.515713 |
| MmugDNA.8914.1.S1_at   | MmugDNA.8914.1 | 10.8  | 10.56 | 0.11 | 0.23 | 1.18  | 0.176492 | 0.002796 | 0.540136 | 0.077966 |
| MmugDNA.8915.1.S1_at   | MmugDNA.8915.1 | 7.46  | 6.78  | 0.6  | 0.17 | 1.6   | 0.122774 | 0.037272 | 0.488115 | 0.237508 |
| MmugDNA.8916.1.S1_at   | MmugDNA.8916.1 | 11.52 | 11.31 | 0.09 | 0.27 | 1.16  | 0.296644 | 0.049681 | 0.632686 | 0.267892 |
| MmugDNA.8917.1.S1_at   | MmugDNA.8917.1 | 4.69  | 4.24  | 0.03 | 0.2  | 1.37  | 0.017074 | 0.005843 | 0.266719 | 0.10467  |
| MmugDNA.8919.1.S1_at   | MmugDNA.8919.1 | 7.8   | 7.04  | 0.68 | 0.48 | 1.7   | 0.334639 | 0.085873 | 0.658449 | 0.338025 |
| MmugDNA.892.1.S1_at    | MmugDNA.892.1  | 7.93  | 6.21  | 0.45 | 0.12 | 3.28  | 0.004293 | 0.002444 | 0.18216  | 0.073201 |
| MmugDNA.8920.1.S1_at   | MmugDNA.8920.1 | 3.97  | 3.97  | 0.34 | 0.17 | 1     | 0.425362 | 0.397968 | 0.715047 | 0.629138 |
| MmugDNA.8922.1.S1_at   | MmugDNA.8922.1 | 6.69  | 7.38  | 1.18 | 0.31 | -1.61 | 0.929951 | 0.783514 | 0.972944 | 0.874643 |
| MmugDNA.8923.1.S1_at   | MmugDNA.8923.1 | 4.14  | 4.05  | 0.2  | 0.03 | 1.06  | 0.774987 | 0.707501 | 0.905462 | 0.830363 |
| MmugDNA.8924.1.S1_at   | MmugDNA.8924.1 | 4.52  | 4.52  | 0.07 | 0.09 | -1    | 0.838596 | 0.696042 | 0.934745 | 0.823404 |
| MmugDNA.8925.1.S1_at   | MmugDNA.8925.1 | 9.44  | 8.91  | 1.24 | 0.63 | 1.44  | 0.349194 | 0.4983   | 0.667502 | 0.697411 |
| MmugDNA.8928.1.S1_at   | MmugDNA.8928.1 | 4.88  | 5.28  | 0.38 | 0.54 | -1.32 | 0.359175 | 0.461895 | 0.673869 | 0.673417 |
| MmugDNA.8929.1.S1_at   | MmugDNA.8929.1 | 6.95  | 6.95  | 0.21 | 0.28 | 1     | 0.731752 | 0.786194 | 0.884008 | 0.876192 |
| MmugDNA.893.1.S1_at    | MmugDNA.893.1  | 5.77  | 5.87  | 0.1  | 0.31 | -1.07 | 0.514805 | 0.246916 | 0.767192 | 0.516238 |
| MmugDNA.8930.1.S1_at   | MmugDNA.8930.1 | 7.42  | 7.27  | 0.22 | 0.14 | 1.11  | 0.345186 | 0.28733  | 0.66508  | 0.548603 |
| MmugDNA.8931.1.S1_at   | MmugDNA.8931.1 | 4.75  | 4.08  | 0.26 | 0.19 | 1.6   | 0.038915 | 0.030729 | 0.345909 | 0.217179 |
| MmugDNA.8932.1.S1_at   | MmugDNA.8932.1 | 3.19  | 3.02  | 0.1  | 0.07 | 1.12  | 0.03488  | 0.043066 | 0.333988 | 0.252157 |
| MmugDNA.8934.1.S1_at   | MmugDNA.8934.1 | 4.63  | 3.83  | 0.36 | 0.07 | 1.74  | 0.02893  | 0.03674  | 0.312442 | 0.236285 |
| MmugDNA.8937.1.S1_at   | MmugDNA.8937.1 | 5.68  | 5.7   | 0.1  | 0.18 | -1.02 | 0.903823 | 0.615637 | 0.961578 | 0.772121 |
| MmugDNA.8938.1.S1_at   | MmugDNA.8938.1 | 3.72  | 3.57  | 0.06 | 0.07 | 1.1   | 0.042223 | 0.348588 | 0.354539 | 0.59263  |
| MmugDNA.8939.1.S1_at   | MmugDNA.8939.1 | 7.54  | 7.55  | 0.27 | 0.13 | -1.01 | 0.35814  | 0.30473  | 0.673071 | 0.561921 |
| MmugDNA.894.1.S1_at    | MmugDNA.894.1  | 4.79  | 5.65  | 0.63 | 0.47 | -1.81 | 0.055157 | 0.014008 | 0.383547 | 0.151595 |
| MmugDNA.8940.1.S1_at   | MmugDNA.8940.1 | 6.57  | 8.25  | 0.63 | 1.24 | -3.21 | 0.377108 | 0.176097 | 0.685542 | 0.452581 |
| MmugDNA.8941.1.S1_at   | MmugDNA.8941.1 | 5.31  | 4.79  | 0.41 | 0.2  | 1.43  | 0.306911 | 0.061098 | 0.639788 | 0.293958 |
| MmugDNA.8942.1.S1_at   | MmugDNA.8942.1 | 3.56  | 3.55  | 0.12 | 0.11 | 1.01  | 0.274159 | 0.391916 | 0.617262 | 0.625419 |
| MmugDNA.8943.1.S1_at   | MmugDNA.8943.1 | 10.16 | 9.79  | 0.06 | 0.32 | 1.29  | 0.15305  | 0.014568 | 0.517474 | 0.153907 |
| MmugDNA.8944.1.S1_at   | MmugDNA.8944.1 | 5.5   | 5.55  | 0.27 | 0.08 | -1.04 | 0.443529 | 0.425938 | 0.726188 | 0.648127 |
| MmugDNA.8945.1.S1_at   | MmugDNA.8945.1 | 4.2   | 4.05  | 0.24 | 0.15 | 1.11  | 0.469153 | 0.474385 | 0.74148  | 0.681421 |



|                        |                |       |       |      |      |       |          |          |          |          |
|------------------------|----------------|-------|-------|------|------|-------|----------|----------|----------|----------|
| MmugDNA.8946.1.S1_at   | MmugDNA.8946.1 | 10.93 | 11.35 | 0.05 | 0.06 | -1.34 | 0.000621 | 0.000229 | 0.136818 | 0.032385 |
| MmugDNA.8947.1.S1_at   | MmugDNA.8947.1 | 5.77  | 6.86  | 0.36 | 1.2  | -2.13 | 0.185447 | 0.160769 | 0.548882 | 0.436897 |
| MmugDNA.8948.1.S1_at   | MmugDNA.8948.1 | 3.24  | 3.17  | 0.48 | 0.15 | 1.05  | 0.408942 | 0.425198 | 0.705687 | 0.647647 |
| MmugDNA.8949.1.S1_at   | MmugDNA.8949.1 | 6.89  | 7.23  | 0.11 | 0.11 | -1.27 | 0.06014  | 0.024051 | 0.393081 | 0.194384 |
| MmugDNA.8949.1.S1_s_at | MmugDNA.8949.1 | 6.4   | 6.19  | 0.49 | 0.12 | 1.16  | 0.778252 | 0.639758 | 0.907397 | 0.788438 |
| MmugDNA.895.1.S1_s_at  | MmugDNA.895.1  | 12.38 | 12.16 | 0.15 | 0.11 | 1.16  | 0.107509 | 0.114639 | 0.468045 | 0.381156 |
| MmugDNA.8951.1.S1_at   | MmugDNA.8951.1 | 8.33  | 7.71  | 0.34 | 0.45 | 1.53  | 0.168621 | 0.038241 | 0.532849 | 0.240265 |
| MmugDNA.8952.1.S1_at   | MmugDNA.8952.1 | 8.52  | 9.94  | 0.26 | 0.96 | -2.68 | 0.055515 | 0.025084 | 0.384086 | 0.19842  |
| MmugDNA.8953.1.S1_at   | MmugDNA.8953.1 | 4.12  | 3.98  | 0.13 | 0.02 | 1.11  | 0.364206 | 0.82693  | 0.677295 | 0.900611 |
| MmugDNA.8955.1.S1_at   | MmugDNA.8955.1 | 3.27  | 3.3   | 0.12 | 0.03 | -1.02 | 0.887409 | 0.446885 | 0.954863 | 0.663072 |
| MmugDNA.8956.1.S1_at   | MmugDNA.8956.1 | 4.23  | 4.41  | 0.1  | 0.36 | -1.13 | 0.426897 | 0.486236 | 0.716003 | 0.689657 |
| MmugDNA.8957.1.S1_at   | MmugDNA.8957.1 | 11.8  | 11.83 | 0.17 | 0.17 | -1.02 | 0.608719 | 0.606686 | 0.820185 | 0.765928 |
| MmugDNA.8959.1.S1_at   | MmugDNA.8959.1 | 9.26  | 8.49  | 0.22 | 0.53 | 1.7   | 0.227625 | 0.177433 | 0.585103 | 0.453773 |
| MmugDNA.8960.1.S1_at   | MmugDNA.8960.1 | 9.48  | 8.45  | 0.43 | 0.94 | 2.04  | 0.133762 | 0.172709 | 0.500334 | 0.449206 |
| MmugDNA.8961.1.S1_at   | MmugDNA.8961.1 | 11    | 10.92 | 0.07 | 0.88 | 1.05  | 0.837509 | 0.894977 | 0.934307 | 0.940055 |
| MmugDNA.8962.1.S1_at   | MmugDNA.8962.1 | 6.46  | 6.48  | 0.09 | 0.14 | -1.02 | 0.726566 | 0.862329 | 0.881065 | 0.921714 |
| MmugDNA.8965.1.S1_at   | MmugDNA.8965.1 | 5.63  | 6.17  | 0.76 | 0.32 | -1.46 | 0.483418 | 0.562007 | 0.749882 | 0.737679 |
| MmugDNA.8967.1.S1_at   | MmugDNA.8967.1 | 4.6   | 4.76  | 0.03 | 0.1  | -1.12 | 0.038926 | 0.111179 | 0.345909 | 0.375798 |
| MmugDNA.8968.1.S1_at   | MmugDNA.8968.1 | 8.32  | 8.29  | 0.14 | 0.16 | 1.02  | 0.314397 | 0.450396 | 0.645738 | 0.665643 |
| MmugDNA.897.1.S1_at    | MmugDNA.897.1  | 4.51  | 4.6   | 0.15 | 0.16 | -1.06 | 0.232606 | 0.428877 | 0.587814 | 0.650408 |
| MmugDNA.8971.1.S1_at   | MmugDNA.8971.1 | 5.01  | 4.46  | 0.26 | 0.36 | 1.46  | 0.500458 | 0.799043 | 0.759571 | 0.884285 |
| MmugDNA.8972.1.S1_at   | MmugDNA.8972.1 | 6.63  | 6.72  | 0.23 | 0.06 | -1.07 | 0.859858 | 0.318029 | 0.943454 | 0.571046 |
| MmugDNA.8973.1.S1_at   | MmugDNA.8973.1 | 3.51  | 3.37  | 0.11 | 0.29 | 1.1   | 0.635274 | 0.765159 | 0.83494  | 0.86347  |
| MmugDNA.8976.1.S1_at   | MmugDNA.8976.1 | 3.85  | 4.09  | 0.11 | 0.07 | -1.18 | 0.066505 | 0.193245 | 0.406564 | 0.468578 |
| MmugDNA.8977.1.S1_at   | MmugDNA.8977.1 | 8.27  | 8.36  | 0.27 | 0.67 | -1.07 | 0.532311 | 0.543651 | 0.777633 | 0.726239 |
| MmugDNA.8978.1.S1_at   | MmugDNA.8978.1 | 6.9   | 6.85  | 0.15 | 0.17 | 1.04  | 0.479189 | 0.715271 | 0.747575 | 0.834959 |
| MmugDNA.8979.1.S1_at   | MmugDNA.8979.1 | 5.93  | 5.22  | 0.51 | 0.38 | 1.64  | 0.156902 | 0.171359 | 0.521709 | 0.447817 |
| MmugDNA.898.1.S1_at    | MmugDNA.898.1  | 6.09  | 6.16  | 0.27 | 0.12 | -1.05 | 0.636441 | 0.780122 | 0.835538 | 0.872514 |
| MmugDNA.8981.1.S1_at   | MmugDNA.8981.1 | 3.73  | 3.36  | 0.24 | 0.21 | 1.29  | 0.054794 | 0.048588 | 0.382363 | 0.265572 |
| MmugDNA.8982.1.S1_at   | MmugDNA.8982.1 | 8.98  | 8.78  | 0.09 | 0.05 | 1.14  | 0.030834 | 0.084846 | 0.320053 | 0.336385 |
| MmugDNA.8983.1.S1_at   | MmugDNA.8983.1 | 6.73  | 7.23  | 0.64 | 0.22 | -1.41 | 0.750181 | 0.848205 | 0.89292  | 0.913822 |
| MmugDNA.8984.1.S1_at   | MmugDNA.8984.1 | 3.24  | 3.38  | 0.11 | 0.11 | -1.1  | 0.11552  | 0.168284 | 0.478809 | 0.444935 |
| MmugDNA.8985.1.S1_at   | MmugDNA.8985.1 | 4.22  | 3.94  | 0.33 | 0.15 | 1.21  | 0.230143 | 0.270451 | 0.587112 | 0.535785 |
| MmugDNA.8986.1.S1_at   | MmugDNA.8986.1 | 3.42  | 3.91  | 0.16 | 0.52 | -1.41 | 0.215079 | 0.192852 | 0.575523 | 0.468376 |
| MmugDNA.8987.1.S1_at   | MmugDNA.8987.1 | 9.78  | 9.89  | 0.08 | 0.95 | -1.08 | 0.830329 | 0.793695 | 0.931421 | 0.881022 |
| MmugDNA.8988.1.S1_at   | MmugDNA.8988.1 | 12.12 | 11.28 | 0.27 | 1.01 | 1.8   | 0.190098 | 0.213822 | 0.552871 | 0.48758  |
| MmugDNA.8989.1.S1_at   | MmugDNA.8989.1 | 9.02  | 9.58  | 0.41 | 0.46 | -1.48 | 0.175611 | 0.194983 | 0.539404 | 0.470138 |
| MmugDNA.8990.1.S1_at   | MmugDNA.8990.1 | 7.54  | 6.69  | 0.22 | 0.41 | 1.81  | 0.030833 | 0.024405 | 0.320053 | 0.19551  |
| MmugDNA.8991.1.S1_at   | MmugDNA.8991.1 | 7.17  | 7.63  | 1.56 | 0.28 | -1.37 | 0.835819 | 0.48043  | 0.93353  | 0.685781 |
| MmugDNA.8992.1.S1_at   | MmugDNA.8992.1 | 6.36  | 6.12  | 0.06 | 0.09 | 1.19  | 0.022088 | 0.098526 | 0.28446  | 0.356636 |
| MmugDNA.8993.1.S1_at   | MmugDNA.8993.1 | 7.41  | 7.54  | 0.28 | 0.23 | -1.09 | 0.603707 | 0.681511 | 0.817285 | 0.814092 |

|                      |                |       |       |      |      |       |          |          |          |          |
|----------------------|----------------|-------|-------|------|------|-------|----------|----------|----------|----------|
| MmugDNA.8994.1.S1_at | MmugDNA.8994.1 | 3.56  | 3.75  | 0.21 | 0.15 | -1.14 | 0.591511 | 0.728516 | 0.810466 | 0.843068 |
| MmugDNA.8995.1.S1_at | MmugDNA.8995.1 | 5.88  | 5.73  | 0.26 | 0.34 | 1.11  | 0.717723 | 0.62948  | 0.876066 | 0.781895 |
| MmugDNA.8997.1.S1_at | MmugDNA.8997.1 | 13.2  | 12.84 | 0.1  | 0.06 | 1.28  | 0.003799 | 0.001457 | 0.179914 | 0.058186 |
| MmugDNA.8998.1.S1_at | MmugDNA.8998.1 | 3.64  | 3.61  | 0.09 | 0.05 | 1.02  | 0.749805 | 0.921024 | 0.892776 | 0.955491 |
| MmugDNA.8999.1.S1_at | MmugDNA.8999.1 | 5.99  | 5.72  | 0.19 | 0.11 | 1.21  | 0.309867 | 0.382923 | 0.641793 | 0.61902  |
| MmugDNA.9.1.S1_at    | MmugDNA.9.1    | 4.52  | 4.52  | 0.14 | 0.1  | 1     | 0.576228 | 0.760255 | 0.802823 | 0.86071  |
| MmugDNA.90.1.S1_at   | MmugDNA.90.1   | 4.02  | 4.11  | 0.24 | 0.06 | -1.06 | 0.841789 | 0.746055 | 0.936256 | 0.852688 |
| MmugDNA.9003.1.S1_at | MmugDNA.9003.1 | 3.43  | 3.58  | 0.17 | 0.17 | -1.11 | 0.429157 | 0.196249 | 0.717334 | 0.471236 |
| MmugDNA.9005.1.S1_at | MmugDNA.9005.1 | 4.78  | 4.86  | 0.03 | 0.15 | -1.06 | 0.368214 | 0.694144 | 0.679785 | 0.822134 |
| MmugDNA.9007.1.S1_at | MmugDNA.9007.1 | 3.47  | 3.11  | 0.13 | 0.22 | 1.28  | 0.154905 | 0.209239 | 0.519574 | 0.48303  |
| MmugDNA.9008.1.S1_at | MmugDNA.9008.1 | 6.35  | 6.37  | 0.03 | 0.22 | -1.01 | 0.896559 | 0.813943 | 0.958765 | 0.892664 |
| MmugDNA.9009.1.S1_at | MmugDNA.9009.1 | 4.27  | 4.35  | 0.84 | 1.05 | -1.06 | 0.944155 | 0.950977 | 0.978677 | 0.972219 |
| MmugDNA.901.1.S1_at  | MmugDNA.901.1  | 6.66  | 6.41  | 0.09 | 1.01 | 1.19  | 0.850856 | 0.678603 | 0.940085 | 0.81228  |
| MmugDNA.9010.1.S1_at | MmugDNA.9010.1 | 4.15  | 4.17  | 0.12 | 0.19 | -1.02 | 0.814923 | 0.51529  | 0.924789 | 0.70823  |
| MmugDNA.9011.1.S1_at | MmugDNA.9011.1 | 9.58  | 8.32  | 0.14 | 0.78 | 2.39  | 0.183684 | 0.1946   | 0.547746 | 0.469707 |
| MmugDNA.9012.1.S1_at | MmugDNA.9012.1 | 4.51  | 4.47  | 0.73 | 0.7  | 1.03  | 0.880256 | 0.955365 | 0.951822 | 0.974645 |
| MmugDNA.9013.1.S1_at | MmugDNA.9013.1 | 5.22  | 5.49  | 0.07 | 0.25 | -1.2  | 0.336064 | 0.446201 | 0.65921  | 0.662743 |
| MmugDNA.9014.1.S1_at | MmugDNA.9014.1 | 6.94  | 7.27  | 0.15 | 0.2  | -1.25 | 0.138043 | 0.317862 | 0.505553 | 0.571042 |
| MmugDNA.9015.1.S1_at | MmugDNA.9015.1 | 3.86  | 3.96  | 0.09 | 0.21 | -1.07 | 0.490153 | 0.8586   | 0.754329 | 0.919494 |
| MmugDNA.9016.1.S1_at | MmugDNA.9016.1 | 6.34  | 6.13  | 0.5  | 0.2  | 1.16  | 0.559695 | 0.237558 | 0.793999 | 0.508196 |
| MmugDNA.9017.1.S1_at | MmugDNA.9017.1 | 7.09  | 5.19  | 0.73 | 0.41 | 3.76  | 0.013846 | 0.006583 | 0.249758 | 0.109998 |
| MmugDNA.9018.1.S1_at | MmugDNA.9018.1 | 4.39  | 4.42  | 0.5  | 0.28 | -1.02 | 0.272767 | 0.39869  | 0.616391 | 0.629458 |
| MmugDNA.9019.1.S1_at | MmugDNA.9019.1 | 6.13  | 6.76  | 0.43 | 0.89 | -1.54 | 0.978876 | 0.450719 | 0.99224  | 0.665844 |
| MmugDNA.9021.1.S1_at | MmugDNA.9021.1 | 5     | 3.74  | 0.47 | 0.34 | 2.39  | 0.031387 | 0.028381 | 0.321627 | 0.210319 |
| MmugDNA.9023.1.S1_at | MmugDNA.9023.1 | 5.62  | 5.53  | 0.13 | 0.08 | 1.07  | 0.673171 | 0.4308   | 0.853359 | 0.651811 |
| MmugDNA.9024.1.S1_at | MmugDNA.9024.1 | 8.2   | 8.77  | 0.44 | 0.41 | -1.49 | 0.065887 | 0.043802 | 0.405342 | 0.25387  |
| MmugDNA.9026.1.S1_at | MmugDNA.9026.1 | 6.07  | 6.1   | 0.17 | 0.09 | -1.02 | 0.828763 | 0.043787 | 0.930517 | 0.25387  |
| MmugDNA.9027.1.S1_at | MmugDNA.9027.1 | 10.74 | 10.68 | 0.1  | 0.22 | 1.04  | 0.688882 | 0.3669   | 0.861215 | 0.606566 |
| MmugDNA.9028.1.S1_at | MmugDNA.9028.1 | 9.63  | 10.3  | 0.06 | 0.33 | -1.59 | 0.010679 | 0.003233 | 0.230991 | 0.08214  |
| MmugDNA.9029.1.S1_at | MmugDNA.9029.1 | 10.98 | 10.33 | 0.05 | 0.37 | 1.56  | 0.039908 | 0.011989 | 0.34828  | 0.141658 |
| MmugDNA.9034.1.S1_at | MmugDNA.9034.1 | 3.74  | 3.74  | 0.1  | 0.1  | 1     | 0.977836 | 0.637731 | 0.99169  | 0.787114 |
| MmugDNA.9036.1.S1_at | MmugDNA.9036.1 | 7.1   | 7.22  | 0.11 | 0.08 | -1.09 | 0.243867 | 0.607424 | 0.595613 | 0.766402 |
| MmugDNA.9037.1.S1_at | MmugDNA.9037.1 | 4.11  | 4.15  | 0.12 | 0.07 | -1.03 | 0.153835 | 0.50817  | 0.518485 | 0.703405 |
| MmugDNA.9038.1.S1_at | MmugDNA.9038.1 | 3.81  | 3.92  | 0.34 | 0.06 | -1.08 | 0.572816 | 0.751532 | 0.801002 | 0.855508 |
| MmugDNA.9039.1.S1_at | MmugDNA.9039.1 | 7.57  | 7.76  | 0.36 | 0.68 | -1.15 | 0.719289 | 0.389211 | 0.876813 | 0.623403 |
| MmugDNA.904.1.S1_at  | MmugDNA.904.1  | 7.86  | 8.14  | 0.61 | 0.58 | -1.21 | 0.682212 | 0.84983  | 0.857815 | 0.914673 |
| MmugDNA.9041.1.S1_at | MmugDNA.9041.1 | 9.1   | 9.79  | 0.22 | 0.67 | -1.61 | 0.483548 | 0.511771 | 0.749927 | 0.705797 |
| MmugDNA.9042.1.S1_at | MmugDNA.9042.1 | 3.54  | 3.27  | 0.1  | 0.3  | 1.21  | 0.642409 | 0.161284 | 0.838763 | 0.437434 |
| MmugDNA.9043.1.S1_at | MmugDNA.9043.1 | 6.85  | 5.6   | 0.22 | 0.68 | 2.38  | 0.042236 | 0.024094 | 0.354563 | 0.194493 |
| MmugDNA.9045.1.S1_at | MmugDNA.9045.1 | 10.35 | 10.21 | 0.21 | 0.28 | 1.11  | 0.275857 | 0.355767 | 0.61793  | 0.597864 |
| MmugDNA.9046.1.S1_at | MmugDNA.9046.1 | 3.06  | 3.18  | 0.19 | 0.07 | -1.08 | 0.854546 | 0.372839 | 0.941244 | 0.611735 |

|                        |                |       |       |      |      |       |          |          |          |          |
|------------------------|----------------|-------|-------|------|------|-------|----------|----------|----------|----------|
| MmugDNA.905.1.S1_at    | MmugDNA.905.1  | 5.16  | 4.64  | 0.34 | 0.24 | 1.44  | 0.038212 | 0.063424 | 0.343724 | 0.298441 |
| MmugDNA.9050.1.S1_at   | MmugDNA.9050.1 | 3.84  | 3.86  | 0    | 0.13 | -1.01 | 0.500729 | 0.666666 | 0.759658 | 0.804716 |
| MmugDNA.9053.1.S1_at   | MmugDNA.9053.1 | 6.84  | 6.93  | 0.24 | 0.15 | -1.06 | 0.426511 | 0.395859 | 0.715839 | 0.627743 |
| MmugDNA.9054.1.S1_at   | MmugDNA.9054.1 | 4.04  | 4.02  | 0.19 | 0.15 | 1.01  | 0.50974  | 0.650559 | 0.764501 | 0.795663 |
| MmugDNA.9057.1.S1_at   | MmugDNA.9057.1 | 8.49  | 9.44  | 0.77 | 1.22 | -1.93 | 0.280574 | 0.323422 | 0.621702 | 0.574466 |
| MmugDNA.9058.1.S1_at   | MmugDNA.9058.1 | 4.34  | 4.34  | 0.08 | 0.15 | -1    | 0.683528 | 0.455229 | 0.85844  | 0.669198 |
| MmugDNA.9059.1.S1_at   | MmugDNA.9059.1 | 6.17  | 6.41  | 0.84 | 0.31 | -1.18 | 0.730607 | 0.389256 | 0.883214 | 0.623403 |
| MmugDNA.9060.1.S1_at   | MmugDNA.9060.1 | 6.78  | 7.13  | 0.15 | 0.05 | -1.27 | 0.040904 | 0.031598 | 0.350506 | 0.219905 |
| MmugDNA.9063.1.S1_at   | MmugDNA.9063.1 | 5.76  | 6.73  | 1.18 | 0.24 | -1.95 | 0.645997 | 0.807156 | 0.840597 | 0.888965 |
| MmugDNA.9064.1.S1_at   | MmugDNA.9064.1 | 11.02 | 10.52 | 0.53 | 0.21 | 1.42  | 0.250642 | 0.066541 | 0.600389 | 0.303711 |
| MmugDNA.9065.1.S1_at   | MmugDNA.9065.1 | 6.79  | 6.74  | 0.33 | 1.12 | 1.03  | 0.386708 | 0.397035 | 0.691563 | 0.62859  |
| MmugDNA.9067.1.S1_at   | MmugDNA.9067.1 | 3.84  | 3.85  | 0.09 | 0.05 | -1    | 0.300584 | 0.116494 | 0.635955 | 0.383671 |
| MmugDNA.9068.1.S1_at   | MmugDNA.9068.1 | 8.67  | 6.18  | 0.28 | 1.41 | 5.62  | 0.090861 | 0.094294 | 0.446466 | 0.350889 |
| MmugDNA.907.1.S1_at    | MmugDNA.907.1  | 6.99  | 7     | 0.2  | 0.03 | -1.01 | 0.297556 | 0.387829 | 0.633356 | 0.622486 |
| MmugDNA.9070.1.S1_at   | MmugDNA.9070.1 | 11.61 | 11.53 | 0.14 | 1.03 | 1.06  | 0.898222 | 0.601657 | 0.959278 | 0.763001 |
| MmugDNA.9071.1.S1_at   | MmugDNA.9071.1 | 5.22  | 3.85  | 0.77 | 0.59 | 2.58  | 0.084033 | 0.153792 | 0.436557 | 0.428488 |
| MmugDNA.9072.1.S1_at   | MmugDNA.9072.1 | 10.67 | 10.13 | 0.2  | 0.49 | 1.45  | 0.286508 | 0.368433 | 0.625572 | 0.60796  |
| MmugDNA.9073.1.S1_at   | MmugDNA.9073.1 | 4.01  | 4.03  | 0.24 | 0.41 | -1.01 | 0.898605 | 0.119894 | 0.959492 | 0.388593 |
| MmugDNA.9074.1.S1_at   | MmugDNA.9074.1 | 11.96 | 12.17 | 0.11 | 0.39 | -1.16 | 0.347176 | 0.434235 | 0.666259 | 0.654422 |
| MmugDNA.9074.1.S1_x_at | MmugDNA.9074.1 | 11.08 | 11.28 | 0.09 | 0.43 | -1.15 | 0.331346 | 0.439871 | 0.656268 | 0.658468 |
| MmugDNA.9075.1.S1_at   | MmugDNA.9075.1 | 10.62 | 9.77  | 0.11 | 0.63 | 1.8   | 0.036435 | 0.013468 | 0.339227 | 0.148626 |
| MmugDNA.9076.1.S1_at   | MmugDNA.9076.1 | 4.7   | 4.7   | 0.11 | 0.07 | 1     | 0.23829  | 0.367121 | 0.591578 | 0.606799 |
| MmugDNA.9077.1.S1_at   | MmugDNA.9077.1 | 5.46  | 5.47  | 0.11 | 0.01 | -1.01 | 0.818439 | 0.182685 | 0.926289 | 0.459186 |
| MmugDNA.9080.1.S1_at   | MmugDNA.9080.1 | 4.78  | 4.65  | 0.19 | 0.21 | 1.1   | 0.863521 | 0.490008 | 0.945233 | 0.692076 |
| MmugDNA.9081.1.S1_at   | MmugDNA.9081.1 | 7.13  | 7.3   | 0.07 | 0.02 | -1.13 | 0.012019 | 0.002533 | 0.239714 | 0.074302 |
| MmugDNA.9082.1.S1_s_at | MmugDNA.9082.1 | 4.72  | 4.71  | 0.02 | 0.12 | 1     | 0.786557 | 0.447313 | 0.91125  | 0.663434 |
| MmugDNA.9084.1.S1_at   | MmugDNA.9084.1 | 6.93  | 7.24  | 0.08 | 0.09 | -1.24 | 0.011504 | 0.004811 | 0.23613  | 0.096859 |
| MmugDNA.9085.1.S1_at   | MmugDNA.9085.1 | 8.37  | 10.09 | 0.46 | 0.69 | -3.31 | 0.025331 | 0.011032 | 0.29891  | 0.136793 |
| MmugDNA.9086.1.S1_at   | MmugDNA.9086.1 | 5.21  | 4.21  | 0.73 | 0.27 | 2     | 0.176712 | 0.202025 | 0.540348 | 0.476448 |
| MmugDNA.9087.1.S1_at   | MmugDNA.9087.1 | 5.46  | 5.64  | 0.32 | 0.2  | -1.14 | 0.418574 | 0.519263 | 0.711395 | 0.710923 |
| MmugDNA.9089.1.S1_at   | MmugDNA.9089.1 | 7.16  | 6.29  | 1.01 | 0.47 | 1.82  | 0.972742 | 0.235977 | 0.989474 | 0.507056 |
| MmugDNA.909.1.S1_at    | MmugDNA.909.1  | 9.39  | 8.64  | 0.72 | 0.68 | 1.69  | 0.998236 | 0.904186 | 0.999299 | 0.94565  |
| MmugDNA.9090.1.S1_at   | MmugDNA.9090.1 | 3.05  | 3.17  | 0.07 | 0.11 | -1.09 | 0.093843 | 0.032476 | 0.45129  | 0.223254 |
| MmugDNA.9091.1.S1_at   | MmugDNA.9091.1 | 11.5  | 11.62 | 0.22 | 0.07 | -1.09 | 0.406543 | 0.330867 | 0.703729 | 0.57958  |
| MmugDNA.9092.1.S1_at   | MmugDNA.9092.1 | 5.43  | 4.06  | 0.98 | 0.26 | 2.59  | 0.301619 | 0.183601 | 0.636509 | 0.459681 |
| MmugDNA.9093.1.S1_at   | MmugDNA.9093.1 | 5.37  | 5.75  | 0.39 | 0.38 | -1.31 | 0.294884 | 0.208879 | 0.631455 | 0.482717 |
| MmugDNA.9094.1.S1_at   | MmugDNA.9094.1 | 7.67  | 8.29  | 0.27 | 0.47 | -1.54 | 0.076906 | 0.026401 | 0.425768 | 0.203571 |
| MmugDNA.9096.1.S1_at   | MmugDNA.9096.1 | 7.67  | 7.2   | 0.12 | 0.32 | 1.39  | 0.332588 | 0.446556 | 0.656913 | 0.662862 |
| MmugDNA.9097.1.S1_at   | MmugDNA.9097.1 | 9.33  | 9.53  | 0.85 | 1.08 | -1.15 | 0.688906 | 0.604022 | 0.861215 | 0.764427 |
| MmugDNA.9098.1.S1_at   | MmugDNA.9098.1 | 10.75 | 11.45 | 0.03 | 0.43 | -1.62 | 0.128618 | 0.067356 | 0.494653 | 0.305525 |
| MmugDNA.9099.1.S1_at   | MmugDNA.9099.1 | 6.1   | 6.1   | 0.1  | 0.11 | 1     | 0.983808 | 0.496679 | 0.994286 | 0.696119 |

|                        |                |       |       |      |      |       |          |          |          |          |
|------------------------|----------------|-------|-------|------|------|-------|----------|----------|----------|----------|
| MmugDNA.9102.1.S1_at   | MmugDNA.9102.1 | 2.94  | 2.97  | 0.08 | 0.18 | -1.02 | 0.712209 | 0.903725 | 0.873896 | 0.945356 |
| MmugDNA.9103.1.S1_at   | MmugDNA.9103.1 | 5.31  | 5.55  | 0.18 | 0.17 | -1.19 | 0.265278 | 0.096997 | 0.610859 | 0.354502 |
| MmugDNA.9104.1.S1_at   | MmugDNA.9104.1 | 10.52 | 9.43  | 0.14 | 0.51 | 2.12  | 0.012582 | 0.005885 | 0.242665 | 0.104899 |
| MmugDNA.9105.1.S1_at   | MmugDNA.9105.1 | 3.17  | 3.14  | 0.13 | 0.13 | 1.02  | 0.536742 | 0.649259 | 0.779637 | 0.794724 |
| MmugDNA.9107.1.S1_at   | MmugDNA.9107.1 | 8.56  | 9.14  | 0.32 | 0.51 | -1.5  | 0.752133 | 0.578207 | 0.89416  | 0.748364 |
| MmugDNA.9108.1.S1_at   | MmugDNA.9108.1 | 3.23  | 3.4   | 0.05 | 0.19 | -1.13 | 0.226261 | 0.415184 | 0.584304 | 0.640745 |
| MmugDNA.9109.1.S1_at   | MmugDNA.9109.1 | 10.71 | 10.33 | 0.49 | 0.39 | 1.3   | 0.248008 | 0.237662 | 0.599056 | 0.50826  |
| MmugDNA.911.1.S1_at    | MmugDNA.911.1  | 8.26  | 7.58  | 0.25 | 0.09 | 1.6   | 0.0047   | 0.005176 | 0.184492 | 0.099727 |
| MmugDNA.9110.1.S1_at   | MmugDNA.9110.1 | 5.19  | 5.57  | 0.35 | 0.62 | -1.3  | 0.582698 | 0.769399 | 0.805847 | 0.866055 |
| MmugDNA.9111.1.S1_at   | MmugDNA.9111.1 | 3.71  | 3.54  | 0.73 | 0.15 | 1.13  | 0.442228 | 0.542675 | 0.725406 | 0.725667 |
| MmugDNA.9112.1.S1_at   | MmugDNA.9112.1 | 6.71  | 6.97  | 0.15 | 0.18 | -1.2  | 0.340813 | 0.468931 | 0.662186 | 0.67794  |
| MmugDNA.9114.1.S1_at   | MmugDNA.9114.1 | 4.36  | 4.77  | 0.96 | 0.06 | -1.33 | 0.85477  | 0.968451 | 0.941248 | 0.982645 |
| MmugDNA.9115.1.S1_at   | MmugDNA.9115.1 | 5.9   | 5.2   | 0.47 | 0.13 | 1.63  | 0.165344 | 0.262261 | 0.529362 | 0.528586 |
| MmugDNA.9116.1.S1_at   | MmugDNA.9116.1 | 6.17  | 6.18  | 0.08 | 0.18 | -1.01 | 0.410025 | 0.519046 | 0.706179 | 0.710813 |
| MmugDNA.9117.1.S1_at   | MmugDNA.9117.1 | 6.63  | 7.14  | 0.23 | 0.3  | -1.42 | 0.127538 | 0.092392 | 0.493834 | 0.348294 |
| MmugDNA.9118.1.S1_at   | MmugDNA.9118.1 | 6.24  | 6.69  | 0.42 | 0.14 | -1.37 | 0.070349 | 0.070462 | 0.414002 | 0.311777 |
| MmugDNA.9119.1.S1_at   | MmugDNA.9119.1 | 7.26  | 7.07  | 0.12 | 0.58 | 1.14  | 0.559004 | 0.437249 | 0.793628 | 0.656613 |
| MmugDNA.9120.1.S1_at   | MmugDNA.9120.1 | 4.3   | 4.05  | 0.19 | 0.28 | 1.19  | 0.245513 | 0.18178  | 0.597122 | 0.458373 |
| MmugDNA.9121.1.S1_at   | MmugDNA.9121.1 | 4.4   | 4.39  | 0.18 | 0.15 | 1.01  | 0.922584 | 0.542587 | 0.970009 | 0.725615 |
| MmugDNA.9122.1.S1_at   | MmugDNA.9122.1 | 7.52  | 6.9   | 0.25 | 0.21 | 1.54  | 0.070495 | 0.100036 | 0.414379 | 0.358901 |
| MmugDNA.9123.1.S1_at   | MmugDNA.9123.1 | 5.84  | 6.01  | 0.16 | 0.03 | -1.12 | 0.514239 | 0.79837  | 0.766816 | 0.883979 |
| MmugDNA.9124.1.S1_at   | MmugDNA.9124.1 | 7.04  | 7.88  | 0.47 | 0.38 | -1.78 | 0.371967 | 0.248684 | 0.682671 | 0.517917 |
| MmugDNA.9125.1.S1_at   | MmugDNA.9125.1 | 4.88  | 5.04  | 0.34 | 0.29 | -1.11 | 0.789956 | 0.498361 | 0.912869 | 0.697442 |
| MmugDNA.9126.1.S1_at   | MmugDNA.9126.1 | 9     | 9.14  | 0.12 | 0.19 | -1.11 | 0.23099  | 0.285886 | 0.587369 | 0.547484 |
| MmugDNA.913.1.S1_at    | MmugDNA.913.1  | 6.28  | 5.39  | 0.3  | 0.37 | 1.85  | 0.032573 | 0.027159 | 0.325457 | 0.205893 |
| MmugDNA.913.1.S1_x_at  | MmugDNA.913.1  | 6.87  | 6.24  | 0.09 | 0.19 | 1.54  | 0.00379  | 0.004509 | 0.179914 | 0.093778 |
| MmugDNA.9146.1.S1_x_at | MmugDNA.9146.1 | 6.9   | 8.24  | 0.67 | 1.59 | -2.52 | 0.435769 | 0.386984 | 0.721367 | 0.621935 |
| MmugDNA.9132.1.S1_at   | MmugDNA.9132.1 | 6.28  | 6.05  | 0    | 0.3  | 1.17  | 0.786295 | 0.75178  | 0.911108 | 0.855696 |
| MmugDNA.9134.1.S1_at   | MmugDNA.9134.1 | 5.57  | 4.43  | 1.3  | 0.79 | 2.2   | 0.370579 | 0.548993 | 0.681578 | 0.729509 |
| MmugDNA.9135.1.S1_at   | MmugDNA.9135.1 | 4.06  | 4.19  | 0.23 | 0.15 | -1.1  | 0.909686 | 0.106188 | 0.964238 | 0.36856  |
| MmugDNA.9136.1.S1_at   | MmugDNA.9136.1 | 4.83  | 4.68  | 0.16 | 0.01 | 1.1   | 0.279864 | 0.066032 | 0.621287 | 0.302361 |
| MmugDNA.9138.1.S1_at   | MmugDNA.9138.1 | 5.53  | 4.91  | 0.26 | 0.26 | 1.54  | 0.041984 | 0.034951 | 0.353762 | 0.231062 |
| MmugDNA.9139.1.S1_at   | MmugDNA.9139.1 | 6.15  | 6.02  | 0.59 | 0.11 | 1.1   | 0.657109 | 0.791679 | 0.84573  | 0.879671 |
| MmugDNA.9140.1.S1_at   | MmugDNA.9140.1 | 3.78  | 3.7   | 0.12 | 0.15 | 1.06  | 0.49498  | 0.690197 | 0.756991 | 0.819386 |
| MmugDNA.9142.1.S1_at   | MmugDNA.9142.1 | 3.47  | 3.46  | 0.12 | 0.02 | 1.01  | 0.271442 | 0.155768 | 0.6157   | 0.431134 |
| MmugDNA.9143.1.S1_at   | MmugDNA.9143.1 | 3.72  | 3.58  | 0.1  | 0.32 | 1.1   | 0.853846 | 0.421766 | 0.940936 | 0.645271 |
| MmugDNA.9144.1.S1_at   | MmugDNA.9144.1 | 5.18  | 5.99  | 0.23 | 0.83 | -1.76 | 0.221408 | 0.265076 | 0.580218 | 0.531    |
| MmugDNA.9145.1.S1_at   | MmugDNA.9145.1 | 7.34  | 7.43  | 0.24 | 0.04 | -1.07 | 0.652932 | 0.64069  | 0.843896 | 0.789053 |
| MmugDNA.9149.1.S1_at   | MmugDNA.9149.1 | 3.28  | 3.45  | 0.09 | 0.04 | -1.13 | 0.044794 | 0.10022  | 0.359043 | 0.359205 |
| MmugDNA.915.1.S1_at    | MmugDNA.915.1  | 2.85  | 2.94  | 0.02 | 0.09 | -1.06 | 0.131432 | 0.093238 | 0.498041 | 0.349352 |
| MmugDNA.9150.1.S1_at   | MmugDNA.9150.1 | 9.23  | 9.26  | 0.13 | 0.25 | -1.02 | 0.361725 | 0.524963 | 0.6754   | 0.714673 |

|                        |                |       |       |      |      |       |          |          |          |          |
|------------------------|----------------|-------|-------|------|------|-------|----------|----------|----------|----------|
| MmugDNA.9152.1.S1_at   | MmugDNA.9152.1 | 9.5   | 9.67  | 0.06 | 0.19 | -1.13 | 0.640789 | 0.397269 | 0.837772 | 0.628773 |
| MmugDNA.9153.1.S1_at   | MmugDNA.9153.1 | 7.36  | 6.8   | 0.62 | 0.66 | 1.48  | 0.343471 | 0.302584 | 0.663676 | 0.560201 |
| MmugDNA.9153.1.S1_s_at | MmugDNA.9153.1 | 7.62  | 7.2   | 0.75 | 0.7  | 1.33  | 0.543085 | 0.62654  | 0.783749 | 0.779856 |
| MmugDNA.9154.1.S1_at   | MmugDNA.9154.1 | 9.8   | 9.87  | 0.04 | 0.04 | -1.05 | 0.511104 | 0.93041  | 0.765243 | 0.960461 |
| MmugDNA.9155.1.S1_s_at | MmugDNA.9155.1 | 7.75  | 9.6   | 0.94 | 0.79 | -3.61 | 0.035201 | 0.028409 | 0.335371 | 0.210385 |
| MmugDNA.9156.1.S1_at   | MmugDNA.9156.1 | 10.08 | 10.2  | 0.19 | 0.28 | -1.09 | 0.887877 | 0.951135 | 0.954933 | 0.972323 |
| MmugDNA.9157.1.S1_at   | MmugDNA.9157.1 | 7.77  | 7.4   | 0.03 | 0.69 | 1.29  | 0.920761 | 0.280525 | 0.969092 | 0.54372  |
| MmugDNA.9159.1.S1_at   | MmugDNA.9159.1 | 3.62  | 3.76  | 0.03 | 0.11 | -1.11 | 0.121277 | 0.062666 | 0.48598  | 0.297037 |
| MmugDNA.9160.1.S1_at   | MmugDNA.9160.1 | 2.96  | 2.9   | 0.43 | 0.31 | 1.04  | 0.688458 | 0.531415 | 0.860974 | 0.718636 |
| MmugDNA.9161.1.S1_at   | MmugDNA.9161.1 | 3.65  | 3.79  | 0.26 | 0    | -1.11 | 0.991061 | 0.987373 | 0.996869 | 0.992932 |
| MmugDNA.9162.1.S1_at   | MmugDNA.9162.1 | 2.96  | 3.13  | 0.1  | 0.11 | -1.12 | 0.083324 | 0.06164  | 0.435702 | 0.295095 |
| MmugDNA.9163.1.S1_at   | MmugDNA.9163.1 | 4.36  | 4.37  | 0.29 | 0    | -1    | 0.874117 | 0.975973 | 0.949565 | 0.986856 |
| MmugDNA.9165.1.S1_at   | MmugDNA.9165.1 | 9.5   | 9.66  | 0.32 | 0.44 | -1.12 | 0.24943  | 0.321167 | 0.600196 | 0.573111 |
| MmugDNA.9166.1.S1_at   | MmugDNA.9166.1 | 5.29  | 5.61  | 0.15 | 0.18 | -1.25 | 0.164455 | 0.118921 | 0.528313 | 0.38714  |
| MmugDNA.9167.1.S1_at   | MmugDNA.9167.1 | 7     | 6.74  | 0.08 | 0.48 | 1.2   | 0.994511 | 0.999637 | 0.998117 | 0.999864 |
| MmugDNA.9168.1.S1_at   | MmugDNA.9168.1 | 5.72  | 5.71  | 0.08 | 0.13 | 1.01  | 0.388091 | 0.355066 | 0.692266 | 0.59749  |
| MmugDNA.9169.1.S1_at   | MmugDNA.9169.1 | 6.15  | 6.16  | 0.11 | 0.11 | -1.01 | 0.702323 | 0.12664  | 0.86858  | 0.397295 |
| MmugDNA.917.1.S1_at    | MmugDNA.917.1  | 4.59  | 4.39  | 0.1  | 0.18 | 1.15  | 0.14663  | 0.20903  | 0.512668 | 0.482823 |
| MmugDNA.9170.1.S1_at   | MmugDNA.9170.1 | 8.16  | 8.14  | 0.07 | 0.59 | 1.02  | 0.998087 | 0.131086 | 0.999259 | 0.403084 |
| MmugDNA.9171.1.S1_s_at | MmugDNA.9171.1 | 13.13 | 13.23 | 0.07 | 0.18 | -1.07 | 0.413974 | 0.597548 | 0.708765 | 0.760237 |
| MmugDNA.9173.1.S1_at   | MmugDNA.9173.1 | 9.17  | 9.05  | 0.09 | 0.07 | 1.08  | 0.22653  | 0.16776  | 0.584429 | 0.444297 |
| MmugDNA.9174.1.S1_at   | MmugDNA.9174.1 | 4.41  | 3.75  | 0.53 | 0.05 | 1.58  | 0.107566 | 0.090726 | 0.468045 | 0.345205 |
| MmugDNA.9175.1.S1_s_at | MmugDNA.9175.1 | 9.83  | 8.09  | 0.2  | 0.74 | 3.33  | 0.038312 | 0.026354 | 0.34385  | 0.203321 |
| MmugDNA.9176.1.S1_at   | MmugDNA.9176.1 | 12.47 | 12.35 | 0.08 | 0.17 | 1.09  | 0.621902 | 0.383162 | 0.827071 | 0.619153 |
| MmugDNA.9178.1.S1_at   | MmugDNA.9178.1 | 7.21  | 7.2   | 0.32 | 0.49 | 1.01  | 0.464779 | 0.676503 | 0.73952  | 0.81095  |
| MmugDNA.918.1.S1_at    | MmugDNA.918.1  | 7.3   | 7.13  | 0.25 | 0.11 | 1.12  | 0.129567 | 0.103199 | 0.495744 | 0.364123 |
| MmugDNA.9180.1.S1_at   | MmugDNA.9180.1 | 8.12  | 8.01  | 0.67 | 0.33 | 1.07  | 0.394221 | 0.088312 | 0.695705 | 0.341721 |
| MmugDNA.9181.1.S1_at   | MmugDNA.9181.1 | 10.5  | 10.08 | 0.17 | 0.58 | 1.34  | 0.298314 | 0.397829 | 0.633851 | 0.629126 |
| MmugDNA.9182.1.S1_at   | MmugDNA.9182.1 | 5.25  | 4.78  | 0.6  | 0.25 | 1.38  | 0.311386 | 0.098411 | 0.64337  | 0.356531 |
| MmugDNA.9183.1.S1_at   | MmugDNA.9183.1 | 7.42  | 7.43  | 0.68 | 0.8  | -1.01 | 0.892702 | 0.542883 | 0.957283 | 0.725834 |
| MmugDNA.9184.1.S1_at   | MmugDNA.9184.1 | 5.58  | 5.22  | 0.46 | 0.34 | 1.28  | 0.270069 | 0.397293 | 0.614629 | 0.628775 |
| MmugDNA.9185.1.S1_at   | MmugDNA.9185.1 | 10.59 | 9.88  | 0.13 | 0.43 | 1.64  | 0.206388 | 0.017909 | 0.56868  | 0.168944 |
| MmugDNA.9186.1.S1_at   | MmugDNA.9186.1 | 11.15 | 10.8  | 0.35 | 0.91 | 1.27  | 0.566129 | 0.754714 | 0.797485 | 0.85732  |
| MmugDNA.9187.1.S1_at   | MmugDNA.9187.1 | 4.32  | 4.68  | 0.24 | 0.14 | -1.28 | 0.138489 | 0.144172 | 0.505769 | 0.418037 |
| MmugDNA.9188.1.S1_at   | MmugDNA.9188.1 | 6.63  | 6.76  | 0.14 | 0.23 | -1.1  | 0.492285 | 0.506964 | 0.75563  | 0.702692 |
| MmugDNA.9189.1.S1_at   | MmugDNA.9189.1 | 3.3   | 3.15  | 0.24 | 0.53 | 1.11  | 0.532255 | 0.768174 | 0.777626 | 0.865413 |
| MmugDNA.919.1.S1_at    | MmugDNA.919.1  | 2.86  | 2.88  | 0.08 | 0.05 | -1.02 | 0.44185  | 0.233891 | 0.725191 | 0.505169 |
| MmugDNA.9190.1.S1_at   | MmugDNA.9190.1 | 3.67  | 3.74  | 0.07 | 0.27 | -1.05 | 0.603882 | 0.112811 | 0.817352 | 0.37844  |
| MmugDNA.9191.1.S1_at   | MmugDNA.9191.1 | 3.77  | 3.85  | 0.32 | 0.35 | -1.05 | 0.794749 | 0.719254 | 0.914801 | 0.837537 |
| MmugDNA.9193.1.S1_at   | MmugDNA.9193.1 | 13.31 | 12.99 | 0.06 | 0.24 | 1.25  | 0.044776 | 0.033417 | 0.359043 | 0.22646  |
| MmugDNA.9194.1.S1_at   | MmugDNA.9194.1 | 11.77 | 11.64 | 0.19 | 0.06 | 1.1   | 0.638105 | 0.659178 | 0.836489 | 0.800594 |

|                        |                |       |       |      |      |       |          |          |          |          |
|------------------------|----------------|-------|-------|------|------|-------|----------|----------|----------|----------|
| MmugDNA.9196.1.S1_at   | MmugDNA.9196.1 | 9.73  | 10.1  | 0.1  | 0.25 | -1.3  | 0.070775 | 0.066716 | 0.414661 | 0.304114 |
| MmugDNA.9196.1.S1_s_at | MmugDNA.9196.1 | 11.67 | 11.69 | 0.1  | 0.08 | -1.01 | 0.984983 | 0.738996 | 0.994692 | 0.848711 |
| MmugDNA.9197.1.S1_at   | MmugDNA.9197.1 | 8.89  | 8.46  | 0.38 | 0.23 | 1.34  | 0.187568 | 0.200127 | 0.550528 | 0.474603 |
| MmugDNA.9198.1.S1_at   | MmugDNA.9198.1 | 4.87  | 5.02  | 0.03 | 0.22 | -1.11 | 0.26783  | 0.401665 | 0.612768 | 0.631068 |
| MmugDNA.92.1.S1_at     | MmugDNA.92.1   | 6.72  | 6.4   | 0.51 | 1.36 | 1.25  | 0.682983 | 0.605006 | 0.858255 | 0.764917 |
| MmugDNA.920.1.S1_at    | MmugDNA.920.1  | 7.28  | 7.05  | 0.6  | 0.22 | 1.17  | 0.532757 | 0.092827 | 0.777862 | 0.349024 |
| MmugDNA.9200.1.S1_at   | MmugDNA.9200.1 | 4.72  | 4.77  | 0.07 | 0.03 | -1.04 | 0.168867 | 0.089792 | 0.533155 | 0.34404  |
| MmugDNA.9201.1.S1_at   | MmugDNA.9201.1 | 9.82  | 10.53 | 0.07 | 0.22 | -1.63 | 0.009601 | 0.005345 | 0.226235 | 0.101089 |
| MmugDNA.9202.1.S1_at   | MmugDNA.9202.1 | 8.84  | 9     | 0.04 | 0.52 | -1.11 | 0.597022 | 0.656921 | 0.813377 | 0.799401 |
| MmugDNA.9203.1.S1_at   | MmugDNA.9203.1 | 12.47 | 12.71 | 0.08 | 0.07 | -1.18 | 0.016548 | 0.001652 | 0.264616 | 0.061436 |
| MmugDNA.9204.1.S1_at   | MmugDNA.9204.1 | 4.42  | 4.46  | 0.11 | 0.38 | -1.03 | 0.599317 | 0.696932 | 0.814562 | 0.824002 |
| MmugDNA.9205.1.S1_at   | MmugDNA.9205.1 | 3.72  | 3.6   | 0.16 | 0.04 | 1.08  | 0.291458 | 0.021525 | 0.628798 | 0.183771 |
| MmugDNA.9207.1.S1_at   | MmugDNA.9207.1 | 3.93  | 4.36  | 1.03 | 0.31 | -1.34 | 0.885095 | 0.913646 | 0.953974 | 0.951422 |
| MmugDNA.9208.1.S1_at   | MmugDNA.9208.1 | 5.78  | 5.86  | 0.11 | 0.12 | -1.06 | 0.462119 | 0.632625 | 0.73822  | 0.783666 |
| MmugDNA.921.1.S1_at    | MmugDNA.921.1  | 4.06  | 4.5   | 0.26 | 0.56 | -1.35 | 0.543483 | 0.70719  | 0.783803 | 0.830201 |
| MmugDNA.9211.1.S1_at   | MmugDNA.9211.1 | 9.65  | 9.12  | 0.46 | 0.72 | 1.44  | 0.805219 | 0.916974 | 0.920016 | 0.95361  |
| MmugDNA.9212.1.S1_at   | MmugDNA.9212.1 | 6.56  | 6.49  | 0.29 | 0.96 | 1.05  | 0.499566 | 0.447806 | 0.759223 | 0.66388  |
| MmugDNA.9213.1.S1_at   | MmugDNA.9213.1 | 8.37  | 8.75  | 0.23 | 0.36 | -1.3  | 0.10928  | 0.105334 | 0.470811 | 0.367168 |
| MmugDNA.9214.1.S1_at   | MmugDNA.9214.1 | 6.79  | 6.9   | 0.15 | 0.21 | -1.08 | 0.103679 | 0.123486 | 0.463383 | 0.393518 |
| MmugDNA.9215.1.S1_s_at | MmugDNA.9215.1 | 10.06 | 10.56 | 0.46 | 0.16 | -1.42 | 0.092628 | 0.110668 | 0.449245 | 0.374854 |
| MmugDNA.9216.1.S1_s_at | MmugDNA.9216.1 | 11.02 | 11.17 | 0.45 | 0.22 | -1.11 | 0.676446 | 0.762186 | 0.854962 | 0.861664 |
| MmugDNA.9217.1.S1_at   | MmugDNA.9217.1 | 5.85  | 5.97  | 0.14 | 0.65 | -1.08 | 0.272444 | 0.229515 | 0.61608  | 0.501534 |
| MmugDNA.922.1.S1_at    | MmugDNA.922.1  | 4.46  | 4.5   | 0.01 | 0.07 | -1.03 | 0.290324 | 0.074475 | 0.628091 | 0.318151 |
| MmugDNA.9220.1.S1_at   | MmugDNA.9220.1 | 4.26  | 4.28  | 0.01 | 0.11 | -1.01 | 0.510228 | 0.505327 | 0.764853 | 0.702073 |
| MmugDNA.9221.1.S1_at   | MmugDNA.9221.1 | 10.49 | 9.89  | 0.36 | 0.94 | 1.52  | 0.112964 | 0.120914 | 0.475579 | 0.38981  |
| MmugDNA.9223.1.S1_at   | MmugDNA.9223.1 | 3.82  | 3.85  | 0.17 | 0.11 | -1.02 | 0.749611 | 0.917197 | 0.89273  | 0.953758 |
| MmugDNA.9224.1.S1_at   | MmugDNA.9224.1 | 5.86  | 5.97  | 0.03 | 0.15 | -1.08 | 0.096744 | 0.154506 | 0.455737 | 0.429396 |
| MmugDNA.9226.1.S1_at   | MmugDNA.9226.1 | 3.16  | 3.11  | 0.15 | 0.09 | 1.03  | 0.511826 | 0.586011 | 0.765318 | 0.753172 |
| MmugDNA.9228.1.S1_at   | MmugDNA.9228.1 | 4.15  | 3.45  | 0.4  | 0.25 | 1.62  | 0.109806 | 0.130938 | 0.470963 | 0.403037 |
| MmugDNA.9229.1.S1_at   | MmugDNA.9229.1 | 6.4   | 5.51  | 0.9  | 0.59 | 1.86  | 0.288292 | 0.327482 | 0.626514 | 0.577308 |
| MmugDNA.923.1.S1_at    | MmugDNA.923.1  | 11.43 | 12.18 | 0.18 | 0.25 | -1.68 | 0.009031 | 0.003394 | 0.222023 | 0.083959 |
| MmugDNA.9230.1.S1_at   | MmugDNA.9230.1 | 8.16  | 7.54  | 0.35 | 0.66 | 1.54  | 0.135163 | 0.15233  | 0.501995 | 0.427072 |
| MmugDNA.9231.1.S1_at   | MmugDNA.9231.1 | 7.09  | 7.75  | 0.67 | 0.66 | -1.58 | 0.130489 | 0.116301 | 0.496851 | 0.383671 |
| MmugDNA.9232.1.S1_at   | MmugDNA.9232.1 | 6.93  | 7.26  | 0.29 | 0.46 | -1.25 | 0.252467 | 0.319602 | 0.601373 | 0.571885 |
| MmugDNA.9233.1.S1_at   | MmugDNA.9233.1 | 10.19 | 10.13 | 0.14 | 0.28 | 1.04  | 0.546531 | 0.541236 | 0.785588 | 0.724781 |
| MmugDNA.9236.1.S1_at   | MmugDNA.9236.1 | 2.86  | 3.07  | 0.09 | 0.14 | -1.16 | 0.232543 | 0.32542  | 0.587814 | 0.575807 |
| MmugDNA.9237.1.S1_at   | MmugDNA.9237.1 | 5.83  | 6.31  | 0.08 | 0.15 | -1.39 | 0.010275 | 0.005177 | 0.228514 | 0.099727 |
| MmugDNA.9239.1.S1_at   | MmugDNA.9239.1 | 5.22  | 4.39  | 0.42 | 0.22 | 1.77  | 0.091271 | 0.054566 | 0.447137 | 0.279115 |
| MmugDNA.924.1.S1_at    | MmugDNA.924.1  | 10.59 | 10.54 | 0.04 | 0.08 | 1.03  | 0.150915 | 0.04686  | 0.515667 | 0.261272 |
| MmugDNA.9240.1.S1_at   | MmugDNA.9240.1 | 7.21  | 7.25  | 0.06 | 0.34 | -1.02 | 0.379379 | 0.536216 | 0.686918 | 0.721574 |
| MmugDNA.9242.1.S1_at   | MmugDNA.9242.1 | 9.9   | 9.21  | 0.46 | 0.35 | 1.62  | 0.273683 | 0.315609 | 0.617179 | 0.569053 |

|                        |                |       |       |      |      |       |          |          |          |          |
|------------------------|----------------|-------|-------|------|------|-------|----------|----------|----------|----------|
| MmugDNA.9243.1.S1_at   | MmugDNA.9243.1 | 5.63  | 7.05  | 1.03 | 0.48 | -2.67 | 0.061511 | 0.05753  | 0.39617  | 0.285919 |
| MmugDNA.9244.1.S1_at   | MmugDNA.9244.1 | 2.97  | 3.01  | 0.04 | 0.29 | -1.02 | 0.620208 | 0.771759 | 0.826026 | 0.867344 |
| MmugDNA.9245.1.S1_at   | MmugDNA.9245.1 | 7.54  | 8.03  | 0.1  | 0.51 | -1.41 | 0.195023 | 0.144075 | 0.558557 | 0.417963 |
| MmugDNA.9247.1.S1_at   | MmugDNA.9247.1 | 6.05  | 6.46  | 0.79 | 0.07 | -1.32 | 0.921334 | 0.990484 | 0.969303 | 0.994623 |
| MmugDNA.9249.1.S1_at   | MmugDNA.9249.1 | 12.21 | 11.73 | 0.15 | 0.25 | 1.4   | 0.111166 | 0.063917 | 0.47321  | 0.29906  |
| MmugDNA.925.1.S1_at    | MmugDNA.925.1  | 11.47 | 11.25 | 0.13 | 0.1  | 1.16  | 0.213189 | 0.132219 | 0.573477 | 0.404274 |
| MmugDNA.9250.1.S1_at   | MmugDNA.9250.1 | 8.96  | 7.93  | 0.52 | 1.17 | 2.04  | 0.879059 | 0.917911 | 0.951455 | 0.954027 |
| MmugDNA.9252.1.S1_at   | MmugDNA.9252.1 | 4.74  | 4.31  | 0.28 | 0.38 | 1.34  | 0.212527 | 0.009434 | 0.572826 | 0.127948 |
| MmugDNA.9254.1.S1_at   | MmugDNA.9254.1 | 7.4   | 7.2   | 0.23 | 0.3  | 1.15  | 0.513757 | 0.727138 | 0.766467 | 0.842187 |
| MmugDNA.9255.1.S1_at   | MmugDNA.9255.1 | 4.3   | 4.23  | 0.11 | 0.16 | 1.05  | 0.913713 | 0.918065 | 0.965875 | 0.954068 |
| MmugDNA.9256.1.S1_at   | MmugDNA.9256.1 | 5.57  | 5.9   | 0.19 | 0.22 | -1.26 | 0.297928 | 0.326779 | 0.633596 | 0.576782 |
| MmugDNA.9258.1.S1_at   | MmugDNA.9258.1 | 3.51  | 3.54  | 0.08 | 0.04 | -1.02 | 0.849613 | 0.247954 | 0.939616 | 0.517431 |
| MmugDNA.9259.1.S1_at   | MmugDNA.9259.1 | 6.82  | 7.13  | 0.21 | 0.58 | -1.24 | 0.496877 | 0.639483 | 0.757692 | 0.788314 |
| MmugDNA.926.1.S1_at    | MmugDNA.926.1  | 7.21  | 7.35  | 0.06 | 0.39 | -1.1  | 0.747959 | 0.021271 | 0.892185 | 0.182573 |
| MmugDNA.9260.1.S1_at   | MmugDNA.9260.1 | 5.93  | 5.95  | 0.23 | 0.05 | -1.01 | 0.649364 | 0.850922 | 0.842441 | 0.91522  |
| MmugDNA.9261.1.S1_at   | MmugDNA.9261.1 | 5.34  | 4.38  | 0.75 | 0.22 | 1.95  | 0.081158 | 0.052373 | 0.431848 | 0.274345 |
| MmugDNA.9263.1.S1_at   | MmugDNA.9263.1 | 8.9   | 9.43  | 0.18 | 0.21 | -1.45 | 0.023393 | 0.037444 | 0.291303 | 0.237777 |
| MmugDNA.9264.1.S1_at   | MmugDNA.9264.1 | 7.22  | 7.46  | 0.27 | 0.09 | -1.19 | 0.154021 | 0.181407 | 0.518553 | 0.457923 |
| MmugDNA.9267.1.S1_at   | MmugDNA.9267.1 | 3.49  | 3.27  | 0.47 | 0.15 | 1.17  | 0.449756 | 0.73238  | 0.730493 | 0.844986 |
| MmugDNA.9268.1.S1_at   | MmugDNA.9268.1 | 9.19  | 9.12  | 0.14 | 0.06 | 1.05  | 0.394675 | 0.037319 | 0.69601  | 0.237622 |
| MmugDNA.927.1.S1_at    | MmugDNA.927.1  | 3.72  | 3.4   | 0.48 | 0.18 | 1.25  | 0.288819 | 0.340928 | 0.626809 | 0.587035 |
| MmugDNA.9270.1.S1_at   | MmugDNA.9270.1 | 11.22 | 10.82 | 0.19 | 0.21 | 1.32  | 0.034285 | 0.033081 | 0.332352 | 0.225106 |
| MmugDNA.9271.1.S1_at   | MmugDNA.9271.1 | 6.22  | 6.28  | 0.31 | 0.44 | -1.04 | 0.807079 | 0.467697 | 0.920973 | 0.677207 |
| MmugDNA.9272.1.S1_at   | MmugDNA.9272.1 | 3.31  | 3.97  | 0.29 | 0.75 | -1.57 | 0.084479 | 0.079642 | 0.437153 | 0.326981 |
| MmugDNA.9273.1.S1_at   | MmugDNA.9273.1 | 5.74  | 5.54  | 0.32 | 0.27 | 1.15  | 0.775807 | 0.914221 | 0.905945 | 0.951773 |
| MmugDNA.9274.1.S1_at   | MmugDNA.9274.1 | 7.48  | 9.12  | 1.04 | 1.4  | -3.1  | 0.209043 | 0.151748 | 0.570648 | 0.426392 |
| MmugDNA.9275.1.S1_at   | MmugDNA.9275.1 | 5.49  | 4.48  | 0.26 | 0.23 | 2.02  | 0.004928 | 0.004826 | 0.185837 | 0.096904 |
| MmugDNA.9276.1.S1_at   | MmugDNA.9276.1 | 6.64  | 6.43  | 0.57 | 0.76 | 1.15  | 0.947593 | 0.869773 | 0.979939 | 0.926118 |
| MmugDNA.9277.1.S1_at   | MmugDNA.9277.1 | 4.89  | 4.71  | 0.81 | 0.22 | 1.14  | 0.701836 | 0.869412 | 0.868197 | 0.92597  |
| MmugDNA.9278.1.S1_at   | MmugDNA.9278.1 | 4.76  | 4.81  | 0.13 | 0.05 | -1.04 | 0.185649 | 0.225208 | 0.548972 | 0.497865 |
| MmugDNA.9279.1.S1_at   | MmugDNA.9279.1 | 5.06  | 4.74  | 0.27 | 0.29 | 1.24  | 0.103355 | 0.096848 | 0.462888 | 0.354254 |
| MmugDNA.9280.1.S1_at   | MmugDNA.9280.1 | 4.55  | 4.79  | 0.14 | 0.17 | -1.19 | 0.139448 | 0.147157 | 0.50694  | 0.421376 |
| MmugDNA.9281.1.S1_at   | MmugDNA.9281.1 | 6.92  | 6.95  | 0.13 | 0.19 | -1.02 | 0.746371 | 0.888258 | 0.891402 | 0.93629  |
| MmugDNA.9283.1.S1_at   | MmugDNA.9283.1 | 6.18  | 6.29  | 0.09 | 0.34 | -1.08 | 0.783466 | 0.885635 | 0.909533 | 0.934982 |
| MmugDNA.9286.1.S1_at   | MmugDNA.9286.1 | 4.91  | 5.26  | 0.28 | 0.41 | -1.27 | 0.881983 | 0.46032  | 0.952617 | 0.672177 |
| MmugDNA.9288.1.S1_at   | MmugDNA.9288.1 | 8     | 7.46  | 0.22 | 0.3  | 1.46  | 0.144952 | 0.411901 | 0.511188 | 0.638434 |
| MmugDNA.9289.1.S1_at   | MmugDNA.9289.1 | 4.59  | 4.4   | 0.01 | 0.05 | 1.14  | 0.001536 | 0.045236 | 0.151506 | 0.257005 |
| MmugDNA.929.1.S1_at    | MmugDNA.929.1  | 4.81  | 5     | 0.36 | 0.31 | -1.14 | 0.975762 | 0.656078 | 0.990667 | 0.798847 |
| MmugDNA.9290.1.S1_s_at | MmugDNA.9290.1 | 3.35  | 3.38  | 0.04 | 0.06 | -1.03 | 0.58102  | 0.425266 | 0.804832 | 0.647679 |
| MmugDNA.9292.1.S1_at   | MmugDNA.9292.1 | 8.04  | 7.83  | 0.07 | 0.19 | 1.15  | 0.460962 | 0.413714 | 0.737307 | 0.639742 |
| MmugDNA.9296.1.S1_at   | MmugDNA.9296.1 | 6.58  | 6.59  | 0.12 | 0.3  | -1.01 | 0.623235 | 0.873538 | 0.827864 | 0.928102 |

|                        |                |       |       |      |      |       |          |          |          |          |
|------------------------|----------------|-------|-------|------|------|-------|----------|----------|----------|----------|
| MmugDNA.9298.1.S1_at   | MmugDNA.9298.1 | 10.64 | 10.53 | 0.31 | 0.48 | 1.08  | 0.30874  | 0.276201 | 0.641091 | 0.540183 |
| MmugDNA.9299.1.S1_at   | MmugDNA.9299.1 | 2.8   | 2.75  | 0.06 | 0.07 | 1.03  | 0.32655  | 0.831958 | 0.653184 | 0.90356  |
| MmugDNA.93.1.S1_at     | MmugDNA.93.1   | 6.78  | 6.93  | 0.17 | 0.09 | -1.11 | 0.320907 | 0.358849 | 0.649662 | 0.600291 |
| MmugDNA.930.1.S1_at    | MmugDNA.930.1  | 3.73  | 3.81  | 0.04 | 0.15 | -1.06 | 0.783436 | 0.937463 | 0.909533 | 0.964687 |
| MmugDNA.9300.1.S1_at   | MmugDNA.9300.1 | 5.84  | 6.2   | 0.31 | 0.05 | -1.28 | 0.043309 | 0.061785 | 0.3567   | 0.295327 |
| MmugDNA.9303.1.S1_at   | MmugDNA.9303.1 | 5.9   | 5.4   | 0.28 | 0.3  | 1.42  | 0.169582 | 0.074619 | 0.533686 | 0.318303 |
| MmugDNA.9305.1.S1_at   | MmugDNA.9305.1 | 5.82  | 6.02  | 0.35 | 0.29 | -1.15 | 0.76252  | 0.896344 | 0.899996 | 0.940817 |
| MmugDNA.9306.1.S1_at   | MmugDNA.9306.1 | 4.93  | 4.65  | 0.07 | 0.12 | 1.21  | 0.109053 | 0.172149 | 0.470811 | 0.448529 |
| MmugDNA.9307.1.S1_x_at | MmugDNA.9307.1 | 11.9  | 12.19 | 0.18 | 0.25 | -1.22 | 0.801861 | 0.942157 | 0.918278 | 0.967154 |
| MmugDNA.9308.1.S1_at   | MmugDNA.9308.1 | 6.24  | 6.76  | 0.52 | 0.42 | -1.43 | 0.134767 | 0.136926 | 0.501738 | 0.409677 |
| MmugDNA.9309.1.S1_at   | MmugDNA.9309.1 | 5.18  | 5.07  | 0.31 | 0.13 | 1.08  | 0.750754 | 0.693476 | 0.893385 | 0.821713 |
| MmugDNA.931.1.S1_at    | MmugDNA.931.1  | 4.42  | 4.37  | 0    | 0.32 | 1.04  | 0.980199 | 0.869525 | 0.992802 | 0.925994 |
| MmugDNA.9310.1.S1_s_at | MmugDNA.9310.1 | 6.44  | 6.47  | 0.11 | 0.13 | -1.02 | 0.32034  | 0.202804 | 0.649463 | 0.477284 |
| MmugDNA.9312.1.S1_at   | MmugDNA.9312.1 | 4.6   | 4.81  | 0.1  | 0.12 | -1.16 | 0.091241 | 0.20027  | 0.447111 | 0.474689 |
| MmugDNA.9314.1.S1_at   | MmugDNA.9314.1 | 4.15  | 4.23  | 0.14 | 0.08 | -1.06 | 0.479172 | 0.730688 | 0.747575 | 0.844055 |
| MmugDNA.9316.1.S1_at   | MmugDNA.9316.1 | 6.84  | 7.22  | 0.09 | 0.24 | -1.3  | 0.169221 | 0.220461 | 0.533594 | 0.493818 |
| MmugDNA.9317.1.S1_at   | MmugDNA.9317.1 | 7.79  | 7.64  | 0.51 | 0.01 | 1.11  | 0.652479 | 0.855087 | 0.843728 | 0.91741  |
| MmugDNA.9318.1.S1_at   | MmugDNA.9318.1 | 9.9   | 9.26  | 0.08 | 0.23 | 1.55  | 0.006701 | 0.003603 | 0.20158  | 0.085876 |
| MmugDNA.9319.1.S1_at   | MmugDNA.9319.1 | 4.73  | 4.96  | 0.44 | 0.15 | -1.17 | 0.928988 | 0.796938 | 0.972607 | 0.882822 |
| MmugDNA.932.1.S1_at    | MmugDNA.932.1  | 4.58  | 4.42  | 0.33 | 0.2  | 1.11  | 0.311395 | 0.347814 | 0.64337  | 0.592161 |
| MmugDNA.9321.1.S1_at   | MmugDNA.9321.1 | 4.33  | 4.26  | 0.15 | 0.19 | 1.05  | 0.555729 | 0.377694 | 0.791477 | 0.615086 |
| MmugDNA.9323.1.S1_at   | MmugDNA.9323.1 | 10.61 | 10.88 | 0.06 | 0.04 | -1.21 | 0.005363 | 0.001138 | 0.191107 | 0.053148 |
| MmugDNA.9324.1.S1_at   | MmugDNA.9324.1 | 4.9   | 4.92  | 0.26 | 0.05 | -1.01 | 0.347297 | 0.496713 | 0.6664   | 0.696148 |
| MmugDNA.9327.1.S1_at   | MmugDNA.9327.1 | 3.46  | 3.41  | 0.15 | 0.03 | 1.03  | 0.636108 | 0.564741 | 0.835329 | 0.739425 |
| MmugDNA.9328.1.S1_at   | MmugDNA.9328.1 | 6.09  | 6.03  | 0.27 | 0.09 | 1.04  | 0.939458 | 0.973337 | 0.976986 | 0.985515 |
| MmugDNA.9331.1.S1_at   | MmugDNA.9331.1 | 7.13  | 6.87  | 0.15 | 0.14 | 1.2   | 0.080312 | 0.219576 | 0.430418 | 0.493192 |
| MmugDNA.9332.1.S1_at   | MmugDNA.9332.1 | 11    | 11.32 | 0.07 | 0.37 | -1.24 | 0.073459 | 0.027654 | 0.418755 | 0.207659 |
| MmugDNA.9334.1.S1_at   | MmugDNA.9334.1 | 7.65  | 7.97  | 0.29 | 0.1  | -1.25 | 0.053676 | 0.206793 | 0.38074  | 0.480945 |
| MmugDNA.9337.1.S1_at   | MmugDNA.9337.1 | 11.4  | 11.52 | 0    | 0.01 | -1.09 | 0.000014 | 0.000152 | 0.112653 | 0.029832 |
| MmugDNA.9340.1.S1_at   | MmugDNA.9340.1 | 6.34  | 6.46  | 0.08 | 0.25 | -1.08 | 0.519087 | 0.371412 | 0.7699   | 0.610191 |
| MmugDNA.9341.1.S1_at   | MmugDNA.9341.1 | 3.44  | 3.52  | 0.19 | 0.38 | -1.06 | 0.581945 | 0.680101 | 0.805507 | 0.813208 |
| MmugDNA.9343.1.S1_at   | MmugDNA.9343.1 | 5.8   | 5.83  | 0.02 | 0.01 | -1.02 | 0.415481 | 0.138203 | 0.709528 | 0.411149 |
| MmugDNA.9344.1.S1_at   | MmugDNA.9344.1 | 3.24  | 3.36  | 0.05 | 0.21 | -1.09 | 0.446298 | 0.427509 | 0.72824  | 0.649302 |
| MmugDNA.9345.1.S1_at   | MmugDNA.9345.1 | 11.29 | 11.13 | 0.02 | 0.09 | 1.11  | 0.042591 | 0.051875 | 0.355272 | 0.273151 |
| MmugDNA.9346.1.S1_at   | MmugDNA.9346.1 | 6.9   | 6.82  | 0.1  | 0.2  | 1.06  | 0.638547 | 0.275686 | 0.836621 | 0.539923 |
| MmugDNA.9348.1.S1_at   | MmugDNA.9348.1 | 3.46  | 3.5   | 0.03 | 0.2  | -1.03 | 0.594104 | 0.345834 | 0.811686 | 0.590997 |
| MmugDNA.935.1.S1_x_at  | MmugDNA.935.1  | 11.08 | 10.81 | 0.79 | 0.19 | 1.21  | 0.264397 | 0.346675 | 0.610152 | 0.591516 |
| MmugDNA.9350.1.S1_at   | MmugDNA.9350.1 | 5.12  | 5.26  | 0.15 | 0.17 | -1.1  | 0.110421 | 0.111799 | 0.4719   | 0.376856 |
| MmugDNA.9353.1.S1_at   | MmugDNA.9353.1 | 9.98  | 9.75  | 0.21 | 0.56 | 1.18  | 0.509195 | 0.085934 | 0.764234 | 0.338115 |
| MmugDNA.9354.1.S1_at   | MmugDNA.9354.1 | 13.05 | 12.86 | 0.07 | 0.22 | 1.13  | 0.058603 | 0.079123 | 0.390844 | 0.32625  |
| MmugDNA.9354.1.S1_x_at | MmugDNA.9354.1 | 13.13 | 12.89 | 0.08 | 0.18 | 1.18  | 0.03135  | 0.028655 | 0.321546 | 0.210956 |



|                        |                |       |       |      |      |       |          |          |          |          |
|------------------------|----------------|-------|-------|------|------|-------|----------|----------|----------|----------|
| MmugDNA.9355.1.S1_at   | MmugDNA.9355.1 | 5.68  | 5.6   | 0.09 | 0.39 | 1.06  | 0.482498 | 0.626346 | 0.749408 | 0.779698 |
| MmugDNA.9357.1.S1_at   | MmugDNA.9357.1 | 6.72  | 6.47  | 0.78 | 0.43 | 1.18  | 0.430769 | 0.370977 | 0.718266 | 0.609964 |
| MmugDNA.9358.1.S1_at   | MmugDNA.9358.1 | 4.35  | 4.03  | 0.13 | 0.22 | 1.25  | 0.036308 | 0.043622 | 0.339201 | 0.253501 |
| MmugDNA.9359.1.S1_at   | MmugDNA.9359.1 | 7.41  | 6.7   | 0.71 | 0.31 | 1.63  | 0.141068 | 0.054464 | 0.50864  | 0.278959 |
| MmugDNA.936.1.S1_at    | MmugDNA.936.1  | 6.34  | 6.25  | 0.18 | 0.56 | 1.06  | 0.255777 | 0.347631 | 0.603643 | 0.592039 |
| MmugDNA.9360.1.S1_at   | MmugDNA.9360.1 | 3.84  | 3.84  | 0.13 | 0    | 1     | 0.388118 | 0.236363 | 0.692266 | 0.507308 |
| MmugDNA.9361.1.S1_at   | MmugDNA.9361.1 | 6.64  | 6.59  | 0.06 | 0.09 | 1.04  | 0.330509 | 0.434076 | 0.655771 | 0.654223 |
| MmugDNA.9362.1.S1_at   | MmugDNA.9362.1 | 7.77  | 7.34  | 0.36 | 0.71 | 1.35  | 0.71907  | 0.845635 | 0.876813 | 0.912169 |
| MmugDNA.9365.1.S1_at   | MmugDNA.9365.1 | 8.86  | 9.64  | 0.36 | 0.31 | -1.72 | 0.037289 | 0.028401 | 0.341194 | 0.210374 |
| MmugDNA.9366.1.S1_at   | MmugDNA.9366.1 | 6.5   | 6.61  | 0.13 | 0.12 | -1.08 | 0.473204 | 0.66872  | 0.744128 | 0.806133 |
| MmugDNA.9367.1.S1_at   | MmugDNA.9367.1 | 4.92  | 4.77  | 0.18 | 0.31 | 1.11  | 0.827426 | 0.729253 | 0.92997  | 0.843541 |
| MmugDNA.937.1.S1_at    | MmugDNA.937.1  | 7.04  | 4.73  | 0.88 | 0.33 | 4.98  | 0.021384 | 0.007465 | 0.282524 | 0.115888 |
| MmugDNA.9370.1.S1_at   | MmugDNA.9370.1 | 4.06  | 4.05  | 0.22 | 0.07 | 1.01  | 0.9761   | 0.726432 | 0.990729 | 0.841687 |
| MmugDNA.9371.1.S1_at   | MmugDNA.9371.1 | 8.73  | 9.17  | 0.17 | 0.29 | -1.36 | 0.226861 | 0.122921 | 0.584769 | 0.392923 |
| MmugDNA.9372.1.S1_at   | MmugDNA.9372.1 | 5.65  | 5.9   | 0.07 | 0.16 | -1.19 | 0.027319 | 0.13475  | 0.307317 | 0.40678  |
| MmugDNA.9373.1.S1_at   | MmugDNA.9373.1 | 7.96  | 7.7   | 0.09 | 0.25 | 1.2   | 0.152118 | 0.011725 | 0.516888 | 0.140206 |
| MmugDNA.9374.1.S1_s_at | MmugDNA.9374.1 | 8.62  | 9.26  | 0.64 | 1.02 | -1.55 | 0.136355 | 0.144185 | 0.503487 | 0.41805  |
| MmugDNA.9375.1.S1_at   | MmugDNA.9375.1 | 8.4   | 8.68  | 0.59 | 0.4  | -1.21 | 0.708926 | 0.073747 | 0.872172 | 0.317093 |
| MmugDNA.9376.1.S1_at   | MmugDNA.9376.1 | 5.53  | 5.67  | 0.13 | 0.25 | -1.1  | 0.390883 | 0.215002 | 0.693845 | 0.488898 |
| MmugDNA.9377.1.S1_at   | MmugDNA.9377.1 | 5.68  | 5.73  | 0.03 | 0.29 | -1.03 | 0.243685 | 0.23599  | 0.595523 | 0.507056 |
| MmugDNA.9378.1.S1_at   | MmugDNA.9378.1 | 6.5   | 6.51  | 0.01 | 0.12 | -1.01 | 0.87815  | 0.308586 | 0.95108  | 0.564575 |
| MmugDNA.9379.1.S1_at   | MmugDNA.9379.1 | 4.72  | 4.04  | 0.15 | 0.33 | 1.6   | 0.098541 | 0.107005 | 0.458486 | 0.36958  |
| MmugDNA.938.1.S1_at    | MmugDNA.938.1  | 7.98  | 7.88  | 0.17 | 0.33 | 1.07  | 0.991267 | 0.639429 | 0.996914 | 0.788289 |
| MmugDNA.9380.1.S1_at   | MmugDNA.9380.1 | 4.84  | 4.94  | 0.14 | 0.15 | -1.07 | 0.191446 | 0.132793 | 0.554456 | 0.404544 |
| MmugDNA.9381.1.S1_at   | MmugDNA.9381.1 | 3.39  | 3.33  | 0.04 | 0.04 | 1.05  | 0.087218 | 0.089588 | 0.441182 | 0.343811 |
| MmugDNA.9382.1.S1_at   | MmugDNA.9382.1 | 3.61  | 3.44  | 0.15 | 0.09 | 1.12  | 0.431424 | 0.817622 | 0.71858  | 0.894787 |
| MmugDNA.9383.1.S1_at   | MmugDNA.9383.1 | 5.18  | 5.26  | 0.42 | 0.04 | -1.06 | 0.363345 | 0.329746 | 0.676615 | 0.578874 |
| MmugDNA.9384.1.S1_at   | MmugDNA.9384.1 | 12.36 | 12.4  | 0.17 | 0.14 | -1.03 | 0.922832 | 0.852522 | 0.970065 | 0.916196 |
| MmugDNA.9385.1.S1_at   | MmugDNA.9385.1 | 6.05  | 5.99  | 0.08 | 0.07 | 1.04  | 0.684771 | 0.305927 | 0.858795 | 0.562732 |
| MmugDNA.9386.1.S1_at   | MmugDNA.9386.1 | 5.32  | 5.45  | 0.51 | 0.13 | -1.1  | 0.537342 | 0.737966 | 0.780008 | 0.848158 |
| MmugDNA.9387.1.S1_at   | MmugDNA.9387.1 | 5.01  | 5.01  | 0.19 | 0.1  | -1    | 0.703311 | 0.301251 | 0.868993 | 0.559356 |
| MmugDNA.9389.1.S1_at   | MmugDNA.9389.1 | 2.89  | 2.85  | 0.11 | 0.05 | 1.03  | 0.184179 | 0.434382 | 0.548032 | 0.654536 |
| MmugDNA.939.1.S1_at    | MmugDNA.939.1  | 9.11  | 10.56 | 0.37 | 0.17 | -2.73 | 0.003007 | 0.001467 | 0.171022 | 0.058401 |
| MmugDNA.9390.1.S1_at   | MmugDNA.9390.1 | 3.87  | 3.62  | 0.25 | 0.16 | 1.19  | 0.516141 | 0.648148 | 0.767807 | 0.794002 |
| MmugDNA.9391.1.S1_at   | MmugDNA.9391.1 | 6.52  | 6.47  | 0.43 | 0.18 | 1.04  | 0.566816 | 0.398538 | 0.797783 | 0.629458 |
| MmugDNA.9392.1.S1_at   | MmugDNA.9392.1 | 12.12 | 12.4  | 0.63 | 1.02 | -1.22 | 0.931486 | 0.678872 | 0.973509 | 0.812474 |
| MmugDNA.9393.1.S1_at   | MmugDNA.9393.1 | 5.28  | 5.25  | 0.24 | 0    | 1.02  | 0.833525 | 0.927938 | 0.932352 | 0.959116 |
| MmugDNA.9396.1.S1_at   | MmugDNA.9396.1 | 9.73  | 10.29 | 0.21 | 0.2  | -1.47 | 0.03825  | 0.015243 | 0.343774 | 0.156859 |
| MmugDNA.9397.1.S1_at   | MmugDNA.9397.1 | 3.73  | 4.02  | 0.14 | 0.02 | -1.22 | 0.009545 | 0.004746 | 0.226076 | 0.096064 |
| MmugDNA.9398.1.S1_at   | MmugDNA.9398.1 | 11.33 | 11.85 | 0.24 | 0.22 | -1.43 | 0.04385  | 0.012346 | 0.357071 | 0.143697 |
| MmugDNA.9399.1.S1_at   | MmugDNA.9399.1 | 6.55  | 6.45  | 0.14 | 0.15 | 1.08  | 0.733695 | 0.663911 | 0.885206 | 0.803242 |

|                        |                |       |       |      |      |       |          |          |          |          |
|------------------------|----------------|-------|-------|------|------|-------|----------|----------|----------|----------|
| MmugDNA.940.1.S1_at    | MmugDNA.940.1  | 3.01  | 2.82  | 0.14 | 0.5  | 1.14  | 0.58033  | 0.202888 | 0.804567 | 0.477312 |
| MmugDNA.9402.1.S1_at   | MmugDNA.9402.1 | 11.75 | 11.74 | 0.14 | 0.1  | 1     | 0.479056 | 0.27716  | 0.747575 | 0.541154 |
| MmugDNA.9402.1.S1_s_at | MmugDNA.9402.1 | 10.14 | 10.26 | 0.25 | 0.2  | -1.08 | 0.186566 | 0.228143 | 0.550106 | 0.500327 |
| MmugDNA.9405.1.S1_at   | MmugDNA.9405.1 | 8.14  | 8.39  | 0.14 | 0.54 | -1.19 | 0.178379 | 0.159915 | 0.542772 | 0.435987 |
| MmugDNA.9406.1.S1_at   | MmugDNA.9406.1 | 6.57  | 7.14  | 1.17 | 0.5  | -1.49 | 0.927181 | 0.535173 | 0.971987 | 0.720821 |
| MmugDNA.9407.1.S1_at   | MmugDNA.9407.1 | 3.99  | 4.12  | 0.18 | 0.14 | -1.1  | 0.647183 | 0.071315 | 0.841246 | 0.313345 |
| MmugDNA.9408.1.S1_at   | MmugDNA.9408.1 | 2.96  | 2.87  | 0.01 | 0.11 | 1.06  | 0.212179 | 0.499752 | 0.572526 | 0.698494 |
| MmugDNA.9409.1.S1_at   | MmugDNA.9409.1 | 4.47  | 4.47  | 0.23 | 0.03 | -1    | 0.967099 | 0.958443 | 0.987726 | 0.976452 |
| MmugDNA.9410.1.S1_at   | MmugDNA.9410.1 | 5.81  | 5.8   | 0.25 | 0.3  | 1.01  | 0.847838 | 0.933086 | 0.939063 | 0.962002 |
| MmugDNA.9411.1.S1_at   | MmugDNA.9411.1 | 4.78  | 4.78  | 0.08 | 0.14 | -1    | 0.593035 | 0.884839 | 0.811221 | 0.934382 |
| MmugDNA.9412.1.S1_at   | MmugDNA.9412.1 | 3.36  | 3.33  | 0.11 | 0.38 | 1.02  | 0.944389 | 0.96382  | 0.978789 | 0.979909 |
| MmugDNA.9414.1.S1_at   | MmugDNA.9414.1 | 3.66  | 3.61  | 0.72 | 0.34 | 1.03  | 0.59802  | 0.423108 | 0.813917 | 0.646145 |
| MmugDNA.9416.1.S1_at   | MmugDNA.9416.1 | 2.98  | 3.16  | 0.07 | 0.17 | -1.13 | 0.273283 | 0.094674 | 0.616738 | 0.351481 |
| MmugDNA.9418.1.S1_at   | MmugDNA.9418.1 | 13.45 | 13.29 | 0.11 | 0.09 | 1.11  | 0.115126 | 0.130096 | 0.478469 | 0.401724 |
| MmugDNA.9419.1.S1_at   | MmugDNA.9419.1 | 3.09  | 3.08  | 0.05 | 0.05 | 1.01  | 0.57805  | 0.830591 | 0.803619 | 0.902794 |
| MmugDNA.942.1.S1_at    | MmugDNA.942.1  | 6.24  | 6.32  | 0.04 | 0.11 | -1.06 | 0.140008 | 0.537035 | 0.507892 | 0.722236 |
| MmugDNA.9421.1.S1_at   | MmugDNA.9421.1 | 10.49 | 11.02 | 0.13 | 0.64 | -1.44 | 0.292956 | 0.37601  | 0.630264 | 0.613815 |
| MmugDNA.9423.1.S1_at   | MmugDNA.9423.1 | 6.4   | 6.93  | 0.31 | 0.51 | -1.44 | 0.188557 | 0.197265 | 0.551538 | 0.472213 |
| MmugDNA.9425.1.S1_at   | MmugDNA.9425.1 | 3.9   | 3.91  | 0.07 | 0.15 | -1.01 | 0.688789 | 0.87873  | 0.861169 | 0.930817 |
| MmugDNA.9426.1.S1_at   | MmugDNA.9426.1 | 3.04  | 2.86  | 0.35 | 0.07 | 1.14  | 0.369418 | 0.523005 | 0.680714 | 0.713429 |
| MmugDNA.9427.1.S1_at   | MmugDNA.9427.1 | 11.9  | 11.44 | 0.13 | 1.21 | 1.38  | 0.174515 | 0.139761 | 0.538194 | 0.413109 |
| MmugDNA.9428.1.S1_at   | MmugDNA.9428.1 | 4.2   | 4.2   | 0.01 | 0.11 | 1     | 0.623654 | 0.181124 | 0.828027 | 0.457582 |
| MmugDNA.9429.1.S1_at   | MmugDNA.9429.1 | 13.06 | 12.57 | 0.08 | 0.16 | 1.4   | 0.006451 | 0.008204 | 0.199625 | 0.120272 |
| MmugDNA.943.1.S1_at    | MmugDNA.943.1  | 4.47  | 4.81  | 0.38 | 0.1  | -1.26 | 0.225077 | 0.235783 | 0.58306  | 0.506949 |
| MmugDNA.9430.1.S1_at   | MmugDNA.9430.1 | 4.97  | 5.04  | 0.11 | 0.07 | -1.05 | 0.485049 | 0.45969  | 0.750727 | 0.671948 |
| MmugDNA.9431.1.S1_at   | MmugDNA.9431.1 | 3.54  | 3.56  | 0.08 | 0.06 | -1.01 | 0.695406 | 0.219703 | 0.864936 | 0.493336 |
| MmugDNA.9432.1.S1_at   | MmugDNA.9432.1 | 5.23  | 5.35  | 0.38 | 0.03 | -1.08 | 0.712943 | 0.315506 | 0.874274 | 0.569004 |
| MmugDNA.9436.1.S1_at   | MmugDNA.9436.1 | 7.7   | 6.44  | 0.69 | 0.08 | 2.39  | 0.020044 | 0.014004 | 0.276484 | 0.151595 |
| MmugDNA.9437.1.S1_at   | MmugDNA.9437.1 | 10.41 | 10.94 | 0.13 | 0.06 | -1.45 | 0.004236 | 0.001067 | 0.181919 | 0.051835 |
| MmugDNA.9439.1.S1_at   | MmugDNA.9439.1 | 4.63  | 4.6   | 0.03 | 0    | 1.02  | 0.176127 | 0.420656 | 0.539664 | 0.644323 |
| MmugDNA.944.1.S1_at    | MmugDNA.944.1  | 12.67 | 12.54 | 0.18 | 0.08 | 1.09  | 0.536819 | 0.243115 | 0.779659 | 0.513356 |
| MmugDNA.9441.1.S1_at   | MmugDNA.9441.1 | 11.36 | 10.36 | 0.06 | 0.67 | 1.99  | 0.024332 | 0.022188 | 0.294535 | 0.186424 |
| MmugDNA.9443.1.S1_at   | MmugDNA.9443.1 | 3.22  | 3.18  | 0.17 | 0.17 | 1.03  | 0.401527 | 0.514846 | 0.700876 | 0.707919 |
| MmugDNA.9444.1.S1_at   | MmugDNA.9444.1 | 7.21  | 7     | 0.65 | 0.78 | 1.15  | 0.156664 | 0.292243 | 0.521541 | 0.552363 |
| MmugDNA.9445.1.S1_at   | MmugDNA.9445.1 | 10.17 | 9.96  | 0.02 | 0.07 | 1.16  | 0.005358 | 0.008269 | 0.191107 | 0.12078  |
| MmugDNA.9445.1.S1_s_at | MmugDNA.9445.1 | 8.82  | 8.71  | 0.06 | 0.15 | 1.08  | 0.263333 | 0.386503 | 0.609348 | 0.621626 |
| MmugDNA.9446.1.S1_at   | MmugDNA.9446.1 | 4.69  | 4.61  | 0.14 | 0.12 | 1.06  | 0.82611  | 0.746556 | 0.929365 | 0.852872 |
| MmugDNA.9447.1.S1_at   | MmugDNA.9447.1 | 5.99  | 7.35  | 0.16 | 0.63 | -2.57 | 0.01022  | 0.003228 | 0.228247 | 0.082124 |
| MmugDNA.9448.1.S1_at   | MmugDNA.9448.1 | 4.88  | 4.89  | 0.4  | 0.39 | -1.01 | 0.97904  | 0.443434 | 0.992315 | 0.661218 |
| MmugDNA.9449.1.S1_at   | MmugDNA.9449.1 | 8.6   | 6.81  | 0.19 | 0.09 | 3.48  | 0.00015  | 0.000034 | 0.112653 | 0.023031 |
| MmugDNA.945.1.S1_s_at  | MmugDNA.945.1  | 3.34  | 3.32  | 0.17 | 0.26 | 1.01  | 0.493421 | 0.368614 | 0.756176 | 0.608107 |

|                         |                 |       |       |      |      |        |          |          |          |          |
|-------------------------|-----------------|-------|-------|------|------|--------|----------|----------|----------|----------|
| MmugDNA.9450.1.S1_at    | MmugDNA.9450.1  | 5.4   | 4.24  | 0.23 | 0.11 | 2.23   | 0.002188 | 0.000383 | 0.159615 | 0.037273 |
| MmugDNA.9451.1.S1_at    | MmugDNA.9451.1  | 4.53  | 4.57  | 0.14 | 0.1  | -1.02  | 0.555608 | 0.653253 | 0.791454 | 0.797335 |
| MmugDNA.9453.1.S1_at    | MmugDNA.9453.1  | 8.28  | 9.45  | 0.35 | 0.91 | -2.25  | 0.15736  | 0.185608 | 0.522148 | 0.461574 |
| MmugDNA.9454.1.S1_at    | MmugDNA.9454.1  | 10.15 | 9.6   | 0.33 | 0.3  | 1.47   | 0.184972 | 0.239729 | 0.548431 | 0.510443 |
| MmugDNA.9455.1.S1_at    | MmugDNA.9455.1  | 5.47  | 6.65  | 0.28 | 0.74 | -2.26  | 0.03406  | 0.027625 | 0.331126 | 0.207522 |
| MmugDNA.9457.1.S1_at    | MmugDNA.9457.1  | 8.81  | 9.01  | 0.29 | 0.06 | -1.14  | 0.561943 | 0.729589 | 0.795052 | 0.843613 |
| MmugDNA.9458.1.S1_at    | MmugDNA.9458.1  | 7.49  | 6.88  | 0.17 | 0.49 | 1.52   | 0.328184 | 0.370517 | 0.654312 | 0.609573 |
| MmugDNA.9459.1.S1_x_at  | MmugDNA.9459.1  | 4.26  | 3.99  | 0.33 | 0.24 | 1.21   | 0.265045 | 0.233094 | 0.61074  | 0.504456 |
| MmugDNA.946.1.S1_at     | MmugDNA.946.1   | 6.78  | 6.9   | 0.33 | 0.29 | -1.08  | 0.235967 | 0.323453 | 0.589893 | 0.574466 |
| MmugDNA.9460.1.S1_at    | MmugDNA.9460.1  | 4.17  | 4.35  | 0.12 | 0.11 | -1.13  | 0.6505   | 0.65292  | 0.842789 | 0.797125 |
| MmugDNA.9461.1.S1_at    | MmugDNA.9461.1  | 3.89  | 3.59  | 0.08 | 0.15 | 1.24   | 0.051327 | 0.052747 | 0.376001 | 0.275315 |
| MmugDNA.9463.1.S1_at    | MmugDNA.9463.1  | 3.41  | 3.37  | 0.29 | 0.12 | 1.03   | 0.333921 | 0.265628 | 0.658024 | 0.531468 |
| MmugDNA.9464.1.S1_at    | MmugDNA.9464.1  | 8.99  | 8.95  | 0.08 | 0.09 | 1.03   | 0.252397 | 0.229234 | 0.601361 | 0.501527 |
| MmugDNA.9467.1.S1_at    | MmugDNA.9467.1  | 7     | 6.26  | 0.4  | 1.05 | 1.66   | 0.884843 | 0.722824 | 0.953839 | 0.839457 |
| MmugDNA.9468.1.S1_at    | MmugDNA.9468.1  | 3.34  | 3.45  | 0.09 | 0.09 | -1.08  | 0.529813 | 0.194448 | 0.776323 | 0.469533 |
| MmugDNA.18446.1.S1_s_at | MmugDNA.18446.1 | 9.8   | 10.21 | 0.77 | 0.98 | -1.33  | 0.921483 | 0.286802 | 0.969398 | 0.548149 |
| MmugDNA.9472.1.S1_at    | MmugDNA.9472.1  | 9.81  | 9.58  | 0.27 | 0.64 | 1.18   | 0.171625 | 0.203301 | 0.535232 | 0.477517 |
| MmugDNA.9473.1.S1_at    | MmugDNA.9473.1  | 7.18  | 11.06 | 0.57 | 2.79 | -14.79 | 0.196571 | 0.11571  | 0.559808 | 0.382814 |
| MmugDNA.9474.1.S1_at    | MmugDNA.9474.1  | 3.32  | 3.33  | 0.12 | 0.03 | -1     | 0.409285 | 0.842513 | 0.705864 | 0.910315 |
| MmugDNA.9475.1.S1_at    | MmugDNA.9475.1  | 6.32  | 8.19  | 0.16 | 1.49 | -3.64  | 0.106572 | 0.050156 | 0.467176 | 0.269105 |
| MmugDNA.9476.1.S1_at    | MmugDNA.9476.1  | 5.59  | 5.69  | 0.12 | 0.13 | -1.07  | 0.721406 | 0.116818 | 0.878074 | 0.384133 |
| MmugDNA.9477.1.S1_at    | MmugDNA.9477.1  | 5.26  | 4.25  | 0.98 | 1.15 | 2.02   | 0.270766 | 0.348526 | 0.615052 | 0.592609 |
| MmugDNA.9478.1.S1_at    | MmugDNA.9478.1  | 3.63  | 3.41  | 0.36 | 1.03 | 1.17   | 0.529632 | 0.126102 | 0.77625  | 0.39672  |
| MmugDNA.9480.1.S1_at    | MmugDNA.9480.1  | 3.58  | 3.76  | 0.11 | 0.17 | -1.14  | 0.846196 | 0.99039  | 0.938294 | 0.994548 |
| MmugDNA.9482.1.S1_at    | MmugDNA.9482.1  | 5.25  | 5.35  | 0.13 | 0.26 | -1.07  | 0.351746 | 0.424581 | 0.669172 | 0.647146 |
| MmugDNA.9483.1.S1_at    | MmugDNA.9483.1  | 5.89  | 7.37  | 0.38 | 0.41 | -2.79  | 0.008301 | 0.004044 | 0.217127 | 0.090281 |
| MmugDNA.9484.1.S1_at    | MmugDNA.9484.1  | 6.04  | 6.02  | 0.2  | 0.08 | 1.02   | 0.704405 | 0.880272 | 0.869588 | 0.931571 |
| MmugDNA.9485.1.S1_at    | MmugDNA.9485.1  | 5.17  | 5.3   | 0.13 | 0.38 | -1.1   | 0.200717 | 0.151417 | 0.5634   | 0.426121 |
| MmugDNA.9486.1.S1_at    | MmugDNA.9486.1  | 8.64  | 7.23  | 0.17 | 0.99 | 2.65   | 0.079947 | 0.029448 | 0.430176 | 0.213368 |
| MmugDNA.9487.1.S1_at    | MmugDNA.9487.1  | 9.81  | 9.86  | 0.03 | 0.24 | -1.03  | 0.767743 | 0.780018 | 0.902473 | 0.872435 |
| MmugDNA.9489.1.S1_at    | MmugDNA.9489.1  | 3.42  | 3.58  | 0.12 | 0.73 | -1.12  | 0.240154 | 0.233159 | 0.593037 | 0.504458 |
| MmugDNA.949.1.S1_at     | MmugDNA.949.1   | 7.89  | 8.06  | 0.5  | 0.82 | -1.12  | 0.387853 | 0.508909 | 0.692145 | 0.703911 |
| MmugDNA.9490.1.S1_at    | MmugDNA.9490.1  | 4.53  | 4.57  | 0.08 | 0.21 | -1.03  | 0.970027 | 0.999369 | 0.988483 | 0.999769 |
| MmugDNA.9492.1.S1_at    | MmugDNA.9492.1  | 7.69  | 7.63  | 0.4  | 0.59 | 1.04   | 0.206295 | 0.263748 | 0.568603 | 0.530052 |
| MmugDNA.9493.1.S1_at    | MmugDNA.9493.1  | 7.41  | 8.08  | 0.82 | 0.69 | -1.6   | 0.112772 | 0.122523 | 0.475249 | 0.392427 |
| MmugDNA.9494.1.S1_at    | MmugDNA.9494.1  | 6.73  | 6.96  | 0.15 | 0.35 | -1.17  | 0.354641 | 0.366732 | 0.670604 | 0.606498 |
| MmugDNA.9498.1.S1_at    | MmugDNA.9498.1  | 9.28  | 8.36  | 0.48 | 1.3  | 1.88   | 0.093671 | 0.069994 | 0.450966 | 0.310761 |
| MmugDNA.9499.1.S1_at    | MmugDNA.9499.1  | 7.92  | 7.45  | 0.4  | 0.28 | 1.39   | 0.066841 | 0.082245 | 0.406981 | 0.331091 |
| MmugDNA.95.1.S1_at      | MmugDNA.95.1    | 7.06  | 6.99  | 0.03 | 0.2  | 1.05   | 0.530847 | 0.638844 | 0.776921 | 0.787894 |
| MmugDNA.9501.1.S1_at    | MmugDNA.9501.1  | 4.08  | 3.45  | 0.44 | 0.18 | 1.55   | 0.246936 | 0.141937 | 0.598047 | 0.415477 |
| MmugDNA.9502.1.S1_at    | MmugDNA.9502.1  | 6.54  | 6.54  | 0.07 | 0.12 | -1.01  | 0.748772 | 0.190499 | 0.892573 | 0.465906 |

|                       |                |       |       |      |      |       |          |          |          |          |
|-----------------------|----------------|-------|-------|------|------|-------|----------|----------|----------|----------|
| MmugDNA.9503.1.S1_at  | MmugDNA.9503.1 | 5.11  | 5.7   | 0.17 | 0.55 | -1.5  | 0.124049 | 0.092675 | 0.489759 | 0.348751 |
| MmugDNA.9504.1.S1_at  | MmugDNA.9504.1 | 6.31  | 6.27  | 1.03 | 0.36 | 1.03  | 0.870914 | 0.865684 | 0.948399 | 0.923638 |
| MmugDNA.9505.1.S1_at  | MmugDNA.9505.1 | 4.74  | 4.78  | 0.28 | 0.21 | -1.03 | 0.768487 | 0.933751 | 0.902719 | 0.9623   |
| MmugDNA.9506.1.S1_at  | MmugDNA.9506.1 | 8.47  | 9.08  | 0.32 | 0.07 | -1.53 | 0.08359  | 0.210376 | 0.435843 | 0.48426  |
| MmugDNA.9507.1.S1_at  | MmugDNA.9507.1 | 10.06 | 9.6   | 0.09 | 0.45 | 1.38  | 0.149167 | 0.129363 | 0.514001 | 0.400748 |
| MmugDNA.9508.1.S1_at  | MmugDNA.9508.1 | 6.78  | 5.97  | 0.74 | 0.75 | 1.75  | 0.200717 | 0.264149 | 0.5634   | 0.530214 |
| MmugDNA.9509.1.S1_at  | MmugDNA.9509.1 | 5.77  | 5.17  | 0.23 | 0.11 | 1.51  | 0.006919 | 0.002115 | 0.202257 | 0.068023 |
| MmugDNA.951.1.S1_at   | MmugDNA.951.1  | 9.89  | 8.42  | 0.46 | 0.77 | 2.77  | 0.076121 | 0.041623 | 0.424738 | 0.24887  |
| MmugDNA.9510.1.S1_at  | MmugDNA.9510.1 | 6.11  | 5.74  | 0.3  | 0    | 1.29  | 0.159669 | 0.065342 | 0.524539 | 0.30137  |
| MmugDNA.9511.1.S1_at  | MmugDNA.9511.1 | 5.21  | 4.61  | 0.13 | 0.64 | 1.52  | 0.45693  | 0.065824 | 0.734612 | 0.301933 |
| MmugDNA.9512.1.S1_at  | MmugDNA.9512.1 | 3.04  | 3.07  | 0.07 | 0.08 | -1.02 | 0.153925 | 0.497617 | 0.518553 | 0.696935 |
| MmugDNA.9514.1.S1_at  | MmugDNA.9514.1 | 10.88 | 10.38 | 0.12 | 0.2  | 1.42  | 0.03246  | 0.037208 | 0.324971 | 0.237285 |
| MmugDNA.9516.1.S1_at  | MmugDNA.9516.1 | 9.89  | 10.21 | 0.48 | 0.07 | -1.24 | 0.209064 | 0.218442 | 0.570667 | 0.492009 |
| MmugDNA.9518.1.S1_at  | MmugDNA.9518.1 | 4.42  | 5.23  | 0.35 | 0.89 | -1.74 | 0.224468 | 0.285557 | 0.582716 | 0.547395 |
| MmugDNA.9519.1.S1_at  | MmugDNA.9519.1 | 4.5   | 3.84  | 0.33 | 0.42 | 1.58  | 0.286517 | 0.081556 | 0.625572 | 0.329764 |
| MmugDNA.952.1.S1_at   | MmugDNA.952.1  | 10.17 | 10.84 | 0.27 | 0.59 | -1.59 | 0.481588 | 0.521166 | 0.749268 | 0.712273 |
| MmugDNA.9520.1.S1_at  | MmugDNA.9520.1 | 6.1   | 6.12  | 0.13 | 0.46 | -1.01 | 0.435419 | 0.302758 | 0.721224 | 0.560307 |
| MmugDNA.9525.1.S1_at  | MmugDNA.9525.1 | 12.04 | 11.67 | 0.2  | 0.17 | 1.29  | 0.118163 | 0.060616 | 0.482295 | 0.292801 |
| MmugDNA.9527.1.S1_at  | MmugDNA.9527.1 | 7.39  | 6.63  | 0.41 | 0.4  | 1.7   | 0.048917 | 0.005072 | 0.370009 | 0.09907  |
| MmugDNA.9530.1.S1_at  | MmugDNA.9530.1 | 3.41  | 3.31  | 0.27 | 0.08 | 1.07  | 0.76802  | 0.914766 | 0.902473 | 0.9521   |
| MmugDNA.9531.1.S1_at  | MmugDNA.9531.1 | 3.89  | 3.94  | 0.05 | 0.16 | -1.03 | 0.159332 | 0.113123 | 0.524174 | 0.379122 |
| MmugDNA.9532.1.S1_at  | MmugDNA.9532.1 | 3.87  | 3.83  | 0.16 | 0.02 | 1.03  | 0.713063 | 0.889819 | 0.874274 | 0.937225 |
| MmugDNA.9533.1.S1_at  | MmugDNA.9533.1 | 5.58  | 5.58  | 0    | 0.09 | -1    | 0.877785 | 0.52727  | 0.951009 | 0.715915 |
| MmugDNA.9534.1.S1_at  | MmugDNA.9534.1 | 7.97  | 8.35  | 0.19 | 0.81 | -1.3  | 0.48236  | 0.737092 | 0.749404 | 0.847795 |
| MmugDNA.9535.1.S1_at  | MmugDNA.9535.1 | 3.33  | 3.34  | 0.05 | 0.13 | -1    | 0.716239 | 0.69715  | 0.875374 | 0.824045 |
| MmugDNA.9538.1.S1_at  | MmugDNA.9538.1 | 4.31  | 4.68  | 0.28 | 0.5  | -1.29 | 0.227513 | 0.261269 | 0.585103 | 0.527739 |
| MmugDNA.9539.1.S1_at  | MmugDNA.9539.1 | 7.94  | 10.39 | 0.26 | 0.09 | -5.46 | 0.000128 | 0.000009 | 0.112653 | 0.016421 |
| MmugDNA.9540.1.S1_at  | MmugDNA.9540.1 | 4.26  | 4.45  | 0.44 | 0.32 | -1.14 | 0.59412  | 0.534737 | 0.811686 | 0.720524 |
| MmugDNA.9541.1.S1_at  | MmugDNA.9541.1 | 4.41  | 4.74  | 0.16 | 0.15 | -1.26 | 0.109117 | 0.364156 | 0.470811 | 0.604488 |
| MmugDNA.9542.1.S1_at  | MmugDNA.9542.1 | 6.1   | 5.86  | 0.06 | 0.32 | 1.18  | 0.260354 | 0.177381 | 0.607157 | 0.453742 |
| MmugDNA.9543.1.S1_at  | MmugDNA.9543.1 | 3.97  | 4.27  | 0.12 | 0.19 | -1.23 | 0.320581 | 0.183645 | 0.649472 | 0.459681 |
| MmugDNA.9544.1.S1_at  | MmugDNA.9544.1 | 3.71  | 3.73  | 0.09 | 0.16 | -1.01 | 0.524529 | 0.744829 | 0.773192 | 0.852198 |
| MmugDNA.9547.1.S1_at  | MmugDNA.9547.1 | 3.42  | 3.51  | 0.03 | 0.03 | -1.07 | 0.019198 | 0.513385 | 0.273146 | 0.706881 |
| MmugDNA.9549.1.S1_at  | MmugDNA.9549.1 | 7.95  | 7.07  | 0.12 | 0.55 | 1.84  | 0.053821 | 0.042661 | 0.380879 | 0.251037 |
| MmugDNA.955.1.S1_at   | MmugDNA.955.1  | 6.78  | 6.85  | 0.13 | 0.05 | -1.05 | 0.154265 | 0.147833 | 0.518796 | 0.42217  |
| MmugDNA.9550.1.S1_at  | MmugDNA.9550.1 | 8.69  | 8.85  | 0.19 | 0.23 | -1.12 | 0.247684 | 0.316615 | 0.598903 | 0.569963 |
| MmugDNA.9551.1.S1_at  | MmugDNA.9551.1 | 12.64 | 12.67 | 0.03 | 0.07 | -1.02 | 0.388506 | 0.003679 | 0.692586 | 0.086591 |
| MmugDNA.9552.1.S1_at  | MmugDNA.9552.1 | 5.78  | 5.48  | 0.31 | 0.3  | 1.23  | 0.336025 | 0.559708 | 0.65921  | 0.736365 |
| MmugDNA.9554.1.S1_at  | MmugDNA.9554.1 | 2.86  | 2.84  | 0.15 | 0.15 | 1.02  | 0.723754 | 0.633476 | 0.879238 | 0.784173 |
| MmugDNA.956.1.S1_s_at | MmugDNA.956.1  | 9.71  | 9.12  | 0.05 | 0.95 | 1.5   | 0.34782  | 0.446407 | 0.66672  | 0.662842 |
| MmugDNA.9561.1.S1_at  | MmugDNA.9561.1 | 8.62  | 8.91  | 0.08 | 0.46 | -1.23 | 0.21683  | 0.27932  | 0.576422 | 0.542962 |

|                        |                |       |       |      |      |       |          |          |          |          |
|------------------------|----------------|-------|-------|------|------|-------|----------|----------|----------|----------|
| MmugDNA.9562.1.S1_at   | MmugDNA.9562.1 | 3.61  | 3.68  | 0.15 | 0.17 | -1.04 | 0.49285  | 0.67798  | 0.755888 | 0.811865 |
| MmugDNA.9563.1.S1_at   | MmugDNA.9563.1 | 5.3   | 5.3   | 0.07 | 0.2  | 1     | 0.575042 | 0.165652 | 0.80205  | 0.441925 |
| MmugDNA.9564.1.S1_at   | MmugDNA.9564.1 | 4.97  | 5.09  | 0.27 | 0.81 | -1.09 | 0.552574 | 0.750829 | 0.78961  | 0.855074 |
| MmugDNA.9565.1.S1_at   | MmugDNA.9565.1 | 6.97  | 7.12  | 0.04 | 0.17 | -1.11 | 0.152377 | 0.108328 | 0.51708  | 0.371601 |
| MmugDNA.9566.1.S1_at   | MmugDNA.9566.1 | 5.86  | 6.04  | 0.07 | 0.33 | -1.13 | 0.797794 | 0.733727 | 0.916116 | 0.845822 |
| MmugDNA.9567.1.S1_at   | MmugDNA.9567.1 | 6.59  | 6.14  | 0.41 | 0.3  | 1.37  | 0.15334  | 0.187865 | 0.517783 | 0.463959 |
| MmugDNA.9568.1.S1_at   | MmugDNA.9568.1 | 3.06  | 2.93  | 0.29 | 0.73 | 1.09  | 0.79815  | 0.713161 | 0.916369 | 0.833655 |
| MmugDNA.9569.1.S1_at   | MmugDNA.9569.1 | 3.81  | 3.67  | 0.35 | 0.14 | 1.1   | 0.167974 | 0.068124 | 0.53244  | 0.307181 |
| MmugDNA.957.1.S1_x_at  | MmugDNA.957.1  | 12.76 | 12.84 | 0.16 | 0.27 | -1.06 | 0.946345 | 0.645001 | 0.979389 | 0.791993 |
| MmugDNA.9570.1.S1_at   | MmugDNA.9570.1 | 3.43  | 3.47  | 0.11 | 0.02 | -1.03 | 0.126127 | 0.167271 | 0.492228 | 0.443684 |
| MmugDNA.9571.1.S1_at   | MmugDNA.9571.1 | 10.25 | 11.26 | 0.12 | 0.18 | -2.01 | 0.000894 | 0.000057 | 0.139813 | 0.025666 |
| MmugDNA.9573.1.S1_at   | MmugDNA.9573.1 | 4.74  | 4.15  | 0.77 | 0.23 | 1.5   | 0.247389 | 0.244755 | 0.598469 | 0.514615 |
| MmugDNA.9574.1.S1_at   | MmugDNA.9574.1 | 3.37  | 3.21  | 0.14 | 0.14 | 1.12  | 0.568389 | 0.234076 | 0.798637 | 0.505319 |
| MmugDNA.9576.1.S1_at   | MmugDNA.9576.1 | 3.02  | 2.99  | 0.03 | 0.18 | 1.02  | 0.840543 | 0.95076  | 0.935775 | 0.972034 |
| MmugDNA.9577.1.S1_s_at | MmugDNA.9577.1 | 9.43  | 9.91  | 0.13 | 0.21 | -1.4  | 0.017978 | 0.019318 | 0.268362 | 0.174723 |
| MmugDNA.9579.1.S1_at   | MmugDNA.9579.1 | 3.45  | 3.52  | 0.27 | 0.14 | -1.05 | 0.158219 | 0.123056 | 0.523042 | 0.393015 |
| MmugDNA.9579.1.S1_x_at | MmugDNA.9579.1 | 2.99  | 3.2   | 0.26 | 0.15 | -1.15 | 0.151634 | 0.314348 | 0.516237 | 0.568273 |
| MmugDNA.958.1.S1_at    | MmugDNA.958.1  | 5.91  | 5.94  | 0.1  | 0.2  | -1.02 | 0.383501 | 0.526483 | 0.689416 | 0.715574 |
| MmugDNA.9583.1.S1_at   | MmugDNA.9583.1 | 5.72  | 5.93  | 0.64 | 0.43 | -1.16 | 0.431019 | 0.607536 | 0.718433 | 0.766417 |
| MmugDNA.9584.1.S1_at   | MmugDNA.9584.1 | 3.35  | 3.34  | 0.07 | 0.18 | 1.01  | 0.290738 | 0.412039 | 0.628456 | 0.638463 |
| MmugDNA.9585.1.S1_at   | MmugDNA.9585.1 | 6.67  | 7.5   | 0.54 | 0.74 | -1.77 | 0.491231 | 0.312301 | 0.754889 | 0.567015 |
| MmugDNA.9586.1.S1_at   | MmugDNA.9586.1 | 3.85  | 3.95  | 0.04 | 0.17 | -1.07 | 0.128339 | 0.100585 | 0.494376 | 0.359845 |
| MmugDNA.9587.1.S1_at   | MmugDNA.9587.1 | 8.42  | 8.32  | 0.28 | 0.27 | 1.07  | 0.316314 | 0.37517  | 0.647209 | 0.613238 |
| MmugDNA.9589.1.S1_at   | MmugDNA.9589.1 | 4.72  | 4.55  | 0.29 | 0.09 | 1.12  | 0.499516 | 0.088901 | 0.759212 | 0.34275  |
| MmugDNA.959.1.S1_at    | MmugDNA.959.1  | 8.8   | 8.67  | 0.17 | 0.26 | 1.09  | 0.147945 | 0.178304 | 0.513442 | 0.45464  |
| MmugDNA.9590.1.S1_at   | MmugDNA.9590.1 | 11.7  | 11.24 | 0.32 | 0.34 | 1.37  | 0.183054 | 0.08982  | 0.547134 | 0.34404  |
| MmugDNA.9593.1.S1_at   | MmugDNA.9593.1 | 4.95  | 3.88  | 0.72 | 0.21 | 2.1   | 0.126155 | 0.183081 | 0.492299 | 0.459493 |
| MmugDNA.9594.1.S1_at   | MmugDNA.9594.1 | 4.24  | 3.34  | 0.42 | 0.19 | 1.86  | 0.06249  | 0.049653 | 0.398319 | 0.267876 |
| MmugDNA.9596.1.S1_at   | MmugDNA.9596.1 | 3.77  | 3.8   | 0.28 | 0.21 | -1.02 | 0.952157 | 0.785138 | 0.982156 | 0.875623 |
| MmugDNA.9598.1.S1_at   | MmugDNA.9598.1 | 8.47  | 7.88  | 0.21 | 0.37 | 1.5   | 0.123853 | 0.162175 | 0.489589 | 0.438335 |
| MmugDNA.9599.1.S1_at   | MmugDNA.9599.1 | 4.3   | 4.29  | 0.1  | 0.09 | 1     | 0.869824 | 0.789451 | 0.947917 | 0.878377 |
| MmugDNA.96.1.S1_at     | MmugDNA.96.1   | 8.94  | 9.99  | 0.51 | 0.68 | -2.06 | 0.123512 | 0.132647 | 0.489253 | 0.404544 |
| MmugDNA.960.1.S1_at    | MmugDNA.960.1  | 8.15  | 8.56  | 0.67 | 0.48 | -1.33 | 0.933115 | 0.974903 | 0.973979 | 0.986264 |
| MmugDNA.9602.1.S1_at   | MmugDNA.9602.1 | 9.16  | 8.79  | 0.23 | 0.72 | 1.29  | 0.77148  | 0.305982 | 0.903848 | 0.562732 |
| MmugDNA.9606.1.S1_at   | MmugDNA.9606.1 | 10.28 | 10.13 | 0.07 | 0.33 | 1.11  | 0.488909 | 0.189642 | 0.753393 | 0.465297 |
| MmugDNA.9608.1.S1_at   | MmugDNA.9608.1 | 9.27  | 8.86  | 0.17 | 0.46 | 1.33  | 0.594166 | 0.469275 | 0.811686 | 0.678191 |
| MmugDNA.9609.1.S1_at   | MmugDNA.9609.1 | 8.75  | 7.19  | 1.01 | 1.2  | 2.94  | 0.120615 | 0.102778 | 0.485724 | 0.363305 |
| MmugDNA.961.1.S1_at    | MmugDNA.961.1  | 6.67  | 6.57  | 0.15 | 0.2  | 1.07  | 0.910464 | 0.357115 | 0.964602 | 0.598798 |
| MmugDNA.9611.1.S1_at   | MmugDNA.9611.1 | 8.48  | 8.12  | 0.14 | 0.52 | 1.28  | 0.44636  | 0.611794 | 0.728244 | 0.769583 |
| MmugDNA.9613.1.S1_at   | MmugDNA.9613.1 | 8.2   | 8.62  | 0.14 | 0.11 | -1.34 | 0.011807 | 0.001724 | 0.237691 | 0.062886 |
| MmugDNA.9616.1.S1_at   | MmugDNA.9616.1 | 12.83 | 11.98 | 0.12 | 0.27 | 1.8   | 0.008824 | 0.001393 | 0.221301 | 0.057005 |

|                        |                |       |       |      |      |       |          |          |          |          |
|------------------------|----------------|-------|-------|------|------|-------|----------|----------|----------|----------|
| MmugDNA.9617.1.S1_at   | MmugDNA.9617.1 | 4.05  | 4.18  | 0.08 | 0.3  | -1.09 | 0.656852 | 0.407103 | 0.845614 | 0.634734 |
| MmugDNA.9618.1.S1_at   | MmugDNA.9618.1 | 5.67  | 5.4   | 0.38 | 0.21 | 1.2   | 0.280545 | 0.36169  | 0.621702 | 0.602419 |
| MmugDNA.9619.1.S1_at   | MmugDNA.9619.1 | 10.88 | 10.9  | 0.1  | 0.14 | -1.01 | 0.921211 | 0.151315 | 0.969237 | 0.426073 |
| MmugDNA.962.1.S1_at    | MmugDNA.962.1  | 10.91 | 10.71 | 0.48 | 0.6  | 1.15  | 0.899113 | 0.49659  | 0.959711 | 0.696119 |
| MmugDNA.9620.1.S1_at   | MmugDNA.9620.1 | 8.17  | 8.27  | 0.27 | 0.85 | -1.07 | 0.352281 | 0.49611  | 0.669556 | 0.695877 |
| MmugDNA.9621.1.S1_at   | MmugDNA.9621.1 | 5.52  | 5.55  | 0.21 | 0.03 | -1.03 | 0.764315 | 0.840793 | 0.900711 | 0.909237 |
| MmugDNA.9622.1.S1_at   | MmugDNA.9622.1 | 7     | 9.17  | 0.87 | 0.53 | -4.51 | 0.024378 | 0.015155 | 0.294535 | 0.156391 |
| MmugDNA.9624.1.S1_at   | MmugDNA.9624.1 | 5.71  | 5.99  | 0.56 | 0.38 | -1.22 | 0.427375 | 0.041383 | 0.716187 | 0.248067 |
| MmugDNA.9625.1.S1_at   | MmugDNA.9625.1 | 10.24 | 10.12 | 0.13 | 0.52 | 1.08  | 0.635388 | 0.569525 | 0.83497  | 0.742452 |
| MmugDNA.9626.1.S1_at   | MmugDNA.9626.1 | 8.25  | 9.01  | 0.08 | 0.15 | -1.69 | 0.001613 | 0.000133 | 0.152612 | 0.029087 |
| MmugDNA.9627.1.S1_at   | MmugDNA.9627.1 | 6.53  | 8.24  | 0.78 | 1.44 | -3.26 | 0.159858 | 0.122939 | 0.524737 | 0.392923 |
| MmugDNA.9628.1.S1_at   | MmugDNA.9628.1 | 3.59  | 3.59  | 0.16 | 0.1  | 1     | 0.767783 | 0.593023 | 0.902473 | 0.758    |
| MmugDNA.963.1.S1_at    | MmugDNA.963.1  | 6.67  | 7     | 0.12 | 0.47 | -1.26 | 0.107434 | 0.064021 | 0.468045 | 0.299166 |
| MmugDNA.9630.1.S1_at   | MmugDNA.9630.1 | 5.15  | 5.05  | 0.05 | 0.1  | 1.07  | 0.592665 | 0.351547 | 0.811144 | 0.595094 |
| MmugDNA.9633.1.S1_at   | MmugDNA.9633.1 | 6.81  | 6.77  | 0.11 | 0.1  | 1.03  | 0.685904 | 0.581991 | 0.859534 | 0.750784 |
| MmugDNA.9635.1.S1_at   | MmugDNA.9635.1 | 8.78  | 7.96  | 0.3  | 0.37 | 1.77  | 0.036355 | 0.038779 | 0.339201 | 0.241916 |
| MmugDNA.9636.1.S1_at   | MmugDNA.9636.1 | 5.04  | 5.02  | 0.1  | 0.33 | 1.01  | 0.317992 | 0.391643 | 0.64802  | 0.625282 |
| MmugDNA.9637.1.S1_at   | MmugDNA.9637.1 | 3.8   | 4.11  | 0.11 | 0.4  | -1.23 | 0.331934 | 0.193815 | 0.656554 | 0.468847 |
| MmugDNA.9638.1.S1_at   | MmugDNA.9638.1 | 5.42  | 5.27  | 0.08 | 0.17 | 1.11  | 0.337164 | 0.403648 | 0.659871 | 0.632266 |
| MmugDNA.9640.1.S1_at   | MmugDNA.9640.1 | 5.34  | 5.28  | 0.03 | 0.08 | 1.04  | 0.284641 | 0.271695 | 0.624327 | 0.536577 |
| MmugDNA.9641.1.S1_at   | MmugDNA.9641.1 | 11.22 | 10.5  | 0.34 | 0.29 | 1.65  | 0.092496 | 0.061648 | 0.449183 | 0.295095 |
| MmugDNA.9643.1.S1_at   | MmugDNA.9643.1 | 5.07  | 5.06  | 0.09 | 0.09 | 1.01  | 0.934909 | 0.994157 | 0.974832 | 0.996438 |
| MmugDNA.9644.1.S1_at   | MmugDNA.9644.1 | 3.88  | 3.86  | 0.15 | 0.12 | 1.02  | 0.836731 | 0.156838 | 0.933991 | 0.432372 |
| MmugDNA.9645.1.S1_at   | MmugDNA.9645.1 | 5.01  | 5.01  | 0.08 | 0.07 | 1     | 0.231774 | 0.437123 | 0.587568 | 0.656547 |
| MmugDNA.9647.1.S1_at   | MmugDNA.9647.1 | 2.88  | 3.2   | 0.21 | 0.17 | -1.24 | 0.213244 | 0.178954 | 0.573532 | 0.455243 |
| MmugDNA.965.1.S1_at    | MmugDNA.965.1  | 11.95 | 11.41 | 0.15 | 0.17 | 1.45  | 0.028042 | 0.015699 | 0.309556 | 0.158742 |
| MmugDNA.9651.1.S1_at   | MmugDNA.9651.1 | 3.75  | 3.73  | 0.39 | 0.2  | 1.02  | 0.856043 | 0.700351 | 0.941845 | 0.826079 |
| MmugDNA.9653.1.S1_at   | MmugDNA.9653.1 | 9.48  | 9.07  | 0.27 | 0.39 | 1.33  | 0.2884   | 0.378146 | 0.626604 | 0.615438 |
| MmugDNA.9654.1.S1_at   | MmugDNA.9654.1 | 9.4   | 9.03  | 1    | 0.28 | 1.3   | 0.584163 | 0.794181 | 0.806924 | 0.881296 |
| MmugDNA.9655.1.S1_at   | MmugDNA.9655.1 | 10.01 | 9.95  | 0.32 | 0.1  | 1.05  | 0.823193 | 0.006599 | 0.928109 | 0.110088 |
| MmugDNA.9656.1.S1_at   | MmugDNA.9656.1 | 7.9   | 8.07  | 0.2  | 0.08 | -1.13 | 0.289384 | 0.140576 | 0.62741  | 0.413822 |
| MmugDNA.9657.1.S1_at   | MmugDNA.9657.1 | 5.18  | 5.28  | 0.26 | 0.13 | -1.07 | 0.345578 | 0.203772 | 0.665245 | 0.478031 |
| MmugDNA.9658.1.S1_at   | MmugDNA.9658.1 | 4.66  | 4.76  | 0.14 | 0    | -1.08 | 0.252038 | 0.024357 | 0.601234 | 0.195335 |
| MmugDNA.966.1.S1_at    | MmugDNA.966.1  | 6.36  | 6.48  | 0.07 | 0.14 | -1.09 | 0.482643 | 0.254208 | 0.749437 | 0.52252  |
| MmugDNA.9660.1.S1_at   | MmugDNA.9660.1 | 3.82  | 4.61  | 0.51 | 0.35 | -1.73 | 0.441837 | 0.650786 | 0.725191 | 0.795801 |
| MmugDNA.9661.1.S1_s_at | MmugDNA.9661.1 | 6.41  | 9.27  | 0.89 | 1.94 | -7.26 | 0.142006 | 0.065064 | 0.509305 | 0.301009 |
| MmugDNA.9663.1.S1_at   | MmugDNA.9663.1 | 6.18  | 6.01  | 0.1  | 0.12 | 1.12  | 0.099639 | 0.211991 | 0.459646 | 0.485975 |
| MmugDNA.9664.1.S1_s_at | MmugDNA.9664.1 | 8.63  | 8.81  | 0.17 | 0.29 | -1.13 | 0.151816 | 0.077406 | 0.516514 | 0.323204 |
| MmugDNA.9665.1.S1_at   | MmugDNA.9665.1 | 5.52  | 5.46  | 0.11 | 0.04 | 1.04  | 0.740702 | 0.435429 | 0.888749 | 0.655194 |
| MmugDNA.9666.1.S1_at   | MmugDNA.9666.1 | 6.4   | 5.87  | 0.22 | 0.02 | 1.45  | 0.006444 | 0.239079 | 0.199625 | 0.509827 |
| MmugDNA.9667.1.S1_at   | MmugDNA.9667.1 | 9.24  | 8.75  | 0.4  | 0.48 | 1.41  | 0.122051 | 0.116409 | 0.487069 | 0.383671 |

|                        |                |       |       |      |      |       |          |          |          |          |
|------------------------|----------------|-------|-------|------|------|-------|----------|----------|----------|----------|
| MmugDNA.9669.1.S1_at   | MmugDNA.9669.1 | 6.04  | 6.07  | 0.28 | 0.27 | -1.02 | 0.550489 | 0.660469 | 0.787936 | 0.801351 |
| MmugDNA.967.1.S1_at    | MmugDNA.967.1  | 4.45  | 4.4   | 0.23 | 0.25 | 1.03  | 0.836294 | 0.854518 | 0.93372  | 0.917099 |
| MmugDNA.9670.1.S1_at   | MmugDNA.9670.1 | 4.99  | 4.48  | 0.63 | 0.16 | 1.42  | 0.279569 | 0.140423 | 0.621136 | 0.413589 |
| MmugDNA.9671.1.S1_at   | MmugDNA.9671.1 | 3.5   | 3.71  | 0.1  | 0.19 | -1.15 | 0.179471 | 0.258598 | 0.543609 | 0.52584  |
| MmugDNA.9672.1.S1_s_at | MmugDNA.9672.1 | 8.32  | 7.35  | 0.16 | 0.38 | 1.96  | 0.033786 | 0.024344 | 0.330218 | 0.195284 |
| MmugDNA.9673.1.S1_at   | MmugDNA.9673.1 | 6.64  | 6.69  | 0.24 | 0.06 | -1.03 | 0.76451  | 0.165392 | 0.900792 | 0.441544 |
| MmugDNA.9674.1.S1_at   | MmugDNA.9674.1 | 3.45  | 3.52  | 0.18 | 0.23 | -1.05 | 0.897828 | 0.988321 | 0.95918  | 0.993461 |
| MmugDNA.9675.1.S1_at   | MmugDNA.9675.1 | 4.45  | 4.2   | 0.07 | 0.18 | 1.19  | 0.075056 | 0.07754  | 0.421797 | 0.323421 |
| MmugDNA.9676.1.S1_at   | MmugDNA.9676.1 | 4.71  | 4.77  | 0.02 | 0.05 | -1.04 | 0.175667 | 0.587071 | 0.539405 | 0.753998 |
| MmugDNA.9676.1.S1_s_at | MmugDNA.9676.1 | 6.33  | 6.25  | 0.93 | 0.17 | 1.06  | 0.656396 | 0.599846 | 0.845392 | 0.761621 |
| MmugDNA.9677.1.S1_at   | MmugDNA.9677.1 | 10.31 | 9.81  | 0.17 | 0.79 | 1.41  | 0.112588 | 0.127699 | 0.475092 | 0.398581 |
| MmugDNA.9678.1.S1_at   | MmugDNA.9678.1 | 7.37  | 6.93  | 0.43 | 0.43 | 1.35  | 0.258432 | 0.212197 | 0.60566  | 0.486081 |
| MmugDNA.968.1.S1_at    | MmugDNA.968.1  | 4.97  | 4.16  | 1.14 | 0.33 | 1.75  | 0.306391 | 0.362726 | 0.639579 | 0.603245 |
| MmugDNA.9680.1.S1_at   | MmugDNA.9680.1 | 4     | 3.91  | 0.18 | 0.21 | 1.07  | 0.448418 | 0.585723 | 0.729651 | 0.753003 |
| MmugDNA.9681.1.S1_at   | MmugDNA.9681.1 | 5.82  | 5.77  | 0.14 | 0.25 | 1.04  | 0.61033  | 0.31539  | 0.821014 | 0.568939 |
| MmugDNA.9684.1.S1_at   | MmugDNA.9684.1 | 5.7   | 5.64  | 0.08 | 0.11 | 1.04  | 0.653212 | 0.228272 | 0.844033 | 0.50046  |
| MmugDNA.9685.1.S1_at   | MmugDNA.9685.1 | 5.54  | 4.99  | 0.24 | 0.06 | 1.46  | 0.057164 | 0.093211 | 0.387483 | 0.34931  |
| MmugDNA.9687.1.S1_at   | MmugDNA.9687.1 | 3.1   | 3     | 0.09 | 0.3  | 1.08  | 0.735686 | 0.858719 | 0.886388 | 0.919548 |
| MmugDNA.9688.1.S1_at   | MmugDNA.9688.1 | 12.34 | 12.08 | 0.04 | 0.11 | 1.19  | 0.02861  | 0.029862 | 0.312031 | 0.214491 |
| MmugDNA.969.1.S1_at    | MmugDNA.969.1  | 3.76  | 3.57  | 0.22 | 0.1  | 1.14  | 0.191234 | 0.149849 | 0.554194 | 0.424463 |
| MmugDNA.9690.1.S1_at   | MmugDNA.9690.1 | 3.91  | 3.91  | 0.14 | 0.02 | 1     | 0.31823  | 0.170411 | 0.648194 | 0.447103 |
| MmugDNA.9691.1.S1_at   | MmugDNA.9691.1 | 8.56  | 8.51  | 0.38 | 0.34 | 1.03  | 0.946626 | 0.837744 | 0.979457 | 0.907286 |
| MmugDNA.9692.1.S1_at   | MmugDNA.9692.1 | 4.78  | 3.92  | 0.62 | 0.42 | 1.82  | 0.571908 | 0.309331 | 0.800433 | 0.564912 |
| MmugDNA.9693.1.S1_at   | MmugDNA.9693.1 | 2.72  | 2.68  | 0.13 | 0.06 | 1.02  | 0.62036  | 0.69169  | 0.826026 | 0.820652 |
| MmugDNA.9694.1.S1_at   | MmugDNA.9694.1 | 5.26  | 5.28  | 0.1  | 0.49 | -1.01 | 0.350049 | 0.481351 | 0.668304 | 0.686374 |
| MmugDNA.9695.1.S1_at   | MmugDNA.9695.1 | 7.45  | 7.61  | 1.4  | 0.28 | -1.12 | 0.894709 | 0.984534 | 0.957917 | 0.991307 |
| MmugDNA.9696.1.S1_at   | MmugDNA.9696.1 | 8.94  | 8.23  | 0.28 | 0.11 | 1.64  | 0.024196 | 0.012731 | 0.294535 | 0.145429 |
| MmugDNA.9698.1.S1_at   | MmugDNA.9698.1 | 2.81  | 2.87  | 0    | 0.15 | -1.04 | 0.672996 | 0.612124 | 0.853341 | 0.769787 |
| MmugDNA.9699.1.S1_at   | MmugDNA.9699.1 | 3.28  | 3.15  | 0.18 | 0.08 | 1.1   | 0.550644 | 0.809095 | 0.787978 | 0.889995 |
| MmugDNA.97.1.S1_at     | MmugDNA.97.1   | 7.79  | 8.45  | 0.17 | 0.42 | -1.58 | 0.256814 | 0.155541 | 0.604419 | 0.430888 |
| MmugDNA.970.1.S1_at    | MmugDNA.970.1  | 5.67  | 5.81  | 0.18 | 0.12 | -1.11 | 0.228737 | 0.330196 | 0.586121 | 0.579016 |
| MmugDNA.9700.1.S1_s_at | MmugDNA.9700.1 | 14.59 | 14.57 | 0.04 | 0.04 | 1.02  | 0.696877 | 0.833182 | 0.86551  | 0.904313 |
| MmugDNA.9702.1.S1_at   | MmugDNA.9702.1 | 6.63  | 6.6   | 0.11 | 0.23 | 1.03  | 0.817473 | 0.946733 | 0.925944 | 0.96978  |
| MmugDNA.9704.1.S1_at   | MmugDNA.9704.1 | 6.82  | 5.46  | 0.12 | 0.51 | 2.57  | 0.011039 | 0.005004 | 0.233671 | 0.098557 |
| MmugDNA.9706.1.S1_at   | MmugDNA.9706.1 | 6.21  | 6.28  | 0.1  | 0.15 | -1.05 | 0.280111 | 0.305287 | 0.621404 | 0.562255 |
| MmugDNA.9707.1.S1_at   | MmugDNA.9707.1 | 11.76 | 12.14 | 0.16 | 0.6  | -1.3  | 0.866013 | 0.180583 | 0.946472 | 0.457191 |
| MmugDNA.9708.1.S1_at   | MmugDNA.9708.1 | 4.17  | 4.18  | 0.12 | 0.06 | -1.01 | 0.520003 | 0.193695 | 0.770575 | 0.468785 |
| MmugDNA.9709.1.S1_at   | MmugDNA.9709.1 | 6.4   | 6.31  | 0.17 | 0.28 | 1.07  | 0.640834 | 0.507334 | 0.837789 | 0.702917 |
| MmugDNA.9710.1.S1_at   | MmugDNA.9710.1 | 10.92 | 10.8  | 0.24 | 0.4  | 1.09  | 0.734073 | 0.663408 | 0.885333 | 0.803    |
| MmugDNA.9711.1.S1_s_at | MmugDNA.9711.1 | 7.39  | 6.64  | 0.17 | 0.17 | 1.69  | 0.006179 | 0.00136  | 0.196546 | 0.056687 |
| MmugDNA.9712.1.S1_at   | MmugDNA.9712.1 | 4.98  | 5.04  | 0.19 | 0.08 | -1.05 | 0.613953 | 0.525767 | 0.823    | 0.715217 |

|                         |                 |       |       |      |      |        |          |          |          |          |
|-------------------------|-----------------|-------|-------|------|------|--------|----------|----------|----------|----------|
| MmugDNA.9714.1.S1_at    | MmugDNA.9714.1  | 6.91  | 6.62  | 0.09 | 0.35 | 1.23   | 0.604632 | 0.729293 | 0.817891 | 0.843541 |
| MmugDNA.9715.1.S1_at    | MmugDNA.9715.1  | 3.7   | 4.22  | 0.23 | 0.59 | -1.43  | 0.594675 | 0.676001 | 0.812108 | 0.810632 |
| MmugDNA.9716.1.S1_at    | MmugDNA.9716.1  | 5.62  | 6.28  | 0.19 | 0.62 | -1.58  | 0.149048 | 0.010796 | 0.514001 | 0.135584 |
| MmugDNA.9717.1.S1_at    | MmugDNA.9717.1  | 5.14  | 5.1   | 0.12 | 0.3  | 1.02   | 0.759422 | 0.601244 | 0.898381 | 0.762609 |
| MmugDNA.9718.1.S1_at    | MmugDNA.9718.1  | 7.93  | 8.09  | 0.9  | 0.74 | -1.12  | 0.492994 | 0.210543 | 0.755892 | 0.484477 |
| MmugDNA.9719.1.S1_at    | MmugDNA.9719.1  | 3.74  | 4.12  | 0.13 | 0.09 | -1.31  | 0.053439 | 0.056505 | 0.380257 | 0.28368  |
| MmugDNA.972.1.S1_at     | MmugDNA.972.1   | 7.15  | 7.3   | 0.97 | 0.9  | -1.11  | 0.601269 | 0.785793 | 0.815685 | 0.875967 |
| MmugDNA.9721.1.S1_at    | MmugDNA.9721.1  | 8.58  | 9.34  | 0.81 | 0.41 | -1.7   | 0.33157  | 0.054077 | 0.656424 | 0.277914 |
| MmugDNA.9722.1.S1_at    | MmugDNA.9722.1  | 4.75  | 4.82  | 0    | 0.1  | -1.04  | 0.228381 | 0.251006 | 0.585843 | 0.519638 |
| MmugDNA.9724.1.S1_at    | MmugDNA.9724.1  | 4.82  | 4.71  | 0.11 | 0.08 | 1.08   | 0.317725 | 0.200215 | 0.64802  | 0.474678 |
| MmugDNA.9726.1.S1_at    | MmugDNA.9726.1  | 5.62  | 5.76  | 0.08 | 0.01 | -1.09  | 0.062279 | 0.117594 | 0.397683 | 0.38531  |
| MmugDNA.9727.1.S1_at    | MmugDNA.9727.1  | 3.69  | 3.52  | 0.3  | 0.04 | 1.12   | 0.275691 | 0.41786  | 0.617878 | 0.642449 |
| MmugDNA.9729.1.S1_at    | MmugDNA.9729.1  | 6.41  | 6.39  | 0.81 | 0.01 | 1.01   | 0.580088 | 0.750027 | 0.804451 | 0.854659 |
| MmugDNA.973.1.S1_at     | MmugDNA.973.1   | 5.55  | 5.54  | 0.02 | 0.12 | 1      | 0.830014 | 0.842096 | 0.931232 | 0.910036 |
| MmugDNA.9732.1.S1_at    | MmugDNA.9732.1  | 6.94  | 10.89 | 0.55 | 0.85 | -15.44 | 0.002606 | 0.003483 | 0.164386 | 0.084834 |
| MmugDNA.9733.1.S1_at    | MmugDNA.9733.1  | 7.03  | 7.56  | 1.13 | 0.66 | -1.44  | 0.981677 | 0.911335 | 0.993374 | 0.950008 |
| MmugDNA.9734.1.S1_at    | MmugDNA.9734.1  | 6.52  | 6.28  | 0.92 | 0.24 | 1.18   | 0.772372 | 0.780293 | 0.90415  | 0.872577 |
| MmugDNA.9735.1.S1_at    | MmugDNA.9735.1  | 4.73  | 3.62  | 0.7  | 0.19 | 2.16   | 0.160039 | 0.320889 | 0.52484  | 0.572869 |
| MmugDNA.9736.1.S1_at    | MmugDNA.9736.1  | 7.49  | 8.23  | 0.18 | 0.37 | -1.67  | 0.035804 | 0.031589 | 0.337573 | 0.219905 |
| MmugDNA.9738.1.S1_at    | MmugDNA.9738.1  | 5.12  | 5.47  | 0.17 | 0.25 | -1.27  | 0.028031 | 0.029608 | 0.309556 | 0.213742 |
| MmugDNA.9739.1.S1_at    | MmugDNA.9739.1  | 3.51  | 3.7   | 0.17 | 0.04 | -1.14  | 0.297403 | 0.400237 | 0.633201 | 0.630158 |
| MmugDNA.974.1.S1_at     | MmugDNA.974.1   | 7.69  | 7.28  | 0.17 | 0.36 | 1.33   | 0.515989 | 0.607875 | 0.76772  | 0.766631 |
| MmugDNA.20440.1.S1_s_at | MmugDNA.20440.1 | 8.32  | 8.02  | 0.5  | 0.4  | 1.23   | 0.597196 | 0.749734 | 0.813431 | 0.854564 |
| MmugDNA.9743.1.S1_at    | MmugDNA.9743.1  | 3.83  | 3.66  | 0.38 | 0.23 | 1.13   | 0.253781 | 0.256379 | 0.602284 | 0.524114 |
| MmugDNA.9746.1.S1_at    | MmugDNA.9746.1  | 3.19  | 3.2   | 0.06 | 0.14 | -1.01  | 0.768451 | 0.541226 | 0.902719 | 0.724781 |
| MmugDNA.9747.1.S1_at    | MmugDNA.9747.1  | 6.1   | 6.27  | 1.34 | 0.15 | -1.12  | 0.433969 | 0.477409 | 0.720302 | 0.683463 |
| MmugDNA.9748.1.S1_at    | MmugDNA.9748.1  | 5.04  | 4.6   | 0.22 | 0.04 | 1.36   | 0.075977 | 0.063135 | 0.424132 | 0.29795  |
| MmugDNA.9749.1.S1_at    | MmugDNA.9749.1  | 10.49 | 9.84  | 0.19 | 0.22 | 1.57   | 0.022072 | 0.012945 | 0.28446  | 0.146418 |
| MmugDNA.9751.1.S1_at    | MmugDNA.9751.1  | 5.3   | 5.52  | 0.19 | 0.35 | -1.16  | 0.702904 | 0.279883 | 0.868924 | 0.543342 |
| MmugDNA.9752.1.S1_at    | MmugDNA.9752.1  | 5.47  | 5.75  | 0.57 | 0.44 | -1.21  | 0.882409 | 0.539209 | 0.952793 | 0.723613 |
| MmugDNA.9753.1.S1_at    | MmugDNA.9753.1  | 5.76  | 5.84  | 0.8  | 0.38 | -1.06  | 0.312478 | 0.458407 | 0.644204 | 0.671165 |
| MmugDNA.9754.1.S1_at    | MmugDNA.9754.1  | 6.95  | 6.53  | 0.3  | 0.44 | 1.34   | 0.603555 | 0.374456 | 0.8172   | 0.6129   |
| MmugDNA.9756.1.S1_at    | MmugDNA.9756.1  | 3.31  | 2.58  | 0.77 | 0.07 | 1.65   | 0.198521 | 0.258564 | 0.561629 | 0.525819 |
| MmugDNA.9757.1.S1_at    | MmugDNA.9757.1  | 12    | 11.97 | 0.1  | 0.18 | 1.03   | 0.738566 | 0.83732  | 0.887754 | 0.90705  |
| MmugDNA.9758.1.S1_at    | MmugDNA.9758.1  | 7.07  | 6.49  | 0.23 | 0.29 | 1.49   | 0.02781  | 0.007519 | 0.309061 | 0.116291 |
| MmugDNA.9759.1.S1_at    | MmugDNA.9759.1  | 3.89  | 3.88  | 0.44 | 0.13 | 1.01   | 0.957014 | 0.646025 | 0.983802 | 0.792676 |
| MmugDNA.976.1.S1_at     | MmugDNA.976.1   | 9.89  | 9.16  | 0.1  | 0.49 | 1.66   | 0.066939 | 0.145531 | 0.406999 | 0.419442 |
| MmugDNA.9761.1.S1_at    | MmugDNA.9761.1  | 4.32  | 4.45  | 0.07 | 0.12 | -1.1   | 0.373703 | 0.586365 | 0.683245 | 0.753444 |
| MmugDNA.9762.1.S1_at    | MmugDNA.9762.1  | 5.23  | 5.26  | 0.16 | 0.18 | -1.02  | 0.699044 | 0.701382 | 0.86659  | 0.826814 |
| MmugDNA.9763.1.S1_at    | MmugDNA.9763.1  | 4.25  | 4.03  | 0.14 | 0.07 | 1.16   | 0.071929 | 0.070082 | 0.416008 | 0.31098  |
| MmugDNA.9764.1.S1_at    | MmugDNA.9764.1  | 3.8   | 4.07  | 0.22 | 0.04 | -1.2   | 0.425709 | 0.601013 | 0.715281 | 0.762462 |



|                        |                |       |       |      |      |       |          |          |          |          |
|------------------------|----------------|-------|-------|------|------|-------|----------|----------|----------|----------|
| MmugDNA.9765.1.S1_at   | MmugDNA.9765.1 | 3.57  | 3.57  | 0.03 | 0.13 | -1    | 0.448144 | 0.415126 | 0.729452 | 0.640713 |
| MmugDNA.9767.1.S1_at   | MmugDNA.9767.1 | 7.9   | 7.19  | 0.43 | 0.15 | 1.64  | 0.093104 | 0.100931 | 0.450362 | 0.360509 |
| MmugDNA.9769.1.S1_at   | MmugDNA.9769.1 | 6.81  | 6.82  | 0.27 | 0.08 | -1.01 | 0.40321  | 0.379969 | 0.701936 | 0.616659 |
| MmugDNA.9770.1.S1_at   | MmugDNA.9770.1 | 10.63 | 8.83  | 0.26 | 0.48 | 3.48  | 0.004221 | 0.001289 | 0.181739 | 0.055585 |
| MmugDNA.9771.1.S1_at   | MmugDNA.9771.1 | 9.79  | 8.51  | 0.28 | 0.57 | 2.43  | 0.02129  | 0.017323 | 0.282524 | 0.166509 |
| MmugDNA.9772.1.S1_at   | MmugDNA.9772.1 | 3.2   | 3.4   | 0.07 | 0.18 | -1.15 | 0.296946 | 0.376475 | 0.632852 | 0.614293 |
| MmugDNA.9773.1.S1_at   | MmugDNA.9773.1 | 3.06  | 3.13  | 0.15 | 0.1  | -1.05 | 0.456511 | 0.400229 | 0.734509 | 0.630158 |
| MmugDNA.9775.1.S1_at   | MmugDNA.9775.1 | 3.71  | 3.68  | 0.07 | 0.1  | 1.02  | 0.948563 | 0.335047 | 0.980294 | 0.582851 |
| MmugDNA.9776.1.S1_at   | MmugDNA.9776.1 | 5.78  | 6.82  | 0.24 | 0.34 | -2.06 | 0.041329 | 0.021072 | 0.351549 | 0.181869 |
| MmugDNA.9777.1.S1_at   | MmugDNA.9777.1 | 3.45  | 3.44  | 0.12 | 0.22 | 1.01  | 0.984768 | 0.996645 | 0.994589 | 0.99808  |
| MmugDNA.978.1.S1_at    | MmugDNA.978.1  | 5.34  | 5.5   | 0.08 | 0.2  | -1.12 | 0.172937 | 0.21264  | 0.536607 | 0.48659  |
| MmugDNA.9781.1.S1_at   | MmugDNA.9781.1 | 3.74  | 3.73  | 0.23 | 0.14 | 1     | 0.967719 | 0.067504 | 0.987919 | 0.305843 |
| MmugDNA.9784.1.S1_at   | MmugDNA.9784.1 | 3.89  | 3.88  | 0.12 | 0.1  | 1.01  | 0.965716 | 0.385784 | 0.987014 | 0.621079 |
| MmugDNA.9785.1.S1_at   | MmugDNA.9785.1 | 8.14  | 7.66  | 0.26 | 0.51 | 1.4   | 0.16541  | 0.217679 | 0.529362 | 0.491274 |
| MmugDNA.9786.1.S1_at   | MmugDNA.9786.1 | 3.59  | 3.51  | 0.1  | 0.18 | 1.06  | 0.70495  | 0.688458 | 0.869857 | 0.818166 |
| MmugDNA.9788.1.S1_at   | MmugDNA.9788.1 | 4.46  | 4.21  | 0.33 | 0.16 | 1.19  | 0.392929 | 0.482865 | 0.694885 | 0.68765  |
| MmugDNA.9789.1.S1_at   | MmugDNA.9789.1 | 6.86  | 7.66  | 1.17 | 0.5  | -1.73 | 0.74857  | 0.887064 | 0.892494 | 0.935666 |
| MmugDNA.9790.1.S1_at   | MmugDNA.9790.1 | 5.63  | 5.75  | 0.07 | 0.08 | -1.09 | 0.130809 | 0.069867 | 0.497198 | 0.31043  |
| MmugDNA.9791.1.S1_at   | MmugDNA.9791.1 | 6.72  | 6.67  | 0.09 | 0.35 | 1.04  | 0.758672 | 0.865444 | 0.898014 | 0.923596 |
| MmugDNA.9792.1.S1_at   | MmugDNA.9792.1 | 3.81  | 3.85  | 0.19 | 0.03 | -1.03 | 0.551663 | 0.541961 | 0.788895 | 0.725169 |
| MmugDNA.9794.1.S1_at   | MmugDNA.9794.1 | 4.18  | 3.8   | 0.18 | 0.03 | 1.29  | 0.030793 | 0.018796 | 0.320006 | 0.172349 |
| MmugDNA.9795.1.S1_at   | MmugDNA.9795.1 | 5.2   | 5.19  | 0.24 | 0.12 | 1.01  | 0.605369 | 0.254438 | 0.81824  | 0.522732 |
| MmugDNA.9796.1.S1_at   | MmugDNA.9796.1 | 5.05  | 5.18  | 0.03 | 0.18 | -1.1  | 0.335704 | 0.398017 | 0.659165 | 0.629138 |
| MmugDNA.9797.1.S1_at   | MmugDNA.9797.1 | 3.72  | 3.57  | 0.01 | 0.14 | 1.11  | 0.047041 | 0.014688 | 0.364849 | 0.154371 |
| MmugDNA.9798.1.S1_at   | MmugDNA.9798.1 | 4.64  | 4.6   | 0.37 | 0.41 | 1.03  | 0.640325 | 0.462341 | 0.837613 | 0.673695 |
| MmugDNA.98.1.S1_at     | MmugDNA.98.1   | 4.92  | 5.42  | 0.52 | 0.59 | -1.41 | 0.299321 | 0.412758 | 0.634854 | 0.63909  |
| MmugDNA.980.1.S1_at    | MmugDNA.980.1  | 5.04  | 5.05  | 0.05 | 0.2  | -1    | 0.295819 | 0.392209 | 0.632164 | 0.625652 |
| MmugDNA.9800.1.S1_at   | MmugDNA.9800.1 | 6.91  | 8.36  | 0.65 | 0.4  | -2.74 | 0.044042 | 0.045288 | 0.357647 | 0.25714  |
| MmugDNA.9803.1.S1_at   | MmugDNA.9803.1 | 8.37  | 8.68  | 0.36 | 0.18 | -1.23 | 0.159173 | 0.085233 | 0.52416  | 0.337096 |
| MmugDNA.9804.1.S1_s_at | MmugDNA.9804.1 | 3.45  | 3.39  | 0.02 | 0.1  | 1.04  | 0.127511 | 0.454104 | 0.493834 | 0.668398 |
| MmugDNA.9805.1.S1_at   | MmugDNA.9805.1 | 6.42  | 6.37  | 0.4  | 0.12 | 1.04  | 0.869934 | 0.972338 | 0.947952 | 0.985083 |
| MmugDNA.9806.1.S1_at   | MmugDNA.9806.1 | 10.99 | 11.38 | 0.19 | 0.44 | -1.3  | 0.189909 | 0.235357 | 0.552778 | 0.506412 |
| MmugDNA.9808.1.S1_at   | MmugDNA.9808.1 | 6.22  | 6.3   | 0.03 | 0.05 | -1.06 | 0.078255 | 0.287806 | 0.428221 | 0.549064 |
| MmugDNA.981.1.S1_at    | MmugDNA.981.1  | 2.89  | 2.98  | 0.09 | 0.09 | -1.07 | 0.455036 | 0.837025 | 0.733644 | 0.906826 |
| MmugDNA.9810.1.S1_s_at | MmugDNA.9810.1 | 12.12 | 11.95 | 0.16 | 0.41 | 1.12  | 0.331666 | 0.358555 | 0.656464 | 0.60007  |
| MmugDNA.9811.1.S1_s_at | MmugDNA.9811.1 | 9.77  | 10.84 | 0.25 | 0.15 | -2.09 | 0.003581 | 0.002473 | 0.179515 | 0.073576 |
| MmugDNA.9812.1.S1_at   | MmugDNA.9812.1 | 4.34  | 4.45  | 0.21 | 0.22 | -1.08 | 0.529829 | 0.579662 | 0.776323 | 0.749254 |
| MmugDNA.9813.1.S1_at   | MmugDNA.9813.1 | 11.74 | 12.58 | 0.21 | 0.09 | -1.79 | 0.002329 | 0.000463 | 0.161798 | 0.038572 |
| MmugDNA.9814.1.S1_at   | MmugDNA.9814.1 | 7.43  | 7.17  | 0.19 | 0.46 | 1.2   | 0.224504 | 0.316284 | 0.582716 | 0.569785 |
| MmugDNA.9815.1.S1_at   | MmugDNA.9815.1 | 4.31  | 5.73  | 1    | 1.53 | -2.68 | 0.46853  | 0.585194 | 0.741077 | 0.752781 |
| MmugDNA.9816.1.S1_at   | MmugDNA.9816.1 | 6.38  | 6.51  | 0.21 | 0.04 | -1.09 | 0.892807 | 0.67431  | 0.957322 | 0.809716 |

|                        |                |       |       |      |      |       |          |          |          |          |
|------------------------|----------------|-------|-------|------|------|-------|----------|----------|----------|----------|
| MmugDNA.9817.1.S1_at   | MmugDNA.9817.1 | 6.81  | 6.77  | 0.45 | 0.48 | 1.03  | 0.927699 | 0.712619 | 0.972035 | 0.833428 |
| MmugDNA.9818.1.S1_at   | MmugDNA.9818.1 | 4.97  | 5.1   | 0.18 | 0.1  | -1.09 | 0.252298 | 0.333743 | 0.601282 | 0.581904 |
| MmugDNA.9819.1.S1_at   | MmugDNA.9819.1 | 3.92  | 3.57  | 0.78 | 0.24 | 1.27  | 0.220796 | 0.218233 | 0.579701 | 0.491764 |
| MmugDNA.982.1.S1_at    | MmugDNA.982.1  | 6.09  | 6.31  | 0.24 | 0.19 | -1.17 | 0.234393 | 0.476506 | 0.588668 | 0.682743 |
| MmugDNA.9820.1.S1_at   | MmugDNA.9820.1 | 4.67  | 5.29  | 0.09 | 0.15 | -1.54 | 0.002695 | 0.000299 | 0.164621 | 0.034892 |
| MmugDNA.9821.1.S1_at   | MmugDNA.9821.1 | 3.04  | 3.04  | 0.22 | 0.09 | 1     | 0.391577 | 0.646727 | 0.694126 | 0.793089 |
| MmugDNA.9825.1.S1_at   | MmugDNA.9825.1 | 3.73  | 3.82  | 0.02 | 0.08 | -1.06 | 0.102657 | 0.162631 | 0.462485 | 0.438724 |
| MmugDNA.9826.1.S1_at   | MmugDNA.9826.1 | 6.15  | 6.32  | 0.12 | 0.18 | -1.13 | 0.131094 | 0.347627 | 0.497542 | 0.592039 |
| MmugDNA.9828.1.S1_at   | MmugDNA.9828.1 | 10.63 | 10.29 | 0.05 | 0.17 | 1.26  | 0.084134 | 0.026787 | 0.436782 | 0.204724 |
| MmugDNA.9828.1.S1_s_at | MmugDNA.9828.1 | 8.59  | 8.3   | 0.06 | 0.32 | 1.22  | 0.161776 | 0.21914  | 0.526573 | 0.492868 |
| MmugDNA.983.1.S1_at    | MmugDNA.983.1  | 4.16  | 3.94  | 0.07 | 0.22 | 1.17  | 0.557683 | 0.562469 | 0.792694 | 0.738025 |
| MmugDNA.9830.1.S1_at   | MmugDNA.9830.1 | 6.1   | 5.86  | 0.22 | 0.69 | 1.18  | 0.71376  | 0.365604 | 0.874563 | 0.605617 |
| MmugDNA.9831.1.S1_at   | MmugDNA.9831.1 | 7.92  | 6.85  | 0.22 | 0.27 | 2.11  | 0.005912 | 0.001921 | 0.193611 | 0.06556  |
| MmugDNA.9832.1.S1_at   | MmugDNA.9832.1 | 9.29  | 10.23 | 1.07 | 0.84 | -1.91 | 0.743472 | 0.503349 | 0.89019  | 0.700823 |
| MmugDNA.9833.1.S1_at   | MmugDNA.9833.1 | 12.6  | 12.82 | 0.02 | 0.16 | -1.17 | 0.072449 | 0.001665 | 0.416971 | 0.061711 |
| MmugDNA.9834.1.S1_at   | MmugDNA.9834.1 | 6.34  | 6.38  | 0.12 | 0.12 | -1.03 | 0.75779  | 0.846349 | 0.897367 | 0.912548 |
| MmugDNA.9835.1.S1_at   | MmugDNA.9835.1 | 3.92  | 4.14  | 0.67 | 0.2  | -1.16 | 0.682268 | 0.830697 | 0.85785  | 0.902872 |
| MmugDNA.9836.1.S1_at   | MmugDNA.9836.1 | 4.03  | 4.22  | 0.19 | 0.1  | -1.15 | 0.497429 | 0.44627  | 0.757987 | 0.662743 |
| MmugDNA.9837.1.S1_at   | MmugDNA.9837.1 | 2.6   | 2.68  | 0.09 | 0.23 | -1.06 | 0.299289 | 0.340266 | 0.634833 | 0.586661 |
| MmugDNA.9838.1.S1_at   | MmugDNA.9838.1 | 11.39 | 11.9  | 0.2  | 0.53 | -1.43 | 0.22186  | 0.166174 | 0.580587 | 0.442738 |
| MmugDNA.9838.1.S1_x_at | MmugDNA.9838.1 | 11.37 | 11.91 | 0.2  | 0.51 | -1.45 | 0.179876 | 0.120428 | 0.544019 | 0.38925  |
| MmugDNA.9839.1.S1_at   | MmugDNA.9839.1 | 4.76  | 4.64  | 0.48 | 0.14 | 1.09  | 0.706312 | 0.815195 | 0.870604 | 0.893385 |
| MmugDNA.984.1.S1_at    | MmugDNA.984.1  | 4.21  | 3.96  | 0.24 | 0.03 | 1.19  | 0.553632 | 0.605459 | 0.790272 | 0.765238 |
| MmugDNA.9840.1.S1_at   | MmugDNA.9840.1 | 4.51  | 4.65  | 0.27 | 0.11 | -1.1  | 0.53877  | 0.045801 | 0.78078  | 0.258337 |
| MmugDNA.9841.1.S1_at   | MmugDNA.9841.1 | 2.8   | 2.78  | 0.06 | 0.03 | 1.02  | 0.101882 | 0.091322 | 0.461313 | 0.346281 |
| MmugDNA.9842.1.S1_at   | MmugDNA.9842.1 | 5.14  | 4.84  | 0.48 | 0.09 | 1.23  | 0.106622 | 0.079647 | 0.467185 | 0.326981 |
| MmugDNA.9843.1.S1_at   | MmugDNA.9843.1 | 4.81  | 4.78  | 0.04 | 0.15 | 1.02  | 0.697155 | 0.778663 | 0.865585 | 0.871528 |
| MmugDNA.9844.1.S1_at   | MmugDNA.9844.1 | 6.03  | 5.93  | 0.05 | 0.08 | 1.07  | 0.115912 | 0.337553 | 0.479361 | 0.584728 |
| MmugDNA.9846.1.S1_at   | MmugDNA.9846.1 | 3.56  | 3.96  | 0.18 | 0.23 | -1.32 | 0.117274 | 0.126797 | 0.481331 | 0.397446 |
| MmugDNA.9847.1.S1_at   | MmugDNA.9847.1 | 6.29  | 6.45  | 0.22 | 0.16 | -1.12 | 0.111135 | 0.168557 | 0.473191 | 0.445172 |
| MmugDNA.9848.1.S1_at   | MmugDNA.9848.1 | 4.3   | 4.1   | 0.07 | 0.11 | 1.14  | 0.090873 | 0.074825 | 0.446466 | 0.318614 |
| MmugDNA.985.1.S1_at    | MmugDNA.985.1  | 6.96  | 8.61  | 1.67 | 1.18 | -3.12 | 0.458809 | 0.325716 | 0.735667 | 0.57602  |
| MmugDNA.9850.1.S1_at   | MmugDNA.9850.1 | 3.78  | 3.9   | 0.2  | 0.22 | -1.09 | 0.949559 | 0.523883 | 0.980822 | 0.714052 |
| MmugDNA.9852.1.S1_at   | MmugDNA.9852.1 | 2.93  | 3     | 0.05 | 0.02 | -1.05 | 0.084397 | 0.387103 | 0.436943 | 0.621935 |
| MmugDNA.9855.1.S1_at   | MmugDNA.9855.1 | 11.99 | 12.04 | 0.11 | 0.22 | -1.04 | 0.443578 | 0.305456 | 0.726245 | 0.562418 |
| MmugDNA.9857.1.S1_at   | MmugDNA.9857.1 | 10.84 | 10.45 | 0.16 | 0.22 | 1.31  | 0.066452 | 0.067736 | 0.406564 | 0.306344 |
| MmugDNA.9857.1.S1_s_at | MmugDNA.9857.1 | 12.07 | 11.69 | 0.13 | 0.18 | 1.3   | 0.040129 | 0.028058 | 0.349119 | 0.20903  |
| MmugDNA.9858.1.S1_at   | MmugDNA.9858.1 | 10.91 | 10.71 | 0.02 | 0.27 | 1.15  | 0.763657 | 0.789662 | 0.900401 | 0.87847  |
| MmugDNA.9859.1.S1_at   | MmugDNA.9859.1 | 5.66  | 6.91  | 0.23 | 0.25 | -2.38 | 0.003193 | 0.002702 | 0.174359 | 0.076461 |
| MmugDNA.986.1.S1_at    | MmugDNA.986.1  | 4.22  | 3.91  | 0.36 | 0.1  | 1.24  | 0.160316 | 0.139352 | 0.525289 | 0.412568 |
| MmugDNA.9861.1.S1_at   | MmugDNA.9861.1 | 5.35  | 6.93  | 0.53 | 0.63 | -2.99 | 0.015937 | 0.010203 | 0.262019 | 0.132451 |

|                        |                |       |       |      |      |        |          |          |          |          |
|------------------------|----------------|-------|-------|------|------|--------|----------|----------|----------|----------|
| MmugDNA.9862.1.S1_at   | MmugDNA.9862.1 | 5.97  | 6.18  | 0.13 | 0.29 | -1.15  | 0.182347 | 0.204183 | 0.546756 | 0.478507 |
| MmugDNA.9864.1.S1_at   | MmugDNA.9864.1 | 3.76  | 3.81  | 0.28 | 0.11 | -1.04  | 0.963558 | 0.623265 | 0.985967 | 0.777666 |
| MmugDNA.9865.1.S1_at   | MmugDNA.9865.1 | 4.57  | 4.55  | 0.14 | 0.18 | 1.01   | 0.803894 | 0.720384 | 0.919349 | 0.838261 |
| MmugDNA.9866.1.S1_at   | MmugDNA.9866.1 | 4.12  | 6.52  | 0.12 | 0.64 | -5.3   | 0.005583 | 0.001418 | 0.191807 | 0.057458 |
| MmugDNA.9867.1.S1_at   | MmugDNA.9867.1 | 8.33  | 8.95  | 0.23 | 0.3  | -1.53  | 0.052966 | 0.01029  | 0.378902 | 0.132841 |
| MmugDNA.9868.1.S1_at   | MmugDNA.9868.1 | 6.49  | 6.07  | 0.16 | 0.48 | 1.33   | 0.610337 | 0.569283 | 0.821014 | 0.742375 |
| MmugDNA.9869.1.S1_at   | MmugDNA.9869.1 | 7.66  | 6.73  | 0.63 | 0.6  | 1.91   | 0.060264 | 0.052224 | 0.393081 | 0.274065 |
| MmugDNA.987.1.S1_at    | MmugDNA.987.1  | 5.56  | 5.63  | 1.14 | 0.16 | -1.05  | 0.973013 | 0.960015 | 0.989561 | 0.977394 |
| MmugDNA.9870.1.S1_at   | MmugDNA.9870.1 | 6.78  | 6.93  | 0.08 | 0.13 | -1.11  | 0.189112 | 0.123326 | 0.552283 | 0.393386 |
| MmugDNA.9871.1.S1_at   | MmugDNA.9871.1 | 10.37 | 9.91  | 0.21 | 0.17 | 1.37   | 0.039305 | 0.007064 | 0.346898 | 0.113284 |
| MmugDNA.9875.1.S1_at   | MmugDNA.9875.1 | 10.11 | 10.37 | 0.36 | 0.43 | -1.2   | 0.43469  | 0.540828 | 0.72069  | 0.724572 |
| MmugDNA.9876.1.S1_s_at | MmugDNA.9876.1 | 4.58  | 4.51  | 0.1  | 0.2  | 1.05   | 0.331355 | 0.81214  | 0.656268 | 0.89155  |
| MmugDNA.9879.1.S1_at   | MmugDNA.9879.1 | 3.81  | 3.95  | 0.21 | 0.05 | -1.1   | 0.735137 | 0.870259 | 0.886089 | 0.926387 |
| MmugDNA.988.1.S1_at    | MmugDNA.988.1  | 9.5   | 9.87  | 0.12 | 0.09 | -1.3   | 0.019749 | 0.047335 | 0.275549 | 0.2623   |
| MmugDNA.9880.1.S1_at   | MmugDNA.9880.1 | 3.61  | 3.72  | 0.65 | 0.49 | -1.08  | 0.669885 | 0.677229 | 0.852318 | 0.811535 |
| MmugDNA.9881.1.S1_s_at | MmugDNA.9881.1 | 10.52 | 10.59 | 0.01 | 0.22 | -1.05  | 0.610382 | 0.109588 | 0.821014 | 0.373525 |
| MmugDNA.9882.1.S1_at   | MmugDNA.9882.1 | 5.7   | 5.62  | 0.02 | 0.12 | 1.06   | 0.259758 | 0.448766 | 0.606733 | 0.664601 |
| MmugDNA.9882.1.S1_s_at | MmugDNA.9882.1 | 3.81  | 3.83  | 0.43 | 0.11 | -1.01  | 0.417422 | 0.37551  | 0.710512 | 0.613453 |
| MmugDNA.9884.1.S1_at   | MmugDNA.9884.1 | 5.46  | 5.55  | 0.08 | 0.15 | -1.07  | 0.161057 | 0.158242 | 0.526189 | 0.43403  |
| MmugDNA.9885.1.S1_at   | MmugDNA.9885.1 | 5.89  | 5.87  | 0.34 | 0.27 | 1.01   | 0.486055 | 0.271483 | 0.751299 | 0.536512 |
| MmugDNA.9886.1.S1_at   | MmugDNA.9886.1 | 8.12  | 8.13  | 0.11 | 0.08 | -1.01  | 0.204381 | 0.347099 | 0.566814 | 0.591815 |
| MmugDNA.9888.1.S1_at   | MmugDNA.9888.1 | 6.82  | 6.75  | 0.36 | 0.61 | 1.05   | 0.822202 | 0.958119 | 0.927604 | 0.976277 |
| MmugDNA.989.1.S1_at    | MmugDNA.989.1  | 5.52  | 5.56  | 0.2  | 0.16 | -1.02  | 0.730717 | 0.722724 | 0.883279 | 0.839378 |
| MmugDNA.9890.1.S1_at   | MmugDNA.9890.1 | 2.99  | 3.13  | 0.23 | 0.24 | -1.1   | 0.528831 | 0.261602 | 0.775764 | 0.528068 |
| MmugDNA.9891.1.S1_at   | MmugDNA.9891.1 | 4.28  | 4.41  | 0.18 | 0.34 | -1.09  | 0.464793 | 0.395186 | 0.73952  | 0.627379 |
| MmugDNA.9893.1.S1_at   | MmugDNA.9893.1 | 10.93 | 10.2  | 0.2  | 0.49 | 1.67   | 0.073965 | 0.026428 | 0.41959  | 0.203748 |
| MmugDNA.9894.1.S1_at   | MmugDNA.9894.1 | 5.15  | 5.48  | 0.1  | 0.24 | -1.26  | 0.088446 | 0.125677 | 0.44331  | 0.396249 |
| MmugDNA.9895.1.S1_at   | MmugDNA.9895.1 | 4.89  | 4.98  | 0.11 | 0.13 | -1.07  | 0.377028 | 0.177121 | 0.685542 | 0.453611 |
| MmugDNA.9896.1.S1_at   | MmugDNA.9896.1 | 8.94  | 8.99  | 0.18 | 0.09 | -1.03  | 0.547985 | 0.707704 | 0.786449 | 0.830472 |
| MmugDNA.9897.1.S1_at   | MmugDNA.9897.1 | 4.48  | 4.5   | 0.17 | 0.24 | -1.01  | 0.447243 | 0.547558 | 0.728865 | 0.728511 |
| MmugDNA.9900.1.S1_at   | MmugDNA.9900.1 | 8.01  | 12.46 | 0.58 | 0.32 | -21.88 | 0.000342 | 0.000267 | 0.127505 | 0.033786 |
| MmugDNA.9901.1.S1_at   | MmugDNA.9901.1 | 7.95  | 7.1   | 0.4  | 0.38 | 1.8    | 0.027886 | 0.008849 | 0.309162 | 0.124493 |
| MmugDNA.9902.1.S1_s_at | MmugDNA.9902.1 | 4.75  | 5.37  | 0.3  | 0.31 | -1.53  | 0.070141 | 0.056749 | 0.413646 | 0.284362 |
| MmugDNA.9903.1.S1_at   | MmugDNA.9903.1 | 3.69  | 3.55  | 0.63 | 0.14 | 1.1    | 0.387915 | 0.361182 | 0.692145 | 0.60207  |
| MmugDNA.9903.1.S1_x_at | MmugDNA.9903.1 | 3.59  | 3.32  | 0.47 | 0.08 | 1.21   | 0.298205 | 0.342247 | 0.633823 | 0.588375 |
| MmugDNA.9904.1.S1_at   | MmugDNA.9904.1 | 6.62  | 6.16  | 0.28 | 0.53 | 1.37   | 0.660237 | 0.84329  | 0.847499 | 0.910767 |
| MmugDNA.9905.1.S1_at   | MmugDNA.9905.1 | 11.11 | 11.21 | 0.12 | 0.27 | -1.07  | 0.739079 | 0.92002  | 0.888088 | 0.954993 |
| MmugDNA.9907.1.S1_at   | MmugDNA.9907.1 | 4.95  | 4.64  | 0.32 | 0.14 | 1.24   | 0.277717 | 0.262388 | 0.619903 | 0.528655 |
| MmugDNA.9908.1.S1_at   | MmugDNA.9908.1 | 8.32  | 8.27  | 0.06 | 0.19 | 1.04   | 0.664858 | 0.490262 | 0.849728 | 0.692302 |
| MmugDNA.991.1.S1_at    | MmugDNA.991.1  | 4.44  | 4.41  | 0.09 | 0.17 | 1.02   | 0.372764 | 0.542642 | 0.683033 | 0.725641 |
| MmugDNA.9911.1.S1_at   | MmugDNA.9911.1 | 7.78  | 6.65  | 0.06 | 0.44 | 2.18   | 0.012388 | 0.03566  | 0.241121 | 0.233228 |

|                        |                |       |       |      |      |       |          |          |          |          |
|------------------------|----------------|-------|-------|------|------|-------|----------|----------|----------|----------|
| MmugDNA.9912.1.S1_at   | MmugDNA.9912.1 | 9.11  | 11.01 | 0.18 | 0.38 | -3.75 | 0.001684 | 0.001722 | 0.15365  | 0.062866 |
| MmugDNA.9913.1.S1_at   | MmugDNA.9913.1 | 4.5   | 4.13  | 0.32 | 0.19 | 1.29  | 0.249925 | 0.325945 | 0.600389 | 0.576213 |
| MmugDNA.9914.1.S1_at   | MmugDNA.9914.1 | 5.44  | 4.39  | 0.63 | 0.77 | 2.07  | 0.255715 | 0.421567 | 0.603526 | 0.645171 |
| MmugDNA.9915.1.S1_at   | MmugDNA.9915.1 | 10.63 | 10.42 | 0.31 | 0.16 | 1.15  | 0.405099 | 0.553758 | 0.703082 | 0.732795 |
| MmugDNA.9916.1.S1_at   | MmugDNA.9916.1 | 4.44  | 4.54  | 0.23 | 0.02 | -1.07 | 0.232385 | 0.312596 | 0.587814 | 0.567268 |
| MmugDNA.9918.1.S1_at   | MmugDNA.9918.1 | 6.13  | 8.3   | 0.36 | 0.22 | -4.51 | 0.000634 | 0.000057 | 0.136818 | 0.025666 |
| MmugDNA.9919.1.S1_at   | MmugDNA.9919.1 | 9.15  | 9.5   | 0.14 | 0.24 | -1.27 | 0.050693 | 0.003675 | 0.37519  | 0.086568 |
| MmugDNA.992.1.S1_at    | MmugDNA.992.1  | 4.25  | 4.42  | 0.34 | 0.44 | -1.12 | 0.513261 | 0.762226 | 0.766181 | 0.861687 |
| MmugDNA.9921.1.S1_at   | MmugDNA.9921.1 | 12.19 | 12.02 | 0.12 | 0.09 | 1.12  | 0.162805 | 0.141552 | 0.527211 | 0.415063 |
| MmugDNA.9923.1.S1_at   | MmugDNA.9923.1 | 7.22  | 7.13  | 0.2  | 0.01 | 1.07  | 0.856433 | 0.760004 | 0.942007 | 0.860519 |
| MmugDNA.9924.1.S1_at   | MmugDNA.9924.1 | 3.24  | 3.25  | 0.15 | 0.07 | -1.01 | 0.227523 | 0.539574 | 0.585103 | 0.723833 |
| MmugDNA.9926.1.S1_x_at | MmugDNA.9926.1 | 5.89  | 4.88  | 0.68 | 0.7  | 2     | 0.111684 | 0.104295 | 0.474019 | 0.365501 |
| MmugDNA.9927.1.S1_at   | MmugDNA.9927.1 | 4.58  | 4.6   | 0.07 | 0.12 | -1.01 | 0.587    | 0.323903 | 0.808414 | 0.574658 |
| MmugDNA.9928.1.S1_at   | MmugDNA.9928.1 | 5.71  | 6.1   | 0.83 | 0.27 | -1.32 | 0.6092   | 0.658926 | 0.82039  | 0.800473 |
| MmugDNA.9929.1.S1_at   | MmugDNA.9929.1 | 3.85  | 3.84  | 0.03 | 0.07 | 1     | 0.309173 | 0.125377 | 0.641361 | 0.396008 |
| MmugDNA.993.1.S1_at    | MmugDNA.993.1  | 10.22 | 10.27 | 0.31 | 0.65 | -1.03 | 0.929321 | 0.573261 | 0.972689 | 0.744991 |
| MmugDNA.9931.1.S1_at   | MmugDNA.9931.1 | 3.19  | 2.98  | 0.25 | 0.17 | 1.15  | 0.230937 | 0.156636 | 0.587369 | 0.432134 |
| MmugDNA.9932.1.S1_at   | MmugDNA.9932.1 | 4.13  | 4.36  | 1.38 | 0.15 | -1.18 | 0.533785 | 0.357069 | 0.778434 | 0.59875  |
| MmugDNA.9934.1.S1_at   | MmugDNA.9934.1 | 5.19  | 5.39  | 0.35 | 0.04 | -1.15 | 0.439243 | 0.433692 | 0.723497 | 0.65392  |
| MmugDNA.9935.1.S1_at   | MmugDNA.9935.1 | 9.38  | 9.41  | 0.17 | 1.03 | -1.02 | 0.795563 | 0.893917 | 0.915216 | 0.939452 |
| MmugDNA.9936.1.S1_s_at | MmugDNA.9936.1 | 12.51 | 12.5  | 0.2  | 0.07 | 1.01  | 0.402945 | 0.347582 | 0.701716 | 0.592019 |
| MmugDNA.9937.1.S1_at   | MmugDNA.9937.1 | 3.39  | 3.39  | 0.04 | 0    | 1     | 0.608025 | 0.662057 | 0.819772 | 0.802105 |
| MmugDNA.9938.1.S1_at   | MmugDNA.9938.1 | 5.03  | 5.02  | 0.36 | 0.15 | 1.01  | 0.514299 | 0.689692 | 0.766859 | 0.819038 |
| MmugDNA.994.1.S1_at    | MmugDNA.994.1  | 5.26  | 5.16  | 0.35 | 0.17 | 1.07  | 0.346842 | 0.414593 | 0.666049 | 0.640431 |
| MmugDNA.9941.1.S1_at   | MmugDNA.9941.1 | 6.41  | 6.81  | 0.31 | 0.58 | -1.32 | 0.283124 | 0.399271 | 0.623246 | 0.629735 |
| MmugDNA.9945.1.S1_at   | MmugDNA.9945.1 | 4.07  | 4.19  | 0.29 | 0.29 | -1.08 | 0.859589 | 0.172491 | 0.943317 | 0.448864 |
| MmugDNA.9946.1.S1_at   | MmugDNA.9946.1 | 9.42  | 9.5   | 0.14 | 0.24 | -1.06 | 0.503871 | 0.043792 | 0.761034 | 0.25387  |
| MmugDNA.9947.1.S1_at   | MmugDNA.9947.1 | 5.75  | 5.37  | 0.51 | 0.16 | 1.3   | 0.393626 | 0.507153 | 0.695396 | 0.702788 |
| MmugDNA.9948.1.S1_at   | MmugDNA.9948.1 | 4.23  | 4.27  | 0.14 | 0.31 | -1.03 | 0.500697 | 0.38277  | 0.759654 | 0.618887 |
| MmugDNA.9949.1.S1_at   | MmugDNA.9949.1 | 4.59  | 5     | 0.3  | 0.1  | -1.32 | 0.334601 | 0.445635 | 0.658444 | 0.662468 |
| MmugDNA.995.1.S1_at    | MmugDNA.995.1  | 5.08  | 5.14  | 0.25 | 0.09 | -1.04 | 0.852906 | 0.943672 | 0.940695 | 0.96797  |
| MmugDNA.9950.1.S1_at   | MmugDNA.9950.1 | 5.19  | 4.71  | 0.13 | 0.48 | 1.4   | 0.243501 | 0.463764 | 0.595296 | 0.674656 |
| MmugDNA.9952.1.S1_at   | MmugDNA.9952.1 | 9.79  | 9.47  | 0.47 | 0.35 | 1.25  | 0.487994 | 0.661127 | 0.752583 | 0.801687 |
| MmugDNA.9953.1.S1_at   | MmugDNA.9953.1 | 5.58  | 5.89  | 1.25 | 0.54 | -1.23 | 0.617682 | 0.808278 | 0.824859 | 0.889645 |
| MmugDNA.9954.1.S1_at   | MmugDNA.9954.1 | 4.23  | 4.04  | 0.17 | 0.1  | 1.14  | 0.527738 | 0.407455 | 0.775076 | 0.635032 |
| MmugDNA.9955.1.S1_at   | MmugDNA.9955.1 | 6.93  | 6.33  | 0.36 | 0.27 | 1.52  | 0.140938 | 0.14725  | 0.508476 | 0.421464 |
| MmugDNA.9956.1.S1_at   | MmugDNA.9956.1 | 6.96  | 7.17  | 0.1  | 0.15 | -1.16 | 0.061278 | 0.052171 | 0.395362 | 0.274023 |
| MmugDNA.9957.1.S1_at   | MmugDNA.9957.1 | 4.84  | 4.82  | 0.34 | 0.23 | 1.01  | 0.224251 | 0.139528 | 0.582619 | 0.412743 |
| MmugDNA.9959.1.S1_at   | MmugDNA.9959.1 | 6.49  | 5.74  | 0.71 | 1.2  | 1.68  | 0.252475 | 0.334988 | 0.601373 | 0.582768 |
| MmugDNA.996.1.S1_at    | MmugDNA.996.1  | 4.23  | 4.41  | 0.14 | 0.4  | -1.13 | 0.370004 | 0.562628 | 0.681113 | 0.7381   |
| MmugDNA.9960.1.S1_at   | MmugDNA.9960.1 | 3.52  | 3.52  | 0.08 | 0.14 | 1     | 0.407971 | 0.173128 | 0.70497  | 0.449765 |

|                          |                  |       |       |      |      |          |          |          |          |          |
|--------------------------|------------------|-------|-------|------|------|----------|----------|----------|----------|----------|
| MmugDNA.9961.1.S1_at     | MmugDNA.9961.1   | 5.59  | 5.63  | 0.02 | 0.11 | -1.02    | 0.307253 | 0.247621 | 0.639889 | 0.517002 |
| MmugDNA.9962.1.S1_at     | MmugDNA.9962.1   | 3.85  | 3.77  | 0.17 | 0.07 | 1.06     | 0.202063 | 0.220206 | 0.56434  | 0.493655 |
| MmugDNA.9963.1.S1_at     | MmugDNA.9963.1   | 10.2  | 9.98  | 0.79 | 0.67 | 1.17     | 0.763819 | 0.313607 | 0.900476 | 0.567977 |
| MmugDNA.9964.1.S1_at     | MmugDNA.9964.1   | 9.64  | 10.5  | 0.23 | 1.03 | -1.81    | 0.687627 | 0.870398 | 0.860572 | 0.926446 |
| MmugDNA.9965.1.S1_at     | MmugDNA.9965.1   | 3.96  | 4.01  | 0.04 | 0.12 | -1.04    | 0.635086 | 0.919363 | 0.834812 | 0.954737 |
| MmugDNA.9966.1.S1_at     | MmugDNA.9966.1   | 10.54 | 10.82 | 0.17 | 0.26 | -1.21    | 0.177375 | 0.199252 | 0.541483 | 0.473946 |
| MmugDNA.9971.1.S1_at     | MmugDNA.9971.1   | 7.57  | 7.5   | 0.14 | 0.2  | 1.05     | 0.559117 | 0.602454 | 0.793647 | 0.763411 |
| MmugDNA.9972.1.S1_at     | MmugDNA.9972.1   | 6.06  | 6.01  | 0.22 | 0.08 | 1.03     | 0.488918 | 0.647516 | 0.753393 | 0.793521 |
| MmugDNA.9975.1.S1_at     | MmugDNA.9975.1   | 7.65  | 7.82  | 0.04 | 0.21 | -1.12    | 0.115329 | 0.020458 | 0.478773 | 0.179597 |
| MmugDNA.9976.1.S1_s_at   | MmugDNA.9976.1   | 6.15  | 6.08  | 0.04 | 0.15 | 1.05     | 0.706398 | 0.392844 | 0.870666 | 0.625854 |
| MmugDNA.9979.1.S1_at     | MmugDNA.9979.1   | 6.57  | 6.44  | 0.18 | 0.07 | 1.09     | 0.761635 | 0.470119 | 0.89965  | 0.678572 |
| MmugDNA.9980.1.S1_at     | MmugDNA.9980.1   | 5.01  | 5.38  | 0.75 | 0.34 | -1.29    | 0.871305 | 0.16506  | 0.948463 | 0.441242 |
| MmugDNA.9981.1.S1_at     | MmugDNA.9981.1   | 3.79  | 5.38  | 0.6  | 0.64 | -3       | 0.066546 | 0.066733 | 0.406564 | 0.304149 |
| MmugDNA.9982.1.S1_at     | MmugDNA.9982.1   | 5.15  | 5.21  | 0.23 | 0.29 | -1.04    | 0.643392 | 0.738305 | 0.839349 | 0.848258 |
| MmugDNA.9983.1.S1_at     | MmugDNA.9983.1   | 11.59 | 10.89 | 0.31 | 0.01 | 1.62     | 0.022734 | 0.003243 | 0.288168 | 0.082187 |
| MmugDNA.9984.1.S1_at     | MmugDNA.9984.1   | 3.57  | 3.65  | 0.15 | 0.14 | -1.05    | 0.288405 | 0.187486 | 0.626604 | 0.463586 |
| MmugDNA.9985.1.S1_at     | MmugDNA.9985.1   | 3.06  | 2.93  | 0.23 | 0.14 | 1.09     | 0.150283 | 0.15511  | 0.515019 | 0.430237 |
| MmugDNA.9986.1.S1_at     | MmugDNA.9986.1   | 11.61 | 11.48 | 0.13 | 0.16 | 1.09     | 0.346721 | 0.281226 | 0.666013 | 0.544374 |
| MmugDNA.34805.1.S1_s_at  | MmugDNA.34805.1  | 12.09 | 11.97 | 0.12 | 0.15 | 1.09     | 0.168125 | 0.202135 | 0.53256  | 0.476557 |
| MmugDNA.9987.1.S1_at     | MmugDNA.9987.1   | 5.1   | 5.27  | 0.1  | 0.21 | -1.12    | 0.210743 | 0.263084 | 0.571945 | 0.529402 |
| MmugDNA.9988.1.S1_at     | MmugDNA.9988.1   | 6.2   | 6.32  | 0.12 | 0.15 | -1.09    | 0.461901 | 0.184462 | 0.738028 | 0.460481 |
| MmugDNA.9989.1.S1_at     | MmugDNA.9989.1   | 6.63  | 6.93  | 0.08 | 0.38 | -1.23    | 0.231141 | 0.245337 | 0.587369 | 0.515132 |
| MmugDNA.999.1.S1_at      | MmugDNA.999.1    | 6.64  | 7.94  | 0.14 | 1.11 | -2.45    | 0.079345 | 0.043646 | 0.429376 | 0.253581 |
| MmugDNA.9990.1.S1_at     | MmugDNA.9990.1   | 6.84  | 6.54  | 1.36 | 0.87 | 1.23     | 0.3061   | 0.382966 | 0.639402 | 0.61903  |
| MmugDNA.9991.1.S1_at     | MmugDNA.9991.1   | 4.72  | 4.67  | 0.04 | 0.12 | 1.04     | 0.284488 | 0.614563 | 0.624317 | 0.771322 |
| MmugDNA.9993.1.S1_at     | MmugDNA.9993.1   | 3.81  | 4.66  | 0.27 | 0.42 | -1.8     | 0.103345 | 0.162796 | 0.462888 | 0.438915 |
| MmugDNA.9995.1.S1_at     | MmugDNA.9995.1   | 3.2   | 3.26  | 0.71 | 0.06 | -1.04    | 0.451689 | 0.591661 | 0.73168  | 0.757176 |
| MmugDNA.9996.1.S1_x_at   | MmugDNA.9996.1   | 8.51  | 7.69  | 0.31 | 0.08 | 1.76     | 0.008771 | 0.004381 | 0.221033 | 0.092641 |
| MmugDNA.9998.1.S1_at     | MmugDNA.9998.1   | 4.76  | 4.89  | 0.12 | 0.21 | -1.1     | 0.147752 | 0.255438 | 0.513337 | 0.523461 |
| MmugDNA.9999.1.S1_at     | MmugDNA.9999.1   | 9.42  | 9.16  | 0.37 | 0.16 | 1.2      | 0.325907 | 0.281554 | 0.653063 | 0.54464  |
| MmuMitochon.3.1.S1_s_at  | MmuMitochon.3.1  | 9.43  | 14.14 | 3.3  | 0.04 | -26.15   | 0.126853 | 0.087365 | 0.493023 | 0.340477 |
| MmuMitochon.4.1.S1_at    | MmuMitochon.4.1  | 9.11  | 13.96 | 2.99 | 0.04 | -28.74   | 0.144174 | 0.105253 | 0.510652 | 0.366999 |
| MmuMitochon.6.1.S1_s_at  | MmuMitochon.6.1  | 11.82 | 14.43 | 2.59 | 0.01 | -6.09    | 0.157576 | 0.122982 | 0.5225   | 0.392923 |
| MmuMitochon.10.1.S1_s_at | MmuMitochon.10.1 | 3.7   | 14.32 | 6.21 | 0.05 | -1583.13 | 0.120411 | 0.08164  | 0.485474 | 0.329836 |
| MmuMitochon.13.1.S1_at   | MmuMitochon.13.1 | 13.89 | 13.8  | 0.17 | 0.13 | 1.07     | 0.252644 | 0.365752 | 0.60145  | 0.605685 |
| AY588945.CDS1.S1_s_at    | AY588945.CDS1    | 5.82  | 5.92  | 0.01 | 0.13 | -1.07    | 0.410212 | 0.118104 | 0.706234 | 0.385979 |
| AY588945.CDS2.S1_s_at    | AY588945.CDS2    | 4.25  | 4.68  | 0.1  | 0.24 | -1.34    | 0.070043 | 0.064723 | 0.413492 | 0.300314 |
| AY588945.CDS3.S1_s_at    | AY588945.CDS3    | 4     | 4.16  | 0.03 | 0.14 | -1.12    | 0.119818 | 0.120573 | 0.484387 | 0.389378 |
| AY588945.CDS4.S1_s_at    | AY588945.CDS4    | 3.09  | 3.1   | 0.06 | 0.2  | -1       | 0.267785 | 0.353361 | 0.612749 | 0.596477 |
| AY588945.CDS6.S1_at      | AY588945.CDS6    | 3.9   | 3.9   | 0.09 | 0.16 | 1        | 0.665733 | 0.828669 | 0.850076 | 0.901558 |
| AY588945.CDS6.S1_s_at    | AY588945.CDS6    | 3.46  | 3.64  | 0.15 | 0.09 | -1.14    | 0.092142 | 0.129417 | 0.448698 | 0.400822 |

|                        |                 |      |      |      |      |       |          |          |          |          |
|------------------------|-----------------|------|------|------|------|-------|----------|----------|----------|----------|
| AY588945.CDS7.S1_s_at  | AY588945.CDS7   | 3.08 | 3.18 | 0.11 | 0.12 | -1.07 | 0.328042 | 0.251814 | 0.654207 | 0.520478 |
| AY588945.CDS8.S1_at    | AY588945.CDS8   | 3.51 | 3.53 | 0.01 | 0.16 | -1.01 | 0.848743 | 0.975356 | 0.939211 | 0.986553 |
| AY588945.CDS9.S1_s_at  | AY588945.CDS9   | 4.39 | 4.52 | 0.31 | 0.22 | -1.1  | 0.47941  | 0.68258  | 0.747663 | 0.814624 |
| NC-004455.CDS1.S1_at   | NC-004455.CDS1  | 5.04 | 5.07 | 0.04 | 0.16 | -1.02 | 0.241359 | 0.192948 | 0.593933 | 0.468455 |
| NC-004455.CDS2.S1_at   | NC-004455.CDS2  | 4.12 | 4.14 | 0.11 | 0.28 | -1.01 | 0.673955 | 0.501334 | 0.853911 | 0.69951  |
| NC-004455.CDS3.S1_at   | NC-004455.CDS3  | 2.9  | 2.88 | 0.09 | 0.16 | 1.01  | 0.511555 | 0.734301 | 0.765318 | 0.846058 |
| NC-004455.CDS4.S1_at   | NC-004455.CDS4  | 4.35 | 4.36 | 0.06 | 0.03 | -1.01 | 0.694269 | 0.301706 | 0.864407 | 0.559643 |
| NC-004455.CDS5.S1_at   | NC-004455.CDS5  | 3.1  | 3.2  | 0.03 | 0.05 | -1.08 | 0.024337 | 0.176491 | 0.294535 | 0.452836 |
| NC-004455.CDS6.S1_at   | NC-004455.CDS6  | 3.77 | 3.65 | 0.1  | 0.26 | 1.09  | 0.9612   | 0.674278 | 0.985013 | 0.809716 |
| NC-004455.CDS7.S1_at   | NC-004455.CDS7  | 4.39 | 4.69 | 0.13 | 0.15 | -1.24 | 0.14532  | 0.193332 | 0.511407 | 0.468657 |
| NC-004455.CDS8.S1_at   | NC-004455.CDS8  | 3.91 | 3.9  | 0.11 | 0.15 | 1.01  | 0.257332 | 0.323986 | 0.604697 | 0.574672 |
| NC-001870.CDS5.S1_at   | NC-001870.CDS5  | 4.02 | 4.35 | 0.32 | 0.26 | -1.26 | 0.212356 | 0.265259 | 0.57259  | 0.531232 |
| NC-001870.CDS6.S1_at   | NC-001870.CDS6  | 3.51 | 3.52 | 0    | 0.06 | -1    | 0.302222 | 0.002421 | 0.636913 | 0.073056 |
| NC-001870.CDS7.S1_s_at | NC-001870.CDS7  | 3.57 | 3.62 | 0.04 | 0.17 | -1.03 | 0.873131 | 0.887695 | 0.94924  | 0.93601  |
| NC-001870.CDS8.S1_at   | NC-001870.CDS8  | 3.13 | 3.34 | 0.07 | 0.19 | -1.16 | 0.391729 | 0.389789 | 0.694179 | 0.623851 |
| NC-001870.CDS8.S1_x_at | NC-001870.CDS8  | 3.33 | 3.33 | 0.03 | 0.08 | -1    | 0.557285 | 0.075169 | 0.792388 | 0.319373 |
| NC-001870.CDS9.S1_at   | NC-001870.CDS9  | 4.09 | 4.24 | 0.01 | 0.26 | -1.11 | 0.486917 | 0.636451 | 0.751857 | 0.786176 |
| NC-001798.CDS1.S1_s_at | NC-001798.CDS1  | 7.55 | 7.8  | 0.05 | 0.12 | -1.2  | 0.036807 | 0.029814 | 0.34044  | 0.214326 |
| NC-001798.CDS2.S1_s_at | NC-001798.CDS2  | 5.89 | 5.91 | 0.11 | 0.15 | -1.02 | 0.718415 | 0.199879 | 0.876426 | 0.474559 |
| NC-001798.CDS3.S1_at   | NC-001798.CDS3  | 4.75 | 5.2  | 0.14 | 0.25 | -1.37 | 0.107582 | 0.110526 | 0.468045 | 0.374742 |
| NC-001798.CDS4.S1_at   | NC-001798.CDS4  | 5.01 | 5.14 | 0.08 | 0.22 | -1.1  | 0.357595 | 0.430015 | 0.672471 | 0.65111  |
| NC-001798.CDS5.S1_at   | NC-001798.CDS5  | 3.84 | 3.9  | 0.12 | 0.21 | -1.04 | 0.197579 | 0.296505 | 0.560593 | 0.555528 |
| NC-001798.CDS6.S1_at   | NC-001798.CDS6  | 5.73 | 5.94 | 0.07 | 0.11 | -1.15 | 0.064449 | 0.060599 | 0.402975 | 0.292776 |
| NC-001798.CDS7.S1_at   | NC-001798.CDS7  | 3.64 | 3.87 | 0.08 | 0.1  | -1.17 | 0.034064 | 0.152191 | 0.331126 | 0.426978 |
| NC-001798.CDS8.S1_at   | NC-001798.CDS8  | 4.43 | 4.51 | 0.08 | 0.18 | -1.06 | 0.184607 | 0.233055 | 0.548202 | 0.50445  |
| NC-001798.CDS9.S1_at   | NC-001798.CDS9  | 5.25 | 5.34 | 0.06 | 0.35 | -1.06 | 0.231287 | 0.29642  | 0.587369 | 0.555525 |
| NC-001798.CDS10.S1_at  | NC-001798.CDS10 | 5.91 | 5.96 | 0.07 | 0.07 | -1.04 | 0.740202 | 0.576367 | 0.888448 | 0.747202 |
| NC-001798.CDS11.S1_at  | NC-001798.CDS11 | 6    | 6.22 | 0.07 | 0.09 | -1.17 | 0.034462 | 0.021524 | 0.333183 | 0.183771 |
| NC-001798.CDS12.S1_at  | NC-001798.CDS12 | 4.68 | 4.87 | 0.18 | 0.28 | -1.14 | 0.352136 | 0.467072 | 0.669435 | 0.676825 |
| NC-001798.CDS13.S1_at  | NC-001798.CDS13 | 4.6  | 4.74 | 0.13 | 0.3  | -1.1  | 0.269146 | 0.350286 | 0.613808 | 0.594034 |
| NC-001798.CDS14.S1_at  | NC-001798.CDS14 | 5.48 | 5.63 | 0.09 | 0.04 | -1.11 | 0.064047 | 0.051542 | 0.402086 | 0.272451 |
| NC-001798.CDS15.S1_at  | NC-001798.CDS15 | 5.45 | 5.8  | 0.17 | 0.17 | -1.27 | 0.07896  | 0.195314 | 0.428609 | 0.470253 |
| NC-001798.CDS16.S1_at  | NC-001798.CDS16 | 4.72 | 4.78 | 0.26 | 0.16 | -1.05 | 0.285365 | 0.423361 | 0.624864 | 0.646277 |
| NC-001798.CDS17.S1_at  | NC-001798.CDS17 | 5.94 | 5.94 | 0.13 | 0.11 | 1     | 0.998036 | 0.947768 | 0.999237 | 0.970346 |
| NC-001798.CDS18.S1_at  | NC-001798.CDS18 | 5.81 | 5.98 | 0.21 | 0.4  | -1.13 | 0.187574 | 0.224777 | 0.550528 | 0.497617 |
| NC-001798.CDS19.S1_at  | NC-001798.CDS19 | 4.78 | 4.88 | 0.06 | 0.32 | -1.07 | 0.215106 | 0.247123 | 0.575523 | 0.516289 |
| NC-001798.CDS20.S1_at  | NC-001798.CDS20 | 6.03 | 6.26 | 0.08 | 0.17 | -1.17 | 0.107538 | 0.199699 | 0.468045 | 0.474335 |
| NC-001798.CDS21.S1_at  | NC-001798.CDS21 | 6.16 | 6.4  | 0.11 | 0.18 | -1.18 | 0.09416  | 0.122647 | 0.451714 | 0.392596 |
| NC-001798.CDS22.S1_at  | NC-001798.CDS22 | 5.56 | 5.63 | 0.11 | 0.12 | -1.05 | 0.903918 | 0.713892 | 0.961578 | 0.833976 |
| NC-001798.CDS23.S1_at  | NC-001798.CDS23 | 5.81 | 5.89 | 0.21 | 0.24 | -1.05 | 0.407332 | 0.631451 | 0.70458  | 0.782839 |
| NC-001798.CDS24.S1_at  | NC-001798.CDS24 | 5.75 | 5.75 | 0.18 | 0    | -1    | 0.349149 | 0.36381  | 0.667453 | 0.604189 |

|                         |                 |      |      |      |      |       |          |          |          |          |
|-------------------------|-----------------|------|------|------|------|-------|----------|----------|----------|----------|
| NC-001798.CDS25.S1_at   | NC-001798.CDS25 | 6.2  | 6.45 | 0.01 | 0.05 | -1.18 | 0.001629 | 0.005777 | 0.152812 | 0.104378 |
| NC-001798.CDS26.S1_at   | NC-001798.CDS26 | 3.77 | 3.88 | 0.07 | 0.02 | -1.08 | 0.121369 | 0.046202 | 0.486036 | 0.259359 |
| NC-001798.CDS27.S1_at   | NC-001798.CDS27 | 4.3  | 4.61 | 0.08 | 0.31 | -1.24 | 0.162397 | 0.196002 | 0.526694 | 0.471005 |
| NC-001798.CDS28.S1_s_at | NC-001798.CDS28 | 5.3  | 5.49 | 0.03 | 0.21 | -1.14 | 0.490654 | 0.62049  | 0.754497 | 0.775449 |
| NC-001798.CDS30.S1_at   | NC-001798.CDS30 | 6.11 | 6.13 | 0.04 | 0.06 | -1.01 | 0.262837 | 0.522181 | 0.609088 | 0.712941 |
| NC-001798.CDS31.S1_at   | NC-001798.CDS31 | 3.54 | 3.56 | 0.1  | 0.08 | -1.02 | 0.467795 | 0.742406 | 0.740845 | 0.850798 |
| NC-001798.CDS32.S1_at   | NC-001798.CDS32 | 7.09 | 7.39 | 0.11 | 0.09 | -1.23 | 0.040641 | 0.029695 | 0.34998  | 0.214029 |
| NC-001798.CDS33.S1_at   | NC-001798.CDS33 | 4.36 | 4.44 | 0.14 | 0.04 | -1.06 | 0.857351 | 0.329786 | 0.942256 | 0.578874 |
| NC-001798.CDS34.S1_at   | NC-001798.CDS34 | 4.87 | 5.28 | 0.11 | 0.15 | -1.33 | 0.039483 | 0.006981 | 0.347288 | 0.112771 |
| NC-001798.CDS35.S1_at   | NC-001798.CDS35 | 4.56 | 4.79 | 0.12 | 0.13 | -1.17 | 0.174053 | 0.139756 | 0.537585 | 0.413109 |
| NC-001798.CDS36.S1_at   | NC-001798.CDS36 | 4.27 | 4.3  | 0.05 | 0.18 | -1.02 | 0.270289 | 0.347356 | 0.614663 | 0.591967 |
| NC-001798.CDS37.S1_at   | NC-001798.CDS37 | 6.56 | 6.64 | 0.13 | 0.15 | -1.06 | 0.465026 | 0.546005 | 0.739772 | 0.727708 |
| NC-001798.CDS38.S1_at   | NC-001798.CDS38 | 4.64 | 4.84 | 0.17 | 0.21 | -1.15 | 0.346367 | 0.484186 | 0.665788 | 0.688399 |
| NC-001798.CDS39.S1_at   | NC-001798.CDS39 | 4.64 | 4.7  | 0.04 | 0.23 | -1.04 | 0.462953 | 0.565838 | 0.738484 | 0.740112 |
| NC-001798.CDS40.S1_at   | NC-001798.CDS40 | 6.39 | 6.49 | 0.09 | 0.24 | -1.07 | 0.441526 | 0.673225 | 0.724962 | 0.809084 |
| NC-001798.CDS41.S1_at   | NC-001798.CDS41 | 5.97 | 6.14 | 0.1  | 0.09 | -1.12 | 0.083542 | 0.146895 | 0.43582  | 0.420934 |
| NC-001798.CDS42.S1_at   | NC-001798.CDS42 | 4.39 | 4.64 | 0    | 0.26 | -1.19 | 0.285398 | 0.105239 | 0.624864 | 0.366999 |
| NC-001798.CDS43.S1_at   | NC-001798.CDS43 | 5.56 | 5.54 | 0.12 | 0    | 1.01  | 0.795278 | 0.757685 | 0.915081 | 0.858941 |
| NC-001798.CDS44.S1_at   | NC-001798.CDS44 | 5.1  | 5.51 | 0.09 | 0.15 | -1.33 | 0.036525 | 0.040689 | 0.339709 | 0.24665  |
| NC-001798.CDS45.S1_at   | NC-001798.CDS45 | 6.55 | 6.66 | 0.11 | 0.1  | -1.08 | 0.219634 | 0.237742 | 0.57907  | 0.50826  |
| NC-001798.CDS46.S1_at   | NC-001798.CDS46 | 6.18 | 6.17 | 0.11 | 0.07 | 1.01  | 0.280622 | 0.364844 | 0.621742 | 0.605139 |
| NC-001798.CDS47.S1_at   | NC-001798.CDS47 | 5.32 | 5.43 | 0.18 | 0.08 | -1.08 | 0.247811 | 0.321874 | 0.599052 | 0.573523 |
| NC-001798.CDS48.S1_at   | NC-001798.CDS48 | 4.13 | 4.21 | 0.06 | 0.2  | -1.06 | 0.431743 | 0.496145 | 0.718638 | 0.695877 |
| NC-001798.CDS49.S1_at   | NC-001798.CDS49 | 4.78 | 4.97 | 0.21 | 0.22 | -1.14 | 0.67192  | 0.85666  | 0.852716 | 0.918123 |
| NC-001798.CDS50.S1_at   | NC-001798.CDS50 | 5.32 | 5.37 | 0.1  | 0.2  | -1.04 | 0.165359 | 0.243975 | 0.529362 | 0.514069 |
| NC-001798.CDS52.S1_at   | NC-001798.CDS52 | 5.92 | 6.08 | 0.1  | 0.02 | -1.12 | 0.046363 | 0.035342 | 0.363009 | 0.232294 |
| NC-001798.CDS53.S1_at   | NC-001798.CDS53 | 4.7  | 4.86 | 0.06 | 0.12 | -1.12 | 0.091355 | 0.088566 | 0.447175 | 0.342004 |
| NC-001798.CDS54.S1_at   | NC-001798.CDS54 | 6.94 | 7.04 | 0.25 | 0.23 | -1.08 | 0.576942 | 0.717234 | 0.803309 | 0.836332 |
| NC-001798.CDS55.S1_at   | NC-001798.CDS55 | 6.94 | 7.07 | 0.19 | 0.09 | -1.1  | 0.153022 | 0.180242 | 0.517464 | 0.456804 |
| NC-001798.CDS56.S1_at   | NC-001798.CDS56 | 5.39 | 5.55 | 0.19 | 0.08 | -1.12 | 0.063269 | 0.054907 | 0.400486 | 0.279775 |
| NC-001798.CDS57.S1_at   | NC-001798.CDS57 | 3.5  | 3.62 | 0.09 | 0.19 | -1.08 | 0.450263 | 0.322301 | 0.730898 | 0.573907 |
| NC-001798.CDS58.S1_at   | NC-001798.CDS58 | 4.22 | 4.67 | 0.02 | 0.26 | -1.37 | 0.046548 | 0.031775 | 0.363306 | 0.220698 |
| NC-001798.CDS59.S1_at   | NC-001798.CDS59 | 5.22 | 5.28 | 0.07 | 0.17 | -1.04 | 0.173997 | 0.151613 | 0.537538 | 0.426354 |
| NC-001798.CDS60.S1_at   | NC-001798.CDS60 | 5.38 | 5.7  | 0.19 | 0.12 | -1.25 | 0.189888 | 0.242449 | 0.552746 | 0.512835 |
| NC-001798.CDS63.S1_s_at | NC-001798.CDS63 | 7.39 | 7.58 | 0.06 | 0.07 | -1.14 | 0.030231 | 0.031085 | 0.317666 | 0.218117 |
| NC-001798.CDS64.S1_at   | NC-001798.CDS64 | 6.46 | 6.39 | 0.18 | 0.11 | 1.05  | 0.589872 | 0.564703 | 0.809648 | 0.739425 |
| NC-001798.CDS65.S1_at   | NC-001798.CDS65 | 5.44 | 5.72 | 0.03 | 0.31 | -1.21 | 0.618115 | 0.60049  | 0.825111 | 0.762128 |
| NC-001798.CDS66.S1_at   | NC-001798.CDS66 | 6.6  | 6.59 | 0.14 | 0.11 | 1.01  | 0.540239 | 0.581746 | 0.781688 | 0.750738 |
| NC-001798.CDS67.S1_at   | NC-001798.CDS67 | 6.69 | 6.87 | 0.09 | 0.16 | -1.13 | 0.157975 | 0.224103 | 0.522944 | 0.497092 |
| NC-001798.CDS68.S1_at   | NC-001798.CDS68 | 5.89 | 5.95 | 0.07 | 0.08 | -1.04 | 0.15069  | 0.201785 | 0.515411 | 0.476367 |
| NC-001798.CDS69.S1_at   | NC-001798.CDS69 | 5.31 | 5.63 | 0.08 | 0.14 | -1.25 | 0.021485 | 0.028187 | 0.282524 | 0.2095   |

|                         |                 |      |      |      |      |       |          |          |          |          |
|-------------------------|-----------------|------|------|------|------|-------|----------|----------|----------|----------|
| NC-001798.CDS70.S1_at   | NC-001798.CDS70 | 5.4  | 5.7  | 0.14 | 0.16 | -1.23 | 0.200053 | 0.117965 | 0.563056 | 0.385858 |
| NC-001798.CDS71.S1_at   | NC-001798.CDS71 | 6.91 | 7.12 | 0.24 | 0.12 | -1.16 | 0.321454 | 0.462923 | 0.650183 | 0.674149 |
| NC-001798.CDS72.S1_at   | NC-001798.CDS72 | 5.13 | 5.22 | 0.1  | 0.05 | -1.06 | 0.21149  | 0.28531  | 0.572267 | 0.547196 |
| NC-001798.CDS73.S1_at   | NC-001798.CDS73 | 6.09 | 6.08 | 0    | 0.08 | 1.01  | 0.526531 | 0.68036  | 0.774143 | 0.813388 |
| NC-001798.CDS74.S1_at   | NC-001798.CDS74 | 6.15 | 6.15 | 0.13 | 0.08 | 1     | 0.444504 | 0.594668 | 0.727001 | 0.758623 |
| NC-001798.CDS75.S1_at   | NC-001798.CDS75 | 7.52 | 7.55 | 0.27 | 0.18 | -1.03 | 0.530582 | 0.663943 | 0.776893 | 0.803246 |
| NC-001798.CDS75.S1_s_at | NC-001798.CDS75 | 5.46 | 5.42 | 0.17 | 0.09 | 1.03  | 0.673883 | 0.67027  | 0.853862 | 0.807201 |
| NC-001798.CDS76.S1_at   | NC-001798.CDS76 | 6.14 | 6.45 | 0.11 | 0.14 | -1.24 | 0.049563 | 0.045124 | 0.371523 | 0.256974 |
| NC-001862.CDS1.S1_at    | NC-001862.CDS1  | 4.51 | 4.52 | 0.15 | 0.12 | -1.01 | 0.523477 | 0.744365 | 0.772553 | 0.85199  |
| NC-001862.CDS2.S1_at    | NC-001862.CDS2  | 3.93 | 3.87 | 0.07 | 0.06 | 1.04  | 0.361181 | 0.835044 | 0.675116 | 0.905549 |
| NC-001401.CDS1.S1_s_at  | NC-001401.CDS1  | 4.59 | 5.1  | 0.07 | 0.3  | -1.42 | 0.161361 | 0.227668 | 0.526364 | 0.499923 |
| NC-001401.CDS5.S1_at    | NC-001401.CDS5  | 4.79 | 4.72 | 0.11 | 0.03 | 1.05  | 0.97087  | 0.155534 | 0.988751 | 0.430888 |
| NC-001542.CDS1.S1_at    | NC-001542.CDS1  | 3.1  | 3.08 | 0.01 | 0.1  | 1.01  | 0.456523 | 0.659054 | 0.734509 | 0.800504 |
| NC-001542.CDS2.S1_at    | NC-001542.CDS2  | 3.55 | 3.61 | 0.08 | 0.25 | -1.04 | 0.874336 | 0.709893 | 0.94962  | 0.831863 |
| NC-001542.CDS3.S1_at    | NC-001542.CDS3  | 3.74 | 3.89 | 0.31 | 0.11 | -1.11 | 0.502304 | 0.531046 | 0.760275 | 0.718384 |
| NC-001542.CDS4.S1_at    | NC-001542.CDS4  | 3.8  | 3.64 | 0.13 | 0.15 | 1.11  | 0.224211 | 0.29128  | 0.582619 | 0.551803 |
| NC-001542.CDS5.S1_at    | NC-001542.CDS5  | 3.94 | 3.96 | 0.18 | 0.04 | -1.02 | 0.500105 | 0.712939 | 0.759402 | 0.833562 |
| NC-001710.CDS1.S1_at    | NC-001710.CDS1  | 3.95 | 4    | 0.08 | 0.06 | -1.04 | 0.897853 | 0.184152 | 0.95918  | 0.460379 |
| NC-001669.CDS1.S1_at    | NC-001669.CDS1  | 3.69 | 4.04 | 0.05 | 0.2  | -1.28 | 0.041657 | 0.013729 | 0.352383 | 0.150093 |
| NC-001669.CDS2.S1_at    | NC-001669.CDS2  | 3.6  | 3.62 | 0.15 | 0.06 | -1.02 | 0.759248 | 0.734088 | 0.898265 | 0.845896 |
| NC-001669.CDS3.S1_s_at  | NC-001669.CDS3  | 3.99 | 3.96 | 0.12 | 0.16 | 1.02  | 0.392219 | 0.598938 | 0.694576 | 0.761244 |
| NC-001669.CDS5.S1_at    | NC-001669.CDS5  | 4.75 | 4.63 | 0.09 | 0.13 | 1.09  | 0.216867 | 0.195654 | 0.576447 | 0.470491 |
| NC-003401.CDS1.S1_at    | NC-003401.CDS1  | 2.99 | 3.28 | 0.13 | 0.09 | -1.22 | 0.078958 | 0.055318 | 0.428609 | 0.281024 |
| NC-003401.CDS2.S1_at    | NC-003401.CDS2  | 3.74 | 3.77 | 0.18 | 0.09 | -1.02 | 0.583353 | 0.318675 | 0.806416 | 0.571315 |
| NC-003401.CDS3.S1_at    | NC-003401.CDS3  | 3.15 | 2.99 | 0.2  | 0.11 | 1.12  | 0.729357 | 0.888321 | 0.882512 | 0.93632  |
| NC-003401.CDS4.S1_at    | NC-003401.CDS4  | 5.16 | 5.31 | 0.06 | 0.03 | -1.11 | 0.017686 | 0.10137  | 0.267454 | 0.36112  |
| NC-003401.CDS5.S1_at    | NC-003401.CDS5  | 3.74 | 3.79 | 0.07 | 0.28 | -1.03 | 0.282695 | 0.404897 | 0.62304  | 0.633393 |
| NC-003401.CDS6.S1_at    | NC-003401.CDS6  | 5.15 | 5.12 | 0.32 | 0.19 | 1.02  | 0.77839  | 0.495036 | 0.907418 | 0.695291 |
| NC-003401.CDS7.S1_at    | NC-003401.CDS7  | 4.4  | 4.57 | 0.19 | 0.08 | -1.13 | 0.2068   | 0.345472 | 0.568816 | 0.590746 |
| NC-003401.CDS8.S1_at    | NC-003401.CDS8  | 4.33 | 4.69 | 0.07 | 0.19 | -1.29 | 0.115    | 0.354958 | 0.478345 | 0.597466 |
| NC-003401.CDS9.S1_at    | NC-003401.CDS9  | 4.53 | 4.54 | 0.25 | 0.09 | -1.01 | 0.454228 | 0.420343 | 0.733184 | 0.644099 |
| NC-003401.CDS10.S1_at   | NC-003401.CDS10 | 4.03 | 4.25 | 0.16 | 0.22 | -1.16 | 0.277501 | 0.145483 | 0.619698 | 0.419424 |
| NC-003401.CDS11.S1_at   | NC-003401.CDS11 | 4.63 | 4.75 | 0.25 | 0.07 | -1.09 | 0.615126 | 0.6042   | 0.823342 | 0.764542 |
| NC-003401.CDS12.S1_at   | NC-003401.CDS12 | 3.18 | 3.3  | 0.27 | 0.07 | -1.08 | 0.469873 | 0.694741 | 0.741958 | 0.822545 |
| NC-003401.CDS13.S1_at   | NC-003401.CDS13 | 5.44 | 5.48 | 0.03 | 0.05 | -1.03 | 0.393197 | 0.043144 | 0.695036 | 0.252421 |
| NC-003401.CDS14.S1_at   | NC-003401.CDS14 | 6.6  | 6.63 | 0.24 | 0.2  | -1.02 | 0.391694 | 0.537548 | 0.694178 | 0.722606 |
| NC-003401.CDS15.S1_at   | NC-003401.CDS15 | 4.54 | 4.57 | 0.09 | 0.24 | -1.02 | 0.810955 | 0.442446 | 0.922893 | 0.660417 |
| NC-003401.CDS16.S1_at   | NC-003401.CDS16 | 4.8  | 4.93 | 0.11 | 0.25 | -1.09 | 0.358406 | 0.362964 | 0.673196 | 0.603471 |
| NC-003401.CDS17.S1_at   | NC-003401.CDS17 | 4.28 | 4.46 | 0.18 | 0.17 | -1.13 | 0.17918  | 0.20548  | 0.543481 | 0.479764 |
| NC-003401.CDS18.S1_at   | NC-003401.CDS18 | 3.27 | 3.51 | 0.16 | 0.12 | -1.19 | 0.237459 | 0.671857 | 0.590991 | 0.808158 |
| NC-003401.CDS19.S1_at   | NC-003401.CDS19 | 4.45 | 4.44 | 0.03 | 0.14 | 1.01  | 0.464495 | 0.032236 | 0.739291 | 0.222213 |



|                         |                 |      |      |      |      |       |          |          |          |          |
|-------------------------|-----------------|------|------|------|------|-------|----------|----------|----------|----------|
| NC-003401.CDS19.S1_s_at | NC-003401.CDS19 | 3.84 | 3.94 | 0.17 | 0.05 | -1.07 | 0.286156 | 0.385385 | 0.625418 | 0.620818 |
| NC-003401.CDS20.S1_at   | NC-003401.CDS20 | 3.59 | 3.69 | 0.01 | 0.1  | -1.07 | 0.300835 | 0.208001 | 0.636012 | 0.482049 |
| NC-003401.CDS21.S1_at   | NC-003401.CDS21 | 2.99 | 3.07 | 0.09 | 0.15 | -1.05 | 0.874036 | 0.582256 | 0.949547 | 0.750921 |
| NC-003401.CDS22.S1_at   | NC-003401.CDS22 | 3.88 | 4    | 0.04 | 0.08 | -1.09 | 0.138836 | 0.110695 | 0.50592  | 0.374854 |
| NC-003401.CDS23.S1_at   | NC-003401.CDS23 | 3.25 | 3.27 | 0.02 | 0.22 | -1.01 | 0.321681 | 0.213861 | 0.650336 | 0.48758  |
| NC-003401.CDS24.S1_at   | NC-003401.CDS24 | 4.43 | 4.43 | 0.02 | 0.17 | 1     | 0.428504 | 0.511377 | 0.716885 | 0.705534 |
| NC-003401.CDS25.S1_at   | NC-003401.CDS25 | 4.83 | 5.06 | 0.15 | 0.06 | -1.17 | 0.047503 | 0.041964 | 0.366554 | 0.24943  |
| NC-003401.CDS26.S1_at   | NC-003401.CDS26 | 5.54 | 5.31 | 0.27 | 0.21 | 1.18  | 0.833055 | 0.812303 | 0.93227  | 0.891561 |
| NC-003401.CDS27.S1_at   | NC-003401.CDS27 | 3.72 | 3.79 | 0.09 | 0.16 | -1.05 | 0.345979 | 0.539963 | 0.665474 | 0.723995 |
| NC-003401.CDS28.S1_at   | NC-003401.CDS28 | 3.72 | 3.66 | 0.17 | 0.21 | 1.04  | 0.859914 | 0.777137 | 0.943454 | 0.870521 |
| NC-003401.CDS29.S1_at   | NC-003401.CDS29 | 3.33 | 3.52 | 0.11 | 0.21 | -1.14 | 0.332181 | 0.096614 | 0.656683 | 0.354145 |
| NC-003401.CDS30.S1_at   | NC-003401.CDS30 | 3.39 | 3.44 | 0.09 | 0.15 | -1.04 | 0.412959 | 0.53763  | 0.708227 | 0.722616 |
| NC-003401.CDS31.S1_at   | NC-003401.CDS31 | 5.03 | 5.19 | 0.1  | 0.06 | -1.12 | 0.036868 | 0.065417 | 0.340443 | 0.301415 |
| NC-003401.CDS32.S1_at   | NC-003401.CDS32 | 3.63 | 3.76 | 0.23 | 0.06 | -1.1  | 0.850403 | 0.670611 | 0.939943 | 0.807444 |
| NC-003401.CDS33.S1_at   | NC-003401.CDS33 | 4.06 | 4.3  | 0.16 | 0.11 | -1.18 | 0.174751 | 0.287483 | 0.538326 | 0.548718 |
| NC-003401.CDS34.S1_at   | NC-003401.CDS34 | 3.84 | 3.99 | 0.08 | 0.07 | -1.11 | 0.066336 | 0.05934  | 0.406394 | 0.29054  |
| NC-003401.CDS35.S1_at   | NC-003401.CDS35 | 3.48 | 3.77 | 0.03 | 0.2  | -1.22 | 0.044731 | 0.021438 | 0.359043 | 0.183342 |
| NC-003401.CDS36.S1_at   | NC-003401.CDS36 | 4.43 | 4.5  | 0.09 | 0.08 | -1.05 | 0.569289 | 0.850611 | 0.79903  | 0.915016 |
| NC-003401.CDS37.S1_at   | NC-003401.CDS37 | 3.36 | 3.67 | 0.02 | 0.14 | -1.24 | 0.036417 | 0.015464 | 0.339201 | 0.157878 |
| NC-003401.CDS38.S1_at   | NC-003401.CDS38 | 3.66 | 3.56 | 0.06 | 0.16 | 1.07  | 0.948358 | 0.729338 | 0.980183 | 0.843541 |
| NC-003401.CDS38.S1_x_at | NC-003401.CDS38 | 3    | 3.01 | 0.02 | 0.05 | -1.01 | 0.692932 | 0.937835 | 0.86374  | 0.964734 |
| NC-003401.CDS39.S1_at   | NC-003401.CDS39 | 3.48 | 3.47 | 0.07 | 0.04 | 1     | 0.837901 | 0.844323 | 0.934532 | 0.911376 |
| NC-003401.CDS40.S1_at   | NC-003401.CDS40 | 4.89 | 4.92 | 0.16 | 0.2  | -1.02 | 0.38316  | 0.523886 | 0.689068 | 0.714052 |
| NC-003401.CDS41.S1_at   | NC-003401.CDS41 | 5.4  | 5.53 | 0.12 | 0.25 | -1.1  | 0.158366 | 0.21109  | 0.523219 | 0.4851   |
| NC-003401.CDS42.S1_at   | NC-003401.CDS42 | 4.92 | 4.96 | 0.01 | 0.25 | -1.03 | 0.275039 | 0.431294 | 0.617642 | 0.652249 |
| NC-003401.CDS43.S1_at   | NC-003401.CDS43 | 3.09 | 3.25 | 0.1  | 0.1  | -1.12 | 0.047678 | 0.078228 | 0.367037 | 0.324765 |
| NC-003401.CDS44.S1_at   | NC-003401.CDS44 | 4.11 | 4.25 | 0.13 | 0.15 | -1.1  | 0.146765 | 0.226756 | 0.512699 | 0.499176 |
| NC-003401.CDS45.S1_at   | NC-003401.CDS45 | 4.58 | 4.66 | 0.1  | 0.34 | -1.06 | 0.235984 | 0.260035 | 0.589904 | 0.52675  |
| NC-003401.CDS46.S1_at   | NC-003401.CDS46 | 4.14 | 4.36 | 0.12 | 0.06 | -1.16 | 0.063598 | 0.289851 | 0.401061 | 0.550831 |
| NC-003401.CDS47.S1_at   | NC-003401.CDS47 | 3.58 | 3.51 | 0.18 | 0.14 | 1.05  | 0.589044 | 0.346219 | 0.809191 | 0.591201 |
| NC-003401.CDS48.S1_at   | NC-003401.CDS48 | 4.59 | 4.96 | 0.11 | 0.31 | -1.29 | 0.119957 | 0.124797 | 0.48448  | 0.395219 |
| NC-003401.CDS49.S1_at   | NC-003401.CDS49 | 4.09 | 4.09 | 0.09 | 0.02 | 1     | 0.478924 | 0.646076 | 0.747575 | 0.792676 |
| NC-003401.CDS50.S1_at   | NC-003401.CDS50 | 4.99 | 4.94 | 0.13 | 0.19 | 1.04  | 0.384397 | 0.522835 | 0.68993  | 0.713416 |
| NC-003401.CDS51.S1_at   | NC-003401.CDS51 | 5.03 | 5.22 | 0.13 | 0.27 | -1.14 | 0.197124 | 0.253431 | 0.560096 | 0.521736 |
| NC-003401.CDS52.S1_at   | NC-003401.CDS52 | 5.49 | 5.7  | 0.14 | 0.15 | -1.16 | 0.102185 | 0.094602 | 0.461767 | 0.351371 |
| NC-003401.CDS53.S1_at   | NC-003401.CDS53 | 5.27 | 5.42 | 0.28 | 0.12 | -1.11 | 0.757645 | 0.919652 | 0.897246 | 0.954874 |
| NC-003401.CDS54.S1_at   | NC-003401.CDS54 | 4.56 | 4.76 | 0.06 | 0.18 | -1.14 | 0.450524 | 0.386693 | 0.731008 | 0.621864 |
| NC-003401.CDS55.S1_at   | NC-003401.CDS55 | 3.12 | 3.36 | 0.2  | 0.11 | -1.18 | 0.099927 | 0.087022 | 0.460002 | 0.339889 |
| NC-003401.CDS56.S1_at   | NC-003401.CDS56 | 3.73 | 3.76 | 0.19 | 0.14 | -1.02 | 0.769431 | 0.849975 | 0.903012 | 0.914673 |
| NC-003401.CDS57.S1_at   | NC-003401.CDS57 | 4.68 | 4.86 | 0.05 | 0.17 | -1.14 | 0.416218 | 0.707615 | 0.709763 | 0.830424 |
| NC-003401.CDS58.S1_at   | NC-003401.CDS58 | 4.08 | 4.13 | 0.11 | 0.19 | -1.04 | 0.367018 | 0.546982 | 0.679287 | 0.728283 |

|                       |                 |      |      |      |      |       |          |          |          |          |
|-----------------------|-----------------|------|------|------|------|-------|----------|----------|----------|----------|
| NC-003401.CDS59.S1_at | NC-003401.CDS59 | 4.01 | 4.22 | 0.12 | 0.27 | -1.16 | 0.23166  | 0.206516 | 0.587487 | 0.480571 |
| NC-003401.CDS60.S1_at | NC-003401.CDS60 | 3.84 | 4.09 | 0.06 | 0.1  | -1.18 | 0.054946 | 0.39402  | 0.382788 | 0.626734 |
| NC-003401.CDS61.S1_at | NC-003401.CDS61 | 4.22 | 4.4  | 0.23 | 0.22 | -1.13 | 0.38175  | 0.468445 | 0.688164 | 0.677714 |
| NC-003401.CDS62.S1_at | NC-003401.CDS62 | 5.51 | 5.37 | 0.18 | 0.16 | 1.1   | 0.914892 | 0.876359 | 0.966349 | 0.929679 |
| NC-003401.CDS63.S1_at | NC-003401.CDS63 | 2.87 | 2.85 | 0.09 | 0.06 | 1.01  | 0.595581 | 0.737601 | 0.812393 | 0.847993 |
| NC-003401.CDS64.S1_at | NC-003401.CDS64 | 5.42 | 5.53 | 0.21 | 0.15 | -1.07 | 0.342369 | 0.461297 | 0.663141 | 0.672971 |
| NC-003401.CDS65.S1_at | NC-003401.CDS65 | 5.21 | 5.21 | 0.06 | 0.04 | -1    | 0.456854 | 0.862214 | 0.73457  | 0.921663 |
| NC-003401.CDS66.S1_at | NC-003401.CDS66 | 5.4  | 5.42 | 0.14 | 0.1  | -1.02 | 0.407331 | 0.549215 | 0.70458  | 0.729705 |
| NC-003401.CDS67.S1_at | NC-003401.CDS67 | 5.23 | 5.21 | 0.29 | 0.1  | 1.02  | 0.721379 | 0.511842 | 0.878074 | 0.705797 |
| NC-003401.CDS68.S1_at | NC-003401.CDS68 | 4.7  | 4.91 | 0.15 | 0.16 | -1.16 | 0.35041  | 0.297247 | 0.668486 | 0.556067 |
| NC-003401.CDS69.S1_at | NC-003401.CDS69 | 6.87 | 7.06 | 0.11 | 0.15 | -1.14 | 0.09403  | 0.141078 | 0.451612 | 0.414592 |
| NC-003401.CDS70.S1_at | NC-003401.CDS70 | 4.57 | 4.71 | 0.12 | 0.2  | -1.1  | 0.356066 | 0.436415 | 0.671384 | 0.655988 |
| NC-003401.CDS71.S1_at | NC-003401.CDS71 | 5.46 | 5.45 | 0.04 | 0.02 | 1     | 0.938403 | 0.408745 | 0.976434 | 0.6359   |
| NC-003401.CDS72.S1_at | NC-003401.CDS72 | 4.59 | 4.74 | 0.18 | 0.18 | -1.11 | 0.16911  | 0.168897 | 0.533412 | 0.445458 |
| NC-003401.CDS73.S1_at | NC-003401.CDS73 | 3.7  | 3.8  | 0.16 | 0.06 | -1.07 | 0.415854 | 0.364783 | 0.70957  | 0.605072 |
| NC-003401.CDS74.S1_at | NC-003401.CDS74 | 3.39 | 3.53 | 0.04 | 0.09 | -1.1  | 0.097071 | 0.221809 | 0.456113 | 0.494948 |
| NC-003401.CDS75.S1_at | NC-003401.CDS75 | 3.95 | 3.99 | 0.04 | 0.11 | -1.03 | 0.400143 | 0.210737 | 0.699704 | 0.48478  |
| NC-003401.CDS76.S1_at | NC-003401.CDS76 | 4.96 | 4.96 | 0    | 0.02 | 1     | 0.312475 | 0.319244 | 0.644204 | 0.571722 |
| NC-003401.CDS77.S1_at | NC-003401.CDS77 | 3.89 | 3.88 | 0.03 | 0.18 | 1.01  | 0.954101 | 0.970721 | 0.983003 | 0.98405  |
| NC-003401.CDS78.S1_at | NC-003401.CDS78 | 4.48 | 4.43 | 0.06 | 0.13 | 1.04  | 0.789146 | 0.206134 | 0.912451 | 0.480348 |
| NC-003401.CDS79.S1_at | NC-003401.CDS79 | 3.12 | 3.1  | 0.07 | 0.08 | 1.01  | 0.459625 | 0.593567 | 0.736367 | 0.758329 |
| NC-003401.CDS80.S1_at | NC-003401.CDS80 | 5.49 | 5.49 | 0.04 | 0.05 | -1.01 | 0.708076 | 0.138167 | 0.871565 | 0.411086 |
| NC-003401.CDS81.S1_at | NC-003401.CDS81 | 4.2  | 4.28 | 0.05 | 0.15 | -1.05 | 0.898435 | 0.79874  | 0.959413 | 0.884072 |
| NC-003401.CDS82.S1_at | NC-003401.CDS82 | 5.78 | 5.78 | 0.02 | 0.08 | 1     | 0.44049  | 0.625623 | 0.724353 | 0.779265 |
| NC-003401.CDS83.S1_at | NC-003401.CDS83 | 6.89 | 7.14 | 0.11 | 0.08 | -1.19 | 0.082405 | 0.14658  | 0.43386  | 0.420591 |
| NC-003401.CDS84.S1_at | NC-003401.CDS84 | 5.9  | 5.9  | 0.12 | 0.06 | 1     | 0.745956 | 0.84255  | 0.891243 | 0.910315 |
| NC-003401.CDS85.S1_at | NC-003401.CDS85 | 4.21 | 4.19 | 0.06 | 0.29 | 1.01  | 0.820324 | 0.886243 | 0.926871 | 0.935248 |
| NC-003401.CDS86.S1_at | NC-003401.CDS86 | 3.83 | 3.65 | 0.2  | 0.14 | 1.14  | 0.233433 | 0.306199 | 0.588137 | 0.562901 |
| NC-003401.CDS87.S1_at | NC-003401.CDS87 | 4    | 4.18 | 0.06 | 0.12 | -1.13 | 0.070305 | 0.039715 | 0.413911 | 0.244271 |
| NC-003401.CDS88.S1_at | NC-003401.CDS88 | 5.09 | 5.15 | 0.08 | 0.25 | -1.04 | 0.674195 | 0.81926  | 0.853988 | 0.895838 |
| NC-003401.CDS89.S1_at | NC-003401.CDS89 | 4.54 | 4.99 | 0.07 | 0.17 | -1.37 | 0.040821 | 0.031896 | 0.350469 | 0.220981 |
| NC-004367.CDS1.S1_at  | NC-004367.CDS1  | 4.38 | 4.37 | 0.12 | 0.1  | 1.01  | 0.946987 | 0.261017 | 0.979543 | 0.527371 |
| NC-004367.CDS2.S1_at  | NC-004367.CDS2  | 4.59 | 4.58 | 0.13 | 0.12 | 1     | 0.550479 | 0.487537 | 0.787936 | 0.690559 |
| NC-004367.CDS3.S1_at  | NC-004367.CDS3  | 3.57 | 3.57 | 0.05 | 0.26 | -1    | 0.462447 | 0.196849 | 0.738248 | 0.471968 |
| NC-004367.CDS4.S1_at  | NC-004367.CDS4  | 5.53 | 5.65 | 0.15 | 0.07 | -1.08 | 0.234686 | 0.337375 | 0.588808 | 0.584592 |
| NC-004367.CDS5.S1_at  | NC-004367.CDS5  | 3.93 | 3.94 | 0.07 | 0.12 | -1.01 | 0.472625 | 0.529869 | 0.743886 | 0.717526 |
| NC-004367.CDS6.S1_at  | NC-004367.CDS6  | 4.2  | 4.2  | 0.13 | 0.1  | 1     | 0.574449 | 0.796109 | 0.801702 | 0.882495 |
| NC-004367.CDS7.S1_at  | NC-004367.CDS7  | 3.31 | 3.48 | 0.13 | 0.16 | -1.12 | 0.266059 | 0.468947 | 0.611558 | 0.67794  |
| NC-004367.CDS8.S1_at  | NC-004367.CDS8  | 3.59 | 3.59 | 0.01 | 0.07 | 1     | 0.41223  | 0.748121 | 0.707873 | 0.853384 |
| NC-004367.CDS9.S1_at  | NC-004367.CDS9  | 3.81 | 4.15 | 0.11 | 0.09 | -1.26 | 0.043755 | 0.062795 | 0.357051 | 0.297193 |
| NC-004367.CDS10.S1_at | NC-004367.CDS10 | 3.95 | 3.95 | 0.02 | 0.01 | 1     | 0.619889 | 0.989587 | 0.82586  | 0.994062 |

|                       |                 |      |      |      |      |       |          |          |          |          |
|-----------------------|-----------------|------|------|------|------|-------|----------|----------|----------|----------|
| NC-004367.CDS11.S1_at | NC-004367.CDS11 | 3.67 | 3.81 | 0.03 | 0.2  | -1.1  | 0.238338 | 0.190266 | 0.591592 | 0.465904 |
| NC-004367.CDS12.S1_at | NC-004367.CDS12 | 4.34 | 4.61 | 0.07 | 0.22 | -1.21 | 0.443111 | 0.565922 | 0.725992 | 0.740165 |
| NC-004367.CDS13.S1_at | NC-004367.CDS13 | 3.8  | 3.84 | 0.07 | 0.17 | -1.03 | 0.492555 | 0.742336 | 0.755881 | 0.850754 |
| NC-004367.CDS14.S1_at | NC-004367.CDS14 | 4.23 | 4.32 | 0.1  | 0.11 | -1.06 | 0.400963 | 0.646796 | 0.700493 | 0.793117 |
| NC-004367.CDS15.S1_at | NC-004367.CDS15 | 4.25 | 4.39 | 0.11 | 0.18 | -1.1  | 0.112704 | 0.110605 | 0.475104 | 0.374854 |
| NC-004367.CDS16.S1_at | NC-004367.CDS16 | 3.05 | 3.26 | 0.19 | 0.23 | -1.15 | 0.694372 | 0.876835 | 0.864407 | 0.92983  |
| NC-004367.CDS17.S1_at | NC-004367.CDS17 | 3.66 | 3.57 | 0.15 | 0.27 | 1.06  | 0.436495 | 0.396649 | 0.721751 | 0.628434 |
| NC-004367.CDS18.S1_at | NC-004367.CDS18 | 4.32 | 4.31 | 0.16 | 0.21 | 1     | 0.994887 | 0.995967 | 0.99821  | 0.997533 |
| NC-004367.CDS19.S1_at | NC-004367.CDS19 | 3.89 | 3.92 | 0.08 | 0.06 | -1.02 | 0.273152 | 0.784917 | 0.616627 | 0.875471 |
| NC-004367.CDS20.S1_at | NC-004367.CDS20 | 4.6  | 4.93 | 0.09 | 0.27 | -1.25 | 0.253514 | 0.314205 | 0.602121 | 0.568185 |
| NC-004367.CDS21.S1_at | NC-004367.CDS21 | 4.21 | 4.19 | 0.08 | 0.13 | 1.02  | 0.819131 | 0.965833 | 0.926528 | 0.980843 |
| NC-004367.CDS22.S1_at | NC-004367.CDS22 | 4.63 | 4.54 | 0.15 | 0.36 | 1.06  | 0.697749 | 0.810562 | 0.865759 | 0.890812 |
| NC-004367.CDS23.S1_at | NC-004367.CDS23 | 2.86 | 2.93 | 0.05 | 0.08 | -1.05 | 0.234271 | 0.195387 | 0.588656 | 0.470253 |
| NC-004367.CDS24.S1_at | NC-004367.CDS24 | 3.47 | 3.87 | 0.29 | 0.21 | -1.32 | 0.292962 | 0.286019 | 0.630264 | 0.547512 |
| NC-004367.CDS25.S1_at | NC-004367.CDS25 | 4.06 | 4.18 | 0.08 | 0.03 | -1.09 | 0.087953 | 0.371913 | 0.442256 | 0.610729 |
| NC-004367.CDS26.S1_at | NC-004367.CDS26 | 3.77 | 3.8  | 0.04 | 0.1  | -1.02 | 0.615484 | 0.805341 | 0.823502 | 0.888113 |
| NC-004367.CDS27.S1_at | NC-004367.CDS27 | 3.62 | 3.71 | 0.1  | 0.06 | -1.07 | 0.927416 | 0.248618 | 0.971995 | 0.517917 |
| NC-004367.CDS28.S1_at | NC-004367.CDS28 | 3.84 | 3.85 | 0.07 | 0.23 | -1.01 | 0.933296 | 0.979962 | 0.974045 | 0.989229 |
| NC-004367.CDS29.S1_at | NC-004367.CDS29 | 4.4  | 4.41 | 0.02 | 0.13 | -1    | 0.288853 | 0.148016 | 0.626809 | 0.422416 |
| NC-004367.CDS30.S1_at | NC-004367.CDS30 | 4.64 | 4.58 | 0.24 | 0.23 | 1.04  | 0.381121 | 0.41278  | 0.687695 | 0.639105 |
| NC-004367.CDS31.S1_at | NC-004367.CDS31 | 4.53 | 4.4  | 0.06 | 0.21 | 1.1   | 0.884421 | 0.474528 | 0.953771 | 0.681511 |
| NC-004367.CDS32.S1_at | NC-004367.CDS32 | 2.82 | 2.85 | 0.1  | 0.09 | -1.03 | 0.437849 | 0.656422 | 0.722586 | 0.799082 |
| NC-004367.CDS33.S1_at | NC-004367.CDS33 | 3.42 | 3.7  | 0.05 | 0.38 | -1.21 | 0.778478 | 0.814494 | 0.907481 | 0.892948 |
| NC-004367.CDS34.S1_at | NC-004367.CDS34 | 3.83 | 4.1  | 0.15 | 0.04 | -1.2  | 0.036697 | 0.030813 | 0.340048 | 0.217376 |
| NC-004367.CDS35.S1_at | NC-004367.CDS35 | 3.68 | 3.67 | 0.07 | 0.15 | 1.01  | 0.490032 | 0.699249 | 0.754288 | 0.825277 |
| NC-004367.CDS36.S1_at | NC-004367.CDS36 | 3.08 | 3.14 | 0.19 | 0.23 | -1.04 | 0.803519 | 0.931439 | 0.919138 | 0.961034 |
| NC-004367.CDS37.S1_at | NC-004367.CDS37 | 5.01 | 5.11 | 0.05 | 0.17 | -1.07 | 0.321666 | 0.451954 | 0.650336 | 0.666717 |
| NC-004367.CDS38.S1_at | NC-004367.CDS38 | 3.32 | 3.36 | 0.15 | 0.18 | -1.03 | 0.593201 | 0.802301 | 0.81131  | 0.886115 |
| NC-004367.CDS39.S1_at | NC-004367.CDS39 | 3.51 | 3.53 | 0.04 | 0.12 | -1.01 | 0.33899  | 0.451818 | 0.661065 | 0.66662  |
| NC-004367.CDS40.S1_at | NC-004367.CDS40 | 3.35 | 3.57 | 0.07 | 0.15 | -1.17 | 0.088946 | 0.088424 | 0.444099 | 0.341877 |
| NC-004367.CDS41.S1_at | NC-004367.CDS41 | 3.25 | 3.44 | 0.03 | 0.14 | -1.14 | 0.092627 | 0.044126 | 0.449245 | 0.254441 |
| NC-004367.CDS42.S1_at | NC-004367.CDS42 | 3.6  | 3.87 | 0.05 | 0.12 | -1.2  | 0.069488 | 0.057088 | 0.412367 | 0.284945 |
| NC-004367.CDS43.S1_at | NC-004367.CDS43 | 3.26 | 3.24 | 0.16 | 0.09 | 1.02  | 0.587782 | 0.290927 | 0.808711 | 0.551499 |
| NC-004367.CDS44.S1_at | NC-004367.CDS44 | 3.41 | 3.47 | 0.15 | 0.15 | -1.05 | 0.41939  | 0.154138 | 0.711796 | 0.42887  |
| NC-004367.CDS45.S1_at | NC-004367.CDS45 | 4.78 | 5.18 | 0.13 | 0.34 | -1.32 | 0.48328  | 0.675033 | 0.749882 | 0.810141 |
| NC-004367.CDS46.S1_at | NC-004367.CDS46 | 4.17 | 4.45 | 0.19 | 0.39 | -1.22 | 0.415022 | 0.559275 | 0.709338 | 0.736207 |
| NC-004367.CDS47.S1_at | NC-004367.CDS47 | 4.26 | 4.45 | 0.23 | 0.27 | -1.14 | 0.176298 | 0.103549 | 0.539927 | 0.364346 |
| NC-004367.CDS48.S1_at | NC-004367.CDS48 | 3.39 | 3.54 | 0.15 | 0.15 | -1.1  | 0.166316 | 0.224588 | 0.529929 | 0.497613 |
| NC-004367.CDS49.S1_at | NC-004367.CDS49 | 3.65 | 3.88 | 0.05 | 0.11 | -1.17 | 0.040866 | 0.008584 | 0.350506 | 0.122976 |
| NC-004367.CDS50.S1_at | NC-004367.CDS50 | 5.2  | 5.27 | 0.2  | 0.17 | -1.05 | 0.285258 | 0.337972 | 0.624811 | 0.585166 |
| NC-004367.CDS51.S1_at | NC-004367.CDS51 | 3.38 | 3.32 | 0.05 | 0.09 | 1.04  | 0.541224 | 0.648731 | 0.78255  | 0.794433 |

|                         |                 |      |      |      |      |       |          |          |          |          |
|-------------------------|-----------------|------|------|------|------|-------|----------|----------|----------|----------|
| NC-004367.CDS52.S1_at   | NC-004367.CDS52 | 4.53 | 4.66 | 0.05 | 0.04 | -1.09 | 0.019366 | 0.015831 | 0.273874 | 0.159537 |
| NC-004367.CDS53.S1_at   | NC-004367.CDS53 | 3.46 | 3.46 | 0.1  | 0.06 | -1    | 0.621639 | 0.756829 | 0.826845 | 0.858443 |
| NC-004367.CDS54.S1_at   | NC-004367.CDS54 | 4.58 | 4.6  | 0.24 | 0.04 | -1.01 | 0.785776 | 0.430027 | 0.910907 | 0.65111  |
| NC-004367.CDS55.S1_at   | NC-004367.CDS55 | 3.54 | 3.59 | 0.21 | 0.15 | -1.03 | 0.933716 | 0.87021  | 0.974319 | 0.926372 |
| NC-004367.CDS56.S1_at   | NC-004367.CDS56 | 2.88 | 2.95 | 0.12 | 0.03 | -1.05 | 0.979191 | 0.912319 | 0.992334 | 0.950583 |
| NC-004367.CDS57.S1_at   | NC-004367.CDS57 | 3.72 | 3.68 | 0.18 | 0.2  | 1.03  | 0.463175 | 0.532938 | 0.738635 | 0.719308 |
| NC-004367.CDS58.S1_at   | NC-004367.CDS58 | 5.66 | 5.7  | 0.46 | 0.14 | -1.03 | 0.349689 | 0.465058 | 0.667907 | 0.675549 |
| NC-004367.CDS59.S1_at   | NC-004367.CDS59 | 3.33 | 3.33 | 0    | 0.08 | 1     | 0.373901 | 0.23254  | 0.683245 | 0.504337 |
| NC-004367.CDS60.S1_at   | NC-004367.CDS60 | 3.43 | 3.62 | 0.03 | 0.2  | -1.14 | 0.119981 | 0.093181 | 0.48448  | 0.34931  |
| NC-004367.CDS61.S1_at   | NC-004367.CDS61 | 3.35 | 3.29 | 0.1  | 0.03 | 1.04  | 0.681041 | 0.199886 | 0.857465 | 0.474559 |
| NC-004367.CDS62.S1_at   | NC-004367.CDS62 | 4.84 | 4.81 | 0.22 | 0.14 | 1.02  | 0.643292 | 0.574028 | 0.83928  | 0.745547 |
| NC-004367.CDS63.S1_at   | NC-004367.CDS63 | 5.48 | 5.49 | 0.13 | 0.02 | -1    | 0.828991 | 0.620979 | 0.930604 | 0.775745 |
| NC-004367.CDS64.S1_at   | NC-004367.CDS64 | 3.32 | 3.33 | 0.07 | 0.07 | -1.01 | 0.858087 | 0.900641 | 0.942652 | 0.943473 |
| NC-004367.CDS65.S1_at   | NC-004367.CDS65 | 3.51 | 3.59 | 0.08 | 0.04 | -1.06 | 0.056336 | 0.037707 | 0.386364 | 0.23859  |
| NC-004367.CDS66.S1_at   | NC-004367.CDS66 | 4.02 | 4.09 | 0.11 | 0.15 | -1.05 | 0.215915 | 0.252752 | 0.575954 | 0.521174 |
| NC-004367.CDS67.S1_at   | NC-004367.CDS67 | 2.81 | 2.98 | 0.03 | 0.16 | -1.12 | 0.194374 | 0.156899 | 0.557827 | 0.432372 |
| NC-004367.CDS68.S1_at   | NC-004367.CDS68 | 4.44 | 4.47 | 0.08 | 0.03 | -1.02 | 0.923494 | 0.209251 | 0.970294 | 0.48303  |
| NC-004367.CDS69.S1_at   | NC-004367.CDS69 | 5.04 | 4.78 | 0.2  | 0.15 | 1.2   | 0.670505 | 0.713531 | 0.852391 | 0.833812 |
| NC-004367.CDS70.S1_at   | NC-004367.CDS70 | 3.97 | 4.03 | 0.06 | 0.09 | -1.04 | 0.521422 | 0.176114 | 0.77135  | 0.452581 |
| NC-004367.CDS71.S1_at   | NC-004367.CDS71 | 4.98 | 5.26 | 0.03 | 0.32 | -1.22 | 0.605061 | 0.78584  | 0.818091 | 0.875982 |
| NC-004367.CDS72.S1_at   | NC-004367.CDS72 | 5.05 | 5.18 | 0.12 | 0.13 | -1.1  | 0.579964 | 0.203016 | 0.804451 | 0.477343 |
| NC-006146.CDS1.S1_s_at  | NC-006146.CDS1  | 3.38 | 3.44 | 0.03 | 0.06 | -1.04 | 0.371773 | 0.020111 | 0.682509 | 0.178118 |
| NC-006146.CDS3.S1_at    | NC-006146.CDS3  | 4.17 | 4.24 | 0.08 | 0.14 | -1.05 | 0.147557 | 0.115754 | 0.513287 | 0.382814 |
| NC-006146.CDS4.S1_at    | NC-006146.CDS4  | 4.55 | 4.6  | 0.08 | 0.34 | -1.03 | 0.449611 | 0.561629 | 0.730423 | 0.73751  |
| NC-006146.CDS5.S1_at    | NC-006146.CDS5  | 5.53 | 5.58 | 0.06 | 0.19 | -1.04 | 0.713741 | 0.446712 | 0.874563 | 0.662889 |
| NC-006146.CDS6.S1_at    | NC-006146.CDS6  | 4.47 | 4.59 | 0.21 | 0.02 | -1.09 | 0.378082 | 0.504011 | 0.686315 | 0.701269 |
| NC-006146.CDS7.S1_at    | NC-006146.CDS7  | 3.83 | 3.87 | 0.27 | 0.14 | -1.02 | 0.538739 | 0.728907 | 0.780756 | 0.8433   |
| NC-006146.CDS8.S1_at    | NC-006146.CDS8  | 5.24 | 4.93 | 0.08 | 0.2  | 1.24  | 0.224518 | 0.380327 | 0.582716 | 0.616984 |
| NC-006146.CDS9.S1_at    | NC-006146.CDS9  | 3.86 | 3.77 | 0.09 | 0    | 1.06  | 0.15813  | 0.079903 | 0.522944 | 0.327207 |
| NC-006146.CDS10.S1_at   | NC-006146.CDS10 | 6.08 | 6.2  | 0.02 | 0.17 | -1.08 | 0.306469 | 0.457439 | 0.639593 | 0.670842 |
| NC-006146.CDS11.S1_at   | NC-006146.CDS11 | 4.17 | 4.4  | 0.03 | 0.21 | -1.18 | 0.366873 | 0.536368 | 0.67921  | 0.721688 |
| NC-006146.CDS12.S1_at   | NC-006146.CDS12 | 6.09 | 6.27 | 0.26 | 0.24 | -1.14 | 0.782479 | 0.588962 | 0.909199 | 0.755275 |
| NC-006146.CDS13.S1_at   | NC-006146.CDS13 | 4.09 | 3.87 | 0.08 | 0.22 | 1.16  | 0.462153 | 0.599527 | 0.738226 | 0.761473 |
| NC-006146.CDS14.S1_at   | NC-006146.CDS14 | 7.12 | 7.24 | 0.05 | 0.12 | -1.09 | 0.294051 | 0.025499 | 0.631115 | 0.200333 |
| NC-006146.CDS14.S1_x_at | NC-006146.CDS14 | 7.08 | 7.17 | 0.07 | 0.04 | -1.06 | 0.102714 | 0.236692 | 0.46254  | 0.507459 |
| NC-006146.CDS15.S1_at   | NC-006146.CDS15 | 4.97 | 5.05 | 0.09 | 0.19 | -1.06 | 0.499444 | 0.651414 | 0.759194 | 0.796212 |
| NC-006146.CDS16.S1_at   | NC-006146.CDS16 | 5.22 | 5.22 | 0    | 0.11 | 1     | 0.374428 | 0.347036 | 0.683641 | 0.59181  |
| NC-006146.CDS17.S1_at   | NC-006146.CDS17 | 5.03 | 5.23 | 0.13 | 0.13 | -1.15 | 0.131361 | 0.11939  | 0.497985 | 0.387887 |
| NC-006146.CDS18.S1_at   | NC-006146.CDS18 | 5.8  | 5.94 | 0.27 | 0.08 | -1.1  | 0.933717 | 0.917984 | 0.974319 | 0.954061 |
| NC-006146.CDS19.S1_at   | NC-006146.CDS19 | 4.89 | 4.99 | 0.2  | 0.11 | -1.07 | 0.182589 | 0.246675 | 0.546812 | 0.516025 |
| NC-006146.CDS20.S1_at   | NC-006146.CDS20 | 6.37 | 6.25 | 0.26 | 0.04 | 1.08  | 0.587607 | 0.607712 | 0.808617 | 0.766491 |

|                         |                 |      |      |      |      |       |          |          |          |          |
|-------------------------|-----------------|------|------|------|------|-------|----------|----------|----------|----------|
| NC-006146.CDS21.S1_at   | NC-006146.CDS21 | 5.64 | 5.75 | 0.09 | 0.2  | -1.08 | 0.279098 | 0.379143 | 0.620933 | 0.616132 |
| NC-006146.CDS22.S1_at   | NC-006146.CDS22 | 6.85 | 6.87 | 0.08 | 0.16 | -1.02 | 0.321643 | 0.339116 | 0.650336 | 0.585891 |
| NC-006146.CDS23.S1_at   | NC-006146.CDS23 | 5.93 | 6.29 | 0.28 | 0.21 | -1.29 | 0.389405 | 0.147208 | 0.692994 | 0.421455 |
| NC-006146.CDS24.S1_at   | NC-006146.CDS24 | 4.58 | 4.72 | 0.05 | 0.14 | -1.1  | 0.124817 | 0.149353 | 0.49077  | 0.423811 |
| NC-006146.CDS25.S1_at   | NC-006146.CDS25 | 6.19 | 6.21 | 0.13 | 0.22 | -1.01 | 0.961847 | 0.944929 | 0.985387 | 0.968827 |
| NC-006146.CDS26.S1_at   | NC-006146.CDS26 | 4.67 | 4.81 | 0.11 | 0.11 | -1.1  | 0.101827 | 0.108602 | 0.461313 | 0.372171 |
| NC-006146.CDS27.S1_s_at | NC-006146.CDS27 | 6.72 | 6.78 | 0.12 | 0.1  | -1.04 | 0.377358 | 0.460416 | 0.685813 | 0.672279 |
| NC-006146.CDS28.S1_at   | NC-006146.CDS28 | 5.63 | 5.71 | 0.14 | 0.19 | -1.05 | 0.743036 | 0.833361 | 0.890085 | 0.904429 |
| NC-006146.CDS29.S1_at   | NC-006146.CDS29 | 4.86 | 4.82 | 0.12 | 0.18 | 1.03  | 0.498883 | 0.680525 | 0.758752 | 0.813481 |
| NC-006146.CDS30.S1_at   | NC-006146.CDS30 | 4.28 | 4.15 | 0.07 | 0.05 | 1.09  | 0.090302 | 0.344351 | 0.445754 | 0.589762 |
| NC-006146.CDS31.S1_at   | NC-006146.CDS31 | 3.08 | 2.91 | 0.17 | 0.11 | 1.13  | 0.150586 | 0.360529 | 0.515411 | 0.601613 |
| NC-006146.CDS32.S1_at   | NC-006146.CDS32 | 5.56 | 5.56 | 0.17 | 0.16 | -1    | 0.954692 | 0.974108 | 0.983073 | 0.98586  |
| NC-006146.CDS33.S1_at   | NC-006146.CDS33 | 5.87 | 6.34 | 0.16 | 0.09 | -1.38 | 0.038718 | 0.050361 | 0.345106 | 0.269658 |
| NC-006146.CDS34.S1_at   | NC-006146.CDS34 | 6.39 | 6.41 | 0.04 | 0.2  | -1.02 | 0.239131 | 0.203868 | 0.592277 | 0.478102 |
| NC-006146.CDS35.S1_at   | NC-006146.CDS35 | 5.46 | 5.65 | 0.14 | 0.21 | -1.14 | 0.747373 | 0.315876 | 0.89179  | 0.569327 |
| NC-006146.CDS36.S1_at   | NC-006146.CDS36 | 3.27 | 3.38 | 0.04 | 0.1  | -1.08 | 0.247016 | 0.065912 | 0.598082 | 0.302129 |
| NC-006146.CDS37.S1_at   | NC-006146.CDS37 | 4.55 | 4.62 | 0.06 | 0.02 | -1.05 | 0.068378 | 0.217463 | 0.410019 | 0.491035 |
| NC-006146.CDS38.S1_at   | NC-006146.CDS38 | 4.76 | 4.88 | 0.27 | 0.16 | -1.08 | 0.430363 | 0.570306 | 0.718042 | 0.743056 |
| NC-006146.CDS39.S1_at   | NC-006146.CDS39 | 5.78 | 5.84 | 0.13 | 0.1  | -1.04 | 0.216883 | 0.273927 | 0.576447 | 0.538452 |
| NC-006146.CDS40.S1_at   | NC-006146.CDS40 | 5.5  | 5.53 | 0.15 | 0.01 | -1.02 | 0.558784 | 0.136573 | 0.793491 | 0.409084 |
| NC-006146.CDS41.S1_at   | NC-006146.CDS41 | 4.81 | 4.82 | 0.07 | 0.06 | -1    | 0.476374 | 0.094291 | 0.746223 | 0.350889 |
| NC-006146.CDS42.S1_at   | NC-006146.CDS42 | 5.13 | 5.15 | 0.06 | 0.15 | -1.02 | 0.909549 | 0.85504  | 0.964209 | 0.917395 |
| NC-006146.CDS43.S1_at   | NC-006146.CDS43 | 5.71 | 5.59 | 0.11 | 0.11 | 1.09  | 0.835164 | 0.178248 | 0.93317  | 0.45458  |
| NC-006146.CDS44.S1_at   | NC-006146.CDS44 | 6.85 | 6.98 | 0.1  | 0.08 | -1.09 | 0.128482 | 0.254289 | 0.494589 | 0.522606 |
| NC-006146.CDS45.S1_at   | NC-006146.CDS45 | 3.78 | 3.78 | 0.05 | 0.1  | -1    | 0.42456  | 0.351271 | 0.714559 | 0.594937 |
| NC-006146.CDS46.S1_at   | NC-006146.CDS46 | 3.51 | 3.39 | 0.03 | 0.16 | 1.09  | 0.268723 | 0.456469 | 0.613394 | 0.670188 |
| NC-006146.CDS47.S1_at   | NC-006146.CDS47 | 4.67 | 4.85 | 0.17 | 0.15 | -1.14 | 0.308626 | 0.127959 | 0.64103  | 0.398901 |
| NC-006146.CDS48.S1_at   | NC-006146.CDS48 | 4.72 | 4.94 | 0.1  | 0.21 | -1.16 | 0.121615 | 0.129165 | 0.486508 | 0.400611 |
| NC-006146.CDS49.S1_at   | NC-006146.CDS49 | 5.14 | 5.22 | 0.15 | 0.03 | -1.06 | 0.454693 | 0.537904 | 0.733343 | 0.722779 |
| NC-006146.CDS50.S1_at   | NC-006146.CDS50 | 5.51 | 5.45 | 0.21 | 0.32 | 1.04  | 0.624681 | 0.633139 | 0.828393 | 0.783969 |
| NC-006146.CDS51.S1_at   | NC-006146.CDS51 | 3.75 | 3.92 | 0.1  | 0.17 | -1.12 | 0.134335 | 0.291608 | 0.500923 | 0.551985 |
| NC-006146.CDS52.S1_at   | NC-006146.CDS52 | 5.58 | 5.73 | 0.03 | 0.17 | -1.11 | 0.22475  | 0.108277 | 0.582807 | 0.371557 |
| NC-006146.CDS53.S1_at   | NC-006146.CDS53 | 4.58 | 4.57 | 0.09 | 0.09 | 1     | 0.571474 | 0.620755 | 0.800184 | 0.775593 |
| NC-006146.CDS54.S1_at   | NC-006146.CDS54 | 6.01 | 6.17 | 0.15 | 0.13 | -1.12 | 0.408482 | 0.385115 | 0.705199 | 0.620662 |
| NC-006146.CDS55.S1_at   | NC-006146.CDS55 | 5.71 | 5.76 | 0.05 | 0.2  | -1.04 | 0.245713 | 0.256338 | 0.597221 | 0.524114 |
| NC-006146.CDS56.S1_at   | NC-006146.CDS56 | 6.38 | 6.51 | 0.03 | 0.08 | -1.1  | 0.111397 | 0.009437 | 0.473545 | 0.127948 |
| NC-006146.CDS57.S1_at   | NC-006146.CDS57 | 5.77 | 6.04 | 0.08 | 0.18 | -1.2  | 0.081034 | 0.073574 | 0.431775 | 0.316905 |
| NC-006146.CDS58.S1_at   | NC-006146.CDS58 | 5.67 | 6.02 | 0.15 | 0.1  | -1.27 | 0.119581 | 0.131152 | 0.484145 | 0.403153 |
| NC-006146.CDS59.S1_at   | NC-006146.CDS59 | 5.08 | 5.27 | 0.1  | 0.12 | -1.14 | 0.084965 | 0.095682 | 0.438065 | 0.3527   |
| NC-006146.CDS60.S1_at   | NC-006146.CDS60 | 5.01 | 5    | 0.12 | 0.17 | 1.01  | 0.77042  | 0.817168 | 0.90333  | 0.894545 |
| NC-006146.CDS61.S1_at   | NC-006146.CDS61 | 4.35 | 4.44 | 0.2  | 0.15 | -1.06 | 0.15924  | 0.184453 | 0.52416  | 0.46048  |

|                        |                 |      |      |      |      |       |          |          |          |          |
|------------------------|-----------------|------|------|------|------|-------|----------|----------|----------|----------|
| NC-006146.CDS62.S1_at  | NC-006146.CDS62 | 3.79 | 3.95 | 0.12 | 0.12 | -1.12 | 0.141906 | 0.103781 | 0.50923  | 0.364519 |
| NC-006146.CDS63.S1_at  | NC-006146.CDS63 | 7.58 | 7.72 | 0.19 | 0.09 | -1.11 | 0.437053 | 0.502255 | 0.722208 | 0.70006  |
| NC-006146.CDS64.S1_at  | NC-006146.CDS64 | 6.55 | 6.77 | 0.23 | 0.11 | -1.17 | 0.318694 | 0.470027 | 0.648651 | 0.678572 |
| NC-006146.CDS65.S1_at  | NC-006146.CDS65 | 3.95 | 4.08 | 0.15 | 0.1  | -1.09 | 0.280751 | 0.204694 | 0.621836 | 0.479056 |
| NC-006146.CDS66.S1_at  | NC-006146.CDS66 | 4.43 | 4.57 | 0.08 | 0.07 | -1.1  | 0.075571 | 0.0674   | 0.422894 | 0.305662 |
| NC-006146.CDS67.S1_at  | NC-006146.CDS67 | 6.1  | 6.19 | 0.1  | 0.02 | -1.06 | 0.135048 | 0.244019 | 0.501995 | 0.514069 |
| NC-006146.CDS68.S1_at  | NC-006146.CDS68 | 5.45 | 5.56 | 0.15 | 0.21 | -1.07 | 0.894101 | 0.689643 | 0.957854 | 0.819004 |
| NC-006146.CDS69.S1_at  | NC-006146.CDS69 | 4.55 | 4.8  | 0.12 | 0.3  | -1.19 | 0.499783 | 0.672612 | 0.759378 | 0.808661 |
| NC-006146.CDS70.S1_at  | NC-006146.CDS70 | 5.74 | 5.9  | 0.15 | 0.1  | -1.12 | 0.385306 | 0.312427 | 0.690458 | 0.567185 |
| NC-006146.CDS71.S1_at  | NC-006146.CDS71 | 6.32 | 6.56 | 0.05 | 0.12 | -1.18 | 0.051048 | 0.040488 | 0.375805 | 0.246264 |
| NC-006146.CDS72.S1_at  | NC-006146.CDS72 | 5.38 | 5.35 | 0.12 | 0.06 | 1.01  | 0.835824 | 0.893551 | 0.93353  | 0.939277 |
| NC-006146.CDS73.S1_at  | NC-006146.CDS73 | 5.46 | 5.46 | 0.13 | 0.13 | 1.01  | 0.569592 | 0.757606 | 0.799095 | 0.858926 |
| NC-006146.CDS74.S1_at  | NC-006146.CDS74 | 5.03 | 5.03 | 0.1  | 0.08 | -1    | 0.47635  | 0.76339  | 0.746223 | 0.862471 |
| NC-006146.CDS75.S1_at  | NC-006146.CDS75 | 6.2  | 6.38 | 0.14 | 0.15 | -1.13 | 0.134053 | 0.145573 | 0.500649 | 0.419456 |
| NC-006146.CDS76.S1_at  | NC-006146.CDS76 | 6.11 | 6.25 | 0.24 | 0.1  | -1.1  | 0.663486 | 0.595646 | 0.84899  | 0.759132 |
| NC-006146.CDS77.S1_at  | NC-006146.CDS77 | 5.37 | 5.25 | 0.15 | 0.13 | 1.09  | 0.097413 | 0.070407 | 0.45638  | 0.311676 |
| NC-006146.CDS78.S1_at  | NC-006146.CDS78 | 5.25 | 5.29 | 0.1  | 0.15 | -1.03 | 0.383133 | 0.537707 | 0.689068 | 0.722661 |
| NC-006146.CDS79.S1_at  | NC-006146.CDS79 | 7.06 | 7.13 | 0.34 | 0.18 | -1.05 | 0.920342 | 0.816911 | 0.96895  | 0.894398 |
| NC-006146.CDS80.S1_at  | NC-006146.CDS80 | 5.14 | 5.23 | 0.08 | 0.38 | -1.06 | 0.623796 | 0.821293 | 0.828047 | 0.897125 |
| NC-001345.CDS1.S1_at   | NC-001345.CDS1  | 5.94 | 6.01 | 0.08 | 0.09 | -1.05 | 0.147278 | 0.033661 | 0.513087 | 0.227052 |
| NC-001345.CDS2.S1_at   | NC-001345.CDS2  | 5.07 | 5.25 | 0.04 | 0.13 | -1.14 | 0.081007 | 0.089673 | 0.431743 | 0.343848 |
| NC-001345.CDS3.S1_at   | NC-001345.CDS3  | 5.5  | 5.58 | 0.07 | 0.03 | -1.06 | 0.175275 | 0.225511 | 0.538985 | 0.498147 |
| NC-001345.CDS4.S1_at   | NC-001345.CDS4  | 5.71 | 5.76 | 0.11 | 0.2  | -1.04 | 0.3866   | 0.507574 | 0.691563 | 0.703118 |
| NC-001345.CDS5.S1_at   | NC-001345.CDS5  | 3.55 | 3.7  | 0.17 | 0.14 | -1.11 | 0.204967 | 0.262747 | 0.567457 | 0.529086 |
| NC-001345.CDS6.S1_s_at | NC-001345.CDS6  | 5.88 | 5.95 | 0.16 | 0.23 | -1.05 | 0.839327 | 0.624193 | 0.935098 | 0.778475 |
| NC-001345.CDS18.S1_at  | NC-001345.CDS18 | 5.49 | 5.69 | 0.28 | 0.14 | -1.15 | 0.676028 | 0.483065 | 0.854832 | 0.687687 |
| NC-001345.CDS19.S1_at  | NC-001345.CDS19 | 3.49 | 3.57 | 0.15 | 0.08 | -1.05 | 0.443233 | 0.265152 | 0.726011 | 0.531078 |
| NC-001345.CDS20.S1_at  | NC-001345.CDS20 | 4.36 | 4.27 | 0.11 | 0.16 | 1.06  | 0.858096 | 0.721023 | 0.942652 | 0.838471 |
| NC-001345.CDS21.S1_at  | NC-001345.CDS21 | 5.8  | 5.77 | 0.06 | 0.08 | 1.02  | 0.638463 | 0.925263 | 0.836621 | 0.957727 |
| NC-001345.CDS22.S1_at  | NC-001345.CDS22 | 4.59 | 4.56 | 0.24 | 0.34 | 1.02  | 0.307722 | 0.445781 | 0.640092 | 0.662505 |
| NC-001345.CDS23.S1_at  | NC-001345.CDS23 | 6.26 | 6.54 | 0.26 | 0.06 | -1.21 | 0.164598 | 0.119405 | 0.528546 | 0.387903 |
| NC-001345.CDS24.S1_at  | NC-001345.CDS24 | 3.79 | 3.81 | 0.19 | 0.16 | -1.01 | 0.461585 | 0.606986 | 0.737724 | 0.766178 |
| NC-001345.CDS25.S1_at  | NC-001345.CDS25 | 2.92 | 3.1  | 0.1  | 0    | -1.13 | 0.11363  | 0.515781 | 0.476938 | 0.708485 |
| NC-001345.CDS26.S1_at  | NC-001345.CDS26 | 6.66 | 6.76 | 0.06 | 0.09 | -1.07 | 0.148057 | 0.159731 | 0.513451 | 0.43585  |
| NC-001345.CDS27.S1_at  | NC-001345.CDS27 | 3.92 | 3.94 | 0.18 | 0.08 | -1.01 | 0.382616 | 0.551551 | 0.688839 | 0.731027 |
| NC-001345.CDS28.S1_at  | NC-001345.CDS28 | 4.75 | 4.99 | 0.2  | 0.18 | -1.18 | 0.254199 | 0.124414 | 0.602339 | 0.394857 |
| NC-001345.CDS29.S1_at  | NC-001345.CDS29 | 6.09 | 6.2  | 0.12 | 0.17 | -1.08 | 0.182862 | 0.175003 | 0.547133 | 0.451647 |
| NC-001345.CDS30.S1_at  | NC-001345.CDS30 | 6.43 | 6.53 | 0.05 | 0.11 | -1.08 | 0.090868 | 0.288381 | 0.446466 | 0.549656 |
| NC-001345.CDS31.S1_at  | NC-001345.CDS31 | 4.69 | 4.95 | 0.16 | 0.52 | -1.2  | 0.211797 | 0.271488 | 0.572347 | 0.536512 |
| NC-001345.CDS32.S1_at  | NC-001345.CDS32 | 5.59 | 5.58 | 0.24 | 0.01 | 1.01  | 0.398094 | 0.408834 | 0.698541 | 0.6359   |
| NC-001345.CDS33.S1_at  | NC-001345.CDS33 | 5.87 | 5.74 | 0.06 | 0.27 | 1.1   | 0.939679 | 0.910538 | 0.977013 | 0.949476 |

|                         |                 |      |      |      |      |       |          |          |          |          |
|-------------------------|-----------------|------|------|------|------|-------|----------|----------|----------|----------|
| NC-001345.CDS34.S1_at   | NC-001345.CDS34 | 5    | 4.87 | 0.08 | 0.18 | 1.09  | 0.821716 | 0.320096 | 0.927464 | 0.572459 |
| NC-001345.CDS35.S1_at   | NC-001345.CDS35 | 5.57 | 5.75 | 0.16 | 0.11 | -1.13 | 0.145512 | 0.141313 | 0.51146  | 0.414874 |
| NC-001345.CDS36.S1_at   | NC-001345.CDS36 | 4.13 | 4.48 | 0.28 | 0.38 | -1.27 | 0.380246 | 0.524701 | 0.68724  | 0.714514 |
| NC-001345.CDS37.S1_at   | NC-001345.CDS37 | 5.17 | 5.17 | 0.01 | 0    | 1     | 0.373901 | 0.353344 | 0.683245 | 0.596477 |
| NC-001345.CDS38.S1_at   | NC-001345.CDS38 | 4.54 | 4.82 | 0.17 | 0.18 | -1.22 | 0.1742   | 0.220867 | 0.537888 | 0.494262 |
| NC-001345.CDS39.S1_at   | NC-001345.CDS39 | 5.67 | 5.82 | 0.22 | 0.14 | -1.11 | 0.433331 | 0.248635 | 0.719904 | 0.517917 |
| NC-001345.CDS40.S1_s_at | NC-001345.CDS40 | 4.71 | 4.77 | 0.18 | 0.13 | -1.04 | 0.265982 | 0.401522 | 0.611558 | 0.631068 |
| NC-001345.CDS41.S1_at   | NC-001345.CDS41 | 4.81 | 4.93 | 0.04 | 0.29 | -1.09 | 0.595805 | 0.747679 | 0.812622 | 0.853234 |
| NC-001345.CDS42.S1_at   | NC-001345.CDS42 | 2.98 | 3.17 | 0.07 | 0.09 | -1.14 | 0.071557 | 0.177989 | 0.415505 | 0.454339 |
| NC-001345.CDS43.S1_at   | NC-001345.CDS43 | 5.17 | 5.19 | 0.16 | 0.19 | -1.01 | 0.197394 | 0.240365 | 0.560419 | 0.510952 |
| NC-001345.CDS44.S1_at   | NC-001345.CDS44 | 4.67 | 4.59 | 0.11 | 0.02 | 1.06  | 0.259299 | 0.266255 | 0.606408 | 0.532078 |
| NC-001345.CDS45.S1_at   | NC-001345.CDS45 | 4.29 | 4.38 | 0.09 | 0.01 | -1.07 | 0.145349 | 0.127724 | 0.511407 | 0.398581 |
| NC-001345.CDS46.S1_at   | NC-001345.CDS46 | 3.74 | 3.9  | 0.24 | 0.12 | -1.11 | 0.601002 | 0.527146 | 0.815637 | 0.715861 |
| NC-001345.CDS47.S1_at   | NC-001345.CDS47 | 5.52 | 5.59 | 0.15 | 0.08 | -1.05 | 0.807897 | 0.243917 | 0.921515 | 0.514069 |
| NC-001345.CDS48.S1_at   | NC-001345.CDS48 | 4.58 | 4.56 | 0.08 | 0.22 | 1.02  | 0.950379 | 0.76244  | 0.981318 | 0.861818 |
| NC-001345.CDS49.S1_at   | NC-001345.CDS49 | 5.43 | 5.64 | 0.12 | 0.08 | -1.16 | 0.065317 | 0.073594 | 0.404407 | 0.316945 |
| NC-001345.CDS51.S1_at   | NC-001345.CDS51 | 4.28 | 4.27 | 0.14 | 0.17 | 1     | 0.604818 | 0.509504 | 0.817951 | 0.704233 |
| NC-001345.CDS52.S1_at   | NC-001345.CDS52 | 3.25 | 3.32 | 0.09 | 0.02 | -1.05 | 0.235354 | 0.411754 | 0.589342 | 0.638434 |
| NC-001345.CDS53.S1_at   | NC-001345.CDS53 | 4.82 | 5.05 | 0.11 | 0.18 | -1.17 | 0.156751 | 0.090377 | 0.521541 | 0.344827 |
| NC-001345.CDS54.S1_at   | NC-001345.CDS54 | 3.71 | 3.79 | 0.14 | 0.07 | -1.06 | 0.375416 | 0.103293 | 0.684712 | 0.364143 |
| NC-001345.CDS55.S1_at   | NC-001345.CDS55 | 4.03 | 3.95 | 0.03 | 0.14 | 1.06  | 0.885009 | 0.593763 | 0.95394  | 0.758418 |
| NC-001345.CDS56.S1_at   | NC-001345.CDS56 | 5.63 | 5.64 | 0.05 | 0.15 | -1.01 | 0.857012 | 0.972845 | 0.942171 | 0.985352 |
| NC-001345.CDS57.S1_at   | NC-001345.CDS57 | 6.1  | 6.15 | 0.09 | 0.15 | -1.04 | 0.251937 | 0.275878 | 0.601195 | 0.540035 |
| NC-001345.CDS58.S1_at   | NC-001345.CDS58 | 5.71 | 5.85 | 0.08 | 0.17 | -1.11 | 0.163121 | 0.165669 | 0.527489 | 0.441925 |
| NC-001345.CDS59.S1_at   | NC-001345.CDS59 | 4.45 | 4.42 | 0.21 | 0.03 | 1.02  | 0.558934 | 0.585385 | 0.793598 | 0.752844 |
| NC-001345.CDS60.S1_at   | NC-001345.CDS60 | 3.27 | 3.33 | 0.21 | 0.07 | -1.04 | 0.370125 | 0.431497 | 0.681113 | 0.652415 |
| NC-001345.CDS61.S1_at   | NC-001345.CDS61 | 5.32 | 5.69 | 0.34 | 0.24 | -1.3  | 0.25798  | 0.268501 | 0.605348 | 0.534123 |
| NC-001345.CDS62.S1_at   | NC-001345.CDS62 | 4.14 | 4.53 | 0.25 | 0.29 | -1.31 | 0.272931 | 0.192179 | 0.616391 | 0.467651 |
| NC-001345.CDS63.S1_at   | NC-001345.CDS63 | 4.81 | 4.95 | 0.17 | 0.21 | -1.1  | 0.623963 | 0.287057 | 0.828158 | 0.548359 |
| NC-001345.CDS64.S1_at   | NC-001345.CDS64 | 3.86 | 3.98 | 0.09 | 0.09 | -1.09 | 0.241475 | 0.310357 | 0.593941 | 0.565552 |
| NC-001345.CDS65.S1_at   | NC-001345.CDS65 | 2.71 | 2.71 | 0.05 | 0    | 1     | 0.373901 | 0.421875 | 0.683245 | 0.645369 |
| NC-001345.CDS65.S1_s_at | NC-001345.CDS65 | 4.08 | 4.23 | 0.09 | 0.08 | -1.11 | 0.225344 | 0.278076 | 0.583384 | 0.541754 |
| NC-001345.CDS66.S1_at   | NC-001345.CDS66 | 5.85 | 5.91 | 0.09 | 0.04 | -1.04 | 0.272924 | 0.303741 | 0.616391 | 0.561148 |
| NC-001345.CDS67.S1_at   | NC-001345.CDS67 | 4.58 | 4.65 | 0.11 | 0.17 | -1.05 | 0.412532 | 0.403959 | 0.707935 | 0.63254  |
| NC-001345.CDS68.S1_at   | NC-001345.CDS68 | 5.6  | 5.56 | 0.14 | 0.09 | 1.02  | 0.714759 | 0.873521 | 0.874968 | 0.928102 |
| NC-001345.CDS69.S1_at   | NC-001345.CDS69 | 4.74 | 5.19 | 0.14 | 0.06 | -1.37 | 0.017891 | 0.088057 | 0.26813  | 0.341547 |
| NC-001345.CDS70.S1_at   | NC-001345.CDS70 | 4.07 | 4.02 | 0.06 | 0.06 | 1.04  | 0.152863 | 0.415252 | 0.517325 | 0.640769 |
| NC-001345.CDS71.S1_at   | NC-001345.CDS71 | 4.51 | 4.75 | 0.24 | 0.04 | -1.17 | 0.463152 | 0.217878 | 0.73862  | 0.491408 |
| NC-001345.CDS72.S1_at   | NC-001345.CDS72 | 5.92 | 6.08 | 0.25 | 0.16 | -1.11 | 0.269281 | 0.259892 | 0.613979 | 0.526748 |
| NC-001345.CDS73.S1_at   | NC-001345.CDS73 | 3.79 | 4.11 | 0.04 | 0.12 | -1.25 | 0.022499 | 0.020063 | 0.287301 | 0.177928 |
| NC-001345.CDS74.S1_at   | NC-001345.CDS74 | 4.95 | 4.94 | 0.07 | 0.18 | 1.01  | 0.827099 | 0.388455 | 0.929776 | 0.622858 |

|                         |                 |      |      |      |      |       |          |          |          |          |
|-------------------------|-----------------|------|------|------|------|-------|----------|----------|----------|----------|
| NC-001345.CDS75.S1_at   | NC-001345.CDS75 | 4.01 | 4.05 | 0.03 | 0.04 | -1.02 | 0.954842 | 0.488281 | 0.983073 | 0.691036 |
| NC-001345.CDS76.S1_at   | NC-001345.CDS76 | 3.75 | 3.77 | 0.15 | 0.21 | -1.01 | 0.482226 | 0.667483 | 0.749398 | 0.805333 |
| NC-001345.CDS77.S1_at   | NC-001345.CDS77 | 4.21 | 4.2  | 0.25 | 0.12 | 1.01  | 0.612408 | 0.43175  | 0.822158 | 0.652537 |
| NC-001345.CDS78.S1_at   | NC-001345.CDS78 | 5.19 | 5.13 | 0.04 | 0.06 | 1.04  | 0.195253 | 0.175265 | 0.558705 | 0.452059 |
| NC-001345.CDS79.S1_at   | NC-001345.CDS79 | 6.63 | 6.89 | 0.17 | 0.1  | -1.19 | 0.156271 | 0.162634 | 0.520986 | 0.438724 |
| NC-001345.CDS80.S1_at   | NC-001345.CDS80 | 5.77 | 5.79 | 0.2  | 0.11 | -1.01 | 0.416871 | 0.539177 | 0.710235 | 0.723588 |
| NC-001345.CDS81.S1_s_at | NC-001345.CDS81 | 6.26 | 6.33 | 0.34 | 0.1  | -1.05 | 0.970622 | 0.653892 | 0.988685 | 0.797692 |
| NC-001345.CDS83.S1_at   | NC-001345.CDS83 | 4.34 | 4.43 | 0.06 | 0.08 | -1.07 | 0.126623 | 0.257888 | 0.492802 | 0.525467 |
| NC-001345.CDS84.S1_at   | NC-001345.CDS84 | 3.75 | 3.78 | 0.27 | 0.07 | -1.03 | 0.620681 | 0.734008 | 0.82609  | 0.845896 |
| NC-001345.CDS85.S1_at   | NC-001345.CDS85 | 5.06 | 5.19 | 0.04 | 0.22 | -1.09 | 0.305785 | 0.477771 | 0.639223 | 0.683777 |
| NC-001345.CDS86.S1_at   | NC-001345.CDS86 | 6.1  | 6.1  | 0.16 | 0.04 | -1    | 0.285515 | 0.327728 | 0.625034 | 0.577549 |
| NC-001345.CDS87.S1_at   | NC-001345.CDS87 | 4.04 | 4.09 | 0.12 | 0.05 | -1.03 | 0.251105 | 0.266931 | 0.600608 | 0.532473 |
| NC-001345.CDS88.S1_at   | NC-001345.CDS88 | 5.52 | 5.54 | 0.1  | 0.12 | -1.01 | 0.411487 | 0.372716 | 0.707377 | 0.611661 |
| NC-001345.CDS89.S1_at   | NC-001345.CDS89 | 5.66 | 5.75 | 0.06 | 0.15 | -1.06 | 0.21757  | 0.129022 | 0.577141 | 0.400513 |
| NC-001345.CDS90.S1_at   | NC-001345.CDS90 | 4.6  | 4.48 | 0.08 | 0.1  | 1.08  | 0.354389 | 0.080659 | 0.670566 | 0.328444 |
| NC-001345.CDS91.S1_at   | NC-001345.CDS91 | 4.8  | 4.99 | 0.08 | 0.15 | -1.14 | 0.137888 | 0.081988 | 0.505329 | 0.330661 |
| NC-001345.CDS92.S1_at   | NC-001345.CDS92 | 6.39 | 6.38 | 0.12 | 0.18 | 1     | 0.657904 | 0.650748 | 0.846209 | 0.795801 |
| NC-001345.CDS93.S1_at   | NC-001345.CDS93 | 4.99 | 5.13 | 0    | 0.1  | -1.11 | 0.123979 | 0.069242 | 0.489701 | 0.309436 |
| NC-001345.CDS94.S1_at   | NC-001345.CDS94 | 4.01 | 4.01 | 0.17 | 0.21 | 1     | 0.379002 | 0.406513 | 0.686586 | 0.634382 |
| NC-006150.CDS1.S1_at    | NC-006150.CDS1  | 4.75 | 5.06 | 0.18 | 0.2  | -1.25 | 0.241523 | 0.243058 | 0.593941 | 0.513356 |
| NC-006150.CDS2.S1_s_at  | NC-006150.CDS2  | 5.6  | 5.65 | 0.11 | 0.16 | -1.03 | 0.253681 | 0.215927 | 0.602177 | 0.489556 |
| NC-006150.CDS3.S1_at    | NC-006150.CDS3  | 3.91 | 4.13 | 0.11 | 0.08 | -1.17 | 0.036079 | 0.023998 | 0.338781 | 0.194183 |
| NC-006150.CDS4.S1_at    | NC-006150.CDS4  | 4.7  | 5    | 0.14 | 0.31 | -1.23 | 0.159487 | 0.213794 | 0.524351 | 0.487564 |
| NC-006150.CDS5.S1_at    | NC-006150.CDS5  | 6.01 | 6.18 | 0.06 | 0.2  | -1.12 | 0.205005 | 0.295139 | 0.567457 | 0.554551 |
| NC-006150.CDS6.S1_at    | NC-006150.CDS6  | 2.68 | 2.78 | 0.03 | 0.03 | -1.07 | 0.024529 | 0.261978 | 0.295176 | 0.52836  |
| NC-006150.CDS7.S1_at    | NC-006150.CDS7  | 3.45 | 3.28 | 0.12 | 0.1  | 1.12  | 0.587476 | 0.393197 | 0.808576 | 0.626132 |
| NC-006150.CDS8.S1_at    | NC-006150.CDS8  | 3.74 | 3.87 | 0.1  | 0.12 | -1.1  | 0.182132 | 0.306267 | 0.546458 | 0.562907 |
| NC-006150.CDS9.S1_at    | NC-006150.CDS9  | 2.95 | 2.93 | 0.05 | 0.21 | 1.01  | 0.594825 | 0.475309 | 0.812182 | 0.682031 |
| NC-006150.CDS10.S1_at   | NC-006150.CDS10 | 3.36 | 3.39 | 0.12 | 0.22 | -1.02 | 0.209045 | 0.26955  | 0.570648 | 0.534821 |
| NC-006150.CDS11.S1_at   | NC-006150.CDS11 | 5.14 | 5.21 | 0.25 | 0.07 | -1.04 | 0.89582  | 0.339977 | 0.958405 | 0.586486 |
| NC-006150.CDS12.S1_at   | NC-006150.CDS12 | 3.47 | 3.46 | 0.04 | 0.08 | 1.01  | 0.814542 | 0.973665 | 0.924758 | 0.985648 |
| NC-006150.CDS13.S1_at   | NC-006150.CDS13 | 3.62 | 3.62 | 0.04 | 0.05 | 1     | 0.994399 | 0.103848 | 0.998043 | 0.364519 |
| NC-006150.CDS14.S1_at   | NC-006150.CDS14 | 3.77 | 4.25 | 0.09 | 0.26 | -1.4  | 0.101038 | 0.088172 | 0.461009 | 0.341721 |
| NC-006150.CDS15.S1_at   | NC-006150.CDS15 | 5.11 | 5.01 | 0.1  | 0.18 | 1.08  | 0.945386 | 0.128007 | 0.979132 | 0.39898  |
| NC-006150.CDS16.S1_at   | NC-006150.CDS16 | 3.81 | 3.86 | 0.14 | 0.22 | -1.04 | 0.259459 | 0.33226  | 0.606562 | 0.580717 |
| NC-006150.CDS17.S1_at   | NC-006150.CDS17 | 4.06 | 4.17 | 0.1  | 0.15 | -1.08 | 0.395894 | 0.413296 | 0.696652 | 0.639586 |
| NC-006150.CDS18.S1_at   | NC-006150.CDS18 | 4.28 | 4.5  | 0.29 | 0.1  | -1.17 | 0.999757 | 0.809153 | 0.999967 | 0.889995 |
| NC-006150.CDS19.S1_at   | NC-006150.CDS19 | 3.04 | 3.05 | 0.06 | 0.09 | -1    | 0.50441  | 0.407921 | 0.761231 | 0.635304 |
| NC-006150.CDS20.S1_at   | NC-006150.CDS20 | 3.67 | 3.67 | 0.03 | 0.1  | -1.01 | 0.24946  | 0.727244 | 0.600196 | 0.84224  |
| NC-006150.CDS21.S1_at   | NC-006150.CDS21 | 2.77 | 2.8  | 0.08 | 0.03 | -1.02 | 0.26603  | 0.351354 | 0.611558 | 0.595026 |
| NC-006150.CDS22.S1_at   | NC-006150.CDS22 | 3.13 | 3.23 | 0.16 | 0.23 | -1.08 | 0.207561 | 0.134176 | 0.569774 | 0.406421 |



|                         |                 |      |      |      |      |       |          |          |          |          |
|-------------------------|-----------------|------|------|------|------|-------|----------|----------|----------|----------|
| NC-006150.CDS23.S1_at   | NC-006150.CDS23 | 3.34 | 3.33 | 0.05 | 0.06 | 1.01  | 0.391286 | 0.584675 | 0.693992 | 0.752482 |
| NC-006150.CDS24.S1_at   | NC-006150.CDS24 | 3.46 | 3.46 | 0.02 | 0.01 | 1     | 0.259771 | 0.097088 | 0.606733 | 0.354605 |
| NC-006150.CDS25.S1_at   | NC-006150.CDS25 | 3.56 | 3.33 | 0.16 | 0.07 | 1.17  | 0.224715 | 0.342884 | 0.582788 | 0.588712 |
| NC-006150.CDS26.S1_at   | NC-006150.CDS26 | 3.78 | 3.84 | 0.05 | 0.02 | -1.04 | 0.163886 | 0.120158 | 0.528211 | 0.388915 |
| NC-006150.CDS27.S1_at   | NC-006150.CDS27 | 3.2  | 3.21 | 0    | 0.13 | -1.01 | 0.34813  | 0.169852 | 0.667    | 0.446544 |
| NC-006150.CDS28.S1_at   | NC-006150.CDS28 | 2.98 | 3.07 | 0.06 | 0.09 | -1.06 | 0.134473 | 0.136035 | 0.501157 | 0.408363 |
| NC-006150.CDS29.S1_at   | NC-006150.CDS29 | 2.98 | 2.93 | 0.1  | 0.09 | 1.04  | 0.981328 | 0.998392 | 0.993278 | 0.999091 |
| NC-006150.CDS30.S1_at   | NC-006150.CDS30 | 5.33 | 5.36 | 0.09 | 0.09 | -1.02 | 0.204659 | 0.249579 | 0.567198 | 0.518645 |
| NC-006150.CDS31.S1_at   | NC-006150.CDS31 | 3.46 | 3.67 | 0.1  | 0.14 | -1.15 | 0.092097 | 0.206708 | 0.448698 | 0.480799 |
| NC-006150.CDS32.S1_at   | NC-006150.CDS32 | 4.17 | 4.37 | 0.08 | 0.22 | -1.15 | 0.075243 | 0.077236 | 0.422131 | 0.322852 |
| NC-006150.CDS33.S1_at   | NC-006150.CDS33 | 3.89 | 4.02 | 0.14 | 0.22 | -1.09 | 0.423248 | 0.372674 | 0.713966 | 0.611617 |
| NC-006150.CDS34.S1_at   | NC-006150.CDS34 | 5.57 | 5.94 | 0.19 | 0.17 | -1.29 | 0.114177 | 0.131438 | 0.47744  | 0.403584 |
| NC-006150.CDS35.S1_at   | NC-006150.CDS35 | 3.98 | 4.15 | 0.16 | 0.12 | -1.13 | 0.217476 | 0.111175 | 0.577095 | 0.376787 |
| NC-006150.CDS36.S1_at   | NC-006150.CDS36 | 4.37 | 4.25 | 0    | 0.19 | 1.08  | 0.984689 | 0.621387 | 0.994566 | 0.775982 |
| NC-006150.CDS37.S1_at   | NC-006150.CDS37 | 3.86 | 3.91 | 0.06 | 0.1  | -1.03 | 0.669953 | 0.605726 | 0.852318 | 0.765429 |
| NC-006150.CDS38.S1_at   | NC-006150.CDS38 | 4.42 | 4.41 | 0.06 | 0.22 | 1     | 0.574281 | 0.720404 | 0.801619 | 0.838261 |
| NC-006150.CDS39.S1_at   | NC-006150.CDS39 | 2.87 | 3.12 | 0.06 | 0.09 | -1.19 | 0.020818 | 0.052237 | 0.280745 | 0.274065 |
| NC-006150.CDS40.S1_at   | NC-006150.CDS40 | 3.23 | 3.7  | 0.02 | 0.22 | -1.39 | 0.054415 | 0.03281  | 0.381851 | 0.22427  |
| NC-006150.CDS41.S1_at   | NC-006150.CDS41 | 3.87 | 4.01 | 0.16 | 0.16 | -1.11 | 0.294523 | 0.397507 | 0.631257 | 0.628923 |
| NC-006150.CDS42.S1_at   | NC-006150.CDS42 | 4.84 | 4.77 | 0.14 | 0.25 | 1.04  | 0.770826 | 0.723797 | 0.903442 | 0.840126 |
| NC-006150.CDS43.S1_at   | NC-006150.CDS43 | 3.62 | 3.83 | 0.13 | 0.12 | -1.16 | 0.397312 | 0.259466 | 0.69773  | 0.526418 |
| NC-006150.CDS44.S1_at   | NC-006150.CDS44 | 4.3  | 4.44 | 0.01 | 0.07 | -1.11 | 0.04321  | 0.016278 | 0.356669 | 0.161661 |
| NC-006150.CDS45.S1_at   | NC-006150.CDS45 | 3.59 | 3.95 | 0.07 | 0.24 | -1.28 | 0.082088 | 0.039964 | 0.433268 | 0.245076 |
| NC-006150.CDS46.S1_at   | NC-006150.CDS46 | 3.41 | 3.39 | 0.09 | 0.04 | 1.01  | 0.855824 | 0.663721 | 0.941722 | 0.803122 |
| NC-006150.CDS47.S1_at   | NC-006150.CDS47 | 5.26 | 5.59 | 0.09 | 0.19 | -1.26 | 0.092689 | 0.089871 | 0.449372 | 0.344073 |
| NC-006150.CDS48.S1_at   | NC-006150.CDS48 | 3.87 | 3.98 | 0.06 | 0.14 | -1.07 | 0.787401 | 0.953186 | 0.91159  | 0.973457 |
| NC-006150.CDS49.S1_at   | NC-006150.CDS49 | 3.82 | 3.96 | 0.08 | 0.2  | -1.1  | 0.163986 | 0.195127 | 0.528211 | 0.470241 |
| NC-006150.CDS50.S1_at   | NC-006150.CDS50 | 4.37 | 4.63 | 0.15 | 0.03 | -1.2  | 0.099739 | 0.092501 | 0.459718 | 0.348445 |
| NC-006150.CDS51.S1_s_at | NC-006150.CDS51 | 4.46 | 4.52 | 0.08 | 0.19 | -1.04 | 0.21814  | 0.312167 | 0.577744 | 0.566915 |
| NC-006150.CDS52.S1_at   | NC-006150.CDS52 | 3.35 | 3.4  | 0.14 | 0.03 | -1.03 | 0.143225 | 0.18684  | 0.510106 | 0.462703 |
| NC-006150.CDS53.S1_at   | NC-006150.CDS53 | 4.74 | 4.83 | 0.05 | 0.21 | -1.07 | 0.624811 | 0.655684 | 0.828459 | 0.7987   |
| NC-006150.CDS54.S1_at   | NC-006150.CDS54 | 2.75 | 2.94 | 0.04 | 0.16 | -1.14 | 0.105626 | 0.160974 | 0.466487 | 0.437116 |
| NC-006150.CDS55.S1_at   | NC-006150.CDS55 | 4.29 | 4.35 | 0.04 | 0.02 | -1.04 | 0.235514 | 0.727633 | 0.589453 | 0.842488 |
| NC-006150.CDS56.S1_at   | NC-006150.CDS56 | 2.93 | 2.84 | 0.02 | 0.01 | 1.06  | 0.006065 | 0.483306 | 0.195337 | 0.687887 |
| NC-006150.CDS57.S1_at   | NC-006150.CDS57 | 4.69 | 4.81 | 0.05 | 0.07 | -1.08 | 0.237413 | 0.018551 | 0.590941 | 0.171365 |
| NC-006150.CDS58.S1_s_at | NC-006150.CDS58 | 4.9  | 5.02 | 0.06 | 0.17 | -1.09 | 0.599916 | 0.627899 | 0.814949 | 0.780849 |
| NC-006150.CDS59.S1_at   | NC-006150.CDS59 | 4.37 | 4.54 | 0    | 0.15 | -1.13 | 0.10429  | 0.052322 | 0.464351 | 0.274201 |
| NC-006150.CDS60.S1_at   | NC-006150.CDS60 | 4.29 | 4.41 | 0.26 | 0.23 | -1.08 | 0.65168  | 0.654418 | 0.843273 | 0.798021 |
| NC-006150.CDS61.S1_at   | NC-006150.CDS61 | 3.53 | 3.55 | 0.09 | 0.13 | -1.01 | 0.201211 | 0.257081 | 0.563821 | 0.524783 |
| NC-006150.CDS62.S1_at   | NC-006150.CDS62 | 3.68 | 3.92 | 0.08 | 0.17 | -1.18 | 0.110369 | 0.140661 | 0.471863 | 0.413964 |
| NC-006150.CDS63.S1_at   | NC-006150.CDS63 | 3.9  | 3.99 | 0.05 | 0.12 | -1.06 | 0.220747 | 0.278931 | 0.579701 | 0.542661 |

|                        |                  |      |      |      |      |       |          |          |          |          |
|------------------------|------------------|------|------|------|------|-------|----------|----------|----------|----------|
| NC-006150.CDS64.S1_at  | NC-006150.CDS64  | 4.64 | 4.74 | 0.04 | 0.17 | -1.07 | 0.274114 | 0.48724  | 0.617262 | 0.690358 |
| NC-006150.CDS65.S1_at  | NC-006150.CDS65  | 4.69 | 4.88 | 0.04 | 0.1  | -1.14 | 0.053072 | 0.042607 | 0.379242 | 0.251035 |
| NC-006150.CDS66.S1_at  | NC-006150.CDS66  | 5.34 | 5.66 | 0.18 | 0.12 | -1.24 | 0.096624 | 0.122978 | 0.455424 | 0.392923 |
| NC-006150.CDS67.S1_at  | NC-006150.CDS67  | 4.08 | 4.14 | 0.04 | 0.08 | -1.05 | 0.097449 | 0.248    | 0.456423 | 0.517487 |
| NC-006150.CDS68.S1_at  | NC-006150.CDS68  | 3.81 | 3.84 | 0.27 | 0.11 | -1.03 | 0.50902  | 0.715509 | 0.764172 | 0.83509  |
| NC-006150.CDS69.S1_at  | NC-006150.CDS69  | 3.84 | 4.14 | 0.03 | 0.15 | -1.23 | 0.035098 | 0.021984 | 0.334836 | 0.185566 |
| NC-006150.CDS70.S1_at  | NC-006150.CDS70  | 3.64 | 3.7  | 0.09 | 0.12 | -1.04 | 0.121958 | 0.157204 | 0.486957 | 0.432684 |
| NC-006150.CDS71.S1_at  | NC-006150.CDS71  | 3.68 | 3.77 | 0.22 | 0.11 | -1.07 | 0.196126 | 0.255016 | 0.559234 | 0.52317  |
| NC-006150.CDS72.S1_at  | NC-006150.CDS72  | 3.89 | 4    | 0.1  | 0.08 | -1.08 | 0.201943 | 0.080952 | 0.564224 | 0.328993 |
| NC-006150.CDS73.S1_at  | NC-006150.CDS73  | 3.66 | 3.64 | 0.18 | 0.22 | 1.01  | 0.87214  | 0.784619 | 0.948957 | 0.875303 |
| NC-006150.CDS74.S1_at  | NC-006150.CDS74  | 4.76 | 4.85 | 0.07 | 0.12 | -1.07 | 0.144644 | 0.12216  | 0.511015 | 0.391819 |
| NC-006150.CDS75.S1_at  | NC-006150.CDS75  | 4.2  | 4.2  | 0.1  | 0.07 | 1     | 0.849324 | 0.529747 | 0.939517 | 0.717498 |
| NC-006150.CDS76.S1_at  | NC-006150.CDS76  | 5.17 | 5.2  | 0.07 | 0.21 | -1.02 | 0.85637  | 0.517019 | 0.942006 | 0.709375 |
| NC-006150.CDS77.S1_at  | NC-006150.CDS77  | 5.48 | 5.65 | 0.16 | 0.06 | -1.12 | 0.12194  | 0.178944 | 0.486957 | 0.455243 |
| NC-006150.CDS78.S1_at  | NC-006150.CDS78  | 3.03 | 3.15 | 0.03 | 0.12 | -1.08 | 0.080938 | 0.216295 | 0.431601 | 0.489844 |
| NC-006150.CDS79.S1_at  | NC-006150.CDS79  | 5.33 | 5.73 | 0.11 | 0.05 | -1.33 | 0.007157 | 0.010192 | 0.205071 | 0.132348 |
| NC-006150.CDS80.S1_at  | NC-006150.CDS80  | 4.5  | 4.68 | 0.05 | 0.14 | -1.13 | 0.311968 | 0.415996 | 0.643771 | 0.641323 |
| NC-006150.CDS81.S1_at  | NC-006150.CDS81  | 4.26 | 4.26 | 0.15 | 0.22 | 1     | 0.469377 | 0.56663  | 0.741679 | 0.740707 |
| NC-006150.CDS82.S1_at  | NC-006150.CDS82  | 3.79 | 3.99 | 0.14 | 0.21 | -1.15 | 0.121305 | 0.132741 | 0.48598  | 0.404544 |
| NC-006150.CDS83.S1_at  | NC-006150.CDS83  | 4.75 | 4.85 | 0.01 | 0.31 | -1.07 | 0.603679 | 0.712445 | 0.817274 | 0.833371 |
| NC-006150.CDS84.S1_at  | NC-006150.CDS84  | 3.66 | 3.81 | 0.11 | 0.15 | -1.11 | 0.4701   | 0.717521 | 0.742134 | 0.836463 |
| NC-006150.CDS85.S1_at  | NC-006150.CDS85  | 3.81 | 3.8  | 0.06 | 0.09 | 1.01  | 0.990237 | 0.539498 | 0.996533 | 0.723763 |
| NC-006150.CDS86.S1_at  | NC-006150.CDS86  | 3.17 | 3.09 | 0.09 | 0.03 | 1.05  | 0.528879 | 0.66616  | 0.775764 | 0.804415 |
| NC-006150.CDS87.S1_at  | NC-006150.CDS87  | 3.9  | 3.94 | 0.1  | 0.11 | -1.03 | 0.335665 | 0.700587 | 0.659165 | 0.826284 |
| NC-006150.CDS88.S1_at  | NC-006150.CDS88  | 3.31 | 3.44 | 0.11 | 0.17 | -1.09 | 0.332426 | 0.239769 | 0.65685  | 0.510505 |
| NC-006150.CDS89.S1_at  | NC-006150.CDS89  | 3.52 | 3.53 | 0.06 | 0.21 | -1.01 | 0.694188 | 0.87904  | 0.864407 | 0.930992 |
| NC-006150.CDS90.S1_at  | NC-006150.CDS90  | 3.51 | 3.7  | 0.07 | 0.03 | -1.14 | 0.020049 | 0.004898 | 0.276484 | 0.097632 |
| NC-006150.CDS91.S1_at  | NC-006150.CDS91  | 5.23 | 5.26 | 0.04 | 0.19 | -1.02 | 0.241672 | 0.254977 | 0.593941 | 0.52317  |
| NC-006150.CDS92.S1_at  | NC-006150.CDS92  | 4.77 | 4.94 | 0.09 | 0.13 | -1.13 | 0.057976 | 0.048257 | 0.389599 | 0.264727 |
| NC-006150.CDS93.S1_at  | NC-006150.CDS93  | 3.66 | 3.81 | 0.05 | 0.28 | -1.11 | 0.960758 | 0.864733 | 0.984947 | 0.923286 |
| NC-006150.CDS94.S1_at  | NC-006150.CDS94  | 6.75 | 7.04 | 0.24 | 0.1  | -1.22 | 0.334438 | 0.454227 | 0.658401 | 0.668474 |
| NC-006150.CDS95.S1_at  | NC-006150.CDS95  | 6.14 | 6.2  | 0.22 | 0.18 | -1.04 | 0.453057 | 0.556935 | 0.732285 | 0.734847 |
| NC-006150.CDS96.S1_at  | NC-006150.CDS96  | 5.41 | 5.44 | 0.25 | 0.11 | -1.02 | 0.430941 | 0.648971 | 0.718416 | 0.794525 |
| NC-006150.CDS97.S1_at  | NC-006150.CDS97  | 5.3  | 5.29 | 0.1  | 0    | 1     | 0.524475 | 0.338196 | 0.773192 | 0.58536  |
| NC-006150.CDS98.S1_at  | NC-006150.CDS98  | 5.81 | 5.88 | 0.01 | 0.17 | -1.05 | 0.25073  | 0.096697 | 0.600389 | 0.35417  |
| NC-006150.CDS99.S1_at  | NC-006150.CDS99  | 4.77 | 5.04 | 0.18 | 0.03 | -1.2  | 0.148039 | 0.171518 | 0.513451 | 0.447895 |
| NC-006150.CDS100.S1_at | NC-006150.CDS100 | 3.35 | 3.31 | 0.13 | 0.06 | 1.03  | 0.694034 | 0.515944 | 0.864359 | 0.708598 |
| NC-006150.CDS101.S1_at | NC-006150.CDS101 | 3.26 | 3.25 | 0.12 | 0.12 | 1.01  | 0.44655  | 0.450406 | 0.728373 | 0.665643 |
| NC-006150.CDS102.S1_at | NC-006150.CDS102 | 3.23 | 3.24 | 0.02 | 0.13 | -1    | 0.683276 | 0.38665  | 0.858347 | 0.621814 |
| NC-006150.CDS103.S1_at | NC-006150.CDS103 | 3.44 | 3.26 | 0.06 | 0.25 | 1.13  | 0.781251 | 0.83488  | 0.908721 | 0.905483 |
| NC-006150.CDS104.S1_at | NC-006150.CDS104 | 6.16 | 6.23 | 0.02 | 0.13 | -1.05 | 0.192162 | 0.215222 | 0.55527  | 0.488977 |

|                          |                  |      |      |      |      |       |          |          |          |          |
|--------------------------|------------------|------|------|------|------|-------|----------|----------|----------|----------|
| NC-006150.CDS105.S1_at   | NC-006150.CDS105 | 3.37 | 3.21 | 0.07 | 0.13 | 1.11  | 0.275753 | 0.402212 | 0.617878 | 0.631247 |
| NC-006150.CDS106.S1_at   | NC-006150.CDS106 | 4.9  | 4.9  | 0.17 | 0.12 | 1     | 0.608108 | 0.537822 | 0.819842 | 0.722758 |
| NC-006150.CDS107.S1_at   | NC-006150.CDS107 | 4.27 | 4.34 | 0.13 | 0.25 | -1.05 | 0.431544 | 0.588796 | 0.718592 | 0.755149 |
| NC-006150.CDS108.S1_at   | NC-006150.CDS108 | 5.34 | 5.41 | 0.13 | 0.31 | -1.05 | 0.726505 | 0.892736 | 0.881049 | 0.938818 |
| NC-006150.CDS109.S1_at   | NC-006150.CDS109 | 3.8  | 3.86 | 0.1  | 0.22 | -1.04 | 0.601224 | 0.796394 | 0.815685 | 0.882647 |
| NC-006150.CDS110.S1_at   | NC-006150.CDS110 | 3.93 | 3.93 | 0    | 0.11 | -1    | 0.601982 | 0.842999 | 0.816272 | 0.91057  |
| NC-006150.CDS111.S1_at   | NC-006150.CDS111 | 3.41 | 3.65 | 0.19 | 0.11 | -1.18 | 0.097047 | 0.127242 | 0.456113 | 0.397935 |
| NC-006150.CDS112.S1_at   | NC-006150.CDS112 | 4.03 | 3.98 | 0.06 | 0.09 | 1.03  | 0.521325 | 0.657985 | 0.77125  | 0.80013  |
| NC-006150.CDS113.S1_at   | NC-006150.CDS113 | 5.36 | 5.48 | 0.13 | 0.06 | -1.08 | 0.164158 | 0.260463 | 0.528211 | 0.527006 |
| NC-006150.CDS114.S1_at   | NC-006150.CDS114 | 5.76 | 5.76 | 0.16 | 0.22 | -1.01 | 0.967227 | 0.764452 | 0.987781 | 0.863114 |
| NC-006150.CDS115.S1_at   | NC-006150.CDS115 | 4.48 | 4.58 | 0.06 | 0.07 | -1.08 | 0.050932 | 0.076402 | 0.37568  | 0.321372 |
| NC-006150.CDS116.S1_at   | NC-006150.CDS116 | 3.59 | 3.58 | 0.03 | 0.11 | 1.01  | 0.533231 | 0.565432 | 0.777978 | 0.739886 |
| NC-006150.CDS117.S1_at   | NC-006150.CDS117 | 4.79 | 4.79 | 0.1  | 0.12 | -1    | 0.607778 | 0.691713 | 0.819521 | 0.820652 |
| NC-006150.CDS118.S1_at   | NC-006150.CDS118 | 4.29 | 4.39 | 0.18 | 0.07 | -1.07 | 0.220653 | 0.375094 | 0.579701 | 0.613186 |
| NC-006150.CDS119.S1_s_at | NC-006150.CDS119 | 3.82 | 4.17 | 0.27 | 0.18 | -1.28 | 0.345625 | 0.341249 | 0.665264 | 0.587344 |
| NC-006150.CDS120.S1_at   | NC-006150.CDS120 | 5.42 | 5.37 | 0.16 | 0.27 | 1.03  | 0.328981 | 0.423898 | 0.654754 | 0.646571 |
| NC-006150.CDS121.S1_at   | NC-006150.CDS121 | 4.81 | 4.99 | 0.09 | 0.06 | -1.13 | 0.033183 | 0.020803 | 0.327417 | 0.180908 |
| NC-006150.CDS122.S1_at   | NC-006150.CDS122 | 4.81 | 4.84 | 0.11 | 0.18 | -1.02 | 0.679152 | 0.890831 | 0.856453 | 0.937722 |
| NC-006150.CDS123.S1_at   | NC-006150.CDS123 | 3.7  | 3.79 | 0.09 | 0.1  | -1.07 | 0.359782 | 0.198724 | 0.673991 | 0.473391 |
| NC-006150.CDS124.S1_at   | NC-006150.CDS124 | 3.96 | 4    | 0.15 | 0.3  | -1.03 | 0.89422  | 0.909124 | 0.957854 | 0.948563 |
| NC-006150.CDS125.S1_at   | NC-006150.CDS125 | 4.7  | 4.76 | 0.13 | 0.17 | -1.04 | 0.535141 | 0.6036   | 0.778933 | 0.764204 |
| NC-006150.CDS126.S1_at   | NC-006150.CDS126 | 3.66 | 3.71 | 0.13 | 0.24 | -1.04 | 0.93547  | 0.625468 | 0.975089 | 0.779182 |
| NC-006150.CDS127.S1_at   | NC-006150.CDS127 | 3.46 | 3.47 | 0.01 | 0.21 | -1.01 | 0.876387 | 0.982463 | 0.950507 | 0.99036  |
| NC-006150.CDS128.S1_at   | NC-006150.CDS128 | 4.63 | 4.87 | 0.06 | 0.03 | -1.18 | 0.013309 | 0.011851 | 0.246471 | 0.140973 |
| NC-006150.CDS129.S1_at   | NC-006150.CDS129 | 3.85 | 3.85 | 0.08 | 0.13 | 1     | 0.644585 | 0.788927 | 0.839786 | 0.878011 |
| NC-006150.CDS130.S1_at   | NC-006150.CDS130 | 5.29 | 5.27 | 0.1  | 0.13 | 1.01  | 0.305101 | 0.355163 | 0.639014 | 0.597552 |
| NC-006150.CDS131.S1_at   | NC-006150.CDS131 | 5.04 | 4.95 | 0.16 | 0.04 | 1.07  | 0.475633 | 0.91586  | 0.745899 | 0.952836 |
| NC-006150.CDS132.S1_at   | NC-006150.CDS132 | 5.51 | 5.74 | 0.06 | 0.28 | -1.17 | 0.2626   | 0.298661 | 0.609039 | 0.557252 |
| NC-006150.CDS133.S1_at   | NC-006150.CDS133 | 3.84 | 4.01 | 0.14 | 0.23 | -1.13 | 0.237619 | 0.307357 | 0.591146 | 0.563634 |
| NC-006150.CDS134.S1_at   | NC-006150.CDS134 | 4.3  | 4.44 | 0.21 | 0.1  | -1.1  | 0.245613 | 0.332795 | 0.597182 | 0.58121  |
| NC-006150.CDS135.S1_at   | NC-006150.CDS135 | 3.22 | 3.38 | 0.04 | 0.12 | -1.12 | 0.111232 | 0.114061 | 0.473262 | 0.380421 |
| NC-006150.CDS136.S1_at   | NC-006150.CDS136 | 4.78 | 5.09 | 0.04 | 0.23 | -1.24 | 0.106954 | 0.17841  | 0.467551 | 0.454778 |
| NC-006150.CDS137.S1_at   | NC-006150.CDS137 | 3.38 | 3.71 | 0.1  | 0.29 | -1.26 | 0.131489 | 0.106241 | 0.498041 | 0.368652 |
| NC-006150.CDS138.S1_at   | NC-006150.CDS138 | 3.9  | 3.79 | 0.06 | 0.19 | 1.08  | 0.811502 | 0.951476 | 0.92323  | 0.972503 |
| NC-006150.CDS139.S1_at   | NC-006150.CDS139 | 4.73 | 4.74 | 0.11 | 0.08 | -1    | 0.529672 | 0.554265 | 0.77625  | 0.733111 |
| NC-006150.CDS140.S1_at   | NC-006150.CDS140 | 4.86 | 4.91 | 0.07 | 0.03 | -1.03 | 0.591367 | 0.123332 | 0.810396 | 0.393386 |
| NC-006150.CDS141.S1_at   | NC-006150.CDS141 | 4.23 | 4.25 | 0.08 | 0.18 | -1.01 | 0.827967 | 0.621932 | 0.930199 | 0.776497 |
| NC-006150.CDS142.S1_at   | NC-006150.CDS142 | 5.16 | 5.22 | 0.03 | 0.09 | -1.04 | 0.163468 | 0.390141 | 0.527867 | 0.624002 |
| NC-006150.CDS143.S1_at   | NC-006150.CDS143 | 3.4  | 3.67 | 0.17 | 0.14 | -1.21 | 0.089511 | 0.094142 | 0.445161 | 0.350851 |
| NC-006150.CDS144.S1_at   | NC-006150.CDS144 | 3.2  | 3.15 | 0.1  | 0.16 | 1.03  | 0.882885 | 0.620643 | 0.952961 | 0.775525 |
| NC-006150.CDS145.S1_s_at | NC-006150.CDS145 | 7.25 | 7.28 | 0.11 | 0.14 | -1.02 | 0.635867 | 0.698472 | 0.835187 | 0.82482  |

|                          |                  |      |      |      |      |       |          |          |          |          |
|--------------------------|------------------|------|------|------|------|-------|----------|----------|----------|----------|
| NC-006150.CDS146.S1_at   | NC-006150.CDS146 | 4.96 | 5.06 | 0.05 | 0.1  | -1.07 | 0.136018 | 0.139844 | 0.502862 | 0.413131 |
| NC-006150.CDS147.S1_at   | NC-006150.CDS147 | 4    | 4.03 | 0.04 | 0.26 | -1.02 | 0.645566 | 0.798937 | 0.840383 | 0.884205 |
| NC-006150.CDS148.S1_at   | NC-006150.CDS148 | 3.36 | 3.41 | 0.1  | 0.07 | -1.04 | 0.543052 | 0.450388 | 0.783741 | 0.665643 |
| NC-006150.CDS149.S1_s_at | NC-006150.CDS149 | 3.9  | 3.93 | 0.16 | 0.1  | -1.02 | 0.450304 | 0.281345 | 0.730917 | 0.544391 |
| NC-006150.CDS150.S1_at   | NC-006150.CDS150 | 2.78 | 2.87 | 0.09 | 0.03 | -1.06 | 0.27113  | 0.149355 | 0.615322 | 0.423811 |
| NC-006150.CDS151.S1_at   | NC-006150.CDS151 | 4.69 | 4.96 | 0.06 | 0.09 | -1.2  | 0.014071 | 0.231284 | 0.250974 | 0.502954 |
| NC-006150.CDS152.S1_at   | NC-006150.CDS152 | 3.96 | 4.03 | 0.18 | 0.2  | -1.05 | 0.29227  | 0.162135 | 0.629514 | 0.438282 |
| NC-006150.CDS153.S1_at   | NC-006150.CDS153 | 3.91 | 3.88 | 0.18 | 0.23 | 1.02  | 0.627087 | 0.765534 | 0.829873 | 0.863726 |
| NC-006150.CDS154.S1_at   | NC-006150.CDS154 | 4.2  | 4.28 | 0.02 | 0.15 | -1.05 | 0.998604 | 0.143142 | 0.9995   | 0.417029 |
| NC-006150.CDS155.S1_at   | NC-006150.CDS155 | 3.02 | 3.21 | 0.08 | 0.19 | -1.14 | 0.376293 | 0.60041  | 0.685105 | 0.762128 |
| NC-006150.CDS156.S1_at   | NC-006150.CDS156 | 3.29 | 3.29 | 0    | 0.18 | 1     | 0.948674 | 0.907378 | 0.980329 | 0.947602 |
| NC-006150.CDS157.S1_at   | NC-006150.CDS157 | 5.44 | 5.53 | 0.2  | 0.06 | -1.07 | 0.906248 | 0.293324 | 0.9627   | 0.553239 |
| NC-006150.CDS158.S1_at   | NC-006150.CDS158 | 4.94 | 4.82 | 0.07 | 0.04 | 1.09  | 0.288834 | 0.063321 | 0.626809 | 0.298315 |
| NC-006150.CDS159.S1_at   | NC-006150.CDS159 | 4.14 | 4.36 | 0.03 | 0.05 | -1.16 | 0.004996 | 0.005821 | 0.187449 | 0.104661 |
| NC-006150.CDS160.S1_at   | NC-006150.CDS160 | 3.99 | 4.17 | 0.11 | 0.14 | -1.13 | 0.105531 | 0.160184 | 0.46647  | 0.436308 |
| NC-006150.CDS161.S1_at   | NC-006150.CDS161 | 4.15 | 4.15 | 0.07 | 0.1  | 1     | 0.796112 | 0.798565 | 0.915412 | 0.884032 |
| NC-006150.CDS162.S1_at   | NC-006150.CDS162 | 6.17 | 6.32 | 0.07 | 0.13 | -1.11 | 0.061727 | 0.079996 | 0.396604 | 0.327352 |
| NC-006150.CDS163.S1_at   | NC-006150.CDS163 | 3.34 | 3.43 | 0.07 | 0.2  | -1.07 | 0.87557  | 0.986829 | 0.950159 | 0.992556 |
| NC-006150.CDS164.S1_at   | NC-006150.CDS164 | 4.48 | 4.5  | 0.01 | 0.22 | -1.01 | 0.608203 | 0.70806  | 0.819872 | 0.83065  |
| NC-006150.CDS165.S1_at   | NC-006150.CDS165 | 5.39 | 5.37 | 0.16 | 0.1  | 1.01  | 0.779077 | 0.977698 | 0.907881 | 0.987864 |
| NC-006150.CDS166.S1_at   | NC-006150.CDS166 | 3.99 | 4.46 | 0.28 | 0.13 | -1.38 | 0.063143 | 0.054832 | 0.400282 | 0.279675 |
| NC-006150.CDS167.S1_at   | NC-006150.CDS167 | 4.03 | 3.99 | 0.12 | 0.21 | 1.03  | 0.639572 | 0.602309 | 0.837243 | 0.763318 |
| NC-006150.CDS168.S1_at   | NC-006150.CDS168 | 3.44 | 3.6  | 0.06 | 0.13 | -1.11 | 0.104558 | 0.175748 | 0.464725 | 0.452344 |
| NC-006150.CDS169.S1_at   | NC-006150.CDS169 | 3.24 | 3.23 | 0.11 | 0.14 | 1.01  | 0.308269 | 0.356585 | 0.64064  | 0.598459 |
| NC-006150.CDS170.S1_at   | NC-006150.CDS170 | 4.98 | 5.27 | 0.09 | 0.27 | -1.23 | 0.618986 | 0.246311 | 0.825395 | 0.515889 |
| NC-006150.CDS171.S1_at   | NC-006150.CDS171 | 5.49 | 5.69 | 0.08 | 0.29 | -1.15 | 0.186682 | 0.235888 | 0.550106 | 0.507056 |
| NC-006150.CDS172.S1_at   | NC-006150.CDS172 | 5.22 | 5.2  | 0.21 | 0.3  | 1.01  | 0.528204 | 0.672558 | 0.775373 | 0.808633 |
| NC-006150.CDS172.S1_s_at | NC-006150.CDS172 | 4.55 | 4.57 | 0.17 | 0.11 | -1.01 | 0.801793 | 0.499609 | 0.918258 | 0.698424 |
| NC-006150.CDS173.S1_at   | NC-006150.CDS173 | 3.39 | 3.29 | 0.12 | 0.24 | 1.08  | 0.574609 | 0.752751 | 0.801793 | 0.855968 |
| NC-006150.CDS174.S1_at   | NC-006150.CDS174 | 4.72 | 4.72 | 0.07 | 0.1  | -1    | 0.693876 | 0.698757 | 0.86428  | 0.824973 |
| NC-006150.CDS175.S1_at   | NC-006150.CDS175 | 5.6  | 5.76 | 0.08 | 0.2  | -1.12 | 0.224187 | 0.334962 | 0.582619 | 0.58275  |
| NC-006150.CDS176.S1_at   | NC-006150.CDS176 | 5.61 | 5.99 | 0.13 | 0.2  | -1.31 | 0.214793 | 0.167251 | 0.575346 | 0.443684 |
| NC-006150.CDS177.S1_at   | NC-006150.CDS177 | 4.6  | 4.68 | 0.1  | 0.16 | -1.06 | 0.171451 | 0.277627 | 0.535166 | 0.541628 |
| NC-006150.CDS178.S1_at   | NC-006150.CDS178 | 4.11 | 4.09 | 0.04 | 0.24 | 1.02  | 0.555543 | 0.74923  | 0.791454 | 0.854266 |
| NC-006150.CDS179.S1_at   | NC-006150.CDS179 | 3.4  | 3.31 | 0.06 | 0.13 | 1.06  | 0.481713 | 0.400216 | 0.749268 | 0.630158 |
| NC-006150.CDS180.S1_at   | NC-006150.CDS180 | 4.99 | 5.04 | 0.07 | 0.1  | -1.03 | 0.881921 | 0.661199 | 0.952617 | 0.801687 |
| NC-006150.CDS181.S1_at   | NC-006150.CDS181 | 2.84 | 3.02 | 0.07 | 0.1  | -1.13 | 0.129804 | 0.072206 | 0.495916 | 0.31474  |
| NC-006150.CDS182.S1_at   | NC-006150.CDS182 | 3.87 | 3.94 | 0.16 | 0.11 | -1.05 | 0.882001 | 0.979977 | 0.952617 | 0.989229 |
| NC-006150.CDS183.S1_at   | NC-006150.CDS183 | 5.22 | 5.22 | 0    | 0.13 | -1    | 0.967972 | 0.822608 | 0.98795  | 0.89799  |
| NC-006150.CDS184.S1_at   | NC-006150.CDS184 | 3.57 | 3.96 | 0    | 0.23 | -1.31 | 0.122907 | 0.085596 | 0.488301 | 0.337588 |
| NC-006150.CDS185.S1_at   | NC-006150.CDS185 | 4.76 | 4.98 | 0.12 | 0.12 | -1.16 | 0.205896 | 0.156259 | 0.568383 | 0.43161  |

|                          |                  |      |      |      |      |       |          |          |          |          |
|--------------------------|------------------|------|------|------|------|-------|----------|----------|----------|----------|
| NC-006150.CDS186.S1_s_at | NC-006150.CDS186 | 4.42 | 4.64 | 0.08 | 0.09 | -1.17 | 0.05092  | 0.04267  | 0.37568  | 0.251037 |
| NC-006150.CDS187.S1_at   | NC-006150.CDS187 | 3.42 | 3.42 | 0.09 | 0.1  | -1    | 0.966131 | 0.574974 | 0.987096 | 0.746216 |
| NC-006150.CDS188.S1_at   | NC-006150.CDS188 | 3.01 | 3.02 | 0.08 | 0.03 | -1.01 | 0.542885 | 0.367654 | 0.783702 | 0.607357 |
| NC-006150.CDS188.S1_s_at | NC-006150.CDS188 | 3.79 | 3.7  | 0.08 | 0.1  | 1.07  | 0.114899 | 0.137513 | 0.478201 | 0.410482 |
| NC-006150.CDS189.S1_at   | NC-006150.CDS189 | 4.28 | 4.27 | 0.4  | 0.02 | 1.01  | 0.552668 | 0.679414 | 0.789643 | 0.812809 |
| NC-006150.CDS190.S1_at   | NC-006150.CDS190 | 2.7  | 2.85 | 0.07 | 0.06 | -1.11 | 0.060144 | 0.169526 | 0.393081 | 0.446167 |
| NC-006150.CDS191.S1_at   | NC-006150.CDS191 | 4.06 | 4.14 | 0.03 | 0.1  | -1.06 | 0.553686 | 0.128148 | 0.790329 | 0.399148 |
| NC-006150.CDS192.S1_at   | NC-006150.CDS192 | 2.98 | 3.28 | 0.12 | 0.05 | -1.22 | 0.02865  | 0.018115 | 0.312031 | 0.169609 |
| NC-006150.CDS193.S1_at   | NC-006150.CDS193 | 3.79 | 4.06 | 0.12 | 0.11 | -1.21 | 0.039304 | 0.02971  | 0.346898 | 0.214029 |
| NC-006150.CDS194.S1_at   | NC-006150.CDS194 | 3.6  | 3.63 | 0.34 | 0.27 | -1.02 | 0.413577 | 0.565427 | 0.70853  | 0.739886 |
| NC-006150.CDS195.S1_at   | NC-006150.CDS195 | 3.62 | 3.64 | 0.06 | 0.37 | -1.01 | 0.721153 | 0.755286 | 0.877982 | 0.857546 |
| NC-006150.CDS196.S1_at   | NC-006150.CDS196 | 2.91 | 2.89 | 0.07 | 0.03 | 1.01  | 0.205234 | 0.339913 | 0.567726 | 0.586449 |
| NC-006150.CDS197.S1_at   | NC-006150.CDS197 | 4.59 | 4.69 | 0.05 | 0.15 | -1.07 | 0.254898 | 0.4632   | 0.602943 | 0.674269 |
| NC-006150.CDS198.S1_at   | NC-006150.CDS198 | 4.74 | 4.73 | 0.08 | 0.24 | 1.01  | 0.705157 | 0.889056 | 0.869959 | 0.936779 |
| NC-006150.CDS199.S1_at   | NC-006150.CDS199 | 3.03 | 2.96 | 0.13 | 0.04 | 1.05  | 0.740157 | 0.845798 | 0.888433 | 0.912246 |
| NC-006150.CDS200.S1_s_at | NC-006150.CDS200 | 4.69 | 4.71 | 0.02 | 0.2  | -1.02 | 0.313032 | 0.189021 | 0.644912 | 0.464897 |
| NC-006150.CDS201.S1_s_at | NC-006150.CDS201 | 4.45 | 4.6  | 0.11 | 0.08 | -1.11 | 0.039691 | 0.032488 | 0.347969 | 0.223254 |
| NC-006150.CDS202.S1_at   | NC-006150.CDS202 | 3.51 | 3.51 | 0.04 | 0.09 | -1    | 0.957345 | 0.424544 | 0.983882 | 0.647141 |
| NC-006150.CDS203.S1_at   | NC-006150.CDS203 | 3.14 | 3.27 | 0.08 | 0.2  | -1.1  | 0.309884 | 0.416399 | 0.641802 | 0.641587 |
| NC-006150.CDS204.S1_at   | NC-006150.CDS204 | 5.74 | 5.5  | 0.17 | 0.26 | 1.18  | 0.9198   | 0.222113 | 0.968755 | 0.495113 |
| NC-006150.CDS205.S1_at   | NC-006150.CDS205 | 5.3  | 5.36 | 0.14 | 0.06 | -1.04 | 0.974047 | 0.434692 | 0.989791 | 0.654756 |
| NC-006150.CDS206.S1_s_at | NC-006150.CDS206 | 5.14 | 5.26 | 0.05 | 0.09 | -1.09 | 0.040424 | 0.052407 | 0.349277 | 0.274414 |
| NC-006150.CDS207.S1_at   | NC-006150.CDS207 | 4.04 | 4.11 | 0.11 | 0.24 | -1.06 | 0.674223 | 0.819546 | 0.853988 | 0.896039 |
| NC-006150.CDS208.S1_at   | NC-006150.CDS208 | 3.82 | 3.82 | 0.14 | 0.04 | 1     | 0.575262 | 0.521546 | 0.802195 | 0.712483 |
| NC-006150.CDS209.S1_at   | NC-006150.CDS209 | 4.15 | 4.15 | 0.05 | 0.09 | -1    | 0.341924 | 0.612384 | 0.662943 | 0.770014 |
| NC-006150.CDS210.S1_at   | NC-006150.CDS210 | 3.51 | 3.52 | 0.14 | 0.29 | -1.01 | 0.429675 | 0.602221 | 0.717686 | 0.763226 |
| NC-006150.CDS211.S1_at   | NC-006150.CDS211 | 3.76 | 3.72 | 0.2  | 0.09 | 1.03  | 0.719527 | 0.661712 | 0.876961 | 0.801903 |
| NC-006150.CDS212.S1_at   | NC-006150.CDS212 | 3.69 | 3.78 | 0.15 | 0.23 | -1.07 | 0.339795 | 0.429302 | 0.661483 | 0.650754 |
| NC-006150.CDS213.S1_at   | NC-006150.CDS213 | 4.24 | 4.24 | 0.22 | 0.16 | 1     | 0.235436 | 0.304933 | 0.589353 | 0.562064 |
| NC-006150.CDS214.S1_at   | NC-006150.CDS214 | 4.43 | 4.27 | 0.13 | 0.12 | 1.11  | 0.505076 | 0.0896   | 0.761548 | 0.343811 |
| NC-006150.CDS215.S1_s_at | NC-006150.CDS215 | 4.52 | 4.47 | 0.06 | 0.13 | 1.04  | 0.850852 | 0.759248 | 0.940085 | 0.860036 |
| NC-006150.CDS216.S1_at   | NC-006150.CDS216 | 3.75 | 3.78 | 0.03 | 0.09 | -1.02 | 0.142853 | 0.097371 | 0.509783 | 0.355074 |
| NC-006150.CDS217.S1_at   | NC-006150.CDS217 | 4.53 | 4.76 | 0.16 | 0.11 | -1.17 | 0.147542 | 0.1164   | 0.513287 | 0.383671 |
| NC-006150.CDS218.S1_at   | NC-006150.CDS218 | 4.7  | 4.79 | 0.01 | 0.1  | -1.06 | 0.334621 | 0.086115 | 0.658444 | 0.338448 |
| NC-006150.CDS219.S1_at   | NC-006150.CDS219 | 3.97 | 4.13 | 0.1  | 0.08 | -1.11 | 0.12421  | 0.154598 | 0.489984 | 0.429489 |
| NC-006150.CDS220.S1_at   | NC-006150.CDS220 | 4.66 | 4.84 | 0.1  | 0.1  | -1.13 | 0.090127 | 0.112174 | 0.445578 | 0.37752  |
| NC-006150.CDS221.S1_at   | NC-006150.CDS221 | 4.94 | 5    | 0.01 | 0.12 | -1.04 | 0.995767 | 0.509487 | 0.998446 | 0.704232 |
| NC-006150.CDS222.S1_at   | NC-006150.CDS222 | 4.02 | 4.1  | 0.08 | 0.26 | -1.06 | 0.781108 | 0.392588 | 0.908721 | 0.625813 |
| NC-006150.CDS222.S1_s_at | NC-006150.CDS222 | 3.41 | 3.34 | 0.07 | 0.08 | 1.05  | 0.52173  | 0.902658 | 0.771533 | 0.944707 |
| NC-006150.CDS223.S1_at   | NC-006150.CDS223 | 4.31 | 4.62 | 0.21 | 0.3  | -1.25 | 0.531568 | 0.630665 | 0.777289 | 0.782345 |
| NC-001781.CDS1.S1_at     | NC-001781.CDS1   | 3.52 | 3.4  | 0.16 | 0.11 | 1.08  | 0.216018 | 0.182272 | 0.575954 | 0.458766 |

|                       |                 |       |       |      |      |       |          |          |          |          |
|-----------------------|-----------------|-------|-------|------|------|-------|----------|----------|----------|----------|
| NC-001781.CDS2.S1_at  | NC-001781.CDS2  | 3.16  | 3.23  | 0.07 | 0.12 | -1.05 | 0.491513 | 0.766563 | 0.755082 | 0.864391 |
| NC-001781.CDS3.S1_at  | NC-001781.CDS3  | 3.4   | 3.63  | 0.02 | 0.14 | -1.17 | 0.06023  | 0.019901 | 0.393081 | 0.177357 |
| NC-001781.CDS4.S1_at  | NC-001781.CDS4  | 4.69  | 4.71  | 0.07 | 0.18 | -1.01 | 0.226083 | 0.100223 | 0.584142 | 0.359205 |
| NC-001781.CDS5.S1_at  | NC-001781.CDS5  | 3.09  | 3.2   | 0.11 | 0.15 | -1.08 | 0.384236 | 0.600488 | 0.689804 | 0.762128 |
| NC-001781.CDS6.S1_at  | NC-001781.CDS6  | 2.53  | 2.47  | 0.07 | 0.08 | 1.04  | 0.972548 | 0.596727 | 0.989473 | 0.759776 |
| NC-001781.CDS7.S1_at  | NC-001781.CDS7  | 4.13  | 4.19  | 0.41 | 0.09 | -1.04 | 0.771704 | 0.929503 | 0.90393  | 0.959749 |
| NC-001781.CDS8.S1_at  | NC-001781.CDS8  | 3.56  | 3.58  | 0.13 | 0.13 | -1.01 | 0.425061 | 0.53312  | 0.714956 | 0.719436 |
| NC-001781.CDS9.S1_at  | NC-001781.CDS9  | 3.64  | 3.72  | 0.18 | 0.19 | -1.06 | 0.992512 | 0.366897 | 0.997431 | 0.606566 |
| NC-001781.CDS10.S1_at | NC-001781.CDS10 | 2.64  | 2.65  | 0.02 | 0.1  | -1.01 | 0.68012  | 0.655444 | 0.85705  | 0.798546 |
| NC-001781.CDS11.S1_at | NC-001781.CDS11 | 2.58  | 2.65  | 0.04 | 0.11 | -1.06 | 0.105586 | 0.229353 | 0.46647  | 0.501527 |
| NC-004148.CDS1.S1_at  | NC-004148.CDS1  | 4.51  | 4.7   | 0.19 | 0.06 | -1.14 | 0.133857 | 0.116688 | 0.500379 | 0.383864 |
| NC-004148.CDS2.S1_at  | NC-004148.CDS2  | 2.85  | 2.95  | 0.01 | 0.1  | -1.08 | 0.398413 | 0.408342 | 0.698693 | 0.635622 |
| NC-004148.CDS3.S1_at  | NC-004148.CDS3  | 3.38  | 3.51  | 0.08 | 0.09 | -1.1  | 0.256977 | 0.334539 | 0.604435 | 0.582504 |
| NC-004148.CDS4.S1_at  | NC-004148.CDS4  | 4.59  | 4.58  | 0.01 | 0.1  | 1     | 0.463891 | 0.420582 | 0.738998 | 0.644279 |
| NC-004148.CDS5.S1_at  | NC-004148.CDS5  | 4.12  | 4.28  | 0.15 | 0.19 | -1.12 | 0.505084 | 0.300932 | 0.761548 | 0.559178 |
| NC-004148.CDS6.S1_at  | NC-004148.CDS6  | 3.38  | 3.31  | 0.05 | 0.09 | 1.05  | 0.147588 | 0.492712 | 0.513287 | 0.693724 |
| NC-004148.CDS7.S1_at  | NC-004148.CDS7  | 2.95  | 3.2   | 0.01 | 0.07 | -1.19 | 0.006475 | 0.061455 | 0.199625 | 0.294706 |
| NC-004148.CDS8.S1_at  | NC-004148.CDS8  | 6.23  | 6.37  | 0.13 | 0.28 | -1.1  | 0.348484 | 0.353172 | 0.667173 | 0.596432 |
| NC-004148.CDS9.S1_at  | NC-004148.CDS9  | 3.31  | 3.35  | 0.44 | 0.12 | -1.03 | 0.879822 | 0.983323 | 0.951698 | 0.990726 |
| Mmu.10692.1.A1_at     | Mmu.10692.1     | 12.67 | 12.42 | 0.11 | 0.26 | 1.19  | 0.649891 | 0.552318 | 0.842537 | 0.731658 |
| Mmu.10692.1.S1_at     | Mmu.10692.1     | 12.34 | 12.16 | 0.08 | 0.25 | 1.13  | 0.65556  | 0.40846  | 0.845005 | 0.635694 |
| MmuSTS.1.1.S1_at      | MmuSTS.1.1      | 3.98  | 3.75  | 0.68 | 0.11 | 1.17  | 0.190875 | 0.222446 | 0.553627 | 0.495516 |
| MmuSTS.10.1.S1_at     | MmuSTS.10.1     | 10    | 9.68  | 0.17 | 0.29 | 1.25  | 0.088296 | 0.067307 | 0.442948 | 0.305414 |
| MmuSTS.100.1.S1_at    | MmuSTS.100.1    | 4.25  | 4.24  | 0.07 | 0.09 | 1.01  | 0.351992 | 0.437316 | 0.66934  | 0.656613 |
| MmuSTS.1000.1.S1_at   | MmuSTS.1000.1   | 10.86 | 10.84 | 0.14 | 0.29 | 1.01  | 0.992419 | 0.877062 | 0.997401 | 0.92994  |
| MmuSTS.1001.1.S1_at   | MmuSTS.1001.1   | 11.8  | 11.85 | 0.18 | 0.03 | -1.04 | 0.674542 | 0.86637  | 0.854194 | 0.923996 |
| MmuSTS.1002.1.S1_at   | MmuSTS.1002.1   | 13.14 | 13.02 | 0.11 | 0.12 | 1.09  | 0.909454 | 0.042488 | 0.964169 | 0.25075  |
| MmuSTS.1003.1.S1_at   | MmuSTS.1003.1   | 9.57  | 9.79  | 0.23 | 0.34 | -1.16 | 0.981623 | 0.309236 | 0.993348 | 0.564807 |
| MmuSTS.1004.1.S1_at   | MmuSTS.1004.1   | 4.02  | 3.72  | 0.3  | 0.13 | 1.23  | 0.141212 | 0.165169 | 0.508805 | 0.441389 |
| MmuSTS.1005.1.S1_at   | MmuSTS.1005.1   | 4.79  | 4.66  | 0.31 | 0.32 | 1.1   | 0.989497 | 0.689041 | 0.996281 | 0.81851  |
| MmuSTS.1006.1.S1_at   | MmuSTS.1006.1   | 11.53 | 11.57 | 0.12 | 0.15 | -1.03 | 0.503083 | 0.272562 | 0.760671 | 0.537323 |
| MmuSTS.1007.1.S1_at   | MmuSTS.1007.1   | 10.2  | 9.23  | 0.16 | 0.62 | 1.96  | 0.046855 | 0.041645 | 0.364195 | 0.24887  |
| MmuSTS.1008.1.S1_at   | MmuSTS.1008.1   | 5.76  | 5.8   | 0.74 | 0.66 | -1.03 | 0.880939 | 0.920222 | 0.952105 | 0.95511  |
| MmuSTS.1009.1.S1_at   | MmuSTS.1009.1   | 9.4   | 8.91  | 0.14 | 0.19 | 1.41  | 0.023541 | 0.014141 | 0.291638 | 0.15208  |
| MmuSTS.101.1.S1_at    | MmuSTS.101.1    | 7.71  | 8.02  | 0.79 | 1.09 | -1.25 | 0.881995 | 0.968752 | 0.952617 | 0.982788 |
| MmuSTS.1010.1.S1_at   | MmuSTS.1010.1   | 5.58  | 5.18  | 0.05 | 0.14 | 1.32  | 0.009583 | 0.004223 | 0.226235 | 0.091422 |
| MmuSTS.1011.1.S1_at   | MmuSTS.1011.1   | 5.49  | 5.78  | 0.2  | 0.65 | -1.23 | 0.120452 | 0.086558 | 0.485479 | 0.33911  |
| MmuSTS.1012.1.S1_at   | MmuSTS.1012.1   | 9.96  | 10.62 | 0.1  | 0.55 | -1.58 | 0.112699 | 0.088035 | 0.475104 | 0.341547 |
| MmuSTS.1013.1.S1_at   | MmuSTS.1013.1   | 6.01  | 6.42  | 0.4  | 0.84 | -1.33 | 0.583748 | 0.787531 | 0.806776 | 0.877072 |
| MmuSTS.1014.1.S1_at   | MmuSTS.1014.1   | 4.55  | 4.5   | 0.1  | 0.12 | 1.03  | 0.494698 | 0.791298 | 0.756829 | 0.879433 |
| MmuSTS.1015.1.S1_s_at | MmuSTS.1015.1   | 3.04  | 3.05  | 0.03 | 0.05 | -1.01 | 0.258809 | 0.292855 | 0.606013 | 0.552837 |

|                       |               |       |       |      |      |       |          |          |          |          |
|-----------------------|---------------|-------|-------|------|------|-------|----------|----------|----------|----------|
| MmuSTS.1016.1.S1_at   | MmuSTS.1016.1 | 10.56 | 10.66 | 0.02 | 0.45 | -1.08 | 0.650009 | 0.69784  | 0.842575 | 0.824445 |
| MmuSTS.1017.1.S1_at   | MmuSTS.1017.1 | 12.83 | 12.84 | 0.03 | 0.2  | -1.01 | 0.814782 | 0.905624 | 0.924758 | 0.946574 |
| MmuSTS.1018.1.S1_at   | MmuSTS.1018.1 | 7.34  | 7.26  | 0.13 | 0.11 | 1.06  | 0.850701 | 0.007462 | 0.940027 | 0.115888 |
| MmuSTS.1019.1.S1_s_at | MmuSTS.1019.1 | 3.92  | 3.61  | 0.07 | 0.05 | 1.24  | 0.006305 | 0.135021 | 0.197819 | 0.406995 |
| MmuSTS.102.1.S1_at    | MmuSTS.102.1  | 10.23 | 10.56 | 0.08 | 0.28 | -1.25 | 0.124007 | 0.028551 | 0.489711 | 0.210768 |
| MmuSTS.1020.1.S1_s_at | MmuSTS.1020.1 | 5.8   | 5.86  | 0.09 | 0.12 | -1.04 | 0.902649 | 0.018422 | 0.961176 | 0.170755 |
| MmuSTS.1021.1.S1_at   | MmuSTS.1021.1 | 8.59  | 7.62  | 0.57 | 0.93 | 1.97  | 0.211568 | 0.273031 | 0.572333 | 0.537644 |
| MmuSTS.1022.1.S1_at   | MmuSTS.1022.1 | 6.32  | 6.32  | 0.16 | 0.07 | 1     | 0.62921  | 0.060593 | 0.831363 | 0.292774 |
| MmuSTS.1023.1.S1_at   | MmuSTS.1023.1 | 7.33  | 7.45  | 0.38 | 0.63 | -1.09 | 0.571354 | 0.78846  | 0.800083 | 0.877644 |
| MmuSTS.1024.1.S1_at   | MmuSTS.1024.1 | 7.81  | 7.17  | 0.42 | 0.16 | 1.56  | 0.059567 | 0.019839 | 0.392595 | 0.177164 |
| MmuSTS.1025.1.S1_at   | MmuSTS.1025.1 | 9.02  | 9.48  | 0.14 | 0.68 | -1.37 | 0.108272 | 0.132731 | 0.469393 | 0.404544 |
| MmuSTS.1026.1.S1_at   | MmuSTS.1026.1 | 9.41  | 9.14  | 0.23 | 0.78 | 1.21  | 0.762503 | 0.927421 | 0.899996 | 0.958778 |
| MmuSTS.1027.1.S1_at   | MmuSTS.1027.1 | 10.01 | 9.69  | 0.32 | 0.28 | 1.25  | 0.283853 | 0.317006 | 0.623797 | 0.570298 |
| MmuSTS.1028.1.S1_at   | MmuSTS.1028.1 | 9.96  | 8.14  | 0.41 | 1.37 | 3.54  | 0.026071 | 0.013383 | 0.30146  | 0.14827  |
| MmuSTS.1029.1.S1_at   | MmuSTS.1029.1 | 10.15 | 9.53  | 0.18 | 0.29 | 1.53  | 0.037377 | 0.031051 | 0.341309 | 0.218115 |
| MmuSTS.103.1.S1_at    | MmuSTS.103.1  | 9.13  | 7.32  | 0.46 | 0.79 | 3.5   | 0.045014 | 0.034141 | 0.359653 | 0.228692 |
| MmuSTS.1030.1.S1_at   | MmuSTS.1030.1 | 8.97  | 9.13  | 0.52 | 0.39 | -1.12 | 0.692937 | 0.14934  | 0.86374  | 0.423811 |
| MmuSTS.1031.1.S1_at   | MmuSTS.1031.1 | 5.2   | 5.38  | 0.08 | 0.13 | -1.13 | 0.118456 | 0.144849 | 0.482934 | 0.418736 |
| MmuSTS.1032.1.S1_at   | MmuSTS.1032.1 | 8.69  | 7.64  | 0.61 | 0.23 | 2.08  | 0.13249  | 0.140409 | 0.498643 | 0.413589 |
| MmuSTS.1033.1.S1_at   | MmuSTS.1033.1 | 10.82 | 11.04 | 0.14 | 0.25 | -1.17 | 0.296389 | 0.198706 | 0.632368 | 0.473391 |
| MmuSTS.1034.1.S1_at   | MmuSTS.1034.1 | 8.78  | 8.52  | 0.24 | 0.05 | 1.2   | 0.152456 | 0.065241 | 0.517115 | 0.301239 |
| MmuSTS.1035.1.S1_s_at | MmuSTS.1035.1 | 5.51  | 5.77  | 0.45 | 0.44 | -1.2  | 0.524615 | 0.421395 | 0.773218 | 0.644994 |
| MmuSTS.1036.1.S1_at   | MmuSTS.1036.1 | 4.9   | 5.33  | 0.89 | 0.79 | -1.34 | 0.948346 | 0.780565 | 0.980183 | 0.872678 |
| MmuSTS.1037.1.S1_at   | MmuSTS.1037.1 | 9.94  | 9.32  | 0.75 | 0.65 | 1.54  | 0.467791 | 0.473433 | 0.740845 | 0.680697 |
| MmuSTS.1038.1.S1_at   | MmuSTS.1038.1 | 7.49  | 7.91  | 0.16 | 0.16 | -1.34 | 0.023781 | 0.009374 | 0.292771 | 0.127634 |
| MmuSTS.1039.1.S1_at   | MmuSTS.1039.1 | 8.93  | 9.74  | 0.11 | 0.42 | -1.75 | 0.015853 | 0.008664 | 0.261493 | 0.123486 |
| MmuSTS.104.1.S1_at    | MmuSTS.104.1  | 10.33 | 9.73  | 0.04 | 0.28 | 1.51  | 0.013484 | 0.006201 | 0.24708  | 0.106821 |
| MmuSTS.1040.1.S1_at   | MmuSTS.1040.1 | 6.33  | 6.44  | 0.25 | 0.76 | -1.08 | 0.460227 | 0.147711 | 0.736782 | 0.422007 |
| MmuSTS.1041.1.S1_at   | MmuSTS.1041.1 | 7.68  | 9.98  | 0.55 | 0.93 | -4.94 | 0.019748 | 0.013057 | 0.275549 | 0.146997 |
| MmuSTS.1042.1.S1_at   | MmuSTS.1042.1 | 10.33 | 9.96  | 0.19 | 0.21 | 1.29  | 0.075697 | 0.073278 | 0.423285 | 0.316233 |
| MmuSTS.1043.1.S1_at   | MmuSTS.1043.1 | 3.74  | 3.53  | 0.24 | 0.11 | 1.16  | 0.814132 | 0.28711  | 0.924638 | 0.5484   |
| MmuSTS.1044.1.S1_at   | MmuSTS.1044.1 | 6.57  | 6.77  | 0.14 | 0.29 | -1.15 | 0.682325 | 0.697563 | 0.857876 | 0.824244 |
| MmuSTS.1045.1.S1_at   | MmuSTS.1045.1 | 5.66  | 5.6   | 0.13 | 0.03 | 1.04  | 0.213031 | 0.102433 | 0.573446 | 0.362627 |
| MmuSTS.1046.1.S1_at   | MmuSTS.1046.1 | 4.52  | 4.62  | 0.09 | 0.09 | -1.07 | 0.239346 | 0.252964 | 0.592443 | 0.521261 |
| MmuSTS.1047.1.S1_at   | MmuSTS.1047.1 | 5.38  | 5.52  | 0.15 | 0.07 | -1.11 | 0.104195 | 0.030833 | 0.464201 | 0.21742  |
| MmuSTS.1048.1.S1_at   | MmuSTS.1048.1 | 11.99 | 11.91 | 0.32 | 0.25 | 1.06  | 0.76934  | 0.156398 | 0.903004 | 0.431702 |
| MmuSTS.1049.1.S1_at   | MmuSTS.1049.1 | 6.26  | 6.31  | 0.1  | 0.06 | -1.03 | 0.622281 | 0.341621 | 0.827345 | 0.587796 |
| MmuSTS.105.1.S1_s_at  | MmuSTS.105.1  | 3.15  | 3.15  | 0.08 | 0.15 | -1    | 0.725139 | 0.747384 | 0.880066 | 0.853149 |
| MmuSTS.1050.1.S1_at   | MmuSTS.1050.1 | 8.39  | 7.58  | 0.39 | 0.1  | 1.75  | 0.065523 | 0.03136  | 0.404593 | 0.219062 |
| MmuSTS.1051.1.S1_at   | MmuSTS.1051.1 | 2.87  | 2.79  | 0.19 | 0.08 | 1.05  | 0.181581 | 0.301295 | 0.546263 | 0.559356 |
| MmuSTS.1052.1.S1_s_at | MmuSTS.1052.1 | 6.4   | 6.42  | 0.18 | 0.13 | -1.02 | 0.506033 | 0.396691 | 0.761997 | 0.628434 |

|                     |               |       |       |      |      |       |          |          |          |          |
|---------------------|---------------|-------|-------|------|------|-------|----------|----------|----------|----------|
| MmuSTS.1053.1.S1_at | MmuSTS.1053.1 | 13.02 | 12.77 | 0.06 | 0.08 | 1.19  | 0.024543 | 0.011732 | 0.295214 | 0.140259 |
| MmuSTS.1054.1.S1_at | MmuSTS.1054.1 | 5.26  | 5.38  | 0.09 | 0.37 | -1.08 | 0.281285 | 0.201442 | 0.622129 | 0.475963 |
| MmuSTS.1055.1.S1_at | MmuSTS.1055.1 | 8.47  | 8.95  | 0.18 | 0.13 | -1.39 | 0.015263 | 0.021412 | 0.257698 | 0.183283 |
| MmuSTS.1056.1.S1_at | MmuSTS.1056.1 | 11.19 | 10.73 | 0.35 | 0.51 | 1.38  | 0.344863 | 0.450238 | 0.664827 | 0.66558  |
| MmuSTS.1057.1.S1_at | MmuSTS.1057.1 | 6.78  | 6.99  | 0.05 | 0.12 | -1.16 | 0.09587  | 0.347943 | 0.453861 | 0.592209 |
| MmuSTS.1058.1.S1_at | MmuSTS.1058.1 | 4.01  | 4.05  | 0.11 | 0.35 | -1.03 | 0.308936 | 0.44647  | 0.641271 | 0.662842 |
| MmuSTS.1059.1.S1_at | MmuSTS.1059.1 | 10.03 | 9.62  | 0.16 | 0.23 | 1.33  | 0.175156 | 0.084637 | 0.538831 | 0.33618  |
| MmuSTS.106.1.S1_at  | MmuSTS.106.1  | 11.58 | 12.35 | 0.3  | 0.24 | -1.7  | 0.016722 | 0.008927 | 0.265094 | 0.124951 |
| MmuSTS.1060.1.S1_at | MmuSTS.1060.1 | 7.66  | 8.45  | 0.22 | 0.82 | -1.73 | 0.475173 | 0.587018 | 0.745579 | 0.753952 |
| MmuSTS.1061.1.S1_at | MmuSTS.1061.1 | 11.53 | 11.36 | 0.13 | 0.11 | 1.13  | 0.255851 | 0.169535 | 0.603662 | 0.446167 |
| MmuSTS.1062.1.S1_at | MmuSTS.1062.1 | 10.93 | 10.28 | 0.04 | 0.16 | 1.57  | 0.002222 | 0.000136 | 0.159816 | 0.029179 |
| MmuSTS.1063.1.S1_at | MmuSTS.1063.1 | 13.62 | 13.59 | 0.06 | 0.02 | 1.02  | 0.87735  | 0.045471 | 0.95087  | 0.2575   |
| MmuSTS.1064.1.S1_at | MmuSTS.1064.1 | 8.97  | 8.93  | 0.08 | 0.56 | 1.03  | 0.86214  | 0.780986 | 0.944557 | 0.872934 |
| MmuSTS.1065.1.S1_at | MmuSTS.1065.1 | 6.28  | 6.34  | 0.03 | 0.21 | -1.05 | 0.201824 | 0.263511 | 0.564072 | 0.529826 |
| MmuSTS.1066.1.S1_at | MmuSTS.1066.1 | 4.56  | 4.5   | 0.06 | 0.28 | 1.04  | 0.604771 | 0.696604 | 0.817951 | 0.823774 |
| MmuSTS.1067.1.S1_at | MmuSTS.1067.1 | 8.34  | 7.64  | 0.57 | 0.67 | 1.62  | 0.219588 | 0.205259 | 0.579028 | 0.479599 |
| MmuSTS.1068.1.S1_at | MmuSTS.1068.1 | 9.19  | 9.23  | 0.17 | 0.21 | -1.03 | 0.847866 | 0.671188 | 0.939063 | 0.807707 |
| MmuSTS.1069.1.S1_at | MmuSTS.1069.1 | 10.39 | 9.22  | 0.51 | 0.18 | 2.25  | 0.048181 | 0.038229 | 0.367919 | 0.240249 |
| MmuSTS.107.1.S1_at  | MmuSTS.107.1  | 10.09 | 9.47  | 0.26 | 1.13 | 1.54  | 0.376261 | 0.489689 | 0.685094 | 0.691862 |
| MmuSTS.1070.1.S1_at | MmuSTS.1070.1 | 3.35  | 3.36  | 0.08 | 0.12 | -1    | 0.433438 | 0.604163 | 0.71999  | 0.764542 |
| MmuSTS.1071.1.S1_at | MmuSTS.1071.1 | 10.09 | 8.9   | 0.19 | 1.08 | 2.28  | 0.500262 | 0.633055 | 0.759451 | 0.783905 |
| MmuSTS.1072.1.S1_at | MmuSTS.1072.1 | 6.51  | 6.2   | 0.24 | 0.23 | 1.24  | 0.478235 | 0.227161 | 0.747114 | 0.499517 |
| MmuSTS.1073.1.S1_at | MmuSTS.1073.1 | 7.88  | 7.12  | 0.18 | 0.68 | 1.69  | 0.428406 | 0.593921 | 0.71683  | 0.758442 |
| MmuSTS.1074.1.S1_at | MmuSTS.1074.1 | 6.32  | 6.48  | 0.15 | 0.1  | -1.12 | 0.351434 | 0.41685  | 0.669126 | 0.641776 |
| MmuSTS.1075.1.S1_at | MmuSTS.1075.1 | 11.44 | 11.5  | 0.09 | 0.34 | -1.04 | 0.673032 | 0.703738 | 0.853341 | 0.828214 |
| MmuSTS.1076.1.S1_at | MmuSTS.1076.1 | 6.05  | 6.71  | 0.31 | 0.48 | -1.57 | 0.083669 | 0.071351 | 0.435945 | 0.313391 |
| MmuSTS.1077.1.S1_at | MmuSTS.1077.1 | 6.26  | 5.61  | 0.29 | 0.63 | 1.57  | 0.089619 | 0.168104 | 0.445276 | 0.444698 |
| MmuSTS.1078.1.S1_at | MmuSTS.1078.1 | 5.84  | 5.95  | 0.22 | 0.12 | -1.07 | 0.402029 | 0.068645 | 0.701135 | 0.308548 |
| MmuSTS.1079.1.S1_at | MmuSTS.1079.1 | 10.54 | 10.21 | 0.12 | 0.65 | 1.26  | 0.379768 | 0.390085 | 0.687063 | 0.624002 |
| MmuSTS.108.1.S1_at  | MmuSTS.108.1  | 8.93  | 8.85  | 0.15 | 0.25 | 1.05  | 0.691085 | 0.736579 | 0.862551 | 0.847627 |
| MmuSTS.1080.1.S1_at | MmuSTS.1080.1 | 6.8   | 6.65  | 0.17 | 0.16 | 1.11  | 0.872679 | 0.568162 | 0.949106 | 0.741859 |
| MmuSTS.1081.1.S1_at | MmuSTS.1081.1 | 5.25  | 7.4   | 1.04 | 1.03 | -4.45 | 0.121673 | 0.140125 | 0.486508 | 0.413394 |
| MmuSTS.1082.1.S1_at | MmuSTS.1082.1 | 5.28  | 5.08  | 0.25 | 0.02 | 1.14  | 0.334802 | 0.484082 | 0.658505 | 0.688318 |
| MmuSTS.1083.1.S1_at | MmuSTS.1083.1 | 3.79  | 3.66  | 0.15 | 0.05 | 1.09  | 0.51298  | 0.493724 | 0.765891 | 0.694316 |
| MmuSTS.1084.1.S1_at | MmuSTS.1084.1 | 5.11  | 5.34  | 0.23 | 0.12 | -1.17 | 0.416447 | 0.470277 | 0.709947 | 0.678582 |
| MmuSTS.1085.1.S1_at | MmuSTS.1085.1 | 6.55  | 6.77  | 0.19 | 0.17 | -1.16 | 0.322475 | 0.427288 | 0.651101 | 0.649175 |
| MmuSTS.1086.1.S1_at | MmuSTS.1086.1 | 9.96  | 10.47 | 0.21 | 0.19 | -1.42 | 0.047983 | 0.045547 | 0.367582 | 0.257596 |
| MmuSTS.1087.1.S1_at | MmuSTS.1087.1 | 10.09 | 9.27  | 0.17 | 0.26 | 1.76  | 0.010412 | 0.005385 | 0.229535 | 0.101199 |
| MmuSTS.1088.1.S1_at | MmuSTS.1088.1 | 7.34  | 8.44  | 0.09 | 0.41 | -2.15 | 0.019789 | 0.00382  | 0.275549 | 0.08794  |
| MmuSTS.1089.1.S1_at | MmuSTS.1089.1 | 12.48 | 11.28 | 0.17 | 1.07 | 2.31  | 0.101047 | 0.081515 | 0.461009 | 0.329764 |
| MmuSTS.109.1.S1_at  | MmuSTS.109.1  | 9.26  | 11.21 | 0.21 | 0.99 | -3.88 | 0.029799 | 0.027043 | 0.315451 | 0.205639 |



|                       |               |       |       |      |      |       |          |          |          |          |
|-----------------------|---------------|-------|-------|------|------|-------|----------|----------|----------|----------|
| MmuSTS.1090.1.S1_at   | MmuSTS.1090.1 | 5.07  | 4.96  | 0.7  | 0.45 | 1.08  | 0.323553 | 0.574895 | 0.65165  | 0.746177 |
| MmuSTS.1091.1.S1_at   | MmuSTS.1091.1 | 7.6   | 7.31  | 0.15 | 0.16 | 1.22  | 0.088491 | 0.054713 | 0.44331  | 0.279379 |
| MmuSTS.1092.1.S1_at   | MmuSTS.1092.1 | 5.78  | 5.72  | 0.19 | 0.15 | 1.04  | 0.726612 | 0.112463 | 0.881097 | 0.377793 |
| MmuSTS.1093.1.S1_at   | MmuSTS.1093.1 | 12.51 | 13    | 0.26 | 0.3  | -1.4  | 0.073417 | 0.042665 | 0.41875  | 0.251037 |
| MmuSTS.1094.1.S1_at   | MmuSTS.1094.1 | 10.35 | 10.57 | 0.16 | 0.28 | -1.17 | 0.11506  | 0.049175 | 0.478382 | 0.266577 |
| MmuSTS.1095.1.S1_at   | MmuSTS.1095.1 | 8.69  | 10.59 | 0.69 | 1.26 | -3.74 | 0.102646 | 0.081132 | 0.462485 | 0.32931  |
| MmuSTS.1096.1.S1_at   | MmuSTS.1096.1 | 7.08  | 6.57  | 0.24 | 0.11 | 1.43  | 0.031803 | 0.036721 | 0.32289  | 0.236221 |
| MmuSTS.1097.1.S1_at   | MmuSTS.1097.1 | 4.32  | 6.44  | 0.23 | 1.61 | -4.37 | 0.08936  | 0.078022 | 0.445032 | 0.324416 |
| MmuSTS.1098.1.S1_at   | MmuSTS.1098.1 | 10.91 | 10.8  | 0.1  | 0.28 | 1.08  | 0.755701 | 0.029238 | 0.896164 | 0.212898 |
| MmuSTS.1099.1.S1_at   | MmuSTS.1099.1 | 10.09 | 8.57  | 0.43 | 0.18 | 2.86  | 0.005409 | 0.001635 | 0.191107 | 0.061167 |
| MmuSTS.11.1.S1_at     | MmuSTS.11.1   | 6.25  | 6.18  | 0.11 | 0.05 | 1.05  | 0.14915  | 0.117052 | 0.514001 | 0.384489 |
| MmuSTS.110.1.S1_at    | MmuSTS.110.1  | 9.73  | 9.81  | 0.15 | 0.12 | -1.05 | 0.713216 | 0.004981 | 0.87436  | 0.098393 |
| MmuSTS.1100.1.S1_at   | MmuSTS.1100.1 | 9.5   | 8.69  | 0.33 | 0.23 | 1.75  | 0.024445 | 0.014144 | 0.294575 | 0.15208  |
| MmuSTS.1101.1.S1_at   | MmuSTS.1101.1 | 7.79  | 7.19  | 0.08 | 0.31 | 1.52  | 0.078932 | 0.078411 | 0.428609 | 0.325189 |
| MmuSTS.1102.1.S1_at   | MmuSTS.1102.1 | 8.21  | 8.07  | 0.04 | 0.26 | 1.1   | 0.306276 | 0.029304 | 0.639466 | 0.21321  |
| MmuSTS.1103.1.S1_at   | MmuSTS.1103.1 | 10.36 | 10.36 | 0.12 | 0.09 | 1     | 0.636014 | 0.747121 | 0.835239 | 0.853124 |
| MmuSTS.1104.1.S1_at   | MmuSTS.1104.1 | 6.99  | 6.9   | 0.18 | 0.48 | 1.07  | 0.846822 | 0.60354  | 0.93848  | 0.764201 |
| MmuSTS.1105.1.S1_at   | MmuSTS.1105.1 | 4.21  | 4.07  | 0.06 | 0.14 | 1.1   | 0.606497 | 0.080715 | 0.818866 | 0.328583 |
| MmuSTS.1106.1.S1_at   | MmuSTS.1106.1 | 9.93  | 10.6  | 0.52 | 1.44 | -1.59 | 0.566583 | 0.613969 | 0.797625 | 0.77098  |
| MmuSTS.1107.1.S1_at   | MmuSTS.1107.1 | 10.71 | 10.66 | 0.14 | 0.25 | 1.03  | 0.534645 | 0.584387 | 0.778804 | 0.75242  |
| MmuSTS.1108.1.S1_at   | MmuSTS.1108.1 | 3.61  | 3.61  | 0.19 | 0.13 | 1     | 0.327284 | 0.374357 | 0.653682 | 0.61282  |
| MmuSTS.1109.1.S1_at   | MmuSTS.1109.1 | 9.59  | 9.96  | 0.27 | 0.06 | -1.3  | 0.111498 | 0.0299   | 0.473707 | 0.214615 |
| MmuSTS.111.1.S1_at    | MmuSTS.111.1  | 4.21  | 4.16  | 0.05 | 0.03 | 1.04  | 0.204313 | 0.90245  | 0.566752 | 0.944564 |
| MmuSTS.1110.1.S1_at   | MmuSTS.1110.1 | 3.99  | 4.29  | 0.01 | 0.23 | -1.23 | 0.135092 | 0.096442 | 0.501995 | 0.35409  |
| MmuSTS.1111.1.S1_at   | MmuSTS.1111.1 | 4.02  | 4.09  | 0.25 | 0.28 | -1.04 | 0.574303 | 0.518601 | 0.801619 | 0.710549 |
| MmuSTS.1112.1.S1_at   | MmuSTS.1112.1 | 7.37  | 6.93  | 0.28 | 0.09 | 1.36  | 0.045288 | 0.093855 | 0.360634 | 0.350298 |
| MmuSTS.1113.1.S1_at   | MmuSTS.1113.1 | 9.22  | 9.4   | 0.13 | 0.69 | -1.13 | 0.728231 | 0.543531 | 0.881826 | 0.726187 |
| MmuSTS.1114.1.S1_at   | MmuSTS.1114.1 | 6.48  | 6.34  | 0.33 | 0.12 | 1.1   | 0.148914 | 0.220968 | 0.51391  | 0.494389 |
| MmuSTS.1115.1.S1_at   | MmuSTS.1115.1 | 3.07  | 4.16  | 0.04 | 0.56 | -2.13 | 0.078751 | 0.06104  | 0.428609 | 0.29389  |
| MmuSTS.1116.1.S1_at   | MmuSTS.1116.1 | 9.54  | 9.76  | 0.29 | 1.82 | -1.17 | 0.453657 | 0.625226 | 0.732829 | 0.779064 |
| MmuSTS.1117.1.S1_at   | MmuSTS.1117.1 | 9.16  | 9.18  | 0.09 | 0.34 | -1.02 | 0.364793 | 0.381332 | 0.677652 | 0.617657 |
| MmuSTS.1118.1.S1_at   | MmuSTS.1118.1 | 7.28  | 7.08  | 0.15 | 0.22 | 1.14  | 0.252553 | 0.258242 | 0.601373 | 0.52558  |
| MmuSTS.1119.1.S1_at   | MmuSTS.1119.1 | 11.17 | 11.48 | 0.13 | 0.59 | -1.23 | 0.419629 | 0.579296 | 0.712008 | 0.74904  |
| MmuSTS.112.1.S1_at    | MmuSTS.112.1  | 5.63  | 6.71  | 0.36 | 0.43 | -2.11 | 0.014331 | 0.001844 | 0.251885 | 0.064452 |
| MmuSTS.1120.1.S1_s_at | MmuSTS.1120.1 | 7.36  | 7.59  | 0.66 | 1.16 | -1.18 | 0.449818 | 0.544276 | 0.730493 | 0.726717 |
| MmuSTS.1121.1.S1_at   | MmuSTS.1121.1 | 8.1   | 6.82  | 0.16 | 0.19 | 2.42  | 0.0006   | 0.000185 | 0.136818 | 0.030511 |
| MmuSTS.1122.1.S1_at   | MmuSTS.1122.1 | 3.99  | 4.03  | 0.13 | 0.1  | -1.03 | 0.644944 | 0.687142 | 0.840031 | 0.817466 |
| MmuSTS.1123.1.S1_at   | MmuSTS.1123.1 | 11.63 | 11.65 | 0.07 | 0.16 | -1.01 | 0.877979 | 0.906073 | 0.951036 | 0.946856 |
| MmuSTS.1124.1.S1_at   | MmuSTS.1124.1 | 8.62  | 9     | 0.14 | 0.12 | -1.31 | 0.007842 | 0.001585 | 0.213476 | 0.060358 |
| MmuSTS.1125.1.S1_at   | MmuSTS.1125.1 | 10.85 | 11.72 | 0.44 | 0.55 | -1.83 | 0.200952 | 0.0963   | 0.563821 | 0.353755 |
| MmuSTS.1126.1.S1_at   | MmuSTS.1126.1 | 3.22  | 3.19  | 0.81 | 0.18 | 1.02  | 0.425101 | 0.38392  | 0.714956 | 0.61978  |

|                       |               |       |       |      |      |        |          |          |          |          |
|-----------------------|---------------|-------|-------|------|------|--------|----------|----------|----------|----------|
| MmuSTS.1127.1.S1_at   | MmuSTS.1127.1 | 5.26  | 7.4   | 0.63 | 1.85 | -4.41  | 0.170795 | 0.105676 | 0.534664 | 0.367779 |
| MmuSTS.1128.1.S1_at   | MmuSTS.1128.1 | 5.18  | 4.81  | 0.43 | 0.31 | 1.3    | 0.36681  | 0.372985 | 0.679209 | 0.611823 |
| MmuSTS.1129.1.S1_at   | MmuSTS.1129.1 | 5.86  | 5.91  | 0.12 | 0.06 | -1.03  | 0.788905 | 0.71806  | 0.912329 | 0.836848 |
| MmuSTS.113.1.S1_at    | MmuSTS.113.1  | 7.5   | 7.29  | 0.61 | 0.14 | 1.16   | 0.525615 | 0.685435 | 0.773828 | 0.81652  |
| MmuSTS.1130.1.S1_at   | MmuSTS.1130.1 | 7.36  | 6.48  | 0.95 | 0.76 | 1.84   | 0.317771 | 0.375887 | 0.64802  | 0.613746 |
| MmuSTS.1131.1.S1_at   | MmuSTS.1131.1 | 6.32  | 5.38  | 0.53 | 0.82 | 1.93   | 0.254599 | 0.338851 | 0.602505 | 0.585891 |
| MmuSTS.1132.1.S1_s_at | MmuSTS.1132.1 | 3.49  | 3.56  | 0.05 | 0.22 | -1.05  | 0.42727  | 0.348449 | 0.716187 | 0.592593 |
| MmuSTS.1133.1.S1_at   | MmuSTS.1133.1 | 7.26  | 8.3   | 0.21 | 0.54 | -2.07  | 0.012342 | 0.010583 | 0.240921 | 0.134213 |
| MmuSTS.1134.1.S1_at   | MmuSTS.1134.1 | 10.83 | 10.77 | 0.07 | 0.02 | 1.04   | 0.134771 | 0.265705 | 0.501738 | 0.531561 |
| MmuSTS.1135.1.S1_at   | MmuSTS.1135.1 | 9.46  | 9.85  | 0.39 | 0.26 | -1.31  | 0.101433 | 0.110662 | 0.461313 | 0.374854 |
| MmuSTS.1136.1.S1_at   | MmuSTS.1136.1 | 5.5   | 9.13  | 1.82 | 3.05 | -12.35 | 0.424802 | 0.244896 | 0.714786 | 0.514728 |
| MmuSTS.1137.1.S1_at   | MmuSTS.1137.1 | 11.12 | 10.73 | 0.21 | 0.19 | 1.31   | 0.069186 | 0.037198 | 0.411374 | 0.237285 |
| MmuSTS.1138.1.S1_at   | MmuSTS.1138.1 | 5.58  | 5.75  | 0.06 | 0.24 | -1.12  | 0.299452 | 0.380717 | 0.634948 | 0.61738  |
| MmuSTS.1139.1.S1_at   | MmuSTS.1139.1 | 7.05  | 6.82  | 0.48 | 0.05 | 1.18   | 0.931112 | 0.118401 | 0.97337  | 0.3864   |
| MmuSTS.114.1.S1_at    | MmuSTS.114.1  | 11.95 | 10.59 | 0.41 | 0.78 | 2.55   | 0.057717 | 0.048386 | 0.388935 | 0.265126 |
| MmuSTS.1140.1.S1_at   | MmuSTS.1140.1 | 4.51  | 4.87  | 0.14 | 0.18 | -1.29  | 0.197599 | 0.250258 | 0.560593 | 0.519282 |
| MmuSTS.1141.1.S1_at   | MmuSTS.1141.1 | 4.18  | 4.35  | 0.21 | 0.08 | -1.12  | 0.476524 | 0.647539 | 0.746246 | 0.793531 |
| MmuSTS.1142.1.S1_at   | MmuSTS.1142.1 | 10.17 | 9.66  | 0.33 | 0.3  | 1.42   | 0.479628 | 0.081282 | 0.74773  | 0.329351 |
| MmuSTS.1143.1.S1_at   | MmuSTS.1143.1 | 5.46  | 5.93  | 0.37 | 0.36 | -1.39  | 0.160338 | 0.049528 | 0.525289 | 0.267481 |
| MmuSTS.1144.1.S1_at   | MmuSTS.1144.1 | 6.96  | 8.37  | 0.3  | 0.72 | -2.66  | 0.024986 | 0.015072 | 0.297401 | 0.1559   |
| MmuSTS.1145.1.S1_at   | MmuSTS.1145.1 | 11.92 | 11.59 | 0.18 | 0.31 | 1.26   | 0.17308  | 0.042685 | 0.536812 | 0.251049 |
| MmuSTS.1146.1.S1_at   | MmuSTS.1146.1 | 7.41  | 6.91  | 0.12 | 0.51 | 1.42   | 0.671858 | 0.726761 | 0.852716 | 0.841963 |
| MmuSTS.1147.1.S1_at   | MmuSTS.1147.1 | 5.78  | 5.52  | 0.12 | 0.06 | 1.2    | 0.07289  | 0.169323 | 0.41816  | 0.445925 |
| MmuSTS.1148.1.S1_at   | MmuSTS.1148.1 | 9.42  | 8.82  | 0.1  | 0.11 | 1.52   | 0.001339 | 0.000137 | 0.146228 | 0.029184 |
| MmuSTS.1149.1.S1_at   | MmuSTS.1149.1 | 9.91  | 9.61  | 0.34 | 0.14 | 1.23   | 0.30828  | 0.25177  | 0.64064  | 0.520444 |
| MmuSTS.115.1.S1_s_at  | MmuSTS.115.1  | 11.07 | 10.64 | 0.2  | 0.33 | 1.34   | 0.06653  | 0.053251 | 0.406564 | 0.276449 |
| MmuSTS.1150.1.S1_at   | MmuSTS.1150.1 | 8.66  | 7     | 0.25 | 0.74 | 3.16   | 0.023187 | 0.014095 | 0.290295 | 0.15195  |
| MmuSTS.1151.1.S1_at   | MmuSTS.1151.1 | 7.4   | 7.02  | 0.1  | 0.08 | 1.31   | 0.005263 | 0.008902 | 0.191107 | 0.124825 |
| MmuSTS.1152.1.S1_at   | MmuSTS.1152.1 | 11.6  | 11.61 | 0.36 | 0.18 | -1.01  | 0.294489 | 0.366768 | 0.631245 | 0.6065   |
| MmuSTS.1153.1.S1_at   | MmuSTS.1153.1 | 5.85  | 4.04  | 0.6  | 0.12 | 3.52   | 0.01365  | 0.006011 | 0.248684 | 0.106068 |
| MmuSTS.1154.1.S1_at   | MmuSTS.1154.1 | 5.05  | 5.15  | 0.12 | 0.21 | -1.07  | 0.872336 | 0.97591  | 0.948981 | 0.986856 |
| MmuSTS.1155.1.S1_at   | MmuSTS.1155.1 | 3.88  | 4.15  | 0.41 | 0.32 | -1.21  | 0.22924  | 0.286079 | 0.586472 | 0.547578 |
| MmuSTS.1156.1.S1_at   | MmuSTS.1156.1 | 5.19  | 4.89  | 0.29 | 0.52 | 1.23   | 0.851716 | 0.606246 | 0.940352 | 0.765727 |
| MmuSTS.1157.1.S1_at   | MmuSTS.1157.1 | 4.95  | 4.65  | 0.31 | 0.11 | 1.23   | 0.14701  | 0.207581 | 0.51306  | 0.481898 |
| MmuSTS.1158.1.S1_at   | MmuSTS.1158.1 | 10.64 | 10.69 | 0.24 | 0.11 | -1.04  | 0.262994 | 0.328972 | 0.609142 | 0.578482 |
| MmuSTS.1159.1.S1_at   | MmuSTS.1159.1 | 5.84  | 5.65  | 0.06 | 0.21 | 1.14   | 0.182075 | 0.232063 | 0.546458 | 0.503781 |
| MmuSTS.116.1.S1_at    | MmuSTS.116.1  | 10.86 | 10.17 | 0.24 | 0.07 | 1.61   | 0.0049   | 0.001792 | 0.185568 | 0.063581 |
| MmuSTS.1160.1.S1_at   | MmuSTS.1160.1 | 8.91  | 8.58  | 0.08 | 0.26 | 1.26   | 0.164914 | 0.004951 | 0.528821 | 0.098015 |
| MmuSTS.1161.1.S1_at   | MmuSTS.1161.1 | 11.24 | 10.5  | 0.03 | 0.87 | 1.67   | 0.183825 | 0.221732 | 0.547947 | 0.494901 |
| MmuSTS.1162.1.S1_at   | MmuSTS.1162.1 | 12.18 | 11.57 | 0.05 | 0.39 | 1.53   | 0.054614 | 0.034691 | 0.382    | 0.230454 |
| MmuSTS.1163.1.S1_at   | MmuSTS.1163.1 | 4.9   | 5.02  | 0.2  | 0.27 | -1.09  | 0.225601 | 0.248698 | 0.583707 | 0.517917 |

|                       |               |       |       |      |      |       |          |          |          |          |
|-----------------------|---------------|-------|-------|------|------|-------|----------|----------|----------|----------|
| MmuSTS.1164.1.S1_at   | MmuSTS.1164.1 | 8.34  | 9.91  | 0.16 | 0.61 | -2.96 | 0.006365 | 0.004991 | 0.198874 | 0.098466 |
| MmuSTS.1165.1.S1_at   | MmuSTS.1165.1 | 8.81  | 8.43  | 0.17 | 0.23 | 1.3   | 0.186992 | 0.323178 | 0.550106 | 0.574396 |
| MmuSTS.1166.1.S1_at   | MmuSTS.1166.1 | 4.16  | 4.27  | 0.2  | 0.11 | -1.08 | 0.332725 | 0.095716 | 0.656938 | 0.352735 |
| MmuSTS.1167.1.S1_at   | MmuSTS.1167.1 | 6.44  | 6.43  | 0.07 | 0.22 | 1.01  | 0.518245 | 0.699898 | 0.769342 | 0.825803 |
| MmuSTS.1168.1.S1_at   | MmuSTS.1168.1 | 7.05  | 8.54  | 0.37 | 1.34 | -2.8  | 0.160408 | 0.127251 | 0.525374 | 0.397935 |
| MmuSTS.1169.1.S1_at   | MmuSTS.1169.1 | 7.7   | 7.6   | 0.09 | 0.34 | 1.08  | 0.887229 | 0.980124 | 0.954863 | 0.989236 |
| MmuSTS.117.1.S1_at    | MmuSTS.117.1  | 8.95  | 8.96  | 0.1  | 0.24 | -1.01 | 0.676159 | 0.125834 | 0.854837 | 0.396315 |
| MmuSTS.1170.1.S1_at   | MmuSTS.1170.1 | 6.47  | 6.68  | 0.05 | 0.29 | -1.16 | 0.131965 | 0.176426 | 0.498114 | 0.45282  |
| MmuSTS.1171.1.S1_at   | MmuSTS.1171.1 | 4.64  | 4.7   | 0.18 | 0.49 | -1.04 | 0.551152 | 0.717952 | 0.788457 | 0.836759 |
| MmuSTS.1172.1.S1_at   | MmuSTS.1172.1 | 12.64 | 12.5  | 0.07 | 0.23 | 1.1   | 0.262633 | 0.247031 | 0.609039 | 0.516238 |
| MmuSTS.1173.1.S1_at   | MmuSTS.1173.1 | 8.75  | 8.33  | 0.07 | 0.42 | 1.34  | 0.053424 | 0.029109 | 0.380257 | 0.212733 |
| MmuSTS.1174.1.S1_at   | MmuSTS.1174.1 | 11.87 | 12.22 | 0.1  | 0.18 | -1.27 | 0.016862 | 0.021881 | 0.266096 | 0.185137 |
| MmuSTS.1175.1.S1_at   | MmuSTS.1175.1 | 3.37  | 3.38  | 0.03 | 0.05 | -1    | 0.515606 | 0.826821 | 0.767629 | 0.900529 |
| MmuSTS.1176.1.S1_at   | MmuSTS.1176.1 | 5.29  | 5.5   | 0.07 | 0.19 | -1.16 | 0.526857 | 0.530191 | 0.774384 | 0.717779 |
| MmuSTS.1177.1.S1_at   | MmuSTS.1177.1 | 3.7   | 3.75  | 0.21 | 0.03 | -1.04 | 0.828671 | 0.58357  | 0.930492 | 0.751826 |
| MmuSTS.1178.1.S1_at   | MmuSTS.1178.1 | 4.46  | 4.37  | 0.22 | 0.05 | 1.06  | 0.564066 | 0.690415 | 0.796391 | 0.81956  |
| MmuSTS.1179.1.S1_s_at | MmuSTS.1179.1 | 2.91  | 2.92  | 0.04 | 0.05 | -1    | 0.793305 | 0.782524 | 0.914348 | 0.874147 |
| MmuSTS.118.1.S1_at    | MmuSTS.118.1  | 11.26 | 10.37 | 0.38 | 0.67 | 1.85  | 0.150137 | 0.187495 | 0.514719 | 0.463586 |
| MmuSTS.1180.1.S1_at   | MmuSTS.1180.1 | 10.91 | 10.72 | 0.23 | 0.16 | 1.14  | 0.826525 | 0.167375 | 0.929552 | 0.443785 |
| MmuSTS.1181.1.S1_at   | MmuSTS.1181.1 | 8.24  | 8.21  | 0.09 | 0.1  | 1.02  | 0.841539 | 0.003616 | 0.936214 | 0.086033 |
| MmuSTS.1182.1.S1_at   | MmuSTS.1182.1 | 10.56 | 10.32 | 0.33 | 0.01 | 1.18  | 0.784062 | 0.861946 | 0.909937 | 0.921546 |
| MmuSTS.1183.1.S1_at   | MmuSTS.1183.1 | 12.36 | 10.65 | 0.09 | 1.33 | 3.28  | 0.10116  | 0.05258  | 0.461009 | 0.274848 |
| MmuSTS.1184.1.S1_at   | MmuSTS.1184.1 | 9.03  | 8.63  | 0.12 | 1.21 | 1.31  | 0.606348 | 0.314703 | 0.818806 | 0.568449 |
| MmuSTS.1185.1.S1_at   | MmuSTS.1185.1 | 7.63  | 8.56  | 0.66 | 1.2  | -1.91 | 0.330222 | 0.297264 | 0.655613 | 0.556067 |
| MmuSTS.1186.1.S1_at   | MmuSTS.1186.1 | 10.96 | 10.41 | 0.17 | 0.64 | 1.47  | 0.399203 | 0.390074 | 0.699174 | 0.624002 |
| MmuSTS.1187.1.S1_at   | MmuSTS.1187.1 | 7.12  | 8.24  | 0.86 | 0.64 | -2.18 | 0.495867 | 0.491481 | 0.757324 | 0.693004 |
| MmuSTS.1188.1.S1_at   | MmuSTS.1188.1 | 7.76  | 10.58 | 0.75 | 0.29 | -7.08 | 0.004364 | 0.001368 | 0.183061 | 0.056902 |
| MmuSTS.1189.1.S1_at   | MmuSTS.1189.1 | 6.25  | 7.57  | 1.08 | 0.43 | -2.49 | 0.15266  | 0.176466 | 0.517325 | 0.452836 |
| MmuSTS.119.1.S1_at    | MmuSTS.119.1  | 10.57 | 10.38 | 0.16 | 0.05 | 1.14  | 0.044142 | 0.03027  | 0.358075 | 0.215828 |
| MmuSTS.1190.1.S1_at   | MmuSTS.1190.1 | 8.46  | 8.25  | 0.12 | 0.56 | 1.15  | 0.606652 | 0.79729  | 0.818943 | 0.883122 |
| MmuSTS.1191.1.S1_at   | MmuSTS.1191.1 | 8.37  | 7.51  | 0.3  | 0.3  | 1.81  | 0.046742 | 0.059837 | 0.363894 | 0.291286 |
| MmuSTS.1192.1.S1_at   | MmuSTS.1192.1 | 10.42 | 10.39 | 0.19 | 0.88 | 1.02  | 0.95142  | 0.891699 | 0.981784 | 0.938272 |
| MmuSTS.1193.1.S1_at   | MmuSTS.1193.1 | 12.17 | 12.77 | 0.6  | 0.25 | -1.51 | 0.072575 | 0.076876 | 0.417185 | 0.322368 |
| MmuSTS.1194.1.S1_at   | MmuSTS.1194.1 | 8.92  | 9.64  | 0.14 | 0.06 | -1.64 | 0.001229 | 0.000132 | 0.145267 | 0.029087 |
| MmuSTS.1195.1.S1_at   | MmuSTS.1195.1 | 5.1   | 5.19  | 0.14 | 0.31 | -1.07 | 0.26186  | 0.407551 | 0.60844  | 0.63505  |
| MmuSTS.1196.1.S1_at   | MmuSTS.1196.1 | 4.17  | 4.74  | 0.15 | 0.59 | -1.48 | 0.14377  | 0.127203 | 0.510387 | 0.397935 |
| MmuSTS.1197.1.S1_s_at | MmuSTS.1197.1 | 4.45  | 4.46  | 0.02 | 0.04 | -1.01 | 0.92329  | 0.353454 | 0.970199 | 0.596547 |
| MmuSTS.1198.1.S1_at   | MmuSTS.1198.1 | 6.24  | 6.11  | 0.19 | 0.03 | 1.09  | 0.883273 | 0.701435 | 0.953021 | 0.826841 |
| MmuSTS.1199.1.S1_at   | MmuSTS.1199.1 | 3.25  | 3.3   | 0.06 | 0.16 | -1.04 | 0.135755 | 0.127125 | 0.502654 | 0.397922 |
| MmuSTS.12.1.S1_at     | MmuSTS.12.1   | 7.41  | 7.2   | 0.29 | 0.19 | 1.15  | 0.871136 | 0.545343 | 0.948463 | 0.727505 |
| MmuSTS.120.1.S1_at    | MmuSTS.120.1  | 7.06  | 6.91  | 0.5  | 0.5  | 1.1   | 0.773888 | 0.428062 | 0.904999 | 0.649619 |

|                     |               |       |       |      |      |       |          |          |          |          |
|---------------------|---------------|-------|-------|------|------|-------|----------|----------|----------|----------|
| MmuSTS.1200.1.S1_at | MmuSTS.1200.1 | 6.95  | 8.54  | 0.42 | 1.41 | -3.01 | 0.147096 | 0.096812 | 0.51306  | 0.354207 |
| MmuSTS.1201.1.S1_at | MmuSTS.1201.1 | 9.77  | 9.03  | 0.1  | 0.27 | 1.68  | 0.008342 | 0.002974 | 0.217705 | 0.079958 |
| MmuSTS.1202.1.S1_at | MmuSTS.1202.1 | 8.05  | 7.6   | 0.19 | 0.17 | 1.37  | 0.05099  | 0.034914 | 0.375705 | 0.231062 |
| MmuSTS.1203.1.S1_at | MmuSTS.1203.1 | 12.86 | 12.56 | 0.25 | 0.58 | 1.23  | 0.62242  | 0.674769 | 0.827386 | 0.810023 |
| MmuSTS.1204.1.S1_at | MmuSTS.1204.1 | 5.95  | 8.2   | 0.87 | 0.85 | -4.76 | 0.061334 | 0.049829 | 0.395541 | 0.268305 |
| MmuSTS.1205.1.S1_at | MmuSTS.1205.1 | 3.46  | 3.65  | 0.04 | 0.11 | -1.14 | 0.091405 | 0.062677 | 0.447175 | 0.29706  |
| MmuSTS.1206.1.S1_at | MmuSTS.1206.1 | 4.29  | 4.32  | 0.32 | 0.14 | -1.02 | 0.984088 | 0.640082 | 0.99433  | 0.78869  |
| MmuSTS.1207.1.S1_at | MmuSTS.1207.1 | 4.83  | 4.79  | 0.25 | 0.13 | 1.02  | 0.704363 | 0.342836 | 0.869588 | 0.588712 |
| MmuSTS.1208.1.S1_at | MmuSTS.1208.1 | 7.32  | 8.06  | 0.19 | 0.16 | -1.67 | 0.011235 | 0.014068 | 0.234875 | 0.151858 |
| MmuSTS.1209.1.S1_at | MmuSTS.1209.1 | 9.91  | 10.27 | 0.14 | 0.29 | -1.28 | 0.101157 | 0.119248 | 0.461009 | 0.387751 |
| MmuSTS.121.1.S1_at  | MmuSTS.121.1  | 10.59 | 10.92 | 0.09 | 0.41 | -1.25 | 0.300633 | 0.375024 | 0.635955 | 0.613186 |
| MmuSTS.1210.1.S1_at | MmuSTS.1210.1 | 7.25  | 7.16  | 0.1  | 0.1  | 1.06  | 0.070343 | 0.079392 | 0.414002 | 0.32676  |
| MmuSTS.1211.1.S1_at | MmuSTS.1211.1 | 7.44  | 7.59  | 1.04 | 0.34 | -1.11 | 0.366613 | 0.195594 | 0.679152 | 0.470441 |
| MmuSTS.1212.1.S1_at | MmuSTS.1212.1 | 4.57  | 4.5   | 0.08 | 0.13 | 1.05  | 0.692896 | 0.562078 | 0.86373  | 0.737747 |
| MmuSTS.1213.1.S1_at | MmuSTS.1213.1 | 5.83  | 5.83  | 0.15 | 0.21 | -1    | 0.922427 | 0.867781 | 0.969928 | 0.924867 |
| MmuSTS.1214.1.S1_at | MmuSTS.1214.1 | 4.49  | 4.26  | 0.2  | 0.22 | 1.18  | 0.232137 | 0.325073 | 0.587814 | 0.575545 |
| MmuSTS.1215.1.S1_at | MmuSTS.1215.1 | 9.96  | 9.53  | 0.13 | 0.13 | 1.35  | 0.016945 | 0.003824 | 0.266211 | 0.08794  |
| MmuSTS.1216.1.S1_at | MmuSTS.1216.1 | 5.47  | 5.48  | 0.1  | 0.12 | -1.01 | 0.936245 | 0.926755 | 0.975282 | 0.958404 |
| MmuSTS.1217.1.S1_at | MmuSTS.1217.1 | 11.25 | 11.26 | 0.07 | 0.22 | -1    | 0.616516 | 0.673194 | 0.824231 | 0.809066 |
| MmuSTS.1218.1.S1_at | MmuSTS.1218.1 | 4.91  | 5.42  | 0.11 | 0.3  | -1.43 | 0.127754 | 0.193222 | 0.494052 | 0.468578 |
| MmuSTS.1219.1.S1_at | MmuSTS.1219.1 | 4.12  | 4.04  | 0.07 | 0.09 | 1.06  | 0.235584 | 0.239059 | 0.589497 | 0.509827 |
| MmuSTS.122.1.S1_at  | MmuSTS.122.1  | 7.43  | 6.44  | 0.31 | 1.59 | 1.99  | 0.374373 | 0.242463 | 0.683612 | 0.512835 |
| MmuSTS.1220.1.S1_at | MmuSTS.1220.1 | 12.85 | 12.42 | 0.1  | 0.39 | 1.35  | 0.049494 | 0.03936  | 0.371515 | 0.243406 |
| MmuSTS.1221.1.S1_at | MmuSTS.1221.1 | 3.14  | 3.31  | 0.17 | 0.06 | -1.13 | 0.743237 | 0.778809 | 0.890118 | 0.871617 |
| MmuSTS.1222.1.S1_at | MmuSTS.1222.1 | 7.99  | 7.84  | 2.14 | 0.78 | 1.11  | 0.811329 | 0.939736 | 0.923139 | 0.965752 |
| MmuSTS.1223.1.S1_at | MmuSTS.1223.1 | 10.83 | 11.78 | 0.51 | 0.4  | -1.93 | 0.1564   | 0.001641 | 0.521151 | 0.06124  |
| MmuSTS.1224.1.S1_at | MmuSTS.1224.1 | 5.08  | 5.22  | 0.6  | 0.14 | -1.1  | 0.619368 | 0.468411 | 0.825506 | 0.677714 |
| MmuSTS.1225.1.S1_at | MmuSTS.1225.1 | 6.54  | 6.94  | 0.45 | 1.13 | -1.32 | 0.981482 | 0.028364 | 0.993316 | 0.21025  |
| MmuSTS.1226.1.S1_at | MmuSTS.1226.1 | 7.17  | 10.15 | 1.93 | 2.23 | -7.86 | 0.485834 | 0.422501 | 0.751144 | 0.645729 |
| MmuSTS.1227.1.S1_at | MmuSTS.1227.1 | 10.4  | 10.63 | 0.17 | 0.29 | -1.17 | 0.28751  | 0.320136 | 0.625987 | 0.572472 |
| MmuSTS.1228.1.S1_at | MmuSTS.1228.1 | 10.54 | 10.51 | 0.34 | 0.39 | 1.02  | 0.578637 | 0.406934 | 0.803905 | 0.634629 |
| MmuSTS.1229.1.S1_at | MmuSTS.1229.1 | 4.14  | 3.75  | 0.3  | 0.44 | 1.31  | 0.281993 | 0.420471 | 0.62254  | 0.644171 |
| MmuSTS.123.1.S1_at  | MmuSTS.123.1  | 11.01 | 10.54 | 0.13 | 0.59 | 1.38  | 0.296353 | 0.275863 | 0.632368 | 0.540035 |
| MmuSTS.1230.1.S1_at | MmuSTS.1230.1 | 3.94  | 3.94  | 0.23 | 0.14 | 1     | 0.453036 | 0.584498 | 0.732285 | 0.752435 |
| MmuSTS.1231.1.S1_at | MmuSTS.1231.1 | 11.09 | 11.18 | 0.06 | 0.14 | -1.06 | 0.53705  | 0.023399 | 0.779741 | 0.191765 |
| MmuSTS.1232.1.S1_at | MmuSTS.1232.1 | 8.73  | 7.85  | 0.71 | 0.72 | 1.85  | 0.481529 | 0.748724 | 0.749268 | 0.853837 |
| MmuSTS.1233.1.S1_at | MmuSTS.1233.1 | 9.52  | 8.62  | 0.19 | 0.48 | 1.86  | 0.039408 | 0.036629 | 0.347121 | 0.235943 |
| MmuSTS.1234.1.S1_at | MmuSTS.1234.1 | 8.88  | 8.28  | 0.12 | 0.62 | 1.52  | 0.152899 | 0.139016 | 0.517325 | 0.412153 |
| MmuSTS.1235.1.S1_at | MmuSTS.1235.1 | 8.63  | 8.48  | 0.27 | 0.4  | 1.11  | 0.251574 | 0.317768 | 0.600969 | 0.570922 |
| MmuSTS.1236.1.S1_at | MmuSTS.1236.1 | 7.38  | 7.68  | 0.21 | 0.63 | -1.23 | 0.441172 | 0.056296 | 0.724743 | 0.283274 |
| MmuSTS.1237.1.S1_at | MmuSTS.1237.1 | 9.94  | 8.02  | 1.13 | 0.85 | 3.79  | 0.197066 | 0.239583 | 0.560042 | 0.510247 |

|                       |               |       |       |      |      |       |          |          |          |          |
|-----------------------|---------------|-------|-------|------|------|-------|----------|----------|----------|----------|
| MmuSTS.1238.1.S1_at   | MmuSTS.1238.1 | 7.08  | 7.86  | 0.58 | 0.63 | -1.71 | 0.414751 | 0.069464 | 0.709338 | 0.309778 |
| MmuSTS.1239.1.S1_at   | MmuSTS.1239.1 | 4.82  | 5.72  | 0.93 | 1.21 | -1.86 | 0.35595  | 0.248699 | 0.671303 | 0.517917 |
| MmuSTS.124.1.S1_at    | MmuSTS.124.1  | 6.64  | 6.66  | 0.46 | 0.14 | -1.01 | 0.36564  | 0.484625 | 0.678363 | 0.68858  |
| MmuSTS.1240.1.S1_at   | MmuSTS.1240.1 | 12.37 | 12.3  | 0.05 | 0.15 | 1.05  | 0.518635 | 0.124556 | 0.769592 | 0.394987 |
| MmuSTS.1241.1.S1_at   | MmuSTS.1241.1 | 9.33  | 9     | 0.11 | 0.06 | 1.26  | 0.01021  | 0.006501 | 0.228247 | 0.109521 |
| MmuSTS.1242.1.S1_s_at | MmuSTS.1242.1 | 5.14  | 5.19  | 0.06 | 0.04 | -1.04 | 0.195887 | 0.301023 | 0.558998 | 0.559198 |
| MmuSTS.1243.1.S1_at   | MmuSTS.1243.1 | 3.46  | 3.54  | 0.1  | 0.21 | -1.06 | 0.594112 | 0.706425 | 0.811686 | 0.829634 |
| MmuSTS.1244.1.S1_at   | MmuSTS.1244.1 | 10.46 | 10.19 | 0.54 | 0.35 | 1.21  | 0.9412   | 0.820337 | 0.977671 | 0.89648  |
| MmuSTS.1245.1.S1_at   | MmuSTS.1245.1 | 7.01  | 8.99  | 0.22 | 0.5  | -3.94 | 0.003698 | 0.002047 | 0.179515 | 0.066887 |
| MmuSTS.1246.1.S1_at   | MmuSTS.1246.1 | 7.77  | 8.45  | 0.32 | 0.85 | -1.61 | 0.375164 | 0.415139 | 0.684418 | 0.640713 |
| MmuSTS.1247.1.S1_at   | MmuSTS.1247.1 | 6.51  | 6.64  | 0.17 | 0.28 | -1.09 | 0.235815 | 0.321426 | 0.589657 | 0.573207 |
| MmuSTS.1248.1.S1_at   | MmuSTS.1248.1 | 9.07  | 8.76  | 0.45 | 0.06 | 1.24  | 0.326659 | 0.316033 | 0.653184 | 0.569488 |
| MmuSTS.1249.1.S1_at   | MmuSTS.1249.1 | 11.09 | 10.87 | 0.16 | 0.16 | 1.17  | 0.249622 | 0.147618 | 0.600196 | 0.421901 |
| MmuSTS.125.1.S1_at    | MmuSTS.125.1  | 4.59  | 4.33  | 0.65 | 0.36 | 1.2   | 0.124215 | 0.185776 | 0.489984 | 0.461631 |
| MmuSTS.1250.1.S1_at   | MmuSTS.1250.1 | 8.18  | 8.49  | 0.13 | 0.7  | -1.24 | 0.534742 | 0.2218   | 0.778804 | 0.494948 |
| MmuSTS.1251.1.S1_at   | MmuSTS.1251.1 | 4.84  | 4.79  | 0.25 | 0.17 | 1.03  | 0.999288 | 0.00587  | 0.999768 | 0.104856 |
| MmuSTS.1252.1.S1_at   | MmuSTS.1252.1 | 6.24  | 6.36  | 0.13 | 0.05 | -1.09 | 0.593167 | 0.545506 | 0.81131  | 0.727564 |
| MmuSTS.1253.1.S1_at   | MmuSTS.1253.1 | 11.2  | 10.23 | 0.15 | 0.12 | 1.96  | 0.00103  | 0.001279 | 0.142474 | 0.055351 |
| MmuSTS.1254.1.S1_at   | MmuSTS.1254.1 | 6.56  | 6.73  | 0.03 | 0.17 | -1.12 | 0.642409 | 0.553432 | 0.838763 | 0.732583 |
| MmuSTS.1255.1.S1_at   | MmuSTS.1255.1 | 6.24  | 6.16  | 0.34 | 0.31 | 1.06  | 0.389111 | 0.307349 | 0.692939 | 0.563634 |
| MmuSTS.1256.1.S1_at   | MmuSTS.1256.1 | 3.39  | 3.42  | 0.17 | 0.12 | -1.02 | 0.838364 | 0.726324 | 0.934652 | 0.841617 |
| MmuSTS.1257.1.S1_at   | MmuSTS.1257.1 | 10.27 | 10.28 | 0.18 | 0.3  | -1    | 0.699419 | 0.369201 | 0.866851 | 0.608669 |
| MmuSTS.1258.1.S1_at   | MmuSTS.1258.1 | 6.6   | 7.69  | 0.62 | 1.29 | -2.12 | 0.456745 | 0.177686 | 0.734529 | 0.454073 |
| MmuSTS.1259.1.S1_at   | MmuSTS.1259.1 | 6.95  | 6.85  | 0.44 | 0.31 | 1.08  | 0.35763  | 0.294682 | 0.672471 | 0.554326 |
| MmuSTS.126.1.S1_at    | MmuSTS.126.1  | 5.4   | 5.6   | 0.15 | 0.1  | -1.15 | 0.249473 | 0.384791 | 0.600196 | 0.620428 |
| MmuSTS.1260.1.S1_at   | MmuSTS.1260.1 | 4.66  | 4.94  | 0.13 | 0.47 | -1.21 | 0.129436 | 0.130381 | 0.495636 | 0.402234 |
| MmuSTS.1261.1.S1_at   | MmuSTS.1261.1 | 7.75  | 9.4   | 0.85 | 0.92 | -3.14 | 0.093191 | 0.060606 | 0.450408 | 0.292783 |
| MmuSTS.1262.1.S1_at   | MmuSTS.1262.1 | 8.19  | 8.36  | 0.17 | 0.07 | -1.12 | 0.366983 | 0.227253 | 0.679267 | 0.499574 |
| MmuSTS.1263.1.S1_at   | MmuSTS.1263.1 | 6.09  | 5.9   | 0.2  | 0.11 | 1.14  | 0.417153 | 0.50996  | 0.710385 | 0.704535 |
| MmuSTS.1264.1.S1_at   | MmuSTS.1264.1 | 8.49  | 7.67  | 0.06 | 0.37 | 1.77  | 0.03805  | 0.029852 | 0.343416 | 0.214481 |
| MmuSTS.1265.1.S1_at   | MmuSTS.1265.1 | 5.73  | 5.34  | 0.08 | 0.09 | 1.31  | 0.004092 | 0.003981 | 0.181739 | 0.089711 |
| MmuSTS.1266.1.S1_s_at | MmuSTS.1266.1 | 8.39  | 8.55  | 0.51 | 0.92 | -1.12 | 0.963769 | 0.44721  | 0.985982 | 0.663391 |
| MmuSTS.1267.1.S1_at   | MmuSTS.1267.1 | 4.46  | 4.51  | 0.12 | 0.03 | -1.03 | 0.183564 | 0.365708 | 0.54773  | 0.605684 |
| MmuSTS.1268.1.S1_at   | MmuSTS.1268.1 | 9.94  | 10.37 | 0.14 | 0.98 | -1.35 | 0.467841 | 0.143617 | 0.740845 | 0.417526 |
| MmuSTS.1269.1.S1_at   | MmuSTS.1269.1 | 6.85  | 6.96  | 0.09 | 0.16 | -1.07 | 0.298002 | 0.384286 | 0.633653 | 0.619994 |
| MmuSTS.127.1.S1_at    | MmuSTS.127.1  | 6.62  | 6.71  | 0.2  | 0.06 | -1.06 | 0.779762 | 0.904283 | 0.908216 | 0.945683 |
| MmuSTS.1270.1.S1_at   | MmuSTS.1270.1 | 4.72  | 5.09  | 0.13 | 0.41 | -1.29 | 0.113526 | 0.110973 | 0.476916 | 0.375405 |
| MmuSTS.1271.1.S1_at   | MmuSTS.1271.1 | 10.97 | 10.42 | 0.31 | 1.75 | 1.47  | 0.600027 | 0.627085 | 0.815049 | 0.780185 |
| MmuSTS.1272.1.S1_at   | MmuSTS.1272.1 | 8.76  | 8.74  | 0.28 | 0.79 | 1.02  | 0.778044 | 0.823904 | 0.907315 | 0.898817 |
| MmuSTS.1273.1.S1_at   | MmuSTS.1273.1 | 11.58 | 10.63 | 0.37 | 1.19 | 1.93  | 0.061961 | 0.045054 | 0.396857 | 0.256789 |
| MmuSTS.1274.1.S1_at   | MmuSTS.1274.1 | 8.35  | 8.63  | 0.37 | 0.41 | -1.22 | 0.395649 | 0.538719 | 0.696523 | 0.723323 |

|                     |               |       |       |      |      |       |          |          |          |          |
|---------------------|---------------|-------|-------|------|------|-------|----------|----------|----------|----------|
| MmuSTS.1275.1.S1_at | MmuSTS.1275.1 | 9.89  | 9.77  | 0.15 | 0.2  | 1.09  | 0.43604  | 0.562594 | 0.721553 | 0.738076 |
| MmuSTS.1276.1.S1_at | MmuSTS.1276.1 | 3.54  | 3.6   | 0.13 | 0.17 | -1.04 | 0.673652 | 0.326386 | 0.853751 | 0.57656  |
| MmuSTS.1277.1.S1_at | MmuSTS.1277.1 | 6.07  | 6.49  | 0.25 | 0.34 | -1.34 | 0.175664 | 0.147716 | 0.539405 | 0.422007 |
| MmuSTS.1278.1.S1_at | MmuSTS.1278.1 | 11.47 | 11.3  | 0.1  | 0.25 | 1.13  | 0.906459 | 0.808065 | 0.962831 | 0.889504 |
| MmuSTS.1279.1.S1_at | MmuSTS.1279.1 | 6.47  | 8.24  | 0.1  | 0.31 | -3.4  | 0.000979 | 0.000141 | 0.139813 | 0.029307 |
| MmuSTS.128.1.S1_at  | MmuSTS.128.1  | 3.96  | 3.93  | 0.06 | 0.19 | 1.02  | 0.819349 | 0.450034 | 0.926528 | 0.665446 |
| MmuSTS.1280.1.S1_at | MmuSTS.1280.1 | 11.69 | 11.53 | 0.13 | 0.59 | 1.12  | 0.66099  | 0.853061 | 0.847971 | 0.916487 |
| MmuSTS.1281.1.S1_at | MmuSTS.1281.1 | 8.11  | 9.36  | 0.16 | 0.66 | -2.38 | 0.042224 | 0.037178 | 0.354539 | 0.237285 |
| MmuSTS.1282.1.S1_at | MmuSTS.1282.1 | 9.36  | 9.46  | 0.36 | 1.19 | -1.08 | 0.451376 | 0.36358  | 0.731557 | 0.603986 |
| MmuSTS.1283.1.S1_at | MmuSTS.1283.1 | 11.87 | 10.06 | 0.07 | 0.45 | 3.52  | 0.004401 | 0.001119 | 0.183061 | 0.052924 |
| MmuSTS.1284.1.S1_at | MmuSTS.1284.1 | 10.65 | 10.62 | 0.27 | 0.15 | 1.02  | 0.535197 | 0.308669 | 0.778933 | 0.56461  |
| MmuSTS.1285.1.S1_at | MmuSTS.1285.1 | 4.69  | 5.37  | 0.12 | 0.23 | -1.61 | 0.015122 | 0.007755 | 0.257529 | 0.117622 |
| MmuSTS.1286.1.S1_at | MmuSTS.1286.1 | 8.41  | 7.9   | 0.25 | 0.54 | 1.42  | 0.198849 | 0.257838 | 0.561936 | 0.525467 |
| MmuSTS.1287.1.S1_at | MmuSTS.1287.1 | 8.1   | 8.17  | 0.2  | 0.47 | -1.05 | 0.423976 | 0.159617 | 0.714238 | 0.435785 |
| MmuSTS.1288.1.S1_at | MmuSTS.1288.1 | 8.7   | 8.82  | 0.25 | 0.2  | -1.09 | 0.524875 | 0.450346 | 0.773313 | 0.665643 |
| MmuSTS.1289.1.S1_at | MmuSTS.1289.1 | 10.12 | 10.13 | 0.07 | 0.12 | -1.01 | 0.399239 | 0.22003  | 0.69919  | 0.49344  |
| MmuSTS.129.1.S1_at  | MmuSTS.129.1  | 3.76  | 3.57  | 0.25 | 0.21 | 1.14  | 0.448283 | 0.519102 | 0.729566 | 0.710813 |
| MmuSTS.1290.1.S1_at | MmuSTS.1290.1 | 3.56  | 3.42  | 0.17 | 0.16 | 1.1   | 0.146969 | 0.406363 | 0.51306  | 0.634297 |
| MmuSTS.1291.1.S1_at | MmuSTS.1291.1 | 9.68  | 9.12  | 0.15 | 0.24 | 1.47  | 0.031022 | 0.017292 | 0.32048  | 0.166482 |
| MmuSTS.1292.1.S1_at | MmuSTS.1292.1 | 7.23  | 7.84  | 0.22 | 0.34 | -1.53 | 0.162356 | 0.209508 | 0.526658 | 0.48315  |
| MmuSTS.1293.1.S1_at | MmuSTS.1293.1 | 6.02  | 6.03  | 0.21 | 0.24 | -1    | 0.512421 | 0.271396 | 0.765592 | 0.536507 |
| MmuSTS.1294.1.S1_at | MmuSTS.1294.1 | 7.9   | 7.55  | 0.25 | 0.61 | 1.28  | 0.280432 | 0.298233 | 0.621646 | 0.556931 |
| MmuSTS.1295.1.S1_at | MmuSTS.1295.1 | 7.78  | 7.41  | 0.07 | 0.09 | 1.29  | 0.00424  | 0.045971 | 0.181942 | 0.258818 |
| MmuSTS.1296.1.S1_at | MmuSTS.1296.1 | 6.54  | 6.61  | 0.16 | 0.19 | -1.05 | 0.929208 | 0.578275 | 0.972668 | 0.748372 |
| MmuSTS.1297.1.S1_at | MmuSTS.1297.1 | 4.79  | 4.92  | 0.15 | 0.32 | -1.09 | 0.223744 | 0.300055 | 0.582123 | 0.558262 |
| MmuSTS.1298.1.S1_at | MmuSTS.1298.1 | 8.32  | 8.13  | 0.29 | 1.28 | 1.14  | 0.447068 | 0.246987 | 0.72871  | 0.516238 |
| MmuSTS.1299.1.S1_at | MmuSTS.1299.1 | 8.07  | 10.21 | 0.9  | 0.38 | -4.39 | 0.016997 | 0.009327 | 0.266496 | 0.12747  |
| MmuSTS.13.1.S1_at   | MmuSTS.13.1   | 8.98  | 7.63  | 0.84 | 0.52 | 2.54  | 0.039203 | 0.010094 | 0.346891 | 0.131794 |
| MmuSTS.130.1.S1_at  | MmuSTS.130.1  | 12.36 | 12.24 | 0.12 | 0.36 | 1.09  | 0.559909 | 0.696286 | 0.79419  | 0.823545 |
| MmuSTS.1300.1.S1_at | MmuSTS.1300.1 | 5.97  | 5.96  | 0.26 | 0.13 | 1.01  | 0.986133 | 0.777758 | 0.995055 | 0.87086  |
| MmuSTS.1301.1.S1_at | MmuSTS.1301.1 | 5.35  | 4.59  | 0.25 | 1.59 | 1.68  | 0.862665 | 0.908494 | 0.944766 | 0.948205 |
| MmuSTS.1302.1.S1_at | MmuSTS.1302.1 | 10.8  | 11.02 | 0.05 | 0.22 | -1.16 | 0.179757 | 0.13981  | 0.543983 | 0.413131 |
| MmuSTS.1303.1.S1_at | MmuSTS.1303.1 | 7.81  | 7.64  | 0.1  | 0.21 | 1.13  | 0.082291 | 0.134902 | 0.433666 | 0.406878 |
| MmuSTS.1304.1.S1_at | MmuSTS.1304.1 | 10.1  | 10.45 | 0.26 | 0.53 | -1.28 | 0.246934 | 0.345508 | 0.598047 | 0.590747 |
| MmuSTS.1305.1.S1_at | MmuSTS.1305.1 | 11.08 | 12.09 | 0.24 | 0.39 | -2.01 | 0.024206 | 0.020504 | 0.294535 | 0.179742 |
| MmuSTS.1306.1.S1_at | MmuSTS.1306.1 | 10.26 | 10.45 | 0.31 | 1.05 | -1.14 | 0.824945 | 0.925949 | 0.929089 | 0.958059 |
| MmuSTS.1307.1.S1_at | MmuSTS.1307.1 | 9.79  | 10.29 | 0.48 | 0.45 | -1.41 | 0.236678 | 0.14076  | 0.590504 | 0.414117 |
| MmuSTS.1308.1.S1_at | MmuSTS.1308.1 | 12.64 | 12.45 | 0.03 | 0.43 | 1.14  | 0.445864 | 0.59073  | 0.728005 | 0.756437 |
| MmuSTS.1309.1.S1_at | MmuSTS.1309.1 | 4.07  | 4.44  | 0.28 | 0.2  | -1.29 | 0.353854 | 0.014327 | 0.670266 | 0.152764 |
| MmuSTS.131.1.S1_at  | MmuSTS.131.1  | 3.76  | 4     | 0.18 | 0.15 | -1.19 | 0.348313 | 0.495361 | 0.66711  | 0.695433 |
| MmuSTS.1310.1.S1_at | MmuSTS.1310.1 | 3.68  | 3.89  | 0.11 | 0.08 | -1.16 | 0.186203 | 0.236099 | 0.549801 | 0.507179 |

|                       |               |       |       |      |      |       |          |          |          |          |
|-----------------------|---------------|-------|-------|------|------|-------|----------|----------|----------|----------|
| MmuSTS.1311.1.S1_at   | MmuSTS.1311.1 | 4.9   | 4.94  | 0.13 | 0.41 | -1.03 | 0.334587 | 0.40001  | 0.658444 | 0.630158 |
| MmuSTS.1312.1.S1_at   | MmuSTS.1312.1 | 8.81  | 9.05  | 0.2  | 0.82 | -1.18 | 0.531677 | 0.712723 | 0.777341 | 0.8335   |
| MmuSTS.1313.1.S1_at   | MmuSTS.1313.1 | 7.19  | 7.79  | 0.4  | 0.55 | -1.51 | 0.132139 | 0.134383 | 0.498325 | 0.406603 |
| MmuSTS.1314.1.S1_at   | MmuSTS.1314.1 | 10.03 | 10.36 | 0.37 | 0.64 | -1.26 | 0.918528 | 0.735577 | 0.96831  | 0.846993 |
| MmuSTS.1315.1.S1_at   | MmuSTS.1315.1 | 6.06  | 6.3   | 0.08 | 0.07 | -1.19 | 0.028278 | 0.313654 | 0.310316 | 0.568009 |
| MmuSTS.1316.1.S1_at   | MmuSTS.1316.1 | 6.82  | 6.49  | 0.61 | 0.83 | 1.26  | 0.482651 | 0.485098 | 0.749437 | 0.688913 |
| MmuSTS.1317.1.S1_at   | MmuSTS.1317.1 | 12.2  | 11.89 | 0.07 | 0.2  | 1.24  | 0.050436 | 0.032087 | 0.374325 | 0.221733 |
| MmuSTS.1318.1.S1_at   | MmuSTS.1318.1 | 8.3   | 8.18  | 0.16 | 0.14 | 1.09  | 0.29296  | 0.441639 | 0.630264 | 0.659769 |
| MmuSTS.1319.1.S1_at   | MmuSTS.1319.1 | 3.63  | 3.74  | 0.02 | 0.1  | -1.08 | 0.13075  | 0.257707 | 0.497065 | 0.525343 |
| MmuSTS.132.1.S1_s_at  | MmuSTS.132.1  | 5.09  | 5.3   | 0.06 | 0.14 | -1.15 | 0.086817 | 0.250465 | 0.440476 | 0.519391 |
| MmuSTS.1320.1.S1_at   | MmuSTS.1320.1 | 8.75  | 9.46  | 0.25 | 0.74 | -1.64 | 0.092921 | 0.018665 | 0.450064 | 0.171716 |
| MmuSTS.1321.1.S1_at   | MmuSTS.1321.1 | 3.99  | 3.96  | 0.15 | 0.24 | 1.02  | 0.438933 | 0.583419 | 0.723412 | 0.751772 |
| MmuSTS.1322.1.S1_at   | MmuSTS.1322.1 | 4.18  | 4.11  | 0.06 | 0.2  | 1.05  | 0.96735  | 0.439814 | 0.987802 | 0.658439 |
| MmuSTS.1323.1.S1_at   | MmuSTS.1323.1 | 12.44 | 12.33 | 0.09 | 0.76 | 1.08  | 0.343035 | 0.303615 | 0.663407 | 0.561073 |
| MmuSTS.1324.1.S1_at   | MmuSTS.1324.1 | 9.46  | 9.32  | 0.03 | 0.48 | 1.1   | 0.495615 | 0.669175 | 0.757268 | 0.806492 |
| MmuSTS.1325.1.S1_at   | MmuSTS.1325.1 | 8.83  | 8.23  | 0.06 | 0.39 | 1.51  | 0.050603 | 0.04537  | 0.374816 | 0.257378 |
| MmuSTS.1326.1.S1_at   | MmuSTS.1326.1 | 8.99  | 8.98  | 0.27 | 0.18 | 1     | 0.389142 | 0.355009 | 0.692939 | 0.597466 |
| MmuSTS.1327.1.S1_at   | MmuSTS.1327.1 | 6.47  | 6.45  | 0.22 | 0.41 | 1.02  | 0.742413 | 0.915852 | 0.889849 | 0.952836 |
| MmuSTS.1328.1.S1_at   | MmuSTS.1328.1 | 9.17  | 8.91  | 0.19 | 0.19 | 1.2   | 0.223771 | 0.192211 | 0.582123 | 0.467665 |
| MmuSTS.1329.1.S1_at   | MmuSTS.1329.1 | 12.66 | 12.6  | 0.07 | 0.06 | 1.04  | 0.710469 | 0.646009 | 0.873052 | 0.792676 |
| MmuSTS.133.1.S1_at    | MmuSTS.133.1  | 14.02 | 13.82 | 0.05 | 0.07 | 1.15  | 0.033023 | 0.028569 | 0.326925 | 0.210791 |
| MmuSTS.1330.1.S1_at   | MmuSTS.1330.1 | 8.99  | 9.96  | 0.2  | 0.34 | -1.96 | 0.009795 | 0.005726 | 0.226444 | 0.104271 |
| MmuSTS.1331.1.S1_at   | MmuSTS.1331.1 | 3.89  | 3.89  | 0.03 | 0.1  | -1    | 0.568547 | 0.868783 | 0.798666 | 0.925437 |
| MmuSTS.1332.1.S1_at   | MmuSTS.1332.1 | 8.66  | 8.88  | 0.26 | 0.08 | -1.16 | 0.22024  | 0.038645 | 0.579311 | 0.241683 |
| MmuSTS.1333.1.S1_at   | MmuSTS.1333.1 | 5.1   | 6.54  | 0.71 | 0.31 | -2.71 | 0.126241 | 0.040413 | 0.492452 | 0.246134 |
| MmuSTS.1334.1.S1_at   | MmuSTS.1334.1 | 5.63  | 5.89  | 0.56 | 0.26 | -1.19 | 0.535986 | 0.011562 | 0.779351 | 0.139171 |
| MmuSTS.1335.1.S1_at   | MmuSTS.1335.1 | 7.45  | 8.25  | 0.33 | 0.22 | -1.74 | 0.016603 | 0.010205 | 0.26475  | 0.132451 |
| MmuSTS.1336.1.S1_at   | MmuSTS.1336.1 | 12.99 | 12.91 | 0.03 | 0.04 | 1.06  | 0.059468 | 0.001496 | 0.392259 | 0.058967 |
| MmuSTS.1336.1.S1_s_at | MmuSTS.1336.1 | 12.92 | 12.76 | 0.03 | 0.1  | 1.12  | 0.218823 | 0.042598 | 0.578251 | 0.251035 |
| MmuSTS.1337.1.S1_at   | MmuSTS.1337.1 | 4.86  | 5     | 0.13 | 0.15 | -1.1  | 0.137674 | 0.149589 | 0.504937 | 0.424115 |
| MmuSTS.1338.1.S1_at   | MmuSTS.1338.1 | 4.6   | 5.02  | 0.64 | 0.19 | -1.33 | 0.823298 | 0.960403 | 0.928131 | 0.977488 |
| MmuSTS.1339.1.S1_at   | MmuSTS.1339.1 | 10.82 | 9.94  | 0.22 | 0.2  | 1.84  | 0.006528 | 0.004355 | 0.199625 | 0.092417 |
| MmuSTS.134.1.S1_at    | MmuSTS.134.1  | 5.92  | 7.02  | 0.25 | 0.67 | -2.14 | 0.108677 | 0.128251 | 0.470135 | 0.399362 |
| MmuSTS.1340.1.S1_at   | MmuSTS.1340.1 | 11.98 | 11.79 | 0.11 | 0.06 | 1.14  | 0.093093 | 0.091264 | 0.450362 | 0.346275 |
| MmuSTS.1341.1.S1_at   | MmuSTS.1341.1 | 8.96  | 9.03  | 0.6  | 0.6  | -1.04 | 0.89609  | 0.237958 | 0.958573 | 0.508495 |
| MmuSTS.1342.1.S1_at   | MmuSTS.1342.1 | 6.45  | 6.43  | 0.07 | 0.27 | 1.01  | 0.440249 | 0.428836 | 0.724158 | 0.650408 |
| MmuSTS.1343.1.S1_at   | MmuSTS.1343.1 | 10.96 | 12.91 | 1.74 | 0.5  | -3.85 | 0.106582 | 0.111285 | 0.467176 | 0.375963 |
| MmuSTS.1344.1.S1_at   | MmuSTS.1344.1 | 6.43  | 6.86  | 0.38 | 0.64 | -1.34 | 0.250574 | 0.171415 | 0.600389 | 0.447874 |
| MmuSTS.1345.1.S1_at   | MmuSTS.1345.1 | 11.21 | 12.68 | 0.71 | 1.26 | -2.77 | 0.282802 | 0.165203 | 0.62312  | 0.441389 |
| MmuSTS.1346.1.S1_at   | MmuSTS.1346.1 | 11.03 | 10.9  | 0.04 | 0.15 | 1.09  | 0.163632 | 0.050605 | 0.527992 | 0.270317 |
| MmuSTS.1347.1.S1_at   | MmuSTS.1347.1 | 12.68 | 12.24 | 0.22 | 0.29 | 1.36  | 0.086088 | 0.001683 | 0.440066 | 0.062108 |

|                       |               |       |       |      |      |        |          |          |          |          |
|-----------------------|---------------|-------|-------|------|------|--------|----------|----------|----------|----------|
| MmuSTS.1348.1.S1_at   | MmuSTS.1348.1 | 5.1   | 7.19  | 0.35 | 1.79 | -4.27  | 0.162277 | 0.098835 | 0.526638 | 0.357002 |
| MmuSTS.1349.1.S1_at   | MmuSTS.1349.1 | 8.81  | 8.2   | 0.37 | 0.57 | 1.52   | 0.390562 | 0.115099 | 0.693739 | 0.381985 |
| MmuSTS.135.1.S1_s_at  | MmuSTS.135.1  | 3.9   | 3.94  | 0.08 | 0.06 | -1.03  | 0.574234 | 0.442263 | 0.801619 | 0.660309 |
| MmuSTS.1350.1.S1_at   | MmuSTS.1350.1 | 7.63  | 7.49  | 0.39 | 0.76 | 1.1    | 0.538001 | 0.352896 | 0.780308 | 0.596217 |
| MmuSTS.1351.1.S1_at   | MmuSTS.1351.1 | 6.65  | 7.35  | 0.53 | 0.44 | -1.63  | 0.134919 | 0.064771 | 0.501995 | 0.300439 |
| MmuSTS.1352.1.S1_at   | MmuSTS.1352.1 | 4.79  | 5.09  | 0.13 | 0.17 | -1.24  | 0.084392 | 0.064248 | 0.436943 | 0.299692 |
| MmuSTS.1353.1.S1_at   | MmuSTS.1353.1 | 4.76  | 4.81  | 0.24 | 0.13 | -1.03  | 0.909675 | 0.498204 | 0.964238 | 0.697351 |
| MmuSTS.1354.1.S1_at   | MmuSTS.1354.1 | 7.78  | 7.08  | 0.24 | 0.81 | 1.63   | 0.215234 | 0.344877 | 0.575623 | 0.590208 |
| MmuSTS.1355.1.S1_at   | MmuSTS.1355.1 | 12.08 | 12.12 | 0.22 | 0.15 | -1.03  | 0.564359 | 0.54273  | 0.796509 | 0.725703 |
| MmuSTS.1356.1.S1_at   | MmuSTS.1356.1 | 5.58  | 6.31  | 0.54 | 0.46 | -1.67  | 0.387759 | 0.354986 | 0.692117 | 0.597466 |
| MmuSTS.1357.1.S1_s_at | MmuSTS.1357.1 | 6.08  | 7.11  | 0.49 | 0.4  | -2.04  | 0.026106 | 0.00509  | 0.30146  | 0.099108 |
| MmuSTS.1358.1.S1_at   | MmuSTS.1358.1 | 2.94  | 3.04  | 0.05 | 0.08 | -1.07  | 0.094756 | 0.474746 | 0.452166 | 0.681695 |
| MmuSTS.1358.1.S1_x_at | MmuSTS.1358.1 | 2.98  | 2.88  | 0.05 | 0.1  | 1.08   | 0.05805  | 0.084601 | 0.389703 | 0.336098 |
| MmuSTS.1359.1.S1_at   | MmuSTS.1359.1 | 9.64  | 10.17 | 0.7  | 0.96 | -1.44  | 0.260053 | 0.314675 | 0.606878 | 0.568437 |
| MmuSTS.136.1.S1_at    | MmuSTS.136.1  | 9.35  | 9.32  | 0.2  | 0.32 | 1.02   | 0.895154 | 0.524183 | 0.95808  | 0.714207 |
| MmuSTS.1360.1.S1_at   | MmuSTS.1360.1 | 12.11 | 12.88 | 0.26 | 0.32 | -1.71  | 0.058802 | 0.043213 | 0.390921 | 0.252647 |
| MmuSTS.1361.1.S1_at   | MmuSTS.1361.1 | 9.68  | 9     | 0.5  | 0.83 | 1.61   | 0.208696 | 0.122056 | 0.570402 | 0.391558 |
| MmuSTS.1362.1.S1_at   | MmuSTS.1362.1 | 11.01 | 11.18 | 0.04 | 0.14 | -1.13  | 0.098016 | 0.026686 | 0.457356 | 0.204241 |
| MmuSTS.1363.1.S1_at   | MmuSTS.1363.1 | 5.2   | 5.45  | 0.1  | 0.82 | -1.19  | 0.329573 | 0.437388 | 0.655218 | 0.656684 |
| MmuSTS.1364.1.S1_at   | MmuSTS.1364.1 | 13.1  | 13    | 0.14 | 0.3  | 1.07   | 0.807035 | 0.946644 | 0.920969 | 0.969766 |
| MmuSTS.1365.1.S1_s_at | MmuSTS.1365.1 | 9.46  | 11.55 | 0.29 | 0.18 | -4.26  | 0.000389 | 0.000314 | 0.12978  | 0.035198 |
| MmuSTS.1366.1.S1_at   | MmuSTS.1366.1 | 12.1  | 12.49 | 0.11 | 0.13 | -1.32  | 0.027569 | 0.091594 | 0.308386 | 0.346713 |
| MmuSTS.1367.1.S1_at   | MmuSTS.1367.1 | 11.01 | 11.69 | 0.47 | 0.13 | -1.6   | 0.079717 | 0.093102 | 0.430147 | 0.349292 |
| MmuSTS.1368.1.S1_at   | MmuSTS.1368.1 | 10.13 | 9.26  | 0.43 | 0.96 | 1.82   | 0.917068 | 0.587232 | 0.967622 | 0.7541   |
| MmuSTS.1369.1.S1_at   | MmuSTS.1369.1 | 10.43 | 10.33 | 0.06 | 0.16 | 1.07   | 0.148836 | 0.180862 | 0.51391  | 0.457391 |
| MmuSTS.137.1.S1_at    | MmuSTS.137.1  | 7.25  | 7.53  | 0.08 | 0.25 | -1.22  | 0.110334 | 0.059913 | 0.471863 | 0.291408 |
| MmuSTS.1370.1.S1_at   | MmuSTS.1370.1 | 11.66 | 10.27 | 0.18 | 0.45 | 2.63   | 0.004171 | 0.001248 | 0.181739 | 0.054879 |
| MmuSTS.1371.1.S1_at   | MmuSTS.1371.1 | 5.81  | 5.73  | 0.04 | 0.08 | 1.06   | 0.064488 | 0.018292 | 0.402975 | 0.170097 |
| MmuSTS.1372.1.S1_at   | MmuSTS.1372.1 | 4.81  | 4.63  | 0.7  | 0.04 | 1.14   | 0.39637  | 0.402311 | 0.696939 | 0.631347 |
| MmuSTS.1373.1.S1_at   | MmuSTS.1373.1 | 7.24  | 7.57  | 0.36 | 0.37 | -1.25  | 0.414824 | 0.170918 | 0.709338 | 0.447561 |
| MmuSTS.1374.1.S1_at   | MmuSTS.1374.1 | 12.24 | 12.23 | 0.13 | 0.2  | 1.01   | 0.668843 | 0.758974 | 0.851986 | 0.859942 |
| MmuSTS.1375.1.S1_at   | MmuSTS.1375.1 | 12.47 | 12.68 | 0.06 | 0.13 | -1.16  | 0.080688 | 0.069736 | 0.431219 | 0.310191 |
| MmuSTS.1376.1.S1_at   | MmuSTS.1376.1 | 6.11  | 6.44  | 0.12 | 0.28 | -1.26  | 0.039699 | 0.029987 | 0.347969 | 0.214956 |
| MmuSTS.1377.1.S1_at   | MmuSTS.1377.1 | 5.11  | 5.42  | 0.22 | 0.21 | -1.24  | 0.436119 | 0.212504 | 0.721633 | 0.486502 |
| MmuSTS.1378.1.S1_at   | MmuSTS.1378.1 | 4.55  | 4.95  | 0.47 | 0.39 | -1.32  | 0.568496 | 0.006593 | 0.798666 | 0.110053 |
| MmuSTS.1379.1.S1_at   | MmuSTS.1379.1 | 7.15  | 7.06  | 0.63 | 0.68 | 1.06   | 0.747708 | 0.674883 | 0.892029 | 0.810065 |
| MmuSTS.138.1.S1_at    | MmuSTS.138.1  | 10.48 | 9.71  | 0.47 | 1    | 1.7    | 0.239093 | 0.233045 | 0.592271 | 0.50445  |
| MmuSTS.1380.1.S1_at   | MmuSTS.1380.1 | 5.62  | 9.54  | 1.56 | 1.98 | -15.21 | 0.074446 | 0.069235 | 0.420198 | 0.309436 |
| MmuSTS.1381.1.S1_at   | MmuSTS.1381.1 | 3.78  | 3.65  | 0.39 | 0.12 | 1.09   | 0.420408 | 0.573435 | 0.712437 | 0.745125 |
| MmuSTS.1382.1.S1_at   | MmuSTS.1382.1 | 3.1   | 3.15  | 0.19 | 0.53 | -1.04  | 0.371729 | 0.348594 | 0.68246  | 0.59263  |
| MmuSTS.1383.1.S1_at   | MmuSTS.1383.1 | 6.31  | 6.54  | 0.36 | 0.56 | -1.17  | 0.285446 | 0.434612 | 0.624927 | 0.654747 |



|                       |               |       |       |      |      |        |          |          |          |          |
|-----------------------|---------------|-------|-------|------|------|--------|----------|----------|----------|----------|
| MmuSTS.1384.1.S1_at   | MmuSTS.1384.1 | 7.57  | 7.14  | 0.45 | 0.27 | 1.35   | 0.151948 | 0.197726 | 0.516573 | 0.472633 |
| MmuSTS.1385.1.S1_at   | MmuSTS.1385.1 | 7.43  | 8.79  | 0.43 | 1.27 | -2.58  | 0.187989 | 0.175483 | 0.551017 | 0.452157 |
| MmuSTS.1386.1.S1_at   | MmuSTS.1386.1 | 6.28  | 6.47  | 0.1  | 0.28 | -1.15  | 0.629403 | 0.709677 | 0.831446 | 0.831736 |
| MmuSTS.1387.1.S1_at   | MmuSTS.1387.1 | 5.75  | 5.78  | 0.11 | 0.13 | -1.02  | 0.356488 | 0.03089  | 0.671576 | 0.217584 |
| MmuSTS.1388.1.S1_at   | MmuSTS.1388.1 | 5.55  | 5.59  | 0.24 | 0.06 | -1.03  | 0.540499 | 0.394077 | 0.781935 | 0.626734 |
| MmuSTS.1389.1.S1_at   | MmuSTS.1389.1 | 6.62  | 6.44  | 0.1  | 0.11 | 1.13   | 0.294829 | 0.120573 | 0.631442 | 0.389378 |
| MmuSTS.139.1.S1_at    | MmuSTS.139.1  | 6.07  | 10.2  | 1.6  | 3.14 | -17.48 | 0.416384 | 0.325162 | 0.709936 | 0.575591 |
| MmuSTS.1390.1.S1_at   | MmuSTS.1390.1 | 5.94  | 6.1   | 0.32 | 0.43 | -1.12  | 0.570413 | 0.61276  | 0.799483 | 0.770189 |
| MmuSTS.1391.1.S1_at   | MmuSTS.1391.1 | 3.61  | 3.78  | 0.15 | 0.02 | -1.13  | 0.320468 | 0.463777 | 0.649472 | 0.674656 |
| MmuSTS.1392.1.S1_at   | MmuSTS.1392.1 | 8.45  | 9.22  | 0.35 | 0.36 | -1.7   | 0.049312 | 0.013994 | 0.371194 | 0.151593 |
| MmuSTS.1393.1.S1_at   | MmuSTS.1393.1 | 5.4   | 5.26  | 0.09 | 0.08 | 1.1    | 0.114393 | 0.031184 | 0.477827 | 0.21838  |
| MmuSTS.1394.1.S1_at   | MmuSTS.1394.1 | 5.28  | 5.33  | 0.02 | 0.07 | -1.03  | 0.346062 | 0.086181 | 0.665548 | 0.338568 |
| MmuSTS.1395.1.S1_at   | MmuSTS.1395.1 | 12.23 | 12.79 | 0.14 | 0.29 | -1.47  | 0.091538 | 0.090727 | 0.447485 | 0.345205 |
| MmuSTS.1396.1.S1_s_at | MmuSTS.1396.1 | 9.18  | 9.31  | 0.09 | 0.18 | -1.09  | 0.266441 | 0.4391   | 0.611901 | 0.657854 |
| MmuSTS.1397.1.S1_at   | MmuSTS.1397.1 | 9.06  | 10.06 | 0.29 | 1.64 | -1.99  | 0.330917 | 0.176435 | 0.656063 | 0.45282  |
| MmuSTS.1398.1.S1_at   | MmuSTS.1398.1 | 9.66  | 10.16 | 0.66 | 1.04 | -1.41  | 0.512856 | 0.178585 | 0.765792 | 0.454817 |
| MmuSTS.1399.1.S1_at   | MmuSTS.1399.1 | 9.67  | 10.84 | 0.78 | 1.3  | -2.25  | 0.184596 | 0.185933 | 0.548202 | 0.461772 |
| MmuSTS.14.1.S1_at     | MmuSTS.14.1   | 9.6   | 10.02 | 0.1  | 0.26 | -1.34  | 0.051416 | 0.015343 | 0.376003 | 0.157315 |
| MmuSTS.140.1.S1_at    | MmuSTS.140.1  | 5.18  | 5.75  | 0.11 | 0.14 | -1.49  | 0.004542 | 0.002843 | 0.184109 | 0.078566 |
| MmuSTS.1400.1.S1_at   | MmuSTS.1400.1 | 5.29  | 5.02  | 0.19 | 0.08 | 1.21   | 0.058821 | 0.043753 | 0.390921 | 0.25387  |
| MmuSTS.1401.1.S1_at   | MmuSTS.1401.1 | 6.14  | 6.24  | 0.06 | 0.16 | -1.07  | 0.124933 | 0.16737  | 0.490864 | 0.443785 |
| MmuSTS.1402.1.S1_at   | MmuSTS.1402.1 | 2.86  | 2.7   | 0.08 | 0.22 | 1.12   | 0.596171 | 0.820985 | 0.812808 | 0.896977 |
| MmuSTS.1403.1.S1_s_at | MmuSTS.1403.1 | 5.65  | 5.79  | 0.07 | 0.09 | -1.1   | 0.250249 | 0.275363 | 0.600389 | 0.539663 |
| MmuSTS.1404.1.S1_at   | MmuSTS.1404.1 | 4.54  | 4.45  | 0.11 | 0.1  | 1.07   | 0.408974 | 0.737713 | 0.705703 | 0.848062 |
| MmuSTS.1405.1.S1_at   | MmuSTS.1405.1 | 5.76  | 6.72  | 0.28 | 0.62 | -1.95  | 0.116954 | 0.123313 | 0.480867 | 0.393386 |
| MmuSTS.1406.1.S1_at   | MmuSTS.1406.1 | 9.78  | 10.96 | 0.34 | 0.61 | -2.25  | 0.038013 | 0.026749 | 0.34335  | 0.204493 |
| MmuSTS.1407.1.S1_at   | MmuSTS.1407.1 | 6.98  | 8.81  | 0.3  | 0.27 | -3.57  | 0.001756 | 0.000235 | 0.154452 | 0.03241  |
| MmuSTS.1408.1.S1_at   | MmuSTS.1408.1 | 6.87  | 6.94  | 0.16 | 0.17 | -1.05  | 0.989993 | 0.8883   | 0.996447 | 0.936315 |
| MmuSTS.1409.1.S1_at   | MmuSTS.1409.1 | 5.34  | 5.07  | 0.4  | 0.22 | 1.21   | 0.965403 | 0.197869 | 0.986795 | 0.472805 |
| MmuSTS.141.1.S1_at    | MmuSTS.141.1  | 10.18 | 9.77  | 0.34 | 0.08 | 1.32   | 0.119383 | 0.147603 | 0.484088 | 0.421901 |
| MmuSTS.1410.1.S1_at   | MmuSTS.1410.1 | 11.58 | 11.77 | 0.12 | 1.62 | -1.14  | 0.483895 | 0.638403 | 0.749945 | 0.787631 |
| MmuSTS.1411.1.S1_at   | MmuSTS.1411.1 | 8.24  | 7.58  | 0.27 | 0.89 | 1.57   | 0.260134 | 0.259689 | 0.60699  | 0.526583 |
| MmuSTS.1412.1.S1_at   | MmuSTS.1412.1 | 5.25  | 5.71  | 0.24 | 0.57 | -1.38  | 0.204589 | 0.246491 | 0.567135 | 0.515917 |
| MmuSTS.1413.1.S1_at   | MmuSTS.1413.1 | 6.26  | 6.38  | 0.01 | 0.17 | -1.09  | 0.879013 | 0.943642 | 0.951455 | 0.967966 |
| MmuSTS.1414.1.S1_at   | MmuSTS.1414.1 | 10.24 | 11.57 | 0.24 | 0.57 | -2.5   | 0.011792 | 0.004967 | 0.237691 | 0.098202 |
| MmuSTS.1415.1.S1_at   | MmuSTS.1415.1 | 11.77 | 10.84 | 0.29 | 0.19 | 1.9    | 0.019205 | 0.015059 | 0.273146 | 0.155852 |
| MmuSTS.1416.1.S1_at   | MmuSTS.1416.1 | 3.85  | 6     | 0.3  | 1.32 | -4.45  | 0.051731 | 0.017787 | 0.376323 | 0.168549 |
| MmuSTS.1417.1.S1_at   | MmuSTS.1417.1 | 12.41 | 12.45 | 0.07 | 0.13 | -1.03  | 0.729781 | 0.887931 | 0.88278  | 0.936115 |
| MmuSTS.1418.1.S1_at   | MmuSTS.1418.1 | 8.62  | 8.54  | 0.11 | 0.11 | 1.06   | 0.267902 | 0.698612 | 0.612836 | 0.824912 |
| MmuSTS.1419.1.S1_at   | MmuSTS.1419.1 | 4.63  | 4.8   | 0.31 | 0.68 | -1.12  | 0.437674 | 0.148668 | 0.722586 | 0.423201 |
| MmuSTS.142.1.S1_at    | MmuSTS.142.1  | 10.98 | 10.81 | 0.11 | 0.37 | 1.13   | 0.169736 | 0.20332  | 0.533943 | 0.477521 |

|                       |               |       |       |      |      |        |          |          |          |          |
|-----------------------|---------------|-------|-------|------|------|--------|----------|----------|----------|----------|
| MmuSTS.1420.1.S1_at   | MmuSTS.1420.1 | 6.71  | 6.71  | 0.81 | 0.72 | -1     | 0.987267 | 0.455922 | 0.995537 | 0.669712 |
| MmuSTS.1421.1.S1_at   | MmuSTS.1421.1 | 6.43  | 6.77  | 0.18 | 0.21 | -1.26  | 0.084609 | 0.089146 | 0.437356 | 0.343188 |
| MmuSTS.1422.1.S1_at   | MmuSTS.1422.1 | 8.96  | 8.77  | 0.19 | 0.3  | 1.14   | 0.39062  | 0.069352 | 0.693739 | 0.309558 |
| MmuSTS.1423.1.S1_at   | MmuSTS.1423.1 | 5     | 5.28  | 0.14 | 0.06 | -1.21  | 0.061796 | 0.040072 | 0.396609 | 0.245388 |
| MmuSTS.1424.1.S1_at   | MmuSTS.1424.1 | 4.82  | 6.51  | 1.35 | 1.82 | -3.23  | 0.531095 | 0.316561 | 0.777049 | 0.569938 |
| MmuSTS.1425.1.S1_at   | MmuSTS.1425.1 | 5.15  | 5.16  | 0.57 | 0.26 | -1.01  | 0.982418 | 0.030483 | 0.993449 | 0.216624 |
| MmuSTS.1426.1.S1_at   | MmuSTS.1426.1 | 13.63 | 13.38 | 0.14 | 0.14 | 1.19   | 0.198225 | 0.158305 | 0.561234 | 0.434043 |
| MmuSTS.1427.1.S1_at   | MmuSTS.1427.1 | 12.75 | 12.64 | 0.03 | 0.13 | 1.08   | 0.168263 | 0.185453 | 0.53256  | 0.461494 |
| MmuSTS.1428.1.S1_at   | MmuSTS.1428.1 | 11.81 | 11.68 | 0.18 | 0.41 | 1.1    | 0.537048 | 0.084776 | 0.779741 | 0.336285 |
| MmuSTS.1429.1.S1_at   | MmuSTS.1429.1 | 10.73 | 9.37  | 0.18 | 1.21 | 2.56   | 0.066233 | 0.070814 | 0.406371 | 0.31231  |
| MmuSTS.143.1.S1_at    | MmuSTS.143.1  | 8.06  | 7.52  | 0.64 | 1    | 1.45   | 0.256223 | 0.160683 | 0.603894 | 0.436758 |
| MmuSTS.1430.1.S1_at   | MmuSTS.1430.1 | 10.14 | 11.27 | 1.31 | 0.97 | -2.19  | 0.582971 | 0.773127 | 0.806097 | 0.868084 |
| MmuSTS.1431.1.S1_at   | MmuSTS.1431.1 | 12.43 | 12.39 | 0.08 | 0.36 | 1.03   | 0.280508 | 0.178803 | 0.621702 | 0.455099 |
| MmuSTS.1432.1.S1_at   | MmuSTS.1432.1 | 12.38 | 12.67 | 0.11 | 0.11 | -1.22  | 0.069039 | 0.050452 | 0.411102 | 0.269897 |
| MmuSTS.1433.1.S1_at   | MmuSTS.1433.1 | 5.96  | 5.07  | 0.27 | 0.78 | 1.85   | 0.146955 | 0.017166 | 0.51306  | 0.165989 |
| MmuSTS.1434.1.S1_at   | MmuSTS.1434.1 | 12.93 | 12.99 | 0.09 | 0.11 | -1.04  | 0.927666 | 0.446485 | 0.972034 | 0.662842 |
| MmuSTS.1434.1.S1_s_at | MmuSTS.1434.1 | 14.35 | 14.3  | 0.04 | 0.02 | 1.03   | 0.768687 | 0.265728 | 0.902722 | 0.531586 |
| MmuSTS.1434.1.S1_x_at | MmuSTS.1434.1 | 13.59 | 13.63 | 0.09 | 0.1  | -1.03  | 0.853141 | 0.534792 | 0.940708 | 0.720557 |
| MmuSTS.1435.1.S1_at   | MmuSTS.1435.1 | 13.68 | 13.58 | 0.02 | 0.1  | 1.07   | 0.205818 | 0.067669 | 0.568377 | 0.306199 |
| MmuSTS.1436.1.S1_at   | MmuSTS.1436.1 | 4.96  | 5.38  | 0.15 | 0.22 | -1.33  | 0.095253 | 0.044942 | 0.453089 | 0.256489 |
| MmuSTS.1437.1.S1_at   | MmuSTS.1437.1 | 8.74  | 13.02 | 2    | 3.08 | -19.49 | 0.55235  | 0.346909 | 0.789424 | 0.591725 |
| MmuSTS.1438.1.S1_at   | MmuSTS.1438.1 | 8.67  | 8.05  | 0.13 | 0.47 | 1.54   | 0.116112 | 0.014665 | 0.4797   | 0.154231 |
| MmuSTS.1439.1.S1_at   | MmuSTS.1439.1 | 11.37 | 10.33 | 0.03 | 0.17 | 2.06   | 0.00046  | 0.000015 | 0.13362  | 0.018351 |
| MmuSTS.144.1.S1_at    | MmuSTS.144.1  | 11.07 | 9.61  | 0.03 | 0.23 | 2.76   | 0.000557 | 0.000048 | 0.136818 | 0.025273 |
| MmuSTS.1440.1.S1_at   | MmuSTS.1440.1 | 7.65  | 8.13  | 0.11 | 0.3  | -1.39  | 0.057574 | 0.001645 | 0.38863  | 0.061345 |
| MmuSTS.1441.1.S1_at   | MmuSTS.1441.1 | 5.07  | 5.66  | 0.6  | 0.54 | -1.51  | 0.16943  | 0.207975 | 0.533686 | 0.482049 |
| MmuSTS.1442.1.S1_at   | MmuSTS.1442.1 | 4.98  | 5.2   | 0.21 | 0.03 | -1.16  | 0.214216 | 0.377228 | 0.574647 | 0.61485  |
| MmuSTS.1443.1.S1_at   | MmuSTS.1443.1 | 9.86  | 11.3  | 0.13 | 0.12 | -2.72  | 0.000143 | 0.000009 | 0.112653 | 0.016421 |
| MmuSTS.1444.1.S1_at   | MmuSTS.1444.1 | 8.68  | 10.6  | 0.77 | 1.78 | -3.77  | 0.334294 | 0.282676 | 0.658315 | 0.54543  |
| MmuSTS.1445.1.S1_at   | MmuSTS.1445.1 | 9.42  | 10.58 | 0.58 | 0.58 | -2.24  | 0.04555  | 0.035023 | 0.36126  | 0.231264 |
| MmuSTS.1446.1.S1_at   | MmuSTS.1446.1 | 5.53  | 5.56  | 0.09 | 0.05 | -1.02  | 0.633184 | 0.926483 | 0.83354  | 0.958312 |
| MmuSTS.1447.1.S1_at   | MmuSTS.1447.1 | 5.82  | 7.34  | 2.33 | 2.03 | -2.86  | 0.44178  | 0.377353 | 0.725144 | 0.6149   |
| MmuSTS.1448.1.S1_at   | MmuSTS.1448.1 | 6.61  | 9.42  | 1.16 | 2.33 | -7.02  | 0.314328 | 0.35009  | 0.645738 | 0.593862 |
| MmuSTS.1449.1.S1_at   | MmuSTS.1449.1 | 11.65 | 11.28 | 0.15 | 0.19 | 1.29   | 0.105649 | 0.078774 | 0.466487 | 0.325725 |
| MmuSTS.145.1.S1_at    | MmuSTS.145.1  | 7.04  | 6.59  | 0.54 | 0.26 | 1.37   | 0.677835 | 0.866052 | 0.855649 | 0.923791 |
| MmuSTS.1450.1.S1_at   | MmuSTS.1450.1 | 11.24 | 10.55 | 0.09 | 0.12 | 1.62   | 0.001347 | 0.000242 | 0.146228 | 0.032681 |
| MmuSTS.1451.1.S1_at   | MmuSTS.1451.1 | 10.87 | 10.39 | 0.06 | 0.11 | 1.39   | 0.004638 | 0.002278 | 0.1844   | 0.07037  |
| MmuSTS.1452.1.S1_at   | MmuSTS.1452.1 | 3.54  | 3.51  | 0.15 | 0.16 | 1.02   | 0.858034 | 0.590173 | 0.942643 | 0.756117 |
| MmuSTS.1453.1.S1_at   | MmuSTS.1453.1 | 9.83  | 8.69  | 0.29 | 0.31 | 2.2    | 0.005997 | 0.001662 | 0.194862 | 0.061704 |
| MmuSTS.1454.1.S1_at   | MmuSTS.1454.1 | 7.69  | 9.1   | 0.78 | 1.17 | -2.65  | 0.090031 | 0.07751  | 0.445441 | 0.323421 |
| MmuSTS.1455.1.S1_at   | MmuSTS.1455.1 | 10.3  | 11.04 | 0.39 | 0.28 | -1.67  | 0.045413 | 0.025004 | 0.361012 | 0.198121 |

|                       |               |       |       |      |      |       |          |          |          |          |
|-----------------------|---------------|-------|-------|------|------|-------|----------|----------|----------|----------|
| MmuSTS.1456.1.S1_at   | MmuSTS.1456.1 | 9.09  | 10.44 | 0.13 | 0.55 | -2.54 | 0.015368 | 0.007521 | 0.258258 | 0.116291 |
| MmuSTS.1457.1.S1_at   | MmuSTS.1457.1 | 7.89  | 8.61  | 0.11 | 0.31 | -1.65 | 0.017762 | 0.008611 | 0.267882 | 0.123102 |
| MmuSTS.1458.1.S1_at   | MmuSTS.1458.1 | 8.13  | 8.33  | 0.09 | 0.36 | -1.14 | 0.598353 | 0.767978 | 0.813939 | 0.865284 |
| MmuSTS.1459.1.S1_at   | MmuSTS.1459.1 | 6.19  | 6.7   | 0.22 | 0.18 | -1.43 | 0.032011 | 0.019353 | 0.323873 | 0.1748   |
| MmuSTS.146.1.S1_at    | MmuSTS.146.1  | 11.95 | 11.83 | 0.08 | 0.14 | 1.09  | 0.184334 | 0.239946 | 0.548138 | 0.510627 |
| MmuSTS.1460.1.S1_at   | MmuSTS.1460.1 | 11.11 | 10.71 | 0.12 | 0.25 | 1.32  | 0.156761 | 0.178255 | 0.521541 | 0.45458  |
| MmuSTS.1461.1.S1_at   | MmuSTS.1461.1 | 10.66 | 10.5  | 0.15 | 0.38 | 1.12  | 0.788531 | 0.849443 | 0.91217  | 0.914533 |
| MmuSTS.1462.1.S1_at   | MmuSTS.1462.1 | 5.9   | 6.36  | 0.84 | 0.9  | -1.38 | 0.656894 | 0.1538   | 0.845614 | 0.428488 |
| MmuSTS.1463.1.S1_at   | MmuSTS.1463.1 | 10.84 | 11.02 | 0.18 | 0.44 | -1.13 | 0.697644 | 0.812147 | 0.865694 | 0.89155  |
| MmuSTS.1464.1.S1_at   | MmuSTS.1464.1 | 5.16  | 5.47  | 0.34 | 0.1  | -1.24 | 0.208111 | 0.255065 | 0.570011 | 0.52317  |
| MmuSTS.1465.1.S1_at   | MmuSTS.1465.1 | 11.56 | 11.73 | 0.19 | 0.22 | -1.13 | 0.744516 | 0.415905 | 0.890646 | 0.641239 |
| MmuSTS.1466.1.S1_s_at | MmuSTS.1466.1 | 3.95  | 3.97  | 0.15 | 0.1  | -1.02 | 0.708185 | 0.814898 | 0.871588 | 0.893213 |
| MmuSTS.1467.1.S1_at   | MmuSTS.1467.1 | 5.84  | 5.97  | 0.11 | 0.08 | -1.09 | 0.129608 | 0.127786 | 0.495744 | 0.398644 |
| MmuSTS.1468.1.S1_at   | MmuSTS.1468.1 | 10.78 | 9.58  | 0.21 | 0.27 | 2.3   | 0.003096 | 0.000244 | 0.172102 | 0.032798 |
| MmuSTS.1469.1.S1_at   | MmuSTS.1469.1 | 9.8   | 9.6   | 0.29 | 0.56 | 1.15  | 0.9523   | 0.01763  | 0.982156 | 0.167839 |
| MmuSTS.147.1.S1_at    | MmuSTS.147.1  | 6.74  | 7.51  | 0.16 | 1.57 | -1.7  | 0.396212 | 0.437453 | 0.696871 | 0.656745 |
| MmuSTS.1470.1.S1_at   | MmuSTS.1470.1 | 3.84  | 3.65  | 0.18 | 0.09 | 1.14  | 0.312017 | 0.036642 | 0.643774 | 0.235943 |
| MmuSTS.1471.1.S1_at   | MmuSTS.1471.1 | 5.28  | 5.33  | 0.05 | 0.16 | -1.04 | 0.632675 | 0.784652 | 0.833252 | 0.875304 |
| MmuSTS.1472.1.S1_at   | MmuSTS.1472.1 | 4.96  | 5.51  | 0.82 | 0.81 | -1.46 | 0.264948 | 0.391851 | 0.610696 | 0.625384 |
| MmuSTS.1473.1.S1_at   | MmuSTS.1473.1 | 3.78  | 4.11  | 0.35 | 0.17 | -1.25 | 0.464078 | 0.603626 | 0.739049 | 0.764215 |
| MmuSTS.1474.1.S1_at   | MmuSTS.1474.1 | 11.33 | 10.17 | 0.22 | 0.87 | 2.23  | 0.042361 | 0.036901 | 0.354659 | 0.236575 |
| MmuSTS.1475.1.S1_at   | MmuSTS.1475.1 | 11.85 | 11.72 | 0.11 | 0.1  | 1.09  | 0.077645 | 0.101704 | 0.427619 | 0.361562 |
| MmuSTS.1476.1.S1_at   | MmuSTS.1476.1 | 10.09 | 10.13 | 0.05 | 0.25 | -1.03 | 0.56036  | 0.505689 | 0.794218 | 0.702218 |
| MmuSTS.1477.1.S1_at   | MmuSTS.1477.1 | 10.49 | 10.96 | 0.11 | 0.54 | -1.38 | 0.163203 | 0.181083 | 0.527521 | 0.457577 |
| MmuSTS.1478.1.S1_at   | MmuSTS.1478.1 | 4.89  | 4.13  | 0.72 | 0.41 | 1.69  | 0.161503 | 0.178514 | 0.526444 | 0.454778 |
| MmuSTS.1479.1.S1_at   | MmuSTS.1479.1 | 6.8   | 8.38  | 0.22 | 1.18 | -3    | 0.089537 | 0.08619  | 0.445161 | 0.338568 |
| MmuSTS.148.1.S1_at    | MmuSTS.148.1  | 11.85 | 11.78 | 0.21 | 0.49 | 1.05  | 0.862869 | 0.941458 | 0.944872 | 0.966805 |
| MmuSTS.1480.1.S1_at   | MmuSTS.1480.1 | 4.75  | 4.75  | 0.16 | 0.03 | -1    | 0.455235 | 0.804743 | 0.733701 | 0.887712 |
| MmuSTS.1481.1.S1_at   | MmuSTS.1481.1 | 4.52  | 4.74  | 0.02 | 0.12 | -1.16 | 0.037857 | 0.08958  | 0.343205 | 0.343811 |
| MmuSTS.1482.1.S1_at   | MmuSTS.1482.1 | 10.97 | 10.61 | 0.05 | 0.26 | 1.28  | 0.239883 | 0.278164 | 0.592812 | 0.541805 |
| MmuSTS.1483.1.S1_at   | MmuSTS.1483.1 | 8.27  | 8.14  | 0.2  | 0.19 | 1.1   | 0.549263 | 0.015698 | 0.78723  | 0.158742 |
| MmuSTS.1484.1.S1_at   | MmuSTS.1484.1 | 7.27  | 7.15  | 0.32 | 0.53 | 1.08  | 0.296211 | 0.341677 | 0.632176 | 0.587796 |
| MmuSTS.1485.1.S1_at   | MmuSTS.1485.1 | 9.04  | 6.72  | 0.25 | 0.48 | 4.99  | 0.001552 | 0.000212 | 0.151907 | 0.032262 |
| MmuSTS.1486.1.S1_at   | MmuSTS.1486.1 | 10.93 | 11.04 | 0.22 | 0.14 | -1.08 | 0.930571 | 0.930328 | 0.973196 | 0.960394 |
| MmuSTS.1487.1.S1_at   | MmuSTS.1487.1 | 9.48  | 8.5   | 0.17 | 0.45 | 1.97  | 0.065776 | 0.056059 | 0.405134 | 0.282647 |
| MmuSTS.1488.1.S1_at   | MmuSTS.1488.1 | 8.66  | 8.38  | 0.07 | 0.03 | 1.22  | 0.004483 | 0.029171 | 0.183586 | 0.212798 |
| MmuSTS.1489.1.S1_at   | MmuSTS.1489.1 | 11.82 | 11.01 | 0.06 | 0.29 | 1.75  | 0.01969  | 0.009341 | 0.275549 | 0.127598 |
| MmuSTS.149.1.S1_at    | MmuSTS.149.1  | 7.26  | 6.5   | 0.55 | 0.41 | 1.7   | 0.150778 | 0.033552 | 0.515443 | 0.226764 |
| MmuSTS.1490.1.S1_at   | MmuSTS.1490.1 | 11.62 | 11.48 | 0.12 | 0.81 | 1.1   | 0.319112 | 0.432194 | 0.648688 | 0.652775 |
| MmuSTS.1491.1.S1_at   | MmuSTS.1491.1 | 9.54  | 10.04 | 0.12 | 0.2  | -1.41 | 0.017883 | 0.011028 | 0.26813  | 0.136793 |
| MmuSTS.1492.1.S1_at   | MmuSTS.1492.1 | 8.7   | 9.38  | 0.51 | 0.13 | -1.59 | 0.042607 | 0.026746 | 0.355272 | 0.204493 |

|                     |               |       |       |      |      |        |          |          |          |          |
|---------------------|---------------|-------|-------|------|------|--------|----------|----------|----------|----------|
| MmuSTS.1493.1.S1_at | MmuSTS.1493.1 | 8.51  | 7.8   | 0.08 | 0.3  | 1.64   | 0.018609 | 0.006091 | 0.270793 | 0.106327 |
| MmuSTS.1494.1.S1_at | MmuSTS.1494.1 | 11.71 | 11.68 | 0.17 | 0.08 | 1.02   | 0.404976 | 0.36569  | 0.703082 | 0.605684 |
| MmuSTS.1495.1.S1_at | MmuSTS.1495.1 | 7.43  | 7.21  | 0.15 | 0.66 | 1.17   | 0.887498 | 0.692963 | 0.954863 | 0.821324 |
| MmuSTS.1496.1.S1_at | MmuSTS.1496.1 | 11.97 | 12.27 | 0.09 | 0.13 | -1.24  | 0.018298 | 0.016949 | 0.269791 | 0.165073 |
| MmuSTS.1497.1.S1_at | MmuSTS.1497.1 | 7.46  | 7.55  | 0.87 | 0.11 | -1.07  | 0.847871 | 0.955164 | 0.939063 | 0.9746   |
| MmuSTS.1498.1.S1_at | MmuSTS.1498.1 | 11.05 | 11.43 | 0.25 | 0.12 | -1.31  | 0.141006 | 0.051235 | 0.508611 | 0.271799 |
| MmuSTS.1499.1.S1_at | MmuSTS.1499.1 | 11.49 | 11.48 | 0.11 | 0.18 | 1.01   | 0.87807  | 0.040739 | 0.951038 | 0.246735 |
| MmuSTS.15.1.S1_at   | MmuSTS.15.1   | 7.97  | 10.44 | 0.29 | 0.32 | -5.51  | 0.000718 | 0.000329 | 0.136818 | 0.035806 |
| MmuSTS.150.1.S1_at  | MmuSTS.150.1  | 9.2   | 8.26  | 0.22 | 0.27 | 1.92   | 0.011165 | 0.007637 | 0.234598 | 0.116928 |
| MmuSTS.1500.1.S1_at | MmuSTS.1500.1 | 12.32 | 12.91 | 0.38 | 0.19 | -1.5   | 0.199871 | 0.237763 | 0.562929 | 0.50826  |
| MmuSTS.1501.1.S1_at | MmuSTS.1501.1 | 10.49 | 11.95 | 0.47 | 0.2  | -2.75  | 0.005546 | 0.001743 | 0.191807 | 0.062895 |
| MmuSTS.1502.1.S1_at | MmuSTS.1502.1 | 9.35  | 8.41  | 0.37 | 0.35 | 1.92   | 0.021897 | 0.017355 | 0.284133 | 0.166751 |
| MmuSTS.1503.1.S1_at | MmuSTS.1503.1 | 7.27  | 7.9   | 0.32 | 0.47 | -1.54  | 0.184165 | 0.249623 | 0.548032 | 0.518682 |
| MmuSTS.1504.1.S1_at | MmuSTS.1504.1 | 12.75 | 12.73 | 0.16 | 0.86 | 1.01   | 0.375807 | 0.460063 | 0.684803 | 0.671989 |
| MmuSTS.1505.1.S1_at | MmuSTS.1505.1 | 4.69  | 5.07  | 0.39 | 0.6  | -1.31  | 0.288912 | 0.014221 | 0.62688  | 0.152283 |
| MmuSTS.1506.1.S1_at | MmuSTS.1506.1 | 7.41  | 7.34  | 0.02 | 0.6  | 1.05   | 0.881941 | 0.018068 | 0.952617 | 0.169379 |
| MmuSTS.1507.1.S1_at | MmuSTS.1507.1 | 8.24  | 8.6   | 0.13 | 0.41 | -1.28  | 0.078664 | 0.118424 | 0.428609 | 0.386431 |
| MmuSTS.1508.1.S1_at | MmuSTS.1508.1 | 7.78  | 7.98  | 0.5  | 0.31 | -1.15  | 0.391727 | 0.291949 | 0.694179 | 0.552156 |
| MmuSTS.1509.1.S1_at | MmuSTS.1509.1 | 6.5   | 6.82  | 0.06 | 0.13 | -1.25  | 0.043122 | 0.018119 | 0.356343 | 0.169609 |
| MmuSTS.151.1.S1_at  | MmuSTS.151.1  | 9.16  | 7.28  | 0.05 | 0.68 | 3.68   | 0.017517 | 0.003603 | 0.267445 | 0.085876 |
| MmuSTS.1510.1.S1_at | MmuSTS.1510.1 | 11.99 | 11.57 | 0.22 | 0.1  | 1.33   | 0.025734 | 0.040819 | 0.300376 | 0.246981 |
| MmuSTS.1511.1.S1_at | MmuSTS.1511.1 | 8.67  | 9.38  | 0.18 | 0.29 | -1.64  | 0.022774 | 0.007009 | 0.288168 | 0.113    |
| MmuSTS.1512.1.S1_at | MmuSTS.1512.1 | 11.31 | 10.61 | 0.16 | 0.2  | 1.62   | 0.008115 | 0.002203 | 0.216555 | 0.069315 |
| MmuSTS.1513.1.S1_at | MmuSTS.1513.1 | 10.38 | 10.5  | 0.33 | 0.2  | -1.08  | 0.850497 | 0.10645  | 0.939988 | 0.368999 |
| MmuSTS.1514.1.S1_at | MmuSTS.1514.1 | 9.41  | 9.79  | 0.16 | 0.87 | -1.3   | 0.590466 | 0.568054 | 0.809851 | 0.741761 |
| MmuSTS.1515.1.S1_at | MmuSTS.1515.1 | 5.09  | 4.69  | 0.54 | 0.57 | 1.32   | 0.853242 | 0.508107 | 0.940741 | 0.70337  |
| MmuSTS.1516.1.S1_at | MmuSTS.1516.1 | 9.21  | 8.88  | 0.21 | 0.38 | 1.26   | 0.520937 | 0.354076 | 0.77105  | 0.597048 |
| MmuSTS.1517.1.S1_at | MmuSTS.1517.1 | 8.62  | 7.94  | 0.31 | 0.11 | 1.61   | 0.028729 | 0.00736  | 0.312166 | 0.115215 |
| MmuSTS.1518.1.S1_at | MmuSTS.1518.1 | 6.24  | 6.86  | 1.19 | 0.48 | -1.53  | 0.253172 | 0.120987 | 0.60185  | 0.389975 |
| MmuSTS.1519.1.S1_at | MmuSTS.1519.1 | 8.77  | 8.73  | 0.37 | 0.59 | 1.03   | 0.943743 | 0.888019 | 0.978535 | 0.936169 |
| MmuSTS.152.1.S1_at  | MmuSTS.152.1  | 10.5  | 10.47 | 0.05 | 0.37 | 1.02   | 0.749856 | 0.22632  | 0.892776 | 0.498781 |
| MmuSTS.1520.1.S1_at | MmuSTS.1520.1 | 11.09 | 11.11 | 0.17 | 0.57 | -1.01  | 0.376656 | 0.383034 | 0.685249 | 0.619068 |
| MmuSTS.1521.1.S1_at | MmuSTS.1521.1 | 3.75  | 3.82  | 0.07 | 0.32 | -1.05  | 0.244871 | 0.436756 | 0.596493 | 0.656276 |
| MmuSTS.1522.1.S1_at | MmuSTS.1522.1 | 7.35  | 7.34  | 0.41 | 0.07 | 1.01   | 0.403502 | 0.473386 | 0.702075 | 0.68068  |
| MmuSTS.1523.1.S1_at | MmuSTS.1523.1 | 9.59  | 13.43 | 1.88 | 3.15 | -14.33 | 0.671059 | 0.329946 | 0.852532 | 0.578874 |
| MmuSTS.1524.1.S1_at | MmuSTS.1524.1 | 11.11 | 10.87 | 0.15 | 0.03 | 1.19   | 0.021252 | 0.020509 | 0.282524 | 0.179742 |
| MmuSTS.1525.1.S1_at | MmuSTS.1525.1 | 7.33  | 6.45  | 0.22 | 1.09 | 1.84   | 0.280651 | 0.238817 | 0.621742 | 0.509485 |
| MmuSTS.1526.1.S1_at | MmuSTS.1526.1 | 12.53 | 12.51 | 0.11 | 0.17 | 1.01   | 0.337717 | 0.461827 | 0.660209 | 0.673361 |
| MmuSTS.1527.1.S1_at | MmuSTS.1527.1 | 12.7  | 12.52 | 0.06 | 0.02 | 1.14   | 0.006652 | 0.003228 | 0.201057 | 0.082124 |
| MmuSTS.1528.1.S1_at | MmuSTS.1528.1 | 11.13 | 11.19 | 0.04 | 0.12 | -1.05  | 0.330946 | 0.1356   | 0.656063 | 0.407742 |
| MmuSTS.1529.1.S1_at | MmuSTS.1529.1 | 12.87 | 12.78 | 0.05 | 0.17 | 1.06   | 0.367846 | 0.366761 | 0.679652 | 0.6065   |

|                       |               |       |       |      |      |       |          |          |          |          |
|-----------------------|---------------|-------|-------|------|------|-------|----------|----------|----------|----------|
| MmuSTS.153.1.S1_at    | MmuSTS.153.1  | 10.28 | 9.67  | 0.15 | 0.28 | 1.53  | 0.031797 | 0.01286  | 0.32289  | 0.14601  |
| MmuSTS.1530.1.S1_at   | MmuSTS.1530.1 | 5.76  | 5.84  | 0.43 | 0.13 | -1.06 | 0.735158 | 0.900243 | 0.886095 | 0.943337 |
| MmuSTS.1531.1.S1_at   | MmuSTS.1531.1 | 7.84  | 6.08  | 0.87 | 0.23 | 3.37  | 0.019851 | 0.00659  | 0.275714 | 0.110037 |
| MmuSTS.1532.1.S1_at   | MmuSTS.1532.1 | 8.43  | 8.71  | 0.28 | 0.08 | -1.22 | 0.248272 | 0.430538 | 0.599152 | 0.651544 |
| MmuSTS.1533.1.S1_at   | MmuSTS.1533.1 | 8.02  | 8.08  | 0.01 | 0.21 | -1.05 | 0.5476   | 0.316396 | 0.786269 | 0.569809 |
| MmuSTS.1533.1.S1_s_at | MmuSTS.1533.1 | 11.95 | 11.9  | 0.1  | 0.21 | 1.04  | 0.952273 | 0.184369 | 0.982156 | 0.460458 |
| MmuSTS.1534.1.S1_at   | MmuSTS.1534.1 | 10.42 | 9.26  | 0.41 | 0.11 | 2.23  | 0.00576  | 0.000656 | 0.192709 | 0.043559 |
| MmuSTS.1535.1.S1_at   | MmuSTS.1535.1 | 10.34 | 9.47  | 0.19 | 0.5  | 1.83  | 0.039515 | 0.007316 | 0.347288 | 0.114875 |
| MmuSTS.1536.1.S1_at   | MmuSTS.1536.1 | 5.15  | 5.18  | 0.23 | 0.15 | -1.02 | 0.580868 | 0.531362 | 0.804812 | 0.718591 |
| MmuSTS.1537.1.S1_at   | MmuSTS.1537.1 | 12.19 | 12.8  | 0.29 | 0.31 | -1.53 | 0.070297 | 0.07423  | 0.413911 | 0.318046 |
| MmuSTS.1538.1.S1_at   | MmuSTS.1538.1 | 6.41  | 6.71  | 0.3  | 0.44 | -1.23 | 0.554133 | 0.009582 | 0.790667 | 0.129001 |
| MmuSTS.1539.1.S1_at   | MmuSTS.1539.1 | 13.03 | 12.49 | 0.11 | 0.21 | 1.45  | 0.00944  | 0.002684 | 0.225096 | 0.076408 |
| MmuSTS.154.1.S1_x_at  | MmuSTS.154.1  | 3.95  | 4.57  | 0.67 | 0.36 | -1.54 | 0.609893 | 0.455816 | 0.820731 | 0.669659 |
| MmuSTS.1540.1.S1_at   | MmuSTS.1540.1 | 9.79  | 9.58  | 0.21 | 0.23 | 1.16  | 0.394863 | 0.134003 | 0.696162 | 0.406197 |
| MmuSTS.1541.1.S1_at   | MmuSTS.1541.1 | 11.11 | 10.53 | 0.35 | 0.2  | 1.5   | 0.081841 | 0.071943 | 0.432956 | 0.314293 |
| MmuSTS.1542.1.S1_at   | MmuSTS.1542.1 | 11.91 | 11.7  | 0.07 | 0.22 | 1.16  | 0.107366 | 0.01243  | 0.468045 | 0.144098 |
| MmuSTS.1543.1.S1_at   | MmuSTS.1543.1 | 3.39  | 3.4   | 0.18 | 0.15 | -1    | 0.867945 | 0.955964 | 0.947274 | 0.975016 |
| MmuSTS.1544.1.S1_at   | MmuSTS.1544.1 | 4.4   | 4.24  | 0.39 | 0.37 | 1.12  | 0.820244 | 0.577481 | 0.92682  | 0.747923 |
| MmuSTS.1545.1.S1_at   | MmuSTS.1545.1 | 7.55  | 7.88  | 0.54 | 0.49 | -1.26 | 0.490968 | 0.671012 | 0.754703 | 0.807635 |
| MmuSTS.1546.1.S1_at   | MmuSTS.1546.1 | 10.02 | 10.92 | 0.3  | 0.88 | -1.87 | 0.479913 | 0.274011 | 0.747918 | 0.538517 |
| MmuSTS.1547.1.S1_at   | MmuSTS.1547.1 | 3.51  | 3.57  | 0.03 | 0.06 | -1.04 | 0.365648 | 0.228179 | 0.678363 | 0.500351 |
| MmuSTS.1547.1.S1_s_at | MmuSTS.1547.1 | 5.34  | 5.49  | 0.51 | 0.43 | -1.11 | 0.861463 | 0.635584 | 0.944134 | 0.785437 |
| MmuSTS.1547.1.S1_x_at | MmuSTS.1547.1 | 4.26  | 4.21  | 0.09 | 0.17 | 1.04  | 0.194893 | 0.308803 | 0.558493 | 0.56463  |
| MmuSTS.1548.1.S1_at   | MmuSTS.1548.1 | 5.72  | 6     | 0.08 | 0.53 | -1.22 | 0.452141 | 0.671495 | 0.731944 | 0.807948 |
| MmuSTS.1549.1.S1_at   | MmuSTS.1549.1 | 10.57 | 10.49 | 0.17 | 0.42 | 1.06  | 0.557943 | 0.643782 | 0.792892 | 0.791128 |
| MmuSTS.155.1.S1_at    | MmuSTS.155.1  | 4.62  | 4.73  | 0.13 | 0.1  | -1.08 | 0.085467 | 0.268627 | 0.439344 | 0.534138 |
| MmuSTS.1550.1.S1_at   | MmuSTS.1550.1 | 10.8  | 10.85 | 0.1  | 0.12 | -1.04 | 0.542761 | 0.756472 | 0.783614 | 0.858223 |
| MmuSTS.1551.1.S1_at   | MmuSTS.1551.1 | 10.4  | 11.54 | 0.15 | 0.25 | -2.19 | 0.002271 | 0.00121  | 0.161559 | 0.054455 |
| MmuSTS.1552.1.S1_x_at | MmuSTS.1552.1 | 7.76  | 7.9   | 0.04 | 0.12 | -1.1  | 0.088035 | 0.053152 | 0.442351 | 0.276345 |
| MmuSTS.1553.1.S1_at   | MmuSTS.1553.1 | 8.85  | 8.1   | 0.18 | 0.19 | 1.68  | 0.006119 | 0.001863 | 0.195826 | 0.064697 |
| MmuSTS.1554.1.S1_at   | MmuSTS.1554.1 | 8.5   | 9.2   | 0.32 | 0.54 | -1.63 | 0.222435 | 0.274046 | 0.580951 | 0.538527 |
| MmuSTS.1555.1.S1_at   | MmuSTS.1555.1 | 10.75 | 10.44 | 0.21 | 0.5  | 1.24  | 0.780223 | 0.669964 | 0.908487 | 0.806982 |
| MmuSTS.1556.1.S1_at   | MmuSTS.1556.1 | 8.71  | 7.89  | 0.4  | 0.28 | 1.77  | 0.128638 | 0.012807 | 0.494653 | 0.145832 |
| MmuSTS.1557.1.S1_at   | MmuSTS.1557.1 | 11.05 | 11.15 | 0.03 | 0.35 | -1.07 | 0.709983 | 0.549252 | 0.87278  | 0.729737 |
| MmuSTS.1558.1.S1_at   | MmuSTS.1558.1 | 10.33 | 8.89  | 0.6  | 0.26 | 2.72  | 0.017535 | 0.008142 | 0.267445 | 0.119736 |
| MmuSTS.1559.1.S1_at   | MmuSTS.1559.1 | 10.97 | 10.62 | 0.62 | 0.05 | 1.28  | 0.16442  | 0.116709 | 0.528313 | 0.383888 |
| MmuSTS.156.1.S1_at    | MmuSTS.156.1  | 11.07 | 11.52 | 0.07 | 0.29 | -1.36 | 0.057484 | 0.021079 | 0.388505 | 0.181869 |
| MmuSTS.1560.1.S1_at   | MmuSTS.1560.1 | 7.41  | 7.52  | 1.79 | 0.65 | -1.08 | 0.871161 | 0.96014  | 0.948463 | 0.977408 |
| MmuSTS.1561.1.S1_s_at | MmuSTS.1561.1 | 12.43 | 12.61 | 0.05 | 0.1  | -1.13 | 0.03667  | 0.016977 | 0.340048 | 0.165195 |
| MmuSTS.1562.1.S1_at   | MmuSTS.1562.1 | 3.16  | 3.14  | 0.04 | 0.16 | 1.01  | 0.869803 | 0.072879 | 0.947917 | 0.315928 |
| MmuSTS.1563.1.S1_at   | MmuSTS.1563.1 | 10.55 | 9.3   | 0.16 | 0.64 | 2.38  | 0.037729 | 0.024642 | 0.342718 | 0.196442 |

|                       |               |       |       |      |      |        |          |          |          |          |
|-----------------------|---------------|-------|-------|------|------|--------|----------|----------|----------|----------|
| MmuSTS.1564.1.S1_at   | MmuSTS.1564.1 | 5.33  | 8.88  | 1.2  | 2.64 | -11.74 | 0.298262 | 0.155379 | 0.633823 | 0.430771 |
| MmuSTS.1565.1.S1_at   | MmuSTS.1565.1 | 8.2   | 7.15  | 0.3  | 0.75 | 2.06   | 0.035793 | 0.018885 | 0.337573 | 0.172872 |
| MmuSTS.1566.1.S1_at   | MmuSTS.1566.1 | 8.61  | 5.45  | 0.94 | 1.38 | 8.93   | 0.130595 | 0.13915  | 0.496961 | 0.412266 |
| MmuSTS.1567.1.S1_at   | MmuSTS.1567.1 | 8.88  | 8.81  | 0.32 | 0.27 | 1.05   | 0.783666 | 0.665348 | 0.909657 | 0.803901 |
| MmuSTS.1568.1.S1_at   | MmuSTS.1568.1 | 4.62  | 4.76  | 0.01 | 0.13 | -1.11  | 0.402655 | 0.404997 | 0.701544 | 0.633428 |
| MmuSTS.1569.1.S1_at   | MmuSTS.1569.1 | 3.56  | 3.66  | 0.28 | 0.38 | -1.07  | 0.985414 | 0.548451 | 0.99475  | 0.729185 |
| MmuSTS.157.1.S1_at    | MmuSTS.157.1  | 7     | 6.33  | 0.16 | 0.23 | 1.59   | 0.006896 | 0.010909 | 0.202181 | 0.136002 |
| MmuSTS.1570.1.S1_at   | MmuSTS.1570.1 | 10.23 | 9.85  | 0.21 | 0.43 | 1.3    | 0.237287 | 0.285107 | 0.590811 | 0.547098 |
| MmuSTS.1571.1.S1_at   | MmuSTS.1571.1 | 9.39  | 10.04 | 0.11 | 0.25 | -1.57  | 0.005473 | 0.002703 | 0.191178 | 0.076461 |
| MmuSTS.1572.1.S1_at   | MmuSTS.1572.1 | 9.18  | 9.54  | 0.28 | 0.36 | -1.28  | 0.57634  | 0.709791 | 0.802914 | 0.831832 |
| MmuSTS.1573.1.S1_at   | MmuSTS.1573.1 | 11    | 10.59 | 0.23 | 0.09 | 1.33   | 0.115876 | 0.038143 | 0.479325 | 0.239936 |
| MmuSTS.1574.1.S1_at   | MmuSTS.1574.1 | 7.67  | 7.53  | 0.09 | 0.1  | 1.11   | 0.283797 | 0.032213 | 0.623796 | 0.222139 |
| MmuSTS.1575.1.S1_at   | MmuSTS.1575.1 | 3.26  | 3.39  | 0.03 | 0.15 | -1.09  | 0.569156 | 0.830992 | 0.798992 | 0.903044 |
| MmuSTS.1576.1.S1_at   | MmuSTS.1576.1 | 4.54  | 4.34  | 0.07 | 0.26 | 1.15   | 0.919004 | 0.1846   | 0.968459 | 0.460628 |
| MmuSTS.1577.1.S1_at   | MmuSTS.1577.1 | 9.39  | 10.25 | 0.34 | 0.56 | -1.81  | 0.07438  | 0.068934 | 0.419963 | 0.308909 |
| MmuSTS.1578.1.S1_at   | MmuSTS.1578.1 | 10.31 | 11.13 | 0.7  | 0.48 | -1.77  | 0.12152  | 0.083673 | 0.486438 | 0.334346 |
| MmuSTS.1579.1.S1_at   | MmuSTS.1579.1 | 8.71  | 8.87  | 0.37 | 0.52 | -1.12  | 0.902971 | 0.281564 | 0.961391 | 0.54464  |
| MmuSTS.158.1.S1_at    | MmuSTS.158.1  | 6.27  | 6.6   | 0.53 | 1.07 | -1.25  | 0.542228 | 0.648168 | 0.783138 | 0.794002 |
| MmuSTS.1580.1.S1_at   | MmuSTS.1580.1 | 9.85  | 10.2  | 0.31 | 0.94 | -1.27  | 0.278484 | 0.385653 | 0.620536 | 0.621079 |
| MmuSTS.1581.1.S1_at   | MmuSTS.1581.1 | 8.99  | 12.5  | 1.37 | 2.07 | -11.41 | 0.324942 | 0.170182 | 0.652259 | 0.446906 |
| MmuSTS.1582.1.S1_s_at | MmuSTS.1582.1 | 8.22  | 8.42  | 0.2  | 0.19 | -1.15  | 0.916593 | 0.1358   | 0.96735  | 0.407979 |
| MmuSTS.1583.1.S1_at   | MmuSTS.1583.1 | 8.33  | 7.02  | 0.17 | 0.06 | 2.48   | 0.00031  | 0.000259 | 0.12562  | 0.033501 |
| MmuSTS.1584.1.S1_at   | MmuSTS.1584.1 | 10.88 | 10.34 | 0.05 | 0.26 | 1.45   | 0.010228 | 0.002246 | 0.228247 | 0.069739 |
| MmuSTS.1585.1.S1_at   | MmuSTS.1585.1 | 5.75  | 5.96  | 0.28 | 0.16 | -1.16  | 0.680822 | 0.220673 | 0.857325 | 0.494087 |
| MmuSTS.1586.1.S1_at   | MmuSTS.1586.1 | 4.69  | 4.72  | 0.16 | 0.07 | -1.02  | 0.379907 | 0.491882 | 0.68708  | 0.693275 |
| MmuSTS.1587.1.S1_at   | MmuSTS.1587.1 | 5.01  | 5.01  | 0.17 | 0.33 | 1      | 0.688306 | 0.563892 | 0.860959 | 0.738913 |
| MmuSTS.1588.1.S1_at   | MmuSTS.1588.1 | 10.28 | 10.17 | 0.04 | 0.12 | 1.08   | 0.142567 | 0.004159 | 0.509727 | 0.091036 |
| MmuSTS.1589.1.S1_at   | MmuSTS.1589.1 | 10.76 | 10.91 | 0.48 | 0.29 | -1.11  | 0.889378 | 0.634381 | 0.955717 | 0.784774 |
| MmuSTS.159.1.S1_at    | MmuSTS.159.1  | 9.31  | 10.25 | 0.29 | 0.92 | -1.91  | 0.148909 | 0.052559 | 0.51391  | 0.274848 |
| MmuSTS.1590.1.S1_at   | MmuSTS.1590.1 | 9.66  | 10.27 | 0.31 | 0.35 | -1.52  | 0.058847 | 0.018796 | 0.390921 | 0.172349 |
| MmuSTS.1591.1.S1_at   | MmuSTS.1591.1 | 12.94 | 12.99 | 0.24 | 0.38 | -1.04  | 0.522874 | 0.713279 | 0.772248 | 0.833666 |
| MmuSTS.1592.1.S1_at   | MmuSTS.1592.1 | 6.9   | 5.44  | 1.41 | 0.41 | 2.76   | 0.186576 | 0.224061 | 0.550106 | 0.497048 |
| MmuSTS.1593.1.S1_at   | MmuSTS.1593.1 | 11.48 | 11.51 | 0.05 | 0.18 | -1.02  | 0.486795 | 0.561177 | 0.751743 | 0.737224 |
| MmuSTS.1594.1.S1_at   | MmuSTS.1594.1 | 10.76 | 10.19 | 0.14 | 0.63 | 1.48   | 0.333673 | 0.182038 | 0.657777 | 0.45857  |
| MmuSTS.1595.1.S1_at   | MmuSTS.1595.1 | 11.34 | 12.06 | 0.04 | 0.24 | -1.64  | 0.007075 | 0.002467 | 0.20404  | 0.073576 |
| MmuSTS.1596.1.S1_at   | MmuSTS.1596.1 | 7.71  | 7.66  | 0.14 | 0.31 | 1.03   | 0.517447 | 0.323809 | 0.76879  | 0.574609 |
| MmuSTS.1597.1.S1_at   | MmuSTS.1597.1 | 11.75 | 11.66 | 0.17 | 0.18 | 1.06   | 0.260291 | 0.17245  | 0.607093 | 0.448864 |
| MmuSTS.1598.1.S1_at   | MmuSTS.1598.1 | 5.06  | 5.13  | 0.11 | 0.06 | -1.05  | 0.197354 | 0.32621  | 0.560377 | 0.576411 |
| MmuSTS.1599.1.S1_at   | MmuSTS.1599.1 | 3.24  | 3.35  | 0.46 | 0.21 | -1.08  | 0.701491 | 0.677705 | 0.868043 | 0.811777 |
| MmuSTS.16.1.S1_s_at   | MmuSTS.16.1   | 14.37 | 14.2  | 0.07 | 0.18 | 1.12   | 0.210913 | 0.14063  | 0.571977 | 0.413897 |
| MmuSTS.16.1.S1_x_at   | MmuSTS.16.1   | 9.75  | 9.57  | 0.09 | 0.14 | 1.13   | 0.25875  | 0.099293 | 0.605954 | 0.357562 |

|                       |               |       |       |      |      |       |          |          |          |          |
|-----------------------|---------------|-------|-------|------|------|-------|----------|----------|----------|----------|
| MmuSTS.160.1.S1_at    | MmuSTS.160.1  | 5.81  | 5.2   | 0.62 | 0.33 | 1.53  | 0.375756 | 0.413566 | 0.684803 | 0.639648 |
| MmuSTS.1600.1.S1_at   | MmuSTS.1600.1 | 7.42  | 7     | 0.28 | 0.23 | 1.34  | 0.026104 | 0.062002 | 0.30146  | 0.295878 |
| MmuSTS.1601.1.S1_at   | MmuSTS.1601.1 | 7.6   | 7.96  | 0.19 | 0.32 | -1.28 | 0.097621 | 0.093326 | 0.456709 | 0.349412 |
| MmuSTS.1602.1.S1_at   | MmuSTS.1602.1 | 6.08  | 6.16  | 0.24 | 0.18 | -1.06 | 0.339857 | 0.455017 | 0.661507 | 0.66903  |
| MmuSTS.1603.1.S1_at   | MmuSTS.1603.1 | 4.32  | 4.04  | 0.28 | 0.3  | 1.21  | 0.472126 | 0.129751 | 0.743515 | 0.401362 |
| MmuSTS.1604.1.S1_at   | MmuSTS.1604.1 | 3.41  | 3.51  | 0.11 | 0.17 | -1.07 | 0.306767 | 0.170343 | 0.639665 | 0.447103 |
| MmuSTS.1605.1.S1_at   | MmuSTS.1605.1 | 5.72  | 5.53  | 0.33 | 0.05 | 1.14  | 0.386329 | 0.475252 | 0.691258 | 0.682031 |
| MmuSTS.1606.1.S1_at   | MmuSTS.1606.1 | 4.34  | 5.18  | 1.05 | 1.45 | -1.79 | 0.835512 | 0.58586  | 0.933379 | 0.753074 |
| MmuSTS.1607.1.S1_at   | MmuSTS.1607.1 | 9.85  | 8.22  | 0.91 | 0.23 | 3.1   | 0.016406 | 0.01369  | 0.263876 | 0.14978  |
| MmuSTS.1608.1.S1_at   | MmuSTS.1608.1 | 11.43 | 10.86 | 0.23 | 0.19 | 1.48  | 0.02695  | 0.005129 | 0.305408 | 0.099421 |
| MmuSTS.1609.1.S1_at   | MmuSTS.1609.1 | 6.68  | 6.78  | 0.11 | 0.22 | -1.07 | 0.966062 | 0.999081 | 0.987096 | 0.999573 |
| MmuSTS.161.1.S1_at    | MmuSTS.161.1  | 8.42  | 7.4   | 0.21 | 0.02 | 2.03  | 0.000858 | 0.000326 | 0.139563 | 0.035633 |
| MmuSTS.1610.1.S1_at   | MmuSTS.1610.1 | 10.61 | 11.02 | 0.14 | 0.47 | -1.33 | 0.821696 | 0.154623 | 0.927464 | 0.429518 |
| MmuSTS.1611.1.S1_at   | MmuSTS.1611.1 | 11.42 | 11.84 | 0.18 | 0.37 | -1.33 | 0.613639 | 0.5648   | 0.822845 | 0.739427 |
| MmuSTS.1612.1.S1_at   | MmuSTS.1612.1 | 5.31  | 7.3   | 0.67 | 1.96 | -3.97 | 0.194793 | 0.194696 | 0.558334 | 0.469765 |
| MmuSTS.1613.1.S1_at   | MmuSTS.1613.1 | 9.2   | 10.8  | 0.32 | 0.3  | -3.03 | 0.004455 | 0.001591 | 0.18357  | 0.06044  |
| MmuSTS.1614.1.S1_at   | MmuSTS.1614.1 | 11.82 | 11.48 | 0.14 | 0.18 | 1.27  | 0.058407 | 0.03391  | 0.39034  | 0.227771 |
| MmuSTS.1615.1.S1_at   | MmuSTS.1615.1 | 6.05  | 6.23  | 0.22 | 0.03 | -1.14 | 0.712477 | 0.52821  | 0.874062 | 0.716462 |
| MmuSTS.1616.1.S1_at   | MmuSTS.1616.1 | 4.23  | 4.32  | 0.14 | 0.11 | -1.06 | 0.788549 | 0.936485 | 0.91217  | 0.964171 |
| MmuSTS.1617.1.S1_at   | MmuSTS.1617.1 | 8.28  | 8.75  | 0.24 | 0.37 | -1.39 | 0.057299 | 0.048096 | 0.387873 | 0.26436  |
| MmuSTS.1618.1.S1_at   | MmuSTS.1618.1 | 11.6  | 10.79 | 0.06 | 0.18 | 1.75  | 0.002043 | 0.000306 | 0.155636 | 0.034918 |
| MmuSTS.1619.1.S1_at   | MmuSTS.1619.1 | 10.28 | 9.19  | 0.15 | 0.15 | 2.12  | 0.001181 | 0.004917 | 0.145267 | 0.097749 |
| MmuSTS.162.1.S1_at    | MmuSTS.162.1  | 7.16  | 6.89  | 0.39 | 0.94 | 1.21  | 0.995754 | 0.172008 | 0.998446 | 0.448404 |
| MmuSTS.1620.1.S1_at   | MmuSTS.1620.1 | 10.72 | 11.2  | 0.44 | 0.08 | -1.39 | 0.522691 | 0.109477 | 0.772212 | 0.373337 |
| MmuSTS.1621.1.S1_at   | MmuSTS.1621.1 | 4.42  | 4.41  | 0.11 | 0.03 | 1     | 0.975269 | 0.078096 | 0.990425 | 0.324578 |
| MmuSTS.1622.1.S1_s_at | MmuSTS.1622.1 | 3.82  | 3.79  | 0.31 | 0.2  | 1.02  | 0.871178 | 0.857141 | 0.948463 | 0.918378 |
| MmuSTS.1623.1.S1_at   | MmuSTS.1623.1 | 5.03  | 4.24  | 0.27 | 0.25 | 1.73  | 0.041466 | 0.031978 | 0.351747 | 0.221216 |
| MmuSTS.1624.1.S1_s_at | MmuSTS.1624.1 | 4.23  | 4.4   | 0.06 | 0.17 | -1.13 | 0.68802  | 0.415289 | 0.860848 | 0.640769 |
| MmuSTS.1625.1.S1_at   | MmuSTS.1625.1 | 3.24  | 3.17  | 0.15 | 0.13 | 1.05  | 0.525011 | 0.074721 | 0.773363 | 0.318465 |
| MmuSTS.1626.1.S1_at   | MmuSTS.1626.1 | 9.14  | 9.16  | 0.22 | 0.45 | -1.02 | 0.723644 | 0.898777 | 0.879213 | 0.942417 |
| MmuSTS.1627.1.S1_at   | MmuSTS.1627.1 | 11.69 | 11.73 | 0.21 | 0.1  | -1.03 | 0.76148  | 0.638254 | 0.899576 | 0.787493 |
| MmuSTS.1628.1.S1_at   | MmuSTS.1628.1 | 3.24  | 3.28  | 0.05 | 0.1  | -1.03 | 0.819121 | 0.957859 | 0.926528 | 0.976177 |
| MmuSTS.1629.1.S1_at   | MmuSTS.1629.1 | 4.1   | 4.47  | 0.15 | 0.21 | -1.29 | 0.066507 | 0.024227 | 0.406564 | 0.194908 |
| MmuSTS.163.1.S1_at    | MmuSTS.163.1  | 3.38  | 3.32  | 0.07 | 0.2  | 1.05  | 0.649725 | 0.824624 | 0.842496 | 0.899309 |
| MmuSTS.1630.1.S1_s_at | MmuSTS.1630.1 | 6.72  | 6.66  | 0.18 | 0.09 | 1.05  | 0.559173 | 0.34076  | 0.79366  | 0.586956 |
| MmuSTS.1631.1.S1_s_at | MmuSTS.1631.1 | 7.54  | 7.62  | 0.17 | 0.08 | -1.06 | 0.275696 | 0.131305 | 0.617878 | 0.403407 |
| MmuSTS.1632.1.S1_s_at | MmuSTS.1632.1 | 4.07  | 3.95  | 0.12 | 0.12 | 1.09  | 0.911898 | 0.774721 | 0.965151 | 0.868833 |
| MmuSTS.1633.1.S1_at   | MmuSTS.1633.1 | 5.61  | 5.48  | 0.18 | 0.25 | 1.09  | 0.674448 | 0.504308 | 0.854194 | 0.701474 |
| MmuSTS.1634.1.S1_at   | MmuSTS.1634.1 | 3.56  | 3.57  | 0.02 | 0.15 | -1.01 | 0.282566 | 0.34967  | 0.622929 | 0.593563 |
| MmuSTS.1635.1.S1_at   | MmuSTS.1635.1 | 6.31  | 6.26  | 0.07 | 0.13 | 1.03  | 0.176269 | 0.301337 | 0.539887 | 0.559366 |
| MmuSTS.1636.1.S1_at   | MmuSTS.1636.1 | 4.27  | 4.11  | 0.09 | 0.03 | 1.12  | 0.156702 | 0.241533 | 0.521541 | 0.512152 |

|                       |               |       |       |      |      |       |          |          |          |          |
|-----------------------|---------------|-------|-------|------|------|-------|----------|----------|----------|----------|
| MmuSTS.1637.1.S1_at   | MmuSTS.1637.1 | 3.17  | 3.16  | 0.2  | 0.1  | 1.01  | 0.815118 | 0.95733  | 0.924824 | 0.975845 |
| MmuSTS.1638.1.S1_at   | MmuSTS.1638.1 | 3.85  | 3.89  | 0.41 | 0.05 | -1.03 | 0.437398 | 0.798384 | 0.722414 | 0.883979 |
| MmuSTS.1639.1.S1_at   | MmuSTS.1639.1 | 6.06  | 6.06  | 0.2  | 0.07 | -1    | 0.938249 | 0.704615 | 0.97635  | 0.828649 |
| MmuSTS.164.1.S1_at    | MmuSTS.164.1  | 6.47  | 8.83  | 0.77 | 1.26 | -5.13 | 0.166098 | 0.186631 | 0.529918 | 0.462425 |
| MmuSTS.1640.1.S1_at   | MmuSTS.1640.1 | 12.12 | 11.75 | 0.16 | 0.46 | 1.29  | 0.089348 | 0.078707 | 0.445032 | 0.325673 |
| MmuSTS.1641.1.S1_at   | MmuSTS.1641.1 | 6.26  | 6.36  | 0.11 | 0.2  | -1.07 | 0.17334  | 0.191658 | 0.537006 | 0.466936 |
| MmuSTS.1642.1.S1_at   | MmuSTS.1642.1 | 5.97  | 6.22  | 0.18 | 0.11 | -1.19 | 0.112153 | 0.073292 | 0.474673 | 0.316241 |
| MmuSTS.1643.1.S1_at   | MmuSTS.1643.1 | 6.43  | 6.3   | 0.18 | 0.13 | 1.1   | 0.769268 | 0.930115 | 0.902994 | 0.96025  |
| MmuSTS.1644.1.S1_at   | MmuSTS.1644.1 | 10.79 | 10.2  | 0.23 | 0.05 | 1.5   | 0.006551 | 0.002696 | 0.199625 | 0.076455 |
| MmuSTS.1645.1.S1_at   | MmuSTS.1645.1 | 5.1   | 5.25  | 0.19 | 0.05 | -1.11 | 0.873016 | 0.808786 | 0.94924  | 0.889895 |
| MmuSTS.1646.1.S1_at   | MmuSTS.1646.1 | 11.02 | 11.17 | 0.13 | 0.15 | -1.11 | 0.222465 | 0.304239 | 0.580951 | 0.561558 |
| MmuSTS.1647.1.S1_at   | MmuSTS.1647.1 | 4.36  | 4.45  | 0.02 | 0.16 | -1.06 | 0.304137 | 0.133569 | 0.638327 | 0.405542 |
| MmuSTS.1648.1.S1_at   | MmuSTS.1648.1 | 9.84  | 8.75  | 0.18 | 0.25 | 2.13  | 0.004725 | 0.001062 | 0.184492 | 0.051766 |
| MmuSTS.1649.1.S1_at   | MmuSTS.1649.1 | 7.11  | 7.8   | 2.07 | 1.54 | -1.62 | 0.812423 | 0.939446 | 0.923648 | 0.965611 |
| MmuSTS.165.1.S1_at    | MmuSTS.165.1  | 11.04 | 10.32 | 0.28 | 0.47 | 1.65  | 0.028875 | 0.009124 | 0.312166 | 0.125994 |
| MmuSTS.1650.1.S1_at   | MmuSTS.1650.1 | 8.9   | 9.32  | 0.23 | 0.09 | -1.34 | 0.045463 | 0.021699 | 0.361034 | 0.184333 |
| MmuSTS.1651.1.S1_at   | MmuSTS.1651.1 | 10.21 | 8.74  | 0.02 | 0.3  | 2.77  | 0.001664 | 0.000305 | 0.15365  | 0.034907 |
| MmuSTS.1652.1.S1_at   | MmuSTS.1652.1 | 9.58  | 9.03  | 0.15 | 0.47 | 1.46  | 0.257904 | 0.168741 | 0.605341 | 0.445379 |
| MmuSTS.1653.1.S1_at   | MmuSTS.1653.1 | 10.6  | 9.34  | 0.21 | 0.44 | 2.39  | 0.005723 | 0.009047 | 0.191956 | 0.1257   |
| MmuSTS.1654.1.S1_at   | MmuSTS.1654.1 | 2.52  | 2.72  | 0.02 | 0.12 | -1.15 | 0.052496 | 0.071879 | 0.377834 | 0.314181 |
| MmuSTS.1654.1.S1_s_at | MmuSTS.1654.1 | 5.18  | 5.03  | 0.24 | 0.08 | 1.11  | 0.581147 | 0.678934 | 0.804902 | 0.81252  |
| MmuSTS.1655.1.S1_at   | MmuSTS.1655.1 | 12.68 | 12.02 | 0.04 | 0.16 | 1.58  | 0.002077 | 0.000402 | 0.155636 | 0.037471 |
| MmuSTS.1656.1.S1_at   | MmuSTS.1656.1 | 5.57  | 5.49  | 0.12 | 0.22 | 1.05  | 0.735906 | 0.821313 | 0.886439 | 0.897125 |
| MmuSTS.1657.1.S1_at   | MmuSTS.1657.1 | 5.36  | 5.55  | 0.19 | 0.08 | -1.15 | 0.101864 | 0.125096 | 0.461313 | 0.395506 |
| MmuSTS.1658.1.S1_at   | MmuSTS.1658.1 | 9.26  | 8.46  | 0.38 | 0.16 | 1.75  | 0.063385 | 0.021195 | 0.400486 | 0.182325 |
| MmuSTS.1659.1.S1_at   | MmuSTS.1659.1 | 11.33 | 12.06 | 0.26 | 0.69 | -1.66 | 0.173843 | 0.176846 | 0.53736  | 0.453284 |
| MmuSTS.166.1.S1_at    | MmuSTS.166.1  | 13.59 | 13.23 | 0.14 | 0.15 | 1.28  | 0.024103 | 0.032352 | 0.294208 | 0.222667 |
| MmuSTS.1660.1.S1_at   | MmuSTS.1660.1 | 9.48  | 8.33  | 0.02 | 0.29 | 2.22  | 0.002444 | 0.000574 | 0.163555 | 0.041171 |
| MmuSTS.1661.1.S1_at   | MmuSTS.1661.1 | 6.01  | 6.22  | 0.1  | 0.22 | -1.15 | 0.220166 | 0.258568 | 0.579297 | 0.525819 |
| MmuSTS.1662.1.S1_at   | MmuSTS.1662.1 | 7.18  | 6.61  | 0.28 | 0.08 | 1.49  | 0.067687 | 0.100432 | 0.408357 | 0.359541 |
| MmuSTS.1663.1.S1_at   | MmuSTS.1663.1 | 9.53  | 8.96  | 0.14 | 0.23 | 1.49  | 0.01533  | 0.004923 | 0.258162 | 0.097801 |
| MmuSTS.1664.1.S1_at   | MmuSTS.1664.1 | 6.63  | 5.77  | 0.47 | 0.69 | 1.82  | 0.388583 | 0.549955 | 0.692653 | 0.730193 |
| MmuSTS.1665.1.S1_at   | MmuSTS.1665.1 | 9.17  | 9.07  | 0.07 | 0.25 | 1.07  | 0.819082 | 0.547997 | 0.926528 | 0.72884  |
| MmuSTS.1666.1.S1_at   | MmuSTS.1666.1 | 6.08  | 6.07  | 0.11 | 0.19 | 1.01  | 0.513689 | 0.528755 | 0.766429 | 0.716808 |
| MmuSTS.1667.1.S1_at   | MmuSTS.1667.1 | 4.91  | 4.92  | 0.17 | 0.09 | -1.01 | 0.661105 | 0.75282  | 0.84802  | 0.855977 |
| MmuSTS.1668.1.S1_at   | MmuSTS.1668.1 | 10.75 | 11.16 | 0.23 | 0.2  | -1.32 | 0.078261 | 0.010753 | 0.428221 | 0.135417 |
| MmuSTS.1669.1.S1_at   | MmuSTS.1669.1 | 6.81  | 7.34  | 0.1  | 0.43 | -1.45 | 0.103315 | 0.081186 | 0.462888 | 0.329351 |
| MmuSTS.167.1.S1_at    | MmuSTS.167.1  | 11.67 | 11.66 | 0.2  | 0.14 | 1.01  | 0.817545 | 0.181816 | 0.925948 | 0.458382 |
| MmuSTS.1670.1.S1_at   | MmuSTS.1670.1 | 8.48  | 8.12  | 0.66 | 0.3  | 1.28  | 0.496498 | 0.029451 | 0.757501 | 0.213368 |
| MmuSTS.1671.1.S1_at   | MmuSTS.1671.1 | 12.4  | 12.33 | 0.04 | 0.25 | 1.05  | 0.590484 | 0.550756 | 0.809851 | 0.730611 |
| MmuSTS.1672.1.S1_at   | MmuSTS.1672.1 | 6.03  | 5.89  | 0.22 | 0.32 | 1.1   | 0.895071 | 0.786368 | 0.95808  | 0.876293 |



|                       |               |       |       |      |      |       |          |          |          |          |
|-----------------------|---------------|-------|-------|------|------|-------|----------|----------|----------|----------|
| MmuSTS.1673.1.S1_at   | MmuSTS.1673.1 | 12.62 | 12.38 | 0.08 | 0.09 | 1.18  | 0.014149 | 0.002477 | 0.251402 | 0.073576 |
| MmuSTS.1674.1.S1_at   | MmuSTS.1674.1 | 11.02 | 10.94 | 0.14 | 0.15 | 1.05  | 0.859343 | 0.981758 | 0.943196 | 0.989984 |
| MmuSTS.1675.1.S1_at   | MmuSTS.1675.1 | 12.03 | 12.03 | 0.11 | 0.18 | -1    | 0.851362 | 0.743888 | 0.940204 | 0.85159  |
| MmuSTS.1676.1.S1_at   | MmuSTS.1676.1 | 9.74  | 8.9   | 0.21 | 0.54 | 1.79  | 0.0744   | 0.050383 | 0.420028 | 0.269722 |
| MmuSTS.1677.1.S1_at   | MmuSTS.1677.1 | 3.25  | 3.55  | 0.07 | 0.1  | -1.23 | 0.0131   | 0.011774 | 0.245262 | 0.140572 |
| MmuSTS.1678.1.S1_at   | MmuSTS.1678.1 | 7.11  | 7.07  | 0.24 | 0.35 | 1.03  | 0.739289 | 0.763194 | 0.888118 | 0.862339 |
| MmuSTS.1679.1.S1_at   | MmuSTS.1679.1 | 7.9   | 7.22  | 0.42 | 0.56 | 1.6   | 0.26253  | 0.283518 | 0.609006 | 0.545959 |
| MmuSTS.168.1.S1_s_at  | MmuSTS.168.1  | 11.18 | 10.99 | 0.14 | 0.47 | 1.13  | 0.381224 | 0.014206 | 0.687806 | 0.152207 |
| MmuSTS.168.1.S1_x_at  | MmuSTS.168.1  | 10.76 | 10.37 | 0.14 | 0.39 | 1.31  | 0.23416  | 0.002137 | 0.588621 | 0.06842  |
| MmuSTS.1680.1.S1_s_at | MmuSTS.1680.1 | 4.94  | 4.89  | 0.09 | 0.09 | 1.04  | 0.926642 | 0.009076 | 0.97179  | 0.125944 |
| MmuSTS.1681.1.S1_at   | MmuSTS.1681.1 | 7.82  | 7.72  | 0.31 | 0.33 | 1.07  | 0.816555 | 0.430325 | 0.9256   | 0.651371 |
| MmuSTS.1682.1.S1_at   | MmuSTS.1682.1 | 12.06 | 12.07 | 0.2  | 0.61 | -1    | 0.584825 | 0.773603 | 0.807159 | 0.868402 |
| MmuSTS.1683.1.S1_at   | MmuSTS.1683.1 | 9.01  | 8.31  | 0.19 | 0.23 | 1.64  | 0.013457 | 0.006155 | 0.24708  | 0.106774 |
| MmuSTS.1684.1.S1_at   | MmuSTS.1684.1 | 8.84  | 8.14  | 0.11 | 0.4  | 1.62  | 0.127549 | 0.178138 | 0.493834 | 0.454508 |
| MmuSTS.1685.1.S1_at   | MmuSTS.1685.1 | 8.46  | 7.79  | 0.12 | 0.13 | 1.59  | 0.002014 | 0.003762 | 0.155636 | 0.087395 |
| MmuSTS.1686.1.S1_at   | MmuSTS.1686.1 | 6.02  | 5.99  | 0.09 | 0.11 | 1.03  | 0.70602  | 0.145485 | 0.870392 | 0.419424 |
| MmuSTS.1687.1.S1_at   | MmuSTS.1687.1 | 11.48 | 12.02 | 0.1  | 0.3  | -1.46 | 0.073414 | 0.051215 | 0.41875  | 0.271799 |
| MmuSTS.1688.1.S1_at   | MmuSTS.1688.1 | 4.09  | 3.62  | 0.3  | 0.12 | 1.39  | 0.104117 | 0.095467 | 0.464201 | 0.352482 |
| MmuSTS.1689.1.S1_at   | MmuSTS.1689.1 | 6.87  | 9.3   | 0.9  | 0.68 | -5.36 | 0.028784 | 0.011344 | 0.312166 | 0.13815  |
| MmuSTS.169.1.S1_at    | MmuSTS.169.1  | 7.73  | 7.88  | 0.14 | 0.38 | -1.11 | 0.794273 | 0.263962 | 0.914561 | 0.530153 |
| MmuSTS.1690.1.S1_at   | MmuSTS.1690.1 | 5.74  | 5.87  | 0.32 | 0.07 | -1.09 | 0.95041  | 0.899627 | 0.981318 | 0.942903 |
| MmuSTS.1691.1.S1_at   | MmuSTS.1691.1 | 4.43  | 4.16  | 0.36 | 0.54 | 1.21  | 0.999718 | 0.986498 | 0.999967 | 0.992355 |
| MmuSTS.1692.1.S1_at   | MmuSTS.1692.1 | 9.2   | 9     | 0.26 | 0.18 | 1.15  | 0.338333 | 0.382609 | 0.660829 | 0.618778 |
| MmuSTS.1693.1.S1_at   | MmuSTS.1693.1 | 6.27  | 6.04  | 1.08 | 0.51 | 1.18  | 0.46127  | 0.171338 | 0.737488 | 0.447813 |
| MmuSTS.1694.1.S1_at   | MmuSTS.1694.1 | 9.27  | 9.09  | 0.61 | 0.17 | 1.14  | 0.632157 | 0.806882 | 0.833058 | 0.888872 |
| MmuSTS.1695.1.S1_at   | MmuSTS.1695.1 | 9.99  | 10.38 | 0.35 | 0.16 | -1.31 | 0.109316 | 0.024419 | 0.470811 | 0.195563 |
| MmuSTS.1696.1.S1_at   | MmuSTS.1696.1 | 2.83  | 2.77  | 0.05 | 0.01 | 1.04  | 0.156229 | 0.271792 | 0.520944 | 0.536577 |
| MmuSTS.1697.1.S1_at   | MmuSTS.1697.1 | 12.2  | 11.96 | 0.19 | 0.25 | 1.18  | 0.245791 | 0.249111 | 0.597234 | 0.51821  |
| MmuSTS.1698.1.S1_s_at | MmuSTS.1698.1 | 5.85  | 6.35  | 0.44 | 0.81 | -1.42 | 0.299192 | 0.422393 | 0.634753 | 0.645722 |
| MmuSTS.1699.1.S1_at   | MmuSTS.1699.1 | 6.72  | 6.8   | 0.11 | 0.15 | -1.06 | 0.725537 | 0.281071 | 0.88033  | 0.54422  |
| MmuSTS.17.1.S1_at     | MmuSTS.17.1   | 9.69  | 9.19  | 0.24 | 0.26 | 1.42  | 0.063506 | 0.053844 | 0.400654 | 0.277598 |
| MmuSTS.170.1.S1_at    | MmuSTS.170.1  | 7.94  | 8.08  | 0.14 | 0.25 | -1.1  | 0.348729 | 0.481406 | 0.667219 | 0.686434 |
| MmuSTS.1700.1.S1_at   | MmuSTS.1700.1 | 10.55 | 10.35 | 0.28 | 0.32 | 1.15  | 0.593789 | 0.443871 | 0.811569 | 0.661533 |
| MmuSTS.1701.1.S1_at   | MmuSTS.1701.1 | 7.64  | 8.48  | 0.42 | 0.91 | -1.79 | 0.244634 | 0.330462 | 0.596278 | 0.579193 |
| MmuSTS.1702.1.S1_at   | MmuSTS.1702.1 | 10.47 | 10    | 0.1  | 0.4  | 1.38  | 0.366953 | 0.369206 | 0.679255 | 0.608669 |
| MmuSTS.1703.1.S1_at   | MmuSTS.1703.1 | 4.91  | 4.98  | 0.13 | 0.09 | -1.05 | 0.421234 | 0.610792 | 0.712907 | 0.768889 |
| MmuSTS.1704.1.S1_at   | MmuSTS.1704.1 | 5.48  | 5.45  | 0.05 | 0.15 | 1.02  | 0.414056 | 0.494216 | 0.708796 | 0.69475  |
| MmuSTS.1705.1.S1_at   | MmuSTS.1705.1 | 9.48  | 10.08 | 0.14 | 0.3  | -1.51 | 0.124413 | 0.168895 | 0.490317 | 0.445458 |
| MmuSTS.1706.1.S1_at   | MmuSTS.1706.1 | 2.96  | 2.99  | 0.06 | 0.08 | -1.02 | 0.937348 | 0.980707 | 0.975858 | 0.989447 |
| MmuSTS.1707.1.S1_at   | MmuSTS.1707.1 | 9.7   | 8.78  | 0.25 | 0.54 | 1.89  | 0.164197 | 0.201649 | 0.528213 | 0.476208 |
| MmuSTS.1708.1.S1_at   | MmuSTS.1708.1 | 11.01 | 9.95  | 0.18 | 0.52 | 2.08  | 0.030814 | 0.015106 | 0.320053 | 0.156008 |

|                       |               |       |       |      |      |        |          |          |          |          |
|-----------------------|---------------|-------|-------|------|------|--------|----------|----------|----------|----------|
| MmuSTS.1709.1.S1_at   | MmuSTS.1709.1 | 9.24  | 11.61 | 1.02 | 1.96 | -5.17  | 0.359179 | 0.305907 | 0.673869 | 0.562732 |
| MmuSTS.171.1.S1_at    | MmuSTS.171.1  | 6.7   | 7.35  | 0.56 | 0.83 | -1.57  | 0.233734 | 0.230559 | 0.588317 | 0.50226  |
| MmuSTS.1710.1.S1_at   | MmuSTS.1710.1 | 5.51  | 5.83  | 0.02 | 0.04 | -1.24  | 0.000287 | 0.000711 | 0.12562  | 0.044419 |
| MmuSTS.1711.1.S1_at   | MmuSTS.1711.1 | 3.58  | 3.59  | 0.11 | 0.22 | -1.01  | 0.339611 | 0.445728 | 0.66132  | 0.662489 |
| MmuSTS.1712.1.S1_at   | MmuSTS.1712.1 | 11.97 | 11.13 | 0.12 | 0.31 | 1.8    | 0.011005 | 0.005682 | 0.233671 | 0.103959 |
| MmuSTS.1713.1.S1_at   | MmuSTS.1713.1 | 2.7   | 3.13  | 0.17 | 0.08 | -1.34  | 0.044183 | 0.039084 | 0.358244 | 0.242995 |
| MmuSTS.1714.1.S1_s_at | MmuSTS.1714.1 | 8.54  | 8.86  | 0.37 | 0.26 | -1.25  | 0.184937 | 0.202412 | 0.548379 | 0.476765 |
| MmuSTS.1715.1.S1_at   | MmuSTS.1715.1 | 4.11  | 4.07  | 0.11 | 0.06 | 1.02   | 0.478046 | 0.406201 | 0.747094 | 0.634213 |
| MmuSTS.1716.1.S1_at   | MmuSTS.1716.1 | 6.25  | 6.42  | 0.47 | 1.21 | -1.12  | 0.887671 | 0.772488 | 0.954863 | 0.867741 |
| MmuSTS.1717.1.S1_at   | MmuSTS.1717.1 | 5.65  | 7.22  | 0.65 | 0.53 | -2.98  | 0.129972 | 0.038733 | 0.496064 | 0.241835 |
| MmuSTS.1718.1.S1_at   | MmuSTS.1718.1 | 3.13  | 3.2   | 0.13 | 0.08 | -1.05  | 0.43383  | 0.547004 | 0.720251 | 0.728283 |
| MmuSTS.1719.1.S1_at   | MmuSTS.1719.1 | 9.68  | 9.42  | 0.14 | 0.12 | 1.2    | 0.156881 | 0.267848 | 0.521671 | 0.533607 |
| MmuSTS.172.1.S1_at    | MmuSTS.172.1  | 13.1  | 13.29 | 0.1  | 0.25 | -1.14  | 0.552276 | 0.70408  | 0.789376 | 0.828326 |
| MmuSTS.1720.1.S1_at   | MmuSTS.1720.1 | 6.78  | 7.07  | 0.49 | 0.29 | -1.22  | 0.657702 | 0.161938 | 0.846091 | 0.438029 |
| MmuSTS.1721.1.S1_at   | MmuSTS.1721.1 | 9.86  | 8.98  | 0.06 | 0.92 | 1.84   | 0.189748 | 0.182741 | 0.552667 | 0.459215 |
| MmuSTS.1722.1.S1_at   | MmuSTS.1722.1 | 13.99 | 13.67 | 0.04 | 0.04 | 1.24   | 0.001394 | 0.000228 | 0.146228 | 0.032385 |
| MmuSTS.1723.1.S1_at   | MmuSTS.1723.1 | 9.48  | 8.59  | 0.38 | 0.79 | 1.85   | 0.22247  | 0.255138 | 0.580951 | 0.52317  |
| MmuSTS.1724.1.S1_at   | MmuSTS.1724.1 | 8.31  | 7.69  | 0.14 | 0.15 | 1.54   | 0.006025 | 0.002378 | 0.195046 | 0.072042 |
| MmuSTS.1725.1.S1_at   | MmuSTS.1725.1 | 10.79 | 9.49  | 0.15 | 0.6  | 2.47   | 0.027948 | 0.010999 | 0.309162 | 0.136623 |
| MmuSTS.1726.1.S1_at   | MmuSTS.1726.1 | 10.14 | 10.56 | 0.02 | 0.58 | -1.33  | 0.844162 | 0.97086  | 0.937436 | 0.984115 |
| MmuSTS.1727.1.S1_at   | MmuSTS.1727.1 | 7.83  | 7.44  | 0.08 | 0.42 | 1.31   | 0.149796 | 0.126448 | 0.514363 | 0.396995 |
| MmuSTS.1728.1.S1_s_at | MmuSTS.1728.1 | 3.78  | 3.79  | 0.07 | 0.11 | -1.01  | 0.200502 | 0.209224 | 0.563327 | 0.48303  |
| MmuSTS.1729.1.S1_at   | MmuSTS.1729.1 | 5.1   | 4.72  | 0.1  | 0.11 | 1.3    | 0.012711 | 0.004422 | 0.243533 | 0.092904 |
| MmuSTS.173.1.S1_at    | MmuSTS.173.1  | 3.9   | 3.59  | 0.46 | 0.36 | 1.23   | 0.247259 | 0.244447 | 0.59834  | 0.514295 |
| MmuSTS.1730.1.S1_at   | MmuSTS.1730.1 | 5.11  | 6.48  | 0.54 | 1.57 | -2.6   | 0.204154 | 0.092564 | 0.566605 | 0.348519 |
| MmuSTS.1731.1.S1_at   | MmuSTS.1731.1 | 5.26  | 5.35  | 0.22 | 0.05 | -1.06  | 0.166995 | 0.199474 | 0.531023 | 0.474069 |
| MmuSTS.1732.1.S1_at   | MmuSTS.1732.1 | 5.12  | 4.44  | 0.61 | 0.38 | 1.6    | 0.236811 | 0.136684 | 0.590574 | 0.409226 |
| MmuSTS.1733.1.S1_at   | MmuSTS.1733.1 | 12.11 | 12.57 | 0.33 | 1.12 | -1.38  | 0.802697 | 0.443115 | 0.918696 | 0.661002 |
| MmuSTS.1734.1.S1_at   | MmuSTS.1734.1 | 7.36  | 8.02  | 0.15 | 0.88 | -1.58  | 0.087785 | 0.066382 | 0.442117 | 0.30331  |
| MmuSTS.1735.1.S1_at   | MmuSTS.1735.1 | 9.69  | 9.99  | 0.1  | 0.23 | -1.23  | 0.104493 | 0.089517 | 0.464556 | 0.343811 |
| MmuSTS.1736.1.S1_at   | MmuSTS.1736.1 | 6.31  | 10.08 | 1.16 | 2.82 | -13.66 | 0.197815 | 0.079433 | 0.560816 | 0.326766 |
| MmuSTS.1737.1.S1_s_at | MmuSTS.1737.1 | 4.47  | 4.49  | 0.05 | 0.15 | -1.02  | 0.284961 | 0.272668 | 0.62459  | 0.537433 |
| MmuSTS.1738.1.S1_s_at | MmuSTS.1738.1 | 8.47  | 8.96  | 0.66 | 1.41 | -1.41  | 0.134652 | 0.170636 | 0.501541 | 0.447219 |
| MmuSTS.1739.1.S1_at   | MmuSTS.1739.1 | 11.72 | 11.57 | 0.13 | 0.32 | 1.11   | 0.767779 | 0.184692 | 0.902473 | 0.460645 |
| MmuSTS.174.1.S1_at    | MmuSTS.174.1  | 9.54  | 9.15  | 0.12 | 0.43 | 1.31   | 0.17228  | 0.040004 | 0.535678 | 0.245193 |
| MmuSTS.1740.1.S1_at   | MmuSTS.1740.1 | 4.45  | 4.68  | 0.17 | 0.14 | -1.17  | 0.141761 | 0.161374 | 0.509159 | 0.437556 |
| MmuSTS.1741.1.S1_at   | MmuSTS.1741.1 | 5.57  | 6.23  | 0.3  | 0.68 | -1.59  | 0.18941  | 0.129058 | 0.552479 | 0.400548 |
| MmuSTS.1742.1.S1_at   | MmuSTS.1742.1 | 6.24  | 6.33  | 0.21 | 0.09 | -1.06  | 0.800113 | 0.497581 | 0.917386 | 0.696935 |
| MmuSTS.1743.1.S1_at   | MmuSTS.1743.1 | 10.82 | 10.56 | 0.36 | 0.67 | 1.2    | 0.495616 | 0.261815 | 0.757268 | 0.528265 |
| MmuSTS.1744.1.S1_at   | MmuSTS.1744.1 | 12.78 | 12.39 | 0.13 | 0.76 | 1.31   | 0.113181 | 0.11966  | 0.476074 | 0.388324 |
| MmuSTS.1745.1.S1_at   | MmuSTS.1745.1 | 5.16  | 4.68  | 0.51 | 0.69 | 1.39   | 0.342354 | 0.002324 | 0.663141 | 0.071237 |

|                       |               |       |       |      |      |       |          |          |          |          |
|-----------------------|---------------|-------|-------|------|------|-------|----------|----------|----------|----------|
| MmuSTS.1746.1.S1_at   | MmuSTS.1746.1 | 11.54 | 11.32 | 0.1  | 0.71 | 1.17  | 0.54029  | 0.615409 | 0.78174  | 0.771963 |
| MmuSTS.1747.1.S1_at   | MmuSTS.1747.1 | 8.3   | 7.39  | 0.3  | 0.92 | 1.88  | 0.220816 | 0.285242 | 0.579701 | 0.547165 |
| MmuSTS.1748.1.S1_at   | MmuSTS.1748.1 | 3.49  | 3.19  | 0.28 | 0.31 | 1.23  | 0.644649 | 0.132605 | 0.839786 | 0.404544 |
| MmuSTS.1749.1.S1_at   | MmuSTS.1749.1 | 9.97  | 9.64  | 0.15 | 0.23 | 1.26  | 0.093315 | 0.043071 | 0.450509 | 0.252157 |
| MmuSTS.175.1.S1_s_at  | MmuSTS.175.1  | 6.16  | 6.16  | 0.16 | 0.13 | 1     | 0.869722 | 0.992623 | 0.947917 | 0.995715 |
| MmuSTS.1750.1.S1_at   | MmuSTS.1750.1 | 8.75  | 9     | 0.69 | 0.72 | -1.19 | 0.160775 | 0.107708 | 0.525884 | 0.370776 |
| MmuSTS.1751.1.S1_at   | MmuSTS.1751.1 | 4.05  | 4.02  | 0.03 | 0.29 | 1.02  | 0.567492 | 0.828691 | 0.798161 | 0.901558 |
| MmuSTS.1752.1.S1_at   | MmuSTS.1752.1 | 2.76  | 2.91  | 0.05 | 0.13 | -1.11 | 0.22834  | 0.011255 | 0.585843 | 0.138053 |
| MmuSTS.1753.1.S1_at   | MmuSTS.1753.1 | 3.3   | 3.19  | 0.1  | 0.22 | 1.08  | 0.650368 | 0.050875 | 0.842789 | 0.270873 |
| MmuSTS.1754.1.S1_at   | MmuSTS.1754.1 | 11.8  | 11.44 | 0.17 | 0.11 | 1.28  | 0.115037 | 0.073117 | 0.478361 | 0.316064 |
| MmuSTS.1755.1.S1_at   | MmuSTS.1755.1 | 7.1   | 7.22  | 0.14 | 0.11 | -1.08 | 0.270287 | 0.515477 | 0.614663 | 0.708325 |
| MmuSTS.1756.1.S1_at   | MmuSTS.1756.1 | 8.42  | 8.85  | 0.06 | 1.41 | -1.35 | 0.838024 | 0.85797  | 0.934582 | 0.919035 |
| MmuSTS.1757.1.S1_at   | MmuSTS.1757.1 | 5.2   | 5.89  | 0.12 | 0.3  | -1.61 | 0.048501 | 0.523102 | 0.368923 | 0.713481 |
| MmuSTS.1758.1.S1_at   | MmuSTS.1758.1 | 6.8   | 6.23  | 0.72 | 0.49 | 1.48  | 0.819697 | 0.898758 | 0.926638 | 0.942416 |
| MmuSTS.1759.1.S1_at   | MmuSTS.1759.1 | 3.8   | 3.78  | 0.03 | 0.07 | 1.01  | 0.875893 | 0.112359 | 0.950267 | 0.377686 |
| MmuSTS.176.1.S1_at    | MmuSTS.176.1  | 4.36  | 4.44  | 0.1  | 0.09 | -1.06 | 0.158008 | 0.165222 | 0.522944 | 0.441399 |
| MmuSTS.1760.1.S1_at   | MmuSTS.1760.1 | 8.96  | 9.51  | 0.09 | 1.38 | -1.46 | 0.566062 | 0.578928 | 0.797485 | 0.748776 |
| MmuSTS.1761.1.S1_at   | MmuSTS.1761.1 | 7.99  | 7.24  | 0.67 | 1.12 | 1.68  | 0.385074 | 0.02457  | 0.69023  | 0.196149 |
| MmuSTS.1762.1.S1_at   | MmuSTS.1762.1 | 8.1   | 7.19  | 1.14 | 1.2  | 1.88  | 0.725825 | 0.156864 | 0.880568 | 0.432372 |
| MmuSTS.1763.1.S1_at   | MmuSTS.1763.1 | 5.04  | 4.95  | 0.15 | 0    | 1.06  | 0.167508 | 0.23028  | 0.531668 | 0.502102 |
| MmuSTS.1764.1.S1_at   | MmuSTS.1764.1 | 5.17  | 5.25  | 0.1  | 0.11 | -1.05 | 0.770446 | 0.757656 | 0.90333  | 0.858927 |
| MmuSTS.1765.1.S1_at   | MmuSTS.1765.1 | 7.66  | 7.05  | 0.2  | 1    | 1.53  | 0.444474 | 0.316653 | 0.726992 | 0.569984 |
| MmuSTS.1766.1.S1_at   | MmuSTS.1766.1 | 7.09  | 6.94  | 0.02 | 0.17 | 1.11  | 0.059043 | 0.052863 | 0.390921 | 0.275521 |
| MmuSTS.1767.1.S1_at   | MmuSTS.1767.1 | 7.98  | 7.02  | 0.19 | 0.03 | 1.95  | 0.001772 | 0.000165 | 0.154452 | 0.030511 |
| MmuSTS.1768.1.S1_at   | MmuSTS.1768.1 | 6.76  | 6.2   | 0.38 | 0.51 | 1.48  | 0.097737 | 0.101889 | 0.456883 | 0.36188  |
| MmuSTS.1769.1.S1_at   | MmuSTS.1769.1 | 9.43  | 9.04  | 0.62 | 1.62 | 1.31  | 0.410881 | 0.440481 | 0.706685 | 0.658967 |
| MmuSTS.177.1.S1_at    | MmuSTS.177.1  | 7.37  | 7.65  | 0.32 | 0.51 | -1.22 | 0.827554 | 0.856832 | 0.930031 | 0.918214 |
| MmuSTS.1770.1.S1_at   | MmuSTS.1770.1 | 12.89 | 13.65 | 0.34 | 0.48 | -1.69 | 0.06275  | 0.053648 | 0.399189 | 0.277225 |
| MmuSTS.1771.1.S1_at   | MmuSTS.1771.1 | 5.14  | 4.97  | 0.07 | 0.25 | 1.13  | 0.55729  | 0.725345 | 0.792388 | 0.840981 |
| MmuSTS.1772.1.S1_at   | MmuSTS.1772.1 | 3.9   | 3.7   | 0.23 | 0.04 | 1.15  | 0.155694 | 0.121662 | 0.520357 | 0.39084  |
| MmuSTS.1772.1.S1_s_at | MmuSTS.1772.1 | 4.4   | 4.66  | 0.45 | 0.12 | -1.2  | 0.961045 | 0.802029 | 0.984976 | 0.885995 |
| MmuSTS.1773.1.S1_at   | MmuSTS.1773.1 | 3.94  | 3.94  | 0.05 | 0.01 | 1     | 0.297568 | 0.612954 | 0.633356 | 0.770327 |
| MmuSTS.1774.1.S1_at   | MmuSTS.1774.1 | 6.89  | 6.82  | 0.14 | 0.27 | 1.05  | 0.524644 | 0.683532 | 0.773218 | 0.815375 |
| MmuSTS.1775.1.S1_at   | MmuSTS.1775.1 | 8.53  | 9.34  | 0.18 | 0.68 | -1.76 | 0.053537 | 0.022376 | 0.380288 | 0.187176 |
| MmuSTS.1776.1.S1_at   | MmuSTS.1776.1 | 10.05 | 9     | 0.55 | 0.31 | 2.07  | 0.028178 | 0.002671 | 0.310041 | 0.076408 |
| MmuSTS.1777.1.S1_s_at | MmuSTS.1777.1 | 5.33  | 3.85  | 0.72 | 1.14 | 2.8   | 0.602759 | 0.68766  | 0.816733 | 0.81766  |
| MmuSTS.1778.1.S1_at   | MmuSTS.1778.1 | 5.91  | 8.98  | 1.81 | 3.03 | -8.41 | 0.523838 | 0.530739 | 0.772848 | 0.718104 |
| MmuSTS.1779.1.S1_at   | MmuSTS.1779.1 | 9.89  | 8.72  | 0.19 | 0.35 | 2.24  | 0.006503 | 0.00149  | 0.199625 | 0.058951 |
| MmuSTS.178.1.S1_at    | MmuSTS.178.1  | 3.15  | 3.24  | 0.07 | 0.22 | -1.07 | 0.754717 | 0.936919 | 0.895621 | 0.964449 |
| MmuSTS.1780.1.S1_at   | MmuSTS.1780.1 | 9.3   | 8.97  | 0.49 | 0.29 | 1.25  | 0.501157 | 0.244115 | 0.759789 | 0.514121 |
| MmuSTS.1781.1.S1_at   | MmuSTS.1781.1 | 6.2   | 6.33  | 0.33 | 0.41 | -1.1  | 0.346594 | 0.42379  | 0.666013 | 0.646542 |

|                       |               |       |       |      |      |        |          |          |          |          |
|-----------------------|---------------|-------|-------|------|------|--------|----------|----------|----------|----------|
| MmuSTS.1782.1.S1_at   | MmuSTS.1782.1 | 7.32  | 7.9   | 0.32 | 0.37 | -1.49  | 0.043399 | 0.05198  | 0.356711 | 0.273453 |
| MmuSTS.1783.1.S1_at   | MmuSTS.1783.1 | 9.68  | 9.44  | 0.13 | 0.42 | 1.18   | 0.697664 | 0.283051 | 0.865694 | 0.545692 |
| MmuSTS.1784.1.S1_at   | MmuSTS.1784.1 | 9.46  | 8.97  | 0.23 | 0.33 | 1.41   | 0.069866 | 0.053232 | 0.41291  | 0.276445 |
| MmuSTS.1785.1.S1_s_at | MmuSTS.1785.1 | 3.68  | 3.61  | 0.05 | 0.04 | 1.05   | 0.136802 | 0.080463 | 0.503939 | 0.328159 |
| MmuSTS.1786.1.S1_s_at | MmuSTS.1786.1 | 3.3   | 3.31  | 0.17 | 0.07 | -1     | 0.525465 | 0.602073 | 0.773758 | 0.763172 |
| MmuSTS.1787.1.S1_at   | MmuSTS.1787.1 | 10.67 | 11.1  | 0.28 | 0.16 | -1.34  | 0.225686 | 0.003507 | 0.583746 | 0.08503  |
| MmuSTS.1788.1.S1_s_at | MmuSTS.1788.1 | 3.95  | 4.17  | 0.13 | 0.01 | -1.16  | 0.131861 | 0.399668 | 0.498114 | 0.629933 |
| MmuSTS.1789.1.S1_at   | MmuSTS.1789.1 | 8.73  | 8.61  | 0.17 | 0.22 | 1.08   | 0.246765 | 0.166652 | 0.59791  | 0.443133 |
| MmuSTS.179.1.S1_at    | MmuSTS.179.1  | 4.02  | 3.98  | 0.16 | 0.08 | 1.03   | 0.825276 | 0.915303 | 0.929153 | 0.952467 |
| MmuSTS.1790.1.S1_at   | MmuSTS.1790.1 | 9.9   | 11.16 | 0.31 | 0.91 | -2.4   | 0.089989 | 0.085975 | 0.445437 | 0.338116 |
| MmuSTS.1791.1.S1_s_at | MmuSTS.1791.1 | 11.64 | 11.83 | 0.16 | 0.15 | -1.14  | 0.272327 | 0.242181 | 0.616016 | 0.512669 |
| MmuSTS.1792.1.S1_at   | MmuSTS.1792.1 | 12.14 | 12.05 | 0.12 | 0.19 | 1.07   | 0.810411 | 0.788085 | 0.922733 | 0.87743  |
| MmuSTS.1793.1.S1_at   | MmuSTS.1793.1 | 7.13  | 6.73  | 0.21 | 0.88 | 1.32   | 0.520463 | 0.100962 | 0.770806 | 0.360525 |
| MmuSTS.1794.1.S1_at   | MmuSTS.1794.1 | 10.48 | 9.04  | 0.26 | 0.35 | 2.71   | 0.005891 | 0.002898 | 0.19355  | 0.079107 |
| MmuSTS.1795.1.S1_at   | MmuSTS.1795.1 | 7.4   | 7.85  | 0.08 | 0.26 | -1.37  | 0.158962 | 0.095652 | 0.52416  | 0.35269  |
| MmuSTS.1796.1.S1_at   | MmuSTS.1796.1 | 6.78  | 6.89  | 0.69 | 0.58 | -1.08  | 0.342835 | 0.03106  | 0.663407 | 0.218115 |
| MmuSTS.1797.1.S1_at   | MmuSTS.1797.1 | 5.8   | 5.93  | 0.44 | 0.43 | -1.1   | 0.42661  | 0.605018 | 0.715846 | 0.764917 |
| MmuSTS.1798.1.S1_at   | MmuSTS.1798.1 | 9.96  | 9.13  | 0.34 | 0.8  | 1.78   | 0.497564 | 0.424257 | 0.758019 | 0.646853 |
| MmuSTS.1799.1.S1_at   | MmuSTS.1799.1 | 10.86 | 10.29 | 0.04 | 0.1  | 1.48   | 0.000948 | 0.00085  | 0.139813 | 0.047089 |
| MmuSTS.18.1.S1_at     | MmuSTS.18.1   | 3.87  | 3.85  | 0.13 | 0.05 | 1.01   | 0.803707 | 0.372366 | 0.919255 | 0.611263 |
| MmuSTS.180.1.S1_at    | MmuSTS.180.1  | 8.9   | 8.53  | 0.11 | 0.23 | 1.29   | 0.032283 | 0.003703 | 0.324516 | 0.086769 |
| MmuSTS.1800.1.S1_at   | MmuSTS.1800.1 | 3.09  | 3.45  | 0.33 | 0.1  | -1.29  | 0.199981 | 0.402499 | 0.56303  | 0.631481 |
| MmuSTS.1800.1.S1_s_at | MmuSTS.1800.1 | 3.72  | 3.76  | 0.35 | 0.21 | -1.03  | 0.360095 | 0.544568 | 0.674232 | 0.726948 |
| MmuSTS.1800.1.S1_x_at | MmuSTS.1800.1 | 4.93  | 5.12  | 0.51 | 0.14 | -1.14  | 0.588045 | 0.817144 | 0.808837 | 0.894545 |
| MmuSTS.1801.1.S1_at   | MmuSTS.1801.1 | 13.09 | 12.49 | 0.13 | 0.4  | 1.52   | 0.035328 | 0.018169 | 0.335959 | 0.169673 |
| MmuSTS.1802.1.S1_at   | MmuSTS.1802.1 | 10.28 | 10.55 | 0.31 | 0.15 | -1.21  | 0.52081  | 0.036252 | 0.771038 | 0.235    |
| MmuSTS.1803.1.S1_at   | MmuSTS.1803.1 | 7.12  | 6.94  | 0.54 | 0.71 | 1.14   | 0.660174 | 0.076226 | 0.847439 | 0.321127 |
| MmuSTS.1804.1.S1_at   | MmuSTS.1804.1 | 6.22  | 6.35  | 0.04 | 0.05 | -1.1   | 0.023514 | 0.020484 | 0.291638 | 0.179669 |
| MmuSTS.1805.1.S1_at   | MmuSTS.1805.1 | 8.96  | 9.72  | 0.2  | 0.46 | -1.69  | 0.048306 | 0.010797 | 0.368148 | 0.135584 |
| MmuSTS.1806.1.S1_at   | MmuSTS.1806.1 | 10.27 | 9.73  | 0.24 | 0.98 | 1.45   | 0.304313 | 0.235858 | 0.638475 | 0.50704  |
| MmuSTS.1807.1.S1_at   | MmuSTS.1807.1 | 8.98  | 8.9   | 0.25 | 0.11 | 1.06   | 0.625761 | 0.774999 | 0.829159 | 0.869027 |
| MmuSTS.1808.1.S1_at   | MmuSTS.1808.1 | 7.56  | 7.2   | 0.13 | 0.61 | 1.29   | 0.280206 | 0.141387 | 0.621476 | 0.414874 |
| MmuSTS.1809.1.S1_at   | MmuSTS.1809.1 | 4.04  | 4.06  | 0.45 | 0.19 | -1.01  | 0.441293 | 0.587852 | 0.724743 | 0.754542 |
| MmuSTS.181.1.S1_at    | MmuSTS.181.1  | 11.9  | 11.3  | 0.17 | 0.1  | 1.51   | 0.009391 | 0.00348  | 0.224725 | 0.084834 |
| MmuSTS.1810.1.S1_at   | MmuSTS.1810.1 | 10.07 | 11.37 | 0.46 | 0.34 | -2.48  | 0.014602 | 0.010087 | 0.254235 | 0.131765 |
| MmuSTS.1811.1.S1_at   | MmuSTS.1811.1 | 11.32 | 11.66 | 0.22 | 0.33 | -1.27  | 0.163209 | 0.191476 | 0.527521 | 0.466821 |
| MmuSTS.1812.1.S1_at   | MmuSTS.1812.1 | 10.81 | 10.64 | 0.34 | 0.26 | 1.13   | 0.91413  | 0.254217 | 0.966066 | 0.52252  |
| MmuSTS.1813.1.S1_at   | MmuSTS.1813.1 | 4.47  | 8.31  | 1.12 | 2.42 | -14.33 | 0.143835 | 0.085476 | 0.510427 | 0.337473 |
| MmuSTS.1814.1.S1_at   | MmuSTS.1814.1 | 5.63  | 5.74  | 0.24 | 0.22 | -1.07  | 0.467688 | 0.290339 | 0.740825 | 0.551169 |
| MmuSTS.1815.1.S1_at   | MmuSTS.1815.1 | 3.34  | 3.18  | 0.05 | 0.19 | 1.12   | 0.172638 | 0.128489 | 0.536258 | 0.399822 |
| MmuSTS.1816.1.S1_at   | MmuSTS.1816.1 | 8.14  | 10.37 | 0.74 | 0.53 | -4.69  | 0.020262 | 0.012643 | 0.277354 | 0.14505  |

|                       |               |       |       |      |      |       |          |          |          |          |
|-----------------------|---------------|-------|-------|------|------|-------|----------|----------|----------|----------|
| MmuSTS.1817.1.S1_at   | MmuSTS.1817.1 | 11.8  | 12.48 | 0.25 | 0.23 | -1.61 | 0.021459 | 0.009909 | 0.282524 | 0.130731 |
| MmuSTS.1818.1.S1_s_at | MmuSTS.1818.1 | 5.91  | 5.94  | 0.05 | 0.07 | -1.02 | 0.930042 | 0.181704 | 0.972958 | 0.458313 |
| MmuSTS.1819.1.S1_a_at | MmuSTS.1819.1 | 6.96  | 7.18  | 0.09 | 0.13 | -1.16 | 0.035599 | 0.024144 | 0.337085 | 0.194543 |
| MmuSTS.1819.1.S1_at   | MmuSTS.1819.1 | 3.39  | 3.41  | 0.11 | 0.07 | -1.01 | 0.56267  | 0.752093 | 0.795463 | 0.855744 |
| MmuSTS.182.1.S1_at    | MmuSTS.182.1  | 6.49  | 6.02  | 1.08 | 0.93 | 1.38  | 0.690656 | 0.371693 | 0.862341 | 0.610481 |
| MmuSTS.1820.1.S1_at   | MmuSTS.1820.1 | 5.92  | 5.82  | 0.25 | 0.03 | 1.07  | 0.593874 | 0.603583 | 0.811664 | 0.764204 |
| MmuSTS.1821.1.S1_at   | MmuSTS.1821.1 | 4.58  | 4.61  | 0.05 | 0.04 | -1.02 | 0.871798 | 0.094532 | 0.948734 | 0.351296 |
| MmuSTS.1822.1.S1_at   | MmuSTS.1822.1 | 11.53 | 11.06 | 0.08 | 0.12 | 1.39  | 0.006172 | 0.003811 | 0.196493 | 0.08794  |
| MmuSTS.1823.1.S1_at   | MmuSTS.1823.1 | 6.31  | 8.51  | 0.93 | 1.91 | -4.58 | 0.280036 | 0.100029 | 0.62132  | 0.3589   |
| MmuSTS.1824.1.S1_at   | MmuSTS.1824.1 | 6.18  | 6.69  | 0.12 | 0.19 | -1.41 | 0.011543 | 0.001973 | 0.236456 | 0.065871 |
| MmuSTS.1825.1.S1_at   | MmuSTS.1825.1 | 9.24  | 9.06  | 0.04 | 0.14 | 1.13  | 0.066972 | 0.115261 | 0.407016 | 0.382262 |
| MmuSTS.1826.1.S1_at   | MmuSTS.1826.1 | 10.58 | 11.93 | 0.39 | 0.72 | -2.55 | 0.049721 | 0.044441 | 0.371923 | 0.25521  |
| MmuSTS.1827.1.S1_at   | MmuSTS.1827.1 | 9.93  | 9.47  | 0.15 | 0.16 | 1.38  | 0.006721 | 0.001781 | 0.20158  | 0.063434 |
| MmuSTS.1828.1.S1_at   | MmuSTS.1828.1 | 6.37  | 6.09  | 0.24 | 0.26 | 1.21  | 0.398906 | 0.638508 | 0.698999 | 0.78765  |
| MmuSTS.1829.1.S1_at   | MmuSTS.1829.1 | 7.83  | 8.31  | 0.38 | 0.42 | -1.4  | 0.42413  | 0.523421 | 0.714371 | 0.713713 |
| MmuSTS.183.1.S1_at    | MmuSTS.183.1  | 6.64  | 7.06  | 1.38 | 0.91 | -1.34 | 0.466112 | 0.639061 | 0.740195 | 0.788038 |
| MmuSTS.1830.1.S1_at   | MmuSTS.1830.1 | 11.41 | 11.31 | 0.17 | 0.18 | 1.07  | 0.544167 | 0.572802 | 0.784268 | 0.74476  |
| MmuSTS.1831.1.S1_at   | MmuSTS.1831.1 | 10.95 | 10.85 | 0.03 | 0.25 | 1.07  | 0.58754  | 0.215228 | 0.808588 | 0.488977 |
| MmuSTS.1832.1.S1_at   | MmuSTS.1832.1 | 10.38 | 9.75  | 0.34 | 0.25 | 1.54  | 0.027696 | 0.025743 | 0.308669 | 0.201029 |
| MmuSTS.1833.1.S1_at   | MmuSTS.1833.1 | 4.16  | 4.2   | 0.17 | 0.13 | -1.03 | 0.166686 | 0.24571  | 0.530356 | 0.515496 |
| MmuSTS.1834.1.S1_at   | MmuSTS.1834.1 | 3.59  | 3.57  | 0.07 | 0.16 | 1.02  | 0.526232 | 0.604973 | 0.774004 | 0.764917 |
| MmuSTS.1835.1.S1_at   | MmuSTS.1835.1 | 3.82  | 3.86  | 0.19 | 0.03 | -1.02 | 0.816276 | 0.828094 | 0.925422 | 0.901214 |
| MmuSTS.1836.1.S1_at   | MmuSTS.1836.1 | 3.23  | 3.32  | 0.06 | 0.18 | -1.06 | 0.296191 | 0.480269 | 0.632176 | 0.68574  |
| MmuSTS.1837.1.S1_at   | MmuSTS.1837.1 | 10.37 | 10.39 | 0.3  | 0.59 | -1.01 | 0.99605  | 0.833805 | 0.998451 | 0.904744 |
| MmuSTS.1838.1.S1_at   | MmuSTS.1838.1 | 9.37  | 9.16  | 0.09 | 0.24 | 1.16  | 0.509831 | 0.685469 | 0.764559 | 0.816523 |
| MmuSTS.1839.1.S1_at   | MmuSTS.1839.1 | 2.88  | 2.87  | 0.17 | 0.04 | 1.01  | 0.354851 | 0.326423 | 0.670686 | 0.576576 |
| MmuSTS.184.1.S1_at    | MmuSTS.184.1  | 9.05  | 9     | 0.1  | 0.28 | 1.04  | 0.718604 | 0.055502 | 0.876527 | 0.281404 |
| MmuSTS.1840.1.S1_at   | MmuSTS.1840.1 | 10.75 | 10.63 | 0.19 | 0.01 | 1.09  | 0.7021   | 0.900596 | 0.868365 | 0.943473 |
| MmuSTS.1841.1.S1_at   | MmuSTS.1841.1 | 12.12 | 12.68 | 0.05 | 0.21 | -1.47 | 0.005609 | 0.00231  | 0.191807 | 0.070884 |
| MmuSTS.1842.1.S1_at   | MmuSTS.1842.1 | 10.25 | 9.93  | 0.33 | 0.45 | 1.25  | 0.162935 | 0.037945 | 0.52737  | 0.239302 |
| MmuSTS.1843.1.S1_at   | MmuSTS.1843.1 | 5.78  | 5.1   | 0.33 | 0.24 | 1.61  | 0.02986  | 0.026613 | 0.315718 | 0.204008 |
| MmuSTS.1844.1.S1_at   | MmuSTS.1844.1 | 5.5   | 5.39  | 0.21 | 0.08 | 1.08  | 0.209949 | 0.20926  | 0.571174 | 0.48303  |
| MmuSTS.1845.1.S1_at   | MmuSTS.1845.1 | 7.86  | 8.81  | 0.16 | 0.27 | -1.94 | 0.006838 | 0.000883 | 0.201708 | 0.047602 |
| MmuSTS.1846.1.S1_s_at | MmuSTS.1846.1 | 4.63  | 4.61  | 0.16 | 0.05 | 1.01  | 0.909723 | 0.991457 | 0.964238 | 0.995223 |
| MmuSTS.1847.1.S1_at   | MmuSTS.1847.1 | 8.92  | 8.47  | 0.19 | 0.42 | 1.37  | 0.248123 | 0.300769 | 0.599076 | 0.558978 |
| MmuSTS.1848.1.S1_at   | MmuSTS.1848.1 | 9.1   | 8.5   | 0.03 | 0.23 | 1.52  | 0.006344 | 0.00443  | 0.19856  | 0.092937 |
| MmuSTS.1849.1.S1_at   | MmuSTS.1849.1 | 4.54  | 4.95  | 0.55 | 0.79 | -1.33 | 0.603567 | 0.315725 | 0.8172   | 0.569148 |
| MmuSTS.185.1.S1_at    | MmuSTS.185.1  | 9.3   | 8.31  | 0.21 | 0.26 | 1.98  | 0.00681  | 0.001575 | 0.201708 | 0.060185 |
| MmuSTS.1850.1.S1_at   | MmuSTS.1850.1 | 8.2   | 8.64  | 0.22 | 1.02 | -1.36 | 0.80135  | 0.557412 | 0.918069 | 0.735031 |
| MmuSTS.1851.1.S1_at   | MmuSTS.1851.1 | 13.16 | 13.28 | 0.05 | 0.07 | -1.09 | 0.16818  | 0.016488 | 0.53256  | 0.162562 |
| MmuSTS.1852.1.S1_at   | MmuSTS.1852.1 | 9.44  | 8.38  | 0.42 | 0.38 | 2.08  | 0.065563 | 0.014507 | 0.404648 | 0.153682 |

|                        |                |       |       |      |      |       |          |          |          |          |
|------------------------|----------------|-------|-------|------|------|-------|----------|----------|----------|----------|
| MmuSTS.1853.1.S1_at    | MmuSTS.1853.1  | 9.79  | 9.46  | 0.2  | 0.29 | 1.26  | 0.191824 | 0.219818 | 0.554827 | 0.493388 |
| MmuSTS.1854.1.S1_at    | MmuSTS.1854.1  | 10.68 | 10.17 | 0.11 | 0.66 | 1.43  | 0.723883 | 0.780147 | 0.879238 | 0.872524 |
| MmuSTS.1855.1.S1_at    | MmuSTS.1855.1  | 13.16 | 12.92 | 0.07 | 0.3  | 1.18  | 0.221146 | 0.260567 | 0.580053 | 0.527084 |
| MmuSTS.1856.1.S1_at    | MmuSTS.1856.1  | 4.64  | 4.22  | 0.49 | 0.19 | 1.35  | 0.430855 | 0.339876 | 0.718362 | 0.586417 |
| MmuSTS.1857.1.S1_at    | MmuSTS.1857.1  | 5.82  | 5.93  | 0.02 | 0.08 | -1.08 | 0.072641 | 0.313941 | 0.417383 | 0.568121 |
| MmuSTS.1858.1.S1_at    | MmuSTS.1858.1  | 9.5   | 9.24  | 0.24 | 0.72 | 1.19  | 0.453094 | 0.562794 | 0.732285 | 0.738167 |
| MmuSTS.1859.1.S1_at    | MmuSTS.1859.1  | 10.14 | 10.05 | 0.07 | 0.55 | 1.06  | 0.712834 | 0.404959 | 0.874257 | 0.633415 |
| MmuSTS.186.1.S1_at     | MmuSTS.186.1   | 5.83  | 5.87  | 0.17 | 0.14 | -1.03 | 0.340842 | 0.347795 | 0.662186 | 0.592154 |
| MmuSTS.1860.1.S1_at    | MmuSTS.1860.1  | 6.23  | 6.15  | 0.1  | 0.22 | 1.06  | 0.133166 | 0.183657 | 0.499568 | 0.459681 |
| MmuSTS.1861.1.S1_at    | MmuSTS.1861.1  | 6.12  | 6.14  | 0.28 | 0.14 | -1.01 | 0.493168 | 0.243595 | 0.756013 | 0.513729 |
| MmuSTS.1862.1.S1_at    | MmuSTS.1862.1  | 5.45  | 5.5   | 0.15 | 0.03 | -1.03 | 0.641879 | 0.291712 | 0.838598 | 0.552054 |
| MmuSTS.1863.1.S1_at    | MmuSTS.1863.1  | 6.71  | 6.59  | 0.34 | 0.05 | 1.09  | 0.582266 | 0.355124 | 0.805629 | 0.597508 |
| MmuSTS.1864.1.S1_at    | MmuSTS.1864.1  | 7.46  | 6.29  | 0.06 | 0.13 | 2.25  | 0.000142 | 0.00005  | 0.112653 | 0.025273 |
| MmuSTS.1865.1.S1_at    | MmuSTS.1865.1  | 3.7   | 3.67  | 0.96 | 0.13 | 1.02  | 0.362871 | 0.408128 | 0.676226 | 0.635476 |
| MmuSTS.1866.1.S1_at    | MmuSTS.1866.1  | 3.96  | 3.86  | 0.23 | 0.12 | 1.07  | 0.434063 | 0.663949 | 0.720304 | 0.803246 |
| MmuSTS.1866.1.S1_s_at  | MmuSTS.1866.1  | 3.56  | 3.5   | 0.13 | 0.13 | 1.05  | 0.913205 | 0.855577 | 0.965628 | 0.917669 |
| MmuSTS.1867.1.S1_at    | MmuSTS.1867.1  | 11.37 | 11.58 | 0.17 | 0.06 | -1.16 | 0.0594   | 0.095426 | 0.392129 | 0.352453 |
| MmuSTS.1868.1.S1_at    | MmuSTS.1868.1  | 12.4  | 12.79 | 0.18 | 0.02 | -1.31 | 0.009377 | 0.001178 | 0.224611 | 0.05381  |
| MmuSTS.1869.1.S1_at    | MmuSTS.1869.1  | 3.12  | 3.2   | 0.03 | 0.12 | -1.06 | 0.97722  | 0.998689 | 0.991302 | 0.999294 |
| MmuSTS.187.1.S1_at     | MmuSTS.187.1   | 9.62  | 9.2   | 0.06 | 0.22 | 1.34  | 0.01438  | 0.008407 | 0.251885 | 0.121726 |
| MmuSTS.1870.1.S1_at    | MmuSTS.1870.1  | 4.99  | 5.54  | 0.17 | 0.51 | -1.47 | 0.137993 | 0.146174 | 0.505467 | 0.420124 |
| MmuSTS.1871.1.S1_at    | MmuSTS.1871.1  | 8.07  | 8.28  | 0.27 | 0.42 | -1.15 | 0.181651 | 0.168869 | 0.546264 | 0.445458 |
| MmuSTS.1872.1.S1_at    | MmuSTS.1872.1  | 5.34  | 8.03  | 1.06 | 2.01 | -6.49 | 0.222215 | 0.230848 | 0.580714 | 0.502545 |
| MmuSTS.1873.1.S1_at    | MmuSTS.1873.1  | 11.74 | 12.02 | 0.07 | 0.13 | -1.21 | 0.013156 | 0.007332 | 0.245329 | 0.115015 |
| MmuSTS.1874.1.S1_at    | MmuSTS.1874.1  | 5.23  | 5.41  | 0.2  | 0.53 | -1.13 | 0.210682 | 0.279496 | 0.571933 | 0.543055 |
| MmuSTS.1875.1.S1_s_at  | MmuSTS.1875.1  | 8.07  | 6.26  | 0.56 | 0.59 | 3.49  | 0.018524 | 0.004135 | 0.270581 | 0.090937 |
| MmuSTS.1876.1.S1_at    | MmuSTS.1876.1  | 8.21  | 8.09  | 0.32 | 0.7  | 1.09  | 0.470696 | 0.21908  | 0.742565 | 0.49285  |
| MmuSTS.1877.1.S1_at    | MmuSTS.1877.1  | 9.97  | 9.75  | 0.26 | 0.46 | 1.16  | 0.335529 | 0.350671 | 0.659165 | 0.594403 |
| MmuSTS.1878.1.S1_at    | MmuSTS.1878.1  | 3.7   | 3.76  | 0.55 | 0.2  | -1.04 | 0.366591 | 0.464445 | 0.679137 | 0.675068 |
| MmuSTS.1879.1.S1_at    | MmuSTS.1879.1  | 5.74  | 4.73  | 0.23 | 0.26 | 2.02  | 0.003933 | 0.002034 | 0.180953 | 0.066885 |
| MmuSTS.188.1.S1_at     | MmuSTS.188.1   | 4.55  | 4.68  | 0.12 | 0.15 | -1.1  | 0.159117 | 0.193539 | 0.52416  | 0.468785 |
| MmuSTS.1880.1.S1_at    | MmuSTS.1880.1  | 12.18 | 12.32 | 0.06 | 0.19 | -1.1  | 0.515297 | 0.575256 | 0.767357 | 0.746427 |
| MmuSTS.1881.1.S1_at    | MmuSTS.1881.1  | 12.86 | 12.87 | 0.18 | 0.51 | -1    | 0.89289  | 0.709941 | 0.957322 | 0.831879 |
| MmuSTS.1882.1.S1_s_at  | MmuSTS.1882.1  | 6.47  | 6.53  | 0.45 | 0.46 | -1.04 | 0.295345 | 0.204861 | 0.631605 | 0.479224 |
| MmuSTS.1883.1.S1_at    | MmuSTS.1883.1  | 12.15 | 11.97 | 0.2  | 0.11 | 1.13  | 0.330726 | 0.442528 | 0.656029 | 0.660487 |
| MmuSTS.1884.1.S1_at    | MmuSTS.1884.1  | 5.89  | 7.31  | 0.35 | 0.36 | -2.67 | 0.013494 | 0.019237 | 0.247174 | 0.174494 |
| MmuSTS.1885.1.S1_at    | MmuSTS.1885.1  | 6.43  | 6.54  | 0.1  | 0.25 | -1.08 | 0.765455 | 0.929238 | 0.901309 | 0.959644 |
| MmuSTS.1886.1.S1_at    | MmuSTS.1886.1  | 5.97  | 6.14  | 0.24 | 0.05 | -1.12 | 0.320085 | 0.314198 | 0.64932  | 0.568185 |
| MmugDNA.2662.1.S1_s_at | MmugDNA.2662.1 | 3.8   | 4.05  | 0.13 | 0.16 | -1.19 | 0.142181 | 0.164911 | 0.509437 | 0.441219 |
| MmuSTS.1889.1.S1_at    | MmuSTS.1889.1  | 8.07  | 9.33  | 0.13 | 0.86 | -2.39 | 0.20414  | 0.217808 | 0.566605 | 0.491376 |
| MmuSTS.189.1.S1_at     | MmuSTS.189.1   | 3.56  | 3.73  | 0.07 | 0.01 | -1.12 | 0.039757 | 0.392458 | 0.347969 | 0.625813 |

|                       |               |       |       |      |      |        |          |          |          |          |
|-----------------------|---------------|-------|-------|------|------|--------|----------|----------|----------|----------|
| MmuSTS.1890.1.S1_at   | MmuSTS.1890.1 | 11.92 | 12.36 | 0.56 | 1.34 | -1.36  | 0.506017 | 0.296359 | 0.761995 | 0.555492 |
| MmuSTS.1891.1.S1_at   | MmuSTS.1891.1 | 11.74 | 11.22 | 0.29 | 0.27 | 1.43   | 0.120928 | 0.140848 | 0.48574  | 0.414237 |
| MmuSTS.1892.1.S1_at   | MmuSTS.1892.1 | 10.92 | 10.98 | 0.06 | 0.14 | -1.04  | 0.688043 | 0.414793 | 0.860848 | 0.640456 |
| MmuSTS.1893.1.S1_s_at | MmuSTS.1893.1 | 5.11  | 7.7   | 2.01 | 1.64 | -6.03  | 0.23365  | 0.318943 | 0.588317 | 0.571532 |
| MmuSTS.1894.1.S1_at   | MmuSTS.1894.1 | 6.39  | 10.32 | 1.64 | 0.47 | -15.18 | 0.018379 | 0.00815  | 0.270103 | 0.119754 |
| MmuSTS.1895.1.S1_at   | MmuSTS.1895.1 | 8.71  | 9.03  | 2.27 | 0.4  | -1.25  | 0.960623 | 0.241188 | 0.9849   | 0.511821 |
| MmuSTS.1896.1.S1_at   | MmuSTS.1896.1 | 6.59  | 6.68  | 0.04 | 0.14 | -1.06  | 0.327858 | 0.340921 | 0.654144 | 0.587035 |
| MmuSTS.1897.1.S1_at   | MmuSTS.1897.1 | 7.8   | 8.27  | 0.3  | 0.41 | -1.39  | 0.221499 | 0.147301 | 0.580285 | 0.421493 |
| MmuSTS.1898.1.S1_at   | MmuSTS.1898.1 | 3.22  | 3.24  | 0.04 | 0.08 | -1.01  | 0.500601 | 0.944109 | 0.759592 | 0.968306 |
| MmuSTS.1899.1.S1_at   | MmuSTS.1899.1 | 2.85  | 2.9   | 0.06 | 0.12 | -1.03  | 0.960423 | 0.659747 | 0.9849   | 0.800854 |
| MmuSTS.19.1.S1_at     | MmuSTS.19.1   | 6.91  | 9.99  | 1.5  | 2.85 | -8.44  | 0.497744 | 0.361933 | 0.758068 | 0.602709 |
| MmuSTS.190.1.S1_at    | MmuSTS.190.1  | 8.91  | 9.79  | 0.24 | 0.39 | -1.84  | 0.012238 | 0.008137 | 0.240418 | 0.119736 |
| MmuSTS.1900.1.S1_at   | MmuSTS.1900.1 | 3.34  | 3.39  | 0.33 | 0.08 | -1.04  | 0.652131 | 0.523908 | 0.843568 | 0.714064 |
| MmuSTS.1901.1.S1_at   | MmuSTS.1901.1 | 4.11  | 4.02  | 0.05 | 0.2  | 1.06   | 0.390899 | 0.075772 | 0.693845 | 0.320348 |
| MmuSTS.1902.1.S1_s_at | MmuSTS.1902.1 | 4.36  | 4.28  | 0.1  | 0.05 | 1.06   | 0.296849 | 0.060168 | 0.632758 | 0.291882 |
| MmuSTS.1903.1.S1_at   | MmuSTS.1903.1 | 6.36  | 6.47  | 0.53 | 0.2  | -1.08  | 0.285134 | 0.351722 | 0.624705 | 0.595164 |
| MmuSTS.1904.1.S1_at   | MmuSTS.1904.1 | 6.64  | 6.87  | 0.08 | 0.52 | -1.17  | 0.190376 | 0.173504 | 0.55304  | 0.449938 |
| MmuSTS.1905.1.S1_at   | MmuSTS.1905.1 | 4.77  | 4.91  | 0.12 | 0.16 | -1.1   | 0.314082 | 0.18316  | 0.645522 | 0.459531 |
| MmuSTS.1906.1.S1_at   | MmuSTS.1906.1 | 4.07  | 4.09  | 0.18 | 0.13 | -1.02  | 0.902604 | 0.987537 | 0.961167 | 0.993022 |
| MmuSTS.1907.1.S1_at   | MmuSTS.1907.1 | 5.49  | 5.59  | 0.23 | 0.09 | -1.07  | 0.797354 | 0.939088 | 0.916012 | 0.965412 |
| MmuSTS.1908.1.S1_at   | MmuSTS.1908.1 | 4.9   | 5.1   | 0.59 | 0.22 | -1.15  | 0.974616 | 0.926618 | 0.990048 | 0.958372 |
| MmuSTS.1909.1.S1_at   | MmuSTS.1909.1 | 8.28  | 7.98  | 0.29 | 0.48 | 1.24   | 0.265426 | 0.22791  | 0.611031 | 0.500211 |
| MmuSTS.191.1.S1_at    | MmuSTS.191.1  | 6.44  | 8.53  | 1.06 | 1.76 | -4.26  | 0.279626 | 0.221816 | 0.621136 | 0.494948 |
| MmuSTS.1910.1.S1_at   | MmuSTS.1910.1 | 4.45  | 4.5   | 0.12 | 0.13 | -1.03  | 0.331568 | 0.449193 | 0.656424 | 0.664892 |
| MmuSTS.1911.1.S1_at   | MmuSTS.1911.1 | 9.85  | 9.84  | 0.09 | 0.77 | 1.01   | 0.906754 | 0.974614 | 0.962987 | 0.986197 |
| MmuSTS.1912.1.S1_at   | MmuSTS.1912.1 | 11.36 | 10.92 | 0.08 | 0.09 | 1.37   | 0.005216 | 0.009483 | 0.190737 | 0.12821  |
| MmuSTS.1913.1.S1_at   | MmuSTS.1913.1 | 10.8  | 10.79 | 0.01 | 0.13 | 1.01   | 0.54769  | 0.23172  | 0.786269 | 0.503551 |
| MmuSTS.1914.1.S1_at   | MmuSTS.1914.1 | 10.15 | 9.76  | 0.23 | 0.26 | 1.31   | 0.170198 | 0.108614 | 0.534249 | 0.372171 |
| MmuSTS.1915.1.S1_at   | MmuSTS.1915.1 | 4.17  | 4.46  | 0.29 | 0.48 | -1.22  | 0.337573 | 0.442306 | 0.660074 | 0.660336 |
| MmuSTS.1916.1.S1_at   | MmuSTS.1916.1 | 3.25  | 3.24  | 0.06 | 0.07 | 1.01   | 0.645736 | 0.469576 | 0.840447 | 0.67829  |
| MmuSTS.1917.1.S1_at   | MmuSTS.1917.1 | 5.26  | 5.36  | 0.41 | 0.2  | -1.07  | 0.662837 | 0.166687 | 0.848771 | 0.443163 |
| MmuSTS.1918.1.S1_at   | MmuSTS.1918.1 | 7.25  | 5.9   | 0.68 | 0.65 | 2.56   | 0.055232 | 0.045942 | 0.383636 | 0.258786 |
| MmuSTS.1919.1.S1_at   | MmuSTS.1919.1 | 7.08  | 7.26  | 0.14 | 0.36 | -1.13  | 0.91238  | 0.559655 | 0.965274 | 0.736365 |
| MmuSTS.192.1.S1_at    | MmuSTS.192.1  | 8.28  | 7.56  | 0.08 | 0.34 | 1.64   | 0.045941 | 0.040409 | 0.362058 | 0.246134 |
| MmuSTS.1920.1.S1_at   | MmuSTS.1920.1 | 8.49  | 8.27  | 0.28 | 0.47 | 1.17   | 0.452706 | 0.032618 | 0.732217 | 0.223644 |
| MmuSTS.1921.1.S1_at   | MmuSTS.1921.1 | 4.79  | 4.89  | 0.28 | 0.24 | -1.07  | 0.740644 | 0.364458 | 0.888738 | 0.604837 |
| MmuSTS.1923.1.S1_at   | MmuSTS.1923.1 | 11.23 | 11.98 | 0.29 | 0.88 | -1.68  | 0.674067 | 0.575909 | 0.853952 | 0.746847 |
| MmuSTS.1924.1.S1_at   | MmuSTS.1924.1 | 8.61  | 7.98  | 0.18 | 0.45 | 1.55   | 0.061578 | 0.026555 | 0.396368 | 0.203915 |
| MmuSTS.1925.1.S1_at   | MmuSTS.1925.1 | 12.68 | 13.93 | 0.29 | 0.24 | -2.39  | 0.009672 | 0.00409  | 0.226235 | 0.09055  |
| MmuSTS.1926.1.S1_at   | MmuSTS.1926.1 | 7.71  | 7.53  | 0.15 | 0.21 | 1.14   | 0.176153 | 0.093109 | 0.539664 | 0.349292 |
| MmuSTS.1927.1.S1_at   | MmuSTS.1927.1 | 4.9   | 7.06  | 1.53 | 1.41 | -4.45  | 0.200645 | 0.186665 | 0.5634   | 0.462459 |

|                      |               |       |       |      |      |       |          |          |          |          |
|----------------------|---------------|-------|-------|------|------|-------|----------|----------|----------|----------|
| MmuSTS.1928.1.S1_at  | MmuSTS.1928.1 | 10.49 | 10.04 | 0.49 | 1.55 | 1.37  | 0.816579 | 0.850696 | 0.925607 | 0.915051 |
| MmuSTS.1929.1.S1_at  | MmuSTS.1929.1 | 12.26 | 12.75 | 0.25 | 1.18 | -1.4  | 0.662897 | 0.852911 | 0.848771 | 0.916372 |
| MmuSTS.193.1.S1_s_at | MmuSTS.193.1  | 10.97 | 10.8  | 0.03 | 0.04 | 1.12  | 0.006128 | 0.044048 | 0.195977 | 0.254195 |
| MmuSTS.1930.1.S1_at  | MmuSTS.1930.1 | 11.87 | 11.82 | 0.28 | 0.76 | 1.03  | 0.311961 | 0.370465 | 0.643771 | 0.609543 |
| MmuSTS.1931.1.S1_at  | MmuSTS.1931.1 | 12.32 | 12.44 | 0.26 | 0.23 | -1.09 | 0.568822 | 0.759285 | 0.798884 | 0.860036 |
| MmuSTS.1932.1.S1_at  | MmuSTS.1932.1 | 9.11  | 9.59  | 0.58 | 0.92 | -1.4  | 0.304393 | 0.362369 | 0.638542 | 0.602965 |
| MmuSTS.1933.1.S1_at  | MmuSTS.1933.1 | 3.01  | 3.1   | 0.08 | 0.2  | -1.07 | 0.963767 | 0.02413  | 0.985982 | 0.1945   |
| MmuSTS.1934.1.S1_at  | MmuSTS.1934.1 | 10.07 | 10.83 | 0.13 | 0.32 | -1.69 | 0.040132 | 0.061774 | 0.349119 | 0.295327 |
| MmuSTS.1935.1.S1_at  | MmuSTS.1935.1 | 10.51 | 10.78 | 0.11 | 0.21 | -1.21 | 0.10011  | 0.194712 | 0.460668 | 0.469765 |
| MmuSTS.1936.1.S1_at  | MmuSTS.1936.1 | 10.17 | 9.81  | 0.18 | 0.18 | 1.29  | 0.042975 | 0.036869 | 0.355814 | 0.23648  |
| MmuSTS.1937.1.S1_at  | MmuSTS.1937.1 | 7.22  | 6.98  | 0.17 | 0.57 | 1.18  | 0.723679 | 0.734437 | 0.879215 | 0.846141 |
| MmuSTS.1938.1.S1_at  | MmuSTS.1938.1 | 4.32  | 4.2   | 0.09 | 0.2  | 1.09  | 0.99681  | 0.957439 | 0.998693 | 0.975899 |
| MmuSTS.1939.1.S1_at  | MmuSTS.1939.1 | 4.35  | 4.2   | 0.32 | 0.28 | 1.11  | 0.505123 | 0.666131 | 0.761548 | 0.804415 |
| MmuSTS.194.1.S1_at   | MmuSTS.194.1  | 4.59  | 4.82  | 0.53 | 0.48 | -1.17 | 0.76871  | 0.738504 | 0.902722 | 0.848349 |
| MmuSTS.1940.1.S1_at  | MmuSTS.1940.1 | 9.63  | 9.37  | 0.18 | 0.66 | 1.19  | 0.67473  | 0.036633 | 0.854234 | 0.235943 |
| MmuSTS.1941.1.S1_at  | MmuSTS.1941.1 | 5.21  | 4.88  | 0.66 | 1.19 | 1.26  | 0.504571 | 0.389035 | 0.76127  | 0.623288 |
| MmuSTS.1942.1.S1_at  | MmuSTS.1942.1 | 4.56  | 4.55  | 0.11 | 0.2  | 1     | 0.428398 | 0.601083 | 0.71683  | 0.762496 |
| MmuSTS.1943.1.S1_at  | MmuSTS.1943.1 | 13.04 | 13.11 | 0.07 | 0.4  | -1.05 | 0.904507 | 0.767425 | 0.961799 | 0.864956 |
| MmuSTS.1944.1.S1_at  | MmuSTS.1944.1 | 6.03  | 7.92  | 1.76 | 1.36 | -3.7  | 0.364957 | 0.413194 | 0.677796 | 0.639484 |
| MmuSTS.1945.1.S1_at  | MmuSTS.1945.1 | 8.18  | 7.66  | 0.16 | 0.51 | 1.44  | 0.232816 | 0.24728  | 0.587927 | 0.516473 |
| MmuSTS.1946.1.S1_at  | MmuSTS.1946.1 | 12.37 | 12.03 | 0.05 | 0.23 | 1.27  | 0.047822 | 0.02366  | 0.367233 | 0.192574 |
| MmuSTS.1947.1.S1_at  | MmuSTS.1947.1 | 3.63  | 3.82  | 0.32 | 0.22 | -1.14 | 0.872584 | 0.203407 | 0.949073 | 0.477634 |
| MmuSTS.1948.1.S1_at  | MmuSTS.1948.1 | 7.19  | 7.27  | 0.12 | 0.17 | -1.06 | 0.692284 | 0.911739 | 0.863369 | 0.950257 |
| MmuSTS.1949.1.S1_at  | MmuSTS.1949.1 | 2.89  | 2.94  | 0.05 | 0.07 | -1.04 | 0.210297 | 0.086633 | 0.571482 | 0.339176 |
| MmuSTS.195.1.S1_at   | MmuSTS.195.1  | 5.43  | 5.65  | 0.19 | 0.17 | -1.16 | 0.477863 | 0.438838 | 0.74705  | 0.657715 |
| MmuSTS.1950.1.S1_at  | MmuSTS.1950.1 | 5.33  | 5.6   | 0.29 | 0.28 | -1.21 | 0.711255 | 0.795064 | 0.873475 | 0.881926 |
| MmuSTS.1951.1.S1_at  | MmuSTS.1951.1 | 4.55  | 4.93  | 0.14 | 0.08 | -1.3  | 0.056941 | 0.062258 | 0.387418 | 0.296325 |
| MmuSTS.1952.1.S1_at  | MmuSTS.1952.1 | 7.04  | 8.93  | 0.56 | 0.56 | -3.7  | 0.014352 | 0.009765 | 0.251885 | 0.129971 |
| MmuSTS.1953.1.S1_at  | MmuSTS.1953.1 | 9.98  | 9.51  | 0.32 | 1.01 | 1.39  | 0.149803 | 0.067765 | 0.514363 | 0.306425 |
| MmuSTS.1954.1.S1_at  | MmuSTS.1954.1 | 3.95  | 4.79  | 0.06 | 0.91 | -1.79 | 0.152387 | 0.135    | 0.51708  | 0.40698  |
| MmuSTS.1955.1.S1_at  | MmuSTS.1955.1 | 12.24 | 11.14 | 0.12 | 0.16 | 2.14  | 0.000705 | 0.000685 | 0.136818 | 0.044166 |
| MmuSTS.1956.1.S1_at  | MmuSTS.1956.1 | 12.92 | 13.14 | 0.25 | 0.08 | -1.17 | 0.158593 | 0.158524 | 0.52369  | 0.434442 |
| MmuSTS.1957.1.S1_at  | MmuSTS.1957.1 | 8.14  | 9.27  | 0.31 | 1.63 | -2.2  | 0.312273 | 0.163957 | 0.644026 | 0.440107 |
| MmuSTS.1958.1.S1_at  | MmuSTS.1958.1 | 7.34  | 8.21  | 0.36 | 1.36 | -1.84 | 0.358068 | 0.264764 | 0.673017 | 0.530791 |
| MmuSTS.1959.1.S1_at  | MmuSTS.1959.1 | 4.4   | 4.39  | 0.06 | 0.03 | 1.01  | 0.600093 | 0.427226 | 0.815064 | 0.649175 |
| MmuSTS.196.1.S1_at   | MmuSTS.196.1  | 11.49 | 11.34 | 0.3  | 0.12 | 1.11  | 0.239176 | 0.286734 | 0.592339 | 0.548112 |
| MmuSTS.1960.1.S1_at  | MmuSTS.1960.1 | 5.08  | 5.6   | 0.79 | 0.18 | -1.44 | 0.695764 | 0.876045 | 0.865007 | 0.929533 |
| MmuSTS.1961.1.S1_at  | MmuSTS.1961.1 | 4.33  | 4.19  | 0.07 | 0.06 | 1.11  | 0.07504  | 0.077189 | 0.421751 | 0.322773 |
| MmuSTS.1962.1.S1_at  | MmuSTS.1962.1 | 10.18 | 10.59 | 0.15 | 0.2  | -1.32 | 0.026649 | 0.004122 | 0.303736 | 0.090887 |
| MmuSTS.1963.1.S1_at  | MmuSTS.1963.1 | 12.18 | 11.07 | 0.25 | 0.69 | 2.15  | 0.02887  | 0.018865 | 0.312166 | 0.172781 |
| MmuSTS.1964.1.S1_at  | MmuSTS.1964.1 | 11.02 | 10.33 | 0.2  | 0.17 | 1.6   | 0.010473 | 0.005248 | 0.229964 | 0.100352 |



|                     |               |       |       |      |      |        |          |          |          |          |
|---------------------|---------------|-------|-------|------|------|--------|----------|----------|----------|----------|
| MmuSTS.1965.1.S1_at | MmuSTS.1965.1 | 8.88  | 8.87  | 0.31 | 0.1  | 1      | 0.38791  | 0.384433 | 0.692145 | 0.620107 |
| MmuSTS.1966.1.S1_at | MmuSTS.1966.1 | 10.2  | 9.24  | 0.09 | 0.23 | 1.94   | 0.002526 | 0.001375 | 0.164386 | 0.05691  |
| MmuSTS.1967.1.S1_at | MmuSTS.1967.1 | 5.89  | 10.44 | 1.49 | 3.5  | -23.35 | 0.383076 | 0.257086 | 0.689068 | 0.524783 |
| MmuSTS.1968.1.S1_at | MmuSTS.1968.1 | 8.93  | 9.19  | 0.64 | 1.14 | -1.2   | 0.611254 | 0.752215 | 0.821568 | 0.855787 |
| MmuSTS.1969.1.S1_at | MmuSTS.1969.1 | 11.36 | 11.21 | 0.37 | 0.41 | 1.11   | 0.918966 | 0.895011 | 0.968454 | 0.940055 |
| MmuSTS.197.1.S1_at  | MmuSTS.197.1  | 10.97 | 9.57  | 0.22 | 0.14 | 2.64   | 0.000719 | 0.000107 | 0.136818 | 0.028099 |
| MmuSTS.1970.1.S1_at | MmuSTS.1970.1 | 7.92  | 8.69  | 0.29 | 0.46 | -1.71  | 0.062942 | 0.069337 | 0.399633 | 0.309558 |
| MmuSTS.1971.1.S1_at | MmuSTS.1971.1 | 11.45 | 11.11 | 0.46 | 0.25 | 1.27   | 0.138556 | 0.015323 | 0.505769 | 0.157164 |
| MmuSTS.1972.1.S1_at | MmuSTS.1972.1 | 7.14  | 7.21  | 0.21 | 0.1  | -1.05  | 0.563536 | 0.544917 | 0.79607  | 0.727184 |
| MmuSTS.1973.1.S1_at | MmuSTS.1973.1 | 5.33  | 7.77  | 1.88 | 0.9  | -5.42  | 0.087634 | 0.073132 | 0.442009 | 0.316064 |
| MmuSTS.1974.1.S1_at | MmuSTS.1974.1 | 5.52  | 5.75  | 0.1  | 0.12 | -1.17  | 0.101643 | 0.150923 | 0.461313 | 0.425523 |
| MmuSTS.1975.1.S1_at | MmuSTS.1975.1 | 6.96  | 7.62  | 0.45 | 1.07 | -1.58  | 0.447285 | 0.488742 | 0.728883 | 0.691338 |
| MmuSTS.1976.1.S1_at | MmuSTS.1976.1 | 5.84  | 5.8   | 0.08 | 0.13 | 1.02   | 0.961026 | 0.076991 | 0.984976 | 0.322421 |
| MmuSTS.1977.1.S1_at | MmuSTS.1977.1 | 9.12  | 9.13  | 0.28 | 0.8  | -1     | 0.278693 | 0.163087 | 0.620785 | 0.439249 |
| MmuSTS.1978.1.S1_at | MmuSTS.1978.1 | 6.15  | 7.07  | 0.82 | 1.31 | -1.89  | 0.371134 | 0.286221 | 0.681832 | 0.547725 |
| MmuSTS.1979.1.S1_at | MmuSTS.1979.1 | 11    | 10.43 | 0.19 | 0.44 | 1.49   | 0.307307 | 0.343155 | 0.639945 | 0.588905 |
| MmuSTS.198.1.S1_at  | MmuSTS.198.1  | 2.82  | 3.11  | 0.1  | 0.07 | -1.22  | 0.027541 | 0.025444 | 0.308386 | 0.200043 |
| MmuSTS.1980.1.S1_at | MmuSTS.1980.1 | 4.08  | 4.24  | 0.09 | 0.14 | -1.11  | 0.41158  | 0.83449  | 0.707473 | 0.905226 |
| MmuSTS.1981.1.S1_at | MmuSTS.1981.1 | 5.06  | 8.38  | 1.53 | 2.83 | -10.02 | 0.557901 | 0.307544 | 0.792877 | 0.563781 |
| MmuSTS.1982.1.S1_at | MmuSTS.1982.1 | 8.44  | 10.49 | 1.24 | 2.27 | -4.15  | 0.541293 | 0.46105  | 0.782592 | 0.672831 |
| MmuSTS.1983.1.S1_at | MmuSTS.1983.1 | 3     | 3.06  | 0.1  | 0.13 | -1.04  | 0.460229 | 0.735465 | 0.736782 | 0.846919 |
| MmuSTS.1984.1.S1_at | MmuSTS.1984.1 | 5.76  | 7.44  | 0.53 | 0.27 | -3.19  | 0.009115 | 0.003509 | 0.222023 | 0.08503  |
| MmuSTS.1985.1.S1_at | MmuSTS.1985.1 | 10.17 | 8.98  | 0.24 | 0.22 | 2.28   | 0.006435 | 0.006241 | 0.199625 | 0.107169 |
| MmuSTS.1986.1.S1_at | MmuSTS.1986.1 | 6.41  | 6.5   | 0.1  | 0.14 | -1.06  | 0.756764 | 0.078207 | 0.896682 | 0.324752 |
| MmuSTS.1987.1.S1_at | MmuSTS.1987.1 | 11.58 | 11.23 | 0.13 | 0.08 | 1.27   | 0.014912 | 0.003823 | 0.256279 | 0.08794  |
| MmuSTS.1988.1.S1_at | MmuSTS.1988.1 | 6.62  | 6.45  | 0.46 | 0.41 | 1.12   | 0.497188 | 0.64456  | 0.757896 | 0.791661 |
| MmuSTS.1989.1.S1_at | MmuSTS.1989.1 | 5.59  | 5.58  | 0.06 | 0.15 | 1.01   | 0.856403 | 0.975465 | 0.942006 | 0.986626 |
| MmuSTS.199.1.S1_at  | MmuSTS.199.1  | 9.4   | 10.47 | 1.23 | 1.62 | -2.1   | 0.511788 | 0.69628  | 0.765318 | 0.823545 |
| MmuSTS.1990.1.S1_at | MmuSTS.1990.1 | 6.19  | 6.24  | 0.07 | 0.12 | -1.03  | 0.344197 | 0.458219 | 0.664255 | 0.671077 |
| MmuSTS.1991.1.S1_at | MmuSTS.1991.1 | 7.23  | 8     | 0.21 | 0.51 | -1.71  | 0.045893 | 0.063872 | 0.361949 | 0.29906  |
| MmuSTS.1992.1.S1_at | MmuSTS.1992.1 | 7.08  | 7.77  | 0.96 | 1.04 | -1.6   | 0.41401  | 0.063588 | 0.708765 | 0.298703 |
| MmuSTS.1993.1.S1_at | MmuSTS.1993.1 | 5.22  | 5.42  | 0.24 | 0.45 | -1.15  | 0.207964 | 0.355125 | 0.569894 | 0.597508 |
| MmuSTS.1994.1.S1_at | MmuSTS.1994.1 | 4.58  | 4.67  | 0.2  | 0.04 | -1.07  | 0.941989 | 0.190398 | 0.977822 | 0.465906 |
| MmuSTS.1995.1.S1_at | MmuSTS.1995.1 | 11.9  | 11.29 | 0.07 | 0.53 | 1.53   | 0.043752 | 0.034353 | 0.357051 | 0.229283 |
| MmuSTS.1996.1.S1_at | MmuSTS.1996.1 | 10.96 | 10.82 | 0.06 | 0.23 | 1.1    | 0.372665 | 0.58135  | 0.682946 | 0.750417 |
| MmuSTS.1997.1.S1_at | MmuSTS.1997.1 | 9.48  | 10.49 | 0.58 | 0.56 | -2.02  | 0.05692  | 0.028482 | 0.387418 | 0.21056  |
| MmuSTS.1998.1.S1_at | MmuSTS.1998.1 | 11.49 | 10.18 | 0.17 | 1.05 | 2.48   | 0.079997 | 0.03691  | 0.430176 | 0.236593 |
| MmuSTS.1999.1.S1_at | MmuSTS.1999.1 | 9.55  | 9.07  | 0.15 | 0.36 | 1.39   | 0.056742 | 0.01556  | 0.386903 | 0.158132 |
| MmuSTS.2.1.S1_at    | MmuSTS.2.1    | 3.99  | 4.03  | 0.05 | 0.2  | -1.03  | 0.496317 | 0.679888 | 0.757473 | 0.8131   |
| MmuSTS.20.1.S1_at   | MmuSTS.20.1   | 7.46  | 10.1  | 1.15 | 2.48 | -6.23  | 0.536528 | 0.488422 | 0.77949  | 0.691144 |
| MmuSTS.200.1.S1_at  | MmuSTS.200.1  | 9.2   | 10.61 | 0.53 | 0.7  | -2.65  | 0.048159 | 0.037957 | 0.367807 | 0.239302 |

|                       |               |       |       |      |      |       |          |          |          |          |
|-----------------------|---------------|-------|-------|------|------|-------|----------|----------|----------|----------|
| MmuSTS.2000.1.S1_at   | MmuSTS.2000.1 | 6.2   | 5.95  | 0.25 | 0.15 | 1.19  | 0.385055 | 0.013983 | 0.690226 | 0.151585 |
| MmuSTS.2001.1.S1_at   | MmuSTS.2001.1 | 11.86 | 11.93 | 0.14 | 0.04 | -1.05 | 0.475055 | 0.349403 | 0.745548 | 0.593406 |
| MmuSTS.2002.1.S1_at   | MmuSTS.2002.1 | 4.02  | 2.73  | 0.52 | 0.18 | 2.46  | 0.023203 | 0.010945 | 0.290295 | 0.13621  |
| MmuSTS.2003.1.S1_at   | MmuSTS.2003.1 | 3.05  | 3.04  | 0.06 | 0.11 | 1     | 0.670377 | 0.756718 | 0.852386 | 0.858361 |
| MmuSTS.2004.1.S1_at   | MmuSTS.2004.1 | 4.73  | 4.74  | 0.26 | 0.14 | -1.01 | 0.98106  | 0.954854 | 0.993178 | 0.974414 |
| MmuSTS.2005.1.S1_at   | MmuSTS.2005.1 | 5.74  | 6.12  | 0.18 | 0.22 | -1.3  | 0.070685 | 0.058223 | 0.414661 | 0.287988 |
| MmuSTS.2006.1.S1_at   | MmuSTS.2006.1 | 12.61 | 12.65 | 0.12 | 0.14 | -1.02 | 0.669942 | 0.259162 | 0.852318 | 0.526264 |
| MmuSTS.2007.1.S1_at   | MmuSTS.2007.1 | 7.44  | 6.84  | 0.5  | 0.24 | 1.51  | 0.099293 | 0.089343 | 0.459226 | 0.343595 |
| MmuSTS.2008.1.S1_at   | MmuSTS.2008.1 | 6.81  | 7.19  | 0.43 | 0.22 | -1.3  | 0.148992 | 0.063826 | 0.513987 | 0.29906  |
| MmuSTS.2009.1.S1_at   | MmuSTS.2009.1 | 7.13  | 6.67  | 0.45 | 0.07 | 1.37  | 0.182207 | 0.208598 | 0.54655  | 0.48252  |
| MmuSTS.201.1.S1_at    | MmuSTS.201.1  | 3.59  | 4.91  | 0.19 | 0.33 | -2.49 | 0.002732 | 0.000799 | 0.165355 | 0.04607  |
| MmuSTS.2010.1.S1_at   | MmuSTS.2010.1 | 4.81  | 4.56  | 0.34 | 0.35 | 1.19  | 0.936749 | 0.676113 | 0.975557 | 0.810713 |
| MmuSTS.2012.1.S1_at   | MmuSTS.2012.1 | 3.82  | 3.64  | 0.18 | 0.33 | 1.13  | 0.986782 | 0.929032 | 0.99532  | 0.959562 |
| MmuSTS.2013.1.S1_at   | MmuSTS.2013.1 | 7.61  | 7.89  | 0.8  | 0.51 | -1.21 | 0.631771 | 0.267539 | 0.83284  | 0.533272 |
| MmuSTS.2014.1.S1_at   | MmuSTS.2014.1 | 2.63  | 2.79  | 0.09 | 0.38 | -1.12 | 0.218389 | 0.332986 | 0.577884 | 0.581326 |
| MmuSTS.2014.1.S1_x_at | MmuSTS.2014.1 | 2.64  | 2.69  | 0.06 | 0.41 | -1.03 | 0.256131 | 0.364318 | 0.603822 | 0.604662 |
| MmuSTS.2015.1.S1_at   | MmuSTS.2015.1 | 5.31  | 5.54  | 0.18 | 0.05 | -1.17 | 0.164027 | 0.200291 | 0.528211 | 0.474689 |
| MmuSTS.2016.1.S1_at   | MmuSTS.2016.1 | 4.98  | 5.29  | 0.06 | 0.14 | -1.24 | 0.026369 | 0.022555 | 0.302842 | 0.187981 |
| MmuSTS.2017.1.S1_at   | MmuSTS.2017.1 | 4.68  | 4.69  | 0.06 | 0.19 | -1    | 0.815225 | 0.777202 | 0.924888 | 0.870556 |
| MmuSTS.2018.1.S1_at   | MmuSTS.2018.1 | 6.31  | 6.11  | 0.24 | 0.09 | 1.15  | 0.663599 | 0.845318 | 0.849022 | 0.911994 |
| MmuSTS.2019.1.S1_at   | MmuSTS.2019.1 | 5.37  | 5.14  | 0.17 | 0.1  | 1.18  | 0.067792 | 0.095219 | 0.408536 | 0.35218  |
| MmuSTS.202.1.S1_s_at  | MmuSTS.202.1  | 5.77  | 4.75  | 1.69 | 0.91 | 2.03  | 0.481094 | 0.318613 | 0.748945 | 0.571258 |
| MmuSTS.2020.1.S1_at   | MmuSTS.2020.1 | 11.87 | 12.2  | 0.15 | 0.28 | -1.26 | 0.262517 | 0.27912  | 0.609006 | 0.542807 |
| MmuSTS.2021.1.S1_at   | MmuSTS.2021.1 | 4.5   | 4.73  | 0.1  | 0.13 | -1.17 | 0.175892 | 0.092437 | 0.53945  | 0.348329 |
| MmuSTS.2022.1.S1_at   | MmuSTS.2022.1 | 6.06  | 6.54  | 1.18 | 1.56 | -1.39 | 0.775269 | 0.673133 | 0.905656 | 0.809011 |
| MmuSTS.2024.1.S1_at   | MmuSTS.2024.1 | 8.47  | 7.81  | 0.05 | 0.48 | 1.58  | 0.078783 | 0.072986 | 0.428609 | 0.315986 |
| MmuSTS.2025.1.S1_at   | MmuSTS.2025.1 | 11.53 | 11.1  | 0.27 | 0.78 | 1.35  | 0.149284 | 0.079803 | 0.514001 | 0.327113 |
| MmuSTS.2026.1.S1_at   | MmuSTS.2026.1 | 10.47 | 10.52 | 0.05 | 0.18 | -1.04 | 0.870808 | 0.628009 | 0.948379 | 0.780911 |
| MmuSTS.2027.1.S1_at   | MmuSTS.2027.1 | 7.85  | 7.11  | 0.38 | 0.23 | 1.67  | 0.033718 | 0.008143 | 0.330119 | 0.119736 |
| MmuSTS.2028.1.S1_at   | MmuSTS.2028.1 | 4.02  | 4.27  | 0.24 | 0.18 | -1.19 | 0.253998 | 0.382531 | 0.602339 | 0.618735 |
| MmuSTS.2029.1.S1_at   | MmuSTS.2029.1 | 10    | 9.19  | 0.14 | 0.18 | 1.76  | 0.002073 | 0.00007  | 0.155636 | 0.025812 |
| MmuSTS.203.1.S1_at    | MmuSTS.203.1  | 3.75  | 4.02  | 0.08 | 0.27 | -1.21 | 0.560582 | 0.180942 | 0.794291 | 0.457418 |
| MmuSTS.2030.1.S1_at   | MmuSTS.2030.1 | 9.55  | 9.21  | 0.04 | 0.65 | 1.27  | 0.877567 | 0.887458 | 0.950953 | 0.935867 |
| MmuSTS.2031.1.S1_at   | MmuSTS.2031.1 | 10.11 | 9.39  | 0.07 | 0.24 | 1.64  | 0.010387 | 0.000364 | 0.229439 | 0.037273 |
| MmuSTS.2032.1.S1_at   | MmuSTS.2032.1 | 3.92  | 4.02  | 0.31 | 0.31 | -1.07 | 0.469859 | 0.737581 | 0.741958 | 0.847993 |
| MmuSTS.2033.1.S1_at   | MmuSTS.2033.1 | 5.19  | 5.01  | 0.21 | 0.43 | 1.13  | 0.828229 | 0.964613 | 0.930243 | 0.980347 |
| MmuSTS.2034.1.S1_at   | MmuSTS.2034.1 | 8.72  | 8.21  | 0.1  | 0.4  | 1.42  | 0.135886 | 0.152579 | 0.502782 | 0.427435 |
| MmuSTS.2035.1.S1_at   | MmuSTS.2035.1 | 11.68 | 12.34 | 0.83 | 0.96 | -1.58 | 0.437411 | 0.435407 | 0.722414 | 0.655194 |
| MmuSTS.2036.1.S1_at   | MmuSTS.2036.1 | 9.37  | 9.07  | 0.43 | 0.59 | 1.22  | 0.968734 | 0.925236 | 0.988176 | 0.957718 |
| MmuSTS.2037.1.S1_at   | MmuSTS.2037.1 | 11.42 | 11.24 | 0.28 | 0.57 | 1.13  | 0.467387 | 0.165665 | 0.74068  | 0.441925 |
| MmuSTS.2038.1.S1_at   | MmuSTS.2038.1 | 5.45  | 5.27  | 0.2  | 0.45 | 1.13  | 0.777438 | 0.636317 | 0.906988 | 0.786047 |

|                       |               |       |       |      |      |       |          |          |          |          |
|-----------------------|---------------|-------|-------|------|------|-------|----------|----------|----------|----------|
| MmuSTS.2039.1.S1_at   | MmuSTS.2039.1 | 10.51 | 9.83  | 0.06 | 0.38 | 1.6   | 0.120102 | 0.0883   | 0.484782 | 0.341721 |
| MmuSTS.204.1.S1_at    | MmuSTS.204.1  | 11.29 | 11.19 | 0.17 | 0.38 | 1.08  | 0.714229 | 0.136382 | 0.87471  | 0.408839 |
| MmuSTS.2040.1.S1_at   | MmuSTS.2040.1 | 9.07  | 8.64  | 0.07 | 0.14 | 1.35  | 0.006062 | 0.001316 | 0.195337 | 0.055939 |
| MmuSTS.2041.1.S1_at   | MmuSTS.2041.1 | 8.75  | 8.21  | 0.45 | 0.37 | 1.45  | 0.23259  | 0.307611 | 0.587814 | 0.563785 |
| MmuSTS.2042.1.S1_at   | MmuSTS.2042.1 | 8.11  | 7.96  | 0.16 | 0.53 | 1.11  | 0.511742 | 0.215693 | 0.765318 | 0.489487 |
| MmuSTS.2043.1.S1_at   | MmuSTS.2043.1 | 7.21  | 5.91  | 0.09 | 0.04 | 2.46  | 0.000021 | 0.000062 | 0.112653 | 0.025666 |
| MmuSTS.2044.1.S1_at   | MmuSTS.2044.1 | 7.65  | 7.18  | 0.15 | 0.44 | 1.38  | 0.328254 | 0.146831 | 0.654312 | 0.42088  |
| MmuSTS.2045.1.S1_at   | MmuSTS.2045.1 | 7.86  | 7.72  | 0.19 | 0.27 | 1.1   | 0.963834 | 0.077431 | 0.985992 | 0.323236 |
| MmuSTS.2046.1.S1_at   | MmuSTS.2046.1 | 9.86  | 10.12 | 0.13 | 0.11 | -1.2  | 0.079355 | 0.073897 | 0.429376 | 0.31727  |
| MmuSTS.2047.1.S1_at   | MmuSTS.2047.1 | 5.03  | 4.75  | 0.96 | 0.36 | 1.22  | 0.569823 | 0.759399 | 0.79921  | 0.860081 |
| MmuSTS.2048.1.S1_at   | MmuSTS.2048.1 | 5.12  | 5.3   | 0.15 | 0.11 | -1.13 | 0.119121 | 0.190909 | 0.483768 | 0.466269 |
| MmuSTS.2049.1.S1_at   | MmuSTS.2049.1 | 12.81 | 12.6  | 0.35 | 0.52 | 1.16  | 0.349408 | 0.475457 | 0.667703 | 0.682155 |
| MmuSTS.205.1.S1_at    | MmuSTS.205.1  | 7.25  | 7.63  | 0.16 | 0.5  | -1.3  | 0.290052 | 0.354897 | 0.628003 | 0.597466 |
| MmuSTS.2050.1.S1_at   | MmuSTS.2050.1 | 3.18  | 3.18  | 0.06 | 0.05 | -1    | 0.756482 | 0.406537 | 0.896527 | 0.634382 |
| MmuSTS.2051.1.S1_at   | MmuSTS.2051.1 | 10.52 | 10.57 | 0.05 | 0.62 | -1.03 | 0.949263 | 0.963992 | 0.980674 | 0.980028 |
| MmuSTS.2052.1.S1_at   | MmuSTS.2052.1 | 10.09 | 9.87  | 0.07 | 0.38 | 1.17  | 0.367167 | 0.350923 | 0.6793   | 0.594639 |
| MmuSTS.2053.1.S1_at   | MmuSTS.2053.1 | 6     | 5.93  | 0.41 | 0.34 | 1.05  | 0.894993 | 0.05519  | 0.958041 | 0.280555 |
| MmuSTS.2054.1.S1_at   | MmuSTS.2054.1 | 6.77  | 6.25  | 0.61 | 0.66 | 1.44  | 0.412613 | 0.510318 | 0.707935 | 0.704827 |
| MmuSTS.2055.1.S1_at   | MmuSTS.2055.1 | 4.47  | 4.23  | 0.93 | 0.75 | 1.19  | 0.735851 | 0.919819 | 0.886439 | 0.954916 |
| MmuSTS.2056.1.S1_at   | MmuSTS.2056.1 | 7.25  | 7.07  | 0.2  | 0.13 | 1.13  | 0.113686 | 0.121713 | 0.476946 | 0.390956 |
| MmuSTS.2057.1.S1_at   | MmuSTS.2057.1 | 9.72  | 9.34  | 0.36 | 0.48 | 1.3   | 0.681665 | 0.791775 | 0.857635 | 0.879741 |
| MmuSTS.2058.1.S1_at   | MmuSTS.2058.1 | 6.46  | 7.04  | 0.35 | 0.78 | -1.49 | 0.087961 | 0.062057 | 0.442256 | 0.29597  |
| MmuSTS.2059.1.S1_at   | MmuSTS.2059.1 | 6.77  | 6.84  | 0.44 | 0.82 | -1.05 | 0.526825 | 0.648013 | 0.774374 | 0.793947 |
| MmuSTS.206.1.S1_at    | MmuSTS.206.1  | 12.34 | 12.55 | 0.07 | 0.04 | -1.16 | 0.006838 | 0.03367  | 0.201708 | 0.227066 |
| MmuSTS.2060.1.S1_at   | MmuSTS.2060.1 | 7.51  | 7.08  | 0.51 | 0.36 | 1.35  | 0.565247 | 0.742669 | 0.796922 | 0.851023 |
| MmuSTS.2061.1.S1_at   | MmuSTS.2061.1 | 11.21 | 10.51 | 0.18 | 0.62 | 1.63  | 0.081753 | 0.065676 | 0.432753 | 0.301631 |
| MmuSTS.2062.1.S1_at   | MmuSTS.2062.1 | 5.21  | 4.81  | 0.56 | 0.1  | 1.32  | 0.093924 | 0.048366 | 0.451538 | 0.265081 |
| MmuSTS.2063.1.S1_at   | MmuSTS.2063.1 | 11.6  | 11.5  | 0.09 | 0.26 | 1.07  | 0.431498 | 0.100791 | 0.718592 | 0.360239 |
| MmuSTS.2064.1.S1_at   | MmuSTS.2064.1 | 13.18 | 12.83 | 0.1  | 0.55 | 1.27  | 0.090202 | 0.086591 | 0.445655 | 0.33911  |
| MmuSTS.2065.1.S1_at   | MmuSTS.2065.1 | 6.67  | 9.52  | 1.99 | 1.25 | -7.19 | 0.096828 | 0.029109 | 0.455871 | 0.212733 |
| MmuSTS.2065.1.S1_s_at | MmuSTS.2065.1 | 6.76  | 9.52  | 1.89 | 1.28 | -6.77 | 0.10028  | 0.035151 | 0.460878 | 0.231645 |
| MmuSTS.2065.1.S1_x_at | MmuSTS.2065.1 | 7.15  | 9.88  | 1.91 | 1.17 | -6.66 | 0.094708 | 0.029236 | 0.452166 | 0.212898 |
| MmuSTS.2066.1.S1_at   | MmuSTS.2066.1 | 11.55 | 10.49 | 0.12 | 0.37 | 2.08  | 0.009399 | 0.004317 | 0.224725 | 0.092178 |
| MmuSTS.2067.1.S1_at   | MmuSTS.2067.1 | 6.87  | 7.3   | 0.11 | 0.4  | -1.35 | 0.058213 | 0.047468 | 0.390133 | 0.262486 |
| MmuSTS.2068.1.S1_at   | MmuSTS.2068.1 | 8.24  | 7.72  | 0.43 | 0.4  | 1.43  | 0.194081 | 0.187059 | 0.557718 | 0.462983 |
| MmuSTS.2069.1.S1_at   | MmuSTS.2069.1 | 11.11 | 10.08 | 0.28 | 0.17 | 2.04  | 0.004113 | 0.000324 | 0.181739 | 0.035587 |
| MmuSTS.207.1.S1_at    | MmuSTS.207.1  | 7.06  | 8.05  | 0.55 | 1.4  | -1.99 | 0.487285 | 0.660705 | 0.752039 | 0.80151  |
| MmuSTS.2070.1.S1_s_at | MmuSTS.2070.1 | 9.22  | 7.88  | 0.72 | 0.33 | 2.52  | 0.025884 | 0.014965 | 0.301128 | 0.155453 |
| MmuSTS.2071.1.S1_at   | MmuSTS.2071.1 | 9.18  | 8.17  | 0.22 | 0.46 | 2.01  | 0.009108 | 0.00347  | 0.222023 | 0.084806 |
| MmuSTS.2073.1.S1_at   | MmuSTS.2073.1 | 10.98 | 11.86 | 0.07 | 1    | -1.85 | 0.223543 | 0.14819  | 0.582017 | 0.422745 |
| MmuSTS.2074.1.S1_at   | MmuSTS.2074.1 | 11.64 | 10.88 | 0.12 | 0.22 | 1.7   | 0.013616 | 0.005861 | 0.248648 | 0.104856 |

|                       |               |       |       |      |      |       |          |          |          |          |
|-----------------------|---------------|-------|-------|------|------|-------|----------|----------|----------|----------|
| MmuSTS.2075.1.S1_at   | MmuSTS.2075.1 | 5.01  | 5.18  | 0.21 | 0.26 | -1.13 | 0.67126  | 0.920551 | 0.852602 | 0.955234 |
| MmuSTS.2076.1.S1_at   | MmuSTS.2076.1 | 4.98  | 5.05  | 0.44 | 0    | -1.05 | 0.611688 | 0.802709 | 0.821755 | 0.886441 |
| MmuSTS.2077.1.S1_at   | MmuSTS.2077.1 | 5.98  | 6.22  | 0.15 | 0.07 | -1.18 | 0.036384 | 0.025518 | 0.339201 | 0.200389 |
| MmuSTS.2078.1.S1_at   | MmuSTS.2078.1 | 5.44  | 4.8   | 0.4  | 0.4  | 1.56  | 0.267795 | 0.519633 | 0.612749 | 0.711208 |
| MmuSTS.2079.1.S1_at   | MmuSTS.2079.1 | 7.52  | 6.99  | 0.16 | 0.28 | 1.45  | 0.066937 | 0.028264 | 0.406999 | 0.209854 |
| MmuSTS.208.1.S1_at    | MmuSTS.208.1  | 6.56  | 5.41  | 0.36 | 0.39 | 2.22  | 0.031259 | 0.018054 | 0.321065 | 0.169372 |
| MmuSTS.2080.1.S1_at   | MmuSTS.2080.1 | 3.5   | 3.59  | 0.09 | 0.25 | -1.06 | 0.624795 | 0.524135 | 0.828458 | 0.714207 |
| MmuSTS.2081.1.S1_at   | MmuSTS.2081.1 | 10.42 | 9.05  | 0.62 | 0.54 | 2.59  | 0.100598 | 0.01129  | 0.461009 | 0.138076 |
| MmuSTS.2082.1.S1_at   | MmuSTS.2082.1 | 9.47  | 9.35  | 0.14 | 0.1  | 1.09  | 0.927445 | 0.022956 | 0.971995 | 0.189548 |
| MmuSTS.2083.1.S1_at   | MmuSTS.2083.1 | 11.77 | 11.74 | 0.07 | 0.18 | 1.03  | 0.729938 | 0.403204 | 0.882795 | 0.631996 |
| MmuSTS.2084.1.S1_at   | MmuSTS.2084.1 | 12.93 | 12.66 | 0.09 | 0.6  | 1.21  | 0.150741 | 0.160379 | 0.515411 | 0.436528 |
| MmuSTS.2085.1.S1_at   | MmuSTS.2085.1 | 4.82  | 4.61  | 0.65 | 0.58 | 1.16  | 0.761626 | 0.761749 | 0.89965  | 0.861459 |
| MmuSTS.2086.1.S1_at   | MmuSTS.2086.1 | 7.29  | 6.97  | 0.14 | 0.33 | 1.24  | 0.452296 | 0.042753 | 0.731986 | 0.251238 |
| MmuSTS.2087.1.S1_at   | MmuSTS.2087.1 | 3.26  | 3.57  | 0.21 | 0.29 | -1.23 | 0.279515 | 0.369408 | 0.621135 | 0.608809 |
| MmuSTS.2088.1.S1_at   | MmuSTS.2088.1 | 8.38  | 8.21  | 0.34 | 0.32 | 1.13  | 0.524188 | 0.454546 | 0.773041 | 0.668668 |
| MmuSTS.2089.1.S1_at   | MmuSTS.2089.1 | 7.76  | 8.24  | 0.53 | 0.84 | -1.4  | 0.418815 | 0.388566 | 0.71162  | 0.622897 |
| MmuSTS.209.1.S1_at    | MmuSTS.209.1  | 6.56  | 7.74  | 1.7  | 0.33 | -2.26 | 0.990426 | 0.980392 | 0.996647 | 0.989333 |
| MmuSTS.2090.1.S1_at   | MmuSTS.2090.1 | 6.38  | 6.49  | 0.52 | 0.62 | -1.08 | 0.645891 | 0.834422 | 0.840534 | 0.905171 |
| MmuSTS.2091.1.S1_at   | MmuSTS.2091.1 | 11.51 | 11.64 | 0.19 | 0.37 | -1.09 | 0.472459 | 0.633242 | 0.743753 | 0.784025 |
| MmuSTS.2092.1.S1_at   | MmuSTS.2092.1 | 7.17  | 6.62  | 0.27 | 0.28 | 1.46  | 0.113146 | 0.101858 | 0.475965 | 0.361836 |
| MmuSTS.2093.1.S1_at   | MmuSTS.2093.1 | 11.03 | 11.75 | 0.09 | 0.21 | -1.65 | 0.005416 | 0.00145  | 0.191107 | 0.057999 |
| MmuSTS.2094.1.S1_at   | MmuSTS.2094.1 | 11.15 | 11.19 | 0.11 | 0.24 | -1.03 | 0.579987 | 0.509194 | 0.804451 | 0.704028 |
| MmuSTS.2095.1.S1_at   | MmuSTS.2095.1 | 3.04  | 3.26  | 0.05 | 0.2  | -1.16 | 0.146604 | 0.182633 | 0.512668 | 0.459167 |
| MmuSTS.2096.1.S1_at   | MmuSTS.2096.1 | 7.49  | 7.3   | 0.41 | 1.16 | 1.14  | 0.96124  | 0.769383 | 0.985015 | 0.866055 |
| MmuSTS.2097.1.S1_s_at | MmuSTS.2097.1 | 4.94  | 4.82  | 0.06 | 0.08 | 1.08  | 0.227549 | 0.176266 | 0.585103 | 0.452718 |
| MmuSTS.2098.1.S1_at   | MmuSTS.2098.1 | 10.6  | 10.32 | 0.15 | 0.31 | 1.21  | 0.355573 | 0.523322 | 0.671128 | 0.713653 |
| MmuSTS.2099.1.S1_at   | MmuSTS.2099.1 | 9.99  | 9.41  | 0.26 | 0.2  | 1.49  | 0.043029 | 0.040979 | 0.355958 | 0.247202 |
| MmuSTS.21.1.S1_at     | MmuSTS.21.1   | 9.89  | 9.69  | 0.19 | 0.05 | 1.15  | 0.518298 | 0.553549 | 0.769365 | 0.732701 |
| MmuSTS.210.1.S1_at    | MmuSTS.210.1  | 3.48  | 3.67  | 0.02 | 0.14 | -1.14 | 0.126694 | 0.089888 | 0.492802 | 0.344073 |
| MmuSTS.2100.1.S1_at   | MmuSTS.2100.1 | 5.25  | 4.98  | 0.36 | 0.81 | 1.2   | 0.65529  | 0.392292 | 0.844842 | 0.625694 |
| MmuSTS.2100.1.S1_x_at | MmuSTS.2100.1 | 5.08  | 4.58  | 0.21 | 0.59 | 1.41  | 0.475479 | 0.417409 | 0.745779 | 0.642209 |
| MmuSTS.2101.1.S1_at   | MmuSTS.2101.1 | 13.08 | 12.79 | 0.12 | 0.07 | 1.22  | 0.011189 | 0.005035 | 0.234598 | 0.098963 |
| MmuSTS.2102.1.S1_at   | MmuSTS.2102.1 | 7.57  | 7.21  | 0.27 | 0.85 | 1.28  | 0.904617 | 0.970149 | 0.961834 | 0.983714 |
| MmuSTS.2103.1.S1_at   | MmuSTS.2103.1 | 12.43 | 12.68 | 0.24 | 0.39 | -1.19 | 0.693591 | 0.33578  | 0.864148 | 0.583515 |
| MmuSTS.2104.1.S1_at   | MmuSTS.2104.1 | 4.82  | 5.07  | 0.84 | 0.74 | -1.19 | 0.503005 | 0.640528 | 0.760605 | 0.78899  |
| MmuSTS.2105.1.S1_s_at | MmuSTS.2105.1 | 7.98  | 7.43  | 1.2  | 0.19 | 1.47  | 0.279739 | 0.280739 | 0.621205 | 0.543935 |
| MmuSTS.2106.1.S1_at   | MmuSTS.2106.1 | 9.58  | 9.03  | 0.23 | 0.16 | 1.46  | 0.011463 | 0.025808 | 0.235981 | 0.201375 |
| MmuSTS.2107.1.S1_at   | MmuSTS.2107.1 | 9.29  | 8.71  | 0.07 | 0.78 | 1.49  | 0.60451  | 0.626218 | 0.817786 | 0.779684 |
| MmuSTS.2108.1.S1_s_at | MmuSTS.2108.1 | 11.49 | 11.43 | 0.07 | 0.03 | 1.04  | 0.133988 | 0.083926 | 0.500516 | 0.334824 |
| MmuSTS.2109.1.S1_at   | MmuSTS.2109.1 | 9.97  | 9.75  | 0.14 | 0.52 | 1.17  | 0.376621 | 0.493508 | 0.685249 | 0.694195 |
| MmuSTS.211.1.S1_s_at  | MmuSTS.211.1  | 4.17  | 4.25  | 0.28 | 0.15 | -1.06 | 0.858691 | 0.338047 | 0.942914 | 0.585223 |

|                       |               |       |       |      |      |       |          |          |          |          |
|-----------------------|---------------|-------|-------|------|------|-------|----------|----------|----------|----------|
| MmuSTS.2110.1.S1_at   | MmuSTS.2110.1 | 11.11 | 10.65 | 0.12 | 0.09 | 1.38  | 0.009519 | 0.011569 | 0.225957 | 0.139219 |
| MmuSTS.2111.1.S1_at   | MmuSTS.2111.1 | 12.23 | 11.89 | 0.12 | 0.15 | 1.26  | 0.038596 | 0.005238 | 0.344737 | 0.100294 |
| MmuSTS.2112.1.S1_at   | MmuSTS.2112.1 | 12.16 | 11.66 | 0.06 | 0.14 | 1.41  | 0.004819 | 0.00111  | 0.184674 | 0.052745 |
| MmuSTS.2113.1.S1_at   | MmuSTS.2113.1 | 8.52  | 7.72  | 0.35 | 0.26 | 1.74  | 0.094702 | 0.063482 | 0.452166 | 0.298441 |
| MmuSTS.2114.1.S1_at   | MmuSTS.2114.1 | 10.52 | 10.16 | 0.02 | 0.15 | 1.29  | 0.007679 | 0.003763 | 0.211086 | 0.087395 |
| MmuSTS.2115.1.S1_at   | MmuSTS.2115.1 | 12.89 | 12.84 | 0.04 | 0.73 | 1.03  | 0.323026 | 0.403696 | 0.651295 | 0.632319 |
| MmuSTS.2116.1.S1_at   | MmuSTS.2116.1 | 7.84  | 8.08  | 0.24 | 0.27 | -1.18 | 0.938829 | 0.407558 | 0.976723 | 0.63505  |
| MmuSTS.2117.1.S1_at   | MmuSTS.2117.1 | 12.67 | 12.42 | 0.05 | 0.27 | 1.19  | 0.061475 | 0.056454 | 0.396086 | 0.283516 |
| MmuSTS.2118.1.S1_at   | MmuSTS.2118.1 | 6.66  | 7.69  | 0.37 | 0.7  | -2.04 | 0.078042 | 0.075182 | 0.428012 | 0.319384 |
| MmuSTS.2119.1.S1_at   | MmuSTS.2119.1 | 10.22 | 10.56 | 0.28 | 0.56 | -1.27 | 0.618761 | 0.750382 | 0.825301 | 0.854787 |
| MmuSTS.212.1.S1_at    | MmuSTS.212.1  | 8.1   | 7.86  | 0.19 | 0.49 | 1.18  | 0.374626 | 0.04686  | 0.683854 | 0.261272 |
| MmuSTS.2120.1.S1_at   | MmuSTS.2120.1 | 10.31 | 9.68  | 0.01 | 0.22 | 1.54  | 0.01574  | 0.008305 | 0.260601 | 0.120929 |
| MmuSTS.2121.1.S1_at   | MmuSTS.2121.1 | 5.68  | 5.75  | 0.23 | 0.15 | -1.05 | 0.869747 | 0.333491 | 0.947917 | 0.581694 |
| MmuSTS.2122.1.S1_at   | MmuSTS.2122.1 | 7.63  | 7.56  | 0.12 | 0.79 | 1.05  | 0.970355 | 0.473673 | 0.988617 | 0.680935 |
| MmuSTS.2123.1.S1_at   | MmuSTS.2123.1 | 7.07  | 7.23  | 0.33 | 0.41 | -1.12 | 0.259374 | 0.360251 | 0.606476 | 0.60129  |
| MmuSTS.2124.1.S1_at   | MmuSTS.2124.1 | 10.78 | 10.65 | 0.3  | 0.11 | 1.09  | 0.447279 | 0.535989 | 0.728883 | 0.721454 |
| MmuSTS.2125.1.S1_at   | MmuSTS.2125.1 | 10.36 | 10.9  | 0.15 | 0.68 | -1.46 | 0.420211 | 0.566255 | 0.712267 | 0.740362 |
| MmuSTS.2126.1.S1_s_at | MmuSTS.2126.1 | 7.81  | 8.65  | 0.44 | 0.98 | -1.79 | 0.381865 | 0.371453 | 0.688282 | 0.610204 |
| MmuSTS.2127.1.S1_at   | MmuSTS.2127.1 | 4.87  | 4.98  | 0.06 | 0.02 | -1.08 | 0.086069 | 0.053505 | 0.440066 | 0.276963 |
| MmuSTS.2128.1.S1_at   | MmuSTS.2128.1 | 4.33  | 4.48  | 0.04 | 0.04 | -1.11 | 0.012617 | 0.027524 | 0.242681 | 0.207161 |
| MmuSTS.2129.1.S1_at   | MmuSTS.2129.1 | 10.9  | 10.67 | 0.21 | 0.2  | 1.17  | 0.374025 | 0.506982 | 0.683309 | 0.702698 |
| MmuSTS.213.1.S1_at    | MmuSTS.213.1  | 11.29 | 11.52 | 0.13 | 0.34 | -1.17 | 0.496237 | 0.349575 | 0.757473 | 0.593539 |
| MmuSTS.2130.1.S1_s_at | MmuSTS.2130.1 | 6.01  | 7.2   | 0.81 | 1.26 | -2.28 | 0.255664 | 0.274802 | 0.603468 | 0.53925  |
| MmuSTS.2131.1.S1_s_at | MmuSTS.2131.1 | 5.32  | 5.33  | 0.46 | 0.09 | -1.01 | 0.864255 | 0.93552  | 0.945492 | 0.96359  |
| MmuSTS.2131.1.S1_x_at | MmuSTS.2131.1 | 7.72  | 7.88  | 0.13 | 0.12 | -1.11 | 0.840917 | 0.303558 | 0.936034 | 0.561022 |
| MmuSTS.2132.1.S1_s_at | MmuSTS.2132.1 | 11.81 | 12    | 0.2  | 0.6  | -1.14 | 0.752391 | 0.383881 | 0.894361 | 0.61978  |
| MmuSTS.2133.1.S1_at   | MmuSTS.2133.1 | 8.82  | 8.48  | 0.12 | 0.06 | 1.26  | 0.011012 | 0.00435  | 0.233671 | 0.092371 |
| MmuSTS.2134.1.S1_at   | MmuSTS.2134.1 | 11.22 | 11.08 | 0.08 | 0.35 | 1.1   | 0.144195 | 0.032616 | 0.510652 | 0.223644 |
| MmuSTS.2135.1.S1_at   | MmuSTS.2135.1 | 8.99  | 8.24  | 0.25 | 0.45 | 1.68  | 0.061234 | 0.017277 | 0.395362 | 0.166459 |
| MmuSTS.2136.1.S1_at   | MmuSTS.2136.1 | 8.87  | 9.57  | 0.78 | 0.61 | -1.63 | 0.143217 | 0.141778 | 0.510106 | 0.415331 |
| MmuSTS.2137.1.S1_at   | MmuSTS.2137.1 | 8.75  | 8.11  | 0.14 | 0.26 | 1.55  | 0.046887 | 0.028836 | 0.364195 | 0.211661 |
| MmuSTS.2138.1.S1_at   | MmuSTS.2138.1 | 12.26 | 11.51 | 0.16 | 0.78 | 1.69  | 0.073461 | 0.067085 | 0.418755 | 0.304939 |
| MmuSTS.2139.1.S1_at   | MmuSTS.2139.1 | 8.18  | 7.89  | 0.28 | 0.36 | 1.22  | 0.23415  | 0.34235  | 0.588621 | 0.588413 |
| MmuSTS.214.1.S1_at    | MmuSTS.214.1  | 3.14  | 3.27  | 0.08 | 0.19 | -1.09 | 0.595262 | 0.294725 | 0.81235  | 0.554345 |
| MmuSTS.2140.1.S1_at   | MmuSTS.2140.1 | 3.77  | 3.9   | 0.17 | 0    | -1.09 | 0.825279 | 0.969556 | 0.929153 | 0.98334  |
| MmuSTS.2141.1.S1_at   | MmuSTS.2141.1 | 7.55  | 7.62  | 0.38 | 0.38 | -1.05 | 0.257773 | 0.243517 | 0.605259 | 0.513585 |
| MmuSTS.2142.1.S1_at   | MmuSTS.2142.1 | 9.83  | 9.67  | 0.07 | 0.6  | 1.11  | 0.617781 | 0.801688 | 0.82487  | 0.885902 |
| MmuSTS.2143.1.S1_at   | MmuSTS.2143.1 | 4.59  | 4.76  | 0.3  | 0.18 | -1.13 | 0.63723  | 0.277905 | 0.836    | 0.541664 |
| MmuSTS.2144.1.S1_at   | MmuSTS.2144.1 | 9.97  | 10.66 | 0.72 | 0.36 | -1.61 | 0.603225 | 0.477353 | 0.817072 | 0.683422 |
| MmuSTS.2145.1.S1_at   | MmuSTS.2145.1 | 6.51  | 6.55  | 0.04 | 0.21 | -1.03 | 0.641351 | 0.434608 | 0.838155 | 0.654747 |
| MmuSTS.2146.1.S1_at   | MmuSTS.2146.1 | 8.74  | 9.45  | 0.02 | 0.46 | -1.64 | 0.066969 | 0.057522 | 0.407016 | 0.285907 |

|                       |               |       |       |      |      |       |          |          |          |          |
|-----------------------|---------------|-------|-------|------|------|-------|----------|----------|----------|----------|
| MmuSTS.2147.1.S1_at   | MmuSTS.2147.1 | 12.39 | 12    | 0.1  | 0.14 | 1.31  | 0.036334 | 0.025981 | 0.339201 | 0.202105 |
| MmuSTS.2148.1.S1_at   | MmuSTS.2148.1 | 3.87  | 3.97  | 0.1  | 0.2  | -1.07 | 0.567926 | 0.661537 | 0.798337 | 0.801856 |
| MmuSTS.2149.1.S1_at   | MmuSTS.2149.1 | 10.58 | 10.5  | 0.27 | 0.31 | 1.06  | 0.390809 | 0.56258  | 0.693845 | 0.738076 |
| MmuSTS.215.1.S1_at    | MmuSTS.215.1  | 6.54  | 8.9   | 0.55 | 2.08 | -5.1  | 0.179747 | 0.220374 | 0.543983 | 0.493783 |
| MmuSTS.2150.1.S1_at   | MmuSTS.2150.1 | 7.27  | 9.54  | 2.11 | 1.34 | -4.83 | 0.206647 | 0.233317 | 0.568816 | 0.50468  |
| MmuSTS.2151.1.S1_at   | MmuSTS.2151.1 | 11.85 | 11.22 | 0.08 | 0.41 | 1.54  | 0.097437 | 0.009142 | 0.456406 | 0.126119 |
| MmuSTS.2152.1.S1_at   | MmuSTS.2152.1 | 9.52  | 9.17  | 0.2  | 0.14 | 1.28  | 0.033196 | 0.005329 | 0.327417 | 0.100928 |
| MmuSTS.2153.1.S1_at   | MmuSTS.2153.1 | 9.33  | 9.12  | 0.06 | 0.15 | 1.15  | 0.094335 | 0.35438  | 0.451866 | 0.597166 |
| MmuSTS.2154.1.S1_at   | MmuSTS.2154.1 | 8.04  | 8.22  | 1.2  | 1.52 | -1.13 | 0.51958  | 0.569082 | 0.77022  | 0.742239 |
| MmuSTS.2155.1.S1_at   | MmuSTS.2155.1 | 8.18  | 8.17  | 0.23 | 0.79 | 1     | 0.719716 | 0.880908 | 0.877054 | 0.932018 |
| MmuSTS.2156.1.S1_at   | MmuSTS.2156.1 | 11.57 | 11.29 | 0.16 | 0.39 | 1.22  | 0.821028 | 0.435425 | 0.92718  | 0.655194 |
| MmuSTS.2156.1.S1_x_at | MmuSTS.2156.1 | 11.47 | 11.17 | 0.22 | 0.41 | 1.23  | 0.88558  | 0.363783 | 0.954118 | 0.604189 |
| MmuSTS.2157.1.S1_at   | MmuSTS.2157.1 | 8.54  | 8.66  | 0.71 | 0.69 | -1.09 | 0.839237 | 0.605939 | 0.935078 | 0.765547 |
| MmuSTS.2158.1.S1_at   | MmuSTS.2158.1 | 11.31 | 11.01 | 0.18 | 0.29 | 1.23  | 0.716574 | 0.658948 | 0.875506 | 0.800473 |
| MmuSTS.2159.1.S1_at   | MmuSTS.2159.1 | 4.27  | 3.88  | 0.22 | 0.09 | 1.31  | 0.200047 | 0.375076 | 0.563056 | 0.613186 |
| MmuSTS.216.1.S1_s_at  | MmuSTS.216.1  | 3.65  | 3.33  | 0.13 | 0    | 1.25  | 0.008839 | 0.002696 | 0.221368 | 0.076455 |
| MmuSTS.2160.1.S1_at   | MmuSTS.2160.1 | 5.49  | 5.52  | 0.16 | 0.25 | -1.02 | 0.898874 | 0.984947 | 0.959611 | 0.991478 |
| MmuSTS.2161.1.S1_at   | MmuSTS.2161.1 | 5.57  | 5.6   | 0.06 | 0.18 | -1.02 | 0.808626 | 0.276228 | 0.921988 | 0.540183 |
| MmuSTS.2162.1.S1_at   | MmuSTS.2162.1 | 6.98  | 6.26  | 0.15 | 0.48 | 1.64  | 0.179071 | 0.036323 | 0.543382 | 0.235105 |
| MmuSTS.2163.1.S1_at   | MmuSTS.2163.1 | 10.44 | 10.24 | 0.31 | 0.46 | 1.15  | 0.414689 | 0.556301 | 0.709338 | 0.734487 |
| MmuSTS.2164.1.S1_at   | MmuSTS.2164.1 | 11.84 | 10.54 | 0.21 | 0.27 | 2.46  | 0.002653 | 0.001735 | 0.164386 | 0.062895 |
| MmuSTS.2164.1.S1_s_at | MmuSTS.2164.1 | 10.86 | 9.61  | 0.2  | 0.35 | 2.39  | 0.003353 | 0.002072 | 0.177442 | 0.067389 |
| MmuSTS.2165.1.S1_at   | MmuSTS.2165.1 | 11.79 | 11.79 | 0.02 | 0.09 | 1.01  | 0.860388 | 0.442792 | 0.943655 | 0.660759 |
| MmuSTS.2166.1.S1_at   | MmuSTS.2166.1 | 7.67  | 7.67  | 0.54 | 1.07 | -1    | 0.674786 | 0.793377 | 0.854234 | 0.880744 |
| MmuSTS.2167.1.S1_s_at | MmuSTS.2167.1 | 8.4   | 8.63  | 0.2  | 0.53 | -1.17 | 0.721638 | 0.119598 | 0.878248 | 0.388247 |
| MmuSTS.2168.1.S1_at   | MmuSTS.2168.1 | 8.17  | 8.7   | 0.19 | 0.21 | -1.44 | 0.030167 | 0.016528 | 0.317217 | 0.162745 |
| MmuSTS.2169.1.S1_at   | MmuSTS.2169.1 | 10.63 | 11.6  | 0.12 | 0.17 | -1.96 | 0.001921 | 0.000626 | 0.155636 | 0.042692 |
| MmuSTS.217.1.S1_at    | MmuSTS.217.1  | 3.45  | 3.44  | 0.51 | 0.14 | 1.01  | 0.410476 | 0.287793 | 0.706382 | 0.549064 |
| MmuSTS.2170.1.S1_at   | MmuSTS.2170.1 | 10.73 | 10.6  | 0.1  | 0.16 | 1.09  | 0.117682 | 0.126255 | 0.48184  | 0.39678  |
| MmuSTS.2171.1.S1_at   | MmuSTS.2171.1 | 11.6  | 11.5  | 0.16 | 0.25 | 1.07  | 0.957164 | 0.430238 | 0.983802 | 0.651295 |
| MmuSTS.2172.1.S1_at   | MmuSTS.2172.1 | 9.24  | 9.65  | 0.15 | 0.5  | -1.32 | 0.541867 | 0.729467 | 0.783014 | 0.843541 |
| MmuSTS.2173.1.S1_at   | MmuSTS.2173.1 | 8.34  | 7.78  | 0.04 | 0.52 | 1.48  | 0.250185 | 0.195246 | 0.600389 | 0.470253 |
| MmuSTS.2174.1.S1_at   | MmuSTS.2174.1 | 10.04 | 10.38 | 0.16 | 0.66 | -1.27 | 0.926463 | 0.399043 | 0.971724 | 0.62969  |
| MmuSTS.2175.1.S1_at   | MmuSTS.2175.1 | 9.14  | 8.5   | 0.05 | 0.72 | 1.55  | 0.226099 | 0.325194 | 0.584142 | 0.575598 |
| MmuSTS.2176.1.S1_at   | MmuSTS.2176.1 | 4.25  | 4.21  | 0.35 | 0.18 | 1.03  | 0.787822 | 0.697196 | 0.911679 | 0.824045 |
| MmuSTS.2177.1.S1_at   | MmuSTS.2177.1 | 3.79  | 3.52  | 0.05 | 0.17 | 1.21  | 0.057838 | 0.030213 | 0.38911  | 0.21576  |
| MmuSTS.2178.1.S1_at   | MmuSTS.2178.1 | 5.55  | 5.86  | 0.25 | 0.27 | -1.24 | 0.457998 | 0.387348 | 0.735139 | 0.622027 |
| MmuSTS.2179.1.S1_at   | MmuSTS.2179.1 | 8.45  | 7.55  | 0.09 | 0.84 | 1.87  | 0.128374 | 0.167009 | 0.494389 | 0.443466 |
| MmuSTS.218.1.S1_at    | MmuSTS.218.1  | 12.04 | 11.77 | 0.08 | 0.09 | 1.2   | 0.009619 | 0.00409  | 0.226235 | 0.09055  |
| MmuSTS.2180.1.S1_at   | MmuSTS.2180.1 | 5.69  | 6.2   | 0.16 | 1.46 | -1.43 | 0.632643 | 0.028681 | 0.833252 | 0.211057 |
| MmuSTS.2181.1.S1_at   | MmuSTS.2181.1 | 5.73  | 5.75  | 0.23 | 0.28 | -1.01 | 0.60224  | 0.805028 | 0.816408 | 0.887934 |

|                     |               |       |       |      |      |       |          |          |          |          |
|---------------------|---------------|-------|-------|------|------|-------|----------|----------|----------|----------|
| MmuSTS.2182.1.S1_at | MmuSTS.2182.1 | 8.33  | 7.68  | 0.37 | 0.05 | 1.57  | 0.016386 | 0.008027 | 0.263839 | 0.119047 |
| MmuSTS.2183.1.S1_at | MmuSTS.2183.1 | 9.54  | 8     | 0.27 | 0.52 | 2.9   | 0.017341 | 0.008702 | 0.267196 | 0.123697 |
| MmuSTS.2184.1.S1_at | MmuSTS.2184.1 | 4.28  | 5.47  | 0.39 | 0.67 | -2.29 | 0.248801 | 0.29869  | 0.599636 | 0.55727  |
| MmuSTS.2185.1.S1_at | MmuSTS.2185.1 | 10.18 | 10.91 | 0.58 | 0.33 | -1.65 | 0.054184 | 0.00903  | 0.381696 | 0.125559 |
| MmuSTS.2186.1.S1_at | MmuSTS.2186.1 | 9.56  | 8.76  | 0.21 | 0.58 | 1.73  | 0.281443 | 0.383126 | 0.622236 | 0.619153 |
| MmuSTS.2187.1.S1_at | MmuSTS.2187.1 | 9.76  | 9.83  | 0.09 | 0.15 | -1.05 | 0.234836 | 0.315588 | 0.589011 | 0.569053 |
| MmuSTS.2188.1.S1_at | MmuSTS.2188.1 | 3.09  | 3.28  | 0.04 | 0.07 | -1.14 | 0.009108 | 0.00381  | 0.222023 | 0.08794  |
| MmuSTS.2189.1.S1_at | MmuSTS.2189.1 | 13.08 | 13.05 | 0.03 | 0.09 | 1.02  | 0.974061 | 0.748309 | 0.989791 | 0.85351  |
| MmuSTS.219.1.S1_at  | MmuSTS.219.1  | 3.84  | 3.87  | 0.13 | 0.15 | -1.02 | 0.831613 | 0.777376 | 0.931819 | 0.87064  |
| MmuSTS.2190.1.S1_at | MmuSTS.2190.1 | 2.91  | 2.84  | 0.12 | 0.31 | 1.05  | 0.397987 | 0.575549 | 0.698478 | 0.746587 |
| MmuSTS.2191.1.S1_at | MmuSTS.2191.1 | 8.46  | 9.36  | 0.15 | 0.3  | -1.86 | 0.007935 | 0.001955 | 0.214461 | 0.065813 |
| MmuSTS.2192.1.S1_at | MmuSTS.2192.1 | 11.52 | 11.59 | 0.26 | 0.35 | -1.05 | 0.171782 | 0.106612 | 0.535344 | 0.36916  |
| MmuSTS.2193.1.S1_at | MmuSTS.2193.1 | 9.99  | 11.69 | 0.49 | 1    | -3.26 | 0.072974 | 0.071291 | 0.418323 | 0.313335 |
| MmuSTS.2194.1.S1_at | MmuSTS.2194.1 | 4.68  | 4.74  | 0.11 | 0.06 | -1.04 | 0.489303 | 0.60094  | 0.753678 | 0.762424 |
| MmuSTS.2195.1.S1_at | MmuSTS.2195.1 | 9.95  | 10.57 | 0.35 | 0.29 | -1.53 | 0.098845 | 0.069552 | 0.458711 | 0.309848 |
| MmuSTS.2196.1.S1_at | MmuSTS.2196.1 | 4.53  | 4.64  | 0.16 | 0.12 | -1.08 | 0.900811 | 0.428117 | 0.960386 | 0.649676 |
| MmuSTS.2197.1.S1_at | MmuSTS.2197.1 | 8.3   | 7.82  | 0.22 | 0.38 | 1.4   | 0.218172 | 0.278532 | 0.57777  | 0.542311 |
| MmuSTS.2198.1.S1_at | MmuSTS.2198.1 | 8.44  | 8.6   | 0.34 | 0.72 | -1.12 | 0.782971 | 0.945083 | 0.909384 | 0.968834 |
| MmuSTS.2199.1.S1_at | MmuSTS.2199.1 | 4.18  | 4.13  | 0.12 | 0.15 | 1.04  | 0.623192 | 0.287654 | 0.827836 | 0.548886 |
| MmuSTS.22.1.S1_at   | MmuSTS.22.1   | 9.64  | 9.05  | 0.13 | 0.5  | 1.51  | 0.121301 | 0.137967 | 0.48598  | 0.410912 |
| MmuSTS.220.1.S1_at  | MmuSTS.220.1  | 11.78 | 10.57 | 0.31 | 0.22 | 2.32  | 0.003529 | 0.000911 | 0.179515 | 0.048322 |
| MmuSTS.2200.1.S1_at | MmuSTS.2200.1 | 10.5  | 10.09 | 0.24 | 0.49 | 1.33  | 0.744347 | 0.593144 | 0.890632 | 0.758096 |
| MmuSTS.2201.1.S1_at | MmuSTS.2201.1 | 3.41  | 3.43  | 0.11 | 0.12 | -1.01 | 0.87006  | 0.361906 | 0.948053 | 0.602682 |
| MmuSTS.2202.1.S1_at | MmuSTS.2202.1 | 8.33  | 7.04  | 0.15 | 0.94 | 2.44  | 0.085915 | 0.073611 | 0.440024 | 0.316945 |
| MmuSTS.2203.1.S1_at | MmuSTS.2203.1 | 6.16  | 6.99  | 0.28 | 0.74 | -1.78 | 0.572356 | 0.281598 | 0.800678 | 0.544655 |
| MmuSTS.2205.1.S1_at | MmuSTS.2205.1 | 3.19  | 3.31  | 0.08 | 0.04 | -1.09 | 0.195714 | 0.180812 | 0.558901 | 0.457306 |
| MmuSTS.2206.1.S1_at | MmuSTS.2206.1 | 9.9   | 9.92  | 0.11 | 0.19 | -1.02 | 0.649684 | 0.586332 | 0.842495 | 0.753438 |
| MmuSTS.2207.1.S1_at | MmuSTS.2207.1 | 11.12 | 11.8  | 0.11 | 0.97 | -1.61 | 0.846479 | 0.453861 | 0.93835  | 0.668321 |
| MmuSTS.2208.1.S1_at | MmuSTS.2208.1 | 7.96  | 8.7   | 0.08 | 0.13 | -1.67 | 0.000722 | 0.000084 | 0.136818 | 0.027016 |
| MmuSTS.2209.1.S1_at | MmuSTS.2209.1 | 9.93  | 10.13 | 0.35 | 0.29 | -1.15 | 0.58924  | 0.226484 | 0.809218 | 0.498961 |
| MmuSTS.221.1.S1_at  | MmuSTS.221.1  | 5.7   | 5.65  | 0.12 | 0.26 | 1.03  | 0.278134 | 0.394117 | 0.62022  | 0.62675  |
| MmuSTS.2210.1.S1_at | MmuSTS.2210.1 | 8.81  | 8.77  | 0.11 | 0.18 | 1.03  | 0.438571 | 0.334078 | 0.723132 | 0.582104 |
| MmuSTS.2211.1.S1_at | MmuSTS.2211.1 | 5.91  | 5.99  | 0.1  | 0.06 | -1.06 | 0.327856 | 0.283798 | 0.654144 | 0.546209 |
| MmuSTS.2212.1.S1_at | MmuSTS.2212.1 | 9.5   | 8.99  | 0.25 | 0.34 | 1.43  | 0.10846  | 0.104468 | 0.469748 | 0.365719 |
| MmuSTS.2213.1.S1_at | MmuSTS.2213.1 | 8.71  | 8.35  | 0.11 | 0.74 | 1.28  | 0.45847  | 0.16458  | 0.735502 | 0.440829 |
| MmuSTS.2214.1.S1_at | MmuSTS.2214.1 | 7.4   | 8.65  | 0.82 | 0.57 | -2.38 | 0.023811 | 0.009838 | 0.292771 | 0.130274 |
| MmuSTS.2215.1.S1_at | MmuSTS.2215.1 | 9.86  | 10.39 | 0.19 | 1    | -1.45 | 0.620619 | 0.718941 | 0.826071 | 0.83732  |
| MmuSTS.2216.1.S1_at | MmuSTS.2216.1 | 8.97  | 8.33  | 0.21 | 0.46 | 1.55  | 0.057826 | 0.045744 | 0.38911  | 0.258221 |
| MmuSTS.2217.1.S1_at | MmuSTS.2217.1 | 3.56  | 3.51  | 0.14 | 0.05 | 1.04  | 0.810103 | 0.740645 | 0.922558 | 0.84983  |
| MmuSTS.2218.1.S1_at | MmuSTS.2218.1 | 10.81 | 11.79 | 0.24 | 0.17 | -1.98 | 0.004026 | 0.001839 | 0.181739 | 0.064374 |
| MmuSTS.2219.1.S1_at | MmuSTS.2219.1 | 10.28 | 9.46  | 0.3  | 0.14 | 1.76  | 0.016119 | 0.006853 | 0.262742 | 0.11185  |

|                     |               |       |       |      |      |       |          |          |          |          |
|---------------------|---------------|-------|-------|------|------|-------|----------|----------|----------|----------|
| MmuSTS.222.1.S1_at  | MmuSTS.222.1  | 4.87  | 4.89  | 0.03 | 0.1  | -1.01 | 0.912535 | 0.881394 | 0.965306 | 0.932335 |
| MmuSTS.2220.1.S1_at | MmuSTS.2220.1 | 8.63  | 8.27  | 0.15 | 0.06 | 1.29  | 0.015889 | 0.009928 | 0.261669 | 0.130813 |
| MmuSTS.2221.1.S1_at | MmuSTS.2221.1 | 11.06 | 10.67 | 0.05 | 0.4  | 1.32  | 0.109962 | 0.065259 | 0.471198 | 0.301239 |
| MmuSTS.2222.1.S1_at | MmuSTS.2222.1 | 3.38  | 3.88  | 0.45 | 0.22 | -1.41 | 0.715014 | 0.545751 | 0.875005 | 0.727653 |
| MmuSTS.2223.1.S1_at | MmuSTS.2223.1 | 7.65  | 7.62  | 0.28 | 0.28 | 1.01  | 0.909931 | 0.363163 | 0.964324 | 0.60356  |
| MmuSTS.2224.1.S1_at | MmuSTS.2224.1 | 5.62  | 5.72  | 0.04 | 0.15 | -1.08 | 0.097906 | 0.105248 | 0.457184 | 0.366999 |
| MmuSTS.2225.1.S1_at | MmuSTS.2225.1 | 7.03  | 7.93  | 0.51 | 0.35 | -1.87 | 0.092961 | 0.094283 | 0.45016  | 0.350889 |
| MmuSTS.2226.1.S1_at | MmuSTS.2226.1 | 11.85 | 12.23 | 0.18 | 0.13 | -1.3  | 0.015035 | 0.00171  | 0.257013 | 0.062657 |
| MmuSTS.2227.1.S1_at | MmuSTS.2227.1 | 7.87  | 8.25  | 0.82 | 0.81 | -1.3  | 0.954608 | 0.039685 | 0.983073 | 0.244271 |
| MmuSTS.2228.1.S1_at | MmuSTS.2228.1 | 9.05  | 9.38  | 0.14 | 0.45 | -1.26 | 0.812391 | 0.760662 | 0.923648 | 0.860963 |
| MmuSTS.2229.1.S1_at | MmuSTS.2229.1 | 8.31  | 8.91  | 0.79 | 1.34 | -1.52 | 0.339235 | 0.275627 | 0.661228 | 0.539867 |
| MmuSTS.223.1.S1_at  | MmuSTS.223.1  | 3.56  | 3.57  | 0.05 | 0.01 | -1.01 | 0.487208 | 0.466235 | 0.752002 | 0.676201 |
| MmuSTS.2230.1.S1_at | MmuSTS.2230.1 | 5.14  | 5.21  | 0.66 | 1.12 | -1.05 | 0.276738 | 0.339683 | 0.618907 | 0.586266 |
| MmuSTS.2231.1.S1_at | MmuSTS.2231.1 | 3.05  | 2.97  | 0.05 | 0.09 | 1.05  | 0.948004 | 0.116223 | 0.980077 | 0.38353  |
| MmuSTS.2232.1.S1_at | MmuSTS.2232.1 | 11.67 | 11.16 | 0.06 | 0.09 | 1.42  | 0.000759 | 0.000134 | 0.136818 | 0.029087 |
| MmuSTS.2233.1.S1_at | MmuSTS.2233.1 | 10.81 | 10.43 | 0.64 | 0.17 | 1.3   | 0.878782 | 0.855468 | 0.95134  | 0.9176   |
| MmuSTS.2234.1.S1_at | MmuSTS.2234.1 | 8.54  | 8.54  | 0.25 | 0.3  | -1    | 0.411255 | 0.39992  | 0.707075 | 0.63009  |
| MmuSTS.2235.1.S1_at | MmuSTS.2235.1 | 4.44  | 4.47  | 0.15 | 0.03 | -1.02 | 0.847811 | 0.717254 | 0.939063 | 0.836332 |
| MmuSTS.2236.1.S1_at | MmuSTS.2236.1 | 6.96  | 7.13  | 0.12 | 0.17 | -1.12 | 0.180542 | 0.033452 | 0.544894 | 0.226517 |
| MmuSTS.2237.1.S1_at | MmuSTS.2237.1 | 3.36  | 3.21  | 0.11 | 0.08 | 1.11  | 0.595847 | 0.657016 | 0.812658 | 0.799401 |
| MmuSTS.2238.1.S1_at | MmuSTS.2238.1 | 6.81  | 7.58  | 0.07 | 0.58 | -1.71 | 0.058599 | 0.040278 | 0.390844 | 0.245902 |
| MmuSTS.2239.1.S1_at | MmuSTS.2239.1 | 9.24  | 8.84  | 0.35 | 0.46 | 1.31  | 0.574251 | 0.657957 | 0.801619 | 0.800122 |
| MmuSTS.224.1.S1_at  | MmuSTS.224.1  | 7.07  | 7.36  | 0.5  | 0.62 | -1.23 | 0.929753 | 0.864994 | 0.972813 | 0.923442 |
| MmuSTS.2240.1.S1_at | MmuSTS.2240.1 | 8.29  | 8.81  | 1    | 0.7  | -1.44 | 0.194173 | 0.235058 | 0.557777 | 0.506267 |
| MmuSTS.2241.1.S1_at | MmuSTS.2241.1 | 8.49  | 8.83  | 0.28 | 0.26 | -1.27 | 0.533928 | 0.090056 | 0.778436 | 0.344402 |
| MmuSTS.2242.1.S1_at | MmuSTS.2242.1 | 11.74 | 11    | 0.08 | 0.18 | 1.67  | 0.002532 | 0.001296 | 0.164386 | 0.055585 |
| MmuSTS.2243.1.S1_at | MmuSTS.2243.1 | 9.17  | 8.87  | 0.09 | 0.28 | 1.23  | 0.219962 | 0.137896 | 0.579144 | 0.410846 |
| MmuSTS.2244.1.S1_at | MmuSTS.2244.1 | 8.3   | 9.82  | 0.84 | 0.47 | -2.85 | 0.032781 | 0.017551 | 0.326108 | 0.167634 |
| MmuSTS.2245.1.S1_at | MmuSTS.2245.1 | 6.45  | 6.9   | 0.11 | 0.18 | -1.37 | 0.008429 | 0.003824 | 0.218339 | 0.08794  |
| MmuSTS.2246.1.S1_at | MmuSTS.2246.1 | 5.79  | 7.72  | 1.04 | 1.48 | -3.81 | 0.278816 | 0.128827 | 0.620835 | 0.400277 |
| MmuSTS.2247.1.S1_at | MmuSTS.2247.1 | 5.54  | 5.57  | 0.09 | 0.18 | -1.03 | 0.501051 | 0.23576  | 0.759772 | 0.506934 |
| MmuSTS.2248.1.S1_at | MmuSTS.2248.1 | 9.8   | 8.72  | 0.03 | 0.2  | 2.12  | 0.001078 | 0.000249 | 0.144025 | 0.03313  |
| MmuSTS.2249.1.S1_at | MmuSTS.2249.1 | 11    | 10.83 | 0.22 | 0.24 | 1.12  | 0.184795 | 0.054312 | 0.548357 | 0.27854  |
| MmuSTS.225.1.S1_at  | MmuSTS.225.1  | 12.45 | 12.71 | 0.09 | 0.14 | -1.19 | 0.151016 | 0.063412 | 0.515728 | 0.298441 |
| MmuSTS.2250.1.S1_at | MmuSTS.2250.1 | 9.81  | 10.35 | 0.4  | 0.63 | -1.46 | 0.184009 | 0.228749 | 0.547964 | 0.501005 |
| MmuSTS.2251.1.S1_at | MmuSTS.2251.1 | 12.12 | 11.8  | 0.06 | 0.14 | 1.25  | 0.015882 | 0.003402 | 0.261669 | 0.084004 |
| MmuSTS.2252.1.S1_at | MmuSTS.2252.1 | 11.37 | 11.13 | 0.14 | 0.14 | 1.18  | 0.060553 | 0.015756 | 0.393743 | 0.159048 |
| MmuSTS.2253.1.S1_at | MmuSTS.2253.1 | 9.43  | 8.73  | 0.38 | 0.17 | 1.63  | 0.037082 | 0.018582 | 0.340697 | 0.171539 |
| MmuSTS.2254.1.S1_at | MmuSTS.2254.1 | 5.43  | 5.52  | 0.13 | 0.09 | -1.07 | 0.351583 | 0.364509 | 0.669126 | 0.604846 |
| MmuSTS.2255.1.S1_at | MmuSTS.2255.1 | 6.23  | 6.31  | 0.18 | 0.38 | -1.06 | 0.634975 | 0.377185 | 0.834795 | 0.614825 |
| MmuSTS.2256.1.S1_at | MmuSTS.2256.1 | 3.92  | 4.24  | 0.55 | 0.34 | -1.24 | 0.880165 | 0.422909 | 0.951822 | 0.646083 |



|                       |               |       |       |      |      |       |          |          |          |          |
|-----------------------|---------------|-------|-------|------|------|-------|----------|----------|----------|----------|
| MmuSTS.2257.1.S1_at   | MmuSTS.2257.1 | 6.65  | 6.09  | 0.94 | 0.23 | 1.48  | 0.274857 | 0.234685 | 0.617628 | 0.505897 |
| MmuSTS.2258.1.S1_s_at | MmuSTS.2258.1 | 12.01 | 12.24 | 0.03 | 0.09 | -1.18 | 0.010384 | 0.004709 | 0.229439 | 0.095492 |
| MmuSTS.2258.1.S1_x_at | MmuSTS.2258.1 | 12.25 | 12.32 | 0.08 | 0.14 | -1.05 | 0.974286 | 0.993875 | 0.989954 | 0.996306 |
| MmuSTS.2259.1.S1_at   | MmuSTS.2259.1 | 7.51  | 7.52  | 0.08 | 0.03 | -1.01 | 0.348267 | 0.259855 | 0.667097 | 0.526735 |
| MmuSTS.226.1.S1_at    | MmuSTS.226.1  | 8.4   | 6.82  | 0.52 | 1.97 | 2.99  | 0.334366 | 0.293856 | 0.658376 | 0.553861 |
| MmuSTS.2260.1.S1_at   | MmuSTS.2260.1 | 4.31  | 4.52  | 0.19 | 0.35 | -1.15 | 0.698455 | 0.792053 | 0.866127 | 0.879814 |
| MmuSTS.2261.1.S1_at   | MmuSTS.2261.1 | 3.45  | 3.43  | 0.04 | 0.19 | 1.01  | 0.667088 | 0.008467 | 0.850778 | 0.122057 |
| MmuSTS.2262.1.S1_at   | MmuSTS.2262.1 | 4.64  | 4.63  | 0.16 | 0.15 | 1.01  | 0.428687 | 0.783359 | 0.717033 | 0.874571 |
| MmuSTS.2263.1.S1_at   | MmuSTS.2263.1 | 5.21  | 7.3   | 0.55 | 1.42 | -4.25 | 0.294816 | 0.255013 | 0.631442 | 0.52317  |
| MmuSTS.2264.1.S1_at   | MmuSTS.2264.1 | 9.97  | 9.65  | 0.3  | 0.22 | 1.25  | 0.081678 | 0.131319 | 0.432665 | 0.403407 |
| MmuSTS.2265.1.S1_at   | MmuSTS.2265.1 | 6.21  | 6.14  | 0.13 | 0.29 | 1.04  | 0.880236 | 0.774891 | 0.951822 | 0.868962 |
| MmuSTS.2266.1.S1_at   | MmuSTS.2266.1 | 11.03 | 10.47 | 0.2  | 0.43 | 1.48  | 0.275763 | 0.354549 | 0.617878 | 0.59726  |
| MmuSTS.2267.1.S1_s_at | MmuSTS.2267.1 | 13.07 | 13.32 | 0.28 | 0.05 | -1.18 | 0.13978  | 0.150882 | 0.507376 | 0.425476 |
| MmuSTS.2268.1.S1_at   | MmuSTS.2268.1 | 9.82  | 9.99  | 0.11 | 0.35 | -1.12 | 0.658385 | 0.334886 | 0.846582 | 0.58275  |
| MmuSTS.2269.1.S1_at   | MmuSTS.2269.1 | 9.61  | 9.67  | 0.17 | 0.17 | -1.05 | 0.690473 | 0.11466  | 0.862173 | 0.381202 |
| MmuSTS.227.1.S1_at    | MmuSTS.227.1  | 10.61 | 10.9  | 0.36 | 0.22 | -1.22 | 0.52837  | 0.561644 | 0.775543 | 0.73751  |
| MmuSTS.2270.1.S1_at   | MmuSTS.2270.1 | 9.65  | 9.34  | 0.12 | 0.25 | 1.24  | 0.04319  | 0.047416 | 0.356646 | 0.262476 |
| MmuSTS.2271.1.S1_at   | MmuSTS.2271.1 | 9.71  | 9.42  | 0.16 | 0.37 | 1.22  | 0.72413  | 0.854033 | 0.879399 | 0.91692  |
| MmuSTS.2272.1.S1_at   | MmuSTS.2272.1 | 12.39 | 12.56 | 0.27 | 0.27 | -1.13 | 0.815758 | 0.44373  | 0.925151 | 0.661427 |
| MmuSTS.2273.1.S1_at   | MmuSTS.2273.1 | 6.89  | 7.01  | 0.25 | 0.38 | -1.08 | 0.534382 | 0.446311 | 0.778711 | 0.66276  |
| MmuSTS.2274.1.S1_at   | MmuSTS.2274.1 | 8.59  | 8.01  | 0.08 | 0.07 | 1.5   | 0.00065  | 0.000266 | 0.136818 | 0.033786 |
| MmuSTS.2275.1.S1_s_at | MmuSTS.2275.1 | 7.54  | 7.82  | 0.43 | 0.11 | -1.21 | 0.335903 | 0.486328 | 0.65921  | 0.689731 |
| MmuSTS.2276.1.S1_at   | MmuSTS.2276.1 | 13.21 | 13.13 | 0.06 | 0.22 | 1.06  | 0.379221 | 0.053533 | 0.68682  | 0.277016 |
| MmuSTS.2276.1.S1_x_at | MmuSTS.2276.1 | 13.06 | 13.06 | 0.11 | 0.23 | 1     | 0.405147 | 0.062289 | 0.703082 | 0.296416 |
| MmuSTS.2277.1.S1_at   | MmuSTS.2277.1 | 10.82 | 10.61 | 0.24 | 0.42 | 1.16  | 0.410018 | 0.175617 | 0.706179 | 0.45218  |
| MmuSTS.2278.1.S1_at   | MmuSTS.2278.1 | 11.67 | 11.17 | 0.58 | 0.4  | 1.41  | 0.874004 | 0.753716 | 0.949547 | 0.856634 |
| MmuSTS.2279.1.S1_at   | MmuSTS.2279.1 | 7.74  | 8.23  | 0.53 | 0.56 | -1.41 | 0.616361 | 0.014664 | 0.824152 | 0.154231 |
| MmuSTS.228.1.S1_at    | MmuSTS.228.1  | 5.93  | 6.9   | 0.27 | 0.85 | -1.95 | 0.537887 | 0.636154 | 0.780227 | 0.785938 |
| MmuSTS.2280.1.S1_at   | MmuSTS.2280.1 | 12.11 | 12.88 | 0.16 | 0.26 | -1.71 | 0.015451 | 0.007245 | 0.258779 | 0.114309 |
| MmuSTS.2281.1.S1_at   | MmuSTS.2281.1 | 9.54  | 9.42  | 0.06 | 0.32 | 1.09  | 0.560244 | 0.726641 | 0.794209 | 0.841892 |
| MmuSTS.2282.1.S1_at   | MmuSTS.2282.1 | 6.91  | 6.7   | 0.3  | 0.27 | 1.15  | 0.897408 | 0.98584  | 0.95917  | 0.991957 |
| MmuSTS.2283.1.S1_at   | MmuSTS.2283.1 | 10    | 9.85  | 0.18 | 0.35 | 1.11  | 0.67067  | 0.856445 | 0.852442 | 0.917996 |
| MmuSTS.2284.1.S1_s_at | MmuSTS.2284.1 | 3.24  | 3.41  | 0.07 | 0.39 | -1.12 | 0.292555 | 0.402476 | 0.629871 | 0.631481 |
| MmuSTS.2285.1.S1_at   | MmuSTS.2285.1 | 5.9   | 6.4   | 0.21 | 0.27 | -1.42 | 0.045453 | 0.013833 | 0.361012 | 0.150838 |
| MmuSTS.2286.1.S1_at   | MmuSTS.2286.1 | 7.68  | 8.31  | 0.11 | 0.8  | -1.55 | 0.833377 | 0.632051 | 0.932336 | 0.78312  |
| MmuSTS.2287.1.S1_at   | MmuSTS.2287.1 | 12.64 | 12.17 | 0.32 | 0.71 | 1.38  | 0.141948 | 0.147607 | 0.509233 | 0.421901 |
| MmuSTS.2288.1.S1_at   | MmuSTS.2288.1 | 13.46 | 13.37 | 0.07 | 0.08 | 1.06  | 0.293051 | 0.258026 | 0.630264 | 0.52557  |
| MmuSTS.2289.1.S1_at   | MmuSTS.2289.1 | 9.63  | 9.35  | 0.12 | 0.15 | 1.21  | 0.112069 | 0.12441  | 0.474571 | 0.394857 |
| MmuSTS.229.1.S1_at    | MmuSTS.229.1  | 4.28  | 4.76  | 0.37 | 1.15 | -1.39 | 0.664394 | 0.745277 | 0.849532 | 0.852332 |
| MmuSTS.2290.1.S1_at   | MmuSTS.2290.1 | 4.99  | 5.13  | 0.15 | 0.1  | -1.1  | 0.181897 | 0.261696 | 0.546458 | 0.528137 |
| MmuSTS.2291.1.S1_at   | MmuSTS.2291.1 | 9.19  | 10    | 0.47 | 0.34 | -1.74 | 0.207573 | 0.198515 | 0.569777 | 0.473391 |

|                       |               |       |       |      |      |       |          |          |          |          |
|-----------------------|---------------|-------|-------|------|------|-------|----------|----------|----------|----------|
| MmuSTS.2292.1.S1_at   | MmuSTS.2292.1 | 7.8   | 7.11  | 0.06 | 0.17 | 1.61  | 0.003669 | 0.001007 | 0.179515 | 0.050657 |
| MmuSTS.2293.1.S1_at   | MmuSTS.2293.1 | 8.29  | 9.05  | 0.44 | 0.69 | -1.7  | 0.352278 | 0.459173 | 0.669556 | 0.671633 |
| MmuSTS.2294.1.S1_at   | MmuSTS.2294.1 | 8.06  | 7.24  | 0.29 | 0.11 | 1.76  | 0.004081 | 0.000584 | 0.181739 | 0.041486 |
| MmuSTS.2295.1.S1_at   | MmuSTS.2295.1 | 10.35 | 10.75 | 0.2  | 0.24 | -1.32 | 0.350261 | 0.421066 | 0.668443 | 0.644721 |
| MmuSTS.2295.1.S1_x_at | MmuSTS.2295.1 | 10.26 | 10.73 | 0.17 | 0.29 | -1.38 | 0.345986 | 0.504629 | 0.665474 | 0.701754 |
| MmuSTS.2296.1.S1_at   | MmuSTS.2296.1 | 11.87 | 11.52 | 0.04 | 0.27 | 1.28  | 0.081762 | 0.079252 | 0.432753 | 0.326444 |
| MmuSTS.2297.1.S1_at   | MmuSTS.2297.1 | 4.24  | 4.38  | 0.09 | 0.12 | -1.1  | 0.483672 | 0.349707 | 0.749945 | 0.593566 |
| MmuSTS.2298.1.S1_at   | MmuSTS.2298.1 | 7.61  | 7.93  | 0.71 | 0.64 | -1.24 | 0.229689 | 0.054665 | 0.586897 | 0.279311 |
| MmuSTS.2299.1.S1_at   | MmuSTS.2299.1 | 8.24  | 8.23  | 0.29 | 0.25 | 1.01  | 0.882344 | 0.898626 | 0.952793 | 0.942296 |
| MmuSTS.23.1.S1_at     | MmuSTS.23.1   | 3.52  | 3.52  | 0.19 | 0.12 | -1    | 0.483407 | 0.848355 | 0.749882 | 0.913909 |
| MmuSTS.230.1.S1_at    | MmuSTS.230.1  | 5.53  | 5.5   | 0.92 | 0.29 | 1.02  | 0.265972 | 0.136096 | 0.611558 | 0.408396 |
| MmuSTS.2300.1.S1_at   | MmuSTS.2300.1 | 9.5   | 9.05  | 0.21 | 0.34 | 1.36  | 0.06627  | 0.002883 | 0.406371 | 0.078985 |
| MmuSTS.2301.1.S1_at   | MmuSTS.2301.1 | 8.94  | 9.1   | 0.14 | 0.16 | -1.12 | 0.372025 | 0.192003 | 0.682671 | 0.467382 |
| MmuSTS.2302.1.S1_at   | MmuSTS.2302.1 | 11.02 | 10.52 | 0.15 | 0.24 | 1.41  | 0.023011 | 0.013115 | 0.28954  | 0.147286 |
| MmuSTS.2303.1.S1_s_at | MmuSTS.2303.1 | 10.35 | 9.03  | 0.26 | 0.23 | 2.49  | 0.001433 | 0.000443 | 0.147916 | 0.038359 |
| MmuSTS.2304.1.S1_at   | MmuSTS.2304.1 | 12.61 | 12.77 | 0.05 | 0.16 | -1.11 | 0.692959 | 0.535128 | 0.86374  | 0.720807 |
| MmuSTS.2305.1.S1_at   | MmuSTS.2305.1 | 12.72 | 12.81 | 0.04 | 0.17 | -1.06 | 0.909523 | 0.517927 | 0.964204 | 0.710031 |
| MmuSTS.2306.1.S1_at   | MmuSTS.2306.1 | 11.34 | 11.41 | 0.07 | 0.11 | -1.05 | 0.268137 | 0.11929  | 0.613029 | 0.387799 |
| MmuSTS.2307.1.S1_at   | MmuSTS.2307.1 | 5.14  | 5.21  | 0.31 | 0.78 | -1.05 | 0.526434 | 0.423596 | 0.774086 | 0.646459 |
| MmuSTS.2308.1.S1_at   | MmuSTS.2308.1 | 5.96  | 6.17  | 0.15 | 0.19 | -1.16 | 0.24009  | 0.182211 | 0.592907 | 0.458739 |
| MmuSTS.2309.1.S1_at   | MmuSTS.2309.1 | 3.23  | 3.29  | 0.15 | 0.04 | -1.04 | 0.689859 | 0.85946  | 0.861835 | 0.919962 |
| MmuSTS.231.1.S1_at    | MmuSTS.231.1  | 4.32  | 4.86  | 0.55 | 0.09 | -1.46 | 0.511779 | 0.508888 | 0.765318 | 0.7039   |
| MmuSTS.231.1.S1_x_at  | MmuSTS.231.1  | 4.9   | 4.97  | 0.12 | 0.21 | -1.04 | 0.265296 | 0.467997 | 0.610859 | 0.677474 |
| MmuSTS.2310.1.S1_at   | MmuSTS.2310.1 | 4.95  | 5.06  | 0.3  | 0.05 | -1.08 | 0.79679  | 0.614339 | 0.915703 | 0.771206 |
| MmuSTS.2311.1.S1_at   | MmuSTS.2311.1 | 5.89  | 5.95  | 0.13 | 0.25 | -1.04 | 0.801818 | 0.940693 | 0.918267 | 0.966415 |
| MmuSTS.2312.1.S1_at   | MmuSTS.2312.1 | 8.69  | 7.81  | 0.37 | 0.43 | 1.84  | 0.064198 | 0.007463 | 0.402491 | 0.115888 |
| MmuSTS.2313.1.S1_at   | MmuSTS.2313.1 | 3.39  | 3.32  | 0.21 | 0.03 | 1.05  | 0.225573 | 0.149861 | 0.583668 | 0.424468 |
| MmuSTS.2314.1.S1_at   | MmuSTS.2314.1 | 4.42  | 4.82  | 0.25 | 0.14 | -1.32 | 0.032867 | 0.053007 | 0.326361 | 0.275891 |
| MmuSTS.2315.1.S1_at   | MmuSTS.2315.1 | 12.75 | 12.64 | 0.05 | 0.08 | 1.08  | 0.080256 | 0.084277 | 0.430341 | 0.335465 |
| MmuSTS.2316.1.S1_at   | MmuSTS.2316.1 | 11.31 | 11    | 0.17 | 0.08 | 1.24  | 0.029861 | 0.021425 | 0.315718 | 0.183331 |
| MmuSTS.2317.1.S1_at   | MmuSTS.2317.1 | 3.92  | 3.97  | 0.04 | 0.01 | -1.03 | 0.104828 | 0.079554 | 0.46526  | 0.326897 |
| MmuSTS.2318.1.S1_at   | MmuSTS.2318.1 | 7.76  | 9.14  | 0.32 | 0.28 | -2.6  | 0.007313 | 0.00278  | 0.20697  | 0.077966 |
| MmuSTS.2319.1.S1_at   | MmuSTS.2319.1 | 4.33  | 3.89  | 0.31 | 0.2  | 1.36  | 0.100678 | 0.052852 | 0.461009 | 0.275521 |
| MmuSTS.232.1.S1_at    | MmuSTS.232.1  | 6.72  | 6.99  | 0.17 | 0.51 | -1.2  | 0.618941 | 0.792213 | 0.825395 | 0.879931 |
| MmuSTS.2320.1.S1_at   | MmuSTS.2320.1 | 4.3   | 4.31  | 0.06 | 0.05 | -1.01 | 0.696902 | 0.946194 | 0.865517 | 0.969447 |
| MmuSTS.2321.1.S1_at   | MmuSTS.2321.1 | 13.93 | 14.03 | 0.01 | 0.44 | -1.07 | 0.59108  | 0.387839 | 0.810224 | 0.622486 |
| MmuSTS.2322.1.S1_at   | MmuSTS.2322.1 | 3.42  | 3.16  | 0.38 | 0.31 | 1.19  | 0.703356 | 0.896475 | 0.868993 | 0.940899 |
| MmuSTS.2323.1.S1_at   | MmuSTS.2323.1 | 12.44 | 11.99 | 0.08 | 0.44 | 1.36  | 0.103869 | 0.096694 | 0.463825 | 0.35417  |
| MmuSTS.2324.1.S1_at   | MmuSTS.2324.1 | 13.39 | 13.23 | 0.08 | 0.07 | 1.12  | 0.041063 | 0.009463 | 0.350547 | 0.128094 |
| MmuSTS.2325.1.S1_at   | MmuSTS.2325.1 | 13.06 | 12.97 | 0.1  | 0.13 | 1.07  | 0.19659  | 0.194041 | 0.559808 | 0.469151 |
| MmuSTS.2326.1.S1_at   | MmuSTS.2326.1 | 12.32 | 12.23 | 0.05 | 0.02 | 1.07  | 0.061852 | 0.031552 | 0.396761 | 0.219708 |

|                       |               |       |       |      |      |       |          |          |          |          |
|-----------------------|---------------|-------|-------|------|------|-------|----------|----------|----------|----------|
| MmuSTS.2327.1.S1_at   | MmuSTS.2327.1 | 7.78  | 8     | 0.1  | 0.32 | -1.17 | 0.46881  | 0.156278 | 0.741287 | 0.43161  |
| MmuSTS.2328.1.S1_at   | MmuSTS.2328.1 | 4.39  | 4.6   | 0.11 | 0.53 | -1.15 | 0.578496 | 0.729343 | 0.803828 | 0.843541 |
| MmuSTS.2329.1.S1_at   | MmuSTS.2329.1 | 7.51  | 6.93  | 0.58 | 0.39 | 1.49  | 0.545948 | 0.319275 | 0.785219 | 0.571722 |
| MmuSTS.233.1.S1_at    | MmuSTS.233.1  | 4.71  | 4.46  | 0.23 | 0.05 | 1.19  | 0.52838  | 0.212363 | 0.775543 | 0.486315 |
| MmuSTS.2330.1.S1_at   | MmuSTS.2330.1 | 10    | 9.89  | 0.25 | 0.52 | 1.07  | 0.391544 | 0.346184 | 0.694126 | 0.591195 |
| MmuSTS.2331.1.S1_at   | MmuSTS.2331.1 | 5.94  | 6.75  | 0.9  | 1.04 | -1.75 | 0.35201  | 0.103707 | 0.66934  | 0.364519 |
| MmuSTS.2332.1.S1_at   | MmuSTS.2332.1 | 6.2   | 6.28  | 0.2  | 0.17 | -1.05 | 0.686425 | 0.167808 | 0.859759 | 0.44438  |
| MmuSTS.2333.1.S1_at   | MmuSTS.2333.1 | 10.23 | 10.02 | 0.05 | 0.33 | 1.16  | 0.812616 | 0.656354 | 0.923729 | 0.799062 |
| MmuSTS.2334.1.S1_at   | MmuSTS.2334.1 | 6.85  | 7.62  | 0.32 | 0.9  | -1.71 | 0.227552 | 0.267736 | 0.585103 | 0.533525 |
| MmuSTS.2335.1.S1_at   | MmuSTS.2335.1 | 11.78 | 11.86 | 0.02 | 0.14 | -1.06 | 0.282503 | 0.046389 | 0.622895 | 0.259896 |
| MmuSTS.2336.1.S1_at   | MmuSTS.2336.1 | 11.17 | 11.4  | 0.07 | 0.06 | -1.17 | 0.006692 | 0.002036 | 0.20158  | 0.066885 |
| MmuSTS.2337.1.S1_at   | MmuSTS.2337.1 | 8.41  | 8.22  | 0.09 | 0.4  | 1.14  | 0.514138 | 0.423913 | 0.766754 | 0.646571 |
| MmuSTS.2338.1.S1_at   | MmuSTS.2338.1 | 2.9   | 3.01  | 0.1  | 0.06 | -1.08 | 0.253104 | 0.014076 | 0.601797 | 0.151885 |
| MmuSTS.2339.1.S1_at   | MmuSTS.2339.1 | 12.51 | 12.7  | 0.17 | 0.33 | -1.15 | 0.236688 | 0.201836 | 0.590504 | 0.476367 |
| MmuSTS.234.1.S1_at    | MmuSTS.234.1  | 9.98  | 10.17 | 0.07 | 0.3  | -1.13 | 0.432135 | 0.568012 | 0.718823 | 0.74176  |
| MmuSTS.2340.1.S1_at   | MmuSTS.2340.1 | 9.62  | 9.29  | 0.22 | 0.68 | 1.25  | 0.389517 | 0.171381 | 0.693    | 0.447852 |
| MmuSTS.2341.1.S1_at   | MmuSTS.2341.1 | 8.81  | 9.1   | 0.16 | 0.2  | -1.22 | 0.199951 | 0.001135 | 0.563004 | 0.053082 |
| MmuSTS.2342.1.S1_at   | MmuSTS.2342.1 | 9.37  | 9.43  | 0.4  | 0.76 | -1.04 | 0.918026 | 0.467561 | 0.968151 | 0.67714  |
| MmuSTS.2343.1.S1_at   | MmuSTS.2343.1 | 8.38  | 8.06  | 0.23 | 0.31 | 1.25  | 0.588682 | 0.805885 | 0.809114 | 0.888395 |
| MmuSTS.2344.1.S1_at   | MmuSTS.2344.1 | 12.88 | 12.75 | 0.05 | 0.06 | 1.09  | 0.022137 | 0.016606 | 0.284595 | 0.163117 |
| MmuSTS.2345.1.S1_at   | MmuSTS.2345.1 | 7.64  | 6.37  | 0.24 | 0.18 | 2.4   | 0.001906 | 0.004552 | 0.155636 | 0.094327 |
| MmuSTS.2346.1.S1_at   | MmuSTS.2346.1 | 11.51 | 11.68 | 0.05 | 0.26 | -1.13 | 0.9176   | 0.980445 | 0.967956 | 0.989333 |
| MmuSTS.2346.1.S1_s_at | MmuSTS.2346.1 | 11.9  | 12.01 | 0.11 | 0.23 | -1.07 | 0.791676 | 0.747459 | 0.913459 | 0.853149 |
| MmuSTS.2347.1.S1_at   | MmuSTS.2347.1 | 6.94  | 6.87  | 0.13 | 0.15 | 1.05  | 0.409922 | 0.320716 | 0.706179 | 0.572811 |
| MmuSTS.2348.1.S1_at   | MmuSTS.2348.1 | 5.96  | 6.02  | 0.22 | 0.14 | -1.04 | 0.901181 | 0.564716 | 0.960522 | 0.739425 |
| MmuSTS.2349.1.S1_at   | MmuSTS.2349.1 | 9.4   | 9.43  | 0.09 | 0.11 | -1.02 | 0.379849 | 0.484891 | 0.68708  | 0.688838 |
| MmuSTS.235.1.S1_at    | MmuSTS.235.1  | 12.01 | 12.22 | 0.05 | 0.1  | -1.15 | 0.083752 | 0.096266 | 0.436042 | 0.353654 |
| MmuSTS.2350.1.S1_at   | MmuSTS.2350.1 | 4.34  | 5.48  | 0.42 | 0.6  | -2.21 | 0.079162 | 0.085497 | 0.428897 | 0.337495 |
| MmuSTS.2351.1.S1_s_at | MmuSTS.2351.1 | 5.85  | 6.58  | 0.55 | 1.03 | -1.65 | 0.353475 | 0.149723 | 0.67013  | 0.424334 |
| MmuSTS.2352.1.S1_at   | MmuSTS.2352.1 | 5.38  | 5.7   | 0.2  | 0.25 | -1.24 | 0.382477 | 0.666476 | 0.688742 | 0.804596 |
| MmuSTS.2353.1.S1_at   | MmuSTS.2353.1 | 5.71  | 5.88  | 0.17 | 0.19 | -1.12 | 0.934149 | 0.527543 | 0.974481 | 0.716154 |
| MmuSTS.2354.1.S1_at   | MmuSTS.2354.1 | 9.42  | 8.37  | 0.52 | 0.13 | 2.08  | 0.05283  | 0.031708 | 0.378449 | 0.220493 |
| MmuSTS.2355.1.S1_at   | MmuSTS.2355.1 | 10.91 | 10.45 | 0.19 | 0.35 | 1.37  | 0.349398 | 0.496056 | 0.667703 | 0.695877 |
| MmuSTS.2356.1.S1_at   | MmuSTS.2356.1 | 3.98  | 4.05  | 0.32 | 0.12 | -1.05 | 0.992062 | 0.998071 | 0.997293 | 0.999009 |
| MmuSTS.2357.1.S1_s_at | MmuSTS.2357.1 | 14.4  | 14.38 | 0.13 | 0.06 | 1.02  | 0.571356 | 0.782218 | 0.800083 | 0.873842 |
| MmuSTS.2357.1.S1_x_at | MmuSTS.2357.1 | 14.49 | 14.48 | 0.08 | 0.04 | 1     | 0.745904 | 0.845247 | 0.891243 | 0.911955 |
| MmuSTS.2358.1.S1_at   | MmuSTS.2358.1 | 8.1   | 8.61  | 0.61 | 0.65 | -1.42 | 0.839106 | 0.594083 | 0.935033 | 0.758517 |
| MmuSTS.2359.1.S1_at   | MmuSTS.2359.1 | 12.04 | 13.81 | 0.73 | 1.31 | -3.39 | 0.485857 | 0.292528 | 0.751144 | 0.55258  |
| MmuSTS.236.1.S1_at    | MmuSTS.236.1  | 12.38 | 11.89 | 0.09 | 0.37 | 1.4   | 0.092475 | 0.037359 | 0.449164 | 0.237723 |
| MmuSTS.2360.1.S1_at   | MmuSTS.2360.1 | 9.54  | 9.55  | 0.14 | 1.36 | -1.01 | 0.997039 | 0.862925 | 0.998834 | 0.922071 |
| MmuSTS.2361.1.S1_at   | MmuSTS.2361.1 | 8.6   | 11.73 | 0.93 | 1.1  | -8.71 | 0.035044 | 0.008306 | 0.334571 | 0.120929 |

|                       |               |       |       |      |      |        |          |          |          |          |
|-----------------------|---------------|-------|-------|------|------|--------|----------|----------|----------|----------|
| MmuSTS.2362.1.S1_at   | MmuSTS.2362.1 | 5.43  | 5.36  | 0.47 | 0.35 | 1.05   | 0.711941 | 0.733615 | 0.873755 | 0.845775 |
| MmuSTS.2363.1.S1_at   | MmuSTS.2363.1 | 12.88 | 12.69 | 0.04 | 0.47 | 1.14   | 0.177988 | 0.202252 | 0.542263 | 0.476665 |
| MmuSTS.2364.1.S1_at   | MmuSTS.2364.1 | 10.79 | 10.33 | 0.08 | 0.2  | 1.37   | 0.020655 | 0.030482 | 0.279122 | 0.216624 |
| MmuSTS.2365.1.S1_at   | MmuSTS.2365.1 | 10.17 | 9.85  | 0.18 | 0.33 | 1.24   | 0.183634 | 0.169605 | 0.54773  | 0.446204 |
| MmuSTS.2366.1.S1_at   | MmuSTS.2366.1 | 3.76  | 3.97  | 0.12 | 0.08 | -1.16  | 0.172065 | 0.182244 | 0.535422 | 0.458762 |
| MmuSTS.2367.1.S1_at   | MmuSTS.2367.1 | 6.42  | 6.49  | 0.09 | 0.07 | -1.05  | 0.076289 | 0.06856  | 0.424738 | 0.308382 |
| MmuSTS.2368.1.S1_at   | MmuSTS.2368.1 | 3.96  | 4.79  | 0.43 | 0.69 | -1.78  | 0.107363 | 0.170116 | 0.468045 | 0.446868 |
| MmuSTS.2369.1.S1_at   | MmuSTS.2369.1 | 4.31  | 4.11  | 0.12 | 0.61 | 1.15   | 0.829767 | 0.523844 | 0.930993 | 0.71405  |
| MmuSTS.237.1.S1_s_at  | MmuSTS.237.1  | 5.41  | 5.38  | 0.11 | 0.06 | 1.02   | 0.79469  | 0.769315 | 0.914794 | 0.866034 |
| MmuSTS.2370.1.S1_at   | MmuSTS.2370.1 | 6.5   | 6.57  | 0.17 | 0.17 | -1.05  | 0.976148 | 0.560434 | 0.990729 | 0.736669 |
| MmuSTS.2371.1.S1_at   | MmuSTS.2371.1 | 12.45 | 11.97 | 0.07 | 0.24 | 1.4    | 0.080132 | 0.074561 | 0.430315 | 0.318185 |
| MmuSTS.2372.1.S1_at   | MmuSTS.2372.1 | 10.62 | 9.71  | 0.17 | 0.29 | 1.88   | 0.013945 | 0.006793 | 0.250089 | 0.111388 |
| MmuSTS.2373.1.S1_at   | MmuSTS.2373.1 | 5.58  | 8.98  | 1.21 | 2.68 | -10.56 | 0.274158 | 0.292863 | 0.617262 | 0.552837 |
| MmuSTS.2374.1.S1_at   | MmuSTS.2374.1 | 8.68  | 8.41  | 0.11 | 0.21 | 1.21   | 0.028479 | 0.004775 | 0.311384 | 0.09642  |
| MmuSTS.2375.1.S1_at   | MmuSTS.2375.1 | 8.71  | 8.71  | 0.15 | 0.16 | 1      | 0.505613 | 0.100074 | 0.761685 | 0.358965 |
| MmuSTS.2376.1.S1_at   | MmuSTS.2376.1 | 12.71 | 12.61 | 0.1  | 0.26 | 1.07   | 0.224866 | 0.156727 | 0.58291  | 0.432216 |
| MmuSTS.2377.1.S1_at   | MmuSTS.2377.1 | 4.29  | 4.32  | 0.11 | 0.03 | -1.02  | 0.516814 | 0.509308 | 0.768274 | 0.704094 |
| MmuSTS.2377.1.S1_s_at | MmuSTS.2377.1 | 11.63 | 11.63 | 0.21 | 0.08 | 1      | 0.496678 | 0.680419 | 0.75763  | 0.813441 |
| MmuSTS.2378.1.S1_at   | MmuSTS.2378.1 | 6.96  | 7.18  | 0.22 | 0.07 | -1.16  | 0.366322 | 0.474884 | 0.679033 | 0.681784 |
| MmuSTS.2379.1.S1_at   | MmuSTS.2379.1 | 10.09 | 10.09 | 0.28 | 0.61 | -1     | 0.681223 | 0.85872  | 0.85748  | 0.919548 |
| MmuSTS.238.1.S1_at    | MmuSTS.238.1  | 10.03 | 9.05  | 0.27 | 0.1  | 1.97   | 0.006156 | 0.001639 | 0.196493 | 0.061228 |
| MmuSTS.2380.1.S1_at   | MmuSTS.2380.1 | 5.02  | 4.52  | 0.73 | 0.16 | 1.42   | 0.359597 | 0.294288 | 0.673991 | 0.55407  |
| MmuSTS.2381.1.S1_at   | MmuSTS.2381.1 | 10.68 | 9.4   | 0.23 | 0.48 | 2.43   | 0.014639 | 0.002161 | 0.254381 | 0.068763 |
| MmuSTS.2382.1.S1_at   | MmuSTS.2382.1 | 6.49  | 6.84  | 0.17 | 0.47 | -1.28  | 0.293092 | 0.30935  | 0.630264 | 0.564912 |
| MmuSTS.2383.1.S1_at   | MmuSTS.2383.1 | 11.75 | 11.1  | 0.42 | 0.25 | 1.57   | 0.171581 | 0.217754 | 0.535232 | 0.491309 |
| MmuSTS.2384.1.S1_at   | MmuSTS.2384.1 | 5.87  | 8.2   | 0.94 | 2.08 | -5.03  | 0.22357  | 0.160448 | 0.582017 | 0.436569 |
| MmuSTS.2385.1.S1_at   | MmuSTS.2385.1 | 3.37  | 3.46  | 0.05 | 0.11 | -1.06  | 0.373821 | 0.779429 | 0.683245 | 0.87211  |
| MmuSTS.2386.1.S1_at   | MmuSTS.2386.1 | 8.49  | 8.22  | 0.41 | 0.72 | 1.21   | 0.383762 | 0.538038 | 0.689519 | 0.722826 |
| MmuSTS.2387.1.S1_at   | MmuSTS.2387.1 | 5.27  | 5.06  | 0.17 | 0.17 | 1.15   | 0.34866  | 0.048416 | 0.667173 | 0.265262 |
| MmuSTS.2388.1.S1_at   | MmuSTS.2388.1 | 2.96  | 2.88  | 0.13 | 0.14 | 1.06   | 0.953697 | 0.677824 | 0.982865 | 0.811825 |
| MmuSTS.2389.1.S1_at   | MmuSTS.2389.1 | 4.31  | 4.41  | 0.28 | 0.49 | -1.07  | 0.653327 | 0.596918 | 0.844065 | 0.75993  |
| MmuSTS.239.1.S1_at    | MmuSTS.239.1  | 11.13 | 9.28  | 0.21 | 0.45 | 3.61   | 0.004502 | 0.001224 | 0.183787 | 0.054593 |
| MmuSTS.2390.1.S1_at   | MmuSTS.2390.1 | 10.44 | 9.61  | 0.05 | 0.3  | 1.78   | 0.004272 | 0.001121 | 0.18216  | 0.052924 |
| MmuSTS.2391.1.S1_at   | MmuSTS.2391.1 | 4.37  | 4.56  | 0.09 | 0.09 | -1.14  | 0.066807 | 0.101696 | 0.406981 | 0.361562 |
| MmuSTS.2392.1.S1_at   | MmuSTS.2392.1 | 5.49  | 5.81  | 0.14 | 0.98 | -1.25  | 0.194807 | 0.012409 | 0.558334 | 0.144066 |
| MmuSTS.2393.1.S1_at   | MmuSTS.2393.1 | 8.85  | 9.96  | 0.21 | 1.09 | -2.16  | 0.158304 | 0.172664 | 0.523156 | 0.449141 |
| MmuSTS.2394.1.S1_at   | MmuSTS.2394.1 | 9.71  | 10.06 | 0.04 | 0.57 | -1.28  | 0.314712 | 0.20481  | 0.64608  | 0.479209 |
| MmuSTS.2395.1.S1_at   | MmuSTS.2395.1 | 5.46  | 5.71  | 0.2  | 0.12 | -1.18  | 0.101046 | 0.143511 | 0.461009 | 0.417449 |
| MmuSTS.2396.1.S1_at   | MmuSTS.2396.1 | 10.8  | 10.79 | 0.27 | 0.33 | 1      | 0.865297 | 0.726756 | 0.945924 | 0.841963 |
| MmuSTS.2397.1.S1_s_at | MmuSTS.2397.1 | 6.34  | 7.66  | 0.68 | 1.21 | -2.51  | 0.201723 | 0.236359 | 0.563988 | 0.507308 |
| MmuSTS.2398.1.S1_at   | MmuSTS.2398.1 | 2.75  | 2.87  | 0.05 | 0.06 | -1.09  | 0.141141 | 0.08635  | 0.508686 | 0.338791 |

|                       |               |       |       |      |      |       |          |          |          |          |
|-----------------------|---------------|-------|-------|------|------|-------|----------|----------|----------|----------|
| MmuSTS.2399.1.S1_at   | MmuSTS.2399.1 | 11.35 | 11.59 | 0.18 | 0.13 | -1.19 | 0.070029 | 0.021832 | 0.413492 | 0.184811 |
| MmuSTS.24.1.S1_at     | MmuSTS.24.1   | 4.95  | 5.32  | 0.05 | 0.77 | -1.3  | 0.354576 | 0.522029 | 0.670604 | 0.712827 |
| MmuSTS.240.1.S1_at    | MmuSTS.240.1  | 2.88  | 2.93  | 0.04 | 0.1  | -1.03 | 0.266964 | 0.347539 | 0.612291 | 0.592019 |
| MmuSTS.2400.1.S1_at   | MmuSTS.2400.1 | 8.3   | 8.14  | 0.16 | 0.05 | 1.11  | 0.168275 | 0.004213 | 0.53256  | 0.091368 |
| MmuSTS.2401.1.S1_at   | MmuSTS.2401.1 | 12.02 | 11.98 | 1.07 | 0.12 | 1.03  | 0.517634 | 0.53383  | 0.768927 | 0.719904 |
| MmuSTS.2401.1.S1_s_at | MmuSTS.2401.1 | 10.85 | 10.6  | 0.16 | 0.09 | 1.2   | 0.068467 | 0.014395 | 0.410144 | 0.153146 |
| MmuSTS.2402.1.S1_at   | MmuSTS.2402.1 | 11.87 | 13.02 | 0.13 | 0.36 | -2.23 | 0.007471 | 0.003618 | 0.208758 | 0.086035 |
| MmuSTS.2403.1.S1_at   | MmuSTS.2403.1 | 7.44  | 6.8   | 0.22 | 0.7  | 1.55  | 0.07672  | 0.033391 | 0.425491 | 0.226396 |
| MmuSTS.2404.1.S1_at   | MmuSTS.2404.1 | 3.96  | 4.14  | 0.07 | 0.25 | -1.14 | 0.248846 | 0.250543 | 0.599656 | 0.519391 |
| MmuSTS.2405.1.S1_at   | MmuSTS.2405.1 | 8.54  | 7.85  | 0.32 | 0.04 | 1.6   | 0.020321 | 0.00336  | 0.277448 | 0.083405 |
| MmuSTS.2406.1.S1_at   | MmuSTS.2406.1 | 5.94  | 6.01  | 0.1  | 0.17 | -1.05 | 0.412407 | 0.497301 | 0.707892 | 0.696622 |
| MmuSTS.2407.1.S1_at   | MmuSTS.2407.1 | 6.14  | 6.35  | 0.29 | 0.12 | -1.16 | 0.208485 | 0.070632 | 0.570354 | 0.311944 |
| MmuSTS.2408.1.S1_at   | MmuSTS.2408.1 | 9.39  | 9.65  | 0.3  | 0.29 | -1.2  | 0.329071 | 0.06121  | 0.654811 | 0.294035 |
| MmuSTS.2408.1.S1_s_at | MmuSTS.2408.1 | 9.57  | 9.67  | 0.27 | 0.29 | -1.08 | 0.392948 | 0.114464 | 0.694895 | 0.381021 |
| MmuSTS.2409.1.S1_at   | MmuSTS.2409.1 | 4.76  | 5.16  | 0.11 | 0.35 | -1.32 | 0.170353 | 0.028958 | 0.534249 | 0.212059 |
| MmuSTS.2409.1.S1_s_at | MmuSTS.2409.1 | 5.19  | 5.22  | 0.13 | 0.11 | -1.03 | 0.414968 | 0.384183 | 0.709338 | 0.619939 |
| MmuSTS.241.1.S1_at    | MmuSTS.241.1  | 5.77  | 5.99  | 0.14 | 0.19 | -1.17 | 0.071471 | 0.039714 | 0.415476 | 0.244271 |
| MmuSTS.2410.1.S1_at   | MmuSTS.2410.1 | 3.61  | 3.76  | 0.27 | 0.5  | -1.11 | 0.86842  | 0.551415 | 0.947476 | 0.730925 |
| MmuSTS.2411.1.S1_at   | MmuSTS.2411.1 | 5.03  | 6.65  | 0.08 | 1.2  | -3.09 | 0.077359 | 0.059892 | 0.427094 | 0.291386 |
| MmuSTS.2412.1.S1_at   | MmuSTS.2412.1 | 7.65  | 7.66  | 0.25 | 0.39 | -1.01 | 0.707129 | 0.633462 | 0.870958 | 0.784173 |
| MmuSTS.2413.1.S1_at   | MmuSTS.2413.1 | 6.42  | 6.52  | 0.23 | 0.17 | -1.07 | 0.715869 | 0.484499 | 0.875256 | 0.688522 |
| MmuSTS.2414.1.S1_at   | MmuSTS.2414.1 | 12.27 | 12.39 | 0.05 | 0.22 | -1.08 | 0.986971 | 0.326727 | 0.995377 | 0.576725 |
| MmuSTS.2415.1.S1_at   | MmuSTS.2415.1 | 5.95  | 5.97  | 0.19 | 0.03 | -1.01 | 0.722632 | 0.896466 | 0.878815 | 0.940899 |
| MmuSTS.2416.1.S1_at   | MmuSTS.2416.1 | 4.29  | 4.17  | 0.05 | 0.1  | 1.08  | 0.28005  | 0.305458 | 0.62132  | 0.562418 |
| MmuSTS.2417.1.S1_at   | MmuSTS.2417.1 | 4.88  | 4.78  | 0.1  | 0.55 | 1.07  | 0.893137 | 0.970712 | 0.957489 | 0.98405  |
| MmuSTS.2418.1.S1_at   | MmuSTS.2418.1 | 8.07  | 8.05  | 0.27 | 0.15 | 1.02  | 0.92285  | 0.203081 | 0.970065 | 0.477343 |
| MmuSTS.2419.1.S1_at   | MmuSTS.2419.1 | 5.18  | 5.11  | 0.75 | 0.41 | 1.05  | 0.609736 | 0.803579 | 0.820635 | 0.886984 |
| MmuSTS.242.1.S1_at    | MmuSTS.242.1  | 7.06  | 7.01  | 0.17 | 0.09 | 1.03  | 0.984247 | 0.373182 | 0.994395 | 0.612033 |
| MmuSTS.242.1.S1_x_at  | MmuSTS.242.1  | 6.68  | 6.69  | 0.23 | 0.03 | -1.01 | 0.78219  | 0.735112 | 0.909138 | 0.846715 |
| MmuSTS.2420.1.S1_at   | MmuSTS.2420.1 | 11.8  | 11.35 | 0.13 | 0.25 | 1.36  | 0.05156  | 0.006184 | 0.376072 | 0.106774 |
| MmuSTS.2421.1.S1_at   | MmuSTS.2421.1 | 4.26  | 4.24  | 0.21 | 0.16 | 1.01  | 0.506318 | 0.634353 | 0.762259 | 0.784758 |
| MmuSTS.2422.1.S1_at   | MmuSTS.2422.1 | 12.34 | 12.44 | 0.05 | 0.34 | -1.07 | 0.66506  | 0.843324 | 0.849774 | 0.910772 |
| MmuSTS.2423.1.S1_at   | MmuSTS.2423.1 | 7.25  | 6.65  | 0.05 | 0.42 | 1.51  | 0.137447 | 0.145458 | 0.504538 | 0.419421 |
| MmuSTS.2424.1.S1_at   | MmuSTS.2424.1 | 5.94  | 6.04  | 0.15 | 0.27 | -1.07 | 0.239666 | 0.32744  | 0.592634 | 0.577284 |
| MmuSTS.2425.1.S1_at   | MmuSTS.2425.1 | 5.23  | 5.25  | 0.13 | 0.08 | -1.02 | 0.346658 | 0.432906 | 0.666013 | 0.65324  |
| MmuSTS.2426.1.S1_at   | MmuSTS.2426.1 | 8.67  | 8.74  | 0.63 | 0.56 | -1.05 | 0.193816 | 0.245437 | 0.557488 | 0.515213 |
| MmuSTS.2427.1.S1_at   | MmuSTS.2427.1 | 9.7   | 9.1   | 0.22 | 0.43 | 1.53  | 0.283004 | 0.206464 | 0.623159 | 0.480571 |
| MmuSTS.2428.1.S1_at   | MmuSTS.2428.1 | 4.46  | 4.31  | 0.15 | 0.08 | 1.11  | 0.395286 | 0.169227 | 0.696396 | 0.445815 |
| MmuSTS.2429.1.S1_at   | MmuSTS.2429.1 | 5.4   | 5.5   | 0.76 | 0.41 | -1.07 | 0.485695 | 0.526671 | 0.751119 | 0.715627 |
| MmuSTS.243.1.S1_at    | MmuSTS.243.1  | 8.11  | 6.6   | 0.26 | 0.19 | 2.85  | 0.001788 | 0.000536 | 0.154452 | 0.040439 |
| MmuSTS.2430.1.S1_at   | MmuSTS.2430.1 | 7.56  | 7.98  | 0.02 | 0.46 | -1.33 | 0.205178 | 0.190889 | 0.567639 | 0.466264 |

|                       |               |       |       |      |      |       |          |          |          |          |
|-----------------------|---------------|-------|-------|------|------|-------|----------|----------|----------|----------|
| MmuSTS.2431.1.S1_at   | MmuSTS.2431.1 | 3.91  | 4.06  | 0.05 | 0.16 | -1.11 | 0.364642 | 0.612591 | 0.6775   | 0.770091 |
| MmuSTS.2432.1.S1_s_at | MmuSTS.2432.1 | 5.96  | 6.06  | 0.15 | 0.22 | -1.07 | 0.626737 | 0.851433 | 0.829789 | 0.915468 |
| MmuSTS.2433.1.S1_at   | MmuSTS.2433.1 | 9.29  | 10.32 | 0.14 | 0.11 | -2.04 | 0.000573 | 0.000088 | 0.136818 | 0.027016 |
| MmuSTS.2434.1.S1_at   | MmuSTS.2434.1 | 7.42  | 7.95  | 0.2  | 0.6  | -1.45 | 0.210038 | 0.030113 | 0.571234 | 0.215388 |
| MmuSTS.2435.1.S1_at   | MmuSTS.2435.1 | 3.82  | 4.1   | 0.24 | 0.23 | -1.22 | 0.368312 | 0.436855 | 0.679832 | 0.656331 |
| MmuSTS.2436.1.S1_at   | MmuSTS.2436.1 | 5.42  | 4.72  | 0.72 | 0.42 | 1.63  | 0.076477 | 0.051078 | 0.425064 | 0.271296 |
| MmuSTS.2437.1.S1_at   | MmuSTS.2437.1 | 4.27  | 4.32  | 0.14 | 0.11 | -1.04 | 0.678738 | 0.452547 | 0.856197 | 0.667147 |
| MmuSTS.2438.1.S1_at   | MmuSTS.2438.1 | 3.22  | 3.21  | 0.11 | 0.06 | 1.01  | 0.714747 | 0.867344 | 0.874968 | 0.924663 |
| MmuSTS.2439.1.S1_at   | MmuSTS.2439.1 | 5.41  | 5.43  | 0.48 | 0.52 | -1.02 | 0.997214 | 0.35589  | 0.99892  | 0.597869 |
| MmuSTS.244.1.S1_at    | MmuSTS.244.1  | 8.85  | 9.4   | 0.21 | 0.93 | -1.47 | 0.400713 | 0.280098 | 0.700264 | 0.543369 |
| MmuSTS.2440.1.S1_at   | MmuSTS.2440.1 | 11.09 | 8.95  | 0.58 | 0.86 | 4.41  | 0.024829 | 0.016581 | 0.2967   | 0.163023 |
| MmuSTS.2441.1.S1_at   | MmuSTS.2441.1 | 10.99 | 11.15 | 0.24 | 0.24 | -1.12 | 0.56137  | 0.733221 | 0.794859 | 0.845568 |
| MmuSTS.2442.1.S1_at   | MmuSTS.2442.1 | 4.38  | 4.58  | 0.08 | 0.16 | -1.15 | 0.390275 | 0.532103 | 0.69348  | 0.718995 |
| MmuSTS.2443.1.S1_at   | MmuSTS.2443.1 | 5.93  | 6.05  | 0.07 | 0.1  | -1.08 | 0.121026 | 0.156206 | 0.48574  | 0.43161  |
| MmuSTS.2444.1.S1_at   | MmuSTS.2444.1 | 5.14  | 5.13  | 0.04 | 0.06 | 1.01  | 0.821214 | 0.001329 | 0.927261 | 0.056205 |
| MmuSTS.2445.1.S1_at   | MmuSTS.2445.1 | 7.33  | 7.13  | 0.07 | 0.34 | 1.15  | 0.173104 | 0.123768 | 0.536812 | 0.393908 |
| MmuSTS.2446.1.S1_at   | MmuSTS.2446.1 | 4.83  | 5.83  | 0.3  | 1.16 | -2    | 0.186746 | 0.140339 | 0.550106 | 0.413522 |
| MmuSTS.2447.1.S1_at   | MmuSTS.2447.1 | 11.02 | 11.02 | 0.26 | 1.31 | 1.01  | 0.584795 | 0.515609 | 0.807143 | 0.708449 |
| MmuSTS.2448.1.S1_at   | MmuSTS.2448.1 | 4.63  | 4.64  | 0.08 | 0.08 | -1    | 0.602471 | 0.256256 | 0.816561 | 0.524079 |
| MmuSTS.2449.1.S1_at   | MmuSTS.2449.1 | 3.85  | 3.91  | 0.1  | 0.09 | -1.05 | 0.694684 | 0.185273 | 0.864583 | 0.461194 |
| MmuSTS.245.1.S1_at    | MmuSTS.245.1  | 10.22 | 10.41 | 0.2  | 0.53 | -1.13 | 0.660834 | 0.748454 | 0.847904 | 0.853639 |
| MmuSTS.2450.1.S1_at   | MmuSTS.2450.1 | 8.79  | 8.61  | 0.39 | 0.56 | 1.13  | 0.258318 | 0.106099 | 0.605637 | 0.368498 |
| MmuSTS.2451.1.S1_at   | MmuSTS.2451.1 | 5.18  | 5.29  | 0.64 | 0.53 | -1.08 | 0.612455 | 0.681218 | 0.822158 | 0.813862 |
| MmuSTS.2452.1.S1_at   | MmuSTS.2452.1 | 9.43  | 8.79  | 0.16 | 1.19 | 1.56  | 0.957413 | 0.519486 | 0.983882 | 0.711062 |
| MmuSTS.2453.1.S1_at   | MmuSTS.2453.1 | 5.99  | 5.01  | 0.76 | 0.3  | 1.98  | 0.160087 | 0.144435 | 0.524868 | 0.418323 |
| MmuSTS.2454.1.S1_at   | MmuSTS.2454.1 | 5.35  | 5.35  | 0.06 | 0.08 | 1     | 0.78192  | 0.049881 | 0.908967 | 0.268445 |
| MmuSTS.2455.1.S1_at   | MmuSTS.2455.1 | 11.81 | 11.12 | 0.19 | 0.14 | 1.62  | 0.015108 | 0.001775 | 0.257529 | 0.0634   |
| MmuSTS.2456.1.S1_at   | MmuSTS.2456.1 | 12.95 | 12.61 | 0.03 | 0.11 | 1.27  | 0.00851  | 0.003777 | 0.219031 | 0.087503 |
| MmuSTS.2457.1.S1_at   | MmuSTS.2457.1 | 6.68  | 10.11 | 1.62 | 2.52 | -10.8 | 0.322435 | 0.223843 | 0.651095 | 0.496802 |
| MmuSTS.2458.1.S1_at   | MmuSTS.2458.1 | 5.77  | 6.03  | 0.77 | 0.37 | -1.2  | 0.263473 | 0.356021 | 0.609402 | 0.598012 |
| MmuSTS.2459.1.S1_at   | MmuSTS.2459.1 | 10.58 | 10.9  | 0.22 | 0.27 | -1.26 | 0.294143 | 0.222975 | 0.631154 | 0.495821 |
| MmuSTS.246.1.S1_at    | MmuSTS.246.1  | 11.09 | 10.78 | 0.08 | 0.14 | 1.25  | 0.057948 | 0.16006  | 0.38951  | 0.436231 |
| MmuSTS.2460.1.S1_at   | MmuSTS.2460.1 | 8.79  | 7.14  | 0.17 | 0.25 | 3.13  | 0.000874 | 0.000108 | 0.139813 | 0.028099 |
| MmuSTS.2461.1.S1_at   | MmuSTS.2461.1 | 9.28  | 9.07  | 0.26 | 0.32 | 1.16  | 0.471126 | 0.62974  | 0.742919 | 0.781989 |
| MmuSTS.2462.1.S1_at   | MmuSTS.2462.1 | 10.77 | 10.58 | 0.31 | 0.32 | 1.14  | 0.100259 | 0.076835 | 0.460878 | 0.322319 |
| MmuSTS.2463.1.S1_at   | MmuSTS.2463.1 | 4.66  | 4.92  | 0.16 | 0.21 | -1.2  | 0.716884 | 0.139067 | 0.875662 | 0.412165 |
| MmuSTS.2464.1.S1_at   | MmuSTS.2464.1 | 6.6   | 9.1   | 0.53 | 0.22 | -5.67 | 0.001544 | 0.003373 | 0.151907 | 0.083569 |
| MmuSTS.2465.1.S1_at   | MmuSTS.2465.1 | 4.96  | 5.15  | 0.15 | 0.1  | -1.14 | 0.345042 | 0.344515 | 0.66494  | 0.589905 |
| MmuSTS.2466.1.S1_at   | MmuSTS.2466.1 | 5.03  | 5.03  | 0.04 | 0.02 | -1    | 0.231923 | 0.414304 | 0.587671 | 0.640189 |
| MmuSTS.2467.1.S1_at   | MmuSTS.2467.1 | 11.36 | 11.36 | 0.3  | 0.65 | 1     | 0.435331 | 0.593994 | 0.721209 | 0.758509 |
| MmuSTS.2468.1.S1_at   | MmuSTS.2468.1 | 11.48 | 11.36 | 0.06 | 0.12 | 1.09  | 0.289659 | 0.155892 | 0.627563 | 0.431279 |

|                     |               |       |       |      |      |       |          |          |          |          |
|---------------------|---------------|-------|-------|------|------|-------|----------|----------|----------|----------|
| MmuSTS.2469.1.S1_at | MmuSTS.2469.1 | 4.68  | 5.06  | 0.12 | 0.09 | -1.3  | 0.018942 | 0.01451  | 0.272319 | 0.153682 |
| MmuSTS.247.1.S1_at  | MmuSTS.247.1  | 9.04  | 9.97  | 0.21 | 0.36 | -1.9  | 0.025108 | 0.012838 | 0.297733 | 0.145955 |
| MmuSTS.2470.1.S1_at | MmuSTS.2470.1 | 10.47 | 10.27 | 0.03 | 0.14 | 1.15  | 0.038004 | 0.095387 | 0.34335  | 0.352428 |
| MmuSTS.2471.1.S1_at | MmuSTS.2471.1 | 5.07  | 4.93  | 1.99 | 0.82 | 1.1   | 0.582389 | 0.527699 | 0.805736 | 0.716221 |
| MmuSTS.2472.1.S1_at | MmuSTS.2472.1 | 5.96  | 5.99  | 0.18 | 0.08 | -1.02 | 0.914288 | 0.957143 | 0.966155 | 0.975767 |
| MmuSTS.2473.1.S1_at | MmuSTS.2473.1 | 9.35  | 9.08  | 0.23 | 0.97 | 1.2   | 0.63142  | 0.102881 | 0.83269  | 0.363508 |
| MmuSTS.2474.1.S1_at | MmuSTS.2474.1 | 9.28  | 8.38  | 0.25 | 0.34 | 1.86  | 0.033555 | 0.023716 | 0.329595 | 0.192852 |
| MmuSTS.2475.1.S1_at | MmuSTS.2475.1 | 4.78  | 4.81  | 0.11 | 0.24 | -1.02 | 0.945709 | 0.842242 | 0.979255 | 0.910143 |
| MmuSTS.2476.1.S1_at | MmuSTS.2476.1 | 8.74  | 9.07  | 0.26 | 0.42 | -1.26 | 0.10629  | 0.124468 | 0.466831 | 0.394865 |
| MmuSTS.2477.1.S1_at | MmuSTS.2477.1 | 10.67 | 8.94  | 0.2  | 0.66 | 3.31  | 0.009099 | 0.004327 | 0.222023 | 0.092251 |
| MmuSTS.2478.1.S1_at | MmuSTS.2478.1 | 12.34 | 11.66 | 0.02 | 0.62 | 1.6   | 0.126032 | 0.055903 | 0.492072 | 0.282209 |
| MmuSTS.2479.1.S1_at | MmuSTS.2479.1 | 6.47  | 6.73  | 0.16 | 0.18 | -1.19 | 0.352697 | 0.456287 | 0.669719 | 0.670064 |
| MmuSTS.248.1.S1_at  | MmuSTS.248.1  | 5.95  | 6.39  | 0.49 | 0.37 | -1.36 | 0.156298 | 0.100931 | 0.521002 | 0.360509 |
| MmuSTS.2480.1.S1_at | MmuSTS.2480.1 | 7.54  | 5.34  | 0.46 | 1.17 | 4.61  | 0.042032 | 0.022271 | 0.353882 | 0.1867   |
| MmuSTS.2481.1.S1_at | MmuSTS.2481.1 | 10.9  | 10.33 | 0.27 | 0.19 | 1.48  | 0.088472 | 0.087252 | 0.44331  | 0.340237 |
| MmuSTS.2482.1.S1_at | MmuSTS.2482.1 | 10.05 | 9.82  | 0.08 | 0.84 | 1.17  | 0.896764 | 0.870392 | 0.958849 | 0.926446 |
| MmuSTS.2483.1.S1_at | MmuSTS.2483.1 | 5.85  | 5.06  | 0.26 | 0.14 | 1.74  | 0.005217 | 0.001893 | 0.190737 | 0.065004 |
| MmuSTS.2484.1.S1_at | MmuSTS.2484.1 | 5.91  | 6.08  | 0.08 | 0.08 | -1.13 | 0.026086 | 0.015825 | 0.30146  | 0.159503 |
| MmuSTS.2485.1.S1_at | MmuSTS.2485.1 | 6.76  | 6.71  | 0.24 | 0.05 | 1.04  | 0.633147 | 0.626385 | 0.833528 | 0.779719 |
| MmuSTS.2486.1.S1_at | MmuSTS.2486.1 | 9.26  | 9.11  | 1.35 | 1.25 | 1.11  | 0.663485 | 0.859556 | 0.84899  | 0.919999 |
| MmuSTS.2487.1.S1_at | MmuSTS.2487.1 | 5.59  | 5.7   | 0.06 | 0.34 | -1.08 | 0.492919 | 0.273605 | 0.755892 | 0.538053 |
| MmuSTS.2488.1.S1_at | MmuSTS.2488.1 | 10.72 | 10.54 | 0.12 | 0.29 | 1.13  | 0.501554 | 0.425892 | 0.76008  | 0.6481   |
| MmuSTS.2489.1.S1_at | MmuSTS.2489.1 | 4.2   | 4.2   | 0.06 | 0.16 | 1     | 0.457608 | 0.310567 | 0.735025 | 0.565771 |
| MmuSTS.249.1.S1_at  | MmuSTS.249.1  | 7.77  | 10.49 | 1.53 | 3.08 | -6.62 | 0.561055 | 0.275906 | 0.794603 | 0.540035 |
| MmuSTS.2490.1.S1_at | MmuSTS.2490.1 | 3.5   | 3.57  | 0.09 | 0.15 | -1.05 | 0.760793 | 0.957548 | 0.899135 | 0.975954 |
| MmuSTS.2491.1.S1_at | MmuSTS.2491.1 | 6.05  | 6.04  | 0.06 | 0.11 | 1.01  | 0.857297 | 0.198765 | 0.942256 | 0.473391 |
| MmuSTS.2492.1.S1_at | MmuSTS.2492.1 | 7.71  | 7.28  | 0.2  | 0.24 | 1.35  | 0.168404 | 0.128137 | 0.532644 | 0.399148 |
| MmuSTS.2493.1.S1_at | MmuSTS.2493.1 | 4.36  | 5.07  | 0.13 | 0.23 | -1.64 | 0.011378 | 0.005601 | 0.235384 | 0.10339  |
| MmuSTS.2494.1.S1_at | MmuSTS.2494.1 | 5.75  | 5.81  | 0.09 | 0.11 | -1.04 | 0.248451 | 0.669853 | 0.59929  | 0.806933 |
| MmuSTS.2495.1.S1_at | MmuSTS.2495.1 | 6.2   | 4.86  | 0.17 | 0.9  | 2.53  | 0.117373 | 0.127889 | 0.481484 | 0.398825 |
| MmuSTS.2496.1.S1_at | MmuSTS.2496.1 | 8.98  | 8.5   | 0.02 | 0.37 | 1.39  | 0.088704 | 0.092236 | 0.443653 | 0.347992 |
| MmuSTS.2497.1.S1_at | MmuSTS.2497.1 | 4.78  | 5.35  | 0.22 | 0.19 | -1.49 | 0.067549 | 0.061116 | 0.408063 | 0.293975 |
| MmuSTS.2498.1.S1_at | MmuSTS.2498.1 | 8.51  | 7.96  | 0.11 | 0.38 | 1.46  | 0.098886 | 0.126042 | 0.458711 | 0.396714 |
| MmuSTS.2499.1.S1_at | MmuSTS.2499.1 | 2.88  | 2.89  | 0.04 | 0.02 | -1.01 | 0.159236 | 0.456191 | 0.52416  | 0.66996  |
| MmuSTS.25.1.S1_at   | MmuSTS.25.1   | 5.15  | 5.26  | 0.16 | 0.07 | -1.08 | 0.79296  | 0.898499 | 0.914102 | 0.94222  |
| MmuSTS.250.1.S1_at  | MmuSTS.250.1  | 7.36  | 7.51  | 0.2  | 0.19 | -1.11 | 0.865113 | 0.644049 | 0.945844 | 0.791291 |
| MmuSTS.2500.1.S1_at | MmuSTS.2500.1 | 7.86  | 7.26  | 0.24 | 0.69 | 1.51  | 0.228404 | 0.27501  | 0.585843 | 0.539419 |
| MmuSTS.2501.1.S1_at | MmuSTS.2501.1 | 10.84 | 11.22 | 0.08 | 0.23 | -1.31 | 0.149277 | 0.187599 | 0.514001 | 0.463628 |
| MmuSTS.2502.1.S1_at | MmuSTS.2502.1 | 6.04  | 6.23  | 0.26 | 0.15 | -1.14 | 0.838998 | 0.965657 | 0.934987 | 0.980751 |
| MmuSTS.2503.1.S1_at | MmuSTS.2503.1 | 10.69 | 8.94  | 0.44 | 1.35 | 3.37  | 0.13575  | 0.169684 | 0.502654 | 0.446263 |
| MmuSTS.2504.1.S1_at | MmuSTS.2504.1 | 6.21  | 8.86  | 1.24 | 1.42 | -6.25 | 0.150171 | 0.11605  | 0.514803 | 0.383268 |

|                       |               |       |       |      |      |       |          |          |          |          |
|-----------------------|---------------|-------|-------|------|------|-------|----------|----------|----------|----------|
| MmuSTS.2505.1.S1_at   | MmuSTS.2505.1 | 8.19  | 6.93  | 0.65 | 0.63 | 2.4   | 0.073974 | 0.027413 | 0.419593 | 0.206759 |
| MmuSTS.2506.1.S1_s_at | MmuSTS.2506.1 | 8.11  | 6.94  | 0.24 | 1.26 | 2.25  | 0.583832 | 0.735626 | 0.806781 | 0.847031 |
| MmuSTS.2507.1.S1_at   | MmuSTS.2507.1 | 8.36  | 8.59  | 0.07 | 0.19 | -1.17 | 0.095872 | 0.030073 | 0.453861 | 0.215243 |
| MmuSTS.2508.1.S1_at   | MmuSTS.2508.1 | 6.95  | 7.97  | 0.31 | 0.4  | -2.04 | 0.030431 | 0.02655  | 0.318433 | 0.203915 |
| MmuSTS.2509.1.S1_at   | MmuSTS.2509.1 | 12.36 | 12.1  | 0.32 | 0.16 | 1.19  | 0.234309 | 0.333154 | 0.588656 | 0.581452 |
| MmuSTS.251.1.S1_at    | MmuSTS.251.1  | 10.64 | 10.74 | 0.11 | 0.51 | -1.07 | 0.840345 | 0.260789 | 0.935653 | 0.52721  |
| MmuSTS.2510.1.S1_at   | MmuSTS.2510.1 | 11.96 | 11.56 | 0.19 | 1.12 | 1.32  | 0.188664 | 0.193981 | 0.551613 | 0.469113 |
| MmuSTS.2511.1.S1_at   | MmuSTS.2511.1 | 10.27 | 10.05 | 0.1  | 0.26 | 1.17  | 0.224829 | 0.052379 | 0.582867 | 0.274345 |
| MmuSTS.2512.1.S1_at   | MmuSTS.2512.1 | 8.93  | 9.77  | 0.47 | 0.8  | -1.8  | 0.270684 | 0.148803 | 0.614969 | 0.423201 |
| MmuSTS.2513.1.S1_at   | MmuSTS.2513.1 | 11.5  | 10.66 | 0.16 | 1.14 | 1.78  | 0.090032 | 0.0907   | 0.445441 | 0.345151 |
| MmuSTS.2514.1.S1_at   | MmuSTS.2514.1 | 8.9   | 9.97  | 0.79 | 1.67 | -2.11 | 0.528624 | 0.233452 | 0.775742 | 0.504809 |
| MmuSTS.2515.1.S1_at   | MmuSTS.2515.1 | 3.58  | 3.6   | 0.04 | 0.05 | -1.02 | 0.423663 | 0.536907 | 0.714199 | 0.722119 |
| MmuSTS.2516.1.S1_at   | MmuSTS.2516.1 | 7     | 7.61  | 0.32 | 0.88 | -1.53 | 0.481333 | 0.655498 | 0.74913  | 0.798583 |
| MmuSTS.2517.1.S1_at   | MmuSTS.2517.1 | 13.07 | 13.01 | 0.08 | 0.08 | 1.05  | 0.204604 | 0.253547 | 0.567135 | 0.521873 |
| MmuSTS.2518.1.S1_s_at | MmuSTS.2518.1 | 11.17 | 11.63 | 0.09 | 0.19 | -1.37 | 0.043788 | 0.013556 | 0.357051 | 0.149001 |
| MmuSTS.2519.1.S1_at   | MmuSTS.2519.1 | 13.58 | 13.58 | 0.07 | 0.16 | -1.01 | 0.396397 | 0.548998 | 0.696939 | 0.729509 |
| MmuSTS.252.1.S1_at    | MmuSTS.252.1  | 3.45  | 3.38  | 0.02 | 0.06 | 1.05  | 0.047488 | 0.299102 | 0.366522 | 0.557663 |
| MmuSTS.2520.1.S1_at   | MmuSTS.2520.1 | 10.85 | 11.59 | 0.24 | 0.15 | -1.67 | 0.021458 | 0.015581 | 0.282524 | 0.158192 |
| MmuSTS.2521.1.S1_at   | MmuSTS.2521.1 | 6.12  | 5.88  | 0.49 | 0.26 | 1.18  | 0.671011 | 0.84958  | 0.852532 | 0.914595 |
| MmuSTS.2522.1.S1_at   | MmuSTS.2522.1 | 6.7   | 6.57  | 0.19 | 0.21 | 1.1   | 0.094975 | 0.183824 | 0.452531 | 0.459909 |
| MmuSTS.2523.1.S1_at   | MmuSTS.2523.1 | 6.96  | 6.35  | 0.44 | 0.36 | 1.52  | 0.309098 | 0.496644 | 0.641346 | 0.696119 |
| MmuSTS.2524.1.S1_at   | MmuSTS.2524.1 | 4.68  | 4.27  | 0.63 | 0.3  | 1.32  | 0.577345 | 0.155513 | 0.803469 | 0.430888 |
| MmuSTS.2525.1.S1_at   | MmuSTS.2525.1 | 3.24  | 3.65  | 0.04 | 0.22 | -1.33 | 0.107845 | 0.116423 | 0.468543 | 0.383671 |
| MmuSTS.2526.1.S1_at   | MmuSTS.2526.1 | 11.36 | 11.39 | 0.11 | 0.32 | -1.02 | 0.665517 | 0.798415 | 0.850023 | 0.883979 |
| MmuSTS.2527.1.S1_at   | MmuSTS.2527.1 | 11.37 | 11.47 | 0.03 | 0.37 | -1.07 | 0.762529 | 0.466684 | 0.899996 | 0.676425 |
| MmuSTS.2528.1.S1_at   | MmuSTS.2528.1 | 3.94  | 3.87  | 0.13 | 0.56 | 1.05  | 0.522359 | 0.322448 | 0.772016 | 0.573985 |
| MmuSTS.2529.1.S1_at   | MmuSTS.2529.1 | 12.81 | 12.76 | 0.09 | 0.17 | 1.03  | 0.64391  | 0.241538 | 0.8397   | 0.512152 |
| MmuSTS.253.1.S1_at    | MmuSTS.253.1  | 10.35 | 10.73 | 0.34 | 0.55 | -1.31 | 0.190983 | 0.246079 | 0.553829 | 0.515827 |
| MmuSTS.2530.1.S1_at   | MmuSTS.2530.1 | 5.61  | 5.54  | 0.26 | 0.19 | 1.06  | 0.556375 | 0.699871 | 0.79173  | 0.82579  |
| MmuSTS.2531.1.S1_at   | MmuSTS.2531.1 | 5.48  | 6.02  | 0.4  | 0.4  | -1.45 | 0.418533 | 0.584607 | 0.711383 | 0.752482 |
| MmuSTS.2532.1.S1_at   | MmuSTS.2532.1 | 11.32 | 11.9  | 0.77 | 1.06 | -1.5  | 0.854722 | 0.556368 | 0.941248 | 0.734507 |
| MmuSTS.2533.1.S1_at   | MmuSTS.2533.1 | 12.86 | 12.32 | 0.17 | 0.48 | 1.45  | 0.036754 | 0.022243 | 0.340337 | 0.18659  |
| MmuSTS.622.1.S1_s_at  | MmuSTS.622.1  | 3.32  | 3.36  | 0.04 | 0.01 | -1.03 | 0.445448 | 0.05752  | 0.727674 | 0.285907 |
| MmuSTS.622.1.S1_x_at  | MmuSTS.622.1  | 5.08  | 4.97  | 0.1  | 0.04 | 1.08  | 0.128624 | 0.043481 | 0.494653 | 0.253152 |
| MmuSTS.623.1.S1_at    | MmuSTS.623.1  | 4.35  | 4.11  | 0.16 | 0.09 | 1.18  | 0.222025 | 0.059602 | 0.580625 | 0.290696 |
| MmuSTS.623.1.S1_s_at  | MmuSTS.623.1  | 3.18  | 3.39  | 0.04 | 0.08 | -1.15 | 0.037555 | 0.123272 | 0.341774 | 0.393358 |
| MmuSTS.623.1.S1_x_at  | MmuSTS.623.1  | 3.41  | 3.46  | 0.16 | 0.16 | -1.03 | 0.670493 | 0.835557 | 0.852391 | 0.905864 |
| MmuSTS.2536.1.S1_at   | MmuSTS.2536.1 | 3.49  | 3.72  | 0.18 | 0.1  | -1.17 | 0.344419 | 0.51109  | 0.664563 | 0.705383 |
| MmuSTS.2537.1.S1_at   | MmuSTS.2537.1 | 10.68 | 11.4  | 0.75 | 0.48 | -1.64 | 0.051398 | 0.033499 | 0.376003 | 0.226577 |
| MmuSTS.2538.1.S1_at   | MmuSTS.2538.1 | 9.98  | 11.12 | 0.34 | 0.4  | -2.22 | 0.017887 | 0.011552 | 0.26813  | 0.139091 |
| MmuSTS.2539.1.S1_at   | MmuSTS.2539.1 | 7.01  | 7.3   | 0.19 | 0.08 | -1.22 | 0.298707 | 0.345999 | 0.634211 | 0.59115  |



|                       |               |       |       |      |      |       |          |          |          |          |
|-----------------------|---------------|-------|-------|------|------|-------|----------|----------|----------|----------|
| MmuSTS.254.1.S1_at    | MmuSTS.254.1  | 6.05  | 5.09  | 0.69 | 0.29 | 1.94  | 0.079963 | 0.202327 | 0.430176 | 0.476691 |
| MmuSTS.2540.1.S1_at   | MmuSTS.2540.1 | 8.59  | 9.24  | 0.73 | 0.92 | -1.57 | 0.413592 | 0.414898 | 0.70853  | 0.640509 |
| MmuSTS.2541.1.S1_at   | MmuSTS.2541.1 | 7.84  | 9.74  | 0.38 | 0.99 | -3.75 | 0.111938 | 0.093148 | 0.474378 | 0.349303 |
| MmuSTS.2542.1.S1_at   | MmuSTS.2542.1 | 3.65  | 3.46  | 0.09 | 0.12 | 1.15  | 0.272638 | 0.283994 | 0.616283 | 0.546237 |
| MmuSTS.2543.1.S1_at   | MmuSTS.2543.1 | 3.38  | 3.24  | 0.19 | 0.07 | 1.1   | 0.230475 | 0.413218 | 0.587222 | 0.639484 |
| MmuSTS.2544.1.S1_at   | MmuSTS.2544.1 | 11.55 | 11.63 | 0.07 | 0.2  | -1.05 | 0.206779 | 0.040806 | 0.568816 | 0.246935 |
| MmuSTS.2545.1.S1_at   | MmuSTS.2545.1 | 8.85  | 8.73  | 0.1  | 0.18 | 1.09  | 0.779701 | 0.409711 | 0.908208 | 0.636759 |
| MmuSTS.2546.1.S1_at   | MmuSTS.2546.1 | 4.25  | 4.39  | 0.1  | 0.47 | -1.1  | 0.594247 | 0.768758 | 0.811746 | 0.865653 |
| MmuSTS.2547.1.S1_at   | MmuSTS.2547.1 | 10.2  | 10.07 | 0.04 | 0.21 | 1.09  | 0.942671 | 0.756548 | 0.978122 | 0.858235 |
| MmuSTS.2548.1.S1_at   | MmuSTS.2548.1 | 9.67  | 9.44  | 0.1  | 0.28 | 1.18  | 0.208414 | 0.103289 | 0.570275 | 0.364143 |
| MmuSTS.2549.1.S1_at   | MmuSTS.2549.1 | 9.61  | 10.46 | 0.36 | 0.32 | -1.81 | 0.051668 | 0.030474 | 0.376177 | 0.216624 |
| MmuSTS.255.1.S1_at    | MmuSTS.255.1  | 11.25 | 10.8  | 0.18 | 0.11 | 1.37  | 0.022735 | 0.022817 | 0.288168 | 0.189214 |
| MmuSTS.2550.1.S1_at   | MmuSTS.2550.1 | 5.9   | 6.04  | 0.11 | 0.11 | -1.11 | 0.084781 | 0.348591 | 0.43769  | 0.59263  |
| MmuSTS.2551.1.S1_at   | MmuSTS.2551.1 | 10.75 | 10.17 | 0.18 | 0.34 | 1.5   | 0.27562  | 0.314486 | 0.617878 | 0.568367 |
| MmuSTS.2552.1.S1_x_at | MmuSTS.2552.1 | 12.44 | 12.47 | 0.19 | 0.27 | -1.02 | 0.566209 | 0.259954 | 0.79749  | 0.52675  |
| MmuSTS.2553.1.S1_at   | MmuSTS.2553.1 | 5.64  | 5.72  | 0.46 | 0.27 | -1.06 | 0.920781 | 0.547175 | 0.969092 | 0.728314 |
| MmuSTS.2554.1.S1_at   | MmuSTS.2554.1 | 9.41  | 9.62  | 0.2  | 0.67 | -1.16 | 0.775307 | 0.282366 | 0.905681 | 0.545076 |
| MmuSTS.2555.1.S1_at   | MmuSTS.2555.1 | 10.48 | 10.22 | 0.3  | 0.12 | 1.2   | 0.307939 | 0.292036 | 0.640352 | 0.552201 |
| MmuSTS.2556.1.S1_at   | MmuSTS.2556.1 | 10.66 | 10.59 | 0.26 | 0.62 | 1.05  | 0.967311 | 0.998229 | 0.987802 | 0.999079 |
| MmuSTS.2557.1.S1_at   | MmuSTS.2557.1 | 7.82  | 8.66  | 0.14 | 0.46 | -1.79 | 0.015228 | 0.006011 | 0.257698 | 0.106068 |
| MmuSTS.2558.1.S1_at   | MmuSTS.2558.1 | 12.46 | 12.34 | 0.17 | 0.06 | 1.09  | 0.098076 | 0.080645 | 0.457356 | 0.328444 |
| MmuSTS.2559.1.S1_at   | MmuSTS.2559.1 | 8.25  | 8.46  | 0.26 | 0.32 | -1.15 | 0.401881 | 0.544202 | 0.7011   | 0.726643 |
| MmuSTS.256.1.S1_at    | MmuSTS.256.1  | 8.12  | 8.09  | 0.03 | 0.41 | 1.02  | 0.747086 | 0.350704 | 0.891702 | 0.59442  |
| MmuSTS.2560.1.S1_at   | MmuSTS.2560.1 | 8.18  | 7.94  | 0.31 | 0.95 | 1.18  | 0.548257 | 0.375301 | 0.786665 | 0.613336 |
| MmuSTS.2561.1.S1_at   | MmuSTS.2561.1 | 6.95  | 7.08  | 0.17 | 0.31 | -1.09 | 0.230587 | 0.299884 | 0.587222 | 0.558158 |
| MmuSTS.2562.1.S1_s_at | MmuSTS.2562.1 | 9.74  | 10.05 | 0.21 | 0.16 | -1.24 | 0.291255 | 0.179518 | 0.628739 | 0.455998 |
| MmuSTS.2563.1.S1_at   | MmuSTS.2563.1 | 9.35  | 8.62  | 0.1  | 0.31 | 1.66  | 0.056007 | 0.032964 | 0.385473 | 0.224771 |
| MmuSTS.2564.1.S1_at   | MmuSTS.2564.1 | 11.78 | 11.43 | 0.15 | 0.17 | 1.28  | 0.043823 | 0.048425 | 0.357051 | 0.265282 |
| MmuSTS.2565.1.S1_at   | MmuSTS.2565.1 | 10.65 | 9.04  | 0.14 | 0.42 | 3.06  | 0.003662 | 0.000872 | 0.179515 | 0.047471 |
| MmuSTS.2566.1.S1_at   | MmuSTS.2566.1 | 12.43 | 12.8  | 0.09 | 0.13 | -1.29 | 0.011192 | 0.010245 | 0.234598 | 0.132655 |
| MmuSTS.2567.1.S1_s_at | MmuSTS.2567.1 | 9.81  | 9.49  | 0.09 | 0.07 | 1.24  | 0.019162 | 0.007991 | 0.273043 | 0.118791 |
| MmuSTS.2568.1.S1_at   | MmuSTS.2568.1 | 11.97 | 11.9  | 0.09 | 0.08 | 1.05  | 0.138075 | 0.231325 | 0.505565 | 0.503024 |
| MmuSTS.2569.1.S1_at   | MmuSTS.2569.1 | 9.62  | 9.04  | 0.08 | 0.27 | 1.5   | 0.029083 | 0.016936 | 0.312686 | 0.165006 |
| MmuSTS.257.1.S1_at    | MmuSTS.257.1  | 11.8  | 12.1  | 0.06 | 0.12 | -1.22 | 0.010739 | 0.003202 | 0.23109  | 0.082015 |
| MmuSTS.2570.1.S1_at   | MmuSTS.2570.1 | 5.75  | 5.86  | 0.09 | 0.12 | -1.08 | 0.26977  | 0.178836 | 0.614423 | 0.455141 |
| MmuSTS.2570.1.S1_x_at | MmuSTS.2570.1 | 5.54  | 5.64  | 0.07 | 0.03 | -1.07 | 0.127908 | 0.017657 | 0.494071 | 0.168002 |
| MmuSTS.2571.1.S1_at   | MmuSTS.2571.1 | 7.92  | 7.77  | 0.06 | 0.24 | 1.11  | 0.328388 | 0.444272 | 0.654375 | 0.661926 |
| MmuSTS.2572.1.S1_at   | MmuSTS.2572.1 | 4.47  | 4.58  | 0.11 | 0.09 | -1.08 | 0.167986 | 0.479597 | 0.53244  | 0.685315 |
| MmuSTS.2573.1.S1_at   | MmuSTS.2573.1 | 10.11 | 9.81  | 0.21 | 0.24 | 1.23  | 0.089866 | 0.076948 | 0.44539  | 0.322421 |
| MmuSTS.2574.1.S1_at   | MmuSTS.2574.1 | 3.68  | 3.72  | 0.25 | 0.18 | -1.03 | 0.302424 | 0.212546 | 0.63692  | 0.486502 |
| MmuSTS.2575.1.S1_at   | MmuSTS.2575.1 | 11.22 | 11.82 | 0.12 | 0.58 | -1.51 | 0.381975 | 0.516334 | 0.688341 | 0.708858 |

|                       |               |       |       |      |      |       |          |          |          |          |
|-----------------------|---------------|-------|-------|------|------|-------|----------|----------|----------|----------|
| MmuSTS.2576.1.S1_at   | MmuSTS.2576.1 | 7.71  | 7.73  | 0.05 | 0.12 | -1.02 | 0.558088 | 0.543828 | 0.792951 | 0.726382 |
| MmuSTS.2577.1.S1_at   | MmuSTS.2577.1 | 11.72 | 11.19 | 0.03 | 0.09 | 1.43  | 0.000921 | 0.000184 | 0.139813 | 0.030511 |
| MmuSTS.2578.1.S1_at   | MmuSTS.2578.1 | 5.18  | 4.62  | 0.51 | 0.24 | 1.48  | 0.093131 | 0.098409 | 0.450362 | 0.356531 |
| MmuSTS.2579.1.S1_at   | MmuSTS.2579.1 | 8.42  | 9.17  | 0.35 | 0.58 | -1.68 | 0.074172 | 0.056954 | 0.419909 | 0.284751 |
| MmuSTS.258.1.S1_at    | MmuSTS.258.1  | 10.75 | 10.69 | 0.21 | 0.18 | 1.04  | 0.471256 | 0.679355 | 0.742955 | 0.812775 |
| MmuSTS.2580.1.S1_at   | MmuSTS.2580.1 | 11.29 | 11.33 | 0.06 | 0.2  | -1.03 | 0.769947 | 0.597437 | 0.903292 | 0.760197 |
| MmuSTS.2581.1.S1_s_at | MmuSTS.2581.1 | 10.29 | 9.66  | 0.04 | 0.35 | 1.54  | 0.026862 | 0.016448 | 0.304933 | 0.162439 |
| MmuSTS.2582.1.S1_at   | MmuSTS.2582.1 | 4.72  | 5.36  | 0.47 | 1.01 | -1.56 | 0.609    | 0.139943 | 0.82024  | 0.413295 |
| MmuSTS.2583.1.S1_at   | MmuSTS.2583.1 | 3.23  | 3.27  | 0.12 | 0.57 | -1.03 | 0.402763 | 0.541619 | 0.701615 | 0.725033 |
| MmuSTS.2584.1.S1_at   | MmuSTS.2584.1 | 10.24 | 10.29 | 0.09 | 0.33 | -1.03 | 0.231995 | 0.187407 | 0.587715 | 0.46345  |
| MmuSTS.2585.1.S1_at   | MmuSTS.2585.1 | 6.74  | 9.27  | 1.08 | 1.92 | -5.77 | 0.254372 | 0.248666 | 0.602363 | 0.517917 |
| MmuSTS.2586.1.S1_at   | MmuSTS.2586.1 | 10.31 | 10.35 | 0.09 | 0.16 | -1.03 | 0.583812 | 0.292005 | 0.806776 | 0.552163 |
| MmuSTS.2587.1.S1_at   | MmuSTS.2587.1 | 10.84 | 10.66 | 0.06 | 0.33 | 1.14  | 0.377237 | 0.586916 | 0.685691 | 0.753896 |
| MmuSTS.2588.1.S1_at   | MmuSTS.2588.1 | 11.98 | 11.69 | 0.07 | 0.22 | 1.23  | 0.044572 | 0.029685 | 0.358786 | 0.214029 |
| MmuSTS.2589.1.S1_at   | MmuSTS.2589.1 | 11.17 | 11.36 | 0.1  | 0.09 | -1.14 | 0.205258 | 0.072775 | 0.567726 | 0.315651 |
| MmuSTS.259.1.S1_at    | MmuSTS.259.1  | 10.28 | 10.31 | 0.26 | 0.26 | -1.03 | 0.86384  | 0.747167 | 0.945367 | 0.853124 |
| MmuSTS.2590.1.S1_at   | MmuSTS.2590.1 | 12.58 | 12.28 | 0.08 | 0.21 | 1.23  | 0.250717 | 0.167906 | 0.600389 | 0.444485 |
| MmuSTS.2591.1.S1_at   | MmuSTS.2591.1 | 10.66 | 10.68 | 0.16 | 0.37 | -1.01 | 0.386358 | 0.548014 | 0.691266 | 0.728843 |
| MmuSTS.2592.1.S1_at   | MmuSTS.2592.1 | 11.35 | 11.41 | 0.17 | 0.55 | -1.05 | 0.926736 | 0.991019 | 0.971811 | 0.994952 |
| MmuSTS.2593.1.S1_at   | MmuSTS.2593.1 | 11.65 | 12.29 | 0.34 | 0.14 | -1.55 | 0.012581 | 0.005359 | 0.242665 | 0.101092 |
| MmuSTS.2594.1.S1_at   | MmuSTS.2594.1 | 4.55  | 4.74  | 0.11 | 0.1  | -1.14 | 0.217181 | 0.093325 | 0.576831 | 0.349412 |
| MmuSTS.2595.1.S1_at   | MmuSTS.2595.1 | 4.98  | 5.02  | 0.09 | 0.29 | -1.03 | 0.785843 | 0.617793 | 0.910907 | 0.773705 |
| MmuSTS.2596.1.S1_at   | MmuSTS.2596.1 | 10.45 | 10.36 | 0.17 | 0.22 | 1.07  | 0.324457 | 0.501156 | 0.651941 | 0.699449 |
| MmuSTS.2597.1.S1_at   | MmuSTS.2597.1 | 10.66 | 10.74 | 0.07 | 0.51 | -1.06 | 0.730639 | 0.887451 | 0.883214 | 0.935867 |
| MmuSTS.2598.1.S1_at   | MmuSTS.2598.1 | 10.04 | 10.06 | 0.04 | 0.57 | -1.02 | 0.770646 | 0.695411 | 0.903354 | 0.822978 |
| MmuSTS.2599.1.S1_at   | MmuSTS.2599.1 | 9.1   | 8.76  | 0.65 | 0.57 | 1.27  | 0.723363 | 0.836967 | 0.879114 | 0.906826 |
| MmuSTS.26.1.S1_at     | MmuSTS.26.1   | 11.44 | 11.47 | 0.11 | 0.22 | -1.02 | 0.687946 | 0.690459 | 0.86083  | 0.819587 |
| MmuSTS.260.1.S1_at    | MmuSTS.260.1  | 4.87  | 5.09  | 0.06 | 0.6  | -1.16 | 0.575091 | 0.738933 | 0.802084 | 0.848676 |
| MmuSTS.2600.1.S1_at   | MmuSTS.2600.1 | 7.95  | 9.02  | 0.11 | 0.51 | -2.09 | 0.020251 | 0.013089 | 0.277322 | 0.14718  |
| MmuSTS.2601.1.S1_at   | MmuSTS.2601.1 | 7.63  | 6.75  | 0.21 | 0.34 | 1.83  | 0.031081 | 0.032206 | 0.32048  | 0.222139 |
| MmuSTS.2602.1.S1_at   | MmuSTS.2602.1 | 8.73  | 8.77  | 0.26 | 0.03 | -1.02 | 0.797737 | 0.454668 | 0.916116 | 0.668763 |
| MmuSTS.2603.1.S1_at   | MmuSTS.2603.1 | 11.33 | 12.04 | 0.52 | 0.48 | -1.63 | 0.166605 | 0.255949 | 0.530266 | 0.523879 |
| MmuSTS.2604.1.S1_at   | MmuSTS.2604.1 | 12.44 | 12.84 | 0.06 | 0.19 | -1.32 | 0.061691 | 0.054099 | 0.396604 | 0.277914 |
| MmuSTS.2605.1.S1_at   | MmuSTS.2605.1 | 7.61  | 7.77  | 0.15 | 0.08 | -1.12 | 0.254378 | 0.281566 | 0.602363 | 0.54464  |
| MmuSTS.2606.1.S1_at   | MmuSTS.2606.1 | 12.52 | 11.23 | 0.34 | 0.55 | 2.45  | 0.023693 | 0.01605  | 0.292646 | 0.160532 |
| MmuSTS.2607.1.S1_at   | MmuSTS.2607.1 | 7.04  | 6.58  | 0.1  | 0.05 | 1.38  | 0.002344 | 0.004733 | 0.162    | 0.095831 |
| MmuSTS.2608.1.S1_at   | MmuSTS.2608.1 | 5.74  | 6.26  | 0.1  | 0.27 | -1.44 | 0.046089 | 0.047892 | 0.362442 | 0.263751 |
| MmuSTS.2609.1.S1_at   | MmuSTS.2609.1 | 10.24 | 9.75  | 0.19 | 0.42 | 1.4   | 0.064941 | 0.061004 | 0.403744 | 0.293811 |
| MmuSTS.261.1.S1_at    | MmuSTS.261.1  | 4.92  | 4.4   | 0.36 | 0.36 | 1.43  | 0.085052 | 0.057764 | 0.438104 | 0.286677 |
| MmuSTS.2610.1.S1_at   | MmuSTS.2610.1 | 7.49  | 7.17  | 0.3  | 0.34 | 1.25  | 0.14707  | 0.166169 | 0.51306  | 0.442738 |
| MmuSTS.2611.1.S1_at   | MmuSTS.2611.1 | 11.24 | 10.4  | 0.04 | 0.34 | 1.78  | 0.012363 | 0.008313 | 0.240921 | 0.120929 |

|                       |               |       |       |      |      |       |          |          |          |          |
|-----------------------|---------------|-------|-------|------|------|-------|----------|----------|----------|----------|
| MmuSTS.2612.1.S1_at   | MmuSTS.2612.1 | 6.59  | 6.44  | 0.62 | 0.09 | 1.11  | 0.592755 | 0.489794 | 0.811174 | 0.691918 |
| MmuSTS.2613.1.S1_at   | MmuSTS.2613.1 | 8.96  | 8.21  | 0.26 | 0.69 | 1.68  | 0.175027 | 0.173794 | 0.538786 | 0.450128 |
| MmuSTS.2614.1.S1_at   | MmuSTS.2614.1 | 12.57 | 12.49 | 0.06 | 0.16 | 1.06  | 0.241783 | 0.097742 | 0.593977 | 0.355598 |
| MmuSTS.2614.1.S1_s_at | MmuSTS.2614.1 | 11.56 | 11.52 | 0.1  | 0.22 | 1.03  | 0.391252 | 0.093126 | 0.693992 | 0.349303 |
| MmuSTS.2614.1.S1_x_at | MmuSTS.2614.1 | 12.25 | 12.24 | 0.06 | 0.18 | 1     | 0.351694 | 0.118372 | 0.669126 | 0.386398 |
| MmuSTS.2615.1.S1_at   | MmuSTS.2615.1 | 12.43 | 12.5  | 0.06 | 0.16 | -1.05 | 0.551684 | 0.332994 | 0.788899 | 0.581326 |
| MmuSTS.2616.1.S1_at   | MmuSTS.2616.1 | 3.75  | 3.88  | 0.09 | 0.14 | -1.09 | 0.0667   | 0.050308 | 0.406869 | 0.269573 |
| MmuSTS.2617.1.S1_at   | MmuSTS.2617.1 | 5.38  | 6.98  | 2.4  | 0.76 | -3.03 | 0.6754   | 0.826712 | 0.854535 | 0.900485 |
| MmuSTS.2618.1.S1_at   | MmuSTS.2618.1 | 6.42  | 6.72  | 0.81 | 0.33 | -1.24 | 0.584092 | 0.733295 | 0.806847 | 0.84558  |
| MmuSTS.2619.1.S1_at   | MmuSTS.2619.1 | 7.85  | 8.11  | 0.49 | 0.34 | -1.2  | 0.355678 | 0.40955  | 0.671185 | 0.636566 |
| MmuSTS.262.1.S1_at    | MmuSTS.262.1  | 10.45 | 10.42 | 0.19 | 0.35 | 1.02  | 0.623655 | 0.539262 | 0.828027 | 0.723665 |
| MmuSTS.2620.1.S1_at   | MmuSTS.2620.1 | 10.21 | 10.09 | 0.07 | 0.43 | 1.09  | 0.557035 | 0.403793 | 0.792286 | 0.632386 |
| MmuSTS.2621.1.S1_at   | MmuSTS.2621.1 | 10.83 | 10.92 | 0.14 | 0.36 | -1.07 | 0.502329 | 0.410451 | 0.760275 | 0.637311 |
| MmuSTS.2622.1.S1_at   | MmuSTS.2622.1 | 8.59  | 7.76  | 0.09 | 0.45 | 1.78  | 0.032227 | 0.034712 | 0.3244   | 0.230506 |
| MmuSTS.2623.1.S1_at   | MmuSTS.2623.1 | 5.96  | 6.07  | 0.19 | 0.05 | -1.08 | 0.223244 | 0.083967 | 0.581723 | 0.334885 |
| MmuSTS.2624.1.S1_at   | MmuSTS.2624.1 | 9.51  | 10.03 | 0.15 | 0.29 | -1.43 | 0.112578 | 0.092455 | 0.475092 | 0.348346 |
| MmuSTS.2625.1.S1_at   | MmuSTS.2625.1 | 9.27  | 9.14  | 0.23 | 0.18 | 1.1   | 0.454944 | 0.756476 | 0.733563 | 0.858223 |
| MmuSTS.2626.1.S1_at   | MmuSTS.2626.1 | 9.17  | 9.15  | 0.24 | 0.37 | 1.02  | 0.77401  | 0.416774 | 0.904999 | 0.64171  |
| MmuSTS.2627.1.S1_at   | MmuSTS.2627.1 | 5.37  | 5.12  | 0.12 | 0.26 | 1.18  | 0.215677 | 0.003483 | 0.575945 | 0.084834 |
| MmuSTS.2628.1.S1_at   | MmuSTS.2628.1 | 10.28 | 9.58  | 0.08 | 0.87 | 1.63  | 0.182984 | 0.225284 | 0.547134 | 0.497892 |
| MmuSTS.2629.1.S1_at   | MmuSTS.2629.1 | 6.62  | 6.49  | 0.31 | 1.43 | 1.09  | 0.954865 | 0.81314  | 0.983073 | 0.891951 |
| MmuSTS.263.1.S1_at    | MmuSTS.263.1  | 11.27 | 11.95 | 0.31 | 0.12 | -1.6  | 0.024593 | 0.011281 | 0.295214 | 0.138076 |
| MmuSTS.2630.1.S1_at   | MmuSTS.2630.1 | 9.08  | 9.83  | 0.19 | 0.66 | -1.68 | 0.166866 | 0.206528 | 0.530864 | 0.480571 |
| MmuSTS.2631.1.S1_at   | MmuSTS.2631.1 | 3.45  | 3.51  | 0.15 | 0.03 | -1.04 | 0.159858 | 0.157156 | 0.524737 | 0.432616 |
| MmuSTS.2632.1.S1_at   | MmuSTS.2632.1 | 6.3   | 4.91  | 0.49 | 0.1  | 2.62  | 0.007497 | 0.002907 | 0.209047 | 0.079157 |
| MmuSTS.2633.1.S1_at   | MmuSTS.2633.1 | 8.99  | 7.98  | 0.58 | 0.43 | 2.01  | 0.052009 | 0.036946 | 0.376949 | 0.236659 |
| MmuSTS.2634.1.S1_at   | MmuSTS.2634.1 | 9.76  | 9.31  | 0.1  | 0.11 | 1.36  | 0.010182 | 0.003499 | 0.228247 | 0.08503  |
| MmuSTS.2635.1.S1_at   | MmuSTS.2635.1 | 7.31  | 6.5   | 0.4  | 1.34 | 1.75  | 0.352004 | 0.431736 | 0.66934  | 0.652535 |
| MmuSTS.2636.1.S1_at   | MmuSTS.2636.1 | 9.47  | 9.04  | 0.19 | 0.07 | 1.35  | 0.018363 | 0.006057 | 0.27003  | 0.106152 |
| MmuSTS.2637.1.S1_at   | MmuSTS.2637.1 | 7.05  | 7.18  | 1.06 | 1.41 | -1.1  | 0.897105 | 0.352042 | 0.959096 | 0.595426 |
| MmuSTS.2638.1.S1_at   | MmuSTS.2638.1 | 5.92  | 5.29  | 0.27 | 0.58 | 1.55  | 0.159664 | 0.300227 | 0.524539 | 0.558443 |
| MmuSTS.2639.1.S1_at   | MmuSTS.2639.1 | 3.74  | 3.92  | 0.05 | 0.18 | -1.14 | 0.127375 | 0.168044 | 0.493834 | 0.444641 |
| MmuSTS.264.1.S1_at    | MmuSTS.264.1  | 4.39  | 4.58  | 0.16 | 0.47 | -1.14 | 0.271564 | 0.394774 | 0.615716 | 0.627208 |
| MmuSTS.2640.1.S1_at   | MmuSTS.2640.1 | 10.69 | 10.58 | 0.52 | 0.31 | 1.08  | 0.97276  | 0.789565 | 0.989474 | 0.878449 |
| MmuSTS.2641.1.S1_at   | MmuSTS.2641.1 | 8.35  | 8.77  | 0.19 | 1.1  | -1.34 | 0.592593 | 0.1169   | 0.811087 | 0.384277 |
| MmuSTS.2642.1.S1_at   | MmuSTS.2642.1 | 7.65  | 7.32  | 0.37 | 0.23 | 1.26  | 0.095695 | 0.102405 | 0.453501 | 0.36259  |
| MmuSTS.2643.1.S1_at   | MmuSTS.2643.1 | 10.94 | 11.46 | 0.25 | 0.12 | -1.43 | 0.013149 | 0.007126 | 0.245277 | 0.113654 |
| MmuSTS.2643.1.S1_x_at | MmuSTS.2643.1 | 10.84 | 11.42 | 0.25 | 0.1  | -1.5  | 0.018801 | 0.011959 | 0.2715   | 0.141475 |
| MmuSTS.2644.1.S1_s_at | MmuSTS.2644.1 | 3.88  | 4.05  | 0.09 | 0.15 | -1.12 | 0.59589  | 0.168935 | 0.812684 | 0.44549  |
| MmuSTS.2645.1.S1_at   | MmuSTS.2645.1 | 11.81 | 10.61 | 0.15 | 0.42 | 2.31  | 0.007388 | 0.001697 | 0.207702 | 0.062399 |
| MmuSTS.2646.1.S1_at   | MmuSTS.2646.1 | 8.36  | 8.26  | 0.23 | 0.44 | 1.07  | 0.830037 | 0.490665 | 0.931238 | 0.692649 |

|                       |               |       |       |      |      |       |          |          |          |          |
|-----------------------|---------------|-------|-------|------|------|-------|----------|----------|----------|----------|
| MmuSTS.2647.1.S1_at   | MmuSTS.2647.1 | 8.93  | 9.57  | 0.13 | 0.1  | -1.56 | 0.002496 | 0.006037 | 0.163729 | 0.106089 |
| MmuSTS.2648.1.S1_at   | MmuSTS.2648.1 | 10.38 | 9.85  | 0.33 | 0.28 | 1.44  | 0.073883 | 0.051619 | 0.419443 | 0.272664 |
| MmuSTS.2649.1.S1_at   | MmuSTS.2649.1 | 9.57  | 10.12 | 0.41 | 0.35 | -1.47 | 0.139468 | 0.030662 | 0.506967 | 0.217142 |
| MmuSTS.265.1.S1_at    | MmuSTS.265.1  | 9.55  | 9.78  | 0.06 | 0.36 | -1.17 | 0.912209 | 0.029436 | 0.96522  | 0.213368 |
| MmuSTS.2650.1.S1_at   | MmuSTS.2650.1 | 4.46  | 4.11  | 0.1  | 0.7  | 1.27  | 0.428447 | 0.012217 | 0.716859 | 0.142932 |
| MmuSTS.2651.1.S1_at   | MmuSTS.2651.1 | 10.33 | 10.1  | 0.16 | 0.37 | 1.17  | 0.654895 | 0.456448 | 0.84477  | 0.670188 |
| MmuSTS.2652.1.S1_at   | MmuSTS.2652.1 | 7.02  | 7.46  | 0.15 | 0.36 | -1.36 | 0.042164 | 0.025062 | 0.354431 | 0.198332 |
| MmuSTS.2653.1.S1_at   | MmuSTS.2653.1 | 9.53  | 9.43  | 0.19 | 0.57 | 1.07  | 0.83252  | 0.792411 | 0.932144 | 0.880041 |
| MmuSTS.2654.1.S1_at   | MmuSTS.2654.1 | 7.65  | 7.66  | 0.37 | 0.22 | -1    | 0.659933 | 0.49659  | 0.847428 | 0.696119 |
| MmuSTS.2655.1.S1_at   | MmuSTS.2655.1 | 11.55 | 10.62 | 0.64 | 0.29 | 1.9   | 0.278799 | 0.263849 | 0.620835 | 0.5301   |
| MmuSTS.2656.1.S1_at   | MmuSTS.2656.1 | 10.39 | 9.56  | 0.23 | 0.1  | 1.77  | 0.009003 | 0.00427  | 0.222023 | 0.091847 |
| MmuSTS.2657.1.S1_at   | MmuSTS.2657.1 | 12.33 | 12.4  | 0.14 | 0.29 | -1.05 | 0.447334 | 0.010018 | 0.728917 | 0.131262 |
| MmuSTS.2658.1.S1_at   | MmuSTS.2658.1 | 11.12 | 10.17 | 0.61 | 0.41 | 1.93  | 0.128689 | 0.141187 | 0.494664 | 0.414709 |
| MmuSTS.2659.1.S1_at   | MmuSTS.2659.1 | 9.42  | 9.01  | 0.2  | 0.19 | 1.33  | 0.057662 | 0.102009 | 0.388861 | 0.362076 |
| MmuSTS.266.1.S1_at    | MmuSTS.266.1  | 3.33  | 3.43  | 0.07 | 0.26 | -1.07 | 0.182989 | 0.38426  | 0.547134 | 0.619994 |
| MmuSTS.2660.1.S1_at   | MmuSTS.2660.1 | 10.89 | 10.71 | 0.38 | 0.67 | 1.13  | 0.973233 | 0.992524 | 0.989575 | 0.995715 |
| MmuSTS.2661.1.S1_at   | MmuSTS.2661.1 | 9.32  | 12.6  | 1.24 | 2.47 | -9.74 | 0.46745  | 0.34901  | 0.740695 | 0.593033 |
| MmuSTS.2662.1.S1_at   | MmuSTS.2662.1 | 4.24  | 4.33  | 0.21 | 0.3  | -1.07 | 0.928508 | 0.32911  | 0.972527 | 0.578482 |
| MmuSTS.2663.1.S1_at   | MmuSTS.2663.1 | 2.88  | 3.08  | 0.17 | 0.22 | -1.15 | 0.873358 | 0.872325 | 0.94924  | 0.927429 |
| MmuSTS.2664.1.S1_at   | MmuSTS.2664.1 | 6.46  | 6.55  | 0.2  | 0.52 | -1.07 | 0.386951 | 0.533596 | 0.691724 | 0.719808 |
| MmuSTS.2665.1.S1_at   | MmuSTS.2665.1 | 4.15  | 4.16  | 0.2  | 0.16 | -1.01 | 0.407819 | 0.554556 | 0.704863 | 0.733264 |
| MmuSTS.2666.1.S1_at   | MmuSTS.2666.1 | 3.55  | 3.44  | 0.11 | 0.18 | 1.08  | 0.695923 | 0.277295 | 0.865073 | 0.54125  |
| MmuSTS.2667.1.S1_at   | MmuSTS.2667.1 | 10.74 | 10.8  | 0.21 | 0.16 | -1.04 | 0.692216 | 0.268526 | 0.86333  | 0.534123 |
| MmuSTS.2668.1.S1_s_at | MmuSTS.2668.1 | 9.94  | 9.18  | 0.2  | 0.04 | 1.7   | 0.005819 | 0.003223 | 0.193191 | 0.082115 |
| MmuSTS.2669.1.S1_at   | MmuSTS.2669.1 | 6.2   | 7.81  | 0.86 | 1.6  | -3.05 | 0.215571 | 0.270998 | 0.575924 | 0.536124 |
| MmuSTS.267.1.S1_at    | MmuSTS.267.1  | 10.42 | 11.04 | 0.08 | 0.35 | -1.53 | 0.022588 | 0.024329 | 0.287386 | 0.195238 |
| MmuSTS.2670.1.S1_at   | MmuSTS.2670.1 | 8.02  | 8.16  | 0.6  | 1.56 | -1.1  | 0.971598 | 0.817158 | 0.989111 | 0.894545 |
| MmuSTS.2671.1.S1_at   | MmuSTS.2671.1 | 5.95  | 6.24  | 0.49 | 0.28 | -1.22 | 0.193321 | 0.303088 | 0.556792 | 0.56055  |
| MmuSTS.2672.1.S1_at   | MmuSTS.2672.1 | 12.08 | 11.21 | 0.19 | 0.64 | 1.83  | 0.033116 | 0.01761  | 0.327101 | 0.167797 |
| MmuSTS.2673.1.S1_at   | MmuSTS.2673.1 | 5.28  | 5.81  | 0.16 | 1.46 | -1.45 | 0.498197 | 0.171282 | 0.758318 | 0.447809 |
| MmuSTS.2674.1.S1_at   | MmuSTS.2674.1 | 3.22  | 3.2   | 0.23 | 0.13 | 1.02  | 0.854129 | 0.105104 | 0.941079 | 0.366755 |
| MmuSTS.2675.1.S1_s_at | MmuSTS.2675.1 | 11.12 | 11.05 | 0.29 | 0.37 | 1.05  | 0.625259 | 0.667449 | 0.82872  | 0.805333 |
| MmuSTS.2676.1.S1_at   | MmuSTS.2676.1 | 3.78  | 3.83  | 0.11 | 0.1  | -1.04 | 0.985794 | 0.438348 | 0.994843 | 0.657341 |
| MmuSTS.2677.1.S1_at   | MmuSTS.2677.1 | 6.57  | 6.23  | 0.07 | 0.17 | 1.27  | 0.05381  | 0.121831 | 0.380879 | 0.391122 |
| MmuSTS.2678.1.S1_at   | MmuSTS.2678.1 | 3.43  | 3.36  | 0.11 | 0.07 | 1.04  | 0.493255 | 0.720587 | 0.756084 | 0.838346 |
| MmuSTS.2679.1.S1_at   | MmuSTS.2679.1 | 8.75  | 8.06  | 0.15 | 0.19 | 1.61  | 0.022527 | 0.013849 | 0.287341 | 0.150924 |
| MmuSTS.268.1.S1_at    | MmuSTS.268.1  | 9.74  | 9.43  | 0.07 | 0.71 | 1.24  | 0.859007 | 0.916654 | 0.943112 | 0.953352 |
| MmuSTS.2680.1.S1_at   | MmuSTS.2680.1 | 7.02  | 8.43  | 0.72 | 1.68 | -2.67 | 0.406539 | 0.244449 | 0.703729 | 0.514295 |
| MmuSTS.2681.1.S1_at   | MmuSTS.2681.1 | 3.13  | 3.27  | 0.02 | 0.16 | -1.1  | 0.44659  | 0.862152 | 0.728373 | 0.921655 |
| MmuSTS.2682.1.S1_at   | MmuSTS.2682.1 | 11.09 | 10.81 | 0.11 | 0.44 | 1.21  | 0.25208  | 0.20183  | 0.601234 | 0.476367 |
| MmuSTS.2683.1.S1_at   | MmuSTS.2683.1 | 5.32  | 5.47  | 0.06 | 0.02 | -1.11 | 0.009668 | 0.009446 | 0.226235 | 0.128022 |

|                       |               |       |       |      |      |       |          |          |          |          |
|-----------------------|---------------|-------|-------|------|------|-------|----------|----------|----------|----------|
| MmuSTS.2684.1.S1_at   | MmuSTS.2684.1 | 5.55  | 5.79  | 0.17 | 0.04 | -1.18 | 0.148503 | 0.164988 | 0.513907 | 0.44123  |
| MmuSTS.2685.1.S1_s_at | MmuSTS.2685.1 | 5.89  | 5.99  | 1.52 | 0.65 | -1.07 | 0.744979 | 0.645891 | 0.890928 | 0.792632 |
| MmuSTS.2686.1.S1_at   | MmuSTS.2686.1 | 5.95  | 5.96  | 0.17 | 0.11 | -1.01 | 0.587156 | 0.416406 | 0.808418 | 0.641587 |
| MmuSTS.2687.1.S1_at   | MmuSTS.2687.1 | 6.51  | 6.39  | 0.1  | 0.14 | 1.08  | 0.741654 | 0.142627 | 0.889293 | 0.416343 |
| MmuSTS.2688.1.S1_at   | MmuSTS.2688.1 | 4.38  | 4.25  | 0.13 | 0.12 | 1.1   | 0.578989 | 0.096999 | 0.80407  | 0.354502 |
| MmuSTS.2689.1.S1_at   | MmuSTS.2689.1 | 8.95  | 9.04  | 0.29 | 0.52 | -1.06 | 0.452507 | 0.432604 | 0.732179 | 0.653025 |
| MmuSTS.269.1.S1_at    | MmuSTS.269.1  | 11.59 | 11.7  | 0.03 | 0.04 | -1.08 | 0.019809 | 0.002872 | 0.275549 | 0.078904 |
| MmuSTS.2690.1.S1_at   | MmuSTS.2690.1 | 8.06  | 8.09  | 0.41 | 0.2  | -1.02 | 0.854924 | 0.77447  | 0.941378 | 0.868766 |
| MmuSTS.2691.1.S1_at   | MmuSTS.2691.1 | 4.17  | 4.13  | 0.09 | 0.19 | 1.03  | 0.788826 | 0.784669 | 0.912301 | 0.875304 |
| MmuSTS.2692.1.S1_at   | MmuSTS.2692.1 | 10.51 | 10.07 | 0.16 | 0.66 | 1.35  | 0.136613 | 0.126744 | 0.503755 | 0.397433 |
| MmuSTS.2693.1.S1_at   | MmuSTS.2693.1 | 6.84  | 5.87  | 0.45 | 0.61 | 1.97  | 0.037291 | 0.015053 | 0.341194 | 0.155825 |
| MmuSTS.2694.1.S1_at   | MmuSTS.2694.1 | 10.39 | 10.56 | 0.1  | 0.24 | -1.12 | 0.824796 | 0.710207 | 0.929004 | 0.831904 |
| MmuSTS.2695.1.S1_at   | MmuSTS.2695.1 | 3.69  | 3.77  | 0.02 | 0.09 | -1.06 | 0.130624 | 0.1823   | 0.497008 | 0.458768 |
| MmuSTS.2696.1.S1_at   | MmuSTS.2696.1 | 6.4   | 6.61  | 0.2  | 0.75 | -1.16 | 0.41361  | 0.607317 | 0.70853  | 0.766358 |
| MmuSTS.2697.1.S1_at   | MmuSTS.2697.1 | 10.5  | 10.08 | 0.19 | 0.12 | 1.33  | 0.019413 | 0.01168  | 0.274042 | 0.140078 |
| MmuSTS.2698.1.S1_at   | MmuSTS.2698.1 | 7.73  | 7.48  | 0.48 | 0.56 | 1.19  | 0.871414 | 0.962606 | 0.948511 | 0.979014 |
| MmuSTS.2698.1.S1_x_at | MmuSTS.2698.1 | 7.91  | 7.63  | 0.42 | 0.6  | 1.21  | 0.84021  | 0.965324 | 0.935562 | 0.980657 |
| MmuSTS.2699.1.S1_at   | MmuSTS.2699.1 | 10.54 | 9.81  | 0.21 | 0.05 | 1.66  | 0.004155 | 0.001857 | 0.181739 | 0.064677 |
| MmuSTS.27.1.S1_at     | MmuSTS.27.1   | 3.65  | 3.78  | 0.39 | 0.19 | -1.1  | 0.771924 | 0.520126 | 0.903991 | 0.711472 |
| MmuSTS.270.1.S1_at    | MmuSTS.270.1  | 6.51  | 6.59  | 0.32 | 0.24 | -1.05 | 0.894925 | 0.724415 | 0.957988 | 0.840474 |
| MmuSTS.2700.1.S1_at   | MmuSTS.2700.1 | 10.47 | 9.41  | 0.13 | 0.29 | 2.08  | 0.006764 | 0.000886 | 0.20158  | 0.047602 |
| MmuSTS.2701.1.S1_at   | MmuSTS.2701.1 | 4.17  | 3.75  | 0.22 | 0.69 | 1.34  | 0.882188 | 0.267934 | 0.952706 | 0.533658 |
| MmuSTS.2702.1.S1_at   | MmuSTS.2702.1 | 12.75 | 12.76 | 0.05 | 0.09 | -1.01 | 0.772119 | 0.78561  | 0.904039 | 0.875891 |
| MmuSTS.2703.1.S1_s_at | MmuSTS.2703.1 | 10.08 | 9.42  | 0.13 | 0.02 | 1.59  | 0.000672 | 0.000054 | 0.136818 | 0.025666 |
| MmuSTS.2704.1.S1_at   | MmuSTS.2704.1 | 6.94  | 7.55  | 0.25 | 0.34 | -1.52 | 0.070201 | 0.027095 | 0.413758 | 0.205797 |
| MmuSTS.2705.1.S1_at   | MmuSTS.2705.1 | 4.19  | 4.11  | 0.26 | 0.66 | 1.06  | 0.675164 | 0.730755 | 0.854421 | 0.844055 |
| MmuSTS.2706.1.S1_at   | MmuSTS.2706.1 | 11.72 | 11.76 | 0.02 | 0.43 | -1.03 | 0.455057 | 0.302624 | 0.733646 | 0.560201 |
| MmuSTS.2707.1.S1_at   | MmuSTS.2707.1 | 9.77  | 10.15 | 0.02 | 0.08 | -1.3  | 0.000988 | 0.000286 | 0.139813 | 0.034857 |
| MmuSTS.2708.1.S1_at   | MmuSTS.2708.1 | 9.81  | 10.32 | 0.17 | 0.44 | -1.42 | 0.202737 | 0.301783 | 0.56534  | 0.559722 |
| MmuSTS.2709.1.S1_at   | MmuSTS.2709.1 | 5.66  | 5.73  | 0.12 | 0.13 | -1.05 | 0.53887  | 0.205221 | 0.780847 | 0.479596 |
| MmuSTS.271.1.S1_at    | MmuSTS.271.1  | 7.87  | 7.95  | 0.28 | 1.02 | -1.06 | 0.911016 | 0.904923 | 0.964858 | 0.946143 |
| MmuSTS.2710.1.S1_at   | MmuSTS.2710.1 | 11.2  | 11.14 | 0.33 | 0.96 | 1.04  | 0.353587 | 0.369658 | 0.670194 | 0.608957 |
| MmuSTS.2711.1.S1_at   | MmuSTS.2711.1 | 10.65 | 11.22 | 0.25 | 0.24 | -1.49 | 0.018489 | 0.011792 | 0.270581 | 0.140625 |
| MmuSTS.2712.1.S1_at   | MmuSTS.2712.1 | 10.03 | 9.4   | 0.28 | 0.6  | 1.55  | 0.421832 | 0.283416 | 0.713215 | 0.54594  |
| MmuSTS.2713.1.S1_at   | MmuSTS.2713.1 | 5.48  | 5.13  | 0.38 | 0.37 | 1.28  | 0.273342 | 0.314096 | 0.616792 | 0.568185 |
| MmuSTS.2714.1.S1_at   | MmuSTS.2714.1 | 8.12  | 8.09  | 0.31 | 0.49 | 1.02  | 0.697578 | 0.065363 | 0.865694 | 0.301409 |
| MmuSTS.2715.1.S1_at   | MmuSTS.2715.1 | 5.99  | 5.8   | 0.16 | 0.31 | 1.14  | 0.589759 | 0.175863 | 0.809598 | 0.452475 |
| MmuSTS.2716.1.S1_at   | MmuSTS.2716.1 | 4.63  | 4.29  | 0.52 | 0.59 | 1.27  | 0.534066 | 0.5742   | 0.778544 | 0.745679 |
| MmuSTS.2717.1.S1_at   | MmuSTS.2717.1 | 9.86  | 9.31  | 0.34 | 0.41 | 1.46  | 0.169221 | 0.207017 | 0.533594 | 0.481115 |
| MmuSTS.2718.1.S1_at   | MmuSTS.2718.1 | 7.84  | 8.27  | 0.18 | 1.03 | -1.35 | 0.506002 | 0.229186 | 0.761993 | 0.501487 |
| MmuSTS.2719.1.S1_at   | MmuSTS.2719.1 | 12.8  | 12.49 | 0.14 | 0.01 | 1.24  | 0.044502 | 0.099872 | 0.358786 | 0.358557 |

|                       |               |       |       |      |      |        |          |          |          |          |
|-----------------------|---------------|-------|-------|------|------|--------|----------|----------|----------|----------|
| MmuSTS.272.1.S1_at    | MmuSTS.272.1  | 4.59  | 4.61  | 0.16 | 0.17 | -1.02  | 0.429549 | 0.591679 | 0.717634 | 0.75718  |
| MmuSTS.2720.1.S1_at   | MmuSTS.2720.1 | 9.29  | 10.23 | 0.1  | 0.47 | -1.92  | 0.069797 | 0.059763 | 0.412907 | 0.291114 |
| MmuSTS.2721.1.S1_at   | MmuSTS.2721.1 | 4.31  | 4.17  | 0.1  | 0.23 | 1.1    | 0.962476 | 0.559342 | 0.985577 | 0.736241 |
| MmuSTS.2722.1.S1_at   | MmuSTS.2722.1 | 7.31  | 7.55  | 0.21 | 0.18 | -1.18  | 0.214059 | 0.200412 | 0.574428 | 0.474782 |
| MmuSTS.2723.1.S1_at   | MmuSTS.2723.1 | 11.87 | 11.29 | 0.24 | 0.18 | 1.5    | 0.051839 | 0.042587 | 0.376487 | 0.251035 |
| MmuSTS.2724.1.S1_at   | MmuSTS.2724.1 | 7.77  | 7.83  | 0.65 | 0.61 | -1.04  | 0.245947 | 0.195144 | 0.597325 | 0.470241 |
| MmuSTS.2725.1.S1_at   | MmuSTS.2725.1 | 8.6   | 8.32  | 0.15 | 0.16 | 1.22   | 0.043683 | 0.041785 | 0.357051 | 0.248981 |
| MmuSTS.2726.1.S1_at   | MmuSTS.2726.1 | 9.97  | 10.29 | 0.16 | 0.52 | -1.25  | 0.423208 | 0.494402 | 0.713946 | 0.694859 |
| MmuSTS.2727.1.S1_at   | MmuSTS.2727.1 | 5.41  | 5.72  | 0.09 | 0.17 | -1.24  | 0.096021 | 0.196521 | 0.454117 | 0.471577 |
| MmuSTS.2728.1.S1_at   | MmuSTS.2728.1 | 8.38  | 8.19  | 0.34 | 0.13 | 1.14   | 0.158082 | 0.199325 | 0.522944 | 0.474002 |
| MmuSTS.2729.1.S1_at   | MmuSTS.2729.1 | 7.47  | 6.22  | 0.26 | 0.88 | 2.38   | 0.288014 | 0.375418 | 0.626381 | 0.613405 |
| MmuSTS.2729.1.S1_s_at | MmuSTS.2729.1 | 9.53  | 8.6   | 0.09 | 0.72 | 1.9    | 0.277993 | 0.363159 | 0.620089 | 0.60356  |
| MmuSTS.273.1.S1_at    | MmuSTS.273.1  | 7.15  | 7.37  | 0.31 | 0.14 | -1.16  | 0.27609  | 0.280028 | 0.618148 | 0.543369 |
| MmuSTS.2730.1.S1_at   | MmuSTS.2730.1 | 6.22  | 6.86  | 0.66 | 0.16 | -1.56  | 0.160463 | 0.089404 | 0.525449 | 0.343637 |
| MmuSTS.2731.1.S1_at   | MmuSTS.2731.1 | 5.84  | 6.87  | 1.47 | 0.14 | -2.05  | 0.862396 | 0.940944 | 0.944681 | 0.966553 |
| MmuSTS.2731.1.S1_x_at | MmuSTS.2731.1 | 8.4   | 8.36  | 0.62 | 0.08 | 1.03   | 0.95768  | 0.964089 | 0.983925 | 0.980052 |
| MmuSTS.2732.1.S1_s_at | MmuSTS.2732.1 | 4.7   | 4.68  | 0.23 | 0.2  | 1.02   | 0.784682 | 0.760356 | 0.910286 | 0.860754 |
| MmuSTS.2733.1.S1_at   | MmuSTS.2733.1 | 4.47  | 4.35  | 0.06 | 0.03 | 1.09   | 0.152884 | 0.181726 | 0.517325 | 0.458324 |
| MmuSTS.2734.1.S1_at   | MmuSTS.2734.1 | 4.32  | 4.21  | 0.1  | 0.13 | 1.08   | 0.422061 | 0.10667  | 0.71333  | 0.369222 |
| MmuSTS.2735.1.S1_at   | MmuSTS.2735.1 | 5.1   | 5.1   | 0.12 | 0.08 | -1     | 0.456329 | 0.221904 | 0.73441  | 0.495019 |
| MmuSTS.2736.1.S1_at   | MmuSTS.2736.1 | 10.69 | 11.31 | 0.69 | 0.34 | -1.54  | 0.13155  | 0.108858 | 0.498041 | 0.372477 |
| MmuSTS.2737.1.S1_at   | MmuSTS.2737.1 | 6.35  | 11.17 | 2.73 | 4.33 | -28.25 | 0.479548 | 0.486676 | 0.747694 | 0.690002 |
| MmuSTS.2738.1.S1_at   | MmuSTS.2738.1 | 9.28  | 8.93  | 0.89 | 0.64 | 1.28   | 0.264054 | 0.17852  | 0.609857 | 0.454778 |
| MmuSTS.2739.1.S1_at   | MmuSTS.2739.1 | 10.23 | 11.04 | 1    | 0.66 | -1.75  | 0.22253  | 0.225578 | 0.580951 | 0.498155 |
| MmuSTS.274.1.S1_at    | MmuSTS.274.1  | 10.98 | 11.78 | 0.46 | 1.13 | -1.73  | 0.82908  | 0.93924  | 0.930604 | 0.965522 |
| MmuSTS.2740.1.S1_at   | MmuSTS.2740.1 | 10.89 | 9.77  | 0.23 | 0.52 | 2.18   | 0.028133 | 0.009452 | 0.30978  | 0.128022 |
| MmuSTS.2741.1.S1_at   | MmuSTS.2741.1 | 11.24 | 11.46 | 0.23 | 0.41 | -1.17  | 0.285186 | 0.070733 | 0.624746 | 0.31213  |
| MmuSTS.2742.1.S1_at   | MmuSTS.2742.1 | 10.08 | 10.55 | 0.6  | 0.81 | -1.38  | 0.837717 | 0.554274 | 0.934459 | 0.733111 |
| MmuSTS.2743.1.S1_at   | MmuSTS.2743.1 | 9.57  | 9.38  | 0.34 | 0.59 | 1.15   | 0.912873 | 0.988656 | 0.96549  | 0.993595 |
| MmuSTS.2744.1.S1_at   | MmuSTS.2744.1 | 8.48  | 8.88  | 0.57 | 1.45 | -1.32  | 0.689432 | 0.863897 | 0.861525 | 0.922755 |
| MmuSTS.2745.1.S1_at   | MmuSTS.2745.1 | 5.79  | 5.88  | 0.03 | 0.23 | -1.06  | 0.516482 | 0.613824 | 0.768127 | 0.77088  |
| MmuSTS.2746.1.S1_at   | MmuSTS.2746.1 | 4.74  | 4.72  | 0.22 | 0.18 | 1.01   | 0.669299 | 0.800075 | 0.852138 | 0.885075 |
| MmuSTS.2747.1.S1_s_at | MmuSTS.2747.1 | 12.68 | 12.46 | 0.17 | 0.2  | 1.16   | 0.108608 | 0.139034 | 0.470004 | 0.412159 |
| MmuSTS.2748.1.S1_at   | MmuSTS.2748.1 | 11.72 | 11.26 | 0.24 | 0.25 | 1.38   | 0.040081 | 0.030363 | 0.348787 | 0.216116 |
| MmuSTS.2749.1.S1_at   | MmuSTS.2749.1 | 9.98  | 10.03 | 0.27 | 0.42 | -1.04  | 0.695474 | 0.3186   | 0.864945 | 0.571258 |
| MmuSTS.275.1.S1_at    | MmuSTS.275.1  | 11.26 | 11.37 | 0.09 | 0.17 | -1.08  | 0.853802 | 0.877694 | 0.940936 | 0.930219 |
| MmuSTS.2750.1.S1_at   | MmuSTS.2750.1 | 8.74  | 8.17  | 0.04 | 0.51 | 1.48   | 0.110726 | 0.078513 | 0.472592 | 0.325285 |
| MmuSTS.2751.1.S1_at   | MmuSTS.2751.1 | 5.48  | 5.5   | 0.09 | 0.17 | -1.01  | 0.34329  | 0.213297 | 0.663541 | 0.487187 |
| MmuSTS.2752.1.S1_at   | MmuSTS.2752.1 | 13.42 | 13.17 | 0.06 | 0.68 | 1.19   | 0.376127 | 0.515772 | 0.685017 | 0.708485 |
| MmuSTS.2753.1.S1_at   | MmuSTS.2753.1 | 6.34  | 6.21  | 0.08 | 0.26 | 1.1    | 0.638536 | 0.354966 | 0.836621 | 0.597466 |
| MmuSTS.2754.1.S1_at   | MmuSTS.2754.1 | 8.79  | 9.03  | 0.25 | 0.2  | -1.17  | 0.729889 | 0.899737 | 0.882784 | 0.942937 |

|                       |               |       |       |      |      |       |          |          |          |          |
|-----------------------|---------------|-------|-------|------|------|-------|----------|----------|----------|----------|
| MmuSTS.2755.1.S1_s_at | MmuSTS.2755.1 | 11.63 | 11.5  | 0.06 | 0.07 | 1.09  | 0.064977 | 0.053507 | 0.403744 | 0.276963 |
| MmuSTS.2756.1.S1_s_at | MmuSTS.2756.1 | 12.14 | 12.09 | 0.08 | 0.12 | 1.04  | 0.956285 | 0.76861  | 0.983483 | 0.865637 |
| MmuSTS.2757.1.S1_s_at | MmuSTS.2757.1 | 10.21 | 10.11 | 0.09 | 0.16 | 1.08  | 0.674194 | 0.095362 | 0.853988 | 0.35239  |
| MmuSTS.2758.1.S1_s_at | MmuSTS.2758.1 | 5.97  | 6.19  | 0.3  | 0.07 | -1.16 | 0.795722 | 0.312998 | 0.915229 | 0.567594 |
| MmuSTS.2759.1.S1_s_at | MmuSTS.2759.1 | 11.28 | 10.56 | 0.09 | 0.31 | 1.64  | 0.017397 | 0.019008 | 0.267445 | 0.173576 |
| MmuSTS.276.1.S1_s_at  | MmuSTS.276.1  | 7.47  | 6.78  | 0.95 | 0.47 | 1.61  | 0.069924 | 0.037483 | 0.413064 | 0.237853 |
| MmuSTS.2760.1.S1_s_at | MmuSTS.2760.1 | 4.97  | 4.22  | 0.52 | 1.11 | 1.68  | 0.675891 | 0.339058 | 0.854832 | 0.585891 |
| MmuSTS.2761.1.S1_s_at | MmuSTS.2761.1 | 5.83  | 5.65  | 0.17 | 0.14 | 1.13  | 0.570095 | 0.501361 | 0.799365 | 0.699529 |
| MmuSTS.2762.1.S1_s_at | MmuSTS.2762.1 | 11.69 | 11.4  | 0.25 | 0.1  | 1.22  | 0.414991 | 0.140166 | 0.709338 | 0.413405 |
| MmuSTS.2763.1.S1_s_at | MmuSTS.2763.1 | 11.96 | 11.85 | 0.1  | 0.49 | 1.08  | 0.623523 | 0.36113  | 0.827977 | 0.60207  |
| MmuSTS.2764.1.S1_s_at | MmuSTS.2764.1 | 7.3   | 7.32  | 0.3  | 0.25 | -1.01 | 0.424045 | 0.635978 | 0.714308 | 0.785812 |
| MmuSTS.2765.1.S1_s_at | MmuSTS.2765.1 | 9.68  | 9.29  | 0.29 | 0.62 | 1.31  | 0.291451 | 0.390118 | 0.628798 | 0.624002 |
| MmuSTS.2766.1.S1_s_at | MmuSTS.2766.1 | 6.52  | 9.76  | 1.38 | 3.17 | -9.39 | 0.353711 | 0.199107 | 0.670266 | 0.473707 |
| MmuSTS.2767.1.S1_s_at | MmuSTS.2767.1 | 4.23  | 4.17  | 0.1  | 0.06 | 1.05  | 0.831373 | 0.965687 | 0.931688 | 0.980751 |
| MmuSTS.2768.1.S1_s_at | MmuSTS.2768.1 | 6.9   | 7.12  | 0.56 | 1.61 | -1.16 | 0.890311 | 0.377803 | 0.956127 | 0.615203 |
| MmuSTS.2769.1.S1_s_at | MmuSTS.2769.1 | 3.29  | 3.14  | 0.06 | 0.21 | 1.11  | 0.645949 | 0.837452 | 0.84059  | 0.907122 |
| MmuSTS.277.1.S1_s_at  | MmuSTS.277.1  | 10.19 | 9.02  | 0.1  | 0.46 | 2.25  | 0.01314  | 0.004609 | 0.245277 | 0.094873 |
| MmuSTS.2770.1.S1_s_at | MmuSTS.2770.1 | 4.45  | 4.78  | 0.27 | 0.53 | -1.26 | 0.36086  | 0.531163 | 0.674857 | 0.718451 |
| MmuSTS.2771.1.S1_s_at | MmuSTS.2771.1 | 3.61  | 3.69  | 0.07 | 0.21 | -1.06 | 0.184265 | 0.206335 | 0.548064 | 0.480524 |
| MmuSTS.2772.1.S1_s_at | MmuSTS.2772.1 | 7.84  | 8.35  | 0.3  | 1.25 | -1.42 | 0.530501 | 0.642767 | 0.776893 | 0.790476 |
| MmuSTS.2773.1.S1_s_at | MmuSTS.2773.1 | 8.47  | 9.34  | 0.32 | 0.42 | -1.83 | 0.013215 | 0.003194 | 0.245924 | 0.08199  |
| MmuSTS.2774.1.S1_s_at | MmuSTS.2774.1 | 3.37  | 3.5   | 0.17 | 0.1  | -1.09 | 0.956319 | 0.73322  | 0.983483 | 0.845568 |
| MmuSTS.2775.1.S1_s_at | MmuSTS.2775.1 | 12.65 | 12.11 | 0.14 | 0.26 | 1.45  | 0.147997 | 0.047882 | 0.513451 | 0.263751 |
| MmuSTS.2776.1.S1_s_at | MmuSTS.2776.1 | 4.06  | 4.49  | 0.11 | 0.45 | -1.34 | 0.227275 | 0.091345 | 0.585089 | 0.346281 |
| MmuSTS.2777.1.S1_s_at | MmuSTS.2777.1 | 9.71  | 8.49  | 0.31 | 0.78 | 2.33  | 0.030171 | 0.018173 | 0.317217 | 0.169673 |
| MmuSTS.2778.1.S1_s_at | MmuSTS.2778.1 | 10.83 | 10.94 | 0.02 | 0.25 | -1.08 | 0.358173 | 0.378302 | 0.673071 | 0.615438 |
| MmuSTS.2779.1.S1_s_at | MmuSTS.2779.1 | 7.75  | 7.38  | 0.15 | 0.59 | 1.29  | 0.475372 | 0.526735 | 0.745757 | 0.715627 |
| MmuSTS.278.1.S1_s_at  | MmuSTS.278.1  | 10.92 | 10.73 | 0.15 | 0.27 | 1.14  | 0.408053 | 0.492129 | 0.70497  | 0.693457 |
| MmuSTS.2780.1.S1_s_at | MmuSTS.2780.1 | 4.51  | 4.69  | 0.51 | 0.6  | -1.14 | 0.296199 | 0.410642 | 0.632176 | 0.637463 |
| MmuSTS.2781.1.S1_s_at | MmuSTS.2781.1 | 10.33 | 10.82 | 0.33 | 0.38 | -1.4  | 0.38375  | 0.133303 | 0.689519 | 0.405049 |
| MmuSTS.2782.1.S1_s_at | MmuSTS.2782.1 | 7.93  | 7.84  | 0.07 | 0.47 | 1.06  | 0.466376 | 0.636917 | 0.740215 | 0.786458 |
| MmuSTS.2783.1.S1_s_at | MmuSTS.2783.1 | 3.34  | 3.51  | 0.1  | 0.12 | -1.12 | 0.111602 | 0.112801 | 0.473844 | 0.37844  |
| MmuSTS.2784.1.S1_s_at | MmuSTS.2784.1 | 5.91  | 6.66  | 0.67 | 0.41 | -1.69 | 0.127502 | 0.136449 | 0.493834 | 0.408866 |
| MmuSTS.2785.1.S1_s_at | MmuSTS.2785.1 | 4.9   | 5.06  | 0.03 | 0.1  | -1.12 | 0.02381  | 0.022842 | 0.292771 | 0.189246 |
| MmuSTS.2786.1.S1_s_at | MmuSTS.2786.1 | 3.55  | 3.91  | 0.89 | 0.4  | -1.28 | 0.85188  | 0.945744 | 0.940401 | 0.969149 |
| MmuSTS.2787.1.S1_s_at | MmuSTS.2787.1 | 5.17  | 5.38  | 0.19 | 0.09 | -1.16 | 0.349866 | 0.393592 | 0.668052 | 0.626497 |
| MmuSTS.2788.1.S1_s_at | MmuSTS.2788.1 | 7.99  | 7.39  | 0.38 | 0.74 | 1.52  | 0.710834 | 0.744277 | 0.873277 | 0.851927 |
| MmuSTS.2789.1.S1_s_at | MmuSTS.2789.1 | 11.35 | 10.77 | 0.14 | 0.26 | 1.5   | 0.065089 | 0.048248 | 0.403867 | 0.264724 |
| MmuSTS.279.1.S1_s_at  | MmuSTS.279.1  | 12.01 | 11.82 | 0.07 | 0.23 | 1.14  | 0.311534 | 0.248092 | 0.643532 | 0.517567 |
| MmuSTS.2790.1.S1_s_at | MmuSTS.2790.1 | 9.8   | 9.46  | 0.21 | 0.26 | 1.27  | 0.384894 | 0.355857 | 0.690118 | 0.597864 |
| MmuSTS.2791.1.S1_s_at | MmuSTS.2791.1 | 7.29  | 8.19  | 0.14 | 0.38 | -1.86 | 0.024095 | 0.015228 | 0.294208 | 0.156798 |

|                       |               |       |       |      |      |        |          |          |          |          |
|-----------------------|---------------|-------|-------|------|------|--------|----------|----------|----------|----------|
| MmuSTS.2793.1.S1_at   | MmuSTS.2793.1 | 4.44  | 4.81  | 0.36 | 0.14 | -1.29  | 0.505818 | 0.606365 | 0.761826 | 0.765747 |
| MmuSTS.2794.1.S1_at   | MmuSTS.2794.1 | 7.84  | 8.58  | 0.28 | 0.48 | -1.68  | 0.072641 | 0.178047 | 0.417383 | 0.454422 |
| MmuSTS.2795.1.S1_at   | MmuSTS.2795.1 | 9.19  | 10.96 | 0.65 | 1.82 | -3.4   | 0.210942 | 0.07549  | 0.571977 | 0.319875 |
| MmuSTS.2796.1.S1_at   | MmuSTS.2796.1 | 8.57  | 7.83  | 0.39 | 0.23 | 1.67   | 0.074018 | 0.048282 | 0.419667 | 0.2648   |
| MmuSTS.2797.1.S1_at   | MmuSTS.2797.1 | 8.18  | 9.29  | 0.26 | 0.62 | -2.17  | 0.046641 | 0.036204 | 0.363511 | 0.234837 |
| MmuSTS.2798.1.S1_at   | MmuSTS.2798.1 | 8.38  | 8.36  | 0.54 | 0.3  | 1.01   | 0.234259 | 0.090101 | 0.588653 | 0.344402 |
| MmuSTS.2799.1.S1_at   | MmuSTS.2799.1 | 5.28  | 5.31  | 0.19 | 0.03 | -1.02  | 0.277872 | 0.240022 | 0.620001 | 0.510717 |
| MmuSTS.28.1.S1_at     | MmuSTS.28.1   | 6.45  | 6.17  | 0.39 | 0.4  | 1.22   | 0.423888 | 0.473205 | 0.714199 | 0.68054  |
| MmuSTS.280.1.S1_at    | MmuSTS.280.1  | 5.9   | 6.52  | 0.08 | 0.13 | -1.54  | 0.001601 | 0.006552 | 0.152612 | 0.109707 |
| MmuSTS.2800.1.S1_at   | MmuSTS.2800.1 | 8.76  | 10.34 | 0.59 | 2    | -2.99  | 0.400158 | 0.331555 | 0.699704 | 0.580182 |
| MmuSTS.2801.1.S1_at   | MmuSTS.2801.1 | 9.6   | 9.56  | 0.11 | 0.22 | 1.03   | 0.490672 | 0.285014 | 0.754497 | 0.547095 |
| MmuSTS.2802.1.S1_at   | MmuSTS.2802.1 | 6.36  | 5.93  | 0.2  | 0.26 | 1.35   | 0.057311 | 0.037717 | 0.387873 | 0.238593 |
| MmuSTS.2803.1.S1_at   | MmuSTS.2803.1 | 9.95  | 9.57  | 0.06 | 0.08 | 1.3    | 0.001899 | 0.000049 | 0.155636 | 0.025273 |
| MmuSTS.2804.1.S1_at   | MmuSTS.2804.1 | 4.11  | 4.39  | 0.51 | 0.46 | -1.21  | 0.879518 | 0.969456 | 0.951533 | 0.983275 |
| MmuSTS.2805.1.S1_at   | MmuSTS.2805.1 | 3.48  | 3.58  | 0.12 | 0.58 | -1.07  | 0.352742 | 0.488127 | 0.66977  | 0.690902 |
| MmuSTS.2806.1.S1_at   | MmuSTS.2806.1 | 4.29  | 4.24  | 0.2  | 0.14 | 1.03   | 0.580145 | 0.554529 | 0.804451 | 0.733264 |
| MmuSTS.2807.1.S1_at   | MmuSTS.2807.1 | 11.01 | 11.22 | 0.15 | 0.72 | -1.16  | 0.474356 | 0.321055 | 0.745071 | 0.573046 |
| MmuSTS.2808.1.S1_s_at | MmuSTS.2808.1 | 12.75 | 12.65 | 0.16 | 0.21 | 1.07   | 0.426847 | 0.066875 | 0.716003 | 0.304533 |
| MmuSTS.2809.1.S1_at   | MmuSTS.2809.1 | 9.64  | 10.23 | 0.21 | 0.6  | -1.51  | 0.129843 | 0.140494 | 0.495916 | 0.413704 |
| MmuSTS.281.1.S1_s_at  | MmuSTS.281.1  | 7.39  | 7.33  | 0.09 | 0.19 | 1.04   | 0.437684 | 0.315317 | 0.722586 | 0.568939 |
| MmuSTS.2810.1.S1_at   | MmuSTS.2810.1 | 11.35 | 11.9  | 0.25 | 0.93 | -1.46  | 0.821771 | 0.94708  | 0.927464 | 0.969997 |
| MmuSTS.2811.1.S1_s_at | MmuSTS.2811.1 | 8.94  | 8.91  | 0.18 | 0.07 | 1.02   | 0.733821 | 0.000438 | 0.88521  | 0.038359 |
| MmuSTS.2812.1.S1_at   | MmuSTS.2812.1 | 4.46  | 4.06  | 0.43 | 0.08 | 1.32   | 0.199915 | 0.21702  | 0.562994 | 0.490646 |
| MmuSTS.2813.1.S1_at   | MmuSTS.2813.1 | 5.55  | 5.57  | 0.16 | 0.01 | -1.02  | 0.725496 | 0.735874 | 0.88031  | 0.847202 |
| MmuSTS.2814.1.S1_at   | MmuSTS.2814.1 | 5.21  | 5.27  | 0.07 | 0.06 | -1.04  | 0.728265 | 0.877308 | 0.881828 | 0.930089 |
| MmuSTS.2815.1.S1_at   | MmuSTS.2815.1 | 3.37  | 3.19  | 0.25 | 0.14 | 1.14   | 0.642338 | 0.493678 | 0.838763 | 0.694288 |
| MmuSTS.2816.1.S1_at   | MmuSTS.2816.1 | 6.47  | 8.7   | 1.31 | 2.47 | -4.68  | 0.508162 | 0.229154 | 0.763534 | 0.501438 |
| MmuSTS.2817.1.S1_at   | MmuSTS.2817.1 | 9.58  | 9.82  | 0.24 | 0.48 | -1.18  | 0.100919 | 0.096582 | 0.461009 | 0.354126 |
| MmuSTS.2818.1.S1_at   | MmuSTS.2818.1 | 10.39 | 10.71 | 0.12 | 0.17 | -1.25  | 0.13276  | 0.001045 | 0.498816 | 0.051426 |
| MmuSTS.2819.1.S1_at   | MmuSTS.2819.1 | 5     | 5.27  | 0.86 | 1.07 | -1.21  | 0.260181 | 0.342703 | 0.607046 | 0.588666 |
| MmuSTS.282.1.S1_s_at  | MmuSTS.282.1  | 5.84  | 6.04  | 0.23 | 0.04 | -1.15  | 0.6572   | 0.739111 | 0.845778 | 0.848806 |
| MmuSTS.2820.1.S1_at   | MmuSTS.2820.1 | 9.79  | 9.85  | 0.05 | 0.31 | -1.04  | 0.663698 | 0.146104 | 0.849077 | 0.420092 |
| MmuSTS.2821.1.S1_at   | MmuSTS.2821.1 | 7.12  | 12.18 | 2.09 | 3.39 | -33.24 | 0.447358 | 0.31155  | 0.728917 | 0.566532 |
| MmuSTS.2822.1.S1_at   | MmuSTS.2822.1 | 7.99  | 6.02  | 1.17 | 1.04 | 3.91   | 0.045546 | 0.026983 | 0.36126  | 0.205465 |
| MmuSTS.2823.1.S1_at   | MmuSTS.2823.1 | 9.51  | 8     | 0.56 | 0.29 | 2.86   | 0.030088 | 0.0098   | 0.316915 | 0.130166 |
| MmuSTS.2824.1.S1_at   | MmuSTS.2824.1 | 8.31  | 7.27  | 0.79 | 0.61 | 2.07   | 0.520716 | 0.471049 | 0.771023 | 0.679172 |
| MmuSTS.2825.1.S1_at   | MmuSTS.2825.1 | 4.13  | 4.28  | 0.08 | 0.09 | -1.11  | 0.166996 | 0.201111 | 0.531023 | 0.475519 |
| MmuSTS.2826.1.S1_at   | MmuSTS.2826.1 | 8.9   | 8.19  | 0.09 | 0.27 | 1.63   | 0.008584 | 0.003434 | 0.219458 | 0.084252 |
| MmuSTS.2827.1.S1_at   | MmuSTS.2827.1 | 3.8   | 4.07  | 0.07 | 0.13 | -1.2   | 0.085742 | 0.045763 | 0.439733 | 0.258277 |
| MmuSTS.2828.1.S1_at   | MmuSTS.2828.1 | 3.21  | 3.1   | 0.11 | 0.03 | 1.08   | 0.447784 | 0.450416 | 0.729203 | 0.665643 |
| MmuSTS.2829.1.S1_at   | MmuSTS.2829.1 | 8.58  | 8.11  | 0.21 | 0.32 | 1.38   | 0.096365 | 0.152544 | 0.454868 | 0.427426 |



|                     |               |       |       |      |      |       |          |          |          |          |
|---------------------|---------------|-------|-------|------|------|-------|----------|----------|----------|----------|
| MmuSTS.283.1.S1_at  | MmuSTS.283.1  | 4.71  | 4.73  | 0.08 | 0.1  | -1.01 | 0.671321 | 0.501492 | 0.852602 | 0.699675 |
| MmuSTS.2830.1.S1_at | MmuSTS.2830.1 | 9.51  | 9.85  | 0.15 | 0.88 | -1.26 | 0.459145 | 0.237039 | 0.735945 | 0.507722 |
| MmuSTS.2831.1.S1_at | MmuSTS.2831.1 | 8.86  | 11.23 | 0.84 | 1.96 | -5.16 | 0.283023 | 0.215168 | 0.623159 | 0.488943 |
| MmuSTS.2832.1.S1_at | MmuSTS.2832.1 | 5.22  | 5.47  | 0.3  | 0.25 | -1.19 | 0.448845 | 0.522136 | 0.729864 | 0.712899 |
| MmuSTS.2833.1.S1_at | MmuSTS.2833.1 | 9.92  | 9.77  | 0.54 | 0.52 | 1.11  | 0.613041 | 0.404504 | 0.822517 | 0.633004 |
| MmuSTS.2834.1.S1_at | MmuSTS.2834.1 | 3.64  | 3.72  | 0.48 | 0.17 | -1.06 | 0.655524 | 0.621474 | 0.845    | 0.776054 |
| MmuSTS.2835.1.S1_at | MmuSTS.2835.1 | 3.45  | 3.33  | 0.07 | 0.09 | 1.09  | 0.151236 | 0.171696 | 0.516011 | 0.448078 |
| MmuSTS.2836.1.S1_at | MmuSTS.2836.1 | 13.42 | 13.31 | 0.02 | 0.05 | 1.08  | 0.022253 | 0.007631 | 0.285183 | 0.116869 |
| MmuSTS.2837.1.S1_at | MmuSTS.2837.1 | 9.55  | 9.41  | 0.38 | 0.57 | 1.1   | 0.60691  | 0.794918 | 0.819124 | 0.881843 |
| MmuSTS.2838.1.S1_at | MmuSTS.2838.1 | 10.55 | 10.12 | 0.2  | 0.27 | 1.35  | 0.083722 | 0.080896 | 0.43598  | 0.328864 |
| MmuSTS.2839.1.S1_at | MmuSTS.2839.1 | 2.79  | 2.74  | 0.02 | 0.08 | 1.03  | 0.749232 | 0.82799  | 0.892627 | 0.901214 |
| MmuSTS.284.1.S1_at  | MmuSTS.284.1  | 6.34  | 6.19  | 0.18 | 0.04 | 1.11  | 0.267502 | 0.244679 | 0.612611 | 0.514512 |
| MmuSTS.2840.1.S1_at | MmuSTS.2840.1 | 4.13  | 4.36  | 0.13 | 0.03 | -1.17 | 0.034022 | 0.020775 | 0.330982 | 0.180849 |
| MmuSTS.2841.1.S1_at | MmuSTS.2841.1 | 6.09  | 6.04  | 0.13 | 0.12 | 1.03  | 0.413038 | 0.436206 | 0.708294 | 0.655879 |
| MmuSTS.2842.1.S1_at | MmuSTS.2842.1 | 7.14  | 9.18  | 0.17 | 0.58 | -4.14 | 0.006804 | 0.002028 | 0.201708 | 0.066885 |
| MmuSTS.2843.1.S1_at | MmuSTS.2843.1 | 13.34 | 13.34 | 0.04 | 0.03 | 1     | 0.817631 | 0.250534 | 0.926022 | 0.519391 |
| MmuSTS.2844.1.S1_at | MmuSTS.2844.1 | 11.9  | 12.28 | 0.11 | 0.39 | -1.3  | 0.506838 | 0.67377  | 0.762515 | 0.809446 |
| MmuSTS.2845.1.S1_at | MmuSTS.2845.1 | 10.38 | 9.36  | 0.1  | 0.36 | 2.03  | 0.005387 | 0.001881 | 0.191107 | 0.064979 |
| MmuSTS.2846.1.S1_at | MmuSTS.2846.1 | 13.2  | 13.48 | 0.05 | 0.14 | -1.21 | 0.052466 | 0.030911 | 0.377721 | 0.217651 |
| MmuSTS.2847.1.S1_at | MmuSTS.2847.1 | 9.82  | 10.41 | 0.49 | 0.75 | -1.5  | 0.293823 | 0.334456 | 0.63101  | 0.582455 |
| MmuSTS.2848.1.S1_at | MmuSTS.2848.1 | 8.75  | 8.89  | 0.11 | 0.21 | -1.11 | 0.117066 | 0.100956 | 0.481132 | 0.360525 |
| MmuSTS.2849.1.S1_at | MmuSTS.2849.1 | 10.66 | 12.11 | 1.04 | 2.02 | -2.73 | 0.650601 | 0.363718 | 0.842789 | 0.604138 |
| MmuSTS.285.1.S1_at  | MmuSTS.285.1  | 11.32 | 11.53 | 0.21 | 0.29 | -1.16 | 0.700222 | 0.641436 | 0.867382 | 0.78954  |
| MmuSTS.2850.1.S1_at | MmuSTS.2850.1 | 4.09  | 4.24  | 0.04 | 0.06 | -1.11 | 0.038939 | 0.031778 | 0.345909 | 0.220698 |
| MmuSTS.2851.1.S1_at | MmuSTS.2851.1 | 11.93 | 11.87 | 0.12 | 0.24 | 1.04  | 0.526283 | 0.417292 | 0.77404  | 0.642141 |
| MmuSTS.2852.1.S1_at | MmuSTS.2852.1 | 10.32 | 10.17 | 0.16 | 0.6  | 1.12  | 0.677707 | 0.673702 | 0.855562 | 0.809382 |
| MmuSTS.2853.1.S1_at | MmuSTS.2853.1 | 5.56  | 6.34  | 0.84 | 1.35 | -1.71 | 0.456069 | 0.118065 | 0.734235 | 0.385921 |
| MmuSTS.2854.1.S1_at | MmuSTS.2854.1 | 12.66 | 12.51 | 0.13 | 0.21 | 1.1   | 0.980476 | 0.924501 | 0.992967 | 0.957386 |
| MmuSTS.2855.1.S1_at | MmuSTS.2855.1 | 7.3   | 8.47  | 0.27 | 0.8  | -2.25 | 0.22019  | 0.153713 | 0.579297 | 0.428413 |
| MmuSTS.2856.1.S1_at | MmuSTS.2856.1 | 8.15  | 8.21  | 0.9  | 0.76 | -1.04 | 0.57922  | 0.680703 | 0.804151 | 0.81356  |
| MmuSTS.2857.1.S1_at | MmuSTS.2857.1 | 8.95  | 9.18  | 0.19 | 0.16 | -1.18 | 0.03759  | 0.042314 | 0.341917 | 0.250297 |
| MmuSTS.2858.1.S1_at | MmuSTS.2858.1 | 7.13  | 7.23  | 0.14 | 0.26 | -1.07 | 0.496484 | 0.006827 | 0.757501 | 0.111597 |
| MmuSTS.2859.1.S1_at | MmuSTS.2859.1 | 5.81  | 5.76  | 0.12 | 0.39 | 1.04  | 0.440556 | 0.710807 | 0.724395 | 0.832265 |
| MmuSTS.286.1.S1_at  | MmuSTS.286.1  | 3.47  | 3.57  | 0.04 | 0.12 | -1.07 | 0.219053 | 0.230338 | 0.578493 | 0.502112 |
| MmuSTS.2860.1.S1_at | MmuSTS.2860.1 | 13.96 | 13.71 | 0.02 | 0.11 | 1.19  | 0.036832 | 0.030319 | 0.34044  | 0.216032 |
| MmuSTS.2861.1.S1_at | MmuSTS.2861.1 | 4.89  | 5.38  | 0.17 | 0.42 | -1.4  | 0.262677 | 0.29293  | 0.609039 | 0.552885 |
| MmuSTS.2862.1.S1_at | MmuSTS.2862.1 | 10.2  | 10.52 | 2.37 | 1.53 | -1.25 | 0.956174 | 0.976258 | 0.983483 | 0.987069 |
| MmuSTS.2863.1.S1_at | MmuSTS.2863.1 | 5.4   | 5.4   | 0.1  | 0.1  | -1    | 0.7646   | 0.827911 | 0.900878 | 0.901197 |
| MmuSTS.2864.1.S1_at | MmuSTS.2864.1 | 6.62  | 6.71  | 0.21 | 0.33 | -1.07 | 0.533004 | 0.410338 | 0.777926 | 0.637216 |
| MmuSTS.2865.1.S1_at | MmuSTS.2865.1 | 4.8   | 4.87  | 0.12 | 0.18 | -1.05 | 0.201149 | 0.26689  | 0.563821 | 0.53244  |
| MmuSTS.2866.1.S1_at | MmuSTS.2866.1 | 12.39 | 12.11 | 0.24 | 0.6  | 1.22  | 0.621307 | 0.444647 | 0.826528 | 0.662072 |

|                       |               |       |       |      |      |       |          |          |          |          |
|-----------------------|---------------|-------|-------|------|------|-------|----------|----------|----------|----------|
| MmuSTS.2867.1.S1_at   | MmuSTS.2867.1 | 9.15  | 8.06  | 0.57 | 0.04 | 2.13  | 0.086184 | 0.035151 | 0.440157 | 0.231645 |
| MmuSTS.2868.1.S1_at   | MmuSTS.2868.1 | 12.42 | 12.04 | 0.16 | 0.19 | 1.3   | 0.143636 | 0.151879 | 0.510312 | 0.426512 |
| MmuSTS.2869.1.S1_at   | MmuSTS.2869.1 | 3.07  | 4.68  | 0.25 | 1.1  | -3.05 | 0.085593 | 0.078111 | 0.439565 | 0.324578 |
| MmuSTS.287.1.S1_at    | MmuSTS.287.1  | 10.33 | 10.23 | 0.1  | 0.28 | 1.07  | 0.222989 | 0.239702 | 0.581595 | 0.510405 |
| MmuSTS.2870.1.S1_at   | MmuSTS.2870.1 | 8.9   | 8.52  | 1.03 | 2.31 | 1.3   | 0.873424 | 0.950347 | 0.94926  | 0.971738 |
| MmuSTS.2871.1.S1_at   | MmuSTS.2871.1 | 3.41  | 3.42  | 0.01 | 0.01 | -1.01 | 0.27461  | 0.74031  | 0.617554 | 0.849596 |
| MmuSTS.2872.1.S1_at   | MmuSTS.2872.1 | 9.88  | 9.61  | 0.18 | 0.21 | 1.21  | 0.465538 | 0.220518 | 0.739948 | 0.493885 |
| MmuSTS.2873.1.S1_at   | MmuSTS.2873.1 | 7.15  | 6.89  | 0.47 | 0.74 | 1.19  | 0.467955 | 0.194386 | 0.740884 | 0.46947  |
| MmuSTS.2874.1.S1_at   | MmuSTS.2874.1 | 5.25  | 5.89  | 1.56 | 1.03 | -1.55 | 0.832972 | 0.197117 | 0.93227  | 0.472213 |
| MmuSTS.2875.1.S1_at   | MmuSTS.2875.1 | 4.16  | 4.25  | 0.09 | 0.22 | -1.06 | 0.374118 | 0.455867 | 0.683335 | 0.669664 |
| MmuSTS.2876.1.S1_at   | MmuSTS.2876.1 | 8.61  | 8.51  | 0.37 | 0.29 | 1.08  | 0.361712 | 0.566767 | 0.6754   | 0.74076  |
| MmuSTS.2877.1.S1_at   | MmuSTS.2877.1 | 6     | 6.17  | 0.14 | 0.31 | -1.13 | 0.415402 | 0.507773 | 0.709515 | 0.703325 |
| MmuSTS.2878.1.S1_at   | MmuSTS.2878.1 | 7.05  | 6.32  | 0.36 | 0.95 | 1.66  | 0.21476  | 0.151104 | 0.575346 | 0.425782 |
| MmuSTS.2879.1.S1_at   | MmuSTS.2879.1 | 10.22 | 10.25 | 0.31 | 0.46 | -1.02 | 0.833049 | 0.107873 | 0.93227  | 0.370945 |
| MmuSTS.288.1.S1_at    | MmuSTS.288.1  | 13.23 | 13.24 | 0.05 | 0.19 | -1    | 0.376678 | 0.457475 | 0.685249 | 0.670862 |
| MmuSTS.2880.1.S1_at   | MmuSTS.2880.1 | 6.15  | 6.42  | 0.23 | 0.4  | -1.2  | 0.393497 | 0.48561  | 0.695261 | 0.68924  |
| MmuSTS.2881.1.S1_at   | MmuSTS.2881.1 | 12.44 | 11.84 | 0.17 | 0.29 | 1.51  | 0.03149  | 0.017147 | 0.321943 | 0.165888 |
| MmuSTS.2882.1.S1_at   | MmuSTS.2882.1 | 10.33 | 11.41 | 0.39 | 0.35 | -2.11 | 0.031947 | 0.014698 | 0.323483 | 0.154371 |
| MmuSTS.2883.1.S1_s_at | MmuSTS.2883.1 | 7.52  | 6.48  | 0.22 | 0.59 | 2.06  | 0.050372 | 0.040401 | 0.374295 | 0.246134 |
| MmuSTS.2884.1.S1_at   | MmuSTS.2884.1 | 6.13  | 6.64  | 0.02 | 0.44 | -1.43 | 0.059192 | 0.053091 | 0.391395 | 0.276139 |
| MmuSTS.2885.1.S1_at   | MmuSTS.2885.1 | 3.86  | 4.09  | 0.54 | 0.29 | -1.17 | 0.831228 | 0.859208 | 0.931682 | 0.919754 |
| MmuSTS.2886.1.S1_at   | MmuSTS.2886.1 | 4.14  | 4.14  | 0.04 | 0.01 | 1     | 0.346877 | 0.04251  | 0.666049 | 0.250786 |
| MmuSTS.2887.1.S1_at   | MmuSTS.2887.1 | 12.71 | 12.55 | 0.04 | 0.15 | 1.12  | 0.090995 | 0.085732 | 0.446856 | 0.337761 |
| MmuSTS.2888.1.S1_at   | MmuSTS.2888.1 | 8.9   | 9.2   | 0.09 | 0.21 | -1.23 | 0.085937 | 0.011128 | 0.440024 | 0.137286 |
| MmuSTS.2889.1.S1_at   | MmuSTS.2889.1 | 3.93  | 3.93  | 0.09 | 0.23 | -1    | 0.756349 | 0.448634 | 0.89645  | 0.664474 |
| MmuSTS.289.1.S1_at    | MmuSTS.289.1  | 7.03  | 7.34  | 0.07 | 0.25 | -1.24 | 0.131939 | 0.093933 | 0.498114 | 0.350445 |
| MmuSTS.2890.1.S1_at   | MmuSTS.2890.1 | 8.05  | 7.74  | 0.28 | 0.34 | 1.24  | 0.256278 | 0.361308 | 0.603927 | 0.602104 |
| MmuSTS.2891.1.S1_at   | MmuSTS.2891.1 | 5.33  | 5.42  | 0.05 | 0.27 | -1.06 | 0.226851 | 0.127658 | 0.584769 | 0.398581 |
| MmuSTS.2892.1.S1_at   | MmuSTS.2892.1 | 7.78  | 7.56  | 0.19 | 0.07 | 1.17  | 0.07251  | 0.070272 | 0.417064 | 0.311342 |
| MmuSTS.2893.1.S1_at   | MmuSTS.2893.1 | 9.27  | 9.53  | 0.48 | 0.41 | -1.2  | 0.683466 | 0.717256 | 0.85844  | 0.836332 |
| MmuSTS.2894.1.S1_at   | MmuSTS.2894.1 | 12.22 | 12.26 | 0.07 | 0.05 | -1.03 | 0.881863 | 0.993214 | 0.952589 | 0.995946 |
| MmuSTS.2895.1.S1_at   | MmuSTS.2895.1 | 8.57  | 8.48  | 0.14 | 0.53 | 1.06  | 0.828236 | 0.725526 | 0.930243 | 0.841043 |
| MmuSTS.2896.1.S1_s_at | MmuSTS.2896.1 | 7.65  | 5.76  | 0.6  | 0.44 | 3.71  | 0.020337 | 0.015731 | 0.277448 | 0.158922 |
| MmuSTS.2897.1.S1_at   | MmuSTS.2897.1 | 5.68  | 6.9   | 0.5  | 1.07 | -2.33 | 0.420564 | 0.115541 | 0.712569 | 0.38267  |
| MmuSTS.2898.1.S1_at   | MmuSTS.2898.1 | 8.59  | 8.07  | 0.13 | 0.68 | 1.44  | 0.512432 | 0.269939 | 0.765592 | 0.53521  |
| MmuSTS.2899.1.S1_at   | MmuSTS.2899.1 | 3.66  | 3.68  | 0.06 | 0.05 | -1.01 | 0.783881 | 0.581942 | 0.909806 | 0.750784 |
| MmuSTS.29.1.S1_at     | MmuSTS.29.1   | 4.05  | 4.16  | 0.16 | 0.45 | -1.08 | 0.862782 | 0.593863 | 0.944816 | 0.758418 |
| MmuSTS.290.1.S1_at    | MmuSTS.290.1  | 6.54  | 6.49  | 0.13 | 0.09 | 1.04  | 0.913461 | 0.255002 | 0.965725 | 0.52317  |
| MmuSTS.2900.1.S1_at   | MmuSTS.2900.1 | 5.71  | 5.88  | 0.07 | 0.21 | -1.12 | 0.267606 | 0.552532 | 0.612666 | 0.731829 |
| MmuSTS.2901.1.S1_at   | MmuSTS.2901.1 | 12.42 | 12.46 | 0.08 | 0.22 | -1.03 | 0.386086 | 0.51258  | 0.691015 | 0.706419 |
| MmuSTS.2902.1.S1_s_at | MmuSTS.2902.1 | 11.54 | 11.54 | 0.18 | 0.15 | -1    | 0.925797 | 0.977066 | 0.97147  | 0.987527 |

|                       |               |       |       |      |      |       |          |          |          |          |
|-----------------------|---------------|-------|-------|------|------|-------|----------|----------|----------|----------|
| MmuSTS.2903.1.S1_at   | MmuSTS.2903.1 | 8.82  | 9.39  | 0.3  | 0.82 | -1.48 | 0.322163 | 0.264145 | 0.650863 | 0.530214 |
| MmuSTS.2904.1.S1_at   | MmuSTS.2904.1 | 3.38  | 3.34  | 0.17 | 0.07 | 1.03  | 0.632949 | 0.241644 | 0.833431 | 0.512225 |
| MmuSTS.2905.1.S1_at   | MmuSTS.2905.1 | 5.3   | 5.43  | 0.16 | 0.05 | -1.09 | 0.510645 | 0.102204 | 0.765151 | 0.362326 |
| MmuSTS.2906.1.S1_at   | MmuSTS.2906.1 | 8.49  | 9.14  | 0.45 | 1.25 | -1.57 | 0.64912  | 0.21507  | 0.84237  | 0.488912 |
| MmuSTS.2907.1.S1_at   | MmuSTS.2907.1 | 10.59 | 10.69 | 0.16 | 0.2  | -1.07 | 0.796636 | 0.797735 | 0.915625 | 0.883466 |
| MmuSTS.2908.1.S1_at   | MmuSTS.2908.1 | 6.41  | 6.6   | 0.09 | 0.14 | -1.14 | 0.145015 | 0.11565  | 0.511188 | 0.382714 |
| MmuSTS.2909.1.S1_at   | MmuSTS.2909.1 | 7.34  | 6.74  | 0.6  | 0.78 | 1.52  | 0.392613 | 0.493633 | 0.694693 | 0.694288 |
| MmuSTS.291.1.S1_s_at  | MmuSTS.291.1  | 4.28  | 4.22  | 0.15 | 0.02 | 1.04  | 0.52228  | 0.438961 | 0.771962 | 0.657787 |
| MmuSTS.2910.1.S1_at   | MmuSTS.2910.1 | 5.61  | 5.64  | 0.18 | 0.13 | -1.02 | 0.623694 | 0.83075  | 0.828033 | 0.902874 |
| MmuSTS.2911.1.S1_at   | MmuSTS.2911.1 | 4.3   | 4.21  | 0.09 | 0.24 | 1.06  | 0.791105 | 0.771734 | 0.913239 | 0.867344 |
| MmuSTS.2912.1.S1_at   | MmuSTS.2912.1 | 8.14  | 10.36 | 0.78 | 1.05 | -4.67 | 0.074347 | 0.054319 | 0.419963 | 0.278551 |
| MmuSTS.2913.1.S1_at   | MmuSTS.2913.1 | 4.27  | 4.25  | 0.15 | 0.07 | 1.02  | 0.58407  | 0.531219 | 0.806847 | 0.718508 |
| MmuSTS.2914.1.S1_at   | MmuSTS.2914.1 | 10.56 | 11.45 | 0.28 | 0.16 | -1.86 | 0.009034 | 0.014729 | 0.222023 | 0.154415 |
| MmuSTS.2915.1.S1_at   | MmuSTS.2915.1 | 6.19  | 6.26  | 0.36 | 0.84 | -1.05 | 0.400339 | 0.479377 | 0.699898 | 0.685126 |
| MmuSTS.2916.1.S1_at   | MmuSTS.2916.1 | 5.26  | 4.93  | 1.94 | 0.34 | 1.26  | 0.689369 | 0.138552 | 0.861525 | 0.411557 |
| MmuSTS.2917.1.S1_s_at | MmuSTS.2917.1 | 6.81  | 5.87  | 1.35 | 1.88 | 1.92  | 0.89267  | 0.977846 | 0.957283 | 0.9879   |
| MmuSTS.2918.1.S1_at   | MmuSTS.2918.1 | 11.93 | 12.69 | 0.15 | 0.08 | -1.69 | 0.001385 | 0.000506 | 0.146228 | 0.039185 |
| MmuSTS.2919.1.S1_s_at | MmuSTS.2919.1 | 6.59  | 9.54  | 2.08 | 2.54 | -7.77 | 0.332215 | 0.296769 | 0.656683 | 0.555779 |
| MmuSTS.292.1.S1_at    | MmuSTS.292.1  | 4.69  | 5.04  | 0.11 | 0.14 | -1.28 | 0.069141 | 0.078851 | 0.411264 | 0.325837 |
| MmuSTS.2920.1.S1_at   | MmuSTS.2920.1 | 12.06 | 11.53 | 0.2  | 0.85 | 1.44  | 0.222755 | 0.283366 | 0.581166 | 0.545922 |
| MmuSTS.2921.1.S1_at   | MmuSTS.2921.1 | 3.85  | 3.84  | 0.09 | 0.21 | 1.01  | 0.435547 | 0.030713 | 0.721273 | 0.217148 |
| MmuSTS.2922.1.S1_at   | MmuSTS.2922.1 | 9.7   | 9.69  | 0.05 | 0.16 | 1     | 0.900665 | 0.90414  | 0.960386 | 0.945621 |
| MmuSTS.2923.1.S1_at   | MmuSTS.2923.1 | 4.25  | 4.24  | 0.04 | 0.15 | 1.01  | 0.444574 | 0.557387 | 0.727044 | 0.735031 |
| MmuSTS.2924.1.S1_at   | MmuSTS.2924.1 | 6.82  | 6.87  | 0.16 | 0.21 | -1.04 | 0.163549 | 0.189263 | 0.527992 | 0.465043 |
| MmuSTS.2925.1.S1_at   | MmuSTS.2925.1 | 3.39  | 3.79  | 0.22 | 0.42 | -1.32 | 0.124645 | 0.10604  | 0.49075  | 0.368427 |
| MmuSTS.2926.1.S1_at   | MmuSTS.2926.1 | 5.05  | 4.92  | 0.06 | 0.14 | 1.1   | 0.331519 | 0.301842 | 0.656424 | 0.559788 |
| MmuSTS.2927.1.S1_at   | MmuSTS.2927.1 | 6.6   | 6.72  | 0.16 | 0.07 | -1.08 | 0.389946 | 0.325981 | 0.693367 | 0.576235 |
| MmuSTS.2928.1.S1_at   | MmuSTS.2928.1 | 3.1   | 3.38  | 0.06 | 0.14 | -1.22 | 0.141136 | 0.125653 | 0.508686 | 0.396249 |
| MmuSTS.2929.1.S1_at   | MmuSTS.2929.1 | 4.42  | 5.04  | 0.18 | 0.46 | -1.54 | 0.426182 | 0.344286 | 0.715597 | 0.589762 |
| MmuSTS.293.1.S1_s_at  | MmuSTS.293.1  | 2.98  | 3.3   | 0.18 | 0.22 | -1.24 | 0.55728  | 0.561678 | 0.792388 | 0.73751  |
| MmuSTS.2930.1.S1_at   | MmuSTS.2930.1 | 3.52  | 3.56  | 0    | 0.05 | -1.02 | 0.138842 | 0.073628 | 0.50592  | 0.316952 |
| MmuSTS.2931.1.S1_at   | MmuSTS.2931.1 | 5.07  | 5.43  | 0.14 | 0.5  | -1.28 | 0.07207  | 0.073151 | 0.416191 | 0.316064 |
| MmuSTS.2932.1.S1_at   | MmuSTS.2932.1 | 5.69  | 6.02  | 0.17 | 0.27 | -1.26 | 0.261275 | 0.348609 | 0.607883 | 0.592637 |
| MmuSTS.2933.1.S1_at   | MmuSTS.2933.1 | 5.61  | 5.72  | 0.17 | 0.09 | -1.08 | 0.720917 | 0.900889 | 0.877853 | 0.943591 |
| MmuSTS.2934.1.S1_at   | MmuSTS.2934.1 | 8.87  | 10.1  | 0.21 | 0.41 | -2.34 | 0.013083 | 0.003908 | 0.245262 | 0.088806 |
| MmuSTS.2935.1.S1_at   | MmuSTS.2935.1 | 5.93  | 5.94  | 0.28 | 0.44 | -1.01 | 0.941844 | 0.398507 | 0.977821 | 0.629458 |
| MmuSTS.2936.1.S1_at   | MmuSTS.2936.1 | 4.79  | 4.99  | 0.08 | 0.16 | -1.15 | 0.118224 | 0.10412  | 0.482489 | 0.365152 |
| MmuSTS.2937.1.S1_at   | MmuSTS.2937.1 | 5.95  | 5.9   | 0.21 | 0.21 | 1.04  | 0.754074 | 0.132888 | 0.895159 | 0.404544 |
| MmuSTS.2938.1.S1_at   | MmuSTS.2938.1 | 9.88  | 11.72 | 1.03 | 0.23 | -3.58 | 0.015739 | 0.010486 | 0.260601 | 0.133872 |
| MmuSTS.2939.1.S1_at   | MmuSTS.2939.1 | 5.93  | 6.08  | 0.1  | 0.07 | -1.11 | 0.130743 | 0.070611 | 0.497065 | 0.311913 |
| MmuSTS.294.1.S1_s_at  | MmuSTS.294.1  | 4.79  | 4.78  | 0.07 | 0.11 | 1.01  | 0.530047 | 0.311945 | 0.776526 | 0.566833 |

|                       |               |       |       |      |      |        |          |          |          |          |
|-----------------------|---------------|-------|-------|------|------|--------|----------|----------|----------|----------|
| MmuSTS.2940.1.S1_at   | MmuSTS.2940.1 | 5.51  | 8.52  | 1.54 | 2.22 | -8.04  | 0.304091 | 0.166932 | 0.638283 | 0.443415 |
| MmuSTS.2941.1.S1_at   | MmuSTS.2941.1 | 7.78  | 7.95  | 0.33 | 1.14 | -1.13  | 0.984502 | 0.755186 | 0.994531 | 0.857488 |
| MmuSTS.2942.1.S1_at   | MmuSTS.2942.1 | 11.05 | 10.9  | 0.08 | 0.14 | 1.11   | 0.064954 | 0.039381 | 0.403744 | 0.243406 |
| MmuSTS.2943.1.S1_at   | MmuSTS.2943.1 | 9.88  | 10.4  | 0.04 | 0.3  | -1.43  | 0.112516 | 0.086318 | 0.474984 | 0.338771 |
| MmuSTS.2944.1.S1_at   | MmuSTS.2944.1 | 9.24  | 9     | 0.16 | 0.6  | 1.17   | 0.728141 | 0.787798 | 0.881806 | 0.877294 |
| MmuSTS.2945.1.S1_s_at | MmuSTS.2945.1 | 3.65  | 3.64  | 0.14 | 0.14 | 1.01   | 0.933161 | 0.1585   | 0.973989 | 0.434442 |
| MmuSTS.2946.1.S1_at   | MmuSTS.2946.1 | 8.42  | 8.45  | 0.37 | 0.3  | -1.01  | 0.90223  | 0.73617  | 0.961001 | 0.847335 |
| MmuSTS.2947.1.S1_at   | MmuSTS.2947.1 | 9.92  | 11.87 | 0.4  | 1.08 | -3.86  | 0.039839 | 0.029623 | 0.34828  | 0.213783 |
| MmuSTS.2948.1.S1_at   | MmuSTS.2948.1 | 5.77  | 6.1   | 0.36 | 0.38 | -1.26  | 0.734587 | 0.859164 | 0.88571  | 0.919754 |
| MmuSTS.2949.1.S1_at   | MmuSTS.2949.1 | 11.25 | 11.39 | 0.16 | 0.1  | -1.1   | 0.332328 | 0.304073 | 0.656742 | 0.561408 |
| MmuSTS.295.1.S1_s_at  | MmuSTS.295.1  | 4.22  | 4.34  | 0.17 | 0.15 | -1.09  | 0.521591 | 0.495028 | 0.771406 | 0.695291 |
| MmuSTS.2950.1.S1_at   | MmuSTS.2950.1 | 11.15 | 10.96 | 0.24 | 0.11 | 1.14   | 0.348612 | 0.271515 | 0.667173 | 0.536545 |
| MmuSTS.2951.1.S1_at   | MmuSTS.2951.1 | 12.63 | 12.37 | 0.03 | 0.07 | 1.19   | 0.002298 | 0.000449 | 0.161798 | 0.038539 |
| MmuSTS.2952.1.S1_at   | MmuSTS.2952.1 | 8.78  | 10.86 | 0.65 | 1.09 | -4.21  | 0.084583 | 0.089835 | 0.437266 | 0.344058 |
| MmuSTS.2953.1.S1_at   | MmuSTS.2953.1 | 9.67  | 10.63 | 0.29 | 0.85 | -1.95  | 0.111563 | 0.085019 | 0.473787 | 0.336744 |
| MmuSTS.2954.1.S1_at   | MmuSTS.2954.1 | 3.5   | 3.45  | 0.04 | 0.29 | 1.03   | 0.451725 | 0.326553 | 0.73168  | 0.576612 |
| MmuSTS.2955.1.S1_at   | MmuSTS.2955.1 | 7.54  | 7.35  | 0.32 | 0.68 | 1.14   | 0.418727 | 0.589298 | 0.711529 | 0.755536 |
| MmuSTS.2956.1.S1_at   | MmuSTS.2956.1 | 9.41  | 13.12 | 1.71 | 2.6  | -13.09 | 0.512257 | 0.339506 | 0.765523 | 0.586095 |
| MmuSTS.2957.1.S1_at   | MmuSTS.2957.1 | 8.79  | 8.22  | 0.2  | 0.3  | 1.48   | 0.046439 | 0.022071 | 0.363009 | 0.185927 |
| MmuSTS.2958.1.S1_at   | MmuSTS.2958.1 | 10.75 | 10.81 | 0.28 | 0.91 | -1.04  | 0.973171 | 0.577391 | 0.989572 | 0.747893 |
| MmuSTS.2959.1.S1_at   | MmuSTS.2959.1 | 4.14  | 4.67  | 0.47 | 0.27 | -1.44  | 0.059892 | 0.099681 | 0.392991 | 0.358211 |
| MmuSTS.296.1.S1_s_at  | MmuSTS.296.1  | 5.56  | 5.78  | 0.13 | 0.08 | -1.16  | 0.120595 | 0.136668 | 0.485724 | 0.409207 |
| MmuSTS.2960.1.S1_at   | MmuSTS.2960.1 | 3.36  | 3.43  | 0.07 | 0.17 | -1.05  | 0.593398 | 0.449165 | 0.811443 | 0.664892 |
| MmuSTS.2961.1.S1_at   | MmuSTS.2961.1 | 7.5   | 7.5   | 0.21 | 0.12 | -1     | 0.39556  | 0.408233 | 0.696523 | 0.635527 |
| MmuSTS.2962.1.S1_at   | MmuSTS.2962.1 | 7.09  | 6.34  | 0.39 | 0.21 | 1.67   | 0.019942 | 0.022823 | 0.276365 | 0.189227 |
| MmuSTS.2963.1.S1_at   | MmuSTS.2963.1 | 4.89  | 4.85  | 0.14 | 0.15 | 1.03   | 0.777275 | 0.121158 | 0.906898 | 0.390217 |
| MmuSTS.2964.1.S1_at   | MmuSTS.2964.1 | 5.4   | 4.67  | 0.33 | 0.11 | 1.66   | 0.046176 | 0.051462 | 0.362604 | 0.272242 |
| MmuSTS.2965.1.S1_at   | MmuSTS.2965.1 | 4.01  | 4.06  | 0.09 | 0.12 | -1.04  | 0.159246 | 0.250597 | 0.52416  | 0.51941  |
| MmuSTS.2966.1.S1_at   | MmuSTS.2966.1 | 5.65  | 5.95  | 0.01 | 0.22 | -1.23  | 0.143852 | 0.049359 | 0.510427 | 0.267081 |
| MmuSTS.2967.1.S1_at   | MmuSTS.2967.1 | 7.87  | 8.04  | 0.46 | 1.25 | -1.13  | 0.656315 | 0.842665 | 0.84536  | 0.910333 |
| MmuSTS.2968.1.S1_at   | MmuSTS.2968.1 | 6.64  | 6.87  | 0.49 | 0.25 | -1.17  | 0.935615 | 0.214756 | 0.975112 | 0.48862  |
| MmuSTS.2969.1.S1_at   | MmuSTS.2969.1 | 3.39  | 3.28  | 0.01 | 0.13 | 1.08   | 0.162784 | 0.482311 | 0.527211 | 0.687186 |
| MmuSTS.297.1.S1_at    | MmuSTS.297.1  | 4.94  | 5.06  | 0.05 | 0.12 | -1.09  | 0.211374 | 0.078427 | 0.572161 | 0.325193 |
| MmuSTS.2970.1.S1_at   | MmuSTS.2970.1 | 11.9  | 11.4  | 0.11 | 0.32 | 1.41   | 0.046886 | 0.040331 | 0.364195 | 0.245973 |
| MmuSTS.2971.1.S1_at   | MmuSTS.2971.1 | 8.43  | 8.66  | 0.25 | 0.59 | -1.17  | 0.458767 | 0.584354 | 0.735644 | 0.752414 |
| MmuSTS.2972.1.S1_at   | MmuSTS.2972.1 | 13.57 | 13.67 | 0.43 | 0.19 | -1.07  | 0.307454 | 0.33404  | 0.639999 | 0.582104 |
| MmuSTS.2973.1.S1_at   | MmuSTS.2973.1 | 10.69 | 10.8  | 0.34 | 0.22 | -1.08  | 0.901235 | 0.822304 | 0.960522 | 0.89777  |
| MmuSTS.2974.1.S1_at   | MmuSTS.2974.1 | 8.86  | 9.2   | 0.23 | 0.39 | -1.26  | 0.959512 | 0.923968 | 0.984648 | 0.957162 |
| MmuSTS.2975.1.S1_at   | MmuSTS.2975.1 | 5.72  | 5.47  | 0.18 | 0.55 | 1.19   | 0.326392 | 0.509607 | 0.653184 | 0.704267 |
| MmuSTS.2976.1.S1_at   | MmuSTS.2976.1 | 10.2  | 10.28 | 0.28 | 0.25 | -1.06  | 0.391605 | 0.040017 | 0.694126 | 0.245241 |
| MmuSTS.2977.1.S1_at   | MmuSTS.2977.1 | 9.6   | 10.84 | 0.21 | 0.33 | -2.35  | 0.010309 | 0.005941 | 0.22898  | 0.105436 |

|                       |               |       |       |      |      |       |          |          |          |          |
|-----------------------|---------------|-------|-------|------|------|-------|----------|----------|----------|----------|
| MmuSTS.2978.1.S1_at   | MmuSTS.2978.1 | 11.76 | 11.86 | 0.25 | 0.16 | -1.07 | 0.582735 | 0.75219  | 0.805878 | 0.855787 |
| MmuSTS.2979.1.S1_at   | MmuSTS.2979.1 | 7.31  | 7.27  | 0.1  | 0.09 | 1.03  | 0.595319 | 0.728668 | 0.812365 | 0.843151 |
| MmuSTS.298.1.S1_at    | MmuSTS.298.1  | 8.06  | 8.29  | 0.67 | 0.91 | -1.18 | 0.157734 | 0.128079 | 0.522564 | 0.399072 |
| MmuSTS.2980.1.S1_at   | MmuSTS.2980.1 | 11.59 | 11.79 | 0.03 | 0.28 | -1.15 | 0.250998 | 0.355021 | 0.600488 | 0.597466 |
| MmuSTS.2981.1.S1_at   | MmuSTS.2981.1 | 11.29 | 11.43 | 0.16 | 0.15 | -1.1  | 0.145553 | 0.139949 | 0.51146  | 0.413295 |
| MmuSTS.2982.1.S1_at   | MmuSTS.2982.1 | 9.77  | 10.04 | 0.19 | 0.2  | -1.2  | 0.052337 | 0.041893 | 0.377516 | 0.249206 |
| MmuSTS.2983.1.S1_at   | MmuSTS.2983.1 | 9.8   | 9.89  | 0.23 | 0.06 | -1.06 | 0.875141 | 0.358706 | 0.949888 | 0.600178 |
| MmuSTS.2984.1.S1_at   | MmuSTS.2984.1 | 4.42  | 4.52  | 0.12 | 0.22 | -1.07 | 0.30573  | 0.410329 | 0.639223 | 0.637216 |
| MmuSTS.2985.1.S1_at   | MmuSTS.2985.1 | 5.08  | 5.8   | 0.22 | 0.53 | -1.65 | 0.025034 | 0.006013 | 0.297733 | 0.106069 |
| MmuSTS.2986.1.S1_at   | MmuSTS.2986.1 | 8.68  | 7.94  | 0.09 | 0.48 | 1.67  | 0.166159 | 0.173511 | 0.529929 | 0.449938 |
| MmuSTS.2987.1.S1_at   | MmuSTS.2987.1 | 12.23 | 12.09 | 0.11 | 0.1  | 1.1   | 0.254145 | 0.347398 | 0.602339 | 0.591987 |
| MmuSTS.2988.1.S1_at   | MmuSTS.2988.1 | 8.56  | 8.17  | 0.22 | 0.34 | 1.32  | 0.157305 | 0.158222 | 0.522148 | 0.43403  |
| MmuSTS.2989.1.S1_at   | MmuSTS.2989.1 | 11.36 | 10.63 | 0.67 | 0.68 | 1.65  | 0.053692 | 0.041066 | 0.38074  | 0.247375 |
| MmuSTS.299.1.S1_at    | MmuSTS.299.1  | 6.49  | 7.49  | 0.36 | 0.55 | -2    | 0.106021 | 0.144704 | 0.466831 | 0.418546 |
| MmuSTS.2990.1.S1_at   | MmuSTS.2990.1 | 7.3   | 6.73  | 0.44 | 0.61 | 1.49  | 0.520819 | 0.630737 | 0.771038 | 0.78239  |
| MmuSTS.2991.1.S1_at   | MmuSTS.2991.1 | 7.42  | 9.49  | 0.26 | 0.2  | -4.19 | 0.000405 | 0.00008  | 0.12978  | 0.027016 |
| MmuSTS.2992.1.S1_at   | MmuSTS.2992.1 | 5.16  | 5.47  | 0.41 | 0.39 | -1.23 | 0.949302 | 0.840801 | 0.98069  | 0.909237 |
| MmuSTS.2993.1.S1_at   | MmuSTS.2993.1 | 11.7  | 11.39 | 0.13 | 0.18 | 1.24  | 0.068627 | 0.052464 | 0.410308 | 0.274577 |
| MmuSTS.2994.1.S1_at   | MmuSTS.2994.1 | 11.34 | 10.89 | 0.28 | 0.22 | 1.36  | 0.467352 | 0.495885 | 0.74068  | 0.695781 |
| MmuSTS.2995.1.S1_at   | MmuSTS.2995.1 | 12.94 | 12.5  | 0.12 | 0.18 | 1.36  | 0.053827 | 0.044064 | 0.380879 | 0.254195 |
| MmuSTS.2996.1.S1_at   | MmuSTS.2996.1 | 6.65  | 6.47  | 0.47 | 0.6  | 1.13  | 0.637892 | 0.816996 | 0.836322 | 0.894454 |
| MmuSTS.2997.1.S1_at   | MmuSTS.2997.1 | 6.35  | 6.3   | 0.11 | 0.12 | 1.04  | 0.457796 | 0.194836 | 0.735135 | 0.46989  |
| MmuSTS.2998.1.S1_at   | MmuSTS.2998.1 | 3.91  | 4.2   | 0.19 | 0.16 | -1.23 | 0.122142 | 0.175229 | 0.487175 | 0.452011 |
| MmuSTS.2999.1.S1_at   | MmuSTS.2999.1 | 11.5  | 11.23 | 0.19 | 0.13 | 1.21  | 0.11979  | 0.142398 | 0.484387 | 0.415965 |
| MmuSTS.3.1.S1_at      | MmuSTS.3.1    | 4.04  | 3.92  | 0.34 | 0.03 | 1.09  | 0.279059 | 0.374178 | 0.620921 | 0.612678 |
| MmuSTS.30.1.S1_s_at   | MmuSTS.30.1   | 9.71  | 8.58  | 0.18 | 0.18 | 2.18  | 0.002663 | 0.001041 | 0.164386 | 0.051426 |
| MmuSTS.3000.1.S1_at   | MmuSTS.3000.1 | 8.47  | 7.82  | 0.18 | 0.92 | 1.56  | 0.145119 | 0.017054 | 0.511224 | 0.165465 |
| MmuSTS.3001.1.S1_at   | MmuSTS.3001.1 | 9.11  | 8.91  | 0.15 | 0.42 | 1.15  | 0.748726 | 0.849115 | 0.892559 | 0.914337 |
| MmuSTS.3002.1.S1_at   | MmuSTS.3002.1 | 9.78  | 9.64  | 0.37 | 0.17 | 1.1   | 0.233809 | 0.260224 | 0.588317 | 0.526807 |
| MmuSTS.3003.1.S1_at   | MmuSTS.3003.1 | 10.23 | 10.34 | 0.43 | 0.12 | -1.08 | 0.482622 | 0.6758   | 0.749437 | 0.810503 |
| MmuSTS.3004.1.S1_at   | MmuSTS.3004.1 | 9.45  | 9.05  | 0.08 | 0.34 | 1.32  | 0.126816 | 0.062776 | 0.492987 | 0.297193 |
| MmuSTS.3005.1.S1_at   | MmuSTS.3005.1 | 5.84  | 5.03  | 0.6  | 0.13 | 1.76  | 0.161092 | 0.156027 | 0.526189 | 0.431444 |
| MmuSTS.3006.1.S1_at   | MmuSTS.3006.1 | 8.27  | 8.89  | 0.42 | 0.28 | -1.53 | 0.174344 | 0.063946 | 0.537982 | 0.29906  |
| MmuSTS.3007.1.S1_at   | MmuSTS.3007.1 | 11.46 | 11.56 | 0.22 | 0.34 | -1.08 | 0.587227 | 0.661699 | 0.808473 | 0.801903 |
| MmuSTS.3008.1.S1_s_at | MmuSTS.3008.1 | 4.09  | 4.07  | 0.07 | 0.06 | 1.02  | 0.898925 | 0.442405 | 0.959627 | 0.660391 |
| MmuSTS.3009.1.S1_at   | MmuSTS.3009.1 | 9.26  | 10.21 | 0.06 | 0.52 | -1.94 | 0.073311 | 0.039016 | 0.418512 | 0.242715 |
| MmuSTS.301.1.S1_s_at  | MmuSTS.301.1  | 3.93  | 4     | 0.06 | 0.11 | -1.05 | 0.211051 | 0.390377 | 0.571977 | 0.624156 |
| MmuSTS.3010.1.S1_at   | MmuSTS.3010.1 | 7.33  | 6.9   | 0.31 | 0.53 | 1.34  | 0.472368 | 0.53474  | 0.743694 | 0.720524 |
| MmuSTS.3011.1.S1_at   | MmuSTS.3011.1 | 9.87  | 10.27 | 0.29 | 0.24 | -1.32 | 0.150571 | 0.161842 | 0.515411 | 0.437937 |
| MmuSTS.3012.1.S1_at   | MmuSTS.3012.1 | 6.73  | 6.87  | 0.12 | 0.16 | -1.11 | 0.097333 | 0.093523 | 0.456366 | 0.349846 |
| MmuSTS.3013.1.S1_at   | MmuSTS.3013.1 | 6.92  | 7.22  | 1.04 | 0.45 | -1.23 | 0.335252 | 0.253321 | 0.659098 | 0.521662 |

|                       |               |       |       |      |      |       |          |          |          |          |
|-----------------------|---------------|-------|-------|------|------|-------|----------|----------|----------|----------|
| MmuSTS.3014.1.S1_at   | MmuSTS.3014.1 | 3.9   | 4.04  | 0.08 | 0.07 | -1.1  | 0.040757 | 0.078317 | 0.35029  | 0.324955 |
| MmuSTS.3015.1.S1_at   | MmuSTS.3015.1 | 8.51  | 9.26  | 0.73 | 0.41 | -1.68 | 0.46273  | 0.522967 | 0.738326 | 0.713429 |
| MmuSTS.3016.1.S1_at   | MmuSTS.3016.1 | 4.68  | 4.91  | 0.19 | 0.26 | -1.18 | 0.515684 | 0.695463 | 0.767629 | 0.822995 |
| MmuSTS.3017.1.S1_at   | MmuSTS.3017.1 | 8.69  | 9     | 0.08 | 0.18 | -1.23 | 0.061008 | 0.141862 | 0.394858 | 0.415372 |
| MmuSTS.3018.1.S1_at   | MmuSTS.3018.1 | 6.46  | 6.89  | 0.83 | 0.35 | -1.34 | 0.323047 | 0.441285 | 0.651295 | 0.659483 |
| MmuSTS.3019.1.S1_at   | MmuSTS.3019.1 | 4.93  | 5.03  | 0.73 | 0.34 | -1.07 | 0.338415 | 0.414201 | 0.66086  | 0.640124 |
| MmuSTS.3020.1.S1_at   | MmuSTS.3020.1 | 3.71  | 3.76  | 0.14 | 0.09 | -1.04 | 0.492806 | 0.503854 | 0.755881 | 0.701193 |
| MmuSTS.3020.1.S1_s_at | MmuSTS.3020.1 | 5.61  | 5.53  | 0.02 | 0.16 | 1.05  | 0.912466 | 0.566026 | 0.965278 | 0.740192 |
| MmuSTS.3021.1.S1_at   | MmuSTS.3021.1 | 11.13 | 10.65 | 0.17 | 0.14 | 1.39  | 0.018082 | 0.013528 | 0.268759 | 0.148875 |
| MmuSTS.3022.1.S1_at   | MmuSTS.3022.1 | 3.54  | 3.59  | 0.39 | 0.22 | -1.03 | 0.940786 | 0.86717  | 0.977466 | 0.924514 |
| MmuSTS.3023.1.S1_at   | MmuSTS.3023.1 | 5.58  | 5.65  | 0.06 | 0.03 | -1.04 | 0.155434 | 0.010898 | 0.520164 | 0.135939 |
| MmuSTS.3024.1.S1_at   | MmuSTS.3024.1 | 12.8  | 12.26 | 0.1  | 0.21 | 1.45  | 0.019085 | 0.002202 | 0.273018 | 0.069315 |
| MmuSTS.3025.1.S1_at   | MmuSTS.3025.1 | 9.21  | 8.85  | 0.15 | 0.94 | 1.29  | 0.915401 | 0.170532 | 0.966542 | 0.447177 |
| MmuSTS.3026.1.S1_at   | MmuSTS.3026.1 | 4.55  | 5.59  | 1.08 | 0.93 | -2.06 | 0.292186 | 0.334226 | 0.629464 | 0.582266 |
| MmuSTS.3027.1.S1_at   | MmuSTS.3027.1 | 6.82  | 6.6   | 0.2  | 0.25 | 1.17  | 0.644265 | 0.370332 | 0.839719 | 0.609407 |
| MmuSTS.3028.1.S1_at   | MmuSTS.3028.1 | 9.62  | 10.41 | 0.22 | 0.51 | -1.72 | 0.063036 | 0.039508 | 0.399858 | 0.243706 |
| MmuSTS.3029.1.S1_at   | MmuSTS.3029.1 | 12.25 | 12.11 | 0.22 | 0.44 | 1.1   | 0.694405 | 0.87925  | 0.864409 | 0.9311   |
| MmuSTS.3030.1.S1_at   | MmuSTS.3030.1 | 9.84  | 11.87 | 0.2  | 0.63 | -4.1  | 0.014841 | 0.012144 | 0.255626 | 0.142633 |
| MmuSTS.3031.1.S1_at   | MmuSTS.3031.1 | 7     | 6.97  | 0.11 | 0.5  | 1.02  | 0.445199 | 0.027937 | 0.727485 | 0.208628 |
| MmuSTS.3032.1.S1_at   | MmuSTS.3032.1 | 11.34 | 11.56 | 0.05 | 0.71 | -1.16 | 0.672696 | 0.175929 | 0.853193 | 0.452486 |
| MmuSTS.3033.1.S1_at   | MmuSTS.3033.1 | 8.07  | 8     | 0.08 | 0.37 | 1.05  | 0.761425 | 0.911965 | 0.899543 | 0.950333 |
| MmuSTS.3034.1.S1_at   | MmuSTS.3034.1 | 10.92 | 11.04 | 0.04 | 0.36 | -1.08 | 0.691373 | 0.856088 | 0.862705 | 0.917842 |
| MmuSTS.3035.1.S1_at   | MmuSTS.3035.1 | 11.52 | 10.92 | 0.05 | 0.16 | 1.52  | 0.005825 | 0.003319 | 0.193191 | 0.082861 |
| MmuSTS.3036.1.S1_at   | MmuSTS.3036.1 | 9.56  | 8.38  | 0.35 | 0.49 | 2.27  | 0.008941 | 0.004579 | 0.221598 | 0.094474 |
| MmuSTS.3037.1.S1_at   | MmuSTS.3037.1 | 4.95  | 5.16  | 0.26 | 0.5  | -1.16 | 0.335407 | 0.462432 | 0.659165 | 0.673754 |
| MmuSTS.3038.1.S1_at   | MmuSTS.3038.1 | 11.84 | 11.95 | 0.14 | 0.12 | -1.08 | 0.376923 | 0.30123  | 0.68545  | 0.559356 |
| MmuSTS.3039.1.S1_at   | MmuSTS.3039.1 | 8.52  | 8.8   | 0.12 | 0.44 | -1.22 | 0.324516 | 0.464251 | 0.651941 | 0.674983 |
| MmuSTS.304.1.S1_at    | MmuSTS.304.1  | 11.42 | 11.29 | 0.02 | 0.15 | 1.1   | 0.056861 | 0.122079 | 0.387323 | 0.39161  |
| MmuSTS.3040.1.S1_at   | MmuSTS.3040.1 | 9.09  | 9.09  | 0.15 | 0.13 | -1    | 0.517023 | 0.607693 | 0.768456 | 0.766491 |
| MmuSTS.3041.1.S1_at   | MmuSTS.3041.1 | 11.79 | 11.57 | 0.19 | 0.21 | 1.16  | 0.939267 | 0.978468 | 0.976927 | 0.988282 |
| MmuSTS.3042.1.S1_at   | MmuSTS.3042.1 | 11.69 | 11.28 | 0.08 | 0.18 | 1.33  | 0.021423 | 0.012278 | 0.282524 | 0.143352 |
| MmuSTS.3043.1.S1_at   | MmuSTS.3043.1 | 6.04  | 6.15  | 0.14 | 0.06 | -1.08 | 0.141092 | 0.195422 | 0.508648 | 0.470253 |
| MmuSTS.3044.1.S1_at   | MmuSTS.3044.1 | 6.11  | 6.39  | 0.19 | 0.22 | -1.22 | 0.291135 | 0.347449 | 0.628725 | 0.592019 |
| MmuSTS.3045.1.S1_at   | MmuSTS.3045.1 | 6.81  | 7.47  | 0.62 | 0.74 | -1.58 | 0.261549 | 0.214236 | 0.608173 | 0.487856 |
| MmuSTS.3046.1.S1_at   | MmuSTS.3046.1 | 11.29 | 11.07 | 0.1  | 0.27 | 1.17  | 0.464709 | 0.593875 | 0.739452 | 0.758418 |
| MmuSTS.3047.1.S1_at   | MmuSTS.3047.1 | 12.72 | 12.55 | 0.06 | 0.11 | 1.12  | 0.064056 | 0.035237 | 0.402086 | 0.231952 |
| MmuSTS.3048.1.S1_at   | MmuSTS.3048.1 | 12.52 | 12.25 | 0.06 | 0.36 | 1.21  | 0.205603 | 0.251182 | 0.568057 | 0.519899 |
| MmuSTS.3049.1.S1_at   | MmuSTS.3049.1 | 2.78  | 2.85  | 0.07 | 0.08 | -1.05 | 0.608811 | 0.194736 | 0.820185 | 0.469774 |
| MmuSTS.305.1.S1_at    | MmuSTS.305.1  | 6.97  | 7.01  | 0.14 | 0.15 | -1.03 | 0.702849 | 0.457398 | 0.868924 | 0.670819 |
| MmuSTS.3050.1.S1_at   | MmuSTS.3050.1 | 10.69 | 10.26 | 1.02 | 0.33 | 1.34  | 0.190463 | 0.225758 | 0.55308  | 0.498159 |
| MmuSTS.3051.1.S1_at   | MmuSTS.3051.1 | 10.43 | 10.75 | 0.29 | 0.1  | -1.25 | 0.21461  | 0.231529 | 0.575095 | 0.503325 |

|                       |               |       |       |      |      |       |          |          |          |          |
|-----------------------|---------------|-------|-------|------|------|-------|----------|----------|----------|----------|
| MmuSTS.3052.1.S1_at   | MmuSTS.3052.1 | 8.11  | 8.09  | 0.07 | 0.16 | 1.02  | 0.861964 | 0.089902 | 0.944477 | 0.344073 |
| MmuSTS.3053.1.S1_at   | MmuSTS.3053.1 | 8.74  | 8.9   | 0.1  | 0.13 | -1.12 | 0.233219 | 0.578732 | 0.588012 | 0.748611 |
| MmuSTS.3054.1.S1_at   | MmuSTS.3054.1 | 10.64 | 10.75 | 0.26 | 0.11 | -1.08 | 0.346308 | 0.269027 | 0.665754 | 0.534425 |
| MmuSTS.3055.1.S1_at   | MmuSTS.3055.1 | 11.39 | 11.18 | 0.09 | 0.28 | 1.15  | 0.119893 | 0.131926 | 0.484457 | 0.403977 |
| MmuSTS.3056.1.S1_at   | MmuSTS.3056.1 | 4.04  | 4.12  | 0.13 | 0.37 | -1.06 | 0.281455 | 0.471003 | 0.622236 | 0.679162 |
| MmuSTS.3057.1.S1_at   | MmuSTS.3057.1 | 9.11  | 8.46  | 0.15 | 0.14 | 1.58  | 0.004877 | 0.005357 | 0.185363 | 0.101092 |
| MmuSTS.3058.1.S1_at   | MmuSTS.3058.1 | 7.71  | 7.25  | 0.15 | 0.29 | 1.37  | 0.061961 | 0.064255 | 0.396857 | 0.299692 |
| MmuSTS.3059.1.S1_s_at | MmuSTS.3059.1 | 13.15 | 13.27 | 0.02 | 0.12 | -1.08 | 0.206814 | 0.215329 | 0.568816 | 0.489062 |
| MmuSTS.306.1.S1_at    | MmuSTS.306.1  | 6.79  | 6.86  | 0.13 | 0.11 | -1.05 | 0.367535 | 0.418264 | 0.679502 | 0.642702 |
| MmuSTS.3060.1.S1_at   | MmuSTS.3060.1 | 10.14 | 11.21 | 0.42 | 0.78 | -2.1  | 0.069023 | 0.054516 | 0.411078 | 0.278993 |
| MmuSTS.3061.1.S1_at   | MmuSTS.3061.1 | 10.36 | 11.17 | 0.14 | 0.12 | -1.75 | 0.002627 | 0.00127  | 0.164386 | 0.055241 |
| MmuSTS.3062.1.S1_at   | MmuSTS.3062.1 | 10.09 | 10.07 | 0.19 | 0.08 | 1.01  | 0.952737 | 0.024536 | 0.982319 | 0.196025 |
| MmuSTS.3063.1.S1_at   | MmuSTS.3063.1 | 8.15  | 6.65  | 0.22 | 0.12 | 2.84  | 0.000528 | 0.000058 | 0.136818 | 0.025666 |
| MmuSTS.3064.1.S1_at   | MmuSTS.3064.1 | 8.58  | 9.56  | 0.34 | 0.35 | -1.98 | 0.01336  | 0.011983 | 0.246471 | 0.141658 |
| MmuSTS.3065.1.S1_at   | MmuSTS.3065.1 | 11.67 | 11.44 | 0.06 | 0.15 | 1.17  | 0.08726  | 0.014799 | 0.441308 | 0.154768 |
| MmuSTS.3066.1.S1_at   | MmuSTS.3066.1 | 7.22  | 7.49  | 0.22 | 0.18 | -1.21 | 0.177732 | 0.246954 | 0.541903 | 0.516238 |
| MmuSTS.3067.1.S1_at   | MmuSTS.3067.1 | 9.02  | 8.36  | 0.1  | 0.37 | 1.58  | 0.035803 | 0.016013 | 0.337573 | 0.160458 |
| MmuSTS.3068.1.S1_at   | MmuSTS.3068.1 | 10.67 | 10.56 | 0.13 | 0.09 | 1.08  | 0.237214 | 0.567985 | 0.590811 | 0.74176  |
| MmuSTS.3069.1.S1_at   | MmuSTS.3069.1 | 6.17  | 6.74  | 0.09 | 0.45 | -1.49 | 0.086884 | 0.029124 | 0.440541 | 0.212733 |
| MmuSTS.307.1.S1_at    | MmuSTS.307.1  | 10.67 | 11.31 | 0.18 | 0.47 | -1.56 | 0.093095 | 0.07162  | 0.450362 | 0.313735 |
| MmuSTS.3070.1.S1_at   | MmuSTS.3070.1 | 12.37 | 11.68 | 0.14 | 0.02 | 1.61  | 0.000824 | 0.000125 | 0.136958 | 0.029087 |
| MmuSTS.3071.1.S1_at   | MmuSTS.3071.1 | 4.43  | 4.46  | 0.19 | 0.09 | -1.02 | 0.358891 | 0.597814 | 0.673592 | 0.760411 |
| MmuSTS.3072.1.S1_at   | MmuSTS.3072.1 | 3.66  | 3.73  | 0.14 | 0.09 | -1.04 | 0.601386 | 0.74599  | 0.815792 | 0.852688 |
| MmuSTS.3073.1.S1_at   | MmuSTS.3073.1 | 5.2   | 5.19  | 0.21 | 0.15 | 1.01  | 0.425508 | 0.624324 | 0.715133 | 0.778564 |
| MmuSTS.3074.1.S1_at   | MmuSTS.3074.1 | 9.56  | 9.3   | 0.11 | 0.06 | 1.2   | 0.020057 | 0.001091 | 0.276484 | 0.052283 |
| MmuSTS.3075.1.S1_at   | MmuSTS.3075.1 | 6.9   | 6.99  | 0.02 | 0.23 | -1.07 | 0.746604 | 0.841352 | 0.891516 | 0.909628 |
| MmuSTS.3076.1.S1_at   | MmuSTS.3076.1 | 3.75  | 3.76  | 0.12 | 0.05 | -1    | 0.644523 | 0.365582 | 0.839786 | 0.605617 |
| MmuSTS.3077.1.S1_at   | MmuSTS.3077.1 | 12.47 | 12.72 | 0.08 | 0.53 | -1.19 | 0.76591  | 0.760173 | 0.901561 | 0.860657 |
| MmuSTS.3078.1.S1_at   | MmuSTS.3078.1 | 5.8   | 5.51  | 0.17 | 0.18 | 1.22  | 0.111937 | 0.045194 | 0.474378 | 0.256979 |
| MmuSTS.3079.1.S1_at   | MmuSTS.3079.1 | 8.82  | 9.4   | 0.16 | 0.22 | -1.49 | 0.016346 | 0.003474 | 0.263616 | 0.084834 |
| MmuSTS.308.1.S1_at    | MmuSTS.308.1  | 6.98  | 8.21  | 0.26 | 0.47 | -2.34 | 0.018356 | 0.028884 | 0.270007 | 0.211763 |
| MmuSTS.3080.1.S1_at   | MmuSTS.3080.1 | 8.11  | 7.47  | 0.07 | 0.12 | 1.56  | 0.00149  | 0.000174 | 0.150888 | 0.030511 |
| MmuSTS.3081.1.S1_at   | MmuSTS.3081.1 | 11.89 | 11.93 | 0.09 | 0.14 | -1.02 | 0.378381 | 0.531045 | 0.686437 | 0.718384 |
| MmuSTS.3082.1.S1_at   | MmuSTS.3082.1 | 12.81 | 12.94 | 0.05 | 0.15 | -1.09 | 0.139383 | 0.132416 | 0.506801 | 0.404409 |
| MmuSTS.3083.1.S1_at   | MmuSTS.3083.1 | 13.02 | 12.88 | 0.08 | 0.09 | 1.1   | 0.09899  | 0.063947 | 0.458711 | 0.29906  |
| MmuSTS.3084.1.S1_at   | MmuSTS.3084.1 | 11.6  | 12.61 | 0.15 | 0.38 | -2.02 | 0.019978 | 0.011987 | 0.276365 | 0.141658 |
| MmuSTS.3085.1.S1_at   | MmuSTS.3085.1 | 10.37 | 11.18 | 0.17 | 0.2  | -1.75 | 0.003666 | 0.000935 | 0.179515 | 0.048962 |
| MmuSTS.3086.1.S1_at   | MmuSTS.3086.1 | 10.42 | 9.56  | 0.16 | 0.32 | 1.81  | 0.015968 | 0.005488 | 0.262019 | 0.102081 |
| MmuSTS.3087.1.S1_at   | MmuSTS.3087.1 | 11.71 | 10.56 | 0.17 | 0.09 | 2.22  | 0.000804 | 0.000267 | 0.136818 | 0.033786 |
| MmuSTS.3088.1.S1_at   | MmuSTS.3088.1 | 8.89  | 8.4   | 0.09 | 0.99 | 1.4   | 0.970789 | 0.026528 | 0.988706 | 0.203899 |
| MmuSTS.3089.1.S1_at   | MmuSTS.3089.1 | 7.21  | 6.82  | 0.17 | 0.3  | 1.31  | 0.333019 | 0.279727 | 0.657247 | 0.543228 |

|                       |               |       |       |      |      |       |          |          |          |          |
|-----------------------|---------------|-------|-------|------|------|-------|----------|----------|----------|----------|
| MmuSTS.309.1.S1_s_at  | MmuSTS.309.1  | 2.77  | 2.77  | 0.09 | 0.06 | 1     | 0.651    | 0.950758 | 0.84297  | 0.972034 |
| MmuSTS.3090.1.S1_at   | MmuSTS.3090.1 | 8.64  | 8.62  | 0.84 | 1.76 | 1.01  | 0.983995 | 0.845057 | 0.994302 | 0.911824 |
| MmuSTS.3091.1.S1_at   | MmuSTS.3091.1 | 12.36 | 12.81 | 0.08 | 0.01 | -1.37 | 0.00078  | 0.000101 | 0.136818 | 0.027996 |
| MmuSTS.3092.1.S1_at   | MmuSTS.3092.1 | 6.83  | 6.64  | 0.22 | 0.23 | 1.14  | 0.435929 | 0.602831 | 0.721544 | 0.763752 |
| MmuSTS.3093.1.S1_at   | MmuSTS.3093.1 | 8.99  | 8.4   | 0.1  | 0.29 | 1.51  | 0.032476 | 0.021667 | 0.324973 | 0.184333 |
| MmuSTS.3094.1.S1_at   | MmuSTS.3094.1 | 3.83  | 3.83  | 0.21 | 0.04 | -1    | 0.695887 | 0.673637 | 0.865073 | 0.809337 |
| MmuSTS.3095.1.S1_at   | MmuSTS.3095.1 | 3.73  | 6.19  | 0.7  | 2.02 | -5.48 | 0.199901 | 0.240941 | 0.562985 | 0.51164  |
| MmuSTS.3096.1.S1_at   | MmuSTS.3096.1 | 6.36  | 5.83  | 0.26 | 1.03 | 1.45  | 0.768056 | 0.741306 | 0.902496 | 0.850237 |
| MmuSTS.3097.1.S1_at   | MmuSTS.3097.1 | 9.49  | 9.66  | 0.18 | 0.47 | -1.13 | 0.772006 | 0.812596 | 0.903991 | 0.89176  |
| MmuSTS.3098.1.S1_at   | MmuSTS.3098.1 | 11.23 | 9.84  | 0.25 | 0.29 | 2.62  | 0.002892 | 0.000381 | 0.169151 | 0.037273 |
| MmuSTS.3099.1.S1_at   | MmuSTS.3099.1 | 9.86  | 9.01  | 0.34 | 0.31 | 1.81  | 0.010169 | 0.004068 | 0.228247 | 0.090288 |
| MmuSTS.31.1.S1_at     | MmuSTS.31.1   | 7.23  | 7.05  | 0.08 | 0.29 | 1.13  | 0.890866 | 0.885979 | 0.956354 | 0.935119 |
| MmuSTS.310.1.S1_at    | MmuSTS.310.1  | 7.36  | 7.35  | 0.42 | 0.94 | 1     | 0.34416  | 0.178676 | 0.664241 | 0.454929 |
| MmuSTS.3100.1.S1_at   | MmuSTS.3100.1 | 12.03 | 11.79 | 0.08 | 0.14 | 1.18  | 0.045332 | 0.005566 | 0.360702 | 0.103068 |
| MmuSTS.3101.1.S1_at   | MmuSTS.3101.1 | 6.31  | 5.87  | 0.52 | 0.94 | 1.35  | 0.382312 | 0.079558 | 0.688612 | 0.326897 |
| MmuSTS.3102.1.S1_at   | MmuSTS.3102.1 | 3.25  | 3.18  | 0.24 | 0.26 | 1.04  | 0.747888 | 0.790066 | 0.892181 | 0.878655 |
| MmuSTS.3103.1.S1_at   | MmuSTS.3103.1 | 10.76 | 10.38 | 0.09 | 0.39 | 1.3   | 0.172436 | 0.113808 | 0.535972 | 0.380052 |
| MmuSTS.3104.1.S1_at   | MmuSTS.3104.1 | 9.15  | 10.6  | 0.1  | 0.6  | -2.73 | 0.015271 | 0.008219 | 0.257698 | 0.12044  |
| MmuSTS.3105.1.S1_at   | MmuSTS.3105.1 | 8.43  | 8.08  | 0.61 | 0.09 | 1.27  | 0.386238 | 0.112279 | 0.691191 | 0.377561 |
| MmuSTS.3106.1.S1_at   | MmuSTS.3106.1 | 12.32 | 12.45 | 0.07 | 0.3  | -1.1  | 0.485131 | 0.654611 | 0.750774 | 0.79809  |
| MmuSTS.3107.1.S1_at   | MmuSTS.3107.1 | 10.14 | 9.74  | 0.05 | 0.23 | 1.32  | 0.057047 | 0.019319 | 0.387418 | 0.174723 |
| MmuSTS.3108.1.S1_at   | MmuSTS.3108.1 | 3.32  | 3.29  | 0.09 | 0.02 | 1.02  | 0.351269 | 0.38708  | 0.669117 | 0.621935 |
| MmuSTS.3109.1.S1_at   | MmuSTS.3109.1 | 10.56 | 10.51 | 0.15 | 0.9  | 1.03  | 0.353255 | 0.486403 | 0.670093 | 0.689764 |
| MmuSTS.311.1.S1_at    | MmuSTS.311.1  | 10.79 | 10.33 | 0.17 | 0.29 | 1.37  | 0.08127  | 0.070668 | 0.431938 | 0.312011 |
| MmuSTS.3110.1.S1_at   | MmuSTS.3110.1 | 12.12 | 12.41 | 0.04 | 0.14 | -1.22 | 0.066111 | 0.060361 | 0.406104 | 0.292291 |
| MmuSTS.3111.1.S1_at   | MmuSTS.3111.1 | 10.62 | 10.42 | 0.29 | 0.16 | 1.15  | 0.729069 | 0.882599 | 0.882395 | 0.933083 |
| MmuSTS.3112.1.S1_at   | MmuSTS.3112.1 | 9.39  | 8.83  | 0.11 | 0.15 | 1.47  | 0.009223 | 0.004348 | 0.223044 | 0.092371 |
| MmuSTS.3113.1.S1_at   | MmuSTS.3113.1 | 3.34  | 3.36  | 0.53 | 0.18 | -1.01 | 0.427766 | 0.318136 | 0.716428 | 0.571046 |
| MmuSTS.3114.1.S1_at   | MmuSTS.3114.1 | 10.91 | 9.99  | 0.13 | 0.17 | 1.89  | 0.001124 | 0.000833 | 0.144631 | 0.046851 |
| MmuSTS.3115.1.S1_at   | MmuSTS.3115.1 | 5.93  | 6.26  | 0.31 | 0.14 | -1.25 | 0.211968 | 0.245144 | 0.572448 | 0.514901 |
| MmuSTS.3116.1.S1_at   | MmuSTS.3116.1 | 9.88  | 11.35 | 0.82 | 0.53 | -2.76 | 0.019177 | 0.012752 | 0.273043 | 0.145496 |
| MmuSTS.3117.1.S1_at   | MmuSTS.3117.1 | 13.41 | 13.33 | 0.14 | 0.24 | 1.06  | 0.95367  | 0.82492  | 0.982865 | 0.899441 |
| MmuSTS.3118.1.S1_at   | MmuSTS.3118.1 | 9.02  | 9.02  | 0.26 | 0.38 | 1     | 0.727702 | 0.882603 | 0.88151  | 0.933083 |
| MmuSTS.3119.1.S1_at   | MmuSTS.3119.1 | 9.16  | 10.1  | 0.19 | 0.4  | -1.91 | 0.031753 | 0.021366 | 0.32269  | 0.183015 |
| MmuSTS.312.1.S1_at    | MmuSTS.312.1  | 11.83 | 11.47 | 0.03 | 0.05 | 1.29  | 0.000223 | 0.000012 | 0.120316 | 0.016526 |
| MmuSTS.3120.1.S1_at   | MmuSTS.3120.1 | 9.57  | 9.27  | 0.2  | 0.44 | 1.23  | 0.526211 | 0.623805 | 0.774004 | 0.778193 |
| MmuSTS.3121.1.S1_at   | MmuSTS.3121.1 | 3.78  | 3.78  | 0.12 | 0.15 | 1     | 0.724614 | 0.148313 | 0.879724 | 0.422869 |
| MmuSTS.3122.1.S1_at   | MmuSTS.3122.1 | 9.35  | 9.21  | 0.53 | 1.15 | 1.1   | 0.896128 | 0.756481 | 0.958577 | 0.858223 |
| MmuSTS.3123.1.S1_at   | MmuSTS.3123.1 | 3.17  | 3.15  | 0.04 | 0.16 | 1.02  | 0.405263 | 0.551045 | 0.703082 | 0.730772 |
| MmuSTS.3124.1.S1_at   | MmuSTS.3124.1 | 8.72  | 8.41  | 0.18 | 0.24 | 1.24  | 0.060011 | 0.074317 | 0.393081 | 0.318046 |
| MmuSTS.3125.1.S1_s_at | MmuSTS.3125.1 | 11.99 | 11.99 | 0.17 | 0.04 | -1    | 0.850967 | 0.727429 | 0.940154 | 0.842336 |



|                       |               |       |       |      |      |       |          |          |          |          |
|-----------------------|---------------|-------|-------|------|------|-------|----------|----------|----------|----------|
| MmuSTS.3126.1.S1_at   | MmuSTS.3126.1 | 5.37  | 5.55  | 0.11 | 0.07 | -1.13 | 0.336845 | 0.349831 | 0.659663 | 0.593595 |
| MmuSTS.3127.1.S1_at   | MmuSTS.3127.1 | 9.9   | 9.72  | 0.21 | 0.31 | 1.14  | 0.3575   | 0.381772 | 0.672471 | 0.617972 |
| MmuSTS.3128.1.S1_at   | MmuSTS.3128.1 | 8.38  | 8.15  | 0.5  | 0.72 | 1.18  | 0.338426 | 0.176254 | 0.66086  | 0.452718 |
| MmuSTS.3129.1.S1_at   | MmuSTS.3129.1 | 10.76 | 8.88  | 0.95 | 0.73 | 3.69  | 0.050259 | 0.031931 | 0.373901 | 0.221119 |
| MmuSTS.313.1.S1_at    | MmuSTS.313.1  | 11.44 | 11.59 | 0.36 | 0.36 | -1.11 | 0.533791 | 0.159207 | 0.778434 | 0.435217 |
| MmuSTS.3130.1.S1_at   | MmuSTS.3130.1 | 5.25  | 7.79  | 1.37 | 2.55 | -5.82 | 0.307466 | 0.168953 | 0.639999 | 0.445515 |
| MmuSTS.3131.1.S1_at   | MmuSTS.3131.1 | 7.77  | 6.09  | 1.19 | 0.95 | 3.19  | 0.15385  | 0.008752 | 0.518485 | 0.124009 |
| MmuSTS.3132.1.S1_at   | MmuSTS.3132.1 | 3.66  | 4.2   | 0.22 | 0.39 | -1.46 | 0.087026 | 0.082509 | 0.440887 | 0.331625 |
| MmuSTS.3133.1.S1_at   | MmuSTS.3133.1 | 10.79 | 11.15 | 0.91 | 1    | -1.28 | 0.986306 | 0.231883 | 0.995151 | 0.503594 |
| MmuSTS.3134.1.S1_at   | MmuSTS.3134.1 | 9.8   | 9.37  | 0.16 | 0.54 | 1.35  | 0.164068 | 0.160078 | 0.528211 | 0.436234 |
| MmuSTS.3135.1.S1_at   | MmuSTS.3135.1 | 12.58 | 10.33 | 0.38 | 1.08 | 4.75  | 0.065153 | 0.059114 | 0.404019 | 0.290056 |
| MmuSTS.3136.1.S1_at   | MmuSTS.3136.1 | 8.12  | 7.52  | 0.77 | 0.33 | 1.52  | 0.143855 | 0.095178 | 0.510427 | 0.35218  |
| MmuSTS.3137.1.S1_at   | MmuSTS.3137.1 | 5.25  | 5.33  | 0.09 | 0.19 | -1.05 | 0.387554 | 0.241117 | 0.691999 | 0.511749 |
| MmuSTS.3138.1.S1_at   | MmuSTS.3138.1 | 6.61  | 6.8   | 0.12 | 0.11 | -1.14 | 0.061096 | 0.073278 | 0.394935 | 0.316233 |
| MmuSTS.3139.1.S1_at   | MmuSTS.3139.1 | 8.96  | 8.8   | 0.38 | 0.22 | 1.12  | 0.669501 | 0.806696 | 0.852167 | 0.888775 |
| MmuSTS.314.1.S1_at    | MmuSTS.314.1  | 5.43  | 5.49  | 0.6  | 0.41 | -1.04 | 0.897366 | 0.762545 | 0.95917  | 0.861881 |
| MmuSTS.3140.1.S1_at   | MmuSTS.3140.1 | 10.47 | 10.31 | 0.18 | 0.3  | 1.12  | 0.771684 | 0.379596 | 0.90393  | 0.616523 |
| MmuSTS.3141.1.S1_at   | MmuSTS.3141.1 | 5.41  | 5.47  | 0.17 | 0.04 | -1.04 | 0.860082 | 0.417471 | 0.943524 | 0.64224  |
| MmuSTS.3142.1.S1_at   | MmuSTS.3142.1 | 7.55  | 7.3   | 0.36 | 0.35 | 1.19  | 0.848749 | 0.472695 | 0.939211 | 0.68007  |
| MmuSTS.3143.1.S1_at   | MmuSTS.3143.1 | 6.63  | 6.5   | 0.86 | 0.42 | 1.09  | 0.737877 | 0.832835 | 0.88741  | 0.90408  |
| MmuSTS.3144.1.S1_at   | MmuSTS.3144.1 | 11.54 | 11.14 | 0.05 | 0.2  | 1.32  | 0.042889 | 0.040045 | 0.355489 | 0.245307 |
| MmuSTS.3145.1.S1_at   | MmuSTS.3145.1 | 11.7  | 11.31 | 0.05 | 0.3  | 1.31  | 0.237071 | 0.095352 | 0.590811 | 0.35239  |
| MmuSTS.3146.1.S1_s_at | MmuSTS.3146.1 | 11.17 | 10.03 | 0.11 | 0.6  | 2.2   | 0.043599 | 0.021945 | 0.356843 | 0.185351 |
| MmuSTS.3147.1.S1_at   | MmuSTS.3147.1 | 4.46  | 7.2   | 1.25 | 0.91 | -6.68 | 0.046877 | 0.034722 | 0.364195 | 0.230506 |
| MmuSTS.3148.1.S1_at   | MmuSTS.3148.1 | 9.2   | 8.09  | 0.24 | 0.39 | 2.16  | 0.008624 | 0.005766 | 0.219657 | 0.104378 |
| MmuSTS.3149.1.S1_at   | MmuSTS.3149.1 | 7.2   | 7.11  | 0.09 | 0.11 | 1.07  | 0.289209 | 0.386451 | 0.627218 | 0.621593 |
| MmuSTS.315.1.S1_at    | MmuSTS.315.1  | 4.93  | 4.91  | 0.47 | 0.27 | 1.01  | 0.688947 | 0.83698  | 0.861244 | 0.906826 |
| MmuSTS.3150.1.S1_at   | MmuSTS.3150.1 | 6.93  | 6.53  | 0.04 | 0.36 | 1.32  | 0.120818 | 0.325908 | 0.48574  | 0.576181 |
| MmuSTS.3151.1.S1_at   | MmuSTS.3151.1 | 3.16  | 3.03  | 0.04 | 0.09 | 1.09  | 0.308351 | 0.600398 | 0.640711 | 0.762128 |
| MmuSTS.3152.1.S1_at   | MmuSTS.3152.1 | 4.23  | 4.3   | 0.45 | 0.2  | -1.05 | 0.543087 | 0.408928 | 0.783749 | 0.63601  |
| MmuSTS.3153.1.S1_s_at | MmuSTS.3153.1 | 3.89  | 3.83  | 0.13 | 0.06 | 1.04  | 0.320577 | 0.32389  | 0.649472 | 0.574656 |
| MmuSTS.3154.1.S1_s_at | MmuSTS.3154.1 | 3.29  | 3.28  | 0.06 | 0.02 | 1     | 0.333534 | 0.484746 | 0.657626 | 0.68867  |
| MmuSTS.3155.1.S1_at   | MmuSTS.3155.1 | 5.18  | 5.13  | 0.18 | 0.16 | 1.04  | 0.874099 | 0.975148 | 0.949565 | 0.986437 |
| MmuSTS.3156.1.S1_at   | MmuSTS.3156.1 | 5.71  | 5.92  | 0.12 | 0.38 | -1.16 | 0.181617 | 0.189304 | 0.546263 | 0.465078 |
| MmuSTS.3157.1.S1_at   | MmuSTS.3157.1 | 4.91  | 5.86  | 0.25 | 1.02 | -1.94 | 0.229696 | 0.325251 | 0.586897 | 0.575648 |
| MmuSTS.3158.1.S1_at   | MmuSTS.3158.1 | 10.37 | 9.35  | 0.5  | 1.03 | 2.04  | 0.841355 | 0.741832 | 0.936191 | 0.850509 |
| MmuSTS.3159.1.S1_at   | MmuSTS.3159.1 | 3.12  | 3.19  | 0.02 | 0.1  | -1.05 | 0.374796 | 0.68915  | 0.684013 | 0.818618 |
| MmuSTS.316.1.S1_at    | MmuSTS.316.1  | 11.13 | 9.98  | 0.06 | 0.88 | 2.21  | 0.080283 | 0.076724 | 0.430342 | 0.322136 |
| MmuSTS.316.1.S1_s_at  | MmuSTS.316.1  | 11.01 | 9.99  | 0.07 | 0.77 | 2.03  | 0.070456 | 0.065266 | 0.414281 | 0.301239 |
| MmuSTS.3160.1.S1_at   | MmuSTS.3160.1 | 4.56  | 4.62  | 0.02 | 0.05 | -1.04 | 0.060336 | 0.302892 | 0.393348 | 0.560356 |
| MmuSTS.3161.1.S1_at   | MmuSTS.3161.1 | 9.17  | 9.37  | 0.24 | 0.4  | -1.15 | 0.480936 | 0.362513 | 0.7488   | 0.603067 |

|                       |               |       |       |      |      |       |          |          |          |          |
|-----------------------|---------------|-------|-------|------|------|-------|----------|----------|----------|----------|
| MmuSTS.3162.1.S1_at   | MmuSTS.3162.1 | 10.54 | 10.31 | 0.15 | 0.23 | 1.17  | 0.194687 | 0.237411 | 0.558163 | 0.508117 |
| MmuSTS.3163.1.S1_at   | MmuSTS.3163.1 | 10.23 | 9.89  | 0.2  | 0.95 | 1.26  | 0.434585 | 0.58204  | 0.720596 | 0.750784 |
| MmuSTS.3164.1.S1_at   | MmuSTS.3164.1 | 10.65 | 12.72 | 0.66 | 1.61 | -4.2  | 0.234252 | 0.13172  | 0.588653 | 0.403854 |
| MmuSTS.3165.1.S1_at   | MmuSTS.3165.1 | 10.21 | 10.66 | 0.24 | 0.43 | -1.36 | 0.071569 | 0.057001 | 0.415505 | 0.284868 |
| MmuSTS.3166.1.S1_s_at | MmuSTS.3166.1 | 3.98  | 4.39  | 1.34 | 0.6  | -1.33 | 0.909043 | 0.439464 | 0.963975 | 0.6582   |
| MmuSTS.3167.1.S1_at   | MmuSTS.3167.1 | 8.05  | 7.73  | 0.16 | 0.25 | 1.24  | 0.214599 | 0.257464 | 0.575095 | 0.52521  |
| MmuSTS.3168.1.S1_at   | MmuSTS.3168.1 | 8.05  | 8.57  | 0.19 | 0.06 | -1.42 | 0.014667 | 0.007509 | 0.254553 | 0.116291 |
| MmuSTS.3169.1.S1_at   | MmuSTS.3169.1 | 2.96  | 3.14  | 0.14 | 0.04 | -1.13 | 0.296668 | 0.465304 | 0.632686 | 0.675704 |
| MmuSTS.317.1.S1_at    | MmuSTS.317.1  | 9.97  | 10.14 | 0.09 | 0.33 | -1.12 | 0.150881 | 0.087552 | 0.515634 | 0.340753 |
| MmuSTS.3170.1.S1_at   | MmuSTS.3170.1 | 10.46 | 10.08 | 0.09 | 0.26 | 1.3   | 0.068077 | 0.012191 | 0.409262 | 0.14287  |
| MmuSTS.3171.1.S1_at   | MmuSTS.3171.1 | 8.11  | 8.29  | 0.21 | 0.15 | -1.13 | 0.119014 | 0.08903  | 0.483719 | 0.342893 |
| MmuSTS.3172.1.S1_at   | MmuSTS.3172.1 | 4.08  | 4.17  | 0.29 | 0.25 | -1.06 | 0.8195   | 0.277727 | 0.926528 | 0.541648 |
| MmuSTS.3173.1.S1_at   | MmuSTS.3173.1 | 9.89  | 9.59  | 0.35 | 0.34 | 1.23  | 0.505831 | 0.458902 | 0.761826 | 0.671498 |
| MmuSTS.3174.1.S1_at   | MmuSTS.3174.1 | 9.87  | 9.84  | 0.34 | 0.63 | 1.02  | 0.390105 | 0.198585 | 0.693398 | 0.473391 |
| MmuSTS.3175.1.S1_at   | MmuSTS.3175.1 | 10.4  | 11.12 | 0.17 | 0.46 | -1.64 | 0.176145 | 0.131211 | 0.539664 | 0.403252 |
| MmuSTS.3176.1.S1_at   | MmuSTS.3176.1 | 10.34 | 11.44 | 0.37 | 1.19 | -2.15 | 0.328961 | 0.313611 | 0.654754 | 0.567977 |
| MmuSTS.3177.1.S1_at   | MmuSTS.3177.1 | 11    | 10.93 | 0.06 | 0.11 | 1.05  | 0.765932 | 0.023598 | 0.901561 | 0.192397 |
| MmuSTS.3178.1.S1_at   | MmuSTS.3178.1 | 12.65 | 12.57 | 0.13 | 0.35 | 1.06  | 0.505099 | 0.370257 | 0.761548 | 0.609406 |
| MmuSTS.3179.1.S1_at   | MmuSTS.3179.1 | 7.5   | 9.02  | 0.64 | 2.03 | -2.86 | 0.390084 | 0.307597 | 0.693398 | 0.563785 |
| MmuSTS.318.1.S1_at    | MmuSTS.318.1  | 7.28  | 7.31  | 0.13 | 0.36 | -1.02 | 0.942257 | 0.121475 | 0.977916 | 0.39062  |
| MmuSTS.3180.1.S1_at   | MmuSTS.3180.1 | 10.89 | 11.52 | 0.21 | 0.34 | -1.55 | 0.025043 | 0.018098 | 0.297733 | 0.169516 |
| MmuSTS.3181.1.S1_at   | MmuSTS.3181.1 | 6.65  | 7.44  | 0.39 | 0.67 | -1.73 | 0.087845 | 0.036991 | 0.442159 | 0.236733 |
| MmuSTS.3182.1.S1_s_at | MmuSTS.3182.1 | 11.59 | 11.21 | 0.29 | 0.29 | 1.3   | 0.18823  | 0.247238 | 0.551197 | 0.516446 |
| MmuSTS.3183.1.S1_at   | MmuSTS.3183.1 | 11.22 | 10.94 | 0.18 | 0.06 | 1.21  | 0.086429 | 0.090344 | 0.440232 | 0.34479  |
| MmuSTS.3184.1.S1_at   | MmuSTS.3184.1 | 11.46 | 11.38 | 0.17 | 1.1  | 1.06  | 0.893367 | 0.70846  | 0.957599 | 0.830919 |
| MmuSTS.3185.1.S1_at   | MmuSTS.3185.1 | 7.77  | 8.64  | 0.2  | 0.8  | -1.82 | 0.178808 | 0.225868 | 0.543165 | 0.498248 |
| MmuSTS.3186.1.S1_at   | MmuSTS.3186.1 | 11.39 | 11.39 | 0.01 | 0.09 | 1     | 0.400923 | 0.126227 | 0.700469 | 0.396754 |
| MmuSTS.3187.1.S1_at   | MmuSTS.3187.1 | 8.68  | 9.1   | 0.22 | 0.07 | -1.34 | 0.034835 | 0.124845 | 0.333964 | 0.395219 |
| MmuSTS.3188.1.S1_at   | MmuSTS.3188.1 | 9.46  | 9.2   | 0.06 | 0.62 | 1.2   | 0.18191  | 0.226769 | 0.546458 | 0.499176 |
| MmuSTS.3189.1.S1_at   | MmuSTS.3189.1 | 11.41 | 10.73 | 0.11 | 0.04 | 1.61  | 0.000511 | 0.000065 | 0.136818 | 0.025805 |
| MmuSTS.319.1.S1_at    | MmuSTS.319.1  | 4.98  | 5.91  | 0.18 | 0.2  | -1.91 | 0.004273 | 0.001338 | 0.18216  | 0.056366 |
| MmuSTS.3190.1.S1_at   | MmuSTS.3190.1 | 4.62  | 4.77  | 0.05 | 0.05 | -1.1  | 0.026482 | 0.016286 | 0.303288 | 0.161712 |
| MmuSTS.3191.1.S1_at   | MmuSTS.3191.1 | 9.33  | 8.68  | 0.23 | 0.34 | 1.57  | 0.091037 | 0.033237 | 0.446877 | 0.225803 |
| MmuSTS.3192.1.S1_at   | MmuSTS.3192.1 | 10.3  | 10.18 | 0.14 | 0.2  | 1.09  | 0.589797 | 0.617273 | 0.809629 | 0.773326 |
| MmuSTS.3193.1.S1_at   | MmuSTS.3193.1 | 12    | 11.44 | 0.21 | 0.35 | 1.47  | 0.116503 | 0.079614 | 0.480339 | 0.326981 |
| MmuSTS.3194.1.S1_at   | MmuSTS.3194.1 | 8.15  | 8.76  | 0.1  | 0.08 | -1.52 | 0.001769 | 0.00154  | 0.154452 | 0.05949  |
| MmuSTS.3195.1.S1_at   | MmuSTS.3195.1 | 5.76  | 5.78  | 0.2  | 0.05 | -1.02 | 0.53588  | 0.343814 | 0.779351 | 0.589508 |
| MmuSTS.3196.1.S1_at   | MmuSTS.3196.1 | 8.64  | 8.44  | 0.25 | 0.02 | 1.15  | 0.269519 | 0.388511 | 0.614187 | 0.622897 |
| MmuSTS.3197.1.S1_at   | MmuSTS.3197.1 | 7.41  | 8.3   | 0.94 | 1.14 | -1.86 | 0.358897 | 0.018182 | 0.673592 | 0.169673 |
| MmuSTS.3198.1.S1_at   | MmuSTS.3198.1 | 9.37  | 9.04  | 0.03 | 0.47 | 1.26  | 0.826212 | 0.722138 | 0.929365 | 0.839044 |
| MmuSTS.3199.1.S1_at   | MmuSTS.3199.1 | 8.6   | 8.8   | 0.23 | 0.4  | -1.15 | 0.290571 | 0.309846 | 0.628315 | 0.565046 |

|                      |               |       |       |      |      |       |          |          |          |          |
|----------------------|---------------|-------|-------|------|------|-------|----------|----------|----------|----------|
| MmuSTS.32.1.S1_at    | MmuSTS.32.1   | 9.52  | 9.75  | 0.15 | 0.94 | -1.18 | 0.604084 | 0.806176 | 0.81746  | 0.88857  |
| MmuSTS.320.1.S1_at   | MmuSTS.320.1  | 5.73  | 5.89  | 0.25 | 0.2  | -1.11 | 0.70745  | 0.797385 | 0.871104 | 0.883171 |
| MmuSTS.3200.1.S1_at  | MmuSTS.3200.1 | 9.76  | 9.93  | 0.25 | 0.18 | -1.12 | 0.140469 | 0.126549 | 0.508385 | 0.397149 |
| MmuSTS.3201.1.S1_at  | MmuSTS.3201.1 | 10.67 | 10.9  | 0.2  | 0.28 | -1.17 | 0.250824 | 0.310113 | 0.600424 | 0.565333 |
| MmuSTS.3202.1.S1_at  | MmuSTS.3202.1 | 8.38  | 8.76  | 0.22 | 1.31 | -1.3  | 0.656845 | 0.54485  | 0.845614 | 0.727178 |
| MmuSTS.3203.1.S1_at  | MmuSTS.3203.1 | 13.01 | 12.42 | 0.1  | 0.45 | 1.5   | 0.275167 | 0.269101 | 0.617694 | 0.534447 |
| MmuSTS.3204.1.S1_at  | MmuSTS.3204.1 | 10.86 | 10.52 | 0.21 | 1.12 | 1.26  | 0.440142 | 0.55779  | 0.724118 | 0.73524  |
| MmuSTS.3205.1.S1_at  | MmuSTS.3205.1 | 8.91  | 8.65  | 0.23 | 0.27 | 1.2   | 0.122253 | 0.138888 | 0.487436 | 0.412037 |
| MmuSTS.3206.1.S1_at  | MmuSTS.3206.1 | 10.88 | 11.28 | 0.05 | 0.08 | -1.32 | 0.001993 | 0.000155 | 0.155636 | 0.030072 |
| MmuSTS.3207.1.S1_at  | MmuSTS.3207.1 | 10.86 | 10.47 | 0.22 | 0.12 | 1.31  | 0.055352 | 0.098108 | 0.383689 | 0.356202 |
| MmuSTS.3208.1.S1_at  | MmuSTS.3208.1 | 11.17 | 10.42 | 0.07 | 0.32 | 1.68  | 0.019225 | 0.011303 | 0.273202 | 0.138076 |
| MmuSTS.3209.1.S1_at  | MmuSTS.3209.1 | 12.18 | 12.13 | 0.12 | 0.1  | 1.03  | 0.630575 | 0.152617 | 0.832156 | 0.427435 |
| MmuSTS.321.1.S1_s_at | MmuSTS.321.1  | 10.42 | 11.16 | 0.1  | 0.34 | -1.66 | 0.062057 | 0.040528 | 0.39703  | 0.246264 |
| MmuSTS.3210.1.S1_at  | MmuSTS.3210.1 | 4.57  | 4.57  | 0.08 | 0    | -1    | 0.602826 | 0.775099 | 0.816768 | 0.869048 |
| MmuSTS.3211.1.S1_at  | MmuSTS.3211.1 | 9.4   | 9.47  | 0.34 | 0.37 | -1.05 | 0.746668 | 0.565165 | 0.891546 | 0.739748 |
| MmuSTS.3212.1.S1_at  | MmuSTS.3212.1 | 5.79  | 5.7   | 0.91 | 1.33 | 1.06  | 0.884625 | 0.64259  | 0.953779 | 0.790343 |
| MmuSTS.3213.1.S1_at  | MmuSTS.3213.1 | 10.14 | 9.96  | 0.15 | 0.31 | 1.14  | 0.404174 | 0.529476 | 0.7026   | 0.717289 |
| MmuSTS.3214.1.S1_at  | MmuSTS.3214.1 | 8.51  | 9.51  | 0.76 | 0.5  | -2.01 | 0.046194 | 0.044013 | 0.362604 | 0.254195 |
| MmuSTS.3215.1.S1_at  | MmuSTS.3215.1 | 9.17  | 9.42  | 0.04 | 0.42 | -1.19 | 0.330948 | 0.449113 | 0.656063 | 0.664892 |
| MmuSTS.3216.1.S1_at  | MmuSTS.3216.1 | 4.4   | 4.29  | 0.25 | 0.24 | 1.08  | 0.946713 | 0.612606 | 0.979465 | 0.770091 |
| MmuSTS.3217.1.S1_at  | MmuSTS.3217.1 | 12.76 | 13.35 | 0.37 | 0.18 | -1.5  | 0.031472 | 0.010543 | 0.321877 | 0.134072 |
| MmuSTS.3218.1.S1_at  | MmuSTS.3218.1 | 9.75  | 10.69 | 0.23 | 0.31 | -1.92 | 0.007982 | 0.00309  | 0.214639 | 0.081194 |
| MmuSTS.3219.1.S1_at  | MmuSTS.3219.1 | 9.82  | 9.21  | 0.27 | 0.18 | 1.53  | 0.021453 | 0.011779 | 0.282524 | 0.140575 |
| MmuSTS.322.1.S1_at   | MmuSTS.322.1  | 5.21  | 5.34  | 0.2  | 0.18 | -1.1  | 0.631164 | 0.674359 | 0.832539 | 0.809748 |
| MmuSTS.3220.1.S1_at  | MmuSTS.3220.1 | 9.66  | 8.49  | 0.52 | 0.45 | 2.26  | 0.040687 | 0.020723 | 0.350025 | 0.180645 |
| MmuSTS.3221.1.S1_at  | MmuSTS.3221.1 | 4.87  | 5.35  | 0.15 | 0.18 | -1.39 | 0.103023 | 0.134247 | 0.46254  | 0.406457 |
| MmuSTS.3222.1.S1_at  | MmuSTS.3222.1 | 8.67  | 9.08  | 0.26 | 0.53 | -1.32 | 0.178478 | 0.204447 | 0.542847 | 0.478821 |
| MmuSTS.3223.1.S1_at  | MmuSTS.3223.1 | 9.32  | 9.72  | 0.14 | 0.49 | -1.32 | 0.132823 | 0.152654 | 0.498913 | 0.427483 |
| MmuSTS.3224.1.S1_at  | MmuSTS.3224.1 | 6.66  | 7.93  | 0.65 | 2.4  | -2.41 | 0.561863 | 0.13066  | 0.795002 | 0.402666 |
| MmuSTS.3225.1.S1_at  | MmuSTS.3225.1 | 10.24 | 9.96  | 0.09 | 0.24 | 1.22  | 0.223126 | 0.015715 | 0.581722 | 0.158858 |
| MmuSTS.3226.1.S1_at  | MmuSTS.3226.1 | 5.91  | 5.99  | 0.2  | 0.16 | -1.05 | 0.445694 | 0.600289 | 0.727885 | 0.762019 |
| MmuSTS.3227.1.S1_at  | MmuSTS.3227.1 | 10.1  | 9.42  | 0.1  | 0.28 | 1.6   | 0.019955 | 0.017412 | 0.276365 | 0.166995 |
| MmuSTS.3228.1.S1_at  | MmuSTS.3228.1 | 7.24  | 7.55  | 0.23 | 0.23 | -1.24 | 0.07985  | 0.079549 | 0.430147 | 0.326897 |
| MmuSTS.3229.1.S1_at  | MmuSTS.3229.1 | 5.93  | 5.34  | 0.3  | 0.97 | 1.5   | 0.886384 | 0.979875 | 0.954566 | 0.989228 |
| MmuSTS.323.1.S1_at   | MmuSTS.323.1  | 6.63  | 6.42  | 0.19 | 0.03 | 1.15  | 0.362476 | 0.509129 | 0.676038 | 0.704012 |
| MmuSTS.3230.1.S1_at  | MmuSTS.3230.1 | 4.42  | 5.1   | 0.35 | 0.41 | -1.6  | 0.203684 | 0.319425 | 0.566259 | 0.571762 |
| MmuSTS.3231.1.S1_at  | MmuSTS.3231.1 | 7.6   | 7.58  | 0.09 | 0.09 | 1.02  | 0.745693 | 0.116685 | 0.891214 | 0.383864 |
| MmuSTS.3232.1.S1_at  | MmuSTS.3232.1 | 5.1   | 5.5   | 0.15 | 0.16 | -1.31 | 0.076349 | 0.013046 | 0.424774 | 0.14696  |
| MmuSTS.3233.1.S1_at  | MmuSTS.3233.1 | 5.42  | 5.79  | 0.18 | 0.26 | -1.3  | 0.17595  | 0.211608 | 0.53945  | 0.485681 |
| MmuSTS.3234.1.S1_at  | MmuSTS.3234.1 | 7.92  | 8.86  | 0.31 | 0.76 | -1.92 | 0.031033 | 0.009474 | 0.32048  | 0.128164 |
| MmuSTS.3235.1.S1_at  | MmuSTS.3235.1 | 3.29  | 3.44  | 0.07 | 0.2  | -1.11 | 0.216352 | 0.291987 | 0.575996 | 0.552163 |

|                       |               |       |       |      |      |        |          |          |          |          |
|-----------------------|---------------|-------|-------|------|------|--------|----------|----------|----------|----------|
| MmuSTS.3236.1.S1_at   | MmuSTS.3236.1 | 12.13 | 11.84 | 0.13 | 0.06 | 1.23   | 0.011338 | 0.004064 | 0.235384 | 0.090288 |
| MmuSTS.3237.1.S1_at   | MmuSTS.3237.1 | 10.12 | 8.36  | 0.24 | 0.34 | 3.39   | 0.001109 | 0.00018  | 0.144223 | 0.030511 |
| MmuSTS.3238.1.S1_at   | MmuSTS.3238.1 | 9.27  | 9.65  | 0.37 | 0.74 | -1.3   | 0.204477 | 0.144682 | 0.56696  | 0.418546 |
| MmuSTS.3239.1.S1_at   | MmuSTS.3239.1 | 8.97  | 10.68 | 0.47 | 1.46 | -3.27  | 0.088084 | 0.091344 | 0.442469 | 0.346281 |
| MmuSTS.324.1.S1_at    | MmuSTS.324.1  | 12.61 | 12.87 | 0.17 | 0.22 | -1.2   | 0.145412 | 0.160962 | 0.511449 | 0.437116 |
| MmuSTS.3240.1.S1_at   | MmuSTS.3240.1 | 10.76 | 10.34 | 0.2  | 0.69 | 1.34   | 0.364859 | 0.445252 | 0.677685 | 0.662338 |
| MmuSTS.3241.1.S1_at   | MmuSTS.3241.1 | 9.31  | 9.24  | 0.26 | 0.07 | 1.05   | 0.573155 | 0.05441  | 0.801055 | 0.278799 |
| MmuSTS.3242.1.S1_at   | MmuSTS.3242.1 | 12.76 | 12.92 | 0.13 | 0.37 | -1.12  | 0.825485 | 0.728343 | 0.929243 | 0.84296  |
| MmuSTS.3243.1.S1_at   | MmuSTS.3243.1 | 12.86 | 12.68 | 0.18 | 0.26 | 1.13   | 0.545916 | 0.335517 | 0.785219 | 0.583326 |
| MmuSTS.3244.1.S1_at   | MmuSTS.3244.1 | 12.36 | 11.93 | 0.53 | 0.87 | 1.34   | 0.116276 | 0.126376 | 0.479815 | 0.396902 |
| MmuSTS.3245.1.S1_at   | MmuSTS.3245.1 | 10.88 | 11.13 | 0.26 | 0.1  | -1.19  | 0.13646  | 0.156466 | 0.503566 | 0.431846 |
| MmuSTS.3246.1.S1_at   | MmuSTS.3246.1 | 10.84 | 11.69 | 0.13 | 0.4  | -1.81  | 0.01454  | 0.006955 | 0.253689 | 0.112678 |
| MmuSTS.3247.1.S1_at   | MmuSTS.3247.1 | 9.28  | 8.88  | 0.33 | 0.3  | 1.32   | 0.398095 | 0.327605 | 0.698541 | 0.577448 |
| MmuSTS.3248.1.S1_at   | MmuSTS.3248.1 | 10.56 | 10.4  | 0.05 | 0.11 | 1.11   | 0.097187 | 0.197819 | 0.456142 | 0.472721 |
| MmuSTS.3249.1.S1_at   | MmuSTS.3249.1 | 7.23  | 8.41  | 0.73 | 1.45 | -2.27  | 0.515824 | 0.539167 | 0.767629 | 0.723588 |
| MmuSTS.325.1.S1_at    | MmuSTS.325.1  | 3.79  | 3.87  | 0.18 | 0.13 | -1.06  | 0.571852 | 0.707797 | 0.800395 | 0.830472 |
| MmuSTS.325.1.S1_s_at  | MmuSTS.325.1  | 5.13  | 5.15  | 0.05 | 0.16 | -1.01  | 0.950602 | 0.75695  | 0.981366 | 0.858495 |
| MmuSTS.3250.1.S1_at   | MmuSTS.3250.1 | 10.64 | 10.83 | 0.09 | 0.26 | -1.14  | 0.775564 | 0.080655 | 0.905841 | 0.328444 |
| MmuSTS.3251.1.S1_at   | MmuSTS.3251.1 | 7.51  | 11.38 | 1.4  | 2.59 | -14.62 | 0.283663 | 0.190371 | 0.623679 | 0.465906 |
| MmuSTS.3252.1.S1_at   | MmuSTS.3252.1 | 6.52  | 8.33  | 0.52 | 1.89 | -3.49  | 0.233867 | 0.190219 | 0.588317 | 0.465854 |
| MmuSTS.3253.1.S1_s_at | MmuSTS.3253.1 | 12.75 | 13.05 | 0.53 | 0.29 | -1.23  | 0.452311 | 0.033803 | 0.731986 | 0.227489 |
| MmuSTS.3254.1.S1_at   | MmuSTS.3254.1 | 6.92  | 7.62  | 0.95 | 0.49 | -1.63  | 0.84431  | 0.72393  | 0.937482 | 0.840188 |
| MmuSTS.3255.1.S1_at   | MmuSTS.3255.1 | 6.27  | 6.37  | 0.24 | 0.51 | -1.07  | 0.797402 | 0.917809 | 0.916048 | 0.954011 |
| MmuSTS.3256.1.S1_at   | MmuSTS.3256.1 | 11.85 | 11.67 | 0.12 | 0.38 | 1.14   | 0.650569 | 0.805093 | 0.842789 | 0.887962 |
| MmuSTS.3257.1.S1_at   | MmuSTS.3257.1 | 7.09  | 6.18  | 0.26 | 0.33 | 1.88   | 0.044062 | 0.011048 | 0.357722 | 0.136843 |
| MmuSTS.3258.1.S1_at   | MmuSTS.3258.1 | 6.63  | 6.73  | 0.11 | 0.3  | -1.07  | 0.322738 | 0.310693 | 0.651245 | 0.565787 |
| MmuSTS.3259.1.S1_at   | MmuSTS.3259.1 | 8     | 7.96  | 0.58 | 0.24 | 1.02   | 0.941097 | 0.299705 | 0.97764  | 0.558037 |
| MmuSTS.326.1.S1_at    | MmuSTS.326.1  | 12.61 | 12.42 | 0.07 | 0.14 | 1.14   | 0.178922 | 0.213884 | 0.543331 | 0.48758  |
| MmuSTS.3260.1.S1_at   | MmuSTS.3260.1 | 4.47  | 4.36  | 0.1  | 0.13 | 1.07   | 0.776943 | 0.594672 | 0.906631 | 0.758623 |
| MmuSTS.3261.1.S1_at   | MmuSTS.3261.1 | 11.25 | 10.63 | 0.16 | 0.5  | 1.54   | 0.1034   | 0.082219 | 0.462888 | 0.331091 |
| MmuSTS.3262.1.S1_at   | MmuSTS.3262.1 | 9.97  | 10.67 | 0.23 | 0.15 | -1.63  | 0.021359 | 0.017871 | 0.282524 | 0.168774 |
| MmuSTS.3263.1.S1_at   | MmuSTS.3263.1 | 10.22 | 10.74 | 0.47 | 0.34 | -1.43  | 0.290586 | 0.400916 | 0.628322 | 0.630658 |
| MmuSTS.3264.1.S1_at   | MmuSTS.3264.1 | 13.91 | 13.13 | 0.05 | 0.51 | 1.71   | 0.037073 | 0.028536 | 0.340697 | 0.210754 |
| MmuSTS.3265.1.S1_at   | MmuSTS.3265.1 | 7.56  | 7.52  | 0.05 | 0.43 | 1.02   | 0.930086 | 0.228151 | 0.97297  | 0.500327 |
| MmuSTS.3266.1.S1_at   | MmuSTS.3266.1 | 12.67 | 12.34 | 0.24 | 0.15 | 1.26   | 0.08664  | 0.040097 | 0.440475 | 0.245388 |
| MmuSTS.3267.1.S1_at   | MmuSTS.3267.1 | 3.87  | 3.82  | 0.29 | 0.13 | 1.04   | 0.339315 | 0.385125 | 0.661232 | 0.620662 |
| MmuSTS.3268.1.S1_at   | MmuSTS.3268.1 | 10.99 | 10.47 | 0.21 | 0.3  | 1.44   | 0.055812 | 0.047431 | 0.384768 | 0.262486 |
| MmuSTS.3269.1.S1_at   | MmuSTS.3269.1 | 8.11  | 9.6   | 0.61 | 1.16 | -2.81  | 0.208602 | 0.114562 | 0.570384 | 0.38111  |
| MmuSTS.3270.1.S1_at   | MmuSTS.3270.1 | 8.82  | 8.26  | 0.25 | 0.09 | 1.48   | 0.0175   | 0.057652 | 0.267445 | 0.286366 |
| MmuSTS.3270.1.S1_s_at | MmuSTS.3270.1 | 8.35  | 7.85  | 0.21 | 0.06 | 1.42   | 0.013018 | 0.027502 | 0.245262 | 0.207161 |
| MmuSTS.3271.1.S1_at   | MmuSTS.3271.1 | 9.65  | 9.49  | 0.13 | 0.32 | 1.12   | 0.310733 | 0.41351  | 0.642654 | 0.639648 |

|                       |               |       |       |      |      |       |          |          |          |          |
|-----------------------|---------------|-------|-------|------|------|-------|----------|----------|----------|----------|
| MmuSTS.3272.1.S1_at   | MmuSTS.3272.1 | 8.92  | 8.39  | 0.26 | 0.94 | 1.44  | 0.207413 | 0.257304 | 0.56957  | 0.525108 |
| MmuSTS.3273.1.S1_at   | MmuSTS.3273.1 | 8.39  | 8.16  | 0.22 | 0.54 | 1.18  | 0.885857 | 0.973533 | 0.954212 | 0.985633 |
| MmuSTS.3274.1.S1_at   | MmuSTS.3274.1 | 10.24 | 10.7  | 0.27 | 0.42 | -1.37 | 0.263933 | 0.23435  | 0.609746 | 0.505629 |
| MmuSTS.3275.1.S1_at   | MmuSTS.3275.1 | 12.58 | 11.39 | 0.2  | 0.41 | 2.28  | 0.009004 | 0.001944 | 0.222023 | 0.065813 |
| MmuSTS.3276.1.S1_at   | MmuSTS.3276.1 | 10.8  | 10.92 | 0.12 | 0.15 | -1.08 | 0.230653 | 0.301014 | 0.587222 | 0.559198 |
| MmuSTS.3277.1.S1_at   | MmuSTS.3277.1 | 9.36  | 8.64  | 0.56 | 0.18 | 1.65  | 0.128826 | 0.148951 | 0.494689 | 0.423294 |
| MmuSTS.3278.1.S1_at   | MmuSTS.3278.1 | 9.39  | 9.25  | 0.09 | 0.2  | 1.1   | 0.225201 | 0.311397 | 0.583077 | 0.566451 |
| MmuSTS.3279.1.S1_at   | MmuSTS.3279.1 | 7.2   | 7.44  | 0.15 | 0.24 | -1.18 | 0.289036 | 0.160903 | 0.627041 | 0.437116 |
| MmuSTS.328.1.S1_at    | MmuSTS.328.1  | 6.77  | 6.88  | 0.08 | 0.14 | -1.08 | 0.399029 | 0.692042 | 0.699064 | 0.82091  |
| MmuSTS.328.1.S1_s_at  | MmuSTS.328.1  | 5.22  | 5.5   | 0.27 | 0.19 | -1.21 | 0.437722 | 0.505058 | 0.722586 | 0.70197  |
| MmuSTS.3280.1.S1_at   | MmuSTS.3280.1 | 7.08  | 5.16  | 0.68 | 0.61 | 3.78  | 0.044083 | 0.032275 | 0.357761 | 0.222396 |
| MmuSTS.3281.1.S1_at   | MmuSTS.3281.1 | 9.89  | 9.71  | 0.25 | 0.37 | 1.13  | 0.349519 | 0.116682 | 0.667847 | 0.383864 |
| MmuSTS.3282.1.S1_at   | MmuSTS.3282.1 | 6.41  | 5.9   | 0.44 | 0.27 | 1.43  | 0.141785 | 0.051845 | 0.509159 | 0.273151 |
| MmuSTS.3283.1.S1_at   | MmuSTS.3283.1 | 7.84  | 7.49  | 0.25 | 0.27 | 1.28  | 0.362324 | 0.494517 | 0.675921 | 0.694909 |
| MmuSTS.3284.1.S1_at   | MmuSTS.3284.1 | 7.94  | 7.8   | 0.27 | 1.13 | 1.1   | 0.702823 | 0.545925 | 0.868924 | 0.727697 |
| MmuSTS.3285.1.S1_at   | MmuSTS.3285.1 | 8.57  | 9.65  | 0.34 | 1.34 | -2.12 | 0.354245 | 0.368648 | 0.670421 | 0.608143 |
| MmuSTS.3286.1.S1_at   | MmuSTS.3286.1 | 6.78  | 6.94  | 0.2  | 0.09 | -1.11 | 0.251397 | 0.081229 | 0.600793 | 0.329351 |
| MmuSTS.3287.1.S1_at   | MmuSTS.3287.1 | 8.83  | 9.04  | 0.29 | 0.15 | -1.16 | 0.275891 | 0.385245 | 0.617968 | 0.620709 |
| MmuSTS.3288.1.S1_at   | MmuSTS.3288.1 | 8.7   | 8.28  | 0.65 | 0.84 | 1.34  | 0.476847 | 0.044611 | 0.746299 | 0.255589 |
| MmuSTS.3289.1.S1_at   | MmuSTS.3289.1 | 9.37  | 9.23  | 0.13 | 0.22 | 1.1   | 0.870193 | 0.812761 | 0.9481   | 0.891794 |
| MmuSTS.329.1.S1_at    | MmuSTS.329.1  | 5.01  | 5.03  | 0.21 | 0.09 | -1.01 | 0.932044 | 0.599041 | 0.973719 | 0.761257 |
| MmuSTS.3290.1.S1_at   | MmuSTS.3290.1 | 4.45  | 4.82  | 0.07 | 0.26 | -1.29 | 0.034583 | 0.002194 | 0.333297 | 0.069206 |
| MmuSTS.3291.1.S1_at   | MmuSTS.3291.1 | 11.42 | 12.04 | 0.22 | 0.48 | -1.53 | 0.192846 | 0.218664 | 0.556141 | 0.492361 |
| MmuSTS.3292.1.S1_at   | MmuSTS.3292.1 | 11.86 | 12.2  | 0.32 | 0.57 | -1.27 | 0.56639  | 0.101323 | 0.797591 | 0.361094 |
| MmuSTS.3293.1.S1_at   | MmuSTS.3293.1 | 3.19  | 3.28  | 0.21 | 0.22 | -1.06 | 0.66728  | 0.639675 | 0.850921 | 0.788389 |
| MmuSTS.3294.1.S1_at   | MmuSTS.3294.1 | 6.1   | 5.53  | 0.9  | 0.56 | 1.48  | 0.306036 | 0.521605 | 0.639293 | 0.712505 |
| MmuSTS.3295.1.S1_at   | MmuSTS.3295.1 | 3.18  | 3.18  | 0.11 | 0.11 | 1     | 0.55955  | 0.638746 | 0.793957 | 0.787827 |
| MmuSTS.3296.1.S1_at   | MmuSTS.3296.1 | 6.55  | 7.04  | 0.39 | 0.23 | -1.4  | 0.092939 | 0.123589 | 0.450095 | 0.393637 |
| MmuSTS.3297.1.S1_at   | MmuSTS.3297.1 | 11.42 | 11.28 | 0.12 | 0.29 | 1.1   | 0.272545 | 0.341225 | 0.616155 | 0.587336 |
| MmuSTS.3298.1.S1_at   | MmuSTS.3298.1 | 7.64  | 7.06  | 0.15 | 0.52 | 1.5   | 0.305086 | 0.402036 | 0.639014 | 0.631153 |
| MmuSTS.3299.1.S1_at   | MmuSTS.3299.1 | 10.36 | 10.08 | 0.69 | 0.99 | 1.22  | 0.928978 | 0.933513 | 0.972607 | 0.962216 |
| MmuSTS.33.1.S1_at     | MmuSTS.33.1   | 9.78  | 9.4   | 0.74 | 0.49 | 1.3   | 0.665702 | 0.646578 | 0.85006  | 0.792965 |
| MmuSTS.330.1.S1_s_at  | MmuSTS.330.1  | 3.02  | 3.1   | 0.07 | 0.15 | -1.06 | 0.331694 | 0.489562 | 0.656468 | 0.691824 |
| MmuSTS.3300.1.S1_at   | MmuSTS.3300.1 | 12.73 | 12.36 | 0.2  | 0.17 | 1.29  | 0.036479 | 0.025566 | 0.339399 | 0.200612 |
| MmuSTS.3301.1.S1_s_at | MmuSTS.3301.1 | 13.53 | 13.43 | 0.05 | 0.09 | 1.07  | 0.10112  | 0.162389 | 0.461009 | 0.438575 |
| MmuSTS.3302.1.S1_at   | MmuSTS.3302.1 | 11.35 | 11.47 | 0.36 | 0.42 | -1.09 | 0.260893 | 0.339091 | 0.60749  | 0.585891 |
| MmuSTS.3303.1.S1_at   | MmuSTS.3303.1 | 6.04  | 6.26  | 0.92 | 1.78 | -1.16 | 0.749987 | 0.902383 | 0.892853 | 0.94454  |
| MmuSTS.3304.1.S1_at   | MmuSTS.3304.1 | 11.63 | 11.41 | 0.17 | 0.22 | 1.17  | 0.594937 | 0.112478 | 0.812253 | 0.377815 |
| MmuSTS.3305.1.S1_at   | MmuSTS.3305.1 | 8.81  | 9.67  | 0.43 | 1.8  | -1.82 | 0.536889 | 0.418202 | 0.779671 | 0.642663 |
| MmuSTS.3306.1.S1_at   | MmuSTS.3306.1 | 6.56  | 6.54  | 0.26 | 0.19 | 1.01  | 0.886687 | 0.60637  | 0.954695 | 0.765747 |
| MmuSTS.3306.1.S1_s_at | MmuSTS.3306.1 | 6.17  | 6.47  | 0.26 | 0.26 | -1.23 | 0.224383 | 0.280599 | 0.582716 | 0.543772 |

|                       |               |       |       |      |      |        |          |          |          |          |
|-----------------------|---------------|-------|-------|------|------|--------|----------|----------|----------|----------|
| MmuSTS.3307.1.S1_at   | MmuSTS.3307.1 | 9.17  | 9.88  | 0.26 | 1.39 | -1.63  | 0.52912  | 0.325277 | 0.775878 | 0.575648 |
| MmuSTS.3308.1.S1_at   | MmuSTS.3308.1 | 7.25  | 8.25  | 0.49 | 0.3  | -2     | 0.037375 | 0.021907 | 0.341309 | 0.185235 |
| MmuSTS.3309.1.S1_at   | MmuSTS.3309.1 | 8.42  | 8.87  | 0.27 | 0.47 | -1.36  | 0.211887 | 0.295449 | 0.572347 | 0.554885 |
| MmuSTS.331.1.S1_s_at  | MmuSTS.331.1  | 3.77  | 4.07  | 0.1  | 0.19 | -1.23  | 0.111659 | 0.173849 | 0.474011 | 0.450133 |
| MmuSTS.3310.1.S1_at   | MmuSTS.3310.1 | 9.55  | 9.05  | 0.18 | 0.27 | 1.42   | 0.024934 | 0.016011 | 0.297145 | 0.160458 |
| MmuSTS.3311.1.S1_at   | MmuSTS.3311.1 | 10.56 | 9     | 0.26 | 0.26 | 2.94   | 0.00266  | 0.000517 | 0.164386 | 0.039588 |
| MmuSTS.3312.1.S1_at   | MmuSTS.3312.1 | 10.1  | 10.5  | 0.07 | 0.57 | -1.32  | 0.093    | 0.069089 | 0.450223 | 0.309061 |
| MmuSTS.3313.1.S1_at   | MmuSTS.3313.1 | 11.91 | 11.39 | 0.12 | 0.09 | 1.44   | 0.004663 | 0.001383 | 0.1844   | 0.056947 |
| MmuSTS.3314.1.S1_at   | MmuSTS.3314.1 | 8.65  | 8.7   | 0.76 | 0.42 | -1.03  | 0.313396 | 0.479637 | 0.645159 | 0.685331 |
| MmuSTS.3315.1.S1_at   | MmuSTS.3315.1 | 7.78  | 7.69  | 0.12 | 0.14 | 1.06   | 0.26104  | 0.151716 | 0.607554 | 0.426383 |
| MmuSTS.3316.1.S1_at   | MmuSTS.3316.1 | 8.81  | 8.93  | 0.27 | 0.42 | -1.08  | 0.935965 | 0.706577 | 0.975172 | 0.829757 |
| MmuSTS.3317.1.S1_at   | MmuSTS.3317.1 | 11.08 | 12.2  | 1.6  | 0.92 | -2.17  | 0.411859 | 0.204618 | 0.707626 | 0.478993 |
| MmuSTS.3318.1.S1_at   | MmuSTS.3318.1 | 10.98 | 9.46  | 0.29 | 0.33 | 2.86   | 0.003196 | 0.000702 | 0.174359 | 0.04424  |
| MmuSTS.3319.1.S1_at   | MmuSTS.3319.1 | 9.38  | 9.8   | 0.35 | 0.82 | -1.34  | 0.427866 | 0.137271 | 0.716476 | 0.410165 |
| MmuSTS.332.1.S1_s_at  | MmuSTS.332.1  | 3.31  | 3.44  | 0.1  | 0.06 | -1.09  | 0.13535  | 0.375882 | 0.502159 | 0.613746 |
| MmuSTS.3320.1.S1_at   | MmuSTS.3320.1 | 10.89 | 9.07  | 0.43 | 0.48 | 3.52   | 0.010954 | 0.010835 | 0.233218 | 0.135705 |
| MmuSTS.3321.1.S1_at   | MmuSTS.3321.1 | 12.82 | 13.03 | 0.06 | 0.15 | -1.16  | 0.080523 | 0.073273 | 0.430594 | 0.316233 |
| MmuSTS.3322.1.S1_at   | MmuSTS.3322.1 | 11.09 | 10.86 | 0.44 | 0.59 | 1.18   | 0.740139 | 0.454565 | 0.888432 | 0.668668 |
| MmuSTS.3323.1.S1_at   | MmuSTS.3323.1 | 10.28 | 10.3  | 0.54 | 0.43 | -1.01  | 0.6052   | 0.543282 | 0.818195 | 0.726012 |
| MmuSTS.3324.1.S1_at   | MmuSTS.3324.1 | 5.89  | 9.75  | 1.35 | 2.81 | -14.45 | 0.315152 | 0.307408 | 0.646362 | 0.563649 |
| MmuSTS.3325.1.S1_at   | MmuSTS.3325.1 | 3.66  | 3.63  | 0.13 | 0.14 | 1.02   | 0.808726 | 0.690277 | 0.922032 | 0.819463 |
| MmuSTS.3326.1.S1_at   | MmuSTS.3326.1 | 5.75  | 5.92  | 0.25 | 1.47 | -1.12  | 0.716635 | 0.310361 | 0.875506 | 0.565552 |
| MmuSTS.3327.1.S1_at   | MmuSTS.3327.1 | 10.25 | 8.33  | 0.12 | 0.25 | 3.79   | 0.000317 | 0.001522 | 0.12562  | 0.059307 |
| MmuSTS.3328.1.S1_at   | MmuSTS.3328.1 | 9.84  | 8.89  | 0.17 | 0.33 | 1.93   | 0.012522 | 0.002899 | 0.24203  | 0.079107 |
| MmuSTS.3329.1.S1_at   | MmuSTS.3329.1 | 11.02 | 10.67 | 0.26 | 0.7  | 1.27   | 0.295774 | 0.411869 | 0.632111 | 0.638434 |
| MmuSTS.333.1.S1_at    | MmuSTS.333.1  | 3.92  | 3.96  | 0.04 | 0.1  | -1.02  | 0.201649 | 0.267771 | 0.563988 | 0.533553 |
| MmuSTS.3330.1.S1_at   | MmuSTS.3330.1 | 6.05  | 6.62  | 0.04 | 0.56 | -1.49  | 0.14163  | 0.193046 | 0.509159 | 0.468554 |
| MmuSTS.3331.1.S1_at   | MmuSTS.3331.1 | 6.64  | 6.47  | 0.12 | 0.15 | 1.13   | 0.482204 | 0.248278 | 0.749398 | 0.517596 |
| MmuSTS.3332.1.S1_at   | MmuSTS.3332.1 | 9.73  | 9.5   | 0.33 | 0.34 | 1.17   | 0.284754 | 0.062363 | 0.624417 | 0.296504 |
| MmuSTS.3333.1.S1_at   | MmuSTS.3333.1 | 9.81  | 10.5  | 0.25 | 0.28 | -1.62  | 0.062913 | 0.042968 | 0.399633 | 0.251849 |
| MmuSTS.3334.1.S1_at   | MmuSTS.3334.1 | 7.67  | 7.37  | 2.33 | 1.82 | 1.24   | 0.910272 | 0.926627 | 0.964495 | 0.958372 |
| MmuSTS.3335.1.S1_at   | MmuSTS.3335.1 | 10.01 | 10.06 | 0.06 | 0.46 | -1.03  | 0.818173 | 0.202934 | 0.926284 | 0.477343 |
| MmuSTS.3336.1.S1_at   | MmuSTS.3336.1 | 7.95  | 8.19  | 0.22 | 0.68 | -1.18  | 0.582103 | 0.463838 | 0.80553  | 0.674663 |
| MmuSTS.3337.1.S1_at   | MmuSTS.3337.1 | 11.43 | 11.31 | 0.2  | 0.2  | 1.08   | 0.556151 | 0.610573 | 0.791617 | 0.76874  |
| MmuSTS.3338.1.S1_at   | MmuSTS.3338.1 | 7.22  | 7.38  | 0.17 | 0.15 | -1.12  | 0.6713   | 0.671256 | 0.852602 | 0.807748 |
| MmuSTS.3339.1.S1_at   | MmuSTS.3339.1 | 6.86  | 7.21  | 1.13 | 0.75 | -1.27  | 0.884203 | 0.333973 | 0.953635 | 0.582063 |
| MmuSTS.334.1.S1_s_at  | MmuSTS.334.1  | 3.74  | 3.73  | 0.12 | 0.13 | 1.01   | 0.789633 | 0.720246 | 0.912656 | 0.838202 |
| MmuSTS.3340.1.S1_at   | MmuSTS.3340.1 | 8.49  | 9.35  | 0.32 | 0.45 | -1.82  | 0.083989 | 0.028889 | 0.436458 | 0.211763 |
| MmuSTS.3341.1.S1_at   | MmuSTS.3341.1 | 3.13  | 3.07  | 0.23 | 0.05 | 1.04   | 0.864219 | 0.848988 | 0.945492 | 0.914252 |
| MmuSTS.3342.1.S1_at   | MmuSTS.3342.1 | 10.41 | 10.09 | 0.24 | 0.51 | 1.25   | 0.589659 | 0.781413 | 0.809545 | 0.873256 |
| MmuSTS.3342.1.S1_s_at | MmuSTS.3342.1 | 11.28 | 10.88 | 0.24 | 0.5  | 1.32   | 0.473633 | 0.593822 | 0.744444 | 0.758418 |

|                       |               |       |       |      |      |        |          |          |          |          |
|-----------------------|---------------|-------|-------|------|------|--------|----------|----------|----------|----------|
| MmuSTS.3343.1.S1_at   | MmuSTS.3343.1 | 5.89  | 6.56  | 0.51 | 0.21 | -1.58  | 0.478559 | 0.155621 | 0.74732  | 0.430977 |
| MmuSTS.3344.1.S1_at   | MmuSTS.3344.1 | 2.86  | 2.81  | 0.08 | 0.05 | 1.04   | 0.733752 | 0.824773 | 0.885206 | 0.89939  |
| MmuSTS.3345.1.S1_at   | MmuSTS.3345.1 | 8.05  | 7.62  | 0.28 | 0.36 | 1.35   | 0.177708 | 0.185253 | 0.541879 | 0.461194 |
| MmuSTS.3346.1.S1_at   | MmuSTS.3346.1 | 3.61  | 3.79  | 0.1  | 0.1  | -1.13  | 0.232596 | 0.162562 | 0.587814 | 0.438708 |
| MmuSTS.3347.1.S1_at   | MmuSTS.3347.1 | 5.38  | 5.39  | 0.03 | 0.12 | -1.01  | 0.957052 | 0.975937 | 0.983802 | 0.986856 |
| MmuSTS.3348.1.S1_at   | MmuSTS.3348.1 | 5.66  | 6.11  | 0.27 | 0.88 | -1.37  | 0.143656 | 0.082639 | 0.510312 | 0.331917 |
| MmuSTS.3349.1.S1_at   | MmuSTS.3349.1 | 6.27  | 8.15  | 0.83 | 1.95 | -3.68  | 0.291585 | 0.254947 | 0.628886 | 0.52317  |
| MmuSTS.335.1.S1_at    | MmuSTS.335.1  | 4.95  | 4.53  | 0.12 | 0.07 | 1.35   | 0.007903 | 0.00723  | 0.214199 | 0.114199 |
| MmuSTS.3350.1.S1_at   | MmuSTS.3350.1 | 3.64  | 3.72  | 0.06 | 0.11 | -1.06  | 0.457643 | 0.770343 | 0.735025 | 0.866591 |
| MmuSTS.3351.1.S1_at   | MmuSTS.3351.1 | 13.1  | 13.24 | 0.03 | 0.02 | -1.1   | 0.002009 | 0.000677 | 0.155636 | 0.04413  |
| MmuSTS.3352.1.S1_at   | MmuSTS.3352.1 | 6.29  | 6.36  | 0.1  | 0.11 | -1.05  | 0.378603 | 0.333807 | 0.68654  | 0.581974 |
| MmuSTS.3353.1.S1_at   | MmuSTS.3353.1 | 5.31  | 7.95  | 0.29 | 2.16 | -6.22  | 0.115446 | 0.116964 | 0.478785 | 0.384343 |
| MmuSTS.3354.1.S1_at   | MmuSTS.3354.1 | 10.77 | 11.38 | 0.59 | 1.01 | -1.52  | 0.27849  | 0.152766 | 0.620536 | 0.427571 |
| MmuSTS.3355.1.S1_at   | MmuSTS.3355.1 | 5.03  | 5.06  | 0.27 | 0.26 | -1.03  | 0.628531 | 0.834955 | 0.83087  | 0.90553  |
| MmuSTS.3356.1.S1_at   | MmuSTS.3356.1 | 5.5   | 6.79  | 0.53 | 1.24 | -2.45  | 0.233078 | 0.163061 | 0.587988 | 0.439224 |
| MmuSTS.3357.1.S1_at   | MmuSTS.3357.1 | 4.06  | 4.18  | 0.08 | 0.05 | -1.09  | 0.514119 | 0.115658 | 0.766748 | 0.382714 |
| MmuSTS.3358.1.S1_at   | MmuSTS.3358.1 | 9.38  | 9.07  | 0.18 | 0.96 | 1.25   | 0.63037  | 0.077852 | 0.832004 | 0.324093 |
| MmuSTS.3359.1.S1_at   | MmuSTS.3359.1 | 6.13  | 6.23  | 0.09 | 0.1  | -1.07  | 0.115324 | 0.049741 | 0.478773 | 0.268104 |
| MmuSTS.336.1.S1_at    | MmuSTS.336.1  | 4.86  | 4.81  | 0.28 | 0.13 | 1.04   | 0.607326 | 0.706401 | 0.819317 | 0.829634 |
| MmuSTS.3360.1.S1_at   | MmuSTS.3360.1 | 5.49  | 5.77  | 0.26 | 0.55 | -1.21  | 0.336028 | 0.351712 | 0.65921  | 0.595164 |
| MmuSTS.3361.1.S1_at   | MmuSTS.3361.1 | 10.63 | 13.24 | 1.21 | 0.76 | -6.11  | 0.096193 | 0.063199 | 0.454363 | 0.298119 |
| MmuSTS.3362.1.S1_at   | MmuSTS.3362.1 | 9.38  | 10.33 | 0.32 | 1.93 | -1.94  | 0.887415 | 0.872672 | 0.954863 | 0.927592 |
| MmuSTS.3363.1.S1_at   | MmuSTS.3363.1 | 7.39  | 6.63  | 0.21 | 0.44 | 1.69   | 0.088772 | 0.06196  | 0.443684 | 0.295759 |
| MmuSTS.3364.1.S1_at   | MmuSTS.3364.1 | 7.39  | 7     | 0.89 | 0.15 | 1.31   | 0.953092 | 0.223125 | 0.982522 | 0.49588  |
| MmuSTS.3365.1.S1_at   | MmuSTS.3365.1 | 11.84 | 11.29 | 0.08 | 0.1  | 1.47   | 0.001746 | 0.000511 | 0.154452 | 0.039357 |
| MmuSTS.3366.1.S1_at   | MmuSTS.3366.1 | 8.78  | 8.42  | 0.12 | 0.04 | 1.28   | 0.01778  | 0.007797 | 0.267882 | 0.117765 |
| MmuSTS.3367.1.S1_at   | MmuSTS.3367.1 | 3.73  | 3.81  | 0.27 | 0.13 | -1.06  | 0.995886 | 0.99452  | 0.998446 | 0.996631 |
| MmuSTS.3368.1.S1_at   | MmuSTS.3368.1 | 11.14 | 11.62 | 0.17 | 0.61 | -1.39  | 0.177047 | 0.113671 | 0.541047 | 0.379818 |
| MmuSTS.3369.1.S1_at   | MmuSTS.3369.1 | 11.72 | 11.28 | 0.25 | 0.23 | 1.35   | 0.09711  | 0.019062 | 0.456115 | 0.173688 |
| MmuSTS.337.1.S1_at    | MmuSTS.337.1  | 4.96  | 4.95  | 0.15 | 0.14 | 1.01   | 0.597429 | 0.668819 | 0.813537 | 0.806227 |
| MmuSTS.3370.1.S1_at   | MmuSTS.3370.1 | 9.52  | 8.94  | 0.41 | 0.61 | 1.5    | 0.171328 | 0.175492 | 0.535166 | 0.452157 |
| MmuSTS.3371.1.S1_at   | MmuSTS.3371.1 | 11.85 | 11.47 | 0.23 | 0.48 | 1.3    | 0.130526 | 0.103858 | 0.496888 | 0.364519 |
| MmuSTS.3372.1.S1_at   | MmuSTS.3372.1 | 6.09  | 6.35  | 0.19 | 0.14 | -1.2   | 0.281058 | 0.248842 | 0.62207  | 0.517951 |
| MmuSTS.3373.1.S1_at   | MmuSTS.3373.1 | 8.36  | 10.83 | 1.61 | 2.45 | -5.54  | 0.375508 | 0.217656 | 0.684785 | 0.491255 |
| MmuSTS.3373.1.S1_s_at | MmuSTS.3373.1 | 6.8   | 9.65  | 1.28 | 2.29 | -7.21  | 0.341452 | 0.188848 | 0.662564 | 0.464789 |
| MmuSTS.3374.1.S1_at   | MmuSTS.3374.1 | 6.94  | 8.18  | 2.24 | 2.11 | -2.37  | 0.668429 | 0.632842 | 0.851851 | 0.783788 |
| MmuSTS.3375.1.S1_at   | MmuSTS.3375.1 | 6.19  | 10.95 | 2.04 | 2.84 | -26.99 | 0.275585 | 0.232879 | 0.617878 | 0.50445  |
| MmuSTS.3376.1.S1_at   | MmuSTS.3376.1 | 12.85 | 12.82 | 0.07 | 0.09 | 1.02   | 0.905646 | 0.37209  | 0.96239  | 0.610943 |
| MmuSTS.3377.1.S1_at   | MmuSTS.3377.1 | 12.02 | 12.56 | 0.09 | 0.13 | -1.45  | 0.006372 | 0.002341 | 0.198947 | 0.071588 |
| MmuSTS.3378.1.S1_at   | MmuSTS.3378.1 | 8.19  | 7.95  | 0.15 | 0.65 | 1.18   | 0.797554 | 0.851757 | 0.91611  | 0.915746 |
| MmuSTS.3379.1.S1_at   | MmuSTS.3379.1 | 13.18 | 13.18 | 0.09 | 0.03 | 1.01   | 0.41414  | 0.43753  | 0.708894 | 0.656769 |

|                       |               |       |       |      |      |        |          |          |          |          |
|-----------------------|---------------|-------|-------|------|------|--------|----------|----------|----------|----------|
| MmuSTS.338.1.S1_at    | MmuSTS.338.1  | 5.58  | 5.61  | 0.13 | 0.18 | -1.02  | 0.681573 | 0.850687 | 0.857635 | 0.915051 |
| MmuSTS.3380.1.S1_at   | MmuSTS.3380.1 | 10.81 | 9.33  | 0.21 | 0.15 | 2.78   | 0.000468 | 0.000036 | 0.133839 | 0.023031 |
| MmuSTS.3381.1.S1_at   | MmuSTS.3381.1 | 5.06  | 6.2   | 0.18 | 0.6  | -2.2   | 0.021278 | 0.011804 | 0.282524 | 0.140698 |
| MmuSTS.3382.1.S1_at   | MmuSTS.3382.1 | 4.59  | 4.24  | 0.54 | 0.56 | 1.27   | 0.315512 | 0.27274  | 0.646683 | 0.537479 |
| MmuSTS.3383.1.S1_at   | MmuSTS.3383.1 | 6.18  | 7.38  | 0.14 | 0.38 | -2.29  | 0.007541 | 0.004146 | 0.209283 | 0.09103  |
| MmuSTS.3384.1.S1_at   | MmuSTS.3384.1 | 11.01 | 10.9  | 0.11 | 0.23 | 1.08   | 0.187059 | 0.259142 | 0.550144 | 0.526264 |
| MmuSTS.3385.1.S1_at   | MmuSTS.3385.1 | 9.21  | 9.07  | 0.14 | 0.09 | 1.1    | 0.564944 | 0.062987 | 0.796834 | 0.297633 |
| MmuSTS.3386.1.S1_at   | MmuSTS.3386.1 | 10.5  | 9.94  | 0.18 | 0.8  | 1.47   | 0.695674 | 0.162845 | 0.864996 | 0.438966 |
| MmuSTS.3387.1.S1_at   | MmuSTS.3387.1 | 8.82  | 11.62 | 1.01 | 2.1  | -6.98  | 0.424339 | 0.501255 | 0.714453 | 0.699458 |
| MmuSTS.3388.1.S1_at   | MmuSTS.3388.1 | 2.87  | 2.94  | 0.05 | 0.1  | -1.04  | 0.379955 | 0.433406 | 0.68708  | 0.653676 |
| MmuSTS.3389.1.S1_at   | MmuSTS.3389.1 | 3.84  | 3.73  | 0.54 | 0.16 | 1.08   | 0.270532 | 0.324241 | 0.614808 | 0.57488  |
| MmuSTS.3390.1.S1_at   | MmuSTS.3390.1 | 9.11  | 8.71  | 0.15 | 0.08 | 1.32   | 0.032706 | 0.036514 | 0.325991 | 0.235526 |
| MmuSTS.3391.1.S1_at   | MmuSTS.3391.1 | 9.6   | 9.55  | 0.21 | 0.38 | 1.04   | 0.561095 | 0.745793 | 0.79462  | 0.852572 |
| MmuSTS.3392.1.S1_at   | MmuSTS.3392.1 | 12.62 | 12.59 | 0.08 | 0.1  | 1.02   | 0.78113  | 0.683868 | 0.908721 | 0.815591 |
| MmuSTS.3393.1.S1_at   | MmuSTS.3393.1 | 9.38  | 9.76  | 0.13 | 0.17 | -1.3   | 0.019553 | 0.007962 | 0.275063 | 0.118702 |
| MmuSTS.3394.1.S1_at   | MmuSTS.3394.1 | 5.56  | 6.74  | 1.23 | 0.38 | -2.27  | 0.542101 | 0.670509 | 0.783075 | 0.807399 |
| MmuSTS.3395.1.S1_at   | MmuSTS.3395.1 | 5.79  | 7.66  | 1.21 | 0.7  | -3.67  | 0.079175 | 0.070204 | 0.428897 | 0.311194 |
| MmuSTS.3396.1.S1_at   | MmuSTS.3396.1 | 6.31  | 6.42  | 0.1  | 0.26 | -1.08  | 0.229167 | 0.297825 | 0.586439 | 0.5565   |
| MmuSTS.3397.1.S1_at   | MmuSTS.3397.1 | 3.54  | 4.24  | 0.42 | 0.49 | -1.62  | 0.133939 | 0.018019 | 0.500505 | 0.169255 |
| MmuSTS.3398.1.S1_at   | MmuSTS.3398.1 | 3.03  | 2.97  | 0.12 | 0.31 | 1.04   | 0.853571 | 0.532071 | 0.940892 | 0.718995 |
| MmuSTS.3399.1.S1_at   | MmuSTS.3399.1 | 7.16  | 6.82  | 0.28 | 0.82 | 1.26   | 0.663246 | 0.802621 | 0.848941 | 0.886389 |
| MmuSTS.34.1.S1_at     | MmuSTS.34.1   | 11.25 | 10.92 | 0.14 | 0.29 | 1.26   | 0.115477 | 0.217743 | 0.478809 | 0.491309 |
| MmuSTS.340.1.S1_at    | MmuSTS.340.1  | 12.8  | 12.06 | 0.11 | 0.1  | 1.68   | 0.000768 | 0.000099 | 0.136818 | 0.027996 |
| MmuSTS.3400.1.S1_at   | MmuSTS.3400.1 | 10.83 | 12.37 | 0.54 | 0.22 | -2.91  | 0.00859  | 0.00796  | 0.219458 | 0.118702 |
| MmuSTS.3401.1.S1_at   | MmuSTS.3401.1 | 5.82  | 8.5   | 1.59 | 1.66 | -6.42  | 0.143563 | 0.10419  | 0.510312 | 0.365326 |
| MmuSTS.3401.1.S1_s_at | MmuSTS.3401.1 | 6.06  | 9.99  | 1.82 | 1.95 | -15.26 | 0.157843 | 0.112687 | 0.522718 | 0.378284 |
| MmuSTS.3402.1.S1_at   | MmuSTS.3402.1 | 9     | 9.87  | 0.14 | 0.28 | -1.83  | 0.005151 | 0.001343 | 0.190164 | 0.056396 |
| MmuSTS.3403.1.S1_at   | MmuSTS.3403.1 | 8.74  | 8.8   | 0.48 | 0.73 | -1.05  | 0.661502 | 0.446243 | 0.848148 | 0.662743 |
| MmuSTS.3404.1.S1_at   | MmuSTS.3404.1 | 9.36  | 9.67  | 0.32 | 0.12 | -1.24  | 0.145589 | 0.285052 | 0.51146  | 0.547095 |
| MmuSTS.3405.1.S1_at   | MmuSTS.3405.1 | 10.84 | 11.23 | 0.31 | 0.4  | -1.31  | 0.259314 | 0.254312 | 0.606416 | 0.522613 |
| MmuSTS.3406.1.S1_at   | MmuSTS.3406.1 | 9.67  | 9.53  | 0.06 | 0.02 | 1.1    | 0.016007 | 0.013126 | 0.262308 | 0.147338 |
| MmuSTS.3407.1.S1_at   | MmuSTS.3407.1 | 10.17 | 9.83  | 0.33 | 0.26 | 1.27   | 0.447182 | 0.393246 | 0.728807 | 0.626174 |
| MmuSTS.3408.1.S1_at   | MmuSTS.3408.1 | 8.47  | 9.69  | 0.2  | 0.47 | -2.32  | 0.013073 | 0.00301  | 0.245262 | 0.080074 |
| MmuSTS.3409.1.S1_at   | MmuSTS.3409.1 | 7.29  | 8.09  | 0.24 | 1    | -1.73  | 0.32625  | 0.425113 | 0.653184 | 0.647579 |
| MmuSTS.341.1.S1_at    | MmuSTS.341.1  | 10.87 | 9.52  | 0.12 | 0.15 | 2.54   | 0.000358 | 0.000064 | 0.128842 | 0.025805 |
| MmuSTS.3410.1.S1_at   | MmuSTS.3410.1 | 10.61 | 10.26 | 0.12 | 0.18 | 1.27   | 0.027344 | 0.031024 | 0.307364 | 0.218074 |
| MmuSTS.3411.1.S1_at   | MmuSTS.3411.1 | 10.37 | 10.54 | 0.18 | 0.32 | -1.12  | 0.710587 | 0.037681 | 0.873085 | 0.23859  |
| MmuSTS.3412.1.S1_s_at | MmuSTS.3412.1 | 10.53 | 10.42 | 0.27 | 0.07 | 1.08   | 0.246808 | 0.200946 | 0.597932 | 0.475426 |
| MmuSTS.3413.1.S1_at   | MmuSTS.3413.1 | 4.68  | 4.85  | 0.31 | 0.04 | -1.13  | 0.291496 | 0.399925 | 0.628798 | 0.63009  |
| MmuSTS.3414.1.S1_at   | MmuSTS.3414.1 | 10.93 | 11.21 | 0.25 | 0.11 | -1.22  | 0.461232 | 0.271473 | 0.737488 | 0.536512 |
| MmuSTS.3415.1.S1_at   | MmuSTS.3415.1 | 9.75  | 7.7   | 0.59 | 0.4  | 4.13   | 0.013916 | 0.006739 | 0.250029 | 0.110984 |



|                      |               |       |       |      |      |       |          |          |          |          |
|----------------------|---------------|-------|-------|------|------|-------|----------|----------|----------|----------|
| MmuSTS.3416.1.S1_at  | MmuSTS.3416.1 | 4.49  | 4.41  | 0.25 | 0.09 | 1.06  | 0.808506 | 0.960591 | 0.921949 | 0.977548 |
| MmuSTS.3417.1.S1_at  | MmuSTS.3417.1 | 7.36  | 7.4   | 0.2  | 0.1  | -1.03 | 0.785162 | 0.013891 | 0.910556 | 0.151189 |
| MmuSTS.3418.1.S1_at  | MmuSTS.3418.1 | 6.71  | 8.3   | 0.34 | 0.29 | -3.01 | 0.003798 | 0.00148  | 0.179914 | 0.058699 |
| MmuSTS.3419.1.S1_at  | MmuSTS.3419.1 | 4.7   | 4.78  | 0.11 | 0.25 | -1.06 | 0.952326 | 0.795967 | 0.982163 | 0.882469 |
| MmuSTS.342.1.S1_s_at | MmuSTS.342.1  | 10.59 | 10.6  | 0.21 | 0.13 | -1.01 | 0.823735 | 0.74653  | 0.928331 | 0.852872 |
| MmuSTS.3420.1.S1_at  | MmuSTS.3420.1 | 10.94 | 9.3   | 1.26 | 0.57 | 3.1   | 0.175849 | 0.053298 | 0.539441 | 0.276463 |
| MmuSTS.3421.1.S1_at  | MmuSTS.3421.1 | 7.43  | 7.22  | 0.38 | 0.03 | 1.15  | 0.37019  | 0.365679 | 0.681113 | 0.605684 |
| MmuSTS.3422.1.S1_at  | MmuSTS.3422.1 | 6.26  | 6.62  | 0.26 | 0.16 | -1.28 | 0.526394 | 0.658989 | 0.77407  | 0.800475 |
| MmuSTS.3423.1.S1_at  | MmuSTS.3423.1 | 8.02  | 7.62  | 0.38 | 0.62 | 1.32  | 0.696876 | 0.02079  | 0.86551  | 0.1809   |
| MmuSTS.3424.1.S1_at  | MmuSTS.3424.1 | 5.73  | 5.77  | 0.04 | 0.21 | -1.03 | 0.264941 | 0.268713 | 0.610696 | 0.534138 |
| MmuSTS.3425.1.S1_at  | MmuSTS.3425.1 | 4.26  | 3.63  | 0.97 | 0.1  | 1.55  | 0.198436 | 0.235787 | 0.561581 | 0.506949 |
| MmuSTS.3426.1.S1_at  | MmuSTS.3426.1 | 4.42  | 4.16  | 0.9  | 0.48 | 1.2   | 0.252149 | 0.303008 | 0.601255 | 0.560461 |
| MmuSTS.3427.1.S1_at  | MmuSTS.3427.1 | 13.04 | 12.85 | 0.08 | 0.19 | 1.14  | 0.311465 | 0.286978 | 0.643464 | 0.548246 |
| MmuSTS.3428.1.S1_at  | MmuSTS.3428.1 | 4.62  | 4.7   | 0.25 | 0.23 | -1.06 | 0.379964 | 0.223843 | 0.68708  | 0.496802 |
| MmuSTS.3429.1.S1_at  | MmuSTS.3429.1 | 10.96 | 10.85 | 0.22 | 0.61 | 1.08  | 0.472826 | 0.164869 | 0.744016 | 0.441191 |
| MmuSTS.343.1.S1_at   | MmuSTS.343.1  | 11.96 | 12.01 | 0.1  | 0.08 | -1.04 | 0.58837  | 0.639229 | 0.808931 | 0.788125 |
| MmuSTS.3430.1.S1_at  | MmuSTS.3430.1 | 10.25 | 9.57  | 0.07 | 0.57 | 1.61  | 0.342875 | 0.462363 | 0.663407 | 0.673709 |
| MmuSTS.3431.1.S1_at  | MmuSTS.3431.1 | 12.73 | 12.59 | 0.17 | 0.51 | 1.11  | 0.490467 | 0.435272 | 0.754439 | 0.655127 |
| MmuSTS.3432.1.S1_at  | MmuSTS.3432.1 | 12.46 | 12.33 | 0.25 | 0.51 | 1.09  | 0.514092 | 0.619724 | 0.766736 | 0.774893 |
| MmuSTS.3433.1.S1_at  | MmuSTS.3433.1 | 13.69 | 13.41 | 0.05 | 0.28 | 1.21  | 0.187671 | 0.229496 | 0.550658 | 0.501527 |
| MmuSTS.3434.1.S1_at  | MmuSTS.3434.1 | 8.28  | 9.1   | 2.11 | 1.45 | -1.77 | 0.611162 | 0.784972 | 0.821508 | 0.875511 |
| MmuSTS.3435.1.S1_at  | MmuSTS.3435.1 | 13.33 | 13.3  | 0.08 | 0.39 | 1.02  | 0.714156 | 0.658623 | 0.874661 | 0.800453 |
| MmuSTS.3436.1.S1_at  | MmuSTS.3436.1 | 8.8   | 8.74  | 0.19 | 0.83 | 1.04  | 0.864227 | 0.22352  | 0.945492 | 0.496363 |
| MmuSTS.3437.1.S1_at  | MmuSTS.3437.1 | 7.75  | 7.85  | 0.2  | 0.55 | -1.07 | 0.791663 | 0.686516 | 0.913459 | 0.817053 |
| MmuSTS.3438.1.S1_at  | MmuSTS.3438.1 | 8.89  | 9.42  | 0.23 | 0.84 | -1.44 | 0.738953 | 0.831421 | 0.888088 | 0.903343 |
| MmuSTS.3439.1.S1_at  | MmuSTS.3439.1 | 13.43 | 13.62 | 0.18 | 0.1  | -1.14 | 0.066704 | 0.031408 | 0.406869 | 0.219107 |
| MmuSTS.344.1.S1_at   | MmuSTS.344.1  | 11.72 | 11.79 | 0.13 | 0.04 | -1.05 | 0.125312 | 0.193636 | 0.49131  | 0.468785 |
| MmuSTS.3440.1.S1_at  | MmuSTS.3440.1 | 13.53 | 12.73 | 0.09 | 0.03 | 1.75  | 0.000142 | 0.000089 | 0.112653 | 0.027016 |
| MmuSTS.3441.1.S1_at  | MmuSTS.3441.1 | 4.27  | 4.75  | 0.35 | 0.29 | -1.39 | 0.549947 | 0.164127 | 0.787543 | 0.440346 |
| MmuSTS.3442.1.S1_at  | MmuSTS.3442.1 | 6.86  | 8.76  | 0.92 | 1.6  | -3.74 | 0.257148 | 0.14703  | 0.604509 | 0.421149 |
| MmuSTS.3443.1.S1_at  | MmuSTS.3443.1 | 8.13  | 8.36  | 0.47 | 1.29 | -1.17 | 0.810184 | 0.575303 | 0.922612 | 0.74643  |
| MmuSTS.3444.1.S1_at  | MmuSTS.3444.1 | 5.65  | 6.24  | 0.21 | 0.86 | -1.5  | 0.263072 | 0.284107 | 0.609142 | 0.546319 |
| MmuSTS.3445.1.S1_at  | MmuSTS.3445.1 | 9.98  | 9.72  | 0.13 | 0.46 | 1.2   | 0.797781 | 0.190955 | 0.916116 | 0.46629  |
| MmuSTS.3446.1.S1_at  | MmuSTS.3446.1 | 9.93  | 10.91 | 0.5  | 0.4  | -1.98 | 0.135946 | 0.143147 | 0.502782 | 0.417029 |
| MmuSTS.3447.1.S1_at  | MmuSTS.3447.1 | 7.19  | 6.92  | 0.14 | 0.28 | 1.21  | 0.221541 | 0.32192  | 0.580303 | 0.573567 |
| MmuSTS.3448.1.S1_at  | MmuSTS.3448.1 | 11.05 | 10.4  | 0.08 | 0.1  | 1.57  | 0.00165  | 0.000521 | 0.15365  | 0.039743 |
| MmuSTS.3449.1.S1_at  | MmuSTS.3449.1 | 12.46 | 11.89 | 0.11 | 0.08 | 1.49  | 0.00197  | 0.000252 | 0.155636 | 0.033325 |
| MmuSTS.345.1.S1_at   | MmuSTS.345.1  | 10    | 11    | 0.14 | 0.33 | -2    | 0.012622 | 0.002504 | 0.242681 | 0.074108 |
| MmuSTS.3450.1.S1_at  | MmuSTS.3450.1 | 10.47 | 10.01 | 0.11 | 0.42 | 1.37  | 0.051609 | 0.013513 | 0.376072 | 0.148824 |
| MmuSTS.3451.1.S1_at  | MmuSTS.3451.1 | 11.23 | 10.62 | 0.08 | 0.17 | 1.53  | 0.005366 | 0.00196  | 0.191107 | 0.065832 |
| MmuSTS.3452.1.S1_at  | MmuSTS.3452.1 | 8.33  | 8.59  | 0.19 | 0.22 | -1.2  | 0.092538 | 0.003413 | 0.449243 | 0.084071 |

|                       |               |       |       |      |      |       |          |          |          |          |
|-----------------------|---------------|-------|-------|------|------|-------|----------|----------|----------|----------|
| MmuSTS.3453.1.S1_at   | MmuSTS.3453.1 | 9.03  | 10.97 | 1.26 | 1.38 | -3.83 | 0.165114 | 0.109092 | 0.529079 | 0.372869 |
| MmuSTS.3454.1.S1_at   | MmuSTS.3454.1 | 12.78 | 12.52 | 0.03 | 0.1  | 1.2   | 0.021592 | 0.013255 | 0.282958 | 0.147707 |
| MmuSTS.3455.1.S1_at   | MmuSTS.3455.1 | 6.38  | 6.27  | 0.08 | 0.28 | 1.08  | 0.619847 | 0.794987 | 0.825832 | 0.881864 |
| MmuSTS.3456.1.S1_at   | MmuSTS.3456.1 | 10.16 | 9.21  | 0.35 | 0.3  | 1.93  | 0.022944 | 0.010132 | 0.289141 | 0.131974 |
| MmuSTS.3457.1.S1_at   | MmuSTS.3457.1 | 8.04  | 8.87  | 0.06 | 0.4  | -1.78 | 0.010864 | 0.002604 | 0.232241 | 0.075487 |
| MmuSTS.3458.1.S1_at   | MmuSTS.3458.1 | 12.26 | 12.62 | 0.11 | 0.35 | -1.28 | 0.443963 | 0.570795 | 0.726538 | 0.74337  |
| MmuSTS.3459.1.S1_at   | MmuSTS.3459.1 | 6.14  | 6.14  | 0.14 | 0.12 | -1    | 0.912308 | 0.042846 | 0.965274 | 0.251589 |
| MmuSTS.346.1.S1_at    | MmuSTS.346.1  | 3.4   | 3.36  | 0.14 | 0.31 | 1.03  | 0.808611 | 0.501072 | 0.921988 | 0.699435 |
| MmuSTS.3460.1.S1_s_at | MmuSTS.3460.1 | 12.57 | 12.52 | 0.2  | 0.24 | 1.03  | 0.553448 | 0.659771 | 0.790139 | 0.800854 |
| MmuSTS.3460.1.S1_x_at | MmuSTS.3460.1 | 12.87 | 12.91 | 0.19 | 0.27 | -1.03 | 0.813267 | 0.645795 | 0.924167 | 0.792588 |
| MmuSTS.3461.1.S1_at   | MmuSTS.3461.1 | 5.29  | 5.2   | 0.15 | 0.47 | 1.06  | 0.861017 | 0.465479 | 0.943939 | 0.675774 |
| MmuSTS.3462.1.S1_at   | MmuSTS.3462.1 | 8.22  | 8.32  | 0.29 | 0.12 | -1.07 | 0.832871 | 0.478042 | 0.93227  | 0.684055 |
| MmuSTS.3463.1.S1_at   | MmuSTS.3463.1 | 9.57  | 9.88  | 0.22 | 0.05 | -1.23 | 0.238357 | 0.270743 | 0.591613 | 0.53602  |
| MmuSTS.3464.1.S1_at   | MmuSTS.3464.1 | 7.74  | 7.75  | 0.35 | 0.5  | -1.01 | 0.321336 | 0.354348 | 0.650037 | 0.597166 |
| MmuSTS.3465.1.S1_at   | MmuSTS.3465.1 | 9.8   | 9.29  | 0.18 | 0.45 | 1.43  | 0.115978 | 0.078556 | 0.479448 | 0.325285 |
| MmuSTS.3466.1.S1_at   | MmuSTS.3466.1 | 8.58  | 9.12  | 0.22 | 0.29 | -1.46 | 0.060146 | 0.044617 | 0.393081 | 0.255589 |
| MmuSTS.3467.1.S1_at   | MmuSTS.3467.1 | 8.75  | 8.43  | 0.09 | 0.27 | 1.24  | 0.078347 | 0.062712 | 0.428302 | 0.297117 |
| MmuSTS.3468.1.S1_at   | MmuSTS.3468.1 | 7.64  | 8.18  | 0.03 | 0.28 | -1.46 | 0.013599 | 0.006254 | 0.24849  | 0.10728  |
| MmuSTS.3469.1.S1_at   | MmuSTS.3469.1 | 9.69  | 9.49  | 0.09 | 0.28 | 1.15  | 0.829135 | 0.854706 | 0.93062  | 0.91719  |
| MmuSTS.347.1.S1_at    | MmuSTS.347.1  | 5.56  | 3.75  | 1.07 | 0.8  | 3.49  | 0.31405  | 0.34496  | 0.645522 | 0.590239 |
| MmuSTS.3470.1.S1_at   | MmuSTS.3470.1 | 11.86 | 11.63 | 0.09 | 0.21 | 1.18  | 0.074625 | 0.015042 | 0.420587 | 0.155766 |
| MmuSTS.3471.1.S1_at   | MmuSTS.3471.1 | 10.12 | 11.27 | 0.26 | 0.22 | -2.22 | 0.007075 | 0.005879 | 0.20404  | 0.104899 |
| MmuSTS.3471.1.S1_s_at | MmuSTS.3471.1 | 10.81 | 11.72 | 0.29 | 0.22 | -1.88 | 0.011935 | 0.006563 | 0.239065 | 0.109857 |
| MmuSTS.3472.1.S1_at   | MmuSTS.3472.1 | 10.49 | 9.25  | 0.1  | 0.21 | 2.37  | 0.000978 | 0.00017  | 0.139813 | 0.030511 |
| MmuSTS.3473.1.S1_at   | MmuSTS.3473.1 | 6.4   | 6.35  | 0.19 | 0.36 | 1.04  | 0.821811 | 0.217851 | 0.927464 | 0.491406 |
| MmuSTS.3474.1.S1_at   | MmuSTS.3474.1 | 8.21  | 7.23  | 0.31 | 0.47 | 1.97  | 0.055876 | 0.03903  | 0.38492  | 0.242772 |
| MmuSTS.3475.1.S1_at   | MmuSTS.3475.1 | 7.3   | 7.03  | 0.72 | 0.27 | 1.2   | 0.554463 | 0.106887 | 0.790755 | 0.369499 |
| MmuSTS.3476.1.S1_at   | MmuSTS.3476.1 | 12.76 | 12.44 | 0.09 | 0.08 | 1.25  | 0.015251 | 0.007259 | 0.257698 | 0.114309 |
| MmuSTS.3477.1.S1_at   | MmuSTS.3477.1 | 11.39 | 11.44 | 0.18 | 0.09 | -1.03 | 0.707121 | 0.387348 | 0.870958 | 0.622027 |
| MmuSTS.3478.1.S1_at   | MmuSTS.3478.1 | 9.37  | 9.9   | 0.87 | 1.01 | -1.44 | 0.25362  | 0.090748 | 0.60216  | 0.345227 |
| MmuSTS.3479.1.S1_at   | MmuSTS.3479.1 | 6.45  | 6.81  | 0.22 | 0.27 | -1.28 | 0.320133 | 0.254717 | 0.649393 | 0.522987 |
| MmuSTS.348.1.S1_at    | MmuSTS.348.1  | 4.19  | 4.25  | 0.19 | 0.1  | -1.04 | 0.611437 | 0.326889 | 0.821704 | 0.576848 |
| MmuSTS.3480.1.S1_at   | MmuSTS.3480.1 | 11.77 | 11.5  | 0.07 | 0.06 | 1.21  | 0.006704 | 0.004967 | 0.20158  | 0.098202 |
| MmuSTS.3481.1.S1_at   | MmuSTS.3481.1 | 3.68  | 4.35  | 0.27 | 0.45 | -1.58 | 0.203687 | 0.111948 | 0.566259 | 0.377063 |
| MmuSTS.3481.1.S1_x_at | MmuSTS.3481.1 | 4.53  | 5.05  | 0.16 | 0.42 | -1.43 | 0.133106 | 0.060161 | 0.499477 | 0.291882 |
| MmuSTS.3482.1.S1_at   | MmuSTS.3482.1 | 4.07  | 4.26  | 0.08 | 0.04 | -1.14 | 0.028658 | 0.174421 | 0.312031 | 0.450894 |
| MmuSTS.3483.1.S1_at   | MmuSTS.3483.1 | 10.94 | 10.84 | 0.07 | 0.11 | 1.07  | 0.185007 | 0.179673 | 0.548443 | 0.456149 |
| MmuSTS.3484.1.S1_at   | MmuSTS.3484.1 | 7.23  | 7.09  | 0.28 | 0.23 | 1.1   | 0.634504 | 0.796624 | 0.834529 | 0.882754 |
| MmuSTS.3485.1.S1_at   | MmuSTS.3485.1 | 12.96 | 12.96 | 0.07 | 0.3  | -1    | 0.861483 | 0.892372 | 0.944137 | 0.938624 |
| MmuSTS.3486.1.S1_s_at | MmuSTS.3486.1 | 8.49  | 9.25  | 0.1  | 0.38 | -1.7  | 0.053256 | 0.036861 | 0.379848 | 0.23648  |
| MmuSTS.3487.1.S1_at   | MmuSTS.3487.1 | 6.72  | 6.47  | 0.37 | 0.45 | 1.18  | 0.703165 | 0.136588 | 0.868993 | 0.409084 |

|                       |               |       |       |      |      |        |          |          |          |          |
|-----------------------|---------------|-------|-------|------|------|--------|----------|----------|----------|----------|
| MmuSTS.3488.1.S1_at   | MmuSTS.3488.1 | 9.01  | 12.16 | 1.04 | 2.8  | -8.85  | 0.409197 | 0.279083 | 0.705781 | 0.542782 |
| MmuSTS.3488.1.S1_s_at | MmuSTS.3488.1 | 8.93  | 11.8  | 1.33 | 2.68 | -7.33  | 0.364843 | 0.279159 | 0.677679 | 0.542814 |
| MmuSTS.3488.1.S1_x_at | MmuSTS.3488.1 | 8.93  | 12.1  | 1.17 | 2.88 | -9.02  | 0.434417 | 0.330274 | 0.720416 | 0.579044 |
| MmuSTS.3489.1.S1_at   | MmuSTS.3489.1 | 9.55  | 13.13 | 2.17 | 2.77 | -11.98 | 0.454453 | 0.241755 | 0.733188 | 0.512327 |
| MmuSTS.349.1.S1_at    | MmuSTS.349.1  | 9.42  | 9.34  | 0.24 | 0.04 | 1.05   | 0.179813 | 0.156025 | 0.544019 | 0.431444 |
| MmuSTS.3490.1.S1_at   | MmuSTS.3490.1 | 7.04  | 8.31  | 0.88 | 1.45 | -2.43  | 0.340073 | 0.362352 | 0.661611 | 0.602965 |
| MmuSTS.3491.1.S1_at   | MmuSTS.3491.1 | 7.58  | 9.08  | 0.84 | 1.15 | -2.83  | 0.290158 | 0.311309 | 0.628012 | 0.566361 |
| MmuSTS.3492.1.S1_at   | MmuSTS.3492.1 | 12.11 | 11.23 | 0.1  | 0.16 | 1.85   | 0.001269 | 0.000198 | 0.145267 | 0.031116 |
| MmuSTS.3493.1.S1_at   | MmuSTS.3493.1 | 10.23 | 10.42 | 0.22 | 0.56 | -1.14  | 0.748088 | 0.549482 | 0.89226  | 0.729879 |
| MmuSTS.3494.1.S1_at   | MmuSTS.3494.1 | 6.29  | 6.32  | 0.1  | 0.04 | -1.03  | 0.766345 | 0.192974 | 0.901727 | 0.468455 |
| MmuSTS.3495.1.S1_at   | MmuSTS.3495.1 | 6.42  | 5.89  | 0.21 | 0.07 | 1.45   | 0.006413 | 0.000464 | 0.199323 | 0.038572 |
| MmuSTS.3496.1.S1_at   | MmuSTS.3496.1 | 8.27  | 8.02  | 0.01 | 0.21 | 1.19   | 0.338874 | 0.485459 | 0.661    | 0.68914  |
| MmuSTS.3497.1.S1_at   | MmuSTS.3497.1 | 6.7   | 6.64  | 0.27 | 0.38 | 1.04   | 0.95787  | 0.80628  | 0.984034 | 0.888642 |
| MmuSTS.3498.1.S1_at   | MmuSTS.3498.1 | 9.08  | 8.75  | 0.14 | 0.21 | 1.26   | 0.084731 | 0.089879 | 0.437559 | 0.344073 |
| MmuSTS.3499.1.S1_at   | MmuSTS.3499.1 | 7.96  | 7.22  | 0.43 | 0.49 | 1.66   | 0.091201 | 0.009656 | 0.447111 | 0.129267 |
| MmuSTS.35.1.S1_at     | MmuSTS.35.1   | 10.94 | 11.02 | 0.08 | 0.31 | -1.06  | 0.469401 | 0.572977 | 0.741694 | 0.744895 |
| MmuSTS.350.1.S1_at    | MmuSTS.350.1  | 8.4   | 8.26  | 0.21 | 0.17 | 1.11   | 0.463486 | 0.248703 | 0.738845 | 0.517917 |
| MmuSTS.3500.1.S1_at   | MmuSTS.3500.1 | 11.72 | 11.55 | 0.26 | 0.04 | 1.13   | 0.194414 | 0.287811 | 0.557827 | 0.549064 |
| MmuSTS.3501.1.S1_at   | MmuSTS.3501.1 | 10.67 | 10.06 | 0.21 | 0.88 | 1.52   | 0.343747 | 0.244326 | 0.663921 | 0.514184 |
| MmuSTS.3502.1.S1_at   | MmuSTS.3502.1 | 7.35  | 7.16  | 0.29 | 0.19 | 1.14   | 0.400919 | 0.325744 | 0.700469 | 0.57602  |
| MmuSTS.3503.1.S1_at   | MmuSTS.3503.1 | 4.25  | 4.02  | 0.37 | 0.05 | 1.17   | 0.871449 | 0.530736 | 0.948511 | 0.718104 |
| MmuSTS.3504.1.S1_at   | MmuSTS.3504.1 | 10.59 | 9.99  | 0.12 | 0.45 | 1.51   | 0.049287 | 0.056763 | 0.371105 | 0.284379 |
| MmuSTS.3505.1.S1_at   | MmuSTS.3505.1 | 7.11  | 6.46  | 0.29 | 0.3  | 1.57   | 0.123287 | 0.014859 | 0.488866 | 0.155055 |
| MmuSTS.3506.1.S1_at   | MmuSTS.3506.1 | 13.01 | 12.93 | 0.12 | 0.2  | 1.05   | 0.436326 | 0.141008 | 0.721646 | 0.414507 |
| MmuSTS.3507.1.S1_at   | MmuSTS.3507.1 | 5.89  | 5.93  | 0.1  | 0.06 | -1.03  | 0.39638  | 0.458273 | 0.696939 | 0.671096 |
| MmuSTS.3508.1.S1_at   | MmuSTS.3508.1 | 6.34  | 6.4   | 0.71 | 0.15 | -1.04  | 0.3344   | 0.389041 | 0.658376 | 0.623288 |
| MmuSTS.3509.1.S1_at   | MmuSTS.3509.1 | 5.57  | 6.19  | 0.42 | 0.67 | -1.54  | 0.093242 | 0.066974 | 0.450461 | 0.304829 |
| MmuSTS.351.1.S1_at    | MmuSTS.351.1  | 6.03  | 5.77  | 0.17 | 0.32 | 1.19   | 0.458307 | 0.486199 | 0.735376 | 0.689643 |
| MmuSTS.3510.1.S1_at   | MmuSTS.3510.1 | 3.18  | 3.31  | 0.05 | 0.13 | -1.09  | 0.111925 | 0.186531 | 0.474378 | 0.462364 |
| MmuSTS.3511.1.S1_at   | MmuSTS.3511.1 | 8.27  | 8.2   | 0.09 | 0.37 | 1.05   | 0.366466 | 0.435336 | 0.679053 | 0.65516  |
| MmuSTS.3512.1.S1_at   | MmuSTS.3512.1 | 9.14  | 10.2  | 0.29 | 0.14 | -2.09  | 0.004315 | 0.000552 | 0.182631 | 0.040948 |
| MmuSTS.3513.1.S1_at   | MmuSTS.3513.1 | 8.74  | 9.06  | 0.13 | 0.3  | -1.25  | 0.280787 | 0.080593 | 0.621843 | 0.328367 |
| MmuSTS.3514.1.S1_at   | MmuSTS.3514.1 | 6.42  | 6.71  | 0.09 | 0.21 | -1.22  | 0.43514  | 0.20071  | 0.721028 | 0.47524  |
| MmuSTS.3515.1.S1_at   | MmuSTS.3515.1 | 9.32  | 8.92  | 0.32 | 0.17 | 1.32   | 0.070147 | 0.077357 | 0.413646 | 0.323153 |
| MmuSTS.3516.1.S1_at   | MmuSTS.3516.1 | 6.69  | 6.29  | 0.52 | 0.3  | 1.31   | 0.72594  | 0.44936  | 0.880666 | 0.665021 |
| MmuSTS.3517.1.S1_at   | MmuSTS.3517.1 | 6.28  | 6.22  | 0.05 | 0.07 | 1.04   | 0.482423 | 0.470257 | 0.749408 | 0.678575 |
| MmuSTS.3518.1.S1_at   | MmuSTS.3518.1 | 3.91  | 3.94  | 0.1  | 0.04 | -1.02  | 0.616177 | 0.373452 | 0.824059 | 0.612267 |
| MmuSTS.3519.1.S1_at   | MmuSTS.3519.1 | 7.4   | 8.28  | 0.96 | 0.76 | -1.85  | 0.291346 | 0.197358 | 0.628798 | 0.472304 |
| MmuSTS.352.1.S1_s_at  | MmuSTS.352.1  | 7.98  | 5.23  | 1.48 | 0.13 | 6.73   | 0.051618 | 0.049783 | 0.376072 | 0.268194 |
| MmuSTS.3520.1.S1_at   | MmuSTS.3520.1 | 8.07  | 7.81  | 0.1  | 0.59 | 1.2    | 0.839739 | 0.771979 | 0.935314 | 0.867436 |
| MmuSTS.3521.1.S1_at   | MmuSTS.3521.1 | 9.75  | 8.99  | 0.15 | 0.15 | 1.69   | 0.004806 | 0.000885 | 0.184674 | 0.047602 |

|                       |               |       |       |      |      |        |          |          |          |          |
|-----------------------|---------------|-------|-------|------|------|--------|----------|----------|----------|----------|
| MmuSTS.3522.1.S1_at   | MmuSTS.3522.1 | 7.06  | 8.11  | 0.43 | 0.59 | -2.07  | 0.070515 | 0.057369 | 0.414379 | 0.285522 |
| MmuSTS.3523.1.S1_at   | MmuSTS.3523.1 | 8.21  | 7.8   | 0.6  | 0.22 | 1.33   | 0.236877 | 0.141406 | 0.590574 | 0.414874 |
| MmuSTS.3524.1.S1_at   | MmuSTS.3524.1 | 7.29  | 8.42  | 0.82 | 0.38 | -2.19  | 0.052788 | 0.043387 | 0.378449 | 0.25294  |
| MmuSTS.3525.1.S1_at   | MmuSTS.3525.1 | 4.19  | 4.05  | 0.12 | 0.11 | 1.1    | 0.909115 | 0.231569 | 0.963983 | 0.503367 |
| MmuSTS.3526.1.S1_at   | MmuSTS.3526.1 | 9.35  | 9.09  | 0.16 | 0.1  | 1.2    | 0.030386 | 0.009376 | 0.318297 | 0.127634 |
| MmuSTS.3527.1.S1_at   | MmuSTS.3527.1 | 5.51  | 5.86  | 0.43 | 1.46 | -1.27  | 0.888462 | 0.38853  | 0.955266 | 0.622897 |
| MmuSTS.3528.1.S1_at   | MmuSTS.3528.1 | 9.19  | 8.71  | 0.71 | 0.76 | 1.39   | 0.588553 | 0.247414 | 0.809056 | 0.516672 |
| MmuSTS.3529.1.S1_at   | MmuSTS.3529.1 | 4.97  | 5.05  | 0.48 | 0.37 | -1.06  | 0.713809 | 0.171322 | 0.874586 | 0.447809 |
| MmuSTS.353.1.S1_s_at  | MmuSTS.353.1  | 9.74  | 7.81  | 0.64 | 0.92 | 3.79   | 0.079981 | 0.075193 | 0.430176 | 0.319384 |
| MmuSTS.3530.1.S1_at   | MmuSTS.3530.1 | 5.33  | 5.46  | 0.2  | 0.1  | -1.09  | 0.292512 | 0.369851 | 0.629859 | 0.609138 |
| MmuSTS.3531.1.S1_at   | MmuSTS.3531.1 | 8.6   | 8.7   | 0.7  | 0.26 | -1.07  | 0.903909 | 0.77999  | 0.961578 | 0.872428 |
| MmuSTS.3531.1.S1_s_at | MmuSTS.3531.1 | 9.82  | 9.93  | 0.61 | 0.63 | -1.08  | 0.832478 | 0.815844 | 0.932134 | 0.893781 |
| MmuSTS.3532.1.S1_at   | MmuSTS.3532.1 | 8.58  | 12.94 | 1.87 | 2.68 | -20.5  | 0.400883 | 0.273902 | 0.700468 | 0.538452 |
| MmuSTS.3533.1.S1_at   | MmuSTS.3533.1 | 12.62 | 12.69 | 0.05 | 0.14 | -1.05  | 0.520879 | 0.051069 | 0.771047 | 0.271281 |
| MmuSTS.3534.1.S1_at   | MmuSTS.3534.1 | 5.52  | 5.67  | 0.13 | 0.14 | -1.1   | 0.215796 | 0.109935 | 0.575954 | 0.374008 |
| MmuSTS.3535.1.S1_at   | MmuSTS.3535.1 | 6.15  | 6.08  | 0.15 | 0.19 | 1.05   | 0.997066 | 0.973756 | 0.998842 | 0.985656 |
| MmuSTS.3536.1.S1_at   | MmuSTS.3536.1 | 10.67 | 10.89 | 0.32 | 0.8  | -1.16  | 0.670297 | 0.63244  | 0.852382 | 0.783528 |
| MmuSTS.3537.1.S1_at   | MmuSTS.3537.1 | 8.39  | 8.67  | 0.46 | 0.36 | -1.22  | 0.944716 | 0.709535 | 0.978975 | 0.831686 |
| MmuSTS.3538.1.S1_at   | MmuSTS.3538.1 | 11.48 | 11.36 | 0.12 | 0.29 | 1.09   | 0.282844 | 0.379491 | 0.623131 | 0.616413 |
| MmuSTS.3539.1.S1_at   | MmuSTS.3539.1 | 7.64  | 7.71  | 0.18 | 0.13 | -1.05  | 0.828065 | 0.776662 | 0.930199 | 0.870173 |
| MmuSTS.354.1.S1_at    | MmuSTS.354.1  | 5.85  | 6.36  | 0.07 | 0.24 | -1.43  | 0.031827 | 0.022583 | 0.323007 | 0.188092 |
| MmuSTS.3540.1.S1_at   | MmuSTS.3540.1 | 8.8   | 8.49  | 0.41 | 0.18 | 1.24   | 0.790841 | 0.849986 | 0.913193 | 0.914673 |
| MmuSTS.3541.1.S1_at   | MmuSTS.3541.1 | 4.59  | 7.03  | 1.43 | 1.43 | -5.4   | 0.232499 | 0.161517 | 0.587814 | 0.437651 |
| MmuSTS.3542.1.S1_at   | MmuSTS.3542.1 | 3.31  | 3.67  | 0.29 | 0.12 | -1.29  | 0.53496  | 0.13761  | 0.778932 | 0.410562 |
| MmuSTS.3543.1.S1_at   | MmuSTS.3543.1 | 8.75  | 9.94  | 0.21 | 0.38 | -2.28  | 0.006392 | 0.004338 | 0.199139 | 0.092354 |
| MmuSTS.3544.1.S1_at   | MmuSTS.3544.1 | 10.35 | 10.02 | 0.18 | 0.52 | 1.26   | 0.315617 | 0.390857 | 0.646683 | 0.624588 |
| MmuSTS.3545.1.S1_at   | MmuSTS.3545.1 | 5.13  | 6.91  | 0.48 | 0.88 | -3.45  | 0.065711 | 0.028884 | 0.404984 | 0.211763 |
| MmuSTS.3546.1.S1_at   | MmuSTS.3546.1 | 10.46 | 10.31 | 0.15 | 0.32 | 1.11   | 0.513611 | 0.609831 | 0.766403 | 0.768137 |
| MmuSTS.3547.1.S1_at   | MmuSTS.3547.1 | 2.86  | 2.86  | 0.04 | 0.06 | 1.01   | 0.558576 | 0.701    | 0.793302 | 0.826611 |
| MmuSTS.3548.1.S1_at   | MmuSTS.3548.1 | 7.39  | 7.47  | 0.2  | 0.25 | -1.06  | 0.535731 | 0.168273 | 0.779302 | 0.444935 |
| MmuSTS.3549.1.S1_at   | MmuSTS.3549.1 | 3.38  | 3.48  | 0.05 | 0.14 | -1.07  | 0.326944 | 0.431136 | 0.653374 | 0.652151 |
| MmuSTS.355.1.S1_at    | MmuSTS.355.1  | 12.66 | 12.76 | 0.09 | 0.25 | -1.08  | 0.244482 | 0.115102 | 0.596252 | 0.381985 |
| MmuSTS.3550.1.S1_s_at | MmuSTS.3550.1 | 13.47 | 13.29 | 0.02 | 0.47 | 1.13   | 0.168758 | 0.183805 | 0.533113 | 0.459882 |
| MmuSTS.3551.1.S1_at   | MmuSTS.3551.1 | 7.91  | 8.04  | 0.18 | 0.29 | -1.09  | 0.850869 | 0.965197 | 0.940085 | 0.98061  |
| MmuSTS.3552.1.S1_at   | MmuSTS.3552.1 | 5.97  | 5.52  | 0.37 | 0.19 | 1.36   | 0.424543 | 0.539945 | 0.714559 | 0.723995 |
| MmuSTS.3552.1.S1_x_at | MmuSTS.3552.1 | 6.43  | 5.85  | 0.51 | 0.25 | 1.49   | 0.433799 | 0.553134 | 0.720251 | 0.73239  |
| MmuSTS.3553.1.S1_at   | MmuSTS.3553.1 | 3.68  | 3.68  | 0.14 | 0.23 | 1      | 0.503845 | 0.568992 | 0.761034 | 0.742216 |
| MmuSTS.3554.1.S1_at   | MmuSTS.3554.1 | 4.9   | 9.45  | 2.27 | 2.62 | -23.31 | 0.25785  | 0.223422 | 0.605259 | 0.496227 |
| MmuSTS.3555.1.S1_at   | MmuSTS.3555.1 | 9.43  | 8.88  | 0.07 | 0.47 | 1.47   | 0.116411 | 0.103594 | 0.480148 | 0.364346 |
| MmuSTS.3556.1.S1_at   | MmuSTS.3556.1 | 5.25  | 5.96  | 0.83 | 0.81 | -1.63  | 0.568952 | 0.167099 | 0.79891  | 0.4436   |
| MmuSTS.3557.1.S1_at   | MmuSTS.3557.1 | 10.59 | 9.41  | 0.3  | 0.95 | 2.27   | 0.143496 | 0.151384 | 0.510312 | 0.426104 |

|                       |               |       |       |      |      |        |          |          |          |          |
|-----------------------|---------------|-------|-------|------|------|--------|----------|----------|----------|----------|
| MmuSTS.3558.1.S1_at   | MmuSTS.3558.1 | 6.3   | 6.55  | 0.21 | 0.12 | -1.19  | 0.436318 | 0.479211 | 0.721646 | 0.685022 |
| MmuSTS.3559.1.S1_at   | MmuSTS.3559.1 | 10.16 | 11.64 | 0.47 | 0.2  | -2.8   | 0.01106  | 0.009185 | 0.233774 | 0.126554 |
| MmuSTS.356.1.S1_s_at  | MmuSTS.356.1  | 11.71 | 11.75 | 0.71 | 0.29 | -1.02  | 0.906159 | 0.658988 | 0.962684 | 0.800475 |
| MmuSTS.3560.1.S1_x_at | MmuSTS.3560.1 | 8.25  | 8.5   | 0.09 | 0.38 | -1.19  | 0.084265 | 0.103498 | 0.436922 | 0.364346 |
| MmuSTS.3561.1.S1_at   | MmuSTS.3561.1 | 11.37 | 11.35 | 0.16 | 0.6  | 1.01   | 0.724463 | 0.256164 | 0.879703 | 0.524069 |
| MmuSTS.3562.1.S1_at   | MmuSTS.3562.1 | 11.74 | 11.09 | 0.05 | 0.09 | 1.57   | 0.000467 | 0.000051 | 0.133839 | 0.025333 |
| MmuSTS.3563.1.S1_at   | MmuSTS.3563.1 | 7.06  | 7.31  | 0.32 | 0.12 | -1.19  | 0.752975 | 0.184685 | 0.894568 | 0.460645 |
| MmuSTS.3564.1.S1_at   | MmuSTS.3564.1 | 7.15  | 7.27  | 0.07 | 0.03 | -1.09  | 0.117306 | 0.125344 | 0.4814   | 0.395994 |
| MmuSTS.3564.1.S1_x_at | MmuSTS.3564.1 | 7.09  | 7.11  | 0.08 | 0.03 | -1.01  | 0.290281 | 0.559679 | 0.628083 | 0.736365 |
| MmuSTS.3565.1.S1_at   | MmuSTS.3565.1 | 5.89  | 6.88  | 0.74 | 0.27 | -1.99  | 0.112517 | 0.016025 | 0.474984 | 0.160532 |
| MmuSTS.3566.1.S1_at   | MmuSTS.3566.1 | 7.15  | 7.6   | 0.18 | 0.47 | -1.37  | 0.127195 | 0.134406 | 0.493553 | 0.406603 |
| MmuSTS.3567.1.S1_at   | MmuSTS.3567.1 | 11.56 | 10.82 | 0.84 | 0.41 | 1.66   | 0.243718 | 0.124997 | 0.595523 | 0.395386 |
| MmuSTS.3568.1.S1_at   | MmuSTS.3568.1 | 7.06  | 6.47  | 0.66 | 1.64 | 1.5    | 0.6204   | 0.492748 | 0.826026 | 0.693756 |
| MmuSTS.3569.1.S1_at   | MmuSTS.3569.1 | 6.46  | 8.83  | 2.29 | 2.81 | -5.2   | 0.540111 | 0.123207 | 0.781591 | 0.393273 |
| MmuSTS.357.1.S1_s_at  | MmuSTS.357.1  | 8.75  | 8.57  | 0.07 | 0.31 | 1.13   | 0.094854 | 0.048507 | 0.452343 | 0.265472 |
| MmuSTS.3570.1.S1_at   | MmuSTS.3570.1 | 10.5  | 10.04 | 0.19 | 2.06 | 1.37   | 0.579102 | 0.51946  | 0.804078 | 0.711062 |
| MmuSTS.3571.1.S1_s_at | MmuSTS.3571.1 | 10.17 | 10.02 | 1.47 | 1.43 | 1.11   | 0.790502 | 0.409051 | 0.913061 | 0.636113 |
| MmuSTS.3572.1.S1_at   | MmuSTS.3572.1 | 7.49  | 7.81  | 0.16 | 0.75 | -1.26  | 0.763867 | 0.027703 | 0.900476 | 0.20785  |
| MmuSTS.3573.1.S1_at   | MmuSTS.3573.1 | 3.39  | 3.4   | 0.96 | 0.59 | -1     | 0.630443 | 0.517617 | 0.832023 | 0.709722 |
| MmuSTS.3574.1.S1_at   | MmuSTS.3574.1 | 9.91  | 9.25  | 0.12 | 0.34 | 1.57   | 0.050679 | 0.017128 | 0.375181 | 0.165775 |
| MmuSTS.3575.1.S1_at   | MmuSTS.3575.1 | 3.5   | 7.13  | 1.88 | 0.56 | -12.33 | 0.078752 | 0.07653  | 0.428609 | 0.321612 |
| MmuSTS.3576.1.S1_at   | MmuSTS.3576.1 | 10.63 | 9.69  | 0.28 | 0.2  | 1.92   | 0.006993 | 0.001211 | 0.202858 | 0.054455 |
| MmuSTS.3577.1.S1_at   | MmuSTS.3577.1 | 4.32  | 4.09  | 0.29 | 0.33 | 1.17   | 0.931077 | 0.420993 | 0.97337  | 0.644662 |
| MmuSTS.3578.1.S1_at   | MmuSTS.3578.1 | 5.64  | 5.72  | 0.24 | 0.04 | -1.05  | 0.191902 | 0.176005 | 0.554902 | 0.452526 |
| MmuSTS.3579.1.S1_at   | MmuSTS.3579.1 | 5.83  | 6.56  | 0.89 | 0.85 | -1.67  | 0.772971 | 0.10571  | 0.904569 | 0.3678   |
| MmuSTS.358.1.S1_at    | MmuSTS.358.1  | 5.83  | 5.73  | 0.11 | 0.03 | 1.07   | 0.13431  | 0.216103 | 0.500903 | 0.489686 |
| MmuSTS.3580.1.S1_at   | MmuSTS.3580.1 | 7.36  | 7.51  | 0.1  | 0.06 | -1.11  | 0.105836 | 0.068792 | 0.466636 | 0.308711 |
| MmuSTS.3581.1.S1_at   | MmuSTS.3581.1 | 3.29  | 3.27  | 0.14 | 0.08 | 1.01   | 0.885557 | 0.294178 | 0.954118 | 0.553974 |
| MmuSTS.3582.1.S1_at   | MmuSTS.3582.1 | 14.31 | 14.08 | 0.09 | 0.26 | 1.18   | 0.111579 | 0.032767 | 0.473787 | 0.224122 |
| MmuSTS.3583.1.S1_at   | MmuSTS.3583.1 | 12.09 | 12.55 | 0.23 | 0.39 | -1.37  | 0.171233 | 0.053897 | 0.535128 | 0.277685 |
| MmuSTS.3584.1.S1_at   | MmuSTS.3584.1 | 3.41  | 3.52  | 0.04 | 0.06 | -1.08  | 0.071799 | 0.039131 | 0.415886 | 0.243056 |
| MmuSTS.3585.1.S1_at   | MmuSTS.3585.1 | 4.64  | 5.03  | 0.2  | 0.33 | -1.32  | 0.138609 | 0.170539 | 0.505839 | 0.447177 |
| MmuSTS.3586.1.S1_at   | MmuSTS.3586.1 | 3.8   | 3.77  | 0.04 | 0.09 | 1.02   | 0.75836  | 0.841749 | 0.897768 | 0.909796 |
| MmuSTS.3587.1.S1_at   | MmuSTS.3587.1 | 5.39  | 7.67  | 0.54 | 2.07 | -4.88  | 0.149538 | 0.131533 | 0.514055 | 0.403658 |
| MmuSTS.3588.1.S1_at   | MmuSTS.3588.1 | 6.07  | 6.25  | 0.09 | 0.08 | -1.14  | 0.028802 | 0.184873 | 0.312166 | 0.460776 |
| MmuSTS.3589.1.S1_at   | MmuSTS.3589.1 | 11.14 | 10.8  | 0.16 | 0.42 | 1.27   | 0.511128 | 0.567146 | 0.765244 | 0.741068 |
| MmuSTS.359.1.S1_at    | MmuSTS.359.1  | 9.67  | 10.87 | 0.17 | 0.21 | -2.3   | 0.001513 | 0.000442 | 0.151506 | 0.038359 |
| MmuSTS.3590.1.S1_at   | MmuSTS.3590.1 | 3.72  | 3.75  | 0.13 | 0.04 | -1.02  | 0.47781  | 0.309226 | 0.74699  | 0.564807 |
| MmuSTS.3591.1.S1_s_at | MmuSTS.3591.1 | 13.4  | 13.27 | 0.08 | 0.04 | 1.09   | 0.047173 | 0.062463 | 0.365553 | 0.296717 |
| MmuSTS.3592.1.S1_at   | MmuSTS.3592.1 | 10.37 | 9.76  | 0.28 | 0.27 | 1.53   | 0.058025 | 0.028558 | 0.389637 | 0.210768 |
| MmuSTS.3593.1.S1_at   | MmuSTS.3593.1 | 8.03  | 7.92  | 0.22 | 0.09 | 1.08   | 0.51641  | 0.019795 | 0.768067 | 0.176951 |

|                       |               |       |       |      |      |       |          |          |          |          |
|-----------------------|---------------|-------|-------|------|------|-------|----------|----------|----------|----------|
| MmuSTS.3594.1.S1_at   | MmuSTS.3594.1 | 6.23  | 5.04  | 0.35 | 0.57 | 2.28  | 0.017924 | 0.010842 | 0.26813  | 0.135758 |
| MmuSTS.3595.1.S1_at   | MmuSTS.3595.1 | 5.73  | 5.79  | 0.24 | 0.12 | -1.04 | 0.753417 | 0.573402 | 0.894862 | 0.745119 |
| MmuSTS.3596.1.S1_at   | MmuSTS.3596.1 | 5.21  | 5.62  | 0.4  | 0.16 | -1.33 | 0.268981 | 0.126162 | 0.613684 | 0.396742 |
| MmuSTS.3597.1.S1_at   | MmuSTS.3597.1 | 3.49  | 3.44  | 0.09 | 0.09 | 1.03  | 0.837193 | 0.228294 | 0.934184 | 0.500467 |
| MmuSTS.3598.1.S1_s_at | MmuSTS.3598.1 | 10.94 | 9.55  | 0.42 | 0.5  | 2.63  | 0.019984 | 0.013301 | 0.276365 | 0.14803  |
| MmuSTS.3599.1.S1_at   | MmuSTS.3599.1 | 7.56  | 7.23  | 0.13 | 0.68 | 1.26  | 0.947349 | 0.995963 | 0.979763 | 0.997533 |
| MmuSTS.36.1.S1_at     | MmuSTS.36.1   | 11.94 | 11.96 | 0.06 | 0.13 | -1.01 | 0.683779 | 0.230673 | 0.858512 | 0.502381 |
| MmuSTS.360.1.S1_at    | MmuSTS.360.1  | 7.06  | 7.37  | 0.03 | 0.71 | -1.24 | 0.478254 | 0.657032 | 0.747114 | 0.799401 |
| MmuSTS.3600.1.S1_at   | MmuSTS.3600.1 | 10.81 | 11.76 | 0.87 | 0.81 | -1.93 | 0.150668 | 0.132114 | 0.515411 | 0.404131 |
| MmuSTS.3601.1.S1_at   | MmuSTS.3601.1 | 12.41 | 12.22 | 0.2  | 0.19 | 1.14  | 0.302376 | 0.396866 | 0.63692  | 0.62846  |
| MmuSTS.3602.1.S1_at   | MmuSTS.3602.1 | 9.8   | 9.81  | 0.12 | 0.04 | -1.01 | 0.965911 | 0.801543 | 0.987096 | 0.885828 |
| MmuSTS.3603.1.S1_at   | MmuSTS.3603.1 | 9.59  | 8.49  | 0.11 | 0.46 | 2.14  | 0.015115 | 0.003549 | 0.257529 | 0.085371 |
| MmuSTS.3604.1.S1_at   | MmuSTS.3604.1 | 8.77  | 5.58  | 0.57 | 1.28 | 9.12  | 0.028822 | 0.019348 | 0.312166 | 0.174785 |
| MmuSTS.3605.1.S1_at   | MmuSTS.3605.1 | 6.52  | 7.18  | 0.94 | 0.96 | -1.58 | 0.6008   | 0.573479 | 0.815477 | 0.745164 |
| MmuSTS.3606.1.S1_at   | MmuSTS.3606.1 | 10.53 | 10.81 | 0.25 | 0.32 | -1.21 | 0.206628 | 0.232117 | 0.568816 | 0.503844 |
| MmuSTS.3607.1.S1_at   | MmuSTS.3607.1 | 10.87 | 11.17 | 0.42 | 0.55 | -1.23 | 0.609682 | 0.629713 | 0.820621 | 0.781989 |
| MmuSTS.3608.1.S1_at   | MmuSTS.3608.1 | 8.71  | 9.64  | 0.54 | 1.76 | -1.91 | 0.538638 | 0.319339 | 0.7807   | 0.571724 |
| MmuSTS.3609.1.S1_at   | MmuSTS.3609.1 | 8.14  | 9.7   | 0.58 | 1.33 | -2.95 | 0.163335 | 0.150421 | 0.527696 | 0.424955 |
| MmuSTS.361.1.A1_at    | MmuSTS.361.1  | 10.58 | 9.41  | 0.14 | 0.38 | 2.25  | 0.00995  | 0.005977 | 0.226899 | 0.105736 |
| MmuSTS.361.1.S1_at    | MmuSTS.361.1  | 9.42  | 8.24  | 0.19 | 0.35 | 2.27  | 0.009658 | 0.003961 | 0.226235 | 0.089522 |
| MmuSTS.3610.1.S1_at   | MmuSTS.3610.1 | 13.39 | 13.47 | 0.11 | 0.44 | -1.06 | 0.701031 | 0.540267 | 0.867793 | 0.724221 |
| MmuSTS.3610.1.S1_x_at | MmuSTS.3610.1 | 13.31 | 13.27 | 0.14 | 0.49 | 1.02  | 0.730883 | 0.700262 | 0.88338  | 0.826029 |
| MmuSTS.3611.1.S1_at   | MmuSTS.3611.1 | 9.64  | 9.93  | 0.12 | 0.49 | -1.22 | 0.860784 | 0.655287 | 0.94382  | 0.798399 |
| MmuSTS.3612.1.S1_at   | MmuSTS.3612.1 | 8.21  | 8.28  | 0.09 | 0.63 | -1.05 | 0.864657 | 0.450851 | 0.945589 | 0.665869 |
| MmuSTS.3613.1.S1_at   | MmuSTS.3613.1 | 4.45  | 4.13  | 0.83 | 0.57 | 1.25  | 0.854215 | 0.681907 | 0.941079 | 0.814226 |
| MmuSTS.3614.1.S1_at   | MmuSTS.3614.1 | 3.92  | 3.89  | 0.15 | 0.19 | 1.02  | 0.715636 | 0.086634 | 0.875237 | 0.339176 |
| MmuSTS.3615.1.S1_at   | MmuSTS.3615.1 | 12.88 | 11.48 | 1.54 | 0.88 | 2.64  | 0.378626 | 0.596196 | 0.68654  | 0.759376 |
| MmuSTS.3616.1.S1_at   | MmuSTS.3616.1 | 6.02  | 6.38  | 0.22 | 0.01 | -1.28 | 0.066745 | 0.108491 | 0.406981 | 0.372066 |
| MmuSTS.3617.1.S1_at   | MmuSTS.3617.1 | 10.57 | 10.75 | 0.25 | 0.56 | -1.13 | 0.307252 | 0.159268 | 0.639889 | 0.435283 |
| MmuSTS.3618.1.S1_at   | MmuSTS.3618.1 | 11.13 | 12.37 | 1.21 | 0.49 | -2.37 | 0.185493 | 0.155617 | 0.5489   | 0.430977 |
| MmuSTS.3619.1.S1_at   | MmuSTS.3619.1 | 10.2  | 10.28 | 0.18 | 0.03 | -1.06 | 0.443792 | 0.613967 | 0.726422 | 0.77098  |
| MmuSTS.362.1.S1_at    | MmuSTS.362.1  | 6.64  | 6.67  | 0.13 | 0.09 | -1.02 | 0.633609 | 0.747773 | 0.833849 | 0.853252 |
| MmuSTS.362.1.S1_s_at  | MmuSTS.362.1  | 4.33  | 4.31  | 0.02 | 0    | 1.01  | 0.099641 | 0.011413 | 0.459646 | 0.138384 |
| MmuSTS.3620.1.S1_at   | MmuSTS.3620.1 | 11.35 | 11.17 | 0.5  | 0.34 | 1.14  | 0.810877 | 0.767117 | 0.922872 | 0.864712 |
| MmuSTS.3621.1.S1_at   | MmuSTS.3621.1 | 10.91 | 11.88 | 1.05 | 1.98 | -1.96 | 0.585446 | 0.77496  | 0.807583 | 0.869002 |
| MmuSTS.3622.1.S1_at   | MmuSTS.3622.1 | 9.3   | 9.31  | 0.17 | 0.11 | -1.01 | 0.773489 | 0.82724  | 0.904857 | 0.9008   |
| MmuSTS.3623.1.S1_at   | MmuSTS.3623.1 | 4.73  | 4.74  | 0.13 | 0.1  | -1    | 0.808441 | 0.944842 | 0.921914 | 0.968794 |
| MmuSTS.3624.1.S1_at   | MmuSTS.3624.1 | 8.55  | 8.55  | 0.07 | 0.11 | 1     | 0.722278 | 0.042854 | 0.878644 | 0.251591 |
| MmuSTS.3625.1.S1_at   | MmuSTS.3625.1 | 11.08 | 11.09 | 0.22 | 0.17 | -1.01 | 0.508377 | 0.673261 | 0.763692 | 0.809084 |
| MmuSTS.3626.1.S1_at   | MmuSTS.3626.1 | 9.14  | 9.72  | 0.29 | 0.17 | -1.5  | 0.057895 | 0.027545 | 0.389419 | 0.207227 |
| MmuSTS.3627.1.S1_at   | MmuSTS.3627.1 | 7.93  | 8.29  | 0.31 | 0.41 | -1.28 | 0.99737  | 0.431711 | 0.998929 | 0.652516 |

|                       |               |       |       |      |      |       |          |          |          |          |
|-----------------------|---------------|-------|-------|------|------|-------|----------|----------|----------|----------|
| MmuSTS.3628.1.S1_at   | MmuSTS.3628.1 | 9.64  | 8.17  | 0.33 | 0.07 | 2.78  | 0.001678 | 0.00038  | 0.15365  | 0.037273 |
| MmuSTS.3629.1.S1_at   | MmuSTS.3629.1 | 6.76  | 6.67  | 0.16 | 0.34 | 1.07  | 0.253825 | 0.267959 | 0.60233  | 0.533687 |
| MmuSTS.363.1.S1_s_at  | MmuSTS.363.1  | 2.66  | 2.75  | 0.12 | 0.04 | -1.07 | 0.336584 | 0.464707 | 0.659533 | 0.675374 |
| MmuSTS.3630.1.S1_at   | MmuSTS.3630.1 | 3.14  | 3.14  | 0.05 | 0.2  | -1    | 0.288134 | 0.389721 | 0.626431 | 0.623783 |
| MmuSTS.3631.1.S1_at   | MmuSTS.3631.1 | 11.36 | 10.54 | 0.26 | 0.47 | 1.77  | 0.063144 | 0.079906 | 0.400282 | 0.327207 |
| MmuSTS.3632.1.S1_at   | MmuSTS.3632.1 | 4.94  | 5.29  | 0.57 | 0.49 | -1.28 | 0.42188  | 0.566398 | 0.713215 | 0.740513 |
| MmuSTS.3633.1.S1_at   | MmuSTS.3633.1 | 12.32 | 12.06 | 0.03 | 0.35 | 1.2   | 0.258226 | 0.307744 | 0.605532 | 0.563932 |
| MmuSTS.3634.1.S1_s_at | MmuSTS.3634.1 | 6.53  | 6.53  | 0.2  | 0.9  | -1.01 | 0.419394 | 0.419448 | 0.711796 | 0.643474 |
| MmuSTS.3635.1.S1_at   | MmuSTS.3635.1 | 10.81 | 10.95 | 0.32 | 0.33 | -1.1  | 0.60538  | 0.461683 | 0.81824  | 0.673237 |
| MmuSTS.3636.1.S1_at   | MmuSTS.3636.1 | 9.95  | 9.64  | 0.25 | 0.3  | 1.24  | 0.99134  | 0.092643 | 0.996946 | 0.34868  |
| MmuSTS.3637.1.S1_at   | MmuSTS.3637.1 | 6.07  | 6.04  | 0.55 | 0.46 | 1.02  | 0.849721 | 0.257579 | 0.939661 | 0.525302 |
| MmuSTS.3638.1.S1_at   | MmuSTS.3638.1 | 7.91  | 10.72 | 0.16 | 0.43 | -7.04 | 0.000644 | 0.000371 | 0.136818 | 0.037273 |
| MmuSTS.3639.1.S1_at   | MmuSTS.3639.1 | 12.27 | 12.18 | 0.09 | 0.54 | 1.06  | 0.764782 | 0.371447 | 0.900939 | 0.610204 |
| MmuSTS.364.1.S1_at    | MmuSTS.364.1  | 6.41  | 6.95  | 0.74 | 0.91 | -1.45 | 0.519656 | 0.381111 | 0.770267 | 0.617478 |
| MmuSTS.3640.1.S1_at   | MmuSTS.3640.1 | 4.84  | 4.87  | 0.36 | 0.39 | -1.02 | 0.771948 | 0.601683 | 0.903991 | 0.763001 |
| MmuSTS.3641.1.S1_at   | MmuSTS.3641.1 | 5.28  | 4.9   | 0.01 | 0.35 | 1.3   | 0.419827 | 0.208291 | 0.712083 | 0.48217  |
| MmuSTS.3642.1.S1_at   | MmuSTS.3642.1 | 6.76  | 6.87  | 0.84 | 0.7  | -1.08 | 0.842065 | 0.32011  | 0.93631  | 0.572464 |
| MmuSTS.3643.1.S1_at   | MmuSTS.3643.1 | 7.16  | 10.35 | 1.26 | 2.61 | -9.12 | 0.339424 | 0.301474 | 0.661307 | 0.559522 |
| MmuSTS.3644.1.S1_at   | MmuSTS.3644.1 | 5.32  | 6.22  | 0.3  | 0.57 | -1.86 | 0.064065 | 0.134631 | 0.402086 | 0.406629 |
| MmuSTS.3645.1.S1_at   | MmuSTS.3645.1 | 6.26  | 6.88  | 0.44 | 0.98 | -1.54 | 0.332222 | 0.472033 | 0.656683 | 0.679835 |
| MmuSTS.3646.1.S1_at   | MmuSTS.3646.1 | 8.68  | 9.26  | 0.36 | 0.41 | -1.5  | 0.239135 | 0.097798 | 0.592277 | 0.355639 |
| MmuSTS.3647.1.S1_at   | MmuSTS.3647.1 | 8.1   | 6.76  | 0.29 | 0.74 | 2.54  | 0.106157 | 0.055507 | 0.466831 | 0.281404 |
| MmuSTS.3648.1.S1_at   | MmuSTS.3648.1 | 13.11 | 13.04 | 0.18 | 0.11 | 1.06  | 0.307433 | 0.364598 | 0.639999 | 0.604917 |
| MmuSTS.3649.1.S1_at   | MmuSTS.3649.1 | 7.01  | 6.94  | 0.06 | 0.71 | 1.05  | 0.848704 | 0.945368 | 0.939211 | 0.968942 |
| MmuSTS.365.1.S1_s_at  | MmuSTS.365.1  | 3.01  | 3.21  | 0.02 | 0.1  | -1.15 | 0.068012 | 0.134664 | 0.409262 | 0.406638 |
| MmuSTS.3650.1.S1_at   | MmuSTS.3650.1 | 9.88  | 9.73  | 0.43 | 1.15 | 1.11  | 0.209505 | 0.244231 | 0.570957 | 0.514167 |
| MmuSTS.3651.1.S1_at   | MmuSTS.3651.1 | 8.3   | 8.4   | 0.17 | 0.39 | -1.07 | 0.771388 | 0.859255 | 0.90382  | 0.919785 |
| MmuSTS.3652.1.S1_at   | MmuSTS.3652.1 | 6.4   | 7.35  | 0.15 | 0.28 | -1.93 | 0.016309 | 0.018918 | 0.263592 | 0.173025 |
| MmuSTS.3653.1.S1_at   | MmuSTS.3653.1 | 4.06  | 4.11  | 0.13 | 0.09 | -1.03 | 0.830837 | 0.257295 | 0.93155  | 0.525108 |
| MmuSTS.3654.1.S1_at   | MmuSTS.3654.1 | 5.77  | 6.36  | 0.65 | 0.42 | -1.5  | 0.058284 | 0.039654 | 0.390177 | 0.244239 |
| MmuSTS.3655.1.S1_at   | MmuSTS.3655.1 | 9.89  | 9.83  | 0.58 | 1    | 1.04  | 0.30061  | 0.357022 | 0.635955 | 0.598737 |
| MmuSTS.3656.1.S1_at   | MmuSTS.3656.1 | 9.9   | 9.32  | 0.33 | 0.57 | 1.49  | 0.195888 | 0.172191 | 0.558998 | 0.448608 |
| MmuSTS.3657.1.S1_at   | MmuSTS.3657.1 | 4.86  | 4.87  | 0.09 | 0.05 | -1.01 | 0.31337  | 0.379734 | 0.64513  | 0.616543 |
| MmuSTS.3658.1.S1_at   | MmuSTS.3658.1 | 10.03 | 9.89  | 0.11 | 0.35 | 1.1   | 0.675342 | 0.256279 | 0.854501 | 0.524079 |
| MmuSTS.3659.1.S1_at   | MmuSTS.3659.1 | 4.87  | 4.95  | 0.07 | 0.09 | -1.05 | 0.343809 | 0.4236   | 0.664017 | 0.646459 |
| MmuSTS.366.1.S1_at    | MmuSTS.366.1  | 6.13  | 6.4   | 0.09 | 0.2  | -1.21 | 0.239973 | 0.303637 | 0.592883 | 0.561088 |
| MmuSTS.3660.1.S1_at   | MmuSTS.3660.1 | 9.59  | 9.05  | 0.3  | 0.61 | 1.46  | 0.245677 | 0.038551 | 0.597192 | 0.241325 |
| MmuSTS.3661.1.S1_at   | MmuSTS.3661.1 | 11.42 | 11.1  | 0.08 | 0.05 | 1.25  | 0.006192 | 0.000743 | 0.196818 | 0.044964 |
| MmuSTS.3662.1.S1_at   | MmuSTS.3662.1 | 11.6  | 11.4  | 0.07 | 0.31 | 1.14  | 0.278394 | 0.346764 | 0.620536 | 0.591536 |
| MmuSTS.3663.1.S1_at   | MmuSTS.3663.1 | 6.96  | 7     | 0.23 | 0.26 | -1.02 | 0.980675 | 0.774234 | 0.993028 | 0.868735 |
| MmuSTS.3664.1.S1_at   | MmuSTS.3664.1 | 10.25 | 10.19 | 0.17 | 0.09 | 1.04  | 0.495829 | 0.706089 | 0.757324 | 0.829633 |

|                       |               |       |       |      |      |       |          |          |          |          |
|-----------------------|---------------|-------|-------|------|------|-------|----------|----------|----------|----------|
| MmuSTS.3665.1.S1_at   | MmuSTS.3665.1 | 13.01 | 12.84 | 0.06 | 0.03 | 1.13  | 0.024361 | 0.013337 | 0.294535 | 0.148042 |
| MmuSTS.3666.1.S1_at   | MmuSTS.3666.1 | 10.5  | 10.35 | 0.13 | 0.24 | 1.11  | 0.48255  | 0.107355 | 0.749408 | 0.370219 |
| MmuSTS.3667.1.S1_at   | MmuSTS.3667.1 | 7.98  | 7.89  | 0.19 | 0.12 | 1.07  | 0.207999 | 0.248706 | 0.569897 | 0.517917 |
| MmuSTS.3668.1.S1_at   | MmuSTS.3668.1 | 8.49  | 7.75  | 0.19 | 0.91 | 1.66  | 0.218194 | 0.269048 | 0.57777  | 0.534425 |
| MmuSTS.3669.1.S1_at   | MmuSTS.3669.1 | 4.21  | 4.48  | 0.04 | 0.27 | -1.21 | 0.119608 | 0.000211 | 0.484145 | 0.032262 |
| MmuSTS.367.1.S1_s_at  | MmuSTS.367.1  | 3.27  | 3.35  | 0.03 | 0.07 | -1.06 | 0.083508 | 0.170946 | 0.43582  | 0.447561 |
| MmuSTS.3670.1.S1_at   | MmuSTS.3670.1 | 5.31  | 5.54  | 0.1  | 0.07 | -1.18 | 0.047974 | 0.082995 | 0.367582 | 0.332692 |
| MmuSTS.3671.1.S1_at   | MmuSTS.3671.1 | 3.37  | 4.88  | 0.21 | 1.62 | -2.86 | 0.178731 | 0.18784  | 0.543018 | 0.46394  |
| MmuSTS.3672.1.S1_at   | MmuSTS.3672.1 | 9.06  | 8.08  | 0.11 | 0.45 | 1.97  | 0.018018 | 0.009358 | 0.268422 | 0.127602 |
| MmuSTS.3673.1.S1_at   | MmuSTS.3673.1 | 11.81 | 11.83 | 0.34 | 0.21 | -1.02 | 0.83089  | 0.961829 | 0.931581 | 0.978471 |
| MmuSTS.3674.1.S1_at   | MmuSTS.3674.1 | 3.71  | 3.84  | 0.05 | 0.13 | -1.1  | 0.397842 | 0.540441 | 0.698318 | 0.724383 |
| MmuSTS.3675.1.S1_at   | MmuSTS.3675.1 | 8.68  | 7.77  | 0.37 | 0.33 | 1.88  | 0.027528 | 0.009008 | 0.308386 | 0.125499 |
| MmuSTS.3676.1.S1_at   | MmuSTS.3676.1 | 10.08 | 8.8   | 0.07 | 0.28 | 2.43  | 0.002081 | 0.009547 | 0.155636 | 0.128745 |
| MmuSTS.3677.1.S1_at   | MmuSTS.3677.1 | 8.02  | 7.39  | 0.12 | 0.48 | 1.55  | 0.273742 | 0.345322 | 0.617195 | 0.59062  |
| MmuSTS.3678.1.S1_at   | MmuSTS.3678.1 | 5.59  | 5.03  | 0.62 | 0.06 | 1.48  | 0.160441 | 0.128957 | 0.525445 | 0.400429 |
| MmuSTS.3679.1.S1_at   | MmuSTS.3679.1 | 8.17  | 7.39  | 0.08 | 0.33 | 1.71  | 0.048483 | 0.03557  | 0.368878 | 0.232813 |
| MmuSTS.368.1.S1_at    | MmuSTS.368.1  | 3.82  | 3.86  | 0.1  | 0.09 | -1.03 | 0.888983 | 0.924527 | 0.955537 | 0.957386 |
| MmuSTS.3680.1.S1_at   | MmuSTS.3680.1 | 5.31  | 5.12  | 0.36 | 0.06 | 1.14  | 0.310659 | 0.297449 | 0.642603 | 0.556105 |
| MmuSTS.3681.1.S1_at   | MmuSTS.3681.1 | 11.92 | 11.91 | 0.11 | 0.12 | 1.01  | 0.958909 | 0.118915 | 0.984382 | 0.38714  |
| MmuSTS.3682.1.S1_x_at | MmuSTS.3682.1 | 9.75  | 9.24  | 0.42 | 0.34 | 1.43  | 0.352807 | 0.257535 | 0.669868 | 0.525294 |
| MmuSTS.3683.1.S1_at   | MmuSTS.3683.1 | 7.78  | 6.57  | 0.32 | 0.14 | 2.31  | 0.002471 | 0.000957 | 0.163555 | 0.049342 |
| MmuSTS.3684.1.S1_at   | MmuSTS.3684.1 | 5.88  | 5.78  | 0.15 | 0.1  | 1.07  | 0.867078 | 0.940553 | 0.946953 | 0.966314 |
| MmuSTS.3685.1.S1_at   | MmuSTS.3685.1 | 6.23  | 6.35  | 0.15 | 0.18 | -1.09 | 0.984377 | 0.643102 | 0.994476 | 0.790678 |
| MmuSTS.3686.1.S1_at   | MmuSTS.3686.1 | 9.47  | 9.37  | 0.48 | 0.58 | 1.08  | 0.434028 | 0.408964 | 0.720304 | 0.636048 |
| MmuSTS.3687.1.S1_at   | MmuSTS.3687.1 | 4.76  | 4.74  | 0.12 | 0.13 | 1.02  | 0.6983   | 0.838856 | 0.866049 | 0.908118 |
| MmuSTS.3688.1.S1_at   | MmuSTS.3688.1 | 8.3   | 7.86  | 0.15 | 1.69 | 1.36  | 0.655844 | 0.338394 | 0.845214 | 0.585432 |
| MmuSTS.3689.1.S1_at   | MmuSTS.3689.1 | 6.92  | 6.97  | 0.12 | 0.33 | -1.03 | 0.325873 | 0.176439 | 0.653063 | 0.45282  |
| MmuSTS.369.1.S1_s_at  | MmuSTS.369.1  | 4.42  | 4.64  | 0.1  | 0.11 | -1.17 | 0.138452 | 0.152801 | 0.505745 | 0.427601 |
| MmuSTS.3690.1.S1_at   | MmuSTS.3690.1 | 13.13 | 13.16 | 0.19 | 0.38 | -1.02 | 0.273411 | 0.349912 | 0.616843 | 0.593668 |
| MmuSTS.3691.1.S1_at   | MmuSTS.3691.1 | 11.26 | 10    | 0.16 | 0.58 | 2.4   | 0.017171 | 0.010451 | 0.266906 | 0.133645 |
| MmuSTS.3692.1.S1_at   | MmuSTS.3692.1 | 11.51 | 11.95 | 0.47 | 0.25 | -1.35 | 0.240221 | 0.26094  | 0.593068 | 0.527351 |
| MmuSTS.3693.1.S1_at   | MmuSTS.3693.1 | 6.3   | 6.98  | 0.17 | 0.95 | -1.61 | 0.279047 | 0.245558 | 0.620921 | 0.515348 |
| MmuSTS.3694.1.S1_at   | MmuSTS.3694.1 | 7.97  | 7.66  | 0.25 | 0.57 | 1.24  | 0.79009  | 0.457265 | 0.912887 | 0.670746 |
| MmuSTS.3695.1.S1_at   | MmuSTS.3695.1 | 11.04 | 11.01 | 0.04 | 0.1  | 1.02  | 0.437834 | 0.017857 | 0.722586 | 0.168774 |
| MmuSTS.3695.1.S1_s_at | MmuSTS.3695.1 | 12.04 | 12.02 | 0.04 | 0.08 | 1.01  | 0.187004 | 0.037226 | 0.550106 | 0.237329 |
| MmuSTS.3696.1.S1_at   | MmuSTS.3696.1 | 11.11 | 10.99 | 0.05 | 0.55 | 1.09  | 0.846658 | 0.733776 | 0.938433 | 0.845859 |
| MmuSTS.3697.1.S1_at   | MmuSTS.3697.1 | 12.29 | 12.14 | 0.02 | 0.08 | 1.1   | 0.068688 | 0.065883 | 0.410488 | 0.302126 |
| MmuSTS.3698.1.S1_at   | MmuSTS.3698.1 | 13.25 | 13.21 | 0.07 | 0.05 | 1.03  | 0.399889 | 0.235258 | 0.699692 | 0.506307 |
| MmuSTS.3699.1.S1_at   | MmuSTS.3699.1 | 7.31  | 6.58  | 0.51 | 0.15 | 1.65  | 0.096058 | 0.04581  | 0.454186 | 0.258337 |
| MmuSTS.37.1.S1_at     | MmuSTS.37.1   | 10.44 | 10.27 | 0.06 | 0.26 | 1.13  | 0.311936 | 0.109696 | 0.643771 | 0.373675 |
| MmuSTS.370.1.S1_at    | MmuSTS.370.1  | 5.77  | 5.45  | 0.2  | 0.32 | 1.25  | 0.384134 | 0.449648 | 0.689715 | 0.665155 |



|                        |                |       |       |      |      |        |          |          |          |          |
|------------------------|----------------|-------|-------|------|------|--------|----------|----------|----------|----------|
| MmuSTS.3700.1.S1_at    | MmuSTS.3700.1  | 12.94 | 12.51 | 0.19 | 0.02 | 1.35   | 0.018942 | 0.009239 | 0.272319 | 0.126946 |
| MmuSTS.3701.1.S1_at    | MmuSTS.3701.1  | 3.94  | 3.86  | 0.26 | 0.14 | 1.05   | 0.7415   | 0.617103 | 0.889293 | 0.77321  |
| MmuSTS.3702.1.S1_at    | MmuSTS.3702.1  | 11.15 | 10.74 | 0.2  | 0.19 | 1.33   | 0.10064  | 0.077406 | 0.461009 | 0.323204 |
| MmuSTS.3703.1.S1_at    | MmuSTS.3703.1  | 3.12  | 3.15  | 0.1  | 0.01 | -1.02  | 0.52304  | 0.436555 | 0.77227  | 0.656048 |
| MmuSTS.3704.1.S1_at    | MmuSTS.3704.1  | 9.59  | 10    | 0.13 | 0.33 | -1.33  | 0.095379 | 0.080697 | 0.453396 | 0.328537 |
| MmuSTS.3705.1.S1_at    | MmuSTS.3705.1  | 5.8   | 7.52  | 0.2  | 0.33 | -3.3   | 0.001297 | 0.001065 | 0.145684 | 0.051835 |
| MmuSTS.3706.1.S1_at    | MmuSTS.3706.1  | 11.63 | 11.33 | 0.15 | 0.34 | 1.23   | 0.240953 | 0.3159   | 0.593706 | 0.569327 |
| MmuSTS.3707.1.S1_at    | MmuSTS.3707.1  | 10.33 | 11.11 | 0.87 | 0.24 | -1.72  | 0.059504 | 0.052438 | 0.392374 | 0.274524 |
| MmuSTS.3708.1.S1_at    | MmuSTS.3708.1  | 5.73  | 5.68  | 0.04 | 0.05 | 1.03   | 0.336937 | 0.001965 | 0.659735 | 0.065838 |
| MmuSTS.3709.1.S1_at    | MmuSTS.3709.1  | 5.08  | 5.26  | 0.04 | 0.08 | -1.13  | 0.063344 | 0.022732 | 0.400486 | 0.188776 |
| MmuSTS.371.1.S1_at     | MmuSTS.371.1   | 3.69  | 3.57  | 0.17 | 0.17 | 1.09   | 0.45144  | 0.525881 | 0.731565 | 0.715223 |
| MmuSTS.3710.1.S1_at    | MmuSTS.3710.1  | 11.61 | 11.62 | 0.11 | 0.1  | -1.01  | 0.445202 | 0.39959  | 0.727485 | 0.629912 |
| MmuSTS.3711.1.S1_s_at  | MmuSTS.3711.1  | 10.5  | 10.72 | 0.12 | 0.12 | -1.17  | 0.253591 | 0.329552 | 0.60216  | 0.578781 |
| MmuSTS.3712.1.S1_at    | MmuSTS.3712.1  | 11.97 | 12.31 | 0.09 | 0.12 | -1.27  | 0.026659 | 0.0207   | 0.303736 | 0.180639 |
| MmuSTS.3713.1.S1_at    | MmuSTS.3713.1  | 11.36 | 10.84 | 0.38 | 0.48 | 1.43   | 0.142423 | 0.138422 | 0.509648 | 0.411336 |
| MmuSTS.3714.1.S1_at    | MmuSTS.3714.1  | 12.23 | 12.45 | 0.29 | 0.45 | -1.16  | 0.904373 | 0.821282 | 0.961729 | 0.897125 |
| MmuSTS.3715.1.S1_at    | MmuSTS.3715.1  | 6.04  | 5.22  | 0.1  | 0.36 | 1.77   | 0.029275 | 0.019914 | 0.313575 | 0.17744  |
| MmuSTS.3716.1.S1_at    | MmuSTS.3716.1  | 4.21  | 4.17  | 0.18 | 0.72 | 1.03   | 0.327821 | 0.326617 | 0.654144 | 0.576649 |
| MmuSTS.3717.1.S1_at    | MmuSTS.3717.1  | 12.59 | 12.66 | 0.05 | 0.53 | -1.05  | 0.448171 | 0.393812 | 0.729474 | 0.626565 |
| MmuSTS.3718.1.S1_at    | MmuSTS.3718.1  | 7.48  | 9.75  | 0.71 | 0.36 | -4.84  | 0.008272 | 0.005315 | 0.217126 | 0.100896 |
| MmuSTS.3719.1.S1_at    | MmuSTS.3719.1  | 7.57  | 9.75  | 0.2  | 1.64 | -4.53  | 0.250788 | 0.087295 | 0.600394 | 0.340327 |
| MmuSTS.372.1.S1_at     | MmuSTS.372.1   | 3.01  | 3.11  | 0.13 | 0.07 | -1.08  | 0.201329 | 0.312633 | 0.563941 | 0.567268 |
| MmunewRS.336.1.S1_at   | MmunewRS.336.1 | 3.58  | 3.78  | 0.05 | 0.05 | -1.15  | 0.006868 | 0.295905 | 0.202005 | 0.555241 |
| MmunewRS.336.1.S1_s_at | MmunewRS.336.1 | 5.55  | 5.55  | 0.15 | 0.09 | 1      | 0.917576 | 0.539334 | 0.967956 | 0.723689 |
| MmuSTS.3720.1.S1_at    | MmuSTS.3720.1  | 5.41  | 8.11  | 0.91 | 2.06 | -6.51  | 0.119692 | 0.027869 | 0.484273 | 0.208453 |
| MmuSTS.3721.1.S1_at    | MmuSTS.3721.1  | 7.16  | 9.43  | 1.66 | 0.19 | -4.82  | 0.265066 | 0.266324 | 0.610763 | 0.532099 |
| MmuSTS.3722.1.S1_at    | MmuSTS.3722.1  | 7.86  | 11.19 | 0.52 | 1    | -10.06 | 0.009298 | 0.005404 | 0.223832 | 0.101457 |
| MmuSTS.3723.1.S1_at    | MmuSTS.3723.1  | 13.86 | 13.76 | 0.01 | 0.12 | 1.07   | 0.228836 | 0.28506  | 0.586178 | 0.547095 |
| MmuSTS.3724.1.S1_at    | MmuSTS.3724.1  | 10.36 | 10.88 | 0.1  | 0.14 | -1.44  | 0.005428 | 0.001594 | 0.191107 | 0.06044  |
| MmuSTS.3725.1.S1_at    | MmuSTS.3725.1  | 8.85  | 9.91  | 0.05 | 0.28 | -2.09  | 0.001822 | 0.001388 | 0.155496 | 0.057005 |
| MmuSTS.3726.1.S1_at    | MmuSTS.3726.1  | 6.5   | 6.71  | 0.9  | 1.07 | -1.16  | 0.405141 | 0.465    | 0.703082 | 0.675534 |
| MmuSTS.3727.1.S1_at    | MmuSTS.3727.1  | 7.45  | 10.23 | 1.33 | 1.72 | -6.88  | 0.20909  | 0.127017 | 0.570667 | 0.397816 |
| MmuSTS.3728.1.S1_at    | MmuSTS.3728.1  | 5.32  | 5.42  | 0.26 | 0.05 | -1.07  | 0.184382 | 0.196317 | 0.548138 | 0.47127  |
| MmuSTS.3729.1.S1_at    | MmuSTS.3729.1  | 10.47 | 10.17 | 0.23 | 0.48 | 1.23   | 0.634941 | 0.488768 | 0.834793 | 0.691355 |
| MmuSTS.3730.1.S1_at    | MmuSTS.3730.1  | 10.11 | 9.48  | 0.21 | 0.2  | 1.54   | 0.02015  | 0.008103 | 0.276895 | 0.119551 |
| MmuSTS.3731.1.S1_at    | MmuSTS.3731.1  | 9.07  | 8.15  | 0.41 | 0.65 | 1.89   | 0.083564 | 0.036934 | 0.43582  | 0.236659 |
| MmuSTS.3732.1.S1_s_at  | MmuSTS.3732.1  | 12.59 | 12.47 | 0.05 | 0.14 | 1.09   | 0.173804 | 0.217361 | 0.53729  | 0.490978 |
| MmuSTS.3733.1.S1_at    | MmuSTS.3733.1  | 4.7   | 4.83  | 0.1  | 0.03 | -1.1   | 0.085682 | 0.102508 | 0.439704 | 0.362796 |
| MmuSTS.3733.1.S1_s_at  | MmuSTS.3733.1  | 6.12  | 6.13  | 0    | 0.24 | -1     | 0.3681   | 0.322306 | 0.679753 | 0.573907 |
| MmuSTS.3734.1.S1_at    | MmuSTS.3734.1  | 3.08  | 2.96  | 0.12 | 0.02 | 1.09   | 0.480485 | 0.669715 | 0.748404 | 0.806829 |
| MmuSTS.3735.1.S1_at    | MmuSTS.3735.1  | 6.89  | 6.91  | 0.04 | 0.15 | -1.01  | 0.304527 | 0.485081 | 0.638589 | 0.688913 |

|                       |               |       |       |      |      |        |          |          |          |          |
|-----------------------|---------------|-------|-------|------|------|--------|----------|----------|----------|----------|
| MmuSTS.3736.1.S1_at   | MmuSTS.3736.1 | 11.87 | 11.83 | 0.18 | 0.17 | 1.03   | 0.664884 | 0.712859 | 0.84973  | 0.833557 |
| MmuSTS.3737.1.S1_at   | MmuSTS.3737.1 | 7.11  | 11.94 | 1.94 | 2.95 | -28.52 | 0.372249 | 0.247003 | 0.682724 | 0.516238 |
| MmuSTS.3738.1.S1_at   | MmuSTS.3738.1 | 11.84 | 11.38 | 0.16 | 0.83 | 1.38   | 0.101242 | 0.087859 | 0.461009 | 0.341218 |
| MmuSTS.3739.1.S1_at   | MmuSTS.3739.1 | 6.41  | 8.65  | 1.28 | 1.6  | -4.74  | 0.152979 | 0.120468 | 0.517385 | 0.38925  |
| MmuSTS.374.1.S1_at    | MmuSTS.374.1  | 5.71  | 6.04  | 0.09 | 0.4  | -1.26  | 0.122482 | 0.107324 | 0.487649 | 0.370219 |
| MmuSTS.3740.1.S1_s_at | MmuSTS.3740.1 | 5.89  | 6.08  | 0.12 | 0.11 | -1.14  | 0.267292 | 0.112345 | 0.612416 | 0.377686 |
| MmuSTS.3741.1.S1_at   | MmuSTS.3741.1 | 8.37  | 6.96  | 1.12 | 1.09 | 2.66   | 0.101551 | 0.017015 | 0.461313 | 0.165348 |
| MmuSTS.3742.1.S1_at   | MmuSTS.3742.1 | 8.52  | 11.23 | 1.94 | 0.5  | -6.55  | 0.078153 | 0.076394 | 0.428221 | 0.321372 |
| MmuSTS.3743.1.S1_at   | MmuSTS.3743.1 | 6.41  | 6.34  | 0.1  | 0.25 | 1.05   | 0.736998 | 0.763456 | 0.886925 | 0.862471 |
| MmuSTS.3744.1.S1_at   | MmuSTS.3744.1 | 9.68  | 10.14 | 0.11 | 0.15 | -1.37  | 0.010485 | 0.003619 | 0.229964 | 0.086035 |
| MmuSTS.3745.1.S1_at   | MmuSTS.3745.1 | 5.13  | 6.02  | 0.49 | 1.02 | -1.84  | 0.308056 | 0.111126 | 0.640452 | 0.375714 |
| MmuSTS.3746.1.S1_at   | MmuSTS.3746.1 | 8.1   | 7.56  | 0.69 | 0.64 | 1.46   | 0.160867 | 0.081478 | 0.525925 | 0.329735 |
| MmuSTS.3747.1.S1_at   | MmuSTS.3747.1 | 9.62  | 10.29 | 0.1  | 0.2  | -1.59  | 0.014842 | 0.011513 | 0.255626 | 0.138773 |
| MmuSTS.3748.1.S1_at   | MmuSTS.3748.1 | 5.84  | 5.64  | 0.2  | 0.17 | 1.15   | 0.145847 | 0.173824 | 0.511704 | 0.450128 |
| MmuSTS.3749.1.S1_at   | MmuSTS.3749.1 | 7.43  | 6.96  | 0.28 | 0.07 | 1.38   | 0.082591 | 0.112792 | 0.434145 | 0.37844  |
| MmuSTS.375.1.S1_at    | MmuSTS.375.1  | 4.57  | 6.12  | 0.53 | 1.8  | -2.93  | 0.226983 | 0.174437 | 0.58486  | 0.450911 |
| MmuSTS.3750.1.S1_at   | MmuSTS.3750.1 | 13.31 | 13.33 | 0.06 | 0.46 | -1.01  | 0.344541 | 0.410834 | 0.664605 | 0.637644 |
| MmuSTS.3751.1.S1_at   | MmuSTS.3751.1 | 10.7  | 9     | 0.23 | 1.49 | 3.25   | 0.080463 | 0.071609 | 0.430491 | 0.313717 |
| MmuSTS.3752.1.S1_at   | MmuSTS.3752.1 | 8.29  | 7.68  | 0.39 | 0.16 | 1.52   | 0.038032 | 0.014197 | 0.343392 | 0.152173 |
| MmuSTS.3753.1.S1_at   | MmuSTS.3753.1 | 3.8   | 4.35  | 0.49 | 0.33 | -1.46  | 0.322438 | 0.107075 | 0.651095 | 0.369728 |
| MmuSTS.3754.1.S1_at   | MmuSTS.3754.1 | 9.33  | 9.78  | 0.31 | 0.28 | -1.36  | 0.127089 | 0.12795  | 0.493395 | 0.398894 |
| MmuSTS.3755.1.S1_at   | MmuSTS.3755.1 | 8.93  | 8.81  | 0.14 | 0.26 | 1.09   | 0.30967  | 0.271979 | 0.641662 | 0.53674  |
| MmuSTS.3756.1.S1_at   | MmuSTS.3756.1 | 5.97  | 5.97  | 0.13 | 0.03 | 1      | 0.873075 | 0.555239 | 0.94924  | 0.733763 |
| MmuSTS.3757.1.S1_at   | MmuSTS.3757.1 | 7.76  | 8.14  | 0.38 | 0.6  | -1.3   | 0.873621 | 0.20867  | 0.949311 | 0.482544 |
| MmuSTS.3758.1.S1_at   | MmuSTS.3758.1 | 13.27 | 13.24 | 0.02 | 0.02 | 1.02   | 0.495813 | 0.07224  | 0.757324 | 0.314836 |
| MmuSTS.3759.1.S1_at   | MmuSTS.3759.1 | 12.38 | 12.3  | 0.05 | 0.04 | 1.05   | 0.083512 | 0.252113 | 0.43582  | 0.520787 |
| MmuSTS.376.1.S1_at    | MmuSTS.376.1  | 11.98 | 12.29 | 0.14 | 0.21 | -1.23  | 0.026811 | 0.013615 | 0.304808 | 0.149362 |
| MmuSTS.3760.1.S1_at   | MmuSTS.3760.1 | 8.3   | 8.24  | 0.07 | 0.01 | 1.05   | 0.244595 | 0.170452 | 0.596278 | 0.447103 |
| MmuSTS.3761.1.S1_at   | MmuSTS.3761.1 | 3.66  | 3.78  | 0.29 | 0.1  | -1.08  | 0.20619  | 0.353066 | 0.568505 | 0.596363 |
| MmuSTS.3762.1.S1_at   | MmuSTS.3762.1 | 3.85  | 3.47  | 0.2  | 0.2  | 1.3    | 0.059557 | 0.103676 | 0.392577 | 0.364465 |
| MmuSTS.3763.1.S1_at   | MmuSTS.3763.1 | 12.44 | 12.26 | 0.14 | 0.12 | 1.13   | 0.076218 | 0.058215 | 0.424738 | 0.287988 |
| MmuSTS.3764.1.S1_at   | MmuSTS.3764.1 | 2.8   | 2.87  | 0.03 | 0.03 | -1.05  | 0.129815 | 0.001397 | 0.495916 | 0.057005 |
| MmuSTS.3765.1.S1_at   | MmuSTS.3765.1 | 8.81  | 8.85  | 0.29 | 0.92 | -1.03  | 0.636768 | 0.454227 | 0.835781 | 0.668474 |
| MmuSTS.3766.1.S1_at   | MmuSTS.3766.1 | 7.04  | 7.18  | 1.53 | 0.67 | -1.1   | 0.710134 | 0.496979 | 0.872852 | 0.696338 |
| MmuSTS.3767.1.S1_at   | MmuSTS.3767.1 | 4.78  | 7.12  | 1.08 | 0.74 | -5.05  | 0.022654 | 0.016478 | 0.287679 | 0.162551 |
| MmuSTS.3768.1.S1_at   | MmuSTS.3768.1 | 7.71  | 7.63  | 0.24 | 0.2  | 1.05   | 0.465373 | 0.640966 | 0.739873 | 0.789319 |
| MmuSTS.3769.1.S1_at   | MmuSTS.3769.1 | 6.06  | 5.26  | 0.47 | 0.81 | 1.74   | 0.229159 | 0.136522 | 0.586439 | 0.409003 |
| MmuSTS.377.1.S1_at    | MmuSTS.377.1  | 5.2   | 5.13  | 0.18 | 0.25 | 1.05   | 0.853217 | 0.967516 | 0.940741 | 0.98208  |
| MmuSTS.3770.1.S1_at   | MmuSTS.3770.1 | 7.19  | 7.25  | 0.03 | 0.2  | -1.04  | 0.225705 | 0.287237 | 0.583746 | 0.548526 |
| MmuSTS.3771.1.S1_at   | MmuSTS.3771.1 | 9.8   | 10.11 | 0.15 | 0.1  | -1.25  | 0.088544 | 0.08439  | 0.443347 | 0.335713 |
| MmuSTS.3772.1.S1_at   | MmuSTS.3772.1 | 9.75  | 9.74  | 0.38 | 0.39 | 1      | 0.996012 | 0.533862 | 0.998451 | 0.71991  |

|                     |               |       |       |      |      |       |          |          |          |          |
|---------------------|---------------|-------|-------|------|------|-------|----------|----------|----------|----------|
| MmuSTS.3773.1.S1_at | MmuSTS.3773.1 | 12.03 | 12.32 | 0.12 | 0.15 | -1.22 | 0.059333 | 0.023712 | 0.391935 | 0.192852 |
| MmuSTS.3774.1.S1_at | MmuSTS.3774.1 | 8.12  | 7.76  | 0.09 | 0.41 | 1.28  | 0.63427  | 0.557068 | 0.834407 | 0.73493  |
| MmuSTS.3775.1.S1_at | MmuSTS.3775.1 | 8.49  | 9.1   | 0.08 | 0.31 | -1.53 | 0.016641 | 0.005669 | 0.26475  | 0.103959 |
| MmuSTS.3776.1.S1_at | MmuSTS.3776.1 | 5.61  | 6.77  | 0.59 | 0.64 | -2.24 | 0.084869 | 0.077036 | 0.437796 | 0.322481 |
| MmuSTS.3777.1.S1_at | MmuSTS.3777.1 | 8.69  | 9.31  | 0.18 | 0.46 | -1.53 | 0.076891 | 0.086573 | 0.425728 | 0.33911  |
| MmuSTS.3778.1.S1_at | MmuSTS.3778.1 | 12.27 | 12.72 | 0.03 | 0.09 | -1.36 | 0.001084 | 0.00032  | 0.144025 | 0.035423 |
| MmuSTS.3779.1.S1_at | MmuSTS.3779.1 | 3.39  | 3.04  | 0.25 | 0.18 | 1.28  | 0.385996 | 0.492239 | 0.690975 | 0.693477 |
| MmuSTS.378.1.S1_at  | MmuSTS.378.1  | 3.87  | 3.64  | 0.77 | 0.08 | 1.17  | 0.310212 | 0.518263 | 0.64223  | 0.710344 |
| MmuSTS.3780.1.S1_at | MmuSTS.3780.1 | 11.32 | 10.95 | 0.41 | 0.13 | 1.29  | 0.053058 | 0.027277 | 0.379207 | 0.206458 |
| MmuSTS.3781.1.S1_at | MmuSTS.3781.1 | 9.33  | 10.04 | 0.04 | 0.85 | -1.64 | 0.216604 | 0.275134 | 0.576225 | 0.539542 |
| MmuSTS.3782.1.S1_at | MmuSTS.3782.1 | 7.04  | 6     | 0.25 | 0.88 | 2.06  | 0.161792 | 0.088265 | 0.526573 | 0.341721 |
| MmuSTS.3783.1.S1_at | MmuSTS.3783.1 | 3.05  | 3.15  | 0.01 | 0.07 | -1.07 | 0.047834 | 0.24095  | 0.367233 | 0.51164  |
| MmuSTS.3784.1.S1_at | MmuSTS.3784.1 | 4.71  | 4.9   | 0.34 | 0.1  | -1.14 | 0.959522 | 0.339929 | 0.984648 | 0.586449 |
| MmuSTS.3785.1.S1_at | MmuSTS.3785.1 | 5.75  | 6.69  | 0.65 | 1.14 | -1.92 | 0.487337 | 0.638875 | 0.752077 | 0.787897 |
| MmuSTS.3786.1.S1_at | MmuSTS.3786.1 | 5.93  | 5.81  | 0.25 | 0.46 | 1.08  | 0.817361 | 0.433528 | 0.925944 | 0.653805 |
| MmuSTS.3787.1.S1_at | MmuSTS.3787.1 | 7.28  | 6.31  | 0.12 | 0.14 | 1.96  | 0.001113 | 0.000531 | 0.144223 | 0.040186 |
| MmuSTS.3788.1.S1_at | MmuSTS.3788.1 | 10.4  | 10.28 | 0.21 | 0.22 | 1.09  | 0.968982 | 0.583288 | 0.988244 | 0.751682 |
| MmuSTS.3789.1.S1_at | MmuSTS.3789.1 | 7.66  | 7.52  | 0.75 | 0.2  | 1.1   | 0.900243 | 0.196525 | 0.960239 | 0.471577 |
| MmuSTS.379.1.S1_at  | MmuSTS.379.1  | 7.99  | 9     | 0.31 | 0.98 | -2.01 | 0.162091 | 0.132299 | 0.526638 | 0.404294 |
| MmuSTS.3790.1.S1_at | MmuSTS.3790.1 | 5.11  | 5.23  | 0.29 | 0.21 | -1.08 | 0.950868 | 0.991376 | 0.981504 | 0.995189 |
| MmuSTS.3791.1.S1_at | MmuSTS.3791.1 | 9.53  | 9.15  | 0.16 | 0.35 | 1.3   | 0.170253 | 0.209603 | 0.534249 | 0.483271 |
| MmuSTS.3792.1.S1_at | MmuSTS.3792.1 | 5.94  | 5.95  | 0.11 | 0.04 | -1.01 | 0.986754 | 0.853749 | 0.99532  | 0.916773 |
| MmuSTS.3793.1.S1_at | MmuSTS.3793.1 | 4.21  | 4.21  | 0.02 | 0.18 | -1.01 | 0.341362 | 0.385708 | 0.662564 | 0.621079 |
| MmuSTS.3794.1.S1_at | MmuSTS.3794.1 | 11.31 | 11.04 | 0.05 | 0.59 | 1.21  | 0.383414 | 0.474134 | 0.689334 | 0.681302 |
| MmuSTS.3795.1.S1_at | MmuSTS.3795.1 | 10.77 | 10.93 | 0.23 | 0.23 | -1.11 | 0.219826 | 0.014737 | 0.579133 | 0.154455 |
| MmuSTS.3796.1.S1_at | MmuSTS.3796.1 | 9.46  | 8.91  | 0.09 | 0.17 | 1.46  | 0.004452 | 0.00179  | 0.18357  | 0.063581 |
| MmuSTS.3797.1.S1_at | MmuSTS.3797.1 | 11.66 | 11.78 | 0.09 | 0.13 | -1.08 | 0.260616 | 0.080483 | 0.607339 | 0.328159 |
| MmuSTS.3798.1.S1_at | MmuSTS.3798.1 | 9.07  | 9.4   | 0.42 | 0.14 | -1.26 | 0.460628 | 0.444853 | 0.737085 | 0.662072 |
| MmuSTS.3799.1.S1_at | MmuSTS.3799.1 | 10.34 | 9.67  | 0.48 | 0.24 | 1.59  | 0.040196 | 0.00776  | 0.349219 | 0.117626 |
| MmuSTS.38.1.S1_at   | MmuSTS.38.1   | 8.64  | 8.51  | 0.31 | 0.03 | 1.09  | 0.53973  | 0.675157 | 0.781249 | 0.810205 |
| MmuSTS.380.1.S1_at  | MmuSTS.380.1  | 4.71  | 4.46  | 0.24 | 0.75 | 1.19  | 0.916995 | 0.721725 | 0.967565 | 0.838808 |
| MmuSTS.3800.1.S1_at | MmuSTS.3800.1 | 12.66 | 12.92 | 0.16 | 0.28 | -1.2  | 0.1818   | 0.222955 | 0.546445 | 0.495821 |
| MmuSTS.3801.1.S1_at | MmuSTS.3801.1 | 13.36 | 13.14 | 0.1  | 0.18 | 1.16  | 0.109367 | 0.022278 | 0.470811 | 0.186724 |
| MmuSTS.3802.1.S1_at | MmuSTS.3802.1 | 3.83  | 3.81  | 0.08 | 0.14 | 1.01  | 0.726461 | 0.368073 | 0.881034 | 0.607669 |
| MmuSTS.3803.1.S1_at | MmuSTS.3803.1 | 9.26  | 8.97  | 0.51 | 0.1  | 1.22  | 0.190726 | 0.223565 | 0.553417 | 0.49642  |
| MmuSTS.3804.1.S1_at | MmuSTS.3804.1 | 7.68  | 7.43  | 0.2  | 0.54 | 1.19  | 0.48364  | 0.190845 | 0.749945 | 0.466228 |
| MmuSTS.3805.1.S1_at | MmuSTS.3805.1 | 8.7   | 8.81  | 0.18 | 0.23 | -1.08 | 0.940782 | 0.98542  | 0.977466 | 0.991761 |
| MmuSTS.3806.1.S1_at | MmuSTS.3806.1 | 11.71 | 12.07 | 0.11 | 0.16 | -1.29 | 0.024378 | 0.016993 | 0.294535 | 0.165285 |
| MmuSTS.3807.1.S1_at | MmuSTS.3807.1 | 8.14  | 7.5   | 0.22 | 0.38 | 1.55  | 0.019151 | 0.006827 | 0.273043 | 0.111597 |
| MmuSTS.3808.1.S1_at | MmuSTS.3808.1 | 8.38  | 8.63  | 0.2  | 0.26 | -1.19 | 0.316889 | 0.046125 | 0.647775 | 0.259154 |
| MmuSTS.3809.1.S1_at | MmuSTS.3809.1 | 6.05  | 5.57  | 0.19 | 0.38 | 1.39  | 0.355865 | 0.587488 | 0.671276 | 0.754278 |

|                       |               |       |       |      |      |       |          |          |          |          |
|-----------------------|---------------|-------|-------|------|------|-------|----------|----------|----------|----------|
| MmuSTS.381.1.S1_at    | MmuSTS.381.1  | 8.91  | 8.42  | 0.12 | 0.23 | 1.4   | 0.010603 | 0.005824 | 0.230764 | 0.104661 |
| MmuSTS.3810.1.S1_s_at | MmuSTS.3810.1 | 3.52  | 3.54  | 0.03 | 0.12 | -1.02 | 0.479058 | 0.654966 | 0.747575 | 0.7982   |
| MmuSTS.3811.1.S1_at   | MmuSTS.3811.1 | 9.4   | 9.54  | 0.14 | 0.39 | -1.1  | 0.410662 | 0.070782 | 0.706555 | 0.312275 |
| MmuSTS.3812.1.S1_at   | MmuSTS.3812.1 | 10.76 | 10.68 | 0.2  | 0.6  | 1.06  | 0.790178 | 0.594508 | 0.912958 | 0.758623 |
| MmuSTS.3813.1.S1_at   | MmuSTS.3813.1 | 7.37  | 7.38  | 0.09 | 0.42 | -1.01 | 0.579958 | 0.330258 | 0.804451 | 0.579044 |
| MmuSTS.3814.1.S1_at   | MmuSTS.3814.1 | 7.83  | 8.62  | 0.83 | 0.37 | -1.73 | 0.080329 | 0.087571 | 0.430418 | 0.3408   |
| MmuSTS.3815.1.S1_at   | MmuSTS.3815.1 | 11.41 | 11.73 | 0.17 | 0.54 | -1.25 | 0.371006 | 0.346765 | 0.681749 | 0.591536 |
| MmuSTS.3816.1.S1_at   | MmuSTS.3816.1 | 10.08 | 10.16 | 0.28 | 0.97 | -1.05 | 0.951449 | 0.367894 | 0.981795 | 0.607469 |
| MmuSTS.3817.1.S1_at   | MmuSTS.3817.1 | 4.98  | 4.6   | 0.31 | 0.21 | 1.3   | 0.361416 | 0.000178 | 0.67519  | 0.030511 |
| MmuSTS.3818.1.S1_at   | MmuSTS.3818.1 | 5.47  | 5.32  | 0.02 | 0.24 | 1.11  | 0.642345 | 0.445283 | 0.838763 | 0.662338 |
| MmuSTS.3819.1.S1_at   | MmuSTS.3819.1 | 12.56 | 11.56 | 0.4  | 1.23 | 2     | 0.125604 | 0.107655 | 0.491527 | 0.370618 |
| MmuSTS.382.1.S1_at    | MmuSTS.382.1  | 3.17  | 3.06  | 0.43 | 0.17 | 1.08  | 0.257208 | 0.419307 | 0.60459  | 0.643445 |
| MmuSTS.3820.1.S1_at   | MmuSTS.3820.1 | 9.93  | 10.55 | 0.19 | 0.26 | -1.54 | 0.051769 | 0.029111 | 0.376396 | 0.212733 |
| MmuSTS.3821.1.S1_at   | MmuSTS.3821.1 | 7.39  | 7.5   | 0.17 | 0.28 | -1.08 | 0.801118 | 0.729862 | 0.918002 | 0.84372  |
| MmuSTS.3822.1.S1_at   | MmuSTS.3822.1 | 9.1   | 9.44  | 0.17 | 0.33 | -1.27 | 0.321172 | 0.392185 | 0.649887 | 0.625652 |
| MmuSTS.3823.1.S1_at   | MmuSTS.3823.1 | 3.74  | 3.73  | 0.02 | 0.19 | 1.01  | 0.959074 | 0.988046 | 0.984456 | 0.993307 |
| MmuSTS.3824.1.S1_at   | MmuSTS.3824.1 | 7.87  | 9.04  | 0.35 | 0.4  | -2.25 | 0.021273 | 0.01122  | 0.282524 | 0.137971 |
| MmuSTS.3825.1.S1_at   | MmuSTS.3825.1 | 4.73  | 3.24  | 0.82 | 0.98 | 2.82  | 0.237516 | 0.350461 | 0.591078 | 0.594161 |
| MmuSTS.3826.1.S1_at   | MmuSTS.3826.1 | 6.88  | 6.66  | 0.28 | 1.1  | 1.16  | 0.584667 | 0.75462  | 0.807089 | 0.85725  |
| MmuSTS.3827.1.S1_at   | MmuSTS.3827.1 | 7.12  | 9.51  | 1.19 | 1.52 | -5.21 | 0.127136 | 0.112237 | 0.493503 | 0.37754  |
| MmuSTS.3828.1.S1_at   | MmuSTS.3828.1 | 11.93 | 11.75 | 0.18 | 0.61 | 1.13  | 0.441614 | 0.425881 | 0.725028 | 0.6481   |
| MmuSTS.3829.1.S1_at   | MmuSTS.3829.1 | 8.41  | 8.28  | 0.2  | 0.06 | 1.1   | 0.325794 | 0.031344 | 0.653033 | 0.219013 |
| MmuSTS.383.1.S1_at    | MmuSTS.383.1  | 3.36  | 3.56  | 0.06 | 0.13 | -1.15 | 0.052832 | 0.090914 | 0.378449 | 0.345543 |
| MmuSTS.3830.1.S1_at   | MmuSTS.3830.1 | 6.26  | 8.55  | 1.46 | 1.11 | -4.87 | 0.2426   | 0.316533 | 0.594448 | 0.569938 |
| MmuSTS.3831.1.S1_at   | MmuSTS.3831.1 | 7.27  | 7.26  | 0.26 | 0.68 | 1.01  | 0.646003 | 0.893283 | 0.840597 | 0.939163 |
| MmuSTS.3832.1.S1_at   | MmuSTS.3832.1 | 3.07  | 3.12  | 0.15 | 0.07 | -1.03 | 0.727207 | 0.429704 | 0.881213 | 0.65099  |
| MmuSTS.3833.1.S1_at   | MmuSTS.3833.1 | 4.3   | 4.42  | 0.22 | 0.18 | -1.08 | 0.81535  | 0.046929 | 0.924967 | 0.261301 |
| MmuSTS.3834.1.S1_at   | MmuSTS.3834.1 | 11.7  | 11.84 | 0.27 | 0.12 | -1.1  | 0.736042 | 0.159921 | 0.886439 | 0.435987 |
| MmuSTS.3835.1.S1_at   | MmuSTS.3835.1 | 7.44  | 7.7   | 0.94 | 0.94 | -1.19 | 0.792043 | 0.426579 | 0.913663 | 0.648739 |
| MmuSTS.3836.1.S1_at   | MmuSTS.3836.1 | 8.41  | 9.23  | 0.06 | 0.14 | -1.77 | 0.000711 | 0.001741 | 0.136818 | 0.062895 |
| MmuSTS.3837.1.S1_at   | MmuSTS.3837.1 | 6.8   | 8.9   | 1.07 | 1.5  | -4.3  | 0.243439 | 0.19715  | 0.595206 | 0.472213 |
| MmuSTS.3838.1.S1_at   | MmuSTS.3838.1 | 3.68  | 3.14  | 0.43 | 1.62 | 1.46  | 0.609597 | 0.789947 | 0.820621 | 0.878631 |
| MmuSTS.3839.1.S1_s_at | MmuSTS.3839.1 | 3.18  | 3.24  | 0.62 | 0.22 | -1.04 | 0.471236 | 0.341978 | 0.742951 | 0.588058 |
| MmuSTS.384.1.S1_at    | MmuSTS.384.1  | 6.89  | 7.01  | 0.09 | 0.1  | -1.09 | 0.230348 | 0.065473 | 0.587222 | 0.301415 |
| MmuSTS.3840.1.S1_at   | MmuSTS.3840.1 | 5.02  | 5.47  | 0.07 | 0.32 | -1.36 | 0.082183 | 0.063683 | 0.433463 | 0.298842 |
| MmuSTS.3841.1.S1_at   | MmuSTS.3841.1 | 2.83  | 2.87  | 0.09 | 0.03 | -1.03 | 0.84427  | 0.87802  | 0.937477 | 0.930359 |
| MmuSTS.3842.1.S1_at   | MmuSTS.3842.1 | 12.7  | 12.91 | 0.14 | 0.18 | -1.16 | 0.159342 | 0.019123 | 0.524174 | 0.174027 |
| MmuSTS.3843.1.S1_at   | MmuSTS.3843.1 | 5.5   | 5.58  | 0.02 | 0.15 | -1.06 | 0.274494 | 0.175    | 0.617491 | 0.451647 |
| MmuSTS.3844.1.S1_at   | MmuSTS.3844.1 | 5.73  | 5.89  | 0.12 | 0.11 | -1.12 | 0.182458 | 0.288977 | 0.546756 | 0.550098 |
| MmuSTS.3845.1.S1_at   | MmuSTS.3845.1 | 11.29 | 11.27 | 0.1  | 0.41 | 1.01  | 0.681794 | 0.86751  | 0.857635 | 0.924699 |
| MmuSTS.3846.1.S1_at   | MmuSTS.3846.1 | 6.25  | 5.71  | 0.67 | 0.18 | 1.45  | 0.215988 | 0.149555 | 0.575954 | 0.424095 |

|                       |               |       |       |      |      |       |          |          |          |          |
|-----------------------|---------------|-------|-------|------|------|-------|----------|----------|----------|----------|
| MmuSTS.3847.1.S1_s_at | MmuSTS.3847.1 | 8.7   | 8.32  | 0.19 | 0.44 | 1.3   | 0.24523  | 0.309372 | 0.596934 | 0.564912 |
| MmuSTS.3848.1.S1_at   | MmuSTS.3848.1 | 8.8   | 8.35  | 0.13 | 0.09 | 1.37  | 0.007069 | 0.008396 | 0.20404  | 0.121673 |
| MmuSTS.3849.1.S1_at   | MmuSTS.3849.1 | 12.06 | 11.06 | 0.25 | 0.8  | 2.01  | 0.054246 | 0.043111 | 0.381802 | 0.252277 |
| MmuSTS.385.1.S1_at    | MmuSTS.385.1  | 3.57  | 3.95  | 0.15 | 0.08 | -1.3  | 0.074913 | 0.01818  | 0.421394 | 0.169673 |
| MmuSTS.3850.1.S1_at   | MmuSTS.3850.1 | 9.03  | 9.14  | 0.59 | 0.5  | -1.08 | 0.584957 | 0.802296 | 0.807261 | 0.886115 |
| MmuSTS.3851.1.S1_at   | MmuSTS.3851.1 | 10.54 | 10.4  | 0.18 | 0.11 | 1.11  | 0.179019 | 0.0607   | 0.543331 | 0.292943 |
| MmuSTS.3852.1.S1_at   | MmuSTS.3852.1 | 5.09  | 5.18  | 0.31 | 0.05 | -1.07 | 0.641895 | 0.842705 | 0.838598 | 0.910346 |
| MmuSTS.3853.1.S1_at   | MmuSTS.3853.1 | 10.86 | 10.12 | 0.01 | 0.39 | 1.68  | 0.084103 | 0.077116 | 0.436782 | 0.322673 |
| MmuSTS.3854.1.S1_at   | MmuSTS.3854.1 | 13.55 | 13.58 | 0.14 | 0.11 | -1.02 | 0.399406 | 0.541652 | 0.699321 | 0.725033 |
| MmuSTS.3855.1.S1_at   | MmuSTS.3855.1 | 5.79  | 5.8   | 0.18 | 0.13 | -1    | 0.606348 | 0.424764 | 0.818806 | 0.64727  |
| MmuSTS.3856.1.S1_at   | MmuSTS.3856.1 | 8.7   | 7.91  | 2.48 | 0.88 | 1.73  | 0.878371 | 0.842602 | 0.951188 | 0.910315 |
| MmuSTS.3857.1.S1_at   | MmuSTS.3857.1 | 4.02  | 3.84  | 0.15 | 0.13 | 1.13  | 0.338715 | 0.050026 | 0.660988 | 0.2689   |
| MmuSTS.3858.1.S1_at   | MmuSTS.3858.1 | 3.79  | 3.78  | 0.01 | 0.05 | 1.01  | 0.565116 | 0.63668  | 0.796922 | 0.78633  |
| MmuSTS.3859.1.S1_at   | MmuSTS.3859.1 | 4.87  | 4.93  | 0.04 | 0.37 | -1.04 | 0.25281  | 0.3415   | 0.601605 | 0.587676 |
| MmuSTS.386.1.S1_at    | MmuSTS.386.1  | 8.83  | 10.98 | 1.93 | 1.32 | -4.45 | 0.289196 | 0.291896 | 0.627218 | 0.552116 |
| MmuSTS.3860.1.S1_at   | MmuSTS.3860.1 | 7.93  | 7.88  | 0.23 | 0.14 | 1.03  | 0.796408 | 0.4686   | 0.915502 | 0.677755 |
| MmuSTS.3861.1.S1_at   | MmuSTS.3861.1 | 11.69 | 11.82 | 0.32 | 0.42 | -1.1  | 0.762361 | 0.880464 | 0.899996 | 0.931694 |
| MmuSTS.3862.1.S1_at   | MmuSTS.3862.1 | 5.85  | 6.04  | 1.19 | 1.1  | -1.14 | 0.640137 | 0.012755 | 0.837599 | 0.145496 |
| MmuSTS.3863.1.S1_at   | MmuSTS.3863.1 | 6.37  | 6.22  | 0.18 | 0.08 | 1.11  | 0.371362 | 0.378427 | 0.682047 | 0.615443 |
| MmuSTS.3864.1.S1_at   | MmuSTS.3864.1 | 8.08  | 7.52  | 0.29 | 0.22 | 1.48  | 0.015131 | 0.009903 | 0.257529 | 0.130717 |
| MmuSTS.3865.1.S1_at   | MmuSTS.3865.1 | 11.98 | 11.79 | 0.1  | 0.34 | 1.14  | 0.988296 | 0.997579 | 0.995887 | 0.99875  |
| MmuSTS.3866.1.S1_at   | MmuSTS.3866.1 | 7.4   | 7.92  | 0.4  | 0.52 | -1.43 | 0.20806  | 0.054481 | 0.569961 | 0.278959 |
| MmuSTS.3867.1.S1_at   | MmuSTS.3867.1 | 5.54  | 5.51  | 0.13 | 0.15 | 1.02  | 0.933932 | 0.405116 | 0.974429 | 0.633482 |
| MmuSTS.3868.1.S1_at   | MmuSTS.3868.1 | 4.33  | 4.38  | 0.27 | 0.4  | -1.03 | 0.619635 | 0.785568 | 0.825711 | 0.875882 |
| MmuSTS.3869.1.S1_at   | MmuSTS.3869.1 | 6.81  | 7.01  | 0.55 | 0.54 | -1.15 | 0.428474 | 0.285238 | 0.71688  | 0.547165 |
| MmuSTS.387.1.S1_at    | MmuSTS.387.1  | 12.46 | 12.33 | 0.1  | 0.81 | 1.09  | 0.76436  | 0.500159 | 0.900715 | 0.698908 |
| MmuSTS.3870.1.S1_at   | MmuSTS.3870.1 | 9.39  | 9.07  | 0.5  | 0.44 | 1.25  | 0.587076 | 0.054385 | 0.808416 | 0.278784 |
| MmuSTS.3871.1.S1_at   | MmuSTS.3871.1 | 8.75  | 8.3   | 0.58 | 0.57 | 1.37  | 0.780274 | 0.506166 | 0.908487 | 0.702359 |
| MmuSTS.3872.1.S1_at   | MmuSTS.3872.1 | 8.79  | 9.43  | 0.67 | 0.28 | -1.55 | 0.229429 | 0.197499 | 0.586579 | 0.472476 |
| MmuSTS.3873.1.S1_at   | MmuSTS.3873.1 | 3.36  | 3.31  | 0.02 | 0.25 | 1.04  | 0.573458 | 0.52545  | 0.801223 | 0.715025 |
| MmuSTS.3874.1.S1_at   | MmuSTS.3874.1 | 10.66 | 12.03 | 1.07 | 1.59 | -2.6  | 0.406669 | 0.529358 | 0.703786 | 0.717257 |
| MmuSTS.3875.1.S1_at   | MmuSTS.3875.1 | 4.04  | 4.15  | 0    | 0.16 | -1.08 | 0.865862 | 0.852569 | 0.946348 | 0.916218 |
| MmuSTS.3876.1.S1_at   | MmuSTS.3876.1 | 3.05  | 3.17  | 0.44 | 0.07 | -1.09 | 0.754651 | 0.321293 | 0.89558  | 0.573184 |
| MmuSTS.3877.1.S1_at   | MmuSTS.3877.1 | 3.15  | 3.05  | 0.02 | 0.14 | 1.07  | 0.293732 | 0.12008  | 0.630897 | 0.388792 |
| MmuSTS.3878.1.S1_at   | MmuSTS.3878.1 | 8.82  | 9.11  | 0.17 | 0.11 | -1.23 | 0.045845 | 0.016693 | 0.361852 | 0.163599 |
| MmuSTS.3879.1.S1_at   | MmuSTS.3879.1 | 10.68 | 12.25 | 0.32 | 0.21 | -2.96 | 0.001672 | 0.000947 | 0.15365  | 0.049071 |
| MmuSTS.388.1.S1_at    | MmuSTS.388.1  | 6.07  | 6.33  | 0.13 | 0.11 | -1.19 | 0.133724 | 0.107561 | 0.500334 | 0.37046  |
| MmuSTS.3880.1.S1_at   | MmuSTS.3880.1 | 11.04 | 10.42 | 0.1  | 0.43 | 1.54  | 0.070779 | 0.040099 | 0.414661 | 0.245388 |
| MmuSTS.3881.1.S1_at   | MmuSTS.3881.1 | 7.62  | 7.63  | 0.2  | 0.21 | -1.01 | 0.649612 | 0.848949 | 0.842493 | 0.914251 |
| MmuSTS.3882.1.S1_at   | MmuSTS.3882.1 | 7.35  | 6.43  | 0.06 | 0.12 | 1.88  | 0.000315 | 0.000027 | 0.12562  | 0.02079  |
| MmuSTS.3883.1.S1_s_at | MmuSTS.3883.1 | 7.31  | 7.17  | 0.17 | 0.19 | 1.11  | 0.631264 | 0.600987 | 0.832608 | 0.762462 |

|                       |               |       |       |      |      |       |          |          |          |          |
|-----------------------|---------------|-------|-------|------|------|-------|----------|----------|----------|----------|
| MmuSTS.3884.1.S1_at   | MmuSTS.3884.1 | 10.86 | 10.53 | 0.18 | 0.34 | 1.25  | 0.088358 | 0.090095 | 0.443133 | 0.344402 |
| MmuSTS.3885.1.S1_at   | MmuSTS.3885.1 | 11.59 | 11.95 | 0.1  | 0.07 | -1.28 | 0.005692 | 0.011134 | 0.191943 | 0.137297 |
| MmuSTS.3886.1.S1_at   | MmuSTS.3886.1 | 5.11  | 5.69  | 0.18 | 0.4  | -1.49 | 0.116549 | 0.043063 | 0.48034  | 0.252157 |
| MmuSTS.3887.1.S1_at   | MmuSTS.3887.1 | 9.25  | 9.99  | 0.33 | 1.16 | -1.67 | 0.36052  | 0.393694 | 0.674604 | 0.626522 |
| MmuSTS.3888.1.S1_at   | MmuSTS.3888.1 | 7.9   | 8     | 0.28 | 0.49 | -1.07 | 0.348998 | 0.04873  | 0.667394 | 0.265744 |
| MmuSTS.3889.1.S1_at   | MmuSTS.3889.1 | 9.74  | 9.38  | 0.06 | 0.21 | 1.28  | 0.092402 | 0.042572 | 0.449058 | 0.251009 |
| MmuSTS.389.1.S1_at    | MmuSTS.389.1  | 3.29  | 3.32  | 0.09 | 0.17 | -1.02 | 0.637094 | 0.760628 | 0.83596  | 0.860949 |
| MmuSTS.389.1.S1_s_at  | MmuSTS.389.1  | 3.72  | 3.64  | 0.06 | 0.13 | 1.06  | 0.785418 | 0.958517 | 0.91073  | 0.976506 |
| MmuSTS.3890.1.S1_at   | MmuSTS.3890.1 | 8.62  | 8.06  | 0.25 | 0.05 | 1.48  | 0.016919 | 0.020904 | 0.266211 | 0.181404 |
| MmuSTS.3891.1.S1_at   | MmuSTS.3891.1 | 11.93 | 11.85 | 0.04 | 0.61 | 1.06  | 0.298602 | 0.355374 | 0.63411  | 0.597738 |
| MmuSTS.3892.1.S1_at   | MmuSTS.3892.1 | 9.21  | 9.36  | 0.11 | 0.8  | -1.11 | 0.584282 | 0.774375 | 0.806956 | 0.868766 |
| MmuSTS.3893.1.S1_at   | MmuSTS.3893.1 | 5.82  | 5.95  | 0.25 | 0.11 | -1.1  | 0.740955 | 0.768105 | 0.888927 | 0.865354 |
| MmuSTS.3894.1.S1_at   | MmuSTS.3894.1 | 10.58 | 10.95 | 0.19 | 0.35 | -1.29 | 0.774473 | 0.558182 | 0.905235 | 0.735446 |
| MmuSTS.3895.1.S1_at   | MmuSTS.3895.1 | 5.84  | 6.09  | 0.22 | 0.14 | -1.19 | 0.279193 | 0.332504 | 0.620979 | 0.580932 |
| MmuSTS.3896.1.S1_at   | MmuSTS.3896.1 | 7.36  | 6.7   | 0.13 | 0.14 | 1.58  | 0.006514 | 0.005451 | 0.199625 | 0.101934 |
| MmuSTS.3897.1.S1_at   | MmuSTS.3897.1 | 7.95  | 7.48  | 0.47 | 0.14 | 1.39  | 0.179242 | 0.019434 | 0.543544 | 0.175133 |
| MmuSTS.3898.1.S1_at   | MmuSTS.3898.1 | 5.32  | 5.7   | 0.35 | 0.87 | -1.31 | 0.80074  | 0.916478 | 0.917828 | 0.953262 |
| MmuSTS.3899.1.S1_at   | MmuSTS.3899.1 | 9.12  | 9.22  | 0.3  | 0.41 | -1.07 | 0.879752 | 0.931755 | 0.951669 | 0.961247 |
| MmuSTS.39.1.S1_at     | MmuSTS.39.1   | 4.97  | 5.33  | 0.2  | 0.35 | -1.28 | 0.396356 | 0.481315 | 0.696939 | 0.686365 |
| MmuSTS.390.1.S1_at    | MmuSTS.390.1  | 4.88  | 4.62  | 0.17 | 0.17 | 1.2   | 0.313821 | 0.507852 | 0.645387 | 0.703358 |
| MmuSTS.3900.1.S1_at   | MmuSTS.3900.1 | 9.62  | 9.13  | 0.09 | 0.51 | 1.4   | 0.288316 | 0.3893   | 0.626514 | 0.623403 |
| MmuSTS.3901.1.S1_at   | MmuSTS.3901.1 | 7.1   | 6.86  | 1.01 | 0.42 | 1.18  | 0.854556 | 0.726892 | 0.941244 | 0.842011 |
| MmuSTS.3902.1.S1_at   | MmuSTS.3902.1 | 11.42 | 11.26 | 0.03 | 0.23 | 1.12  | 0.094457 | 0.044891 | 0.452059 | 0.256424 |
| MmuSTS.3903.1.S1_at   | MmuSTS.3903.1 | 11.18 | 11.1  | 0.24 | 0.3  | 1.06  | 0.644147 | 0.698345 | 0.839719 | 0.82478  |
| MmuSTS.3904.1.S1_at   | MmuSTS.3904.1 | 4.85  | 4.92  | 0.05 | 0.13 | -1.05 | 0.132711 | 0.168998 | 0.49874  | 0.445567 |
| MmuSTS.3905.1.S1_at   | MmuSTS.3905.1 | 5.7   | 6.47  | 0.22 | 1.22 | -1.71 | 0.224503 | 0.288594 | 0.582716 | 0.549827 |
| MmuSTS.3906.1.S1_at   | MmuSTS.3906.1 | 10.16 | 10.34 | 0.15 | 0.32 | -1.14 | 0.472458 | 0.180755 | 0.743753 | 0.457294 |
| MmuSTS.3907.1.S1_at   | MmuSTS.3907.1 | 10.47 | 10.69 | 0.13 | 0.02 | -1.17 | 0.042311 | 0.018608 | 0.354594 | 0.171539 |
| MmuSTS.3908.1.S1_at   | MmuSTS.3908.1 | 13.45 | 13.44 | 0.09 | 0.4  | 1.01  | 0.881741 | 0.42315  | 0.952522 | 0.646172 |
| MmuSTS.3909.1.S1_at   | MmuSTS.3909.1 | 4.7   | 4.56  | 0.21 | 0.64 | 1.1   | 0.671324 | 0.692935 | 0.852602 | 0.821308 |
| MmuSTS.391.1.S1_at    | MmuSTS.391.1  | 5.08  | 5.07  | 0.07 | 0.15 | 1.01  | 0.55854  | 0.734938 | 0.793302 | 0.846588 |
| MmuSTS.3910.1.S1_at   | MmuSTS.3910.1 | 7.32  | 7.31  | 0.4  | 0.55 | 1.01  | 0.789569 | 0.894423 | 0.912621 | 0.939731 |
| MmuSTS.3911.1.S1_at   | MmuSTS.3911.1 | 8.49  | 9.15  | 0.14 | 0.16 | -1.58 | 0.002921 | 0.001032 | 0.170069 | 0.051297 |
| MmuSTS.3912.1.S1_at   | MmuSTS.3912.1 | 6.74  | 8.86  | 0.93 | 1.87 | -4.33 | 0.210207 | 0.165009 | 0.571368 | 0.44123  |
| MmuSTS.3913.1.S1_at   | MmuSTS.3913.1 | 7.48  | 7.96  | 0.48 | 0.18 | -1.39 | 0.242193 | 0.239353 | 0.594305 | 0.510039 |
| MmuSTS.3914.1.S1_at   | MmuSTS.3914.1 | 5.46  | 5.44  | 0.17 | 0.31 | 1.01  | 0.600812 | 0.584851 | 0.815477 | 0.75256  |
| MmuSTS.3915.1.S1_at   | MmuSTS.3915.1 | 11.27 | 10.66 | 0.04 | 0.13 | 1.52  | 0.00212  | 0.000563 | 0.157411 | 0.041049 |
| MmuSTS.3916.1.S1_at   | MmuSTS.3916.1 | 10.07 | 10.08 | 0.11 | 0.18 | -1.01 | 0.623198 | 0.721222 | 0.827836 | 0.838628 |
| MmuSTS.3917.1.S1_at   | MmuSTS.3917.1 | 12.73 | 12.8  | 0.01 | 0.17 | -1.05 | 0.3451   | 0.315092 | 0.66498  | 0.568838 |
| MmuSTS.3918.1.S1_at   | MmuSTS.3918.1 | 11.91 | 10.94 | 0.23 | 1.38 | 1.96  | 0.104791 | 0.079331 | 0.465197 | 0.326621 |
| MmuSTS.3919.1.S1_s_at | MmuSTS.3919.1 | 10.16 | 10.99 | 0.4  | 1.11 | -1.77 | 0.320839 | 0.289253 | 0.649654 | 0.550293 |

|                       |               |       |       |      |      |       |          |          |          |          |
|-----------------------|---------------|-------|-------|------|------|-------|----------|----------|----------|----------|
| MmuSTS.392.1.S1_s_at  | MmuSTS.392.1  | 4.38  | 4.64  | 0.19 | 0.04 | -1.2  | 0.272822 | 0.378308 | 0.616391 | 0.615438 |
| MmuSTS.3920.1.S1_at   | MmuSTS.3920.1 | 7.6   | 7.77  | 0.23 | 0.11 | -1.13 | 0.28651  | 0.416042 | 0.625572 | 0.641342 |
| MmuSTS.3921.1.S1_at   | MmuSTS.3921.1 | 11.03 | 11.11 | 0    | 0.61 | -1.06 | 0.94184  | 0.973266 | 0.977821 | 0.985495 |
| MmuSTS.3922.1.S1_at   | MmuSTS.3922.1 | 9.13  | 9.23  | 0.21 | 0.31 | -1.07 | 0.954004 | 0.175372 | 0.982954 | 0.452114 |
| MmuSTS.3923.1.S1_at   | MmuSTS.3923.1 | 10.92 | 10.16 | 0.17 | 0.21 | 1.7   | 0.00653  | 0.001862 | 0.199625 | 0.064697 |
| MmuSTS.3924.1.S1_at   | MmuSTS.3924.1 | 11.87 | 11.64 | 0.21 | 0.08 | 1.17  | 0.112684 | 0.020157 | 0.475104 | 0.178414 |
| MmuSTS.3925.1.S1_at   | MmuSTS.3925.1 | 10.4  | 8.92  | 0.06 | 0.99 | 2.79  | 0.058401 | 0.0504   | 0.39034  | 0.269732 |
| MmuSTS.3926.1.S1_at   | MmuSTS.3926.1 | 10.76 | 11.36 | 0.17 | 0.14 | -1.52 | 0.006172 | 0.004277 | 0.196493 | 0.091847 |
| MmuSTS.3926.1.S1_s_at | MmuSTS.3926.1 | 12.23 | 12.51 | 0.04 | 0.2  | -1.21 | 0.067668 | 0.025804 | 0.408357 | 0.201375 |
| MmuSTS.3927.1.S1_s_at | MmuSTS.3927.1 | 8.94  | 8.89  | 0.11 | 0.14 | 1.03  | 0.699941 | 0.42218  | 0.867217 | 0.645549 |
| MmuSTS.3928.1.S1_at   | MmuSTS.3928.1 | 13.41 | 13.52 | 0.12 | 0.09 | -1.08 | 0.156105 | 0.179478 | 0.520741 | 0.455939 |
| MmuSTS.3929.1.S1_at   | MmuSTS.3929.1 | 10.71 | 10.47 | 0.34 | 0.08 | 1.19  | 0.283862 | 0.428755 | 0.623797 | 0.650316 |
| MmuSTS.393.1.S1_s_at  | MmuSTS.393.1  | 4.87  | 4.99  | 0.12 | 0.13 | -1.09 | 0.898628 | 0.681747 | 0.959492 | 0.814127 |
| MmuSTS.3930.1.S1_at   | MmuSTS.3930.1 | 7.79  | 7.16  | 0.26 | 0.55 | 1.55  | 0.255019 | 0.314509 | 0.603068 | 0.568372 |
| MmuSTS.3931.1.S1_at   | MmuSTS.3931.1 | 12.1  | 11.94 | 0.24 | 0.8  | 1.12  | 0.970937 | 0.741514 | 0.988781 | 0.850328 |
| MmuSTS.3932.1.S1_at   | MmuSTS.3932.1 | 6.61  | 7.81  | 0.92 | 0.9  | -2.3  | 0.312811 | 0.191021 | 0.644715 | 0.46629  |
| MmuSTS.3933.1.S1_at   | MmuSTS.3933.1 | 10.41 | 11.74 | 0.21 | 0.08 | -2.52 | 0.000324 | 0.000183 | 0.12562  | 0.030511 |
| MmuSTS.3934.1.S1_at   | MmuSTS.3934.1 | 5.52  | 4.45  | 1.31 | 0.09 | 2.11  | 0.238865 | 0.165192 | 0.59202  | 0.441389 |
| MmuSTS.3935.1.S1_at   | MmuSTS.3935.1 | 6.74  | 7.34  | 0.47 | 0.62 | -1.51 | 0.298723 | 0.272619 | 0.634211 | 0.537379 |
| MmuSTS.3935.1.S1_s_at | MmuSTS.3935.1 | 7.89  | 8.4   | 0.45 | 0.67 | -1.42 | 0.296119 | 0.180538 | 0.632176 | 0.457138 |
| MmuSTS.3936.1.S1_at   | MmuSTS.3936.1 | 5.66  | 5.48  | 0.34 | 1.46 | 1.13  | 0.577901 | 0.061945 | 0.803619 | 0.295734 |
| MmuSTS.3937.1.S1_at   | MmuSTS.3937.1 | 9.88  | 10.49 | 0.22 | 0.99 | -1.53 | 0.355008 | 0.153195 | 0.670716 | 0.428023 |
| MmuSTS.3938.1.S1_at   | MmuSTS.3938.1 | 10.29 | 9.92  | 0.11 | 0.34 | 1.28  | 0.344861 | 0.149983 | 0.664827 | 0.424617 |
| MmuSTS.3939.1.S1_at   | MmuSTS.3939.1 | 7.56  | 7.56  | 0.11 | 0.15 | 1     | 0.592262 | 0.222186 | 0.810875 | 0.495178 |
| MmuSTS.394.1.S1_s_at  | MmuSTS.394.1  | 4.46  | 4.36  | 0.12 | 0.19 | 1.07  | 0.884223 | 0.434787 | 0.953637 | 0.654826 |
| MmuSTS.3940.1.S1_at   | MmuSTS.3940.1 | 10.3  | 10.8  | 0.32 | 0.3  | -1.42 | 0.042653 | 0.030977 | 0.355272 | 0.217853 |
| MmuSTS.3941.1.S1_at   | MmuSTS.3941.1 | 10.75 | 10.58 | 0.17 | 0.42 | 1.12  | 0.205965 | 0.200238 | 0.568403 | 0.474689 |
| MmuSTS.3942.1.S1_at   | MmuSTS.3942.1 | 4.16  | 4.38  | 0.14 | 0.15 | -1.17 | 0.652412 | 0.121826 | 0.843704 | 0.391122 |
| MmuSTS.3943.1.S1_at   | MmuSTS.3943.1 | 7.62  | 7.74  | 0.7  | 0.86 | -1.08 | 0.875079 | 0.844698 | 0.949887 | 0.911602 |
| MmuSTS.3944.1.S1_at   | MmuSTS.3944.1 | 11.36 | 11.11 | 0.14 | 0.21 | 1.19  | 0.215014 | 0.051052 | 0.575507 | 0.271214 |
| MmuSTS.3945.1.S1_at   | MmuSTS.3945.1 | 4.8   | 4.95  | 0.3  | 0.74 | -1.1  | 0.187167 | 0.209387 | 0.550249 | 0.483069 |
| MmuSTS.3946.1.S1_at   | MmuSTS.3946.1 | 7.77  | 9.58  | 1.28 | 1.61 | -3.5  | 0.25457  | 0.22566  | 0.602465 | 0.498155 |
| MmuSTS.3947.1.S1_at   | MmuSTS.3947.1 | 10.73 | 10.75 | 0.07 | 0.13 | -1.01 | 0.210199 | 0.269847 | 0.571368 | 0.535135 |
| MmuSTS.3948.1.S1_at   | MmuSTS.3948.1 | 9.65  | 9.7   | 0.69 | 0.22 | -1.04 | 0.832122 | 0.658828 | 0.931955 | 0.800473 |
| MmuSTS.3949.1.S1_at   | MmuSTS.3949.1 | 11.16 | 11.38 | 0.07 | 0.14 | -1.16 | 0.222131 | 0.269046 | 0.580674 | 0.534425 |
| MmuSTS.395.1.S1_s_at  | MmuSTS.395.1  | 5.19  | 5.27  | 0.13 | 0.23 | -1.05 | 0.354881 | 0.126454 | 0.670686 | 0.396995 |
| MmuSTS.3950.1.S1_at   | MmuSTS.3950.1 | 10.94 | 10.41 | 0.26 | 0.25 | 1.44  | 0.044397 | 0.033559 | 0.358591 | 0.226764 |
| MmuSTS.3951.1.S1_at   | MmuSTS.3951.1 | 6.79  | 6.35  | 0.21 | 0.83 | 1.36  | 0.988069 | 0.880479 | 0.995811 | 0.931694 |
| MmuSTS.3952.1.S1_at   | MmuSTS.3952.1 | 8.68  | 8.37  | 0.14 | 0.11 | 1.25  | 0.058836 | 0.07483  | 0.390921 | 0.318614 |
| MmuSTS.3953.1.S1_s_at | MmuSTS.3953.1 | 9.09  | 9.1   | 0.41 | 0.14 | -1.01 | 0.801917 | 0.949673 | 0.918289 | 0.97122  |
| MmuSTS.3954.1.S1_at   | MmuSTS.3954.1 | 8.4   | 7.49  | 0.15 | 0.37 | 1.88  | 0.007951 | 0.002005 | 0.214568 | 0.066428 |

|                       |               |       |       |      |      |        |          |          |          |          |
|-----------------------|---------------|-------|-------|------|------|--------|----------|----------|----------|----------|
| MmuSTS.3955.1.S1_at   | MmuSTS.3955.1 | 9.92  | 9.55  | 0.05 | 0.45 | 1.29   | 0.221867 | 0.278702 | 0.580587 | 0.542416 |
| MmuSTS.3956.1.S1_at   | MmuSTS.3956.1 | 9.41  | 8.99  | 0.05 | 0.3  | 1.33   | 0.077961 | 0.073246 | 0.428012 | 0.316225 |
| MmuSTS.3957.1.S1_at   | MmuSTS.3957.1 | 12.22 | 11.99 | 0.17 | 0.24 | 1.18   | 0.477115 | 0.556951 | 0.746476 | 0.73485  |
| MmuSTS.3958.1.S1_at   | MmuSTS.3958.1 | 9.94  | 9.53  | 0.08 | 0.38 | 1.33   | 0.187655 | 0.252564 | 0.550643 | 0.521128 |
| MmuSTS.3959.1.S1_at   | MmuSTS.3959.1 | 7     | 6.95  | 0.12 | 0.08 | 1.04   | 0.281223 | 0.39802  | 0.622129 | 0.629138 |
| MmuSTS.396.1.S1_at    | MmuSTS.396.1  | 3.58  | 3.71  | 0.06 | 0.09 | -1.09  | 0.090092 | 0.205077 | 0.445566 | 0.479391 |
| MmuSTS.3960.1.S1_at   | MmuSTS.3960.1 | 11.08 | 11.09 | 0.12 | 0.56 | -1.01  | 0.964481 | 0.415699 | 0.986234 | 0.641033 |
| MmuSTS.3961.1.S1_at   | MmuSTS.3961.1 | 5.12  | 5.04  | 0.11 | 0.04 | 1.06   | 0.442959 | 0.312925 | 0.725962 | 0.567524 |
| MmuSTS.3962.1.S1_at   | MmuSTS.3962.1 | 10.52 | 11.9  | 0.09 | 0.28 | -2.6   | 0.00183  | 0.000391 | 0.155496 | 0.03746  |
| MmuSTS.3963.1.S1_at   | MmuSTS.3963.1 | 2.75  | 2.74  | 0.07 | 0.21 | 1.01   | 0.84787  | 0.739747 | 0.939063 | 0.849223 |
| MmuSTS.3964.1.S1_at   | MmuSTS.3964.1 | 8.68  | 9.19  | 0.23 | 1.21 | -1.43  | 0.381512 | 0.257542 | 0.68795  | 0.525294 |
| MmuSTS.3965.1.S1_at   | MmuSTS.3965.1 | 10.85 | 11.32 | 0.32 | 2.02 | -1.39  | 0.950677 | 0.9382   | 0.981376 | 0.964949 |
| MmuSTS.3966.1.S1_at   | MmuSTS.3966.1 | 7     | 6.58  | 0.34 | 0.25 | 1.35   | 0.713879 | 0.014452 | 0.874591 | 0.153403 |
| MmuSTS.3967.1.S1_at   | MmuSTS.3967.1 | 5.81  | 6.49  | 0.06 | 0.94 | -1.6   | 0.209948 | 0.229395 | 0.571174 | 0.501527 |
| MmuSTS.3968.1.S1_at   | MmuSTS.3968.1 | 8.79  | 8.67  | 0.55 | 0.64 | 1.09   | 0.932563 | 0.10363  | 0.973903 | 0.364426 |
| MmuSTS.3969.1.S1_at   | MmuSTS.3969.1 | 6.38  | 5.87  | 0.44 | 0.6  | 1.43   | 0.327128 | 0.026017 | 0.653601 | 0.202179 |
| MmuSTS.397.1.S1_s_at  | MmuSTS.397.1  | 5.44  | 5.61  | 0.19 | 0.08 | -1.12  | 0.221029 | 0.266229 | 0.579967 | 0.532045 |
| MmuSTS.3970.1.S1_at   | MmuSTS.3970.1 | 5.43  | 5.46  | 0.08 | 0.14 | -1.02  | 0.209728 | 0.281334 | 0.571042 | 0.544391 |
| MmuSTS.3971.1.S1_at   | MmuSTS.3971.1 | 13.08 | 13.83 | 0.45 | 0.7  | -1.68  | 0.329356 | 0.20487  | 0.654983 | 0.479224 |
| MmuSTS.3972.1.S1_at   | MmuSTS.3972.1 | 9.5   | 9.62  | 0.09 | 0.84 | -1.09  | 0.60884  | 0.742735 | 0.820185 | 0.851023 |
| MmuSTS.3973.1.S1_at   | MmuSTS.3973.1 | 10.62 | 12.05 | 0.19 | 0.37 | -2.68  | 0.004182 | 0.0011   | 0.181739 | 0.052486 |
| MmuSTS.3974.1.S1_at   | MmuSTS.3974.1 | 10.25 | 10.35 | 0.39 | 0.62 | -1.08  | 0.672084 | 0.392723 | 0.852829 | 0.62583  |
| MmuSTS.3975.1.S1_at   | MmuSTS.3975.1 | 3.07  | 2.96  | 0.06 | 0.16 | 1.08   | 0.501974 | 0.590174 | 0.760244 | 0.756117 |
| MmuSTS.3975.1.S1_x_at | MmuSTS.3975.1 | 3.89  | 3.95  | 0.07 | 0.06 | -1.04  | 0.694373 | 0.127635 | 0.864407 | 0.398571 |
| MmuSTS.3976.1.S1_at   | MmuSTS.3976.1 | 11.37 | 11.25 | 0.04 | 0.32 | 1.09   | 0.557702 | 0.418125 | 0.792701 | 0.642619 |
| MmuSTS.3977.1.S1_at   | MmuSTS.3977.1 | 10.76 | 10.33 | 0.11 | 0.28 | 1.35   | 0.128056 | 0.140198 | 0.49425  | 0.413405 |
| MmuSTS.3978.1.S1_at   | MmuSTS.3978.1 | 13.62 | 13.52 | 0.05 | 0.07 | 1.08   | 0.110954 | 0.086947 | 0.472762 | 0.339802 |
| MmuSTS.3979.1.S1_at   | MmuSTS.3979.1 | 7.49  | 9.86  | 1.22 | 1.47 | -5.19  | 0.150806 | 0.101144 | 0.515443 | 0.360794 |
| MmuSTS.398.1.S1_s_at  | MmuSTS.398.1  | 3.32  | 3.44  | 0.11 | 0.14 | -1.09  | 0.124143 | 0.144046 | 0.489863 | 0.417912 |
| MmuSTS.3980.1.S1_at   | MmuSTS.3980.1 | 9.79  | 9.82  | 0.78 | 0.81 | -1.02  | 0.488435 | 0.400994 | 0.752978 | 0.630658 |
| MmuSTS.3981.1.S1_at   | MmuSTS.3981.1 | 5.92  | 5.89  | 1.05 | 0.56 | 1.02   | 0.452367 | 0.450149 | 0.732021 | 0.665505 |
| MmuSTS.3982.1.S1_at   | MmuSTS.3982.1 | 7.48  | 8.17  | 0.18 | 0.63 | -1.62  | 0.134744 | 0.057244 | 0.501726 | 0.285059 |
| MmuSTS.3983.1.S1_at   | MmuSTS.3983.1 | 6     | 6.18  | 0.07 | 0.36 | -1.14  | 0.388974 | 0.138372 | 0.692814 | 0.411244 |
| MmuSTS.3984.1.S1_at   | MmuSTS.3984.1 | 10.74 | 10.18 | 0.21 | 0.43 | 1.47   | 0.049204 | 0.035243 | 0.370907 | 0.23196  |
| MmuSTS.3985.1.S1_at   | MmuSTS.3985.1 | 4.76  | 5.67  | 0.32 | 1.15 | -1.88  | 0.230498 | 0.264481 | 0.587222 | 0.530437 |
| MmuSTS.3986.1.S1_at   | MmuSTS.3986.1 | 2.75  | 2.71  | 0.03 | 0.13 | 1.03   | 0.705509 | 0.636669 | 0.870099 | 0.78633  |
| MmuSTS.3987.1.S1_at   | MmuSTS.3987.1 | 7.14  | 7.05  | 0.11 | 0.43 | 1.06   | 0.60343  | 0.75726  | 0.817154 | 0.858672 |
| MmuSTS.3988.1.S1_at   | MmuSTS.3988.1 | 7.39  | 11.9  | 1.54 | 2.55 | -22.75 | 0.230603 | 0.156149 | 0.587222 | 0.43161  |
| MmuSTS.3989.1.S1_at   | MmuSTS.3989.1 | 11.39 | 11.59 | 0.3  | 0.47 | -1.15  | 0.420484 | 0.134122 | 0.712506 | 0.406393 |
| MmuSTS.399.1.S1_s_at  | MmuSTS.399.1  | 3.51  | 3.66  | 0.08 | 0.06 | -1.11  | 0.045318 | 0.03971  | 0.360702 | 0.244271 |
| MmuSTS.3990.1.S1_at   | MmuSTS.3990.1 | 10.27 | 10.27 | 0.18 | 0.64 | 1      | 0.979416 | 0.89132  | 0.99244  | 0.938078 |



|                       |               |       |       |      |      |       |          |          |          |          |
|-----------------------|---------------|-------|-------|------|------|-------|----------|----------|----------|----------|
| MmuSTS.3991.1.S1_at   | MmuSTS.3991.1 | 11.17 | 10.98 | 0.1  | 0.18 | 1.14  | 0.561921 | 0.746248 | 0.795052 | 0.85272  |
| MmuSTS.3992.1.S1_at   | MmuSTS.3992.1 | 12.27 | 12.07 | 0.06 | 0.17 | 1.15  | 0.051834 | 0.021095 | 0.376487 | 0.181869 |
| MmuSTS.3993.1.S1_at   | MmuSTS.3993.1 | 6.37  | 6.87  | 0.18 | 0.29 | -1.41 | 0.035194 | 0.031033 | 0.335371 | 0.218074 |
| MmuSTS.3994.1.S1_at   | MmuSTS.3994.1 | 5.34  | 7.66  | 0.28 | 0.94 | -5    | 0.018277 | 0.012103 | 0.269791 | 0.142307 |
| MmuSTS.3995.1.S1_at   | MmuSTS.3995.1 | 5.74  | 5.79  | 0.18 | 0.12 | -1.04 | 0.784128 | 0.73813  | 0.909937 | 0.848203 |
| MmuSTS.3996.1.S1_s_at | MmuSTS.3996.1 | 10.75 | 10.57 | 0.4  | 0.39 | 1.13  | 0.94574  | 0.253226 | 0.979268 | 0.521614 |
| MmuSTS.3997.1.S1_at   | MmuSTS.3997.1 | 7.41  | 10.06 | 0.65 | 0.72 | -6.27 | 0.009745 | 0.003994 | 0.226235 | 0.089884 |
| MmuSTS.3998.1.S1_at   | MmuSTS.3998.1 | 6.7   | 7.61  | 0.45 | 0.64 | -1.88 | 0.113534 | 0.109686 | 0.476916 | 0.373675 |
| MmuSTS.3999.1.S1_at   | MmuSTS.3999.1 | 3.31  | 3.4   | 0.11 | 0.03 | -1.06 | 0.436569 | 0.070877 | 0.72179  | 0.312373 |
| MmuSTS.4.1.S1_at      | MmuSTS.4.1    | 6.19  | 5.93  | 0.34 | 0.1  | 1.19  | 0.362096 | 0.427037 | 0.675688 | 0.649087 |
| MmuSTS.40.1.S1_at     | MmuSTS.40.1   | 10.4  | 10.71 | 0.12 | 0.3  | -1.24 | 0.326297 | 0.454287 | 0.653184 | 0.66849  |
| MmuSTS.400.1.S1_s_at  | MmuSTS.400.1  | 4.61  | 4.6   | 0.12 | 0.18 | 1.01  | 0.270262 | 0.355597 | 0.614663 | 0.597844 |
| MmuSTS.4000.1.S1_at   | MmuSTS.4000.1 | 6.56  | 7.76  | 2.5  | 0.71 | -2.3  | 0.69746  | 0.85076  | 0.865682 | 0.915085 |
| MmuSTS.4001.1.S1_at   | MmuSTS.4001.1 | 5.25  | 5.32  | 0.12 | 0.14 | -1.05 | 0.923908 | 0.980076 | 0.97054  | 0.989236 |
| MmuSTS.4002.1.S1_at   | MmuSTS.4002.1 | 10.88 | 11.33 | 0.33 | 1.28 | -1.37 | 0.683711 | 0.650967 | 0.858476 | 0.795942 |
| MmuSTS.4003.1.S1_at   | MmuSTS.4003.1 | 4.68  | 5.43  | 0.1  | 0.39 | -1.69 | 0.099041 | 0.000714 | 0.458758 | 0.044419 |
| MmuSTS.4004.1.S1_at   | MmuSTS.4004.1 | 12.92 | 13.46 | 0.1  | 0.16 | -1.45 | 0.023151 | 0.007919 | 0.290295 | 0.11857  |
| MmuSTS.4005.1.S1_at   | MmuSTS.4005.1 | 12.2  | 12.57 | 0.35 | 0.39 | -1.29 | 0.703397 | 0.780669 | 0.868993 | 0.872739 |
| MmuSTS.4006.1.S1_at   | MmuSTS.4006.1 | 4.77  | 4.86  | 0.22 | 0.11 | -1.07 | 0.323953 | 0.247293 | 0.65179  | 0.516479 |
| MmuSTS.4007.1.S1_at   | MmuSTS.4007.1 | 10.07 | 10.42 | 0.09 | 0.49 | -1.28 | 0.278049 | 0.017916 | 0.620162 | 0.168983 |
| MmuSTS.4008.1.S1_at   | MmuSTS.4008.1 | 6.12  | 6.32  | 0.09 | 0.12 | -1.15 | 0.209587 | 0.051399 | 0.570957 | 0.272185 |
| MmuSTS.4009.1.S1_s_at | MmuSTS.4009.1 | 5.91  | 5.71  | 0.14 | 0.18 | 1.15  | 0.911455 | 0.164855 | 0.965013 | 0.44118  |
| MmuSTS.401.1.S1_at    | MmuSTS.401.1  | 5.83  | 6.04  | 0.23 | 0.23 | -1.15 | 0.355969 | 0.115535 | 0.671314 | 0.38267  |
| MmuSTS.401.1.S1_s_at  | MmuSTS.401.1  | 4.93  | 4.79  | 0.33 | 0.22 | 1.1   | 0.509184 | 0.646156 | 0.764234 | 0.792676 |
| MmuSTS.4010.1.S1_at   | MmuSTS.4010.1 | 10.2  | 9.7   | 0.1  | 0.26 | 1.41  | 0.139395 | 0.085281 | 0.506801 | 0.337119 |
| MmuSTS.4011.1.S1_at   | MmuSTS.4011.1 | 11.12 | 10.68 | 0.11 | 0.05 | 1.36  | 0.003063 | 0.001398 | 0.172102 | 0.057005 |
| MmuSTS.4012.1.S1_at   | MmuSTS.4012.1 | 9.54  | 10.61 | 0.21 | 0.27 | -2.09 | 0.005968 | 0.001818 | 0.194485 | 0.063958 |
| MmuSTS.4013.1.S1_at   | MmuSTS.4013.1 | 10.61 | 10.97 | 0.29 | 0.1  | -1.28 | 0.26297  | 0.344711 | 0.609142 | 0.59007  |
| MmuSTS.4014.1.S1_at   | MmuSTS.4014.1 | 4.48  | 4.74  | 0.07 | 0.14 | -1.2  | 0.029216 | 0.075003 | 0.313575 | 0.319064 |
| MmuSTS.4015.1.S1_s_at | MmuSTS.4015.1 | 4.32  | 4.51  | 0.25 | 0.3  | -1.14 | 0.216309 | 0.21611  | 0.575963 | 0.489686 |
| MmuSTS.4016.1.S1_at   | MmuSTS.4016.1 | 12.42 | 11.68 | 0.3  | 0.08 | 1.67  | 0.018891 | 0.004351 | 0.272197 | 0.092371 |
| MmuSTS.4017.1.S1_at   | MmuSTS.4017.1 | 9.43  | 8.92  | 0.6  | 0.63 | 1.43  | 0.405394 | 0.539918 | 0.703122 | 0.723995 |
| MmuSTS.4018.1.S1_at   | MmuSTS.4018.1 | 4.48  | 4.55  | 0.11 | 0.19 | -1.05 | 0.181203 | 0.218379 | 0.54572  | 0.491929 |
| MmuSTS.4019.1.S1_at   | MmuSTS.4019.1 | 4.17  | 7.1   | 0.06 | 1.23 | -7.58 | 0.014938 | 0.004324 | 0.256483 | 0.092241 |
| MmuSTS.402.1.S1_s_at  | MmuSTS.402.1  | 4.63  | 4.46  | 0.17 | 0.27 | 1.13  | 0.196106 | 0.138012 | 0.559231 | 0.410919 |
| MmuSTS.4020.1.S1_at   | MmuSTS.4020.1 | 10.48 | 12.13 | 0.3  | 0.49 | -3.14 | 0.004702 | 0.00076  | 0.184492 | 0.04544  |
| MmuSTS.4021.1.S1_at   | MmuSTS.4021.1 | 3.33  | 3.48  | 0.07 | 0.22 | -1.1  | 0.086017 | 0.060782 | 0.440041 | 0.29326  |
| MmuSTS.4022.1.S1_at   | MmuSTS.4022.1 | 8.11  | 6.18  | 0.47 | 0.18 | 3.81  | 0.003869 | 0.001399 | 0.180184 | 0.057005 |
| MmuSTS.4023.1.S1_at   | MmuSTS.4023.1 | 11.21 | 11.28 | 0.12 | 0.09 | -1.06 | 0.313302 | 0.000247 | 0.645086 | 0.032979 |
| MmuSTS.4024.1.S1_at   | MmuSTS.4024.1 | 3.1   | 2.93  | 0.28 | 0.21 | 1.12  | 0.663736 | 0.653245 | 0.849084 | 0.797335 |
| MmuSTS.4025.1.S1_at   | MmuSTS.4025.1 | 11.89 | 12.19 | 0.23 | 0.61 | -1.24 | 0.494497 | 0.244947 | 0.756791 | 0.514752 |

|                       |               |       |       |      |      |        |          |          |          |          |
|-----------------------|---------------|-------|-------|------|------|--------|----------|----------|----------|----------|
| MmuSTS.4026.1.S1_at   | MmuSTS.4026.1 | 7.31  | 7.22  | 0.9  | 0.31 | 1.06   | 0.435617 | 0.190335 | 0.721273 | 0.465906 |
| MmuSTS.4027.1.S1_at   | MmuSTS.4027.1 | 5.33  | 5.37  | 0.59 | 0.69 | -1.03  | 0.21862  | 0.255889 | 0.578214 | 0.523862 |
| MmuSTS.4028.1.S1_at   | MmuSTS.4028.1 | 8.7   | 8.96  | 0.26 | 0.43 | -1.2   | 0.324894 | 0.286958 | 0.652243 | 0.548246 |
| MmuSTS.4029.1.S1_at   | MmuSTS.4029.1 | 11.15 | 12.15 | 0.2  | 0.18 | -2.01  | 0.004121 | 0.003412 | 0.181739 | 0.084071 |
| MmuSTS.403.1.S1_at    | MmuSTS.403.1  | 2.83  | 2.98  | 0    | 0.25 | -1.11  | 0.386088 | 0.326189 | 0.691015 | 0.576393 |
| MmuSTS.403.1.S1_s_at  | MmuSTS.403.1  | 4.3   | 4.47  | 0.05 | 0.11 | -1.12  | 0.081089 | 0.044364 | 0.431831 | 0.255119 |
| MmuSTS.4030.1.S1_at   | MmuSTS.4030.1 | 12.97 | 12.76 | 0.06 | 0.17 | 1.15   | 0.123183 | 0.076501 | 0.488769 | 0.321584 |
| MmuSTS.4031.1.S1_s_at | MmuSTS.4031.1 | 2.96  | 2.98  | 0.07 | 0.11 | -1.02  | 0.590096 | 0.663153 | 0.809764 | 0.80284  |
| MmuSTS.4032.1.S1_at   | MmuSTS.4032.1 | 6.04  | 11.31 | 1.73 | 3.24 | -38.47 | 0.297292 | 0.199989 | 0.633162 | 0.474603 |
| MmuSTS.4033.1.S1_at   | MmuSTS.4033.1 | 6.31  | 7.65  | 1.11 | 1.32 | -2.53  | 0.357145 | 0.18737  | 0.672128 | 0.463386 |
| MmuSTS.4034.1.S1_at   | MmuSTS.4034.1 | 5.46  | 8.88  | 1.09 | 3.24 | -10.72 | 0.278666 | 0.236244 | 0.620751 | 0.507252 |
| MmuSTS.4035.1.S1_at   | MmuSTS.4035.1 | 7.16  | 7.32  | 0.19 | 0.09 | -1.12  | 0.245578 | 0.308667 | 0.597182 | 0.56461  |
| MmuSTS.4036.1.S1_at   | MmuSTS.4036.1 | 13.33 | 13.04 | 0.08 | 0.69 | 1.22   | 0.163736 | 0.066367 | 0.528049 | 0.303265 |
| MmuSTS.4037.1.S1_at   | MmuSTS.4037.1 | 8.32  | 8.79  | 0.18 | 0.65 | -1.38  | 0.373418 | 0.022804 | 0.683245 | 0.189194 |
| MmuSTS.4038.1.S1_at   | MmuSTS.4038.1 | 4.19  | 4.16  | 0.17 | 0.18 | 1.02   | 0.975739 | 0.908141 | 0.990667 | 0.947949 |
| MmuSTS.4039.1.S1_at   | MmuSTS.4039.1 | 3.67  | 4.54  | 0.21 | 1.31 | -1.82  | 0.263496 | 0.302259 | 0.609402 | 0.560092 |
| MmuSTS.404.1.S1_at    | MmuSTS.404.1  | 4.24  | 4.15  | 0.03 | 0.12 | 1.06   | 0.372409 | 0.664468 | 0.682812 | 0.803396 |
| MmuSTS.4040.1.S1_at   | MmuSTS.4040.1 | 7.3   | 7.58  | 0.1  | 0.18 | -1.21  | 0.083554 | 0.102621 | 0.43582  | 0.362991 |
| MmuSTS.4041.1.S1_at   | MmuSTS.4041.1 | 10.9  | 12.19 | 0.32 | 0.25 | -2.46  | 0.011501 | 0.005366 | 0.23613  | 0.101135 |
| MmuSTS.4042.1.S1_at   | MmuSTS.4042.1 | 7.11  | 7.99  | 0.76 | 0.89 | -1.84  | 0.306641 | 0.429637 | 0.639596 | 0.650973 |
| MmuSTS.4043.1.S1_at   | MmuSTS.4043.1 | 9.66  | 9.87  | 0.42 | 0.88 | -1.16  | 0.576807 | 0.509322 | 0.8033   | 0.704095 |
| MmuSTS.4044.1.S1_at   | MmuSTS.4044.1 | 9.77  | 10    | 0.12 | 0.18 | -1.17  | 0.262076 | 0.312963 | 0.608753 | 0.567554 |
| MmuSTS.4045.1.S1_at   | MmuSTS.4045.1 | 6.17  | 6.23  | 1.11 | 0.81 | -1.04  | 0.344883 | 0.119852 | 0.664827 | 0.388577 |
| MmuSTS.4046.1.S1_at   | MmuSTS.4046.1 | 8.08  | 9.35  | 0.39 | 0.37 | -2.41  | 0.037135 | 0.008614 | 0.340777 | 0.123108 |
| MmuSTS.4047.1.S1_at   | MmuSTS.4047.1 | 5.9   | 6.67  | 1.25 | 1.6  | -1.69  | 0.53974  | 0.406716 | 0.781249 | 0.634487 |
| MmuSTS.4049.1.S1_at   | MmuSTS.4049.1 | 6.46  | 6.35  | 0.08 | 0.2  | 1.07   | 0.846616 | 0.326851 | 0.938406 | 0.576848 |
| MmuSTS.405.1.S1_at    | MmuSTS.405.1  | 5.84  | 6.15  | 0.22 | 0.16 | -1.24  | 0.3119   | 0.359034 | 0.643771 | 0.600414 |
| MmuSTS.405.1.S1_s_at  | MmuSTS.405.1  | 5.63  | 5.7   | 0.14 | 0.09 | -1.05  | 0.291381 | 0.251787 | 0.628798 | 0.520459 |
| MmuSTS.4050.1.S1_at   | MmuSTS.4050.1 | 3.27  | 3.63  | 0.06 | 0.44 | -1.28  | 0.232282 | 0.266937 | 0.587814 | 0.532473 |
| MmuSTS.4051.1.S1_at   | MmuSTS.4051.1 | 8.94  | 8.86  | 0.47 | 0.37 | 1.05   | 0.993687 | 0.999542 | 0.997754 | 0.999859 |
| MmuSTS.4052.1.S1_at   | MmuSTS.4052.1 | 5.02  | 5.38  | 0.13 | 0.51 | -1.28  | 0.26518  | 0.291935 | 0.610859 | 0.552156 |
| MmuSTS.4053.1.S1_at   | MmuSTS.4053.1 | 8.56  | 7.53  | 0.32 | 1.52 | 2.04   | 0.082164 | 0.085304 | 0.43345  | 0.337139 |
| MmuSTS.4054.1.S1_at   | MmuSTS.4054.1 | 8.24  | 8.27  | 0.1  | 0.26 | -1.02  | 0.335417 | 0.567864 | 0.659165 | 0.741693 |
| MmuSTS.4055.1.S1_at   | MmuSTS.4055.1 | 10.17 | 10.6  | 0.23 | 0.52 | -1.35  | 0.430649 | 0.28619  | 0.718201 | 0.547713 |
| MmuSTS.4056.1.S1_at   | MmuSTS.4056.1 | 3.46  | 3.43  | 0.17 | 0.11 | 1.02   | 0.420222 | 0.564367 | 0.712267 | 0.739211 |
| MmuSTS.4057.1.S1_at   | MmuSTS.4057.1 | 7.98  | 7.91  | 0.05 | 0.09 | 1.05   | 0.577762 | 0.001471 | 0.803559 | 0.058457 |
| MmuSTS.4058.1.S1_at   | MmuSTS.4058.1 | 10.38 | 9.9   | 0.2  | 0.34 | 1.39   | 0.191909 | 0.043997 | 0.554902 | 0.254195 |
| MmuSTS.4059.1.S1_at   | MmuSTS.4059.1 | 7.56  | 8.34  | 0.14 | 0.22 | -1.72  | 0.004815 | 0.001525 | 0.184674 | 0.059307 |
| MmuSTS.406.1.S1_at    | MmuSTS.406.1  | 3.26  | 3.42  | 0.05 | 0.17 | -1.11  | 0.237916 | 0.327128 | 0.591296 | 0.577136 |
| MmuSTS.4060.1.S1_at   | MmuSTS.4060.1 | 5.86  | 6.09  | 0.06 | 0.13 | -1.18  | 0.148119 | 0.111314 | 0.513463 | 0.375989 |
| MmuSTS.4061.1.S1_s_at | MmuSTS.4061.1 | 3.58  | 3.54  | 0.07 | 0.07 | 1.03   | 0.174408 | 0.229953 | 0.538041 | 0.501802 |

|                      |               |       |       |      |      |        |          |          |          |          |
|----------------------|---------------|-------|-------|------|------|--------|----------|----------|----------|----------|
| MmuSTS.4063.1.S1_at  | MmuSTS.4063.1 | 10.19 | 9.94  | 0.01 | 0.23 | 1.19   | 0.208906 | 0.265434 | 0.570476 | 0.531363 |
| MmuSTS.4064.1.S1_at  | MmuSTS.4064.1 | 6.14  | 5.73  | 0.79 | 0.53 | 1.33   | 0.568167 | 0.70413  | 0.798451 | 0.828337 |
| MmuSTS.4065.1.S1_at  | MmuSTS.4065.1 | 6.67  | 7.8   | 0.14 | 0.17 | -2.18  | 0.001303 | 0.000216 | 0.145684 | 0.032385 |
| MmuSTS.4066.1.S1_at  | MmuSTS.4066.1 | 7.33  | 7.25  | 0.06 | 0.27 | 1.05   | 0.569901 | 0.587254 | 0.79921  | 0.754106 |
| MmuSTS.4067.1.S1_at  | MmuSTS.4067.1 | 4.55  | 4.55  | 0.11 | 0.07 | 1      | 0.955357 | 0.718424 | 0.983289 | 0.837032 |
| MmuSTS.4068.1.S1_at  | MmuSTS.4068.1 | 7.25  | 7.02  | 0.11 | 0.3  | 1.17   | 0.336846 | 0.155167 | 0.659663 | 0.430328 |
| MmuSTS.4069.1.S1_at  | MmuSTS.4069.1 | 3.22  | 3.39  | 0.16 | 0.27 | -1.13  | 0.622674 | 0.770084 | 0.827617 | 0.866476 |
| MmuSTS.407.1.S1_s_at | MmuSTS.407.1  | 4.09  | 4.03  | 0.09 | 0.12 | 1.04   | 0.819391 | 0.957519 | 0.926528 | 0.975944 |
| MmuSTS.4070.1.S1_at  | MmuSTS.4070.1 | 3.5   | 3.77  | 0.41 | 0.56 | -1.2   | 0.504086 | 0.542455 | 0.761108 | 0.725516 |
| MmuSTS.4071.1.S1_at  | MmuSTS.4071.1 | 6.02  | 7.48  | 1.68 | 0.79 | -2.75  | 0.657828 | 0.783549 | 0.846174 | 0.874664 |
| MmuSTS.4072.1.S1_at  | MmuSTS.4072.1 | 10    | 10.14 | 1.3  | 0.27 | -1.1   | 0.253917 | 0.233413 | 0.602339 | 0.504761 |
| MmuSTS.4073.1.S1_at  | MmuSTS.4073.1 | 10.3  | 11.42 | 0.18 | 0.04 | -2.17  | 0.000661 | 0.000372 | 0.136818 | 0.037273 |
| MmuSTS.4074.1.S1_at  | MmuSTS.4074.1 | 7.79  | 7.66  | 0.11 | 0.78 | 1.09   | 0.828066 | 0.785971 | 0.930199 | 0.876026 |
| MmuSTS.4075.1.S1_at  | MmuSTS.4075.1 | 7.61  | 7.03  | 0.34 | 0.24 | 1.5    | 0.114962 | 0.069729 | 0.478345 | 0.310191 |
| MmuSTS.4076.1.S1_at  | MmuSTS.4076.1 | 6.49  | 6.81  | 0.18 | 0.53 | -1.25  | 0.953224 | 0.747819 | 0.98261  | 0.853252 |
| MmuSTS.4077.1.S1_at  | MmuSTS.4077.1 | 11.12 | 10.64 | 0.13 | 0.23 | 1.39   | 0.040427 | 0.029983 | 0.349277 | 0.214956 |
| MmuSTS.4078.1.S1_at  | MmuSTS.4078.1 | 7.05  | 6.81  | 0.22 | 0.12 | 1.18   | 0.170369 | 0.301571 | 0.534249 | 0.55955  |
| MmuSTS.4079.1.S1_at  | MmuSTS.4079.1 | 10.21 | 10.18 | 0.07 | 0.11 | 1.02   | 0.850379 | 0.295943 | 0.939943 | 0.555241 |
| MmuSTS.408.1.S1_at   | MmuSTS.408.1  | 5.6   | 10.2  | 1.23 | 2.85 | -24.23 | 0.16437  | 0.132494 | 0.528264 | 0.404544 |
| MmuSTS.4080.1.S1_at  | MmuSTS.4080.1 | 10.13 | 9.62  | 0.27 | 0.73 | 1.42   | 0.476798 | 0.232291 | 0.746293 | 0.504024 |
| MmuSTS.4081.1.S1_at  | MmuSTS.4081.1 | 4.85  | 5.14  | 0.51 | 0.79 | -1.22  | 0.773355 | 0.613473 | 0.9048   | 0.770558 |
| MmuSTS.4082.1.S1_at  | MmuSTS.4082.1 | 7.62  | 7.56  | 0.24 | 0.27 | 1.04   | 0.661776 | 0.161113 | 0.848219 | 0.437279 |
| MmuSTS.4083.1.S1_at  | MmuSTS.4083.1 | 8.28  | 7.9   | 0.21 | 0.83 | 1.3    | 0.505604 | 0.338927 | 0.761685 | 0.585891 |
| MmuSTS.4084.1.S1_at  | MmuSTS.4084.1 | 8.65  | 7.67  | 0.11 | 0.47 | 1.96   | 0.0259   | 0.004867 | 0.301128 | 0.097453 |
| MmuSTS.4085.1.S1_at  | MmuSTS.4085.1 | 12.86 | 12.1  | 0.35 | 0.48 | 1.7    | 0.328011 | 0.374465 | 0.654203 | 0.6129   |
| MmuSTS.4086.1.S1_at  | MmuSTS.4086.1 | 9.41  | 10.68 | 0.18 | 0.46 | -2.42  | 0.017545 | 0.010867 | 0.267454 | 0.135879 |
| MmuSTS.4087.1.S1_at  | MmuSTS.4087.1 | 7.98  | 10.1  | 0.38 | 0.38 | -4.35  | 0.003884 | 0.002876 | 0.180184 | 0.078929 |
| MmuSTS.4088.1.S1_at  | MmuSTS.4088.1 | 10.53 | 9.75  | 0.27 | 0.36 | 1.72   | 0.059693 | 0.042632 | 0.39273  | 0.251037 |
| MmuSTS.4089.1.S1_at  | MmuSTS.4089.1 | 10.51 | 10.43 | 0.04 | 0.25 | 1.05   | 0.607677 | 0.784987 | 0.819497 | 0.875511 |
| MmuSTS.409.1.S1_at   | MmuSTS.409.1  | 4.17  | 4.24  | 0.12 | 0.09 | -1.05  | 0.892963 | 0.634245 | 0.957322 | 0.784729 |
| MmuSTS.4090.1.S1_at  | MmuSTS.4090.1 | 5.42  | 4.38  | 0.6  | 0.23 | 2.06   | 0.071088 | 0.043178 | 0.414673 | 0.252554 |
| MmuSTS.4091.1.S1_at  | MmuSTS.4091.1 | 6.4   | 9.69  | 2.5  | 2.57 | -9.8   | 0.576444 | 0.396341 | 0.803039 | 0.628112 |
| MmuSTS.4092.1.S1_at  | MmuSTS.4092.1 | 6.59  | 7.59  | 0.2  | 0.36 | -2.01  | 0.012738 | 0.008959 | 0.243533 | 0.125097 |
| MmuSTS.4093.1.S1_at  | MmuSTS.4093.1 | 8.44  | 6.98  | 0.88 | 0.74 | 2.75   | 0.063228 | 0.147353 | 0.400486 | 0.421554 |
| MmuSTS.4094.1.S1_at  | MmuSTS.4094.1 | 8.03  | 7.68  | 0.61 | 0.85 | 1.28   | 0.631814 | 0.823109 | 0.83284  | 0.898356 |
| MmuSTS.4095.1.S1_at  | MmuSTS.4095.1 | 6.87  | 7.31  | 0.3  | 0.36 | -1.36  | 0.071702 | 0.015727 | 0.415695 | 0.158912 |
| MmuSTS.4096.1.S1_at  | MmuSTS.4096.1 | 10.69 | 10.66 | 0.35 | 0.62 | 1.02   | 0.317404 | 0.242053 | 0.647902 | 0.512624 |
| MmuSTS.4097.1.S1_at  | MmuSTS.4097.1 | 10.59 | 9.93  | 0.02 | 0.37 | 1.58   | 0.047252 | 0.026381 | 0.365679 | 0.203474 |
| MmuSTS.4098.1.S1_at  | MmuSTS.4098.1 | 9.59  | 8.9   | 0.15 | 0.2  | 1.61   | 0.008676 | 0.005073 | 0.220211 | 0.09907  |
| MmuSTS.4099.1.S1_at  | MmuSTS.4099.1 | 8.78  | 10.49 | 0.6  | 0.32 | -3.27  | 0.013622 | 0.007123 | 0.248655 | 0.113654 |
| MmuSTS.41.1.S1_at    | MmuSTS.41.1   | 6.5   | 6.5   | 0.13 | 0.05 | 1      | 0.496637 | 0.185415 | 0.757609 | 0.461443 |

|                       |               |       |       |      |      |       |          |          |          |          |
|-----------------------|---------------|-------|-------|------|------|-------|----------|----------|----------|----------|
| MmuSTS.410.1.S1_at    | MmuSTS.410.1  | 8.98  | 10.31 | 0.18 | 0.17 | -2.51 | 0.000603 | 0.000132 | 0.136818 | 0.029087 |
| MmuSTS.4100.1.S1_at   | MmuSTS.4100.1 | 4.83  | 5.01  | 0.18 | 0.11 | -1.13 | 0.177788 | 0.15334  | 0.541903 | 0.428139 |
| MmuSTS.4101.1.S1_at   | MmuSTS.4101.1 | 7.4   | 7.48  | 0.25 | 0.07 | -1.06 | 0.653661 | 0.271138 | 0.844257 | 0.536259 |
| MmuSTS.4102.1.S1_at   | MmuSTS.4102.1 | 12.12 | 12.19 | 0.3  | 0.1  | -1.05 | 0.769568 | 0.918016 | 0.903088 | 0.954068 |
| MmuSTS.4103.1.S1_at   | MmuSTS.4103.1 | 11.75 | 11.64 | 0.11 | 0.22 | 1.08  | 0.928684 | 0.99318  | 0.972607 | 0.995946 |
| MmuSTS.4104.1.S1_at   | MmuSTS.4104.1 | 10.34 | 10.17 | 0.1  | 0.24 | 1.12  | 0.493401 | 0.229757 | 0.756176 | 0.501761 |
| MmuSTS.4105.1.S1_at   | MmuSTS.4105.1 | 6.77  | 6.86  | 0.33 | 0.4  | -1.07 | 0.561687 | 0.725219 | 0.79493  | 0.840945 |
| MmuSTS.4106.1.S1_s_at | MmuSTS.4106.1 | 7.83  | 9     | 0.5  | 0.8  | -2.25 | 0.033392 | 0.018225 | 0.328667 | 0.169777 |
| MmuSTS.4107.1.S1_at   | MmuSTS.4107.1 | 6.83  | 6.58  | 0.44 | 0.14 | 1.19  | 0.577681 | 0.094541 | 0.803559 | 0.351296 |
| MmuSTS.4108.1.S1_at   | MmuSTS.4108.1 | 5.32  | 5.3   | 0.16 | 0.03 | 1.02  | 0.403621 | 0.090388 | 0.702178 | 0.344834 |
| MmuSTS.4109.1.S1_at   | MmuSTS.4109.1 | 11.56 | 9.54  | 0.41 | 0.41 | 4.07  | 0.00301  | 0.000959 | 0.171022 | 0.049342 |
| MmuSTS.411.1.S1_at    | MmuSTS.411.1  | 6.75  | 7.18  | 0.35 | 0.68 | -1.35 | 0.577636 | 0.475047 | 0.803559 | 0.681872 |
| MmuSTS.4110.1.S1_at   | MmuSTS.4110.1 | 6.75  | 7.26  | 0.29 | 0.14 | -1.42 | 0.089252 | 0.066639 | 0.444908 | 0.303959 |
| MmuSTS.4111.1.S1_at   | MmuSTS.4111.1 | 4.95  | 4.95  | 0.27 | 0.88 | -1    | 0.801676 | 0.944984 | 0.918184 | 0.968834 |
| MmuSTS.4112.1.S1_at   | MmuSTS.4112.1 | 14.21 | 13.63 | 0.18 | 0.25 | 1.49  | 0.032746 | 0.022209 | 0.326023 | 0.186513 |
| MmuSTS.4113.1.S1_at   | MmuSTS.4113.1 | 8.58  | 8.07  | 0.55 | 0.47 | 1.43  | 0.192853 | 0.206505 | 0.556141 | 0.480571 |
| MmuSTS.4114.1.S1_at   | MmuSTS.4114.1 | 5.19  | 5.24  | 0.26 | 0.35 | -1.04 | 0.832759 | 0.427672 | 0.932258 | 0.649406 |
| MmuSTS.4115.1.S1_s_at | MmuSTS.4115.1 | 11.51 | 10.68 | 0.28 | 0.74 | 1.77  | 0.089469 | 0.111025 | 0.445142 | 0.37554  |
| MmuSTS.4116.1.S1_at   | MmuSTS.4116.1 | 9.44  | 10.17 | 0.62 | 1.02 | -1.66 | 0.564432 | 0.684511 | 0.796534 | 0.81598  |
| MmuSTS.4117.1.S1_at   | MmuSTS.4117.1 | 9.83  | 9.85  | 0.23 | 0.25 | -1.01 | 0.485798 | 0.349331 | 0.751144 | 0.593355 |
| MmuSTS.4118.1.S1_s_at | MmuSTS.4118.1 | 3.54  | 3.77  | 0.88 | 0.13 | -1.17 | 0.628898 | 0.353264 | 0.831105 | 0.596477 |
| MmuSTS.4119.1.S1_at   | MmuSTS.4119.1 | 4.56  | 4.58  | 0.08 | 0.1  | -1.02 | 0.367882 | 0.449082 | 0.679669 | 0.664892 |
| MmuSTS.412.1.S1_at    | MmuSTS.412.1  | 5.24  | 5.58  | 0.16 | 1    | -1.26 | 0.203783 | 0.230139 | 0.5663   | 0.502007 |
| MmuSTS.4120.1.S1_s_at | MmuSTS.4120.1 | 7.85  | 7.32  | 0.07 | 0.26 | 1.45  | 0.020929 | 0.005631 | 0.281582 | 0.103694 |
| MmuSTS.4121.1.S1_at   | MmuSTS.4121.1 | 7.47  | 8.02  | 0.22 | 0.33 | -1.46 | 0.024195 | 0.009841 | 0.294535 | 0.130274 |
| MmuSTS.4122.1.S1_at   | MmuSTS.4122.1 | 11.34 | 10.78 | 0.17 | 0.37 | 1.48  | 0.030012 | 0.017932 | 0.316643 | 0.168998 |
| MmuSTS.4123.1.S1_at   | MmuSTS.4123.1 | 9.23  | 9.72  | 0.2  | 0.44 | -1.4  | 0.112338 | 0.125195 | 0.474794 | 0.395674 |
| MmuSTS.4124.1.S1_at   | MmuSTS.4124.1 | 9.92  | 11.52 | 1.3  | 0.36 | -3.04 | 0.152574 | 0.194542 | 0.517325 | 0.469632 |
| MmuSTS.4125.1.S1_at   | MmuSTS.4125.1 | 4.91  | 4.94  | 0.69 | 0.29 | -1.03 | 0.395615 | 0.306611 | 0.696523 | 0.563185 |
| MmuSTS.4126.1.S1_at   | MmuSTS.4126.1 | 13.33 | 13.33 | 0.07 | 0.1  | -1    | 0.840982 | 0.795501 | 0.936067 | 0.882189 |
| MmuSTS.4127.1.S1_at   | MmuSTS.4127.1 | 11.56 | 11.84 | 0.12 | 0.23 | -1.21 | 0.200579 | 0.17829  | 0.5634   | 0.454627 |
| MmuSTS.4128.1.S1_at   | MmuSTS.4128.1 | 5.34  | 5.41  | 0.12 | 0.16 | -1.05 | 0.236476 | 0.125515 | 0.590476 | 0.396226 |
| MmuSTS.4129.1.S1_at   | MmuSTS.4129.1 | 12.42 | 12.63 | 0.12 | 0.21 | -1.16 | 0.309779 | 0.372753 | 0.641716 | 0.611661 |
| MmuSTS.413.1.S1_at    | MmuSTS.413.1  | 4.43  | 4.16  | 0.23 | 0.27 | 1.21  | 0.524902 | 0.580257 | 0.773313 | 0.749616 |
| MmuSTS.4130.1.S1_at   | MmuSTS.4130.1 | 13.53 | 13.5  | 0.05 | 0.08 | 1.02  | 0.532148 | 0.657394 | 0.777626 | 0.799695 |
| MmuSTS.4131.1.S1_at   | MmuSTS.4131.1 | 12.23 | 11.48 | 0.07 | 0.15 | 1.68  | 0.002434 | 0.000976 | 0.163555 | 0.049854 |
| MmuSTS.4132.1.S1_at   | MmuSTS.4132.1 | 9.34  | 9.46  | 0.08 | 0.05 | -1.09 | 0.167466 | 0.081553 | 0.531631 | 0.329764 |
| MmuSTS.4133.1.S1_at   | MmuSTS.4133.1 | 13.47 | 13.11 | 0.04 | 0.5  | 1.28  | 0.178654 | 0.215669 | 0.542945 | 0.489477 |
| MmuSTS.4134.1.S1_at   | MmuSTS.4134.1 | 3.45  | 3.62  | 0.18 | 0.1  | -1.13 | 0.394358 | 0.432306 | 0.695759 | 0.652778 |
| MmuSTS.4135.1.S1_at   | MmuSTS.4135.1 | 9.77  | 9.26  | 0.03 | 0.55 | 1.42  | 0.551463 | 0.142069 | 0.788752 | 0.415655 |
| MmuSTS.4136.1.S1_at   | MmuSTS.4136.1 | 8.23  | 9.32  | 0.28 | 0.21 | -2.13 | 0.004755 | 0.000841 | 0.184674 | 0.047013 |

|                      |               |       |       |      |      |       |          |          |          |          |
|----------------------|---------------|-------|-------|------|------|-------|----------|----------|----------|----------|
| MmuSTS.4137.1.S1_at  | MmuSTS.4137.1 | 10.21 | 9.75  | 0.44 | 0.48 | 1.38  | 0.64738  | 0.710316 | 0.841333 | 0.831912 |
| MmuSTS.4138.1.S1_at  | MmuSTS.4138.1 | 8.26  | 10.22 | 0.62 | 1.01 | -3.89 | 0.020474 | 0.015174 | 0.278215 | 0.15652  |
| MmuSTS.4139.1.S1_at  | MmuSTS.4139.1 | 3.49  | 3.46  | 0.17 | 0.46 | 1.02  | 0.961458 | 0.002289 | 0.985162 | 0.07045  |
| MmuSTS.414.1.S1_s_at | MmuSTS.414.1  | 7.97  | 7.72  | 0.31 | 0.55 | 1.19  | 0.935672 | 0.925682 | 0.975127 | 0.957937 |
| MmuSTS.4140.1.S1_at  | MmuSTS.4140.1 | 4.93  | 5.21  | 0.22 | 0.08 | -1.21 | 0.369717 | 0.520987 | 0.680848 | 0.712102 |
| MmuSTS.4141.1.S1_at  | MmuSTS.4141.1 | 6.45  | 5.2   | 0.2  | 0.48 | 2.38  | 0.017925 | 0.008132 | 0.26813  | 0.11972  |
| MmuSTS.4142.1.S1_at  | MmuSTS.4142.1 | 7.38  | 8.03  | 0.12 | 0.52 | -1.57 | 0.109954 | 0.096755 | 0.471198 | 0.354171 |
| MmuSTS.4143.1.S1_at  | MmuSTS.4143.1 | 7.76  | 5.83  | 0.49 | 0.23 | 3.79  | 0.00416  | 0.000848 | 0.181739 | 0.047089 |
| MmuSTS.4144.1.S1_at  | MmuSTS.4144.1 | 11.81 | 11.59 | 0.27 | 0.41 | 1.17  | 0.791184 | 0.200727 | 0.91325  | 0.47524  |
| MmuSTS.4145.1.S1_at  | MmuSTS.4145.1 | 9.32  | 8.52  | 0.13 | 0.05 | 1.74  | 0.000416 | 0.000232 | 0.130717 | 0.03241  |
| MmuSTS.4146.1.S1_at  | MmuSTS.4146.1 | 6.03  | 7.24  | 1.66 | 1.25 | -2.32 | 0.422677 | 0.115012 | 0.71364  | 0.38182  |
| MmuSTS.4147.1.S1_at  | MmuSTS.4147.1 | 4.47  | 4.24  | 0.02 | 0.13 | 1.17  | 0.137246 | 0.142194 | 0.504356 | 0.415754 |
| MmuSTS.4148.1.S1_at  | MmuSTS.4148.1 | 9.77  | 9.37  | 0.12 | 0.14 | 1.32  | 0.012939 | 0.002969 | 0.244895 | 0.079958 |
| MmuSTS.4149.1.S1_at  | MmuSTS.4149.1 | 7.9   | 7.73  | 0.11 | 0.16 | 1.13  | 0.113704 | 0.181828 | 0.476946 | 0.458385 |
| MmuSTS.415.1.S1_at   | MmuSTS.415.1  | 6.72  | 6.24  | 0.77 | 0.28 | 1.4   | 0.537598 | 0.200874 | 0.780064 | 0.475369 |
| MmuSTS.4150.1.S1_at  | MmuSTS.4150.1 | 11.48 | 11.06 | 0.22 | 0.29 | 1.34  | 0.050418 | 0.019677 | 0.374295 | 0.176276 |
| MmuSTS.4151.1.S1_at  | MmuSTS.4151.1 | 11.56 | 11.53 | 0.25 | 0.26 | 1.02  | 0.244611 | 0.273252 | 0.596278 | 0.537788 |
| MmuSTS.4152.1.S1_at  | MmuSTS.4152.1 | 5.53  | 5.51  | 0.12 | 0.18 | 1.01  | 0.270894 | 0.44225  | 0.615155 | 0.660308 |
| MmuSTS.4153.1.S1_at  | MmuSTS.4153.1 | 3.4   | 3.39  | 0.28 | 0.07 | 1     | 0.731879 | 0.616088 | 0.884095 | 0.772461 |
| MmuSTS.4154.1.S1_at  | MmuSTS.4154.1 | 10.12 | 10.28 | 0.21 | 0.24 | -1.12 | 0.107248 | 0.130941 | 0.467913 | 0.403037 |
| MmuSTS.4155.1.S1_at  | MmuSTS.4155.1 | 8.54  | 8.33  | 0.45 | 0.42 | 1.16  | 0.43287  | 0.625057 | 0.719363 | 0.778973 |
| MmuSTS.4156.1.S1_at  | MmuSTS.4156.1 | 4.13  | 4.06  | 0.15 | 0.14 | 1.05  | 0.820939 | 0.746634 | 0.92718  | 0.852888 |
| MmuSTS.4157.1.S1_at  | MmuSTS.4157.1 | 12.55 | 11.95 | 0.06 | 0.31 | 1.51  | 0.015256 | 0.013093 | 0.257698 | 0.14718  |
| MmuSTS.4158.1.S1_at  | MmuSTS.4158.1 | 10.24 | 10.19 | 0.04 | 0.13 | 1.04  | 0.135674 | 0.029523 | 0.50255  | 0.213506 |
| MmuSTS.4159.1.S1_at  | MmuSTS.4159.1 | 11.95 | 12.08 | 0.04 | 0.17 | -1.09 | 0.259199 | 0.243251 | 0.60632  | 0.513356 |
| MmuSTS.416.1.S1_at   | MmuSTS.416.1  | 12.04 | 11.89 | 0.12 | 0.29 | 1.11  | 0.289665 | 0.37757  | 0.627563 | 0.615012 |
| MmuSTS.4160.1.S1_at  | MmuSTS.4160.1 | 5.73  | 5.83  | 0.17 | 0.12 | -1.07 | 0.962565 | 0.803862 | 0.985589 | 0.887148 |
| MmuSTS.4161.1.S1_at  | MmuSTS.4161.1 | 10.8  | 10.29 | 0.11 | 0.1  | 1.42  | 0.004436 | 0.001206 | 0.183475 | 0.054389 |
| MmuSTS.4162.1.S1_at  | MmuSTS.4162.1 | 11.29 | 10.99 | 0.17 | 0.12 | 1.23  | 0.164686 | 0.055256 | 0.528638 | 0.280809 |
| MmuSTS.4163.1.S1_at  | MmuSTS.4163.1 | 10.73 | 10.52 | 0.06 | 0.08 | 1.15  | 0.039993 | 0.006892 | 0.348591 | 0.112203 |
| MmuSTS.4164.1.S1_at  | MmuSTS.4164.1 | 7.39  | 7.71  | 0.49 | 0.96 | -1.25 | 0.590299 | 0.226893 | 0.809851 | 0.499276 |
| MmuSTS.4165.1.S1_at  | MmuSTS.4165.1 | 4.24  | 4.02  | 0.12 | 0.2  | 1.16  | 0.532239 | 0.244121 | 0.777626 | 0.514121 |
| MmuSTS.4166.1.S1_at  | MmuSTS.4166.1 | 5.98  | 6.05  | 0.68 | 0.54 | -1.05 | 0.700536 | 0.290022 | 0.867502 | 0.551016 |
| MmuSTS.4167.1.S1_at  | MmuSTS.4167.1 | 10.84 | 10.45 | 0.13 | 0.2  | 1.31  | 0.022733 | 0.01201  | 0.288168 | 0.141846 |
| MmuSTS.4168.1.S1_at  | MmuSTS.4168.1 | 7.37  | 6.13  | 0.28 | 0.37 | 2.35  | 0.018232 | 0.028013 | 0.269591 | 0.208903 |
| MmuSTS.4169.1.S1_at  | MmuSTS.4169.1 | 12.81 | 11.97 | 0.06 | 0.15 | 1.79  | 0.00113  | 0.00023  | 0.144692 | 0.032385 |
| MmuSTS.417.1.S1_at   | MmuSTS.417.1  | 10.79 | 8.73  | 0.61 | 1.87 | 4.19  | 0.106316 | 0.104811 | 0.466831 | 0.366313 |
| MmuSTS.4170.1.S1_at  | MmuSTS.4170.1 | 11.58 | 11.78 | 0.08 | 0.41 | -1.14 | 0.344818 | 0.399148 | 0.664827 | 0.62969  |
| MmuSTS.4171.1.S1_at  | MmuSTS.4171.1 | 10.05 | 10.69 | 0.14 | 0.21 | -1.55 | 0.022968 | 0.013468 | 0.289363 | 0.148626 |
| MmuSTS.4172.1.S1_at  | MmuSTS.4172.1 | 7.22  | 7.34  | 0.19 | 0.16 | -1.09 | 0.185584 | 0.084409 | 0.548924 | 0.335713 |
| MmuSTS.4173.1.S1_at  | MmuSTS.4173.1 | 7.19  | 6.23  | 0.19 | 0.73 | 1.95  | 0.094619 | 0.071331 | 0.452166 | 0.313366 |

|                       |               |       |       |      |      |       |          |          |          |          |
|-----------------------|---------------|-------|-------|------|------|-------|----------|----------|----------|----------|
| MmuSTS.4174.1.S1_at   | MmuSTS.4174.1 | 10.09 | 9.63  | 0.23 | 0.44 | 1.38  | 0.159166 | 0.181532 | 0.52416  | 0.458087 |
| MmuSTS.4175.1.S1_at   | MmuSTS.4175.1 | 3.6   | 3.54  | 0.37 | 0.19 | 1.05  | 0.781083 | 0.761592 | 0.908721 | 0.861459 |
| MmuSTS.4176.1.S1_at   | MmuSTS.4176.1 | 9.28  | 10.82 | 0.53 | 1.74 | -2.93 | 0.274737 | 0.172987 | 0.617628 | 0.449625 |
| MmuSTS.4177.1.S1_at   | MmuSTS.4177.1 | 3.33  | 3.39  | 0.04 | 0.17 | -1.05 | 0.497736 | 0.601842 | 0.758068 | 0.763113 |
| MmuSTS.4178.1.S1_at   | MmuSTS.4178.1 | 8.72  | 6.74  | 1.72 | 0.96 | 3.93  | 0.089857 | 0.032936 | 0.44539  | 0.224663 |
| MmuSTS.4179.1.S1_at   | MmuSTS.4179.1 | 10.5  | 10.19 | 0.09 | 0.15 | 1.24  | 0.095361 | 0.120107 | 0.453393 | 0.38882  |
| MmuSTS.418.1.S1_s_at  | MmuSTS.418.1  | 3.53  | 3.6   | 0.06 | 0.32 | -1.05 | 0.590504 | 0.710474 | 0.809851 | 0.832042 |
| MmuSTS.4180.1.S1_at   | MmuSTS.4180.1 | 11.71 | 11.76 | 0.17 | 0.13 | -1.04 | 0.367675 | 0.124872 | 0.679512 | 0.395219 |
| MmuSTS.4181.1.S1_at   | MmuSTS.4181.1 | 8.84  | 9.29  | 0.48 | 0.21 | -1.36 | 0.28571  | 0.180804 | 0.625142 | 0.457306 |
| MmuSTS.4182.1.S1_at   | MmuSTS.4182.1 | 8.16  | 6.47  | 0.13 | 0.55 | 3.23  | 0.006034 | 0.00177  | 0.195046 | 0.063359 |
| MmuSTS.4183.1.S1_at   | MmuSTS.4183.1 | 6.89  | 6.96  | 0.04 | 0.02 | -1.05 | 0.095615 | 0.453303 | 0.453501 | 0.667688 |
| MmuSTS.4184.1.S1_at   | MmuSTS.4184.1 | 9     | 7.87  | 0.17 | 0.13 | 2.19  | 0.000715 | 0.000067 | 0.136818 | 0.025805 |
| MmuSTS.4185.1.S1_at   | MmuSTS.4185.1 | 10.49 | 10.21 | 0.72 | 1.09 | 1.22  | 0.822882 | 0.92722  | 0.927956 | 0.958627 |
| MmuSTS.4186.1.S1_at   | MmuSTS.4186.1 | 10.54 | 10.1  | 0.22 | 0.13 | 1.36  | 0.023292 | 0.014017 | 0.290685 | 0.151595 |
| MmuSTS.4187.1.S1_at   | MmuSTS.4187.1 | 8.73  | 8.88  | 0.07 | 0.66 | -1.1  | 0.305121 | 0.203195 | 0.639014 | 0.477415 |
| MmuSTS.4188.1.S1_at   | MmuSTS.4188.1 | 4.73  | 4.78  | 0.11 | 0.14 | -1.03 | 0.570262 | 0.322609 | 0.799452 | 0.574023 |
| MmuSTS.4189.1.S1_at   | MmuSTS.4189.1 | 6.78  | 7.07  | 0.58 | 0.43 | -1.22 | 0.905936 | 0.970782 | 0.962563 | 0.984072 |
| MmuSTS.4189.1.S1_s_at | MmuSTS.4189.1 | 6.74  | 7.71  | 0.77 | 0.33 | -1.95 | 0.338945 | 0.358317 | 0.661044 | 0.599823 |
| MmuSTS.419.1.S1_s_at  | MmuSTS.419.1  | 3.1   | 3.12  | 0.08 | 0.07 | -1.02 | 0.590917 | 0.814448 | 0.810135 | 0.892923 |
| MmuSTS.4190.1.S1_at   | MmuSTS.4190.1 | 12.45 | 12.46 | 0.02 | 0.07 | -1    | 0.926554 | 0.993997 | 0.971724 | 0.996372 |
| MmuSTS.4191.1.S1_at   | MmuSTS.4191.1 | 5.44  | 5.17  | 0.11 | 0.18 | 1.21  | 0.124158 | 0.164893 | 0.489863 | 0.441213 |
| MmuSTS.4192.1.S1_at   | MmuSTS.4192.1 | 11.08 | 9.71  | 0.43 | 0.48 | 2.58  | 0.045924 | 0.040325 | 0.362058 | 0.245973 |
| MmuSTS.4193.1.S1_at   | MmuSTS.4193.1 | 11.17 | 9.59  | 0.29 | 0.48 | 2.99  | 0.006715 | 0.003045 | 0.20158  | 0.080462 |
| MmuSTS.4194.1.S1_at   | MmuSTS.4194.1 | 3.6   | 3.94  | 0.07 | 0.24 | -1.26 | 0.201577 | 0.246133 | 0.563988 | 0.51585  |
| MmuSTS.4194.1.S1_s_at | MmuSTS.4194.1 | 3.31  | 3.35  | 0.01 | 0.09 | -1.03 | 0.482156 | 0.339205 | 0.749398 | 0.585918 |
| MmuSTS.4195.1.S1_at   | MmuSTS.4195.1 | 9     | 11.32 | 0.89 | 1.76 | -4.98 | 0.193879 | 0.133347 | 0.55753  | 0.405139 |
| MmuSTS.4196.1.S1_at   | MmuSTS.4196.1 | 4.36  | 4.43  | 0.16 | 0.24 | -1.05 | 0.14443  | 0.183024 | 0.510994 | 0.459493 |
| MmuSTS.4197.1.S1_at   | MmuSTS.4197.1 | 3.71  | 3.98  | 0.3  | 0.63 | -1.21 | 0.258631 | 0.239177 | 0.605843 | 0.509902 |
| MmuSTS.4198.1.S1_at   | MmuSTS.4198.1 | 5.1   | 4.77  | 0.46 | 0.07 | 1.26  | 0.223442 | 0.242752 | 0.581912 | 0.5131   |
| MmuSTS.4199.1.S1_at   | MmuSTS.4199.1 | 6.38  | 6.34  | 0.21 | 0.12 | 1.03  | 0.7939   | 0.874932 | 0.914508 | 0.929042 |
| MmuSTS.42.1.S1_at     | MmuSTS.42.1   | 2.94  | 2.88  | 0.02 | 0.06 | 1.04  | 0.217379 | 0.474261 | 0.57694  | 0.68135  |
| MmuSTS.42.1.S1_s_at   | MmuSTS.42.1   | 4.54  | 4.13  | 0.49 | 0.15 | 1.33  | 0.327447 | 0.101087 | 0.65384  | 0.360724 |
| MmuSTS.420.1.S1_s_at  | MmuSTS.420.1  | 3.28  | 3.22  | 0.09 | 0.06 | 1.04  | 0.300917 | 0.220795 | 0.636012 | 0.494262 |
| MmuSTS.4200.1.S1_at   | MmuSTS.4200.1 | 3.58  | 5.76  | 0.28 | 1.05 | -4.54 | 0.025929 | 0.016423 | 0.301193 | 0.162253 |
| MmuSTS.4200.1.S1_x_at | MmuSTS.4200.1 | 3.55  | 5.84  | 0.46 | 1.08 | -4.86 | 0.033715 | 0.023735 | 0.330119 | 0.192893 |
| MmuSTS.4201.1.S1_at   | MmuSTS.4201.1 | 9.85  | 10.06 | 0.6  | 0.44 | -1.16 | 0.675846 | 0.062249 | 0.854832 | 0.296325 |
| MmuSTS.4202.1.S1_at   | MmuSTS.4202.1 | 5.16  | 5.2   | 0.3  | 0.15 | -1.03 | 0.333705 | 0.279025 | 0.657792 | 0.542782 |
| MmuSTS.4203.1.S1_at   | MmuSTS.4203.1 | 6.42  | 6.4   | 0.17 | 0.17 | 1.02  | 0.787257 | 0.749564 | 0.911524 | 0.854499 |
| MmuSTS.4204.1.S1_at   | MmuSTS.4204.1 | 7.22  | 7.14  | 0.06 | 0.14 | 1.05  | 0.274626 | 0.124843 | 0.617555 | 0.395219 |
| MmuSTS.4205.1.S1_at   | MmuSTS.4205.1 | 9.22  | 9.23  | 0.11 | 1.25 | -1.01 | 0.980779 | 0.686686 | 0.993045 | 0.817182 |
| MmuSTS.4206.1.S1_at   | MmuSTS.4206.1 | 8.07  | 7.48  | 0.12 | 0.27 | 1.51  | 0.048783 | 0.039527 | 0.369576 | 0.243753 |

|                       |               |       |       |      |      |       |          |          |          |          |
|-----------------------|---------------|-------|-------|------|------|-------|----------|----------|----------|----------|
| MmuSTS.4207.1.S1_at   | MmuSTS.4207.1 | 6.32  | 6.32  | 0.25 | 0.42 | -1.01 | 0.68938  | 0.760175 | 0.861525 | 0.860657 |
| MmuSTS.4208.1.S1_at   | MmuSTS.4208.1 | 4.62  | 4.83  | 0.21 | 0.25 | -1.15 | 0.261522 | 0.20501  | 0.608136 | 0.479296 |
| MmuSTS.4209.1.S1_at   | MmuSTS.4209.1 | 10.21 | 10    | 0.07 | 0.28 | 1.16  | 0.304157 | 0.216872 | 0.638341 | 0.490478 |
| MmuSTS.421.1.S1_at    | MmuSTS.421.1  | 10.09 | 10.33 | 0.15 | 0.2  | -1.18 | 0.118528 | 0.012102 | 0.48294  | 0.142307 |
| MmuSTS.4210.1.S1_at   | MmuSTS.4210.1 | 7.09  | 7.1   | 0.11 | 0.17 | -1.01 | 0.853499 | 0.573657 | 0.940884 | 0.745229 |
| MmuSTS.4211.1.S1_at   | MmuSTS.4211.1 | 5.07  | 5.09  | 0.38 | 0.19 | -1.01 | 0.491948 | 0.531037 | 0.75541  | 0.718384 |
| MmuSTS.4212.1.S1_at   | MmuSTS.4212.1 | 12.22 | 12.21 | 0.24 | 0.06 | 1.01  | 0.309445 | 0.061642 | 0.641539 | 0.295095 |
| MmuSTS.4213.1.S1_at   | MmuSTS.4213.1 | 6.72  | 7.93  | 0.12 | 0.15 | -2.31 | 0.000433 | 0.000066 | 0.131418 | 0.025805 |
| MmuSTS.4214.1.S1_at   | MmuSTS.4214.1 | 6.99  | 6.33  | 0.76 | 0.78 | 1.58  | 0.446139 | 0.503258 | 0.728161 | 0.700751 |
| MmuSTS.4215.1.S1_at   | MmuSTS.4215.1 | 7.44  | 7.78  | 0.25 | 0.15 | -1.27 | 0.100868 | 0.023643 | 0.461009 | 0.192558 |
| MmuSTS.4216.1.S1_at   | MmuSTS.4216.1 | 10.94 | 11.99 | 0.59 | 0.17 | -2.06 | 0.018092 | 0.009762 | 0.268759 | 0.129961 |
| MmuSTS.4217.1.S1_at   | MmuSTS.4217.1 | 11.97 | 11.64 | 0.06 | 0.25 | 1.26  | 0.086754 | 0.026463 | 0.440475 | 0.203812 |
| MmuSTS.4218.1.S1_at   | MmuSTS.4218.1 | 2.82  | 2.85  | 0.03 | 0.02 | -1.02 | 0.390571 | 0.665072 | 0.693739 | 0.803733 |
| MmuSTS.4219.1.S1_at   | MmuSTS.4219.1 | 9.81  | 9.87  | 0.07 | 0.28 | -1.04 | 0.686251 | 0.357234 | 0.859695 | 0.598864 |
| MmuSTS.422.1.S1_at    | MmuSTS.422.1  | 9.53  | 9.96  | 0.34 | 0.69 | -1.35 | 0.234404 | 0.299418 | 0.588668 | 0.55788  |
| MmuSTS.4220.1.S1_at   | MmuSTS.4220.1 | 3.02  | 3.01  | 0.17 | 0.17 | 1.01  | 0.661373 | 0.675079 | 0.848124 | 0.810146 |
| MmuSTS.4221.1.S1_at   | MmuSTS.4221.1 | 7.98  | 8.15  | 0.67 | 0.4  | -1.12 | 0.394128 | 0.53055  | 0.695705 | 0.718042 |
| MmuSTS.4222.1.S1_at   | MmuSTS.4222.1 | 6.19  | 9.19  | 1.81 | 1.46 | -7.96 | 0.237301 | 0.163518 | 0.590811 | 0.439751 |
| MmuSTS.4223.1.S1_at   | MmuSTS.4223.1 | 8.25  | 8.24  | 0.59 | 0.74 | 1     | 0.759098 | 0.847377 | 0.898239 | 0.913303 |
| MmuSTS.4224.1.S1_at   | MmuSTS.4224.1 | 9.33  | 9.49  | 0.2  | 0.39 | -1.12 | 0.830626 | 0.12267  | 0.931542 | 0.392645 |
| MmuSTS.4225.1.S1_at   | MmuSTS.4225.1 | 10.55 | 10.56 | 0.15 | 0.4  | -1.01 | 0.40329  | 0.43629  | 0.701955 | 0.655923 |
| MmuSTS.4226.1.S1_at   | MmuSTS.4226.1 | 8.61  | 8.58  | 0.22 | 0.11 | 1.02  | 0.787966 | 0.140181 | 0.911726 | 0.413405 |
| MmuSTS.4227.1.S1_at   | MmuSTS.4227.1 | 10.45 | 10.53 | 0.31 | 0.56 | -1.06 | 0.316698 | 0.522975 | 0.647624 | 0.713429 |
| MmuSTS.4228.1.S1_at   | MmuSTS.4228.1 | 12.11 | 12.69 | 0.23 | 0.23 | -1.5  | 0.075937 | 0.050146 | 0.42407  | 0.269087 |
| MmuSTS.4229.1.S1_at   | MmuSTS.4229.1 | 9.49  | 7.93  | 0.13 | 0.17 | 2.94  | 0.000241 | 0.000021 | 0.125103 | 0.019635 |
| MmuSTS.423.1.S1_at    | MmuSTS.423.1  | 5.72  | 7.12  | 1.07 | 0.31 | -2.64 | 0.354129 | 0.399455 | 0.67034  | 0.629799 |
| MmuSTS.4230.1.S1_at   | MmuSTS.4230.1 | 8.5   | 8.6   | 0.05 | 0.1  | -1.07 | 0.191325 | 0.151908 | 0.554259 | 0.426547 |
| MmuSTS.4231.1.S1_at   | MmuSTS.4231.1 | 4.84  | 3.36  | 0.73 | 1.36 | 2.77  | 0.753003 | 0.858522 | 0.894568 | 0.919428 |
| MmuSTS.4232.1.S1_at   | MmuSTS.4232.1 | 6.01  | 6.18  | 0.04 | 0.14 | -1.12 | 0.054583 | 0.052193 | 0.381936 | 0.274036 |
| MmuSTS.4233.1.S1_at   | MmuSTS.4233.1 | 9.66  | 9.36  | 0.13 | 0.54 | 1.23  | 0.302297 | 0.41447  | 0.63692  | 0.640342 |
| MmuSTS.4234.1.S1_at   | MmuSTS.4234.1 | 5.28  | 5.34  | 0.1  | 0.06 | -1.04 | 0.582618 | 0.381523 | 0.805828 | 0.617702 |
| MmuSTS.4235.1.S1_s_at | MmuSTS.4235.1 | 3.61  | 3.85  | 0.05 | 0.12 | -1.18 | 0.026892 | 0.062859 | 0.305076 | 0.297418 |
| MmuSTS.4236.1.S1_at   | MmuSTS.4236.1 | 7.01  | 6.98  | 0.17 | 0.14 | 1.02  | 0.438378 | 0.568402 | 0.723035 | 0.741962 |
| MmuSTS.4237.1.S1_at   | MmuSTS.4237.1 | 6.46  | 6.35  | 0.24 | 1.49 | 1.08  | 0.936359 | 0.428915 | 0.975344 | 0.650409 |
| MmuSTS.4238.1.S1_at   | MmuSTS.4238.1 | 4.33  | 3.98  | 0.33 | 0.11 | 1.27  | 0.142199 | 0.081021 | 0.509437 | 0.329172 |
| MmuSTS.4239.1.S1_at   | MmuSTS.4239.1 | 6.2   | 7.82  | 0.64 | 1.62 | -3.07 | 0.256099 | 0.273873 | 0.603805 | 0.538438 |
| MmuSTS.424.1.S1_s_at  | MmuSTS.424.1  | 3.81  | 3.93  | 0.01 | 0.06 | -1.09 | 0.035536 | 0.039687 | 0.336769 | 0.244271 |
| MmuSTS.4240.1.S1_at   | MmuSTS.4240.1 | 4.3   | 4.37  | 0.16 | 0.1  | -1.05 | 0.483065 | 0.385133 | 0.749775 | 0.620662 |
| MmuSTS.4241.1.S1_at   | MmuSTS.4241.1 | 5.15  | 5.4   | 0.13 | 0.09 | -1.19 | 0.073491 | 0.072198 | 0.418788 | 0.31474  |
| MmuSTS.4242.1.S1_at   | MmuSTS.4242.1 | 9.94  | 9.84  | 0.36 | 0.07 | 1.07  | 0.278613 | 0.313501 | 0.620712 | 0.567926 |
| MmuSTS.4243.1.S1_at   | MmuSTS.4243.1 | 9.17  | 9.14  | 0.1  | 0.1  | 1.02  | 0.82204  | 0.26558  | 0.927526 | 0.531432 |

|                       |               |       |       |      |      |       |          |          |          |          |
|-----------------------|---------------|-------|-------|------|------|-------|----------|----------|----------|----------|
| MmuSTS.4243.1.S1_s_at | MmuSTS.4243.1 | 9.99  | 9.99  | 0.18 | 0.05 | -1    | 0.704819 | 0.12131  | 0.869814 | 0.390351 |
| MmuSTS.4244.1.S1_at   | MmuSTS.4244.1 | 11.39 | 11.36 | 0.16 | 0.34 | 1.02  | 0.808456 | 0.480839 | 0.921914 | 0.686    |
| MmuSTS.4245.1.S1_at   | MmuSTS.4245.1 | 8.16  | 8.48  | 0.23 | 0.93 | -1.24 | 0.39177  | 0.48099  | 0.694229 | 0.686044 |
| MmuSTS.4246.1.S1_at   | MmuSTS.4246.1 | 11.72 | 12.12 | 0.14 | 0.29 | -1.31 | 0.106008 | 0.062606 | 0.466831 | 0.297022 |
| MmuSTS.4247.1.S1_at   | MmuSTS.4247.1 | 5.59  | 6.32  | 0.4  | 0.44 | -1.66 | 0.405705 | 0.391729 | 0.703322 | 0.625301 |
| MmuSTS.4248.1.S1_at   | MmuSTS.4248.1 | 9.36  | 9.4   | 0.49 | 0.32 | -1.03 | 0.601212 | 0.795529 | 0.815685 | 0.882189 |
| MmuSTS.4249.1.S1_at   | MmuSTS.4249.1 | 13.07 | 13.16 | 0.14 | 0.25 | -1.06 | 0.239715 | 0.195363 | 0.5927   | 0.470253 |
| MmuSTS.425.1.S1_at    | MmuSTS.425.1  | 4.18  | 4.24  | 0.18 | 0.12 | -1.04 | 0.643526 | 0.36525  | 0.839421 | 0.605412 |
| MmuSTS.4250.1.S1_at   | MmuSTS.4250.1 | 11.11 | 9.78  | 0.24 | 0.48 | 2.52  | 0.029989 | 0.00664  | 0.316568 | 0.110449 |
| MmuSTS.4251.1.S1_at   | MmuSTS.4251.1 | 10.56 | 10.98 | 0.4  | 0.75 | -1.34 | 0.212164 | 0.131529 | 0.572526 | 0.403658 |
| MmuSTS.4252.1.S1_at   | MmuSTS.4252.1 | 7.67  | 7.75  | 0.29 | 0.62 | -1.06 | 0.874583 | 0.944929 | 0.949695 | 0.968827 |
| MmuSTS.4253.1.S1_at   | MmuSTS.4253.1 | 6.74  | 6.86  | 0.12 | 0.12 | -1.09 | 0.24564  | 0.068725 | 0.597182 | 0.308711 |
| MmuSTS.4254.1.S1_at   | MmuSTS.4254.1 | 11.99 | 11.86 | 0.17 | 0.45 | 1.09  | 0.654353 | 0.331457 | 0.844578 | 0.580121 |
| MmuSTS.4255.1.S1_at   | MmuSTS.4255.1 | 8.97  | 9.58  | 0.76 | 0.74 | -1.52 | 0.169817 | 0.170451 | 0.534043 | 0.447103 |
| MmuSTS.4256.1.S1_at   | MmuSTS.4256.1 | 8.09  | 9.11  | 0.41 | 0.56 | -2.03 | 0.139314 | 0.143956 | 0.506801 | 0.41787  |
| MmuSTS.4257.1.S1_at   | MmuSTS.4257.1 | 11.26 | 11.09 | 0.09 | 0.17 | 1.12  | 0.174379 | 0.165383 | 0.538041 | 0.441544 |
| MmuSTS.4258.1.S1_at   | MmuSTS.4258.1 | 11.52 | 11.98 | 0.13 | 0.49 | -1.38 | 0.518128 | 0.597389 | 0.769276 | 0.760182 |
| MmuSTS.4259.1.S1_at   | MmuSTS.4259.1 | 5.63  | 5.52  | 0.19 | 0.12 | 1.09  | 0.609502 | 0.825646 | 0.820528 | 0.899784 |
| MmuSTS.426.1.S1_at    | MmuSTS.426.1  | 4.87  | 5.36  | 0.21 | 0.15 | -1.41 | 0.037415 | 0.022974 | 0.341439 | 0.189592 |
| MmuSTS.4260.1.S1_at   | MmuSTS.4260.1 | 9.63  | 11.32 | 0.57 | 0.37 | -3.23 | 0.042463 | 0.031073 | 0.355049 | 0.218117 |
| MmuSTS.4261.1.S1_at   | MmuSTS.4261.1 | 6.1   | 6.88  | 0.69 | 0.67 | -1.71 | 0.244866 | 0.255858 | 0.596493 | 0.523854 |
| MmuSTS.4262.1.S1_at   | MmuSTS.4262.1 | 7.42  | 7.54  | 0.2  | 0.04 | -1.09 | 0.920868 | 0.944175 | 0.969098 | 0.968355 |
| MmuSTS.4263.1.S1_at   | MmuSTS.4263.1 | 3.97  | 3.97  | 0.06 | 0    | 1     | 0.762935 | 0.498777 | 0.900081 | 0.697765 |
| MmuSTS.4264.1.S1_at   | MmuSTS.4264.1 | 8.82  | 8.08  | 0.24 | 0.28 | 1.67  | 0.054591 | 0.024201 | 0.381944 | 0.194795 |
| MmuSTS.4265.1.S1_at   | MmuSTS.4265.1 | 10.54 | 10.04 | 0.15 | 1.11 | 1.41  | 0.539933 | 0.711072 | 0.781415 | 0.8324   |
| MmuSTS.4266.1.S1_at   | MmuSTS.4266.1 | 4.11  | 4.07  | 0.17 | 0.15 | 1.03  | 0.7035   | 0.734114 | 0.86908  | 0.845896 |
| MmuSTS.4267.1.S1_at   | MmuSTS.4267.1 | 7.22  | 7.11  | 0.01 | 0.53 | 1.08  | 0.809799 | 0.942729 | 0.922372 | 0.967499 |
| MmuSTS.4268.1.S1_at   | MmuSTS.4268.1 | 7.87  | 7.76  | 0.15 | 0.7  | 1.08  | 0.949219 | 0.525959 | 0.980674 | 0.715291 |
| MmuSTS.4269.1.S1_at   | MmuSTS.4269.1 | 8.34  | 7.71  | 0.82 | 0.59 | 1.55  | 0.789371 | 0.827912 | 0.912587 | 0.901197 |
| MmuSTS.427.1.S1_s_at  | MmuSTS.427.1  | 4     | 3.89  | 0.17 | 0.04 | 1.08  | 0.887744 | 0.866823 | 0.954902 | 0.924317 |
| MmuSTS.4270.1.S1_at   | MmuSTS.4270.1 | 4.03  | 3.79  | 0.07 | 0.12 | 1.18  | 0.09683  | 0.028307 | 0.455871 | 0.21008  |
| MmuSTS.4271.1.S1_at   | MmuSTS.4271.1 | 10.22 | 10.33 | 0.3  | 0.69 | -1.08 | 0.857888 | 0.904331 | 0.942522 | 0.945708 |
| MmuSTS.4272.1.S1_at   | MmuSTS.4272.1 | 7.76  | 7.1   | 0.3  | 0.33 | 1.58  | 0.310176 | 0.459882 | 0.64218  | 0.671989 |
| MmuSTS.4273.1.S1_at   | MmuSTS.4273.1 | 12.31 | 12.09 | 0.08 | 0.18 | 1.16  | 0.143282 | 0.169559 | 0.510177 | 0.446179 |
| MmuSTS.4274.1.S1_at   | MmuSTS.4274.1 | 6.57  | 6.72  | 0.55 | 0.26 | -1.11 | 0.823318 | 0.228887 | 0.928131 | 0.501124 |
| MmuSTS.4275.1.S1_at   | MmuSTS.4275.1 | 11.53 | 10.41 | 0.23 | 0.18 | 2.16  | 0.00255  | 0.000986 | 0.164386 | 0.050145 |
| MmuSTS.4276.1.S1_at   | MmuSTS.4276.1 | 10.48 | 10.27 | 0.11 | 0.28 | 1.15  | 0.105208 | 0.137826 | 0.465675 | 0.41079  |
| MmuSTS.4277.1.S1_at   | MmuSTS.4277.1 | 3.45  | 3.55  | 0.09 | 0.16 | -1.07 | 0.353302 | 0.539114 | 0.670121 | 0.723558 |
| MmuSTS.4278.1.S1_at   | MmuSTS.4278.1 | 5.12  | 5.15  | 0.3  | 0.17 | -1.02 | 0.954132 | 0.896154 | 0.983003 | 0.940656 |
| MmuSTS.4279.1.S1_at   | MmuSTS.4279.1 | 7.72  | 6.13  | 0.12 | 1.09 | 3.03  | 0.206005 | 0.16785  | 0.568449 | 0.444426 |
| MmuSTS.428.1.S1_s_at  | MmuSTS.428.1  | 3.57  | 3.76  | 0.1  | 0.12 | -1.14 | 0.082854 | 0.082241 | 0.434645 | 0.331091 |



|                       |               |       |       |      |      |        |          |          |          |          |
|-----------------------|---------------|-------|-------|------|------|--------|----------|----------|----------|----------|
| MmuSTS.4280.1.S1_s_at | MmuSTS.4280.1 | 11.93 | 12.06 | 0.06 | 0.19 | -1.1   | 0.92895  | 0.676524 | 0.972607 | 0.81095  |
| MmuSTS.4281.1.S1_at   | MmuSTS.4281.1 | 8.32  | 8.6   | 0.31 | 0.77 | -1.21  | 0.76187  | 0.459437 | 0.899767 | 0.671741 |
| MmuSTS.4282.1.S1_at   | MmuSTS.4282.1 | 7.85  | 9.41  | 0.26 | 1.79 | -2.95  | 0.203524 | 0.246516 | 0.566041 | 0.515917 |
| MmuSTS.4283.1.S1_at   | MmuSTS.4283.1 | 9.71  | 8.47  | 0.42 | 0.69 | 2.36   | 0.026503 | 0.014957 | 0.303372 | 0.155453 |
| MmuSTS.4284.1.S1_at   | MmuSTS.4284.1 | 11.1  | 11.04 | 0.05 | 0.19 | 1.04   | 0.651207 | 0.354342 | 0.843066 | 0.597166 |
| MmuSTS.4285.1.S1_at   | MmuSTS.4285.1 | 11.04 | 10.72 | 0.12 | 0.05 | 1.25   | 0.016325 | 0.007817 | 0.263592 | 0.117908 |
| MmuSTS.4286.1.S1_at   | MmuSTS.4286.1 | 5.97  | 6.32  | 0.14 | 0.38 | -1.27  | 0.831461 | 0.944585 | 0.931748 | 0.968621 |
| MmuSTS.4287.1.S1_at   | MmuSTS.4287.1 | 9.38  | 8.25  | 0.19 | 0.1  | 2.2    | 0.000808 | 0.000083 | 0.136818 | 0.027016 |
| MmuSTS.4288.1.S1_at   | MmuSTS.4288.1 | 9.98  | 9.78  | 0.08 | 0.12 | 1.15   | 0.123334 | 0.075551 | 0.488979 | 0.319982 |
| MmuSTS.4289.1.S1_at   | MmuSTS.4289.1 | 7.31  | 6.76  | 0.02 | 0.23 | 1.46   | 0.014239 | 0.005165 | 0.251724 | 0.09972  |
| MmuSTS.429.1.S1_at    | MmuSTS.429.1  | 3.69  | 3.88  | 0.13 | 0.11 | -1.14  | 0.116024 | 0.142349 | 0.479523 | 0.415923 |
| MmuSTS.4290.1.S1_at   | MmuSTS.4290.1 | 8.52  | 8.49  | 0.18 | 0.53 | 1.02   | 0.737088 | 0.854172 | 0.886925 | 0.916964 |
| MmuSTS.4291.1.S1_at   | MmuSTS.4291.1 | 8.06  | 7.98  | 0.37 | 0.02 | 1.05   | 0.650636 | 0.784003 | 0.842789 | 0.874963 |
| MmuSTS.4292.1.S1_at   | MmuSTS.4292.1 | 12.61 | 12.67 | 0.03 | 0.16 | -1.04  | 0.356833 | 0.294006 | 0.671818 | 0.553909 |
| MmuSTS.4293.1.S1_at   | MmuSTS.4293.1 | 6.04  | 6.13  | 0.07 | 0.11 | -1.07  | 0.128948 | 0.144648 | 0.494943 | 0.418477 |
| MmuSTS.4294.1.S1_at   | MmuSTS.4294.1 | 11.42 | 11.75 | 0.06 | 0.05 | -1.25  | 0.002785 | 0.000852 | 0.166278 | 0.047136 |
| MmuSTS.4295.1.S1_at   | MmuSTS.4295.1 | 9     | 9.99  | 0.22 | 0.14 | -1.99  | 0.004467 | 0.000338 | 0.183586 | 0.036485 |
| MmuSTS.4296.1.S1_at   | MmuSTS.4296.1 | 11.04 | 11.32 | 0.09 | 0.35 | -1.21  | 0.22874  | 0.342535 | 0.586121 | 0.588543 |
| MmuSTS.4297.1.S1_at   | MmuSTS.4297.1 | 11.44 | 11.82 | 0.12 | 0.13 | -1.3   | 0.039033 | 0.018191 | 0.346242 | 0.169695 |
| MmuSTS.4298.1.S1_at   | MmuSTS.4298.1 | 7.21  | 7.07  | 0.22 | 0.46 | 1.11   | 0.597444 | 0.432287 | 0.813537 | 0.652778 |
| MmuSTS.4299.1.S1_at   | MmuSTS.4299.1 | 7.61  | 7.88  | 0.13 | 0.3  | -1.21  | 0.174893 | 0.090889 | 0.538538 | 0.345525 |
| MmuSTS.43.1.S1_at     | MmuSTS.43.1   | 10.53 | 11.2  | 0.11 | 0.25 | -1.58  | 0.030252 | 0.021046 | 0.317712 | 0.181869 |
| MmuSTS.430.1.S1_at    | MmuSTS.430.1  | 3.39  | 3.24  | 0.18 | 0.06 | 1.11   | 0.627793 | 0.87019  | 0.83033  | 0.926372 |
| MmuSTS.4300.1.S1_at   | MmuSTS.4300.1 | 9.72  | 9     | 0.13 | 0.38 | 1.64   | 0.140668 | 0.125097 | 0.508385 | 0.395506 |
| MmuSTS.4301.1.S1_at   | MmuSTS.4301.1 | 10.17 | 10.02 | 0.15 | 1.01 | 1.11   | 0.912668 | 0.963891 | 0.965428 | 0.979963 |
| MmuSTS.4302.1.S1_at   | MmuSTS.4302.1 | 5.06  | 5.59  | 0.3  | 0.47 | -1.44  | 0.15435  | 0.096221 | 0.518928 | 0.353541 |
| MmuSTS.4303.1.S1_at   | MmuSTS.4303.1 | 8.94  | 8.93  | 0.04 | 0.14 | 1.01   | 0.748834 | 0.219941 | 0.892607 | 0.49344  |
| MmuSTS.4304.1.S1_at   | MmuSTS.4304.1 | 5.77  | 5.45  | 0.16 | 0.76 | 1.25   | 0.478638 | 0.322071 | 0.747332 | 0.573662 |
| MmuSTS.4305.1.S1_at   | MmuSTS.4305.1 | 11.11 | 10.97 | 0.07 | 0.28 | 1.1    | 0.188649 | 0.017323 | 0.551613 | 0.166509 |
| MmuSTS.4306.1.S1_at   | MmuSTS.4306.1 | 6.92  | 7.59  | 0.09 | 1.44 | -1.59  | 0.405227 | 0.516567 | 0.703082 | 0.709034 |
| MmuSTS.4307.1.S1_at   | MmuSTS.4307.1 | 9.01  | 8.52  | 0.13 | 0.43 | 1.41   | 0.12131  | 0.063194 | 0.48598  | 0.298119 |
| MmuSTS.4308.1.S1_s_at | MmuSTS.4308.1 | 6.98  | 10.94 | 1.79 | 2.77 | -15.52 | 0.451307 | 0.351069 | 0.731547 | 0.594752 |
| MmuSTS.4309.1.S1_at   | MmuSTS.4309.1 | 6.82  | 6.64  | 0.13 | 0.09 | 1.14   | 0.069531 | 0.002841 | 0.412367 | 0.078566 |
| MmuSTS.431.1.S1_at    | MmuSTS.431.1  | 4.81  | 5.02  | 0.27 | 0.12 | -1.16  | 0.241804 | 0.297985 | 0.593977 | 0.556695 |
| MmuSTS.431.1.S1_s_at  | MmuSTS.431.1  | 3.44  | 3.41  | 0.03 | 0.14 | 1.02   | 0.622808 | 0.409496 | 0.827692 | 0.636528 |
| MmuSTS.4310.1.S1_at   | MmuSTS.4310.1 | 9.16  | 8.4   | 0.11 | 0.6  | 1.7    | 0.042083 | 0.014248 | 0.353974 | 0.152403 |
| MmuSTS.4311.1.S1_at   | MmuSTS.4311.1 | 7.05  | 5.4   | 0.63 | 0.36 | 3.14   | 0.01887  | 0.008714 | 0.272039 | 0.123746 |
| MmuSTS.4311.1.S1_x_at | MmuSTS.4311.1 | 7.09  | 5.75  | 0.6  | 0.24 | 2.52   | 0.034186 | 0.011861 | 0.33191  | 0.140973 |
| MmuSTS.4312.1.S1_at   | MmuSTS.4312.1 | 8.9   | 9.03  | 0.61 | 0.73 | -1.09  | 0.468699 | 0.620155 | 0.741184 | 0.775248 |
| MmuSTS.4313.1.S1_at   | MmuSTS.4313.1 | 8.63  | 11.64 | 1.47 | 2.51 | -8.09  | 0.395925 | 0.195767 | 0.696652 | 0.470637 |
| MmuSTS.4314.1.S1_at   | MmuSTS.4314.1 | 3.28  | 3.28  | 0.08 | 0.03 | 1      | 0.772146 | 0.620568 | 0.904039 | 0.77549  |

|                       |               |       |       |      |      |       |          |          |          |          |
|-----------------------|---------------|-------|-------|------|------|-------|----------|----------|----------|----------|
| MmuSTS.4315.1.S1_at   | MmuSTS.4315.1 | 10.58 | 9.83  | 0.18 | 0.12 | 1.68  | 0.00362  | 0.002349 | 0.179515 | 0.07161  |
| MmuSTS.4316.1.S1_at   | MmuSTS.4316.1 | 11.77 | 11.88 | 0.19 | 0.05 | -1.08 | 0.199487 | 0.053792 | 0.562475 | 0.277457 |
| MmuSTS.4316.1.S1_s_at | MmuSTS.4316.1 | 11.02 | 11.14 | 0.16 | 0.02 | -1.08 | 0.073151 | 0.009435 | 0.418452 | 0.127948 |
| MmuSTS.4317.1.S1_at   | MmuSTS.4317.1 | 9.65  | 12.12 | 0.48 | 0.4  | -5.52 | 0.004417 | 0.002222 | 0.183429 | 0.069434 |
| MmuSTS.4318.1.S1_at   | MmuSTS.4318.1 | 9.92  | 10.02 | 0.15 | 0.51 | -1.08 | 0.416847 | 0.570524 | 0.710218 | 0.743151 |
| MmuSTS.4319.1.S1_s_at | MmuSTS.4319.1 | 7.37  | 7.11  | 0.11 | 0.37 | 1.2   | 0.188855 | 0.271405 | 0.551869 | 0.536507 |
| MmuSTS.432.1.S1_at    | MmuSTS.432.1  | 3.22  | 3.17  | 0.06 | 0.14 | 1.03  | 0.460195 | 0.658312 | 0.736771 | 0.800259 |
| MmuSTS.432.1.S1_s_at  | MmuSTS.432.1  | 3.05  | 3.05  | 0.13 | 0    | -1    | 0.877072 | 0.907372 | 0.950716 | 0.947602 |
| MmuSTS.4320.1.S1_at   | MmuSTS.4320.1 | 6.22  | 6.03  | 0.97 | 0.53 | 1.14  | 0.528005 | 0.420381 | 0.775296 | 0.644099 |
| MmuSTS.4321.1.S1_at   | MmuSTS.4321.1 | 11.91 | 12.28 | 0.21 | 0.56 | -1.29 | 0.437224 | 0.105216 | 0.722285 | 0.366982 |
| MmuSTS.4322.1.S1_at   | MmuSTS.4322.1 | 7.11  | 7.04  | 0.79 | 0.71 | 1.05  | 0.613091 | 0.750258 | 0.822517 | 0.854766 |
| MmuSTS.4323.1.S1_at   | MmuSTS.4323.1 | 9.08  | 9.84  | 0.29 | 0.18 | -1.7  | 0.016293 | 0.008368 | 0.263592 | 0.121371 |
| MmuSTS.4324.1.S1_at   | MmuSTS.4324.1 | 4.63  | 4.73  | 0.09 | 0.5  | -1.07 | 0.674766 | 0.375594 | 0.854234 | 0.613533 |
| MmuSTS.4325.1.S1_at   | MmuSTS.4325.1 | 3.92  | 3.57  | 0.24 | 0.17 | 1.27  | 0.146003 | 0.128293 | 0.512003 | 0.399469 |
| MmuSTS.4326.1.S1_at   | MmuSTS.4326.1 | 11.23 | 11.6  | 0.23 | 0.11 | -1.29 | 0.065949 | 0.008224 | 0.405534 | 0.120459 |
| MmuSTS.4327.1.S1_at   | MmuSTS.4327.1 | 5.87  | 5.63  | 0.11 | 0.26 | 1.18  | 0.796153 | 0.2411   | 0.915412 | 0.511749 |
| MmuSTS.4328.1.S1_at   | MmuSTS.4328.1 | 13.59 | 13.45 | 0.09 | 0.4  | 1.1   | 0.176004 | 0.198481 | 0.539464 | 0.473391 |
| MmuSTS.4328.1.S1_x_at | MmuSTS.4328.1 | 13.69 | 13.56 | 0.07 | 0.42 | 1.1   | 0.171651 | 0.203022 | 0.535232 | 0.477343 |
| MmuSTS.4329.1.S1_at   | MmuSTS.4329.1 | 11.1  | 12.48 | 0.54 | 0.32 | -2.61 | 0.043633 | 0.032883 | 0.356892 | 0.224478 |
| MmuSTS.433.1.S1_s_at  | MmuSTS.433.1  | 3.99  | 4.06  | 0.08 | 0.01 | -1.05 | 0.126705 | 0.09275  | 0.492811 | 0.34896  |
| MmuSTS.4330.1.S1_at   | MmuSTS.4330.1 | 11.93 | 12.14 | 0.27 | 0.48 | -1.15 | 0.797251 | 0.27215  | 0.915973 | 0.536939 |
| MmuSTS.4331.1.S1_at   | MmuSTS.4331.1 | 9.02  | 7.71  | 0.22 | 0.46 | 2.49  | 0.007939 | 0.003096 | 0.214461 | 0.081194 |
| MmuSTS.4332.1.S1_at   | MmuSTS.4332.1 | 12.53 | 12.26 | 0.14 | 0.36 | 1.21  | 0.121267 | 0.114336 | 0.48598  | 0.380835 |
| MmuSTS.4333.1.S1_at   | MmuSTS.4333.1 | 7.17  | 6.24  | 0.65 | 0.2  | 1.91  | 0.059453 | 0.051862 | 0.392237 | 0.273151 |
| MmuSTS.4334.1.S1_at   | MmuSTS.4334.1 | 7.87  | 8.2   | 0.06 | 0.46 | -1.26 | 0.300516 | 0.334671 | 0.635931 | 0.582581 |
| MmuSTS.4335.1.S1_at   | MmuSTS.4335.1 | 8.7   | 8.54  | 0.15 | 0.17 | 1.11  | 0.21288  | 0.240259 | 0.57334  | 0.510851 |
| MmuSTS.4336.1.S1_at   | MmuSTS.4336.1 | 11.3  | 10.98 | 0.2  | 0.48 | 1.25  | 0.292044 | 0.025165 | 0.62939  | 0.198794 |
| MmuSTS.4337.1.S1_at   | MmuSTS.4337.1 | 7.96  | 8.07  | 0.1  | 0.7  | -1.08 | 0.856863 | 0.907867 | 0.942171 | 0.947871 |
| MmuSTS.4338.1.S1_at   | MmuSTS.4338.1 | 6.03  | 6.25  | 0.15 | 0.16 | -1.16 | 0.452712 | 0.648542 | 0.732217 | 0.794319 |
| MmuSTS.4339.1.S1_at   | MmuSTS.4339.1 | 5.46  | 7.37  | 0.55 | 1.72 | -3.77 | 0.163696 | 0.132801 | 0.527992 | 0.404544 |
| MmuSTS.434.1.S1_at    | MmuSTS.434.1  | 3.48  | 3.57  | 0.1  | 0.02 | -1.07 | 0.116178 | 0.079799 | 0.479787 | 0.327113 |
| MmuSTS.4340.1.S1_at   | MmuSTS.4340.1 | 4.55  | 4.28  | 0.42 | 0.14 | 1.21  | 0.426713 | 0.645633 | 0.715941 | 0.792444 |
| MmuSTS.4341.1.S1_at   | MmuSTS.4341.1 | 11.01 | 11.21 | 0.27 | 0.18 | -1.14 | 0.740276 | 0.063672 | 0.888498 | 0.298832 |
| MmuSTS.4342.1.S1_at   | MmuSTS.4342.1 | 4.04  | 4.85  | 0.24 | 0.7  | -1.75 | 0.131126 | 0.101517 | 0.497595 | 0.361343 |
| MmuSTS.4343.1.S1_at   | MmuSTS.4343.1 | 6.39  | 6.46  | 0.13 | 0.06 | -1.05 | 0.671834 | 0.371076 | 0.852716 | 0.609998 |
| MmuSTS.4344.1.S1_at   | MmuSTS.4344.1 | 12.76 | 12.48 | 0.16 | 0.47 | 1.21  | 0.616567 | 0.659546 | 0.824231 | 0.800801 |
| MmuSTS.4345.1.S1_at   | MmuSTS.4345.1 | 8.1   | 8.02  | 0.12 | 0.63 | 1.06  | 0.879738 | 0.916312 | 0.951669 | 0.953126 |
| MmuSTS.4346.1.S1_at   | MmuSTS.4346.1 | 9.14  | 8.36  | 0.15 | 0.25 | 1.71  | 0.017292 | 0.007252 | 0.267101 | 0.114309 |
| MmuSTS.4347.1.S1_at   | MmuSTS.4347.1 | 5.45  | 5.4   | 0.22 | 0.15 | 1.03  | 0.470589 | 0.652049 | 0.742485 | 0.796529 |
| MmuSTS.4348.1.S1_at   | MmuSTS.4348.1 | 6.78  | 6.84  | 0.11 | 0.07 | -1.04 | 0.634524 | 0.022007 | 0.834534 | 0.18564  |
| MmuSTS.4349.1.S1_at   | MmuSTS.4349.1 | 11.88 | 11.6  | 0.05 | 0.17 | 1.22  | 0.060786 | 0.027117 | 0.394325 | 0.205797 |

|                       |               |       |       |      |      |        |          |          |          |          |
|-----------------------|---------------|-------|-------|------|------|--------|----------|----------|----------|----------|
| MmuSTS.435.1.S1_at    | MmuSTS.435.1  | 3.04  | 2.97  | 0.13 | 0.08 | 1.05   | 0.326461 | 0.113017 | 0.653184 | 0.378885 |
| MmuSTS.4350.1.S1_at   | MmuSTS.4350.1 | 6.3   | 6.61  | 0.14 | 0.31 | -1.23  | 0.207491 | 0.05616  | 0.569624 | 0.282888 |
| MmuSTS.4351.1.S1_at   | MmuSTS.4351.1 | 12.62 | 12.8  | 0.06 | 0.18 | -1.13  | 0.241837 | 0.252521 | 0.594001 | 0.521079 |
| MmuSTS.4352.1.S1_at   | MmuSTS.4352.1 | 2.97  | 3.33  | 0.34 | 0.27 | -1.28  | 0.228915 | 0.204492 | 0.586256 | 0.478845 |
| MmuSTS.4353.1.S1_at   | MmuSTS.4353.1 | 4.09  | 4.68  | 0.72 | 0.68 | -1.51  | 0.776242 | 0.694988 | 0.906244 | 0.822709 |
| MmuSTS.4354.1.S1_at   | MmuSTS.4354.1 | 6.41  | 6.56  | 1.68 | 0.91 | -1.11  | 0.868554 | 0.629257 | 0.947564 | 0.781747 |
| MmuSTS.4355.1.S1_at   | MmuSTS.4355.1 | 10.97 | 10.83 | 0.52 | 0.24 | 1.1    | 0.651974 | 0.302777 | 0.843447 | 0.560307 |
| MmuSTS.4356.1.S1_at   | MmuSTS.4356.1 | 4.39  | 4.38  | 0.01 | 0.1  | 1.01   | 0.75098  | 0.588763 | 0.893533 | 0.755137 |
| MmuSTS.4357.1.S1_at   | MmuSTS.4357.1 | 11.45 | 11.4  | 0.21 | 0.29 | 1.04   | 0.314932 | 0.386256 | 0.646232 | 0.621469 |
| MmuSTS.4358.1.S1_at   | MmuSTS.4358.1 | 6.21  | 6.2   | 0.18 | 0.06 | 1      | 0.718121 | 0.778891 | 0.876329 | 0.871673 |
| MmuSTS.4359.1.S1_at   | MmuSTS.4359.1 | 4.93  | 4.83  | 0.08 | 0.07 | 1.07   | 0.156999 | 0.040752 | 0.521736 | 0.246735 |
| MmuSTS.436.1.S1_s_at  | MmuSTS.436.1  | 4.71  | 4.96  | 0.14 | 0.1  | -1.18  | 0.117379 | 0.153407 | 0.481484 | 0.42827  |
| MmuSTS.4360.1.S1_at   | MmuSTS.4360.1 | 5.47  | 4.15  | 0.56 | 0.87 | 2.49   | 0.130518 | 0.151585 | 0.496888 | 0.426333 |
| MmuSTS.4361.1.S1_at   | MmuSTS.4361.1 | 11.75 | 11.1  | 0.07 | 0.35 | 1.56   | 0.036988 | 0.021673 | 0.340567 | 0.184333 |
| MmuSTS.4362.1.S1_at   | MmuSTS.4362.1 | 5.66  | 5.65  | 0.53 | 0.41 | 1      | 0.550232 | 0.687693 | 0.787781 | 0.817662 |
| MmuSTS.4363.1.S1_at   | MmuSTS.4363.1 | 12.55 | 12.5  | 0.02 | 0.09 | 1.03   | 0.485593 | 0.496622 | 0.751041 | 0.696119 |
| MmuSTS.4364.1.S1_at   | MmuSTS.4364.1 | 10.04 | 10.91 | 0.32 | 0.69 | -1.83  | 0.18561  | 0.248553 | 0.548968 | 0.517842 |
| MmuSTS.4365.1.S1_at   | MmuSTS.4365.1 | 6.13  | 6.05  | 0.06 | 0.21 | 1.05   | 0.916524 | 0.464149 | 0.967338 | 0.674916 |
| MmuSTS.4366.1.S1_at   | MmuSTS.4366.1 | 7.62  | 6.43  | 0.18 | 0.31 | 2.27   | 0.007982 | 0.004169 | 0.214639 | 0.091036 |
| MmuSTS.4367.1.S1_at   | MmuSTS.4367.1 | 9.38  | 9.28  | 0.25 | 0.41 | 1.07   | 0.780266 | 0.208904 | 0.908487 | 0.482721 |
| MmuSTS.4368.1.S1_at   | MmuSTS.4368.1 | 8.06  | 10.24 | 0.14 | 0.66 | -4.53  | 0.008906 | 0.003704 | 0.221598 | 0.086769 |
| MmuSTS.4369.1.S1_at   | MmuSTS.4369.1 | 10.35 | 10.14 | 0.29 | 0.02 | 1.16   | 0.25658  | 0.275901 | 0.604298 | 0.540035 |
| MmuSTS.437.1.S1_at    | MmuSTS.437.1  | 6.05  | 6     | 0.3  | 0.18 | 1.04   | 0.593775 | 0.770615 | 0.811569 | 0.866798 |
| MmuSTS.4370.1.S1_at   | MmuSTS.4370.1 | 4.7   | 9.35  | 2.08 | 3.12 | -25.14 | 0.298619 | 0.317461 | 0.63411  | 0.570681 |
| MmuSTS.4371.1.S1_at   | MmuSTS.4371.1 | 2.96  | 2.84  | 0.12 | 0.18 | 1.09   | 0.211419 | 0.10236  | 0.572194 | 0.362527 |
| MmuSTS.4372.1.S1_at   | MmuSTS.4372.1 | 11.1  | 11.09 | 0.19 | 0.73 | 1.01   | 0.844986 | 0.2505   | 0.937773 | 0.519391 |
| MmuSTS.4373.1.S1_at   | MmuSTS.4373.1 | 3.68  | 3.63  | 0.3  | 0.16 | 1.04   | 0.184194 | 0.211284 | 0.548032 | 0.485418 |
| MmuSTS.4374.1.S1_at   | MmuSTS.4374.1 | 6.42  | 6.27  | 0.16 | 0.86 | 1.11   | 0.975653 | 0.090562 | 0.990625 | 0.345026 |
| MmuSTS.4375.1.S1_at   | MmuSTS.4375.1 | 7.96  | 8.97  | 0.76 | 0.43 | -2.01  | 0.184446 | 0.188949 | 0.548146 | 0.464854 |
| MmuSTS.4376.1.S1_at   | MmuSTS.4376.1 | 9.5   | 9.42  | 0.15 | 0.16 | 1.05   | 0.897595 | 0.063034 | 0.95917  | 0.297739 |
| MmuSTS.4377.1.S1_at   | MmuSTS.4377.1 | 3.36  | 3.2   | 0.04 | 0.13 | 1.12   | 0.112932 | 0.427984 | 0.475558 | 0.649602 |
| MmuSTS.4377.1.S1_s_at | MmuSTS.4377.1 | 3     | 2.93  | 0.06 | 0.01 | 1.05   | 0.17981  | 0.480302 | 0.544019 | 0.68574  |
| MmuSTS.4378.1.S1_at   | MmuSTS.4378.1 | 7.57  | 7.42  | 0.51 | 0.37 | 1.11   | 0.877052 | 0.052588 | 0.950716 | 0.274848 |
| MmuSTS.4379.1.S1_at   | MmuSTS.4379.1 | 5.94  | 6.67  | 0.33 | 0.71 | -1.66  | 0.123011 | 0.096807 | 0.488452 | 0.354207 |
| MmuSTS.438.1.S1_at    | MmuSTS.438.1  | 6.08  | 6.39  | 0.12 | 0.38 | -1.24  | 0.175828 | 0.21013  | 0.539441 | 0.483968 |
| MmuSTS.4380.1.S1_at   | MmuSTS.4380.1 | 3.6   | 3.64  | 0.07 | 0.01 | -1.02  | 0.176415 | 0.245863 | 0.540023 | 0.51552  |
| MmuSTS.4381.1.S1_at   | MmuSTS.4381.1 | 4.46  | 4.59  | 0.04 | 0.06 | -1.1   | 0.025943 | 0.051423 | 0.301229 | 0.272204 |
| MmuSTS.4382.1.S1_at   | MmuSTS.4382.1 | 4.64  | 6.24  | 0.08 | 0.95 | -3.04  | 0.05541  | 0.05434  | 0.383716 | 0.278605 |
| MmuSTS.4383.1.S1_at   | MmuSTS.4383.1 | 7.35  | 7.63  | 0.06 | 0.88 | -1.21  | 0.767957 | 0.058396 | 0.902473 | 0.288407 |
| MmuSTS.4384.1.S1_at   | MmuSTS.4384.1 | 3.37  | 4.68  | 0.36 | 1.12 | -2.46  | 0.111159 | 0.137998 | 0.47321  | 0.410919 |
| MmuSTS.4385.1.S1_at   | MmuSTS.4385.1 | 5.75  | 5.78  | 0.14 | 0.12 | -1.02  | 0.788989 | 0.782692 | 0.91235  | 0.874202 |

|                     |               |       |       |      |      |       |          |          |          |          |
|---------------------|---------------|-------|-------|------|------|-------|----------|----------|----------|----------|
| MmuSTS.4386.1.S1_at | MmuSTS.4386.1 | 5.61  | 5.67  | 0.23 | 0.12 | -1.04 | 0.628092 | 0.738422 | 0.830517 | 0.848292 |
| MmuSTS.4387.1.S1_at | MmuSTS.4387.1 | 7.01  | 7.19  | 0.15 | 0.35 | -1.13 | 0.616054 | 0.53554  | 0.823957 | 0.721087 |
| MmuSTS.4388.1.S1_at | MmuSTS.4388.1 | 10.35 | 9.82  | 0.24 | 0.29 | 1.44  | 0.023599 | 0.010943 | 0.291969 | 0.13621  |
| MmuSTS.4389.1.S1_at | MmuSTS.4389.1 | 5.72  | 5.67  | 0.1  | 0.72 | 1.03  | 0.455236 | 0.226863 | 0.733701 | 0.499276 |
| MmuSTS.439.1.S1_at  | MmuSTS.439.1  | 8.69  | 9.24  | 0.39 | 0.17 | -1.46 | 0.159546 | 0.201374 | 0.524412 | 0.47589  |
| MmuSTS.4390.1.S1_at | MmuSTS.4390.1 | 4.52  | 4.37  | 0.95 | 0.25 | 1.11  | 0.381267 | 0.193641 | 0.687811 | 0.468785 |
| MmuSTS.4391.1.S1_at | MmuSTS.4391.1 | 4.31  | 4.47  | 0.26 | 0.09 | -1.12 | 0.830387 | 0.69897  | 0.931452 | 0.825058 |
| MmuSTS.4392.1.S1_at | MmuSTS.4392.1 | 10.24 | 10.26 | 0.33 | 0.37 | -1.01 | 0.819238 | 0.937697 | 0.926528 | 0.964687 |
| MmuSTS.4393.1.S1_at | MmuSTS.4393.1 | 4.63  | 4.2   | 0.18 | 0.25 | 1.35  | 0.064489 | 0.131406 | 0.402975 | 0.403577 |
| MmuSTS.4394.1.S1_at | MmuSTS.4394.1 | 7.18  | 8.48  | 0.27 | 0.39 | -2.46 | 0.016648 | 0.00982  | 0.26475  | 0.130205 |
| MmuSTS.4395.1.S1_at | MmuSTS.4395.1 | 6.22  | 6.43  | 0.37 | 0.38 | -1.15 | 0.504845 | 0.253608 | 0.761488 | 0.521956 |
| MmuSTS.4396.1.S1_at | MmuSTS.4396.1 | 5.18  | 5.12  | 0.16 | 0.02 | 1.05  | 0.702279 | 0.885691 | 0.868546 | 0.934982 |
| MmuSTS.4397.1.S1_at | MmuSTS.4397.1 | 8.47  | 8.47  | 0.16 | 0.09 | 1     | 0.899825 | 0.987512 | 0.960025 | 0.993022 |
| MmuSTS.4398.1.S1_at | MmuSTS.4398.1 | 3.75  | 3.69  | 0.14 | 0.05 | 1.04  | 0.577325 | 0.913912 | 0.803468 | 0.951568 |
| MmuSTS.4399.1.S1_at | MmuSTS.4399.1 | 10.68 | 9.12  | 0.26 | 0.34 | 2.96  | 0.004485 | 0.000895 | 0.183586 | 0.047825 |
| MmuSTS.44.1.S1_at   | MmuSTS.44.1   | 11.44 | 11.2  | 0.3  | 0.09 | 1.19  | 0.060502 | 0.11899  | 0.393715 | 0.387269 |
| MmuSTS.440.1.S1_at  | MmuSTS.440.1  | 4.38  | 4.25  | 0.5  | 0.22 | 1.09  | 0.389745 | 0.01123  | 0.693243 | 0.138014 |
| MmuSTS.4400.1.S1_at | MmuSTS.4400.1 | 3.32  | 3.43  | 0.01 | 0.09 | -1.08 | 0.102962 | 0.34005  | 0.46254  | 0.586516 |
| MmuSTS.4401.1.S1_at | MmuSTS.4401.1 | 3.85  | 3.56  | 0.14 | 0.07 | 1.22  | 0.03927  | 0.039165 | 0.346898 | 0.243072 |
| MmuSTS.4402.1.S1_at | MmuSTS.4402.1 | 4.5   | 4.14  | 0.36 | 0.53 | 1.29  | 0.301574 | 0.423473 | 0.636486 | 0.646367 |
| MmuSTS.4403.1.S1_at | MmuSTS.4403.1 | 9.69  | 9.66  | 0.12 | 0.41 | 1.02  | 0.646607 | 0.832666 | 0.840949 | 0.904017 |
| MmuSTS.4404.1.S1_at | MmuSTS.4404.1 | 3.12  | 3.35  | 0.1  | 0.16 | -1.18 | 0.287529 | 0.268904 | 0.625987 | 0.534356 |
| MmuSTS.4405.1.S1_at | MmuSTS.4405.1 | 4.79  | 4.62  | 0.17 | 0.09 | 1.13  | 0.17299  | 0.171658 | 0.536655 | 0.448044 |
| MmuSTS.4406.1.S1_at | MmuSTS.4406.1 | 10.84 | 10.31 | 0.18 | 0.59 | 1.45  | 0.300117 | 0.403595 | 0.635415 | 0.632235 |
| MmuSTS.4407.1.S1_at | MmuSTS.4407.1 | 7.75  | 8.88  | 0.54 | 0.85 | -2.18 | 0.119925 | 0.121571 | 0.48448  | 0.390688 |
| MmuSTS.4408.1.S1_at | MmuSTS.4408.1 | 12.15 | 11.79 | 0.31 | 0.44 | 1.29  | 0.97319  | 0.471522 | 0.989572 | 0.6795   |
| MmuSTS.4409.1.S1_at | MmuSTS.4409.1 | 12.6  | 12.31 | 0.08 | 0.06 | 1.22  | 0.008663 | 0.002883 | 0.220084 | 0.078985 |
| MmuSTS.441.1.S1_at  | MmuSTS.441.1  | 4.8   | 4.98  | 0.3  | 0.13 | -1.13 | 0.140731 | 0.159895 | 0.508448 | 0.435987 |
| MmuSTS.4410.1.S1_at | MmuSTS.4410.1 | 7.28  | 6.96  | 0.34 | 0.73 | 1.26  | 0.846094 | 0.120635 | 0.938232 | 0.389476 |
| MmuSTS.4411.1.S1_at | MmuSTS.4411.1 | 13.21 | 13.24 | 0.05 | 0.12 | -1.02 | 0.705511 | 0.005595 | 0.870099 | 0.10339  |
| MmuSTS.4412.1.S1_at | MmuSTS.4412.1 | 8.33  | 8.25  | 0.22 | 0.26 | 1.05  | 0.296198 | 0.334944 | 0.632176 | 0.58275  |
| MmuSTS.4413.1.S1_at | MmuSTS.4413.1 | 3.31  | 3.31  | 0.02 | 0.04 | -1    | 0.994369 | 0.153714 | 0.998033 | 0.428413 |
| MmuSTS.4414.1.S1_at | MmuSTS.4414.1 | 11.98 | 12.38 | 0.19 | 0.17 | -1.32 | 0.124552 | 0.002999 | 0.490526 | 0.079958 |
| MmuSTS.4415.1.S1_at | MmuSTS.4415.1 | 10.91 | 10.66 | 0.26 | 0.08 | 1.19  | 0.347751 | 0.284234 | 0.666662 | 0.546461 |
| MmuSTS.4416.1.S1_at | MmuSTS.4416.1 | 4.79  | 4.9   | 0.25 | 0.18 | -1.08 | 0.993696 | 0.760812 | 0.997754 | 0.861028 |
| MmuSTS.4417.1.S1_at | MmuSTS.4417.1 | 11.35 | 11.88 | 0.35 | 0.23 | -1.45 | 0.061736 | 0.039067 | 0.396604 | 0.242914 |
| MmuSTS.4418.1.S1_at | MmuSTS.4418.1 | 5.73  | 5.72  | 0.1  | 0.03 | 1.01  | 0.963096 | 0.346123 | 0.985728 | 0.591186 |
| MmuSTS.4419.1.S1_at | MmuSTS.4419.1 | 9.75  | 10.15 | 0.89 | 0.77 | -1.32 | 0.845808 | 0.654981 | 0.93814  | 0.7982   |
| MmuSTS.442.1.S1_at  | MmuSTS.442.1  | 8.02  | 8.7   | 0.32 | 0.39 | -1.6  | 0.126413 | 0.081264 | 0.492762 | 0.329351 |
| MmuSTS.4420.1.S1_at | MmuSTS.4420.1 | 10.99 | 9.72  | 0.18 | 0.27 | 2.41  | 0.001274 | 0.000073 | 0.145267 | 0.026477 |
| MmuSTS.4421.1.S1_at | MmuSTS.4421.1 | 11.14 | 11.81 | 0.17 | 0.19 | -1.59 | 0.010268 | 0.014638 | 0.228514 | 0.154176 |

|                       |               |       |       |      |      |       |          |          |          |          |
|-----------------------|---------------|-------|-------|------|------|-------|----------|----------|----------|----------|
| MmuSTS.4422.1.S1_at   | MmuSTS.4422.1 | 7.63  | 8.65  | 0.64 | 2.05 | -2.01 | 0.515667 | 0.438718 | 0.767629 | 0.657639 |
| MmuSTS.4423.1.S1_at   | MmuSTS.4423.1 | 6.87  | 6.6   | 0.13 | 0.14 | 1.2   | 0.049909 | 0.023239 | 0.372507 | 0.191096 |
| MmuSTS.4424.1.S1_at   | MmuSTS.4424.1 | 9.47  | 11.35 | 0.29 | 0.67 | -3.66 | 0.011714 | 0.004299 | 0.237531 | 0.092019 |
| MmuSTS.4425.1.S1_at   | MmuSTS.4425.1 | 8.86  | 8.98  | 0.64 | 0.77 | -1.09 | 0.284305 | 0.109605 | 0.62413  | 0.373559 |
| MmuSTS.4426.1.S1_at   | MmuSTS.4426.1 | 8.35  | 8.8   | 0.26 | 0.27 | -1.36 | 0.109869 | 0.097753 | 0.47102  | 0.355611 |
| MmuSTS.4427.1.S1_at   | MmuSTS.4427.1 | 4.05  | 3.93  | 0.23 | 0.12 | 1.08  | 0.165845 | 0.451354 | 0.529848 | 0.666168 |
| MmuSTS.4428.1.S1_at   | MmuSTS.4428.1 | 10.22 | 10.58 | 0.22 | 0.05 | -1.28 | 0.05249  | 0.024593 | 0.377834 | 0.196239 |
| MmuSTS.4429.1.S1_at   | MmuSTS.4429.1 | 6.48  | 6.21  | 0.18 | 0.34 | 1.2   | 0.109147 | 0.109156 | 0.470811 | 0.373015 |
| MmuSTS.443.1.S1_at    | MmuSTS.443.1  | 11.32 | 10.61 | 0.14 | 0.2  | 1.63  | 0.006569 | 0.001784 | 0.199625 | 0.063434 |
| MmuSTS.4430.1.S1_at   | MmuSTS.4430.1 | 6.75  | 8.23  | 0.64 | 0.36 | -2.78 | 0.047034 | 0.027527 | 0.364849 | 0.207161 |
| MmuSTS.4431.1.S1_at   | MmuSTS.4431.1 | 4.53  | 4.55  | 0.28 | 0.18 | -1.02 | 0.962823 | 0.15411  | 0.985644 | 0.42887  |
| MmuSTS.4432.1.S1_at   | MmuSTS.4432.1 | 9.74  | 9.48  | 0.07 | 0.23 | 1.2   | 0.108402 | 0.001584 | 0.469638 | 0.060358 |
| MmuSTS.4433.1.S1_at   | MmuSTS.4433.1 | 7.92  | 7.63  | 0.16 | 0.56 | 1.22  | 0.333836 | 0.221369 | 0.657952 | 0.494644 |
| MmuSTS.4434.1.S1_at   | MmuSTS.4434.1 | 3.21  | 3.28  | 0.16 | 0.13 | -1.05 | 0.896859 | 0.475715 | 0.958912 | 0.682332 |
| MmuSTS.4435.1.S1_at   | MmuSTS.4435.1 | 8.34  | 8.19  | 0.11 | 0.45 | 1.11  | 0.572533 | 0.236083 | 0.800799 | 0.507179 |
| MmuSTS.4436.1.S1_at   | MmuSTS.4436.1 | 3.82  | 4.01  | 0.1  | 0.23 | -1.14 | 0.144716 | 0.048931 | 0.511058 | 0.265988 |
| MmuSTS.4437.1.S1_at   | MmuSTS.4437.1 | 10.16 | 9.92  | 0.37 | 0.15 | 1.18  | 0.366153 | 0.497026 | 0.678944 | 0.696385 |
| MmuSTS.4438.1.S1_at   | MmuSTS.4438.1 | 4.76  | 4.84  | 0.11 | 0.2  | -1.06 | 0.496798 | 0.426952 | 0.757692 | 0.649072 |
| MmuSTS.4439.1.S1_at   | MmuSTS.4439.1 | 4.1   | 4.1   | 0.01 | 0.17 | 1     | 0.35613  | 0.49944  | 0.671384 | 0.698289 |
| MmuSTS.444.1.S1_at    | MmuSTS.444.1  | 6.05  | 6.8   | 0.23 | 0.22 | -1.69 | 0.014142 | 0.006201 | 0.251402 | 0.106821 |
| MmuSTS.4440.1.S1_at   | MmuSTS.4440.1 | 7.46  | 7.56  | 0.08 | 0.06 | -1.07 | 0.187287 | 0.03207  | 0.550374 | 0.22165  |
| MmuSTS.4441.1.S1_at   | MmuSTS.4441.1 | 12.43 | 11.9  | 0.11 | 0.15 | 1.44  | 0.007625 | 0.002637 | 0.210602 | 0.075979 |
| MmuSTS.4442.1.S1_at   | MmuSTS.4442.1 | 4.19  | 4.18  | 0.19 | 0.17 | 1.01  | 0.254104 | 0.348963 | 0.602339 | 0.59297  |
| MmuSTS.4443.1.S1_s_at | MmuSTS.4443.1 | 5.13  | 5.95  | 0.63 | 1.13 | -1.77 | 0.533856 | 0.247524 | 0.778436 | 0.516859 |
| MmuSTS.4444.1.S1_at   | MmuSTS.4444.1 | 5.11  | 5.23  | 1.04 | 0.97 | -1.09 | 0.8611   | 0.644703 | 0.94401  | 0.7918   |
| MmuSTS.4445.1.S1_at   | MmuSTS.4445.1 | 11.62 | 12.19 | 0.34 | 0.26 | -1.48 | 0.07744  | 0.043495 | 0.427142 | 0.25316  |
| MmuSTS.4446.1.S1_at   | MmuSTS.4446.1 | 3.36  | 3.36  | 0.12 | 0.16 | 1     | 0.442041 | 0.479307 | 0.725347 | 0.685088 |
| MmuSTS.4447.1.S1_at   | MmuSTS.4447.1 | 3.98  | 4.06  | 0.36 | 0.32 | -1.05 | 0.409677 | 0.458221 | 0.705918 | 0.671077 |
| MmuSTS.4448.1.S1_at   | MmuSTS.4448.1 | 3.23  | 3.25  | 0.09 | 0.03 | -1.02 | 0.329109 | 0.667325 | 0.65484  | 0.805297 |
| MmuSTS.4449.1.S1_at   | MmuSTS.4449.1 | 7.55  | 7.74  | 0.19 | 0.09 | -1.14 | 0.199042 | 0.255489 | 0.5621   | 0.523505 |
| MmuSTS.445.1.S1_at    | MmuSTS.445.1  | 4.65  | 4.84  | 0.27 | 0.19 | -1.14 | 0.703616 | 0.380502 | 0.869102 | 0.617165 |
| MmuSTS.4450.1.S1_at   | MmuSTS.4450.1 | 4.06  | 4.23  | 0.15 | 0.05 | -1.12 | 0.620936 | 0.141812 | 0.826264 | 0.415331 |
| MmuSTS.4451.1.S1_at   | MmuSTS.4451.1 | 4.36  | 4.45  | 0.12 | 0.16 | -1.06 | 0.18808  | 0.242159 | 0.551073 | 0.512652 |
| MmuSTS.4452.1.S1_at   | MmuSTS.4452.1 | 9.96  | 10.48 | 0.3  | 0.91 | -1.43 | 0.394238 | 0.560384 | 0.695705 | 0.736645 |
| MmuSTS.4453.1.S1_at   | MmuSTS.4453.1 | 9     | 8.94  | 0.06 | 0.1  | 1.04  | 0.352552 | 0.202739 | 0.669669 | 0.477174 |
| MmuSTS.4454.1.S1_at   | MmuSTS.4454.1 | 10.39 | 10.01 | 0.31 | 0.18 | 1.3   | 0.081087 | 0.084324 | 0.431831 | 0.335578 |
| MmuSTS.4455.1.S1_at   | MmuSTS.4455.1 | 8.49  | 7.59  | 0.46 | 1.24 | 1.86  | 0.107267 | 0.09766  | 0.467913 | 0.355554 |
| MmuSTS.4456.1.S1_at   | MmuSTS.4456.1 | 3.65  | 3.36  | 0.35 | 0.38 | 1.22  | 0.933018 | 0.576656 | 0.973979 | 0.747307 |
| MmuSTS.4457.1.S1_at   | MmuSTS.4457.1 | 3.77  | 3.72  | 0.05 | 0.07 | 1.04  | 0.262917 | 0.338267 | 0.609125 | 0.585417 |
| MmuSTS.4458.1.S1_at   | MmuSTS.4458.1 | 6.38  | 8.98  | 1.87 | 2.03 | -6.08 | 0.307468 | 0.253104 | 0.639999 | 0.521426 |
| MmuSTS.4459.1.S1_at   | MmuSTS.4459.1 | 10.39 | 9.65  | 0.09 | 0.25 | 1.67  | 0.012474 | 0.005293 | 0.241976 | 0.100738 |

|                       |               |       |       |      |      |       |          |          |          |          |
|-----------------------|---------------|-------|-------|------|------|-------|----------|----------|----------|----------|
| MmuSTS.446.1.S1_at    | MmuSTS.446.1  | 6.16  | 6.13  | 0.14 | 0.07 | 1.02  | 0.918357 | 0.626293 | 0.96831  | 0.779698 |
| MmuSTS.4460.1.S1_at   | MmuSTS.4460.1 | 11.95 | 11.71 | 0.03 | 0.18 | 1.19  | 0.093607 | 0.079051 | 0.450966 | 0.326117 |
| MmuSTS.4461.1.S1_at   | MmuSTS.4461.1 | 8.58  | 8.31  | 0.06 | 0.28 | 1.21  | 0.137934 | 0.05618  | 0.505364 | 0.282948 |
| MmuSTS.4462.1.S1_at   | MmuSTS.4462.1 | 5.8   | 5.97  | 0.04 | 0.08 | -1.12 | 0.033017 | 0.046062 | 0.326925 | 0.258977 |
| MmuSTS.4463.1.S1_at   | MmuSTS.4463.1 | 11.78 | 11.88 | 0.03 | 0.28 | -1.08 | 0.52333  | 0.395575 | 0.772491 | 0.627566 |
| MmuSTS.4464.1.S1_at   | MmuSTS.4464.1 | 3.32  | 3.36  | 0.11 | 0.04 | -1.03 | 0.238759 | 0.422723 | 0.592015 | 0.645895 |
| MmuSTS.4465.1.S1_at   | MmuSTS.4465.1 | 8.68  | 9.21  | 0.48 | 0.65 | -1.44 | 0.236406 | 0.288501 | 0.590428 | 0.549786 |
| MmuSTS.4466.1.S1_at   | MmuSTS.4466.1 | 4.84  | 4.93  | 0.07 | 0.23 | -1.06 | 0.174856 | 0.129677 | 0.538524 | 0.401322 |
| MmuSTS.4467.1.S1_at   | MmuSTS.4467.1 | 11.37 | 11.17 | 0    | 0.21 | 1.15  | 0.178664 | 0.244781 | 0.542945 | 0.514629 |
| MmuSTS.4468.1.S1_at   | MmuSTS.4468.1 | 7.68  | 9.3   | 0.39 | 0.65 | -3.07 | 0.009742 | 0.004305 | 0.226235 | 0.092019 |
| MmuSTS.4469.1.S1_at   | MmuSTS.4469.1 | 12.74 | 12.99 | 0.05 | 0.15 | -1.19 | 0.05136  | 0.013137 | 0.376001 | 0.147338 |
| MmuSTS.4469.1.S1_s_at | MmuSTS.4469.1 | 8.16  | 9.59  | 0.27 | 0.48 | -2.69 | 0.02236  | 0.015536 | 0.286071 | 0.158053 |
| MmuSTS.447.1.S1_at    | MmuSTS.447.1  | 8.81  | 7.93  | 0.35 | 0.33 | 1.84  | 0.026578 | 0.022415 | 0.303505 | 0.187375 |
| MmuSTS.4470.1.S1_at   | MmuSTS.4470.1 | 11.29 | 11.97 | 0.3  | 0.92 | -1.6  | 0.304763 | 0.188046 | 0.638784 | 0.464144 |
| MmuSTS.4471.1.S1_at   | MmuSTS.4471.1 | 4.24  | 4.25  | 0.06 | 0.18 | -1.01 | 0.631119 | 0.861579 | 0.8325   | 0.921322 |
| MmuSTS.4472.1.S1_at   | MmuSTS.4472.1 | 7.85  | 8.28  | 0.09 | 0.13 | -1.35 | 0.009146 | 0.001879 | 0.222351 | 0.064979 |
| MmuSTS.4473.1.S1_at   | MmuSTS.4473.1 | 7.02  | 7.26  | 0.15 | 0.21 | -1.17 | 0.09262  | 0.070254 | 0.449245 | 0.311287 |
| MmuSTS.4474.1.S1_at   | MmuSTS.4474.1 | 10.37 | 10.91 | 0.06 | 0.36 | -1.45 | 0.1977   | 0.152797 | 0.560698 | 0.427601 |
| MmuSTS.4475.1.S1_at   | MmuSTS.4475.1 | 10.06 | 10.02 | 0.09 | 0.3  | 1.03  | 0.841322 | 0.895614 | 0.936191 | 0.940329 |
| MmuSTS.4476.1.S1_at   | MmuSTS.4476.1 | 3.41  | 3.54  | 0.06 | 0.09 | -1.1  | 0.111778 | 0.05358  | 0.474019 | 0.277127 |
| MmuSTS.4477.1.S1_at   | MmuSTS.4477.1 | 11.83 | 11.35 | 0.09 | 0.18 | 1.39  | 0.014067 | 0.006467 | 0.250974 | 0.109304 |
| MmuSTS.4478.1.S1_at   | MmuSTS.4478.1 | 13.77 | 13.78 | 0.02 | 0.07 | -1.01 | 0.344406 | 0.460193 | 0.664563 | 0.672102 |
| MmuSTS.4479.1.S1_s_at | MmuSTS.4479.1 | 5.94  | 6.09  | 0.1  | 0.09 | -1.11 | 0.145603 | 0.17086  | 0.51146  | 0.447509 |
| MmuSTS.448.1.S1_at    | MmuSTS.448.1  | 8.3   | 8.22  | 0.22 | 0.3  | 1.06  | 0.5887   | 0.70273  | 0.809114 | 0.827685 |
| MmuSTS.4480.1.S1_at   | MmuSTS.4480.1 | 12.49 | 12.32 | 0.08 | 0.29 | 1.12  | 0.424214 | 0.576014 | 0.714453 | 0.746933 |
| MmuSTS.4481.1.S1_at   | MmuSTS.4481.1 | 12.11 | 12.08 | 0.06 | 0.1  | 1.02  | 0.972453 | 0.153442 | 0.989473 | 0.42827  |
| MmuSTS.4482.1.S1_at   | MmuSTS.4482.1 | 6.76  | 6.97  | 0.4  | 0.52 | -1.16 | 0.612403 | 0.791418 | 0.822158 | 0.879492 |
| MmuSTS.4483.1.S1_s_at | MmuSTS.4483.1 | 4.46  | 4.52  | 0.03 | 0.04 | -1.04 | 0.074337 | 0.057    | 0.419963 | 0.284868 |
| MmuSTS.4484.1.S1_at   | MmuSTS.4484.1 | 8.59  | 9.82  | 0.12 | 0.28 | -2.34 | 0.002959 | 0.001545 | 0.170703 | 0.05949  |
| MmuSTS.4485.1.S1_at   | MmuSTS.4485.1 | 3.79  | 3.73  | 0.09 | 0.04 | 1.04  | 0.65182  | 0.247276 | 0.84335  | 0.516473 |
| MmuSTS.4486.1.S1_at   | MmuSTS.4486.1 | 4.7   | 4.62  | 0.06 | 0.23 | 1.06  | 0.921033 | 0.276309 | 0.969195 | 0.540303 |
| MmuSTS.4487.1.S1_at   | MmuSTS.4487.1 | 10.2  | 10.58 | 0.32 | 0.2  | -1.3  | 0.404087 | 0.5622   | 0.702538 | 0.737871 |
| MmuSTS.4488.1.S1_at   | MmuSTS.4488.1 | 5.98  | 5.99  | 0.15 | 0.38 | -1.01 | 0.814941 | 0.746533 | 0.924789 | 0.852872 |
| MmuSTS.4489.1.S1_at   | MmuSTS.4489.1 | 5.99  | 5.73  | 0.17 | 0.02 | 1.2   | 0.045249 | 0.024644 | 0.360474 | 0.196442 |
| MmuSTS.449.1.S1_at    | MmuSTS.449.1  | 7.25  | 7.37  | 0.09 | 0.32 | -1.09 | 0.573051 | 0.256504 | 0.801055 | 0.524275 |
| MmuSTS.4490.1.S1_at   | MmuSTS.4490.1 | 5.21  | 5.14  | 0.16 | 0.14 | 1.05  | 0.647217 | 0.601923 | 0.841246 | 0.763122 |
| MmuSTS.4491.1.S1_at   | MmuSTS.4491.1 | 4.07  | 4     | 0.63 | 0.4  | 1.05  | 0.477726 | 0.668384 | 0.746913 | 0.805938 |
| MmuSTS.4492.1.S1_at   | MmuSTS.4492.1 | 6.09  | 5.42  | 0.28 | 0.49 | 1.59  | 0.075382 | 0.074295 | 0.422289 | 0.318046 |
| MmuSTS.4493.1.S1_at   | MmuSTS.4493.1 | 12.06 | 11.98 | 0.04 | 0.22 | 1.06  | 0.566513 | 0.425657 | 0.797591 | 0.648    |
| MmuSTS.4494.1.S1_at   | MmuSTS.4494.1 | 6.14  | 6.28  | 0.05 | 0.19 | -1.1  | 0.091146 | 0.0635   | 0.447111 | 0.298444 |
| MmuSTS.4495.1.S1_at   | MmuSTS.4495.1 | 5.42  | 4.3   | 0.96 | 0.22 | 2.17  | 0.085068 | 0.109227 | 0.438105 | 0.37308  |

|                     |               |       |       |      |      |        |          |          |          |          |
|---------------------|---------------|-------|-------|------|------|--------|----------|----------|----------|----------|
| MmuSTS.4496.1.S1_at | MmuSTS.4496.1 | 7.13  | 6.07  | 0.3  | 0.55 | 2.08   | 0.071941 | 0.234679 | 0.416008 | 0.505897 |
| MmuSTS.4497.1.S1_at | MmuSTS.4497.1 | 3.15  | 3.14  | 0.17 | 0.12 | 1.01   | 0.96485  | 0.766118 | 0.986477 | 0.86411  |
| MmuSTS.4498.1.S1_at | MmuSTS.4498.1 | 7.49  | 8.19  | 0.15 | 0.58 | -1.62  | 0.093662 | 0.097347 | 0.450966 | 0.355066 |
| MmuSTS.4499.1.S1_at | MmuSTS.4499.1 | 9.38  | 8.84  | 0.19 | 0.3  | 1.45   | 0.047965 | 0.011894 | 0.367582 | 0.141204 |
| MmuSTS.45.1.S1_at   | MmuSTS.45.1   | 8.59  | 8.37  | 0.08 | 0.29 | 1.17   | 0.27505  | 0.156205 | 0.617642 | 0.43161  |
| MmuSTS.450.1.S1_at  | MmuSTS.450.1  | 10.05 | 9.49  | 0.11 | 0.53 | 1.47   | 0.140985 | 0.127171 | 0.508604 | 0.397922 |
| MmuSTS.4500.1.S1_at | MmuSTS.4500.1 | 9.52  | 8.5   | 0.45 | 0.64 | 2.02   | 0.223665 | 0.290139 | 0.582123 | 0.551134 |
| MmuSTS.4501.1.S1_at | MmuSTS.4501.1 | 8.24  | 8.61  | 0.11 | 0.22 | -1.28  | 0.039968 | 0.062416 | 0.348438 | 0.296669 |
| MmuSTS.4502.1.S1_at | MmuSTS.4502.1 | 9.18  | 9.02  | 0.31 | 0.38 | 1.12   | 0.217489 | 0.223465 | 0.577099 | 0.49626  |
| MmuSTS.4503.1.S1_at | MmuSTS.4503.1 | 9.46  | 9.62  | 0.17 | 0.3  | -1.11  | 0.22232  | 0.351591 | 0.580835 | 0.595109 |
| MmuSTS.4504.1.S1_at | MmuSTS.4504.1 | 9.32  | 9.09  | 0.13 | 0.11 | 1.17   | 0.135551 | 0.318807 | 0.502421 | 0.571379 |
| MmuSTS.4505.1.S1_at | MmuSTS.4505.1 | 10.36 | 10.19 | 0.08 | 0.04 | 1.13   | 0.054439 | 0.060895 | 0.381851 | 0.293504 |
| MmuSTS.4506.1.S1_at | MmuSTS.4506.1 | 10.92 | 10.64 | 0.37 | 0.25 | 1.21   | 0.167674 | 0.113823 | 0.531986 | 0.380062 |
| MmuSTS.4507.1.S1_at | MmuSTS.4507.1 | 8.99  | 10.27 | 0.1  | 0.25 | -2.44  | 0.001344 | 0.000118 | 0.146228 | 0.028664 |
| MmuSTS.4508.1.S1_at | MmuSTS.4508.1 | 12.55 | 11.63 | 0.41 | 0.24 | 1.89   | 0.069383 | 0.040777 | 0.412035 | 0.246842 |
| MmuSTS.4509.1.S1_at | MmuSTS.4509.1 | 4.19  | 4.15  | 0.13 | 0.13 | 1.03   | 0.367168 | 0.459268 | 0.6793   | 0.671678 |
| MmuSTS.451.1.S1_at  | MmuSTS.451.1  | 9.02  | 9.53  | 0.09 | 0.06 | -1.43  | 0.00143  | 0.002214 | 0.147916 | 0.069424 |
| MmuSTS.4510.1.S1_at | MmuSTS.4510.1 | 5.76  | 5.85  | 0.09 | 0.09 | -1.07  | 0.232702 | 0.066343 | 0.587814 | 0.303207 |
| MmuSTS.4511.1.S1_at | MmuSTS.4511.1 | 7.86  | 8.01  | 0.35 | 0.56 | -1.11  | 0.156444 | 0.156941 | 0.521176 | 0.432372 |
| MmuSTS.4512.1.S1_at | MmuSTS.4512.1 | 4.68  | 4.49  | 0    | 0.16 | 1.14   | 0.340492 | 0.192567 | 0.661961 | 0.46807  |
| MmuSTS.4513.1.S1_at | MmuSTS.4513.1 | 11.31 | 10.03 | 0.32 | 0.36 | 2.43   | 0.031858 | 0.02148  | 0.32312  | 0.183627 |
| MmuSTS.4514.1.S1_at | MmuSTS.4514.1 | 7.8   | 7.64  | 0.14 | 0.62 | 1.12   | 0.504514 | 0.252301 | 0.76127  | 0.52096  |
| MmuSTS.4515.1.S1_at | MmuSTS.4515.1 | 12.15 | 12.56 | 0.32 | 0.33 | -1.33  | 0.186589 | 0.15827  | 0.550106 | 0.43403  |
| MmuSTS.4516.1.S1_at | MmuSTS.4516.1 | 10.01 | 9.41  | 0.07 | 0.23 | 1.52   | 0.012119 | 0.006403 | 0.240229 | 0.108767 |
| MmuSTS.4517.1.S1_at | MmuSTS.4517.1 | 8.66  | 8.35  | 0.21 | 0.08 | 1.25   | 0.028744 | 0.025332 | 0.312166 | 0.199522 |
| MmuSTS.4518.1.S1_at | MmuSTS.4518.1 | 6.76  | 6.63  | 0.28 | 0.57 | 1.09   | 0.378334 | 0.534631 | 0.686434 | 0.720477 |
| MmuSTS.4519.1.S1_at | MmuSTS.4519.1 | 13.11 | 12.98 | 0.18 | 0.41 | 1.1    | 0.481517 | 0.378809 | 0.749268 | 0.615795 |
| MmuSTS.452.1.S1_at  | MmuSTS.452.1  | 4.2   | 4.33  | 0.16 | 0.13 | -1.09  | 0.222223 | 0.265956 | 0.580714 | 0.531796 |
| MmuSTS.4520.1.S1_at | MmuSTS.4520.1 | 8.88  | 7.79  | 0.43 | 0.48 | 2.13   | 0.054398 | 0.00477  | 0.381851 | 0.096363 |
| MmuSTS.4521.1.S1_at | MmuSTS.4521.1 | 4.54  | 4.86  | 0.09 | 0.21 | -1.24  | 0.214357 | 0.324825 | 0.574854 | 0.575369 |
| MmuSTS.4522.1.S1_at | MmuSTS.4522.1 | 7.86  | 7.92  | 0.13 | 0.4  | -1.05  | 0.379692 | 0.194489 | 0.687063 | 0.46959  |
| MmuSTS.4523.1.S1_at | MmuSTS.4523.1 | 6.71  | 6.36  | 0.53 | 0.08 | 1.27   | 0.274994 | 0.268624 | 0.617642 | 0.534138 |
| MmuSTS.4524.1.S1_at | MmuSTS.4524.1 | 7.06  | 6.67  | 1.05 | 1.21 | 1.31   | 0.678058 | 0.56933  | 0.855759 | 0.742375 |
| MmuSTS.4525.1.S1_at | MmuSTS.4525.1 | 5.76  | 5.82  | 0.1  | 0.16 | -1.05  | 0.949988 | 0.797947 | 0.981093 | 0.883664 |
| MmuSTS.4526.1.S1_at | MmuSTS.4526.1 | 6.58  | 10.4  | 1.17 | 2.59 | -14.08 | 0.27026  | 0.247005 | 0.614663 | 0.516238 |
| MmuSTS.4527.1.S1_at | MmuSTS.4527.1 | 7.75  | 7.61  | 0.18 | 0.3  | 1.11   | 0.732254 | 0.898869 | 0.884299 | 0.942457 |
| MmuSTS.4528.1.S1_at | MmuSTS.4528.1 | 6.73  | 7.65  | 0.47 | 0.77 | -1.89  | 0.067405 | 0.066195 | 0.407664 | 0.302797 |
| MmuSTS.4529.1.S1_at | MmuSTS.4529.1 | 3.25  | 3.15  | 0.28 | 0.31 | 1.07   | 0.408867 | 0.456699 | 0.705637 | 0.670408 |
| MmuSTS.453.1.S1_at  | MmuSTS.453.1  | 9.94  | 10.53 | 0.17 | 0.51 | -1.5   | 0.161482 | 0.098635 | 0.526444 | 0.356743 |
| MmuSTS.4530.1.S1_at | MmuSTS.4530.1 | 11.98 | 11.8  | 0.06 | 0.3  | 1.13   | 0.364947 | 0.441853 | 0.677796 | 0.659939 |
| MmuSTS.4531.1.S1_at | MmuSTS.4531.1 | 10.01 | 9.24  | 0.08 | 0.38 | 1.7    | 0.073509 | 0.048861 | 0.418798 | 0.265858 |

|                       |               |       |       |      |      |       |          |          |          |          |
|-----------------------|---------------|-------|-------|------|------|-------|----------|----------|----------|----------|
| MmuSTS.4532.1.S1_at   | MmuSTS.4532.1 | 10.51 | 10.81 | 0.15 | 0.11 | -1.23 | 0.0553   | 0.052853 | 0.383689 | 0.275521 |
| MmuSTS.4533.1.S1_at   | MmuSTS.4533.1 | 10.34 | 8.77  | 0.24 | 0.13 | 2.95  | 0.000604 | 0.000091 | 0.136818 | 0.027225 |
| MmuSTS.4534.1.S1_at   | MmuSTS.4534.1 | 5.81  | 8.62  | 1.74 | 3    | -7.03 | 0.485497 | 0.245582 | 0.750946 | 0.515348 |
| MmuSTS.4535.1.S1_at   | MmuSTS.4535.1 | 7.56  | 7.18  | 0.08 | 0.6  | 1.31  | 0.091369 | 0.017903 | 0.447175 | 0.168922 |
| MmuSTS.4536.1.S1_at   | MmuSTS.4536.1 | 7.78  | 7.73  | 0.25 | 0.37 | 1.04  | 0.611478 | 0.806609 | 0.821704 | 0.888732 |
| MmuSTS.4537.1.S1_at   | MmuSTS.4537.1 | 6.58  | 8.07  | 0.95 | 1.63 | -2.81 | 0.267936 | 0.138835 | 0.612874 | 0.412015 |
| MmuSTS.4538.1.S1_at   | MmuSTS.4538.1 | 12.45 | 11.84 | 0.67 | 0.35 | 1.52  | 0.969701 | 0.998055 | 0.988417 | 0.999009 |
| MmuSTS.4539.1.S1_s_at | MmuSTS.4539.1 | 3.3   | 3.39  | 0.18 | 0.06 | -1.06 | 0.896523 | 0.918431 | 0.958765 | 0.95425  |
| MmuSTS.454.1.S1_at    | MmuSTS.454.1  | 8.72  | 10    | 0.28 | 0.69 | -2.42 | 0.055508 | 0.039614 | 0.384086 | 0.244052 |
| MmuSTS.4540.1.S1_at   | MmuSTS.4540.1 | 8.29  | 8.87  | 0.54 | 0.41 | -1.49 | 0.705039 | 0.259299 | 0.869884 | 0.526418 |
| MmuSTS.4541.1.S1_at   | MmuSTS.4541.1 | 3.03  | 3.16  | 0.09 | 0.07 | -1.1  | 0.068859 | 0.049523 | 0.410654 | 0.267481 |
| MmuSTS.4542.1.S1_at   | MmuSTS.4542.1 | 9.98  | 10.1  | 0.78 | 0.54 | -1.08 | 0.482561 | 0.658841 | 0.749408 | 0.800473 |
| MmuSTS.4543.1.S1_at   | MmuSTS.4543.1 | 6.19  | 5.55  | 0.73 | 1.51 | 1.56  | 0.625127 | 0.276664 | 0.82869  | 0.540596 |
| MmuSTS.4544.1.S1_at   | MmuSTS.4544.1 | 5.84  | 5.95  | 0.15 | 0.24 | -1.08 | 0.802653 | 0.167222 | 0.918666 | 0.443684 |
| MmuSTS.4545.1.S1_at   | MmuSTS.4545.1 | 4.24  | 4.23  | 0.09 | 0.07 | 1.01  | 0.771957 | 0.931823 | 0.903991 | 0.961265 |
| MmuSTS.4546.1.S1_at   | MmuSTS.4546.1 | 11.4  | 10.74 | 0.17 | 0.2  | 1.59  | 0.009154 | 0.002167 | 0.222384 | 0.068824 |
| MmuSTS.4547.1.S1_at   | MmuSTS.4547.1 | 3.46  | 4.13  | 0.05 | 0.6  | -1.59 | 0.113527 | 0.124693 | 0.476916 | 0.39513  |
| MmuSTS.4548.1.S1_at   | MmuSTS.4548.1 | 5.69  | 6.66  | 0.06 | 0.84 | -1.95 | 0.118521 | 0.112643 | 0.48294  | 0.378183 |
| MmuSTS.4549.1.S1_at   | MmuSTS.4549.1 | 6.09  | 6.06  | 0.53 | 0.3  | 1.02  | 0.855142 | 0.963186 | 0.941454 | 0.979435 |
| MmuSTS.455.1.S1_s_at  | MmuSTS.455.1  | 3.77  | 3.82  | 0.07 | 0.03 | -1.04 | 0.136068 | 0.15825  | 0.502918 | 0.43403  |
| MmuSTS.4550.1.S1_at   | MmuSTS.4550.1 | 4.02  | 4.1   | 0.06 | 0.1  | -1.06 | 0.099813 | 0.095168 | 0.459718 | 0.35218  |
| MmuSTS.4551.1.S1_at   | MmuSTS.4551.1 | 6.42  | 8.96  | 1    | 1.03 | -5.82 | 0.034823 | 0.030619 | 0.333964 | 0.216919 |
| MmuSTS.4552.1.S1_at   | MmuSTS.4552.1 | 6.2   | 6.52  | 0.11 | 0.11 | -1.24 | 0.091868 | 0.090816 | 0.448335 | 0.345355 |
| MmuSTS.4553.1.S1_at   | MmuSTS.4553.1 | 10.81 | 11.52 | 0.38 | 1.06 | -1.64 | 0.2916   | 0.228032 | 0.628893 | 0.500228 |
| MmuSTS.4554.1.S1_at   | MmuSTS.4554.1 | 10.7  | 10.18 | 0.06 | 0.15 | 1.43  | 0.005052 | 0.002443 | 0.188092 | 0.073201 |
| MmuSTS.4555.1.S1_at   | MmuSTS.4555.1 | 4.2   | 3.61  | 1.14 | 0.53 | 1.5   | 0.34587  | 0.757174 | 0.665347 | 0.858648 |
| MmuSTS.4556.1.S1_at   | MmuSTS.4556.1 | 6.09  | 6.27  | 0.09 | 0.07 | -1.13 | 0.034508 | 0.041995 | 0.333289 | 0.249463 |
| MmuSTS.4557.1.S1_at   | MmuSTS.4557.1 | 5.24  | 5.74  | 0.23 | 0.19 | -1.42 | 0.213793 | 0.284967 | 0.573977 | 0.547071 |
| MmuSTS.4558.1.S1_at   | MmuSTS.4558.1 | 7.05  | 6.62  | 0.3  | 0.01 | 1.34  | 0.21878  | 0.164998 | 0.578251 | 0.44123  |
| MmuSTS.4559.1.S1_at   | MmuSTS.4559.1 | 8.52  | 9.12  | 0.32 | 0.26 | -1.51 | 0.052873 | 0.042212 | 0.378593 | 0.24989  |
| MmuSTS.456.1.S1_at    | MmuSTS.456.1  | 8.82  | 8.87  | 0.23 | 0.02 | -1.03 | 0.61926  | 0.044246 | 0.825435 | 0.25493  |
| MmuSTS.4560.1.S1_at   | MmuSTS.4560.1 | 5.6   | 5.66  | 0.07 | 0.19 | -1.04 | 0.689896 | 0.584103 | 0.861835 | 0.752201 |
| MmuSTS.4561.1.S1_at   | MmuSTS.4561.1 | 5.51  | 5.35  | 0.05 | 0.16 | 1.12  | 0.538872 | 0.126489 | 0.780847 | 0.397038 |
| MmuSTS.4562.1.S1_at   | MmuSTS.4562.1 | 11.07 | 10.46 | 0.04 | 1.07 | 1.53  | 0.112043 | 0.130939 | 0.474497 | 0.403037 |
| MmuSTS.4563.1.S1_at   | MmuSTS.4563.1 | 3.73  | 3.79  | 0.08 | 0.07 | -1.04 | 0.155785 | 0.476344 | 0.520384 | 0.682695 |
| MmuSTS.4564.1.S1_at   | MmuSTS.4564.1 | 9.33  | 9.71  | 0.33 | 0.33 | -1.3  | 0.305479 | 0.369744 | 0.639223 | 0.609048 |
| MmuSTS.4565.1.S1_at   | MmuSTS.4565.1 | 7.93  | 8.34  | 0.97 | 1.67 | -1.33 | 0.535971 | 0.659852 | 0.779351 | 0.800897 |
| MmuSTS.4566.1.S1_at   | MmuSTS.4566.1 | 4.5   | 4.25  | 0.14 | 0.22 | 1.2   | 0.584312 | 0.770617 | 0.806956 | 0.866798 |
| MmuSTS.4567.1.S1_at   | MmuSTS.4567.1 | 7.98  | 12.55 | 2.11 | 2.89 | -23.7 | 0.451759 | 0.26025  | 0.73168  | 0.526807 |
| MmuSTS.4568.1.S1_at   | MmuSTS.4568.1 | 12.21 | 12.19 | 0.05 | 0.03 | 1.02  | 0.8185   | 0.965538 | 0.926289 | 0.980739 |
| MmuSTS.4569.1.S1_at   | MmuSTS.4569.1 | 11.04 | 11.02 | 0.31 | 0.2  | 1.01  | 0.829513 | 0.457699 | 0.930814 | 0.670897 |



|                       |               |       |       |      |      |       |          |          |          |          |
|-----------------------|---------------|-------|-------|------|------|-------|----------|----------|----------|----------|
| MmuSTS.457.1.S1_at    | MmuSTS.457.1  | 6.09  | 5.76  | 0.49 | 0.21 | 1.26  | 0.274551 | 0.179613 | 0.617491 | 0.456042 |
| MmuSTS.457.1.S1_s_at  | MmuSTS.457.1  | 5.41  | 5.39  | 0.23 | 0.2  | 1.02  | 0.864443 | 0.851475 | 0.945537 | 0.91548  |
| MmuSTS.4570.1.S1_at   | MmuSTS.4570.1 | 5.32  | 5.22  | 0.03 | 0.11 | 1.07  | 0.574391 | 0.686503 | 0.801702 | 0.817053 |
| MmuSTS.4571.1.S1_s_at | MmuSTS.4571.1 | 3.81  | 3.8   | 0.12 | 0.2  | 1.01  | 0.88448  | 0.547268 | 0.953771 | 0.728346 |
| MmuSTS.4572.1.S1_at   | MmuSTS.4572.1 | 9.61  | 8.82  | 0.16 | 0.41 | 1.72  | 0.027945 | 0.006904 | 0.309162 | 0.11226  |
| MmuSTS.4573.1.S1_at   | MmuSTS.4573.1 | 6.3   | 7.82  | 0.27 | 1    | -2.86 | 0.048636 | 0.042379 | 0.3691   | 0.250533 |
| MmuSTS.4574.1.S1_at   | MmuSTS.4574.1 | 9.14  | 9.06  | 0.24 | 0.38 | 1.06  | 0.377947 | 0.314437 | 0.686226 | 0.568319 |
| MmuSTS.4575.1.S1_at   | MmuSTS.4575.1 | 11.25 | 12.11 | 0.24 | 0.19 | -1.81 | 0.007514 | 0.002731 | 0.209134 | 0.077041 |
| MmuSTS.4576.1.S1_at   | MmuSTS.4576.1 | 6.33  | 6.56  | 0.26 | 0.1  | -1.17 | 0.242623 | 0.311174 | 0.594448 | 0.566215 |
| MmuSTS.4577.1.S1_at   | MmuSTS.4577.1 | 11.87 | 12.03 | 0.17 | 0.26 | -1.12 | 0.305895 | 0.249857 | 0.639227 | 0.518876 |
| MmuSTS.4578.1.S1_at   | MmuSTS.4578.1 | 12.15 | 12.08 | 0.05 | 0.2  | 1.05  | 0.337143 | 0.476899 | 0.659871 | 0.683011 |
| MmuSTS.4579.1.S1_at   | MmuSTS.4579.1 | 10.47 | 11.36 | 0.28 | 0.21 | -1.86 | 0.013857 | 0.007354 | 0.249758 | 0.115197 |
| MmuSTS.458.1.S1_s_at  | MmuSTS.458.1  | 3.01  | 3.13  | 0.15 | 0.04 | -1.09 | 0.740018 | 0.663553 | 0.888408 | 0.803017 |
| MmuSTS.4580.1.S1_at   | MmuSTS.4580.1 | 4.27  | 4.22  | 1.83 | 0.33 | 1.03  | 0.375824 | 0.345705 | 0.684803 | 0.590854 |
| MmuSTS.4581.1.S1_at   | MmuSTS.4581.1 | 11.68 | 8.95  | 0.44 | 1.57 | 6.64  | 0.169429 | 0.205004 | 0.533686 | 0.479296 |
| MmuSTS.4582.1.S1_at   | MmuSTS.4582.1 | 5.53  | 5.54  | 0.06 | 0.17 | -1.01 | 0.549084 | 0.454292 | 0.787104 | 0.66849  |
| MmuSTS.4583.1.S1_at   | MmuSTS.4583.1 | 11.26 | 10.34 | 0.44 | 0.33 | 1.89  | 0.051899 | 0.081368 | 0.376668 | 0.329516 |
| MmuSTS.4584.1.S1_at   | MmuSTS.4584.1 | 6.74  | 6.36  | 0.03 | 0.17 | 1.3   | 0.044611 | 0.18915  | 0.358796 | 0.464997 |
| MmuSTS.4585.1.S1_at   | MmuSTS.4585.1 | 5.2   | 4.81  | 0.44 | 0.38 | 1.31  | 0.32179  | 0.200297 | 0.650384 | 0.474689 |
| MmuSTS.4586.1.S1_at   | MmuSTS.4586.1 | 6.24  | 6.35  | 0.26 | 0.49 | -1.08 | 0.456193 | 0.176431 | 0.734359 | 0.45282  |
| MmuSTS.4587.1.S1_at   | MmuSTS.4587.1 | 6.71  | 7.2   | 0.39 | 0.48 | -1.4  | 0.176376 | 0.201062 | 0.539984 | 0.475509 |
| MmuSTS.4588.1.S1_at   | MmuSTS.4588.1 | 3.94  | 4.11  | 0.08 | 0.14 | -1.13 | 0.154187 | 0.03605  | 0.518748 | 0.234272 |
| MmuSTS.4589.1.S1_at   | MmuSTS.4589.1 | 9.82  | 9.12  | 0.66 | 1.01 | 1.63  | 0.132639 | 0.144799 | 0.49874  | 0.418661 |
| MmuSTS.459.1.S1_at    | MmuSTS.459.1  | 7.58  | 7.93  | 0.29 | 0.34 | -1.27 | 0.221754 | 0.130337 | 0.580435 | 0.402172 |
| MmuSTS.4590.1.S1_at   | MmuSTS.4590.1 | 8.06  | 8.68  | 0.89 | 1.56 | -1.54 | 0.803742 | 0.194699 | 0.919275 | 0.469765 |
| MmuSTS.4591.1.S1_at   | MmuSTS.4591.1 | 9.4   | 9.13  | 0.13 | 0.14 | 1.2   | 0.070252 | 0.095375 | 0.413849 | 0.352414 |
| MmuSTS.4592.1.S1_at   | MmuSTS.4592.1 | 4.33  | 4.42  | 0.38 | 0.13 | -1.06 | 0.741941 | 0.517489 | 0.889525 | 0.709615 |
| MmuSTS.4593.1.S1_at   | MmuSTS.4593.1 | 9.55  | 9.25  | 0.38 | 0.21 | 1.23  | 0.482474 | 0.418984 | 0.749408 | 0.643191 |
| MmuSTS.4594.1.S1_at   | MmuSTS.4594.1 | 11.69 | 11.11 | 0.17 | 0.32 | 1.49  | 0.219565 | 0.055508 | 0.579016 | 0.281404 |
| MmuSTS.4595.1.S1_at   | MmuSTS.4595.1 | 8.03  | 9.99  | 0.65 | 1.19 | -3.88 | 0.066461 | 0.032043 | 0.406564 | 0.221577 |
| MmuSTS.4596.1.S1_at   | MmuSTS.4596.1 | 6.02  | 5.17  | 0.33 | 0.62 | 1.8   | 0.107202 | 0.117167 | 0.467913 | 0.384627 |
| MmuSTS.4597.1.S1_at   | MmuSTS.4597.1 | 7.1   | 7.24  | 0.14 | 0.31 | -1.1  | 0.443489 | 0.525153 | 0.726153 | 0.714766 |
| MmuSTS.4598.1.S1_at   | MmuSTS.4598.1 | 11.61 | 11.46 | 0.36 | 0.42 | 1.12  | 0.816329 | 0.220791 | 0.925443 | 0.494262 |
| MmuSTS.4599.1.S1_at   | MmuSTS.4599.1 | 10.24 | 10    | 0.14 | 0.11 | 1.18  | 0.090879 | 0.080935 | 0.446466 | 0.328973 |
| MmuSTS.46.1.S1_at     | MmuSTS.46.1   | 10.37 | 9.67  | 0.08 | 0.21 | 1.62  | 0.003494 | 0.001574 | 0.178634 | 0.060185 |
| MmuSTS.460.1.S1_s_at  | MmuSTS.460.1  | 3.32  | 3.6   | 0.07 | 0.04 | -1.21 | 0.003325 | 0.00112  | 0.177442 | 0.052924 |
| MmuSTS.4600.1.S1_at   | MmuSTS.4600.1 | 9.31  | 9.37  | 0.28 | 0.15 | -1.04 | 0.920995 | 0.849471 | 0.969194 | 0.914534 |
| MmuSTS.4601.1.S1_at   | MmuSTS.4601.1 | 3.72  | 3.99  | 0.07 | 0.18 | -1.21 | 0.30596  | 0.448099 | 0.639227 | 0.664016 |
| MmuSTS.4602.1.S1_at   | MmuSTS.4602.1 | 5.52  | 6     | 0.46 | 0.49 | -1.4  | 0.965459 | 0.641306 | 0.986828 | 0.789506 |
| MmuSTS.4603.1.S1_x_at | MmuSTS.4603.1 | 5.83  | 8.2   | 1.15 | 2.43 | -5.16 | 0.273584 | 0.366529 | 0.617155 | 0.606274 |
| MmuSTS.4604.1.S1_at   | MmuSTS.4604.1 | 5.24  | 7.29  | 0.57 | 1.63 | -4.13 | 0.109272 | 0.110665 | 0.470811 | 0.374854 |

|                       |               |       |       |      |      |       |          |          |          |          |
|-----------------------|---------------|-------|-------|------|------|-------|----------|----------|----------|----------|
| MmuSTS.4605.1.S1_at   | MmuSTS.4605.1 | 7.32  | 7.47  | 0.23 | 0.1  | -1.11 | 0.338853 | 0.189545 | 0.660988 | 0.465281 |
| MmuSTS.4606.1.S1_at   | MmuSTS.4606.1 | 7.06  | 9.04  | 0.49 | 0.62 | -3.95 | 0.007604 | 0.003579 | 0.210366 | 0.085582 |
| MmuSTS.4607.1.S1_at   | MmuSTS.4607.1 | 6.01  | 6.01  | 0.23 | 0.11 | -1    | 0.695639 | 0.816526 | 0.864996 | 0.894202 |
| MmuSTS.4608.1.S1_at   | MmuSTS.4608.1 | 5.1   | 5.54  | 0.01 | 0.36 | -1.36 | 0.097824 | 0.074394 | 0.457014 | 0.318058 |
| MmuSTS.4609.1.S1_at   | MmuSTS.4609.1 | 3.95  | 4.25  | 0.43 | 1.12 | -1.23 | 0.427075 | 0.592295 | 0.716089 | 0.757674 |
| MmuSTS.461.1.S1_s_at  | MmuSTS.461.1  | 4.26  | 4.34  | 0.15 | 0.12 | -1.06 | 0.770062 | 0.457612 | 0.90333  | 0.670889 |
| MmuSTS.4610.1.S1_at   | MmuSTS.4610.1 | 9.8   | 9.9   | 0.12 | 0.3  | -1.07 | 0.212507 | 0.27117  | 0.572821 | 0.536263 |
| MmuSTS.4611.1.S1_at   | MmuSTS.4611.1 | 7.25  | 7.44  | 0.17 | 0.09 | -1.14 | 0.269148 | 0.351534 | 0.613808 | 0.595094 |
| MmuSTS.4612.1.S1_at   | MmuSTS.4612.1 | 8.73  | 8.13  | 0.38 | 0.49 | 1.51  | 0.171518 | 0.137388 | 0.535166 | 0.410318 |
| MmuSTS.4613.1.S1_at   | MmuSTS.4613.1 | 10.92 | 10.63 | 0.23 | 0.58 | 1.23  | 0.15428  | 0.180941 | 0.518796 | 0.457418 |
| MmuSTS.4614.1.S1_at   | MmuSTS.4614.1 | 10.03 | 9.49  | 0.07 | 0.29 | 1.46  | 0.095769 | 0.073375 | 0.45362  | 0.316469 |
| MmuSTS.4615.1.S1_at   | MmuSTS.4615.1 | 13.2  | 12.57 | 0.17 | 0.19 | 1.56  | 0.020449 | 0.010682 | 0.278215 | 0.134971 |
| MmuSTS.4616.1.S1_at   | MmuSTS.4616.1 | 11.59 | 11.21 | 0.19 | 0.25 | 1.3   | 0.094409 | 0.078378 | 0.451998 | 0.325077 |
| MmuSTS.4617.1.S1_at   | MmuSTS.4617.1 | 11.37 | 11.33 | 0.37 | 0.29 | 1.03  | 0.196493 | 0.265518 | 0.559808 | 0.531409 |
| MmuSTS.4618.1.S1_at   | MmuSTS.4618.1 | 3.19  | 3.18  | 0.01 | 0.11 | 1.01  | 0.515657 | 0.695493 | 0.767629 | 0.823012 |
| MmuSTS.4619.1.S1_at   | MmuSTS.4619.1 | 6.62  | 5.45  | 0.72 | 1.3  | 2.24  | 0.684837 | 0.543404 | 0.858795 | 0.726105 |
| MmuSTS.462.1.S1_at    | MmuSTS.462.1  | 3.47  | 3.43  | 0.07 | 0.08 | 1.02  | 0.52282  | 0.068051 | 0.772248 | 0.307142 |
| MmuSTS.4620.1.S1_at   | MmuSTS.4620.1 | 9.96  | 9.45  | 0.18 | 0.21 | 1.42  | 0.081195 | 0.072601 | 0.431848 | 0.315526 |
| MmuSTS.4621.1.S1_at   | MmuSTS.4621.1 | 11.89 | 11.86 | 0.07 | 0.18 | 1.02  | 0.549468 | 0.220186 | 0.787327 | 0.493655 |
| MmuSTS.4622.1.S1_at   | MmuSTS.4622.1 | 9.47  | 8.68  | 0.31 | 0.24 | 1.73  | 0.020398 | 0.008275 | 0.27792  | 0.12078  |
| MmuSTS.4623.1.S1_at   | MmuSTS.4623.1 | 6.91  | 6.38  | 0.34 | 1    | 1.44  | 0.434957 | 0.248315 | 0.72094  | 0.5176   |
| MmuSTS.4624.1.S1_at   | MmuSTS.4624.1 | 9.35  | 9.04  | 0.15 | 0.48 | 1.24  | 0.907659 | 0.38091  | 0.963338 | 0.617426 |
| MmuSTS.4625.1.S1_at   | MmuSTS.4625.1 | 3.67  | 3.69  | 0.06 | 0.2  | -1.01 | 0.949919 | 0.940589 | 0.981078 | 0.966326 |
| MmuSTS.4626.1.S1_at   | MmuSTS.4626.1 | 7.63  | 8.23  | 0.27 | 0.35 | -1.52 | 0.08332  | 0.101629 | 0.435702 | 0.361529 |
| MmuSTS.4627.1.S1_at   | MmuSTS.4627.1 | 9.74  | 9.88  | 0.09 | 0.43 | -1.1  | 0.612825 | 0.818134 | 0.822443 | 0.895106 |
| MmuSTS.4628.1.S1_at   | MmuSTS.4628.1 | 11.49 | 11.54 | 0.07 | 0.31 | -1.03 | 0.618652 | 0.686366 | 0.825259 | 0.816948 |
| MmuSTS.4629.1.S1_at   | MmuSTS.4629.1 | 5.71  | 5.71  | 0.09 | 0.05 | -1    | 0.83691  | 0.977649 | 0.934072 | 0.987833 |
| MmuSTS.463.1.S1_s_at  | MmuSTS.463.1  | 3.74  | 3.85  | 0.16 | 0.11 | -1.08 | 0.261185 | 0.476245 | 0.607754 | 0.682616 |
| MmuSTS.4630.1.S1_at   | MmuSTS.4630.1 | 8.55  | 9.74  | 0.28 | 0.36 | -2.28 | 0.01797  | 0.004127 | 0.268362 | 0.090887 |
| MmuSTS.4631.1.S1_at   | MmuSTS.4631.1 | 11.17 | 10.96 | 0.18 | 0.23 | 1.16  | 0.135445 | 0.145457 | 0.502264 | 0.419421 |
| MmuSTS.4632.1.S1_at   | MmuSTS.4632.1 | 5.48  | 5.48  | 0.06 | 0.08 | -1    | 0.927216 | 0.962085 | 0.971987 | 0.978692 |
| MmuSTS.4633.1.S1_at   | MmuSTS.4633.1 | 7.64  | 6.66  | 0.54 | 1.58 | 1.97  | 0.3054   | 0.290266 | 0.639203 | 0.551169 |
| MmuSTS.4634.1.S1_x_at | MmuSTS.4634.1 | 13.86 | 13.86 | 0.19 | 0.26 | 1     | 0.935817 | 0.983234 | 0.975172 | 0.990726 |
| MmuSTS.4635.1.S1_at   | MmuSTS.4635.1 | 8.72  | 9.14  | 0.08 | 0.37 | -1.34 | 0.131029 | 0.141785 | 0.497438 | 0.415331 |
| MmuSTS.4636.1.S1_at   | MmuSTS.4636.1 | 6.09  | 6.21  | 0.16 | 0.15 | -1.09 | 0.293623 | 0.346729 | 0.630735 | 0.591536 |
| MmuSTS.4637.1.S1_at   | MmuSTS.4637.1 | 11.05 | 10.31 | 0.26 | 0.51 | 1.66  | 0.109926 | 0.142149 | 0.471117 | 0.41575  |
| MmuSTS.4638.1.S1_at   | MmuSTS.4638.1 | 6.3   | 6.97  | 0.33 | 0.16 | -1.59 | 0.085534 | 0.026916 | 0.43944  | 0.205227 |
| MmuSTS.4639.1.S1_at   | MmuSTS.4639.1 | 7.99  | 6.55  | 0.51 | 0.47 | 2.73  | 0.049841 | 0.01751  | 0.372242 | 0.167516 |
| MmuSTS.464.1.S1_at    | MmuSTS.464.1  | 3.34  | 3.21  | 0.06 | 0.21 | 1.09  | 0.56059  | 0.305268 | 0.794291 | 0.562255 |
| MmuSTS.4640.1.S1_at   | MmuSTS.4640.1 | 3.37  | 3.49  | 0.34 | 0.13 | -1.09 | 0.739406 | 0.180058 | 0.888141 | 0.456601 |
| MmuSTS.4640.1.S1_s_at | MmuSTS.4640.1 | 4.31  | 4.52  | 0.29 | 0.14 | -1.15 | 0.803688 | 0.276634 | 0.919253 | 0.540596 |

|                       |               |       |       |      |      |       |          |          |          |          |
|-----------------------|---------------|-------|-------|------|------|-------|----------|----------|----------|----------|
| MmuSTS.4641.1.S1_at   | MmuSTS.4641.1 | 5.29  | 5.19  | 0.08 | 0.1  | 1.07  | 0.578662 | 0.280095 | 0.803905 | 0.543369 |
| MmuSTS.4642.1.S1_at   | MmuSTS.4642.1 | 4.78  | 5.59  | 0.04 | 0.71 | -1.75 | 0.121723 | 0.102944 | 0.486508 | 0.363634 |
| MmuSTS.4643.1.S1_at   | MmuSTS.4643.1 | 5.48  | 5.67  | 0.05 | 0.17 | -1.15 | 0.399884 | 0.564773 | 0.699692 | 0.739427 |
| MmuSTS.4644.1.S1_at   | MmuSTS.4644.1 | 6.69  | 7.1   | 0.18 | 0.44 | -1.33 | 0.264355 | 0.088165 | 0.610135 | 0.341721 |
| MmuSTS.4645.1.S1_at   | MmuSTS.4645.1 | 10.25 | 10.28 | 0.11 | 0.31 | -1.02 | 0.894785 | 0.437567 | 0.957917 | 0.656785 |
| MmuSTS.4646.1.S1_at   | MmuSTS.4646.1 | 10.2  | 9.06  | 0.27 | 1.04 | 2.21  | 0.519488 | 0.076992 | 0.770186 | 0.322421 |
| MmuSTS.4647.1.S1_at   | MmuSTS.4647.1 | 3.35  | 3.21  | 0.09 | 0.01 | 1.1   | 0.134226 | 0.072594 | 0.500737 | 0.315519 |
| MmuSTS.4648.1.S1_at   | MmuSTS.4648.1 | 6.13  | 6.14  | 0.14 | 0.22 | -1    | 0.962068 | 0.996923 | 0.985456 | 0.99822  |
| MmuSTS.4649.1.S1_at   | MmuSTS.4649.1 | 4.9   | 5.11  | 0.25 | 0.37 | -1.16 | 0.794236 | 0.38576  | 0.914561 | 0.621079 |
| MmuSTS.465.1.S1_s_at  | MmuSTS.465.1  | 4.39  | 4.33  | 0.04 | 0.07 | 1.04  | 0.234183 | 0.285946 | 0.588621 | 0.547505 |
| MmuSTS.4650.1.S1_at   | MmuSTS.4650.1 | 11.72 | 11.39 | 0.2  | 0.26 | 1.26  | 0.134543 | 0.167911 | 0.5013   | 0.444485 |
| MmuSTS.4651.1.S1_at   | MmuSTS.4651.1 | 4.44  | 4.49  | 0.38 | 0.52 | -1.04 | 0.768999 | 0.692143 | 0.902867 | 0.82091  |
| MmuSTS.4652.1.S1_at   | MmuSTS.4652.1 | 5.32  | 5.4   | 0.14 | 0.16 | -1.06 | 0.29684  | 0.513927 | 0.632758 | 0.707322 |
| MmuSTS.4653.1.S1_at   | MmuSTS.4653.1 | 4.11  | 4.12  | 0.06 | 0.05 | -1.01 | 0.45876  | 0.808992 | 0.735644 | 0.889981 |
| MmuSTS.4654.1.S1_at   | MmuSTS.4654.1 | 3.6   | 3.69  | 0.15 | 0.1  | -1.07 | 0.895174 | 0.945627 | 0.95808  | 0.969098 |
| MmuSTS.4655.1.S1_at   | MmuSTS.4655.1 | 6.68  | 7.02  | 0.35 | 1.12 | -1.27 | 0.482995 | 0.68401  | 0.749773 | 0.81565  |
| MmuSTS.4656.1.S1_at   | MmuSTS.4656.1 | 8.03  | 8.51  | 0.04 | 0.06 | -1.4  | 0.000396 | 0.000127 | 0.12978  | 0.029087 |
| MmuSTS.4657.1.S1_at   | MmuSTS.4657.1 | 5.23  | 5.17  | 0.26 | 0.35 | 1.04  | 0.817152 | 0.5757   | 0.9259   | 0.746728 |
| MmuSTS.4658.1.S1_at   | MmuSTS.4658.1 | 12.99 | 13.37 | 0.03 | 0.32 | -1.29 | 0.360398 | 0.07717  | 0.674449 | 0.322751 |
| MmuSTS.4659.1.S1_at   | MmuSTS.4659.1 | 10.2  | 10.15 | 0.8  | 1.07 | 1.04  | 0.607193 | 0.799642 | 0.819255 | 0.884762 |
| MmuSTS.466.1.S1_at    | MmuSTS.466.1  | 6.67  | 9.63  | 1.31 | 2.4  | -7.76 | 0.310558 | 0.195516 | 0.642594 | 0.470351 |
| MmuSTS.4660.1.S1_at   | MmuSTS.4660.1 | 7.48  | 10.78 | 1.48 | 0.56 | -9.88 | 0.021216 | 0.013019 | 0.282524 | 0.146821 |
| MmuSTS.4661.1.S1_at   | MmuSTS.4661.1 | 6.78  | 8.24  | 1.82 | 1.39 | -2.74 | 0.188776 | 0.041705 | 0.55182  | 0.24887  |
| MmuSTS.4662.1.S1_at   | MmuSTS.4662.1 | 10.44 | 10.02 | 0.84 | 0.48 | 1.34  | 0.472468 | 0.640162 | 0.743753 | 0.788733 |
| MmuSTS.4663.1.S1_at   | MmuSTS.4663.1 | 8.88  | 10.61 | 0.4  | 1.06 | -3.31 | 0.068392 | 0.058197 | 0.410019 | 0.287988 |
| MmuSTS.4664.1.S1_at   | MmuSTS.4664.1 | 12.07 | 12.8  | 0.32 | 0.3  | -1.67 | 0.044254 | 0.022142 | 0.358277 | 0.186249 |
| MmuSTS.4666.1.S1_at   | MmuSTS.4666.1 | 9.6   | 10.09 | 0.6  | 1.12 | -1.4  | 0.323818 | 0.156199 | 0.651789 | 0.43161  |
| MmuSTS.4667.1.S1_at   | MmuSTS.4667.1 | 8.43  | 9.03  | 0.31 | 1.09 | -1.51 | 0.428291 | 0.214025 | 0.716796 | 0.487633 |
| MmuSTS.4668.1.S1_at   | MmuSTS.4668.1 | 7.02  | 7.08  | 0.2  | 0.1  | -1.04 | 0.825531 | 0.227936 | 0.929243 | 0.500211 |
| MmuSTS.4669.1.S1_at   | MmuSTS.4669.1 | 3.84  | 4.12  | 0.14 | 0.24 | -1.21 | 0.10856  | 0.290157 | 0.469989 | 0.551134 |
| MmuSTS.467.1.S1_at    | MmuSTS.467.1  | 12.22 | 11.73 | 0.19 | 0.98 | 1.4   | 0.153531 | 0.158285 | 0.517927 | 0.43403  |
| MmuSTS.4670.1.S1_s_at | MmuSTS.4670.1 | 5.09  | 5.12  | 0.13 | 0.17 | -1.02 | 0.620181 | 0.82     | 0.826026 | 0.896303 |
| MmuSTS.4671.1.S1_at   | MmuSTS.4671.1 | 4.98  | 5.82  | 0.3  | 1.12 | -1.79 | 0.32403  | 0.442501 | 0.651826 | 0.660478 |
| MmuSTS.4672.1.S1_at   | MmuSTS.4672.1 | 5.46  | 6.39  | 0.99 | 1    | -1.91 | 0.297321 | 0.332325 | 0.633199 | 0.580754 |
| MmuSTS.4673.1.S1_at   | MmuSTS.4673.1 | 6.97  | 7.1   | 0.09 | 0.18 | -1.09 | 0.195041 | 0.168139 | 0.558557 | 0.444724 |
| MmuSTS.4674.1.S1_at   | MmuSTS.4674.1 | 11.82 | 11.39 | 0.27 | 0.35 | 1.35  | 0.332572 | 0.434653 | 0.656905 | 0.654756 |
| MmuSTS.4675.1.S1_at   | MmuSTS.4675.1 | 13.47 | 13.55 | 0.09 | 0.14 | -1.06 | 0.411251 | 0.580801 | 0.707075 | 0.749953 |
| MmuSTS.4676.1.S1_at   | MmuSTS.4676.1 | 7.85  | 9.41  | 0.42 | 0.39 | -2.94 | 0.029886 | 0.016316 | 0.315853 | 0.161818 |
| MmuSTS.4677.1.S1_at   | MmuSTS.4677.1 | 7.75  | 8.78  | 0.31 | 0.76 | -2.04 | 0.18093  | 0.220427 | 0.54536  | 0.493818 |
| MmuSTS.4678.1.S1_at   | MmuSTS.4678.1 | 8.42  | 8.4   | 0.05 | 0.85 | 1.01  | 0.974952 | 0.750825 | 0.990211 | 0.855074 |
| MmuSTS.4679.1.S1_s_at | MmuSTS.4679.1 | 3.59  | 3.81  | 0.12 | 0.19 | -1.17 | 0.509399 | 0.703743 | 0.764331 | 0.828214 |

|                       |               |       |       |      |      |       |          |          |          |          |
|-----------------------|---------------|-------|-------|------|------|-------|----------|----------|----------|----------|
| MmuSTS.468.1.S1_at    | MmuSTS.468.1  | 9.6   | 9.41  | 0.08 | 0.25 | 1.14  | 0.11386  | 0.113327 | 0.477183 | 0.379419 |
| MmuSTS.4680.1.S1_at   | MmuSTS.4680.1 | 4.22  | 7     | 0.27 | 0.41 | -6.85 | 0.000361 | 0.000602 | 0.128842 | 0.041985 |
| MmuSTS.4681.1.S1_at   | MmuSTS.4681.1 | 9.3   | 10.16 | 0.21 | 0.99 | -1.81 | 0.220788 | 0.234041 | 0.579701 | 0.505312 |
| MmuSTS.4682.1.S1_s_at | MmuSTS.4682.1 | 10.87 | 10.87 | 0.26 | 0.22 | 1     | 0.680817 | 0.411887 | 0.857325 | 0.638434 |
| MmuSTS.4683.1.S1_at   | MmuSTS.4683.1 | 12.45 | 12.82 | 0.09 | 0.17 | -1.29 | 0.038054 | 0.032664 | 0.343416 | 0.223791 |
| MmuSTS.4684.1.S1_at   | MmuSTS.4684.1 | 9.09  | 8.61  | 0.05 | 0.05 | 1.39  | 0.00024  | 0.000905 | 0.125103 | 0.048084 |
| MmuSTS.4685.1.S1_at   | MmuSTS.4685.1 | 11.99 | 11.38 | 0.11 | 0.01 | 1.53  | 0.000674 | 0.000039 | 0.136818 | 0.023828 |
| MmuSTS.4686.1.S1_at   | MmuSTS.4686.1 | 4.34  | 4.31  | 0.11 | 0.16 | 1.02  | 0.442631 | 0.610629 | 0.725706 | 0.76874  |
| MmuSTS.4687.1.S1_at   | MmuSTS.4687.1 | 11.71 | 11.8  | 0.13 | 0.31 | -1.07 | 0.769    | 0.503986 | 0.902867 | 0.701267 |
| MmuSTS.4688.1.S1_at   | MmuSTS.4688.1 | 9.41  | 9.32  | 0.09 | 0.4  | 1.07  | 0.788947 | 0.456925 | 0.912329 | 0.67059  |
| MmuSTS.4689.1.S1_at   | MmuSTS.4689.1 | 7.66  | 5.73  | 0.31 | 0.31 | 3.79  | 0.003478 | 0.000885 | 0.178634 | 0.047602 |
| MmuSTS.469.1.S1_s_at  | MmuSTS.469.1  | 3.54  | 4.34  | 0.3  | 0.41 | -1.74 | 0.055226 | 0.090521 | 0.383636 | 0.345015 |
| MmuSTS.4690.1.S1_at   | MmuSTS.4690.1 | 10.09 | 10.4  | 0.46 | 1.34 | -1.24 | 0.420875 | 0.314273 | 0.712776 | 0.568254 |
| MmuSTS.4691.1.S1_at   | MmuSTS.4691.1 | 12.72 | 12.02 | 0.08 | 0.54 | 1.62  | 0.033122 | 0.026095 | 0.327101 | 0.20248  |
| MmuSTS.4692.1.S1_at   | MmuSTS.4692.1 | 3.95  | 3.87  | 0.11 | 0.05 | 1.05  | 0.493881 | 0.672499 | 0.756383 | 0.808599 |
| MmuSTS.4693.1.S1_at   | MmuSTS.4693.1 | 10.53 | 10.17 | 0.19 | 0.31 | 1.28  | 0.173394 | 0.103539 | 0.537006 | 0.364346 |
| MmuSTS.4694.1.S1_at   | MmuSTS.4694.1 | 12.44 | 12.67 | 0.18 | 0.09 | -1.17 | 0.098254 | 0.040537 | 0.457816 | 0.246264 |
| MmuSTS.4695.1.S1_at   | MmuSTS.4695.1 | 10.39 | 10.05 | 0.09 | 0.08 | 1.26  | 0.00824  | 0.005362 | 0.216948 | 0.101092 |
| MmuSTS.4696.1.S1_at   | MmuSTS.4696.1 | 10.56 | 10.88 | 0.22 | 0.38 | -1.24 | 0.52459  | 0.141326 | 0.773218 | 0.414874 |
| MmuSTS.4697.1.S1_at   | MmuSTS.4697.1 | 12.38 | 12.84 | 0.23 | 0.5  | -1.38 | 0.612419 | 0.047069 | 0.822158 | 0.261469 |
| MmuSTS.4698.1.S1_at   | MmuSTS.4698.1 | 6.1   | 6.24  | 0.16 | 0.18 | -1.1  | 0.196233 | 0.014848 | 0.559427 | 0.154971 |
| MmuSTS.4699.1.S1_at   | MmuSTS.4699.1 | 10.3  | 10.31 | 0.45 | 0.5  | -1.01 | 0.862959 | 0.093766 | 0.94495  | 0.350241 |
| MmuSTS.47.1.S1_at     | MmuSTS.47.1   | 5.77  | 5.78  | 0.12 | 0.14 | -1.01 | 0.409429 | 0.621173 | 0.705878 | 0.775813 |
| MmuSTS.470.1.S1_at    | MmuSTS.470.1  | 12.74 | 12.63 | 0.09 | 0.11 | 1.08  | 0.201468 | 0.078596 | 0.563988 | 0.325343 |
| MmuSTS.4700.1.S1_at   | MmuSTS.4700.1 | 8.8   | 8.08  | 0.97 | 0.28 | 1.65  | 0.221576 | 0.075407 | 0.580303 | 0.319705 |
| MmuSTS.4701.1.S1_at   | MmuSTS.4701.1 | 5.26  | 5.45  | 0.15 | 0.12 | -1.14 | 0.122312 | 0.169611 | 0.48746  | 0.446204 |
| MmuSTS.4702.1.S1_at   | MmuSTS.4702.1 | 3.95  | 3.91  | 0.19 | 0.08 | 1.03  | 0.201399 | 0.228113 | 0.563974 | 0.500298 |
| MmuSTS.4703.1.S1_at   | MmuSTS.4703.1 | 6.35  | 6.79  | 0.17 | 0.31 | -1.36 | 0.039284 | 0.008696 | 0.346898 | 0.123683 |
| MmuSTS.4704.1.S1_at   | MmuSTS.4704.1 | 11.36 | 11.69 | 0.73 | 0.26 | -1.26 | 0.295157 | 0.38622  | 0.631561 | 0.621444 |
| MmuSTS.4705.1.S1_at   | MmuSTS.4705.1 | 3.24  | 3.26  | 0.17 | 0.11 | -1.02 | 0.899636 | 0.861368 | 0.959901 | 0.921151 |
| MmuSTS.4706.1.S1_at   | MmuSTS.4706.1 | 9.73  | 9.34  | 0.15 | 0.08 | 1.31  | 0.032174 | 0.005805 | 0.3244   | 0.104597 |
| MmuSTS.4707.1.S1_at   | MmuSTS.4707.1 | 8.68  | 8.31  | 0.03 | 0.36 | 1.29  | 0.13645  | 0.10739  | 0.503566 | 0.370219 |
| MmuSTS.4708.1.S1_at   | MmuSTS.4708.1 | 6.73  | 6.33  | 0.14 | 0.02 | 1.32  | 0.007621 | 0.008696 | 0.210602 | 0.123683 |
| MmuSTS.4709.1.S1_s_at | MmuSTS.4709.1 | 12.65 | 12.69 | 0.1  | 0.11 | -1.03 | 0.78381  | 0.705876 | 0.909797 | 0.829555 |
| MmuSTS.471.1.S1_at    | MmuSTS.471.1  | 9.25  | 9.51  | 0.15 | 0.56 | -1.19 | 0.466033 | 0.293603 | 0.740195 | 0.5536   |
| MmuSTS.4710.1.S1_at   | MmuSTS.4710.1 | 13.66 | 13.54 | 0.05 | 0.06 | 1.08  | 0.061496 | 0.072958 | 0.39612  | 0.315986 |
| MmuSTS.4711.1.S1_at   | MmuSTS.4711.1 | 11.19 | 11.51 | 0.2  | 0.22 | -1.25 | 0.147471 | 0.135468 | 0.513287 | 0.407554 |
| MmuSTS.4712.1.S1_at   | MmuSTS.4712.1 | 13.41 | 13.34 | 0.02 | 0.04 | 1.05  | 0.024077 | 0.016618 | 0.294208 | 0.163117 |
| MmuSTS.4713.1.S1_at   | MmuSTS.4713.1 | 11.11 | 11.77 | 0.17 | 0.2  | -1.58 | 0.019307 | 0.018635 | 0.273655 | 0.171648 |
| MmuSTS.4714.1.S1_at   | MmuSTS.4714.1 | 11.34 | 11.13 | 0.1  | 0.52 | 1.16  | 0.877569 | 0.329944 | 0.950953 | 0.578874 |
| MmuSTS.4715.1.S1_at   | MmuSTS.4715.1 | 9.68  | 9.03  | 0.15 | 0.04 | 1.57  | 0.001895 | 0.000711 | 0.155636 | 0.044419 |

|                       |               |       |       |      |      |       |          |          |          |          |
|-----------------------|---------------|-------|-------|------|------|-------|----------|----------|----------|----------|
| MmuSTS.4716.1.S1_at   | MmuSTS.4716.1 | 10.15 | 9.37  | 0.08 | 0.21 | 1.72  | 0.00476  | 0.001307 | 0.184674 | 0.055656 |
| MmuSTS.4717.1.S1_at   | MmuSTS.4717.1 | 5.61  | 5.3   | 0.5  | 0.52 | 1.24  | 0.452318 | 0.413061 | 0.731986 | 0.63939  |
| MmuSTS.4718.1.S1_at   | MmuSTS.4718.1 | 4.46  | 4.59  | 0.28 | 0.13 | -1.09 | 0.595423 | 0.821648 | 0.812365 | 0.897303 |
| MmuSTS.4719.1.S1_at   | MmuSTS.4719.1 | 9.12  | 7.6   | 0.57 | 0.29 | 2.87  | 0.020414 | 0.010564 | 0.278002 | 0.134181 |
| MmuSTS.472.1.S1_at    | MmuSTS.472.1  | 11.48 | 12.55 | 0.45 | 0.57 | -2.1  | 0.038022 | 0.009268 | 0.343358 | 0.127089 |
| MmuSTS.4720.1.S1_at   | MmuSTS.4720.1 | 4.61  | 4.8   | 0.25 | 0.59 | -1.14 | 0.354183 | 0.510536 | 0.670387 | 0.704999 |
| MmuSTS.4721.1.S1_at   | MmuSTS.4721.1 | 9.37  | 8.74  | 0.19 | 0.54 | 1.55  | 0.044003 | 0.027332 | 0.357601 | 0.206625 |
| MmuSTS.4722.1.S1_at   | MmuSTS.4722.1 | 11.6  | 10.79 | 0.25 | 0.06 | 1.75  | 0.006445 | 0.000562 | 0.199625 | 0.041049 |
| MmuSTS.4723.1.S1_at   | MmuSTS.4723.1 | 5.09  | 4.87  | 0.48 | 0.24 | 1.16  | 0.318611 | 0.492347 | 0.648593 | 0.693485 |
| MmuSTS.4724.1.S1_at   | MmuSTS.4724.1 | 9.74  | 9.74  | 0.13 | 0.13 | 1     | 0.922596 | 0.94568  | 0.970009 | 0.969126 |
| MmuSTS.4725.1.S1_at   | MmuSTS.4725.1 | 12.01 | 11.79 | 0.42 | 0.45 | 1.17  | 0.350039 | 0.448065 | 0.668304 | 0.663986 |
| MmuSTS.4726.1.S1_at   | MmuSTS.4726.1 | 9.72  | 9.78  | 0.25 | 0.36 | -1.04 | 0.850656 | 0.925513 | 0.940027 | 0.957833 |
| MmuSTS.4727.1.S1_s_at | MmuSTS.4727.1 | 7.53  | 7.55  | 0.61 | 0.17 | -1.01 | 0.333353 | 0.006125 | 0.657539 | 0.106581 |
| MmuSTS.4728.1.S1_at   | MmuSTS.4728.1 | 9.56  | 8.55  | 0.2  | 0.23 | 2.01  | 0.007086 | 0.002087 | 0.20404  | 0.067506 |
| MmuSTS.4729.1.S1_at   | MmuSTS.4729.1 | 9.44  | 8.9   | 0.28 | 0.24 | 1.45  | 0.032454 | 0.021801 | 0.324971 | 0.184765 |
| MmuSTS.473.1.S1_at    | MmuSTS.473.1  | 6.36  | 6.42  | 0.01 | 0.05 | -1.05 | 0.077145 | 0.035908 | 0.426641 | 0.234002 |
| MmuSTS.4730.1.S1_at   | MmuSTS.4730.1 | 9.58  | 9.31  | 0.09 | 0.46 | 1.2   | 0.364223 | 0.284435 | 0.677295 | 0.546637 |
| MmuSTS.4731.1.S1_at   | MmuSTS.4731.1 | 10.2  | 9.92  | 0.17 | 0.31 | 1.22  | 0.262849 | 0.14875  | 0.609088 | 0.423201 |
| MmuSTS.4732.1.S1_at   | MmuSTS.4732.1 | 5.91  | 5.92  | 0.04 | 0.07 | -1    | 0.60239  | 0.370289 | 0.81654  | 0.609406 |
| MmuSTS.4733.1.S1_at   | MmuSTS.4733.1 | 11.84 | 11.87 | 0.08 | 0.12 | -1.02 | 0.282068 | 0.246095 | 0.622553 | 0.515832 |
| MmuSTS.4734.1.S1_at   | MmuSTS.4734.1 | 10.52 | 10.37 | 0.27 | 0.19 | 1.11  | 0.259039 | 0.153285 | 0.606181 | 0.428139 |
| MmuSTS.4735.1.S1_at   | MmuSTS.4735.1 | 8.63  | 8.59  | 0.05 | 0.25 | 1.03  | 0.524934 | 0.554017 | 0.773313 | 0.73293  |
| MmuSTS.4736.1.S1_at   | MmuSTS.4736.1 | 5.74  | 5.75  | 0.33 | 0.3  | -1    | 0.33224  | 0.291028 | 0.656683 | 0.551574 |
| MmuSTS.4737.1.S1_at   | MmuSTS.4737.1 | 10.4  | 10.11 | 0.33 | 0.29 | 1.22  | 0.070781 | 0.016217 | 0.414661 | 0.161389 |
| MmuSTS.4738.1.S1_at   | MmuSTS.4738.1 | 5.22  | 7.97  | 1.86 | 2.84 | -6.7  | 0.425179 | 0.303536 | 0.715011 | 0.561005 |
| MmuSTS.4739.1.S1_at   | MmuSTS.4739.1 | 6.51  | 6.98  | 0.24 | 0.94 | -1.39 | 0.3125   | 0.293677 | 0.644218 | 0.553665 |
| MmuSTS.474.1.S1_at    | MmuSTS.474.1  | 8.69  | 8.27  | 0.11 | 0.19 | 1.34  | 0.051823 | 0.045985 | 0.376487 | 0.258838 |
| MmuSTS.4740.1.S1_at   | MmuSTS.4740.1 | 8.38  | 11.54 | 1.9  | 2.86 | -8.93 | 0.562964 | 0.253803 | 0.795624 | 0.52217  |
| MmuSTS.4741.1.S1_at   | MmuSTS.4741.1 | 7.75  | 10.68 | 0.41 | 1    | -7.61 | 0.012621 | 0.010347 | 0.242681 | 0.133184 |
| MmuSTS.4742.1.S1_at   | MmuSTS.4742.1 | 7.41  | 7.86  | 0.51 | 0.17 | -1.37 | 0.182139 | 0.213136 | 0.546458 | 0.487054 |
| MmuSTS.4743.1.S1_at   | MmuSTS.4743.1 | 5.95  | 6.17  | 0.09 | 0.11 | -1.16 | 0.079694 | 0.145403 | 0.430147 | 0.419421 |
| MmuSTS.4744.1.S1_at   | MmuSTS.4744.1 | 9.55  | 9.93  | 0.25 | 0.44 | -1.3  | 0.174021 | 0.221348 | 0.537549 | 0.494644 |
| MmuSTS.4745.1.S1_at   | MmuSTS.4745.1 | 9.24  | 8.87  | 0.13 | 0.56 | 1.29  | 0.355697 | 0.22579  | 0.671185 | 0.498159 |
| MmuSTS.4745.1.S1_s_at | MmuSTS.4745.1 | 10.58 | 10.23 | 0.12 | 0.49 | 1.28  | 0.209766 | 0.119737 | 0.571042 | 0.388481 |
| MmuSTS.4746.1.S1_at   | MmuSTS.4746.1 | 9.69  | 9.51  | 0.24 | 0.19 | 1.14  | 0.912185 | 0.839454 | 0.96522  | 0.908523 |
| MmuSTS.4747.1.S1_at   | MmuSTS.4747.1 | 9.89  | 9.72  | 0.12 | 0.08 | 1.13  | 0.066994 | 0.042917 | 0.407016 | 0.251759 |
| MmuSTS.4747.1.S1_s_at | MmuSTS.4747.1 | 10.49 | 10.23 | 0.12 | 0.12 | 1.2   | 0.032945 | 0.022848 | 0.326759 | 0.189246 |
| MmuSTS.4748.1.S1_at   | MmuSTS.4748.1 | 7.62  | 7.98  | 0.69 | 0.29 | -1.28 | 0.287866 | 0.148665 | 0.626282 | 0.423201 |
| MmuSTS.4749.1.S1_at   | MmuSTS.4749.1 | 9.29  | 9.22  | 0.08 | 0.26 | 1.05  | 0.521585 | 0.709481 | 0.771406 | 0.831671 |
| MmuSTS.475.1.S1_at    | MmuSTS.475.1  | 12.08 | 12.17 | 0.14 | 0.09 | -1.07 | 0.614643 | 0.505513 | 0.823258 | 0.702189 |
| MmuSTS.4750.1.S1_at   | MmuSTS.4750.1 | 10.36 | 10.61 | 0.12 | 0.05 | -1.19 | 0.069517 | 0.010182 | 0.412367 | 0.132317 |

|                      |               |       |       |      |      |       |          |          |          |          |
|----------------------|---------------|-------|-------|------|------|-------|----------|----------|----------|----------|
| MmuSTS.4751.1.S1_at  | MmuSTS.4751.1 | 8.48  | 8.55  | 0.09 | 0.44 | -1.05 | 0.603352 | 0.761187 | 0.817133 | 0.86123  |
| MmuSTS.4752.1.S1_at  | MmuSTS.4752.1 | 10.18 | 9.52  | 0.2  | 0.32 | 1.57  | 0.0388   | 0.024901 | 0.345488 | 0.197685 |
| MmuSTS.4753.1.S1_at  | MmuSTS.4753.1 | 5.76  | 6.06  | 0.79 | 1.19 | -1.23 | 0.834859 | 0.393604 | 0.933063 | 0.626497 |
| MmuSTS.4754.1.S1_at  | MmuSTS.4754.1 | 10.72 | 11.01 | 0.13 | 0.44 | -1.22 | 0.275917 | 0.256562 | 0.617987 | 0.524321 |
| MmuSTS.4755.1.S1_at  | MmuSTS.4755.1 | 3.61  | 3.61  | 0.16 | 0.08 | -1    | 0.77329  | 0.323322 | 0.904764 | 0.57443  |
| MmuSTS.4756.1.S1_at  | MmuSTS.4756.1 | 7.56  | 7.37  | 0.2  | 0.18 | 1.14  | 0.263965 | 0.316082 | 0.609766 | 0.569541 |
| MmuSTS.4757.1.S1_at  | MmuSTS.4757.1 | 12.97 | 12.72 | 0.15 | 0.29 | 1.18  | 0.147898 | 0.129272 | 0.513442 | 0.400682 |
| MmuSTS.4758.1.S1_at  | MmuSTS.4758.1 | 12.04 | 12.08 | 0.04 | 0.11 | -1.03 | 0.630344 | 0.105494 | 0.832004 | 0.367413 |
| MmuSTS.4759.1.S1_at  | MmuSTS.4759.1 | 11.82 | 11.76 | 0.17 | 0.09 | 1.04  | 0.354636 | 0.218933 | 0.670604 | 0.492716 |
| MmuSTS.476.1.S1_s_at | MmuSTS.476.1  | 4.21  | 4.37  | 0.3  | 0.06 | -1.12 | 0.969886 | 0.579964 | 0.98846  | 0.749354 |
| MmuSTS.4760.1.S1_at  | MmuSTS.4760.1 | 10.16 | 10.1  | 0.12 | 0.11 | 1.04  | 0.253662 | 0.346299 | 0.602177 | 0.59124  |
| MmuSTS.4761.1.S1_at  | MmuSTS.4761.1 | 3.15  | 3.32  | 0.18 | 0.14 | -1.12 | 0.119495 | 0.206551 | 0.484145 | 0.480584 |
| MmuSTS.4762.1.S1_at  | MmuSTS.4762.1 | 10.62 | 9.86  | 0.08 | 0.39 | 1.69  | 0.034183 | 0.025952 | 0.33191  | 0.20198  |
| MmuSTS.4763.1.S1_at  | MmuSTS.4763.1 | 8.57  | 9.1   | 0.44 | 0.44 | -1.45 | 0.110303 | 0.057834 | 0.471863 | 0.286866 |
| MmuSTS.4764.1.S1_at  | MmuSTS.4764.1 | 12.09 | 12.42 | 0.03 | 0.4  | -1.26 | 0.421638 | 0.49466  | 0.713186 | 0.69497  |
| MmuSTS.4765.1.S1_at  | MmuSTS.4765.1 | 8.85  | 8.34  | 0.16 | 0.22 | 1.42  | 0.077328 | 0.013951 | 0.427027 | 0.151468 |
| MmuSTS.4766.1.S1_at  | MmuSTS.4766.1 | 7.7   | 8.49  | 0.36 | 0.86 | -1.73 | 0.325966 | 0.405886 | 0.653156 | 0.634037 |
| MmuSTS.4767.1.S1_at  | MmuSTS.4767.1 | 8.04  | 7.7   | 0.19 | 0.31 | 1.27  | 0.649601 | 0.839453 | 0.842493 | 0.908523 |
| MmuSTS.4768.1.S1_at  | MmuSTS.4768.1 | 11.7  | 11.72 | 0.02 | 0.2  | -1.01 | 0.462656 | 0.064427 | 0.738289 | 0.300001 |
| MmuSTS.4769.1.S1_at  | MmuSTS.4769.1 | 8.16  | 7.48  | 0.2  | 0.37 | 1.6   | 0.058969 | 0.060489 | 0.390921 | 0.292569 |
| MmuSTS.477.1.S1_s_at | MmuSTS.477.1  | 4.52  | 4.47  | 0.18 | 0.09 | 1.04  | 0.679117 | 0.885178 | 0.85643  | 0.934628 |
| MmuSTS.4770.1.S1_at  | MmuSTS.4770.1 | 8.54  | 8.16  | 0.12 | 0.4  | 1.3   | 0.525319 | 0.612517 | 0.77363  | 0.770071 |
| MmuSTS.4771.1.S1_at  | MmuSTS.4771.1 | 6.75  | 6.73  | 0.18 | 0.01 | 1.02  | 0.481572 | 0.691706 | 0.749268 | 0.820652 |
| MmuSTS.4772.1.S1_at  | MmuSTS.4772.1 | 7.98  | 7.81  | 0.47 | 0.8  | 1.12  | 0.504207 | 0.320431 | 0.761176 | 0.572648 |
| MmuSTS.4773.1.S1_at  | MmuSTS.4773.1 | 12.09 | 11.57 | 0.07 | 0.3  | 1.44  | 0.039507 | 0.021442 | 0.347288 | 0.183342 |
| MmuSTS.4774.1.S1_at  | MmuSTS.4774.1 | 8.2   | 7.61  | 0.14 | 0.19 | 1.51  | 0.017721 | 0.011337 | 0.267612 | 0.138125 |
| MmuSTS.4775.1.S1_at  | MmuSTS.4775.1 | 8.78  | 8.24  | 0.07 | 0.7  | 1.46  | 0.255057 | 0.066354 | 0.603072 | 0.303235 |
| MmuSTS.4776.1.S1_at  | MmuSTS.4776.1 | 11.39 | 10.87 | 0.12 | 0.28 | 1.43  | 0.037388 | 0.035368 | 0.341309 | 0.232348 |
| MmuSTS.4777.1.S1_at  | MmuSTS.4777.1 | 4.36  | 4.56  | 0.06 | 0.38 | -1.15 | 0.491827 | 0.425871 | 0.755302 | 0.6481   |
| MmuSTS.4778.1.S1_at  | MmuSTS.4778.1 | 6.87  | 7.02  | 1    | 0.55 | -1.11 | 0.839908 | 0.762031 | 0.935462 | 0.861597 |
| MmuSTS.4779.1.S1_at  | MmuSTS.4779.1 | 6.98  | 7.85  | 0.14 | 0.24 | -1.83 | 0.009621 | 0.009091 | 0.226235 | 0.125944 |
| MmuSTS.478.1.S1_s_at | MmuSTS.478.1  | 4.76  | 4.77  | 0.21 | 0.23 | -1.01 | 0.627884 | 0.828721 | 0.830409 | 0.901558 |
| MmuSTS.4780.1.S1_at  | MmuSTS.4780.1 | 4.86  | 4.74  | 0.24 | 0.1  | 1.09  | 0.638825 | 0.81098  | 0.836818 | 0.890949 |
| MmuSTS.4781.1.S1_at  | MmuSTS.4781.1 | 10.47 | 10.01 | 0.25 | 0.16 | 1.38  | 0.040993 | 0.031859 | 0.35051  | 0.220909 |
| MmuSTS.4782.1.S1_at  | MmuSTS.4782.1 | 11.45 | 12.11 | 0.47 | 0.05 | -1.58 | 0.073405 | 0.067953 | 0.41875  | 0.306905 |
| MmuSTS.4783.1.S1_at  | MmuSTS.4783.1 | 8.63  | 8.19  | 0.23 | 0.12 | 1.36  | 0.09472  | 0.104346 | 0.452166 | 0.36558  |
| MmuSTS.4784.1.S1_at  | MmuSTS.4784.1 | 13.28 | 12.93 | 0.14 | 0.17 | 1.27  | 0.103156 | 0.106935 | 0.462856 | 0.369499 |
| MmuSTS.4785.1.S1_at  | MmuSTS.4785.1 | 9.86  | 9.68  | 0.17 | 0.85 | 1.13  | 0.944517 | 0.931409 | 0.978846 | 0.961034 |
| MmuSTS.4786.1.S1_at  | MmuSTS.4786.1 | 7.69  | 6.34  | 0.1  | 0.61 | 2.54  | 0.030557 | 0.01392  | 0.319059 | 0.151344 |
| MmuSTS.4787.1.S1_at  | MmuSTS.4787.1 | 11.52 | 10.56 | 0.23 | 0.23 | 1.96  | 0.006773 | 0.003546 | 0.201707 | 0.085371 |
| MmuSTS.4788.1.S1_at  | MmuSTS.4788.1 | 7.02  | 7.34  | 0.07 | 0.05 | -1.25 | 0.002296 | 0.01968  | 0.161798 | 0.176276 |

|                      |               |       |       |      |      |       |          |          |          |          |
|----------------------|---------------|-------|-------|------|------|-------|----------|----------|----------|----------|
| MmuSTS.4789.1.S1_at  | MmuSTS.4789.1 | 7.67  | 8.25  | 0.12 | 0.3  | -1.5  | 0.055864 | 0.027763 | 0.384905 | 0.208034 |
| MmuSTS.479.1.S1_s_at | MmuSTS.479.1  | 4.73  | 4.83  | 0.12 | 0.08 | -1.08 | 0.311192 | 0.470232 | 0.643196 | 0.678572 |
| MmuSTS.4790.1.S1_at  | MmuSTS.4790.1 | 8.52  | 8.26  | 0.08 | 0.4  | 1.2   | 0.294647 | 0.46947  | 0.631395 | 0.678248 |
| MmuSTS.4791.1.S1_at  | MmuSTS.4791.1 | 7.05  | 6.33  | 0.17 | 0.34 | 1.65  | 0.012531 | 0.003739 | 0.24203  | 0.08718  |
| MmuSTS.4792.1.S1_at  | MmuSTS.4792.1 | 7.58  | 6.73  | 0.3  | 0.94 | 1.81  | 0.16184  | 0.129236 | 0.526573 | 0.400635 |
| MmuSTS.4793.1.S1_at  | MmuSTS.4793.1 | 8.24  | 8.55  | 0.08 | 0.47 | -1.24 | 0.79364  | 0.370288 | 0.914488 | 0.609406 |
| MmuSTS.4794.1.S1_at  | MmuSTS.4794.1 | 10.95 | 10.15 | 0.13 | 0.23 | 1.74  | 0.00657  | 0.002046 | 0.199625 | 0.066887 |
| MmuSTS.4795.1.S1_at  | MmuSTS.4795.1 | 3.46  | 3.47  | 0.2  | 0.12 | -1.01 | 0.757214 | 0.862708 | 0.897006 | 0.921951 |
| MmuSTS.4796.1.S1_at  | MmuSTS.4796.1 | 6.74  | 7.99  | 0.61 | 2.36 | -2.38 | 0.579422 | 0.351264 | 0.804265 | 0.594937 |
| MmuSTS.4797.1.S1_at  | MmuSTS.4797.1 | 11.07 | 11.24 | 0.15 | 0.38 | -1.12 | 0.441247 | 0.382976 | 0.724743 | 0.61903  |
| MmuSTS.4798.1.S1_at  | MmuSTS.4798.1 | 5.49  | 5.29  | 0.21 | 0.41 | 1.15  | 0.749888 | 0.869306 | 0.892776 | 0.925876 |
| MmuSTS.4799.1.S1_at  | MmuSTS.4799.1 | 5.43  | 5.59  | 0.26 | 0.22 | -1.12 | 0.366271 | 0.343276 | 0.679018 | 0.589026 |
| MmuSTS.48.1.S1_at    | MmuSTS.48.1   | 11.59 | 11.43 | 0.11 | 0.3  | 1.12  | 0.619945 | 0.710547 | 0.82586  | 0.832109 |
| MmuSTS.480.1.S1_s_at | MmuSTS.480.1  | 4.45  | 4.56  | 0.11 | 0.02 | -1.07 | 0.179386 | 0.241137 | 0.543593 | 0.511749 |
| MmuSTS.4800.1.S1_at  | MmuSTS.4800.1 | 3.45  | 3.4   | 0.41 | 0.1  | 1.04  | 0.704396 | 0.726902 | 0.869588 | 0.842011 |
| MmuSTS.4801.1.S1_at  | MmuSTS.4801.1 | 4.21  | 3.81  | 0.33 | 0.74 | 1.32  | 0.842619 | 0.711101 | 0.936509 | 0.832375 |
| MmuSTS.4802.1.S1_at  | MmuSTS.4802.1 | 5.87  | 5.76  | 0.24 | 0.08 | 1.08  | 0.219555 | 0.166384 | 0.579016 | 0.442884 |
| MmuSTS.4803.1.S1_at  | MmuSTS.4803.1 | 12.8  | 12.58 | 0.14 | 0.72 | 1.16  | 0.762271 | 0.464294 | 0.899996 | 0.674993 |
| MmuSTS.4804.1.S1_at  | MmuSTS.4804.1 | 5.12  | 5.32  | 0.08 | 0.09 | -1.14 | 0.022573 | 0.048443 | 0.287341 | 0.26532  |
| MmuSTS.4805.1.S1_at  | MmuSTS.4805.1 | 8.42  | 8.03  | 0.38 | 0.04 | 1.31  | 0.049937 | 0.003041 | 0.372556 | 0.080419 |
| MmuSTS.4806.1.S1_at  | MmuSTS.4806.1 | 8.38  | 7.36  | 0.2  | 0.51 | 2.02  | 0.056341 | 0.023269 | 0.386364 | 0.191218 |
| MmuSTS.4807.1.S1_at  | MmuSTS.4807.1 | 6.47  | 6.59  | 0.13 | 0.11 | -1.08 | 0.256062 | 0.299458 | 0.603805 | 0.557907 |
| MmuSTS.4808.1.S1_at  | MmuSTS.4808.1 | 6.77  | 6.93  | 0.13 | 0.06 | -1.12 | 0.539466 | 0.385783 | 0.781125 | 0.621079 |
| MmuSTS.4809.1.S1_at  | MmuSTS.4809.1 | 9.79  | 9.37  | 0.23 | 0.31 | 1.34  | 0.272785 | 0.010266 | 0.616391 | 0.132661 |
| MmuSTS.481.1.S1_s_at | MmuSTS.481.1  | 4.32  | 4.16  | 0.14 | 0.11 | 1.12  | 0.431433 | 0.360155 | 0.71858  | 0.601268 |
| MmuSTS.4810.1.S1_at  | MmuSTS.4810.1 | 10.19 | 10.55 | 0.16 | 0.07 | -1.28 | 0.030712 | 0.00533  | 0.319646 | 0.100928 |
| MmuSTS.4811.1.S1_at  | MmuSTS.4811.1 | 9.47  | 10.6  | 0.29 | 0.21 | -2.18 | 0.003782 | 0.001156 | 0.179914 | 0.053615 |
| MmuSTS.4812.1.S1_at  | MmuSTS.4812.1 | 2.96  | 2.93  | 0.5  | 0.11 | 1.02  | 0.427857 | 0.394528 | 0.716476 | 0.627068 |
| MmuSTS.4813.1.S1_at  | MmuSTS.4813.1 | 4.01  | 4.75  | 0.46 | 0.38 | -1.67 | 0.38578  | 0.345981 | 0.690905 | 0.59115  |
| MmuSTS.4814.1.S1_at  | MmuSTS.4814.1 | 4.1   | 4.16  | 0.34 | 0.24 | -1.04 | 0.488859 | 0.439859 | 0.753346 | 0.658468 |
| MmuSTS.4815.1.S1_at  | MmuSTS.4815.1 | 9.84  | 6.75  | 0.85 | 2.72 | 8.49  | 0.142516 | 0.05039  | 0.509696 | 0.269732 |
| MmuSTS.4816.1.S1_at  | MmuSTS.4816.1 | 11.62 | 12.85 | 0.32 | 0.24 | -2.35 | 0.003622 | 0.003544 | 0.179515 | 0.085371 |
| MmuSTS.4817.1.S1_at  | MmuSTS.4817.1 | 2.86  | 2.97  | 0.03 | 0.09 | -1.08 | 0.100627 | 0.278006 | 0.461009 | 0.541696 |
| MmuSTS.4818.1.S1_at  | MmuSTS.4818.1 | 4.4   | 3.9   | 0.46 | 0.07 | 1.41  | 0.293803 | 0.454957 | 0.630994 | 0.669021 |
| MmuSTS.4819.1.S1_at  | MmuSTS.4819.1 | 7.93  | 7.7   | 0.24 | 0.62 | 1.18  | 0.219248 | 0.007153 | 0.578716 | 0.113788 |
| MmuSTS.482.1.S1_at   | MmuSTS.482.1  | 6.01  | 6     | 0.09 | 0.11 | 1.01  | 0.968321 | 0.135751 | 0.988076 | 0.407925 |
| MmuSTS.482.1.S1_s_at | MmuSTS.482.1  | 4.68  | 4.75  | 0.28 | 0.01 | -1.05 | 0.562461 | 0.76936  | 0.795358 | 0.866048 |
| MmuSTS.4820.1.S1_at  | MmuSTS.4820.1 | 5.12  | 4.85  | 0.4  | 0.15 | 1.2   | 0.314744 | 0.283058 | 0.64608  | 0.545692 |
| MmuSTS.4821.1.S1_at  | MmuSTS.4821.1 | 10.28 | 9.41  | 0.24 | 0.91 | 1.83  | 0.08289  | 0.067836 | 0.43467  | 0.306639 |
| MmuSTS.4822.1.S1_at  | MmuSTS.4822.1 | 13    | 12.23 | 0.17 | 0.33 | 1.7   | 0.088493 | 0.077438 | 0.44331  | 0.323236 |
| MmuSTS.4823.1.S1_at  | MmuSTS.4823.1 | 5.39  | 7.38  | 0.33 | 2.11 | -3.97 | 0.232405 | 0.289748 | 0.587814 | 0.550776 |

|                        |                |       |       |      |      |        |          |          |          |          |
|------------------------|----------------|-------|-------|------|------|--------|----------|----------|----------|----------|
| MmuSTS.4824.1.S1_at    | MmuSTS.4824.1  | 4.14  | 4.75  | 0.02 | 0.29 | -1.52  | 0.023685 | 0.001893 | 0.292613 | 0.065004 |
| MmuSTS.4825.1.S1_at    | MmuSTS.4825.1  | 6.28  | 6.31  | 0.13 | 0.18 | -1.02  | 0.60564  | 0.449416 | 0.818434 | 0.665054 |
| MmuSTS.4826.1.S1_at    | MmuSTS.4826.1  | 9.88  | 11.87 | 0.83 | 0.61 | -3.98  | 0.01543  | 0.010168 | 0.25855  | 0.13217  |
| MmuSTS.4827.1.S1_at    | MmuSTS.4827.1  | 7.41  | 6.52  | 0.41 | 0.26 | 1.85   | 0.078657 | 0.13085  | 0.428609 | 0.403037 |
| MmuSTS.4828.1.S1_at    | MmuSTS.4828.1  | 4.44  | 6.97  | 1.12 | 0.76 | -5.77  | 0.09648  | 0.093195 | 0.455149 | 0.34931  |
| MmuSTS.4829.1.S1_at    | MmuSTS.4829.1  | 9.33  | 9.07  | 0.68 | 0.36 | 1.2    | 0.636329 | 0.695967 | 0.835475 | 0.823362 |
| MmuSTS.483.1.S1_s_at   | MmuSTS.483.1   | 3.41  | 3.47  | 0.01 | 0.05 | -1.04  | 0.337873 | 0.436488 | 0.660345 | 0.656022 |
| MmuSTS.4830.1.S1_at    | MmuSTS.4830.1  | 3.93  | 4.08  | 0.06 | 0.07 | -1.11  | 0.040494 | 0.431828 | 0.349461 | 0.6526   |
| MmuSTS.4831.1.S1_at    | MmuSTS.4831.1  | 6.57  | 6.49  | 0.11 | 0.09 | 1.06   | 0.435695 | 0.039999 | 0.721315 | 0.245193 |
| MmuSTS.4832.1.S1_at    | MmuSTS.4832.1  | 6.26  | 6.37  | 0.24 | 0.09 | -1.08  | 0.632583 | 0.405476 | 0.833252 | 0.633774 |
| MmuSTS.4833.1.S1_at    | MmuSTS.4833.1  | 5.98  | 6.04  | 0.13 | 0.1  | -1.04  | 0.43112  | 0.489479 | 0.718464 | 0.691824 |
| MmuSTS.4834.1.S1_at    | MmuSTS.4834.1  | 8.3   | 6.54  | 0.5  | 0.65 | 3.37   | 0.022146 | 0.046645 | 0.284595 | 0.260499 |
| MmuSTS.4835.1.S1_at    | MmuSTS.4835.1  | 8.93  | 9.3   | 0.09 | 0.25 | -1.29  | 0.049821 | 0.034276 | 0.372217 | 0.229049 |
| MmuSTS.4836.1.S1_at    | MmuSTS.4836.1  | 10.84 | 12.69 | 0.67 | 1.4  | -3.59  | 0.182473 | 0.023668 | 0.546756 | 0.192612 |
| MmuSTS.4837.1.S1_at    | MmuSTS.4837.1  | 11.41 | 11.84 | 0.38 | 0.52 | -1.35  | 0.142839 | 0.108196 | 0.509783 | 0.371557 |
| MmuSTS.4838.1.S1_at    | MmuSTS.4838.1  | 10.45 | 10.12 | 0.26 | 0.41 | 1.26   | 0.752524 | 0.205759 | 0.894384 | 0.48007  |
| MmuSTS.4839.1.S1_at    | MmuSTS.4839.1  | 12.75 | 12.8  | 0.12 | 0.7  | -1.03  | 0.557296 | 0.746185 | 0.792388 | 0.852688 |
| MmuSTS.484.1.S1_s_at   | MmuSTS.484.1   | 4.21  | 4.32  | 0.18 | 0.07 | -1.08  | 0.470199 | 0.387606 | 0.74218  | 0.622234 |
| MmuSTS.4840.1.S1_at    | MmuSTS.4840.1  | 3.91  | 3.98  | 0.14 | 0.08 | -1.05  | 0.438658 | 0.075511 | 0.723208 | 0.319939 |
| MmuSTS.4841.1.S1_at    | MmuSTS.4841.1  | 5.1   | 5.22  | 0.16 | 0.1  | -1.09  | 0.534883 | 0.679888 | 0.778892 | 0.8131   |
| MmuSTS.4842.1.S1_at    | MmuSTS.4842.1  | 5.5   | 9.18  | 1.64 | 2.82 | -12.83 | 0.292966 | 0.322916 | 0.630264 | 0.574257 |
| MmuSTS.4843.1.S1_at    | MmuSTS.4843.1  | 11.13 | 10.63 | 0.08 | 0.53 | 1.41   | 0.149347 | 0.138274 | 0.514001 | 0.411198 |
| MmuSTS.4844.1.S1_at    | MmuSTS.4844.1  | 13.12 | 13.24 | 0.29 | 0.88 | -1.08  | 0.496712 | 0.650071 | 0.75763  | 0.795399 |
| MmuSTS.4845.1.S1_at    | MmuSTS.4845.1  | 4.6   | 4.51  | 0.11 | 0.09 | 1.06   | 0.785761 | 0.033643 | 0.910907 | 0.227006 |
| MmuSTS.485.1.S1_at     | MmuSTS.485.1   | 5.35  | 5.43  | 0.45 | 0.02 | -1.05  | 0.843251 | 0.189895 | 0.936941 | 0.465424 |
| MmunewRS.696.1.S1_at   | MmunewRS.696.1 | 3.2   | 3.21  | 0.02 | 0.01 | -1.01  | 0.518695 | 0.491324 | 0.769592 | 0.692931 |
| MmunewRS.696.1.S1_s_at | MmunewRS.696.1 | 3.28  | 3.26  | 0.2  | 0.01 | 1.01   | 0.960198 | 0.809533 | 0.98486  | 0.890191 |
| MmuSTS.486.1.S1_at     | MmuSTS.486.1   | 10.64 | 10.93 | 0.1  | 0.11 | -1.22  | 0.042545 | 0.289136 | 0.355202 | 0.550283 |
| MmuSTS.487.1.S1_at     | MmuSTS.487.1   | 11    | 11.19 | 0.14 | 0.28 | -1.15  | 0.34826  | 0.134871 | 0.667097 | 0.406878 |
| MmuSTS.488.1.S1_at     | MmuSTS.488.1   | 9.16  | 9.06  | 0.07 | 0.2  | 1.08   | 0.482471 | 0.605671 | 0.749408 | 0.765377 |
| MmuSTS.489.1.S1_s_at   | MmuSTS.489.1   | 10.83 | 10.7  | 0.14 | 0.35 | 1.1    | 0.780971 | 0.925752 | 0.908683 | 0.95799  |
| MmuSTS.49.1.S1_at      | MmuSTS.49.1    | 10.24 | 9.46  | 0.25 | 0.32 | 1.72   | 0.053966 | 0.05049  | 0.381209 | 0.270049 |
| MmuSTS.490.1.S1_at     | MmuSTS.490.1   | 11.2  | 11.12 | 0.09 | 0.34 | 1.05   | 0.72354  | 0.417535 | 0.879208 | 0.642252 |
| MmuSTS.491.1.S1_at     | MmuSTS.491.1   | 11.33 | 12.11 | 0.14 | 0.31 | -1.71  | 0.025484 | 0.008672 | 0.299515 | 0.123535 |
| MmuSTS.492.1.S1_at     | MmuSTS.492.1   | 8.06  | 9.31  | 0.75 | 0.81 | -2.37  | 0.10835  | 0.043843 | 0.469578 | 0.254002 |
| MmuSTS.493.1.S1_at     | MmuSTS.493.1   | 7.43  | 7.65  | 0.16 | 0.46 | -1.16  | 0.403375 | 0.548714 | 0.701956 | 0.729333 |
| MmuSTS.494.1.S1_at     | MmuSTS.494.1   | 5.52  | 5.43  | 0.09 | 0.1  | 1.07   | 0.241262 | 0.129213 | 0.593801 | 0.400635 |
| MmuSTS.495.1.S1_at     | MmuSTS.495.1   | 9.49  | 9.9   | 0.09 | 0.12 | -1.32  | 0.006285 | 0.002061 | 0.1975   | 0.0672   |
| MmuSTS.496.1.S1_s_at   | MmuSTS.496.1   | 3.27  | 3.27  | 0    | 0.04 | 1      | 0.492663 | 0.667664 | 0.755881 | 0.805472 |
| MmuSTS.497.1.S1_s_at   | MmuSTS.497.1   | 4.13  | 3.98  | 0.14 | 0.14 | 1.11   | 0.520149 | 0.719229 | 0.770623 | 0.837526 |
| MmuSTS.498.1.S1_at     | MmuSTS.498.1   | 4.34  | 4.24  | 0.13 | 0.22 | 1.07   | 0.236109 | 0.271635 | 0.590122 | 0.536577 |



|                      |              |       |       |      |      |       |          |          |          |          |
|----------------------|--------------|-------|-------|------|------|-------|----------|----------|----------|----------|
| MmuSTS.499.1.S1_at   | MmuSTS.499.1 | 3.29  | 3.4   | 0.08 | 0.04 | -1.08 | 0.098993 | 0.011074 | 0.458711 | 0.137002 |
| MmuSTS.5.1.S1_at     | MmuSTS.5.1   | 6.71  | 5.78  | 0.15 | 0.76 | 1.9   | 0.328455 | 0.101775 | 0.654375 | 0.361653 |
| MmuSTS.50.1.S1_at    | MmuSTS.50.1  | 9.95  | 10.05 | 0.18 | 0.95 | -1.07 | 0.826427 | 0.958197 | 0.929529 | 0.976332 |
| MmuSTS.500.1.S1_s_at | MmuSTS.500.1 | 3.54  | 3.69  | 0.27 | 0.17 | -1.11 | 0.99148  | 0.921186 | 0.99695  | 0.955622 |
| MmuSTS.501.1.S1_at   | MmuSTS.501.1 | 3.48  | 3.32  | 0.21 | 0.06 | 1.12  | 0.384789 | 0.172494 | 0.690114 | 0.448864 |
| MmuSTS.502.1.S1_s_at | MmuSTS.502.1 | 3.32  | 3.33  | 0.01 | 0    | -1.01 | 0.257717 | 0.097043 | 0.605259 | 0.354531 |
| MmuSTS.503.1.S1_s_at | MmuSTS.503.1 | 4.77  | 4.75  | 0.2  | 0.35 | 1.01  | 0.954239 | 0.954245 | 0.983062 | 0.973995 |
| MmuSTS.504.1.S1_s_at | MmuSTS.504.1 | 3.76  | 3.72  | 0.22 | 0.05 | 1.03  | 0.537114 | 0.788553 | 0.779812 | 0.877729 |
| MmuSTS.505.1.S1_s_at | MmuSTS.505.1 | 4.27  | 4.19  | 0.15 | 0.05 | 1.05  | 0.936215 | 0.976475 | 0.975274 | 0.987202 |
| MmuSTS.506.1.S1_at   | MmuSTS.506.1 | 4.73  | 4.82  | 0.37 | 0.1  | -1.06 | 0.805899 | 0.02861  | 0.92039  | 0.210901 |
| MmuSTS.507.1.S1_s_at | MmuSTS.507.1 | 6.87  | 6.68  | 0.27 | 0.23 | 1.14  | 0.51819  | 0.705201 | 0.769301 | 0.829062 |
| MmuSTS.508.1.S1_at   | MmuSTS.508.1 | 8.84  | 7.76  | 0.18 | 0.07 | 2.11  | 0.000633 | 0.000061 | 0.136818 | 0.025666 |
| MmuSTS.509.1.S1_at   | MmuSTS.509.1 | 4.48  | 4.62  | 0.03 | 0.11 | -1.1  | 0.149186 | 0.019419 | 0.514001 | 0.175117 |
| MmuSTS.51.1.S1_at    | MmuSTS.51.1  | 10.22 | 9.89  | 0.08 | 0.31 | 1.25  | 0.433772 | 0.522076 | 0.720251 | 0.712853 |
| MmuSTS.510.1.S1_at   | MmuSTS.510.1 | 11.92 | 11.82 | 0.16 | 0.29 | 1.07  | 0.879886 | 0.173177 | 0.951729 | 0.44977  |
| MmuSTS.511.1.S1_s_at | MmuSTS.511.1 | 7.09  | 7.37  | 0.07 | 0.45 | -1.22 | 0.26005  | 0.174665 | 0.606878 | 0.451216 |
| MmuSTS.512.1.S1_at   | MmuSTS.512.1 | 13.8  | 14.11 | 0.23 | 0.08 | -1.25 | 0.040909 | 0.030296 | 0.350506 | 0.215937 |
| MmuSTS.513.1.S1_at   | MmuSTS.513.1 | 11.21 | 11.25 | 0.17 | 0.31 | -1.03 | 0.700156 | 0.841513 | 0.867341 | 0.909663 |
| MmuSTS.514.1.S1_at   | MmuSTS.514.1 | 10.96 | 11.05 | 0.25 | 0.18 | -1.06 | 0.288036 | 0.373533 | 0.626381 | 0.612327 |
| MmuSTS.515.1.S1_at   | MmuSTS.515.1 | 11.15 | 11.89 | 0.24 | 0.49 | -1.67 | 0.140054 | 0.162299 | 0.508025 | 0.438447 |
| MmuSTS.516.1.S1_s_at | MmuSTS.516.1 | 4.22  | 4.13  | 0.07 | 0.16 | 1.06  | 0.641896 | 0.196916 | 0.838598 | 0.472072 |
| MmuSTS.517.1.S1_at   | MmuSTS.517.1 | 2.89  | 3.05  | 0.07 | 0.14 | -1.12 | 0.301142 | 0.419568 | 0.636252 | 0.643528 |
| MmuSTS.517.1.S1_s_at | MmuSTS.517.1 | 4.23  | 4.2   | 0.1  | 0.25 | 1.02  | 0.410082 | 0.492039 | 0.706179 | 0.693403 |
| MmuSTS.518.1.S1_s_at | MmuSTS.518.1 | 4.6   | 4.51  | 0.1  | 0.08 | 1.07  | 0.62963  | 0.620766 | 0.831614 | 0.775593 |
| MmuSTS.519.1.S1_s_at | MmuSTS.519.1 | 4.77  | 5     | 0.15 | 0.12 | -1.17 | 0.164891 | 0.188643 | 0.528816 | 0.464569 |
| MmuSTS.52.1.S1_at    | MmuSTS.52.1  | 3.07  | 3.15  | 0.11 | 0.18 | -1.06 | 0.794    | 0.77574  | 0.914561 | 0.869526 |
| MmuSTS.520.1.S1_s_at | MmuSTS.520.1 | 3.56  | 3.55  | 0.09 | 0.13 | 1.01  | 0.449337 | 0.623962 | 0.73019  | 0.778285 |
| MmuSTS.521.1.S1_s_at | MmuSTS.521.1 | 4.55  | 4.41  | 0.07 | 0.14 | 1.1   | 0.158154 | 0.272039 | 0.522944 | 0.536838 |
| MmuSTS.522.1.S1_at   | MmuSTS.522.1 | 3.77  | 3.8   | 0.05 | 0.04 | -1.02 | 0.187522 | 0.238213 | 0.550527 | 0.508825 |
| MmuSTS.523.1.S1_at   | MmuSTS.523.1 | 4.95  | 4.84  | 0.29 | 0.18 | 1.08  | 0.440194 | 0.585696 | 0.724158 | 0.752987 |
| MmuSTS.523.1.S1_s_at | MmuSTS.523.1 | 3     | 3.05  | 0.07 | 0.02 | -1.04 | 0.167276 | 0.389178 | 0.531441 | 0.623403 |
| MmuSTS.525.1.S1_s_at | MmuSTS.525.1 | 2.89  | 2.86  | 0.12 | 0.09 | 1.01  | 0.747587 | 0.737114 | 0.891945 | 0.847802 |
| MmuSTS.526.1.S1_at   | MmuSTS.526.1 | 11.95 | 12.12 | 0.09 | 0.22 | -1.13 | 0.169994 | 0.158071 | 0.534161 | 0.433851 |
| MmuSTS.527.1.S1_at   | MmuSTS.527.1 | 4.99  | 3.86  | 0.64 | 0.57 | 2.19  | 0.381011 | 0.087691 | 0.68761  | 0.340941 |
| MmuSTS.528.1.S1_at   | MmuSTS.528.1 | 8.9   | 7.93  | 0.19 | 0.57 | 1.95  | 0.058242 | 0.040543 | 0.390133 | 0.246264 |
| MmuSTS.529.1.S1_at   | MmuSTS.529.1 | 11.82 | 11.48 | 0.07 | 0.74 | 1.27  | 0.449138 | 0.506277 | 0.730082 | 0.702368 |
| MmuSTS.53.1.S1_at    | MmuSTS.53.1  | 6.09  | 6.27  | 0.11 | 0.06 | -1.13 | 0.106259 | 0.084932 | 0.466831 | 0.336552 |
| MmuSTS.530.1.S1_at   | MmuSTS.530.1 | 4.85  | 4.85  | 0.11 | 0.02 | -1    | 0.462348 | 0.008604 | 0.738226 | 0.123072 |
| MmuSTS.531.1.S1_at   | MmuSTS.531.1 | 6.16  | 8.14  | 0.44 | 0.64 | -3.94 | 0.018554 | 0.012784 | 0.270581 | 0.145715 |
| MmuSTS.532.1.S1_at   | MmuSTS.532.1 | 5.53  | 5.62  | 0.09 | 0.12 | -1.06 | 0.430854 | 0.416598 | 0.718362 | 0.641647 |
| MmuSTS.533.1.S1_at   | MmuSTS.533.1 | 13.68 | 13.25 | 0.38 | 0.43 | 1.34  | 0.243094 | 0.240242 | 0.594744 | 0.510851 |

|                      |              |       |       |      |      |        |          |          |          |          |
|----------------------|--------------|-------|-------|------|------|--------|----------|----------|----------|----------|
| MmuSTS.534.1.S1_at   | MmuSTS.534.1 | 8.47  | 8.17  | 0.12 | 0.67 | 1.23   | 0.651191 | 0.822403 | 0.843066 | 0.897826 |
| MmuSTS.535.1.S1_at   | MmuSTS.535.1 | 7.24  | 8.88  | 0.43 | 1.3  | -3.11  | 0.096079 | 0.068194 | 0.454234 | 0.307336 |
| MmuSTS.536.1.S1_s_at | MmuSTS.536.1 | 3.67  | 3.56  | 0.1  | 0.17 | 1.08   | 0.327679 | 0.469587 | 0.654066 | 0.67829  |
| MmuSTS.537.1.S1_s_at | MmuSTS.537.1 | 3.24  | 3.18  | 0.07 | 0.09 | 1.05   | 0.72475  | 0.906748 | 0.879818 | 0.947216 |
| MmuSTS.538.1.S1_at   | MmuSTS.538.1 | 3.66  | 3.67  | 0.21 | 0.16 | -1     | 0.244231 | 0.127233 | 0.596039 | 0.397935 |
| MmuSTS.538.1.S1_s_at | MmuSTS.538.1 | 3.46  | 3.35  | 0.19 | 0.07 | 1.08   | 0.991527 | 0.305865 | 0.99695  | 0.562731 |
| MmuSTS.539.1.S1_at   | MmuSTS.539.1 | 7.12  | 6.63  | 0.27 | 0.51 | 1.4    | 0.234056 | 0.313432 | 0.588587 | 0.567879 |
| MmuSTS.54.1.S1_at    | MmuSTS.54.1  | 13.2  | 12.87 | 0.11 | 0.27 | 1.25   | 0.066164 | 0.043956 | 0.40632  | 0.254126 |
| MmuSTS.54.1.S1_s_at  | MmuSTS.54.1  | 13.6  | 13.41 | 0.06 | 0.31 | 1.14   | 0.106042 | 0.02165  | 0.466831 | 0.184333 |
| MmuSTS.540.1.S1_at   | MmuSTS.540.1 | 8.7   | 8.47  | 0.08 | 0.21 | 1.17   | 0.133772 | 0.234363 | 0.500334 | 0.505636 |
| MmuSTS.541.1.S1_at   | MmuSTS.541.1 | 9.75  | 9.73  | 0.11 | 0.24 | 1.02   | 0.497544 | 0.671502 | 0.758019 | 0.807948 |
| MmuSTS.542.1.S1_at   | MmuSTS.542.1 | 11.55 | 11.94 | 0.09 | 0.45 | -1.31  | 0.240303 | 0.225645 | 0.593146 | 0.498155 |
| MmuSTS.543.1.S1_at   | MmuSTS.543.1 | 4.1   | 7.07  | 0.6  | 2.63 | -7.83  | 0.185345 | 0.117587 | 0.54877  | 0.38531  |
| MmuSTS.544.1.S1_at   | MmuSTS.544.1 | 4.64  | 4.74  | 0.05 | 0.07 | -1.07  | 0.076561 | 0.045489 | 0.425098 | 0.2575   |
| MmuSTS.545.1.S1_at   | MmuSTS.545.1 | 11.54 | 9.85  | 0.96 | 1.05 | 3.23   | 0.114777 | 0.096106 | 0.478025 | 0.353322 |
| MmuSTS.546.1.S1_at   | MmuSTS.546.1 | 6.22  | 6.06  | 0.8  | 0.63 | 1.12   | 0.646889 | 0.356767 | 0.84111  | 0.598574 |
| MmuSTS.547.1.S1_at   | MmuSTS.547.1 | 5     | 4.82  | 0.44 | 0.56 | 1.13   | 0.405557 | 0.066043 | 0.70327  | 0.302387 |
| MmuSTS.548.1.S1_at   | MmuSTS.548.1 | 3.92  | 4.23  | 0.23 | 0.16 | -1.24  | 0.326822 | 0.427473 | 0.653261 | 0.649302 |
| MmuSTS.549.1.S1_at   | MmuSTS.549.1 | 9.55  | 8.38  | 0.16 | 0.23 | 2.25   | 0.001974 | 0.000389 | 0.155636 | 0.037374 |
| MmuSTS.55.1.S1_at    | MmuSTS.55.1  | 11.89 | 12.08 | 0.1  | 0.14 | -1.14  | 0.24538  | 0.047597 | 0.597013 | 0.262953 |
| MmuSTS.550.1.S1_s_at | MmuSTS.550.1 | 6.62  | 6.85  | 0.14 | 0.07 | -1.17  | 0.08149  | 0.077182 | 0.432455 | 0.322773 |
| MmuSTS.551.1.S1_at   | MmuSTS.551.1 | 6.86  | 6.88  | 0.19 | 0.09 | -1.02  | 0.593413 | 0.554969 | 0.811443 | 0.733559 |
| MmuSTS.552.1.S1_at   | MmuSTS.552.1 | 11.1  | 10.39 | 0.17 | 1.4  | 1.63   | 0.156617 | 0.188428 | 0.521515 | 0.464416 |
| MmuSTS.553.1.S1_at   | MmuSTS.553.1 | 4.78  | 4.65  | 0.38 | 0.12 | 1.09   | 0.41161  | 0.54227  | 0.707473 | 0.725385 |
| MmuSTS.554.1.S1_at   | MmuSTS.554.1 | 5.52  | 5.37  | 0.12 | 0.25 | 1.11   | 0.35648  | 0.486956 | 0.671576 | 0.690122 |
| MmuSTS.555.1.S1_at   | MmuSTS.555.1 | 3.9   | 4.03  | 0.1  | 0.34 | -1.09  | 0.189933 | 0.259345 | 0.55279  | 0.526418 |
| MmuSTS.556.1.S1_at   | MmuSTS.556.1 | 9.26  | 9.29  | 0.47 | 0.38 | -1.02  | 0.557248 | 0.425448 | 0.792388 | 0.647848 |
| MmuSTS.557.1.S1_at   | MmuSTS.557.1 | 6.38  | 6.47  | 0.08 | 0.09 | -1.06  | 0.466077 | 0.109205 | 0.740195 | 0.37308  |
| MmuSTS.558.1.S1_at   | MmuSTS.558.1 | 5.54  | 7.54  | 1.02 | 2.3  | -3.99  | 0.320584 | 0.397838 | 0.649472 | 0.629126 |
| MmuSTS.559.1.S1_at   | MmuSTS.559.1 | 10.63 | 10.59 | 0.17 | 0.11 | 1.03   | 0.32356  | 0.492671 | 0.65165  | 0.693708 |
| MmuSTS.56.1.S1_at    | MmuSTS.56.1  | 6.15  | 10.34 | 1.76 | 2.85 | -18.26 | 0.361831 | 0.284444 | 0.675478 | 0.546637 |
| MmuSTS.560.1.S1_at   | MmuSTS.560.1 | 8.14  | 8.15  | 0.16 | 0.29 | -1.01  | 0.297439 | 0.013582 | 0.633201 | 0.14912  |
| MmuSTS.561.1.S1_at   | MmuSTS.561.1 | 4.26  | 3.66  | 0.34 | 0.16 | 1.52   | 0.135884 | 0.078547 | 0.502782 | 0.325285 |
| MmuSTS.562.1.S1_at   | MmuSTS.562.1 | 10.98 | 10.38 | 0.07 | 0.6  | 1.52   | 0.104545 | 0.10876  | 0.464706 | 0.372285 |
| MmuSTS.563.1.S1_at   | MmuSTS.563.1 | 5.81  | 6.11  | 0.38 | 0.5  | -1.23  | 0.113285 | 0.154605 | 0.476362 | 0.429489 |
| MmuSTS.564.1.S1_at   | MmuSTS.564.1 | 5.14  | 5.68  | 0.22 | 0.22 | -1.44  | 0.099613 | 0.102285 | 0.459597 | 0.362395 |
| MmuSTS.565.1.S1_s_at | MmuSTS.565.1 | 6.78  | 6.68  | 0.28 | 0.11 | 1.07   | 0.512287 | 0.116844 | 0.765523 | 0.384188 |
| MmuSTS.566.1.S1_at   | MmuSTS.566.1 | 8.36  | 8.23  | 0.1  | 0.05 | 1.09   | 0.19665  | 0.044957 | 0.559808 | 0.256489 |
| MmuSTS.567.1.S1_at   | MmuSTS.567.1 | 6.54  | 6.62  | 1.75 | 1.71 | -1.06  | 0.612885 | 0.578558 | 0.822443 | 0.748589 |
| MmuSTS.568.1.S1_at   | MmuSTS.568.1 | 12.08 | 12.01 | 0.03 | 0.04 | 1.05   | 0.058384 | 0.005486 | 0.390304 | 0.102081 |
| MmuSTS.569.1.S1_at   | MmuSTS.569.1 | 3.45  | 3.38  | 0.16 | 0.18 | 1.05   | 0.81766  | 0.192509 | 0.926022 | 0.467958 |

|                      |              |       |       |      |      |       |          |          |          |          |
|----------------------|--------------|-------|-------|------|------|-------|----------|----------|----------|----------|
| MmuSTS.57.1.S1_at    | MmuSTS.57.1  | 4.12  | 4.12  | 0.15 | 0.32 | 1     | 0.686457 | 0.683856 | 0.859779 | 0.815591 |
| MmuSTS.570.1.S1_at   | MmuSTS.570.1 | 8.56  | 7.92  | 0.09 | 0.24 | 1.56  | 0.009732 | 0.003256 | 0.226235 | 0.082277 |
| MmuSTS.571.1.S1_at   | MmuSTS.571.1 | 4.76  | 4.85  | 0.15 | 0.16 | -1.07 | 0.470321 | 0.698111 | 0.742283 | 0.824615 |
| MmuSTS.572.1.S1_at   | MmuSTS.572.1 | 5.77  | 5.04  | 0.82 | 1.76 | 1.66  | 0.545563 | 0.044013 | 0.785008 | 0.254195 |
| MmuSTS.573.1.S1_at   | MmuSTS.573.1 | 4.05  | 3.99  | 0.04 | 0.04 | 1.05  | 0.063287 | 0.741853 | 0.400486 | 0.850515 |
| MmuSTS.574.1.S1_at   | MmuSTS.574.1 | 13.32 | 13    | 0.22 | 0.1  | 1.25  | 0.094793 | 0.048808 | 0.452244 | 0.265858 |
| MmuSTS.575.1.S1_at   | MmuSTS.575.1 | 4.58  | 4.84  | 0.07 | 0.08 | -1.19 | 0.015    | 0.04765  | 0.256953 | 0.263138 |
| MmuSTS.576.1.S1_at   | MmuSTS.576.1 | 3.91  | 3.81  | 0.08 | 0.08 | 1.07  | 0.282001 | 0.424985 | 0.62254  | 0.647458 |
| MmuSTS.577.1.S1_at   | MmuSTS.577.1 | 10.09 | 10.9  | 0.07 | 0.31 | -1.75 | 0.009817 | 0.003686 | 0.226445 | 0.086591 |
| MmuSTS.578.1.S1_at   | MmuSTS.578.1 | 3.2   | 3.14  | 0.14 | 0.11 | 1.04  | 0.478344 | 0.47268  | 0.747138 | 0.68007  |
| MmuSTS.579.1.S1_at   | MmuSTS.579.1 | 5.88  | 5.93  | 0.03 | 0.14 | -1.03 | 0.551873 | 0.792688 | 0.789041 | 0.880287 |
| MmuSTS.58.1.S1_s_at  | MmuSTS.58.1  | 11.14 | 10.89 | 0.14 | 0.29 | 1.18  | 0.97882  | 0.249488 | 0.992232 | 0.518532 |
| MmuSTS.580.1.S1_at   | MmuSTS.580.1 | 4.73  | 4.49  | 0.12 | 0.16 | 1.19  | 0.364296 | 0.617734 | 0.677295 | 0.773649 |
| MmuSTS.581.1.S1_at   | MmuSTS.581.1 | 10.91 | 10.11 | 0.38 | 0.31 | 1.75  | 0.034718 | 0.017633 | 0.333642 | 0.167841 |
| MmuSTS.582.1.S1_at   | MmuSTS.582.1 | 5.96  | 6.25  | 0.03 | 0.38 | -1.22 | 0.785835 | 0.724827 | 0.910907 | 0.840693 |
| MmuSTS.583.1.S1_at   | MmuSTS.583.1 | 3.5   | 3.47  | 0.02 | 0.05 | 1.02  | 0.99367  | 0.435909 | 0.997754 | 0.655618 |
| MmuSTS.584.1.S1_at   | MmuSTS.584.1 | 6.55  | 6.47  | 0.31 | 0.42 | 1.06  | 0.864276 | 0.746872 | 0.945492 | 0.853023 |
| MmuSTS.585.1.S1_at   | MmuSTS.585.1 | 11.11 | 10.97 | 0.17 | 1.11 | 1.1   | 0.288834 | 0.35935  | 0.626809 | 0.600641 |
| MmuSTS.586.1.S1_at   | MmuSTS.586.1 | 13.42 | 13.39 | 0.03 | 0.14 | 1.02  | 0.531439 | 0.717797 | 0.777199 | 0.836614 |
| MmuSTS.587.1.S1_at   | MmuSTS.587.1 | 13.27 | 12.96 | 0.08 | 0.24 | 1.24  | 0.108286 | 0.065581 | 0.469418 | 0.301476 |
| MmuSTS.588.1.S1_at   | MmuSTS.588.1 | 13.38 | 13.13 | 0.06 | 0.14 | 1.19  | 0.027174 | 0.014345 | 0.306629 | 0.152894 |
| MmuSTS.589.1.S1_at   | MmuSTS.589.1 | 5.78  | 4.12  | 0.36 | 0.61 | 3.16  | 0.016176 | 0.02811  | 0.26311  | 0.209286 |
| MmuSTS.59.1.S1_at    | MmuSTS.59.1  | 6.31  | 6.76  | 0.1  | 0.49 | -1.36 | 0.617154 | 0.739068 | 0.824551 | 0.848775 |
| MmuSTS.590.1.S1_at   | MmuSTS.590.1 | 5.48  | 3.92  | 0.84 | 0.36 | 2.95  | 0.036218 | 0.068096 | 0.339118 | 0.307142 |
| MmuSTS.591.1.S1_at   | MmuSTS.591.1 | 5.23  | 5.21  | 0.05 | 0.17 | 1.01  | 0.9664   | 0.468639 | 0.987279 | 0.677755 |
| MmuSTS.592.1.S1_at   | MmuSTS.592.1 | 5.71  | 5.81  | 0.18 | 0.06 | -1.07 | 0.991275 | 0.282083 | 0.996914 | 0.544937 |
| MmuSTS.593.1.S1_at   | MmuSTS.593.1 | 3.74  | 3.88  | 0.05 | 0.09 | -1.11 | 0.046239 | 0.026821 | 0.362674 | 0.204901 |
| MmuSTS.594.1.S1_at   | MmuSTS.594.1 | 3.97  | 3.98  | 0.01 | 0.07 | -1    | 0.383139 | 0.422371 | 0.689068 | 0.645709 |
| MmuSTS.595.1.S1_at   | MmuSTS.595.1 | 5.47  | 5.17  | 0.37 | 0.55 | 1.23  | 0.887651 | 0.445239 | 0.954863 | 0.662338 |
| MmuSTS.596.1.S1_at   | MmuSTS.596.1 | 9.62  | 8.89  | 0.14 | 0.52 | 1.65  | 0.061025 | 0.024578 | 0.394911 | 0.196149 |
| MmuSTS.597.1.S1_at   | MmuSTS.597.1 | 3.87  | 3.87  | 0.17 | 0.07 | -1    | 0.786001 | 0.840181 | 0.911048 | 0.908919 |
| MmuSTS.597.1.S1_s_at | MmuSTS.597.1 | 11.45 | 11.46 | 0.01 | 0.14 | -1    | 0.409529 | 0.001349 | 0.70588  | 0.056546 |
| MmuSTS.598.1.S1_at   | MmuSTS.598.1 | 6.01  | 6.06  | 0.34 | 0.31 | -1.03 | 0.848888 | 0.840225 | 0.939232 | 0.908948 |
| MmuSTS.599.1.S1_at   | MmuSTS.599.1 | 8.05  | 8.77  | 0.82 | 0.86 | -1.65 | 0.324453 | 0.454257 | 0.651941 | 0.66849  |
| MmuSTS.6.1.S1_at     | MmuSTS.6.1   | 12.29 | 11.97 | 0.15 | 0.64 | 1.25  | 0.136114 | 0.153681 | 0.502946 | 0.428413 |
| MmuSTS.60.1.S1_at    | MmuSTS.60.1  | 10.38 | 10.21 | 0.15 | 0.26 | 1.12  | 0.147585 | 0.166748 | 0.513287 | 0.443215 |
| MmuSTS.600.1.S1_at   | MmuSTS.600.1 | 5.32  | 5.16  | 0.13 | 0.35 | 1.12  | 0.665878 | 0.295445 | 0.850144 | 0.554885 |
| MmuSTS.601.1.S1_at   | MmuSTS.601.1 | 4.58  | 4.47  | 0.08 | 0.03 | 1.08  | 0.087135 | 0.209555 | 0.441151 | 0.483234 |
| MmuSTS.602.1.S1_at   | MmuSTS.602.1 | 12.32 | 9.53  | 0.67 | 0.38 | 6.93  | 0.002671 | 0.000571 | 0.164386 | 0.041171 |
| MmuSTS.603.1.S1_at   | MmuSTS.603.1 | 12.82 | 10.06 | 0.36 | 0.35 | 6.75  | 0.000529 | 0.000051 | 0.136818 | 0.025273 |
| MmuSTS.604.1.S1_at   | MmuSTS.604.1 | 6.22  | 5.59  | 0.3  | 0.3  | 1.54  | 0.039512 | 0.01052  | 0.347288 | 0.13398  |

|                      |              |       |       |      |      |       |          |          |          |          |
|----------------------|--------------|-------|-------|------|------|-------|----------|----------|----------|----------|
| MmuSTS.605.1.S1_at   | MmuSTS.605.1 | 9.15  | 8.88  | 0.32 | 0.36 | 1.2   | 0.311783 | 0.373088 | 0.643692 | 0.611955 |
| MmuSTS.606.1.S1_at   | MmuSTS.606.1 | 13.09 | 13.24 | 0.05 | 0.23 | -1.11 | 0.313122 | 0.050241 | 0.64497  | 0.269432 |
| MmuSTS.607.1.S1_at   | MmuSTS.607.1 | 6.21  | 6.24  | 0.2  | 0.03 | -1.03 | 0.700446 | 0.622357 | 0.867446 | 0.776862 |
| MmuSTS.608.1.S1_at   | MmuSTS.608.1 | 12.44 | 12.25 | 0.05 | 0.02 | 1.14  | 0.002643 | 0.000321 | 0.164386 | 0.035462 |
| MmuSTS.609.1.S1_at   | MmuSTS.609.1 | 4.7   | 4.84  | 0.09 | 0.11 | -1.1  | 0.060104 | 0.111236 | 0.393081 | 0.375882 |
| MmuSTS.61.1.S1_at    | MmuSTS.61.1  | 10.48 | 9.64  | 0.26 | 0.39 | 1.78  | 0.015966 | 0.002999 | 0.262019 | 0.079958 |
| MmuSTS.610.1.S1_at   | MmuSTS.610.1 | 4.99  | 5.66  | 0.53 | 0.43 | -1.59 | 0.194303 | 0.12915  | 0.557805 | 0.400611 |
| MmuSTS.611.1.S1_at   | MmuSTS.611.1 | 3.04  | 3.17  | 0.11 | 0.09 | -1.09 | 0.206704 | 0.394968 | 0.568816 | 0.627216 |
| MmuSTS.612.1.S1_at   | MmuSTS.612.1 | 7.3   | 7.75  | 1.26 | 0.52 | -1.36 | 0.795368 | 0.864589 | 0.915142 | 0.923249 |
| MmuSTS.613.1.S1_at   | MmuSTS.613.1 | 2.96  | 2.89  | 0.05 | 0.15 | 1.05  | 0.305567 | 0.347037 | 0.639223 | 0.59181  |
| MmuSTS.614.1.S1_at   | MmuSTS.614.1 | 5.15  | 8.41  | 1.28 | 0.78 | -9.6  | 0.022851 | 0.008926 | 0.288316 | 0.124951 |
| MmuSTS.615.1.S1_at   | MmuSTS.615.1 | 10.07 | 11.22 | 0.69 | 1.25 | -2.21 | 0.459947 | 0.062609 | 0.736616 | 0.297022 |
| MmuSTS.616.1.S1_at   | MmuSTS.616.1 | 5.77  | 5.92  | 0.08 | 0.35 | -1.11 | 0.536568 | 0.310684 | 0.77949  | 0.565787 |
| MmuSTS.617.1.S1_at   | MmuSTS.617.1 | 11.81 | 12.02 | 0.72 | 0.18 | -1.15 | 0.814782 | 0.624976 | 0.924758 | 0.778972 |
| MmuSTS.619.1.S1_at   | MmuSTS.619.1 | 5.17  | 5.26  | 0.07 | 0.08 | -1.07 | 0.247549 | 0.160976 | 0.59874  | 0.437116 |
| MmuSTS.62.1.S1_at    | MmuSTS.62.1  | 11.37 | 11.87 | 0.23 | 0.42 | -1.41 | 0.204714 | 0.265996 | 0.567258 | 0.531815 |
| MmuSTS.620.1.S1_at   | MmuSTS.620.1 | 2.7   | 2.71  | 0.04 | 0.16 | -1    | 0.402509 | 0.52919  | 0.701431 | 0.717207 |
| MmuSTS.621.1.S1_x_at | MmuSTS.621.1 | 2.59  | 2.61  | 0.08 | 0.04 | -1.01 | 0.353796 | 0.370631 | 0.670266 | 0.609664 |
| MmuSTS.624.1.S1_at   | MmuSTS.624.1 | 3.36  | 3.32  | 0.13 | 0.03 | 1.03  | 0.863238 | 0.820323 | 0.944982 | 0.89648  |
| MmuSTS.624.1.S1_s_at | MmuSTS.624.1 | 3.19  | 3.29  | 0.1  | 0.09 | -1.07 | 0.289677 | 0.41355  | 0.627563 | 0.639648 |
| MmuSTS.625.1.S1_at   | MmuSTS.625.1 | 4.67  | 4.75  | 0.07 | 0.17 | -1.06 | 0.879921 | 0.884875 | 0.951735 | 0.934401 |
| MmuSTS.626.1.S1_at   | MmuSTS.626.1 | 11.28 | 11.41 | 0.23 | 0.23 | -1.1  | 0.381384 | 0.405709 | 0.687881 | 0.633894 |
| MmuSTS.627.1.S1_at   | MmuSTS.627.1 | 4.63  | 4.8   | 0.15 | 0.1  | -1.12 | 0.36633  | 0.378167 | 0.679033 | 0.615438 |
| MmuSTS.628.1.S1_at   | MmuSTS.628.1 | 10.21 | 10.89 | 0.93 | 1.05 | -1.6  | 0.299516 | 0.274297 | 0.634993 | 0.538751 |
| MmuSTS.629.1.S1_at   | MmuSTS.629.1 | 7.94  | 8.75  | 0.47 | 0.6  | -1.75 | 0.083437 | 0.07257  | 0.43582  | 0.315511 |
| MmuSTS.63.1.S1_at    | MmuSTS.63.1  | 6.87  | 6.01  | 0.54 | 0.85 | 1.81  | 0.424692 | 0.473916 | 0.71467  | 0.681111 |
| MmuSTS.630.1.S1_at   | MmuSTS.630.1 | 6.34  | 6.46  | 0.19 | 0.2  | -1.08 | 0.708266 | 0.874989 | 0.871646 | 0.929084 |
| MmuSTS.631.1.S1_at   | MmuSTS.631.1 | 11.94 | 12.1  | 0.17 | 0.89 | -1.12 | 0.922462 | 0.878558 | 0.969945 | 0.930686 |
| MmuSTS.632.1.S1_at   | MmuSTS.632.1 | 9.3   | 9.69  | 0.3  | 0.57 | -1.31 | 0.125817 | 0.009378 | 0.491824 | 0.127634 |
| MmuSTS.633.1.S1_at   | MmuSTS.633.1 | 10.26 | 10.25 | 0.29 | 0.57 | 1.01  | 0.819876 | 0.820823 | 0.92676  | 0.896833 |
| MmuSTS.634.1.S1_at   | MmuSTS.634.1 | 6.83  | 6.95  | 0.07 | 0.51 | -1.09 | 0.213365 | 0.023905 | 0.573596 | 0.193679 |
| MmuSTS.635.1.S1_at   | MmuSTS.635.1 | 4.7   | 5     | 0.13 | 0.86 | -1.23 | 0.18489  | 0.180654 | 0.548379 | 0.457245 |
| MmuSTS.636.1.S1_at   | MmuSTS.636.1 | 6.75  | 7.75  | 0.61 | 0.48 | -2    | 0.17854  | 0.234245 | 0.54288  | 0.505485 |
| MmuSTS.636.1.S1_s_at | MmuSTS.636.1 | 6.18  | 6.73  | 0.81 | 0.39 | -1.46 | 0.338992 | 0.574227 | 0.661065 | 0.745688 |
| MmuSTS.637.1.S1_at   | MmuSTS.637.1 | 4.26  | 4.32  | 0.4  | 0.14 | -1.04 | 0.842472 | 0.921932 | 0.936474 | 0.955975 |
| MmuSTS.638.1.S1_at   | MmuSTS.638.1 | 3.95  | 4.01  | 0.21 | 0.27 | -1.04 | 0.357032 | 0.017758 | 0.672044 | 0.168392 |
| MmuSTS.639.1.S1_at   | MmuSTS.639.1 | 7.42  | 7.92  | 0.1  | 0.42 | -1.41 | 0.175965 | 0.395158 | 0.53945  | 0.627379 |
| MmuSTS.64.1.S1_at    | MmuSTS.64.1  | 12.5  | 11.99 | 0.08 | 0.77 | 1.43  | 0.263068 | 0.35449  | 0.609142 | 0.597257 |
| MmuSTS.640.1.S1_at   | MmuSTS.640.1 | 6.25  | 6.37  | 0.12 | 0.08 | -1.09 | 0.200224 | 0.400044 | 0.563139 | 0.630158 |
| MmuSTS.641.1.S1_at   | MmuSTS.641.1 | 7.57  | 8.41  | 0.61 | 1.73 | -1.78 | 0.666665 | 0.407606 | 0.850525 | 0.635057 |
| MmuSTS.642.1.S1_at   | MmuSTS.642.1 | 3.4   | 3.45  | 0.1  | 0.3  | -1.04 | 0.192846 | 0.211647 | 0.556141 | 0.485681 |

|                      |              |       |       |      |      |       |          |          |          |          |
|----------------------|--------------|-------|-------|------|------|-------|----------|----------|----------|----------|
| MmuSTS.643.1.S1_at   | MmuSTS.643.1 | 8.54  | 9.54  | 0.34 | 0.59 | -2.01 | 0.05077  | 0.033136 | 0.375333 | 0.225324 |
| MmuSTS.644.1.S1_at   | MmuSTS.644.1 | 10.05 | 8.77  | 0.43 | 0.07 | 2.44  | 0.006745 | 0.001148 | 0.20158  | 0.05344  |
| MmuSTS.645.1.S1_at   | MmuSTS.645.1 | 10.64 | 10.48 | 0.1  | 0.09 | 1.12  | 0.507444 | 0.007685 | 0.762839 | 0.117153 |
| MmuSTS.646.1.S1_at   | MmuSTS.646.1 | 6.31  | 7.26  | 0.23 | 0.45 | -1.93 | 0.011776 | 0.006297 | 0.237691 | 0.107763 |
| MmuSTS.647.1.S1_at   | MmuSTS.647.1 | 4     | 3.9   | 0.26 | 0.53 | 1.07  | 0.781719 | 0.647059 | 0.908921 | 0.793279 |
| MmuSTS.648.1.S1_at   | MmuSTS.648.1 | 10.84 | 10.68 | 0.39 | 0.73 | 1.11  | 0.364384 | 0.498354 | 0.677318 | 0.697442 |
| MmuSTS.649.1.S1_at   | MmuSTS.649.1 | 6.98  | 7     | 0.11 | 0.05 | -1.01 | 0.481594 | 0.685771 | 0.749268 | 0.816612 |
| MmuSTS.65.1.S1_at    | MmuSTS.65.1  | 8.88  | 8.62  | 0.28 | 0.15 | 1.2   | 0.592914 | 0.801248 | 0.811221 | 0.88568  |
| MmuSTS.650.1.S1_at   | MmuSTS.650.1 | 6     | 7.18  | 0.67 | 0.49 | -2.27 | 0.062132 | 0.012819 | 0.397269 | 0.145864 |
| MmuSTS.651.1.S1_at   | MmuSTS.651.1 | 10.62 | 11.41 | 0.17 | 0.84 | -1.73 | 0.528936 | 0.345845 | 0.775764 | 0.590998 |
| MmuSTS.652.1.S1_at   | MmuSTS.652.1 | 8     | 9.37  | 1.88 | 2.26 | -2.58 | 0.488963 | 0.429702 | 0.753397 | 0.65099  |
| MmuSTS.652.1.S1_s_at | MmuSTS.652.1 | 6.27  | 7.95  | 1.24 | 1.93 | -3.21 | 0.374977 | 0.391418 | 0.684217 | 0.625086 |
| MmuSTS.653.1.S1_at   | MmuSTS.653.1 | 6.56  | 6.7   | 0.13 | 0.27 | -1.1  | 0.42344  | 0.388775 | 0.714109 | 0.62307  |
| MmuSTS.654.1.S1_at   | MmuSTS.654.1 | 5.26  | 5.06  | 0.19 | 0.06 | 1.14  | 0.220952 | 0.299219 | 0.579857 | 0.557769 |
| MmuSTS.655.1.S1_at   | MmuSTS.655.1 | 7.49  | 6.18  | 0.03 | 0.14 | 2.48  | 0.000131 | 0.000011 | 0.112653 | 0.016526 |
| MmuSTS.656.1.S1_at   | MmuSTS.656.1 | 3.94  | 3.98  | 0.06 | 0.09 | -1.03 | 0.531817 | 0.653841 | 0.777475 | 0.797692 |
| MmuSTS.657.1.S1_at   | MmuSTS.657.1 | 10.07 | 10.8  | 0.56 | 0.25 | -1.67 | 0.058226 | 0.040032 | 0.390133 | 0.245254 |
| MmuSTS.658.1.S1_at   | MmuSTS.658.1 | 10.33 | 10.25 | 0.2  | 0.18 | 1.05  | 0.373965 | 0.12543  | 0.68329  | 0.396079 |
| MmuSTS.659.1.S1_at   | MmuSTS.659.1 | 6.81  | 6.97  | 0.19 | 0.18 | -1.12 | 0.334101 | 0.442448 | 0.658035 | 0.660417 |
| MmuSTS.66.1.S1_at    | MmuSTS.66.1  | 4.14  | 6.34  | 0.93 | 1.85 | -4.61 | 0.282812 | 0.093039 | 0.62312  | 0.3492   |
| MmuSTS.660.1.S1_at   | MmuSTS.660.1 | 3.84  | 3.71  | 0.11 | 0.25 | 1.09  | 0.872318 | 0.5114   | 0.948981 | 0.705547 |
| MmuSTS.661.1.S1_at   | MmuSTS.661.1 | 8.58  | 7.64  | 0.15 | 0.64 | 1.92  | 0.267139 | 0.124089 | 0.612309 | 0.394389 |
| MmuSTS.662.1.S1_at   | MmuSTS.662.1 | 6.99  | 7.16  | 0.16 | 0.07 | -1.12 | 0.405306 | 0.103796 | 0.703084 | 0.364519 |
| MmuSTS.663.1.S1_at   | MmuSTS.663.1 | 6.22  | 6.33  | 0.18 | 0.23 | -1.08 | 0.11998  | 0.190735 | 0.48448  | 0.466168 |
| MmuSTS.663.1.S1_x_at | MmuSTS.663.1 | 6.08  | 6.09  | 0.23 | 0.27 | -1.01 | 0.226642 | 0.333805 | 0.584603 | 0.581974 |
| MmuSTS.664.1.S1_at   | MmuSTS.664.1 | 10.13 | 11.57 | 0.34 | 0.54 | -2.7  | 0.029386 | 0.029343 | 0.313903 | 0.213228 |
| MmuSTS.665.1.S1_at   | MmuSTS.665.1 | 12.77 | 12.54 | 0.11 | 0.3  | 1.17  | 0.13516  | 0.14956  | 0.501995 | 0.424095 |
| MmuSTS.666.1.S1_at   | MmuSTS.666.1 | 8.68  | 7.57  | 0.17 | 0.34 | 2.15  | 0.006201 | 0.001816 | 0.196897 | 0.063958 |
| MmuSTS.667.1.S1_at   | MmuSTS.667.1 | 7.4   | 7.7   | 0.03 | 0.07 | -1.23 | 0.001647 | 0.038382 | 0.15365  | 0.240813 |
| MmuSTS.668.1.S1_at   | MmuSTS.668.1 | 6.41  | 6.77  | 0.48 | 0.21 | -1.28 | 0.215818 | 0.211809 | 0.575954 | 0.485784 |
| MmuSTS.669.1.S1_at   | MmuSTS.669.1 | 7.5   | 7.54  | 0.2  | 0.1  | -1.03 | 0.460788 | 0.098111 | 0.737133 | 0.356202 |
| MmuSTS.67.1.S1_at    | MmuSTS.67.1  | 5.89  | 5.81  | 0.32 | 0.09 | 1.06  | 0.44119  | 0.547024 | 0.724743 | 0.728283 |
| MmuSTS.670.1.S1_at   | MmuSTS.670.1 | 12.18 | 12.07 | 0.04 | 0.07 | 1.08  | 0.060145 | 0.000643 | 0.393081 | 0.042928 |
| MmuSTS.671.1.S1_at   | MmuSTS.671.1 | 6.43  | 6.35  | 0.52 | 0.4  | 1.06  | 0.372651 | 0.53185  | 0.682946 | 0.718957 |
| MmuSTS.672.1.S1_at   | MmuSTS.672.1 | 8.43  | 8.03  | 0.2  | 0.23 | 1.31  | 0.022189 | 0.014096 | 0.284758 | 0.15195  |
| MmuSTS.673.1.S1_at   | MmuSTS.673.1 | 10.97 | 9.68  | 0.06 | 0.24 | 2.44  | 0.001219 | 0.000194 | 0.145267 | 0.030888 |
| MmuSTS.673.1.S1_s_at | MmuSTS.673.1 | 10.51 | 8.88  | 0.11 | 0.29 | 3.1   | 0.001465 | 0.000236 | 0.150304 | 0.03241  |
| MmuSTS.674.1.S1_at   | MmuSTS.674.1 | 10.58 | 10.08 | 0.27 | 0.16 | 1.42  | 0.048742 | 0.037093 | 0.369504 | 0.237141 |
| MmuSTS.675.1.S1_at   | MmuSTS.675.1 | 12.72 | 12.59 | 0.08 | 0.14 | 1.09  | 0.203327 | 0.249228 | 0.566041 | 0.518313 |
| MmuSTS.676.1.S1_at   | MmuSTS.676.1 | 5.32  | 6.05  | 0.2  | 0.84 | -1.66 | 0.165067 | 0.201855 | 0.528994 | 0.476373 |
| MmuSTS.677.1.S1_at   | MmuSTS.677.1 | 6.32  | 6.36  | 0.17 | 0.46 | -1.02 | 0.727174 | 0.853437 | 0.88121  | 0.916601 |

|                      |              |       |       |      |      |       |          |          |          |          |
|----------------------|--------------|-------|-------|------|------|-------|----------|----------|----------|----------|
| MmuSTS.678.1.S1_at   | MmuSTS.678.1 | 3.01  | 3.2   | 0.06 | 0.05 | -1.14 | 0.010538 | 0.003094 | 0.230404 | 0.081194 |
| MmuSTS.679.1.S1_at   | MmuSTS.679.1 | 6.3   | 6.75  | 0.85 | 1.44 | -1.37 | 0.415691 | 0.576405 | 0.709528 | 0.747202 |
| MmuSTS.68.1.S1_at    | MmuSTS.68.1  | 7.48  | 9.93  | 2.26 | 3.76 | -5.49 | 0.556727 | 0.108442 | 0.792039 | 0.371943 |
| MmuSTS.680.1.S1_at   | MmuSTS.680.1 | 3.29  | 3.58  | 0.05 | 0.18 | -1.22 | 0.052405 | 0.139729 | 0.377577 | 0.413083 |
| MmuSTS.681.1.S1_at   | MmuSTS.681.1 | 6.83  | 7.95  | 1.31 | 1.58 | -2.17 | 0.412675 | 0.542446 | 0.70797  | 0.725516 |
| MmuSTS.682.1.S1_at   | MmuSTS.682.1 | 5.96  | 7.02  | 0.45 | 0.79 | -2.08 | 0.069147 | 0.06523  | 0.411264 | 0.301239 |
| MmuSTS.683.1.S1_at   | MmuSTS.683.1 | 6.56  | 5.53  | 0.29 | 0.12 | 2.04  | 0.008929 | 0.002681 | 0.221598 | 0.076408 |
| MmuSTS.684.1.S1_at   | MmuSTS.684.1 | 4.94  | 5.79  | 0.36 | 1.17 | -1.8  | 0.33849  | 0.455731 | 0.66094  | 0.669659 |
| MmuSTS.685.1.S1_at   | MmuSTS.685.1 | 8.22  | 8.23  | 0.01 | 0.16 | -1    | 0.418853 | 0.061645 | 0.711627 | 0.295095 |
| MmuSTS.686.1.S1_at   | MmuSTS.686.1 | 3.74  | 4.92  | 0.48 | 1.56 | -2.26 | 0.305018 | 0.416633 | 0.639014 | 0.64165  |
| MmuSTS.687.1.S1_at   | MmuSTS.687.1 | 3.57  | 3.82  | 0.3  | 0.08 | -1.19 | 0.227657 | 0.260729 | 0.585103 | 0.52721  |
| MmuSTS.688.1.S1_at   | MmuSTS.688.1 | 7.66  | 8.52  | 0.34 | 1.27 | -1.81 | 0.280001 | 0.376045 | 0.621317 | 0.613853 |
| MmuSTS.689.1.S1_at   | MmuSTS.689.1 | 8.76  | 7.52  | 0.16 | 0.59 | 2.37  | 0.062222 | 0.06883  | 0.397572 | 0.308714 |
| MmuSTS.690.1.S1_at   | MmuSTS.690.1 | 8.04  | 10.69 | 1.91 | 1.18 | -6.29 | 0.531654 | 0.660122 | 0.777341 | 0.801083 |
| MmuSTS.691.1.S1_at   | MmuSTS.691.1 | 11.02 | 11.26 | 0.13 | 0.29 | -1.18 | 0.201074 | 0.18257  | 0.563821 | 0.459065 |
| MmuSTS.692.1.S1_at   | MmuSTS.692.1 | 4.12  | 4.26  | 0.09 | 0.46 | -1.11 | 0.373266 | 0.516821 | 0.683245 | 0.70925  |
| MmuSTS.693.1.S1_at   | MmuSTS.693.1 | 11.78 | 12.06 | 0.07 | 0.05 | -1.22 | 0.004576 | 0.024125 | 0.1844   | 0.1945   |
| MmuSTS.694.1.S1_at   | MmuSTS.694.1 | 6.68  | 6.82  | 0.43 | 0.32 | -1.1  | 0.284604 | 0.440389 | 0.624327 | 0.658939 |
| MmuSTS.695.1.S1_at   | MmuSTS.695.1 | 8.2   | 7.16  | 0.37 | 1.14 | 2.05  | 0.169189 | 0.072908 | 0.533567 | 0.315942 |
| MmuSTS.696.1.S1_at   | MmuSTS.696.1 | 10.9  | 10.87 | 0.32 | 0.14 | 1.02  | 0.387217 | 0.263454 | 0.691895 | 0.529764 |
| MmuSTS.697.1.S1_at   | MmuSTS.697.1 | 10.71 | 11.1  | 0.07 | 0.19 | -1.31 | 0.035313 | 0.025512 | 0.335876 | 0.200366 |
| MmuSTS.698.1.S1_at   | MmuSTS.698.1 | 7.32  | 7.59  | 0.05 | 0.09 | -1.21 | 0.006026 | 0.007197 | 0.195046 | 0.114062 |
| MmuSTS.699.1.S1_at   | MmuSTS.699.1 | 3.67  | 5.91  | 0.42 | 2.14 | -4.72 | 0.169286 | 0.139548 | 0.533619 | 0.412779 |
| MmuSTS.7.1.S1_at     | MmuSTS.7.1   | 8.05  | 7.69  | 0.25 | 0.31 | 1.29  | 0.235779 | 0.094292 | 0.589652 | 0.350889 |
| MmuSTS.70.1.S1_at    | MmuSTS.70.1  | 6.23  | 6.41  | 0.14 | 0.17 | -1.14 | 0.154039 | 0.177852 | 0.518579 | 0.454167 |
| MmuSTS.700.1.S1_at   | MmuSTS.700.1 | 5.47  | 8.27  | 1.53 | 1.86 | -6.95 | 0.270114 | 0.282248 | 0.614663 | 0.544991 |
| MmuSTS.701.1.S1_at   | MmuSTS.701.1 | 8.27  | 9.88  | 0.28 | 0.59 | -3.06 | 0.023906 | 0.011283 | 0.293263 | 0.138076 |
| MmuSTS.702.1.S1_at   | MmuSTS.702.1 | 13.92 | 12    | 0.13 | 1.13 | 3.79  | 0.03973  | 0.017089 | 0.347969 | 0.165617 |
| MmuSTS.703.1.S1_at   | MmuSTS.703.1 | 6.4   | 7.61  | 0.72 | 1.51 | -2.31 | 0.486982 | 0.33365  | 0.751857 | 0.581819 |
| MmuSTS.704.1.S1_at   | MmuSTS.704.1 | 9.08  | 10.75 | 1.12 | 1.07 | -3.19 | 0.285811 | 0.247852 | 0.625208 | 0.51728  |
| MmuSTS.705.1.S1_at   | MmuSTS.705.1 | 11.24 | 10.58 | 0.05 | 0.36 | 1.58  | 0.031597 | 0.007158 | 0.322337 | 0.113788 |
| MmuSTS.706.1.S1_at   | MmuSTS.706.1 | 6.39  | 6.12  | 0.07 | 0.55 | 1.21  | 0.84633  | 0.720847 | 0.93835  | 0.838368 |
| MmuSTS.707.1.S1_at   | MmuSTS.707.1 | 7.48  | 7.65  | 0.36 | 0.23 | -1.12 | 0.200265 | 0.251393 | 0.563139 | 0.520132 |
| MmuSTS.708.1.S1_at   | MmuSTS.708.1 | 6.67  | 8.08  | 0.57 | 1.23 | -2.66 | 0.169093 | 0.148213 | 0.533399 | 0.422745 |
| MmuSTS.709.1.S1_s_at | MmuSTS.709.1 | 3.92  | 4.06  | 0.1  | 0.16 | -1.11 | 0.433413 | 0.166618 | 0.719972 | 0.443115 |
| MmuSTS.71.1.S1_at    | MmuSTS.71.1  | 12.29 | 12.01 | 0.13 | 0.1  | 1.21  | 0.072502 | 0.070138 | 0.417064 | 0.311033 |
| MmuSTS.710.1.S1_at   | MmuSTS.710.1 | 11.43 | 11.07 | 0.27 | 0.59 | 1.28  | 0.354488 | 0.45405  | 0.670587 | 0.668394 |
| MmuSTS.711.1.S1_at   | MmuSTS.711.1 | 5.27  | 5.6   | 0.05 | 0.8  | -1.26 | 0.424423 | 0.398682 | 0.714513 | 0.629458 |
| MmuSTS.712.1.S1_at   | MmuSTS.712.1 | 3.87  | 3.84  | 0.08 | 0.07 | 1.02  | 0.292483 | 0.537556 | 0.629851 | 0.722606 |
| MmuSTS.713.1.S1_at   | MmuSTS.713.1 | 7.58  | 7.39  | 0.57 | 0.61 | 1.14  | 0.779728 | 0.174593 | 0.908216 | 0.451097 |
| MmuSTS.713.1.S1_x_at | MmuSTS.713.1 | 7.5   | 7.41  | 0.17 | 0.52 | 1.06  | 0.81573  | 0.102038 | 0.925151 | 0.362102 |

|                     |              |       |       |      |      |        |          |          |          |          |
|---------------------|--------------|-------|-------|------|------|--------|----------|----------|----------|----------|
| MmuSTS.714.1.S1_at  | MmuSTS.714.1 | 6.75  | 7.91  | 0.33 | 0.87 | -2.24  | 0.037177 | 0.009057 | 0.340791 | 0.125799 |
| MmuSTS.715.1.S1_at  | MmuSTS.715.1 | 12.76 | 12.61 | 0.07 | 0.18 | 1.11   | 0.283049 | 0.285779 | 0.623159 | 0.547484 |
| MmuSTS.716.1.S1_at  | MmuSTS.716.1 | 5.89  | 5.74  | 0.1  | 0.13 | 1.11   | 0.798424 | 0.919241 | 0.916444 | 0.954653 |
| MmuSTS.717.1.S1_at  | MmuSTS.717.1 | 3.3   | 4.92  | 1.02 | 1.37 | -3.07  | 0.377256 | 0.24988  | 0.685701 | 0.518876 |
| MmuSTS.718.1.S1_at  | MmuSTS.718.1 | 8.22  | 11.32 | 1.62 | 2.82 | -8.56  | 0.464171 | 0.240893 | 0.739138 | 0.511584 |
| MmuSTS.719.1.S1_at  | MmuSTS.719.1 | 9.36  | 9.38  | 0.46 | 0.96 | -1.01  | 0.720978 | 0.747247 | 0.87787  | 0.853149 |
| MmuSTS.72.1.S1_at   | MmuSTS.72.1  | 11.2  | 11.35 | 0.22 | 0.93 | -1.11  | 0.811634 | 0.756371 | 0.923289 | 0.858223 |
| MmuSTS.720.1.S1_at  | MmuSTS.720.1 | 4.46  | 5.08  | 0.3  | 0.22 | -1.54  | 0.093301 | 0.064944 | 0.450486 | 0.300855 |
| MmuSTS.721.1.S1_at  | MmuSTS.721.1 | 6.14  | 11.16 | 1.2  | 3.78 | -32.39 | 0.394707 | 0.283221 | 0.69601  | 0.545783 |
| MmuSTS.722.1.S1_at  | MmuSTS.722.1 | 6.98  | 8.21  | 0.25 | 0.58 | -2.35  | 0.071336 | 0.002483 | 0.41512  | 0.073652 |
| MmuSTS.723.1.S1_at  | MmuSTS.723.1 | 10.87 | 10.8  | 0.17 | 0.17 | 1.05   | 0.644148 | 0.775981 | 0.839719 | 0.869682 |
| MmuSTS.725.1.S1_at  | MmuSTS.725.1 | 11.63 | 11.45 | 0.05 | 0.09 | 1.13   | 0.064585 | 0.024621 | 0.402975 | 0.19635  |
| MmuSTS.726.1.S1_at  | MmuSTS.726.1 | 5.8   | 5.77  | 0.1  | 0.14 | 1.03   | 0.736495 | 0.871263 | 0.886692 | 0.92684  |
| MmuSTS.727.1.S1_at  | MmuSTS.727.1 | 8.07  | 7.45  | 0.31 | 0.37 | 1.54   | 0.193273 | 0.024111 | 0.556746 | 0.1945   |
| MmuSTS.728.1.S1_at  | MmuSTS.728.1 | 10.31 | 10.2  | 0.22 | 0.12 | 1.07   | 0.736547 | 0.125206 | 0.886692 | 0.395684 |
| MmuSTS.729.1.S1_at  | MmuSTS.729.1 | 10.39 | 10.04 | 0.16 | 0.43 | 1.27   | 0.343425 | 0.195251 | 0.663639 | 0.470253 |
| MmuSTS.73.1.S1_s_at | MmuSTS.73.1  | 10.75 | 10.83 | 0.05 | 0.25 | -1.05  | 0.656812 | 0.487159 | 0.845614 | 0.690281 |
| MmuSTS.730.1.S1_at  | MmuSTS.730.1 | 11.22 | 11.41 | 0.07 | 0.1  | -1.14  | 0.073855 | 0.06321  | 0.419443 | 0.298119 |
| MmuSTS.731.1.S1_at  | MmuSTS.731.1 | 11.4  | 11.45 | 0.2  | 0.19 | -1.03  | 0.38999  | 0.420496 | 0.693398 | 0.644185 |
| MmuSTS.732.1.S1_at  | MmuSTS.732.1 | 5.56  | 5.84  | 0.22 | 0.33 | -1.21  | 0.560096 | 0.263008 | 0.79419  | 0.529397 |
| MmuSTS.733.1.S1_at  | MmuSTS.733.1 | 9.14  | 9.21  | 0.09 | 0.3  | -1.05  | 0.689758 | 0.245879 | 0.861769 | 0.51552  |
| MmuSTS.734.1.S1_at  | MmuSTS.734.1 | 13.42 | 13.44 | 0.04 | 0.05 | -1.01  | 0.83167  | 0.757184 | 0.931835 | 0.858648 |
| MmuSTS.735.1.S1_at  | MmuSTS.735.1 | 7.24  | 7.3   | 0.5  | 0.57 | -1.05  | 0.656579 | 0.424151 | 0.845432 | 0.646747 |
| MmuSTS.736.1.S1_at  | MmuSTS.736.1 | 11.3  | 11.74 | 0.19 | 0.16 | -1.36  | 0.071271 | 0.064692 | 0.414994 | 0.300314 |
| MmuSTS.737.1.S1_at  | MmuSTS.737.1 | 10.64 | 10.75 | 0.02 | 0.25 | -1.08  | 0.399037 | 0.564045 | 0.699064 | 0.738956 |
| MmuSTS.738.1.S1_at  | MmuSTS.738.1 | 3.6   | 3.48  | 0.08 | 0.08 | 1.08   | 0.06547  | 0.047359 | 0.404567 | 0.262353 |
| MmuSTS.739.1.S1_at  | MmuSTS.739.1 | 5.63  | 5.79  | 0.05 | 0.19 | -1.11  | 0.233688 | 0.30896  | 0.588317 | 0.564656 |
| MmuSTS.74.1.S1_at   | MmuSTS.74.1  | 10.14 | 10.31 | 0.15 | 0.52 | -1.13  | 0.616956 | 0.71107  | 0.824363 | 0.8324   |
| MmuSTS.740.1.S1_at  | MmuSTS.740.1 | 12.45 | 12.3  | 0.09 | 0.22 | 1.11   | 0.34687  | 0.18233  | 0.666049 | 0.458787 |
| MmuSTS.741.1.S1_at  | MmuSTS.741.1 | 3.81  | 3.85  | 0.32 | 0.09 | -1.03  | 0.507569 | 0.595741 | 0.76294  | 0.759208 |
| MmuSTS.742.1.S1_at  | MmuSTS.742.1 | 4.87  | 4.98  | 0.19 | 0.2  | -1.07  | 0.927014 | 0.692531 | 0.971962 | 0.821061 |
| MmuSTS.743.1.S1_at  | MmuSTS.743.1 | 12.46 | 11.29 | 0.82 | 0.38 | 2.25   | 0.09508  | 0.091553 | 0.45279  | 0.346652 |
| MmuSTS.744.1.S1_at  | MmuSTS.744.1 | 11.32 | 11.56 | 0.08 | 0.22 | -1.18  | 0.208915 | 0.198491 | 0.570476 | 0.473391 |
| MmuSTS.745.1.S1_at  | MmuSTS.745.1 | 7.08  | 4.21  | 0.69 | 0.91 | 7.29   | 0.019163 | 0.00442  | 0.273043 | 0.092904 |
| MmuSTS.746.1.S1_at  | MmuSTS.746.1 | 9.35  | 9.36  | 0.35 | 0.71 | -1     | 0.669284 | 0.670347 | 0.852138 | 0.807242 |
| MmuSTS.747.1.S1_at  | MmuSTS.747.1 | 9.13  | 8.94  | 0.16 | 0.44 | 1.14   | 0.862232 | 0.416093 | 0.944609 | 0.64135  |
| MmuSTS.748.1.S1_at  | MmuSTS.748.1 | 4.97  | 5.17  | 0.09 | 0.08 | -1.15  | 0.090221 | 0.042674 | 0.445665 | 0.251037 |
| MmuSTS.749.1.S1_at  | MmuSTS.749.1 | 11.26 | 10.08 | 0.06 | 0.23 | 2.27   | 0.001507 | 0.000287 | 0.151412 | 0.034857 |
| MmuSTS.75.1.S1_at   | MmuSTS.75.1  | 5.26  | 5.24  | 0.06 | 0.05 | 1.02   | 0.398348 | 0.652938 | 0.698654 | 0.797125 |
| MmuSTS.750.1.S1_at  | MmuSTS.750.1 | 4.46  | 4.6   | 0.24 | 0.1  | -1.11  | 0.986791 | 0.100762 | 0.99532  | 0.360174 |
| MmuSTS.751.1.S1_at  | MmuSTS.751.1 | 7.06  | 7.36  | 0.31 | 0.59 | -1.23  | 0.597918 | 0.275533 | 0.813804 | 0.539743 |

|                      |              |       |       |      |      |       |          |          |          |          |
|----------------------|--------------|-------|-------|------|------|-------|----------|----------|----------|----------|
| MmuSTS.752.1.S1_at   | MmuSTS.752.1 | 13.44 | 13.48 | 0.03 | 0.2  | -1.03 | 0.779978 | 0.934374 | 0.908408 | 0.962766 |
| MmuSTS.753.1.S1_at   | MmuSTS.753.1 | 6.84  | 6.89  | 0.2  | 0.06 | -1.04 | 0.828704 | 0.848572 | 0.930492 | 0.91405  |
| MmuSTS.754.1.S1_at   | MmuSTS.754.1 | 7.43  | 7.36  | 0.35 | 0.97 | 1.05  | 0.287016 | 0.126089 | 0.625695 | 0.39672  |
| MmuSTS.755.1.S1_at   | MmuSTS.755.1 | 6.4   | 6.38  | 0.25 | 0.27 | 1.01  | 0.579122 | 0.13706  | 0.804078 | 0.409836 |
| MmuSTS.756.1.S1_at   | MmuSTS.756.1 | 5.21  | 5.44  | 0.17 | 0.14 | -1.17 | 0.202069 | 0.153093 | 0.56434  | 0.428011 |
| MmuSTS.757.1.S1_at   | MmuSTS.757.1 | 9.04  | 9.86  | 0.29 | 0.44 | -1.76 | 0.042645 | 0.028503 | 0.355272 | 0.210658 |
| MmuSTS.758.1.S1_at   | MmuSTS.758.1 | 6.82  | 7.15  | 0.29 | 0.37 | -1.26 | 0.224228 | 0.274607 | 0.582619 | 0.539059 |
| MmuSTS.759.1.S1_at   | MmuSTS.759.1 | 4.56  | 4.58  | 0.31 | 0.12 | -1.02 | 0.941824 | 0.982216 | 0.977821 | 0.990289 |
| MmuSTS.76.1.S1_at    | MmuSTS.76.1  | 6.05  | 5.92  | 0.02 | 0.14 | 1.09  | 0.200874 | 0.06904  | 0.563681 | 0.309017 |
| MmuSTS.76.1.S1_x_at  | MmuSTS.76.1  | 6.22  | 6.23  | 0.07 | 0.1  | -1.01 | 0.972753 | 0.695823 | 0.989474 | 0.823223 |
| MmuSTS.760.1.S1_at   | MmuSTS.760.1 | 10.23 | 10.01 | 0.12 | 0.08 | 1.16  | 0.037035 | 0.031379 | 0.340567 | 0.219065 |
| MmuSTS.761.1.S1_at   | MmuSTS.761.1 | 2.91  | 2.94  | 0.12 | 0.12 | -1.02 | 0.754361 | 0.202    | 0.895359 | 0.476444 |
| MmuSTS.762.1.S1_at   | MmuSTS.762.1 | 4.07  | 4.26  | 0.24 | 0.24 | -1.14 | 0.959618 | 0.942887 | 0.984651 | 0.967564 |
| MmuSTS.763.1.S1_at   | MmuSTS.763.1 | 12.24 | 11.8  | 0.13 | 0.12 | 1.36  | 0.040636 | 0.024044 | 0.34998  | 0.194371 |
| MmuSTS.764.1.S1_at   | MmuSTS.764.1 | 10.9  | 10.84 | 0.08 | 0.26 | 1.04  | 0.653866 | 0.723638 | 0.844407 | 0.840028 |
| MmuSTS.765.1.S1_at   | MmuSTS.765.1 | 7.44  | 6.92  | 0.4  | 0.09 | 1.43  | 0.102743 | 0.087846 | 0.46254  | 0.341218 |
| MmuSTS.766.1.S1_at   | MmuSTS.766.1 | 6.15  | 5.88  | 0.27 | 0.17 | 1.21  | 0.198773 | 0.248498 | 0.561812 | 0.517769 |
| MmuSTS.767.1.S1_at   | MmuSTS.767.1 | 6.9   | 7.03  | 0.13 | 0.06 | -1.1  | 0.23128  | 0.256614 | 0.587369 | 0.524408 |
| MmuSTS.768.1.S1_at   | MmuSTS.768.1 | 4.24  | 4.49  | 0.09 | 0.09 | -1.19 | 0.047445 | 0.087589 | 0.366371 | 0.340846 |
| MmuSTS.769.1.S1_at   | MmuSTS.769.1 | 13.49 | 12.16 | 0.24 | 1.81 | 2.52  | 0.161715 | 0.119494 | 0.526573 | 0.388143 |
| MmuSTS.77.1.S1_at    | MmuSTS.77.1  | 10.96 | 11.19 | 0.12 | 0.16 | -1.17 | 0.288458 | 0.059357 | 0.626693 | 0.29054  |
| MmuSTS.770.1.S1_at   | MmuSTS.770.1 | 7.19  | 7.53  | 0.06 | 0.18 | -1.26 | 0.038937 | 0.050599 | 0.345909 | 0.270317 |
| MmuSTS.771.1.S1_at   | MmuSTS.771.1 | 11.28 | 11.44 | 0.02 | 0.29 | -1.12 | 0.439735 | 0.482268 | 0.723763 | 0.687144 |
| MmuSTS.772.1.S1_at   | MmuSTS.772.1 | 10.52 | 10.32 | 0.16 | 0.81 | 1.15  | 0.188354 | 0.157003 | 0.551348 | 0.432467 |
| MmuSTS.773.1.S1_at   | MmuSTS.773.1 | 11.45 | 11.07 | 0.11 | 0.12 | 1.31  | 0.028015 | 0.043546 | 0.309509 | 0.253261 |
| MmuSTS.774.1.S1_at   | MmuSTS.774.1 | 3.57  | 3.56  | 0.17 | 0.08 | 1.01  | 0.98225  | 0.998819 | 0.993449 | 0.999367 |
| MmuSTS.775.1.S1_at   | MmuSTS.775.1 | 3.42  | 3.57  | 0.05 | 0.15 | -1.11 | 0.705305 | 0.72077  | 0.870004 | 0.838368 |
| MmuSTS.776.1.S1_at   | MmuSTS.776.1 | 5.6   | 5.78  | 0.17 | 0.12 | -1.13 | 0.426813 | 0.621194 | 0.715983 | 0.775813 |
| MmuSTS.777.1.S1_at   | MmuSTS.777.1 | 4.58  | 4.74  | 0.16 | 0.05 | -1.11 | 0.181709 | 0.410012 | 0.546282 | 0.63704  |
| MmuSTS.778.1.S1_at   | MmuSTS.778.1 | 3.18  | 3.04  | 0.2  | 0.93 | 1.1   | 0.460007 | 0.343936 | 0.736649 | 0.589617 |
| MmuSTS.779.1.S1_at   | MmuSTS.779.1 | 5.59  | 5.17  | 0.62 | 0.45 | 1.34  | 0.764949 | 0.285378 | 0.901028 | 0.547227 |
| MmuSTS.78.1.S1_at    | MmuSTS.78.1  | 5.46  | 6.01  | 0.25 | 0.09 | -1.47 | 0.018341 | 0.112783 | 0.270007 | 0.37844  |
| MmuSTS.780.1.S1_s_at | MmuSTS.780.1 | 4.06  | 4.22  | 0.09 | 0.06 | -1.11 | 0.073162 | 0.46929  | 0.418452 | 0.678193 |
| MmuSTS.781.1.S1_at   | MmuSTS.781.1 | 4.43  | 4.43  | 0.05 | 0.09 | 1     | 0.697664 | 0.489076 | 0.865694 | 0.691588 |
| MmuSTS.782.1.S1_at   | MmuSTS.782.1 | 4.94  | 4.81  | 0.16 | 0.12 | 1.1   | 0.336427 | 0.415152 | 0.659444 | 0.640713 |
| MmuSTS.783.1.S1_at   | MmuSTS.783.1 | 3.5   | 3.55  | 0.1  | 0.06 | -1.03 | 0.559489 | 0.430352 | 0.793957 | 0.651374 |
| MmuSTS.784.1.S1_at   | MmuSTS.784.1 | 3.49  | 3.57  | 0.17 | 0.1  | -1.05 | 0.501721 | 0.802024 | 0.760131 | 0.885995 |
| MmuSTS.785.1.S1_at   | MmuSTS.785.1 | 9.83  | 9.9   | 0.09 | 0.33 | -1.05 | 0.324583 | 0.203478 | 0.651941 | 0.477701 |
| MmuSTS.786.1.S1_at   | MmuSTS.786.1 | 3.85  | 4.12  | 0.09 | 0.11 | -1.21 | 0.063996 | 0.094897 | 0.401945 | 0.352    |
| MmuSTS.787.1.S1_at   | MmuSTS.787.1 | 7.9   | 7.69  | 0.04 | 0.1  | 1.16  | 0.033236 | 0.006366 | 0.327577 | 0.108489 |
| MmuSTS.788.1.S1_at   | MmuSTS.788.1 | 6.3   | 6.31  | 0.16 | 0.06 | -1.01 | 0.289333 | 0.340488 | 0.62733  | 0.586776 |



|                      |              |       |       |      |      |       |          |          |          |          |
|----------------------|--------------|-------|-------|------|------|-------|----------|----------|----------|----------|
| MmuSTS.789.1.S1_at   | MmuSTS.789.1 | 8.69  | 9.61  | 0.91 | 0.32 | -1.9  | 0.168466 | 0.220379 | 0.532662 | 0.493783 |
| MmuSTS.79.1.S1_at    | MmuSTS.79.1  | 11.13 | 11.18 | 0.2  | 0.18 | -1.04 | 0.705166 | 0.759063 | 0.869959 | 0.859979 |
| MmuSTS.790.1.S1_at   | MmuSTS.790.1 | 7.28  | 7.19  | 0.12 | 0.15 | 1.06  | 0.751517 | 0.571851 | 0.893789 | 0.744056 |
| MmuSTS.791.1.S1_at   | MmuSTS.791.1 | 8.2   | 8.69  | 0.89 | 0.21 | -1.41 | 0.33344  | 0.037777 | 0.657597 | 0.238746 |
| MmuSTS.792.1.S1_at   | MmuSTS.792.1 | 10.56 | 10.61 | 0.19 | 0.49 | -1.04 | 0.83262  | 0.730663 | 0.932191 | 0.844055 |
| MmuSTS.793.1.S1_at   | MmuSTS.793.1 | 11.67 | 11.75 | 0.38 | 0.66 | -1.05 | 0.743013 | 0.09818  | 0.890085 | 0.356253 |
| MmuSTS.794.1.S1_at   | MmuSTS.794.1 | 5.41  | 5.5   | 0.04 | 0.14 | -1.07 | 0.713814 | 0.784451 | 0.874586 | 0.875181 |
| MmuSTS.795.1.S1_at   | MmuSTS.795.1 | 9.03  | 8.89  | 0.26 | 1.76 | 1.1   | 0.390187 | 0.264491 | 0.693438 | 0.530437 |
| MmuSTS.796.1.S1_at   | MmuSTS.796.1 | 7.56  | 8.33  | 0.29 | 0.46 | -1.71 | 0.092613 | 0.074507 | 0.449245 | 0.318173 |
| MmuSTS.797.1.S1_at   | MmuSTS.797.1 | 4.03  | 4.19  | 0.15 | 0.25 | -1.12 | 0.395735 | 0.240716 | 0.696561 | 0.511447 |
| MmuSTS.798.1.S1_at   | MmuSTS.798.1 | 10.15 | 8.98  | 0.25 | 0.58 | 2.25  | 0.126984 | 0.132518 | 0.493203 | 0.404544 |
| MmuSTS.799.1.S1_at   | MmuSTS.799.1 | 2.78  | 3.16  | 0.18 | 0.26 | -1.3  | 0.162376 | 0.147655 | 0.526658 | 0.421957 |
| MmuSTS.8.1.S1_at     | MmuSTS.8.1   | 12.39 | 11.96 | 0.24 | 0.39 | 1.34  | 0.063978 | 0.020311 | 0.401945 | 0.178899 |
| MmuSTS.80.1.S1_at    | MmuSTS.80.1  | 10.05 | 10.18 | 0.07 | 0.53 | -1.09 | 0.762384 | 0.925797 | 0.899996 | 0.958018 |
| MmuSTS.800.1.S1_at   | MmuSTS.800.1 | 7.6   | 7.31  | 0.26 | 0.48 | 1.22  | 0.655034 | 0.150129 | 0.84477  | 0.424714 |
| MmuSTS.801.1.S1_s_at | MmuSTS.801.1 | 10.41 | 7.85  | 0.53 | 1.49 | 5.9   | 0.200048 | 0.202219 | 0.563056 | 0.476628 |
| MmuSTS.802.1.S1_at   | MmuSTS.802.1 | 3.89  | 3.92  | 0.28 | 0.2  | -1.02 | 0.625315 | 0.449184 | 0.828732 | 0.664892 |
| MmuSTS.803.1.S1_at   | MmuSTS.803.1 | 5.03  | 6.38  | 0.34 | 1.49 | -2.55 | 0.249822 | 0.131459 | 0.600339 | 0.403584 |
| MmuSTS.804.1.S1_at   | MmuSTS.804.1 | 4.83  | 5.01  | 0.16 | 0.03 | -1.14 | 0.219405 | 0.275833 | 0.578771 | 0.540035 |
| MmuSTS.805.1.S1_at   | MmuSTS.805.1 | 11.88 | 11.67 | 0.08 | 0.28 | 1.15  | 0.707753 | 0.888769 | 0.87126  | 0.936623 |
| MmuSTS.806.1.S1_at   | MmuSTS.806.1 | 10.51 | 9.7   | 0.66 | 0.17 | 1.76  | 0.124509 | 0.179087 | 0.490468 | 0.455436 |
| MmuSTS.807.1.S1_at   | MmuSTS.807.1 | 4.25  | 3.81  | 0.26 | 0.29 | 1.35  | 0.129148 | 0.278081 | 0.495114 | 0.541754 |
| MmuSTS.808.1.S1_at   | MmuSTS.808.1 | 10.76 | 10.69 | 0.12 | 0.3  | 1.05  | 0.451286 | 0.000752 | 0.731547 | 0.045271 |
| MmuSTS.809.1.S1_at   | MmuSTS.809.1 | 11.56 | 11.36 | 0.15 | 0.19 | 1.14  | 0.285143 | 0.064707 | 0.624705 | 0.300314 |
| MmuSTS.81.1.S1_at    | MmuSTS.81.1  | 3.01  | 2.76  | 0.18 | 0.04 | 1.19  | 0.087525 | 0.065601 | 0.441877 | 0.301514 |
| MmuSTS.810.1.S1_at   | MmuSTS.810.1 | 7.45  | 7.21  | 0.06 | 0.49 | 1.18  | 0.361981 | 0.46209  | 0.675592 | 0.673537 |
| MmuSTS.811.1.S1_at   | MmuSTS.811.1 | 5.9   | 5.9   | 0.05 | 0.07 | 1     | 0.957486 | 0.498116 | 0.983882 | 0.697266 |
| MmuSTS.812.1.S1_at   | MmuSTS.812.1 | 5.69  | 5.73  | 0.14 | 0.13 | -1.02 | 0.79381  | 0.534372 | 0.914508 | 0.720341 |
| MmuSTS.813.1.S1_at   | MmuSTS.813.1 | 11.51 | 12.2  | 0.06 | 0.1  | -1.62 | 0.000481 | 0.003893 | 0.134999 | 0.088806 |
| MmuSTS.814.1.S1_s_at | MmuSTS.814.1 | 5.23  | 5.1   | 0.48 | 0.47 | 1.09  | 0.266807 | 0.431457 | 0.612291 | 0.652374 |
| MmuSTS.815.1.S1_at   | MmuSTS.815.1 | 8.54  | 8.69  | 0.17 | 0.33 | -1.11 | 0.201871 | 0.040909 | 0.564129 | 0.247161 |
| MmuSTS.816.1.S1_at   | MmuSTS.816.1 | 9     | 9.13  | 0.1  | 0.05 | -1.1  | 0.044505 | 0.049627 | 0.358786 | 0.267843 |
| MmuSTS.817.1.S1_at   | MmuSTS.817.1 | 7.05  | 6.65  | 0.72 | 0.42 | 1.31  | 0.554111 | 0.660816 | 0.790657 | 0.801589 |
| MmuSTS.818.1.S1_at   | MmuSTS.818.1 | 6.83  | 5.95  | 0.05 | 0.57 | 1.85  | 0.021849 | 0.019168 | 0.283931 | 0.1742   |
| MmuSTS.819.1.S1_at   | MmuSTS.819.1 | 6.65  | 6.9   | 0.3  | 0.46 | -1.19 | 0.474439 | 0.31312  | 0.745157 | 0.567684 |
| MmuSTS.82.1.S1_at    | MmuSTS.82.1  | 10.32 | 9.72  | 0.23 | 0.01 | 1.51  | 0.022844 | 0.013863 | 0.288292 | 0.150985 |
| MmuSTS.820.1.S1_at   | MmuSTS.820.1 | 9.06  | 8.88  | 0.2  | 0.42 | 1.14  | 0.235782 | 0.280342 | 0.589652 | 0.543556 |
| MmuSTS.821.1.S1_at   | MmuSTS.821.1 | 10.43 | 9.42  | 0.13 | 0.26 | 2.01  | 0.003502 | 0.00088  | 0.178634 | 0.047602 |
| MmuSTS.822.1.S1_at   | MmuSTS.822.1 | 12.23 | 12.09 | 0.04 | 0.59 | 1.1   | 0.539522 | 0.613239 | 0.78115  | 0.770484 |
| MmuSTS.823.1.S1_at   | MmuSTS.823.1 | 9.62  | 8.77  | 0.16 | 0.71 | 1.8   | 0.119137 | 0.100651 | 0.483768 | 0.360009 |
| MmuSTS.824.1.S1_at   | MmuSTS.824.1 | 9.96  | 9.56  | 0.08 | 0.25 | 1.32  | 0.139354 | 0.075033 | 0.506801 | 0.31917  |

|                      |              |       |       |      |      |        |          |          |          |          |
|----------------------|--------------|-------|-------|------|------|--------|----------|----------|----------|----------|
| MmuSTS.825.1.S1_at   | MmuSTS.825.1 | 9.99  | 10.73 | 0.24 | 0.04 | -1.66  | 0.009034 | 0.006333 | 0.222023 | 0.108074 |
| MmuSTS.825.1.S1_x_at | MmuSTS.825.1 | 9.9   | 10.58 | 0.26 | 0.07 | -1.61  | 0.009462 | 0.006625 | 0.225313 | 0.110304 |
| MmuSTS.826.1.S1_at   | MmuSTS.826.1 | 5.24  | 5.71  | 0.37 | 0.09 | -1.38  | 0.157936 | 0.087665 | 0.52291  | 0.340941 |
| MmuSTS.827.1.S1_at   | MmuSTS.827.1 | 2.99  | 2.93  | 0.09 | 0.06 | 1.04   | 0.675128 | 0.840642 | 0.854421 | 0.909176 |
| MmuSTS.827.1.S1_s_at | MmuSTS.827.1 | 3.76  | 3.76  | 0.03 | 0.01 | -1     | 0.573302 | 0.240233 | 0.801138 | 0.510851 |
| MmuSTS.828.1.S1_at   | MmuSTS.828.1 | 7.77  | 7.42  | 0.09 | 0.16 | 1.28   | 0.024257 | 0.104482 | 0.294535 | 0.36573  |
| MmuSTS.829.1.S1_at   | MmuSTS.829.1 | 7.3   | 6.21  | 0.14 | 0.57 | 2.13   | 0.02168  | 0.020083 | 0.283263 | 0.178007 |
| MmuSTS.83.1.S1_at    | MmuSTS.83.1  | 10.67 | 9.6   | 0.19 | 0.74 | 2.09   | 0.216138 | 0.262616 | 0.575954 | 0.528973 |
| MmuSTS.830.1.S1_at   | MmuSTS.830.1 | 6.43  | 11    | 1.62 | 2.72 | -23.77 | 0.253453 | 0.166083 | 0.602055 | 0.442666 |
| MmuSTS.831.1.S1_at   | MmuSTS.831.1 | 12.05 | 11.54 | 0.05 | 0.14 | 1.43   | 0.005519 | 0.000505 | 0.191603 | 0.039158 |
| MmuSTS.832.1.S1_at   | MmuSTS.832.1 | 7.55  | 7.42  | 0.33 | 0.23 | 1.09   | 0.584521 | 0.191489 | 0.80707  | 0.466823 |
| MmuSTS.833.1.S1_s_at | MmuSTS.833.1 | 10.67 | 10.85 | 0.25 | 0.03 | -1.13  | 0.10973  | 0.128472 | 0.470963 | 0.399814 |
| MmuSTS.834.1.S1_at   | MmuSTS.834.1 | 12.46 | 12.34 | 0.08 | 0.21 | 1.09   | 0.345706 | 0.245186 | 0.665264 | 0.514949 |
| MmuSTS.835.1.S1_at   | MmuSTS.835.1 | 9.38  | 10.12 | 0.97 | 0.97 | -1.66  | 0.461397 | 0.160623 | 0.737557 | 0.436745 |
| MmuSTS.836.1.S1_at   | MmuSTS.836.1 | 3.83  | 4.38  | 0.22 | 0.35 | -1.46  | 0.276956 | 0.019013 | 0.619155 | 0.173596 |
| MmuSTS.837.1.S1_at   | MmuSTS.837.1 | 10.75 | 10.71 | 0.19 | 0.21 | 1.03   | 0.644596 | 0.5093   | 0.839786 | 0.704094 |
| MmuSTS.838.1.S1_at   | MmuSTS.838.1 | 9.31  | 8.54  | 0.14 | 0.1  | 1.7    | 0.001711 | 0.010774 | 0.154381 | 0.135471 |
| MmuSTS.839.1.S1_at   | MmuSTS.839.1 | 6.97  | 7.62  | 0.38 | 0.37 | -1.57  | 0.101055 | 0.139249 | 0.461009 | 0.412427 |
| MmuSTS.84.1.S1_at    | MmuSTS.84.1  | 4.5   | 5.13  | 0.53 | 0.66 | -1.55  | 0.218823 | 0.334618 | 0.578251 | 0.582581 |
| MmuSTS.840.1.S1_at   | MmuSTS.840.1 | 12.38 | 12.36 | 0.03 | 0.2  | 1.01   | 0.923503 | 0.056956 | 0.970294 | 0.284751 |
| MmuSTS.841.1.S1_at   | MmuSTS.841.1 | 9.87  | 10.39 | 0.09 | 0.1  | -1.43  | 0.002079 | 0.000451 | 0.155636 | 0.038539 |
| MmuSTS.842.1.S1_at   | MmuSTS.842.1 | 8.21  | 7.59  | 0.2  | 0.28 | 1.53   | 0.060419 | 0.051294 | 0.393599 | 0.271872 |
| MmuSTS.843.1.S1_at   | MmuSTS.843.1 | 6.54  | 7.12  | 0.67 | 0.47 | -1.5   | 0.414777 | 0.34974  | 0.709338 | 0.593566 |
| MmuSTS.844.1.S1_at   | MmuSTS.844.1 | 9.19  | 10.73 | 0.75 | 2.09 | -2.91  | 0.567866 | 0.491491 | 0.798321 | 0.693004 |
| MmuSTS.845.1.S1_at   | MmuSTS.845.1 | 5.1   | 5.51  | 0.25 | 0.53 | -1.33  | 0.293995 | 0.392565 | 0.631046 | 0.625813 |
| MmuSTS.846.1.S1_at   | MmuSTS.846.1 | 5.77  | 5.77  | 0.21 | 0.13 | -1     | 0.777621 | 0.81005  | 0.907051 | 0.890518 |
| MmuSTS.847.1.S1_at   | MmuSTS.847.1 | 9.49  | 9.18  | 0.16 | 0.27 | 1.24   | 0.215023 | 0.29051  | 0.575507 | 0.55123  |
| MmuSTS.848.1.S1_s_at | MmuSTS.848.1 | 8.3   | 8.23  | 0.22 | 1.08 | 1.05   | 0.899444 | 0.936002 | 0.959813 | 0.963932 |
| MmuSTS.849.1.S1_at   | MmuSTS.849.1 | 4.64  | 4.61  | 0.3  | 0.32 | 1.02   | 0.659576 | 0.604014 | 0.847196 | 0.764427 |
| MmuSTS.85.1.S1_s_at  | MmuSTS.85.1  | 3.84  | 6.82  | 1.22 | 1.73 | -7.87  | 0.14296  | 0.069962 | 0.509942 | 0.31072  |
| MmuSTS.850.1.S1_at   | MmuSTS.850.1 | 6.74  | 6.83  | 0.34 | 0.35 | -1.06  | 0.163552 | 0.164836 | 0.527992 | 0.441152 |
| MmuSTS.851.1.S1_at   | MmuSTS.851.1 | 11.47 | 11.55 | 0.1  | 0.07 | -1.06  | 0.16228  | 0.214125 | 0.526638 | 0.487729 |
| MmuSTS.852.1.S1_at   | MmuSTS.852.1 | 4.99  | 5.07  | 0.11 | 0.19 | -1.06  | 0.238433 | 0.359134 | 0.591767 | 0.600506 |
| MmuSTS.853.1.S1_at   | MmuSTS.853.1 | 12.2  | 12.27 | 0.05 | 0.41 | -1.06  | 0.366587 | 0.505322 | 0.679137 | 0.702073 |
| MmuSTS.854.1.S1_at   | MmuSTS.854.1 | 6.32  | 6.1   | 0.28 | 0.21 | 1.17   | 0.345365 | 0.526147 | 0.665151 | 0.715401 |
| MmuSTS.854.1.S1_s_at | MmuSTS.854.1 | 7.65  | 6.99  | 0.3  | 0.47 | 1.58   | 0.155531 | 0.271304 | 0.520256 | 0.53644  |
| MmuSTS.855.1.S1_at   | MmuSTS.855.1 | 7.48  | 7.35  | 0.18 | 0.07 | 1.09   | 0.875296 | 0.744657 | 0.949951 | 0.852121 |
| MmuSTS.856.1.S1_at   | MmuSTS.856.1 | 6.23  | 5.55  | 0.5  | 0.63 | 1.61   | 0.926375 | 0.130547 | 0.971724 | 0.402412 |
| MmuSTS.857.1.S1_at   | MmuSTS.857.1 | 9.09  | 9     | 0.11 | 0.31 | 1.06   | 0.847014 | 0.335939 | 0.938542 | 0.583577 |
| MmuSTS.858.1.S1_at   | MmuSTS.858.1 | 6.62  | 5.52  | 0.27 | 0.11 | 2.15   | 0.001984 | 0.010536 | 0.155636 | 0.134072 |
| MmuSTS.859.1.S1_at   | MmuSTS.859.1 | 2.88  | 2.94  | 0.01 | 0.15 | -1.04  | 0.444944 | 0.70831  | 0.727353 | 0.830869 |

|                      |              |       |       |      |      |        |          |          |          |          |
|----------------------|--------------|-------|-------|------|------|--------|----------|----------|----------|----------|
| MmuSTS.86.1.S1_at    | MmuSTS.86.1  | 7.2   | 11.12 | 1.28 | 3.97 | -15.13 | 0.495857 | 0.54961  | 0.757324 | 0.729956 |
| MmuSTS.86.1.S1_x_at  | MmuSTS.86.1  | 7.31  | 11.14 | 1.09 | 4.02 | -14.18 | 0.541844 | 0.608486 | 0.783014 | 0.767082 |
| MmuSTS.860.1.S1_s_at | MmuSTS.860.1 | 7.84  | 8.46  | 0.32 | 0.7  | -1.53  | 0.232593 | 0.259604 | 0.587814 | 0.526525 |
| MmuSTS.861.1.S1_at   | MmuSTS.861.1 | 9.07  | 8.97  | 0.37 | 0.75 | 1.08   | 0.578344 | 0.71473  | 0.803822 | 0.8345   |
| MmuSTS.861.1.S1_s_at | MmuSTS.861.1 | 8.45  | 8.34  | 0.38 | 0.6  | 1.07   | 0.465109 | 0.643013 | 0.739804 | 0.790587 |
| MmuSTS.862.1.S1_at   | MmuSTS.862.1 | 4.94  | 4.79  | 0.47 | 0.39 | 1.11   | 0.642378 | 0.771849 | 0.838763 | 0.867372 |
| MmuSTS.863.1.S1_at   | MmuSTS.863.1 | 6.9   | 7.28  | 0.16 | 0.63 | -1.3   | 0.127942 | 0.142747 | 0.494096 | 0.416625 |
| MmuSTS.864.1.S1_at   | MmuSTS.864.1 | 10.84 | 10.56 | 0.08 | 0.22 | 1.21   | 0.072079 | 0.080199 | 0.416191 | 0.327801 |
| MmuSTS.865.1.S1_at   | MmuSTS.865.1 | 5.96  | 5.86  | 0.12 | 0.26 | 1.07   | 0.837501 | 0.556718 | 0.934307 | 0.734725 |
| MmuSTS.866.1.S1_at   | MmuSTS.866.1 | 4.32  | 4.26  | 0.12 | 0.79 | 1.05   | 0.449385 | 0.53602  | 0.73019  | 0.721454 |
| MmuSTS.867.1.S1_at   | MmuSTS.867.1 | 5.89  | 5.96  | 0.14 | 0.08 | -1.05  | 0.464441 | 0.489674 | 0.739248 | 0.691862 |
| MmuSTS.868.1.S1_at   | MmuSTS.868.1 | 9.49  | 9.31  | 0.24 | 0.18 | 1.14   | 0.264287 | 0.215372 | 0.610059 | 0.489067 |
| MmuSTS.869.1.S1_at   | MmuSTS.869.1 | 7.95  | 6.83  | 0.22 | 0.38 | 2.18   | 0.023452 | 0.012354 | 0.291512 | 0.14376  |
| MmuSTS.87.1.S1_at    | MmuSTS.87.1  | 11.11 | 13.47 | 0.96 | 1.24 | -5.16  | 0.285406 | 0.163168 | 0.624864 | 0.439303 |
| MmuSTS.870.1.S1_at   | MmuSTS.870.1 | 8.27  | 8.46  | 0.17 | 0.31 | -1.14  | 0.721687 | 0.123922 | 0.878248 | 0.394201 |
| MmuSTS.871.1.S1_at   | MmuSTS.871.1 | 10.48 | 10.01 | 0.3  | 0.43 | 1.39   | 0.098477 | 0.098928 | 0.458486 | 0.357049 |
| MmuSTS.872.1.S1_at   | MmuSTS.872.1 | 4.21  | 4.45  | 0.13 | 0.21 | -1.18  | 0.216577 | 0.304857 | 0.576213 | 0.561994 |
| MmuSTS.873.1.S1_at   | MmuSTS.873.1 | 10.2  | 9.86  | 0.14 | 0.07 | 1.26   | 0.010189 | 0.007659 | 0.228247 | 0.117089 |
| MmuSTS.874.1.S1_at   | MmuSTS.874.1 | 4.46  | 4.64  | 0.05 | 0.14 | -1.13  | 0.15603  | 0.130896 | 0.520741 | 0.403037 |
| MmuSTS.875.1.S1_at   | MmuSTS.875.1 | 4.6   | 4.85  | 0.12 | 0.15 | -1.19  | 0.160855 | 0.184454 | 0.525925 | 0.46048  |
| MmuSTS.876.1.S1_at   | MmuSTS.876.1 | 9.17  | 8.97  | 0.07 | 0.16 | 1.14   | 0.104231 | 0.041005 | 0.464247 | 0.247202 |
| MmuSTS.877.1.S1_at   | MmuSTS.877.1 | 11.63 | 11.91 | 0.23 | 0.54 | -1.22  | 0.646215 | 0.547072 | 0.84077  | 0.728283 |
| MmuSTS.878.1.S1_s_at | MmuSTS.878.1 | 12.44 | 12.01 | 0.22 | 0.42 | 1.35   | 0.203783 | 0.222503 | 0.5663   | 0.495581 |
| MmuSTS.879.1.S1_at   | MmuSTS.879.1 | 11.04 | 11.11 | 0.11 | 0.17 | -1.06  | 0.511918 | 0.710262 | 0.765383 | 0.831904 |
| MmuSTS.88.1.S1_at    | MmuSTS.88.1  | 9.73  | 9.42  | 0.04 | 0.23 | 1.25   | 0.205326 | 0.3181   | 0.567827 | 0.571046 |
| MmuSTS.880.1.S1_at   | MmuSTS.880.1 | 9.76  | 9.28  | 0.27 | 0.35 | 1.39   | 0.215179 | 0.009377 | 0.575592 | 0.127634 |
| MmuSTS.881.1.S1_at   | MmuSTS.881.1 | 11.96 | 11.99 | 0.17 | 0.23 | -1.02  | 0.379856 | 0.128667 | 0.68708  | 0.400083 |
| MmuSTS.882.1.S1_at   | MmuSTS.882.1 | 10.09 | 9.24  | 0.15 | 0.29 | 1.8    | 0.008259 | 0.003246 | 0.216948 | 0.082187 |
| MmuSTS.883.1.S1_at   | MmuSTS.883.1 | 7.72  | 8.22  | 0.17 | 0.23 | -1.41  | 0.025922 | 0.025393 | 0.301179 | 0.199747 |
| MmuSTS.884.1.S1_at   | MmuSTS.884.1 | 5.29  | 5.3   | 0.14 | 0.17 | -1.01  | 0.243967 | 0.276579 | 0.595699 | 0.540591 |
| MmuSTS.885.1.S1_at   | MmuSTS.885.1 | 10.03 | 9.42  | 0.06 | 0.19 | 1.52   | 0.012881 | 0.005634 | 0.244544 | 0.103705 |
| MmuSTS.886.1.S1_at   | MmuSTS.886.1 | 9.78  | 9.23  | 0.17 | 0.38 | 1.46   | 0.047092 | 0.038368 | 0.365085 | 0.240795 |
| MmuSTS.887.1.S1_at   | MmuSTS.887.1 | 4.82  | 4.82  | 0.48 | 0.13 | 1      | 0.826755 | 0.958409 | 0.9296   | 0.976452 |
| MmuSTS.888.1.S1_at   | MmuSTS.888.1 | 10.94 | 10.59 | 0.11 | 0.21 | 1.27   | 0.104697 | 0.044024 | 0.46507  | 0.254195 |
| MmuSTS.889.1.S1_at   | MmuSTS.889.1 | 8.68  | 6.74  | 1.34 | 0.34 | 3.85   | 0.238977 | 0.088907 | 0.592095 | 0.34275  |
| MmuSTS.89.1.S1_at    | MmuSTS.89.1  | 3.45  | 3.86  | 0.07 | 0.16 | -1.33  | 0.025306 | 0.016743 | 0.298754 | 0.163889 |
| MmuSTS.890.1.S1_at   | MmuSTS.890.1 | 7.48  | 6.06  | 0.07 | 0.47 | 2.69   | 0.006224 | 0.001887 | 0.197039 | 0.065004 |
| MmuSTS.891.1.S1_at   | MmuSTS.891.1 | 10.84 | 10.5  | 0.1  | 1.26 | 1.26   | 0.588357 | 0.777571 | 0.808931 | 0.870732 |
| MmuSTS.892.1.S1_at   | MmuSTS.892.1 | 6.3   | 6.21  | 0.18 | 0.14 | 1.06   | 0.519748 | 0.497859 | 0.77032  | 0.697071 |
| MmuSTS.893.1.S1_s_at | MmuSTS.893.1 | 7.12  | 5.76  | 0.07 | 0.74 | 2.57   | 0.042643 | 0.024351 | 0.355272 | 0.195315 |
| MmuSTS.894.1.S1_at   | MmuSTS.894.1 | 6.15  | 5.44  | 0.22 | 0.05 | 1.63   | 0.003042 | 0.004216 | 0.172102 | 0.091375 |

|                      |              |       |       |      |      |        |          |          |          |          |
|----------------------|--------------|-------|-------|------|------|--------|----------|----------|----------|----------|
| MmuSTS.895.1.S1_at   | MmuSTS.895.1 | 7.42  | 5.82  | 1.19 | 0.33 | 3.03   | 0.116484 | 0.062892 | 0.48032  | 0.297494 |
| MmuSTS.896.1.S1_at   | MmuSTS.896.1 | 8.29  | 8.21  | 0.23 | 0.47 | 1.05   | 0.816021 | 0.948322 | 0.925292 | 0.970536 |
| MmuSTS.897.1.S1_at   | MmuSTS.897.1 | 8.22  | 8.06  | 0.16 | 0.69 | 1.12   | 0.597848 | 0.28921  | 0.813757 | 0.550293 |
| MmuSTS.898.1.S1_at   | MmuSTS.898.1 | 6.96  | 7.79  | 0.39 | 0.6  | -1.77  | 0.058758 | 0.061069 | 0.390921 | 0.293952 |
| MmuSTS.899.1.S1_at   | MmuSTS.899.1 | 6.6   | 7.84  | 0.42 | 1.22 | -2.36  | 0.179385 | 0.218538 | 0.543593 | 0.492142 |
| MmuSTS.9.1.S1_at     | MmuSTS.9.1   | 13.07 | 13.07 | 0.03 | 0.02 | 1      | 0.963233 | 0.752621 | 0.985796 | 0.855965 |
| MmuSTS.90.1.S1_at    | MmuSTS.90.1  | 10.15 | 8.99  | 0.51 | 0.55 | 2.24   | 0.255273 | 0.046172 | 0.603156 | 0.259313 |
| MmuSTS.900.1.S1_at   | MmuSTS.900.1 | 7.38  | 7.48  | 0.15 | 0.08 | -1.07  | 0.138834 | 0.225469 | 0.50592  | 0.498129 |
| MmuSTS.901.1.S1_at   | MmuSTS.901.1 | 8.65  | 10.44 | 1.41 | 0.2  | -3.47  | 0.118365 | 0.044313 | 0.482673 | 0.255021 |
| MmuSTS.902.1.S1_at   | MmuSTS.902.1 | 6.43  | 6.47  | 0.14 | 0.21 | -1.03  | 0.746072 | 0.804918 | 0.891243 | 0.88785  |
| MmuSTS.903.1.S1_at   | MmuSTS.903.1 | 8.01  | 6.91  | 0.27 | 0.56 | 2.14   | 0.042834 | 0.04253  | 0.355382 | 0.250848 |
| MmuSTS.904.1.S1_at   | MmuSTS.904.1 | 6.76  | 6.21  | 0.28 | 0.64 | 1.47   | 0.666755 | 0.110482 | 0.850609 | 0.374684 |
| MmuSTS.905.1.S1_at   | MmuSTS.905.1 | 11.43 | 10.73 | 0.16 | 0.89 | 1.62   | 0.084487 | 0.082929 | 0.437153 | 0.332465 |
| MmuSTS.906.1.S1_at   | MmuSTS.906.1 | 4.22  | 4.19  | 0.21 | 0.13 | 1.02   | 0.49599  | 0.692364 | 0.757394 | 0.820984 |
| MmuSTS.907.1.S1_at   | MmuSTS.907.1 | 4.09  | 4.14  | 0.02 | 0.2  | -1.04  | 0.244888 | 0.277966 | 0.596503 | 0.541664 |
| MmuSTS.908.1.S1_at   | MmuSTS.908.1 | 5.97  | 5.91  | 0.21 | 0.23 | 1.05   | 0.391983 | 0.429115 | 0.694373 | 0.65062  |
| MmuSTS.909.1.S1_at   | MmuSTS.909.1 | 4.3   | 3.67  | 0.34 | 0.23 | 1.55   | 0.058858 | 0.028349 | 0.390921 | 0.210223 |
| MmuSTS.91.1.S1_at    | MmuSTS.91.1  | 6.52  | 7.43  | 0.96 | 1.7  | -1.89  | 0.687147 | 0.393684 | 0.860175 | 0.626522 |
| MmuSTS.910.1.S1_at   | MmuSTS.910.1 | 8.64  | 8.57  | 0.04 | 0.84 | 1.05   | 0.860099 | 0.960331 | 0.943524 | 0.977459 |
| MmuSTS.911.1.S1_at   | MmuSTS.911.1 | 11.68 | 11.43 | 0.19 | 0.61 | 1.19   | 0.353567 | 0.058485 | 0.67018  | 0.288549 |
| MmuSTS.912.1.S1_at   | MmuSTS.912.1 | 5.63  | 5.71  | 0.25 | 0.76 | -1.06  | 0.900374 | 0.98674  | 0.960269 | 0.992539 |
| MmuSTS.913.1.S1_at   | MmuSTS.913.1 | 12.37 | 12.29 | 0.15 | 0.06 | 1.06   | 0.510932 | 0.013661 | 0.765151 | 0.149641 |
| MmuSTS.914.1.S1_at   | MmuSTS.914.1 | 4.71  | 4.82  | 0.11 | 0.16 | -1.08  | 0.372104 | 0.581781 | 0.682724 | 0.750765 |
| MmuSTS.915.1.S1_at   | MmuSTS.915.1 | 11.63 | 10.99 | 0.1  | 0.35 | 1.56   | 0.024303 | 0.006253 | 0.294535 | 0.10728  |
| MmuSTS.916.1.S1_at   | MmuSTS.916.1 | 11.89 | 12.56 | 0.08 | 0.12 | -1.59  | 0.001375 | 0.000225 | 0.146228 | 0.032385 |
| MmuSTS.917.1.S1_at   | MmuSTS.917.1 | 7.27  | 7.2   | 0.18 | 0.21 | 1.05   | 0.156569 | 0.203071 | 0.52142  | 0.477343 |
| MmuSTS.918.1.S1_at   | MmuSTS.918.1 | 6.09  | 6.65  | 0.82 | 0.81 | -1.47  | 0.269621 | 0.027469 | 0.614187 | 0.207063 |
| MmuSTS.918.1.S1_s_at | MmuSTS.918.1 | 8.59  | 8.07  | 0.37 | 0.5  | 1.43   | 0.179587 | 0.183397 | 0.543812 | 0.459553 |
| MmuSTS.919.1.S1_at   | MmuSTS.919.1 | 7.18  | 9.52  | 1.2  | 0.32 | -5.09  | 0.064686 | 0.075777 | 0.403239 | 0.320348 |
| MmuSTS.92.1.S1_at    | MmuSTS.92.1  | 9.61  | 11.67 | 0.58 | 0.22 | -4.16  | 0.005975 | 0.00194  | 0.194485 | 0.065813 |
| MmuSTS.920.1.S1_at   | MmuSTS.920.1 | 3.42  | 4.78  | 0.42 | 0.61 | -2.58  | 0.029158 | 0.025578 | 0.313305 | 0.20065  |
| MmuSTS.921.1.S1_at   | MmuSTS.921.1 | 7.21  | 11.63 | 2.13 | 0.34 | -21.39 | 0.06143  | 0.061133 | 0.395841 | 0.293981 |
| MmuSTS.922.1.S1_at   | MmuSTS.922.1 | 2.86  | 2.88  | 0.06 | 0.31 | -1.02  | 0.537003 | 0.637015 | 0.779741 | 0.786561 |
| MmuSTS.923.1.S1_at   | MmuSTS.923.1 | 4.44  | 7.95  | 0.97 | 1.1  | -11.34 | 0.00841  | 0.007965 | 0.21832  | 0.118702 |
| MmuSTS.924.1.S1_at   | MmuSTS.924.1 | 9.92  | 9.16  | 0.39 | 0.61 | 1.7    | 0.053989 | 0.0142   | 0.381209 | 0.152173 |
| MmuSTS.925.1.S1_at   | MmuSTS.925.1 | 10.03 | 9.91  | 0.26 | 0.55 | 1.09   | 0.46265  | 0.199962 | 0.738289 | 0.474603 |
| MmuSTS.926.1.S1_at   | MmuSTS.926.1 | 9.82  | 9.65  | 0.11 | 0.14 | 1.13   | 0.034533 | 0.024167 | 0.333289 | 0.194633 |
| MmuSTS.927.1.S1_at   | MmuSTS.927.1 | 8.46  | 9.86  | 0.34 | 0.31 | -2.63  | 0.012208 | 0.002902 | 0.240358 | 0.079116 |
| MmuSTS.928.1.S1_at   | MmuSTS.928.1 | 7.98  | 8.08  | 0.07 | 0.29 | -1.07  | 0.155873 | 0.132931 | 0.52051  | 0.404616 |
| MmuSTS.929.1.S1_at   | MmuSTS.929.1 | 9.39  | 10.91 | 0.65 | 0.95 | -2.87  | 0.133196 | 0.063844 | 0.499568 | 0.29906  |
| MmuSTS.93.1.S1_at    | MmuSTS.93.1  | 8.22  | 9.84  | 0.64 | 1.52 | -3.07  | 0.190504 | 0.237644 | 0.55308  | 0.50826  |

|                      |              |       |       |      |      |       |          |          |          |          |
|----------------------|--------------|-------|-------|------|------|-------|----------|----------|----------|----------|
| MmuSTS.930.1.S1_at   | MmuSTS.930.1 | 7.8   | 8.06  | 0.43 | 0.96 | -1.19 | 0.451046 | 0.503912 | 0.731469 | 0.701193 |
| MmuSTS.931.1.S1_at   | MmuSTS.931.1 | 4.85  | 4.9   | 0.04 | 0.09 | -1.04 | 0.922255 | 0.603268 | 0.969863 | 0.764037 |
| MmuSTS.932.1.S1_s_at | MmuSTS.932.1 | 3.33  | 3.21  | 0.06 | 0.64 | 1.09  | 0.552615 | 0.708674 | 0.78961  | 0.831025 |
| MmuSTS.933.1.S1_at   | MmuSTS.933.1 | 6.01  | 5.89  | 0.64 | 0.67 | 1.09  | 0.491008 | 0.548855 | 0.754717 | 0.729463 |
| MmuSTS.934.1.S1_at   | MmuSTS.934.1 | 10.27 | 12.1  | 0.42 | 1.15 | -3.56 | 0.177454 | 0.213107 | 0.541506 | 0.487054 |
| MmuSTS.935.1.S1_at   | MmuSTS.935.1 | 9.36  | 8.66  | 0.22 | 0.4  | 1.63  | 0.057085 | 0.046529 | 0.387418 | 0.260221 |
| MmuSTS.936.1.S1_at   | MmuSTS.936.1 | 7.22  | 6.67  | 0.66 | 0.18 | 1.47  | 0.265513 | 0.285979 | 0.611153 | 0.547506 |
| MmuSTS.937.1.S1_at   | MmuSTS.937.1 | 12.68 | 12.87 | 0.17 | 1.06 | -1.14 | 0.44658  | 0.511846 | 0.728373 | 0.705797 |
| MmuSTS.938.1.S1_at   | MmuSTS.938.1 | 3.3   | 3.32  | 0.09 | 0.07 | -1.01 | 0.804374 | 0.952466 | 0.919555 | 0.973066 |
| MmuSTS.939.1.S1_at   | MmuSTS.939.1 | 3.59  | 3.74  | 0.12 | 0.08 | -1.11 | 0.119053 | 0.15174  | 0.483725 | 0.426392 |
| MmuSTS.94.1.S1_at    | MmuSTS.94.1  | 12.66 | 12.69 | 0.04 | 0.39 | -1.02 | 0.925179 | 0.638234 | 0.971045 | 0.787493 |
| MmuSTS.940.1.S1_at   | MmuSTS.940.1 | 12.16 | 12.69 | 0.41 | 0.51 | -1.44 | 0.258865 | 0.249245 | 0.606062 | 0.518324 |
| MmuSTS.941.1.S1_at   | MmuSTS.941.1 | 6.64  | 7.68  | 0.19 | 0.61 | -2.05 | 0.023214 | 0.017738 | 0.290295 | 0.168367 |
| MmuSTS.942.1.S1_at   | MmuSTS.942.1 | 6.38  | 7.56  | 0.54 | 1.04 | -2.27 | 0.26016  | 0.246862 | 0.607023 | 0.516233 |
| MmuSTS.943.1.S1_at   | MmuSTS.943.1 | 10.82 | 11.59 | 0.22 | 0.8  | -1.7  | 0.217878 | 0.280516 | 0.577569 | 0.54372  |
| MmuSTS.944.1.S1_at   | MmuSTS.944.1 | 8.24  | 8.71  | 0.11 | 0.23 | -1.39 | 0.060174 | 0.065469 | 0.393081 | 0.301415 |
| MmuSTS.945.1.S1_at   | MmuSTS.945.1 | 5.05  | 5.39  | 0.07 | 0.24 | -1.26 | 0.225065 | 0.304329 | 0.58306  | 0.561645 |
| MmuSTS.946.1.S1_at   | MmuSTS.946.1 | 8.42  | 9.33  | 0.36 | 0.44 | -1.88 | 0.049244 | 0.036022 | 0.370998 | 0.234255 |
| MmuSTS.947.1.S1_at   | MmuSTS.947.1 | 8.46  | 8.31  | 0.41 | 0.17 | 1.11  | 0.536003 | 0.733332 | 0.779351 | 0.845598 |
| MmuSTS.948.1.S1_at   | MmuSTS.948.1 | 9.7   | 9.1   | 0.2  | 0.62 | 1.52  | 0.112389 | 0.109503 | 0.474902 | 0.373339 |
| MmuSTS.949.1.S1_at   | MmuSTS.949.1 | 4.76  | 4.29  | 0.59 | 1.06 | 1.38  | 0.820481 | 0.496571 | 0.926918 | 0.696119 |
| MmuSTS.95.1.S1_at    | MmuSTS.95.1  | 13.06 | 9.95  | 0.88 | 0.68 | 8.67  | 0.024444 | 0.004617 | 0.294575 | 0.094942 |
| MmuSTS.950.1.S1_at   | MmuSTS.950.1 | 10.47 | 10.63 | 0.39 | 0.37 | -1.12 | 0.499051 | 0.681519 | 0.758833 | 0.814092 |
| MmuSTS.951.1.S1_at   | MmuSTS.951.1 | 7.99  | 7.5   | 0.2  | 0.24 | 1.41  | 0.050151 | 0.041844 | 0.373452 | 0.249172 |
| MmuSTS.952.1.S1_at   | MmuSTS.952.1 | 10.27 | 9.94  | 0.13 | 0.34 | 1.25  | 0.214749 | 0.201486 | 0.575346 | 0.476026 |
| MmuSTS.953.1.S1_at   | MmuSTS.953.1 | 7.44  | 7.01  | 0.09 | 0.27 | 1.34  | 0.24074  | 0.303433 | 0.593541 | 0.560914 |
| MmuSTS.954.1.S1_at   | MmuSTS.954.1 | 11.81 | 12.1  | 0.29 | 0.13 | -1.22 | 0.372149 | 0.462129 | 0.682724 | 0.673568 |
| MmuSTS.955.1.S1_at   | MmuSTS.955.1 | 12.11 | 11.47 | 0.07 | 0.29 | 1.56  | 0.053847 | 0.044069 | 0.380919 | 0.254198 |
| MmuSTS.956.1.S1_at   | MmuSTS.956.1 | 12.41 | 11.87 | 0.14 | 0.11 | 1.46  | 0.009054 | 0.003332 | 0.222023 | 0.083001 |
| MmuSTS.957.1.S1_at   | MmuSTS.957.1 | 12.38 | 12.4  | 0.17 | 0.14 | -1.01 | 0.873278 | 0.976464 | 0.94924  | 0.987202 |
| MmuSTS.958.1.S1_at   | MmuSTS.958.1 | 10.29 | 10.09 | 0.25 | 0.39 | 1.14  | 0.694953 | 0.808365 | 0.864696 | 0.889697 |
| MmuSTS.959.1.S1_at   | MmuSTS.959.1 | 11.09 | 10.92 | 0.28 | 0.18 | 1.13  | 0.265769 | 0.342381 | 0.611392 | 0.588445 |
| MmuSTS.96.1.S1_at    | MmuSTS.96.1  | 3.57  | 3.79  | 0.13 | 0.07 | -1.16 | 0.062549 | 0.055013 | 0.398492 | 0.280018 |
| MmuSTS.960.1.S1_at   | MmuSTS.960.1 | 12.19 | 12.07 | 0.17 | 0.13 | 1.08  | 0.077999 | 0.054599 | 0.428012 | 0.279201 |
| MmuSTS.961.1.S1_at   | MmuSTS.961.1 | 12.7  | 12.45 | 0.15 | 0.07 | 1.19  | 0.025696 | 0.025623 | 0.300275 | 0.200834 |
| MmuSTS.962.1.S1_at   | MmuSTS.962.1 | 10.6  | 10.66 | 0.17 | 0.1  | -1.04 | 0.810884 | 0.078109 | 0.922872 | 0.324578 |
| MmuSTS.963.1.S1_at   | MmuSTS.963.1 | 2.72  | 2.73  | 0.14 | 0.03 | -1.01 | 0.514252 | 0.480875 | 0.766816 | 0.686    |
| MmuSTS.963.1.S1_x_at | MmuSTS.963.1 | 2.92  | 2.79  | 0.21 | 0.08 | 1.09  | 0.418723 | 0.301613 | 0.711529 | 0.55955  |
| MmuSTS.964.1.S1_at   | MmuSTS.964.1 | 6.69  | 6.82  | 0.08 | 0.16 | -1.1  | 0.118659 | 0.190993 | 0.48294  | 0.46629  |
| MmuSTS.965.1.S1_at   | MmuSTS.965.1 | 12.08 | 12.21 | 0.19 | 0.08 | -1.09 | 0.336014 | 0.462184 | 0.65921  | 0.673601 |
| MmuSTS.966.1.S1_at   | MmuSTS.966.1 | 11.02 | 10.81 | 0.08 | 0.25 | 1.16  | 0.828966 | 0.52578  | 0.930604 | 0.715217 |

|                       |                 |       |       |      |      |        |          |          |          |          |
|-----------------------|-----------------|-------|-------|------|------|--------|----------|----------|----------|----------|
| MmuSTS.967.1.S1_at    | MmuSTS.967.1    | 4.72  | 4.7   | 0.24 | 0.16 | 1.02   | 0.921419 | 0.616532 | 0.969369 | 0.772748 |
| MmuSTS.968.1.S1_at    | MmuSTS.968.1    | 3.47  | 3.45  | 0.36 | 0.2  | 1.01   | 0.922979 | 0.993803 | 0.970084 | 0.996274 |
| MmuSTS.969.1.S1_at    | MmuSTS.969.1    | 8.31  | 7.43  | 0.14 | 0.56 | 1.85   | 0.039229 | 0.027835 | 0.346898 | 0.208365 |
| MmuSTS.97.1.S1_at     | MmuSTS.97.1     | 6.09  | 5.85  | 0.26 | 0.11 | 1.18   | 0.722752 | 0.886851 | 0.878819 | 0.935553 |
| MmuSTS.970.1.S1_at    | MmuSTS.970.1    | 11.95 | 11.27 | 0.04 | 1.03 | 1.6    | 0.274828 | 0.36264  | 0.617628 | 0.603188 |
| MmuSTS.971.1.S1_at    | MmuSTS.971.1    | 5.55  | 5.67  | 0.11 | 0.18 | -1.09  | 0.838964 | 0.877933 | 0.934983 | 0.930322 |
| MmuSTS.972.1.S1_at    | MmuSTS.972.1    | 7.16  | 6.09  | 0.55 | 0.23 | 2.1    | 0.018537 | 0.008522 | 0.270581 | 0.122518 |
| MmuSTS.973.1.S1_s_at  | MmuSTS.973.1    | 7.95  | 5.87  | 0.26 | 0.57 | 4.24   | 0.009098 | 0.004068 | 0.222023 | 0.090288 |
| MmuSTS.974.1.S1_at    | MmuSTS.974.1    | 11.13 | 10.72 | 0.1  | 0.12 | 1.32   | 0.008748 | 0.003775 | 0.220948 | 0.08749  |
| MmuSTS.975.1.S1_at    | MmuSTS.975.1    | 7.87  | 7.34  | 0.22 | 0.09 | 1.45   | 0.04635  | 0.00675  | 0.363009 | 0.11113  |
| MmuSTS.976.1.S1_at    | MmuSTS.976.1    | 9.16  | 8.24  | 0.22 | 0.29 | 1.89   | 0.016656 | 0.010257 | 0.26475  | 0.132655 |
| MmuSTS.977.1.S1_at    | MmuSTS.977.1    | 5.93  | 6.06  | 0.05 | 0.22 | -1.09  | 0.258104 | 0.385939 | 0.605434 | 0.621161 |
| MmuSTS.978.1.S1_at    | MmuSTS.978.1    | 8.32  | 8.57  | 0.22 | 0.3  | -1.19  | 0.748084 | 0.52748  | 0.89226  | 0.716154 |
| MmuSTS.979.1.S1_at    | MmuSTS.979.1    | 12.86 | 12.96 | 0.09 | 0.13 | -1.07  | 0.606273 | 0.687574 | 0.818776 | 0.81762  |
| MmuSTS.98.1.S1_at     | MmuSTS.98.1     | 10.05 | 9.89  | 0.13 | 0.27 | 1.12   | 0.138118 | 0.03627  | 0.505616 | 0.235    |
| MmuSTS.980.1.S1_s_at  | MmuSTS.980.1    | 7.24  | 7.26  | 0.05 | 0.05 | -1.01  | 0.487467 | 0.830812 | 0.75211  | 0.902905 |
| MmuSTS.981.1.S1_s_at  | MmuSTS.981.1    | 4.54  | 4.62  | 0.11 | 0.13 | -1.05  | 0.494597 | 0.560069 | 0.756791 | 0.736464 |
| MmuSTS.982.1.S1_at    | MmuSTS.982.1    | 10.98 | 10.58 | 0.74 | 0.71 | 1.32   | 0.524793 | 0.44962  | 0.773287 | 0.665151 |
| MmuSTS.983.1.S1_at    | MmuSTS.983.1    | 8.37  | 8.03  | 1.24 | 0.79 | 1.26   | 0.663176 | 0.514056 | 0.848941 | 0.707422 |
| MmuSTS.984.1.S1_at    | MmuSTS.984.1    | 6.56  | 6.54  | 0.01 | 0.12 | 1.01   | 0.274614 | 0.32744  | 0.617554 | 0.577284 |
| MmuSTS.985.1.S1_at    | MmuSTS.985.1    | 3.77  | 4.38  | 0.22 | 1.1  | -1.53  | 0.198027 | 0.129176 | 0.561022 | 0.400611 |
| MmuSTS.986.1.S1_at    | MmuSTS.986.1    | 5.91  | 5.85  | 0.13 | 0.19 | 1.04   | 0.867158 | 0.971365 | 0.946979 | 0.984419 |
| MmuSTS.987.1.S1_at    | MmuSTS.987.1    | 4.26  | 4.46  | 0.21 | 0.22 | -1.15  | 0.650502 | 0.801711 | 0.842789 | 0.885902 |
| MmuSTS.988.1.S1_at    | MmuSTS.988.1    | 5.14  | 4.96  | 0.52 | 0.31 | 1.14   | 0.810864 | 0.093052 | 0.922872 | 0.3492   |
| MmuSTS.989.1.S1_at    | MmuSTS.989.1    | 10.41 | 10.69 | 0.05 | 0.26 | -1.22  | 0.123765 | 0.121794 | 0.489534 | 0.391074 |
| MmuSTS.99.1.S1_at     | MmuSTS.99.1     | 3.21  | 3.2   | 0.22 | 0.08 | 1      | 0.375928 | 0.088185 | 0.684819 | 0.341721 |
| MmuSTS.990.1.S1_at    | MmuSTS.990.1    | 11.84 | 11.04 | 0.43 | 0.52 | 1.75   | 0.351925 | 0.482231 | 0.669313 | 0.687128 |
| MmuSTS.991.1.S1_at    | MmuSTS.991.1    | 6.93  | 10.76 | 1.63 | 3.01 | -14.29 | 0.482249 | 0.31438  | 0.749398 | 0.56831  |
| MmuSTS.992.1.S1_at    | MmuSTS.992.1    | 11.58 | 11.06 | 0.07 | 0.17 | 1.44   | 0.012517 | 0.004967 | 0.24203  | 0.098202 |
| MmuSTS.993.1.S1_at    | MmuSTS.993.1    | 3.37  | 3.22  | 0.89 | 0.23 | 1.11   | 0.377625 | 0.452695 | 0.685995 | 0.667253 |
| MmuSTS.994.1.S1_at    | MmuSTS.994.1    | 7.93  | 7.64  | 0.17 | 0.28 | 1.22   | 0.545818 | 0.624302 | 0.785219 | 0.778555 |
| MmuSTS.995.1.S1_at    | MmuSTS.995.1    | 7.38  | 6.97  | 0.06 | 0.1  | 1.33   | 0.002581 | 0.000139 | 0.164386 | 0.029296 |
| MmuSTS.996.1.S1_at    | MmuSTS.996.1    | 12.4  | 11.84 | 0.11 | 0.11 | 1.47   | 0.008677 | 0.003176 | 0.220211 | 0.081873 |
| MmuSTS.997.1.S1_at    | MmuSTS.997.1    | 5     | 5.02  | 0.03 | 0.11 | -1.01  | 0.59745  | 0.048816 | 0.813537 | 0.265858 |
| MmuSTS.998.1.S1_at    | MmuSTS.998.1    | 5.71  | 5.77  | 0.28 | 0.09 | -1.04  | 0.885133 | 0.326094 | 0.95398  | 0.576315 |
| MmuSTS.999.1.S1_at    | MmuSTS.999.1    | 10.77 | 10.9  | 0.25 | 0.57 | -1.09  | 0.672592 | 0.182021 | 0.853193 | 0.458566 |
| MmugDNA.10.1.S1_s_at  | MmugDNA.10.1    | 6.13  | 6.27  | 0.17 | 0.09 | -1.1   | 0.454444 | 0.653578 | 0.733188 | 0.797512 |
| MmugDNA.100.1.S1_at   | MmugDNA.100.1   | 5.31  | 6.03  | 1.06 | 1.58 | -1.64  | 0.467482 | 0.644034 | 0.740695 | 0.791291 |
| MmugDNA.10000.1.S1_at | MmugDNA.10000.1 | 12.53 | 12.61 | 0.08 | 0.4  | -1.06  | 0.632931 | 0.675682 | 0.833431 | 0.810429 |
| MmugDNA.10001.1.S1_at | MmugDNA.10001.1 | 10.53 | 10.25 | 0    | 0.27 | 1.21   | 0.149365 | 0.128609 | 0.514001 | 0.400031 |
| MmugDNA.10004.1.S1_at | MmugDNA.10004.1 | 3.46  | 3.45  | 0.14 | 0.01 | 1.01   | 0.729817 | 0.706114 | 0.88278  | 0.829634 |

|                         |                 |       |       |      |      |        |          |          |          |          |
|-------------------------|-----------------|-------|-------|------|------|--------|----------|----------|----------|----------|
| MmugDNA.10006.1.S1_at   | MmugDNA.10006.1 | 12.26 | 11.93 | 0.07 | 0.18 | 1.26   | 0.06559  | 0.059769 | 0.404648 | 0.291114 |
| MmugDNA.10008.1.S1_at   | MmugDNA.10008.1 | 9.51  | 11.08 | 0.28 | 0.51 | -2.98  | 0.019847 | 0.010024 | 0.275714 | 0.131279 |
| MmugDNA.10011.1.S1_at   | MmugDNA.10011.1 | 10.04 | 8.98  | 0.27 | 0.49 | 2.08   | 0.009801 | 0.003661 | 0.226444 | 0.086526 |
| MmugDNA.10012.1.S1_at   | MmugDNA.10012.1 | 6.32  | 5.45  | 0.53 | 0.86 | 1.83   | 0.189653 | 0.376157 | 0.552487 | 0.613978 |
| MmugDNA.10014.1.S1_s_at | MmugDNA.10014.1 | 9.37  | 10.38 | 0.31 | 0.09 | -2     | 0.007637 | 0.002129 | 0.210743 | 0.068239 |
| MmugDNA.10018.1.S1_at   | MmugDNA.10018.1 | 10.93 | 9.69  | 0.16 | 1.11 | 2.37   | 0.043566 | 0.034171 | 0.356798 | 0.228728 |
| MmugDNA.10025.1.S1_at   | MmugDNA.10025.1 | 12.44 | 12.57 | 0.06 | 0.29 | -1.1   | 0.555363 | 0.2595   | 0.791366 | 0.526418 |
| MmugDNA.10031.1.S1_at   | MmugDNA.10031.1 | 12.25 | 12.49 | 0.04 | 0.43 | -1.18  | 0.980044 | 0.999127 | 0.992757 | 0.999599 |
| MmugDNA.10032.1.S1_at   | MmugDNA.10032.1 | 3.68  | 3.76  | 0.12 | 0.14 | -1.06  | 0.895085 | 0.194757 | 0.95808  | 0.469774 |
| MmugDNA.10033.1.S1_at   | MmugDNA.10033.1 | 10.13 | 10.5  | 0.22 | 0.26 | -1.29  | 0.357167 | 0.544098 | 0.67213  | 0.726614 |
| MmugDNA.10040.1.S1_at   | MmugDNA.10040.1 | 10.18 | 8.92  | 0.12 | 0.27 | 2.39   | 0.001871 | 0.001166 | 0.155636 | 0.053615 |
| MmugDNA.10044.1.S1_at   | MmugDNA.10044.1 | 8.03  | 7.16  | 0.11 | 0.06 | 1.83   | 0.000237 | 0.000022 | 0.125103 | 0.019635 |
| MmugDNA.10059.1.S1_at   | MmugDNA.10059.1 | 10.23 | 9.44  | 0.25 | 0.34 | 1.73   | 0.025913 | 0.012815 | 0.301177 | 0.145843 |
| MmugDNA.10064.1.S1_at   | MmugDNA.10064.1 | 3.34  | 3.44  | 0.06 | 0.09 | -1.07  | 0.054452 | 0.057814 | 0.381851 | 0.286845 |
| MmugDNA.10069.1.S1_at   | MmugDNA.10069.1 | 9.2   | 8.26  | 0.26 | 0.41 | 1.91   | 0.068097 | 0.080782 | 0.409262 | 0.328657 |
| MmugDNA.10073.1.S1_s_at | MmugDNA.10073.1 | 11.14 | 11.84 | 0.29 | 0.39 | -1.62  | 0.054395 | 0.034232 | 0.381851 | 0.228869 |
| MmugDNA.10078.1.S1_at   | MmugDNA.10078.1 | 5.91  | 5.86  | 0.06 | 0.08 | 1.04   | 0.389936 | 0.245813 | 0.693367 | 0.515519 |
| MmugDNA.10084.1.S1_at   | MmugDNA.10084.1 | 10.3  | 10.37 | 0.36 | 0.28 | -1.05  | 0.376427 | 0.36889  | 0.685219 | 0.608429 |
| MmugDNA.10096.1.S1_at   | MmugDNA.10096.1 | 10.19 | 10.63 | 0.29 | 0.23 | -1.35  | 0.133939 | 0.1313   | 0.500505 | 0.403407 |
| MmugDNA.10101.1.S1_at   | MmugDNA.10101.1 | 4.62  | 4.56  | 0.09 | 0.09 | 1.04   | 0.649545 | 0.867436 | 0.842493 | 0.924699 |
| MmugDNA.10110.1.S1_at   | MmugDNA.10110.1 | 9.13  | 13.09 | 1.29 | 2.77 | -15.59 | 0.404229 | 0.195243 | 0.7026   | 0.470253 |
| MmugDNA.10114.1.S1_at   | MmugDNA.10114.1 | 10.22 | 9.08  | 0.59 | 1.26 | 2.21   | 0.274842 | 0.310552 | 0.617628 | 0.565771 |
| MmugDNA.10116.1.S1_at   | MmugDNA.10116.1 | 10.09 | 9.24  | 0.58 | 0.23 | 1.81   | 0.09738  | 0.13086  | 0.45638  | 0.403037 |
| MmugDNA.10119.1.S1_at   | MmugDNA.10119.1 | 4.33  | 4.28  | 0.13 | 0.2  | 1.04   | 0.65841  | 0.800318 | 0.846592 | 0.885129 |
| MmugDNA.1012.1.S1_at    | MmugDNA.1012.1  | 12.82 | 12.74 | 0.05 | 0.12 | 1.06   | 0.228107 | 0.112538 | 0.585454 | 0.377928 |
| MmugDNA.10122.1.S1_at   | MmugDNA.10122.1 | 10.44 | 9.84  | 0.05 | 0.42 | 1.52   | 0.233885 | 0.288712 | 0.588328 | 0.549856 |
| MmugDNA.10130.1.S1_at   | MmugDNA.10130.1 | 10.5  | 12.17 | 0.63 | 0.32 | -3.18  | 0.009395 | 0.006649 | 0.224725 | 0.110505 |
| MmugDNA.10134.1.S1_at   | MmugDNA.10134.1 | 10.24 | 10.48 | 0.16 | 0.13 | -1.18  | 0.07939  | 0.079207 | 0.429386 | 0.32639  |
| MmugDNA.10137.1.S1_at   | MmugDNA.10137.1 | 5.19  | 4.85  | 0.13 | 0.4  | 1.26   | 0.641516 | 0.848458 | 0.838311 | 0.913984 |
| MmugDNA.10138.1.S1_at   | MmugDNA.10138.1 | 9.38  | 9.42  | 0.19 | 0.07 | -1.03  | 0.783265 | 0.292636 | 0.909454 | 0.552705 |
| MmugDNA.10150.1.S1_s_at | MmugDNA.10150.1 | 5.39  | 5.41  | 0.1  | 0.05 | -1.02  | 0.996071 | 0.295369 | 0.998451 | 0.554814 |
| MmugDNA.10153.1.S1_at   | MmugDNA.10153.1 | 3.45  | 3.44  | 0.01 | 0.13 | 1.01   | 0.401788 | 0.355808 | 0.70103  | 0.597864 |
| MmugDNA.10156.1.S1_at   | MmugDNA.10156.1 | 11    | 11.12 | 0.3  | 1.42 | -1.08  | 0.454321 | 0.404674 | 0.733184 | 0.633175 |
| MmugDNA.10158.1.S1_at   | MmugDNA.10158.1 | 11.54 | 10.79 | 0.34 | 0.26 | 1.68   | 0.049071 | 0.038034 | 0.370633 | 0.239596 |
| MmugDNA.10162.1.S1_at   | MmugDNA.10162.1 | 5.48  | 6.51  | 0.4  | 0.31 | -2.05  | 0.051012 | 0.044436 | 0.375705 | 0.25521  |
| MmugDNA.10177.1.S1_at   | MmugDNA.10177.1 | 9.02  | 9.56  | 0.36 | 0.61 | -1.45  | 0.239218 | 0.309558 | 0.592413 | 0.564987 |
| MmugDNA.10182.1.S1_at   | MmugDNA.10182.1 | 10.88 | 11.46 | 0.14 | 0.12 | -1.5   | 0.006476 | 0.012003 | 0.199625 | 0.141798 |
| MmugDNA.10186.1.S1_at   | MmugDNA.10186.1 | 11.51 | 10.26 | 0.22 | 0.23 | 2.39   | 0.001562 | 0.000257 | 0.151907 | 0.033501 |
| MmugDNA.10195.1.S1_at   | MmugDNA.10195.1 | 11.16 | 10.62 | 0.08 | 0.14 | 1.46   | 0.003462 | 0.000203 | 0.178436 | 0.03171  |
| MmugDNA.10196.1.S1_at   | MmugDNA.10196.1 | 11.41 | 11.39 | 0.15 | 0.08 | 1.01   | 0.428011 | 0.114316 | 0.716548 | 0.380835 |
| MmugDNA.10197.1.S1_at   | MmugDNA.10197.1 | 6.59  | 8.36  | 0.37 | 1.6  | -3.41  | 0.183221 | 0.183317 | 0.547309 | 0.459553 |

|                       |                 |       |       |      |      |       |          |          |          |          |
|-----------------------|-----------------|-------|-------|------|------|-------|----------|----------|----------|----------|
| MmugDNA.10200.1.S1_at | MmugDNA.10200.1 | 6.48  | 7.1   | 0.13 | 1.42 | -1.54 | 0.3158   | 0.381979 | 0.646695 | 0.618252 |
| MmugDNA.10209.1.S1_at | MmugDNA.10209.1 | 7.45  | 8.57  | 0.79 | 0.35 | -2.17 | 0.064365 | 0.052863 | 0.402966 | 0.275521 |
| MmugDNA.10212.1.S1_at | MmugDNA.10212.1 | 5.45  | 5.79  | 0.16 | 0.21 | -1.26 | 0.09827  | 0.103418 | 0.457836 | 0.364309 |
| MmugDNA.10214.1.S1_at | MmugDNA.10214.1 | 6.55  | 6.52  | 0.13 | 0.17 | 1.02  | 0.942017 | 0.766671 | 0.977822 | 0.864438 |
| MmugDNA.10216.1.S1_at | MmugDNA.10216.1 | 7.04  | 7.12  | 0.33 | 0.1  | -1.05 | 0.603316 | 0.728324 | 0.817111 | 0.842956 |
| MmugDNA.10218.1.S1_at | MmugDNA.10218.1 | 7.38  | 7.31  | 0.03 | 0.14 | 1.06  | 0.301936 | 0.310737 | 0.636792 | 0.565809 |
| MmugDNA.10220.1.S1_at | MmugDNA.10220.1 | 8.37  | 8.72  | 0.24 | 0.53 | -1.27 | 0.078771 | 0.040354 | 0.428609 | 0.245984 |
| MmugDNA.10222.1.S1_at | MmugDNA.10222.1 | 12.27 | 11.72 | 0.18 | 0.44 | 1.46  | 0.351517 | 0.501559 | 0.669126 | 0.699719 |
| MmugDNA.10223.1.S1_at | MmugDNA.10223.1 | 10.11 | 9.15  | 0.06 | 0.27 | 1.94  | 0.003825 | 0.01347  | 0.179914 | 0.148626 |
| MmugDNA.10227.1.S1_at | MmugDNA.10227.1 | 3.93  | 4.45  | 0.22 | 0.65 | -1.43 | 0.090513 | 0.073018 | 0.445901 | 0.316017 |
| MmugDNA.10236.1.S1_at | MmugDNA.10236.1 | 9.38  | 9.61  | 0.18 | 0.45 | -1.17 | 0.242693 | 0.317604 | 0.594515 | 0.570787 |
| MmugDNA.10240.1.S1_at | MmugDNA.10240.1 | 5.66  | 5.79  | 0.05 | 0.28 | -1.09 | 0.801494 | 0.687856 | 0.918152 | 0.817746 |
| MmugDNA.10243.1.S1_at | MmugDNA.10243.1 | 10.09 | 9.64  | 0.06 | 0.14 | 1.37  | 0.008889 | 0.007905 | 0.221598 | 0.118524 |
| MmugDNA.10249.1.S1_at | MmugDNA.10249.1 | 11.47 | 10.48 | 0.23 | 1.54 | 1.98  | 0.111557 | 0.116377 | 0.473787 | 0.383671 |
| MmugDNA.10253.1.S1_at | MmugDNA.10253.1 | 8.39  | 8.14  | 0.22 | 0.32 | 1.19  | 0.422128 | 0.582389 | 0.713412 | 0.751018 |
| MmugDNA.10257.1.S1_at | MmugDNA.10257.1 | 5.99  | 6.18  | 0.31 | 0.5  | -1.14 | 0.814034 | 0.238093 | 0.924546 | 0.50868  |
| MmugDNA.10259.1.S1_at | MmugDNA.10259.1 | 10.6  | 10.54 | 0.05 | 0.29 | 1.05  | 0.639751 | 0.526286 | 0.837347 | 0.715497 |
| MmugDNA.10260.1.S1_at | MmugDNA.10260.1 | 11.35 | 10.84 | 0.05 | 0.77 | 1.43  | 0.187654 | 0.159033 | 0.550643 | 0.435217 |
| MmugDNA.10261.1.S1_at | MmugDNA.10261.1 | 8.62  | 8.62  | 0.14 | 0.18 | -1    | 0.578488 | 0.055767 | 0.803828 | 0.282044 |
| MmugDNA.10267.1.S1_at | MmugDNA.10267.1 | 4.56  | 4.25  | 0.21 | 0.14 | 1.24  | 0.216554 | 0.102134 | 0.576206 | 0.362199 |
| MmugDNA.10269.1.S1_at | MmugDNA.10269.1 | 9.86  | 9.49  | 0.14 | 0.52 | 1.29  | 0.24103  | 0.241038 | 0.593741 | 0.511657 |
| MmugDNA.1027.1.S1_at  | MmugDNA.1027.1  | 10.45 | 9.53  | 0.27 | 0.9  | 1.89  | 0.077761 | 0.052156 | 0.427756 | 0.273967 |
| MmugDNA.10271.1.S1_at | MmugDNA.10271.1 | 5.92  | 6.04  | 0.09 | 0.11 | -1.09 | 0.178381 | 0.048376 | 0.542772 | 0.265095 |
| MmugDNA.10272.1.S1_at | MmugDNA.10272.1 | 7.33  | 7.66  | 0.12 | 0.56 | -1.26 | 0.238288 | 0.257454 | 0.591578 | 0.52521  |
| MmugDNA.10274.1.S1_at | MmugDNA.10274.1 | 3.79  | 3.92  | 0.16 | 0.1  | -1.1  | 0.742789 | 0.579735 | 0.89004  | 0.74927  |
| MmugDNA.10278.1.S1_at | MmugDNA.10278.1 | 4.03  | 4.46  | 0.4  | 0.15 | -1.34 | 0.483423 | 0.426672 | 0.749882 | 0.648796 |
| MmugDNA.1028.1.S1_at  | MmugDNA.1028.1  | 11.45 | 13.98 | 1.07 | 1.36 | -5.77 | 0.293858 | 0.144046 | 0.631033 | 0.417912 |
| MmugDNA.10283.1.S1_at | MmugDNA.10283.1 | 5.39  | 5.52  | 0.07 | 0.1  | -1.1  | 0.400677 | 0.238531 | 0.700264 | 0.509122 |
| MmugDNA.10284.1.S1_at | MmugDNA.10284.1 | 8.47  | 6.9   | 0.34 | 0.42 | 2.98  | 0.006174 | 0.001542 | 0.196493 | 0.05949  |
| MmugDNA.10286.1.S1_at | MmugDNA.10286.1 | 11.53 | 11.25 | 0.16 | 0.49 | 1.22  | 0.294608 | 0.364196 | 0.631382 | 0.604513 |
| MmugDNA.10287.1.S1_at | MmugDNA.10287.1 | 7.32  | 7.29  | 0.19 | 0.05 | 1.02  | 0.6331   | 0.778807 | 0.833528 | 0.871617 |
| MmugDNA.10288.1.S1_at | MmugDNA.10288.1 | 8.12  | 7.92  | 0.07 | 0.08 | 1.15  | 0.062016 | 0.104524 | 0.39691  | 0.365803 |
| MmugDNA.10302.1.S1_at | MmugDNA.10302.1 | 10.32 | 10.8  | 0.06 | 0.32 | -1.39 | 0.070604 | 0.044031 | 0.414443 | 0.254195 |
| MmugDNA.10306.1.S1_at | MmugDNA.10306.1 | 7.24  | 7.71  | 0.29 | 0.07 | -1.39 | 0.039538 | 0.051427 | 0.347318 | 0.272204 |
| MmugDNA.10307.1.S1_at | MmugDNA.10307.1 | 8.07  | 7.75  | 0.2  | 0.44 | 1.25  | 0.880246 | 0.969199 | 0.951822 | 0.98309  |
| MmugDNA.10311.1.S1_at | MmugDNA.10311.1 | 4.63  | 5.03  | 0.36 | 0.77 | -1.32 | 0.367643 | 0.511842 | 0.679512 | 0.705797 |
| MmugDNA.10320.1.S1_at | MmugDNA.10320.1 | 9.15  | 9.1   | 0.21 | 0.19 | 1.04  | 0.502492 | 0.011524 | 0.76039  | 0.138822 |
| MmugDNA.10322.1.S1_at | MmugDNA.10322.1 | 4.35  | 3.77  | 1.07 | 0.23 | 1.49  | 0.292482 | 0.352488 | 0.629851 | 0.595743 |
| MmugDNA.10327.1.S1_at | MmugDNA.10327.1 | 7.84  | 8.41  | 0.26 | 0.32 | -1.48 | 0.08551  | 0.097007 | 0.439394 | 0.354507 |
| MmugDNA.10328.1.S1_at | MmugDNA.10328.1 | 11.74 | 11.23 | 0.13 | 0.46 | 1.42  | 0.113024 | 0.116187 | 0.475614 | 0.383524 |
| MmugDNA.10331.1.S1_at | MmugDNA.10331.1 | 11.23 | 11.33 | 0.23 | 0.06 | -1.07 | 0.604501 | 0.077837 | 0.817786 | 0.324079 |



|                         |                 |       |       |      |      |       |          |          |          |          |
|-------------------------|-----------------|-------|-------|------|------|-------|----------|----------|----------|----------|
| MmugDNA.10333.1.S1_at   | MmugDNA.10333.1 | 9.61  | 9.25  | 0.12 | 0.33 | 1.29  | 0.286519 | 0.164454 | 0.625572 | 0.440678 |
| MmugDNA.10334.1.S1_at   | MmugDNA.10334.1 | 8.12  | 8.54  | 0.05 | 0.22 | -1.34 | 0.016092 | 0.011717 | 0.262631 | 0.140206 |
| MmugDNA.10335.1.S1_at   | MmugDNA.10335.1 | 9.5   | 8.97  | 0.39 | 0.33 | 1.45  | 0.131187 | 0.102648 | 0.497719 | 0.363001 |
| MmugDNA.10338.1.S1_at   | MmugDNA.10338.1 | 8.97  | 9.11  | 0.07 | 0.42 | -1.1  | 0.442672 | 0.578556 | 0.725706 | 0.748589 |
| MmugDNA.10345.1.S1_at   | MmugDNA.10345.1 | 8.67  | 8.6   | 0.24 | 0.06 | 1.05  | 0.23015  | 0.278935 | 0.587112 | 0.542661 |
| MmugDNA.10347.1.S1_at   | MmugDNA.10347.1 | 4.57  | 4.33  | 0.27 | 0.21 | 1.19  | 0.364025 | 0.050247 | 0.677121 | 0.269432 |
| MmugDNA.10349.1.S1_at   | MmugDNA.10349.1 | 9.51  | 9.7   | 0.15 | 0.49 | -1.14 | 0.797083 | 0.666111 | 0.915839 | 0.804415 |
| MmugDNA.10350.1.S1_at   | MmugDNA.10350.1 | 9.63  | 9.01  | 0.14 | 0.1  | 1.53  | 0.002969 | 0.000365 | 0.170703 | 0.037273 |
| MmugDNA.10356.1.S1_at   | MmugDNA.10356.1 | 10.34 | 9.89  | 0.17 | 0.58 | 1.37  | 0.865521 | 0.293018 | 0.946109 | 0.552978 |
| MmugDNA.10357.1.S1_at   | MmugDNA.10357.1 | 6.99  | 6.94  | 0.09 | 0.11 | 1.03  | 0.477717 | 0.456159 | 0.746913 | 0.669949 |
| MmugDNA.10363.1.S1_at   | MmugDNA.10363.1 | 10.18 | 10.07 | 0.18 | 0.13 | 1.08  | 0.721445 | 0.291502 | 0.878095 | 0.551864 |
| MmugDNA.10369.1.S1_at   | MmugDNA.10369.1 | 7.28  | 6.51  | 0.44 | 0.61 | 1.7   | 0.10575  | 0.023545 | 0.466526 | 0.192231 |
| MmugDNA.1037.1.S1_at    | MmugDNA.1037.1  | 5.15  | 5.15  | 0.19 | 0.07 | 1     | 0.863623 | 0.260362 | 0.945247 | 0.526915 |
| MmugDNA.10370.1.S1_at   | MmugDNA.10370.1 | 11.09 | 10.07 | 0.15 | 0.15 | 2.03  | 0.001333 | 0.000291 | 0.146228 | 0.034892 |
| MmugDNA.10371.1.S1_at   | MmugDNA.10371.1 | 8.92  | 7.94  | 0.38 | 0.48 | 1.97  | 0.056007 | 0.035774 | 0.385473 | 0.233489 |
| MmugDNA.10383.1.S1_at   | MmugDNA.10383.1 | 5.99  | 6.06  | 0.16 | 0.09 | -1.05 | 0.626637 | 0.401274 | 0.829735 | 0.630898 |
| MmugDNA.10385.1.S1_at   | MmugDNA.10385.1 | 3.66  | 3.66  | 0.08 | 0.31 | -1.01 | 0.745337 | 0.553151 | 0.891065 | 0.73239  |
| MmugDNA.10386.1.S1_at   | MmugDNA.10386.1 | 9.01  | 8.8   | 0.06 | 0.07 | 1.16  | 0.023353 | 0.006463 | 0.291168 | 0.109304 |
| MmugDNA.10387.1.S1_at   | MmugDNA.10387.1 | 7.04  | 7.09  | 0.13 | 0.12 | -1.04 | 0.642973 | 0.146742 | 0.839092 | 0.42078  |
| MmugDNA.10389.1.S1_at   | MmugDNA.10389.1 | 10.95 | 10.94 | 0.27 | 0.48 | 1.01  | 0.237896 | 0.287373 | 0.591296 | 0.548636 |
| MmugDNA.10390.1.S1_at   | MmugDNA.10390.1 | 11.99 | 12.04 | 0.17 | 0.08 | -1.03 | 0.969938 | 0.284896 | 0.988483 | 0.54701  |
| MmugDNA.10394.1.S1_at   | MmugDNA.10394.1 | 9.14  | 9.28  | 0.16 | 0.38 | -1.1  | 0.405152 | 0.395495 | 0.703082 | 0.627504 |
| MmugDNA.10395.1.S1_at   | MmugDNA.10395.1 | 8.53  | 8.88  | 0.27 | 0.2  | -1.27 | 0.076416 | 0.090105 | 0.425011 | 0.344402 |
| MmugDNA.10397.1.S1_at   | MmugDNA.10397.1 | 7.47  | 7.2   | 0.14 | 0.62 | 1.2   | 0.872182 | 0.83816  | 0.948957 | 0.907587 |
| MmugDNA.10398.1.S1_at   | MmugDNA.10398.1 | 9.91  | 9.61  | 0.17 | 0.18 | 1.23  | 0.045446 | 0.01393  | 0.361012 | 0.151382 |
| MmugDNA.10398.1.S1_s_at | MmugDNA.10398.1 | 8.63  | 8.37  | 0.07 | 0.06 | 1.2   | 0.00998  | 0.00151  | 0.226899 | 0.059146 |
| MmugDNA.10399.1.S1_at   | MmugDNA.10399.1 | 9.78  | 9.91  | 0.79 | 0.41 | -1.1  | 0.575593 | 0.253477 | 0.802403 | 0.521768 |
| MmugDNA.1040.1.S1_at    | MmugDNA.1040.1  | 8.33  | 8.61  | 0.14 | 0.36 | -1.21 | 0.469876 | 0.353181 | 0.741958 | 0.596432 |
| MmugDNA.10403.1.S1_at   | MmugDNA.10403.1 | 10.23 | 10.3  | 0.4  | 0.42 | -1.05 | 0.911805 | 0.104052 | 0.965151 | 0.364988 |
| MmugDNA.10405.1.S1_at   | MmugDNA.10405.1 | 11.12 | 11.93 | 0.06 | 0.24 | -1.75 | 0.011045 | 0.007745 | 0.233671 | 0.117619 |
| MmugDNA.10410.1.S1_at   | MmugDNA.10410.1 | 7.16  | 8.11  | 0.41 | 0.58 | -1.93 | 0.083874 | 0.072531 | 0.436311 | 0.31548  |
| MmugDNA.10411.1.S1_at   | MmugDNA.10411.1 | 8.5   | 9.12  | 0.24 | 0.25 | -1.53 | 0.034344 | 0.029816 | 0.332707 | 0.214326 |
| MmugDNA.10415.1.S1_at   | MmugDNA.10415.1 | 6.01  | 6.01  | 0.08 | 0.2  | 1     | 0.837906 | 0.44843  | 0.934532 | 0.664264 |
| MmugDNA.10417.1.S1_at   | MmugDNA.10417.1 | 7.42  | 5.29  | 0.11 | 0.72 | 4.37  | 0.008194 | 0.00822  | 0.216841 | 0.12044  |
| MmugDNA.10421.1.S1_at   | MmugDNA.10421.1 | 10.53 | 12.13 | 0.46 | 0.93 | -3.02 | 0.078686 | 0.066911 | 0.428609 | 0.304608 |
| MmugDNA.10422.1.S1_s_at | MmugDNA.10422.1 | 5.7   | 6.36  | 0.16 | 0.56 | -1.58 | 0.221708 | 0.306452 | 0.580397 | 0.563029 |
| MmugDNA.10423.1.S1_at   | MmugDNA.10423.1 | 11.03 | 10.97 | 0.17 | 0.3  | 1.05  | 0.792157 | 0.28254  | 0.913702 | 0.545266 |
| MmugDNA.10424.1.S1_at   | MmugDNA.10424.1 | 6.07  | 5.3   | 0.22 | 0.9  | 1.7   | 0.360594 | 0.362018 | 0.674645 | 0.602727 |
| MmugDNA.10425.1.S1_at   | MmugDNA.10425.1 | 7.67  | 7.64  | 0.15 | 0.17 | 1.02  | 0.973337 | 0.796123 | 0.989597 | 0.882495 |
| MmugDNA.10426.1.S1_at   | MmugDNA.10426.1 | 9.07  | 9.51  | 0.46 | 1.09 | -1.35 | 0.536794 | 0.174369 | 0.779659 | 0.450824 |
| MmugDNA.10429.1.S1_at   | MmugDNA.10429.1 | 8.1   | 7.77  | 0.29 | 0.12 | 1.26  | 0.272602 | 0.26872  | 0.616227 | 0.534138 |

|                         |                 |       |       |      |      |       |          |          |          |          |
|-------------------------|-----------------|-------|-------|------|------|-------|----------|----------|----------|----------|
| MmugDNA.10432.1.S1_at   | MmugDNA.10432.1 | 12.71 | 12.48 | 0.18 | 0.17 | 1.17  | 0.101731 | 0.127179 | 0.461313 | 0.397923 |
| MmugDNA.10435.1.S1_at   | MmugDNA.10435.1 | 10.01 | 11.7  | 0.28 | 0.57 | -3.22 | 0.019339 | 0.016095 | 0.273725 | 0.160775 |
| MmugDNA.10443.1.S1_s_at | MmugDNA.10443.1 | 8.19  | 8.24  | 0.43 | 0.47 | -1.03 | 0.745043 | 0.092933 | 0.890933 | 0.349029 |
| MmugDNA.10444.1.S1_at   | MmugDNA.10444.1 | 13.87 | 13.72 | 0.07 | 0.07 | 1.11  | 0.035679 | 0.023022 | 0.3373   | 0.189836 |
| MmugDNA.10445.1.S1_at   | MmugDNA.10445.1 | 11.07 | 10.87 | 0.1  | 0.64 | 1.15  | 0.727385 | 0.902206 | 0.881308 | 0.944402 |
| MmugDNA.10446.1.S1_at   | MmugDNA.10446.1 | 11.27 | 10.68 | 0.46 | 0.46 | 1.51  | 0.080216 | 0.065227 | 0.430341 | 0.301239 |
| MmugDNA.10448.1.S1_at   | MmugDNA.10448.1 | 9.78  | 10.19 | 0.3  | 0.33 | -1.33 | 0.479251 | 0.533694 | 0.747627 | 0.719848 |
| MmugDNA.10450.1.S1_at   | MmugDNA.10450.1 | 7.36  | 7.5   | 0.21 | 0.14 | -1.1  | 0.738796 | 0.154776 | 0.88801  | 0.42979  |
| MmugDNA.10452.1.S1_at   | MmugDNA.10452.1 | 6.85  | 7.77  | 0.26 | 0.12 | -1.9  | 0.005944 | 0.00416  | 0.193926 | 0.091036 |
| MmugDNA.10453.1.S1_at   | MmugDNA.10453.1 | 4.69  | 3.98  | 0.43 | 0.25 | 1.64  | 0.068523 | 0.030186 | 0.410201 | 0.215679 |
| MmugDNA.10458.1.S1_at   | MmugDNA.10458.1 | 9.38  | 9.95  | 0.61 | 0.81 | -1.49 | 0.427979 | 0.497085 | 0.716548 | 0.696431 |
| MmugDNA.10459.1.S1_at   | MmugDNA.10459.1 | 11.42 | 11.33 | 0.12 | 1.06 | 1.06  | 0.322741 | 0.435285 | 0.651245 | 0.655127 |
| MmugDNA.10463.1.S1_at   | MmugDNA.10463.1 | 7.53  | 7.23  | 0.18 | 0.21 | 1.23  | 0.297005 | 0.374097 | 0.632882 | 0.612678 |
| MmugDNA.10464.1.S1_at   | MmugDNA.10464.1 | 6.03  | 6.16  | 0.14 | 0.16 | -1.09 | 0.441304 | 0.293214 | 0.724743 | 0.553144 |
| MmugDNA.10467.1.S1_x_at | MmugDNA.10467.1 | 3.25  | 3.34  | 0.09 | 0.24 | -1.07 | 0.673212 | 0.320849 | 0.853359 | 0.572849 |
| MmugDNA.10468.1.S1_at   | MmugDNA.10468.1 | 3.87  | 3.4   | 0.37 | 0.03 | 1.38  | 0.263072 | 0.166876 | 0.609142 | 0.443334 |
| MmugDNA.10474.1.S1_at   | MmugDNA.10474.1 | 6.09  | 6.23  | 0.15 | 0.07 | -1.1  | 0.144816 | 0.213131 | 0.511163 | 0.487054 |
| MmugDNA.10477.1.S1_at   | MmugDNA.10477.1 | 7.68  | 7.26  | 0.18 | 0.27 | 1.33  | 0.034307 | 0.022283 | 0.332475 | 0.186724 |
| MmugDNA.10481.1.S1_at   | MmugDNA.10481.1 | 5.41  | 7.54  | 1.12 | 1.99 | -4.37 | 0.267645 | 0.192449 | 0.612672 | 0.467952 |
| MmugDNA.10482.1.S1_at   | MmugDNA.10482.1 | 5.16  | 5.05  | 0.19 | 0.42 | 1.08  | 0.683994 | 0.316482 | 0.858543 | 0.569889 |
| MmugDNA.10491.1.S1_at   | MmugDNA.10491.1 | 7.73  | 8.13  | 0.21 | 0.69 | -1.32 | 0.245625 | 0.320396 | 0.597182 | 0.572648 |
| MmugDNA.10494.1.S1_at   | MmugDNA.10494.1 | 12.27 | 11.9  | 0.14 | 0.09 | 1.29  | 0.028277 | 0.018042 | 0.310316 | 0.169372 |
| MmugDNA.1050.1.S1_s_at  | MmugDNA.1050.1  | 4.11  | 4.09  | 0.08 | 0.05 | 1.02  | 0.850189 | 0.974134 | 0.939853 | 0.985864 |
| MmugDNA.10506.1.S1_at   | MmugDNA.10506.1 | 10.72 | 11.51 | 0.11 | 0.02 | -1.73 | 0.000246 | 0.00018  | 0.12562  | 0.030511 |
| MmugDNA.1051.1.S1_at    | MmugDNA.1051.1  | 5.11  | 5.18  | 0.14 | 0.14 | -1.05 | 0.377721 | 0.004694 | 0.686056 | 0.095363 |
| MmugDNA.10512.1.S1_at   | MmugDNA.10512.1 | 3.36  | 3.57  | 0.09 | 0.15 | -1.16 | 0.09689  | 0.120646 | 0.455899 | 0.389476 |
| MmugDNA.10525.1.S1_at   | MmugDNA.10525.1 | 6.92  | 6.74  | 0.18 | 0.34 | 1.13  | 0.717662 | 0.745952 | 0.876022 | 0.852688 |
| MmugDNA.10526.1.S1_at   | MmugDNA.10526.1 | 9.17  | 11.73 | 1.17 | 1.05 | -5.87 | 0.058438 | 0.037749 | 0.390361 | 0.238716 |
| MmugDNA.10528.1.S1_at   | MmugDNA.10528.1 | 7.12  | 6.54  | 0.05 | 0.37 | 1.5   | 0.039147 | 0.012507 | 0.346585 | 0.144302 |
| MmugDNA.10530.1.S1_at   | MmugDNA.10530.1 | 5.51  | 5.49  | 0.13 | 0.01 | 1.02  | 0.681232 | 0.907962 | 0.85748  | 0.947889 |
| MmugDNA.10531.1.S1_at   | MmugDNA.10531.1 | 5.24  | 4.88  | 0.24 | 0.22 | 1.28  | 0.151358 | 0.246468 | 0.516063 | 0.515899 |
| MmugDNA.10542.1.S1_at   | MmugDNA.10542.1 | 8.57  | 8.68  | 0.37 | 0.58 | -1.08 | 0.859915 | 0.53605  | 0.943454 | 0.721454 |
| MmugDNA.10548.1.S1_at   | MmugDNA.10548.1 | 8.29  | 8.02  | 0.17 | 0.37 | 1.21  | 0.486067 | 0.368727 | 0.751299 | 0.608236 |
| MmugDNA.10549.1.S1_at   | MmugDNA.10549.1 | 6.24  | 6.24  | 0.18 | 0.16 | 1     | 0.816398 | 0.94998  | 0.925448 | 0.971462 |
| MmugDNA.1056.1.S1_at    | MmugDNA.1056.1  | 9.99  | 9.35  | 0.22 | 0.25 | 1.56  | 0.047781 | 0.041893 | 0.367233 | 0.249206 |
| MmugDNA.10563.1.S1_at   | MmugDNA.10563.1 | 8.21  | 8.68  | 0.4  | 0.91 | -1.39 | 0.570635 | 0.458894 | 0.799614 | 0.671498 |
| MmugDNA.10570.1.S1_at   | MmugDNA.10570.1 | 9.01  | 8.58  | 0.53 | 0.99 | 1.34  | 0.821266 | 0.903142 | 0.927293 | 0.94497  |
| MmugDNA.10574.1.S1_at   | MmugDNA.10574.1 | 7.55  | 7.52  | 0.13 | 0.32 | 1.02  | 0.911595 | 0.543633 | 0.965046 | 0.726239 |
| MmugDNA.10575.1.S1_at   | MmugDNA.10575.1 | 9.53  | 8.96  | 0.04 | 0.35 | 1.49  | 0.036329 | 0.029534 | 0.339201 | 0.213525 |
| MmugDNA.10578.1.S1_at   | MmugDNA.10578.1 | 12.73 | 12.96 | 0.04 | 0.14 | -1.17 | 0.028574 | 0.024736 | 0.311783 | 0.196967 |
| MmugDNA.10587.1.S1_at   | MmugDNA.10587.1 | 6.83  | 6.64  | 0.19 | 0.2  | 1.14  | 0.311273 | 0.120004 | 0.643293 | 0.388672 |

|                         |                 |       |       |      |      |        |          |          |          |          |
|-------------------------|-----------------|-------|-------|------|------|--------|----------|----------|----------|----------|
| MmugDNA.10588.1.S1_at   | MmugDNA.10588.1 | 12.07 | 11.86 | 0.08 | 0.39 | 1.16   | 0.268487 | 0.34713  | 0.613192 | 0.591815 |
| MmugDNA.10589.1.S1_at   | MmugDNA.10589.1 | 6.87  | 6.01  | 0.1  | 0.17 | 1.81   | 0.001324 | 0.000289 | 0.146228 | 0.034892 |
| MmugDNA.10594.1.S1_at   | MmugDNA.10594.1 | 8.18  | 8.04  | 0.15 | 0.05 | 1.11   | 0.214359 | 0.363668 | 0.574854 | 0.604075 |
| MmugDNA.10599.1.S1_at   | MmugDNA.10599.1 | 4.21  | 4.4   | 0.39 | 0.22 | -1.14  | 0.868952 | 0.905805 | 0.947822 | 0.946726 |
| MmugDNA.10610.1.S1_s_at | MmugDNA.10610.1 | 11.8  | 11.42 | 0.09 | 0.15 | 1.3    | 0.01394  | 0.006658 | 0.250089 | 0.110505 |
| MmugDNA.10611.1.S1_at   | MmugDNA.10611.1 | 7.94  | 6.68  | 0.94 | 0.76 | 2.39   | 0.262341 | 0.133551 | 0.608902 | 0.405525 |
| MmugDNA.10614.1.S1_at   | MmugDNA.10614.1 | 3.02  | 3.07  | 0.09 | 0.3  | -1.04  | 0.302982 | 0.465695 | 0.637233 | 0.675863 |
| MmugDNA.10628.1.S1_at   | MmugDNA.10628.1 | 12.29 | 11.63 | 0.2  | 0.15 | 1.58   | 0.019    | 0.003018 | 0.272675 | 0.080204 |
| MmugDNA.10637.1.S1_at   | MmugDNA.10637.1 | 7.95  | 7.99  | 0.15 | 0.11 | -1.03  | 0.665259 | 0.523975 | 0.849897 | 0.714099 |
| MmugDNA.10638.1.S1_at   | MmugDNA.10638.1 | 12.76 | 13.21 | 0.41 | 0.07 | -1.36  | 0.163935 | 0.200797 | 0.528211 | 0.47529  |
| MmugDNA.1064.1.S1_at    | MmugDNA.1064.1  | 4.25  | 4.33  | 0.04 | 0.38 | -1.06  | 0.488699 | 0.817436 | 0.753254 | 0.894694 |
| MmugDNA.10640.1.S1_s_at | MmugDNA.10640.1 | 9.72  | 9.27  | 0.82 | 0.77 | 1.37   | 0.537862 | 0.393734 | 0.780212 | 0.626534 |
| MmugDNA.10643.1.S1_s_at | MmugDNA.10643.1 | 11.65 | 11.58 | 0.48 | 0.35 | 1.05   | 0.978252 | 0.006213 | 0.99193  | 0.106916 |
| MmugDNA.10647.1.S1_at   | MmugDNA.10647.1 | 3.43  | 3.47  | 0.13 | 0.02 | -1.02  | 0.537617 | 0.705454 | 0.780064 | 0.829222 |
| MmugDNA.10649.1.S1_at   | MmugDNA.10649.1 | 12.57 | 12.3  | 0.15 | 0.38 | 1.21   | 0.300049 | 0.13989  | 0.635344 | 0.413192 |
| MmugDNA.10663.1.S1_at   | MmugDNA.10663.1 | 5.29  | 5.11  | 0.27 | 0.2  | 1.14   | 0.173148 | 0.046563 | 0.536812 | 0.260267 |
| MmugDNA.10666.1.S1_at   | MmugDNA.10666.1 | 11.6  | 11.28 | 0.25 | 0.14 | 1.25   | 0.133502 | 0.173188 | 0.50015  | 0.449773 |
| MmugDNA.10668.1.S1_at   | MmugDNA.10668.1 | 4.96  | 4.58  | 0.09 | 0.15 | 1.3    | 0.06547  | 0.057849 | 0.404567 | 0.286898 |
| MmugDNA.1067.1.S1_s_at  | MmugDNA.1067.1  | 11.41 | 11.45 | 0.07 | 0.2  | -1.03  | 0.310274 | 0.324592 | 0.642233 | 0.575149 |
| MmugDNA.10675.1.S1_at   | MmugDNA.10675.1 | 11.77 | 11.76 | 0.15 | 0.1  | 1.01   | 0.770526 | 0.523814 | 0.90333  | 0.714044 |
| MmugDNA.10676.1.S1_s_at | MmugDNA.10676.1 | 9.93  | 9.78  | 0.31 | 0.42 | 1.1    | 0.231564 | 0.280073 | 0.587471 | 0.543369 |
| MmugDNA.10679.1.S1_at   | MmugDNA.10679.1 | 12.57 | 12.85 | 0.23 | 0.05 | -1.21  | 0.046924 | 0.022669 | 0.36432  | 0.188607 |
| MmugDNA.1068.1.S1_at    | MmugDNA.1068.1  | 11.63 | 12.86 | 0.63 | 0.67 | -2.35  | 0.242698 | 0.324263 | 0.594515 | 0.574893 |
| MmugDNA.10680.1.S1_at   | MmugDNA.10680.1 | 9.23  | 9.75  | 0.26 | 0.24 | -1.44  | 0.095572 | 0.095196 | 0.453501 | 0.35218  |
| MmugDNA.10682.1.S1_at   | MmugDNA.10682.1 | 6.31  | 6.05  | 0.16 | 0.19 | 1.2    | 0.694626 | 0.245779 | 0.864562 | 0.515519 |
| MmugDNA.10684.1.S1_at   | MmugDNA.10684.1 | 6.21  | 5.94  | 0.2  | 0.14 | 1.21   | 0.162816 | 0.238612 | 0.527211 | 0.509233 |
| MmugDNA.10685.1.S1_at   | MmugDNA.10685.1 | 6.74  | 6.88  | 0.3  | 0.17 | -1.1   | 0.86189  | 0.062949 | 0.944464 | 0.297579 |
| MmugDNA.10688.1.S1_at   | MmugDNA.10688.1 | 7.8   | 7.48  | 1.09 | 0.25 | 1.25   | 0.219102 | 0.225667 | 0.578533 | 0.498155 |
| MmugDNA.10692.1.S1_at   | MmugDNA.10692.1 | 11.19 | 11.35 | 0.15 | 0.23 | -1.12  | 0.148637 | 0.053745 | 0.51391  | 0.277384 |
| MmugDNA.10695.1.S1_at   | MmugDNA.10695.1 | 6.88  | 7.01  | 0.05 | 0.05 | -1.1   | 0.054282 | 0.394954 | 0.38184  | 0.627216 |
| MmugDNA.10698.1.S1_at   | MmugDNA.10698.1 | 6.93  | 6.99  | 0.07 | 0.04 | -1.04  | 0.170033 | 0.421973 | 0.534161 | 0.645406 |
| MmugDNA.10699.1.S1_at   | MmugDNA.10699.1 | 3.19  | 3.07  | 0.15 | 0.08 | 1.08   | 0.957077 | 0.731071 | 0.983802 | 0.844197 |
| MmugDNA.107.1.S1_at     | MmugDNA.107.1   | 4.18  | 4.18  | 0.19 | 0.25 | 1      | 0.787653 | 0.901614 | 0.911639 | 0.944007 |
| MmugDNA.10707.1.S1_at   | MmugDNA.10707.1 | 7.6   | 7.87  | 0.42 | 0.21 | -1.21  | 0.32496  | 0.283744 | 0.652259 | 0.546185 |
| MmugDNA.10708.1.S1_at   | MmugDNA.10708.1 | 12.4  | 12.48 | 0.03 | 0.15 | -1.06  | 0.625222 | 0.33346  | 0.82872  | 0.581683 |
| MmugDNA.10710.1.S1_at   | MmugDNA.10710.1 | 4.83  | 4.9   | 0.16 | 0.24 | -1.05  | 0.308192 | 0.236147 | 0.640608 | 0.507188 |
| MmugDNA.10712.1.S1_at   | MmugDNA.10712.1 | 5.49  | 8.88  | 0.77 | 0.28 | -10.52 | 0.002677 | 0.001298 | 0.164386 | 0.055585 |
| MmugDNA.10727.1.S1_at   | MmugDNA.10727.1 | 9.55  | 10.26 | 0.26 | 0.62 | -1.63  | 0.227779 | 0.121484 | 0.585222 | 0.390624 |
| MmugDNA.10728.1.S1_at   | MmugDNA.10728.1 | 12.35 | 12.49 | 0.06 | 0.05 | -1.1   | 0.035903 | 0.040677 | 0.338042 | 0.246631 |
| MmugDNA.10734.1.S1_at   | MmugDNA.10734.1 | 7.37  | 7.42  | 0.4  | 0.24 | -1.04  | 0.897324 | 0.022864 | 0.959157 | 0.189271 |
| MmugDNA.10736.1.S1_at   | MmugDNA.10736.1 | 6.22  | 6.34  | 0.15 | 0.1  | -1.09  | 0.494938 | 0.043242 | 0.756991 | 0.252677 |

|                         |                 |       |       |      |      |       |          |          |          |          |
|-------------------------|-----------------|-------|-------|------|------|-------|----------|----------|----------|----------|
| MmugDNA.10741.1.S1_s_at | MmugDNA.10741.1 | 12.17 | 12.06 | 0.16 | 0.14 | 1.07  | 0.71412  | 0.19321  | 0.874661 | 0.468578 |
| MmugDNA.10743.1.S1_at   | MmugDNA.10743.1 | 12.09 | 11.71 | 0.15 | 0.1  | 1.31  | 0.009942 | 0.000865 | 0.226899 | 0.047425 |
| MmugDNA.10745.1.S1_at   | MmugDNA.10745.1 | 3.68  | 3.66  | 0.06 | 0.04 | 1.01  | 0.706705 | 0.923678 | 0.870821 | 0.95708  |
| MmugDNA.10754.1.S1_at   | MmugDNA.10754.1 | 7.17  | 7.48  | 0.12 | 0.12 | -1.24 | 0.040854 | 0.030843 | 0.350506 | 0.217427 |
| MmugDNA.1076.1.S1_at    | MmugDNA.1076.1  | 11.66 | 11.36 | 0.1  | 0.1  | 1.23  | 0.012732 | 0.003241 | 0.243533 | 0.082187 |
| MmugDNA.10763.1.S1_at   | MmugDNA.10763.1 | 3.6   | 3.63  | 0.21 | 0.03 | -1.02 | 0.893303 | 0.709073 | 0.957572 | 0.831303 |
| MmugDNA.10764.1.S1_at   | MmugDNA.10764.1 | 3.63  | 3.75  | 0.26 | 0.07 | -1.09 | 0.587725 | 0.795766 | 0.808695 | 0.882339 |
| MmugDNA.10769.1.S1_at   | MmugDNA.10769.1 | 5.81  | 6.01  | 0.09 | 0.09 | -1.15 | 0.142471 | 0.176037 | 0.509652 | 0.452526 |
| MmugDNA.1077.1.S1_at    | MmugDNA.1077.1  | 5.92  | 5.98  | 0.17 | 0.04 | -1.04 | 0.724529 | 0.194526 | 0.879724 | 0.469632 |
| MmugDNA.10771.1.S1_at   | MmugDNA.10771.1 | 8.19  | 8.89  | 0.43 | 0.33 | -1.63 | 0.095716 | 0.095999 | 0.453531 | 0.353302 |
| MmugDNA.10773.1.S1_at   | MmugDNA.10773.1 | 7.35  | 7.42  | 0.01 | 0.13 | -1.05 | 0.36592  | 0.21748  | 0.678686 | 0.491035 |
| MmugDNA.10776.1.S1_at   | MmugDNA.10776.1 | 4.9   | 4.93  | 0.12 | 0.03 | -1.02 | 0.232364 | 0.258299 | 0.587814 | 0.525596 |
| MmugDNA.10777.1.S1_at   | MmugDNA.10777.1 | 4.01  | 3.92  | 0.12 | 0.1  | 1.07  | 0.770685 | 0.936582 | 0.903354 | 0.964214 |
| MmugDNA.10778.1.S1_at   | MmugDNA.10778.1 | 11.53 | 10.65 | 0.11 | 0.26 | 1.84  | 0.004261 | 0.004778 | 0.18216  | 0.09644  |
| MmugDNA.10783.1.S1_at   | MmugDNA.10783.1 | 10.02 | 10.28 | 0.05 | 0.14 | -1.2  | 0.018822 | 0.010554 | 0.271573 | 0.134149 |
| MmugDNA.10790.1.S1_at   | MmugDNA.10790.1 | 11.67 | 11.5  | 0.26 | 0.22 | 1.12  | 0.457908 | 0.437328 | 0.735139 | 0.656613 |
| MmugDNA.10791.1.S1_at   | MmugDNA.10791.1 | 5.02  | 4.52  | 0.57 | 0.26 | 1.42  | 0.204655 | 0.248919 | 0.567198 | 0.517972 |
| MmugDNA.10796.1.S1_at   | MmugDNA.10796.1 | 5.8   | 5.75  | 0.03 | 0.22 | 1.03  | 0.549545 | 0.628319 | 0.787363 | 0.781112 |
| MmugDNA.10807.1.S1_at   | MmugDNA.10807.1 | 5.43  | 5.43  | 0.01 | 0.12 | 1     | 0.649222 | 0.441359 | 0.84237  | 0.659552 |
| MmugDNA.1081.1.S1_at    | MmugDNA.1081.1  | 8.88  | 10.05 | 0.18 | 0.63 | -2.24 | 0.05152  | 0.046057 | 0.376072 | 0.258977 |
| MmugDNA.10811.1.S1_at   | MmugDNA.10811.1 | 3.61  | 3.47  | 0.52 | 0.2  | 1.1   | 0.582623 | 0.554486 | 0.805828 | 0.733245 |
| MmugDNA.10812.1.S1_at   | MmugDNA.10812.1 | 9.87  | 9.65  | 0.07 | 0.01 | 1.16  | 0.009429 | 0.011034 | 0.225039 | 0.136793 |
| MmugDNA.10819.1.S1_at   | MmugDNA.10819.1 | 3.66  | 3.36  | 0.41 | 0.11 | 1.23  | 0.294596 | 0.253902 | 0.631382 | 0.522257 |
| MmugDNA.10823.1.S1_at   | MmugDNA.10823.1 | 6.05  | 4.98  | 0.7  | 0.19 | 2.1   | 0.136375 | 0.084196 | 0.503488 | 0.33527  |
| MmugDNA.10829.1.S1_at   | MmugDNA.10829.1 | 6.56  | 5.36  | 0.12 | 0.55 | 2.29  | 0.025837 | 0.012323 | 0.300857 | 0.143659 |
| MmugDNA.10840.1.S1_at   | MmugDNA.10840.1 | 5.15  | 4.77  | 0.43 | 1.31 | 1.3   | 0.723315 | 0.856743 | 0.879114 | 0.918137 |
| MmugDNA.10844.1.S1_at   | MmugDNA.10844.1 | 11.58 | 11.25 | 0.04 | 0.15 | 1.26  | 0.01715  | 0.005691 | 0.266906 | 0.104029 |
| MmugDNA.10850.1.S1_at   | MmugDNA.10850.1 | 5.18  | 5.33  | 0.27 | 0.11 | -1.11 | 0.534075 | 0.532713 | 0.778544 | 0.719203 |
| MmugDNA.10855.1.S1_at   | MmugDNA.10855.1 | 11.23 | 10.67 | 0.04 | 0.63 | 1.48  | 0.118992 | 0.047539 | 0.483699 | 0.262717 |
| MmugDNA.10863.1.S1_at   | MmugDNA.10863.1 | 7.14  | 7.4   | 0.18 | 0.15 | -1.2  | 0.337029 | 0.348001 | 0.659858 | 0.592215 |
| MmugDNA.10869.1.S1_at   | MmugDNA.10869.1 | 11.25 | 11.19 | 0.07 | 0.29 | 1.04  | 0.663413 | 0.414815 | 0.84899  | 0.640456 |
| MmugDNA.10872.1.S1_at   | MmugDNA.10872.1 | 10.66 | 10.33 | 0.08 | 0.12 | 1.26  | 0.018605 | 0.000438 | 0.270793 | 0.038359 |
| MmugDNA.10874.1.S1_s_at | MmugDNA.10874.1 | 5.34  | 5.33  | 0.13 | 0.14 | 1.01  | 0.626326 | 0.44664  | 0.829532 | 0.66287  |
| MmugDNA.10875.1.S1_at   | MmugDNA.10875.1 | 8.58  | 8.79  | 0.21 | 0.4  | -1.16 | 0.65597  | 0.725085 | 0.845266 | 0.840867 |
| MmugDNA.10876.1.S1_at   | MmugDNA.10876.1 | 10.52 | 10.13 | 0.1  | 0.08 | 1.31  | 0.003874 | 0.000843 | 0.180184 | 0.047013 |
| MmugDNA.10878.1.S1_at   | MmugDNA.10878.1 | 8.96  | 10.47 | 0.17 | 0.85 | -2.86 | 0.041478 | 0.035467 | 0.351795 | 0.232564 |
| MmugDNA.10883.1.S1_at   | MmugDNA.10883.1 | 9.9   | 9.4   | 0.21 | 0.25 | 1.41  | 0.048578 | 0.038689 | 0.369003 | 0.24169  |
| MmugDNA.10884.1.S1_at   | MmugDNA.10884.1 | 12.19 | 11.27 | 0.17 | 0.47 | 1.9   | 0.102163 | 0.100858 | 0.46173  | 0.360398 |
| MmugDNA.10889.1.S1_at   | MmugDNA.10889.1 | 2.84  | 2.87  | 0.07 | 0.12 | -1.03 | 0.693001 | 0.87124  | 0.86374  | 0.926834 |
| MmugDNA.10893.1.S1_at   | MmugDNA.10893.1 | 4.15  | 4.29  | 0.24 | 0.44 | -1.11 | 0.216771 | 0.37963  | 0.576408 | 0.616523 |
| MmugDNA.10896.1.S1_at   | MmugDNA.10896.1 | 4.83  | 4.58  | 0.85 | 0.26 | 1.19  | 0.316891 | 0.392019 | 0.647775 | 0.625519 |

|                         |                 |       |       |      |      |       |          |          |          |          |
|-------------------------|-----------------|-------|-------|------|------|-------|----------|----------|----------|----------|
| MmugDNA.10899.1.S1_at   | MmugDNA.10899.1 | 8.69  | 7.56  | 0.17 | 0.18 | 2.19  | 0.001775 | 0.000398 | 0.154452 | 0.037471 |
| MmugDNA.10899.1.S1_s_at | MmugDNA.10899.1 | 8.04  | 7.27  | 0.14 | 0.4  | 1.71  | 0.032714 | 0.018638 | 0.325998 | 0.171648 |
| MmugDNA.10900.1.S1_at   | MmugDNA.10900.1 | 10.09 | 9.17  | 0.54 | 0.61 | 1.89  | 0.20557  | 0.274954 | 0.568054 | 0.539402 |
| MmugDNA.10904.1.S1_at   | MmugDNA.10904.1 | 5.82  | 5.95  | 0.28 | 0.17 | -1.09 | 0.781186 | 0.874326 | 0.908721 | 0.928622 |
| MmugDNA.10906.1.S1_at   | MmugDNA.10906.1 | 8.05  | 9.34  | 0.28 | 0.63 | -2.46 | 0.051602 | 0.048785 | 0.376072 | 0.26581  |
| MmugDNA.10907.1.S1_at   | MmugDNA.10907.1 | 11.04 | 11.57 | 0.09 | 0.21 | -1.44 | 0.019149 | 0.005577 | 0.273043 | 0.103193 |
| MmugDNA.10908.1.S1_at   | MmugDNA.10908.1 | 11.62 | 11.66 | 0.24 | 0.08 | -1.03 | 0.867579 | 0.050504 | 0.947145 | 0.270066 |
| MmugDNA.1091.1.S1_at    | MmugDNA.1091.1  | 7.5   | 8.05  | 0.13 | 0.4  | -1.46 | 0.078828 | 0.071317 | 0.428609 | 0.313345 |
| MmugDNA.10911.1.S1_at   | MmugDNA.10911.1 | 9.56  | 10.66 | 0.45 | 1.23 | -2.15 | 0.602254 | 0.236634 | 0.816408 | 0.50743  |
| MmugDNA.10912.1.S1_at   | MmugDNA.10912.1 | 6.51  | 7.49  | 0.49 | 0.45 | -1.97 | 0.098977 | 0.135454 | 0.458711 | 0.407535 |
| MmugDNA.1092.1.S1_at    | MmugDNA.1092.1  | 8.08  | 8.28  | 0.33 | 0.33 | -1.14 | 0.94708  | 0.01913  | 0.979602 | 0.174059 |
| MmugDNA.10921.1.S1_at   | MmugDNA.10921.1 | 11.06 | 11.28 | 0.07 | 0.15 | -1.16 | 0.136034 | 0.004633 | 0.502862 | 0.094988 |
| MmugDNA.10922.1.S1_at   | MmugDNA.10922.1 | 12.12 | 11.95 | 0.36 | 0.27 | 1.13  | 0.896085 | 0.234103 | 0.958573 | 0.505319 |
| MmugDNA.10923.1.S1_at   | MmugDNA.10923.1 | 7.36  | 8.61  | 0.33 | 0.63 | -2.38 | 0.035476 | 0.05517  | 0.336631 | 0.280519 |
| MmugDNA.10925.1.S1_at   | MmugDNA.10925.1 | 5.82  | 6.2   | 0.44 | 0.79 | -1.3  | 0.893572 | 0.382309 | 0.957655 | 0.618482 |
| MmugDNA.10926.1.S1_at   | MmugDNA.10926.1 | 11.05 | 11.13 | 0.07 | 0.26 | -1.06 | 0.762673 | 0.281919 | 0.900005 | 0.544864 |
| MmugDNA.10928.1.S1_at   | MmugDNA.10928.1 | 10.19 | 10.46 | 0.12 | 0.29 | -1.21 | 0.227085 | 0.111039 | 0.584952 | 0.375566 |
| MmugDNA.1093.1.S1_at    | MmugDNA.1093.1  | 10.51 | 11.16 | 0.14 | 0.33 | -1.56 | 0.012365 | 0.0065   | 0.240921 | 0.109521 |
| MmugDNA.10931.1.S1_at   | MmugDNA.10931.1 | 10.54 | 10.13 | 0.22 | 0.33 | 1.33  | 0.154621 | 0.167276 | 0.519189 | 0.443684 |
| MmugDNA.10937.1.S1_at   | MmugDNA.10937.1 | 4.14  | 4.21  | 0.14 | 0.08 | -1.05 | 0.520381 | 0.446072 | 0.770745 | 0.662684 |
| MmugDNA.1094.1.S1_at    | MmugDNA.1094.1  | 5.52  | 5.54  | 0.17 | 0.06 | -1.01 | 0.473948 | 0.258316 | 0.744717 | 0.5256   |
| MmugDNA.10940.1.S1_at   | MmugDNA.10940.1 | 3.96  | 3.9   | 0.38 | 0.01 | 1.04  | 0.777529 | 0.940559 | 0.907014 | 0.966314 |
| MmugDNA.10942.1.S1_at   | MmugDNA.10942.1 | 7.77  | 7.56  | 0.53 | 1.78 | 1.15  | 0.707353 | 0.871975 | 0.871092 | 0.927131 |
| MmugDNA.10943.1.S1_at   | MmugDNA.10943.1 | 6.8   | 5.67  | 0.15 | 0.65 | 2.18  | 0.057113 | 0.027502 | 0.387418 | 0.207161 |
| MmugDNA.10946.1.S1_at   | MmugDNA.10946.1 | 4.81  | 5.49  | 0.03 | 0.15 | -1.6  | 0.001583 | 0.000945 | 0.151907 | 0.049054 |
| MmugDNA.1096.1.S1_at    | MmugDNA.1096.1  | 8.99  | 9.78  | 0.06 | 0.38 | -1.72 | 0.01592  | 0.004896 | 0.261859 | 0.097632 |
| MmugDNA.10975.1.S1_at   | MmugDNA.10975.1 | 4.45  | 4.51  | 0.11 | 0.24 | -1.04 | 0.995053 | 0.272974 | 0.998246 | 0.53761  |
| MmugDNA.10976.1.S1_at   | MmugDNA.10976.1 | 13.09 | 12.9  | 0.08 | 0.06 | 1.15  | 0.042973 | 0.033904 | 0.355814 | 0.227771 |
| MmugDNA.10977.1.S1_at   | MmugDNA.10977.1 | 10.3  | 10.36 | 0.19 | 0.42 | -1.04 | 0.885792 | 0.880981 | 0.954201 | 0.932039 |
| MmugDNA.10979.1.S1_at   | MmugDNA.10979.1 | 8.69  | 7.86  | 0.28 | 0.73 | 1.78  | 0.445985 | 0.22106  | 0.728075 | 0.494471 |
| MmugDNA.10981.1.S1_at   | MmugDNA.10981.1 | 11.71 | 11.31 | 0.08 | 0.11 | 1.31  | 0.01206  | 0.0051   | 0.2399   | 0.099108 |
| MmugDNA.10986.1.S1_s_at | MmugDNA.10986.1 | 10.53 | 10.42 | 0.21 | 0.55 | 1.08  | 0.550277 | 0.490665 | 0.787781 | 0.692649 |
| MmugDNA.1099.1.S1_at    | MmugDNA.1099.1  | 4     | 4.35  | 0.43 | 0.43 | -1.28 | 0.714577 | 0.710763 | 0.874952 | 0.832259 |
| MmugDNA.10990.1.S1_at   | MmugDNA.10990.1 | 7.24  | 6.76  | 0.24 | 0.22 | 1.4   | 0.032494 | 0.009819 | 0.325032 | 0.130205 |
| MmugDNA.10995.1.S1_at   | MmugDNA.10995.1 | 12.58 | 12.47 | 0.09 | 0.1  | 1.08  | 0.243867 | 0.255121 | 0.595613 | 0.52317  |
| MmugDNA.10998.1.S1_at   | MmugDNA.10998.1 | 10    | 9.45  | 0.26 | 0.36 | 1.47  | 0.061948 | 0.042657 | 0.396857 | 0.251037 |
| MmugDNA.11001.1.S1_at   | MmugDNA.11001.1 | 10.47 | 10.29 | 0.1  | 0.26 | 1.13  | 0.505146 | 0.101445 | 0.761548 | 0.36121  |
| MmugDNA.11002.1.S1_at   | MmugDNA.11002.1 | 7.44  | 8.92  | 0.64 | 0.92 | -2.79 | 0.047873 | 0.039472 | 0.367407 | 0.243642 |
| MmugDNA.11003.1.S1_at   | MmugDNA.11003.1 | 8.3   | 7.28  | 0.19 | 0.76 | 2.02  | 0.09619  | 0.081076 | 0.454363 | 0.329249 |
| MmugDNA.11004.1.S1_at   | MmugDNA.11004.1 | 4.46  | 4.37  | 0.11 | 0.08 | 1.06  | 0.520141 | 0.181533 | 0.770623 | 0.458087 |
| MmugDNA.11009.1.S1_at   | MmugDNA.11009.1 | 11.4  | 11.82 | 0.21 | 0.6  | -1.33 | 0.824162 | 0.876941 | 0.928646 | 0.929868 |

|                         |                 |       |       |      |      |       |          |          |          |          |
|-------------------------|-----------------|-------|-------|------|------|-------|----------|----------|----------|----------|
| MmugDNA.11020.1.S1_at   | MmugDNA.11020.1 | 10.18 | 9.61  | 0.18 | 0.34 | 1.48  | 0.175906 | 0.058045 | 0.53945  | 0.287507 |
| MmugDNA.11026.1.S1_at   | MmugDNA.11026.1 | 11.97 | 12.33 | 0.21 | 0.12 | -1.28 | 0.06982  | 0.064864 | 0.412907 | 0.300719 |
| MmugDNA.11027.1.S1_at   | MmugDNA.11027.1 | 8.9   | 7.96  | 0.33 | 0.31 | 1.92  | 0.094887 | 0.003167 | 0.452401 | 0.081793 |
| MmugDNA.11032.1.S1_at   | MmugDNA.11032.1 | 7.33  | 6.31  | 0.26 | 0.34 | 2.02  | 0.018796 | 0.013155 | 0.2715   | 0.147338 |
| MmugDNA.11035.1.S1_at   | MmugDNA.11035.1 | 7.49  | 6.96  | 0.33 | 0.2  | 1.44  | 0.115787 | 0.041616 | 0.479325 | 0.24887  |
| MmugDNA.11036.1.S1_at   | MmugDNA.11036.1 | 11.99 | 11.98 | 0.05 | 0.15 | 1.01  | 0.349077 | 0.315744 | 0.667394 | 0.569157 |
| MmugDNA.11040.1.S1_at   | MmugDNA.11040.1 | 10.64 | 10.81 | 0.1  | 0.2  | -1.12 | 0.272292 | 0.408412 | 0.616016 | 0.635685 |
| MmugDNA.11044.1.S1_at   | MmugDNA.11044.1 | 4.21  | 4.31  | 0.12 | 0.22 | -1.07 | 0.337211 | 0.113102 | 0.659871 | 0.379073 |
| MmugDNA.11045.1.S1_at   | MmugDNA.11045.1 | 3.07  | 3     | 0.13 | 0.12 | 1.05  | 0.549007 | 0.736032 | 0.787067 | 0.847309 |
| MmugDNA.11045.1.S1_s_at | MmugDNA.11045.1 | 6.73  | 6.71  | 0.23 | 0.86 | 1.01  | 0.669546 | 0.781117 | 0.852167 | 0.873036 |
| MmugDNA.11046.1.S1_at   | MmugDNA.11046.1 | 10.56 | 10.87 | 0.19 | 0.25 | -1.24 | 0.190515 | 0.031005 | 0.55308  | 0.217993 |
| MmugDNA.11047.1.S1_at   | MmugDNA.11047.1 | 9.83  | 9.33  | 0.4  | 0.2  | 1.41  | 0.489586 | 0.715679 | 0.753948 | 0.835159 |
| MmugDNA.11048.1.S1_at   | MmugDNA.11048.1 | 5.51  | 5.31  | 0.26 | 0.19 | 1.15  | 0.307316 | 0.133294 | 0.639945 | 0.405049 |
| MmugDNA.11049.1.S1_at   | MmugDNA.11049.1 | 4.06  | 4.1   | 0.08 | 0.03 | -1.02 | 0.708398 | 0.952487 | 0.871709 | 0.973066 |
| MmugDNA.11051.1.S1_at   | MmugDNA.11051.1 | 8.42  | 8.75  | 0.14 | 0.68 | -1.26 | 0.320729 | 0.308082 | 0.64956  | 0.564219 |
| MmugDNA.11052.1.S1_at   | MmugDNA.11052.1 | 11.59 | 11.57 | 0.07 | 0.14 | 1.01  | 0.80226  | 0.224847 | 0.918464 | 0.497653 |
| MmugDNA.11058.1.S1_at   | MmugDNA.11058.1 | 12.21 | 12.02 | 0.08 | 0.05 | 1.14  | 0.013216 | 0.005889 | 0.245924 | 0.104899 |
| MmugDNA.1106.1.S1_at    | MmugDNA.1106.1  | 8.58  | 8.4   | 0.29 | 1.02 | 1.13  | 0.797461 | 0.947276 | 0.916095 | 0.970103 |
| MmugDNA.11064.1.S1_at   | MmugDNA.11064.1 | 9.52  | 9.31  | 0.33 | 0.24 | 1.16  | 0.156445 | 0.175616 | 0.521176 | 0.45218  |
| MmugDNA.11066.1.S1_at   | MmugDNA.11066.1 | 12    | 12.11 | 0.24 | 0.32 | -1.08 | 0.266681 | 0.369291 | 0.612144 | 0.6087   |
| MmugDNA.11072.1.S1_at   | MmugDNA.11072.1 | 11.05 | 10.63 | 0.11 | 0.19 | 1.34  | 0.013695 | 0.004447 | 0.248874 | 0.092958 |
| MmugDNA.11073.1.S1_at   | MmugDNA.11073.1 | 3.77  | 3.73  | 0.24 | 0.07 | 1.02  | 0.544225 | 0.300717 | 0.784278 | 0.558959 |
| MmugDNA.11075.1.S1_at   | MmugDNA.11075.1 | 3.83  | 3.41  | 0.56 | 0.15 | 1.34  | 0.249207 | 0.269279 | 0.600061 | 0.534534 |
| MmugDNA.11078.1.S1_at   | MmugDNA.11078.1 | 5.69  | 5.84  | 0.11 | 0.35 | -1.12 | 0.502037 | 0.338118 | 0.760244 | 0.585286 |
| MmugDNA.11078.1.S1_s_at | MmugDNA.11078.1 | 5.97  | 6.43  | 0.04 | 0.45 | -1.38 | 0.171509 | 0.059353 | 0.535166 | 0.29054  |
| MmugDNA.11079.1.S1_at   | MmugDNA.11079.1 | 8.32  | 8.74  | 0.3  | 0.57 | -1.33 | 0.187363 | 0.272855 | 0.550428 | 0.537586 |
| MmugDNA.11084.1.S1_at   | MmugDNA.11084.1 | 2.97  | 2.91  | 0.25 | 0.51 | 1.04  | 0.620732 | 0.665457 | 0.826104 | 0.80399  |
| MmugDNA.11088.1.S1_at   | MmugDNA.11088.1 | 6.06  | 6.84  | 0.38 | 0.18 | -1.72 | 0.0494   | 0.055893 | 0.37138  | 0.282185 |
| MmugDNA.11092.1.S1_at   | MmugDNA.11092.1 | 7.99  | 8.25  | 0.8  | 0.74 | -1.2  | 0.550005 | 0.688274 | 0.787584 | 0.818009 |
| MmugDNA.11095.1.S1_at   | MmugDNA.11095.1 | 5.18  | 5.39  | 0.25 | 0.17 | -1.15 | 0.483195 | 0.62342  | 0.749882 | 0.777776 |
| MmugDNA.111.1.S1_at     | MmugDNA.111.1   | 8.94  | 7.84  | 0.23 | 0.61 | 2.15  | 0.066216 | 0.088287 | 0.406371 | 0.341721 |
| MmugDNA.11101.1.S1_at   | MmugDNA.11101.1 | 8.18  | 8.7   | 0.18 | 0.68 | -1.43 | 0.242726 | 0.32689  | 0.594529 | 0.576848 |
| MmugDNA.11105.1.S1_at   | MmugDNA.11105.1 | 9     | 8.57  | 0.24 | 0.62 | 1.35  | 0.981724 | 0.668669 | 0.993374 | 0.806111 |
| MmugDNA.11108.1.S1_at   | MmugDNA.11108.1 | 8.86  | 9.11  | 0.24 | 0.39 | -1.19 | 0.412334 | 0.425876 | 0.707888 | 0.6481   |
| MmugDNA.11112.1.S1_at   | MmugDNA.11112.1 | 5.3   | 5.2   | 0.02 | 0.12 | 1.07  | 0.703317 | 0.82224  | 0.868993 | 0.897741 |
| MmugDNA.11115.1.S1_at   | MmugDNA.11115.1 | 7.14  | 7.19  | 0.51 | 0.62 | -1.04 | 0.676086 | 0.695339 | 0.854832 | 0.82295  |
| MmugDNA.11115.1.S1_s_at | MmugDNA.11115.1 | 8.63  | 8.84  | 0.7  | 1.09 | -1.15 | 0.726761 | 0.297321 | 0.881115 | 0.556071 |
| MmugDNA.11117.1.S1_at   | MmugDNA.11117.1 | 8.27  | 6.83  | 0.05 | 0.49 | 2.72  | 0.013249 | 0.006177 | 0.246279 | 0.106774 |
| MmugDNA.11132.1.S1_at   | MmugDNA.11132.1 | 6.62  | 6.64  | 0.13 | 0.09 | -1.01 | 0.914286 | 0.832713 | 0.966155 | 0.904023 |
| MmugDNA.11134.1.S1_at   | MmugDNA.11134.1 | 8.65  | 8.82  | 0.62 | 0.72 | -1.12 | 0.702679 | 0.670283 | 0.868878 | 0.807201 |
| MmugDNA.1114.1.S1_at    | MmugDNA.1114.1  | 3.59  | 3.92  | 0.07 | 0.14 | -1.25 | 0.039803 | 0.021006 | 0.3482   | 0.181715 |

|                         |                 |       |       |      |      |       |          |          |          |          |
|-------------------------|-----------------|-------|-------|------|------|-------|----------|----------|----------|----------|
| MmugDNA.11143.1.S1_at   | MmugDNA.11143.1 | 11.64 | 11.8  | 0.11 | 0.24 | -1.12 | 0.124355 | 0.054701 | 0.490248 | 0.279343 |
| MmugDNA.11163.1.S1_at   | MmugDNA.11163.1 | 10.76 | 10.54 | 0.12 | 0.63 | 1.16  | 0.380887 | 0.528471 | 0.687597 | 0.716643 |
| MmugDNA.11165.1.S1_at   | MmugDNA.11165.1 | 5.13  | 5.23  | 0.07 | 0.01 | -1.07 | 0.129536 | 0.184578 | 0.495744 | 0.460617 |
| MmugDNA.11168.1.S1_at   | MmugDNA.11168.1 | 12.51 | 12.35 | 0.09 | 0.08 | 1.12  | 0.048632 | 0.019391 | 0.3691   | 0.175022 |
| MmugDNA.11171.1.S1_at   | MmugDNA.11171.1 | 11.73 | 11.01 | 0.03 | 0.46 | 1.64  | 0.119808 | 0.053611 | 0.484387 | 0.277182 |
| MmugDNA.11176.1.S1_at   | MmugDNA.11176.1 | 6.82  | 6.49  | 0.16 | 0.49 | 1.26  | 0.268275 | 0.08353  | 0.613105 | 0.334076 |
| MmugDNA.11192.1.S1_at   | MmugDNA.11192.1 | 6.9   | 7.13  | 0.15 | 0.26 | -1.17 | 0.273841 | 0.248345 | 0.617262 | 0.5176   |
| MmugDNA.11197.1.S1_at   | MmugDNA.11197.1 | 10.87 | 10.84 | 0.34 | 0.23 | 1.02  | 0.555571 | 0.693692 | 0.791454 | 0.821874 |
| MmugDNA.1120.1.S1_at    | MmugDNA.1120.1  | 6.36  | 8.27  | 1.19 | 2.31 | -3.75 | 0.589747 | 0.221928 | 0.809598 | 0.495019 |
| MmugDNA.11204.1.S1_at   | MmugDNA.11204.1 | 8.99  | 7.43  | 0.18 | 0.41 | 2.96  | 0.005534 | 0.001684 | 0.191802 | 0.062108 |
| MmugDNA.11206.1.S1_at   | MmugDNA.11206.1 | 12.01 | 12.07 | 0.11 | 0.06 | -1.04 | 0.635803 | 0.890751 | 0.835187 | 0.937717 |
| MmugDNA.11207.1.S1_at   | MmugDNA.11207.1 | 8.89  | 8.75  | 0.52 | 0.43 | 1.1   | 0.423846 | 0.213572 | 0.714199 | 0.48741  |
| MmugDNA.11216.1.S1_at   | MmugDNA.11216.1 | 12.7  | 12.44 | 0.1  | 0.07 | 1.19  | 0.043724 | 0.039664 | 0.357051 | 0.244271 |
| MmugDNA.11219.1.S1_at   | MmugDNA.11219.1 | 11.74 | 11.92 | 0.12 | 0.16 | -1.14 | 0.358637 | 0.141479 | 0.67333  | 0.415019 |
| MmugDNA.11223.1.S1_at   | MmugDNA.11223.1 | 5.16  | 5.06  | 0.17 | 0.16 | 1.07  | 0.427094 | 0.131451 | 0.716089 | 0.403584 |
| MmugDNA.11235.1.S1_at   | MmugDNA.11235.1 | 3.63  | 3.11  | 0.3  | 0.11 | 1.43  | 0.059641 | 0.05485  | 0.39273  | 0.279693 |
| MmugDNA.11237.1.S1_at   | MmugDNA.11237.1 | 9.41  | 8.88  | 0.32 | 0.53 | 1.44  | 0.119509 | 0.093535 | 0.484145 | 0.349846 |
| MmugDNA.11238.1.S1_at   | MmugDNA.11238.1 | 8.96  | 7.94  | 0.63 | 0.56 | 2.02  | 0.11964  | 0.132869 | 0.484149 | 0.404544 |
| MmugDNA.11243.1.S1_at   | MmugDNA.11243.1 | 9.17  | 9.12  | 0.14 | 0.15 | 1.04  | 0.946305 | 0.034796 | 0.979374 | 0.230686 |
| MmugDNA.11251.1.S1_at   | MmugDNA.11251.1 | 11.44 | 12.72 | 0.64 | 0.4  | -2.42 | 0.101888 | 0.046877 | 0.461313 | 0.261272 |
| MmugDNA.11254.1.S1_at   | MmugDNA.11254.1 | 7.6   | 7.55  | 0.17 | 0.12 | 1.04  | 0.601101 | 0.496142 | 0.815683 | 0.695877 |
| MmugDNA.11257.1.S1_s_at | MmugDNA.11257.1 | 11.01 | 10.57 | 0.26 | 0.44 | 1.36  | 0.495984 | 0.706624 | 0.757394 | 0.829794 |
| MmugDNA.11259.1.S1_at   | MmugDNA.11259.1 | 3.47  | 3.41  | 0.2  | 0.06 | 1.04  | 0.192803 | 0.183318 | 0.556141 | 0.459553 |
| MmugDNA.11263.1.S1_at   | MmugDNA.11263.1 | 3.07  | 2.97  | 0.68 | 0.32 | 1.07  | 0.522022 | 0.052569 | 0.771756 | 0.274848 |
| MmugDNA.11273.1.S1_at   | MmugDNA.11273.1 | 11.43 | 11.12 | 0.02 | 0.09 | 1.24  | 0.005175 | 0.001963 | 0.190313 | 0.065832 |
| MmugDNA.11279.1.S1_at   | MmugDNA.11279.1 | 6.73  | 6.66  | 0.2  | 0.05 | 1.05  | 0.161101 | 0.185054 | 0.526189 | 0.460891 |
| MmugDNA.11281.1.S1_at   | MmugDNA.11281.1 | 10.03 | 9.76  | 0.07 | 0.38 | 1.21  | 0.32364  | 0.442319 | 0.65165  | 0.660336 |
| MmugDNA.11286.1.S1_at   | MmugDNA.11286.1 | 6.71  | 6.89  | 0.05 | 0.12 | -1.13 | 0.061768 | 0.17341  | 0.396609 | 0.449918 |
| MmugDNA.11287.1.S1_s_at | MmugDNA.11287.1 | 13.15 | 13.39 | 0.08 | 0.42 | -1.19 | 0.727821 | 0.587313 | 0.881594 | 0.754131 |
| MmugDNA.11294.1.S1_at   | MmugDNA.11294.1 | 8.63  | 9.96  | 0.2  | 0.46 | -2.52 | 0.029117 | 0.025095 | 0.31299  | 0.19845  |
| MmugDNA.11298.1.S1_at   | MmugDNA.11298.1 | 7.3   | 6.41  | 0.32 | 0.67 | 1.86  | 0.198382 | 0.142238 | 0.561522 | 0.415754 |
| MmugDNA.113.1.S1_at     | MmugDNA.113.1   | 7.72  | 6.69  | 0.11 | 0.38 | 2.04  | 0.021065 | 0.000461 | 0.281953 | 0.038572 |
| MmugDNA.11300.1.S1_at   | MmugDNA.11300.1 | 6.89  | 8.55  | 0.53 | 0.32 | -3.16 | 0.005588 | 0.001711 | 0.191807 | 0.062657 |
| MmugDNA.11301.1.S1_at   | MmugDNA.11301.1 | 7.72  | 7.17  | 1.13 | 0.5  | 1.46  | 0.852186 | 0.027115 | 0.940569 | 0.205797 |
| MmugDNA.11309.1.S1_at   | MmugDNA.11309.1 | 2.9   | 2.87  | 0.03 | 0.02 | 1.02  | 0.098078 | 0.190415 | 0.457356 | 0.465906 |
| MmugDNA.11310.1.S1_at   | MmugDNA.11310.1 | 7.83  | 8.22  | 0.87 | 0.84 | -1.31 | 0.99824  | 0.914292 | 0.999299 | 0.951813 |
| MmugDNA.11311.1.S1_at   | MmugDNA.11311.1 | 9.34  | 9.33  | 0.14 | 0.07 | 1     | 0.855536 | 0.409471 | 0.941542 | 0.636521 |
| MmugDNA.11314.1.S1_at   | MmugDNA.11314.1 | 4.05  | 4.14  | 0.14 | 0.19 | -1.06 | 0.575736 | 0.283164 | 0.802481 | 0.545694 |
| MmugDNA.11315.1.S1_at   | MmugDNA.11315.1 | 8.04  | 7.89  | 0.98 | 0.24 | 1.11  | 0.568541 | 0.773743 | 0.798666 | 0.868448 |
| MmugDNA.11316.1.S1_at   | MmugDNA.11316.1 | 10.88 | 11.14 | 0.16 | 0.97 | -1.2  | 0.781218 | 0.739166 | 0.908721 | 0.848851 |
| MmugDNA.11320.1.S1_at   | MmugDNA.11320.1 | 9.38  | 7.86  | 0.13 | 0.44 | 2.87  | 0.003005 | 0.000372 | 0.171022 | 0.037273 |

|                         |                 |       |       |      |      |        |          |          |          |          |
|-------------------------|-----------------|-------|-------|------|------|--------|----------|----------|----------|----------|
| MmugDNA.11321.1.S1_at   | MmugDNA.11321.1 | 11.17 | 10.45 | 0.06 | 0.37 | 1.65   | 0.088767 | 0.085662 | 0.443684 | 0.337744 |
| MmugDNA.11327.1.S1_s_at | MmugDNA.11327.1 | 6.22  | 6.24  | 0.04 | 0.06 | -1.01  | 0.670921 | 0.790005 | 0.852532 | 0.878631 |
| MmugDNA.11328.1.S1_at   | MmugDNA.11328.1 | 11.03 | 11.15 | 1.17 | 0.91 | -1.09  | 0.850151 | 0.272794 | 0.939853 | 0.537505 |
| MmugDNA.11332.1.S1_at   | MmugDNA.11332.1 | 9.41  | 8.96  | 0.43 | 0.59 | 1.36   | 0.162328 | 0.182732 | 0.526658 | 0.459215 |
| MmugDNA.11336.1.S1_at   | MmugDNA.11336.1 | 6.66  | 6.27  | 0.23 | 0.14 | 1.31   | 0.166876 | 0.20489  | 0.530864 | 0.479227 |
| MmugDNA.11338.1.S1_at   | MmugDNA.11338.1 | 6.71  | 6.59  | 0.06 | 0.09 | 1.09   | 0.084367 | 0.032888 | 0.436943 | 0.224486 |
| MmugDNA.11341.1.S1_s_at | MmugDNA.11341.1 | 7.61  | 7.17  | 0.5  | 0.13 | 1.36   | 0.601291 | 0.714139 | 0.815685 | 0.834155 |
| MmugDNA.11342.1.S1_at   | MmugDNA.11342.1 | 8.63  | 8.69  | 0.43 | 0.49 | -1.05  | 0.939259 | 0.13034  | 0.976927 | 0.402172 |
| MmugDNA.11346.1.S1_at   | MmugDNA.11346.1 | 10.05 | 9.72  | 0.15 | 0.15 | 1.26   | 0.145889 | 0.138236 | 0.511704 | 0.411198 |
| MmugDNA.11347.1.S1_at   | MmugDNA.11347.1 | 3.73  | 3.8   | 0.26 | 0.04 | -1.05  | 0.522418 | 0.724083 | 0.772025 | 0.840308 |
| MmugDNA.11349.1.S1_at   | MmugDNA.11349.1 | 13.1  | 13.15 | 0.21 | 0.26 | -1.04  | 0.429333 | 0.549715 | 0.717455 | 0.730002 |
| MmugDNA.11350.1.S1_at   | MmugDNA.11350.1 | 8.79  | 8.62  | 0.55 | 0.67 | 1.13   | 0.284846 | 0.169456 | 0.624466 | 0.446075 |
| MmugDNA.11351.1.S1_at   | MmugDNA.11351.1 | 8.4   | 7.66  | 0.68 | 1.43 | 1.68   | 0.460302 | 0.12508  | 0.736876 | 0.395506 |
| MmugDNA.11352.1.S1_at   | MmugDNA.11352.1 | 6.73  | 7.82  | 0.66 | 0.27 | -2.13  | 0.058292 | 0.058885 | 0.390177 | 0.289418 |
| MmugDNA.11353.1.S1_at   | MmugDNA.11353.1 | 5.33  | 8.85  | 2.18 | 3.07 | -11.49 | 0.306938 | 0.306541 | 0.639788 | 0.563095 |
| MmugDNA.11355.1.S1_at   | MmugDNA.11355.1 | 8     | 6.77  | 0.23 | 0.74 | 2.35   | 0.044832 | 0.034792 | 0.359043 | 0.230686 |
| MmugDNA.11358.1.S1_at   | MmugDNA.11358.1 | 9.48  | 9.16  | 0.03 | 0.08 | 1.25   | 0.002869 | 0.007948 | 0.16908  | 0.118702 |
| MmugDNA.1136.1.S1_at    | MmugDNA.1136.1  | 12.92 | 12.7  | 0.02 | 0.18 | 1.17   | 0.365411 | 0.29998  | 0.678257 | 0.558262 |
| MmugDNA.11360.1.S1_at   | MmugDNA.11360.1 | 6.85  | 7.72  | 0.21 | 0.12 | -1.83  | 0.002037 | 0.000813 | 0.155636 | 0.046271 |
| MmugDNA.11362.1.S1_at   | MmugDNA.11362.1 | 6.17  | 5.71  | 0.42 | 0.27 | 1.38   | 0.141725 | 0.129029 | 0.509159 | 0.400513 |
| MmugDNA.11364.1.S1_at   | MmugDNA.11364.1 | 10.82 | 9.61  | 0.18 | 0.26 | 2.31   | 0.001735 | 0.000574 | 0.154452 | 0.041171 |
| MmugDNA.11365.1.S1_at   | MmugDNA.11365.1 | 13.43 | 13.77 | 0.16 | 0.41 | -1.27  | 0.332508 | 0.329815 | 0.656875 | 0.578874 |
| MmugDNA.11366.1.S1_at   | MmugDNA.11366.1 | 3.44  | 3.5   | 0.12 | 0.12 | -1.04  | 0.267593 | 0.345656 | 0.612666 | 0.590854 |
| MmugDNA.11368.1.S1_at   | MmugDNA.11368.1 | 3.18  | 3.27  | 0.12 | 0.06 | -1.06  | 0.902259 | 0.922292 | 0.961012 | 0.956244 |
| MmugDNA.11369.1.S1_at   | MmugDNA.11369.1 | 3.21  | 3.18  | 0.1  | 0.24 | 1.02   | 0.408692 | 0.249466 | 0.705462 | 0.518532 |
| MmugDNA.11375.1.S1_at   | MmugDNA.11375.1 | 9.45  | 9.12  | 0.25 | 0.94 | 1.26   | 0.199131 | 0.275317 | 0.562104 | 0.539663 |
| MmugDNA.11378.1.S1_at   | MmugDNA.11378.1 | 11.16 | 10.76 | 0.17 | 0.18 | 1.32   | 0.095693 | 0.114772 | 0.453501 | 0.381311 |
| MmugDNA.11379.1.S1_at   | MmugDNA.11379.1 | 12.76 | 12.77 | 0.12 | 0.18 | -1.01  | 0.906956 | 0.537123 | 0.963023 | 0.722298 |
| MmugDNA.11380.1.S1_at   | MmugDNA.11380.1 | 4.03  | 4.1   | 0.07 | 0.08 | -1.06  | 0.331696 | 0.184949 | 0.656468 | 0.460776 |
| MmugDNA.11386.1.S1_at   | MmugDNA.11386.1 | 10.89 | 10.35 | 0.22 | 0.15 | 1.46   | 0.014957 | 0.008282 | 0.256514 | 0.12078  |
| MmugDNA.11387.1.S1_at   | MmugDNA.11387.1 | 6.92  | 7.01  | 0.22 | 0.03 | -1.07  | 0.909651 | 0.916179 | 0.964238 | 0.953065 |
| MmugDNA.11389.1.S1_at   | MmugDNA.11389.1 | 8.29  | 9.82  | 0.64 | 1.83 | -2.88  | 0.422381 | 0.425762 | 0.71345  | 0.648082 |
| MmugDNA.11398.1.S1_s_at | MmugDNA.11398.1 | 9.87  | 9.12  | 0.32 | 0.31 | 1.68   | 0.071651 | 0.037709 | 0.415639 | 0.23859  |
| MmugDNA.11406.1.S1_at   | MmugDNA.11406.1 | 10.5  | 9.98  | 0.24 | 0.55 | 1.43   | 0.663975 | 0.849843 | 0.849245 | 0.914673 |
| MmugDNA.11419.1.S1_at   | MmugDNA.11419.1 | 9.16  | 9.39  | 0.18 | 0.08 | -1.17  | 0.182089 | 0.022624 | 0.546458 | 0.188352 |
| MmugDNA.11424.1.S1_at   | MmugDNA.11424.1 | 6.94  | 8.07  | 0.95 | 1.75 | -2.19  | 0.662078 | 0.858906 | 0.848422 | 0.919654 |
| MmugDNA.11426.1.S1_at   | MmugDNA.11426.1 | 3.06  | 3.14  | 0.15 | 0.05 | -1.06  | 0.921781 | 0.874052 | 0.969615 | 0.928462 |
| MmugDNA.11427.1.S1_at   | MmugDNA.11427.1 | 4.03  | 3.77  | 0.35 | 0.03 | 1.2    | 0.24671  | 0.317965 | 0.597861 | 0.571046 |
| MmugDNA.11430.1.S1_at   | MmugDNA.11430.1 | 7.46  | 9.53  | 1.1  | 2.21 | -4.2   | 0.427107 | 0.299317 | 0.716089 | 0.557811 |
| MmugDNA.11438.1.S1_at   | MmugDNA.11438.1 | 7.32  | 7.16  | 0.07 | 0.22 | 1.12   | 0.326887 | 0.440898 | 0.653341 | 0.659138 |
| MmugDNA.11456.1.S1_at   | MmugDNA.11456.1 | 11.35 | 11.33 | 0.14 | 0.25 | 1.01   | 0.380107 | 0.547296 | 0.68724  | 0.728364 |



|                         |                 |       |       |      |      |       |          |          |          |          |
|-------------------------|-----------------|-------|-------|------|------|-------|----------|----------|----------|----------|
| MmugDNA.1146.1.S1_at    | MmugDNA.1146.1  | 12.05 | 11.64 | 0.14 | 0.12 | 1.33  | 0.006361 | 0.00202  | 0.198858 | 0.06682  |
| MmugDNA.11461.1.S1_at   | MmugDNA.11461.1 | 7.71  | 7.88  | 0.05 | 0.14 | -1.13 | 0.129142 | 0.103729 | 0.495114 | 0.364519 |
| MmugDNA.11462.1.S1_at   | MmugDNA.11462.1 | 10.49 | 9.85  | 0.1  | 0.05 | 1.55  | 0.000428 | 0.000049 | 0.131276 | 0.025273 |
| MmugDNA.11463.1.S1_at   | MmugDNA.11463.1 | 4.74  | 4.87  | 0.06 | 0.11 | -1.09 | 0.148805 | 0.09858  | 0.51391  | 0.356709 |
| MmugDNA.11465.1.S1_at   | MmugDNA.11465.1 | 6.57  | 6.79  | 0.17 | 0.11 | -1.16 | 0.093419 | 0.071594 | 0.450649 | 0.313714 |
| MmugDNA.11466.1.S1_at   | MmugDNA.11466.1 | 4.09  | 3.61  | 0.83 | 0.52 | 1.4   | 0.501411 | 0.018687 | 0.759972 | 0.171717 |
| MmugDNA.11468.1.S1_at   | MmugDNA.11468.1 | 8.53  | 8.58  | 0.09 | 0.19 | -1.03 | 0.484984 | 0.350615 | 0.750701 | 0.594364 |
| MmugDNA.11486.1.S1_at   | MmugDNA.11486.1 | 5.79  | 5.78  | 0.14 | 0.08 | 1.01  | 0.808377 | 0.610868 | 0.921904 | 0.768948 |
| MmugDNA.11494.1.S1_at   | MmugDNA.11494.1 | 5.45  | 5.47  | 0.09 | 0.05 | -1.01 | 0.195864 | 0.222598 | 0.558998 | 0.495617 |
| MmugDNA.11508.1.S1_at   | MmugDNA.11508.1 | 4.92  | 4.27  | 0.78 | 0.34 | 1.57  | 0.232368 | 0.16868  | 0.587814 | 0.445352 |
| MmugDNA.11509.1.S1_at   | MmugDNA.11509.1 | 7.85  | 8.12  | 0.11 | 0.16 | -1.21 | 0.170421 | 0.152161 | 0.534249 | 0.426919 |
| MmugDNA.11516.1.S1_at   | MmugDNA.11516.1 | 9.88  | 9.7   | 0.22 | 0.52 | 1.13  | 0.673723 | 0.724577 | 0.853751 | 0.840552 |
| MmugDNA.11519.1.S1_at   | MmugDNA.11519.1 | 9.53  | 9.3   | 0.25 | 0.69 | 1.17  | 0.933951 | 0.973121 | 0.974429 | 0.985424 |
| MmugDNA.11527.1.S1_at   | MmugDNA.11527.1 | 4.41  | 4.62  | 1.01 | 0.2  | -1.16 | 0.463549 | 0.430898 | 0.738852 | 0.651894 |
| MmugDNA.11532.1.S1_at   | MmugDNA.11532.1 | 10.36 | 10.55 | 0.45 | 0.52 | -1.14 | 0.378962 | 0.46609  | 0.686586 | 0.676117 |
| MmugDNA.11533.1.S1_at   | MmugDNA.11533.1 | 3.41  | 3.26  | 0.01 | 0.03 | 1.1   | 0.002123 | 0.156238 | 0.157411 | 0.43161  |
| MmugDNA.11535.1.S1_at   | MmugDNA.11535.1 | 10.99 | 10.68 | 0.31 | 0.3  | 1.23  | 0.125274 | 0.074819 | 0.49131  | 0.318614 |
| MmugDNA.11539.1.S1_at   | MmugDNA.11539.1 | 7.38  | 7.51  | 0.13 | 0.2  | -1.09 | 0.197442 | 0.015976 | 0.560419 | 0.160458 |
| MmugDNA.1154.1.S1_at    | MmugDNA.1154.1  | 9.11  | 9.78  | 0.83 | 1.23 | -1.59 | 0.624986 | 0.748678 | 0.828566 | 0.853802 |
| MmugDNA.11541.1.S1_at   | MmugDNA.11541.1 | 4.78  | 4.71  | 0.81 | 0.42 | 1.05  | 0.395271 | 0.380434 | 0.696396 | 0.617091 |
| MmugDNA.11549.1.S1_at   | MmugDNA.11549.1 | 8.91  | 8.11  | 0.27 | 0.53 | 1.75  | 0.084335 | 0.076515 | 0.436943 | 0.321589 |
| MmugDNA.11555.1.S1_at   | MmugDNA.11555.1 | 10.27 | 10.04 | 0.02 | 0.41 | 1.18  | 0.332926 | 0.247772 | 0.657188 | 0.517199 |
| MmugDNA.11557.1.S1_at   | MmugDNA.11557.1 | 11.94 | 10.68 | 0.18 | 0.21 | 2.39  | 0.001124 | 0.000642 | 0.144631 | 0.042928 |
| MmugDNA.1156.1.S1_at    | MmugDNA.1156.1  | 4.86  | 4.62  | 0.1  | 0.19 | 1.19  | 0.103021 | 0.166694 | 0.46254  | 0.443163 |
| MmugDNA.11564.1.S1_at   | MmugDNA.11564.1 | 7.45  | 7.67  | 0.13 | 0.1  | -1.17 | 0.089465 | 0.085578 | 0.445142 | 0.337567 |
| MmugDNA.11570.1.S1_at   | MmugDNA.11570.1 | 7.54  | 8.02  | 0.28 | 0.47 | -1.4  | 0.081249 | 0.112855 | 0.431938 | 0.378487 |
| MmugDNA.11575.1.S1_at   | MmugDNA.11575.1 | 8.05  | 8.22  | 0.18 | 0.15 | -1.12 | 0.418435 | 0.297987 | 0.711351 | 0.556695 |
| MmugDNA.11580.1.S1_at   | MmugDNA.11580.1 | 7.74  | 7.86  | 0.19 | 0.32 | -1.08 | 0.460847 | 0.022863 | 0.737191 | 0.189271 |
| MmugDNA.11582.1.S1_at   | MmugDNA.11582.1 | 6.39  | 7.2   | 0.42 | 0.81 | -1.74 | 0.269061 | 0.120449 | 0.613808 | 0.38925  |
| MmugDNA.11583.1.S1_at   | MmugDNA.11583.1 | 11.49 | 10.71 | 0.05 | 0.85 | 1.72  | 0.159885 | 0.182682 | 0.524745 | 0.459186 |
| MmugDNA.11585.1.S1_at   | MmugDNA.11585.1 | 7.32  | 6.84  | 0.1  | 0.19 | 1.39  | 0.00962  | 0.017505 | 0.226235 | 0.167516 |
| MmugDNA.11589.1.S1_at   | MmugDNA.11589.1 | 6.86  | 7.28  | 0.58 | 0.65 | -1.34 | 0.350197 | 0.293231 | 0.668409 | 0.553156 |
| MmugDNA.11591.1.S1_s_at | MmugDNA.11591.1 | 5.93  | 6.53  | 0.55 | 0.93 | -1.51 | 0.190168 | 0.244687 | 0.552952 | 0.514512 |
| MmugDNA.11594.1.S1_at   | MmugDNA.11594.1 | 5.3   | 5.37  | 0.17 | 0.11 | -1.05 | 0.735527 | 0.318151 | 0.886318 | 0.571046 |
| MmugDNA.11595.1.S1_at   | MmugDNA.11595.1 | 9.64  | 9.57  | 0.04 | 0.2  | 1.05  | 0.727321 | 0.816596 | 0.881258 | 0.894202 |
| MmugDNA.1160.1.S1_at    | MmugDNA.1160.1  | 5.97  | 6.22  | 0.28 | 0.23 | -1.19 | 0.105635 | 0.104565 | 0.466487 | 0.365816 |
| MmugDNA.11601.1.S1_at   | MmugDNA.11601.1 | 8.73  | 8.85  | 0.18 | 0.22 | -1.08 | 0.998286 | 0.151771 | 0.999306 | 0.426413 |
| MmugDNA.11605.1.S1_at   | MmugDNA.11605.1 | 4.51  | 4.55  | 0.09 | 0.16 | -1.03 | 0.58911  | 0.772659 | 0.809193 | 0.867785 |
| MmugDNA.11610.1.S1_at   | MmugDNA.11610.1 | 12.26 | 12.07 | 0.11 | 0.25 | 1.14  | 0.246313 | 0.187336 | 0.597666 | 0.463366 |
| MmugDNA.11614.1.S1_at   | MmugDNA.11614.1 | 9.73  | 11.62 | 0.69 | 1.23 | -3.7  | 0.120258 | 0.060182 | 0.485252 | 0.291882 |
| MmugDNA.11618.1.S1_at   | MmugDNA.11618.1 | 12.8  | 12.85 | 0.11 | 0.05 | -1.03 | 0.286338 | 0.074729 | 0.625548 | 0.318465 |

|                         |                 |       |       |      |      |       |          |          |          |          |
|-------------------------|-----------------|-------|-------|------|------|-------|----------|----------|----------|----------|
| MmugDNA.11618.1.S1_s_at | MmugDNA.11618.1 | 13.18 | 13.18 | 0.07 | 0.01 | -1    | 0.46233  | 0.055704 | 0.738226 | 0.281853 |
| MmugDNA.1162.1.S1_at    | MmugDNA.1162.1  | 12.24 | 12.45 | 0.24 | 0.82 | -1.15 | 0.954525 | 0.881174 | 0.983073 | 0.932188 |
| MmugDNA.11622.1.S1_at   | MmugDNA.11622.1 | 8.91  | 9.78  | 0.58 | 0.37 | -1.83 | 0.073732 | 0.069455 | 0.419243 | 0.309778 |
| MmugDNA.11623.1.S1_at   | MmugDNA.11623.1 | 6.95  | 8.29  | 0.47 | 0.43 | -2.54 | 0.039047 | 0.03366  | 0.346242 | 0.227052 |
| MmugDNA.11624.1.S1_at   | MmugDNA.11624.1 | 6.07  | 6.07  | 0.16 | 0.06 | -1.01 | 0.660129 | 0.912206 | 0.847439 | 0.950522 |
| MmugDNA.11625.1.S1_at   | MmugDNA.11625.1 | 9.08  | 7.61  | 0.35 | 0.99 | 2.76  | 0.068569 | 0.061514 | 0.410201 | 0.294835 |
| MmugDNA.11626.1.S1_at   | MmugDNA.11626.1 | 9.85  | 9.43  | 0.29 | 0.16 | 1.34  | 0.063942 | 0.066524 | 0.40189  | 0.303705 |
| MmugDNA.11627.1.S1_at   | MmugDNA.11627.1 | 5.19  | 5.29  | 0.15 | 0.04 | -1.07 | 0.315917 | 0.497472 | 0.646746 | 0.696806 |
| MmugDNA.11630.1.S1_at   | MmugDNA.11630.1 | 9.36  | 9.34  | 0.1  | 0.35 | 1.02  | 0.254333 | 0.081651 | 0.602363 | 0.329836 |
| MmugDNA.11631.1.S1_s_at | MmugDNA.11631.1 | 3.88  | 4.52  | 2.21 | 0.64 | -1.56 | 0.646145 | 0.817371 | 0.840741 | 0.89468  |
| MmugDNA.11635.1.S1_at   | MmugDNA.11635.1 | 3.36  | 3.78  | 0.05 | 0.19 | -1.34 | 0.021443 | 0.012054 | 0.282524 | 0.142044 |
| MmugDNA.11637.1.S1_at   | MmugDNA.11637.1 | 7.67  | 7.44  | 0.24 | 0.28 | 1.17  | 0.42926  | 0.515385 | 0.717422 | 0.708274 |
| MmugDNA.11637.1.S1_s_at | MmugDNA.11637.1 | 8.08  | 7.38  | 0.48 | 0.64 | 1.62  | 0.427396 | 0.492583 | 0.716187 | 0.693633 |
| MmugDNA.11639.1.S1_at   | MmugDNA.11639.1 | 10.23 | 10.81 | 0.13 | 0.14 | -1.49 | 0.003799 | 0.001133 | 0.179914 | 0.053052 |
| MmugDNA.11647.1.S1_at   | MmugDNA.11647.1 | 4.89  | 5.25  | 0.35 | 0.45 | -1.28 | 0.687891 | 0.136169 | 0.860812 | 0.408498 |
| MmugDNA.11648.1.S1_at   | MmugDNA.11648.1 | 6.48  | 6.59  | 0.07 | 0.08 | -1.08 | 0.074169 | 0.039932 | 0.419909 | 0.244926 |
| MmugDNA.11649.1.S1_at   | MmugDNA.11649.1 | 11.38 | 11.55 | 0.22 | 0.33 | -1.13 | 0.960952 | 0.877027 | 0.984976 | 0.92994  |
| MmugDNA.11650.1.S1_at   | MmugDNA.11650.1 | 6.01  | 5.52  | 1.06 | 1.12 | 1.41  | 0.778235 | 0.906865 | 0.907397 | 0.947253 |
| MmugDNA.11652.1.S1_at   | MmugDNA.11652.1 | 11.91 | 11.48 | 0.09 | 0.07 | 1.34  | 0.003648 | 0.000044 | 0.179515 | 0.025273 |
| MmugDNA.11653.1.S1_at   | MmugDNA.11653.1 | 9.02  | 8.56  | 0.01 | 0.23 | 1.37  | 0.036415 | 0.010776 | 0.339201 | 0.135471 |
| MmugDNA.11654.1.S1_at   | MmugDNA.11654.1 | 5.85  | 5.99  | 0.22 | 0.16 | -1.1  | 0.809459 | 0.729451 | 0.922228 | 0.843541 |
| MmugDNA.11655.1.S1_at   | MmugDNA.11655.1 | 5.75  | 5.95  | 0.3  | 0.07 | -1.15 | 0.315609 | 0.445591 | 0.646683 | 0.662468 |
| MmugDNA.11660.1.S1_at   | MmugDNA.11660.1 | 8.1   | 8.53  | 0.14 | 0.29 | -1.35 | 0.0488   | 0.039709 | 0.369654 | 0.244271 |
| MmugDNA.11661.1.S1_at   | MmugDNA.11661.1 | 10.02 | 11.03 | 0.29 | 0.32 | -2.02 | 0.018018 | 0.009481 | 0.268422 | 0.12821  |
| MmugDNA.11662.1.S1_at   | MmugDNA.11662.1 | 4.96  | 4.24  | 0.18 | 0.31 | 1.64  | 0.090638 | 0.087715 | 0.446183 | 0.340964 |
| MmugDNA.1167.1.S1_at    | MmugDNA.1167.1  | 10.66 | 10.47 | 0.06 | 0.13 | 1.14  | 0.044447 | 0.003819 | 0.358591 | 0.08794  |
| MmugDNA.11672.1.S1_at   | MmugDNA.11672.1 | 9.8   | 10.3  | 0.64 | 0.47 | -1.42 | 0.479413 | 0.214422 | 0.747663 | 0.488132 |
| MmugDNA.11673.1.S1_at   | MmugDNA.11673.1 | 5.18  | 5.36  | 0.33 | 0.52 | -1.13 | 0.610926 | 0.448632 | 0.821394 | 0.664474 |
| MmugDNA.11680.1.S1_at   | MmugDNA.11680.1 | 6.29  | 8.59  | 1.22 | 1.77 | -4.92 | 0.290967 | 0.276215 | 0.628652 | 0.540183 |
| MmugDNA.11681.1.S1_at   | MmugDNA.11681.1 | 5.38  | 5.41  | 0.04 | 0.05 | -1.02 | 0.476627 | 0.538445 | 0.746273 | 0.723141 |
| MmugDNA.11684.1.S1_at   | MmugDNA.11684.1 | 10.36 | 9.8   | 0.32 | 0.47 | 1.47  | 0.097196 | 0.04969  | 0.456142 | 0.267908 |
| MmugDNA.11685.1.S1_at   | MmugDNA.11685.1 | 9.06  | 9.9   | 0.26 | 0.19 | -1.79 | 0.020223 | 0.006895 | 0.277311 | 0.11222  |
| MmugDNA.11691.1.S1_at   | MmugDNA.11691.1 | 7.61  | 7.81  | 0.17 | 0.08 | -1.15 | 0.194708 | 0.166839 | 0.558172 | 0.443311 |
| MmugDNA.11692.1.S1_at   | MmugDNA.11692.1 | 10.66 | 11.14 | 0.22 | 0.8  | -1.4  | 0.400666 | 0.340242 | 0.700264 | 0.586637 |
| MmugDNA.11693.1.S1_at   | MmugDNA.11693.1 | 12.67 | 12.34 | 0.02 | 0.19 | 1.26  | 0.111828 | 0.16711  | 0.474156 | 0.4436   |
| MmugDNA.11694.1.S1_at   | MmugDNA.11694.1 | 8.69  | 8.48  | 0.2  | 0.2  | 1.16  | 0.340371 | 0.229154 | 0.661779 | 0.501438 |
| MmugDNA.11699.1.S1_at   | MmugDNA.11699.1 | 9.92  | 9.31  | 0.17 | 0.16 | 1.52  | 0.017738 | 0.008495 | 0.267685 | 0.122289 |
| MmugDNA.1170.1.S1_at    | MmugDNA.1170.1  | 7.69  | 7.12  | 0.32 | 0.48 | 1.49  | 0.086351 | 0.095962 | 0.440224 | 0.353252 |
| MmugDNA.11701.1.S1_at   | MmugDNA.11701.1 | 5.91  | 5.9   | 0.4  | 0.37 | 1.01  | 0.901999 | 0.255545 | 0.960872 | 0.523538 |
| MmugDNA.11702.1.S1_at   | MmugDNA.11702.1 | 5.31  | 5.22  | 0.12 | 0.06 | 1.07  | 0.231224 | 0.040901 | 0.587369 | 0.247161 |
| MmugDNA.11708.1.S1_at   | MmugDNA.11708.1 | 8.85  | 8.52  | 0.52 | 0.26 | 1.26  | 0.504914 | 0.068065 | 0.761548 | 0.307142 |

|                       |                 |       |       |      |      |       |          |          |          |          |
|-----------------------|-----------------|-------|-------|------|------|-------|----------|----------|----------|----------|
| MmugDNA.11712.1.S1_at | MmugDNA.11712.1 | 9.72  | 9.77  | 0.1  | 0.4  | -1.03 | 0.616963 | 0.289204 | 0.824363 | 0.550293 |
| MmugDNA.11720.1.S1_at | MmugDNA.11720.1 | 8.5   | 7.68  | 0.25 | 0.27 | 1.77  | 0.013058 | 0.006502 | 0.245262 | 0.109521 |
| MmugDNA.11728.1.S1_at | MmugDNA.11728.1 | 5.16  | 5.66  | 0.08 | 0.33 | -1.41 | 0.089202 | 0.160917 | 0.444872 | 0.437116 |
| MmugDNA.11729.1.S1_at | MmugDNA.11729.1 | 6.31  | 6     | 0.55 | 0.53 | 1.24  | 0.32056  | 0.021491 | 0.649472 | 0.183661 |
| MmugDNA.11735.1.S1_at | MmugDNA.11735.1 | 8.85  | 9.64  | 0.21 | 0.54 | -1.74 | 0.102626 | 0.09322  | 0.462485 | 0.34931  |
| MmugDNA.11741.1.S1_at | MmugDNA.11741.1 | 7.84  | 7.64  | 0.17 | 0.45 | 1.15  | 0.631561 | 0.658285 | 0.83275  | 0.800244 |
| MmugDNA.11746.1.S1_at | MmugDNA.11746.1 | 6.81  | 7.02  | 0.75 | 0.85 | -1.16 | 0.820953 | 0.099181 | 0.92718  | 0.357379 |
| MmugDNA.11748.1.S1_at | MmugDNA.11748.1 | 8.41  | 8.7   | 0.14 | 0.76 | -1.23 | 0.53057  | 0.485191 | 0.776893 | 0.688969 |
| MmugDNA.11754.1.S1_at | MmugDNA.11754.1 | 9.17  | 9.33  | 0.15 | 0.05 | -1.12 | 0.148327 | 0.003167 | 0.513732 | 0.081793 |
| MmugDNA.11756.1.S1_at | MmugDNA.11756.1 | 4.3   | 4.12  | 0.17 | 0.16 | 1.14  | 0.974948 | 0.395037 | 0.990211 | 0.627268 |
| MmugDNA.11758.1.S1_at | MmugDNA.11758.1 | 9.72  | 10    | 0.15 | 0.26 | -1.22 | 0.155892 | 0.01554  | 0.520511 | 0.158053 |
| MmugDNA.11759.1.S1_at | MmugDNA.11759.1 | 12.9  | 12.88 | 0.12 | 0.11 | 1.02  | 0.661476 | 0.735773 | 0.848148 | 0.847144 |
| MmugDNA.11763.1.S1_at | MmugDNA.11763.1 | 7.97  | 6.99  | 0.38 | 0.31 | 1.97  | 0.043361 | 0.013931 | 0.356711 | 0.151382 |
| MmugDNA.11765.1.S1_at | MmugDNA.11765.1 | 4.76  | 5.73  | 0.37 | 1.61 | -1.97 | 0.336575 | 0.07576  | 0.659533 | 0.320348 |
| MmugDNA.11770.1.S1_at | MmugDNA.11770.1 | 7.23  | 5.96  | 0.35 | 0.42 | 2.42  | 0.008166 | 0.002365 | 0.216841 | 0.0718   |
| MmugDNA.11773.1.S1_at | MmugDNA.11773.1 | 11.1  | 10.5  | 0.16 | 0.16 | 1.52  | 0.006283 | 0.005178 | 0.1975   | 0.099727 |
| MmugDNA.11779.1.S1_at | MmugDNA.11779.1 | 8.79  | 8.33  | 0.05 | 0.09 | 1.38  | 0.001837 | 0.053626 | 0.155636 | 0.277224 |
| MmugDNA.11781.1.S1_at | MmugDNA.11781.1 | 7.35  | 8.4   | 0.76 | 1.86 | -2.07 | 0.493717 | 0.456895 | 0.756299 | 0.670565 |
| MmugDNA.11783.1.S1_at | MmugDNA.11783.1 | 10.58 | 10.59 | 0.22 | 0.35 | -1.01 | 0.680737 | 0.416069 | 0.857307 | 0.641342 |
| MmugDNA.11787.1.S1_at | MmugDNA.11787.1 | 5.07  | 5.08  | 0.1  | 0.19 | -1.01 | 0.965509 | 0.881499 | 0.986828 | 0.932382 |
| MmugDNA.11788.1.S1_at | MmugDNA.11788.1 | 9.5   | 9.28  | 0.1  | 0.29 | 1.16  | 0.849769 | 0.736267 | 0.939683 | 0.8474   |
| MmugDNA.1179.1.S1_at  | MmugDNA.1179.1  | 7.17  | 7.77  | 0.26 | 0.7  | -1.52 | 0.225714 | 0.339039 | 0.583746 | 0.585891 |
| MmugDNA.11791.1.S1_at | MmugDNA.11791.1 | 7.59  | 6.71  | 0.06 | 0.52 | 1.83  | 0.072311 | 0.078305 | 0.416651 | 0.324949 |
| MmugDNA.11793.1.S1_at | MmugDNA.11793.1 | 7.55  | 7.37  | 0.17 | 0.25 | 1.13  | 0.332271 | 0.489115 | 0.656683 | 0.691616 |
| MmugDNA.11795.1.S1_at | MmugDNA.11795.1 | 6.78  | 5.99  | 0.23 | 0.4  | 1.73  | 0.01803  | 0.014433 | 0.268422 | 0.153335 |
| MmugDNA.11797.1.S1_at | MmugDNA.11797.1 | 6.4   | 6.3   | 0.15 | 0.37 | 1.08  | 0.938697 | 0.105088 | 0.976644 | 0.366755 |
| MmugDNA.11799.1.S1_at | MmugDNA.11799.1 | 10.59 | 9.88  | 0.33 | 0.55 | 1.63  | 0.164325 | 0.150812 | 0.528238 | 0.425335 |
| MmugDNA.11801.1.S1_at | MmugDNA.11801.1 | 3.72  | 3.77  | 0.33 | 0.13 | -1.04 | 0.927927 | 0.993024 | 0.972211 | 0.995888 |
| MmugDNA.11809.1.S1_at | MmugDNA.11809.1 | 12.34 | 12.18 | 0.06 | 0.21 | 1.11  | 0.315216 | 0.066914 | 0.646414 | 0.304608 |
| MmugDNA.11811.1.S1_at | MmugDNA.11811.1 | 11.03 | 9.69  | 0.12 | 0.52 | 2.53  | 0.010483 | 0.004303 | 0.229964 | 0.092019 |
| MmugDNA.11814.1.S1_at | MmugDNA.11814.1 | 10.51 | 9     | 0.07 | 0.54 | 2.85  | 0.019329 | 0.007211 | 0.273655 | 0.11412  |
| MmugDNA.11817.1.S1_at | MmugDNA.11817.1 | 11.76 | 12.23 | 0.29 | 0.14 | -1.38 | 0.037475 | 0.028603 | 0.3415   | 0.210901 |
| MmugDNA.11818.1.S1_at | MmugDNA.11818.1 | 7.27  | 5.75  | 0.1  | 0.34 | 2.87  | 0.001524 | 0.000295 | 0.151506 | 0.034892 |
| MmugDNA.11820.1.S1_at | MmugDNA.11820.1 | 4.56  | 3.72  | 0.29 | 0.71 | 1.78  | 0.395282 | 0.564292 | 0.696396 | 0.739149 |
| MmugDNA.11824.1.S1_at | MmugDNA.11824.1 | 2.68  | 2.78  | 0.06 | 0.08 | -1.07 | 0.332519 | 0.407704 | 0.656875 | 0.635135 |
| MmugDNA.11825.1.S1_at | MmugDNA.11825.1 | 4.24  | 4.22  | 0.05 | 0.06 | 1.02  | 0.958846 | 0.839063 | 0.984371 | 0.908268 |
| MmugDNA.1183.1.S1_at  | MmugDNA.1183.1  | 7.51  | 7.5   | 0.11 | 0.07 | 1     | 0.97585  | 0.729447 | 0.990673 | 0.843541 |
| MmugDNA.11837.1.S1_at | MmugDNA.11837.1 | 5.6   | 5.86  | 0.13 | 0.19 | -1.2  | 0.176107 | 0.051738 | 0.539647 | 0.272993 |
| MmugDNA.1184.1.S1_at  | MmugDNA.1184.1  | 6.4   | 6.42  | 0.02 | 0.21 | -1.01 | 0.376666 | 0.198562 | 0.685249 | 0.473391 |
| MmugDNA.11843.1.S1_at | MmugDNA.11843.1 | 9.76  | 10.21 | 0.34 | 0.67 | -1.36 | 0.581901 | 0.387869 | 0.805507 | 0.622486 |
| MmugDNA.11846.1.S1_at | MmugDNA.11846.1 | 6     | 5.85  | 0.85 | 0.19 | 1.11  | 0.719727 | 0.439392 | 0.877054 | 0.658142 |

|                         |                 |       |       |      |      |       |          |          |          |          |
|-------------------------|-----------------|-------|-------|------|------|-------|----------|----------|----------|----------|
| MmugDNA.11848.1.S1_at   | MmugDNA.11848.1 | 12.29 | 12.31 | 0.06 | 0.23 | -1.01 | 0.632526 | 0.246687 | 0.833252 | 0.51603  |
| MmugDNA.11853.1.S1_at   | MmugDNA.11853.1 | 3.4   | 3.4   | 0.11 | 0.06 | -1    | 0.415045 | 0.607465 | 0.709338 | 0.766417 |
| MmugDNA.11858.1.S1_at   | MmugDNA.11858.1 | 5.94  | 6.01  | 0.06 | 0.16 | -1.05 | 0.165741 | 0.213131 | 0.529716 | 0.487054 |
| MmugDNA.11863.1.S1_at   | MmugDNA.11863.1 | 8.74  | 8.68  | 0.24 | 1.26 | 1.04  | 0.812937 | 0.953355 | 0.923975 | 0.97351  |
| MmugDNA.11864.1.S1_at   | MmugDNA.11864.1 | 8.86  | 8.8   | 0.12 | 0.13 | 1.04  | 0.279984 | 0.360005 | 0.621313 | 0.601198 |
| MmugDNA.11868.1.S1_at   | MmugDNA.11868.1 | 10.5  | 10.66 | 0.17 | 0.23 | -1.12 | 0.931682 | 0.815859 | 0.973579 | 0.893781 |
| MmugDNA.11873.1.S1_s_at | MmugDNA.11873.1 | 9.97  | 10.28 | 0.16 | 1.2  | -1.25 | 0.641771 | 0.83327  | 0.838538 | 0.904386 |
| MmugDNA.11879.1.S1_at   | MmugDNA.11879.1 | 10.37 | 9.67  | 0.26 | 0.69 | 1.63  | 0.155012 | 0.198535 | 0.519706 | 0.473391 |
| MmugDNA.11884.1.S1_at   | MmugDNA.11884.1 | 5.91  | 6.03  | 0.19 | 0.23 | -1.09 | 0.226675 | 0.146058 | 0.584603 | 0.420073 |
| MmugDNA.11886.1.S1_at   | MmugDNA.11886.1 | 9.38  | 9.38  | 0.06 | 0.45 | -1    | 0.935332 | 0.128726 | 0.975003 | 0.400135 |
| MmugDNA.11889.1.S1_at   | MmugDNA.11889.1 | 9.21  | 8.74  | 0.15 | 0.21 | 1.38  | 0.021162 | 0.012161 | 0.282498 | 0.142648 |
| MmugDNA.11890.1.S1_at   | MmugDNA.11890.1 | 10.46 | 10.12 | 0.12 | 0.49 | 1.27  | 0.982714 | 0.248346 | 0.993597 | 0.5176   |
| MmugDNA.11891.1.S1_at   | MmugDNA.11891.1 | 10.34 | 10.06 | 0.27 | 0.79 | 1.21  | 0.138695 | 0.135087 | 0.505884 | 0.407128 |
| MmugDNA.11893.1.S1_at   | MmugDNA.11893.1 | 10.56 | 10.51 | 0.05 | 0.35 | 1.04  | 0.510497 | 0.244275 | 0.765058 | 0.514184 |
| MmugDNA.11895.1.S1_at   | MmugDNA.11895.1 | 13.06 | 13.03 | 0.12 | 0.06 | 1.02  | 0.631787 | 0.828428 | 0.83284  | 0.901406 |
| MmugDNA.11896.1.S1_at   | MmugDNA.11896.1 | 5.03  | 5.06  | 0.13 | 0.07 | -1.02 | 0.424302 | 0.47472  | 0.714453 | 0.681695 |
| MmugDNA.11898.1.S1_at   | MmugDNA.11898.1 | 7.58  | 8     | 1.2  | 0.92 | -1.35 | 0.285805 | 0.106866 | 0.625208 | 0.369489 |
| MmugDNA.119.1.S1_at     | MmugDNA.119.1   | 7.53  | 6.16  | 0.31 | 0.9  | 2.58  | 0.067305 | 0.054536 | 0.40738  | 0.279042 |
| MmugDNA.11911.1.S1_at   | MmugDNA.11911.1 | 3.85  | 3.99  | 0.36 | 0.29 | -1.1  | 0.910739 | 0.618148 | 0.964728 | 0.773929 |
| MmugDNA.11913.1.S1_at   | MmugDNA.11913.1 | 5.4   | 5.52  | 0.18 | 0.15 | -1.09 | 0.410355 | 0.105658 | 0.706281 | 0.367776 |
| MmugDNA.11915.1.S1_at   | MmugDNA.11915.1 | 7.86  | 8.48  | 0.49 | 0.58 | -1.53 | 0.082507 | 0.071749 | 0.434069 | 0.31401  |
| MmugDNA.11918.1.S1_s_at | MmugDNA.11918.1 | 10.9  | 11.43 | 0.32 | 0.31 | -1.45 | 0.107023 | 0.130074 | 0.467698 | 0.401724 |
| MmugDNA.11934.1.S1_at   | MmugDNA.11934.1 | 11.42 | 11.28 | 0.02 | 0.14 | 1.1   | 0.131077 | 0.01801  | 0.497517 | 0.169233 |
| MmugDNA.11937.1.S1_at   | MmugDNA.11937.1 | 5.22  | 4.9   | 0.8  | 0.19 | 1.25  | 0.766342 | 0.1266   | 0.901727 | 0.397214 |
| MmugDNA.11945.1.S1_at   | MmugDNA.11945.1 | 11.4  | 12.04 | 0.12 | 0.05 | -1.56 | 0.001    | 0.001946 | 0.139813 | 0.065813 |
| MmugDNA.11966.1.S1_at   | MmugDNA.11966.1 | 7.39  | 7.73  | 0.12 | 0.18 | -1.27 | 0.046742 | 0.025539 | 0.363894 | 0.200461 |
| MmugDNA.11970.1.S1_at   | MmugDNA.11970.1 | 9.49  | 8.67  | 0.14 | 0.23 | 1.77  | 0.007151 | 0.000564 | 0.205071 | 0.041049 |
| MmugDNA.11974.1.S1_at   | MmugDNA.11974.1 | 10.24 | 10.24 | 0.14 | 0.72 | -1    | 0.965365 | 0.371805 | 0.986774 | 0.610589 |
| MmugDNA.11978.1.S1_at   | MmugDNA.11978.1 | 13.75 | 13.77 | 0    | 0.07 | -1.01 | 0.251681 | 0.277556 | 0.601007 | 0.54152  |
| MmugDNA.11979.1.S1_at   | MmugDNA.11979.1 | 13.45 | 13.48 | 0.14 | 0.04 | -1.03 | 0.964299 | 0.801202 | 0.9862   | 0.885679 |
| MmugDNA.1198.1.S1_at    | MmugDNA.1198.1  | 9.01  | 9.46  | 0.42 | 0.58 | -1.37 | 0.530895 | 0.161418 | 0.776921 | 0.437604 |
| MmugDNA.11985.1.S1_at   | MmugDNA.11985.1 | 11.28 | 11.24 | 0.11 | 0.2  | 1.02  | 0.954642 | 0.329313 | 0.983073 | 0.578703 |
| MmugDNA.11989.1.S1_at   | MmugDNA.11989.1 | 4.79  | 5.5   | 0.35 | 0.28 | -1.64 | 0.122747 | 0.216158 | 0.488113 | 0.489701 |
| MmugDNA.11993.1.S1_at   | MmugDNA.11993.1 | 10.47 | 10.92 | 0.19 | 0.05 | -1.36 | 0.008233 | 0.001423 | 0.216948 | 0.057604 |
| MmugDNA.11998.1.S1_at   | MmugDNA.11998.1 | 9.8   | 11.27 | 0.17 | 0.35 | -2.78 | 0.004196 | 0.001752 | 0.181739 | 0.063106 |
| MmugDNA.12003.1.S1_s_at | MmugDNA.12003.1 | 5.15  | 4.98  | 0.14 | 0.27 | 1.13  | 0.498818 | 0.699396 | 0.758719 | 0.825344 |
| MmugDNA.12007.1.S1_at   | MmugDNA.12007.1 | 9.1   | 8.72  | 0.21 | 0.33 | 1.3   | 0.101038 | 0.022987 | 0.461009 | 0.189624 |
| MmugDNA.12008.1.S1_at   | MmugDNA.12008.1 | 5.99  | 6.08  | 0.19 | 0.06 | -1.06 | 0.361848 | 0.338198 | 0.675478 | 0.58536  |
| MmugDNA.1201.1.S1_at    | MmugDNA.1201.1  | 8.23  | 8.56  | 0.12 | 1.06 | -1.26 | 0.693643 | 0.660932 | 0.864171 | 0.801637 |
| MmugDNA.12013.1.S1_at   | MmugDNA.12013.1 | 4.1   | 3.82  | 0.17 | 0.24 | 1.22  | 0.383577 | 0.438501 | 0.68944  | 0.657459 |
| MmugDNA.12016.1.S1_at   | MmugDNA.12016.1 | 10.89 | 11.64 | 0.05 | 0.08 | -1.68 | 0.000218 | 0.000088 | 0.120316 | 0.027016 |

|                       |                 |       |       |      |      |       |          |          |          |          |
|-----------------------|-----------------|-------|-------|------|------|-------|----------|----------|----------|----------|
| MmugDNA.12019.1.S1_at | MmugDNA.12019.1 | 9.82  | 8.61  | 0.21 | 0.18 | 2.31  | 0.00273  | 0.000609 | 0.165355 | 0.042176 |
| MmugDNA.12026.1.S1_at | MmugDNA.12026.1 | 6.32  | 6.14  | 0.2  | 0.09 | 1.13  | 0.298154 | 0.123707 | 0.633823 | 0.393843 |
| MmugDNA.12033.1.S1_at | MmugDNA.12033.1 | 10.73 | 10.34 | 0.2  | 0.43 | 1.31  | 0.478397 | 0.597118 | 0.747177 | 0.760092 |
| MmugDNA.12046.1.S1_at | MmugDNA.12046.1 | 3.75  | 3.91  | 0.16 | 0.05 | -1.11 | 0.091191 | 0.089804 | 0.447111 | 0.34404  |
| MmugDNA.1206.1.S1_at  | MmugDNA.1206.1  | 7.88  | 7.81  | 0.11 | 0.16 | 1.05  | 0.602597 | 0.835891 | 0.816617 | 0.906115 |
| MmugDNA.12060.1.S1_at | MmugDNA.12060.1 | 9.65  | 9.37  | 0.5  | 0.12 | 1.21  | 0.333723 | 0.405352 | 0.657803 | 0.633693 |
| MmugDNA.12065.1.S1_at | MmugDNA.12065.1 | 7.92  | 9.98  | 0.86 | 2.04 | -4.17 | 0.212182 | 0.134901 | 0.572526 | 0.406878 |
| MmugDNA.12067.1.S1_at | MmugDNA.12067.1 | 7.08  | 7.27  | 0.26 | 0.48 | -1.15 | 0.337285 | 0.519102 | 0.659871 | 0.710813 |
| MmugDNA.12069.1.S1_at | MmugDNA.12069.1 | 11.36 | 10.37 | 0.15 | 0.6  | 1.99  | 0.058894 | 0.036034 | 0.390921 | 0.234255 |
| MmugDNA.12070.1.S1_at | MmugDNA.12070.1 | 5.31  | 4.74  | 0.43 | 0.3  | 1.48  | 0.164296 | 0.135679 | 0.528238 | 0.407841 |
| MmugDNA.12071.1.S1_at | MmugDNA.12071.1 | 11.37 | 12.26 | 0.25 | 0.14 | -1.85 | 0.005297 | 0.000766 | 0.191107 | 0.04544  |
| MmugDNA.12073.1.S1_at | MmugDNA.12073.1 | 7.7   | 7.78  | 0.22 | 0.05 | -1.06 | 0.714701 | 0.443835 | 0.874968 | 0.661517 |
| MmugDNA.12075.1.S1_at | MmugDNA.12075.1 | 11.25 | 9.19  | 0.11 | 0.26 | 4.18  | 0.000309 | 0.000032 | 0.12562  | 0.022097 |
| MmugDNA.12082.1.S1_at | MmugDNA.12082.1 | 8.19  | 7.05  | 0.51 | 0.36 | 2.21  | 0.056387 | 0.048641 | 0.386477 | 0.265613 |
| MmugDNA.12087.1.S1_at | MmugDNA.12087.1 | 9.16  | 9.28  | 0.42 | 0.22 | -1.09 | 0.698381 | 0.285839 | 0.866082 | 0.547484 |
| MmugDNA.12090.1.S1_at | MmugDNA.12090.1 | 7.05  | 6.3   | 0.3  | 0.17 | 1.68  | 0.043625 | 0.006431 | 0.356892 | 0.108902 |
| MmugDNA.12091.1.S1_at | MmugDNA.12091.1 | 8.68  | 10.1  | 0.29 | 0.36 | -2.67 | 0.016538 | 0.007513 | 0.264616 | 0.116291 |
| MmugDNA.12094.1.S1_at | MmugDNA.12094.1 | 3.83  | 4.92  | 0.65 | 1.09 | -2.13 | 0.330782 | 0.16287  | 0.656063 | 0.438966 |
| MmugDNA.12109.1.S1_at | MmugDNA.12109.1 | 10.63 | 9.15  | 0.22 | 0.3  | 2.78  | 0.003071 | 0.005229 | 0.172102 | 0.100184 |
| MmugDNA.12110.1.S1_at | MmugDNA.12110.1 | 3.47  | 3.25  | 0.15 | 0.18 | 1.16  | 0.313605 | 0.478239 | 0.645195 | 0.684243 |
| MmugDNA.12114.1.S1_at | MmugDNA.12114.1 | 10.93 | 10.13 | 0.28 | 0.07 | 1.74  | 0.009307 | 0.004542 | 0.223832 | 0.094165 |
| MmugDNA.12128.1.S1_at | MmugDNA.12128.1 | 8.86  | 9.1   | 0.13 | 0.2  | -1.18 | 0.232366 | 0.161172 | 0.587814 | 0.437346 |
| MmugDNA.12134.1.S1_at | MmugDNA.12134.1 | 11.11 | 11.99 | 0.37 | 0.23 | -1.84 | 0.014945 | 0.00911  | 0.256509 | 0.125983 |
| MmugDNA.12136.1.S1_at | MmugDNA.12136.1 | 7.03  | 7.04  | 0.2  | 0.54 | -1.01 | 0.606423 | 0.322723 | 0.818834 | 0.574043 |
| MmugDNA.12139.1.S1_at | MmugDNA.12139.1 | 5.94  | 6.37  | 0.12 | 0.18 | -1.35 | 0.025755 | 0.012454 | 0.300497 | 0.14417  |
| MmugDNA.12140.1.S1_at | MmugDNA.12140.1 | 9.06  | 8.76  | 0.14 | 0.59 | 1.23  | 0.142619 | 0.13238  | 0.509741 | 0.404344 |
| MmugDNA.12141.1.S1_at | MmugDNA.12141.1 | 5.95  | 5.33  | 0.71 | 0.41 | 1.53  | 0.597204 | 0.748985 | 0.813431 | 0.85406  |
| MmugDNA.12148.1.S1_at | MmugDNA.12148.1 | 5.32  | 5.68  | 0.11 | 0.19 | -1.29 | 0.214116 | 0.280333 | 0.574523 | 0.543556 |
| MmugDNA.12150.1.S1_at | MmugDNA.12150.1 | 5.08  | 5.29  | 0.4  | 0.36 | -1.16 | 0.484243 | 0.61804  | 0.750235 | 0.773852 |
| MmugDNA.12151.1.S1_at | MmugDNA.12151.1 | 10.28 | 8.22  | 0.34 | 0.4  | 4.17  | 0.003649 | 0.00118  | 0.179515 | 0.053826 |
| MmugDNA.12153.1.S1_at | MmugDNA.12153.1 | 6.45  | 6.76  | 0.41 | 0.55 | -1.24 | 0.384778 | 0.479789 | 0.690114 | 0.68541  |
| MmugDNA.12156.1.S1_at | MmugDNA.12156.1 | 8.8   | 8.57  | 0.18 | 0.3  | 1.17  | 0.076293 | 0.078569 | 0.424738 | 0.325285 |
| MmugDNA.12161.1.S1_at | MmugDNA.12161.1 | 12.92 | 12.77 | 0.06 | 0.08 | 1.11  | 0.081953 | 0.057065 | 0.433242 | 0.284945 |
| MmugDNA.12165.1.S1_at | MmugDNA.12165.1 | 11.43 | 11.36 | 0.21 | 0.15 | 1.05  | 0.880996 | 0.089017 | 0.952105 | 0.342876 |
| MmugDNA.12166.1.S1_at | MmugDNA.12166.1 | 10.92 | 11.12 | 0.42 | 0.48 | -1.14 | 0.343159 | 0.475404 | 0.663475 | 0.682125 |
| MmugDNA.1217.1.S1_at  | MmugDNA.1217.1  | 4.53  | 5.62  | 0.37 | 0.46 | -2.14 | 0.047816 | 0.000068 | 0.367233 | 0.025805 |
| MmugDNA.12175.1.S1_at | MmugDNA.12175.1 | 9.85  | 8.74  | 0.18 | 0.09 | 2.16  | 0.000474 | 0.000093 | 0.13422  | 0.027285 |
| MmugDNA.12184.1.S1_at | MmugDNA.12184.1 | 3.6   | 3.66  | 0.04 | 0.02 | -1.05 | 0.156972 | 0.230435 | 0.521736 | 0.502204 |
| MmugDNA.12190.1.S1_at | MmugDNA.12190.1 | 6.37  | 6.39  | 0.14 | 0.08 | -1.01 | 0.263425 | 0.373535 | 0.609348 | 0.612327 |
| MmugDNA.12193.1.S1_at | MmugDNA.12193.1 | 10.03 | 10.53 | 0.17 | 0.14 | -1.41 | 0.00942  | 0.00116  | 0.225034 | 0.053615 |
| MmugDNA.12200.1.S1_at | MmugDNA.12200.1 | 5.81  | 5.7   | 0.19 | 0.09 | 1.08  | 0.147972 | 0.576463 | 0.513442 | 0.747241 |

|                        |                 |       |       |      |      |       |          |          |          |          |
|------------------------|-----------------|-------|-------|------|------|-------|----------|----------|----------|----------|
| MmugDNA.12202.1.S1_at  | MmugDNA.12202.1 | 8.46  | 8.21  | 0.13 | 0.21 | 1.19  | 0.147709 | 0.041033 | 0.513337 | 0.247319 |
| MmugDNA.12206.1.S1_at  | MmugDNA.12206.1 | 9.77  | 9.5   | 0.1  | 0.23 | 1.2   | 0.068134 | 0.02336  | 0.409384 | 0.191577 |
| MmugDNA.12215.1.S1_at  | MmugDNA.12215.1 | 6.26  | 4.8   | 0.73 | 0.81 | 2.75  | 0.406013 | 0.556394 | 0.7035   | 0.734507 |
| MmugDNA.12218.1.S1_at  | MmugDNA.12218.1 | 10.5  | 9.55  | 0.1  | 0.21 | 1.93  | 0.003915 | 0.000768 | 0.180728 | 0.04544  |
| MmugDNA.12219.1.S1_at  | MmugDNA.12219.1 | 2.54  | 2.68  | 0.05 | 0.06 | -1.1  | 0.06097  | 0.094959 | 0.394705 | 0.352054 |
| MmugDNA.1222.1.S1_at   | MmugDNA.1222.1  | 4.87  | 4.92  | 0.07 | 0.05 | -1.04 | 0.257612 | 0.347749 | 0.605093 | 0.592107 |
| MmugDNA.12222.1.S1_at  | MmugDNA.12222.1 | 3.99  | 3.83  | 0.26 | 0.19 | 1.12  | 0.168836 | 0.186408 | 0.533155 | 0.46226  |
| MmugDNA.12226.1.S1_at  | MmugDNA.12226.1 | 10.99 | 10.96 | 0.4  | 0.34 | 1.02  | 0.433874 | 0.457852 | 0.720251 | 0.670983 |
| MmugDNA.12228.1.S1_at  | MmugDNA.12228.1 | 7.98  | 8.23  | 0.16 | 0.31 | -1.19 | 0.063864 | 0.018421 | 0.401767 | 0.170755 |
| MmugDNA.12229.1.S1_at  | MmugDNA.12229.1 | 9.32  | 9.55  | 0.16 | 0.37 | -1.17 | 0.511298 | 0.636888 | 0.765295 | 0.786441 |
| MmugDNA.1223.1.S1_at   | MmugDNA.1223.1  | 10.36 | 9.94  | 0.15 | 0.08 | 1.34  | 0.010835 | 0.00136  | 0.232232 | 0.056687 |
| MmugDNA.12234.1.S1_at  | MmugDNA.12234.1 | 10.3  | 10.45 | 0.15 | 0.13 | -1.11 | 0.228007 | 0.221799 | 0.585398 | 0.494948 |
| MmugDNA.12239.1.S1_at  | MmugDNA.12239.1 | 8.29  | 9.61  | 0.45 | 0.34 | -2.5  | 0.032016 | 0.039814 | 0.323873 | 0.244569 |
| MmugDNA.1225.1.S1_x_at | MmugDNA.1225.1  | 11.99 | 11.81 | 0.42 | 0.12 | 1.13  | 0.174439 | 0.240297 | 0.538085 | 0.510871 |
| MmugDNA.12251.1.S1_at  | MmugDNA.12251.1 | 12.39 | 11.96 | 0.17 | 0.39 | 1.35  | 0.363332 | 0.496442 | 0.676615 | 0.69607  |
| MmugDNA.12262.1.S1_at  | MmugDNA.12262.1 | 11.66 | 11.2  | 0.16 | 0.16 | 1.38  | 0.0943   | 0.032944 | 0.451807 | 0.224663 |
| MmugDNA.12264.1.S1_at  | MmugDNA.12264.1 | 3.74  | 3.96  | 0.17 | 0.23 | -1.17 | 0.30094  | 0.411509 | 0.636012 | 0.638215 |
| MmugDNA.1227.1.S1_s_at | MmugDNA.1227.1  | 8.75  | 9.29  | 0.24 | 0.46 | -1.45 | 0.108648 | 0.119265 | 0.470118 | 0.387769 |
| MmugDNA.12277.1.S1_at  | MmugDNA.12277.1 | 12.63 | 11.62 | 0.11 | 0.33 | 2.01  | 0.005146 | 0.00183  | 0.190164 | 0.064224 |
| MmugDNA.12290.1.S1_at  | MmugDNA.12290.1 | 4.97  | 5.04  | 0.02 | 0.13 | -1.05 | 0.251437 | 0.130094 | 0.600805 | 0.401724 |
| MmugDNA.12293.1.S1_at  | MmugDNA.12293.1 | 7.73  | 7.55  | 0.2  | 0.13 | 1.13  | 0.176935 | 0.238688 | 0.5408   | 0.509376 |
| MmugDNA.12296.1.S1_at  | MmugDNA.12296.1 | 7.7   | 7.86  | 0.04 | 0.09 | -1.12 | 0.145863 | 0.012928 | 0.511704 | 0.146343 |
| MmugDNA.12302.1.S1_at  | MmugDNA.12302.1 | 11.93 | 11.83 | 0.14 | 0.16 | 1.07  | 0.208512 | 0.102552 | 0.570355 | 0.362904 |
| MmugDNA.12305.1.S1_at  | MmugDNA.12305.1 | 13.3  | 12.93 | 0.03 | 0.11 | 1.29  | 0.005556 | 0.001733 | 0.191807 | 0.062895 |
| MmugDNA.12314.1.S1_at  | MmugDNA.12314.1 | 12.19 | 11.87 | 0.23 | 0.22 | 1.25  | 0.074839 | 0.05429  | 0.421159 | 0.278485 |
| MmugDNA.12315.1.S1_at  | MmugDNA.12315.1 | 6.91  | 7.1   | 0.11 | 0.08 | -1.14 | 0.192241 | 0.204571 | 0.555316 | 0.478946 |
| MmugDNA.12321.1.S1_at  | MmugDNA.12321.1 | 12.3  | 12.54 | 0.21 | 0.21 | -1.18 | 0.103999 | 0.061798 | 0.464135 | 0.295352 |
| MmugDNA.12328.1.S1_at  | MmugDNA.12328.1 | 11.35 | 11.21 | 0.26 | 0.07 | 1.1   | 0.223654 | 0.130519 | 0.582123 | 0.402373 |
| MmugDNA.12334.1.S1_at  | MmugDNA.12334.1 | 9.97  | 9.9   | 0.13 | 0.19 | 1.05  | 0.329164 | 0.480335 | 0.654879 | 0.68574  |
| MmugDNA.12342.1.S1_at  | MmugDNA.12342.1 | 6.49  | 6.78  | 0.81 | 0.19 | -1.22 | 0.650438 | 0.699433 | 0.842789 | 0.825365 |
| MmugDNA.12349.1.S1_at  | MmugDNA.12349.1 | 4.12  | 4.2   | 0.08 | 0.14 | -1.05 | 0.28769  | 0.33306  | 0.626103 | 0.581374 |
| MmugDNA.12350.1.S1_at  | MmugDNA.12350.1 | 6.41  | 6.51  | 0.19 | 0.11 | -1.08 | 0.345855 | 0.400805 | 0.665343 | 0.630649 |
| MmugDNA.12352.1.S1_at  | MmugDNA.12352.1 | 3.39  | 3.37  | 0.2  | 0.12 | 1.01  | 0.997701 | 0.946999 | 0.999071 | 0.969952 |
| MmugDNA.12353.1.S1_at  | MmugDNA.12353.1 | 6.59  | 5.45  | 0.16 | 0.26 | 2.21  | 0.003539 | 0.00347  | 0.179515 | 0.084806 |
| MmugDNA.12354.1.S1_at  | MmugDNA.12354.1 | 5.63  | 5.76  | 0.05 | 0.49 | -1.1  | 0.249469 | 0.277762 | 0.600196 | 0.541664 |
| MmugDNA.12361.1.S1_at  | MmugDNA.12361.1 | 5.67  | 5.83  | 0.05 | 0.07 | -1.12 | 0.032246 | 0.071398 | 0.3244   | 0.313518 |
| MmugDNA.12365.1.S1_at  | MmugDNA.12365.1 | 8.96  | 9.61  | 0.21 | 0.53 | -1.57 | 0.099352 | 0.103584 | 0.459226 | 0.364346 |
| MmugDNA.12371.1.S1_at  | MmugDNA.12371.1 | 6.09  | 6.02  | 0.38 | 0.74 | 1.05  | 0.657919 | 0.610903 | 0.846209 | 0.768948 |
| MmugDNA.12373.1.S1_at  | MmugDNA.12373.1 | 6.16  | 6.39  | 0.3  | 0.18 | -1.17 | 0.437373 | 0.569954 | 0.722414 | 0.742751 |
| MmugDNA.12374.1.S1_at  | MmugDNA.12374.1 | 9.2   | 10.22 | 0.17 | 0.32 | -2.03 | 0.006878 | 0.001755 | 0.202005 | 0.063111 |
| MmugDNA.12376.1.S1_at  | MmugDNA.12376.1 | 11.75 | 11.5  | 0.33 | 0.32 | 1.19  | 0.422167 | 0.590166 | 0.713418 | 0.756117 |

|                         |                 |       |       |      |      |       |          |          |          |          |
|-------------------------|-----------------|-------|-------|------|------|-------|----------|----------|----------|----------|
| MmugDNA.12382.1.S1_at   | MmugDNA.12382.1 | 11.44 | 10.97 | 0.07 | 0.52 | 1.39  | 0.368308 | 0.509094 | 0.679832 | 0.703993 |
| MmugDNA.12383.1.S1_at   | MmugDNA.12383.1 | 10.16 | 10.32 | 0.1  | 0.25 | -1.12 | 0.76215  | 0.534833 | 0.899937 | 0.720557 |
| MmugDNA.12386.1.S1_at   | MmugDNA.12386.1 | 9.89  | 9.81  | 0.13 | 0.28 | 1.06  | 0.8577   | 0.195417 | 0.942373 | 0.470253 |
| MmugDNA.12390.1.S1_s_at | MmugDNA.12390.1 | 12.78 | 13.04 | 0.11 | 0.09 | -1.2  | 0.021374 | 0.012196 | 0.282524 | 0.142872 |
| MmugDNA.12391.1.S1_at   | MmugDNA.12391.1 | 4.61  | 4.63  | 0.06 | 0.05 | -1.01 | 0.182567 | 0.468566 | 0.546812 | 0.677755 |
| MmugDNA.12393.1.S1_at   | MmugDNA.12393.1 | 10.24 | 9.03  | 0.06 | 0.55 | 2.3   | 0.042257 | 0.036473 | 0.354563 | 0.235458 |
| MmugDNA.12399.1.S1_at   | MmugDNA.12399.1 | 12.1  | 12.03 | 0.08 | 0.03 | 1.05  | 0.093235 | 0.015577 | 0.450461 | 0.158192 |
| MmugDNA.12408.1.S1_at   | MmugDNA.12408.1 | 6.78  | 7.02  | 0.16 | 0.22 | -1.18 | 0.448106 | 0.623357 | 0.729435 | 0.777726 |
| MmugDNA.12426.1.S1_at   | MmugDNA.12426.1 | 8.07  | 7.84  | 0.12 | 0.16 | 1.18  | 0.215363 | 0.1777   | 0.575838 | 0.454073 |
| MmugDNA.12436.1.S1_at   | MmugDNA.12436.1 | 7.35  | 6.81  | 0.32 | 0.47 | 1.45  | 0.390514 | 0.055053 | 0.693724 | 0.280138 |
| MmugDNA.1244.1.S1_at    | MmugDNA.1244.1  | 8.93  | 8.44  | 0.08 | 0.89 | 1.4   | 0.962174 | 0.943265 | 0.985456 | 0.967814 |
| MmugDNA.12443.1.S1_at   | MmugDNA.12443.1 | 9.86  | 9.12  | 0.25 | 0.89 | 1.67  | 0.302388 | 0.217449 | 0.63692  | 0.491035 |
| MmugDNA.12446.1.S1_at   | MmugDNA.12446.1 | 13.76 | 13.28 | 0.05 | 0.19 | 1.39  | 0.01335  | 0.009525 | 0.246471 | 0.128521 |
| MmugDNA.12450.1.S1_s_at | MmugDNA.12450.1 | 7.93  | 8.08  | 0.27 | 0.04 | -1.11 | 0.883383 | 0.862838 | 0.95312  | 0.922029 |
| MmugDNA.12450.1.S1_x_at | MmugDNA.12450.1 | 5.62  | 5.59  | 0.21 | 0.02 | 1.02  | 0.729558 | 0.794756 | 0.882686 | 0.881719 |
| MmugDNA.12459.1.S1_at   | MmugDNA.12459.1 | 6.98  | 6.64  | 0.3  | 0.45 | 1.27  | 0.312583 | 0.457529 | 0.644363 | 0.670864 |
| MmugDNA.12461.1.S1_at   | MmugDNA.12461.1 | 8.51  | 8.58  | 0.07 | 0.23 | -1.04 | 0.684654 | 0.805127 | 0.858795 | 0.887962 |
| MmugDNA.12465.1.S1_at   | MmugDNA.12465.1 | 4.48  | 4.51  | 0.48 | 0.22 | -1.02 | 0.465431 | 0.581363 | 0.739873 | 0.750417 |
| MmugDNA.12469.1.S1_at   | MmugDNA.12469.1 | 4.88  | 5.15  | 0.05 | 0.11 | -1.21 | 0.013889 | 0.056186 | 0.249758 | 0.282948 |
| MmugDNA.12478.1.S1_at   | MmugDNA.12478.1 | 12.53 | 12.85 | 0.15 | 0.06 | -1.25 | 0.011192 | 0.009402 | 0.234598 | 0.127832 |
| MmugDNA.1248.1.S1_at    | MmugDNA.1248.1  | 7.84  | 8.38  | 0.37 | 0.33 | -1.45 | 0.189503 | 0.121352 | 0.552479 | 0.390389 |
| MmugDNA.12480.1.S1_at   | MmugDNA.12480.1 | 12.19 | 12.31 | 0.09 | 0.23 | -1.08 | 0.637238 | 0.581872 | 0.836    | 0.750784 |
| MmugDNA.12483.1.S1_at   | MmugDNA.12483.1 | 4.66  | 4.6   | 0.39 | 0.28 | 1.04  | 0.578402 | 0.724573 | 0.803822 | 0.840552 |
| MmugDNA.12484.1.S1_at   | MmugDNA.12484.1 | 10.23 | 10.09 | 0.19 | 0.29 | 1.1   | 0.883016 | 0.405319 | 0.952961 | 0.633679 |
| MmugDNA.12487.1.S1_at   | MmugDNA.12487.1 | 6.99  | 6.84  | 0.46 | 0.52 | 1.11  | 0.773547 | 0.798738 | 0.904884 | 0.884072 |
| MmugDNA.12490.1.S1_at   | MmugDNA.12490.1 | 8.62  | 7.56  | 0.24 | 0.48 | 2.07  | 0.018254 | 0.003668 | 0.269698 | 0.086563 |
| MmugDNA.125.1.S1_at     | MmugDNA.125.1   | 5.74  | 5.41  | 0.15 | 0.28 | 1.25  | 0.121192 | 0.081393 | 0.48598  | 0.329571 |
| MmugDNA.12501.1.S1_at   | MmugDNA.12501.1 | 9.02  | 8.88  | 0.22 | 0.05 | 1.1   | 0.107494 | 0.150996 | 0.468045 | 0.425628 |
| MmugDNA.12503.1.S1_at   | MmugDNA.12503.1 | 4.36  | 4.35  | 0.06 | 0    | 1     | 0.435593 | 0.092961 | 0.721273 | 0.349059 |
| MmugDNA.12505.1.S1_at   | MmugDNA.12505.1 | 11.81 | 12.7  | 0.19 | 0.03 | -1.86 | 0.001225 | 0.000276 | 0.145267 | 0.034199 |
| MmugDNA.1251.1.S1_at    | MmugDNA.1251.1  | 11.65 | 12.05 | 0.56 | 0.33 | -1.32 | 0.93591  | 0.281537 | 0.975172 | 0.54464  |
| MmugDNA.12511.1.S1_at   | MmugDNA.12511.1 | 3.82  | 4.65  | 0.32 | 0.38 | -1.77 | 0.030385 | 0.02035  | 0.318297 | 0.179112 |
| MmugDNA.12515.1.S1_at   | MmugDNA.12515.1 | 3.82  | 3.88  | 0.09 | 0.18 | -1.05 | 0.82234  | 0.937685 | 0.927682 | 0.964687 |
| MmugDNA.12524.1.S1_at   | MmugDNA.12524.1 | 8.82  | 9.38  | 1.24 | 0.75 | -1.47 | 0.292562 | 0.134967 | 0.629871 | 0.406951 |
| MmugDNA.12529.1.S1_at   | MmugDNA.12529.1 | 4.77  | 5.41  | 0.13 | 0.32 | -1.56 | 0.085332 | 0.048483 | 0.438823 | 0.265407 |
| MmugDNA.12530.1.S1_at   | MmugDNA.12530.1 | 11.23 | 11.14 | 0.26 | 0.17 | 1.06  | 0.255426 | 0.240572 | 0.60322  | 0.511229 |
| MmugDNA.12533.1.S1_at   | MmugDNA.12533.1 | 4.97  | 5.05  | 0.3  | 0.09 | -1.05 | 0.991184 | 0.803276 | 0.996899 | 0.88676  |
| MmugDNA.12535.1.S1_at   | MmugDNA.12535.1 | 8.96  | 8.36  | 0.15 | 0.57 | 1.51  | 0.488186 | 0.668017 | 0.752792 | 0.805702 |
| MmugDNA.12539.1.S1_s_at | MmugDNA.12539.1 | 6.19  | 6.39  | 0.07 | 0.29 | -1.15 | 0.323359 | 0.310671 | 0.651559 | 0.565787 |
| MmugDNA.12540.1.S1_at   | MmugDNA.12540.1 | 9.86  | 9.43  | 0.38 | 0.08 | 1.35  | 0.126767 | 0.016496 | 0.492863 | 0.162577 |
| MmugDNA.12543.1.S1_at   | MmugDNA.12543.1 | 10.99 | 11.84 | 0.41 | 0.17 | -1.8  | 0.017656 | 0.012798 | 0.267454 | 0.145832 |

|                         |                 |       |       |      |      |       |          |          |          |          |
|-------------------------|-----------------|-------|-------|------|------|-------|----------|----------|----------|----------|
| MmugDNA.12544.1.S1_at   | MmugDNA.12544.1 | 9.18  | 8.98  | 0.4  | 0.72 | 1.14  | 0.939254 | 0.139851 | 0.976927 | 0.413131 |
| MmugDNA.12546.1.S1_at   | MmugDNA.12546.1 | 12.73 | 13.1  | 0.2  | 0.07 | -1.3  | 0.035482 | 0.034725 | 0.336631 | 0.230506 |
| MmugDNA.12548.1.S1_at   | MmugDNA.12548.1 | 12.37 | 12.48 | 0.06 | 0.05 | -1.08 | 0.028368 | 0.016503 | 0.311036 | 0.162611 |
| MmugDNA.12549.1.S1_at   | MmugDNA.12549.1 | 10.12 | 10.12 | 0.12 | 0.21 | 1     | 0.820185 | 0.262363 | 0.92682  | 0.528655 |
| MmugDNA.12550.1.S1_at   | MmugDNA.12550.1 | 3.74  | 3.89  | 0.12 | 0.08 | -1.11 | 0.716083 | 0.23052  | 0.87529  | 0.502251 |
| MmugDNA.12551.1.S1_at   | MmugDNA.12551.1 | 6.42  | 9.38  | 1.04 | 2.63 | -7.81 | 0.614438 | 0.514608 | 0.823199 | 0.707767 |
| MmugDNA.12551.1.S1_s_at | MmugDNA.12551.1 | 3.86  | 4.62  | 0.26 | 0.89 | -1.69 | 0.246264 | 0.285665 | 0.597666 | 0.547395 |
| MmugDNA.12555.1.S1_at   | MmugDNA.12555.1 | 5.82  | 5.79  | 0.09 | 0.07 | 1.03  | 0.245855 | 0.220864 | 0.597278 | 0.494262 |
| MmugDNA.12556.1.S1_at   | MmugDNA.12556.1 | 3.52  | 3.56  | 0.05 | 0.18 | -1.03 | 0.915265 | 0.833343 | 0.966496 | 0.904427 |
| MmugDNA.12557.1.S1_at   | MmugDNA.12557.1 | 6.28  | 6.36  | 0.03 | 0.27 | -1.06 | 0.255293 | 0.38259  | 0.603158 | 0.618766 |
| MmugDNA.12559.1.S1_at   | MmugDNA.12559.1 | 9.66  | 9.49  | 0.14 | 0.08 | 1.12  | 0.126601 | 0.08776  | 0.492802 | 0.341027 |
| MmugDNA.12560.1.S1_at   | MmugDNA.12560.1 | 9.33  | 8.66  | 0.37 | 0.92 | 1.59  | 0.078415 | 0.134647 | 0.428471 | 0.406629 |
| MmugDNA.12563.1.S1_at   | MmugDNA.12563.1 | 4.86  | 4.91  | 0.13 | 0.09 | -1.04 | 0.872112 | 0.318517 | 0.948957 | 0.571239 |
| MmugDNA.12564.1.S1_at   | MmugDNA.12564.1 | 8.27  | 8.2   | 0.34 | 0.53 | 1.05  | 0.747073 | 0.611384 | 0.891702 | 0.769286 |
| MmugDNA.12567.1.S1_at   | MmugDNA.12567.1 | 11.82 | 11.9  | 0.2  | 0.17 | -1.06 | 0.800732 | 0.012497 | 0.917828 | 0.144302 |
| MmugDNA.12568.1.S1_at   | MmugDNA.12568.1 | 8.24  | 7.37  | 0.11 | 0.12 | 1.83  | 0.000609 | 0.00008  | 0.136818 | 0.027016 |
| MmugDNA.1257.1.S1_at    | MmugDNA.1257.1  | 12.05 | 11.43 | 0.22 | 0.27 | 1.54  | 0.039739 | 0.027823 | 0.347969 | 0.208337 |
| MmugDNA.12570.1.S1_at   | MmugDNA.12570.1 | 9.75  | 8.42  | 0.11 | 0.54 | 2.51  | 0.018485 | 0.011652 | 0.270581 | 0.139826 |
| MmugDNA.12571.1.S1_at   | MmugDNA.12571.1 | 8.04  | 8.15  | 0.33 | 0.09 | -1.08 | 0.762957 | 0.907674 | 0.900081 | 0.947753 |
| MmugDNA.12573.1.S1_at   | MmugDNA.12573.1 | 11.72 | 12    | 0.27 | 0.14 | -1.21 | 0.045219 | 0.039764 | 0.360405 | 0.244402 |
| MmugDNA.12577.1.S1_at   | MmugDNA.12577.1 | 7.94  | 8.55  | 0.18 | 0.36 | -1.52 | 0.105741 | 0.072078 | 0.466526 | 0.314519 |
| MmugDNA.12587.1.S1_at   | MmugDNA.12587.1 | 3.47  | 3.52  | 0.11 | 0.13 | -1.03 | 0.184427 | 0.331411 | 0.548138 | 0.580076 |
| MmugDNA.12592.1.S1_at   | MmugDNA.12592.1 | 12.54 | 12.41 | 0.01 | 0.29 | 1.1   | 0.45395  | 0.579569 | 0.733035 | 0.749192 |
| MmugDNA.12593.1.S1_at   | MmugDNA.12593.1 | 12.23 | 12.19 | 0.11 | 0.17 | 1.02  | 0.893821 | 0.282821 | 0.957768 | 0.545524 |
| MmugDNA.12595.1.S1_at   | MmugDNA.12595.1 | 12.39 | 12.52 | 0.11 | 0.14 | -1.09 | 0.69176  | 0.329467 | 0.863006 | 0.578781 |
| MmugDNA.12596.1.S1_at   | MmugDNA.12596.1 | 6.54  | 6.54  | 0.02 | 0.32 | -1    | 0.380514 | 0.146883 | 0.687322 | 0.420934 |
| MmugDNA.12598.1.S1_at   | MmugDNA.12598.1 | 9.67  | 9.71  | 0.03 | 0.21 | -1.03 | 0.58649  | 0.353299 | 0.808146 | 0.596477 |
| MmugDNA.12599.1.S1_at   | MmugDNA.12599.1 | 11.72 | 11.87 | 0.09 | 0.18 | -1.11 | 0.271416 | 0.045348 | 0.61568  | 0.257279 |
| MmugDNA.126.1.S1_at     | MmugDNA.126.1   | 8.29  | 8.26  | 0.26 | 0.61 | 1.02  | 0.806455 | 0.796846 | 0.920665 | 0.882814 |
| MmugDNA.1260.1.S1_at    | MmugDNA.1260.1  | 9.42  | 9.87  | 0.16 | 0.58 | -1.36 | 0.279917 | 0.167053 | 0.621287 | 0.443535 |
| MmugDNA.12602.1.S1_at   | MmugDNA.12602.1 | 8.79  | 8.94  | 0.22 | 0.17 | -1.11 | 0.35622  | 0.017586 | 0.671447 | 0.167721 |
| MmugDNA.12604.1.S1_at   | MmugDNA.12604.1 | 10.5  | 9.3   | 0.55 | 0.1  | 2.29  | 0.063124 | 0.04676  | 0.400268 | 0.260948 |
| MmugDNA.12610.1.S1_at   | MmugDNA.12610.1 | 10.81 | 10.78 | 0.04 | 0.14 | 1.02  | 0.829904 | 0.506849 | 0.931127 | 0.702624 |
| MmugDNA.12611.1.S1_at   | MmugDNA.12611.1 | 10.3  | 10.51 | 0.07 | 0.34 | -1.15 | 0.359289 | 0.424342 | 0.673869 | 0.646926 |
| MmugDNA.12617.1.S1_at   | MmugDNA.12617.1 | 10.74 | 10.27 | 0.17 | 0.36 | 1.39  | 0.250807 | 0.072779 | 0.600413 | 0.315651 |
| MmugDNA.1262.1.S1_at    | MmugDNA.1262.1  | 4.69  | 4.63  | 0.25 | 0.21 | 1.04  | 0.721406 | 0.6125   | 0.878074 | 0.770071 |
| MmugDNA.12622.1.S1_at   | MmugDNA.12622.1 | 6.39  | 6.12  | 0.84 | 0.94 | 1.21  | 0.64015  | 0.305951 | 0.837599 | 0.562732 |
| MmugDNA.12623.1.S1_at   | MmugDNA.12623.1 | 10.11 | 9.23  | 0.15 | 0.39 | 1.84  | 0.021963 | 0.011785 | 0.28441  | 0.140575 |
| MmugDNA.12624.1.S1_at   | MmugDNA.12624.1 | 9.53  | 10.24 | 0.24 | 0.86 | -1.64 | 0.315581 | 0.210249 | 0.646683 | 0.484073 |
| MmugDNA.12625.1.S1_at   | MmugDNA.12625.1 | 6.25  | 6.56  | 0.26 | 1.27 | -1.24 | 0.627282 | 0.31792  | 0.830029 | 0.571046 |
| MmugDNA.12627.1.S1_at   | MmugDNA.12627.1 | 5.06  | 5.14  | 0.1  | 0.14 | -1.06 | 0.213378 | 0.026985 | 0.573596 | 0.205465 |



|                         |                 |       |       |      |      |       |          |          |          |          |
|-------------------------|-----------------|-------|-------|------|------|-------|----------|----------|----------|----------|
| MmugDNA.12628.1.S1_at   | MmugDNA.12628.1 | 6.21  | 5.27  | 0.59 | 0.49 | 1.93  | 0.040247 | 0.130273 | 0.349251 | 0.402037 |
| MmugDNA.12634.1.S1_at   | MmugDNA.12634.1 | 5.56  | 5.6   | 0.09 | 0.18 | -1.03 | 0.935635 | 0.736968 | 0.975112 | 0.847779 |
| MmugDNA.12640.1.S1_at   | MmugDNA.12640.1 | 6.99  | 5.89  | 0.33 | 0.34 | 2.14  | 0.035895 | 0.037417 | 0.338042 | 0.237777 |
| MmugDNA.12648.1.S1_at   | MmugDNA.12648.1 | 10.11 | 10.97 | 0.4  | 0.62 | -1.82 | 0.104755 | 0.022549 | 0.465114 | 0.187981 |
| MmugDNA.1265.1.S1_at    | MmugDNA.1265.1  | 7.93  | 8.36  | 0.11 | 0.28 | -1.34 | 0.307469 | 0.191095 | 0.639999 | 0.466364 |
| MmugDNA.12657.1.S1_at   | MmugDNA.12657.1 | 4.52  | 4.66  | 0.13 | 0.12 | -1.1  | 0.571206 | 0.798589 | 0.799936 | 0.884032 |
| MmugDNA.12666.1.S1_at   | MmugDNA.12666.1 | 10.56 | 10.22 | 0.3  | 0.29 | 1.27  | 0.049162 | 0.026584 | 0.370772 | 0.203998 |
| MmugDNA.12666.1.S1_s_at | MmugDNA.12666.1 | 10.84 | 10.37 | 0.22 | 0.28 | 1.38  | 0.037992 | 0.017316 | 0.343341 | 0.166509 |
| MmugDNA.12688.1.S1_at   | MmugDNA.12688.1 | 9.47  | 9.55  | 0.15 | 0.15 | -1.06 | 0.54255  | 0.542944 | 0.783423 | 0.725861 |
| MmugDNA.1269.1.S1_at    | MmugDNA.1269.1  | 8.06  | 8.03  | 0.1  | 0.11 | 1.02  | 0.226524 | 0.054561 | 0.584429 | 0.279114 |
| MmugDNA.12691.1.S1_at   | MmugDNA.12691.1 | 10.27 | 9.57  | 0.05 | 0.09 | 1.62  | 0.000297 | 0.000028 | 0.12562  | 0.021152 |
| MmugDNA.1270.1.S1_at    | MmugDNA.1270.1  | 3.34  | 2.97  | 0.25 | 0.07 | 1.29  | 0.101812 | 0.084733 | 0.461313 | 0.336218 |
| MmugDNA.12703.1.S1_at   | MmugDNA.12703.1 | 8.47  | 7.6   | 0.29 | 0.35 | 1.84  | 0.103641 | 0.098519 | 0.463383 | 0.356636 |
| MmugDNA.12711.1.S1_at   | MmugDNA.12711.1 | 8.81  | 8.14  | 0.15 | 0.13 | 1.59  | 0.002235 | 0.000266 | 0.160286 | 0.033786 |
| MmugDNA.12725.1.S1_at   | MmugDNA.12725.1 | 4.49  | 7.79  | 0.78 | 0.65 | -9.89 | 0.005222 | 0.001415 | 0.190783 | 0.057432 |
| MmugDNA.12728.1.S1_at   | MmugDNA.12728.1 | 6.11  | 6.15  | 0.06 | 0.33 | -1.03 | 0.743141 | 0.5013   | 0.890095 | 0.699499 |
| MmugDNA.12736.1.S1_at   | MmugDNA.12736.1 | 6.83  | 6.85  | 0.21 | 0.12 | -1.02 | 0.288593 | 0.354948 | 0.626729 | 0.597466 |
| MmugDNA.12737.1.S1_at   | MmugDNA.12737.1 | 10.99 | 10.93 | 0.1  | 0.05 | 1.04  | 0.334747 | 0.102399 | 0.658461 | 0.36259  |
| MmugDNA.12738.1.S1_at   | MmugDNA.12738.1 | 2.97  | 3.11  | 0.23 | 0.04 | -1.11 | 0.787284 | 0.938489 | 0.911535 | 0.965059 |
| MmugDNA.12740.1.S1_at   | MmugDNA.12740.1 | 6.01  | 6.18  | 0.04 | 0.29 | -1.13 | 0.138706 | 0.108796 | 0.505884 | 0.37236  |
| MmugDNA.12743.1.S1_at   | MmugDNA.12743.1 | 10.04 | 10.58 | 0.27 | 1.19 | -1.46 | 0.497569 | 0.525628 | 0.758019 | 0.715154 |
| MmugDNA.12745.1.S1_at   | MmugDNA.12745.1 | 6.4   | 7.36  | 0.94 | 1.42 | -1.95 | 0.359717 | 0.375673 | 0.673991 | 0.613577 |
| MmugDNA.12748.1.S1_at   | MmugDNA.12748.1 | 3.75  | 3.85  | 0.16 | 0.21 | -1.07 | 0.920957 | 0.507984 | 0.969173 | 0.703358 |
| MmugDNA.12749.1.S1_s_at | MmugDNA.12749.1 | 12.7  | 11.94 | 0.18 | 0.4  | 1.69  | 0.033852 | 0.009324 | 0.330262 | 0.127466 |
| MmugDNA.12751.1.S1_at   | MmugDNA.12751.1 | 4.9   | 4.91  | 0.08 | 0.03 | -1.01 | 0.575932 | 0.068874 | 0.802615 | 0.308799 |
| MmugDNA.12757.1.S1_s_at | MmugDNA.12757.1 | 7.49  | 6.95  | 0.12 | 0.36 | 1.45  | 0.220432 | 0.278565 | 0.579413 | 0.542327 |
| MmugDNA.12759.1.S1_at   | MmugDNA.12759.1 | 6.62  | 6.74  | 0.1  | 0.13 | -1.09 | 0.485352 | 0.626834 | 0.750896 | 0.780001 |
| MmugDNA.12780.1.S1_at   | MmugDNA.12780.1 | 5.49  | 5.42  | 0.3  | 0.48 | 1.05  | 0.913267 | 0.772044 | 0.965645 | 0.867462 |
| MmugDNA.12786.1.S1_at   | MmugDNA.12786.1 | 6.07  | 6.43  | 1.07 | 0.83 | -1.28 | 0.509983 | 0.185178 | 0.764635 | 0.461071 |
| MmugDNA.12791.1.S1_at   | MmugDNA.12791.1 | 10.11 | 10.07 | 0.31 | 0.35 | 1.03  | 0.376513 | 0.149252 | 0.685245 | 0.42373  |
| MmugDNA.12792.1.S1_at   | MmugDNA.12792.1 | 4.3   | 4.42  | 0.14 | 0.15 | -1.09 | 0.32972  | 0.101684 | 0.655349 | 0.361562 |
| MmugDNA.12795.1.S1_at   | MmugDNA.12795.1 | 12.25 | 12.1  | 0.1  | 0.07 | 1.11  | 0.112619 | 0.096061 | 0.475095 | 0.353319 |
| MmugDNA.12797.1.S1_at   | MmugDNA.12797.1 | 5.5   | 5.49  | 0.03 | 0.27 | 1.01  | 0.609181 | 0.152146 | 0.82039  | 0.426919 |
| MmugDNA.128.1.S1_at     | MmugDNA.128.1   | 5.97  | 5.95  | 0.16 | 0.15 | 1.01  | 0.798576 | 0.678942 | 0.91652  | 0.81252  |
| MmugDNA.12801.1.S1_at   | MmugDNA.12801.1 | 7.73  | 7.88  | 0.23 | 0.03 | -1.11 | 0.337189 | 0.414133 | 0.659871 | 0.640063 |
| MmugDNA.12803.1.S1_s_at | MmugDNA.12803.1 | 12.02 | 11.55 | 0.31 | 0.14 | 1.38  | 0.105305 | 0.082932 | 0.465877 | 0.332465 |
| MmugDNA.12810.1.S1_at   | MmugDNA.12810.1 | 4.88  | 3.4   | 0.57 | 0.11 | 2.79  | 0.017652 | 0.005178 | 0.267454 | 0.099727 |
| MmugDNA.12811.1.S1_at   | MmugDNA.12811.1 | 4.08  | 4.49  | 0.34 | 0.15 | -1.33 | 0.395253 | 0.538051 | 0.696396 | 0.722826 |
| MmugDNA.12823.1.S1_at   | MmugDNA.12823.1 | 10.17 | 9.94  | 0.14 | 0.24 | 1.18  | 0.109894 | 0.004877 | 0.47102  | 0.097507 |
| MmugDNA.12828.1.S1_at   | MmugDNA.12828.1 | 7.04  | 6.65  | 0.48 | 0.62 | 1.31  | 0.235275 | 0.302213 | 0.589342 | 0.560092 |
| MmugDNA.12835.1.S1_at   | MmugDNA.12835.1 | 7.22  | 7.32  | 0.17 | 0.33 | -1.08 | 0.183124 | 0.242501 | 0.547234 | 0.51284  |

|                         |                 |       |       |      |      |       |          |          |          |          |
|-------------------------|-----------------|-------|-------|------|------|-------|----------|----------|----------|----------|
| MmugDNA.12836.1.S1_at   | MmugDNA.12836.1 | 6.03  | 5.45  | 0.2  | 0.29 | 1.5   | 0.212447 | 0.528235 | 0.572718 | 0.716462 |
| MmugDNA.12841.1.S1_at   | MmugDNA.12841.1 | 7.8   | 8.56  | 0.69 | 0.97 | -1.7  | 0.219968 | 0.189419 | 0.579144 | 0.465117 |
| MmugDNA.12851.1.S1_at   | MmugDNA.12851.1 | 10.72 | 10.39 | 0.4  | 0.2  | 1.26  | 0.059925 | 0.049879 | 0.392994 | 0.268445 |
| MmugDNA.12854.1.S1_at   | MmugDNA.12854.1 | 8.23  | 9.66  | 0.12 | 0.3  | -2.69 | 0.002726 | 0.000498 | 0.165355 | 0.038955 |
| MmugDNA.12855.1.S1_at   | MmugDNA.12855.1 | 7.55  | 7.38  | 0.4  | 0.08 | 1.13  | 0.254334 | 0.334223 | 0.602363 | 0.582266 |
| MmugDNA.12857.1.S1_at   | MmugDNA.12857.1 | 11.89 | 10.67 | 0.12 | 1.24 | 2.33  | 0.145206 | 0.168668 | 0.511329 | 0.445352 |
| MmugDNA.1286.1.S1_at    | MmugDNA.1286.1  | 11.07 | 11.4  | 0.15 | 0.14 | -1.26 | 0.051722 | 0.04239  | 0.376323 | 0.250533 |
| MmugDNA.12863.1.S1_at   | MmugDNA.12863.1 | 9.55  | 10.42 | 0.28 | 0.39 | -1.84 | 0.14709  | 0.152255 | 0.51306  | 0.427045 |
| MmugDNA.12865.1.S1_at   | MmugDNA.12865.1 | 9.26  | 9.85  | 0.16 | 0.29 | -1.51 | 0.041019 | 0.024894 | 0.35051  | 0.197685 |
| MmugDNA.12866.1.S1_at   | MmugDNA.12866.1 | 5.29  | 5.33  | 0.06 | 0.19 | -1.02 | 0.506955 | 0.598605 | 0.762591 | 0.760996 |
| MmugDNA.12873.1.S1_at   | MmugDNA.12873.1 | 7.25  | 7.18  | 0.15 | 0.26 | 1.05  | 0.81997  | 0.917593 | 0.926819 | 0.953897 |
| MmugDNA.12875.1.S1_at   | MmugDNA.12875.1 | 5.69  | 6.01  | 0.25 | 0.11 | -1.25 | 0.338728 | 0.448819 | 0.660988 | 0.664636 |
| MmugDNA.12878.1.S1_at   | MmugDNA.12878.1 | 8.93  | 8.43  | 0.34 | 0.1  | 1.41  | 0.071665 | 0.012681 | 0.415639 | 0.145201 |
| MmugDNA.12880.1.S1_at   | MmugDNA.12880.1 | 5.41  | 5.46  | 0.06 | 0.08 | -1.04 | 0.352057 | 0.424516 | 0.669358 | 0.647118 |
| MmugDNA.12881.1.S1_at   | MmugDNA.12881.1 | 7.25  | 8.06  | 0.85 | 0.5  | -1.75 | 0.244572 | 0.114336 | 0.596278 | 0.380835 |
| MmugDNA.12885.1.S1_at   | MmugDNA.12885.1 | 5.37  | 5.48  | 0.13 | 0.11 | -1.08 | 0.903834 | 0.340042 | 0.961578 | 0.586516 |
| MmugDNA.12889.1.S1_at   | MmugDNA.12889.1 | 8.29  | 8.59  | 0.15 | 0.38 | -1.23 | 0.166602 | 0.193246 | 0.530266 | 0.468578 |
| MmugDNA.12896.1.S1_at   | MmugDNA.12896.1 | 5.78  | 6.16  | 0.14 | 0.12 | -1.3  | 0.026015 | 0.01795  | 0.30146  | 0.168998 |
| MmugDNA.1290.1.S1_at    | MmugDNA.1290.1  | 13.65 | 13.64 | 0.06 | 0.05 | 1.01  | 0.19456  | 0.229613 | 0.558002 | 0.501574 |
| MmugDNA.12900.1.S1_at   | MmugDNA.12900.1 | 10.58 | 10.78 | 0.12 | 0.15 | -1.15 | 0.196783 | 0.085236 | 0.559808 | 0.337096 |
| MmugDNA.12904.1.S1_at   | MmugDNA.12904.1 | 4.87  | 4.93  | 0.02 | 0.23 | -1.04 | 0.567001 | 0.739796 | 0.797895 | 0.849224 |
| MmugDNA.12904.1.S1_x_at | MmugDNA.12904.1 | 4.69  | 4.86  | 0.14 | 0.08 | -1.13 | 0.622103 | 0.831418 | 0.827275 | 0.903343 |
| MmugDNA.12908.1.S1_at   | MmugDNA.12908.1 | 6.84  | 6.36  | 0.41 | 0.28 | 1.39  | 0.263728 | 0.159092 | 0.609646 | 0.435217 |
| MmugDNA.12914.1.S1_at   | MmugDNA.12914.1 | 9.36  | 8.65  | 0.09 | 1.29 | 1.64  | 0.28964  | 0.339363 | 0.627563 | 0.586    |
| MmugDNA.12923.1.S1_at   | MmugDNA.12923.1 | 11.15 | 10.48 | 0.17 | 0.11 | 1.6   | 0.004366 | 0.000174 | 0.183061 | 0.030511 |
| MmugDNA.12924.1.S1_at   | MmugDNA.12924.1 | 6.71  | 6.88  | 0.11 | 0.22 | -1.13 | 0.169564 | 0.243098 | 0.533686 | 0.513356 |
| MmugDNA.1294.1.S1_s_at  | MmugDNA.1294.1  | 4.38  | 4.23  | 0.37 | 0.24 | 1.12  | 0.522325 | 0.779961 | 0.771995 | 0.872426 |
| MmugDNA.12943.1.S1_at   | MmugDNA.12943.1 | 8.87  | 8.36  | 0.03 | 0.09 | 1.43  | 0.0006   | 0.000136 | 0.136818 | 0.029179 |
| MmugDNA.12944.1.S1_at   | MmugDNA.12944.1 | 10.19 | 10.32 | 0.47 | 0.8  | -1.1  | 0.929856 | 0.826986 | 0.972875 | 0.900654 |
| MmugDNA.1295.1.S1_at    | MmugDNA.1295.1  | 11.06 | 10.86 | 0.2  | 0.63 | 1.15  | 0.747679 | 0.62853  | 0.892015 | 0.781248 |
| MmugDNA.12951.1.S1_at   | MmugDNA.12951.1 | 8.6   | 8.79  | 0.32 | 0.35 | -1.14 | 0.571982 | 0.227396 | 0.800514 | 0.499659 |
| MmugDNA.12952.1.S1_at   | MmugDNA.12952.1 | 6.35  | 6.14  | 0.25 | 0.19 | 1.16  | 0.381675 | 0.599481 | 0.688087 | 0.761468 |
| MmugDNA.12954.1.S1_at   | MmugDNA.12954.1 | 7.17  | 6.31  | 0.46 | 0.65 | 1.81  | 0.135772 | 0.096639 | 0.502654 | 0.354145 |
| MmugDNA.12958.1.S1_at   | MmugDNA.12958.1 | 8     | 7.69  | 0.22 | 0.18 | 1.25  | 0.295452 | 0.240848 | 0.631738 | 0.511547 |
| MmugDNA.1296.1.S1_at    | MmugDNA.1296.1  | 4.45  | 5.68  | 0.96 | 1.4  | -2.36 | 0.279218 | 0.141101 | 0.620979 | 0.414602 |
| MmugDNA.12968.1.S1_at   | MmugDNA.12968.1 | 12.16 | 12.06 | 0.17 | 0.12 | 1.07  | 0.352364 | 0.452689 | 0.669556 | 0.667253 |
| MmugDNA.12969.1.S1_at   | MmugDNA.12969.1 | 7.44  | 6.69  | 0.28 | 0.44 | 1.68  | 0.044228 | 0.033384 | 0.358276 | 0.226396 |
| MmugDNA.1297.1.S1_at    | MmugDNA.1297.1  | 9.4   | 9.5   | 0.12 | 0.35 | -1.08 | 0.658812 | 0.547244 | 0.846726 | 0.728342 |
| MmugDNA.12971.1.S1_at   | MmugDNA.12971.1 | 8.95  | 8.96  | 0.03 | 0.12 | -1.01 | 0.957212 | 0.958866 | 0.983824 | 0.976695 |
| MmugDNA.12973.1.S1_at   | MmugDNA.12973.1 | 5.69  | 5.56  | 0.72 | 0.79 | 1.1   | 0.797075 | 0.937628 | 0.915839 | 0.964687 |
| MmugDNA.12975.1.S1_at   | MmugDNA.12975.1 | 4.2   | 4.12  | 0.1  | 0.19 | 1.06  | 0.5465   | 0.921804 | 0.785565 | 0.955925 |

|                         |                 |       |       |      |      |       |          |          |          |          |
|-------------------------|-----------------|-------|-------|------|------|-------|----------|----------|----------|----------|
| MmugDNA.12977.1.S1_at   | MmugDNA.12977.1 | 4.58  | 4.7   | 0.43 | 1.25 | -1.09 | 0.338948 | 0.388605 | 0.661044 | 0.622917 |
| MmugDNA.12989.1.A1_at   | MmugDNA.12989.1 | 3.96  | 4.39  | 0.21 | 0.38 | -1.35 | 0.288574 | 0.378819 | 0.626714 | 0.615795 |
| MmugDNA.12989.1.S1_at   | MmugDNA.12989.1 | 4.35  | 4.91  | 0.22 | 0.28 | -1.47 | 0.155072 | 0.163199 | 0.519839 | 0.439324 |
| MmugDNA.12994.1.S1_at   | MmugDNA.12994.1 | 10.54 | 9.55  | 0.27 | 0.56 | 1.99  | 0.210623 | 0.226957 | 0.57188  | 0.499276 |
| MmugDNA.12996.1.S1_at   | MmugDNA.12996.1 | 7.95  | 7.99  | 0.2  | 0.16 | -1.03 | 0.930542 | 0.915869 | 0.973196 | 0.952836 |
| MmugDNA.12997.1.S1_at   | MmugDNA.12997.1 | 13.03 | 12.72 | 0.14 | 0.51 | 1.23  | 0.470559 | 0.538856 | 0.742482 | 0.723368 |
| MmugDNA.12999.1.S1_at   | MmugDNA.12999.1 | 6.97  | 7.04  | 0.09 | 0.03 | -1.06 | 0.186739 | 0.355397 | 0.550106 | 0.597738 |
| MmugDNA.13001.1.S1_at   | MmugDNA.13001.1 | 5.55  | 5.66  | 0.21 | 0.18 | -1.08 | 0.993984 | 0.928801 | 0.997929 | 0.959449 |
| MmugDNA.1301.1.S1_at    | MmugDNA.1301.1  | 6.79  | 6.71  | 0.18 | 0.28 | 1.06  | 0.385609 | 0.114065 | 0.69072  | 0.380421 |
| MmugDNA.13010.1.S1_at   | MmugDNA.13010.1 | 11.3  | 11.53 | 0.03 | 0.42 | -1.17 | 0.435781 | 0.565785 | 0.721367 | 0.740112 |
| MmugDNA.13011.1.S1_at   | MmugDNA.13011.1 | 7.45  | 7.05  | 0.33 | 0.56 | 1.32  | 0.522504 | 0.538356 | 0.772116 | 0.723074 |
| MmugDNA.13019.1.S1_at   | MmugDNA.13019.1 | 3.1   | 2.98  | 0.02 | 0.06 | 1.09  | 0.077605 | 0.61426  | 0.427486 | 0.77118  |
| MmugDNA.13023.1.S1_at   | MmugDNA.13023.1 | 4.59  | 5.61  | 0.18 | 0.67 | -2.04 | 0.107825 | 0.043237 | 0.468492 | 0.252677 |
| MmugDNA.13025.1.S1_at   | MmugDNA.13025.1 | 3.12  | 3.15  | 0.06 | 0.05 | -1.03 | 0.763357 | 0.866828 | 0.900256 | 0.924317 |
| MmugDNA.1303.1.S1_at    | MmugDNA.1303.1  | 3.61  | 3.68  | 0.13 | 0.15 | -1.05 | 0.177928 | 0.128351 | 0.542205 | 0.399618 |
| MmugDNA.1303.1.S1_s_at  | MmugDNA.1303.1  | 3.94  | 4.14  | 0.05 | 0.11 | -1.15 | 0.064559 | 0.053358 | 0.402975 | 0.27654  |
| MmugDNA.13030.1.S1_at   | MmugDNA.13030.1 | 5.07  | 5.03  | 0.14 | 0.17 | 1.02  | 0.900877 | 0.783611 | 0.960387 | 0.874696 |
| MmugDNA.13032.1.S1_at   | MmugDNA.13032.1 | 5.9   | 5.91  | 0.29 | 0.07 | -1.01 | 0.309643 | 0.593418 | 0.641662 | 0.758267 |
| MmugDNA.13034.1.S1_at   | MmugDNA.13034.1 | 13.78 | 13.83 | 0.07 | 0.02 | -1.03 | 0.923072 | 0.724357 | 0.970098 | 0.840457 |
| MmugDNA.13037.1.S1_at   | MmugDNA.13037.1 | 6.43  | 6.64  | 0.34 | 0.17 | -1.16 | 0.561492 | 0.155969 | 0.794887 | 0.431376 |
| MmugDNA.13039.1.S1_at   | MmugDNA.13039.1 | 12.81 | 12.71 | 0.09 | 0.05 | 1.07  | 0.678739 | 0.891806 | 0.856197 | 0.938309 |
| MmugDNA.13040.1.S1_at   | MmugDNA.13040.1 | 2.86  | 2.85  | 0.06 | 0.1  | 1.01  | 0.803382 | 0.587304 | 0.919122 | 0.754131 |
| MmugDNA.13044.1.S1_at   | MmugDNA.13044.1 | 8.62  | 7.92  | 0.12 | 0.51 | 1.63  | 0.095671 | 0.100577 | 0.453501 | 0.359845 |
| MmugDNA.13046.1.S1_at   | MmugDNA.13046.1 | 7.68  | 7.05  | 0.51 | 0.44 | 1.54  | 0.328553 | 0.216074 | 0.654375 | 0.489679 |
| MmugDNA.13052.1.S1_at   | MmugDNA.13052.1 | 11.94 | 11.74 | 0.19 | 0.5  | 1.15  | 0.532106 | 0.418462 | 0.777626 | 0.642876 |
| MmugDNA.13053.1.S1_at   | MmugDNA.13053.1 | 8.5   | 7.69  | 0.31 | 0.39 | 1.76  | 0.056866 | 0.041589 | 0.387323 | 0.248831 |
| MmugDNA.13057.1.S1_at   | MmugDNA.13057.1 | 6.99  | 7.07  | 0.05 | 0.1  | -1.05 | 0.147645 | 0.098623 | 0.513287 | 0.356743 |
| MmugDNA.13058.1.S1_at   | MmugDNA.13058.1 | 4.89  | 4.76  | 0.56 | 0.09 | 1.09  | 0.370955 | 0.123978 | 0.681748 | 0.394262 |
| MmugDNA.13061.1.S1_at   | MmugDNA.13061.1 | 6.99  | 7.14  | 0.1  | 0.08 | -1.11 | 0.188224 | 0.215616 | 0.551197 | 0.489397 |
| MmugDNA.13064.1.S1_at   | MmugDNA.13064.1 | 5.11  | 4.94  | 0.27 | 0.54 | 1.12  | 0.649556 | 0.745005 | 0.842493 | 0.852261 |
| MmugDNA.13074.1.S1_at   | MmugDNA.13074.1 | 11.16 | 11.34 | 0.62 | 0.69 | -1.14 | 0.801236 | 0.600552 | 0.918018 | 0.76217  |
| MmugDNA.13076.1.S1_at   | MmugDNA.13076.1 | 5.31  | 4.7   | 0.04 | 0.85 | 1.52  | 0.861463 | 0.901214 | 0.944134 | 0.943829 |
| MmugDNA.13077.1.S1_at   | MmugDNA.13077.1 | 5.39  | 5.59  | 0.3  | 0.11 | -1.15 | 0.222982 | 0.184121 | 0.581595 | 0.460323 |
| MmugDNA.13085.1.S1_at   | MmugDNA.13085.1 | 6.78  | 6.97  | 0.02 | 0.21 | -1.14 | 0.202931 | 0.281531 | 0.565548 | 0.54464  |
| MmugDNA.13096.1.S1_x_at | MmugDNA.13096.1 | 11.38 | 11.43 | 0.16 | 0.82 | -1.03 | 0.953812 | 0.143671 | 0.982872 | 0.417555 |
| MmugDNA.13097.1.S1_at   | MmugDNA.13097.1 | 10.17 | 9.66  | 0.1  | 0.06 | 1.42  | 0.001103 | 0.000131 | 0.144223 | 0.029087 |
| MmugDNA.13099.1.S1_at   | MmugDNA.13099.1 | 4.15  | 4.9   | 0.56 | 1.77 | -1.68 | 0.440524 | 0.613434 | 0.724387 | 0.770528 |
| MmugDNA.131.1.S1_at     | MmugDNA.131.1   | 9.27  | 9.14  | 0.27 | 0.33 | 1.09  | 0.577729 | 0.241893 | 0.803559 | 0.512489 |
| MmugDNA.1310.1.S1_at    | MmugDNA.1310.1  | 6.74  | 8.49  | 0.48 | 1.18 | -3.38 | 0.119569 | 0.122021 | 0.484145 | 0.391468 |
| MmugDNA.13102.1.S1_at   | MmugDNA.13102.1 | 11.61 | 11.57 | 0.09 | 0.06 | 1.03  | 0.139475 | 0.137923 | 0.506967 | 0.410892 |
| MmugDNA.13104.1.S1_at   | MmugDNA.13104.1 | 7.86  | 7.88  | 0.12 | 0.16 | -1.01 | 0.702532 | 0.857558 | 0.868757 | 0.918694 |

|                         |                 |       |       |      |      |       |          |          |          |          |
|-------------------------|-----------------|-------|-------|------|------|-------|----------|----------|----------|----------|
| MmugDNA.13120.1.S1_at   | MmugDNA.13120.1 | 9.93  | 9.73  | 0.08 | 0.14 | 1.15  | 0.264109 | 0.112717 | 0.609857 | 0.378336 |
| MmugDNA.13121.1.S1_at   | MmugDNA.13121.1 | 5     | 4.85  | 0.35 | 0.25 | 1.11  | 0.435729 | 0.268822 | 0.721326 | 0.534258 |
| MmugDNA.13127.1.S1_at   | MmugDNA.13127.1 | 9.43  | 8.88  | 0.36 | 0.36 | 1.46  | 0.654915 | 0.838074 | 0.84477  | 0.90755  |
| MmugDNA.13140.1.S1_at   | MmugDNA.13140.1 | 6.07  | 6.16  | 0.81 | 0.88 | -1.07 | 0.673417 | 0.854311 | 0.853546 | 0.917018 |
| MmugDNA.13151.1.S1_at   | MmugDNA.13151.1 | 6.7   | 6.59  | 0.37 | 1.05 | 1.08  | 0.821153 | 0.372308 | 0.927232 | 0.611225 |
| MmugDNA.13156.1.S1_at   | MmugDNA.13156.1 | 12.08 | 13.04 | 0.09 | 0.28 | -1.95 | 0.005083 | 0.001207 | 0.18885  | 0.054389 |
| MmugDNA.13162.1.S1_at   | MmugDNA.13162.1 | 6.78  | 6.8   | 0.2  | 0.3  | -1.02 | 0.858827 | 0.945066 | 0.943028 | 0.968834 |
| MmugDNA.13165.1.S1_at   | MmugDNA.13165.1 | 5.12  | 5.53  | 0.2  | 0.04 | -1.32 | 0.030873 | 0.020527 | 0.32011  | 0.179788 |
| MmugDNA.13172.1.S1_at   | MmugDNA.13172.1 | 10.65 | 10.85 | 0.07 | 0.38 | -1.15 | 0.506527 | 0.685808 | 0.762415 | 0.816612 |
| MmugDNA.13173.1.S1_at   | MmugDNA.13173.1 | 11.69 | 10.78 | 0.2  | 0.79 | 1.88  | 0.044884 | 0.033139 | 0.359175 | 0.225324 |
| MmugDNA.13177.1.S1_at   | MmugDNA.13177.1 | 11.58 | 11.29 | 0.12 | 0.22 | 1.22  | 0.139649 | 0.171205 | 0.507148 | 0.447792 |
| MmugDNA.13178.1.S1_at   | MmugDNA.13178.1 | 8.2   | 8.4   | 0.23 | 0.37 | -1.15 | 0.141443 | 0.165548 | 0.509067 | 0.441872 |
| MmugDNA.13179.1.S1_at   | MmugDNA.13179.1 | 3.79  | 4.52  | 0.48 | 0.45 | -1.66 | 0.619543 | 0.00801  | 0.825656 | 0.118982 |
| MmugDNA.13185.1.S1_at   | MmugDNA.13185.1 | 5.56  | 5.5   | 0.19 | 0.11 | 1.04  | 0.940231 | 0.983167 | 0.977296 | 0.990726 |
| MmugDNA.13186.1.S1_at   | MmugDNA.13186.1 | 3.06  | 2.96  | 0.03 | 0.06 | 1.07  | 0.0547   | 0.05728  | 0.38215  | 0.285187 |
| MmugDNA.13188.1.S1_at   | MmugDNA.13188.1 | 6.1   | 6.03  | 0.07 | 0.14 | 1.05  | 0.779237 | 0.37125  | 0.907965 | 0.610135 |
| MmugDNA.13189.1.S1_at   | MmugDNA.13189.1 | 10.11 | 9.49  | 0.16 | 0.65 | 1.54  | 0.267491 | 0.357685 | 0.612611 | 0.599297 |
| MmugDNA.13197.1.S1_at   | MmugDNA.13197.1 | 2.95  | 2.95  | 0.01 | 0.03 | -1    | 0.479294 | 0.372415 | 0.747644 | 0.611306 |
| MmugDNA.132.1.S1_at     | MmugDNA.132.1   | 3.38  | 3.36  | 0.19 | 0.24 | 1.01  | 0.623759 | 0.09788  | 0.828047 | 0.355678 |
| MmugDNA.13201.1.S1_at   | MmugDNA.13201.1 | 11.36 | 11.42 | 0.11 | 0.17 | -1.05 | 0.575937 | 0.715173 | 0.802615 | 0.834894 |
| MmugDNA.13218.1.S1_at   | MmugDNA.13218.1 | 5.89  | 6.23  | 0.48 | 0.59 | -1.27 | 0.728721 | 0.858093 | 0.882138 | 0.919063 |
| MmugDNA.13224.1.S1_at   | MmugDNA.13224.1 | 5.96  | 5.93  | 0.1  | 0.31 | 1.03  | 0.911297 | 0.962035 | 0.965013 | 0.978659 |
| MmugDNA.13227.1.S1_at   | MmugDNA.13227.1 | 11.53 | 11.28 | 0.23 | 0.1  | 1.19  | 0.168773 | 0.00868  | 0.533113 | 0.123557 |
| MmugDNA.13230.1.S1_at   | MmugDNA.13230.1 | 5.25  | 5.23  | 0.17 | 0.13 | 1.01  | 0.924057 | 0.440701 | 0.970594 | 0.659076 |
| MmugDNA.13231.1.S1_at   | MmugDNA.13231.1 | 4.68  | 4.76  | 0.12 | 0.11 | -1.06 | 0.911339 | 0.918081 | 0.965013 | 0.954068 |
| MmugDNA.13233.1.S1_at   | MmugDNA.13233.1 | 10.12 | 9.72  | 0.38 | 1.11 | 1.32  | 0.773715 | 0.835149 | 0.90499  | 0.905607 |
| MmugDNA.13242.1.S1_at   | MmugDNA.13242.1 | 9.83  | 9.7   | 0.11 | 0.32 | 1.09  | 0.595097 | 0.444596 | 0.812276 | 0.662072 |
| MmugDNA.13252.1.S1_at   | MmugDNA.13252.1 | 3.63  | 3.84  | 0.16 | 0.25 | -1.15 | 0.40585  | 0.51565  | 0.703427 | 0.708451 |
| MmugDNA.13266.1.S1_at   | MmugDNA.13266.1 | 5.83  | 6.39  | 0.14 | 0.25 | -1.48 | 0.038476 | 0.028517 | 0.344376 | 0.210725 |
| MmugDNA.13269.1.S1_at   | MmugDNA.13269.1 | 10.85 | 10    | 0.1  | 0.4  | 1.8   | 0.017639 | 0.024263 | 0.267454 | 0.194952 |
| MmugDNA.1327.1.S1_at    | MmugDNA.1327.1  | 6.28  | 6.45  | 0.19 | 0.04 | -1.12 | 0.337741 | 0.506054 | 0.660209 | 0.702351 |
| MmugDNA.13270.1.S1_at   | MmugDNA.13270.1 | 11.22 | 11.59 | 0.06 | 0.23 | -1.29 | 0.038183 | 0.041284 | 0.343636 | 0.247995 |
| MmugDNA.13273.1.S1_at   | MmugDNA.13273.1 | 5.99  | 6.12  | 0.05 | 0.12 | -1.1  | 0.053459 | 0.22493  | 0.380257 | 0.497696 |
| MmugDNA.13277.1.S1_at   | MmugDNA.13277.1 | 6.29  | 6.41  | 0.27 | 0.36 | -1.09 | 0.602366 | 0.104456 | 0.816536 | 0.365719 |
| MmugDNA.13284.1.S1_at   | MmugDNA.13284.1 | 8.56  | 8.73  | 0.2  | 0.06 | -1.12 | 0.22132  | 0.180583 | 0.580161 | 0.457191 |
| MmugDNA.13285.1.S1_at   | MmugDNA.13285.1 | 12.14 | 12.82 | 0.37 | 0.38 | -1.6  | 0.043809 | 0.031202 | 0.357051 | 0.218421 |
| MmugDNA.13290.1.S1_at   | MmugDNA.13290.1 | 8.61  | 8.66  | 0.15 | 0.4  | -1.03 | 0.968702 | 0.680878 | 0.988176 | 0.813622 |
| MmugDNA.13293.1.S1_at   | MmugDNA.13293.1 | 9.17  | 9.27  | 0.3  | 0.21 | -1.07 | 0.588305 | 0.616043 | 0.808931 | 0.772446 |
| MmugDNA.13299.1.S1_at   | MmugDNA.13299.1 | 4.66  | 4.75  | 0.23 | 0.18 | -1.06 | 0.350398 | 0.368806 | 0.668486 | 0.608313 |
| MmugDNA.133.1.S1_at     | MmugDNA.133.1   | 6.83  | 6.02  | 0.08 | 0.41 | 1.75  | 0.063036 | 0.039593 | 0.399858 | 0.244002 |
| MmugDNA.13300.1.S1_s_at | MmugDNA.13300.1 | 6.51  | 9.03  | 0.94 | 2.11 | -5.72 | 0.269738 | 0.173794 | 0.614377 | 0.450128 |

|                         |                 |       |       |      |      |        |          |          |          |          |
|-------------------------|-----------------|-------|-------|------|------|--------|----------|----------|----------|----------|
| MmugDNA.13302.1.S1_at   | MmugDNA.13302.1 | 5.14  | 4.42  | 0.72 | 0.48 | 1.65   | 0.131226 | 0.157076 | 0.497792 | 0.432547 |
| MmugDNA.13303.1.S1_s_at | MmugDNA.13303.1 | 12.11 | 12.23 | 0.06 | 0.03 | -1.09  | 0.020643 | 0.014175 | 0.279122 | 0.152173 |
| MmugDNA.13304.1.S1_at   | MmugDNA.13304.1 | 7.77  | 7.28  | 0.25 | 0.74 | 1.41   | 0.670715 | 0.76656  | 0.852442 | 0.864391 |
| MmugDNA.13306.1.S1_at   | MmugDNA.13306.1 | 11.16 | 10.52 | 1.35 | 1.1  | 1.56   | 0.508166 | 0.15418  | 0.763534 | 0.428941 |
| MmugDNA.13308.1.S1_at   | MmugDNA.13308.1 | 6.71  | 6.21  | 0.1  | 0.24 | 1.41   | 0.028746 | 0.001111 | 0.312166 | 0.052745 |
| MmugDNA.13312.1.S1_at   | MmugDNA.13312.1 | 10.85 | 10.61 | 0.07 | 0.21 | 1.18   | 0.356145 | 0.386261 | 0.671384 | 0.621469 |
| MmugDNA.13320.1.S1_at   | MmugDNA.13320.1 | 10.74 | 10.98 | 0.25 | 0.27 | -1.18  | 0.561221 | 0.724734 | 0.794725 | 0.840659 |
| MmugDNA.13325.1.S1_at   | MmugDNA.13325.1 | 9.29  | 9.97  | 0.08 | 0.21 | -1.6   | 0.005627 | 0.008363 | 0.191943 | 0.121327 |
| MmugDNA.13327.1.S1_at   | MmugDNA.13327.1 | 5.37  | 5.44  | 0.1  | 0.09 | -1.05  | 0.367055 | 0.162918 | 0.679287 | 0.439062 |
| MmugDNA.13329.1.S1_at   | MmugDNA.13329.1 | 10.19 | 10.5  | 0.18 | 0.22 | -1.25  | 0.064205 | 0.047745 | 0.402491 | 0.263394 |
| MmugDNA.13332.1.S1_at   | MmugDNA.13332.1 | 3.75  | 3.74  | 0.1  | 0.06 | 1      | 0.355329 | 0.430696 | 0.670969 | 0.651691 |
| MmugDNA.13338.1.S1_at   | MmugDNA.13338.1 | 9.21  | 8.12  | 0.13 | 0.35 | 2.12   | 0.006401 | 0.002075 | 0.199157 | 0.067389 |
| MmugDNA.13339.1.S1_at   | MmugDNA.13339.1 | 10.96 | 10.7  | 0.07 | 0.33 | 1.19   | 0.660523 | 0.865128 | 0.847722 | 0.923484 |
| MmugDNA.13346.1.S1_at   | MmugDNA.13346.1 | 11.37 | 11.34 | 0.09 | 0.24 | 1.02   | 0.681186 | 0.035198 | 0.85748  | 0.231787 |
| MmugDNA.13349.1.S1_at   | MmugDNA.13349.1 | 5.31  | 5.16  | 0.24 | 0.08 | 1.11   | 0.664022 | 0.868266 | 0.849245 | 0.925234 |
| MmugDNA.1335.1.S1_at    | MmugDNA.1335.1  | 4.61  | 5.18  | 0.11 | 0.39 | -1.48  | 0.083901 | 0.110139 | 0.436311 | 0.374244 |
| MmugDNA.13352.1.S1_at   | MmugDNA.13352.1 | 10.39 | 9.76  | 0.2  | 0.42 | 1.55   | 0.195125 | 0.150108 | 0.55858  | 0.42471  |
| MmugDNA.13352.1.S1_s_at | MmugDNA.13352.1 | 10.14 | 9.69  | 0.2  | 0.53 | 1.37   | 0.261405 | 0.348425 | 0.607983 | 0.592591 |
| MmugDNA.13355.1.S1_at   | MmugDNA.13355.1 | 4.5   | 4.45  | 0.08 | 0    | 1.03   | 0.419765 | 0.635421 | 0.712083 | 0.785405 |
| MmugDNA.13356.1.S1_at   | MmugDNA.13356.1 | 12.12 | 11.98 | 0.16 | 0.05 | 1.1    | 0.271946 | 0.378267 | 0.615834 | 0.615438 |
| MmugDNA.13366.1.S1_at   | MmugDNA.13366.1 | 7.82  | 11.02 | 1.76 | 2.89 | -9.2   | 0.345705 | 0.196216 | 0.665264 | 0.471236 |
| MmugDNA.13380.1.S1_at   | MmugDNA.13380.1 | 7.64  | 7.62  | 0.44 | 0.41 | 1.02   | 0.749004 | 0.814992 | 0.892627 | 0.893221 |
| MmugDNA.13381.1.S1_at   | MmugDNA.13381.1 | 8.6   | 7.55  | 0.37 | 0.35 | 2.08   | 0.026114 | 0.015219 | 0.30146  | 0.156741 |
| MmugDNA.13382.1.S1_at   | MmugDNA.13382.1 | 9.94  | 10.28 | 0.34 | 0.15 | -1.27  | 0.060001 | 0.048923 | 0.393081 | 0.26597  |
| MmugDNA.13386.1.S1_at   | MmugDNA.13386.1 | 10.09 | 8.83  | 0.24 | 0.54 | 2.38   | 0.013932 | 0.006429 | 0.250082 | 0.108902 |
| MmugDNA.13391.1.S1_at   | MmugDNA.13391.1 | 7.16  | 7.67  | 0.14 | 0.48 | -1.43  | 0.047998 | 0.036086 | 0.367582 | 0.234414 |
| MmugDNA.13394.1.S1_at   | MmugDNA.13394.1 | 4.72  | 7.17  | 0.54 | 2.02 | -5.47  | 0.15842  | 0.172107 | 0.5233   | 0.448529 |
| MmugDNA.13397.1.S1_x_at | MmugDNA.13397.1 | 7.34  | 10.22 | 0.83 | 2.2  | -7.33  | 0.219057 | 0.209447 | 0.578493 | 0.483069 |
| MmugDNA.13398.1.S1_at   | MmugDNA.13398.1 | 5.22  | 4.85  | 0.19 | 0.07 | 1.29   | 0.060136 | 0.090535 | 0.393081 | 0.345015 |
| MmugDNA.134.1.S1_at     | MmugDNA.134.1   | 11.71 | 11.78 | 0.19 | 0.33 | -1.05  | 0.880711 | 0.789066 | 0.952026 | 0.878078 |
| MmugDNA.13400.1.S1_at   | MmugDNA.13400.1 | 12.01 | 11.54 | 0.21 | 0.52 | 1.39   | 0.084572 | 0.054084 | 0.437266 | 0.277914 |
| MmugDNA.13400.1.S1_s_at | MmugDNA.13400.1 | 11.16 | 10.89 | 0.37 | 0.63 | 1.2    | 0.168081 | 0.183707 | 0.53256  | 0.459766 |
| MmugDNA.13402.1.S1_at   | MmugDNA.13402.1 | 8.5   | 9.23  | 0.66 | 0.37 | -1.66  | 0.206456 | 0.242403 | 0.56878  | 0.51282  |
| MmugDNA.13403.1.S1_at   | MmugDNA.13403.1 | 9.15  | 12.99 | 1.63 | 2.69 | -14.31 | 0.493609 | 0.351942 | 0.756279 | 0.595335 |
| MmugDNA.13406.1.S1_at   | MmugDNA.13406.1 | 6.38  | 5.99  | 0.38 | 0.06 | 1.31   | 0.180955 | 0.245789 | 0.54536  | 0.515519 |
| MmugDNA.13407.1.S1_at   | MmugDNA.13407.1 | 6.35  | 6.08  | 0.09 | 0.17 | 1.21   | 0.090889 | 0.010873 | 0.446466 | 0.135892 |
| MmugDNA.13408.1.S1_at   | MmugDNA.13408.1 | 10.13 | 9.95  | 0.08 | 0.72 | 1.13   | 0.768238 | 0.70305  | 0.90261  | 0.827866 |
| MmugDNA.1341.1.S1_at    | MmugDNA.1341.1  | 8.94  | 8.52  | 0.25 | 0.54 | 1.34   | 0.310366 | 0.42847  | 0.642359 | 0.650015 |
| MmugDNA.13417.1.S1_at   | MmugDNA.13417.1 | 6.58  | 6.88  | 0.17 | 0.26 | -1.23  | 0.187888 | 0.293103 | 0.550964 | 0.553014 |
| MmugDNA.13418.1.S1_at   | MmugDNA.13418.1 | 9.54  | 9.22  | 0.17 | 0.31 | 1.25   | 0.305203 | 0.161688 | 0.639039 | 0.437771 |
| MmugDNA.13422.1.S1_at   | MmugDNA.13422.1 | 6.39  | 9.71  | 1.23 | 2.42 | -9.96  | 0.235267 | 0.255034 | 0.589342 | 0.52317  |

|                         |                 |       |       |      |      |       |          |          |          |          |
|-------------------------|-----------------|-------|-------|------|------|-------|----------|----------|----------|----------|
| MmugDNA.13424.1.S1_a_at | MmugDNA.13424.1 | 12.65 | 11.49 | 0.24 | 1.38 | 2.23  | 0.103926 | 0.077461 | 0.463945 | 0.323279 |
| MmugDNA.13424.1.S1_at   | MmugDNA.13424.1 | 11.82 | 10.23 | 0.32 | 1.5  | 3.01  | 0.078053 | 0.039126 | 0.428012 | 0.243056 |
| MmugDNA.13426.1.S1_at   | MmugDNA.13426.1 | 7.9   | 8.07  | 0.5  | 0.53 | -1.12 | 0.458877 | 0.186568 | 0.735754 | 0.462364 |
| MmugDNA.13428.1.S1_at   | MmugDNA.13428.1 | 7.68  | 4.46  | 0.02 | 0.13 | 9.28  | 0.000002 | 1.98E-07 | 0.047602 | 0.005999 |
| MmugDNA.13432.1.S1_at   | MmugDNA.13432.1 | 5.42  | 5.5   | 0.23 | 0.54 | -1.05 | 0.677772 | 0.413741 | 0.855591 | 0.639751 |
| MmugDNA.13436.1.S1_s_at | MmugDNA.13436.1 | 8.2   | 8.49  | 0.2  | 0.34 | -1.22 | 0.114082 | 0.122964 | 0.47744  | 0.392923 |
| MmugDNA.13439.1.S1_at   | MmugDNA.13439.1 | 5.65  | 5.94  | 0.23 | 0.12 | -1.22 | 0.364341 | 0.305975 | 0.677295 | 0.562732 |
| MmugDNA.1344.1.S1_at    | MmugDNA.1344.1  | 4.38  | 4.29  | 0.26 | 0.17 | 1.06  | 0.947154 | 0.980877 | 0.979639 | 0.989478 |
| MmugDNA.13444.1.S1_at   | MmugDNA.13444.1 | 6.38  | 6.62  | 0.05 | 0.33 | -1.19 | 0.238961 | 0.296024 | 0.592082 | 0.555295 |
| MmugDNA.13445.1.S1_at   | MmugDNA.13445.1 | 5.5   | 5.05  | 0.65 | 0.25 | 1.36  | 0.260466 | 0.303975 | 0.607292 | 0.561344 |
| MmugDNA.13455.1.S1_at   | MmugDNA.13455.1 | 10.96 | 11.31 | 0.26 | 0.5  | -1.28 | 0.237996 | 0.266746 | 0.591399 | 0.53241  |
| MmugDNA.13467.1.S1_at   | MmugDNA.13467.1 | 11.56 | 11.36 | 0.11 | 0.08 | 1.15  | 0.017168 | 0.024491 | 0.266906 | 0.19587  |
| MmugDNA.13472.1.S1_at   | MmugDNA.13472.1 | 6.18  | 6.22  | 0.21 | 0.27 | -1.03 | 0.928765 | 0.72208  | 0.972607 | 0.838998 |
| MmugDNA.13481.1.S1_at   | MmugDNA.13481.1 | 12.47 | 11.98 | 0.07 | 0.23 | 1.4   | 0.022981 | 0.005927 | 0.289363 | 0.105331 |
| MmugDNA.13482.1.S1_at   | MmugDNA.13482.1 | 9.67  | 9.73  | 0.07 | 0.15 | -1.04 | 0.944998 | 0.923927 | 0.97903  | 0.957162 |
| MmugDNA.13486.1.S1_at   | MmugDNA.13486.1 | 8.18  | 8.6   | 1.21 | 1.48 | -1.34 | 0.430458 | 0.552412 | 0.718048 | 0.731728 |
| MmugDNA.13488.1.S1_at   | MmugDNA.13488.1 | 11.11 | 9.84  | 0.27 | 0.48 | 2.4   | 0.019288 | 0.008915 | 0.273655 | 0.12491  |
| MmugDNA.13490.1.S1_at   | MmugDNA.13490.1 | 2.96  | 2.91  | 0.09 | 0.02 | 1.03  | 0.590358 | 0.751836 | 0.809851 | 0.855698 |
| MmugDNA.13493.1.S1_at   | MmugDNA.13493.1 | 5.18  | 5.1   | 0.5  | 0.59 | 1.06  | 0.516896 | 0.701332 | 0.768352 | 0.826814 |
| MmugDNA.13498.1.S1_at   | MmugDNA.13498.1 | 12.61 | 12.35 | 0.13 | 0.48 | 1.19  | 0.421888 | 0.249864 | 0.713215 | 0.518876 |
| MmugDNA.13510.1.S1_at   | MmugDNA.13510.1 | 11.88 | 11.71 | 0.13 | 0.19 | 1.12  | 0.712144 | 0.891623 | 0.873857 | 0.938242 |
| MmugDNA.13513.1.S1_at   | MmugDNA.13513.1 | 11.1  | 10.91 | 0.21 | 0.22 | 1.14  | 0.201292 | 0.183447 | 0.563927 | 0.459574 |
| MmugDNA.1352.1.S1_at    | MmugDNA.1352.1  | 11.21 | 10.45 | 0.22 | 0.1  | 1.69  | 0.004671 | 0.001173 | 0.1844   | 0.053791 |
| MmugDNA.13520.1.S1_at   | MmugDNA.13520.1 | 5.57  | 6.81  | 0.6  | 0.13 | -2.36 | 0.025916 | 0.016372 | 0.301177 | 0.16199  |
| MmugDNA.13524.1.S1_at   | MmugDNA.13524.1 | 7.55  | 7.63  | 0.24 | 0.26 | -1.06 | 0.602716 | 0.800121 | 0.816696 | 0.885076 |
| MmugDNA.13528.1.S1_at   | MmugDNA.13528.1 | 5.4   | 5.52  | 0.07 | 0.12 | -1.09 | 0.189252 | 0.11564  | 0.552386 | 0.382714 |
| MmugDNA.1353.1.S1_at    | MmugDNA.1353.1  | 5.76  | 5.77  | 0.55 | 1.02 | -1.01 | 0.648285 | 0.268886 | 0.841805 | 0.534345 |
| MmugDNA.13531.1.S1_at   | MmugDNA.13531.1 | 10.59 | 12.36 | 0.85 | 1.61 | -3.4  | 0.292986 | 0.22841  | 0.630264 | 0.500587 |
| MmugDNA.13532.1.S1_at   | MmugDNA.13532.1 | 8.24  | 7.43  | 0.28 | 0.44 | 1.75  | 0.082754 | 0.079184 | 0.434438 | 0.32639  |
| MmugDNA.13536.1.S1_at   | MmugDNA.13536.1 | 12.89 | 12.84 | 0.11 | 0.28 | 1.03  | 0.531288 | 0.693531 | 0.777132 | 0.82172  |
| MmugDNA.13538.1.S1_at   | MmugDNA.13538.1 | 6.78  | 6.91  | 0.06 | 0.27 | -1.1  | 0.139395 | 0.130076 | 0.506801 | 0.401724 |
| MmugDNA.13544.1.S1_at   | MmugDNA.13544.1 | 11.27 | 11.26 | 0.21 | 0.48 | 1.01  | 0.908321 | 0.737814 | 0.96372  | 0.848096 |
| MmugDNA.13559.1.S1_at   | MmugDNA.13559.1 | 12.88 | 12.84 | 0.2  | 0.05 | 1.03  | 0.710678 | 0.331848 | 0.873152 | 0.580411 |
| MmugDNA.13561.1.S1_at   | MmugDNA.13561.1 | 11.29 | 11.28 | 0.28 | 0.17 | 1.01  | 0.267837 | 0.392177 | 0.612768 | 0.625652 |
| MmugDNA.13565.1.S1_at   | MmugDNA.13565.1 | 11.86 | 10.54 | 0.24 | 0.19 | 2.49  | 0.001275 | 0.000422 | 0.145267 | 0.038266 |
| MmugDNA.13568.1.S1_at   | MmugDNA.13568.1 | 7.28  | 7.43  | 0.19 | 0.18 | -1.12 | 0.383254 | 0.079868 | 0.689198 | 0.327203 |
| MmugDNA.13568.1.S1_s_at | MmugDNA.13568.1 | 5.82  | 5.96  | 0.12 | 0.18 | -1.11 | 0.228849 | 0.271101 | 0.586178 | 0.536259 |
| MmugDNA.13569.1.S1_at   | MmugDNA.13569.1 | 12.57 | 11.94 | 0.07 | 0.23 | 1.55  | 0.0203   | 0.011084 | 0.277443 | 0.137039 |
| MmugDNA.13571.1.S1_at   | MmugDNA.13571.1 | 6.54  | 6.54  | 0.21 | 0.16 | -1.01 | 0.618637 | 0.814055 | 0.825259 | 0.892736 |
| MmugDNA.13584.1.S1_at   | MmugDNA.13584.1 | 10.87 | 9.71  | 0.34 | 0.18 | 2.24  | 0.007108 | 0.001593 | 0.204209 | 0.06044  |
| MmugDNA.13590.1.S1_at   | MmugDNA.13590.1 | 5.75  | 7.69  | 0.84 | 1.87 | -3.84 | 0.331885 | 0.277396 | 0.65653  | 0.541326 |

|                         |                 |       |       |      |      |       |          |          |          |          |
|-------------------------|-----------------|-------|-------|------|------|-------|----------|----------|----------|----------|
| MmugDNA.13593.1.S1_at   | MmugDNA.13593.1 | 7.89  | 8.28  | 0.1  | 0.67 | -1.3  | 0.196635 | 0.224594 | 0.559808 | 0.497613 |
| MmugDNA.13596.1.S1_at   | MmugDNA.13596.1 | 10.57 | 10.35 | 0.27 | 0.17 | 1.16  | 0.1024   | 0.090464 | 0.462289 | 0.344952 |
| MmugDNA.13605.1.S1_at   | MmugDNA.13605.1 | 5.24  | 5.4   | 0.06 | 0.06 | -1.11 | 0.037489 | 0.242239 | 0.3415   | 0.51267  |
| MmugDNA.13612.1.S1_at   | MmugDNA.13612.1 | 7.27  | 7.29  | 0.01 | 0.26 | -1.01 | 0.313849 | 0.299255 | 0.645387 | 0.557769 |
| MmugDNA.13613.1.S1_at   | MmugDNA.13613.1 | 5.07  | 5.09  | 0.15 | 0.18 | -1.01 | 0.833902 | 0.828707 | 0.932486 | 0.901558 |
| MmugDNA.13617.1.S1_at   | MmugDNA.13617.1 | 7.79  | 7.67  | 0.14 | 0.26 | 1.09  | 0.896329 | 0.985584 | 0.958686 | 0.991812 |
| MmugDNA.13619.1.S1_at   | MmugDNA.13619.1 | 4.4   | 4.28  | 0.05 | 0.04 | 1.09  | 0.046894 | 0.038063 | 0.364195 | 0.239717 |
| MmugDNA.13620.1.S1_at   | MmugDNA.13620.1 | 5.82  | 6.07  | 0.12 | 0.38 | -1.19 | 0.902062 | 0.747725 | 0.96088  | 0.853252 |
| MmugDNA.13622.1.S1_at   | MmugDNA.13622.1 | 4.59  | 4.43  | 0.19 | 0.08 | 1.12  | 0.397136 | 0.601956 | 0.697519 | 0.763127 |
| MmugDNA.13625.1.S1_at   | MmugDNA.13625.1 | 12.16 | 11.89 | 0.08 | 0.16 | 1.21  | 0.049726 | 0.035466 | 0.371923 | 0.232564 |
| MmugDNA.13625.1.S1_s_at | MmugDNA.13625.1 | 11.44 | 11.16 | 0.06 | 0.15 | 1.21  | 0.030055 | 0.019836 | 0.316741 | 0.177162 |
| MmugDNA.13626.1.S1_at   | MmugDNA.13626.1 | 9.65  | 10.14 | 0.56 | 0.52 | -1.41 | 0.310899 | 0.345976 | 0.642848 | 0.59115  |
| MmugDNA.13627.1.S1_at   | MmugDNA.13627.1 | 4.19  | 4     | 0.31 | 0.42 | 1.14  | 0.884529 | 0.889122 | 0.953771 | 0.936796 |
| MmugDNA.13628.1.S1_at   | MmugDNA.13628.1 | 6.79  | 6.26  | 0.4  | 0.63 | 1.44  | 0.263409 | 0.032604 | 0.609348 | 0.223643 |
| MmugDNA.13630.1.S1_at   | MmugDNA.13630.1 | 3.64  | 3.66  | 0.17 | 0.51 | -1.01 | 0.478217 | 0.623076 | 0.747114 | 0.777502 |
| MmugDNA.13631.1.S1_at   | MmugDNA.13631.1 | 8.68  | 8.64  | 0.47 | 0.25 | 1.03  | 0.915438 | 0.318441 | 0.966542 | 0.571239 |
| MmugDNA.13631.1.S1_s_at | MmugDNA.13631.1 | 10.39 | 9.97  | 0.36 | 0.24 | 1.34  | 0.184257 | 0.182468 | 0.548064 | 0.459057 |
| MmugDNA.13634.1.S1_at   | MmugDNA.13634.1 | 10.19 | 10.22 | 0.36 | 0.17 | -1.02 | 0.450382 | 0.518023 | 0.730948 | 0.710089 |
| MmugDNA.13638.1.S1_at   | MmugDNA.13638.1 | 9.37  | 10.8  | 0.58 | 1.14 | -2.7  | 0.130841 | 0.099217 | 0.497198 | 0.357394 |
| MmugDNA.13640.1.S1_at   | MmugDNA.13640.1 | 5.92  | 6     | 0.16 | 0.15 | -1.06 | 0.530829 | 0.664568 | 0.776921 | 0.803448 |
| MmugDNA.13644.1.S1_at   | MmugDNA.13644.1 | 5.06  | 5.08  | 0.21 | 0.13 | -1.02 | 0.532931 | 0.651948 | 0.777862 | 0.796529 |
| MmugDNA.13648.1.S1_at   | MmugDNA.13648.1 | 6     | 6.2   | 0.17 | 0.15 | -1.14 | 0.50164  | 0.064691 | 0.760109 | 0.300314 |
| MmugDNA.13654.1.S1_at   | MmugDNA.13654.1 | 11.87 | 11.29 | 0.15 | 0.19 | 1.49  | 0.01288  | 0.005648 | 0.244544 | 0.103804 |
| MmugDNA.13655.1.S1_s_at | MmugDNA.13655.1 | 8.21  | 8.22  | 0.15 | 0.22 | -1    | 0.983272 | 0.950146 | 0.993951 | 0.971594 |
| MmugDNA.13662.1.S1_at   | MmugDNA.13662.1 | 4.67  | 4.89  | 0.21 | 0.14 | -1.16 | 0.111155 | 0.115775 | 0.47321  | 0.382814 |
| MmugDNA.13663.1.S1_at   | MmugDNA.13663.1 | 11.63 | 11.56 | 0.07 | 0.17 | 1.05  | 0.778598 | 0.813168 | 0.90756  | 0.891963 |
| MmugDNA.13664.1.S1_at   | MmugDNA.13664.1 | 10.31 | 10.53 | 0.33 | 0.05 | -1.16 | 0.474455 | 0.441721 | 0.745159 | 0.659854 |
| MmugDNA.13666.1.S1_at   | MmugDNA.13666.1 | 3.59  | 3.58  | 0.1  | 0.17 | 1.01  | 0.495376 | 0.444585 | 0.757219 | 0.662072 |
| MmugDNA.13667.1.S1_at   | MmugDNA.13667.1 | 7.9   | 8.53  | 0.13 | 0.23 | -1.55 | 0.046481 | 0.125847 | 0.363009 | 0.396315 |
| MmugDNA.13667.1.S1_x_at | MmugDNA.13667.1 | 7.9   | 8.43  | 0.21 | 0.1  | -1.44 | 0.029208 | 0.053602 | 0.313575 | 0.277182 |
| MmugDNA.13670.1.S1_at   | MmugDNA.13670.1 | 10.39 | 10.26 | 0.29 | 0.1  | 1.1   | 0.441567 | 0.60688  | 0.724996 | 0.766118 |
| MmugDNA.13674.1.S1_at   | MmugDNA.13674.1 | 5.47  | 5.61  | 0.2  | 0.31 | -1.1  | 0.194502 | 0.208646 | 0.557973 | 0.482544 |
| MmugDNA.13679.1.S1_at   | MmugDNA.13679.1 | 6.41  | 6.59  | 0.19 | 0.14 | -1.13 | 0.578106 | 0.580383 | 0.803639 | 0.749646 |
| MmugDNA.13690.1.S1_at   | MmugDNA.13690.1 | 10.84 | 11.21 | 0.3  | 0.7  | -1.3  | 0.457003 | 0.633996 | 0.734644 | 0.784594 |
| MmugDNA.13693.1.S1_at   | MmugDNA.13693.1 | 9.73  | 8.89  | 0.36 | 0.06 | 1.79  | 0.036656 | 0.008358 | 0.340048 | 0.121281 |
| MmugDNA.13694.1.S1_at   | MmugDNA.13694.1 | 11.49 | 11.38 | 0.15 | 0.26 | 1.08  | 0.702705 | 0.848651 | 0.868889 | 0.914061 |
| MmugDNA.13696.1.S1_at   | MmugDNA.13696.1 | 11.04 | 10.96 | 0.15 | 0.05 | 1.06  | 0.918543 | 0.112187 | 0.96831  | 0.377537 |
| MmugDNA.13699.1.S1_at   | MmugDNA.13699.1 | 12.48 | 12.69 | 0.04 | 0.21 | -1.15 | 0.166265 | 0.134581 | 0.529929 | 0.406629 |
| MmugDNA.13699.1.S1_s_at | MmugDNA.13699.1 | 11.79 | 12.06 | 0.07 | 0.19 | -1.21 | 0.08938  | 0.074555 | 0.445032 | 0.318185 |
| MmugDNA.137.1.S1_at     | MmugDNA.137.1   | 7.91  | 7.99  | 0.27 | 0.38 | -1.05 | 0.786417 | 0.748536 | 0.91117  | 0.853696 |
| MmugDNA.13701.1.S1_at   | MmugDNA.13701.1 | 5.05  | 5.1   | 0.1  | 0.09 | -1.04 | 0.348499 | 0.557345 | 0.667173 | 0.735031 |

|                         |                 |       |       |      |      |        |          |          |          |          |
|-------------------------|-----------------|-------|-------|------|------|--------|----------|----------|----------|----------|
| MmugDNA.13702.1.S1_at   | MmugDNA.13702.1 | 12.47 | 12.71 | 0.05 | 0.24 | -1.18  | 0.126579 | 0.144157 | 0.492802 | 0.418037 |
| MmugDNA.13708.1.S1_at   | MmugDNA.13708.1 | 10.01 | 10.34 | 0.23 | 0.13 | -1.25  | 0.120431 | 0.019541 | 0.485479 | 0.175536 |
| MmugDNA.1371.1.S1_at    | MmugDNA.1371.1  | 6.61  | 7.72  | 0.07 | 0.31 | -2.15  | 0.003867 | 0.001232 | 0.180184 | 0.05478  |
| MmugDNA.13713.1.S1_at   | MmugDNA.13713.1 | 7.51  | 8.19  | 0.14 | 0.47 | -1.6   | 0.310274 | 0.055839 | 0.642233 | 0.282161 |
| MmugDNA.13716.1.S1_s_at | MmugDNA.13716.1 | 10.98 | 11.58 | 0.23 | 0.35 | -1.51  | 0.032216 | 0.023833 | 0.3244   | 0.193372 |
| MmugDNA.13718.1.S1_at   | MmugDNA.13718.1 | 7.03  | 7.08  | 0.18 | 0.25 | -1.04  | 0.647602 | 0.761049 | 0.841539 | 0.861185 |
| MmugDNA.13719.1.S1_at   | MmugDNA.13719.1 | 11.97 | 11.71 | 0.15 | 0.21 | 1.2    | 0.728163 | 0.506266 | 0.881806 | 0.702368 |
| MmugDNA.13723.1.S1_at   | MmugDNA.13723.1 | 11.48 | 11.59 | 0.18 | 0.05 | -1.08  | 0.887931 | 0.324434 | 0.954955 | 0.575042 |
| MmugDNA.13723.1.S1_s_at | MmugDNA.13723.1 | 12.08 | 12.19 | 0.09 | 0.07 | -1.08  | 0.369178 | 0.224241 | 0.680589 | 0.497164 |
| MmugDNA.13727.1.S1_at   | MmugDNA.13727.1 | 10.63 | 10.25 | 0.03 | 0.44 | 1.3    | 0.679386 | 0.544882 | 0.856585 | 0.727183 |
| MmugDNA.13729.1.S1_at   | MmugDNA.13729.1 | 6.4   | 6.51  | 0.05 | 0.01 | -1.08  | 0.041527 | 0.082141 | 0.351929 | 0.330937 |
| MmugDNA.13734.1.S1_at   | MmugDNA.13734.1 | 8.46  | 8.42  | 0.18 | 0.35 | 1.03   | 0.98733  | 0.958425 | 0.995543 | 0.976452 |
| MmugDNA.13739.1.S1_at   | MmugDNA.13739.1 | 11.24 | 11.26 | 0.2  | 0.24 | -1.01  | 0.645447 | 0.817532 | 0.840383 | 0.894746 |
| MmugDNA.13740.1.S1_at   | MmugDNA.13740.1 | 3.07  | 3.06  | 0.03 | 0.1  | 1.01   | 0.934787 | 0.825555 | 0.974762 | 0.899762 |
| MmugDNA.13742.1.S1_at   | MmugDNA.13742.1 | 10.79 | 11.05 | 0.19 | 0.28 | -1.2   | 0.11082  | 0.134872 | 0.472704 | 0.406878 |
| MmugDNA.13742.1.S1_s_at | MmugDNA.13742.1 | 10.98 | 11.19 | 0.28 | 0.22 | -1.16  | 0.162856 | 0.185919 | 0.527275 | 0.461772 |
| MmugDNA.13744.1.S1_at   | MmugDNA.13744.1 | 3.1   | 3.22  | 0.14 | 0.27 | -1.09  | 0.335632 | 0.228748 | 0.659165 | 0.501005 |
| MmugDNA.13750.1.S1_at   | MmugDNA.13750.1 | 10.37 | 10.02 | 0.04 | 0.19 | 1.28   | 0.106045 | 0.119813 | 0.466831 | 0.388577 |
| MmugDNA.13752.1.S1_at   | MmugDNA.13752.1 | 10.12 | 9.42  | 0.12 | 0.12 | 1.62   | 0.002122 | 0.005048 | 0.157411 | 0.099019 |
| MmugDNA.13753.1.S1_at   | MmugDNA.13753.1 | 4.15  | 4.2   | 0.06 | 0.03 | -1.03  | 0.068824 | 0.234878 | 0.410654 | 0.506125 |
| MmugDNA.13754.1.S1_at   | MmugDNA.13754.1 | 5.7   | 5.85  | 0.08 | 0.1  | -1.11  | 0.169906 | 0.085818 | 0.534129 | 0.337901 |
| MmugDNA.13757.1.S1_at   | MmugDNA.13757.1 | 7.29  | 11.13 | 1.74 | 3.53 | -14.33 | 0.519496 | 0.193752 | 0.770186 | 0.468828 |
| MmugDNA.13758.1.S1_at   | MmugDNA.13758.1 | 11.46 | 11.16 | 0.18 | 0.26 | 1.23   | 0.16524  | 0.048866 | 0.529291 | 0.265858 |
| MmugDNA.13760.1.S1_at   | MmugDNA.13760.1 | 11.92 | 11.25 | 0.16 | 0.32 | 1.59   | 0.02151  | 0.004046 | 0.282524 | 0.090281 |
| MmugDNA.13767.1.S1_at   | MmugDNA.13767.1 | 5.16  | 8.33  | 0.27 | 0.28 | -9.03  | 0.000149 | 0.002626 | 0.112653 | 0.075772 |
| MmugDNA.13774.1.S1_at   | MmugDNA.13774.1 | 12.46 | 12.41 | 0.27 | 0.02 | 1.04   | 0.355575 | 0.241607 | 0.671128 | 0.512212 |
| MmugDNA.13776.1.S1_s_at | MmugDNA.13776.1 | 12.45 | 12.26 | 0.11 | 0.15 | 1.14   | 0.298154 | 0.289251 | 0.633823 | 0.550293 |
| MmugDNA.13777.1.S1_at   | MmugDNA.13777.1 | 7.59  | 8.24  | 0.26 | 1.12 | -1.57  | 0.366536 | 0.467427 | 0.679082 | 0.677085 |
| MmugDNA.1378.1.S1_at    | MmugDNA.1378.1  | 4.42  | 4.45  | 0.05 | 0.09 | -1.02  | 0.732941 | 0.29175  | 0.884739 | 0.552054 |
| MmugDNA.13783.1.S1_at   | MmugDNA.13783.1 | 6.43  | 6.51  | 0.05 | 0.19 | -1.06  | 0.168591 | 0.253375 | 0.532849 | 0.521701 |
| MmugDNA.13790.1.S1_at   | MmugDNA.13790.1 | 12.05 | 12.05 | 0.03 | 0.13 | -1     | 0.39382  | 0.389347 | 0.695522 | 0.62342  |
| MmugDNA.13792.1.S1_at   | MmugDNA.13792.1 | 6.52  | 6.7   | 0.05 | 0.12 | -1.13  | 0.060223 | 0.072799 | 0.393081 | 0.315651 |
| MmugDNA.13802.1.S1_at   | MmugDNA.13802.1 | 12.8  | 12.63 | 0.09 | 0.26 | 1.12   | 0.375996 | 0.056564 | 0.684847 | 0.283838 |
| MmugDNA.13806.1.S1_at   | MmugDNA.13806.1 | 5.13  | 5.28  | 0.11 | 0.43 | -1.1   | 0.635963 | 0.395432 | 0.835221 | 0.627474 |
| MmugDNA.13810.1.S1_at   | MmugDNA.13810.1 | 13.52 | 13.46 | 0.05 | 0.3  | 1.04   | 0.244754 | 0.221485 | 0.596374 | 0.494795 |
| MmugDNA.13815.1.S1_at   | MmugDNA.13815.1 | 10.34 | 10.08 | 0.44 | 0.37 | 1.19   | 0.217641 | 0.248148 | 0.577214 | 0.517567 |
| MmugDNA.13828.1.S1_at   | MmugDNA.13828.1 | 4.3   | 4.22  | 0.87 | 0.14 | 1.06   | 0.383552 | 0.008715 | 0.689419 | 0.123746 |
| MmugDNA.13832.1.S1_s_at | MmugDNA.13832.1 | 10.8  | 10.85 | 0.28 | 0.21 | -1.04  | 0.865019 | 0.599497 | 0.945844 | 0.76147  |
| MmugDNA.13833.1.S1_at   | MmugDNA.13833.1 | 8.84  | 10.04 | 0.24 | 0.21 | -2.29  | 0.006595 | 0.002414 | 0.200254 | 0.072905 |
| MmugDNA.13836.1.S1_at   | MmugDNA.13836.1 | 7.22  | 7.34  | 0.07 | 0.13 | -1.08  | 0.229494 | 0.059011 | 0.586579 | 0.289764 |
| MmugDNA.13838.1.S1_at   | MmugDNA.13838.1 | 9.24  | 8.63  | 0.09 | 0.67 | 1.53   | 0.526379 | 0.725263 | 0.77407  | 0.840954 |



|                         |                 |       |       |      |      |       |          |          |          |          |
|-------------------------|-----------------|-------|-------|------|------|-------|----------|----------|----------|----------|
| MmugDNA.13842.1.S1_at   | MmugDNA.13842.1 | 10.07 | 10.2  | 0.01 | 0.14 | -1.09 | 0.138037 | 0.005593 | 0.505553 | 0.10339  |
| MmugDNA.13848.1.S1_at   | MmugDNA.13848.1 | 6.78  | 6.68  | 0.1  | 0.23 | 1.07  | 0.853812 | 0.972968 | 0.940936 | 0.985389 |
| MmugDNA.13852.1.S1_at   | MmugDNA.13852.1 | 8.02  | 8     | 0.1  | 0.23 | 1.02  | 0.318862 | 0.236078 | 0.648688 | 0.507179 |
| MmugDNA.13861.1.S1_at   | MmugDNA.13861.1 | 4.59  | 4.86  | 0.08 | 0.85 | -1.2  | 0.306537 | 0.290521 | 0.639593 | 0.551231 |
| MmugDNA.13869.1.S1_x_at | MmugDNA.13869.1 | 3.87  | 3.77  | 0.15 | 0.06 | 1.07  | 0.171598 | 0.129426 | 0.535232 | 0.400827 |
| MmugDNA.13872.1.S1_at   | MmugDNA.13872.1 | 6.55  | 6.54  | 0.18 | 0.51 | 1     | 0.769759 | 0.356229 | 0.903186 | 0.598166 |
| MmugDNA.13873.1.S1_at   | MmugDNA.13873.1 | 9.15  | 8.26  | 0.26 | 0.21 | 1.86  | 0.004913 | 0.001906 | 0.185749 | 0.065148 |
| MmugDNA.13874.1.S1_at   | MmugDNA.13874.1 | 3.96  | 3.9   | 0.09 | 0.03 | 1.04  | 0.98778  | 0.077929 | 0.995652 | 0.324277 |
| MmugDNA.13875.1.S1_at   | MmugDNA.13875.1 | 12.86 | 12.71 | 0.1  | 0.1  | 1.11  | 0.143464 | 0.133024 | 0.510312 | 0.40469  |
| MmugDNA.13881.1.S1_at   | MmugDNA.13881.1 | 7.4   | 6.77  | 0.34 | 0.24 | 1.54  | 0.045847 | 0.039907 | 0.361852 | 0.244852 |
| MmugDNA.13882.1.S1_at   | MmugDNA.13882.1 | 8.66  | 8.39  | 0.02 | 0.53 | 1.2   | 0.433471 | 0.171305 | 0.72     | 0.447809 |
| MmugDNA.13883.1.S1_at   | MmugDNA.13883.1 | 4.11  | 4.04  | 0.12 | 0.15 | 1.05  | 0.985684 | 0.616347 | 0.994806 | 0.772571 |
| MmugDNA.13886.1.S1_at   | MmugDNA.13886.1 | 6.59  | 7.08  | 0.11 | 0.47 | -1.4  | 0.146643 | 0.080882 | 0.512668 | 0.328858 |
| MmugDNA.13893.1.S1_at   | MmugDNA.13893.1 | 12.13 | 12.11 | 0.02 | 0.1  | 1.01  | 0.98548  | 0.506572 | 0.99475  | 0.702503 |
| MmugDNA.139.1.S1_at     | MmugDNA.139.1   | 11.6  | 11.44 | 0.03 | 0.24 | 1.12  | 0.2968   | 0.457175 | 0.632752 | 0.670746 |
| MmugDNA.13900.1.S1_at   | MmugDNA.13900.1 | 3.91  | 3.87  | 0.02 | 0.2  | 1.02  | 0.856634 | 0.505832 | 0.942104 | 0.702218 |
| MmugDNA.1391.1.S1_at    | MmugDNA.1391.1  | 8.16  | 7.41  | 1.09 | 0.74 | 1.69  | 0.14889  | 0.170393 | 0.51391  | 0.447103 |
| MmugDNA.13911.1.S1_s_at | MmugDNA.13911.1 | 10.24 | 10.57 | 0.19 | 0.31 | -1.26 | 0.086714 | 0.056838 | 0.440475 | 0.284531 |
| MmugDNA.13913.1.S1_at   | MmugDNA.13913.1 | 9.27  | 9.15  | 0.18 | 0.36 | 1.09  | 0.336776 | 0.497847 | 0.659663 | 0.697071 |
| MmugDNA.13914.1.S1_at   | MmugDNA.13914.1 | 6.38  | 7.8   | 0.27 | 0.47 | -2.67 | 0.007679 | 0.00309  | 0.211086 | 0.081194 |
| MmugDNA.13916.1.S1_at   | MmugDNA.13916.1 | 11.46 | 10.62 | 0.09 | 0.5  | 1.79  | 0.023741 | 0.008309 | 0.292771 | 0.120929 |
| MmugDNA.13917.1.S1_at   | MmugDNA.13917.1 | 9.25  | 7.81  | 0.71 | 0.24 | 2.72  | 0.026382 | 0.01355  | 0.302928 | 0.149001 |
| MmugDNA.13932.1.S1_at   | MmugDNA.13932.1 | 7.05  | 6.53  | 0.41 | 0.25 | 1.44  | 0.171341 | 0.215152 | 0.535166 | 0.488943 |
| MmugDNA.13933.1.S1_at   | MmugDNA.13933.1 | 12.86 | 12.79 | 0.37 | 0.73 | 1.05  | 0.289533 | 0.391231 | 0.627563 | 0.624922 |
| MmugDNA.1394.1.S1_at    | MmugDNA.1394.1  | 11.19 | 10.58 | 0.09 | 0.25 | 1.53  | 0.011139 | 0.005408 | 0.23433  | 0.10146  |
| MmugDNA.13945.1.S1_at   | MmugDNA.13945.1 | 6.25  | 6.37  | 0.07 | 0.06 | -1.09 | 0.05143  | 0.085337 | 0.376003 | 0.337219 |
| MmugDNA.13946.1.S1_at   | MmugDNA.13946.1 | 5.44  | 5.46  | 0.05 | 0.14 | -1.01 | 0.620506 | 0.328684 | 0.826026 | 0.578213 |
| MmugDNA.1395.1.S1_at    | MmugDNA.1395.1  | 6.39  | 6.37  | 0.11 | 0.09 | 1.01  | 0.787316 | 0.910901 | 0.911552 | 0.949723 |
| MmugDNA.13953.1.S1_at   | MmugDNA.13953.1 | 11.16 | 11.05 | 0.18 | 0.3  | 1.07  | 0.627499 | 0.791801 | 0.830191 | 0.879751 |
| MmugDNA.13954.1.S1_at   | MmugDNA.13954.1 | 7.57  | 7.72  | 0.29 | 0.1  | -1.11 | 0.687206 | 0.77068  | 0.860228 | 0.866801 |
| MmugDNA.13955.1.S1_at   | MmugDNA.13955.1 | 12.17 | 12.04 | 0.07 | 0.08 | 1.09  | 0.116166 | 0.09153  | 0.479775 | 0.346614 |
| MmugDNA.13957.1.S1_at   | MmugDNA.13957.1 | 9.32  | 10.36 | 0.22 | 1    | -2.05 | 0.598507 | 0.741071 | 0.81395  | 0.850126 |
| MmugDNA.13958.1.S1_at   | MmugDNA.13958.1 | 6.36  | 6.37  | 0.9  | 0.88 | -1.01 | 0.959885 | 0.991686 | 0.98484  | 0.995392 |
| MmugDNA.13973.1.S1_at   | MmugDNA.13973.1 | 7.26  | 7.08  | 0.14 | 0.11 | 1.13  | 0.103249 | 0.056198 | 0.462888 | 0.282972 |
| MmugDNA.13976.1.S1_at   | MmugDNA.13976.1 | 4.02  | 4.07  | 1.24 | 0.1  | -1.04 | 0.44559  | 0.578937 | 0.727828 | 0.748776 |
| MmugDNA.13979.1.S1_at   | MmugDNA.13979.1 | 7.33  | 8.45  | 0.17 | 0.18 | -2.17 | 0.001384 | 0.000694 | 0.146228 | 0.044179 |
| MmugDNA.13983.1.S1_at   | MmugDNA.13983.1 | 6.8   | 6.65  | 0.03 | 0.15 | 1.11  | 0.139277 | 0.173335 | 0.506801 | 0.449791 |
| MmugDNA.13984.1.S1_at   | MmugDNA.13984.1 | 7.62  | 7.8   | 0.13 | 0.22 | -1.14 | 0.496857 | 0.664458 | 0.757692 | 0.803396 |
| MmugDNA.13992.1.S1_at   | MmugDNA.13992.1 | 10.65 | 10.04 | 0.22 | 0.24 | 1.53  | 0.070074 | 0.029191 | 0.413521 | 0.212884 |
| MmugDNA.13999.1.S1_at   | MmugDNA.13999.1 | 5.62  | 5.45  | 0.44 | 0.65 | 1.12  | 0.381912 | 0.09634  | 0.688295 | 0.353827 |
| MmugDNA.14006.1.S1_at   | MmugDNA.14006.1 | 7.69  | 5.54  | 0.38 | 0.32 | 4.45  | 0.001927 | 0.000282 | 0.155636 | 0.034568 |

|                         |                 |       |       |      |      |       |          |          |          |          |
|-------------------------|-----------------|-------|-------|------|------|-------|----------|----------|----------|----------|
| MmugDNA.14009.1.S1_s_at | MmugDNA.14009.1 | 8.2   | 9.85  | 0.55 | 0.48 | -3.14 | 0.011341 | 0.00268  | 0.235384 | 0.076408 |
| MmugDNA.14011.1.S1_s_at | MmugDNA.14011.1 | 3.76  | 4.01  | 0.14 | 0.46 | -1.19 | 0.444358 | 0.281878 | 0.726944 | 0.544844 |
| MmugDNA.14020.1.S1_at   | MmugDNA.14020.1 | 8.74  | 8.9   | 0.43 | 0.33 | -1.11 | 0.275724 | 0.274496 | 0.617878 | 0.538987 |
| MmugDNA.14022.1.S1_at   | MmugDNA.14022.1 | 6.03  | 6.08  | 0.16 | 0.18 | -1.04 | 0.284908 | 0.453262 | 0.62455  | 0.667661 |
| MmugDNA.14031.1.S1_at   | MmugDNA.14031.1 | 12.87 | 12.76 | 0.06 | 0.1  | 1.08  | 0.156635 | 0.280992 | 0.52152  | 0.544166 |
| MmugDNA.14033.1.S1_at   | MmugDNA.14033.1 | 3.08  | 2.86  | 0.42 | 0.19 | 1.16  | 0.26579  | 0.311577 | 0.611392 | 0.566537 |
| MmugDNA.14037.1.S1_at   | MmugDNA.14037.1 | 5.85  | 5.97  | 0.04 | 0.06 | -1.08 | 0.334649 | 0.244335 | 0.658449 | 0.514184 |
| MmugDNA.14045.1.S1_at   | MmugDNA.14045.1 | 4.52  | 4.78  | 0.28 | 0.29 | -1.2  | 0.307681 | 0.40769  | 0.640082 | 0.635135 |
| MmugDNA.14046.1.A1_at   | MmugDNA.14046.1 | 6.01  | 6.12  | 0.09 | 0.31 | -1.08 | 0.519454 | 0.344069 | 0.770186 | 0.58962  |
| MmugDNA.14046.1.S1_at   | MmugDNA.14046.1 | 5.76  | 5.97  | 0.25 | 0.08 | -1.16 | 0.609359 | 0.658547 | 0.82044  | 0.800401 |
| MmugDNA.14048.1.S1_at   | MmugDNA.14048.1 | 13.06 | 13.12 | 0.05 | 0.1  | -1.04 | 0.669534 | 0.854633 | 0.852167 | 0.917159 |
| MmugDNA.14052.1.S1_at   | MmugDNA.14052.1 | 7.04  | 7.05  | 0.04 | 0.18 | -1    | 0.913498 | 0.697973 | 0.965725 | 0.824551 |
| MmugDNA.14052.1.S1_s_at | MmugDNA.14052.1 | 5.66  | 5.84  | 0.2  | 0.08 | -1.13 | 0.440624 | 0.015423 | 0.724412 | 0.157699 |
| MmugDNA.14054.1.S1_at   | MmugDNA.14054.1 | 12.6  | 12.57 | 0.1  | 0.08 | 1.02  | 0.907946 | 0.028112 | 0.963478 | 0.209286 |
| MmugDNA.14061.1.S1_at   | MmugDNA.14061.1 | 4.23  | 4     | 0.09 | 0.08 | 1.17  | 0.023376 | 0.115544 | 0.291303 | 0.38267  |
| MmugDNA.14067.1.S1_at   | MmugDNA.14067.1 | 4.46  | 4.26  | 0.19 | 0.11 | 1.15  | 0.503623 | 0.738315 | 0.760979 | 0.848258 |
| MmugDNA.14068.1.S1_at   | MmugDNA.14068.1 | 12.25 | 12.09 | 0.12 | 0.51 | 1.12  | 0.612333 | 0.416703 | 0.822151 | 0.64167  |
| MmugDNA.14075.1.S1_at   | MmugDNA.14075.1 | 11.17 | 9.51  | 0.34 | 0.11 | 3.14  | 0.001274 | 0.00019  | 0.145267 | 0.030754 |
| MmugDNA.14076.1.S1_at   | MmugDNA.14076.1 | 8.65  | 6.68  | 0.09 | 0.59 | 3.94  | 0.005333 | 0.001995 | 0.191107 | 0.066264 |
| MmugDNA.14076.1.S1_s_at | MmugDNA.14076.1 | 9.18  | 7.29  | 0.24 | 0.53 | 3.69  | 0.006546 | 0.002643 | 0.199625 | 0.076012 |
| MmugDNA.14078.1.S1_at   | MmugDNA.14078.1 | 11.09 | 11.03 | 0.22 | 0.13 | 1.04  | 0.449139 | 0.525789 | 0.730082 | 0.715217 |
| MmugDNA.14080.1.S1_at   | MmugDNA.14080.1 | 7.13  | 7.2   | 0.16 | 0.13 | -1.05 | 0.299665 | 0.417553 | 0.635035 | 0.642252 |
| MmugDNA.14081.1.S1_at   | MmugDNA.14081.1 | 11.78 | 11.21 | 0.04 | 0.16 | 1.48  | 0.009728 | 0.004159 | 0.226235 | 0.091036 |
| MmugDNA.14088.1.S1_at   | MmugDNA.14088.1 | 10.79 | 10.61 | 0.18 | 0.2  | 1.13  | 0.719856 | 0.357375 | 0.87715  | 0.598986 |
| MmugDNA.14089.1.S1_at   | MmugDNA.14089.1 | 6.95  | 7.41  | 0.33 | 1.14 | -1.37 | 0.528094 | 0.620933 | 0.775362 | 0.775708 |
| MmugDNA.14090.1.S1_at   | MmugDNA.14090.1 | 8.03  | 8.06  | 0.04 | 0.23 | -1.02 | 0.733921 | 0.809833 | 0.88527  | 0.890412 |
| MmugDNA.14093.1.S1_at   | MmugDNA.14093.1 | 11.08 | 10.99 | 0.26 | 0.27 | 1.07  | 0.401512 | 0.386972 | 0.700872 | 0.621935 |
| MmugDNA.14096.1.S1_at   | MmugDNA.14096.1 | 3.54  | 3.6   | 0.09 | 0.16 | -1.05 | 0.491146 | 0.54764  | 0.754846 | 0.728583 |
| MmugDNA.14099.1.S1_at   | MmugDNA.14099.1 | 9.98  | 9.6   | 0.24 | 0.29 | 1.3   | 0.099308 | 0.05912  | 0.459226 | 0.290056 |
| MmugDNA.14109.1.S1_at   | MmugDNA.14109.1 | 7.29  | 7.16  | 0.49 | 0.19 | 1.09  | 0.715181 | 0.183377 | 0.875005 | 0.459553 |
| MmugDNA.14110.1.S1_at   | MmugDNA.14110.1 | 11.93 | 11.98 | 0.22 | 0.32 | -1.04 | 0.696297 | 0.615041 | 0.86516  | 0.771703 |
| MmugDNA.14118.1.S1_at   | MmugDNA.14118.1 | 8.83  | 8.07  | 0.43 | 0.46 | 1.69  | 0.114261 | 0.119674 | 0.477533 | 0.388324 |
| MmugDNA.1412.1.S1_at    | MmugDNA.1412.1  | 4.82  | 4.74  | 0.24 | 0.06 | 1.06  | 0.184188 | 0.247644 | 0.548032 | 0.517028 |
| MmugDNA.14121.1.S1_at   | MmugDNA.14121.1 | 5.84  | 5.15  | 0.42 | 0.22 | 1.62  | 0.098297 | 0.222721 | 0.457881 | 0.495669 |
| MmugDNA.14123.1.S1_at   | MmugDNA.14123.1 | 10.26 | 9.41  | 0.12 | 0.38 | 1.81  | 0.028967 | 0.017068 | 0.312556 | 0.165561 |
| MmugDNA.14124.1.S1_at   | MmugDNA.14124.1 | 10.26 | 10.22 | 0.28 | 0.38 | 1.03  | 0.283985 | 0.511918 | 0.623838 | 0.705856 |
| MmugDNA.14128.1.S1_at   | MmugDNA.14128.1 | 3.53  | 3.87  | 0.18 | 0.27 | -1.26 | 0.149809 | 0.332882 | 0.514363 | 0.581266 |
| MmugDNA.14132.1.S1_at   | MmugDNA.14132.1 | 10.25 | 10.94 | 0.46 | 1.1  | -1.61 | 0.382006 | 0.390127 | 0.688372 | 0.624002 |
| MmugDNA.14137.1.S1_at   | MmugDNA.14137.1 | 13.4  | 13.54 | 0.15 | 0.08 | -1.1  | 0.070587 | 0.078769 | 0.414439 | 0.325725 |
| MmugDNA.14139.1.S1_at   | MmugDNA.14139.1 | 7.9   | 7.54  | 0.17 | 0.05 | 1.28  | 0.018296 | 0.011949 | 0.269791 | 0.141415 |
| MmugDNA.1414.1.S1_at    | MmugDNA.1414.1  | 7.05  | 6.06  | 0.24 | 0.28 | 1.99  | 0.031078 | 0.022562 | 0.32048  | 0.187982 |

|                         |                 |       |       |      |      |       |          |          |          |          |
|-------------------------|-----------------|-------|-------|------|------|-------|----------|----------|----------|----------|
| MmugDNA.14145.1.S1_s_at | MmugDNA.14145.1 | 7.76  | 7.31  | 0.11 | 0.43 | 1.37  | 0.113385 | 0.212378 | 0.476642 | 0.486325 |
| MmugDNA.14147.1.S1_at   | MmugDNA.14147.1 | 6.36  | 6.43  | 0.13 | 0.13 | -1.05 | 0.23443  | 0.189533 | 0.588668 | 0.465277 |
| MmugDNA.14151.1.S1_at   | MmugDNA.14151.1 | 11.46 | 11.57 | 0.16 | 0.35 | -1.08 | 0.415462 | 0.285972 | 0.709528 | 0.547506 |
| MmugDNA.14154.1.S1_at   | MmugDNA.14154.1 | 10.66 | 10.69 | 0.22 | 0.15 | -1.03 | 0.926857 | 0.945197 | 0.971861 | 0.968914 |
| MmugDNA.14155.1.S1_at   | MmugDNA.14155.1 | 6.89  | 7.71  | 0.34 | 0.97 | -1.77 | 0.249774 | 0.232167 | 0.600329 | 0.503874 |
| MmugDNA.1416.1.S1_at    | MmugDNA.1416.1  | 7.9   | 7.8   | 0.11 | 0.23 | 1.07  | 0.557923 | 0.323731 | 0.792886 | 0.574587 |
| MmugDNA.14168.1.S1_at   | MmugDNA.14168.1 | 8.64  | 8.42  | 0.35 | 0.14 | 1.17  | 0.365527 | 0.091095 | 0.678307 | 0.345932 |
| MmugDNA.14171.1.S1_s_at | MmugDNA.14171.1 | 10.11 | 9.69  | 0.09 | 0.34 | 1.33  | 0.463668 | 0.324327 | 0.738895 | 0.574924 |
| MmugDNA.14172.1.S1_at   | MmugDNA.14172.1 | 6.47  | 6.25  | 0.59 | 0.37 | 1.16  | 0.777505 | 0.683169 | 0.907006 | 0.815172 |
| MmugDNA.14174.1.S1_at   | MmugDNA.14174.1 | 2.9   | 3.02  | 0.01 | 0.05 | -1.09 | 0.029285 | 0.167415 | 0.31358  | 0.443785 |
| MmugDNA.14178.1.S1_at   | MmugDNA.14178.1 | 3.89  | 3.88  | 0.11 | 0.12 | 1.01  | 0.946039 | 0.477447 | 0.979359 | 0.683498 |
| MmugDNA.14185.1.S1_at   | MmugDNA.14185.1 | 4.25  | 3.88  | 0.58 | 0.19 | 1.29  | 0.173565 | 0.106207 | 0.537183 | 0.368585 |
| MmugDNA.14188.1.S1_at   | MmugDNA.14188.1 | 4.89  | 5.05  | 0.08 | 0.04 | -1.12 | 0.14456  | 0.289869 | 0.511015 | 0.550831 |
| MmugDNA.14192.1.S1_at   | MmugDNA.14192.1 | 6.87  | 6.7   | 0.98 | 0.99 | 1.13  | 0.834817 | 0.212114 | 0.933053 | 0.486036 |
| MmugDNA.14193.1.S1_at   | MmugDNA.14193.1 | 11.6  | 11.58 | 0.11 | 0.47 | 1.01  | 0.647007 | 0.481332 | 0.841179 | 0.686365 |
| MmugDNA.14194.1.S1_at   | MmugDNA.14194.1 | 12.03 | 11.92 | 0.09 | 0.09 | 1.08  | 0.061691 | 0.055359 | 0.396604 | 0.281125 |
| MmugDNA.14203.1.S1_at   | MmugDNA.14203.1 | 6.49  | 6.55  | 0.08 | 0.17 | -1.05 | 0.798952 | 0.917278 | 0.916772 | 0.953776 |
| MmugDNA.14204.1.S1_at   | MmugDNA.14204.1 | 7.17  | 8.75  | 1.76 | 1.71 | -2.98 | 0.376586 | 0.101387 | 0.685249 | 0.36112  |
| MmugDNA.14206.1.S1_at   | MmugDNA.14206.1 | 5.09  | 5.11  | 0.19 | 0.05 | -1.02 | 0.708929 | 0.727245 | 0.872172 | 0.84224  |
| MmugDNA.14209.1.S1_at   | MmugDNA.14209.1 | 6.44  | 6.52  | 0.08 | 0.04 | -1.05 | 0.352551 | 0.437904 | 0.669669 | 0.657026 |
| MmugDNA.1421.1.S1_at    | MmugDNA.1421.1  | 10.3  | 10.2  | 0.48 | 0.54 | 1.07  | 0.612867 | 0.127932 | 0.822443 | 0.398887 |
| MmugDNA.14210.1.S1_at   | MmugDNA.14210.1 | 12.6  | 12.88 | 0.22 | 0.06 | -1.21 | 0.335732 | 0.203638 | 0.659165 | 0.47789  |
| MmugDNA.14211.1.S1_at   | MmugDNA.14211.1 | 6.44  | 6.6   | 0.17 | 0.17 | -1.12 | 0.291027 | 0.365336 | 0.628696 | 0.605468 |
| MmugDNA.14213.1.S1_at   | MmugDNA.14213.1 | 11.64 | 11.52 | 0.18 | 0.21 | 1.08  | 0.162593 | 0.233828 | 0.526894 | 0.505169 |
| MmugDNA.14218.1.S1_at   | MmugDNA.14218.1 | 6.12  | 6.07  | 0.61 | 0.41 | 1.04  | 0.651664 | 0.851811 | 0.843273 | 0.915767 |
| MmugDNA.14227.1.S1_at   | MmugDNA.14227.1 | 8.13  | 10.94 | 1.78 | 2.39 | -7.04 | 0.496934 | 0.312708 | 0.757692 | 0.567299 |
| MmugDNA.14230.1.S1_at   | MmugDNA.14230.1 | 9.75  | 10.21 | 0.13 | 0.58 | -1.38 | 0.177305 | 0.236386 | 0.541368 | 0.507308 |
| MmugDNA.14231.1.S1_at   | MmugDNA.14231.1 | 8.16  | 7.01  | 0.22 | 0.85 | 2.23  | 0.104413 | 0.010569 | 0.464351 | 0.134182 |
| MmugDNA.14233.1.S1_at   | MmugDNA.14233.1 | 10.95 | 11.5  | 0.11 | 0.12 | -1.47 | 0.004339 | 0.000877 | 0.182757 | 0.047586 |
| MmugDNA.14234.1.S1_at   | MmugDNA.14234.1 | 13.77 | 13.71 | 0.14 | 0.35 | 1.04  | 0.269858 | 0.3752   | 0.614491 | 0.613249 |
| MmugDNA.1424.1.S1_at    | MmugDNA.1424.1  | 5.88  | 5.93  | 0.17 | 0.08 | -1.03 | 0.825815 | 0.884682 | 0.929311 | 0.934321 |
| MmugDNA.14243.1.S1_at   | MmugDNA.14243.1 | 5.81  | 5.87  | 0.02 | 0.18 | -1.04 | 0.536832 | 0.814968 | 0.779659 | 0.893221 |
| MmugDNA.14245.1.S1_at   | MmugDNA.14245.1 | 5.75  | 5.52  | 0.1  | 0.17 | 1.17  | 0.473972 | 0.623243 | 0.744733 | 0.777656 |
| MmugDNA.14253.1.S1_at   | MmugDNA.14253.1 | 4.6   | 4.39  | 0.27 | 0.12 | 1.16  | 0.323059 | 0.102909 | 0.651295 | 0.363558 |
| MmugDNA.14255.1.S1_at   | MmugDNA.14255.1 | 9.51  | 9.03  | 0.16 | 0.08 | 1.39  | 0.006742 | 0.00228  | 0.20158  | 0.07037  |
| MmugDNA.14256.1.S1_at   | MmugDNA.14256.1 | 12.32 | 12.31 | 0.05 | 0.04 | 1.01  | 0.577631 | 0.104035 | 0.803559 | 0.36495  |
| MmugDNA.14257.1.S1_at   | MmugDNA.14257.1 | 11.15 | 10.39 | 0.44 | 0.46 | 1.69  | 0.11092  | 0.066175 | 0.472762 | 0.302783 |
| MmugDNA.14258.1.S1_s_at | MmugDNA.14258.1 | 13.51 | 13.49 | 0.1  | 0.21 | 1.01  | 0.764297 | 0.866858 | 0.900711 | 0.92433  |
| MmugDNA.14260.1.S1_at   | MmugDNA.14260.1 | 4.14  | 4.49  | 0.06 | 0.13 | -1.27 | 0.009997 | 0.003906 | 0.226899 | 0.088806 |
| MmugDNA.14261.1.S1_at   | MmugDNA.14261.1 | 5.72  | 5.68  | 0.19 | 0.09 | 1.03  | 0.852437 | 0.947887 | 0.940647 | 0.970378 |
| MmugDNA.14268.1.S1_at   | MmugDNA.14268.1 | 10.27 | 10.01 | 0.37 | 0.37 | 1.2   | 0.478955 | 0.606325 | 0.747575 | 0.765746 |

|                         |                 |       |       |      |      |       |          |          |          |          |
|-------------------------|-----------------|-------|-------|------|------|-------|----------|----------|----------|----------|
| MmugDNA.14272.1.S1_at   | MmugDNA.14272.1 | 3.46  | 3.53  | 0.03 | 0.06 | -1.05 | 0.364283 | 0.223324 | 0.677295 | 0.49612  |
| MmugDNA.14282.1.S1_at   | MmugDNA.14282.1 | 5     | 5.03  | 0.2  | 0.32 | -1.02 | 0.248412 | 0.203441 | 0.599265 | 0.477634 |
| MmugDNA.14285.1.S1_at   | MmugDNA.14285.1 | 10.23 | 9.06  | 0.17 | 0.7  | 2.25  | 0.139296 | 0.143296 | 0.506801 | 0.417283 |
| MmugDNA.14287.1.S1_at   | MmugDNA.14287.1 | 5.35  | 5.62  | 0.16 | 0.14 | -1.2  | 0.255328 | 0.096873 | 0.603158 | 0.354286 |
| MmugDNA.14289.1.S1_at   | MmugDNA.14289.1 | 10.86 | 9.66  | 0.21 | 0.46 | 2.3   | 0.006908 | 0.002783 | 0.202257 | 0.077966 |
| MmugDNA.14290.1.S1_at   | MmugDNA.14290.1 | 10.15 | 11.03 | 0.12 | 1    | -1.84 | 0.234146 | 0.273782 | 0.588621 | 0.538287 |
| MmugDNA.14297.1.S1_at   | MmugDNA.14297.1 | 4.17  | 4.14  | 0.12 | 0.05 | 1.02  | 0.415917 | 0.7125   | 0.70957  | 0.833383 |
| MmugDNA.14298.1.S1_at   | MmugDNA.14298.1 | 6.6   | 6.96  | 0.02 | 0.45 | -1.28 | 0.08277  | 0.042467 | 0.434442 | 0.250702 |
| MmugDNA.14300.1.S1_at   | MmugDNA.14300.1 | 9.78  | 10.19 | 0.31 | 0.2  | -1.33 | 0.171931 | 0.18477  | 0.535422 | 0.460661 |
| MmugDNA.14303.1.S1_at   | MmugDNA.14303.1 | 5.52  | 8.25  | 3.06 | 3.11 | -6.63 | 0.735596 | 0.260503 | 0.88634  | 0.527026 |
| MmugDNA.14306.1.S1_at   | MmugDNA.14306.1 | 6.56  | 7.63  | 0.54 | 1.28 | -2.1  | 0.398541 | 0.147744 | 0.698755 | 0.42203  |
| MmugDNA.14307.1.S1_at   | MmugDNA.14307.1 | 9.38  | 9.55  | 0.34 | 0.56 | -1.13 | 0.143733 | 0.170576 | 0.510387 | 0.447204 |
| MmugDNA.14308.1.S1_at   | MmugDNA.14308.1 | 7.21  | 7.35  | 0.99 | 0.65 | -1.1  | 0.766569 | 0.649077 | 0.901851 | 0.794569 |
| MmugDNA.14310.1.S1_at   | MmugDNA.14310.1 | 11.49 | 11.83 | 0.24 | 0.35 | -1.26 | 0.141545 | 0.09603  | 0.509111 | 0.353302 |
| MmugDNA.14314.1.S1_at   | MmugDNA.14314.1 | 4.28  | 4.28  | 0.4  | 0.35 | -1    | 0.950964 | 0.761763 | 0.981558 | 0.861459 |
| MmugDNA.14318.1.S1_at   | MmugDNA.14318.1 | 5.03  | 5.23  | 0.11 | 0.18 | -1.15 | 0.254264 | 0.330156 | 0.602361 | 0.578987 |
| MmugDNA.14326.1.S1_at   | MmugDNA.14326.1 | 5.08  | 5.35  | 0.03 | 0.34 | -1.2  | 0.170954 | 0.141825 | 0.534983 | 0.415331 |
| MmugDNA.14327.1.S1_at   | MmugDNA.14327.1 | 9.59  | 10.65 | 0.21 | 0.67 | -2.09 | 0.064225 | 0.055075 | 0.402521 | 0.280198 |
| MmugDNA.14329.1.S1_at   | MmugDNA.14329.1 | 9.72  | 9.69  | 0.27 | 0.07 | 1.02  | 0.337699 | 0.375399 | 0.660206 | 0.613405 |
| MmugDNA.14333.1.S1_at   | MmugDNA.14333.1 | 7.02  | 6.8   | 0.25 | 0.05 | 1.16  | 0.479616 | 0.171484 | 0.74773  | 0.447895 |
| MmugDNA.14338.1.S1_at   | MmugDNA.14338.1 | 7.04  | 7.08  | 0.07 | 0.15 | -1.03 | 0.252145 | 0.150188 | 0.601255 | 0.424841 |
| MmugDNA.14341.1.S1_at   | MmugDNA.14341.1 | 3.43  | 3.64  | 0.09 | 0.09 | -1.16 | 0.024472 | 0.022155 | 0.294691 | 0.186325 |
| MmugDNA.14342.1.S1_at   | MmugDNA.14342.1 | 7.17  | 10.12 | 1.16 | 2.73 | -7.71 | 0.297433 | 0.248772 | 0.633201 | 0.517931 |
| MmugDNA.14347.1.S1_s_at | MmugDNA.14347.1 | 7.61  | 5.15  | 1.22 | 0.1  | 5.5   | 0.016048 | 0.000497 | 0.262409 | 0.038955 |
| MmugDNA.14350.1.S1_at   | MmugDNA.14350.1 | 8.41  | 9.81  | 0.68 | 0.73 | -2.64 | 0.164245 | 0.19876  | 0.528238 | 0.473391 |
| MmugDNA.14352.1.S1_at   | MmugDNA.14352.1 | 10.24 | 8.87  | 0.22 | 0.62 | 2.6   | 0.027617 | 0.019989 | 0.308386 | 0.177571 |
| MmugDNA.14355.1.S1_at   | MmugDNA.14355.1 | 9.22  | 8.18  | 0.38 | 0.43 | 2.06  | 0.035402 | 0.024612 | 0.336288 | 0.196308 |
| MmugDNA.14356.1.S1_at   | MmugDNA.14356.1 | 9.09  | 8.95  | 0.16 | 0.24 | 1.1   | 0.362824 | 0.118874 | 0.676226 | 0.387068 |
| MmugDNA.14359.1.S1_at   | MmugDNA.14359.1 | 6.97  | 7.61  | 0.15 | 0.35 | -1.56 | 0.056967 | 0.049053 | 0.387418 | 0.266406 |
| MmugDNA.14361.1.S1_at   | MmugDNA.14361.1 | 7.87  | 8.17  | 0.17 | 0.51 | -1.23 | 0.230629 | 0.132734 | 0.587222 | 0.404544 |
| MmugDNA.14370.1.S1_at   | MmugDNA.14370.1 | 3.16  | 3.21  | 0.09 | 0.07 | -1.04 | 0.235801 | 0.403276 | 0.589657 | 0.631998 |
| MmugDNA.14372.1.S1_at   | MmugDNA.14372.1 | 5.45  | 5.61  | 0.07 | 0.1  | -1.11 | 0.151785 | 0.077232 | 0.516514 | 0.322852 |
| MmugDNA.14373.1.S1_at   | MmugDNA.14373.1 | 3.57  | 3.66  | 0.08 | 0.1  | -1.07 | 0.15154  | 0.186111 | 0.516183 | 0.461934 |
| MmugDNA.14375.1.S1_at   | MmugDNA.14375.1 | 9.06  | 12.02 | 1.19 | 2.62 | -7.82 | 0.362308 | 0.290642 | 0.675921 | 0.551363 |
| MmugDNA.1438.1.S1_at    | MmugDNA.1438.1  | 5.77  | 5.49  | 0.06 | 0.5  | 1.21  | 0.902821 | 0.694987 | 0.961281 | 0.822709 |
| MmugDNA.14380.1.S1_at   | MmugDNA.14380.1 | 13.26 | 13.78 | 0.12 | 0.24 | -1.43 | 0.050245 | 0.061763 | 0.373901 | 0.295327 |
| MmugDNA.14382.1.S1_at   | MmugDNA.14382.1 | 4.76  | 4.65  | 0.15 | 0.16 | 1.08  | 0.831311 | 0.336417 | 0.931682 | 0.583831 |
| MmugDNA.14385.1.S1_at   | MmugDNA.14385.1 | 3.5   | 3.53  | 0.07 | 0.16 | -1.02 | 0.584375 | 0.426791 | 0.80696  | 0.648883 |
| MmugDNA.14387.1.S1_at   | MmugDNA.14387.1 | 12.76 | 12.45 | 0.13 | 0.13 | 1.24  | 0.082139 | 0.073553 | 0.433362 | 0.316874 |
| MmugDNA.14388.1.S1_at   | MmugDNA.14388.1 | 9.18  | 9.33  | 0.17 | 0.3  | -1.11 | 0.684229 | 0.783216 | 0.858637 | 0.874547 |
| MmugDNA.14394.1.S1_at   | MmugDNA.14394.1 | 11.86 | 11.28 | 0.19 | 0    | 1.5   | 0.013482 | 0.001493 | 0.24708  | 0.058967 |

|                         |                 |       |       |      |      |        |          |          |          |          |
|-------------------------|-----------------|-------|-------|------|------|--------|----------|----------|----------|----------|
| MmugDNA.14396.1.S1_at   | MmugDNA.14396.1 | 9.05  | 8.34  | 0.14 | 0.09 | 1.63   | 0.002014 | 0.002542 | 0.155636 | 0.074521 |
| MmugDNA.144.1.S1_at     | MmugDNA.144.1   | 10.55 | 10.78 | 0.15 | 0.19 | -1.17  | 0.251398 | 0.276828 | 0.600793 | 0.540757 |
| MmugDNA.14400.1.S1_at   | MmugDNA.14400.1 | 10.85 | 10.93 | 0.1  | 0.14 | -1.06  | 0.824307 | 0.938097 | 0.928728 | 0.964929 |
| MmugDNA.14401.1.S1_at   | MmugDNA.14401.1 | 7.29  | 6.99  | 0.18 | 0.65 | 1.23   | 0.445123 | 0.648171 | 0.727444 | 0.794002 |
| MmugDNA.14404.1.S1_at   | MmugDNA.14404.1 | 5.83  | 8.94  | 1.79 | 3.01 | -8.59  | 0.353827 | 0.260457 | 0.670266 | 0.527006 |
| MmugDNA.14407.1.S1_at   | MmugDNA.14407.1 | 7.93  | 7.88  | 0.08 | 0.34 | 1.03   | 0.295737 | 0.229905 | 0.632091 | 0.501802 |
| MmugDNA.14408.1.S1_at   | MmugDNA.14408.1 | 9.94  | 9.26  | 0.28 | 0.21 | 1.6    | 0.034612 | 0.028043 | 0.333297 | 0.208977 |
| MmugDNA.14410.1.S1_at   | MmugDNA.14410.1 | 7.84  | 7.71  | 0.15 | 0.27 | 1.1    | 0.760146 | 0.880223 | 0.898845 | 0.931571 |
| MmugDNA.14412.1.S1_at   | MmugDNA.14412.1 | 5.95  | 6.19  | 0.33 | 0.27 | -1.19  | 0.365362 | 0.062537 | 0.678238 | 0.296906 |
| MmugDNA.14416.1.S1_at   | MmugDNA.14416.1 | 9.69  | 9.64  | 0.36 | 1    | 1.04   | 0.493178 | 0.666146 | 0.756013 | 0.804415 |
| MmugDNA.14438.1.S1_at   | MmugDNA.14438.1 | 9     | 8.77  | 0.23 | 1.05 | 1.17   | 0.624139 | 0.062904 | 0.828178 | 0.297495 |
| MmugDNA.14440.1.S1_at   | MmugDNA.14440.1 | 10.82 | 11.25 | 0.11 | 0.18 | -1.34  | 0.019087 | 0.011388 | 0.273018 | 0.13824  |
| MmugDNA.14443.1.S1_at   | MmugDNA.14443.1 | 3.53  | 3.39  | 0.14 | 0.54 | 1.1    | 0.76128  | 0.925917 | 0.899431 | 0.958059 |
| MmugDNA.14453.1.S1_at   | MmugDNA.14453.1 | 9.88  | 7.76  | 0.13 | 0.82 | 4.35   | 0.011664 | 0.004447 | 0.237051 | 0.092958 |
| MmugDNA.14455.1.S1_at   | MmugDNA.14455.1 | 4.75  | 4.94  | 0.07 | 0.31 | -1.15  | 0.113945 | 0.177203 | 0.47735  | 0.453647 |
| MmugDNA.14456.1.S1_at   | MmugDNA.14456.1 | 5.09  | 5.47  | 0.1  | 1.89 | -1.3   | 0.561204 | 0.74182  | 0.794725 | 0.850509 |
| MmugDNA.14458.1.S1_at   | MmugDNA.14458.1 | 9.19  | 8.76  | 0.15 | 0.39 | 1.35   | 0.094247 | 0.106627 | 0.45175  | 0.36916  |
| MmugDNA.14459.1.S1_at   | MmugDNA.14459.1 | 8.82  | 8.18  | 0.3  | 0.2  | 1.56   | 0.06691  | 0.048769 | 0.406999 | 0.265793 |
| MmugDNA.14461.1.S1_at   | MmugDNA.14461.1 | 5.05  | 4.97  | 0.11 | 0.1  | 1.06   | 0.859143 | 0.35147  | 0.943112 | 0.595084 |
| MmugDNA.14463.1.S1_at   | MmugDNA.14463.1 | 5.57  | 6.44  | 0.14 | 0.52 | -1.83  | 0.103921 | 0.097023 | 0.463945 | 0.354531 |
| MmugDNA.14464.1.S1_at   | MmugDNA.14464.1 | 11.11 | 11.36 | 0.05 | 0.24 | -1.19  | 0.120881 | 0.032093 | 0.48574  | 0.221745 |
| MmugDNA.14465.1.S1_at   | MmugDNA.14465.1 | 6.76  | 6.61  | 0.27 | 0.53 | 1.11   | 0.827784 | 0.672902 | 0.930092 | 0.80887  |
| MmugDNA.14480.1.S1_at   | MmugDNA.14480.1 | 10.08 | 9.72  | 0.07 | 0.67 | 1.28   | 0.635054 | 0.585611 | 0.834812 | 0.752934 |
| MmugDNA.14483.1.S1_at   | MmugDNA.14483.1 | 10.89 | 11.34 | 0.17 | 0.22 | -1.37  | 0.038475 | 0.027161 | 0.344376 | 0.205893 |
| MmugDNA.14484.1.S1_at   | MmugDNA.14484.1 | 11.25 | 10.97 | 0.16 | 0.17 | 1.22   | 0.24607  | 0.30414  | 0.597459 | 0.561492 |
| MmugDNA.14499.1.S1_at   | MmugDNA.14499.1 | 8.57  | 8.04  | 0.28 | 0.41 | 1.44   | 0.281276 | 0.50807  | 0.622129 | 0.703358 |
| MmugDNA.1450.1.S1_at    | MmugDNA.1450.1  | 7.92  | 8.44  | 0.48 | 0.83 | -1.44  | 0.370681 | 0.160373 | 0.681582 | 0.436528 |
| MmugDNA.14501.1.S1_at   | MmugDNA.14501.1 | 10.94 | 10.62 | 0.18 | 0.16 | 1.25   | 0.073941 | 0.077761 | 0.419542 | 0.323917 |
| MmugDNA.14502.1.S1_s_at | MmugDNA.14502.1 | 9.64  | 9.46  | 0.07 | 0.18 | 1.13   | 0.108417 | 0.210731 | 0.469638 | 0.48478  |
| MmugDNA.14505.1.S1_at   | MmugDNA.14505.1 | 8.4   | 8.47  | 0.07 | 0.61 | -1.05  | 0.99586  | 0.614304 | 0.998446 | 0.771206 |
| MmugDNA.14506.1.S1_at   | MmugDNA.14506.1 | 11.64 | 11.26 | 0.11 | 0.11 | 1.31   | 0.02418  | 0.0153   | 0.294535 | 0.157071 |
| MmugDNA.14507.1.S1_at   | MmugDNA.14507.1 | 9.56  | 9.05  | 0.16 | 0.21 | 1.42   | 0.016891 | 0.009802 | 0.266107 | 0.130166 |
| MmugDNA.14520.1.S1_at   | MmugDNA.14520.1 | 4.28  | 4.22  | 0.29 | 0.06 | 1.04   | 0.254218 | 0.21319  | 0.602339 | 0.487069 |
| MmugDNA.14527.1.S1_at   | MmugDNA.14527.1 | 4.61  | 4.65  | 0.06 | 0.02 | -1.03  | 0.931615 | 0.139319 | 0.973548 | 0.412518 |
| MmugDNA.1453.1.S1_at    | MmugDNA.1453.1  | 9.3   | 9.73  | 0.13 | 0.13 | -1.35  | 0.009434 | 0.008145 | 0.225052 | 0.119736 |
| MmugDNA.14530.1.S1_at   | MmugDNA.14530.1 | 10.88 | 11.02 | 0.25 | 0.09 | -1.1   | 0.404221 | 0.376248 | 0.7026   | 0.614089 |
| MmugDNA.14531.1.S1_at   | MmugDNA.14531.1 | 6.78  | 6.77  | 0.16 | 0.12 | 1.01   | 0.530545 | 0.184087 | 0.776893 | 0.460306 |
| MmugDNA.14532.1.S1_at   | MmugDNA.14532.1 | 5.17  | 5.31  | 0.12 | 0.08 | -1.11  | 0.115847 | 0.105258 | 0.479325 | 0.366999 |
| MmugDNA.1454.1.S1_at    | MmugDNA.1454.1  | 9.39  | 8.97  | 0.18 | 0.39 | 1.34   | 0.125244 | 0.142308 | 0.49131  | 0.415848 |
| MmugDNA.14543.1.S1_at   | MmugDNA.14543.1 | 11.4  | 10.71 | 0.32 | 1.14 | 1.61   | 0.448779 | 0.449719 | 0.729823 | 0.665204 |
| MmugDNA.14544.1.S1_at   | MmugDNA.14544.1 | 10.03 | 13.37 | 1.32 | 2.03 | -10.09 | 0.345344 | 0.278128 | 0.665135 | 0.541783 |

|                         |                 |       |       |      |      |        |          |          |          |          |
|-------------------------|-----------------|-------|-------|------|------|--------|----------|----------|----------|----------|
| MmugDNA.14546.1.S1_at   | MmugDNA.14546.1 | 6.83  | 6.95  | 0.09 | 0.12 | -1.09  | 0.117354 | 0.105055 | 0.481484 | 0.366736 |
| MmugDNA.14551.1.S1_at   | MmugDNA.14551.1 | 7.58  | 12.45 | 1.61 | 3.87 | -29.06 | 0.404939 | 0.214035 | 0.703082 | 0.487633 |
| MmugDNA.14555.1.S1_at   | MmugDNA.14555.1 | 4.79  | 5.07  | 0.16 | 0.29 | -1.22  | 0.536479 | 0.74768  | 0.77949  | 0.853234 |
| MmugDNA.1456.1.S1_at    | MmugDNA.1456.1  | 9.65  | 8.98  | 0.06 | 0.31 | 1.59   | 0.034858 | 0.019967 | 0.333988 | 0.17752  |
| MmugDNA.14562.1.S1_at   | MmugDNA.14562.1 | 10.2  | 9.71  | 0.04 | 0.11 | 1.4    | 0.001882 | 0.000195 | 0.155636 | 0.030949 |
| MmugDNA.14563.1.S1_at   | MmugDNA.14563.1 | 5.6   | 5.76  | 0.07 | 0.1  | -1.12  | 0.104291 | 0.078801 | 0.464351 | 0.325757 |
| MmugDNA.14571.1.S1_s_at | MmugDNA.14571.1 | 10.23 | 9.55  | 0.15 | 0.08 | 1.61   | 0.004601 | 0.000146 | 0.1844   | 0.029509 |
| MmugDNA.14572.1.S1_at   | MmugDNA.14572.1 | 11.65 | 11.09 | 0.13 | 0.07 | 1.48   | 0.00123  | 0.000182 | 0.145267 | 0.030511 |
| MmugDNA.14573.1.S1_at   | MmugDNA.14573.1 | 7.82  | 7.39  | 0.22 | 0.47 | 1.35   | 0.204923 | 0.206513 | 0.567457 | 0.480571 |
| MmugDNA.14577.1.S1_at   | MmugDNA.14577.1 | 12.99 | 13.22 | 0.03 | 0.23 | -1.17  | 0.187906 | 0.22125  | 0.550964 | 0.49459  |
| MmugDNA.14583.1.S1_at   | MmugDNA.14583.1 | 7.79  | 7.81  | 0.09 | 0.02 | -1.01  | 0.49209  | 0.655123 | 0.755441 | 0.798309 |
| MmugDNA.14588.1.S1_at   | MmugDNA.14588.1 | 11.82 | 11.73 | 0.03 | 0.21 | 1.06   | 0.88308  | 0.884659 | 0.952961 | 0.934321 |
| MmugDNA.14592.1.S1_at   | MmugDNA.14592.1 | 11.8  | 11.68 | 0.29 | 0.13 | 1.08   | 0.608255 | 0.855915 | 0.819872 | 0.917744 |
| MmugDNA.14593.1.S1_at   | MmugDNA.14593.1 | 11.58 | 9.78  | 0.5  | 0.27 | 3.47   | 0.004019 | 0.001205 | 0.181739 | 0.054389 |
| MmugDNA.146.1.S1_at     | MmugDNA.146.1   | 5.9   | 5.89  | 0.16 | 0.1  | 1.01   | 0.32856  | 0.437224 | 0.654375 | 0.656606 |
| MmugDNA.1460.1.S1_at    | MmugDNA.1460.1  | 10.34 | 9.48  | 0.68 | 1.09 | 1.81   | 0.349736 | 0.385745 | 0.667941 | 0.621079 |
| MmugDNA.14601.1.S1_at   | MmugDNA.14601.1 | 12.13 | 12.35 | 0.21 | 0.22 | -1.17  | 0.685487 | 0.287945 | 0.859154 | 0.549227 |
| MmugDNA.14609.1.S1_at   | MmugDNA.14609.1 | 7.21  | 6.75  | 1.19 | 2.06 | 1.38   | 0.588716 | 0.733488 | 0.809114 | 0.845679 |
| MmugDNA.14617.1.S1_at   | MmugDNA.14617.1 | 8.57  | 8.78  | 0.37 | 1.05 | -1.16  | 0.645845 | 0.577842 | 0.840534 | 0.748148 |
| MmugDNA.14617.1.S1_s_at | MmugDNA.14617.1 | 8.2   | 8.56  | 0.49 | 1.03 | -1.28  | 0.501126 | 0.374903 | 0.759789 | 0.613144 |
| MmugDNA.14620.1.S1_at   | MmugDNA.14620.1 | 12.12 | 12.2  | 0.09 | 0.29 | -1.06  | 0.657451 | 0.043789 | 0.845998 | 0.25387  |
| MmugDNA.14623.1.S1_at   | MmugDNA.14623.1 | 9.85  | 9.63  | 0.28 | 0.36 | 1.16   | 0.836833 | 0.955407 | 0.934027 | 0.974655 |
| MmugDNA.14626.1.S1_at   | MmugDNA.14626.1 | 10.31 | 10.31 | 0.07 | 0.28 | -1     | 0.782661 | 0.881934 | 0.909285 | 0.932674 |
| MmugDNA.14631.1.S1_at   | MmugDNA.14631.1 | 11.42 | 10.53 | 0.04 | 0.23 | 1.86   | 0.002678 | 0.000686 | 0.164386 | 0.044166 |
| MmugDNA.14637.1.S1_at   | MmugDNA.14637.1 | 6.74  | 6.15  | 0.72 | 0.35 | 1.5    | 0.802349 | 0.065357 | 0.918464 | 0.301409 |
| MmugDNA.14644.1.S1_at   | MmugDNA.14644.1 | 4.91  | 4.84  | 0.18 | 0.21 | 1.05   | 0.938995 | 0.294758 | 0.976761 | 0.554345 |
| MmugDNA.1465.1.S1_at    | MmugDNA.1465.1  | 3.88  | 4.71  | 0.09 | 0.57 | -1.77  | 0.131809 | 0.09664  | 0.498041 | 0.354145 |
| MmugDNA.14651.1.S1_at   | MmugDNA.14651.1 | 6.17  | 8.87  | 0.75 | 1.04 | -6.49  | 0.039935 | 0.036913 | 0.3483   | 0.236593 |
| MmugDNA.14656.1.S1_at   | MmugDNA.14656.1 | 8.04  | 7     | 0.21 | 1.08 | 2.06   | 0.540176 | 0.069046 | 0.781618 | 0.309017 |
| MmugDNA.14658.1.S1_at   | MmugDNA.14658.1 | 10.44 | 10.09 | 0.04 | 0.4  | 1.28   | 0.633235 | 0.25388  | 0.833566 | 0.522233 |
| MmugDNA.14659.1.S1_at   | MmugDNA.14659.1 | 10.29 | 8.65  | 0.26 | 0.02 | 3.12   | 0.000399 | 0.000005 | 0.12978  | 0.015647 |
| MmugDNA.14660.1.S1_at   | MmugDNA.14660.1 | 11.9  | 11.75 | 0.18 | 0.06 | 1.11   | 0.802112 | 0.754564 | 0.918358 | 0.857242 |
| MmugDNA.14670.1.S1_at   | MmugDNA.14670.1 | 6.6   | 6.84  | 0.19 | 0.27 | -1.18  | 0.124105 | 0.146772 | 0.489857 | 0.420799 |
| MmugDNA.14671.1.S1_at   | MmugDNA.14671.1 | 10.27 | 9.86  | 0.02 | 0.29 | 1.33   | 0.044524 | 0.036669 | 0.358786 | 0.235973 |
| MmugDNA.14673.1.S1_at   | MmugDNA.14673.1 | 8.65  | 8.79  | 0.25 | 0.46 | -1.1   | 0.42242  | 0.608661 | 0.713459 | 0.767185 |
| MmugDNA.14675.1.S1_at   | MmugDNA.14675.1 | 12.71 | 12.36 | 0.05 | 0.73 | 1.28   | 0.14174  | 0.168447 | 0.509159 | 0.445092 |
| MmugDNA.14678.1.S1_at   | MmugDNA.14678.1 | 6.29  | 6.22  | 0.02 | 0.09 | 1.05   | 0.306619 | 0.027726 | 0.639593 | 0.207965 |
| MmugDNA.14684.1.S1_at   | MmugDNA.14684.1 | 11.09 | 11.32 | 0.09 | 0.14 | -1.18  | 0.050543 | 0.025848 | 0.374643 | 0.201605 |
| MmugDNA.14686.1.S1_s_at | MmugDNA.14686.1 | 12.09 | 11.9  | 0.1  | 0.13 | 1.14   | 0.054318 | 0.003766 | 0.381851 | 0.087404 |
| MmugDNA.14691.1.S1_at   | MmugDNA.14691.1 | 8.19  | 9.59  | 0.77 | 1.12 | -2.63  | 0.230305 | 0.117068 | 0.587222 | 0.384494 |
| MmugDNA.147.1.S1_at     | MmugDNA.147.1   | 3.37  | 3.18  | 0.08 | 0.08 | 1.13   | 0.046353 | 0.074247 | 0.363009 | 0.318046 |

|                         |                 |       |       |      |      |       |          |          |          |          |
|-------------------------|-----------------|-------|-------|------|------|-------|----------|----------|----------|----------|
| MmugDNA.14700.1.S1_at   | MmugDNA.14700.1 | 8.01  | 7.72  | 0.21 | 0.33 | 1.22  | 0.101949 | 0.183542 | 0.461337 | 0.459681 |
| MmugDNA.14702.1.S1_at   | MmugDNA.14702.1 | 8.86  | 9.09  | 0.14 | 0.13 | -1.18 | 0.213427 | 0.024941 | 0.573606 | 0.197799 |
| MmugDNA.14704.1.S1_at   | MmugDNA.14704.1 | 10.74 | 11.05 | 0.14 | 0.11 | -1.24 | 0.035494 | 0.021697 | 0.336631 | 0.184333 |
| MmugDNA.14711.1.S1_at   | MmugDNA.14711.1 | 7.86  | 6.7   | 0.38 | 1.55 | 2.23  | 0.229716 | 0.190926 | 0.586918 | 0.466269 |
| MmugDNA.14712.1.S1_at   | MmugDNA.14712.1 | 7.01  | 8.44  | 0.6  | 0.79 | -2.7  | 0.056212 | 0.029805 | 0.386006 | 0.214318 |
| MmugDNA.1472.1.S1_at    | MmugDNA.1472.1  | 9.56  | 9.53  | 1    | 0.97 | 1.02  | 0.885055 | 0.604106 | 0.953961 | 0.764496 |
| MmugDNA.1472.1.S1_s_at  | MmugDNA.1472.1  | 9.03  | 8.8   | 1.15 | 1.05 | 1.18  | 0.830741 | 0.650517 | 0.93155  | 0.795663 |
| MmugDNA.14720.1.S1_at   | MmugDNA.14720.1 | 3.4   | 3.19  | 0.26 | 0.19 | 1.16  | 0.666966 | 0.866927 | 0.850752 | 0.924385 |
| MmugDNA.14721.1.S1_at   | MmugDNA.14721.1 | 6.65  | 7.63  | 0.42 | 0.93 | -1.96 | 0.163632 | 0.127163 | 0.527992 | 0.397922 |
| MmugDNA.14722.1.S1_at   | MmugDNA.14722.1 | 5.47  | 5.7   | 0.47 | 0.11 | -1.17 | 0.136663 | 0.159804 | 0.503815 | 0.435871 |
| MmugDNA.14725.1.S1_at   | MmugDNA.14725.1 | 6.07  | 5.32  | 0.65 | 0.35 | 1.68  | 0.242298 | 0.335627 | 0.594307 | 0.583403 |
| MmugDNA.14726.1.S1_at   | MmugDNA.14726.1 | 7.02  | 7     | 0.17 | 0.14 | 1.01  | 0.653174 | 0.656408 | 0.844028 | 0.799082 |
| MmugDNA.14729.1.S1_at   | MmugDNA.14729.1 | 6.3   | 6.41  | 0.28 | 0.45 | -1.08 | 0.185187 | 0.201368 | 0.54869  | 0.47589  |
| MmugDNA.14730.1.S1_at   | MmugDNA.14730.1 | 4.56  | 4.91  | 0.42 | 0.17 | -1.28 | 0.745206 | 0.498987 | 0.891027 | 0.69793  |
| MmugDNA.14733.1.S1_at   | MmugDNA.14733.1 | 9.45  | 9.92  | 0.24 | 0.96 | -1.38 | 0.42189  | 0.334942 | 0.713215 | 0.58275  |
| MmugDNA.14737.1.S1_at   | MmugDNA.14737.1 | 7.57  | 8.05  | 0.57 | 0.35 | -1.39 | 0.331256 | 0.384576 | 0.656225 | 0.62023  |
| MmugDNA.14743.1.S1_at   | MmugDNA.14743.1 | 5.17  | 5.22  | 0.14 | 0.14 | -1.03 | 0.330605 | 0.391449 | 0.655888 | 0.625086 |
| MmugDNA.1475.1.S1_at    | MmugDNA.1475.1  | 6.57  | 6.19  | 0.19 | 0.34 | 1.3   | 0.153795 | 0.074395 | 0.518459 | 0.318058 |
| MmugDNA.14753.1.S1_at   | MmugDNA.14753.1 | 10.88 | 10.87 | 0.04 | 0.41 | 1     | 0.995074 | 0.966667 | 0.998246 | 0.98148  |
| MmugDNA.14762.1.S1_at   | MmugDNA.14762.1 | 5.32  | 5.7   | 0.22 | 0.22 | -1.3  | 0.355996 | 0.027561 | 0.671343 | 0.207319 |
| MmugDNA.14765.1.S1_at   | MmugDNA.14765.1 | 12.3  | 12.6  | 0.13 | 0.43 | -1.24 | 0.23756  | 0.301987 | 0.591131 | 0.559929 |
| MmugDNA.14767.1.S1_at   | MmugDNA.14767.1 | 7.7   | 5.9   | 0.62 | 0.14 | 3.48  | 0.008707 | 0.015667 | 0.220503 | 0.158598 |
| MmugDNA.14769.1.S1_at   | MmugDNA.14769.1 | 9.32  | 9.38  | 0.34 | 0.29 | -1.04 | 0.456926 | 0.306958 | 0.734612 | 0.563427 |
| MmugDNA.14770.1.S1_at   | MmugDNA.14770.1 | 6.32  | 7.84  | 0.36 | 0.95 | -2.86 | 0.061671 | 0.012038 | 0.396574 | 0.142019 |
| MmugDNA.14772.1.S1_at   | MmugDNA.14772.1 | 10.52 | 9.47  | 0.22 | 0.6  | 2.08  | 0.046204 | 0.013803 | 0.362615 | 0.150578 |
| MmugDNA.14773.1.S1_at   | MmugDNA.14773.1 | 10.24 | 8.88  | 0.06 | 0.75 | 2.57  | 0.105116 | 0.103354 | 0.46558  | 0.36423  |
| MmugDNA.14778.1.S1_at   | MmugDNA.14778.1 | 11.3  | 11.18 | 0.19 | 0.2  | 1.08  | 0.099054 | 0.06261  | 0.458776 | 0.297022 |
| MmugDNA.14791.1.S1_at   | MmugDNA.14791.1 | 6.5   | 6.17  | 0.09 | 0.31 | 1.26  | 0.164593 | 0.177171 | 0.528546 | 0.453631 |
| MmugDNA.14803.1.S1_s_at | MmugDNA.14803.1 | 10.56 | 9.81  | 0.13 | 0.39 | 1.69  | 0.04459  | 0.010102 | 0.358786 | 0.131859 |
| MmugDNA.1481.1.S1_at    | MmugDNA.1481.1  | 4.83  | 5.04  | 0.14 | 0.09 | -1.16 | 0.121314 | 0.081722 | 0.48598  | 0.330011 |
| MmugDNA.14810.1.S1_at   | MmugDNA.14810.1 | 11.55 | 11.66 | 0.13 | 0.15 | -1.08 | 0.187894 | 0.384739 | 0.550964 | 0.620363 |
| MmugDNA.14815.1.S1_at   | MmugDNA.14815.1 | 3.56  | 3.6   | 0.02 | 0.2  | -1.03 | 0.673053 | 0.740402 | 0.853342 | 0.849642 |
| MmugDNA.14817.1.S1_at   | MmugDNA.14817.1 | 12.93 | 12.92 | 0.04 | 0.06 | 1     | 0.392859 | 0.098652 | 0.694841 | 0.356743 |
| MmugDNA.14819.1.S1_at   | MmugDNA.14819.1 | 12.18 | 11.51 | 0.27 | 0.11 | 1.58  | 0.008463 | 0.003673 | 0.218339 | 0.086568 |
| MmugDNA.14821.1.S1_at   | MmugDNA.14821.1 | 2.86  | 3.24  | 0.12 | 0.19 | -1.3  | 0.140892 | 0.223735 | 0.508448 | 0.496672 |
| MmugDNA.14822.1.S1_at   | MmugDNA.14822.1 | 9.45  | 8.83  | 0.07 | 0.24 | 1.53  | 0.016642 | 0.009667 | 0.26475  | 0.129379 |
| MmugDNA.14824.1.S1_at   | MmugDNA.14824.1 | 6.47  | 5.2   | 0.83 | 0.45 | 2.42  | 0.277146 | 0.248296 | 0.619302 | 0.5176   |
| MmugDNA.14825.1.S1_at   | MmugDNA.14825.1 | 5.81  | 5.9   | 0.16 | 0.09 | -1.06 | 0.944541 | 0.136709 | 0.978852 | 0.409259 |
| MmugDNA.14826.1.S1_at   | MmugDNA.14826.1 | 9.24  | 9.06  | 0.1  | 0.05 | 1.13  | 0.03232  | 0.028143 | 0.324641 | 0.209306 |
| MmugDNA.1483.1.S1_at    | MmugDNA.1483.1  | 8.2   | 8.29  | 0.17 | 0.87 | -1.06 | 0.920525 | 0.965657 | 0.969046 | 0.980751 |
| MmugDNA.14830.1.S1_at   | MmugDNA.14830.1 | 4.96  | 5.43  | 0.19 | 0.29 | -1.39 | 0.127978 | 0.143151 | 0.494126 | 0.417029 |

|                         |                 |       |       |      |      |       |          |          |          |          |
|-------------------------|-----------------|-------|-------|------|------|-------|----------|----------|----------|----------|
| MmugDNA.14831.1.S1_at   | MmugDNA.14831.1 | 6.75  | 6.9   | 0.13 | 0.12 | -1.11 | 0.223068 | 0.201953 | 0.581684 | 0.476412 |
| MmugDNA.14832.1.S1_at   | MmugDNA.14832.1 | 12.97 | 13.07 | 0.08 | 0.23 | -1.07 | 0.693123 | 0.074525 | 0.863807 | 0.318173 |
| MmugDNA.14835.1.S1_at   | MmugDNA.14835.1 | 11.29 | 11.66 | 0.06 | 0.7  | -1.29 | 0.250993 | 0.228528 | 0.600488 | 0.500752 |
| MmugDNA.14838.1.S1_at   | MmugDNA.14838.1 | 5.21  | 5.04  | 0.28 | 0.11 | 1.13  | 0.643481 | 0.289392 | 0.839402 | 0.550431 |
| MmugDNA.14839.1.S1_at   | MmugDNA.14839.1 | 7.32  | 6.82  | 0.54 | 0.24 | 1.42  | 0.259643 | 0.294462 | 0.606728 | 0.554212 |
| MmugDNA.14842.1.S1_at   | MmugDNA.14842.1 | 6.67  | 5.49  | 0.75 | 0.51 | 2.27  | 0.14259  | 0.127888 | 0.509727 | 0.398825 |
| MmugDNA.14844.1.S1_at   | MmugDNA.14844.1 | 12.62 | 12.57 | 0.08 | 0.18 | 1.04  | 0.541536 | 0.252593 | 0.782728 | 0.521145 |
| MmugDNA.14849.1.S1_at   | MmugDNA.14849.1 | 10.02 | 10.2  | 0.13 | 0.11 | -1.13 | 0.139013 | 0.315432 | 0.506234 | 0.568949 |
| MmugDNA.1485.1.S1_at    | MmugDNA.1485.1  | 10.6  | 12.14 | 0.22 | 1.73 | -2.91 | 0.295923 | 0.226931 | 0.632176 | 0.499276 |
| MmugDNA.14852.1.S1_at   | MmugDNA.14852.1 | 4.6   | 4.63  | 0.19 | 0.04 | -1.02 | 0.812481 | 0.696593 | 0.923656 | 0.823774 |
| MmugDNA.14853.1.S1_at   | MmugDNA.14853.1 | 5.76  | 6.01  | 0.06 | 0.18 | -1.19 | 0.264837 | 0.341757 | 0.61058  | 0.587862 |
| MmugDNA.14857.1.S1_at   | MmugDNA.14857.1 | 4.6   | 4.7   | 0.13 | 0.25 | -1.07 | 0.61234  | 0.462864 | 0.822151 | 0.674149 |
| MmugDNA.14858.1.S1_at   | MmugDNA.14858.1 | 4.01  | 4.06  | 0.15 | 0.05 | -1.04 | 0.924619 | 0.768953 | 0.970804 | 0.865764 |
| MmugDNA.14860.1.S1_at   | MmugDNA.14860.1 | 11.66 | 11.04 | 0.04 | 0.51 | 1.54  | 0.087163 | 0.090761 | 0.441153 | 0.345227 |
| MmugDNA.14861.1.S1_at   | MmugDNA.14861.1 | 12.2  | 12.45 | 0.07 | 0.07 | -1.19 | 0.006755 | 0.002476 | 0.20158  | 0.073576 |
| MmugDNA.14862.1.S1_at   | MmugDNA.14862.1 | 5.85  | 6.69  | 0.95 | 0.93 | -1.8  | 0.676991 | 0.166783 | 0.855271 | 0.443274 |
| MmugDNA.14866.1.S1_at   | MmugDNA.14866.1 | 11.44 | 10.91 | 0.14 | 0.41 | 1.44  | 0.150829 | 0.108661 | 0.515488 | 0.372171 |
| MmugDNA.14866.1.S1_s_at | MmugDNA.14866.1 | 11.75 | 11.28 | 0.15 | 0.38 | 1.38  | 0.165215 | 0.131039 | 0.529274 | 0.40306  |
| MmugDNA.14872.1.S1_at   | MmugDNA.14872.1 | 7.11  | 7.36  | 0.41 | 0.16 | -1.19 | 0.964697 | 0.591617 | 0.986359 | 0.757155 |
| MmugDNA.14876.1.S1_at   | MmugDNA.14876.1 | 5.32  | 5.3   | 0.26 | 0.46 | 1.02  | 0.478529 | 0.254745 | 0.747296 | 0.523015 |
| MmugDNA.14886.1.S1_at   | MmugDNA.14886.1 | 9.93  | 9.29  | 0.15 | 0.77 | 1.55  | 0.19785  | 0.20424  | 0.560852 | 0.478541 |
| MmugDNA.14893.1.S1_at   | MmugDNA.14893.1 | 11.92 | 11.5  | 0.04 | 0.04 | 1.33  | 0.000153 | 0.00002  | 0.112653 | 0.019635 |
| MmugDNA.14897.1.S1_at   | MmugDNA.14897.1 | 12.48 | 13.01 | 0.02 | 0.05 | -1.45 | 0.000044 | 0.0003   | 0.112653 | 0.034892 |
| MmugDNA.14899.1.S1_at   | MmugDNA.14899.1 | 4.76  | 4.89  | 0.3  | 0.1  | -1.1  | 0.851666 | 0.579868 | 0.940337 | 0.749321 |
| MmugDNA.14908.1.S1_at   | MmugDNA.14908.1 | 6.26  | 6.37  | 0.11 | 0.15 | -1.08 | 0.362001 | 0.241925 | 0.675605 | 0.512489 |
| MmugDNA.14909.1.S1_at   | MmugDNA.14909.1 | 8.71  | 7.83  | 0.52 | 0.49 | 1.84  | 0.111896 | 0.099736 | 0.474378 | 0.358288 |
| MmugDNA.14912.1.S1_at   | MmugDNA.14912.1 | 5.4   | 4.97  | 0.77 | 0.93 | 1.35  | 0.654241 | 0.395423 | 0.844551 | 0.627474 |
| MmugDNA.14912.1.S1_s_at | MmugDNA.14912.1 | 5.01  | 4.99  | 0.17 | 0.04 | 1.02  | 0.953831 | 0.784464 | 0.982872 | 0.875181 |
| MmugDNA.14913.1.S1_at   | MmugDNA.14913.1 | 13.23 | 12.38 | 0.21 | 0.1  | 1.8   | 0.003965 | 0.000403 | 0.181455 | 0.037471 |
| MmugDNA.14920.1.S1_at   | MmugDNA.14920.1 | 7.33  | 7.37  | 0.03 | 0.26 | -1.03 | 0.6179   | 0.517281 | 0.824923 | 0.709435 |
| MmugDNA.14925.1.S1_at   | MmugDNA.14925.1 | 5.77  | 6.51  | 0.3  | 0.34 | -1.68 | 0.025396 | 0.021076 | 0.299142 | 0.181869 |
| MmugDNA.14929.1.S1_at   | MmugDNA.14929.1 | 10.51 | 10.98 | 0.12 | 0.21 | -1.39 | 0.041914 | 0.02992  | 0.353435 | 0.214643 |
| MmugDNA.1493.1.S1_at    | MmugDNA.1493.1  | 6.6   | 6.38  | 0.3  | 0.28 | 1.16  | 0.955505 | 0.535354 | 0.983289 | 0.720907 |
| MmugDNA.1494.1.S1_at    | MmugDNA.1494.1  | 11.74 | 11.98 | 0.21 | 0.06 | -1.18 | 0.046902 | 0.033103 | 0.364198 | 0.225221 |
| MmugDNA.14944.1.S1_at   | MmugDNA.14944.1 | 9.75  | 10.01 | 0.11 | 0.23 | -1.2  | 0.058998 | 0.040835 | 0.390921 | 0.246981 |
| MmugDNA.14944.1.S1_s_at | MmugDNA.14944.1 | 7.72  | 8.04  | 0.24 | 0.2  | -1.25 | 0.067005 | 0.087855 | 0.407016 | 0.341218 |
| MmugDNA.14945.1.S1_at   | MmugDNA.14945.1 | 12.85 | 12.8  | 0.05 | 0.11 | 1.04  | 0.794592 | 0.813576 | 0.914727 | 0.892313 |
| MmugDNA.14946.1.S1_at   | MmugDNA.14946.1 | 8.1   | 8.48  | 0.23 | 0.38 | -1.3  | 0.220933 | 0.130458 | 0.57985  | 0.4023   |
| MmugDNA.14947.1.S1_at   | MmugDNA.14947.1 | 10.81 | 10.05 | 0.34 | 0.36 | 1.7   | 0.030284 | 0.016602 | 0.317775 | 0.163117 |
| MmugDNA.14949.1.S1_at   | MmugDNA.14949.1 | 3.3   | 3.06  | 0.2  | 0.11 | 1.18  | 0.091229 | 0.173136 | 0.447111 | 0.449765 |
| MmugDNA.14950.1.S1_at   | MmugDNA.14950.1 | 12.63 | 12.77 | 0.04 | 0.2  | -1.1  | 0.996334 | 0.817771 | 0.998506 | 0.894834 |



|                         |                 |       |       |      |      |       |          |          |          |          |
|-------------------------|-----------------|-------|-------|------|------|-------|----------|----------|----------|----------|
| MmugDNA.14951.1.S1_s_at | MmugDNA.14951.1 | 11.76 | 11.55 | 0.11 | 0.02 | 1.16  | 0.015499 | 0.008952 | 0.259039 | 0.125082 |
| MmugDNA.14954.1.S1_at   | MmugDNA.14954.1 | 10.49 | 10.47 | 0.15 | 0.17 | 1.01  | 0.49196  | 0.691824 | 0.75541  | 0.82074  |
| MmugDNA.14955.1.S1_at   | MmugDNA.14955.1 | 9.17  | 8.5   | 0.41 | 0.35 | 1.59  | 0.10534  | 0.00311  | 0.465928 | 0.081305 |
| MmugDNA.14959.1.S1_at   | MmugDNA.14959.1 | 11.49 | 10.83 | 0.1  | 0.5  | 1.58  | 0.032742 | 0.014922 | 0.326023 | 0.155285 |
| MmugDNA.14962.1.S1_at   | MmugDNA.14962.1 | 10.85 | 9.86  | 0.17 | 0.59 | 1.98  | 0.057465 | 0.035136 | 0.388505 | 0.231645 |
| MmugDNA.14964.1.S1_at   | MmugDNA.14964.1 | 11.3  | 10.57 | 0.33 | 1.28 | 1.66  | 0.431664 | 0.377952 | 0.718606 | 0.615264 |
| MmugDNA.14967.1.S1_at   | MmugDNA.14967.1 | 9.01  | 9.12  | 0.39 | 0.28 | -1.08 | 0.438498 | 0.587113 | 0.72304  | 0.75402  |
| MmugDNA.14970.1.S1_at   | MmugDNA.14970.1 | 4.81  | 4.82  | 0.11 | 0.05 | -1.01 | 0.806639 | 0.667674 | 0.920793 | 0.805472 |
| MmugDNA.14973.1.S1_at   | MmugDNA.14973.1 | 10.53 | 9.23  | 0.11 | 0.05 | 2.46  | 0.00005  | 0.000009 | 0.112653 | 0.016421 |
| MmugDNA.14978.1.S1_at   | MmugDNA.14978.1 | 5.96  | 5.69  | 0.26 | 0.04 | 1.2   | 0.127886 | 0.500413 | 0.494071 | 0.699036 |
| MmugDNA.1498.1.S1_at    | MmugDNA.1498.1  | 10.8  | 11.13 | 0.05 | 0.17 | -1.25 | 0.041504 | 0.009039 | 0.351839 | 0.125644 |
| MmugDNA.14982.1.S1_at   | MmugDNA.14982.1 | 10.48 | 9.94  | 0.09 | 0.06 | 1.45  | 0.000952 | 0.000313 | 0.139813 | 0.035198 |
| MmugDNA.14985.1.S1_at   | MmugDNA.14985.1 | 6.02  | 6.87  | 0.68 | 0.72 | -1.81 | 0.500384 | 0.617862 | 0.759527 | 0.773736 |
| MmugDNA.14989.1.S1_at   | MmugDNA.14989.1 | 5.14  | 5.35  | 0.1  | 0.28 | -1.16 | 0.333205 | 0.400333 | 0.657492 | 0.630169 |
| MmugDNA.1499.1.S1_at    | MmugDNA.1499.1  | 10.69 | 11.5  | 0.48 | 1.18 | -1.75 | 0.453693 | 0.477324 | 0.732829 | 0.683422 |
| MmugDNA.14992.1.S1_at   | MmugDNA.14992.1 | 5.12  | 5.29  | 0.17 | 0.09 | -1.13 | 0.185463 | 0.183626 | 0.548882 | 0.459681 |
| MmugDNA.14995.1.S1_at   | MmugDNA.14995.1 | 9.25  | 9.62  | 0.24 | 1.09 | -1.29 | 0.653921 | 0.827801 | 0.844436 | 0.901152 |
| MmugDNA.14999.1.S1_at   | MmugDNA.14999.1 | 6     | 5.89  | 0.18 | 0.08 | 1.08  | 0.613042 | 0.484517 | 0.822517 | 0.688529 |
| MmugDNA.150.1.S1_at     | MmugDNA.150.1   | 12.39 | 12.35 | 0.02 | 0.15 | 1.03  | 0.546289 | 0.717648 | 0.785392 | 0.836515 |
| MmugDNA.15002.1.S1_at   | MmugDNA.15002.1 | 10.11 | 9.45  | 0.17 | 1.19 | 1.58  | 0.454747 | 0.613288 | 0.733358 | 0.770491 |
| MmugDNA.15004.1.S1_at   | MmugDNA.15004.1 | 11.52 | 11.91 | 0.47 | 0.52 | -1.31 | 0.235016 | 0.061119 | 0.589268 | 0.293975 |
| MmugDNA.1501.1.S1_at    | MmugDNA.1501.1  | 12.67 | 12.62 | 0.13 | 0.93 | 1.03  | 0.351966 | 0.475025 | 0.66934  | 0.681859 |
| MmugDNA.15010.1.S1_at   | MmugDNA.15010.1 | 9.96  | 9.31  | 0.1  | 0.46 | 1.57  | 0.086221 | 0.084663 | 0.440212 | 0.33618  |
| MmugDNA.15014.1.S1_at   | MmugDNA.15014.1 | 8.92  | 8.31  | 0.18 | 0.1  | 1.53  | 0.003845 | 0.004403 | 0.179914 | 0.092846 |
| MmugDNA.15020.1.S1_at   | MmugDNA.15020.1 | 12.61 | 12.3  | 0.09 | 0.15 | 1.24  | 0.087522 | 0.081158 | 0.441877 | 0.329346 |
| MmugDNA.15022.1.S1_at   | MmugDNA.15022.1 | 8.26  | 8.98  | 0.09 | 0.2  | -1.64 | 0.004627 | 0.001961 | 0.1844   | 0.065832 |
| MmugDNA.15037.1.S1_at   | MmugDNA.15037.1 | 12.36 | 13.05 | 0.17 | 0.06 | -1.62 | 0.004101 | 0.001212 | 0.181739 | 0.054455 |
| MmugDNA.15045.1.S1_at   | MmugDNA.15045.1 | 5.09  | 4.79  | 0.23 | 0.18 | 1.23  | 0.145608 | 0.114679 | 0.51146  | 0.381227 |
| MmugDNA.15046.1.S1_at   | MmugDNA.15046.1 | 9.77  | 9.93  | 0.82 | 0.93 | -1.12 | 0.665446 | 0.054054 | 0.850011 | 0.277914 |
| MmugDNA.1505.1.S1_at    | MmugDNA.1505.1  | 11.59 | 11.3  | 0.15 | 0.16 | 1.23  | 0.085275 | 0.097206 | 0.438726 | 0.354886 |
| MmugDNA.15052.1.S1_at   | MmugDNA.15052.1 | 7.61  | 8.11  | 0.16 | 0.05 | -1.41 | 0.006764 | 0.004978 | 0.20158  | 0.098369 |
| MmugDNA.15054.1.S1_x_at | MmugDNA.15054.1 | 7.7   | 7.24  | 0.31 | 0.08 | 1.38  | 0.106392 | 0.06348  | 0.466831 | 0.298441 |
| MmugDNA.15055.1.S1_at   | MmugDNA.15055.1 | 5.26  | 5.37  | 0.22 | 0.2  | -1.08 | 0.496327 | 0.369935 | 0.757473 | 0.609164 |
| MmugDNA.15058.1.S1_at   | MmugDNA.15058.1 | 7.99  | 7.4   | 0.15 | 0.9  | 1.5   | 0.787523 | 0.923968 | 0.911632 | 0.957162 |
| MmugDNA.15062.1.S1_at   | MmugDNA.15062.1 | 10.4  | 9.91  | 0.4  | 0.56 | 1.4   | 0.29848  | 0.232159 | 0.633981 | 0.503874 |
| MmugDNA.15063.1.S1_s_at | MmugDNA.15063.1 | 6.36  | 7.84  | 0.45 | 0.38 | -2.79 | 0.016532 | 0.009086 | 0.264616 | 0.125944 |
| MmugDNA.15064.1.S1_at   | MmugDNA.15064.1 | 5.1   | 5.1   | 0.07 | 0.06 | -1    | 0.948627 | 0.994969 | 0.98032  | 0.996893 |
| MmugDNA.15075.1.S1_at   | MmugDNA.15075.1 | 7.38  | 8.01  | 0.47 | 1.99 | -1.54 | 0.745388 | 0.894334 | 0.891065 | 0.939697 |
| MmugDNA.15076.1.S1_at   | MmugDNA.15076.1 | 13.51 | 13.42 | 0.05 | 0.07 | 1.07  | 0.102031 | 0.111279 | 0.461412 | 0.375963 |
| MmugDNA.15079.1.S1_at   | MmugDNA.15079.1 | 3.93  | 3.79  | 0.15 | 0.09 | 1.1   | 0.552208 | 0.725726 | 0.78937  | 0.841146 |
| MmugDNA.15079.1.S1_s_at | MmugDNA.15079.1 | 4.43  | 4.25  | 0.76 | 0.21 | 1.13  | 0.574499 | 0.582059 | 0.801702 | 0.750784 |

|                         |                 |       |       |      |      |        |          |          |          |          |
|-------------------------|-----------------|-------|-------|------|------|--------|----------|----------|----------|----------|
| MmugDNA.15084.1.S1_s_at | MmugDNA.15084.1 | 9.93  | 13.46 | 1.38 | 2.61 | -11.58 | 0.481679 | 0.260967 | 0.749268 | 0.527351 |
| MmugDNA.15086.1.S1_at   | MmugDNA.15086.1 | 9.5   | 9.31  | 0.16 | 0.15 | 1.14   | 0.097278 | 0.264351 | 0.456253 | 0.530385 |
| MmugDNA.15089.1.S1_at   | MmugDNA.15089.1 | 6.43  | 5.74  | 0.79 | 0.47 | 1.61   | 0.250608 | 0.378293 | 0.600389 | 0.615438 |
| MmugDNA.1509.1.S1_s_at  | MmugDNA.1509.1  | 10.24 | 10.2  | 0.34 | 0.29 | 1.03   | 0.49197  | 0.476632 | 0.75541  | 0.682812 |
| MmugDNA.15092.1.S1_at   | MmugDNA.15092.1 | 8.62  | 9.5   | 0.24 | 0.48 | -1.83  | 0.183413 | 0.190528 | 0.547598 | 0.465906 |
| MmugDNA.15101.1.S1_at   | MmugDNA.15101.1 | 6     | 5.96  | 0.17 | 0.06 | 1.03   | 0.469814 | 0.355234 | 0.741958 | 0.597576 |
| MmugDNA.15113.1.S1_at   | MmugDNA.15113.1 | 7.45  | 7.92  | 0.14 | 0.42 | -1.38  | 0.452947 | 0.633714 | 0.732219 | 0.784372 |
| MmugDNA.15114.1.S1_at   | MmugDNA.15114.1 | 9.86  | 8.48  | 0.19 | 0.39 | 2.61   | 0.007995 | 0.003573 | 0.214679 | 0.085556 |
| MmugDNA.15120.1.A1_at   | MmugDNA.15120.1 | 7.63  | 7.51  | 0.36 | 0.28 | 1.09   | 0.34583  | 0.443384 | 0.665318 | 0.66118  |
| MmugDNA.15120.1.S1_at   | MmugDNA.15120.1 | 7.06  | 6.98  | 0.54 | 0.24 | 1.05   | 0.53285  | 0.679231 | 0.777862 | 0.81275  |
| MmugDNA.15126.1.S1_at   | MmugDNA.15126.1 | 7.88  | 7.32  | 0.21 | 0.44 | 1.48   | 0.198738 | 0.240079 | 0.561773 | 0.510776 |
| MmugDNA.15127.1.S1_at   | MmugDNA.15127.1 | 9.61  | 9.54  | 0.27 | 0.39 | 1.04   | 0.670414 | 0.661279 | 0.852387 | 0.801687 |
| MmugDNA.15132.1.S1_at   | MmugDNA.15132.1 | 4.5   | 4.94  | 0.12 | 0.62 | -1.36  | 0.114992 | 0.099868 | 0.478345 | 0.358557 |
| MmugDNA.15135.1.S1_at   | MmugDNA.15135.1 | 3.47  | 3.59  | 0.23 | 0.06 | -1.09  | 0.794759 | 0.722886 | 0.914801 | 0.839474 |
| MmugDNA.15141.1.S1_at   | MmugDNA.15141.1 | 3.16  | 3.17  | 0.11 | 0.05 | -1.01  | 0.868113 | 0.929199 | 0.947305 | 0.959644 |
| MmugDNA.15141.1.S1_s_at | MmugDNA.15141.1 | 3.36  | 3.48  | 0.08 | 0.18 | -1.09  | 0.596474 | 0.839125 | 0.812967 | 0.908316 |
| MmugDNA.15148.1.S1_at   | MmugDNA.15148.1 | 5.04  | 5.09  | 0.16 | 0.18 | -1.04  | 0.785846 | 0.933502 | 0.910907 | 0.962216 |
| MmugDNA.1515.1.S1_at    | MmugDNA.1515.1  | 4.83  | 6.16  | 0.84 | 1.51 | -2.52  | 0.263352 | 0.155694 | 0.609348 | 0.431054 |
| MmugDNA.15150.1.S1_at   | MmugDNA.15150.1 | 10.49 | 10.4  | 0.12 | 0.21 | 1.07   | 0.193613 | 0.013354 | 0.557178 | 0.148152 |
| MmugDNA.15152.1.S1_at   | MmugDNA.15152.1 | 10.89 | 11.17 | 0.3  | 0.2  | -1.22  | 0.451449 | 0.263812 | 0.731565 | 0.530086 |
| MmugDNA.15153.1.S1_at   | MmugDNA.15153.1 | 12.52 | 11.63 | 0.08 | 1.32 | 1.85   | 0.129849 | 0.157422 | 0.495916 | 0.432911 |
| MmugDNA.15155.1.S1_at   | MmugDNA.15155.1 | 6.69  | 5.37  | 1.1  | 0.8  | 2.5    | 0.216019 | 0.279749 | 0.575954 | 0.543232 |
| MmugDNA.15162.1.S1_at   | MmugDNA.15162.1 | 6.14  | 6.33  | 0.07 | 0.13 | -1.15  | 0.090405 | 0.089499 | 0.445834 | 0.343811 |
| MmugDNA.15162.1.S1_s_at | MmugDNA.15162.1 | 6     | 6.19  | 0.08 | 0.21 | -1.14  | 0.139583 | 0.184997 | 0.507081 | 0.460814 |
| MmugDNA.15167.1.S1_at   | MmugDNA.15167.1 | 4.8   | 4.84  | 0.11 | 0.2  | -1.03  | 0.457858 | 0.629746 | 0.735139 | 0.781989 |
| MmugDNA.15170.1.S1_s_at | MmugDNA.15170.1 | 5.16  | 5.11  | 0.59 | 0.52 | 1.03   | 0.21621  | 0.256161 | 0.575962 | 0.524069 |
| MmugDNA.15175.1.S1_at   | MmugDNA.15175.1 | 12.91 | 12.96 | 0.08 | 0.18 | -1.04  | 0.617617 | 0.584724 | 0.824836 | 0.752515 |
| MmugDNA.15176.1.S1_at   | MmugDNA.15176.1 | 8.79  | 8.72  | 0.18 | 0.21 | 1.05   | 0.367204 | 0.49873  | 0.67932  | 0.697733 |
| MmugDNA.15178.1.S1_at   | MmugDNA.15178.1 | 10.92 | 10.99 | 0.3  | 0.19 | -1.05  | 0.351249 | 0.154857 | 0.669117 | 0.429849 |
| MmugDNA.15193.1.S1_at   | MmugDNA.15193.1 | 5.53  | 5.49  | 0.39 | 0.03 | 1.03   | 0.565434 | 0.263852 | 0.797069 | 0.5301   |
| MmugDNA.15194.1.S1_at   | MmugDNA.15194.1 | 9.55  | 9.47  | 0.14 | 1.1  | 1.06   | 0.947118 | 0.900995 | 0.97962  | 0.943658 |
| MmugDNA.15195.1.S1_at   | MmugDNA.15195.1 | 4.83  | 5.87  | 0.45 | 0.57 | -2.06  | 0.159197 | 0.063859 | 0.52416  | 0.29906  |
| MmugDNA.15195.1.S1_s_at | MmugDNA.15195.1 | 5.75  | 5.7   | 0.51 | 0.58 | 1.03   | 0.54976  | 0.739623 | 0.787481 | 0.849117 |
| MmugDNA.15205.1.S1_at   | MmugDNA.15205.1 | 11    | 10.19 | 0.29 | 0.19 | 1.75   | 0.031225 | 0.015669 | 0.32089  | 0.158598 |
| MmugDNA.15208.1.S1_at   | MmugDNA.15208.1 | 4.65  | 4.65  | 0.31 | 0.33 | -1     | 0.957324 | 0.833108 | 0.983882 | 0.90427  |
| MmugDNA.15209.1.S1_at   | MmugDNA.15209.1 | 11.01 | 11.07 | 0.14 | 0.34 | -1.04  | 0.291701 | 0.399807 | 0.629042 | 0.630016 |
| MmugDNA.15212.1.S1_at   | MmugDNA.15212.1 | 6.68  | 7.67  | 0.5  | 0.31 | -1.99  | 0.036004 | 0.026392 | 0.338683 | 0.203529 |
| MmugDNA.15218.1.S1_at   | MmugDNA.15218.1 | 11.56 | 11.66 | 0.17 | 0.11 | -1.07  | 0.230653 | 0.069545 | 0.587222 | 0.309848 |
| MmugDNA.15222.1.S1_at   | MmugDNA.15222.1 | 13.21 | 13.2  | 0.04 | 0.17 | 1.01   | 0.769204 | 0.918758 | 0.902992 | 0.954387 |
| MmugDNA.15225.1.S1_at   | MmugDNA.15225.1 | 5.99  | 5.94  | 0.17 | 0.15 | 1.04   | 0.852024 | 0.837146 | 0.940437 | 0.906917 |
| MmugDNA.15227.1.S1_at   | MmugDNA.15227.1 | 13.34 | 13.29 | 0.04 | 0.02 | 1.04   | 0.402423 | 0.369237 | 0.701407 | 0.608691 |

|                         |                 |       |       |      |      |       |          |          |          |          |
|-------------------------|-----------------|-------|-------|------|------|-------|----------|----------|----------|----------|
| MmugDNA.15229.1.S1_at   | MmugDNA.15229.1 | 9.63  | 9.33  | 0.2  | 0.14 | 1.23  | 0.201727 | 0.106938 | 0.563988 | 0.369499 |
| MmugDNA.15233.1.S1_at   | MmugDNA.15233.1 | 9.63  | 8.99  | 0.25 | 0.49 | 1.55  | 0.056216 | 0.049468 | 0.386006 | 0.267334 |
| MmugDNA.15234.1.S1_at   | MmugDNA.15234.1 | 12.75 | 12.39 | 0.12 | 0.41 | 1.29  | 0.233158 | 0.073132 | 0.587994 | 0.316064 |
| MmugDNA.15236.1.S1_at   | MmugDNA.15236.1 | 6.17  | 5.72  | 0.61 | 0.12 | 1.36  | 0.341996 | 0.13892  | 0.662986 | 0.412037 |
| MmugDNA.15238.1.S1_at   | MmugDNA.15238.1 | 5.12  | 4.66  | 0.37 | 0.16 | 1.37  | 0.367542 | 0.086796 | 0.679502 | 0.339559 |
| MmugDNA.15239.1.S1_at   | MmugDNA.15239.1 | 8.37  | 7.21  | 0.12 | 0.17 | 2.24  | 0.000694 | 0.000077 | 0.136818 | 0.027016 |
| MmugDNA.15240.1.S1_at   | MmugDNA.15240.1 | 6.29  | 6.32  | 0.17 | 0.2  | -1.02 | 0.74326  | 0.877782 | 0.890118 | 0.930256 |
| MmugDNA.15241.1.S1_at   | MmugDNA.15241.1 | 5.93  | 7.36  | 0.36 | 0.6  | -2.69 | 0.045798 | 0.040228 | 0.361834 | 0.245805 |
| MmugDNA.15244.1.S1_at   | MmugDNA.15244.1 | 7.57  | 8.24  | 0.43 | 0.98 | -1.58 | 0.546316 | 0.652175 | 0.785392 | 0.796592 |
| MmugDNA.15245.1.S1_at   | MmugDNA.15245.1 | 10.32 | 10.74 | 0.05 | 0.04 | -1.34 | 0.000314 | 0.000097 | 0.12562  | 0.027841 |
| MmugDNA.15250.1.S1_at   | MmugDNA.15250.1 | 12.2  | 11.29 | 0.17 | 0.43 | 1.88  | 0.022076 | 0.005039 | 0.28446  | 0.098963 |
| MmugDNA.15251.1.S1_at   | MmugDNA.15251.1 | 9.63  | 9.58  | 0.11 | 0.2  | 1.03  | 0.468044 | 0.68324  | 0.740976 | 0.81521  |
| MmugDNA.15258.1.S1_at   | MmugDNA.15258.1 | 5.29  | 5.29  | 0.1  | 0.03 | -1    | 0.406101 | 0.207252 | 0.703553 | 0.481388 |
| MmugDNA.15259.1.S1_at   | MmugDNA.15259.1 | 10.28 | 9.54  | 0.16 | 0.31 | 1.67  | 0.051276 | 0.039109 | 0.376001 | 0.24303  |
| MmugDNA.1526.1.S1_at    | MmugDNA.1526.1  | 7.18  | 7.64  | 0.43 | 0.64 | -1.38 | 0.204512 | 0.260763 | 0.567029 | 0.52721  |
| MmugDNA.15260.1.S1_at   | MmugDNA.15260.1 | 8.29  | 6.67  | 0.43 | 0.24 | 3.08  | 0.004244 | 0.001123 | 0.181942 | 0.052924 |
| MmugDNA.15261.1.S1_at   | MmugDNA.15261.1 | 9.11  | 10.06 | 0.39 | 0.56 | -1.93 | 0.09671  | 0.108777 | 0.455647 | 0.372322 |
| MmugDNA.15263.1.S1_at   | MmugDNA.15263.1 | 10.16 | 10.95 | 0.25 | 0.4  | -1.73 | 0.031551 | 0.014098 | 0.322068 | 0.15195  |
| MmugDNA.15267.1.S1_at   | MmugDNA.15267.1 | 10.31 | 11.02 | 0.16 | 0.73 | -1.63 | 0.199256 | 0.249775 | 0.562215 | 0.518876 |
| MmugDNA.15271.1.S1_at   | MmugDNA.15271.1 | 6.63  | 6.97  | 0.2  | 0.32 | -1.27 | 0.239509 | 0.1074   | 0.592545 | 0.370219 |
| MmugDNA.15279.1.S1_at   | MmugDNA.15279.1 | 11.91 | 11.45 | 0.27 | 0.11 | 1.37  | 0.021501 | 0.020245 | 0.282524 | 0.178671 |
| MmugDNA.1528.1.S1_at    | MmugDNA.1528.1  | 5.79  | 5.47  | 0.64 | 0.81 | 1.25  | 0.828785 | 0.126312 | 0.930517 | 0.396786 |
| MmugDNA.15281.1.S1_at   | MmugDNA.15281.1 | 6.23  | 6.19  | 0.13 | 0.15 | 1.03  | 0.151801 | 0.20171  | 0.516514 | 0.476237 |
| MmugDNA.15285.1.S1_at   | MmugDNA.15285.1 | 9.59  | 9.81  | 0.11 | 0.41 | -1.16 | 0.918648 | 0.758789 | 0.96831  | 0.859824 |
| MmugDNA.15286.1.S1_at   | MmugDNA.15286.1 | 10.55 | 11.61 | 0.11 | 0.14 | -2.08 | 0.000652 | 0.000472 | 0.136818 | 0.038572 |
| MmugDNA.15288.1.S1_at   | MmugDNA.15288.1 | 3.73  | 3.91  | 0.1  | 0.24 | -1.13 | 0.418367 | 0.438174 | 0.711317 | 0.657196 |
| MmugDNA.15292.1.S1_at   | MmugDNA.15292.1 | 12.57 | 12.58 | 0.22 | 0.06 | -1.01 | 0.404628 | 0.039443 | 0.702853 | 0.243592 |
| MmugDNA.15293.1.S1_at   | MmugDNA.15293.1 | 4.93  | 4.6   | 0.42 | 0.19 | 1.25  | 0.92974  | 0.994516 | 0.972813 | 0.996631 |
| MmugDNA.15296.1.S1_at   | MmugDNA.15296.1 | 13.43 | 13.23 | 0.03 | 0.23 | 1.15  | 0.19572  | 0.224598 | 0.558901 | 0.497613 |
| MmugDNA.15298.1.S1_at   | MmugDNA.15298.1 | 11.3  | 10.79 | 0.1  | 0.6  | 1.42  | 0.226025 | 0.041674 | 0.584065 | 0.24887  |
| MmugDNA.15298.1.S1_x_at | MmugDNA.15298.1 | 11.13 | 10.63 | 0.08 | 0.6  | 1.42  | 0.215612 | 0.03514  | 0.575924 | 0.231645 |
| MmugDNA.15299.1.S1_at   | MmugDNA.15299.1 | 12.62 | 12.99 | 0.08 | 0.29 | -1.29 | 0.087947 | 0.040206 | 0.442256 | 0.24575  |
| MmugDNA.15305.1.S1_at   | MmugDNA.15305.1 | 11.03 | 10.54 | 0.13 | 0.17 | 1.4   | 0.020474 | 0.025337 | 0.278215 | 0.199522 |
| MmugDNA.15307.1.S1_at   | MmugDNA.15307.1 | 3.32  | 3.63  | 0.15 | 0.13 | -1.24 | 0.09513  | 0.197648 | 0.452947 | 0.47262  |
| MmugDNA.15309.1.S1_at   | MmugDNA.15309.1 | 12.09 | 12.04 | 0.09 | 0.16 | 1.04  | 0.754666 | 0.051594 | 0.89558  | 0.272614 |
| MmugDNA.15310.1.S1_at   | MmugDNA.15310.1 | 12.75 | 13.04 | 0.08 | 0.19 | -1.22 | 0.11554  | 0.016964 | 0.478809 | 0.165103 |
| MmugDNA.15314.1.S1_at   | MmugDNA.15314.1 | 11.45 | 11.21 | 0.1  | 0.25 | 1.18  | 0.213875 | 0.284936 | 0.574137 | 0.547047 |
| MmugDNA.15315.1.S1_at   | MmugDNA.15315.1 | 7.9   | 7.8   | 0.23 | 0.25 | 1.07  | 0.133225 | 0.340823 | 0.499568 | 0.586978 |
| MmugDNA.15317.1.S1_at   | MmugDNA.15317.1 | 10.89 | 10.64 | 0.11 | 0.37 | 1.19  | 0.297039 | 0.406669 | 0.632904 | 0.634475 |
| MmugDNA.15319.1.S1_at   | MmugDNA.15319.1 | 6.99  | 6.84  | 0.53 | 0.83 | 1.11  | 0.745969 | 0.443607 | 0.891243 | 0.661336 |
| MmugDNA.15328.1.S1_at   | MmugDNA.15328.1 | 9.72  | 9.25  | 0.5  | 1.65 | 1.38  | 0.36931  | 0.499501 | 0.680609 | 0.69832  |

|                         |                 |       |       |      |      |        |          |          |          |          |
|-------------------------|-----------------|-------|-------|------|------|--------|----------|----------|----------|----------|
| MmugDNA.15329.1.S1_at   | MmugDNA.15329.1 | 11.61 | 11.65 | 0.18 | 0.22 | -1.03  | 0.727867 | 0.291849 | 0.881604 | 0.552086 |
| MmugDNA.1533.1.S1_at    | MmugDNA.1533.1  | 7.09  | 11.19 | 1.52 | 2.52 | -17.12 | 0.242793 | 0.159652 | 0.59459  | 0.435785 |
| MmugDNA.15331.1.S1_s_at | MmugDNA.15331.1 | 8.38  | 8.62  | 0.22 | 0.15 | -1.19  | 0.127997 | 0.117879 | 0.494163 | 0.38579  |
| MmugDNA.15333.1.S1_at   | MmugDNA.15333.1 | 4.97  | 4.87  | 0.05 | 0.2  | 1.08   | 0.467411 | 0.435115 | 0.74068  | 0.655021 |
| MmugDNA.15334.1.S1_s_at | MmugDNA.15334.1 | 11.96 | 12.47 | 0.12 | 0.28 | -1.42  | 0.042775 | 0.028614 | 0.355382 | 0.210901 |
| MmugDNA.15336.1.S1_at   | MmugDNA.15336.1 | 13.14 | 12.87 | 0.03 | 0.13 | 1.21   | 0.022803 | 0.001075 | 0.288178 | 0.051908 |
| MmugDNA.15337.1.S1_s_at | MmugDNA.15337.1 | 7.92  | 7.35  | 0.19 | 0.15 | 1.48   | 0.026696 | 0.012711 | 0.304027 | 0.145355 |
| MmugDNA.15343.1.S1_at   | MmugDNA.15343.1 | 9.61  | 10.08 | 0.11 | 0.22 | -1.38  | 0.075748 | 0.009122 | 0.423457 | 0.125994 |
| MmugDNA.15345.1.S1_at   | MmugDNA.15345.1 | 6.69  | 6.44  | 0.12 | 0.66 | 1.19   | 0.539744 | 0.452022 | 0.781249 | 0.666754 |
| MmugDNA.15348.1.S1_at   | MmugDNA.15348.1 | 9.07  | 9.77  | 0.34 | 0.59 | -1.63  | 0.136417 | 0.165099 | 0.503566 | 0.441318 |
| MmugDNA.15352.1.S1_at   | MmugDNA.15352.1 | 10.99 | 10.81 | 0.15 | 0.25 | 1.13   | 0.095596 | 0.103344 | 0.453501 | 0.36422  |
| MmugDNA.15352.1.S1_s_at | MmugDNA.15352.1 | 11.69 | 11.57 | 0.09 | 0.3  | 1.09   | 0.129648 | 0.144422 | 0.495794 | 0.418323 |
| MmugDNA.15354.1.S1_at   | MmugDNA.15354.1 | 4.01  | 3.58  | 0.4  | 0.01 | 1.35   | 0.41012  | 0.472099 | 0.706221 | 0.679861 |
| MmugDNA.15357.1.S1_at   | MmugDNA.15357.1 | 6.18  | 5.93  | 0.43 | 0.75 | 1.19   | 0.722643 | 0.897664 | 0.878815 | 0.941624 |
| MmugDNA.15358.1.S1_at   | MmugDNA.15358.1 | 12.55 | 12.5  | 0.09 | 0.11 | 1.04   | 0.38929  | 0.381101 | 0.692956 | 0.617478 |
| MmugDNA.15359.1.S1_at   | MmugDNA.15359.1 | 12.85 | 13.06 | 0.09 | 0.21 | -1.16  | 0.429621 | 0.032141 | 0.717667 | 0.221991 |
| MmugDNA.15359.1.S1_s_at | MmugDNA.15359.1 | 12.87 | 13.06 | 0.11 | 0.19 | -1.14  | 0.344591 | 0.05477  | 0.664643 | 0.279535 |
| MmugDNA.15361.1.S1_at   | MmugDNA.15361.1 | 7.87  | 7.9   | 0.07 | 0.27 | -1.02  | 0.771505 | 0.088187 | 0.903856 | 0.341721 |
| MmugDNA.15364.1.S1_at   | MmugDNA.15364.1 | 10.59 | 9.48  | 0.46 | 0.46 | 2.15   | 0.052116 | 0.042244 | 0.376989 | 0.249997 |
| MmugDNA.15370.1.S1_at   | MmugDNA.15370.1 | 5.81  | 5.6   | 0.15 | 0.78 | 1.16   | 0.755377 | 0.808314 | 0.896082 | 0.889665 |
| MmugDNA.15374.1.S1_at   | MmugDNA.15374.1 | 10.37 | 10.18 | 0.22 | 0.27 | 1.14   | 0.430176 | 0.076948 | 0.717956 | 0.322421 |
| MmugDNA.15379.1.S1_at   | MmugDNA.15379.1 | 4.31  | 4.53  | 1.81 | 0.1  | -1.17  | 0.504729 | 0.520305 | 0.7614   | 0.711612 |
| MmugDNA.15380.1.S1_at   | MmugDNA.15380.1 | 3.29  | 3.37  | 0.05 | 0.19 | -1.06  | 0.809145 | 0.648995 | 0.922202 | 0.794525 |
| MmugDNA.15397.1.S1_at   | MmugDNA.15397.1 | 11.33 | 11.15 | 0.17 | 0.06 | 1.14   | 0.061338 | 0.024029 | 0.395541 | 0.194351 |
| MmugDNA.15398.1.S1_at   | MmugDNA.15398.1 | 8.94  | 9.07  | 0.12 | 0.5  | -1.09  | 0.282403 | 0.369561 | 0.622852 | 0.608927 |
| MmugDNA.15399.1.S1_at   | MmugDNA.15399.1 | 12.62 | 12.58 | 0.16 | 0.24 | 1.03   | 0.786392 | 0.660927 | 0.91117  | 0.801637 |
| MmugDNA.154.1.S1_at     | MmugDNA.154.1   | 8.15  | 8.18  | 0.26 | 0.26 | -1.02  | 0.889901 | 0.224266 | 0.955977 | 0.497164 |
| MmugDNA.1540.1.S1_at    | MmugDNA.1540.1  | 9.62  | 9.59  | 0.34 | 0.27 | 1.02   | 0.414128 | 0.150571 | 0.708894 | 0.425106 |
| MmugDNA.15405.1.S1_at   | MmugDNA.15405.1 | 3.97  | 3.99  | 0.12 | 0.14 | -1.01  | 0.42738  | 0.171873 | 0.716187 | 0.448295 |
| MmugDNA.15409.1.S1_at   | MmugDNA.15409.1 | 9.38  | 8.29  | 0.35 | 0.3  | 2.13   | 0.008546 | 0.00035  | 0.21941  | 0.037097 |
| MmugDNA.15418.1.S1_at   | MmugDNA.15418.1 | 5.31  | 5.46  | 0.03 | 0.18 | -1.11  | 0.072138 | 0.089359 | 0.416376 | 0.343611 |
| MmugDNA.15419.1.S1_at   | MmugDNA.15419.1 | 5.05  | 4.55  | 0.35 | 0.24 | 1.42   | 0.189801 | 0.123435 | 0.552692 | 0.393452 |
| MmugDNA.15422.1.S1_at   | MmugDNA.15422.1 | 6.8   | 9.5   | 1.07 | 1.96 | -6.51  | 0.212069 | 0.143755 | 0.572526 | 0.417583 |
| MmugDNA.15424.1.S1_at   | MmugDNA.15424.1 | 10.21 | 9.58  | 0.57 | 0.11 | 1.55   | 0.331766 | 0.417714 | 0.656468 | 0.642382 |
| MmugDNA.15428.1.S1_at   | MmugDNA.15428.1 | 10.03 | 9.8   | 0.04 | 0.1  | 1.17   | 0.018806 | 0.020253 | 0.2715   | 0.178702 |
| MmugDNA.15428.1.S1_s_at | MmugDNA.15428.1 | 11    | 10.77 | 0.07 | 0.09 | 1.17   | 0.018909 | 0.012232 | 0.2723   | 0.142996 |
| MmugDNA.1543.1.S1_at    | MmugDNA.1543.1  | 6.36  | 5.03  | 1.66 | 0.4  | 2.51   | 0.733756 | 0.669434 | 0.885206 | 0.806626 |
| MmugDNA.1544.1.S1_at    | MmugDNA.1544.1  | 9.75  | 9.89  | 0.31 | 0.32 | -1.11  | 0.555319 | 0.207499 | 0.791334 | 0.481813 |
| MmugDNA.15444.1.S1_at   | MmugDNA.15444.1 | 7.22  | 7.33  | 0.16 | 0.16 | -1.08  | 0.445281 | 0.61688  | 0.727524 | 0.773019 |
| MmugDNA.15445.1.S1_at   | MmugDNA.15445.1 | 7.27  | 7.71  | 0.39 | 0.66 | -1.35  | 0.543975 | 0.257463 | 0.784217 | 0.52521  |
| MmugDNA.15446.1.S1_at   | MmugDNA.15446.1 | 7.33  | 7.26  | 0.16 | 0.48 | 1.04   | 0.861887 | 0.133707 | 0.944464 | 0.405647 |

|                         |                 |       |       |      |      |       |          |          |          |          |
|-------------------------|-----------------|-------|-------|------|------|-------|----------|----------|----------|----------|
| MmugDNA.15453.1.S1_s_at | MmugDNA.15453.1 | 5.52  | 5.52  | 0.23 | 0.5  | -1    | 0.416926 | 0.578741 | 0.71026  | 0.748611 |
| MmugDNA.15455.1.S1_at   | MmugDNA.15455.1 | 9.48  | 9.83  | 0.26 | 0.16 | -1.27 | 0.067203 | 0.035078 | 0.407231 | 0.231478 |
| MmugDNA.1546.1.S1_at    | MmugDNA.1546.1  | 8.64  | 8.53  | 0.07 | 0.19 | 1.07  | 0.370184 | 0.763547 | 0.681113 | 0.86248  |
| MmugDNA.15469.1.S1_at   | MmugDNA.15469.1 | 4.99  | 5.27  | 0.07 | 0.24 | -1.21 | 0.186787 | 0.161846 | 0.550106 | 0.437937 |
| MmugDNA.15472.1.S1_at   | MmugDNA.15472.1 | 8.58  | 9.72  | 0.21 | 0.52 | -2.19 | 0.017525 | 0.006143 | 0.267445 | 0.10676  |
| MmugDNA.15476.1.S1_at   | MmugDNA.15476.1 | 6.14  | 6.47  | 0.09 | 1.03 | -1.26 | 0.654474 | 0.2874   | 0.844586 | 0.548657 |
| MmugDNA.15481.1.S1_at   | MmugDNA.15481.1 | 4.58  | 4.22  | 0.22 | 0.06 | 1.29  | 0.065137 | 0.042947 | 0.403971 | 0.251793 |
| MmugDNA.15482.1.S1_at   | MmugDNA.15482.1 | 5.07  | 5.37  | 0.17 | 0.46 | -1.23 | 0.272269 | 0.300015 | 0.616016 | 0.558262 |
| MmugDNA.15485.1.S1_at   | MmugDNA.15485.1 | 9.03  | 8.25  | 0.3  | 0.12 | 1.72  | 0.005372 | 0.002275 | 0.191107 | 0.070332 |
| MmugDNA.15490.1.S1_at   | MmugDNA.15490.1 | 10.5  | 9.88  | 0.25 | 0.49 | 1.54  | 0.395525 | 0.5777   | 0.696523 | 0.748038 |
| MmugDNA.15500.1.S1_at   | MmugDNA.15500.1 | 5.57  | 5.69  | 0.11 | 0.11 | -1.08 | 0.875003 | 0.928583 | 0.949856 | 0.959399 |
| MmugDNA.15501.1.S1_at   | MmugDNA.15501.1 | 10.08 | 11.01 | 0.08 | 0.49 | -1.89 | 0.013856 | 0.008562 | 0.249758 | 0.122771 |
| MmugDNA.15504.1.S1_at   | MmugDNA.15504.1 | 6.98  | 7.31  | 0.11 | 0.08 | -1.26 | 0.019537 | 0.02209  | 0.27501  | 0.185972 |
| MmugDNA.15505.1.S1_at   | MmugDNA.15505.1 | 5.04  | 5.28  | 0.14 | 0.15 | -1.18 | 0.126544 | 0.169517 | 0.492802 | 0.446167 |
| MmugDNA.15506.1.S1_at   | MmugDNA.15506.1 | 5.39  | 5.33  | 0.29 | 0.23 | 1.04  | 0.848582 | 0.97253  | 0.939211 | 0.985221 |
| MmugDNA.15509.1.S1_at   | MmugDNA.15509.1 | 4.9   | 4.87  | 0.22 | 0.5  | 1.02  | 0.899234 | 0.515904 | 0.959714 | 0.708562 |
| MmugDNA.15512.1.S1_at   | MmugDNA.15512.1 | 8.21  | 7.4   | 0.6  | 0.12 | 1.75  | 0.067247 | 0.031305 | 0.407273 | 0.21885  |
| MmugDNA.15512.1.S1_s_at | MmugDNA.15512.1 | 7.46  | 6.69  | 0.61 | 0.2  | 1.7   | 0.080776 | 0.07539  | 0.431336 | 0.319693 |
| MmugDNA.15515.1.S1_at   | MmugDNA.15515.1 | 10.3  | 11.26 | 0.43 | 1.07 | -1.94 | 0.246303 | 0.220569 | 0.597666 | 0.49398  |
| MmugDNA.15518.1.S1_at   | MmugDNA.15518.1 | 5.27  | 5.29  | 0.08 | 0.07 | -1.01 | 0.423504 | 0.077733 | 0.71414  | 0.323851 |
| MmugDNA.15523.1.S1_at   | MmugDNA.15523.1 | 5.2   | 5.31  | 0.15 | 0.15 | -1.08 | 0.107466 | 0.094064 | 0.468045 | 0.350707 |
| MmugDNA.15525.1.S1_at   | MmugDNA.15525.1 | 5.11  | 5.11  | 0.05 | 0.09 | 1     | 0.402827 | 0.64726  | 0.701662 | 0.793355 |
| MmugDNA.15528.1.S1_at   | MmugDNA.15528.1 | 5.77  | 5.67  | 0.31 | 0.17 | 1.07  | 0.27838  | 0.412936 | 0.620536 | 0.639254 |
| MmugDNA.15530.1.S1_at   | MmugDNA.15530.1 | 9.1   | 10.01 | 0.18 | 0.5  | -1.87 | 0.060783 | 0.045321 | 0.394325 | 0.257202 |
| MmugDNA.15536.1.S1_at   | MmugDNA.15536.1 | 11.2  | 11.58 | 0.2  | 0.31 | -1.3  | 0.18079  | 0.133303 | 0.545241 | 0.405049 |
| MmugDNA.15537.1.S1_at   | MmugDNA.15537.1 | 12.25 | 12.7  | 0.18 | 0.18 | -1.36 | 0.035074 | 0.024605 | 0.334694 | 0.196276 |
| MmugDNA.1554.1.S1_at    | MmugDNA.1554.1  | 11.33 | 11.71 | 0.06 | 0.09 | -1.31 | 0.002684 | 0.002291 | 0.164386 | 0.07045  |
| MmugDNA.15540.1.S1_at   | MmugDNA.15540.1 | 8.37  | 9.39  | 0.49 | 1.28 | -2.02 | 0.287492 | 0.291993 | 0.625987 | 0.552163 |
| MmugDNA.15544.1.S1_at   | MmugDNA.15544.1 | 8.23  | 6.41  | 0.21 | 0.48 | 3.53  | 0.007409 | 0.003368 | 0.207773 | 0.083517 |
| MmugDNA.15548.1.S1_at   | MmugDNA.15548.1 | 11.12 | 10.81 | 0.02 | 0.21 | 1.25  | 0.02222  | 0.015889 | 0.284988 | 0.159934 |
| MmugDNA.1555.1.S1_at    | MmugDNA.1555.1  | 6.08  | 6.03  | 0.31 | 0.37 | 1.04  | 0.885253 | 0.886817 | 0.954022 | 0.935553 |
| MmugDNA.15554.1.S1_at   | MmugDNA.15554.1 | 6.18  | 5.86  | 0.1  | 0.36 | 1.24  | 0.808588 | 0.181428 | 0.921985 | 0.457923 |
| MmugDNA.15556.1.S1_at   | MmugDNA.15556.1 | 12.31 | 12.21 | 0.12 | 0.26 | 1.07  | 0.544404 | 0.746028 | 0.784363 | 0.852688 |
| MmugDNA.15556.1.S1_s_at | MmugDNA.15556.1 | 11.9  | 11.79 | 0.1  | 0.24 | 1.08  | 0.320921 | 0.466279 | 0.649662 | 0.676227 |
| MmugDNA.15559.1.S1_at   | MmugDNA.15559.1 | 4.35  | 4.46  | 0.16 | 0.06 | -1.08 | 0.116751 | 0.085221 | 0.480612 | 0.337096 |
| MmugDNA.15560.1.S1_at   | MmugDNA.15560.1 | 11.43 | 11.27 | 0.28 | 1.03 | 1.12  | 0.227862 | 0.246536 | 0.585266 | 0.515917 |
| MmugDNA.15563.1.S1_at   | MmugDNA.15563.1 | 13.29 | 12.97 | 0.08 | 0.19 | 1.26  | 0.073652 | 0.033526 | 0.419075 | 0.226727 |
| MmugDNA.15565.1.S1_at   | MmugDNA.15565.1 | 8.52  | 9.39  | 0.22 | 0.41 | -1.82 | 0.031752 | 0.024035 | 0.32269  | 0.194358 |
| MmugDNA.15566.1.S1_at   | MmugDNA.15566.1 | 11.98 | 12.2  | 0.17 | 0.32 | -1.17 | 0.201192 | 0.232955 | 0.563821 | 0.50445  |
| MmugDNA.15567.1.S1_at   | MmugDNA.15567.1 | 11.36 | 11.19 | 0.25 | 0.24 | 1.12  | 0.587035 | 0.032225 | 0.808416 | 0.222167 |
| MmugDNA.15568.1.S1_at   | MmugDNA.15568.1 | 7.77  | 7.5   | 0.16 | 0.36 | 1.2   | 0.748138 | 0.702561 | 0.89228  | 0.827615 |

|                         |                 |       |       |      |      |       |          |          |          |          |
|-------------------------|-----------------|-------|-------|------|------|-------|----------|----------|----------|----------|
| MmugDNA.15573.1.S1_s_at | MmugDNA.15573.1 | 12.73 | 12.91 | 0    | 0.69 | -1.13 | 0.620374 | 0.799391 | 0.826026 | 0.884559 |
| MmugDNA.15573.1.S1_x_at | MmugDNA.15573.1 | 9.25  | 9.49  | 0.04 | 0.74 | -1.19 | 0.787096 | 0.939826 | 0.911476 | 0.965805 |
| MmugDNA.15574.1.S1_at   | MmugDNA.15574.1 | 5.75  | 5.85  | 0.11 | 0.2  | -1.07 | 0.306932 | 0.370435 | 0.639788 | 0.609512 |
| MmugDNA.15575.1.S1_at   | MmugDNA.15575.1 | 7.26  | 7.3   | 0.08 | 0.13 | -1.03 | 0.370497 | 0.242455 | 0.681501 | 0.512835 |
| MmugDNA.15576.1.S1_at   | MmugDNA.15576.1 | 6.6   | 7.98  | 0.2  | 1.48 | -2.6  | 0.20936  | 0.235132 | 0.570957 | 0.50629  |
| MmugDNA.15583.1.S1_at   | MmugDNA.15583.1 | 7.42  | 7.13  | 0.37 | 0.11 | 1.22  | 0.341394 | 0.117872 | 0.662564 | 0.38579  |
| MmugDNA.15585.1.S1_at   | MmugDNA.15585.1 | 10.35 | 9.05  | 0.12 | 0.49 | 2.46  | 0.005196 | 0.000437 | 0.190431 | 0.038359 |
| MmugDNA.15586.1.S1_at   | MmugDNA.15586.1 | 11.53 | 10.39 | 0.21 | 0.7  | 2.2   | 0.154711 | 0.162066 | 0.519298 | 0.438173 |
| MmugDNA.15587.1.S1_at   | MmugDNA.15587.1 | 6.99  | 6.8   | 0.96 | 0.25 | 1.14  | 0.357202 | 0.236242 | 0.67213  | 0.507252 |
| MmugDNA.15589.1.S1_at   | MmugDNA.15589.1 | 11.29 | 11.11 | 0.29 | 1.02 | 1.13  | 0.643469 | 0.804487 | 0.839402 | 0.887566 |
| MmugDNA.15592.1.S1_at   | MmugDNA.15592.1 | 7.91  | 8.6   | 0.27 | 0.15 | -1.61 | 0.013781 | 0.000842 | 0.249758 | 0.047013 |
| MmugDNA.15593.1.S1_at   | MmugDNA.15593.1 | 10.39 | 10.32 | 0.15 | 0.76 | 1.05  | 0.961882 | 0.687088 | 0.985387 | 0.817434 |
| MmugDNA.15594.1.S1_at   | MmugDNA.15594.1 | 7.46  | 7.33  | 0.24 | 0.12 | 1.09  | 0.346278 | 0.384111 | 0.665754 | 0.619926 |
| MmugDNA.15596.1.S1_at   | MmugDNA.15596.1 | 7.17  | 6.44  | 0.18 | 0.68 | 1.67  | 0.218208 | 0.073068 | 0.57777  | 0.316017 |
| MmugDNA.156.1.S1_at     | MmugDNA.156.1   | 6.44  | 6.5   | 0.15 | 0.11 | -1.04 | 0.147113 | 0.132811 | 0.51306  | 0.404544 |
| MmugDNA.15603.1.S1_at   | MmugDNA.15603.1 | 11.64 | 11.64 | 0.04 | 0.46 | -1    | 0.672349 | 0.858806 | 0.853002 | 0.919602 |
| MmugDNA.15604.1.S1_at   | MmugDNA.15604.1 | 10.76 | 10.41 | 0.09 | 0.17 | 1.28  | 0.049382 | 0.05397  | 0.37138  | 0.27777  |
| MmugDNA.15605.1.S1_at   | MmugDNA.15605.1 | 11.77 | 11.5  | 0.09 | 0.34 | 1.2   | 0.25429  | 0.103124 | 0.602363 | 0.364026 |
| MmugDNA.15608.1.S1_at   | MmugDNA.15608.1 | 3.06  | 2.94  | 0.07 | 0.07 | 1.09  | 0.2167   | 0.307835 | 0.576318 | 0.56397  |
| MmugDNA.15610.1.S1_at   | MmugDNA.15610.1 | 4.95  | 5.25  | 0.17 | 0.25 | -1.23 | 0.362406 | 0.076513 | 0.675977 | 0.321589 |
| MmugDNA.15611.1.S1_at   | MmugDNA.15611.1 | 5.97  | 6.88  | 0.53 | 1.2  | -1.89 | 0.334424 | 0.264804 | 0.658398 | 0.530803 |
| MmugDNA.15615.1.S1_at   | MmugDNA.15615.1 | 11.44 | 11.38 | 0.12 | 0.08 | 1.04  | 0.586069 | 0.748494 | 0.807867 | 0.853666 |
| MmugDNA.15616.1.S1_at   | MmugDNA.15616.1 | 9.18  | 8.62  | 0.2  | 0.13 | 1.48  | 0.012912 | 0.00604  | 0.244747 | 0.106089 |
| MmugDNA.15617.1.S1_at   | MmugDNA.15617.1 | 8.24  | 8.12  | 0.64 | 1.01 | 1.09  | 0.958859 | 0.923495 | 0.984371 | 0.956997 |
| MmugDNA.15620.1.S1_at   | MmugDNA.15620.1 | 12.75 | 12.15 | 0.08 | 0.13 | 1.51  | 0.003016 | 0.000489 | 0.171083 | 0.038921 |
| MmugDNA.15621.1.S1_at   | MmugDNA.15621.1 | 5.46  | 7     | 0.34 | 0.33 | -2.9  | 0.00362  | 0.001576 | 0.179515 | 0.060185 |
| MmugDNA.15625.1.S1_at   | MmugDNA.15625.1 | 8.55  | 7.9   | 0.23 | 0.09 | 1.57  | 0.012062 | 0.012776 | 0.2399   | 0.145663 |
| MmugDNA.15626.1.S1_at   | MmugDNA.15626.1 | 3.7   | 3.71  | 0.07 | 0.28 | -1.01 | 0.857477 | 0.743679 | 0.942274 | 0.851456 |
| MmugDNA.1563.1.S1_at    | MmugDNA.1563.1  | 7.51  | 7.99  | 0.18 | 0.2  | -1.4  | 0.041389 | 0.049152 | 0.351626 | 0.266534 |
| MmugDNA.1563.1.S1_s_at  | MmugDNA.1563.1  | 6.27  | 7.65  | 0.46 | 0.65 | -2.61 | 0.071291 | 0.072978 | 0.415023 | 0.315986 |
| MmugDNA.15631.1.S1_at   | MmugDNA.15631.1 | 5.82  | 6.02  | 0.16 | 0.06 | -1.15 | 0.254336 | 0.101799 | 0.602363 | 0.361714 |
| MmugDNA.15633.1.S1_at   | MmugDNA.15633.1 | 10.33 | 10.16 | 0.23 | 0.07 | 1.13  | 0.193926 | 0.100966 | 0.55756  | 0.360525 |
| MmugDNA.15634.1.S1_at   | MmugDNA.15634.1 | 4.88  | 5.37  | 0.15 | 0.48 | -1.4  | 0.169985 | 0.198848 | 0.534161 | 0.473475 |
| MmugDNA.15637.1.S1_at   | MmugDNA.15637.1 | 4.55  | 4.56  | 0.03 | 0.01 | -1    | 0.378465 | 0.580303 | 0.686482 | 0.749618 |
| MmugDNA.15638.1.S1_at   | MmugDNA.15638.1 | 9.35  | 9.35  | 0.15 | 0.72 | -1    | 0.863632 | 0.538308 | 0.945247 | 0.723028 |
| MmugDNA.1564.1.S1_at    | MmugDNA.1564.1  | 3.7   | 3.79  | 0.29 | 0.1  | -1.07 | 0.331356 | 0.026172 | 0.656268 | 0.202785 |
| MmugDNA.15641.1.S1_at   | MmugDNA.15641.1 | 11.04 | 10.73 | 0.19 | 0.05 | 1.25  | 0.026135 | 0.019309 | 0.301461 | 0.174723 |
| MmugDNA.15646.1.S1_at   | MmugDNA.15646.1 | 3.3   | 3.37  | 0.07 | 0.02 | -1.05 | 0.62442  | 0.208661 | 0.828251 | 0.482544 |
| MmugDNA.15647.1.S1_at   | MmugDNA.15647.1 | 5.29  | 4.85  | 0.35 | 0.31 | 1.35  | 0.38824  | 0.375312 | 0.69236  | 0.613336 |
| MmugDNA.15656.1.S1_at   | MmugDNA.15656.1 | 12.41 | 12.75 | 0.13 | 0.27 | -1.26 | 0.325803 | 0.302308 | 0.653033 | 0.560092 |
| MmugDNA.1566.1.S1_at    | MmugDNA.1566.1  | 6.51  | 6.7   | 0.23 | 0.18 | -1.14 | 0.445782 | 0.297374 | 0.727984 | 0.556072 |

|                         |                 |       |       |      |      |       |          |          |          |          |
|-------------------------|-----------------|-------|-------|------|------|-------|----------|----------|----------|----------|
| MmugDNA.15660.1.S1_at   | MmugDNA.15660.1 | 6.92  | 7.02  | 0.09 | 0.07 | -1.07 | 0.392235 | 0.469931 | 0.694576 | 0.678572 |
| MmugDNA.15661.1.S1_at   | MmugDNA.15661.1 | 5.78  | 5.84  | 0.55 | 0.11 | -1.04 | 0.370193 | 0.526755 | 0.681113 | 0.715627 |
| MmugDNA.15662.1.S1_at   | MmugDNA.15662.1 | 5.3   | 5.46  | 0.07 | 0.05 | -1.12 | 0.047223 | 0.025379 | 0.365679 | 0.199678 |
| MmugDNA.15664.1.S1_at   | MmugDNA.15664.1 | 7.22  | 7.33  | 0.04 | 0.1  | -1.08 | 0.145448 | 0.04086  | 0.511449 | 0.247004 |
| MmugDNA.15665.1.S1_at   | MmugDNA.15665.1 | 5.84  | 5.9   | 0.08 | 0.25 | -1.04 | 0.822551 | 0.527651 | 0.927767 | 0.716174 |
| MmugDNA.15666.1.S1_at   | MmugDNA.15666.1 | 3.33  | 3.69  | 0.06 | 0.28 | -1.28 | 0.121001 | 0.154795 | 0.48574  | 0.429813 |
| MmugDNA.15667.1.S1_at   | MmugDNA.15667.1 | 11.88 | 11.91 | 0.05 | 0.03 | -1.02 | 0.683506 | 0.604761 | 0.85844  | 0.764797 |
| MmugDNA.1567.1.S1_at    | MmugDNA.1567.1  | 6.55  | 8.55  | 0.95 | 2.26 | -3.99 | 0.334937 | 0.194784 | 0.658673 | 0.469807 |
| MmugDNA.15671.1.S1_at   | MmugDNA.15671.1 | 3.69  | 3.86  | 0.15 | 0.3  | -1.13 | 0.942353 | 0.992159 | 0.977926 | 0.99553  |
| MmugDNA.15679.1.S1_at   | MmugDNA.15679.1 | 5.16  | 5.19  | 0.09 | 0.05 | -1.02 | 0.154002 | 0.31068  | 0.518553 | 0.565787 |
| MmugDNA.1568.1.S1_at    | MmugDNA.1568.1  | 11.3  | 11.23 | 0.15 | 0.09 | 1.06  | 0.46996  | 0.09684  | 0.742046 | 0.354254 |
| MmugDNA.15682.1.S1_at   | MmugDNA.15682.1 | 4.14  | 4.13  | 0.2  | 0.01 | 1.01  | 0.330689 | 0.498087 | 0.656004 | 0.697261 |
| MmugDNA.15691.1.S1_s_at | MmugDNA.15691.1 | 8.16  | 8.22  | 0.08 | 0.57 | -1.04 | 0.33396  | 0.213469 | 0.658024 | 0.487369 |
| MmugDNA.15693.1.S1_at   | MmugDNA.15693.1 | 10.99 | 10.6  | 0.22 | 0.38 | 1.31  | 0.266244 | 0.03455  | 0.61177  | 0.229979 |
| MmugDNA.15696.1.S1_at   | MmugDNA.15696.1 | 5.26  | 5.23  | 0.12 | 0.25 | 1.02  | 0.626913 | 0.307817 | 0.829836 | 0.56397  |
| MmugDNA.15700.1.S1_s_at | MmugDNA.15700.1 | 9.99  | 9.21  | 0.06 | 0.89 | 1.72  | 0.213528 | 0.072645 | 0.573715 | 0.315579 |
| MmugDNA.15703.1.S1_at   | MmugDNA.15703.1 | 10.16 | 9.45  | 0.05 | 0.56 | 1.63  | 0.080137 | 0.08631  | 0.430315 | 0.338771 |
| MmugDNA.15706.1.S1_at   | MmugDNA.15706.1 | 10.43 | 10.3  | 0.17 | 0.38 | 1.09  | 0.53659  | 0.523446 | 0.779501 | 0.713714 |
| MmugDNA.15708.1.S1_s_at | MmugDNA.15708.1 | 12.19 | 11.89 | 0.09 | 0.34 | 1.23  | 0.22319  | 0.275243 | 0.581723 | 0.53963  |
| MmugDNA.15709.1.S1_at   | MmugDNA.15709.1 | 4.94  | 5.14  | 0.09 | 0.14 | -1.15 | 0.514359 | 0.106384 | 0.766907 | 0.36895  |
| MmugDNA.15710.1.S1_at   | MmugDNA.15710.1 | 8.5   | 8.38  | 0.16 | 0.26 | 1.09  | 0.39976  | 0.5369   | 0.699664 | 0.722119 |
| MmugDNA.15715.1.S1_at   | MmugDNA.15715.1 | 12.03 | 11.87 | 0.18 | 0.11 | 1.11  | 0.237217 | 0.066321 | 0.590811 | 0.303189 |
| MmugDNA.15719.1.S1_at   | MmugDNA.15719.1 | 10.63 | 9.79  | 0.24 | 0.3  | 1.79  | 0.021426 | 0.005471 | 0.282524 | 0.102081 |
| MmugDNA.15721.1.S1_at   | MmugDNA.15721.1 | 9.17  | 8.12  | 0.66 | 0.19 | 2.07  | 0.021032 | 0.006161 | 0.281947 | 0.106774 |
| MmugDNA.15723.1.S1_at   | MmugDNA.15723.1 | 10.75 | 10.42 | 0.34 | 0.39 | 1.26  | 0.726026 | 0.715635 | 0.880708 | 0.835159 |
| MmugDNA.15726.1.S1_at   | MmugDNA.15726.1 | 4.35  | 4.36  | 0.34 | 0.07 | -1.01 | 0.965277 | 0.604451 | 0.986736 | 0.76464  |
| MmugDNA.15732.1.S1_at   | MmugDNA.15732.1 | 3     | 2.93  | 0.26 | 0.09 | 1.05  | 0.273971 | 0.24321  | 0.617262 | 0.513356 |
| MmugDNA.15733.1.S1_at   | MmugDNA.15733.1 | 5.4   | 5.42  | 0.28 | 0.21 | -1.01 | 0.377419 | 0.337319 | 0.685856 | 0.584533 |
| MmugDNA.15740.1.S1_at   | MmugDNA.15740.1 | 11.01 | 11.16 | 0.13 | 0.1  | -1.11 | 0.863949 | 0.250521 | 0.945408 | 0.519391 |
| MmugDNA.15744.1.S1_at   | MmugDNA.15744.1 | 4.31  | 4.49  | 0.54 | 0.01 | -1.13 | 0.836603 | 0.831922 | 0.933911 | 0.90356  |
| MmugDNA.15746.1.S1_at   | MmugDNA.15746.1 | 6.76  | 6.5   | 0.19 | 0.31 | 1.2   | 0.215729 | 0.033298 | 0.575954 | 0.226087 |
| MmugDNA.15747.1.S1_at   | MmugDNA.15747.1 | 11.65 | 11.86 | 0.11 | 0.14 | -1.15 | 0.233115 | 0.070516 | 0.587988 | 0.311777 |
| MmugDNA.15751.1.S1_at   | MmugDNA.15751.1 | 9.6   | 8.28  | 0.22 | 0.21 | 2.5   | 0.002076 | 0.000346 | 0.155636 | 0.037    |
| MmugDNA.15752.1.S1_at   | MmugDNA.15752.1 | 8.82  | 9.86  | 0.45 | 0.38 | -2.06 | 0.131897 | 0.092533 | 0.498114 | 0.348504 |
| MmugDNA.15754.1.S1_at   | MmugDNA.15754.1 | 10.54 | 8.71  | 0.12 | 0.1  | 3.56  | 0.00003  | 0.000001 | 0.112653 | 0.007307 |
| MmugDNA.15759.1.S1_at   | MmugDNA.15759.1 | 11.75 | 12.31 | 0.01 | 0.03 | -1.48 | 0.000006 | 0.000023 | 0.099981 | 0.019635 |
| MmugDNA.15760.1.S1_at   | MmugDNA.15760.1 | 11.74 | 13.24 | 0.35 | 0.71 | -2.82 | 0.074543 | 0.063413 | 0.420428 | 0.298441 |
| MmugDNA.15762.1.S1_at   | MmugDNA.15762.1 | 6.98  | 9.73  | 1.33 | 2.43 | -6.74 | 0.36986  | 0.228305 | 0.681021 | 0.500471 |
| MmugDNA.15770.1.S1_at   | MmugDNA.15770.1 | 6.81  | 6.95  | 0.15 | 0.15 | -1.1  | 0.201727 | 0.24878  | 0.563988 | 0.517931 |
| MmugDNA.15775.1.S1_at   | MmugDNA.15775.1 | 9.56  | 9.51  | 0.07 | 0.18 | 1.04  | 0.199643 | 0.214366 | 0.562708 | 0.488047 |
| MmugDNA.15780.1.S1_at   | MmugDNA.15780.1 | 11.96 | 11.91 | 0.21 | 0.24 | 1.03  | 0.317177 | 0.440114 | 0.647872 | 0.658719 |

|                         |                 |       |       |      |      |       |          |          |          |          |
|-------------------------|-----------------|-------|-------|------|------|-------|----------|----------|----------|----------|
| MmugDNA.15782.1.S1_at   | MmugDNA.15782.1 | 8.82  | 10.32 | 0.6  | 1.2  | -2.84 | 0.161493 | 0.111685 | 0.526444 | 0.37664  |
| MmugDNA.15793.1.S1_at   | MmugDNA.15793.1 | 6.32  | 6.28  | 0.2  | 0.17 | 1.02  | 0.950313 | 0.664083 | 0.981318 | 0.803247 |
| MmugDNA.15802.1.S1_at   | MmugDNA.15802.1 | 12.18 | 11.98 | 0.11 | 0.21 | 1.15  | 0.23561  | 0.285883 | 0.589497 | 0.547484 |
| MmugDNA.15804.1.S1_at   | MmugDNA.15804.1 | 11.31 | 11.37 | 0.16 | 0.15 | -1.04 | 0.454187 | 0.193094 | 0.733184 | 0.468554 |
| MmugDNA.15809.1.S1_at   | MmugDNA.15809.1 | 7     | 7.28  | 0.05 | 0.14 | -1.21 | 0.045573 | 0.034345 | 0.36126  | 0.229283 |
| MmugDNA.15811.1.S1_at   | MmugDNA.15811.1 | 9.83  | 9.63  | 0.05 | 0.14 | 1.15  | 0.036959 | 0.000261 | 0.340513 | 0.033678 |
| MmugDNA.15817.1.S1_at   | MmugDNA.15817.1 | 3.58  | 3.67  | 0.13 | 0.08 | -1.06 | 0.910661 | 0.900404 | 0.964695 | 0.94344  |
| MmugDNA.15818.1.S1_at   | MmugDNA.15818.1 | 7     | 6.37  | 0.61 | 0.21 | 1.55  | 0.137113 | 0.133107 | 0.504356 | 0.404734 |
| MmugDNA.15820.1.S1_at   | MmugDNA.15820.1 | 8.25  | 7.9   | 1.21 | 0.98 | 1.27  | 0.99257  | 0.546663 | 0.997451 | 0.728135 |
| MmugDNA.15821.1.S1_at   | MmugDNA.15821.1 | 9.8   | 10.97 | 0.52 | 0.29 | -2.25 | 0.01291  | 0.005804 | 0.244747 | 0.104597 |
| MmugDNA.1583.1.S1_at    | MmugDNA.1583.1  | 3.55  | 4.07  | 0.21 | 0.22 | -1.43 | 0.201405 | 0.250197 | 0.563974 | 0.519222 |
| MmugDNA.15835.1.S1_at   | MmugDNA.15835.1 | 10.85 | 10.06 | 0.36 | 0.88 | 1.73  | 0.117184 | 0.069758 | 0.481176 | 0.31026  |
| MmugDNA.15837.1.S1_at   | MmugDNA.15837.1 | 6.15  | 5.99  | 0.13 | 0.6  | 1.12  | 0.848315 | 0.603943 | 0.939211 | 0.764419 |
| MmugDNA.15841.1.S1_at   | MmugDNA.15841.1 | 13.65 | 13.83 | 0.02 | 0.12 | -1.13 | 0.048771 | 0.01208  | 0.369576 | 0.14216  |
| MmugDNA.15847.1.S1_at   | MmugDNA.15847.1 | 10.32 | 10.36 | 0.11 | 0.44 | -1.03 | 0.960814 | 0.870549 | 0.984947 | 0.926446 |
| MmugDNA.15851.1.S1_at   | MmugDNA.15851.1 | 11.23 | 10.65 | 0.14 | 0.59 | 1.49  | 0.09862  | 0.051693 | 0.458486 | 0.272892 |
| MmugDNA.15857.1.S1_s_at | MmugDNA.15857.1 | 9.37  | 9.94  | 0.6  | 0.36 | -1.49 | 0.085966 | 0.062335 | 0.440024 | 0.296503 |
| MmugDNA.15859.1.S1_at   | MmugDNA.15859.1 | 10.28 | 10.36 | 0.06 | 0.13 | -1.05 | 0.678806 | 0.657056 | 0.856249 | 0.799413 |
| MmugDNA.15859.1.S1_s_at | MmugDNA.15859.1 | 11.08 | 11.04 | 0.05 | 0.11 | 1.02  | 0.75618  | 0.822318 | 0.896391 | 0.89777  |
| MmugDNA.15860.1.S1_at   | MmugDNA.15860.1 | 5.23  | 4.82  | 0.82 | 0.53 | 1.33  | 0.811227 | 0.439014 | 0.923061 | 0.657802 |
| MmugDNA.15861.1.S1_s_at | MmugDNA.15861.1 | 12.74 | 12.28 | 0.12 | 0.04 | 1.38  | 0.002397 | 0.00205  | 0.163555 | 0.066887 |
| MmugDNA.15865.1.S1_at   | MmugDNA.15865.1 | 7.94  | 10.28 | 0.94 | 2.24 | -5.06 | 0.235324 | 0.236622 | 0.589342 | 0.50743  |
| MmugDNA.15867.1.S1_at   | MmugDNA.15867.1 | 5.83  | 5.89  | 0.27 | 0.39 | -1.04 | 0.917878 | 0.040985 | 0.968033 | 0.247202 |
| MmugDNA.15869.1.S1_at   | MmugDNA.15869.1 | 6.2   | 6.22  | 0.06 | 0.05 | -1.01 | 0.589624 | 0.029364 | 0.80952  | 0.213234 |
| MmugDNA.15878.1.S1_at   | MmugDNA.15878.1 | 12.84 | 12.87 | 0.03 | 0.04 | -1.02 | 0.440042 | 0.445885 | 0.72409  | 0.662593 |
| MmugDNA.15881.1.S1_at   | MmugDNA.15881.1 | 12.85 | 12.85 | 0.06 | 0.14 | 1     | 0.92743  | 0.925964 | 0.971995 | 0.958059 |
| MmugDNA.15884.1.S1_at   | MmugDNA.15884.1 | 2.98  | 3.1   | 0.14 | 0.03 | -1.09 | 0.267988 | 0.18103  | 0.612875 | 0.457529 |
| MmugDNA.15887.1.S1_at   | MmugDNA.15887.1 | 8.74  | 8.89  | 0.19 | 0.13 | -1.11 | 0.422648 | 0.063271 | 0.713614 | 0.298244 |
| MmugDNA.15888.1.S1_at   | MmugDNA.15888.1 | 4.17  | 4.51  | 0.49 | 0.31 | -1.27 | 0.512288 | 0.45845  | 0.765523 | 0.671168 |
| MmugDNA.1589.1.S1_at    | MmugDNA.1589.1  | 9.34  | 10.37 | 0.53 | 1.13 | -2.04 | 0.262899 | 0.336924 | 0.609115 | 0.584156 |
| MmugDNA.15890.1.S1_at   | MmugDNA.15890.1 | 5.58  | 4.15  | 1.02 | 1.39 | 2.7   | 0.560167 | 0.49231  | 0.794197 | 0.693485 |
| MmugDNA.15898.1.S1_at   | MmugDNA.15898.1 | 9.88  | 10.1  | 0.11 | 0.48 | -1.16 | 0.526835 | 0.505419 | 0.774374 | 0.702133 |
| MmugDNA.15898.1.S1_s_at | MmugDNA.15898.1 | 12.1  | 12.54 | 0.2  | 0.57 | -1.35 | 0.40289  | 0.341837 | 0.701704 | 0.587929 |
| MmugDNA.159.1.S1_at     | MmugDNA.159.1   | 6.31  | 6.26  | 0.27 | 0.02 | 1.03  | 0.590302 | 0.508109 | 0.809851 | 0.70337  |
| MmugDNA.15904.1.S1_at   | MmugDNA.15904.1 | 7.48  | 7.89  | 0.52 | 1.12 | -1.33 | 0.946122 | 0.301321 | 0.979359 | 0.559356 |
| MmugDNA.15906.1.S1_at   | MmugDNA.15906.1 | 11.51 | 11.15 | 0.05 | 0.37 | 1.28  | 0.275031 | 0.286942 | 0.617642 | 0.548246 |
| MmugDNA.15911.1.S1_at   | MmugDNA.15911.1 | 6.39  | 6.61  | 0.15 | 0.18 | -1.17 | 0.509941 | 0.655807 | 0.764615 | 0.798709 |
| MmugDNA.15912.1.S1_at   | MmugDNA.15912.1 | 9.05  | 9.57  | 0.59 | 0.9  | -1.44 | 0.482153 | 0.255665 | 0.749398 | 0.523619 |
| MmugDNA.15913.1.S1_at   | MmugDNA.15913.1 | 11.93 | 11.53 | 0.17 | 0.17 | 1.32  | 0.042448 | 0.124706 | 0.355049 | 0.39513  |
| MmugDNA.15916.1.S1_at   | MmugDNA.15916.1 | 7.65  | 8.28  | 0.51 | 1.01 | -1.55 | 0.340926 | 0.257054 | 0.662203 | 0.524781 |
| MmugDNA.15917.1.S1_at   | MmugDNA.15917.1 | 5.09  | 5.3   | 0.06 | 0.08 | -1.16 | 0.015904 | 0.00887  | 0.261669 | 0.12465  |



|                         |                 |       |       |      |      |        |          |          |          |          |
|-------------------------|-----------------|-------|-------|------|------|--------|----------|----------|----------|----------|
| MmugDNA.15918.1.S1_at   | MmugDNA.15918.1 | 12.83 | 12.97 | 0.11 | 0.12 | -1.1   | 0.170765 | 0.056392 | 0.534647 | 0.283382 |
| MmugDNA.15921.1.S1_at   | MmugDNA.15921.1 | 5.06  | 5.01  | 0.23 | 0.05 | 1.04   | 0.233819 | 0.309544 | 0.588317 | 0.564987 |
| MmugDNA.15923.1.S1_at   | MmugDNA.15923.1 | 9.33  | 9.05  | 0.25 | 0.67 | 1.21   | 0.341484 | 0.446613 | 0.662575 | 0.66287  |
| MmugDNA.15927.1.S1_at   | MmugDNA.15927.1 | 8.4   | 9.13  | 0.03 | 0.17 | -1.65  | 0.002037 | 0.009802 | 0.155636 | 0.130166 |
| MmugDNA.15932.1.S1_at   | MmugDNA.15932.1 | 8.76  | 7.91  | 0.09 | 0.29 | 1.8    | 0.022772 | 0.011239 | 0.288168 | 0.138014 |
| MmugDNA.15938.1.S1_at   | MmugDNA.15938.1 | 10.75 | 10.64 | 0.22 | 0.12 | 1.08   | 0.72294  | 0.90979  | 0.878924 | 0.949108 |
| MmugDNA.15940.1.S1_at   | MmugDNA.15940.1 | 5.75  | 10.93 | 1.42 | 3.59 | -36.32 | 0.189613 | 0.052913 | 0.552487 | 0.275647 |
| MmugDNA.15943.1.S1_at   | MmugDNA.15943.1 | 9.14  | 9.29  | 0.1  | 0.05 | -1.11  | 0.091222 | 0.090696 | 0.447111 | 0.345151 |
| MmugDNA.15943.1.S1_s_at | MmugDNA.15943.1 | 9.43  | 9.52  | 0.18 | 0.18 | -1.06  | 0.36767  | 0.360025 | 0.679512 | 0.601198 |
| MmugDNA.15943.1.S1_x_at | MmugDNA.15943.1 | 9.15  | 9.29  | 0.11 | 0.03 | -1.1   | 0.13169  | 0.106706 | 0.498041 | 0.369298 |
| MmugDNA.15944.1.S1_at   | MmugDNA.15944.1 | 4.72  | 4.74  | 0.05 | 0.09 | -1.02  | 0.421296 | 0.16526  | 0.712907 | 0.441459 |
| MmugDNA.15948.1.S1_at   | MmugDNA.15948.1 | 4.88  | 4.99  | 0.21 | 0.12 | -1.08  | 0.476601 | 0.476476 | 0.746273 | 0.682725 |
| MmugDNA.15949.1.S1_at   | MmugDNA.15949.1 | 4.32  | 3.97  | 0.27 | 0.2  | 1.28   | 0.160973 | 0.205978 | 0.526153 | 0.480222 |
| MmugDNA.15954.1.S1_at   | MmugDNA.15954.1 | 11.03 | 11.3  | 0.27 | 0.16 | -1.21  | 0.163357 | 0.195233 | 0.527696 | 0.470253 |
| MmugDNA.15955.1.S1_at   | MmugDNA.15955.1 | 8.75  | 7.58  | 0.24 | 0.17 | 2.25   | 0.002586 | 0.000407 | 0.164386 | 0.037601 |
| MmugDNA.15957.1.S1_at   | MmugDNA.15957.1 | 8.55  | 8.82  | 0.43 | 0.53 | -1.21  | 0.231518 | 0.264999 | 0.587406 | 0.530973 |
| MmugDNA.15959.1.S1_at   | MmugDNA.15959.1 | 7.95  | 7.58  | 0.51 | 0.49 | 1.29   | 0.390586 | 0.175722 | 0.693739 | 0.452344 |
| MmugDNA.1596.1.S1_at    | MmugDNA.1596.1  | 13.39 | 13.27 | 0.04 | 0.23 | 1.09   | 0.361755 | 0.482494 | 0.675408 | 0.687323 |
| MmugDNA.15960.1.S1_at   | MmugDNA.15960.1 | 10.96 | 11.18 | 0.19 | 0.07 | -1.17  | 0.044398 | 0.036198 | 0.358591 | 0.234829 |
| MmugDNA.15961.1.S1_at   | MmugDNA.15961.1 | 9.59  | 9.24  | 0.12 | 0.08 | 1.28   | 0.02766  | 0.007575 | 0.308507 | 0.116509 |
| MmugDNA.15962.1.S1_at   | MmugDNA.15962.1 | 6.26  | 6.89  | 0.28 | 0.23 | -1.54  | 0.021689 | 0.023557 | 0.283263 | 0.192238 |
| MmugDNA.15978.1.S1_at   | MmugDNA.15978.1 | 3.55  | 3.62  | 0.39 | 0.3  | -1.04  | 0.731624 | 0.892402 | 0.883972 | 0.938637 |
| MmugDNA.15983.1.S1_at   | MmugDNA.15983.1 | 10.29 | 10.37 | 0.13 | 0.02 | -1.06  | 0.107275 | 0.00427  | 0.467913 | 0.091847 |
| MmugDNA.15984.1.S1_at   | MmugDNA.15984.1 | 11.62 | 11.67 | 0.08 | 0.21 | -1.04  | 0.633255 | 0.727291 | 0.833571 | 0.84224  |
| MmugDNA.1599.1.S1_at    | MmugDNA.1599.1  | 12.97 | 12.87 | 0.07 | 0.16 | 1.08   | 0.515743 | 0.43519  | 0.767629 | 0.655058 |
| MmugDNA.15993.1.S1_at   | MmugDNA.15993.1 | 10.57 | 11.53 | 0.1  | 0.44 | -1.95  | 0.032921 | 0.010951 | 0.326647 | 0.136223 |
| MmugDNA.15994.1.S1_at   | MmugDNA.15994.1 | 11.08 | 10.95 | 0.1  | 0.29 | 1.1    | 0.432445 | 0.35652  | 0.719041 | 0.598459 |
| MmugDNA.15997.1.S1_s_at | MmugDNA.15997.1 | 3.23  | 7.98  | 1.65 | 3.23 | -26.82 | 0.234443 | 0.181639 | 0.588668 | 0.458236 |
| MmugDNA.16.1.S1_at      | MmugDNA.16.1    | 7.35  | 7.15  | 0.18 | 0.2  | 1.14   | 0.647073 | 0.401769 | 0.841216 | 0.631068 |
| MmugDNA.16002.1.S1_at   | MmugDNA.16002.1 | 7.6   | 8.12  | 0.06 | 0.13 | -1.43  | 0.003484 | 0.000841 | 0.178634 | 0.047013 |
| MmugDNA.1601.1.S1_at    | MmugDNA.1601.1  | 7.08  | 7.07  | 0.18 | 0.06 | 1      | 0.731449 | 0.91872  | 0.883821 | 0.954387 |
| MmugDNA.16010.1.S1_at   | MmugDNA.16010.1 | 4.8   | 4.59  | 0.18 | 0.14 | 1.16   | 0.404207 | 0.415222 | 0.7026   | 0.640766 |
| MmugDNA.16011.1.S1_at   | MmugDNA.16011.1 | 10.09 | 10.88 | 0.45 | 0.29 | -1.72  | 0.156714 | 0.11801  | 0.521541 | 0.385881 |
| MmugDNA.16012.1.S1_at   | MmugDNA.16012.1 | 7.85  | 7.2   | 0.02 | 0.26 | 1.57   | 0.013969 | 0.00491  | 0.250102 | 0.097662 |
| MmugDNA.16013.1.S1_at   | MmugDNA.16013.1 | 5.62  | 5.35  | 0.03 | 0.04 | 1.21   | 0.000668 | 0.002208 | 0.136818 | 0.069408 |
| MmugDNA.16021.1.S1_at   | MmugDNA.16021.1 | 4.71  | 4.73  | 0.22 | 0.31 | -1.01  | 0.657214 | 0.630668 | 0.845778 | 0.782345 |
| MmugDNA.16022.1.S1_at   | MmugDNA.16022.1 | 4.72  | 4.99  | 0.07 | 0.38 | -1.21  | 0.402633 | 0.552304 | 0.701533 | 0.731658 |
| MmugDNA.16024.1.S1_at   | MmugDNA.16024.1 | 10.72 | 10.43 | 0.11 | 0.3  | 1.22   | 0.18952  | 0.149134 | 0.552479 | 0.423572 |
| MmugDNA.16025.1.S1_at   | MmugDNA.16025.1 | 8.62  | 8.64  | 0.01 | 0.78 | -1.01  | 0.943271 | 0.97463  | 0.97844  | 0.986197 |
| MmugDNA.16028.1.S1_at   | MmugDNA.16028.1 | 12.42 | 12    | 0.16 | 0.39 | 1.33   | 0.291134 | 0.511791 | 0.628725 | 0.705797 |
| MmugDNA.1603.1.S1_at    | MmugDNA.1603.1  | 5.61  | 5.5   | 0.25 | 0.13 | 1.08   | 0.636183 | 0.300727 | 0.835356 | 0.558959 |

|                       |                 |       |       |      |      |       |          |          |          |          |
|-----------------------|-----------------|-------|-------|------|------|-------|----------|----------|----------|----------|
| MmugDNA.16031.1.S1_at | MmugDNA.16031.1 | 10.26 | 11.06 | 0.11 | 0.64 | -1.73 | 0.085494 | 0.076367 | 0.439394 | 0.321368 |
| MmugDNA.16040.1.S1_at | MmugDNA.16040.1 | 7.64  | 9.37  | 0.79 | 1.87 | -3.33 | 0.420873 | 0.371832 | 0.712776 | 0.610615 |
| MmugDNA.16041.1.S1_at | MmugDNA.16041.1 | 6.26  | 5.46  | 0.58 | 0.39 | 1.74  | 0.053494 | 0.061174 | 0.380257 | 0.293981 |
| MmugDNA.16045.1.S1_at | MmugDNA.16045.1 | 13.59 | 13.94 | 0.15 | 0.28 | -1.27 | 0.396677 | 0.406404 | 0.697146 | 0.634305 |
| MmugDNA.16048.1.S1_at | MmugDNA.16048.1 | 10.72 | 10.98 | 0.33 | 0.21 | -1.2  | 0.101181 | 0.100807 | 0.461009 | 0.360275 |
| MmugDNA.16049.1.S1_at | MmugDNA.16049.1 | 10.02 | 9.31  | 0.05 | 0.39 | 1.64  | 0.09867  | 0.063973 | 0.458526 | 0.299066 |
| MmugDNA.16050.1.S1_at | MmugDNA.16050.1 | 3.19  | 3.29  | 0.06 | 0.13 | -1.07 | 0.956864 | 0.45312  | 0.983792 | 0.667551 |
| MmugDNA.16051.1.S1_at | MmugDNA.16051.1 | 3.72  | 3.82  | 0.33 | 0.1  | -1.07 | 0.708289 | 0.257754 | 0.871646 | 0.525376 |
| MmugDNA.16052.1.S1_at | MmugDNA.16052.1 | 8.64  | 8.7   | 0.07 | 0.16 | -1.05 | 0.45867  | 0.661211 | 0.7356   | 0.801687 |
| MmugDNA.16053.1.S1_at | MmugDNA.16053.1 | 11.96 | 12.09 | 0.08 | 0.14 | -1.1  | 0.259953 | 0.299278 | 0.606878 | 0.557769 |
| MmugDNA.16054.1.S1_at | MmugDNA.16054.1 | 11.13 | 11.35 | 0.09 | 0.34 | -1.16 | 0.271486 | 0.067053 | 0.615706 | 0.304872 |
| MmugDNA.16057.1.S1_at | MmugDNA.16057.1 | 5.5   | 5.5   | 0.04 | 0.05 | 1.01  | 0.744943 | 0.583785 | 0.890922 | 0.751989 |
| MmugDNA.16058.1.S1_at | MmugDNA.16058.1 | 9.5   | 9.17  | 0.16 | 0.15 | 1.25  | 0.056172 | 0.067331 | 0.386006 | 0.305482 |
| MmugDNA.16059.1.S1_at | MmugDNA.16059.1 | 3.56  | 3.59  | 0.17 | 0.05 | -1.02 | 0.634377 | 0.750309 | 0.834486 | 0.854766 |
| MmugDNA.1606.1.S1_at  | MmugDNA.1606.1  | 5.43  | 5.57  | 0.26 | 0.1  | -1.1  | 0.337426 | 0.358769 | 0.659935 | 0.600237 |
| MmugDNA.16060.1.S1_at | MmugDNA.16060.1 | 3.97  | 4.03  | 0.24 | 0.07 | -1.04 | 0.791788 | 0.667672 | 0.913493 | 0.805472 |
| MmugDNA.16062.1.S1_at | MmugDNA.16062.1 | 11.96 | 11.74 | 0.03 | 0.11 | 1.16  | 0.028058 | 0.048661 | 0.309619 | 0.265613 |
| MmugDNA.16063.1.S1_at | MmugDNA.16063.1 | 11.47 | 11.48 | 0.04 | 0.61 | -1.01 | 0.99843  | 0.950713 | 0.99939  | 0.972024 |
| MmugDNA.16069.1.S1_at | MmugDNA.16069.1 | 9.4   | 9.65  | 0.34 | 0.41 | -1.19 | 0.556069 | 0.029705 | 0.791585 | 0.214029 |
| MmugDNA.16075.1.S1_at | MmugDNA.16075.1 | 6.07  | 5.93  | 0.09 | 0.32 | 1.1   | 0.663607 | 0.548689 | 0.849022 | 0.729318 |
| MmugDNA.16079.1.S1_at | MmugDNA.16079.1 | 10.04 | 11.03 | 0.27 | 0.52 | -1.99 | 0.054513 | 0.040998 | 0.381851 | 0.247202 |
| MmugDNA.1608.1.S1_at  | MmugDNA.1608.1  | 7.26  | 6.98  | 0.21 | 0.43 | 1.21  | 0.252566 | 0.332442 | 0.601373 | 0.58087  |
| MmugDNA.16086.1.S1_at | MmugDNA.16086.1 | 3.64  | 3.62  | 0.06 | 0.1  | 1.01  | 0.606817 | 0.896998 | 0.819045 | 0.941205 |
| MmugDNA.16089.1.S1_at | MmugDNA.16089.1 | 6.94  | 7.07  | 0.06 | 0.18 | -1.1  | 0.149409 | 0.190449 | 0.514001 | 0.465906 |
| MmugDNA.1609.1.S1_at  | MmugDNA.1609.1  | 10.44 | 10.75 | 0.17 | 0.38 | -1.24 | 0.214221 | 0.276712 | 0.574647 | 0.540618 |
| MmugDNA.16092.1.S1_at | MmugDNA.16092.1 | 10.11 | 8.95  | 0.13 | 0.08 | 2.25  | 0.000172 | 0.000067 | 0.118376 | 0.025805 |
| MmugDNA.16097.1.S1_at | MmugDNA.16097.1 | 9.28  | 8.92  | 0.14 | 0.11 | 1.29  | 0.031798 | 0.061099 | 0.32289  | 0.293958 |
| MmugDNA.16098.1.S1_at | MmugDNA.16098.1 | 3.28  | 3.44  | 0.14 | 0.06 | -1.12 | 0.130069 | 0.165359 | 0.496292 | 0.441544 |
| MmugDNA.16101.1.S1_at | MmugDNA.16101.1 | 10.69 | 10.46 | 0.04 | 0.21 | 1.17  | 0.095284 | 0.104767 | 0.453089 | 0.366208 |
| MmugDNA.16104.1.S1_at | MmugDNA.16104.1 | 5.29  | 6.89  | 0.65 | 0.77 | -3.02 | 0.035421 | 0.01594  | 0.336358 | 0.160254 |
| MmugDNA.16105.1.S1_at | MmugDNA.16105.1 | 9.76  | 10.77 | 0.95 | 0.55 | -2.01 | 0.109523 | 0.050612 | 0.470811 | 0.270317 |
| MmugDNA.16113.1.S1_at | MmugDNA.16113.1 | 12.18 | 12.13 | 0.14 | 0.14 | 1.03  | 0.141642 | 0.02013  | 0.509159 | 0.17825  |
| MmugDNA.16116.1.S1_at | MmugDNA.16116.1 | 5.31  | 5.25  | 0.15 | 0.32 | 1.04  | 0.470524 | 0.641335 | 0.742471 | 0.789506 |
| MmugDNA.16118.1.S1_at | MmugDNA.16118.1 | 8.12  | 9.09  | 0.15 | 0.73 | -1.96 | 0.149415 | 0.085979 | 0.514001 | 0.338116 |
| MmugDNA.16122.1.S1_at | MmugDNA.16122.1 | 4.43  | 4.48  | 0.12 | 0.04 | -1.03 | 0.344685 | 0.39544  | 0.664708 | 0.627474 |
| MmugDNA.16127.1.S1_at | MmugDNA.16127.1 | 6.49  | 6.85  | 0.21 | 0.27 | -1.28 | 0.119615 | 0.109973 | 0.484145 | 0.374065 |
| MmugDNA.16131.1.S1_at | MmugDNA.16131.1 | 11.25 | 11.1  | 0.14 | 0.13 | 1.11  | 0.20663  | 0.130621 | 0.568816 | 0.402594 |
| MmugDNA.16132.1.S1_at | MmugDNA.16132.1 | 5.53  | 5.38  | 0.18 | 0.25 | 1.11  | 0.195705 | 0.14595  | 0.558901 | 0.419967 |
| MmugDNA.16137.1.S1_at | MmugDNA.16137.1 | 10.8  | 11.22 | 0.35 | 0.38 | -1.34 | 0.342743 | 0.139789 | 0.663407 | 0.413122 |
| MmugDNA.1614.1.S1_at  | MmugDNA.1614.1  | 9.4   | 10.56 | 0.82 | 1.06 | -2.24 | 0.54589  | 0.593721 | 0.785219 | 0.758417 |
| MmugDNA.16140.1.S1_at | MmugDNA.16140.1 | 10    | 10.49 | 0.2  | 0.2  | -1.4  | 0.098829 | 0.094112 | 0.458711 | 0.35079  |

|                         |                 |       |       |      |      |        |          |          |          |          |
|-------------------------|-----------------|-------|-------|------|------|--------|----------|----------|----------|----------|
| MmugDNA.16142.1.S1_at   | MmugDNA.16142.1 | 7.14  | 6.36  | 0.74 | 0.14 | 1.72   | 0.156691 | 0.164955 | 0.521541 | 0.44123  |
| MmugDNA.16143.1.S1_at   | MmugDNA.16143.1 | 8.22  | 7.96  | 0.09 | 0.34 | 1.2    | 0.274155 | 0.156278 | 0.617262 | 0.43161  |
| MmugDNA.16144.1.S1_at   | MmugDNA.16144.1 | 7.76  | 7.63  | 0.07 | 0.37 | 1.1    | 0.667906 | 0.48778  | 0.851379 | 0.690669 |
| MmugDNA.16148.1.S1_at   | MmugDNA.16148.1 | 9.8   | 9.59  | 0.23 | 0.36 | 1.16   | 0.671    | 0.828996 | 0.852532 | 0.901691 |
| MmugDNA.16150.1.S1_at   | MmugDNA.16150.1 | 4.93  | 4.96  | 0.19 | 0.11 | -1.02  | 0.532443 | 0.742121 | 0.77773  | 0.850618 |
| MmugDNA.16156.1.S1_at   | MmugDNA.16156.1 | 5.54  | 5.56  | 0.15 | 0.04 | -1.01  | 0.347308 | 0.593849 | 0.6664   | 0.758418 |
| MmugDNA.16158.1.S1_at   | MmugDNA.16158.1 | 5.7   | 9.17  | 0.85 | 2.68 | -11.08 | 0.208434 | 0.261399 | 0.570275 | 0.527887 |
| MmugDNA.16159.1.S1_at   | MmugDNA.16159.1 | 9.29  | 7.78  | 0.35 | 0.79 | 2.85   | 0.039857 | 0.020154 | 0.34828  | 0.178414 |
| MmugDNA.16160.1.S1_at   | MmugDNA.16160.1 | 10.11 | 10.14 | 0.41 | 0.55 | -1.02  | 0.640818 | 0.051163 | 0.837789 | 0.27167  |
| MmugDNA.16162.1.S1_at   | MmugDNA.16162.1 | 3.71  | 3.68  | 0.1  | 0.34 | 1.02   | 0.367572 | 0.500163 | 0.679502 | 0.698908 |
| MmugDNA.16165.1.S1_at   | MmugDNA.16165.1 | 6.21  | 6.14  | 0.67 | 0.1  | 1.05   | 0.292151 | 0.386784 | 0.629464 | 0.621895 |
| MmugDNA.16166.1.S1_at   | MmugDNA.16166.1 | 4.78  | 5.21  | 0.16 | 0.52 | -1.34  | 0.846986 | 0.71499  | 0.938541 | 0.834761 |
| MmugDNA.16168.1.S1_at   | MmugDNA.16168.1 | 11.38 | 10.8  | 0.12 | 0.24 | 1.5    | 0.03538  | 0.02699  | 0.336277 | 0.205476 |
| MmugDNA.16168.1.S1_s_at | MmugDNA.16168.1 | 11.19 | 10.48 | 0.08 | 0.36 | 1.64   | 0.084437 | 0.07522  | 0.437025 | 0.319399 |
| MmugDNA.16169.1.S1_at   | MmugDNA.16169.1 | 5.31  | 8.73  | 0.79 | 2.34 | -10.68 | 0.100535 | 0.083812 | 0.461009 | 0.334648 |
| MmugDNA.1617.1.S1_at    | MmugDNA.1617.1  | 5.55  | 6.28  | 0.92 | 1.34 | -1.65  | 0.495852 | 0.629468 | 0.757324 | 0.781895 |
| MmugDNA.16170.1.S1_s_at | MmugDNA.16170.1 | 12.61 | 12.33 | 0.18 | 0.16 | 1.22   | 0.125693 | 0.027629 | 0.491732 | 0.207522 |
| MmugDNA.16173.1.S1_at   | MmugDNA.16173.1 | 9.76  | 9.34  | 0.3  | 0.5  | 1.33   | 0.40226  | 0.163492 | 0.701365 | 0.439731 |
| MmugDNA.16179.1.S1_at   | MmugDNA.16179.1 | 4.82  | 4.81  | 0.1  | 0.39 | 1.01   | 0.743698 | 0.928815 | 0.890194 | 0.959449 |
| MmugDNA.1618.1.S1_at    | MmugDNA.1618.1  | 5.93  | 5.9   | 0.19 | 0.11 | 1.02   | 0.499482 | 0.676953 | 0.759212 | 0.81126  |
| MmugDNA.16181.1.S1_at   | MmugDNA.16181.1 | 7.18  | 6.95  | 0.11 | 0.41 | 1.18   | 0.318768 | 0.401606 | 0.648688 | 0.631068 |
| MmugDNA.16183.1.S1_at   | MmugDNA.16183.1 | 8.87  | 9.19  | 0.07 | 0.3  | -1.25  | 0.145723 | 0.092416 | 0.511596 | 0.348296 |
| MmugDNA.16185.1.S1_at   | MmugDNA.16185.1 | 12.82 | 13    | 0.09 | 0.12 | -1.13  | 0.067113 | 0.102073 | 0.407071 | 0.362122 |
| MmugDNA.16186.1.S1_at   | MmugDNA.16186.1 | 10.58 | 10.25 | 0.15 | 0.59 | 1.26   | 0.451266 | 0.458373 | 0.731538 | 0.671165 |
| MmugDNA.16187.1.S1_at   | MmugDNA.16187.1 | 9.81  | 9.44  | 0.23 | 0.29 | 1.29   | 0.089031 | 0.018127 | 0.444442 | 0.169609 |
| MmugDNA.16188.1.S1_at   | MmugDNA.16188.1 | 8.54  | 8.18  | 0.23 | 0.05 | 1.28   | 0.164204 | 0.231049 | 0.528213 | 0.502774 |
| MmugDNA.16189.1.S1_at   | MmugDNA.16189.1 | 4.25  | 4.48  | 0.15 | 0.1  | -1.17  | 0.170455 | 0.127728 | 0.534249 | 0.398581 |
| MmugDNA.16193.1.S1_at   | MmugDNA.16193.1 | 12.5  | 12.57 | 0.09 | 0.09 | -1.05  | 0.850696 | 0.819716 | 0.940027 | 0.896133 |
| MmugDNA.1620.1.S1_s_at  | MmugDNA.1620.1  | 7.14  | 6.87  | 0.31 | 0.09 | 1.21   | 0.18452  | 0.085749 | 0.548202 | 0.337761 |
| MmugDNA.16200.1.S1_at   | MmugDNA.16200.1 | 10.26 | 9.54  | 0.41 | 0.22 | 1.65   | 0.05236  | 0.040399 | 0.377519 | 0.246134 |
| MmugDNA.16202.1.S1_at   | MmugDNA.16202.1 | 6.86  | 7.64  | 0.15 | 0.43 | -1.72  | 0.017628 | 0.006646 | 0.267454 | 0.110505 |
| MmugDNA.1621.1.S1_at    | MmugDNA.1621.1  | 3.34  | 3.14  | 0.03 | 0.07 | 1.15   | 0.004853 | 0.001203 | 0.185146 | 0.054389 |
| MmugDNA.16210.1.S1_at   | MmugDNA.16210.1 | 10.36 | 10.38 | 0.19 | 0.8  | -1.02  | 0.98019  | 0.462654 | 0.992802 | 0.673983 |
| MmugDNA.16211.1.S1_at   | MmugDNA.16211.1 | 4.61  | 4.31  | 0.39 | 0.24 | 1.23   | 0.260585 | 0.121221 | 0.607303 | 0.390348 |
| MmugDNA.16213.1.S1_at   | MmugDNA.16213.1 | 4.87  | 5.15  | 0.07 | 0.17 | -1.22  | 0.041712 | 0.049168 | 0.352538 | 0.266566 |
| MmugDNA.16214.1.S1_at   | MmugDNA.16214.1 | 12.48 | 12.59 | 0.14 | 0.06 | -1.07  | 0.348589 | 0.14137  | 0.667173 | 0.414874 |
| MmugDNA.16217.1.S1_at   | MmugDNA.16217.1 | 4.53  | 4.31  | 0.2  | 0.16 | 1.17   | 0.195472 | 0.483975 | 0.558901 | 0.688262 |
| MmugDNA.16234.1.S1_at   | MmugDNA.16234.1 | 8.54  | 8.65  | 0.12 | 0.16 | -1.08  | 0.159552 | 0.080563 | 0.524412 | 0.328319 |
| MmugDNA.16240.1.S1_at   | MmugDNA.16240.1 | 12.13 | 11.35 | 0.21 | 0.06 | 1.72   | 0.004509 | 0.000676 | 0.183797 | 0.04413  |
| MmugDNA.16245.1.S1_at   | MmugDNA.16245.1 | 6.91  | 6.77  | 0.36 | 0.19 | 1.1    | 0.216516 | 0.108072 | 0.576136 | 0.371281 |
| MmugDNA.16253.1.S1_at   | MmugDNA.16253.1 | 10.14 | 8.96  | 0.55 | 1.22 | 2.25   | 0.207671 | 0.217468 | 0.569822 | 0.491035 |

|                         |                 |       |       |      |      |       |          |          |          |          |
|-------------------------|-----------------|-------|-------|------|------|-------|----------|----------|----------|----------|
| MmugDNA.16253.1.S1_s_at | MmugDNA.16253.1 | 9.7   | 8.21  | 0.59 | 1.55 | 2.81  | 0.148015 | 0.16729  | 0.513451 | 0.443697 |
| MmugDNA.16255.1.S1_at   | MmugDNA.16255.1 | 7.47  | 10.25 | 1.5  | 2.38 | -6.88 | 0.43045  | 0.340637 | 0.718048 | 0.586801 |
| MmugDNA.16262.1.S1_at   | MmugDNA.16262.1 | 3.43  | 3.44  | 0.02 | 0.12 | -1    | 0.91314  | 0.464438 | 0.965594 | 0.675068 |
| MmugDNA.16266.1.S1_at   | MmugDNA.16266.1 | 2.73  | 2.77  | 0.08 | 0.08 | -1.03 | 0.448529 | 0.451192 | 0.729722 | 0.666085 |
| MmugDNA.16266.1.S1_s_at | MmugDNA.16266.1 | 3.56  | 3.67  | 0.01 | 0.08 | -1.09 | 0.099777 | 0.035553 | 0.459718 | 0.232812 |
| MmugDNA.16268.1.S1_at   | MmugDNA.16268.1 | 12.61 | 12.75 | 0.38 | 0.34 | -1.11 | 0.293936 | 0.399141 | 0.631033 | 0.62969  |
| MmugDNA.16268.1.S1_s_at | MmugDNA.16268.1 | 12.56 | 12.68 | 0.41 | 0.31 | -1.09 | 0.304656 | 0.411996 | 0.638758 | 0.638434 |
| MmugDNA.1627.1.S1_at    | MmugDNA.1627.1  | 4.49  | 4.52  | 0.08 | 0.05 | -1.02 | 0.303858 | 0.140818 | 0.638083 | 0.414202 |
| MmugDNA.16274.1.S1_at   | MmugDNA.16274.1 | 6.59  | 6.47  | 0.23 | 0.75 | 1.09  | 0.989199 | 0.952872 | 0.99615  | 0.973271 |
| MmugDNA.16279.1.S1_at   | MmugDNA.16279.1 | 7.68  | 6.92  | 0.43 | 0.12 | 1.68  | 0.078057 | 0.055423 | 0.428012 | 0.281318 |
| MmugDNA.16280.1.S1_at   | MmugDNA.16280.1 | 10.32 | 10.82 | 0.22 | 0.27 | -1.41 | 0.196393 | 0.217961 | 0.559664 | 0.491553 |
| MmugDNA.16282.1.S1_x_at | MmugDNA.16282.1 | 4.46  | 4.37  | 0.55 | 0.11 | 1.06  | 0.250082 | 0.329007 | 0.600389 | 0.578482 |
| MmugDNA.16297.1.S1_at   | MmugDNA.16297.1 | 7.86  | 8.95  | 0.21 | 1.12 | -2.13 | 0.164091 | 0.104104 | 0.528211 | 0.365122 |
| MmugDNA.1631.1.S1_at    | MmugDNA.1631.1  | 6.07  | 6.57  | 0.21 | 1.03 | -1.41 | 0.51445  | 0.594585 | 0.76693  | 0.758623 |
| MmugDNA.16314.1.S1_at   | MmugDNA.16314.1 | 8.66  | 9.05  | 0.23 | 0.28 | -1.31 | 0.33398  | 0.16145  | 0.658024 | 0.437604 |
| MmugDNA.16318.1.S1_at   | MmugDNA.16318.1 | 6.81  | 6.49  | 0.26 | 0.34 | 1.25  | 0.113703 | 0.08118  | 0.476946 | 0.329351 |
| MmugDNA.1632.1.S1_at    | MmugDNA.1632.1  | 7.03  | 7.32  | 0.13 | 0.38 | -1.23 | 0.186961 | 0.130972 | 0.550106 | 0.403037 |
| MmugDNA.16321.1.S1_at   | MmugDNA.16321.1 | 6.76  | 6.96  | 0.06 | 0.32 | -1.15 | 0.325255 | 0.346042 | 0.652571 | 0.59115  |
| MmugDNA.16323.1.S1_at   | MmugDNA.16323.1 | 10.45 | 10.38 | 0.26 | 0.18 | 1.05  | 0.146348 | 0.16674  | 0.512489 | 0.443215 |
| MmugDNA.16327.1.S1_at   | MmugDNA.16327.1 | 9.66  | 10.31 | 0.21 | 0.6  | -1.56 | 0.208467 | 0.231186 | 0.570335 | 0.5029   |
| MmugDNA.16332.1.S1_at   | MmugDNA.16332.1 | 5.3   | 5.51  | 0.14 | 0.04 | -1.16 | 0.17359  | 0.215855 | 0.537183 | 0.489536 |
| MmugDNA.16335.1.S1_at   | MmugDNA.16335.1 | 7.82  | 7.77  | 0.03 | 0.32 | 1.03  | 0.706848 | 0.38276  | 0.870891 | 0.618887 |
| MmugDNA.16337.1.S1_at   | MmugDNA.16337.1 | 7.32  | 7.42  | 0.36 | 0.08 | -1.07 | 0.665883 | 0.236972 | 0.850144 | 0.507675 |
| MmugDNA.16340.1.S1_s_at | MmugDNA.16340.1 | 8.19  | 9     | 0.56 | 1.03 | -1.75 | 0.19151  | 0.208417 | 0.554528 | 0.482316 |
| MmugDNA.16343.1.S1_at   | MmugDNA.16343.1 | 8.15  | 8.51  | 0.22 | 0.47 | -1.29 | 0.064348 | 0.033852 | 0.402966 | 0.227639 |
| MmugDNA.16349.1.S1_at   | MmugDNA.16349.1 | 5.8   | 5.11  | 0.79 | 1.74 | 1.61  | 0.82809  | 0.836744 | 0.930199 | 0.906703 |
| MmugDNA.16356.1.S1_at   | MmugDNA.16356.1 | 13.07 | 13.13 | 0.02 | 0.03 | -1.04 | 0.024564 | 0.018895 | 0.295214 | 0.172935 |
| MmugDNA.16362.1.S1_at   | MmugDNA.16362.1 | 5.5   | 5.4   | 0.16 | 0.06 | 1.07  | 0.406424 | 0.188532 | 0.703708 | 0.464458 |
| MmugDNA.16364.1.S1_at   | MmugDNA.16364.1 | 10.56 | 9.98  | 0.12 | 0.37 | 1.5   | 0.054897 | 0.040189 | 0.382765 | 0.245709 |
| MmugDNA.16366.1.S1_at   | MmugDNA.16366.1 | 9.3   | 8.4   | 0.29 | 0.47 | 1.87  | 0.055828 | 0.034992 | 0.384793 | 0.231175 |
| MmugDNA.16367.1.S1_at   | MmugDNA.16367.1 | 5.4   | 7.31  | 0.03 | 1.5  | -3.77 | 0.09522  | 0.096525 | 0.453047 | 0.354096 |
| MmugDNA.16368.1.S1_at   | MmugDNA.16368.1 | 6.6   | 6.99  | 0.09 | 0.01 | -1.31 | 0.002674 | 0.000572 | 0.164386 | 0.041171 |
| MmugDNA.16370.1.S1_at   | MmugDNA.16370.1 | 7.6   | 6.8   | 0.22 | 0.44 | 1.74  | 0.158569 | 0.089395 | 0.52369  | 0.343637 |
| MmugDNA.16372.1.S1_at   | MmugDNA.16372.1 | 8.87  | 8.36  | 0.2  | 0.07 | 1.42  | 0.01485  | 0.003661 | 0.255626 | 0.086526 |
| MmugDNA.16382.1.S1_at   | MmugDNA.16382.1 | 5.41  | 5.43  | 0.01 | 0.09 | -1.02 | 0.654481 | 0.401868 | 0.844586 | 0.63109  |
| MmugDNA.16387.1.S1_at   | MmugDNA.16387.1 | 6.72  | 6.58  | 0.24 | 1.02 | 1.1   | 0.776423 | 0.218421 | 0.90634  | 0.491983 |
| MmugDNA.1639.1.S1_at    | MmugDNA.1639.1  | 11.96 | 11.79 | 0.12 | 0.29 | 1.12  | 0.364426 | 0.036402 | 0.677322 | 0.235284 |
| MmugDNA.16390.1.S1_at   | MmugDNA.16390.1 | 8.63  | 8.35  | 0.29 | 0.04 | 1.22  | 0.109173 | 0.10175  | 0.470811 | 0.361627 |
| MmugDNA.16400.1.S1_at   | MmugDNA.16400.1 | 9.28  | 10.06 | 0.82 | 1.13 | -1.71 | 0.496951 | 0.645605 | 0.757692 | 0.792428 |
| MmugDNA.16404.1.S1_at   | MmugDNA.16404.1 | 4.43  | 4.49  | 0.08 | 0.08 | -1.04 | 0.320378 | 0.186025 | 0.649472 | 0.461878 |
| MmugDNA.16407.1.S1_at   | MmugDNA.16407.1 | 4.37  | 4.27  | 0.27 | 0.04 | 1.07  | 0.436794 | 0.282088 | 0.722049 | 0.544937 |

|                         |                 |       |       |      |      |       |          |          |          |          |
|-------------------------|-----------------|-------|-------|------|------|-------|----------|----------|----------|----------|
| MmugDNA.16412.1.S1_at   | MmugDNA.16412.1 | 2.87  | 2.87  | 0.04 | 0.01 | -1    | 0.705415 | 0.974699 | 0.870063 | 0.986238 |
| MmugDNA.16420.1.S1_at   | MmugDNA.16420.1 | 12.03 | 11.68 | 0.12 | 0.43 | 1.27  | 0.268086 | 0.355454 | 0.612992 | 0.597738 |
| MmugDNA.16421.1.S1_s_at | MmugDNA.16421.1 | 8.5   | 9.68  | 0.17 | 0.98 | -2.27 | 0.112411 | 0.117012 | 0.474902 | 0.384405 |
| MmugDNA.16424.1.S1_at   | MmugDNA.16424.1 | 8.51  | 9.55  | 0.45 | 0.92 | -2.06 | 0.237835 | 0.247764 | 0.591288 | 0.517199 |
| MmugDNA.16426.1.S1_at   | MmugDNA.16426.1 | 12.08 | 10.76 | 0.65 | 0.18 | 2.51  | 0.013372 | 0.006709 | 0.246471 | 0.110872 |
| MmugDNA.16427.1.S1_at   | MmugDNA.16427.1 | 3.39  | 3.56  | 0.07 | 0.09 | -1.13 | 0.084942 | 0.04276  | 0.43805  | 0.251253 |
| MmugDNA.16431.1.S1_at   | MmugDNA.16431.1 | 12.38 | 12.05 | 0.17 | 0.36 | 1.26  | 0.36206  | 0.492803 | 0.675653 | 0.6938   |
| MmugDNA.16432.1.S1_at   | MmugDNA.16432.1 | 6.11  | 6.2   | 0.12 | 0.21 | -1.07 | 0.880021 | 0.969805 | 0.951785 | 0.983498 |
| MmugDNA.16433.1.S1_at   | MmugDNA.16433.1 | 4.6   | 4.52  | 0.05 | 0.08 | 1.06  | 0.691241 | 0.040954 | 0.862603 | 0.247202 |
| MmugDNA.16447.1.S1_at   | MmugDNA.16447.1 | 8.64  | 8.69  | 0.05 | 0.31 | -1.03 | 0.814581 | 0.630551 | 0.924758 | 0.782306 |
| MmugDNA.16448.1.S1_at   | MmugDNA.16448.1 | 7.07  | 6.72  | 0.68 | 0.31 | 1.27  | 0.968729 | 0.977324 | 0.988176 | 0.987656 |
| MmugDNA.16449.1.S1_at   | MmugDNA.16449.1 | 10.46 | 9.92  | 0.3  | 0.27 | 1.45  | 0.060106 | 0.050982 | 0.393081 | 0.27106  |
| MmugDNA.16450.1.S1_at   | MmugDNA.16450.1 | 7.86  | 7.87  | 0.09 | 0.2  | -1    | 0.993373 | 0.945468 | 0.997754 | 0.968984 |
| MmugDNA.16451.1.S1_s_at | MmugDNA.16451.1 | 13.68 | 13.9  | 0.03 | 0.04 | -1.16 | 0.001161 | 0.0002   | 0.145267 | 0.031344 |
| MmugDNA.16454.1.S1_s_at | MmugDNA.16454.1 | 10.95 | 11.15 | 0.17 | 0.36 | -1.15 | 0.389197 | 0.019549 | 0.692956 | 0.175563 |
| MmugDNA.16458.1.S1_at   | MmugDNA.16458.1 | 7.36  | 7.46  | 0.57 | 0.51 | -1.08 | 0.769637 | 0.843665 | 0.903122 | 0.910936 |
| MmugDNA.16459.1.S1_at   | MmugDNA.16459.1 | 12.61 | 12.41 | 0.06 | 0.15 | 1.15  | 0.025074 | 0.018982 | 0.297733 | 0.173405 |
| MmugDNA.16464.1.S1_at   | MmugDNA.16464.1 | 8.88  | 8.02  | 0.1  | 0.01 | 1.81  | 0.000122 | 0.000061 | 0.112653 | 0.025666 |
| MmugDNA.16466.1.S1_at   | MmugDNA.16466.1 | 5     | 7.82  | 0.48 | 0.52 | -7.08 | 0.002291 | 0.000537 | 0.161798 | 0.040439 |
| MmugDNA.16469.1.S1_at   | MmugDNA.16469.1 | 9.9   | 9.2   | 0.42 | 0.21 | 1.63  | 0.100362 | 0.097735 | 0.460878 | 0.355598 |
| MmugDNA.16474.1.S1_at   | MmugDNA.16474.1 | 10.84 | 11.56 | 0.51 | 0.91 | -1.65 | 0.304722 | 0.202507 | 0.638784 | 0.476819 |
| MmugDNA.16474.1.S1_s_at | MmugDNA.16474.1 | 11.18 | 11.97 | 0.56 | 0.87 | -1.74 | 0.27429  | 0.208017 | 0.617262 | 0.482049 |
| MmugDNA.16476.1.S1_at   | MmugDNA.16476.1 | 8.46  | 8.88  | 0.16 | 0.2  | -1.34 | 0.128416 | 0.207522 | 0.494517 | 0.481824 |
| MmugDNA.16477.1.S1_at   | MmugDNA.16477.1 | 13.3  | 13.3  | 0.07 | 0.21 | -1    | 0.545845 | 0.02549  | 0.785219 | 0.200313 |
| MmugDNA.16478.1.S1_at   | MmugDNA.16478.1 | 13.35 | 13.44 | 0.09 | 0.13 | -1.06 | 0.608264 | 0.32551  | 0.819872 | 0.575827 |
| MmugDNA.16480.1.S1_at   | MmugDNA.16480.1 | 4.65  | 3.41  | 0.16 | 0.21 | 2.37  | 0.001919 | 0.000457 | 0.155636 | 0.038572 |
| MmugDNA.16484.1.S1_at   | MmugDNA.16484.1 | 6.49  | 7.07  | 0.14 | 0.4  | -1.49 | 0.109275 | 0.104228 | 0.470811 | 0.365373 |
| MmugDNA.16490.1.S1_at   | MmugDNA.16490.1 | 13.22 | 12.56 | 0.05 | 0.42 | 1.58  | 0.04227  | 0.029082 | 0.354563 | 0.212721 |
| MmugDNA.16493.1.S1_at   | MmugDNA.16493.1 | 4.69  | 4.82  | 0.06 | 0.12 | -1.09 | 0.27812  | 0.115238 | 0.620214 | 0.38221  |
| MmugDNA.16495.1.S1_at   | MmugDNA.16495.1 | 11.87 | 11.36 | 0.1  | 0.21 | 1.42  | 0.042351 | 0.033383 | 0.354659 | 0.226396 |
| MmugDNA.16497.1.S1_at   | MmugDNA.16497.1 | 4.2   | 4.21  | 0.11 | 0.03 | -1    | 0.430732 | 0.275204 | 0.718249 | 0.53962  |
| MmugDNA.1650.1.S1_at    | MmugDNA.1650.1  | 8.77  | 8.59  | 0.2  | 0.34 | 1.14  | 0.858086 | 0.231842 | 0.942652 | 0.503592 |
| MmugDNA.16500.1.S1_at   | MmugDNA.16500.1 | 4.77  | 4.73  | 0.13 | 0.14 | 1.03  | 0.514826 | 0.435832 | 0.767192 | 0.65554  |
| MmugDNA.16520.1.S1_at   | MmugDNA.16520.1 | 2.78  | 2.81  | 0.07 | 0.05 | -1.03 | 0.281162 | 0.067064 | 0.622118 | 0.304872 |
| MmugDNA.16529.1.S1_at   | MmugDNA.16529.1 | 11.58 | 11.57 | 0.06 | 0.07 | 1.01  | 0.860848 | 0.732898 | 0.943852 | 0.845436 |
| MmugDNA.1653.1.S1_at    | MmugDNA.1653.1  | 5.42  | 5.53  | 0.12 | 0.16 | -1.08 | 0.97037  | 0.979053 | 0.988617 | 0.988666 |
| MmugDNA.16530.1.S1_at   | MmugDNA.16530.1 | 6.13  | 6.72  | 0.2  | 0.71 | -1.5  | 0.324145 | 0.147628 | 0.651854 | 0.421901 |
| MmugDNA.16541.1.S1_at   | MmugDNA.16541.1 | 7.46  | 7.27  | 0.15 | 0.2  | 1.14  | 0.122123 | 0.124766 | 0.487136 | 0.395215 |
| MmugDNA.16554.1.S1_at   | MmugDNA.16554.1 | 6.39  | 5.63  | 0.28 | 0.23 | 1.69  | 0.017633 | 0.197232 | 0.267454 | 0.472213 |
| MmugDNA.16556.1.S1_at   | MmugDNA.16556.1 | 9.57  | 10.95 | 0.78 | 1.2  | -2.61 | 0.196722 | 0.144559 | 0.559808 | 0.418424 |
| MmugDNA.16558.1.S1_at   | MmugDNA.16558.1 | 7.39  | 7.84  | 0.19 | 0.98 | -1.37 | 0.524766 | 0.473924 | 0.77328  | 0.681111 |

|                         |                 |       |       |      |      |       |          |          |          |          |
|-------------------------|-----------------|-------|-------|------|------|-------|----------|----------|----------|----------|
| MmugDNA.1656.1.S1_at    | MmugDNA.1656.1  | 7.57  | 7.39  | 0.3  | 0.11 | 1.13  | 0.281875 | 0.457692 | 0.62238  | 0.670897 |
| MmugDNA.16560.1.S1_at   | MmugDNA.16560.1 | 4.66  | 4.82  | 0.04 | 0.02 | -1.12 | 0.002054 | 0.00505  | 0.155636 | 0.099019 |
| MmugDNA.16563.1.S1_at   | MmugDNA.16563.1 | 3.73  | 3.72  | 0.15 | 0.07 | 1.01  | 0.588877 | 0.008278 | 0.809161 | 0.12078  |
| MmugDNA.16575.1.S1_at   | MmugDNA.16575.1 | 4.38  | 4.09  | 0.27 | 0.07 | 1.23  | 0.442717 | 0.119666 | 0.725736 | 0.388324 |
| MmugDNA.16579.1.S1_at   | MmugDNA.16579.1 | 8.04  | 7.4   | 0.3  | 0.43 | 1.56  | 0.259036 | 0.05823  | 0.606181 | 0.287988 |
| MmugDNA.16579.1.S1_s_at | MmugDNA.16579.1 | 7.61  | 6.6   | 0.73 | 0.5  | 2.01  | 0.242291 | 0.025503 | 0.594307 | 0.200333 |
| MmugDNA.16582.1.S1_at   | MmugDNA.16582.1 | 10.46 | 10.11 | 0.13 | 0.27 | 1.27  | 0.077828 | 0.071822 | 0.427855 | 0.314082 |
| MmugDNA.16586.1.S1_at   | MmugDNA.16586.1 | 4.4   | 4.66  | 0.1  | 0.14 | -1.19 | 0.202032 | 0.092859 | 0.56434  | 0.349024 |
| MmugDNA.16593.1.S1_at   | MmugDNA.16593.1 | 11.5  | 11.17 | 0.06 | 0.18 | 1.26  | 0.021727 | 0.010873 | 0.283391 | 0.135892 |
| MmugDNA.16597.1.S1_at   | MmugDNA.16597.1 | 6.45  | 6.72  | 0.06 | 0.19 | -1.2  | 0.267473 | 0.324781 | 0.612607 | 0.575311 |
| MmugDNA.16603.1.S1_at   | MmugDNA.16603.1 | 11.26 | 11.95 | 0.42 | 0.36 | -1.62 | 0.047317 | 0.044267 | 0.365873 | 0.254932 |
| MmugDNA.16608.1.S1_at   | MmugDNA.16608.1 | 7.42  | 9.75  | 0.52 | 0.31 | -5.02 | 0.002016 | 0.000636 | 0.155636 | 0.042882 |
| MmugDNA.1661.1.S1_s_at  | MmugDNA.1661.1  | 11.14 | 10.99 | 0.15 | 0.68 | 1.11  | 0.691912 | 0.276374 | 0.863115 | 0.540334 |
| MmugDNA.16610.1.S1_at   | MmugDNA.16610.1 | 8.95  | 8.73  | 0.42 | 0.43 | 1.17  | 0.95257  | 0.986203 | 0.9823   | 0.992172 |
| MmugDNA.16614.1.S1_at   | MmugDNA.16614.1 | 5     | 5.1   | 0.15 | 0.31 | -1.07 | 0.368805 | 0.56253  | 0.680234 | 0.738055 |
| MmugDNA.16617.1.S1_at   | MmugDNA.16617.1 | 6.14  | 6.17  | 0.15 | 0.41 | -1.02 | 0.929528 | 0.060936 | 0.972741 | 0.293629 |
| MmugDNA.16620.1.S1_at   | MmugDNA.16620.1 | 5.67  | 5.74  | 0.01 | 0.13 | -1.04 | 0.86323  | 0.322119 | 0.944982 | 0.573728 |
| MmugDNA.16625.1.S1_at   | MmugDNA.16625.1 | 10.05 | 10.06 | 0.04 | 0.16 | -1    | 0.697216 | 0.419421 | 0.865585 | 0.643471 |
| MmugDNA.16626.1.S1_at   | MmugDNA.16626.1 | 7.13  | 6.38  | 0.3  | 0.12 | 1.68  | 0.024521 | 0.000431 | 0.295152 | 0.038359 |
| MmugDNA.16643.1.S1_at   | MmugDNA.16643.1 | 8.89  | 9.22  | 0.15 | 0.02 | -1.26 | 0.010487 | 0.011088 | 0.229964 | 0.137048 |
| MmugDNA.16645.1.S1_at   | MmugDNA.16645.1 | 7.25  | 7.28  | 0.05 | 0.16 | -1.02 | 0.404284 | 0.159101 | 0.702606 | 0.435217 |
| MmugDNA.16649.1.S1_at   | MmugDNA.16649.1 | 3.45  | 3.51  | 0.08 | 0.05 | -1.04 | 0.123021 | 0.134644 | 0.488452 | 0.406629 |
| MmugDNA.16657.1.S1_at   | MmugDNA.16657.1 | 11.43 | 11.65 | 0.16 | 0.17 | -1.16 | 0.172505 | 0.165636 | 0.536116 | 0.441925 |
| MmugDNA.16663.1.S1_at   | MmugDNA.16663.1 | 7.59  | 7.16  | 0.35 | 0.07 | 1.35  | 0.036644 | 0.025906 | 0.340048 | 0.201728 |
| MmugDNA.16668.1.S1_at   | MmugDNA.16668.1 | 12.23 | 12.53 | 0.25 | 0.49 | -1.23 | 0.414729 | 0.237203 | 0.709338 | 0.507928 |
| MmugDNA.1667.1.S1_at    | MmugDNA.1667.1  | 5.85  | 5.96  | 0.43 | 0.89 | -1.08 | 0.688979 | 0.836292 | 0.861244 | 0.90636  |
| MmugDNA.16672.1.S1_at   | MmugDNA.16672.1 | 3.48  | 3.53  | 0.2  | 0    | -1.04 | 0.628278 | 0.812409 | 0.8307   | 0.891629 |
| MmugDNA.16676.1.S1_at   | MmugDNA.16676.1 | 10.27 | 9.26  | 0.1  | 0.36 | 2.03  | 0.011891 | 0.005495 | 0.238658 | 0.102081 |
| MmugDNA.16677.1.S1_at   | MmugDNA.16677.1 | 8.04  | 8.78  | 0.33 | 0.64 | -1.66 | 0.130715 | 0.06903  | 0.497065 | 0.309017 |
| MmugDNA.1668.1.S1_at    | MmugDNA.1668.1  | 4.91  | 5.15  | 0.12 | 0.2  | -1.18 | 0.458411 | 0.191939 | 0.735452 | 0.467295 |
| MmugDNA.16680.1.S1_at   | MmugDNA.16680.1 | 11.62 | 10.97 | 0.12 | 0.92 | 1.57  | 0.095176 | 0.093889 | 0.452984 | 0.350402 |
| MmugDNA.16683.1.S1_at   | MmugDNA.16683.1 | 7.84  | 9.05  | 0.55 | 1.26 | -2.32 | 0.188538 | 0.153714 | 0.551518 | 0.428413 |
| MmugDNA.16694.1.S1_at   | MmugDNA.16694.1 | 9.62  | 9.43  | 0.1  | 0.28 | 1.14  | 0.749229 | 0.024109 | 0.892627 | 0.1945   |
| MmugDNA.16696.1.S1_s_at | MmugDNA.16696.1 | 10.62 | 10.22 | 0.05 | 0.06 | 1.32  | 0.000924 | 0.000291 | 0.139813 | 0.034892 |
| MmugDNA.16698.1.S1_at   | MmugDNA.16698.1 | 12.92 | 12.77 | 0.14 | 0.21 | 1.11  | 0.17176  | 0.231903 | 0.535321 | 0.503597 |
| MmugDNA.167.1.S1_at     | MmugDNA.167.1   | 11.83 | 12.39 | 0.5  | 1.2  | -1.47 | 0.585651 | 0.634751 | 0.807608 | 0.785012 |
| MmugDNA.1670.1.S1_at    | MmugDNA.1670.1  | 9.75  | 10.07 | 0.31 | 0.53 | -1.25 | 0.574087 | 0.053323 | 0.801508 | 0.276481 |
| MmugDNA.16701.1.S1_at   | MmugDNA.16701.1 | 10.01 | 10.08 | 0.15 | 0.33 | -1.04 | 0.77559  | 0.097047 | 0.905852 | 0.354531 |
| MmugDNA.16709.1.S1_s_at | MmugDNA.16709.1 | 11.2  | 11.24 | 0.29 | 0.22 | -1.02 | 0.623098 | 0.16532  | 0.827785 | 0.441514 |
| MmugDNA.16710.1.S1_at   | MmugDNA.16710.1 | 12.9  | 12.92 | 0.16 | 0.03 | -1.01 | 0.826158 | 0.919528 | 0.929365 | 0.954822 |
| MmugDNA.16722.1.S1_at   | MmugDNA.16722.1 | 12.1  | 11.77 | 0.15 | 0.04 | 1.26  | 0.019221 | 0.002513 | 0.273202 | 0.074158 |

|                         |                 |       |       |      |      |       |          |          |          |          |
|-------------------------|-----------------|-------|-------|------|------|-------|----------|----------|----------|----------|
| MmugDNA.16729.1.S1_at   | MmugDNA.16729.1 | 3.37  | 3.29  | 0.09 | 0.08 | 1.06  | 0.264352 | 0.457297 | 0.610135 | 0.670746 |
| MmugDNA.1673.1.S1_at    | MmugDNA.1673.1  | 5.79  | 6     | 0.51 | 0.53 | -1.15 | 0.778648 | 0.737002 | 0.907599 | 0.847784 |
| MmugDNA.16732.1.S1_at   | MmugDNA.16732.1 | 5.76  | 5.76  | 0.15 | 0.16 | -1    | 0.924835 | 0.311166 | 0.970896 | 0.566215 |
| MmugDNA.16733.1.S1_at   | MmugDNA.16733.1 | 5.3   | 5.55  | 0.07 | 0.24 | -1.19 | 0.160838 | 0.11214  | 0.525925 | 0.377431 |
| MmugDNA.16736.1.S1_at   | MmugDNA.16736.1 | 6.62  | 6.01  | 0.44 | 0.21 | 1.53  | 0.088065 | 0.06391  | 0.442415 | 0.29906  |
| MmugDNA.16738.1.S1_at   | MmugDNA.16738.1 | 4.87  | 4.89  | 0.16 | 0.1  | -1.01 | 0.568907 | 0.400881 | 0.798907 | 0.630658 |
| MmugDNA.16747.1.S1_at   | MmugDNA.16747.1 | 10.93 | 11.03 | 0.09 | 0.09 | -1.08 | 0.418629 | 0.05713  | 0.711442 | 0.284945 |
| MmugDNA.16748.1.S1_at   | MmugDNA.16748.1 | 8.55  | 8.09  | 0.64 | 0.38 | 1.37  | 0.657639 | 0.246898 | 0.846091 | 0.516238 |
| MmugDNA.1675.1.S1_at    | MmugDNA.1675.1  | 10.04 | 10.42 | 0.23 | 0.36 | -1.3  | 0.393767 | 0.487728 | 0.695522 | 0.690658 |
| MmugDNA.16750.1.S1_at   | MmugDNA.16750.1 | 6.3   | 6.81  | 0.12 | 0.43 | -1.42 | 0.066249 | 0.032597 | 0.406371 | 0.223643 |
| MmugDNA.16751.1.S1_at   | MmugDNA.16751.1 | 5.86  | 6.08  | 0.05 | 0.17 | -1.17 | 0.109329 | 0.106846 | 0.470811 | 0.369467 |
| MmugDNA.16753.1.S1_at   | MmugDNA.16753.1 | 9.61  | 10.25 | 0.17 | 0.21 | -1.56 | 0.019309 | 0.010556 | 0.273655 | 0.134149 |
| MmugDNA.16755.1.S1_at   | MmugDNA.16755.1 | 7.75  | 7.38  | 0.89 | 0.35 | 1.29  | 0.579953 | 0.220777 | 0.804451 | 0.494262 |
| MmugDNA.16756.1.S1_at   | MmugDNA.16756.1 | 9.57  | 9.55  | 0.15 | 0.23 | 1.01  | 0.961672 | 0.423448 | 0.985248 | 0.646347 |
| MmugDNA.16758.1.S1_at   | MmugDNA.16758.1 | 5.21  | 5.14  | 0.12 | 0.28 | 1.05  | 0.681564 | 0.713743 | 0.857635 | 0.833937 |
| MmugDNA.16763.1.S1_at   | MmugDNA.16763.1 | 11.5  | 12.11 | 0.22 | 0.1  | -1.53 | 0.009734 | 0.007565 | 0.226235 | 0.116437 |
| MmugDNA.16765.1.S1_at   | MmugDNA.16765.1 | 12.34 | 12.25 | 0.04 | 0.65 | 1.06  | 0.31189  | 0.270031 | 0.643771 | 0.535332 |
| MmugDNA.16766.1.S1_at   | MmugDNA.16766.1 | 9.98  | 10.48 | 0.25 | 0.79 | -1.41 | 0.491048 | 0.670944 | 0.754717 | 0.807629 |
| MmugDNA.1677.1.S1_at    | MmugDNA.1677.1  | 9.98  | 10.31 | 0.15 | 0.24 | -1.26 | 0.131774 | 0.032435 | 0.498041 | 0.223088 |
| MmugDNA.16773.1.S1_at   | MmugDNA.16773.1 | 9.77  | 9.44  | 0.18 | 0.05 | 1.25  | 0.056963 | 0.010497 | 0.387418 | 0.133872 |
| MmugDNA.16776.1.S1_at   | MmugDNA.16776.1 | 5.94  | 7.68  | 0.65 | 1.38 | -3.33 | 0.331759 | 0.328074 | 0.656468 | 0.577851 |
| MmugDNA.16779.1.S1_at   | MmugDNA.16779.1 | 5.97  | 6.38  | 0.28 | 0.26 | -1.32 | 0.067518 | 0.02619  | 0.407949 | 0.202804 |
| MmugDNA.16785.1.S1_s_at | MmugDNA.16785.1 | 4.78  | 4.85  | 0.03 | 0.08 | -1.05 | 0.244897 | 0.462539 | 0.596503 | 0.673854 |
| MmugDNA.16788.1.S1_at   | MmugDNA.16788.1 | 5.96  | 5.99  | 0.06 | 0.09 | -1.02 | 0.943727 | 0.135128 | 0.978535 | 0.407131 |
| MmugDNA.1679.1.S1_at    | MmugDNA.1679.1  | 7.36  | 9.38  | 1.77 | 2.5  | -4.06 | 0.52581  | 0.561227 | 0.773937 | 0.737235 |
| MmugDNA.16791.1.S1_at   | MmugDNA.16791.1 | 9.6   | 9.9   | 0.07 | 0.02 | -1.23 | 0.002298 | 0.001739 | 0.161798 | 0.062895 |
| MmugDNA.16796.1.S1_at   | MmugDNA.16796.1 | 10.22 | 10.33 | 0.2  | 0.64 | -1.08 | 0.975769 | 0.20577  | 0.990667 | 0.48007  |
| MmugDNA.16801.1.S1_at   | MmugDNA.16801.1 | 6.49  | 8.35  | 0.36 | 1.95 | -3.62 | 0.273825 | 0.282201 | 0.617262 | 0.544949 |
| MmugDNA.16802.1.S1_at   | MmugDNA.16802.1 | 9.84  | 9.89  | 0.13 | 0.18 | -1.04 | 0.421219 | 0.562675 | 0.712907 | 0.7381   |
| MmugDNA.16807.1.S1_at   | MmugDNA.16807.1 | 5.84  | 5.94  | 0.13 | 0.05 | -1.08 | 0.271174 | 0.184242 | 0.615378 | 0.460382 |
| MmugDNA.16810.1.S1_at   | MmugDNA.16810.1 | 11.78 | 11.33 | 0.34 | 0.29 | 1.37  | 0.135505 | 0.159161 | 0.5024   | 0.435217 |
| MmugDNA.16812.1.S1_at   | MmugDNA.16812.1 | 7.07  | 7.4   | 0.34 | 0.1  | -1.26 | 0.258244 | 0.296573 | 0.605548 | 0.555566 |
| MmugDNA.16814.1.S1_at   | MmugDNA.16814.1 | 13.26 | 13.03 | 0.12 | 0.12 | 1.17  | 0.027822 | 0.01741  | 0.309107 | 0.166995 |
| MmugDNA.16816.1.S1_at   | MmugDNA.16816.1 | 6.46  | 6.97  | 0.05 | 0.3  | -1.42 | 0.039881 | 0.024771 | 0.34828  | 0.197156 |
| MmugDNA.1682.1.S1_at    | MmugDNA.1682.1  | 6.23  | 8.11  | 0.76 | 1.76 | -3.68 | 0.271546 | 0.23273  | 0.615716 | 0.504378 |
| MmugDNA.16820.1.S1_at   | MmugDNA.16820.1 | 6.83  | 6.51  | 0.47 | 0.95 | 1.25  | 0.528675 | 0.101314 | 0.775742 | 0.361094 |
| MmugDNA.16823.1.S1_at   | MmugDNA.16823.1 | 9.33  | 6.51  | 0.48 | 1.44 | 7.07  | 0.033701 | 0.035937 | 0.330119 | 0.234032 |
| MmugDNA.16833.1.S1_at   | MmugDNA.16833.1 | 10.06 | 8.11  | 0.08 | 0.4  | 3.87  | 0.001317 | 0.000232 | 0.146228 | 0.03241  |
| MmugDNA.16840.1.S1_at   | MmugDNA.16840.1 | 9.78  | 9.53  | 0.16 | 0.35 | 1.19  | 0.544857 | 0.690946 | 0.784655 | 0.820018 |
| MmugDNA.16842.1.S1_at   | MmugDNA.16842.1 | 12.8  | 12.77 | 0.18 | 0.01 | 1.02  | 0.623768 | 0.841919 | 0.828047 | 0.909939 |
| MmugDNA.16849.1.S1_at   | MmugDNA.16849.1 | 9.04  | 7.65  | 0.13 | 0.57 | 2.62  | 0.014658 | 0.006062 | 0.254553 | 0.106159 |

|                         |                 |       |       |      |      |       |          |          |          |          |
|-------------------------|-----------------|-------|-------|------|------|-------|----------|----------|----------|----------|
| MmugDNA.16850.1.S1_at   | MmugDNA.16850.1 | 7.17  | 7.26  | 0.25 | 0.51 | -1.07 | 0.94684  | 0.873803 | 0.979482 | 0.928235 |
| MmugDNA.16852.1.S1_at   | MmugDNA.16852.1 | 3.88  | 4.76  | 0.1  | 1    | -1.83 | 0.18094  | 0.246945 | 0.54536  | 0.516238 |
| MmugDNA.16855.1.S1_at   | MmugDNA.16855.1 | 10.32 | 9.75  | 0.57 | 1.45 | 1.49  | 0.404326 | 0.468689 | 0.702606 | 0.677808 |
| MmugDNA.16857.1.S1_at   | MmugDNA.16857.1 | 10.65 | 10.37 | 0.18 | 0.19 | 1.21  | 0.104587 | 0.041937 | 0.464775 | 0.249397 |
| MmugDNA.16863.1.S1_at   | MmugDNA.16863.1 | 6.91  | 7.25  | 0.56 | 0.62 | -1.26 | 0.944453 | 0.351838 | 0.978798 | 0.595274 |
| MmugDNA.16869.1.S1_at   | MmugDNA.16869.1 | 12.26 | 12.39 | 0.07 | 0.15 | -1.09 | 0.5406   | 0.316401 | 0.782017 | 0.569809 |
| MmugDNA.16873.1.S1_at   | MmugDNA.16873.1 | 9.53  | 10.16 | 0.5  | 0.05 | -1.54 | 0.054539 | 0.042    | 0.381851 | 0.249463 |
| MmugDNA.16874.1.S1_s_at | MmugDNA.16874.1 | 10.3  | 9.77  | 0.32 | 0.91 | 1.45  | 0.12475  | 0.135609 | 0.49077  | 0.407744 |
| MmugDNA.16876.1.S1_at   | MmugDNA.16876.1 | 3.43  | 3.41  | 0.15 | 0.16 | 1.01  | 0.545803 | 0.749725 | 0.785219 | 0.854564 |
| MmugDNA.16878.1.S1_at   | MmugDNA.16878.1 | 7.18  | 7.25  | 0.32 | 0.96 | -1.05 | 0.650545 | 0.317567 | 0.842789 | 0.570774 |
| MmugDNA.16883.1.S1_at   | MmugDNA.16883.1 | 12.97 | 13.13 | 0.05 | 0.25 | -1.11 | 0.415393 | 0.250403 | 0.709515 | 0.519391 |
| MmugDNA.16884.1.S1_s_at | MmugDNA.16884.1 | 10.5  | 11.14 | 0.35 | 0.19 | -1.56 | 0.07093  | 0.074458 | 0.414673 | 0.318106 |
| MmugDNA.16885.1.S1_at   | MmugDNA.16885.1 | 4.3   | 4.31  | 0.16 | 0.16 | -1.01 | 0.244372 | 0.163545 | 0.596151 | 0.439765 |
| MmugDNA.16895.1.S1_at   | MmugDNA.16895.1 | 8.9   | 9.73  | 0.52 | 0.59 | -1.78 | 0.221841 | 0.281911 | 0.580575 | 0.544864 |
| MmugDNA.16896.1.S1_at   | MmugDNA.16896.1 | 7.14  | 7.03  | 0.35 | 0.41 | 1.08  | 0.949161 | 0.506551 | 0.980663 | 0.702503 |
| MmugDNA.16897.1.S1_x_at | MmugDNA.16897.1 | 5.11  | 5.29  | 0.11 | 0.13 | -1.13 | 0.212991 | 0.183656 | 0.573396 | 0.459681 |
| MmugDNA.16902.1.S1_at   | MmugDNA.16902.1 | 9.71  | 11.2  | 0.35 | 0.43 | -2.81 | 0.010716 | 0.007424 | 0.23109  | 0.115848 |
| MmugDNA.16904.1.S1_at   | MmugDNA.16904.1 | 6.36  | 6.92  | 0.19 | 0.25 | -1.48 | 0.066777 | 0.197196 | 0.406981 | 0.472213 |
| MmugDNA.16905.1.S1_at   | MmugDNA.16905.1 | 3.87  | 4.03  | 0.09 | 0.15 | -1.11 | 0.342699 | 0.616334 | 0.663407 | 0.772571 |
| MmugDNA.16906.1.S1_at   | MmugDNA.16906.1 | 12.66 | 12.89 | 0.19 | 0.07 | -1.17 | 0.135572 | 0.095099 | 0.502421 | 0.352151 |
| MmugDNA.16908.1.S1_at   | MmugDNA.16908.1 | 2.73  | 2.88  | 0.05 | 0.07 | -1.11 | 0.079053 | 0.075152 | 0.428609 | 0.319339 |
| MmugDNA.16908.1.S1_x_at | MmugDNA.16908.1 | 4.42  | 4.53  | 0.03 | 0.15 | -1.08 | 0.258215 | 0.079763 | 0.605532 | 0.327052 |
| MmugDNA.16909.1.S1_at   | MmugDNA.16909.1 | 11.11 | 10.77 | 0.19 | 0.38 | 1.27  | 0.26386  | 0.052463 | 0.609683 | 0.274577 |
| MmugDNA.16910.1.S1_at   | MmugDNA.16910.1 | 11.04 | 11.05 | 0.25 | 0.16 | -1.01 | 0.914641 | 0.972248 | 0.966289 | 0.985011 |
| MmugDNA.16912.1.S1_s_at | MmugDNA.16912.1 | 10.85 | 10.22 | 0.17 | 0.49 | 1.55  | 0.126962 | 0.168487 | 0.493156 | 0.445108 |
| MmugDNA.16913.1.S1_at   | MmugDNA.16913.1 | 12.78 | 12.7  | 0.04 | 0.08 | 1.06  | 0.334229 | 0.234118 | 0.658235 | 0.505319 |
| MmugDNA.16920.1.S1_at   | MmugDNA.16920.1 | 6.6   | 6.53  | 0.14 | 0.2  | 1.05  | 0.824988 | 0.225822 | 0.929089 | 0.498187 |
| MmugDNA.16923.1.S1_at   | MmugDNA.16923.1 | 6.54  | 6.39  | 0.3  | 0.15 | 1.11  | 0.257968 | 0.371169 | 0.605348 | 0.610113 |
| MmugDNA.16950.1.S1_at   | MmugDNA.16950.1 | 2.85  | 2.81  | 0.08 | 0.15 | 1.03  | 0.864262 | 0.974791 | 0.945492 | 0.986245 |
| MmugDNA.16958.1.S1_at   | MmugDNA.16958.1 | 9.64  | 9.77  | 0.23 | 0.48 | -1.09 | 0.650043 | 0.225591 | 0.842598 | 0.498155 |
| MmugDNA.16965.1.S1_at   | MmugDNA.16965.1 | 4.64  | 4.68  | 0.04 | 0.06 | -1.03 | 0.814737 | 0.100187 | 0.924758 | 0.359195 |
| MmugDNA.16971.1.S1_at   | MmugDNA.16971.1 | 3.61  | 3.65  | 0.06 | 0.19 | -1.03 | 0.636657 | 0.387011 | 0.835714 | 0.621935 |
| MmugDNA.16972.1.S1_at   | MmugDNA.16972.1 | 4.37  | 4.43  | 0.03 | 0.02 | -1.04 | 0.150599 | 0.24128  | 0.515411 | 0.511911 |
| MmugDNA.16980.1.S1_at   | MmugDNA.16980.1 | 6.7   | 6.6   | 0.04 | 0.15 | 1.08  | 0.321558 | 0.149692 | 0.650266 | 0.424291 |
| MmugDNA.16982.1.S1_at   | MmugDNA.16982.1 | 9.78  | 9.53  | 0.12 | 0.49 | 1.2   | 0.13978  | 0.129905 | 0.507376 | 0.401511 |
| MmugDNA.16983.1.S1_at   | MmugDNA.16983.1 | 3.83  | 3.7   | 0.03 | 0.04 | 1.1   | 0.006825 | 0.03248  | 0.201708 | 0.223254 |
| MmugDNA.1699.1.S1_at    | MmugDNA.1699.1  | 5.31  | 5.53  | 0.17 | 0.18 | -1.17 | 0.18304  | 0.409378 | 0.547134 | 0.636452 |
| MmugDNA.170.1.S1_at     | MmugDNA.170.1   | 4.04  | 4.08  | 0.15 | 0.19 | -1.03 | 0.549374 | 0.343134 | 0.787299 | 0.588897 |
| MmugDNA.17002.1.S1_at   | MmugDNA.17002.1 | 11.68 | 11.16 | 0.08 | 0.18 | 1.44  | 0.012236 | 0.002862 | 0.240418 | 0.078756 |
| MmugDNA.17004.1.S1_at   | MmugDNA.17004.1 | 8.26  | 8.2   | 0.02 | 0.5  | 1.04  | 0.78273  | 0.924043 | 0.909285 | 0.957178 |
| MmugDNA.17005.1.S1_at   | MmugDNA.17005.1 | 9.49  | 9     | 0.34 | 0.58 | 1.4   | 0.466151 | 0.090906 | 0.740195 | 0.345537 |



|                         |                 |       |       |      |      |       |          |          |          |          |
|-------------------------|-----------------|-------|-------|------|------|-------|----------|----------|----------|----------|
| MmugDNA.17006.1.S1_at   | MmugDNA.17006.1 | 9.27  | 8.3   | 0.12 | 0.22 | 1.97  | 0.002805 | 0.000679 | 0.166634 | 0.04413  |
| MmugDNA.1701.1.S1_at    | MmugDNA.1701.1  | 5.9   | 5.92  | 0.46 | 0.28 | -1.01 | 0.591846 | 0.506784 | 0.810672 | 0.702575 |
| MmugDNA.17013.1.S1_at   | MmugDNA.17013.1 | 5.32  | 5.39  | 0.16 | 0.17 | -1.05 | 0.745946 | 0.768652 | 0.891243 | 0.865638 |
| MmugDNA.17016.1.S1_at   | MmugDNA.17016.1 | 7.7   | 7.42  | 0.75 | 0.36 | 1.21  | 0.215949 | 0.071276 | 0.575954 | 0.313318 |
| MmugDNA.17017.1.S1_at   | MmugDNA.17017.1 | 9     | 9.41  | 0.87 | 1.08 | -1.33 | 0.699058 | 0.048942 | 0.86659  | 0.266021 |
| MmugDNA.1702.1.S1_at    | MmugDNA.1702.1  | 8.09  | 9.92  | 0.7  | 0.82 | -3.55 | 0.045442 | 0.041871 | 0.361012 | 0.249187 |
| MmugDNA.17021.1.S1_at   | MmugDNA.17021.1 | 11.5  | 11.67 | 0.09 | 0.15 | -1.12 | 0.08942  | 0.13421  | 0.445076 | 0.406453 |
| MmugDNA.17025.1.S1_at   | MmugDNA.17025.1 | 11.54 | 11.34 | 0.1  | 0.13 | 1.15  | 0.168091 | 0.110299 | 0.53256  | 0.374403 |
| MmugDNA.17029.1.S1_at   | MmugDNA.17029.1 | 12.57 | 12.31 | 0.22 | 0.29 | 1.2   | 0.468049 | 0.032677 | 0.740976 | 0.223827 |
| MmugDNA.17029.1.S1_s_at | MmugDNA.17029.1 | 13.54 | 13.24 | 0.16 | 0.2  | 1.23  | 0.250188 | 0.055964 | 0.600389 | 0.28236  |
| MmugDNA.17031.1.S1_at   | MmugDNA.17031.1 | 9.95  | 9.45  | 0.08 | 0.13 | 1.42  | 0.010901 | 0.029851 | 0.232742 | 0.214481 |
| MmugDNA.17034.1.S1_at   | MmugDNA.17034.1 | 9.2   | 8.56  | 0.28 | 1.09 | 1.56  | 0.336838 | 0.46557  | 0.659663 | 0.675811 |
| MmugDNA.17036.1.S1_at   | MmugDNA.17036.1 | 7.38  | 8     | 0.18 | 1.54 | -1.54 | 0.532337 | 0.507991 | 0.777633 | 0.703358 |
| MmugDNA.17038.1.S1_at   | MmugDNA.17038.1 | 7.47  | 7.51  | 0.04 | 0.04 | -1.03 | 0.244754 | 0.225121 | 0.596374 | 0.497779 |
| MmugDNA.17039.1.S1_at   | MmugDNA.17039.1 | 5.52  | 5.18  | 0.23 | 0.23 | 1.26  | 0.114181 | 0.124458 | 0.47744  | 0.394865 |
| MmugDNA.17044.1.S1_at   | MmugDNA.17044.1 | 11.38 | 10.14 | 0.23 | 0.77 | 2.35  | 0.227079 | 0.272167 | 0.584952 | 0.536939 |
| MmugDNA.17048.1.S1_at   | MmugDNA.17048.1 | 11.07 | 10.93 | 0.2  | 0.23 | 1.1   | 0.739727 | 0.920548 | 0.888213 | 0.955234 |
| MmugDNA.17049.1.S1_at   | MmugDNA.17049.1 | 4.14  | 4.05  | 0.19 | 0.22 | 1.07  | 0.633347 | 0.514913 | 0.833644 | 0.707937 |
| MmugDNA.17051.1.S1_at   | MmugDNA.17051.1 | 6.49  | 6.71  | 0.2  | 0.17 | -1.16 | 0.198497 | 0.224756 | 0.561629 | 0.497617 |
| MmugDNA.17052.1.S1_at   | MmugDNA.17052.1 | 7.08  | 6.23  | 0.18 | 0.17 | 1.8   | 0.005184 | 0.002075 | 0.190313 | 0.067389 |
| MmugDNA.17053.1.S1_at   | MmugDNA.17053.1 | 8.83  | 9.14  | 0.12 | 0.1  | -1.24 | 0.027848 | 0.014108 | 0.309107 | 0.15195  |
| MmugDNA.17056.1.S1_at   | MmugDNA.17056.1 | 8.26  | 8.23  | 0.17 | 0.07 | 1.02  | 0.524546 | 0.689802 | 0.773192 | 0.819112 |
| MmugDNA.17056.1.S1_s_at | MmugDNA.17056.1 | 5.38  | 4.96  | 0.17 | 0.48 | 1.34  | 0.269163 | 0.384075 | 0.613808 | 0.619926 |
| MmugDNA.17065.1.S1_at   | MmugDNA.17065.1 | 9.11  | 9.19  | 0.26 | 0.74 | -1.05 | 0.997325 | 0.266737 | 0.99892  | 0.53241  |
| MmugDNA.17068.1.S1_at   | MmugDNA.17068.1 | 6.2   | 6.44  | 0.08 | 0.08 | -1.19 | 0.021579 | 0.014154 | 0.282862 | 0.152107 |
| MmugDNA.17069.1.S1_at   | MmugDNA.17069.1 | 9.08  | 9.42  | 0.13 | 0.18 | -1.26 | 0.041687 | 0.042693 | 0.352383 | 0.251049 |
| MmugDNA.17072.1.S1_at   | MmugDNA.17072.1 | 11.14 | 10.45 | 0.23 | 0.05 | 1.61  | 0.00656  | 0.003616 | 0.199625 | 0.086033 |
| MmugDNA.17072.1.S1_x_at | MmugDNA.17072.1 | 10.9  | 10.18 | 0.18 | 0.1  | 1.64  | 0.003686 | 0.001616 | 0.179515 | 0.06074  |
| MmugDNA.17073.1.S1_at   | MmugDNA.17073.1 | 5.58  | 5.58  | 0.03 | 0.1  | -1    | 0.902899 | 0.539755 | 0.961346 | 0.723926 |
| MmugDNA.17075.1.S1_at   | MmugDNA.17075.1 | 4.76  | 4.85  | 0.28 | 0.09 | -1.07 | 0.534877 | 0.766081 | 0.778892 | 0.864102 |
| MmugDNA.17083.1.S1_at   | MmugDNA.17083.1 | 12.8  | 12.49 | 0.06 | 0.04 | 1.24  | 0.001265 | 0.000373 | 0.145267 | 0.037273 |
| MmugDNA.17084.1.S1_at   | MmugDNA.17084.1 | 4.55  | 6.36  | 1.95 | 0.81 | -3.5  | 0.395176 | 0.261859 | 0.696396 | 0.528265 |
| MmugDNA.17093.1.S1_at   | MmugDNA.17093.1 | 7.52  | 6.76  | 0.36 | 0.38 | 1.69  | 0.150758 | 0.098181 | 0.515411 | 0.356253 |
| MmugDNA.17097.1.S1_at   | MmugDNA.17097.1 | 5.57  | 5.23  | 0.1  | 0.39 | 1.27  | 0.147077 | 0.065767 | 0.51306  | 0.301767 |
| MmugDNA.17099.1.S1_at   | MmugDNA.17099.1 | 7.8   | 7.74  | 0.25 | 0.08 | 1.04  | 0.384753 | 0.401816 | 0.690114 | 0.631075 |
| MmugDNA.17100.1.S1_at   | MmugDNA.17100.1 | 10.08 | 9.01  | 0.33 | 0.68 | 2.1   | 0.019931 | 0.010833 | 0.276356 | 0.135705 |
| MmugDNA.17105.1.S1_at   | MmugDNA.17105.1 | 12.26 | 12.27 | 0.04 | 0.05 | -1.01 | 0.9224   | 0.621185 | 0.969928 | 0.775813 |
| MmugDNA.17109.1.S1_at   | MmugDNA.17109.1 | 7.57  | 7.44  | 0.15 | 0.55 | 1.1   | 0.19298  | 0.307142 | 0.556235 | 0.563487 |
| MmugDNA.1711.1.S1_at    | MmugDNA.1711.1  | 9.01  | 7.57  | 0.07 | 0.18 | 2.72  | 0.000216 | 0.000025 | 0.120316 | 0.020254 |
| MmugDNA.17111.1.S1_at   | MmugDNA.17111.1 | 6.42  | 5.56  | 0.64 | 0.12 | 1.81  | 0.26141  | 0.195004 | 0.607983 | 0.470146 |
| MmugDNA.17113.1.S1_at   | MmugDNA.17113.1 | 5.54  | 5.34  | 0.55 | 0.82 | 1.14  | 0.961067 | 0.765549 | 0.984976 | 0.863726 |

|                         |                 |       |       |      |      |       |          |          |          |          |
|-------------------------|-----------------|-------|-------|------|------|-------|----------|----------|----------|----------|
| MmugDNA.17118.1.S1_at   | MmugDNA.17118.1 | 8.48  | 8.98  | 0.47 | 0.37 | -1.41 | 0.580824 | 0.173619 | 0.804812 | 0.449965 |
| MmugDNA.17122.1.S1_at   | MmugDNA.17122.1 | 4.36  | 4.35  | 0.24 | 0.03 | 1.01  | 0.346261 | 0.202131 | 0.665754 | 0.476557 |
| MmugDNA.17125.1.S1_at   | MmugDNA.17125.1 | 6.75  | 6.83  | 0.2  | 0.17 | -1.06 | 0.644618 | 0.76037  | 0.839786 | 0.860754 |
| MmugDNA.17135.1.S1_at   | MmugDNA.17135.1 | 9.88  | 10.47 | 0.17 | 0.41 | -1.51 | 0.070892 | 0.06557  | 0.414673 | 0.301476 |
| MmugDNA.1714.1.S1_at    | MmugDNA.1714.1  | 6.83  | 6.94  | 0.23 | 0.07 | -1.07 | 0.550258 | 0.559827 | 0.787781 | 0.736394 |
| MmugDNA.17140.1.S1_at   | MmugDNA.17140.1 | 6.52  | 6.51  | 0.12 | 0.13 | 1.01  | 0.458663 | 0.206422 | 0.7356   | 0.480571 |
| MmugDNA.17142.1.S1_at   | MmugDNA.17142.1 | 6.91  | 6.96  | 0.14 | 0.12 | -1.04 | 0.296608 | 0.258069 | 0.632686 | 0.525574 |
| MmugDNA.17143.1.S1_x_at | MmugDNA.17143.1 | 6.7   | 5.93  | 0.34 | 0.41 | 1.7   | 0.106391 | 0.088442 | 0.466831 | 0.341877 |
| MmugDNA.1715.1.S1_at    | MmugDNA.1715.1  | 7.85  | 6.81  | 0.32 | 0.36 | 2.05  | 0.02204  | 0.01615  | 0.28446  | 0.161087 |
| MmugDNA.17158.1.S1_at   | MmugDNA.17158.1 | 3.64  | 3.69  | 0.05 | 0.03 | -1.03 | 0.82501  | 0.304603 | 0.929089 | 0.561838 |
| MmugDNA.17159.1.S1_at   | MmugDNA.17159.1 | 9.48  | 8.87  | 0.49 | 1.06 | 1.52  | 0.998637 | 0.999621 | 0.999507 | 0.999864 |
| MmugDNA.17159.1.S1_s_at | MmugDNA.17159.1 | 10.46 | 10.25 | 0.33 | 0.98 | 1.16  | 0.864535 | 0.855318 | 0.94556  | 0.917526 |
| MmugDNA.17164.1.S1_s_at | MmugDNA.17164.1 | 6.32  | 6.39  | 0.24 | 0.31 | -1.05 | 0.735262 | 0.56454  | 0.88618  | 0.739363 |
| MmugDNA.17182.1.S1_at   | MmugDNA.17182.1 | 3.21  | 3.17  | 0.02 | 0.18 | 1.03  | 0.666104 | 0.346303 | 0.850262 | 0.59124  |
| MmugDNA.17188.1.S1_at   | MmugDNA.17188.1 | 7.69  | 7.38  | 0.29 | 0.11 | 1.24  | 0.043325 | 0.034382 | 0.3567   | 0.229382 |
| MmugDNA.17189.1.S1_at   | MmugDNA.17189.1 | 4.75  | 4.64  | 0.27 | 0.1  | 1.08  | 0.396069 | 0.203627 | 0.696779 | 0.47789  |
| MmugDNA.17193.1.S1_at   | MmugDNA.17193.1 | 6.47  | 6.91  | 0.2  | 0.36 | -1.35 | 0.111828 | 0.114011 | 0.474156 | 0.38036  |
| MmugDNA.17196.1.S1_at   | MmugDNA.17196.1 | 12.52 | 12.25 | 0.12 | 0.3  | 1.2   | 0.117472 | 0.122901 | 0.481559 | 0.392923 |
| MmugDNA.17198.1.S1_at   | MmugDNA.17198.1 | 3.42  | 3.24  | 0.43 | 0.42 | 1.13  | 0.884796 | 0.403488 | 0.953827 | 0.632164 |
| MmugDNA.17201.1.S1_at   | MmugDNA.17201.1 | 6.67  | 5.28  | 0.25 | 0.32 | 2.61  | 0.007049 | 0.002237 | 0.203955 | 0.069642 |
| MmugDNA.17203.1.S1_at   | MmugDNA.17203.1 | 12.66 | 12.41 | 0.11 | 0.1  | 1.18  | 0.112708 | 0.120662 | 0.475104 | 0.389476 |
| MmugDNA.17205.1.S1_at   | MmugDNA.17205.1 | 5.83  | 5.95  | 0.14 | 0.12 | -1.09 | 0.848122 | 0.56457  | 0.939154 | 0.739366 |
| MmugDNA.17209.1.S1_at   | MmugDNA.17209.1 | 5.92  | 6.01  | 0.07 | 0.12 | -1.06 | 0.214951 | 0.297424 | 0.57547  | 0.556086 |
| MmugDNA.1721.1.S1_at    | MmugDNA.1721.1  | 8.24  | 7.24  | 0.6  | 0.63 | 2.01  | 0.094375 | 0.093051 | 0.451912 | 0.3492   |
| MmugDNA.17212.1.S1_at   | MmugDNA.17212.1 | 3.24  | 3.15  | 0.27 | 0.17 | 1.06  | 0.963915 | 0.802722 | 0.985998 | 0.886441 |
| MmugDNA.17213.1.S1_at   | MmugDNA.17213.1 | 5.21  | 5.53  | 0.14 | 0.21 | -1.25 | 0.101133 | 0.078721 | 0.461009 | 0.325673 |
| MmugDNA.17216.1.S1_at   | MmugDNA.17216.1 | 5.41  | 5.31  | 0.04 | 0.19 | 1.07  | 0.366104 | 0.282172 | 0.678919 | 0.544937 |
| MmugDNA.17218.1.S1_at   | MmugDNA.17218.1 | 8.79  | 9.48  | 0.54 | 0.88 | -1.61 | 0.508386 | 0.501207 | 0.763692 | 0.699449 |
| MmugDNA.17219.1.S1_at   | MmugDNA.17219.1 | 8.35  | 7.46  | 0.26 | 0.11 | 1.86  | 0.005073 | 0.004145 | 0.188726 | 0.091027 |
| MmugDNA.17220.1.S1_at   | MmugDNA.17220.1 | 6.85  | 6.93  | 0.19 | 0.04 | -1.06 | 0.521529 | 0.551794 | 0.771406 | 0.731221 |
| MmugDNA.17221.1.S1_at   | MmugDNA.17221.1 | 7.08  | 7.31  | 0.04 | 0.27 | -1.17 | 0.068014 | 0.0542   | 0.409262 | 0.278211 |
| MmugDNA.17224.1.A1_at   | MmugDNA.17224.1 | 6.32  | 6.56  | 0.41 | 0.06 | -1.18 | 0.389411 | 0.518366 | 0.692994 | 0.71038  |
| MmugDNA.17224.1.S1_at   | MmugDNA.17224.1 | 6.75  | 6.87  | 0.33 | 0.04 | -1.09 | 0.56834  | 0.680783 | 0.798588 | 0.813594 |
| MmugDNA.17225.1.S1_at   | MmugDNA.17225.1 | 10.94 | 11.06 | 0.11 | 0.12 | -1.08 | 0.094047 | 0.091354 | 0.451612 | 0.346281 |
| MmugDNA.17229.1.S1_at   | MmugDNA.17229.1 | 5.89  | 5.91  | 0.19 | 0.13 | -1.01 | 0.749265 | 0.880455 | 0.892627 | 0.931694 |
| MmugDNA.17238.1.S1_at   | MmugDNA.17238.1 | 9.62  | 10.73 | 0.57 | 0.77 | -2.16 | 0.130225 | 0.061182 | 0.496613 | 0.293981 |
| MmugDNA.17241.1.S1_at   | MmugDNA.17241.1 | 5.79  | 5.97  | 0.19 | 0.2  | -1.13 | 0.651842 | 0.823161 | 0.84335  | 0.898361 |
| MmugDNA.17242.1.S1_at   | MmugDNA.17242.1 | 9.96  | 9.42  | 0.31 | 0.46 | 1.45  | 0.398862 | 0.079438 | 0.698954 | 0.326766 |
| MmugDNA.17250.1.S1_at   | MmugDNA.17250.1 | 3.49  | 3.32  | 0.1  | 0.08 | 1.13  | 0.231265 | 0.144712 | 0.587369 | 0.418546 |
| MmugDNA.17253.1.S1_at   | MmugDNA.17253.1 | 10.13 | 9.63  | 0.67 | 0.54 | 1.41  | 0.309067 | 0.308322 | 0.641346 | 0.564425 |
| MmugDNA.17254.1.S1_at   | MmugDNA.17254.1 | 5.87  | 6.05  | 0.3  | 0.1  | -1.13 | 0.635428 | 0.803796 | 0.83497  | 0.887124 |

|                         |                 |       |       |      |      |       |          |          |          |          |
|-------------------------|-----------------|-------|-------|------|------|-------|----------|----------|----------|----------|
| MmugDNA.17256.1.S1_at   | MmugDNA.17256.1 | 4.4   | 4.57  | 0.07 | 0.06 | -1.12 | 0.15399  | 0.144376 | 0.518553 | 0.418323 |
| MmugDNA.17259.1.S1_at   | MmugDNA.17259.1 | 8.96  | 8.82  | 0.16 | 0.59 | 1.1   | 0.71218  | 0.889799 | 0.873881 | 0.937223 |
| MmugDNA.17269.1.S1_at   | MmugDNA.17269.1 | 8.3   | 7.42  | 0.19 | 0.11 | 1.84  | 0.003127 | 0.000689 | 0.172569 | 0.044166 |
| MmugDNA.17277.1.S1_at   | MmugDNA.17277.1 | 9.18  | 8.89  | 0.16 | 0.48 | 1.22  | 0.137718 | 0.188591 | 0.504992 | 0.464557 |
| MmugDNA.17286.1.S1_at   | MmugDNA.17286.1 | 12.15 | 11.89 | 0.25 | 0.32 | 1.2   | 0.559661 | 0.394421 | 0.793999 | 0.626982 |
| MmugDNA.17292.1.S1_at   | MmugDNA.17292.1 | 7.33  | 7.01  | 0.25 | 0.37 | 1.25  | 0.14154  | 0.131083 | 0.509111 | 0.403084 |
| MmugDNA.17294.1.S1_at   | MmugDNA.17294.1 | 7.21  | 7.5   | 0.28 | 0.52 | -1.22 | 0.23129  | 0.166231 | 0.587369 | 0.442777 |
| MmugDNA.17295.1.S1_at   | MmugDNA.17295.1 | 10.2  | 10.67 | 0.3  | 0.69 | -1.39 | 0.820867 | 0.951681 | 0.927175 | 0.972543 |
| MmugDNA.17299.1.S1_at   | MmugDNA.17299.1 | 3.14  | 3.31  | 0    | 0.1  | -1.12 | 0.074058 | 0.141414 | 0.419667 | 0.414874 |
| MmugDNA.173.1.S1_at     | MmugDNA.173.1   | 6.89  | 7.07  | 0.05 | 0.12 | -1.14 | 0.223056 | 0.14789  | 0.581681 | 0.422263 |
| MmugDNA.17300.1.S1_s_at | MmugDNA.17300.1 | 6.61  | 6.97  | 1.04 | 0.43 | -1.29 | 0.85947  | 0.973696 | 0.94324  | 0.985648 |
| MmugDNA.17319.1.S1_at   | MmugDNA.17319.1 | 12.26 | 12.22 | 0.11 | 0.3  | 1.03  | 0.711252 | 0.899877 | 0.873475 | 0.943047 |
| MmugDNA.17322.1.S1_at   | MmugDNA.17322.1 | 6.54  | 6.64  | 0.14 | 0.03 | -1.07 | 0.328411 | 0.377494 | 0.654375 | 0.614984 |
| MmugDNA.17329.1.S1_at   | MmugDNA.17329.1 | 12    | 10.21 | 0.06 | 1    | 3.46  | 0.014368 | 0.006916 | 0.251885 | 0.112399 |
| MmugDNA.1734.1.S1_at    | MmugDNA.1734.1  | 5.57  | 5.52  | 0.31 | 0.19 | 1.03  | 0.524153 | 0.256891 | 0.773034 | 0.52471  |
| MmugDNA.17344.1.S1_at   | MmugDNA.17344.1 | 5.94  | 6.76  | 0.28 | 0.4  | -1.77 | 0.086059 | 0.028579 | 0.440066 | 0.210834 |
| MmugDNA.17348.1.S1_at   | MmugDNA.17348.1 | 12.27 | 12.14 | 0.1  | 0.04 | 1.09  | 0.095153 | 0.001887 | 0.452979 | 0.065004 |
| MmugDNA.17350.1.S1_at   | MmugDNA.17350.1 | 11.98 | 11.4  | 0.06 | 0.32 | 1.49  | 0.100302 | 0.088614 | 0.460878 | 0.342165 |
| MmugDNA.17360.1.S1_at   | MmugDNA.17360.1 | 6.56  | 6.71  | 0.16 | 0.09 | -1.11 | 0.608844 | 0.678419 | 0.820185 | 0.812189 |
| MmugDNA.17362.1.S1_at   | MmugDNA.17362.1 | 11.23 | 12.01 | 0.35 | 0.28 | -1.72 | 0.071005 | 0.065689 | 0.414673 | 0.301631 |
| MmugDNA.17365.1.S1_at   | MmugDNA.17365.1 | 10.2  | 13.12 | 1.65 | 2.75 | -7.61 | 0.608829 | 0.508384 | 0.820185 | 0.70359  |
| MmugDNA.17366.1.S1_s_at | MmugDNA.17366.1 | 10.11 | 9.59  | 0.16 | 0.17 | 1.43  | 0.018953 | 0.027632 | 0.272319 | 0.207522 |
| MmugDNA.17369.1.S1_at   | MmugDNA.17369.1 | 3.84  | 3.83  | 0.04 | 0.09 | 1.01  | 0.586747 | 0.11158  | 0.80826  | 0.376407 |
| MmugDNA.17373.1.S1_at   | MmugDNA.17373.1 | 6.26  | 4.63  | 2.15 | 0.09 | 3.08  | 0.247569 | 0.20279  | 0.598762 | 0.477273 |
| MmugDNA.17384.1.S1_at   | MmugDNA.17384.1 | 9.19  | 8.7   | 0.3  | 0.28 | 1.4   | 0.121821 | 0.171065 | 0.486761 | 0.447601 |
| MmugDNA.17390.1.S1_at   | MmugDNA.17390.1 | 4.03  | 4.24  | 0.06 | 0.12 | -1.15 | 0.21845  | 0.457261 | 0.577909 | 0.670746 |
| MmugDNA.17393.1.S1_at   | MmugDNA.17393.1 | 11.35 | 10.68 | 0.08 | 0.32 | 1.59  | 0.025123 | 0.016396 | 0.297733 | 0.162135 |
| MmugDNA.17395.1.S1_at   | MmugDNA.17395.1 | 12.39 | 12.05 | 0.14 | 0.49 | 1.26  | 0.317658 | 0.030193 | 0.648004 | 0.215693 |
| MmugDNA.17397.1.S1_at   | MmugDNA.17397.1 | 5.83  | 5.26  | 0.59 | 0.53 | 1.48  | 0.496627 | 0.327657 | 0.757609 | 0.577464 |
| MmugDNA.17400.1.S1_at   | MmugDNA.17400.1 | 10.45 | 11.06 | 0.15 | 0.16 | -1.53 | 0.009487 | 0.004204 | 0.22572  | 0.091368 |
| MmugDNA.17406.1.S1_at   | MmugDNA.17406.1 | 4.81  | 5.28  | 0.12 | 0.27 | -1.38 | 0.050562 | 0.034178 | 0.374677 | 0.228728 |
| MmugDNA.17407.1.S1_at   | MmugDNA.17407.1 | 6.63  | 6.74  | 0.12 | 0.33 | -1.08 | 0.618142 | 0.806722 | 0.825111 | 0.888783 |
| MmugDNA.17409.1.S1_s_at | MmugDNA.17409.1 | 10.6  | 11.19 | 0.1  | 0.42 | -1.51 | 0.228924 | 0.227625 | 0.586256 | 0.499898 |
| MmugDNA.17413.1.S1_at   | MmugDNA.17413.1 | 9.62  | 10.04 | 0.27 | 0.66 | -1.33 | 0.33951  | 0.467447 | 0.661307 | 0.677085 |
| MmugDNA.17419.1.S1_at   | MmugDNA.17419.1 | 5.22  | 5.08  | 0.16 | 0.01 | 1.1   | 0.646696 | 0.211513 | 0.841044 | 0.48563  |
| MmugDNA.1742.1.S1_at    | MmugDNA.1742.1  | 11.08 | 10.91 | 0.16 | 0.11 | 1.13  | 0.229958 | 0.101708 | 0.587053 | 0.361562 |
| MmugDNA.17422.1.S1_at   | MmugDNA.17422.1 | 4.5   | 4.66  | 0.16 | 0.3  | -1.12 | 0.996746 | 0.602105 | 0.998654 | 0.763172 |
| MmugDNA.17426.1.S1_at   | MmugDNA.17426.1 | 11.49 | 10.23 | 0.73 | 1.33 | 2.39  | 0.139789 | 0.159366 | 0.507376 | 0.435417 |
| MmugDNA.17430.1.S1_at   | MmugDNA.17430.1 | 10.94 | 11.24 | 0.06 | 0.06 | -1.23 | 0.002554 | 0.014876 | 0.164386 | 0.155055 |
| MmugDNA.17430.1.S1_s_at | MmugDNA.17430.1 | 10.25 | 10.55 | 0.12 | 0.11 | -1.24 | 0.021006 | 0.041334 | 0.281947 | 0.247995 |
| MmugDNA.17433.1.S1_at   | MmugDNA.17433.1 | 11.07 | 10.09 | 0.06 | 0.31 | 1.98  | 0.011017 | 0.004643 | 0.233671 | 0.095    |

|                         |                 |       |       |      |      |       |          |          |          |          |
|-------------------------|-----------------|-------|-------|------|------|-------|----------|----------|----------|----------|
| MmugDNA.17444.1.S1_at   | MmugDNA.17444.1 | 8.56  | 8.31  | 0.32 | 0.41 | 1.19  | 0.878557 | 0.028634 | 0.951291 | 0.210901 |
| MmugDNA.17448.1.S1_at   | MmugDNA.17448.1 | 12.28 | 12.04 | 0.11 | 0.1  | 1.18  | 0.091548 | 0.069254 | 0.447485 | 0.309453 |
| MmugDNA.17450.1.S1_at   | MmugDNA.17450.1 | 10    | 9.18  | 0.12 | 0.2  | 1.76  | 0.004736 | 0.000768 | 0.184674 | 0.04544  |
| MmugDNA.17451.1.S1_at   | MmugDNA.17451.1 | 6.6   | 6.72  | 0.28 | 0.69 | -1.08 | 0.8178   | 0.886875 | 0.926038 | 0.93556  |
| MmugDNA.17453.1.S1_at   | MmugDNA.17453.1 | 5.84  | 5.95  | 0.11 | 0.04 | -1.08 | 0.06398  | 0.273294 | 0.401945 | 0.537788 |
| MmugDNA.17463.1.S1_at   | MmugDNA.17463.1 | 7.73  | 8.04  | 0.36 | 0.2  | -1.24 | 0.50902  | 0.54145  | 0.764172 | 0.724928 |
| MmugDNA.17467.1.S1_at   | MmugDNA.17467.1 | 11.8  | 11.61 | 0.06 | 0.26 | 1.14  | 0.559575 | 0.363308 | 0.793957 | 0.60371  |
| MmugDNA.17468.1.S1_at   | MmugDNA.17468.1 | 4.73  | 4.74  | 0.63 | 0.75 | -1.01 | 0.620302 | 0.676636 | 0.826026 | 0.811009 |
| MmugDNA.17469.1.S1_at   | MmugDNA.17469.1 | 9.77  | 9.51  | 0.32 | 0.22 | 1.2   | 0.226426 | 0.325787 | 0.584429 | 0.576049 |
| MmugDNA.17470.1.S1_at   | MmugDNA.17470.1 | 11.81 | 11.81 | 0.14 | 0.26 | 1     | 0.963871 | 0.941959 | 0.985998 | 0.96711  |
| MmugDNA.1748.1.S1_at    | MmugDNA.1748.1  | 6.41  | 7.19  | 0.63 | 0.68 | -1.71 | 0.233162 | 0.12005  | 0.587994 | 0.388733 |
| MmugDNA.17485.1.S1_at   | MmugDNA.17485.1 | 3.55  | 3.54  | 0.14 | 0.27 | 1     | 0.449107 | 0.511207 | 0.730082 | 0.705447 |
| MmugDNA.17492.1.S1_at   | MmugDNA.17492.1 | 6.04  | 5.95  | 0.14 | 0.04 | 1.06  | 0.497929 | 0.112842 | 0.758109 | 0.378467 |
| MmugDNA.17497.1.S1_at   | MmugDNA.17497.1 | 7.47  | 6.81  | 0.19 | 0.15 | 1.59  | 0.011863 | 0.083822 | 0.238365 | 0.334662 |
| MmugDNA.17499.1.S1_at   | MmugDNA.17499.1 | 4.05  | 4.02  | 0.12 | 0.06 | 1.02  | 0.602627 | 0.752277 | 0.816617 | 0.855787 |
| MmugDNA.17503.1.S1_at   | MmugDNA.17503.1 | 11.02 | 11.08 | 0.13 | 0.17 | -1.04 | 0.137655 | 0.15005  | 0.504937 | 0.424693 |
| MmugDNA.17505.1.S1_at   | MmugDNA.17505.1 | 6.78  | 6.99  | 0.16 | 0.19 | -1.16 | 0.566111 | 0.099483 | 0.797485 | 0.357862 |
| MmugDNA.17506.1.S1_at   | MmugDNA.17506.1 | 12.61 | 12.65 | 0.07 | 0.31 | -1.03 | 0.387936 | 0.480221 | 0.692145 | 0.68574  |
| MmugDNA.17511.1.S1_at   | MmugDNA.17511.1 | 5.48  | 5.83  | 0.03 | 0.62 | -1.27 | 0.372021 | 0.391094 | 0.682671 | 0.624833 |
| MmugDNA.17513.1.S1_at   | MmugDNA.17513.1 | 12.15 | 11.67 | 0.3  | 0.63 | 1.4   | 0.231628 | 0.182334 | 0.587487 | 0.458787 |
| MmugDNA.17518.1.S1_at   | MmugDNA.17518.1 | 9.75  | 9.13  | 0.26 | 0.3  | 1.53  | 0.043009 | 0.036866 | 0.355958 | 0.23648  |
| MmugDNA.17519.1.S1_at   | MmugDNA.17519.1 | 5.57  | 5.52  | 0.36 | 0.4  | 1.03  | 0.845412 | 0.535063 | 0.938022 | 0.720775 |
| MmugDNA.1752.1.S1_s_at  | MmugDNA.1752.1  | 5.88  | 5.89  | 0.1  | 0.28 | -1.01 | 0.252698 | 0.287435 | 0.601507 | 0.548683 |
| MmugDNA.17523.1.S1_at   | MmugDNA.17523.1 | 5.86  | 5.91  | 0.09 | 0.14 | -1.04 | 0.265018 | 0.351884 | 0.61074  | 0.595331 |
| MmugDNA.17526.1.S1_at   | MmugDNA.17526.1 | 8.02  | 7.99  | 0.05 | 0.04 | 1.02  | 0.871244 | 0.442364 | 0.948463 | 0.660366 |
| MmugDNA.17527.1.S1_at   | MmugDNA.17527.1 | 11.44 | 11.51 | 0.05 | 0.17 | -1.05 | 0.61145  | 0.483296 | 0.821704 | 0.687887 |
| MmugDNA.17530.1.S1_at   | MmugDNA.17530.1 | 12.43 | 11.83 | 0.13 | 0.29 | 1.52  | 0.012759 | 0.005724 | 0.243715 | 0.104271 |
| MmugDNA.17531.1.S1_at   | MmugDNA.17531.1 | 11.45 | 11.71 | 0.05 | 0.1  | -1.19 | 0.013853 | 0.009502 | 0.249758 | 0.128379 |
| MmugDNA.17533.1.S1_at   | MmugDNA.17533.1 | 13.07 | 13    | 0.07 | 0.08 | 1.05  | 0.291551 | 0.113533 | 0.628857 | 0.379632 |
| MmugDNA.17537.1.S1_at   | MmugDNA.17537.1 | 4.94  | 5.05  | 0.2  | 0.04 | -1.08 | 0.925251 | 0.551703 | 0.971082 | 0.731155 |
| MmugDNA.17538.1.S1_at   | MmugDNA.17538.1 | 6.67  | 6.74  | 0.08 | 0.09 | -1.05 | 0.152609 | 0.180427 | 0.517325 | 0.457077 |
| MmugDNA.17539.1.S1_at   | MmugDNA.17539.1 | 8.03  | 8.88  | 0.13 | 1.11 | -1.79 | 0.270671 | 0.338422 | 0.614969 | 0.585432 |
| MmugDNA.17542.1.S1_at   | MmugDNA.17542.1 | 3.69  | 4.12  | 0.12 | 0.05 | -1.35 | 0.005691 | 0.001835 | 0.191943 | 0.064337 |
| MmugDNA.17547.1.S1_at   | MmugDNA.17547.1 | 8.59  | 9.29  | 0.86 | 0.69 | -1.62 | 0.39316  | 0.540725 | 0.695026 | 0.724514 |
| MmugDNA.17554.1.S1_at   | MmugDNA.17554.1 | 4.19  | 6.33  | 0.24 | 1.84 | -4.41 | 0.143678 | 0.110644 | 0.51035  | 0.374854 |
| MmugDNA.17555.1.S1_at   | MmugDNA.17555.1 | 4.39  | 4.34  | 0.24 | 0.12 | 1.04  | 0.745444 | 0.428894 | 0.891098 | 0.650409 |
| MmugDNA.17562.1.S1_at   | MmugDNA.17562.1 | 7.3   | 6.87  | 0.34 | 0.46 | 1.34  | 0.561698 | 0.738819 | 0.79493  | 0.848618 |
| MmugDNA.17562.1.S1_s_at | MmugDNA.17562.1 | 7.75  | 7.56  | 0.38 | 0.36 | 1.14  | 0.64452  | 0.830344 | 0.839786 | 0.902644 |
| MmugDNA.17567.1.S1_at   | MmugDNA.17567.1 | 8.37  | 8.37  | 0.07 | 0.35 | 1     | 0.769039 | 0.401414 | 0.902888 | 0.631018 |
| MmugDNA.17568.1.S1_at   | MmugDNA.17568.1 | 11.14 | 10.17 | 0.29 | 0.16 | 1.96  | 0.003547 | 0.000499 | 0.179515 | 0.038955 |
| MmugDNA.17571.1.S1_at   | MmugDNA.17571.1 | 3.47  | 3.54  | 0.05 | 0.15 | -1.05 | 0.257826 | 0.218973 | 0.605259 | 0.492722 |

|                         |                 |       |       |      |      |       |          |          |          |          |
|-------------------------|-----------------|-------|-------|------|------|-------|----------|----------|----------|----------|
| MmugDNA.17573.1.S1_at   | MmugDNA.17573.1 | 12.62 | 12.6  | 0.04 | 0.05 | 1.01  | 0.187831 | 0.185631 | 0.550915 | 0.461588 |
| MmugDNA.17574.1.S1_at   | MmugDNA.17574.1 | 5.98  | 6.1   | 0.07 | 0.08 | -1.09 | 0.133205 | 0.090118 | 0.499568 | 0.344424 |
| MmugDNA.17575.1.S1_at   | MmugDNA.17575.1 | 10.33 | 9.96  | 0.08 | 0.15 | 1.29  | 0.018406 | 0.001718 | 0.270285 | 0.062797 |
| MmugDNA.17579.1.S1_at   | MmugDNA.17579.1 | 5.95  | 7.16  | 0.14 | 0.18 | -2.32 | 0.000554 | 0.000083 | 0.136818 | 0.027016 |
| MmugDNA.17583.1.S1_at   | MmugDNA.17583.1 | 11.69 | 11.38 | 0.15 | 0.08 | 1.24  | 0.016211 | 0.006685 | 0.263449 | 0.110612 |
| MmugDNA.17585.1.S1_at   | MmugDNA.17585.1 | 8.85  | 8.29  | 0.12 | 0.21 | 1.47  | 0.007864 | 0.010039 | 0.213846 | 0.131334 |
| MmugDNA.17587.1.S1_at   | MmugDNA.17587.1 | 7.49  | 7.66  | 0.14 | 0.02 | -1.12 | 0.425595 | 0.220469 | 0.715187 | 0.493818 |
| MmugDNA.17599.1.S1_at   | MmugDNA.17599.1 | 7.06  | 6.51  | 0.13 | 0.31 | 1.47  | 0.068502 | 0.018239 | 0.410201 | 0.169844 |
| MmugDNA.176.1.S1_at     | MmugDNA.176.1   | 3.59  | 3.54  | 0.04 | 0    | 1.04  | 0.033657 | 0.008866 | 0.330119 | 0.12465  |
| MmugDNA.1760.1.S1_s_at  | MmugDNA.1760.1  | 10.48 | 10.71 | 0.13 | 0.04 | -1.17 | 0.161169 | 0.033748 | 0.526204 | 0.227391 |
| MmugDNA.17601.1.S1_at   | MmugDNA.17601.1 | 4.74  | 5.56  | 0.08 | 0.72 | -1.77 | 0.060171 | 0.067044 | 0.393081 | 0.304872 |
| MmugDNA.17603.1.S1_at   | MmugDNA.17603.1 | 10.48 | 10.07 | 0.12 | 0.36 | 1.32  | 0.168434 | 0.134366 | 0.532652 | 0.406603 |
| MmugDNA.17604.1.S1_at   | MmugDNA.17604.1 | 8.89  | 8.61  | 0.13 | 0.25 | 1.21  | 0.094958 | 0.292284 | 0.452531 | 0.552389 |
| MmugDNA.17606.1.S1_at   | MmugDNA.17606.1 | 5.19  | 5.47  | 0.26 | 0.82 | -1.21 | 0.144646 | 0.174956 | 0.511015 | 0.451599 |
| MmugDNA.1761.1.S1_at    | MmugDNA.1761.1  | 11.25 | 11.39 | 0.06 | 0.18 | -1.1  | 0.17167  | 0.247228 | 0.53526  | 0.516446 |
| MmugDNA.17612.1.S1_at   | MmugDNA.17612.1 | 2.97  | 2.78  | 0.4  | 0.09 | 1.14  | 0.945513 | 0.318966 | 0.979206 | 0.57154  |
| MmugDNA.17614.1.S1_at   | MmugDNA.17614.1 | 5.98  | 4.67  | 0.84 | 0.26 | 2.48  | 0.068103 | 0.057067 | 0.409262 | 0.284945 |
| MmugDNA.17617.1.S1_s_at | MmugDNA.17617.1 | 9.43  | 9.04  | 0.05 | 0.21 | 1.3   | 0.013397 | 0.002347 | 0.24652  | 0.07161  |
| MmugDNA.17624.1.S1_at   | MmugDNA.17624.1 | 9.42  | 8.38  | 0.24 | 0.94 | 2.05  | 0.502773 | 0.672942 | 0.760493 | 0.808874 |
| MmugDNA.17625.1.S1_at   | MmugDNA.17625.1 | 8.56  | 7.89  | 0.15 | 0.17 | 1.59  | 0.008082 | 0.006899 | 0.215994 | 0.112257 |
| MmugDNA.1763.1.S1_at    | MmugDNA.1763.1  | 8.73  | 8.16  | 0.1  | 0.36 | 1.49  | 0.091383 | 0.001522 | 0.447175 | 0.059307 |
| MmugDNA.17632.1.S1_at   | MmugDNA.17632.1 | 10.24 | 9.91  | 0.24 | 0.13 | 1.25  | 0.501808 | 0.550711 | 0.760145 | 0.730611 |
| MmugDNA.17636.1.S1_at   | MmugDNA.17636.1 | 11.4  | 10.35 | 0.2  | 0.46 | 2.07  | 0.084125 | 0.06904  | 0.436782 | 0.309017 |
| MmugDNA.17640.1.S1_at   | MmugDNA.17640.1 | 7.48  | 7.29  | 0.26 | 0.35 | 1.14  | 0.809264 | 0.511372 | 0.922223 | 0.705534 |
| MmugDNA.17642.1.S1_at   | MmugDNA.17642.1 | 5.13  | 5.46  | 0.12 | 0.04 | -1.25 | 0.006602 | 0.003362 | 0.200265 | 0.083405 |
| MmugDNA.17643.1.S1_at   | MmugDNA.17643.1 | 4.9   | 4.74  | 0.2  | 0.41 | 1.11  | 0.489288 | 0.54798  | 0.753678 | 0.72884  |
| MmugDNA.17644.1.S1_s_at | MmugDNA.17644.1 | 9     | 12.09 | 1.33 | 0.86 | -8.49 | 0.066288 | 0.043063 | 0.406371 | 0.252157 |
| MmugDNA.17655.1.S1_at   | MmugDNA.17655.1 | 12.72 | 12.86 | 0.22 | 0.09 | -1.1  | 0.548486 | 0.455991 | 0.786665 | 0.669758 |
| MmugDNA.17657.1.S1_at   | MmugDNA.17657.1 | 12.89 | 12.59 | 0.19 | 0.26 | 1.23  | 0.250188 | 0.299012 | 0.600389 | 0.557628 |
| MmugDNA.17658.1.S1_at   | MmugDNA.17658.1 | 12.25 | 12.01 | 0.13 | 0.14 | 1.18  | 0.091234 | 0.087839 | 0.447111 | 0.341218 |
| MmugDNA.17659.1.S1_at   | MmugDNA.17659.1 | 11.11 | 11.31 | 0.19 | 0.6  | -1.15 | 0.567732 | 0.774926 | 0.798292 | 0.868983 |
| MmugDNA.17662.1.S1_s_at | MmugDNA.17662.1 | 10.42 | 10.02 | 0.25 | 0.06 | 1.32  | 0.03901  | 0.028622 | 0.346188 | 0.210901 |
| MmugDNA.17663.1.S1_at   | MmugDNA.17663.1 | 4.77  | 4.6   | 0.24 | 0.03 | 1.12  | 0.929074 | 0.993164 | 0.972621 | 0.995946 |
| MmugDNA.17664.1.S1_at   | MmugDNA.17664.1 | 6.3   | 6.28  | 0.13 | 0.1  | 1.01  | 0.522789 | 0.660369 | 0.772248 | 0.801285 |
| MmugDNA.17671.1.S1_at   | MmugDNA.17671.1 | 7.22  | 7.5   | 0.08 | 0.07 | -1.21 | 0.009766 | 0.010587 | 0.22625  | 0.134213 |
| MmugDNA.17676.1.S1_at   | MmugDNA.17676.1 | 3.22  | 2.69  | 0.22 | 0.13 | 1.44  | 0.041427 | 0.032583 | 0.351726 | 0.223585 |
| MmugDNA.17681.1.S1_at   | MmugDNA.17681.1 | 7.77  | 7.38  | 0.28 | 0.23 | 1.31  | 0.145133 | 0.038219 | 0.511224 | 0.240217 |
| MmugDNA.17682.1.S1_at   | MmugDNA.17682.1 | 5.13  | 5.21  | 0.05 | 0.01 | -1.06 | 0.152757 | 0.029371 | 0.517325 | 0.213239 |
| MmugDNA.17684.1.S1_at   | MmugDNA.17684.1 | 10.13 | 8.23  | 1.38 | 1.01 | 3.72  | 0.254559 | 0.278142 | 0.602465 | 0.541783 |
| MmugDNA.17686.1.S1_at   | MmugDNA.17686.1 | 12.63 | 13.23 | 0.55 | 0.19 | -1.52 | 0.110594 | 0.055986 | 0.472297 | 0.282442 |
| MmugDNA.17689.1.S1_at   | MmugDNA.17689.1 | 7.36  | 7.4   | 0.06 | 0.08 | -1.03 | 0.448735 | 0.622993 | 0.729784 | 0.777444 |

|                         |                 |       |       |      |      |       |          |          |          |          |
|-------------------------|-----------------|-------|-------|------|------|-------|----------|----------|----------|----------|
| MmugDNA.17690.1.S1_at   | MmugDNA.17690.1 | 4.94  | 5.06  | 0.18 | 0.16 | -1.09 | 0.517297 | 0.671957 | 0.768711 | 0.808177 |
| MmugDNA.17693.1.S1_at   | MmugDNA.17693.1 | 8.95  | 9.45  | 0.33 | 0.3  | -1.41 | 0.106433 | 0.008282 | 0.466881 | 0.12078  |
| MmugDNA.17696.1.S1_at   | MmugDNA.17696.1 | 6.63  | 7.61  | 0.78 | 0.18 | -1.97 | 0.297002 | 0.145408 | 0.632882 | 0.419421 |
| MmugDNA.17696.1.S1_s_at | MmugDNA.17696.1 | 7.5   | 8.15  | 0.5  | 0.21 | -1.58 | 0.194381 | 0.144948 | 0.557827 | 0.418862 |
| MmugDNA.17699.1.S1_at   | MmugDNA.17699.1 | 5.94  | 6     | 0.17 | 0.16 | -1.04 | 0.327957 | 0.253124 | 0.654202 | 0.521447 |
| MmugDNA.17704.1.S1_at   | MmugDNA.17704.1 | 13.56 | 13.35 | 0.19 | 0.54 | 1.16  | 0.517803 | 0.659664 | 0.769053 | 0.800835 |
| MmugDNA.17705.1.S1_s_at | MmugDNA.17705.1 | 6.04  | 6.25  | 0.17 | 0.16 | -1.15 | 0.229488 | 0.286742 | 0.586579 | 0.548112 |
| MmugDNA.17709.1.S1_at   | MmugDNA.17709.1 | 12.35 | 12    | 0.05 | 0.04 | 1.28  | 0.000854 | 0.000802 | 0.139544 | 0.04607  |
| MmugDNA.17715.1.S1_at   | MmugDNA.17715.1 | 12.22 | 11.82 | 0.13 | 0.1  | 1.32  | 0.014705 | 0.036846 | 0.254893 | 0.236451 |
| MmugDNA.17727.1.S1_at   | MmugDNA.17727.1 | 7.23  | 7.24  | 0.12 | 0.9  | -1    | 0.765577 | 0.928977 | 0.901366 | 0.959524 |
| MmugDNA.17728.1.S1_at   | MmugDNA.17728.1 | 7.08  | 7.06  | 0.19 | 0.15 | 1.01  | 0.500253 | 0.801915 | 0.759451 | 0.885989 |
| MmugDNA.17730.1.S1_at   | MmugDNA.17730.1 | 10.8  | 10.79 | 0.15 | 0.3  | 1.01  | 0.280295 | 0.053961 | 0.621522 | 0.27777  |
| MmugDNA.17734.1.S1_at   | MmugDNA.17734.1 | 2.72  | 2.8   | 0    | 0.05 | -1.06 | 0.044354 | 0.059477 | 0.358476 | 0.290548 |
| MmugDNA.17735.1.S1_at   | MmugDNA.17735.1 | 8.3   | 7.49  | 0.19 | 0.49 | 1.76  | 0.110659 | 0.113251 | 0.472498 | 0.379287 |
| MmugDNA.17736.1.S1_at   | MmugDNA.17736.1 | 12.29 | 11.55 | 0.12 | 0.67 | 1.67  | 0.092559 | 0.061418 | 0.449243 | 0.294688 |
| MmugDNA.17737.1.S1_at   | MmugDNA.17737.1 | 4.55  | 4.65  | 0.1  | 0.26 | -1.08 | 0.496021 | 0.510508 | 0.757394 | 0.704979 |
| MmugDNA.17738.1.S1_at   | MmugDNA.17738.1 | 7.4   | 7.21  | 0.13 | 0.13 | 1.15  | 0.036381 | 0.021116 | 0.339201 | 0.181927 |
| MmugDNA.17750.1.S1_at   | MmugDNA.17750.1 | 10.4  | 10.56 | 0.33 | 0.12 | -1.12 | 0.477944 | 0.476858 | 0.747094 | 0.683007 |
| MmugDNA.17758.1.S1_at   | MmugDNA.17758.1 | 7.94  | 8.81  | 0.63 | 0.6  | -1.82 | 0.156319 | 0.044406 | 0.521015 | 0.255192 |
| MmugDNA.1776.1.S1_at    | MmugDNA.1776.1  | 9.86  | 9.12  | 0.31 | 0.58 | 1.68  | 0.053746 | 0.028147 | 0.380818 | 0.209306 |
| MmugDNA.17760.1.S1_at   | MmugDNA.17760.1 | 6.36  | 5.09  | 0.41 | 1.16 | 2.41  | 0.322229 | 0.440614 | 0.650897 | 0.659029 |
| MmugDNA.17762.1.S1_at   | MmugDNA.17762.1 | 6.35  | 7.11  | 0.24 | 0.24 | -1.7  | 0.069442 | 0.038862 | 0.412294 | 0.242062 |
| MmugDNA.17762.1.S1_s_at | MmugDNA.17762.1 | 6.6   | 7.59  | 0.17 | 0.45 | -1.99 | 0.03145  | 0.020276 | 0.321864 | 0.178742 |
| MmugDNA.17764.1.S1_at   | MmugDNA.17764.1 | 7.66  | 7.08  | 0.14 | 0.21 | 1.5   | 0.010101 | 0.001467 | 0.228097 | 0.058401 |
| MmugDNA.17769.1.S1_at   | MmugDNA.17769.1 | 5.09  | 5.2   | 0.16 | 0.26 | -1.08 | 0.786993 | 0.4995   | 0.911417 | 0.69832  |
| MmugDNA.17773.1.S1_at   | MmugDNA.17773.1 | 9.3   | 8.53  | 0.32 | 0.19 | 1.71  | 0.007571 | 0.002075 | 0.209555 | 0.067389 |
| MmugDNA.17779.1.S1_at   | MmugDNA.17779.1 | 11.8  | 12.29 | 0.55 | 0.92 | -1.41 | 0.980165 | 0.820998 | 0.992802 | 0.896977 |
| MmugDNA.17781.1.S1_at   | MmugDNA.17781.1 | 12.44 | 12.91 | 0.08 | 0.33 | -1.39 | 0.203506 | 0.080232 | 0.566041 | 0.32783  |
| MmugDNA.17782.1.S1_at   | MmugDNA.17782.1 | 11.02 | 11.36 | 0.1  | 0.27 | -1.27 | 0.086106 | 0.100743 | 0.440066 | 0.360154 |
| MmugDNA.1779.1.S1_at    | MmugDNA.1779.1  | 5.83  | 6.03  | 0.26 | 0.36 | -1.15 | 0.354613 | 0.492249 | 0.670604 | 0.693477 |
| MmugDNA.17791.1.S1_at   | MmugDNA.17791.1 | 7.79  | 6.84  | 0.58 | 1.41 | 1.93  | 0.695786 | 0.677452 | 0.865007 | 0.81167  |
| MmugDNA.17793.1.S1_at   | MmugDNA.17793.1 | 3.7   | 3.78  | 0.1  | 0.08 | -1.06 | 0.575545 | 0.477543 | 0.802378 | 0.683599 |
| MmugDNA.17798.1.S1_at   | MmugDNA.17798.1 | 3.65  | 3.76  | 0.12 | 0.03 | -1.08 | 0.220772 | 0.396745 | 0.579701 | 0.628438 |
| MmugDNA.17805.1.S1_at   | MmugDNA.17805.1 | 4.86  | 4.74  | 0.29 | 0.15 | 1.09  | 0.776465 | 0.333196 | 0.906353 | 0.581467 |
| MmugDNA.17819.1.S1_at   | MmugDNA.17819.1 | 6.61  | 7.67  | 0.78 | 1.33 | -2.09 | 0.320897 | 0.348804 | 0.649662 | 0.592834 |
| MmugDNA.17826.1.S1_at   | MmugDNA.17826.1 | 6.65  | 6.97  | 0.16 | 0.18 | -1.25 | 0.098795 | 0.133664 | 0.458711 | 0.405612 |
| MmugDNA.17828.1.S1_at   | MmugDNA.17828.1 | 9.39  | 8.59  | 0.69 | 0.31 | 1.74  | 0.188096 | 0.181126 | 0.551073 | 0.457582 |
| MmugDNA.17829.1.S1_at   | MmugDNA.17829.1 | 6.12  | 6.11  | 0.19 | 0.05 | 1.01  | 0.741461 | 0.278736 | 0.889293 | 0.542441 |
| MmugDNA.17832.1.S1_at   | MmugDNA.17832.1 | 11.39 | 11.39 | 0.16 | 0.31 | 1     | 0.670906 | 0.848973 | 0.852532 | 0.914252 |
| MmugDNA.17834.1.S1_at   | MmugDNA.17834.1 | 5.21  | 5.76  | 0.15 | 0.29 | -1.46 | 0.051031 | 0.035658 | 0.375731 | 0.233228 |
| MmugDNA.17835.1.S1_at   | MmugDNA.17835.1 | 6.52  | 6.61  | 0.15 | 0.82 | -1.07 | 0.562811 | 0.729169 | 0.795556 | 0.843509 |

|                         |                 |       |       |      |      |        |          |          |          |          |
|-------------------------|-----------------|-------|-------|------|------|--------|----------|----------|----------|----------|
| MmugDNA.17837.1.S1_at   | MmugDNA.17837.1 | 8.55  | 8.75  | 0.22 | 0.17 | -1.15  | 0.836478 | 0.885943 | 0.933827 | 0.935118 |
| MmugDNA.17838.1.S1_at   | MmugDNA.17838.1 | 10.92 | 11.02 | 0.23 | 0.14 | -1.07  | 0.588848 | 0.503614 | 0.809161 | 0.700988 |
| MmugDNA.17840.1.S1_at   | MmugDNA.17840.1 | 5.93  | 8.21  | 0.55 | 0.45 | -4.85  | 0.008682 | 0.003939 | 0.220232 | 0.089266 |
| MmugDNA.17842.1.S1_at   | MmugDNA.17842.1 | 11.75 | 10.41 | 0.24 | 0.23 | 2.54   | 0.001226 | 0.000176 | 0.145267 | 0.030511 |
| MmugDNA.17843.1.S1_at   | MmugDNA.17843.1 | 6.53  | 6.75  | 0.15 | 0.13 | -1.16  | 0.10285  | 0.120933 | 0.46254  | 0.389847 |
| MmugDNA.17848.1.S1_at   | MmugDNA.17848.1 | 12.64 | 12.35 | 0.05 | 0.07 | 1.22   | 0.001944 | 0.00048  | 0.155636 | 0.038665 |
| MmugDNA.17851.1.S1_at   | MmugDNA.17851.1 | 12.31 | 12.11 | 0.03 | 0.33 | 1.15   | 0.116824 | 0.132899 | 0.48074  | 0.404544 |
| MmugDNA.17855.1.S1_at   | MmugDNA.17855.1 | 12.37 | 12.39 | 0.13 | 0.02 | -1.02  | 0.95897  | 0.995412 | 0.984402 | 0.997147 |
| MmugDNA.17858.1.S1_at   | MmugDNA.17858.1 | 7.4   | 7.19  | 0.06 | 0.8  | 1.15   | 0.739096 | 0.658536 | 0.888088 | 0.800401 |
| MmugDNA.17859.1.S1_at   | MmugDNA.17859.1 | 10.09 | 9.48  | 0.11 | 0.43 | 1.53   | 0.066452 | 0.062308 | 0.406564 | 0.296445 |
| MmugDNA.17860.1.S1_at   | MmugDNA.17860.1 | 12.96 | 12.78 | 0.05 | 0.13 | 1.13   | 0.384034 | 0.231614 | 0.689677 | 0.503403 |
| MmugDNA.17862.1.A1_at   | MmugDNA.17862.1 | 4.66  | 4.78  | 0.15 | 0.11 | -1.09  | 0.756558 | 0.125695 | 0.896578 | 0.396249 |
| MmugDNA.17862.1.S1_at   | MmugDNA.17862.1 | 4.64  | 4.64  | 0.21 | 0.17 | -1     | 0.712715 | 0.8904   | 0.874193 | 0.937539 |
| MmugDNA.17865.1.S1_at   | MmugDNA.17865.1 | 5.37  | 6.01  | 0.1  | 0.11 | -1.56  | 0.001914 | 0.00024  | 0.155636 | 0.032579 |
| MmugDNA.17867.1.S1_at   | MmugDNA.17867.1 | 10.02 | 9.82  | 0.13 | 0.12 | 1.15   | 0.211598 | 0.10864  | 0.572347 | 0.372171 |
| MmugDNA.17879.1.S1_at   | MmugDNA.17879.1 | 8.56  | 8.08  | 0.18 | 0.47 | 1.4    | 0.597752 | 0.594462 | 0.813703 | 0.758623 |
| MmugDNA.17881.1.S1_at   | MmugDNA.17881.1 | 7.47  | 7.46  | 0.02 | 0.38 | 1      | 0.366805 | 0.469582 | 0.679209 | 0.67829  |
| MmugDNA.17884.1.S1_at   | MmugDNA.17884.1 | 9.78  | 9.7   | 0.15 | 0.27 | 1.06   | 0.835223 | 0.02439  | 0.933181 | 0.195507 |
| MmugDNA.17885.1.S1_at   | MmugDNA.17885.1 | 6.91  | 7.41  | 0.17 | 0.49 | -1.41  | 0.112863 | 0.014325 | 0.475341 | 0.152764 |
| MmugDNA.17887.1.S1_s_at | MmugDNA.17887.1 | 11.83 | 11.33 | 0.29 | 0.42 | 1.41   | 0.469441 | 0.642291 | 0.741714 | 0.790122 |
| MmugDNA.17893.1.S1_at   | MmugDNA.17893.1 | 14.72 | 14.72 | 0.03 | 0.01 | 1      | 0.290389 | 0.354513 | 0.628091 | 0.59726  |
| MmugDNA.179.1.S1_at     | MmugDNA.179.1   | 13.01 | 13.07 | 0.12 | 0.03 | -1.05  | 0.405248 | 0.504931 | 0.703082 | 0.701953 |
| MmugDNA.1790.1.S1_at    | MmugDNA.1790.1  | 4.59  | 3.78  | 0.5  | 0.45 | 1.75   | 0.102933 | 0.062085 | 0.46254  | 0.29606  |
| MmugDNA.17906.1.S1_at   | MmugDNA.17906.1 | 11.71 | 11.6  | 0.09 | 0.12 | 1.07   | 0.356756 | 0.153107 | 0.671744 | 0.428011 |
| MmugDNA.17907.1.S1_at   | MmugDNA.17907.1 | 9.52  | 9.61  | 0.22 | 0.53 | -1.06  | 0.990186 | 0.878881 | 0.99652  | 0.930872 |
| MmugDNA.17907.1.S1_s_at | MmugDNA.17907.1 | 10.67 | 10.68 | 0.31 | 0.62 | -1.01  | 0.772675 | 0.674376 | 0.904334 | 0.809751 |
| MmugDNA.17909.1.S1_at   | MmugDNA.17909.1 | 7.78  | 9.05  | 0.35 | 0.72 | -2.4   | 0.131727 | 0.012445 | 0.498041 | 0.14417  |
| MmugDNA.17910.1.S1_at   | MmugDNA.17910.1 | 10.73 | 10.89 | 0.24 | 0.39 | -1.12  | 0.228648 | 0.241208 | 0.586121 | 0.511821 |
| MmugDNA.17919.1.S1_at   | MmugDNA.17919.1 | 4.79  | 4.73  | 0.52 | 0.02 | 1.04   | 0.570137 | 0.674577 | 0.799371 | 0.809882 |
| MmugDNA.17925.1.S1_at   | MmugDNA.17925.1 | 12.23 | 11.38 | 0.15 | 0.48 | 1.8    | 0.063958 | 0.039191 | 0.401945 | 0.243089 |
| MmugDNA.17931.1.S1_at   | MmugDNA.17931.1 | 8.93  | 8.6   | 0.14 | 0.07 | 1.26   | 0.022311 | 0.002955 | 0.285586 | 0.079945 |
| MmugDNA.17938.1.S1_at   | MmugDNA.17938.1 | 6.94  | 11.84 | 1.58 | 2.71 | -30.04 | 0.197007 | 0.063809 | 0.560025 | 0.29906  |
| MmugDNA.17939.1.S1_at   | MmugDNA.17939.1 | 5.52  | 5.3   | 0.28 | 0.03 | 1.16   | 0.238844 | 0.064152 | 0.592015 | 0.29954  |
| MmugDNA.17940.1.S1_at   | MmugDNA.17940.1 | 11.56 | 11.59 | 0.47 | 0.08 | -1.02  | 0.901446 | 0.731399 | 0.960634 | 0.84431  |
| MmugDNA.17941.1.S1_at   | MmugDNA.17941.1 | 12.96 | 11.52 | 1.17 | 1    | 2.7    | 0.401393 | 0.103234 | 0.700828 | 0.364143 |
| MmugDNA.17943.1.S1_at   | MmugDNA.17943.1 | 10.25 | 11.92 | 0.49 | 0.45 | -3.18  | 0.030805 | 0.024813 | 0.320053 | 0.197371 |
| MmugDNA.17947.1.S1_at   | MmugDNA.17947.1 | 7.4   | 6.16  | 0.35 | 0.46 | 2.35   | 0.027408 | 0.007924 | 0.307806 | 0.11857  |
| MmugDNA.17950.1.S1_s_at | MmugDNA.17950.1 | 10.12 | 7.77  | 0.26 | 1.03 | 5.09   | 0.045138 | 0.014783 | 0.360276 | 0.154635 |
| MmugDNA.17951.1.S1_at   | MmugDNA.17951.1 | 7.33  | 7.4   | 0.47 | 0.85 | -1.05  | 0.479342 | 0.625494 | 0.747644 | 0.779196 |
| MmugDNA.17952.1.S1_at   | MmugDNA.17952.1 | 4.12  | 4.18  | 0.08 | 0.08 | -1.04  | 0.735969 | 0.282268 | 0.886439 | 0.544999 |
| MmugDNA.17963.1.S1_at   | MmugDNA.17963.1 | 4.74  | 4.9   | 0.32 | 0.07 | -1.11  | 0.938645 | 0.980141 | 0.976609 | 0.989236 |

|                         |                 |       |       |      |      |       |          |          |          |          |
|-------------------------|-----------------|-------|-------|------|------|-------|----------|----------|----------|----------|
| MmugDNA.17965.1.S1_at   | MmugDNA.17965.1 | 12.33 | 13.19 | 0.37 | 0.59 | -1.82 | 0.249441 | 0.315618 | 0.600196 | 0.569053 |
| MmugDNA.17967.1.S1_at   | MmugDNA.17967.1 | 3.56  | 3.74  | 0.13 | 0.47 | -1.13 | 0.184908 | 0.19598  | 0.548379 | 0.470976 |
| MmugDNA.17968.1.S1_at   | MmugDNA.17968.1 | 7.53  | 6.83  | 0.16 | 0.21 | 1.62  | 0.017137 | 0.03272  | 0.266906 | 0.223956 |
| MmugDNA.17969.1.S1_at   | MmugDNA.17969.1 | 3.81  | 4.06  | 0.1  | 0.19 | -1.18 | 0.456217 | 0.282357 | 0.734359 | 0.545076 |
| MmugDNA.17969.1.S1_s_at | MmugDNA.17969.1 | 3.64  | 3.62  | 0.16 | 0.39 | 1.01  | 0.756444 | 0.921463 | 0.896513 | 0.955761 |
| MmugDNA.17977.1.S1_at   | MmugDNA.17977.1 | 11.95 | 12.31 | 0.27 | 1.83 | -1.28 | 0.644335 | 0.650849 | 0.839729 | 0.795849 |
| MmugDNA.1798.1.S1_at    | MmugDNA.1798.1  | 3.53  | 3.07  | 0.24 | 0.24 | 1.37  | 0.39431  | 0.153118 | 0.695726 | 0.428011 |
| MmugDNA.17986.1.S1_at   | MmugDNA.17986.1 | 9.75  | 10.56 | 0.35 | 1.18 | -1.75 | 0.347526 | 0.404078 | 0.666496 | 0.632599 |
| MmugDNA.17986.1.S1_s_at | MmugDNA.17986.1 | 10.08 | 10.71 | 0.39 | 0.99 | -1.55 | 0.312177 | 0.375329 | 0.643949 | 0.613336 |
| MmugDNA.17991.1.S1_at   | MmugDNA.17991.1 | 12.24 | 12.04 | 0.04 | 0.38 | 1.14  | 0.485432 | 0.082417 | 0.750946 | 0.331381 |
| MmugDNA.17992.1.S1_at   | MmugDNA.17992.1 | 5.87  | 5.96  | 0.47 | 0.02 | -1.06 | 0.724339 | 0.590422 | 0.879592 | 0.756223 |
| MmugDNA.17994.1.S1_at   | MmugDNA.17994.1 | 6.22  | 5.98  | 0.47 | 0.47 | 1.18  | 0.678388 | 0.613112 | 0.856    | 0.770416 |
| MmugDNA.17995.1.S1_at   | MmugDNA.17995.1 | 7.1   | 7.03  | 0.12 | 0.2  | 1.05  | 0.895955 | 0.710253 | 0.958489 | 0.831904 |
| MmugDNA.17996.1.S1_at   | MmugDNA.17996.1 | 5.68  | 5.81  | 0.11 | 0.14 | -1.09 | 0.207669 | 0.180462 | 0.569822 | 0.457115 |
| MmugDNA.17997.1.S1_at   | MmugDNA.17997.1 | 6.41  | 6.41  | 0.71 | 0.82 | 1.01  | 0.266783 | 0.232364 | 0.612291 | 0.504088 |
| MmugDNA.17998.1.S1_at   | MmugDNA.17998.1 | 13.68 | 13.48 | 0.14 | 0.08 | 1.15  | 0.131486 | 0.062769 | 0.498041 | 0.297193 |
| MmugDNA.180.1.S1_at     | MmugDNA.180.1   | 4.12  | 4.23  | 0.04 | 0.07 | -1.08 | 0.075197 | 0.335533 | 0.422122 | 0.583326 |
| MmugDNA.1800.1.S1_at    | MmugDNA.1800.1  | 9.07  | 9.35  | 0.56 | 0.52 | -1.21 | 0.232888 | 0.168326 | 0.587927 | 0.444973 |
| MmugDNA.18001.1.S1_at   | MmugDNA.18001.1 | 7.76  | 6.93  | 0.11 | 0.71 | 1.77  | 0.110681 | 0.027925 | 0.472524 | 0.208597 |
| MmugDNA.18006.1.S1_at   | MmugDNA.18006.1 | 10.36 | 10.35 | 0.16 | 0.22 | 1.01  | 0.917405 | 0.615127 | 0.967843 | 0.771756 |
| MmugDNA.18010.1.S1_at   | MmugDNA.18010.1 | 6.32  | 6.34  | 0.27 | 0.12 | -1.02 | 0.991469 | 0.689889 | 0.99695  | 0.819167 |
| MmugDNA.18011.1.S1_at   | MmugDNA.18011.1 | 10.79 | 10.69 | 0.1  | 0.27 | 1.07  | 0.673702 | 0.138954 | 0.853751 | 0.412048 |
| MmugDNA.18013.1.S1_at   | MmugDNA.18013.1 | 6.71  | 8.31  | 0.68 | 1.57 | -3.03 | 0.304192 | 0.22422  | 0.638341 | 0.497164 |
| MmugDNA.18015.1.S1_at   | MmugDNA.18015.1 | 8.74  | 11.71 | 1    | 2.27 | -7.84 | 0.302169 | 0.229749 | 0.636884 | 0.501761 |
| MmugDNA.1802.1.S1_at    | MmugDNA.1802.1  | 5.12  | 5.13  | 0.25 | 0.09 | -1.01 | 0.978041 | 0.932182 | 0.991754 | 0.961538 |
| MmugDNA.18026.1.S1_at   | MmugDNA.18026.1 | 3.76  | 3.57  | 0.23 | 0.02 | 1.14  | 0.213057 | 0.117605 | 0.573447 | 0.38531  |
| MmugDNA.18028.1.S1_at   | MmugDNA.18028.1 | 5.23  | 5.27  | 0.11 | 0.39 | -1.03 | 0.460342 | 0.631391 | 0.736877 | 0.782816 |
| MmugDNA.18031.1.S1_at   | MmugDNA.18031.1 | 5.24  | 5.24  | 0.21 | 0.04 | -1.01 | 0.41391  | 0.06279  | 0.708746 | 0.297193 |
| MmugDNA.18032.1.S1_at   | MmugDNA.18032.1 | 3.7   | 3.74  | 0.23 | 0.26 | -1.03 | 0.554823 | 0.732935 | 0.791099 | 0.84546  |
| MmugDNA.18039.1.S1_at   | MmugDNA.18039.1 | 12.97 | 12.8  | 0.16 | 0.42 | 1.13  | 0.18745  | 0.184196 | 0.550505 | 0.460382 |
| MmugDNA.18046.1.S1_at   | MmugDNA.18046.1 | 10.42 | 10.08 | 0.2  | 0.21 | 1.27  | 0.26134  | 0.280604 | 0.607952 | 0.543772 |
| MmugDNA.18055.1.S1_at   | MmugDNA.18055.1 | 10.97 | 10.72 | 0.32 | 0.42 | 1.18  | 0.595115 | 0.79075  | 0.812276 | 0.878973 |
| MmugDNA.18060.1.S1_at   | MmugDNA.18060.1 | 7.25  | 7.31  | 0.12 | 0.08 | -1.05 | 0.731384 | 0.3891   | 0.883783 | 0.623345 |
| MmugDNA.18065.1.S1_at   | MmugDNA.18065.1 | 6.35  | 5.54  | 0.64 | 0.74 | 1.76  | 0.569729 | 0.436555 | 0.79916  | 0.656048 |
| MmugDNA.18069.1.S1_at   | MmugDNA.18069.1 | 10.09 | 9.62  | 0.13 | 0.38 | 1.39  | 0.142669 | 0.165385 | 0.509765 | 0.441544 |
| MmugDNA.18070.1.S1_at   | MmugDNA.18070.1 | 7.83  | 9.83  | 0.53 | 0.67 | -4    | 0.021577 | 0.009923 | 0.282862 | 0.130787 |
| MmugDNA.18070.1.S1_s_at | MmugDNA.18070.1 | 9.76  | 11.4  | 0.44 | 0.54 | -3.12 | 0.023418 | 0.01133  | 0.29136  | 0.138076 |
| MmugDNA.18083.1.S1_at   | MmugDNA.18083.1 | 11.29 | 10.77 | 0.13 | 0.14 | 1.43  | 0.005787 | 0.001797 | 0.193191 | 0.063638 |
| MmugDNA.18087.1.S1_at   | MmugDNA.18087.1 | 10.79 | 11.11 | 0.29 | 0.37 | -1.25 | 0.676034 | 0.682324 | 0.854832 | 0.814506 |
| MmugDNA.18095.1.S1_at   | MmugDNA.18095.1 | 10.72 | 12.01 | 0.29 | 0.29 | -2.46 | 0.005416 | 0.002443 | 0.191107 | 0.073201 |
| MmugDNA.18096.1.S1_at   | MmugDNA.18096.1 | 11.11 | 10.81 | 0.25 | 0.2  | 1.23  | 0.107424 | 0.163153 | 0.468045 | 0.439303 |



|                         |                 |       |       |      |      |        |          |          |          |          |
|-------------------------|-----------------|-------|-------|------|------|--------|----------|----------|----------|----------|
| MmugDNA.18099.1.S1_at   | MmugDNA.18099.1 | 8.26  | 8.74  | 0.51 | 1.63 | -1.4   | 0.710481 | 0.292963 | 0.873052 | 0.552926 |
| MmugDNA.18100.1.S1_at   | MmugDNA.18100.1 | 13.21 | 13.44 | 0.26 | 0.37 | -1.17  | 0.64728  | 0.316416 | 0.841286 | 0.569809 |
| MmugDNA.18105.1.S1_at   | MmugDNA.18105.1 | 6.14  | 5.49  | 0.85 | 1.19 | 1.57   | 0.474906 | 0.21428  | 0.745447 | 0.487894 |
| MmugDNA.18111.1.S1_s_at | MmugDNA.18111.1 | 5.32  | 5.23  | 0.2  | 0.53 | 1.07   | 0.860087 | 0.979306 | 0.943524 | 0.988845 |
| MmugDNA.18112.1.S1_at   | MmugDNA.18112.1 | 7.9   | 8.17  | 0.23 | 0.38 | -1.21  | 0.62305  | 0.694867 | 0.827763 | 0.822638 |
| MmugDNA.18113.1.S1_s_at | MmugDNA.18113.1 | 6.06  | 6.07  | 0.13 | 0.31 | -1     | 0.696695 | 0.873092 | 0.865426 | 0.927823 |
| MmugDNA.18114.1.S1_at   | MmugDNA.18114.1 | 7.43  | 5.34  | 0.31 | 0.92 | 4.24   | 0.046935 | 0.007738 | 0.364343 | 0.11758  |
| MmugDNA.1812.1.S1_at    | MmugDNA.1812.1  | 5.17  | 5.36  | 0.18 | 0.16 | -1.14  | 0.30165  | 0.417539 | 0.63652  | 0.642252 |
| MmugDNA.18122.1.S1_at   | MmugDNA.18122.1 | 10.46 | 10.2  | 0.22 | 0.64 | 1.2    | 0.732569 | 0.913236 | 0.884502 | 0.951146 |
| MmugDNA.18123.1.S1_at   | MmugDNA.18123.1 | 12.04 | 11.69 | 0.05 | 0.19 | 1.27   | 0.030723 | 0.001505 | 0.319646 | 0.0591   |
| MmugDNA.18124.1.S1_at   | MmugDNA.18124.1 | 3.11  | 3.14  | 0.15 | 0.14 | -1.03  | 0.701512 | 0.823094 | 0.868043 | 0.898356 |
| MmugDNA.18127.1.S1_at   | MmugDNA.18127.1 | 5.23  | 6.3   | 1.06 | 1.42 | -2.1   | 0.684008 | 0.864867 | 0.858543 | 0.923362 |
| MmugDNA.18128.1.S1_at   | MmugDNA.18128.1 | 5.25  | 5.26  | 0.35 | 0.23 | -1.01  | 0.348608 | 0.223845 | 0.667173 | 0.496802 |
| MmugDNA.18130.1.S1_at   | MmugDNA.18130.1 | 7.19  | 7.04  | 0.26 | 0.24 | 1.11   | 0.84961  | 0.949817 | 0.939616 | 0.971332 |
| MmugDNA.18134.1.S1_at   | MmugDNA.18134.1 | 6.17  | 6.29  | 0.29 | 0.95 | -1.09  | 0.699839 | 0.188413 | 0.867131 | 0.464416 |
| MmugDNA.18136.1.S1_at   | MmugDNA.18136.1 | 3.38  | 3.4   | 0.06 | 0.05 | -1.01  | 0.520128 | 0.675986 | 0.770623 | 0.810632 |
| MmugDNA.18138.1.S1_at   | MmugDNA.18138.1 | 5.78  | 5.88  | 0.12 | 0.45 | -1.07  | 0.275495 | 0.34322  | 0.617878 | 0.588968 |
| MmugDNA.18141.1.S1_at   | MmugDNA.18141.1 | 12.28 | 11.96 | 0.05 | 0.21 | 1.25   | 0.052553 | 0.012525 | 0.378142 | 0.144385 |
| MmugDNA.18150.1.S1_at   | MmugDNA.18150.1 | 6.02  | 6.81  | 0.02 | 0.15 | -1.73  | 0.000914 | 0.000111 | 0.139813 | 0.028099 |
| MmugDNA.18158.1.S1_at   | MmugDNA.18158.1 | 7.77  | 8.5   | 0.25 | 0.65 | -1.66  | 0.153415 | 0.049011 | 0.517785 | 0.266257 |
| MmugDNA.18163.1.S1_at   | MmugDNA.18163.1 | 8.82  | 7.56  | 0.63 | 0.56 | 2.39   | 0.148278 | 0.165576 | 0.513711 | 0.44189  |
| MmugDNA.18169.1.S1_at   | MmugDNA.18169.1 | 9.71  | 10.45 | 0.33 | 0.14 | -1.67  | 0.042118 | 0.032329 | 0.354214 | 0.222602 |
| MmugDNA.18179.1.S1_at   | MmugDNA.18179.1 | 6.79  | 6.98  | 0.14 | 0.07 | -1.14  | 0.453582 | 0.077037 | 0.73276  | 0.322481 |
| MmugDNA.18181.1.S1_at   | MmugDNA.18181.1 | 10.78 | 10.99 | 0.08 | 0.2  | -1.16  | 0.069423 | 0.075938 | 0.412224 | 0.320634 |
| MmugDNA.18185.1.S1_at   | MmugDNA.18185.1 | 12.2  | 12.24 | 0.06 | 0.1  | -1.03  | 0.524536 | 0.188751 | 0.773192 | 0.464735 |
| MmugDNA.18186.1.S1_at   | MmugDNA.18186.1 | 5.03  | 5.22  | 0.07 | 0.2  | -1.14  | 0.292988 | 0.115809 | 0.630264 | 0.382854 |
| MmugDNA.18187.1.S1_s_at | MmugDNA.18187.1 | 7.99  | 8.64  | 0.25 | 0.35 | -1.57  | 0.109226 | 0.114356 | 0.470811 | 0.380861 |
| MmugDNA.18189.1.S1_at   | MmugDNA.18189.1 | 12.21 | 11.9  | 0.25 | 0.48 | 1.24   | 0.675453 | 0.784601 | 0.85454  | 0.875301 |
| MmugDNA.18191.1.S1_at   | MmugDNA.18191.1 | 11.52 | 11.4  | 0.2  | 0.14 | 1.09   | 0.234604 | 0.047297 | 0.588808 | 0.262176 |
| MmugDNA.18192.1.S1_at   | MmugDNA.18192.1 | 12.15 | 12.05 | 0.1  | 0.14 | 1.07   | 0.403047 | 0.532351 | 0.701791 | 0.719017 |
| MmugDNA.18193.1.S1_at   | MmugDNA.18193.1 | 10.19 | 12.28 | 0.05 | 2.26 | -4.25  | 0.573712 | 0.43124  | 0.801332 | 0.652233 |
| MmugDNA.18195.1.S1_at   | MmugDNA.18195.1 | 6.02  | 6.08  | 0.1  | 0.07 | -1.04  | 0.941854 | 0.537872 | 0.977821 | 0.722773 |
| MmugDNA.18199.1.S1_at   | MmugDNA.18199.1 | 7.34  | 7.71  | 0.24 | 0.6  | -1.29  | 0.240789 | 0.325188 | 0.593579 | 0.575598 |
| MmugDNA.182.1.S1_at     | MmugDNA.182.1   | 3.44  | 3.59  | 0.09 | 0.12 | -1.11  | 0.193752 | 0.204723 | 0.557435 | 0.479071 |
| MmugDNA.1820.1.S1_at    | MmugDNA.1820.1  | 10.39 | 10.63 | 0.12 | 0.06 | -1.18  | 0.088787 | 0.052926 | 0.443684 | 0.275685 |
| MmugDNA.18216.1.S1_at   | MmugDNA.18216.1 | 9.8   | 9.76  | 0.14 | 0.39 | 1.03   | 0.72788  | 0.880437 | 0.881604 | 0.931694 |
| MmugDNA.18224.1.S1_at   | MmugDNA.18224.1 | 5.78  | 9.63  | 2.03 | 2.72 | -14.43 | 0.348893 | 0.199023 | 0.667271 | 0.473614 |
| MmugDNA.18227.1.S1_at   | MmugDNA.18227.1 | 12.09 | 10.89 | 0.13 | 0.49 | 2.3    | 0.030944 | 0.010734 | 0.320347 | 0.135307 |
| MmugDNA.18228.1.S1_at   | MmugDNA.18228.1 | 4.64  | 4.74  | 0.14 | 0.14 | -1.07  | 0.855726 | 0.395412 | 0.941673 | 0.627474 |
| MmugDNA.18233.1.S1_at   | MmugDNA.18233.1 | 7.93  | 7.75  | 0.76 | 0.34 | 1.13   | 0.606396 | 0.129223 | 0.818834 | 0.400635 |
| MmugDNA.18235.1.S1_at   | MmugDNA.18235.1 | 13.54 | 13.11 | 0.1  | 0.76 | 1.34   | 0.211396 | 0.245434 | 0.572162 | 0.515213 |

|                         |                 |       |       |      |      |        |          |          |          |          |
|-------------------------|-----------------|-------|-------|------|------|--------|----------|----------|----------|----------|
| MmugDNA.18236.1.S1_at   | MmugDNA.18236.1 | 5.73  | 5.78  | 0.05 | 0.06 | -1.03  | 0.387512 | 0.580847 | 0.691999 | 0.749953 |
| MmugDNA.1824.1.S1_at    | MmugDNA.1824.1  | 7.56  | 7.5   | 0.17 | 0.14 | 1.05   | 0.842481 | 0.468256 | 0.936474 | 0.6777   |
| MmugDNA.18241.1.S1_at   | MmugDNA.18241.1 | 11.76 | 11.56 | 0.14 | 0.04 | 1.15   | 0.157328 | 0.060772 | 0.522148 | 0.29326  |
| MmugDNA.18254.1.S1_at   | MmugDNA.18254.1 | 5.76  | 5.8   | 0.05 | 0.08 | -1.03  | 0.246376 | 0.364562 | 0.597681 | 0.604915 |
| MmugDNA.18259.1.S1_at   | MmugDNA.18259.1 | 11.54 | 11.56 | 0.23 | 0.13 | -1.02  | 0.934895 | 0.850507 | 0.974832 | 0.914979 |
| MmugDNA.18263.1.S1_at   | MmugDNA.18263.1 | 10.48 | 11.06 | 0.17 | 0.23 | -1.5   | 0.052005 | 0.058544 | 0.376949 | 0.288669 |
| MmugDNA.18270.1.S1_at   | MmugDNA.18270.1 | 8.1   | 7.25  | 0.3  | 0.39 | 1.8    | 0.050033 | 0.029805 | 0.372968 | 0.214318 |
| MmugDNA.18278.1.S1_at   | MmugDNA.18278.1 | 13.08 | 13.17 | 0.04 | 0.15 | -1.06  | 0.297115 | 0.371024 | 0.632989 | 0.609964 |
| MmugDNA.18279.1.S1_at   | MmugDNA.18279.1 | 11.86 | 11.85 | 0.17 | 0.28 | 1      | 0.607729 | 0.007037 | 0.819497 | 0.113112 |
| MmugDNA.1828.1.S1_at    | MmugDNA.1828.1  | 7.01  | 10.99 | 1.81 | 2.98 | -15.78 | 0.421298 | 0.191139 | 0.712907 | 0.4664   |
| MmugDNA.18280.1.S1_at   | MmugDNA.18280.1 | 4.05  | 4.21  | 0.08 | 0.01 | -1.12  | 0.022535 | 0.030528 | 0.287341 | 0.216711 |
| MmugDNA.18281.1.S1_s_at | MmugDNA.18281.1 | 11.33 | 11.03 | 0.07 | 0.1  | 1.24   | 0.02566  | 0.014817 | 0.300275 | 0.154879 |
| MmugDNA.18290.1.S1_at   | MmugDNA.18290.1 | 10.58 | 10.7  | 0.39 | 0.2  | -1.08  | 0.863038 | 0.156429 | 0.944982 | 0.431767 |
| MmugDNA.18294.1.S1_at   | MmugDNA.18294.1 | 6.5   | 6.7   | 0.21 | 0.12 | -1.15  | 0.580133 | 0.762032 | 0.804451 | 0.861597 |
| MmugDNA.18297.1.S1_at   | MmugDNA.18297.1 | 10.86 | 10.97 | 0.04 | 0.42 | -1.08  | 0.560094 | 0.653866 | 0.79419  | 0.797692 |
| MmugDNA.1830.1.S1_at    | MmugDNA.1830.1  | 10.84 | 11.23 | 0.22 | 0.2  | -1.31  | 0.07776  | 0.073096 | 0.427756 | 0.316064 |
| MmugDNA.18301.1.S1_at   | MmugDNA.18301.1 | 10.26 | 9.83  | 0.05 | 0.61 | 1.34   | 0.293235 | 0.306434 | 0.630314 | 0.563029 |
| MmugDNA.18309.1.S1_at   | MmugDNA.18309.1 | 4.5   | 4.79  | 0.68 | 0.49 | -1.22  | 0.879164 | 0.402552 | 0.951481 | 0.631481 |
| MmugDNA.1832.1.S1_at    | MmugDNA.1832.1  | 6.28  | 11.28 | 2.32 | 3.29 | -32.12 | 0.381641 | 0.234989 | 0.688065 | 0.506162 |
| MmugDNA.18323.1.S1_at   | MmugDNA.18323.1 | 4.14  | 4.13  | 0.27 | 0.2  | 1      | 0.648103 | 0.259649 | 0.841735 | 0.526538 |
| MmugDNA.18326.1.S1_at   | MmugDNA.18326.1 | 11.34 | 11.06 | 0.2  | 0.08 | 1.22   | 0.080948 | 0.058688 | 0.431601 | 0.288956 |
| MmugDNA.1833.1.S1_at    | MmugDNA.1833.1  | 9.96  | 9.52  | 0.16 | 0.24 | 1.36   | 0.054836 | 0.054085 | 0.382442 | 0.277914 |
| MmugDNA.18332.1.S1_at   | MmugDNA.18332.1 | 5.55  | 5.6   | 0.31 | 0.17 | -1.04  | 0.339039 | 0.445171 | 0.66113  | 0.662331 |
| MmugDNA.18333.1.S1_at   | MmugDNA.18333.1 | 4.65  | 6.22  | 0.46 | 1.34 | -2.96  | 0.19005  | 0.226223 | 0.552832 | 0.498692 |
| MmugDNA.18333.1.S1_x_at | MmugDNA.18333.1 | 4.78  | 6.14  | 0.2  | 1.47 | -2.56  | 0.222317 | 0.258117 | 0.580835 | 0.525574 |
| MmugDNA.18335.1.S1_at   | MmugDNA.18335.1 | 12.27 | 12.82 | 0.24 | 0.1  | -1.46  | 0.064413 | 0.065898 | 0.402975 | 0.302129 |
| MmugDNA.18337.1.S1_at   | MmugDNA.18337.1 | 8.82  | 8.36  | 0.55 | 0.23 | 1.38   | 0.12857  | 0.150407 | 0.494653 | 0.424951 |
| MmugDNA.18346.1.S1_at   | MmugDNA.18346.1 | 4.51  | 4.38  | 0.18 | 0.03 | 1.1    | 0.520975 | 0.705099 | 0.77105  | 0.828994 |
| MmugDNA.18347.1.S1_at   | MmugDNA.18347.1 | 10.2  | 10.49 | 0.16 | 0.3  | -1.23  | 0.366181 | 0.163436 | 0.678947 | 0.439629 |
| MmugDNA.18348.1.S1_at   | MmugDNA.18348.1 | 6.93  | 6.53  | 0.39 | 0.08 | 1.32   | 0.552952 | 0.034783 | 0.789712 | 0.230686 |
| MmugDNA.18349.1.S1_at   | MmugDNA.18349.1 | 3.35  | 3.33  | 0.01 | 0.06 | 1.02   | 0.807104 | 0.152502 | 0.920973 | 0.427329 |
| MmugDNA.18350.1.S1_at   | MmugDNA.18350.1 | 7.78  | 7.83  | 0.16 | 0.17 | -1.03  | 0.493605 | 0.017515 | 0.756279 | 0.167516 |
| MmugDNA.18351.1.S1_at   | MmugDNA.18351.1 | 7.07  | 7.09  | 0.64 | 0.57 | -1.02  | 0.586908 | 0.663514 | 0.808357 | 0.803016 |
| MmugDNA.18353.1.S1_at   | MmugDNA.18353.1 | 10.33 | 10.36 | 0.04 | 0.14 | -1.02  | 0.694158 | 0.451209 | 0.864407 | 0.666085 |
| MmugDNA.18354.1.S1_at   | MmugDNA.18354.1 | 6.59  | 5.73  | 1.35 | 0.74 | 1.81   | 0.413499 | 0.44424  | 0.70853  | 0.661897 |
| MmugDNA.18355.1.S1_at   | MmugDNA.18355.1 | 2.76  | 2.81  | 0.09 | 0.1  | -1.04  | 0.273143 | 0.252459 | 0.616627 | 0.521073 |
| MmugDNA.18357.1.S1_at   | MmugDNA.18357.1 | 11.44 | 10.45 | 0.13 | 0.32 | 1.99   | 0.00825  | 0.017292 | 0.216948 | 0.166482 |
| MmugDNA.18358.1.S1_at   | MmugDNA.18358.1 | 8.72  | 9.09  | 0.14 | 0.45 | -1.3   | 0.699138 | 0.883037 | 0.866628 | 0.93328  |
| MmugDNA.18359.1.S1_at   | MmugDNA.18359.1 | 6.17  | 6.07  | 0.13 | 0.16 | 1.07   | 0.14914  | 0.134369 | 0.514001 | 0.406603 |
| MmugDNA.18361.1.S1_s_at | MmugDNA.18361.1 | 8.04  | 8.93  | 0.16 | 1.01 | -1.86  | 0.248192 | 0.225484 | 0.599145 | 0.498129 |
| MmugDNA.18363.1.S1_at   | MmugDNA.18363.1 | 8.28  | 9.93  | 0.62 | 0.97 | -3.15  | 0.063448 | 0.053692 | 0.400574 | 0.277304 |

|                         |                 |       |       |      |      |       |          |          |          |          |
|-------------------------|-----------------|-------|-------|------|------|-------|----------|----------|----------|----------|
| MmugDNA.18366.1.S1_at   | MmugDNA.18366.1 | 9.1   | 8.57  | 0.2  | 0.2  | 1.44  | 0.046607 | 0.045252 | 0.363347 | 0.257066 |
| MmugDNA.1837.1.S1_at    | MmugDNA.1837.1  | 5.89  | 6.01  | 0.15 | 0.19 | -1.09 | 0.359785 | 0.400218 | 0.673991 | 0.630158 |
| MmugDNA.18373.1.S1_at   | MmugDNA.18373.1 | 7.07  | 6.92  | 0.18 | 0.06 | 1.12  | 0.201664 | 0.134984 | 0.563988 | 0.406955 |
| MmugDNA.18374.1.S1_at   | MmugDNA.18374.1 | 9.19  | 8.49  | 0.24 | 0.32 | 1.62  | 0.040821 | 0.030081 | 0.350469 | 0.215243 |
| MmugDNA.18376.1.S1_at   | MmugDNA.18376.1 | 3.89  | 3.91  | 0.25 | 0.04 | -1.01 | 0.913477 | 0.926038 | 0.965725 | 0.958117 |
| MmugDNA.18378.1.S1_at   | MmugDNA.18378.1 | 10.09 | 9.96  | 0.26 | 0.31 | 1.09  | 0.659171 | 0.020715 | 0.847037 | 0.180645 |
| MmugDNA.18382.1.S1_at   | MmugDNA.18382.1 | 9.62  | 9.37  | 0.13 | 0.11 | 1.18  | 0.077555 | 0.090657 | 0.427345 | 0.345151 |
| MmugDNA.18385.1.S1_at   | MmugDNA.18385.1 | 10.34 | 10.65 | 0.21 | 0.29 | -1.24 | 0.134229 | 0.108729 | 0.500737 | 0.372257 |
| MmugDNA.18391.1.S1_at   | MmugDNA.18391.1 | 9.74  | 10.12 | 0.1  | 0.94 | -1.31 | 0.593546 | 0.19309  | 0.811509 | 0.468554 |
| MmugDNA.18398.1.S1_at   | MmugDNA.18398.1 | 4.85  | 4.73  | 0.33 | 0.27 | 1.08  | 0.289771 | 0.221911 | 0.627688 | 0.495019 |
| MmugDNA.18399.1.S1_at   | MmugDNA.18399.1 | 3.26  | 6.19  | 2.22 | 2.52 | -7.59 | 0.498666 | 0.279369 | 0.758596 | 0.543012 |
| MmugDNA.18401.1.S1_s_at | MmugDNA.18401.1 | 9.85  | 10.16 | 0.37 | 0.62 | -1.24 | 0.368482 | 0.439486 | 0.67994  | 0.6582   |
| MmugDNA.18407.1.S1_at   | MmugDNA.18407.1 | 5.44  | 5.33  | 0.15 | 0.08 | 1.08  | 0.872501 | 0.760613 | 0.94905  | 0.860949 |
| MmugDNA.1841.1.S1_at    | MmugDNA.1841.1  | 12.76 | 12.73 | 0.1  | 0.34 | 1.02  | 0.31292  | 0.425312 | 0.644798 | 0.647696 |
| MmugDNA.18412.1.S1_at   | MmugDNA.18412.1 | 6.95  | 7.07  | 0.09 | 0.28 | -1.09 | 0.641992 | 0.876003 | 0.838658 | 0.929526 |
| MmugDNA.18413.1.S1_at   | MmugDNA.18413.1 | 11.23 | 10.66 | 0.08 | 0.06 | 1.49  | 0.000589 | 0.000082 | 0.136818 | 0.027016 |
| MmugDNA.18414.1.S1_at   | MmugDNA.18414.1 | 10.22 | 9.7   | 0.05 | 0.3  | 1.43  | 0.088615 | 0.066334 | 0.44348  | 0.303194 |
| MmugDNA.18415.1.S1_at   | MmugDNA.18415.1 | 9.57  | 10.24 | 1.01 | 0.48 | -1.59 | 0.314005 | 0.295652 | 0.645488 | 0.555108 |
| MmugDNA.18423.1.S1_at   | MmugDNA.18423.1 | 3.22  | 3.33  | 0.09 | 0.07 | -1.08 | 0.332892 | 0.536182 | 0.657145 | 0.721547 |
| MmugDNA.18425.1.S1_at   | MmugDNA.18425.1 | 5.54  | 5.2   | 0.21 | 0.06 | 1.27  | 0.11368  | 0.084619 | 0.476946 | 0.336144 |
| MmugDNA.18426.1.S1_at   | MmugDNA.18426.1 | 9.12  | 9.38  | 0.15 | 0.35 | -1.2  | 0.095641 | 0.072353 | 0.453501 | 0.315146 |
| MmugDNA.18431.1.S1_at   | MmugDNA.18431.1 | 7.55  | 7.84  | 0.23 | 0.44 | -1.23 | 0.355807 | 0.563256 | 0.671276 | 0.738506 |
| MmugDNA.18432.1.S1_at   | MmugDNA.18432.1 | 6.15  | 8.18  | 1.01 | 1.8  | -4.07 | 0.179479 | 0.193099 | 0.543609 | 0.468554 |
| MmugDNA.18434.1.S1_at   | MmugDNA.18434.1 | 9.06  | 8.98  | 0.18 | 0.23 | 1.06  | 0.30967  | 0.309645 | 0.641662 | 0.564991 |
| MmugDNA.18435.1.S1_x_at | MmugDNA.18435.1 | 11.98 | 11.59 | 0.44 | 0.16 | 1.31  | 0.18434  | 0.237673 | 0.548138 | 0.50826  |
| MmugDNA.18441.1.S1_at   | MmugDNA.18441.1 | 3.66  | 3.73  | 0.16 | 0.11 | -1.05 | 0.256532 | 0.35498  | 0.604268 | 0.597466 |
| MmugDNA.18445.1.S1_at   | MmugDNA.18445.1 | 7.05  | 9.29  | 0.91 | 1.86 | -4.71 | 0.231431 | 0.17469  | 0.587406 | 0.451231 |
| MmugDNA.18451.1.S1_at   | MmugDNA.18451.1 | 13.17 | 13.04 | 0.06 | 0.24 | 1.1   | 0.149168 | 0.170608 | 0.514001 | 0.447204 |
| MmugDNA.18453.1.S1_at   | MmugDNA.18453.1 | 5.86  | 5.98  | 0.31 | 0.19 | -1.09 | 0.643626 | 0.835664 | 0.83953  | 0.905942 |
| MmugDNA.18455.1.S1_at   | MmugDNA.18455.1 | 7.34  | 7.39  | 0.22 | 0.13 | -1.04 | 0.425105 | 0.538878 | 0.714956 | 0.723368 |
| MmugDNA.18457.1.S1_at   | MmugDNA.18457.1 | 6.4   | 7.08  | 0.33 | 0.08 | -1.6  | 0.067718 | 0.047416 | 0.408357 | 0.262476 |
| MmugDNA.18458.1.S1_at   | MmugDNA.18458.1 | 8.38  | 8.32  | 0.18 | 0.29 | 1.04  | 0.856871 | 0.407111 | 0.942171 | 0.634734 |
| MmugDNA.18461.1.S1_at   | MmugDNA.18461.1 | 9.47  | 8.65  | 0.16 | 0.28 | 1.76  | 0.009766 | 0.001383 | 0.22625  | 0.056947 |
| MmugDNA.18463.1.S1_at   | MmugDNA.18463.1 | 8.94  | 8.55  | 1.25 | 0.66 | 1.31  | 0.958583 | 0.976576 | 0.984337 | 0.987237 |
| MmugDNA.18465.1.S1_at   | MmugDNA.18465.1 | 5.89  | 5.56  | 0.2  | 0.18 | 1.26  | 0.086829 | 0.405061 | 0.440476 | 0.63348  |
| MmugDNA.1847.1.S1_at    | MmugDNA.1847.1  | 13.8  | 13.74 | 0.05 | 0.12 | 1.04  | 0.570154 | 0.049589 | 0.799374 | 0.267692 |
| MmugDNA.18473.1.S1_at   | MmugDNA.18473.1 | 5.14  | 4.85  | 0.14 | 0.04 | 1.23  | 0.009846 | 0.073741 | 0.226637 | 0.317089 |
| MmugDNA.18474.1.S1_s_at | MmugDNA.18474.1 | 9.44  | 10.4  | 0.18 | 0.47 | -1.95 | 0.082054 | 0.026561 | 0.433268 | 0.203915 |
| MmugDNA.18477.1.S1_at   | MmugDNA.18477.1 | 8.31  | 8.72  | 0.72 | 0.23 | -1.33 | 0.402397 | 0.33766  | 0.701398 | 0.584856 |
| MmugDNA.18481.1.S1_at   | MmugDNA.18481.1 | 5.81  | 6.4   | 0.32 | 0.22 | -1.5  | 0.141138 | 0.12936  | 0.508686 | 0.400748 |
| MmugDNA.18483.1.S1_at   | MmugDNA.18483.1 | 6.24  | 6.59  | 0.44 | 0.22 | -1.28 | 0.169421 | 0.177599 | 0.533686 | 0.453962 |

|                         |                 |       |       |      |      |       |          |          |          |          |
|-------------------------|-----------------|-------|-------|------|------|-------|----------|----------|----------|----------|
| MmugDNA.18486.1.S1_s_at | MmugDNA.18486.1 | 12.88 | 12.46 | 0.82 | 0.64 | 1.33  | 0.762957 | 0.224439 | 0.900081 | 0.497441 |
| MmugDNA.18488.1.S1_at   | MmugDNA.18488.1 | 5.42  | 5.33  | 0.25 | 0.08 | 1.06  | 0.569482 | 0.248156 | 0.799047 | 0.517567 |
| MmugDNA.18490.1.S1_at   | MmugDNA.18490.1 | 9.68  | 9.83  | 0.06 | 0.43 | -1.11 | 0.984735 | 0.492884 | 0.994574 | 0.693817 |
| MmugDNA.18495.1.S1_at   | MmugDNA.18495.1 | 11.28 | 11.74 | 0.01 | 0.05 | -1.37 | 0.00009  | 0.000011 | 0.112653 | 0.016526 |
| MmugDNA.18498.1.S1_at   | MmugDNA.18498.1 | 5.92  | 8.21  | 0.87 | 1.69 | -4.86 | 0.195531 | 0.203082 | 0.558901 | 0.477343 |
| MmugDNA.18499.1.S1_at   | MmugDNA.18499.1 | 7.3   | 7.35  | 0.11 | 0.18 | -1.03 | 0.91275  | 0.736389 | 0.965456 | 0.847485 |
| MmugDNA.18500.1.S1_at   | MmugDNA.18500.1 | 3.7   | 3.88  | 0.21 | 0.44 | -1.14 | 0.742708 | 0.918418 | 0.890001 | 0.95425  |
| MmugDNA.18502.1.S1_at   | MmugDNA.18502.1 | 12.79 | 12.64 | 0.03 | 0.12 | 1.11  | 0.043668 | 0.001739 | 0.357024 | 0.062895 |
| MmugDNA.18508.1.S1_at   | MmugDNA.18508.1 | 9.04  | 10.4  | 0.65 | 0.2  | -2.57 | 0.030392 | 0.016202 | 0.318297 | 0.16133  |
| MmugDNA.18510.1.S1_at   | MmugDNA.18510.1 | 9.93  | 9.43  | 0.3  | 0.2  | 1.41  | 0.170218 | 0.183404 | 0.534249 | 0.459553 |
| MmugDNA.18511.1.S1_at   | MmugDNA.18511.1 | 11.91 | 11.72 | 0.26 | 0.49 | 1.14  | 0.767048 | 0.256517 | 0.902073 | 0.524275 |
| MmugDNA.18513.1.S1_s_at | MmugDNA.18513.1 | 12.94 | 12.9  | 0.19 | 0.02 | 1.03  | 0.41674  | 0.403375 | 0.710179 | 0.632083 |
| MmugDNA.18515.1.S1_at   | MmugDNA.18515.1 | 7.92  | 7.93  | 0.21 | 0.29 | -1.01 | 0.883093 | 0.03196  | 0.952961 | 0.221191 |
| MmugDNA.18516.1.S1_at   | MmugDNA.18516.1 | 9.85  | 9.65  | 0.21 | 0.27 | 1.15  | 0.077525 | 0.051927 | 0.427315 | 0.273337 |
| MmugDNA.18519.1.S1_at   | MmugDNA.18519.1 | 3.29  | 3.44  | 0.07 | 0.41 | -1.11 | 0.576553 | 0.237732 | 0.803128 | 0.50826  |
| MmugDNA.18520.1.S1_at   | MmugDNA.18520.1 | 11.68 | 11.58 | 0.16 | 0.45 | 1.08  | 0.505191 | 0.655279 | 0.761548 | 0.798399 |
| MmugDNA.18528.1.S1_at   | MmugDNA.18528.1 | 10.58 | 10.48 | 0.1  | 0.68 | 1.08  | 0.929738 | 0.811071 | 0.972813 | 0.890975 |
| MmugDNA.18538.1.S1_at   | MmugDNA.18538.1 | 8.52  | 10.03 | 1.09 | 1.06 | -2.86 | 0.176716 | 0.199357 | 0.540348 | 0.474002 |
| MmugDNA.18538.1.S1_s_at | MmugDNA.18538.1 | 8.72  | 10.28 | 1.15 | 1.11 | -2.94 | 0.172793 | 0.205275 | 0.536452 | 0.479599 |
| MmugDNA.18539.1.S1_at   | MmugDNA.18539.1 | 7.62  | 7.44  | 0.45 | 0.25 | 1.13  | 0.919604 | 0.404517 | 0.968755 | 0.633004 |
| MmugDNA.18541.1.S1_at   | MmugDNA.18541.1 | 9.67  | 10.29 | 0.1  | 0.38 | -1.54 | 0.045061 | 0.035424 | 0.359895 | 0.232539 |
| MmugDNA.18544.1.S1_at   | MmugDNA.18544.1 | 7.34  | 7.56  | 0.14 | 0.47 | -1.17 | 0.27015  | 0.186027 | 0.614663 | 0.461878 |
| MmugDNA.18548.1.S1_at   | MmugDNA.18548.1 | 11.51 | 10.28 | 0.43 | 0.72 | 2.35  | 0.087429 | 0.04607  | 0.441776 | 0.258977 |
| MmugDNA.18551.1.S1_at   | MmugDNA.18551.1 | 8.74  | 7.55  | 0.06 | 0.8  | 2.29  | 0.188151 | 0.24498  | 0.551088 | 0.514782 |
| MmugDNA.18552.1.S1_at   | MmugDNA.18552.1 | 10.91 | 11.02 | 0.05 | 0.29 | -1.08 | 0.489952 | 0.665107 | 0.754239 | 0.803733 |
| MmugDNA.18555.1.S1_at   | MmugDNA.18555.1 | 7.84  | 7.49  | 0.12 | 0.01 | 1.27  | 0.013878 | 0.009676 | 0.249758 | 0.129405 |
| MmugDNA.18556.1.S1_at   | MmugDNA.18556.1 | 12    | 11.11 | 0.31 | 1.7  | 1.85  | 0.130407 | 0.143412 | 0.496851 | 0.41743  |
| MmugDNA.18557.1.S1_at   | MmugDNA.18557.1 | 5.2   | 5.28  | 0.01 | 0.15 | -1.05 | 0.131644 | 0.174238 | 0.498041 | 0.450573 |
| MmugDNA.18559.1.S1_at   | MmugDNA.18559.1 | 11.62 | 11.76 | 0.06 | 0.09 | -1.1  | 0.102692 | 0.114496 | 0.462537 | 0.381041 |
| MmugDNA.18563.1.S1_at   | MmugDNA.18563.1 | 5.09  | 5.12  | 0.04 | 0.06 | -1.02 | 0.645714 | 0.308849 | 0.840447 | 0.564656 |
| MmugDNA.18566.1.S1_at   | MmugDNA.18566.1 | 5.73  | 5.7   | 0.13 | 0.15 | 1.02  | 0.961504 | 0.772967 | 0.98519  | 0.867983 |
| MmugDNA.18569.1.S1_at   | MmugDNA.18569.1 | 7.96  | 7.28  | 0.64 | 0.65 | 1.6   | 0.12291  | 0.152719 | 0.488301 | 0.427571 |
| MmugDNA.1857.1.S1_at    | MmugDNA.1857.1  | 3.35  | 3.27  | 0.18 | 0.1  | 1.06  | 0.346023 | 0.480774 | 0.665497 | 0.686    |
| MmugDNA.18573.1.S1_at   | MmugDNA.18573.1 | 5.95  | 6.18  | 0.18 | 0.14 | -1.17 | 0.166432 | 0.143395 | 0.53009  | 0.417409 |
| MmugDNA.18574.1.S1_at   | MmugDNA.18574.1 | 3.36  | 3.33  | 0.32 | 0.04 | 1.02  | 0.315512 | 0.145415 | 0.646683 | 0.419421 |
| MmugDNA.18578.1.S1_at   | MmugDNA.18578.1 | 10.08 | 9.98  | 0.29 | 0.51 | 1.07  | 0.369759 | 0.332043 | 0.680877 | 0.580568 |
| MmugDNA.18584.1.S1_at   | MmugDNA.18584.1 | 10.34 | 10.17 | 0.11 | 0.42 | 1.12  | 0.386227 | 0.517911 | 0.691191 | 0.710027 |
| MmugDNA.18585.1.S1_at   | MmugDNA.18585.1 | 5.37  | 5.39  | 0.08 | 0.03 | -1.02 | 0.158292 | 0.191879 | 0.523156 | 0.467257 |
| MmugDNA.18586.1.S1_at   | MmugDNA.18586.1 | 10.41 | 9.47  | 0.18 | 0.01 | 1.92  | 0.000752 | 0.000025 | 0.136818 | 0.020254 |
| MmugDNA.18588.1.S1_at   | MmugDNA.18588.1 | 8.14  | 8.6   | 0.35 | 0.22 | -1.37 | 0.363892 | 0.411077 | 0.677018 | 0.637877 |
| MmugDNA.18590.1.S1_at   | MmugDNA.18590.1 | 13.39 | 13.42 | 0.03 | 0.11 | -1.02 | 0.867892 | 0.254138 | 0.947272 | 0.522439 |

|                         |                 |       |       |      |      |       |          |          |          |          |
|-------------------------|-----------------|-------|-------|------|------|-------|----------|----------|----------|----------|
| MmugDNA.18592.1.S1_at   | MmugDNA.18592.1 | 6.53  | 6     | 0.2  | 0.72 | 1.45  | 0.915441 | 0.977578 | 0.966542 | 0.987812 |
| MmugDNA.18593.1.S1_at   | MmugDNA.18593.1 | 11.88 | 12    | 0.08 | 0.16 | -1.09 | 0.17517  | 0.173017 | 0.538831 | 0.449661 |
| MmugDNA.18595.1.S1_at   | MmugDNA.18595.1 | 9.37  | 8.81  | 0.07 | 0.6  | 1.47  | 0.281233 | 0.276604 | 0.622129 | 0.540596 |
| MmugDNA.18597.1.S1_at   | MmugDNA.18597.1 | 5.29  | 5.52  | 0.08 | 0.12 | -1.17 | 0.047987 | 0.026315 | 0.367582 | 0.203232 |
| MmugDNA.1860.1.S1_at    | MmugDNA.1860.1  | 5.03  | 6.83  | 1.03 | 0.69 | -3.48 | 0.058994 | 0.043296 | 0.390921 | 0.252847 |
| MmugDNA.18600.1.S1_at   | MmugDNA.18600.1 | 4.49  | 4.35  | 0.16 | 0.13 | 1.1   | 0.337819 | 0.077789 | 0.660312 | 0.323933 |
| MmugDNA.18606.1.S1_at   | MmugDNA.18606.1 | 4.18  | 4.16  | 0.09 | 0.18 | 1.01  | 0.545225 | 0.66989  | 0.784786 | 0.806933 |
| MmugDNA.18607.1.S1_at   | MmugDNA.18607.1 | 8.49  | 8.06  | 0.57 | 0.09 | 1.35  | 0.342321 | 0.227737 | 0.663129 | 0.499979 |
| MmugDNA.18611.1.S1_at   | MmugDNA.18611.1 | 12.75 | 12.34 | 0.09 | 0.14 | 1.32  | 0.030047 | 0.031262 | 0.316741 | 0.218668 |
| MmugDNA.18611.1.S1_x_at | MmugDNA.18611.1 | 12.46 | 12.06 | 0.1  | 0.1  | 1.32  | 0.017879 | 0.01133  | 0.26813  | 0.138076 |
| MmugDNA.18612.1.S1_at   | MmugDNA.18612.1 | 11.09 | 10.76 | 0.26 | 0.68 | 1.25  | 0.417757 | 0.467669 | 0.710734 | 0.677207 |
| MmugDNA.18614.1.S1_at   | MmugDNA.18614.1 | 10.56 | 10.81 | 0.1  | 0.08 | -1.19 | 0.009037 | 0.004151 | 0.222023 | 0.091036 |
| MmugDNA.18615.1.S1_at   | MmugDNA.18615.1 | 10.3  | 9.34  | 0.19 | 0.09 | 1.95  | 0.000723 | 0.000108 | 0.136818 | 0.028099 |
| MmugDNA.18621.1.S1_at   | MmugDNA.18621.1 | 4.03  | 4.09  | 0.08 | 0.22 | -1.04 | 0.555102 | 0.790768 | 0.791244 | 0.878973 |
| MmugDNA.18630.1.S1_at   | MmugDNA.18630.1 | 8.18  | 8.8   | 0.32 | 0.51 | -1.54 | 0.119091 | 0.127827 | 0.483744 | 0.398723 |
| MmugDNA.18631.1.S1_at   | MmugDNA.18631.1 | 4.69  | 4.59  | 0.09 | 0.22 | 1.07  | 0.326726 | 0.381046 | 0.653192 | 0.617478 |
| MmugDNA.18633.1.S1_at   | MmugDNA.18633.1 | 5     | 3.82  | 0.72 | 0.78 | 2.27  | 0.630696 | 0.557565 | 0.832274 | 0.73509  |
| MmugDNA.18635.1.S1_at   | MmugDNA.18635.1 | 12.96 | 13.02 | 0.07 | 0.15 | -1.04 | 0.622316 | 0.763525 | 0.827345 | 0.862473 |
| MmugDNA.18638.1.S1_s_at | MmugDNA.18638.1 | 7.88  | 6.91  | 0.56 | 0.32 | 1.97  | 0.138058 | 0.110891 | 0.505565 | 0.375256 |
| MmugDNA.18643.1.S1_s_at | MmugDNA.18643.1 | 11.68 | 11.74 | 0.31 | 0.21 | -1.04 | 0.676065 | 0.795758 | 0.854832 | 0.882339 |
| MmugDNA.18645.1.S1_at   | MmugDNA.18645.1 | 8.37  | 8.28  | 0.49 | 0.58 | 1.06  | 0.445136 | 0.578535 | 0.727444 | 0.748589 |
| MmugDNA.18647.1.S1_s_at | MmugDNA.18647.1 | 7.1   | 7.28  | 0.12 | 0.13 | -1.13 | 0.354235 | 0.098504 | 0.670421 | 0.356636 |
| MmugDNA.18648.1.S1_at   | MmugDNA.18648.1 | 8.53  | 7.29  | 0.38 | 0.51 | 2.36  | 0.050955 | 0.050315 | 0.375705 | 0.269573 |
| MmugDNA.1865.1.S1_at    | MmugDNA.1865.1  | 7.5   | 7.4   | 0.16 | 0.24 | 1.07  | 0.54833  | 0.589038 | 0.786665 | 0.755336 |
| MmugDNA.18650.1.S1_at   | MmugDNA.18650.1 | 4.6   | 4.72  | 0.16 | 0.13 | -1.08 | 0.719148 | 0.357169 | 0.876813 | 0.598831 |
| MmugDNA.18652.1.S1_at   | MmugDNA.18652.1 | 9.01  | 6.97  | 0.23 | 0.15 | 4.1   | 0.000239 | 0.000074 | 0.125103 | 0.0265   |
| MmugDNA.18653.1.S1_at   | MmugDNA.18653.1 | 8.18  | 7.36  | 0.93 | 0.75 | 1.77  | 0.517658 | 0.183358 | 0.768927 | 0.459553 |
| MmugDNA.18655.1.S1_at   | MmugDNA.18655.1 | 11.54 | 10.69 | 0.17 | 0.4  | 1.8   | 0.022792 | 0.014728 | 0.288178 | 0.154415 |
| MmugDNA.18657.1.S1_s_at | MmugDNA.18657.1 | 5.27  | 5.25  | 0.12 | 0.08 | 1.01  | 0.336528 | 0.248218 | 0.659517 | 0.517574 |
| MmugDNA.18659.1.S1_at   | MmugDNA.18659.1 | 8.86  | 8.39  | 0.33 | 0.6  | 1.38  | 0.184087 | 0.294917 | 0.547989 | 0.554462 |
| MmugDNA.1866.1.S1_at    | MmugDNA.1866.1  | 10.8  | 10.8  | 0.04 | 0.24 | 1.01  | 0.750845 | 0.291938 | 0.893432 | 0.552156 |
| MmugDNA.18662.1.S1_at   | MmugDNA.18662.1 | 5.36  | 3.79  | 1.1  | 0.06 | 2.96  | 0.072418 | 0.095613 | 0.416971 | 0.352645 |
| MmugDNA.18664.1.S1_at   | MmugDNA.18664.1 | 3.92  | 3.89  | 0.2  | 0.08 | 1.02  | 0.517348 | 0.551436 | 0.768744 | 0.73093  |
| MmugDNA.18665.1.S1_at   | MmugDNA.18665.1 | 12.14 | 12.26 | 0.16 | 0.17 | -1.09 | 0.394889 | 0.542915 | 0.696184 | 0.725841 |
| MmugDNA.18667.1.S1_at   | MmugDNA.18667.1 | 10.87 | 12.39 | 0.64 | 0.05 | -2.86 | 0.007514 | 0.003462 | 0.209134 | 0.084734 |
| MmugDNA.18668.1.S1_at   | MmugDNA.18668.1 | 5.56  | 5.52  | 0.1  | 0.07 | 1.03  | 0.209272 | 0.187566 | 0.570957 | 0.463628 |
| MmugDNA.18670.1.S1_s_at | MmugDNA.18670.1 | 10.33 | 10.43 | 0.13 | 0.49 | -1.08 | 0.661617 | 0.132663 | 0.848148 | 0.404544 |
| MmugDNA.18673.1.S1_at   | MmugDNA.18673.1 | 12.38 | 12.43 | 0.03 | 0.07 | -1.04 | 0.340503 | 0.140124 | 0.661961 | 0.413394 |
| MmugDNA.18674.1.S1_at   | MmugDNA.18674.1 | 8.62  | 6.64  | 0.72 | 0.84 | 3.95  | 0.11691  | 0.246164 | 0.480867 | 0.515874 |
| MmugDNA.18681.1.S1_at   | MmugDNA.18681.1 | 8.1   | 7.98  | 0.4  | 0.8  | 1.08  | 0.713902 | 0.871918 | 0.874591 | 0.927098 |
| MmugDNA.18682.1.S1_at   | MmugDNA.18682.1 | 10.5  | 10.35 | 0.05 | 0.1  | 1.11  | 0.089778 | 0.038147 | 0.445334 | 0.239936 |

|                         |                 |       |       |      |      |       |          |          |          |          |
|-------------------------|-----------------|-------|-------|------|------|-------|----------|----------|----------|----------|
| MmugDNA.18684.1.S1_at   | MmugDNA.18684.1 | 7.21  | 7.03  | 0.35 | 0.26 | 1.13  | 0.894732 | 0.216574 | 0.957917 | 0.490224 |
| MmugDNA.18687.1.S1_at   | MmugDNA.18687.1 | 11.59 | 10.58 | 0.19 | 0.14 | 2.01  | 0.003748 | 0.000384 | 0.179914 | 0.037273 |
| MmugDNA.18688.1.S1_at   | MmugDNA.18688.1 | 9.96  | 9.49  | 0.19 | 0.15 | 1.39  | 0.015681 | 0.029766 | 0.260208 | 0.214185 |
| MmugDNA.18690.1.S1_at   | MmugDNA.18690.1 | 5.87  | 5.78  | 0.06 | 0.21 | 1.06  | 0.395674 | 0.002684 | 0.696523 | 0.076408 |
| MmugDNA.18698.1.S1_at   | MmugDNA.18698.1 | 11.44 | 11.94 | 0.04 | 0.39 | -1.41 | 0.283989 | 0.06265  | 0.623838 | 0.297022 |
| MmugDNA.18699.1.S1_at   | MmugDNA.18699.1 | 6.83  | 6.94  | 0.2  | 0.51 | -1.08 | 0.704692 | 0.90513  | 0.869745 | 0.94617  |
| MmugDNA.18701.1.S1_at   | MmugDNA.18701.1 | 4.05  | 4     | 0.1  | 0.06 | 1.03  | 0.521468 | 0.696163 | 0.771397 | 0.823455 |
| MmugDNA.18704.1.S1_at   | MmugDNA.18704.1 | 6.62  | 7.61  | 1.12 | 1.02 | -1.99 | 0.355263 | 0.234954 | 0.670893 | 0.506146 |
| MmugDNA.18707.1.S1_at   | MmugDNA.18707.1 | 2.97  | 3.24  | 0.03 | 0.16 | -1.2  | 0.049542 | 0.071333 | 0.371515 | 0.313366 |
| MmugDNA.18715.1.S1_at   | MmugDNA.18715.1 | 8.2   | 8.5   | 0.17 | 0.23 | -1.23 | 0.331518 | 0.371163 | 0.656424 | 0.610113 |
| MmugDNA.18717.1.S1_at   | MmugDNA.18717.1 | 2.92  | 3.04  | 0.13 | 0.09 | -1.09 | 0.526939 | 0.559743 | 0.774459 | 0.736365 |
| MmugDNA.18722.1.S1_at   | MmugDNA.18722.1 | 5.4   | 5.28  | 0.71 | 1    | 1.09  | 0.908775 | 0.292233 | 0.963816 | 0.552363 |
| MmugDNA.18724.1.S1_at   | MmugDNA.18724.1 | 3.61  | 3.68  | 0.02 | 0.03 | -1.05 | 0.029672 | 0.218209 | 0.315023 | 0.491764 |
| MmugDNA.18724.1.S1_s_at | MmugDNA.18724.1 | 6.67  | 6.23  | 0.4  | 0.87 | 1.36  | 0.401436 | 0.343721 | 0.70084  | 0.589444 |
| MmugDNA.18724.1.S1_x_at | MmugDNA.18724.1 | 4.09  | 3.95  | 0.04 | 0.1  | 1.11  | 0.114784 | 0.310205 | 0.478025 | 0.565386 |
| MmugDNA.1873.1.S1_at    | MmugDNA.1873.1  | 6.75  | 7.09  | 0.25 | 0.2  | -1.27 | 0.199782 | 0.075084 | 0.562888 | 0.319283 |
| MmugDNA.18730.1.S1_at   | MmugDNA.18730.1 | 11.32 | 11.23 | 0.02 | 0.21 | 1.07  | 0.405064 | 0.141197 | 0.703082 | 0.414709 |
| MmugDNA.18734.1.S1_at   | MmugDNA.18734.1 | 6.01  | 5.79  | 0.26 | 0.36 | 1.16  | 0.580583 | 0.08083  | 0.804747 | 0.32875  |
| MmugDNA.18735.1.S1_at   | MmugDNA.18735.1 | 10.93 | 10.87 | 0.22 | 0.05 | 1.04  | 0.644577 | 0.815798 | 0.839786 | 0.893771 |
| MmugDNA.18741.1.S1_at   | MmugDNA.18741.1 | 5.52  | 5.16  | 0.26 | 0.27 | 1.28  | 0.151805 | 0.17562  | 0.516514 | 0.45218  |
| MmugDNA.18744.1.S1_at   | MmugDNA.18744.1 | 5.88  | 6.09  | 0.02 | 0.13 | -1.16 | 0.039509 | 0.204631 | 0.347288 | 0.478995 |
| MmugDNA.18748.1.S1_at   | MmugDNA.18748.1 | 4.6   | 4.42  | 0.37 | 0.1  | 1.13  | 0.208495 | 0.225747 | 0.570354 | 0.498159 |
| MmugDNA.1875.1.S1_at    | MmugDNA.1875.1  | 11.64 | 11.26 | 0.2  | 0.14 | 1.3   | 0.022398 | 0.012841 | 0.286428 | 0.145955 |
| MmugDNA.18751.1.S1_at   | MmugDNA.18751.1 | 3.75  | 3.74  | 0.06 | 0.15 | 1.01  | 0.859457 | 0.277706 | 0.94324  | 0.541648 |
| MmugDNA.18752.1.S1_at   | MmugDNA.18752.1 | 8.87  | 8.79  | 0.35 | 0.4  | 1.06  | 0.965002 | 0.329575 | 0.986575 | 0.578781 |
| MmugDNA.18755.1.S1_at   | MmugDNA.18755.1 | 4.02  | 4.06  | 0.17 | 0.05 | -1.03 | 0.499269 | 0.083994 | 0.759076 | 0.3349   |
| MmugDNA.18756.1.S1_at   | MmugDNA.18756.1 | 10.09 | 9.14  | 0.25 | 0.19 | 1.94  | 0.005478 | 0.001666 | 0.191178 | 0.061711 |
| MmugDNA.18757.1.S1_at   | MmugDNA.18757.1 | 10.03 | 9.69  | 0.17 | 0.53 | 1.27  | 0.47566  | 0.519706 | 0.745899 | 0.711271 |
| MmugDNA.18759.1.S1_at   | MmugDNA.18759.1 | 5.96  | 5.55  | 0.12 | 0.24 | 1.33  | 0.115433 | 0.036534 | 0.478773 | 0.235621 |
| MmugDNA.1876.1.S1_at    | MmugDNA.1876.1  | 7.25  | 6.84  | 0.42 | 0.08 | 1.33  | 0.149719 | 0.159182 | 0.514322 | 0.435217 |
| MmugDNA.18760.1.S1_at   | MmugDNA.18760.1 | 8.89  | 8.59  | 0.06 | 0.18 | 1.23  | 0.075633 | 0.06017  | 0.423097 | 0.291882 |
| MmugDNA.18770.1.S1_at   | MmugDNA.18770.1 | 13.42 | 13.35 | 0.08 | 0.16 | 1.04  | 0.300307 | 0.349225 | 0.635717 | 0.593263 |
| MmugDNA.18774.1.S1_at   | MmugDNA.18774.1 | 5.59  | 5.32  | 0.24 | 0.31 | 1.2   | 0.232699 | 0.312578 | 0.587814 | 0.567268 |
| MmugDNA.18776.1.S1_at   | MmugDNA.18776.1 | 7.16  | 7.43  | 0.09 | 0.67 | -1.21 | 0.190547 | 0.222569 | 0.553097 | 0.495615 |
| MmugDNA.18777.1.S1_at   | MmugDNA.18777.1 | 12.38 | 12.45 | 0.06 | 0.09 | -1.06 | 0.442119 | 0.021126 | 0.725385 | 0.181957 |
| MmugDNA.18793.1.S1_at   | MmugDNA.18793.1 | 6.53  | 6.66  | 0.14 | 0.03 | -1.09 | 0.185215 | 0.162604 | 0.54869  | 0.43872  |
| MmugDNA.18794.1.S1_at   | MmugDNA.18794.1 | 12.08 | 11.58 | 0.02 | 0.9  | 1.41  | 0.124814 | 0.049775 | 0.49077  | 0.26818  |
| MmugDNA.18796.1.S1_at   | MmugDNA.18796.1 | 4.53  | 4.74  | 0.11 | 0.14 | -1.16 | 0.142179 | 0.178196 | 0.509437 | 0.454531 |
| MmugDNA.18799.1.S1_at   | MmugDNA.18799.1 | 6.03  | 7.13  | 0.14 | 1.07 | -2.15 | 0.139249 | 0.159667 | 0.506801 | 0.435785 |
| MmugDNA.1880.1.S1_at    | MmugDNA.1880.1  | 9.55  | 8.59  | 0.33 | 0.62 | 1.94  | 0.186845 | 0.097391 | 0.550106 | 0.355097 |
| MmugDNA.18802.1.S1_at   | MmugDNA.18802.1 | 6.17  | 6.34  | 0.1  | 0.04 | -1.12 | 0.049372 | 0.017747 | 0.371376 | 0.168367 |

|                         |                 |       |       |      |      |       |          |          |          |          |
|-------------------------|-----------------|-------|-------|------|------|-------|----------|----------|----------|----------|
| MmugDNA.18804.1.S1_at   | MmugDNA.18804.1 | 8.37  | 8.34  | 0.56 | 1.03 | 1.02  | 0.718642 | 0.478445 | 0.876527 | 0.684481 |
| MmugDNA.18807.1.S1_at   | MmugDNA.18807.1 | 8.48  | 7.49  | 0.48 | 0.58 | 1.99  | 0.182124 | 0.161115 | 0.546458 | 0.437279 |
| MmugDNA.18817.1.S1_at   | MmugDNA.18817.1 | 4.8   | 4.97  | 0.18 | 0.44 | -1.13 | 0.208782 | 0.366788 | 0.570422 | 0.606502 |
| MmugDNA.1882.1.S1_s_at  | MmugDNA.1882.1  | 10.95 | 10.73 | 0.2  | 0.04 | 1.16  | 0.365041 | 0.434404 | 0.677904 | 0.654546 |
| MmugDNA.18823.1.S1_at   | MmugDNA.18823.1 | 6.7   | 6.72  | 0.06 | 0.09 | -1.02 | 0.191129 | 0.221277 | 0.554011 | 0.4946   |
| MmugDNA.18826.1.S1_at   | MmugDNA.18826.1 | 4.38  | 4.27  | 0.1  | 0.11 | 1.08  | 0.196548 | 0.432532 | 0.559808 | 0.65297  |
| MmugDNA.18827.1.S1_at   | MmugDNA.18827.1 | 10.41 | 9.96  | 0.11 | 0.27 | 1.36  | 0.048292 | 0.041033 | 0.368148 | 0.247319 |
| MmugDNA.18828.1.S1_at   | MmugDNA.18828.1 | 12.16 | 12.17 | 0.24 | 0.36 | -1.01 | 0.984845 | 0.999634 | 0.994647 | 0.999864 |
| MmugDNA.18830.1.S1_at   | MmugDNA.18830.1 | 12.5  | 12    | 0.44 | 1.67 | 1.42  | 0.221524 | 0.154485 | 0.580303 | 0.429395 |
| MmugDNA.18834.1.S1_at   | MmugDNA.18834.1 | 4.47  | 5.83  | 0.88 | 1.84 | -2.57 | 0.392235 | 0.207937 | 0.694576 | 0.482049 |
| MmugDNA.18840.1.S1_at   | MmugDNA.18840.1 | 7.84  | 7.42  | 0.39 | 0.61 | 1.34  | 0.503109 | 0.617979 | 0.760671 | 0.773846 |
| MmugDNA.18843.1.S1_at   | MmugDNA.18843.1 | 9.3   | 10.55 | 0.47 | 0.29 | -2.36 | 0.01723  | 0.007667 | 0.266964 | 0.117109 |
| MmugDNA.18844.1.S1_at   | MmugDNA.18844.1 | 4.58  | 5.05  | 0.17 | 0.94 | -1.38 | 0.30222  | 0.404071 | 0.636913 | 0.632599 |
| MmugDNA.18845.1.S1_at   | MmugDNA.18845.1 | 4.88  | 4.92  | 0.16 | 0.17 | -1.03 | 0.846307 | 0.154647 | 0.93835  | 0.429562 |
| MmugDNA.18846.1.S1_at   | MmugDNA.18846.1 | 8.69  | 8.84  | 0.3  | 0.46 | -1.11 | 0.941488 | 0.929685 | 0.977713 | 0.9599   |
| MmugDNA.18857.1.S1_at   | MmugDNA.18857.1 | 7.37  | 6.95  | 0.22 | 0.09 | 1.34  | 0.044283 | 0.025646 | 0.358336 | 0.200834 |
| MmugDNA.18860.1.S1_at   | MmugDNA.18860.1 | 5.07  | 4.8   | 0.27 | 0.56 | 1.21  | 0.771423 | 0.933351 | 0.903841 | 0.962162 |
| MmugDNA.18863.1.S1_at   | MmugDNA.18863.1 | 3.17  | 3.12  | 0.05 | 0.13 | 1.04  | 0.560147 | 0.751909 | 0.79419  | 0.855714 |
| MmugDNA.18864.1.S1_at   | MmugDNA.18864.1 | 6.52  | 6.54  | 0.22 | 0.09 | -1.01 | 0.460346 | 0.265681 | 0.736877 | 0.531553 |
| MmugDNA.18866.1.S1_at   | MmugDNA.18866.1 | 5.19  | 5.33  | 0.17 | 0.15 | -1.1  | 0.91919  | 0.790415 | 0.968566 | 0.878858 |
| MmugDNA.18867.1.S1_at   | MmugDNA.18867.1 | 8.6   | 8.5   | 0.09 | 0.12 | 1.07  | 0.277301 | 0.342339 | 0.619436 | 0.588413 |
| MmugDNA.18869.1.S1_at   | MmugDNA.18869.1 | 5.08  | 5.06  | 0.07 | 0.14 | 1.02  | 0.692306 | 0.713324 | 0.863369 | 0.833681 |
| MmugDNA.1887.1.S1_at    | MmugDNA.1887.1  | 9.45  | 9.63  | 0.13 | 0.61 | -1.13 | 0.535197 | 0.456616 | 0.778933 | 0.670304 |
| MmugDNA.18872.1.S1_at   | MmugDNA.18872.1 | 11.4  | 11.11 | 0.12 | 0.21 | 1.23  | 0.254716 | 0.026154 | 0.602593 | 0.202721 |
| MmugDNA.18873.1.S1_at   | MmugDNA.18873.1 | 10.48 | 10.61 | 0.21 | 0.61 | -1.09 | 0.547169 | 0.52807  | 0.785992 | 0.71643  |
| MmugDNA.18878.1.S1_at   | MmugDNA.18878.1 | 8.71  | 7.93  | 0.26 | 0.08 | 1.71  | 0.017595 | 0.010391 | 0.267454 | 0.133359 |
| MmugDNA.18880.1.S1_at   | MmugDNA.18880.1 | 9.32  | 8.12  | 0.65 | 0.14 | 2.31  | 0.100759 | 0.021814 | 0.461009 | 0.184771 |
| MmugDNA.18890.1.S1_at   | MmugDNA.18890.1 | 6.86  | 7.77  | 0.48 | 0.93 | -1.88 | 0.306428 | 0.205538 | 0.639593 | 0.47981  |
| MmugDNA.18892.1.S1_s_at | MmugDNA.18892.1 | 6.41  | 6.28  | 0.35 | 0.19 | 1.09  | 0.855536 | 0.733833 | 0.941542 | 0.845891 |
| MmugDNA.18897.1.S1_at   | MmugDNA.18897.1 | 4.79  | 4.82  | 0.19 | 0.17 | -1.02 | 0.83621  | 0.924549 | 0.933665 | 0.957386 |
| MmugDNA.18903.1.S1_at   | MmugDNA.18903.1 | 6.92  | 7.04  | 0.43 | 0.43 | -1.08 | 0.899036 | 0.959338 | 0.959684 | 0.976949 |
| MmugDNA.18905.1.S1_at   | MmugDNA.18905.1 | 7.45  | 7.63  | 0.15 | 0.14 | -1.14 | 0.362132 | 0.351421 | 0.675706 | 0.595054 |
| MmugDNA.18907.1.S1_at   | MmugDNA.18907.1 | 5.48  | 5.53  | 0.14 | 0.14 | -1.04 | 0.492588 | 0.670735 | 0.755881 | 0.807469 |
| MmugDNA.18909.1.S1_at   | MmugDNA.18909.1 | 5.33  | 5.46  | 0.04 | 0.1  | -1.09 | 0.3149   | 0.757506 | 0.646191 | 0.858849 |
| MmugDNA.18913.1.S1_at   | MmugDNA.18913.1 | 9.92  | 9.7   | 0.04 | 0.05 | 1.16  | 0.003829 | 0.001319 | 0.179914 | 0.055996 |
| MmugDNA.18917.1.S1_at   | MmugDNA.18917.1 | 9.79  | 9.92  | 0.14 | 0.07 | -1.09 | 0.387257 | 0.551674 | 0.691895 | 0.731153 |
| MmugDNA.18923.1.S1_at   | MmugDNA.18923.1 | 7.11  | 7.24  | 0.15 | 0.27 | -1.09 | 0.189525 | 0.169643 | 0.552479 | 0.446221 |
| MmugDNA.18925.1.S1_at   | MmugDNA.18925.1 | 4.22  | 4.53  | 0.36 | 0.21 | -1.24 | 0.66578  | 0.905072 | 0.850095 | 0.946165 |
| MmugDNA.18928.1.S1_at   | MmugDNA.18928.1 | 4.92  | 7.21  | 1.35 | 2.03 | -4.9  | 0.348542 | 0.204509 | 0.667173 | 0.478845 |
| MmugDNA.18937.1.S1_at   | MmugDNA.18937.1 | 5.81  | 5.68  | 0.53 | 0.34 | 1.09  | 0.18751  | 0.173494 | 0.550527 | 0.449938 |
| MmugDNA.18940.1.S1_at   | MmugDNA.18940.1 | 3.8   | 3.78  | 0.12 | 0.21 | 1.02  | 0.59557  | 0.294058 | 0.812393 | 0.553912 |

|                         |                 |       |       |      |      |       |          |          |          |          |
|-------------------------|-----------------|-------|-------|------|------|-------|----------|----------|----------|----------|
| MmugDNA.18942.1.S1_at   | MmugDNA.18942.1 | 8.55  | 8.33  | 0.12 | 0.15 | 1.16  | 0.058162 | 0.021013 | 0.390093 | 0.18172  |
| MmugDNA.18948.1.S1_at   | MmugDNA.18948.1 | 11.4  | 11.47 | 0.2  | 0.11 | -1.05 | 0.50029  | 0.0492   | 0.759454 | 0.266627 |
| MmugDNA.18953.1.S1_at   | MmugDNA.18953.1 | 9.83  | 9.2   | 0.14 | 0.25 | 1.55  | 0.027996 | 0.031944 | 0.309449 | 0.221125 |
| MmugDNA.18955.1.S1_at   | MmugDNA.18955.1 | 11.1  | 10.2  | 0.16 | 0.21 | 1.87  | 0.003918 | 0.001125 | 0.180728 | 0.052924 |
| MmugDNA.18956.1.S1_s_at | MmugDNA.18956.1 | 10.5  | 10.68 | 0.07 | 0.16 | -1.13 | 0.451429 | 0.028043 | 0.731565 | 0.208977 |
| MmugDNA.18958.1.S1_at   | MmugDNA.18958.1 | 8.92  | 9.08  | 0.11 | 0.25 | -1.12 | 0.131235 | 0.01945  | 0.497792 | 0.175136 |
| MmugDNA.18969.1.S1_at   | MmugDNA.18969.1 | 11.96 | 12.09 | 0.02 | 0.07 | -1.1  | 0.089323 | 0.036946 | 0.445016 | 0.236659 |
| MmugDNA.18970.1.S1_at   | MmugDNA.18970.1 | 7.19  | 6.6   | 0.38 | 0.36 | 1.5   | 0.103711 | 0.111393 | 0.463457 | 0.376126 |
| MmugDNA.18973.1.S1_at   | MmugDNA.18973.1 | 10.48 | 10.89 | 0.15 | 0.65 | -1.32 | 0.333986 | 0.452044 | 0.658024 | 0.666759 |
| MmugDNA.18980.1.S1_at   | MmugDNA.18980.1 | 6.61  | 6.48  | 0.19 | 0.08 | 1.1   | 0.730343 | 0.053939 | 0.88311  | 0.277766 |
| MmugDNA.18990.1.S1_at   | MmugDNA.18990.1 | 5.98  | 5.57  | 0.22 | 0.72 | 1.32  | 0.962321 | 0.917916 | 0.985531 | 0.954027 |
| MmugDNA.18991.1.S1_at   | MmugDNA.18991.1 | 9.52  | 9.62  | 0.23 | 0.6  | -1.07 | 0.456208 | 0.604303 | 0.734359 | 0.764558 |
| MmugDNA.18992.1.S1_at   | MmugDNA.18992.1 | 6.77  | 6.78  | 0.02 | 0.05 | -1    | 0.808101 | 0.662594 | 0.921609 | 0.802443 |
| MmugDNA.18993.1.S1_at   | MmugDNA.18993.1 | 5.33  | 5.35  | 0.14 | 0.33 | -1.01 | 0.742519 | 0.141954 | 0.889888 | 0.415503 |
| MmugDNA.18996.1.S1_at   | MmugDNA.18996.1 | 10.73 | 10.58 | 0.15 | 0.13 | 1.12  | 0.149542 | 0.093478 | 0.514055 | 0.34983  |
| MmugDNA.18998.1.S1_at   | MmugDNA.18998.1 | 8.75  | 8.58  | 0.17 | 0.28 | 1.13  | 0.867539 | 0.607346 | 0.947135 | 0.766359 |
| MmugDNA.18999.1.S1_at   | MmugDNA.18999.1 | 8.82  | 9.92  | 0.92 | 0.77 | -2.15 | 0.219337 | 0.142905 | 0.57872  | 0.416854 |
| MmugDNA.19000.1.S1_at   | MmugDNA.19000.1 | 4.66  | 4.6   | 0.19 | 0.1  | 1.04  | 0.811044 | 0.953039 | 0.922946 | 0.973379 |
| MmugDNA.19005.1.S1_at   | MmugDNA.19005.1 | 8.38  | 7.79  | 0.36 | 0.15 | 1.5   | 0.053803 | 0.063187 | 0.380879 | 0.298115 |
| MmugDNA.19008.1.S1_at   | MmugDNA.19008.1 | 12.72 | 12.76 | 0.11 | 0.83 | -1.03 | 0.559618 | 0.561023 | 0.793993 | 0.737076 |
| MmugDNA.19013.1.S1_s_at | MmugDNA.19013.1 | 3.59  | 3.93  | 0.17 | 0.06 | -1.26 | 0.105881 | 0.047017 | 0.466646 | 0.261469 |
| MmugDNA.19017.1.S1_at   | MmugDNA.19017.1 | 4.1   | 4.18  | 0.04 | 0.16 | -1.06 | 0.573403 | 0.40007  | 0.801219 | 0.630158 |
| MmugDNA.19022.1.S1_at   | MmugDNA.19022.1 | 4.18  | 4.45  | 0.18 | 0.42 | -1.21 | 0.504093 | 0.735172 | 0.761108 | 0.846748 |
| MmugDNA.19026.1.S1_at   | MmugDNA.19026.1 | 5.53  | 5.51  | 0.24 | 0.06 | 1.01  | 0.537393 | 0.464858 | 0.780008 | 0.675463 |
| MmugDNA.19033.1.S1_at   | MmugDNA.19033.1 | 3.52  | 3.56  | 0.26 | 0.08 | -1.03 | 0.467772 | 0.610264 | 0.740845 | 0.7685   |
| MmugDNA.19039.1.S1_at   | MmugDNA.19039.1 | 4.23  | 4.26  | 0.01 | 0.11 | -1.02 | 0.60438  | 0.901776 | 0.817728 | 0.944082 |
| MmugDNA.19040.1.S1_at   | MmugDNA.19040.1 | 9.27  | 9.87  | 0.2  | 0.11 | -1.52 | 0.014104 | 0.007806 | 0.251137 | 0.117858 |
| MmugDNA.19043.1.S1_at   | MmugDNA.19043.1 | 11.5  | 10.59 | 0.52 | 0.22 | 1.89  | 0.130878 | 0.249448 | 0.497198 | 0.518532 |
| MmugDNA.19047.1.S1_at   | MmugDNA.19047.1 | 11.85 | 11.73 | 0.06 | 0.22 | 1.09  | 0.637832 | 0.820008 | 0.836263 | 0.896303 |
| MmugDNA.19049.1.S1_at   | MmugDNA.19049.1 | 9.95  | 10.11 | 0.19 | 0.3  | -1.12 | 0.158224 | 0.10992  | 0.523042 | 0.37398  |
| MmugDNA.19050.1.S1_at   | MmugDNA.19050.1 | 11.52 | 12.02 | 0.35 | 0.75 | -1.42 | 0.378829 | 0.225639 | 0.68656  | 0.498155 |
| MmugDNA.19051.1.S1_at   | MmugDNA.19051.1 | 12.13 | 12.16 | 0.29 | 0.08 | -1.02 | 0.666522 | 0.764562 | 0.850466 | 0.863128 |
| MmugDNA.19056.1.S1_at   | MmugDNA.19056.1 | 11.9  | 10.43 | 0.72 | 1.3  | 2.77  | 0.235298 | 0.153725 | 0.589342 | 0.428413 |
| MmugDNA.19066.1.S1_at   | MmugDNA.19066.1 | 6.89  | 10.81 | 1.51 | 3.55 | -15.2 | 0.449816 | 0.341391 | 0.730493 | 0.587526 |
| MmugDNA.19068.1.S1_x_at | MmugDNA.19068.1 | 3.86  | 3.91  | 0.04 | 0.19 | -1.03 | 0.234541 | 0.321351 | 0.588797 | 0.57319  |
| MmugDNA.19069.1.S1_at   | MmugDNA.19069.1 | 9.8   | 9.61  | 0.21 | 0.15 | 1.15  | 0.103419 | 0.044906 | 0.462896 | 0.256424 |
| MmugDNA.19070.1.S1_at   | MmugDNA.19070.1 | 7.42  | 7.84  | 0.42 | 0.51 | -1.34 | 0.549004 | 0.288347 | 0.787067 | 0.549631 |
| MmugDNA.19074.1.S1_at   | MmugDNA.19074.1 | 7.97  | 7.73  | 0.31 | 0.34 | 1.18  | 0.433221 | 0.618181 | 0.719869 | 0.77393  |
| MmugDNA.19075.1.S1_at   | MmugDNA.19075.1 | 7.08  | 7.23  | 0.18 | 0.09 | -1.11 | 0.4313   | 0.532873 | 0.718569 | 0.719273 |
| MmugDNA.19086.1.S1_at   | MmugDNA.19086.1 | 4.75  | 7.03  | 0.9  | 2.08 | -4.86 | 0.329648 | 0.24347  | 0.655293 | 0.513527 |
| MmugDNA.19092.1.S1_at   | MmugDNA.19092.1 | 11.58 | 11.52 | 0.04 | 0.12 | 1.04  | 0.167311 | 0.155521 | 0.531441 | 0.430888 |



|                         |                 |       |       |      |      |        |          |          |          |          |
|-------------------------|-----------------|-------|-------|------|------|--------|----------|----------|----------|----------|
| MmugDNA.19096.1.S1_at   | MmugDNA.19096.1 | 3.26  | 3.26  | 0.05 | 0.07 | 1      | 0.969047 | 0.054859 | 0.988244 | 0.279693 |
| MmugDNA.19097.1.S1_at   | MmugDNA.19097.1 | 7.64  | 7.58  | 0.23 | 0.27 | 1.04   | 0.991762 | 0.99375  | 0.9971   | 0.996274 |
| MmugDNA.1910.1.S1_at    | MmugDNA.1910.1  | 8.38  | 8.46  | 0.11 | 0.3  | -1.05  | 0.304434 | 0.22192  | 0.638542 | 0.495019 |
| MmugDNA.19107.1.S1_at   | MmugDNA.19107.1 | 9.4   | 9.68  | 0.18 | 0.04 | -1.21  | 0.1554   | 0.09674  | 0.520164 | 0.354171 |
| MmugDNA.19109.1.S1_at   | MmugDNA.19109.1 | 5.93  | 6.95  | 0.5  | 0.66 | -2.03  | 0.078237 | 0.032621 | 0.428221 | 0.223644 |
| MmugDNA.1911.1.S1_at    | MmugDNA.1911.1  | 9.15  | 9.01  | 0.36 | 0.21 | 1.1    | 0.331123 | 0.160117 | 0.656127 | 0.436296 |
| MmugDNA.19111.1.S1_at   | MmugDNA.19111.1 | 11.47 | 12.6  | 0.35 | 0.81 | -2.2   | 0.406306 | 0.37688  | 0.703645 | 0.614628 |
| MmugDNA.19112.1.S1_at   | MmugDNA.19112.1 | 3.31  | 3.33  | 0.27 | 0.05 | -1.02  | 0.535999 | 0.303655 | 0.779351 | 0.561088 |
| MmugDNA.19113.1.S1_at   | MmugDNA.19113.1 | 10.75 | 13.23 | 1.14 | 0.3  | -5.56  | 0.021723 | 0.014647 | 0.283391 | 0.154213 |
| MmugDNA.19120.1.S1_at   | MmugDNA.19120.1 | 5.33  | 6.39  | 0.7  | 1.15 | -2.09  | 0.211007 | 0.195379 | 0.571977 | 0.470253 |
| MmugDNA.19123.1.S1_at   | MmugDNA.19123.1 | 6.58  | 5.96  | 0.32 | 0.78 | 1.54   | 0.146622 | 0.101601 | 0.512668 | 0.361498 |
| MmugDNA.19125.1.S1_at   | MmugDNA.19125.1 | 3.54  | 3.71  | 0.23 | 0.11 | -1.13  | 0.269974 | 0.486563 | 0.614574 | 0.689898 |
| MmugDNA.19126.1.S1_at   | MmugDNA.19126.1 | 2.94  | 4.9   | 0.2  | 0.93 | -3.9   | 0.030188 | 0.048674 | 0.317274 | 0.265629 |
| MmugDNA.19127.1.S1_s_at | MmugDNA.19127.1 | 11.56 | 11.08 | 0.21 | 0.17 | 1.39   | 0.079258 | 0.069689 | 0.429178 | 0.310164 |
| MmugDNA.19132.1.S1_at   | MmugDNA.19132.1 | 10.15 | 9.93  | 0.31 | 0.24 | 1.17   | 0.7067   | 0.057732 | 0.870821 | 0.2866   |
| MmugDNA.19138.1.S1_at   | MmugDNA.19138.1 | 7.42  | 7.75  | 0.23 | 0.2  | -1.25  | 0.67311  | 0.34245  | 0.853353 | 0.588507 |
| MmugDNA.19145.1.S1_at   | MmugDNA.19145.1 | 12.8  | 11.96 | 0.18 | 1.05 | 1.8    | 0.180516 | 0.144906 | 0.544845 | 0.418811 |
| MmugDNA.19153.1.S1_at   | MmugDNA.19153.1 | 7.29  | 7.16  | 0.13 | 0.09 | 1.1    | 0.502595 | 0.377396 | 0.760484 | 0.6149   |
| MmugDNA.1916.1.S1_at    | MmugDNA.1916.1  | 5.68  | 5.9   | 1.27 | 0.27 | -1.17  | 0.807724 | 0.768063 | 0.921401 | 0.865344 |
| MmugDNA.19161.1.S1_at   | MmugDNA.19161.1 | 8.95  | 9.22  | 0.47 | 0.95 | -1.21  | 0.651346 | 0.7146   | 0.843142 | 0.834435 |
| MmugDNA.19162.1.S1_at   | MmugDNA.19162.1 | 4.56  | 4.55  | 0.02 | 0    | 1      | 0.468594 | 0.993337 | 0.741107 | 0.99605  |
| MmugDNA.19166.1.S1_at   | MmugDNA.19166.1 | 11.47 | 11.31 | 0.14 | 0.13 | 1.12   | 0.222154 | 0.296283 | 0.580675 | 0.555423 |
| MmugDNA.19167.1.S1_at   | MmugDNA.19167.1 | 4.05  | 4.15  | 0.1  | 0.15 | -1.07  | 0.9216   | 0.119244 | 0.969463 | 0.387751 |
| MmugDNA.19168.1.S1_at   | MmugDNA.19168.1 | 8.74  | 8.38  | 0.07 | 0.19 | 1.29   | 0.041097 | 0.030241 | 0.350569 | 0.215784 |
| MmugDNA.19170.1.S1_at   | MmugDNA.19170.1 | 11.65 | 10.67 | 0.12 | 0.63 | 1.96   | 0.041781 | 0.03014  | 0.352614 | 0.215467 |
| MmugDNA.19183.1.S1_at   | MmugDNA.19183.1 | 5.59  | 5.47  | 0.15 | 0.08 | 1.09   | 0.205753 | 0.271724 | 0.568293 | 0.536577 |
| MmugDNA.1920.1.S1_at    | MmugDNA.1920.1  | 10.33 | 10.49 | 0.35 | 0.07 | -1.12  | 0.853608 | 0.191246 | 0.940909 | 0.466553 |
| MmugDNA.19203.1.S1_at   | MmugDNA.19203.1 | 13.18 | 13.14 | 0.03 | 0.21 | 1.03   | 0.75383  | 0.854509 | 0.89507  | 0.917099 |
| MmugDNA.19204.1.S1_at   | MmugDNA.19204.1 | 11.66 | 11.88 | 0.18 | 0.3  | -1.16  | 0.098046 | 0.012344 | 0.457356 | 0.143697 |
| MmugDNA.19207.1.S1_at   | MmugDNA.19207.1 | 13.06 | 12.98 | 0.04 | 0.1  | 1.06   | 0.217992 | 0.285352 | 0.577569 | 0.547198 |
| MmugDNA.19208.1.S1_at   | MmugDNA.19208.1 | 11.35 | 10.99 | 0.07 | 0.17 | 1.28   | 0.102059 | 0.125759 | 0.461443 | 0.396313 |
| MmugDNA.19209.1.S1_s_at | MmugDNA.19209.1 | 5.05  | 8.86  | 0.91 | 1.89 | -13.99 | 0.042639 | 0.023249 | 0.355272 | 0.191114 |
| MmugDNA.19214.1.S1_at   | MmugDNA.19214.1 | 6.56  | 6.63  | 0.16 | 0.18 | -1.05  | 0.612329 | 0.227729 | 0.822151 | 0.499979 |
| MmugDNA.19217.1.S1_at   | MmugDNA.19217.1 | 7.63  | 6.63  | 1.05 | 2.5  | 2      | 0.772986 | 0.746442 | 0.904569 | 0.852816 |
| MmugDNA.19219.1.S1_at   | MmugDNA.19219.1 | 7.41  | 6.97  | 0.49 | 0.69 | 1.36   | 0.931105 | 0.775652 | 0.97337  | 0.869465 |
| MmugDNA.19220.1.S1_at   | MmugDNA.19220.1 | 5.68  | 5.81  | 0.14 | 0.29 | -1.1   | 0.472881 | 0.576092 | 0.744065 | 0.74698  |
| MmugDNA.19222.1.S1_at   | MmugDNA.19222.1 | 7.1   | 4.07  | 0.33 | 0.21 | 8.16   | 0.000203 | 0.000012 | 0.120316 | 0.016526 |
| MmugDNA.19224.1.S1_at   | MmugDNA.19224.1 | 12.47 | 11.99 | 0.04 | 0.12 | 1.4    | 0.003448 | 0.000804 | 0.17833  | 0.04607  |
| MmugDNA.19225.1.S1_at   | MmugDNA.19225.1 | 5.52  | 6.31  | 0.31 | 1.17 | -1.73  | 0.326375 | 0.242586 | 0.653184 | 0.51293  |
| MmugDNA.19229.1.S1_at   | MmugDNA.19229.1 | 10.22 | 10.18 | 0.33 | 0.08 | 1.03   | 0.998463 | 0.464375 | 0.99939  | 0.67504  |
| MmugDNA.19230.1.S1_at   | MmugDNA.19230.1 | 11.54 | 11.59 | 0.34 | 0.11 | -1.03  | 0.791809 | 0.680545 | 0.913493 | 0.813481 |

|                         |                 |       |       |      |      |       |          |          |          |          |
|-------------------------|-----------------|-------|-------|------|------|-------|----------|----------|----------|----------|
| MmugDNA.19230.1.S1_s_at | MmugDNA.19230.1 | 10.81 | 10.94 | 0.39 | 0.11 | -1.09 | 0.327549 | 0.177354 | 0.653899 | 0.453742 |
| MmugDNA.19231.1.S1_at   | MmugDNA.19231.1 | 4.98  | 5.65  | 0.98 | 1.34 | -1.59 | 0.775016 | 0.888382 | 0.905462 | 0.936346 |
| MmugDNA.19233.1.S1_at   | MmugDNA.19233.1 | 9.24  | 9.13  | 0.27 | 0.18 | 1.08  | 0.644632 | 0.648068 | 0.839786 | 0.793977 |
| MmugDNA.19236.1.S1_at   | MmugDNA.19236.1 | 11.79 | 11.56 | 0.25 | 0.22 | 1.18  | 0.538255 | 0.724241 | 0.780442 | 0.840433 |
| MmugDNA.19238.1.S1_at   | MmugDNA.19238.1 | 11.43 | 11.18 | 0.08 | 0.73 | 1.19  | 0.396747 | 0.279911 | 0.697224 | 0.543342 |
| MmugDNA.19242.1.S1_at   | MmugDNA.19242.1 | 11.7  | 11.43 | 0.2  | 0.04 | 1.21  | 0.149977 | 0.11009  | 0.514522 | 0.374221 |
| MmugDNA.19246.1.S1_s_at | MmugDNA.19246.1 | 7.55  | 9.18  | 0.51 | 0.4  | -3.09 | 0.006849 | 0.003091 | 0.201713 | 0.081194 |
| MmugDNA.19250.1.S1_at   | MmugDNA.19250.1 | 5.02  | 5.23  | 0.51 | 0.07 | -1.16 | 0.886107 | 0.884961 | 0.954381 | 0.934455 |
| MmugDNA.19252.1.S1_at   | MmugDNA.19252.1 | 10.65 | 9.96  | 0.05 | 0.33 | 1.62  | 0.018901 | 0.006665 | 0.272263 | 0.11055  |
| MmugDNA.19254.1.S1_at   | MmugDNA.19254.1 | 4.59  | 4.51  | 0.32 | 0.21 | 1.06  | 0.668858 | 0.768964 | 0.851986 | 0.865764 |
| MmugDNA.19255.1.S1_at   | MmugDNA.19255.1 | 3.38  | 3.38  | 0.11 | 0.08 | -1    | 0.240301 | 0.458018 | 0.593146 | 0.671022 |
| MmugDNA.19258.1.S1_at   | MmugDNA.19258.1 | 3.7   | 3.62  | 0.06 | 0.02 | 1.06  | 0.140804 | 0.09492  | 0.508448 | 0.352044 |
| MmugDNA.19264.1.S1_at   | MmugDNA.19264.1 | 12.68 | 13.12 | 0.17 | 0.08 | -1.36 | 0.048309 | 0.039284 | 0.368148 | 0.243338 |
| MmugDNA.19265.1.S1_at   | MmugDNA.19265.1 | 12.03 | 11.84 | 0.24 | 0.14 | 1.14  | 0.245708 | 0.266306 | 0.597221 | 0.532099 |
| MmugDNA.19266.1.S1_at   | MmugDNA.19266.1 | 3.77  | 5.44  | 0.26 | 1.6  | -3.16 | 0.147664 | 0.043683 | 0.513301 | 0.253711 |
| MmugDNA.1927.1.S1_at    | MmugDNA.1927.1  | 11.25 | 9.92  | 0.17 | 0.2  | 2.51  | 0.001099 | 0.000141 | 0.144223 | 0.029307 |
| MmugDNA.19272.1.S1_s_at | MmugDNA.19272.1 | 11.16 | 10.03 | 0.34 | 0.23 | 2.18  | 0.006959 | 0.002248 | 0.202573 | 0.069739 |
| MmugDNA.19276.1.S1_at   | MmugDNA.19276.1 | 10.42 | 10.6  | 0.42 | 0.16 | -1.13 | 0.577495 | 0.508972 | 0.803534 | 0.703967 |
| MmugDNA.19282.1.S1_at   | MmugDNA.19282.1 | 13.48 | 13.39 | 0.12 | 0.04 | 1.06  | 0.19034  | 0.293447 | 0.553031 | 0.553405 |
| MmugDNA.19284.1.S1_at   | MmugDNA.19284.1 | 5.11  | 5.51  | 0.63 | 0.33 | -1.32 | 0.743932 | 0.310748 | 0.890337 | 0.565809 |
| MmugDNA.19286.1.S1_at   | MmugDNA.19286.1 | 7.91  | 7.89  | 0.57 | 0.61 | 1.01  | 0.931069 | 0.578225 | 0.97337  | 0.748369 |
| MmugDNA.1929.1.S1_at    | MmugDNA.1929.1  | 7.75  | 7.92  | 0.07 | 0.28 | -1.12 | 0.780401 | 0.571689 | 0.908495 | 0.743916 |
| MmugDNA.19295.1.S1_at   | MmugDNA.19295.1 | 8.93  | 8.61  | 0.12 | 0.18 | 1.25  | 0.241919 | 0.200828 | 0.594092 | 0.475342 |
| MmugDNA.19298.1.S1_at   | MmugDNA.19298.1 | 8.23  | 10.05 | 0.16 | 1.03 | -3.53 | 0.041152 | 0.027122 | 0.350833 | 0.205797 |
| MmugDNA.19300.1.S1_at   | MmugDNA.19300.1 | 9.31  | 8.94  | 0.14 | 0.39 | 1.3   | 0.522369 | 0.72729  | 0.772016 | 0.84224  |
| MmugDNA.19301.1.S1_at   | MmugDNA.19301.1 | 10.31 | 11.6  | 0.92 | 0.19 | -2.44 | 0.0923   | 0.077266 | 0.448803 | 0.322945 |
| MmugDNA.19302.1.S1_at   | MmugDNA.19302.1 | 8.48  | 7.33  | 0.05 | 0.71 | 2.22  | 0.046844 | 0.027948 | 0.364195 | 0.208684 |
| MmugDNA.19311.1.S1_at   | MmugDNA.19311.1 | 10.59 | 10.12 | 0.19 | 0.08 | 1.39  | 0.04648  | 0.026675 | 0.363009 | 0.204238 |
| MmugDNA.19315.1.S1_at   | MmugDNA.19315.1 | 8.01  | 7.21  | 0.24 | 0.11 | 1.75  | 0.005335 | 0.003926 | 0.191107 | 0.089123 |
| MmugDNA.19316.1.S1_at   | MmugDNA.19316.1 | 6.49  | 5.99  | 0.34 | 0.09 | 1.41  | 0.099328 | 0.098379 | 0.459226 | 0.356513 |
| MmugDNA.19318.1.S1_at   | MmugDNA.19318.1 | 11.72 | 11.54 | 0.09 | 0.27 | 1.13  | 0.130985 | 0.121742 | 0.497345 | 0.391024 |
| MmugDNA.19320.1.S1_at   | MmugDNA.19320.1 | 3.56  | 3.65  | 0.22 | 0.05 | -1.07 | 0.987178 | 0.952514 | 0.99552  | 0.973066 |
| MmugDNA.19320.1.S1_x_at | MmugDNA.19320.1 | 3.48  | 3.62  | 0.29 | 0.07 | -1.1  | 0.903779 | 0.523826 | 0.961578 | 0.714044 |
| MmugDNA.19324.1.S1_at   | MmugDNA.19324.1 | 8.46  | 10.09 | 0.37 | 0.55 | -3.1  | 0.019083 | 0.00658  | 0.273018 | 0.109973 |
| MmugDNA.19331.1.S1_at   | MmugDNA.19331.1 | 9.21  | 8.17  | 0.27 | 1.02 | 2.05  | 0.162125 | 0.1809   | 0.526638 | 0.457397 |
| MmugDNA.19332.1.S1_at   | MmugDNA.19332.1 | 4.26  | 4.82  | 0.94 | 1.06 | -1.48 | 0.979636 | 0.181383 | 0.992458 | 0.457918 |
| MmugDNA.1934.1.S1_at    | MmugDNA.1934.1  | 4.7   | 4.95  | 0.23 | 0.32 | -1.19 | 0.460766 | 0.590868 | 0.737133 | 0.75649  |
| MmugDNA.19341.1.S1_at   | MmugDNA.19341.1 | 4.65  | 4.67  | 0.12 | 0.1  | -1.01 | 0.914103 | 0.896656 | 0.966066 | 0.94094  |
| MmugDNA.19342.1.S1_at   | MmugDNA.19342.1 | 4.51  | 3.28  | 0.7  | 0.22 | 2.36  | 0.141882 | 0.097423 | 0.509205 | 0.355097 |
| MmugDNA.19347.1.S1_at   | MmugDNA.19347.1 | 6.85  | 6.38  | 0.42 | 0.82 | 1.38  | 0.969063 | 0.63364  | 0.988244 | 0.784317 |
| MmugDNA.19348.1.S1_at   | MmugDNA.19348.1 | 6.97  | 7.14  | 0.24 | 0.04 | -1.12 | 0.335967 | 0.362782 | 0.65921  | 0.603287 |

|                         |                 |       |       |      |      |       |          |          |          |          |
|-------------------------|-----------------|-------|-------|------|------|-------|----------|----------|----------|----------|
| MmugDNA.19349.1.S1_at   | MmugDNA.19349.1 | 7.82  | 7.42  | 0.39 | 0.11 | 1.32  | 0.081696 | 0.082338 | 0.432665 | 0.331312 |
| MmugDNA.19352.1.S1_at   | MmugDNA.19352.1 | 3.42  | 3.33  | 0.1  | 0.21 | 1.06  | 0.827937 | 0.477349 | 0.930199 | 0.683422 |
| MmugDNA.19353.1.S1_at   | MmugDNA.19353.1 | 10.33 | 10.17 | 0.2  | 0.1  | 1.11  | 0.301408 | 0.230859 | 0.636366 | 0.502546 |
| MmugDNA.19358.1.S1_at   | MmugDNA.19358.1 | 5.69  | 5.8   | 0.14 | 0.14 | -1.08 | 0.459204 | 0.436342 | 0.735965 | 0.655923 |
| MmugDNA.19361.1.S1_at   | MmugDNA.19361.1 | 5.81  | 5.89  | 0.11 | 0.17 | -1.06 | 0.220407 | 0.3295   | 0.579376 | 0.578781 |
| MmugDNA.19362.1.S1_s_at | MmugDNA.19362.1 | 4.45  | 4.69  | 0.41 | 0.13 | -1.18 | 0.481453 | 0.342796 | 0.749268 | 0.588712 |
| MmugDNA.19370.1.S1_at   | MmugDNA.19370.1 | 7.53  | 6.42  | 0.18 | 0.12 | 2.16  | 0.00122  | 0.00038  | 0.145267 | 0.037273 |
| MmugDNA.19377.1.S1_at   | MmugDNA.19377.1 | 13.43 | 13.87 | 0.19 | 0.42 | -1.36 | 0.274515 | 0.174594 | 0.617491 | 0.451097 |
| MmugDNA.19380.1.S1_at   | MmugDNA.19380.1 | 11.6  | 10.69 | 0.06 | 0.53 | 1.88  | 0.121066 | 0.060069 | 0.485798 | 0.291761 |
| MmugDNA.19382.1.S1_at   | MmugDNA.19382.1 | 7.03  | 5.61  | 0.76 | 0.6  | 2.67  | 0.057814 | 0.052585 | 0.38911  | 0.274848 |
| MmugDNA.19383.1.S1_at   | MmugDNA.19383.1 | 10.48 | 9.89  | 0.12 | 0.16 | 1.51  | 0.006211 | 0.002037 | 0.197039 | 0.066885 |
| MmugDNA.19385.1.S1_at   | MmugDNA.19385.1 | 11.82 | 11.89 | 0.08 | 0.18 | -1.05 | 0.40174  | 0.336852 | 0.701003 | 0.584113 |
| MmugDNA.19388.1.S1_at   | MmugDNA.19388.1 | 7.28  | 7.44  | 0.17 | 0.19 | -1.12 | 0.335432 | 0.211769 | 0.659165 | 0.485757 |
| MmugDNA.1939.1.S1_at    | MmugDNA.1939.1  | 8.01  | 9.13  | 0.9  | 1.55 | -2.18 | 0.373981 | 0.212294 | 0.683296 | 0.486197 |
| MmugDNA.19390.1.S1_at   | MmugDNA.19390.1 | 5.37  | 5.35  | 1.04 | 0.08 | 1.02  | 0.333177 | 0.259477 | 0.657485 | 0.526418 |
| MmugDNA.19394.1.S1_at   | MmugDNA.19394.1 | 10.52 | 10.88 | 0.37 | 0.22 | -1.29 | 0.146738 | 0.135206 | 0.512699 | 0.407275 |
| MmugDNA.19402.1.S1_at   | MmugDNA.19402.1 | 13.53 | 12.03 | 0.33 | 0.46 | 2.83  | 0.007742 | 0.002281 | 0.211846 | 0.07037  |
| MmugDNA.1941.1.S1_at    | MmugDNA.1941.1  | 4.1   | 4.1   | 0.24 | 0.29 | -1    | 0.898666 | 0.982419 | 0.959505 | 0.99036  |
| MmugDNA.19411.1.S1_at   | MmugDNA.19411.1 | 5.09  | 4.59  | 0.49 | 0.48 | 1.41  | 0.588371 | 0.013631 | 0.808931 | 0.149433 |
| MmugDNA.19417.1.S1_at   | MmugDNA.19417.1 | 12.06 | 11.17 | 0.4  | 1.61 | 1.86  | 0.126456 | 0.091465 | 0.492783 | 0.346492 |
| MmugDNA.19418.1.S1_at   | MmugDNA.19418.1 | 4.33  | 4.39  | 0.3  | 0.05 | -1.04 | 0.705787 | 0.823182 | 0.870298 | 0.898361 |
| MmugDNA.1942.1.S1_at    | MmugDNA.1942.1  | 11.45 | 12.47 | 0.25 | 0.28 | -2.03 | 0.030685 | 0.02131  | 0.319646 | 0.182738 |
| MmugDNA.19420.1.S1_at   | MmugDNA.19420.1 | 11.3  | 10.23 | 0.26 | 0.18 | 2.1   | 0.005319 | 0.000018 | 0.191107 | 0.019635 |
| MmugDNA.19428.1.S1_at   | MmugDNA.19428.1 | 8.68  | 7.55  | 1.14 | 2.55 | 2.19  | 0.388858 | 0.513835 | 0.692804 | 0.707281 |
| MmugDNA.19430.1.S1_at   | MmugDNA.19430.1 | 10.82 | 10.91 | 0.02 | 0.46 | -1.07 | 0.846487 | 0.964288 | 0.93835  | 0.98014  |
| MmugDNA.19435.1.S1_at   | MmugDNA.19435.1 | 5.98  | 5.46  | 0.08 | 0.2  | 1.44  | 0.028196 | 0.018465 | 0.310079 | 0.170923 |
| MmugDNA.19435.1.S1_s_at | MmugDNA.19435.1 | 12.67 | 12.26 | 0.27 | 0.2  | 1.33  | 0.112215 | 0.117601 | 0.474694 | 0.38531  |
| MmugDNA.19438.1.S1_at   | MmugDNA.19438.1 | 11.16 | 10.54 | 0.17 | 0.3  | 1.53  | 0.047934 | 0.016179 | 0.367582 | 0.161214 |
| MmugDNA.19443.1.S1_at   | MmugDNA.19443.1 | 8.78  | 9.3   | 0.36 | 1.49 | -1.43 | 0.594967 | 0.276745 | 0.812253 | 0.540655 |
| MmugDNA.19449.1.S1_at   | MmugDNA.19449.1 | 12.45 | 11.48 | 0.53 | 0.26 | 1.95  | 0.147733 | 0.098635 | 0.513337 | 0.356743 |
| MmugDNA.19449.1.S1_s_at | MmugDNA.19449.1 | 12.18 | 11.19 | 0.47 | 0.28 | 1.98  | 0.154092 | 0.08592  | 0.518614 | 0.338084 |
| MmugDNA.19455.1.S1_at   | MmugDNA.19455.1 | 10.81 | 10.71 | 0.02 | 0.19 | 1.07  | 0.409528 | 0.418893 | 0.70588  | 0.643141 |
| MmugDNA.19456.1.S1_at   | MmugDNA.19456.1 | 13.53 | 13.3  | 0.02 | 0.21 | 1.17  | 0.118099 | 0.010692 | 0.482198 | 0.135065 |
| MmugDNA.19457.1.S1_at   | MmugDNA.19457.1 | 13.68 | 13.48 | 0.1  | 0.05 | 1.15  | 0.047609 | 0.055625 | 0.366884 | 0.281649 |
| MmugDNA.19457.1.S1_s_at | MmugDNA.19457.1 | 13.91 | 13.69 | 0.11 | 0.09 | 1.17  | 0.060676 | 0.056715 | 0.394109 | 0.284246 |
| MmugDNA.19463.1.S1_s_at | MmugDNA.19463.1 | 3.57  | 3.37  | 0.2  | 0.13 | 1.15  | 0.250619 | 0.70532  | 0.600389 | 0.829145 |
| MmugDNA.19464.1.S1_at   | MmugDNA.19464.1 | 12.31 | 11.58 | 0.11 | 0.01 | 1.66  | 0.000374 | 0.000036 | 0.12925  | 0.023031 |
| MmugDNA.19475.1.S1_at   | MmugDNA.19475.1 | 10.87 | 10.31 | 0.16 | 0.5  | 1.47  | 0.067219 | 0.05554  | 0.407232 | 0.281454 |
| MmugDNA.19481.1.S1_at   | MmugDNA.19481.1 | 5.83  | 6     | 0.04 | 0.25 | -1.13 | 0.532329 | 0.662422 | 0.777633 | 0.802321 |
| MmugDNA.19484.1.S1_at   | MmugDNA.19484.1 | 7.85  | 5.67  | 1.49 | 1.31 | 4.53  | 0.641344 | 0.771084 | 0.838155 | 0.866936 |
| MmugDNA.19486.1.S1_at   | MmugDNA.19486.1 | 4.6   | 4.98  | 0.29 | 0.44 | -1.3  | 0.652969 | 0.785611 | 0.843896 | 0.875891 |

|                         |                 |       |       |      |      |       |          |          |          |          |
|-------------------------|-----------------|-------|-------|------|------|-------|----------|----------|----------|----------|
| MmugDNA.19488.1.S1_at   | MmugDNA.19488.1 | 6.14  | 7.24  | 0.32 | 0.49 | -2.14 | 0.01429  | 0.003414 | 0.251885 | 0.084071 |
| MmugDNA.19492.1.S1_at   | MmugDNA.19492.1 | 3.53  | 4.03  | 0.09 | 0.09 | -1.41 | 0.005796 | 0.292139 | 0.193191 | 0.552299 |
| MmugDNA.195.1.S1_at     | MmugDNA.195.1   | 11.15 | 11.32 | 0.04 | 0.13 | -1.13 | 0.109017 | 0.018351 | 0.470796 | 0.170347 |
| MmugDNA.19506.1.S1_at   | MmugDNA.19506.1 | 4.32  | 4.16  | 0.31 | 0.32 | 1.12  | 0.983915 | 0.94809  | 0.994301 | 0.970446 |
| MmugDNA.19512.1.S1_at   | MmugDNA.19512.1 | 7.05  | 7.71  | 0.87 | 0.54 | -1.58 | 0.901918 | 0.003296 | 0.960843 | 0.082571 |
| MmugDNA.19513.1.S1_at   | MmugDNA.19513.1 | 3.64  | 3.75  | 0.3  | 0.09 | -1.08 | 0.507228 | 0.473505 | 0.762788 | 0.680769 |
| MmugDNA.19515.1.S1_at   | MmugDNA.19515.1 | 3.82  | 3.83  | 0.13 | 0.22 | -1.01 | 0.454975 | 0.408558 | 0.733591 | 0.635752 |
| MmugDNA.19520.1.S1_at   | MmugDNA.19520.1 | 10.31 | 11.32 | 0.46 | 0.59 | -2.01 | 0.021131 | 0.01014  | 0.282335 | 0.131979 |
| MmugDNA.19530.1.S1_at   | MmugDNA.19530.1 | 3.88  | 4.03  | 0.21 | 0.12 | -1.11 | 0.33127  | 0.085807 | 0.656225 | 0.337901 |
| MmugDNA.19533.1.S1_at   | MmugDNA.19533.1 | 10.59 | 10.99 | 0.52 | 0.88 | -1.32 | 0.305821 | 0.23305  | 0.639227 | 0.50445  |
| MmugDNA.19534.1.S1_at   | MmugDNA.19534.1 | 4.05  | 4.01  | 0.55 | 0.18 | 1.03  | 0.595425 | 0.625747 | 0.812365 | 0.779309 |
| MmugDNA.19538.1.S1_at   | MmugDNA.19538.1 | 3.59  | 3.74  | 0.2  | 0.2  | -1.11 | 0.923378 | 0.826028 | 0.970253 | 0.900052 |
| MmugDNA.19540.1.S1_at   | MmugDNA.19540.1 | 9.85  | 10.07 | 0.36 | 0.07 | -1.16 | 0.134237 | 0.017535 | 0.500737 | 0.167632 |
| MmugDNA.19543.1.S1_at   | MmugDNA.19543.1 | 8.68  | 8.38  | 0.12 | 0.21 | 1.23  | 0.302337 | 0.114193 | 0.63692  | 0.380758 |
| MmugDNA.19546.1.S1_at   | MmugDNA.19546.1 | 4.29  | 4.49  | 0.26 | 0.2  | -1.15 | 0.225699 | 0.014292 | 0.583746 | 0.152639 |
| MmugDNA.19551.1.S1_at   | MmugDNA.19551.1 | 7.93  | 8.21  | 0.22 | 0.03 | -1.22 | 0.112332 | 0.037404 | 0.474794 | 0.237776 |
| MmugDNA.19552.1.S1_s_at | MmugDNA.19552.1 | 11.17 | 11.03 | 0.1  | 0.05 | 1.1   | 0.26196  | 0.044589 | 0.608592 | 0.255578 |
| MmugDNA.19553.1.S1_at   | MmugDNA.19553.1 | 8.85  | 8.32  | 0.16 | 0.44 | 1.44  | 0.090006 | 0.057783 | 0.445441 | 0.286744 |
| MmugDNA.19556.1.S1_at   | MmugDNA.19556.1 | 9.33  | 8.31  | 0.08 | 0.73 | 2.02  | 0.090468 | 0.046227 | 0.445834 | 0.259397 |
| MmugDNA.19561.1.S1_at   | MmugDNA.19561.1 | 3.35  | 3.61  | 0.16 | 0.08 | -1.2  | 0.102825 | 0.090695 | 0.46254  | 0.345151 |
| MmugDNA.19562.1.S1_at   | MmugDNA.19562.1 | 8.41  | 8.52  | 0.09 | 0.2  | -1.08 | 0.674875 | 0.266636 | 0.854259 | 0.532396 |
| MmugDNA.19566.1.S1_at   | MmugDNA.19566.1 | 4.08  | 4.93  | 0.15 | 0.6  | -1.8  | 0.069236 | 0.065168 | 0.411484 | 0.301239 |
| MmugDNA.19567.1.S1_at   | MmugDNA.19567.1 | 9.8   | 10.66 | 0.93 | 1.29 | -1.82 | 0.874843 | 0.529104 | 0.949799 | 0.717134 |
| MmugDNA.19567.1.S1_s_at | MmugDNA.19567.1 | 9.56  | 10.1  | 1.07 | 1.18 | -1.45 | 0.746031 | 0.792989 | 0.891243 | 0.880435 |
| MmugDNA.19574.1.S1_at   | MmugDNA.19574.1 | 5.12  | 6.29  | 0.65 | 0.96 | -2.24 | 0.162964 | 0.146852 | 0.527373 | 0.42088  |
| MmugDNA.19575.1.S1_at   | MmugDNA.19575.1 | 3.79  | 3.84  | 0.15 | 0.21 | -1.04 | 0.859007 | 0.766653 | 0.943112 | 0.864438 |
| MmugDNA.19576.1.S1_at   | MmugDNA.19576.1 | 7.36  | 6.8   | 0.62 | 0.31 | 1.48  | 0.106966 | 0.132828 | 0.467565 | 0.404544 |
| MmugDNA.19577.1.S1_at   | MmugDNA.19577.1 | 6.05  | 6.73  | 0.3  | 0.57 | -1.6  | 0.275338 | 0.319425 | 0.617789 | 0.571762 |
| MmugDNA.19579.1.S1_at   | MmugDNA.19579.1 | 3.69  | 3.73  | 0.15 | 0.11 | -1.03 | 0.707168 | 0.384128 | 0.870977 | 0.619926 |
| MmugDNA.19580.1.S1_at   | MmugDNA.19580.1 | 10.68 | 9.93  | 0.11 | 1.13 | 1.68  | 0.299928 | 0.186595 | 0.635282 | 0.462398 |
| MmugDNA.19581.1.S1_at   | MmugDNA.19581.1 | 8.42  | 8.14  | 0.26 | 0.49 | 1.21  | 0.408919 | 0.532162 | 0.705675 | 0.718995 |
| MmugDNA.19586.1.S1_at   | MmugDNA.19586.1 | 3.38  | 3.43  | 0.13 | 0.12 | -1.03 | 0.791166 | 0.403244 | 0.913249 | 0.631996 |
| MmugDNA.19588.1.S1_at   | MmugDNA.19588.1 | 11.06 | 10.93 | 0.16 | 0.06 | 1.09  | 0.076001 | 0.135357 | 0.424221 | 0.40745  |
| MmugDNA.19594.1.S1_at   | MmugDNA.19594.1 | 9.42  | 10.21 | 0.21 | 0.25 | -1.74 | 0.045725 | 0.023461 | 0.36158  | 0.191956 |
| MmugDNA.19598.1.S1_at   | MmugDNA.19598.1 | 8.95  | 8.73  | 0.18 | 0.12 | 1.17  | 0.39467  | 0.113929 | 0.69601  | 0.380184 |
| MmugDNA.19599.1.S1_at   | MmugDNA.19599.1 | 8.29  | 8.35  | 0.24 | 0.2  | -1.05 | 0.939035 | 0.988989 | 0.976764 | 0.993708 |
| MmugDNA.19601.1.S1_at   | MmugDNA.19601.1 | 6.47  | 6.78  | 0.29 | 0.83 | -1.23 | 0.297773 | 0.208052 | 0.63352  | 0.482049 |
| MmugDNA.19604.1.S1_at   | MmugDNA.19604.1 | 5.49  | 5.03  | 0.85 | 0.87 | 1.37  | 0.911137 | 0.375169 | 0.964927 | 0.613238 |
| MmugDNA.19605.1.S1_at   | MmugDNA.19605.1 | 6.1   | 5.96  | 0.34 | 0.39 | 1.1   | 0.644649 | 0.504689 | 0.839786 | 0.701774 |
| MmugDNA.1961.1.S1_at    | MmugDNA.1961.1  | 4.47  | 4.5   | 0.08 | 0.12 | -1.03 | 0.285881 | 0.402529 | 0.625309 | 0.631481 |
| MmugDNA.19613.1.S1_at   | MmugDNA.19613.1 | 11.28 | 11.04 | 0.15 | 0.03 | 1.18  | 0.147715 | 0.237421 | 0.513337 | 0.508117 |

|                         |                 |       |       |      |      |       |          |          |          |          |
|-------------------------|-----------------|-------|-------|------|------|-------|----------|----------|----------|----------|
| MmugDNA.19614.1.S1_at   | MmugDNA.19614.1 | 7.72  | 8.96  | 0.27 | 0.44 | -2.35 | 0.016867 | 0.001889 | 0.266096 | 0.065004 |
| MmugDNA.19615.1.S1_at   | MmugDNA.19615.1 | 3.81  | 4.16  | 0.13 | 0.09 | -1.28 | 0.069517 | 0.048651 | 0.412367 | 0.265613 |
| MmugDNA.19622.1.S1_at   | MmugDNA.19622.1 | 5.64  | 5.89  | 0.52 | 0.44 | -1.19 | 0.62732  | 0.566176 | 0.830037 | 0.740296 |
| MmugDNA.19644.1.S1_at   | MmugDNA.19644.1 | 9.41  | 10.16 | 0.13 | 1.22 | -1.69 | 0.4743   | 0.55793  | 0.745027 | 0.735297 |
| MmugDNA.19651.1.S1_at   | MmugDNA.19651.1 | 6.42  | 7.4   | 1.08 | 0.72 | -1.98 | 0.104146 | 0.121541 | 0.464201 | 0.390665 |
| MmugDNA.19653.1.S1_at   | MmugDNA.19653.1 | 8.14  | 8.23  | 0.07 | 0.76 | -1.06 | 0.468977 | 0.651652 | 0.741355 | 0.796301 |
| MmugDNA.19660.1.S1_s_at | MmugDNA.19660.1 | 9.64  | 9.85  | 0.04 | 0.46 | -1.16 | 0.158322 | 0.01647  | 0.523171 | 0.162534 |
| MmugDNA.19663.1.S1_at   | MmugDNA.19663.1 | 10.13 | 9.73  | 0.2  | 0.04 | 1.32  | 0.031561 | 0.016744 | 0.322068 | 0.163889 |
| MmugDNA.19666.1.S1_at   | MmugDNA.19666.1 | 5.65  | 5.88  | 0.05 | 0.11 | -1.17 | 0.071891 | 0.017599 | 0.415896 | 0.167721 |
| MmugDNA.1967.1.S1_at    | MmugDNA.1967.1  | 8.02  | 8.56  | 0.09 | 0.24 | -1.45 | 0.007888 | 0.004003 | 0.214199 | 0.089969 |
| MmugDNA.19671.1.S1_at   | MmugDNA.19671.1 | 4.68  | 4.79  | 0.1  | 0.02 | -1.08 | 0.050321 | 0.015615 | 0.374103 | 0.158353 |
| MmugDNA.19674.1.S1_at   | MmugDNA.19674.1 | 9.91  | 9.74  | 0.1  | 0.36 | 1.12  | 0.315978 | 0.160074 | 0.646799 | 0.436234 |
| MmugDNA.19677.1.S1_at   | MmugDNA.19677.1 | 5.28  | 5.29  | 0.05 | 0.18 | -1    | 0.354674 | 0.290493 | 0.670643 | 0.55123  |
| MmugDNA.19679.1.S1_at   | MmugDNA.19679.1 | 13.22 | 13.43 | 0.13 | 0.02 | -1.16 | 0.02181  | 0.017893 | 0.28382  | 0.16888  |
| MmugDNA.19682.1.S1_at   | MmugDNA.19682.1 | 10.33 | 10.6  | 0.03 | 0.16 | -1.21 | 0.064571 | 0.036097 | 0.402975 | 0.234417 |
| MmugDNA.19685.1.S1_at   | MmugDNA.19685.1 | 8.69  | 8.4   | 0.2  | 0.21 | 1.22  | 0.081588 | 0.031119 | 0.432654 | 0.218175 |
| MmugDNA.19685.1.S1_s_at | MmugDNA.19685.1 | 10.09 | 9.45  | 0.44 | 0.17 | 1.56  | 0.052703 | 0.048727 | 0.378395 | 0.265744 |
| MmugDNA.19686.1.S1_at   | MmugDNA.19686.1 | 7.99  | 7.49  | 0.1  | 0.23 | 1.42  | 0.070143 | 0.033294 | 0.413646 | 0.226086 |
| MmugDNA.19691.1.S1_at   | MmugDNA.19691.1 | 6.96  | 11.17 | 2.92 | 3.33 | -18.5 | 0.43116  | 0.213221 | 0.718464 | 0.487098 |
| MmugDNA.197.1.S1_at     | MmugDNA.197.1   | 10.76 | 10.35 | 0.23 | 1.02 | 1.33  | 0.280721 | 0.345761 | 0.62183  | 0.590931 |
| MmugDNA.19701.1.S1_at   | MmugDNA.19701.1 | 5.69  | 5.66  | 0.14 | 0.15 | 1.02  | 0.66091  | 0.377238 | 0.847931 | 0.61485  |
| MmugDNA.19704.1.S1_at   | MmugDNA.19704.1 | 12.27 | 12.18 | 0.1  | 0.1  | 1.06  | 0.89017  | 0.838733 | 0.956053 | 0.908041 |
| MmugDNA.19706.1.S1_s_at | MmugDNA.19706.1 | 12.89 | 12.86 | 0.14 | 0.09 | 1.02  | 0.786786 | 0.893315 | 0.911324 | 0.939163 |
| MmugDNA.19712.1.S1_at   | MmugDNA.19712.1 | 4.74  | 4.1   | 0.34 | 0.23 | 1.56  | 0.034571 | 0.011848 | 0.333297 | 0.140973 |
| MmugDNA.19714.1.S1_at   | MmugDNA.19714.1 | 10.96 | 11.29 | 0.25 | 0.27 | -1.25 | 0.234541 | 0.194814 | 0.588797 | 0.46986  |
| MmugDNA.19718.1.S1_at   | MmugDNA.19718.1 | 10.76 | 10    | 0.28 | 0.4  | 1.7   | 0.038126 | 0.065742 | 0.343587 | 0.301766 |
| MmugDNA.19725.1.S1_at   | MmugDNA.19725.1 | 12.14 | 12.56 | 0.1  | 0.5  | -1.34 | 0.246499 | 0.291051 | 0.597777 | 0.551574 |
| MmugDNA.19727.1.S1_at   | MmugDNA.19727.1 | 10.99 | 10.76 | 0.26 | 0.73 | 1.18  | 0.644296 | 0.809976 | 0.839719 | 0.890518 |
| MmugDNA.19729.1.S1_at   | MmugDNA.19729.1 | 11.14 | 11.19 | 0.14 | 0.3  | -1.03 | 0.488215 | 0.02433  | 0.752793 | 0.195238 |
| MmugDNA.19736.1.S1_at   | MmugDNA.19736.1 | 7.43  | 6.3   | 0.46 | 0.9  | 2.18  | 0.133843 | 0.162819 | 0.500371 | 0.438932 |
| MmugDNA.19738.1.S1_at   | MmugDNA.19738.1 | 10.55 | 10.89 | 0.16 | 0.1  | -1.26 | 0.04774  | 0.026902 | 0.367097 | 0.205158 |
| MmugDNA.19748.1.S1_at   | MmugDNA.19748.1 | 11.82 | 11.56 | 0.53 | 0.93 | 1.2   | 0.925857 | 0.96527  | 0.97147  | 0.980629 |
| MmugDNA.1975.1.S1_at    | MmugDNA.1975.1  | 6.67  | 6.8   | 0.15 | 0.28 | -1.1  | 0.157814 | 0.172402 | 0.522669 | 0.448837 |
| MmugDNA.19751.1.S1_at   | MmugDNA.19751.1 | 5.28  | 5.16  | 0.03 | 0.12 | 1.08  | 0.757165 | 0.744565 | 0.897005 | 0.852091 |
| MmugDNA.19752.1.S1_at   | MmugDNA.19752.1 | 3.83  | 3.96  | 0.09 | 0.22 | -1.1  | 0.215178 | 0.098446 | 0.575592 | 0.356564 |
| MmugDNA.19754.1.S1_at   | MmugDNA.19754.1 | 9.24  | 8.82  | 0.31 | 0.37 | 1.33  | 0.561535 | 0.742764 | 0.794887 | 0.851023 |
| MmugDNA.19755.1.S1_at   | MmugDNA.19755.1 | 8.55  | 9.62  | 0.24 | 0.21 | -2.09 | 0.002948 | 0.000789 | 0.170703 | 0.045969 |
| MmugDNA.19756.1.S1_at   | MmugDNA.19756.1 | 5.97  | 5.69  | 0.12 | 0.03 | 1.21  | 0.03848  | 0.014159 | 0.344376 | 0.152107 |
| MmugDNA.19760.1.S1_at   | MmugDNA.19760.1 | 3.33  | 3.21  | 0.18 | 0.04 | 1.09  | 0.247011 | 0.42136  | 0.598082 | 0.644994 |
| MmugDNA.19765.1.S1_at   | MmugDNA.19765.1 | 12.12 | 11.62 | 0.02 | 0.07 | 1.41  | 0.000221 | 0.000254 | 0.120316 | 0.033475 |
| MmugDNA.19768.1.S1_at   | MmugDNA.19768.1 | 10.27 | 9.14  | 0.12 | 0.11 | 2.19  | 0.000275 | 0.000144 | 0.12562  | 0.029509 |

|                         |                 |       |       |      |      |        |          |          |          |          |
|-------------------------|-----------------|-------|-------|------|------|--------|----------|----------|----------|----------|
| MmugDNA.19769.1.S1_at   | MmugDNA.19769.1 | 5.35  | 5.22  | 0.64 | 0.05 | 1.09   | 0.329111 | 0.545163 | 0.65484  | 0.727411 |
| MmugDNA.19770.1.S1_at   | MmugDNA.19770.1 | 6.69  | 6.23  | 0.45 | 0.37 | 1.37   | 0.826243 | 0.960319 | 0.929367 | 0.977459 |
| MmugDNA.19770.1.S1_s_at | MmugDNA.19770.1 | 7.12  | 6.56  | 0.81 | 0.67 | 1.47   | 0.593436 | 0.785359 | 0.811443 | 0.875741 |
| MmugDNA.19774.1.S1_at   | MmugDNA.19774.1 | 10.69 | 9.81  | 0.15 | 0.27 | 1.84   | 0.008455 | 0.003437 | 0.218339 | 0.084282 |
| MmugDNA.19777.1.S1_s_at | MmugDNA.19777.1 | 13.52 | 13.59 | 0.05 | 0.06 | -1.05  | 0.149285 | 0.058802 | 0.514001 | 0.289228 |
| MmugDNA.19784.1.S1_at   | MmugDNA.19784.1 | 11.9  | 11.73 | 0.12 | 0.27 | 1.13   | 0.652981 | 0.759152 | 0.843896 | 0.859995 |
| MmugDNA.19786.1.S1_at   | MmugDNA.19786.1 | 8.1   | 7.88  | 0.05 | 0.48 | 1.16   | 0.46854  | 0.196576 | 0.741077 | 0.471608 |
| MmugDNA.19791.1.S1_at   | MmugDNA.19791.1 | 6.43  | 7     | 0.1  | 0.75 | -1.48  | 0.486778 | 0.472395 | 0.751738 | 0.679986 |
| MmugDNA.19799.1.S1_at   | MmugDNA.19799.1 | 6.2   | 6.18  | 0.05 | 0.09 | 1.01   | 0.995857 | 0.559213 | 0.998446 | 0.736143 |
| MmugDNA.198.1.S1_at     | MmugDNA.198.1   | 10.7  | 9.45  | 0.1  | 0.18 | 2.38   | 0.000645 | 0.000157 | 0.136818 | 0.030199 |
| MmugDNA.19801.1.S1_at   | MmugDNA.19801.1 | 3.12  | 3.05  | 0.05 | 0.12 | 1.05   | 0.958476 | 0.346877 | 0.984324 | 0.591709 |
| MmugDNA.19809.1.S1_at   | MmugDNA.19809.1 | 5.3   | 5.29  | 0.13 | 0.14 | 1.01   | 0.912367 | 0.639843 | 0.965274 | 0.788487 |
| MmugDNA.19810.1.S1_at   | MmugDNA.19810.1 | 10.06 | 9.62  | 0.16 | 0.2  | 1.36   | 0.022088 | 0.014057 | 0.28446  | 0.151841 |
| MmugDNA.19811.1.S1_at   | MmugDNA.19811.1 | 4.71  | 3.93  | 0.22 | 0.06 | 1.72   | 0.004643 | 0.000881 | 0.1844   | 0.047602 |
| MmugDNA.19823.1.S1_at   | MmugDNA.19823.1 | 7.97  | 9.44  | 0.36 | 0.47 | -2.77  | 0.007336 | 0.004403 | 0.207019 | 0.092846 |
| MmugDNA.19824.1.S1_at   | MmugDNA.19824.1 | 6.29  | 6.13  | 0.34 | 0.79 | 1.12   | 0.930552 | 0.308051 | 0.973196 | 0.56421  |
| MmugDNA.19827.1.S1_at   | MmugDNA.19827.1 | 8.96  | 8.97  | 0.15 | 0.23 | -1     | 0.538876 | 0.721951 | 0.780847 | 0.838904 |
| MmugDNA.19830.1.S1_at   | MmugDNA.19830.1 | 5.6   | 5.7   | 0.1  | 0.02 | -1.07  | 0.227487 | 0.181332 | 0.585103 | 0.457834 |
| MmugDNA.19835.1.S1_s_at | MmugDNA.19835.1 | 11.16 | 11.32 | 0.11 | 0.15 | -1.11  | 0.974478 | 0.274547 | 0.99004  | 0.53901  |
| MmugDNA.19836.1.S1_at   | MmugDNA.19836.1 | 8.31  | 7.83  | 0.26 | 0.32 | 1.39   | 0.595099 | 0.058987 | 0.812276 | 0.289676 |
| MmugDNA.19837.1.S1_at   | MmugDNA.19837.1 | 9.04  | 8.55  | 0.02 | 0.09 | 1.41   | 0.000826 | 0.000139 | 0.136958 | 0.029307 |
| MmugDNA.19838.1.S1_at   | MmugDNA.19838.1 | 5.03  | 5.03  | 0.27 | 0.08 | -1     | 0.295238 | 0.530053 | 0.631561 | 0.717721 |
| MmugDNA.19839.1.S1_at   | MmugDNA.19839.1 | 7.55  | 7.84  | 0.11 | 0.03 | -1.22  | 0.00623  | 0.002221 | 0.197112 | 0.069434 |
| MmugDNA.19840.1.S1_at   | MmugDNA.19840.1 | 5.38  | 4.68  | 0.7  | 0.33 | 1.62   | 0.137896 | 0.049016 | 0.505329 | 0.266257 |
| MmugDNA.19841.1.S1_at   | MmugDNA.19841.1 | 8.85  | 8.47  | 0.08 | 0.23 | 1.3    | 0.046673 | 0.011397 | 0.363595 | 0.138253 |
| MmugDNA.19842.1.S1_at   | MmugDNA.19842.1 | 5.65  | 9.26  | 1.01 | 0.35 | -12.28 | 0.003648 | 0.004556 | 0.179515 | 0.094355 |
| MmugDNA.19857.1.S1_at   | MmugDNA.19857.1 | 11.84 | 11.68 | 0.11 | 0.17 | 1.11   | 0.137263 | 0.019886 | 0.504356 | 0.177357 |
| MmugDNA.19858.1.S1_at   | MmugDNA.19858.1 | 11.21 | 11.04 | 0.21 | 0.12 | 1.13   | 0.301102 | 0.414748 | 0.636251 | 0.640456 |
| MmugDNA.19864.1.S1_at   | MmugDNA.19864.1 | 9.32  | 10.04 | 0.22 | 0.42 | -1.65  | 0.165558 | 0.12916  | 0.529547 | 0.400611 |
| MmugDNA.19867.1.S1_at   | MmugDNA.19867.1 | 10.59 | 9.95  | 0.16 | 0.2  | 1.56   | 0.01017  | 0.002988 | 0.228247 | 0.079958 |
| MmugDNA.1987.1.S1_at    | MmugDNA.1987.1  | 7.35  | 11.02 | 1.9  | 2.6  | -12.78 | 0.428815 | 0.479116 | 0.71704  | 0.684942 |
| MmugDNA.19871.1.S1_at   | MmugDNA.19871.1 | 10.93 | 10.65 | 0.15 | 0.11 | 1.21   | 0.031091 | 0.020859 | 0.32048  | 0.181218 |
| MmugDNA.19875.1.S1_at   | MmugDNA.19875.1 | 9.56  | 9.34  | 0.18 | 0.17 | 1.16   | 0.172091 | 0.220991 | 0.535422 | 0.494389 |
| MmugDNA.19881.1.S1_at   | MmugDNA.19881.1 | 10.53 | 10.45 | 0.23 | 0.12 | 1.05   | 0.30661  | 0.52944  | 0.639593 | 0.717276 |
| MmugDNA.19883.1.S1_at   | MmugDNA.19883.1 | 9.95  | 9.32  | 0.03 | 0.36 | 1.55   | 0.108107 | 0.146368 | 0.468909 | 0.420368 |
| MmugDNA.19884.1.S1_at   | MmugDNA.19884.1 | 4.51  | 4.59  | 0.29 | 0.06 | -1.06  | 0.667105 | 0.779575 | 0.850779 | 0.872217 |
| MmugDNA.19888.1.S1_at   | MmugDNA.19888.1 | 10.93 | 10.61 | 0.17 | 0.47 | 1.24   | 0.112828 | 0.0508   | 0.475271 | 0.270583 |
| MmugDNA.19899.1.S1_at   | MmugDNA.19899.1 | 4.29  | 4.19  | 0.07 | 0.06 | 1.08   | 0.180273 | 0.483118 | 0.544487 | 0.687725 |
| MmugDNA.19902.1.S1_at   | MmugDNA.19902.1 | 3.34  | 3.38  | 0.08 | 0.21 | -1.03  | 0.272806 | 0.358657 | 0.616391 | 0.600164 |
| MmugDNA.19908.1.S1_at   | MmugDNA.19908.1 | 4.19  | 4.44  | 1.22 | 0.32 | -1.19  | 0.912809 | 0.749882 | 0.965461 | 0.854631 |
| MmugDNA.19909.1.S1_at   | MmugDNA.19909.1 | 6.63  | 5.91  | 0.1  | 0.19 | 1.65   | 0.005982 | 0.005329 | 0.194622 | 0.100928 |

|                         |                 |       |       |      |      |       |          |          |          |          |
|-------------------------|-----------------|-------|-------|------|------|-------|----------|----------|----------|----------|
| MmugDNA.19910.1.S1_s_at | MmugDNA.19910.1 | 10.02 | 10.11 | 0.26 | 0.04 | -1.06 | 0.19105  | 0.172429 | 0.553903 | 0.448837 |
| MmugDNA.19915.1.S1_at   | MmugDNA.19915.1 | 9.71  | 9.1   | 0.09 | 0.56 | 1.53  | 0.04593  | 0.019415 | 0.362058 | 0.175117 |
| MmugDNA.19921.1.S1_at   | MmugDNA.19921.1 | 5.92  | 7.17  | 0.73 | 1.08 | -2.38 | 0.163954 | 0.187741 | 0.528211 | 0.463739 |
| MmugDNA.19923.1.S1_at   | MmugDNA.19923.1 | 9.73  | 9.16  | 0.83 | 0.09 | 1.48  | 0.877694 | 0.468407 | 0.950993 | 0.677714 |
| MmugDNA.19924.1.S1_at   | MmugDNA.19924.1 | 8.99  | 8.91  | 0.08 | 0.22 | 1.05  | 0.253703 | 0.101544 | 0.602177 | 0.361393 |
| MmugDNA.1993.1.S1_at    | MmugDNA.1993.1  | 7.16  | 8.34  | 0.22 | 0.61 | -2.28 | 0.017604 | 0.005797 | 0.267454 | 0.104597 |
| MmugDNA.19937.1.S1_at   | MmugDNA.19937.1 | 5.94  | 6.01  | 0.51 | 0.57 | -1.05 | 0.977636 | 0.189072 | 0.991534 | 0.464897 |
| MmugDNA.19938.1.S1_at   | MmugDNA.19938.1 | 7.62  | 7.65  | 0.32 | 0.32 | -1.02 | 0.63891  | 0.747932 | 0.836878 | 0.853333 |
| MmugDNA.1994.1.S1_at    | MmugDNA.1994.1  | 9.52  | 9.04  | 0.14 | 0.38 | 1.39  | 0.089942 | 0.042918 | 0.445437 | 0.251759 |
| MmugDNA.19940.1.S1_at   | MmugDNA.19940.1 | 4.73  | 4.53  | 0.24 | 0.08 | 1.15  | 0.487015 | 0.745734 | 0.751872 | 0.85256  |
| MmugDNA.19941.1.S1_at   | MmugDNA.19941.1 | 4.65  | 4.72  | 0.28 | 0.15 | -1.05 | 0.971399 | 0.925822 | 0.989061 | 0.958025 |
| MmugDNA.19948.1.S1_at   | MmugDNA.19948.1 | 8.35  | 8.57  | 0.05 | 0.29 | -1.17 | 0.48533  | 0.664051 | 0.750894 | 0.803247 |
| MmugDNA.19950.1.S1_at   | MmugDNA.19950.1 | 7.14  | 7.57  | 0.79 | 0.66 | -1.35 | 0.431493 | 0.485481 | 0.718592 | 0.68914  |
| MmugDNA.19953.1.S1_at   | MmugDNA.19953.1 | 5.49  | 5.61  | 0.14 | 0.23 | -1.09 | 0.838457 | 0.258189 | 0.934673 | 0.525574 |
| MmugDNA.19954.1.S1_at   | MmugDNA.19954.1 | 6.77  | 6.61  | 0.09 | 0.24 | 1.12  | 0.132305 | 0.234482 | 0.498572 | 0.505674 |
| MmugDNA.19955.1.S1_at   | MmugDNA.19955.1 | 4.25  | 4.33  | 0.34 | 0.26 | -1.06 | 0.903144 | 0.066603 | 0.961412 | 0.303842 |
| MmugDNA.19956.1.S1_at   | MmugDNA.19956.1 | 9.92  | 9.69  | 0.4  | 0.21 | 1.18  | 0.1598   | 0.09825  | 0.52471  | 0.356289 |
| MmugDNA.19961.1.S1_at   | MmugDNA.19961.1 | 7.78  | 6.98  | 0.24 | 1.05 | 1.75  | 0.368601 | 0.377148 | 0.680048 | 0.614819 |
| MmugDNA.19965.1.S1_at   | MmugDNA.19965.1 | 8.9   | 7.78  | 0.59 | 0.43 | 2.18  | 0.128691 | 0.135102 | 0.494664 | 0.407128 |
| MmugDNA.19966.1.S1_at   | MmugDNA.19966.1 | 4.92  | 5.15  | 1.12 | 0.27 | -1.17 | 0.856333 | 0.759318 | 0.942006 | 0.860036 |
| MmugDNA.1997.1.S1_at    | MmugDNA.1997.1  | 8.43  | 8.34  | 0.84 | 0.06 | 1.06  | 0.309064 | 0.283251 | 0.641346 | 0.545822 |
| MmugDNA.19972.1.S1_at   | MmugDNA.19972.1 | 11.74 | 12.05 | 0.13 | 0.55 | -1.24 | 0.410884 | 0.215042 | 0.706685 | 0.488898 |
| MmugDNA.19974.1.S1_at   | MmugDNA.19974.1 | 3.17  | 3.19  | 0.27 | 0.02 | -1.02 | 0.866293 | 0.382254 | 0.94664  | 0.618438 |
| MmugDNA.19979.1.S1_at   | MmugDNA.19979.1 | 7.66  | 8.56  | 0.33 | 1.19 | -1.86 | 0.36707  | 0.21945  | 0.679287 | 0.493156 |
| MmugDNA.19988.1.S1_at   | MmugDNA.19988.1 | 7.85  | 7.94  | 0.29 | 1.35 | -1.06 | 0.907234 | 0.428904 | 0.963168 | 0.650409 |
| MmugDNA.19992.1.S1_at   | MmugDNA.19992.1 | 11.01 | 11.37 | 0.06 | 0.56 | -1.29 | 0.27966  | 0.247073 | 0.621154 | 0.516259 |
| MmugDNA.19997.1.S1_s_at | MmugDNA.19997.1 | 12.89 | 12.13 | 0.08 | 0.23 | 1.69  | 0.008415 | 0.009583 | 0.21832  | 0.129001 |
| MmugDNA.19998.1.S1_at   | MmugDNA.19998.1 | 3.19  | 3.26  | 0.01 | 0.1  | -1.05 | 0.252314 | 0.60655  | 0.601282 | 0.765811 |
| MmugDNA.19999.1.S1_at   | MmugDNA.19999.1 | 10.74 | 10.86 | 0.46 | 0.08 | -1.09 | 0.722027 | 0.670993 | 0.87848  | 0.807635 |
| MmugDNA.20000.1.S1_s_at | MmugDNA.20000.1 | 6.45  | 5.72  | 0.4  | 0.4  | 1.65  | 0.169465 | 0.098743 | 0.533686 | 0.356828 |
| MmugDNA.20003.1.S1_at   | MmugDNA.20003.1 | 10.68 | 10.02 | 0.1  | 0.19 | 1.58  | 0.004654 | 0.000886 | 0.1844   | 0.047602 |
| MmugDNA.20004.1.S1_at   | MmugDNA.20004.1 | 12.89 | 12.9  | 0.03 | 0.08 | -1    | 0.801195 | 0.830536 | 0.918016 | 0.902753 |
| MmugDNA.20005.1.S1_at   | MmugDNA.20005.1 | 11.37 | 10.98 | 0.03 | 0.52 | 1.31  | 0.214605 | 0.069613 | 0.575095 | 0.309956 |
| MmugDNA.20012.1.S1_at   | MmugDNA.20012.1 | 8.77  | 9.18  | 0.1  | 0.49 | -1.33 | 0.286774 | 0.070988 | 0.625572 | 0.312602 |
| MmugDNA.20022.1.S1_at   | MmugDNA.20022.1 | 11.8  | 11.44 | 0.12 | 0.37 | 1.28  | 0.141548 | 0.096501 | 0.509111 | 0.35409  |
| MmugDNA.20022.1.S1_s_at | MmugDNA.20022.1 | 12.36 | 11.91 | 0.11 | 0.33 | 1.37  | 0.097754 | 0.066803 | 0.456904 | 0.304363 |
| MmugDNA.20031.1.S1_at   | MmugDNA.20031.1 | 11.8  | 12.31 | 0.27 | 0.36 | -1.43 | 0.185273 | 0.262341 | 0.548759 | 0.528633 |
| MmugDNA.20037.1.S1_at   | MmugDNA.20037.1 | 9.22  | 9.44  | 0.48 | 0.62 | -1.16 | 0.689217 | 0.818684 | 0.86142  | 0.895523 |
| MmugDNA.20046.1.S1_at   | MmugDNA.20046.1 | 8.57  | 8.43  | 0.62 | 0.22 | 1.1   | 0.669198 | 0.133066 | 0.852133 | 0.404726 |
| MmugDNA.20047.1.S1_at   | MmugDNA.20047.1 | 12.1  | 12.4  | 0.11 | 0.15 | -1.23 | 0.05686  | 0.022757 | 0.387323 | 0.188918 |
| MmugDNA.20050.1.S1_at   | MmugDNA.20050.1 | 12.8  | 12.83 | 0.2  | 0.24 | -1.02 | 0.766261 | 0.478658 | 0.901717 | 0.684657 |

|                         |                 |       |       |      |      |       |          |          |          |          |
|-------------------------|-----------------|-------|-------|------|------|-------|----------|----------|----------|----------|
| MmugDNA.20051.1.S1_at   | MmugDNA.20051.1 | 3.2   | 3.23  | 0.09 | 0.08 | -1.02 | 0.978593 | 0.965545 | 0.992128 | 0.980739 |
| MmugDNA.20054.1.S1_at   | MmugDNA.20054.1 | 4.33  | 4.1   | 0.1  | 0.24 | 1.17  | 0.267182 | 0.240318 | 0.612322 | 0.510874 |
| MmugDNA.20055.1.S1_at   | MmugDNA.20055.1 | 9.87  | 8.82  | 0.2  | 0.25 | 2.06  | 0.002996 | 0.000286 | 0.171022 | 0.034857 |
| MmugDNA.20066.1.S1_at   | MmugDNA.20066.1 | 10.75 | 11.64 | 0.1  | 0.29 | -1.87 | 0.01694  | 0.012422 | 0.266211 | 0.144095 |
| MmugDNA.20067.1.S1_at   | MmugDNA.20067.1 | 6.28  | 7.45  | 0.15 | 0.45 | -2.26 | 0.012796 | 0.004471 | 0.24376  | 0.09331  |
| MmugDNA.20073.1.S1_at   | MmugDNA.20073.1 | 9.4   | 8.63  | 0.34 | 0.75 | 1.7   | 0.158378 | 0.166132 | 0.523226 | 0.442694 |
| MmugDNA.20079.1.S1_at   | MmugDNA.20079.1 | 12.74 | 12.27 | 0.08 | 0.41 | 1.38  | 0.148142 | 0.177012 | 0.513475 | 0.453444 |
| MmugDNA.20085.1.S1_at   | MmugDNA.20085.1 | 3.86  | 4.06  | 0.23 | 0.39 | -1.14 | 0.560274 | 0.792859 | 0.794209 | 0.880387 |
| MmugDNA.20090.1.S1_at   | MmugDNA.20090.1 | 9.19  | 8.87  | 0.26 | 0.22 | 1.25  | 0.158708 | 0.15522  | 0.523826 | 0.430451 |
| MmugDNA.20095.1.S1_at   | MmugDNA.20095.1 | 3.9   | 4.29  | 0.23 | 0.43 | -1.31 | 0.103225 | 0.126295 | 0.462888 | 0.396786 |
| MmugDNA.201.1.S1_s_at   | MmugDNA.201.1   | 7.58  | 7.89  | 0.16 | 0.24 | -1.23 | 0.294753 | 0.454122 | 0.631442 | 0.668407 |
| MmugDNA.2010.1.S1_at    | MmugDNA.2010.1  | 10.31 | 10.1  | 0.03 | 0.09 | 1.16  | 0.019754 | 0.013582 | 0.275549 | 0.14912  |
| MmugDNA.20106.1.S1_at   | MmugDNA.20106.1 | 9.36  | 11.61 | 0.39 | 0.32 | -4.75 | 0.003102 | 0.000716 | 0.172102 | 0.044419 |
| MmugDNA.20110.1.S1_at   | MmugDNA.20110.1 | 9.24  | 10.07 | 0.2  | 0.3  | -1.77 | 0.024193 | 0.007725 | 0.294535 | 0.117463 |
| MmugDNA.20111.1.S1_at   | MmugDNA.20111.1 | 12.86 | 13.16 | 0.15 | 0.1  | -1.23 | 0.046746 | 0.045852 | 0.363894 | 0.258389 |
| MmugDNA.20117.1.S1_at   | MmugDNA.20117.1 | 8.14  | 8.94  | 0.63 | 1.13 | -1.74 | 0.287888 | 0.217583 | 0.626292 | 0.491183 |
| MmugDNA.20126.1.S1_at   | MmugDNA.20126.1 | 11.66 | 10.81 | 0.4  | 0.11 | 1.8   | 0.028042 | 0.02845  | 0.309556 | 0.210466 |
| MmugDNA.20127.1.S1_at   | MmugDNA.20127.1 | 8.68  | 8.97  | 0.63 | 1.14 | -1.22 | 0.694981 | 0.385371 | 0.864699 | 0.620818 |
| MmugDNA.20128.1.S1_s_at | MmugDNA.20128.1 | 12.74 | 12.75 | 0.05 | 0.16 | -1    | 0.811709 | 0.490437 | 0.923289 | 0.692457 |
| MmugDNA.20129.1.S1_at   | MmugDNA.20129.1 | 13.07 | 13.36 | 0.11 | 0.21 | -1.23 | 0.086663 | 0.093753 | 0.440475 | 0.350241 |
| MmugDNA.2013.1.S1_at    | MmugDNA.2013.1  | 3.71  | 3.59  | 0.52 | 0.13 | 1.08  | 0.823404 | 0.85425  | 0.928164 | 0.916971 |
| MmugDNA.20131.1.S1_at   | MmugDNA.20131.1 | 10.08 | 10.3  | 0.21 | 0.22 | -1.17 | 0.054495 | 0.044196 | 0.381851 | 0.254709 |
| MmugDNA.20134.1.S1_at   | MmugDNA.20134.1 | 13.01 | 12.68 | 0.09 | 0.04 | 1.26  | 0.004399 | 0.000979 | 0.183061 | 0.049927 |
| MmugDNA.2014.1.S1_at    | MmugDNA.2014.1  | 7.32  | 8.84  | 0.73 | 0.48 | -2.88 | 0.057586 | 0.05126  | 0.38863  | 0.271825 |
| MmugDNA.20144.1.S1_at   | MmugDNA.20144.1 | 11.26 | 11.29 | 0.26 | 0.17 | -1.02 | 0.480736 | 0.510881 | 0.748597 | 0.70525  |
| MmugDNA.20145.1.S1_at   | MmugDNA.20145.1 | 5.77  | 5.24  | 1.2  | 0.6  | 1.45  | 0.563422 | 0.488242 | 0.79597  | 0.691    |
| MmugDNA.20146.1.S1_at   | MmugDNA.20146.1 | 5.36  | 5.47  | 0.17 | 0.15 | -1.08 | 0.509057 | 0.167377 | 0.764172 | 0.443785 |
| MmugDNA.20150.1.S1_at   | MmugDNA.20150.1 | 11.45 | 11.02 | 0.26 | 0.13 | 1.35  | 0.086157 | 0.022473 | 0.44011  | 0.187564 |
| MmugDNA.20157.1.S1_at   | MmugDNA.20157.1 | 9.74  | 8.7   | 0.63 | 2.15 | 2.05  | 0.439481 | 0.606583 | 0.723617 | 0.765834 |
| MmugDNA.20158.1.S1_at   | MmugDNA.20158.1 | 3.19  | 3.66  | 0.6  | 1.23 | -1.39 | 0.389296 | 0.154474 | 0.692956 | 0.429395 |
| MmugDNA.20158.1.S1_s_at | MmugDNA.20158.1 | 4.57  | 5.33  | 0.27 | 1.06 | -1.7  | 0.340922 | 0.232174 | 0.662203 | 0.503874 |
| MmugDNA.20159.1.S1_at   | MmugDNA.20159.1 | 8.4   | 7.27  | 0.64 | 0.26 | 2.19  | 0.106933 | 0.100082 | 0.467551 | 0.358968 |
| MmugDNA.20164.1.S1_at   | MmugDNA.20164.1 | 6.09  | 6.29  | 0.31 | 0.13 | -1.15 | 0.237203 | 0.305588 | 0.590811 | 0.562504 |
| MmugDNA.20165.1.S1_at   | MmugDNA.20165.1 | 5.13  | 5.77  | 0.06 | 0.35 | -1.55 | 0.043547 | 0.025008 | 0.356798 | 0.198121 |
| MmugDNA.20170.1.S1_at   | MmugDNA.20170.1 | 4.62  | 5.6   | 0.25 | 0.19 | -1.98 | 0.003322 | 0.000621 | 0.177442 | 0.042498 |
| MmugDNA.20174.1.S1_at   | MmugDNA.20174.1 | 3.41  | 3.17  | 0.18 | 0.13 | 1.18  | 0.263547 | 0.297008 | 0.609468 | 0.555957 |
| MmugDNA.20175.1.S1_at   | MmugDNA.20175.1 | 10.84 | 10.93 | 0.32 | 0.29 | -1.07 | 0.363209 | 0.093777 | 0.676579 | 0.350256 |
| MmugDNA.20177.1.S1_at   | MmugDNA.20177.1 | 9.69  | 10.29 | 0.27 | 0.47 | -1.52 | 0.190304 | 0.229379 | 0.553031 | 0.501527 |
| MmugDNA.20179.1.S1_at   | MmugDNA.20179.1 | 10.57 | 10.49 | 0.25 | 0.5  | 1.06  | 0.572217 | 0.550447 | 0.800678 | 0.730443 |
| MmugDNA.20182.1.S1_at   | MmugDNA.20182.1 | 8.53  | 8.4   | 0.18 | 0.91 | 1.09  | 0.297852 | 0.254049 | 0.633549 | 0.522387 |
| MmugDNA.20184.1.S1_at   | MmugDNA.20184.1 | 5.59  | 5.62  | 0.11 | 0.16 | -1.02 | 0.178686 | 0.208977 | 0.54298  | 0.482763 |



|                         |                 |       |       |      |      |        |          |          |          |          |
|-------------------------|-----------------|-------|-------|------|------|--------|----------|----------|----------|----------|
| MmugDNA.20192.1.S1_at   | MmugDNA.20192.1 | 6.4   | 6.52  | 0.13 | 0.28 | -1.09  | 0.454348 | 0.208122 | 0.733184 | 0.482082 |
| MmugDNA.20193.1.S1_at   | MmugDNA.20193.1 | 11.8  | 12.3  | 0.07 | 0.22 | -1.41  | 0.009837 | 0.003937 | 0.226637 | 0.089257 |
| MmugDNA.20195.1.S1_at   | MmugDNA.20195.1 | 7.19  | 7.16  | 0.03 | 0.04 | 1.03   | 0.092523 | 0.087326 | 0.449243 | 0.3404   |
| MmugDNA.20197.1.S1_at   | MmugDNA.20197.1 | 10.38 | 10.54 | 0.29 | 0.45 | -1.12  | 0.490354 | 0.388245 | 0.754396 | 0.622692 |
| MmugDNA.20198.1.S1_at   | MmugDNA.20198.1 | 10.66 | 11.49 | 0.08 | 0.13 | -1.78  | 0.001421 | 0.000213 | 0.147697 | 0.032361 |
| MmugDNA.202.1.S1_at     | MmugDNA.202.1   | 3.72  | 3.61  | 0.21 | 0.05 | 1.08   | 0.535312 | 0.579896 | 0.778956 | 0.749335 |
| MmugDNA.20201.1.S1_at   | MmugDNA.20201.1 | 7     | 6.94  | 0.31 | 0.4  | 1.04   | 0.992945 | 0.94329  | 0.997597 | 0.967814 |
| MmugDNA.20203.1.S1_at   | MmugDNA.20203.1 | 7.52  | 7.44  | 0.21 | 0.34 | 1.06   | 0.438347 | 0.553851 | 0.723011 | 0.732845 |
| MmugDNA.20206.1.S1_at   | MmugDNA.20206.1 | 4.15  | 4.1   | 0.38 | 0.12 | 1.04   | 0.475786 | 0.302282 | 0.745964 | 0.560092 |
| MmugDNA.2021.1.S1_at    | MmugDNA.2021.1  | 8.81  | 8.38  | 0.27 | 0.2  | 1.35   | 0.220475 | 0.039774 | 0.579485 | 0.24444  |
| MmugDNA.20219.1.S1_at   | MmugDNA.20219.1 | 9.34  | 8.86  | 0.21 | 0.85 | 1.39   | 0.562479 | 0.169336 | 0.795358 | 0.445925 |
| MmugDNA.20220.1.S1_at   | MmugDNA.20220.1 | 4.7   | 6.03  | 0.52 | 1.25 | -2.52  | 0.123252 | 0.12581  | 0.488839 | 0.396313 |
| MmugDNA.20221.1.S1_at   | MmugDNA.20221.1 | 6.28  | 6.25  | 0.03 | 0.17 | 1.02   | 0.580045 | 0.281825 | 0.804451 | 0.544844 |
| MmugDNA.20227.1.S1_at   | MmugDNA.20227.1 | 7.4   | 8.45  | 0.16 | 0.45 | -2.07  | 0.040624 | 0.047495 | 0.34998  | 0.262554 |
| MmugDNA.20234.1.S1_at   | MmugDNA.20234.1 | 4.39  | 4.5   | 0.01 | 0.36 | -1.08  | 0.747974 | 0.57907  | 0.892185 | 0.748857 |
| MmugDNA.20241.1.S1_at   | MmugDNA.20241.1 | 12.42 | 12.54 | 0.05 | 0.13 | -1.09  | 0.181668 | 0.163648 | 0.546264 | 0.439841 |
| MmugDNA.2026.1.S1_at    | MmugDNA.2026.1  | 9.22  | 9.58  | 0.42 | 1.11 | -1.28  | 0.583907 | 0.612048 | 0.806781 | 0.76972  |
| MmugDNA.2027.1.S1_at    | MmugDNA.2027.1  | 7.41  | 7.25  | 0.08 | 0.21 | 1.12   | 0.232026 | 0.076579 | 0.58772  | 0.32173  |
| MmugDNA.20271.1.S1_at   | MmugDNA.20271.1 | 10.06 | 10.89 | 0.26 | 0.58 | -1.79  | 0.129798 | 0.12555  | 0.495916 | 0.396226 |
| MmugDNA.20272.1.S1_at   | MmugDNA.20272.1 | 12.8  | 12.05 | 0.27 | 0.78 | 1.68   | 0.548237 | 0.711005 | 0.786665 | 0.832375 |
| MmugDNA.20275.1.S1_at   | MmugDNA.20275.1 | 11.83 | 11.17 | 1.11 | 1.08 | 1.58   | 0.661603 | 0.849833 | 0.848148 | 0.914673 |
| MmugDNA.20278.1.S1_at   | MmugDNA.20278.1 | 13.59 | 13.54 | 0.34 | 0.19 | 1.03   | 0.946463 | 0.86522  | 0.979443 | 0.923533 |
| MmugDNA.20287.1.S1_at   | MmugDNA.20287.1 | 3.57  | 3.35  | 0.18 | 0.35 | 1.16   | 0.912185 | 0.922335 | 0.96522  | 0.95627  |
| MmugDNA.2029.1.S1_at    | MmugDNA.2029.1  | 4.57  | 3.69  | 0.86 | 0.06 | 1.83   | 0.161475 | 0.147783 | 0.526444 | 0.422072 |
| MmugDNA.20291.1.S1_at   | MmugDNA.20291.1 | 7.51  | 5.69  | 0.6  | 0.43 | 3.53   | 0.042725 | 0.014121 | 0.355382 | 0.152004 |
| MmugDNA.20292.1.S1_at   | MmugDNA.20292.1 | 8.75  | 8.68  | 0.02 | 0.29 | 1.05   | 0.702867 | 0.814353 | 0.868924 | 0.892923 |
| MmugDNA.20299.1.S1_at   | MmugDNA.20299.1 | 6.41  | 6.17  | 0.07 | 0.37 | 1.18   | 0.325636 | 0.448269 | 0.652943 | 0.664167 |
| MmugDNA.20302.1.S1_at   | MmugDNA.20302.1 | 8.75  | 8.75  | 0.19 | 1.43 | -1     | 0.825828 | 0.729352 | 0.929311 | 0.843541 |
| MmugDNA.20303.1.S1_at   | MmugDNA.20303.1 | 3.83  | 3.74  | 0.38 | 0.02 | 1.06   | 0.530118 | 0.514333 | 0.776565 | 0.707645 |
| MmugDNA.20304.1.S1_at   | MmugDNA.20304.1 | 10.98 | 11.05 | 0.11 | 0.24 | -1.05  | 0.639052 | 0.190307 | 0.83697  | 0.465906 |
| MmugDNA.20306.1.S1_at   | MmugDNA.20306.1 | 11.84 | 11.53 | 0.15 | 0.15 | 1.24   | 0.067861 | 0.117608 | 0.408606 | 0.38531  |
| MmugDNA.20308.1.S1_at   | MmugDNA.20308.1 | 11.98 | 11.19 | 0.25 | 0.12 | 1.73   | 0.009322 | 0.001188 | 0.223892 | 0.054071 |
| MmugDNA.20313.1.S1_at   | MmugDNA.20313.1 | 7.01  | 10.75 | 1.35 | 2.83 | -13.36 | 0.368337 | 0.245275 | 0.679846 | 0.515052 |
| MmugDNA.20319.1.S1_at   | MmugDNA.20319.1 | 4.13  | 4.69  | 0.16 | 0.34 | -1.48  | 0.173742 | 0.079254 | 0.537255 | 0.326444 |
| MmugDNA.20321.1.S1_at   | MmugDNA.20321.1 | 8.7   | 8.21  | 0.06 | 0.38 | 1.4    | 0.351549 | 0.247116 | 0.669126 | 0.516289 |
| MmugDNA.20325.1.S1_s_at | MmugDNA.20325.1 | 7.83  | 9.12  | 0.29 | 0.46 | -2.44  | 0.016274 | 0.014296 | 0.263592 | 0.152643 |
| MmugDNA.20327.1.S1_at   | MmugDNA.20327.1 | 13.42 | 13.02 | 0.13 | 0.11 | 1.32   | 0.008965 | 0.003815 | 0.221914 | 0.08794  |
| MmugDNA.20327.1.S1_s_at | MmugDNA.20327.1 | 11.68 | 11.09 | 0.23 | 0.11 | 1.5    | 0.010398 | 0.002217 | 0.229439 | 0.069424 |
| MmugDNA.20328.1.S1_at   | MmugDNA.20328.1 | 10.13 | 10.3  | 0.24 | 0.09 | -1.13  | 0.393287 | 0.530555 | 0.695123 | 0.718042 |
| MmugDNA.20328.1.S1_s_at | MmugDNA.20328.1 | 10.42 | 10.56 | 0.31 | 0.15 | -1.1   | 0.721509 | 0.303566 | 0.87812  | 0.561022 |
| MmugDNA.20333.1.S1_at   | MmugDNA.20333.1 | 3.98  | 4.29  | 0.11 | 0.2  | -1.24  | 0.080871 | 0.147016 | 0.431371 | 0.421133 |

|                         |                 |       |       |      |      |       |          |          |          |          |
|-------------------------|-----------------|-------|-------|------|------|-------|----------|----------|----------|----------|
| MmugDNA.20342.1.S1_at   | MmugDNA.20342.1 | 10.36 | 9.03  | 0.09 | 0.2  | 2.51  | 0.000618 | 0.000117 | 0.136818 | 0.028664 |
| MmugDNA.20348.1.S1_at   | MmugDNA.20348.1 | 3.12  | 3.11  | 0.07 | 0.14 | 1.01  | 0.902534 | 0.985108 | 0.961142 | 0.991531 |
| MmugDNA.20349.1.S1_at   | MmugDNA.20349.1 | 3.12  | 3.08  | 0.03 | 0.13 | 1.03  | 0.782222 | 0.703507 | 0.909138 | 0.828103 |
| MmugDNA.20350.1.S1_at   | MmugDNA.20350.1 | 9.29  | 8.46  | 0.34 | 0.26 | 1.79  | 0.03193  | 0.001952 | 0.323433 | 0.065813 |
| MmugDNA.20354.1.S1_at   | MmugDNA.20354.1 | 4.14  | 4.7   | 0.14 | 0.65 | -1.47 | 0.170045 | 0.200957 | 0.534161 | 0.475426 |
| MmugDNA.20357.1.S1_at   | MmugDNA.20357.1 | 9.09  | 11.58 | 1.07 | 0.42 | -5.62 | 0.033758 | 0.023775 | 0.330119 | 0.193037 |
| MmugDNA.20359.1.S1_at   | MmugDNA.20359.1 | 9.1   | 8.36  | 0.14 | 0.12 | 1.68  | 0.003098 | 0.005683 | 0.172102 | 0.103959 |
| MmugDNA.20364.1.S1_at   | MmugDNA.20364.1 | 5.22  | 5.41  | 0.6  | 0.17 | -1.14 | 0.714593 | 0.729328 | 0.874952 | 0.843541 |
| MmugDNA.20373.1.S1_at   | MmugDNA.20373.1 | 9.84  | 9.97  | 0.36 | 0.24 | -1.1  | 0.331272 | 0.129958 | 0.656225 | 0.401533 |
| MmugDNA.20377.1.S1_at   | MmugDNA.20377.1 | 9.91  | 9.97  | 0.33 | 0.29 | -1.04 | 0.829336 | 0.900939 | 0.930749 | 0.943618 |
| MmugDNA.20378.1.S1_at   | MmugDNA.20378.1 | 5.72  | 5.71  | 0.18 | 0.16 | 1.01  | 0.605947 | 0.412571 | 0.818647 | 0.638941 |
| MmugDNA.20379.1.S1_at   | MmugDNA.20379.1 | 9.57  | 8.92  | 0.21 | 0.54 | 1.56  | 0.120442 | 0.137802 | 0.485479 | 0.410769 |
| MmugDNA.2038.1.S1_at    | MmugDNA.2038.1  | 4.8   | 4.78  | 0.29 | 0.04 | 1.01  | 0.479612 | 0.635437 | 0.74773  | 0.785405 |
| MmugDNA.20380.1.S1_at   | MmugDNA.20380.1 | 10.96 | 10.65 | 0.16 | 0.3  | 1.24  | 0.715323 | 0.871072 | 0.875005 | 0.926785 |
| MmugDNA.20381.1.S1_at   | MmugDNA.20381.1 | 5.18  | 5.63  | 0.07 | 0.33 | -1.37 | 0.095272 | 0.095427 | 0.453089 | 0.352453 |
| MmugDNA.20386.1.S1_at   | MmugDNA.20386.1 | 5     | 5.3   | 0.04 | 0.3  | -1.23 | 0.086821 | 0.107749 | 0.440476 | 0.370816 |
| MmugDNA.20397.1.S1_at   | MmugDNA.20397.1 | 10.81 | 9.83  | 0.11 | 0.29 | 1.97  | 0.003844 | 0.000599 | 0.179914 | 0.041969 |
| MmugDNA.20399.1.S1_at   | MmugDNA.20399.1 | 5.17  | 5.17  | 0.16 | 0.14 | -1    | 0.414795 | 0.597775 | 0.709338 | 0.760398 |
| MmugDNA.204.1.S1_at     | MmugDNA.204.1   | 4.82  | 6.95  | 0.3  | 0.56 | -4.37 | 0.006278 | 0.00203  | 0.1975   | 0.066885 |
| MmugDNA.20405.1.S1_at   | MmugDNA.20405.1 | 7.77  | 5.34  | 0.69 | 0.36 | 5.38  | 0.004261 | 0.001077 | 0.18216  | 0.051912 |
| MmugDNA.20415.1.S1_at   | MmugDNA.20415.1 | 5.12  | 5.09  | 0.22 | 0.08 | 1.02  | 0.7123   | 0.438964 | 0.873984 | 0.657787 |
| MmugDNA.20416.1.S1_s_at | MmugDNA.20416.1 | 11.17 | 11.05 | 0.17 | 0.1  | 1.08  | 0.20434  | 0.115369 | 0.566774 | 0.382394 |
| MmugDNA.20418.1.S1_at   | MmugDNA.20418.1 | 5.23  | 5.29  | 0.03 | 0.08 | -1.04 | 0.188128 | 0.453592 | 0.551088 | 0.668035 |
| MmugDNA.20420.1.S1_at   | MmugDNA.20420.1 | 5.84  | 5.92  | 0.1  | 0.1  | -1.06 | 0.196354 | 0.281024 | 0.559613 | 0.544179 |
| MmugDNA.20421.1.S1_at   | MmugDNA.20421.1 | 4.39  | 4.42  | 0.12 | 0.03 | -1.02 | 0.901815 | 0.844823 | 0.960815 | 0.911684 |
| MmugDNA.20423.1.S1_at   | MmugDNA.20423.1 | 5.96  | 6.11  | 0.08 | 0.07 | -1.11 | 0.303655 | 0.107778 | 0.637873 | 0.370847 |
| MmugDNA.20425.1.S1_at   | MmugDNA.20425.1 | 5.46  | 5.44  | 0.17 | 0.14 | 1.02  | 0.662516 | 0.742063 | 0.848652 | 0.850608 |
| MmugDNA.20427.1.S1_at   | MmugDNA.20427.1 | 7.48  | 7.18  | 0.12 | 0.14 | 1.23  | 0.104322 | 0.023212 | 0.464351 | 0.190932 |
| MmugDNA.20427.1.S1_x_at | MmugDNA.20427.1 | 7.98  | 7.63  | 0.05 | 0.12 | 1.27  | 0.010239 | 0.001271 | 0.228255 | 0.055241 |
| MmugDNA.20430.1.S1_at   | MmugDNA.20430.1 | 13.1  | 12.99 | 0.3  | 0.17 | 1.08  | 0.993004 | 0.373759 | 0.997597 | 0.61241  |
| MmugDNA.2044.1.S1_at    | MmugDNA.2044.1  | 10.37 | 9.89  | 0.18 | 0.44 | 1.4   | 0.295348 | 0.181765 | 0.631605 | 0.458373 |
| MmugDNA.20442.1.S1_at   | MmugDNA.20442.1 | 9.15  | 10.18 | 0.38 | 0.99 | -2.04 | 0.140259 | 0.088237 | 0.508065 | 0.341721 |
| MmugDNA.20447.1.S1_at   | MmugDNA.20447.1 | 13.11 | 13.02 | 0.06 | 0.32 | 1.07  | 0.504303 | 0.595386 | 0.761197 | 0.759091 |
| MmugDNA.20449.1.S1_at   | MmugDNA.20449.1 | 4.27  | 4.24  | 0.07 | 0.01 | 1.02  | 0.443875 | 0.829111 | 0.726463 | 0.90176  |
| MmugDNA.20453.1.S1_at   | MmugDNA.20453.1 | 12.89 | 12.73 | 0.11 | 0.2  | 1.12  | 0.269383 | 0.086451 | 0.614131 | 0.338938 |
| MmugDNA.20454.1.S1_at   | MmugDNA.20454.1 | 4.61  | 5.17  | 0.36 | 0.42 | -1.48 | 0.204356 | 0.087095 | 0.566774 | 0.340073 |
| MmugDNA.20455.1.S1_at   | MmugDNA.20455.1 | 6.93  | 9.36  | 0.71 | 0.58 | -5.39 | 0.007669 | 0.002613 | 0.211086 | 0.075662 |
| MmugDNA.20457.1.S1_at   | MmugDNA.20457.1 | 5.17  | 5.01  | 0.14 | 0.18 | 1.12  | 0.176404 | 0.073724 | 0.540019 | 0.317071 |
| MmugDNA.20459.1.S1_at   | MmugDNA.20459.1 | 12.3  | 11.92 | 0.14 | 0.06 | 1.31  | 0.008647 | 0.003518 | 0.219885 | 0.085137 |
| MmugDNA.20465.1.S1_at   | MmugDNA.20465.1 | 9.05  | 8.84  | 0.09 | 0.61 | 1.15  | 0.525537 | 0.723731 | 0.773765 | 0.840105 |
| MmugDNA.20467.1.S1_at   | MmugDNA.20467.1 | 5.77  | 7.74  | 0.45 | 2.27 | -3.92 | 0.295632 | 0.148528 | 0.631968 | 0.423074 |

|                         |                 |       |       |      |      |       |          |          |          |          |
|-------------------------|-----------------|-------|-------|------|------|-------|----------|----------|----------|----------|
| MmugDNA.20470.1.S1_at   | MmugDNA.20470.1 | 10.35 | 10.2  | 0.09 | 0.58 | 1.11  | 0.758763 | 0.123188 | 0.898078 | 0.393257 |
| MmugDNA.20473.1.S1_at   | MmugDNA.20473.1 | 3.47  | 3.46  | 0.45 | 0.28 | 1.01  | 0.915014 | 0.879381 | 0.966361 | 0.931144 |
| MmugDNA.20482.1.S1_at   | MmugDNA.20482.1 | 9.5   | 9.94  | 0.15 | 1.45 | -1.36 | 0.707555 | 0.183932 | 0.871138 | 0.46007  |
| MmugDNA.20487.1.S1_at   | MmugDNA.20487.1 | 4.89  | 4.41  | 0.19 | 0.21 | 1.4   | 0.023544 | 0.003868 | 0.291638 | 0.088475 |
| MmugDNA.20489.1.S1_at   | MmugDNA.20489.1 | 3.34  | 3.36  | 0.08 | 0.08 | -1.01 | 0.652094 | 0.594416 | 0.84354  | 0.758623 |
| MmugDNA.20492.1.S1_at   | MmugDNA.20492.1 | 13.08 | 13.19 | 0.25 | 0.23 | -1.07 | 0.605108 | 0.745133 | 0.818112 | 0.852267 |
| MmugDNA.20494.1.S1_at   | MmugDNA.20494.1 | 11.5  | 11.79 | 0.08 | 0.26 | -1.22 | 0.317971 | 0.0072   | 0.64802  | 0.114071 |
| MmugDNA.20496.1.S1_at   | MmugDNA.20496.1 | 6.51  | 6.65  | 0.33 | 0.17 | -1.1  | 0.765491 | 0.594151 | 0.901309 | 0.758517 |
| MmugDNA.20496.1.S1_s_at | MmugDNA.20496.1 | 3.42  | 3.38  | 0.07 | 0.62 | 1.03  | 0.375804 | 0.55656  | 0.684803 | 0.734609 |
| MmugDNA.2050.1.S1_at    | MmugDNA.2050.1  | 5.82  | 5.95  | 0.17 | 0.14 | -1.09 | 0.335938 | 0.480987 | 0.65921  | 0.686044 |
| MmugDNA.20505.1.S1_at   | MmugDNA.20505.1 | 9.06  | 8.74  | 0.17 | 0.27 | 1.25  | 0.065835 | 0.040372 | 0.405296 | 0.246054 |
| MmugDNA.20512.1.S1_at   | MmugDNA.20512.1 | 5.16  | 4.97  | 0.31 | 0.15 | 1.14  | 0.230011 | 0.306441 | 0.587112 | 0.563029 |
| MmugDNA.20516.1.S1_at   | MmugDNA.20516.1 | 4.4   | 4.41  | 0.01 | 0.07 | -1.01 | 0.534589 | 0.64492  | 0.778781 | 0.791938 |
| MmugDNA.20518.1.S1_at   | MmugDNA.20518.1 | 9.4   | 10.01 | 0.42 | 0.22 | -1.53 | 0.323618 | 0.146529 | 0.65165  | 0.420581 |
| MmugDNA.20520.1.S1_at   | MmugDNA.20520.1 | 11.56 | 12.28 | 0.15 | 0.18 | -1.66 | 0.010113 | 0.007039 | 0.228193 | 0.113112 |
| MmugDNA.20521.1.S1_at   | MmugDNA.20521.1 | 11.87 | 12.22 | 0.23 | 0.08 | -1.27 | 0.282904 | 0.03344  | 0.623131 | 0.226517 |
| MmugDNA.20535.1.S1_at   | MmugDNA.20535.1 | 10.61 | 9.74  | 0.41 | 0.22 | 1.82  | 0.024278 | 0.01196  | 0.294535 | 0.141475 |
| MmugDNA.2054.1.S1_at    | MmugDNA.2054.1  | 5.12  | 7.52  | 0.61 | 0.99 | -5.26 | 0.034433 | 0.032639 | 0.333081 | 0.223694 |
| MmugDNA.20540.1.S1_at   | MmugDNA.20540.1 | 9.11  | 8.91  | 0.45 | 0.46 | 1.15  | 0.898859 | 0.048368 | 0.959611 | 0.265081 |
| MmugDNA.20542.1.S1_at   | MmugDNA.20542.1 | 11.85 | 11.45 | 0.11 | 0.3  | 1.32  | 0.278828 | 0.42339  | 0.620835 | 0.646277 |
| MmugDNA.20549.1.S1_at   | MmugDNA.20549.1 | 6.47  | 6.78  | 0.08 | 0.14 | -1.24 | 0.018942 | 0.010812 | 0.272319 | 0.135636 |
| MmugDNA.2055.1.S1_at    | MmugDNA.2055.1  | 14    | 13.95 | 0.06 | 0.22 | 1.04  | 0.424659 | 0.471531 | 0.714637 | 0.6795   |
| MmugDNA.20560.1.S1_at   | MmugDNA.20560.1 | 6.77  | 7.05  | 0.02 | 0.48 | -1.21 | 0.419086 | 0.042676 | 0.711691 | 0.251037 |
| MmugDNA.20561.1.S1_at   | MmugDNA.20561.1 | 5.45  | 5.28  | 0.08 | 2.25 | 1.12  | 0.762011 | 0.892218 | 0.899852 | 0.938574 |
| MmugDNA.20570.1.S1_at   | MmugDNA.20570.1 | 9.89  | 9.93  | 0.21 | 0.21 | -1.03 | 0.391284 | 0.62978  | 0.693992 | 0.781989 |
| MmugDNA.20573.1.S1_at   | MmugDNA.20573.1 | 6.32  | 6.09  | 0.22 | 0.13 | 1.18  | 0.12473  | 0.168138 | 0.49077  | 0.444724 |
| MmugDNA.20574.1.S1_at   | MmugDNA.20574.1 | 7.72  | 8.36  | 0.85 | 0.65 | -1.56 | 0.161579 | 0.097983 | 0.526481 | 0.355882 |
| MmugDNA.20577.1.S1_at   | MmugDNA.20577.1 | 5.68  | 5.64  | 0.17 | 0.17 | 1.03  | 0.960819 | 0.988078 | 0.984947 | 0.99332  |
| MmugDNA.20581.1.S1_at   | MmugDNA.20581.1 | 3.92  | 3.76  | 0.1  | 0.01 | 1.12  | 0.166213 | 0.200119 | 0.529929 | 0.474603 |
| MmugDNA.20586.1.S1_at   | MmugDNA.20586.1 | 8.5   | 8.41  | 0.26 | 0.31 | 1.07  | 0.706314 | 0.481113 | 0.870604 | 0.686152 |
| MmugDNA.20588.1.S1_at   | MmugDNA.20588.1 | 10.78 | 10.25 | 0.15 | 0.34 | 1.44  | 0.049576 | 0.040356 | 0.371523 | 0.245984 |
| MmugDNA.20598.1.S1_at   | MmugDNA.20598.1 | 11.28 | 10.67 | 0.2  | 0.11 | 1.52  | 0.010652 | 0.003867 | 0.230991 | 0.088475 |
| MmugDNA.20601.1.S1_at   | MmugDNA.20601.1 | 9.89  | 9.07  | 0.33 | 0.41 | 1.77  | 0.264288 | 0.354762 | 0.610059 | 0.597429 |
| MmugDNA.20601.1.S1_s_at | MmugDNA.20601.1 | 10.04 | 9.37  | 0.29 | 0.37 | 1.59  | 0.234626 | 0.298062 | 0.588808 | 0.556707 |
| MmugDNA.20602.1.S1_at   | MmugDNA.20602.1 | 12.51 | 12.22 | 0.16 | 0.19 | 1.22  | 0.152618 | 0.17357  | 0.517325 | 0.449956 |
| MmugDNA.20604.1.S1_at   | MmugDNA.20604.1 | 12.91 | 13.51 | 0.69 | 0.3  | -1.52 | 0.096375 | 0.064344 | 0.454868 | 0.29983  |
| MmugDNA.20610.1.S1_at   | MmugDNA.20610.1 | 8.16  | 7.63  | 0.11 | 0.52 | 1.44  | 0.205269 | 0.274886 | 0.567726 | 0.53934  |
| MmugDNA.20611.1.S1_at   | MmugDNA.20611.1 | 8.96  | 9.85  | 0.24 | 0.2  | -1.86 | 0.006253 | 0.003095 | 0.197349 | 0.081194 |
| MmugDNA.20612.1.S1_at   | MmugDNA.20612.1 | 10.52 | 10.84 | 0.26 | 0.15 | -1.25 | 0.052388 | 0.026498 | 0.37757  | 0.203897 |
| MmugDNA.20616.1.S1_at   | MmugDNA.20616.1 | 4.11  | 4.49  | 0.42 | 0.37 | -1.3  | 0.312956 | 0.405448 | 0.644831 | 0.633767 |
| MmugDNA.20636.1.S1_at   | MmugDNA.20636.1 | 4.58  | 4.69  | 1.1  | 0.25 | -1.08 | 0.36681  | 0.510497 | 0.679209 | 0.704979 |

|                         |                 |       |       |      |      |        |          |          |          |          |
|-------------------------|-----------------|-------|-------|------|------|--------|----------|----------|----------|----------|
| MmugDNA.20650.1.S1_at   | MmugDNA.20650.1 | 5.92  | 6.06  | 0.1  | 0.12 | -1.1   | 0.174405 | 0.287585 | 0.538041 | 0.548871 |
| MmugDNA.2066.1.S1_at    | MmugDNA.2066.1  | 6.46  | 7.33  | 0.21 | 1.5  | -1.82  | 0.431104 | 0.174275 | 0.718464 | 0.450648 |
| MmugDNA.2066.1.S1_s_at  | MmugDNA.2066.1  | 6.96  | 8.19  | 0.36 | 1.42 | -2.35  | 0.284833 | 0.213644 | 0.624464 | 0.487441 |
| MmugDNA.20660.1.S1_at   | MmugDNA.20660.1 | 9.02  | 8.93  | 0.24 | 0.21 | 1.06   | 0.794133 | 0.082905 | 0.914561 | 0.332446 |
| MmugDNA.20669.1.S1_at   | MmugDNA.20669.1 | 7.61  | 7.34  | 0.29 | 0.95 | 1.21   | 0.763434 | 0.886834 | 0.900278 | 0.935553 |
| MmugDNA.20670.1.S1_at   | MmugDNA.20670.1 | 10.74 | 11    | 0.11 | 0.13 | -1.2   | 0.054898 | 0.006378 | 0.382765 | 0.108551 |
| MmugDNA.20670.1.S1_s_at | MmugDNA.20670.1 | 9.98  | 10.3  | 0.06 | 0.17 | -1.25  | 0.087379 | 0.062962 | 0.441741 | 0.297586 |
| MmugDNA.20671.1.S1_at   | MmugDNA.20671.1 | 12.18 | 10.4  | 0.31 | 0.55 | 3.44   | 0.015342 | 0.007677 | 0.258162 | 0.117153 |
| MmugDNA.20672.1.S1_at   | MmugDNA.20672.1 | 10.86 | 10.62 | 0.14 | 0.3  | 1.18   | 0.190949 | 0.185848 | 0.553761 | 0.461695 |
| MmugDNA.20675.1.S1_at   | MmugDNA.20675.1 | 9.32  | 9.23  | 0.08 | 0.55 | 1.07   | 0.411425 | 0.164445 | 0.707304 | 0.440678 |
| MmugDNA.20683.1.S1_at   | MmugDNA.20683.1 | 8.82  | 7.13  | 0.11 | 0.52 | 3.23   | 0.005177 | 0.001507 | 0.190313 | 0.0591   |
| MmugDNA.20685.1.S1_at   | MmugDNA.20685.1 | 9.2   | 9.01  | 0.1  | 0.19 | 1.14   | 0.344515 | 0.507458 | 0.664605 | 0.703026 |
| MmugDNA.20686.1.S1_at   | MmugDNA.20686.1 | 4.32  | 4.26  | 0.22 | 0.18 | 1.04   | 0.903669 | 0.396611 | 0.961578 | 0.628434 |
| MmugDNA.20687.1.S1_at   | MmugDNA.20687.1 | 5.43  | 5.41  | 0.22 | 0.47 | 1.01   | 0.297614 | 0.450691 | 0.633388 | 0.665844 |
| MmugDNA.20693.1.S1_at   | MmugDNA.20693.1 | 8.25  | 10.64 | 2.18 | 1.76 | -5.25  | 0.355362 | 0.180787 | 0.671008 | 0.457306 |
| MmugDNA.20694.1.S1_at   | MmugDNA.20694.1 | 9.1   | 9.08  | 0.29 | 0.19 | 1.01   | 0.704112 | 0.383394 | 0.869429 | 0.619384 |
| MmugDNA.20698.1.S1_at   | MmugDNA.20698.1 | 7.76  | 6.61  | 0.64 | 0.64 | 2.23   | 0.049221 | 0.013708 | 0.370983 | 0.149947 |
| MmugDNA.20702.1.S1_at   | MmugDNA.20702.1 | 7.12  | 7.19  | 0.05 | 0.03 | -1.06  | 0.045632 | 0.059288 | 0.361322 | 0.290528 |
| MmugDNA.20706.1.S1_at   | MmugDNA.20706.1 | 6.34  | 5.55  | 0.32 | 0.11 | 1.73   | 0.01564  | 0.025212 | 0.259915 | 0.19911  |
| MmugDNA.2071.1.S1_at    | MmugDNA.2071.1  | 7.3   | 8.17  | 0.33 | 0.38 | -1.83  | 0.02031  | 0.012337 | 0.277448 | 0.143659 |
| MmugDNA.20711.1.A1_at   | MmugDNA.20711.1 | 6.42  | 6.58  | 0.16 | 0.16 | -1.12  | 0.494575 | 0.480013 | 0.756791 | 0.685613 |
| MmugDNA.20711.1.S1_at   | MmugDNA.20711.1 | 6.27  | 6.33  | 0.15 | 0.17 | -1.04  | 0.657643 | 0.703791 | 0.846091 | 0.828234 |
| MmugDNA.20719.1.S1_s_at | MmugDNA.20719.1 | 13.04 | 12.83 | 0.05 | 0.01 | 1.15   | 0.00517  | 0.002846 | 0.190313 | 0.078601 |
| MmugDNA.2072.1.S1_at    | MmugDNA.2072.1  | 5.8   | 5.85  | 0.06 | 0.24 | -1.03  | 0.260063 | 0.358441 | 0.606878 | 0.599994 |
| MmugDNA.20725.1.S1_at   | MmugDNA.20725.1 | 6.76  | 6.88  | 0.09 | 0.17 | -1.09  | 0.342319 | 0.122629 | 0.663129 | 0.392564 |
| MmugDNA.20726.1.S1_at   | MmugDNA.20726.1 | 6.75  | 6.97  | 0.13 | 0.12 | -1.17  | 0.109616 | 0.106176 | 0.470811 | 0.36856  |
| MmugDNA.20728.1.S1_at   | MmugDNA.20728.1 | 11.4  | 11.6  | 0.13 | 0.14 | -1.15  | 0.062811 | 0.061096 | 0.399328 | 0.293958 |
| MmugDNA.20730.1.S1_at   | MmugDNA.20730.1 | 8.83  | 8.85  | 0.32 | 0.18 | -1.01  | 0.727158 | 0.810006 | 0.88121  | 0.890518 |
| MmugDNA.20731.1.S1_at   | MmugDNA.20731.1 | 9.95  | 10.44 | 0.23 | 0.34 | -1.4   | 0.039912 | 0.027592 | 0.34828  | 0.207431 |
| MmugDNA.20732.1.S1_at   | MmugDNA.20732.1 | 10.68 | 11.11 | 0.15 | 0.37 | -1.34  | 0.122913 | 0.009922 | 0.488301 | 0.130787 |
| MmugDNA.20734.1.S1_at   | MmugDNA.20734.1 | 10.41 | 10.21 | 0.13 | 0.32 | 1.15   | 0.116584 | 0.123263 | 0.48034  | 0.393358 |
| MmugDNA.20738.1.S1_at   | MmugDNA.20738.1 | 7.49  | 7.15  | 0.85 | 0.58 | 1.27   | 0.20669  | 0.260467 | 0.568816 | 0.527006 |
| MmugDNA.20764.1.S1_at   | MmugDNA.20764.1 | 8.3   | 8.53  | 0.19 | 0.31 | -1.17  | 0.787818 | 0.133017 | 0.911679 | 0.40469  |
| MmugDNA.20768.1.S1_at   | MmugDNA.20768.1 | 5.2   | 8.63  | 0.65 | 2.78 | -10.82 | 0.15956  | 0.068104 | 0.524412 | 0.307142 |
| MmugDNA.20770.1.S1_s_at | MmugDNA.20770.1 | 12.17 | 11.86 | 0.07 | 0.31 | 1.25   | 0.071711 | 0.042506 | 0.415695 | 0.250786 |
| MmugDNA.20776.1.S1_at   | MmugDNA.20776.1 | 8.93  | 9.17  | 0.18 | 0.09 | -1.18  | 0.163249 | 0.201797 | 0.527611 | 0.476367 |
| MmugDNA.20780.1.S1_at   | MmugDNA.20780.1 | 6.16  | 6.41  | 0.07 | 0.27 | -1.19  | 0.184097 | 0.031418 | 0.547989 | 0.219107 |
| MmugDNA.20784.1.S1_at   | MmugDNA.20784.1 | 11.13 | 11.78 | 0.41 | 0.61 | -1.57  | 0.235056 | 0.110448 | 0.589325 | 0.374684 |
| MmugDNA.20790.1.S1_at   | MmugDNA.20790.1 | 6.57  | 6.68  | 0.13 | 0.14 | -1.08  | 0.344319 | 0.29826  | 0.664468 | 0.556931 |
| MmugDNA.20794.1.S1_at   | MmugDNA.20794.1 | 6.91  | 6.97  | 0.21 | 0.51 | -1.04  | 0.80899  | 0.607509 | 0.922125 | 0.766417 |
| MmugDNA.208.1.S1_at     | MmugDNA.208.1   | 6.66  | 8.28  | 0.16 | 0.48 | -3.07  | 0.003411 | 0.001176 | 0.178033 | 0.05381  |

|                         |                 |       |       |      |      |        |          |          |          |          |
|-------------------------|-----------------|-------|-------|------|------|--------|----------|----------|----------|----------|
| MmugDNA.20800.1.S1_at   | MmugDNA.20800.1 | 12.14 | 11.14 | 0.06 | 0.85 | 2.01   | 0.343573 | 0.466047 | 0.663694 | 0.676096 |
| MmugDNA.20802.1.S1_at   | MmugDNA.20802.1 | 10.25 | 9.67  | 0.02 | 0.08 | 1.5    | 0.000341 | 0.000007 | 0.127505 | 0.016421 |
| MmugDNA.20810.1.S1_s_at | MmugDNA.20810.1 | 7.18  | 7.39  | 0.08 | 0.07 | -1.15  | 0.04916  | 0.04431  | 0.370772 | 0.255021 |
| MmugDNA.20819.1.S1_at   | MmugDNA.20819.1 | 8.8   | 8.95  | 0.27 | 0.59 | -1.11  | 0.51178  | 0.330164 | 0.765318 | 0.578987 |
| MmugDNA.20819.1.S1_s_at | MmugDNA.20819.1 | 8.31  | 8.42  | 0.28 | 0.5  | -1.08  | 0.314745 | 0.350686 | 0.64608  | 0.594409 |
| MmugDNA.20825.1.S1_at   | MmugDNA.20825.1 | 4.97  | 4.95  | 0.19 | 0.08 | 1.02   | 0.396956 | 0.514895 | 0.697433 | 0.707931 |
| MmugDNA.2083.1.S1_at    | MmugDNA.2083.1  | 10.24 | 10.32 | 0.19 | 0.39 | -1.06  | 0.72625  | 0.555842 | 0.880882 | 0.734119 |
| MmugDNA.20834.1.S1_at   | MmugDNA.20834.1 | 10.22 | 9.72  | 0.03 | 0.28 | 1.42   | 0.038704 | 0.014837 | 0.345106 | 0.154918 |
| MmugDNA.20835.1.S1_at   | MmugDNA.20835.1 | 5.77  | 5.59  | 0.38 | 0.23 | 1.14   | 0.671311 | 0.139695 | 0.852602 | 0.413029 |
| MmugDNA.20839.1.S1_at   | MmugDNA.20839.1 | 12.12 | 12.09 | 0.03 | 0.09 | 1.02   | 0.828293 | 0.0036   | 0.930272 | 0.085874 |
| MmugDNA.20840.1.S1_at   | MmugDNA.20840.1 | 6.73  | 6.83  | 0.18 | 0.08 | -1.08  | 0.774025 | 0.191158 | 0.904999 | 0.466426 |
| MmugDNA.20842.1.S1_at   | MmugDNA.20842.1 | 9.12  | 9.2   | 0.17 | 0.29 | -1.05  | 0.499962 | 0.584941 | 0.759402 | 0.752584 |
| MmugDNA.20843.1.S1_at   | MmugDNA.20843.1 | 8.64  | 8.94  | 0.17 | 0.23 | -1.23  | 0.144925 | 0.149439 | 0.511188 | 0.423893 |
| MmugDNA.20848.1.S1_at   | MmugDNA.20848.1 | 12.77 | 12.41 | 0.07 | 0.12 | 1.28   | 0.012148 | 0.005351 | 0.240358 | 0.101092 |
| MmugDNA.20855.1.S1_at   | MmugDNA.20855.1 | 3.13  | 3.13  | 0.01 | 0.06 | 1      | 0.444651 | 0.348003 | 0.72708  | 0.592215 |
| MmugDNA.2086.1.S1_at    | MmugDNA.2086.1  | 6.22  | 6.96  | 0.94 | 0.46 | -1.67  | 0.166706 | 0.177745 | 0.530388 | 0.454107 |
| MmugDNA.20861.1.S1_at   | MmugDNA.20861.1 | 9.51  | 11.73 | 0.74 | 0.49 | -4.65  | 0.017082 | 0.007365 | 0.266719 | 0.115268 |
| MmugDNA.20865.1.S1_at   | MmugDNA.20865.1 | 12.8  | 12.72 | 0.07 | 0.12 | 1.06   | 0.120871 | 0.145857 | 0.48574  | 0.419888 |
| MmugDNA.20871.1.S1_at   | MmugDNA.20871.1 | 12.4  | 12.53 | 0.06 | 0.19 | -1.09  | 0.458324 | 0.083995 | 0.735379 | 0.3349   |
| MmugDNA.20880.1.S1_at   | MmugDNA.20880.1 | 6.03  | 6.12  | 0.19 | 0.19 | -1.07  | 0.409794 | 0.289727 | 0.70606  | 0.550776 |
| MmugDNA.20885.1.S1_at   | MmugDNA.20885.1 | 11.5  | 10.79 | 0.2  | 0.31 | 1.64   | 0.065584 | 0.068347 | 0.404648 | 0.307894 |
| MmugDNA.20899.1.S1_at   | MmugDNA.20899.1 | 5.89  | 6.53  | 0.44 | 0.7  | -1.56  | 0.661732 | 0.724405 | 0.848183 | 0.840474 |
| MmugDNA.209.1.S1_at     | MmugDNA.209.1   | 7.12  | 6.64  | 0.15 | 0.03 | 1.39   | 0.009083 | 0.003748 | 0.222023 | 0.087236 |
| MmugDNA.20906.1.S1_at   | MmugDNA.20906.1 | 7.09  | 6.78  | 0.77 | 0.93 | 1.24   | 0.857014 | 0.169332 | 0.942171 | 0.445925 |
| MmugDNA.20907.1.S1_at   | MmugDNA.20907.1 | 9.12  | 10.31 | 0.21 | 1.13 | -2.28  | 0.194546 | 0.093827 | 0.558002 | 0.350281 |
| MmugDNA.20916.1.S1_at   | MmugDNA.20916.1 | 8.78  | 8.38  | 0.15 | 0.18 | 1.32   | 0.088923 | 0.007782 | 0.444028 | 0.117732 |
| MmugDNA.20928.1.S1_at   | MmugDNA.20928.1 | 11.47 | 12.13 | 0.12 | 0.28 | -1.58  | 0.019515 | 0.007562 | 0.275001 | 0.116437 |
| MmugDNA.2093.1.S1_at    | MmugDNA.2093.1  | 3.83  | 3.69  | 0.47 | 0.05 | 1.1    | 0.303141 | 0.35058  | 0.637386 | 0.594324 |
| MmugDNA.20932.1.S1_at   | MmugDNA.20932.1 | 9.26  | 9.14  | 0.24 | 0.48 | 1.08   | 0.683646 | 0.855207 | 0.85844  | 0.917457 |
| MmugDNA.20957.1.S1_at   | MmugDNA.20957.1 | 10.94 | 10.39 | 0.08 | 0.29 | 1.46   | 0.027763 | 0.011045 | 0.308973 | 0.136837 |
| MmugDNA.20958.1.S1_at   | MmugDNA.20958.1 | 11.52 | 11.64 | 0.16 | 0.83 | -1.09  | 0.509869 | 0.666257 | 0.764572 | 0.804419 |
| MmugDNA.20963.1.S1_at   | MmugDNA.20963.1 | 4.8   | 4.89  | 0.19 | 0.18 | -1.06  | 0.654265 | 0.148912 | 0.844551 | 0.423284 |
| MmugDNA.20979.1.S1_at   | MmugDNA.20979.1 | 13.81 | 13.8  | 0.02 | 0.12 | 1.01   | 0.999149 | 0.889139 | 0.99976  | 0.936796 |
| MmugDNA.20983.1.S1_at   | MmugDNA.20983.1 | 5.6   | 6.76  | 0.88 | 0.54 | -2.23  | 0.138711 | 0.047157 | 0.505884 | 0.261755 |
| MmugDNA.20986.1.S1_s_at | MmugDNA.20986.1 | 9.27  | 9.87  | 0.3  | 0.65 | -1.51  | 0.269281 | 0.172082 | 0.613979 | 0.448508 |
| MmugDNA.20995.1.S1_at   | MmugDNA.20995.1 | 7.3   | 11.34 | 2.06 | 2.99 | -16.48 | 0.342742 | 0.2998   | 0.663407 | 0.558081 |
| MmugDNA.21.1.S1_at      | MmugDNA.21.1    | 10.73 | 10.74 | 0.04 | 0.42 | -1.01  | 0.899137 | 0.916517 | 0.959714 | 0.953266 |
| MmugDNA.210.1.S1_at     | MmugDNA.210.1   | 4.56  | 7.81  | 2.2  | 2.21 | -9.5   | 0.425016 | 0.533747 | 0.714956 | 0.719857 |
| MmugDNA.21002.1.S1_at   | MmugDNA.21002.1 | 10.28 | 10.48 | 0.12 | 0.11 | -1.14  | 0.102464 | 0.019101 | 0.46236  | 0.173887 |
| MmugDNA.21004.1.S1_at   | MmugDNA.21004.1 | 4.67  | 4.72  | 0.13 | 0.12 | -1.04  | 0.913764 | 0.510045 | 0.96591  | 0.704549 |
| MmugDNA.21005.1.S1_at   | MmugDNA.21005.1 | 7.72  | 7.52  | 0.2  | 0.1  | 1.15   | 0.117043 | 0.082171 | 0.481105 | 0.331021 |

|                         |                 |       |       |      |      |       |          |          |          |          |
|-------------------------|-----------------|-------|-------|------|------|-------|----------|----------|----------|----------|
| MmugDNA.21007.1.S1_s_at | MmugDNA.21007.1 | 13.69 | 13.85 | 0.16 | 0.17 | -1.12 | 0.344194 | 0.472328 | 0.664255 | 0.679963 |
| MmugDNA.21009.1.S1_at   | MmugDNA.21009.1 | 5.44  | 5.35  | 0.15 | 0.04 | 1.07  | 0.39516  | 0.603592 | 0.696396 | 0.764204 |
| MmugDNA.2101.1.S1_at    | MmugDNA.2101.1  | 13.42 | 13.14 | 0.1  | 0.68 | 1.21  | 0.401147 | 0.545525 | 0.700652 | 0.727564 |
| MmugDNA.21013.1.S1_at   | MmugDNA.21013.1 | 6.75  | 7     | 0.2  | 0.11 | -1.19 | 0.345387 | 0.369319 | 0.665169 | 0.6087   |
| MmugDNA.21023.1.S1_at   | MmugDNA.21023.1 | 10.73 | 10.83 | 0.22 | 0.01 | -1.07 | 0.782481 | 0.868585 | 0.909199 | 0.925383 |
| MmugDNA.21026.1.S1_at   | MmugDNA.21026.1 | 5.87  | 5.91  | 0.43 | 0.13 | -1.03 | 0.880347 | 0.960331 | 0.951847 | 0.977459 |
| MmugDNA.21032.1.S1_at   | MmugDNA.21032.1 | 12.95 | 13.11 | 0.02 | 0.51 | -1.12 | 0.755865 | 0.53994  | 0.896248 | 0.723995 |
| MmugDNA.21038.1.S1_at   | MmugDNA.21038.1 | 4.12  | 4.14  | 0.1  | 0.31 | -1.02 | 0.520089 | 0.683922 | 0.770623 | 0.815618 |
| MmugDNA.21041.1.S1_at   | MmugDNA.21041.1 | 10.06 | 9.94  | 0.18 | 0.69 | 1.09  | 0.807166 | 0.837525 | 0.920996 | 0.907127 |
| MmugDNA.21042.1.S1_at   | MmugDNA.21042.1 | 5.97  | 6.14  | 0.12 | 0.07 | -1.12 | 0.095581 | 0.155833 | 0.453501 | 0.431211 |
| MmugDNA.21047.1.S1_at   | MmugDNA.21047.1 | 10.54 | 10.24 | 0.24 | 0.35 | 1.23  | 0.065421 | 0.069793 | 0.404567 | 0.310331 |
| MmugDNA.21051.1.S1_at   | MmugDNA.21051.1 | 3.5   | 3.83  | 0.14 | 0.01 | -1.26 | 0.031867 | 0.558855 | 0.32312  | 0.73591  |
| MmugDNA.21058.1.S1_at   | MmugDNA.21058.1 | 9.42  | 8.46  | 0.25 | 0.72 | 1.95  | 0.419224 | 0.574057 | 0.711714 | 0.745566 |
| MmugDNA.21059.1.S1_at   | MmugDNA.21059.1 | 11.79 | 10.93 | 0.27 | 0.66 | 1.82  | 0.056954 | 0.022872 | 0.387418 | 0.189285 |
| MmugDNA.21065.1.S1_at   | MmugDNA.21065.1 | 7.13  | 7.73  | 0.19 | 0.37 | -1.52 | 0.141945 | 0.038668 | 0.509233 | 0.24169  |
| MmugDNA.21067.1.S1_at   | MmugDNA.21067.1 | 12.44 | 12.51 | 0.06 | 0.41 | -1.05 | 0.527112 | 0.443613 | 0.774565 | 0.661336 |
| MmugDNA.21071.1.S1_at   | MmugDNA.21071.1 | 13.21 | 13.15 | 0.08 | 0.15 | 1.04  | 0.47295  | 0.324235 | 0.7441   | 0.57488  |
| MmugDNA.21074.1.S1_at   | MmugDNA.21074.1 | 12.22 | 12.96 | 0.12 | 0.43 | -1.67 | 0.064998 | 0.053278 | 0.403744 | 0.276463 |
| MmugDNA.21077.1.S1_at   | MmugDNA.21077.1 | 9.57  | 10.18 | 0.42 | 0.76 | -1.53 | 0.725171 | 0.744837 | 0.880066 | 0.852198 |
| MmugDNA.2108.1.S1_s_at  | MmugDNA.2108.1  | 6.99  | 8.22  | 0.85 | 1.13 | -2.34 | 0.429832 | 0.382009 | 0.717757 | 0.618258 |
| MmugDNA.21080.1.S1_at   | MmugDNA.21080.1 | 5.84  | 5.5   | 1.44 | 0.49 | 1.27  | 0.278646 | 0.400266 | 0.620751 | 0.630158 |
| MmugDNA.21082.1.S1_at   | MmugDNA.21082.1 | 3.21  | 3.21  | 0.1  | 0.01 | -1    | 0.697638 | 0.869079 | 0.865694 | 0.925671 |
| MmugDNA.21084.1.S1_at   | MmugDNA.21084.1 | 4.22  | 4.22  | 0.12 | 0.02 | 1     | 0.43756  | 0.199401 | 0.722547 | 0.474002 |
| MmugDNA.21085.1.S1_at   | MmugDNA.21085.1 | 4.46  | 4.44  | 0.12 | 0.16 | 1.02  | 0.819548 | 0.500683 | 0.926529 | 0.699229 |
| MmugDNA.21086.1.S1_at   | MmugDNA.21086.1 | 5.62  | 5.74  | 0.13 | 0.11 | -1.09 | 0.562591 | 0.432713 | 0.795395 | 0.653094 |
| MmugDNA.21088.1.S1_at   | MmugDNA.21088.1 | 5.53  | 5.62  | 0.14 | 0.08 | -1.06 | 0.8357   | 0.303301 | 0.933475 | 0.560748 |
| MmugDNA.2109.1.S1_at    | MmugDNA.2109.1  | 6.64  | 6.43  | 0.06 | 0.29 | 1.15  | 0.998047 | 0.775044 | 0.999237 | 0.869035 |
| MmugDNA.21090.1.S1_at   | MmugDNA.21090.1 | 4.97  | 4.98  | 0.09 | 0.03 | -1    | 0.245442 | 0.708678 | 0.59706  | 0.831025 |
| MmugDNA.21095.1.S1_at   | MmugDNA.21095.1 | 10.82 | 10.22 | 0.43 | 1.07 | 1.52  | 0.221918 | 0.27292  | 0.580625 | 0.53761  |
| MmugDNA.21098.1.S1_at   | MmugDNA.21098.1 | 6.24  | 5.71  | 0.87 | 0.14 | 1.45  | 0.298253 | 0.373967 | 0.633823 | 0.612588 |
| MmugDNA.211.1.S1_at     | MmugDNA.211.1   | 6.77  | 6.83  | 0.12 | 0.18 | -1.04 | 0.467474 | 0.811031 | 0.740695 | 0.890966 |
| MmugDNA.21100.1.S1_at   | MmugDNA.21100.1 | 7.59  | 6.8   | 0.19 | 0.5  | 1.72  | 0.023975 | 0.012447 | 0.293729 | 0.14417  |
| MmugDNA.21104.1.S1_at   | MmugDNA.21104.1 | 9.07  | 7.11  | 0.52 | 0.46 | 3.87  | 0.008592 | 0.001975 | 0.219458 | 0.065871 |
| MmugDNA.21105.1.S1_at   | MmugDNA.21105.1 | 10.51 | 9.31  | 0.37 | 0.23 | 2.29  | 0.008776 | 0.003989 | 0.221033 | 0.089804 |
| MmugDNA.21108.1.S1_at   | MmugDNA.21108.1 | 6.87  | 7.27  | 0.29 | 0.57 | -1.32 | 0.171827 | 0.134472 | 0.535401 | 0.406626 |
| MmugDNA.21109.1.S1_at   | MmugDNA.21109.1 | 11.53 | 11.65 | 0.25 | 0.37 | -1.09 | 0.258079 | 0.172107 | 0.605415 | 0.448529 |
| MmugDNA.21118.1.S1_at   | MmugDNA.21118.1 | 6.08  | 6.26  | 0.1  | 0.08 | -1.13 | 0.063358 | 0.039153 | 0.400486 | 0.243072 |
| MmugDNA.2112.1.S1_at    | MmugDNA.2112.1  | 7.46  | 7.73  | 0.35 | 0.42 | -1.21 | 0.678068 | 0.60192  | 0.855759 | 0.763122 |
| MmugDNA.21120.1.S1_at   | MmugDNA.21120.1 | 6.43  | 6.24  | 1.07 | 0.65 | 1.14  | 0.790389 | 0.885103 | 0.91303  | 0.934567 |
| MmugDNA.21122.1.S1_at   | MmugDNA.21122.1 | 4.88  | 4.99  | 0.17 | 0.17 | -1.08 | 0.830332 | 0.46582  | 0.931421 | 0.675969 |
| MmugDNA.21125.1.S1_at   | MmugDNA.21125.1 | 8.43  | 7.66  | 0.43 | 1.03 | 1.7   | 0.318872 | 0.415143 | 0.648688 | 0.640713 |

|                         |                 |       |       |      |      |       |          |          |          |          |
|-------------------------|-----------------|-------|-------|------|------|-------|----------|----------|----------|----------|
| MmugDNA.21125.1.S1_s_at | MmugDNA.21125.1 | 7.76  | 7.51  | 0.18 | 0.23 | 1.19  | 0.267902 | 0.341671 | 0.612836 | 0.587796 |
| MmugDNA.21126.1.S1_at   | MmugDNA.21126.1 | 5.42  | 5.63  | 0.1  | 0.15 | -1.16 | 0.340799 | 0.026495 | 0.662186 | 0.203897 |
| MmugDNA.21127.1.S1_at   | MmugDNA.21127.1 | 6.3   | 7.34  | 0.28 | 0.78 | -2.05 | 0.080471 | 0.029309 | 0.430491 | 0.21321  |
| MmugDNA.21128.1.S1_at   | MmugDNA.21128.1 | 12.96 | 13.09 | 0.05 | 0.24 | -1.09 | 0.987561 | 0.864636 | 0.995569 | 0.923264 |
| MmugDNA.21136.1.S1_at   | MmugDNA.21136.1 | 13.96 | 13.37 | 0.15 | 0.38 | 1.5   | 0.035049 | 0.023457 | 0.334571 | 0.191956 |
| MmugDNA.21138.1.S1_at   | MmugDNA.21138.1 | 11.55 | 11.48 | 0.09 | 0.2  | 1.05  | 0.855776 | 0.907606 | 0.941689 | 0.947753 |
| MmugDNA.21144.1.S1_at   | MmugDNA.21144.1 | 3.98  | 4.09  | 0.25 | 0.09 | -1.08 | 0.943848 | 0.997791 | 0.978535 | 0.998906 |
| MmugDNA.21145.1.S1_s_at | MmugDNA.21145.1 | 6.76  | 6.76  | 0.18 | 0.12 | -1    | 0.791449 | 0.557242 | 0.91338  | 0.735031 |
| MmugDNA.21146.1.S1_at   | MmugDNA.21146.1 | 12.63 | 12.36 | 0.1  | 0.14 | 1.2   | 0.029072 | 0.00923  | 0.312634 | 0.126903 |
| MmugDNA.21148.1.S1_at   | MmugDNA.21148.1 | 9.75  | 11.46 | 0.11 | 0.45 | -3.27 | 0.002886 | 0.002883 | 0.169151 | 0.078985 |
| MmugDNA.2115.1.S1_at    | MmugDNA.2115.1  | 13.23 | 13.07 | 0.04 | 0.19 | 1.12  | 0.135065 | 0.150764 | 0.501995 | 0.425322 |
| MmugDNA.21150.1.S1_at   | MmugDNA.21150.1 | 6.57  | 6.57  | 0.22 | 0.14 | 1     | 0.542133 | 0.593504 | 0.783078 | 0.758322 |
| MmugDNA.21158.1.S1_at   | MmugDNA.21158.1 | 4.03  | 4.11  | 0.12 | 0.11 | -1.05 | 0.494882 | 0.37581  | 0.756991 | 0.613697 |
| MmugDNA.21162.1.S1_at   | MmugDNA.21162.1 | 11.47 | 10.36 | 0.2  | 0.16 | 2.16  | 0.003305 | 0.001035 | 0.177442 | 0.051314 |
| MmugDNA.21164.1.S1_at   | MmugDNA.21164.1 | 6.95  | 7.7   | 0.61 | 0.7  | -1.68 | 0.248124 | 0.207249 | 0.599076 | 0.481388 |
| MmugDNA.21166.1.S1_at   | MmugDNA.21166.1 | 6.05  | 6.18  | 0.11 | 0.31 | -1.09 | 0.42977  | 0.486403 | 0.717708 | 0.689764 |
| MmugDNA.21171.1.S1_at   | MmugDNA.21171.1 | 5.51  | 5.6   | 0.22 | 0.72 | -1.07 | 0.81527  | 0.936153 | 0.924897 | 0.963987 |
| MmugDNA.21188.1.S1_at   | MmugDNA.21188.1 | 6.31  | 6.38  | 0.04 | 0.27 | -1.05 | 0.952292 | 0.144567 | 0.982156 | 0.418425 |
| MmugDNA.21189.1.S1_at   | MmugDNA.21189.1 | 5.53  | 6.13  | 0.2  | 0.8  | -1.51 | 0.209381 | 0.236241 | 0.570957 | 0.507252 |
| MmugDNA.21195.1.S1_at   | MmugDNA.21195.1 | 9.91  | 8.89  | 0.18 | 0.47 | 2.02  | 0.02105  | 0.00959  | 0.281947 | 0.129058 |
| MmugDNA.21199.1.S1_at   | MmugDNA.21199.1 | 5.34  | 5.93  | 0.18 | 0.58 | -1.51 | 0.223229 | 0.272054 | 0.581723 | 0.536847 |
| MmugDNA.21211.1.S1_at   | MmugDNA.21211.1 | 7.57  | 7.47  | 0.7  | 0.74 | 1.07  | 0.38457  | 0.244314 | 0.690074 | 0.514184 |
| MmugDNA.21214.1.S1_at   | MmugDNA.21214.1 | 8.69  | 7.94  | 0.41 | 0.37 | 1.68  | 0.073115 | 0.042596 | 0.418452 | 0.251035 |
| MmugDNA.21216.1.S1_at   | MmugDNA.21216.1 | 11.01 | 10.67 | 0.18 | 0.25 | 1.27  | 0.101541 | 0.058373 | 0.461313 | 0.288369 |
| MmugDNA.21230.1.S1_at   | MmugDNA.21230.1 | 12.88 | 12.69 | 0.05 | 0.09 | 1.14  | 0.085083 | 0.072646 | 0.438136 | 0.315579 |
| MmugDNA.21234.1.S1_at   | MmugDNA.21234.1 | 5.38  | 5.43  | 0.06 | 0.04 | -1.03 | 0.131589 | 0.390979 | 0.498041 | 0.62469  |
| MmugDNA.21236.1.S1_at   | MmugDNA.21236.1 | 9.98  | 9.61  | 0.16 | 0.07 | 1.29  | 0.051344 | 0.004531 | 0.376001 | 0.094006 |
| MmugDNA.2124.1.S1_at    | MmugDNA.2124.1  | 13.87 | 13.69 | 0.06 | 0.06 | 1.13  | 0.101552 | 0.030806 | 0.461313 | 0.217376 |
| MmugDNA.21240.1.S1_at   | MmugDNA.21240.1 | 7.01  | 7.21  | 0.31 | 0.08 | -1.15 | 0.272771 | 0.356802 | 0.616391 | 0.598603 |
| MmugDNA.21242.1.S1_at   | MmugDNA.21242.1 | 5.98  | 8.09  | 0.98 | 1.55 | -4.3  | 0.219299 | 0.120693 | 0.57872  | 0.389548 |
| MmugDNA.21246.1.S1_at   | MmugDNA.21246.1 | 12.66 | 12.65 | 0.09 | 0.12 | 1.01  | 0.283861 | 0.351037 | 0.623797 | 0.594737 |
| MmugDNA.21250.1.S1_at   | MmugDNA.21250.1 | 7.93  | 8.5   | 0.26 | 1.16 | -1.48 | 0.441186 | 0.49074  | 0.724743 | 0.692666 |
| MmugDNA.21252.1.S1_at   | MmugDNA.21252.1 | 4.83  | 5.06  | 0.38 | 0.08 | -1.18 | 0.922004 | 0.390753 | 0.969683 | 0.624518 |
| MmugDNA.21266.1.S1_at   | MmugDNA.21266.1 | 9.23  | 9.69  | 0.79 | 0.52 | -1.37 | 0.390608 | 0.524292 | 0.693739 | 0.714254 |
| MmugDNA.21266.1.S1_s_at | MmugDNA.21266.1 | 9.71  | 9.32  | 0.83 | 0.62 | 1.31  | 0.773885 | 0.915835 | 0.904999 | 0.952836 |
| MmugDNA.21269.1.S1_at   | MmugDNA.21269.1 | 5.94  | 6.17  | 0.19 | 0.15 | -1.17 | 0.36064  | 0.216557 | 0.674645 | 0.490207 |
| MmugDNA.21270.1.S1_at   | MmugDNA.21270.1 | 5.2   | 5.17  | 0.11 | 0.23 | 1.02  | 0.993142 | 0.631222 | 0.997652 | 0.782734 |
| MmugDNA.21273.1.S1_at   | MmugDNA.21273.1 | 6.61  | 8.7   | 0.74 | 1.29 | -4.24 | 0.047715 | 0.01659  | 0.367063 | 0.163051 |
| MmugDNA.21274.1.S1_at   | MmugDNA.21274.1 | 11.41 | 11.17 | 0.09 | 0.21 | 1.18  | 0.365012 | 0.525823 | 0.677875 | 0.715217 |
| MmugDNA.21275.1.S1_at   | MmugDNA.21275.1 | 8.04  | 7     | 0.16 | 0.51 | 2.06  | 0.029896 | 0.016862 | 0.315903 | 0.164584 |
| MmugDNA.21276.1.S1_at   | MmugDNA.21276.1 | 6.71  | 7.42  | 0.17 | 0.63 | -1.63 | 0.162965 | 0.015406 | 0.527373 | 0.157628 |

|                         |                 |       |       |      |      |       |          |          |          |          |
|-------------------------|-----------------|-------|-------|------|------|-------|----------|----------|----------|----------|
| MmugDNA.21283.1.S1_at   | MmugDNA.21283.1 | 9.2   | 9.81  | 0.35 | 0.21 | -1.52 | 0.082923 | 0.101074 | 0.434718 | 0.360724 |
| MmugDNA.21287.1.S1_at   | MmugDNA.21287.1 | 5.76  | 5.88  | 0.03 | 0.08 | -1.08 | 0.025472 | 0.005456 | 0.29951  | 0.101952 |
| MmugDNA.21289.1.S1_at   | MmugDNA.21289.1 | 12.67 | 12.51 | 0.19 | 0.18 | 1.12  | 0.534985 | 0.713107 | 0.778933 | 0.833638 |
| MmugDNA.213.1.S1_at     | MmugDNA.213.1   | 6.59  | 7.98  | 0.67 | 0.29 | -2.63 | 0.112305 | 0.109512 | 0.474794 | 0.373339 |
| MmugDNA.2130.1.S1_at    | MmugDNA.2130.1  | 10.09 | 10.08 | 0.27 | 0.31 | 1.01  | 0.247933 | 0.202516 | 0.599052 | 0.476819 |
| MmugDNA.21300.1.S1_at   | MmugDNA.21300.1 | 4.41  | 4     | 0.15 | 0.12 | 1.32  | 0.020856 | 0.012633 | 0.281049 | 0.145027 |
| MmugDNA.21315.1.S1_at   | MmugDNA.21315.1 | 11.11 | 10.9  | 0.29 | 0.35 | 1.15  | 0.618134 | 0.664277 | 0.825111 | 0.803298 |
| MmugDNA.21317.1.S1_at   | MmugDNA.21317.1 | 10.34 | 9.83  | 0.13 | 0.86 | 1.42  | 0.284805 | 0.377893 | 0.62445  | 0.615264 |
| MmugDNA.21338.1.S1_at   | MmugDNA.21338.1 | 8.55  | 9.9   | 0.28 | 0.32 | -2.56 | 0.005554 | 0.004721 | 0.191807 | 0.095706 |
| MmugDNA.21339.1.S1_at   | MmugDNA.21339.1 | 11.89 | 11.93 | 0.11 | 0.15 | -1.02 | 0.593615 | 0.867039 | 0.811547 | 0.924449 |
| MmugDNA.2134.1.S1_at    | MmugDNA.2134.1  | 8.22  | 7.76  | 0.13 | 0.47 | 1.38  | 0.522734 | 0.674869 | 0.772248 | 0.810065 |
| MmugDNA.21346.1.S1_at   | MmugDNA.21346.1 | 12    | 10.73 | 0.17 | 0.58 | 2.41  | 0.020608 | 0.010984 | 0.279056 | 0.136546 |
| MmugDNA.21347.1.S1_s_at | MmugDNA.21347.1 | 12.48 | 12.38 | 0.11 | 0.07 | 1.07  | 0.124779 | 0.096221 | 0.49077  | 0.353541 |
| MmugDNA.21353.1.S1_at   | MmugDNA.21353.1 | 3.76  | 4.04  | 0.08 | 0.39 | -1.21 | 0.688903 | 0.594208 | 0.861215 | 0.758517 |
| MmugDNA.21353.1.S1_s_at | MmugDNA.21353.1 | 5.01  | 5.44  | 0.38 | 0.4  | -1.35 | 0.56731  | 0.608395 | 0.798078 | 0.767074 |
| MmugDNA.21371.1.S1_at   | MmugDNA.21371.1 | 4.75  | 5.1   | 0.51 | 1.16 | -1.27 | 0.286722 | 0.213733 | 0.625572 | 0.487551 |
| MmugDNA.21376.1.S1_s_at | MmugDNA.21376.1 | 10.84 | 10.78 | 0.19 | 0.22 | 1.04  | 0.758549 | 0.741821 | 0.897919 | 0.850509 |
| MmugDNA.21377.1.S1_at   | MmugDNA.21377.1 | 10.42 | 9.88  | 0.1  | 0.22 | 1.45  | 0.009744 | 0.027254 | 0.226235 | 0.206326 |
| MmugDNA.21380.1.S1_at   | MmugDNA.21380.1 | 13.14 | 12.88 | 0.12 | 0.25 | 1.19  | 0.296089 | 0.182895 | 0.632176 | 0.459365 |
| MmugDNA.21382.1.S1_at   | MmugDNA.21382.1 | 11.77 | 11.52 | 0.18 | 0.21 | 1.19  | 0.045529 | 0.033479 | 0.36126  | 0.226577 |
| MmugDNA.21386.1.S1_at   | MmugDNA.21386.1 | 7.58  | 7.06  | 0.13 | 0.2  | 1.44  | 0.018618 | 0.031728 | 0.270832 | 0.22055  |
| MmugDNA.21387.1.S1_at   | MmugDNA.21387.1 | 6.33  | 6.26  | 0.5  | 0.33 | 1.06  | 0.63278  | 0.451399 | 0.833319 | 0.666186 |
| MmugDNA.21391.1.S1_at   | MmugDNA.21391.1 | 5.58  | 5.67  | 0.15 | 0.11 | -1.06 | 0.664992 | 0.446581 | 0.849774 | 0.662862 |
| MmugDNA.2140.1.S1_at    | MmugDNA.2140.1  | 10.46 | 10.47 | 0.15 | 0.1  | -1.01 | 0.683959 | 0.847515 | 0.858543 | 0.913321 |
| MmugDNA.21403.1.S1_at   | MmugDNA.21403.1 | 10.82 | 9.42  | 0.22 | 0.16 | 2.64  | 0.000882 | 0.000119 | 0.139813 | 0.028664 |
| MmugDNA.21404.1.S1_at   | MmugDNA.21404.1 | 8.69  | 8.6   | 0.12 | 0.4  | 1.06  | 0.619245 | 0.632957 | 0.825435 | 0.783881 |
| MmugDNA.21407.1.S1_at   | MmugDNA.21407.1 | 10.73 | 10.24 | 0.16 | 0.71 | 1.4   | 0.328496 | 0.418076 | 0.654375 | 0.642582 |
| MmugDNA.21410.1.S1_at   | MmugDNA.21410.1 | 6.35  | 6.39  | 0.04 | 0.04 | -1.03 | 0.306995 | 0.007831 | 0.63983  | 0.117929 |
| MmugDNA.21414.1.S1_at   | MmugDNA.21414.1 | 9.64  | 9.67  | 0.03 | 0.45 | -1.03 | 0.481283 | 0.707468 | 0.749074 | 0.830361 |
| MmugDNA.2142.1.S1_at    | MmugDNA.2142.1  | 8.38  | 8.22  | 0.03 | 0.08 | 1.12  | 0.013923 | 0.00654  | 0.250029 | 0.109652 |
| MmugDNA.21423.1.S1_at   | MmugDNA.21423.1 | 7.31  | 7.27  | 0.25 | 0.1  | 1.03  | 0.872641 | 0.140274 | 0.9491   | 0.413448 |
| MmugDNA.21431.1.S1_at   | MmugDNA.21431.1 | 6.45  | 5.68  | 0.26 | 0.36 | 1.7   | 0.076946 | 0.111976 | 0.425944 | 0.37707  |
| MmugDNA.21435.1.S1_at   | MmugDNA.21435.1 | 12.84 | 12.79 | 0.04 | 0.08 | 1.03  | 0.194111 | 0.236565 | 0.557718 | 0.507364 |
| MmugDNA.21436.1.S1_at   | MmugDNA.21436.1 | 9.76  | 9.51  | 0.29 | 0.18 | 1.19  | 0.198379 | 0.178439 | 0.561522 | 0.454778 |
| MmugDNA.21439.1.S1_at   | MmugDNA.21439.1 | 10.3  | 13.41 | 1.81 | 2.3  | -8.64 | 0.537656 | 0.355711 | 0.780064 | 0.597864 |
| MmugDNA.21441.1.S1_at   | MmugDNA.21441.1 | 13.29 | 13.2  | 0.01 | 0.07 | 1.07  | 0.039661 | 0.009402 | 0.347812 | 0.127832 |
| MmugDNA.21446.1.S1_at   | MmugDNA.21446.1 | 6.89  | 6.62  | 0.31 | 0.25 | 1.2   | 0.701198 | 0.88272  | 0.86794  | 0.93317  |
| MmugDNA.2145.1.S1_at    | MmugDNA.2145.1  | 12.11 | 11.8  | 0.07 | 0.75 | 1.24  | 0.145744 | 0.171511 | 0.511603 | 0.447895 |
| MmugDNA.21462.1.S1_at   | MmugDNA.21462.1 | 10.59 | 9.21  | 0.24 | 0.39 | 2.61  | 0.004611 | 0.000344 | 0.1844   | 0.036921 |
| MmugDNA.21467.1.S1_at   | MmugDNA.21467.1 | 8.77  | 8.71  | 0.27 | 0.15 | 1.04  | 0.817293 | 0.730878 | 0.925925 | 0.844119 |
| MmugDNA.21472.1.S1_at   | MmugDNA.21472.1 | 10.93 | 10.83 | 0.15 | 0.13 | 1.07  | 0.398592 | 0.104639 | 0.698762 | 0.365941 |



|                         |                 |       |       |      |      |       |          |          |          |          |
|-------------------------|-----------------|-------|-------|------|------|-------|----------|----------|----------|----------|
| MmugDNA.21476.1.S1_at   | MmugDNA.21476.1 | 11.53 | 11.7  | 0.08 | 0.08 | -1.12 | 0.069095 | 0.043676 | 0.411264 | 0.253711 |
| MmugDNA.21483.1.S1_at   | MmugDNA.21483.1 | 9.13  | 8.5   | 0.07 | 0.36 | 1.54  | 0.049809 | 0.017544 | 0.372194 | 0.167632 |
| MmugDNA.21487.1.S1_at   | MmugDNA.21487.1 | 8.97  | 8.69  | 0.12 | 0.92 | 1.21  | 0.283553 | 0.32147  | 0.623624 | 0.573226 |
| MmugDNA.21489.1.S1_at   | MmugDNA.21489.1 | 12.11 | 11.92 | 0.02 | 0.13 | 1.15  | 0.0433   | 0.015048 | 0.3567   | 0.155803 |
| MmugDNA.21492.1.S1_at   | MmugDNA.21492.1 | 11.4  | 11.16 | 0.19 | 0.02 | 1.18  | 0.115381 | 0.115987 | 0.478773 | 0.383164 |
| MmugDNA.2150.1.S1_at    | MmugDNA.2150.1  | 7.9   | 6.7   | 0.24 | 0.97 | 2.31  | 0.32     | 0.408844 | 0.649268 | 0.6359   |
| MmugDNA.21502.1.S1_at   | MmugDNA.21502.1 | 10.67 | 10.13 | 0.21 | 0.08 | 1.46  | 0.016866 | 0.011451 | 0.266096 | 0.13846  |
| MmugDNA.21510.1.S1_at   | MmugDNA.21510.1 | 12.57 | 12.83 | 0.23 | 0.36 | -1.2  | 0.565223 | 0.46658  | 0.796922 | 0.676398 |
| MmugDNA.21515.1.S1_at   | MmugDNA.21515.1 | 11.36 | 10.44 | 0.26 | 0.35 | 1.89  | 0.009652 | 0.00117  | 0.226235 | 0.053714 |
| MmugDNA.21516.1.S1_at   | MmugDNA.21516.1 | 11.04 | 10.9  | 0.09 | 0.56 | 1.1   | 0.5202   | 0.49323  | 0.770651 | 0.694009 |
| MmugDNA.21518.1.S1_at   | MmugDNA.21518.1 | 11.65 | 11.28 | 0.45 | 0.98 | 1.3   | 0.734065 | 0.902392 | 0.885333 | 0.94454  |
| MmugDNA.21523.1.S1_at   | MmugDNA.21523.1 | 5.72  | 5.8   | 0.17 | 0.12 | -1.06 | 0.192688 | 0.13281  | 0.556004 | 0.404544 |
| MmugDNA.21524.1.S1_at   | MmugDNA.21524.1 | 8.43  | 7.2   | 0.5  | 0.55 | 2.35  | 0.211805 | 0.208024 | 0.572347 | 0.482049 |
| MmugDNA.21524.1.S1_s_at | MmugDNA.21524.1 | 8.39  | 7.97  | 0.26 | 0.47 | 1.34  | 0.607415 | 0.458545 | 0.819336 | 0.671232 |
| MmugDNA.21525.1.S1_at   | MmugDNA.21525.1 | 6.39  | 7.54  | 0.91 | 0.44 | -2.21 | 0.092051 | 0.069526 | 0.448698 | 0.309848 |
| MmugDNA.21525.1.S1_s_at | MmugDNA.21525.1 | 7.39  | 8     | 0.22 | 0.35 | -1.53 | 0.043785 | 0.060669 | 0.357051 | 0.292876 |
| MmugDNA.21526.1.S1_at   | MmugDNA.21526.1 | 4.54  | 4.51  | 0.05 | 0.29 | 1.02  | 0.830917 | 0.662859 | 0.931586 | 0.802631 |
| MmugDNA.21528.1.S1_at   | MmugDNA.21528.1 | 6.8   | 6.89  | 0.15 | 0.04 | -1.06 | 0.970661 | 0.987255 | 0.988685 | 0.992852 |
| MmugDNA.21529.1.S1_at   | MmugDNA.21529.1 | 9.51  | 9.04  | 0.24 | 0.27 | 1.38  | 0.26659  | 0.137984 | 0.612032 | 0.410912 |
| MmugDNA.21530.1.S1_at   | MmugDNA.21530.1 | 3.19  | 3.23  | 0.02 | 0.02 | -1.03 | 0.032997 | 0.012725 | 0.326925 | 0.145429 |
| MmugDNA.21534.1.S1_at   | MmugDNA.21534.1 | 11.66 | 11.65 | 0.05 | 0.18 | 1     | 0.534204 | 0.687193 | 0.77862  | 0.817509 |
| MmugDNA.21539.1.S1_at   | MmugDNA.21539.1 | 3.9   | 3.92  | 0.02 | 0.1  | -1.02 | 0.215141 | 0.646542 | 0.575579 | 0.792953 |
| MmugDNA.21540.1.S1_at   | MmugDNA.21540.1 | 12.02 | 13.44 | 0.68 | 1.05 | -2.67 | 0.577994 | 0.305396 | 0.803619 | 0.562397 |
| MmugDNA.21543.1.S1_at   | MmugDNA.21543.1 | 12.04 | 11.47 | 0.06 | 0.27 | 1.49  | 0.026943 | 0.007864 | 0.305387 | 0.118072 |
| MmugDNA.21546.1.S1_at   | MmugDNA.21546.1 | 12.25 | 11.91 | 0.08 | 0.34 | 1.26  | 0.155158 | 0.175245 | 0.519932 | 0.452027 |
| MmugDNA.21551.1.S1_at   | MmugDNA.21551.1 | 3.91  | 4.05  | 0.18 | 0.06 | -1.1  | 0.885225 | 0.769774 | 0.954017 | 0.866333 |
| MmugDNA.21552.1.S1_at   | MmugDNA.21552.1 | 11.1  | 10.2  | 0.24 | 0.12 | 1.86  | 0.005818 | 0.000961 | 0.193191 | 0.049342 |
| MmugDNA.21555.1.S1_at   | MmugDNA.21555.1 | 6.14  | 5.71  | 0.24 | 0.17 | 1.35  | 0.025203 | 0.007235 | 0.298141 | 0.11424  |
| MmugDNA.21556.1.S1_at   | MmugDNA.21556.1 | 10.65 | 10.04 | 0.1  | 0.3  | 1.52  | 0.023521 | 0.012559 | 0.291638 | 0.144501 |
| MmugDNA.21561.1.S1_at   | MmugDNA.21561.1 | 5.31  | 5.38  | 0.19 | 0.08 | -1.05 | 0.542125 | 0.747372 | 0.783078 | 0.853149 |
| MmugDNA.21562.1.S1_at   | MmugDNA.21562.1 | 5.96  | 5.43  | 1.22 | 0.72 | 1.44  | 0.236742 | 0.314301 | 0.590504 | 0.568263 |
| MmugDNA.21566.1.S1_at   | MmugDNA.21566.1 | 7.56  | 7.69  | 0.09 | 0.21 | -1.09 | 0.28456  | 0.344187 | 0.624327 | 0.589762 |
| MmugDNA.21567.1.S1_at   | MmugDNA.21567.1 | 8.27  | 8.95  | 0.11 | 0.13 | -1.61 | 0.003994 | 0.001024 | 0.181739 | 0.051079 |
| MmugDNA.21575.1.S1_at   | MmugDNA.21575.1 | 9.01  | 10.04 | 0.82 | 1.04 | -2.04 | 0.314424 | 0.441269 | 0.645757 | 0.659477 |
| MmugDNA.21586.1.S1_at   | MmugDNA.21586.1 | 13.41 | 12.98 | 0.05 | 0.4  | 1.35  | 0.084231 | 0.073358 | 0.436922 | 0.316469 |
| MmugDNA.21589.1.S1_at   | MmugDNA.21589.1 | 6.31  | 6.67  | 0.52 | 0.59 | -1.28 | 0.565021 | 0.188231 | 0.796891 | 0.464251 |
| MmugDNA.2159.1.S1_at    | MmugDNA.2159.1  | 6.69  | 6.83  | 0.12 | 0.09 | -1.1  | 0.401552 | 0.556243 | 0.700896 | 0.734449 |
| MmugDNA.21590.1.S1_at   | MmugDNA.21590.1 | 2.95  | 2.92  | 0.73 | 0.07 | 1.02  | 0.353413 | 0.477608 | 0.67013  | 0.683636 |
| MmugDNA.21590.1.S1_x_at | MmugDNA.21590.1 | 3.34  | 3.28  | 0.82 | 0.12 | 1.04  | 0.320557 | 0.451054 | 0.649472 | 0.666004 |
| MmugDNA.21593.1.S1_at   | MmugDNA.21593.1 | 3.93  | 3.89  | 0.06 | 0.05 | 1.03  | 0.645521 | 0.296139 | 0.840383 | 0.555339 |
| MmugDNA.21599.1.S1_at   | MmugDNA.21599.1 | 11.46 | 10.89 | 0.24 | 0.61 | 1.49  | 0.243371 | 0.309973 | 0.595143 | 0.565227 |

|                         |                 |       |       |      |      |       |          |          |          |          |
|-------------------------|-----------------|-------|-------|------|------|-------|----------|----------|----------|----------|
| MmugDNA.21602.1.S1_at   | MmugDNA.21602.1 | 12.29 | 11.99 | 0.08 | 0.25 | 1.23  | 0.36928  | 0.012122 | 0.680609 | 0.142442 |
| MmugDNA.21603.1.S1_at   | MmugDNA.21603.1 | 6.22  | 6.28  | 0.13 | 0.13 | -1.04 | 0.842327 | 0.299551 | 0.93646  | 0.557945 |
| MmugDNA.21607.1.S1_at   | MmugDNA.21607.1 | 5.79  | 5.85  | 0.04 | 0.12 | -1.05 | 0.321193 | 0.356191 | 0.649887 | 0.598158 |
| MmugDNA.21608.1.S1_at   | MmugDNA.21608.1 | 9.97  | 10.13 | 0.18 | 0.07 | -1.11 | 0.272241 | 0.317854 | 0.616016 | 0.571042 |
| MmugDNA.2161.1.S1_at    | MmugDNA.2161.1  | 4.84  | 4.63  | 0    | 0.24 | 1.16  | 0.391813 | 0.469922 | 0.694281 | 0.678572 |
| MmugDNA.21612.1.S1_at   | MmugDNA.21612.1 | 7.38  | 7.47  | 0.1  | 0.21 | -1.06 | 0.829397 | 0.007585 | 0.930756 | 0.11658  |
| MmugDNA.2162.1.S1_at    | MmugDNA.2162.1  | 9.86  | 10.05 | 0.28 | 0.31 | -1.14 | 0.561449 | 0.520774 | 0.794887 | 0.711942 |
| MmugDNA.21620.1.S1_at   | MmugDNA.21620.1 | 7.87  | 7.83  | 0.07 | 0.21 | 1.03  | 0.529634 | 0.705462 | 0.77625  | 0.829222 |
| MmugDNA.21621.1.S1_s_at | MmugDNA.21621.1 | 10.96 | 11.01 | 0.32 | 0.22 | -1.04 | 0.568521 | 0.326001 | 0.798666 | 0.576235 |
| MmugDNA.21622.1.S1_at   | MmugDNA.21622.1 | 6.37  | 6.5   | 0.19 | 0.23 | -1.09 | 0.242257 | 0.035877 | 0.594307 | 0.233893 |
| MmugDNA.21629.1.S1_at   | MmugDNA.21629.1 | 4.19  | 4.22  | 0.07 | 0.02 | -1.02 | 0.954592 | 0.361085 | 0.983073 | 0.602069 |
| MmugDNA.21630.1.S1_at   | MmugDNA.21630.1 | 10.37 | 9.67  | 0.15 | 0.17 | 1.62  | 0.005895 | 0.002005 | 0.19355  | 0.066428 |
| MmugDNA.21633.1.S1_at   | MmugDNA.21633.1 | 9.11  | 8.9   | 0.18 | 0.73 | 1.16  | 0.927722 | 0.886648 | 0.972035 | 0.935519 |
| MmugDNA.21634.1.S1_at   | MmugDNA.21634.1 | 11.64 | 12    | 0.22 | 0.16 | -1.28 | 0.147772 | 0.100746 | 0.513337 | 0.360154 |
| MmugDNA.21636.1.S1_at   | MmugDNA.21636.1 | 6.26  | 6.38  | 0.15 | 0.15 | -1.08 | 0.445039 | 0.587205 | 0.727399 | 0.754083 |
| MmugDNA.21651.1.S1_at   | MmugDNA.21651.1 | 13.01 | 12.76 | 0.09 | 0.07 | 1.18  | 0.015789 | 0.010274 | 0.261091 | 0.132734 |
| MmugDNA.21655.1.S1_at   | MmugDNA.21655.1 | 4.42  | 5.79  | 0.35 | 1.25 | -2.59 | 0.212288 | 0.27182  | 0.572552 | 0.536584 |
| MmugDNA.21661.1.S1_at   | MmugDNA.21661.1 | 12.28 | 12.2  | 0.1  | 0.16 | 1.06  | 0.528049 | 0.543652 | 0.775339 | 0.726239 |
| MmugDNA.21665.1.S1_at   | MmugDNA.21665.1 | 12.31 | 12.8  | 0.11 | 0.12 | -1.41 | 0.011649 | 0.009107 | 0.237051 | 0.125983 |
| MmugDNA.2167.1.S1_at    | MmugDNA.2167.1  | 6.35  | 6.76  | 0.19 | 0.42 | -1.33 | 0.810325 | 0.548981 | 0.922692 | 0.729509 |
| MmugDNA.21671.1.S1_at   | MmugDNA.21671.1 | 9.78  | 10.38 | 0.08 | 0.6  | -1.51 | 0.047583 | 0.040096 | 0.366797 | 0.245388 |
| MmugDNA.2168.1.S1_at    | MmugDNA.2168.1  | 6.48  | 5.8   | 1.24 | 0.78 | 1.6   | 0.695946 | 0.828652 | 0.865073 | 0.901558 |
| MmugDNA.21682.1.S1_at   | MmugDNA.21682.1 | 9.37  | 9.09  | 0.15 | 0.57 | 1.22  | 0.907594 | 0.803402 | 0.963338 | 0.886844 |
| MmugDNA.21684.1.S1_at   | MmugDNA.21684.1 | 10.84 | 11.1  | 0.44 | 0.64 | -1.19 | 0.53085  | 0.690345 | 0.776921 | 0.819507 |
| MmugDNA.21691.1.S1_at   | MmugDNA.21691.1 | 11.4  | 11.53 | 0.1  | 0.1  | -1.1  | 0.340664 | 0.46994  | 0.662123 | 0.678572 |
| MmugDNA.21692.1.S1_at   | MmugDNA.21692.1 | 9.57  | 9.51  | 0.12 | 0.08 | 1.04  | 0.144377 | 0.070439 | 0.510911 | 0.311737 |
| MmugDNA.21695.1.S1_at   | MmugDNA.21695.1 | 13.09 | 13.02 | 0.19 | 0.02 | 1.05  | 0.675012 | 0.133994 | 0.854371 | 0.406194 |
| MmugDNA.21697.1.S1_at   | MmugDNA.21697.1 | 12.46 | 12.38 | 0.05 | 0.21 | 1.06  | 0.211263 | 0.272174 | 0.572065 | 0.536939 |
| MmugDNA.21699.1.S1_at   | MmugDNA.21699.1 | 6.55  | 8.02  | 0.29 | 0.43 | -2.78 | 0.010026 | 0.004204 | 0.226901 | 0.091368 |
| MmugDNA.2170.1.S1_at    | MmugDNA.2170.1  | 4.81  | 4.93  | 0.23 | 0.77 | -1.08 | 0.258225 | 0.322847 | 0.605532 | 0.574192 |
| MmugDNA.21701.1.S1_at   | MmugDNA.21701.1 | 13.05 | 12.88 | 0.1  | 0.31 | 1.12  | 0.370989 | 0.482454 | 0.681748 | 0.687298 |
| MmugDNA.21702.1.S1_at   | MmugDNA.21702.1 | 9.26  | 9.2   | 0.17 | 0.25 | 1.04  | 0.81383  | 0.088243 | 0.924404 | 0.341721 |
| MmugDNA.21705.1.A1_at   | MmugDNA.21705.1 | 5.82  | 5.74  | 0.09 | 0.27 | 1.06  | 0.999875 | 0.638887 | 0.999967 | 0.787897 |
| MmugDNA.21705.1.S1_at   | MmugDNA.21705.1 | 5.56  | 5.62  | 0.15 | 0.33 | -1.04 | 0.773072 | 0.932618 | 0.904634 | 0.961739 |
| MmugDNA.21706.1.S1_at   | MmugDNA.21706.1 | 7.45  | 6.78  | 0.26 | 0.6  | 1.6   | 0.1426   | 0.058509 | 0.509727 | 0.288585 |
| MmugDNA.21708.1.S1_at   | MmugDNA.21708.1 | 3.88  | 6.68  | 1.3  | 1.07 | -6.98 | 0.066763 | 0.060526 | 0.406981 | 0.292664 |
| MmugDNA.21714.1.S1_at   | MmugDNA.21714.1 | 12.8  | 12.32 | 0.01 | 0.11 | 1.4   | 0.001813 | 0.000468 | 0.155338 | 0.038572 |
| MmugDNA.21719.1.S1_at   | MmugDNA.21719.1 | 9.27  | 9.05  | 0.1  | 0.16 | 1.17  | 0.200005 | 0.276539 | 0.563056 | 0.540552 |
| MmugDNA.2172.1.S1_at    | MmugDNA.2172.1  | 13.14 | 12.95 | 0.05 | 0.08 | 1.14  | 0.057144 | 0.023903 | 0.387418 | 0.193679 |
| MmugDNA.21722.1.S1_at   | MmugDNA.21722.1 | 7.94  | 6.77  | 0.22 | 0.29 | 2.25  | 0.008885 | 0.025681 | 0.221598 | 0.200834 |
| MmugDNA.21723.1.S1_at   | MmugDNA.21723.1 | 11.51 | 10.98 | 0.37 | 0.19 | 1.44  | 0.161512 | 0.138907 | 0.526444 | 0.412037 |

|                         |                 |       |       |      |      |       |          |          |          |          |
|-------------------------|-----------------|-------|-------|------|------|-------|----------|----------|----------|----------|
| MmugDNA.21725.1.S1_at   | MmugDNA.21725.1 | 11.44 | 11.42 | 0.11 | 0.19 | 1.01  | 0.871992 | 0.317082 | 0.948847 | 0.570347 |
| MmugDNA.21726.1.S1_at   | MmugDNA.21726.1 | 4.95  | 5.82  | 0.17 | 0.51 | -1.83 | 0.047978 | 0.029348 | 0.367582 | 0.213228 |
| MmugDNA.2173.1.S1_at    | MmugDNA.2173.1  | 9.96  | 9.77  | 0.31 | 0.27 | 1.14  | 0.657232 | 0.270446 | 0.845779 | 0.535785 |
| MmugDNA.21737.1.S1_at   | MmugDNA.21737.1 | 5.48  | 7.94  | 1.49 | 1.14 | -5.49 | 0.204968 | 0.267995 | 0.567457 | 0.533738 |
| MmugDNA.21738.1.S1_at   | MmugDNA.21738.1 | 5.39  | 5.56  | 0.05 | 0.23 | -1.13 | 0.195568 | 0.106298 | 0.558901 | 0.368766 |
| MmugDNA.21740.1.S1_at   | MmugDNA.21740.1 | 7.97  | 6.47  | 0.95 | 0.78 | 2.83  | 0.288674 | 0.385144 | 0.626793 | 0.620662 |
| MmugDNA.21745.1.S1_at   | MmugDNA.21745.1 | 11.67 | 11.41 | 0.2  | 0.59 | 1.2   | 0.249363 | 0.064424 | 0.60019  | 0.300001 |
| MmugDNA.21748.1.S1_at   | MmugDNA.21748.1 | 5.24  | 5.29  | 0.16 | 0.2  | -1.03 | 0.830708 | 0.572555 | 0.93155  | 0.744566 |
| MmugDNA.21749.1.S1_at   | MmugDNA.21749.1 | 5.27  | 5.17  | 0.1  | 0.05 | 1.07  | 0.187915 | 0.218816 | 0.550964 | 0.492537 |
| MmugDNA.2175.1.S1_at    | MmugDNA.2175.1  | 12.72 | 12.71 | 0.13 | 0.09 | 1.01  | 0.326484 | 0.118577 | 0.653184 | 0.38654  |
| MmugDNA.21756.1.S1_at   | MmugDNA.21756.1 | 11.66 | 11.27 | 0.15 | 0.23 | 1.31  | 0.10297  | 0.150227 | 0.46254  | 0.42486  |
| MmugDNA.2176.1.S1_at    | MmugDNA.2176.1  | 7.11  | 9.42  | 0.6  | 0.67 | -4.96 | 0.007378 | 0.00282  | 0.207684 | 0.078275 |
| MmugDNA.21762.1.S1_at   | MmugDNA.21762.1 | 12.03 | 11.53 | 0.12 | 0.46 | 1.42  | 0.106131 | 0.111343 | 0.466831 | 0.376045 |
| MmugDNA.21768.1.S1_at   | MmugDNA.21768.1 | 6.71  | 6.6   | 0.19 | 0.36 | 1.08  | 0.68621  | 0.478232 | 0.859694 | 0.684243 |
| MmugDNA.21787.1.S1_at   | MmugDNA.21787.1 | 4.4   | 4.42  | 0.1  | 0.1  | -1.01 | 0.849565 | 0.209439 | 0.939616 | 0.483069 |
| MmugDNA.21795.1.S1_at   | MmugDNA.21795.1 | 5.96  | 6.35  | 0.17 | 0.28 | -1.31 | 0.150071 | 0.165205 | 0.514662 | 0.441389 |
| MmugDNA.21803.1.S1_at   | MmugDNA.21803.1 | 10.29 | 10.64 | 0.22 | 1.19 | -1.28 | 0.656404 | 0.654374 | 0.845392 | 0.798021 |
| MmugDNA.21806.1.S1_at   | MmugDNA.21806.1 | 3.73  | 3.5   | 0.2  | 0.24 | 1.18  | 0.254144 | 0.361428 | 0.602339 | 0.602201 |
| MmugDNA.21807.1.S1_at   | MmugDNA.21807.1 | 11.46 | 11.23 | 0.19 | 0.42 | 1.17  | 0.746561 | 0.594446 | 0.891508 | 0.758623 |
| MmugDNA.21809.1.S1_at   | MmugDNA.21809.1 | 12.04 | 11.93 | 0.06 | 0.24 | 1.08  | 0.970719 | 0.988849 | 0.988689 | 0.993642 |
| MmugDNA.21811.1.S1_at   | MmugDNA.21811.1 | 6.66  | 6.72  | 0.18 | 0.38 | -1.04 | 0.338843 | 0.368185 | 0.660988 | 0.607793 |
| MmugDNA.21814.1.S1_at   | MmugDNA.21814.1 | 5.9   | 5.96  | 0.18 | 0.5  | -1.04 | 0.304876 | 0.355746 | 0.638856 | 0.597864 |
| MmugDNA.21818.1.S1_at   | MmugDNA.21818.1 | 4.3   | 4.38  | 0.17 | 0.09 | -1.06 | 0.73696  | 0.768087 | 0.886925 | 0.865352 |
| MmugDNA.21826.1.S1_at   | MmugDNA.21826.1 | 5.59  | 5.47  | 0.32 | 0.29 | 1.09  | 0.375676 | 0.011619 | 0.684803 | 0.139603 |
| MmugDNA.21829.1.S1_at   | MmugDNA.21829.1 | 7.8   | 7.85  | 0.11 | 0.32 | -1.03 | 0.907554 | 0.942246 | 0.963333 | 0.967221 |
| MmugDNA.21835.1.S1_s_at | MmugDNA.21835.1 | 8.02  | 8.51  | 0.6  | 0.28 | -1.4  | 0.167327 | 0.222859 | 0.531441 | 0.495769 |
| MmugDNA.21839.1.S1_at   | MmugDNA.21839.1 | 8.27  | 8.35  | 1.14 | 0.57 | -1.06 | 0.730625 | 0.834302 | 0.883214 | 0.905078 |
| MmugDNA.2184.1.S1_at    | MmugDNA.2184.1  | 4.46  | 4.55  | 0.31 | 0.21 | -1.06 | 0.409978 | 0.159658 | 0.706179 | 0.435785 |
| MmugDNA.21840.1.S1_at   | MmugDNA.21840.1 | 10.25 | 10.01 | 0.13 | 0.12 | 1.18  | 0.039627 | 0.045156 | 0.347789 | 0.256979 |
| MmugDNA.21844.1.S1_at   | MmugDNA.21844.1 | 6.91  | 8.43  | 0.49 | 1.16 | -2.86 | 0.071376 | 0.056552 | 0.415198 | 0.283835 |
| MmugDNA.21847.1.S1_at   | MmugDNA.21847.1 | 6.05  | 6.2   | 0.06 | 0.18 | -1.12 | 0.7622   | 0.941975 | 0.899955 | 0.96711  |
| MmugDNA.2185.1.S1_at    | MmugDNA.2185.1  | 10.1  | 10.51 | 0.12 | 0.64 | -1.33 | 0.571754 | 0.737192 | 0.800374 | 0.847855 |
| MmugDNA.21852.1.S1_at   | MmugDNA.21852.1 | 6.48  | 6.86  | 0.47 | 0.78 | -1.3  | 0.519597 | 0.230757 | 0.770223 | 0.502451 |
| MmugDNA.2186.1.S1_at    | MmugDNA.2186.1  | 11.49 | 11.33 | 0.2  | 0.13 | 1.12  | 0.214845 | 0.011623 | 0.575397 | 0.13962  |
| MmugDNA.21865.1.S1_at   | MmugDNA.21865.1 | 9.86  | 9.84  | 0.27 | 0.26 | 1.01  | 0.828435 | 0.90085  | 0.930342 | 0.943581 |
| MmugDNA.21866.1.S1_at   | MmugDNA.21866.1 | 6.2   | 7.18  | 0.23 | 1.07 | -1.97 | 0.218023 | 0.115568 | 0.577569 | 0.382674 |
| MmugDNA.21867.1.S1_at   | MmugDNA.21867.1 | 11.65 | 11.48 | 0.42 | 0.11 | 1.13  | 0.28268  | 0.171061 | 0.62304  | 0.447601 |
| MmugDNA.21867.1.S1_s_at | MmugDNA.21867.1 | 10.52 | 10.72 | 0.23 | 0.17 | -1.15 | 0.238482 | 0.015601 | 0.591811 | 0.158262 |
| MmugDNA.21868.1.S1_at   | MmugDNA.21868.1 | 6.22  | 6.17  | 0.58 | 0.37 | 1.04  | 0.205851 | 0.321694 | 0.568383 | 0.573346 |
| MmugDNA.2187.1.S1_at    | MmugDNA.2187.1  | 12.79 | 12.85 | 0.16 | 0.03 | -1.04 | 0.631891 | 0.43037  | 0.832895 | 0.651383 |
| MmugDNA.21870.1.S1_at   | MmugDNA.21870.1 | 9.33  | 9.32  | 0.09 | 0.22 | 1     | 0.307951 | 0.303005 | 0.640352 | 0.560461 |

|                         |                 |       |       |      |      |        |          |          |          |          |
|-------------------------|-----------------|-------|-------|------|------|--------|----------|----------|----------|----------|
| MmugDNA.21873.1.S1_at   | MmugDNA.21873.1 | 2.64  | 2.72  | 0.14 | 0.02 | -1.05  | 0.962141 | 0.476189 | 0.985456 | 0.682566 |
| MmugDNA.21875.1.S1_at   | MmugDNA.21875.1 | 4.86  | 4.82  | 0.61 | 0.06 | 1.03   | 0.88652  | 0.599212 | 0.954601 | 0.761365 |
| MmugDNA.21876.1.S1_at   | MmugDNA.21876.1 | 4.02  | 4.02  | 0.12 | 0.18 | -1     | 0.873448 | 0.98179  | 0.94926  | 0.989993 |
| MmugDNA.21878.1.S1_at   | MmugDNA.21878.1 | 11.58 | 11.63 | 0.08 | 0.17 | -1.04  | 0.683413 | 0.432364 | 0.85844  | 0.652794 |
| MmugDNA.21887.1.S1_at   | MmugDNA.21887.1 | 11.43 | 10.92 | 0.21 | 0.25 | 1.42   | 0.03075  | 0.033288 | 0.31976  | 0.226074 |
| MmugDNA.21889.1.S1_at   | MmugDNA.21889.1 | 3.77  | 3.75  | 0.12 | 0.07 | 1.02   | 0.988449 | 0.983427 | 0.995944 | 0.99078  |
| MmugDNA.21894.1.S1_at   | MmugDNA.21894.1 | 4.29  | 4.36  | 0.21 | 0.05 | -1.05  | 0.520278 | 0.715589 | 0.77071  | 0.835127 |
| MmugDNA.21895.1.S1_at   | MmugDNA.21895.1 | 5.98  | 6.02  | 0.74 | 1.26 | -1.02  | 0.927963 | 0.509102 | 0.97223  | 0.703993 |
| MmugDNA.21899.1.S1_at   | MmugDNA.21899.1 | 10.42 | 10.77 | 0.11 | 0.24 | -1.27  | 0.057066 | 0.043379 | 0.387418 | 0.25294  |
| MmugDNA.219.1.S1_at     | MmugDNA.219.1   | 4.23  | 4.31  | 0.14 | 0.32 | -1.06  | 0.907933 | 0.158783 | 0.963478 | 0.43488  |
| MmugDNA.21904.1.S1_at   | MmugDNA.21904.1 | 10.54 | 10.82 | 0.1  | 0.26 | -1.21  | 0.314974 | 0.135595 | 0.646263 | 0.407742 |
| MmugDNA.21912.1.S1_at   | MmugDNA.21912.1 | 7.79  | 10.06 | 0.99 | 0.86 | -4.85  | 0.065403 | 0.049123 | 0.404567 | 0.266534 |
| MmugDNA.21920.1.S1_at   | MmugDNA.21920.1 | 4.8   | 5.02  | 0.04 | 0.13 | -1.17  | 0.032959 | 0.023067 | 0.326786 | 0.190066 |
| MmugDNA.21924.1.S1_at   | MmugDNA.21924.1 | 12.1  | 12.24 | 0.07 | 0.18 | -1.11  | 0.200287 | 0.108042 | 0.563141 | 0.37127  |
| MmugDNA.21928.1.S1_at   | MmugDNA.21928.1 | 6.73  | 7.02  | 0.33 | 0.06 | -1.22  | 0.69849  | 0.748045 | 0.866129 | 0.853351 |
| MmugDNA.21934.1.S1_at   | MmugDNA.21934.1 | 5.93  | 5.96  | 0.15 | 0.03 | -1.03  | 0.658619 | 0.119158 | 0.846726 | 0.387553 |
| MmugDNA.21945.1.S1_at   | MmugDNA.21945.1 | 13.36 | 13.57 | 0.04 | 0.1  | -1.15  | 0.088356 | 0.012218 | 0.443133 | 0.142932 |
| MmugDNA.21947.1.S1_at   | MmugDNA.21947.1 | 10.12 | 9.88  | 0.23 | 0.23 | 1.18   | 0.057061 | 0.017867 | 0.387418 | 0.168774 |
| MmugDNA.21948.1.S1_at   | MmugDNA.21948.1 | 6     | 6.11  | 0.19 | 1.62 | -1.08  | 0.342244 | 0.429248 | 0.663129 | 0.650729 |
| MmugDNA.21953.1.S1_at   | MmugDNA.21953.1 | 7.29  | 9.76  | 1.69 | 1.56 | -5.55  | 0.125387 | 0.080997 | 0.491333 | 0.329124 |
| MmugDNA.21954.1.S1_at   | MmugDNA.21954.1 | 6.15  | 6.13  | 0.18 | 0.18 | 1.01   | 0.196882 | 0.11222  | 0.559903 | 0.377537 |
| MmugDNA.21955.1.S1_at   | MmugDNA.21955.1 | 7.1   | 11.29 | 1.36 | 1.08 | -18.32 | 0.049187 | 0.047451 | 0.370886 | 0.262486 |
| MmugDNA.21974.1.S1_at   | MmugDNA.21974.1 | 3.96  | 4.05  | 0.12 | 0.26 | -1.07  | 0.213332 | 0.207674 | 0.573596 | 0.481906 |
| MmugDNA.21987.1.S1_at   | MmugDNA.21987.1 | 10.79 | 10.94 | 0.21 | 0.1  | -1.11  | 0.332454 | 0.004839 | 0.65685  | 0.097041 |
| MmugDNA.21989.1.S1_at   | MmugDNA.21989.1 | 10.91 | 11.38 | 0.15 | 0.08 | -1.38  | 0.008204 | 0.001582 | 0.216841 | 0.060356 |
| MmugDNA.21994.1.S1_at   | MmugDNA.21994.1 | 12.69 | 12.33 | 0.07 | 0.1  | 1.28   | 0.006603 | 0.000773 | 0.200265 | 0.045568 |
| MmugDNA.21995.1.S1_at   | MmugDNA.21995.1 | 9.73  | 9.93  | 0.23 | 0.38 | -1.15  | 0.098658 | 0.047853 | 0.458509 | 0.263679 |
| MmugDNA.21995.1.S1_s_at | MmugDNA.21995.1 | 9.61  | 9.89  | 0.15 | 0.41 | -1.21  | 0.083513 | 0.056777 | 0.43582  | 0.284379 |
| MmugDNA.21998.1.S1_at   | MmugDNA.21998.1 | 8.99  | 8.03  | 0.18 | 0.56 | 1.94   | 0.078638 | 0.069275 | 0.428609 | 0.309468 |
| MmugDNA.2200.1.S1_s_at  | MmugDNA.2200.1  | 4.53  | 4.25  | 0.28 | 0.27 | 1.22   | 0.626115 | 0.30761  | 0.829387 | 0.563785 |
| MmugDNA.22001.1.S1_at   | MmugDNA.22001.1 | 3.25  | 3.36  | 0.07 | 0.06 | -1.08  | 0.108549 | 0.1044   | 0.469977 | 0.365697 |
| MmugDNA.2201.1.S1_at    | MmugDNA.2201.1  | 10.56 | 10.56 | 0.16 | 0.2  | -1     | 0.89356  | 0.136783 | 0.957655 | 0.40939  |
| MmugDNA.22018.1.S1_at   | MmugDNA.22018.1 | 5.42  | 5.54  | 0.06 | 0.07 | -1.08  | 0.522876 | 0.225218 | 0.772248 | 0.497865 |
| MmugDNA.22020.1.S1_at   | MmugDNA.22020.1 | 4.92  | 4.33  | 0.43 | 0.16 | 1.5    | 0.157213 | 0.19781  | 0.521954 | 0.472721 |
| MmugDNA.22021.1.S1_at   | MmugDNA.22021.1 | 10.98 | 11.12 | 0.15 | 0.11 | -1.11  | 0.162629 | 0.13619  | 0.526897 | 0.408517 |
| MmugDNA.22026.1.S1_at   | MmugDNA.22026.1 | 5.28  | 5.1   | 0.16 | 0.41 | 1.13   | 0.903227 | 0.426705 | 0.961415 | 0.648808 |
| MmugDNA.22052.1.S1_at   | MmugDNA.22052.1 | 8.26  | 8.57  | 0.18 | 0.02 | -1.24  | 0.063417 | 0.000528 | 0.400499 | 0.040039 |
| MmugDNA.22055.1.S1_at   | MmugDNA.22055.1 | 4.08  | 3.73  | 0.38 | 0.28 | 1.27   | 0.245049 | 0.051031 | 0.596709 | 0.271214 |
| MmugDNA.22057.1.S1_at   | MmugDNA.22057.1 | 5.62  | 5.18  | 0.64 | 0.76 | 1.35   | 0.425859 | 0.328436 | 0.715367 | 0.578066 |
| MmugDNA.22059.1.S1_at   | MmugDNA.22059.1 | 7.2   | 7.31  | 0.25 | 0.72 | -1.08  | 0.604775 | 0.785906 | 0.817951 | 0.87599  |
| MmugDNA.22060.1.S1_at   | MmugDNA.22060.1 | 6.5   | 6.7   | 0.08 | 0.16 | -1.15  | 0.12961  | 0.051285 | 0.495744 | 0.271872 |

|                        |                 |       |       |      |      |        |          |          |          |          |
|------------------------|-----------------|-------|-------|------|------|--------|----------|----------|----------|----------|
| MmugDNA.22063.1.S1_at  | MmugDNA.22063.1 | 11.48 | 11.32 | 0.18 | 0.81 | 1.11   | 0.446928 | 0.435502 | 0.728666 | 0.655256 |
| MmugDNA.22066.1.S1_at  | MmugDNA.22066.1 | 10.55 | 10.13 | 0.18 | 0.24 | 1.34   | 0.180295 | 0.175444 | 0.544489 | 0.452157 |
| MmugDNA.22068.1.S1_at  | MmugDNA.22068.1 | 10.16 | 9.94  | 0.13 | 0.27 | 1.17   | 0.15033  | 0.1146   | 0.51508  | 0.381156 |
| MmugDNA.22069.1.S1_at  | MmugDNA.22069.1 | 5.72  | 5.76  | 0.08 | 0.09 | -1.03  | 0.115594 | 0.119867 | 0.478909 | 0.388577 |
| MmugDNA.2207.1.S1_at   | MmugDNA.2207.1  | 7.6   | 7.87  | 0.19 | 0.81 | -1.21  | 0.201136 | 0.255674 | 0.563821 | 0.523619 |
| MmugDNA.22074.1.S1_at  | MmugDNA.22074.1 | 3.97  | 4.03  | 0.08 | 0.02 | -1.04  | 0.278833 | 0.329766 | 0.620835 | 0.578874 |
| MmugDNA.22075.1.S1_at  | MmugDNA.22075.1 | 9.72  | 10.48 | 0.19 | 0.31 | -1.7   | 0.022001 | 0.042342 | 0.28446  | 0.250382 |
| MmugDNA.22077.1.S1_at  | MmugDNA.22077.1 | 4.01  | 7.46  | 0.77 | 2.24 | -10.9  | 0.216705 | 0.148243 | 0.576318 | 0.422745 |
| MmugDNA.22079.1.S1_at  | MmugDNA.22079.1 | 6.08  | 6.29  | 0.25 | 0.1  | -1.16  | 0.187931 | 0.176286 | 0.550964 | 0.452726 |
| MmugDNA.22083.1.S1_at  | MmugDNA.22083.1 | 3.93  | 3.88  | 0.42 | 0.15 | 1.04   | 0.869714 | 0.926752 | 0.947917 | 0.958404 |
| MmugDNA.22091.1.S1_at  | MmugDNA.22091.1 | 6.07  | 10.61 | 1.85 | 3.21 | -23.19 | 0.465039 | 0.289187 | 0.739772 | 0.550293 |
| MmugDNA.22094.1.S1_at  | MmugDNA.22094.1 | 5.75  | 5.09  | 0.45 | 1.29 | 1.57   | 0.919827 | 0.636733 | 0.968755 | 0.78635  |
| MmugDNA.22095.1.S1_at  | MmugDNA.22095.1 | 6.37  | 7.46  | 0.59 | 1.09 | -2.12  | 0.262703 | 0.097034 | 0.609039 | 0.354531 |
| MmugDNA.22096.1.S1_at  | MmugDNA.22096.1 | 12.3  | 12.95 | 0.22 | 0.66 | -1.57  | 0.184539 | 0.14685  | 0.548202 | 0.42088  |
| MmugDNA.22097.1.S1_at  | MmugDNA.22097.1 | 5.47  | 5.68  | 0.56 | 0.12 | -1.15  | 0.53255  | 0.175705 | 0.777757 | 0.452333 |
| MmugDNA.22098.1.S1_at  | MmugDNA.22098.1 | 7.22  | 8.58  | 1.22 | 0.52 | -2.57  | 0.036846 | 0.033451 | 0.34044  | 0.226517 |
| MmugDNA.22099.1.S1_at  | MmugDNA.22099.1 | 12.62 | 12.67 | 0.13 | 0.1  | -1.03  | 0.927286 | 0.255912 | 0.971995 | 0.523862 |
| MmugDNA.2210.1.S1_at   | MmugDNA.2210.1  | 12.14 | 11.18 | 0.13 | 0.77 | 1.94   | 0.042825 | 0.029882 | 0.355382 | 0.21455  |
| MmugDNA.22110.1.S1_at  | MmugDNA.22110.1 | 11.68 | 10.96 | 0.25 | 1.22 | 1.65   | 0.403331 | 0.513107 | 0.701956 | 0.706759 |
| MmugDNA.22111.1.S1_at  | MmugDNA.22111.1 | 9.09  | 8.84  | 0.22 | 0.32 | 1.19   | 0.873601 | 0.271541 | 0.949309 | 0.536547 |
| MmugDNA.22112.1.S1_at  | MmugDNA.22112.1 | 4.32  | 4.35  | 0.35 | 0.28 | -1.02  | 0.972962 | 0.896555 | 0.989561 | 0.940905 |
| MmugDNA.22115.1.S1_at  | MmugDNA.22115.1 | 9.51  | 10.17 | 0.13 | 0.06 | -1.58  | 0.001466 | 0.000173 | 0.150304 | 0.030511 |
| MmugDNA.22116.1.S1_at  | MmugDNA.22116.1 | 7.03  | 7.63  | 2.07 | 2.05 | -1.51  | 0.805996 | 0.187348 | 0.920419 | 0.463373 |
| MmugDNA.22118.1.S1_at  | MmugDNA.22118.1 | 8.03  | 8.23  | 0.27 | 1.11 | -1.15  | 0.974964 | 0.457143 | 0.990211 | 0.670743 |
| MmugDNA.22119.1.S1_at  | MmugDNA.22119.1 | 10.71 | 10.44 | 0.17 | 0.22 | 1.21   | 0.135923 | 0.167521 | 0.502782 | 0.443968 |
| MmugDNA.22121.1.S1_at  | MmugDNA.22121.1 | 8.84  | 9.99  | 0.53 | 0.65 | -2.22  | 0.0799   | 0.057998 | 0.430176 | 0.287327 |
| MmugDNA.22125.1.S1_at  | MmugDNA.22125.1 | 10.52 | 9.63  | 0.33 | 0.57 | 1.86   | 0.084672 | 0.085383 | 0.43753  | 0.337278 |
| MmugDNA.22131.1.S1_at  | MmugDNA.22131.1 | 7.69  | 8.06  | 0.16 | 0.21 | -1.28  | 0.162453 | 0.163561 | 0.52672  | 0.439765 |
| MmugDNA.22132.1.S1_at  | MmugDNA.22132.1 | 9.54  | 9.22  | 0.31 | 0.34 | 1.25   | 0.86251  | 0.639457 | 0.944715 | 0.788306 |
| MmugDNA.22134.1.S1_at  | MmugDNA.22134.1 | 10.65 | 10.53 | 0.17 | 0.06 | 1.09   | 0.82351  | 0.225377 | 0.928175 | 0.498017 |
| MmugDNA.2214.1.S1_at   | MmugDNA.2214.1  | 8.86  | 8.65  | 0.23 | 0.66 | 1.16   | 0.992422 | 0.554126 | 0.997401 | 0.732988 |
| MmugDNA.22140.1.S1_at  | MmugDNA.22140.1 | 5.26  | 5.36  | 0.06 | 0.08 | -1.07  | 0.12333  | 0.103499 | 0.488979 | 0.364346 |
| MmugDNA.22143.1.S1_at  | MmugDNA.22143.1 | 7.04  | 6.83  | 0.05 | 0.19 | 1.16   | 0.05714  | 0.039181 | 0.387418 | 0.243081 |
| MmugDNA.22148.1.S1_at  | MmugDNA.22148.1 | 3.21  | 3.39  | 0.12 | 0.01 | -1.14  | 0.046448 | 0.036665 | 0.363009 | 0.235973 |
| MmugDNA.2215.1.S1_at   | MmugDNA.2215.1  | 6.64  | 7.23  | 0.21 | 0.51 | -1.5   | 0.139394 | 0.098247 | 0.506801 | 0.356289 |
| MmugDNA.2215.1.S1_x_at | MmugDNA.2215.1  | 6.2   | 6.77  | 0.19 | 0.48 | -1.48  | 0.12108  | 0.073766 | 0.485798 | 0.317123 |
| MmugDNA.22154.1.S1_at  | MmugDNA.22154.1 | 12.44 | 12.39 | 0.27 | 0.09 | 1.04   | 0.539549 | 0.798359 | 0.78115  | 0.883979 |
| MmugDNA.22156.1.S1_at  | MmugDNA.22156.1 | 3.56  | 4.21  | 0.26 | 0.34 | -1.57  | 0.064063 | 0.135725 | 0.402086 | 0.407917 |
| MmugDNA.22160.1.S1_at  | MmugDNA.22160.1 | 5.92  | 7.84  | 1.01 | 2.6  | -3.78  | 0.451831 | 0.332858 | 0.731736 | 0.581266 |
| MmugDNA.22165.1.S1_at  | MmugDNA.22165.1 | 7.92  | 7.68  | 0.61 | 0.56 | 1.18   | 0.610937 | 0.742905 | 0.821394 | 0.851074 |
| MmugDNA.22167.1.S1_at  | MmugDNA.22167.1 | 8.62  | 8.33  | 0.26 | 0.09 | 1.22   | 0.417539 | 0.085055 | 0.710571 | 0.336812 |

|                         |                 |       |       |      |      |       |          |          |          |          |
|-------------------------|-----------------|-------|-------|------|------|-------|----------|----------|----------|----------|
| MmugDNA.22170.1.S1_at   | MmugDNA.22170.1 | 7.52  | 9.17  | 0.58 | 0.64 | -3.16 | 0.046392 | 0.035427 | 0.363009 | 0.232539 |
| MmugDNA.22172.1.S1_at   | MmugDNA.22172.1 | 8.91  | 8.25  | 0.32 | 0.52 | 1.58  | 0.127706 | 0.082139 | 0.493978 | 0.330937 |
| MmugDNA.22174.1.S1_at   | MmugDNA.22174.1 | 2.85  | 3.08  | 0.12 | 0.11 | -1.17 | 0.206689 | 0.302753 | 0.568816 | 0.560307 |
| MmugDNA.22175.1.S1_s_at | MmugDNA.22175.1 | 5.87  | 5.87  | 0.14 | 0.03 | -1    | 0.821342 | 0.595269 | 0.927303 | 0.759074 |
| MmugDNA.22176.1.S1_at   | MmugDNA.22176.1 | 12.02 | 11.75 | 0.06 | 0.05 | 1.2   | 0.002956 | 0.003037 | 0.170703 | 0.080386 |
| MmugDNA.22178.1.S1_at   | MmugDNA.22178.1 | 5.49  | 5.24  | 0.27 | 0.44 | 1.19  | 0.673085 | 0.105218 | 0.853353 | 0.366982 |
| MmugDNA.2218.1.S1_at    | MmugDNA.2218.1  | 5.88  | 6.05  | 0.12 | 0.15 | -1.13 | 0.156809 | 0.419633 | 0.521577 | 0.643571 |
| MmugDNA.22186.1.S1_at   | MmugDNA.22186.1 | 4.41  | 4.61  | 0.1  | 0.17 | -1.14 | 0.228997 | 0.314109 | 0.586303 | 0.568185 |
| MmugDNA.22190.1.S1_at   | MmugDNA.22190.1 | 11.97 | 12.6  | 0.25 | 0.11 | -1.55 | 0.006819 | 0.002627 | 0.201708 | 0.075772 |
| MmugDNA.22191.1.S1_at   | MmugDNA.22191.1 | 4.31  | 4.51  | 0.18 | 0.18 | -1.15 | 0.581089 | 0.054999 | 0.804843 | 0.279974 |
| MmugDNA.22192.1.S1_at   | MmugDNA.22192.1 | 12.33 | 12.47 | 0.47 | 0.54 | -1.1  | 0.675104 | 0.659724 | 0.854421 | 0.800854 |
| MmugDNA.22195.1.S1_at   | MmugDNA.22195.1 | 5.33  | 5.63  | 0.17 | 0.71 | -1.23 | 0.39469  | 0.408781 | 0.69601  | 0.6359   |
| MmugDNA.22197.1.S1_at   | MmugDNA.22197.1 | 4.34  | 4.64  | 0.1  | 0.45 | -1.23 | 0.38366  | 0.478706 | 0.689472 | 0.684691 |
| MmugDNA.22199.1.S1_at   | MmugDNA.22199.1 | 11.61 | 11.58 | 0.08 | 0.85 | 1.02  | 0.990937 | 0.936557 | 0.996858 | 0.964214 |
| MmugDNA.2220.1.S1_at    | MmugDNA.2220.1  | 10.79 | 11.17 | 0.04 | 0.14 | -1.3  | 0.009339 | 0.003354 | 0.224009 | 0.083359 |
| MmugDNA.22200.1.S1_at   | MmugDNA.22200.1 | 11.22 | 11.13 | 0.08 | 0.28 | 1.06  | 0.421129 | 0.524879 | 0.712872 | 0.714635 |
| MmugDNA.22200.1.S1_s_at | MmugDNA.22200.1 | 12.02 | 11.88 | 0.08 | 0.24 | 1.1   | 0.418943 | 0.593237 | 0.711627 | 0.758138 |
| MmugDNA.22218.1.S1_at   | MmugDNA.22218.1 | 7.88  | 7.88  | 0.15 | 0.11 | -1    | 0.486597 | 0.577103 | 0.751702 | 0.74764  |
| MmugDNA.22218.1.S1_s_at | MmugDNA.22218.1 | 6.34  | 6.25  | 0.48 | 0.07 | 1.07  | 0.566204 | 0.539608 | 0.79749  | 0.723854 |
| MmugDNA.22221.1.S1_at   | MmugDNA.22221.1 | 12.01 | 12.42 | 0.12 | 0.03 | -1.33 | 0.002303 | 0.002142 | 0.161798 | 0.06849  |
| MmugDNA.22224.1.S1_at   | MmugDNA.22224.1 | 12.3  | 12.39 | 0.06 | 0.05 | -1.06 | 0.338415 | 0.097699 | 0.66086  | 0.355581 |
| MmugDNA.22229.1.S1_at   | MmugDNA.22229.1 | 6.4   | 6.25  | 0.9  | 0.23 | 1.11  | 0.870658 | 0.767326 | 0.948314 | 0.864882 |
| MmugDNA.2223.1.S1_at    | MmugDNA.2223.1  | 4.99  | 4.48  | 0.26 | 0.13 | 1.42  | 0.057043 | 0.05543  | 0.387418 | 0.281328 |
| MmugDNA.22231.1.S1_at   | MmugDNA.22231.1 | 5.21  | 5.15  | 0.27 | 0    | 1.04  | 0.697867 | 0.709926 | 0.865823 | 0.831879 |
| MmugDNA.22233.1.S1_at   | MmugDNA.22233.1 | 3.57  | 3.5   | 0.24 | 0.13 | 1.05  | 0.973079 | 0.841863 | 0.989572 | 0.909901 |
| MmugDNA.22235.1.S1_at   | MmugDNA.22235.1 | 10.67 | 10.06 | 0.63 | 1.28 | 1.53  | 0.483293 | 0.664219 | 0.749882 | 0.803247 |
| MmugDNA.22240.1.S1_at   | MmugDNA.22240.1 | 7.2   | 7.08  | 0.28 | 0.12 | 1.09  | 0.755618 | 0.676406 | 0.896094 | 0.810935 |
| MmugDNA.22241.1.S1_at   | MmugDNA.22241.1 | 11.4  | 10.61 | 0.06 | 0.19 | 1.73  | 0.003544 | 0.001223 | 0.179515 | 0.054593 |
| MmugDNA.22244.1.S1_at   | MmugDNA.22244.1 | 10.28 | 10.71 | 0.12 | 0.34 | -1.34 | 0.299961 | 0.348721 | 0.635282 | 0.592732 |
| MmugDNA.22246.1.S1_at   | MmugDNA.22246.1 | 12.08 | 12.11 | 0.17 | 0.01 | -1.02 | 0.3007   | 0.393714 | 0.635955 | 0.626522 |
| MmugDNA.22248.1.S1_at   | MmugDNA.22248.1 | 7.42  | 7.72  | 0.11 | 0.1  | -1.23 | 0.051161 | 0.037942 | 0.375935 | 0.239302 |
| MmugDNA.2225.1.S1_at    | MmugDNA.2225.1  | 10.36 | 10.4  | 0.15 | 0.65 | -1.03 | 0.939564 | 0.990023 | 0.977007 | 0.994311 |
| MmugDNA.22251.1.S1_at   | MmugDNA.22251.1 | 10.36 | 10.29 | 0.2  | 0.41 | 1.05  | 0.505469 | 0.626753 | 0.761643 | 0.779979 |
| MmugDNA.22252.1.S1_at   | MmugDNA.22252.1 | 12.14 | 12.28 | 0.11 | 0.31 | -1.1  | 0.848974 | 0.067895 | 0.939268 | 0.306745 |
| MmugDNA.22262.1.S1_at   | MmugDNA.22262.1 | 3.17  | 3.31  | 0.07 | 0.23 | -1.11 | 0.596183 | 0.846114 | 0.812808 | 0.912389 |
| MmugDNA.22263.1.S1_x_at | MmugDNA.22263.1 | 5.34  | 5.81  | 0.91 | 0.27 | -1.38 | 0.654933 | 0.302103 | 0.84477  | 0.560071 |
| MmugDNA.22266.1.S1_at   | MmugDNA.22266.1 | 4.96  | 4.93  | 0.19 | 0.08 | 1.02  | 0.938981 | 0.695827 | 0.976761 | 0.823223 |
| MmugDNA.22266.1.S1_x_at | MmugDNA.22266.1 | 4.91  | 4.84  | 0.05 | 0.12 | 1.05  | 0.771042 | 0.703236 | 0.903594 | 0.827928 |
| MmugDNA.22279.1.S1_at   | MmugDNA.22279.1 | 6.38  | 6.64  | 0.17 | 0.5  | -1.2  | 0.380407 | 0.473839 | 0.687269 | 0.681082 |
| MmugDNA.22282.1.S1_at   | MmugDNA.22282.1 | 11.21 | 11.5  | 0.16 | 0.26 | -1.22 | 0.274962 | 0.320443 | 0.617642 | 0.572648 |
| MmugDNA.22284.1.S1_at   | MmugDNA.22284.1 | 5.03  | 5.03  | 0.04 | 0.02 | -1    | 0.76914  | 0.127993 | 0.902947 | 0.398959 |

|                         |                 |       |       |      |      |        |          |          |          |          |
|-------------------------|-----------------|-------|-------|------|------|--------|----------|----------|----------|----------|
| MmugDNA.22285.1.S1_at   | MmugDNA.22285.1 | 6.05  | 6.13  | 0.19 | 0.08 | -1.06  | 0.583922 | 0.670687 | 0.806781 | 0.807467 |
| MmugDNA.22287.1.S1_at   | MmugDNA.22287.1 | 6.04  | 5.93  | 0.25 | 0.39 | 1.08   | 0.681902 | 0.014594 | 0.857635 | 0.154067 |
| MmugDNA.22295.1.S1_at   | MmugDNA.22295.1 | 5.83  | 5.71  | 0.58 | 0.73 | 1.09   | 0.841243 | 0.47931  | 0.936191 | 0.685088 |
| MmugDNA.22298.1.S1_at   | MmugDNA.22298.1 | 7.24  | 7.38  | 0.51 | 0.26 | -1.1   | 0.430131 | 0.298646 | 0.717956 | 0.557252 |
| MmugDNA.223.1.S1_at     | MmugDNA.223.1   | 6.03  | 6.47  | 0.86 | 1.23 | -1.36  | 0.609941 | 0.771358 | 0.820763 | 0.867153 |
| MmugDNA.2230.1.S1_at    | MmugDNA.2230.1  | 8.18  | 8.26  | 0.16 | 0.24 | -1.06  | 0.903987 | 0.745726 | 0.961613 | 0.85256  |
| MmugDNA.22301.1.S1_at   | MmugDNA.22301.1 | 4.26  | 3.99  | 0.25 | 0.04 | 1.21   | 0.440724 | 0.441802 | 0.724464 | 0.659938 |
| MmugDNA.22309.1.S1_at   | MmugDNA.22309.1 | 7.94  | 6.7   | 0.18 | 1.51 | 2.36   | 0.066397 | 0.055788 | 0.406564 | 0.282044 |
| MmugDNA.22312.1.S1_at   | MmugDNA.22312.1 | 8.67  | 8.61  | 0.05 | 0.28 | 1.04   | 0.831755 | 0.933826 | 0.931835 | 0.962332 |
| MmugDNA.22314.1.S1_at   | MmugDNA.22314.1 | 10.99 | 10.62 | 0.13 | 0.27 | 1.29   | 0.264551 | 0.106991 | 0.610267 | 0.369557 |
| MmugDNA.22319.1.S1_at   | MmugDNA.22319.1 | 7.01  | 6.91  | 0.34 | 0.38 | 1.07   | 0.84084  | 0.936472 | 0.935988 | 0.964171 |
| MmugDNA.22328.1.S1_at   | MmugDNA.22328.1 | 5.72  | 5.79  | 0.17 | 0.15 | -1.05  | 0.209678 | 0.260082 | 0.571019 | 0.52675  |
| MmugDNA.22332.1.S1_at   | MmugDNA.22332.1 | 12.05 | 11.63 | 0.15 | 0.07 | 1.34   | 0.01122  | 0.001304 | 0.234875 | 0.055628 |
| MmugDNA.22343.1.S1_at   | MmugDNA.22343.1 | 13.17 | 13.16 | 0.03 | 0.05 | 1.01   | 0.175506 | 0.171246 | 0.539297 | 0.447792 |
| MmugDNA.22343.1.S1_s_at | MmugDNA.22343.1 | 12.28 | 12.39 | 0.01 | 0.12 | -1.07  | 0.759867 | 0.835547 | 0.898651 | 0.905864 |
| MmugDNA.22344.1.S1_at   | MmugDNA.22344.1 | 13.18 | 13.04 | 0.02 | 0.08 | 1.11   | 0.029252 | 0.017585 | 0.313575 | 0.167721 |
| MmugDNA.22345.1.S1_at   | MmugDNA.22345.1 | 5.35  | 5.38  | 0.22 | 0.04 | -1.02  | 0.914866 | 0.565366 | 0.966341 | 0.739877 |
| MmugDNA.22346.1.S1_at   | MmugDNA.22346.1 | 12.47 | 12.39 | 0.06 | 0.16 | 1.05   | 0.884766 | 0.976969 | 0.95382  | 0.987472 |
| MmugDNA.22354.1.S1_at   | MmugDNA.22354.1 | 9.21  | 8.56  | 0.2  | 0.45 | 1.57   | 0.1148   | 0.10237  | 0.478043 | 0.362527 |
| MmugDNA.22359.1.S1_at   | MmugDNA.22359.1 | 10.49 | 9.61  | 1.42 | 0.63 | 1.85   | 0.240333 | 0.224244 | 0.593146 | 0.497164 |
| MmugDNA.22360.1.S1_at   | MmugDNA.22360.1 | 8.11  | 8.76  | 0.38 | 0.88 | -1.57  | 0.348349 | 0.356994 | 0.667155 | 0.598736 |
| MmugDNA.22360.1.S1_s_at | MmugDNA.22360.1 | 10.14 | 10.52 | 0.57 | 0.81 | -1.3   | 0.764292 | 0.62888  | 0.900711 | 0.781499 |
| MmugDNA.22362.1.S1_at   | MmugDNA.22362.1 | 13.21 | 13.28 | 0.06 | 0.08 | -1.05  | 0.847884 | 0.014373 | 0.939063 | 0.15304  |
| MmugDNA.22364.1.S1_at   | MmugDNA.22364.1 | 12.69 | 12.7  | 0.06 | 0.09 | -1.01  | 0.601039 | 0.027    | 0.815637 | 0.2055   |
| MmugDNA.22366.1.S1_at   | MmugDNA.22366.1 | 7.74  | 7.82  | 0.16 | 0.06 | -1.06  | 0.701284 | 0.004759 | 0.868005 | 0.096243 |
| MmugDNA.22371.1.S1_at   | MmugDNA.22371.1 | 13.49 | 13.45 | 0.13 | 0.02 | 1.03   | 0.66163  | 0.801466 | 0.848148 | 0.885779 |
| MmugDNA.22373.1.S1_at   | MmugDNA.22373.1 | 6.89  | 6.71  | 0.46 | 0.56 | 1.13   | 0.956951 | 0.043789 | 0.983802 | 0.25387  |
| MmugDNA.22376.1.S1_at   | MmugDNA.22376.1 | 5.7   | 7.62  | 1.38 | 2.24 | -3.78  | 0.501642 | 0.442902 | 0.760109 | 0.660816 |
| MmugDNA.22380.1.S1_at   | MmugDNA.22380.1 | 5.66  | 5.05  | 0.91 | 0.52 | 1.53   | 0.369863 | 0.390564 | 0.681021 | 0.624329 |
| MmugDNA.22383.1.S1_at   | MmugDNA.22383.1 | 5.79  | 5.82  | 0.04 | 0.11 | -1.02  | 0.694301 | 0.462139 | 0.864407 | 0.673568 |
| MmugDNA.22387.1.S1_at   | MmugDNA.22387.1 | 5.19  | 5.29  | 0.12 | 0.08 | -1.07  | 0.609658 | 0.245887 | 0.820621 | 0.51552  |
| MmugDNA.22388.1.S1_at   | MmugDNA.22388.1 | 7.47  | 7.38  | 0.19 | 0.22 | 1.07   | 0.257748 | 0.248864 | 0.605259 | 0.517951 |
| MmugDNA.22389.1.S1_at   | MmugDNA.22389.1 | 3.67  | 3.72  | 0.19 | 0.46 | -1.04  | 0.828059 | 0.968926 | 0.930199 | 0.982889 |
| MmugDNA.22392.1.S1_at   | MmugDNA.22392.1 | 5.86  | 5.76  | 0.16 | 0.14 | 1.07   | 0.58466  | 0.314862 | 0.807089 | 0.568619 |
| MmugDNA.2240.1.S1_at    | MmugDNA.2240.1  | 8.69  | 9.16  | 0.25 | 0.27 | -1.38  | 0.110893 | 0.11552  | 0.472762 | 0.38267  |
| MmugDNA.22401.1.S1_at   | MmugDNA.22401.1 | 4.75  | 4.76  | 0.11 | 0.1  | -1.01  | 0.507735 | 0.3969   | 0.763087 | 0.628464 |
| MmugDNA.22407.1.S1_at   | MmugDNA.22407.1 | 7.31  | 9.06  | 0.21 | 0.66 | -3.36  | 0.010271 | 0.004166 | 0.228514 | 0.091036 |
| MmugDNA.22418.1.S1_at   | MmugDNA.22418.1 | 9.27  | 8.78  | 0.08 | 0.53 | 1.41   | 0.208989 | 0.260667 | 0.570642 | 0.527199 |
| MmugDNA.22421.1.S1_at   | MmugDNA.22421.1 | 3.43  | 3.41  | 0.2  | 0.11 | 1.01   | 0.692463 | 0.230105 | 0.863394 | 0.501982 |
| MmugDNA.22422.1.S1_at   | MmugDNA.22422.1 | 7.91  | 8.18  | 0.32 | 0.67 | -1.21  | 0.490423 | 0.31195  | 0.754415 | 0.566833 |
| MmugDNA.22426.1.S1_at   | MmugDNA.22426.1 | 5.43  | 8.88  | 1.78 | 2.78 | -10.93 | 0.229927 | 0.162458 | 0.587007 | 0.438575 |

|                         |                 |       |       |      |      |       |          |          |          |          |
|-------------------------|-----------------|-------|-------|------|------|-------|----------|----------|----------|----------|
| MmugDNA.22429.1.S1_at   | MmugDNA.22429.1 | 10.46 | 10.19 | 0.02 | 0.24 | 1.21  | 0.064789 | 0.026733 | 0.403383 | 0.204492 |
| MmugDNA.22431.1.S1_s_at | MmugDNA.22431.1 | 4.97  | 4.94  | 0.35 | 0.44 | 1.02  | 0.795154 | 0.860314 | 0.915026 | 0.920379 |
| MmugDNA.22446.1.S1_at   | MmugDNA.22446.1 | 8.15  | 7.18  | 0.51 | 0.38 | 1.95  | 0.043409 | 0.013155 | 0.356711 | 0.147338 |
| MmugDNA.2245.1.S1_at    | MmugDNA.2245.1  | 11.46 | 11.07 | 0.35 | 0.13 | 1.31  | 0.140501 | 0.133861 | 0.508385 | 0.405882 |
| MmugDNA.22453.1.S1_at   | MmugDNA.22453.1 | 4.88  | 4.63  | 0.24 | 0.16 | 1.18  | 0.076833 | 0.06399  | 0.425685 | 0.299074 |
| MmugDNA.22455.1.S1_at   | MmugDNA.22455.1 | 9.36  | 9.48  | 0.11 | 0.21 | -1.09 | 0.242198 | 0.298029 | 0.594305 | 0.556695 |
| MmugDNA.22456.1.S1_at   | MmugDNA.22456.1 | 9.52  | 9.04  | 0.47 | 1.56 | 1.4   | 0.537629 | 0.394156 | 0.780064 | 0.62675  |
| MmugDNA.22456.1.S1_s_at | MmugDNA.22456.1 | 9.98  | 9.19  | 0.55 | 1.65 | 1.74  | 0.673972 | 0.492195 | 0.853911 | 0.693477 |
| MmugDNA.22464.1.S1_at   | MmugDNA.22464.1 | 7.43  | 6.48  | 0.43 | 0.26 | 1.94  | 0.126887 | 0.122326 | 0.49303  | 0.392032 |
| MmugDNA.22467.1.S1_at   | MmugDNA.22467.1 | 9.65  | 9.83  | 0.14 | 0.46 | -1.14 | 0.429981 | 0.431547 | 0.717858 | 0.652437 |
| MmugDNA.2247.1.S1_at    | MmugDNA.2247.1  | 7.54  | 7.59  | 0.2  | 0.21 | -1.03 | 0.618648 | 0.740865 | 0.825259 | 0.849975 |
| MmugDNA.22474.1.S1_at   | MmugDNA.22474.1 | 6.43  | 6.65  | 0.38 | 0.34 | -1.17 | 0.232849 | 0.177752 | 0.587927 | 0.454107 |
| MmugDNA.22479.1.S1_at   | MmugDNA.22479.1 | 9.02  | 10.1  | 0.44 | 1.61 | -2.11 | 0.402313 | 0.48672  | 0.701375 | 0.690047 |
| MmugDNA.22481.1.S1_at   | MmugDNA.22481.1 | 8.68  | 8.45  | 0.15 | 0.29 | 1.18  | 0.303011 | 0.076378 | 0.637254 | 0.321368 |
| MmugDNA.22485.1.S1_at   | MmugDNA.22485.1 | 10.26 | 10.56 | 0.17 | 0.39 | -1.24 | 0.256905 | 0.371393 | 0.60443  | 0.610177 |
| MmugDNA.22487.1.S1_at   | MmugDNA.22487.1 | 10.16 | 9.92  | 0.03 | 0.4  | 1.18  | 0.115717 | 0.074137 | 0.479157 | 0.31781  |
| MmugDNA.22495.1.S1_at   | MmugDNA.22495.1 | 10.9  | 10.95 | 0.07 | 0.18 | -1.03 | 0.254611 | 0.001742 | 0.602508 | 0.062895 |
| MmugDNA.22500.1.S1_at   | MmugDNA.22500.1 | 6.3   | 6.42  | 0.14 | 0.06 | -1.09 | 0.557317 | 0.308242 | 0.792388 | 0.564378 |
| MmugDNA.22502.1.S1_at   | MmugDNA.22502.1 | 4.39  | 4.39  | 0.03 | 0.05 | -1    | 0.873027 | 0.315607 | 0.94924  | 0.569053 |
| MmugDNA.22505.1.S1_at   | MmugDNA.22505.1 | 6.95  | 6.62  | 0.22 | 0.12 | 1.25  | 0.138197 | 0.155019 | 0.505618 | 0.430053 |
| MmugDNA.22509.1.S1_at   | MmugDNA.22509.1 | 6.95  | 7.11  | 0.09 | 0.1  | -1.12 | 0.207921 | 0.040164 | 0.569864 | 0.245709 |
| MmugDNA.22512.1.S1_at   | MmugDNA.22512.1 | 7.97  | 7.79  | 0.32 | 0.13 | 1.14  | 0.431889 | 0.629064 | 0.718681 | 0.781597 |
| MmugDNA.22518.1.S1_at   | MmugDNA.22518.1 | 9.83  | 8.39  | 0.3  | 0.4  | 2.71  | 0.010336 | 0.005136 | 0.2294   | 0.099462 |
| MmugDNA.2252.1.S1_at    | MmugDNA.2252.1  | 13.73 | 13.32 | 0.04 | 0.18 | 1.33  | 0.00859  | 0.003178 | 0.219458 | 0.081873 |
| MmugDNA.22520.1.S1_at   | MmugDNA.22520.1 | 12.81 | 12.25 | 0.15 | 0.23 | 1.47  | 0.024391 | 0.01449  | 0.294535 | 0.153669 |
| MmugDNA.22526.1.S1_at   | MmugDNA.22526.1 | 4.7   | 4.84  | 0.3  | 0.13 | -1.1  | 0.704713 | 0.557912 | 0.869745 | 0.735292 |
| MmugDNA.22532.1.S1_at   | MmugDNA.22532.1 | 3.98  | 4.08  | 0.04 | 0.09 | -1.07 | 0.046587 | 0.097215 | 0.363346 | 0.354886 |
| MmugDNA.22537.1.S1_s_at | MmugDNA.22537.1 | 12.35 | 11.7  | 0.35 | 0.36 | 1.57  | 0.452602 | 0.433621 | 0.732213 | 0.65387  |
| MmugDNA.22543.1.S1_at   | MmugDNA.22543.1 | 7     | 6.19  | 0.05 | 0.32 | 1.75  | 0.01244  | 0.005756 | 0.241605 | 0.104378 |
| MmugDNA.22545.1.S1_at   | MmugDNA.22545.1 | 12.21 | 12.91 | 0.15 | 0.22 | -1.63 | 0.010654 | 0.003859 | 0.230991 | 0.088378 |
| MmugDNA.22546.1.S1_at   | MmugDNA.22546.1 | 6.82  | 6.83  | 0.1  | 0.08 | -1.01 | 0.899396 | 0.539135 | 0.959781 | 0.723569 |
| MmugDNA.22549.1.S1_at   | MmugDNA.22549.1 | 9.14  | 8.76  | 0.21 | 0.23 | 1.3   | 0.232047 | 0.326286 | 0.587722 | 0.576452 |
| MmugDNA.2255.1.S1_at    | MmugDNA.2255.1  | 9.76  | 9     | 0.21 | 1.4  | 1.7   | 0.300746 | 0.034788 | 0.635958 | 0.230686 |
| MmugDNA.22554.1.S1_at   | MmugDNA.22554.1 | 11.82 | 11.59 | 0.11 | 0.25 | 1.17  | 0.206913 | 0.268593 | 0.56893  | 0.534138 |
| MmugDNA.22554.1.S1_s_at | MmugDNA.22554.1 | 8.76  | 8.67  | 0.07 | 0.19 | 1.07  | 0.284641 | 0.214748 | 0.624327 | 0.48862  |
| MmugDNA.22560.1.S1_at   | MmugDNA.22560.1 | 9.68  | 9.95  | 0.05 | 0.37 | -1.21 | 0.265044 | 0.302879 | 0.61074  | 0.560356 |
| MmugDNA.22568.1.S1_at   | MmugDNA.22568.1 | 12.64 | 12.51 | 0.18 | 0.05 | 1.09  | 0.476216 | 0.129284 | 0.746145 | 0.400692 |
| MmugDNA.22569.1.S1_at   | MmugDNA.22569.1 | 5.79  | 5.8   | 0.24 | 0.1  | -1.01 | 0.702931 | 0.701269 | 0.868924 | 0.826775 |
| MmugDNA.22573.1.S1_at   | MmugDNA.22573.1 | 5.77  | 6.18  | 0.18 | 0.27 | -1.32 | 0.13236  | 0.064531 | 0.498572 | 0.300255 |
| MmugDNA.22579.1.S1_at   | MmugDNA.22579.1 | 8.24  | 10.2  | 1.16 | 1.9  | -3.87 | 0.254472 | 0.229108 | 0.602425 | 0.501438 |
| MmugDNA.2258.1.S1_at    | MmugDNA.2258.1  | 12.13 | 11.07 | 0.27 | 0.12 | 2.09  | 0.003684 | 0.000685 | 0.179515 | 0.044166 |



|                         |                 |       |       |      |      |       |          |          |          |          |
|-------------------------|-----------------|-------|-------|------|------|-------|----------|----------|----------|----------|
| MmugDNA.22582.1.S1_at   | MmugDNA.22582.1 | 8.13  | 7.7   | 1.29 | 0.89 | 1.35  | 0.513084 | 0.50449  | 0.766004 | 0.701617 |
| MmugDNA.2259.1.S1_at    | MmugDNA.2259.1  | 11.27 | 11.38 | 0.03 | 0.29 | -1.08 | 0.686978 | 0.681629 | 0.860056 | 0.814092 |
| MmugDNA.22594.1.S1_at   | MmugDNA.22594.1 | 6.78  | 6.77  | 0.08 | 0.12 | 1     | 0.923238 | 0.970533 | 0.970183 | 0.983953 |
| MmugDNA.22595.1.S1_at   | MmugDNA.22595.1 | 10.29 | 11.03 | 0.13 | 0.14 | -1.67 | 0.003588 | 0.000717 | 0.179515 | 0.044419 |
| MmugDNA.22596.1.S1_at   | MmugDNA.22596.1 | 6.66  | 6.82  | 0.21 | 0.21 | -1.12 | 0.404814 | 0.571653 | 0.703075 | 0.743888 |
| MmugDNA.22596.1.S1_s_at | MmugDNA.22596.1 | 6.88  | 6.94  | 0.19 | 0.47 | -1.04 | 0.483679 | 0.608777 | 0.749945 | 0.767285 |
| MmugDNA.22597.1.S1_at   | MmugDNA.22597.1 | 6.63  | 6.73  | 0.13 | 0.11 | -1.07 | 0.971475 | 0.992608 | 0.9891   | 0.995715 |
| MmugDNA.226.1.S1_at     | MmugDNA.226.1   | 8.02  | 8.04  | 0.09 | 0.63 | -1.02 | 0.701438 | 0.825065 | 0.868043 | 0.899488 |
| MmugDNA.22607.1.S1_at   | MmugDNA.22607.1 | 10.4  | 10.2  | 0.53 | 0.54 | 1.14  | 0.935901 | 0.219474 | 0.975172 | 0.493156 |
| MmugDNA.22609.1.S1_at   | MmugDNA.22609.1 | 9.2   | 9.75  | 0.09 | 0.83 | -1.47 | 0.351917 | 0.494896 | 0.669313 | 0.695168 |
| MmugDNA.22610.1.S1_at   | MmugDNA.22610.1 | 4.02  | 4.12  | 0.18 | 0.04 | -1.07 | 0.908885 | 0.255694 | 0.963875 | 0.52364  |
| MmugDNA.22617.1.S1_at   | MmugDNA.22617.1 | 3.58  | 3.54  | 0.04 | 0.01 | 1.02  | 0.266257 | 0.065843 | 0.611772 | 0.301996 |
| MmugDNA.22619.1.S1_at   | MmugDNA.22619.1 | 7.24  | 8.32  | 0.53 | 1.58 | -2.12 | 0.36255  | 0.434679 | 0.676104 | 0.654756 |
| MmugDNA.22619.1.S1_x_at | MmugDNA.22619.1 | 6.3   | 7.69  | 0.5  | 1.28 | -2.63 | 0.232146 | 0.279879 | 0.587814 | 0.543342 |
| MmugDNA.22620.1.S1_at   | MmugDNA.22620.1 | 5.88  | 6.29  | 0.11 | 0.2  | -1.33 | 0.056322 | 0.048634 | 0.38633  | 0.265602 |
| MmugDNA.22622.1.S1_at   | MmugDNA.22622.1 | 6.64  | 6.4   | 0.17 | 0.35 | 1.19  | 0.264094 | 0.34805  | 0.609857 | 0.59222  |
| MmugDNA.22627.1.S1_at   | MmugDNA.22627.1 | 4.85  | 4.54  | 0.19 | 0.17 | 1.24  | 0.380815 | 0.681719 | 0.687597 | 0.814123 |
| MmugDNA.22629.1.S1_at   | MmugDNA.22629.1 | 6.92  | 6.01  | 0.1  | 1.09 | 1.88  | 0.706298 | 0.622124 | 0.870604 | 0.77667  |
| MmugDNA.22631.1.S1_at   | MmugDNA.22631.1 | 10.24 | 8.93  | 0.14 | 0.18 | 2.48  | 0.000528 | 0.000037 | 0.136818 | 0.023168 |
| MmugDNA.22632.1.S1_at   | MmugDNA.22632.1 | 5.35  | 5.18  | 0.49 | 0.12 | 1.12  | 0.582374 | 0.559525 | 0.805736 | 0.736353 |
| MmugDNA.22634.1.S1_at   | MmugDNA.22634.1 | 8.84  | 8.83  | 0.28 | 0.1  | 1     | 0.991538 | 0.281957 | 0.99695  | 0.544868 |
| MmugDNA.22640.1.S1_at   | MmugDNA.22640.1 | 11.39 | 10.22 | 0.3  | 0.95 | 2.24  | 0.094204 | 0.095647 | 0.451714 | 0.35269  |
| MmugDNA.22642.1.S1_at   | MmugDNA.22642.1 | 7.79  | 8.22  | 0.18 | 0.24 | -1.35 | 0.059634 | 0.027279 | 0.39273  | 0.206458 |
| MmugDNA.2265.1.S1_at    | MmugDNA.2265.1  | 11.55 | 11.3  | 0.15 | 0.06 | 1.19  | 0.058249 | 0.042437 | 0.390133 | 0.250663 |
| MmugDNA.22655.1.S1_at   | MmugDNA.22655.1 | 6.46  | 6.35  | 0.03 | 0.17 | 1.08  | 0.325908 | 0.373669 | 0.653063 | 0.612403 |
| MmugDNA.22659.1.S1_at   | MmugDNA.22659.1 | 11.65 | 11.74 | 0.03 | 0.83 | -1.06 | 0.918142 | 0.536002 | 0.968215 | 0.721454 |
| MmugDNA.2266.1.S1_at    | MmugDNA.2266.1  | 2.9   | 2.93  | 0.07 | 0.14 | -1.02 | 0.848008 | 0.939036 | 0.939103 | 0.9654   |
| MmugDNA.22660.1.S1_at   | MmugDNA.22660.1 | 6.38  | 6.37  | 0.12 | 0.2  | 1.01  | 0.662176 | 0.857993 | 0.848423 | 0.919035 |
| MmugDNA.22663.1.S1_at   | MmugDNA.22663.1 | 4.54  | 4.57  | 0.16 | 0.1  | -1.02 | 0.789204 | 0.260071 | 0.912479 | 0.52675  |
| MmugDNA.22665.1.S1_at   | MmugDNA.22665.1 | 9.32  | 8.39  | 0.2  | 0.39 | 1.91  | 0.034426 | 0.02651  | 0.333077 | 0.203899 |
| MmugDNA.22679.1.S1_at   | MmugDNA.22679.1 | 8.89  | 8.73  | 0.24 | 0.47 | 1.12  | 0.671463 | 0.189903 | 0.852716 | 0.465424 |
| MmugDNA.22688.1.S1_at   | MmugDNA.22688.1 | 4.28  | 4.18  | 0.06 | 0.06 | 1.07  | 0.392706 | 0.460718 | 0.694744 | 0.672646 |
| MmugDNA.2269.1.S1_at    | MmugDNA.2269.1  | 13.35 | 13.39 | 0.08 | 0.14 | -1.03 | 0.386507 | 0.388324 | 0.691438 | 0.62274  |
| MmugDNA.22692.1.S1_at   | MmugDNA.22692.1 | 10.46 | 11.04 | 0.19 | 0.62 | -1.5  | 0.067805 | 0.072586 | 0.408536 | 0.315511 |
| MmugDNA.22693.1.S1_at   | MmugDNA.22693.1 | 7.56  | 7.4   | 0.3  | 0.27 | 1.12  | 0.715215 | 0.039731 | 0.875005 | 0.244323 |
| MmugDNA.22711.1.S1_at   | MmugDNA.22711.1 | 9.81  | 9.08  | 0.04 | 0.4  | 1.67  | 0.035677 | 0.026047 | 0.3373   | 0.202256 |
| MmugDNA.22712.1.S1_at   | MmugDNA.22712.1 | 9.06  | 7.91  | 0.31 | 0.43 | 2.22  | 0.034362 | 0.026113 | 0.332818 | 0.202544 |
| MmugDNA.22722.1.S1_at   | MmugDNA.22722.1 | 7.49  | 7.6   | 0.22 | 0.06 | -1.08 | 0.406822 | 0.369041 | 0.703936 | 0.608583 |
| MmugDNA.22726.1.S1_at   | MmugDNA.22726.1 | 9.61  | 9.58  | 0.13 | 0.42 | 1.02  | 0.988592 | 0.850567 | 0.995952 | 0.914988 |
| MmugDNA.22731.1.S1_at   | MmugDNA.22731.1 | 6.07  | 6.17  | 0.14 | 0.05 | -1.07 | 0.4234   | 0.521759 | 0.714064 | 0.712623 |
| MmugDNA.22735.1.S1_at   | MmugDNA.22735.1 | 11.41 | 11.45 | 0.08 | 0.24 | -1.03 | 0.530238 | 0.710207 | 0.776693 | 0.831904 |

|                         |                 |       |       |      |      |       |          |          |          |          |
|-------------------------|-----------------|-------|-------|------|------|-------|----------|----------|----------|----------|
| MmugDNA.22736.1.S1_at   | MmugDNA.22736.1 | 4.93  | 4.92  | 0.08 | 0.32 | 1.01  | 0.826089 | 0.420979 | 0.929365 | 0.644662 |
| MmugDNA.22748.1.S1_at   | MmugDNA.22748.1 | 7.83  | 9.09  | 0.51 | 1.34 | -2.39 | 0.220834 | 0.17301  | 0.579718 | 0.449661 |
| MmugDNA.22756.1.S1_at   | MmugDNA.22756.1 | 10.94 | 11.43 | 0.12 | 0.1  | -1.41 | 0.006545 | 0.004001 | 0.199625 | 0.089969 |
| MmugDNA.22762.1.S1_at   | MmugDNA.22762.1 | 12.75 | 13.13 | 0.05 | 0.31 | -1.3  | 0.331994 | 0.444346 | 0.656622 | 0.66198  |
| MmugDNA.22769.1.S1_at   | MmugDNA.22769.1 | 10.4  | 9.56  | 0.16 | 0.79 | 1.79  | 0.405924 | 0.560738 | 0.7035   | 0.736921 |
| MmugDNA.22782.1.S1_at   | MmugDNA.22782.1 | 7.15  | 7.24  | 0.11 | 0.02 | -1.06 | 0.668917 | 0.216688 | 0.851986 | 0.490311 |
| MmugDNA.22783.1.S1_at   | MmugDNA.22783.1 | 11.49 | 11.74 | 0.16 | 0.39 | -1.19 | 0.082521 | 0.044318 | 0.434069 | 0.255021 |
| MmugDNA.22786.1.S1_at   | MmugDNA.22786.1 | 13.12 | 13.5  | 0.06 | 0.04 | -1.3  | 0.000956 | 0.000676 | 0.139813 | 0.04413  |
| MmugDNA.22787.1.S1_at   | MmugDNA.22787.1 | 11.69 | 10.16 | 0.1  | 0.13 | 2.88  | 0.000103 | 0.000693 | 0.112653 | 0.044166 |
| MmugDNA.22788.1.S1_s_at | MmugDNA.22788.1 | 8.09  | 11.07 | 1.07 | 2.09 | -7.92 | 0.23069  | 0.081503 | 0.587222 | 0.329764 |
| MmugDNA.2279.1.S1_at    | MmugDNA.2279.1  | 7.66  | 7.86  | 0.16 | 0.1  | -1.15 | 0.469555 | 0.080906 | 0.741806 | 0.328883 |
| MmugDNA.22792.1.S1_at   | MmugDNA.22792.1 | 4.42  | 4.51  | 0.06 | 0.13 | -1.06 | 0.552242 | 0.607537 | 0.789376 | 0.766417 |
| MmugDNA.22798.1.S1_at   | MmugDNA.22798.1 | 3.7   | 3.89  | 0.05 | 0.34 | -1.14 | 0.439435 | 0.642053 | 0.723601 | 0.789995 |
| MmugDNA.228.1.S1_at     | MmugDNA.228.1   | 10.94 | 11.64 | 0.07 | 0.69 | -1.62 | 0.165374 | 0.031058 | 0.529362 | 0.218115 |
| MmugDNA.2280.1.S1_at    | MmugDNA.2280.1  | 4.65  | 4.64  | 0.16 | 0.11 | 1     | 0.772435 | 0.917801 | 0.904204 | 0.954011 |
| MmugDNA.22804.1.S1_at   | MmugDNA.22804.1 | 12.18 | 12.02 | 0.07 | 0.06 | 1.12  | 0.081447 | 0.040064 | 0.432432 | 0.245388 |
| MmugDNA.22805.1.S1_at   | MmugDNA.22805.1 | 11.27 | 11.26 | 0.19 | 0.14 | 1.01  | 0.463333 | 0.642752 | 0.738686 | 0.790476 |
| MmugDNA.22807.1.S1_at   | MmugDNA.22807.1 | 3.41  | 3.45  | 0.07 | 0.09 | -1.02 | 0.252898 | 0.329071 | 0.601631 | 0.578482 |
| MmugDNA.2281.1.S1_at    | MmugDNA.2281.1  | 7.02  | 6.88  | 0.15 | 0.54 | 1.1   | 0.766026 | 0.913189 | 0.901634 | 0.951134 |
| MmugDNA.22810.1.S1_at   | MmugDNA.22810.1 | 5.83  | 6.57  | 0.29 | 0.67 | -1.66 | 0.159173 | 0.219095 | 0.52416  | 0.49285  |
| MmugDNA.22811.1.S1_at   | MmugDNA.22811.1 | 4.19  | 4.16  | 0.07 | 0.12 | 1.03  | 0.589278 | 0.749378 | 0.809218 | 0.85438  |
| MmugDNA.2282.1.S1_at    | MmugDNA.2282.1  | 10.32 | 11.35 | 0.37 | 0.57 | -2.05 | 0.016317 | 0.00506  | 0.263592 | 0.09907  |
| MmugDNA.22821.1.S1_at   | MmugDNA.22821.1 | 5.15  | 5.4   | 0.06 | 0.15 | -1.19 | 0.15918  | 0.145532 | 0.52416  | 0.419442 |
| MmugDNA.22822.1.S1_at   | MmugDNA.22822.1 | 8.63  | 9.01  | 0.09 | 0.47 | -1.3  | 0.577383 | 0.257369 | 0.803479 | 0.525179 |
| MmugDNA.22836.1.S1_s_at | MmugDNA.22836.1 | 10.25 | 10.53 | 0.33 | 0.31 | -1.21 | 0.367642 | 0.074945 | 0.679512 | 0.318924 |
| MmugDNA.22850.1.S1_at   | MmugDNA.22850.1 | 10.1  | 9.27  | 0.2  | 0.16 | 1.78  | 0.004883 | 0.001533 | 0.185463 | 0.059437 |
| MmugDNA.22851.1.S1_at   | MmugDNA.22851.1 | 8.31  | 8.02  | 0.16 | 0.29 | 1.22  | 0.126592 | 0.118248 | 0.492802 | 0.386244 |
| MmugDNA.22853.1.S1_at   | MmugDNA.22853.1 | 7.84  | 7.86  | 0.24 | 0.31 | -1.02 | 0.939785 | 0.245542 | 0.977013 | 0.515347 |
| MmugDNA.22856.1.S1_at   | MmugDNA.22856.1 | 10.84 | 12.26 | 0.36 | 0.28 | -2.67 | 0.003347 | 0.001145 | 0.177442 | 0.053384 |
| MmugDNA.2286.1.S1_s_at  | MmugDNA.2286.1  | 6.01  | 6.12  | 0.14 | 0.03 | -1.08 | 0.492201 | 0.238516 | 0.755545 | 0.509112 |
| MmugDNA.22860.1.S1_at   | MmugDNA.22860.1 | 10.43 | 10.19 | 0.14 | 0.17 | 1.18  | 0.28535  | 0.343747 | 0.624864 | 0.589457 |
| MmugDNA.22863.1.S1_s_at | MmugDNA.22863.1 | 13.04 | 12.71 | 0.08 | 0.08 | 1.26  | 0.011669 | 0.021074 | 0.237051 | 0.181869 |
| MmugDNA.22866.1.S1_at   | MmugDNA.22866.1 | 11.29 | 11.14 | 0.05 | 0.11 | 1.11  | 0.0989   | 0.260697 | 0.458711 | 0.527199 |
| MmugDNA.22867.1.S1_at   | MmugDNA.22867.1 | 11.03 | 10.62 | 0.2  | 0.23 | 1.32  | 0.028514 | 0.018651 | 0.311509 | 0.171653 |
| MmugDNA.22871.1.S1_at   | MmugDNA.22871.1 | 3.67  | 3.75  | 0.04 | 0.08 | -1.06 | 0.192739 | 0.319177 | 0.556046 | 0.571688 |
| MmugDNA.22875.1.S1_at   | MmugDNA.22875.1 | 10.89 | 10.95 | 0.15 | 0.13 | -1.04 | 0.217552 | 0.161539 | 0.577141 | 0.43767  |
| MmugDNA.22876.1.S1_at   | MmugDNA.22876.1 | 3.15  | 3.07  | 0.03 | 0.17 | 1.06  | 0.534726 | 0.68532  | 0.778804 | 0.816457 |
| MmugDNA.22878.1.S1_at   | MmugDNA.22878.1 | 10.16 | 9.5   | 1.5  | 0.65 | 1.58  | 0.951217 | 0.305759 | 0.981671 | 0.562731 |
| MmugDNA.2288.1.S1_at    | MmugDNA.2288.1  | 5.97  | 4.49  | 0.79 | 0.49 | 2.78  | 0.232492 | 0.229449 | 0.587814 | 0.501527 |
| MmugDNA.22888.1.S1_at   | MmugDNA.22888.1 | 11.68 | 10.92 | 0.56 | 1.08 | 1.69  | 0.403518 | 0.472423 | 0.702079 | 0.67999  |
| MmugDNA.2289.1.S1_at    | MmugDNA.2289.1  | 3.38  | 3.49  | 0.07 | 0.43 | -1.08 | 0.233996 | 0.320631 | 0.588525 | 0.572718 |

|                         |                 |       |       |      |      |       |          |          |          |          |
|-------------------------|-----------------|-------|-------|------|------|-------|----------|----------|----------|----------|
| MmugDNA.2290.1.S1_at    | MmugDNA.2290.1  | 6.56  | 7.72  | 0.21 | 0.35 | -2.23 | 0.01854  | 0.008033 | 0.270581 | 0.119091 |
| MmugDNA.22901.1.S1_at   | MmugDNA.22901.1 | 7.57  | 8.61  | 0.46 | 1.02 | -2.06 | 0.170075 | 0.196718 | 0.534192 | 0.471783 |
| MmugDNA.2291.1.S1_at    | MmugDNA.2291.1  | 5.99  | 5.54  | 1.02 | 0.81 | 1.37  | 0.995705 | 0.666803 | 0.998446 | 0.804789 |
| MmugDNA.2292.1.S1_at    | MmugDNA.2292.1  | 8.11  | 5.77  | 0.54 | 0.94 | 5.06  | 0.044799 | 0.033485 | 0.359043 | 0.226577 |
| MmugDNA.22923.1.S1_at   | MmugDNA.22923.1 | 12.27 | 12.12 | 0.19 | 0.23 | 1.11  | 0.304981 | 0.06516  | 0.638988 | 0.301238 |
| MmugDNA.22929.1.S1_at   | MmugDNA.22929.1 | 14    | 13.97 | 0.1  | 0.03 | 1.03  | 0.578989 | 0.521023 | 0.80407  | 0.712115 |
| MmugDNA.22932.1.S1_at   | MmugDNA.22932.1 | 9.05  | 9.72  | 0.19 | 0.72 | -1.6  | 0.225936 | 0.053495 | 0.583922 | 0.276963 |
| MmugDNA.22934.1.S1_at   | MmugDNA.22934.1 | 11.51 | 11.64 | 0.05 | 0.1  | -1.1  | 0.078349 | 0.016923 | 0.428302 | 0.164991 |
| MmugDNA.22936.1.S1_at   | MmugDNA.22936.1 | 12.63 | 12.75 | 0.01 | 0.11 | -1.09 | 0.350627 | 0.398648 | 0.668568 | 0.629458 |
| MmugDNA.2294.1.S1_at    | MmugDNA.2294.1  | 7.4   | 7.21  | 0.16 | 0.12 | 1.14  | 0.361365 | 0.162006 | 0.675185 | 0.438108 |
| MmugDNA.22941.1.S1_at   | MmugDNA.22941.1 | 6.13  | 6.14  | 0.12 | 0.2  | -1    | 0.801495 | 0.948934 | 0.918152 | 0.97078  |
| MmugDNA.22947.1.S1_s_at | MmugDNA.22947.1 | 12.44 | 12.57 | 0.09 | 0.2  | -1.09 | 0.946103 | 0.694319 | 0.979359 | 0.822254 |
| MmugDNA.22950.1.S1_at   | MmugDNA.22950.1 | 6.29  | 6.44  | 0.08 | 0.11 | -1.11 | 0.167711 | 0.144203 | 0.532014 | 0.418082 |
| MmugDNA.22955.1.S1_at   | MmugDNA.22955.1 | 12.46 | 12.57 | 0.09 | 0.06 | -1.08 | 0.149627 | 0.060675 | 0.514171 | 0.292876 |
| MmugDNA.22958.1.S1_at   | MmugDNA.22958.1 | 12.38 | 11.9  | 0.13 | 0.15 | 1.4   | 0.011166 | 0.002701 | 0.234598 | 0.076461 |
| MmugDNA.22965.1.S1_at   | MmugDNA.22965.1 | 10.24 | 10    | 0.15 | 0.56 | 1.19  | 0.698885 | 0.448211 | 0.866456 | 0.664144 |
| MmugDNA.22967.1.S1_at   | MmugDNA.22967.1 | 12.36 | 11.89 | 0.11 | 0.31 | 1.39  | 0.202539 | 0.255067 | 0.564967 | 0.52317  |
| MmugDNA.22972.1.S1_at   | MmugDNA.22972.1 | 9.21  | 9.09  | 0.11 | 0.26 | 1.09  | 0.335927 | 0.464259 | 0.65921  | 0.674983 |
| MmugDNA.22975.1.S1_at   | MmugDNA.22975.1 | 12.6  | 11.84 | 0.14 | 0.5  | 1.69  | 0.059714 | 0.045705 | 0.39273  | 0.258049 |
| MmugDNA.22985.1.S1_at   | MmugDNA.22985.1 | 11.04 | 11.02 | 0.11 | 0.09 | 1.01  | 0.669918 | 0.01732  | 0.852318 | 0.166509 |
| MmugDNA.22986.1.S1_at   | MmugDNA.22986.1 | 5.79  | 5.57  | 0.15 | 0.06 | 1.17  | 0.116244 | 0.093326 | 0.479808 | 0.349412 |
| MmugDNA.2299.1.S1_at    | MmugDNA.2299.1  | 9.99  | 10.11 | 0.23 | 0.41 | -1.08 | 0.611876 | 0.017074 | 0.821861 | 0.165589 |
| MmugDNA.22991.1.S1_at   | MmugDNA.22991.1 | 12.54 | 12.5  | 0.09 | 0.16 | 1.03  | 0.721227 | 0.438648 | 0.878012 | 0.657605 |
| MmugDNA.2300.1.S1_at    | MmugDNA.2300.1  | 12.97 | 12.8  | 0.1  | 0.39 | 1.13  | 0.746241 | 0.327657 | 0.891365 | 0.577464 |
| MmugDNA.23003.1.S1_s_at | MmugDNA.23003.1 | 13.16 | 13.12 | 0.06 | 0.09 | 1.02  | 0.124095 | 0.046575 | 0.489857 | 0.260267 |
| MmugDNA.23007.1.S1_at   | MmugDNA.23007.1 | 8.23  | 7.18  | 0.3  | 0.15 | 2.07  | 0.00515  | 0.00452  | 0.190164 | 0.093971 |
| MmugDNA.23015.1.S1_at   | MmugDNA.23015.1 | 10.69 | 10.59 | 0.24 | 0.3  | 1.07  | 0.495034 | 0.14871  | 0.757014 | 0.423201 |
| MmugDNA.23021.1.S1_at   | MmugDNA.23021.1 | 7.04  | 7.12  | 0.14 | 0.04 | -1.06 | 0.5004   | 0.183716 | 0.759529 | 0.459769 |
| MmugDNA.23023.1.S1_at   | MmugDNA.23023.1 | 9.03  | 7.76  | 0.36 | 0.23 | 2.41  | 0.004329 | 0.000973 | 0.182631 | 0.049791 |
| MmugDNA.23027.1.S1_at   | MmugDNA.23027.1 | 10.88 | 10.94 | 0.3  | 0.23 | -1.04 | 0.709011 | 0.569337 | 0.872229 | 0.742375 |
| MmugDNA.23028.1.S1_at   | MmugDNA.23028.1 | 12.01 | 12.07 | 0.16 | 0.19 | -1.04 | 0.343    | 0.249451 | 0.663407 | 0.518532 |
| MmugDNA.2304.1.S1_at    | MmugDNA.2304.1  | 7.6   | 7.55  | 0.25 | 0.11 | 1.04  | 0.444713 | 0.571754 | 0.727131 | 0.743982 |
| MmugDNA.23040.1.S1_at   | MmugDNA.23040.1 | 3.98  | 4.98  | 0.07 | 0.38 | -2.01 | 0.010744 | 0.00492  | 0.23109  | 0.097771 |
| MmugDNA.23041.1.S1_at   | MmugDNA.23041.1 | 9.97  | 9.3   | 0.58 | 0.19 | 1.6   | 0.334972 | 0.111628 | 0.658715 | 0.376546 |
| MmugDNA.23042.1.S1_at   | MmugDNA.23042.1 | 6.93  | 7.21  | 0.19 | 0.48 | -1.21 | 0.395861 | 0.498856 | 0.696652 | 0.697821 |
| MmugDNA.23045.1.S1_at   | MmugDNA.23045.1 | 5.8   | 5.78  | 0.46 | 0.41 | 1.02  | 0.691388 | 0.87675  | 0.862705 | 0.92982  |
| MmugDNA.23046.1.S1_at   | MmugDNA.23046.1 | 3.91  | 3.94  | 0.1  | 0.1  | -1.02 | 0.439203 | 0.461567 | 0.723488 | 0.673162 |
| MmugDNA.23047.1.S1_at   | MmugDNA.23047.1 | 5.43  | 5.28  | 0.14 | 0.14 | 1.11  | 0.968576 | 0.386043 | 0.988176 | 0.621296 |
| MmugDNA.23049.1.S1_at   | MmugDNA.23049.1 | 7.38  | 7.41  | 0.09 | 0.08 | -1.02 | 0.133166 | 0.209314 | 0.499568 | 0.483038 |
| MmugDNA.23053.1.S1_at   | MmugDNA.23053.1 | 7.55  | 7.42  | 0.07 | 0.17 | 1.09  | 0.580254 | 0.409947 | 0.804551 | 0.636977 |
| MmugDNA.23058.1.S1_at   | MmugDNA.23058.1 | 8.15  | 8.05  | 0.16 | 0.43 | 1.07  | 0.89061  | 0.820139 | 0.956235 | 0.896336 |

|                         |                 |       |       |      |      |       |          |          |          |          |
|-------------------------|-----------------|-------|-------|------|------|-------|----------|----------|----------|----------|
| MmugDNA.2306.1.S1_s_at  | MmugDNA.2306.1  | 8.17  | 7.49  | 0.33 | 0.84 | 1.6   | 0.275321 | 0.192357 | 0.617789 | 0.467834 |
| MmugDNA.23060.1.S1_s_at | MmugDNA.23060.1 | 6.49  | 6.21  | 0.24 | 0.05 | 1.22  | 0.042338 | 0.031262 | 0.354659 | 0.218668 |
| MmugDNA.23064.1.S1_s_at | MmugDNA.23064.1 | 8.54  | 8.4   | 0.14 | 0.11 | 1.1   | 0.526017 | 0.143526 | 0.773971 | 0.417469 |
| MmugDNA.23068.1.S1_s_at | MmugDNA.23068.1 | 12.07 | 12.01 | 0.04 | 0.17 | 1.04  | 0.672079 | 0.188523 | 0.852829 | 0.464458 |
| MmugDNA.23070.1.S1_s_at | MmugDNA.23070.1 | 5.18  | 5.24  | 0.07 | 0.03 | -1.05 | 0.319036 | 0.629654 | 0.648688 | 0.781989 |
| MmugDNA.23075.1.S1_s_at | MmugDNA.23075.1 | 4.53  | 4.58  | 0.35 | 0.42 | -1.04 | 0.434015 | 0.412111 | 0.720304 | 0.638537 |
| MmugDNA.23080.1.S1_s_at | MmugDNA.23080.1 | 9.28  | 9.4   | 0.25 | 1.03 | -1.09 | 0.800888 | 0.916328 | 0.917917 | 0.953126 |
| MmugDNA.23082.1.S1_s_at | MmugDNA.23082.1 | 9.02  | 10.01 | 0.74 | 1.05 | -1.99 | 0.267356 | 0.28844  | 0.612462 | 0.549749 |
| MmugDNA.23088.1.S1_s_at | MmugDNA.23088.1 | 12    | 12.38 | 0.06 | 0.23 | -1.3  | 0.055424 | 0.046721 | 0.383716 | 0.260831 |
| MmugDNA.2309.1.S1_s_at  | MmugDNA.2309.1  | 10.37 | 10.72 | 0.3  | 0.1  | -1.27 | 0.266011 | 0.44806  | 0.611558 | 0.663986 |
| MmugDNA.23095.1.S1_s_at | MmugDNA.23095.1 | 7.21  | 7.45  | 0.37 | 0.19 | -1.18 | 0.141431 | 0.162413 | 0.509067 | 0.438575 |
| MmugDNA.23098.1.S1_s_at | MmugDNA.23098.1 | 9     | 8.97  | 0.17 | 0.39 | 1.02  | 0.322528 | 0.081446 | 0.651178 | 0.329632 |
| MmugDNA.23108.1.S1_s_at | MmugDNA.23108.1 | 9.74  | 10.52 | 0.72 | 1.23 | -1.73 | 0.42529  | 0.215025 | 0.715047 | 0.488898 |
| MmugDNA.23115.1.S1_s_at | MmugDNA.23115.1 | 6.71  | 6.67  | 0.13 | 0.1  | 1.03  | 0.382576 | 0.150816 | 0.688839 | 0.425335 |
| MmugDNA.23120.1.S1_s_at | MmugDNA.23120.1 | 8.4   | 7.86  | 0.06 | 0.87 | 1.45  | 0.421523 | 0.449476 | 0.713104 | 0.665087 |
| MmugDNA.23121.1.S1_s_at | MmugDNA.23121.1 | 6.37  | 6.61  | 0.14 | 0.03 | -1.18 | 0.102929 | 0.110537 | 0.46254  | 0.374755 |
| MmugDNA.23128.1.S1_s_at | MmugDNA.23128.1 | 8.25  | 8.15  | 0.15 | 0.1  | 1.07  | 0.326629 | 0.002611 | 0.653184 | 0.075645 |
| MmugDNA.23129.1.S1_s_at | MmugDNA.23129.1 | 3.72  | 3.74  | 0.03 | 0.22 | -1.01 | 0.988761 | 0.646034 | 0.995968 | 0.792676 |
| MmugDNA.23133.1.S1_s_at | MmugDNA.23133.1 | 4.55  | 4.68  | 0.08 | 0.09 | -1.09 | 0.038403 | 0.081689 | 0.344272 | 0.329928 |
| MmugDNA.23136.1.S1_s_at | MmugDNA.23136.1 | 3.36  | 3.29  | 0.18 | 0.16 | 1.05  | 0.84875  | 0.306006 | 0.939211 | 0.562757 |
| MmugDNA.23137.1.S1_s_at | MmugDNA.23137.1 | 8.12  | 7.74  | 0.59 | 0.61 | 1.3   | 0.99543  | 0.477678 | 0.998376 | 0.6837   |
| MmugDNA.2314.1.S1_s_at  | MmugDNA.2314.1  | 5.45  | 5.44  | 0.07 | 0.19 | 1.01  | 0.305057 | 0.347437 | 0.639014 | 0.592019 |
| MmugDNA.23143.1.S1_s_at | MmugDNA.23143.1 | 11.6  | 10.75 | 0.29 | 0.78 | 1.8   | 0.254819 | 0.145212 | 0.602784 | 0.419214 |
| MmugDNA.23149.1.S1_s_at | MmugDNA.23149.1 | 4.61  | 4.32  | 0.18 | 0.21 | 1.22  | 0.144102 | 0.003408 | 0.510652 | 0.084071 |
| MmugDNA.2315.1.S1_s_at  | MmugDNA.2315.1  | 9.35  | 9     | 0.42 | 0.4  | 1.28  | 0.951618 | 0.350261 | 0.981912 | 0.594012 |
| MmugDNA.23158.1.S1_s_at | MmugDNA.23158.1 | 8.16  | 8.17  | 0.44 | 0.31 | -1.01 | 0.250487 | 0.254718 | 0.600389 | 0.522987 |
| MmugDNA.2316.1.S1_s_at  | MmugDNA.2316.1  | 13.75 | 13.79 | 0.27 | 0.52 | -1.03 | 0.555901 | 0.721988 | 0.791566 | 0.838928 |
| MmugDNA.23160.1.S1_s_at | MmugDNA.23160.1 | 4.7   | 4.48  | 0.34 | 0.46 | 1.16  | 0.896545 | 0.709897 | 0.958765 | 0.831863 |
| MmugDNA.23162.1.S1_s_at | MmugDNA.23162.1 | 3.22  | 3.3   | 0.58 | 0.11 | -1.06 | 0.405134 | 0.687292 | 0.703082 | 0.817535 |
| MmugDNA.2317.1.S1_s_at  | MmugDNA.2317.1  | 11.63 | 11.62 | 0.19 | 0.18 | 1.01  | 0.409014 | 0.395482 | 0.705716 | 0.627503 |
| MmugDNA.23173.1.S1_s_at | MmugDNA.23173.1 | 6.58  | 6.89  | 0.38 | 0.29 | -1.24 | 0.144758 | 0.000283 | 0.511163 | 0.034683 |
| MmugDNA.23174.1.S1_s_at | MmugDNA.23174.1 | 10.92 | 10.55 | 0.42 | 0.44 | 1.3   | 0.268577 | 0.334492 | 0.613299 | 0.582498 |
| MmugDNA.23177.1.S1_s_at | MmugDNA.23177.1 | 9.55  | 10.22 | 0.11 | 0.58 | -1.6  | 0.135341 | 0.008743 | 0.502159 | 0.123975 |
| MmugDNA.23179.1.S1_s_at | MmugDNA.23179.1 | 3.59  | 3.75  | 0.05 | 0.22 | -1.12 | 0.203063 | 0.192512 | 0.565661 | 0.467958 |
| MmugDNA.23181.1.S1_s_at | MmugDNA.23181.1 | 7.82  | 7.39  | 0.36 | 0.42 | 1.34  | 0.46249  | 0.467015 | 0.738248 | 0.676774 |
| MmugDNA.23182.1.S1_s_at | MmugDNA.23182.1 | 5.59  | 5.71  | 0.19 | 0.22 | -1.09 | 0.350644 | 0.455733 | 0.668568 | 0.669659 |
| MmugDNA.23183.1.S1_s_at | MmugDNA.23183.1 | 12.03 | 11.76 | 0.14 | 0.72 | 1.21  | 0.184267 | 0.193637 | 0.548064 | 0.468785 |
| MmugDNA.23187.1.S1_s_at | MmugDNA.23187.1 | 2.86  | 2.85  | 0.08 | 0.1  | 1     | 0.665502 | 0.599083 | 0.850023 | 0.761287 |
| MmugDNA.23195.1.S1_s_at | MmugDNA.23195.1 | 4.26  | 3.95  | 0.99 | 0.31 | 1.24  | 0.641476 | 0.805648 | 0.838297 | 0.888316 |
| MmugDNA.23197.1.S1_s_at | MmugDNA.23197.1 | 3.15  | 3.37  | 0.1  | 0.02 | -1.17 | 0.045218 | 0.028386 | 0.360405 | 0.210319 |
| MmugDNA.232.1.S1_s_at   | MmugDNA.232.1   | 12.79 | 12.48 | 0.19 | 0.38 | 1.24  | 0.407709 | 0.55642  | 0.704802 | 0.734507 |

|                         |                 |       |       |      |      |       |          |          |          |          |
|-------------------------|-----------------|-------|-------|------|------|-------|----------|----------|----------|----------|
| MmugDNA.2320.1.S1_at    | MmugDNA.2320.1  | 8.25  | 7.53  | 0.3  | 0.41 | 1.65  | 0.119081 | 0.020785 | 0.483744 | 0.180899 |
| MmugDNA.23200.1.S1_at   | MmugDNA.23200.1 | 10.03 | 10.52 | 0.58 | 0.8  | -1.41 | 0.566092 | 0.642232 | 0.797485 | 0.790086 |
| MmugDNA.23202.1.S1_at   | MmugDNA.23202.1 | 8.97  | 8.55  | 0.28 | 0.21 | 1.33  | 0.315703 | 0.482498 | 0.646695 | 0.687323 |
| MmugDNA.23207.1.S1_at   | MmugDNA.23207.1 | 6.75  | 10.06 | 1.16 | 3    | -9.9  | 0.343043 | 0.245832 | 0.663407 | 0.515519 |
| MmugDNA.2321.1.S1_at    | MmugDNA.2321.1  | 9.48  | 10.63 | 0.64 | 0.51 | -2.22 | 0.072458 | 0.038328 | 0.416971 | 0.240641 |
| MmugDNA.23211.1.S1_at   | MmugDNA.23211.1 | 11    | 9.72  | 0.1  | 0.27 | 2.42  | 0.002    | 0.00243  | 0.155636 | 0.073093 |
| MmugDNA.23216.1.S1_at   | MmugDNA.23216.1 | 4.47  | 4.5   | 0.03 | 0.01 | -1.02 | 0.190688 | 0.482878 | 0.553339 | 0.68765  |
| MmugDNA.23217.1.S1_at   | MmugDNA.23217.1 | 9.91  | 11.42 | 0.41 | 0.42 | -2.85 | 0.01981  | 0.011312 | 0.275549 | 0.138076 |
| MmugDNA.23222.1.S1_at   | MmugDNA.23222.1 | 9.83  | 9.8   | 0.13 | 0.07 | 1.03  | 0.746227 | 0.89657  | 0.891365 | 0.940905 |
| MmugDNA.23234.1.S1_at   | MmugDNA.23234.1 | 6.03  | 6.13  | 0.04 | 0.15 | -1.07 | 0.119608 | 0.120471 | 0.484145 | 0.38925  |
| MmugDNA.23236.1.S1_at   | MmugDNA.23236.1 | 6.8   | 6.86  | 0.2  | 0.08 | -1.05 | 0.25358  | 0.433384 | 0.60216  | 0.653662 |
| MmugDNA.2324.1.S1_at    | MmugDNA.2324.1  | 8.55  | 8.62  | 0.07 | 0.66 | -1.05 | 0.65809  | 0.790532 | 0.846306 | 0.878895 |
| MmugDNA.23243.1.S1_at   | MmugDNA.23243.1 | 5.11  | 5.06  | 0.06 | 0.28 | 1.04  | 0.88579  | 0.992255 | 0.954201 | 0.995588 |
| MmugDNA.23245.1.S1_at   | MmugDNA.23245.1 | 3.22  | 3.18  | 0.07 | 0.05 | 1.02  | 0.514423 | 0.403818 | 0.76693  | 0.632393 |
| MmugDNA.23247.1.S1_at   | MmugDNA.23247.1 | 10.67 | 11.12 | 0.03 | 0.25 | -1.36 | 0.030256 | 0.004219 | 0.317712 | 0.091392 |
| MmugDNA.23250.1.S1_at   | MmugDNA.23250.1 | 10.77 | 11.61 | 0.52 | 0.81 | -1.79 | 0.14351  | 0.173342 | 0.510312 | 0.449791 |
| MmugDNA.23251.1.S1_at   | MmugDNA.23251.1 | 10.32 | 10.75 | 0.19 | 0.39 | -1.35 | 0.165529 | 0.127716 | 0.529547 | 0.398581 |
| MmugDNA.23254.1.A1_at   | MmugDNA.23254.1 | 3.28  | 2.97  | 0.24 | 0.05 | 1.24  | 0.051237 | 0.015081 | 0.376001 | 0.155923 |
| MmugDNA.23254.1.S1_at   | MmugDNA.23254.1 | 3.37  | 3.31  | 0.28 | 0.06 | 1.05  | 0.359794 | 0.325756 | 0.673991 | 0.57602  |
| MmugDNA.23256.1.S1_at   | MmugDNA.23256.1 | 9.87  | 9.02  | 0.21 | 0.66 | 1.8   | 0.056015 | 0.048904 | 0.385473 | 0.265919 |
| MmugDNA.23262.1.S1_at   | MmugDNA.23262.1 | 9.07  | 8.72  | 0.24 | 0.14 | 1.27  | 0.455163 | 0.308961 | 0.733701 | 0.564656 |
| MmugDNA.23267.1.S1_at   | MmugDNA.23267.1 | 10.01 | 10.41 | 0.13 | 0.21 | -1.32 | 0.036026 | 0.003136 | 0.338744 | 0.081639 |
| MmugDNA.23271.1.S1_at   | MmugDNA.23271.1 | 8.9   | 9.1   | 0.17 | 0.25 | -1.15 | 0.536846 | 0.595585 | 0.779659 | 0.759091 |
| MmugDNA.23271.1.S1_s_at | MmugDNA.23271.1 | 10.85 | 10.86 | 0.07 | 0.23 | -1    | 0.733801 | 0.836166 | 0.885206 | 0.9063   |
| MmugDNA.23289.1.S1_at   | MmugDNA.23289.1 | 5.66  | 5.52  | 0.12 | 0.21 | 1.1   | 0.337114 | 0.222191 | 0.659871 | 0.495178 |
| MmugDNA.23290.1.S1_at   | MmugDNA.23290.1 | 5.79  | 7.49  | 0.47 | 1.3  | -3.26 | 0.102105 | 0.054667 | 0.461507 | 0.279311 |
| MmugDNA.23292.1.S1_at   | MmugDNA.23292.1 | 8.38  | 9.55  | 0.51 | 0.28 | -2.25 | 0.040155 | 0.049267 | 0.3492   | 0.266828 |
| MmugDNA.2330.1.S1_at    | MmugDNA.2330.1  | 10    | 9.96  | 0.15 | 0.14 | 1.03  | 0.466788 | 0.410502 | 0.740411 | 0.637352 |
| MmugDNA.23303.1.S1_at   | MmugDNA.23303.1 | 13.58 | 13.59 | 0.04 | 0.01 | -1.01 | 0.180603 | 0.031972 | 0.544923 | 0.2212   |
| MmugDNA.23304.1.S1_at   | MmugDNA.23304.1 | 8.9   | 10.78 | 0.59 | 1    | -3.67 | 0.050163 | 0.038339 | 0.373452 | 0.240682 |
| MmugDNA.23307.1.S1_at   | MmugDNA.23307.1 | 9.34  | 8.68  | 0.12 | 0.49 | 1.58  | 0.066595 | 0.054893 | 0.406564 | 0.279748 |
| MmugDNA.2331.1.S1_at    | MmugDNA.2331.1  | 6.44  | 6.7   | 0.11 | 0.32 | -1.19 | 0.421609 | 0.117242 | 0.713163 | 0.384777 |
| MmugDNA.23322.1.S1_at   | MmugDNA.23322.1 | 12.32 | 12.3  | 0.01 | 0.23 | 1.01  | 0.893972 | 0.403716 | 0.95784  | 0.632331 |
| MmugDNA.23326.1.S1_at   | MmugDNA.23326.1 | 6.18  | 6     | 0.12 | 0.18 | 1.14  | 0.1497   | 0.105054 | 0.514291 | 0.366736 |
| MmugDNA.23326.1.S1_x_at | MmugDNA.23326.1 | 8.05  | 7.91  | 0.08 | 0.15 | 1.1   | 0.082716 | 0.099466 | 0.43437  | 0.357827 |
| MmugDNA.23328.1.S1_at   | MmugDNA.23328.1 | 6.69  | 6.68  | 0.12 | 0.09 | 1.01  | 0.414674 | 0.489869 | 0.709338 | 0.691972 |
| MmugDNA.2333.1.S1_at    | MmugDNA.2333.1  | 11.76 | 11.35 | 0.4  | 0.19 | 1.32  | 0.16567  | 0.041253 | 0.529716 | 0.247995 |
| MmugDNA.2333.1.S1_s_at  | MmugDNA.2333.1  | 11.78 | 11.46 | 0.2  | 0.27 | 1.25  | 0.131963 | 0.036374 | 0.498114 | 0.235146 |
| MmugDNA.23334.1.S1_at   | MmugDNA.23334.1 | 11.09 | 11    | 0.18 | 0.22 | 1.06  | 0.815369 | 0.215237 | 0.924969 | 0.488977 |
| MmugDNA.23337.1.S1_at   | MmugDNA.23337.1 | 10.94 | 11.65 | 0.64 | 0.28 | -1.64 | 0.094885 | 0.026455 | 0.452401 | 0.203779 |
| MmugDNA.2334.1.S1_at    | MmugDNA.2334.1  | 6.75  | 7.26  | 0.34 | 0.7  | -1.43 | 0.478807 | 0.390805 | 0.747509 | 0.624547 |

|                         |                 |       |       |      |      |       |          |          |          |          |
|-------------------------|-----------------|-------|-------|------|------|-------|----------|----------|----------|----------|
| MmugDNA.23346.1.S1_at   | MmugDNA.23346.1 | 11.89 | 11.64 | 0.1  | 0.23 | 1.19  | 0.438849 | 0.482964 | 0.723342 | 0.687687 |
| MmugDNA.23352.1.S1_at   | MmugDNA.23352.1 | 8.97  | 8.84  | 0.17 | 0.66 | 1.1   | 0.685557 | 0.876649 | 0.859209 | 0.929744 |
| MmugDNA.23356.1.S1_at   | MmugDNA.23356.1 | 7.15  | 6.48  | 0.41 | 0.51 | 1.6   | 0.474371 | 0.300159 | 0.745071 | 0.558356 |
| MmugDNA.23358.1.S1_at   | MmugDNA.23358.1 | 13.16 | 13.26 | 0.07 | 0.13 | -1.07 | 0.102072 | 0.045116 | 0.461443 | 0.256956 |
| MmugDNA.2337.1.S1_at    | MmugDNA.2337.1  | 5.23  | 5.23  | 0.65 | 0.31 | 1     | 0.969867 | 0.612044 | 0.98846  | 0.76972  |
| MmugDNA.23373.1.S1_at   | MmugDNA.23373.1 | 5.69  | 5.96  | 0.15 | 0.02 | -1.21 | 0.101964 | 0.099342 | 0.461342 | 0.35761  |
| MmugDNA.23378.1.S1_at   | MmugDNA.23378.1 | 6.94  | 6.33  | 0.98 | 0.53 | 1.53  | 0.743798 | 0.182698 | 0.890217 | 0.459186 |
| MmugDNA.23379.1.S1_at   | MmugDNA.23379.1 | 11.56 | 11.22 | 0.1  | 0.14 | 1.27  | 0.050297 | 0.061687 | 0.374026 | 0.295135 |
| MmugDNA.2338.1.S1_at    | MmugDNA.2338.1  | 6.01  | 5.64  | 0.1  | 0.94 | 1.29  | 0.472476 | 0.29571  | 0.743753 | 0.555138 |
| MmugDNA.23387.1.S1_at   | MmugDNA.23387.1 | 6.12  | 7.39  | 0.58 | 0.21 | -2.41 | 0.036925 | 0.013481 | 0.340495 | 0.148688 |
| MmugDNA.23388.1.S1_at   | MmugDNA.23388.1 | 2.59  | 2.67  | 0.02 | 0.06 | -1.06 | 0.040225 | 0.045202 | 0.349219 | 0.256979 |
| MmugDNA.23392.1.S1_at   | MmugDNA.23392.1 | 10    | 9.97  | 0.45 | 0.15 | 1.02  | 0.477029 | 0.202433 | 0.746452 | 0.476772 |
| MmugDNA.23403.1.A1_at   | MmugDNA.23403.1 | 6.03  | 5.79  | 0.25 | 0.26 | 1.18  | 0.336298 | 0.479025 | 0.659402 | 0.684885 |
| MmugDNA.23403.1.S1_at   | MmugDNA.23403.1 | 5.62  | 5.67  | 0.05 | 0.09 | -1.03 | 0.580863 | 0.929425 | 0.804812 | 0.959707 |
| MmugDNA.23405.1.S1_s_at | MmugDNA.23405.1 | 11.85 | 11.86 | 0.07 | 0.23 | -1    | 0.749494 | 0.719604 | 0.89273  | 0.837761 |
| MmugDNA.23407.1.S1_at   | MmugDNA.23407.1 | 11.15 | 11.06 | 0.28 | 0.01 | 1.07  | 0.184884 | 0.11322  | 0.548379 | 0.379229 |
| MmugDNA.23414.1.S1_at   | MmugDNA.23414.1 | 6.54  | 6.61  | 0.04 | 0.1  | -1.05 | 0.575672 | 0.421666 | 0.802449 | 0.645222 |
| MmugDNA.23423.1.S1_at   | MmugDNA.23423.1 | 9.8   | 9.88  | 0.18 | 0.12 | -1.06 | 0.461376 | 0.201128 | 0.737557 | 0.475519 |
| MmugDNA.23424.1.S1_at   | MmugDNA.23424.1 | 9.26  | 9.46  | 0.78 | 0.33 | -1.15 | 0.65585  | 0.781656 | 0.845214 | 0.87342  |
| MmugDNA.23425.1.S1_at   | MmugDNA.23425.1 | 9.59  | 10.57 | 1.79 | 1.45 | -1.98 | 0.458692 | 0.568597 | 0.735608 | 0.742052 |
| MmugDNA.23428.1.S1_at   | MmugDNA.23428.1 | 12.05 | 11.81 | 0.09 | 0.21 | 1.18  | 0.121607 | 0.135514 | 0.486508 | 0.407621 |
| MmugDNA.23431.1.S1_at   | MmugDNA.23431.1 | 6.35  | 6.55  | 0.48 | 0.12 | -1.15 | 0.820464 | 0.75263  | 0.926918 | 0.855965 |
| MmugDNA.23434.1.S1_at   | MmugDNA.23434.1 | 13.6  | 13.44 | 0.04 | 0.04 | 1.12  | 0.006749 | 0.002866 | 0.20158  | 0.078799 |
| MmugDNA.23436.1.S1_at   | MmugDNA.23436.1 | 3.23  | 3.23  | 0.06 | 0.12 | 1     | 0.615012 | 0.782665 | 0.823334 | 0.874202 |
| MmugDNA.23445.1.S1_at   | MmugDNA.23445.1 | 8.68  | 7.82  | 0.21 | 0.19 | 1.82  | 0.008132 | 0.001392 | 0.216797 | 0.057005 |
| MmugDNA.23448.1.S1_at   | MmugDNA.23448.1 | 6.33  | 6.46  | 0.1  | 0.12 | -1.09 | 0.216373 | 0.239589 | 0.575996 | 0.510247 |
| MmugDNA.23451.1.S1_at   | MmugDNA.23451.1 | 4.41  | 5.69  | 1.16 | 0.94 | -2.43 | 0.799978 | 0.566988 | 0.917312 | 0.740935 |
| MmugDNA.2347.1.S1_s_at  | MmugDNA.2347.1  | 11.8  | 11.09 | 0.08 | 0.32 | 1.63  | 0.024263 | 0.010422 | 0.294535 | 0.133525 |
| MmugDNA.23473.1.S1_at   | MmugDNA.23473.1 | 5.57  | 5.8   | 0.04 | 0.16 | -1.17 | 0.25439  | 0.208889 | 0.602363 | 0.482717 |
| MmugDNA.23474.1.S1_at   | MmugDNA.23474.1 | 4.88  | 5.06  | 0.01 | 0.07 | -1.14 | 0.013338 | 0.006266 | 0.246471 | 0.107376 |
| MmugDNA.23486.1.S1_at   | MmugDNA.23486.1 | 6.64  | 6.75  | 0.02 | 0.11 | -1.08 | 0.206567 | 0.129966 | 0.568816 | 0.401533 |
| MmugDNA.23489.1.S1_at   | MmugDNA.23489.1 | 4.56  | 4.62  | 0.12 | 0.06 | -1.04 | 0.224527 | 0.50578  | 0.582716 | 0.702218 |
| MmugDNA.23492.1.S1_at   | MmugDNA.23492.1 | 4.98  | 5.08  | 0.09 | 0.14 | -1.07 | 0.342086 | 0.609659 | 0.663038 | 0.767957 |
| MmugDNA.23498.1.S1_at   | MmugDNA.23498.1 | 10.48 | 10.27 | 0.15 | 0.17 | 1.15  | 0.088812 | 0.092784 | 0.443684 | 0.348989 |
| MmugDNA.235.1.S1_at     | MmugDNA.235.1   | 6.65  | 6.69  | 0.1  | 0.12 | -1.02 | 0.853812 | 0.144171 | 0.940936 | 0.418037 |
| MmugDNA.23500.1.S1_at   | MmugDNA.23500.1 | 12.61 | 12.44 | 0.12 | 0.83 | 1.12  | 0.302307 | 0.402204 | 0.63692  | 0.631247 |
| MmugDNA.23501.1.S1_at   | MmugDNA.23501.1 | 12.67 | 12.68 | 0.04 | 0.39 | -1.01 | 0.407892 | 0.509022 | 0.704911 | 0.703967 |
| MmugDNA.23510.1.S1_at   | MmugDNA.23510.1 | 4.58  | 4     | 0.27 | 0.22 | 1.5   | 0.104023 | 0.090867 | 0.464135 | 0.345474 |
| MmugDNA.23511.1.S1_at   | MmugDNA.23511.1 | 7.46  | 6.46  | 0.59 | 0.52 | 2     | 0.449369 | 0.501896 | 0.73019  | 0.699953 |
| MmugDNA.23513.1.S1_at   | MmugDNA.23513.1 | 5.94  | 6.01  | 0.44 | 0.14 | -1.05 | 0.509522 | 0.421187 | 0.764387 | 0.644807 |
| MmugDNA.23514.1.S1_at   | MmugDNA.23514.1 | 5.76  | 5.78  | 0.1  | 0.14 | -1.02 | 0.749637 | 0.871016 | 0.89273  | 0.926745 |

|                         |                 |       |       |      |      |       |          |          |          |          |
|-------------------------|-----------------|-------|-------|------|------|-------|----------|----------|----------|----------|
| MmugDNA.23515.1.S1_at   | MmugDNA.23515.1 | 11.91 | 11.68 | 0.09 | 0.15 | 1.18  | 0.041925 | 0.003709 | 0.353435 | 0.0868   |
| MmugDNA.23523.1.S1_at   | MmugDNA.23523.1 | 11.5  | 11.76 | 0.21 | 0.09 | -1.2  | 0.219147 | 0.254698 | 0.578562 | 0.522987 |
| MmugDNA.23523.1.S1_s_at | MmugDNA.23523.1 | 10.89 | 11.27 | 0.16 | 0.14 | -1.3  | 0.064977 | 0.078154 | 0.403744 | 0.324634 |
| MmugDNA.23535.1.S1_at   | MmugDNA.23535.1 | 5.53  | 5.57  | 0.17 | 0.09 | -1.02 | 0.940606 | 0.928669 | 0.97745  | 0.959449 |
| MmugDNA.23538.1.S1_at   | MmugDNA.23538.1 | 6.49  | 6.46  | 0.2  | 0.02 | 1.02  | 0.824094 | 0.226748 | 0.928595 | 0.499176 |
| MmugDNA.23542.1.S1_at   | MmugDNA.23542.1 | 9.76  | 9.57  | 0.08 | 0.26 | 1.14  | 0.769919 | 0.189203 | 0.90328  | 0.464997 |
| MmugDNA.23556.1.S1_at   | MmugDNA.23556.1 | 8.3   | 8.78  | 0.58 | 0.66 | -1.4  | 0.285586 | 0.400025 | 0.625066 | 0.630158 |
| MmugDNA.23559.1.S1_at   | MmugDNA.23559.1 | 7.86  | 7.85  | 1.01 | 0.84 | 1.01  | 0.685185 | 0.614332 | 0.858887 | 0.771206 |
| MmugDNA.23560.1.S1_at   | MmugDNA.23560.1 | 7.22  | 7.59  | 0.16 | 0.42 | -1.29 | 0.074311 | 0.077054 | 0.419963 | 0.322498 |
| MmugDNA.23564.1.S1_at   | MmugDNA.23564.1 | 11.04 | 11.32 | 0.22 | 0.87 | -1.21 | 0.902151 | 0.38952  | 0.960936 | 0.623635 |
| MmugDNA.23564.1.S1_s_at | MmugDNA.23564.1 | 8.38  | 9.01  | 0.3  | 1.05 | -1.54 | 0.40875  | 0.236769 | 0.705493 | 0.507513 |
| MmugDNA.23567.1.S1_at   | MmugDNA.23567.1 | 8.46  | 8.78  | 0.25 | 0.59 | -1.25 | 0.359488 | 0.487308 | 0.673889 | 0.690398 |
| MmugDNA.23572.1.S1_s_at | MmugDNA.23572.1 | 9.2   | 9.27  | 0.13 | 0.37 | -1.05 | 0.830971 | 0.468165 | 0.931586 | 0.677624 |
| MmugDNA.23575.1.S1_at   | MmugDNA.23575.1 | 10.5  | 9.99  | 0.58 | 0.73 | 1.43  | 0.217712 | 0.246914 | 0.577315 | 0.516238 |
| MmugDNA.23577.1.S1_at   | MmugDNA.23577.1 | 10.1  | 10.35 | 0.22 | 0.25 | -1.19 | 0.099244 | 0.108632 | 0.459133 | 0.372171 |
| MmugDNA.23582.1.S1_at   | MmugDNA.23582.1 | 8.26  | 8.46  | 0.17 | 0.72 | -1.15 | 0.519703 | 0.270965 | 0.770306 | 0.536099 |
| MmugDNA.23582.1.S1_s_at | MmugDNA.23582.1 | 9.17  | 9.11  | 0.24 | 0.65 | 1.04  | 0.332068 | 0.350794 | 0.656667 | 0.594515 |
| MmugDNA.23583.1.S1_at   | MmugDNA.23583.1 | 6.43  | 6.53  | 0.18 | 0.8  | -1.07 | 0.770081 | 0.890542 | 0.90333  | 0.937632 |
| MmugDNA.23584.1.S1_at   | MmugDNA.23584.1 | 9.3   | 9.62  | 0.23 | 0.19 | -1.25 | 0.120279 | 0.104956 | 0.485252 | 0.366527 |
| MmugDNA.23586.1.S1_at   | MmugDNA.23586.1 | 11.93 | 11.7  | 0.32 | 0.23 | 1.17  | 0.829502 | 0.93857  | 0.930814 | 0.965059 |
| MmugDNA.23588.1.S1_at   | MmugDNA.23588.1 | 6.35  | 6.3   | 0.45 | 0.52 | 1.04  | 0.542949 | 0.735465 | 0.783716 | 0.846919 |
| MmugDNA.23592.1.S1_at   | MmugDNA.23592.1 | 4.79  | 4.94  | 0.11 | 0.13 | -1.11 | 0.145855 | 0.437544 | 0.511704 | 0.656769 |
| MmugDNA.23593.1.S1_at   | MmugDNA.23593.1 | 8.08  | 8.42  | 0.22 | 0.43 | -1.27 | 0.255668 | 0.211924 | 0.603468 | 0.48594  |
| MmugDNA.23596.1.S1_at   | MmugDNA.23596.1 | 8.91  | 8.89  | 0.21 | 0.16 | 1.01  | 0.454899 | 0.146005 | 0.733535 | 0.420006 |
| MmugDNA.23596.1.S1_s_at | MmugDNA.23596.1 | 10.39 | 10.42 | 0.09 | 0.14 | -1.02 | 0.625682 | 0.642941 | 0.829114 | 0.79055  |
| MmugDNA.23603.1.S1_at   | MmugDNA.23603.1 | 12.2  | 12.21 | 0.25 | 0.21 | -1.01 | 0.850928 | 0.317276 | 0.940131 | 0.570504 |
| MmugDNA.23607.1.S1_at   | MmugDNA.23607.1 | 2.99  | 2.97  | 0.04 | 0.14 | 1.01  | 0.558168 | 0.339133 | 0.793014 | 0.585891 |
| MmugDNA.23609.1.S1_at   | MmugDNA.23609.1 | 7.28  | 7.57  | 0.18 | 0.81 | -1.23 | 0.722679 | 0.577097 | 0.878819 | 0.74764  |
| MmugDNA.23615.1.S1_at   | MmugDNA.23615.1 | 11.1  | 11.64 | 0.19 | 0.43 | -1.45 | 0.287307 | 0.388739 | 0.625926 | 0.623031 |
| MmugDNA.23619.1.S1_at   | MmugDNA.23619.1 | 10.49 | 11.44 | 0.2  | 0.09 | -1.92 | 0.00185  | 0.001083 | 0.155636 | 0.05215  |
| MmugDNA.23628.1.S1_at   | MmugDNA.23628.1 | 12.15 | 11.21 | 0.04 | 0.4  | 1.91  | 0.03695  | 0.027886 | 0.340513 | 0.208455 |
| MmugDNA.23630.1.S1_at   | MmugDNA.23630.1 | 5.05  | 5.59  | 0.18 | 0.16 | -1.46 | 0.042279 | 0.027696 | 0.354563 | 0.207837 |
| MmugDNA.23634.1.S1_at   | MmugDNA.23634.1 | 5.26  | 5.37  | 0.1  | 0.15 | -1.08 | 0.13041  | 0.144047 | 0.496851 | 0.417912 |
| MmugDNA.23639.1.S1_at   | MmugDNA.23639.1 | 9.1   | 10.44 | 0.27 | 0.5  | -2.54 | 0.01461  | 0.019178 | 0.254235 | 0.1742   |
| MmugDNA.2364.1.S1_at    | MmugDNA.2364.1  | 9.18  | 9.16  | 0.36 | 0.3  | 1.01  | 0.584993 | 0.650491 | 0.807262 | 0.795663 |
| MmugDNA.23641.1.S1_at   | MmugDNA.23641.1 | 5.87  | 6.82  | 0.31 | 1.18 | -1.92 | 0.178373 | 0.004568 | 0.542772 | 0.094375 |
| MmugDNA.23642.1.S1_at   | MmugDNA.23642.1 | 3.07  | 3.13  | 0.2  | 0.2  | -1.04 | 0.727274 | 0.773697 | 0.881234 | 0.868433 |
| MmugDNA.23645.1.S1_at   | MmugDNA.23645.1 | 8.49  | 7.8   | 0.39 | 0.81 | 1.62  | 0.42381  | 0.585999 | 0.714199 | 0.753172 |
| MmugDNA.23646.1.S1_at   | MmugDNA.23646.1 | 11.55 | 11.49 | 0.26 | 0.18 | 1.04  | 0.589227 | 0.792012 | 0.809218 | 0.879813 |
| MmugDNA.23660.1.S1_at   | MmugDNA.23660.1 | 4.74  | 5.22  | 0.48 | 0.19 | -1.39 | 0.117257 | 0.131429 | 0.481321 | 0.403584 |
| MmugDNA.23662.1.S1_at   | MmugDNA.23662.1 | 4.61  | 5.34  | 0.59 | 0.93 | -1.66 | 0.295895 | 0.280053 | 0.632176 | 0.543369 |

|                         |                 |       |       |      |      |       |          |          |          |          |
|-------------------------|-----------------|-------|-------|------|------|-------|----------|----------|----------|----------|
| MmugDNA.23662.1.S1_s_at | MmugDNA.23662.1 | 6.75  | 7.25  | 0.1  | 0.88 | -1.42 | 0.182602 | 0.187189 | 0.546812 | 0.463153 |
| MmugDNA.23665.1.S1_at   | MmugDNA.23665.1 | 12.17 | 12.38 | 0.05 | 0.49 | -1.15 | 0.725418 | 0.811583 | 0.880256 | 0.891244 |
| MmugDNA.23668.1.S1_s_at | MmugDNA.23668.1 | 10.02 | 11.57 | 0.28 | 0.33 | -2.92 | 0.004857 | 0.002507 | 0.185146 | 0.074142 |
| MmugDNA.23670.1.S1_at   | MmugDNA.23670.1 | 12.2  | 12.33 | 0.09 | 0.28 | -1.1  | 0.521943 | 0.027242 | 0.771733 | 0.206279 |
| MmugDNA.23676.1.S1_at   | MmugDNA.23676.1 | 4.98  | 5.06  | 0.12 | 0.03 | -1.06 | 0.267729 | 0.062946 | 0.612723 | 0.297579 |
| MmugDNA.23678.1.S1_at   | MmugDNA.23678.1 | 3.99  | 4.06  | 0.35 | 0.12 | -1.05 | 0.46441  | 0.569609 | 0.739221 | 0.742525 |
| MmugDNA.23689.1.S1_at   | MmugDNA.23689.1 | 9.87  | 9.87  | 0.14 | 0.39 | 1     | 0.919342 | 0.984409 | 0.968622 | 0.991287 |
| MmugDNA.23693.1.S1_at   | MmugDNA.23693.1 | 6.91  | 9.61  | 1.4  | 1.22 | -6.48 | 0.067831 | 0.024252 | 0.408558 | 0.194952 |
| MmugDNA.23694.1.S1_at   | MmugDNA.23694.1 | 4.16  | 4.36  | 0.37 | 0.28 | -1.16 | 0.43694  | 0.680678 | 0.72211  | 0.813548 |
| MmugDNA.23695.1.S1_s_at | MmugDNA.23695.1 | 9.51  | 9.09  | 0.7  | 0.28 | 1.34  | 0.195503 | 0.122289 | 0.558901 | 0.391973 |
| MmugDNA.23702.1.S1_at   | MmugDNA.23702.1 | 5.71  | 5.92  | 0.17 | 0.12 | -1.15 | 0.238587 | 0.323876 | 0.591896 | 0.574656 |
| MmugDNA.23704.1.S1_at   | MmugDNA.23704.1 | 7.47  | 7.33  | 0.65 | 0.81 | 1.1   | 0.677409 | 0.737222 | 0.8555   | 0.847869 |
| MmugDNA.23709.1.S1_at   | MmugDNA.23709.1 | 12.63 | 12.57 | 0.14 | 0.33 | 1.04  | 0.907669 | 0.703591 | 0.963338 | 0.828139 |
| MmugDNA.23718.1.S1_at   | MmugDNA.23718.1 | 6.78  | 7.01  | 0.22 | 0.25 | -1.17 | 0.154231 | 0.038263 | 0.518796 | 0.240378 |
| MmugDNA.23719.1.S1_at   | MmugDNA.23719.1 | 11.39 | 10.12 | 0.18 | 0.14 | 2.42  | 0.001051 | 0.000079 | 0.142994 | 0.027016 |
| MmugDNA.23722.1.S1_at   | MmugDNA.23722.1 | 5.39  | 5.34  | 0.48 | 0.16 | 1.04  | 0.556037 | 0.19718  | 0.791585 | 0.472213 |
| MmugDNA.23725.1.S1_at   | MmugDNA.23725.1 | 11.65 | 11.73 | 0.14 | 0.32 | -1.06 | 0.269398 | 0.069693 | 0.614131 | 0.310164 |
| MmugDNA.23734.1.S1_at   | MmugDNA.23734.1 | 7.94  | 7.51  | 0.2  | 0.45 | 1.35  | 0.281486 | 0.387991 | 0.622236 | 0.62253  |
| MmugDNA.23740.1.S1_at   | MmugDNA.23740.1 | 4.83  | 5.18  | 0.12 | 0.5  | -1.27 | 0.127522 | 0.203057 | 0.493834 | 0.477343 |
| MmugDNA.23741.1.S1_at   | MmugDNA.23741.1 | 10.34 | 9.81  | 0.17 | 0.1  | 1.45  | 0.018653 | 0.010019 | 0.270832 | 0.131262 |
| MmugDNA.2375.1.S1_at    | MmugDNA.2375.1  | 7.06  | 7.84  | 0.36 | 0.89 | -1.72 | 0.218574 | 0.273203 | 0.578123 | 0.537788 |
| MmugDNA.23757.1.S1_at   | MmugDNA.23757.1 | 9.89  | 9.37  | 0.09 | 0.6  | 1.43  | 0.591117 | 0.595216 | 0.810224 | 0.759023 |
| MmugDNA.23758.1.S1_at   | MmugDNA.23758.1 | 7.96  | 7.37  | 0.08 | 0.22 | 1.5   | 0.011957 | 0.007443 | 0.239065 | 0.115858 |
| MmugDNA.23758.1.S1_x_at | MmugDNA.23758.1 | 7.93  | 7.29  | 0.14 | 0.18 | 1.55  | 0.015272 | 0.004343 | 0.257698 | 0.092354 |
| MmugDNA.2376.1.S1_at    | MmugDNA.2376.1  | 5.78  | 8.83  | 1.91 | 2.32 | -8.29 | 0.253269 | 0.237542 | 0.601892 | 0.508196 |
| MmugDNA.23765.1.S1_at   | MmugDNA.23765.1 | 5.32  | 5.32  | 0.21 | 0.24 | -1    | 0.84916  | 0.956045 | 0.939404 | 0.975043 |
| MmugDNA.23771.1.S1_at   | MmugDNA.23771.1 | 10.78 | 10.95 | 0.14 | 0.33 | -1.13 | 0.320046 | 0.174018 | 0.649292 | 0.450269 |
| MmugDNA.23772.1.S1_at   | MmugDNA.23772.1 | 3.92  | 3.91  | 0.01 | 0.15 | 1     | 0.330002 | 0.32527  | 0.655479 | 0.575648 |
| MmugDNA.23781.1.S1_s_at | MmugDNA.23781.1 | 10.99 | 10.54 | 0.11 | 0.22 | 1.37  | 0.082074 | 0.067306 | 0.433268 | 0.305414 |
| MmugDNA.23788.1.S1_at   | MmugDNA.23788.1 | 6.33  | 6.38  | 0.22 | 0.08 | -1.04 | 0.649229 | 0.737296 | 0.84237  | 0.847869 |
| MmugDNA.23790.1.S1_at   | MmugDNA.23790.1 | 8.73  | 7.9   | 0.11 | 0.64 | 1.79  | 0.087303 | 0.086218 | 0.441484 | 0.33863  |
| MmugDNA.23792.1.S1_at   | MmugDNA.23792.1 | 4.13  | 4.1   | 0.06 | 0.22 | 1.02  | 0.791262 | 0.927735 | 0.9133   | 0.958972 |
| MmugDNA.23793.1.S1_at   | MmugDNA.23793.1 | 8.7   | 8.61  | 0.07 | 0.07 | 1.07  | 0.237316 | 0.586008 | 0.590811 | 0.753172 |
| MmugDNA.23793.1.S1_s_at | MmugDNA.23793.1 | 9.09  | 9.07  | 0.1  | 0.18 | 1.01  | 0.593052 | 0.856014 | 0.811221 | 0.917803 |
| MmugDNA.238.1.S1_at     | MmugDNA.238.1   | 9.3   | 9.92  | 0.38 | 0.76 | -1.54 | 0.229284 | 0.286297 | 0.586472 | 0.547784 |
| MmugDNA.23812.1.S1_at   | MmugDNA.23812.1 | 9.3   | 10.44 | 0.14 | 0.39 | -2.21 | 0.013371 | 0.00929  | 0.246471 | 0.127128 |
| MmugDNA.23817.1.S1_at   | MmugDNA.23817.1 | 6.04  | 6.2   | 0.08 | 0.2  | -1.12 | 0.301316 | 0.360061 | 0.636349 | 0.601204 |
| MmugDNA.23824.1.S1_at   | MmugDNA.23824.1 | 10.36 | 9.83  | 0.58 | 0.81 | 1.44  | 0.983526 | 0.754529 | 0.994094 | 0.857221 |
| MmugDNA.23833.1.S1_at   | MmugDNA.23833.1 | 5.13  | 4.98  | 0.17 | 0.29 | 1.11  | 0.948238 | 0.437962 | 0.980164 | 0.657057 |
| MmugDNA.23854.1.S1_at   | MmugDNA.23854.1 | 7.51  | 7.42  | 0.13 | 0.18 | 1.07  | 0.610372 | 0.82758  | 0.821014 | 0.901078 |
| MmugDNA.23862.1.S1_at   | MmugDNA.23862.1 | 5.94  | 7.44  | 0.83 | 1.56 | -2.83 | 0.451533 | 0.296953 | 0.731625 | 0.555895 |



|                         |                 |       |       |      |      |       |          |          |          |          |
|-------------------------|-----------------|-------|-------|------|------|-------|----------|----------|----------|----------|
| MmugDNA.23879.1.S1_at   | MmugDNA.23879.1 | 3.03  | 3.21  | 0.12 | 0.1  | -1.13 | 0.126218 | 0.129739 | 0.4924   | 0.401362 |
| MmugDNA.23887.1.S1_at   | MmugDNA.23887.1 | 3.06  | 2.96  | 0.09 | 0.04 | 1.07  | 0.290977 | 0.582878 | 0.628652 | 0.751428 |
| MmugDNA.23889.1.S1_s_at | MmugDNA.23889.1 | 9.74  | 10.16 | 0.3  | 0.26 | -1.34 | 0.04802  | 0.032069 | 0.367582 | 0.22165  |
| MmugDNA.23894.1.S1_at   | MmugDNA.23894.1 | 4.94  | 6.17  | 0.27 | 0.62 | -2.35 | 0.134707 | 0.128811 | 0.501649 | 0.400277 |
| MmugDNA.23896.1.S1_at   | MmugDNA.23896.1 | 12.48 | 12.23 | 0.06 | 0.12 | 1.18  | 0.018029 | 0.005737 | 0.268422 | 0.104271 |
| MmugDNA.23905.1.S1_at   | MmugDNA.23905.1 | 5.34  | 5.2   | 0.1  | 0.23 | 1.1   | 0.677542 | 0.795992 | 0.855526 | 0.882479 |
| MmugDNA.23909.1.S1_at   | MmugDNA.23909.1 | 7.5   | 6.52  | 0.3  | 0.15 | 1.97  | 0.010617 | 0.015473 | 0.230922 | 0.157908 |
| MmugDNA.23925.1.S1_at   | MmugDNA.23925.1 | 8.36  | 10.3  | 0.2  | 2.13 | -3.83 | 0.308694 | 0.412814 | 0.641054 | 0.639121 |
| MmugDNA.23928.1.S1_at   | MmugDNA.23928.1 | 11.26 | 10.97 | 0.02 | 0.11 | 1.23  | 0.020901 | 0.039261 | 0.281371 | 0.243333 |
| MmugDNA.23928.1.S1_x_at | MmugDNA.23928.1 | 11.21 | 11.02 | 0.01 | 0.05 | 1.14  | 0.004546 | 0.04874  | 0.184109 | 0.265744 |
| MmugDNA.2393.1.S1_at    | MmugDNA.2393.1  | 7.49  | 7.4   | 0.23 | 0.22 | 1.06  | 0.632652 | 0.754747 | 0.833252 | 0.857323 |
| MmugDNA.23932.1.S1_at   | MmugDNA.23932.1 | 6.03  | 6.11  | 0.13 | 0.17 | -1.06 | 0.15854  | 0.127534 | 0.523628 | 0.398407 |
| MmugDNA.23933.1.S1_at   | MmugDNA.23933.1 | 12.13 | 11.27 | 0.12 | 0.33 | 1.82  | 0.017036 | 0.013058 | 0.266551 | 0.146997 |
| MmugDNA.23938.1.S1_at   | MmugDNA.23938.1 | 11.03 | 10.85 | 0.03 | 0.36 | 1.13  | 0.858526 | 0.841384 | 0.942856 | 0.909644 |
| MmugDNA.23938.1.S1_s_at | MmugDNA.23938.1 | 11.65 | 11.58 | 0.06 | 0.33 | 1.05  | 0.816235 | 0.811543 | 0.925395 | 0.891234 |
| MmugDNA.2394.1.S1_at    | MmugDNA.2394.1  | 6.36  | 7.72  | 1.11 | 0.71 | -2.56 | 0.269984 | 0.153518 | 0.614574 | 0.42827  |
| MmugDNA.23942.1.S1_at   | MmugDNA.23942.1 | 6.72  | 6.58  | 0.46 | 1.01 | 1.11  | 0.78438  | 0.28585  | 0.910126 | 0.547484 |
| MmugDNA.23945.1.S1_at   | MmugDNA.23945.1 | 6.27  | 6.25  | 0.04 | 0.33 | 1.01  | 0.871334 | 0.459839 | 0.948463 | 0.671989 |
| MmugDNA.2395.1.S1_at    | MmugDNA.2395.1  | 10.3  | 10.58 | 0.05 | 0.53 | -1.21 | 0.982323 | 0.810583 | 0.993449 | 0.890812 |
| MmugDNA.23952.1.S1_at   | MmugDNA.23952.1 | 3.9   | 4.16  | 0.17 | 0.05 | -1.2  | 0.152917 | 0.174388 | 0.517325 | 0.450842 |
| MmugDNA.23954.1.S1_at   | MmugDNA.23954.1 | 7.24  | 8.64  | 0.89 | 0.96 | -2.63 | 0.186613 | 0.194373 | 0.550106 | 0.469464 |
| MmugDNA.23979.1.S1_at   | MmugDNA.23979.1 | 9.48  | 7.98  | 0.08 | 0.3  | 2.83  | 0.002107 | 0.001758 | 0.157086 | 0.063146 |
| MmugDNA.23982.1.S1_at   | MmugDNA.23982.1 | 11.52 | 10.48 | 0.35 | 0.25 | 2.05  | 0.018785 | 0.009617 | 0.2715   | 0.12918  |
| MmugDNA.23983.1.S1_at   | MmugDNA.23983.1 | 12.25 | 11.84 | 0.1  | 0.6  | 1.33  | 0.207668 | 0.225646 | 0.569822 | 0.498155 |
| MmugDNA.23986.1.S1_at   | MmugDNA.23986.1 | 5.77  | 5.76  | 0.39 | 0.19 | 1.01  | 0.996031 | 0.917236 | 0.998451 | 0.953758 |
| MmugDNA.2399.1.S1_at    | MmugDNA.2399.1  | 11.66 | 11.12 | 0.12 | 0.22 | 1.45  | 0.039659 | 0.039124 | 0.347812 | 0.243056 |
| MmugDNA.23995.1.S1_at   | MmugDNA.23995.1 | 8.54  | 7.62  | 0.13 | 0.89 | 1.89  | 0.165873 | 0.219237 | 0.529848 | 0.493013 |
| MmugDNA.23998.1.S1_at   | MmugDNA.23998.1 | 7     | 6.78  | 0.11 | 0.14 | 1.16  | 0.533901 | 0.500723 | 0.778436 | 0.699242 |
| MmugDNA.24001.1.S1_at   | MmugDNA.24001.1 | 6.14  | 6.1   | 0.15 | 0.04 | 1.03  | 0.550568 | 0.366377 | 0.787958 | 0.606087 |
| MmugDNA.24003.1.S1_at   | MmugDNA.24003.1 | 4.95  | 4.89  | 0.13 | 0.11 | 1.04  | 0.250464 | 0.33488  | 0.600389 | 0.58275  |
| MmugDNA.24004.1.S1_at   | MmugDNA.24004.1 | 9.35  | 9.43  | 0.17 | 0.16 | -1.06 | 0.622178 | 0.136409 | 0.827294 | 0.408839 |
| MmugDNA.24005.1.S1_at   | MmugDNA.24005.1 | 8.13  | 5.96  | 1.62 | 0.99 | 4.5   | 0.220283 | 0.158149 | 0.579323 | 0.433976 |
| MmugDNA.24006.1.S1_s_at | MmugDNA.24006.1 | 3.22  | 3.16  | 0.07 | 0.08 | 1.05  | 0.708323 | 0.956531 | 0.871656 | 0.975294 |
| MmugDNA.24007.1.S1_at   | MmugDNA.24007.1 | 9.84  | 9.07  | 0.2  | 0.21 | 1.7   | 0.01161  | 0.002449 | 0.236889 | 0.073236 |
| MmugDNA.2401.1.S1_s_at  | MmugDNA.2401.1  | 8.2   | 8.34  | 0.26 | 0.28 | -1.1  | 0.111579 | 0.147965 | 0.473787 | 0.422364 |
| MmugDNA.24017.1.S1_at   | MmugDNA.24017.1 | 9.49  | 9.57  | 0.21 | 0.51 | -1.06 | 0.258136 | 0.087672 | 0.605455 | 0.340941 |
| MmugDNA.24023.1.S1_at   | MmugDNA.24023.1 | 10    | 9.55  | 0.35 | 1.17 | 1.37  | 0.348839 | 0.398957 | 0.667271 | 0.629665 |
| MmugDNA.24026.1.S1_s_at | MmugDNA.24026.1 | 12.01 | 12.06 | 0.08 | 0.02 | -1.04 | 0.473372 | 0.36695  | 0.74421  | 0.606583 |
| MmugDNA.24027.1.S1_at   | MmugDNA.24027.1 | 10.04 | 9.26  | 0.05 | 0.86 | 1.71  | 0.207003 | 0.268663 | 0.568965 | 0.534138 |
| MmugDNA.24028.1.S1_at   | MmugDNA.24028.1 | 8.99  | 8.16  | 0.36 | 0.12 | 1.77  | 0.018747 | 0.003115 | 0.2715   | 0.081314 |
| MmugDNA.2403.1.S1_at    | MmugDNA.2403.1  | 5.56  | 6.05  | 0.47 | 0.88 | -1.41 | 0.264654 | 0.065057 | 0.610398 | 0.301009 |

|                         |                 |       |       |      |      |       |          |          |          |          |
|-------------------------|-----------------|-------|-------|------|------|-------|----------|----------|----------|----------|
| MmugDNA.24036.1.S1_s_at | MmugDNA.24036.1 | 9.74  | 11.35 | 0.42 | 0.3  | -3.06 | 0.00691  | 0.002531 | 0.202257 | 0.074292 |
| MmugDNA.24039.1.S1_at   | MmugDNA.24039.1 | 9.12  | 7.82  | 0.02 | 0.96 | 2.45  | 0.091591 | 0.09196  | 0.447624 | 0.347297 |
| MmugDNA.24044.1.S1_at   | MmugDNA.24044.1 | 3.67  | 3.76  | 0.05 | 0.35 | -1.07 | 0.216873 | 0.219848 | 0.576447 | 0.493388 |
| MmugDNA.24047.1.S1_s_at | MmugDNA.24047.1 | 12.22 | 11.16 | 0.07 | 0.49 | 2.09  | 0.023447 | 0.006853 | 0.291512 | 0.11185  |
| MmugDNA.24048.1.S1_at   | MmugDNA.24048.1 | 5.65  | 6.9   | 1.2  | 1.11 | -2.37 | 0.574731 | 0.049424 | 0.801835 | 0.267237 |
| MmugDNA.24069.1.S1_at   | MmugDNA.24069.1 | 6.59  | 6.46  | 0.07 | 0.15 | 1.09  | 0.189454 | 0.214719 | 0.552479 | 0.488578 |
| MmugDNA.24071.1.S1_at   | MmugDNA.24071.1 | 13.26 | 13.28 | 0.08 | 0.17 | -1.01 | 0.858222 | 0.373063 | 0.942698 | 0.611933 |
| MmugDNA.24076.1.S1_at   | MmugDNA.24076.1 | 9.73  | 8.62  | 0.19 | 1.22 | 2.16  | 0.159902 | 0.095257 | 0.524745 | 0.352251 |
| MmugDNA.24078.1.S1_at   | MmugDNA.24078.1 | 4.93  | 5.29  | 0.18 | 0.14 | -1.28 | 0.039753 | 0.03249  | 0.347969 | 0.223254 |
| MmugDNA.24081.1.S1_at   | MmugDNA.24081.1 | 8.4   | 8.4   | 0.08 | 0.22 | 1     | 0.796582 | 0.678757 | 0.915622 | 0.812378 |
| MmugDNA.24091.1.S1_at   | MmugDNA.24091.1 | 5.22  | 5.25  | 1.09 | 0.88 | -1.02 | 0.812212 | 0.920348 | 0.923605 | 0.95511  |
| MmugDNA.241.1.S1_at     | MmugDNA.241.1   | 7.51  | 8.04  | 0.16 | 0.61 | -1.45 | 0.073899 | 0.078873 | 0.419443 | 0.325852 |
| MmugDNA.24100.1.S1_at   | MmugDNA.24100.1 | 10.05 | 10.03 | 0.38 | 0.59 | 1.01  | 0.498315 | 0.669198 | 0.75837  | 0.806492 |
| MmugDNA.24112.1.S1_at   | MmugDNA.24112.1 | 9.97  | 9.93  | 0.17 | 0.08 | 1.03  | 0.404077 | 0.400905 | 0.702538 | 0.630658 |
| MmugDNA.24115.1.S1_at   | MmugDNA.24115.1 | 9.4   | 9.43  | 0.05 | 0.22 | -1.02 | 0.393062 | 0.012934 | 0.694956 | 0.146387 |
| MmugDNA.24119.1.S1_at   | MmugDNA.24119.1 | 4.34  | 4.54  | 0.06 | 0.1  | -1.14 | 0.049041 | 0.070695 | 0.370523 | 0.312066 |
| MmugDNA.24127.1.S1_at   | MmugDNA.24127.1 | 11.99 | 12.16 | 0.18 | 0.45 | -1.13 | 0.944428 | 0.755672 | 0.978798 | 0.85776  |
| MmugDNA.2413.1.S1_at    | MmugDNA.2413.1  | 9.94  | 11.3  | 0.47 | 0.49 | -2.57 | 0.046349 | 0.032691 | 0.363009 | 0.223883 |
| MmugDNA.24135.1.S1_at   | MmugDNA.24135.1 | 11.47 | 11.1  | 0.09 | 0.22 | 1.29  | 0.053982 | 0.013273 | 0.381209 | 0.147875 |
| MmugDNA.2414.1.S1_at    | MmugDNA.2414.1  | 8.65  | 8.17  | 0.49 | 1.11 | 1.4   | 0.532269 | 0.214852 | 0.777626 | 0.488734 |
| MmugDNA.24144.1.S1_at   | MmugDNA.24144.1 | 11.98 | 11.95 | 0.13 | 0.2  | 1.02  | 0.926781 | 0.48419  | 0.971827 | 0.688399 |
| MmugDNA.24146.1.S1_at   | MmugDNA.24146.1 | 11.04 | 11.45 | 0.32 | 0.72 | -1.33 | 0.44046  | 0.252709 | 0.724349 | 0.521174 |
| MmugDNA.24147.1.S1_at   | MmugDNA.24147.1 | 11.49 | 11.43 | 0.36 | 0.31 | 1.04  | 0.758792 | 0.579799 | 0.898078 | 0.749289 |
| MmugDNA.24148.1.S1_at   | MmugDNA.24148.1 | 12.19 | 11.72 | 0.08 | 0.11 | 1.38  | 0.005388 | 0.000302 | 0.191107 | 0.034907 |
| MmugDNA.24151.1.S1_at   | MmugDNA.24151.1 | 11.78 | 11.57 | 0.23 | 0.18 | 1.15  | 0.369913 | 0.143294 | 0.681073 | 0.417283 |
| MmugDNA.24157.1.S1_at   | MmugDNA.24157.1 | 5.37  | 5.35  | 0.21 | 0.07 | 1.01  | 0.624411 | 0.579494 | 0.828251 | 0.74918  |
| MmugDNA.24158.1.S1_at   | MmugDNA.24158.1 | 9.49  | 8.7   | 0.29 | 0.35 | 1.73  | 0.09807  | 0.095595 | 0.457356 | 0.352645 |
| MmugDNA.2416.1.S1_at    | MmugDNA.2416.1  | 4.65  | 4.44  | 0.14 | 0.17 | 1.16  | 0.14479  | 0.154199 | 0.511163 | 0.428949 |
| MmugDNA.24160.1.S1_at   | MmugDNA.24160.1 | 3.36  | 3.47  | 0.16 | 0.38 | -1.08 | 0.80547  | 0.638588 | 0.920217 | 0.787711 |
| MmugDNA.24161.1.S1_at   | MmugDNA.24161.1 | 7.53  | 8.1   | 0.2  | 0.22 | -1.49 | 0.016619 | 0.005545 | 0.26475  | 0.10275  |
| MmugDNA.24169.1.S1_at   | MmugDNA.24169.1 | 8.19  | 7.88  | 0.12 | 0.24 | 1.24  | 0.334019 | 0.330775 | 0.658024 | 0.579558 |
| MmugDNA.24172.1.S1_at   | MmugDNA.24172.1 | 11.44 | 9.85  | 0.36 | 0.36 | 3.02  | 0.005174 | 0.003032 | 0.190313 | 0.080386 |
| MmugDNA.24174.1.S1_at   | MmugDNA.24174.1 | 9.64  | 9.35  | 0.25 | 0.52 | 1.22  | 0.46017  | 0.409976 | 0.736754 | 0.637002 |
| MmugDNA.24181.1.S1_s_at | MmugDNA.24181.1 | 7.6   | 8.41  | 0.44 | 0.8  | -1.75 | 0.322394 | 0.199973 | 0.651095 | 0.474603 |
| MmugDNA.24185.1.S1_at   | MmugDNA.24185.1 | 8.48  | 8.45  | 0.09 | 0.17 | 1.02  | 0.918582 | 0.85465  | 0.96831  | 0.917159 |
| MmugDNA.24187.1.S1_at   | MmugDNA.24187.1 | 3.53  | 3.75  | 0.08 | 0.06 | -1.16 | 0.040559 | 0.058548 | 0.349669 | 0.288669 |
| MmugDNA.2419.1.S1_at    | MmugDNA.2419.1  | 4.86  | 5.37  | 0.43 | 0.31 | -1.42 | 0.786871 | 0.862624 | 0.911336 | 0.92189  |
| MmugDNA.24191.1.S1_at   | MmugDNA.24191.1 | 6.3   | 6.31  | 0.12 | 0.11 | -1.01 | 0.800047 | 0.824782 | 0.917371 | 0.89939  |
| MmugDNA.24192.1.S1_at   | MmugDNA.24192.1 | 4.45  | 4.55  | 0.21 | 0.07 | -1.07 | 0.371973 | 0.531961 | 0.682671 | 0.718995 |
| MmugDNA.24198.1.S1_at   | MmugDNA.24198.1 | 3.75  | 3.39  | 0.25 | 0.06 | 1.29  | 0.199752 | 0.324313 | 0.562833 | 0.574924 |
| MmugDNA.24203.1.S1_s_at | MmugDNA.24203.1 | 10.16 | 10.22 | 0.35 | 0.3  | -1.04 | 0.963567 | 0.986203 | 0.985967 | 0.992172 |

|                         |                 |       |       |      |      |        |          |          |          |          |
|-------------------------|-----------------|-------|-------|------|------|--------|----------|----------|----------|----------|
| MmugDNA.24205.1.S1_at   | MmugDNA.24205.1 | 6.53  | 6.73  | 0.22 | 0.02 | -1.15  | 0.292854 | 0.391782 | 0.630183 | 0.625301 |
| MmugDNA.24206.1.S1_at   | MmugDNA.24206.1 | 7.91  | 8.12  | 0.17 | 0.06 | -1.16  | 0.13503  | 0.142933 | 0.501995 | 0.416854 |
| MmugDNA.24210.1.S1_at   | MmugDNA.24210.1 | 10.33 | 10.68 | 0.14 | 0.25 | -1.28  | 0.056685 | 0.085159 | 0.386838 | 0.336997 |
| MmugDNA.24212.1.S1_at   | MmugDNA.24212.1 | 6.94  | 6.74  | 0.84 | 1.28 | 1.15   | 0.835663 | 0.221741 | 0.933468 | 0.494901 |
| MmugDNA.24215.1.S1_at   | MmugDNA.24215.1 | 12.08 | 10.13 | 0.09 | 0.67 | 3.86   | 0.009267 | 0.005954 | 0.22371  | 0.105513 |
| MmugDNA.24224.1.S1_at   | MmugDNA.24224.1 | 11.89 | 12.09 | 0.1  | 0.21 | -1.15  | 0.379696 | 0.264424 | 0.687063 | 0.530385 |
| MmugDNA.24228.1.S1_at   | MmugDNA.24228.1 | 11.67 | 11.61 | 0.21 | 0.29 | 1.04   | 0.645381 | 0.788212 | 0.840339 | 0.877514 |
| MmugDNA.24230.1.S1_s_at | MmugDNA.24230.1 | 11.14 | 11.63 | 0.06 | 0.1  | -1.4   | 0.002471 | 0.000319 | 0.163555 | 0.035423 |
| MmugDNA.24231.1.S1_at   | MmugDNA.24231.1 | 12.07 | 11.83 | 0.19 | 0.3  | 1.19   | 0.900242 | 0.971613 | 0.960239 | 0.984594 |
| MmugDNA.24238.1.S1_at   | MmugDNA.24238.1 | 5.09  | 5.11  | 0.16 | 0.2  | -1.02  | 0.6833   | 0.042739 | 0.858347 | 0.251216 |
| MmugDNA.24243.1.S1_at   | MmugDNA.24243.1 | 7.04  | 7.08  | 0.23 | 0.17 | -1.03  | 0.536655 | 0.672078 | 0.779531 | 0.808295 |
| MmugDNA.2425.1.S1_at    | MmugDNA.2425.1  | 10.47 | 9.73  | 0.09 | 0.69 | 1.67   | 0.280991 | 0.105544 | 0.622015 | 0.367526 |
| MmugDNA.24251.1.S1_at   | MmugDNA.24251.1 | 5.65  | 5.63  | 0.42 | 0.31 | 1.01   | 0.548893 | 0.680647 | 0.787036 | 0.813542 |
| MmugDNA.24263.1.S1_at   | MmugDNA.24263.1 | 11.84 | 11.39 | 0.16 | 0.25 | 1.37   | 0.029002 | 0.011361 | 0.312556 | 0.138214 |
| MmugDNA.24266.1.S1_at   | MmugDNA.24266.1 | 8.29  | 7.29  | 0.13 | 0.36 | 2      | 0.016635 | 0.022433 | 0.26475  | 0.187441 |
| MmugDNA.24267.1.S1_at   | MmugDNA.24267.1 | 12.9  | 12.83 | 0.07 | 0.19 | 1.05   | 0.389621 | 0.519179 | 0.693116 | 0.710878 |
| MmugDNA.2427.1.S1_at    | MmugDNA.2427.1  | 13.15 | 12.74 | 0.12 | 0.13 | 1.33   | 0.022004 | 0.003586 | 0.28446  | 0.085687 |
| MmugDNA.24275.1.S1_at   | MmugDNA.24275.1 | 7.61  | 7.8   | 0.16 | 0.05 | -1.14  | 0.150083 | 0.101692 | 0.51467  | 0.361562 |
| MmugDNA.24278.1.S1_at   | MmugDNA.24278.1 | 11.81 | 11.53 | 0.13 | 0.18 | 1.21   | 0.266055 | 0.392232 | 0.611558 | 0.625652 |
| MmugDNA.24286.1.S1_at   | MmugDNA.24286.1 | 10.96 | 12.84 | 0.39 | 0.53 | -3.67  | 0.009855 | 0.007897 | 0.226637 | 0.118462 |
| MmugDNA.24287.1.S1_at   | MmugDNA.24287.1 | 8.52  | 5.72  | 0.24 | 0.89 | 6.98   | 0.015529 | 0.031336 | 0.259093 | 0.219011 |
| MmugDNA.24291.1.S1_s_at | MmugDNA.24291.1 | 7.97  | 11.75 | 1.69 | 2.92 | -13.69 | 0.523927 | 0.541785 | 0.772859 | 0.725064 |
| MmugDNA.24305.1.S1_at   | MmugDNA.24305.1 | 11.21 | 10.98 | 0.08 | 0.15 | 1.17   | 0.093145 | 0.091047 | 0.450362 | 0.345842 |
| MmugDNA.24306.1.S1_at   | MmugDNA.24306.1 | 4.2   | 3.9   | 0.32 | 0.19 | 1.23   | 0.283348 | 0.200718 | 0.623353 | 0.47524  |
| MmugDNA.24308.1.S1_at   | MmugDNA.24308.1 | 9.5   | 10.95 | 0.64 | 0.8  | -2.73  | 0.056362 | 0.02733  | 0.386404 | 0.206625 |
| MmugDNA.2431.1.S1_at    | MmugDNA.2431.1  | 9.15  | 9.19  | 0.11 | 0.1  | -1.03  | 0.854985 | 0.429372 | 0.941387 | 0.650823 |
| MmugDNA.24325.1.S1_at   | MmugDNA.24325.1 | 11.84 | 12.32 | 0.16 | 0.21 | -1.39  | 0.027306 | 0.0146   | 0.307317 | 0.15408  |
| MmugDNA.24330.1.S1_at   | MmugDNA.24330.1 | 9.85  | 10.16 | 0.25 | 0.48 | -1.24  | 0.603723 | 0.158834 | 0.817286 | 0.434952 |
| MmugDNA.24333.1.S1_at   | MmugDNA.24333.1 | 10.27 | 9.55  | 0.07 | 0.27 | 1.65   | 0.028109 | 0.016926 | 0.309743 | 0.164991 |
| MmugDNA.24341.1.S1_at   | MmugDNA.24341.1 | 8.71  | 7.95  | 0.24 | 0.16 | 1.7    | 0.005586 | 0.003054 | 0.191807 | 0.080596 |
| MmugDNA.24342.1.S1_at   | MmugDNA.24342.1 | 3.54  | 3.57  | 0.11 | 0.08 | -1.02  | 0.340117 | 0.403544 | 0.661621 | 0.632211 |
| MmugDNA.24343.1.S1_at   | MmugDNA.24343.1 | 6.09  | 6.87  | 0.16 | 0.68 | -1.72  | 0.073409 | 0.083408 | 0.41875  | 0.333699 |
| MmugDNA.24350.1.S1_at   | MmugDNA.24350.1 | 12.64 | 12.88 | 0.19 | 0.16 | -1.19  | 0.112434 | 0.093628 | 0.474902 | 0.349995 |
| MmugDNA.2436.1.S1_at    | MmugDNA.2436.1  | 6.34  | 7.44  | 0.96 | 0.36 | -2.15  | 0.135141 | 0.173675 | 0.501995 | 0.450021 |
| MmugDNA.24363.1.S1_at   | MmugDNA.24363.1 | 6.84  | 8.88  | 0.55 | 0.94 | -4.11  | 0.045125 | 0.041844 | 0.360243 | 0.249172 |
| MmugDNA.24364.1.S1_at   | MmugDNA.24364.1 | 7.31  | 8.6   | 0.45 | 1.06 | -2.45  | 0.144174 | 0.130859 | 0.510652 | 0.403037 |
| MmugDNA.24379.1.S1_at   | MmugDNA.24379.1 | 10.62 | 10.94 | 0.73 | 0.27 | -1.24  | 0.396151 | 0.271144 | 0.69683  | 0.536259 |
| MmugDNA.2438.1.S1_at    | MmugDNA.2438.1  | 11.31 | 10.97 | 0.25 | 0.25 | 1.26   | 0.100135 | 0.062625 | 0.460676 | 0.297022 |
| MmugDNA.24380.1.S1_at   | MmugDNA.24380.1 | 13.59 | 13.22 | 0.06 | 0.18 | 1.29   | 0.017195 | 0.008126 | 0.266942 | 0.11972  |
| MmugDNA.2439.1.S1_at    | MmugDNA.2439.1  | 11.58 | 11.78 | 0.11 | 0.34 | -1.15  | 0.278395 | 0.029235 | 0.620536 | 0.212898 |
| MmugDNA.24390.1.S1_at   | MmugDNA.24390.1 | 11.36 | 11.27 | 0.03 | 0.17 | 1.06   | 0.954993 | 0.993814 | 0.983073 | 0.996274 |

|                         |                 |       |       |      |      |        |          |          |          |          |
|-------------------------|-----------------|-------|-------|------|------|--------|----------|----------|----------|----------|
| MmugDNA.24395.1.S1_at   | MmugDNA.24395.1 | 8.46  | 8.42  | 0.09 | 0.22 | 1.03   | 0.57798  | 0.12872  | 0.803619 | 0.400135 |
| MmugDNA.24397.1.S1_at   | MmugDNA.24397.1 | 10.83 | 9.97  | 0.34 | 0.12 | 1.81   | 0.024258 | 0.004306 | 0.294535 | 0.092019 |
| MmugDNA.24397.1.S1_x_at | MmugDNA.24397.1 | 10.77 | 10.01 | 0.31 | 0.15 | 1.7    | 0.020197 | 0.003214 | 0.277251 | 0.082043 |
| MmugDNA.24403.1.S1_at   | MmugDNA.24403.1 | 4.81  | 3.76  | 0.64 | 0.35 | 2.07   | 0.220059 | 0.085742 | 0.579237 | 0.337761 |
| MmugDNA.24413.1.S1_at   | MmugDNA.24413.1 | 12.53 | 12.37 | 0.08 | 0.41 | 1.12   | 0.46899  | 0.65308  | 0.741355 | 0.79718  |
| MmugDNA.24421.1.S1_at   | MmugDNA.24421.1 | 9.86  | 8.6   | 0.03 | 0.87 | 2.4    | 0.025249 | 0.015982 | 0.298384 | 0.160458 |
| MmugDNA.24422.1.S1_at   | MmugDNA.24422.1 | 3.07  | 3.02  | 0.1  | 0.22 | 1.04   | 0.555115 | 0.76857  | 0.791244 | 0.865637 |
| MmugDNA.24426.1.S1_at   | MmugDNA.24426.1 | 10.61 | 10.12 | 0.25 | 0.37 | 1.41   | 0.181331 | 0.110226 | 0.545837 | 0.374349 |
| MmugDNA.24431.1.S1_at   | MmugDNA.24431.1 | 4.6   | 4.92  | 0.04 | 0.1  | -1.26  | 0.013102 | 0.001859 | 0.245262 | 0.064693 |
| MmugDNA.24432.1.S1_at   | MmugDNA.24432.1 | 6.39  | 5.86  | 0.07 | 0.24 | 1.45   | 0.012216 | 0.00299  | 0.240418 | 0.079958 |
| MmugDNA.24437.1.S1_at   | MmugDNA.24437.1 | 6.44  | 6.56  | 0.39 | 0.77 | -1.09  | 0.750508 | 0.568247 | 0.893172 | 0.741866 |
| MmugDNA.24448.1.S1_at   | MmugDNA.24448.1 | 6.25  | 5.42  | 0.29 | 0.29 | 1.78   | 0.024429 | 0.013979 | 0.294575 | 0.151585 |
| MmugDNA.24450.1.S1_at   | MmugDNA.24450.1 | 8.49  | 8.24  | 0.36 | 0.42 | 1.19   | 0.465205 | 0.451162 | 0.739822 | 0.666085 |
| MmugDNA.24451.1.S1_at   | MmugDNA.24451.1 | 4.38  | 6.39  | 1.07 | 0.42 | -4.03  | 0.103303 | 0.075741 | 0.462888 | 0.32034  |
| MmugDNA.24454.1.S1_at   | MmugDNA.24454.1 | 5.29  | 5.64  | 0.03 | 0.53 | -1.27  | 0.097929 | 0.09533  | 0.457244 | 0.35236  |
| MmugDNA.24456.1.S1_at   | MmugDNA.24456.1 | 6.64  | 6.67  | 0.07 | 0.06 | -1.02  | 0.422981 | 0.612515 | 0.713789 | 0.770071 |
| MmugDNA.24456.1.S1_s_at | MmugDNA.24456.1 | 6.4   | 6.4   | 0.07 | 0.18 | 1      | 0.763023 | 0.846524 | 0.900081 | 0.912676 |
| MmugDNA.24456.1.S1_x_at | MmugDNA.24456.1 | 5.35  | 5.49  | 0.24 | 0.11 | -1.1   | 0.432546 | 0.582924 | 0.719094 | 0.75147  |
| MmugDNA.2446.1.S1_at    | MmugDNA.2446.1  | 10.8  | 10.26 | 0.17 | 0.2  | 1.45   | 0.084295 | 0.105057 | 0.436922 | 0.366736 |
| MmugDNA.24462.1.S1_at   | MmugDNA.24462.1 | 10.65 | 9.6   | 0.15 | 0.45 | 2.06   | 0.045836 | 0.035834 | 0.361852 | 0.233759 |
| MmugDNA.24463.1.S1_at   | MmugDNA.24463.1 | 4.15  | 4.26  | 0.24 | 0.23 | -1.08  | 0.245608 | 0.204854 | 0.597182 | 0.479224 |
| MmugDNA.24471.1.S1_at   | MmugDNA.24471.1 | 3.73  | 3.41  | 0.12 | 0.23 | 1.25   | 0.162142 | 0.103439 | 0.526638 | 0.364346 |
| MmugDNA.24474.1.S1_at   | MmugDNA.24474.1 | 8.83  | 8.55  | 0.2  | 0.15 | 1.22   | 0.140524 | 0.103762 | 0.508385 | 0.364519 |
| MmugDNA.24476.1.S1_at   | MmugDNA.24476.1 | 9.43  | 9.98  | 0.51 | 0.52 | -1.47  | 0.561806 | 0.703733 | 0.794986 | 0.828214 |
| MmugDNA.24477.1.S1_at   | MmugDNA.24477.1 | 10.38 | 10.7  | 0.13 | 0.05 | -1.25  | 0.051129 | 0.230758 | 0.375935 | 0.502451 |
| MmugDNA.24478.1.S1_at   | MmugDNA.24478.1 | 12.09 | 11.77 | 0.19 | 0.41 | 1.25   | 0.242384 | 0.283481 | 0.594377 | 0.545959 |
| MmugDNA.2449.1.S1_at    | MmugDNA.2449.1  | 4.89  | 4.79  | 0.05 | 0.02 | 1.08   | 0.056204 | 0.186418 | 0.386006 | 0.462263 |
| MmugDNA.24498.1.S1_at   | MmugDNA.24498.1 | 12.15 | 11.23 | 0.1  | 0.2  | 1.9    | 0.002457 | 0.000389 | 0.163555 | 0.037374 |
| MmugDNA.2450.1.S1_at    | MmugDNA.2450.1  | 9.07  | 8.37  | 0.42 | 0.12 | 1.62   | 0.048434 | 0.028296 | 0.368732 | 0.210038 |
| MmugDNA.24500.1.S1_at   | MmugDNA.24500.1 | 10.61 | 10.87 | 0.16 | 0.83 | -1.2   | 0.717103 | 0.23155  | 0.875713 | 0.503348 |
| MmugDNA.24509.1.S1_at   | MmugDNA.24509.1 | 6.39  | 6.57  | 0.18 | 0.06 | -1.13  | 0.688227 | 0.883472 | 0.860914 | 0.933594 |
| MmugDNA.24510.1.S1_at   | MmugDNA.24510.1 | 8.05  | 8     | 0.12 | 0.18 | 1.04   | 0.963888 | 0.819048 | 0.985998 | 0.895738 |
| MmugDNA.24512.1.S1_at   | MmugDNA.24512.1 | 4.93  | 5.28  | 0.65 | 0.84 | -1.27  | 0.632711 | 0.618019 | 0.833252 | 0.773852 |
| MmugDNA.24523.1.S1_at   | MmugDNA.24523.1 | 9.78  | 8.97  | 0.42 | 0.42 | 1.74   | 0.039149 | 0.005606 | 0.346585 | 0.103449 |
| MmugDNA.24533.1.S1_at   | MmugDNA.24533.1 | 6.61  | 11.46 | 1.72 | 2.89 | -28.81 | 0.260764 | 0.180308 | 0.607423 | 0.456927 |
| MmugDNA.24538.1.S1_at   | MmugDNA.24538.1 | 5.88  | 5.9   | 0.09 | 0.05 | -1.02  | 0.686364 | 0.59257  | 0.859743 | 0.757844 |
| MmugDNA.24551.1.S1_at   | MmugDNA.24551.1 | 9.51  | 11.13 | 0.23 | 0.55 | -3.07  | 0.009883 | 0.004442 | 0.226668 | 0.092958 |
| MmugDNA.24555.1.S1_at   | MmugDNA.24555.1 | 6.29  | 6.67  | 0.16 | 0.31 | -1.3   | 0.120037 | 0.051418 | 0.484595 | 0.272204 |
| MmugDNA.24563.1.S1_at   | MmugDNA.24563.1 | 10.49 | 9.59  | 0.16 | 0.15 | 1.86   | 0.00409  | 0.001224 | 0.181739 | 0.054593 |
| MmugDNA.24566.1.S1_at   | MmugDNA.24566.1 | 5.91  | 6.05  | 0.4  | 0.46 | -1.1   | 0.805777 | 0.437882 | 0.920349 | 0.657015 |
| MmugDNA.24567.1.S1_at   | MmugDNA.24567.1 | 5.16  | 5.13  | 0.17 | 0.06 | 1.02   | 0.934727 | 0.819677 | 0.974758 | 0.896127 |

|                         |                 |       |       |      |      |       |          |          |          |          |
|-------------------------|-----------------|-------|-------|------|------|-------|----------|----------|----------|----------|
| MmugDNA.24570.1.S1_at   | MmugDNA.24570.1 | 8.55  | 7.72  | 0.24 | 0.56 | 1.78  | 0.04176  | 0.036081 | 0.352614 | 0.234413 |
| MmugDNA.24582.1.S1_at   | MmugDNA.24582.1 | 3.37  | 3.68  | 0.02 | 0.18 | -1.24 | 0.108955 | 0.043417 | 0.470733 | 0.253032 |
| MmugDNA.24586.1.S1_at   | MmugDNA.24586.1 | 6.15  | 6.5   | 0.15 | 0.63 | -1.28 | 0.355233 | 0.368924 | 0.670893 | 0.608449 |
| MmugDNA.24595.1.S1_at   | MmugDNA.24595.1 | 4.64  | 5.75  | 0.43 | 1.65 | -2.17 | 0.261446 | 0.307156 | 0.608013 | 0.563487 |
| MmugDNA.24598.1.S1_at   | MmugDNA.24598.1 | 5.88  | 5.3   | 0.23 | 0.86 | 1.49  | 0.878996 | 0.65855  | 0.951455 | 0.800401 |
| MmugDNA.24600.1.S1_at   | MmugDNA.24600.1 | 4.98  | 4.75  | 0.18 | 0.01 | 1.18  | 0.090558 | 0.122436 | 0.446017 | 0.392278 |
| MmugDNA.24602.1.S1_at   | MmugDNA.24602.1 | 5.11  | 5.14  | 0.21 | 0.02 | -1.02 | 0.578053 | 0.397872 | 0.803619 | 0.629138 |
| MmugDNA.24614.1.S1_at   | MmugDNA.24614.1 | 10.84 | 9.98  | 0.23 | 0.88 | 1.82  | 0.059045 | 0.04381  | 0.390921 | 0.25387  |
| MmugDNA.2462.1.S1_at    | MmugDNA.2462.1  | 5.06  | 4.8   | 0.11 | 0.24 | 1.19  | 0.06201  | 0.093596 | 0.39691  | 0.349952 |
| MmugDNA.24624.1.S1_at   | MmugDNA.24624.1 | 5.18  | 5.21  | 0.04 | 0.06 | -1.02 | 0.931583 | 0.780357 | 0.973537 | 0.872597 |
| MmugDNA.24625.1.S1_at   | MmugDNA.24625.1 | 7     | 7.36  | 0.31 | 0.12 | -1.29 | 0.456468 | 0.701936 | 0.734509 | 0.827192 |
| MmugDNA.24630.1.S1_s_at | MmugDNA.24630.1 | 6.16  | 7.31  | 0.76 | 0.66 | -2.23 | 0.324304 | 0.446567 | 0.651927 | 0.662862 |
| MmugDNA.24631.1.S1_at   | MmugDNA.24631.1 | 7.93  | 7.44  | 0.11 | 0.43 | 1.41  | 0.300564 | 0.198852 | 0.635955 | 0.473475 |
| MmugDNA.24633.1.S1_at   | MmugDNA.24633.1 | 6.83  | 7.14  | 0.19 | 0.13 | -1.24 | 0.241695 | 0.304293 | 0.593941 | 0.5616   |
| MmugDNA.24635.1.S1_s_at | MmugDNA.24635.1 | 4.84  | 5.15  | 0.04 | 0.32 | -1.25 | 0.191791 | 0.238439 | 0.554827 | 0.50907  |
| MmugDNA.24636.1.S1_at   | MmugDNA.24636.1 | 3.14  | 3.18  | 0.1  | 0.08 | -1.03 | 0.482447 | 0.466602 | 0.749408 | 0.676398 |
| MmugDNA.24645.1.S1_at   | MmugDNA.24645.1 | 5.36  | 5.37  | 0.77 | 0.39 | -1.01 | 0.537638 | 0.703199 | 0.780064 | 0.827928 |
| MmugDNA.24646.1.S1_at   | MmugDNA.24646.1 | 5.83  | 5.76  | 0.19 | 0.11 | 1.05  | 0.962107 | 0.821292 | 0.985456 | 0.897125 |
| MmugDNA.24651.1.S1_at   | MmugDNA.24651.1 | 5.17  | 5.3   | 0.18 | 0.27 | -1.1  | 0.668878 | 0.097415 | 0.851986 | 0.355097 |
| MmugDNA.24652.1.S1_at   | MmugDNA.24652.1 | 3.95  | 4.54  | 0.44 | 0.18 | -1.5  | 0.451196 | 0.60934  | 0.731503 | 0.767726 |
| MmugDNA.24653.1.S1_at   | MmugDNA.24653.1 | 10.91 | 7.96  | 2.57 | 2.21 | 7.76  | 0.376764 | 0.469641 | 0.685294 | 0.678318 |
| MmugDNA.24659.1.S1_at   | MmugDNA.24659.1 | 5.67  | 5.81  | 0.13 | 0.05 | -1.1  | 0.343568 | 0.102027 | 0.663694 | 0.362086 |
| MmugDNA.24667.1.S1_at   | MmugDNA.24667.1 | 4.71  | 4.55  | 0.22 | 0.26 | 1.12  | 0.639294 | 0.56746  | 0.837081 | 0.741351 |
| MmugDNA.24668.1.S1_at   | MmugDNA.24668.1 | 13.14 | 13.01 | 0.06 | 0.17 | 1.09  | 0.300218 | 0.268246 | 0.635553 | 0.533977 |
| MmugDNA.2467.1.S1_at    | MmugDNA.2467.1  | 7.4   | 6.43  | 0.4  | 0.64 | 1.96  | 0.060609 | 0.033057 | 0.393814 | 0.225068 |
| MmugDNA.24671.1.S1_at   | MmugDNA.24671.1 | 5.09  | 6.29  | 0.46 | 0.87 | -2.31 | 0.165386 | 0.105305 | 0.529362 | 0.367141 |
| MmugDNA.24674.1.S1_at   | MmugDNA.24674.1 | 7.96  | 7.72  | 0.29 | 0.48 | 1.18  | 0.925604 | 0.729689 | 0.971413 | 0.843649 |
| MmugDNA.24679.1.S1_at   | MmugDNA.24679.1 | 3.76  | 4.29  | 0.27 | 0.23 | -1.44 | 0.022533 | 0.091806 | 0.287341 | 0.346977 |
| MmugDNA.24681.1.S1_at   | MmugDNA.24681.1 | 5.41  | 7.24  | 0.95 | 1.81 | -3.54 | 0.360734 | 0.2611   | 0.674646 | 0.527481 |
| MmugDNA.24682.1.S1_at   | MmugDNA.24682.1 | 4.54  | 4.49  | 0.06 | 0.21 | 1.04  | 0.823119 | 0.617553 | 0.928109 | 0.773477 |
| MmugDNA.24685.1.S1_at   | MmugDNA.24685.1 | 8.37  | 9.19  | 0.32 | 0.82 | -1.77 | 0.260478 | 0.243149 | 0.607292 | 0.513356 |
| MmugDNA.24690.1.S1_at   | MmugDNA.24690.1 | 10.91 | 10.44 | 0.15 | 1.07 | 1.38  | 0.159075 | 0.163604 | 0.52416  | 0.439768 |
| MmugDNA.24691.1.S1_at   | MmugDNA.24691.1 | 10.55 | 10.42 | 0.17 | 0.27 | 1.09  | 0.892635 | 0.358227 | 0.957281 | 0.599754 |
| MmugDNA.24692.1.S1_at   | MmugDNA.24692.1 | 4.24  | 4.25  | 0.26 | 0.1  | -1.01 | 0.303902 | 0.483321 | 0.638087 | 0.687887 |
| MmugDNA.247.1.S1_at     | MmugDNA.247.1   | 5.2   | 5.17  | 0.25 | 0.07 | 1.02  | 0.914077 | 0.376936 | 0.966066 | 0.614678 |
| MmugDNA.2470.1.S1_at    | MmugDNA.2470.1  | 6.5   | 6.44  | 0.19 | 0.28 | 1.04  | 0.372487 | 0.120283 | 0.682812 | 0.389248 |
| MmugDNA.24703.1.S1_at   | MmugDNA.24703.1 | 4.47  | 4.39  | 0.05 | 0.04 | 1.06  | 0.127589 | 0.196952 | 0.493884 | 0.472072 |
| MmugDNA.24705.1.S1_at   | MmugDNA.24705.1 | 5.93  | 6.07  | 0.07 | 0.26 | -1.11 | 0.783265 | 0.268679 | 0.909454 | 0.534138 |
| MmugDNA.24707.1.S1_at   | MmugDNA.24707.1 | 4.92  | 5.22  | 0.06 | 0.08 | -1.23 | 0.011733 | 0.00962  | 0.237595 | 0.12918  |
| MmugDNA.24708.1.S1_at   | MmugDNA.24708.1 | 7.93  | 7.6   | 1.32 | 0.53 | 1.26  | 0.165061 | 0.25278  | 0.528994 | 0.521174 |
| MmugDNA.24711.1.S1_at   | MmugDNA.24711.1 | 7.64  | 8.09  | 0.1  | 0.25 | -1.37 | 0.051748 | 0.038431 | 0.376339 | 0.240918 |

|                         |                 |       |       |      |      |       |          |          |          |          |
|-------------------------|-----------------|-------|-------|------|------|-------|----------|----------|----------|----------|
| MmugDNA.24712.1.S1_at   | MmugDNA.24712.1 | 3.16  | 3.1   | 0.05 | 0.03 | 1.04  | 0.389779 | 0.17937  | 0.693279 | 0.455841 |
| MmugDNA.24713.1.S1_at   | MmugDNA.24713.1 | 11.57 | 11.61 | 0.16 | 0.41 | -1.03 | 0.855936 | 0.947363 | 0.941786 | 0.970137 |
| MmugDNA.24715.1.S1_at   | MmugDNA.24715.1 | 8.9   | 9.28  | 0.06 | 0.32 | -1.31 | 0.125232 | 0.138636 | 0.49131  | 0.411695 |
| MmugDNA.24718.1.S1_at   | MmugDNA.24718.1 | 8.01  | 7.19  | 0.41 | 0.27 | 1.76  | 0.052277 | 0.026516 | 0.377309 | 0.203899 |
| MmugDNA.24721.1.S1_at   | MmugDNA.24721.1 | 8.62  | 9.67  | 0.14 | 0.5  | -2.07 | 0.044764 | 0.030677 | 0.359043 | 0.217148 |
| MmugDNA.24722.1.S1_s_at | MmugDNA.24722.1 | 12.07 | 12    | 0.11 | 0.21 | 1.05  | 0.73806  | 0.631762 | 0.887509 | 0.782957 |
| MmugDNA.24724.1.S1_at   | MmugDNA.24724.1 | 12.83 | 13.06 | 0.15 | 0.12 | -1.17 | 0.555742 | 0.382855 | 0.791477 | 0.61893  |
| MmugDNA.24727.1.S1_at   | MmugDNA.24727.1 | 9.39  | 9.27  | 0.15 | 0.25 | 1.09  | 0.203373 | 0.268698 | 0.566041 | 0.534138 |
| MmugDNA.24728.1.S1_at   | MmugDNA.24728.1 | 10.49 | 9.68  | 0.17 | 0.11 | 1.75  | 0.001656 | 0.000244 | 0.15365  | 0.032798 |
| MmugDNA.2473.1.S1_at    | MmugDNA.2473.1  | 9.66  | 10.02 | 0.02 | 0.6  | -1.28 | 0.111525 | 0.095742 | 0.47371  | 0.352753 |
| MmugDNA.24731.1.S1_at   | MmugDNA.24731.1 | 13.58 | 13.54 | 0.06 | 0.05 | 1.03  | 0.205725 | 0.142133 | 0.568246 | 0.415728 |
| MmugDNA.24736.1.S1_s_at | MmugDNA.24736.1 | 11.21 | 12.23 | 0.33 | 0.24 | -2.02 | 0.013376 | 0.00423  | 0.246471 | 0.091435 |
| MmugDNA.24737.1.S1_at   | MmugDNA.24737.1 | 11.37 | 11.07 | 0.13 | 0.09 | 1.23  | 0.018884 | 0.011722 | 0.272168 | 0.140206 |
| MmugDNA.24739.1.S1_at   | MmugDNA.24739.1 | 11.01 | 11.5  | 0.07 | 0.2  | -1.4  | 0.009369 | 0.011508 | 0.22453  | 0.138744 |
| MmugDNA.24740.1.S1_at   | MmugDNA.24740.1 | 6.91  | 5.8   | 0.39 | 0.31 | 2.15  | 0.033421 | 0.001603 | 0.328828 | 0.060491 |
| MmugDNA.24742.1.S1_at   | MmugDNA.24742.1 | 10.03 | 9.59  | 0.23 | 0.09 | 1.35  | 0.040368 | 0.037563 | 0.349277 | 0.238211 |
| MmugDNA.24742.1.S1_s_at | MmugDNA.24742.1 | 9.54  | 9.22  | 0.34 | 0.12 | 1.24  | 0.207474 | 0.186542 | 0.569624 | 0.462364 |
| MmugDNA.24743.1.S1_at   | MmugDNA.24743.1 | 3.12  | 3.31  | 0.05 | 0.12 | -1.14 | 0.186974 | 0.171463 | 0.550106 | 0.447895 |
| MmugDNA.24744.1.S1_at   | MmugDNA.24744.1 | 6.64  | 6.91  | 0.44 | 0.81 | -1.21 | 0.426932 | 0.519371 | 0.716003 | 0.710998 |
| MmugDNA.24746.1.S1_at   | MmugDNA.24746.1 | 11.3  | 11.62 | 0.14 | 0.2  | -1.25 | 0.085043 | 0.079275 | 0.438104 | 0.326444 |
| MmugDNA.24747.1.S1_at   | MmugDNA.24747.1 | 5.64  | 8.86  | 1.47 | 2.44 | -9.34 | 0.32805  | 0.285895 | 0.654207 | 0.547484 |
| MmugDNA.24749.1.S1_at   | MmugDNA.24749.1 | 12.09 | 12.05 | 0.01 | 0.23 | 1.03  | 0.539178 | 0.723523 | 0.780929 | 0.839934 |
| MmugDNA.24753.1.S1_at   | MmugDNA.24753.1 | 8.98  | 8.93  | 0.03 | 0.21 | 1.03  | 0.293881 | 0.357881 | 0.631033 | 0.599493 |
| MmugDNA.2476.1.S1_at    | MmugDNA.2476.1  | 6.5   | 5.77  | 0.29 | 0.44 | 1.66  | 0.193091 | 0.082838 | 0.556449 | 0.332362 |
| MmugDNA.24761.1.S1_at   | MmugDNA.24761.1 | 9.65  | 9.83  | 0.2  | 0.73 | -1.13 | 0.623615 | 0.744716 | 0.828015 | 0.852165 |
| MmugDNA.24771.1.S1_at   | MmugDNA.24771.1 | 7.34  | 8.93  | 0.54 | 1.26 | -3    | 0.199585 | 0.155541 | 0.562633 | 0.430888 |
| MmugDNA.24773.1.S1_at   | MmugDNA.24773.1 | 4.43  | 4.36  | 0.08 | 0.14 | 1.05  | 0.488739 | 0.489702 | 0.753263 | 0.691862 |
| MmugDNA.24778.1.S1_at   | MmugDNA.24778.1 | 6.52  | 6.43  | 0.29 | 0.29 | 1.07  | 0.326327 | 0.429369 | 0.653184 | 0.650823 |
| MmugDNA.2478.1.S1_at    | MmugDNA.2478.1  | 11.77 | 14.13 | 1.06 | 1.33 | -5.12 | 0.366737 | 0.212564 | 0.679209 | 0.486502 |
| MmugDNA.24780.1.S1_at   | MmugDNA.24780.1 | 12.32 | 11.34 | 0.27 | 0.07 | 1.98  | 0.003757 | 0.001128 | 0.179914 | 0.05299  |
| MmugDNA.24783.1.S1_at   | MmugDNA.24783.1 | 6.02  | 7.25  | 1.07 | 1.25 | -2.35 | 0.622727 | 0.034209 | 0.827633 | 0.228779 |
| MmugDNA.24784.1.S1_at   | MmugDNA.24784.1 | 12.27 | 12.07 | 0.07 | 0.08 | 1.15  | 0.020405 | 0.011703 | 0.277953 | 0.140174 |
| MmugDNA.24789.1.S1_at   | MmugDNA.24789.1 | 5.35  | 5.81  | 0.17 | 0.26 | -1.38 | 0.074343 | 0.060412 | 0.419963 | 0.292435 |
| MmugDNA.24791.1.S1_at   | MmugDNA.24791.1 | 11.81 | 11.9  | 0.07 | 0.23 | -1.06 | 0.41262  | 0.051636 | 0.707935 | 0.272698 |
| MmugDNA.24793.1.S1_at   | MmugDNA.24793.1 | 9.04  | 8.31  | 0.24 | 1.22 | 1.65  | 0.20934  | 0.243739 | 0.570957 | 0.513899 |
| MmugDNA.24794.1.S1_at   | MmugDNA.24794.1 | 7.18  | 7.12  | 0.01 | 0.1  | 1.05  | 0.774857 | 0.939899 | 0.905462 | 0.96581  |
| MmugDNA.24794.1.S1_s_at | MmugDNA.24794.1 | 7.49  | 6.89  | 0.17 | 0.36 | 1.51  | 0.277589 | 0.364419 | 0.619763 | 0.604791 |
| MmugDNA.24797.1.S1_at   | MmugDNA.24797.1 | 5.14  | 4.34  | 0.4  | 0.99 | 1.75  | 0.608187 | 0.804599 | 0.819872 | 0.88762  |
| MmugDNA.24798.1.S1_at   | MmugDNA.24798.1 | 6.02  | 6.02  | 0.19 | 0.02 | 1     | 0.848922 | 0.857727 | 0.939249 | 0.918838 |
| MmugDNA.24803.1.S1_at   | MmugDNA.24803.1 | 8.88  | 8.41  | 0.24 | 0.25 | 1.38  | 0.335882 | 0.035255 | 0.65921  | 0.231987 |
| MmugDNA.24804.1.S1_at   | MmugDNA.24804.1 | 3.73  | 4.07  | 0.06 | 0.19 | -1.27 | 0.059354 | 0.028243 | 0.392025 | 0.209816 |

|                         |                 |       |       |      |      |       |          |          |          |          |
|-------------------------|-----------------|-------|-------|------|------|-------|----------|----------|----------|----------|
| MmugDNA.24809.1.S1_at   | MmugDNA.24809.1 | 11.34 | 10.53 | 0.2  | 0.24 | 1.76  | 0.033039 | 0.020758 | 0.32696  | 0.180781 |
| MmugDNA.2481.1.S1_at    | MmugDNA.2481.1  | 3.18  | 3.15  | 0.05 | 0.12 | 1.02  | 0.884571 | 0.172783 | 0.953771 | 0.449341 |
| MmugDNA.24810.1.S1_at   | MmugDNA.24810.1 | 4.2   | 4.36  | 0.2  | 0.29 | -1.12 | 0.254062 | 0.202878 | 0.602339 | 0.477312 |
| MmugDNA.24816.1.S1_at   | MmugDNA.24816.1 | 2.62  | 2.63  | 0.02 | 0.09 | -1.01 | 0.325001 | 0.412549 | 0.652259 | 0.638941 |
| MmugDNA.24819.1.S1_at   | MmugDNA.24819.1 | 9.5   | 9.9   | 0.12 | 0.24 | -1.32 | 0.151259 | 0.04242  | 0.516026 | 0.250616 |
| MmugDNA.24820.1.S1_at   | MmugDNA.24820.1 | 11.64 | 11.78 | 0.11 | 0.13 | -1.1  | 0.110908 | 0.167125 | 0.472762 | 0.443617 |
| MmugDNA.24823.1.S1_at   | MmugDNA.24823.1 | 5.87  | 5.89  | 0.11 | 0.11 | -1.01 | 0.764907 | 0.491729 | 0.900999 | 0.693243 |
| MmugDNA.24828.1.S1_at   | MmugDNA.24828.1 | 10.21 | 9.88  | 0.26 | 0.17 | 1.26  | 0.210802 | 0.094345 | 0.571977 | 0.350889 |
| MmugDNA.24838.1.S1_at   | MmugDNA.24838.1 | 11.23 | 11.73 | 0.16 | 0.27 | -1.41 | 0.044858 | 0.034134 | 0.359086 | 0.228692 |
| MmugDNA.24839.1.S1_at   | MmugDNA.24839.1 | 5.94  | 6.26  | 0.07 | 0.12 | -1.24 | 0.063156 | 0.065768 | 0.400282 | 0.301767 |
| MmugDNA.24841.1.S1_at   | MmugDNA.24841.1 | 13.33 | 13.03 | 0.05 | 0.25 | 1.23  | 0.137472 | 0.119855 | 0.504544 | 0.388577 |
| MmugDNA.24861.1.S1_s_at | MmugDNA.24861.1 | 11.68 | 11.74 | 0.13 | 0.24 | -1.05 | 0.413306 | 0.062545 | 0.70838  | 0.296914 |
| MmugDNA.24862.1.S1_at   | MmugDNA.24862.1 | 7.66  | 7.76  | 0.15 | 0.39 | -1.08 | 0.216376 | 0.299383 | 0.575996 | 0.557857 |
| MmugDNA.24865.1.S1_at   | MmugDNA.24865.1 | 5.12  | 5.05  | 0.22 | 0.73 | 1.05  | 0.649724 | 0.794156 | 0.842496 | 0.881296 |
| MmugDNA.24878.1.S1_at   | MmugDNA.24878.1 | 11.13 | 10.08 | 0.11 | 0.28 | 2.07  | 0.005585 | 0.005073 | 0.191807 | 0.09907  |
| MmugDNA.24879.1.S1_at   | MmugDNA.24879.1 | 5.93  | 5.86  | 0.19 | 0.16 | 1.05  | 0.582013 | 0.725197 | 0.805507 | 0.840939 |
| MmugDNA.24880.1.S1_s_at | MmugDNA.24880.1 | 12.97 | 12.62 | 0.06 | 0.19 | 1.27  | 0.030033 | 0.011917 | 0.316741 | 0.141283 |
| MmugDNA.24887.1.S1_at   | MmugDNA.24887.1 | 11.49 | 11.08 | 0.32 | 0.86 | 1.33  | 0.245915 | 0.321694 | 0.597304 | 0.573346 |
| MmugDNA.24888.1.S1_s_at | MmugDNA.24888.1 | 8.84  | 8.92  | 0.06 | 0.2  | -1.05 | 0.271786 | 0.365936 | 0.615805 | 0.605798 |
| MmugDNA.2490.1.S1_at    | MmugDNA.2490.1  | 10.14 | 10.4  | 0.9  | 1.23 | -1.19 | 0.544887 | 0.211463 | 0.784663 | 0.485578 |
| MmugDNA.24907.1.S1_at   | MmugDNA.24907.1 | 11.87 | 12.04 | 0.17 | 0.08 | -1.12 | 0.093282 | 0.07365  | 0.450474 | 0.316984 |
| MmugDNA.24911.1.S1_at   | MmugDNA.24911.1 | 8.42  | 7.94  | 0.58 | 0.71 | 1.39  | 0.449834 | 0.45856  | 0.730493 | 0.671232 |
| MmugDNA.24918.1.S1_at   | MmugDNA.24918.1 | 9.61  | 9.57  | 0.27 | 0.11 | 1.03  | 0.723119 | 0.852041 | 0.878988 | 0.915853 |
| MmugDNA.24927.1.S1_at   | MmugDNA.24927.1 | 11.42 | 11.27 | 0.24 | 0.18 | 1.11  | 0.266791 | 0.11894  | 0.612291 | 0.387176 |
| MmugDNA.24936.1.S1_at   | MmugDNA.24936.1 | 12.05 | 11.7  | 0.21 | 0.11 | 1.28  | 0.066059 | 0.04051  | 0.405837 | 0.246264 |
| MmugDNA.24945.1.S1_at   | MmugDNA.24945.1 | 5.29  | 5.37  | 0.03 | 0.15 | -1.05 | 0.241412 | 0.15275  | 0.593941 | 0.427571 |
| MmugDNA.24946.1.S1_at   | MmugDNA.24946.1 | 4.69  | 5.2   | 0.22 | 0.13 | -1.43 | 0.025851 | 0.026334 | 0.300915 | 0.203321 |
| MmugDNA.24950.1.S1_at   | MmugDNA.24950.1 | 3.13  | 3.16  | 0.14 | 0.14 | -1.02 | 0.335566 | 0.58807  | 0.659165 | 0.754719 |
| MmugDNA.24950.1.S1_s_at | MmugDNA.24950.1 | 11.25 | 8.65  | 0.58 | 1.02 | 6.07  | 0.025671 | 0.016415 | 0.300275 | 0.162201 |
| MmugDNA.24951.1.S1_at   | MmugDNA.24951.1 | 12.32 | 12.92 | 0.08 | 0.3  | -1.51 | 0.032355 | 0.018676 | 0.324688 | 0.171717 |
| MmugDNA.24957.1.S1_at   | MmugDNA.24957.1 | 6.35  | 6.24  | 0.12 | 0.09 | 1.07  | 0.519276 | 0.716503 | 0.770115 | 0.835751 |
| MmugDNA.24959.1.S1_at   | MmugDNA.24959.1 | 8.73  | 8.67  | 0.34 | 0.23 | 1.05  | 0.526327 | 0.513407 | 0.77404  | 0.706881 |
| MmugDNA.24960.1.S1_at   | MmugDNA.24960.1 | 6.46  | 6.47  | 0.24 | 0.08 | -1    | 0.830844 | 0.537252 | 0.93155  | 0.722344 |
| MmugDNA.24964.1.S1_at   | MmugDNA.24964.1 | 6.33  | 6.5   | 0.2  | 0.34 | -1.13 | 0.598735 | 0.694591 | 0.814077 | 0.822424 |
| MmugDNA.2497.1.S1_at    | MmugDNA.2497.1  | 4.55  | 4.56  | 0.36 | 0.13 | -1.01 | 0.569701 | 0.6206   | 0.79916  | 0.775511 |
| MmugDNA.24970.1.S1_at   | MmugDNA.24970.1 | 10.2  | 9.96  | 0.21 | 0.44 | 1.18  | 0.691908 | 0.292663 | 0.863115 | 0.552736 |
| MmugDNA.24972.1.S1_at   | MmugDNA.24972.1 | 8.05  | 8.68  | 0.66 | 1.21 | -1.55 | 0.565336 | 0.420458 | 0.796995 | 0.644171 |
| MmugDNA.24979.1.S1_at   | MmugDNA.24979.1 | 3.26  | 3.18  | 0.12 | 0.09 | 1.05  | 0.228772 | 0.410835 | 0.586121 | 0.637644 |
| MmugDNA.24984.1.S1_at   | MmugDNA.24984.1 | 13.3  | 13.08 | 0.06 | 0.16 | 1.17  | 0.098468 | 0.095724 | 0.458486 | 0.352735 |
| MmugDNA.24998.1.S1_at   | MmugDNA.24998.1 | 6.2   | 6.4   | 0.1  | 0.11 | -1.16 | 0.058246 | 0.050749 | 0.390133 | 0.270423 |
| MmugDNA.25.1.S1_at      | MmugDNA.25.1    | 6.29  | 7.2   | 0.29 | 0.22 | -1.88 | 0.028063 | 0.021065 | 0.309619 | 0.181869 |

|                         |                 |       |       |      |      |       |          |          |          |          |
|-------------------------|-----------------|-------|-------|------|------|-------|----------|----------|----------|----------|
| MmugDNA.25002.1.S1_at   | MmugDNA.25002.1 | 9.09  | 9.93  | 0.17 | 0.34 | -1.79 | 0.0198   | 0.009748 | 0.275549 | 0.129897 |
| MmugDNA.25003.1.S1_at   | MmugDNA.25003.1 | 12.67 | 12.8  | 0.06 | 0.11 | -1.1  | 0.090765 | 0.148203 | 0.446311 | 0.422745 |
| MmugDNA.25007.1.S1_at   | MmugDNA.25007.1 | 6.93  | 6.98  | 0.25 | 0.26 | -1.03 | 0.924178 | 0.850761 | 0.970594 | 0.915085 |
| MmugDNA.25007.1.S1_s_at | MmugDNA.25007.1 | 11.18 | 10.48 | 0.37 | 0.29 | 1.62  | 0.305753 | 0.413042 | 0.639223 | 0.63938  |
| MmugDNA.25012.1.S1_at   | MmugDNA.25012.1 | 10.96 | 10.26 | 0.36 | 1.31 | 1.62  | 0.53756  | 0.425    | 0.780064 | 0.647464 |
| MmugDNA.25013.1.S1_at   | MmugDNA.25013.1 | 4.24  | 3.92  | 0.03 | 0.06 | 1.25  | 0.001043 | 0.000102 | 0.142738 | 0.028099 |
| MmugDNA.25018.1.S1_at   | MmugDNA.25018.1 | 6.14  | 6.46  | 0.31 | 0.18 | -1.25 | 0.871934 | 0.31078  | 0.948804 | 0.565832 |
| MmugDNA.25024.1.S1_at   | MmugDNA.25024.1 | 7.05  | 7.07  | 0.14 | 0.09 | -1.01 | 0.799151 | 0.654584 | 0.916874 | 0.798087 |
| MmugDNA.25028.1.S1_at   | MmugDNA.25028.1 | 4.29  | 4.18  | 0.16 | 0.13 | 1.08  | 0.1002   | 0.112451 | 0.460854 | 0.377784 |
| MmugDNA.25033.1.S1_at   | MmugDNA.25033.1 | 4.83  | 4.67  | 0.15 | 0.09 | 1.12  | 0.406084 | 0.221253 | 0.703553 | 0.49459  |
| MmugDNA.25034.1.S1_at   | MmugDNA.25034.1 | 6.54  | 7.28  | 0.02 | 0.4  | -1.67 | 0.033437 | 0.0675   | 0.328861 | 0.305843 |
| MmugDNA.25035.1.S1_s_at | MmugDNA.25035.1 | 8.66  | 9.02  | 0.19 | 0.56 | -1.29 | 0.114069 | 0.122993 | 0.47744  | 0.392923 |
| MmugDNA.25044.1.S1_at   | MmugDNA.25044.1 | 2.8   | 2.75  | 0.07 | 0.05 | 1.03  | 0.887001 | 0.420911 | 0.954777 | 0.644578 |
| MmugDNA.25045.1.S1_at   | MmugDNA.25045.1 | 11.21 | 11.06 | 0.48 | 0.2  | 1.11  | 0.691711 | 0.723918 | 0.862985 | 0.840188 |
| MmugDNA.25045.1.S1_s_at | MmugDNA.25045.1 | 12.39 | 12.29 | 0.34 | 0.21 | 1.07  | 0.579839 | 0.649113 | 0.804451 | 0.794594 |
| MmugDNA.2505.1.S1_at    | MmugDNA.2505.1  | 5.01  | 5.36  | 0.14 | 0.16 | -1.27 | 0.053841 | 0.000777 | 0.380919 | 0.045626 |
| MmugDNA.25053.1.S1_at   | MmugDNA.25053.1 | 4.25  | 4.06  | 0.34 | 0.18 | 1.14  | 0.428785 | 0.306968 | 0.71704  | 0.563427 |
| MmugDNA.25058.1.S1_at   | MmugDNA.25058.1 | 9.37  | 8.99  | 0.29 | 0.57 | 1.3   | 0.359738 | 0.062194 | 0.673991 | 0.296296 |
| MmugDNA.25060.1.S1_at   | MmugDNA.25060.1 | 7.18  | 7.9   | 0.24 | 0.08 | -1.64 | 0.023368 | 0.023966 | 0.291289 | 0.194025 |
| MmugDNA.25061.1.S1_at   | MmugDNA.25061.1 | 6.4   | 6.34  | 0.15 | 0.14 | 1.04  | 0.696284 | 0.875805 | 0.86516  | 0.929464 |
| MmugDNA.25068.1.S1_at   | MmugDNA.25068.1 | 7.05  | 7.19  | 0.08 | 0.1  | -1.1  | 0.284109 | 0.099676 | 0.623962 | 0.358211 |
| MmugDNA.25071.1.S1_at   | MmugDNA.25071.1 | 7.63  | 7.77  | 0.14 | 0.18 | -1.1  | 0.735999 | 0.890567 | 0.886439 | 0.93764  |
| MmugDNA.25072.1.S1_at   | MmugDNA.25072.1 | 9.2   | 8.81  | 0.82 | 0.3  | 1.31  | 0.108907 | 0.086621 | 0.470644 | 0.339176 |
| MmugDNA.25076.1.S1_at   | MmugDNA.25076.1 | 6.31  | 6.41  | 0.14 | 0.03 | -1.08 | 0.196705 | 0.036041 | 0.559808 | 0.234269 |
| MmugDNA.25079.1.S1_at   | MmugDNA.25079.1 | 11.03 | 10.56 | 0.1  | 0.36 | 1.39  | 0.07677  | 0.074612 | 0.425638 | 0.318299 |
| MmugDNA.25081.1.S1_at   | MmugDNA.25081.1 | 5.84  | 6.44  | 1.44 | 1.09 | -1.51 | 0.877905 | 0.87182  | 0.951034 | 0.927078 |
| MmugDNA.25088.1.S1_at   | MmugDNA.25088.1 | 6.03  | 5.56  | 0.91 | 0.87 | 1.39  | 0.560401 | 0.450913 | 0.794218 | 0.66589  |
| MmugDNA.25090.1.S1_at   | MmugDNA.25090.1 | 8.17  | 8     | 0.09 | 0.83 | 1.12  | 0.841824 | 0.467848 | 0.936256 | 0.677386 |
| MmugDNA.25103.1.S1_at   | MmugDNA.25103.1 | 5.66  | 5.41  | 0.38 | 0.14 | 1.19  | 0.370644 | 0.290443 | 0.681582 | 0.551169 |
| MmugDNA.25111.1.S1_at   | MmugDNA.25111.1 | 4.61  | 4.4   | 0.23 | 0.12 | 1.15  | 0.932339 | 0.559003 | 0.973784 | 0.735977 |
| MmugDNA.25114.1.S1_at   | MmugDNA.25114.1 | 7.74  | 8.23  | 0.15 | 0.11 | -1.41 | 0.011641 | 0.000663 | 0.237051 | 0.0439   |
| MmugDNA.25115.1.S1_at   | MmugDNA.25115.1 | 13.24 | 12.14 | 0.57 | 0.48 | 2.14  | 0.056108 | 0.027243 | 0.385762 | 0.206279 |
| MmugDNA.2512.1.S1_at    | MmugDNA.2512.1  | 9.21  | 7.61  | 0.13 | 0.12 | 3.03  | 0.000136 | 0.000052 | 0.112653 | 0.025333 |
| MmugDNA.25121.1.S1_at   | MmugDNA.25121.1 | 11.65 | 12.06 | 0.21 | 0.34 | -1.33 | 0.383133 | 0.505292 | 0.689068 | 0.702073 |
| MmugDNA.25137.1.S1_at   | MmugDNA.25137.1 | 7.58  | 7.7   | 0.22 | 0.8  | -1.08 | 0.415265 | 0.543121 | 0.709433 | 0.725952 |
| MmugDNA.25140.1.S1_at   | MmugDNA.25140.1 | 5.09  | 4.59  | 0.5  | 0.53 | 1.42  | 0.342786 | 0.222272 | 0.663407 | 0.495318 |
| MmugDNA.25146.1.S1_at   | MmugDNA.25146.1 | 11.67 | 12.09 | 0.05 | 0.18 | -1.34 | 0.008232 | 0.00195  | 0.216948 | 0.065813 |
| MmugDNA.25147.1.S1_at   | MmugDNA.25147.1 | 10.1  | 9.56  | 0.05 | 0.42 | 1.45  | 0.046158 | 0.030472 | 0.362577 | 0.216624 |
| MmugDNA.25153.1.S1_at   | MmugDNA.25153.1 | 11.49 | 11.57 | 0.05 | 0.26 | -1.06 | 0.303329 | 0.406466 | 0.637543 | 0.634352 |
| MmugDNA.25159.1.S1_at   | MmugDNA.25159.1 | 12.1  | 12.09 | 0.15 | 0.17 | 1     | 0.379769 | 0.471616 | 0.687063 | 0.679537 |
| MmugDNA.25164.1.S1_at   | MmugDNA.25164.1 | 11.04 | 10.32 | 0.03 | 0.19 | 1.65  | 0.002355 | 0.000457 | 0.162    | 0.038572 |



|                         |                 |       |       |      |      |       |          |          |          |          |
|-------------------------|-----------------|-------|-------|------|------|-------|----------|----------|----------|----------|
| MmugDNA.25165.1.S1_at   | MmugDNA.25165.1 | 10.01 | 10.57 | 0.06 | 0.47 | -1.47 | 0.067155 | 0.064186 | 0.407071 | 0.299592 |
| MmugDNA.25169.1.S1_at   | MmugDNA.25169.1 | 3.82  | 3.9   | 0.2  | 0.43 | -1.06 | 0.702996 | 0.909013 | 0.868924 | 0.948484 |
| MmugDNA.25173.1.S1_at   | MmugDNA.25173.1 | 5.21  | 5.3   | 0.06 | 0.17 | -1.07 | 0.21731  | 0.26866  | 0.576885 | 0.534138 |
| MmugDNA.25176.1.S1_at   | MmugDNA.25176.1 | 3.85  | 3.94  | 0.17 | 0.04 | -1.06 | 0.95223  | 0.674883 | 0.982156 | 0.810065 |
| MmugDNA.25181.1.S1_at   | MmugDNA.25181.1 | 8.95  | 9.35  | 0.74 | 0.64 | -1.32 | 0.683933 | 0.122337 | 0.858543 | 0.392032 |
| MmugDNA.25184.1.S1_at   | MmugDNA.25184.1 | 7.41  | 7.61  | 0.09 | 0.13 | -1.14 | 0.107065 | 0.105953 | 0.467743 | 0.36826  |
| MmugDNA.2519.1.S1_at    | MmugDNA.2519.1  | 9.29  | 9.45  | 0.2  | 0.3  | -1.12 | 0.137266 | 0.158628 | 0.504356 | 0.434612 |
| MmugDNA.25198.1.S1_at   | MmugDNA.25198.1 | 9.99  | 8.64  | 0.24 | 0.16 | 2.54  | 0.001388 | 0.000032 | 0.146228 | 0.022097 |
| MmugDNA.252.1.S1_at     | MmugDNA.252.1   | 6.93  | 7.86  | 0.52 | 0.92 | -1.9  | 0.202255 | 0.247039 | 0.564606 | 0.516238 |
| MmugDNA.25203.1.S1_at   | MmugDNA.25203.1 | 12.51 | 11.69 | 0.03 | 0.23 | 1.77  | 0.003345 | 0.000903 | 0.177442 | 0.048084 |
| MmugDNA.25204.1.S1_at   | MmugDNA.25204.1 | 7.82  | 7.08  | 0.47 | 0.5  | 1.67  | 0.103455 | 0.073372 | 0.463014 | 0.316469 |
| MmugDNA.25205.1.S1_s_at | MmugDNA.25205.1 | 6.11  | 4.5   | 0.35 | 0.28 | 3.03  | 0.004723 | 0.002107 | 0.184492 | 0.067887 |
| MmugDNA.25208.1.S1_at   | MmugDNA.25208.1 | 10.64 | 10.33 | 1.36 | 1.58 | 1.23  | 0.611481 | 0.34557  | 0.821704 | 0.590813 |
| MmugDNA.2521.1.S1_at    | MmugDNA.2521.1  | 4.89  | 5     | 0.02 | 0.12 | -1.08 | 0.156509 | 0.137275 | 0.521319 | 0.410165 |
| MmugDNA.25211.1.S1_at   | MmugDNA.25211.1 | 6.67  | 7.7   | 0.13 | 0.27 | -2.05 | 0.003819 | 0.003606 | 0.179914 | 0.085909 |
| MmugDNA.25213.1.S1_at   | MmugDNA.25213.1 | 4.45  | 4.54  | 0.09 | 0.34 | -1.06 | 0.207649 | 0.284943 | 0.569822 | 0.547047 |
| MmugDNA.25218.1.S1_at   | MmugDNA.25218.1 | 4.25  | 3.9   | 0.84 | 0.2  | 1.27  | 0.132615 | 0.032747 | 0.49874  | 0.224042 |
| MmugDNA.2522.1.S1_at    | MmugDNA.2522.1  | 3.67  | 3.42  | 0.16 | 0.05 | 1.19  | 0.258698 | 0.123366 | 0.605887 | 0.393391 |
| MmugDNA.25220.1.S1_at   | MmugDNA.25220.1 | 6.74  | 6.66  | 0.23 | 0.18 | 1.06  | 0.396534 | 0.016846 | 0.697062 | 0.164528 |
| MmugDNA.25221.1.S1_at   | MmugDNA.25221.1 | 5.77  | 5.76  | 0.04 | 0.03 | 1     | 0.188292 | 0.162759 | 0.551276 | 0.438913 |
| MmugDNA.25223.1.S1_at   | MmugDNA.25223.1 | 9.62  | 9.24  | 0.12 | 0.22 | 1.3   | 0.035542 | 0.003522 | 0.336769 | 0.085137 |
| MmugDNA.25225.1.S1_at   | MmugDNA.25225.1 | 5.89  | 5.82  | 0.56 | 0.19 | 1.05  | 0.916628 | 0.960904 | 0.96735  | 0.977791 |
| MmugDNA.25229.1.S1_at   | MmugDNA.25229.1 | 4.55  | 4.91  | 0.23 | 0.39 | -1.29 | 0.306607 | 0.051734 | 0.639593 | 0.272993 |
| MmugDNA.25235.1.S1_at   | MmugDNA.25235.1 | 2.95  | 2.98  | 0.06 | 0.15 | -1.02 | 0.418711 | 0.601032 | 0.711529 | 0.762468 |
| MmugDNA.25243.1.S1_at   | MmugDNA.25243.1 | 6.93  | 9.53  | 1.21 | 1.82 | -6.09 | 0.129152 | 0.097628 | 0.495114 | 0.355473 |
| MmugDNA.25250.1.S1_at   | MmugDNA.25250.1 | 11.48 | 11.2  | 0.1  | 0.19 | 1.21  | 0.075835 | 0.025501 | 0.423698 | 0.200333 |
| MmugDNA.25255.1.S1_s_at | MmugDNA.25255.1 | 4.17  | 4.15  | 0.56 | 0.04 | 1.02  | 0.894447 | 0.984417 | 0.957917 | 0.991287 |
| MmugDNA.25258.1.S1_s_at | MmugDNA.25258.1 | 9.8   | 10.16 | 0.12 | 0.01 | -1.29 | 0.006081 | 0.007402 | 0.195337 | 0.115643 |
| MmugDNA.25263.1.S1_at   | MmugDNA.25263.1 | 9.02  | 8.68  | 0.39 | 0.19 | 1.27  | 0.181682 | 0.002143 | 0.546277 | 0.068507 |
| MmugDNA.25267.1.S1_at   | MmugDNA.25267.1 | 10.63 | 11.69 | 0.38 | 0.4  | -2.08 | 0.032584 | 0.011498 | 0.325505 | 0.138685 |
| MmugDNA.2527.1.S1_at    | MmugDNA.2527.1  | 11.83 | 11.72 | 0.14 | 0.03 | 1.08  | 0.241677 | 0.019717 | 0.593941 | 0.176461 |
| MmugDNA.25277.1.S1_at   | MmugDNA.25277.1 | 5.77  | 5.76  | 0.14 | 0.25 | 1.01  | 0.87704  | 0.818221 | 0.950716 | 0.895149 |
| MmugDNA.25281.1.S1_at   | MmugDNA.25281.1 | 12.24 | 12.09 | 0.09 | 0.33 | 1.11  | 0.483244 | 0.271574 | 0.749882 | 0.536577 |
| MmugDNA.25285.1.S1_at   | MmugDNA.25285.1 | 6.45  | 6.04  | 0.87 | 0.38 | 1.33  | 0.278317 | 0.371051 | 0.6205   | 0.609975 |
| MmugDNA.25292.1.S1_at   | MmugDNA.25292.1 | 11.74 | 11.28 | 0.16 | 0.22 | 1.37  | 0.026581 | 0.003922 | 0.303505 | 0.089057 |
| MmugDNA.25299.1.S1_at   | MmugDNA.25299.1 | 10.03 | 10.01 | 0.16 | 0.67 | 1.01  | 0.788595 | 0.142273 | 0.91217  | 0.41579  |
| MmugDNA.25302.1.S1_at   | MmugDNA.25302.1 | 10.54 | 11.49 | 0.27 | 0.57 | -1.93 | 0.07725  | 0.023726 | 0.426761 | 0.192873 |
| MmugDNA.25305.1.S1_at   | MmugDNA.25305.1 | 6.45  | 6.51  | 0.16 | 0.11 | -1.04 | 0.219362 | 0.264117 | 0.578758 | 0.530214 |
| MmugDNA.25307.1.S1_at   | MmugDNA.25307.1 | 10.2  | 10.79 | 0.09 | 0.57 | -1.51 | 0.451758 | 0.236182 | 0.73168  | 0.507225 |
| MmugDNA.25321.1.S1_at   | MmugDNA.25321.1 | 6.41  | 6.87  | 0.71 | 0.84 | -1.38 | 0.468083 | 0.56358  | 0.740986 | 0.738718 |
| MmugDNA.25322.1.S1_at   | MmugDNA.25322.1 | 8.93  | 9.21  | 0.31 | 0.13 | -1.22 | 0.076681 | 0.066717 | 0.425368 | 0.304114 |

|                         |                 |       |       |      |      |       |          |          |          |          |
|-------------------------|-----------------|-------|-------|------|------|-------|----------|----------|----------|----------|
| MmugDNA.25327.1.S1_at   | MmugDNA.25327.1 | 9.87  | 9.8   | 0.45 | 0.15 | 1.05  | 0.475877 | 0.577435 | 0.746016 | 0.747923 |
| MmugDNA.2533.1.S1_at    | MmugDNA.2533.1  | 11.98 | 11.62 | 0.32 | 0.21 | 1.28  | 0.24158  | 0.325527 | 0.593941 | 0.575827 |
| MmugDNA.25337.1.S1_at   | MmugDNA.25337.1 | 5.93  | 5.97  | 0.2  | 0.17 | -1.03 | 0.373391 | 0.445285 | 0.683245 | 0.662338 |
| MmugDNA.25341.1.S1_at   | MmugDNA.25341.1 | 10.56 | 12    | 0.17 | 0.75 | -2.72 | 0.030909 | 0.025865 | 0.320207 | 0.201654 |
| MmugDNA.25342.1.S1_at   | MmugDNA.25342.1 | 6.71  | 6.97  | 0.14 | 0.18 | -1.2  | 0.350926 | 0.259632 | 0.66887  | 0.526525 |
| MmugDNA.25343.1.S1_at   | MmugDNA.25343.1 | 9.34  | 8.9   | 0.22 | 0.11 | 1.36  | 0.036388 | 0.013455 | 0.339201 | 0.148623 |
| MmugDNA.25347.1.S1_at   | MmugDNA.25347.1 | 8.39  | 8.55  | 0.28 | 0.18 | -1.12 | 0.842109 | 0.290653 | 0.936316 | 0.551363 |
| MmugDNA.25348.1.S1_at   | MmugDNA.25348.1 | 6.37  | 5.92  | 0.44 | 0.47 | 1.37  | 0.132097 | 0.11295  | 0.498298 | 0.378759 |
| MmugDNA.25353.1.S1_at   | MmugDNA.25353.1 | 10.73 | 10.62 | 0.23 | 0.36 | 1.08  | 0.463093 | 0.360182 | 0.738603 | 0.601275 |
| MmugDNA.25354.1.S1_at   | MmugDNA.25354.1 | 11.38 | 11.4  | 0.12 | 0.27 | -1.01 | 0.297388 | 0.428663 | 0.633201 | 0.650233 |
| MmugDNA.25359.1.S1_at   | MmugDNA.25359.1 | 11.41 | 12.2  | 0.43 | 0.46 | -1.73 | 0.114421 | 0.10314  | 0.477887 | 0.364041 |
| MmugDNA.25362.1.S1_at   | MmugDNA.25362.1 | 6.62  | 9.17  | 1.07 | 2.19 | -5.86 | 0.317953 | 0.144241 | 0.64802  | 0.418146 |
| MmugDNA.25367.1.S1_at   | MmugDNA.25367.1 | 7.83  | 8.01  | 0.43 | 0.48 | -1.13 | 0.463894 | 0.24849  | 0.738998 | 0.517769 |
| MmugDNA.25369.1.S1_at   | MmugDNA.25369.1 | 3.32  | 3.24  | 0.5  | 0.06 | 1.05  | 0.655239 | 0.752288 | 0.844826 | 0.855787 |
| MmugDNA.25370.1.S1_at   | MmugDNA.25370.1 | 7.67  | 7.81  | 0.18 | 0.51 | -1.1  | 0.657665 | 0.883472 | 0.846091 | 0.933594 |
| MmugDNA.25384.1.S1_at   | MmugDNA.25384.1 | 13.01 | 12.37 | 0.07 | 0.56 | 1.56  | 0.039042 | 0.015679 | 0.346242 | 0.158633 |
| MmugDNA.25386.1.S1_at   | MmugDNA.25386.1 | 11.24 | 10.35 | 0.81 | 0.33 | 1.86  | 0.589333 | 0.44138  | 0.80924  | 0.659552 |
| MmugDNA.25389.1.S1_at   | MmugDNA.25389.1 | 10.02 | 9.65  | 0.14 | 0.04 | 1.29  | 0.013695 | 0.00067  | 0.248874 | 0.04413  |
| MmugDNA.25396.1.S1_at   | MmugDNA.25396.1 | 13.64 | 13.49 | 0.09 | 0.14 | 1.11  | 0.142883 | 0.143157 | 0.509839 | 0.417029 |
| MmugDNA.254.1.S1_at     | MmugDNA.254.1   | 3.61  | 3.74  | 0.29 | 0.05 | -1.1  | 0.836024 | 0.290404 | 0.933635 | 0.551169 |
| MmugDNA.25400.1.S1_s_at | MmugDNA.25400.1 | 13.44 | 12.7  | 0.04 | 0.75 | 1.67  | 0.134926 | 0.151498 | 0.501995 | 0.426223 |
| MmugDNA.25404.1.S1_at   | MmugDNA.25404.1 | 7.45  | 8.47  | 0.68 | 1.17 | -2.03 | 0.319353 | 0.430636 | 0.648832 | 0.651655 |
| MmugDNA.25409.1.S1_at   | MmugDNA.25409.1 | 7.21  | 6.88  | 0.62 | 0.48 | 1.25  | 0.118595 | 0.088872 | 0.48294  | 0.34272  |
| MmugDNA.25416.1.S1_at   | MmugDNA.25416.1 | 3.48  | 3.27  | 0.12 | 0.14 | 1.15  | 0.109044 | 0.360666 | 0.470811 | 0.601717 |
| MmugDNA.2542.1.S1_at    | MmugDNA.2542.1  | 7.65  | 7.39  | 0.11 | 0.14 | 1.2   | 0.057147 | 0.083938 | 0.387418 | 0.334848 |
| MmugDNA.25428.1.S1_at   | MmugDNA.25428.1 | 6.97  | 6.63  | 0.41 | 0.22 | 1.27  | 0.9527   | 0.297083 | 0.982319 | 0.555996 |
| MmugDNA.2543.1.S1_at    | MmugDNA.2543.1  | 8.6   | 8.83  | 0.3  | 0.52 | -1.17 | 0.407514 | 0.005851 | 0.704692 | 0.104779 |
| MmugDNA.25431.1.S1_at   | MmugDNA.25431.1 | 8.59  | 9.08  | 0.09 | 0.45 | -1.4  | 0.039158 | 0.008144 | 0.346585 | 0.119736 |
| MmugDNA.25433.1.S1_at   | MmugDNA.25433.1 | 5.5   | 5.33  | 0.08 | 0.25 | 1.12  | 0.874711 | 0.791655 | 0.949773 | 0.879663 |
| MmugDNA.25436.1.S1_at   | MmugDNA.25436.1 | 12.35 | 10.9  | 0.15 | 0.17 | 2.74  | 0.000404 | 0.000069 | 0.12978  | 0.025812 |
| MmugDNA.25439.1.S1_at   | MmugDNA.25439.1 | 4.41  | 3.89  | 0.13 | 0.16 | 1.43  | 0.01534  | 0.009282 | 0.258162 | 0.127101 |
| MmugDNA.25440.1.S1_at   | MmugDNA.25440.1 | 7.14  | 7.19  | 0.21 | 0.14 | -1.03 | 0.912805 | 0.674949 | 0.965461 | 0.810089 |
| MmugDNA.25440.1.S1_s_at | MmugDNA.25440.1 | 5.9   | 6.12  | 0.12 | 0.13 | -1.17 | 0.06632  | 0.232793 | 0.406394 | 0.504426 |
| MmugDNA.25452.1.S1_at   | MmugDNA.25452.1 | 11.57 | 11.37 | 0.53 | 0.35 | 1.16  | 0.130584 | 0.192897 | 0.496961 | 0.468379 |
| MmugDNA.25454.1.S1_at   | MmugDNA.25454.1 | 8.28  | 7.9   | 0.36 | 0.3  | 1.3   | 0.264661 | 0.345295 | 0.610398 | 0.590593 |
| MmugDNA.25459.1.S1_at   | MmugDNA.25459.1 | 2.83  | 2.85  | 0.06 | 0.09 | -1.01 | 0.429948 | 0.606779 | 0.717824 | 0.766027 |
| MmugDNA.25461.1.S1_at   | MmugDNA.25461.1 | 12.4  | 12.44 | 0.07 | 0.17 | -1.03 | 0.893362 | 0.883814 | 0.957599 | 0.933691 |
| MmugDNA.25463.1.S1_at   | MmugDNA.25463.1 | 12.7  | 12.24 | 0.12 | 0.11 | 1.38  | 0.007975 | 0.002909 | 0.214639 | 0.079157 |
| MmugDNA.25463.1.S1_s_at | MmugDNA.25463.1 | 11.76 | 11.48 | 0.13 | 0.11 | 1.21  | 0.040544 | 0.020417 | 0.349598 | 0.179442 |
| MmugDNA.25468.1.S1_at   | MmugDNA.25468.1 | 8.38  | 7.96  | 0.5  | 0.27 | 1.34  | 0.152557 | 0.286012 | 0.517312 | 0.547512 |
| MmugDNA.25469.1.S1_at   | MmugDNA.25469.1 | 9     | 8.87  | 0.28 | 0.33 | 1.1   | 0.855433 | 0.704082 | 0.941542 | 0.828326 |

|                         |                 |       |       |      |      |       |          |          |          |          |
|-------------------------|-----------------|-------|-------|------|------|-------|----------|----------|----------|----------|
| MmugDNA.25471.1.S1_at   | MmugDNA.25471.1 | 10.75 | 9.75  | 0.19 | 0.23 | 2     | 0.003761 | 0.000893 | 0.179914 | 0.047789 |
| MmugDNA.25472.1.S1_at   | MmugDNA.25472.1 | 4.14  | 4.02  | 0.11 | 0.12 | 1.09  | 0.431672 | 0.632934 | 0.718606 | 0.783881 |
| MmugDNA.25477.1.S1_at   | MmugDNA.25477.1 | 6.67  | 6.2   | 0.54 | 0.26 | 1.39  | 0.094586 | 0.096673 | 0.452166 | 0.35417  |
| MmugDNA.25481.1.S1_at   | MmugDNA.25481.1 | 6.75  | 6.73  | 0.11 | 0.04 | 1.01  | 0.738445 | 0.129884 | 0.887681 | 0.401509 |
| MmugDNA.25487.1.S1_at   | MmugDNA.25487.1 | 13.45 | 13.41 | 0.07 | 0.03 | 1.03  | 0.44326  | 0.525219 | 0.726011 | 0.714809 |
| MmugDNA.2549.1.S1_at    | MmugDNA.2549.1  | 8.19  | 8.16  | 0.53 | 0.82 | 1.02  | 0.413312 | 0.584385 | 0.70838  | 0.75242  |
| MmugDNA.2549.1.S1_x_at  | MmugDNA.2549.1  | 8.06  | 7.9   | 0.55 | 0.41 | 1.12  | 0.373118 | 0.489787 | 0.683245 | 0.691918 |
| MmugDNA.25492.1.S1_s_at | MmugDNA.25492.1 | 10.8  | 10.43 | 0.23 | 0.39 | 1.29  | 0.70584  | 0.255983 | 0.870323 | 0.523919 |
| MmugDNA.25494.1.S1_at   | MmugDNA.25494.1 | 11.97 | 11.51 | 0.03 | 0.28 | 1.37  | 0.130159 | 0.159676 | 0.496561 | 0.435785 |
| MmugDNA.25496.1.S1_at   | MmugDNA.25496.1 | 5.59  | 6.55  | 0.18 | 0.8  | -1.95 | 0.389464 | 0.15689  | 0.692994 | 0.432372 |
| MmugDNA.2550.1.S1_at    | MmugDNA.2550.1  | 13.27 | 13.08 | 0.12 | 0.44 | 1.14  | 0.505574 | 0.559742 | 0.761685 | 0.736365 |
| MmugDNA.25504.1.S1_at   | MmugDNA.25504.1 | 10.2  | 9.06  | 0.35 | 0.13 | 2.2   | 0.011556 | 0.012404 | 0.236469 | 0.144058 |
| MmugDNA.25508.1.S1_at   | MmugDNA.25508.1 | 9.49  | 8.13  | 0.39 | 0.5  | 2.56  | 0.054634 | 0.020018 | 0.382043 | 0.177698 |
| MmugDNA.25509.1.S1_at   | MmugDNA.25509.1 | 5.21  | 5.41  | 0.18 | 0.59 | -1.15 | 0.766274 | 0.753806 | 0.901717 | 0.856687 |
| MmugDNA.25513.1.S1_at   | MmugDNA.25513.1 | 7.36  | 7.34  | 0.27 | 0.03 | 1.01  | 0.939556 | 0.662461 | 0.977007 | 0.802351 |
| MmugDNA.25515.1.S1_at   | MmugDNA.25515.1 | 8.27  | 6.22  | 0.35 | 0.15 | 4.14  | 0.001036 | 0.000209 | 0.142738 | 0.032262 |
| MmugDNA.25525.1.S1_at   | MmugDNA.25525.1 | 6.92  | 7.2   | 0.23 | 0.35 | -1.22 | 0.466793 | 0.416542 | 0.740411 | 0.641647 |
| MmugDNA.25527.1.S1_at   | MmugDNA.25527.1 | 4.91  | 5.23  | 0.11 | 0.15 | -1.25 | 0.111216 | 0.119005 | 0.473262 | 0.387269 |
| MmugDNA.25529.1.S1_at   | MmugDNA.25529.1 | 12.49 | 12.74 | 0.19 | 0.14 | -1.19 | 0.117342 | 0.082894 | 0.481472 | 0.332437 |
| MmugDNA.25530.1.S1_at   | MmugDNA.25530.1 | 12.69 | 12.77 | 0.09 | 0.22 | -1.06 | 0.305759 | 0.37971  | 0.639223 | 0.616542 |
| MmugDNA.25535.1.S1_at   | MmugDNA.25535.1 | 10.47 | 9.89  | 0.13 | 0.63 | 1.49  | 0.167336 | 0.107895 | 0.531441 | 0.370945 |
| MmugDNA.25538.1.S1_at   | MmugDNA.25538.1 | 3.66  | 3.63  | 0.31 | 0.1  | 1.02  | 0.72241  | 0.867678 | 0.878695 | 0.924794 |
| MmugDNA.25540.1.S1_at   | MmugDNA.25540.1 | 11.86 | 11.94 | 0.15 | 0.16 | -1.06 | 0.164241 | 0.183775 | 0.528238 | 0.459871 |
| MmugDNA.25541.1.S1_at   | MmugDNA.25541.1 | 7.73  | 6.99  | 0.26 | 0.43 | 1.66  | 0.192348 | 0.216142 | 0.555471 | 0.489701 |
| MmugDNA.25552.1.S1_at   | MmugDNA.25552.1 | 3.96  | 3.86  | 0.4  | 0.17 | 1.07  | 0.398708 | 0.296275 | 0.698864 | 0.555423 |
| MmugDNA.25552.1.S1_s_at | MmugDNA.25552.1 | 5.97  | 5.92  | 0.15 | 0.18 | 1.03  | 0.624562 | 0.109677 | 0.828315 | 0.373675 |
| MmugDNA.25553.1.S1_at   | MmugDNA.25553.1 | 8.67  | 7.48  | 0.44 | 0.46 | 2.27  | 0.030822 | 0.025122 | 0.320053 | 0.198608 |
| MmugDNA.25561.1.S1_at   | MmugDNA.25561.1 | 7.01  | 6.86  | 0.49 | 0.56 | 1.11  | 0.798847 | 0.468294 | 0.916751 | 0.6777   |
| MmugDNA.25570.1.S1_at   | MmugDNA.25570.1 | 6.18  | 4.77  | 0.47 | 0.82 | 2.67  | 0.044457 | 0.020716 | 0.358591 | 0.180645 |
| MmugDNA.25572.1.S1_at   | MmugDNA.25572.1 | 13.97 | 13.97 | 0.02 | 0.18 | 1     | 0.327168 | 0.446627 | 0.653651 | 0.66287  |
| MmugDNA.25572.1.S1_s_at | MmugDNA.25572.1 | 13.45 | 13.4  | 0.04 | 0.14 | 1.03  | 0.252819 | 0.304541 | 0.601605 | 0.561803 |
| MmugDNA.25573.1.S1_at   | MmugDNA.25573.1 | 6.85  | 6.41  | 0.08 | 0.87 | 1.35  | 0.972792 | 0.876406 | 0.989488 | 0.929683 |
| MmugDNA.25583.1.S1_at   | MmugDNA.25583.1 | 8.36  | 9.32  | 0.38 | 0.26 | -1.94 | 0.024763 | 0.019433 | 0.296308 | 0.175133 |
| MmugDNA.25587.1.S1_at   | MmugDNA.25587.1 | 10.85 | 10.61 | 0.15 | 0.29 | 1.19  | 0.318086 | 0.058381 | 0.64802  | 0.288369 |
| MmugDNA.25590.1.S1_at   | MmugDNA.25590.1 | 10.72 | 10.71 | 0.04 | 0.14 | 1     | 0.561541 | 0.75984  | 0.794887 | 0.860462 |
| MmugDNA.25594.1.S1_at   | MmugDNA.25594.1 | 4.55  | 4.09  | 0.53 | 0.14 | 1.37  | 0.180803 | 0.12909  | 0.545244 | 0.400583 |
| MmugDNA.25601.1.S1_at   | MmugDNA.25601.1 | 7.1   | 6.57  | 0.19 | 0.72 | 1.44  | 0.796285 | 0.282253 | 0.91548  | 0.544991 |
| MmugDNA.25616.1.S1_at   | MmugDNA.25616.1 | 6.37  | 6.87  | 0.09 | 0.2  | -1.41 | 0.040918 | 0.071152 | 0.350506 | 0.313041 |
| MmugDNA.25617.1.S1_at   | MmugDNA.25617.1 | 3.41  | 3.05  | 0.24 | 0.13 | 1.28  | 0.142489 | 0.176761 | 0.509652 | 0.45319  |
| MmugDNA.25619.1.S1_at   | MmugDNA.25619.1 | 9.39  | 8.99  | 0.3  | 0.32 | 1.31  | 0.230534 | 0.248265 | 0.587222 | 0.517596 |
| MmugDNA.25621.1.S1_at   | MmugDNA.25621.1 | 8.85  | 8.31  | 0.21 | 0.28 | 1.46  | 0.06156  | 0.048001 | 0.396368 | 0.264109 |

|                         |                 |       |       |      |      |       |          |          |          |          |
|-------------------------|-----------------|-------|-------|------|------|-------|----------|----------|----------|----------|
| MmugDNA.25622.1.S1_at   | MmugDNA.25622.1 | 9.25  | 8.73  | 0.29 | 0.53 | 1.44  | 0.124028 | 0.128209 | 0.489711 | 0.399281 |
| MmugDNA.25626.1.S1_at   | MmugDNA.25626.1 | 8.08  | 8.56  | 0.27 | 0.34 | -1.4  | 0.053815 | 0.040739 | 0.380879 | 0.246735 |
| MmugDNA.2563.1.S1_at    | MmugDNA.2563.1  | 10.49 | 10.1  | 0.23 | 0.47 | 1.31  | 0.135535 | 0.142937 | 0.502421 | 0.416854 |
| MmugDNA.25634.1.S1_at   | MmugDNA.25634.1 | 10.76 | 11.4  | 0.03 | 0.22 | -1.56 | 0.014932 | 0.012737 | 0.256467 | 0.14546  |
| MmugDNA.25642.1.S1_at   | MmugDNA.25642.1 | 3.42  | 3.47  | 0.11 | 0.06 | -1.04 | 0.291476 | 0.313297 | 0.628798 | 0.567753 |
| MmugDNA.25646.1.S1_s_at | MmugDNA.25646.1 | 10.27 | 10.24 | 0.14 | 0.32 | 1.02  | 0.734218 | 0.428049 | 0.885447 | 0.649619 |
| MmugDNA.25647.1.S1_at   | MmugDNA.25647.1 | 4.34  | 4.2   | 0.43 | 0.23 | 1.1   | 0.305023 | 0.213413 | 0.639014 | 0.48728  |
| MmugDNA.25649.1.S1_at   | MmugDNA.25649.1 | 4.9   | 4.74  | 0.2  | 0.14 | 1.12  | 0.810567 | 0.34448  | 0.922837 | 0.589886 |
| MmugDNA.2565.1.S1_at    | MmugDNA.2565.1  | 4.96  | 4.93  | 0.1  | 0.17 | 1.02  | 0.551896 | 0.519838 | 0.789052 | 0.71135  |
| MmugDNA.25652.1.S1_at   | MmugDNA.25652.1 | 6.76  | 7.83  | 0.24 | 0.46 | -2.1  | 0.032221 | 0.004689 | 0.3244   | 0.095363 |
| MmugDNA.25656.1.S1_at   | MmugDNA.25656.1 | 7.26  | 5.12  | 0.67 | 0.57 | 4.42  | 0.016038 | 0.013373 | 0.262409 | 0.14827  |
| MmugDNA.2566.1.S1_at    | MmugDNA.2566.1  | 9.57  | 9.5   | 0.12 | 0.12 | 1.05  | 0.552907 | 0.086154 | 0.789712 | 0.338528 |
| MmugDNA.25666.1.S1_at   | MmugDNA.25666.1 | 12.5  | 12.56 | 0.11 | 0.25 | -1.05 | 0.436693 | 0.517131 | 0.721926 | 0.709435 |
| MmugDNA.25667.1.S1_at   | MmugDNA.25667.1 | 7.56  | 7.68  | 0.51 | 1.04 | -1.09 | 0.821809 | 0.155532 | 0.927464 | 0.430888 |
| MmugDNA.25674.1.S1_at   | MmugDNA.25674.1 | 6.98  | 7.31  | 0.08 | 0.78 | -1.25 | 0.918155 | 0.979477 | 0.968215 | 0.988961 |
| MmugDNA.25678.1.S1_at   | MmugDNA.25678.1 | 7.08  | 7.62  | 0.16 | 0.42 | -1.45 | 0.064529 | 0.056091 | 0.402975 | 0.282723 |
| MmugDNA.25679.1.S1_at   | MmugDNA.25679.1 | 8.15  | 8.03  | 0.04 | 0.29 | 1.09  | 0.436875 | 0.444421 | 0.72207  | 0.662053 |
| MmugDNA.25681.1.S1_at   | MmugDNA.25681.1 | 7.75  | 7.02  | 0.3  | 0.41 | 1.65  | 0.018436 | 0.010602 | 0.270416 | 0.134272 |
| MmugDNA.25693.1.S1_at   | MmugDNA.25693.1 | 9.54  | 8.98  | 0.21 | 0.28 | 1.48  | 0.014045 | 0.020477 | 0.250965 | 0.179644 |
| MmugDNA.25698.1.S1_at   | MmugDNA.25698.1 | 9.16  | 9.48  | 0.17 | 0.27 | -1.25 | 0.099137 | 0.087548 | 0.458841 | 0.340753 |
| MmugDNA.25703.1.S1_at   | MmugDNA.25703.1 | 12.49 | 12.19 | 0.22 | 0.14 | 1.23  | 0.317847 | 0.434271 | 0.64802  | 0.65444  |
| MmugDNA.25704.1.S1_at   | MmugDNA.25704.1 | 9.35  | 9.25  | 0.24 | 1.37 | 1.07  | 0.898565 | 0.806004 | 0.959492 | 0.888436 |
| MmugDNA.2571.1.S1_at    | MmugDNA.2571.1  | 9.72  | 9.65  | 0.42 | 0.06 | 1.05  | 0.814583 | 0.000674 | 0.924758 | 0.04413  |
| MmugDNA.2571.1.S1_s_at  | MmugDNA.2571.1  | 10.43 | 10.33 | 0.38 | 0.04 | 1.08  | 0.701648 | 0.0004   | 0.868123 | 0.037471 |
| MmugDNA.2571.1.S1_x_at  | MmugDNA.2571.1  | 10.12 | 9.98  | 0.38 | 0.08 | 1.1   | 0.73941  | 0.000496 | 0.888141 | 0.038955 |
| MmugDNA.25716.1.S1_at   | MmugDNA.25716.1 | 8.82  | 8.72  | 0.11 | 0.28 | 1.07  | 0.807945 | 0.83962  | 0.921546 | 0.908582 |
| MmugDNA.25719.1.S1_at   | MmugDNA.25719.1 | 9.13  | 9.57  | 0.16 | 0.67 | -1.36 | 0.141702 | 0.169553 | 0.509159 | 0.446179 |
| MmugDNA.25725.1.S1_at   | MmugDNA.25725.1 | 4.72  | 4.53  | 0.82 | 0.56 | 1.14  | 0.861928 | 0.92632  | 0.944477 | 0.958277 |
| MmugDNA.2573.1.S1_at    | MmugDNA.2573.1  | 12.71 | 12.67 | 0.05 | 0.11 | 1.03  | 0.579357 | 0.393151 | 0.804257 | 0.626102 |
| MmugDNA.25730.1.S1_at   | MmugDNA.25730.1 | 11.74 | 11.37 | 0.06 | 0.25 | 1.3   | 0.186821 | 0.129158 | 0.550106 | 0.400611 |
| MmugDNA.25736.1.S1_at   | MmugDNA.25736.1 | 3.18  | 3.17  | 0.11 | 0.09 | 1     | 0.748471 | 0.609771 | 0.892476 | 0.768079 |
| MmugDNA.25746.1.S1_at   | MmugDNA.25746.1 | 3.81  | 3.59  | 0.18 | 0.13 | 1.16  | 0.333337 | 0.253269 | 0.657539 | 0.521645 |
| MmugDNA.25753.1.S1_at   | MmugDNA.25753.1 | 7.25  | 7.13  | 0.14 | 0.06 | 1.09  | 0.256667 | 0.044088 | 0.604414 | 0.254278 |
| MmugDNA.25755.1.S1_at   | MmugDNA.25755.1 | 8.44  | 8.91  | 0.58 | 0.5  | -1.39 | 0.155649 | 0.131336 | 0.520357 | 0.403431 |
| MmugDNA.25759.1.S1_at   | MmugDNA.25759.1 | 5.13  | 5.12  | 0.06 | 0.1  | 1     | 0.528747 | 0.802819 | 0.775764 | 0.886441 |
| MmugDNA.25764.1.S1_at   | MmugDNA.25764.1 | 6.46  | 6.5   | 0.2  | 0.94 | -1.03 | 0.365105 | 0.493897 | 0.677975 | 0.69445  |
| MmugDNA.25765.1.S1_at   | MmugDNA.25765.1 | 7.08  | 7.06  | 0.27 | 0.23 | 1.01  | 0.502061 | 0.718451 | 0.760244 | 0.837045 |
| MmugDNA.25766.1.S1_at   | MmugDNA.25766.1 | 12.33 | 12.18 | 0.16 | 0.13 | 1.11  | 0.143485 | 0.19966  | 0.510312 | 0.474335 |
| MmugDNA.25768.1.S1_at   | MmugDNA.25768.1 | 14.25 | 14.26 | 0.1  | 0.08 | -1    | 0.614456 | 0.804614 | 0.823199 | 0.88762  |
| MmugDNA.25770.1.S1_at   | MmugDNA.25770.1 | 14.34 | 14.27 | 0.07 | 0.04 | 1.05  | 0.395558 | 0.547454 | 0.696523 | 0.728464 |
| MmugDNA.25771.1.S1_at   | MmugDNA.25771.1 | 3.64  | 3.73  | 0.15 | 0.17 | -1.06 | 0.122442 | 0.139778 | 0.487622 | 0.413114 |

|                         |                 |       |       |      |      |       |          |          |          |          |
|-------------------------|-----------------|-------|-------|------|------|-------|----------|----------|----------|----------|
| MmugDNA.25777.1.S1_at   | MmugDNA.25777.1 | 10.39 | 9.41  | 0.28 | 0.95 | 1.98  | 0.073877 | 0.057749 | 0.419443 | 0.286658 |
| MmugDNA.25779.1.S1_at   | MmugDNA.25779.1 | 7.32  | 7.7   | 0.14 | 0.53 | -1.3  | 0.097171 | 0.052274 | 0.456142 | 0.274146 |
| MmugDNA.25789.1.S1_at   | MmugDNA.25789.1 | 8.98  | 9.02  | 0.1  | 0.17 | -1.03 | 0.963493 | 0.998179 | 0.985967 | 0.999049 |
| MmugDNA.25794.1.S1_s_at | MmugDNA.25794.1 | 5.21  | 6.14  | 0.82 | 0.95 | -1.9  | 0.325808 | 0.359809 | 0.653033 | 0.601084 |
| MmugDNA.25795.1.S1_at   | MmugDNA.25795.1 | 11.07 | 11.19 | 0.1  | 0.29 | -1.09 | 0.153822 | 0.158488 | 0.518485 | 0.434433 |
| MmugDNA.25796.1.S1_s_at | MmugDNA.25796.1 | 13.89 | 13.95 | 0.07 | 0.07 | -1.04 | 0.960033 | 0.774768 | 0.98486  | 0.868861 |
| MmugDNA.258.1.S1_s_at   | MmugDNA.258.1   | 10.44 | 10.18 | 0.19 | 0.14 | 1.2   | 0.280034 | 0.091935 | 0.62132  | 0.347267 |
| MmugDNA.25805.1.S1_at   | MmugDNA.25805.1 | 4.06  | 4.07  | 0.16 | 0.18 | -1.01 | 0.203532 | 0.290432 | 0.566041 | 0.551169 |
| MmugDNA.25824.1.S1_at   | MmugDNA.25824.1 | 5.05  | 5.01  | 0.08 | 0.02 | 1.03  | 0.407824 | 0.886173 | 0.704863 | 0.935211 |
| MmugDNA.2583.1.S1_s_at  | MmugDNA.2583.1  | 5.09  | 5.26  | 0.06 | 1.27 | -1.12 | 0.28902  | 0.365115 | 0.627041 | 0.605299 |
| MmugDNA.25831.1.S1_at   | MmugDNA.25831.1 | 13.4  | 13.33 | 0.34 | 0.06 | 1.05  | 0.577733 | 0.768417 | 0.803559 | 0.865521 |
| MmugDNA.25831.1.S1_s_at | MmugDNA.25831.1 | 14.46 | 14.44 | 0.08 | 0.04 | 1.01  | 0.907041 | 0.96273  | 0.963023 | 0.979102 |
| MmugDNA.25833.1.S1_at   | MmugDNA.25833.1 | 14.08 | 14.12 | 0.06 | 0.07 | -1.02 | 0.734855 | 0.321402 | 0.885892 | 0.573207 |
| MmugDNA.25833.1.S1_s_at | MmugDNA.25833.1 | 14.26 | 14.31 | 0.04 | 0.08 | -1.03 | 0.848364 | 0.267439 | 0.939211 | 0.533173 |
| MmugDNA.25843.1.S1_at   | MmugDNA.25843.1 | 14.28 | 14.33 | 0.07 | 0.06 | -1.04 | 0.756149 | 0.585488 | 0.896385 | 0.752852 |
| MmugDNA.2586.1.S1_at    | MmugDNA.2586.1  | 11.55 | 11.67 | 0.16 | 0.38 | -1.08 | 0.838449 | 0.94854  | 0.934673 | 0.970655 |
| MmugDNA.25861.1.S1_at   | MmugDNA.25861.1 | 6.71  | 6.82  | 0.11 | 0.12 | -1.08 | 0.649216 | 0.859034 | 0.84237  | 0.919753 |
| MmugDNA.25864.1.S1_at   | MmugDNA.25864.1 | 13.38 | 13.68 | 0.13 | 0.1  | -1.24 | 0.015395 | 0.004568 | 0.258258 | 0.094375 |
| MmugDNA.25869.1.S1_at   | MmugDNA.25869.1 | 14.26 | 14.24 | 0.04 | 0.05 | 1.01  | 0.827857 | 0.927593 | 0.930154 | 0.958862 |
| MmugDNA.25870.1.S1_at   | MmugDNA.25870.1 | 6.89  | 5.22  | 0.52 | 0.77 | 3.17  | 0.057835 | 0.047059 | 0.38911  | 0.261469 |
| MmugDNA.25879.1.S1_at   | MmugDNA.25879.1 | 8.76  | 9.03  | 0.27 | 0.2  | -1.21 | 0.201497 | 0.252435 | 0.563988 | 0.521061 |
| MmugDNA.2588.1.S1_at    | MmugDNA.2588.1  | 9.98  | 10.1  | 0.27 | 0.34 | -1.09 | 0.551504 | 0.394986 | 0.788791 | 0.627225 |
| MmugDNA.25881.1.S1_at   | MmugDNA.25881.1 | 8.46  | 8.38  | 0.71 | 0.15 | 1.05  | 0.244425 | 0.236401 | 0.596199 | 0.507314 |
| MmugDNA.25884.1.S1_at   | MmugDNA.25884.1 | 7.64  | 8.16  | 0.46 | 0.36 | -1.43 | 0.094016 | 0.068254 | 0.451612 | 0.307556 |
| MmugDNA.25888.1.S1_at   | MmugDNA.25888.1 | 4.88  | 4.91  | 0.23 | 0.1  | -1.02 | 0.98927  | 0.994587 | 0.996186 | 0.99666  |
| MmugDNA.2589.1.S1_at    | MmugDNA.2589.1  | 8.62  | 9.16  | 0.23 | 0.21 | -1.45 | 0.055134 | 0.038664 | 0.383547 | 0.24169  |
| MmugDNA.25896.1.S1_at   | MmugDNA.25896.1 | 8.06  | 7.34  | 0.25 | 0.31 | 1.65  | 0.034448 | 0.029717 | 0.333108 | 0.214029 |
| MmugDNA.25900.1.S1_at   | MmugDNA.25900.1 | 8.55  | 8.75  | 0.24 | 0.14 | -1.15 | 0.809393 | 0.944891 | 0.922228 | 0.968825 |
| MmugDNA.25903.1.S1_at   | MmugDNA.25903.1 | 14.05 | 14.07 | 0.1  | 0.14 | -1.01 | 0.854243 | 0.526361 | 0.941079 | 0.71555  |
| MmugDNA.25903.1.S1_s_at | MmugDNA.25903.1 | 14.09 | 14.08 | 0.04 | 0.06 | 1.01  | 0.145636 | 0.112274 | 0.51146  | 0.377561 |
| MmugDNA.2591.1.S1_at    | MmugDNA.2591.1  | 11.63 | 11.56 | 0.03 | 0.16 | 1.05  | 0.688323 | 0.568296 | 0.860959 | 0.741876 |
| MmugDNA.2591.1.S1_s_at  | MmugDNA.2591.1  | 10.97 | 11.09 | 0.08 | 0.15 | -1.08 | 0.113616 | 0.062312 | 0.476938 | 0.296445 |
| MmugDNA.2592.1.S1_at    | MmugDNA.2592.1  | 10.21 | 9.67  | 0.34 | 0.55 | 1.46  | 0.269838 | 0.352407 | 0.614491 | 0.595722 |
| MmugDNA.25921.1.S1_at   | MmugDNA.25921.1 | 14.01 | 14.01 | 0.1  | 0.02 | -1    | 0.992706 | 0.907286 | 0.997518 | 0.947562 |
| MmugDNA.25923.1.S1_at   | MmugDNA.25923.1 | 7.77  | 7.91  | 0.42 | 0.57 | -1.11 | 0.910799 | 0.752234 | 0.964763 | 0.855787 |
| MmugDNA.25924.1.S1_s_at | MmugDNA.25924.1 | 10.4  | 10.36 | 0.24 | 0.24 | 1.03  | 0.732172 | 0.493018 | 0.88427  | 0.69397  |
| MmugDNA.25925.1.S1_at   | MmugDNA.25925.1 | 12.42 | 12.38 | 0.15 | 0.16 | 1.03  | 0.336112 | 0.119971 | 0.659241 | 0.388672 |
| MmugDNA.25927.1.S1_at   | MmugDNA.25927.1 | 11.14 | 10.21 | 0.23 | 1.39 | 1.9   | 0.2999   | 0.420391 | 0.635282 | 0.644099 |
| MmugDNA.25931.1.S1_at   | MmugDNA.25931.1 | 5.09  | 5.12  | 0.15 | 0.23 | -1.03 | 0.318945 | 0.431547 | 0.648688 | 0.652437 |
| MmugDNA.25936.1.S1_at   | MmugDNA.25936.1 | 9.42  | 9.19  | 0.1  | 0.21 | 1.17  | 0.238223 | 0.296236 | 0.591564 | 0.555423 |
| MmugDNA.25941.1.S1_at   | MmugDNA.25941.1 | 5.88  | 5.21  | 0.33 | 0.39 | 1.6   | 0.42193  | 0.027134 | 0.713215 | 0.205864 |

|                       |                 |       |       |      |      |       |          |          |          |          |
|-----------------------|-----------------|-------|-------|------|------|-------|----------|----------|----------|----------|
| MmugDNA.25943.1.S1_at | MmugDNA.25943.1 | 10.81 | 11.2  | 0.2  | 0.32 | -1.31 | 0.219994 | 0.23947  | 0.579158 | 0.510159 |
| MmugDNA.25950.1.S1_at | MmugDNA.25950.1 | 14.11 | 14.1  | 0.06 | 0.07 | 1     | 0.506957 | 0.288625 | 0.762591 | 0.549827 |
| MmugDNA.25951.1.S1_at | MmugDNA.25951.1 | 8.59  | 8.46  | 0.44 | 0.52 | 1.1   | 0.4094   | 0.203674 | 0.705878 | 0.477907 |
| MmugDNA.25954.1.S1_at | MmugDNA.25954.1 | 14.33 | 14.35 | 0.1  | 0.1  | -1.01 | 0.630496 | 0.705345 | 0.832073 | 0.829145 |
| MmugDNA.25955.1.S1_at | MmugDNA.25955.1 | 14.26 | 14.28 | 0.08 | 0.09 | -1.02 | 0.809889 | 0.688488 | 0.922375 | 0.818184 |
| MmugDNA.25958.1.S1_at | MmugDNA.25958.1 | 8.85  | 8.35  | 0.2  | 0.38 | 1.41  | 0.080787 | 0.084559 | 0.431352 | 0.335953 |
| MmugDNA.25963.1.S1_at | MmugDNA.25963.1 | 7.89  | 7.68  | 0.16 | 0.16 | 1.16  | 0.229272 | 0.328695 | 0.586472 | 0.578213 |
| MmugDNA.25964.1.S1_at | MmugDNA.25964.1 | 11.41 | 11.08 | 0.1  | 0.62 | 1.26  | 0.438698 | 0.258106 | 0.723251 | 0.525574 |
| MmugDNA.25969.1.S1_at | MmugDNA.25969.1 | 8.8   | 7.5   | 0.25 | 0.52 | 2.46  | 0.043589 | 0.017257 | 0.35682  | 0.166393 |
| MmugDNA.25970.1.S1_at | MmugDNA.25970.1 | 6.42  | 6.43  | 0.08 | 0.05 | -1.01 | 0.319742 | 0.342888 | 0.649072 | 0.588712 |
| MmugDNA.25986.1.S1_at | MmugDNA.25986.1 | 10.29 | 10.24 | 0.49 | 0.41 | 1.04  | 0.598084 | 0.443284 | 0.813939 | 0.661138 |
| MmugDNA.25993.1.S1_at | MmugDNA.25993.1 | 10.03 | 10.13 | 0.05 | 0.23 | -1.07 | 0.466861 | 0.640184 | 0.740411 | 0.788741 |
| MmugDNA.2600.1.S1_at  | MmugDNA.2600.1  | 7.07  | 6.71  | 0.08 | 0.41 | 1.29  | 0.191042 | 0.03824  | 0.553903 | 0.240265 |
| MmugDNA.26005.1.S1_at | MmugDNA.26005.1 | 8.64  | 7.61  | 0.6  | 0.08 | 2.04  | 0.038072 | 0.003035 | 0.343458 | 0.080386 |
| MmugDNA.26015.1.S1_at | MmugDNA.26015.1 | 6.1   | 6.3   | 0.41 | 0.07 | -1.15 | 0.356797 | 0.003579 | 0.671778 | 0.085582 |
| MmugDNA.26022.1.S1_at | MmugDNA.26022.1 | 5.3   | 5.59  | 0.3  | 0.46 | -1.23 | 0.233443 | 0.274072 | 0.588137 | 0.538557 |
| MmugDNA.26028.1.S1_at | MmugDNA.26028.1 | 8.75  | 7.55  | 0.09 | 0.38 | 2.3   | 0.003489 | 0.000578 | 0.178634 | 0.041382 |
| MmugDNA.26044.1.S1_at | MmugDNA.26044.1 | 4.66  | 4.41  | 0.18 | 0.15 | 1.19  | 0.087701 | 0.062203 | 0.442017 | 0.296296 |
| MmugDNA.26045.1.S1_at | MmugDNA.26045.1 | 6.86  | 7.17  | 0.63 | 0.83 | -1.24 | 0.705077 | 0.866283 | 0.869909 | 0.923959 |
| MmugDNA.2605.1.S1_at  | MmugDNA.2605.1  | 8.54  | 8.43  | 0.12 | 0.79 | 1.08  | 0.866872 | 0.973779 | 0.946862 | 0.985656 |
| MmugDNA.26069.1.S1_at | MmugDNA.26069.1 | 4.76  | 4.4   | 0.2  | 0.22 | 1.28  | 0.240055 | 0.532164 | 0.592883 | 0.718995 |
| MmugDNA.2607.1.S1_at  | MmugDNA.2607.1  | 5.27  | 5.16  | 0.23 | 0.17 | 1.08  | 0.260486 | 0.375924 | 0.607292 | 0.61375  |
| MmugDNA.26072.1.S1_at | MmugDNA.26072.1 | 8.99  | 9.12  | 0.37 | 0.47 | -1.09 | 0.637192 | 0.330134 | 0.836    | 0.578987 |
| MmugDNA.26076.1.S1_at | MmugDNA.26076.1 | 3.55  | 3.65  | 0.19 | 0.22 | -1.07 | 0.436659 | 0.245449 | 0.721916 | 0.515213 |
| MmugDNA.26077.1.A1_at | MmugDNA.26077.1 | 7.49  | 7.41  | 0.29 | 0.46 | 1.06  | 0.335327 | 0.452064 | 0.659098 | 0.66677  |
| MmugDNA.26077.1.S1_at | MmugDNA.26077.1 | 7.44  | 7.19  | 0.34 | 0.67 | 1.19  | 0.297253 | 0.398352 | 0.633131 | 0.629355 |
| MmugDNA.26084.1.S1_at | MmugDNA.26084.1 | 11.01 | 11.03 | 0.08 | 0.69 | -1.01 | 0.983016 | 0.616194 | 0.993768 | 0.772513 |
| MmugDNA.26094.1.S1_at | MmugDNA.26094.1 | 12.29 | 11.84 | 0.14 | 0.22 | 1.36  | 0.066346 | 0.058207 | 0.406394 | 0.287988 |
| MmugDNA.26095.1.S1_at | MmugDNA.26095.1 | 10.07 | 9.54  | 0.04 | 0.3  | 1.44  | 0.104932 | 0.003248 | 0.465307 | 0.082187 |
| MmugDNA.26104.1.S1_at | MmugDNA.26104.1 | 8.82  | 10.4  | 0.43 | 0.9  | -2.99 | 0.034214 | 0.020984 | 0.332057 | 0.181647 |
| MmugDNA.2612.1.S1_at  | MmugDNA.2612.1  | 3.58  | 3.63  | 0.07 | 0.22 | -1.03 | 0.266497 | 0.378218 | 0.611924 | 0.615438 |
| MmugDNA.26132.1.S1_at | MmugDNA.26132.1 | 3.02  | 3.02  | 0.19 | 0.14 | 1     | 0.781245 | 0.849538 | 0.908721 | 0.914587 |
| MmugDNA.2614.1.S1_at  | MmugDNA.2614.1  | 8.64  | 8.12  | 0.47 | 1.13 | 1.43  | 0.977543 | 0.979386 | 0.991497 | 0.988889 |
| MmugDNA.26140.1.S1_at | MmugDNA.26140.1 | 7.35  | 7.94  | 0.15 | 0.17 | -1.5  | 0.013387 | 0.007165 | 0.246478 | 0.113808 |
| MmugDNA.26148.1.S1_at | MmugDNA.26148.1 | 9.14  | 9.47  | 0.09 | 0.17 | -1.26 | 0.042728 | 0.000129 | 0.355382 | 0.029087 |
| MmugDNA.26149.1.S1_at | MmugDNA.26149.1 | 5.73  | 5.9   | 0.36 | 0.25 | -1.13 | 0.892912 | 0.574797 | 0.957322 | 0.746142 |
| MmugDNA.26150.1.S1_at | MmugDNA.26150.1 | 8.96  | 8.76  | 0.18 | 0.22 | 1.15  | 0.733901 | 0.075643 | 0.88527  | 0.320087 |
| MmugDNA.26151.1.S1_at | MmugDNA.26151.1 | 4.36  | 4.34  | 0.06 | 0.35 | 1.02  | 0.524913 | 0.171245 | 0.773313 | 0.447792 |
| MmugDNA.26155.1.S1_at | MmugDNA.26155.1 | 5.61  | 5.28  | 0.04 | 0.19 | 1.26  | 0.061884 | 0.085615 | 0.396761 | 0.337614 |
| MmugDNA.26158.1.S1_at | MmugDNA.26158.1 | 5.29  | 5.32  | 0.27 | 0.06 | -1.02 | 0.976754 | 0.463953 | 0.991096 | 0.674724 |
| MmugDNA.26163.1.S1_at | MmugDNA.26163.1 | 6.94  | 6.5   | 0.14 | 0.19 | 1.36  | 0.009996 | 0.001992 | 0.226899 | 0.066247 |

|                         |                 |       |       |      |      |        |          |          |          |          |
|-------------------------|-----------------|-------|-------|------|------|--------|----------|----------|----------|----------|
| MmugDNA.26165.1.S1_at   | MmugDNA.26165.1 | 7.53  | 7.12  | 0.05 | 0.15 | 1.32   | 0.010985 | 0.005871 | 0.233531 | 0.104856 |
| MmugDNA.26169.1.S1_at   | MmugDNA.26169.1 | 4.92  | 5.07  | 0.21 | 0.18 | -1.11  | 0.88143  | 0.980804 | 0.952341 | 0.989478 |
| MmugDNA.26170.1.S1_at   | MmugDNA.26170.1 | 4.16  | 4.98  | 0.16 | 0.8  | -1.76  | 0.169416 | 0.190698 | 0.533686 | 0.466141 |
| MmugDNA.26171.1.S1_at   | MmugDNA.26171.1 | 8.42  | 7.89  | 0.07 | 0.47 | 1.45   | 0.16591  | 0.205565 | 0.529851 | 0.47981  |
| MmugDNA.26174.1.S1_at   | MmugDNA.26174.1 | 4.7   | 5.08  | 0.39 | 0.65 | -1.31  | 0.398622 | 0.723088 | 0.698762 | 0.839592 |
| MmugDNA.26177.1.S1_at   | MmugDNA.26177.1 | 11.69 | 11.69 | 0.06 | 0.5  | -1     | 0.969615 | 0.505091 | 0.98841  | 0.70197  |
| MmugDNA.26179.1.S1_at   | MmugDNA.26179.1 | 4.46  | 4.59  | 0.22 | 0.04 | -1.1   | 0.946609 | 0.555315 | 0.979457 | 0.733767 |
| MmugDNA.26187.1.S1_at   | MmugDNA.26187.1 | 11.11 | 10.82 | 0.12 | 0.05 | 1.22   | 0.025901 | 0.128382 | 0.301128 | 0.399645 |
| MmugDNA.26188.1.S1_at   | MmugDNA.26188.1 | 6.92  | 7.07  | 0.28 | 0.07 | -1.11  | 0.794232 | 0.305419 | 0.914561 | 0.562418 |
| MmugDNA.26193.1.S1_at   | MmugDNA.26193.1 | 7.12  | 8.89  | 0.32 | 0.72 | -3.42  | 0.010909 | 0.004152 | 0.232826 | 0.091036 |
| MmugDNA.26195.1.S1_at   | MmugDNA.26195.1 | 5.1   | 5.2   | 0.17 | 0.1  | -1.07  | 0.250678 | 0.390055 | 0.600389 | 0.624002 |
| MmugDNA.262.1.S1_at     | MmugDNA.262.1   | 12.39 | 12.17 | 0.09 | 0.38 | 1.16   | 0.341907 | 0.428562 | 0.662934 | 0.650098 |
| MmugDNA.2620.1.S1_at    | MmugDNA.2620.1  | 12.04 | 11.94 | 0.2  | 0.18 | 1.08   | 0.772573 | 0.907644 | 0.904267 | 0.947753 |
| MmugDNA.26204.1.S1_at   | MmugDNA.26204.1 | 10.04 | 9.78  | 0.23 | 0.36 | 1.2    | 0.791748 | 0.509021 | 0.913482 | 0.703967 |
| MmugDNA.26209.1.S1_at   | MmugDNA.26209.1 | 10.49 | 10.83 | 0.23 | 0.57 | -1.26  | 0.122233 | 0.126201 | 0.48746  | 0.396748 |
| MmugDNA.2621.1.S1_at    | MmugDNA.2621.1  | 12.37 | 12.41 | 0.19 | 0.12 | -1.03  | 0.321753 | 0.388213 | 0.650384 | 0.62268  |
| MmugDNA.26212.1.S1_at   | MmugDNA.26212.1 | 11.11 | 8.97  | 0.43 | 0.35 | 4.41   | 0.001681 | 0.000367 | 0.15365  | 0.037273 |
| MmugDNA.26219.1.S1_at   | MmugDNA.26219.1 | 12.58 | 11.69 | 0.21 | 0.93 | 1.86   | 0.132472 | 0.115373 | 0.498643 | 0.382394 |
| MmugDNA.2622.1.S1_at    | MmugDNA.2622.1  | 10.08 | 9.93  | 0.05 | 0.49 | 1.11   | 0.44776  | 0.259776 | 0.729195 | 0.526648 |
| MmugDNA.26226.1.S1_at   | MmugDNA.26226.1 | 12.48 | 12.78 | 0.06 | 0.22 | -1.23  | 0.081625 | 0.089123 | 0.432665 | 0.343152 |
| MmugDNA.2623.1.S1_at    | MmugDNA.2623.1  | 9.71  | 9.94  | 0.1  | 0.55 | -1.18  | 0.466497 | 0.462844 | 0.740215 | 0.674149 |
| MmugDNA.2624.1.S1_at    | MmugDNA.2624.1  | 6.11  | 6.34  | 0.69 | 0.3  | -1.17  | 0.155678 | 0.137074 | 0.520357 | 0.409843 |
| MmugDNA.26243.1.S1_at   | MmugDNA.26243.1 | 7.52  | 3.82  | 1.8  | 2.34 | 13     | 0.311076 | 0.405868 | 0.643066 | 0.634037 |
| MmugDNA.26251.1.S1_at   | MmugDNA.26251.1 | 12.13 | 10.85 | 0.25 | 0.09 | 2.43   | 0.000737 | 0.000079 | 0.136818 | 0.027016 |
| MmugDNA.26256.1.S1_at   | MmugDNA.26256.1 | 6.67  | 11.26 | 1.77 | 3.45 | -24.11 | 0.336473 | 0.232433 | 0.659486 | 0.504189 |
| MmugDNA.26261.1.S1_at   | MmugDNA.26261.1 | 12.74 | 12.69 | 0.07 | 0.11 | 1.04   | 0.165737 | 0.205238 | 0.529716 | 0.479596 |
| MmugDNA.26264.1.S1_at   | MmugDNA.26264.1 | 11.63 | 11.92 | 0.08 | 0.38 | -1.22  | 0.245662 | 0.100978 | 0.597182 | 0.360543 |
| MmugDNA.26272.1.S1_s_at | MmugDNA.26272.1 | 9.14  | 9.3   | 0.23 | 0.3  | -1.12  | 0.718965 | 0.016254 | 0.876792 | 0.161612 |
| MmugDNA.26281.1.S1_at   | MmugDNA.26281.1 | 6.76  | 6.93  | 0.03 | 0.11 | -1.12  | 0.179957 | 0.115901 | 0.544105 | 0.383065 |
| MmugDNA.26286.1.S1_at   | MmugDNA.26286.1 | 6.62  | 6.14  | 0.91 | 0.59 | 1.39   | 0.736209 | 0.384496 | 0.886493 | 0.620142 |
| MmugDNA.26288.1.S1_at   | MmugDNA.26288.1 | 6.01  | 6.14  | 0.07 | 0.11 | -1.09  | 0.104877 | 0.094262 | 0.46527  | 0.350889 |
| MmugDNA.26289.1.S1_at   | MmugDNA.26289.1 | 10.37 | 10.06 | 0.31 | 0.31 | 1.24   | 0.18797  | 0.15916  | 0.551017 | 0.435217 |
| MmugDNA.26298.1.S1_at   | MmugDNA.26298.1 | 7.3   | 7.64  | 0.26 | 1.62 | -1.26  | 0.576867 | 0.600029 | 0.8033   | 0.761762 |
| MmugDNA.26305.1.S1_at   | MmugDNA.26305.1 | 4.99  | 5     | 0.1  | 0.12 | -1     | 0.821951 | 0.760797 | 0.927484 | 0.861028 |
| MmugDNA.26307.1.S1_at   | MmugDNA.26307.1 | 6.54  | 5.96  | 0.95 | 0.18 | 1.5    | 0.108412 | 0.027119 | 0.469638 | 0.205797 |
| MmugDNA.26310.1.S1_at   | MmugDNA.26310.1 | 13.16 | 12.95 | 0.1  | 0.33 | 1.16   | 0.163032 | 0.176661 | 0.527396 | 0.453138 |
| MmugDNA.26314.1.S1_at   | MmugDNA.26314.1 | 10.74 | 10.89 | 0.26 | 0.13 | -1.11  | 0.272888 | 0.360001 | 0.616391 | 0.601198 |
| MmugDNA.26316.1.S1_at   | MmugDNA.26316.1 | 6.21  | 6.45  | 0.17 | 0.42 | -1.19  | 0.121641 | 0.148719 | 0.486508 | 0.423201 |
| MmugDNA.26317.1.S1_at   | MmugDNA.26317.1 | 11.46 | 11.47 | 0.15 | 0.11 | -1     | 0.47212  | 0.022667 | 0.743515 | 0.188607 |
| MmugDNA.26318.1.S1_at   | MmugDNA.26318.1 | 12.08 | 12.66 | 0.11 | 0.16 | -1.5   | 0.007285 | 0.003197 | 0.206649 | 0.08199  |
| MmugDNA.26323.1.S1_at   | MmugDNA.26323.1 | 3.46  | 3.74  | 0.14 | 0.12 | -1.21  | 0.271459 | 0.18452  | 0.6157   | 0.460559 |

|                         |                 |       |       |      |      |       |          |          |          |          |
|-------------------------|-----------------|-------|-------|------|------|-------|----------|----------|----------|----------|
| MmugDNA.26328.1.S1_at   | MmugDNA.26328.1 | 12.95 | 12.44 | 0.08 | 0.11 | 1.43  | 0.005825 | 0.001881 | 0.193191 | 0.064979 |
| MmugDNA.2633.1.S1_at    | MmugDNA.2633.1  | 9.7   | 9.29  | 0.09 | 0.18 | 1.33  | 0.01297  | 0.005249 | 0.245045 | 0.100352 |
| MmugDNA.26347.1.S1_at   | MmugDNA.26347.1 | 11.37 | 11.85 | 0.21 | 0.12 | -1.4  | 0.055212 | 0.078527 | 0.383636 | 0.325285 |
| MmugDNA.2635.1.S1_s_at  | MmugDNA.2635.1  | 8.28  | 8.38  | 0.3  | 0.11 | -1.07 | 0.56486  | 0.613129 | 0.796834 | 0.770419 |
| MmugDNA.26353.1.S1_at   | MmugDNA.26353.1 | 8.45  | 8.63  | 0.14 | 0.3  | -1.13 | 0.355171 | 0.500905 | 0.670851 | 0.699336 |
| MmugDNA.26355.1.S1_at   | MmugDNA.26355.1 | 7.94  | 10.35 | 0.87 | 1.21 | -5.31 | 0.098985 | 0.079491 | 0.458711 | 0.32681  |
| MmugDNA.26357.1.S1_at   | MmugDNA.26357.1 | 4.25  | 3.87  | 1.24 | 0.47 | 1.31  | 0.719901 | 0.842592 | 0.87718  | 0.910315 |
| MmugDNA.26358.1.S1_at   | MmugDNA.26358.1 | 5.89  | 5.72  | 0.37 | 0.14 | 1.13  | 0.433778 | 0.003115 | 0.720251 | 0.081314 |
| MmugDNA.26367.1.S1_at   | MmugDNA.26367.1 | 10.06 | 9.89  | 0.31 | 0.57 | 1.13  | 0.921564 | 0.937349 | 0.969445 | 0.964687 |
| MmugDNA.2637.1.S1_at    | MmugDNA.2637.1  | 8.99  | 8.59  | 0.15 | 0.2  | 1.32  | 0.047223 | 0.050671 | 0.365679 | 0.270317 |
| MmugDNA.26376.1.S1_at   | MmugDNA.26376.1 | 5.23  | 5.48  | 0.18 | 0.22 | -1.18 | 0.507364 | 0.769256 | 0.762788 | 0.866004 |
| MmugDNA.26382.1.S1_at   | MmugDNA.26382.1 | 12.06 | 11.66 | 0.16 | 0.31 | 1.32  | 0.113591 | 0.142411 | 0.476938 | 0.415965 |
| MmugDNA.2639.1.S1_at    | MmugDNA.2639.1  | 7.54  | 7.32  | 0.13 | 0.16 | 1.17  | 0.068808 | 0.039293 | 0.410654 | 0.243338 |
| MmugDNA.26391.1.S1_at   | MmugDNA.26391.1 | 4.86  | 4.84  | 0.16 | 0.13 | 1.01  | 0.812742 | 0.910171 | 0.923852 | 0.949342 |
| MmugDNA.26394.1.S1_at   | MmugDNA.26394.1 | 6.55  | 6.71  | 0.72 | 0.37 | -1.11 | 0.816819 | 0.791932 | 0.925751 | 0.879785 |
| MmugDNA.26396.1.S1_at   | MmugDNA.26396.1 | 11.93 | 11.65 | 0.26 | 0.86 | 1.21  | 0.61003  | 0.526878 | 0.820842 | 0.71564  |
| MmugDNA.26397.1.S1_at   | MmugDNA.26397.1 | 11.48 | 11.34 | 0.16 | 0.52 | 1.1   | 0.664801 | 0.546554 | 0.849708 | 0.728079 |
| MmugDNA.26399.1.S1_at   | MmugDNA.26399.1 | 6.59  | 6.66  | 0.1  | 0.26 | -1.06 | 0.35449  | 0.363597 | 0.670587 | 0.603996 |
| MmugDNA.26399.1.S1_s_at | MmugDNA.26399.1 | 9.8   | 9.7   | 0.15 | 0.31 | 1.07  | 0.596218 | 0.774016 | 0.812808 | 0.868608 |
| MmugDNA.2640.1.S1_at    | MmugDNA.2640.1  | 5.62  | 5.71  | 0.08 | 0.15 | -1.07 | 0.226936 | 0.081752 | 0.584827 | 0.330085 |
| MmugDNA.26408.1.S1_at   | MmugDNA.26408.1 | 5.97  | 6.06  | 0.06 | 0.04 | -1.06 | 0.133774 | 0.213749 | 0.500334 | 0.487564 |
| MmugDNA.26410.1.S1_at   | MmugDNA.26410.1 | 5.74  | 5.7   | 0.7  | 0.2  | 1.03  | 0.554365 | 0.349831 | 0.790679 | 0.593595 |
| MmugDNA.26413.1.S1_at   | MmugDNA.26413.1 | 10.94 | 11.14 | 0.06 | 0.34 | -1.15 | 0.371233 | 0.519193 | 0.681905 | 0.710878 |
| MmugDNA.26426.1.S1_at   | MmugDNA.26426.1 | 6.65  | 8.2   | 0.83 | 1.19 | -2.92 | 0.212384 | 0.107738 | 0.572606 | 0.370816 |
| MmugDNA.26430.1.S1_at   | MmugDNA.26430.1 | 10.59 | 11    | 0.15 | 0.18 | -1.34 | 0.016604 | 0.007962 | 0.26475  | 0.118702 |
| MmugDNA.26432.1.S1_at   | MmugDNA.26432.1 | 4.63  | 4.71  | 0.46 | 0.18 | -1.05 | 0.816058 | 0.928874 | 0.925294 | 0.959449 |
| MmugDNA.26436.1.S1_at   | MmugDNA.26436.1 | 10.43 | 9.99  | 0.07 | 0.67 | 1.36  | 0.898836 | 0.809121 | 0.959609 | 0.889995 |
| MmugDNA.26446.1.S1_at   | MmugDNA.26446.1 | 11    | 11.09 | 0.25 | 0.48 | -1.07 | 0.849063 | 0.270908 | 0.939334 | 0.536026 |
| MmugDNA.26447.1.S1_at   | MmugDNA.26447.1 | 7.71  | 7.78  | 0.41 | 0.41 | -1.05 | 0.526112 | 0.364737 | 0.773971 | 0.605053 |
| MmugDNA.2646.1.S1_at    | MmugDNA.2646.1  | 9.34  | 9.48  | 0.13 | 0.28 | -1.1  | 0.709567 | 0.25016  | 0.872538 | 0.519186 |
| MmugDNA.26461.1.S1_at   | MmugDNA.26461.1 | 9.67  | 10.62 | 0.12 | 0.21 | -1.93 | 0.003571 | 0.001431 | 0.179515 | 0.057607 |
| MmugDNA.26466.1.S1_at   | MmugDNA.26466.1 | 7.98  | 7.34  | 0.01 | 0.44 | 1.55  | 0.039151 | 0.008405 | 0.346585 | 0.121726 |
| MmugDNA.26467.1.S1_at   | MmugDNA.26467.1 | 12.22 | 12.1  | 0.02 | 0.17 | 1.09  | 0.798211 | 0.951161 | 0.916399 | 0.972331 |
| MmugDNA.2647.1.S1_s_at  | MmugDNA.2647.1  | 12.24 | 12.39 | 0.25 | 0.49 | -1.11 | 0.745567 | 0.742904 | 0.891143 | 0.851074 |
| MmugDNA.26476.1.S1_at   | MmugDNA.26476.1 | 8.43  | 8.98  | 0.37 | 0.37 | -1.47 | 0.070086 | 0.03474  | 0.413521 | 0.230577 |
| MmugDNA.26485.1.S1_s_at | MmugDNA.26485.1 | 14.07 | 13.95 | 0.22 | 0.13 | 1.09  | 0.748293 | 0.609305 | 0.892364 | 0.767713 |
| MmugDNA.26489.1.S1_at   | MmugDNA.26489.1 | 12.35 | 11.93 | 0.18 | 0.58 | 1.34  | 0.204599 | 0.256951 | 0.567135 | 0.524777 |
| MmugDNA.26491.1.S1_at   | MmugDNA.26491.1 | 10.05 | 9.47  | 0.19 | 0.62 | 1.49  | 0.111488 | 0.074349 | 0.473703 | 0.318046 |
| MmugDNA.26500.1.S1_at   | MmugDNA.26500.1 | 10.44 | 10.16 | 0.29 | 0.37 | 1.21  | 0.39456  | 0.178745 | 0.69593  | 0.455039 |
| MmugDNA.26505.1.S1_at   | MmugDNA.26505.1 | 11.92 | 11.42 | 0.26 | 0.57 | 1.42  | 0.178394 | 0.2001   | 0.542772 | 0.474603 |
| MmugDNA.26506.1.S1_at   | MmugDNA.26506.1 | 14.46 | 14.43 | 0.03 | 0.09 | 1.02  | 0.487916 | 0.407304 | 0.752507 | 0.634886 |



|                         |                 |       |       |      |      |       |          |          |          |          |
|-------------------------|-----------------|-------|-------|------|------|-------|----------|----------|----------|----------|
| MmugDNA.26509.1.S1_at   | MmugDNA.26509.1 | 3.46  | 3.36  | 0.08 | 0.05 | 1.07  | 0.390196 | 0.469691 | 0.693438 | 0.678347 |
| MmugDNA.26510.1.S1_at   | MmugDNA.26510.1 | 4.81  | 7.32  | 0.59 | 1.63 | -5.7  | 0.111762 | 0.138194 | 0.474019 | 0.411145 |
| MmugDNA.26511.1.S1_at   | MmugDNA.26511.1 | 12.54 | 12.31 | 0.09 | 0.07 | 1.18  | 0.044006 | 0.007989 | 0.357601 | 0.118791 |
| MmugDNA.26514.1.S1_at   | MmugDNA.26514.1 | 5.31  | 5.36  | 0.13 | 0.18 | -1.03 | 0.212126 | 0.234429 | 0.572526 | 0.505674 |
| MmugDNA.26520.1.S1_at   | MmugDNA.26520.1 | 5.77  | 5.57  | 0.46 | 1.1  | 1.15  | 0.932154 | 0.415483 | 0.973745 | 0.64091  |
| MmugDNA.26525.1.S1_at   | MmugDNA.26525.1 | 6.06  | 6.55  | 0.1  | 0.21 | -1.4  | 0.051231 | 0.040272 | 0.376001 | 0.245902 |
| MmugDNA.26529.1.S1_at   | MmugDNA.26529.1 | 14.27 | 14.22 | 0.02 | 0.04 | 1.03  | 0.199038 | 0.162017 | 0.5621   | 0.438108 |
| MmugDNA.26533.1.S1_at   | MmugDNA.26533.1 | 4.74  | 4.9   | 0.12 | 0.06 | -1.12 | 0.108347 | 0.074734 | 0.469578 | 0.318465 |
| MmugDNA.26537.1.S1_at   | MmugDNA.26537.1 | 7.44  | 7.09  | 0.06 | 0.33 | 1.27  | 0.390657 | 0.534437 | 0.693739 | 0.720369 |
| MmugDNA.26541.1.S1_at   | MmugDNA.26541.1 | 6.12  | 7.45  | 0.14 | 0.28 | -2.52 | 0.001113 | 0.000248 | 0.144223 | 0.032979 |
| MmugDNA.26545.1.S1_at   | MmugDNA.26545.1 | 10.24 | 5.92  | 0.53 | 1.46 | 20.01 | 0.022544 | 0.006219 | 0.287341 | 0.106916 |
| MmugDNA.26547.1.S1_at   | MmugDNA.26547.1 | 6.45  | 6.45  | 0.19 | 0.1  | 1     | 0.793877 | 0.515348 | 0.914508 | 0.708259 |
| MmugDNA.26552.1.S1_at   | MmugDNA.26552.1 | 5.8   | 5.82  | 0.08 | 0.07 | -1.01 | 0.817159 | 0.365534 | 0.9259   | 0.605602 |
| MmugDNA.26556.1.S1_at   | MmugDNA.26556.1 | 7.01  | 7.1   | 0.01 | 0.13 | -1.06 | 0.354876 | 0.464419 | 0.670686 | 0.675068 |
| MmugDNA.26557.1.S1_at   | MmugDNA.26557.1 | 8.02  | 8.32  | 0.05 | 0.18 | -1.24 | 0.072914 | 0.088011 | 0.41825  | 0.341482 |
| MmugDNA.2656.1.S1_at    | MmugDNA.2656.1  | 6.13  | 6.26  | 0.15 | 0.08 | -1.1  | 0.378877 | 0.531667 | 0.686571 | 0.718819 |
| MmugDNA.26561.1.S1_at   | MmugDNA.26561.1 | 7.14  | 7.3   | 0.06 | 0.18 | -1.12 | 0.165064 | 0.176466 | 0.528994 | 0.452836 |
| MmugDNA.26564.1.S1_at   | MmugDNA.26564.1 | 8.5   | 7.95  | 0.2  | 0.15 | 1.46  | 0.019176 | 0.010147 | 0.273043 | 0.132001 |
| MmugDNA.26568.1.S1_at   | MmugDNA.26568.1 | 7.74  | 7.96  | 0.19 | 0.61 | -1.16 | 0.285012 | 0.386271 | 0.624632 | 0.621469 |
| MmugDNA.26575.1.S1_at   | MmugDNA.26575.1 | 5.69  | 5.85  | 0.19 | 0.03 | -1.12 | 0.184576 | 0.272182 | 0.548202 | 0.536939 |
| MmugDNA.26578.1.S1_x_at | MmugDNA.26578.1 | 7.24  | 7.49  | 0.14 | 0.13 | -1.19 | 0.213248 | 0.274041 | 0.573532 | 0.538527 |
| MmugDNA.26579.1.S1_at   | MmugDNA.26579.1 | 7.4   | 7.58  | 0.29 | 0.18 | -1.14 | 0.700687 | 0.681044 | 0.86753  | 0.813776 |
| MmugDNA.26585.1.S1_at   | MmugDNA.26585.1 | 12.19 | 11.62 | 0.17 | 0.07 | 1.49  | 0.005906 | 0.000619 | 0.19355  | 0.042444 |
| MmugDNA.26588.1.S1_at   | MmugDNA.26588.1 | 10.8  | 9.83  | 0.04 | 0.34 | 1.95  | 0.010222 | 0.006577 | 0.228247 | 0.109968 |
| MmugDNA.26593.1.S1_at   | MmugDNA.26593.1 | 9.67  | 10.22 | 0.05 | 0.03 | -1.46 | 0.000126 | 0.000715 | 0.112653 | 0.044419 |
| MmugDNA.26597.1.S1_at   | MmugDNA.26597.1 | 6.94  | 6.94  | 0.17 | 0.47 | 1     | 0.383162 | 0.511075 | 0.689068 | 0.705383 |
| MmugDNA.2660.1.S1_at    | MmugDNA.2660.1  | 10.88 | 10.18 | 0.13 | 0.2  | 1.62  | 0.013057 | 0.004423 | 0.245262 | 0.092904 |
| MmugDNA.26602.1.S1_at   | MmugDNA.26602.1 | 8.14  | 9.44  | 0.42 | 0.2  | -2.46 | 0.007899 | 0.003212 | 0.214199 | 0.082023 |
| MmugDNA.26604.1.S1_at   | MmugDNA.26604.1 | 10.98 | 11.49 | 0.07 | 0.2  | -1.43 | 0.012106 | 0.010709 | 0.240061 | 0.135227 |
| MmugDNA.26604.1.S1_s_at | MmugDNA.26604.1 | 12.05 | 12.46 | 0.01 | 0.17 | -1.33 | 0.016894 | 0.022706 | 0.266107 | 0.188723 |
| MmugDNA.26610.1.S1_at   | MmugDNA.26610.1 | 5.74  | 4.86  | 0.34 | 0.28 | 1.84  | 0.036713 | 0.052085 | 0.340137 | 0.273814 |
| MmugDNA.26613.1.S1_at   | MmugDNA.26613.1 | 6.27  | 8.32  | 0.45 | 1.41 | -4.14 | 0.084073 | 0.061498 | 0.43668  | 0.294828 |
| MmugDNA.26623.1.S1_at   | MmugDNA.26623.1 | 5.1   | 5.96  | 0.09 | 0.72 | -1.81 | 0.135964 | 0.190501 | 0.502802 | 0.465906 |
| MmugDNA.26626.1.S1_at   | MmugDNA.26626.1 | 5.44  | 6.63  | 0.31 | 0.38 | -2.29 | 0.025209 | 0.011643 | 0.298141 | 0.139789 |
| MmugDNA.26627.1.S1_at   | MmugDNA.26627.1 | 4.62  | 4.72  | 0.16 | 0.08 | -1.07 | 0.77965  | 0.149958 | 0.908204 | 0.424608 |
| MmugDNA.26629.1.S1_at   | MmugDNA.26629.1 | 11.84 | 11.43 | 0.09 | 0.21 | 1.33  | 0.047546 | 0.027231 | 0.366705 | 0.206279 |
| MmugDNA.26637.1.S1_at   | MmugDNA.26637.1 | 10.24 | 10.98 | 0.06 | 0.37 | -1.67 | 0.086348 | 0.065723 | 0.440224 | 0.30176  |
| MmugDNA.26642.1.S1_at   | MmugDNA.26642.1 | 12.81 | 12.99 | 0.13 | 0.71 | -1.14 | 0.518607 | 0.572032 | 0.769592 | 0.744198 |
| MmugDNA.26643.1.S1_at   | MmugDNA.26643.1 | 5.98  | 5.86  | 0.19 | 0.1  | 1.09  | 0.710203 | 0.740329 | 0.872914 | 0.849596 |
| MmugDNA.26645.1.S1_at   | MmugDNA.26645.1 | 10.13 | 10.17 | 0.18 | 0.27 | -1.03 | 0.892873 | 0.890262 | 0.957322 | 0.937505 |
| MmugDNA.26646.1.S1_at   | MmugDNA.26646.1 | 4.37  | 4.11  | 0.42 | 0.14 | 1.2   | 0.20336  | 0.259997 | 0.566041 | 0.52675  |

|                         |                 |       |       |      |      |       |          |          |          |          |
|-------------------------|-----------------|-------|-------|------|------|-------|----------|----------|----------|----------|
| MmugDNA.26648.1.S1_at   | MmugDNA.26648.1 | 9.3   | 8.72  | 0.04 | 0.18 | 1.5   | 0.00923  | 0.00406  | 0.223119 | 0.090288 |
| MmugDNA.26661.1.S1_at   | MmugDNA.26661.1 | 6.78  | 6.72  | 0.19 | 0.33 | 1.04  | 0.477395 | 0.644357 | 0.746589 | 0.791566 |
| MmugDNA.26664.1.S1_at   | MmugDNA.26664.1 | 12.66 | 12.7  | 0.38 | 0.23 | -1.03 | 0.849609 | 0.167407 | 0.939616 | 0.443785 |
| MmugDNA.26668.1.S1_s_at | MmugDNA.26668.1 | 13.7  | 13.68 | 0.15 | 0.24 | 1.02  | 0.704107 | 0.433185 | 0.869429 | 0.653513 |
| MmugDNA.26669.1.S1_at   | MmugDNA.26669.1 | 11.49 | 11.74 | 0.12 | 0.4  | -1.19 | 0.338092 | 0.434284 | 0.66054  | 0.65444  |
| MmugDNA.26670.1.S1_at   | MmugDNA.26670.1 | 6.52  | 6.71  | 0.16 | 0.12 | -1.15 | 0.115667 | 0.116634 | 0.479024 | 0.383829 |
| MmugDNA.26672.1.S1_at   | MmugDNA.26672.1 | 13.26 | 13.37 | 0.1  | 0.25 | -1.08 | 0.320474 | 0.392522 | 0.649472 | 0.625813 |
| MmugDNA.26673.1.S1_at   | MmugDNA.26673.1 | 6.24  | 6.24  | 0.12 | 0.2  | -1    | 0.405386 | 0.236705 | 0.703122 | 0.507459 |
| MmugDNA.26674.1.S1_at   | MmugDNA.26674.1 | 11.54 | 12.72 | 0.65 | 0.65 | -2.27 | 0.089988 | 0.052584 | 0.445437 | 0.274848 |
| MmugDNA.26679.1.S1_at   | MmugDNA.26679.1 | 4.94  | 4.78  | 0.29 | 0.22 | 1.12  | 0.187719 | 0.049104 | 0.550758 | 0.266518 |
| MmugDNA.2668.1.S1_at    | MmugDNA.2668.1  | 6.55  | 6.59  | 0.17 | 0.17 | -1.03 | 0.377762 | 0.579159 | 0.686056 | 0.748918 |
| MmugDNA.26681.1.S1_at   | MmugDNA.26681.1 | 12.68 | 13.03 | 0.01 | 0.08 | -1.27 | 0.001187 | 0.001074 | 0.145267 | 0.051908 |
| MmugDNA.26686.1.S1_at   | MmugDNA.26686.1 | 11.14 | 11.28 | 0.09 | 0.23 | -1.1  | 0.885664 | 0.870099 | 0.95416  | 0.926348 |
| MmugDNA.26687.1.S1_at   | MmugDNA.26687.1 | 9.18  | 9.2   | 0.29 | 0.22 | -1.02 | 0.694496 | 0.870897 | 0.864461 | 0.926656 |
| MmugDNA.26689.1.S1_at   | MmugDNA.26689.1 | 3.61  | 3.33  | 0.34 | 0.08 | 1.22  | 0.396407 | 0.495072 | 0.696939 | 0.695319 |
| MmugDNA.2669.1.S1_at    | MmugDNA.2669.1  | 11.03 | 10.97 | 0.03 | 0.42 | 1.04  | 0.797771 | 0.7461   | 0.916116 | 0.852688 |
| MmugDNA.26693.1.S1_at   | MmugDNA.26693.1 | 13.13 | 13.22 | 0.09 | 0.35 | -1.06 | 0.658535 | 0.828051 | 0.846693 | 0.901214 |
| MmugDNA.26695.1.S1_at   | MmugDNA.26695.1 | 10.93 | 9.59  | 0.39 | 0.03 | 2.54  | 0.004041 | 0.000564 | 0.181739 | 0.041049 |
| MmugDNA.26696.1.S1_at   | MmugDNA.26696.1 | 8.53  | 8.21  | 0.27 | 0.23 | 1.25  | 0.087761 | 0.035775 | 0.442117 | 0.233489 |
| MmugDNA.26702.1.S1_at   | MmugDNA.26702.1 | 8.49  | 8.13  | 0.21 | 0.8  | 1.28  | 0.483845 | 0.271472 | 0.749945 | 0.536512 |
| MmugDNA.26707.1.S1_at   | MmugDNA.26707.1 | 8.09  | 8.07  | 0.35 | 0.14 | 1.01  | 0.744717 | 0.494285 | 0.890744 | 0.694791 |
| MmugDNA.26715.1.S1_at   | MmugDNA.26715.1 | 4.92  | 5.01  | 0.06 | 0.04 | -1.06 | 0.037551 | 0.125693 | 0.341774 | 0.396249 |
| MmugDNA.26729.1.S1_at   | MmugDNA.26729.1 | 7.25  | 7.44  | 0.17 | 0.2  | -1.14 | 0.477142 | 0.283727 | 0.746496 | 0.54618  |
| MmugDNA.2673.1.S1_at    | MmugDNA.2673.1  | 6.64  | 7.32  | 0.21 | 0.59 | -1.61 | 0.065256 | 0.053863 | 0.404234 | 0.277613 |
| MmugDNA.26732.1.S1_at   | MmugDNA.26732.1 | 3.62  | 3.56  | 0.16 | 0.04 | 1.04  | 0.818512 | 0.689007 | 0.926289 | 0.818488 |
| MmugDNA.26734.1.S1_at   | MmugDNA.26734.1 | 10.18 | 9.86  | 0.23 | 0.09 | 1.25  | 0.032463 | 0.012312 | 0.324971 | 0.143646 |
| MmugDNA.26735.1.S1_at   | MmugDNA.26735.1 | 7.89  | 7.32  | 0.39 | 0.31 | 1.49  | 0.363198 | 0.35283  | 0.676579 | 0.596151 |
| MmugDNA.26737.1.S1_at   | MmugDNA.26737.1 | 6.31  | 6.41  | 0.29 | 0.15 | -1.07 | 0.947648 | 0.840178 | 0.979939 | 0.908919 |
| MmugDNA.26746.1.S1_at   | MmugDNA.26746.1 | 7.95  | 9.35  | 0.54 | 0.69 | -2.64 | 0.061918 | 0.054223 | 0.396857 | 0.278275 |
| MmugDNA.26749.1.S1_at   | MmugDNA.26749.1 | 6.31  | 6.36  | 0.09 | 0.11 | -1.03 | 0.399853 | 0.550381 | 0.699692 | 0.73041  |
| MmugDNA.26751.1.S1_at   | MmugDNA.26751.1 | 9.97  | 10.02 | 0.07 | 0.34 | -1.03 | 0.585003 | 0.704171 | 0.807262 | 0.828349 |
| MmugDNA.26752.1.S1_at   | MmugDNA.26752.1 | 3.91  | 3.88  | 0.11 | 0.08 | 1.02  | 0.474787 | 0.038878 | 0.74537  | 0.24211  |
| MmugDNA.26759.1.S1_at   | MmugDNA.26759.1 | 4     | 3.98  | 0.02 | 0.15 | 1.02  | 0.453098 | 0.687389 | 0.732285 | 0.817576 |
| MmugDNA.26763.1.S1_at   | MmugDNA.26763.1 | 11.62 | 11.46 | 0.15 | 0.28 | 1.12  | 0.538602 | 0.489289 | 0.7807   | 0.691774 |
| MmugDNA.26767.1.S1_at   | MmugDNA.26767.1 | 3.19  | 3.08  | 0.08 | 0.06 | 1.08  | 0.184827 | 0.161837 | 0.548357 | 0.437937 |
| MmugDNA.26767.1.S1_x_at | MmugDNA.26767.1 | 3.27  | 3.21  | 0.21 | 0.02 | 1.04  | 0.702447 | 0.38922  | 0.868692 | 0.623403 |
| MmugDNA.26774.1.S1_at   | MmugDNA.26774.1 | 12.68 | 12.22 | 0.02 | 0.36 | 1.37  | 0.035557 | 0.025365 | 0.336812 | 0.199629 |
| MmugDNA.26787.1.S1_at   | MmugDNA.26787.1 | 9.46  | 8.49  | 0.41 | 0.05 | 1.96  | 0.0175   | 0.012056 | 0.267445 | 0.142044 |
| MmugDNA.2679.1.S1_at    | MmugDNA.2679.1  | 11.9  | 12.15 | 0.06 | 0.1  | -1.19 | 0.06911  | 0.014528 | 0.411264 | 0.15376  |
| MmugDNA.26796.1.S1_at   | MmugDNA.26796.1 | 12.32 | 9.74  | 0.1  | 1.25 | 5.98  | 0.020108 | 0.008532 | 0.27674  | 0.122563 |
| MmugDNA.26797.1.S1_s_at | MmugDNA.26797.1 | 10.18 | 9.74  | 0.28 | 0.28 | 1.36  | 0.137452 | 0.094572 | 0.504538 | 0.351353 |

|                         |                 |       |       |      |      |       |          |          |          |          |
|-------------------------|-----------------|-------|-------|------|------|-------|----------|----------|----------|----------|
| MmugDNA.26799.1.S1_at   | MmugDNA.26799.1 | 6.97  | 10.16 | 2.29 | 2.19 | -9.11 | 0.383145 | 0.344977 | 0.689068 | 0.590239 |
| MmugDNA.26806.1.S1_at   | MmugDNA.26806.1 | 4.38  | 4.21  | 0.07 | 0.07 | 1.12  | 0.042619 | 0.381211 | 0.355272 | 0.617537 |
| MmugDNA.26808.1.S1_at   | MmugDNA.26808.1 | 4.33  | 4.46  | 0.08 | 0.1  | -1.1  | 0.058384 | 0.043531 | 0.390304 | 0.253227 |
| MmugDNA.2681.1.S1_s_at  | MmugDNA.2681.1  | 11.72 | 11.69 | 0.17 | 0.1  | 1.02  | 0.514175 | 0.39328  | 0.766766 | 0.626189 |
| MmugDNA.26814.1.S1_at   | MmugDNA.26814.1 | 8.09  | 8.2   | 0.2  | 0.24 | -1.08 | 0.519528 | 0.514119 | 0.770186 | 0.707434 |
| MmugDNA.26818.1.S1_at   | MmugDNA.26818.1 | 9.76  | 8.77  | 0.19 | 0.29 | 1.99  | 0.004471 | 0.003845 | 0.183586 | 0.088232 |
| MmugDNA.2682.1.S1_s_at  | MmugDNA.2682.1  | 13.29 | 13.25 | 0.05 | 0.18 | 1.03  | 0.401289 | 0.580339 | 0.700768 | 0.749637 |
| MmugDNA.26828.1.S1_at   | MmugDNA.26828.1 | 12.35 | 12.42 | 0.1  | 0.2  | -1.05 | 0.305687 | 0.334945 | 0.639223 | 0.58275  |
| MmugDNA.26837.1.S1_at   | MmugDNA.26837.1 | 12.77 | 12.73 | 0.08 | 0.15 | 1.03  | 0.445002 | 0.710679 | 0.72736  | 0.83219  |
| MmugDNA.26838.1.S1_s_at | MmugDNA.26838.1 | 5.81  | 5.81  | 0.29 | 0.21 | -1    | 0.876568 | 0.977017 | 0.950613 | 0.987496 |
| MmugDNA.26841.1.S1_at   | MmugDNA.26841.1 | 7.58  | 8.42  | 0.14 | 0.41 | -1.79 | 0.016294 | 0.007761 | 0.263592 | 0.117626 |
| MmugDNA.26854.1.S1_at   | MmugDNA.26854.1 | 9.95  | 9.95  | 0.28 | 0.26 | -1    | 0.578621 | 0.230027 | 0.803905 | 0.501872 |
| MmugDNA.26855.1.S1_at   | MmugDNA.26855.1 | 13.33 | 12.86 | 0.27 | 0.32 | 1.39  | 0.064857 | 0.048129 | 0.403707 | 0.264417 |
| MmugDNA.26872.1.S1_at   | MmugDNA.26872.1 | 13.22 | 13.09 | 0.12 | 0.09 | 1.1   | 0.154463 | 0.170557 | 0.51902  | 0.447179 |
| MmugDNA.26873.1.S1_at   | MmugDNA.26873.1 | 8.92  | 9.14  | 0.2  | 0.16 | -1.17 | 0.077966 | 0.032198 | 0.428012 | 0.222139 |
| MmugDNA.26881.1.S1_at   | MmugDNA.26881.1 | 6.54  | 6.42  | 0.16 | 0.07 | 1.09  | 0.532196 | 0.69339  | 0.777626 | 0.821664 |
| MmugDNA.26884.1.S1_at   | MmugDNA.26884.1 | 6.87  | 6.92  | 0.12 | 0.15 | -1.04 | 0.404078 | 0.416539 | 0.702538 | 0.641647 |
| MmugDNA.26885.1.S1_at   | MmugDNA.26885.1 | 3.74  | 3.79  | 0.01 | 0.03 | -1.03 | 0.039944 | 0.844528 | 0.3483   | 0.911525 |
| MmugDNA.26899.1.S1_at   | MmugDNA.26899.1 | 10.27 | 9.36  | 0.4  | 0.07 | 1.88  | 0.009969 | 0.001582 | 0.226899 | 0.060356 |
| MmugDNA.26903.1.S1_at   | MmugDNA.26903.1 | 10.85 | 11.03 | 0.03 | 0.3  | -1.13 | 0.262978 | 0.182069 | 0.609142 | 0.45857  |
| MmugDNA.26904.1.S1_at   | MmugDNA.26904.1 | 9.88  | 9.37  | 0.06 | 0.37 | 1.42  | 0.202197 | 0.270436 | 0.564549 | 0.535785 |
| MmugDNA.26905.1.S1_at   | MmugDNA.26905.1 | 12.19 | 11.72 | 0.13 | 0.23 | 1.39  | 0.029016 | 0.021827 | 0.312556 | 0.184799 |
| MmugDNA.26911.1.S1_at   | MmugDNA.26911.1 | 6.38  | 7.59  | 0.32 | 0.33 | -2.32 | 0.016758 | 0.007788 | 0.265281 | 0.117764 |
| MmugDNA.26915.1.S1_at   | MmugDNA.26915.1 | 12.12 | 11.67 | 0.31 | 1.57 | 1.37  | 0.206538 | 0.243143 | 0.568816 | 0.513356 |
| MmugDNA.26923.1.S1_at   | MmugDNA.26923.1 | 5.64  | 5.56  | 0.22 | 0.48 | 1.05  | 0.722783 | 0.128835 | 0.878819 | 0.400277 |
| MmugDNA.26925.1.S1_s_at | MmugDNA.26925.1 | 10.69 | 13.69 | 1.38 | 2.43 | -7.99 | 0.638366 | 0.374326 | 0.836591 | 0.612807 |
| MmugDNA.26926.1.S1_at   | MmugDNA.26926.1 | 12.83 | 12.74 | 0.27 | 0.12 | 1.06  | 0.803816 | 0.951569 | 0.919339 | 0.972522 |
| MmugDNA.26929.1.S1_s_at | MmugDNA.26929.1 | 5.58  | 5.89  | 0.23 | 0.22 | -1.24 | 0.476402 | 0.155659 | 0.746232 | 0.431037 |
| MmugDNA.26932.1.S1_at   | MmugDNA.26932.1 | 8.86  | 8.75  | 0.21 | 0.7  | 1.08  | 0.730528 | 0.686611 | 0.883213 | 0.81711  |
| MmugDNA.26933.1.S1_at   | MmugDNA.26933.1 | 7.16  | 7.5   | 0.22 | 0.25 | -1.26 | 0.756685 | 0.421888 | 0.896628 | 0.645369 |
| MmugDNA.2694.1.S1_at    | MmugDNA.2694.1  | 12.49 | 11.41 | 0.19 | 0.35 | 2.12  | 0.006871 | 0.002222 | 0.202005 | 0.069434 |
| MmugDNA.26947.1.S1_at   | MmugDNA.26947.1 | 10.65 | 9.62  | 0.08 | 0.2  | 2.05  | 0.001166 | 0.000127 | 0.145267 | 0.029087 |
| MmugDNA.26949.1.S1_at   | MmugDNA.26949.1 | 9.48  | 9.5   | 0.05 | 0.2  | -1.01 | 0.945563 | 0.905986 | 0.979221 | 0.946822 |
| MmugDNA.26951.1.S1_at   | MmugDNA.26951.1 | 8.19  | 7.38  | 0.16 | 0.55 | 1.76  | 0.208707 | 0.207693 | 0.570402 | 0.481924 |
| MmugDNA.26957.1.S1_at   | MmugDNA.26957.1 | 6.83  | 6.88  | 0.03 | 0.07 | -1.04 | 0.332542 | 0.019744 | 0.656895 | 0.176666 |
| MmugDNA.26959.1.S1_at   | MmugDNA.26959.1 | 4.3   | 4.25  | 0.17 | 0.08 | 1.03  | 0.954758 | 0.410542 | 0.983073 | 0.637376 |
| MmugDNA.26962.1.S1_at   | MmugDNA.26962.1 | 3.52  | 3.5   | 0.23 | 0.06 | 1.01  | 0.712832 | 0.927255 | 0.874257 | 0.958645 |
| MmugDNA.26964.1.S1_at   | MmugDNA.26964.1 | 7.47  | 8.14  | 0.55 | 0.73 | -1.58 | 0.136515 | 0.163098 | 0.503619 | 0.439256 |
| MmugDNA.26968.1.S1_at   | MmugDNA.26968.1 | 11.8  | 12.21 | 0.04 | 0.26 | -1.33 | 0.035788 | 0.017538 | 0.337573 | 0.167632 |
| MmugDNA.26968.1.S1_s_at | MmugDNA.26968.1 | 12.21 | 12.72 | 0.12 | 0.17 | -1.43 | 0.01134  | 0.007601 | 0.235384 | 0.116611 |
| MmugDNA.26971.1.S1_at   | MmugDNA.26971.1 | 7.23  | 4.92  | 1.17 | 0.76 | 4.94  | 0.034905 | 0.016066 | 0.334018 | 0.160618 |

|                         |                 |       |       |      |      |       |          |          |          |          |
|-------------------------|-----------------|-------|-------|------|------|-------|----------|----------|----------|----------|
| MmugDNA.26972.1.S1_at   | MmugDNA.26972.1 | 11.94 | 11.97 | 0.12 | 0.29 | -1.02 | 0.889452 | 0.558721 | 0.955727 | 0.735863 |
| MmugDNA.26975.1.S1_at   | MmugDNA.26975.1 | 7.35  | 6.84  | 0.16 | 0.29 | 1.42  | 0.141585 | 0.112013 | 0.509159 | 0.377171 |
| MmugDNA.26976.1.S1_at   | MmugDNA.26976.1 | 12.21 | 11.95 | 0.05 | 0.26 | 1.2   | 0.157689 | 0.168188 | 0.522549 | 0.444824 |
| MmugDNA.26978.1.S1_s_at | MmugDNA.26978.1 | 4.98  | 4.77  | 0.21 | 0.12 | 1.16  | 0.043905 | 0.046234 | 0.357357 | 0.259397 |
| MmugDNA.2698.1.S1_at    | MmugDNA.2698.1  | 13.37 | 13.09 | 0.19 | 0.16 | 1.22  | 0.602026 | 0.020512 | 0.816272 | 0.179742 |
| MmugDNA.26982.1.S1_at   | MmugDNA.26982.1 | 10.51 | 9.66  | 0.1  | 0.36 | 1.8   | 0.016876 | 0.007295 | 0.266107 | 0.114639 |
| MmugDNA.26990.1.S1_at   | MmugDNA.26990.1 | 8.16  | 7.58  | 0.51 | 0.21 | 1.5   | 0.053601 | 0.032578 | 0.380559 | 0.223585 |
| MmugDNA.26993.1.S1_at   | MmugDNA.26993.1 | 8.9   | 8.76  | 0.32 | 0.1  | 1.1   | 0.515123 | 0.494413 | 0.767288 | 0.694859 |
| MmugDNA.26994.1.S1_at   | MmugDNA.26994.1 | 5.92  | 5.83  | 0.24 | 0.12 | 1.07  | 0.351523 | 0.483438 | 0.669126 | 0.687931 |
| MmugDNA.26997.1.S1_at   | MmugDNA.26997.1 | 10.07 | 10.14 | 0.13 | 0.29 | -1.05 | 0.434384 | 0.583961 | 0.720416 | 0.752073 |
| MmugDNA.27000.1.S1_at   | MmugDNA.27000.1 | 9.84  | 9.7   | 0.04 | 0.69 | 1.1   | 0.232968 | 0.25621  | 0.587954 | 0.524069 |
| MmugDNA.27001.1.S1_at   | MmugDNA.27001.1 | 7.08  | 5.59  | 0.18 | 0.63 | 2.82  | 0.046791 | 0.038615 | 0.364126 | 0.241584 |
| MmugDNA.27002.1.S1_at   | MmugDNA.27002.1 | 8.54  | 7.47  | 0.36 | 0.97 | 2.1   | 0.147157 | 0.17125  | 0.51306  | 0.447792 |
| MmugDNA.27004.1.S1_at   | MmugDNA.27004.1 | 13.05 | 12.97 | 0.08 | 0.12 | 1.06  | 0.306676 | 0.234128 | 0.639643 | 0.505319 |
| MmugDNA.27006.1.S1_at   | MmugDNA.27006.1 | 3.86  | 4.03  | 0.15 | 0.22 | -1.13 | 0.614304 | 0.349386 | 0.823199 | 0.593405 |
| MmugDNA.27009.1.S1_at   | MmugDNA.27009.1 | 3.17  | 3.2   | 0.01 | 0.09 | -1.02 | 0.553607 | 0.429796 | 0.790258 | 0.651036 |
| MmugDNA.2701.1.S1_at    | MmugDNA.2701.1  | 13.58 | 13.32 | 0.07 | 0.07 | 1.2   | 0.018439 | 0.005737 | 0.270416 | 0.104271 |
| MmugDNA.27012.1.S1_at   | MmugDNA.27012.1 | 11.45 | 11.49 | 0.45 | 0.12 | -1.03 | 0.618691 | 0.641683 | 0.82527  | 0.789672 |
| MmugDNA.27017.1.S1_at   | MmugDNA.27017.1 | 7.84  | 8.28  | 0.02 | 0.03 | -1.35 | 0.000032 | 0.000036 | 0.112653 | 0.023031 |
| MmugDNA.27018.1.S1_at   | MmugDNA.27018.1 | 8.09  | 7.38  | 0.14 | 0.71 | 1.63  | 0.320942 | 0.438034 | 0.649664 | 0.657058 |
| MmugDNA.27019.1.S1_at   | MmugDNA.27019.1 | 11.85 | 11.88 | 0.08 | 0.16 | -1.02 | 0.753774 | 0.733925 | 0.895044 | 0.845896 |
| MmugDNA.2702.1.S1_at    | MmugDNA.2702.1  | 5.62  | 5.57  | 0.2  | 0.13 | 1.03  | 0.890459 | 0.674508 | 0.956183 | 0.809853 |
| MmugDNA.27020.1.S1_at   | MmugDNA.27020.1 | 8.93  | 8.47  | 0.07 | 0.3  | 1.38  | 0.047657 | 0.016454 | 0.367037 | 0.162441 |
| MmugDNA.27022.1.S1_s_at | MmugDNA.27022.1 | 10.47 | 9.77  | 0.18 | 0.42 | 1.62  | 0.162482 | 0.217281 | 0.526743 | 0.490911 |
| MmugDNA.27023.1.S1_at   | MmugDNA.27023.1 | 10.56 | 10.33 | 0.15 | 0.72 | 1.17  | 0.640414 | 0.631574 | 0.837628 | 0.782845 |
| MmugDNA.27027.1.S1_at   | MmugDNA.27027.1 | 7.37  | 5.24  | 0.19 | 1.01 | 4.37  | 0.060579 | 0.062464 | 0.393743 | 0.296717 |
| MmugDNA.27029.1.S1_at   | MmugDNA.27029.1 | 6.42  | 6.38  | 0.08 | 0.22 | 1.03  | 0.399967 | 0.285727 | 0.699692 | 0.54744  |
| MmugDNA.27030.1.S1_at   | MmugDNA.27030.1 | 7.52  | 7.32  | 0.27 | 0.54 | 1.15  | 0.228375 | 0.083958 | 0.585843 | 0.334877 |
| MmugDNA.27038.1.S1_at   | MmugDNA.27038.1 | 10.73 | 10.8  | 0.1  | 0.11 | -1.05 | 0.236751 | 0.120902 | 0.590504 | 0.389796 |
| MmugDNA.2704.1.S1_at    | MmugDNA.2704.1  | 12.3  | 12.22 | 0.21 | 0.04 | 1.06  | 0.152709 | 0.09275  | 0.517325 | 0.34896  |
| MmugDNA.27042.1.S1_at   | MmugDNA.27042.1 | 5.96  | 6.78  | 0.42 | 0.61 | -1.77 | 0.172363 | 0.087991 | 0.535842 | 0.341456 |
| MmugDNA.27044.1.S1_at   | MmugDNA.27044.1 | 6.15  | 5.76  | 0.22 | 0.17 | 1.31  | 0.208134 | 0.142244 | 0.570044 | 0.415754 |
| MmugDNA.27045.1.S1_at   | MmugDNA.27045.1 | 9.38  | 10.87 | 0.76 | 1.2  | -2.81 | 0.380432 | 0.423813 | 0.687269 | 0.646547 |
| MmugDNA.27046.1.S1_at   | MmugDNA.27046.1 | 6.09  | 5.98  | 0.39 | 0.26 | 1.08  | 0.790986 | 0.554952 | 0.913202 | 0.733559 |
| MmugDNA.27050.1.S1_at   | MmugDNA.27050.1 | 9.29  | 9.11  | 0.58 | 0.49 | 1.13  | 0.821902 | 0.039512 | 0.927464 | 0.243706 |
| MmugDNA.27052.1.S1_at   | MmugDNA.27052.1 | 9.05  | 8.54  | 0.2  | 0.33 | 1.42  | 0.150097 | 0.212961 | 0.514684 | 0.4869   |
| MmugDNA.27053.1.S1_at   | MmugDNA.27053.1 | 12.13 | 11.81 | 0.2  | 0.21 | 1.25  | 0.27833  | 0.369879 | 0.6205   | 0.609138 |
| MmugDNA.27053.1.S1_s_at | MmugDNA.27053.1 | 11.23 | 10.99 | 0.18 | 0.27 | 1.18  | 0.291162 | 0.34056  | 0.628725 | 0.586789 |
| MmugDNA.27056.1.S1_at   | MmugDNA.27056.1 | 11.07 | 10.81 | 0.3  | 0.41 | 1.2   | 0.915109 | 0.294598 | 0.9664   | 0.554282 |
| MmugDNA.27059.1.S1_at   | MmugDNA.27059.1 | 12.66 | 12.61 | 0.14 | 0.13 | 1.04  | 0.682288 | 0.141657 | 0.85785  | 0.415207 |
| MmugDNA.27071.1.S1_at   | MmugDNA.27071.1 | 12.18 | 11.96 | 0.14 | 0.47 | 1.16  | 0.743727 | 0.026537 | 0.890194 | 0.203915 |

|                         |                 |       |       |      |      |       |          |          |          |          |
|-------------------------|-----------------|-------|-------|------|------|-------|----------|----------|----------|----------|
| MmugDNA.27080.1.S1_at   | MmugDNA.27080.1 | 6.67  | 6.41  | 0.31 | 0.67 | 1.2   | 0.924911 | 0.820599 | 0.97091  | 0.896677 |
| MmugDNA.27082.1.S1_at   | MmugDNA.27082.1 | 11.78 | 11.66 | 0.08 | 0.15 | 1.09  | 0.337451 | 0.269284 | 0.659935 | 0.534534 |
| MmugDNA.27084.1.S1_at   | MmugDNA.27084.1 | 7.46  | 7.09  | 0.1  | 0.21 | 1.29  | 0.078886 | 0.062981 | 0.428609 | 0.297633 |
| MmugDNA.27090.1.S1_at   | MmugDNA.27090.1 | 10.16 | 8.97  | 0.08 | 0.69 | 2.28  | 0.042494 | 0.027527 | 0.355111 | 0.207161 |
| MmugDNA.27093.1.S1_at   | MmugDNA.27093.1 | 9.95  | 12.6  | 1.22 | 2.14 | -6.32 | 0.519631 | 0.330739 | 0.770253 | 0.57952  |
| MmugDNA.27107.1.S1_at   | MmugDNA.27107.1 | 6.3   | 6.22  | 0.22 | 0.27 | 1.06  | 0.755552 | 0.419882 | 0.896094 | 0.643733 |
| MmugDNA.27108.1.S1_at   | MmugDNA.27108.1 | 9.52  | 8.78  | 0.46 | 0.75 | 1.67  | 0.232733 | 0.228576 | 0.587827 | 0.500752 |
| MmugDNA.27111.1.S1_at   | MmugDNA.27111.1 | 11.9  | 10.93 | 0.08 | 0.43 | 1.96  | 0.02169  | 0.010726 | 0.283263 | 0.135271 |
| MmugDNA.27116.1.S1_at   | MmugDNA.27116.1 | 7.61  | 8.59  | 0.42 | 0.08 | -1.97 | 0.011134 | 0.00401  | 0.234325 | 0.089969 |
| MmugDNA.27119.1.S1_at   | MmugDNA.27119.1 | 10.03 | 9.26  | 0.1  | 0.47 | 1.7   | 0.099499 | 0.070029 | 0.459387 | 0.310889 |
| MmugDNA.27126.1.S1_at   | MmugDNA.27126.1 | 12.5  | 12.74 | 0.18 | 0.51 | -1.18 | 0.354105 | 0.336701 | 0.67034  | 0.584037 |
| MmugDNA.27127.1.S1_at   | MmugDNA.27127.1 | 3.29  | 3.27  | 0.07 | 0.07 | 1.01  | 0.447705 | 0.801466 | 0.729195 | 0.885779 |
| MmugDNA.27128.1.S1_at   | MmugDNA.27128.1 | 8.82  | 9.05  | 0.16 | 0.32 | -1.17 | 0.124987 | 0.150929 | 0.491005 | 0.425523 |
| MmugDNA.27129.1.S1_at   | MmugDNA.27129.1 | 6.7   | 7.01  | 0.14 | 0.49 | -1.23 | 0.56757  | 0.560554 | 0.798186 | 0.736809 |
| MmugDNA.27133.1.S1_at   | MmugDNA.27133.1 | 4.45  | 4.52  | 0.03 | 0.22 | -1.05 | 0.6736   | 0.631031 | 0.853708 | 0.782599 |
| MmugDNA.27139.1.S1_at   | MmugDNA.27139.1 | 11.25 | 10.2  | 0.19 | 0.34 | 2.06  | 0.00552  | 0.002226 | 0.191603 | 0.069502 |
| MmugDNA.2714.1.S1_at    | MmugDNA.2714.1  | 6.97  | 6.75  | 0.28 | 0.3  | 1.16  | 0.394017 | 0.192105 | 0.6956   | 0.46757  |
| MmugDNA.27155.1.S1_at   | MmugDNA.27155.1 | 8.03  | 8.13  | 0.14 | 0.18 | -1.07 | 0.700069 | 0.006533 | 0.867253 | 0.109634 |
| MmugDNA.27157.1.S1_at   | MmugDNA.27157.1 | 8.08  | 7.91  | 0.05 | 0.18 | 1.12  | 0.087617 | 0.078126 | 0.442009 | 0.324578 |
| MmugDNA.27160.1.S1_at   | MmugDNA.27160.1 | 9.2   | 9.06  | 0.47 | 0.17 | 1.1   | 0.501646 | 0.133001 | 0.760109 | 0.404667 |
| MmugDNA.27163.1.S1_at   | MmugDNA.27163.1 | 3.82  | 3.5   | 0.22 | 0.14 | 1.25  | 0.177522 | 0.326122 | 0.54156  | 0.576315 |
| MmugDNA.27171.1.S1_at   | MmugDNA.27171.1 | 5.27  | 4.6   | 0.53 | 0.72 | 1.59  | 0.52593  | 0.145703 | 0.773971 | 0.419653 |
| MmugDNA.27171.1.S1_x_at | MmugDNA.27171.1 | 5.37  | 4.67  | 0.4  | 0.42 | 1.61  | 0.249316 | 0.135397 | 0.60017  | 0.407478 |
| MmugDNA.27173.1.S1_at   | MmugDNA.27173.1 | 11.77 | 11.58 | 0.07 | 0.24 | 1.14  | 0.454591 | 0.655446 | 0.733285 | 0.798546 |
| MmugDNA.27174.1.S1_at   | MmugDNA.27174.1 | 11.52 | 10.78 | 0.12 | 0.37 | 1.66  | 0.032566 | 0.022216 | 0.325457 | 0.186513 |
| MmugDNA.27177.1.S1_at   | MmugDNA.27177.1 | 7.29  | 7.28  | 0.03 | 0.12 | 1.01  | 0.387173 | 0.055407 | 0.691895 | 0.28129  |
| MmugDNA.27181.1.S1_at   | MmugDNA.27181.1 | 8.97  | 8.55  | 0.12 | 0.5  | 1.34  | 0.239588 | 0.262006 | 0.592608 | 0.52836  |
| MmugDNA.27185.1.S1_at   | MmugDNA.27185.1 | 11.57 | 11.17 | 0.17 | 0.2  | 1.32  | 0.027785 | 0.009843 | 0.308973 | 0.130274 |
| MmugDNA.27189.1.S1_at   | MmugDNA.27189.1 | 10.53 | 10.44 | 0.14 | 0.51 | 1.06  | 0.773952 | 0.704939 | 0.904999 | 0.828883 |
| MmugDNA.2719.1.S1_at    | MmugDNA.2719.1  | 10.86 | 11.3  | 0.29 | 0.64 | -1.36 | 0.524169 | 0.613507 | 0.773034 | 0.770578 |
| MmugDNA.27195.1.S1_s_at | MmugDNA.27195.1 | 9.49  | 9.23  | 0.35 | 0.13 | 1.2   | 0.261805 | 0.093287 | 0.608392 | 0.349412 |
| MmugDNA.27199.1.S1_at   | MmugDNA.27199.1 | 5.68  | 5.67  | 0.2  | 0.23 | 1     | 0.514749 | 0.366361 | 0.767167 | 0.606087 |
| MmugDNA.27201.1.S1_at   | MmugDNA.27201.1 | 12.51 | 12.33 | 0.11 | 0.14 | 1.13  | 0.319193 | 0.397378 | 0.648688 | 0.628812 |
| MmugDNA.27204.1.S1_at   | MmugDNA.27204.1 | 12.67 | 11.55 | 0.07 | 0.18 | 2.18  | 0.000515 | 0.000379 | 0.136818 | 0.037273 |
| MmugDNA.27208.1.S1_at   | MmugDNA.27208.1 | 7.01  | 7.27  | 0.05 | 0.03 | -1.2  | 0.003152 | 0.001385 | 0.173324 | 0.056984 |
| MmugDNA.27213.1.S1_at   | MmugDNA.27213.1 | 8.4   | 9.24  | 0.27 | 0.04 | -1.8  | 0.004645 | 0.003247 | 0.1844   | 0.082187 |
| MmugDNA.27214.1.S1_at   | MmugDNA.27214.1 | 5.47  | 5.59  | 0.52 | 0.18 | -1.09 | 0.884736 | 0.95499  | 0.95382  | 0.974501 |
| MmugDNA.27218.1.S1_at   | MmugDNA.27218.1 | 3.16  | 3.18  | 0.66 | 0.33 | -1.02 | 0.603593 | 0.52683  | 0.817214 | 0.715627 |
| MmugDNA.27219.1.S1_at   | MmugDNA.27219.1 | 10.01 | 9.6   | 0.08 | 0.31 | 1.33  | 0.196385 | 0.027189 | 0.559664 | 0.206016 |
| MmugDNA.27223.1.S1_at   | MmugDNA.27223.1 | 8.43  | 7.34  | 0.65 | 0.08 | 2.12  | 0.1262   | 0.065059 | 0.4924   | 0.301009 |
| MmugDNA.27226.1.S1_at   | MmugDNA.27226.1 | 4.9   | 4.92  | 0.11 | 0.08 | -1.01 | 0.27074  | 0.284649 | 0.615043 | 0.546877 |

|                         |                 |       |       |      |      |        |          |          |          |          |
|-------------------------|-----------------|-------|-------|------|------|--------|----------|----------|----------|----------|
| MmugDNA.27230.1.S1_at   | MmugDNA.27230.1 | 4.66  | 4.66  | 0.17 | 0.07 | 1      | 0.368786 | 0.432519 | 0.680234 | 0.65297  |
| MmugDNA.27232.1.S1_at   | MmugDNA.27232.1 | 8.48  | 8.08  | 0.32 | 0.22 | 1.32   | 0.035298 | 0.094164 | 0.335858 | 0.350859 |
| MmugDNA.27237.1.S1_at   | MmugDNA.27237.1 | 6.98  | 8.32  | 0.69 | 1.54 | -2.52  | 0.245404 | 0.24665  | 0.597021 | 0.515994 |
| MmugDNA.27238.1.S1_at   | MmugDNA.27238.1 | 14.31 | 14.24 | 0.02 | 0.34 | 1.05   | 0.259045 | 0.335294 | 0.606181 | 0.58305  |
| MmugDNA.27239.1.S1_at   | MmugDNA.27239.1 | 4.91  | 6.34  | 0.73 | 0.64 | -2.68  | 0.027517 | 0.016723 | 0.308386 | 0.163772 |
| MmugDNA.27239.1.S1_s_at | MmugDNA.27239.1 | 5.43  | 5.71  | 0.2  | 0.52 | -1.22  | 0.227511 | 0.229462 | 0.585103 | 0.501527 |
| MmugDNA.27240.1.S1_at   | MmugDNA.27240.1 | 3.32  | 3.29  | 0.01 | 0.14 | 1.02   | 0.691572 | 0.272878 | 0.862864 | 0.537598 |
| MmugDNA.27241.1.S1_at   | MmugDNA.27241.1 | 4.24  | 4.12  | 0.07 | 0.12 | 1.08   | 0.638355 | 0.077502 | 0.836591 | 0.323421 |
| MmugDNA.27242.1.S1_at   | MmugDNA.27242.1 | 6.32  | 5.95  | 0.09 | 0.67 | 1.3    | 0.417184 | 0.148736 | 0.710385 | 0.423201 |
| MmugDNA.27246.1.S1_s_at | MmugDNA.27246.1 | 10.3  | 9.78  | 0.25 | 0.37 | 1.43   | 0.18898  | 0.106631 | 0.552017 | 0.36916  |
| MmugDNA.27250.1.S1_at   | MmugDNA.27250.1 | 3.48  | 3.45  | 0.21 | 0.21 | 1.03   | 0.829532 | 0.275427 | 0.930814 | 0.539682 |
| MmugDNA.27258.1.S1_at   | MmugDNA.27258.1 | 6.61  | 6.63  | 0.13 | 0.06 | -1.01  | 0.711045 | 0.646163 | 0.873387 | 0.792676 |
| MmugDNA.27262.1.S1_at   | MmugDNA.27262.1 | 3.75  | 3.85  | 0.06 | 0.09 | -1.07  | 0.036862 | 0.081438 | 0.340442 | 0.329632 |
| MmugDNA.27263.1.S1_at   | MmugDNA.27263.1 | 3.43  | 3.55  | 0.22 | 0.08 | -1.08  | 0.811975 | 0.872102 | 0.923477 | 0.927229 |
| MmugDNA.27265.1.S1_at   | MmugDNA.27265.1 | 5.84  | 7.75  | 0.4  | 0.29 | -3.75  | 0.0046   | 0.004126 | 0.1844   | 0.090887 |
| MmugDNA.27267.1.S1_at   | MmugDNA.27267.1 | 12.26 | 12.1  | 0.33 | 0.83 | 1.11   | 0.992344 | 0.388573 | 0.997401 | 0.622897 |
| MmugDNA.2727.1.S1_at    | MmugDNA.2727.1  | 13.69 | 13.58 | 0.07 | 0.04 | 1.08   | 0.035764 | 0.038926 | 0.33757  | 0.242297 |
| MmugDNA.27272.1.S1_at   | MmugDNA.27272.1 | 6.88  | 6.98  | 0.15 | 0.06 | -1.07  | 0.471629 | 0.423376 | 0.743311 | 0.646277 |
| MmugDNA.27274.1.S1_at   | MmugDNA.27274.1 | 11.31 | 10.58 | 0.13 | 0.36 | 1.66   | 0.058513 | 0.060573 | 0.39057  | 0.292769 |
| MmugDNA.27276.1.S1_at   | MmugDNA.27276.1 | 10    | 8.75  | 0.18 | 0.55 | 2.39   | 0.021498 | 0.015461 | 0.282524 | 0.157878 |
| MmugDNA.27279.1.S1_at   | MmugDNA.27279.1 | 9.95  | 9.83  | 0.23 | 0.14 | 1.09   | 0.318738 | 0.533394 | 0.648672 | 0.719587 |
| MmugDNA.27280.1.S1_at   | MmugDNA.27280.1 | 5.93  | 6     | 0.04 | 0.11 | -1.05  | 0.439196 | 0.483405 | 0.723488 | 0.687911 |
| MmugDNA.27284.1.S1_at   | MmugDNA.27284.1 | 9.68  | 9.84  | 0.37 | 0.47 | -1.12  | 0.595283 | 0.570339 | 0.81235  | 0.743056 |
| MmugDNA.27292.1.S1_at   | MmugDNA.27292.1 | 4.02  | 4.32  | 0.32 | 0.13 | -1.22  | 0.393976 | 0.627361 | 0.6956   | 0.780374 |
| MmugDNA.27298.1.S1_at   | MmugDNA.27298.1 | 4.9   | 10.47 | 1.66 | 3.3  | -47.48 | 0.251055 | 0.069467 | 0.600545 | 0.309778 |
| MmugDNA.27300.1.S1_at   | MmugDNA.27300.1 | 9.12  | 9.4   | 0.17 | 0.81 | -1.21  | 0.857502 | 0.43212  | 0.942274 | 0.652775 |
| MmugDNA.27318.1.S1_at   | MmugDNA.27318.1 | 5.04  | 5.36  | 0.13 | 0.23 | -1.25  | 0.065728 | 0.072073 | 0.405027 | 0.314519 |
| MmugDNA.27320.1.S1_s_at | MmugDNA.27320.1 | 10.95 | 10.98 | 0.22 | 0.42 | -1.02  | 0.989642 | 0.992119 | 0.996313 | 0.995515 |
| MmugDNA.27327.1.S1_at   | MmugDNA.27327.1 | 7.72  | 5.98  | 0.4  | 0.61 | 3.33   | 0.020271 | 0.01587  | 0.277405 | 0.159807 |
| MmugDNA.2733.1.S1_s_at  | MmugDNA.2733.1  | 7.84  | 6.95  | 0.36 | 0.86 | 1.85   | 0.466788 | 0.242392 | 0.740411 | 0.51282  |
| MmugDNA.27330.1.S1_at   | MmugDNA.27330.1 | 10.43 | 9.64  | 0.25 | 0.38 | 1.73   | 0.061656 | 0.041004 | 0.396574 | 0.247202 |
| MmugDNA.27332.1.S1_at   | MmugDNA.27332.1 | 7.21  | 7.25  | 0.04 | 0.13 | -1.03  | 0.323529 | 0.392943 | 0.65165  | 0.625917 |
| MmugDNA.27337.1.S1_at   | MmugDNA.27337.1 | 11.68 | 11.53 | 0.29 | 0.16 | 1.11   | 0.963544 | 0.875409 | 0.985967 | 0.929245 |
| MmugDNA.27339.1.S1_at   | MmugDNA.27339.1 | 12.01 | 12.2  | 0.22 | 0.76 | -1.14  | 0.49366  | 0.672931 | 0.756299 | 0.808874 |
| MmugDNA.27341.1.S1_at   | MmugDNA.27341.1 | 5.41  | 5.48  | 0.18 | 0.19 | -1.05  | 0.299236 | 0.432479 | 0.634789 | 0.65293  |
| MmugDNA.27342.1.S1_at   | MmugDNA.27342.1 | 8.13  | 7.77  | 0.65 | 0.42 | 1.28   | 0.601503 | 0.712549 | 0.815909 | 0.833383 |
| MmugDNA.27352.1.S1_at   | MmugDNA.27352.1 | 8.58  | 10.14 | 0.28 | 0.57 | -2.96  | 0.015556 | 0.009644 | 0.259146 | 0.129267 |
| MmugDNA.27353.1.S1_at   | MmugDNA.27353.1 | 6.23  | 6.42  | 0.23 | 0.07 | -1.15  | 0.641352 | 0.0541   | 0.838155 | 0.277914 |
| MmugDNA.27356.1.S1_at   | MmugDNA.27356.1 | 3.5   | 3.59  | 0.05 | 0.28 | -1.07  | 0.77763  | 0.782768 | 0.907051 | 0.874253 |
| MmugDNA.27358.1.S1_at   | MmugDNA.27358.1 | 10.81 | 9.47  | 0.42 | 0.48 | 2.53   | 0.017337 | 0.009284 | 0.267196 | 0.127101 |
| MmugDNA.27361.1.S1_at   | MmugDNA.27361.1 | 3.03  | 3.76  | 0.4  | 0.75 | -1.66  | 0.129087 | 0.222975 | 0.495114 | 0.495821 |

|                         |                 |       |       |      |      |       |          |          |          |          |
|-------------------------|-----------------|-------|-------|------|------|-------|----------|----------|----------|----------|
| MmugDNA.27362.1.S1_at   | MmugDNA.27362.1 | 6.58  | 6.93  | 0.05 | 0.14 | -1.28 | 0.014369 | 0.004816 | 0.251885 | 0.096904 |
| MmugDNA.27363.1.S1_at   | MmugDNA.27363.1 | 11.4  | 10.86 | 0.21 | 0.21 | 1.45  | 0.021044 | 0.008307 | 0.281947 | 0.120929 |
| MmugDNA.27364.1.S1_at   | MmugDNA.27364.1 | 6.76  | 7.05  | 0.17 | 0.08 | -1.22 | 0.092279 | 0.034951 | 0.448803 | 0.231062 |
| MmugDNA.2737.1.S1_at    | MmugDNA.2737.1  | 4.05  | 4.26  | 0.26 | 0.09 | -1.15 | 0.735021 | 0.874929 | 0.88601  | 0.929042 |
| MmugDNA.2738.1.S1_at    | MmugDNA.2738.1  | 6.12  | 6.1   | 0.08 | 0.31 | 1.01  | 0.347633 | 0.493302 | 0.6666   | 0.694036 |
| MmugDNA.27381.1.S1_at   | MmugDNA.27381.1 | 9.92  | 10.19 | 0.18 | 0.08 | -1.2  | 0.024758 | 0.013231 | 0.296308 | 0.147534 |
| MmugDNA.27382.1.S1_at   | MmugDNA.27382.1 | 11.97 | 11.97 | 0.13 | 0.22 | -1    | 0.921128 | 0.412061 | 0.969237 | 0.638478 |
| MmugDNA.27383.1.S1_at   | MmugDNA.27383.1 | 3.39  | 2.92  | 0.28 | 0.07 | 1.39  | 0.027316 | 0.057942 | 0.307317 | 0.287157 |
| MmugDNA.27384.1.S1_at   | MmugDNA.27384.1 | 7.76  | 7.76  | 0.42 | 0.38 | 1     | 0.392082 | 0.538771 | 0.694439 | 0.723368 |
| MmugDNA.27385.1.S1_at   | MmugDNA.27385.1 | 12.45 | 12.46 | 0.07 | 0.5  | -1.01 | 0.901471 | 0.987674 | 0.960638 | 0.993121 |
| MmugDNA.27387.1.S1_s_at | MmugDNA.27387.1 | 8.8   | 9.24  | 0.4  | 1.01 | -1.35 | 0.419833 | 0.552001 | 0.712083 | 0.731422 |
| MmugDNA.2739.1.S1_at    | MmugDNA.2739.1  | 3.16  | 3.49  | 0.13 | 0.15 | -1.26 | 0.088855 | 0.084027 | 0.443814 | 0.334975 |
| MmugDNA.27403.1.S1_at   | MmugDNA.27403.1 | 8.93  | 6.21  | 1.03 | 0.67 | 6.6   | 0.019108 | 0.010808 | 0.273018 | 0.135636 |
| MmugDNA.27412.1.S1_at   | MmugDNA.27412.1 | 4.11  | 5.57  | 0.86 | 0.77 | -2.74 | 0.215264 | 0.034941 | 0.575645 | 0.231062 |
| MmugDNA.27425.1.S1_at   | MmugDNA.27425.1 | 7.44  | 7.4   | 0.14 | 0.33 | 1.03  | 0.860188 | 0.108081 | 0.943524 | 0.371281 |
| MmugDNA.27427.1.S1_at   | MmugDNA.27427.1 | 11.78 | 11.58 | 0.05 | 0.28 | 1.15  | 0.233595 | 0.208183 | 0.588317 | 0.482086 |
| MmugDNA.27428.1.S1_at   | MmugDNA.27428.1 | 3.77  | 3.78  | 0.11 | 0.09 | -1    | 0.597476 | 0.867518 | 0.813537 | 0.924699 |
| MmugDNA.27429.1.S1_at   | MmugDNA.27429.1 | 7.76  | 7.88  | 0.07 | 0.12 | -1.09 | 0.177742 | 0.030848 | 0.541903 | 0.217427 |
| MmugDNA.2743.1.S1_at    | MmugDNA.2743.1  | 7.73  | 8.15  | 0.64 | 0.5  | -1.34 | 0.295782 | 0.403159 | 0.632111 | 0.631964 |
| MmugDNA.27432.1.S1_at   | MmugDNA.27432.1 | 10.66 | 11.53 | 0.19 | 0.42 | -1.82 | 0.014311 | 0.00725  | 0.251885 | 0.114309 |
| MmugDNA.27435.1.S1_at   | MmugDNA.27435.1 | 10.36 | 10.31 | 0.13 | 0.05 | 1.03  | 0.707402 | 0.632596 | 0.871104 | 0.783658 |
| MmugDNA.27438.1.S1_at   | MmugDNA.27438.1 | 9.81  | 8.65  | 0.19 | 0.53 | 2.23  | 0.082481 | 0.092555 | 0.434039 | 0.348519 |
| MmugDNA.27452.1.S1_at   | MmugDNA.27452.1 | 13.38 | 13.22 | 0.05 | 0.18 | 1.12  | 0.22018  | 0.195758 | 0.579297 | 0.470637 |
| MmugDNA.27463.1.S1_at   | MmugDNA.27463.1 | 12.16 | 12.2  | 0.15 | 0.29 | -1.02 | 0.883131 | 0.241757 | 0.952965 | 0.512327 |
| MmugDNA.27464.1.S1_at   | MmugDNA.27464.1 | 5.99  | 5.82  | 0.27 | 0.19 | 1.12  | 0.574236 | 0.742994 | 0.801619 | 0.851103 |
| MmugDNA.27467.1.S1_at   | MmugDNA.27467.1 | 3.73  | 3.78  | 0.02 | 0.08 | -1.04 | 0.648897 | 0.048858 | 0.842266 | 0.265858 |
| MmugDNA.27476.1.S1_at   | MmugDNA.27476.1 | 11.58 | 11.58 | 0.06 | 0.34 | -1    | 0.859061 | 0.56789  | 0.943112 | 0.741693 |
| MmugDNA.27477.1.S1_at   | MmugDNA.27477.1 | 5.3   | 5.52  | 0.12 | 0.16 | -1.17 | 0.149401 | 0.15211  | 0.514001 | 0.426866 |
| MmugDNA.27484.1.S1_at   | MmugDNA.27484.1 | 3.75  | 3.67  | 0.07 | 0.53 | 1.05  | 0.444575 | 0.632526 | 0.727044 | 0.783598 |
| MmugDNA.27489.1.S1_at   | MmugDNA.27489.1 | 5.37  | 5.61  | 0.51 | 0.57 | -1.18 | 0.467091 | 0.649004 | 0.740562 | 0.794525 |
| MmugDNA.27495.1.S1_at   | MmugDNA.27495.1 | 11.01 | 10.75 | 0.19 | 0.13 | 1.2   | 0.256778 | 0.012727 | 0.604419 | 0.145429 |
| MmugDNA.27497.1.S1_at   | MmugDNA.27497.1 | 4.58  | 5.59  | 0.42 | 0.79 | -2.01 | 0.11033  | 0.045166 | 0.471863 | 0.256979 |
| MmugDNA.27499.1.S1_at   | MmugDNA.27499.1 | 11.29 | 10.2  | 0.16 | 0.54 | 2.13  | 0.026848 | 0.010401 | 0.304933 | 0.133414 |
| MmugDNA.2752.1.S1_at    | MmugDNA.2752.1  | 11.43 | 11.54 | 0.11 | 0.03 | -1.08 | 0.199165 | 0.199044 | 0.562139 | 0.473621 |
| MmugDNA.27520.1.S1_at   | MmugDNA.27520.1 | 8.15  | 8     | 0.1  | 0.37 | 1.11  | 0.179391 | 0.229149 | 0.543593 | 0.501438 |
| MmugDNA.27539.1.S1_at   | MmugDNA.27539.1 | 6.08  | 7.89  | 1.09 | 0.97 | -3.49 | 0.146355 | 0.158624 | 0.512489 | 0.434612 |
| MmugDNA.2755.1.S1_at    | MmugDNA.2755.1  | 11.69 | 11.43 | 0.15 | 1.55 | 1.19  | 0.260999 | 0.295569 | 0.607554 | 0.555051 |
| MmugDNA.27552.1.S1_at   | MmugDNA.27552.1 | 8.6   | 8.22  | 0.05 | 0.3  | 1.3   | 0.124403 | 0.143499 | 0.490313 | 0.417442 |
| MmugDNA.27557.1.S1_at   | MmugDNA.27557.1 | 11.44 | 10.76 | 0.13 | 0.83 | 1.59  | 0.245123 | 0.319227 | 0.596806 | 0.571716 |
| MmugDNA.27564.1.S1_at   | MmugDNA.27564.1 | 3.17  | 3.27  | 0.18 | 0.22 | -1.07 | 0.493428 | 0.740607 | 0.756176 | 0.849805 |
| MmugDNA.27579.1.S1_at   | MmugDNA.27579.1 | 12.51 | 12.88 | 0.18 | 0.13 | -1.29 | 0.213986 | 0.281376 | 0.574348 | 0.544411 |

|                         |                 |       |       |      |      |        |          |          |          |          |
|-------------------------|-----------------|-------|-------|------|------|--------|----------|----------|----------|----------|
| MmugDNA.27580.1.S1_at   | MmugDNA.27580.1 | 5.21  | 5.33  | 0.27 | 0    | -1.09  | 0.904398 | 0.729626 | 0.961729 | 0.843613 |
| MmugDNA.27584.1.S1_at   | MmugDNA.27584.1 | 5.64  | 4.66  | 0.4  | 0.15 | 1.97   | 0.013668 | 0.007373 | 0.248813 | 0.115313 |
| MmugDNA.27593.1.S1_at   | MmugDNA.27593.1 | 7.62  | 7.34  | 0.06 | 0.25 | 1.21   | 0.161361 | 0.14755  | 0.526364 | 0.421872 |
| MmugDNA.27606.1.S1_at   | MmugDNA.27606.1 | 9.73  | 10.74 | 0.3  | 0.5  | -2.01  | 0.037343 | 0.026295 | 0.341309 | 0.203132 |
| MmugDNA.27612.1.S1_at   | MmugDNA.27612.1 | 10.69 | 10.93 | 0.13 | 0.17 | -1.18  | 0.139737 | 0.127726 | 0.507376 | 0.398581 |
| MmugDNA.27617.1.S1_at   | MmugDNA.27617.1 | 6.81  | 6.88  | 0.17 | 0.28 | -1.05  | 0.434109 | 0.290422 | 0.720313 | 0.551169 |
| MmugDNA.27621.1.S1_at   | MmugDNA.27621.1 | 6.96  | 6.97  | 0.49 | 0.69 | -1.01  | 0.848588 | 0.078418 | 0.939211 | 0.325192 |
| MmugDNA.27626.1.S1_at   | MmugDNA.27626.1 | 5.76  | 5.9   | 0.11 | 0.09 | -1.1   | 0.358156 | 0.368327 | 0.673071 | 0.607917 |
| MmugDNA.27628.1.S1_s_at | MmugDNA.27628.1 | 14.04 | 14.14 | 0.09 | 0.06 | -1.07  | 0.109358 | 0.094837 | 0.470811 | 0.35185  |
| MmugDNA.2764.1.S1_at    | MmugDNA.2764.1  | 11.89 | 12.53 | 0.27 | 0.57 | -1.56  | 0.203421 | 0.254054 | 0.566041 | 0.522387 |
| MmugDNA.27652.1.S1_at   | MmugDNA.27652.1 | 11.18 | 11.21 | 0.29 | 0.13 | -1.02  | 0.584388 | 0.621644 | 0.80696  | 0.77621  |
| MmugDNA.27655.1.S1_at   | MmugDNA.27655.1 | 7.91  | 8.25  | 0.47 | 0.8  | -1.26  | 0.654206 | 0.780223 | 0.844551 | 0.87255  |
| MmugDNA.27659.1.S1_at   | MmugDNA.27659.1 | 7.88  | 7.38  | 0.25 | 0.19 | 1.41   | 0.066528 | 0.004994 | 0.406564 | 0.098469 |
| MmugDNA.27659.1.S1_s_at | MmugDNA.27659.1 | 7.18  | 6.71  | 0.04 | 0.32 | 1.38   | 0.029779 | 0.01     | 0.315397 | 0.131262 |
| MmugDNA.27660.1.S1_at   | MmugDNA.27660.1 | 5.67  | 5.68  | 0.07 | 0.04 | -1     | 0.831232 | 0.587144 | 0.931682 | 0.754042 |
| MmugDNA.27663.1.S1_at   | MmugDNA.27663.1 | 5.82  | 10.25 | 1.31 | 3.11 | -21.48 | 0.289572 | 0.183614 | 0.627563 | 0.459681 |
| MmugDNA.27664.1.S1_at   | MmugDNA.27664.1 | 10.06 | 12.52 | 0.91 | 1.91 | -5.49  | 0.341838 | 0.193079 | 0.662882 | 0.468554 |
| MmugDNA.27666.1.S1_at   | MmugDNA.27666.1 | 9.67  | 9.23  | 0.25 | 0.17 | 1.35   | 0.045864 | 0.048889 | 0.361884 | 0.265897 |
| MmugDNA.2767.1.S1_at    | MmugDNA.2767.1  | 11.18 | 10.75 | 0.13 | 0.15 | 1.35   | 0.020049 | 0.011853 | 0.276484 | 0.140973 |
| MmugDNA.27671.1.S1_at   | MmugDNA.27671.1 | 7.57  | 8.53  | 0.29 | 0.65 | -1.95  | 0.129902 | 0.145258 | 0.495954 | 0.419278 |
| MmugDNA.27675.1.S1_at   | MmugDNA.27675.1 | 4.68  | 5.59  | 1.26 | 1.35 | -1.88  | 0.529215 | 0.702692 | 0.775959 | 0.827658 |
| MmugDNA.27676.1.S1_at   | MmugDNA.27676.1 | 6.53  | 7.23  | 1.32 | 0.43 | -1.63  | 0.303199 | 0.103544 | 0.637386 | 0.364346 |
| MmugDNA.2768.1.S1_at    | MmugDNA.2768.1  | 11.43 | 10.69 | 0.24 | 0.36 | 1.67   | 0.020128 | 0.001051 | 0.27674  | 0.051467 |
| MmugDNA.27681.1.S1_at   | MmugDNA.27681.1 | 4.14  | 5.33  | 0.54 | 1.42 | -2.29  | 0.242993 | 0.259992 | 0.594744 | 0.52675  |
| MmugDNA.27682.1.S1_at   | MmugDNA.27682.1 | 12.65 | 12.79 | 0.01 | 0.25 | -1.1   | 0.680273 | 0.71822  | 0.857131 | 0.836905 |
| MmugDNA.27683.1.S1_at   | MmugDNA.27683.1 | 7.25  | 7.15  | 0.16 | 0.6  | 1.07   | 0.982028 | 0.258076 | 0.993449 | 0.525574 |
| MmugDNA.27684.1.S1_at   | MmugDNA.27684.1 | 6.28  | 6.89  | 0.76 | 1.2  | -1.52  | 0.814326 | 0.776505 | 0.92475  | 0.870052 |
| MmugDNA.27685.1.S1_at   | MmugDNA.27685.1 | 12.22 | 12.6  | 0.18 | 0.08 | -1.3   | 0.034877 | 0.024576 | 0.333988 | 0.196149 |
| MmugDNA.27687.1.S1_at   | MmugDNA.27687.1 | 10.81 | 11.3  | 0.09 | 0.29 | -1.41  | 0.058535 | 0.002045 | 0.390663 | 0.066887 |
| MmugDNA.27687.1.S1_s_at | MmugDNA.27687.1 | 12.23 | 12.48 | 0.15 | 0.19 | -1.19  | 0.101746 | 0.001641 | 0.461313 | 0.06124  |
| MmugDNA.27688.1.S1_at   | MmugDNA.27688.1 | 5.58  | 5.69  | 0.21 | 0.18 | -1.08  | 0.197992 | 0.282584 | 0.561022 | 0.545292 |
| MmugDNA.27689.1.S1_at   | MmugDNA.27689.1 | 11.99 | 11.88 | 0.08 | 0.12 | 1.08   | 0.260872 | 0.248063 | 0.60749  | 0.517567 |
| MmugDNA.27690.1.S1_at   | MmugDNA.27690.1 | 5.29  | 5.12  | 0.19 | 0.12 | 1.12   | 0.919174 | 0.66964  | 0.968566 | 0.806795 |
| MmugDNA.27691.1.S1_at   | MmugDNA.27691.1 | 3.83  | 4     | 0.06 | 0.2  | -1.12  | 0.25139  | 0.618819 | 0.600793 | 0.774185 |
| MmugDNA.27693.1.S1_at   | MmugDNA.27693.1 | 14.35 | 14.38 | 0.05 | 0.04 | -1.02  | 0.959344 | 0.789668 | 0.984581 | 0.87847  |
| MmugDNA.27695.1.S1_at   | MmugDNA.27695.1 | 9.25  | 9.9   | 0.21 | 0.66 | -1.57  | 0.524554 | 0.693234 | 0.773192 | 0.821571 |
| MmugDNA.27696.1.S1_at   | MmugDNA.27696.1 | 3.7   | 3.52  | 0.81 | 0.15 | 1.13   | 0.274846 | 0.177278 | 0.617628 | 0.45372  |
| MmugDNA.27699.1.S1_at   | MmugDNA.27699.1 | 7.27  | 7.51  | 0.13 | 0.11 | -1.18  | 0.217699 | 0.332518 | 0.577309 | 0.580937 |
| MmugDNA.277.1.S1_at     | MmugDNA.277.1   | 10.22 | 10.75 | 0.54 | 0.47 | -1.44  | 0.583812 | 0.578596 | 0.806776 | 0.748595 |
| MmugDNA.27710.1.S1_at   | MmugDNA.27710.1 | 11.13 | 10.27 | 0.16 | 0.43 | 1.82   | 0.094163 | 0.055415 | 0.451714 | 0.281304 |
| MmugDNA.27715.1.S1_at   | MmugDNA.27715.1 | 3.76  | 3.86  | 0.27 | 0.15 | -1.07  | 0.842141 | 0.528554 | 0.936318 | 0.716664 |



|                         |                 |       |       |      |      |       |          |          |          |          |
|-------------------------|-----------------|-------|-------|------|------|-------|----------|----------|----------|----------|
| MmugDNA.27729.1.S1_at   | MmugDNA.27729.1 | 4.61  | 4.44  | 0.44 | 0.17 | 1.13  | 0.759652 | 0.728762 | 0.898488 | 0.843203 |
| MmugDNA.27730.1.S1_at   | MmugDNA.27730.1 | 9.55  | 9.86  | 0.53 | 1.66 | -1.24 | 0.877698 | 0.892952 | 0.950993 | 0.938954 |
| MmugDNA.27741.1.S1_at   | MmugDNA.27741.1 | 6.79  | 6.6   | 0.11 | 0.21 | 1.14  | 0.268248 | 0.24631  | 0.613105 | 0.515889 |
| MmugDNA.27744.1.S1_at   | MmugDNA.27744.1 | 12.02 | 11.42 | 0.1  | 0.13 | 1.52  | 0.0027   | 0.000268 | 0.164621 | 0.033786 |
| MmugDNA.27746.1.S1_at   | MmugDNA.27746.1 | 7.32  | 6.99  | 0.09 | 0.04 | 1.26  | 0.002866 | 0.052641 | 0.16908  | 0.274934 |
| MmugDNA.27747.1.S1_at   | MmugDNA.27747.1 | 10.41 | 11.61 | 0.17 | 0.14 | -2.3  | 0.000697 | 0.000085 | 0.136818 | 0.027016 |
| MmugDNA.27747.1.S1_s_at | MmugDNA.27747.1 | 11.5  | 12.35 | 0.29 | 0.28 | -1.8  | 0.030921 | 0.019348 | 0.320266 | 0.174785 |
| MmugDNA.27752.1.S1_at   | MmugDNA.27752.1 | 9.02  | 10.43 | 0.54 | 2.07 | -2.67 | 0.535565 | 0.303851 | 0.77916  | 0.561225 |
| MmugDNA.27753.1.S1_at   | MmugDNA.27753.1 | 6.77  | 6.75  | 0.77 | 0.78 | 1.01  | 0.609384 | 0.491895 | 0.820443 | 0.693275 |
| MmugDNA.27757.1.S1_at   | MmugDNA.27757.1 | 6.7   | 6.98  | 0.26 | 0.86 | -1.22 | 0.943693 | 0.583875 | 0.978535 | 0.752043 |
| MmugDNA.27758.1.S1_at   | MmugDNA.27758.1 | 11.05 | 9.95  | 0.12 | 0.8  | 2.14  | 0.093612 | 0.080409 | 0.450966 | 0.328048 |
| MmugDNA.27760.1.S1_at   | MmugDNA.27760.1 | 6.67  | 6.8   | 0.11 | 0.13 | -1.09 | 0.931247 | 0.144129 | 0.973425 | 0.418024 |
| MmugDNA.27762.1.S1_at   | MmugDNA.27762.1 | 6.95  | 6.44  | 0.25 | 0.08 | 1.43  | 0.011516 | 0.00908  | 0.23613  | 0.125944 |
| MmugDNA.27763.1.S1_at   | MmugDNA.27763.1 | 13.7  | 13.71 | 0.07 | 0.5  | -1.01 | 0.416698 | 0.475916 | 0.710169 | 0.682387 |
| MmugDNA.27766.1.S1_at   | MmugDNA.27766.1 | 13.25 | 13.16 | 0.06 | 0.02 | 1.07  | 0.027768 | 0.043437 | 0.308973 | 0.253043 |
| MmugDNA.27769.1.S1_at   | MmugDNA.27769.1 | 8.93  | 8.84  | 0.15 | 0.08 | 1.07  | 0.153277 | 0.156498 | 0.517764 | 0.431866 |
| MmugDNA.2777.1.S1_at    | MmugDNA.2777.1  | 4.09  | 4.05  | 0.03 | 0    | 1.02  | 0.132169 | 0.272975 | 0.49836  | 0.53761  |
| MmugDNA.27772.1.S1_at   | MmugDNA.27772.1 | 3.94  | 4.88  | 1.01 | 0.8  | -1.92 | 0.558123 | 0.145041 | 0.792979 | 0.418994 |
| MmugDNA.27773.1.S1_s_at | MmugDNA.27773.1 | 4.17  | 3.69  | 1.04 | 0.15 | 1.39  | 0.332811 | 0.455639 | 0.657058 | 0.669614 |
| MmugDNA.27776.1.S1_at   | MmugDNA.27776.1 | 7.67  | 7.64  | 0.12 | 0.13 | 1.02  | 0.580405 | 0.21491  | 0.804571 | 0.488845 |
| MmugDNA.27779.1.S1_at   | MmugDNA.27779.1 | 11.53 | 11.62 | 0.2  | 0.11 | -1.06 | 0.834912 | 0.064426 | 0.933081 | 0.300001 |
| MmugDNA.2778.1.S1_at    | MmugDNA.2778.1  | 11.19 | 11.66 | 0.32 | 0.17 | -1.38 | 0.145208 | 0.086338 | 0.511329 | 0.338777 |
| MmugDNA.27781.1.S1_at   | MmugDNA.27781.1 | 5.69  | 5.85  | 0.13 | 0.23 | -1.11 | 0.46305  | 0.237395 | 0.73857  | 0.508117 |
| MmugDNA.27785.1.S1_at   | MmugDNA.27785.1 | 11.29 | 11.81 | 0.48 | 0.24 | -1.43 | 0.266435 | 0.204843 | 0.611901 | 0.479223 |
| MmugDNA.27787.1.S1_at   | MmugDNA.27787.1 | 10.39 | 10.4  | 0.07 | 0.16 | -1.01 | 0.794257 | 0.457577 | 0.914561 | 0.670864 |
| MmugDNA.27788.1.S1_at   | MmugDNA.27788.1 | 13.28 | 13.33 | 0.05 | 0.08 | -1.04 | 0.948891 | 0.006357 | 0.980457 | 0.108372 |
| MmugDNA.27793.1.S1_at   | MmugDNA.27793.1 | 6.47  | 7.16  | 1.08 | 0.38 | -1.62 | 0.287452 | 0.011486 | 0.625987 | 0.138627 |
| MmugDNA.278.1.S1_at     | MmugDNA.278.1   | 13.63 | 13.76 | 0.12 | 0.25 | -1.1  | 0.344541 | 0.220449 | 0.664605 | 0.493818 |
| MmugDNA.2780.1.S1_at    | MmugDNA.2780.1  | 9.83  | 9.65  | 0.04 | 0.11 | 1.14  | 0.140239 | 0.472976 | 0.508065 | 0.680272 |
| MmugDNA.27801.1.S1_at   | MmugDNA.27801.1 | 9.22  | 9.24  | 0.34 | 0.66 | -1.01 | 0.947644 | 0.451692 | 0.979939 | 0.666544 |
| MmugDNA.27804.1.S1_at   | MmugDNA.27804.1 | 10.58 | 10.36 | 0.23 | 0.34 | 1.16  | 0.324033 | 0.43281  | 0.651826 | 0.653151 |
| MmugDNA.27805.1.S1_at   | MmugDNA.27805.1 | 8.64  | 8.58  | 0.11 | 0.23 | 1.04  | 0.980608 | 0.906655 | 0.992987 | 0.947216 |
| MmugDNA.27808.1.S1_at   | MmugDNA.27808.1 | 9.35  | 9.2   | 0.05 | 0.34 | 1.11  | 0.746294 | 0.833066 | 0.891388 | 0.90427  |
| MmugDNA.2781.1.S1_at    | MmugDNA.2781.1  | 5.98  | 8.91  | 0.9  | 2.25 | -7.64 | 0.253087 | 0.185257 | 0.601794 | 0.461194 |
| MmugDNA.27816.1.S1_at   | MmugDNA.27816.1 | 10    | 9.74  | 0.29 | 0.15 | 1.2   | 0.256237 | 0.356557 | 0.603894 | 0.598459 |
| MmugDNA.2782.1.S1_at    | MmugDNA.2782.1  | 9.44  | 8.81  | 0.19 | 0.05 | 1.54  | 0.004894 | 0.001273 | 0.185557 | 0.055241 |
| MmugDNA.27827.1.S1_at   | MmugDNA.27827.1 | 8.63  | 8.21  | 0.41 | 0.72 | 1.34  | 0.353939 | 0.506423 | 0.670266 | 0.702383 |
| MmugDNA.27829.1.S1_at   | MmugDNA.27829.1 | 6.66  | 5.5   | 0.24 | 0.33 | 2.22  | 0.004621 | 0.004181 | 0.1844   | 0.091077 |
| MmugDNA.27833.1.S1_at   | MmugDNA.27833.1 | 8.06  | 9     | 0.15 | 0.08 | -1.91 | 0.000578 | 0.000305 | 0.136818 | 0.034907 |
| MmugDNA.27835.1.S1_at   | MmugDNA.27835.1 | 11.42 | 11.85 | 0.04 | 0.25 | -1.34 | 0.034936 | 0.02056  | 0.334102 | 0.179918 |
| MmugDNA.27836.1.S1_at   | MmugDNA.27836.1 | 6     | 5.99  | 0.31 | 0.29 | 1.01  | 0.863673 | 0.310563 | 0.945247 | 0.565771 |

|                         |                 |       |       |      |      |       |          |          |          |          |
|-------------------------|-----------------|-------|-------|------|------|-------|----------|----------|----------|----------|
| MmugDNA.27839.1.S1_at   | MmugDNA.27839.1 | 3.26  | 3.25  | 0.02 | 0.23 | 1.01  | 0.462047 | 0.396876 | 0.738159 | 0.62846  |
| MmugDNA.27844.1.S1_at   | MmugDNA.27844.1 | 3.43  | 3.75  | 0.08 | 0.15 | -1.25 | 0.087473 | 0.155584 | 0.441877 | 0.430941 |
| MmugDNA.27845.1.S1_at   | MmugDNA.27845.1 | 12.12 | 11.31 | 0.23 | 1.01 | 1.76  | 0.291214 | 0.39678  | 0.628725 | 0.62845  |
| MmugDNA.27848.1.S1_at   | MmugDNA.27848.1 | 12.14 | 11.15 | 0.13 | 0.48 | 1.98  | 0.09303  | 0.092537 | 0.45033  | 0.348504 |
| MmugDNA.2785.1.S1_at    | MmugDNA.2785.1  | 6.57  | 5.77  | 0.67 | 0.89 | 1.74  | 0.572958 | 0.351268 | 0.801055 | 0.594937 |
| MmugDNA.27850.1.S1_at   | MmugDNA.27850.1 | 3.47  | 4.66  | 0.48 | 0.46 | -2.29 | 0.163811 | 0.235567 | 0.528049 | 0.506633 |
| MmugDNA.27857.1.S1_at   | MmugDNA.27857.1 | 8.44  | 8.22  | 0.19 | 0.26 | 1.16  | 0.763622 | 0.654987 | 0.900388 | 0.7982   |
| MmugDNA.2786.1.S1_at    | MmugDNA.2786.1  | 5.6   | 8.08  | 1.22 | 2.16 | -5.59 | 0.315746 | 0.233702 | 0.646695 | 0.505032 |
| MmugDNA.27869.1.S1_at   | MmugDNA.27869.1 | 10.82 | 10.61 | 0.14 | 0.08 | 1.16  | 0.098908 | 0.038705 | 0.458711 | 0.24169  |
| MmugDNA.27870.1.S1_at   | MmugDNA.27870.1 | 10.93 | 10.85 | 0.09 | 0.35 | 1.06  | 0.862577 | 0.953419 | 0.944723 | 0.97351  |
| MmugDNA.27873.1.S1_at   | MmugDNA.27873.1 | 6.57  | 6.67  | 0.13 | 0.12 | -1.07 | 0.625992 | 0.400787 | 0.829275 | 0.63064  |
| MmugDNA.27876.1.S1_at   | MmugDNA.27876.1 | 10.82 | 9.21  | 0.53 | 0.96 | 3.04  | 0.043773 | 0.027388 | 0.357051 | 0.206719 |
| MmugDNA.2788.1.S1_at    | MmugDNA.2788.1  | 7.45  | 7.77  | 0.14 | 0.43 | -1.25 | 0.377918 | 0.52967  | 0.686212 | 0.717463 |
| MmugDNA.27885.1.S1_at   | MmugDNA.27885.1 | 9.68  | 8.53  | 0.4  | 0.24 | 2.21  | 0.013385 | 0.001122 | 0.246478 | 0.052924 |
| MmugDNA.27886.1.S1_at   | MmugDNA.27886.1 | 9.57  | 9.16  | 0.08 | 0.38 | 1.33  | 0.424374 | 0.191008 | 0.714453 | 0.46629  |
| MmugDNA.27888.1.S1_at   | MmugDNA.27888.1 | 5.38  | 5.3   | 0.49 | 0.5  | 1.06  | 0.448612 | 0.643148 | 0.729722 | 0.79068  |
| MmugDNA.27895.1.S1_at   | MmugDNA.27895.1 | 7.7   | 7.26  | 0.4  | 1.58 | 1.36  | 0.534183 | 0.719442 | 0.77862  | 0.837645 |
| MmugDNA.27900.1.S1_at   | MmugDNA.27900.1 | 9     | 9.12  | 0.33 | 0.44 | -1.08 | 0.421216 | 0.189646 | 0.712907 | 0.465297 |
| MmugDNA.27903.1.S1_at   | MmugDNA.27903.1 | 4.7   | 4.64  | 0.37 | 0.45 | 1.04  | 0.971956 | 0.404175 | 0.989291 | 0.632691 |
| MmugDNA.27905.1.S1_at   | MmugDNA.27905.1 | 3.86  | 3.61  | 0.28 | 0.52 | 1.18  | 0.872212 | 0.327191 | 0.948969 | 0.577156 |
| MmugDNA.27907.1.S1_at   | MmugDNA.27907.1 | 6.5   | 6.73  | 0.11 | 0.14 | -1.17 | 0.114729 | 0.117143 | 0.478025 | 0.384582 |
| MmugDNA.27910.1.S1_at   | MmugDNA.27910.1 | 3.8   | 3.86  | 0.42 | 0.17 | -1.04 | 0.647895 | 0.834319 | 0.841735 | 0.905078 |
| MmugDNA.27912.1.S1_at   | MmugDNA.27912.1 | 9.62  | 9.81  | 0.15 | 0.29 | -1.14 | 0.697    | 0.605133 | 0.865546 | 0.764917 |
| MmugDNA.27913.1.S1_at   | MmugDNA.27913.1 | 6.74  | 8.78  | 1.01 | 0.56 | -4.1  | 0.155882 | 0.139649 | 0.52051  | 0.412964 |
| MmugDNA.27914.1.S1_at   | MmugDNA.27914.1 | 3.31  | 3.28  | 0.07 | 0.07 | 1.02  | 0.967777 | 0.699368 | 0.987919 | 0.825344 |
| MmugDNA.27915.1.S1_at   | MmugDNA.27915.1 | 12.07 | 12.83 | 0.29 | 0.48 | -1.7  | 0.185184 | 0.091785 | 0.54869  | 0.346977 |
| MmugDNA.2792.1.S1_at    | MmugDNA.2792.1  | 10.6  | 9.66  | 0.09 | 0.34 | 1.92  | 0.01188  | 0.004837 | 0.238618 | 0.097041 |
| MmugDNA.27922.1.S1_at   | MmugDNA.27922.1 | 8.02  | 8.08  | 0.52 | 0.03 | -1.04 | 0.281695 | 0.268344 | 0.62238  | 0.534041 |
| MmugDNA.27929.1.S1_at   | MmugDNA.27929.1 | 7.52  | 7.44  | 0.5  | 0.18 | 1.06  | 0.406025 | 0.567676 | 0.7035   | 0.74156  |
| MmugDNA.27934.1.S1_at   | MmugDNA.27934.1 | 5.47  | 5.53  | 0.13 | 0.12 | -1.05 | 0.113026 | 0.12253  | 0.475614 | 0.392427 |
| MmugDNA.27940.1.S1_at   | MmugDNA.27940.1 | 11.84 | 12.05 | 0.29 | 0.1  | -1.16 | 0.41396  | 0.289683 | 0.708765 | 0.550747 |
| MmugDNA.2795.1.S1_at    | MmugDNA.2795.1  | 4.49  | 4.7   | 0.07 | 0.39 | -1.16 | 0.21637  | 0.135425 | 0.575996 | 0.407515 |
| MmugDNA.27954.1.S1_at   | MmugDNA.27954.1 | 3.03  | 2.99  | 0.13 | 0.07 | 1.03  | 0.457422 | 0.532461 | 0.734933 | 0.719065 |
| MmugDNA.27955.1.S1_at   | MmugDNA.27955.1 | 8.91  | 8.57  | 0.49 | 0.42 | 1.26  | 0.527181 | 0.701005 | 0.774581 | 0.826611 |
| MmugDNA.27957.1.S1_at   | MmugDNA.27957.1 | 9.74  | 9.17  | 0.37 | 0.32 | 1.49  | 0.203783 | 0.080626 | 0.5663   | 0.328427 |
| MmugDNA.27961.1.S1_at   | MmugDNA.27961.1 | 4.74  | 4.93  | 0.28 | 0.18 | -1.15 | 0.080705 | 0.131111 | 0.43122  | 0.403084 |
| MmugDNA.27963.1.S1_at   | MmugDNA.27963.1 | 3.21  | 3.1   | 0.07 | 0.04 | 1.07  | 0.063356 | 0.001542 | 0.400486 | 0.05949  |
| MmugDNA.27963.1.S1_x_at | MmugDNA.27963.1 | 3.4   | 3.61  | 0.04 | 0.16 | -1.15 | 0.238913 | 0.023743 | 0.59202  | 0.192893 |
| MmugDNA.2797.1.S1_at    | MmugDNA.2797.1  | 6.51  | 6.77  | 0.27 | 0.25 | -1.2  | 0.57574  | 0.48511  | 0.802481 | 0.688913 |
| MmugDNA.27971.1.S1_at   | MmugDNA.27971.1 | 7.04  | 8.85  | 0.58 | 1.1  | -3.49 | 0.188965 | 0.025744 | 0.552006 | 0.201029 |
| MmugDNA.27973.1.S1_at   | MmugDNA.27973.1 | 7.54  | 7.7   | 1.36 | 0.91 | -1.11 | 0.54304  | 0.163835 | 0.783741 | 0.440054 |

|                         |                 |       |       |      |      |       |          |          |          |          |
|-------------------------|-----------------|-------|-------|------|------|-------|----------|----------|----------|----------|
| MmugDNA.27978.1.S1_at   | MmugDNA.27978.1 | 7.14  | 7.34  | 0.07 | 0.02 | -1.14 | 0.013975 | 0.020362 | 0.250102 | 0.17912  |
| MmugDNA.27983.1.S1_at   | MmugDNA.27983.1 | 10.17 | 9.88  | 0.11 | 0.27 | 1.22  | 0.399526 | 0.508491 | 0.699439 | 0.703646 |
| MmugDNA.27987.1.S1_at   | MmugDNA.27987.1 | 5.81  | 7.87  | 0.7  | 2.44 | -4.17 | 0.208631 | 0.191098 | 0.570384 | 0.466364 |
| MmugDNA.27990.1.S1_at   | MmugDNA.27990.1 | 12.34 | 12.71 | 0.09 | 0.06 | -1.29 | 0.004026 | 0.001357 | 0.181739 | 0.056687 |
| MmugDNA.27992.1.S1_at   | MmugDNA.27992.1 | 4.54  | 4.79  | 0.29 | 0.36 | -1.19 | 0.479225 | 0.592869 | 0.74761  | 0.757932 |
| MmugDNA.27997.1.S1_at   | MmugDNA.27997.1 | 5.16  | 5.1   | 0.21 | 0.08 | 1.04  | 0.425307 | 0.485508 | 0.715047 | 0.689159 |
| MmugDNA.28001.1.S1_at   | MmugDNA.28001.1 | 4.75  | 4.9   | 0.12 | 0.07 | -1.11 | 0.081706 | 0.119595 | 0.432673 | 0.388247 |
| MmugDNA.28002.1.S1_at   | MmugDNA.28002.1 | 11.04 | 10.41 | 0.32 | 0.54 | 1.55  | 0.052219 | 0.013811 | 0.377174 | 0.150628 |
| MmugDNA.28005.1.S1_at   | MmugDNA.28005.1 | 10.63 | 10.53 | 0.06 | 0.57 | 1.07  | 0.760176 | 0.323852 | 0.898847 | 0.574656 |
| MmugDNA.2801.1.S1_at    | MmugDNA.2801.1  | 6.1   | 6.16  | 0.13 | 0.06 | -1.04 | 0.572303 | 0.090525 | 0.800678 | 0.345015 |
| MmugDNA.28015.1.S1_at   | MmugDNA.28015.1 | 10.81 | 11.22 | 0.16 | 0.63 | -1.32 | 0.239263 | 0.2404   | 0.592442 | 0.510966 |
| MmugDNA.28020.1.S1_at   | MmugDNA.28020.1 | 11.36 | 10.52 | 0.2  | 0.16 | 1.79  | 0.003068 | 0.0004   | 0.172102 | 0.037471 |
| MmugDNA.28023.1.S1_at   | MmugDNA.28023.1 | 14.33 | 14.31 | 0.04 | 0.04 | 1.02  | 0.224373 | 0.105313 | 0.582716 | 0.367145 |
| MmugDNA.28027.1.S1_at   | MmugDNA.28027.1 | 3.29  | 3.39  | 0.21 | 0.2  | -1.07 | 0.512708 | 0.445633 | 0.765738 | 0.662468 |
| MmugDNA.28033.1.S1_at   | MmugDNA.28033.1 | 10.09 | 9.34  | 0.37 | 1.37 | 1.69  | 0.099491 | 0.070671 | 0.459387 | 0.312011 |
| MmugDNA.28034.1.S1_at   | MmugDNA.28034.1 | 12.78 | 12.92 | 0.09 | 0.09 | -1.1  | 0.169419 | 0.076763 | 0.533686 | 0.322197 |
| MmugDNA.28036.1.S1_at   | MmugDNA.28036.1 | 6.82  | 6.88  | 0.2  | 0.16 | -1.04 | 0.710761 | 0.226273 | 0.873213 | 0.498726 |
| MmugDNA.28037.1.S1_s_at | MmugDNA.28037.1 | 9.61  | 9.8   | 0.2  | 0.04 | -1.14 | 0.467628 | 0.305481 | 0.740772 | 0.562437 |
| MmugDNA.28038.1.S1_at   | MmugDNA.28038.1 | 5.66  | 5.31  | 0.14 | 0.31 | 1.27  | 0.39441  | 0.568889 | 0.69577  | 0.742129 |
| MmugDNA.2804.1.S1_at    | MmugDNA.2804.1  | 10.17 | 9.85  | 0.13 | 0.11 | 1.25  | 0.082605 | 0.016477 | 0.434174 | 0.162551 |
| MmugDNA.28042.1.S1_at   | MmugDNA.28042.1 | 9.46  | 9.88  | 0.29 | 0.19 | -1.34 | 0.104639 | 0.077946 | 0.464971 | 0.324283 |
| MmugDNA.28049.1.S1_at   | MmugDNA.28049.1 | 10.96 | 10.37 | 0.25 | 0.07 | 1.51  | 0.021613 | 0.015963 | 0.283041 | 0.160375 |
| MmugDNA.28053.1.S1_at   | MmugDNA.28053.1 | 9.76  | 9.97  | 0.02 | 0.34 | -1.16 | 0.370422 | 0.354746 | 0.681457 | 0.597422 |
| MmugDNA.28057.1.S1_at   | MmugDNA.28057.1 | 6.33  | 6.51  | 0.2  | 0.09 | -1.13 | 0.378524 | 0.520065 | 0.686519 | 0.711472 |
| MmugDNA.28060.1.S1_s_at | MmugDNA.28060.1 | 10.02 | 9.45  | 0.02 | 0.74 | 1.48  | 0.138075 | 0.103123 | 0.505565 | 0.364026 |
| MmugDNA.28067.1.S1_at   | MmugDNA.28067.1 | 6.02  | 5.67  | 0.63 | 0.23 | 1.27  | 0.536646 | 0.072147 | 0.779531 | 0.314664 |
| MmugDNA.2807.1.S1_at    | MmugDNA.2807.1  | 5.28  | 5.15  | 0.54 | 0.19 | 1.1   | 0.739604 | 0.682447 | 0.888213 | 0.814526 |
| MmugDNA.28073.1.S1_at   | MmugDNA.28073.1 | 8.82  | 9.52  | 0.77 | 0.49 | -1.62 | 0.134431 | 0.102681 | 0.50107  | 0.363067 |
| MmugDNA.28076.1.S1_at   | MmugDNA.28076.1 | 11.8  | 12.04 | 0.06 | 0.28 | -1.18 | 0.206261 | 0.260534 | 0.568566 | 0.527039 |
| MmugDNA.28079.1.S1_at   | MmugDNA.28079.1 | 8.21  | 8.68  | 0.14 | 0.64 | -1.39 | 0.2111   | 0.115986 | 0.571977 | 0.383164 |
| MmugDNA.28086.1.S1_at   | MmugDNA.28086.1 | 7.91  | 7.84  | 0.28 | 0.65 | 1.05  | 0.874804 | 0.978708 | 0.949796 | 0.988411 |
| MmugDNA.28096.1.S1_at   | MmugDNA.28096.1 | 9.55  | 8.81  | 0.27 | 0.56 | 1.67  | 0.126734 | 0.184038 | 0.492863 | 0.460224 |
| MmugDNA.28097.1.S1_s_at | MmugDNA.28097.1 | 6.34  | 7.39  | 0.37 | 0.27 | -2.08 | 0.016154 | 0.008502 | 0.262923 | 0.1223   |
| MmugDNA.28101.1.S1_at   | MmugDNA.28101.1 | 11.34 | 11.31 | 0.17 | 0.19 | 1.02  | 0.60862  | 0.010495 | 0.820119 | 0.133872 |
| MmugDNA.28109.1.S1_at   | MmugDNA.28109.1 | 6.96  | 6.98  | 0.06 | 0.13 | -1.01 | 0.887279 | 0.628328 | 0.954863 | 0.781112 |
| MmugDNA.28113.1.S1_at   | MmugDNA.28113.1 | 3.62  | 3.87  | 0.14 | 0.42 | -1.18 | 0.367948 | 0.505788 | 0.679739 | 0.702218 |
| MmugDNA.28117.1.S1_at   | MmugDNA.28117.1 | 11.97 | 11.69 | 0.15 | 0.06 | 1.22  | 0.056719 | 0.005935 | 0.386849 | 0.105426 |
| MmugDNA.28118.1.S1_at   | MmugDNA.28118.1 | 9.92  | 9.17  | 0.16 | 0.16 | 1.69  | 0.002041 | 0.000359 | 0.155636 | 0.037273 |
| MmugDNA.28121.1.S1_at   | MmugDNA.28121.1 | 4.67  | 4.9   | 0.58 | 0.36 | -1.17 | 0.762679 | 0.599093 | 0.900005 | 0.761287 |
| MmugDNA.28128.1.S1_at   | MmugDNA.28128.1 | 8.29  | 8.32  | 0.3  | 0.24 | -1.02 | 0.559991 | 0.11051  | 0.79419  | 0.374711 |
| MmugDNA.28137.1.S1_at   | MmugDNA.28137.1 | 5.97  | 6.24  | 0.23 | 0.23 | -1.21 | 0.087486 | 0.254279 | 0.441877 | 0.522605 |

|                         |                 |       |       |      |      |       |          |          |          |          |
|-------------------------|-----------------|-------|-------|------|------|-------|----------|----------|----------|----------|
| MmugDNA.28147.1.S1_at   | MmugDNA.28147.1 | 5.89  | 5.92  | 0.05 | 0.04 | -1.02 | 0.208679 | 0.299698 | 0.570402 | 0.558037 |
| MmugDNA.28159.1.S1_at   | MmugDNA.28159.1 | 8.01  | 7.71  | 0.07 | 0.45 | 1.23  | 0.096881 | 0.116552 | 0.455899 | 0.383705 |
| MmugDNA.2816.1.S1_at    | MmugDNA.2816.1  | 8.41  | 8.67  | 0.16 | 0.07 | -1.19 | 0.02727  | 0.009693 | 0.307187 | 0.129497 |
| MmugDNA.2816.1.S1_s_at  | MmugDNA.2816.1  | 6.81  | 6.84  | 0.16 | 0.14 | -1.02 | 0.226145 | 0.27531  | 0.584205 | 0.539663 |
| MmugDNA.28164.1.S1_at   | MmugDNA.28164.1 | 12.14 | 12.37 | 0.16 | 0.26 | -1.17 | 0.575279 | 0.39036  | 0.802197 | 0.624156 |
| MmugDNA.28165.1.S1_at   | MmugDNA.28165.1 | 7.81  | 7.04  | 0.11 | 1.24 | 1.7   | 0.261765 | 0.229455 | 0.60838  | 0.501527 |
| MmugDNA.28169.1.S1_at   | MmugDNA.28169.1 | 7.46  | 7.4   | 0.13 | 0.13 | 1.04  | 0.684544 | 0.697496 | 0.858788 | 0.824228 |
| MmugDNA.28179.1.S1_at   | MmugDNA.28179.1 | 11.63 | 11.42 | 0.17 | 1.24 | 1.16  | 0.569511 | 0.529089 | 0.799054 | 0.717133 |
| MmugDNA.28186.1.S1_at   | MmugDNA.28186.1 | 6.82  | 6.93  | 0.15 | 0.13 | -1.08 | 0.319111 | 0.445338 | 0.648688 | 0.662338 |
| MmugDNA.28190.1.S1_s_at | MmugDNA.28190.1 | 4.71  | 4.68  | 0.31 | 0.07 | 1.02  | 0.753467 | 0.916687 | 0.894888 | 0.953368 |
| MmugDNA.28191.1.S1_at   | MmugDNA.28191.1 | 9.83  | 9.15  | 0.1  | 0.82 | 1.59  | 0.772515 | 0.920858 | 0.904254 | 0.955413 |
| MmugDNA.28192.1.S1_at   | MmugDNA.28192.1 | 5.01  | 4.63  | 0.38 | 0.67 | 1.29  | 0.82735  | 0.234912 | 0.92997  | 0.506125 |
| MmugDNA.28198.1.S1_at   | MmugDNA.28198.1 | 5.5   | 6.25  | 0.03 | 1.13 | -1.68 | 0.223187 | 0.270276 | 0.581723 | 0.535654 |
| MmugDNA.2820.1.S1_at    | MmugDNA.2820.1  | 4     | 4.12  | 0.22 | 0.12 | -1.09 | 0.586876 | 0.221071 | 0.808357 | 0.494475 |
| MmugDNA.28206.1.S1_at   | MmugDNA.28206.1 | 4.59  | 4.45  | 0.12 | 0.16 | 1.1   | 0.308846 | 0.534562 | 0.641235 | 0.72045  |
| MmugDNA.28206.1.S1_x_at | MmugDNA.28206.1 | 8.08  | 8.12  | 0.04 | 0.18 | -1.03 | 0.492983 | 0.657011 | 0.755892 | 0.799401 |
| MmugDNA.28210.1.S1_at   | MmugDNA.28210.1 | 10.35 | 9.83  | 0.16 | 0.2  | 1.44  | 0.008352 | 0.003336 | 0.217705 | 0.083072 |
| MmugDNA.28211.1.S1_at   | MmugDNA.28211.1 | 9.42  | 9.04  | 0.14 | 0.11 | 1.3   | 0.012203 | 0.004755 | 0.240358 | 0.096208 |
| MmugDNA.28230.1.S1_at   | MmugDNA.28230.1 | 9.62  | 9.6   | 0.09 | 0.2  | 1.01  | 0.841427 | 0.774237 | 0.936191 | 0.868735 |
| MmugDNA.28234.1.S1_at   | MmugDNA.28234.1 | 4.75  | 5.54  | 1.35 | 1.24 | -1.73 | 0.595469 | 0.546268 | 0.812365 | 0.727894 |
| MmugDNA.28244.1.S1_at   | MmugDNA.28244.1 | 10.63 | 11.15 | 0.08 | 0.22 | -1.43 | 0.015042 | 0.001713 | 0.257013 | 0.062657 |
| MmugDNA.28246.1.S1_at   | MmugDNA.28246.1 | 11.2  | 10.64 | 0.19 | 0.11 | 1.47  | 0.02388  | 0.015431 | 0.293078 | 0.157727 |
| MmugDNA.28250.1.S1_at   | MmugDNA.28250.1 | 8.07  | 8.28  | 0.21 | 0.53 | -1.16 | 0.537535 | 0.146733 | 0.780064 | 0.42078  |
| MmugDNA.28252.1.S1_s_at | MmugDNA.28252.1 | 10.8  | 10.58 | 0.18 | 0.04 | 1.17  | 0.05437  | 0.042031 | 0.381851 | 0.249464 |
| MmugDNA.28260.1.S1_at   | MmugDNA.28260.1 | 6.89  | 9.54  | 1.23 | 2.35 | -6.27 | 0.211058 | 0.155409 | 0.571977 | 0.430802 |
| MmugDNA.28279.1.S1_at   | MmugDNA.28279.1 | 11.74 | 11.82 | 0.11 | 0.4  | -1.06 | 0.787553 | 0.918106 | 0.911638 | 0.954068 |
| MmugDNA.2828.1.S1_at    | MmugDNA.2828.1  | 6.1   | 6.12  | 0.09 | 0.34 | -1.02 | 0.453213 | 0.613712 | 0.732425 | 0.770786 |
| MmugDNA.28282.1.S1_at   | MmugDNA.28282.1 | 9     | 8.79  | 0.4  | 0.16 | 1.15  | 0.746834 | 0.123575 | 0.89155  | 0.393637 |
| MmugDNA.28284.1.S1_at   | MmugDNA.28284.1 | 11.86 | 11.78 | 0.17 | 0.03 | 1.05  | 0.780095 | 0.435786 | 0.908464 | 0.655526 |
| MmugDNA.28288.1.S1_at   | MmugDNA.28288.1 | 9.22  | 10.65 | 0.26 | 0.51 | -2.68 | 0.025526 | 0.018086 | 0.299597 | 0.169435 |
| MmugDNA.28291.1.S1_at   | MmugDNA.28291.1 | 9.87  | 9.83  | 0.13 | 0.47 | 1.03  | 0.342253 | 0.545797 | 0.663129 | 0.727653 |
| MmugDNA.28294.1.S1_at   | MmugDNA.28294.1 | 9.3   | 8.85  | 0.01 | 0.04 | 1.36  | 0.000045 | 0.000005 | 0.112653 | 0.015647 |
| MmugDNA.28294.1.S1_s_at | MmugDNA.28294.1 | 10.2  | 9.58  | 0.1  | 0.08 | 1.54  | 0.001093 | 0.000182 | 0.144223 | 0.030511 |
| MmugDNA.28295.1.S1_at   | MmugDNA.28295.1 | 6.41  | 6.7   | 0.1  | 0.09 | -1.22 | 0.029569 | 0.073631 | 0.314766 | 0.316952 |
| MmugDNA.2830.1.S1_at    | MmugDNA.2830.1  | 9.76  | 9.65  | 0.17 | 0.45 | 1.08  | 0.723402 | 0.756594 | 0.879142 | 0.858257 |
| MmugDNA.28301.1.S1_at   | MmugDNA.28301.1 | 4.92  | 4.9   | 0.11 | 0.15 | 1.01  | 0.637193 | 0.25194  | 0.836    | 0.520632 |
| MmugDNA.28305.1.S1_at   | MmugDNA.28305.1 | 8.78  | 7.91  | 0.3  | 0.09 | 1.82  | 0.019395 | 0.005624 | 0.273927 | 0.103682 |
| MmugDNA.28307.1.S1_at   | MmugDNA.28307.1 | 5.16  | 5.1   | 0.2  | 0.03 | 1.04  | 0.659738 | 0.350217 | 0.847313 | 0.593975 |
| MmugDNA.28309.1.S1_at   | MmugDNA.28309.1 | 4.62  | 4.89  | 0.13 | 0.12 | -1.21 | 0.051973 | 0.06118  | 0.376945 | 0.293981 |
| MmugDNA.28314.1.S1_at   | MmugDNA.28314.1 | 10.7  | 10.64 | 0.23 | 0.25 | 1.04  | 0.803442 | 0.829784 | 0.919138 | 0.902214 |
| MmugDNA.28316.1.S1_at   | MmugDNA.28316.1 | 12.73 | 12.61 | 0.14 | 0.02 | 1.08  | 0.707444 | 0.281723 | 0.871104 | 0.544807 |

|                         |                 |       |       |      |      |       |          |          |          |          |
|-------------------------|-----------------|-------|-------|------|------|-------|----------|----------|----------|----------|
| MmugDNA.28322.1.S1_at   | MmugDNA.28322.1 | 11.97 | 11.87 | 0.21 | 0.13 | 1.07  | 0.777409 | 0.343439 | 0.906975 | 0.58921  |
| MmugDNA.28323.1.S1_at   | MmugDNA.28323.1 | 4.82  | 4.81  | 0.24 | 0.07 | 1.01  | 0.359235 | 0.445367 | 0.673869 | 0.662343 |
| MmugDNA.28328.1.S1_at   | MmugDNA.28328.1 | 12.28 | 12.33 | 0.09 | 0.16 | -1.03 | 0.580953 | 0.714188 | 0.804828 | 0.834155 |
| MmugDNA.2833.1.S1_at    | MmugDNA.2833.1  | 5.83  | 5.93  | 0.16 | 0.12 | -1.07 | 0.633737 | 0.540866 | 0.833934 | 0.724604 |
| MmugDNA.28331.1.S1_at   | MmugDNA.28331.1 | 6.11  | 6.24  | 0.23 | 0.42 | -1.09 | 0.255013 | 0.097609 | 0.603068 | 0.355473 |
| MmugDNA.28333.1.S1_at   | MmugDNA.28333.1 | 3.63  | 3.77  | 0.1  | 0.05 | -1.1  | 0.103971 | 0.221387 | 0.464069 | 0.494644 |
| MmugDNA.28347.1.S1_at   | MmugDNA.28347.1 | 6.61  | 6.52  | 0.17 | 0.14 | 1.06  | 0.250701 | 0.114427 | 0.600389 | 0.38101  |
| MmugDNA.28349.1.S1_at   | MmugDNA.28349.1 | 8.06  | 7.56  | 0.43 | 0.68 | 1.41  | 0.24931  | 0.268553 | 0.60017  | 0.534126 |
| MmugDNA.28351.1.S1_at   | MmugDNA.28351.1 | 9.37  | 9.1   | 0.29 | 0.72 | 1.2   | 0.254221 | 0.334721 | 0.602339 | 0.582615 |
| MmugDNA.2836.1.S1_s_at  | MmugDNA.2836.1  | 11.48 | 11.9  | 0.09 | 0.19 | -1.34 | 0.065422 | 0.03397  | 0.404567 | 0.227969 |
| MmugDNA.28361.1.S1_at   | MmugDNA.28361.1 | 4.21  | 4.29  | 0.29 | 0.01 | -1.05 | 0.954377 | 0.726169 | 0.983073 | 0.84147  |
| MmugDNA.28367.1.S1_at   | MmugDNA.28367.1 | 12.97 | 13.23 | 0.33 | 0.26 | -1.19 | 0.745974 | 0.366141 | 0.891243 | 0.605941 |
| MmugDNA.28369.1.S1_at   | MmugDNA.28369.1 | 9.2   | 10.01 | 0.39 | 0.38 | -1.75 | 0.06341  | 0.056762 | 0.400499 | 0.284379 |
| MmugDNA.28376.1.S1_at   | MmugDNA.28376.1 | 4.37  | 4.58  | 0.16 | 0.11 | -1.16 | 0.330248 | 0.491944 | 0.655613 | 0.693325 |
| MmugDNA.28380.1.S1_at   | MmugDNA.28380.1 | 5.44  | 5.5   | 0.48 | 0.22 | -1.04 | 0.896377 | 0.828919 | 0.958707 | 0.901662 |
| MmugDNA.28382.1.S1_at   | MmugDNA.28382.1 | 7.49  | 7.52  | 0.21 | 0.12 | -1.02 | 0.382871 | 0.494476 | 0.688989 | 0.694893 |
| MmugDNA.28382.1.S1_s_at | MmugDNA.28382.1 | 8.22  | 8.39  | 0.19 | 0.18 | -1.13 | 0.567974 | 0.761886 | 0.79835  | 0.861579 |
| MmugDNA.28390.1.S1_at   | MmugDNA.28390.1 | 7.18  | 6.77  | 0.15 | 0.45 | 1.33  | 0.57443  | 0.647321 | 0.801702 | 0.793411 |
| MmugDNA.28393.1.S1_s_at | MmugDNA.28393.1 | 8.67  | 9.21  | 0.28 | 0.28 | -1.46 | 0.062084 | 0.045815 | 0.397152 | 0.258337 |
| MmugDNA.2840.1.S1_at    | MmugDNA.2840.1  | 10.2  | 10.2  | 0.1  | 0.25 | 1     | 0.339296 | 0.447839 | 0.661232 | 0.663881 |
| MmugDNA.28401.1.S1_at   | MmugDNA.28401.1 | 4.8   | 4.88  | 0.45 | 0.11 | -1.05 | 0.471731 | 0.526397 | 0.743333 | 0.715557 |
| MmugDNA.28402.1.S1_at   | MmugDNA.28402.1 | 7.09  | 7.1   | 0.05 | 0.15 | -1.01 | 0.229032 | 0.198344 | 0.586303 | 0.473267 |
| MmugDNA.28413.1.S1_at   | MmugDNA.28413.1 | 6.03  | 6.53  | 0.14 | 0.92 | -1.42 | 0.422751 | 0.075897 | 0.713675 | 0.320523 |
| MmugDNA.28414.1.S1_at   | MmugDNA.28414.1 | 4.24  | 4.29  | 0.09 | 0.02 | -1.03 | 0.202417 | 0.390261 | 0.564714 | 0.624128 |
| MmugDNA.28415.1.S1_at   | MmugDNA.28415.1 | 10.99 | 10.25 | 0.16 | 1.06 | 1.66  | 0.098406 | 0.094994 | 0.458268 | 0.352071 |
| MmugDNA.28418.1.S1_at   | MmugDNA.28418.1 | 4.06  | 3.78  | 0.03 | 0.06 | 1.22  | 0.001554 | 0.056703 | 0.151907 | 0.284214 |
| MmugDNA.28419.1.S1_at   | MmugDNA.28419.1 | 6.24  | 6.37  | 0.07 | 0.1  | -1.09 | 0.127124 | 0.068098 | 0.493494 | 0.307142 |
| MmugDNA.28420.1.S1_at   | MmugDNA.28420.1 | 11.74 | 11.78 | 0.12 | 0.12 | -1.03 | 0.905994 | 0.094843 | 0.962579 | 0.35185  |
| MmugDNA.28420.1.S1_s_at | MmugDNA.28420.1 | 9.89  | 10.14 | 0.19 | 0.21 | -1.19 | 0.361005 | 0.488653 | 0.675009 | 0.691273 |
| MmugDNA.28422.1.S1_at   | MmugDNA.28422.1 | 10.89 | 10.94 | 0.13 | 0.08 | -1.04 | 0.74322  | 0.729303 | 0.890118 | 0.843541 |
| MmugDNA.28423.1.S1_s_at | MmugDNA.28423.1 | 6.9   | 7.68  | 0.4  | 0.25 | -1.72 | 0.144085 | 0.156492 | 0.510652 | 0.431866 |
| MmugDNA.28430.1.S1_at   | MmugDNA.28430.1 | 9.31  | 9.4   | 0.14 | 0    | -1.07 | 0.275838 | 0.049915 | 0.61793  | 0.268548 |
| MmugDNA.28437.1.S1_at   | MmugDNA.28437.1 | 7.91  | 7.64  | 0.1  | 0.3  | 1.21  | 0.603379 | 0.142954 | 0.817133 | 0.416854 |
| MmugDNA.28439.1.S1_at   | MmugDNA.28439.1 | 8.29  | 7.26  | 0.09 | 0.29 | 2.04  | 0.008703 | 0.007969 | 0.220503 | 0.118702 |
| MmugDNA.28440.1.S1_at   | MmugDNA.28440.1 | 6.4   | 6.52  | 0.07 | 0.02 | -1.09 | 0.136759 | 0.353031 | 0.503852 | 0.596356 |
| MmugDNA.28441.1.S1_at   | MmugDNA.28441.1 | 4.49  | 4.32  | 0.06 | 0.09 | 1.12  | 0.038679 | 0.058149 | 0.345054 | 0.287812 |
| MmugDNA.28443.1.S1_at   | MmugDNA.28443.1 | 3.75  | 3.46  | 0.19 | 0.56 | 1.23  | 0.536511 | 0.527545 | 0.77949  | 0.716154 |
| MmugDNA.28444.1.S1_at   | MmugDNA.28444.1 | 5.35  | 5.68  | 0.1  | 0.09 | -1.26 | 0.021526 | 0.007943 | 0.282524 | 0.118702 |
| MmugDNA.28446.1.S1_at   | MmugDNA.28446.1 | 10.02 | 9.63  | 0.04 | 0.69 | 1.31  | 0.370694 | 0.535738 | 0.681582 | 0.721262 |
| MmugDNA.28451.1.S1_at   | MmugDNA.28451.1 | 9.59  | 9.92  | 0.27 | 0.3  | -1.26 | 0.119598 | 0.062805 | 0.484145 | 0.297213 |
| MmugDNA.28453.1.S1_at   | MmugDNA.28453.1 | 5.26  | 5.47  | 0.06 | 0.54 | -1.16 | 0.520039 | 0.343306 | 0.770598 | 0.58905  |

|                         |                 |       |       |      |      |        |          |          |          |          |
|-------------------------|-----------------|-------|-------|------|------|--------|----------|----------|----------|----------|
| MmugDNA.28455.1.S1_at   | MmugDNA.28455.1 | 7.2   | 6.87  | 0.13 | 0.08 | 1.25   | 0.053148 | 0.120413 | 0.379463 | 0.38925  |
| MmugDNA.28455.1.S1_s_at | MmugDNA.28455.1 | 7.26  | 6.97  | 0.14 | 0.3  | 1.23   | 0.135291 | 0.116488 | 0.502087 | 0.383671 |
| MmugDNA.2846.1.S1_at    | MmugDNA.2846.1  | 11.01 | 11.1  | 0.14 | 0.15 | -1.07  | 0.335576 | 0.269857 | 0.659165 | 0.535135 |
| MmugDNA.28461.1.S1_at   | MmugDNA.28461.1 | 2.98  | 2.98  | 0.07 | 0.12 | 1      | 0.251646 | 0.352956 | 0.601007 | 0.596268 |
| MmugDNA.28462.1.S1_at   | MmugDNA.28462.1 | 5.75  | 8.57  | 0.39 | 0.27 | -7.07  | 0.000393 | 0.000154 | 0.12978  | 0.030065 |
| MmugDNA.28465.1.S1_at   | MmugDNA.28465.1 | 8.08  | 6.1   | 0.3  | 1.31 | 3.95   | 0.077944 | 0.055956 | 0.428012 | 0.28236  |
| MmugDNA.28467.1.S1_at   | MmugDNA.28467.1 | 11.34 | 11.92 | 0.21 | 0.25 | -1.5   | 0.033773 | 0.025275 | 0.330204 | 0.19945  |
| MmugDNA.2847.1.S1_at    | MmugDNA.2847.1  | 9.49  | 9.49  | 0.24 | 0.39 | -1     | 0.841673 | 0.148237 | 0.936215 | 0.422745 |
| MmugDNA.28471.1.S1_at   | MmugDNA.28471.1 | 7.25  | 6.83  | 0.22 | 0.32 | 1.34   | 0.260496 | 0.378595 | 0.607292 | 0.615638 |
| MmugDNA.28472.1.S1_at   | MmugDNA.28472.1 | 9.76  | 9.31  | 0.13 | 0.25 | 1.36   | 0.142821 | 0.181325 | 0.509783 | 0.457834 |
| MmugDNA.28473.1.S1_at   | MmugDNA.28473.1 | 4.03  | 3.98  | 0.18 | 0.09 | 1.03   | 0.837812 | 0.53201  | 0.934478 | 0.718995 |
| MmugDNA.28474.1.S1_at   | MmugDNA.28474.1 | 12.68 | 12.8  | 0.07 | 0.12 | -1.09  | 0.429451 | 0.4807   | 0.717559 | 0.68597  |
| MmugDNA.28478.1.S1_at   | MmugDNA.28478.1 | 6.55  | 6.32  | 0.3  | 0.37 | 1.18   | 0.195595 | 0.169715 | 0.558901 | 0.446287 |
| MmugDNA.28479.1.S1_at   | MmugDNA.28479.1 | 5.04  | 4.91  | 0.26 | 0.42 | 1.09   | 0.736513 | 0.139876 | 0.886692 | 0.413173 |
| MmugDNA.28485.1.S1_at   | MmugDNA.28485.1 | 8.35  | 9.07  | 1.47 | 0.86 | -1.64  | 0.484777 | 0.631294 | 0.750677 | 0.782751 |
| MmugDNA.28489.1.S1_at   | MmugDNA.28489.1 | 12.89 | 13.08 | 0.13 | 0.17 | -1.14  | 0.198882 | 0.225029 | 0.561939 | 0.49773  |
| MmugDNA.2849.1.S1_s_at  | MmugDNA.2849.1  | 9.73  | 10.48 | 0.3  | 0.71 | -1.68  | 0.09335  | 0.06393  | 0.450557 | 0.29906  |
| MmugDNA.28490.1.S1_at   | MmugDNA.28490.1 | 9.82  | 10.11 | 0.24 | 0.52 | -1.22  | 0.98069  | 0.780637 | 0.993028 | 0.872726 |
| MmugDNA.28493.1.S1_at   | MmugDNA.28493.1 | 3.61  | 3.54  | 0.16 | 0.11 | 1.05   | 0.743911 | 0.765475 | 0.890332 | 0.863679 |
| MmugDNA.28495.1.S1_at   | MmugDNA.28495.1 | 8.72  | 8.37  | 0.16 | 0.1  | 1.28   | 0.043822 | 0.050046 | 0.357051 | 0.268916 |
| MmugDNA.28497.1.S1_at   | MmugDNA.28497.1 | 5.73  | 9.36  | 1.77 | 2.99 | -12.39 | 0.463531 | 0.378388 | 0.738846 | 0.615443 |
| MmugDNA.28501.1.S1_at   | MmugDNA.28501.1 | 9.58  | 10.42 | 0.62 | 0.53 | -1.8   | 0.309264 | 0.35816  | 0.641409 | 0.599694 |
| MmugDNA.28504.1.S1_at   | MmugDNA.28504.1 | 13.31 | 12.71 | 0.09 | 0.1  | 1.52   | 0.002298 | 0.000477 | 0.161798 | 0.038572 |
| MmugDNA.28514.1.S1_at   | MmugDNA.28514.1 | 6.06  | 6.06  | 0.38 | 0.28 | 1      | 0.994121 | 0.945287 | 0.997979 | 0.968942 |
| MmugDNA.28527.1.S1_at   | MmugDNA.28527.1 | 5.98  | 6.42  | 0.11 | 0.14 | -1.36  | 0.051126 | 0.023446 | 0.375935 | 0.191956 |
| MmugDNA.2853.1.S1_at    | MmugDNA.2853.1  | 13.1  | 13.21 | 0.11 | 0.23 | -1.08  | 0.769761 | 0.117637 | 0.903186 | 0.385352 |
| MmugDNA.28530.1.S1_s_at | MmugDNA.28530.1 | 10.99 | 11.41 | 0.1  | 0.28 | -1.34  | 0.031426 | 0.042106 | 0.321864 | 0.249656 |
| MmugDNA.28531.1.S1_at   | MmugDNA.28531.1 | 11.42 | 10.15 | 0.32 | 0.64 | 2.42   | 0.031733 | 0.056771 | 0.322685 | 0.284379 |
| MmugDNA.28534.1.S1_at   | MmugDNA.28534.1 | 8     | 9.54  | 0.39 | 0.54 | -2.9   | 0.017793 | 0.00775  | 0.267882 | 0.117622 |
| MmugDNA.28535.1.S1_s_at | MmugDNA.28535.1 | 11.16 | 11.55 | 0.16 | 0.14 | -1.31  | 0.02186  | 0.004088 | 0.283995 | 0.09055  |
| MmugDNA.28538.1.S1_at   | MmugDNA.28538.1 | 9.75  | 9.39  | 0.27 | 0.55 | 1.28   | 0.455751 | 0.488595 | 0.733977 | 0.691222 |
| MmugDNA.28544.1.S1_at   | MmugDNA.28544.1 | 8.69  | 7.74  | 0.92 | 0.55 | 1.94   | 0.179415 | 0.209578 | 0.543593 | 0.483264 |
| MmugDNA.28546.1.S1_at   | MmugDNA.28546.1 | 11.28 | 10.11 | 0.24 | 0.27 | 2.26   | 0.003674 | 0.000405 | 0.179515 | 0.03749  |
| MmugDNA.2855.1.S1_at    | MmugDNA.2855.1  | 11.3  | 11.03 | 0.07 | 0.33 | 1.2    | 0.084394 | 0.082761 | 0.436943 | 0.33223  |
| MmugDNA.28554.1.S1_at   | MmugDNA.28554.1 | 6.37  | 6.41  | 0.27 | 0.15 | -1.03  | 0.844665 | 0.686194 | 0.93762  | 0.816834 |
| MmugDNA.28561.1.S1_at   | MmugDNA.28561.1 | 6.51  | 6.36  | 0.39 | 0.75 | 1.11   | 0.56898  | 0.491822 | 0.79891  | 0.693275 |
| MmugDNA.28566.1.S1_at   | MmugDNA.28566.1 | 3.07  | 3.22  | 0.23 | 0.1  | -1.11  | 0.416468 | 0.032181 | 0.709959 | 0.222111 |
| MmugDNA.28569.1.S1_at   | MmugDNA.28569.1 | 4.44  | 4.19  | 0.2  | 0.07 | 1.19   | 0.342684 | 0.195744 | 0.663407 | 0.470637 |
| MmugDNA.2857.1.S1_at    | MmugDNA.2857.1  | 9.76  | 9.38  | 0.05 | 0.19 | 1.31   | 0.02904  | 0.014518 | 0.312556 | 0.15371  |
| MmugDNA.28570.1.S1_at   | MmugDNA.28570.1 | 4.92  | 5.03  | 0.04 | 0.19 | -1.08  | 0.094291 | 0.150393 | 0.451807 | 0.424934 |
| MmugDNA.28571.1.S1_at   | MmugDNA.28571.1 | 8.73  | 8.05  | 0.66 | 0.26 | 1.61   | 0.178248 | 0.256128 | 0.542524 | 0.524069 |

|                         |                 |       |       |      |      |       |          |          |          |          |
|-------------------------|-----------------|-------|-------|------|------|-------|----------|----------|----------|----------|
| MmugDNA.28572.1.S1_at   | MmugDNA.28572.1 | 8.47  | 8.45  | 0.12 | 0.4  | 1.01  | 0.916198 | 0.990658 | 0.967072 | 0.994725 |
| MmugDNA.28574.1.S1_at   | MmugDNA.28574.1 | 7.43  | 6.04  | 0.33 | 0.25 | 2.62  | 0.005938 | 0.002772 | 0.193916 | 0.077863 |
| MmugDNA.28591.1.S1_s_at | MmugDNA.28591.1 | 7.49  | 7.63  | 0.21 | 0.27 | -1.1  | 0.563951 | 0.691834 | 0.796337 | 0.82074  |
| MmugDNA.28599.1.S1_at   | MmugDNA.28599.1 | 12.36 | 12.18 | 0.22 | 0.18 | 1.13  | 0.651615 | 0.052148 | 0.843271 | 0.273955 |
| MmugDNA.286.1.S1_at     | MmugDNA.286.1   | 5.66  | 4.68  | 0.36 | 0.37 | 1.97  | 0.019632 | 0.022216 | 0.275549 | 0.186513 |
| MmugDNA.286.1.S1_s_at   | MmugDNA.286.1   | 7.26  | 6.48  | 0.34 | 0.16 | 1.73  | 0.018415 | 0.009772 | 0.270303 | 0.130026 |
| MmugDNA.28603.1.S1_at   | MmugDNA.28603.1 | 3.81  | 3.78  | 0.02 | 0.1  | 1.02  | 0.718319 | 0.278618 | 0.876382 | 0.542329 |
| MmugDNA.28625.1.S1_at   | MmugDNA.28625.1 | 9.17  | 9.45  | 0.07 | 1.07 | -1.21 | 0.648202 | 0.792999 | 0.84178  | 0.880435 |
| MmugDNA.28626.1.S1_at   | MmugDNA.28626.1 | 11.75 | 11.69 | 0.07 | 0.5  | 1.04  | 0.694901 | 0.675702 | 0.864696 | 0.810429 |
| MmugDNA.28627.1.S1_at   | MmugDNA.28627.1 | 9.8   | 9.73  | 0.09 | 0.36 | 1.05  | 0.914778 | 0.951225 | 0.966289 | 0.972378 |
| MmugDNA.2863.1.S1_at    | MmugDNA.2863.1  | 11.09 | 11.23 | 0.06 | 0.17 | -1.11 | 0.291769 | 0.380061 | 0.629048 | 0.61674  |
| MmugDNA.28631.1.S1_at   | MmugDNA.28631.1 | 9.23  | 11.4  | 0.67 | 0.73 | -4.49 | 0.028549 | 0.010315 | 0.311702 | 0.132962 |
| MmugDNA.28634.1.S1_at   | MmugDNA.28634.1 | 10.81 | 11.48 | 0.23 | 0.28 | -1.59 | 0.091431 | 0.076976 | 0.447175 | 0.322421 |
| MmugDNA.28635.1.S1_at   | MmugDNA.28635.1 | 11.75 | 13.23 | 0.67 | 0.19 | -2.79 | 0.018772 | 0.011823 | 0.2715   | 0.140866 |
| MmugDNA.28641.1.S1_at   | MmugDNA.28641.1 | 8.07  | 8.56  | 0.19 | 0.83 | -1.41 | 0.315942 | 0.433074 | 0.646774 | 0.653448 |
| MmugDNA.28643.1.S1_at   | MmugDNA.28643.1 | 7.13  | 6.73  | 0.86 | 0.26 | 1.32  | 0.375725 | 0.426434 | 0.684803 | 0.648601 |
| MmugDNA.28666.1.S1_at   | MmugDNA.28666.1 | 6.9   | 7.01  | 0.41 | 0.53 | -1.08 | 0.635924 | 0.625662 | 0.835212 | 0.779265 |
| MmugDNA.28672.1.S1_at   | MmugDNA.28672.1 | 3.3   | 3.44  | 0.16 | 0.1  | -1.1  | 0.604003 | 0.511778 | 0.817401 | 0.705797 |
| MmugDNA.28678.1.S1_at   | MmugDNA.28678.1 | 10.62 | 10.1  | 0.07 | 0.16 | 1.44  | 0.006809 | 0.004408 | 0.201708 | 0.092846 |
| MmugDNA.28682.1.S1_at   | MmugDNA.28682.1 | 4.1   | 4.16  | 0.46 | 0.14 | -1.04 | 0.518952 | 0.314638 | 0.769765 | 0.568415 |
| MmugDNA.28683.1.S1_at   | MmugDNA.28683.1 | 8.89  | 7.72  | 0.08 | 0.27 | 2.25  | 0.003343 | 0.002983 | 0.177442 | 0.079958 |
| MmugDNA.28686.1.S1_at   | MmugDNA.28686.1 | 10.25 | 10.15 | 0.07 | 0.33 | 1.08  | 0.577983 | 0.278647 | 0.803619 | 0.542347 |
| MmugDNA.28689.1.S1_at   | MmugDNA.28689.1 | 11.92 | 12.34 | 0.18 | 0.25 | -1.34 | 0.051942 | 0.056372 | 0.376805 | 0.283382 |
| MmugDNA.28694.1.S1_at   | MmugDNA.28694.1 | 10.74 | 10.99 | 0.35 | 0.72 | -1.19 | 0.6151   | 0.444697 | 0.823342 | 0.662072 |
| MmugDNA.28694.1.S1_s_at | MmugDNA.28694.1 | 10.41 | 10.71 | 0.29 | 0.79 | -1.24 | 0.820167 | 0.852472 | 0.92682  | 0.916174 |
| MmugDNA.28698.1.S1_at   | MmugDNA.28698.1 | 12.27 | 8.76  | 2.56 | 0.67 | 11.41 | 0.250139 | 0.194944 | 0.600389 | 0.470088 |
| MmugDNA.28698.1.S1_x_at | MmugDNA.28698.1 | 12.32 | 8.84  | 2.55 | 0.65 | 11.11 | 0.252064 | 0.197663 | 0.601234 | 0.472633 |
| MmugDNA.2870.1.S1_at    | MmugDNA.2870.1  | 9.05  | 8.79  | 0.28 | 0.81 | 1.2   | 0.466522 | 0.653642 | 0.740215 | 0.797546 |
| MmugDNA.28700.1.S1_at   | MmugDNA.28700.1 | 10.15 | 10.56 | 0.09 | 0.42 | -1.33 | 0.40451  | 0.386976 | 0.702765 | 0.621935 |
| MmugDNA.28704.1.S1_at   | MmugDNA.28704.1 | 11.46 | 11.88 | 0.12 | 0.12 | -1.34 | 0.012184 | 0.006468 | 0.240358 | 0.109304 |
| MmugDNA.28706.1.S1_at   | MmugDNA.28706.1 | 4.8   | 4.98  | 0.1  | 0.27 | -1.14 | 0.621293 | 0.422576 | 0.826528 | 0.645762 |
| MmugDNA.28721.1.S1_at   | MmugDNA.28721.1 | 10.83 | 11.16 | 0.4  | 0.34 | -1.26 | 0.456715 | 0.360068 | 0.734529 | 0.601204 |
| MmugDNA.28724.1.S1_at   | MmugDNA.28724.1 | 10.83 | 11.55 | 0.09 | 0.38 | -1.65 | 0.067739 | 0.028242 | 0.408375 | 0.209816 |
| MmugDNA.2873.1.S1_at    | MmugDNA.2873.1  | 8.68  | 8.52  | 0.28 | 0.2  | 1.12  | 0.833653 | 0.544836 | 0.932356 | 0.727177 |
| MmugDNA.28738.1.S1_at   | MmugDNA.28738.1 | 11.15 | 10.23 | 0.17 | 0.6  | 1.89  | 0.140513 | 0.154139 | 0.508385 | 0.42887  |
| MmugDNA.2874.1.S1_at    | MmugDNA.2874.1  | 9.88  | 9.01  | 0.14 | 0.24 | 1.83  | 0.00657  | 0.002726 | 0.199625 | 0.076945 |
| MmugDNA.28742.1.S1_at   | MmugDNA.28742.1 | 10.97 | 10.52 | 0.12 | 0.82 | 1.37  | 0.382322 | 0.397935 | 0.688612 | 0.629138 |
| MmugDNA.28748.1.S1_at   | MmugDNA.28748.1 | 9.71  | 10.22 | 0.09 | 0.31 | -1.42 | 0.028649 | 0.011281 | 0.312031 | 0.138076 |
| MmugDNA.28749.1.S1_at   | MmugDNA.28749.1 | 7.11  | 7.06  | 0.2  | 0.33 | 1.03  | 0.562033 | 0.076634 | 0.795109 | 0.321912 |
| MmugDNA.2875.1.S1_at    | MmugDNA.2875.1  | 9.14  | 8.29  | 0.1  | 0.18 | 1.8   | 0.001663 | 0.000324 | 0.15365  | 0.035587 |
| MmugDNA.28752.1.S1_at   | MmugDNA.28752.1 | 7.37  | 6.89  | 0.05 | 0.34 | 1.39  | 0.031955 | 0.008278 | 0.323492 | 0.12078  |

|                         |                 |       |       |      |      |       |          |          |          |          |
|-------------------------|-----------------|-------|-------|------|------|-------|----------|----------|----------|----------|
| MmugDNA.28757.1.S1_at   | MmugDNA.28757.1 | 4.61  | 4.51  | 0.2  | 0.19 | 1.07  | 0.496299 | 0.787747 | 0.757473 | 0.877256 |
| MmugDNA.28758.1.S1_at   | MmugDNA.28758.1 | 3.62  | 3.64  | 0.26 | 0.15 | -1.01 | 0.639514 | 0.831838 | 0.837223 | 0.903518 |
| MmugDNA.28773.1.S1_at   | MmugDNA.28773.1 | 4.52  | 4.93  | 0.15 | 0.21 | -1.34 | 0.096146 | 0.107517 | 0.454327 | 0.370389 |
| MmugDNA.28779.1.S1_at   | MmugDNA.28779.1 | 13.59 | 13.53 | 0.04 | 0.13 | 1.04  | 0.54977  | 0.562535 | 0.787481 | 0.738055 |
| MmugDNA.2878.1.S1_at    | MmugDNA.2878.1  | 8.6   | 8.03  | 0.09 | 0.44 | 1.48  | 0.089619 | 0.102635 | 0.445276 | 0.362991 |
| MmugDNA.28787.1.S1_at   | MmugDNA.28787.1 | 11.4  | 12.21 | 0.3  | 0.13 | -1.75 | 0.009013 | 0.004664 | 0.222023 | 0.095301 |
| MmugDNA.28792.1.S1_at   | MmugDNA.28792.1 | 10.03 | 9.52  | 0.13 | 0.85 | 1.43  | 0.290368 | 0.387278 | 0.628091 | 0.622027 |
| MmugDNA.2881.1.S1_at    | MmugDNA.2881.1  | 5.51  | 5.46  | 0.18 | 0.68 | 1.03  | 0.577976 | 0.720744 | 0.803619 | 0.838368 |
| MmugDNA.2882.1.S1_at    | MmugDNA.2882.1  | 10.13 | 10.07 | 0.15 | 0.71 | 1.04  | 0.313944 | 0.280441 | 0.645482 | 0.543648 |
| MmugDNA.28820.1.S1_at   | MmugDNA.28820.1 | 8.62  | 9.34  | 0.71 | 0.81 | -1.65 | 0.284091 | 0.396283 | 0.623949 | 0.628076 |
| MmugDNA.28821.1.S1_at   | MmugDNA.28821.1 | 10.93 | 9.94  | 0.06 | 0.18 | 1.98  | 0.000945 | 0.000214 | 0.139813 | 0.032361 |
| MmugDNA.28822.1.S1_at   | MmugDNA.28822.1 | 3.86  | 3.75  | 0.1  | 0.19 | 1.08  | 0.959249 | 0.989421 | 0.98454  | 0.994009 |
| MmugDNA.28828.1.S1_at   | MmugDNA.28828.1 | 4.72  | 5.67  | 0.11 | 0.65 | -1.93 | 0.058811 | 0.063652 | 0.390921 | 0.298815 |
| MmugDNA.28831.1.S1_at   | MmugDNA.28831.1 | 6.1   | 6.13  | 0.06 | 0.16 | -1.02 | 0.592741 | 0.851025 | 0.811174 | 0.915265 |
| MmugDNA.28837.1.S1_at   | MmugDNA.28837.1 | 5.16  | 5.28  | 0.07 | 0.1  | -1.09 | 0.328616 | 0.1032   | 0.654397 | 0.364123 |
| MmugDNA.2884.1.S1_at    | MmugDNA.2884.1  | 10.88 | 11.43 | 0.05 | 0.34 | -1.47 | 0.053575 | 0.044452 | 0.380422 | 0.25521  |
| MmugDNA.28842.1.S1_at   | MmugDNA.28842.1 | 9.22  | 9.98  | 0.36 | 0.39 | -1.7  | 0.06479  | 0.059576 | 0.403383 | 0.290619 |
| MmugDNA.28843.1.S1_at   | MmugDNA.28843.1 | 13.2  | 13.26 | 0.12 | 0.12 | -1.04 | 0.112447 | 0.087247 | 0.474902 | 0.340237 |
| MmugDNA.28848.1.S1_at   | MmugDNA.28848.1 | 11.93 | 11.73 | 0.05 | 0.19 | 1.15  | 0.237427 | 0.06369  | 0.590941 | 0.298842 |
| MmugDNA.28855.1.S1_at   | MmugDNA.28855.1 | 13.39 | 13.52 | 0.15 | 0.15 | -1.1  | 0.127813 | 0.080059 | 0.494071 | 0.327429 |
| MmugDNA.28875.1.S1_at   | MmugDNA.28875.1 | 3.11  | 3.19  | 0.04 | 0.27 | -1.06 | 0.8954   | 0.712534 | 0.958114 | 0.833383 |
| MmugDNA.28879.1.S1_at   | MmugDNA.28879.1 | 8.23  | 8.03  | 0.62 | 0.12 | 1.15  | 0.647116 | 0.712437 | 0.841218 | 0.833371 |
| MmugDNA.28880.1.S1_at   | MmugDNA.28880.1 | 6.87  | 7.13  | 0.04 | 0.02 | -1.19 | 0.00032  | 0.000135 | 0.12562  | 0.029087 |
| MmugDNA.28883.1.S1_at   | MmugDNA.28883.1 | 9.42  | 9.6   | 0.12 | 0.2  | -1.13 | 0.150672 | 0.032874 | 0.515411 | 0.224478 |
| MmugDNA.28889.1.S1_at   | MmugDNA.28889.1 | 6.05  | 6.2   | 0.54 | 0.96 | -1.11 | 0.450803 | 0.620247 | 0.731302 | 0.775303 |
| MmugDNA.28890.1.S1_at   | MmugDNA.28890.1 | 6.92  | 6.63  | 0.15 | 0.19 | 1.22  | 0.062781 | 0.054754 | 0.399296 | 0.279506 |
| MmugDNA.289.1.S1_at     | MmugDNA.289.1   | 3.19  | 3.36  | 0.1  | 0.22 | -1.13 | 0.37504  | 0.589908 | 0.68431  | 0.755994 |
| MmugDNA.28903.1.S1_at   | MmugDNA.28903.1 | 4.17  | 4.26  | 0.14 | 0.12 | -1.06 | 0.197933 | 0.257593 | 0.561022 | 0.525302 |
| MmugDNA.28907.1.S1_at   | MmugDNA.28907.1 | 7.47  | 7.22  | 0.11 | 0.2  | 1.19  | 0.159123 | 0.115627 | 0.52416  | 0.382714 |
| MmugDNA.28911.1.S1_at   | MmugDNA.28911.1 | 8.76  | 8.94  | 0.12 | 0.31 | -1.14 | 0.243337 | 0.283804 | 0.595087 | 0.546209 |
| MmugDNA.28916.1.S1_at   | MmugDNA.28916.1 | 7.86  | 7.52  | 0.27 | 0.31 | 1.27  | 0.449206 | 0.546087 | 0.730162 | 0.727769 |
| MmugDNA.28918.1.S1_at   | MmugDNA.28918.1 | 11.54 | 11.7  | 0.05 | 0.08 | -1.12 | 0.023869 | 0.005221 | 0.293078 | 0.100105 |
| MmugDNA.28919.1.A1_at   | MmugDNA.28919.1 | 3.72  | 3.68  | 0.19 | 0.18 | 1.03  | 0.719364 | 0.810629 | 0.876814 | 0.890812 |
| MmugDNA.28919.1.S1_at   | MmugDNA.28919.1 | 3.67  | 3.68  | 0.08 | 0.18 | -1.01 | 0.802718 | 0.697664 | 0.9187   | 0.824317 |
| MmugDNA.2892.1.S1_at    | MmugDNA.2892.1  | 3.89  | 3.96  | 0.08 | 0.02 | -1.04 | 0.124345 | 0.610552 | 0.490248 | 0.768734 |
| MmugDNA.28922.1.S1_at   | MmugDNA.28922.1 | 7.9   | 8.22  | 0.26 | 0.27 | -1.25 | 0.076965 | 0.07073  | 0.425961 | 0.31213  |
| MmugDNA.28933.1.S1_at   | MmugDNA.28933.1 | 12.84 | 12.55 | 0.14 | 0.34 | 1.23  | 0.054446 | 0.011672 | 0.381851 | 0.140009 |
| MmugDNA.28936.1.S1_x_at | MmugDNA.28936.1 | 11.79 | 11.64 | 0.44 | 0.14 | 1.12  | 0.212619 | 0.301625 | 0.57292  | 0.55955  |
| MmugDNA.2895.1.S1_at    | MmugDNA.2895.1  | 9     | 9.48  | 0.35 | 0.59 | -1.39 | 0.227306 | 0.24405  | 0.585089 | 0.514111 |
| MmugDNA.28958.1.S1_at   | MmugDNA.28958.1 | 10.59 | 10.38 | 0.22 | 0.06 | 1.16  | 0.251486 | 0.002948 | 0.600859 | 0.079945 |
| MmugDNA.28959.1.S1_s_at | MmugDNA.28959.1 | 12.15 | 12.32 | 0.16 | 0.16 | -1.13 | 0.207489 | 0.076379 | 0.569624 | 0.321368 |



|                         |                 |       |       |      |      |       |          |          |          |          |
|-------------------------|-----------------|-------|-------|------|------|-------|----------|----------|----------|----------|
| MmugDNA.28963.1.S1_at   | MmugDNA.28963.1 | 4.83  | 6.76  | 0.55 | 1.34 | -3.81 | 0.074887 | 0.032804 | 0.421338 | 0.22427  |
| MmugDNA.28965.1.S1_at   | MmugDNA.28965.1 | 12.26 | 11.6  | 0.05 | 0.05 | 1.58  | 0.000075 | 0.000003 | 0.112653 | 0.013386 |
| MmugDNA.2897.1.S1_at    | MmugDNA.2897.1  | 10.87 | 10.88 | 0.22 | 0.09 | -1.01 | 0.451064 | 0.6455   | 0.731469 | 0.792355 |
| MmugDNA.28982.1.S1_s_at | MmugDNA.28982.1 | 12.15 | 12.39 | 0.11 | 0.22 | -1.18 | 0.143836 | 0.107475 | 0.510427 | 0.370311 |
| MmugDNA.28984.1.S1_at   | MmugDNA.28984.1 | 8.22  | 7.83  | 0.34 | 0.09 | 1.31  | 0.109399 | 0.091423 | 0.470811 | 0.34639  |
| MmugDNA.28986.1.S1_at   | MmugDNA.28986.1 | 9.6   | 10.12 | 0.21 | 0.19 | -1.43 | 0.139531 | 0.1266   | 0.506996 | 0.397214 |
| MmugDNA.28987.1.S1_at   | MmugDNA.28987.1 | 8.45  | 7.88  | 0.14 | 0.39 | 1.49  | 0.130784 | 0.163036 | 0.497154 | 0.439203 |
| MmugDNA.28997.1.S1_at   | MmugDNA.28997.1 | 8.37  | 8.32  | 0.28 | 0.56 | 1.03  | 0.361657 | 0.46749  | 0.6754   | 0.677091 |
| MmugDNA.28998.1.S1_at   | MmugDNA.28998.1 | 12.07 | 12.25 | 0.17 | 0.11 | -1.13 | 0.856294 | 0.457561 | 0.941984 | 0.670864 |
| MmugDNA.29.1.S1_at      | MmugDNA.29.1    | 11.3  | 11.15 | 0.1  | 0.2  | 1.11  | 0.506179 | 0.363545 | 0.762112 | 0.603957 |
| MmugDNA.29001.1.S1_at   | MmugDNA.29001.1 | 12.83 | 12.81 | 0.07 | 0.07 | 1.02  | 0.927177 | 0.225594 | 0.971987 | 0.498155 |
| MmugDNA.29006.1.S1_at   | MmugDNA.29006.1 | 9.48  | 8.77  | 0.34 | 0.08 | 1.64  | 0.063439 | 0.116403 | 0.400574 | 0.383671 |
| MmugDNA.29007.1.S1_at   | MmugDNA.29007.1 | 10.41 | 10.18 | 0.29 | 0.9  | 1.18  | 0.96551  | 0.994041 | 0.986828 | 0.996397 |
| MmugDNA.2901.1.S1_at    | MmugDNA.2901.1  | 9.86  | 9.83  | 0.11 | 0.1  | 1.02  | 0.863804 | 0.338567 | 0.945348 | 0.585564 |
| MmugDNA.29014.1.S1_at   | MmugDNA.29014.1 | 4.93  | 5.3   | 0.16 | 0.06 | -1.29 | 0.040994 | 0.052357 | 0.35051  | 0.274315 |
| MmugDNA.29018.1.S1_at   | MmugDNA.29018.1 | 11.64 | 11.75 | 0.02 | 0.03 | -1.08 | 0.007682 | 0.000046 | 0.211086 | 0.025273 |
| MmugDNA.2902.1.S1_at    | MmugDNA.2902.1  | 8.04  | 7.72  | 0.11 | 0.13 | 1.25  | 0.042155 | 0.025666 | 0.354431 | 0.200834 |
| MmugDNA.29022.1.S1_at   | MmugDNA.29022.1 | 11.94 | 11.34 | 0.04 | 0.17 | 1.52  | 0.002887 | 0.001484 | 0.169151 | 0.058804 |
| MmugDNA.29023.1.S1_at   | MmugDNA.29023.1 | 11.44 | 11.48 | 0.4  | 0.04 | -1.03 | 0.69494  | 0.022435 | 0.864696 | 0.187441 |
| MmugDNA.29025.1.S1_at   | MmugDNA.29025.1 | 5.46  | 4.86  | 0.08 | 0.61 | 1.51  | 0.541646 | 0.304421 | 0.782793 | 0.561712 |
| MmugDNA.29029.1.S1_at   | MmugDNA.29029.1 | 6.79  | 6.97  | 0.2  | 0.18 | -1.13 | 0.983326 | 0.014214 | 0.993968 | 0.152269 |
| MmugDNA.29030.1.S1_at   | MmugDNA.29030.1 | 8     | 8.13  | 0.05 | 0.28 | -1.1  | 0.184985 | 0.085393 | 0.548438 | 0.337289 |
| MmugDNA.29036.1.S1_at   | MmugDNA.29036.1 | 12.05 | 11.28 | 0.16 | 0.12 | 1.71  | 0.002746 | 0.000934 | 0.165355 | 0.048962 |
| MmugDNA.29038.1.S1_at   | MmugDNA.29038.1 | 5.53  | 5.66  | 0.17 | 0.11 | -1.09 | 0.303442 | 0.173714 | 0.637681 | 0.450055 |
| MmugDNA.29040.1.S1_at   | MmugDNA.29040.1 | 9.81  | 8.89  | 0.13 | 1.21 | 1.89  | 0.233777 | 0.166014 | 0.588317 | 0.442579 |
| MmugDNA.29042.1.S1_at   | MmugDNA.29042.1 | 9.92  | 9.52  | 0.21 | 0.11 | 1.32  | 0.059869 | 0.014198 | 0.392969 | 0.152173 |
| MmugDNA.29046.1.S1_at   | MmugDNA.29046.1 | 6.64  | 5.8   | 0.56 | 0.63 | 1.8   | 0.103396 | 0.01907  | 0.462888 | 0.173701 |
| MmugDNA.29048.1.S1_at   | MmugDNA.29048.1 | 5.57  | 5.52  | 0.15 | 0.1  | 1.03  | 0.304062 | 0.411056 | 0.638248 | 0.637874 |
| MmugDNA.29049.1.S1_at   | MmugDNA.29049.1 | 4.65  | 4.83  | 0.16 | 0.43 | -1.13 | 0.520291 | 0.583104 | 0.77071  | 0.751559 |
| MmugDNA.2905.1.S1_at    | MmugDNA.2905.1  | 10.3  | 10.25 | 0.03 | 0.16 | 1.03  | 0.211042 | 0.300093 | 0.571977 | 0.558262 |
| MmugDNA.29053.1.S1_at   | MmugDNA.29053.1 | 11.1  | 10.34 | 0.1  | 0.42 | 1.7   | 0.100352 | 0.101289 | 0.460878 | 0.361069 |
| MmugDNA.29055.1.S1_at   | MmugDNA.29055.1 | 3.37  | 3.47  | 0.1  | 0.28 | -1.07 | 0.413932 | 0.561215 | 0.708746 | 0.737235 |
| MmugDNA.2906.1.S1_at    | MmugDNA.2906.1  | 3.26  | 3.12  | 1.05 | 0.4  | 1.1   | 0.476064 | 0.392804 | 0.746125 | 0.625846 |
| MmugDNA.29066.1.S1_at   | MmugDNA.29066.1 | 4.8   | 4.8   | 0.03 | 0.04 | 1     | 0.609226 | 0.203851 | 0.82039  | 0.478102 |
| MmugDNA.29068.1.S1_at   | MmugDNA.29068.1 | 5.91  | 5.99  | 0.02 | 0.12 | -1.06 | 0.286701 | 0.388141 | 0.625572 | 0.622607 |
| MmugDNA.29073.1.S1_at   | MmugDNA.29073.1 | 7.19  | 7.08  | 0.16 | 0.42 | 1.08  | 0.790005 | 0.390556 | 0.912878 | 0.624329 |
| MmugDNA.29075.1.S1_at   | MmugDNA.29075.1 | 3.43  | 3.75  | 0.22 | 0.41 | -1.25 | 0.96262  | 0.754796 | 0.985589 | 0.857323 |
| MmugDNA.29088.1.S1_at   | MmugDNA.29088.1 | 3.01  | 3.18  | 0.07 | 0.14 | -1.12 | 0.117581 | 0.252316 | 0.481816 | 0.52096  |
| MmugDNA.29090.1.S1_at   | MmugDNA.29090.1 | 12.57 | 12.61 | 0.11 | 0.08 | -1.03 | 0.278472 | 0.049005 | 0.620536 | 0.266254 |
| MmugDNA.29093.1.S1_at   | MmugDNA.29093.1 | 7.32  | 8.59  | 0.93 | 0.97 | -2.41 | 0.39918  | 0.172076 | 0.699174 | 0.448508 |
| MmugDNA.29094.1.S1_at   | MmugDNA.29094.1 | 5.15  | 4.58  | 1.76 | 0.23 | 1.49  | 0.594987 | 0.31316  | 0.812253 | 0.567717 |

|                         |                 |       |       |      |      |       |          |          |          |          |
|-------------------------|-----------------|-------|-------|------|------|-------|----------|----------|----------|----------|
| MmugDNA.29100.1.S1_at   | MmugDNA.29100.1 | 13.67 | 13.78 | 0.03 | 0.19 | -1.08 | 0.882785 | 0.729035 | 0.952922 | 0.843391 |
| MmugDNA.29101.1.S1_at   | MmugDNA.29101.1 | 9.92  | 10.77 | 0.6  | 0.58 | -1.8  | 0.07313  | 0.035733 | 0.418452 | 0.233413 |
| MmugDNA.29104.1.S1_at   | MmugDNA.29104.1 | 5.55  | 5.63  | 0.13 | 0.23 | -1.05 | 0.661591 | 0.394969 | 0.848148 | 0.627216 |
| MmugDNA.29110.1.S1_at   | MmugDNA.29110.1 | 9.94  | 9.46  | 0.23 | 0.27 | 1.4   | 0.044825 | 0.048656 | 0.359043 | 0.265613 |
| MmugDNA.29118.1.S1_at   | MmugDNA.29118.1 | 8.33  | 8.84  | 0.34 | 0.5  | -1.42 | 0.742188 | 0.59359  | 0.889679 | 0.758334 |
| MmugDNA.29119.1.S1_at   | MmugDNA.29119.1 | 5.36  | 5.09  | 0.24 | 0.57 | 1.2   | 0.78314  | 0.300074 | 0.909454 | 0.558262 |
| MmugDNA.2912.1.S1_at    | MmugDNA.2912.1  | 12.25 | 12.69 | 0.06 | 0.29 | -1.35 | 0.052629 | 0.043921 | 0.378332 | 0.254098 |
| MmugDNA.29127.1.S1_at   | MmugDNA.29127.1 | 9.59  | 9.15  | 0.08 | 0.12 | 1.35  | 0.012498 | 0.011284 | 0.242029 | 0.138076 |
| MmugDNA.29130.1.S1_at   | MmugDNA.29130.1 | 6.15  | 5.67  | 0.67 | 0.88 | 1.4   | 0.970501 | 0.96555  | 0.988658 | 0.980739 |
| MmugDNA.29134.1.S1_at   | MmugDNA.29134.1 | 10.77 | 10.24 | 0.55 | 0.22 | 1.45  | 0.550005 | 0.544761 | 0.787584 | 0.727107 |
| MmugDNA.29136.1.S1_at   | MmugDNA.29136.1 | 6.33  | 6.72  | 0.16 | 0.45 | -1.32 | 0.082257 | 0.055669 | 0.433636 | 0.281785 |
| MmugDNA.29138.1.S1_at   | MmugDNA.29138.1 | 6.97  | 7.03  | 0.04 | 0.16 | -1.04 | 0.604009 | 0.201436 | 0.817401 | 0.475963 |
| MmugDNA.29139.1.S1_at   | MmugDNA.29139.1 | 5.36  | 4.71  | 0.15 | 0.37 | 1.57  | 0.152602 | 0.157812 | 0.517325 | 0.433475 |
| MmugDNA.29144.1.S1_at   | MmugDNA.29144.1 | 13.1  | 13.17 | 0.09 | 0.13 | -1.05 | 0.280226 | 0.275479 | 0.621476 | 0.539697 |
| MmugDNA.29146.1.S1_at   | MmugDNA.29146.1 | 7.75  | 7.53  | 0.17 | 0.33 | 1.17  | 0.46625  | 0.508004 | 0.740215 | 0.703358 |
| MmugDNA.29147.1.S1_at   | MmugDNA.29147.1 | 7.09  | 6.45  | 0.09 | 0.52 | 1.56  | 0.036895 | 0.030599 | 0.34048  | 0.216887 |
| MmugDNA.2915.1.S1_at    | MmugDNA.2915.1  | 7.8   | 8.13  | 0.48 | 0.06 | -1.26 | 0.848711 | 0.059199 | 0.939211 | 0.290208 |
| MmugDNA.29151.1.S1_at   | MmugDNA.29151.1 | 11.39 | 11.15 | 0.24 | 0.02 | 1.18  | 0.235252 | 0.1768   | 0.589342 | 0.45321  |
| MmugDNA.29154.1.S1_at   | MmugDNA.29154.1 | 3.77  | 3.84  | 0.05 | 0.24 | -1.05 | 0.530489 | 0.694635 | 0.776893 | 0.822439 |
| MmugDNA.29157.1.S1_at   | MmugDNA.29157.1 | 11.63 | 11.27 | 0.07 | 0.3  | 1.28  | 0.094301 | 0.023455 | 0.451807 | 0.191956 |
| MmugDNA.29164.1.S1_a_at | MmugDNA.29164.1 | 6.5   | 7     | 0.23 | 0.04 | -1.42 | 0.022565 | 0.028196 | 0.287341 | 0.209526 |
| MmugDNA.29172.1.S1_at   | MmugDNA.29172.1 | 7.53  | 7.29  | 0.06 | 0.21 | 1.19  | 0.384295 | 0.134055 | 0.689886 | 0.406276 |
| MmugDNA.29174.1.S1_at   | MmugDNA.29174.1 | 8.01  | 7.97  | 0.32 | 0.97 | 1.03  | 0.384032 | 0.262402 | 0.689677 | 0.528655 |
| MmugDNA.29174.1.S1_s_at | MmugDNA.29174.1 | 6.89  | 6.92  | 0.19 | 0.19 | -1.02 | 0.703216 | 0.812796 | 0.868993 | 0.891795 |
| MmugDNA.29176.1.S1_at   | MmugDNA.29176.1 | 4.12  | 3.92  | 0.79 | 0.49 | 1.14  | 0.745225 | 0.701114 | 0.891027 | 0.826647 |
| MmugDNA.29183.1.S1_at   | MmugDNA.29183.1 | 12.23 | 11.69 | 0.09 | 0.25 | 1.45  | 0.032344 | 0.007984 | 0.324641 | 0.118766 |
| MmugDNA.29186.1.S1_at   | MmugDNA.29186.1 | 10.68 | 10.18 | 0.67 | 0.15 | 1.42  | 0.764816 | 0.620852 | 0.900939 | 0.775643 |
| MmugDNA.29188.1.S1_at   | MmugDNA.29188.1 | 12.12 | 11.66 | 0.09 | 0.13 | 1.37  | 0.006782 | 0.003274 | 0.201708 | 0.082366 |
| MmugDNA.29191.1.S1_at   | MmugDNA.29191.1 | 10.85 | 10.08 | 0.09 | 0.41 | 1.71  | 0.096169 | 0.113    | 0.454331 | 0.378851 |
| MmugDNA.29196.1.S1_at   | MmugDNA.29196.1 | 3.86  | 3.9   | 0.15 | 0.27 | -1.03 | 0.909937 | 0.403827 | 0.964324 | 0.632393 |
| MmugDNA.29197.1.S1_at   | MmugDNA.29197.1 | 10.07 | 10.92 | 0.15 | 0.39 | -1.8  | 0.025272 | 0.015981 | 0.298484 | 0.160458 |
| MmugDNA.29204.1.S1_at   | MmugDNA.29204.1 | 9.93  | 8.77  | 0.4  | 0.39 | 2.23  | 0.012327 | 0.005968 | 0.240913 | 0.105656 |
| MmugDNA.29211.1.S1_s_at | MmugDNA.29211.1 | 3.28  | 3.24  | 0.13 | 0.07 | 1.03  | 0.939792 | 0.82705  | 0.977013 | 0.900686 |
| MmugDNA.29213.1.S1_at   | MmugDNA.29213.1 | 7.37  | 5.96  | 0.58 | 0.67 | 2.67  | 0.050407 | 0.0432   | 0.374295 | 0.25263  |
| MmugDNA.29213.1.S1_s_at | MmugDNA.29213.1 | 9.44  | 8.92  | 0.23 | 0.7  | 1.44  | 0.25097  | 0.049279 | 0.600488 | 0.266845 |
| MmugDNA.29217.1.S1_at   | MmugDNA.29217.1 | 6.33  | 6.42  | 0.14 | 0.08 | -1.06 | 0.491041 | 0.189408 | 0.754717 | 0.465117 |
| MmugDNA.29218.1.S1_at   | MmugDNA.29218.1 | 3.69  | 3.9   | 0.14 | 0.19 | -1.16 | 0.094465 | 0.134429 | 0.452059 | 0.406603 |
| MmugDNA.29220.1.S1_at   | MmugDNA.29220.1 | 8.04  | 6.99  | 0.2  | 0.45 | 2.07  | 0.011027 | 0.004611 | 0.233671 | 0.09488  |
| MmugDNA.29223.1.S1_at   | MmugDNA.29223.1 | 9.42  | 8.99  | 0.17 | 0.67 | 1.35  | 0.908683 | 0.854512 | 0.963816 | 0.917099 |
| MmugDNA.2923.1.S1_at    | MmugDNA.2923.1  | 13.99 | 14.08 | 0.16 | 0.12 | -1.07 | 0.892728 | 0.68918  | 0.957283 | 0.818618 |
| MmugDNA.29230.1.S1_at   | MmugDNA.29230.1 | 10.66 | 10.6  | 0.06 | 0.12 | 1.04  | 0.326541 | 0.437715 | 0.653184 | 0.656896 |

|                         |                 |       |       |      |      |       |          |          |          |          |
|-------------------------|-----------------|-------|-------|------|------|-------|----------|----------|----------|----------|
| MmugDNA.29234.1.S1_at   | MmugDNA.29234.1 | 10.3  | 10.68 | 0.13 | 0.14 | -1.3  | 0.054918 | 0.066121 | 0.382788 | 0.302613 |
| MmugDNA.29242.1.S1_at   | MmugDNA.29242.1 | 9.68  | 9.39  | 0.16 | 0.42 | 1.22  | 0.358618 | 0.452822 | 0.67333  | 0.667356 |
| MmugDNA.29244.1.S1_at   | MmugDNA.29244.1 | 6.95  | 6.9   | 0.31 | 0.36 | 1.04  | 0.598504 | 0.123114 | 0.81395  | 0.393123 |
| MmugDNA.29246.1.S1_at   | MmugDNA.29246.1 | 6.39  | 6.14  | 0.16 | 0.32 | 1.19  | 0.85009  | 0.541034 | 0.939853 | 0.724718 |
| MmugDNA.2925.1.S1_at    | MmugDNA.2925.1  | 8.23  | 8.62  | 0.88 | 1.45 | -1.31 | 0.691134 | 0.651635 | 0.862571 | 0.796299 |
| MmugDNA.29251.1.S1_at   | MmugDNA.29251.1 | 6.99  | 6.62  | 0.57 | 0.35 | 1.29  | 0.905058 | 0.113492 | 0.962071 | 0.37961  |
| MmugDNA.29254.1.S1_at   | MmugDNA.29254.1 | 3.6   | 3.78  | 0.41 | 0.76 | -1.13 | 0.518203 | 0.309826 | 0.769301 | 0.565044 |
| MmugDNA.29263.1.S1_at   | MmugDNA.29263.1 | 8.86  | 9.72  | 0.57 | 0.94 | -1.81 | 0.23129  | 0.178952 | 0.587369 | 0.455243 |
| MmugDNA.29265.1.S1_at   | MmugDNA.29265.1 | 4.93  | 5.13  | 0.05 | 0.05 | -1.15 | 0.006795 | 0.046342 | 0.201708 | 0.259796 |
| MmugDNA.29269.1.S1_at   | MmugDNA.29269.1 | 9.47  | 9.42  | 0.37 | 0.14 | 1.03  | 0.472134 | 0.663477 | 0.743515 | 0.803016 |
| MmugDNA.29272.1.S1_at   | MmugDNA.29272.1 | 5.93  | 5.96  | 0.01 | 0.03 | -1.02 | 0.315404 | 0.076006 | 0.646675 | 0.320676 |
| MmugDNA.29274.1.S1_at   | MmugDNA.29274.1 | 8.34  | 8.66  | 0.19 | 0.28 | -1.25 | 0.236848 | 0.205671 | 0.590574 | 0.480015 |
| MmugDNA.29275.1.S1_s_at | MmugDNA.29275.1 | 9.34  | 9.07  | 0.16 | 0.17 | 1.2   | 0.182119 | 0.003416 | 0.546458 | 0.084071 |
| MmugDNA.29277.1.S1_at   | MmugDNA.29277.1 | 12.46 | 12.39 | 0.06 | 0.07 | 1.06  | 0.519523 | 0.703984 | 0.770186 | 0.828326 |
| MmugDNA.29278.1.S1_at   | MmugDNA.29278.1 | 9.37  | 9.67  | 0.16 | 0.33 | -1.23 | 0.099086 | 0.076807 | 0.458783 | 0.322252 |
| MmugDNA.2928.1.S1_at    | MmugDNA.2928.1  | 11.53 | 11.38 | 0.09 | 0.18 | 1.11  | 0.462928 | 0.181719 | 0.738484 | 0.458324 |
| MmugDNA.29285.1.S1_at   | MmugDNA.29285.1 | 9.21  | 8.81  | 0.43 | 0.98 | 1.32  | 0.588042 | 0.390523 | 0.808837 | 0.624319 |
| MmugDNA.29288.1.S1_at   | MmugDNA.29288.1 | 7.27  | 7.52  | 0.67 | 0.69 | -1.19 | 0.137694 | 0.114733 | 0.504937 | 0.381279 |
| MmugDNA.29299.1.S1_at   | MmugDNA.29299.1 | 10.1  | 9.39  | 0.32 | 0.44 | 1.64  | 0.093389 | 0.064073 | 0.450649 | 0.299311 |
| MmugDNA.29304.1.S1_at   | MmugDNA.29304.1 | 7     | 8.7   | 0.76 | 1.01 | -3.24 | 0.041982 | 0.031071 | 0.353762 | 0.218117 |
| MmugDNA.29308.1.S1_at   | MmugDNA.29308.1 | 4.62  | 4.48  | 0.8  | 0.27 | 1.1   | 0.410836 | 0.390478 | 0.70666  | 0.624267 |
| MmugDNA.29314.1.S1_at   | MmugDNA.29314.1 | 10.34 | 10.85 | 0.07 | 0.27 | -1.42 | 0.041457 | 0.044484 | 0.351747 | 0.255252 |
| MmugDNA.29316.1.S1_at   | MmugDNA.29316.1 | 11.08 | 11.01 | 0.45 | 0.82 | 1.05  | 0.96363  | 0.846725 | 0.985982 | 0.912823 |
| MmugDNA.29319.1.S1_at   | MmugDNA.29319.1 | 5.56  | 5.8   | 0.09 | 0.06 | -1.18 | 0.036855 | 0.038996 | 0.34044  | 0.242644 |
| MmugDNA.29320.1.S1_at   | MmugDNA.29320.1 | 12.3  | 11.78 | 0.1  | 0.47 | 1.43  | 0.130951 | 0.210153 | 0.497252 | 0.483994 |
| MmugDNA.29321.1.S1_at   | MmugDNA.29321.1 | 7.86  | 7.76  | 0.17 | 0.39 | 1.07  | 0.843256 | 0.322709 | 0.936941 | 0.574043 |
| MmugDNA.29321.1.S1_s_at | MmugDNA.29321.1 | 9.67  | 9.45  | 0.1  | 0.35 | 1.16  | 0.336071 | 0.33148  | 0.65921  | 0.580121 |
| MmugDNA.29322.1.S1_at   | MmugDNA.29322.1 | 2.81  | 2.93  | 0.04 | 0.06 | -1.08 | 0.07564  | 0.573125 | 0.423097 | 0.744941 |
| MmugDNA.29327.1.S1_at   | MmugDNA.29327.1 | 11.93 | 12.08 | 0.16 | 0.18 | -1.11 | 0.170684 | 0.204001 | 0.534517 | 0.47829  |
| MmugDNA.29328.1.S1_at   | MmugDNA.29328.1 | 6.33  | 6.43  | 0.13 | 0.16 | -1.07 | 0.457196 | 0.463332 | 0.734738 | 0.674359 |
| MmugDNA.2933.1.S1_at    | MmugDNA.2933.1  | 11.7  | 11.67 | 0    | 0.05 | 1.02  | 0.376478 | 0.014364 | 0.685245 | 0.152977 |
| MmugDNA.29330.1.S1_at   | MmugDNA.29330.1 | 10.79 | 10.68 | 0.21 | 0.39 | 1.08  | 0.475844 | 0.532672 | 0.746012 | 0.719186 |
| MmugDNA.29333.1.S1_at   | MmugDNA.29333.1 | 11.32 | 10.58 | 0.59 | 0.65 | 1.67  | 0.142911 | 0.12684  | 0.509886 | 0.397499 |
| MmugDNA.2934.1.S1_at    | MmugDNA.2934.1  | 12.52 | 12.71 | 0.2  | 0.18 | -1.15 | 0.630313 | 0.767908 | 0.832004 | 0.865256 |
| MmugDNA.2935.1.S1_at    | MmugDNA.2935.1  | 9.79  | 9.05  | 0.18 | 0.09 | 1.68  | 0.004049 | 0.002096 | 0.181739 | 0.067731 |
| MmugDNA.29353.1.S1_at   | MmugDNA.29353.1 | 4.97  | 7.47  | 1.06 | 2.21 | -5.66 | 0.200222 | 0.145299 | 0.563139 | 0.41934  |
| MmugDNA.2936.1.S1_at    | MmugDNA.2936.1  | 9.17  | 7.96  | 0.8  | 0.75 | 2.32  | 0.109754 | 0.033121 | 0.470963 | 0.225287 |
| MmugDNA.29370.1.S1_at   | MmugDNA.29370.1 | 11.92 | 12.16 | 0.05 | 0.28 | -1.18 | 0.077544 | 0.039    | 0.427344 | 0.242645 |
| MmugDNA.29374.1.S1_at   | MmugDNA.29374.1 | 12.16 | 12.33 | 0.18 | 0.21 | -1.13 | 0.660866 | 0.266883 | 0.847916 | 0.53244  |
| MmugDNA.29375.1.S1_at   | MmugDNA.29375.1 | 10.1  | 9.82  | 0.23 | 0.19 | 1.21  | 0.073458 | 0.070857 | 0.418755 | 0.312357 |
| MmugDNA.29391.1.S1_at   | MmugDNA.29391.1 | 9.32  | 9.28  | 0.08 | 0.31 | 1.02  | 0.414394 | 0.525771 | 0.709245 | 0.715217 |

|                         |                 |       |       |      |      |       |          |          |          |          |
|-------------------------|-----------------|-------|-------|------|------|-------|----------|----------|----------|----------|
| MmugDNA.2940.1.S1_at    | MmugDNA.2940.1  | 13.13 | 12.93 | 0.04 | 0.2  | 1.14  | 0.060303 | 0.07079  | 0.393181 | 0.312277 |
| MmugDNA.29410.1.S1_at   | MmugDNA.29410.1 | 5.78  | 5.66  | 0    | 0.02 | 1.09  | 0.000664 | 0.022485 | 0.136818 | 0.187631 |
| MmugDNA.29411.1.S1_at   | MmugDNA.29411.1 | 12.34 | 12.3  | 0.18 | 0.15 | 1.03  | 0.405372 | 0.409326 | 0.703122 | 0.636442 |
| MmugDNA.29417.1.S1_at   | MmugDNA.29417.1 | 7.4   | 7.38  | 0.14 | 0.01 | 1.01  | 0.802902 | 0.876181 | 0.918811 | 0.929602 |
| MmugDNA.29418.1.S1_at   | MmugDNA.29418.1 | 9.95  | 9.85  | 0.06 | 0.07 | 1.07  | 0.132087 | 0.572292 | 0.498298 | 0.744371 |
| MmugDNA.2942.1.S1_at    | MmugDNA.2942.1  | 7.79  | 7.88  | 0.18 | 0.53 | -1.06 | 0.758978 | 0.85979  | 0.898179 | 0.920098 |
| MmugDNA.29433.1.S1_at   | MmugDNA.29433.1 | 4.2   | 4.06  | 0.18 | 0.28 | 1.1   | 0.50971  | 0.312063 | 0.764485 | 0.566894 |
| MmugDNA.29436.1.S1_at   | MmugDNA.29436.1 | 10.92 | 11.22 | 0.06 | 1.19 | -1.23 | 0.736031 | 0.604297 | 0.886439 | 0.764558 |
| MmugDNA.2944.1.S1_at    | MmugDNA.2944.1  | 3.16  | 3.29  | 0.06 | 0.14 | -1.1  | 0.215943 | 0.200411 | 0.575954 | 0.474782 |
| MmugDNA.29440.1.S1_at   | MmugDNA.29440.1 | 12.26 | 12.06 | 0.1  | 0.09 | 1.15  | 0.064587 | 0.026688 | 0.402975 | 0.204241 |
| MmugDNA.29444.1.S1_at   | MmugDNA.29444.1 | 5.76  | 6.1   | 0.07 | 0.18 | -1.26 | 0.051359 | 0.074285 | 0.376001 | 0.318046 |
| MmugDNA.29449.1.S1_at   | MmugDNA.29449.1 | 8.49  | 7.8   | 0.14 | 0.18 | 1.61  | 0.004208 | 0.001445 | 0.181739 | 0.05795  |
| MmugDNA.2945.1.S1_at    | MmugDNA.2945.1  | 7.94  | 8.04  | 0.16 | 0.11 | -1.07 | 0.355523 | 0.492869 | 0.671128 | 0.693817 |
| MmugDNA.29467.1.S1_at   | MmugDNA.29467.1 | 11.89 | 11.68 | 0.1  | 0.16 | 1.16  | 0.080874 | 0.302316 | 0.431371 | 0.560092 |
| MmugDNA.29473.1.S1_at   | MmugDNA.29473.1 | 5.56  | 8.84  | 1.55 | 2.54 | -9.76 | 0.331708 | 0.275364 | 0.656468 | 0.539663 |
| MmugDNA.29475.1.S1_at   | MmugDNA.29475.1 | 5.95  | 5.95  | 0.21 | 0.23 | 1     | 0.236001 | 0.302083 | 0.589918 | 0.560071 |
| MmugDNA.29477.1.S1_at   | MmugDNA.29477.1 | 8.45  | 5.3   | 1.91 | 0.93 | 8.84  | 0.20171  | 0.195863 | 0.563988 | 0.470757 |
| MmugDNA.2948.1.S1_at    | MmugDNA.2948.1  | 9.81  | 10.23 | 0.07 | 0.01 | -1.34 | 0.000358 | 0.000386 | 0.128842 | 0.037273 |
| MmugDNA.29483.1.S1_at   | MmugDNA.29483.1 | 3.79  | 3.96  | 0.11 | 0.31 | -1.13 | 0.553838 | 0.165744 | 0.790417 | 0.442014 |
| MmugDNA.29494.1.S1_at   | MmugDNA.29494.1 | 11.41 | 12.06 | 0.14 | 0.35 | -1.57 | 0.060205 | 0.049347 | 0.393081 | 0.267081 |
| MmugDNA.29507.1.S1_at   | MmugDNA.29507.1 | 11.55 | 11.39 | 0.26 | 0.19 | 1.12  | 0.661108 | 0.823816 | 0.84802  | 0.898803 |
| MmugDNA.2951.1.S1_at    | MmugDNA.2951.1  | 11.45 | 11.15 | 0.28 | 0.46 | 1.24  | 0.168111 | 0.193665 | 0.53256  | 0.468785 |
| MmugDNA.2951.1.S1_s_at  | MmugDNA.2951.1  | 10.94 | 10.78 | 0.25 | 0.63 | 1.11  | 0.248912 | 0.273502 | 0.599669 | 0.537917 |
| MmugDNA.29514.1.S1_at   | MmugDNA.29514.1 | 5.19  | 5.79  | 0.12 | 0.41 | -1.52 | 0.084315 | 0.037639 | 0.436922 | 0.238465 |
| MmugDNA.29517.1.S1_at   | MmugDNA.29517.1 | 8.94  | 9.47  | 0.29 | 0.41 | -1.44 | 0.165089 | 0.160775 | 0.529031 | 0.436897 |
| MmugDNA.29522.1.S1_at   | MmugDNA.29522.1 | 5.46  | 5.89  | 0.19 | 0.25 | -1.34 | 0.231362 | 0.293956 | 0.587372 | 0.553909 |
| MmugDNA.29529.1.S1_at   | MmugDNA.29529.1 | 12.46 | 12.85 | 0.07 | 0.22 | -1.31 | 0.014162 | 0.008326 | 0.251402 | 0.121089 |
| MmugDNA.2953.1.S1_at    | MmugDNA.2953.1  | 5.82  | 5.66  | 0.23 | 0.14 | 1.12  | 0.562649 | 0.446345 | 0.795455 | 0.662773 |
| MmugDNA.29530.1.S1_at   | MmugDNA.29530.1 | 9.98  | 10.3  | 0.16 | 0.25 | -1.25 | 0.210079 | 0.246745 | 0.571286 | 0.51609  |
| MmugDNA.29530.1.S1_s_at | MmugDNA.29530.1 | 11.02 | 10.93 | 0.1  | 0.23 | 1.06  | 0.737647 | 0.193612 | 0.887266 | 0.468785 |
| MmugDNA.29531.1.S1_at   | MmugDNA.29531.1 | 6.79  | 6.8   | 0.08 | 0.1  | -1.01 | 0.373636 | 0.463123 | 0.683245 | 0.67424  |
| MmugDNA.29533.1.S1_at   | MmugDNA.29533.1 | 5.51  | 5.51  | 0.15 | 0.18 | -1    | 0.958482 | 0.72181  | 0.984324 | 0.838851 |
| MmugDNA.29534.1.S1_at   | MmugDNA.29534.1 | 11.93 | 11.98 | 0.09 | 0.51 | -1.04 | 0.628819 | 0.545634 | 0.831022 | 0.727579 |
| MmugDNA.2954.1.S1_at    | MmugDNA.2954.1  | 6.16  | 5.46  | 0.84 | 1.49 | 1.62  | 0.546811 | 0.375872 | 0.785716 | 0.613746 |
| MmugDNA.29540.1.S1_at   | MmugDNA.29540.1 | 6.86  | 6.89  | 0.13 | 0.18 | -1.02 | 0.972668 | 0.429649 | 0.989474 | 0.650973 |
| MmugDNA.29558.1.S1_at   | MmugDNA.29558.1 | 3.23  | 3.09  | 0.26 | 0.07 | 1.1   | 0.676986 | 0.47458  | 0.855271 | 0.681553 |
| MmugDNA.29561.1.S1_at   | MmugDNA.29561.1 | 6.77  | 6.83  | 0.09 | 0.07 | -1.04 | 0.950592 | 0.32649  | 0.981366 | 0.576576 |
| MmugDNA.29562.1.S1_at   | MmugDNA.29562.1 | 10.59 | 10.43 | 0.15 | 0.43 | 1.12  | 0.564766 | 0.642083 | 0.796827 | 0.789995 |
| MmugDNA.29565.1.S1_at   | MmugDNA.29565.1 | 9.97  | 10.75 | 0.17 | 0.17 | -1.71 | 0.002455 | 0.000635 | 0.163555 | 0.042882 |
| MmugDNA.29566.1.S1_s_at | MmugDNA.29566.1 | 6.89  | 8.21  | 0.65 | 1.56 | -2.48 | 0.355945 | 0.399954 | 0.671303 | 0.630116 |
| MmugDNA.29569.1.S1_at   | MmugDNA.29569.1 | 10.36 | 9.87  | 0.22 | 0.11 | 1.4   | 0.01387  | 0.005707 | 0.249758 | 0.104143 |

|                         |                 |       |       |      |      |       |          |          |          |          |
|-------------------------|-----------------|-------|-------|------|------|-------|----------|----------|----------|----------|
| MmugDNA.29570.1.S1_at   | MmugDNA.29570.1 | 3.48  | 3.55  | 0.65 | 0.38 | -1.06 | 0.652254 | 0.693927 | 0.843581 | 0.821989 |
| MmugDNA.29571.1.S1_at   | MmugDNA.29571.1 | 12.03 | 11.92 | 0.04 | 0.07 | 1.08  | 0.124359 | 0.055579 | 0.490248 | 0.281596 |
| MmugDNA.29577.1.S1_at   | MmugDNA.29577.1 | 5.46  | 4.93  | 0.61 | 0.37 | 1.44  | 0.536402 | 0.424825 | 0.77949  | 0.64729  |
| MmugDNA.29578.1.S1_at   | MmugDNA.29578.1 | 10.45 | 9.84  | 0.07 | 0.51 | 1.52  | 0.099429 | 0.08237  | 0.459305 | 0.331354 |
| MmugDNA.29582.1.S1_at   | MmugDNA.29582.1 | 5.06  | 5.28  | 0.3  | 0.13 | -1.16 | 0.892332 | 0.663198 | 0.957146 | 0.802857 |
| MmugDNA.29585.1.S1_at   | MmugDNA.29585.1 | 12.54 | 12.48 | 0.89 | 0.3  | 1.05  | 0.467349 | 0.549343 | 0.74068  | 0.729804 |
| MmugDNA.29588.1.S1_at   | MmugDNA.29588.1 | 7.66  | 7.3   | 0.27 | 0.48 | 1.28  | 0.977846 | 0.337069 | 0.99169  | 0.584337 |
| MmugDNA.29593.1.S1_at   | MmugDNA.29593.1 | 6.57  | 6.53  | 0.09 | 0.12 | 1.03  | 0.29424  | 0.410827 | 0.631204 | 0.637644 |
| MmugDNA.29594.1.S1_at   | MmugDNA.29594.1 | 4.62  | 3.78  | 0.54 | 0.5  | 1.78  | 0.165522 | 0.12355  | 0.529547 | 0.393629 |
| MmugDNA.29599.1.S1_at   | MmugDNA.29599.1 | 8.98  | 9.71  | 0.41 | 0.83 | -1.66 | 0.263192 | 0.12263  | 0.609297 | 0.392564 |
| MmugDNA.2960.1.S1_at    | MmugDNA.2960.1  | 3.28  | 3.24  | 0.19 | 0.09 | 1.03  | 0.225439 | 0.317922 | 0.583536 | 0.571046 |
| MmugDNA.29604.1.S1_at   | MmugDNA.29604.1 | 9.85  | 8.95  | 0.18 | 0.27 | 1.86  | 0.011702 | 0.005075 | 0.23742  | 0.099077 |
| MmugDNA.29616.1.S1_at   | MmugDNA.29616.1 | 7.44  | 7.72  | 0.39 | 0.38 | -1.22 | 0.395222 | 0.060039 | 0.696396 | 0.291714 |
| MmugDNA.29617.1.S1_at   | MmugDNA.29617.1 | 7.91  | 7.66  | 0.13 | 0.22 | 1.19  | 0.415048 | 0.547495 | 0.709338 | 0.728479 |
| MmugDNA.29617.1.S1_s_at | MmugDNA.29617.1 | 10.61 | 10.35 | 0.09 | 0.33 | 1.2   | 0.21057  | 0.174486 | 0.5718   | 0.450952 |
| MmugDNA.29621.1.S1_at   | MmugDNA.29621.1 | 6.96  | 7.47  | 0.31 | 0.23 | -1.43 | 0.180586 | 0.197897 | 0.544908 | 0.472828 |
| MmugDNA.29622.1.S1_at   | MmugDNA.29622.1 | 6.53  | 6.13  | 0.25 | 0.34 | 1.33  | 0.145322 | 0.11802  | 0.511407 | 0.385881 |
| MmugDNA.29625.1.S1_at   | MmugDNA.29625.1 | 6.54  | 7.51  | 0.14 | 0.39 | -1.96 | 0.015867 | 0.016686 | 0.261608 | 0.163569 |
| MmugDNA.29627.1.S1_at   | MmugDNA.29627.1 | 4.32  | 4.7   | 0.25 | 0.33 | -1.3  | 0.853818 | 0.84391  | 0.940936 | 0.911089 |
| MmugDNA.2963.1.S1_at    | MmugDNA.2963.1  | 5.36  | 5.22  | 0.18 | 0.44 | 1.11  | 0.145024 | 0.016328 | 0.511188 | 0.16183  |
| MmugDNA.29648.1.S1_at   | MmugDNA.29648.1 | 8.14  | 8.17  | 0.29 | 0.14 | -1.02 | 0.429163 | 0.592945 | 0.717334 | 0.757956 |
| MmugDNA.29656.1.S1_at   | MmugDNA.29656.1 | 7.47  | 7.63  | 0.25 | 0.19 | -1.12 | 0.9072   | 0.172858 | 0.96315  | 0.449424 |
| MmugDNA.29670.1.S1_at   | MmugDNA.29670.1 | 8.6   | 8.39  | 0.41 | 0.57 | 1.15  | 0.31372  | 0.009643 | 0.645323 | 0.129267 |
| MmugDNA.29675.1.S1_at   | MmugDNA.29675.1 | 9.55  | 8.82  | 0.07 | 0.21 | 1.66  | 0.009803 | 0.010307 | 0.226444 | 0.132897 |
| MmugDNA.29681.1.S1_at   | MmugDNA.29681.1 | 10.38 | 10.42 | 0.07 | 0.06 | -1.03 | 0.992082 | 0.000824 | 0.997293 | 0.046626 |
| MmugDNA.29689.1.S1_at   | MmugDNA.29689.1 | 4.65  | 4.7   | 0.06 | 0.11 | -1.04 | 0.41163  | 0.758973 | 0.70748  | 0.859942 |
| MmugDNA.2969.1.S1_at    | MmugDNA.2969.1  | 2.97  | 2.97  | 0.08 | 0.07 | 1     | 0.286093 | 0.436431 | 0.625392 | 0.65599  |
| MmugDNA.29697.1.S1_s_at | MmugDNA.29697.1 | 6.25  | 6.33  | 0.11 | 0.14 | -1.06 | 0.587017 | 0.057413 | 0.808415 | 0.285608 |
| MmugDNA.29706.1.S1_at   | MmugDNA.29706.1 | 9.72  | 9.76  | 0.02 | 0.2  | -1.03 | 0.698564 | 0.532783 | 0.8662   | 0.719235 |
| MmugDNA.29710.1.S1_at   | MmugDNA.29710.1 | 6.91  | 6.71  | 0.2  | 0.47 | 1.15  | 0.844428 | 0.154379 | 0.937553 | 0.429245 |
| MmugDNA.29712.1.S1_at   | MmugDNA.29712.1 | 3.58  | 3.29  | 0.62 | 0.13 | 1.22  | 0.159502 | 0.162598 | 0.524351 | 0.43872  |
| MmugDNA.2972.1.S1_at    | MmugDNA.2972.1  | 9.84  | 10.04 | 0.39 | 0.54 | -1.15 | 0.90831  | 0.865881 | 0.96372  | 0.923757 |
| MmugDNA.29720.1.S1_at   | MmugDNA.29720.1 | 5.64  | 5.75  | 0.1  | 0.19 | -1.08 | 0.178605 | 0.212772 | 0.542922 | 0.486769 |
| MmugDNA.29722.1.S1_at   | MmugDNA.29722.1 | 5     | 5.77  | 0.98 | 1.18 | -1.7  | 0.570616 | 0.392688 | 0.799614 | 0.625813 |
| MmugDNA.29723.1.S1_at   | MmugDNA.29723.1 | 13.68 | 13.66 | 0.08 | 0.09 | 1.01  | 0.793055 | 0.102349 | 0.914172 | 0.362527 |
| MmugDNA.29724.1.S1_at   | MmugDNA.29724.1 | 3.86  | 3.75  | 0.21 | 0.11 | 1.08  | 0.606002 | 0.401002 | 0.818673 | 0.630658 |
| MmugDNA.29726.1.S1_at   | MmugDNA.29726.1 | 7.79  | 6.65  | 0.28 | 1.03 | 2.19  | 0.145008 | 0.16757  | 0.511188 | 0.443998 |
| MmugDNA.29727.1.S1_at   | MmugDNA.29727.1 | 2.99  | 3.43  | 0.1  | 0.25 | -1.35 | 0.132678 | 0.039297 | 0.49874  | 0.243338 |
| MmugDNA.29729.1.S1_at   | MmugDNA.29729.1 | 6.41  | 6.45  | 0.3  | 0.08 | -1.03 | 0.288136 | 0.232671 | 0.626431 | 0.504359 |
| MmugDNA.2973.1.S1_at    | MmugDNA.2973.1  | 10.88 | 10.76 | 0.1  | 0.49 | 1.09  | 0.211796 | 0.139526 | 0.572347 | 0.412743 |
| MmugDNA.29735.1.S1_at   | MmugDNA.29735.1 | 6.91  | 6.77  | 0.16 | 0.16 | 1.11  | 0.130265 | 0.050496 | 0.496613 | 0.270052 |

|                         |                 |       |       |      |      |       |          |          |          |          |
|-------------------------|-----------------|-------|-------|------|------|-------|----------|----------|----------|----------|
| MmugDNA.29736.1.S1_at   | MmugDNA.29736.1 | 6.96  | 7.16  | 0.12 | 0.24 | -1.15 | 0.184028 | 0.225059 | 0.547964 | 0.49773  |
| MmugDNA.2974.1.S1_at    | MmugDNA.2974.1  | 8.12  | 7.67  | 0.24 | 0.15 | 1.37  | 0.031733 | 0.008378 | 0.322685 | 0.121478 |
| MmugDNA.29743.1.S1_at   | MmugDNA.29743.1 | 7.37  | 7.68  | 1.26 | 0.39 | -1.24 | 0.457959 | 0.637863 | 0.735139 | 0.787216 |
| MmugDNA.29744.1.S1_at   | MmugDNA.29744.1 | 6.43  | 6.61  | 0.22 | 0.09 | -1.13 | 0.835416 | 0.859635 | 0.933311 | 0.92003  |
| MmugDNA.29748.1.S1_at   | MmugDNA.29748.1 | 8.03  | 7.89  | 0.1  | 0.38 | 1.1   | 0.747763 | 0.836756 | 0.892054 | 0.906703 |
| MmugDNA.2975.1.S1_at    | MmugDNA.2975.1  | 10.89 | 10.14 | 0.3  | 0.12 | 1.68  | 0.014608 | 0.007035 | 0.254235 | 0.113112 |
| MmugDNA.29754.1.S1_at   | MmugDNA.29754.1 | 5.93  | 5.87  | 0.69 | 0.24 | 1.04  | 0.785333 | 0.946446 | 0.910672 | 0.969629 |
| MmugDNA.29761.1.S1_at   | MmugDNA.29761.1 | 6.34  | 6.28  | 0.07 | 0.14 | 1.04  | 0.531929 | 0.328001 | 0.77756  | 0.5778   |
| MmugDNA.29763.1.S1_at   | MmugDNA.29763.1 | 12.76 | 12.77 | 0.07 | 0.16 | -1.01 | 0.759883 | 0.124091 | 0.898651 | 0.394389 |
| MmugDNA.29779.1.S1_at   | MmugDNA.29779.1 | 4.31  | 4.29  | 0.05 | 0.19 | 1.01  | 0.803506 | 0.675746 | 0.919138 | 0.810457 |
| MmugDNA.2978.1.S1_at    | MmugDNA.2978.1  | 11.18 | 10.84 | 0.1  | 0.07 | 1.26  | 0.018594 | 0.012253 | 0.270786 | 0.143179 |
| MmugDNA.29788.1.S1_at   | MmugDNA.29788.1 | 5.76  | 5.75  | 0.08 | 0.19 | 1.01  | 0.388294 | 0.539835 | 0.69241  | 0.723976 |
| MmugDNA.29792.1.S1_s_at | MmugDNA.29792.1 | 5.88  | 6.63  | 0.99 | 0.52 | -1.69 | 0.496867 | 0.628867 | 0.757692 | 0.781499 |
| MmugDNA.29799.1.S1_at   | MmugDNA.29799.1 | 10.59 | 11.14 | 0.14 | 0.26 | -1.46 | 0.037344 | 0.048715 | 0.341309 | 0.265744 |
| MmugDNA.29801.1.S1_at   | MmugDNA.29801.1 | 10.34 | 10.02 | 0.29 | 0.54 | 1.25  | 0.34552  | 0.437276 | 0.665245 | 0.656613 |
| MmugDNA.29802.1.S1_at   | MmugDNA.29802.1 | 9.35  | 9.47  | 0.4  | 0.56 | -1.08 | 0.736454 | 0.21108  | 0.886692 | 0.485099 |
| MmugDNA.29807.1.S1_at   | MmugDNA.29807.1 | 3.03  | 3.07  | 0.1  | 0.21 | -1.02 | 0.784731 | 0.871463 | 0.910286 | 0.926844 |
| MmugDNA.29807.1.S1_x_at | MmugDNA.29807.1 | 3.25  | 3.3   | 0.1  | 0.04 | -1.03 | 0.871765 | 0.490487 | 0.948717 | 0.692472 |
| MmugDNA.2981.1.S1_s_at  | MmugDNA.2981.1  | 10.44 | 10.32 | 0.13 | 0.29 | 1.09  | 0.220354 | 0.065367 | 0.579323 | 0.301409 |
| MmugDNA.29812.1.S1_at   | MmugDNA.29812.1 | 5.87  | 6.03  | 0.13 | 0.17 | -1.12 | 0.477973 | 0.132419 | 0.747094 | 0.404409 |
| MmugDNA.29814.1.S1_at   | MmugDNA.29814.1 | 8.43  | 8.49  | 0.4  | 0.64 | -1.04 | 0.38097  | 0.230357 | 0.68761  | 0.502115 |
| MmugDNA.29815.1.S1_at   | MmugDNA.29815.1 | 7.03  | 7.22  | 0.13 | 0.06 | -1.15 | 0.101271 | 0.036983 | 0.461009 | 0.236733 |
| MmugDNA.29819.1.S1_at   | MmugDNA.29819.1 | 6.84  | 6.24  | 0.09 | 0.15 | 1.51  | 0.005581 | 0.018597 | 0.191807 | 0.171539 |
| MmugDNA.29820.1.S1_at   | MmugDNA.29820.1 | 8.72  | 9.1   | 0.17 | 0.5  | -1.3  | 0.173014 | 0.198768 | 0.536666 | 0.473391 |
| MmugDNA.29822.1.S1_at   | MmugDNA.29822.1 | 7.61  | 7.05  | 0.44 | 1.35 | 1.48  | 0.807654 | 0.950253 | 0.921358 | 0.971666 |
| MmugDNA.29828.1.S1_at   | MmugDNA.29828.1 | 5.94  | 5.73  | 0.16 | 0.77 | 1.16  | 0.733339 | 0.751242 | 0.884989 | 0.855385 |
| MmugDNA.29830.1.S1_at   | MmugDNA.29830.1 | 4.35  | 4.19  | 0.68 | 0.11 | 1.12  | 0.243538 | 0.132289 | 0.59533  | 0.404294 |
| MmugDNA.29833.1.S1_at   | MmugDNA.29833.1 | 11.26 | 10.79 | 0.09 | 0.26 | 1.39  | 0.051826 | 0.051024 | 0.376487 | 0.271203 |
| MmugDNA.29839.1.S1_at   | MmugDNA.29839.1 | 9.47  | 9.98  | 0.05 | 0.99 | -1.43 | 0.458643 | 0.562809 | 0.7356   | 0.738167 |
| MmugDNA.29843.1.S1_at   | MmugDNA.29843.1 | 10.82 | 10.63 | 0.1  | 0.15 | 1.14  | 0.361409 | 0.001807 | 0.67519  | 0.063714 |
| MmugDNA.2985.1.S1_at    | MmugDNA.2985.1  | 5.02  | 5.01  | 0.14 | 0.2  | 1.01  | 0.920554 | 0.819033 | 0.969057 | 0.895738 |
| MmugDNA.29851.1.S1_at   | MmugDNA.29851.1 | 11.98 | 11.65 | 0.1  | 0.11 | 1.26  | 0.011587 | 0.003226 | 0.236694 | 0.082124 |
| MmugDNA.29855.1.S1_at   | MmugDNA.29855.1 | 12.69 | 12.7  | 0.21 | 0.02 | -1.01 | 0.500653 | 0.816268 | 0.759607 | 0.894028 |
| MmugDNA.29858.1.S1_at   | MmugDNA.29858.1 | 5.02  | 5.33  | 0.25 | 0.1  | -1.24 | 0.123735 | 0.124411 | 0.489534 | 0.394857 |
| MmugDNA.29861.1.S1_at   | MmugDNA.29861.1 | 8.23  | 8.01  | 0.02 | 0.49 | 1.16  | 0.820688 | 0.605809 | 0.927084 | 0.765497 |
| MmugDNA.29863.1.S1_at   | MmugDNA.29863.1 | 11.58 | 11.53 | 0.16 | 0.37 | 1.03  | 0.867526 | 0.338455 | 0.947135 | 0.585447 |
| MmugDNA.29867.1.S1_at   | MmugDNA.29867.1 | 6.37  | 6.37  | 0.2  | 0.07 | 1     | 0.86938  | 0.881575 | 0.947917 | 0.932407 |
| MmugDNA.29871.1.S1_at   | MmugDNA.29871.1 | 12.62 | 12.37 | 0.07 | 0.18 | 1.19  | 0.17916  | 0.098528 | 0.543481 | 0.356636 |
| MmugDNA.29871.1.S1_s_at | MmugDNA.29871.1 | 12.51 | 12.17 | 0.12 | 0.2  | 1.26  | 0.172091 | 0.224796 | 0.535422 | 0.497617 |
| MmugDNA.29872.1.S1_at   | MmugDNA.29872.1 | 10.65 | 10.14 | 0.14 | 0.34 | 1.43  | 0.060994 | 0.019919 | 0.394813 | 0.177443 |
| MmugDNA.29873.1.S1_at   | MmugDNA.29873.1 | 12.3  | 12.03 | 0.19 | 0.13 | 1.2   | 0.096835 | 0.150282 | 0.455871 | 0.424877 |

|                         |                 |       |       |      |      |       |          |          |          |          |
|-------------------------|-----------------|-------|-------|------|------|-------|----------|----------|----------|----------|
| MmugDNA.29876.1.S1_at   | MmugDNA.29876.1 | 6.3   | 6.39  | 0.2  | 0.19 | -1.06 | 0.16069  | 0.143018 | 0.525769 | 0.41689  |
| MmugDNA.29878.1.S1_at   | MmugDNA.29878.1 | 10.45 | 10.43 | 0.17 | 0.46 | 1.01  | 0.530609 | 0.473443 | 0.776893 | 0.680697 |
| MmugDNA.29879.1.S1_at   | MmugDNA.29879.1 | 13.11 | 13.08 | 0.11 | 0.11 | 1.02  | 0.808575 | 0.298573 | 0.921985 | 0.557183 |
| MmugDNA.2988.1.S1_at    | MmugDNA.2988.1  | 10.32 | 10    | 0.21 | 0.43 | 1.25  | 0.185252 | 0.21335  | 0.54874  | 0.487225 |
| MmugDNA.29880.1.S1_at   | MmugDNA.29880.1 | 7.91  | 7.01  | 0.41 | 0.46 | 1.86  | 0.138301 | 0.089041 | 0.505691 | 0.342913 |
| MmugDNA.29884.1.S1_at   | MmugDNA.29884.1 | 13.37 | 13.03 | 0.09 | 0.02 | 1.26  | 0.002389 | 0.00038  | 0.163555 | 0.037273 |
| MmugDNA.2989.1.S1_at    | MmugDNA.2989.1  | 12.19 | 12.21 | 0.1  | 0.3  | -1.02 | 0.856898 | 0.718886 | 0.942171 | 0.83732  |
| MmugDNA.29890.1.S1_at   | MmugDNA.29890.1 | 6.64  | 6.75  | 0.04 | 0.12 | -1.08 | 0.441928 | 0.77035  | 0.725274 | 0.866591 |
| MmugDNA.29891.1.S1_s_at | MmugDNA.29891.1 | 9.7   | 9.74  | 0.31 | 0.17 | -1.03 | 0.728792 | 0.918792 | 0.882204 | 0.954387 |
| MmugDNA.29895.1.S1_at   | MmugDNA.29895.1 | 11.04 | 10.93 | 0.46 | 0.14 | 1.08  | 0.253976 | 0.250136 | 0.602339 | 0.519168 |
| MmugDNA.29897.1.S1_s_at | MmugDNA.29897.1 | 11.46 | 11.44 | 0.08 | 0.25 | 1.01  | 0.564838 | 0.79376  | 0.796834 | 0.881039 |
| MmugDNA.29922.1.S1_at   | MmugDNA.29922.1 | 4.4   | 4.35  | 0.19 | 0.1  | 1.03  | 0.908156 | 0.917181 | 0.963624 | 0.953758 |
| MmugDNA.29924.1.S1_at   | MmugDNA.29924.1 | 9.23  | 8.78  | 0.24 | 0.36 | 1.36  | 0.12927  | 0.068073 | 0.49535  | 0.307142 |
| MmugDNA.29936.1.S1_at   | MmugDNA.29936.1 | 10.56 | 10.3  | 0.29 | 0.04 | 1.2   | 0.209951 | 0.021817 | 0.571174 | 0.184771 |
| MmugDNA.29939.1.S1_at   | MmugDNA.29939.1 | 5.58  | 5.53  | 0.08 | 0.11 | 1.04  | 0.103007 | 0.041739 | 0.46254  | 0.24892  |
| MmugDNA.29941.1.S1_at   | MmugDNA.29941.1 | 5.28  | 5.2   | 0.08 | 0.2  | 1.05  | 0.84161  | 0.544906 | 0.936215 | 0.727184 |
| MmugDNA.29950.1.S1_at   | MmugDNA.29950.1 | 3.9   | 4.18  | 0.21 | 0.08 | -1.22 | 0.380039 | 0.081245 | 0.687171 | 0.329351 |
| MmugDNA.29952.1.S1_at   | MmugDNA.29952.1 | 9.46  | 9.28  | 0.16 | 0.78 | 1.13  | 0.291932 | 0.493206 | 0.629224 | 0.694005 |
| MmugDNA.29954.1.S1_at   | MmugDNA.29954.1 | 7.55  | 7.03  | 0.12 | 0.8  | 1.43  | 0.927051 | 0.796687 | 0.971962 | 0.882782 |
| MmugDNA.29956.1.S1_at   | MmugDNA.29956.1 | 2.74  | 2.77  | 0.13 | 0.11 | -1.02 | 0.396482 | 0.731941 | 0.697018 | 0.844751 |
| MmugDNA.29958.1.S1_s_at | MmugDNA.29958.1 | 11.42 | 11.57 | 0.07 | 0.32 | -1.11 | 0.547693 | 0.603722 | 0.786269 | 0.764262 |
| MmugDNA.29962.1.S1_at   | MmugDNA.29962.1 | 5.74  | 6.08  | 0.18 | 0.2  | -1.27 | 0.120304 | 0.20587  | 0.485252 | 0.480109 |
| MmugDNA.29965.1.S1_at   | MmugDNA.29965.1 | 8.57  | 7.57  | 0.17 | 0.64 | 2     | 0.101459 | 0.115697 | 0.461313 | 0.382814 |
| MmugDNA.2997.1.S1_at    | MmugDNA.2997.1  | 4.62  | 5.43  | 0.7  | 0.47 | -1.76 | 0.165806 | 0.099554 | 0.529848 | 0.35796  |
| MmugDNA.29970.1.S1_at   | MmugDNA.29970.1 | 5.06  | 5.07  | 0.11 | 0.05 | -1.01 | 0.364379 | 0.62729  | 0.677318 | 0.780361 |
| MmugDNA.29972.1.S1_at   | MmugDNA.29972.1 | 11.07 | 11.11 | 0.63 | 0.27 | -1.03 | 0.536409 | 0.218482 | 0.77949  | 0.492079 |
| MmugDNA.29975.1.S1_at   | MmugDNA.29975.1 | 6.4   | 6.39  | 0.24 | 0.36 | 1     | 0.474365 | 0.648512 | 0.745071 | 0.7943   |
| MmugDNA.29977.1.S1_at   | MmugDNA.29977.1 | 6.28  | 6.36  | 0.1  | 0.19 | -1.06 | 0.483526 | 0.492516 | 0.749915 | 0.693604 |
| MmugDNA.29979.1.A1_at   | MmugDNA.29979.1 | 7.4   | 7.14  | 0.21 | 0.09 | 1.19  | 0.082117 | 0.064913 | 0.433313 | 0.300818 |
| MmugDNA.29979.1.S1_at   | MmugDNA.29979.1 | 6.71  | 6.48  | 0.12 | 0    | 1.17  | 0.013096 | 0.006273 | 0.245262 | 0.107461 |
| MmugDNA.29989.1.S1_at   | MmugDNA.29989.1 | 5.01  | 5.13  | 0.13 | 0.14 | -1.09 | 0.279602 | 0.163605 | 0.621136 | 0.439768 |
| MmugDNA.2999.1.S1_at    | MmugDNA.2999.1  | 4.36  | 4.55  | 0.23 | 0.07 | -1.14 | 0.426907 | 0.282132 | 0.716003 | 0.544937 |
| MmugDNA.29994.1.S1_at   | MmugDNA.29994.1 | 12.59 | 12.71 | 0.25 | 0.33 | -1.09 | 0.338119 | 0.450938 | 0.660556 | 0.665908 |
| MmugDNA.29996.1.S1_at   | MmugDNA.29996.1 | 11.89 | 11.59 | 0.19 | 0.16 | 1.23  | 0.263086 | 0.16029  | 0.609147 | 0.436406 |
| MmugDNA.3000.1.S1_at    | MmugDNA.3000.1  | 11.15 | 11.47 | 0.27 | 0.06 | -1.25 | 0.098574 | 0.082553 | 0.458486 | 0.3317   |
| MmugDNA.30003.1.S1_at   | MmugDNA.30003.1 | 7.21  | 7.52  | 0.41 | 0.62 | -1.24 | 0.538067 | 0.011476 | 0.780382 | 0.138611 |
| MmugDNA.3001.1.S1_at    | MmugDNA.3001.1  | 12.4  | 12.52 | 0.25 | 0.57 | -1.09 | 0.55731  | 0.582629 | 0.792388 | 0.751273 |
| MmugDNA.30010.1.S1_at   | MmugDNA.30010.1 | 9.18  | 9.01  | 0.11 | 0.24 | 1.12  | 0.597602 | 0.742379 | 0.813541 | 0.850786 |
| MmugDNA.30011.1.S1_at   | MmugDNA.30011.1 | 3.33  | 3.56  | 0.11 | 0.03 | -1.18 | 0.061088 | 0.059451 | 0.394935 | 0.290548 |
| MmugDNA.30013.1.S1_at   | MmugDNA.30013.1 | 9.54  | 8.81  | 0.16 | 0.57 | 1.66  | 0.072277 | 0.06312  | 0.416651 | 0.29795  |
| MmugDNA.30016.1.S1_at   | MmugDNA.30016.1 | 5.49  | 5.43  | 0.04 | 0.08 | 1.05  | 0.5605   | 0.013664 | 0.794285 | 0.149643 |

|                         |                 |       |       |      |      |       |          |          |          |          |
|-------------------------|-----------------|-------|-------|------|------|-------|----------|----------|----------|----------|
| MmugDNA.30019.1.S1_at   | MmugDNA.30019.1 | 8.38  | 10.89 | 1.29 | 1.58 | -5.7  | 0.131504 | 0.060638 | 0.498041 | 0.292849 |
| MmugDNA.30026.1.S1_at   | MmugDNA.30026.1 | 8.74  | 7.91  | 0.19 | 0.91 | 1.78  | 0.61632  | 0.809335 | 0.824145 | 0.890103 |
| MmugDNA.30027.1.S1_at   | MmugDNA.30027.1 | 9.89  | 9.56  | 0.19 | 0.72 | 1.26  | 0.861188 | 0.945073 | 0.944018 | 0.968834 |
| MmugDNA.30028.1.S1_at   | MmugDNA.30028.1 | 11.06 | 11.5  | 0.27 | 0.79 | -1.36 | 0.415099 | 0.344725 | 0.709338 | 0.590076 |
| MmugDNA.30030.1.S1_at   | MmugDNA.30030.1 | 6.79  | 6.66  | 0.26 | 0.33 | 1.1   | 0.893907 | 0.936329 | 0.95779  | 0.964104 |
| MmugDNA.30031.1.S1_at   | MmugDNA.30031.1 | 4.09  | 4.18  | 0.14 | 0.1  | -1.06 | 0.537976 | 0.753317 | 0.780308 | 0.85647  |
| MmugDNA.30032.1.S1_at   | MmugDNA.30032.1 | 9.85  | 9.26  | 0.41 | 0.76 | 1.5   | 0.335559 | 0.283163 | 0.659165 | 0.545694 |
| MmugDNA.30033.1.S1_at   | MmugDNA.30033.1 | 12.61 | 12.82 | 0.08 | 0.19 | -1.15 | 0.207124 | 0.160972 | 0.569165 | 0.437116 |
| MmugDNA.30038.1.S1_at   | MmugDNA.30038.1 | 6.83  | 6.45  | 0.56 | 0.59 | 1.3   | 0.409409 | 0.602821 | 0.705878 | 0.763752 |
| MmugDNA.3004.1.S1_at    | MmugDNA.3004.1  | 11.71 | 11.95 | 0.18 | 0.14 | -1.18 | 0.065121 | 0.042932 | 0.40393  | 0.251759 |
| MmugDNA.30042.1.S1_at   | MmugDNA.30042.1 | 9.5   | 9.74  | 0.26 | 0.77 | -1.18 | 0.246466 | 0.322563 | 0.597777 | 0.573991 |
| MmugDNA.30044.1.S1_at   | MmugDNA.30044.1 | 10.26 | 9.62  | 0.48 | 0.44 | 1.56  | 0.178855 | 0.116507 | 0.543243 | 0.383671 |
| MmugDNA.30045.1.S1_at   | MmugDNA.30045.1 | 6.65  | 6.67  | 0.17 | 0.12 | -1.02 | 0.307873 | 0.375468 | 0.640297 | 0.613412 |
| MmugDNA.30046.1.S1_at   | MmugDNA.30046.1 | 6.3   | 6.54  | 0.2  | 0.07 | -1.18 | 0.177398 | 0.125525 | 0.541483 | 0.396226 |
| MmugDNA.3005.1.S1_at    | MmugDNA.3005.1  | 11.76 | 11.74 | 0.16 | 0.09 | 1.01  | 0.906636 | 0.752282 | 0.96294  | 0.855787 |
| MmugDNA.30057.1.S1_at   | MmugDNA.30057.1 | 7.25  | 7.19  | 0.12 | 0.23 | 1.04  | 0.706295 | 0.893583 | 0.870604 | 0.939277 |
| MmugDNA.30059.1.S1_at   | MmugDNA.30059.1 | 3.28  | 3.33  | 0    | 0.13 | -1.04 | 0.594727 | 0.336562 | 0.812136 | 0.58391  |
| MmugDNA.30064.1.S1_at   | MmugDNA.30064.1 | 9.36  | 8.56  | 0.15 | 0.06 | 1.74  | 0.000801 | 0.000223 | 0.136818 | 0.032385 |
| MmugDNA.30067.1.S1_at   | MmugDNA.30067.1 | 7.83  | 7.63  | 0.06 | 0.23 | 1.15  | 0.174253 | 0.215363 | 0.537904 | 0.489067 |
| MmugDNA.30069.1.S1_at   | MmugDNA.30069.1 | 4.71  | 4.74  | 0.21 | 0.2  | -1.02 | 0.998878 | 0.620264 | 0.999653 | 0.775303 |
| MmugDNA.30074.1.S1_at   | MmugDNA.30074.1 | 5.57  | 5.7   | 0.23 | 0.11 | -1.09 | 0.774616 | 0.241133 | 0.905314 | 0.511749 |
| MmugDNA.30076.1.S1_at   | MmugDNA.30076.1 | 10.38 | 10.24 | 1.04 | 0.81 | 1.1   | 0.918653 | 0.929935 | 0.96831  | 0.960138 |
| MmugDNA.30079.1.S1_at   | MmugDNA.30079.1 | 11.62 | 11.49 | 0.17 | 0.15 | 1.09  | 0.781428 | 0.300643 | 0.908775 | 0.558941 |
| MmugDNA.30085.1.S1_at   | MmugDNA.30085.1 | 6.4   | 6.27  | 0.19 | 0.15 | 1.1   | 0.537514 | 0.723773 | 0.780064 | 0.840126 |
| MmugDNA.30089.1.S1_at   | MmugDNA.30089.1 | 5.96  | 6.1   | 0.16 | 0.04 | -1.1  | 0.510666 | 0.688279 | 0.765151 | 0.818009 |
| MmugDNA.30089.1.S1_x_at | MmugDNA.30089.1 | 6.07  | 6.11  | 0.04 | 0.04 | -1.03 | 0.112209 | 0.088532 | 0.474694 | 0.341947 |
| MmugDNA.30097.1.S1_at   | MmugDNA.30097.1 | 11.49 | 11.65 | 0.49 | 0.04 | -1.12 | 0.477298 | 0.629882 | 0.746589 | 0.782009 |
| MmugDNA.30098.1.S1_at   | MmugDNA.30098.1 | 7.66  | 8.44  | 0.14 | 0.66 | -1.72 | 0.196159 | 0.241876 | 0.559268 | 0.512475 |
| MmugDNA.30102.1.S1_at   | MmugDNA.30102.1 | 7.2   | 10.16 | 1.31 | 2.61 | -7.8  | 0.264165 | 0.156276 | 0.609909 | 0.43161  |
| MmugDNA.30103.1.S1_at   | MmugDNA.30103.1 | 7.73  | 7.28  | 0.54 | 1.09 | 1.37  | 0.787699 | 0.157891 | 0.911639 | 0.433583 |
| MmugDNA.30105.1.S1_at   | MmugDNA.30105.1 | 9.41  | 8.17  | 0.37 | 0.67 | 2.35  | 0.032068 | 0.014342 | 0.324083 | 0.152889 |
| MmugDNA.30108.1.S1_at   | MmugDNA.30108.1 | 2.68  | 2.66  | 0.13 | 0.01 | 1.01  | 0.647329 | 0.838973 | 0.841323 | 0.908226 |
| MmugDNA.3011.1.S1_at    | MmugDNA.3011.1  | 11.13 | 10.85 | 0.22 | 0.22 | 1.21  | 0.116217 | 0.087334 | 0.479808 | 0.340404 |
| MmugDNA.3013.1.S1_at    | MmugDNA.3013.1  | 4.26  | 4.4   | 0.13 | 0.02 | -1.1  | 0.527988 | 0.143012 | 0.775293 | 0.41689  |
| MmugDNA.30136.1.S1_at   | MmugDNA.30136.1 | 10.81 | 10.15 | 0.21 | 0.14 | 1.58  | 0.005487 | 0.004313 | 0.191209 | 0.092121 |
| MmugDNA.30138.1.S1_at   | MmugDNA.30138.1 | 3.99  | 3.96  | 0.07 | 0.05 | 1.02  | 0.313974 | 0.461484 | 0.645488 | 0.673151 |
| MmugDNA.30140.1.S1_at   | MmugDNA.30140.1 | 9.86  | 9.38  | 0.19 | 0.62 | 1.39  | 0.186061 | 0.204579 | 0.549597 | 0.478946 |
| MmugDNA.30145.1.S1_at   | MmugDNA.30145.1 | 5.56  | 5.62  | 0.01 | 0.09 | -1.04 | 0.098542 | 0.080109 | 0.458486 | 0.327579 |
| MmugDNA.30147.1.S1_at   | MmugDNA.30147.1 | 5.34  | 5.07  | 0.43 | 1.13 | 1.21  | 0.873319 | 0.488591 | 0.94924  | 0.691222 |
| MmugDNA.3015.1.S1_at    | MmugDNA.3015.1  | 12.49 | 12.11 | 0.11 | 0.04 | 1.31  | 0.003362 | 0.000741 | 0.177484 | 0.044929 |
| MmugDNA.30154.1.S1_at   | MmugDNA.30154.1 | 9.01  | 8.69  | 0.14 | 0.23 | 1.25  | 0.037304 | 0.029767 | 0.341247 | 0.214185 |



|                         |                 |       |       |      |      |       |          |          |          |          |
|-------------------------|-----------------|-------|-------|------|------|-------|----------|----------|----------|----------|
| MmugDNA.30156.1.S1_at   | MmugDNA.30156.1 | 7.76  | 7.08  | 0.03 | 0.25 | 1.6   | 0.008934 | 0.002109 | 0.221598 | 0.067909 |
| MmugDNA.30162.1.S1_at   | MmugDNA.30162.1 | 4.26  | 4.09  | 0.4  | 0.26 | 1.13  | 0.912472 | 0.968503 | 0.965278 | 0.982645 |
| MmugDNA.30163.1.S1_at   | MmugDNA.30163.1 | 7.9   | 7.8   | 0.12 | 0.36 | 1.07  | 0.65703  | 0.643929 | 0.845704 | 0.791217 |
| MmugDNA.30164.1.S1_at   | MmugDNA.30164.1 | 10.68 | 9.94  | 0.37 | 0.14 | 1.67  | 0.071599 | 0.086847 | 0.415578 | 0.339651 |
| MmugDNA.30168.1.S1_at   | MmugDNA.30168.1 | 9.4   | 9.15  | 0.02 | 0.24 | 1.19  | 0.052387 | 0.071016 | 0.37757  | 0.312648 |
| MmugDNA.30169.1.S1_at   | MmugDNA.30169.1 | 5.83  | 6     | 0.19 | 0.08 | -1.12 | 0.248525 | 0.009961 | 0.599309 | 0.131094 |
| MmugDNA.30175.1.S1_at   | MmugDNA.30175.1 | 3.8   | 3.76  | 0.07 | 0.26 | 1.02  | 0.372812 | 0.132632 | 0.683054 | 0.404544 |
| MmugDNA.30177.1.S1_at   | MmugDNA.30177.1 | 5     | 5.26  | 0.08 | 0.16 | -1.2  | 0.09423  | 0.09372  | 0.45175  | 0.350192 |
| MmugDNA.3018.1.S1_at    | MmugDNA.3018.1  | 6.07  | 6.2   | 0.02 | 0.16 | -1.1  | 0.168266 | 0.097582 | 0.53256  | 0.355456 |
| MmugDNA.30181.1.S1_at   | MmugDNA.30181.1 | 9.63  | 8.76  | 0.38 | 0.46 | 1.83  | 0.07449  | 0.079484 | 0.420311 | 0.32681  |
| MmugDNA.30181.1.S1_s_at | MmugDNA.30181.1 | 7.76  | 6.96  | 0.53 | 0.61 | 1.74  | 0.11509  | 0.113557 | 0.478433 | 0.379632 |
| MmugDNA.30183.1.S1_at   | MmugDNA.30183.1 | 12.74 | 12.95 | 0.15 | 0.18 | -1.16 | 0.469206 | 0.626814 | 0.741519 | 0.779995 |
| MmugDNA.30186.1.S1_at   | MmugDNA.30186.1 | 9.17  | 8.01  | 0.96 | 1.47 | 2.24  | 0.37347  | 0.279076 | 0.683245 | 0.542782 |
| MmugDNA.30187.1.S1_at   | MmugDNA.30187.1 | 11.44 | 11.29 | 0.18 | 0.03 | 1.11  | 0.268726 | 0.181952 | 0.613394 | 0.458483 |
| MmugDNA.30190.1.S1_at   | MmugDNA.30190.1 | 4.8   | 5.03  | 0.05 | 0.04 | -1.17 | 0.003159 | 0.013283 | 0.173416 | 0.147922 |
| MmugDNA.30193.1.S1_at   | MmugDNA.30193.1 | 4.59  | 4.45  | 0.18 | 0.06 | 1.1   | 0.231831 | 0.190381 | 0.587568 | 0.465906 |
| MmugDNA.30200.1.S1_at   | MmugDNA.30200.1 | 8.96  | 7.66  | 0.07 | 0.27 | 2.46  | 0.001998 | 0.000391 | 0.155636 | 0.03746  |
| MmugDNA.30215.1.S1_at   | MmugDNA.30215.1 | 8.6   | 8.36  | 0.23 | 0.13 | 1.19  | 0.042245 | 0.025715 | 0.354563 | 0.201008 |
| MmugDNA.30219.1.S1_at   | MmugDNA.30219.1 | 3.27  | 3.14  | 0.04 | 0.15 | 1.09  | 0.639255 | 0.789988 | 0.837071 | 0.878631 |
| MmugDNA.30220.1.S1_at   | MmugDNA.30220.1 | 4.18  | 5.49  | 0.76 | 0.34 | -2.47 | 0.03641  | 0.046295 | 0.339201 | 0.25959  |
| MmugDNA.30227.1.S1_at   | MmugDNA.30227.1 | 12.17 | 11.63 | 0.21 | 0.53 | 1.45  | 0.090792 | 0.083306 | 0.446383 | 0.333375 |
| MmugDNA.30229.1.S1_at   | MmugDNA.30229.1 | 3.79  | 3.99  | 0.09 | 0.13 | -1.15 | 0.071131 | 0.057081 | 0.414673 | 0.284945 |
| MmugDNA.30249.1.S1_s_at | MmugDNA.30249.1 | 6.38  | 6.62  | 0.19 | 0.09 | -1.18 | 0.390123 | 0.514592 | 0.693403 | 0.707767 |
| MmugDNA.30250.1.S1_at   | MmugDNA.30250.1 | 8.18  | 5.89  | 0.26 | 0.6  | 4.91  | 0.00326  | 0.002473 | 0.176021 | 0.073576 |
| MmugDNA.30255.1.S1_at   | MmugDNA.30255.1 | 10.92 | 11.26 | 0.11 | 0.32 | -1.26 | 0.105195 | 0.124773 | 0.465675 | 0.395215 |
| MmugDNA.30257.1.S1_at   | MmugDNA.30257.1 | 13.1  | 13.17 | 0.1  | 0.18 | -1.05 | 0.792941 | 0.229902 | 0.914102 | 0.501802 |
| MmugDNA.3026.1.S1_at    | MmugDNA.3026.1  | 4.22  | 4.2   | 0.21 | 0.15 | 1.02  | 0.882364 | 0.768707 | 0.952793 | 0.865653 |
| MmugDNA.30263.1.S1_at   | MmugDNA.30263.1 | 4.94  | 5.71  | 0.28 | 0.83 | -1.69 | 0.206912 | 0.284903 | 0.56893  | 0.54701  |
| MmugDNA.30266.1.S1_at   | MmugDNA.30266.1 | 6.53  | 6.72  | 0.1  | 0.04 | -1.14 | 0.100812 | 0.105209 | 0.461009 | 0.366982 |
| MmugDNA.30268.1.S1_at   | MmugDNA.30268.1 | 11.54 | 11.18 | 0.05 | 0.09 | 1.28  | 0.005458 | 0.000572 | 0.191178 | 0.041171 |
| MmugDNA.3027.1.S1_at    | MmugDNA.3027.1  | 3.79  | 3.87  | 0.08 | 0.17 | -1.06 | 0.587456 | 0.410072 | 0.808576 | 0.637065 |
| MmugDNA.3027.1.S1_s_at  | MmugDNA.3027.1  | 10.03 | 10.52 | 0.2  | 0.74 | -1.4  | 0.354351 | 0.442215 | 0.67056  | 0.660275 |
| MmugDNA.30271.1.S1_at   | MmugDNA.30271.1 | 10.61 | 12.51 | 0.46 | 0.66 | -3.72 | 0.023793 | 0.011304 | 0.292771 | 0.138076 |
| MmugDNA.30286.1.S1_at   | MmugDNA.30286.1 | 10.09 | 9.89  | 0.65 | 0.36 | 1.15  | 0.248001 | 0.308478 | 0.599056 | 0.564515 |
| MmugDNA.30287.1.S1_at   | MmugDNA.30287.1 | 6.91  | 7.79  | 1.04 | 1.64 | -1.84 | 0.517442 | 0.130978 | 0.76879  | 0.403037 |
| MmugDNA.30297.1.S1_at   | MmugDNA.30297.1 | 5.19  | 5.24  | 0.14 | 0.09 | -1.03 | 0.664441 | 0.891187 | 0.849555 | 0.937993 |
| MmugDNA.30298.1.S1_at   | MmugDNA.30298.1 | 10.91 | 10.35 | 0.06 | 0.09 | 1.48  | 0.001228 | 0.00047  | 0.145267 | 0.038572 |
| MmugDNA.30299.1.S1_at   | MmugDNA.30299.1 | 6.73  | 6.73  | 0.14 | 0.11 | 1     | 0.639381 | 0.878866 | 0.837174 | 0.930872 |
| MmugDNA.30300.1.S1_at   | MmugDNA.30300.1 | 11.54 | 11.11 | 0.14 | 0.92 | 1.34  | 0.157768 | 0.193691 | 0.522564 | 0.468785 |
| MmugDNA.30302.1.S1_at   | MmugDNA.30302.1 | 6.04  | 6.1   | 0.13 | 0.08 | -1.04 | 0.623523 | 0.764122 | 0.827977 | 0.862852 |
| MmugDNA.30319.1.S1_at   | MmugDNA.30319.1 | 10.56 | 11.1  | 0.28 | 0.59 | -1.46 | 0.350692 | 0.181284 | 0.668574 | 0.457821 |

|                         |                 |       |       |      |      |       |          |          |          |          |
|-------------------------|-----------------|-------|-------|------|------|-------|----------|----------|----------|----------|
| MmugDNA.30321.1.S1_at   | MmugDNA.30321.1 | 9.8   | 9.33  | 0.31 | 0.28 | 1.39  | 0.054674 | 0.041262 | 0.382115 | 0.247995 |
| MmugDNA.30322.1.S1_at   | MmugDNA.30322.1 | 5.98  | 5.65  | 0.33 | 0.1  | 1.25  | 0.271528 | 0.13512  | 0.615716 | 0.407131 |
| MmugDNA.30323.1.S1_at   | MmugDNA.30323.1 | 10.9  | 10.69 | 0.09 | 0.37 | 1.16  | 0.570771 | 0.763422 | 0.799645 | 0.862471 |
| MmugDNA.30328.1.S1_at   | MmugDNA.30328.1 | 13.31 | 13.22 | 0.08 | 0.16 | 1.06  | 0.941795 | 0.831623 | 0.977821 | 0.903452 |
| MmugDNA.30329.1.S1_at   | MmugDNA.30329.1 | 11.61 | 11.64 | 0.07 | 0.12 | -1.02 | 0.541905 | 0.723171 | 0.783019 | 0.839639 |
| MmugDNA.30331.1.S1_at   | MmugDNA.30331.1 | 8.59  | 9.21  | 0.77 | 1.34 | -1.53 | 0.345775 | 0.201838 | 0.665315 | 0.476367 |
| MmugDNA.30333.1.S1_at   | MmugDNA.30333.1 | 6.07  | 6.15  | 0.12 | 0.08 | -1.05 | 0.221332 | 0.291746 | 0.580161 | 0.552054 |
| MmugDNA.30334.1.S1_at   | MmugDNA.30334.1 | 7.55  | 7.22  | 0.26 | 0.26 | 1.25  | 0.227503 | 0.090104 | 0.585103 | 0.344402 |
| MmugDNA.3034.1.S1_at    | MmugDNA.3034.1  | 5.96  | 6.07  | 0.05 | 0.11 | -1.07 | 0.108782 | 0.121267 | 0.470294 | 0.390351 |
| MmugDNA.30341.1.S1_at   | MmugDNA.30341.1 | 6.77  | 6.43  | 0.25 | 0.13 | 1.27  | 0.051748 | 0.114974 | 0.376339 | 0.381719 |
| MmugDNA.30350.1.S1_at   | MmugDNA.30350.1 | 5.17  | 5.91  | 0.8  | 1.89 | -1.67 | 0.505592 | 0.337101 | 0.761685 | 0.584337 |
| MmugDNA.30351.1.S1_at   | MmugDNA.30351.1 | 13.46 | 13.42 | 0.05 | 0.06 | 1.03  | 0.754454 | 0.454148 | 0.89545  | 0.668407 |
| MmugDNA.30352.1.S1_at   | MmugDNA.30352.1 | 13.02 | 13.01 | 0.15 | 0.07 | 1     | 0.24081  | 0.336764 | 0.593592 | 0.584089 |
| MmugDNA.30355.1.S1_s_at | MmugDNA.30355.1 | 5.85  | 5.97  | 0.18 | 0.12 | -1.09 | 0.943793 | 0.986234 | 0.978535 | 0.992174 |
| MmugDNA.30359.1.S1_at   | MmugDNA.30359.1 | 7.88  | 7.59  | 0.25 | 0.17 | 1.22  | 0.09522  | 0.203352 | 0.453047 | 0.477574 |
| MmugDNA.30361.1.S1_at   | MmugDNA.30361.1 | 6.46  | 6.42  | 0.23 | 0.3  | 1.03  | 0.487706 | 0.656915 | 0.752271 | 0.799401 |
| MmugDNA.30366.1.S1_at   | MmugDNA.30366.1 | 3.92  | 4.37  | 0.68 | 0.49 | -1.37 | 0.785176 | 0.046904 | 0.910556 | 0.261281 |
| MmugDNA.30367.1.S1_at   | MmugDNA.30367.1 | 6.25  | 6.2   | 0.67 | 0.77 | 1.03  | 0.92904  | 0.380812 | 0.972621 | 0.617426 |
| MmugDNA.30371.1.S1_at   | MmugDNA.30371.1 | 3.36  | 3.2   | 0.06 | 0.34 | 1.11  | 0.859788 | 0.742758 | 0.943433 | 0.851023 |
| MmugDNA.30376.1.S1_at   | MmugDNA.30376.1 | 11.84 | 10.74 | 0.08 | 0.46 | 2.15  | 0.017913 | 0.010141 | 0.26813  | 0.131979 |
| MmugDNA.30378.1.S1_at   | MmugDNA.30378.1 | 3.91  | 4.12  | 0.41 | 0.23 | -1.15 | 0.990858 | 0.781864 | 0.99683  | 0.873558 |
| MmugDNA.30384.1.S1_s_at | MmugDNA.30384.1 | 7.89  | 8.45  | 0.67 | 0.94 | -1.47 | 0.956308 | 0.876023 | 0.983483 | 0.929528 |
| MmugDNA.30391.1.S1_at   | MmugDNA.30391.1 | 7.07  | 7.51  | 0.19 | 0.09 | -1.35 | 0.016585 | 0.0213   | 0.26475  | 0.182706 |
| MmugDNA.30392.1.S1_at   | MmugDNA.30392.1 | 6.27  | 7.06  | 0.08 | 0.49 | -1.72 | 0.023127 | 0.011914 | 0.290272 | 0.141283 |
| MmugDNA.3040.1.S1_at    | MmugDNA.3040.1  | 8.18  | 7.51  | 0.82 | 0.8  | 1.59  | 0.16939  | 0.158016 | 0.533686 | 0.433769 |
| MmugDNA.30406.1.S1_at   | MmugDNA.30406.1 | 9.41  | 9.94  | 0.21 | 0.22 | -1.45 | 0.042162 | 0.003122 | 0.354431 | 0.081345 |
| MmugDNA.30412.1.S1_at   | MmugDNA.30412.1 | 7.86  | 8.05  | 0.17 | 0.24 | -1.14 | 0.1302   | 0.103071 | 0.496613 | 0.36396  |
| MmugDNA.30416.1.S1_at   | MmugDNA.30416.1 | 3.09  | 3.15  | 0.08 | 0.02 | -1.05 | 0.924795 | 0.329697 | 0.970893 | 0.578874 |
| MmugDNA.30419.1.S1_at   | MmugDNA.30419.1 | 10.55 | 10.09 | 0.2  | 0.48 | 1.37  | 0.178953 | 0.088056 | 0.543331 | 0.341547 |
| MmugDNA.30425.1.S1_at   | MmugDNA.30425.1 | 10.21 | 9.65  | 0.05 | 0.38 | 1.48  | 0.045581 | 0.049468 | 0.361262 | 0.267334 |
| MmugDNA.30427.1.S1_at   | MmugDNA.30427.1 | 8.58  | 8.55  | 0.35 | 0.21 | 1.02  | 0.898549 | 0.898234 | 0.959492 | 0.942072 |
| MmugDNA.30429.1.S1_at   | MmugDNA.30429.1 | 11.1  | 10.94 | 0.04 | 0.17 | 1.11  | 0.194607 | 0.126107 | 0.558002 | 0.39672  |
| MmugDNA.30433.1.S1_at   | MmugDNA.30433.1 | 10.38 | 9.51  | 0.34 | 0.28 | 1.83  | 0.045422 | 0.014061 | 0.361012 | 0.151841 |
| MmugDNA.30435.1.S1_at   | MmugDNA.30435.1 | 11.15 | 11.33 | 0.33 | 0.15 | -1.13 | 0.966242 | 0.588655 | 0.987156 | 0.755137 |
| MmugDNA.30439.1.S1_at   | MmugDNA.30439.1 | 9.64  | 9.12  | 0.14 | 0.25 | 1.44  | 0.058872 | 0.037199 | 0.390921 | 0.237285 |
| MmugDNA.30445.1.S1_at   | MmugDNA.30445.1 | 10.52 | 9.95  | 0.08 | 0.35 | 1.49  | 0.041493 | 0.017208 | 0.351839 | 0.166206 |
| MmugDNA.30446.1.S1_at   | MmugDNA.30446.1 | 7.82  | 7.41  | 0.32 | 0.26 | 1.33  | 0.071552 | 0.073486 | 0.415505 | 0.316769 |
| MmugDNA.30447.1.S1_at   | MmugDNA.30447.1 | 7.37  | 8.29  | 0.28 | 0.25 | -1.9  | 0.021525 | 0.015553 | 0.282524 | 0.158118 |
| MmugDNA.3045.1.S1_at    | MmugDNA.3045.1  | 10.77 | 10.78 | 0.39 | 0.36 | -1.01 | 0.80875  | 0.490174 | 0.922032 | 0.692234 |
| MmugDNA.30456.1.S1_at   | MmugDNA.30456.1 | 10.19 | 10.72 | 0.1  | 0.2  | -1.44 | 0.005884 | 0.00116  | 0.19355  | 0.053615 |
| MmugDNA.3046.1.S1_at    | MmugDNA.3046.1  | 13.58 | 13.77 | 0.14 | 0.09 | -1.14 | 0.06241  | 0.049456 | 0.397999 | 0.267334 |

|                         |                 |       |       |      |      |       |          |          |          |          |
|-------------------------|-----------------|-------|-------|------|------|-------|----------|----------|----------|----------|
| MmugDNA.30463.1.S1_at   | MmugDNA.30463.1 | 11.25 | 11.97 | 0.5  | 0.42 | -1.64 | 0.12652  | 0.138623 | 0.492802 | 0.41168  |
| MmugDNA.30464.1.S1_at   | MmugDNA.30464.1 | 9.12  | 8.82  | 0.2  | 0.8  | 1.23  | 0.839951 | 0.048357 | 0.935467 | 0.265081 |
| MmugDNA.30466.1.S1_at   | MmugDNA.30466.1 | 9.07  | 9.96  | 0.13 | 0.61 | -1.86 | 0.064615 | 0.011175 | 0.403099 | 0.137551 |
| MmugDNA.30467.1.S1_at   | MmugDNA.30467.1 | 4.57  | 4.44  | 0.18 | 0.04 | 1.09  | 0.262435 | 0.600611 | 0.608974 | 0.762183 |
| MmugDNA.30481.1.S1_at   | MmugDNA.30481.1 | 6.44  | 5.98  | 0.74 | 0.01 | 1.37  | 0.257426 | 0.180388 | 0.60481  | 0.457066 |
| MmugDNA.30487.1.S1_at   | MmugDNA.30487.1 | 3.84  | 3.79  | 0.26 | 0.13 | 1.03  | 0.487389 | 0.085769 | 0.752093 | 0.337818 |
| MmugDNA.3049.1.S1_at    | MmugDNA.3049.1  | 11.16 | 10.81 | 0.25 | 0.2  | 1.27  | 0.117432 | 0.047722 | 0.481525 | 0.263325 |
| MmugDNA.30490.1.S1_at   | MmugDNA.30490.1 | 8.44  | 8.04  | 0.09 | 0.43 | 1.32  | 0.221623 | 0.299239 | 0.580348 | 0.557769 |
| MmugDNA.30496.1.S1_at   | MmugDNA.30496.1 | 8.4   | 7.86  | 0.12 | 0.36 | 1.45  | 0.132419 | 0.096406 | 0.498635 | 0.354015 |
| MmugDNA.30503.1.A1_at   | MmugDNA.30503.1 | 3.34  | 3.35  | 0.09 | 0.21 | -1.01 | 0.952243 | 0.76475  | 0.982156 | 0.863203 |
| MmugDNA.30503.1.S1_at   | MmugDNA.30503.1 | 4.99  | 4.94  | 0.26 | 0.32 | 1.04  | 0.904389 | 0.465365 | 0.961729 | 0.675748 |
| MmugDNA.30507.1.S1_at   | MmugDNA.30507.1 | 3.53  | 3.49  | 0.06 | 0.08 | 1.03  | 0.861179 | 0.847175 | 0.944018 | 0.91316  |
| MmugDNA.30510.1.S1_at   | MmugDNA.30510.1 | 7.94  | 7.97  | 0.33 | 0.29 | -1.02 | 0.927203 | 0.659357 | 0.971987 | 0.800682 |
| MmugDNA.30512.1.S1_at   | MmugDNA.30512.1 | 4.93  | 5.19  | 0.38 | 0.54 | -1.2  | 0.990654 | 0.128412 | 0.996762 | 0.399676 |
| MmugDNA.30515.1.S1_at   | MmugDNA.30515.1 | 5.45  | 5.85  | 0.09 | 0.06 | -1.31 | 0.00138  | 0.000165 | 0.146228 | 0.030511 |
| MmugDNA.30517.1.S1_at   | MmugDNA.30517.1 | 5.77  | 5.96  | 0.16 | 0.06 | -1.14 | 0.168185 | 0.207746 | 0.53256  | 0.482005 |
| MmugDNA.30526.1.S1_at   | MmugDNA.30526.1 | 3.25  | 2.89  | 0.06 | 0.09 | 1.29  | 0.004501 | 0.001242 | 0.183787 | 0.054826 |
| MmugDNA.30528.1.S1_at   | MmugDNA.30528.1 | 4.69  | 4.65  | 0.04 | 0.02 | 1.03  | 0.197678 | 0.011285 | 0.560665 | 0.138076 |
| MmugDNA.3053.1.S1_at    | MmugDNA.3053.1  | 8.27  | 7.67  | 0.06 | 0.43 | 1.51  | 0.229536 | 0.233521 | 0.586637 | 0.504849 |
| MmugDNA.30530.1.S1_at   | MmugDNA.30530.1 | 11.41 | 10.79 | 0.22 | 0.09 | 1.54  | 0.012684 | 0.010766 | 0.243385 | 0.135471 |
| MmugDNA.30534.1.S1_at   | MmugDNA.30534.1 | 2.98  | 3.01  | 0.28 | 0.14 | -1.02 | 0.728213 | 0.80191  | 0.881825 | 0.885989 |
| MmugDNA.30537.1.S1_at   | MmugDNA.30537.1 | 9.8   | 9.56  | 0.07 | 1.12 | 1.18  | 0.669867 | 0.818657 | 0.852318 | 0.895512 |
| MmugDNA.30541.1.S1_at   | MmugDNA.30541.1 | 6.51  | 6.4   | 0.15 | 0.12 | 1.07  | 0.195637 | 0.018045 | 0.558901 | 0.169372 |
| MmugDNA.30551.1.S1_at   | MmugDNA.30551.1 | 10.19 | 10.35 | 0.27 | 0.13 | -1.12 | 0.307967 | 0.369868 | 0.640352 | 0.609138 |
| MmugDNA.30554.1.S1_at   | MmugDNA.30554.1 | 10.43 | 10.8  | 0.39 | 0.47 | -1.29 | 0.123969 | 0.095443 | 0.489701 | 0.35247  |
| MmugDNA.30555.1.S1_at   | MmugDNA.30555.1 | 9.04  | 9.23  | 0.19 | 0.21 | -1.14 | 0.319525 | 0.043771 | 0.649068 | 0.25387  |
| MmugDNA.30559.1.S1_at   | MmugDNA.30559.1 | 8.37  | 8.24  | 0.08 | 0.45 | 1.1   | 0.252301 | 0.207967 | 0.601282 | 0.482049 |
| MmugDNA.30562.1.S1_at   | MmugDNA.30562.1 | 4.64  | 4.62  | 0.26 | 0.68 | 1.01  | 0.965851 | 0.722637 | 0.987081 | 0.83935  |
| MmugDNA.30563.1.S1_at   | MmugDNA.30563.1 | 3.45  | 3.48  | 0.07 | 0.12 | -1.02 | 0.955818 | 0.226111 | 0.983384 | 0.49859  |
| MmugDNA.30565.1.S1_at   | MmugDNA.30565.1 | 6.65  | 7.16  | 0.19 | 0.72 | -1.42 | 0.299415 | 0.191023 | 0.634938 | 0.46629  |
| MmugDNA.30566.1.S1_at   | MmugDNA.30566.1 | 12.47 | 12.17 | 0.03 | 0.22 | 1.23  | 0.07134  | 0.079856 | 0.41512  | 0.327179 |
| MmugDNA.30568.1.S1_at   | MmugDNA.30568.1 | 6.17  | 6.4   | 0.11 | 0.27 | -1.17 | 0.254474 | 0.297174 | 0.602425 | 0.556031 |
| MmugDNA.30572.1.S1_at   | MmugDNA.30572.1 | 11    | 11.57 | 0.18 | 0.12 | -1.48 | 0.012049 | 0.014558 | 0.239875 | 0.153907 |
| MmugDNA.30578.1.S1_at   | MmugDNA.30578.1 | 11.47 | 11.38 | 0.23 | 0.24 | 1.06  | 0.564901 | 0.575226 | 0.796834 | 0.746406 |
| MmugDNA.30581.1.S1_at   | MmugDNA.30581.1 | 8.29  | 7.8   | 0.05 | 0.5  | 1.4   | 0.538113 | 0.742801 | 0.780401 | 0.851029 |
| MmugDNA.30582.1.S1_at   | MmugDNA.30582.1 | 10.33 | 9.57  | 0.64 | 0.09 | 1.69  | 0.10937  | 0.127138 | 0.470811 | 0.397922 |
| MmugDNA.3059.1.S1_at    | MmugDNA.3059.1  | 4.76  | 5.16  | 0.14 | 0.06 | -1.32 | 0.01703  | 0.007433 | 0.266551 | 0.115858 |
| MmugDNA.30592.1.S1_at   | MmugDNA.30592.1 | 11.54 | 11.08 | 2.87 | 2.37 | 1.38  | 0.938901 | 0.510629 | 0.97676  | 0.705036 |
| MmugDNA.30592.1.S1_s_at | MmugDNA.30592.1 | 11.33 | 11.76 | 0.11 | 0.14 | -1.34 | 0.021318 | 0.040176 | 0.282524 | 0.245709 |
| MmugDNA.30593.1.S1_at   | MmugDNA.30593.1 | 11.51 | 11.44 | 0.15 | 0.48 | 1.05  | 0.28959  | 0.207051 | 0.627563 | 0.481115 |
| MmugDNA.30594.1.S1_at   | MmugDNA.30594.1 | 6.56  | 5.92  | 0.08 | 0.24 | 1.56  | 0.013131 | 0.005703 | 0.245277 | 0.104102 |

|                         |                 |       |       |      |      |       |          |          |          |          |
|-------------------------|-----------------|-------|-------|------|------|-------|----------|----------|----------|----------|
| MmugDNA.30595.1.S1_at   | MmugDNA.30595.1 | 8.22  | 8.32  | 0.13 | 0.11 | -1.07 | 0.334321 | 0.001959 | 0.658336 | 0.065832 |
| MmugDNA.30598.1.S1_at   | MmugDNA.30598.1 | 10.89 | 11.25 | 0.25 | 0.24 | -1.28 | 0.122312 | 0.050947 | 0.48746  | 0.270968 |
| MmugDNA.3060.1.S1_at    | MmugDNA.3060.1  | 10.71 | 10.76 | 0.13 | 0.15 | -1.03 | 0.216256 | 0.259477 | 0.575963 | 0.526418 |
| MmugDNA.30601.1.S1_at   | MmugDNA.30601.1 | 9.2   | 10.29 | 0.29 | 0.22 | -2.12 | 0.00631  | 0.003198 | 0.197853 | 0.08199  |
| MmugDNA.30604.1.S1_at   | MmugDNA.30604.1 | 6.3   | 6.66  | 0.4  | 0.21 | -1.29 | 0.174593 | 0.181197 | 0.538248 | 0.457667 |
| MmugDNA.30609.1.S1_at   | MmugDNA.30609.1 | 5.06  | 4.96  | 0.09 | 0.48 | 1.07  | 0.854756 | 0.942163 | 0.941248 | 0.967154 |
| MmugDNA.30611.1.S1_at   | MmugDNA.30611.1 | 9.86  | 10.31 | 0.07 | 0.5  | -1.36 | 0.1888   | 0.171794 | 0.551828 | 0.448198 |
| MmugDNA.30615.1.S1_at   | MmugDNA.30615.1 | 6.26  | 6.92  | 0.04 | 0.28 | -1.57 | 0.035626 | 0.038375 | 0.337224 | 0.240795 |
| MmugDNA.30619.1.S1_at   | MmugDNA.30619.1 | 13.47 | 13.48 | 0.05 | 0.06 | -1.01 | 0.507343 | 0.751202 | 0.762788 | 0.855385 |
| MmugDNA.30620.1.S1_at   | MmugDNA.30620.1 | 12.47 | 12.62 | 0.08 | 0.2  | -1.11 | 0.068831 | 0.085607 | 0.410654 | 0.337607 |
| MmugDNA.30621.1.S1_at   | MmugDNA.30621.1 | 12.25 | 12.06 | 0.23 | 0.07 | 1.14  | 0.347945 | 0.527236 | 0.666816 | 0.715896 |
| MmugDNA.30623.1.S1_at   | MmugDNA.30623.1 | 5.85  | 5.96  | 0.26 | 0.1  | -1.09 | 0.252503 | 0.289559 | 0.601373 | 0.55061  |
| MmugDNA.30628.1.S1_at   | MmugDNA.30628.1 | 10.27 | 9.78  | 0.08 | 0.1  | 1.4   | 0.00191  | 0.000114 | 0.155636 | 0.028568 |
| MmugDNA.30629.1.S1_at   | MmugDNA.30629.1 | 3.78  | 3.73  | 0.03 | 0.14 | 1.04  | 0.508967 | 0.657636 | 0.764172 | 0.79986  |
| MmugDNA.30632.1.S1_at   | MmugDNA.30632.1 | 9.95  | 9.58  | 0.2  | 0.05 | 1.3   | 0.088235 | 0.097705 | 0.442892 | 0.355581 |
| MmugDNA.30634.1.S1_at   | MmugDNA.30634.1 | 3.44  | 3.48  | 0.08 | 0.28 | -1.03 | 0.303786 | 0.263108 | 0.638047 | 0.529431 |
| MmugDNA.30635.1.S1_s_at | MmugDNA.30635.1 | 10.18 | 10.83 | 0.22 | 0.43 | -1.57 | 0.055778 | 0.037466 | 0.3847   | 0.237837 |
| MmugDNA.30636.1.S1_at   | MmugDNA.30636.1 | 8.67  | 8.93  | 0.31 | 0.5  | -1.2  | 0.610517 | 0.687614 | 0.821056 | 0.817624 |
| MmugDNA.30639.1.S1_at   | MmugDNA.30639.1 | 7.15  | 6.95  | 0.13 | 0.22 | 1.14  | 0.441761 | 0.584511 | 0.725144 | 0.752435 |
| MmugDNA.3064.1.S1_at    | MmugDNA.3064.1  | 13.79 | 13.66 | 0.01 | 0.01 | 1.09  | 0.000035 | 0.000051 | 0.112653 | 0.025273 |
| MmugDNA.30643.1.S1_at   | MmugDNA.30643.1 | 9.54  | 9.32  | 0.3  | 0.2  | 1.16  | 0.348791 | 0.451696 | 0.667251 | 0.666544 |
| MmugDNA.30644.1.S1_at   | MmugDNA.30644.1 | 11.65 | 11.84 | 0.26 | 0.94 | -1.14 | 0.75958  | 0.859683 | 0.898447 | 0.920049 |
| MmugDNA.30645.1.S1_at   | MmugDNA.30645.1 | 9.77  | 9.88  | 0.29 | 0.77 | -1.08 | 0.631818 | 0.701396 | 0.83284  | 0.826814 |
| MmugDNA.30646.1.S1_at   | MmugDNA.30646.1 | 12.01 | 12.01 | 0.25 | 0.33 | 1     | 0.876473 | 0.557562 | 0.950553 | 0.73509  |
| MmugDNA.30648.1.S1_at   | MmugDNA.30648.1 | 9.18  | 9.16  | 0.18 | 0.19 | 1.02  | 0.585794 | 0.7927   | 0.807699 | 0.880287 |
| MmugDNA.30649.1.S1_at   | MmugDNA.30649.1 | 9.86  | 10.17 | 0.24 | 0.39 | -1.24 | 0.906903 | 0.839057 | 0.963023 | 0.908268 |
| MmugDNA.3065.1.S1_at    | MmugDNA.3065.1  | 6.46  | 6.42  | 0.23 | 0.53 | 1.03  | 0.492162 | 0.183211 | 0.755528 | 0.459553 |
| MmugDNA.30654.1.S1_at   | MmugDNA.30654.1 | 7.84  | 7.57  | 0.61 | 1.75 | 1.2   | 0.373559 | 0.031549 | 0.683245 | 0.219708 |
| MmugDNA.30659.1.S1_at   | MmugDNA.30659.1 | 11.86 | 11.64 | 0.09 | 0.08 | 1.17  | 0.035102 | 0.025059 | 0.334836 | 0.198332 |
| MmugDNA.30662.1.S1_at   | MmugDNA.30662.1 | 4.13  | 5.02  | 0.24 | 0.8  | -1.86 | 0.150792 | 0.17269  | 0.515443 | 0.449186 |
| MmugDNA.30665.1.S1_at   | MmugDNA.30665.1 | 12.14 | 12.1  | 0.13 | 0.02 | 1.03  | 0.517957 | 0.419382 | 0.76914  | 0.643466 |
| MmugDNA.30666.1.S1_at   | MmugDNA.30666.1 | 6.75  | 7.37  | 0.32 | 0.37 | -1.54 | 0.175673 | 0.176266 | 0.539405 | 0.452718 |
| MmugDNA.30667.1.S1_at   | MmugDNA.30667.1 | 12.1  | 11.84 | 0.13 | 0.07 | 1.19  | 0.063915 | 0.056397 | 0.401767 | 0.283382 |
| MmugDNA.30670.1.S1_at   | MmugDNA.30670.1 | 5.93  | 6.11  | 0.11 | 0.21 | -1.13 | 0.496942 | 0.544769 | 0.757692 | 0.727107 |
| MmugDNA.30671.1.S1_at   | MmugDNA.30671.1 | 11.38 | 10.96 | 0.06 | 0.25 | 1.34  | 0.044725 | 0.014289 | 0.359043 | 0.152639 |
| MmugDNA.30677.1.S1_at   | MmugDNA.30677.1 | 5.45  | 5.44  | 0.69 | 0.58 | 1.01  | 0.746918 | 0.892716 | 0.891569 | 0.938817 |
| MmugDNA.30678.1.S1_at   | MmugDNA.30678.1 | 6.78  | 6.8   | 0.12 | 0.15 | -1.02 | 0.916642 | 0.44729  | 0.96735  | 0.663434 |
| MmugDNA.30679.1.S1_at   | MmugDNA.30679.1 | 8.88  | 8.24  | 0.38 | 0.18 | 1.56  | 0.054295 | 0.050949 | 0.381841 | 0.270968 |
| MmugDNA.30683.1.S1_at   | MmugDNA.30683.1 | 9.03  | 7.89  | 0.73 | 0.16 | 2.2   | 0.104008 | 0.0254   | 0.464135 | 0.199747 |
| MmugDNA.30684.1.S1_at   | MmugDNA.30684.1 | 6.54  | 6.71  | 0.1  | 0.03 | -1.12 | 0.074376 | 0.031177 | 0.419963 | 0.21838  |
| MmugDNA.30686.1.S1_at   | MmugDNA.30686.1 | 9.27  | 8.6   | 0.29 | 0.23 | 1.6   | 0.052572 | 0.058383 | 0.378231 | 0.288369 |

|                         |                 |       |       |      |      |        |          |          |          |          |
|-------------------------|-----------------|-------|-------|------|------|--------|----------|----------|----------|----------|
| MmugDNA.30688.1.S1_at   | MmugDNA.30688.1 | 3.41  | 3.54  | 0.05 | 0.18 | -1.1   | 0.986711 | 0.584629 | 0.99532  | 0.752482 |
| MmugDNA.30689.1.S1_at   | MmugDNA.30689.1 | 8.49  | 8.42  | 0.07 | 0.18 | 1.05   | 0.650745 | 0.070131 | 0.842847 | 0.311029 |
| MmugDNA.30691.1.S1_at   | MmugDNA.30691.1 | 9.83  | 9.07  | 0.28 | 0.2  | 1.69   | 0.023232 | 0.015668 | 0.290413 | 0.158598 |
| MmugDNA.30694.1.S1_s_at | MmugDNA.30694.1 | 10.11 | 9.95  | 0.38 | 0.23 | 1.11   | 0.830796 | 0.514217 | 0.93155  | 0.707531 |
| MmugDNA.30706.1.S1_at   | MmugDNA.30706.1 | 7.22  | 8.78  | 0.27 | 1.21 | -2.94  | 0.10257  | 0.095659 | 0.462417 | 0.35269  |
| MmugDNA.30711.1.S1_at   | MmugDNA.30711.1 | 5.12  | 5.54  | 0.33 | 0.17 | -1.34  | 0.063784 | 0.055745 | 0.401568 | 0.282006 |
| MmugDNA.30712.1.S1_at   | MmugDNA.30712.1 | 10.29 | 9.87  | 0.06 | 0.13 | 1.34   | 0.017493 | 0.017031 | 0.267445 | 0.165384 |
| MmugDNA.30712.1.S1_s_at | MmugDNA.30712.1 | 9.54  | 9.23  | 0.1  | 0.24 | 1.24   | 0.27575  | 0.119855 | 0.617878 | 0.388577 |
| MmugDNA.30713.1.S1_at   | MmugDNA.30713.1 | 7.96  | 7.89  | 0.11 | 0.54 | 1.05   | 0.503008 | 0.199341 | 0.760605 | 0.474002 |
| MmugDNA.30715.1.S1_at   | MmugDNA.30715.1 | 9.85  | 9.82  | 0.15 | 0.25 | 1.02   | 0.850354 | 0.967488 | 0.939943 | 0.982071 |
| MmugDNA.30719.1.S1_at   | MmugDNA.30719.1 | 8.98  | 9.22  | 0.27 | 0.17 | -1.18  | 0.342838 | 0.022872 | 0.663407 | 0.189285 |
| MmugDNA.30725.1.S1_at   | MmugDNA.30725.1 | 6.93  | 10.9  | 1.26 | 3.11 | -15.74 | 0.377089 | 0.283954 | 0.685542 | 0.546237 |
| MmugDNA.30730.1.S1_at   | MmugDNA.30730.1 | 6.77  | 6.65  | 0.03 | 0.08 | 1.08   | 0.08286  | 0.218087 | 0.434645 | 0.491683 |
| MmugDNA.30733.1.S1_at   | MmugDNA.30733.1 | 8.05  | 8.07  | 0.04 | 0.06 | -1.01  | 0.15683  | 0.005545 | 0.521577 | 0.10275  |
| MmugDNA.30744.1.S1_at   | MmugDNA.30744.1 | 9.28  | 9.09  | 0.31 | 0.19 | 1.14   | 0.398603 | 0.086703 | 0.698762 | 0.339345 |
| MmugDNA.30744.1.S1_s_at | MmugDNA.30744.1 | 9.79  | 9.67  | 0.33 | 0.16 | 1.09   | 0.395204 | 0.416587 | 0.696396 | 0.641647 |
| MmugDNA.30746.1.S1_at   | MmugDNA.30746.1 | 6.09  | 6.38  | 0.12 | 0.36 | -1.22  | 0.198512 | 0.178539 | 0.561629 | 0.454778 |
| MmugDNA.30747.1.S1_s_at | MmugDNA.30747.1 | 9.33  | 9.4   | 0.19 | 0.17 | -1.05  | 0.400098 | 0.387538 | 0.699692 | 0.622163 |
| MmugDNA.30757.1.S1_at   | MmugDNA.30757.1 | 11.32 | 11.41 | 0.21 | 0.6  | -1.06  | 0.496336 | 0.635777 | 0.757473 | 0.785637 |
| MmugDNA.3076.1.S1_at    | MmugDNA.3076.1  | 6.95  | 6.64  | 0.49 | 0.31 | 1.24   | 0.137211 | 0.157561 | 0.504356 | 0.433131 |
| MmugDNA.30765.1.S1_at   | MmugDNA.30765.1 | 3.24  | 3.31  | 0.07 | 0.13 | -1.06  | 0.684501 | 0.734108 | 0.858788 | 0.845896 |
| MmugDNA.30768.1.S1_at   | MmugDNA.30768.1 | 11.94 | 12.15 | 0.11 | 0.27 | -1.16  | 0.517966 | 0.029422 | 0.76914  | 0.213368 |
| MmugDNA.30769.1.S1_at   | MmugDNA.30769.1 | 12.77 | 12.59 | 0.2  | 0.06 | 1.14   | 0.053563 | 0.116165 | 0.380387 | 0.383524 |
| MmugDNA.30771.1.S1_at   | MmugDNA.30771.1 | 6.68  | 6.33  | 0.22 | 0.43 | 1.28   | 0.181467 | 0.121455 | 0.546065 | 0.390578 |
| MmugDNA.30772.1.S1_at   | MmugDNA.30772.1 | 6.16  | 6.5   | 0.21 | 0.16 | -1.27  | 0.090334 | 0.10257  | 0.445788 | 0.362929 |
| MmugDNA.30775.1.S1_at   | MmugDNA.30775.1 | 8.12  | 7.93  | 0.37 | 0.88 | 1.15   | 0.920651 | 0.982667 | 0.969077 | 0.990442 |
| MmugDNA.30776.1.S1_at   | MmugDNA.30776.1 | 9.11  | 9.22  | 0.05 | 0.12 | -1.08  | 0.407318 | 0.299991 | 0.70458  | 0.558262 |
| MmugDNA.30778.1.S1_at   | MmugDNA.30778.1 | 7.03  | 6.95  | 0.11 | 0.26 | 1.06   | 0.674646 | 0.867489 | 0.854214 | 0.924699 |
| MmugDNA.30780.1.S1_at   | MmugDNA.30780.1 | 11.54 | 11.63 | 0.17 | 0.31 | -1.07  | 0.969265 | 0.127226 | 0.988296 | 0.397935 |
| MmugDNA.30781.1.S1_at   | MmugDNA.30781.1 | 10.05 | 10.51 | 0.28 | 0.42 | -1.38  | 0.10367  | 0.063919 | 0.463383 | 0.29906  |
| MmugDNA.30784.1.S1_at   | MmugDNA.30784.1 | 9.85  | 8.59  | 0.44 | 1.51 | 2.39   | 0.224585 | 0.242494 | 0.58277  | 0.51284  |
| MmugDNA.30790.1.S1_at   | MmugDNA.30790.1 | 8.62  | 8.47  | 0.12 | 0.03 | 1.11   | 0.093427 | 0.038087 | 0.450649 | 0.239753 |
| MmugDNA.30797.1.S1_at   | MmugDNA.30797.1 | 2.79  | 2.78  | 0.15 | 0.07 | 1      | 0.239684 | 0.510593 | 0.592652 | 0.70503  |
| MmugDNA.30798.1.S1_s_at | MmugDNA.30798.1 | 13.14 | 13.17 | 0.07 | 0.1  | -1.02  | 0.788609 | 0.345338 | 0.91217  | 0.590627 |
| MmugDNA.30799.1.S1_at   | MmugDNA.30799.1 | 10.86 | 10.42 | 0.04 | 0.27 | 1.36   | 0.146712 | 0.018937 | 0.512688 | 0.173137 |
| MmugDNA.30800.1.S1_at   | MmugDNA.30800.1 | 8.68  | 9.29  | 0.06 | 1.35 | -1.52  | 0.496263 | 0.301537 | 0.757473 | 0.55955  |
| MmugDNA.30802.1.S1_at   | MmugDNA.30802.1 | 11.53 | 11.89 | 0.24 | 0.35 | -1.28  | 0.373187 | 0.234951 | 0.683245 | 0.506146 |
| MmugDNA.30803.1.S1_at   | MmugDNA.30803.1 | 8.44  | 7.79  | 0.2  | 0.26 | 1.58   | 0.0163   | 0.003902 | 0.263592 | 0.088806 |
| MmugDNA.30804.1.S1_at   | MmugDNA.30804.1 | 6.42  | 6.54  | 0.17 | 0.1  | -1.09  | 0.335848 | 0.358484 | 0.65921  | 0.600011 |
| MmugDNA.30818.1.S1_at   | MmugDNA.30818.1 | 7.27  | 7.3   | 0.32 | 0.17 | -1.02  | 0.67413  | 0.084701 | 0.853988 | 0.336196 |
| MmugDNA.3082.1.S1_at    | MmugDNA.3082.1  | 11.34 | 10.95 | 0.23 | 0.36 | 1.31   | 0.825698 | 0.944382 | 0.929258 | 0.968528 |

|                         |                 |       |       |      |      |       |          |          |          |          |
|-------------------------|-----------------|-------|-------|------|------|-------|----------|----------|----------|----------|
| MmugDNA.30824.1.S1_at   | MmugDNA.30824.1 | 8.07  | 8.16  | 0.31 | 0.09 | -1.07 | 0.507826 | 0.659058 | 0.763154 | 0.800504 |
| MmugDNA.30828.1.S1_at   | MmugDNA.30828.1 | 11.99 | 11.9  | 0.13 | 0.14 | 1.07  | 0.593048 | 0.399844 | 0.811221 | 0.630048 |
| MmugDNA.30829.1.S1_at   | MmugDNA.30829.1 | 12.48 | 12.81 | 0.19 | 0.18 | -1.26 | 0.194199 | 0.164404 | 0.557777 | 0.440678 |
| MmugDNA.30830.1.S1_s_at | MmugDNA.30830.1 | 11.99 | 11.91 | 0.05 | 0.37 | 1.05  | 0.649692 | 0.837953 | 0.842495 | 0.907475 |
| MmugDNA.30831.1.S1_at   | MmugDNA.30831.1 | 10.3  | 10.65 | 0.2  | 0.2  | -1.27 | 0.194335 | 0.148811 | 0.557805 | 0.423201 |
| MmugDNA.30832.1.S1_at   | MmugDNA.30832.1 | 7.16  | 7.79  | 1.18 | 1.21 | -1.55 | 0.958097 | 0.96348  | 0.984122 | 0.979631 |
| MmugDNA.30836.1.S1_at   | MmugDNA.30836.1 | 10.59 | 10.79 | 0.18 | 0.4  | -1.15 | 0.163782 | 0.237474 | 0.528049 | 0.508139 |
| MmugDNA.30837.1.S1_at   | MmugDNA.30837.1 | 11.55 | 11.36 | 0.14 | 0.15 | 1.14  | 0.102486 | 0.022398 | 0.46236  | 0.187298 |
| MmugDNA.30841.1.S1_at   | MmugDNA.30841.1 | 8.36  | 8.53  | 0.23 | 0.09 | -1.13 | 0.232621 | 0.39803  | 0.587814 | 0.629138 |
| MmugDNA.30841.1.S1_x_at | MmugDNA.30841.1 | 9.36  | 9.46  | 0.13 | 0.14 | -1.07 | 0.619679 | 0.765858 | 0.825711 | 0.863946 |
| MmugDNA.30847.1.S1_at   | MmugDNA.30847.1 | 8.01  | 8.5   | 0.25 | 0.3  | -1.41 | 0.029847 | 0.028973 | 0.315694 | 0.212109 |
| MmugDNA.30848.1.S1_at   | MmugDNA.30848.1 | 8.04  | 7.26  | 0.03 | 0.71 | 1.72  | 0.421054 | 0.661223 | 0.712858 | 0.801687 |
| MmugDNA.30862.1.S1_at   | MmugDNA.30862.1 | 9.27  | 9.75  | 0.47 | 0.5  | -1.39 | 0.137924 | 0.147266 | 0.505364 | 0.421464 |
| MmugDNA.30874.1.S1_at   | MmugDNA.30874.1 | 4.97  | 5.91  | 0.64 | 0.37 | -1.92 | 0.064958 | 0.06395  | 0.403744 | 0.29906  |
| MmugDNA.30885.1.S1_at   | MmugDNA.30885.1 | 11.47 | 10.88 | 0.16 | 0.54 | 1.51  | 0.194571 | 0.021419 | 0.558002 | 0.183315 |
| MmugDNA.30894.1.S1_at   | MmugDNA.30894.1 | 3.08  | 3.18  | 0.04 | 0.12 | -1.08 | 0.218289 | 0.02962  | 0.577874 | 0.213783 |
| MmugDNA.30897.1.S1_at   | MmugDNA.30897.1 | 11.12 | 11.44 | 0.1  | 0.26 | -1.25 | 0.115004 | 0.001186 | 0.478345 | 0.054053 |
| MmugDNA.30902.1.S1_at   | MmugDNA.30902.1 | 8.75  | 7.9   | 0.07 | 1.43 | 1.8   | 0.340372 | 0.370837 | 0.661779 | 0.609814 |
| MmugDNA.3091.1.S1_at    | MmugDNA.3091.1  | 7.5   | 7.13  | 0.3  | 0.07 | 1.29  | 0.041309 | 0.01627  | 0.35151  | 0.161649 |
| MmugDNA.30914.1.S1_at   | MmugDNA.30914.1 | 5.31  | 6.51  | 0.06 | 1.12 | -2.3  | 0.145369 | 0.179129 | 0.511407 | 0.45547  |
| MmugDNA.30916.1.S1_at   | MmugDNA.30916.1 | 3.49  | 3.58  | 0.11 | 0.08 | -1.06 | 0.139014 | 0.178631 | 0.506234 | 0.454847 |
| MmugDNA.30919.1.S1_at   | MmugDNA.30919.1 | 8.49  | 6.61  | 0.44 | 0.14 | 3.68  | 0.004598 | 0.001243 | 0.1844   | 0.054826 |
| MmugDNA.3092.1.S1_at    | MmugDNA.3092.1  | 10.07 | 9.97  | 0.8  | 0.57 | 1.07  | 0.418202 | 0.585388 | 0.711197 | 0.752844 |
| MmugDNA.30921.1.S1_at   | MmugDNA.30921.1 | 7.33  | 7.7   | 0.34 | 0.38 | -1.29 | 0.718215 | 0.583796 | 0.876373 | 0.751989 |
| MmugDNA.30922.1.S1_x_at | MmugDNA.30922.1 | 4.18  | 4.14  | 0.22 | 0.08 | 1.03  | 0.28886  | 0.364508 | 0.626809 | 0.604846 |
| MmugDNA.30929.1.S1_at   | MmugDNA.30929.1 | 7.26  | 8.76  | 0.3  | 0.35 | -2.84 | 0.005032 | 0.001603 | 0.187868 | 0.060491 |
| MmugDNA.30933.1.S1_at   | MmugDNA.30933.1 | 6.48  | 6.39  | 0.22 | 0.19 | 1.06  | 0.88023  | 0.50837  | 0.951822 | 0.703589 |
| MmugDNA.30934.1.S1_at   | MmugDNA.30934.1 | 6.64  | 6.16  | 0.04 | 0.17 | 1.4   | 0.008559 | 0.003209 | 0.21941  | 0.082023 |
| MmugDNA.30937.1.S1_at   | MmugDNA.30937.1 | 8.97  | 8.68  | 0.12 | 0.39 | 1.23  | 0.257347 | 0.118401 | 0.604706 | 0.3864   |
| MmugDNA.30943.1.S1_at   | MmugDNA.30943.1 | 10.9  | 10.95 | 0.19 | 0.24 | -1.03 | 0.949119 | 0.556448 | 0.980654 | 0.734507 |
| MmugDNA.30953.1.S1_at   | MmugDNA.30953.1 | 7.6   | 7.7   | 0.33 | 0.24 | -1.07 | 0.357007 | 0.470806 | 0.672044 | 0.679123 |
| MmugDNA.30966.1.S1_at   | MmugDNA.30966.1 | 9.77  | 8.6   | 0.32 | 0.09 | 2.26  | 0.003577 | 0.007554 | 0.179515 | 0.116437 |
| MmugDNA.30973.1.S1_at   | MmugDNA.30973.1 | 10.34 | 10.17 | 0.29 | 0.4  | 1.12  | 0.858849 | 0.966539 | 0.943028 | 0.98139  |
| MmugDNA.30978.1.S1_at   | MmugDNA.30978.1 | 7.58  | 7.26  | 0.35 | 0.92 | 1.24  | 0.604974 | 0.084541 | 0.818068 | 0.335953 |
| MmugDNA.30984.1.S1_at   | MmugDNA.30984.1 | 10.42 | 9.63  | 0.1  | 1.15 | 1.73  | 0.105573 | 0.087484 | 0.46647  | 0.340617 |
| MmugDNA.30985.1.S1_at   | MmugDNA.30985.1 | 8.41  | 8.06  | 0.15 | 0.18 | 1.28  | 0.077712 | 0.070547 | 0.427714 | 0.311777 |
| MmugDNA.30998.1.S1_at   | MmugDNA.30998.1 | 12.18 | 11.86 | 0.2  | 0.56 | 1.25  | 0.901757 | 0.268664 | 0.960796 | 0.534138 |
| MmugDNA.3100.1.S1_at    | MmugDNA.3100.1  | 6.15  | 6.43  | 0.42 | 0.27 | -1.21 | 0.274336 | 0.365494 | 0.61727  | 0.605587 |
| MmugDNA.31002.1.S1_at   | MmugDNA.31002.1 | 6.45  | 6.42  | 0.06 | 0.06 | 1.02  | 0.498436 | 0.656998 | 0.758399 | 0.799401 |
| MmugDNA.31012.1.S1_at   | MmugDNA.31012.1 | 10.02 | 10.85 | 0.76 | 2.27 | -1.78 | 0.660061 | 0.38701  | 0.847439 | 0.621935 |
| MmugDNA.31013.1.S1_at   | MmugDNA.31013.1 | 6.3   | 6.2   | 0.11 | 0.43 | 1.08  | 0.466535 | 0.561586 | 0.740215 | 0.737505 |

|                         |                 |       |       |      |      |        |          |          |          |          |
|-------------------------|-----------------|-------|-------|------|------|--------|----------|----------|----------|----------|
| MmugDNA.31015.1.S1_at   | MmugDNA.31015.1 | 10.1  | 10.34 | 0.34 | 1.16 | -1.18  | 0.580092 | 0.774307 | 0.804451 | 0.868751 |
| MmugDNA.31018.1.S1_at   | MmugDNA.31018.1 | 7.57  | 7.61  | 0.22 | 0.1  | -1.03  | 0.529508 | 0.697842 | 0.776234 | 0.824445 |
| MmugDNA.31021.1.S1_at   | MmugDNA.31021.1 | 10.58 | 9.51  | 0.27 | 0.62 | 2.09   | 0.139552 | 0.160855 | 0.507003 | 0.43709  |
| MmugDNA.31030.1.S1_at   | MmugDNA.31030.1 | 8.35  | 7.06  | 0.53 | 0.32 | 2.46   | 0.01076  | 0.004582 | 0.231196 | 0.094484 |
| MmugDNA.31034.1.S1_at   | MmugDNA.31034.1 | 13.46 | 12.8  | 0.62 | 0.84 | 1.59   | 0.578384 | 0.443835 | 0.803822 | 0.661517 |
| MmugDNA.31040.1.S1_at   | MmugDNA.31040.1 | 10    | 9.56  | 0.16 | 0.07 | 1.36   | 0.010848 | 0.005218 | 0.232239 | 0.100105 |
| MmugDNA.31043.1.S1_at   | MmugDNA.31043.1 | 7.54  | 7.96  | 0.49 | 0.48 | -1.34  | 0.946024 | 0.079189 | 0.979359 | 0.32639  |
| MmugDNA.31049.1.S1_at   | MmugDNA.31049.1 | 3.49  | 3.43  | 0.09 | 0.1  | 1.04   | 0.930247 | 0.579518 | 0.973022 | 0.74918  |
| MmugDNA.3105.1.S1_at    | MmugDNA.3105.1  | 6.16  | 6.28  | 0.09 | 0.09 | -1.08  | 0.085328 | 0.050556 | 0.438823 | 0.270222 |
| MmugDNA.31054.1.S1_at   | MmugDNA.31054.1 | 6.01  | 4.87  | 0.61 | 0.76 | 2.2    | 0.172075 | 0.177801 | 0.535422 | 0.454111 |
| MmugDNA.31056.1.S1_at   | MmugDNA.31056.1 | 8.43  | 8.92  | 0.47 | 0.41 | -1.4   | 0.211633 | 0.282137 | 0.572347 | 0.544937 |
| MmugDNA.31057.1.S1_at   | MmugDNA.31057.1 | 5.07  | 5.21  | 0.01 | 0.13 | -1.1   | 0.499735 | 0.410342 | 0.759348 | 0.637216 |
| MmugDNA.3106.1.S1_at    | MmugDNA.3106.1  | 11.86 | 12.99 | 0.41 | 1.29 | -2.19  | 0.449088 | 0.419529 | 0.730082 | 0.643507 |
| MmugDNA.31067.1.S1_x_at | MmugDNA.31067.1 | 9.09  | 9.17  | 0.3  | 0.18 | -1.06  | 0.665537 | 0.606205 | 0.850023 | 0.765727 |
| MmugDNA.31070.1.S1_at   | MmugDNA.31070.1 | 10.34 | 10.17 | 0.1  | 0.25 | 1.13   | 0.587472 | 0.652193 | 0.808576 | 0.796592 |
| MmugDNA.31080.1.S1_at   | MmugDNA.31080.1 | 9.17  | 8.37  | 0.05 | 0.28 | 1.74   | 0.007357 | 0.002818 | 0.207312 | 0.078275 |
| MmugDNA.31085.1.S1_at   | MmugDNA.31085.1 | 10.91 | 10.96 | 0.14 | 0.88 | -1.04  | 0.967928 | 0.983158 | 0.98795  | 0.990726 |
| MmugDNA.31088.1.S1_at   | MmugDNA.31088.1 | 11.73 | 11.61 | 0.05 | 0.05 | 1.09   | 0.037989 | 0.035463 | 0.343341 | 0.232564 |
| MmugDNA.31090.1.S1_at   | MmugDNA.31090.1 | 10.98 | 10.42 | 0.13 | 0.49 | 1.47   | 0.130911 | 0.049088 | 0.497246 | 0.266518 |
| MmugDNA.31092.1.S1_at   | MmugDNA.31092.1 | 9     | 7.45  | 0.31 | 0.61 | 2.92   | 0.022136 | 0.015911 | 0.284595 | 0.160062 |
| MmugDNA.31096.1.S1_at   | MmugDNA.31096.1 | 12.08 | 12.01 | 0.06 | 0.07 | 1.05   | 0.375663 | 0.099513 | 0.684803 | 0.357898 |
| MmugDNA.31096.1.S1_x_at | MmugDNA.31096.1 | 12.26 | 12.25 | 0.04 | 0.08 | 1      | 0.369604 | 0.45379  | 0.680782 | 0.668253 |
| MmugDNA.31098.1.S1_at   | MmugDNA.31098.1 | 7.47  | 9.27  | 0.34 | 0.38 | -3.48  | 0.004821 | 0.0015   | 0.184674 | 0.059054 |
| MmugDNA.31100.1.S1_at   | MmugDNA.31100.1 | 10.15 | 9.29  | 0.12 | 0.29 | 1.82   | 0.003819 | 0.003231 | 0.179914 | 0.08214  |
| MmugDNA.31106.1.S1_at   | MmugDNA.31106.1 | 10.11 | 9.58  | 0.12 | 0.4  | 1.44   | 0.08959  | 0.045963 | 0.44526  | 0.258818 |
| MmugDNA.31107.1.S1_at   | MmugDNA.31107.1 | 6.98  | 7.16  | 0.24 | 0.33 | -1.13  | 0.180766 | 0.243637 | 0.545228 | 0.513777 |
| MmugDNA.31109.1.S1_at   | MmugDNA.31109.1 | 9.75  | 8.91  | 0.34 | 0.55 | 1.79   | 0.050996 | 0.044316 | 0.375705 | 0.255021 |
| MmugDNA.31112.1.S1_at   | MmugDNA.31112.1 | 10.95 | 12.05 | 0.2  | 0.27 | -2.15  | 0.008087 | 0.003244 | 0.21602  | 0.082187 |
| MmugDNA.31114.1.S1_at   | MmugDNA.31114.1 | 7.69  | 7.47  | 0.47 | 0.29 | 1.16   | 0.94112  | 0.454667 | 0.97764  | 0.668763 |
| MmugDNA.31120.1.S1_at   | MmugDNA.31120.1 | 9.35  | 9.57  | 0.09 | 0.33 | -1.16  | 0.903221 | 0.175888 | 0.961415 | 0.452486 |
| MmugDNA.31122.1.S1_at   | MmugDNA.31122.1 | 10.57 | 10.85 | 0.3  | 0.36 | -1.21  | 0.252537 | 0.30502  | 0.601373 | 0.562176 |
| MmugDNA.31125.1.S1_at   | MmugDNA.31125.1 | 5.5   | 10.47 | 1.61 | 3.5  | -31.24 | 0.384557 | 0.244316 | 0.690074 | 0.514184 |
| MmugDNA.31131.1.S1_at   | MmugDNA.31131.1 | 11.75 | 11.79 | 0.11 | 0.18 | -1.03  | 0.897562 | 0.895019 | 0.95917  | 0.940055 |
| MmugDNA.31132.1.S1_at   | MmugDNA.31132.1 | 5.04  | 4.78  | 0.15 | 0.28 | 1.2    | 0.084692 | 0.050714 | 0.43753  | 0.270344 |
| MmugDNA.31134.1.S1_at   | MmugDNA.31134.1 | 3.7   | 2.81  | 0.65 | 0.09 | 1.86   | 0.252877 | 0.260763 | 0.601608 | 0.52721  |
| MmugDNA.31135.1.S1_at   | MmugDNA.31135.1 | 10.82 | 10.97 | 0.16 | 0.68 | -1.11  | 0.643921 | 0.504064 | 0.8397   | 0.701301 |
| MmugDNA.31139.1.S1_at   | MmugDNA.31139.1 | 5.03  | 5.14  | 0.07 | 0.17 | -1.08  | 0.18484  | 0.297507 | 0.548357 | 0.556122 |
| MmugDNA.3114.1.S1_at    | MmugDNA.3114.1  | 12.27 | 11.89 | 0.13 | 0.16 | 1.3    | 0.014643 | 0.001115 | 0.254381 | 0.052851 |
| MmugDNA.31141.1.S1_at   | MmugDNA.31141.1 | 7.07  | 9.27  | 0.91 | 2.18 | -4.61  | 0.40534  | 0.229674 | 0.703121 | 0.501661 |
| MmugDNA.31148.1.S1_at   | MmugDNA.31148.1 | 6.47  | 6.78  | 0.02 | 0.06 | -1.24  | 0.001275 | 0.00079  | 0.145267 | 0.045969 |
| MmugDNA.31150.1.S1_at   | MmugDNA.31150.1 | 10.91 | 11.03 | 0.1  | 0.41 | -1.08  | 0.211013 | 0.174029 | 0.571977 | 0.450275 |

|                         |                 |       |       |      |      |       |          |          |          |          |
|-------------------------|-----------------|-------|-------|------|------|-------|----------|----------|----------|----------|
| MmugDNA.31154.1.S1_at   | MmugDNA.31154.1 | 9.65  | 9.55  | 0.17 | 0.32 | 1.08  | 0.536466 | 0.201414 | 0.77949  | 0.475963 |
| MmugDNA.31157.1.S1_at   | MmugDNA.31157.1 | 7.02  | 7.13  | 0.17 | 0.03 | -1.08 | 0.175384 | 0.209071 | 0.539136 | 0.482861 |
| MmugDNA.31162.1.S1_at   | MmugDNA.31162.1 | 9.24  | 9.47  | 0.29 | 0.02 | -1.17 | 0.199575 | 0.160274 | 0.562633 | 0.436406 |
| MmugDNA.31166.1.S1_at   | MmugDNA.31166.1 | 7.23  | 7.17  | 0.37 | 0.26 | 1.05  | 0.315521 | 0.279255 | 0.646683 | 0.54293  |
| MmugDNA.31172.1.S1_at   | MmugDNA.31172.1 | 5.76  | 5.81  | 0.1  | 0.35 | -1.04 | 0.438784 | 0.025357 | 0.723309 | 0.199595 |
| MmugDNA.31175.1.S1_at   | MmugDNA.31175.1 | 5.67  | 5.69  | 0.14 | 0.18 | -1.02 | 0.631416 | 0.388068 | 0.83269  | 0.622598 |
| MmugDNA.31177.1.S1_at   | MmugDNA.31177.1 | 5.98  | 6.07  | 0.13 | 0.09 | -1.06 | 0.38294  | 0.154411 | 0.689029 | 0.429288 |
| MmugDNA.31181.1.S1_at   | MmugDNA.31181.1 | 12.63 | 12.76 | 0.13 | 0.1  | -1.09 | 0.084576 | 0.071594 | 0.437266 | 0.313714 |
| MmugDNA.31181.1.S1_s_at | MmugDNA.31181.1 | 12.1  | 12.25 | 0.22 | 0.06 | -1.11 | 0.080522 | 0.069851 | 0.430594 | 0.310389 |
| MmugDNA.31185.1.S1_at   | MmugDNA.31185.1 | 5.74  | 5.76  | 0.18 | 0.07 | -1.02 | 0.914976 | 0.730452 | 0.966361 | 0.844017 |
| MmugDNA.31198.1.S1_at   | MmugDNA.31198.1 | 9.37  | 8.82  | 0.14 | 0.03 | 1.46  | 0.00177  | 0.000772 | 0.154452 | 0.045568 |
| MmugDNA.31201.1.S1_at   | MmugDNA.31201.1 | 8.23  | 9.42  | 0.44 | 0.47 | -2.29 | 0.141544 | 0.126482 | 0.509111 | 0.397038 |
| MmugDNA.31211.1.S1_at   | MmugDNA.31211.1 | 11.57 | 11.41 | 0.03 | 0.33 | 1.11  | 0.169188 | 0.21503  | 0.533567 | 0.488898 |
| MmugDNA.31218.1.S1_at   | MmugDNA.31218.1 | 5.81  | 6.83  | 0.1  | 1.22 | -2.03 | 0.218397 | 0.260523 | 0.577884 | 0.527038 |
| MmugDNA.31219.1.S1_at   | MmugDNA.31219.1 | 6.97  | 7.23  | 0.22 | 0.24 | -1.2  | 0.271934 | 0.15035  | 0.615834 | 0.42489  |
| MmugDNA.3122.1.S1_at    | MmugDNA.3122.1  | 11.34 | 11.57 | 0.15 | 0.44 | -1.17 | 0.146181 | 0.101467 | 0.512187 | 0.361266 |
| MmugDNA.31221.1.S1_at   | MmugDNA.31221.1 | 4.97  | 4.85  | 0.23 | 0.22 | 1.09  | 0.431785 | 0.487153 | 0.718638 | 0.690281 |
| MmugDNA.31223.1.S1_at   | MmugDNA.31223.1 | 4.15  | 4.1   | 0.54 | 1.47 | 1.04  | 0.942657 | 0.537206 | 0.978122 | 0.72233  |
| MmugDNA.31225.1.S1_at   | MmugDNA.31225.1 | 5.8   | 5.84  | 0.3  | 0.28 | -1.03 | 0.631508 | 0.76862  | 0.832749 | 0.865637 |
| MmugDNA.31227.1.S1_at   | MmugDNA.31227.1 | 3.19  | 3.18  | 0.62 | 0.07 | 1.01  | 0.411403 | 0.445898 | 0.707301 | 0.662593 |
| MmugDNA.31232.1.S1_at   | MmugDNA.31232.1 | 7.21  | 6.69  | 0.36 | 0.61 | 1.44  | 0.155429 | 0.195207 | 0.520164 | 0.470253 |
| MmugDNA.31244.1.S1_at   | MmugDNA.31244.1 | 7.31  | 6.9   | 0.45 | 0.44 | 1.33  | 0.337435 | 0.573076 | 0.659935 | 0.744941 |
| MmugDNA.31256.1.S1_at   | MmugDNA.31256.1 | 6.29  | 6     | 1.05 | 0.81 | 1.23  | 0.766394 | 0.234889 | 0.901765 | 0.506125 |
| MmugDNA.31258.1.S1_at   | MmugDNA.31258.1 | 12.01 | 11.71 | 0.3  | 0.34 | 1.23  | 0.11581  | 0.137945 | 0.479325 | 0.410912 |
| MmugDNA.31261.1.S1_at   | MmugDNA.31261.1 | 5.88  | 6.65  | 0.19 | 0.79 | -1.71 | 0.258826 | 0.343777 | 0.606013 | 0.589483 |
| MmugDNA.31263.1.S1_at   | MmugDNA.31263.1 | 4.12  | 4.17  | 0.27 | 0.1  | -1.03 | 0.944385 | 0.993014 | 0.978789 | 0.995888 |
| MmugDNA.31269.1.S1_at   | MmugDNA.31269.1 | 8.42  | 8.32  | 0.08 | 0.05 | 1.07  | 0.117831 | 0.033209 | 0.481982 | 0.225663 |
| MmugDNA.31270.1.S1_at   | MmugDNA.31270.1 | 7.03  | 6.73  | 0.06 | 0.16 | 1.24  | 0.054209 | 0.041122 | 0.381696 | 0.247654 |
| MmugDNA.31272.1.S1_at   | MmugDNA.31272.1 | 7.67  | 7.77  | 0.3  | 0.2  | -1.07 | 0.851422 | 0.752703 | 0.940204 | 0.855968 |
| MmugDNA.31274.1.S1_at   | MmugDNA.31274.1 | 8.23  | 7.84  | 0.24 | 0.31 | 1.31  | 0.170952 | 0.034565 | 0.534983 | 0.23001  |
| MmugDNA.31277.1.S1_at   | MmugDNA.31277.1 | 12.69 | 12.53 | 0.04 | 0.37 | 1.11  | 0.408321 | 0.562816 | 0.705117 | 0.738167 |
| MmugDNA.31288.1.S1_at   | MmugDNA.31288.1 | 9.85  | 9.5   | 0.17 | 0.29 | 1.28  | 0.082679 | 0.034528 | 0.434325 | 0.229979 |
| MmugDNA.31289.1.S1_at   | MmugDNA.31289.1 | 10.34 | 9.69  | 0.14 | 0.24 | 1.57  | 0.011955 | 0.002604 | 0.239065 | 0.075487 |
| MmugDNA.3129.1.S1_at    | MmugDNA.3129.1  | 6.97  | 6.51  | 0.37 | 1.69 | 1.38  | 0.632681 | 0.256809 | 0.833252 | 0.524607 |
| MmugDNA.31291.1.S1_at   | MmugDNA.31291.1 | 12.15 | 11.99 | 0.15 | 0.18 | 1.12  | 0.341937 | 0.207614 | 0.662945 | 0.481906 |
| MmugDNA.31292.1.S1_at   | MmugDNA.31292.1 | 7.1   | 6.82  | 0.22 | 0.31 | 1.21  | 0.701966 | 0.56617  | 0.86824  | 0.740296 |
| MmugDNA.31293.1.S1_at   | MmugDNA.31293.1 | 5.87  | 6.9   | 0.7  | 1    | -2.04 | 0.099665 | 0.113163 | 0.459668 | 0.379184 |
| MmugDNA.3130.1.S1_at    | MmugDNA.3130.1  | 5.1   | 5.25  | 0.14 | 0.35 | -1.11 | 0.360723 | 0.448554 | 0.674646 | 0.66441  |
| MmugDNA.31306.1.S1_at   | MmugDNA.31306.1 | 10.7  | 10.25 | 0.15 | 0.36 | 1.37  | 0.061938 | 0.028643 | 0.396857 | 0.210901 |
| MmugDNA.31312.1.S1_at   | MmugDNA.31312.1 | 4.96  | 5.15  | 0.62 | 0.35 | -1.14 | 0.758836 | 0.752795 | 0.89809  | 0.855968 |
| MmugDNA.31313.1.S1_at   | MmugDNA.31313.1 | 11.18 | 11.55 | 0.83 | 0.49 | -1.3  | 0.183312 | 0.169843 | 0.547348 | 0.446544 |



|                         |                 |       |       |      |      |       |          |          |          |          |
|-------------------------|-----------------|-------|-------|------|------|-------|----------|----------|----------|----------|
| MmugDNA.31324.1.S1_at   | MmugDNA.31324.1 | 10.57 | 9.91  | 0.15 | 0.26 | 1.58  | 0.019991 | 0.015019 | 0.276365 | 0.155736 |
| MmugDNA.31327.1.S1_at   | MmugDNA.31327.1 | 5.7   | 5.76  | 0.26 | 0.32 | -1.04 | 0.583009 | 0.108977 | 0.806097 | 0.37269  |
| MmugDNA.3133.1.S1_at    | MmugDNA.3133.1  | 11.2  | 10.8  | 0.13 | 0.2  | 1.33  | 0.029676 | 0.025099 | 0.315023 | 0.19845  |
| MmugDNA.31330.1.S1_at   | MmugDNA.31330.1 | 11.47 | 10.89 | 0.03 | 0.04 | 1.49  | 0.00004  | 0.000036 | 0.112653 | 0.023031 |
| MmugDNA.31331.1.S1_at   | MmugDNA.31331.1 | 10.94 | 10.27 | 0.14 | 0.37 | 1.6   | 0.018989 | 0.009167 | 0.272631 | 0.126331 |
| MmugDNA.31333.1.S1_at   | MmugDNA.31333.1 | 13.72 | 13.74 | 0.07 | 0.02 | -1.01 | 0.614326 | 0.006372 | 0.823199 | 0.108546 |
| MmugDNA.31335.1.S1_at   | MmugDNA.31335.1 | 11.97 | 11.84 | 0.06 | 0.16 | 1.09  | 0.28216  | 0.026252 | 0.62258  | 0.202991 |
| MmugDNA.31336.1.S1_at   | MmugDNA.31336.1 | 7.37  | 7.17  | 0.14 | 0.4  | 1.15  | 0.889071 | 0.385793 | 0.955591 | 0.621079 |
| MmugDNA.31337.1.S1_at   | MmugDNA.31337.1 | 13.11 | 12.81 | 0.02 | 0.08 | 1.24  | 0.002585 | 0.000678 | 0.164386 | 0.04413  |
| MmugDNA.31341.1.S1_at   | MmugDNA.31341.1 | 6.56  | 6.78  | 0.13 | 0.1  | -1.17 | 0.082122 | 0.183432 | 0.433313 | 0.459574 |
| MmugDNA.3135.1.S1_at    | MmugDNA.3135.1  | 5.93  | 6.25  | 0.17 | 0.26 | -1.25 | 0.115147 | 0.184104 | 0.47852  | 0.460323 |
| MmugDNA.31351.1.S1_at   | MmugDNA.31351.1 | 9.08  | 8.87  | 0.34 | 0.35 | 1.16  | 0.805814 | 0.136427 | 0.92037  | 0.408839 |
| MmugDNA.31356.1.S1_at   | MmugDNA.31356.1 | 10.17 | 8.53  | 0.33 | 0.63 | 3.1   | 0.035407 | 0.017731 | 0.336288 | 0.168367 |
| MmugDNA.31359.1.S1_at   | MmugDNA.31359.1 | 3.76  | 3.68  | 0.28 | 0.19 | 1.06  | 0.436154 | 0.411924 | 0.721644 | 0.638434 |
| MmugDNA.31360.1.S1_at   | MmugDNA.31360.1 | 3.66  | 3.58  | 0.14 | 0.05 | 1.05  | 0.863375 | 0.180667 | 0.945092 | 0.457245 |
| MmugDNA.31362.1.S1_at   | MmugDNA.31362.1 | 7.89  | 8.98  | 0.17 | 0.24 | -2.13 | 0.002351 | 0.000384 | 0.162    | 0.037273 |
| MmugDNA.3137.1.S1_at    | MmugDNA.3137.1  | 11.27 | 11.08 | 0.03 | 0.3  | 1.14  | 0.43277  | 0.115444 | 0.719265 | 0.382557 |
| MmugDNA.31371.1.S1_at   | MmugDNA.31371.1 | 8.67  | 8.79  | 0.15 | 0.8  | -1.09 | 0.685645 | 0.871452 | 0.859291 | 0.926844 |
| MmugDNA.31378.1.S1_at   | MmugDNA.31378.1 | 10.9  | 10.95 | 0.16 | 0.18 | -1.03 | 0.694247 | 0.061071 | 0.864407 | 0.293952 |
| MmugDNA.31385.1.S1_at   | MmugDNA.31385.1 | 7.91  | 7.87  | 0.03 | 0.74 | 1.03  | 0.397168 | 0.274525 | 0.697527 | 0.538987 |
| MmugDNA.31387.1.S1_x_at | MmugDNA.31387.1 | 3.59  | 3.61  | 0.07 | 0.13 | -1.01 | 0.434593 | 0.698385 | 0.720596 | 0.82478  |
| MmugDNA.31388.1.S1_at   | MmugDNA.31388.1 | 10.6  | 10.77 | 0.35 | 0.05 | -1.13 | 0.47653  | 0.216008 | 0.746246 | 0.48965  |
| MmugDNA.31388.1.S1_s_at | MmugDNA.31388.1 | 12.08 | 12.2  | 0.28 | 0.01 | -1.09 | 0.478138 | 0.505352 | 0.747114 | 0.702077 |
| MmugDNA.31389.1.S1_at   | MmugDNA.31389.1 | 7.14  | 9.01  | 0.48 | 0.43 | -3.67 | 0.007337 | 0.005952 | 0.207019 | 0.105513 |
| MmugDNA.31391.1.S1_at   | MmugDNA.31391.1 | 8.49  | 8.13  | 0.18 | 0.45 | 1.28  | 0.321221 | 0.37292  | 0.649889 | 0.611775 |
| MmugDNA.31393.1.S1_at   | MmugDNA.31393.1 | 3.96  | 4.02  | 0.1  | 0.09 | -1.04 | 0.676818 | 0.682467 | 0.85524  | 0.814526 |
| MmugDNA.31394.1.S1_at   | MmugDNA.31394.1 | 10.49 | 10.65 | 0.08 | 0.36 | -1.12 | 0.538617 | 0.629877 | 0.7807   | 0.782009 |
| MmugDNA.31396.1.S1_at   | MmugDNA.31396.1 | 11.73 | 11.75 | 0.15 | 0.13 | -1.02 | 0.185055 | 0.305116 | 0.548475 | 0.562255 |
| MmugDNA.31398.1.S1_at   | MmugDNA.31398.1 | 3.83  | 4.07  | 0.11 | 0.23 | -1.18 | 0.07095  | 0.024011 | 0.414673 | 0.194236 |
| MmugDNA.31405.1.S1_at   | MmugDNA.31405.1 | 12.02 | 11.94 | 0.1  | 1.01 | 1.06  | 0.393047 | 0.398034 | 0.694954 | 0.629138 |
| MmugDNA.31406.1.S1_at   | MmugDNA.31406.1 | 10.89 | 11.69 | 0.15 | 0.36 | -1.74 | 0.024827 | 0.010748 | 0.2967   | 0.135385 |
| MmugDNA.31411.1.S1_at   | MmugDNA.31411.1 | 6.24  | 6.23  | 0.14 | 0.15 | 1.01  | 0.558627 | 0.283755 | 0.793334 | 0.546185 |
| MmugDNA.31412.1.S1_at   | MmugDNA.31412.1 | 5.75  | 5.68  | 0.05 | 0.17 | 1.05  | 0.787893 | 0.73048  | 0.911709 | 0.844017 |
| MmugDNA.31412.1.S1_s_at | MmugDNA.31412.1 | 13.99 | 13.84 | 0.05 | 0.07 | 1.11  | 0.055148 | 0.050352 | 0.383547 | 0.269642 |
| MmugDNA.31414.1.S1_at   | MmugDNA.31414.1 | 9.95  | 9.89  | 0.23 | 0.63 | 1.04  | 0.907916 | 0.36059  | 0.963478 | 0.601629 |
| MmugDNA.31419.1.S1_at   | MmugDNA.31419.1 | 6.43  | 6.5   | 0.07 | 0.12 | -1.05 | 0.376546 | 0.518525 | 0.685245 | 0.710477 |
| MmugDNA.31425.1.S1_at   | MmugDNA.31425.1 | 4.11  | 4.07  | 0.02 | 0.02 | 1.03  | 0.034052 | 0.09259  | 0.331126 | 0.348529 |
| MmugDNA.31427.1.S1_at   | MmugDNA.31427.1 | 4.58  | 4.71  | 0.13 | 0.2  | -1.1  | 0.490594 | 0.320053 | 0.754497 | 0.572421 |
| MmugDNA.31428.1.S1_at   | MmugDNA.31428.1 | 9.99  | 10.05 | 0.27 | 0.26 | -1.04 | 0.948303 | 0.08884  | 0.980175 | 0.342663 |
| MmugDNA.31436.1.S1_at   | MmugDNA.31436.1 | 9.24  | 9.77  | 0.09 | 0.21 | -1.44 | 0.025403 | 0.020228 | 0.299142 | 0.178641 |
| MmugDNA.3144.1.S1_at    | MmugDNA.3144.1  | 10.43 | 10.53 | 0.18 | 0.6  | -1.07 | 0.744092 | 0.470203 | 0.890428 | 0.678572 |

|                         |                 |       |       |      |      |       |          |          |          |          |
|-------------------------|-----------------|-------|-------|------|------|-------|----------|----------|----------|----------|
| MmugDNA.31446.1.S1_at   | MmugDNA.31446.1 | 11.16 | 11.11 | 0.11 | 0.11 | 1.03  | 0.893437 | 0.058777 | 0.957616 | 0.289182 |
| MmugDNA.31447.1.S1_at   | MmugDNA.31447.1 | 3.59  | 3.7   | 0.1  | 0.09 | -1.08 | 0.227121 | 0.143318 | 0.584952 | 0.417294 |
| MmugDNA.31448.1.S1_at   | MmugDNA.31448.1 | 12.14 | 12.33 | 0.03 | 0.08 | -1.14 | 0.016123 | 0.007983 | 0.262742 | 0.118766 |
| MmugDNA.31449.1.S1_at   | MmugDNA.31449.1 | 4.25  | 4.54  | 0.18 | 0.12 | -1.22 | 0.075653 | 0.063291 | 0.423128 | 0.298244 |
| MmugDNA.31450.1.S1_at   | MmugDNA.31450.1 | 6.82  | 7.07  | 0.18 | 0.04 | -1.19 | 0.117649 | 0.069956 | 0.48184  | 0.31072  |
| MmugDNA.31452.1.S1_at   | MmugDNA.31452.1 | 3.4   | 3.37  | 0.1  | 0.03 | 1.02  | 0.184867 | 0.324242 | 0.548379 | 0.57488  |
| MmugDNA.31456.1.S1_at   | MmugDNA.31456.1 | 7.28  | 7.12  | 0.75 | 1.03 | 1.11  | 0.924527 | 0.969521 | 0.970746 | 0.983323 |
| MmugDNA.31458.1.S1_at   | MmugDNA.31458.1 | 9.71  | 9.95  | 0.17 | 0.06 | -1.18 | 0.063383 | 0.061007 | 0.400486 | 0.293811 |
| MmugDNA.31462.1.S1_at   | MmugDNA.31462.1 | 5     | 5.06  | 0.06 | 0.05 | -1.04 | 0.060605 | 0.052063 | 0.393814 | 0.273754 |
| MmugDNA.31467.1.S1_at   | MmugDNA.31467.1 | 12.89 | 12.68 | 0.15 | 0.02 | 1.16  | 0.211847 | 0.164797 | 0.572347 | 0.441106 |
| MmugDNA.31476.1.S1_at   | MmugDNA.31476.1 | 5.56  | 5.24  | 0.26 | 0.32 | 1.25  | 0.169319 | 0.234082 | 0.533651 | 0.505319 |
| MmugDNA.31478.1.S1_at   | MmugDNA.31478.1 | 7.08  | 7.38  | 0.12 | 0.42 | -1.24 | 0.293743 | 0.107776 | 0.630897 | 0.370847 |
| MmugDNA.31481.1.S1_at   | MmugDNA.31481.1 | 6.42  | 6.35  | 0.19 | 0.26 | 1.05  | 0.786165 | 0.531791 | 0.911069 | 0.718951 |
| MmugDNA.31482.1.S1_at   | MmugDNA.31482.1 | 7.57  | 7.66  | 0.36 | 0.26 | -1.07 | 0.879477 | 0.564273 | 0.951533 | 0.739142 |
| MmugDNA.31482.1.S1_s_at | MmugDNA.31482.1 | 13.47 | 13.56 | 0.23 | 0.07 | -1.07 | 0.482323 | 0.353759 | 0.749404 | 0.596815 |
| MmugDNA.31484.1.S1_at   | MmugDNA.31484.1 | 5.29  | 5.39  | 0.1  | 0.09 | -1.07 | 0.14524  | 0.266789 | 0.511329 | 0.53241  |
| MmugDNA.31486.1.S1_at   | MmugDNA.31486.1 | 5.33  | 5.34  | 0.21 | 0.18 | -1.01 | 0.752961 | 0.509095 | 0.894568 | 0.703993 |
| MmugDNA.31492.1.S1_at   | MmugDNA.31492.1 | 11.48 | 11.46 | 0.03 | 0.53 | 1.01  | 0.90029  | 0.701673 | 0.960269 | 0.826974 |
| MmugDNA.31501.1.S1_at   | MmugDNA.31501.1 | 7.39  | 5.99  | 0.07 | 0.53 | 2.64  | 0.022795 | 0.020332 | 0.288178 | 0.179024 |
| MmugDNA.31505.1.S1_at   | MmugDNA.31505.1 | 11.47 | 11.47 | 0.15 | 0.04 | -1    | 0.382222 | 0.542001 | 0.688573 | 0.725169 |
| MmugDNA.31506.1.S1_at   | MmugDNA.31506.1 | 10.61 | 9.21  | 0.64 | 1.87 | 2.64  | 0.41843  | 0.188899 | 0.711351 | 0.464818 |
| MmugDNA.31508.1.S1_at   | MmugDNA.31508.1 | 12.38 | 12.54 | 0.23 | 0.09 | -1.12 | 0.229828 | 0.34111  | 0.587007 | 0.587233 |
| MmugDNA.31509.1.S1_at   | MmugDNA.31509.1 | 11.28 | 11.23 | 0.15 | 0.15 | 1.03  | 0.730509 | 0.250465 | 0.88321  | 0.519391 |
| MmugDNA.31513.1.S1_at   | MmugDNA.31513.1 | 10.48 | 11.23 | 0.05 | 0.25 | -1.68 | 0.006536 | 0.001937 | 0.199625 | 0.065795 |
| MmugDNA.31523.1.S1_at   | MmugDNA.31523.1 | 11.1  | 10.82 | 0.25 | 0.45 | 1.22  | 0.258832 | 0.185116 | 0.606013 | 0.460962 |
| MmugDNA.31523.1.S1_s_at | MmugDNA.31523.1 | 11.9  | 11.6  | 0.21 | 0.37 | 1.23  | 0.230344 | 0.126684 | 0.587222 | 0.397363 |
| MmugDNA.31524.1.S1_at   | MmugDNA.31524.1 | 11.15 | 11.12 | 0.08 | 0.42 | 1.02  | 0.267073 | 0.304617 | 0.612309 | 0.561838 |
| MmugDNA.31528.1.S1_at   | MmugDNA.31528.1 | 5.08  | 5.19  | 0.03 | 0.15 | -1.08 | 0.088542 | 0.133467 | 0.443347 | 0.405337 |
| MmugDNA.31529.1.S1_at   | MmugDNA.31529.1 | 9.44  | 9.73  | 0.1  | 0.1  | -1.22 | 0.045904 | 0.030898 | 0.361978 | 0.217584 |
| MmugDNA.31531.1.S1_at   | MmugDNA.31531.1 | 5.31  | 5.46  | 0.23 | 0.51 | -1.11 | 0.272103 | 0.356564 | 0.61597  | 0.598459 |
| MmugDNA.31532.1.S1_at   | MmugDNA.31532.1 | 8.7   | 8.89  | 0.18 | 0.72 | -1.15 | 0.863102 | 0.779916 | 0.944982 | 0.872422 |
| MmugDNA.31533.1.S1_at   | MmugDNA.31533.1 | 8.6   | 10.04 | 1.58 | 2.68 | -2.72 | 0.767426 | 0.782615 | 0.902317 | 0.874202 |
| MmugDNA.31534.1.S1_at   | MmugDNA.31534.1 | 5.87  | 7.07  | 0.44 | 0.88 | -2.3  | 0.170267 | 0.086793 | 0.534249 | 0.339559 |
| MmugDNA.31535.1.S1_at   | MmugDNA.31535.1 | 11.45 | 11.58 | 0.11 | 0.1  | -1.1  | 0.57115  | 0.758693 | 0.7999   | 0.859734 |
| MmugDNA.31536.1.S1_at   | MmugDNA.31536.1 | 8.61  | 8.99  | 0.07 | 0.15 | -1.3  | 0.048109 | 0.078997 | 0.367807 | 0.326009 |
| MmugDNA.31538.1.S1_at   | MmugDNA.31538.1 | 3.89  | 4.12  | 0.13 | 0.14 | -1.17 | 0.133846 | 0.189422 | 0.500371 | 0.465117 |
| MmugDNA.31540.1.S1_at   | MmugDNA.31540.1 | 6.18  | 6.01  | 0.15 | 0.09 | 1.12  | 0.286213 | 0.124352 | 0.625493 | 0.394826 |
| MmugDNA.31545.1.A1_at   | MmugDNA.31545.1 | 6.74  | 6.81  | 0.05 | 0.03 | -1.05 | 0.047034 | 0.055469 | 0.364849 | 0.281404 |
| MmugDNA.31545.1.S1_at   | MmugDNA.31545.1 | 5.65  | 5.88  | 0.08 | 0.26 | -1.18 | 0.309711 | 0.38125  | 0.641716 | 0.617581 |
| MmugDNA.31553.1.S1_at   | MmugDNA.31553.1 | 8.94  | 8.5   | 0.14 | 0.22 | 1.36  | 0.033678 | 0.028479 | 0.330119 | 0.21056  |
| MmugDNA.31554.1.S1_at   | MmugDNA.31554.1 | 6.26  | 6.41  | 0.25 | 0.23 | -1.11 | 0.94461  | 0.893324 | 0.978885 | 0.939163 |

|                         |                 |       |       |      |      |       |          |          |          |          |
|-------------------------|-----------------|-------|-------|------|------|-------|----------|----------|----------|----------|
| MmugDNA.31555.1.S1_at   | MmugDNA.31555.1 | 6.35  | 6.43  | 0.06 | 0.09 | -1.05 | 0.744236 | 0.144693 | 0.890539 | 0.418546 |
| MmugDNA.31556.1.S1_at   | MmugDNA.31556.1 | 12.24 | 12.72 | 0.08 | 0.36 | -1.39 | 0.112796 | 0.129491 | 0.475249 | 0.400938 |
| MmugDNA.31557.1.S1_at   | MmugDNA.31557.1 | 9.52  | 9.41  | 0.17 | 0.37 | 1.08  | 0.148905 | 0.062867 | 0.51391  | 0.297427 |
| MmugDNA.31558.1.S1_at   | MmugDNA.31558.1 | 9.45  | 9.4   | 0.17 | 0.5  | 1.04  | 0.31215  | 0.18293  | 0.643924 | 0.45941  |
| MmugDNA.31559.1.S1_at   | MmugDNA.31559.1 | 10.13 | 10.3  | 0.23 | 0.16 | -1.12 | 0.267539 | 0.007588 | 0.612616 | 0.11658  |
| MmugDNA.31560.1.S1_at   | MmugDNA.31560.1 | 5.75  | 5.94  | 0.14 | 0.09 | -1.14 | 0.331829 | 0.53975  | 0.656517 | 0.723926 |
| MmugDNA.31562.1.S1_at   | MmugDNA.31562.1 | 10.24 | 10.43 | 0.12 | 0.2  | -1.14 | 0.11693  | 0.059296 | 0.480867 | 0.290528 |
| MmugDNA.31563.1.S1_at   | MmugDNA.31563.1 | 10.41 | 10.43 | 0.19 | 0.29 | -1.01 | 0.294211 | 0.396759 | 0.631202 | 0.628438 |
| MmugDNA.31564.1.S1_at   | MmugDNA.31564.1 | 8.19  | 7.64  | 0.83 | 1.12 | 1.46  | 0.215914 | 0.273255 | 0.575954 | 0.537788 |
| MmugDNA.31566.1.S1_at   | MmugDNA.31566.1 | 7.36  | 5.86  | 0.87 | 0.6  | 2.84  | 0.06447  | 0.059442 | 0.402975 | 0.290548 |
| MmugDNA.31571.1.S1_at   | MmugDNA.31571.1 | 8.03  | 8.09  | 0.26 | 0.27 | -1.04 | 0.532902 | 0.395284 | 0.777862 | 0.62738  |
| MmugDNA.3158.1.S1_at    | MmugDNA.3158.1  | 8.27  | 9.17  | 1.18 | 2.02 | -1.87 | 0.943319 | 0.357182 | 0.978467 | 0.598833 |
| MmugDNA.31583.1.S1_at   | MmugDNA.31583.1 | 5.64  | 5.66  | 0.48 | 0.5  | -1.02 | 0.956935 | 0.916105 | 0.983802 | 0.953063 |
| MmugDNA.31588.1.S1_s_at | MmugDNA.31588.1 | 5.77  | 10.65 | 1.36 | 3.57 | -29.5 | 0.373876 | 0.269232 | 0.683245 | 0.534534 |
| MmugDNA.31591.1.S1_at   | MmugDNA.31591.1 | 6.52  | 6.56  | 0.1  | 0.12 | -1.03 | 0.859147 | 0.774443 | 0.943112 | 0.868766 |
| MmugDNA.31593.1.S1_at   | MmugDNA.31593.1 | 7.85  | 7.99  | 0.04 | 0.19 | -1.1  | 0.149598 | 0.032425 | 0.514118 | 0.223049 |
| MmugDNA.31597.1.S1_at   | MmugDNA.31597.1 | 13.04 | 13.5  | 0.09 | 0.08 | -1.37 | 0.004442 | 0.002602 | 0.183475 | 0.075487 |
| MmugDNA.316.1.S1_at     | MmugDNA.316.1   | 6.51  | 5.65  | 0.63 | 0.41 | 1.81  | 0.445812 | 0.594827 | 0.728005 | 0.758675 |
| MmugDNA.3160.1.S1_s_at  | MmugDNA.3160.1  | 12.78 | 12.67 | 0.08 | 0.07 | 1.08  | 0.064981 | 0.031385 | 0.403744 | 0.219065 |
| MmugDNA.31603.1.S1_at   | MmugDNA.31603.1 | 6.63  | 6.59  | 0.07 | 0.09 | 1.03  | 0.302723 | 0.419345 | 0.63706  | 0.643449 |
| MmugDNA.31613.1.S1_at   | MmugDNA.31613.1 | 6.49  | 6.79  | 0.09 | 0.11 | -1.23 | 0.043334 | 0.031383 | 0.356711 | 0.219065 |
| MmugDNA.31618.1.S1_at   | MmugDNA.31618.1 | 9.43  | 8.97  | 0.15 | 0.37 | 1.38  | 0.158247 | 0.148699 | 0.523085 | 0.423201 |
| MmugDNA.31619.1.S1_at   | MmugDNA.31619.1 | 13.07 | 12.88 | 0.04 | 0.08 | 1.14  | 0.025644 | 0.014063 | 0.300197 | 0.151841 |
| MmugDNA.31619.1.S1_s_at | MmugDNA.31619.1 | 9.74  | 9.55  | 0.07 | 0.32 | 1.14  | 0.491896 | 0.330286 | 0.755362 | 0.579046 |
| MmugDNA.31624.1.S1_at   | MmugDNA.31624.1 | 9     | 8.18  | 0.15 | 0.43 | 1.76  | 0.111514 | 0.113213 | 0.47371  | 0.379229 |
| MmugDNA.31625.1.S1_at   | MmugDNA.31625.1 | 5.92  | 5.82  | 0.05 | 0.19 | 1.07  | 0.894703 | 0.871093 | 0.957917 | 0.926785 |
| MmugDNA.31630.1.S1_at   | MmugDNA.31630.1 | 10.79 | 11.1  | 0.12 | 0.25 | -1.24 | 0.054281 | 0.065151 | 0.38184  | 0.301225 |
| MmugDNA.31633.1.S1_at   | MmugDNA.31633.1 | 5.02  | 5.48  | 0.3  | 0.27 | -1.37 | 0.072997 | 0.076472 | 0.418323 | 0.321562 |
| MmugDNA.31636.1.S1_at   | MmugDNA.31636.1 | 10.7  | 10.39 | 0.29 | 0.15 | 1.24  | 0.267472 | 0.310625 | 0.612607 | 0.565787 |
| MmugDNA.3164.1.S1_at    | MmugDNA.3164.1  | 11.21 | 10.35 | 0.15 | 0.76 | 1.82  | 0.171948 | 0.210803 | 0.535422 | 0.484883 |
| MmugDNA.31644.1.S1_at   | MmugDNA.31644.1 | 11.04 | 11.11 | 0.18 | 0.18 | -1.05 | 0.809873 | 0.941709 | 0.922375 | 0.966969 |
| MmugDNA.31645.1.S1_at   | MmugDNA.31645.1 | 6.21  | 6.54  | 0.14 | 0.1  | -1.26 | 0.040825 | 0.045574 | 0.350469 | 0.257646 |
| MmugDNA.31647.1.S1_at   | MmugDNA.31647.1 | 12.96 | 12.85 | 0.11 | 0.4  | 1.08  | 0.966044 | 0.910752 | 0.987096 | 0.949643 |
| MmugDNA.31649.1.S1_at   | MmugDNA.31649.1 | 3.08  | 3.08  | 0.16 | 0.09 | 1     | 0.968753 | 0.998151 | 0.988176 | 0.999039 |
| MmugDNA.31652.1.S1_at   | MmugDNA.31652.1 | 10.84 | 10.74 | 0.23 | 0.28 | 1.07  | 0.803028 | 0.228065 | 0.918877 | 0.500249 |
| MmugDNA.31654.1.S1_s_at | MmugDNA.31654.1 | 9.26  | 8.85  | 0.24 | 0.27 | 1.33  | 0.180744 | 0.205394 | 0.545222 | 0.479751 |
| MmugDNA.31655.1.S1_at   | MmugDNA.31655.1 | 10    | 9.85  | 0.31 | 0.45 | 1.11  | 0.30577  | 0.361478 | 0.639223 | 0.602216 |
| MmugDNA.31657.1.S1_at   | MmugDNA.31657.1 | 12.56 | 12.14 | 0.12 | 0.23 | 1.34  | 0.031196 | 0.017548 | 0.32089  | 0.167632 |
| MmugDNA.31659.1.S1_at   | MmugDNA.31659.1 | 8.81  | 9.27  | 0.21 | 0.83 | -1.37 | 0.303025 | 0.416512 | 0.637259 | 0.641647 |
| MmugDNA.31660.1.S1_at   | MmugDNA.31660.1 | 7.46  | 7.35  | 0.13 | 0.08 | 1.08  | 0.197591 | 0.036777 | 0.560593 | 0.236291 |
| MmugDNA.31662.1.S1_at   | MmugDNA.31662.1 | 9.46  | 8.88  | 0.14 | 0.6  | 1.5   | 0.670005 | 0.666151 | 0.852318 | 0.804415 |

|                         |                 |       |       |      |      |       |          |          |          |          |
|-------------------------|-----------------|-------|-------|------|------|-------|----------|----------|----------|----------|
| MmugDNA.31671.1.S1_at   | MmugDNA.31671.1 | 4.23  | 4.72  | 0.22 | 0.41 | -1.41 | 0.313247 | 0.390855 | 0.645054 | 0.624588 |
| MmugDNA.31677.1.S1_s_at | MmugDNA.31677.1 | 13.24 | 13.19 | 0.09 | 0.04 | 1.04  | 0.212163 | 0.030641 | 0.572526 | 0.217046 |
| MmugDNA.31679.1.S1_at   | MmugDNA.31679.1 | 9.94  | 9.04  | 0.13 | 0.41 | 1.87  | 0.059037 | 0.037788 | 0.390921 | 0.238765 |
| MmugDNA.31682.1.S1_at   | MmugDNA.31682.1 | 7.63  | 7.59  | 0.04 | 0.11 | 1.03  | 0.22375  | 0.333568 | 0.582123 | 0.581791 |
| MmugDNA.31684.1.S1_at   | MmugDNA.31684.1 | 5.67  | 5.62  | 0.17 | 0.17 | 1.03  | 0.772371 | 0.651632 | 0.90415  | 0.796299 |
| MmugDNA.31685.1.S1_at   | MmugDNA.31685.1 | 10.45 | 10.68 | 0.12 | 0.29 | -1.17 | 0.666987 | 0.300576 | 0.850752 | 0.558876 |
| MmugDNA.31689.1.S1_at   | MmugDNA.31689.1 | 9.52  | 9.09  | 0.14 | 0.31 | 1.35  | 0.253533 | 0.232083 | 0.602121 | 0.503802 |
| MmugDNA.3169.1.S1_at    | MmugDNA.3169.1  | 12.3  | 12.72 | 0.12 | 0.09 | -1.34 | 0.009048 | 0.001325 | 0.222023 | 0.056164 |
| MmugDNA.31690.1.S1_at   | MmugDNA.31690.1 | 11.97 | 12.14 | 0.21 | 0.47 | -1.13 | 0.954778 | 0.971867 | 0.983073 | 0.984795 |
| MmugDNA.31692.1.S1_at   | MmugDNA.31692.1 | 5.75  | 8.14  | 0.41 | 1.77 | -5.24 | 0.094133 | 0.048835 | 0.451714 | 0.265858 |
| MmugDNA.31696.1.S1_at   | MmugDNA.31696.1 | 9.46  | 9.19  | 0.48 | 0.23 | 1.21  | 0.671771 | 0.06958  | 0.852716 | 0.309848 |
| MmugDNA.31699.1.S1_at   | MmugDNA.31699.1 | 7.02  | 6.8   | 0.84 | 1.13 | 1.16  | 0.972517 | 0.852698 | 0.989473 | 0.916254 |
| MmugDNA.31704.1.S1_at   | MmugDNA.31704.1 | 11.15 | 11.19 | 0.11 | 0.13 | -1.03 | 0.81815  | 0.156805 | 0.926284 | 0.432353 |
| MmugDNA.31709.1.S1_at   | MmugDNA.31709.1 | 12.04 | 11.61 | 0.22 | 0.26 | 1.34  | 0.206869 | 0.261102 | 0.568908 | 0.527481 |
| MmugDNA.31713.1.S1_at   | MmugDNA.31713.1 | 5.11  | 5.03  | 0.2  | 0.08 | 1.06  | 0.929494 | 0.995202 | 0.972735 | 0.996999 |
| MmugDNA.31716.1.S1_s_at | MmugDNA.31716.1 | 6.99  | 7.3   | 0.3  | 0.57 | -1.24 | 0.328815 | 0.273067 | 0.654645 | 0.537644 |
| MmugDNA.31718.1.S1_at   | MmugDNA.31718.1 | 10.59 | 10.77 | 0.28 | 0.62 | -1.13 | 0.723675 | 0.445944 | 0.879215 | 0.662623 |
| MmugDNA.31719.1.S1_at   | MmugDNA.31719.1 | 10.01 | 9.54  | 0.12 | 0.28 | 1.39  | 0.103    | 0.076532 | 0.46254  | 0.321612 |
| MmugDNA.31719.1.S1_s_at | MmugDNA.31719.1 | 10.52 | 10.14 | 0.21 | 0.24 | 1.3   | 0.144491 | 0.166692 | 0.511015 | 0.443163 |
| MmugDNA.3172.1.S1_at    | MmugDNA.3172.1  | 6.87  | 6.37  | 0.07 | 0.41 | 1.41  | 0.319139 | 0.115039 | 0.648688 | 0.381885 |
| MmugDNA.31728.1.S1_at   | MmugDNA.31728.1 | 2.93  | 3.03  | 0.05 | 0.16 | -1.08 | 0.175572 | 0.153891 | 0.539315 | 0.428542 |
| MmugDNA.31733.1.S1_at   | MmugDNA.31733.1 | 11.78 | 11.73 | 0.1  | 0.62 | 1.03  | 0.396363 | 0.499618 | 0.696939 | 0.698424 |
| MmugDNA.31738.1.S1_at   | MmugDNA.31738.1 | 3.94  | 4.1   | 0.11 | 0.12 | -1.11 | 0.081493 | 0.093709 | 0.432455 | 0.350192 |
| MmugDNA.31746.1.S1_at   | MmugDNA.31746.1 | 10.12 | 10.33 | 0.55 | 0.25 | -1.15 | 0.359365 | 0.491122 | 0.673869 | 0.692777 |
| MmugDNA.31753.1.S1_at   | MmugDNA.31753.1 | 4.73  | 4.78  | 0.58 | 0.23 | -1.04 | 0.681548 | 0.855426 | 0.857635 | 0.917581 |
| MmugDNA.3176.1.S1_at    | MmugDNA.3176.1  | 6.1   | 6.08  | 0.07 | 0.13 | 1.02  | 0.719974 | 0.329774 | 0.877214 | 0.578874 |
| MmugDNA.31764.1.S1_at   | MmugDNA.31764.1 | 10.83 | 10.79 | 0.12 | 0.12 | 1.03  | 0.579655 | 0.279064 | 0.804438 | 0.542782 |
| MmugDNA.31765.1.S1_at   | MmugDNA.31765.1 | 12.73 | 12.49 | 0.17 | 0.6  | 1.18  | 0.156997 | 0.159454 | 0.521736 | 0.435568 |
| MmugDNA.31767.1.S1_at   | MmugDNA.31767.1 | 4.44  | 4.83  | 0.41 | 0.25 | -1.32 | 0.324583 | 0.187536 | 0.651941 | 0.463628 |
| MmugDNA.31772.1.S1_at   | MmugDNA.31772.1 | 12.59 | 12.65 | 0.05 | 0.21 | -1.04 | 0.607751 | 0.790309 | 0.819507 | 0.878795 |
| MmugDNA.31779.1.S1_at   | MmugDNA.31779.1 | 6.02  | 6.11  | 0.03 | 0.29 | -1.06 | 0.661641 | 0.638495 | 0.848148 | 0.78765  |
| MmugDNA.31781.1.S1_at   | MmugDNA.31781.1 | 8.89  | 8.76  | 0.12 | 0.3  | 1.09  | 0.618991 | 0.059927 | 0.825395 | 0.291419 |
| MmugDNA.31784.1.S1_at   | MmugDNA.31784.1 | 7.03  | 7.06  | 0.33 | 0.13 | -1.02 | 0.59948  | 0.391207 | 0.814594 | 0.624922 |
| MmugDNA.31789.1.S1_s_at | MmugDNA.31789.1 | 6.51  | 6.81  | 0.19 | 0.06 | -1.23 | 0.074637 | 0.06984  | 0.420587 | 0.310363 |
| MmugDNA.31791.1.S1_at   | MmugDNA.31791.1 | 6.31  | 6.18  | 0.13 | 0.17 | 1.09  | 0.355415 | 0.480926 | 0.671033 | 0.686018 |
| MmugDNA.3180.1.S1_at    | MmugDNA.3180.1  | 10.48 | 11.5  | 0.15 | 0.39 | -2.03 | 0.013031 | 0.006842 | 0.245262 | 0.111782 |
| MmugDNA.31806.1.S1_at   | MmugDNA.31806.1 | 8.79  | 7.79  | 0.26 | 0.18 | 2     | 0.005443 | 0.001389 | 0.191107 | 0.057005 |
| MmugDNA.3182.1.S1_at    | MmugDNA.3182.1  | 7.65  | 7.55  | 0.3  | 0.15 | 1.07  | 0.493353 | 0.708041 | 0.756149 | 0.830647 |
| MmugDNA.31837.1.S1_at   | MmugDNA.31837.1 | 10.63 | 10.49 | 0.17 | 0.32 | 1.1   | 0.811674 | 0.757327 | 0.923289 | 0.85872  |
| MmugDNA.31841.1.S1_at   | MmugDNA.31841.1 | 6.17  | 9.37  | 0.63 | 2.93 | -9.23 | 0.345462 | 0.188639 | 0.665175 | 0.464569 |
| MmugDNA.31850.1.S1_at   | MmugDNA.31850.1 | 9.93  | 10.33 | 0.58 | 0.78 | -1.31 | 0.210454 | 0.083072 | 0.57172  | 0.332911 |

|                         |                 |       |       |      |      |       |          |          |          |          |
|-------------------------|-----------------|-------|-------|------|------|-------|----------|----------|----------|----------|
| MmugDNA.31861.1.S1_at   | MmugDNA.31861.1 | 7.66  | 7.82  | 0.37 | 0.33 | -1.12 | 0.517979 | 0.449517 | 0.76914  | 0.665109 |
| MmugDNA.31867.1.S1_at   | MmugDNA.31867.1 | 10.14 | 10.43 | 0.1  | 0.36 | -1.22 | 0.083268 | 0.066809 | 0.435702 | 0.304365 |
| MmugDNA.31877.1.S1_at   | MmugDNA.31877.1 | 5.58  | 5.49  | 0.22 | 0.16 | 1.06  | 0.451992 | 0.669134 | 0.731815 | 0.806492 |
| MmugDNA.31893.1.S1_at   | MmugDNA.31893.1 | 6.97  | 7.46  | 0.23 | 0.26 | -1.4  | 0.040301 | 0.03136  | 0.349277 | 0.219062 |
| MmugDNA.31899.1.S1_at   | MmugDNA.31899.1 | 7.24  | 7.29  | 0.23 | 0.06 | -1.04 | 0.853575 | 0.823991 | 0.940892 | 0.898873 |
| MmugDNA.319.1.S1_at     | MmugDNA.319.1   | 11.29 | 10.78 | 0.12 | 0.28 | 1.42  | 0.071756 | 0.074029 | 0.415852 | 0.317579 |
| MmugDNA.3190.1.S1_at    | MmugDNA.3190.1  | 8.36  | 8.45  | 0.33 | 0.36 | -1.07 | 0.407404 | 0.166368 | 0.704624 | 0.442884 |
| MmugDNA.31903.1.S1_at   | MmugDNA.31903.1 | 8.33  | 9.43  | 0.36 | 1.26 | -2.15 | 0.224951 | 0.263155 | 0.582943 | 0.529465 |
| MmugDNA.31905.1.S1_at   | MmugDNA.31905.1 | 4.66  | 6.43  | 0.68 | 0.23 | -3.4  | 0.02132  | 0.033814 | 0.282524 | 0.227489 |
| MmugDNA.31906.1.S1_at   | MmugDNA.31906.1 | 6.4   | 6.38  | 0.08 | 0.18 | 1.02  | 0.616372 | 0.655887 | 0.824152 | 0.798739 |
| MmugDNA.31916.1.S1_at   | MmugDNA.31916.1 | 6.78  | 6.62  | 0.13 | 0.3  | 1.12  | 0.296729 | 0.113545 | 0.632686 | 0.379632 |
| MmugDNA.31918.1.S1_at   | MmugDNA.31918.1 | 8.61  | 8.6   | 0.84 | 0.86 | 1.01  | 0.783343 | 0.246431 | 0.909482 | 0.515899 |
| MmugDNA.31920.1.S1_at   | MmugDNA.31920.1 | 7.53  | 7.56  | 0.68 | 1.36 | -1.02 | 0.994584 | 0.876449 | 0.998128 | 0.929683 |
| MmugDNA.31931.1.S1_at   | MmugDNA.31931.1 | 9.02  | 9.62  | 0.37 | 0.43 | -1.52 | 0.031706 | 0.030576 | 0.322685 | 0.216818 |
| MmugDNA.31934.1.S1_at   | MmugDNA.31934.1 | 6.63  | 6.59  | 0.01 | 0.17 | 1.03  | 0.695966 | 0.648    | 0.865073 | 0.793947 |
| MmugDNA.31936.1.S1_at   | MmugDNA.31936.1 | 5.03  | 7.73  | 1.62 | 2.62 | -6.49 | 0.387649 | 0.399174 | 0.692111 | 0.629695 |
| MmugDNA.31945.1.S1_at   | MmugDNA.31945.1 | 5.28  | 5.05  | 0.47 | 0.04 | 1.17  | 0.127638 | 0.118001 | 0.493916 | 0.385881 |
| MmugDNA.31946.1.S1_at   | MmugDNA.31946.1 | 4.84  | 4.77  | 0.71 | 0.12 | 1.05  | 0.305526 | 0.287379 | 0.639223 | 0.548636 |
| MmugDNA.31948.1.S1_at   | MmugDNA.31948.1 | 6.91  | 7.05  | 0.07 | 0.14 | -1.1  | 0.32441  | 0.427852 | 0.651941 | 0.649582 |
| MmugDNA.31955.1.S1_at   | MmugDNA.31955.1 | 11.72 | 11.2  | 0.09 | 0.6  | 1.44  | 0.195093 | 0.23388  | 0.558557 | 0.505169 |
| MmugDNA.31962.1.S1_s_at | MmugDNA.31962.1 | 10.36 | 10.49 | 0.05 | 0.47 | -1.1  | 0.682673 | 0.85619  | 0.858083 | 0.917861 |
| MmugDNA.31965.1.S1_at   | MmugDNA.31965.1 | 11.75 | 11.79 | 0.08 | 0.17 | -1.03 | 0.790032 | 0.790012 | 0.912878 | 0.878631 |
| MmugDNA.31968.1.S1_at   | MmugDNA.31968.1 | 11.96 | 11.89 | 0.1  | 0.27 | 1.05  | 0.795182 | 0.317563 | 0.915028 | 0.570774 |
| MmugDNA.31970.1.S1_at   | MmugDNA.31970.1 | 7.44  | 7.91  | 0.22 | 0.6  | -1.38 | 0.136533 | 0.120766 | 0.503652 | 0.389579 |
| MmugDNA.31979.1.S1_at   | MmugDNA.31979.1 | 9.42  | 9.2   | 0.21 | 0.16 | 1.16  | 0.089741 | 0.103456 | 0.445334 | 0.364346 |
| MmugDNA.31987.1.S1_at   | MmugDNA.31987.1 | 6.24  | 6.29  | 0.2  | 0.27 | -1.04 | 0.562736 | 0.706182 | 0.795492 | 0.829634 |
| MmugDNA.31989.1.S1_at   | MmugDNA.31989.1 | 11.94 | 11.75 | 0.03 | 0.1  | 1.14  | 0.081118 | 0.056656 | 0.431848 | 0.284094 |
| MmugDNA.31993.1.S1_at   | MmugDNA.31993.1 | 6.14  | 7.98  | 0.9  | 1.72 | -3.59 | 0.207873 | 0.139603 | 0.569854 | 0.41286  |
| MmugDNA.31995.1.S1_at   | MmugDNA.31995.1 | 8.37  | 8.72  | 0.37 | 1.29 | -1.27 | 0.788788 | 0.654977 | 0.912277 | 0.7982   |
| MmugDNA.31996.1.S1_at   | MmugDNA.31996.1 | 7.21  | 7.6   | 0.01 | 0.4  | -1.31 | 0.19083  | 0.37874  | 0.553627 | 0.615748 |
| MmugDNA.31997.1.S1_at   | MmugDNA.31997.1 | 5.91  | 6.14  | 0.16 | 0.21 | -1.18 | 0.186639 | 0.204913 | 0.550106 | 0.479254 |
| MmugDNA.32002.1.S1_at   | MmugDNA.32002.1 | 7.16  | 6.9   | 0.25 | 0.19 | 1.2   | 0.21665  | 0.276843 | 0.576287 | 0.540757 |
| MmugDNA.32004.1.S1_at   | MmugDNA.32004.1 | 7     | 8.08  | 0.51 | 0.75 | -2.12 | 0.110683 | 0.07927  | 0.472524 | 0.326444 |
| MmugDNA.32007.1.S1_at   | MmugDNA.32007.1 | 10.97 | 10.76 | 0.2  | 0.31 | 1.15  | 0.456458 | 0.404198 | 0.734509 | 0.632691 |
| MmugDNA.32013.1.S1_at   | MmugDNA.32013.1 | 10.99 | 10.67 | 0.23 | 0.1  | 1.24  | 0.080721 | 0.111345 | 0.431239 | 0.376045 |
| MmugDNA.32014.1.S1_at   | MmugDNA.32014.1 | 3.26  | 3.3   | 0.11 | 0.18 | -1.03 | 0.998213 | 0.922474 | 0.999299 | 0.956333 |
| MmugDNA.32018.1.S1_at   | MmugDNA.32018.1 | 11.4  | 10.74 | 0.03 | 0.36 | 1.58  | 0.073666 | 0.050183 | 0.419083 | 0.269223 |
| MmugDNA.32019.1.S1_at   | MmugDNA.32019.1 | 12.28 | 12.08 | 0.05 | 0.11 | 1.14  | 0.022037 | 0.003175 | 0.28446  | 0.081873 |
| MmugDNA.32022.1.S1_at   | MmugDNA.32022.1 | 4.33  | 4.42  | 0.16 | 0.68 | -1.07 | 0.294478 | 0.32627  | 0.631245 | 0.576452 |
| MmugDNA.32024.1.S1_at   | MmugDNA.32024.1 | 4.63  | 4.82  | 0.08 | 0.07 | -1.14 | 0.028266 | 0.129402 | 0.310316 | 0.4008   |
| MmugDNA.32031.1.S1_at   | MmugDNA.32031.1 | 4.78  | 4.81  | 0.17 | 0.11 | -1.02 | 0.733174 | 0.434257 | 0.884874 | 0.654437 |

|                         |                 |       |       |      |      |       |          |          |          |          |
|-------------------------|-----------------|-------|-------|------|------|-------|----------|----------|----------|----------|
| MmugDNA.32037.1.S1_at   | MmugDNA.32037.1 | 9.4   | 8.97  | 0.19 | 0.28 | 1.35  | 0.163673 | 0.182981 | 0.527992 | 0.459452 |
| MmugDNA.32042.1.S1_at   | MmugDNA.32042.1 | 3.73  | 4.56  | 0.18 | 0.42 | -1.78 | 0.142719 | 0.268726 | 0.509765 | 0.534138 |
| MmugDNA.32051.1.S1_at   | MmugDNA.32051.1 | 10.61 | 12.24 | 0.41 | 0.62 | -3.1  | 0.032472 | 0.017319 | 0.324973 | 0.166509 |
| MmugDNA.32054.1.S1_at   | MmugDNA.32054.1 | 10.08 | 10.36 | 0.24 | 0.49 | -1.21 | 0.15993  | 0.14023  | 0.524745 | 0.413405 |
| MmugDNA.32058.1.S1_at   | MmugDNA.32058.1 | 6.13  | 6.27  | 0.17 | 0.06 | -1.1  | 0.256362 | 0.254563 | 0.603974 | 0.522863 |
| MmugDNA.32059.1.S1_at   | MmugDNA.32059.1 | 7.34  | 7.85  | 1.18 | 0.94 | -1.43 | 0.428416 | 0.145841 | 0.71683  | 0.419888 |
| MmugDNA.32063.1.S1_at   | MmugDNA.32063.1 | 11.11 | 11.88 | 0.03 | 0.35 | -1.71 | 0.017711 | 0.013559 | 0.267594 | 0.149001 |
| MmugDNA.32064.1.S1_at   | MmugDNA.32064.1 | 6.67  | 6.56  | 1.09 | 0.93 | 1.08  | 0.9024   | 0.972994 | 0.961084 | 0.985389 |
| MmugDNA.32065.1.S1_at   | MmugDNA.32065.1 | 10.6  | 9.46  | 0.24 | 0.26 | 2.21  | 0.011119 | 0.004629 | 0.234282 | 0.094988 |
| MmugDNA.32067.1.S1_at   | MmugDNA.32067.1 | 6     | 6.47  | 0.35 | 0.5  | -1.39 | 0.975909 | 0.913364 | 0.990694 | 0.95123  |
| MmugDNA.32074.1.S1_at   | MmugDNA.32074.1 | 7.92  | 7.87  | 0.11 | 0.22 | 1.04  | 0.338352 | 0.275785 | 0.66084  | 0.540035 |
| MmugDNA.32079.1.S1_at   | MmugDNA.32079.1 | 9.44  | 9.48  | 0.18 | 0.33 | -1.03 | 0.729714 | 0.74287  | 0.88278  | 0.851074 |
| MmugDNA.3208.1.S1_at    | MmugDNA.3208.1  | 10.89 | 11.01 | 0.04 | 0.04 | -1.08 | 0.0085   | 0.021728 | 0.219031 | 0.184348 |
| MmugDNA.32081.1.S1_at   | MmugDNA.32081.1 | 13.78 | 13.75 | 0.04 | 0    | 1.02  | 0.419132 | 0.133658 | 0.711691 | 0.405612 |
| MmugDNA.32084.1.S1_at   | MmugDNA.32084.1 | 4.74  | 4.72  | 0.97 | 0.13 | 1.01  | 0.378149 | 0.39665  | 0.686315 | 0.628434 |
| MmugDNA.32085.1.S1_at   | MmugDNA.32085.1 | 10.97 | 10.29 | 0.24 | 0.32 | 1.6   | 0.03773  | 0.02694  | 0.342718 | 0.2053   |
| MmugDNA.32086.1.S1_at   | MmugDNA.32086.1 | 7.44  | 7.33  | 0.1  | 0.07 | 1.08  | 0.086579 | 0.093385 | 0.440436 | 0.349581 |
| MmugDNA.32089.1.S1_at   | MmugDNA.32089.1 | 9.97  | 9.77  | 0.2  | 0.22 | 1.15  | 0.060934 | 0.023576 | 0.394705 | 0.192311 |
| MmugDNA.3209.1.S1_at    | MmugDNA.3209.1  | 10.03 | 9.98  | 0.26 | 0.55 | 1.03  | 0.441881 | 0.36807  | 0.725219 | 0.607669 |
| MmugDNA.32090.1.S1_at   | MmugDNA.32090.1 | 11.88 | 11.05 | 0.07 | 0.48 | 1.77  | 0.041337 | 0.023131 | 0.351555 | 0.190443 |
| MmugDNA.32091.1.S1_at   | MmugDNA.32091.1 | 7.37  | 6.85  | 0.08 | 0.08 | 1.43  | 0.001965 | 0.000134 | 0.155636 | 0.029087 |
| MmugDNA.32093.1.S1_at   | MmugDNA.32093.1 | 5.1   | 5.06  | 0.14 | 0.06 | 1.03  | 0.550036 | 0.089575 | 0.787606 | 0.343811 |
| MmugDNA.32094.1.S1_at   | MmugDNA.32094.1 | 11.26 | 14.18 | 2.16 | 1.47 | -7.56 | 0.256719 | 0.173655 | 0.604414 | 0.450003 |
| MmugDNA.32097.1.S1_at   | MmugDNA.32097.1 | 8.36  | 8.07  | 0.15 | 0.12 | 1.22  | 0.123695 | 0.527243 | 0.489492 | 0.715896 |
| MmugDNA.32098.1.S1_at   | MmugDNA.32098.1 | 8.36  | 8.29  | 0.31 | 0.27 | 1.05  | 0.395345 | 0.221993 | 0.696441 | 0.49507  |
| MmugDNA.32099.1.S1_at   | MmugDNA.32099.1 | 8.77  | 8.59  | 0.23 | 0.1  | 1.13  | 0.166226 | 0.176697 | 0.529929 | 0.453142 |
| MmugDNA.32101.1.S1_s_at | MmugDNA.32101.1 | 11.49 | 11.39 | 0.22 | 0.3  | 1.07  | 0.822266 | 0.933855 | 0.927638 | 0.962344 |
| MmugDNA.32103.1.S1_at   | MmugDNA.32103.1 | 3.4   | 3.58  | 0.07 | 0.08 | -1.13 | 0.103203 | 0.221634 | 0.462888 | 0.494901 |
| MmugDNA.32116.1.S1_at   | MmugDNA.32116.1 | 11.97 | 11.43 | 0.12 | 0.41 | 1.45  | 0.132008 | 0.118884 | 0.498128 | 0.387068 |
| MmugDNA.32116.1.S1_s_at | MmugDNA.32116.1 | 11.47 | 11.02 | 0.06 | 0.49 | 1.37  | 0.166037 | 0.180472 | 0.529882 | 0.457115 |
| MmugDNA.32124.1.S1_at   | MmugDNA.32124.1 | 12.97 | 13.23 | 0.22 | 0.21 | -1.2  | 0.246864 | 0.158288 | 0.597999 | 0.43403  |
| MmugDNA.32124.1.S1_s_at | MmugDNA.32124.1 | 12.11 | 12.62 | 0.33 | 0.3  | -1.43 | 0.160048 | 0.053192 | 0.52484  | 0.276445 |
| MmugDNA.32127.1.S1_at   | MmugDNA.32127.1 | 9.87  | 8.6   | 0.18 | 0.04 | 2.4   | 0.000427 | 0.000023 | 0.131276 | 0.019635 |
| MmugDNA.32128.1.S1_at   | MmugDNA.32128.1 | 5.12  | 4.81  | 0.17 | 0.15 | 1.23  | 0.040206 | 0.070284 | 0.349219 | 0.31135  |
| MmugDNA.32129.1.S1_at   | MmugDNA.32129.1 | 4     | 3.97  | 0.11 | 0.18 | 1.02  | 0.588606 | 0.563483 | 0.809084 | 0.738692 |
| MmugDNA.32131.1.S1_at   | MmugDNA.32131.1 | 6.47  | 6.66  | 0.17 | 0.09 | -1.14 | 0.178488 | 0.232122 | 0.542847 | 0.503844 |
| MmugDNA.32132.1.S1_at   | MmugDNA.32132.1 | 4.6   | 4.88  | 0.34 | 0.17 | -1.21 | 0.7454   | 0.540529 | 0.891065 | 0.724446 |
| MmugDNA.32144.1.S1_at   | MmugDNA.32144.1 | 3.8   | 3.77  | 0.36 | 0.13 | 1.02  | 0.350382 | 0.314012 | 0.668486 | 0.568178 |
| MmugDNA.32145.1.S1_at   | MmugDNA.32145.1 | 11.37 | 10.81 | 0.15 | 0.32 | 1.47  | 0.12138  | 0.125139 | 0.486043 | 0.395577 |
| MmugDNA.32148.1.S1_at   | MmugDNA.32148.1 | 7.22  | 6.98  | 0.49 | 0.5  | 1.18  | 0.586394 | 0.074527 | 0.808106 | 0.318173 |
| MmugDNA.32150.1.S1_at   | MmugDNA.32150.1 | 4.37  | 4.41  | 0.16 | 0.07 | -1.02 | 0.802541 | 0.957168 | 0.918577 | 0.975774 |

|                         |                 |       |       |      |      |       |          |          |          |          |
|-------------------------|-----------------|-------|-------|------|------|-------|----------|----------|----------|----------|
| MmugDNA.32163.1.S1_at   | MmugDNA.32163.1 | 4.33  | 4.33  | 0.04 | 0.06 | -1    | 0.559883 | 0.271672 | 0.794178 | 0.536577 |
| MmugDNA.32169.1.S1_at   | MmugDNA.32169.1 | 6.45  | 6.29  | 0.17 | 0.57 | 1.12  | 0.68091  | 0.624116 | 0.857401 | 0.778434 |
| MmugDNA.32170.1.S1_at   | MmugDNA.32170.1 | 8.62  | 7.58  | 1.4  | 1.78 | 2.06  | 0.477309 | 0.583544 | 0.746589 | 0.751822 |
| MmugDNA.32172.1.S1_at   | MmugDNA.32172.1 | 11.79 | 10.81 | 0.06 | 0.28 | 1.96  | 0.005003 | 0.003261 | 0.187576 | 0.082278 |
| MmugDNA.32180.1.S1_at   | MmugDNA.32180.1 | 10.07 | 11.37 | 0.88 | 1.76 | -2.46 | 0.498353 | 0.237307 | 0.75837  | 0.508027 |
| MmugDNA.32182.1.S1_at   | MmugDNA.32182.1 | 9.86  | 10.04 | 0.65 | 1.82 | -1.13 | 0.445978 | 0.303383 | 0.728075 | 0.560842 |
| MmugDNA.32186.1.S1_at   | MmugDNA.32186.1 | 12.09 | 12.03 | 0.19 | 0.4  | 1.04  | 0.877392 | 0.9805   | 0.95087  | 0.989333 |
| MmugDNA.32191.1.S1_at   | MmugDNA.32191.1 | 9.3   | 9.46  | 0.09 | 0.34 | -1.11 | 0.17163  | 0.060341 | 0.535232 | 0.292254 |
| MmugDNA.32194.1.S1_at   | MmugDNA.32194.1 | 3     | 3.02  | 0.03 | 0.04 | -1.02 | 0.523374 | 0.567741 | 0.772529 | 0.741608 |
| MmugDNA.32195.1.S1_at   | MmugDNA.32195.1 | 7.96  | 7.68  | 0.44 | 0.43 | 1.21  | 0.927342 | 0.99436  | 0.971995 | 0.996547 |
| MmugDNA.322.1.S1_at     | MmugDNA.322.1   | 4.96  | 4.92  | 0.04 | 0.02 | 1.02  | 0.163127 | 0.806485 | 0.527489 | 0.888651 |
| MmugDNA.3220.1.S1_at    | MmugDNA.3220.1  | 9.35  | 9.68  | 0.39 | 0.82 | -1.26 | 0.527655 | 0.455076 | 0.775008 | 0.669066 |
| MmugDNA.32206.1.S1_at   | MmugDNA.32206.1 | 13.02 | 12.9  | 0.08 | 0.08 | 1.09  | 0.100632 | 0.025879 | 0.461009 | 0.201696 |
| MmugDNA.32220.1.S1_at   | MmugDNA.32220.1 | 6.3   | 6.47  | 0.26 | 0.09 | -1.13 | 0.54707  | 0.730744 | 0.785936 | 0.844055 |
| MmugDNA.32221.1.S1_at   | MmugDNA.32221.1 | 11.39 | 11.39 | 0.07 | 0.2  | -1    | 0.429839 | 0.158283 | 0.717757 | 0.43403  |
| MmugDNA.32223.1.S1_at   | MmugDNA.32223.1 | 13.5  | 13.41 | 0.01 | 0.04 | 1.07  | 0.021648 | 0.019315 | 0.283201 | 0.174723 |
| MmugDNA.32226.1.S1_at   | MmugDNA.32226.1 | 4.4   | 4.36  | 0.05 | 0.1  | 1.03  | 0.579797 | 0.937756 | 0.804451 | 0.964687 |
| MmugDNA.32229.1.S1_at   | MmugDNA.32229.1 | 9.87  | 9.17  | 0.2  | 0.27 | 1.62  | 0.011385 | 0.006277 | 0.235384 | 0.107487 |
| MmugDNA.3223.1.S1_at    | MmugDNA.3223.1  | 7.92  | 7.12  | 0.49 | 1.06 | 1.74  | 0.132696 | 0.127476 | 0.49874  | 0.398349 |
| MmugDNA.32230.1.S1_at   | MmugDNA.32230.1 | 7.04  | 7.54  | 0.63 | 0.99 | -1.42 | 0.49911  | 0.511574 | 0.7589   | 0.705677 |
| MmugDNA.32239.1.S1_at   | MmugDNA.32239.1 | 7.8   | 7.98  | 0.2  | 0.43 | -1.13 | 0.424305 | 0.61782  | 0.714453 | 0.773715 |
| MmugDNA.32242.1.S1_at   | MmugDNA.32242.1 | 5.23  | 5.36  | 0.14 | 0.19 | -1.09 | 0.506961 | 0.625165 | 0.762591 | 0.779025 |
| MmugDNA.32243.1.S1_at   | MmugDNA.32243.1 | 7     | 7.02  | 0.2  | 0.03 | -1.01 | 0.885735 | 0.880029 | 0.954179 | 0.93148  |
| MmugDNA.32245.1.S1_at   | MmugDNA.32245.1 | 10.27 | 10.18 | 0.6  | 0.01 | 1.07  | 0.41565  | 0.571283 | 0.709528 | 0.743642 |
| MmugDNA.32248.1.S1_at   | MmugDNA.32248.1 | 10.1  | 10.46 | 0.06 | 0.18 | -1.28 | 0.042075 | 0.047461 | 0.353974 | 0.262486 |
| MmugDNA.32248.1.S1_s_at | MmugDNA.32248.1 | 9.1   | 9.44  | 0.04 | 0.17 | -1.26 | 0.025256 | 0.020533 | 0.298384 | 0.179788 |
| MmugDNA.32249.1.S1_at   | MmugDNA.32249.1 | 9.91  | 9.7   | 0.21 | 0.22 | 1.16  | 0.257321 | 0.254129 | 0.604697 | 0.522439 |
| MmugDNA.32251.1.S1_at   | MmugDNA.32251.1 | 12.71 | 12.35 | 0.08 | 0.04 | 1.28  | 0.001172 | 0.000186 | 0.145267 | 0.030511 |
| MmugDNA.32254.1.S1_s_at | MmugDNA.32254.1 | 11.01 | 10.91 | 0.37 | 0.78 | 1.07  | 0.779222 | 0.411758 | 0.907965 | 0.638434 |
| MmugDNA.32255.1.S1_at   | MmugDNA.32255.1 | 10.05 | 10.25 | 0.25 | 0.24 | -1.14 | 0.692811 | 0.505462 | 0.863644 | 0.702161 |
| MmugDNA.32258.1.S1_at   | MmugDNA.32258.1 | 8.01  | 7.37  | 0.27 | 1.41 | 1.56  | 0.479732 | 0.630168 | 0.747804 | 0.782181 |
| MmugDNA.3226.1.S1_at    | MmugDNA.3226.1  | 12.65 | 12.84 | 0.04 | 0.12 | -1.14 | 0.054069 | 0.103282 | 0.381421 | 0.364143 |
| MmugDNA.32264.1.S1_at   | MmugDNA.32264.1 | 7.28  | 8.42  | 0.8  | 0.89 | -2.21 | 0.344125 | 0.062052 | 0.664238 | 0.29597  |
| MmugDNA.32274.1.S1_at   | MmugDNA.32274.1 | 13.92 | 13.95 | 0.05 | 0.11 | -1.02 | 0.807108 | 0.482102 | 0.920973 | 0.687016 |
| MmugDNA.32277.1.S1_at   | MmugDNA.32277.1 | 9.01  | 8.5   | 0.22 | 0.15 | 1.42  | 0.01746  | 0.023534 | 0.267445 | 0.192231 |
| MmugDNA.32278.1.S1_at   | MmugDNA.32278.1 | 11.16 | 10.53 | 0.25 | 0.14 | 1.54  | 0.017381 | 0.006471 | 0.267445 | 0.109304 |
| MmugDNA.32280.1.S1_at   | MmugDNA.32280.1 | 10.5  | 10.35 | 0.09 | 0.17 | 1.11  | 0.2485   | 0.055572 | 0.599309 | 0.28159  |
| MmugDNA.32283.1.S1_at   | MmugDNA.32283.1 | 6.32  | 6.36  | 0.08 | 0.21 | -1.03 | 0.669923 | 0.308701 | 0.852318 | 0.564619 |
| MmugDNA.32289.1.S1_at   | MmugDNA.32289.1 | 6.2   | 6.28  | 0.08 | 0.02 | -1.06 | 0.045238 | 0.117693 | 0.360442 | 0.385421 |
| MmugDNA.32293.1.S1_at   | MmugDNA.32293.1 | 10.37 | 10.59 | 0.09 | 0.07 | -1.16 | 0.081404 | 0.389216 | 0.432288 | 0.623403 |
| MmugDNA.32295.1.S1_s_at | MmugDNA.32295.1 | 9.19  | 8.17  | 0.07 | 0.64 | 2.04  | 0.173315 | 0.179543 | 0.537006 | 0.456011 |

|                       |                 |       |       |      |      |       |          |          |          |          |
|-----------------------|-----------------|-------|-------|------|------|-------|----------|----------|----------|----------|
| MmugDNA.323.1.S1_at   | MmugDNA.323.1   | 8.79  | 8.96  | 0.2  | 0.88 | -1.13 | 0.744219 | 0.774219 | 0.890539 | 0.868735 |
| MmugDNA.32300.1.S1_at | MmugDNA.32300.1 | 12.85 | 13.07 | 0.07 | 0.02 | -1.16 | 0.004765 | 0.004128 | 0.184674 | 0.090887 |
| MmugDNA.32302.1.S1_at | MmugDNA.32302.1 | 13.35 | 13.34 | 0.03 | 0.05 | 1.01  | 0.525926 | 0.729812 | 0.773971 | 0.843695 |
| MmugDNA.32306.1.S1_at | MmugDNA.32306.1 | 6.19  | 6.18  | 0.2  | 0.06 | 1     | 0.428023 | 0.448849 | 0.716548 | 0.664661 |
| MmugDNA.32307.1.S1_at | MmugDNA.32307.1 | 12.98 | 13.32 | 0.09 | 0.28 | -1.26 | 0.078882 | 0.088197 | 0.428609 | 0.341721 |
| MmugDNA.32309.1.S1_at | MmugDNA.32309.1 | 13.13 | 13.46 | 0.07 | 0.5  | -1.26 | 0.878069 | 0.493185 | 0.951038 | 0.694004 |
| MmugDNA.3231.1.S1_at  | MmugDNA.3231.1  | 6.88  | 8.63  | 0.65 | 1.5  | -3.35 | 0.242324 | 0.226951 | 0.594342 | 0.499276 |
| MmugDNA.32318.1.S1_at | MmugDNA.32318.1 | 5.37  | 5.55  | 0.08 | 0.09 | -1.14 | 0.044719 | 0.009967 | 0.359043 | 0.131094 |
| MmugDNA.3232.1.S1_at  | MmugDNA.3232.1  | 6.96  | 7.02  | 0.17 | 0.67 | -1.04 | 0.637025 | 0.526716 | 0.83591  | 0.715627 |
| MmugDNA.32321.1.S1_at | MmugDNA.32321.1 | 9.41  | 9.29  | 0.49 | 0.17 | 1.09  | 0.301947 | 0.418291 | 0.636792 | 0.642707 |
| MmugDNA.32328.1.S1_at | MmugDNA.32328.1 | 11.58 | 11.72 | 0.37 | 0.45 | -1.1  | 0.875957 | 0.232377 | 0.950267 | 0.504088 |
| MmugDNA.32329.1.S1_at | MmugDNA.32329.1 | 12.73 | 11.8  | 0.05 | 0.25 | 1.91  | 0.003371 | 0.000529 | 0.177484 | 0.040069 |
| MmugDNA.32334.1.S1_at | MmugDNA.32334.1 | 13.16 | 13.13 | 0.04 | 0.08 | 1.02  | 0.41826  | 0.478297 | 0.711206 | 0.684289 |
| MmugDNA.32339.1.S1_at | MmugDNA.32339.1 | 6.64  | 6.32  | 0.29 | 0.42 | 1.24  | 0.249043 | 0.097812 | 0.599743 | 0.355639 |
| MmugDNA.32344.1.S1_at | MmugDNA.32344.1 | 9.01  | 8.53  | 0.41 | 0.7  | 1.39  | 0.938198 | 0.334895 | 0.976335 | 0.58275  |
| MmugDNA.32345.1.S1_at | MmugDNA.32345.1 | 9.65  | 9.58  | 0.27 | 0.28 | 1.05  | 0.691129 | 0.211375 | 0.862571 | 0.48553  |
| MmugDNA.32346.1.A1_at | MmugDNA.32346.1 | 4.37  | 4.46  | 0.19 | 0.12 | -1.06 | 0.69782  | 0.265041 | 0.865786 | 0.531    |
| MmugDNA.32346.1.S1_at | MmugDNA.32346.1 | 4.6   | 4.85  | 0.22 | 0.03 | -1.19 | 0.291004 | 0.259457 | 0.628684 | 0.526418 |
| MmugDNA.32347.1.S1_at | MmugDNA.32347.1 | 9.57  | 9.76  | 0.09 | 0.08 | -1.14 | 0.093248 | 0.045708 | 0.450461 | 0.258049 |
| MmugDNA.32354.1.S1_at | MmugDNA.32354.1 | 5.59  | 5.98  | 0.14 | 0.4  | -1.32 | 0.079064 | 0.124503 | 0.428609 | 0.39495  |
| MmugDNA.32355.1.S1_at | MmugDNA.32355.1 | 11.73 | 11.13 | 0.05 | 0.34 | 1.52  | 0.030445 | 0.005257 | 0.318517 | 0.100401 |
| MmugDNA.32359.1.S1_at | MmugDNA.32359.1 | 11.05 | 11.27 | 0.27 | 0.29 | -1.16 | 0.988382 | 0.988592 | 0.995918 | 0.993572 |
| MmugDNA.32362.1.S1_at | MmugDNA.32362.1 | 11.15 | 13.15 | 0.81 | 1.15 | -3.98 | 0.321455 | 0.202264 | 0.650183 | 0.476672 |
| MmugDNA.32364.1.S1_at | MmugDNA.32364.1 | 10.78 | 10.21 | 0.03 | 0.08 | 1.49  | 0.000256 | 0.000233 | 0.12562  | 0.03241  |
| MmugDNA.32366.1.S1_at | MmugDNA.32366.1 | 6.79  | 5.43  | 0.27 | 0.9  | 2.57  | 0.048604 | 0.04186  | 0.369025 | 0.249172 |
| MmugDNA.32374.1.S1_at | MmugDNA.32374.1 | 8.62  | 8.45  | 0.21 | 0.21 | 1.13  | 0.422846 | 0.097718 | 0.713744 | 0.355598 |
| MmugDNA.32375.1.S1_at | MmugDNA.32375.1 | 5.16  | 5.36  | 0.04 | 0.03 | -1.15 | 0.001129 | 0.090215 | 0.144692 | 0.344604 |
| MmugDNA.32377.1.S1_at | MmugDNA.32377.1 | 9.17  | 8.53  | 0.06 | 0.39 | 1.56  | 0.051438 | 0.027303 | 0.376003 | 0.206611 |
| MmugDNA.32381.1.S1_at | MmugDNA.32381.1 | 11.41 | 10.74 | 0.35 | 0.54 | 1.6   | 0.155693 | 0.166489 | 0.520357 | 0.442928 |
| MmugDNA.32384.1.S1_at | MmugDNA.32384.1 | 7.51  | 7.49  | 0.02 | 0.1  | 1.02  | 0.650537 | 0.745768 | 0.842789 | 0.852562 |
| MmugDNA.32385.1.S1_at | MmugDNA.32385.1 | 10.88 | 10.46 | 0.15 | 0.23 | 1.34  | 0.061257 | 0.042408 | 0.395362 | 0.250603 |
| MmugDNA.32386.1.S1_at | MmugDNA.32386.1 | 11.4  | 11.79 | 0.36 | 0.15 | -1.31 | 0.175515 | 0.182953 | 0.539297 | 0.459434 |
| MmugDNA.32387.1.S1_at | MmugDNA.32387.1 | 8.25  | 8.28  | 0.64 | 0.4  | -1.02 | 0.588126 | 0.516702 | 0.80889  | 0.709161 |
| MmugDNA.32388.1.S1_at | MmugDNA.32388.1 | 12.62 | 13.01 | 0.14 | 0.79 | -1.31 | 0.904043 | 0.956341 | 0.96164  | 0.975138 |
| MmugDNA.32390.1.S1_at | MmugDNA.32390.1 | 9.1   | 9.85  | 0.29 | 0.52 | -1.68 | 0.447747 | 0.259887 | 0.729195 | 0.526748 |
| MmugDNA.32391.1.S1_at | MmugDNA.32391.1 | 11.46 | 12.1  | 0.17 | 0.16 | -1.56 | 0.009995 | 0.002043 | 0.226899 | 0.066887 |
| MmugDNA.32393.1.S1_at | MmugDNA.32393.1 | 4.71  | 4.83  | 0.02 | 0.1  | -1.08 | 0.384827 | 0.075711 | 0.690114 | 0.320299 |
| MmugDNA.32395.1.S1_at | MmugDNA.32395.1 | 9.45  | 8.61  | 0.23 | 0.35 | 1.79  | 0.0172   | 0.009096 | 0.266942 | 0.125944 |
| MmugDNA.32398.1.S1_at | MmugDNA.32398.1 | 5.85  | 5.98  | 0.12 | 0.36 | -1.09 | 0.200737 | 0.304035 | 0.563417 | 0.561388 |
| MmugDNA.32400.1.S1_at | MmugDNA.32400.1 | 6.23  | 6.15  | 0.23 | 0.41 | 1.05  | 0.694692 | 0.823927 | 0.864583 | 0.898821 |
| MmugDNA.32405.1.S1_at | MmugDNA.32405.1 | 4.55  | 4.41  | 0.11 | 0.14 | 1.1   | 0.377622 | 0.359691 | 0.685995 | 0.600963 |



|                         |                 |       |       |      |      |        |          |          |          |          |
|-------------------------|-----------------|-------|-------|------|------|--------|----------|----------|----------|----------|
| MmugDNA.32408.1.S1_at   | MmugDNA.32408.1 | 7.4   | 7.59  | 0.16 | 0.07 | -1.14  | 0.388099 | 0.198373 | 0.692266 | 0.473292 |
| MmugDNA.32410.1.S1_at   | MmugDNA.32410.1 | 11.19 | 11.08 | 0.23 | 0.76 | 1.07   | 0.627562 | 0.187644 | 0.830191 | 0.463663 |
| MmugDNA.32413.1.S1_at   | MmugDNA.32413.1 | 8.74  | 7.15  | 0.42 | 0.38 | 3.01   | 0.008375 | 0.002026 | 0.217946 | 0.066885 |
| MmugDNA.32415.1.S1_at   | MmugDNA.32415.1 | 5.18  | 5.24  | 0.18 | 0.09 | -1.05  | 0.579293 | 0.389529 | 0.804232 | 0.623635 |
| MmugDNA.32419.1.S1_at   | MmugDNA.32419.1 | 11.52 | 12.05 | 0.09 | 0.12 | -1.45  | 0.003665 | 0.000672 | 0.179515 | 0.04413  |
| MmugDNA.32420.1.S1_at   | MmugDNA.32420.1 | 10.62 | 11.06 | 0.02 | 0.13 | -1.36  | 0.007233 | 0.003949 | 0.205916 | 0.089397 |
| MmugDNA.32422.1.S1_at   | MmugDNA.32422.1 | 6.37  | 9.28  | 1.26 | 2.49 | -7.55  | 0.387293 | 0.274348 | 0.691895 | 0.538779 |
| MmugDNA.32423.1.S1_at   | MmugDNA.32423.1 | 7.39  | 7.28  | 0.16 | 1.01 | 1.08   | 0.309073 | 0.202661 | 0.641346 | 0.477075 |
| MmugDNA.32430.1.S1_at   | MmugDNA.32430.1 | 10.06 | 10.12 | 0.05 | 0.25 | -1.04  | 0.680352 | 0.837028 | 0.857147 | 0.906826 |
| MmugDNA.32432.1.S1_at   | MmugDNA.32432.1 | 9.68  | 9.06  | 0.12 | 0.2  | 1.54   | 0.016039 | 0.003267 | 0.262409 | 0.082312 |
| MmugDNA.32433.1.S1_at   | MmugDNA.32433.1 | 8.07  | 7.71  | 0.18 | 0.2  | 1.29   | 0.019813 | 0.010404 | 0.275549 | 0.133414 |
| MmugDNA.32435.1.S1_at   | MmugDNA.32435.1 | 5.43  | 5.63  | 0.17 | 0.07 | -1.15  | 0.402054 | 0.47366  | 0.701135 | 0.680935 |
| MmugDNA.32442.1.S1_at   | MmugDNA.32442.1 | 12.11 | 12.12 | 0.08 | 0.03 | -1.01  | 0.906729 | 0.62224  | 0.96298  | 0.776771 |
| MmugDNA.3245.1.S1_at    | MmugDNA.3245.1  | 5.53  | 5.75  | 0.14 | 0.28 | -1.16  | 0.180209 | 0.286649 | 0.544371 | 0.548077 |
| MmugDNA.32450.1.S1_at   | MmugDNA.32450.1 | 6.91  | 6.71  | 0.6  | 0.63 | 1.15   | 0.618848 | 0.520485 | 0.825375 | 0.711799 |
| MmugDNA.32452.1.S1_at   | MmugDNA.32452.1 | 10.83 | 10.65 | 0.04 | 0.46 | 1.13   | 0.532632 | 0.412757 | 0.777813 | 0.63909  |
| MmugDNA.32453.1.S1_at   | MmugDNA.32453.1 | 10.11 | 9.55  | 0.22 | 1.54 | 1.48   | 0.449698 | 0.31364  | 0.730493 | 0.568002 |
| MmugDNA.32458.1.S1_at   | MmugDNA.32458.1 | 10.42 | 10.41 | 0.25 | 1.05 | 1.01   | 0.890068 | 0.877111 | 0.956021 | 0.92996  |
| MmugDNA.32459.1.S1_at   | MmugDNA.32459.1 | 7.61  | 7.81  | 0.12 | 0.13 | -1.15  | 0.266041 | 0.201127 | 0.611558 | 0.475519 |
| MmugDNA.32460.1.S1_at   | MmugDNA.32460.1 | 5.45  | 5.5   | 0.19 | 0.04 | -1.04  | 0.499374 | 0.822595 | 0.759149 | 0.89799  |
| MmugDNA.32466.1.S1_at   | MmugDNA.32466.1 | 9.93  | 10.45 | 0.21 | 0.31 | -1.44  | 0.1747   | 0.10459  | 0.538288 | 0.36588  |
| MmugDNA.32470.1.S1_at   | MmugDNA.32470.1 | 12.73 | 12.43 | 0.1  | 0.59 | 1.23   | 0.337959 | 0.461031 | 0.660463 | 0.672829 |
| MmugDNA.32485.1.S1_at   | MmugDNA.32485.1 | 6.42  | 7.67  | 0.2  | 0.7  | -2.37  | 0.029045 | 0.003958 | 0.312556 | 0.089504 |
| MmugDNA.32493.1.S1_at   | MmugDNA.32493.1 | 6.07  | 5.7   | 0.53 | 0.4  | 1.28   | 0.913154 | 0.039498 | 0.965594 | 0.243676 |
| MmugDNA.32495.1.S1_at   | MmugDNA.32495.1 | 10.79 | 11.73 | 0.7  | 0.57 | -1.92  | 0.157606 | 0.072736 | 0.522514 | 0.31565  |
| MmugDNA.32496.1.S1_at   | MmugDNA.32496.1 | 7.09  | 7.32  | 0.32 | 0.02 | -1.17  | 0.848732 | 0.953405 | 0.939211 | 0.97351  |
| MmugDNA.32501.1.S1_at   | MmugDNA.32501.1 | 9.43  | 9.19  | 0.44 | 1.15 | 1.18   | 0.593264 | 0.779995 | 0.811362 | 0.872428 |
| MmugDNA.32504.1.S1_at   | MmugDNA.32504.1 | 6.34  | 6.15  | 0.17 | 0.05 | 1.14   | 0.050406 | 0.022985 | 0.374295 | 0.189624 |
| MmugDNA.3251.1.S1_at    | MmugDNA.3251.1  | 7.6   | 6.9   | 0.41 | 0.1  | 1.63   | 0.021281 | 0.006662 | 0.282524 | 0.110544 |
| MmugDNA.32511.1.S1_x_at | MmugDNA.32511.1 | 3.03  | 3.16  | 0.1  | 0.06 | -1.09  | 0.118649 | 0.239943 | 0.48294  | 0.510627 |
| MmugDNA.32515.1.S1_at   | MmugDNA.32515.1 | 6.72  | 7.15  | 0.15 | 0.36 | -1.35  | 0.182878 | 0.145102 | 0.547133 | 0.419055 |
| MmugDNA.32516.1.S1_at   | MmugDNA.32516.1 | 7.09  | 7.98  | 0.31 | 0.32 | -1.85  | 0.050595 | 0.02217  | 0.374816 | 0.186409 |
| MmugDNA.32522.1.S1_at   | MmugDNA.32522.1 | 6.91  | 7.38  | 0.12 | 0.71 | -1.38  | 0.173635 | 0.103187 | 0.53719  | 0.364123 |
| MmugDNA.32528.1.S1_at   | MmugDNA.32528.1 | 9.26  | 8.48  | 0.05 | 0.2  | 1.72   | 0.00341  | 0.001192 | 0.178033 | 0.054172 |
| MmugDNA.32529.1.S1_at   | MmugDNA.32529.1 | 6.16  | 6.22  | 0.07 | 0.02 | -1.04  | 0.159843 | 0.189104 | 0.524737 | 0.464934 |
| MmugDNA.32531.1.S1_at   | MmugDNA.32531.1 | 6.54  | 6.37  | 0.41 | 0.34 | 1.12   | 0.742832 | 0.662789 | 0.890068 | 0.802583 |
| MmugDNA.32535.1.S1_x_at | MmugDNA.32535.1 | 5.37  | 4.95  | 0.65 | 0.52 | 1.33   | 0.379751 | 0.222995 | 0.687063 | 0.495821 |
| MmugDNA.32538.1.S1_at   | MmugDNA.32538.1 | 5.6   | 10.15 | 1.4  | 3.59 | -23.48 | 0.400071 | 0.261641 | 0.699692 | 0.528107 |
| MmugDNA.32540.1.S1_at   | MmugDNA.32540.1 | 6.1   | 8.32  | 1.06 | 1.86 | -4.64  | 0.369594 | 0.360816 | 0.680782 | 0.601929 |
| MmugDNA.32541.1.S1_at   | MmugDNA.32541.1 | 5.16  | 5.15  | 0.03 | 0.32 | 1      | 0.99571  | 0.629945 | 0.998446 | 0.782031 |
| MmugDNA.32542.1.S1_at   | MmugDNA.32542.1 | 9.44  | 9.12  | 0.12 | 0.13 | 1.24   | 0.04737  | 0.062707 | 0.365901 | 0.297117 |

|                         |                 |       |       |      |      |       |          |          |          |          |
|-------------------------|-----------------|-------|-------|------|------|-------|----------|----------|----------|----------|
| MmugDNA.32546.1.S1_at   | MmugDNA.32546.1 | 10.34 | 9.63  | 0.15 | 0.49 | 1.64  | 0.090474 | 0.067211 | 0.445834 | 0.305225 |
| MmugDNA.32558.1.S1_at   | MmugDNA.32558.1 | 5.1   | 5.23  | 0.08 | 0.11 | -1.09 | 0.125746 | 0.060531 | 0.491824 | 0.292664 |
| MmugDNA.32561.1.S1_at   | MmugDNA.32561.1 | 9.94  | 9.9   | 0.27 | 0.23 | 1.02  | 0.673563 | 0.806347 | 0.853682 | 0.888642 |
| MmugDNA.32566.1.S1_at   | MmugDNA.32566.1 | 5.87  | 6.2   | 0.08 | 0.36 | -1.26 | 0.34845  | 0.46386  | 0.667173 | 0.674663 |
| MmugDNA.32567.1.S1_at   | MmugDNA.32567.1 | 9.22  | 9.53  | 0.16 | 0.59 | -1.24 | 0.596802 | 0.170459 | 0.813202 | 0.447103 |
| MmugDNA.32570.1.S1_at   | MmugDNA.32570.1 | 10.49 | 13.31 | 1.26 | 1.91 | -7.06 | 0.489243 | 0.243863 | 0.753638 | 0.514047 |
| MmugDNA.32576.1.S1_at   | MmugDNA.32576.1 | 6.52  | 6.52  | 0.16 | 0.2  | 1     | 0.878478 | 0.623832 | 0.951226 | 0.778207 |
| MmugDNA.32577.1.S1_s_at | MmugDNA.32577.1 | 11.55 | 11.09 | 0.22 | 0.16 | 1.37  | 0.026478 | 0.019601 | 0.303288 | 0.175863 |
| MmugDNA.3258.1.S1_at    | MmugDNA.3258.1  | 11.6  | 11.3  | 0.1  | 0.18 | 1.23  | 0.105179 | 0.081564 | 0.465675 | 0.329764 |
| MmugDNA.32582.1.S1_at   | MmugDNA.32582.1 | 9.65  | 10.87 | 0.36 | 0.38 | -2.32 | 0.057713 | 0.049138 | 0.388935 | 0.266534 |
| MmugDNA.32583.1.S1_at   | MmugDNA.32583.1 | 6.08  | 6.12  | 0.02 | 0.12 | -1.03 | 0.706881 | 0.132826 | 0.870891 | 0.404544 |
| MmugDNA.32584.1.S1_at   | MmugDNA.32584.1 | 9.65  | 8.44  | 0.29 | 0.4  | 2.31  | 0.024128 | 0.01545  | 0.294374 | 0.157803 |
| MmugDNA.32585.1.S1_at   | MmugDNA.32585.1 | 8.17  | 6.67  | 0.11 | 0.41 | 2.83  | 0.005134 | 0.002048 | 0.18993  | 0.066887 |
| MmugDNA.32586.1.S1_at   | MmugDNA.32586.1 | 4.14  | 4.22  | 0.11 | 0.36 | -1.06 | 0.371312 | 0.420003 | 0.681979 | 0.643787 |
| MmugDNA.32591.1.S1_at   | MmugDNA.32591.1 | 9.13  | 9.98  | 0.06 | 0.19 | -1.81 | 0.001522 | 0.000731 | 0.151506 | 0.044701 |
| MmugDNA.32594.1.S1_at   | MmugDNA.32594.1 | 9.02  | 7.41  | 0.07 | 1.13 | 3.06  | 0.099487 | 0.07094  | 0.459387 | 0.312444 |
| MmugDNA.32596.1.S1_at   | MmugDNA.32596.1 | 12.94 | 12.83 | 0.05 | 0.25 | 1.08  | 0.204011 | 0.201692 | 0.566526 | 0.476214 |
| MmugDNA.326.1.S1_at     | MmugDNA.326.1   | 8.57  | 8.32  | 0.16 | 0.35 | 1.19  | 0.566808 | 0.200494 | 0.797783 | 0.474913 |
| MmugDNA.32601.1.S1_at   | MmugDNA.32601.1 | 8.92  | 10.38 | 0.27 | 0.1  | -2.75 | 0.001185 | 0.000419 | 0.145267 | 0.038093 |
| MmugDNA.32608.1.S1_at   | MmugDNA.32608.1 | 10.06 | 9.57  | 0.21 | 0.4  | 1.4   | 0.215153 | 0.040928 | 0.575583 | 0.247161 |
| MmugDNA.32612.1.S1_s_at | MmugDNA.32612.1 | 9.02  | 9.8   | 2.06 | 0.64 | -1.72 | 0.99018  | 0.951891 | 0.99652  | 0.972702 |
| MmugDNA.32613.1.S1_at   | MmugDNA.32613.1 | 4.77  | 4.98  | 0.04 | 0.24 | -1.16 | 0.082664 | 0.061494 | 0.434309 | 0.294828 |
| MmugDNA.32624.1.S1_at   | MmugDNA.32624.1 | 12.69 | 11.61 | 0.29 | 0.56 | 2.11  | 0.040741 | 0.038691 | 0.350262 | 0.24169  |
| MmugDNA.32626.1.S1_at   | MmugDNA.32626.1 | 12.53 | 11.78 | 0.22 | 0.81 | 1.68  | 0.086909 | 0.078817 | 0.440586 | 0.325757 |
| MmugDNA.32641.1.S1_at   | MmugDNA.32641.1 | 8.48  | 8.43  | 0.18 | 0.18 | 1.04  | 0.255545 | 0.208953 | 0.603393 | 0.482751 |
| MmugDNA.32643.1.S1_at   | MmugDNA.32643.1 | 7.02  | 6.39  | 0.15 | 1.03 | 1.55  | 0.440703 | 0.57628  | 0.724464 | 0.747148 |
| MmugDNA.32645.1.S1_at   | MmugDNA.32645.1 | 2.95  | 2.96  | 0.21 | 0.09 | -1.01 | 0.511871 | 0.281026 | 0.76536  | 0.544179 |
| MmugDNA.32653.1.S1_at   | MmugDNA.32653.1 | 4.52  | 3.81  | 0.62 | 0.1  | 1.63  | 0.128786 | 0.067527 | 0.494664 | 0.305921 |
| MmugDNA.32656.1.S1_at   | MmugDNA.32656.1 | 7.35  | 6.72  | 0.34 | 0.36 | 1.55  | 0.136823 | 0.131688 | 0.503945 | 0.403835 |
| MmugDNA.32660.1.S1_at   | MmugDNA.32660.1 | 13.12 | 12.83 | 0.12 | 0.14 | 1.22  | 0.058635 | 0.044056 | 0.390868 | 0.254195 |
| MmugDNA.32660.1.S1_s_at | MmugDNA.32660.1 | 12.29 | 12.01 | 0.12 | 0    | 1.21  | 0.036108 | 0.029776 | 0.338812 | 0.214208 |
| MmugDNA.32678.1.S1_at   | MmugDNA.32678.1 | 3.02  | 3.03  | 0.05 | 0.24 | -1.01 | 0.367538 | 0.092383 | 0.679502 | 0.348294 |
| MmugDNA.32683.1.S1_at   | MmugDNA.32683.1 | 6.51  | 6.8   | 0.28 | 1.01 | -1.22 | 0.233428 | 0.290713 | 0.588137 | 0.551382 |
| MmugDNA.32690.1.S1_at   | MmugDNA.32690.1 | 11.98 | 11.61 | 0.24 | 0.46 | 1.29  | 0.473263 | 0.250055 | 0.744128 | 0.519111 |
| MmugDNA.32697.1.S1_s_at | MmugDNA.32697.1 | 10.06 | 10.22 | 0.18 | 0.03 | -1.12 | 0.072312 | 0.06591  | 0.416651 | 0.302129 |
| MmugDNA.327.1.S1_at     | MmugDNA.327.1   | 8.09  | 7.88  | 0.18 | 0.67 | 1.16  | 0.976125 | 0.991947 | 0.990729 | 0.995469 |
| MmugDNA.32703.1.S1_at   | MmugDNA.32703.1 | 7.22  | 5.45  | 0.73 | 0.46 | 3.41  | 0.017015 | 0.008025 | 0.266551 | 0.119047 |
| MmugDNA.32709.1.S1_at   | MmugDNA.32709.1 | 6.68  | 6.69  | 0.32 | 0.36 | -1.01 | 0.930922 | 0.02839  | 0.973359 | 0.210321 |
| MmugDNA.32715.1.S1_at   | MmugDNA.32715.1 | 12.13 | 11.79 | 0.19 | 0.44 | 1.26  | 0.182518 | 0.206205 | 0.546767 | 0.480377 |
| MmugDNA.32716.1.S1_at   | MmugDNA.32716.1 | 5.87  | 6.92  | 0.15 | 0.68 | -2.06 | 0.052606 | 0.024669 | 0.378269 | 0.196608 |
| MmugDNA.3272.1.S1_at    | MmugDNA.3272.1  | 7.17  | 7.26  | 0.19 | 0.09 | -1.06 | 0.524156 | 0.433369 | 0.773034 | 0.653658 |

|                       |                 |       |       |      |      |       |          |          |          |          |
|-----------------------|-----------------|-------|-------|------|------|-------|----------|----------|----------|----------|
| MmugDNA.32724.1.S1_at | MmugDNA.32724.1 | 7.18  | 6.47  | 0.27 | 0.14 | 1.64  | 0.010831 | 0.001681 | 0.232232 | 0.062096 |
| MmugDNA.32725.1.S1_at | MmugDNA.32725.1 | 3.39  | 3.51  | 0.15 | 0.19 | -1.09 | 0.718905 | 0.298787 | 0.87676  | 0.557392 |
| MmugDNA.32728.1.S1_at | MmugDNA.32728.1 | 7.87  | 8.09  | 0.18 | 0.52 | -1.17 | 0.984626 | 0.467493 | 0.994541 | 0.677091 |
| MmugDNA.32731.1.S1_at | MmugDNA.32731.1 | 6.23  | 5.25  | 0.8  | 0.55 | 1.97  | 0.114441 | 0.085974 | 0.477887 | 0.338116 |
| MmugDNA.32732.1.S1_at | MmugDNA.32732.1 | 6.42  | 6.46  | 0.19 | 0.07 | -1.03 | 0.793433 | 0.342706 | 0.914389 | 0.588666 |
| MmugDNA.32734.1.S1_at | MmugDNA.32734.1 | 3.66  | 3.75  | 0.06 | 0.12 | -1.07 | 0.886899 | 0.547842 | 0.954734 | 0.728723 |
| MmugDNA.32735.1.S1_at | MmugDNA.32735.1 | 10.08 | 9.77  | 0.07 | 0.24 | 1.24  | 0.07722  | 0.02532  | 0.426701 | 0.199522 |
| MmugDNA.32740.1.S1_at | MmugDNA.32740.1 | 4.86  | 4.9   | 0.08 | 0.08 | -1.03 | 0.532141 | 0.025789 | 0.777626 | 0.201323 |
| MmugDNA.32741.1.S1_at | MmugDNA.32741.1 | 6.7   | 6.91  | 0.07 | 0.21 | -1.15 | 0.113622 | 0.118183 | 0.476938 | 0.386115 |
| MmugDNA.32742.1.S1_at | MmugDNA.32742.1 | 5.8   | 6.18  | 0.17 | 0.93 | -1.31 | 0.659458 | 0.659577 | 0.847196 | 0.800802 |
| MmugDNA.3276.1.S1_at  | MmugDNA.3276.1  | 10.4  | 10.85 | 0.53 | 0.17 | -1.37 | 0.225006 | 0.065255 | 0.583024 | 0.301239 |
| MmugDNA.32761.1.S1_at | MmugDNA.32761.1 | 9.98  | 10.21 | 0.34 | 0.32 | -1.17 | 0.166247 | 0.139833 | 0.529929 | 0.413131 |
| MmugDNA.32763.1.S1_at | MmugDNA.32763.1 | 3.7   | 3.5   | 0.07 | 0.48 | 1.15  | 0.419761 | 0.275938 | 0.712083 | 0.540035 |
| MmugDNA.32776.1.S1_at | MmugDNA.32776.1 | 10.91 | 10.24 | 0.14 | 0.2  | 1.59  | 0.005131 | 0.001008 | 0.18993  | 0.050657 |
| MmugDNA.32777.1.S1_at | MmugDNA.32777.1 | 9.41  | 9.04  | 0.09 | 0.15 | 1.3   | 0.012289 | 0.00374  | 0.240706 | 0.08718  |
| MmugDNA.32784.1.S1_at | MmugDNA.32784.1 | 12.39 | 12.97 | 0.09 | 0.24 | -1.49 | 0.013016 | 0.007597 | 0.245262 | 0.11661  |
| MmugDNA.32786.1.S1_at | MmugDNA.32786.1 | 4.26  | 3.55  | 0.35 | 1.52 | 1.64  | 0.893873 | 0.975273 | 0.957773 | 0.986526 |
| MmugDNA.32799.1.S1_at | MmugDNA.32799.1 | 10.62 | 11.66 | 0.25 | 0.69 | -2.05 | 0.096159 | 0.064218 | 0.454327 | 0.299668 |
| MmugDNA.328.1.S1_at   | MmugDNA.328.1   | 12.21 | 12.79 | 0.24 | 0.36 | -1.5  | 0.065069 | 0.016168 | 0.403867 | 0.161172 |
| MmugDNA.32800.1.S1_at | MmugDNA.32800.1 | 4.66  | 3.78  | 0.56 | 0.28 | 1.84  | 0.101162 | 0.027347 | 0.461009 | 0.206637 |
| MmugDNA.32803.1.S1_at | MmugDNA.32803.1 | 5.17  | 5.3   | 0.12 | 0.13 | -1.09 | 0.110254 | 0.191659 | 0.471863 | 0.466936 |
| MmugDNA.32804.1.S1_at | MmugDNA.32804.1 | 7.61  | 7.59  | 0.12 | 0.12 | 1.01  | 0.729725 | 0.722707 | 0.88278  | 0.839378 |
| MmugDNA.32805.1.S1_at | MmugDNA.32805.1 | 7.18  | 7.16  | 0.09 | 0.16 | 1.01  | 0.448433 | 0.233704 | 0.729653 | 0.505032 |
| MmugDNA.32807.1.S1_at | MmugDNA.32807.1 | 9.43  | 9.39  | 0.12 | 0.18 | 1.03  | 0.46039  | 0.521515 | 0.736906 | 0.712483 |
| MmugDNA.32812.1.S1_at | MmugDNA.32812.1 | 7.6   | 8.43  | 0.82 | 0.64 | -1.78 | 0.226348 | 0.271531 | 0.584404 | 0.536547 |
| MmugDNA.3282.1.S1_at  | MmugDNA.3282.1  | 4.26  | 4.33  | 0.18 | 0.53 | -1.05 | 0.210968 | 0.182653 | 0.571977 | 0.459186 |
| MmugDNA.32821.1.S1_at | MmugDNA.32821.1 | 3.22  | 3.15  | 0.1  | 0.08 | 1.05  | 0.781897 | 0.873223 | 0.908961 | 0.92788  |
| MmugDNA.32827.1.S1_at | MmugDNA.32827.1 | 11.41 | 11.36 | 0.23 | 1.34 | 1.03  | 0.87968  | 0.66064  | 0.95165  | 0.801485 |
| MmugDNA.32828.1.S1_at | MmugDNA.32828.1 | 6.77  | 6.78  | 0.19 | 0.14 | -1.01 | 0.766533 | 0.539854 | 0.901848 | 0.723982 |
| MmugDNA.32837.1.S1_at | MmugDNA.32837.1 | 11.5  | 12.04 | 0.23 | 0.36 | -1.46 | 0.086654 | 0.074092 | 0.440475 | 0.317745 |
| MmugDNA.32840.1.S1_at | MmugDNA.32840.1 | 8.46  | 7.98  | 0.2  | 0.44 | 1.39  | 0.713096 | 0.730583 | 0.874295 | 0.844055 |
| MmugDNA.32841.1.S1_at | MmugDNA.32841.1 | 5.84  | 6.07  | 0.24 | 0.1  | -1.17 | 0.613313 | 0.450829 | 0.822642 | 0.665869 |
| MmugDNA.32848.1.S1_at | MmugDNA.32848.1 | 7.45  | 9.54  | 0.68 | 2.99 | -4.26 | 0.6097   | 0.490007 | 0.820621 | 0.692076 |
| MmugDNA.32852.1.S1_at | MmugDNA.32852.1 | 7.75  | 8.35  | 0.54 | 1.06 | -1.52 | 0.256732 | 0.179448 | 0.604414 | 0.455929 |
| MmugDNA.32856.1.S1_at | MmugDNA.32856.1 | 8.99  | 8.37  | 0.27 | 0.19 | 1.53  | 0.026182 | 0.012285 | 0.301676 | 0.143369 |
| MmugDNA.32866.1.S1_at | MmugDNA.32866.1 | 5.26  | 5.17  | 0.14 | 0.16 | 1.07  | 0.59631  | 0.755328 | 0.812857 | 0.857558 |
| MmugDNA.32870.1.S1_at | MmugDNA.32870.1 | 7.92  | 7.82  | 0.09 | 0.19 | 1.08  | 0.639614 | 0.499147 | 0.837251 | 0.698006 |
| MmugDNA.32873.1.S1_at | MmugDNA.32873.1 | 11.4  | 11.2  | 0.08 | 0.53 | 1.15  | 0.632148 | 0.801332 | 0.833058 | 0.885696 |
| MmugDNA.32876.1.S1_at | MmugDNA.32876.1 | 8.7   | 8.84  | 0.23 | 0.15 | -1.1  | 0.41936  | 0.190302 | 0.711792 | 0.465906 |
| MmugDNA.32877.1.S1_at | MmugDNA.32877.1 | 11.69 | 11.1  | 0.07 | 0.03 | 1.5   | 0.000145 | 0.000036 | 0.112653 | 0.023031 |
| MmugDNA.32878.1.S1_at | MmugDNA.32878.1 | 5.22  | 5.59  | 0.1  | 0.12 | -1.29 | 0.028001 | 0.020164 | 0.309449 | 0.178414 |

|                         |                 |       |       |      |      |       |          |          |          |          |
|-------------------------|-----------------|-------|-------|------|------|-------|----------|----------|----------|----------|
| MmugDNA.32883.1.S1_at   | MmugDNA.32883.1 | 4.87  | 4.57  | 0.22 | 0.07 | 1.23  | 0.198023 | 0.262058 | 0.561022 | 0.528374 |
| MmugDNA.32885.1.S1_at   | MmugDNA.32885.1 | 7.09  | 9.15  | 0.66 | 1.63 | -4.15 | 0.19811  | 0.174184 | 0.561111 | 0.450479 |
| MmugDNA.32888.1.S1_at   | MmugDNA.32888.1 | 12.03 | 11.22 | 0.61 | 0.83 | 1.75  | 0.227255 | 0.311455 | 0.585089 | 0.566456 |
| MmugDNA.32889.1.S1_at   | MmugDNA.32889.1 | 8.54  | 8.37  | 0.2  | 0.42 | 1.13  | 0.463665 | 0.567659 | 0.738895 | 0.74156  |
| MmugDNA.32889.1.S1_s_at | MmugDNA.32889.1 | 8.21  | 7.9   | 0.21 | 0.5  | 1.24  | 0.249948 | 0.347875 | 0.600389 | 0.592196 |
| MmugDNA.32890.1.S1_at   | MmugDNA.32890.1 | 9.67  | 9.77  | 0.08 | 0.33 | -1.07 | 0.19924  | 0.224261 | 0.562215 | 0.497164 |
| MmugDNA.32902.1.S1_at   | MmugDNA.32902.1 | 11.48 | 11.78 | 0.1  | 0.5  | -1.23 | 0.337201 | 0.450023 | 0.659871 | 0.665446 |
| MmugDNA.32903.1.S1_at   | MmugDNA.32903.1 | 9.27  | 8.62  | 0.22 | 0.56 | 1.57  | 0.091612 | 0.075554 | 0.447666 | 0.319982 |
| MmugDNA.32904.1.S1_at   | MmugDNA.32904.1 | 12.99 | 12.92 | 0.05 | 0.07 | 1.05  | 0.14781  | 0.008588 | 0.51336  | 0.123008 |
| MmugDNA.32907.1.S1_at   | MmugDNA.32907.1 | 11.35 | 11.42 | 0.17 | 0.13 | -1.05 | 0.323596 | 0.034445 | 0.65165  | 0.229628 |
| MmugDNA.32908.1.S1_at   | MmugDNA.32908.1 | 9.03  | 9.2   | 0.44 | 0.24 | -1.12 | 0.640656 | 0.146851 | 0.837755 | 0.42088  |
| MmugDNA.32914.1.S1_at   | MmugDNA.32914.1 | 12.1  | 11.11 | 0.02 | 0.1  | 1.98  | 0.000076 | 0.00001  | 0.112653 | 0.016526 |
| MmugDNA.32917.1.S1_at   | MmugDNA.32917.1 | 11.78 | 11.39 | 0.24 | 1.08 | 1.31  | 0.481233 | 0.162279 | 0.74904  | 0.438447 |
| MmugDNA.32920.1.S1_at   | MmugDNA.32920.1 | 13.09 | 12.96 | 0.04 | 0.14 | 1.1   | 0.154062 | 0.114638 | 0.518614 | 0.381156 |
| MmugDNA.32921.1.S1_at   | MmugDNA.32921.1 | 6.76  | 6.34  | 0.52 | 0.19 | 1.34  | 0.818231 | 0.069707 | 0.926289 | 0.310164 |
| MmugDNA.32925.1.S1_s_at | MmugDNA.32925.1 | 12.12 | 11.9  | 0.13 | 0.03 | 1.16  | 0.038911 | 0.027401 | 0.345909 | 0.206752 |
| MmugDNA.32938.1.S1_at   | MmugDNA.32938.1 | 3.4   | 3.24  | 0.2  | 0.08 | 1.12  | 0.782249 | 0.354825 | 0.909138 | 0.59746  |
| MmugDNA.32939.1.S1_at   | MmugDNA.32939.1 | 11.47 | 11.79 | 0.16 | 0.05 | -1.24 | 0.106071 | 0.007664 | 0.466831 | 0.117095 |
| MmugDNA.32944.1.S1_at   | MmugDNA.32944.1 | 5.11  | 5.18  | 0.18 | 0.13 | -1.05 | 0.612245 | 0.22764  | 0.822151 | 0.499898 |
| MmugDNA.32950.1.S1_at   | MmugDNA.32950.1 | 4.82  | 4.37  | 0.49 | 0.07 | 1.36  | 0.06028  | 0.057103 | 0.393081 | 0.284945 |
| MmugDNA.32953.1.S1_at   | MmugDNA.32953.1 | 8.94  | 6.04  | 1.06 | 0.37 | 7.49  | 0.014493 | 0.003247 | 0.253191 | 0.082187 |
| MmugDNA.32954.1.S1_at   | MmugDNA.32954.1 | 10.36 | 9.29  | 0.09 | 0.2  | 2.1   | 0.000999 | 0.000228 | 0.139813 | 0.032385 |
| MmugDNA.32958.1.S1_at   | MmugDNA.32958.1 | 6.56  | 6.75  | 0.3  | 0.11 | -1.14 | 0.421283 | 0.513035 | 0.712907 | 0.706696 |
| MmugDNA.32960.1.S1_at   | MmugDNA.32960.1 | 5.43  | 5.58  | 0.26 | 0.15 | -1.11 | 0.65254  | 0.643294 | 0.843759 | 0.79084  |
| MmugDNA.32962.1.S1_at   | MmugDNA.32962.1 | 10.72 | 9.54  | 0.39 | 1.05 | 2.27  | 0.207269 | 0.255076 | 0.569417 | 0.52317  |
| MmugDNA.32966.1.S1_at   | MmugDNA.32966.1 | 7.11  | 7.43  | 0.17 | 0.66 | -1.24 | 0.482979 | 0.586304 | 0.749771 | 0.753427 |
| MmugDNA.32968.1.S1_at   | MmugDNA.32968.1 | 7.8   | 7.81  | 0.19 | 0.13 | -1.01 | 0.591132 | 0.77183  | 0.810224 | 0.867369 |
| MmugDNA.32977.1.S1_at   | MmugDNA.32977.1 | 9.84  | 9.54  | 0.26 | 0.22 | 1.23  | 0.077851 | 0.03072  | 0.427855 | 0.217174 |
| MmugDNA.3298.1.S1_at    | MmugDNA.3298.1  | 12.55 | 12.03 | 0.05 | 0.07 | 1.43  | 0.000301 | 0.000017 | 0.12562  | 0.019635 |
| MmugDNA.32988.1.S1_at   | MmugDNA.32988.1 | 7.97  | 7.81  | 0.24 | 0.38 | 1.11  | 0.310618 | 0.324993 | 0.642603 | 0.575512 |
| MmugDNA.32990.1.S1_at   | MmugDNA.32990.1 | 5.86  | 5.96  | 0.44 | 1.14 | -1.07 | 0.711636 | 0.742738 | 0.873646 | 0.851023 |
| MmugDNA.32991.1.S1_at   | MmugDNA.32991.1 | 8.75  | 7.69  | 0.7  | 0.67 | 2.09  | 0.322852 | 0.22868  | 0.651245 | 0.500897 |
| MmugDNA.32998.1.S1_at   | MmugDNA.32998.1 | 7.06  | 7.1   | 0.33 | 0.08 | -1.03 | 0.693658 | 0.877227 | 0.864171 | 0.930041 |
| MmugDNA.33001.1.S1_at   | MmugDNA.33001.1 | 9.83  | 10.52 | 0.25 | 0.72 | -1.61 | 0.278984 | 0.202723 | 0.620884 | 0.477174 |
| MmugDNA.33003.1.S1_at   | MmugDNA.33003.1 | 2.94  | 3.08  | 0.15 | 0.07 | -1.1  | 0.296875 | 0.37389  | 0.632758 | 0.612508 |
| MmugDNA.33004.1.S1_at   | MmugDNA.33004.1 | 5.15  | 5.13  | 0.49 | 0.1  | 1.01  | 0.857513 | 0.948772 | 0.942274 | 0.970752 |
| MmugDNA.33011.1.S1_at   | MmugDNA.33011.1 | 9.64  | 10.3  | 0.18 | 0.84 | -1.58 | 0.87944  | 0.686987 | 0.951533 | 0.817375 |
| MmugDNA.33014.1.S1_at   | MmugDNA.33014.1 | 12.05 | 12.13 | 0.02 | 0.08 | -1.05 | 0.122656 | 0.105531 | 0.487896 | 0.367515 |
| MmugDNA.33017.1.S1_at   | MmugDNA.33017.1 | 10.94 | 10.75 | 0.23 | 0.28 | 1.14  | 0.96411  | 0.741    | 0.986102 | 0.850089 |
| MmugDNA.33019.1.S1_at   | MmugDNA.33019.1 | 7.51  | 7.55  | 0.26 | 0.07 | -1.03 | 0.946888 | 0.977482 | 0.979482 | 0.987777 |
| MmugDNA.3303.1.S1_at    | MmugDNA.3303.1  | 11.42 | 11.11 | 0.03 | 0.23 | 1.24  | 0.13197  | 0.116339 | 0.498114 | 0.383671 |

|                         |                 |       |       |      |      |       |          |          |          |          |
|-------------------------|-----------------|-------|-------|------|------|-------|----------|----------|----------|----------|
| MmugDNA.33031.1.S1_at   | MmugDNA.33031.1 | 12.05 | 11.91 | 0.16 | 0.19 | 1.1   | 0.184697 | 0.020271 | 0.548318 | 0.17872  |
| MmugDNA.33032.1.S1_at   | MmugDNA.33032.1 | 8.69  | 8.3   | 0.35 | 0.73 | 1.3   | 0.175012 | 0.208005 | 0.538785 | 0.482049 |
| MmugDNA.33036.1.S1_at   | MmugDNA.33036.1 | 6.63  | 6.04  | 0.67 | 0.41 | 1.51  | 0.387582 | 0.575178 | 0.692026 | 0.746362 |
| MmugDNA.33037.1.S1_s_at | MmugDNA.33037.1 | 7.67  | 8.86  | 0.36 | 0.25 | -2.28 | 0.02303  | 0.028597 | 0.289574 | 0.210901 |
| MmugDNA.3304.1.S1_at    | MmugDNA.3304.1  | 3.41  | 3.14  | 0.22 | 0.35 | 1.2   | 0.880543 | 0.935104 | 0.951941 | 0.963274 |
| MmugDNA.33042.1.S1_at   | MmugDNA.33042.1 | 7.41  | 7.29  | 0.39 | 0.42 | 1.09  | 0.626999 | 0.086987 | 0.82984  | 0.339851 |
| MmugDNA.3305.1.S1_at    | MmugDNA.3305.1  | 10.25 | 10.78 | 0.26 | 0.27 | -1.44 | 0.130276 | 0.072695 | 0.496613 | 0.31561  |
| MmugDNA.33059.1.S1_at   | MmugDNA.33059.1 | 12.52 | 11.96 | 0.18 | 0.15 | 1.48  | 0.006628 | 0.002754 | 0.200678 | 0.077522 |
| MmugDNA.3306.1.S1_at    | MmugDNA.3306.1  | 7.42  | 6.7   | 0.34 | 0.26 | 1.65  | 0.092141 | 0.02958  | 0.448698 | 0.213628 |
| MmugDNA.33060.1.S1_at   | MmugDNA.33060.1 | 7.77  | 10.44 | 1.85 | 3    | -6.39 | 0.504633 | 0.354235 | 0.761343 | 0.597105 |
| MmugDNA.33060.1.S1_x_at | MmugDNA.33060.1 | 7.84  | 10.12 | 1.74 | 2.82 | -4.87 | 0.492672 | 0.349224 | 0.755881 | 0.593263 |
| MmugDNA.33065.1.S1_at   | MmugDNA.33065.1 | 11.37 | 10.99 | 0.13 | 0.35 | 1.3   | 0.406302 | 0.527509 | 0.703645 | 0.716154 |
| MmugDNA.33067.1.S1_at   | MmugDNA.33067.1 | 4.87  | 4.79  | 0.02 | 0.45 | 1.05  | 0.570466 | 0.584731 | 0.799521 | 0.752515 |
| MmugDNA.33071.1.S1_at   | MmugDNA.33071.1 | 9.02  | 8.78  | 0.99 | 0.7  | 1.18  | 0.921194 | 0.353191 | 0.969237 | 0.596432 |
| MmugDNA.33079.1.S1_at   | MmugDNA.33079.1 | 5.76  | 6.08  | 0.13 | 0.14 | -1.24 | 0.151028 | 0.181051 | 0.515733 | 0.457562 |
| MmugDNA.33082.1.S1_s_at | MmugDNA.33082.1 | 10.31 | 9.56  | 0.36 | 0.18 | 1.68  | 0.037341 | 0.015006 | 0.341309 | 0.155713 |
| MmugDNA.33083.1.S1_at   | MmugDNA.33083.1 | 12.6  | 12.25 | 0.2  | 0.28 | 1.28  | 0.203422 | 0.317707 | 0.566041 | 0.57089  |
| MmugDNA.33085.1.S1_at   | MmugDNA.33085.1 | 4.26  | 3.9   | 0.55 | 0.06 | 1.29  | 0.163975 | 0.207665 | 0.528211 | 0.481906 |
| MmugDNA.33088.1.S1_at   | MmugDNA.33088.1 | 3.83  | 3.85  | 0.13 | 0.08 | -1.02 | 0.347814 | 0.477827 | 0.66672  | 0.683839 |
| MmugDNA.33089.1.S1_at   | MmugDNA.33089.1 | 9.83  | 10.14 | 0.23 | 0.7  | -1.24 | 0.614993 | 0.675684 | 0.823328 | 0.810429 |
| MmugDNA.33093.1.S1_at   | MmugDNA.33093.1 | 3     | 3.19  | 0.02 | 0.09 | -1.14 | 0.066429 | 0.05909  | 0.406564 | 0.289985 |
| MmugDNA.33095.1.S1_at   | MmugDNA.33095.1 | 3.62  | 3.36  | 0.18 | 0.11 | 1.2   | 0.061103 | 0.297064 | 0.394935 | 0.555996 |
| MmugDNA.33098.1.S1_at   | MmugDNA.33098.1 | 8.56  | 6     | 0.18 | 0.71 | 5.88  | 0.008594 | 0.001748 | 0.219458 | 0.062998 |
| MmugDNA.33099.1.S1_at   | MmugDNA.33099.1 | 10.74 | 10.19 | 0.15 | 0.19 | 1.47  | 0.015825 | 0.011276 | 0.261411 | 0.138076 |
| MmugDNA.3310.1.S1_at    | MmugDNA.3310.1  | 10.49 | 11.49 | 0.26 | 0.18 | -2    | 0.006717 | 0.002256 | 0.20158  | 0.069943 |
| MmugDNA.33114.1.S1_at   | MmugDNA.33114.1 | 4.34  | 4.41  | 0.3  | 0.15 | -1.05 | 0.7468   | 0.08891  | 0.89155  | 0.34275  |
| MmugDNA.33116.1.S1_at   | MmugDNA.33116.1 | 3.52  | 3.54  | 0.03 | 0.15 | -1.02 | 0.601898 | 0.68595  | 0.816272 | 0.816691 |
| MmugDNA.33119.1.S1_at   | MmugDNA.33119.1 | 9.72  | 8.93  | 0.57 | 0.63 | 1.72  | 0.701514 | 0.874669 | 0.868043 | 0.928837 |
| MmugDNA.33120.1.S1_x_at | MmugDNA.33120.1 | 4.18  | 4.78  | 0.43 | 0.51 | -1.51 | 0.452032 | 0.449369 | 0.731815 | 0.665021 |
| MmugDNA.33123.1.S1_at   | MmugDNA.33123.1 | 8.62  | 9.77  | 0.35 | 0.36 | -2.22 | 0.007338 | 0.002501 | 0.207019 | 0.074067 |
| MmugDNA.33130.1.S1_at   | MmugDNA.33130.1 | 10.53 | 9.49  | 0.22 | 0.23 | 2.07  | 0.007301 | 0.002391 | 0.206851 | 0.072347 |
| MmugDNA.33135.1.S1_at   | MmugDNA.33135.1 | 9.77  | 9.58  | 0.02 | 0.28 | 1.14  | 0.291718 | 0.482944 | 0.629042 | 0.687681 |
| MmugDNA.33136.1.S1_at   | MmugDNA.33136.1 | 3.33  | 3.33  | 0.07 | 0.08 | -1    | 0.766822 | 0.222806 | 0.901915 | 0.495734 |
| MmugDNA.33137.1.S1_at   | MmugDNA.33137.1 | 8.09  | 6.99  | 0.48 | 0.42 | 2.15  | 0.027462 | 0.0167   | 0.308086 | 0.163642 |
| MmugDNA.33139.1.S1_at   | MmugDNA.33139.1 | 5.32  | 5.62  | 0.88 | 0.46 | -1.23 | 0.996659 | 0.572964 | 0.998586 | 0.744895 |
| MmugDNA.33140.1.S1_at   | MmugDNA.33140.1 | 5.98  | 6     | 0.05 | 0.09 | -1.01 | 0.284631 | 0.309825 | 0.624327 | 0.565044 |
| MmugDNA.33141.1.S1_at   | MmugDNA.33141.1 | 9.05  | 8.54  | 0.18 | 0.19 | 1.42  | 0.01504  | 0.009464 | 0.257013 | 0.128094 |
| MmugDNA.33143.1.S1_at   | MmugDNA.33143.1 | 11.8  | 11.83 | 0.71 | 0.65 | -1.02 | 0.274202 | 0.184713 | 0.617262 | 0.460645 |
| MmugDNA.33149.1.S1_s_at | MmugDNA.33149.1 | 10.81 | 9.51  | 0.05 | 0.72 | 2.45  | 0.090665 | 0.089405 | 0.446193 | 0.343637 |
| MmugDNA.33159.1.S1_s_at | MmugDNA.33159.1 | 9.72  | 9.16  | 0.15 | 0.49 | 1.47  | 0.355666 | 0.485451 | 0.671185 | 0.68914  |
| MmugDNA.33161.1.S1_at   | MmugDNA.33161.1 | 4.12  | 3.96  | 0.32 | 0.22 | 1.11  | 0.695786 | 0.584201 | 0.865007 | 0.75229  |

|                         |                 |       |       |      |      |       |          |          |          |          |
|-------------------------|-----------------|-------|-------|------|------|-------|----------|----------|----------|----------|
| MmugDNA.33162.1.S1_at   | MmugDNA.33162.1 | 10.17 | 12.33 | 0.7  | 0.21 | -4.45 | 0.013924 | 0.006537 | 0.250029 | 0.109634 |
| MmugDNA.33163.1.S1_at   | MmugDNA.33163.1 | 13.07 | 13.26 | 0.03 | 0.08 | -1.14 | 0.018604 | 0.015693 | 0.270793 | 0.158742 |
| MmugDNA.33171.1.S1_at   | MmugDNA.33171.1 | 6.09  | 6.89  | 0.33 | 0.73 | -1.74 | 0.057058 | 0.05211  | 0.387418 | 0.273866 |
| MmugDNA.33172.1.S1_at   | MmugDNA.33172.1 | 12.1  | 11.71 | 0.63 | 0.52 | 1.31  | 0.415585 | 0.520083 | 0.709528 | 0.711472 |
| MmugDNA.33179.1.S1_s_at | MmugDNA.33179.1 | 8.22  | 7.2   | 0.47 | 0.12 | 2.03  | 0.028414 | 0.013187 | 0.311187 | 0.14735  |
| MmugDNA.33183.1.S1_at   | MmugDNA.33183.1 | 11.3  | 10.04 | 0.18 | 1.03 | 2.39  | 0.121146 | 0.134482 | 0.485953 | 0.406626 |
| MmugDNA.33184.1.S1_at   | MmugDNA.33184.1 | 10.79 | 9.95  | 0.19 | 0.07 | 1.78  | 0.001865 | 0.000373 | 0.155636 | 0.037273 |
| MmugDNA.33191.1.S1_at   | MmugDNA.33191.1 | 12.22 | 12.39 | 0.17 | 0.1  | -1.12 | 0.140279 | 0.055879 | 0.508065 | 0.282172 |
| MmugDNA.33193.1.S1_at   | MmugDNA.33193.1 | 6.09  | 6     | 0.15 | 0.15 | 1.06  | 0.206964 | 0.086498 | 0.568934 | 0.33907  |
| MmugDNA.33194.1.S1_at   | MmugDNA.33194.1 | 6.75  | 6.85  | 0.1  | 0.18 | -1.07 | 0.512715 | 0.525106 | 0.765738 | 0.714766 |
| MmugDNA.33195.1.S1_at   | MmugDNA.33195.1 | 9.64  | 10.69 | 0.63 | 1.09 | -2.07 | 0.237745 | 0.270499 | 0.591287 | 0.535835 |
| MmugDNA.33210.1.S1_at   | MmugDNA.33210.1 | 12.13 | 10.67 | 0.11 | 0.49 | 2.74  | 0.016133 | 0.002115 | 0.262828 | 0.068023 |
| MmugDNA.33212.1.S1_at   | MmugDNA.33212.1 | 10.38 | 10.34 | 0.24 | 0.58 | 1.03  | 0.964534 | 0.982178 | 0.986249 | 0.990279 |
| MmugDNA.33214.1.S1_at   | MmugDNA.33214.1 | 7.99  | 9.91  | 0.34 | 0.96 | -3.78 | 0.042842 | 0.02319  | 0.355382 | 0.190776 |
| MmugDNA.33216.1.S1_s_at | MmugDNA.33216.1 | 11.42 | 11.88 | 0.11 | 0.24 | -1.37 | 0.174204 | 0.098394 | 0.537888 | 0.356531 |
| MmugDNA.33218.1.S1_at   | MmugDNA.33218.1 | 11.02 | 11.94 | 0.19 | 0.19 | -1.88 | 0.008966 | 0.00405  | 0.221914 | 0.090281 |
| MmugDNA.33218.1.S1_s_at | MmugDNA.33218.1 | 10.94 | 12.05 | 0.31 | 0.11 | -2.15 | 0.004089 | 0.00069  | 0.181739 | 0.044166 |
| MmugDNA.33225.1.S1_at   | MmugDNA.33225.1 | 6.94  | 7.04  | 0.16 | 0.1  | -1.07 | 0.494581 | 0.610741 | 0.756791 | 0.768844 |
| MmugDNA.33226.1.S1_at   | MmugDNA.33226.1 | 9.25  | 9.7   | 0.25 | 0.33 | -1.36 | 0.10636  | 0.044858 | 0.466831 | 0.256375 |
| MmugDNA.33236.1.S1_at   | MmugDNA.33236.1 | 10.11 | 9.68  | 0.13 | 0.25 | 1.34  | 0.062131 | 0.092791 | 0.397269 | 0.34899  |
| MmugDNA.33237.1.S1_at   | MmugDNA.33237.1 | 6.98  | 7.01  | 0.13 | 0.09 | -1.03 | 0.650333 | 0.587196 | 0.842789 | 0.754083 |
| MmugDNA.33240.1.S1_at   | MmugDNA.33240.1 | 5.92  | 6.76  | 0.79 | 1.53 | -1.78 | 0.459895 | 0.48647  | 0.736616 | 0.68984  |
| MmugDNA.33242.1.S1_at   | MmugDNA.33242.1 | 11.08 | 10.94 | 0.44 | 0.38 | 1.1   | 0.634413 | 0.106574 | 0.834512 | 0.369107 |
| MmugDNA.33249.1.S1_at   | MmugDNA.33249.1 | 3.67  | 3.36  | 0.12 | 0.08 | 1.24  | 0.072231 | 0.099192 | 0.416651 | 0.357379 |
| MmugDNA.33251.1.S1_at   | MmugDNA.33251.1 | 11.69 | 12.18 | 0.15 | 0.16 | -1.4  | 0.012527 | 0.009691 | 0.24203  | 0.129497 |
| MmugDNA.33252.1.S1_at   | MmugDNA.33252.1 | 11.28 | 10.47 | 0.09 | 0.41 | 1.76  | 0.029867 | 0.011922 | 0.315718 | 0.141304 |
| MmugDNA.33255.1.S1_at   | MmugDNA.33255.1 | 11.49 | 12.21 | 0.1  | 0.25 | -1.65 | 0.013193 | 0.00687  | 0.245834 | 0.111992 |
| MmugDNA.33260.1.S1_s_at | MmugDNA.33260.1 | 10.48 | 10.28 | 0.09 | 0.09 | 1.15  | 0.053153 | 0.032814 | 0.379463 | 0.22427  |
| MmugDNA.33262.1.S1_at   | MmugDNA.33262.1 | 6.23  | 6.13  | 0.07 | 0.1  | 1.07  | 0.092385 | 0.177504 | 0.449015 | 0.453888 |
| MmugDNA.33263.1.S1_at   | MmugDNA.33263.1 | 8.53  | 8.44  | 0.35 | 0.37 | 1.07  | 0.334915 | 0.470649 | 0.658654 | 0.67895  |
| MmugDNA.33270.1.S1_at   | MmugDNA.33270.1 | 8.5   | 8.67  | 0.17 | 0.47 | -1.13 | 0.893663 | 0.044927 | 0.957703 | 0.25646  |
| MmugDNA.33272.1.S1_at   | MmugDNA.33272.1 | 9.74  | 9.9   | 0.04 | 0.43 | -1.12 | 0.540772 | 0.730622 | 0.782181 | 0.844055 |
| MmugDNA.33274.1.S1_at   | MmugDNA.33274.1 | 11.87 | 11.77 | 0.38 | 0.24 | 1.08  | 0.287856 | 0.381504 | 0.626282 | 0.617691 |
| MmugDNA.33276.1.S1_at   | MmugDNA.33276.1 | 8.91  | 8.39  | 0.05 | 0.15 | 1.44  | 0.002628 | 0.000613 | 0.164386 | 0.042275 |
| MmugDNA.33279.1.S1_at   | MmugDNA.33279.1 | 3.89  | 3.57  | 0.08 | 0.08 | 1.25  | 0.006929 | 0.006543 | 0.202377 | 0.109667 |
| MmugDNA.33281.1.S1_at   | MmugDNA.33281.1 | 9.28  | 8.67  | 0.12 | 0.08 | 1.53  | 0.001249 | 0.000234 | 0.145267 | 0.03241  |
| MmugDNA.33283.1.S1_at   | MmugDNA.33283.1 | 7.05  | 6.67  | 0.35 | 0.57 | 1.3   | 0.344348 | 0.309677 | 0.664498 | 0.565005 |
| MmugDNA.33286.1.S1_at   | MmugDNA.33286.1 | 10.37 | 9.49  | 0.3  | 0.31 | 1.83  | 0.023959 | 0.011846 | 0.293601 | 0.140973 |
| MmugDNA.33290.1.S1_at   | MmugDNA.33290.1 | 6.09  | 6.08  | 0.09 | 0.08 | 1     | 0.878192 | 0.185702 | 0.95108  | 0.46163  |
| MmugDNA.33292.1.S1_at   | MmugDNA.33292.1 | 10.09 | 9.74  | 0.28 | 1.21 | 1.27  | 0.572534 | 0.753554 | 0.800799 | 0.856527 |
| MmugDNA.33296.1.S1_at   | MmugDNA.33296.1 | 12.29 | 12.18 | 0.03 | 0.75 | 1.08  | 0.53608  | 0.660537 | 0.779351 | 0.801398 |

|                         |                 |       |       |      |      |        |          |          |          |          |
|-------------------------|-----------------|-------|-------|------|------|--------|----------|----------|----------|----------|
| MmugDNA.333.1.S1_at     | MmugDNA.333.1   | 7.23  | 6.92  | 0.16 | 0.27 | 1.24   | 0.109789 | 0.099119 | 0.470963 | 0.357258 |
| MmugDNA.33302.1.S1_at   | MmugDNA.33302.1 | 11.45 | 11.03 | 0.12 | 0.16 | 1.34   | 0.025442 | 0.015017 | 0.299417 | 0.155736 |
| MmugDNA.33303.1.S1_at   | MmugDNA.33303.1 | 13.38 | 13.38 | 0.13 | 0.15 | -1     | 0.984515 | 0.994904 | 0.994531 | 0.996846 |
| MmugDNA.33307.1.S1_s_at | MmugDNA.33307.1 | 4.34  | 4.42  | 0.36 | 0.2  | -1.06  | 0.97556  | 0.873059 | 0.990569 | 0.927822 |
| MmugDNA.33308.1.S1_at   | MmugDNA.33308.1 | 9.74  | 9.93  | 0.23 | 0.06 | -1.14  | 0.164183 | 0.305324 | 0.528211 | 0.562304 |
| MmugDNA.3331.1.S1_at    | MmugDNA.3331.1  | 4.05  | 6.7   | 0.23 | 2.02 | -6.29  | 0.107983 | 0.06235  | 0.46872  | 0.296503 |
| MmugDNA.33312.1.S1_at   | MmugDNA.33312.1 | 11.62 | 11.46 | 0.21 | 0.22 | 1.12   | 0.656048 | 0.743689 | 0.845304 | 0.851456 |
| MmugDNA.33318.1.S1_at   | MmugDNA.33318.1 | 11.6  | 11.04 | 0.06 | 0.09 | 1.48   | 0.000626 | 0.000293 | 0.136818 | 0.034892 |
| MmugDNA.33320.1.S1_at   | MmugDNA.33320.1 | 11.52 | 11.75 | 0.05 | 0.29 | -1.17  | 0.300664 | 0.392835 | 0.635955 | 0.625854 |
| MmugDNA.33323.1.S1_at   | MmugDNA.33323.1 | 8.75  | 8.08  | 0.13 | 0.24 | 1.59   | 0.007393 | 0.007533 | 0.207702 | 0.116336 |
| MmugDNA.33325.1.S1_at   | MmugDNA.33325.1 | 5.74  | 5.97  | 0.24 | 0.09 | -1.18  | 0.771147 | 0.190828 | 0.903657 | 0.466228 |
| MmugDNA.33326.1.S1_at   | MmugDNA.33326.1 | 7     | 7.02  | 0.28 | 0.84 | -1.01  | 0.76935  | 0.893382 | 0.903004 | 0.939163 |
| MmugDNA.33327.1.S1_s_at | MmugDNA.33327.1 | 11.55 | 11.81 | 0.26 | 1.83 | -1.19  | 0.486664 | 0.387133 | 0.751702 | 0.621935 |
| MmugDNA.33329.1.S1_at   | MmugDNA.33329.1 | 6.33  | 5.55  | 0.74 | 1.13 | 1.71   | 0.937523 | 0.989915 | 0.975901 | 0.994222 |
| MmugDNA.33330.1.S1_at   | MmugDNA.33330.1 | 7.3   | 6.84  | 0.31 | 0.45 | 1.38   | 0.537509 | 0.56063  | 0.780064 | 0.736889 |
| MmugDNA.33331.1.S1_at   | MmugDNA.33331.1 | 3.63  | 3.39  | 0.12 | 0.16 | 1.18   | 0.38928  | 0.367685 | 0.692956 | 0.607369 |
| MmugDNA.33333.1.S1_at   | MmugDNA.33333.1 | 12.14 | 12.19 | 0.07 | 0.21 | -1.04  | 0.65559  | 0.84374  | 0.845018 | 0.91098  |
| MmugDNA.33336.1.S1_at   | MmugDNA.33336.1 | 5.65  | 6     | 0.14 | 0.16 | -1.27  | 0.038904 | 0.05584  | 0.345909 | 0.282161 |
| MmugDNA.33338.1.S1_at   | MmugDNA.33338.1 | 5.56  | 5.54  | 0.2  | 0.69 | 1.01   | 0.739443 | 0.019069 | 0.888141 | 0.173701 |
| MmugDNA.33341.1.S1_at   | MmugDNA.33341.1 | 4.93  | 4.32  | 0.18 | 0.07 | 1.52   | 0.003051 | 0.002998 | 0.172102 | 0.079958 |
| MmugDNA.33343.1.S1_at   | MmugDNA.33343.1 | 3.41  | 3.24  | 0.08 | 0.16 | 1.12   | 0.319151 | 0.489517 | 0.648688 | 0.691824 |
| MmugDNA.33360.1.S1_at   | MmugDNA.33360.1 | 2.97  | 2.88  | 0.1  | 0.18 | 1.07   | 0.681785 | 0.896553 | 0.857635 | 0.940905 |
| MmugDNA.33366.1.S1_s_at | MmugDNA.33366.1 | 7.94  | 8.3   | 0.21 | 0.31 | -1.29  | 0.158053 | 0.169678 | 0.522944 | 0.446263 |
| MmugDNA.33367.1.S1_at   | MmugDNA.33367.1 | 5.48  | 5.61  | 0.32 | 0.06 | -1.09  | 0.689058 | 0.521601 | 0.861302 | 0.712505 |
| MmugDNA.33370.1.S1_at   | MmugDNA.33370.1 | 12.93 | 12.81 | 0.08 | 0.23 | 1.09   | 0.461298 | 0.626625 | 0.73751  | 0.779896 |
| MmugDNA.33370.1.S1_s_at | MmugDNA.33370.1 | 12.2  | 11.95 | 0.16 | 0.32 | 1.19   | 0.556782 | 0.618821 | 0.792093 | 0.774185 |
| MmugDNA.33371.1.S1_at   | MmugDNA.33371.1 | 6.99  | 6.5   | 0.16 | 0.12 | 1.41   | 0.043633 | 0.035319 | 0.356892 | 0.232207 |
| MmugDNA.33387.1.S1_at   | MmugDNA.33387.1 | 11.32 | 9.77  | 0.15 | 0.22 | 2.94   | 0.000359 | 0.00011  | 0.128842 | 0.028099 |
| MmugDNA.33390.1.S1_at   | MmugDNA.33390.1 | 5.77  | 5.94  | 0.16 | 0.1  | -1.13  | 0.406014 | 0.330948 | 0.7035   | 0.579631 |
| MmugDNA.33390.1.S1_s_at | MmugDNA.33390.1 | 5.6   | 5.83  | 0.14 | 0.14 | -1.17  | 0.11093  | 0.110493 | 0.472762 | 0.374684 |
| MmugDNA.33392.1.S1_at   | MmugDNA.33392.1 | 12.11 | 12.45 | 0.16 | 0.07 | -1.27  | 0.027098 | 0.017077 | 0.306427 | 0.165589 |
| MmugDNA.33395.1.S1_at   | MmugDNA.33395.1 | 4.5   | 4.32  | 0.55 | 0.1  | 1.14   | 0.582101 | 0.296253 | 0.80553  | 0.555423 |
| MmugDNA.334.1.S1_at     | MmugDNA.334.1   | 6.64  | 10    | 0.97 | 2.25 | -10.29 | 0.092141 | 0.087623 | 0.448698 | 0.340878 |
| MmugDNA.33409.1.S1_at   | MmugDNA.33409.1 | 7.68  | 7.73  | 0.18 | 0.03 | -1.03  | 0.669948 | 0.862404 | 0.852318 | 0.921765 |
| MmugDNA.33410.1.S1_at   | MmugDNA.33410.1 | 9.36  | 9.85  | 0.28 | 0.3  | -1.4   | 0.254112 | 0.356863 | 0.602339 | 0.598641 |
| MmugDNA.3342.1.S1_at    | MmugDNA.3342.1  | 10.37 | 10.26 | 0.24 | 0.54 | 1.08   | 0.8831   | 0.513147 | 0.952961 | 0.706796 |
| MmugDNA.33423.1.S1_at   | MmugDNA.33423.1 | 5.28  | 5.37  | 0.03 | 0.14 | -1.07  | 0.24367  | 0.346567 | 0.595516 | 0.591427 |
| MmugDNA.33426.1.S1_at   | MmugDNA.33426.1 | 10.07 | 10.18 | 0.46 | 0.27 | -1.08  | 0.98138  | 0.086161 | 0.993311 | 0.33853  |
| MmugDNA.33429.1.S1_at   | MmugDNA.33429.1 | 12.06 | 12.01 | 0.1  | 0.4  | 1.04   | 0.931579 | 0.98879  | 0.973537 | 0.993611 |
| MmugDNA.33430.1.S1_at   | MmugDNA.33430.1 | 11.65 | 12.2  | 0.17 | 0.28 | -1.46  | 0.083151 | 0.070841 | 0.435485 | 0.31232  |
| MmugDNA.33433.1.S1_at   | MmugDNA.33433.1 | 9.36  | 8.61  | 0.11 | 0.35 | 1.68   | 0.024885 | 0.042467 | 0.296896 | 0.250702 |

|                         |                 |       |       |      |      |       |          |          |          |          |
|-------------------------|-----------------|-------|-------|------|------|-------|----------|----------|----------|----------|
| MmugDNA.33434.1.S1_at   | MmugDNA.33434.1 | 6.58  | 7.5   | 0.31 | 0.48 | -1.89 | 0.113784 | 0.095849 | 0.477094 | 0.352962 |
| MmugDNA.33436.1.S1_at   | MmugDNA.33436.1 | 12.62 | 12.7  | 0.16 | 0.8  | -1.06 | 0.472261 | 0.641253 | 0.743607 | 0.789506 |
| MmugDNA.33438.1.S1_at   | MmugDNA.33438.1 | 10.67 | 10.66 | 0.1  | 0.09 | 1.01  | 0.99285  | 0.769045 | 0.997561 | 0.865823 |
| MmugDNA.33439.1.S1_at   | MmugDNA.33439.1 | 4.32  | 4.45  | 0.27 | 0.08 | -1.09 | 0.572576 | 0.681572 | 0.800799 | 0.814092 |
| MmugDNA.33443.1.S1_at   | MmugDNA.33443.1 | 7.33  | 7.33  | 0.42 | 0.45 | -1    | 0.789482 | 0.900637 | 0.912587 | 0.943473 |
| MmugDNA.33449.1.S1_at   | MmugDNA.33449.1 | 6.11  | 5.56  | 0.19 | 1.32 | 1.47  | 0.539395 | 0.308698 | 0.781064 | 0.564619 |
| MmugDNA.33451.1.S1_at   | MmugDNA.33451.1 | 4.83  | 5.19  | 0.32 | 0.19 | -1.28 | 0.11197  | 0.117465 | 0.474392 | 0.385175 |
| MmugDNA.33460.1.S1_at   | MmugDNA.33460.1 | 10.68 | 10.64 | 0.14 | 0.09 | 1.03  | 0.897585 | 0.009276 | 0.95917  | 0.127101 |
| MmugDNA.33463.1.S1_at   | MmugDNA.33463.1 | 11.95 | 11.61 | 0.03 | 0.26 | 1.26  | 0.031648 | 0.037517 | 0.32249  | 0.23801  |
| MmugDNA.33465.1.S1_s_at | MmugDNA.33465.1 | 7.96  | 7.54  | 0.37 | 0.1  | 1.34  | 0.097822 | 0.017317 | 0.457014 | 0.166509 |
| MmugDNA.33466.1.S1_s_at | MmugDNA.33466.1 | 11.49 | 11.46 | 0.06 | 0.32 | 1.02  | 0.905052 | 0.136058 | 0.962071 | 0.408363 |
| MmugDNA.33467.1.S1_at   | MmugDNA.33467.1 | 5.16  | 5.31  | 0.09 | 0.15 | -1.11 | 0.134482 | 0.141396 | 0.501157 | 0.414874 |
| MmugDNA.33472.1.S1_at   | MmugDNA.33472.1 | 4.61  | 5.31  | 0.35 | 1.95 | -1.63 | 0.228727 | 0.312078 | 0.586121 | 0.566904 |
| MmugDNA.33483.1.S1_at   | MmugDNA.33483.1 | 11.99 | 12.14 | 0.07 | 0.3  | -1.11 | 0.577205 | 0.764576 | 0.803447 | 0.863128 |
| MmugDNA.33484.1.S1_at   | MmugDNA.33484.1 | 6.76  | 6.57  | 0.32 | 0.55 | 1.14  | 0.980162 | 0.501234 | 0.992802 | 0.699458 |
| MmugDNA.3350.1.S1_at    | MmugDNA.3350.1  | 10.31 | 10.4  | 0.37 | 0.15 | -1.06 | 0.840821 | 0.099312 | 0.935988 | 0.357584 |
| MmugDNA.33513.1.S1_at   | MmugDNA.33513.1 | 9.29  | 9.33  | 0.31 | 0.44 | -1.03 | 0.851873 | 0.258952 | 0.940401 | 0.526175 |
| MmugDNA.33515.1.S1_at   | MmugDNA.33515.1 | 6.59  | 6.48  | 0.12 | 0.24 | 1.08  | 0.35636  | 0.244553 | 0.671525 | 0.514375 |
| MmugDNA.33518.1.S1_at   | MmugDNA.33518.1 | 11.6  | 10.94 | 0.23 | 1.12 | 1.58  | 0.301844 | 0.365943 | 0.636716 | 0.605798 |
| MmugDNA.33529.1.S1_at   | MmugDNA.33529.1 | 5.83  | 6.34  | 0.18 | 0.54 | -1.42 | 0.220637 | 0.240186 | 0.579701 | 0.51084  |
| MmugDNA.33535.1.S1_at   | MmugDNA.33535.1 | 5.39  | 5.43  | 0.08 | 0.51 | -1.03 | 0.323413 | 0.443935 | 0.651622 | 0.661553 |
| MmugDNA.33536.1.S1_at   | MmugDNA.33536.1 | 4.88  | 4.43  | 0.19 | 0.23 | 1.37  | 0.135905 | 0.083282 | 0.502782 | 0.333372 |
| MmugDNA.33537.1.S1_at   | MmugDNA.33537.1 | 7.68  | 6.16  | 0.16 | 0.75 | 2.86  | 0.054785 | 0.06464  | 0.382363 | 0.300314 |
| MmugDNA.33538.1.S1_at   | MmugDNA.33538.1 | 6.07  | 6.07  | 0.31 | 0.04 | 1     | 0.989172 | 0.843877 | 0.99615  | 0.911072 |
| MmugDNA.33538.1.S1_s_at | MmugDNA.33538.1 | 4.8   | 4.82  | 0.04 | 0.16 | -1.01 | 0.985151 | 0.523151 | 0.99475  | 0.713528 |
| MmugDNA.33541.1.S1_at   | MmugDNA.33541.1 | 4.78  | 5.24  | 0.1  | 0.34 | -1.38 | 0.097057 | 0.09569  | 0.456113 | 0.3527   |
| MmugDNA.33543.1.S1_at   | MmugDNA.33543.1 | 5.42  | 4.78  | 0.16 | 0.18 | 1.56  | 0.017924 | 0.143854 | 0.26813  | 0.417712 |
| MmugDNA.33544.1.S1_at   | MmugDNA.33544.1 | 10.51 | 10.23 | 0.03 | 0.19 | 1.21  | 0.200856 | 0.171801 | 0.563681 | 0.448198 |
| MmugDNA.33546.1.S1_at   | MmugDNA.33546.1 | 8.97  | 8.79  | 0.34 | 0.61 | 1.13  | 0.965248 | 0.863825 | 0.986736 | 0.922697 |
| MmugDNA.33558.1.S1_s_at | MmugDNA.33558.1 | 5.28  | 5.6   | 0.85 | 0.4  | -1.25 | 0.739636 | 0.157978 | 0.888213 | 0.433725 |
| MmugDNA.33562.1.S1_at   | MmugDNA.33562.1 | 6.38  | 5.96  | 0.45 | 0.63 | 1.34  | 0.561647 | 0.628362 | 0.79493  | 0.781113 |
| MmugDNA.33563.1.S1_at   | MmugDNA.33563.1 | 9.01  | 8.64  | 0.3  | 0.34 | 1.29  | 0.254203 | 0.207906 | 0.602339 | 0.482049 |
| MmugDNA.33563.1.S1_s_at | MmugDNA.33563.1 | 7.14  | 6.8   | 0.23 | 0.27 | 1.26  | 0.287166 | 0.145875 | 0.625794 | 0.419888 |
| MmugDNA.33569.1.S1_at   | MmugDNA.33569.1 | 10.72 | 9.99  | 0.2  | 0.51 | 1.65  | 0.072283 | 0.089642 | 0.416651 | 0.343842 |
| MmugDNA.33571.1.S1_at   | MmugDNA.33571.1 | 5.13  | 5.2   | 0.09 | 0.29 | -1.05 | 0.684665 | 0.532694 | 0.858795 | 0.719197 |
| MmugDNA.33572.1.S1_at   | MmugDNA.33572.1 | 4.15  | 4.06  | 0.06 | 0.21 | 1.06  | 0.552816 | 0.373224 | 0.789705 | 0.612045 |
| MmugDNA.33573.1.S1_at   | MmugDNA.33573.1 | 9.85  | 9.73  | 0.36 | 0.06 | 1.08  | 0.16217  | 0.117117 | 0.526638 | 0.384557 |
| MmugDNA.33573.1.S1_s_at | MmugDNA.33573.1 | 9.75  | 9.44  | 0.35 | 0.05 | 1.24  | 0.067752 | 0.041281 | 0.408402 | 0.247995 |
| MmugDNA.33589.1.S1_at   | MmugDNA.33589.1 | 10.59 | 8.68  | 0.45 | 1.32 | 3.76  | 0.307488 | 0.275203 | 0.639999 | 0.53962  |
| MmugDNA.33590.1.S1_at   | MmugDNA.33590.1 | 10.96 | 10.02 | 0.24 | 0.14 | 1.92  | 0.004789 | 0.001595 | 0.184674 | 0.06044  |
| MmugDNA.33592.1.S1_at   | MmugDNA.33592.1 | 8.8   | 7.7   | 0.67 | 0.78 | 2.15  | 0.665444 | 0.437183 | 0.850011 | 0.656591 |



|                         |                 |       |       |      |      |        |          |          |          |          |
|-------------------------|-----------------|-------|-------|------|------|--------|----------|----------|----------|----------|
| MmugDNA.33593.1.S1_at   | MmugDNA.33593.1 | 5     | 4.81  | 0.17 | 0.11 | 1.15   | 0.581042 | 0.427341 | 0.804842 | 0.649175 |
| MmugDNA.33599.1.S1_at   | MmugDNA.33599.1 | 11.13 | 11.07 | 0.27 | 0.11 | 1.04   | 0.918343 | 0.009917 | 0.96831  | 0.130767 |
| MmugDNA.33600.1.S1_at   | MmugDNA.33600.1 | 6.39  | 6.55  | 0.23 | 0.23 | -1.12  | 0.531411 | 0.708524 | 0.777199 | 0.830943 |
| MmugDNA.33607.1.S1_at   | MmugDNA.33607.1 | 11.4  | 11.09 | 0.28 | 0.15 | 1.23   | 0.049123 | 0.065617 | 0.37077  | 0.301554 |
| MmugDNA.33607.1.S1_s_at | MmugDNA.33607.1 | 10.79 | 10.62 | 0.3  | 0.15 | 1.12   | 0.093668 | 0.118986 | 0.450966 | 0.387269 |
| MmugDNA.33609.1.S1_at   | MmugDNA.33609.1 | 10.43 | 10.5  | 0.07 | 0.14 | -1.05  | 0.439141 | 0.60585  | 0.723488 | 0.765513 |
| MmugDNA.33612.1.S1_at   | MmugDNA.33612.1 | 6.3   | 4.66  | 0.25 | 0.22 | 3.11   | 0.00191  | 0.001247 | 0.155636 | 0.054879 |
| MmugDNA.33618.1.S1_at   | MmugDNA.33618.1 | 7.29  | 7.49  | 0.14 | 0.55 | -1.15  | 0.143782 | 0.16357  | 0.510387 | 0.439765 |
| MmugDNA.33619.1.S1_at   | MmugDNA.33619.1 | 11.96 | 12.01 | 0.06 | 0.17 | -1.03  | 0.206685 | 0.220083 | 0.568816 | 0.493519 |
| MmugDNA.33625.1.S1_at   | MmugDNA.33625.1 | 3.25  | 7.53  | 1.66 | 2.76 | -19.33 | 0.275533 | 0.053606 | 0.617878 | 0.277182 |
| MmugDNA.33630.1.S1_at   | MmugDNA.33630.1 | 6.8   | 8.41  | 0.44 | 0.68 | -3.06  | 0.019991 | 0.011458 | 0.276365 | 0.138479 |
| MmugDNA.33633.1.S1_at   | MmugDNA.33633.1 | 9.81  | 9.31  | 0.29 | 0.24 | 1.41   | 0.048894 | 0.001375 | 0.369994 | 0.05691  |
| MmugDNA.33640.1.S1_at   | MmugDNA.33640.1 | 6     | 6.95  | 0.12 | 0.44 | -1.93  | 0.012167 | 0.00292  | 0.240358 | 0.079396 |
| MmugDNA.33643.1.S1_at   | MmugDNA.33643.1 | 5.03  | 5.1   | 0.03 | 0.2  | -1.05  | 0.499913 | 0.66688  | 0.759402 | 0.804864 |
| MmugDNA.33644.1.S1_at   | MmugDNA.33644.1 | 7.6   | 9.9   | 0.9  | 2.05 | -4.9   | 0.356279 | 0.414136 | 0.671447 | 0.640063 |
| MmugDNA.33646.1.S1_at   | MmugDNA.33646.1 | 6.38  | 6.52  | 0.13 | 0.33 | -1.1   | 0.691207 | 0.258385 | 0.862582 | 0.525642 |
| MmugDNA.33653.1.S1_at   | MmugDNA.33653.1 | 4.48  | 4.94  | 0.64 | 0.63 | -1.37  | 0.316553 | 0.090291 | 0.647548 | 0.3447   |
| MmugDNA.33655.1.S1_at   | MmugDNA.33655.1 | 11.72 | 11.41 | 0.26 | 0.4  | 1.24   | 0.309522 | 0.387917 | 0.641555 | 0.622509 |
| MmugDNA.33658.1.S1_at   | MmugDNA.33658.1 | 7.16  | 7.2   | 0.09 | 0.06 | -1.03  | 0.621903 | 0.242908 | 0.827071 | 0.513284 |
| MmugDNA.33659.1.S1_at   | MmugDNA.33659.1 | 8.65  | 9.01  | 0.34 | 0.43 | -1.28  | 0.28184  | 0.241526 | 0.62238  | 0.512152 |
| MmugDNA.33661.1.S1_at   | MmugDNA.33661.1 | 12.1  | 12.14 | 0.42 | 0.85 | -1.03  | 0.582181 | 0.447935 | 0.805554 | 0.663902 |
| MmugDNA.33666.1.S1_at   | MmugDNA.33666.1 | 11.67 | 11.4  | 0.1  | 0.18 | 1.21   | 0.036203 | 0.027161 | 0.339036 | 0.205893 |
| MmugDNA.33669.1.S1_at   | MmugDNA.33669.1 | 4.99  | 4.73  | 0.13 | 0.07 | 1.2    | 0.142157 | 0.041819 | 0.509437 | 0.249099 |
| MmugDNA.33670.1.S1_at   | MmugDNA.33670.1 | 6.88  | 6.78  | 0.14 | 0.1  | 1.07   | 0.783861 | 0.855007 | 0.909806 | 0.917393 |
| MmugDNA.33675.1.S1_at   | MmugDNA.33675.1 | 11.65 | 11.32 | 0.1  | 0.91 | 1.26   | 0.170462 | 0.206038 | 0.534249 | 0.480273 |
| MmugDNA.33677.1.S1_at   | MmugDNA.33677.1 | 7.16  | 7.24  | 0.17 | 0.08 | -1.06  | 0.563921 | 0.60067  | 0.796337 | 0.762228 |
| MmugDNA.33678.1.S1_at   | MmugDNA.33678.1 | 8.02  | 8.31  | 0.58 | 0.35 | -1.23  | 0.872821 | 0.121515 | 0.949183 | 0.39064  |
| MmugDNA.33685.1.S1_at   | MmugDNA.33685.1 | 11.29 | 12.02 | 0.12 | 0.09 | -1.66  | 0.001286 | 0.000749 | 0.145565 | 0.045119 |
| MmugDNA.3369.1.S1_at    | MmugDNA.3369.1  | 8.96  | 9.37  | 0.26 | 0.86 | -1.33  | 0.303409 | 0.365883 | 0.63767  | 0.605775 |
| MmugDNA.33695.1.S1_at   | MmugDNA.33695.1 | 8.23  | 7.99  | 0.1  | 0.03 | 1.18   | 0.018302 | 0.134587 | 0.269791 | 0.406629 |
| MmugDNA.337.1.S1_at     | MmugDNA.337.1   | 4.61  | 4.36  | 0.55 | 0.17 | 1.19   | 0.230629 | 0.349768 | 0.587222 | 0.593578 |
| MmugDNA.3370.1.S1_at    | MmugDNA.3370.1  | 8.01  | 8.64  | 0.44 | 0.41 | -1.54  | 0.301733 | 0.254826 | 0.636594 | 0.523051 |
| MmugDNA.33712.1.S1_at   | MmugDNA.33712.1 | 10.25 | 10.53 | 0.1  | 0.19 | -1.22  | 0.036762 | 0.019239 | 0.340337 | 0.174494 |
| MmugDNA.33714.1.S1_at   | MmugDNA.33714.1 | 9.22  | 9.48  | 0.12 | 0.16 | -1.19  | 0.080458 | 0.071186 | 0.430491 | 0.31311  |
| MmugDNA.33715.1.S1_at   | MmugDNA.33715.1 | 6.76  | 5.6   | 0.33 | 0.96 | 2.23   | 0.07859  | 0.083836 | 0.428609 | 0.33469  |
| MmugDNA.33723.1.S1_at   | MmugDNA.33723.1 | 6.6   | 7.04  | 0.21 | 0.27 | -1.36  | 0.120529 | 0.033066 | 0.485617 | 0.225068 |
| MmugDNA.33729.1.S1_at   | MmugDNA.33729.1 | 7.19  | 7.09  | 0.31 | 0.27 | 1.07   | 0.377794 | 0.465234 | 0.68609  | 0.675638 |
| MmugDNA.33732.1.S1_s_at | MmugDNA.33732.1 | 9.02  | 8.78  | 0.18 | 0.15 | 1.18   | 0.08106  | 0.128964 | 0.431807 | 0.400429 |
| MmugDNA.33737.1.S1_at   | MmugDNA.33737.1 | 8.58  | 8.05  | 0.18 | 0.49 | 1.44   | 0.314838 | 0.203921 | 0.64614  | 0.478164 |
| MmugDNA.33738.1.S1_at   | MmugDNA.33738.1 | 11.91 | 11.91 | 0.02 | 0.07 | 1.01   | 0.755138 | 0.03732  | 0.8959   | 0.237622 |
| MmugDNA.33746.1.S1_at   | MmugDNA.33746.1 | 7.72  | 7.3   | 0.24 | 0.22 | 1.33   | 0.058851 | 0.06702  | 0.390921 | 0.304872 |

|                         |                 |       |       |      |      |        |          |          |          |          |
|-------------------------|-----------------|-------|-------|------|------|--------|----------|----------|----------|----------|
| MmugDNA.33751.1.S1_at   | MmugDNA.33751.1 | 7.65  | 7.36  | 0.22 | 0.44 | 1.22   | 0.176928 | 0.205004 | 0.5408   | 0.479296 |
| MmugDNA.33762.1.S1_at   | MmugDNA.33762.1 | 9.31  | 8.3   | 0.19 | 0.56 | 2.02   | 0.1088   | 0.070533 | 0.470332 | 0.311777 |
| MmugDNA.33773.1.S1_at   | MmugDNA.33773.1 | 9.79  | 9.69  | 0.15 | 0.4  | 1.07   | 0.527373 | 0.334518 | 0.774798 | 0.582498 |
| MmugDNA.33776.1.S1_at   | MmugDNA.33776.1 | 4.35  | 4.72  | 0.14 | 0.19 | -1.3   | 0.056459 | 0.022648 | 0.386477 | 0.188488 |
| MmugDNA.33779.1.S1_at   | MmugDNA.33779.1 | 4.89  | 4.26  | 0.2  | 0.29 | 1.54   | 0.07501  | 0.090947 | 0.421728 | 0.345594 |
| MmugDNA.33782.1.S1_at   | MmugDNA.33782.1 | 9.53  | 9.23  | 0.12 | 0.3  | 1.23   | 0.361228 | 0.023286 | 0.675116 | 0.191274 |
| MmugDNA.33787.1.S1_at   | MmugDNA.33787.1 | 10.45 | 10.27 | 0.13 | 0.88 | 1.13   | 0.841825 | 0.750123 | 0.936256 | 0.854713 |
| MmugDNA.33794.1.S1_at   | MmugDNA.33794.1 | 3.41  | 3.48  | 0.08 | 0.06 | -1.05  | 0.678257 | 0.264955 | 0.855916 | 0.530944 |
| MmugDNA.33795.1.S1_at   | MmugDNA.33795.1 | 6.27  | 6.03  | 0.28 | 0.19 | 1.19   | 0.593325 | 0.357322 | 0.811417 | 0.598949 |
| MmugDNA.33798.1.S1_at   | MmugDNA.33798.1 | 7.23  | 6.62  | 0.2  | 0.09 | 1.53   | 0.010866 | 0.011275 | 0.232241 | 0.138076 |
| MmugDNA.33800.1.S1_at   | MmugDNA.33800.1 | 12.48 | 12.93 | 0.17 | 0.13 | -1.37  | 0.027617 | 0.020953 | 0.308386 | 0.181537 |
| MmugDNA.33806.1.S1_at   | MmugDNA.33806.1 | 6.22  | 6.3   | 0.03 | 0.14 | -1.06  | 0.118824 | 0.108094 | 0.48339  | 0.371281 |
| MmugDNA.33816.1.S1_at   | MmugDNA.33816.1 | 3.37  | 3.14  | 0.16 | 0.17 | 1.18   | 0.109002 | 0.443361 | 0.470784 | 0.661168 |
| MmugDNA.33817.1.S1_at   | MmugDNA.33817.1 | 11.43 | 11.02 | 0.1  | 0.18 | 1.33   | 0.017855 | 0.010118 | 0.26813  | 0.131869 |
| MmugDNA.33820.1.S1_at   | MmugDNA.33820.1 | 9.47  | 9.6   | 0.09 | 0.11 | -1.09  | 0.264858 | 0.199711 | 0.610599 | 0.474335 |
| MmugDNA.33826.1.S1_at   | MmugDNA.33826.1 | 10.83 | 10.77 | 0.04 | 0.03 | 1.04   | 0.077372 | 0.268467 | 0.427094 | 0.534123 |
| MmugDNA.33830.1.S1_at   | MmugDNA.33830.1 | 12.1  | 12.26 | 0.12 | 0.06 | -1.12  | 0.279709 | 0.541635 | 0.621165 | 0.725033 |
| MmugDNA.33832.1.S1_at   | MmugDNA.33832.1 | 4.64  | 4.65  | 0.04 | 0.15 | -1     | 0.887428 | 0.980877 | 0.954863 | 0.989478 |
| MmugDNA.33832.1.S1_s_at | MmugDNA.33832.1 | 5.08  | 5.16  | 0.14 | 0.21 | -1.06  | 0.841274 | 0.408303 | 0.936191 | 0.635596 |
| MmugDNA.33845.1.S1_at   | MmugDNA.33845.1 | 6.76  | 11.82 | 2.06 | 3.3  | -33.46 | 0.379875 | 0.21199  | 0.68708  | 0.485975 |
| MmugDNA.33846.1.S1_at   | MmugDNA.33846.1 | 6.27  | 6.43  | 0.16 | 0.21 | -1.12  | 0.56892  | 0.787205 | 0.798907 | 0.876889 |
| MmugDNA.33851.1.S1_at   | MmugDNA.33851.1 | 10.22 | 10.41 | 0.12 | 0.12 | -1.13  | 0.15238  | 0.213803 | 0.51708  | 0.487564 |
| MmugDNA.33855.1.S1_at   | MmugDNA.33855.1 | 10.43 | 9.85  | 0.15 | 0.14 | 1.49   | 0.009386 | 0.012751 | 0.224715 | 0.145496 |
| MmugDNA.33857.1.S1_at   | MmugDNA.33857.1 | 12.45 | 12.76 | 0.08 | 0.14 | -1.24  | 0.069331 | 0.041169 | 0.411955 | 0.247733 |
| MmugDNA.33858.1.S1_at   | MmugDNA.33858.1 | 3.8   | 3.83  | 0.11 | 0.19 | -1.02  | 0.348896 | 0.527586 | 0.667271 | 0.716154 |
| MmugDNA.33859.1.S1_at   | MmugDNA.33859.1 | 5.3   | 5.38  | 0.08 | 0.11 | -1.06  | 0.457466 | 0.661936 | 0.734933 | 0.802028 |
| MmugDNA.33876.1.S1_s_at | MmugDNA.33876.1 | 6.87  | 7.93  | 0.17 | 1.07 | -2.08  | 0.207892 | 0.245066 | 0.569854 | 0.51484  |
| MmugDNA.33879.1.S1_at   | MmugDNA.33879.1 | 4.77  | 4.71  | 0.11 | 0.51 | 1.05   | 0.506516 | 0.035989 | 0.762415 | 0.234165 |
| MmugDNA.33882.1.S1_at   | MmugDNA.33882.1 | 9.13  | 8.42  | 0.05 | 0.31 | 1.63   | 0.051897 | 0.045708 | 0.376668 | 0.258049 |
| MmugDNA.33885.1.S1_at   | MmugDNA.33885.1 | 3.83  | 3.89  | 0.04 | 0.04 | -1.04  | 0.112133 | 0.4529   | 0.474673 | 0.667359 |
| MmugDNA.33893.1.S1_at   | MmugDNA.33893.1 | 4.49  | 4.4   | 0.07 | 0.13 | 1.06   | 0.956595 | 0.45044  | 0.983613 | 0.665643 |
| MmugDNA.33897.1.S1_at   | MmugDNA.33897.1 | 10.46 | 9.99  | 0.24 | 0.49 | 1.38   | 0.325465 | 0.387621 | 0.65274  | 0.622239 |
| MmugDNA.33900.1.S1_at   | MmugDNA.33900.1 | 6.46  | 5.55  | 0.05 | 0.34 | 1.87   | 0.004877 | 0.004576 | 0.185363 | 0.094474 |
| MmugDNA.33902.1.S1_at   | MmugDNA.33902.1 | 10    | 9.89  | 0.11 | 0.17 | 1.08   | 0.161697 | 0.290447 | 0.526573 | 0.551169 |
| MmugDNA.33905.1.S1_at   | MmugDNA.33905.1 | 12.12 | 11.79 | 0.23 | 0.25 | 1.25   | 0.567915 | 0.501257 | 0.798337 | 0.699458 |
| MmugDNA.33907.1.S1_at   | MmugDNA.33907.1 | 6.05  | 6.81  | 0.94 | 0.33 | -1.69  | 0.246002 | 0.38651  | 0.597361 | 0.621626 |
| MmugDNA.33908.1.S1_at   | MmugDNA.33908.1 | 10.69 | 10.87 | 0.16 | 0.25 | -1.13  | 0.195696 | 0.227998 | 0.558901 | 0.500211 |
| MmugDNA.33918.1.S1_at   | MmugDNA.33918.1 | 11.08 | 9.43  | 0.51 | 1.25 | 3.13   | 0.134393 | 0.114052 | 0.500998 | 0.380421 |
| MmugDNA.33920.1.S1_at   | MmugDNA.33920.1 | 6.52  | 6.78  | 0.34 | 0.33 | -1.2   | 0.402168 | 0.335907 | 0.701277 | 0.58354  |
| MmugDNA.33926.1.S1_at   | MmugDNA.33926.1 | 12.92 | 12.73 | 0.18 | 0.13 | 1.14   | 0.301621 | 0.125061 | 0.636509 | 0.395506 |
| MmugDNA.33927.1.S1_at   | MmugDNA.33927.1 | 7.3   | 9.02  | 0.41 | 0.06 | -3.3   | 0.00222  | 0.000555 | 0.159816 | 0.040995 |

|                         |                 |       |       |      |      |       |          |          |          |          |
|-------------------------|-----------------|-------|-------|------|------|-------|----------|----------|----------|----------|
| MmugDNA.33928.1.S1_at   | MmugDNA.33928.1 | 10.71 | 10.71 | 0.19 | 0.05 | -1.01 | 0.777743 | 0.093972 | 0.907092 | 0.350467 |
| MmugDNA.33929.1.S1_at   | MmugDNA.33929.1 | 8.48  | 6.96  | 0.24 | 0.17 | 2.86  | 0.001192 | 0.000109 | 0.145267 | 0.028099 |
| MmugDNA.33931.1.S1_at   | MmugDNA.33931.1 | 12.55 | 12.55 | 0.17 | 0.29 | -1    | 0.960325 | 0.38958  | 0.98486  | 0.623668 |
| MmugDNA.33932.1.S1_at   | MmugDNA.33932.1 | 5.73  | 6     | 0.53 | 0.24 | -1.2  | 0.194338 | 0.219878 | 0.557805 | 0.493401 |
| MmugDNA.33934.1.S1_at   | MmugDNA.33934.1 | 12.29 | 12.29 | 0.07 | 0.1  | -1    | 0.996645 | 0.324706 | 0.998586 | 0.575255 |
| MmugDNA.33935.1.S1_at   | MmugDNA.33935.1 | 8.74  | 8.68  | 0.12 | 0.23 | 1.05  | 0.755916 | 0.343537 | 0.896248 | 0.589301 |
| MmugDNA.3394.1.S1_at    | MmugDNA.3394.1  | 4.4   | 4.26  | 0.17 | 0.12 | 1.1   | 0.568992 | 0.607381 | 0.79891  | 0.766384 |
| MmugDNA.33941.1.S1_at   | MmugDNA.33941.1 | 5.25  | 5.39  | 0.13 | 0.17 | -1.1  | 0.877121 | 0.910295 | 0.95073  | 0.949391 |
| MmugDNA.33949.1.S1_at   | MmugDNA.33949.1 | 8.14  | 8.42  | 0.44 | 1.03 | -1.21 | 0.578559 | 0.260091 | 0.803867 | 0.52675  |
| MmugDNA.33950.1.S1_at   | MmugDNA.33950.1 | 9.99  | 9.48  | 0.39 | 0.27 | 1.43  | 0.133876 | 0.157326 | 0.500415 | 0.432817 |
| MmugDNA.33951.1.S1_at   | MmugDNA.33951.1 | 3.37  | 3.3   | 0.01 | 0.16 | 1.06  | 0.445256 | 0.657995 | 0.727524 | 0.80013  |
| MmugDNA.33952.1.S1_at   | MmugDNA.33952.1 | 7.12  | 7.06  | 0.24 | 0.05 | 1.04  | 0.718565 | 0.576568 | 0.876527 | 0.747267 |
| MmugDNA.33953.1.S1_at   | MmugDNA.33953.1 | 3.67  | 3.65  | 0.08 | 0.1  | 1.01  | 0.5993   | 0.602839 | 0.814562 | 0.763752 |
| MmugDNA.33954.1.S1_at   | MmugDNA.33954.1 | 9.05  | 7.2   | 0.58 | 0.12 | 3.6   | 0.013292 | 0.006685 | 0.246471 | 0.110612 |
| MmugDNA.33962.1.S1_at   | MmugDNA.33962.1 | 6.26  | 6.35  | 0.54 | 0.06 | -1.06 | 0.306314 | 0.505108 | 0.639467 | 0.70197  |
| MmugDNA.33965.1.S1_at   | MmugDNA.33965.1 | 6.47  | 6.4   | 0.09 | 0.12 | 1.05  | 0.64306  | 0.176204 | 0.839146 | 0.452714 |
| MmugDNA.33966.1.S1_s_at | MmugDNA.33966.1 | 11.36 | 12.22 | 0.05 | 0.34 | -1.82 | 0.011426 | 0.002785 | 0.235747 | 0.077966 |
| MmugDNA.33967.1.S1_at   | MmugDNA.33967.1 | 10.92 | 10.36 | 0.22 | 0.33 | 1.47  | 0.09152  | 0.085668 | 0.447485 | 0.337744 |
| MmugDNA.33969.1.S1_at   | MmugDNA.33969.1 | 10.88 | 9.98  | 0.19 | 0.17 | 1.87  | 0.003389 | 0.000596 | 0.177719 | 0.041941 |
| MmugDNA.3397.1.S1_at    | MmugDNA.3397.1  | 6.75  | 6.62  | 0.05 | 0.1  | 1.09  | 0.13221  | 0.060412 | 0.498449 | 0.292435 |
| MmugDNA.33973.1.S1_at   | MmugDNA.33973.1 | 11.02 | 11.44 | 0.33 | 0.05 | -1.34 | 0.288297 | 0.088073 | 0.626514 | 0.341573 |
| MmugDNA.33975.1.S1_at   | MmugDNA.33975.1 | 12.74 | 12.73 | 0.06 | 0.1  | 1.01  | 0.528795 | 0.445391 | 0.775764 | 0.662343 |
| MmugDNA.33978.1.S1_at   | MmugDNA.33978.1 | 11.72 | 11.85 | 0.08 | 0.08 | -1.09 | 0.08427  | 0.087346 | 0.436922 | 0.340426 |
| MmugDNA.33979.1.S1_at   | MmugDNA.33979.1 | 13.52 | 13.33 | 0.17 | 0.47 | 1.14  | 0.241055 | 0.212518 | 0.593741 | 0.486502 |
| MmugDNA.33982.1.S1_at   | MmugDNA.33982.1 | 8.47  | 8.4   | 0.18 | 0.11 | 1.05  | 0.599733 | 0.440376 | 0.814785 | 0.658939 |
| MmugDNA.33987.1.S1_at   | MmugDNA.33987.1 | 6.27  | 6.31  | 0.16 | 0.15 | -1.02 | 0.302169 | 0.28854  | 0.636884 | 0.549821 |
| MmugDNA.33989.1.S1_at   | MmugDNA.33989.1 | 9.05  | 7.63  | 0.18 | 0.69 | 2.68  | 0.021769 | 0.009837 | 0.283669 | 0.130274 |
| MmugDNA.33994.1.S1_at   | MmugDNA.33994.1 | 7.39  | 7.67  | 0.19 | 1.07 | -1.21 | 0.236891 | 0.08655  | 0.590579 | 0.33911  |
| MmugDNA.33996.1.S1_at   | MmugDNA.33996.1 | 4.1   | 4.25  | 0.42 | 0.24 | -1.1  | 0.521584 | 0.736168 | 0.771406 | 0.847335 |
| MmugDNA.33997.1.S1_at   | MmugDNA.33997.1 | 4.52  | 4.62  | 0.12 | 0.05 | -1.07 | 0.729117 | 0.09872  | 0.882395 | 0.356811 |
| MmugDNA.34.1.S1_at      | MmugDNA.34.1    | 6.22  | 9.19  | 1.65 | 3    | -7.85 | 0.547932 | 0.371754 | 0.786405 | 0.610541 |
| MmugDNA.34003.1.S1_at   | MmugDNA.34003.1 | 11.66 | 11.64 | 0.07 | 0.1  | 1.02  | 0.355846 | 0.480942 | 0.671276 | 0.686018 |
| MmugDNA.34004.1.S1_at   | MmugDNA.34004.1 | 9.64  | 10.04 | 0.06 | 0.6  | -1.32 | 0.307667 | 0.440404 | 0.640082 | 0.658939 |
| MmugDNA.34004.1.S1_s_at | MmugDNA.34004.1 | 10.66 | 11.07 | 0.07 | 0.5  | -1.33 | 0.173141 | 0.207103 | 0.536812 | 0.481189 |
| MmugDNA.34008.1.S1_at   | MmugDNA.34008.1 | 7.31  | 7.54  | 0.22 | 0.2  | -1.17 | 0.927424 | 0.925668 | 0.971995 | 0.957937 |
| MmugDNA.34009.1.S1_at   | MmugDNA.34009.1 | 8.51  | 7.58  | 0.19 | 0.41 | 1.9   | 0.033512 | 0.022377 | 0.329295 | 0.187176 |
| MmugDNA.34011.1.S1_at   | MmugDNA.34011.1 | 5.78  | 5.86  | 0.22 | 0.04 | -1.06 | 0.918772 | 0.921015 | 0.968396 | 0.955491 |
| MmugDNA.34012.1.S1_at   | MmugDNA.34012.1 | 10.79 | 10.87 | 0.17 | 0.37 | -1.05 | 0.743065 | 0.196555 | 0.890085 | 0.471584 |
| MmugDNA.34012.1.S1_x_at | MmugDNA.34012.1 | 10.89 | 10.99 | 0.18 | 0.37 | -1.07 | 0.68173  | 0.216204 | 0.857635 | 0.489765 |
| MmugDNA.34014.1.S1_at   | MmugDNA.34014.1 | 5.3   | 4.38  | 0.49 | 0.34 | 1.89  | 0.044175 | 0.028465 | 0.358244 | 0.210523 |
| MmugDNA.3402.1.S1_at    | MmugDNA.3402.1  | 5.31  | 3.88  | 1.47 | 0.41 | 2.69  | 0.23269  | 0.189011 | 0.587814 | 0.464897 |

|                         |                 |       |       |      |      |        |          |          |          |          |
|-------------------------|-----------------|-------|-------|------|------|--------|----------|----------|----------|----------|
| MmugDNA.34026.1.S1_at   | MmugDNA.34026.1 | 6.86  | 7.08  | 0.38 | 0.92 | -1.16  | 0.486061 | 0.386112 | 0.751299 | 0.621345 |
| MmugDNA.34027.1.S1_at   | MmugDNA.34027.1 | 6.4   | 7.81  | 0.69 | 1.45 | -2.65  | 0.385816 | 0.420028 | 0.690905 | 0.643804 |
| MmugDNA.34029.1.S1_at   | MmugDNA.34029.1 | 10.96 | 10.55 | 0.08 | 0.5  | 1.33   | 0.206542 | 0.198706 | 0.568816 | 0.473391 |
| MmugDNA.34030.1.S1_at   | MmugDNA.34030.1 | 9.31  | 9.44  | 0.29 | 0.18 | -1.1   | 0.110823 | 0.126198 | 0.472704 | 0.396748 |
| MmugDNA.34032.1.S1_at   | MmugDNA.34032.1 | 12.26 | 12.81 | 0.14 | 0.32 | -1.46  | 0.060767 | 0.053035 | 0.394325 | 0.275954 |
| MmugDNA.34033.1.S1_at   | MmugDNA.34033.1 | 9.31  | 8.58  | 0.27 | 0.33 | 1.65   | 0.146464 | 0.161346 | 0.512624 | 0.437519 |
| MmugDNA.34034.1.S1_at   | MmugDNA.34034.1 | 4.65  | 4.54  | 0.21 | 0.06 | 1.08   | 0.767166 | 0.137181 | 0.902171 | 0.410045 |
| MmugDNA.34035.1.S1_at   | MmugDNA.34035.1 | 9.44  | 9.35  | 0.12 | 0.32 | 1.06   | 0.672906 | 0.415079 | 0.853295 | 0.640695 |
| MmugDNA.34040.1.S1_at   | MmugDNA.34040.1 | 11.83 | 11.29 | 0.07 | 0.32 | 1.45   | 0.141014 | 0.229912 | 0.508611 | 0.501802 |
| MmugDNA.3405.1.S1_at    | MmugDNA.3405.1  | 9.41  | 9.95  | 0.3  | 0.82 | -1.45  | 0.35628  | 0.453026 | 0.671447 | 0.667463 |
| MmugDNA.34055.1.S1_at   | MmugDNA.34055.1 | 10.84 | 11.11 | 0.08 | 0.16 | -1.21  | 0.023827 | 0.016407 | 0.292816 | 0.162188 |
| MmugDNA.34056.1.S1_at   | MmugDNA.34056.1 | 11.08 | 10.46 | 0.34 | 0.24 | 1.53   | 0.067326 | 0.072463 | 0.407416 | 0.315294 |
| MmugDNA.34057.1.S1_at   | MmugDNA.34057.1 | 11.68 | 12.03 | 0.15 | 0.41 | -1.27  | 0.269535 | 0.366082 | 0.614187 | 0.605906 |
| MmugDNA.3406.1.S1_at    | MmugDNA.3406.1  | 11.31 | 11.66 | 0.23 | 0.42 | -1.28  | 0.142852 | 0.13041  | 0.509783 | 0.402257 |
| MmugDNA.34063.1.S1_at   | MmugDNA.34063.1 | 10.27 | 10.47 | 0.19 | 0.02 | -1.15  | 0.195767 | 0.236289 | 0.558925 | 0.507287 |
| MmugDNA.34063.1.S1_s_at | MmugDNA.34063.1 | 11.97 | 12.02 | 0.03 | 0.05 | -1.04  | 0.101948 | 0.275777 | 0.461337 | 0.540035 |
| MmugDNA.34064.1.S1_at   | MmugDNA.34064.1 | 9.07  | 9.95  | 0.48 | 0.5  | -1.84  | 0.209537 | 0.294332 | 0.570957 | 0.55407  |
| MmugDNA.34065.1.S1_at   | MmugDNA.34065.1 | 10.46 | 10.82 | 0.38 | 0.06 | -1.28  | 0.468462 | 0.29741  | 0.741077 | 0.556078 |
| MmugDNA.34067.1.S1_s_at | MmugDNA.34067.1 | 5.37  | 5.58  | 0.04 | 0.09 | -1.16  | 0.029754 | 0.058227 | 0.315286 | 0.287988 |
| MmugDNA.34068.1.S1_at   | MmugDNA.34068.1 | 6.79  | 6.99  | 0.13 | 0.07 | -1.15  | 0.263161 | 0.055768 | 0.609268 | 0.282044 |
| MmugDNA.34070.1.S1_at   | MmugDNA.34070.1 | 9.27  | 9.56  | 0.2  | 0.29 | -1.22  | 0.167629 | 0.205315 | 0.531909 | 0.479639 |
| MmugDNA.34071.1.S1_at   | MmugDNA.34071.1 | 7.65  | 7.6   | 0.06 | 0.08 | 1.03   | 0.165743 | 0.320863 | 0.529716 | 0.572849 |
| MmugDNA.34076.1.S1_at   | MmugDNA.34076.1 | 5     | 4.77  | 0.14 | 0.17 | 1.18   | 0.681439 | 0.382849 | 0.857635 | 0.61893  |
| MmugDNA.3408.1.S1_at    | MmugDNA.3408.1  | 9.97  | 9.87  | 0.1  | 0.35 | 1.07   | 0.474202 | 0.215001 | 0.744894 | 0.488898 |
| MmugDNA.34085.1.S1_at   | MmugDNA.34085.1 | 6.21  | 6.25  | 0.05 | 0.04 | -1.03  | 0.210035 | 0.241633 | 0.571234 | 0.512225 |
| MmugDNA.34089.1.S1_at   | MmugDNA.34089.1 | 10.68 | 10.7  | 0.33 | 0.09 | -1.01  | 0.901234 | 0.986918 | 0.960522 | 0.992589 |
| MmugDNA.34092.1.S1_at   | MmugDNA.34092.1 | 11.28 | 10.18 | 0.35 | 0.28 | 2.15   | 0.020654 | 0.017598 | 0.279122 | 0.167721 |
| MmugDNA.34095.1.S1_at   | MmugDNA.34095.1 | 3.38  | 3.32  | 0.18 | 0.12 | 1.05   | 0.535415 | 0.543579 | 0.779078 | 0.726214 |
| MmugDNA.34097.1.S1_at   | MmugDNA.34097.1 | 9.77  | 9.15  | 0.15 | 0.44 | 1.54   | 0.167193 | 0.211427 | 0.531306 | 0.485559 |
| MmugDNA.34098.1.S1_at   | MmugDNA.34098.1 | 6.65  | 6.68  | 0.07 | 0.17 | -1.02  | 0.302745 | 0.079654 | 0.63706  | 0.326981 |
| MmugDNA.341.1.S1_at     | MmugDNA.341.1   | 5.67  | 6.22  | 0.81 | 0.95 | -1.46  | 0.211084 | 0.218753 | 0.571977 | 0.492438 |
| MmugDNA.3410.1.S1_at    | MmugDNA.3410.1  | 5.36  | 5.75  | 0.23 | 0.15 | -1.32  | 0.029005 | 0.022216 | 0.312556 | 0.186513 |
| MmugDNA.34105.1.S1_at   | MmugDNA.34105.1 | 4.34  | 4.86  | 0.4  | 0.44 | -1.44  | 0.417079 | 0.145329 | 0.710338 | 0.419365 |
| MmugDNA.34108.1.S1_at   | MmugDNA.34108.1 | 9.19  | 8.61  | 0.45 | 1.45 | 1.49   | 0.599569 | 0.203076 | 0.814624 | 0.477343 |
| MmugDNA.34116.1.S1_x_at | MmugDNA.34116.1 | 12.41 | 12.38 | 0.55 | 0.13 | 1.02   | 0.274945 | 0.353915 | 0.617642 | 0.596894 |
| MmugDNA.34119.1.S1_at   | MmugDNA.34119.1 | 6.57  | 10.34 | 1.96 | 2.61 | -13.66 | 0.262144 | 0.186103 | 0.608858 | 0.461934 |
| MmugDNA.34120.1.S1_at   | MmugDNA.34120.1 | 11.37 | 11.34 | 0.07 | 0.06 | 1.02   | 0.635535 | 0.804193 | 0.83497  | 0.887383 |
| MmugDNA.34121.1.S1_at   | MmugDNA.34121.1 | 4.23  | 4.27  | 0.03 | 0.04 | -1.03  | 0.528739 | 0.749917 | 0.775764 | 0.854631 |
| MmugDNA.34123.1.S1_at   | MmugDNA.34123.1 | 8.06  | 8.38  | 0.6  | 1.4  | -1.25  | 0.632252 | 0.676688 | 0.833122 | 0.811035 |
| MmugDNA.34133.1.S1_at   | MmugDNA.34133.1 | 12.62 | 12.27 | 0.09 | 0.34 | 1.27   | 0.191335 | 0.091957 | 0.554259 | 0.347297 |
| MmugDNA.34135.1.S1_at   | MmugDNA.34135.1 | 12.38 | 13.03 | 0.46 | 0.39 | -1.57  | 0.030981 | 0.019062 | 0.320444 | 0.173688 |

|                         |                 |       |       |      |      |       |          |          |          |          |
|-------------------------|-----------------|-------|-------|------|------|-------|----------|----------|----------|----------|
| MmugDNA.34136.1.S1_at   | MmugDNA.34136.1 | 7.52  | 9.06  | 0.63 | 0.6  | -2.91 | 0.040572 | 0.02869  | 0.349722 | 0.211093 |
| MmugDNA.34143.1.S1_at   | MmugDNA.34143.1 | 10.11 | 9.75  | 0.16 | 0.47 | 1.28  | 0.234507 | 0.270083 | 0.588776 | 0.535356 |
| MmugDNA.34144.1.S1_at   | MmugDNA.34144.1 | 7.52  | 7.2   | 0.51 | 1.27 | 1.25  | 0.259264 | 0.367177 | 0.606366 | 0.606834 |
| MmugDNA.34145.1.S1_at   | MmugDNA.34145.1 | 11.97 | 11.81 | 0.07 | 0.08 | 1.12  | 0.067279 | 0.02122  | 0.407317 | 0.182388 |
| MmugDNA.34151.1.S1_at   | MmugDNA.34151.1 | 10.76 | 11.07 | 0.24 | 0.36 | -1.24 | 0.114301 | 0.117844 | 0.477555 | 0.38576  |
| MmugDNA.34153.1.S1_at   | MmugDNA.34153.1 | 5.35  | 5.43  | 0.16 | 0.21 | -1.05 | 0.373577 | 0.687745 | 0.683245 | 0.817665 |
| MmugDNA.3416.1.S1_at    | MmugDNA.3416.1  | 12.33 | 12.36 | 0.01 | 0.47 | -1.02 | 0.976254 | 0.900815 | 0.990792 | 0.943562 |
| MmugDNA.34160.1.S1_at   | MmugDNA.34160.1 | 9.33  | 9.77  | 0.3  | 0.62 | -1.35 | 0.588058 | 0.285564 | 0.808837 | 0.547395 |
| MmugDNA.34168.1.S1_at   | MmugDNA.34168.1 | 4.73  | 4.83  | 0.14 | 0.44 | -1.07 | 0.956305 | 0.946677 | 0.983483 | 0.969772 |
| MmugDNA.34171.1.S1_at   | MmugDNA.34171.1 | 10.08 | 11.18 | 0.13 | 0.04 | -2.15 | 0.000207 | 0.000023 | 0.120316 | 0.019635 |
| MmugDNA.34174.1.S1_s_at | MmugDNA.34174.1 | 3.66  | 3.57  | 0.76 | 0.1  | 1.07  | 0.344987 | 0.445777 | 0.66494  | 0.662505 |
| MmugDNA.3418.1.S1_at    | MmugDNA.3418.1  | 9.59  | 8.77  | 0.12 | 0.72 | 1.76  | 0.103685 | 0.096044 | 0.463383 | 0.353306 |
| MmugDNA.34184.1.S1_at   | MmugDNA.34184.1 | 12.94 | 12.9  | 0.08 | 0.33 | 1.03  | 0.31468  | 0.35653  | 0.646066 | 0.598459 |
| MmugDNA.3420.1.S1_at    | MmugDNA.3420.1  | 9.19  | 9.38  | 0.05 | 0.17 | -1.15 | 0.072196 | 0.045973 | 0.416574 | 0.258818 |
| MmugDNA.34204.1.S1_at   | MmugDNA.34204.1 | 8     | 6.26  | 0.03 | 0.88 | 3.36  | 0.066044 | 0.018798 | 0.405791 | 0.172349 |
| MmugDNA.34209.1.S1_at   | MmugDNA.34209.1 | 4.19  | 4.18  | 0.01 | 0.1  | 1.01  | 0.703932 | 0.788065 | 0.869377 | 0.877426 |
| MmugDNA.34216.1.S1_at   | MmugDNA.34216.1 | 9.25  | 8.7   | 0.23 | 0.56 | 1.47  | 0.272166 | 0.264653 | 0.616016 | 0.530661 |
| MmugDNA.34222.1.S1_s_at | MmugDNA.34222.1 | 8.87  | 8.9   | 0.1  | 0.26 | -1.02 | 0.2729   | 0.309234 | 0.616391 | 0.564807 |
| MmugDNA.34227.1.S1_at   | MmugDNA.34227.1 | 4.34  | 4.08  | 0.09 | 0.04 | 1.2   | 0.024907 | 0.024382 | 0.297089 | 0.195473 |
| MmugDNA.3423.1.S1_at    | MmugDNA.3423.1  | 6.12  | 6.06  | 0.2  | 0.03 | 1.04  | 0.579049 | 0.888669 | 0.804078 | 0.936536 |
| MmugDNA.34233.1.S1_at   | MmugDNA.34233.1 | 9.32  | 8.54  | 0.15 | 0.22 | 1.72  | 0.004182 | 0.004111 | 0.181739 | 0.090887 |
| MmugDNA.34241.1.S1_at   | MmugDNA.34241.1 | 8.35  | 8.02  | 0.1  | 0.42 | 1.25  | 0.501404 | 0.659283 | 0.759972 | 0.80063  |
| MmugDNA.34243.1.S1_at   | MmugDNA.34243.1 | 7.12  | 6.48  | 0.81 | 0.55 | 1.56  | 0.554345 | 0.238224 | 0.790679 | 0.508825 |
| MmugDNA.34245.1.S1_at   | MmugDNA.34245.1 | 3.67  | 3.79  | 0.05 | 0.28 | -1.09 | 0.510779 | 0.391782 | 0.765151 | 0.625301 |
| MmugDNA.34254.1.S1_at   | MmugDNA.34254.1 | 7.21  | 6.22  | 0.55 | 0.54 | 1.99  | 0.057591 | 0.045236 | 0.38863  | 0.257005 |
| MmugDNA.34254.1.S1_s_at | MmugDNA.34254.1 | 7.55  | 6.88  | 0.41 | 0.3  | 1.59  | 0.032878 | 0.014936 | 0.326361 | 0.155342 |
| MmugDNA.34256.1.S1_at   | MmugDNA.34256.1 | 5.16  | 5.24  | 0.22 | 0.13 | -1.06 | 0.511088 | 0.72163  | 0.765243 | 0.838771 |
| MmugDNA.34259.1.S1_at   | MmugDNA.34259.1 | 10.38 | 10.17 | 0.09 | 0.54 | 1.15  | 0.794565 | 0.638139 | 0.914727 | 0.787396 |
| MmugDNA.34260.1.S1_at   | MmugDNA.34260.1 | 5.16  | 5.08  | 0.06 | 0.1  | 1.05  | 0.499875 | 0.396908 | 0.759402 | 0.628464 |
| MmugDNA.34264.1.S1_at   | MmugDNA.34264.1 | 9.32  | 10.93 | 0.54 | 0.88 | -3.04 | 0.053815 | 0.032146 | 0.380879 | 0.222002 |
| MmugDNA.34265.1.S1_at   | MmugDNA.34265.1 | 12.07 | 11.77 | 0.25 | 0.17 | 1.23  | 0.119304 | 0.067049 | 0.484049 | 0.304872 |
| MmugDNA.34265.1.S1_s_at | MmugDNA.34265.1 | 11.01 | 10.79 | 0.24 | 0.25 | 1.17  | 0.150994 | 0.131679 | 0.51572  | 0.403829 |
| MmugDNA.34269.1.S1_at   | MmugDNA.34269.1 | 10.99 | 11.31 | 0.17 | 0.16 | -1.24 | 0.200016 | 0.063044 | 0.563056 | 0.297758 |
| MmugDNA.3427.1.S1_at    | MmugDNA.3427.1  | 13.12 | 13.12 | 0.09 | 0.09 | -1    | 0.533809 | 0.594307 | 0.778434 | 0.758574 |
| MmugDNA.3428.1.S1_at    | MmugDNA.3428.1  | 9.79  | 8.35  | 0.45 | 0.4  | 2.71  | 0.01097  | 0.008769 | 0.233379 | 0.124009 |
| MmugDNA.34280.1.S1_at   | MmugDNA.34280.1 | 7.62  | 7.43  | 0.25 | 0.11 | 1.14  | 0.395336 | 0.285591 | 0.696441 | 0.547395 |
| MmugDNA.34283.1.S1_at   | MmugDNA.34283.1 | 5.37  | 5.56  | 0.14 | 0.33 | -1.14 | 0.875546 | 0.807087 | 0.950153 | 0.888946 |
| MmugDNA.34287.1.S1_at   | MmugDNA.34287.1 | 10.84 | 10.46 | 0.17 | 0.18 | 1.3   | 0.066289 | 0.043524 | 0.406371 | 0.253227 |
| MmugDNA.34290.1.S1_at   | MmugDNA.34290.1 | 7.36  | 7.19  | 0.41 | 1.19 | 1.13  | 0.815238 | 0.840098 | 0.924888 | 0.908905 |
| MmugDNA.34292.1.S1_at   | MmugDNA.34292.1 | 9.42  | 9.3   | 0.45 | 0.06 | 1.08  | 0.683805 | 0.875664 | 0.858512 | 0.929374 |
| MmugDNA.34293.1.S1_at   | MmugDNA.34293.1 | 12.49 | 13.04 | 0.11 | 0.25 | -1.46 | 0.024932 | 0.022464 | 0.297145 | 0.187548 |

|                         |                 |       |       |      |      |       |          |          |          |          |
|-------------------------|-----------------|-------|-------|------|------|-------|----------|----------|----------|----------|
| MmugDNA.34309.1.S1_at   | MmugDNA.34309.1 | 6.16  | 5.46  | 0.31 | 0.68 | 1.63  | 0.201483 | 0.246239 | 0.563988 | 0.515889 |
| MmugDNA.3431.1.S1_at    | MmugDNA.3431.1  | 12.23 | 12.29 | 0.12 | 0.07 | -1.04 | 0.95634  | 0.027327 | 0.983483 | 0.206625 |
| MmugDNA.34310.1.S1_at   | MmugDNA.34310.1 | 8.75  | 8.68  | 0.16 | 0.12 | 1.05  | 0.112983 | 0.163523 | 0.475584 | 0.439751 |
| MmugDNA.34326.1.S1_at   | MmugDNA.34326.1 | 11.24 | 10.56 | 0.32 | 0.18 | 1.61  | 0.020147 | 0.018126 | 0.276895 | 0.169609 |
| MmugDNA.34328.1.S1_at   | MmugDNA.34328.1 | 4.53  | 3.68  | 0.39 | 0.69 | 1.81  | 0.152205 | 0.076975 | 0.51689  | 0.322421 |
| MmugDNA.3433.1.S1_at    | MmugDNA.3433.1  | 11.15 | 11.13 | 0.13 | 0.37 | 1.01  | 0.881752 | 0.918957 | 0.952522 | 0.954477 |
| MmugDNA.34330.1.S1_at   | MmugDNA.34330.1 | 6.51  | 7.24  | 0.27 | 0.44 | -1.67 | 0.086506 | 0.097965 | 0.440232 | 0.355867 |
| MmugDNA.34332.1.S1_at   | MmugDNA.34332.1 | 11.23 | 10.12 | 0.28 | 0.5  | 2.16  | 0.021359 | 0.009235 | 0.282524 | 0.126941 |
| MmugDNA.34333.1.S1_at   | MmugDNA.34333.1 | 9.83  | 10.38 | 0.1  | 0.28 | -1.46 | 0.068924 | 0.045446 | 0.410832 | 0.2575   |
| MmugDNA.34338.1.S1_at   | MmugDNA.34338.1 | 4.24  | 4.31  | 0.21 | 0.28 | -1.05 | 0.619283 | 0.074901 | 0.825435 | 0.318838 |
| MmugDNA.3434.1.S1_at    | MmugDNA.3434.1  | 11.76 | 12.11 | 0.1  | 0.16 | -1.28 | 0.081162 | 0.077629 | 0.431848 | 0.323621 |
| MmugDNA.34340.1.S1_at   | MmugDNA.34340.1 | 11.63 | 11.78 | 0.05 | 0.58 | -1.11 | 0.715961 | 0.709849 | 0.875256 | 0.831863 |
| MmugDNA.3435.1.S1_at    | MmugDNA.3435.1  | 13.19 | 13.08 | 0.04 | 0.07 | 1.08  | 0.096913 | 0.148639 | 0.455899 | 0.423201 |
| MmugDNA.34353.1.S1_at   | MmugDNA.34353.1 | 8.85  | 8.27  | 0.47 | 0.71 | 1.5   | 0.959611 | 0.994092 | 0.984651 | 0.99641  |
| MmugDNA.34356.1.S1_at   | MmugDNA.34356.1 | 5.06  | 4.99  | 0.21 | 0.18 | 1.05  | 0.638266 | 0.650337 | 0.836542 | 0.795586 |
| MmugDNA.3436.1.S1_at    | MmugDNA.3436.1  | 13.02 | 12.59 | 0.11 | 0.24 | 1.35  | 0.04816  | 0.038421 | 0.367807 | 0.240918 |
| MmugDNA.34364.1.S1_at   | MmugDNA.34364.1 | 3.72  | 3.91  | 0.03 | 0.07 | -1.15 | 0.017023 | 0.104516 | 0.266551 | 0.365803 |
| MmugDNA.34376.1.S1_at   | MmugDNA.34376.1 | 4.19  | 3.81  | 0.43 | 0.03 | 1.31  | 0.188441 | 0.18902  | 0.551451 | 0.464897 |
| MmugDNA.34380.1.S1_at   | MmugDNA.34380.1 | 10.38 | 10.4  | 0.18 | 0.03 | -1.02 | 0.496706 | 0.494349 | 0.75763  | 0.694829 |
| MmugDNA.34382.1.S1_at   | MmugDNA.34382.1 | 11.27 | 10.31 | 0.3  | 0.19 | 1.95  | 0.009676 | 0.003416 | 0.226235 | 0.084071 |
| MmugDNA.34384.1.S1_s_at | MmugDNA.34384.1 | 12.44 | 12.73 | 0.06 | 0.1  | -1.23 | 0.019772 | 0.025229 | 0.275549 | 0.199215 |
| MmugDNA.34389.1.S1_at   | MmugDNA.34389.1 | 11.59 | 11.5  | 0.28 | 0.5  | 1.07  | 0.670404 | 0.785689 | 0.852387 | 0.875924 |
| MmugDNA.34397.1.S1_at   | MmugDNA.34397.1 | 5.26  | 5.33  | 0.12 | 0.08 | -1.05 | 0.220748 | 0.242157 | 0.579701 | 0.512652 |
| MmugDNA.3440.1.S1_at    | MmugDNA.3440.1  | 7.33  | 7.3   | 0.13 | 0.04 | 1.02  | 0.226403 | 0.341043 | 0.584429 | 0.587164 |
| MmugDNA.34402.1.S1_at   | MmugDNA.34402.1 | 4.14  | 4.43  | 0.06 | 0.12 | -1.22 | 0.03115  | 0.01636  | 0.32069  | 0.161959 |
| MmugDNA.34405.1.S1_at   | MmugDNA.34405.1 | 5.72  | 5.71  | 0.14 | 0.12 | 1.01  | 0.872146 | 0.0592   | 0.948957 | 0.290208 |
| MmugDNA.34405.1.S1_s_at | MmugDNA.34405.1 | 5.43  | 5.77  | 0.11 | 0.17 | -1.27 | 0.060262 | 0.072156 | 0.393081 | 0.314676 |
| MmugDNA.34407.1.S1_at   | MmugDNA.34407.1 | 7.35  | 7.81  | 0.48 | 0.38 | -1.38 | 0.541501 | 0.324501 | 0.782715 | 0.57507  |
| MmugDNA.34409.1.S1_at   | MmugDNA.34409.1 | 5.48  | 3.9   | 0.51 | 0.21 | 3     | 0.00812  | 0.040234 | 0.216579 | 0.245805 |
| MmugDNA.34415.1.S1_at   | MmugDNA.34415.1 | 5.43  | 5.48  | 0.25 | 0.19 | -1.04 | 0.886875 | 0.415297 | 0.954734 | 0.640769 |
| MmugDNA.34420.1.S1_at   | MmugDNA.34420.1 | 7.09  | 7.24  | 0.15 | 0.2  | -1.1  | 0.466304 | 0.579559 | 0.740215 | 0.749192 |
| MmugDNA.34428.1.S1_s_at | MmugDNA.34428.1 | 10.66 | 10.74 | 0.2  | 0.08 | -1.06 | 0.202327 | 0.101049 | 0.564612 | 0.3607   |
| MmugDNA.34431.1.S1_at   | MmugDNA.34431.1 | 12.2  | 11.62 | 0.12 | 0.18 | 1.5   | 0.00893  | 0.003544 | 0.221598 | 0.085371 |
| MmugDNA.34440.1.S1_at   | MmugDNA.34440.1 | 11.93 | 12.06 | 0.13 | 0.36 | -1.1  | 0.595413 | 0.783329 | 0.812365 | 0.874571 |
| MmugDNA.34442.1.S1_at   | MmugDNA.34442.1 | 5.43  | 5.23  | 0.19 | 0.08 | 1.14  | 0.505426 | 0.697197 | 0.761643 | 0.824045 |
| MmugDNA.34451.1.S1_at   | MmugDNA.34451.1 | 4.89  | 8.03  | 1.29 | 0.69 | -8.84 | 0.026425 | 0.015309 | 0.303192 | 0.157082 |
| MmugDNA.34456.1.S1_at   | MmugDNA.34456.1 | 4.73  | 4.83  | 0.02 | 0.04 | -1.07 | 0.029592 | 0.072791 | 0.314766 | 0.315651 |
| MmugDNA.34468.1.S1_at   | MmugDNA.34468.1 | 9.29  | 8.72  | 0.16 | 0.29 | 1.48  | 0.18086  | 0.141793 | 0.545334 | 0.415331 |
| MmugDNA.34471.1.S1_at   | MmugDNA.34471.1 | 12.5  | 11.94 | 0.23 | 0.51 | 1.47  | 0.228637 | 0.313928 | 0.586121 | 0.568116 |
| MmugDNA.34471.1.S1_s_at | MmugDNA.34471.1 | 12.63 | 12.09 | 0.21 | 0.49 | 1.45  | 0.226255 | 0.276048 | 0.584304 | 0.540071 |
| MmugDNA.34474.1.S1_at   | MmugDNA.34474.1 | 7.36  | 7.07  | 0.25 | 0.42 | 1.22  | 0.359284 | 0.377905 | 0.673869 | 0.615264 |

|                         |                 |       |       |      |      |       |          |          |          |          |
|-------------------------|-----------------|-------|-------|------|------|-------|----------|----------|----------|----------|
| MmugDNA.3448.1.S1_at    | MmugDNA.3448.1  | 7.5   | 7.53  | 0.06 | 0.29 | -1.02 | 0.409614 | 0.44616  | 0.70588  | 0.662743 |
| MmugDNA.34482.1.S1_at   | MmugDNA.34482.1 | 6.77  | 6.76  | 0.05 | 0.13 | 1     | 0.799448 | 0.652952 | 0.916962 | 0.797125 |
| MmugDNA.34496.1.S1_at   | MmugDNA.34496.1 | 2.72  | 2.75  | 0.13 | 0.02 | -1.02 | 0.643111 | 0.618408 | 0.839168 | 0.774054 |
| MmugDNA.34498.1.S1_at   | MmugDNA.34498.1 | 6.4   | 6.29  | 0.45 | 0.24 | 1.08  | 0.615156 | 0.685337 | 0.823342 | 0.816458 |
| MmugDNA.3450.1.S1_at    | MmugDNA.3450.1  | 11.61 | 11.71 | 0.16 | 0.28 | -1.07 | 0.985315 | 0.715348 | 0.99475  | 0.834994 |
| MmugDNA.34500.1.S1_s_at | MmugDNA.34500.1 | 6.12  | 6.35  | 0.16 | 0.42 | -1.17 | 0.229331 | 0.149919 | 0.586472 | 0.424549 |
| MmugDNA.34501.1.S1_at   | MmugDNA.34501.1 | 7.96  | 7.66  | 0.32 | 0.2  | 1.23  | 0.118638 | 0.077041 | 0.48294  | 0.322481 |
| MmugDNA.34503.1.S1_at   | MmugDNA.34503.1 | 5.29  | 5.36  | 0.1  | 0.11 | -1.05 | 0.293578 | 0.323858 | 0.630715 | 0.574656 |
| MmugDNA.34505.1.S1_at   | MmugDNA.34505.1 | 5.63  | 5.84  | 0.12 | 0.1  | -1.16 | 0.038102 | 0.040925 | 0.343554 | 0.247161 |
| MmugDNA.34509.1.S1_at   | MmugDNA.34509.1 | 6.55  | 6.61  | 0.24 | 0.07 | -1.04 | 0.855487 | 0.937009 | 0.941542 | 0.964492 |
| MmugDNA.34510.1.S1_at   | MmugDNA.34510.1 | 9.6   | 9.33  | 0.21 | 0.6  | 1.21  | 0.839445 | 0.17752  | 0.935124 | 0.453888 |
| MmugDNA.34517.1.S1_at   | MmugDNA.34517.1 | 9.6   | 7.35  | 2.63 | 0.51 | 4.77  | 0.659821 | 0.861301 | 0.847358 | 0.921113 |
| MmugDNA.34523.1.S1_at   | MmugDNA.34523.1 | 3.41  | 3.35  | 0.07 | 0.04 | 1.04  | 0.803972 | 0.675364 | 0.919355 | 0.81026  |
| MmugDNA.34528.1.S1_at   | MmugDNA.34528.1 | 11.12 | 10.96 | 0.08 | 0.25 | 1.12  | 0.307233 | 0.079102 | 0.639889 | 0.326188 |
| MmugDNA.34534.1.S1_at   | MmugDNA.34534.1 | 8.94  | 9.16  | 0.2  | 1.23 | -1.17 | 0.948566 | 0.796969 | 0.980294 | 0.882822 |
| MmugDNA.34538.1.S1_at   | MmugDNA.34538.1 | 10.73 | 10.76 | 0.23 | 0.86 | -1.02 | 0.537021 | 0.472216 | 0.779741 | 0.679876 |
| MmugDNA.34542.1.S1_at   | MmugDNA.34542.1 | 11.31 | 11.58 | 0.19 | 0.28 | -1.21 | 0.635848 | 0.580079 | 0.835187 | 0.749447 |
| MmugDNA.34546.1.S1_at   | MmugDNA.34546.1 | 6.89  | 7.64  | 0.22 | 0.6  | -1.68 | 0.072083 | 0.089618 | 0.416191 | 0.343811 |
| MmugDNA.34550.1.S1_at   | MmugDNA.34550.1 | 8.46  | 8.28  | 0.12 | 0.45 | 1.13  | 0.598261 | 0.787867 | 0.813939 | 0.877314 |
| MmugDNA.34551.1.S1_at   | MmugDNA.34551.1 | 10.66 | 10.73 | 0.35 | 0.41 | -1.05 | 0.353947 | 0.034676 | 0.670266 | 0.230412 |
| MmugDNA.34554.1.S1_at   | MmugDNA.34554.1 | 8.65  | 8.71  | 0.07 | 0.25 | -1.04 | 0.186937 | 0.082417 | 0.550106 | 0.331381 |
| MmugDNA.34557.1.S1_at   | MmugDNA.34557.1 | 12.25 | 12.09 | 0.09 | 0.11 | 1.12  | 0.168592 | 0.205901 | 0.532849 | 0.480109 |
| MmugDNA.3456.1.S1_at    | MmugDNA.3456.1  | 7.12  | 7.23  | 0.17 | 0.05 | -1.08 | 0.867551 | 0.270998 | 0.947135 | 0.536124 |
| MmugDNA.34566.1.S1_at   | MmugDNA.34566.1 | 8.59  | 8.1   | 0.23 | 0.33 | 1.4   | 0.208222 | 0.011175 | 0.570088 | 0.137551 |
| MmugDNA.34567.1.S1_at   | MmugDNA.34567.1 | 5.5   | 5.77  | 0.13 | 0.09 | -1.21 | 0.034034 | 0.046634 | 0.331045 | 0.260495 |
| MmugDNA.34575.1.S1_at   | MmugDNA.34575.1 | 10.98 | 10.81 | 0.17 | 0.47 | 1.13  | 0.644616 | 0.833986 | 0.839786 | 0.904865 |
| MmugDNA.34575.1.S1_s_at | MmugDNA.34575.1 | 10.24 | 9.97  | 0.18 | 0.35 | 1.21  | 0.761683 | 0.909056 | 0.899666 | 0.948511 |
| MmugDNA.34582.1.S1_at   | MmugDNA.34582.1 | 6.48  | 7.26  | 0.2  | 0.3  | -1.72 | 0.040899 | 0.03362  | 0.350506 | 0.227006 |
| MmugDNA.34583.1.S1_at   | MmugDNA.34583.1 | 8.3   | 8.2   | 0.09 | 0.15 | 1.07  | 0.466335 | 0.568047 | 0.740215 | 0.741761 |
| MmugDNA.34588.1.S1_at   | MmugDNA.34588.1 | 11.33 | 11.06 | 0.1  | 0.13 | 1.21  | 0.04452  | 0.006038 | 0.358786 | 0.106089 |
| MmugDNA.34589.1.S1_at   | MmugDNA.34589.1 | 12.31 | 12.38 | 0.25 | 0.25 | -1.05 | 0.378123 | 0.247168 | 0.686315 | 0.516341 |
| MmugDNA.34589.1.S1_s_at | MmugDNA.34589.1 | 11.42 | 11.43 | 0.34 | 0.41 | -1.01 | 0.395377 | 0.331711 | 0.696441 | 0.580294 |
| MmugDNA.34597.1.S1_at   | MmugDNA.34597.1 | 4.48  | 4.61  | 0.02 | 0.38 | -1.09 | 0.583693 | 0.663098 | 0.806738 | 0.802828 |
| MmugDNA.34598.1.S1_at   | MmugDNA.34598.1 | 4.16  | 4.27  | 0.38 | 0.14 | -1.08 | 0.957774 | 0.519096 | 0.983962 | 0.710813 |
| MmugDNA.34599.1.S1_at   | MmugDNA.34599.1 | 8.58  | 8.6   | 0.17 | 0.28 | -1.01 | 0.523596 | 0.696345 | 0.772643 | 0.823596 |
| MmugDNA.34603.1.S1_at   | MmugDNA.34603.1 | 9.52  | 9.38  | 0.25 | 0.08 | 1.1   | 0.175466 | 0.025563 | 0.539219 | 0.200612 |
| MmugDNA.34608.1.S1_at   | MmugDNA.34608.1 | 8.92  | 9.03  | 0.24 | 0.58 | -1.08 | 0.72235  | 0.900675 | 0.878651 | 0.943491 |
| MmugDNA.34609.1.S1_at   | MmugDNA.34609.1 | 8.07  | 7.73  | 0.69 | 0.76 | 1.27  | 0.683587 | 0.602645 | 0.85844  | 0.763561 |
| MmugDNA.34622.1.S1_at   | MmugDNA.34622.1 | 9.27  | 9.28  | 0.36 | 0.36 | -1.01 | 0.587359 | 0.165184 | 0.808571 | 0.441389 |
| MmugDNA.34623.1.S1_at   | MmugDNA.34623.1 | 6.2   | 6.15  | 0.27 | 0.05 | 1.04  | 0.528135 | 0.612687 | 0.775373 | 0.770138 |
| MmugDNA.34627.1.S1_at   | MmugDNA.34627.1 | 12.12 | 12.08 | 0.06 | 0.26 | 1.03  | 0.83751  | 0.230911 | 0.934307 | 0.502548 |

|                         |                 |       |       |      |      |        |          |          |          |          |
|-------------------------|-----------------|-------|-------|------|------|--------|----------|----------|----------|----------|
| MmugDNA.3463.1.S1_at    | MmugDNA.3463.1  | 8.48  | 7.48  | 0.11 | 0.24 | 2      | 0.002974 | 0.000355 | 0.170703 | 0.037229 |
| MmugDNA.34635.1.S1_at   | MmugDNA.34635.1 | 11.89 | 10.93 | 0.55 | 0.79 | 1.95   | 0.320314 | 0.09156  | 0.649463 | 0.346652 |
| MmugDNA.34639.1.S1_at   | MmugDNA.34639.1 | 6.63  | 4.21  | 0.33 | 0.67 | 5.34   | 0.009619 | 0.004061 | 0.226235 | 0.090288 |
| MmugDNA.34645.1.S1_s_at | MmugDNA.34645.1 | 9.65  | 10.05 | 0.4  | 0.61 | -1.31  | 0.335111 | 0.018256 | 0.658916 | 0.169945 |
| MmugDNA.34649.1.S1_at   | MmugDNA.34649.1 | 4.19  | 3.98  | 0.6  | 0.67 | 1.16   | 0.919432 | 0.800353 | 0.968686 | 0.885129 |
| MmugDNA.34650.1.S1_at   | MmugDNA.34650.1 | 11.65 | 12.23 | 0.05 | 0.12 | -1.5   | 0.001574 | 0.00006  | 0.151907 | 0.025666 |
| MmugDNA.34652.1.S1_at   | MmugDNA.34652.1 | 10.28 | 10.63 | 0.05 | 0.36 | -1.28  | 0.442834 | 0.471916 | 0.72586  | 0.679793 |
| MmugDNA.34655.1.S1_at   | MmugDNA.34655.1 | 5.33  | 5.13  | 0.57 | 0.33 | 1.15   | 0.77966  | 0.926649 | 0.908204 | 0.958374 |
| MmugDNA.34656.1.S1_at   | MmugDNA.34656.1 | 8.67  | 8.28  | 0.33 | 0.13 | 1.3    | 0.170488 | 0.173853 | 0.534249 | 0.450133 |
| MmugDNA.34658.1.S1_at   | MmugDNA.34658.1 | 7.1   | 12.06 | 2.28 | 3.02 | -31.03 | 0.16746  | 0.092153 | 0.531631 | 0.347825 |
| MmugDNA.34663.1.S1_at   | MmugDNA.34663.1 | 3.48  | 4.03  | 0.2  | 0.28 | -1.46  | 0.096518 | 0.08475  | 0.455258 | 0.336233 |
| MmugDNA.3467.1.S1_s_at  | MmugDNA.3467.1  | 11.97 | 11.66 | 0.1  | 0.19 | 1.23   | 0.095917 | 0.087471 | 0.453957 | 0.340617 |
| MmugDNA.34671.1.S1_at   | MmugDNA.34671.1 | 12.32 | 12.71 | 0.2  | 0.28 | -1.31  | 0.096836 | 0.062352 | 0.455871 | 0.296503 |
| MmugDNA.34672.1.S1_at   | MmugDNA.34672.1 | 3.53  | 3.67  | 0.09 | 0.13 | -1.11  | 0.388798 | 0.556545 | 0.692804 | 0.734607 |
| MmugDNA.34674.1.S1_at   | MmugDNA.34674.1 | 6.17  | 6.11  | 0.18 | 0.14 | 1.04   | 0.809594 | 0.386384 | 0.922251 | 0.621593 |
| MmugDNA.34676.1.S1_at   | MmugDNA.34676.1 | 11.34 | 11.39 | 0.53 | 0.72 | -1.04  | 0.215817 | 0.236361 | 0.575954 | 0.507308 |
| MmugDNA.34679.1.S1_at   | MmugDNA.34679.1 | 14.15 | 14.12 | 0.12 | 0.14 | 1.02   | 0.739174 | 0.893789 | 0.888118 | 0.939386 |
| MmugDNA.3468.1.S1_at    | MmugDNA.3468.1  | 13.4  | 13.51 | 0.11 | 0.18 | -1.08  | 0.930937 | 0.711711 | 0.973359 | 0.832794 |
| MmugDNA.34680.1.S1_at   | MmugDNA.34680.1 | 9.24  | 9.2   | 0.05 | 0.65 | 1.03   | 0.70463  | 0.548093 | 0.869745 | 0.728874 |
| MmugDNA.34681.1.S1_at   | MmugDNA.34681.1 | 9.24  | 8.74  | 0.18 | 0.52 | 1.42   | 0.549903 | 0.578398 | 0.787505 | 0.748482 |
| MmugDNA.34692.1.S1_at   | MmugDNA.34692.1 | 6.76  | 6.99  | 0.1  | 0.18 | -1.17  | 0.331403 | 0.107141 | 0.656337 | 0.36981  |
| MmugDNA.34696.1.S1_at   | MmugDNA.34696.1 | 11.41 | 11.13 | 0.1  | 0.21 | 1.21   | 0.112809 | 0.12989  | 0.475249 | 0.401509 |
| MmugDNA.34697.1.S1_at   | MmugDNA.34697.1 | 4.38  | 4.41  | 0.08 | 0.04 | -1.02  | 0.781424 | 0.562865 | 0.908775 | 0.738191 |
| MmugDNA.34699.1.S1_at   | MmugDNA.34699.1 | 4.24  | 4.29  | 0.14 | 0.16 | -1.03  | 0.221126 | 0.294191 | 0.580053 | 0.553979 |
| MmugDNA.34701.1.S1_at   | MmugDNA.34701.1 | 5.16  | 5.05  | 0.36 | 0.43 | 1.08   | 0.642602 | 0.882457 | 0.838763 | 0.933022 |
| MmugDNA.34704.1.S1_at   | MmugDNA.34704.1 | 10.2  | 9.85  | 0.28 | 0.16 | 1.27   | 0.13177  | 0.09295  | 0.498041 | 0.349044 |
| MmugDNA.3471.1.S1_at    | MmugDNA.3471.1  | 7.49  | 7.63  | 0.33 | 0.24 | -1.1   | 0.390108 | 0.196015 | 0.693398 | 0.471016 |
| MmugDNA.34717.1.S1_at   | MmugDNA.34717.1 | 9.42  | 9.65  | 0.25 | 0.61 | -1.17  | 0.915962 | 0.335863 | 0.966921 | 0.583533 |
| MmugDNA.34718.1.S1_at   | MmugDNA.34718.1 | 6.21  | 6.2   | 0.47 | 0.12 | 1.01   | 0.375673 | 0.49525  | 0.684803 | 0.695411 |
| MmugDNA.34721.1.S1_at   | MmugDNA.34721.1 | 4.91  | 4.84  | 0.35 | 0.14 | 1.05   | 0.725432 | 0.536022 | 0.880256 | 0.721454 |
| MmugDNA.34729.1.S1_s_at | MmugDNA.34729.1 | 8.66  | 9.55  | 0.56 | 0.53 | -1.86  | 0.061347 | 0.04939  | 0.395551 | 0.267165 |
| MmugDNA.34732.1.S1_at   | MmugDNA.34732.1 | 4.95  | 4.93  | 0.13 | 0.21 | 1.02   | 0.513144 | 0.655579 | 0.766071 | 0.798663 |
| MmugDNA.34735.1.S1_at   | MmugDNA.34735.1 | 3.25  | 3.13  | 0.26 | 0.04 | 1.08   | 0.488961 | 0.685546 | 0.753397 | 0.816542 |
| MmugDNA.34736.1.S1_at   | MmugDNA.34736.1 | 5.21  | 5.23  | 0.15 | 0.35 | -1.01  | 0.586902 | 0.416969 | 0.808357 | 0.641869 |
| MmugDNA.34739.1.S1_at   | MmugDNA.34739.1 | 12.21 | 11.32 | 0.04 | 0.15 | 1.86   | 0.000695 | 0.000257 | 0.136818 | 0.033501 |
| MmugDNA.34743.1.S1_at   | MmugDNA.34743.1 | 11.45 | 12.17 | 0.17 | 0.11 | -1.64  | 0.003093 | 0.000857 | 0.172102 | 0.047296 |
| MmugDNA.34747.1.S1_at   | MmugDNA.34747.1 | 10.27 | 10.8  | 0.13 | 0.62 | -1.45  | 0.274909 | 0.070291 | 0.617642 | 0.31135  |
| MmugDNA.34748.1.S1_at   | MmugDNA.34748.1 | 12.14 | 12.95 | 0.22 | 0.56 | -1.75  | 0.089971 | 0.056464 | 0.445437 | 0.283516 |
| MmugDNA.34753.1.S1_at   | MmugDNA.34753.1 | 5.78  | 5.85  | 0.04 | 0.08 | -1.05  | 0.378746 | 0.026176 | 0.68656  | 0.202787 |
| MmugDNA.34757.1.S1_s_at | MmugDNA.34757.1 | 12.84 | 12.73 | 0.11 | 0.05 | 1.08   | 0.557374 | 0.048975 | 0.792405 | 0.266119 |
| MmugDNA.34759.1.S1_at   | MmugDNA.34759.1 | 10.96 | 11.61 | 0.17 | 0.38 | -1.56  | 0.040922 | 0.036306 | 0.350506 | 0.235105 |



|                         |                 |       |       |      |      |        |          |          |          |          |
|-------------------------|-----------------|-------|-------|------|------|--------|----------|----------|----------|----------|
| MmugDNA.34761.1.S1_at   | MmugDNA.34761.1 | 11.12 | 10.25 | 0.15 | 0.07 | 1.82   | 0.001074 | 0.000118 | 0.144025 | 0.028664 |
| MmugDNA.34763.1.S1_at   | MmugDNA.34763.1 | 7.89  | 8.03  | 0.3  | 0.21 | -1.1   | 0.934769 | 0.657883 | 0.974762 | 0.800051 |
| MmugDNA.34766.1.S1_at   | MmugDNA.34766.1 | 3.31  | 3.5   | 0.18 | 0.15 | -1.14  | 0.897593 | 0.427314 | 0.95917  | 0.649175 |
| MmugDNA.34768.1.S1_at   | MmugDNA.34768.1 | 8.66  | 8.29  | 0.1  | 0.14 | 1.29   | 0.02176  | 0.021688 | 0.283634 | 0.184333 |
| MmugDNA.34773.1.S1_at   | MmugDNA.34773.1 | 5.23  | 5.07  | 0.28 | 0.13 | 1.12   | 0.649499 | 0.470144 | 0.842493 | 0.678572 |
| MmugDNA.34776.1.S1_at   | MmugDNA.34776.1 | 8.46  | 8.31  | 0.35 | 0.42 | 1.11   | 0.881185 | 0.68861  | 0.952244 | 0.818251 |
| MmugDNA.34778.1.S1_s_at | MmugDNA.34778.1 | 11.92 | 11.96 | 0.04 | 0.16 | -1.03  | 0.310229 | 0.018694 | 0.642233 | 0.171742 |
| MmugDNA.34780.1.S1_at   | MmugDNA.34780.1 | 6.05  | 6.01  | 0.02 | 0.12 | 1.03   | 0.173379 | 0.311167 | 0.537006 | 0.566215 |
| MmugDNA.34781.1.S1_at   | MmugDNA.34781.1 | 3.24  | 3.41  | 0.05 | 0.1  | -1.13  | 0.081545 | 0.061614 | 0.432522 | 0.295094 |
| MmugDNA.34787.1.S1_at   | MmugDNA.34787.1 | 8.15  | 9.8   | 1.54 | 2.28 | -3.14  | 0.509847 | 0.305812 | 0.764561 | 0.562731 |
| MmugDNA.34796.1.S1_at   | MmugDNA.34796.1 | 5.61  | 5.65  | 0.23 | 0.05 | -1.03  | 0.695595 | 0.736062 | 0.864996 | 0.847311 |
| MmugDNA.34798.1.S1_at   | MmugDNA.34798.1 | 5.49  | 5.87  | 0.22 | 0.32 | -1.3   | 0.456348 | 0.677078 | 0.734416 | 0.811373 |
| MmugDNA.348.1.S1_at     | MmugDNA.348.1   | 12.23 | 12    | 0.11 | 0.16 | 1.17   | 0.087802 | 0.094597 | 0.442117 | 0.351371 |
| MmugDNA.3480.1.S1_at    | MmugDNA.3480.1  | 10.3  | 11.2  | 0.29 | 1.11 | -1.86  | 0.300691 | 0.335996 | 0.635955 | 0.583601 |
| MmugDNA.34800.1.S1_at   | MmugDNA.34800.1 | 8.63  | 8.15  | 0.25 | 0.17 | 1.4    | 0.037272 | 0.021436 | 0.341194 | 0.183342 |
| MmugDNA.34804.1.S1_at   | MmugDNA.34804.1 | 5.86  | 6.27  | 0.09 | 0.26 | -1.32  | 0.041619 | 0.028147 | 0.352305 | 0.209306 |
| MmugDNA.34807.1.S1_at   | MmugDNA.34807.1 | 7.89  | 7.56  | 0.35 | 0.1  | 1.26   | 0.059236 | 0.011328 | 0.391537 | 0.138076 |
| MmugDNA.34813.1.S1_at   | MmugDNA.34813.1 | 5.48  | 5.86  | 0.27 | 0.34 | -1.3   | 0.415853 | 0.033699 | 0.70957  | 0.227173 |
| MmugDNA.34814.1.S1_at   | MmugDNA.34814.1 | 11.02 | 11.1  | 0.09 | 0.57 | -1.06  | 0.512753 | 0.326504 | 0.765738 | 0.576576 |
| MmugDNA.34815.1.S1_at   | MmugDNA.34815.1 | 2.96  | 3.03  | 0.02 | 0.08 | -1.05  | 0.318845 | 0.531346 | 0.648688 | 0.718588 |
| MmugDNA.34816.1.S1_at   | MmugDNA.34816.1 | 11.56 | 11.45 | 0.16 | 0.08 | 1.08   | 0.13066  | 0.006037 | 0.49705  | 0.106089 |
| MmugDNA.34819.1.S1_at   | MmugDNA.34819.1 | 10.88 | 10.74 | 0.35 | 0.13 | 1.1    | 0.144982 | 0.168631 | 0.511188 | 0.445303 |
| MmugDNA.34848.1.S1_at   | MmugDNA.34848.1 | 3.09  | 3.13  | 0.18 | 0.05 | -1.03  | 0.251651 | 0.276643 | 0.601007 | 0.540596 |
| MmugDNA.34850.1.S1_at   | MmugDNA.34850.1 | 3.56  | 3.58  | 0.01 | 0.17 | -1.01  | 0.676912 | 0.818022 | 0.85524  | 0.895039 |
| MmugDNA.34854.1.S1_at   | MmugDNA.34854.1 | 8.32  | 8.31  | 0.18 | 0.32 | 1.01   | 0.307383 | 0.010713 | 0.639999 | 0.135227 |
| MmugDNA.34873.1.S1_at   | MmugDNA.34873.1 | 4.17  | 4.38  | 0.14 | 0.13 | -1.15  | 0.14805  | 0.221895 | 0.513451 | 0.495019 |
| MmugDNA.34874.1.S1_at   | MmugDNA.34874.1 | 8.84  | 9.07  | 0.18 | 0.13 | -1.17  | 0.375977 | 0.181838 | 0.684836 | 0.458388 |
| MmugDNA.34879.1.S1_at   | MmugDNA.34879.1 | 8.37  | 9.43  | 0.14 | 0.16 | -2.1   | 0.000973 | 0.000527 | 0.139813 | 0.040039 |
| MmugDNA.34882.1.S1_at   | MmugDNA.34882.1 | 5.85  | 7.33  | 0.68 | 1.17 | -2.8   | 0.241135 | 0.227559 | 0.593741 | 0.499841 |
| MmugDNA.34884.1.S1_at   | MmugDNA.34884.1 | 3.74  | 3.69  | 0.13 | 0.15 | 1.04   | 0.879799 | 0.576642 | 0.951698 | 0.747307 |
| MmugDNA.34886.1.S1_at   | MmugDNA.34886.1 | 8.88  | 8.08  | 0.21 | 0.52 | 1.74   | 0.047689 | 0.030833 | 0.367037 | 0.21742  |
| MmugDNA.34889.1.S1_at   | MmugDNA.34889.1 | 8.6   | 7.97  | 0.13 | 0.19 | 1.55   | 0.012795 | 0.012893 | 0.24376  | 0.14622  |
| MmugDNA.34895.1.S1_at   | MmugDNA.34895.1 | 8.96  | 9.48  | 0.22 | 0.52 | -1.43  | 0.166581 | 0.113757 | 0.530266 | 0.379943 |
| MmugDNA.3490.1.S1_at    | MmugDNA.3490.1  | 5.89  | 9.95  | 2.18 | 0.85 | -16.75 | 0.102777 | 0.082801 | 0.46254  | 0.332331 |
| MmugDNA.34901.1.S1_at   | MmugDNA.34901.1 | 9.41  | 10.38 | 0.41 | 0.78 | -1.96  | 0.115648 | 0.103124 | 0.479022 | 0.364026 |
| MmugDNA.34903.1.S1_at   | MmugDNA.34903.1 | 9.66  | 9.82  | 0.14 | 0.26 | -1.11  | 0.865096 | 0.743084 | 0.945844 | 0.851135 |
| MmugDNA.34905.1.S1_at   | MmugDNA.34905.1 | 5.95  | 6.05  | 0.15 | 0.02 | -1.07  | 0.416834 | 0.626907 | 0.710218 | 0.780046 |
| MmugDNA.3491.1.S1_at    | MmugDNA.3491.1  | 7.28  | 6.46  | 0.6  | 0.91 | 1.77   | 0.337532 | 0.487027 | 0.660048 | 0.690176 |
| MmugDNA.34916.1.S1_at   | MmugDNA.34916.1 | 7.79  | 8.14  | 0.18 | 0.36 | -1.27  | 0.126646 | 0.029517 | 0.492802 | 0.21349  |
| MmugDNA.34917.1.S1_at   | MmugDNA.34917.1 | 7.88  | 8.01  | 1.14 | 0.17 | -1.1   | 0.903788 | 0.981146 | 0.961578 | 0.989586 |
| MmugDNA.34921.1.S1_at   | MmugDNA.34921.1 | 5.78  | 4.47  | 1.07 | 0.48 | 2.48   | 0.114193 | 0.152938 | 0.47744  | 0.42777  |

|                         |                 |       |       |      |      |       |          |          |          |          |
|-------------------------|-----------------|-------|-------|------|------|-------|----------|----------|----------|----------|
| MmugDNA.34925.1.S1_at   | MmugDNA.34925.1 | 13.28 | 13.16 | 0.1  | 0.23 | 1.08  | 0.451679 | 0.328069 | 0.73168  | 0.577851 |
| MmugDNA.34926.1.S1_at   | MmugDNA.34926.1 | 4.65  | 4.85  | 0.15 | 0.22 | -1.14 | 0.21069  | 0.325551 | 0.571933 | 0.575831 |
| MmugDNA.34929.1.S1_at   | MmugDNA.34929.1 | 10.4  | 10.25 | 0.14 | 0.52 | 1.11  | 0.230554 | 0.250543 | 0.587222 | 0.519391 |
| MmugDNA.34930.1.S1_at   | MmugDNA.34930.1 | 6.4   | 6.02  | 0.21 | 0.23 | 1.31  | 0.108013 | 0.095775 | 0.468731 | 0.352753 |
| MmugDNA.34933.1.S1_at   | MmugDNA.34933.1 | 7.55  | 7.41  | 0.55 | 0.46 | 1.1   | 0.371811 | 0.293936 | 0.682509 | 0.553893 |
| MmugDNA.34933.1.S1_x_at | MmugDNA.34933.1 | 7.94  | 7.5   | 0.48 | 0.35 | 1.35  | 0.269098 | 0.218337 | 0.613808 | 0.491877 |
| MmugDNA.34935.1.S1_at   | MmugDNA.34935.1 | 5.64  | 5.53  | 0.05 | 0.16 | 1.07  | 0.841874 | 0.845397 | 0.936271 | 0.912061 |
| MmugDNA.34940.1.S1_at   | MmugDNA.34940.1 | 5.93  | 6.01  | 0.11 | 0.12 | -1.06 | 0.288765 | 0.276047 | 0.626809 | 0.540071 |
| MmugDNA.34947.1.S1_at   | MmugDNA.34947.1 | 9.23  | 9.32  | 0.4  | 0.09 | -1.07 | 0.312848 | 0.417117 | 0.64472  | 0.642022 |
| MmugDNA.34949.1.S1_at   | MmugDNA.34949.1 | 7.65  | 7.12  | 0.07 | 0.09 | 1.44  | 0.001198 | 0.000636 | 0.145267 | 0.042882 |
| MmugDNA.34951.1.S1_at   | MmugDNA.34951.1 | 13.29 | 13.2  | 0.09 | 0.11 | 1.07  | 0.667542 | 0.190075 | 0.851131 | 0.465717 |
| MmugDNA.34954.1.S1_at   | MmugDNA.34954.1 | 11.81 | 12.01 | 0.1  | 0.31 | -1.14 | 0.420864 | 0.506597 | 0.712776 | 0.702503 |
| MmugDNA.34955.1.S1_at   | MmugDNA.34955.1 | 7.99  | 8.73  | 0.08 | 0.44 | -1.68 | 0.158222 | 0.101349 | 0.523042 | 0.36112  |
| MmugDNA.34961.1.S1_at   | MmugDNA.34961.1 | 10.64 | 10.46 | 0.23 | 0.13 | 1.13  | 0.275757 | 0.309699 | 0.617878 | 0.565005 |
| MmugDNA.34968.1.S1_at   | MmugDNA.34968.1 | 3.26  | 3.3   | 0.08 | 0.07 | -1.03 | 0.166353 | 0.1885   | 0.529966 | 0.464458 |
| MmugDNA.34970.1.S1_at   | MmugDNA.34970.1 | 12.01 | 12.62 | 0.01 | 0.13 | -1.53 | 0.002197 | 0.000804 | 0.159615 | 0.04607  |
| MmugDNA.34971.1.S1_at   | MmugDNA.34971.1 | 8.14  | 8.03  | 0.2  | 0.17 | 1.08  | 0.252344 | 0.339803 | 0.601289 | 0.586394 |
| MmugDNA.34978.1.S1_at   | MmugDNA.34978.1 | 10.26 | 9.77  | 0.07 | 0.1  | 1.4   | 0.003695 | 0.000415 | 0.179515 | 0.038093 |
| MmugDNA.34981.1.S1_at   | MmugDNA.34981.1 | 7.3   | 6.68  | 0.36 | 0.81 | 1.54  | 0.108652 | 0.128879 | 0.470118 | 0.400306 |
| MmugDNA.34986.1.S1_at   | MmugDNA.34986.1 | 8.81  | 10.12 | 0.45 | 0.53 | -2.48 | 0.024706 | 0.015067 | 0.296144 | 0.155875 |
| MmugDNA.3499.1.S1_at    | MmugDNA.3499.1  | 10.37 | 8.63  | 0.35 | 0.88 | 3.35  | 0.109623 | 0.113162 | 0.470811 | 0.379184 |
| MmugDNA.34990.1.S1_at   | MmugDNA.34990.1 | 11.5  | 11.31 | 0.14 | 0.25 | 1.14  | 0.322945 | 0.201963 | 0.651259 | 0.476412 |
| MmugDNA.34998.1.S1_s_at | MmugDNA.34998.1 | 9.91  | 9.32  | 0.14 | 0.18 | 1.51  | 0.008079 | 0.00329  | 0.215994 | 0.082553 |
| MmugDNA.34999.1.S1_at   | MmugDNA.34999.1 | 11.98 | 10.74 | 0.09 | 0.14 | 2.35  | 0.000328 | 0.000013 | 0.12562  | 0.017532 |
| MmugDNA.35.1.S1_at      | MmugDNA.35.1    | 9.96  | 9.24  | 0.11 | 0.26 | 1.65  | 0.011441 | 0.002977 | 0.235799 | 0.079958 |
| MmugDNA.3500.1.S1_at    | MmugDNA.3500.1  | 6.05  | 6.03  | 0.08 | 0.1  | 1.02  | 0.855221 | 0.983754 | 0.941454 | 0.990952 |
| MmugDNA.35000.1.S1_at   | MmugDNA.35000.1 | 9.02  | 8.44  | 0.17 | 0.5  | 1.5   | 0.226985 | 0.056866 | 0.58486  | 0.284598 |
| MmugDNA.35001.1.S1_at   | MmugDNA.35001.1 | 4.72  | 6.15  | 1.14 | 0.9  | -2.69 | 0.187043 | 0.233011 | 0.550144 | 0.50445  |
| MmugDNA.35003.1.S1_at   | MmugDNA.35003.1 | 11.68 | 11.36 | 0.14 | 0.47 | 1.25  | 0.838172 | 0.750222 | 0.934593 | 0.854752 |
| MmugDNA.35009.1.S1_at   | MmugDNA.35009.1 | 5.89  | 5.97  | 0.1  | 0.15 | -1.06 | 0.434571 | 0.628347 | 0.720596 | 0.781112 |
| MmugDNA.35011.1.S1_at   | MmugDNA.35011.1 | 5.36  | 5.49  | 0.23 | 1.19 | -1.09 | 0.91022  | 0.453954 | 0.964495 | 0.668338 |
| MmugDNA.35014.1.S1_at   | MmugDNA.35014.1 | 5.1   | 5.24  | 0.09 | 0.14 | -1.11 | 0.540662 | 0.287253 | 0.782043 | 0.548526 |
| MmugDNA.35015.1.S1_at   | MmugDNA.35015.1 | 7.25  | 7.8   | 0.08 | 0.23 | -1.47 | 0.054511 | 0.04515  | 0.381851 | 0.256979 |
| MmugDNA.35017.1.S1_at   | MmugDNA.35017.1 | 8.34  | 8.37  | 0.25 | 0.2  | -1.02 | 0.389699 | 0.482735 | 0.693184 | 0.687512 |
| MmugDNA.35019.1.S1_at   | MmugDNA.35019.1 | 11.14 | 10.84 | 0.05 | 0.27 | 1.23  | 0.092201 | 0.054736 | 0.448698 | 0.27944  |
| MmugDNA.3502.1.S1_at    | MmugDNA.3502.1  | 12.88 | 11.76 | 0.16 | 0.61 | 2.17  | 0.131513 | 0.146822 | 0.498041 | 0.42088  |
| MmugDNA.35020.1.S1_at   | MmugDNA.35020.1 | 10.21 | 9.91  | 0.21 | 0.17 | 1.23  | 0.404339 | 0.026877 | 0.702606 | 0.205096 |
| MmugDNA.35022.1.S1_at   | MmugDNA.35022.1 | 12.76 | 12.69 | 0.06 | 0.1  | 1.05  | 0.751351 | 0.244929 | 0.893728 | 0.514752 |
| MmugDNA.35035.1.S1_at   | MmugDNA.35035.1 | 11.91 | 12.14 | 0.25 | 0.31 | -1.18 | 0.129571 | 0.128649 | 0.495744 | 0.400083 |
| MmugDNA.35040.1.S1_s_at | MmugDNA.35040.1 | 9.03  | 9.22  | 0.09 | 0.15 | -1.14 | 0.133329 | 0.187557 | 0.499818 | 0.463628 |
| MmugDNA.35046.1.S1_at   | MmugDNA.35046.1 | 6.44  | 6.61  | 0.01 | 0.05 | -1.13 | 0.002451 | 0.000447 | 0.163555 | 0.038539 |

|                        |                 |       |       |      |      |       |          |          |          |          |
|------------------------|-----------------|-------|-------|------|------|-------|----------|----------|----------|----------|
| MmugDNA.3505.1.S1_at   | MmugDNA.3505.1  | 4.44  | 6.34  | 0.39 | 0.79 | -3.74 | 0.026621 | 0.013512 | 0.303736 | 0.148824 |
| MmugDNA.35050.1.S1_at  | MmugDNA.35050.1 | 9.94  | 10.01 | 0.22 | 0.39 | -1.05 | 0.898039 | 0.40477  | 0.959278 | 0.633269 |
| MmugDNA.35052.1.S1_at  | MmugDNA.35052.1 | 10.96 | 11.43 | 0.44 | 0.62 | -1.38 | 0.516056 | 0.26986  | 0.76772  | 0.535135 |
| MmugDNA.35053.1.S1_at  | MmugDNA.35053.1 | 6.91  | 7.11  | 0.11 | 0.12 | -1.15 | 0.10467  | 0.082379 | 0.465029 | 0.331354 |
| MmugDNA.35054.1.S1_at  | MmugDNA.35054.1 | 7.16  | 7.33  | 0.41 | 0.22 | -1.12 | 0.521283 | 0.615467 | 0.77121  | 0.772012 |
| MmugDNA.35059.1.S1_at  | MmugDNA.35059.1 | 8.5   | 8.35  | 0.81 | 0.16 | 1.11  | 0.649294 | 0.17366  | 0.842392 | 0.450003 |
| MmugDNA.35061.1.S1_at  | MmugDNA.35061.1 | 11.64 | 11.23 | 0.13 | 0.17 | 1.32  | 0.056215 | 0.048573 | 0.386006 | 0.265572 |
| MmugDNA.35063.1.S1_at  | MmugDNA.35063.1 | 9.15  | 9.39  | 0.28 | 0.48 | -1.18 | 0.793604 | 0.037385 | 0.914488 | 0.237776 |
| MmugDNA.35064.1.S1_at  | MmugDNA.35064.1 | 8.64  | 7.46  | 0.15 | 0.42 | 2.27  | 0.010574 | 0.004049 | 0.230404 | 0.090281 |
| MmugDNA.35066.1.S1_at  | MmugDNA.35066.1 | 5.63  | 5.8   | 0.15 | 0.02 | -1.13 | 0.085571 | 0.03712  | 0.439495 | 0.23717  |
| MmugDNA.35067.1.S1_at  | MmugDNA.35067.1 | 11.61 | 11.26 | 0.1  | 0.1  | 1.28  | 0.005267 | 0.003162 | 0.191107 | 0.081787 |
| MmugDNA.35069.1.S1_at  | MmugDNA.35069.1 | 10.66 | 10.54 | 0.11 | 1.34 | 1.09  | 0.633833 | 0.797327 | 0.83402  | 0.883144 |
| MmugDNA.35077.1.S1_at  | MmugDNA.35077.1 | 6.04  | 6.44  | 0.2  | 0.11 | -1.32 | 0.117997 | 0.204982 | 0.482063 | 0.479296 |
| MmugDNA.35081.1.S1_at  | MmugDNA.35081.1 | 4.3   | 4.36  | 0.15 | 0.15 | -1.04 | 0.653942 | 0.671002 | 0.844442 | 0.807635 |
| MmugDNA.35086.1.S1_at  | MmugDNA.35086.1 | 11.6  | 11.93 | 0.09 | 0.12 | -1.26 | 0.011587 | 0.006932 | 0.236694 | 0.112493 |
| MmugDNA.35098.1.S1_at  | MmugDNA.35098.1 | 7.93  | 8.89  | 0.23 | 0.15 | -1.94 | 0.003886 | 0.000566 | 0.180184 | 0.041049 |
| MmugDNA.35103.1.S1_at  | MmugDNA.35103.1 | 14.46 | 14.28 | 0.04 | 0.12 | 1.13  | 0.071061 | 0.046891 | 0.414673 | 0.261281 |
| MmugDNA.35105.1.S1_at  | MmugDNA.35105.1 | 11.16 | 11.1  | 0.19 | 0.51 | 1.04  | 0.97272  | 0.741115 | 0.989474 | 0.850131 |
| MmugDNA.35106.1.S1_at  | MmugDNA.35106.1 | 7.5   | 6.08  | 0.18 | 0.7  | 2.67  | 0.012974 | 0.008476 | 0.245048 | 0.12212  |
| MmugDNA.35108.1.S1_at  | MmugDNA.35108.1 | 9.11  | 9.1   | 0.3  | 0.17 | 1.01  | 0.973527 | 0.637948 | 0.989603 | 0.787234 |
| MmugDNA.3511.1.S1_at   | MmugDNA.3511.1  | 6.85  | 6.16  | 0.05 | 0.36 | 1.61  | 0.060361 | 0.030268 | 0.393414 | 0.215828 |
| MmugDNA.35114.1.S1_at  | MmugDNA.35114.1 | 9.46  | 9.58  | 0.31 | 0.2  | -1.08 | 0.191903 | 0.168554 | 0.554902 | 0.445172 |
| MmugDNA.3512.1.S1_at   | MmugDNA.3512.1  | 7.44  | 7.74  | 0.45 | 0.44 | -1.23 | 0.437127 | 0.504531 | 0.722208 | 0.701656 |
| MmugDNA.35120.1.S1_at  | MmugDNA.35120.1 | 3.35  | 3.34  | 0.3  | 0.13 | 1.01  | 0.651792 | 0.531465 | 0.84335  | 0.718657 |
| MmugDNA.35121.1.S1_at  | MmugDNA.35121.1 | 6.62  | 5.78  | 0.42 | 0.92 | 1.8   | 0.310674 | 0.254155 | 0.642607 | 0.522453 |
| MmugDNA.35129.1.S1_at  | MmugDNA.35129.1 | 6.15  | 5.66  | 0.2  | 0.24 | 1.41  | 0.031818 | 0.164729 | 0.322974 | 0.441044 |
| MmugDNA.35130.1.S1_at  | MmugDNA.35130.1 | 12.57 | 12.63 | 0.1  | 0.11 | -1.04 | 0.84594  | 0.051849 | 0.938188 | 0.273151 |
| MmugDNA.35131.1.S1_at  | MmugDNA.35131.1 | 4.82  | 6.44  | 0.12 | 0.8  | -3.08 | 0.026637 | 0.011765 | 0.303736 | 0.140492 |
| MmugDNA.35133.1.S1_at  | MmugDNA.35133.1 | 4.6   | 4.51  | 0.15 | 0.3  | 1.06  | 0.387864 | 0.043808 | 0.692145 | 0.25387  |
| MmugDNA.35136.1.S1_at  | MmugDNA.35136.1 | 11.38 | 11.08 | 0.3  | 1.24 | 1.23  | 0.528659 | 0.697172 | 0.775742 | 0.824045 |
| MmugDNA.35141.1.S1_at  | MmugDNA.35141.1 | 10.08 | 10.19 | 0.35 | 0.32 | -1.08 | 0.655039 | 0.16328  | 0.84477  | 0.439456 |
| MmugDNA.35145.1.S1_at  | MmugDNA.35145.1 | 9.02  | 8.89  | 0.21 | 0.38 | 1.09  | 0.474703 | 0.188338 | 0.74537  | 0.46433  |
| MmugDNA.35149.1.S1_at  | MmugDNA.35149.1 | 9.05  | 9.6   | 0.31 | 0.14 | -1.46 | 0.015145 | 0.007504 | 0.257529 | 0.116291 |
| MmugDNA.35150.1.S1_at  | MmugDNA.35150.1 | 10.21 | 9.65  | 0.37 | 0.06 | 1.48  | 0.019862 | 0.010106 | 0.275714 | 0.131859 |
| MmugDNA.35156.1.S1_at  | MmugDNA.35156.1 | 12.73 | 12.58 | 0.07 | 0.24 | 1.11  | 0.368035 | 0.531964 | 0.679753 | 0.718995 |
| MmugDNA.3516.1.S1_s_at | MmugDNA.3516.1  | 9.27  | 9     | 0.28 | 0.4  | 1.21  | 0.803553 | 0.110723 | 0.919138 | 0.374854 |
| MmugDNA.35161.1.S1_at  | MmugDNA.35161.1 | 3.02  | 3.11  | 0.14 | 0.18 | -1.07 | 0.422327 | 0.239287 | 0.71345  | 0.509995 |
| MmugDNA.35165.1.S1_at  | MmugDNA.35165.1 | 10.34 | 9.75  | 0.17 | 1.02 | 1.51  | 0.426442 | 0.586309 | 0.715792 | 0.753427 |
| MmugDNA.35169.1.S1_at  | MmugDNA.35169.1 | 6.56  | 5.69  | 0.13 | 0.67 | 1.83  | 0.353796 | 0.142913 | 0.670266 | 0.416854 |
| MmugDNA.3517.1.S1_at   | MmugDNA.3517.1  | 7.73  | 6.89  | 0.22 | 0.05 | 1.79  | 0.004549 | 0.004425 | 0.184109 | 0.092904 |
| MmugDNA.35178.1.S1_at  | MmugDNA.35178.1 | 12.67 | 12.85 | 0.04 | 0.15 | -1.13 | 0.103856 | 0.101359 | 0.463825 | 0.36112  |

|                         |                 |       |       |      |      |       |          |          |          |          |
|-------------------------|-----------------|-------|-------|------|------|-------|----------|----------|----------|----------|
| MmugDNA.3518.1.S1_at    | MmugDNA.3518.1  | 6.4   | 6.73  | 0.03 | 0.16 | -1.26 | 0.027322 | 0.070564 | 0.307317 | 0.311781 |
| MmugDNA.35182.1.S1_at   | MmugDNA.35182.1 | 9.1   | 9.2   | 0.22 | 1.24 | -1.07 | 0.695517 | 0.861973 | 0.864969 | 0.921556 |
| MmugDNA.35184.1.S1_at   | MmugDNA.35184.1 | 7.26  | 7.22  | 0.48 | 0.19 | 1.03  | 0.916135 | 0.595474 | 0.967043 | 0.759091 |
| MmugDNA.35189.1.S1_at   | MmugDNA.35189.1 | 12.58 | 12.33 | 0.02 | 0.2  | 1.19  | 0.253697 | 0.003882 | 0.602177 | 0.0887   |
| MmugDNA.3519.1.S1_at    | MmugDNA.3519.1  | 4.38  | 4.41  | 0.03 | 0.02 | -1.02 | 0.112025 | 0.062997 | 0.474496 | 0.297642 |
| MmugDNA.35192.1.S1_at   | MmugDNA.35192.1 | 9.96  | 7.68  | 0.13 | 0.41 | 4.86  | 0.000798 | 0.000123 | 0.136818 | 0.029087 |
| MmugDNA.35206.1.S1_at   | MmugDNA.35206.1 | 9.77  | 9.81  | 0.1  | 0.31 | -1.03 | 0.61309  | 0.625812 | 0.822517 | 0.779339 |
| MmugDNA.35206.1.S1_s_at | MmugDNA.35206.1 | 9.48  | 9.78  | 0.08 | 0.32 | -1.23 | 0.171133 | 0.064263 | 0.535105 | 0.299692 |
| MmugDNA.35207.1.S1_at   | MmugDNA.35207.1 | 4.63  | 7.22  | 0.06 | 0.99 | -6.02 | 0.009641 | 0.009672 | 0.226235 | 0.129405 |
| MmugDNA.35208.1.S1_at   | MmugDNA.35208.1 | 4.39  | 4.3   | 0.2  | 0.14 | 1.07  | 0.564559 | 0.330107 | 0.796663 | 0.578983 |
| MmugDNA.35209.1.S1_at   | MmugDNA.35209.1 | 12.67 | 12.03 | 0.21 | 0.14 | 1.56  | 0.019097 | 0.011376 | 0.273018 | 0.138214 |
| MmugDNA.35210.1.S1_at   | MmugDNA.35210.1 | 5.54  | 5.36  | 0.18 | 0.14 | 1.14  | 0.549134 | 0.511036 | 0.787104 | 0.705358 |
| MmugDNA.35214.1.S1_at   | MmugDNA.35214.1 | 3.3   | 3.35  | 0.15 | 0.55 | -1.04 | 0.745134 | 0.907638 | 0.890969 | 0.947753 |
| MmugDNA.35228.1.S1_at   | MmugDNA.35228.1 | 11.74 | 11.71 | 0.14 | 0.29 | 1.02  | 0.670758 | 0.474281 | 0.852476 | 0.68135  |
| MmugDNA.35232.1.S1_at   | MmugDNA.35232.1 | 7.71  | 6.81  | 0.34 | 0.23 | 1.86  | 0.010837 | 0.003687 | 0.232232 | 0.086591 |
| MmugDNA.35236.1.S1_at   | MmugDNA.35236.1 | 11.21 | 11.2  | 0.2  | 0.24 | 1.01  | 0.218135 | 0.270635 | 0.577744 | 0.535927 |
| MmugDNA.35241.1.S1_at   | MmugDNA.35241.1 | 12.05 | 12.05 | 0.15 | 0.13 | 1     | 0.563134 | 0.770727 | 0.7958   | 0.866807 |
| MmugDNA.35243.1.S1_s_at | MmugDNA.35243.1 | 3.76  | 3.96  | 0.05 | 0.06 | -1.15 | 0.021056 | 0.009686 | 0.281947 | 0.129473 |
| MmugDNA.35245.1.S1_at   | MmugDNA.35245.1 | 11.28 | 9.71  | 0.08 | 1.14 | 2.97  | 0.145438 | 0.109412 | 0.511449 | 0.373239 |
| MmugDNA.3526.1.S1_at    | MmugDNA.3526.1  | 2.95  | 3.29  | 0.09 | 0.3  | -1.26 | 0.146567 | 0.117909 | 0.512668 | 0.385837 |
| MmugDNA.35260.1.S1_at   | MmugDNA.35260.1 | 7.19  | 8.23  | 0.2  | 0.21 | -2.06 | 0.005754 | 0.001271 | 0.192635 | 0.055241 |
| MmugDNA.35261.1.S1_at   | MmugDNA.35261.1 | 9.76  | 12.3  | 0.97 | 1.98 | -5.8  | 0.392599 | 0.206436 | 0.694693 | 0.480571 |
| MmugDNA.35263.1.S1_at   | MmugDNA.35263.1 | 13.16 | 13.15 | 0.1  | 0.53 | 1     | 0.41573  | 0.457939 | 0.709528 | 0.670999 |
| MmugDNA.35267.1.S1_at   | MmugDNA.35267.1 | 9.9   | 9.64  | 0.27 | 0.55 | 1.2   | 0.35574  | 0.501011 | 0.671194 | 0.699373 |
| MmugDNA.35270.1.S1_at   | MmugDNA.35270.1 | 6.77  | 7.02  | 0.18 | 0.21 | -1.19 | 0.120889 | 0.030222 | 0.48574  | 0.21576  |
| MmugDNA.35286.1.S1_at   | MmugDNA.35286.1 | 6.99  | 7.84  | 0.61 | 0.36 | -1.8  | 0.088001 | 0.074586 | 0.442265 | 0.318266 |
| MmugDNA.3529.1.S1_at    | MmugDNA.3529.1  | 11.65 | 11.39 | 0.35 | 0.28 | 1.2   | 0.335835 | 0.313429 | 0.65921  | 0.567879 |
| MmugDNA.35293.1.S1_at   | MmugDNA.35293.1 | 13.54 | 13.74 | 0.08 | 0.17 | -1.15 | 0.43388  | 0.227592 | 0.720251 | 0.499882 |
| MmugDNA.35294.1.S1_at   | MmugDNA.35294.1 | 11.05 | 10.4  | 0.1  | 0.38 | 1.56  | 0.047763 | 0.040983 | 0.367162 | 0.247202 |
| MmugDNA.35302.1.S1_at   | MmugDNA.35302.1 | 11.73 | 11.74 | 0.32 | 0.29 | -1.01 | 0.567256 | 0.018699 | 0.798063 | 0.171742 |
| MmugDNA.35304.1.S1_at   | MmugDNA.35304.1 | 11.98 | 12    | 0.24 | 0.42 | -1.02 | 0.963111 | 0.991784 | 0.985728 | 0.995392 |
| MmugDNA.35307.1.S1_at   | MmugDNA.35307.1 | 12.47 | 11.99 | 0.52 | 0.89 | 1.4   | 0.324973 | 0.267593 | 0.652259 | 0.53333  |
| MmugDNA.35311.1.S1_at   | MmugDNA.35311.1 | 6.6   | 8.05  | 0.97 | 1.75 | -2.72 | 0.330752 | 0.326082 | 0.656056 | 0.576315 |
| MmugDNA.35313.1.S1_at   | MmugDNA.35313.1 | 8.76  | 8.5   | 0.61 | 0.57 | 1.2   | 0.67597  | 0.315402 | 0.854832 | 0.568939 |
| MmugDNA.35321.1.S1_at   | MmugDNA.35321.1 | 10.06 | 11.92 | 0.3  | 0.2  | -3.64 | 0.000667 | 0.000092 | 0.136818 | 0.027225 |
| MmugDNA.35328.1.S1_at   | MmugDNA.35328.1 | 8.13  | 8.61  | 0.32 | 0.5  | -1.4  | 0.260844 | 0.324534 | 0.60749  | 0.57507  |
| MmugDNA.35331.1.S1_at   | MmugDNA.35331.1 | 8.07  | 8.15  | 0.31 | 0.48 | -1.06 | 0.321081 | 0.248958 | 0.649794 | 0.518026 |
| MmugDNA.35334.1.S1_at   | MmugDNA.35334.1 | 4.68  | 4.68  | 0.25 | 0.2  | 1     | 0.475407 | 0.471177 | 0.745766 | 0.679213 |
| MmugDNA.35338.1.S1_at   | MmugDNA.35338.1 | 4.5   | 4.05  | 0.25 | 0.06 | 1.37  | 0.108008 | 0.143728 | 0.468731 | 0.417583 |
| MmugDNA.35339.1.S1_at   | MmugDNA.35339.1 | 5.03  | 5.33  | 0.08 | 0.14 | -1.22 | 0.0322   | 0.106134 | 0.3244   | 0.368499 |
| MmugDNA.3534.1.S1_at    | MmugDNA.3534.1  | 11.25 | 10.52 | 0.14 | 0.25 | 1.65  | 0.009758 | 0.007125 | 0.22625  | 0.113654 |

|                         |                 |       |       |      |      |       |          |          |          |          |
|-------------------------|-----------------|-------|-------|------|------|-------|----------|----------|----------|----------|
| MmugDNA.35341.1.S1_at   | MmugDNA.35341.1 | 12.13 | 11.75 | 0.06 | 0.1  | 1.31  | 0.005095 | 0.001653 | 0.189099 | 0.061436 |
| MmugDNA.35361.1.S1_at   | MmugDNA.35361.1 | 12.38 | 12.22 | 0.13 | 0.09 | 1.12  | 0.111932 | 0.226337 | 0.474378 | 0.498783 |
| MmugDNA.35362.1.S1_at   | MmugDNA.35362.1 | 10.88 | 10.79 | 0.02 | 0.35 | 1.06  | 0.993689 | 0.558133 | 0.997754 | 0.735418 |
| MmugDNA.35363.1.S1_at   | MmugDNA.35363.1 | 9.67  | 9.48  | 0.2  | 0.18 | 1.14  | 0.061099 | 0.074372 | 0.394935 | 0.318053 |
| MmugDNA.35367.1.S1_at   | MmugDNA.35367.1 | 10.8  | 10.84 | 0.09 | 0.31 | -1.03 | 0.479895 | 0.149025 | 0.747918 | 0.423337 |
| MmugDNA.35368.1.S1_at   | MmugDNA.35368.1 | 8.02  | 8.45  | 0.23 | 0.28 | -1.35 | 0.093745 | 0.132621 | 0.451056 | 0.404544 |
| MmugDNA.35383.1.S1_at   | MmugDNA.35383.1 | 11.53 | 10.53 | 0.19 | 0.18 | 2.01  | 0.002483 | 0.000459 | 0.163555 | 0.038572 |
| MmugDNA.35389.1.S1_at   | MmugDNA.35389.1 | 8.06  | 5.67  | 0.67 | 0.91 | 5.22  | 0.027005 | 0.011416 | 0.305827 | 0.138384 |
| MmugDNA.35394.1.S1_at   | MmugDNA.35394.1 | 4.26  | 4.26  | 0.02 | 0.04 | -1    | 0.372422 | 0.3811   | 0.682812 | 0.617478 |
| MmugDNA.35395.1.S1_at   | MmugDNA.35395.1 | 6.64  | 8.01  | 0.26 | 0.53 | -2.58 | 0.056293 | 0.050917 | 0.38633  | 0.270955 |
| MmugDNA.35402.1.S1_at   | MmugDNA.35402.1 | 4.57  | 5.89  | 0.59 | 1.09 | -2.51 | 0.242505 | 0.399615 | 0.594448 | 0.629912 |
| MmugDNA.35404.1.S1_at   | MmugDNA.35404.1 | 14.4  | 14.26 | 0.05 | 0.06 | 1.1   | 0.047558 | 0.025669 | 0.366705 | 0.200834 |
| MmugDNA.35424.1.S1_at   | MmugDNA.35424.1 | 12.15 | 11.7  | 0.1  | 0.13 | 1.36  | 0.014847 | 0.010788 | 0.255626 | 0.135565 |
| MmugDNA.35426.1.S1_at   | MmugDNA.35426.1 | 6.66  | 6.83  | 0.08 | 0.16 | -1.13 | 0.242637 | 0.229347 | 0.594448 | 0.501527 |
| MmugDNA.35427.1.S1_at   | MmugDNA.35427.1 | 12.57 | 12.37 | 0.17 | 0.76 | 1.15  | 0.463673 | 0.468406 | 0.738895 | 0.677714 |
| MmugDNA.35430.1.S1_s_at | MmugDNA.35430.1 | 5.95  | 5.73  | 0.34 | 0.05 | 1.17  | 0.323733 | 0.395934 | 0.651695 | 0.627788 |
| MmugDNA.35432.1.S1_at   | MmugDNA.35432.1 | 13.5  | 13.07 | 0.51 | 0.26 | 1.34  | 0.95815  | 0.995916 | 0.984153 | 0.997533 |
| MmugDNA.3544.1.S1_at    | MmugDNA.3544.1  | 7.24  | 8.44  | 0.71 | 0.53 | -2.3  | 0.062889 | 0.063258 | 0.399544 | 0.298244 |
| MmugDNA.35444.1.S1_at   | MmugDNA.35444.1 | 6.16  | 5.53  | 2.43 | 0.76 | 1.54  | 0.347312 | 0.4474   | 0.6664   | 0.66348  |
| MmugDNA.35444.1.S1_x_at | MmugDNA.35444.1 | 6.32  | 5.81  | 2.1  | 0.4  | 1.42  | 0.47734  | 0.527433 | 0.746589 | 0.716117 |
| MmugDNA.35447.1.S1_at   | MmugDNA.35447.1 | 6.43  | 6.29  | 0.12 | 0.11 | 1.1   | 0.943703 | 0.201057 | 0.978535 | 0.475509 |
| MmugDNA.35448.1.S1_at   | MmugDNA.35448.1 | 12.04 | 11.5  | 0.16 | 0.2  | 1.45  | 0.050035 | 0.030728 | 0.372968 | 0.217179 |
| MmugDNA.35448.1.S1_s_at | MmugDNA.35448.1 | 12.22 | 11.85 | 0.17 | 0.15 | 1.29  | 0.044671 | 0.019033 | 0.35902  | 0.173644 |
| MmugDNA.35450.1.S1_at   | MmugDNA.35450.1 | 12.45 | 12.9  | 0.13 | 0.82 | -1.36 | 0.452884 | 0.496434 | 0.732217 | 0.69607  |
| MmugDNA.35453.1.S1_at   | MmugDNA.35453.1 | 7.21  | 7.25  | 0.06 | 0.03 | -1.03 | 0.715321 | 0.361265 | 0.875005 | 0.602104 |
| MmugDNA.35455.1.S1_at   | MmugDNA.35455.1 | 5.94  | 5.2   | 0.66 | 0.35 | 1.67  | 0.631693 | 0.832546 | 0.832821 | 0.903934 |
| MmugDNA.35457.1.S1_s_at | MmugDNA.35457.1 | 12.6  | 12.84 | 0.15 | 0.14 | -1.19 | 0.052041 | 0.02731  | 0.376952 | 0.206625 |
| MmugDNA.35459.1.S1_at   | MmugDNA.35459.1 | 4.38  | 4.17  | 0.1  | 0.01 | 1.15  | 0.061662 | 0.044742 | 0.396574 | 0.256009 |
| MmugDNA.35468.1.S1_at   | MmugDNA.35468.1 | 8.96  | 7.91  | 0.32 | 0.57 | 2.06  | 0.118233 | 0.026039 | 0.482489 | 0.202252 |
| MmugDNA.35469.1.S1_at   | MmugDNA.35469.1 | 8.66  | 8.07  | 0.04 | 0.27 | 1.5   | 0.031696 | 0.007469 | 0.322685 | 0.115888 |
| MmugDNA.3547.1.S1_at    | MmugDNA.3547.1  | 9.2   | 9.61  | 0.2  | 0.31 | -1.32 | 0.117742 | 0.162529 | 0.481889 | 0.438649 |
| MmugDNA.35470.1.S1_at   | MmugDNA.35470.1 | 6.89  | 7.18  | 0.26 | 0.52 | -1.23 | 0.231258 | 0.327847 | 0.587369 | 0.577625 |
| MmugDNA.35473.1.S1_at   | MmugDNA.35473.1 | 9.2   | 8.18  | 0.14 | 0.39 | 2.02  | 0.014358 | 0.007728 | 0.251885 | 0.117463 |
| MmugDNA.3548.1.S1_at    | MmugDNA.3548.1  | 7.07  | 7.21  | 0.09 | 0.18 | -1.1  | 0.292083 | 0.048621 | 0.629447 | 0.265602 |
| MmugDNA.35480.1.S1_at   | MmugDNA.35480.1 | 11.9  | 11.89 | 0.12 | 0.54 | 1.01  | 0.705029 | 0.149357 | 0.869884 | 0.423811 |
| MmugDNA.35484.1.S1_at   | MmugDNA.35484.1 | 10.62 | 10.05 | 0.1  | 0.34 | 1.49  | 0.066535 | 0.032461 | 0.406564 | 0.22324  |
| MmugDNA.35488.1.S1_at   | MmugDNA.35488.1 | 4.21  | 4.13  | 0.14 | 0.09 | 1.06  | 0.325671 | 0.648689 | 0.652943 | 0.794407 |
| MmugDNA.3549.1.S1_at    | MmugDNA.3549.1  | 8.41  | 8.24  | 0.07 | 0.1  | 1.12  | 0.09208  | 0.093531 | 0.448698 | 0.349846 |
| MmugDNA.35490.1.S1_at   | MmugDNA.35490.1 | 6.9   | 6.14  | 1.04 | 0.57 | 1.69  | 0.311114 | 0.423836 | 0.643066 | 0.646547 |
| MmugDNA.35494.1.S1_at   | MmugDNA.35494.1 | 13.24 | 13.04 | 0.05 | 0.12 | 1.15  | 0.026115 | 0.014031 | 0.30146  | 0.15169  |
| MmugDNA.35496.1.S1_at   | MmugDNA.35496.1 | 3.26  | 3.31  | 0.06 | 0.08 | -1.03 | 0.245762 | 0.370263 | 0.597234 | 0.609406 |

|                         |                 |       |       |      |      |       |          |          |          |          |
|-------------------------|-----------------|-------|-------|------|------|-------|----------|----------|----------|----------|
| MmugDNA.35498.1.S1_at   | MmugDNA.35498.1 | 5.79  | 5.8   | 0.01 | 0.16 | -1.01 | 0.813442 | 0.640593 | 0.924267 | 0.789025 |
| MmugDNA.355.1.S1_at     | MmugDNA.355.1   | 3.95  | 4.12  | 0.04 | 0.1  | -1.12 | 0.033802 | 0.026113 | 0.33023  | 0.202544 |
| MmugDNA.35503.1.S1_at   | MmugDNA.35503.1 | 7.21  | 6.93  | 0.21 | 0.28 | 1.22  | 0.404475 | 0.348248 | 0.702746 | 0.592441 |
| MmugDNA.35504.1.S1_at   | MmugDNA.35504.1 | 8.13  | 8.1   | 0.02 | 0.02 | 1.02  | 0.210717 | 0.025615 | 0.571933 | 0.200819 |
| MmugDNA.3551.1.S1_at    | MmugDNA.3551.1  | 7.59  | 9.68  | 0.83 | 1.13 | -4.26 | 0.301528 | 0.394165 | 0.636466 | 0.62675  |
| MmugDNA.35516.1.S1_at   | MmugDNA.35516.1 | 10.61 | 12.01 | 0.67 | 1.86 | -2.64 | 0.454345 | 0.365524 | 0.733184 | 0.605602 |
| MmugDNA.35522.1.S1_at   | MmugDNA.35522.1 | 5.07  | 5.37  | 0.03 | 0.21 | -1.23 | 0.068588 | 0.021236 | 0.410201 | 0.182455 |
| MmugDNA.35525.1.S1_at   | MmugDNA.35525.1 | 5.75  | 5.95  | 0.05 | 0.22 | -1.15 | 0.158068 | 0.151183 | 0.522944 | 0.42587  |
| MmugDNA.35529.1.S1_at   | MmugDNA.35529.1 | 6.77  | 5.93  | 0.49 | 0.74 | 1.78  | 0.138255 | 0.200114 | 0.505671 | 0.474603 |
| MmugDNA.35530.1.S1_at   | MmugDNA.35530.1 | 6.72  | 6.79  | 0.19 | 0.45 | -1.05 | 0.443743 | 0.605965 | 0.726404 | 0.765547 |
| MmugDNA.35532.1.S1_at   | MmugDNA.35532.1 | 2.78  | 2.77  | 0.05 | 0.11 | 1     | 0.402357 | 0.647017 | 0.701375 | 0.793279 |
| MmugDNA.35534.1.S1_at   | MmugDNA.35534.1 | 6.29  | 6.53  | 0.1  | 0.08 | -1.19 | 0.029452 | 0.06849  | 0.314283 | 0.308214 |
| MmugDNA.35537.1.S1_at   | MmugDNA.35537.1 | 11.92 | 13.48 | 0.65 | 0.51 | -2.95 | 0.036346 | 0.027596 | 0.339201 | 0.207431 |
| MmugDNA.35544.1.S1_at   | MmugDNA.35544.1 | 10.85 | 10.35 | 0.06 | 0.5  | 1.42  | 0.175176 | 0.102348 | 0.538831 | 0.362527 |
| MmugDNA.35548.1.S1_s_at | MmugDNA.35548.1 | 8.22  | 8.73  | 0.33 | 0.61 | -1.43 | 0.479148 | 0.654512 | 0.747575 | 0.798087 |
| MmugDNA.35557.1.S1_at   | MmugDNA.35557.1 | 10.62 | 10.96 | 0.06 | 0.13 | -1.27 | 0.016601 | 0.001502 | 0.26475  | 0.059065 |
| MmugDNA.35558.1.S1_at   | MmugDNA.35558.1 | 10.82 | 10.99 | 0.23 | 0.16 | -1.13 | 0.313448 | 0.179043 | 0.645195 | 0.455404 |
| MmugDNA.35559.1.S1_at   | MmugDNA.35559.1 | 13.15 | 12.67 | 0.06 | 0.81 | 1.39  | 0.10639  | 0.078931 | 0.466831 | 0.325916 |
| MmugDNA.35562.1.S1_at   | MmugDNA.35562.1 | 7.59  | 6.31  | 0.04 | 1.55 | 2.43  | 0.68308  | 0.863718 | 0.858329 | 0.922638 |
| MmugDNA.35566.1.S1_at   | MmugDNA.35566.1 | 9.8   | 9.76  | 0.22 | 0.02 | 1.03  | 0.57341  | 0.780323 | 0.801219 | 0.872592 |
| MmugDNA.35571.1.S1_at   | MmugDNA.35571.1 | 10.17 | 7.75  | 0.24 | 0.83 | 5.38  | 0.010485 | 0.004247 | 0.229964 | 0.091685 |
| MmugDNA.35573.1.S1_at   | MmugDNA.35573.1 | 8.47  | 9.12  | 0.64 | 0.09 | -1.56 | 0.128227 | 0.019228 | 0.494307 | 0.174494 |
| MmugDNA.35576.1.S1_at   | MmugDNA.35576.1 | 3.94  | 4.02  | 0.21 | 0.03 | -1.05 | 0.608488 | 0.777573 | 0.819999 | 0.870732 |
| MmugDNA.35579.1.S1_at   | MmugDNA.35579.1 | 10.78 | 10.49 | 0.2  | 0.33 | 1.22  | 0.991999 | 0.855093 | 0.997262 | 0.91741  |
| MmugDNA.3558.1.S1_at    | MmugDNA.3558.1  | 11.12 | 10.49 | 0.19 | 0.66 | 1.55  | 0.213522 | 0.147928 | 0.573715 | 0.422304 |
| MmugDNA.35580.1.S1_at   | MmugDNA.35580.1 | 9.3   | 9.54  | 0.31 | 0.59 | -1.18 | 0.624371 | 0.507556 | 0.828251 | 0.703118 |
| MmugDNA.35583.1.S1_at   | MmugDNA.35583.1 | 4.44  | 3.72  | 0.47 | 1.48 | 1.64  | 0.88649  | 0.340239 | 0.954601 | 0.586637 |
| MmugDNA.35585.1.S1_at   | MmugDNA.35585.1 | 5.25  | 6     | 0.33 | 1.39 | -1.69 | 0.188502 | 0.232956 | 0.551451 | 0.50445  |
| MmugDNA.35588.1.S1_at   | MmugDNA.35588.1 | 10.17 | 10.15 | 0.1  | 0.17 | 1.01  | 0.623438 | 0.064848 | 0.827977 | 0.30069  |
| MmugDNA.35589.1.S1_at   | MmugDNA.35589.1 | 4.39  | 4.56  | 0.17 | 0.11 | -1.12 | 0.332563 | 0.499088 | 0.656905 | 0.697988 |
| MmugDNA.3559.1.S1_at    | MmugDNA.3559.1  | 3.24  | 3.13  | 0.03 | 0.1  | 1.08  | 0.206645 | 0.103254 | 0.568816 | 0.364143 |
| MmugDNA.35592.1.S1_at   | MmugDNA.35592.1 | 4.38  | 4.38  | 0.18 | 0.12 | -1    | 0.712761 | 0.887518 | 0.874217 | 0.935902 |
| MmugDNA.35594.1.S1_at   | MmugDNA.35594.1 | 6.71  | 9.28  | 0.92 | 2.3  | -5.93 | 0.354547 | 0.294871 | 0.670595 | 0.554429 |
| MmugDNA.35598.1.S1_at   | MmugDNA.35598.1 | 6.4   | 6.61  | 0.12 | 0.1  | -1.16 | 0.128344 | 0.144591 | 0.494376 | 0.418466 |
| MmugDNA.3560.1.S1_at    | MmugDNA.3560.1  | 4.36  | 4.37  | 0.13 | 0.12 | -1.01 | 0.560401 | 0.782633 | 0.794218 | 0.874202 |
| MmugDNA.35607.1.S1_at   | MmugDNA.35607.1 | 11.66 | 11.57 | 0.09 | 0.09 | 1.06  | 0.244647 | 0.233328 | 0.596278 | 0.50468  |
| MmugDNA.35610.1.S1_at   | MmugDNA.35610.1 | 10.18 | 9.52  | 0.35 | 0.17 | 1.58  | 0.120769 | 0.117141 | 0.48574  | 0.384582 |
| MmugDNA.35613.1.S1_at   | MmugDNA.35613.1 | 4.11  | 4.07  | 0.27 | 0.19 | 1.03  | 0.393798 | 0.57453  | 0.695522 | 0.745961 |
| MmugDNA.35617.1.S1_at   | MmugDNA.35617.1 | 4.56  | 4.62  | 0.18 | 0.11 | -1.04 | 0.984613 | 0.069005 | 0.994541 | 0.309017 |
| MmugDNA.35619.1.S1_at   | MmugDNA.35619.1 | 4.89  | 5.2   | 0.31 | 0.21 | -1.24 | 0.245834 | 0.2342   | 0.597272 | 0.505449 |
| MmugDNA.35629.1.S1_at   | MmugDNA.35629.1 | 12.41 | 10.71 | 0.47 | 0.89 | 3.26  | 0.105301 | 0.011393 | 0.465877 | 0.13824  |

|                         |                 |       |       |      |      |        |          |          |          |          |
|-------------------------|-----------------|-------|-------|------|------|--------|----------|----------|----------|----------|
| MmugDNA.3563.1.S1_at    | MmugDNA.3563.1  | 3.69  | 3.66  | 0.03 | 0.02 | 1.02   | 0.113896 | 0.085829 | 0.477258 | 0.337901 |
| MmugDNA.35637.1.S1_at   | MmugDNA.35637.1 | 6.13  | 6.39  | 0.12 | 0.28 | -1.2   | 0.252559 | 0.289717 | 0.601373 | 0.550776 |
| MmugDNA.35638.1.S1_at   | MmugDNA.35638.1 | 5.94  | 6.31  | 0.08 | 0.12 | -1.3   | 0.01037  | 0.003631 | 0.229439 | 0.086261 |
| MmugDNA.35643.1.S1_at   | MmugDNA.35643.1 | 11.51 | 11.47 | 0.11 | 0.2  | 1.02   | 0.910377 | 0.244845 | 0.96453  | 0.514662 |
| MmugDNA.35645.1.S1_s_at | MmugDNA.35645.1 | 5.04  | 6.32  | 0.44 | 1.44 | -2.44  | 0.209574 | 0.173854 | 0.570957 | 0.450133 |
| MmugDNA.35647.1.S1_at   | MmugDNA.35647.1 | 9.42  | 8.91  | 0.43 | 0.39 | 1.43   | 0.901499 | 0.804529 | 0.960648 | 0.887587 |
| MmugDNA.35648.1.S1_at   | MmugDNA.35648.1 | 9.73  | 9.06  | 0.08 | 0.13 | 1.6    | 0.001394 | 0.000236 | 0.146228 | 0.03241  |
| MmugDNA.35651.1.S1_at   | MmugDNA.35651.1 | 5.51  | 6.59  | 0.45 | 0.77 | -2.11  | 0.142606 | 0.130188 | 0.509727 | 0.401892 |
| MmugDNA.35656.1.S1_at   | MmugDNA.35656.1 | 4.9   | 4.25  | 0.39 | 0.52 | 1.57   | 0.735468 | 0.283118 | 0.886267 | 0.545694 |
| MmugDNA.3566.1.S1_at    | MmugDNA.3566.1  | 5.87  | 5.6   | 0.23 | 0.11 | 1.21   | 0.422624 | 0.524753 | 0.713606 | 0.714552 |
| MmugDNA.35679.1.S1_at   | MmugDNA.35679.1 | 9.56  | 9.24  | 0.26 | 0.09 | 1.25   | 0.036732 | 0.007965 | 0.340197 | 0.118702 |
| MmugDNA.35680.1.S1_at   | MmugDNA.35680.1 | 6.77  | 6.48  | 0.24 | 0.2  | 1.22   | 0.099782 | 0.308804 | 0.459718 | 0.56463  |
| MmugDNA.35681.1.S1_at   | MmugDNA.35681.1 | 5.34  | 6.09  | 0.21 | 0.86 | -1.68  | 0.259008 | 0.18886  | 0.606181 | 0.464789 |
| MmugDNA.35682.1.S1_at   | MmugDNA.35682.1 | 9.18  | 8.96  | 0.08 | 0.21 | 1.17   | 0.488368 | 0.021283 | 0.752919 | 0.182646 |
| MmugDNA.35683.1.S1_at   | MmugDNA.35683.1 | 6.06  | 6.09  | 0.21 | 0.18 | -1.02  | 0.437596 | 0.714039 | 0.72256  | 0.834108 |
| MmugDNA.35685.1.S1_at   | MmugDNA.35685.1 | 11.27 | 11.15 | 0.18 | 0.18 | 1.09   | 0.194604 | 0.180326 | 0.558002 | 0.456953 |
| MmugDNA.35687.1.S1_at   | MmugDNA.35687.1 | 10.98 | 11.06 | 0.07 | 0.11 | -1.06  | 0.120318 | 0.112823 | 0.485252 | 0.37844  |
| MmugDNA.35695.1.S1_at   | MmugDNA.35695.1 | 8.21  | 8.1   | 0.09 | 0.7  | 1.07   | 0.860439 | 0.973404 | 0.943676 | 0.985537 |
| MmugDNA.35697.1.S1_at   | MmugDNA.35697.1 | 9.52  | 9.92  | 0.43 | 0.45 | -1.32  | 0.703376 | 0.875903 | 0.868993 | 0.929502 |
| MmugDNA.35700.1.S1_at   | MmugDNA.35700.1 | 10.29 | 11.64 | 0.79 | 0.37 | -2.54  | 0.052357 | 0.043379 | 0.377519 | 0.25294  |
| MmugDNA.35702.1.S1_at   | MmugDNA.35702.1 | 6.73  | 6.53  | 0.31 | 0.48 | 1.15   | 0.797767 | 0.879165 | 0.916116 | 0.931052 |
| MmugDNA.35704.1.S1_at   | MmugDNA.35704.1 | 11.06 | 11.2  | 0.15 | 0.16 | -1.1   | 0.709509 | 0.199587 | 0.872536 | 0.474211 |
| MmugDNA.35709.1.S1_at   | MmugDNA.35709.1 | 8.35  | 9.07  | 0.49 | 0.94 | -1.65  | 0.757169 | 0.911736 | 0.897005 | 0.950257 |
| MmugDNA.3571.1.S1_at    | MmugDNA.3571.1  | 11.92 | 11.99 | 0.07 | 0.17 | -1.05  | 0.905597 | 0.775071 | 0.962377 | 0.869035 |
| MmugDNA.35711.1.S1_at   | MmugDNA.35711.1 | 10.95 | 10.67 | 0.14 | 0.85 | 1.21   | 0.648102 | 0.763482 | 0.841735 | 0.862471 |
| MmugDNA.3572.1.S1_at    | MmugDNA.3572.1  | 7.5   | 7.6   | 0.11 | 0.24 | -1.07  | 0.325818 | 0.223114 | 0.653033 | 0.49588  |
| MmugDNA.35720.1.S1_at   | MmugDNA.35720.1 | 6.5   | 4.81  | 0.18 | 0.62 | 3.24   | 0.022185 | 0.005775 | 0.284758 | 0.104378 |
| MmugDNA.35724.1.S1_at   | MmugDNA.35724.1 | 12.3  | 12.67 | 0.32 | 0.14 | -1.29  | 0.052679 | 0.071508 | 0.378395 | 0.313706 |
| MmugDNA.35730.1.S1_at   | MmugDNA.35730.1 | 5.84  | 9.17  | 1.44 | 2.42 | -10.04 | 0.202131 | 0.257545 | 0.564423 | 0.525294 |
| MmugDNA.35734.1.S1_at   | MmugDNA.35734.1 | 9.45  | 7.44  | 0.89 | 1.23 | 4.01   | 0.087821 | 0.05266  | 0.442117 | 0.275004 |
| MmugDNA.35738.1.S1_at   | MmugDNA.35738.1 | 10.52 | 8.98  | 0.11 | 0.11 | 2.92   | 0.000071 | 0.000019 | 0.112653 | 0.019635 |
| MmugDNA.35741.1.S1_at   | MmugDNA.35741.1 | 10.75 | 10.64 | 0.35 | 0.14 | 1.08   | 0.920671 | 0.179406 | 0.969077 | 0.455908 |
| MmugDNA.35742.1.S1_at   | MmugDNA.35742.1 | 7.42  | 7.02  | 0.13 | 0.32 | 1.31   | 0.0903   | 0.114973 | 0.445754 | 0.381719 |
| MmugDNA.35745.1.S1_at   | MmugDNA.35745.1 | 7.83  | 7.94  | 0.08 | 0.69 | -1.08  | 0.792    | 0.184846 | 0.913645 | 0.460776 |
| MmugDNA.3575.1.S1_at    | MmugDNA.3575.1  | 6.3   | 6.35  | 0.07 | 0.37 | -1.04  | 0.731023 | 0.097421 | 0.883468 | 0.355097 |
| MmugDNA.35758.1.S1_at   | MmugDNA.35758.1 | 5.36  | 4.85  | 0.4  | 0.38 | 1.43   | 0.419125 | 0.506686 | 0.711691 | 0.702546 |
| MmugDNA.35759.1.S1_at   | MmugDNA.35759.1 | 7.42  | 7.41  | 0.14 | 0.12 | 1.01   | 0.902417 | 0.905124 | 0.961084 | 0.94617  |
| MmugDNA.3576.1.S1_at    | MmugDNA.3576.1  | 8.2   | 6.85  | 0.23 | 0.33 | 2.55   | 0.005474 | 0.001007 | 0.191178 | 0.050657 |
| MmugDNA.35760.1.S1_at   | MmugDNA.35760.1 | 6.91  | 7.1   | 0.79 | 0.3  | -1.14  | 0.622346 | 0.084505 | 0.827348 | 0.335901 |
| MmugDNA.35763.1.S1_at   | MmugDNA.35763.1 | 10.19 | 10.15 | 0.21 | 0.27 | 1.03   | 0.346391 | 0.40849  | 0.665792 | 0.635694 |
| MmugDNA.35767.1.S1_s_at | MmugDNA.35767.1 | 12.76 | 12.37 | 0.16 | 0.26 | 1.31   | 0.137157 | 0.049331 | 0.504356 | 0.267063 |

|                         |                 |       |       |      |      |       |          |          |          |          |
|-------------------------|-----------------|-------|-------|------|------|-------|----------|----------|----------|----------|
| MmugDNA.35771.1.S1_at   | MmugDNA.35771.1 | 9.26  | 7.86  | 0.06 | 0.69 | 2.65  | 0.027028 | 0.019949 | 0.305897 | 0.177476 |
| MmugDNA.35773.1.S1_at   | MmugDNA.35773.1 | 6.26  | 6.2   | 0.15 | 0.11 | 1.05  | 0.792146 | 0.928426 | 0.913702 | 0.959349 |
| MmugDNA.35776.1.S1_at   | MmugDNA.35776.1 | 11.43 | 10.2  | 0.11 | 0.49 | 2.36  | 0.023779 | 0.015037 | 0.292771 | 0.155766 |
| MmugDNA.35779.1.S1_at   | MmugDNA.35779.1 | 5.13  | 5.06  | 0.19 | 0.1  | 1.05  | 0.928827 | 0.411169 | 0.972607 | 0.637937 |
| MmugDNA.3578.1.S1_at    | MmugDNA.3578.1  | 6.42  | 6.65  | 0.18 | 0.07 | -1.17 | 0.223389 | 0.255362 | 0.581891 | 0.523406 |
| MmugDNA.35783.1.S1_at   | MmugDNA.35783.1 | 11.24 | 11.68 | 0.16 | 0.7  | -1.36 | 0.351932 | 0.308819 | 0.669313 | 0.56463  |
| MmugDNA.35790.1.S1_at   | MmugDNA.35790.1 | 7.68  | 6.87  | 1.39 | 1.17 | 1.75  | 0.422825 | 0.255019 | 0.713742 | 0.52317  |
| MmugDNA.35791.1.S1_at   | MmugDNA.35791.1 | 10.64 | 11.1  | 0.28 | 0.12 | -1.37 | 0.200177 | 0.287414 | 0.563133 | 0.548663 |
| MmugDNA.35794.1.S1_at   | MmugDNA.35794.1 | 7.97  | 8.48  | 0.14 | 0.99 | -1.43 | 0.458301 | 0.263083 | 0.735376 | 0.529402 |
| MmugDNA.35796.1.S1_at   | MmugDNA.35796.1 | 6.81  | 6.05  | 0.6  | 0.51 | 1.69  | 0.366267 | 0.32956  | 0.679018 | 0.578781 |
| MmugDNA.3580.1.S1_at    | MmugDNA.3580.1  | 11.88 | 11.84 | 0.12 | 0.24 | 1.03  | 0.720863 | 0.328331 | 0.877828 | 0.578034 |
| MmugDNA.35804.1.S1_at   | MmugDNA.35804.1 | 8.83  | 9.05  | 0.03 | 0.36 | -1.17 | 0.313887 | 0.119543 | 0.645397 | 0.388208 |
| MmugDNA.35807.1.S1_at   | MmugDNA.35807.1 | 8.07  | 6.78  | 0.74 | 0.38 | 2.45  | 0.063315 | 0.074603 | 0.400486 | 0.318299 |
| MmugDNA.35808.1.S1_at   | MmugDNA.35808.1 | 9.54  | 9.52  | 0.05 | 0.06 | 1.01  | 0.413584 | 0.000517 | 0.70853  | 0.039588 |
| MmugDNA.35810.1.S1_at   | MmugDNA.35810.1 | 6.69  | 9.19  | 1.24 | 1.02 | -5.63 | 0.044929 | 0.031835 | 0.35922  | 0.220909 |
| MmugDNA.35814.1.S1_at   | MmugDNA.35814.1 | 8.47  | 6.85  | 0.12 | 0.64 | 3.09  | 0.023585 | 0.011784 | 0.291854 | 0.140575 |
| MmugDNA.35816.1.S1_at   | MmugDNA.35816.1 | 6.46  | 6.51  | 0.16 | 0.17 | -1.03 | 0.353245 | 0.486856 | 0.670093 | 0.690091 |
| MmugDNA.35818.1.S1_at   | MmugDNA.35818.1 | 6.91  | 7.11  | 0.28 | 0.18 | -1.15 | 0.387428 | 0.279163 | 0.691966 | 0.542814 |
| MmugDNA.35823.1.S1_s_at | MmugDNA.35823.1 | 5.24  | 5.28  | 0.12 | 0.01 | -1.03 | 0.187848 | 0.097243 | 0.550934 | 0.3549   |
| MmugDNA.35828.1.S1_s_at | MmugDNA.35828.1 | 8.48  | 8.26  | 0.39 | 0.16 | 1.17  | 0.42053  | 0.075144 | 0.712542 | 0.319332 |
| MmugDNA.3583.1.S1_at    | MmugDNA.3583.1  | 6.43  | 6.39  | 0.12 | 0.11 | 1.03  | 0.646399 | 0.350198 | 0.840888 | 0.593963 |
| MmugDNA.35831.1.S1_at   | MmugDNA.35831.1 | 5.39  | 4.95  | 0.83 | 0.37 | 1.36  | 0.265913 | 0.142924 | 0.611558 | 0.416854 |
| MmugDNA.35837.1.S1_at   | MmugDNA.35837.1 | 7.81  | 7.63  | 0.1  | 0.13 | 1.13  | 0.099612 | 0.103725 | 0.459597 | 0.364519 |
| MmugDNA.35839.1.S1_at   | MmugDNA.35839.1 | 9.9   | 10.03 | 0.2  | 0.03 | -1.09 | 0.771013 | 0.611647 | 0.903581 | 0.769481 |
| MmugDNA.3584.1.S1_at    | MmugDNA.3584.1  | 5.6   | 5.58  | 0.13 | 0.06 | 1.01  | 0.818289 | 0.646133 | 0.926289 | 0.792676 |
| MmugDNA.35843.1.S1_at   | MmugDNA.35843.1 | 9.72  | 8.95  | 0.11 | 0.17 | 1.7   | 0.003364 | 0.000691 | 0.177484 | 0.044166 |
| MmugDNA.35844.1.S1_at   | MmugDNA.35844.1 | 10.79 | 10.3  | 0.29 | 0.22 | 1.4   | 0.16628  | 0.189343 | 0.529929 | 0.465092 |
| MmugDNA.35846.1.S1_at   | MmugDNA.35846.1 | 10.24 | 10.41 | 0.09 | 0.31 | -1.12 | 0.448575 | 0.118116 | 0.729722 | 0.385993 |
| MmugDNA.35847.1.S1_at   | MmugDNA.35847.1 | 7.09  | 7.15  | 0.14 | 0.06 | -1.05 | 0.354173 | 0.448233 | 0.670387 | 0.664158 |
| MmugDNA.35851.1.S1_at   | MmugDNA.35851.1 | 8.96  | 8.57  | 0.15 | 0.12 | 1.31  | 0.085758 | 0.051267 | 0.43977  | 0.271825 |
| MmugDNA.35853.1.S1_at   | MmugDNA.35853.1 | 7.49  | 7.35  | 0.75 | 0.83 | 1.1   | 0.675991 | 0.208005 | 0.854832 | 0.482049 |
| MmugDNA.35854.1.S1_at   | MmugDNA.35854.1 | 7.72  | 8.74  | 0.24 | 1.22 | -2.02 | 0.297575 | 0.113755 | 0.633356 | 0.379943 |
| MmugDNA.35867.1.S1_at   | MmugDNA.35867.1 | 6.55  | 7.3   | 1.31 | 1.04 | -1.68 | 0.70279  | 0.848183 | 0.868924 | 0.913817 |
| MmugDNA.35868.1.S1_at   | MmugDNA.35868.1 | 3.54  | 3.54  | 0.3  | 0.12 | 1     | 0.918911 | 0.154084 | 0.968454 | 0.428867 |
| MmugDNA.35870.1.S1_at   | MmugDNA.35870.1 | 7.33  | 6.98  | 0.17 | 0.63 | 1.27  | 0.640753 | 0.165174 | 0.83776  | 0.441389 |
| MmugDNA.35871.1.S1_at   | MmugDNA.35871.1 | 3.59  | 3.59  | 0.06 | 0.11 | -1    | 0.989215 | 0.909417 | 0.99615  | 0.948813 |
| MmugDNA.35874.1.S1_at   | MmugDNA.35874.1 | 5.1   | 5.36  | 0.19 | 0.19 | -1.2  | 0.176697 | 0.211649 | 0.540348 | 0.485681 |
| MmugDNA.35875.1.S1_at   | MmugDNA.35875.1 | 12.92 | 13.01 | 0.09 | 0.35 | -1.07 | 0.671282 | 0.835458 | 0.852602 | 0.905836 |
| MmugDNA.35876.1.S1_at   | MmugDNA.35876.1 | 5.92  | 7.08  | 0.81 | 0.75 | -2.23 | 0.304871 | 0.124979 | 0.638856 | 0.395386 |
| MmugDNA.35877.1.S1_s_at | MmugDNA.35877.1 | 13.53 | 13.48 | 0.04 | 0.27 | 1.04  | 0.552232 | 0.058128 | 0.789376 | 0.287755 |
| MmugDNA.3588.1.S1_at    | MmugDNA.3588.1  | 11.34 | 10.64 | 0.32 | 0.25 | 1.63  | 0.034571 | 0.024368 | 0.333297 | 0.195393 |



|                         |                 |       |       |      |      |       |          |          |          |          |
|-------------------------|-----------------|-------|-------|------|------|-------|----------|----------|----------|----------|
| MmugDNA.35887.1.S1_at   | MmugDNA.35887.1 | 6.3   | 6.3   | 0.07 | 0.07 | 1     | 0.983853 | 0.026273 | 0.994291 | 0.203033 |
| MmugDNA.35890.1.S1_at   | MmugDNA.35890.1 | 8.05  | 8.19  | 0.25 | 0.35 | -1.1  | 0.600462 | 0.626163 | 0.815209 | 0.779643 |
| MmugDNA.35890.1.S1_s_at | MmugDNA.35890.1 | 8.21  | 7.93  | 0.45 | 0.83 | 1.21  | 0.942494 | 0.877576 | 0.977996 | 0.930173 |
| MmugDNA.35891.1.S1_at   | MmugDNA.35891.1 | 6.21  | 6.32  | 0.11 | 0.1  | -1.08 | 0.333699 | 0.704108 | 0.657792 | 0.82833  |
| MmugDNA.35897.1.S1_at   | MmugDNA.35897.1 | 10.18 | 10.36 | 0.07 | 0.76 | -1.13 | 0.995813 | 0.729825 | 0.998446 | 0.843695 |
| MmugDNA.3590.1.S1_at    | MmugDNA.3590.1  | 10.09 | 10.12 | 0.16 | 0.17 | -1.02 | 0.807147 | 0.931437 | 0.920996 | 0.961034 |
| MmugDNA.35906.1.S1_at   | MmugDNA.35906.1 | 8.36  | 9.24  | 0.26 | 0.4  | -1.84 | 0.015948 | 0.006418 | 0.262019 | 0.108813 |
| MmugDNA.35910.1.S1_at   | MmugDNA.35910.1 | 9.29  | 9.08  | 0.33 | 0.09 | 1.16  | 0.087655 | 0.025684 | 0.442009 | 0.200834 |
| MmugDNA.35916.1.S1_at   | MmugDNA.35916.1 | 12.54 | 12.69 | 0.04 | 0.14 | -1.11 | 0.394523 | 0.174884 | 0.695889 | 0.451561 |
| MmugDNA.35917.1.S1_at   | MmugDNA.35917.1 | 7.91  | 7.02  | 0.47 | 0.56 | 1.86  | 0.299492 | 0.105195 | 0.634993 | 0.366982 |
| MmugDNA.35934.1.S1_at   | MmugDNA.35934.1 | 13.44 | 13.45 | 0.06 | 0.05 | -1    | 0.643073 | 0.082872 | 0.839146 | 0.332423 |
| MmugDNA.35937.1.S1_at   | MmugDNA.35937.1 | 7.35  | 7.42  | 0.15 | 0.13 | -1.05 | 0.839165 | 0.444412 | 0.935069 | 0.662053 |
| MmugDNA.35940.1.S1_at   | MmugDNA.35940.1 | 9.33  | 8.77  | 0.17 | 0.19 | 1.47  | 0.024304 | 0.010948 | 0.294535 | 0.13621  |
| MmugDNA.35942.1.S1_at   | MmugDNA.35942.1 | 6.72  | 6.21  | 0.84 | 0.37 | 1.42  | 0.37071  | 0.213884 | 0.681582 | 0.48758  |
| MmugDNA.35949.1.S1_at   | MmugDNA.35949.1 | 6.94  | 6.98  | 0.13 | 0.01 | -1.03 | 0.575431 | 0.150492 | 0.802261 | 0.425011 |
| MmugDNA.35951.1.S1_at   | MmugDNA.35951.1 | 11.71 | 11.43 | 0.19 | 0.91 | 1.22  | 0.739916 | 0.380789 | 0.888334 | 0.617426 |
| MmugDNA.3596.1.S1_at    | MmugDNA.3596.1  | 7.21  | 7.36  | 0.26 | 0.09 | -1.11 | 0.471073 | 0.519922 | 0.742883 | 0.7114   |
| MmugDNA.35963.1.S1_at   | MmugDNA.35963.1 | 7.31  | 7.25  | 0.06 | 0.18 | 1.04  | 0.87239  | 0.953709 | 0.948997 | 0.973663 |
| MmugDNA.35965.1.S1_at   | MmugDNA.35965.1 | 5.14  | 7.81  | 1.56 | 3.12 | -6.35 | 0.61776  | 0.327446 | 0.82487  | 0.577284 |
| MmugDNA.35972.1.S1_at   | MmugDNA.35972.1 | 4.83  | 4.89  | 0.13 | 0.2  | -1.04 | 0.359671 | 0.478956 | 0.673991 | 0.684806 |
| MmugDNA.35983.1.S1_at   | MmugDNA.35983.1 | 3.55  | 3.63  | 0.14 | 0.03 | -1.06 | 0.882747 | 0.967044 | 0.952901 | 0.981752 |
| MmugDNA.35984.1.S1_at   | MmugDNA.35984.1 | 4.85  | 4.43  | 0.08 | 0.04 | 1.34  | 0.001581 | 0.049984 | 0.151907 | 0.268812 |
| MmugDNA.35986.1.S1_at   | MmugDNA.35986.1 | 5.45  | 5.28  | 0.08 | 0.28 | 1.13  | 0.11668  | 0.258083 | 0.480433 | 0.525574 |
| MmugDNA.35993.1.S1_at   | MmugDNA.35993.1 | 5.04  | 4.79  | 0.19 | 0.13 | 1.19  | 0.065528 | 0.016041 | 0.404593 | 0.160532 |
| MmugDNA.36.1.S1_at      | MmugDNA.36.1    | 7.52  | 9.88  | 1.39 | 1.65 | -5.14 | 0.300881 | 0.323548 | 0.636012 | 0.574497 |
| MmugDNA.36001.1.S1_at   | MmugDNA.36001.1 | 6.26  | 6.77  | 0.19 | 0.84 | -1.43 | 0.332351 | 0.228923 | 0.656764 | 0.501181 |
| MmugDNA.36005.1.S1_at   | MmugDNA.36005.1 | 9.42  | 8.69  | 0.29 | 0.36 | 1.65  | 0.25703  | 0.140452 | 0.60447  | 0.413627 |
| MmugDNA.3601.1.S1_at    | MmugDNA.3601.1  | 5.92  | 5.45  | 0.36 | 0.12 | 1.38  | 0.076551 | 0.061948 | 0.425098 | 0.295734 |
| MmugDNA.36013.1.S1_at   | MmugDNA.36013.1 | 7.13  | 7.23  | 0.21 | 0.76 | -1.07 | 0.583226 | 0.458669 | 0.806282 | 0.671276 |
| MmugDNA.36017.1.S1_at   | MmugDNA.36017.1 | 5.98  | 5.99  | 0.02 | 0.16 | -1    | 0.512151 | 0.779809 | 0.765453 | 0.87235  |
| MmugDNA.36018.1.S1_at   | MmugDNA.36018.1 | 10.96 | 11.33 | 0.19 | 0.13 | -1.29 | 0.064339 | 0.082735 | 0.402966 | 0.332205 |
| MmugDNA.36026.1.S1_at   | MmugDNA.36026.1 | 3.84  | 3.53  | 0.04 | 0.12 | 1.24  | 0.012511 | 0.050814 | 0.24203  | 0.270632 |
| MmugDNA.36031.1.S1_at   | MmugDNA.36031.1 | 11.52 | 11.32 | 0.17 | 0.36 | 1.15  | 0.339345 | 0.170691 | 0.661266 | 0.447288 |
| MmugDNA.36034.1.S1_at   | MmugDNA.36034.1 | 3.48  | 3.36  | 0.35 | 0.03 | 1.09  | 0.375205 | 0.193093 | 0.684468 | 0.468554 |
| MmugDNA.36035.1.S1_s_at | MmugDNA.36035.1 | 11.75 | 11.41 | 0.4  | 0.45 | 1.27  | 0.744685 | 0.724758 | 0.890734 | 0.840668 |
| MmugDNA.36037.1.S1_at   | MmugDNA.36037.1 | 10.92 | 11.01 | 0.11 | 0.08 | -1.06 | 0.745886 | 0.01484  | 0.891243 | 0.154918 |
| MmugDNA.36038.1.S1_s_at | MmugDNA.36038.1 | 3.42  | 3.29  | 0.1  | 0.06 | 1.09  | 0.269543 | 0.173266 | 0.614187 | 0.449791 |
| MmugDNA.36039.1.S1_at   | MmugDNA.36039.1 | 5.11  | 5.31  | 0.16 | 0.09 | -1.15 | 0.122312 | 0.066185 | 0.48746  | 0.302785 |
| MmugDNA.36041.1.S1_at   | MmugDNA.36041.1 | 6.83  | 6.82  | 0.08 | 0.36 | 1.01  | 0.846386 | 0.850998 | 0.93835  | 0.915265 |
| MmugDNA.36042.1.S1_at   | MmugDNA.36042.1 | 11.02 | 10.12 | 0.53 | 0.34 | 1.86  | 0.175667 | 0.167108 | 0.539405 | 0.4436   |
| MmugDNA.36046.1.S1_at   | MmugDNA.36046.1 | 10.63 | 10.23 | 0.27 | 0.1  | 1.32  | 0.239387 | 0.050588 | 0.592443 | 0.270301 |

|                         |                 |       |       |      |      |       |          |          |          |          |
|-------------------------|-----------------|-------|-------|------|------|-------|----------|----------|----------|----------|
| MmugDNA.36047.1.S1_at   | MmugDNA.36047.1 | 9.19  | 10.15 | 0.29 | 0.57 | -1.94 | 0.059917 | 0.041633 | 0.392991 | 0.24887  |
| MmugDNA.36049.1.S1_at   | MmugDNA.36049.1 | 10.68 | 9.58  | 0.43 | 0.19 | 2.14  | 0.020867 | 0.007157 | 0.281123 | 0.113788 |
| MmugDNA.36053.1.S1_at   | MmugDNA.36053.1 | 6.28  | 6.26  | 0.13 | 0.3  | 1.01  | 0.930176 | 0.956365 | 0.972992 | 0.975143 |
| MmugDNA.36055.1.S1_at   | MmugDNA.36055.1 | 8.5   | 10.08 | 0.84 | 1.28 | -2.99 | 0.21926  | 0.205137 | 0.578719 | 0.47951  |
| MmugDNA.36058.1.S1_at   | MmugDNA.36058.1 | 10.98 | 10.22 | 0.08 | 0.33 | 1.7   | 0.038324 | 0.036334 | 0.34385  | 0.235105 |
| MmugDNA.36059.1.S1_at   | MmugDNA.36059.1 | 3.29  | 3.48  | 0.17 | 0.31 | -1.14 | 0.16201  | 0.20078  | 0.526638 | 0.475282 |
| MmugDNA.36064.1.S1_at   | MmugDNA.36064.1 | 7.52  | 7.51  | 0.09 | 0.09 | 1.01  | 0.905553 | 0.02109  | 0.962349 | 0.181869 |
| MmugDNA.36073.1.S1_at   | MmugDNA.36073.1 | 9.63  | 9.35  | 0.06 | 0.23 | 1.22  | 0.037767 | 0.027105 | 0.342816 | 0.205797 |
| MmugDNA.36074.1.S1_at   | MmugDNA.36074.1 | 5.44  | 5.49  | 0.16 | 0.09 | -1.04 | 0.947861 | 0.966483 | 0.980005 | 0.981353 |
| MmugDNA.36076.1.S1_at   | MmugDNA.36076.1 | 13.01 | 12.98 | 0.07 | 0.28 | 1.02  | 0.766758 | 0.517621 | 0.901912 | 0.709722 |
| MmugDNA.36085.1.S1_at   | MmugDNA.36085.1 | 11.69 | 11.34 | 0.05 | 0.2  | 1.27  | 0.118316 | 0.138047 | 0.482619 | 0.410919 |
| MmugDNA.36086.1.S1_at   | MmugDNA.36086.1 | 11.84 | 11.82 | 0.14 | 0.22 | 1.02  | 0.204316 | 0.377261 | 0.566752 | 0.614869 |
| MmugDNA.36086.1.S1_s_at | MmugDNA.36086.1 | 11.96 | 11.85 | 0.13 | 0.18 | 1.08  | 0.216253 | 0.279397 | 0.575963 | 0.543027 |
| MmugDNA.36098.1.S1_at   | MmugDNA.36098.1 | 10.46 | 8.6   | 0.6  | 0.38 | 3.63  | 0.010166 | 0.00548  | 0.228247 | 0.102081 |
| MmugDNA.36100.1.S1_at   | MmugDNA.36100.1 | 10.66 | 10.29 | 0.18 | 0.44 | 1.29  | 0.214941 | 0.213284 | 0.57547  | 0.487179 |
| MmugDNA.36101.1.S1_at   | MmugDNA.36101.1 | 4.73  | 4.74  | 0.1  | 0.32 | -1.01 | 0.371095 | 0.486118 | 0.681832 | 0.689618 |
| MmugDNA.36102.1.S1_at   | MmugDNA.36102.1 | 8.14  | 8.4   | 0.26 | 0.35 | -1.2  | 0.312481 | 0.366407 | 0.644204 | 0.606092 |
| MmugDNA.36103.1.S1_at   | MmugDNA.36103.1 | 10.19 | 9.71  | 0.22 | 0.12 | 1.4   | 0.106516 | 0.059534 | 0.467045 | 0.290548 |
| MmugDNA.36105.1.S1_at   | MmugDNA.36105.1 | 8.56  | 8.67  | 0.37 | 0.57 | -1.08 | 0.557679 | 0.746327 | 0.792694 | 0.85272  |
| MmugDNA.36108.1.S1_at   | MmugDNA.36108.1 | 9.43  | 9.79  | 0.27 | 0.25 | -1.29 | 0.081208 | 0.068523 | 0.431851 | 0.308267 |
| MmugDNA.36110.1.S1_at   | MmugDNA.36110.1 | 4.29  | 4.02  | 0.13 | 0.15 | 1.2   | 0.27798  | 0.150089 | 0.620089 | 0.424698 |
| MmugDNA.36114.1.S1_at   | MmugDNA.36114.1 | 10.01 | 10.21 | 0.27 | 0.16 | -1.15 | 0.608281 | 0.531096 | 0.819872 | 0.718415 |
| MmugDNA.36116.1.S1_at   | MmugDNA.36116.1 | 5.29  | 7.88  | 1.41 | 2    | -6.02 | 0.307086 | 0.251764 | 0.639861 | 0.520444 |
| MmugDNA.36118.1.S1_at   | MmugDNA.36118.1 | 10.2  | 9.98  | 0.07 | 0.11 | 1.17  | 0.031662 | 0.047908 | 0.322565 | 0.263765 |
| MmugDNA.36120.1.S1_at   | MmugDNA.36120.1 | 5.49  | 5.49  | 0.58 | 0.1  | -1    | 0.387225 | 0.333399 | 0.691895 | 0.581668 |
| MmugDNA.36127.1.S1_at   | MmugDNA.36127.1 | 5.96  | 6.14  | 0.25 | 0.15 | -1.14 | 0.819856 | 0.692156 | 0.926758 | 0.82091  |
| MmugDNA.36129.1.S1_at   | MmugDNA.36129.1 | 10.99 | 10.63 | 0.14 | 0.47 | 1.28  | 0.180487 | 0.11506  | 0.544821 | 0.381931 |
| MmugDNA.3613.1.S1_at    | MmugDNA.3613.1  | 6.97  | 6.59  | 0.1  | 0.65 | 1.3   | 0.700549 | 0.865453 | 0.867502 | 0.923596 |
| MmugDNA.36130.1.S1_at   | MmugDNA.36130.1 | 10.15 | 9.38  | 0.14 | 0.29 | 1.71  | 0.018806 | 0.005119 | 0.2715   | 0.09927  |
| MmugDNA.36132.1.S1_at   | MmugDNA.36132.1 | 6.83  | 7.08  | 0.16 | 0.09 | -1.19 | 0.149176 | 0.130362 | 0.514001 | 0.402216 |
| MmugDNA.36140.1.S1_at   | MmugDNA.36140.1 | 10.83 | 10.63 | 0.04 | 0.25 | 1.15  | 0.08338  | 0.011217 | 0.43582  | 0.137962 |
| MmugDNA.36144.1.S1_at   | MmugDNA.36144.1 | 5.32  | 5.22  | 0.18 | 0.23 | 1.07  | 0.532085 | 0.134702 | 0.777626 | 0.406729 |
| MmugDNA.36148.1.S1_at   | MmugDNA.36148.1 | 4.92  | 5.18  | 0.17 | 0.04 | -1.2  | 0.086883 | 0.007454 | 0.440541 | 0.115872 |
| MmugDNA.3615.1.S1_at    | MmugDNA.3615.1  | 4.03  | 3.9   | 0.12 | 0.08 | 1.09  | 0.20404  | 0.17326  | 0.566552 | 0.449791 |
| MmugDNA.36161.1.S1_at   | MmugDNA.36161.1 | 6     | 6.29  | 0.67 | 0.23 | -1.22 | 0.481932 | 0.566149 | 0.749333 | 0.740296 |
| MmugDNA.36167.1.S1_at   | MmugDNA.36167.1 | 3.2   | 3.23  | 1.16 | 0.26 | -1.02 | 0.413762 | 0.360893 | 0.708642 | 0.60194  |
| MmugDNA.36168.1.S1_at   | MmugDNA.36168.1 | 5.9   | 5.94  | 0.17 | 0.31 | -1.03 | 0.319996 | 0.473285 | 0.649268 | 0.680582 |
| MmugDNA.36171.1.S1_at   | MmugDNA.36171.1 | 3.43  | 3.44  | 0.26 | 0.1  | -1.01 | 0.443166 | 0.616834 | 0.725992 | 0.772992 |
| MmugDNA.36175.1.S1_at   | MmugDNA.36175.1 | 12.07 | 11.6  | 0.32 | 0.31 | 1.39  | 0.155093 | 0.186918 | 0.519871 | 0.462786 |
| MmugDNA.36182.1.S1_at   | MmugDNA.36182.1 | 9.98  | 9.57  | 1.19 | 1.34 | 1.33  | 0.989681 | 0.374963 | 0.996315 | 0.613186 |
| MmugDNA.36183.1.S1_at   | MmugDNA.36183.1 | 6.23  | 6.21  | 0.05 | 0.18 | 1.01  | 0.411827 | 0.523995 | 0.707626 | 0.714108 |

|                         |                 |       |       |      |      |        |          |          |          |          |
|-------------------------|-----------------|-------|-------|------|------|--------|----------|----------|----------|----------|
| MmugDNA.36185.1.S1_at   | MmugDNA.36185.1 | 6.55  | 6.7   | 1.45 | 0.24 | -1.11  | 0.507246 | 0.332963 | 0.762788 | 0.581326 |
| MmugDNA.36186.1.S1_at   | MmugDNA.36186.1 | 3.51  | 3.5   | 0.08 | 0.05 | 1.01   | 0.36451  | 0.501082 | 0.67737  | 0.699435 |
| MmugDNA.36188.1.S1_at   | MmugDNA.36188.1 | 8.12  | 8.16  | 0.06 | 0.36 | -1.03  | 0.296171 | 0.309581 | 0.632176 | 0.564987 |
| MmugDNA.36196.1.S1_at   | MmugDNA.36196.1 | 9.75  | 10.06 | 0.08 | 0.66 | -1.23  | 0.807508 | 0.243105 | 0.921249 | 0.513356 |
| MmugDNA.36197.1.S1_at   | MmugDNA.36197.1 | 7.5   | 7.06  | 0.03 | 0.32 | 1.36   | 0.235709 | 0.293149 | 0.589606 | 0.553061 |
| MmugDNA.36201.1.S1_at   | MmugDNA.36201.1 | 4.81  | 8.93  | 1.4  | 0.87 | -17.32 | 0.023397 | 0.007566 | 0.291303 | 0.116437 |
| MmugDNA.36212.1.S1_at   | MmugDNA.36212.1 | 4.89  | 5.1   | 0.17 | 0.12 | -1.16  | 0.430377 | 0.366187 | 0.718042 | 0.605975 |
| MmugDNA.36216.1.S1_at   | MmugDNA.36216.1 | 11.17 | 10.57 | 0.05 | 0.19 | 1.51   | 0.003334 | 0.000429 | 0.177442 | 0.038359 |
| MmugDNA.36219.1.S1_at   | MmugDNA.36219.1 | 12.71 | 12.59 | 0.04 | 0.18 | 1.09   | 0.176155 | 0.14989  | 0.539664 | 0.424511 |
| MmugDNA.3622.1.S1_at    | MmugDNA.3622.1  | 8.57  | 8.02  | 0.57 | 0.84 | 1.47   | 0.679171 | 0.258366 | 0.856456 | 0.525631 |
| MmugDNA.36222.1.S1_at   | MmugDNA.36222.1 | 6.27  | 5.84  | 0.76 | 0.09 | 1.35   | 0.34031  | 0.306749 | 0.661731 | 0.5633   |
| MmugDNA.3623.1.S1_at    | MmugDNA.3623.1  | 8.44  | 8.13  | 1.09 | 0.45 | 1.25   | 0.507441 | 0.676561 | 0.762839 | 0.810956 |
| MmugDNA.36233.1.S1_at   | MmugDNA.36233.1 | 13.22 | 13.1  | 0.05 | 0.06 | 1.09   | 0.029698 | 0.019052 | 0.31509  | 0.173688 |
| MmugDNA.36234.1.S1_at   | MmugDNA.36234.1 | 5.34  | 5.36  | 0.18 | 0.15 | -1.01  | 0.430248 | 0.356573 | 0.717986 | 0.598459 |
| MmugDNA.3624.1.S1_at    | MmugDNA.3624.1  | 10.48 | 11.03 | 0.08 | 0.42 | -1.46  | 0.085067 | 0.087429 | 0.438105 | 0.340617 |
| MmugDNA.36241.1.S1_at   | MmugDNA.36241.1 | 12.26 | 11.76 | 0.14 | 0.41 | 1.42   | 0.378913 | 0.484004 | 0.686586 | 0.688263 |
| MmugDNA.36250.1.S1_at   | MmugDNA.36250.1 | 9     | 8.64  | 0.19 | 0.15 | 1.28   | 0.022605 | 0.006551 | 0.287448 | 0.109707 |
| MmugDNA.36250.1.S1_x_at | MmugDNA.36250.1 | 8.94  | 8.45  | 0.29 | 0.07 | 1.41   | 0.032325 | 0.016036 | 0.324641 | 0.160532 |
| MmugDNA.36251.1.S1_at   | MmugDNA.36251.1 | 8.54  | 7.71  | 0.15 | 0.4  | 1.77   | 0.02953  | 0.016438 | 0.314679 | 0.162368 |
| MmugDNA.36254.1.S1_at   | MmugDNA.36254.1 | 11.49 | 11.06 | 0.05 | 0.33 | 1.35   | 0.114082 | 0.087003 | 0.47744  | 0.339865 |
| MmugDNA.36256.1.S1_at   | MmugDNA.36256.1 | 3.26  | 3.3   | 0.09 | 0.14 | -1.03  | 0.975837 | 0.173826 | 0.990673 | 0.450128 |
| MmugDNA.36257.1.S1_at   | MmugDNA.36257.1 | 9     | 8.66  | 0.07 | 0.25 | 1.27   | 0.244015 | 0.231892 | 0.595699 | 0.503594 |
| MmugDNA.36263.1.S1_at   | MmugDNA.36263.1 | 7.46  | 7.34  | 0.1  | 0.12 | 1.08   | 0.68468  | 0.344029 | 0.858795 | 0.58962  |
| MmugDNA.36266.1.S1_at   | MmugDNA.36266.1 | 7.59  | 7.23  | 0.08 | 0.29 | 1.28   | 0.153421 | 0.215387 | 0.517785 | 0.489067 |
| MmugDNA.36271.1.S1_at   | MmugDNA.36271.1 | 4     | 4.17  | 0.06 | 0.07 | -1.12  | 0.156028 | 0.069687 | 0.520741 | 0.310164 |
| MmugDNA.36276.1.S1_at   | MmugDNA.36276.1 | 9.86  | 9.72  | 0.21 | 0.22 | 1.11   | 0.384881 | 0.014403 | 0.690118 | 0.153204 |
| MmugDNA.36278.1.S1_at   | MmugDNA.36278.1 | 9.18  | 9.21  | 0.24 | 0.15 | -1.02  | 0.762328 | 0.49512  | 0.899996 | 0.695319 |
| MmugDNA.36279.1.S1_at   | MmugDNA.36279.1 | 8.05  | 8.65  | 0.3  | 0.28 | -1.52  | 0.045071 | 0.028808 | 0.359925 | 0.211578 |
| MmugDNA.36280.1.S1_at   | MmugDNA.36280.1 | 6.42  | 6.77  | 0.37 | 0.21 | -1.28  | 0.083513 | 0.056852 | 0.43582  | 0.284556 |
| MmugDNA.36281.1.S1_at   | MmugDNA.36281.1 | 8.43  | 7.96  | 0.29 | 0.13 | 1.39   | 0.023551 | 0.079221 | 0.291638 | 0.326399 |
| MmugDNA.36282.1.S1_at   | MmugDNA.36282.1 | 4.32  | 5.11  | 0.5  | 0.45 | -1.73  | 0.161474 | 0.244175 | 0.526444 | 0.514164 |
| MmugDNA.36283.1.S1_at   | MmugDNA.36283.1 | 9.79  | 9.11  | 0.53 | 0.1  | 1.6    | 0.066616 | 0.096411 | 0.406609 | 0.354015 |
| MmugDNA.36284.1.S1_at   | MmugDNA.36284.1 | 12.23 | 12.01 | 0.05 | 0.12 | 1.17   | 0.083413 | 0.181867 | 0.43582  | 0.458395 |
| MmugDNA.36286.1.S1_at   | MmugDNA.36286.1 | 11.52 | 12.74 | 0.26 | 0.27 | -2.33  | 0.004213 | 0.000979 | 0.181739 | 0.049927 |
| MmugDNA.36293.1.S1_at   | MmugDNA.36293.1 | 9.52  | 9.54  | 0.55 | 0.59 | -1.01  | 0.644237 | 0.435507 | 0.839719 | 0.655256 |
| MmugDNA.36294.1.S1_at   | MmugDNA.36294.1 | 4.88  | 4.27  | 0.58 | 0.23 | 1.53   | 0.132472 | 0.084547 | 0.498643 | 0.335953 |
| MmugDNA.36297.1.S1_at   | MmugDNA.36297.1 | 8.4   | 9.09  | 0.37 | 0.27 | -1.62  | 0.052686 | 0.05385  | 0.378395 | 0.277598 |
| MmugDNA.36298.1.S1_at   | MmugDNA.36298.1 | 5.7   | 5.91  | 0.13 | 0.08 | -1.15  | 0.148909 | 0.170746 | 0.51391  | 0.447316 |
| MmugDNA.36299.1.S1_s_at | MmugDNA.36299.1 | 3.71  | 3.89  | 0.13 | 0.16 | -1.13  | 0.113657 | 0.118732 | 0.476946 | 0.386775 |
| MmugDNA.36301.1.S1_at   | MmugDNA.36301.1 | 11.41 | 11.33 | 0.13 | 0.09 | 1.06   | 0.0899   | 0.06582  | 0.44539  | 0.301933 |
| MmugDNA.36303.1.S1_at   | MmugDNA.36303.1 | 6.09  | 5.83  | 0.49 | 0.13 | 1.2    | 0.254015 | 0.162447 | 0.602339 | 0.438575 |

|                         |                 |       |       |      |      |       |          |          |          |          |
|-------------------------|-----------------|-------|-------|------|------|-------|----------|----------|----------|----------|
| MmugDNA.36308.1.S1_at   | MmugDNA.36308.1 | 11.61 | 11.22 | 0.09 | 0.36 | 1.31  | 0.060359 | 0.039173 | 0.393414 | 0.243072 |
| MmugDNA.3631.1.S1_at    | MmugDNA.3631.1  | 8.69  | 7.75  | 0.1  | 0.32 | 1.92  | 0.00357  | 0.000893 | 0.179515 | 0.047789 |
| MmugDNA.36318.1.S1_at   | MmugDNA.36318.1 | 10.5  | 10.82 | 1    | 1.06 | -1.24 | 0.773857 | 0.507757 | 0.904999 | 0.703325 |
| MmugDNA.36319.1.S1_at   | MmugDNA.36319.1 | 6.28  | 6.31  | 0.2  | 0.21 | -1.02 | 0.720497 | 0.67243  | 0.877567 | 0.808568 |
| MmugDNA.3633.1.S1_at    | MmugDNA.3633.1  | 9.6   | 9.44  | 0.08 | 0.08 | 1.12  | 0.094636 | 0.042026 | 0.452166 | 0.249463 |
| MmugDNA.3634.1.S1_at    | MmugDNA.3634.1  | 5.6   | 5.55  | 0.21 | 0.13 | 1.03  | 0.614264 | 0.436905 | 0.823186 | 0.656357 |
| MmugDNA.36342.1.S1_s_at | MmugDNA.36342.1 | 9.32  | 8.74  | 0.21 | 0.59 | 1.49  | 0.260576 | 0.301627 | 0.607303 | 0.55955  |
| MmugDNA.36345.1.S1_at   | MmugDNA.36345.1 | 10.52 | 10.95 | 0.35 | 0.41 | -1.35 | 0.297204 | 0.352538 | 0.633051 | 0.595789 |
| MmugDNA.3635.1.S1_at    | MmugDNA.3635.1  | 4.09  | 4.04  | 0.43 | 0.16 | 1.03  | 0.898103 | 0.978862 | 0.959278 | 0.988548 |
| MmugDNA.36354.1.S1_at   | MmugDNA.36354.1 | 7.58  | 7.06  | 0.65 | 0.49 | 1.44  | 0.799145 | 0.798489 | 0.916874 | 0.884012 |
| MmugDNA.36355.1.S1_at   | MmugDNA.36355.1 | 10.7  | 11.14 | 0.23 | 0.14 | -1.36 | 0.059057 | 0.060048 | 0.390921 | 0.291714 |
| MmugDNA.3636.1.S1_at    | MmugDNA.3636.1  | 3.79  | 3.91  | 0.26 | 0.05 | -1.08 | 0.971583 | 0.985949 | 0.989111 | 0.99201  |
| MmugDNA.36364.1.S1_at   | MmugDNA.36364.1 | 3.97  | 4.06  | 0.08 | 0.19 | -1.07 | 0.376383 | 0.510339 | 0.685198 | 0.704837 |
| MmugDNA.36368.1.S1_at   | MmugDNA.36368.1 | 11.1  | 11.27 | 0.21 | 0.24 | -1.13 | 0.186751 | 0.229044 | 0.550106 | 0.501378 |
| MmugDNA.36369.1.S1_at   | MmugDNA.36369.1 | 4.28  | 6.32  | 0.2  | 1.24 | -4.1  | 0.122609 | 0.04209  | 0.487859 | 0.249638 |
| MmugDNA.36371.1.S1_at   | MmugDNA.36371.1 | 7.33  | 7.36  | 0.16 | 0.07 | -1.02 | 0.767468 | 0.232373 | 0.902346 | 0.504088 |
| MmugDNA.36372.1.S1_at   | MmugDNA.36372.1 | 9.9   | 9.97  | 0.2  | 0.23 | -1.05 | 0.793887 | 0.942726 | 0.914508 | 0.967499 |
| MmugDNA.36375.1.S1_at   | MmugDNA.36375.1 | 3.68  | 3.67  | 0.01 | 0.14 | 1     | 0.423815 | 0.535202 | 0.714199 | 0.720821 |
| MmugDNA.36378.1.S1_at   | MmugDNA.36378.1 | 5.4   | 5.49  | 0.1  | 0.14 | -1.06 | 0.798949 | 0.843642 | 0.916772 | 0.91093  |
| MmugDNA.36382.1.S1_at   | MmugDNA.36382.1 | 10.92 | 10.61 | 0.24 | 0.28 | 1.24  | 0.143204 | 0.110174 | 0.510106 | 0.374314 |
| MmugDNA.36383.1.S1_at   | MmugDNA.36383.1 | 5.52  | 5.6   | 0.19 | 0.08 | -1.06 | 0.843302 | 0.120884 | 0.936953 | 0.389784 |
| MmugDNA.36389.1.S1_at   | MmugDNA.36389.1 | 5.97  | 5.55  | 0.67 | 0.09 | 1.34  | 0.403926 | 0.000187 | 0.702465 | 0.030598 |
| MmugDNA.36391.1.S1_at   | MmugDNA.36391.1 | 9.11  | 8.88  | 0.2  | 0.15 | 1.17  | 0.22128  | 0.322046 | 0.580161 | 0.57365  |
| MmugDNA.36392.1.S1_at   | MmugDNA.36392.1 | 11.17 | 11.19 | 0.23 | 0.25 | -1.02 | 0.432734 | 0.312181 | 0.719228 | 0.566915 |
| MmugDNA.36394.1.S1_s_at | MmugDNA.36394.1 | 12.1  | 12.4  | 0.06 | 0.94 | -1.23 | 0.824304 | 0.875841 | 0.928728 | 0.929484 |
| MmugDNA.36395.1.S1_at   | MmugDNA.36395.1 | 12.49 | 12.34 | 0.15 | 0.05 | 1.11  | 0.295452 | 0.006512 | 0.631738 | 0.109536 |
| MmugDNA.36404.1.S1_at   | MmugDNA.36404.1 | 12.51 | 12.42 | 0.03 | 0.11 | 1.07  | 0.317169 | 0.277289 | 0.647872 | 0.54125  |
| MmugDNA.36406.1.S1_at   | MmugDNA.36406.1 | 12.14 | 12.27 | 0.03 | 0.19 | -1.09 | 0.372979 | 0.299005 | 0.683189 | 0.557628 |
| MmugDNA.36408.1.S1_at   | MmugDNA.36408.1 | 5.01  | 4.56  | 0.24 | 0.28 | 1.37  | 0.195785 | 0.283633 | 0.558925 | 0.546058 |
| MmugDNA.36409.1.S1_at   | MmugDNA.36409.1 | 4.01  | 2.86  | 0.7  | 0.1  | 2.21  | 0.165733 | 0.236416 | 0.529716 | 0.507314 |
| MmugDNA.36411.1.S1_at   | MmugDNA.36411.1 | 11.16 | 10.73 | 0.05 | 0.13 | 1.35  | 0.004295 | 0.003141 | 0.18216  | 0.081652 |
| MmugDNA.36418.1.S1_at   | MmugDNA.36418.1 | 5.63  | 5.86  | 0.2  | 0.02 | -1.17 | 0.401753 | 0.391487 | 0.701003 | 0.625086 |
| MmugDNA.36425.1.S1_at   | MmugDNA.36425.1 | 8.59  | 8.29  | 0.04 | 0.12 | 1.23  | 0.006948 | 0.000271 | 0.202482 | 0.033839 |
| MmugDNA.36430.1.S1_at   | MmugDNA.36430.1 | 3.56  | 3.8   | 0.24 | 0.46 | -1.19 | 0.943592 | 0.953484 | 0.978535 | 0.97352  |
| MmugDNA.36433.1.S1_at   | MmugDNA.36433.1 | 6.84  | 8     | 0.47 | 1.03 | -2.25 | 0.148859 | 0.147769 | 0.51391  | 0.422056 |
| MmugDNA.36434.1.S1_at   | MmugDNA.36434.1 | 5.38  | 5.67  | 0.61 | 0.64 | -1.23 | 0.508709 | 0.133125 | 0.763905 | 0.404764 |
| MmugDNA.36435.1.S1_s_at | MmugDNA.36435.1 | 10.62 | 10.85 | 0.04 | 0.08 | -1.17 | 0.004215 | 0.013182 | 0.181739 | 0.14735  |
| MmugDNA.36443.1.S1_at   | MmugDNA.36443.1 | 11.96 | 11.63 | 0.27 | 0.29 | 1.26  | 0.222654 | 0.198836 | 0.581088 | 0.473475 |
| MmugDNA.36444.1.S1_at   | MmugDNA.36444.1 | 11.38 | 11.08 | 0.14 | 0.14 | 1.23  | 0.285134 | 0.400998 | 0.624705 | 0.630658 |
| MmugDNA.36445.1.S1_at   | MmugDNA.36445.1 | 6.73  | 6.94  | 0.14 | 0.12 | -1.16 | 0.566362 | 0.305842 | 0.797591 | 0.562731 |
| MmugDNA.36448.1.S1_at   | MmugDNA.36448.1 | 11.41 | 10.93 | 0.16 | 0.31 | 1.39  | 0.16122  | 0.205436 | 0.526266 | 0.479764 |

|                       |                 |       |       |      |      |        |          |          |          |          |
|-----------------------|-----------------|-------|-------|------|------|--------|----------|----------|----------|----------|
| MmugDNA.3645.1.S1_at  | MmugDNA.3645.1  | 11.92 | 12.11 | 0.02 | 0.14 | -1.14  | 0.088603 | 0.031672 | 0.44348  | 0.22028  |
| MmugDNA.36451.1.S1_at | MmugDNA.36451.1 | 14.35 | 14.35 | 0.12 | 0.08 | -1     | 0.797828 | 0.945267 | 0.916118 | 0.968942 |
| MmugDNA.36454.1.S1_at | MmugDNA.36454.1 | 6.2   | 6.31  | 0.13 | 0.04 | -1.08  | 0.160595 | 0.102409 | 0.525655 | 0.36259  |
| MmugDNA.36456.1.S1_at | MmugDNA.36456.1 | 6.81  | 7.11  | 0.04 | 0.29 | -1.24  | 0.369439 | 0.495799 | 0.680714 | 0.695734 |
| MmugDNA.36458.1.S1_at | MmugDNA.36458.1 | 11.88 | 11.87 | 0.08 | 0.19 | 1.01   | 0.302462 | 0.401046 | 0.63692  | 0.630667 |
| MmugDNA.36459.1.S1_at | MmugDNA.36459.1 | 8.57  | 12.29 | 1.88 | 2.91 | -13.16 | 0.646906 | 0.38946  | 0.84111  | 0.623564 |
| MmugDNA.36468.1.S1_at | MmugDNA.36468.1 | 3.73  | 3.49  | 0.13 | 0.19 | 1.18   | 0.670085 | 0.114104 | 0.852318 | 0.380528 |
| MmugDNA.36470.1.S1_at | MmugDNA.36470.1 | 10.99 | 9.61  | 0.21 | 0.43 | 2.61   | 0.011046 | 0.006053 | 0.233671 | 0.106152 |
| MmugDNA.36471.1.S1_at | MmugDNA.36471.1 | 5.88  | 6.02  | 0.16 | 0.13 | -1.1   | 0.269127 | 0.272182 | 0.613808 | 0.536939 |
| MmugDNA.36474.1.S1_at | MmugDNA.36474.1 | 11.87 | 9.84  | 0.21 | 0.85 | 4.06   | 0.032381 | 0.040744 | 0.324784 | 0.246735 |
| MmugDNA.36475.1.S1_at | MmugDNA.36475.1 | 11.7  | 11.65 | 0.15 | 0.03 | 1.04   | 0.683288 | 0.651438 | 0.858347 | 0.796213 |
| MmugDNA.36477.1.S1_at | MmugDNA.36477.1 | 6.99  | 7.02  | 0.18 | 0.32 | -1.02  | 0.205377 | 0.249047 | 0.567878 | 0.518159 |
| MmugDNA.36481.1.S1_at | MmugDNA.36481.1 | 9.2   | 9.94  | 0.07 | 0.41 | -1.67  | 0.096577 | 0.018045 | 0.455338 | 0.169372 |
| MmugDNA.36482.1.S1_at | MmugDNA.36482.1 | 11.96 | 11.98 | 0.14 | 0.36 | -1.01  | 0.740083 | 0.879185 | 0.888425 | 0.931052 |
| MmugDNA.36483.1.S1_at | MmugDNA.36483.1 | 7.85  | 8.43  | 0.37 | 0.38 | -1.49  | 0.30824  | 0.216419 | 0.64064  | 0.49     |
| MmugDNA.36489.1.S1_at | MmugDNA.36489.1 | 12.3  | 12.69 | 0.43 | 0.16 | -1.3   | 0.24098  | 0.208171 | 0.593738 | 0.482086 |
| MmugDNA.36492.1.S1_at | MmugDNA.36492.1 | 4.32  | 4.88  | 0.12 | 0.59 | -1.48  | 0.16621  | 0.001426 | 0.529929 | 0.057607 |
| MmugDNA.36495.1.S1_at | MmugDNA.36495.1 | 8.77  | 6.73  | 0.85 | 1.14 | 4.11   | 0.078958 | 0.074955 | 0.428609 | 0.318932 |
| MmugDNA.36496.1.S1_at | MmugDNA.36496.1 | 5.49  | 5.63  | 0.57 | 0.83 | -1.1   | 0.451882 | 0.58147  | 0.731768 | 0.750474 |
| MmugDNA.36497.1.S1_at | MmugDNA.36497.1 | 7.83  | 10.09 | 1.04 | 2.13 | -4.79  | 0.367681 | 0.28986  | 0.679512 | 0.550831 |
| MmugDNA.36501.1.S1_at | MmugDNA.36501.1 | 5.35  | 5.51  | 0.05 | 0.11 | -1.11  | 0.143264 | 0.12306  | 0.510159 | 0.393015 |
| MmugDNA.36502.1.S1_at | MmugDNA.36502.1 | 11.05 | 10.95 | 0.02 | 0.2  | 1.07   | 0.151751 | 0.068177 | 0.516502 | 0.307314 |
| MmugDNA.36503.1.S1_at | MmugDNA.36503.1 | 3.72  | 3.62  | 0.24 | 0.1  | 1.07   | 0.32022  | 0.429851 | 0.64942  | 0.651082 |
| MmugDNA.36505.1.S1_at | MmugDNA.36505.1 | 9.68  | 9.53  | 0.35 | 0.44 | 1.11   | 0.298177 | 0.401719 | 0.633823 | 0.631068 |
| MmugDNA.36507.1.S1_at | MmugDNA.36507.1 | 10.04 | 9.9   | 0.22 | 0.35 | 1.1    | 0.883109 | 0.877281 | 0.952961 | 0.930079 |
| MmugDNA.36516.1.S1_at | MmugDNA.36516.1 | 8.74  | 10.68 | 0.43 | 0.48 | -3.84  | 0.012205 | 0.00756  | 0.240358 | 0.116437 |
| MmugDNA.36517.1.S1_at | MmugDNA.36517.1 | 11.86 | 11.19 | 0.08 | 0.34 | 1.59   | 0.078739 | 0.057445 | 0.428609 | 0.285736 |
| MmugDNA.3652.1.S1_at  | MmugDNA.3652.1  | 11.97 | 12.07 | 0.11 | 0.08 | -1.07  | 0.498581 | 0.116164 | 0.758511 | 0.383524 |
| MmugDNA.36521.1.S1_at | MmugDNA.36521.1 | 10.94 | 10.77 | 0.42 | 0.2  | 1.13   | 0.240677 | 0.305153 | 0.593522 | 0.562255 |
| MmugDNA.36523.1.S1_at | MmugDNA.36523.1 | 9.55  | 10.43 | 0.42 | 0.25 | -1.83  | 0.065991 | 0.061467 | 0.405651 | 0.294736 |
| MmugDNA.36525.1.S1_at | MmugDNA.36525.1 | 9.68  | 10.49 | 0.3  | 0.55 | -1.76  | 0.064988 | 0.054032 | 0.403744 | 0.277914 |
| MmugDNA.36529.1.S1_at | MmugDNA.36529.1 | 10.73 | 10.59 | 0.16 | 0.27 | 1.1    | 0.31802  | 0.095431 | 0.64802  | 0.352453 |
| MmugDNA.3654.1.S1_at  | MmugDNA.3654.1  | 7.29  | 7.21  | 0.41 | 0.47 | 1.05   | 0.718618 | 0.628462 | 0.876527 | 0.781199 |
| MmugDNA.36544.1.S1_at | MmugDNA.36544.1 | 10.29 | 10.43 | 0.28 | 0.15 | -1.1   | 0.297898 | 0.447525 | 0.633563 | 0.663579 |
| MmugDNA.36545.1.S1_at | MmugDNA.36545.1 | 9.82  | 10.49 | 0.48 | 0.14 | -1.59  | 0.060016 | 0.044663 | 0.393081 | 0.255753 |
| MmugDNA.36546.1.S1_at | MmugDNA.36546.1 | 12.64 | 12.33 | 0.14 | 0.18 | 1.24   | 0.040317 | 0.019313 | 0.349277 | 0.174723 |
| MmugDNA.36547.1.S1_at | MmugDNA.36547.1 | 4.03  | 4.15  | 0.25 | 0.25 | -1.09  | 0.409594 | 0.409784 | 0.70588  | 0.636816 |
| MmugDNA.36548.1.S1_at | MmugDNA.36548.1 | 6.52  | 6.36  | 0.11 | 0.19 | 1.11   | 0.974399 | 0.308055 | 0.989998 | 0.56421  |
| MmugDNA.36550.1.S1_at | MmugDNA.36550.1 | 3.59  | 3.37  | 1.46 | 0.25 | 1.16   | 0.395432 | 0.411897 | 0.69645  | 0.638434 |
| MmugDNA.36554.1.S1_at | MmugDNA.36554.1 | 3.61  | 3.59  | 0.51 | 0.16 | 1.01   | 0.266212 | 0.233117 | 0.611749 | 0.504458 |
| MmugDNA.36555.1.S1_at | MmugDNA.36555.1 | 9.21  | 7.26  | 0.87 | 1.33 | 3.87   | 0.305998 | 0.39023  | 0.63924  | 0.624116 |

|                         |                 |       |       |      |      |        |          |          |          |          |
|-------------------------|-----------------|-------|-------|------|------|--------|----------|----------|----------|----------|
| MmugDNA.36556.1.S1_at   | MmugDNA.36556.1 | 10.24 | 9.18  | 0.31 | 0.38 | 2.08   | 0.019532 | 0.001635 | 0.27501  | 0.061167 |
| MmugDNA.36559.1.S1_at   | MmugDNA.36559.1 | 9.02  | 8.71  | 0.28 | 0.32 | 1.24   | 0.269945 | 0.326912 | 0.614557 | 0.576863 |
| MmugDNA.36563.1.S1_at   | MmugDNA.36563.1 | 6.09  | 6.08  | 0.07 | 0.17 | 1      | 0.356113 | 0.470837 | 0.671384 | 0.679124 |
| MmugDNA.36566.1.S1_at   | MmugDNA.36566.1 | 11.94 | 11.38 | 0.18 | 0.32 | 1.47   | 0.11004  | 0.058306 | 0.471453 | 0.288258 |
| MmugDNA.36567.1.S1_at   | MmugDNA.36567.1 | 9.52  | 8.17  | 0.37 | 0.49 | 2.55   | 0.02355  | 0.009969 | 0.291638 | 0.131094 |
| MmugDNA.36570.1.S1_at   | MmugDNA.36570.1 | 5.54  | 5.7   | 0.05 | 0.1  | -1.12  | 0.026719 | 0.01767  | 0.304153 | 0.168065 |
| MmugDNA.36573.1.S1_at   | MmugDNA.36573.1 | 3.54  | 3.74  | 0.23 | 0.42 | -1.14  | 0.384055 | 0.354036 | 0.689679 | 0.597005 |
| MmugDNA.36574.1.S1_at   | MmugDNA.36574.1 | 8.75  | 8.55  | 0.03 | 0.16 | 1.15   | 0.145071 | 0.068681 | 0.511209 | 0.308653 |
| MmugDNA.36576.1.S1_at   | MmugDNA.36576.1 | 7.99  | 12.4  | 2.28 | 2.83 | -21.22 | 0.336664 | 0.210054 | 0.659639 | 0.483835 |
| MmugDNA.36578.1.S1_at   | MmugDNA.36578.1 | 7.59  | 7.37  | 0.68 | 0.4  | 1.17   | 0.983724 | 0.258262 | 0.994242 | 0.52558  |
| MmugDNA.36580.1.S1_at   | MmugDNA.36580.1 | 7.16  | 7.56  | 0.04 | 0.3  | -1.33  | 0.276327 | 0.114847 | 0.618408 | 0.381487 |
| MmugDNA.36588.1.S1_at   | MmugDNA.36588.1 | 6.93  | 6.79  | 0.02 | 0.2  | 1.1    | 0.302095 | 0.423981 | 0.636849 | 0.646619 |
| MmugDNA.3659.1.S1_at    | MmugDNA.3659.1  | 11.9  | 11.76 | 0.22 | 0.47 | 1.11   | 0.77666  | 0.856143 | 0.906454 | 0.917847 |
| MmugDNA.36593.1.S1_at   | MmugDNA.36593.1 | 7.68  | 6.56  | 0.33 | 0.61 | 2.17   | 0.0849   | 0.07968  | 0.437878 | 0.326981 |
| MmugDNA.36597.1.S1_at   | MmugDNA.36597.1 | 6.55  | 6.43  | 0.22 | 0.49 | 1.09   | 0.166625 | 0.025278 | 0.530266 | 0.19945  |
| MmugDNA.366.1.S1_at     | MmugDNA.366.1   | 6.63  | 7.11  | 0.42 | 0.64 | -1.4   | 0.29327  | 0.306201 | 0.630351 | 0.562901 |
| MmugDNA.3660.1.S1_at    | MmugDNA.3660.1  | 11.4  | 9.82  | 0.18 | 0.28 | 2.98   | 0.001975 | 0.000369 | 0.155636 | 0.037273 |
| MmugDNA.36601.1.S1_at   | MmugDNA.36601.1 | 5.9   | 6.22  | 0.09 | 0.24 | -1.24  | 0.055452 | 0.028086 | 0.383797 | 0.209154 |
| MmugDNA.36608.1.S1_at   | MmugDNA.36608.1 | 3.81  | 3.83  | 0.14 | 0.16 | -1.01  | 0.724967 | 0.686945 | 0.879971 | 0.817365 |
| MmugDNA.36609.1.S1_at   | MmugDNA.36609.1 | 11.13 | 10.19 | 0.06 | 0.62 | 1.93   | 0.049165 | 0.017303 | 0.370772 | 0.166509 |
| MmugDNA.3661.1.S1_at    | MmugDNA.3661.1  | 10.99 | 11.09 | 0.04 | 0.21 | -1.07  | 0.715076 | 0.81553  | 0.875005 | 0.893609 |
| MmugDNA.36610.1.S1_at   | MmugDNA.36610.1 | 11.33 | 11.5  | 0.23 | 0.37 | -1.13  | 0.220109 | 0.317111 | 0.579297 | 0.570377 |
| MmugDNA.36612.1.S1_at   | MmugDNA.36612.1 | 12.6  | 12.78 | 0.08 | 0.14 | -1.13  | 0.15236  | 0.235314 | 0.51708  | 0.506346 |
| MmugDNA.36612.1.S1_s_at | MmugDNA.36612.1 | 12.6  | 12.8  | 0.04 | 0.09 | -1.15  | 0.04287  | 0.077375 | 0.355448 | 0.323177 |
| MmugDNA.36613.1.S1_at   | MmugDNA.36613.1 | 6.5   | 6.55  | 0.3  | 0.35 | -1.03  | 0.857538 | 0.961321 | 0.942274 | 0.97814  |
| MmugDNA.36617.1.S1_at   | MmugDNA.36617.1 | 4.8   | 5.65  | 0.14 | 0.87 | -1.81  | 0.170782 | 0.200135 | 0.534664 | 0.474603 |
| MmugDNA.36618.1.S1_at   | MmugDNA.36618.1 | 8.81  | 8.53  | 0.39 | 0.22 | 1.21   | 0.952705 | 0.958009 | 0.982319 | 0.976273 |
| MmugDNA.36618.1.S1_s_at | MmugDNA.36618.1 | 10.24 | 9.8   | 0.38 | 0.41 | 1.35   | 0.276007 | 0.402868 | 0.618086 | 0.631631 |
| MmugDNA.36620.1.S1_at   | MmugDNA.36620.1 | 10.91 | 10.67 | 0.11 | 0.28 | 1.17   | 0.656461 | 0.703103 | 0.845392 | 0.827866 |
| MmugDNA.36621.1.S1_s_at | MmugDNA.36621.1 | 6.94  | 7.71  | 0.62 | 1.09 | -1.7   | 0.475351 | 0.653414 | 0.745747 | 0.797435 |
| MmugDNA.36630.1.S1_at   | MmugDNA.36630.1 | 9.31  | 8.84  | 0.47 | 0.45 | 1.38   | 0.396782 | 0.007909 | 0.697224 | 0.118534 |
| MmugDNA.36631.1.S1_at   | MmugDNA.36631.1 | 10.01 | 10.11 | 0.21 | 0.31 | -1.06  | 0.436297 | 0.580266 | 0.721646 | 0.749616 |
| MmugDNA.36632.1.S1_s_at | MmugDNA.36632.1 | 4.85  | 4.92  | 0.1  | 0.16 | -1.05  | 0.25099  | 0.199753 | 0.600488 | 0.474382 |
| MmugDNA.36633.1.S1_at   | MmugDNA.36633.1 | 5.99  | 6.06  | 0.21 | 0.05 | -1.05  | 0.669155 | 0.475878 | 0.852119 | 0.682387 |
| MmugDNA.36634.1.S1_at   | MmugDNA.36634.1 | 6.37  | 6.44  | 0.36 | 0.61 | -1.05  | 0.870546 | 0.639218 | 0.948314 | 0.788125 |
| MmugDNA.36636.1.S1_at   | MmugDNA.36636.1 | 9.76  | 10.51 | 0.09 | 0.61 | -1.69  | 0.348882 | 0.284148 | 0.667271 | 0.546362 |
| MmugDNA.36639.1.S1_at   | MmugDNA.36639.1 | 9.12  | 8.55  | 0.16 | 0.33 | 1.49   | 0.153501 | 0.088107 | 0.517898 | 0.341641 |
| MmugDNA.3664.1.S1_at    | MmugDNA.3664.1  | 11.47 | 11.66 | 0.14 | 0.42 | -1.15  | 0.533131 | 0.397295 | 0.777978 | 0.628775 |
| MmugDNA.36640.1.S1_s_at | MmugDNA.36640.1 | 7.89  | 7.91  | 0.14 | 0.08 | -1.01  | 0.486154 | 0.266471 | 0.751411 | 0.532234 |
| MmugDNA.36642.1.S1_at   | MmugDNA.36642.1 | 4.99  | 4.72  | 0.37 | 0.14 | 1.21   | 0.588301 | 0.771415 | 0.808931 | 0.867177 |
| MmugDNA.36643.1.S1_at   | MmugDNA.36643.1 | 9.95  | 10.94 | 0.23 | 0.31 | -1.99  | 0.008597 | 0.003068 | 0.219458 | 0.080783 |

|                         |                 |       |       |      |      |       |          |          |          |          |
|-------------------------|-----------------|-------|-------|------|------|-------|----------|----------|----------|----------|
| MmugDNA.36644.1.S1_at   | MmugDNA.36644.1 | 5.14  | 4.98  | 0.27 | 0.47 | 1.11  | 0.748043 | 0.092598 | 0.892248 | 0.348536 |
| MmugDNA.36645.1.S1_at   | MmugDNA.36645.1 | 12.23 | 11.37 | 0.23 | 0.26 | 1.81  | 0.012715 | 0.005041 | 0.243533 | 0.098963 |
| MmugDNA.36647.1.S1_at   | MmugDNA.36647.1 | 3.26  | 3.26  | 0.05 | 0.04 | -1    | 0.248387 | 0.355891 | 0.599259 | 0.597869 |
| MmugDNA.36648.1.S1_at   | MmugDNA.36648.1 | 10.48 | 9.28  | 0.3  | 0.21 | 2.29  | 0.00804  | 0.003728 | 0.215219 | 0.087042 |
| MmugDNA.36649.1.S1_at   | MmugDNA.36649.1 | 11.86 | 12.12 | 0.34 | 0.33 | -1.2  | 0.796349 | 0.964751 | 0.91548  | 0.980422 |
| MmugDNA.36650.1.S1_at   | MmugDNA.36650.1 | 10.7  | 10.97 | 0.03 | 0.28 | -1.2  | 0.154622 | 0.046644 | 0.519189 | 0.260499 |
| MmugDNA.36655.1.S1_at   | MmugDNA.36655.1 | 3.66  | 3.52  | 0.31 | 0.03 | 1.1   | 0.32743  | 0.262214 | 0.65384  | 0.528516 |
| MmugDNA.36657.1.S1_at   | MmugDNA.36657.1 | 10.38 | 9.99  | 0.14 | 0.24 | 1.31  | 0.093802 | 0.005625 | 0.451215 | 0.103682 |
| MmugDNA.3666.1.S1_at    | MmugDNA.3666.1  | 9.35  | 9.08  | 0.18 | 0.21 | 1.21  | 0.280804 | 0.075129 | 0.621845 | 0.31932  |
| MmugDNA.36660.1.S1_at   | MmugDNA.36660.1 | 9.33  | 8.32  | 0.34 | 0.34 | 2.02  | 0.021039 | 0.006682 | 0.281947 | 0.110612 |
| MmugDNA.36662.1.S1_at   | MmugDNA.36662.1 | 9.22  | 10.59 | 0.76 | 0.34 | -2.6  | 0.081674 | 0.076495 | 0.432665 | 0.321584 |
| MmugDNA.36664.1.S1_at   | MmugDNA.36664.1 | 11.5  | 11.45 | 0.15 | 0.07 | 1.04  | 0.579915 | 0.650876 | 0.804451 | 0.795849 |
| MmugDNA.36668.1.S1_at   | MmugDNA.36668.1 | 12.45 | 12.49 | 0.05 | 0.19 | -1.03 | 0.582135 | 0.256978 | 0.805537 | 0.524781 |
| MmugDNA.36672.1.S1_at   | MmugDNA.36672.1 | 11.4  | 11.47 | 0.21 | 0.59 | -1.05 | 0.83763  | 0.678674 | 0.934402 | 0.812328 |
| MmugDNA.36673.1.S1_at   | MmugDNA.36673.1 | 3.62  | 3.44  | 0.25 | 0.31 | 1.13  | 0.481596 | 0.569376 | 0.749268 | 0.742382 |
| MmugDNA.36676.1.S1_at   | MmugDNA.36676.1 | 11.6  | 11.25 | 0.14 | 0.31 | 1.27  | 0.641294 | 0.228284 | 0.838155 | 0.500466 |
| MmugDNA.36678.1.S1_at   | MmugDNA.36678.1 | 11.04 | 11.44 | 0.28 | 0.27 | -1.31 | 0.359465 | 0.490023 | 0.673869 | 0.692076 |
| MmugDNA.36680.1.S1_s_at | MmugDNA.36680.1 | 12.65 | 11.91 | 0.19 | 0.27 | 1.66  | 0.045177 | 0.012688 | 0.360276 | 0.145243 |
| MmugDNA.36693.1.S1_at   | MmugDNA.36693.1 | 11.1  | 11.08 | 0.12 | 0.19 | 1.01  | 0.807745 | 0.282503 | 0.921402 | 0.545215 |
| MmugDNA.36699.1.S1_at   | MmugDNA.36699.1 | 8.32  | 7.11  | 0.35 | 0.47 | 2.32  | 0.022913 | 0.015527 | 0.288889 | 0.158053 |
| MmugDNA.36701.1.S1_at   | MmugDNA.36701.1 | 6.61  | 6.9   | 0.79 | 0.3  | -1.21 | 0.717226 | 0.132579 | 0.87574  | 0.404544 |
| MmugDNA.36704.1.S1_at   | MmugDNA.36704.1 | 5.31  | 5.28  | 0.12 | 0.16 | 1.02  | 0.32425  | 0.360866 | 0.651891 | 0.601938 |
| MmugDNA.36705.1.S1_at   | MmugDNA.36705.1 | 11.85 | 11.9  | 0.49 | 0.1  | -1.04 | 0.8697   | 0.54574  | 0.947917 | 0.727653 |
| MmugDNA.36707.1.S1_at   | MmugDNA.36707.1 | 12.03 | 12.1  | 0.09 | 0.57 | -1.05 | 0.629899 | 0.67397  | 0.831779 | 0.809483 |
| MmugDNA.36711.1.S1_at   | MmugDNA.36711.1 | 10.53 | 9.73  | 0.45 | 0.23 | 1.75  | 0.026832 | 0.029006 | 0.304856 | 0.212234 |
| MmugDNA.36714.1.S1_at   | MmugDNA.36714.1 | 9.25  | 8.46  | 0.23 | 0.46 | 1.73  | 0.02974  | 0.014595 | 0.315271 | 0.154067 |
| MmugDNA.36718.1.S1_at   | MmugDNA.36718.1 | 5.79  | 6     | 0.17 | 0.12 | -1.15 | 0.273869 | 0.369108 | 0.617262 | 0.608618 |
| MmugDNA.36719.1.S1_at   | MmugDNA.36719.1 | 8.11  | 7.87  | 0.06 | 0.15 | 1.18  | 0.034284 | 0.023978 | 0.332352 | 0.194091 |
| MmugDNA.36720.1.S1_at   | MmugDNA.36720.1 | 7.28  | 7.09  | 0.08 | 0.02 | 1.14  | 0.007299 | 0.006023 | 0.206851 | 0.106089 |
| MmugDNA.36721.1.S1_at   | MmugDNA.36721.1 | 6.01  | 6.02  | 0.07 | 0.13 | -1.01 | 0.581774 | 0.837187 | 0.805434 | 0.906927 |
| MmugDNA.36725.1.S1_at   | MmugDNA.36725.1 | 3.35  | 3.32  | 0.15 | 0.07 | 1.02  | 0.811467 | 0.465945 | 0.923224 | 0.676055 |
| MmugDNA.36726.1.S1_at   | MmugDNA.36726.1 | 7.42  | 6.56  | 0.56 | 0.25 | 1.81  | 0.107574 | 0.137355 | 0.468045 | 0.41029  |
| MmugDNA.36727.1.S1_at   | MmugDNA.36727.1 | 10.8  | 9.85  | 0.28 | 0.44 | 1.94  | 0.051304 | 0.040624 | 0.376001 | 0.246424 |
| MmugDNA.3673.1.S1_at    | MmugDNA.3673.1  | 12.54 | 12.77 | 0.13 | 0.25 | -1.18 | 0.280222 | 0.261998 | 0.621476 | 0.52836  |
| MmugDNA.36730.1.S1_at   | MmugDNA.36730.1 | 6.83  | 6.65  | 0.37 | 1.54 | 1.13  | 0.678969 | 0.825519 | 0.856302 | 0.89976  |
| MmugDNA.36731.1.S1_at   | MmugDNA.36731.1 | 11.2  | 11.2  | 0.12 | 0.21 | 1     | 0.700246 | 0.830205 | 0.867391 | 0.902541 |
| MmugDNA.36732.1.S1_s_at | MmugDNA.36732.1 | 11.07 | 12.35 | 0.35 | 0.13 | -2.42 | 0.005256 | 0.001877 | 0.191107 | 0.064979 |
| MmugDNA.36733.1.S1_at   | MmugDNA.36733.1 | 12.09 | 11.91 | 0.03 | 0.07 | 1.14  | 0.018563 | 0.016194 | 0.270581 | 0.161289 |
| MmugDNA.36733.1.S1_s_at | MmugDNA.36733.1 | 12.24 | 12.02 | 0.03 | 0.11 | 1.16  | 0.030703 | 0.010917 | 0.319646 | 0.136017 |
| MmugDNA.36736.1.S1_at   | MmugDNA.36736.1 | 6.75  | 6.48  | 0.41 | 0.24 | 1.2   | 0.081888 | 0.04729  | 0.433119 | 0.262176 |
| MmugDNA.36737.1.S1_at   | MmugDNA.36737.1 | 5.4   | 5.58  | 0.37 | 0.49 | -1.13 | 0.782677 | 0.933589 | 0.909285 | 0.962229 |

|                         |                 |       |       |      |      |        |          |          |          |          |
|-------------------------|-----------------|-------|-------|------|------|--------|----------|----------|----------|----------|
| MmugDNA.36737.1.S1_s_at | MmugDNA.36737.1 | 6.56  | 7.05  | 0.3  | 0.26 | -1.41  | 0.04316  | 0.051477 | 0.356517 | 0.27227  |
| MmugDNA.36740.1.S1_at   | MmugDNA.36740.1 | 4.99  | 5.1   | 0.31 | 0.08 | -1.09  | 0.609347 | 0.465649 | 0.82044  | 0.675863 |
| MmugDNA.36744.1.S1_at   | MmugDNA.36744.1 | 13.63 | 13.66 | 0.05 | 0.09 | -1.02  | 0.907297 | 0.706047 | 0.963196 | 0.829633 |
| MmugDNA.36747.1.S1_at   | MmugDNA.36747.1 | 6.47  | 6.53  | 0.14 | 0.25 | -1.04  | 0.501018 | 0.587502 | 0.759772 | 0.754278 |
| MmugDNA.36748.1.S1_at   | MmugDNA.36748.1 | 11.19 | 10.14 | 0.34 | 0.46 | 2.07   | 0.028722 | 0.054889 | 0.312166 | 0.279748 |
| MmugDNA.36749.1.S1_at   | MmugDNA.36749.1 | 6.49  | 10.29 | 1.66 | 3.42 | -13.89 | 0.548426 | 0.276498 | 0.786665 | 0.540513 |
| MmugDNA.36752.1.S1_at   | MmugDNA.36752.1 | 5.92  | 6.21  | 0.13 | 0.32 | -1.22  | 0.542237 | 0.754918 | 0.783138 | 0.857334 |
| MmugDNA.36753.1.S1_at   | MmugDNA.36753.1 | 6.73  | 7.2   | 0.23 | 0.35 | -1.38  | 0.073813 | 0.059489 | 0.419443 | 0.290548 |
| MmugDNA.36754.1.S1_at   | MmugDNA.36754.1 | 9.61  | 9.31  | 0.19 | 0.35 | 1.23   | 0.240594 | 0.352003 | 0.593462 | 0.595381 |
| MmugDNA.36754.1.S1_s_at | MmugDNA.36754.1 | 9.53  | 9.33  | 0.13 | 0.44 | 1.15   | 0.640502 | 0.569667 | 0.837646 | 0.742565 |
| MmugDNA.36756.1.S1_at   | MmugDNA.36756.1 | 10.49 | 10.02 | 0.08 | 0.53 | 1.38   | 0.655774 | 0.437501 | 0.845156 | 0.656769 |
| MmugDNA.36766.1.S1_at   | MmugDNA.36766.1 | 10.1  | 9.94  | 0.23 | 0.15 | 1.12   | 0.327329 | 0.383587 | 0.653682 | 0.619556 |
| MmugDNA.36767.1.S1_s_at | MmugDNA.36767.1 | 12.39 | 12.19 | 0.01 | 0.06 | 1.15   | 0.006145 | 0.001805 | 0.19639  | 0.063714 |
| MmugDNA.36779.1.S1_at   | MmugDNA.36779.1 | 12.33 | 12.23 | 0.19 | 0.16 | 1.07   | 0.252445 | 0.347656 | 0.601373 | 0.592045 |
| MmugDNA.36783.1.S1_at   | MmugDNA.36783.1 | 6.08  | 6.23  | 0.01 | 0.09 | -1.11  | 0.087436 | 0.027697 | 0.441776 | 0.207837 |
| MmugDNA.36784.1.S1_at   | MmugDNA.36784.1 | 10.72 | 10.95 | 0.14 | 0.62 | -1.17  | 0.832905 | 0.915157 | 0.93227  | 0.952344 |
| MmugDNA.36789.1.S1_at   | MmugDNA.36789.1 | 6.85  | 6.63  | 0.23 | 0.09 | 1.17   | 0.353063 | 0.601839 | 0.669964 | 0.763113 |
| MmugDNA.36793.1.S1_at   | MmugDNA.36793.1 | 8.42  | 8.45  | 0.19 | 0.54 | -1.02  | 0.972628 | 0.865831 | 0.989474 | 0.923757 |
| MmugDNA.36794.1.S1_at   | MmugDNA.36794.1 | 11.12 | 11.74 | 0.39 | 0.36 | -1.53  | 0.164167 | 0.140233 | 0.528211 | 0.413405 |
| MmugDNA.36795.1.S1_at   | MmugDNA.36795.1 | 4.08  | 4.12  | 0.09 | 0.14 | -1.03  | 0.765137 | 0.737619 | 0.901149 | 0.847996 |
| MmugDNA.36796.1.S1_at   | MmugDNA.36796.1 | 3.78  | 3.65  | 0.09 | 0.21 | 1.1    | 0.40364  | 0.299395 | 0.702178 | 0.557857 |
| MmugDNA.36797.1.S1_at   | MmugDNA.36797.1 | 9.99  | 10.77 | 0.21 | 0.2  | -1.73  | 0.010361 | 0.00342  | 0.229439 | 0.084124 |
| MmugDNA.36806.1.S1_at   | MmugDNA.36806.1 | 10.92 | 10.92 | 0.09 | 0.16 | -1     | 0.670709 | 0.215746 | 0.852442 | 0.489503 |
| MmugDNA.36827.1.S1_at   | MmugDNA.36827.1 | 5.54  | 6.82  | 0.97 | 0.1  | -2.44  | 0.102947 | 0.06855  | 0.46254  | 0.308364 |
| MmugDNA.36828.1.S1_at   | MmugDNA.36828.1 | 4.74  | 4.81  | 0.03 | 0.06 | -1.05  | 0.149962 | 0.08729  | 0.514522 | 0.340327 |
| MmugDNA.36834.1.S1_at   | MmugDNA.36834.1 | 9.42  | 9.01  | 0.4  | 0.3  | 1.33   | 0.315189 | 0.097517 | 0.646383 | 0.355338 |
| MmugDNA.36847.1.S1_at   | MmugDNA.36847.1 | 5.69  | 6.36  | 0.66 | 0.14 | -1.58  | 0.220365 | 0.343599 | 0.579323 | 0.589322 |
| MmugDNA.3685.1.S1_at    | MmugDNA.3685.1  | 8.78  | 8.81  | 0.36 | 0.21 | -1.02  | 0.845151 | 0.254766 | 0.937864 | 0.523037 |
| MmugDNA.36854.1.S1_at   | MmugDNA.36854.1 | 4.38  | 4.43  | 0.1  | 0.03 | -1.03  | 0.175695 | 0.374513 | 0.539412 | 0.6129   |
| MmugDNA.36863.1.S1_at   | MmugDNA.36863.1 | 5.42  | 5.35  | 0.2  | 0.06 | 1.05   | 0.151219 | 0.096108 | 0.515989 | 0.353322 |
| MmugDNA.36864.1.S1_at   | MmugDNA.36864.1 | 4.21  | 4.24  | 0.03 | 0.17 | -1.02  | 0.619522 | 0.809328 | 0.82565  | 0.890103 |
| MmugDNA.36867.1.S1_at   | MmugDNA.36867.1 | 5.41  | 5.58  | 0.08 | 0.15 | -1.13  | 0.226341 | 0.330071 | 0.584404 | 0.578938 |
| MmugDNA.3687.1.S1_at    | MmugDNA.3687.1  | 4.45  | 4.48  | 0.06 | 0.33 | -1.02  | 0.314532 | 0.351014 | 0.645887 | 0.594736 |
| MmugDNA.36875.1.S1_at   | MmugDNA.36875.1 | 3.38  | 3.42  | 0.02 | 0.2  | -1.03  | 0.230088 | 0.243956 | 0.587112 | 0.514069 |
| MmugDNA.36878.1.S1_at   | MmugDNA.36878.1 | 5.19  | 6.72  | 0.94 | 0.46 | -2.89  | 0.10737  | 0.108437 | 0.468045 | 0.371943 |
| MmugDNA.36883.1.S1_at   | MmugDNA.36883.1 | 11.9  | 10.63 | 0.27 | 0.54 | 2.41   | 0.021831 | 0.010562 | 0.283865 | 0.134181 |
| MmugDNA.36886.1.S1_at   | MmugDNA.36886.1 | 3.68  | 3.79  | 0.09 | 0.1  | -1.09  | 0.458019 | 0.132643 | 0.735139 | 0.404544 |
| MmugDNA.36887.1.S1_at   | MmugDNA.36887.1 | 5.72  | 5.87  | 0.25 | 0.07 | -1.11  | 0.427582 | 0.567852 | 0.716341 | 0.741693 |
| MmugDNA.3689.1.S1_at    | MmugDNA.3689.1  | 8.12  | 8.3   | 0.41 | 0.35 | -1.13  | 0.756268 | 0.888432 | 0.896415 | 0.936361 |
| MmugDNA.36894.1.S1_at   | MmugDNA.36894.1 | 13    | 13.14 | 0.09 | 0.08 | -1.1   | 0.601964 | 0.010371 | 0.816272 | 0.133236 |
| MmugDNA.36897.1.S1_at   | MmugDNA.36897.1 | 8.59  | 8.44  | 0.75 | 0.59 | 1.11   | 0.171493 | 0.195443 | 0.535166 | 0.470259 |



|                         |                 |       |       |      |      |       |          |          |          |          |
|-------------------------|-----------------|-------|-------|------|------|-------|----------|----------|----------|----------|
| MmugDNA.3690.1.S1_at    | MmugDNA.3690.1  | 5.17  | 6.66  | 0.76 | 0.81 | -2.81 | 0.087113 | 0.086339 | 0.441151 | 0.338777 |
| MmugDNA.36905.1.S1_at   | MmugDNA.36905.1 | 12.4  | 12.26 | 0.15 | 0.11 | 1.11  | 0.492686 | 0.087414 | 0.755881 | 0.340589 |
| MmugDNA.36906.1.S1_at   | MmugDNA.36906.1 | 3.79  | 3.76  | 0.06 | 0.29 | 1.02  | 0.482062 | 0.627394 | 0.749398 | 0.780374 |
| MmugDNA.36907.1.S1_at   | MmugDNA.36907.1 | 8.89  | 9.32  | 0.17 | 0.25 | -1.35 | 0.124923 | 0.139494 | 0.490861 | 0.412743 |
| MmugDNA.36912.1.S1_at   | MmugDNA.36912.1 | 8.15  | 9.15  | 0.67 | 1.09 | -1.99 | 0.127025 | 0.083895 | 0.493251 | 0.334776 |
| MmugDNA.36918.1.S1_at   | MmugDNA.36918.1 | 4.02  | 3.99  | 0.06 | 0.18 | 1.02  | 0.820106 | 0.529195 | 0.92682  | 0.717207 |
| MmugDNA.36924.1.S1_at   | MmugDNA.36924.1 | 7.07  | 7.08  | 0.17 | 0.09 | -1.01 | 0.354709 | 0.462482 | 0.670686 | 0.673807 |
| MmugDNA.36934.1.S1_at   | MmugDNA.36934.1 | 7.55  | 7.17  | 0.47 | 0.99 | 1.3   | 0.873847 | 0.747047 | 0.94944  | 0.853124 |
| MmugDNA.36939.1.S1_at   | MmugDNA.36939.1 | 7.65  | 7.62  | 0.19 | 0.02 | 1.02  | 0.319188 | 0.142624 | 0.648688 | 0.416343 |
| MmugDNA.36940.1.S1_at   | MmugDNA.36940.1 | 7.23  | 5.96  | 0.28 | 0.44 | 2.41  | 0.02277  | 0.013565 | 0.288168 | 0.149001 |
| MmugDNA.36946.1.S1_at   | MmugDNA.36946.1 | 12.92 | 12.61 | 0.1  | 0.53 | 1.24  | 0.118656 | 0.107391 | 0.48294  | 0.370219 |
| MmugDNA.36948.1.S1_at   | MmugDNA.36948.1 | 10.96 | 10.01 | 0.07 | 0.19 | 1.93  | 0.000774 | 0.000107 | 0.136818 | 0.028099 |
| MmugDNA.36954.1.S1_at   | MmugDNA.36954.1 | 7.88  | 7.96  | 0.48 | 0.31 | -1.06 | 0.688749 | 0.164459 | 0.861169 | 0.440678 |
| MmugDNA.36963.1.S1_at   | MmugDNA.36963.1 | 11.9  | 12.22 | 0.12 | 0.45 | -1.25 | 0.257254 | 0.337413 | 0.60459  | 0.58462  |
| MmugDNA.36965.1.S1_at   | MmugDNA.36965.1 | 10.48 | 11.02 | 0.34 | 0.24 | -1.45 | 0.066987 | 0.05129  | 0.407016 | 0.271872 |
| MmugDNA.36966.1.S1_at   | MmugDNA.36966.1 | 5.97  | 5.86  | 0.12 | 0.28 | 1.08  | 0.775764 | 0.841437 | 0.905945 | 0.909663 |
| MmugDNA.36967.1.S1_at   | MmugDNA.36967.1 | 5.26  | 6.18  | 0.11 | 0.91 | -1.9  | 0.149402 | 0.09009  | 0.514001 | 0.344402 |
| MmugDNA.36968.1.S1_at   | MmugDNA.36968.1 | 8.12  | 6     | 1.01 | 0.4  | 4.34  | 0.026351 | 0.007592 | 0.302842 | 0.11661  |
| MmugDNA.36971.1.S1_at   | MmugDNA.36971.1 | 8.34  | 7.73  | 0.13 | 0.46 | 1.52  | 0.272352 | 0.229276 | 0.616016 | 0.501527 |
| MmugDNA.36979.1.S1_at   | MmugDNA.36979.1 | 4.93  | 5.94  | 1.52 | 0.32 | -2.01 | 0.775696 | 0.600736 | 0.905895 | 0.76224  |
| MmugDNA.36982.1.S1_at   | MmugDNA.36982.1 | 12.55 | 12.35 | 0.14 | 0.47 | 1.14  | 0.183248 | 0.213926 | 0.547309 | 0.487596 |
| MmugDNA.36982.1.S1_s_at | MmugDNA.36982.1 | 12.13 | 11.73 | 0.22 | 0.62 | 1.31  | 0.183297 | 0.221615 | 0.547348 | 0.494901 |
| MmugDNA.36983.1.S1_at   | MmugDNA.36983.1 | 5.3   | 5.44  | 0.08 | 0.03 | -1.1  | 0.150656 | 0.018901 | 0.515411 | 0.172961 |
| MmugDNA.36985.1.S1_at   | MmugDNA.36985.1 | 11.72 | 11.46 | 0.18 | 0.44 | 1.2   | 0.863668 | 0.338367 | 0.945247 | 0.585432 |
| MmugDNA.36986.1.S1_at   | MmugDNA.36986.1 | 9.52  | 8.91  | 0.16 | 0.4  | 1.53  | 0.027553 | 0.025332 | 0.308386 | 0.199522 |
| MmugDNA.36990.1.S1_at   | MmugDNA.36990.1 | 6.32  | 7.52  | 0.72 | 0.27 | -2.3  | 0.141205 | 0.074325 | 0.508805 | 0.318046 |
| MmugDNA.36992.1.S1_at   | MmugDNA.36992.1 | 10.04 | 10.25 | 0.05 | 0.99 | -1.16 | 0.713905 | 0.832169 | 0.874591 | 0.90371  |
| MmugDNA.37002.1.S1_at   | MmugDNA.37002.1 | 5.29  | 5.37  | 0.18 | 0.15 | -1.06 | 0.305534 | 0.551069 | 0.639223 | 0.730772 |
| MmugDNA.37003.1.S1_at   | MmugDNA.37003.1 | 6.05  | 6.32  | 0.43 | 0.18 | -1.2  | 0.380988 | 0.468469 | 0.68761  | 0.67773  |
| MmugDNA.37004.1.S1_at   | MmugDNA.37004.1 | 6.64  | 6.37  | 0.29 | 0.11 | 1.21  | 0.521764 | 0.815643 | 0.771533 | 0.893657 |
| MmugDNA.37016.1.S1_s_at | MmugDNA.37016.1 | 10.91 | 10.4  | 0.27 | 0.63 | 1.43  | 0.263437 | 0.211457 | 0.609348 | 0.485578 |
| MmugDNA.37017.1.S1_at   | MmugDNA.37017.1 | 9.46  | 9.18  | 0.22 | 0.34 | 1.22  | 0.079671 | 0.212872 | 0.430109 | 0.486798 |
| MmugDNA.37020.1.S1_at   | MmugDNA.37020.1 | 9.09  | 8.66  | 0.02 | 0.18 | 1.35  | 0.012348 | 0.004293 | 0.240921 | 0.091989 |
| MmugDNA.37022.1.S1_at   | MmugDNA.37022.1 | 11.32 | 11.21 | 0.21 | 0.74 | 1.08  | 0.546843 | 0.724311 | 0.785716 | 0.840433 |
| MmugDNA.37028.1.S1_at   | MmugDNA.37028.1 | 3.93  | 3.94  | 0.05 | 0.06 | -1.01 | 0.526016 | 0.024119 | 0.773971 | 0.1945   |
| MmugDNA.3703.1.S1_at    | MmugDNA.3703.1  | 8.1   | 6.99  | 0.09 | 0.63 | 2.17  | 0.107316 | 0.068908 | 0.467976 | 0.308844 |
| MmugDNA.37031.1.S1_at   | MmugDNA.37031.1 | 7.16  | 7.32  | 0.16 | 0.12 | -1.12 | 0.508097 | 0.329268 | 0.763474 | 0.57869  |
| MmugDNA.37034.1.S1_at   | MmugDNA.37034.1 | 11.38 | 11.55 | 0.25 | 0.4  | -1.12 | 0.528369 | 0.739334 | 0.775543 | 0.848915 |
| MmugDNA.37035.1.S1_at   | MmugDNA.37035.1 | 10.43 | 10.07 | 0.11 | 0.3  | 1.29  | 0.058605 | 0.024217 | 0.390844 | 0.19489  |
| MmugDNA.37042.1.S1_at   | MmugDNA.37042.1 | 9.83  | 9.66  | 0.09 | 0.45 | 1.12  | 0.688147 | 0.626632 | 0.860858 | 0.779896 |
| MmugDNA.37044.1.S1_at   | MmugDNA.37044.1 | 10.73 | 11.41 | 0.37 | 0.21 | -1.6  | 0.052341 | 0.026971 | 0.377516 | 0.205423 |

|                         |                 |       |       |      |      |       |          |          |          |          |
|-------------------------|-----------------|-------|-------|------|------|-------|----------|----------|----------|----------|
| MmugDNA.37044.1.S1_s_at | MmugDNA.37044.1 | 11.11 | 11.8  | 0.08 | 0.17 | -1.61 | 0.00414  | 0.000638 | 0.181739 | 0.042882 |
| MmugDNA.37045.1.S1_at   | MmugDNA.37045.1 | 2.88  | 2.89  | 0.13 | 0.18 | -1    | 0.560627 | 0.670622 | 0.794316 | 0.807444 |
| MmugDNA.37050.1.S1_at   | MmugDNA.37050.1 | 11.97 | 12.37 | 0.38 | 0.43 | -1.31 | 0.151041 | 0.152909 | 0.515746 | 0.42777  |
| MmugDNA.37053.1.S1_at   | MmugDNA.37053.1 | 6.96  | 7.11  | 0.11 | 0.19 | -1.11 | 0.193017 | 0.228765 | 0.556279 | 0.501005 |
| MmugDNA.37054.1.S1_at   | MmugDNA.37054.1 | 7     | 9.28  | 1.22 | 1.63 | -4.85 | 0.266484 | 0.260334 | 0.611921 | 0.526897 |
| MmugDNA.37055.1.S1_at   | MmugDNA.37055.1 | 7.2   | 7.22  | 0.17 | 0.17 | -1.01 | 0.946152 | 0.994761 | 0.979359 | 0.996729 |
| MmugDNA.37061.1.S1_at   | MmugDNA.37061.1 | 12.97 | 12.91 | 0.04 | 0.28 | 1.04  | 0.707947 | 0.887934 | 0.871457 | 0.936115 |
| MmugDNA.37064.1.S1_at   | MmugDNA.37064.1 | 6.9   | 9.64  | 0.3  | 2.14 | -6.68 | 0.147557 | 0.099911 | 0.513287 | 0.358624 |
| MmugDNA.37068.1.S1_at   | MmugDNA.37068.1 | 4.46  | 4.29  | 0.19 | 0.12 | 1.13  | 0.614475 | 0.647125 | 0.823199 | 0.793279 |
| MmugDNA.37069.1.S1_at   | MmugDNA.37069.1 | 6.02  | 5.97  | 0.38 | 0.32 | 1.04  | 0.613015 | 0.138837 | 0.822517 | 0.412015 |
| MmugDNA.3707.1.S1_at    | MmugDNA.3707.1  | 10.49 | 9.75  | 0.08 | 0.11 | 1.66  | 0.000744 | 0.000546 | 0.136818 | 0.040793 |
| MmugDNA.37072.1.S1_at   | MmugDNA.37072.1 | 13.11 | 13.12 | 0.02 | 0.14 | -1.01 | 0.43784  | 0.461034 | 0.722586 | 0.672829 |
| MmugDNA.37074.1.S1_at   | MmugDNA.37074.1 | 4.9   | 4.78  | 0.06 | 0.12 | 1.09  | 0.851331 | 0.808508 | 0.940204 | 0.889757 |
| MmugDNA.37076.1.S1_at   | MmugDNA.37076.1 | 13.32 | 13.19 | 0.14 | 0.18 | 1.09  | 0.140474 | 0.124458 | 0.508385 | 0.394865 |
| MmugDNA.37077.1.S1_at   | MmugDNA.37077.1 | 6.71  | 6.81  | 0.17 | 0.08 | -1.07 | 0.274173 | 0.297338 | 0.617262 | 0.556071 |
| MmugDNA.37078.1.S1_at   | MmugDNA.37078.1 | 4.93  | 5.07  | 0.15 | 0.03 | -1.1  | 0.471149 | 0.195175 | 0.742919 | 0.470253 |
| MmugDNA.37083.1.S1_at   | MmugDNA.37083.1 | 10.38 | 10.79 | 0.53 | 0.39 | -1.33 | 0.3678   | 0.042603 | 0.679614 | 0.251035 |
| MmugDNA.37089.1.S1_at   | MmugDNA.37089.1 | 7.61  | 7.02  | 0.28 | 0.5  | 1.5   | 0.425169 | 0.035533 | 0.715011 | 0.232768 |
| MmugDNA.37094.1.S1_at   | MmugDNA.37094.1 | 6.25  | 7.25  | 0.47 | 1.14 | -2    | 0.127183 | 0.120011 | 0.493553 | 0.388672 |
| MmugDNA.37097.1.S1_at   | MmugDNA.37097.1 | 4.24  | 4.53  | 0.24 | 0.39 | -1.23 | 0.344527 | 0.480421 | 0.664605 | 0.685781 |
| MmugDNA.371.1.S1_at     | MmugDNA.371.1   | 5.85  | 5.43  | 0.15 | 0.05 | 1.33  | 0.005243 | 0.002248 | 0.19102  | 0.069739 |
| MmugDNA.37104.1.S1_at   | MmugDNA.37104.1 | 6.21  | 6.35  | 0.1  | 0.13 | -1.1  | 0.577614 | 0.389951 | 0.803559 | 0.624002 |
| MmugDNA.37106.1.S1_at   | MmugDNA.37106.1 | 7.63  | 7.74  | 0.11 | 0.04 | -1.08 | 0.13122  | 0.174466 | 0.497792 | 0.450952 |
| MmugDNA.37110.1.S1_at   | MmugDNA.37110.1 | 4.47  | 4.85  | 0.2  | 0.13 | -1.31 | 0.085426 | 0.018197 | 0.439217 | 0.169696 |
| MmugDNA.37114.1.S1_at   | MmugDNA.37114.1 | 6.82  | 7.74  | 0.23 | 2.73 | -1.89 | 0.679619 | 0.347091 | 0.856669 | 0.591815 |
| MmugDNA.37116.1.S1_at   | MmugDNA.37116.1 | 8.11  | 8.13  | 0.1  | 0.13 | -1.01 | 0.496366 | 0.078245 | 0.757473 | 0.324785 |
| MmugDNA.37118.1.S1_at   | MmugDNA.37118.1 | 9.76  | 9.37  | 0.06 | 0.16 | 1.31  | 0.036043 | 0.002171 | 0.338744 | 0.068862 |
| MmugDNA.3712.1.S1_at    | MmugDNA.3712.1  | 11.86 | 12.53 | 0.14 | 0.12 | -1.58 | 0.004376 | 0.001835 | 0.183061 | 0.064337 |
| MmugDNA.37121.1.S1_at   | MmugDNA.37121.1 | 11.98 | 11.83 | 0.14 | 0.38 | 1.11  | 0.367638 | 0.352939 | 0.679512 | 0.596259 |
| MmugDNA.37128.1.S1_at   | MmugDNA.37128.1 | 11.57 | 11.06 | 0.37 | 0.32 | 1.42  | 0.33624  | 0.241335 | 0.659402 | 0.511952 |
| MmugDNA.37135.1.S1_at   | MmugDNA.37135.1 | 8.9   | 8.96  | 0.5  | 0.9  | -1.04 | 0.899481 | 0.796817 | 0.959832 | 0.882803 |
| MmugDNA.37137.1.S1_at   | MmugDNA.37137.1 | 6.73  | 6.95  | 0.17 | 0.09 | -1.16 | 0.176713 | 0.327926 | 0.540348 | 0.577744 |
| MmugDNA.37138.1.S1_at   | MmugDNA.37138.1 | 5.91  | 5.74  | 0.97 | 0.78 | 1.13  | 0.406108 | 0.08682  | 0.703553 | 0.339594 |
| MmugDNA.37144.1.S1_at   | MmugDNA.37144.1 | 6.14  | 6.12  | 0.09 | 0.05 | 1.01  | 0.547931 | 0.032709 | 0.786405 | 0.223942 |
| MmugDNA.37147.1.S1_at   | MmugDNA.37147.1 | 7.26  | 7.2   | 0.31 | 0.66 | 1.04  | 0.938585 | 0.85998  | 0.976565 | 0.920188 |
| MmugDNA.37149.1.S1_at   | MmugDNA.37149.1 | 6.92  | 6.76  | 0.5  | 0.71 | 1.12  | 0.677444 | 0.268989 | 0.855524 | 0.534389 |
| MmugDNA.37149.1.S1_s_at | MmugDNA.37149.1 | 7.9   | 8.11  | 0.29 | 0.55 | -1.16 | 0.466833 | 0.334967 | 0.740411 | 0.58275  |
| MmugDNA.37153.1.S1_at   | MmugDNA.37153.1 | 11.31 | 11.53 | 0.16 | 0.32 | -1.17 | 0.194101 | 0.259497 | 0.557718 | 0.526418 |
| MmugDNA.37154.1.S1_at   | MmugDNA.37154.1 | 9.28  | 12.44 | 1.63 | 1.44 | -8.9  | 0.218702 | 0.137577 | 0.578242 | 0.410555 |
| MmugDNA.37156.1.S1_at   | MmugDNA.37156.1 | 6.34  | 6.42  | 0.25 | 0.51 | -1.05 | 0.881695 | 0.542286 | 0.952505 | 0.725385 |
| MmugDNA.37167.1.S1_at   | MmugDNA.37167.1 | 9.1   | 9.92  | 1.12 | 0.83 | -1.77 | 0.641978 | 0.838501 | 0.838658 | 0.907883 |

|                         |                 |       |       |      |      |        |          |          |          |          |
|-------------------------|-----------------|-------|-------|------|------|--------|----------|----------|----------|----------|
| MmugDNA.37168.1.S1_at   | MmugDNA.37168.1 | 5.96  | 9.34  | 1.62 | 2.09 | -10.46 | 0.228489 | 0.163343 | 0.585917 | 0.43947  |
| MmugDNA.37168.1.S1_s_at | MmugDNA.37168.1 | 5.3   | 8.57  | 1.7  | 2.03 | -9.66  | 0.233343 | 0.182601 | 0.588108 | 0.459107 |
| MmugDNA.3717.1.S1_at    | MmugDNA.3717.1  | 9.71  | 9.93  | 0.17 | 0.15 | -1.17  | 0.341858 | 0.040494 | 0.662882 | 0.246264 |
| MmugDNA.37171.1.S1_at   | MmugDNA.37171.1 | 6.79  | 6.77  | 0.21 | 0.05 | 1.01   | 0.986856 | 0.949213 | 0.995328 | 0.970902 |
| MmugDNA.37173.1.S1_at   | MmugDNA.37173.1 | 4.4   | 5.05  | 0.29 | 0.32 | -1.58  | 0.026589 | 0.022588 | 0.303523 | 0.188092 |
| MmugDNA.37175.1.S1_at   | MmugDNA.37175.1 | 12.11 | 12.15 | 0.12 | 0.07 | -1.03  | 0.420946 | 0.056842 | 0.712792 | 0.284531 |
| MmugDNA.37176.1.S1_at   | MmugDNA.37176.1 | 5.05  | 7.21  | 1.33 | 1.84 | -4.5   | 0.22128  | 0.169277 | 0.580161 | 0.44588  |
| MmugDNA.37178.1.S1_at   | MmugDNA.37178.1 | 3.34  | 3.2   | 0.27 | 0.42 | 1.1    | 0.74657  | 0.919971 | 0.891508 | 0.954967 |
| MmugDNA.37179.1.S1_at   | MmugDNA.37179.1 | 10.49 | 9.87  | 0.2  | 0.38 | 1.53   | 0.044065 | 0.012698 | 0.357722 | 0.145316 |
| MmugDNA.37188.1.S1_at   | MmugDNA.37188.1 | 6.7   | 6.81  | 0.15 | 0.05 | -1.07  | 0.351707 | 0.515603 | 0.669126 | 0.708449 |
| MmugDNA.37189.1.S1_at   | MmugDNA.37189.1 | 6     | 6.5   | 0.46 | 0.42 | -1.41  | 0.200428 | 0.289244 | 0.563298 | 0.550293 |
| MmugDNA.37200.1.S1_at   | MmugDNA.37200.1 | 10.3  | 10.64 | 0.48 | 0.48 | -1.26  | 0.957144 | 0.861531 | 0.983802 | 0.921307 |
| MmugDNA.37201.1.S1_at   | MmugDNA.37201.1 | 10.22 | 9.69  | 0.36 | 1.44 | 1.44   | 0.354893 | 0.475742 | 0.670686 | 0.682332 |
| MmugDNA.37205.1.S1_at   | MmugDNA.37205.1 | 6.95  | 6.36  | 0.34 | 0.38 | 1.51   | 0.065824 | 0.046434 | 0.405296 | 0.260036 |
| MmugDNA.37206.1.S1_at   | MmugDNA.37206.1 | 8.69  | 9.5   | 0.58 | 0.81 | -1.75  | 0.233787 | 0.169852 | 0.588317 | 0.446544 |
| MmugDNA.37209.1.S1_at   | MmugDNA.37209.1 | 7.06  | 7.29  | 0.14 | 0.2  | -1.18  | 0.084808 | 0.048273 | 0.437699 | 0.264779 |
| MmugDNA.37212.1.S1_at   | MmugDNA.37212.1 | 9.97  | 9.87  | 0.21 | 0.2  | 1.07   | 0.535025 | 0.589126 | 0.778933 | 0.755393 |
| MmugDNA.37225.1.S1_at   | MmugDNA.37225.1 | 8.14  | 8.1   | 0.4  | 0.37 | 1.03   | 0.877705 | 0.402598 | 0.950993 | 0.631505 |
| MmugDNA.37237.1.S1_at   | MmugDNA.37237.1 | 7.82  | 7.51  | 0.07 | 0.21 | 1.23   | 0.0772   | 0.04159  | 0.426681 | 0.248831 |
| MmugDNA.37248.1.S1_at   | MmugDNA.37248.1 | 4.7   | 4.93  | 0.08 | 0.03 | -1.17  | 0.010031 | 0.004695 | 0.226901 | 0.095363 |
| MmugDNA.37251.1.S1_at   | MmugDNA.37251.1 | 12.37 | 12    | 0.21 | 0.19 | 1.3    | 0.07842  | 0.024339 | 0.428471 | 0.19528  |
| MmugDNA.37253.1.S1_at   | MmugDNA.37253.1 | 11.96 | 11.45 | 0.18 | 0.53 | 1.42   | 0.774214 | 0.876755 | 0.905065 | 0.92982  |
| MmugDNA.37253.1.S1_s_at | MmugDNA.37253.1 | 9.29  | 9.01  | 0.4  | 0.53 | 1.21   | 0.887578 | 0.500378 | 0.954863 | 0.699024 |
| MmugDNA.37257.1.S1_at   | MmugDNA.37257.1 | 3.52  | 3.26  | 0.17 | 0.22 | 1.2    | 0.147418 | 0.054576 | 0.513235 | 0.279138 |
| MmugDNA.37261.1.S1_at   | MmugDNA.37261.1 | 7.68  | 7.56  | 0.16 | 0.21 | 1.09   | 0.446354 | 0.589308 | 0.728244 | 0.755536 |
| MmugDNA.37262.1.S1_at   | MmugDNA.37262.1 | 6.29  | 6.38  | 0.04 | 0.17 | -1.07  | 0.340987 | 0.322741 | 0.662232 | 0.574043 |
| MmugDNA.37265.1.S1_s_at | MmugDNA.37265.1 | 8.1   | 8.31  | 0.89 | 1.04 | -1.15  | 0.970735 | 0.486328 | 0.988689 | 0.689731 |
| MmugDNA.37268.1.S1_at   | MmugDNA.37268.1 | 6.24  | 6.35  | 0.24 | 0.08 | -1.08  | 0.440875 | 0.561897 | 0.724535 | 0.737659 |
| MmugDNA.37269.1.S1_at   | MmugDNA.37269.1 | 9.82  | 9.47  | 0.2  | 0.06 | 1.27   | 0.070814 | 0.026543 | 0.414661 | 0.203915 |
| MmugDNA.37270.1.S1_at   | MmugDNA.37270.1 | 7.69  | 7.56  | 0.09 | 0.15 | 1.09   | 0.712548 | 0.601052 | 0.874083 | 0.762475 |
| MmugDNA.37271.1.S1_at   | MmugDNA.37271.1 | 8.66  | 9.02  | 0.1  | 0.47 | -1.28  | 0.07155  | 0.035475 | 0.415505 | 0.232564 |
| MmugDNA.37272.1.S1_at   | MmugDNA.37272.1 | 6.11  | 6.16  | 0.09 | 0.17 | -1.04  | 0.225105 | 0.178122 | 0.58306  | 0.454504 |
| MmugDNA.37274.1.S1_at   | MmugDNA.37274.1 | 5.76  | 5.99  | 0.2  | 0.26 | -1.18  | 0.112256 | 0.071421 | 0.474778 | 0.313555 |
| MmugDNA.37274.1.S1_s_at | MmugDNA.37274.1 | 7.19  | 7.47  | 0.1  | 0.2  | -1.22  | 0.054699 | 0.042926 | 0.38215  | 0.251759 |
| MmugDNA.37276.1.S1_at   | MmugDNA.37276.1 | 10.82 | 10.43 | 0.05 | 0.22 | 1.31   | 0.091006 | 0.056207 | 0.446856 | 0.282978 |
| MmugDNA.37277.1.S1_at   | MmugDNA.37277.1 | 11.16 | 11.19 | 0.21 | 0.28 | -1.02  | 0.753666 | 0.871    | 0.894957 | 0.926745 |
| MmugDNA.37286.1.S1_at   | MmugDNA.37286.1 | 4.3   | 4.28  | 0.13 | 0.07 | 1.01   | 0.677311 | 0.834556 | 0.855438 | 0.905227 |
| MmugDNA.37289.1.S1_at   | MmugDNA.37289.1 | 11.6  | 11.25 | 0.04 | 0.19 | 1.27   | 0.022737 | 0.013304 | 0.288168 | 0.14804  |
| MmugDNA.37290.1.S1_at   | MmugDNA.37290.1 | 4.94  | 5.26  | 0.09 | 0.29 | -1.25  | 0.08602  | 0.099359 | 0.440041 | 0.357636 |
| MmugDNA.37292.1.S1_at   | MmugDNA.37292.1 | 8.53  | 8.48  | 0.27 | 0.14 | 1.04   | 0.607162 | 0.063293 | 0.819255 | 0.298244 |
| MmugDNA.37297.1.S1_at   | MmugDNA.37297.1 | 12.67 | 12.56 | 0.12 | 0.44 | 1.08   | 0.254489 | 0.337117 | 0.602425 | 0.584337 |

|                         |                 |       |       |      |      |       |          |          |          |          |
|-------------------------|-----------------|-------|-------|------|------|-------|----------|----------|----------|----------|
| MmugDNA.37304.1.S1_at   | MmugDNA.37304.1 | 5.71  | 5.54  | 0.31 | 0.22 | 1.13  | 0.301815 | 0.351369 | 0.636716 | 0.595032 |
| MmugDNA.37304.1.S1_x_at | MmugDNA.37304.1 | 5.74  | 5.38  | 0.29 | 0.12 | 1.29  | 0.121604 | 0.090635 | 0.486508 | 0.345151 |
| MmugDNA.37306.1.S1_at   | MmugDNA.37306.1 | 7.99  | 6.89  | 0.1  | 0.66 | 2.15  | 0.053142 | 0.042562 | 0.379463 | 0.250978 |
| MmugDNA.37307.1.S1_at   | MmugDNA.37307.1 | 10.02 | 8.93  | 0.09 | 0.36 | 2.13  | 0.014238 | 0.008633 | 0.251724 | 0.123154 |
| MmugDNA.37310.1.S1_at   | MmugDNA.37310.1 | 5.29  | 5.75  | 0.47 | 0.29 | -1.37 | 0.329447 | 0.419258 | 0.655089 | 0.643425 |
| MmugDNA.37316.1.S1_s_at | MmugDNA.37316.1 | 10.31 | 10.22 | 0.27 | 0.04 | 1.07  | 0.22991  | 0.177796 | 0.587007 | 0.454111 |
| MmugDNA.37317.1.S1_at   | MmugDNA.37317.1 | 4.29  | 4.03  | 0.08 | 0.1  | 1.2   | 0.046376 | 0.035923 | 0.363009 | 0.234021 |
| MmugDNA.37327.1.S1_at   | MmugDNA.37327.1 | 6.42  | 6.46  | 0.1  | 0.15 | -1.03 | 0.283932 | 0.387848 | 0.623838 | 0.622486 |
| MmugDNA.3733.1.S1_at    | MmugDNA.3733.1  | 12.27 | 11.74 | 0.15 | 0.48 | 1.45  | 0.157135 | 0.186299 | 0.521923 | 0.462168 |
| MmugDNA.37332.1.S1_at   | MmugDNA.37332.1 | 5.7   | 4.55  | 0.77 | 0.57 | 2.22  | 0.10956  | 0.015399 | 0.470811 | 0.157585 |
| MmugDNA.37336.1.S1_at   | MmugDNA.37336.1 | 3.77  | 4.12  | 0.45 | 0.21 | -1.27 | 0.51453  | 0.692546 | 0.76693  | 0.821061 |
| MmugDNA.37337.1.S1_at   | MmugDNA.37337.1 | 12.87 | 12.76 | 0.1  | 0.19 | 1.08  | 0.790605 | 0.37798  | 0.91308  | 0.615264 |
| MmugDNA.37341.1.S1_at   | MmugDNA.37341.1 | 9.22  | 9.18  | 0.13 | 1.22 | 1.02  | 0.675431 | 0.616987 | 0.854537 | 0.773098 |
| MmugDNA.37343.1.S1_at   | MmugDNA.37343.1 | 10.93 | 11.01 | 0.12 | 0.02 | -1.06 | 0.830214 | 0.000487 | 0.931377 | 0.038813 |
| MmugDNA.37345.1.S1_s_at | MmugDNA.37345.1 | 10.84 | 10.88 | 0.06 | 0.38 | -1.03 | 0.779703 | 0.910471 | 0.908208 | 0.949462 |
| MmugDNA.37346.1.S1_at   | MmugDNA.37346.1 | 3.32  | 3.55  | 0.19 | 0.24 | -1.17 | 0.518079 | 0.007212 | 0.769229 | 0.11412  |
| MmugDNA.3736.1.S1_at    | MmugDNA.3736.1  | 6.33  | 6.8   | 0.24 | 1.29 | -1.38 | 0.395281 | 0.491439 | 0.696396 | 0.693004 |
| MmugDNA.37362.1.S1_at   | MmugDNA.37362.1 | 7.37  | 7.36  | 0.1  | 0.4  | 1.01  | 0.927508 | 0.380521 | 0.972003 | 0.617172 |
| MmugDNA.37364.1.S1_at   | MmugDNA.37364.1 | 10.94 | 11.14 | 0.13 | 0.19 | -1.15 | 0.42146  | 0.237846 | 0.713049 | 0.508341 |
| MmugDNA.37366.1.S1_at   | MmugDNA.37366.1 | 10.11 | 9.96  | 0.29 | 0.36 | 1.11  | 0.176008 | 0.226228 | 0.539464 | 0.498692 |
| MmugDNA.37385.1.S1_at   | MmugDNA.37385.1 | 11.15 | 11.36 | 0.08 | 0.07 | -1.15 | 0.061888 | 0.000486 | 0.396761 | 0.038806 |
| MmugDNA.37389.1.S1_x_at | MmugDNA.37389.1 | 10.64 | 10.27 | 0.52 | 0.25 | 1.29  | 0.192221 | 0.260042 | 0.555316 | 0.52675  |
| MmugDNA.37391.1.S1_at   | MmugDNA.37391.1 | 12.07 | 11.48 | 0.14 | 0.77 | 1.5   | 0.156094 | 0.063439 | 0.520741 | 0.298441 |
| MmugDNA.37393.1.S1_at   | MmugDNA.37393.1 | 6.69  | 6.73  | 0.13 | 0.05 | -1.03 | 0.135165 | 0.173954 | 0.501995 | 0.450247 |
| MmugDNA.37403.1.S1_at   | MmugDNA.37403.1 | 11.4  | 11.54 | 0.12 | 0.07 | -1.1  | 0.276628 | 0.175973 | 0.618796 | 0.452526 |
| MmugDNA.37403.1.S1_s_at | MmugDNA.37403.1 | 10.92 | 10.93 | 0.15 | 0.06 | -1.01 | 0.532898 | 0.503466 | 0.777862 | 0.700892 |
| MmugDNA.37404.1.S1_at   | MmugDNA.37404.1 | 11.8  | 11.48 | 0.21 | 0.3  | 1.24  | 0.110698 | 0.117007 | 0.472545 | 0.384405 |
| MmugDNA.37407.1.S1_at   | MmugDNA.37407.1 | 5.84  | 6.43  | 0.3  | 0.65 | -1.5  | 0.156299 | 0.17017  | 0.521002 | 0.446906 |
| MmugDNA.37408.1.S1_at   | MmugDNA.37408.1 | 9.65  | 9.42  | 0.16 | 0.12 | 1.17  | 0.198199 | 0.216956 | 0.561209 | 0.490571 |
| MmugDNA.3741.1.S1_at    | MmugDNA.3741.1  | 3.12  | 3.06  | 0.25 | 0.15 | 1.04  | 0.739374 | 0.924598 | 0.888141 | 0.957386 |
| MmugDNA.37410.1.S1_at   | MmugDNA.37410.1 | 7.28  | 6.84  | 0.3  | 0.26 | 1.36  | 0.109349 | 0.009012 | 0.470811 | 0.125499 |
| MmugDNA.37420.1.S1_at   | MmugDNA.37420.1 | 4.01  | 3.78  | 0.09 | 0.3  | 1.17  | 0.668773 | 0.549846 | 0.851986 | 0.730104 |
| MmugDNA.37422.1.S1_at   | MmugDNA.37422.1 | 9.68  | 9.97  | 0.19 | 0.04 | -1.22 | 0.140642 | 0.00265  | 0.508385 | 0.07609  |
| MmugDNA.37426.1.S1_at   | MmugDNA.37426.1 | 11.58 | 11.4  | 0.08 | 0.33 | 1.13  | 0.415196 | 0.379312 | 0.709417 | 0.616294 |
| MmugDNA.3743.1.S1_at    | MmugDNA.3743.1  | 7.57  | 8.18  | 0.6  | 0.72 | -1.53 | 0.127788 | 0.148833 | 0.494071 | 0.423218 |
| MmugDNA.37430.1.S1_at   | MmugDNA.37430.1 | 5.1   | 5.14  | 0.41 | 0.26 | -1.03 | 0.509763 | 0.179914 | 0.764501 | 0.456453 |
| MmugDNA.37431.1.S1_at   | MmugDNA.37431.1 | 5.21  | 5.23  | 0.22 | 0.07 | -1.02 | 0.22982  | 0.038031 | 0.587007 | 0.239596 |
| MmugDNA.37444.1.S1_at   | MmugDNA.37444.1 | 11.5  | 11.69 | 0.08 | 0.1  | -1.14 | 0.070439 | 0.007782 | 0.414257 | 0.117732 |
| MmugDNA.37448.1.S1_at   | MmugDNA.37448.1 | 11.36 | 11.36 | 0.09 | 0.09 | -1    | 0.921773 | 0.242673 | 0.969615 | 0.513032 |
| MmugDNA.37450.1.S1_at   | MmugDNA.37450.1 | 10.42 | 10.27 | 0.35 | 1.12 | 1.11  | 0.995875 | 0.780792 | 0.998446 | 0.872821 |
| MmugDNA.37451.1.S1_at   | MmugDNA.37451.1 | 11    | 10.6  | 0.1  | 0.34 | 1.32  | 0.173197 | 0.140145 | 0.536888 | 0.413394 |

|                         |                 |       |       |      |      |        |          |          |          |          |
|-------------------------|-----------------|-------|-------|------|------|--------|----------|----------|----------|----------|
| MmugDNA.3746.1.S1_at    | MmugDNA.3746.1  | 4.67  | 10.65 | 1.61 | 3.87 | -63.33 | 0.229307 | 0.234575 | 0.586472 | 0.505783 |
| MmugDNA.37467.1.S1_at   | MmugDNA.37467.1 | 10.77 | 11.73 | 0.26 | 0.55 | -1.96  | 0.054576 | 0.038753 | 0.381936 | 0.241916 |
| MmugDNA.37470.1.S1_at   | MmugDNA.37470.1 | 10.59 | 10.55 | 0.13 | 0.17 | 1.02   | 0.752335 | 0.391315 | 0.89432  | 0.625    |
| MmugDNA.37472.1.S1_at   | MmugDNA.37472.1 | 12.23 | 12.24 | 0.35 | 0.17 | -1.01  | 0.785103 | 0.298513 | 0.910525 | 0.557175 |
| MmugDNA.37474.1.S1_at   | MmugDNA.37474.1 | 10.94 | 11.64 | 0.05 | 0.31 | -1.63  | 0.01612  | 0.009254 | 0.262742 | 0.126968 |
| MmugDNA.37475.1.S1_s_at | MmugDNA.37475.1 | 10.8  | 10.83 | 0.21 | 0.09 | -1.02  | 0.755801 | 0.148136 | 0.896243 | 0.422668 |
| MmugDNA.37488.1.S1_at   | MmugDNA.37488.1 | 9.02  | 9.27  | 0.21 | 0.25 | -1.19  | 0.10885  | 0.113845 | 0.470435 | 0.380071 |
| MmugDNA.3749.1.S1_at    | MmugDNA.3749.1  | 4.17  | 4.24  | 0.28 | 0.14 | -1.05  | 0.623378 | 0.363851 | 0.827971 | 0.604215 |
| MmugDNA.37494.1.S1_at   | MmugDNA.37494.1 | 7.05  | 7.08  | 0.03 | 0.39 | -1.02  | 0.329725 | 0.301527 | 0.655349 | 0.55955  |
| MmugDNA.37497.1.S1_at   | MmugDNA.37497.1 | 11.01 | 10.96 | 0.66 | 0.18 | 1.04   | 0.485432 | 0.502418 | 0.750946 | 0.700154 |
| MmugDNA.37498.1.S1_at   | MmugDNA.37498.1 | 5.76  | 5.84  | 0.1  | 0.12 | -1.06  | 0.386867 | 0.517597 | 0.691684 | 0.709722 |
| MmugDNA.375.1.S1_s_at   | MmugDNA.375.1   | 11.28 | 10.98 | 0.38 | 0.44 | 1.23   | 0.810819 | 0.920636 | 0.922872 | 0.955258 |
| MmugDNA.37500.1.S1_at   | MmugDNA.37500.1 | 3.59  | 3.68  | 0.05 | 0.09 | -1.07  | 0.139891 | 0.026878 | 0.507641 | 0.205096 |
| MmugDNA.37502.1.S1_at   | MmugDNA.37502.1 | 8.94  | 9.06  | 0.17 | 0.95 | -1.09  | 0.817101 | 0.816222 | 0.9259   | 0.893995 |
| MmugDNA.37503.1.S1_at   | MmugDNA.37503.1 | 7.42  | 8.06  | 0.19 | 0.17 | -1.55  | 0.027621 | 0.021654 | 0.308386 | 0.184333 |
| MmugDNA.37504.1.S1_at   | MmugDNA.37504.1 | 4.43  | 5.34  | 0.51 | 0.77 | -1.88  | 0.304554 | 0.34916  | 0.638617 | 0.59321  |
| MmugDNA.37505.1.S1_at   | MmugDNA.37505.1 | 8.12  | 8.56  | 0.25 | 0.74 | -1.35  | 0.592074 | 0.263151 | 0.810775 | 0.529465 |
| MmugDNA.37512.1.S1_s_at | MmugDNA.37512.1 | 9.2   | 9.15  | 0.1  | 0.23 | 1.03   | 0.719698 | 0.406192 | 0.877054 | 0.634213 |
| MmugDNA.37513.1.S1_at   | MmugDNA.37513.1 | 8.05  | 7.48  | 0.81 | 0.32 | 1.48   | 0.883101 | 0.101667 | 0.952961 | 0.361562 |
| MmugDNA.37516.1.S1_at   | MmugDNA.37516.1 | 7.19  | 6.76  | 0.33 | 0.37 | 1.35   | 0.171745 | 0.245342 | 0.535304 | 0.515132 |
| MmugDNA.37517.1.S1_at   | MmugDNA.37517.1 | 8.77  | 9.15  | 0.22 | 0.25 | -1.3   | 0.228124 | 0.110053 | 0.585454 | 0.374179 |
| MmugDNA.37520.1.S1_at   | MmugDNA.37520.1 | 8.34  | 7.96  | 0.17 | 0.17 | 1.3    | 0.030997 | 0.022893 | 0.32048  | 0.18934  |
| MmugDNA.37522.1.S1_at   | MmugDNA.37522.1 | 3.1   | 3.04  | 0.2  | 0.03 | 1.04   | 0.714813 | 0.477183 | 0.874968 | 0.683287 |
| MmugDNA.37529.1.S1_at   | MmugDNA.37529.1 | 10.78 | 9.69  | 0.55 | 0.73 | 2.13   | 0.179338 | 0.216735 | 0.543593 | 0.490311 |
| MmugDNA.37537.1.S1_at   | MmugDNA.37537.1 | 11.08 | 11.39 | 0.04 | 0.39 | -1.24  | 0.249577 | 0.351407 | 0.600196 | 0.595054 |
| MmugDNA.3754.1.S1_at    | MmugDNA.3754.1  | 10.62 | 10.5  | 0.09 | 0.19 | 1.09   | 0.895287 | 0.004488 | 0.958083 | 0.093554 |
| MmugDNA.37542.1.S1_at   | MmugDNA.37542.1 | 8.92  | 9.19  | 0.2  | 0.3  | -1.21  | 0.436233 | 0.179471 | 0.721644 | 0.455939 |
| MmugDNA.37543.1.S1_at   | MmugDNA.37543.1 | 11.02 | 10.7  | 0.04 | 0.67 | 1.25   | 0.142261 | 0.163922 | 0.509527 | 0.440105 |
| MmugDNA.37544.1.S1_at   | MmugDNA.37544.1 | 10.34 | 10.26 | 0.17 | 0.18 | 1.06   | 0.620293 | 0.25815  | 0.826026 | 0.525574 |
| MmugDNA.37546.1.S1_at   | MmugDNA.37546.1 | 10.08 | 8.4   | 0.68 | 1.04 | 3.21   | 0.168241 | 0.184696 | 0.53256  | 0.460645 |
| MmugDNA.37554.1.S1_at   | MmugDNA.37554.1 | 4.83  | 4.75  | 0.82 | 0.24 | 1.06   | 0.852744 | 0.744727 | 0.940647 | 0.852165 |
| MmugDNA.37557.1.S1_at   | MmugDNA.37557.1 | 8.27  | 8.44  | 0.6  | 1.16 | -1.13  | 0.584068 | 0.737058 | 0.806847 | 0.847791 |
| MmugDNA.37558.1.S1_at   | MmugDNA.37558.1 | 8.81  | 8.77  | 0.14 | 0.14 | 1.03   | 0.869528 | 0.042625 | 0.947917 | 0.251037 |
| MmugDNA.37561.1.S1_at   | MmugDNA.37561.1 | 7.88  | 6.93  | 0.09 | 0.61 | 1.93   | 0.142975 | 0.071041 | 0.509942 | 0.312704 |
| MmugDNA.37563.1.S1_at   | MmugDNA.37563.1 | 5.78  | 4.91  | 0.77 | 0.26 | 1.84   | 0.243994 | 0.23092  | 0.595699 | 0.502548 |
| MmugDNA.37564.1.S1_at   | MmugDNA.37564.1 | 11.67 | 11.1  | 0.1  | 0.22 | 1.48   | 0.01032  | 0.005207 | 0.22913  | 0.100033 |
| MmugDNA.37566.1.S1_at   | MmugDNA.37566.1 | 7.26  | 7.37  | 0.14 | 0.26 | -1.08  | 0.38142  | 0.472826 | 0.687881 | 0.680162 |
| MmugDNA.37572.1.S1_at   | MmugDNA.37572.1 | 5.35  | 5.33  | 0.12 | 0.23 | 1.02   | 0.806074 | 0.904925 | 0.920449 | 0.946143 |
| MmugDNA.37575.1.S1_at   | MmugDNA.37575.1 | 4.8   | 4.68  | 0.13 | 0.2  | 1.09   | 0.513942 | 0.255619 | 0.766673 | 0.523608 |
| MmugDNA.37587.1.S1_at   | MmugDNA.37587.1 | 5.41  | 5.42  | 0.04 | 0.03 | -1.01  | 0.948382 | 0.661317 | 0.980183 | 0.801687 |
| MmugDNA.3759.1.S1_a_at  | MmugDNA.3759.1  | 8.03  | 6.84  | 0.36 | 1.01 | 2.28   | 0.141127 | 0.11987  | 0.508686 | 0.388577 |

|                         |                 |       |       |      |      |       |          |          |          |          |
|-------------------------|-----------------|-------|-------|------|------|-------|----------|----------|----------|----------|
| MmugDNA.3759.1.S1_at    | MmugDNA.3759.1  | 8.06  | 6.91  | 0.42 | 0.72 | 2.21  | 0.097831 | 0.087467 | 0.457014 | 0.340617 |
| MmugDNA.37591.1.S1_at   | MmugDNA.37591.1 | 10.73 | 10.44 | 0.37 | 0.2  | 1.22  | 0.239745 | 0.063367 | 0.59272  | 0.298403 |
| MmugDNA.37593.1.S1_at   | MmugDNA.37593.1 | 5.61  | 5.7   | 0.05 | 0.07 | -1.06 | 0.123354 | 0.017837 | 0.488991 | 0.168707 |
| MmugDNA.37599.1.S1_at   | MmugDNA.37599.1 | 8.3   | 8.03  | 0.35 | 0.95 | 1.21  | 0.664803 | 0.761604 | 0.849708 | 0.861459 |
| MmugDNA.37601.1.S1_at   | MmugDNA.37601.1 | 10.76 | 11.74 | 0.65 | 0.39 | -1.98 | 0.086514 | 0.082608 | 0.440232 | 0.33182  |
| MmugDNA.37601.1.S1_s_at | MmugDNA.37601.1 | 12.13 | 12.5  | 0.65 | 0.35 | -1.29 | 0.179392 | 0.22127  | 0.543593 | 0.4946   |
| MmugDNA.37605.1.S1_at   | MmugDNA.37605.1 | 11.3  | 11.99 | 0.17 | 0.55 | -1.62 | 0.439607 | 0.5316   | 0.723686 | 0.718783 |
| MmugDNA.37608.1.S1_at   | MmugDNA.37608.1 | 8.7   | 9.79  | 0.35 | 0.42 | -2.13 | 0.020565 | 0.014257 | 0.27883  | 0.152418 |
| MmugDNA.37621.1.S1_at   | MmugDNA.37621.1 | 5.13  | 5.23  | 0.1  | 0.1  | -1.07 | 0.506527 | 0.603783 | 0.762415 | 0.764299 |
| MmugDNA.37622.1.S1_at   | MmugDNA.37622.1 | 6.04  | 5.99  | 0.59 | 0.5  | 1.04  | 0.987224 | 0.988653 | 0.995537 | 0.993595 |
| MmugDNA.37624.1.S1_at   | MmugDNA.37624.1 | 6.11  | 6.03  | 0.26 | 0.24 | 1.06  | 0.628082 | 0.054338 | 0.830517 | 0.278605 |
| MmugDNA.3763.1.S1_at    | MmugDNA.3763.1  | 7.9   | 7.75  | 0.16 | 0.21 | 1.11  | 0.333484 | 0.464789 | 0.657597 | 0.67542  |
| MmugDNA.3764.1.S1_at    | MmugDNA.3764.1  | 5.15  | 5.37  | 0.2  | 0.17 | -1.17 | 0.275041 | 0.312259 | 0.617642 | 0.566963 |
| MmugDNA.37640.1.S1_at   | MmugDNA.37640.1 | 8.33  | 7.97  | 0.25 | 0.07 | 1.28  | 0.073828 | 0.040589 | 0.419443 | 0.246322 |
| MmugDNA.37648.1.S1_at   | MmugDNA.37648.1 | 6.31  | 5.63  | 0.36 | 0.17 | 1.6   | 0.112852 | 0.320292 | 0.475334 | 0.572616 |
| MmugDNA.3765.1.S1_at    | MmugDNA.3765.1  | 11.25 | 11.39 | 0.23 | 0.1  | -1.1  | 0.511633 | 0.648178 | 0.765318 | 0.794002 |
| MmugDNA.37655.1.S1_at   | MmugDNA.37655.1 | 5.69  | 5.81  | 0.03 | 0.1  | -1.09 | 0.100887 | 0.15097  | 0.461009 | 0.425588 |
| MmugDNA.37656.1.S1_at   | MmugDNA.37656.1 | 3.83  | 4.02  | 0.18 | 0.15 | -1.14 | 0.475773 | 0.308757 | 0.745964 | 0.56463  |
| MmugDNA.3766.1.S1_at    | MmugDNA.3766.1  | 4.57  | 4.7   | 0.22 | 0.07 | -1.09 | 0.510486 | 0.761687 | 0.765058 | 0.861459 |
| MmugDNA.37663.1.S1_at   | MmugDNA.37663.1 | 11.04 | 11.23 | 0.02 | 0.25 | -1.15 | 0.213336 | 0.256725 | 0.573596 | 0.524574 |
| MmugDNA.37667.1.S1_at   | MmugDNA.37667.1 | 7.11  | 8.3   | 0.5  | 1.44 | -2.28 | 0.263382 | 0.181316 | 0.609348 | 0.457834 |
| MmugDNA.37670.1.S1_at   | MmugDNA.37670.1 | 12.37 | 12.47 | 0.03 | 0.07 | -1.07 | 0.093591 | 0.073562 | 0.450966 | 0.31689  |
| MmugDNA.37671.1.S1_at   | MmugDNA.37671.1 | 9.52  | 8.66  | 0.23 | 0.85 | 1.82  | 0.493117 | 0.672102 | 0.756007 | 0.808305 |
| MmugDNA.37672.1.S1_s_at | MmugDNA.37672.1 | 12.37 | 11.9  | 0.45 | 0.56 | 1.39  | 0.551148 | 0.521204 | 0.788457 | 0.712304 |
| MmugDNA.37674.1.S1_at   | MmugDNA.37674.1 | 7.76  | 7.97  | 0.21 | 0.07 | -1.16 | 0.154769 | 0.167792 | 0.519343 | 0.444359 |
| MmugDNA.37678.1.S1_at   | MmugDNA.37678.1 | 4.23  | 4.43  | 0.89 | 0.55 | -1.15 | 0.627119 | 0.541198 | 0.829895 | 0.724781 |
| MmugDNA.3768.1.S1_at    | MmugDNA.3768.1  | 7.85  | 7.16  | 0.13 | 0.35 | 1.61  | 0.036338 | 0.011381 | 0.339201 | 0.138214 |
| MmugDNA.37680.1.S1_at   | MmugDNA.37680.1 | 10.08 | 7.9   | 0.37 | 0.82 | 4.55  | 0.021946 | 0.013319 | 0.28441  | 0.148042 |
| MmugDNA.37690.1.S1_at   | MmugDNA.37690.1 | 8.74  | 6.65  | 0.26 | 0.35 | 4.25  | 0.001267 | 0.000193 | 0.145267 | 0.030888 |
| MmugDNA.37698.1.S1_at   | MmugDNA.37698.1 | 7.37  | 5.87  | 0.04 | 0.79 | 2.82  | 0.085013 | 0.072462 | 0.438076 | 0.315294 |
| MmugDNA.37708.1.S1_at   | MmugDNA.37708.1 | 9.71  | 11.07 | 0.42 | 0.15 | -2.56 | 0.009361 | 0.011441 | 0.224425 | 0.13846  |
| MmugDNA.37710.1.S1_at   | MmugDNA.37710.1 | 9.62  | 9.44  | 0.12 | 0.35 | 1.14  | 0.699249 | 0.673985 | 0.866704 | 0.809483 |
| MmugDNA.37715.1.S1_at   | MmugDNA.37715.1 | 9.83  | 9.69  | 0.31 | 0.28 | 1.1   | 0.635039 | 0.004141 | 0.834812 | 0.091027 |
| MmugDNA.37728.1.S1_at   | MmugDNA.37728.1 | 12.05 | 12.34 | 0.07 | 0.32 | -1.22 | 0.261794 | 0.344996 | 0.608392 | 0.590253 |
| MmugDNA.37732.1.S1_at   | MmugDNA.37732.1 | 9     | 8.17  | 0.14 | 0.3  | 1.78  | 0.031203 | 0.023367 | 0.32089  | 0.19158  |
| MmugDNA.37737.1.S1_at   | MmugDNA.37737.1 | 10.09 | 10.64 | 0.05 | 0.32 | -1.46 | 0.125767 | 0.16361  | 0.491824 | 0.439768 |
| MmugDNA.37741.1.S1_at   | MmugDNA.37741.1 | 7.82  | 7.57  | 0.08 | 0.25 | 1.19  | 0.157639 | 0.240139 | 0.522514 | 0.510821 |
| MmugDNA.37744.1.S1_at   | MmugDNA.37744.1 | 5.3   | 5.35  | 0.21 | 0.19 | -1.04 | 0.677543 | 0.878464 | 0.855526 | 0.930638 |
| MmugDNA.37748.1.S1_at   | MmugDNA.37748.1 | 3.51  | 4.73  | 0.37 | 0.94 | -2.34 | 0.105138 | 0.037943 | 0.46558  | 0.239302 |
| MmugDNA.37748.1.S1_s_at | MmugDNA.37748.1 | 5.15  | 6.37  | 0.51 | 0.77 | -2.33 | 0.086219 | 0.038077 | 0.440212 | 0.239748 |
| MmugDNA.3775.1.S1_at    | MmugDNA.3775.1  | 9.55  | 8.94  | 0.07 | 0.44 | 1.53  | 0.057119 | 0.048535 | 0.387418 | 0.265534 |

|                         |                 |       |       |      |      |       |          |          |          |          |
|-------------------------|-----------------|-------|-------|------|------|-------|----------|----------|----------|----------|
| MmugDNA.37756.1.S1_at   | MmugDNA.37756.1 | 10.35 | 10.58 | 0.41 | 0.03 | -1.17 | 0.569896 | 0.665182 | 0.79921  | 0.803767 |
| MmugDNA.37759.1.S1_at   | MmugDNA.37759.1 | 6.76  | 6.52  | 0.23 | 0.29 | 1.18  | 0.636925 | 0.302125 | 0.83591  | 0.560071 |
| MmugDNA.3776.1.S1_at    | MmugDNA.3776.1  | 9.01  | 9.04  | 0.15 | 0.26 | -1.02 | 0.915135 | 0.920704 | 0.9664   | 0.95529  |
| MmugDNA.37762.1.S1_at   | MmugDNA.37762.1 | 11.7  | 11.18 | 0.08 | 0.38 | 1.44  | 0.105745 | 0.023054 | 0.466526 | 0.190013 |
| MmugDNA.37765.1.S1_at   | MmugDNA.37765.1 | 4.08  | 4.43  | 0.13 | 0.21 | -1.28 | 0.077844 | 0.407185 | 0.427855 | 0.634794 |
| MmugDNA.37766.1.S1_at   | MmugDNA.37766.1 | 7.62  | 7.1   | 0.03 | 0.2  | 1.43  | 0.014372 | 0.008497 | 0.251885 | 0.122289 |
| MmugDNA.37779.1.S1_at   | MmugDNA.37779.1 | 6.61  | 7.1   | 0.84 | 0.29 | -1.4  | 0.566556 | 0.755702 | 0.797608 | 0.85776  |
| MmugDNA.37784.1.S1_at   | MmugDNA.37784.1 | 3.46  | 3.08  | 1.07 | 0.17 | 1.3   | 0.182413 | 0.147871 | 0.546756 | 0.422231 |
| MmugDNA.37797.1.S1_at   | MmugDNA.37797.1 | 6.65  | 6.83  | 0.16 | 0.15 | -1.13 | 0.215409 | 0.264473 | 0.575857 | 0.530437 |
| MmugDNA.37798.1.S1_at   | MmugDNA.37798.1 | 14.26 | 14.26 | 0.02 | 0.12 | 1     | 0.663082 | 0.852205 | 0.848885 | 0.915967 |
| MmugDNA.37802.1.S1_at   | MmugDNA.37802.1 | 13.91 | 13.85 | 0.16 | 0.19 | 1.05  | 0.801624 | 0.90806  | 0.918156 | 0.947901 |
| MmugDNA.37803.1.S1_at   | MmugDNA.37803.1 | 6.69  | 6.65  | 0.12 | 0.26 | 1.02  | 0.86981  | 0.813367 | 0.947917 | 0.892144 |
| MmugDNA.37811.1.S1_at   | MmugDNA.37811.1 | 9     | 8.77  | 0.23 | 0.71 | 1.17  | 0.367366 | 0.166258 | 0.67949  | 0.442798 |
| MmugDNA.37813.1.S1_at   | MmugDNA.37813.1 | 12.46 | 12.45 | 0.11 | 0.02 | 1.01  | 0.918451 | 0.495511 | 0.96831  | 0.695527 |
| MmugDNA.37814.1.S1_at   | MmugDNA.37814.1 | 8.57  | 7.45  | 0.11 | 0.36 | 2.17  | 0.005366 | 0.002521 | 0.191107 | 0.074158 |
| MmugDNA.3782.1.S1_at    | MmugDNA.3782.1  | 9.53  | 9.74  | 0.03 | 0.43 | -1.16 | 0.476465 | 0.658469 | 0.746232 | 0.800376 |
| MmugDNA.37820.1.S1_s_at | MmugDNA.37820.1 | 13.76 | 13.7  | 0.03 | 0.07 | 1.05  | 0.201958 | 0.018647 | 0.564224 | 0.171648 |
| MmugDNA.37823.1.S1_at   | MmugDNA.37823.1 | 5.7   | 6.04  | 0.13 | 0.1  | -1.27 | 0.060126 | 0.048434 | 0.393081 | 0.265307 |
| MmugDNA.37829.1.S1_at   | MmugDNA.37829.1 | 10.22 | 9.58  | 0.06 | 0.34 | 1.56  | 0.094145 | 0.119616 | 0.451714 | 0.388255 |
| MmugDNA.37834.1.S1_at   | MmugDNA.37834.1 | 7.9   | 7.05  | 0.41 | 0.41 | 1.81  | 0.083511 | 0.09119  | 0.43582  | 0.346097 |
| MmugDNA.37835.1.S1_at   | MmugDNA.37835.1 | 7.03  | 7.56  | 0.09 | 0.17 | -1.44 | 0.018162 | 0.008171 | 0.269313 | 0.119886 |
| MmugDNA.37837.1.S1_at   | MmugDNA.37837.1 | 10.12 | 10.17 | 0.05 | 0.08 | -1.04 | 0.386341 | 0.275302 | 0.691258 | 0.539663 |
| MmugDNA.3784.1.S1_at    | MmugDNA.3784.1  | 2.95  | 2.91  | 0.08 | 0.03 | 1.02  | 0.468841 | 0.057051 | 0.741287 | 0.284945 |
| MmugDNA.37840.1.S1_at   | MmugDNA.37840.1 | 8.03  | 9.19  | 0.21 | 0.39 | -2.24 | 0.011619 | 0.004403 | 0.236956 | 0.092846 |
| MmugDNA.37845.1.S1_at   | MmugDNA.37845.1 | 8.33  | 7.57  | 0.3  | 0.1  | 1.69  | 0.019606 | 0.00795  | 0.275549 | 0.118702 |
| MmugDNA.37853.1.S1_at   | MmugDNA.37853.1 | 9.51  | 10.51 | 0.2  | 0.65 | -2    | 0.175526 | 0.215746 | 0.539299 | 0.489503 |
| MmugDNA.37861.1.S1_s_at | MmugDNA.37861.1 | 9.94  | 9.31  | 0.28 | 0.24 | 1.55  | 0.061056 | 0.068295 | 0.394925 | 0.307706 |
| MmugDNA.37865.1.S1_at   | MmugDNA.37865.1 | 11.45 | 11.4  | 0.23 | 0.12 | 1.03  | 0.752613 | 0.918804 | 0.894415 | 0.954387 |
| MmugDNA.37869.1.S1_at   | MmugDNA.37869.1 | 8.53  | 8.35  | 0.18 | 0.11 | 1.13  | 0.329131 | 0.510799 | 0.654855 | 0.705196 |
| MmugDNA.3787.1.S1_at    | MmugDNA.3787.1  | 10.16 | 10.1  | 0.21 | 0.28 | 1.04  | 0.646182 | 0.450815 | 0.840752 | 0.665869 |
| MmugDNA.37871.1.S1_at   | MmugDNA.37871.1 | 4.55  | 4.65  | 0.02 | 0.09 | -1.07 | 0.505345 | 0.41657  | 0.761594 | 0.641647 |
| MmugDNA.37880.1.S1_at   | MmugDNA.37880.1 | 6.85  | 5.71  | 0.77 | 0.44 | 2.22  | 0.051606 | 0.057242 | 0.376072 | 0.285059 |
| MmugDNA.37891.1.S1_at   | MmugDNA.37891.1 | 4.39  | 4.6   | 0.07 | 0.06 | -1.16 | 0.031468 | 0.101733 | 0.321877 | 0.361601 |
| MmugDNA.37899.1.S1_at   | MmugDNA.37899.1 | 4.47  | 4.17  | 0.24 | 0.1  | 1.23  | 0.353419 | 0.253244 | 0.67013  | 0.521614 |
| MmugDNA.37900.1.S1_at   | MmugDNA.37900.1 | 12.89 | 12.84 | 0.06 | 0.04 | 1.04  | 0.591747 | 0.175846 | 0.810601 | 0.452475 |
| MmugDNA.37904.1.S1_at   | MmugDNA.37904.1 | 11.15 | 10.93 | 0.49 | 0.59 | 1.16  | 0.428029 | 0.449667 | 0.716548 | 0.665156 |
| MmugDNA.37909.1.S1_at   | MmugDNA.37909.1 | 9.69  | 9.04  | 0.06 | 0.43 | 1.57  | 0.100536 | 0.093323 | 0.461009 | 0.349412 |
| MmugDNA.3791.1.S1_at    | MmugDNA.3791.1  | 11.33 | 11.95 | 0.13 | 0.14 | -1.53 | 0.004819 | 0.001398 | 0.184674 | 0.057005 |
| MmugDNA.37921.1.S1_at   | MmugDNA.37921.1 | 8.21  | 9.85  | 0.64 | 1.64 | -3.12 | 0.257819 | 0.283155 | 0.605259 | 0.545694 |
| MmugDNA.37922.1.S1_at   | MmugDNA.37922.1 | 5.06  | 5.02  | 0.66 | 0.08 | 1.03  | 0.393625 | 0.161479 | 0.695396 | 0.437616 |
| MmugDNA.37923.1.S1_at   | MmugDNA.37923.1 | 12.24 | 11.75 | 0.2  | 0.29 | 1.4   | 0.061915 | 0.051256 | 0.396857 | 0.271825 |

|                         |                 |       |       |      |      |       |          |          |          |          |
|-------------------------|-----------------|-------|-------|------|------|-------|----------|----------|----------|----------|
| MmugDNA.37925.1.S1_at   | MmugDNA.37925.1 | 10.61 | 10.95 | 0.25 | 0.18 | -1.26 | 0.086961 | 0.016612 | 0.440725 | 0.163117 |
| MmugDNA.37927.1.S1_at   | MmugDNA.37927.1 | 9.51  | 8.63  | 0.99 | 0.23 | 1.85  | 0.668949 | 0.655153 | 0.851986 | 0.798309 |
| MmugDNA.37935.1.S1_at   | MmugDNA.37935.1 | 5.2   | 5.32  | 0.1  | 0.03 | -1.09 | 0.258568 | 0.360861 | 0.605793 | 0.601938 |
| MmugDNA.37936.1.S1_at   | MmugDNA.37936.1 | 9.21  | 8.59  | 0.25 | 0.54 | 1.53  | 0.260712 | 0.352903 | 0.607375 | 0.596217 |
| MmugDNA.37947.1.S1_at   | MmugDNA.37947.1 | 5.85  | 5.87  | 0.08 | 0.24 | -1.01 | 0.858401 | 0.692259 | 0.942805 | 0.820949 |
| MmugDNA.37954.1.S1_at   | MmugDNA.37954.1 | 2.95  | 2.95  | 0.06 | 0.56 | -1    | 0.33007  | 0.399616 | 0.655539 | 0.629912 |
| MmugDNA.37957.1.S1_at   | MmugDNA.37957.1 | 5.41  | 4.99  | 0.21 | 0.04 | 1.34  | 0.061732 | 0.02482  | 0.396604 | 0.197372 |
| MmugDNA.37959.1.S1_at   | MmugDNA.37959.1 | 4.24  | 4.73  | 0.22 | 0.17 | -1.41 | 0.065621 | 0.160415 | 0.404757 | 0.436528 |
| MmugDNA.37960.1.S1_at   | MmugDNA.37960.1 | 6.3   | 6.33  | 0.16 | 0.14 | -1.02 | 0.408922 | 0.440902 | 0.705675 | 0.659138 |
| MmugDNA.37961.1.S1_at   | MmugDNA.37961.1 | 8.48  | 9.14  | 0.29 | 0.48 | -1.57 | 0.112794 | 0.111196 | 0.475249 | 0.375832 |
| MmugDNA.37962.1.S1_at   | MmugDNA.37962.1 | 3.42  | 3.47  | 0.88 | 0.08 | -1.03 | 0.41943  | 0.442847 | 0.711796 | 0.660759 |
| MmugDNA.37963.1.S1_at   | MmugDNA.37963.1 | 9.3   | 8.42  | 0.22 | 1.36 | 1.84  | 0.329045 | 0.319038 | 0.654811 | 0.571591 |
| MmugDNA.37965.1.S1_at   | MmugDNA.37965.1 | 5.64  | 5.22  | 0.67 | 0.05 | 1.34  | 0.157719 | 0.002545 | 0.522564 | 0.07453  |
| MmugDNA.37973.1.S1_at   | MmugDNA.37973.1 | 2.98  | 3.23  | 0.09 | 0.18 | -1.19 | 0.122523 | 0.169087 | 0.487737 | 0.44561  |
| MmugDNA.37974.1.S1_at   | MmugDNA.37974.1 | 5.84  | 6     | 0.02 | 0.15 | -1.12 | 0.114262 | 0.043935 | 0.477533 | 0.254098 |
| MmugDNA.37980.1.S1_s_at | MmugDNA.37980.1 | 10.09 | 10.17 | 0.04 | 0.02 | -1.06 | 0.035915 | 0.024833 | 0.33808  | 0.197413 |
| MmugDNA.37982.1.S1_at   | MmugDNA.37982.1 | 6.24  | 5.54  | 0.69 | 0.47 | 1.62  | 0.165675 | 0.206208 | 0.529716 | 0.480377 |
| MmugDNA.37992.1.S1_at   | MmugDNA.37992.1 | 10.25 | 10.92 | 0.17 | 0.23 | -1.59 | 0.012764 | 0.004494 | 0.243715 | 0.093593 |
| MmugDNA.37993.1.S1_s_at | MmugDNA.37993.1 | 12.51 | 12.63 | 0.22 | 0.14 | -1.09 | 0.2462   | 0.346416 | 0.597663 | 0.591247 |
| MmugDNA.37995.1.S1_at   | MmugDNA.37995.1 | 10.94 | 11.46 | 0.14 | 0.34 | -1.43 | 0.137206 | 0.10041  | 0.504356 | 0.359541 |
| MmugDNA.37996.1.S1_at   | MmugDNA.37996.1 | 6.11  | 4.25  | 0.44 | 0.67 | 3.63  | 0.017153 | 0.009145 | 0.266906 | 0.12613  |
| MmugDNA.37998.1.S1_s_at | MmugDNA.37998.1 | 11.11 | 10.88 | 0.33 | 0.33 | 1.17  | 0.438198 | 0.654785 | 0.722864 | 0.798154 |
| MmugDNA.37999.1.S1_at   | MmugDNA.37999.1 | 4.85  | 4.81  | 0.12 | 0.1  | 1.03  | 0.80448  | 0.641553 | 0.919555 | 0.7896   |
| MmugDNA.38.1.S1_at      | MmugDNA.38.1    | 11.08 | 11.28 | 0.03 | 0.25 | -1.15 | 0.143655 | 0.101562 | 0.510312 | 0.361407 |
| MmugDNA.38000.1.S1_at   | MmugDNA.38000.1 | 12.72 | 12.72 | 0.18 | 0.36 | 1     | 0.420147 | 0.404237 | 0.712259 | 0.632691 |
| MmugDNA.38001.1.S1_at   | MmugDNA.38001.1 | 10.01 | 9.15  | 0.3  | 0.13 | 1.81  | 0.011041 | 0.00326  | 0.233671 | 0.082278 |
| MmugDNA.38003.1.S1_at   | MmugDNA.38003.1 | 11.51 | 11.77 | 0.19 | 0.43 | -1.2  | 0.407247 | 0.301605 | 0.70451  | 0.55955  |
| MmugDNA.38006.1.S1_s_at | MmugDNA.38006.1 | 6.04  | 8.97  | 1.18 | 2.12 | -7.64 | 0.250708 | 0.137714 | 0.600389 | 0.410711 |
| MmugDNA.38008.1.S1_at   | MmugDNA.38008.1 | 9.13  | 8.76  | 0.33 | 0.16 | 1.29  | 0.093676 | 0.089922 | 0.450966 | 0.344119 |
| MmugDNA.38010.1.S1_at   | MmugDNA.38010.1 | 13.43 | 13.26 | 0.07 | 0.19 | 1.13  | 0.22145  | 0.021675 | 0.580261 | 0.184333 |
| MmugDNA.38026.1.S1_at   | MmugDNA.38026.1 | 9.62  | 9.96  | 0.29 | 0.48 | -1.27 | 0.123656 | 0.053931 | 0.489487 | 0.277766 |
| MmugDNA.38029.1.S1_at   | MmugDNA.38029.1 | 3.16  | 3.06  | 0.02 | 0.07 | 1.07  | 0.08497  | 0.07007  | 0.438065 | 0.310966 |
| MmugDNA.38047.1.S1_at   | MmugDNA.38047.1 | 7.39  | 7.08  | 0.26 | 0.08 | 1.24  | 0.144777 | 0.040914 | 0.511163 | 0.247161 |
| MmugDNA.38049.1.S1_at   | MmugDNA.38049.1 | 8     | 7.66  | 0.16 | 1.01 | 1.27  | 0.235308 | 0.317638 | 0.589342 | 0.570802 |
| MmugDNA.38052.1.S1_at   | MmugDNA.38052.1 | 8.37  | 6.88  | 0.15 | 0.28 | 2.8   | 0.00121  | 0.000296 | 0.145267 | 0.034892 |
| MmugDNA.38053.1.S1_at   | MmugDNA.38053.1 | 7.52  | 10.34 | 0.46 | 0.02 | -7.02 | 0.00052  | 0.000182 | 0.136818 | 0.030511 |
| MmugDNA.38054.1.S1_at   | MmugDNA.38054.1 | 5.69  | 5.66  | 0.21 | 0.07 | 1.03  | 0.274194 | 0.278141 | 0.617262 | 0.541783 |
| MmugDNA.38062.1.S1_at   | MmugDNA.38062.1 | 10.79 | 10.96 | 0.44 | 0.49 | -1.13 | 0.317241 | 0.413101 | 0.64789  | 0.639419 |
| MmugDNA.38063.1.S1_at   | MmugDNA.38063.1 | 4.8   | 4.21  | 0.47 | 0.47 | 1.51  | 0.891536 | 0.577913 | 0.956781 | 0.748185 |
| MmugDNA.38069.1.S1_at   | MmugDNA.38069.1 | 8.12  | 8.41  | 0.27 | 0.12 | -1.22 | 0.138214 | 0.0528   | 0.505618 | 0.275412 |
| MmugDNA.38070.1.S1_at   | MmugDNA.38070.1 | 6.1   | 5.51  | 0.24 | 1.69 | 1.51  | 0.553132 | 0.743549 | 0.789884 | 0.851395 |



|                         |                 |       |       |      |      |       |          |          |          |          |
|-------------------------|-----------------|-------|-------|------|------|-------|----------|----------|----------|----------|
| MmugDNA.38072.1.S1_at   | MmugDNA.38072.1 | 10.24 | 9.78  | 0.17 | 0.31 | 1.38  | 0.035677 | 0.027168 | 0.3373   | 0.205893 |
| MmugDNA.38081.1.S1_at   | MmugDNA.38081.1 | 3.19  | 3.26  | 0.06 | 0.19 | -1.04 | 0.211756 | 0.417915 | 0.572347 | 0.642484 |
| MmugDNA.38086.1.S1_at   | MmugDNA.38086.1 | 10.35 | 9.72  | 0.24 | 0.06 | 1.54  | 0.012316 | 0.004852 | 0.240869 | 0.097235 |
| MmugDNA.38099.1.S1_at   | MmugDNA.38099.1 | 10.29 | 9.98  | 0.16 | 0.12 | 1.24  | 0.043516 | 0.079905 | 0.356798 | 0.327207 |
| MmugDNA.38102.1.S1_at   | MmugDNA.38102.1 | 11.16 | 11.15 | 0.15 | 0.21 | 1.01  | 0.587074 | 0.022863 | 0.808416 | 0.189271 |
| MmugDNA.38103.1.S1_at   | MmugDNA.38103.1 | 8.36  | 8.44  | 0.07 | 0.11 | -1.06 | 0.460436 | 0.181438 | 0.736935 | 0.457927 |
| MmugDNA.38107.1.S1_at   | MmugDNA.38107.1 | 3.94  | 3.86  | 0.04 | 0.35 | 1.05  | 0.57792  | 0.645206 | 0.803619 | 0.792105 |
| MmugDNA.3811.1.S1_at    | MmugDNA.3811.1  | 9.04  | 8.63  | 0.21 | 0.05 | 1.33  | 0.026923 | 0.014478 | 0.305225 | 0.153571 |
| MmugDNA.38117.1.S1_at   | MmugDNA.38117.1 | 12.18 | 11.81 | 0.2  | 0.18 | 1.29  | 0.184251 | 0.219621 | 0.548064 | 0.493215 |
| MmugDNA.38121.1.S1_at   | MmugDNA.38121.1 | 10.42 | 10.2  | 0.76 | 0.39 | 1.17  | 0.944871 | 0.995269 | 0.979001 | 0.997042 |
| MmugDNA.38124.1.S1_at   | MmugDNA.38124.1 | 7.18  | 6.8   | 0.25 | 0.07 | 1.3   | 0.034592 | 0.023719 | 0.333297 | 0.192852 |
| MmugDNA.38132.1.S1_at   | MmugDNA.38132.1 | 12.48 | 12.25 | 0.11 | 0.11 | 1.18  | 0.074299 | 0.030537 | 0.419963 | 0.216711 |
| MmugDNA.38135.1.S1_at   | MmugDNA.38135.1 | 9.84  | 10.21 | 0.13 | 0.33 | -1.29 | 0.398117 | 0.12989  | 0.698541 | 0.401509 |
| MmugDNA.38136.1.S1_at   | MmugDNA.38136.1 | 6.47  | 6.61  | 0.06 | 0.07 | -1.11 | 0.035287 | 0.008735 | 0.335829 | 0.12396  |
| MmugDNA.38137.1.S1_at   | MmugDNA.38137.1 | 8.19  | 8.46  | 0.26 | 0.18 | -1.2  | 0.474762 | 0.685539 | 0.74537  | 0.816542 |
| MmugDNA.38137.1.S1_x_at | MmugDNA.38137.1 | 8.42  | 8.75  | 0.26 | 0.13 | -1.26 | 0.532163 | 0.72026  | 0.777626 | 0.838202 |
| MmugDNA.38138.1.S1_at   | MmugDNA.38138.1 | 9.77  | 10.25 | 0.65 | 0.25 | -1.39 | 0.112039 | 0.116494 | 0.474497 | 0.383671 |
| MmugDNA.38148.1.S1_at   | MmugDNA.38148.1 | 12.15 | 12.14 | 0.08 | 0.21 | 1.01  | 0.642826 | 0.548574 | 0.838962 | 0.729276 |
| MmugDNA.3815.1.S1_at    | MmugDNA.3815.1  | 3.14  | 3.44  | 0.04 | 0.19 | -1.24 | 0.082406 | 0.059828 | 0.43386  | 0.291286 |
| MmugDNA.38153.1.S1_at   | MmugDNA.38153.1 | 6.58  | 6.64  | 0.14 | 0.14 | -1.04 | 0.349419 | 0.183549 | 0.667703 | 0.459681 |
| MmugDNA.38158.1.S1_at   | MmugDNA.38158.1 | 6.78  | 6.12  | 0.12 | 0.32 | 1.58  | 0.053348 | 0.038812 | 0.380173 | 0.241916 |
| MmugDNA.38158.1.S1_s_at | MmugDNA.38158.1 | 8.02  | 7.88  | 0.13 | 0.07 | 1.1   | 0.064756 | 0.081006 | 0.403383 | 0.329134 |
| MmugDNA.3816.1.S1_at    | MmugDNA.3816.1  | 12.83 | 12.7  | 0.07 | 0.09 | 1.09  | 0.622993 | 0.723497 | 0.82774  | 0.839925 |
| MmugDNA.38161.1.S1_at   | MmugDNA.38161.1 | 12.3  | 12.46 | 0.07 | 0.23 | -1.12 | 0.721115 | 0.874302 | 0.877957 | 0.928616 |
| MmugDNA.38165.1.S1_at   | MmugDNA.38165.1 | 9.12  | 8.42  | 0.35 | 0.45 | 1.62  | 0.198135 | 0.266025 | 0.561111 | 0.531815 |
| MmugDNA.38167.1.S1_at   | MmugDNA.38167.1 | 10.14 | 10.03 | 0.13 | 0.18 | 1.08  | 0.506617 | 0.30369  | 0.762432 | 0.561113 |
| MmugDNA.38182.1.S1_at   | MmugDNA.38182.1 | 5.85  | 5.84  | 0.29 | 0.02 | 1     | 0.877394 | 0.599255 | 0.95087  | 0.761382 |
| MmugDNA.38182.1.S1_s_at | MmugDNA.38182.1 | 5.72  | 5.72  | 0.25 | 0.1  | -1    | 0.443783 | 0.585032 | 0.726422 | 0.752682 |
| MmugDNA.38186.1.S1_at   | MmugDNA.38186.1 | 10.46 | 9.77  | 0.14 | 0.81 | 1.62  | 0.228679 | 0.265372 | 0.586121 | 0.531337 |
| MmugDNA.38195.1.S1_at   | MmugDNA.38195.1 | 7.4   | 6.19  | 0.15 | 0.38 | 2.31  | 0.018374 | 0.009636 | 0.270103 | 0.129267 |
| MmugDNA.38196.1.S1_at   | MmugDNA.38196.1 | 8.61  | 8.88  | 0.26 | 0.24 | -1.2  | 0.07373  | 0.079953 | 0.419243 | 0.327321 |
| MmugDNA.382.1.S1_at     | MmugDNA.382.1   | 7.56  | 7.67  | 0.12 | 0.02 | -1.07 | 0.275668 | 0.36407  | 0.617878 | 0.604449 |
| MmugDNA.38203.1.S1_at   | MmugDNA.38203.1 | 3.83  | 3.99  | 0.09 | 0.19 | -1.12 | 0.887822 | 0.05276  | 0.954933 | 0.275315 |
| MmugDNA.3821.1.A1_at    | MmugDNA.3821.1  | 4.88  | 5.17  | 0.06 | 0.13 | -1.23 | 0.027854 | 0.010317 | 0.309107 | 0.132962 |
| MmugDNA.3821.1.S1_at    | MmugDNA.3821.1  | 5.03  | 5.19  | 0.21 | 0.11 | -1.11 | 0.503487 | 0.145491 | 0.760916 | 0.419424 |
| MmugDNA.38216.1.S1_at   | MmugDNA.38216.1 | 12.64 | 12.57 | 0.07 | 0.16 | 1.05  | 0.836142 | 0.805819 | 0.933665 | 0.888395 |
| MmugDNA.38217.1.S1_at   | MmugDNA.38217.1 | 7.03  | 7.1   | 0.03 | 0.15 | -1.05 | 0.521995 | 0.476772 | 0.771756 | 0.682921 |
| MmugDNA.3822.1.S1_at    | MmugDNA.3822.1  | 6.33  | 6     | 0.38 | 1.02 | 1.26  | 0.234201 | 0.209769 | 0.588621 | 0.483536 |
| MmugDNA.38223.1.S1_at   | MmugDNA.38223.1 | 6.16  | 6.32  | 0.05 | 0.13 | -1.12 | 0.097188 | 0.098535 | 0.456142 | 0.356636 |
| MmugDNA.3823.1.S1_at    | MmugDNA.3823.1  | 6.28  | 6.56  | 0.26 | 0.08 | -1.21 | 0.456742 | 0.507296 | 0.734529 | 0.702917 |
| MmugDNA.38239.1.S1_at   | MmugDNA.38239.1 | 11.24 | 10.78 | 0.15 | 0.24 | 1.38  | 0.149318 | 0.072432 | 0.514001 | 0.315282 |

|                         |                 |       |       |      |      |       |          |          |          |          |
|-------------------------|-----------------|-------|-------|------|------|-------|----------|----------|----------|----------|
| MmugDNA.38240.1.S1_at   | MmugDNA.38240.1 | 11.33 | 11.21 | 0.53 | 0.14 | 1.09  | 0.578135 | 0.724706 | 0.803658 | 0.840645 |
| MmugDNA.38244.1.S1_at   | MmugDNA.38244.1 | 4.43  | 4.55  | 0.01 | 0.02 | -1.09 | 0.001378 | 0.01161  | 0.146228 | 0.139525 |
| MmugDNA.3825.1.S1_at    | MmugDNA.3825.1  | 6.52  | 6.72  | 0.19 | 0.08 | -1.14 | 0.555627 | 0.597291 | 0.791454 | 0.76013  |
| MmugDNA.38252.1.S1_at   | MmugDNA.38252.1 | 6.05  | 5.24  | 0.32 | 0.48 | 1.76  | 0.053118 | 0.17785  | 0.379463 | 0.454167 |
| MmugDNA.38254.1.S1_at   | MmugDNA.38254.1 | 9.21  | 9.33  | 0.2  | 0.21 | -1.08 | 0.370591 | 0.373849 | 0.681578 | 0.61248  |
| MmugDNA.38255.1.S1_at   | MmugDNA.38255.1 | 8.47  | 8.17  | 0.12 | 0.99 | 1.24  | 0.649226 | 0.155685 | 0.84237  | 0.431054 |
| MmugDNA.38256.1.S1_at   | MmugDNA.38256.1 | 5.86  | 6.08  | 0.11 | 0.28 | -1.17 | 0.531466 | 0.643138 | 0.777205 | 0.79068  |
| MmugDNA.38257.1.S1_at   | MmugDNA.38257.1 | 8.12  | 7.41  | 0.16 | 0.22 | 1.63  | 0.009148 | 0.002895 | 0.222351 | 0.079107 |
| MmugDNA.38258.1.S1_at   | MmugDNA.38258.1 | 4.24  | 4     | 0.15 | 0.24 | 1.18  | 0.156673 | 0.452887 | 0.521541 | 0.667359 |
| MmugDNA.3826.1.S1_at    | MmugDNA.3826.1  | 3.73  | 3.19  | 1.38 | 0.19 | 1.45  | 0.168192 | 0.185356 | 0.53256  | 0.461323 |
| MmugDNA.38260.1.S1_at   | MmugDNA.38260.1 | 8.11  | 7.89  | 0.18 | 0.51 | 1.17  | 0.84472  | 0.036775 | 0.937622 | 0.236291 |
| MmugDNA.38266.1.S1_at   | MmugDNA.38266.1 | 11.94 | 11.72 | 0.33 | 0.29 | 1.16  | 0.159787 | 0.090679 | 0.52471  | 0.345151 |
| MmugDNA.38270.1.S1_at   | MmugDNA.38270.1 | 6.62  | 6.66  | 0.14 | 0.08 | -1.03 | 0.352356 | 0.139274 | 0.669556 | 0.412461 |
| MmugDNA.38277.1.S1_at   | MmugDNA.38277.1 | 6.63  | 6.28  | 0.15 | 0.18 | 1.27  | 0.211736 | 0.244336 | 0.572347 | 0.514184 |
| MmugDNA.38277.1.S1_s_at | MmugDNA.38277.1 | 7.79  | 7.46  | 0.14 | 0.2  | 1.26  | 0.057387 | 0.032994 | 0.388098 | 0.224886 |
| MmugDNA.38282.1.S1_at   | MmugDNA.38282.1 | 6.23  | 5.75  | 0.6  | 0.35 | 1.4   | 0.169272 | 0.154222 | 0.533619 | 0.428967 |
| MmugDNA.38283.1.S1_at   | MmugDNA.38283.1 | 9.06  | 9.94  | 0.06 | 0.23 | -1.84 | 0.003721 | 0.002192 | 0.179914 | 0.069173 |
| MmugDNA.38284.1.S1_x_at | MmugDNA.38284.1 | 9.09  | 9.07  | 0.09 | 0.08 | 1.02  | 0.421934 | 0.047817 | 0.713215 | 0.263649 |
| MmugDNA.38290.1.S1_at   | MmugDNA.38290.1 | 11.05 | 11.52 | 0.1  | 0.55 | -1.39 | 0.112775 | 0.08843  | 0.475249 | 0.341877 |
| MmugDNA.38293.1.S1_at   | MmugDNA.38293.1 | 7.88  | 8.28  | 0.39 | 0.33 | -1.32 | 0.193937 | 0.065635 | 0.55756  | 0.301564 |
| MmugDNA.38298.1.S1_at   | MmugDNA.38298.1 | 8.22  | 7.65  | 0.52 | 0.51 | 1.48  | 0.603906 | 0.194216 | 0.817352 | 0.469316 |
| MmugDNA.383.1.S1_at     | MmugDNA.383.1   | 5.6   | 5.85  | 0.26 | 0.15 | -1.18 | 0.578259 | 0.552531 | 0.803767 | 0.731829 |
| MmugDNA.38309.1.S1_s_at | MmugDNA.38309.1 | 12.53 | 12.17 | 0.16 | 0.19 | 1.29  | 0.138424 | 0.109125 | 0.505745 | 0.372957 |
| MmugDNA.3831.1.S1_at    | MmugDNA.3831.1  | 4.57  | 4.84  | 0.1  | 0.51 | -1.2  | 0.159701 | 0.13217  | 0.524581 | 0.404274 |
| MmugDNA.38323.1.S1_at   | MmugDNA.38323.1 | 4.61  | 4.66  | 0.16 | 0.21 | -1.04 | 0.846976 | 0.246289 | 0.938541 | 0.515889 |
| MmugDNA.38327.1.S1_at   | MmugDNA.38327.1 | 7.07  | 7.13  | 0.25 | 0.05 | -1.04 | 0.575243 | 0.480383 | 0.80219  | 0.685752 |
| MmugDNA.38328.1.S1_at   | MmugDNA.38328.1 | 9.79  | 9.6   | 0.16 | 0.16 | 1.14  | 0.523098 | 0.454801 | 0.772273 | 0.668859 |
| MmugDNA.38332.1.S1_at   | MmugDNA.38332.1 | 7.28  | 7.2   | 0.12 | 0.17 | 1.06  | 0.611866 | 0.8056   | 0.821861 | 0.888306 |
| MmugDNA.38334.1.S1_at   | MmugDNA.38334.1 | 7.61  | 7.87  | 0.76 | 1.28 | -1.2  | 0.499329 | 0.216152 | 0.759102 | 0.489701 |
| MmugDNA.38339.1.S1_at   | MmugDNA.38339.1 | 10.39 | 10.93 | 0.14 | 0.35 | -1.45 | 0.074504 | 0.061303 | 0.420348 | 0.294321 |
| MmugDNA.38343.1.S1_at   | MmugDNA.38343.1 | 3.55  | 3.76  | 0.5  | 0.28 | -1.16 | 0.719306 | 0.846454 | 0.876813 | 0.912643 |
| MmugDNA.38346.1.S1_at   | MmugDNA.38346.1 | 8.05  | 9.71  | 0.61 | 1.17 | -3.15 | 0.035898 | 0.029144 | 0.338042 | 0.212767 |
| MmugDNA.38357.1.S1_at   | MmugDNA.38357.1 | 11.42 | 10.27 | 0.21 | 1.08 | 2.23  | 0.104333 | 0.108525 | 0.464351 | 0.37207  |
| MmugDNA.38358.1.S1_at   | MmugDNA.38358.1 | 8.8   | 8.08  | 0.16 | 0.21 | 1.65  | 0.020483 | 0.018999 | 0.278215 | 0.173527 |
| MmugDNA.38361.1.S1_at   | MmugDNA.38361.1 | 11.41 | 11.43 | 0.23 | 0.08 | -1.02 | 0.255155 | 0.315872 | 0.603094 | 0.569327 |
| MmugDNA.38366.1.S1_at   | MmugDNA.38366.1 | 10.45 | 11.57 | 0.24 | 0.45 | -2.18 | 0.017489 | 0.00718  | 0.267445 | 0.113932 |
| MmugDNA.38367.1.S1_at   | MmugDNA.38367.1 | 10.97 | 12.02 | 0.1  | 0.43 | -2.07 | 0.029028 | 0.021321 | 0.312556 | 0.182772 |
| MmugDNA.38368.1.S1_at   | MmugDNA.38368.1 | 13.46 | 13.67 | 0.16 | 0.1  | -1.16 | 0.153402 | 0.181146 | 0.517785 | 0.457583 |
| MmugDNA.3837.1.S1_at    | MmugDNA.3837.1  | 2.74  | 2.87  | 0.07 | 0.08 | -1.1  | 0.125339 | 0.079612 | 0.49131  | 0.326981 |
| MmugDNA.38371.1.S1_at   | MmugDNA.38371.1 | 11.1  | 11.2  | 0.36 | 0.65 | -1.07 | 0.815502 | 0.842592 | 0.925041 | 0.910315 |
| MmugDNA.38375.1.S1_at   | MmugDNA.38375.1 | 5.75  | 5.83  | 0.2  | 0.17 | -1.06 | 0.739416 | 0.761639 | 0.888141 | 0.861459 |

|                         |                 |       |       |      |      |       |          |          |          |          |
|-------------------------|-----------------|-------|-------|------|------|-------|----------|----------|----------|----------|
| MmugDNA.38379.1.S1_at   | MmugDNA.38379.1 | 11.18 | 10.65 | 0.08 | 0.17 | 1.44  | 0.003975 | 0.001243 | 0.181631 | 0.054826 |
| MmugDNA.38386.1.S1_at   | MmugDNA.38386.1 | 3.16  | 3.09  | 0.02 | 0.08 | 1.05  | 0.190068 | 0.507973 | 0.552832 | 0.703358 |
| MmugDNA.38387.1.S1_at   | MmugDNA.38387.1 | 13.17 | 13.31 | 0.12 | 0.11 | -1.1  | 0.102203 | 0.0291   | 0.461767 | 0.212733 |
| MmugDNA.38388.1.S1_at   | MmugDNA.38388.1 | 3.38  | 3.39  | 0.12 | 0.08 | -1    | 0.854571 | 0.332151 | 0.941244 | 0.580584 |
| MmugDNA.38396.1.S1_at   | MmugDNA.38396.1 | 8.48  | 8.25  | 0.12 | 0.37 | 1.18  | 0.949236 | 0.989907 | 0.980674 | 0.994222 |
| MmugDNA.38404.1.S1_at   | MmugDNA.38404.1 | 4.85  | 4.8   | 0.56 | 0.6  | 1.04  | 0.963796 | 0.568038 | 0.985991 | 0.741761 |
| MmugDNA.38411.1.S1_at   | MmugDNA.38411.1 | 10.4  | 10.67 | 0.16 | 0.23 | -1.21 | 0.368795 | 0.462908 | 0.680234 | 0.674149 |
| MmugDNA.38412.1.S1_at   | MmugDNA.38412.1 | 12.76 | 12.76 | 0.04 | 0.11 | 1     | 0.86591  | 0.853177 | 0.946378 | 0.916521 |
| MmugDNA.38416.1.S1_at   | MmugDNA.38416.1 | 8.75  | 8.83  | 0.11 | 0.23 | -1.06 | 0.446909 | 0.371007 | 0.728666 | 0.609964 |
| MmugDNA.38416.1.S1_s_at | MmugDNA.38416.1 | 11.24 | 11.17 | 0.16 | 0.3  | 1.05  | 0.823816 | 0.903772 | 0.928378 | 0.945386 |
| MmugDNA.38417.1.S1_at   | MmugDNA.38417.1 | 3.73  | 3.69  | 0.07 | 0.21 | 1.03  | 0.547629 | 0.33771  | 0.786269 | 0.584885 |
| MmugDNA.38426.1.S1_at   | MmugDNA.38426.1 | 9.75  | 9.41  | 0.17 | 0.29 | 1.27  | 0.060245 | 0.021221 | 0.393081 | 0.182388 |
| MmugDNA.38433.1.S1_at   | MmugDNA.38433.1 | 10.58 | 10.66 | 0.22 | 0.08 | -1.06 | 0.536898 | 0.031765 | 0.779671 | 0.220664 |
| MmugDNA.38439.1.S1_at   | MmugDNA.38439.1 | 6.49  | 6.4   | 0.17 | 0.06 | 1.07  | 0.514371 | 0.62862  | 0.766907 | 0.781323 |
| MmugDNA.38450.1.S1_at   | MmugDNA.38450.1 | 5.16  | 5.25  | 0.08 | 0.26 | -1.06 | 0.300364 | 0.425896 | 0.635797 | 0.6481   |
| MmugDNA.38454.1.S1_at   | MmugDNA.38454.1 | 7.8   | 7.59  | 0.06 | 0.1  | 1.15  | 0.037385 | 0.086566 | 0.341309 | 0.33911  |
| MmugDNA.38455.1.S1_at   | MmugDNA.38455.1 | 5.39  | 5.65  | 0.1  | 0.11 | -1.19 | 0.011366 | 0.005378 | 0.235384 | 0.101199 |
| MmugDNA.38459.1.S1_at   | MmugDNA.38459.1 | 8.98  | 9.21  | 0.08 | 0.09 | -1.17 | 0.04172  | 0.053862 | 0.352545 | 0.277613 |
| MmugDNA.38460.1.S1_at   | MmugDNA.38460.1 | 6.46  | 6.55  | 0.09 | 0.1  | -1.06 | 0.274305 | 0.190775 | 0.617262 | 0.466228 |
| MmugDNA.38469.1.S1_at   | MmugDNA.38469.1 | 5.28  | 4.85  | 0.47 | 0.17 | 1.35  | 0.370056 | 0.354999 | 0.681113 | 0.597466 |
| MmugDNA.38474.1.S1_at   | MmugDNA.38474.1 | 10.29 | 10.94 | 0.5  | 0.72 | -1.56 | 0.42781  | 0.59411  | 0.716428 | 0.758517 |
| MmugDNA.38474.1.S1_s_at | MmugDNA.38474.1 | 11    | 11.62 | 0.5  | 0.69 | -1.53 | 0.480167 | 0.661986 | 0.748124 | 0.802051 |
| MmugDNA.38475.1.S1_at   | MmugDNA.38475.1 | 10.91 | 11.22 | 0.17 | 0.47 | -1.24 | 0.354966 | 0.192328 | 0.670716 | 0.467833 |
| MmugDNA.38479.1.S1_at   | MmugDNA.38479.1 | 5.87  | 6.03  | 0.12 | 0.07 | -1.12 | 0.359341 | 0.325513 | 0.673869 | 0.575827 |
| MmugDNA.38481.1.S1_at   | MmugDNA.38481.1 | 10.65 | 12.82 | 0.76 | 0.41 | -4.49 | 0.02176  | 0.014001 | 0.283634 | 0.151595 |
| MmugDNA.38484.1.S1_at   | MmugDNA.38484.1 | 7.05  | 7.05  | 1.09 | 0.51 | -1    | 0.401034 | 0.223004 | 0.700559 | 0.495821 |
| MmugDNA.38488.1.S1_s_at | MmugDNA.38488.1 | 9.71  | 9.89  | 0.21 | 0.2  | -1.14 | 0.487339 | 0.304592 | 0.752077 | 0.561838 |
| MmugDNA.38489.1.S1_at   | MmugDNA.38489.1 | 3.37  | 3.32  | 0.11 | 0.09 | 1.03  | 0.790722 | 0.736982 | 0.913155 | 0.847779 |
| MmugDNA.38492.1.S1_at   | MmugDNA.38492.1 | 5.64  | 4.71  | 0.13 | 0.67 | 1.9   | 0.18835  | 0.057413 | 0.551348 | 0.285608 |
| MmugDNA.38498.1.S1_at   | MmugDNA.38498.1 | 11.1  | 11.2  | 0.15 | 0.19 | -1.07 | 0.194799 | 0.305976 | 0.558334 | 0.562732 |
| MmugDNA.38501.1.S1_at   | MmugDNA.38501.1 | 10.52 | 10.24 | 0.56 | 0.18 | 1.21  | 0.463807 | 0.592696 | 0.738994 | 0.757854 |
| MmugDNA.38506.1.S1_at   | MmugDNA.38506.1 | 10.47 | 12.11 | 0.55 | 0.7  | -3.12 | 0.037475 | 0.026018 | 0.3415   | 0.202179 |
| MmugDNA.38508.1.S1_at   | MmugDNA.38508.1 | 10.88 | 10.91 | 0.05 | 0.24 | -1.02 | 0.825048 | 0.920225 | 0.9291   | 0.95511  |
| MmugDNA.3851.1.S1_at    | MmugDNA.3851.1  | 4.19  | 4.02  | 0.32 | 0.25 | 1.13  | 0.207737 | 0.110644 | 0.569822 | 0.374854 |
| MmugDNA.38510.1.S1_at   | MmugDNA.38510.1 | 5.9   | 6.79  | 0.67 | 1.32 | -1.85 | 0.428816 | 0.208271 | 0.71704  | 0.48217  |
| MmugDNA.38513.1.S1_at   | MmugDNA.38513.1 | 6.11  | 6.22  | 0.09 | 0.09 | -1.08 | 0.115082 | 0.062706 | 0.478433 | 0.297117 |
| MmugDNA.38515.1.S1_at   | MmugDNA.38515.1 | 7.39  | 7.01  | 0.21 | 0.34 | 1.3   | 0.201478 | 0.258478 | 0.563988 | 0.525758 |
| MmugDNA.38516.1.S1_at   | MmugDNA.38516.1 | 8.34  | 10.82 | 1.01 | 1.33 | -5.58 | 0.143649 | 0.063878 | 0.510312 | 0.29906  |
| MmugDNA.38518.1.S1_at   | MmugDNA.38518.1 | 5.16  | 5.05  | 0.17 | 0.07 | 1.08  | 0.726724 | 0.413549 | 0.881115 | 0.639648 |
| MmugDNA.38522.1.S1_at   | MmugDNA.38522.1 | 9.88  | 9.99  | 0.48 | 0.53 | -1.08 | 0.573578 | 0.756942 | 0.801305 | 0.858495 |
| MmugDNA.38524.1.S1_at   | MmugDNA.38524.1 | 13.19 | 13.16 | 0.06 | 0.07 | 1.03  | 0.774039 | 0.005419 | 0.904999 | 0.10157  |

|                         |                 |       |       |      |      |        |          |          |          |          |
|-------------------------|-----------------|-------|-------|------|------|--------|----------|----------|----------|----------|
| MmugDNA.38525.1.S1_at   | MmugDNA.38525.1 | 10.87 | 10.59 | 0.32 | 0.23 | 1.22   | 0.12134  | 0.132776 | 0.485996 | 0.404544 |
| MmugDNA.38526.1.S1_at   | MmugDNA.38526.1 | 10.78 | 11.21 | 0.22 | 0.14 | -1.35  | 0.042507 | 0.017    | 0.355128 | 0.165304 |
| MmugDNA.38527.1.S1_at   | MmugDNA.38527.1 | 4.3   | 4.51  | 0.15 | 0.11 | -1.16  | 0.320461 | 0.605789 | 0.649472 | 0.76549  |
| MmugDNA.38528.1.S1_at   | MmugDNA.38528.1 | 7.75  | 8.17  | 0.42 | 1.05 | -1.33  | 0.330303 | 0.433034 | 0.655613 | 0.653414 |
| MmugDNA.3853.1.S1_at    | MmugDNA.3853.1  | 7.61  | 7.6   | 0.33 | 0.53 | 1.01   | 0.815045 | 0.347585 | 0.924824 | 0.592019 |
| MmugDNA.38530.1.S1_at   | MmugDNA.38530.1 | 7.14  | 11.07 | 1.23 | 2.88 | -15.28 | 0.253671 | 0.186694 | 0.602177 | 0.462471 |
| MmugDNA.38534.1.S1_at   | MmugDNA.38534.1 | 13.11 | 12.92 | 0.19 | 0.17 | 1.14   | 0.084411 | 0.04928  | 0.436964 | 0.266845 |
| MmugDNA.38535.1.S1_at   | MmugDNA.38535.1 | 8.26  | 8.13  | 0.21 | 0.13 | 1.1    | 0.182975 | 0.145548 | 0.547134 | 0.419451 |
| MmugDNA.38539.1.S1_x_at | MmugDNA.38539.1 | 6.89  | 6.95  | 0.22 | 0.19 | -1.04  | 0.501144 | 0.609345 | 0.759789 | 0.767726 |
| MmugDNA.38548.1.S1_s_at | MmugDNA.38548.1 | 11.37 | 11.37 | 0.19 | 0.04 | -1     | 0.378042 | 0.034953 | 0.686315 | 0.231062 |
| MmugDNA.38549.1.S1_at   | MmugDNA.38549.1 | 9.79  | 9.14  | 0.09 | 0.39 | 1.57   | 0.044444 | 0.028851 | 0.358591 | 0.211661 |
| MmugDNA.38554.1.S1_at   | MmugDNA.38554.1 | 8.51  | 9.33  | 0.06 | 0.41 | -1.77  | 0.05032  | 0.036317 | 0.374103 | 0.235105 |
| MmugDNA.38556.1.S1_at   | MmugDNA.38556.1 | 10.1  | 10.59 | 0.17 | 0.54 | -1.4   | 0.085297 | 0.078815 | 0.438726 | 0.325757 |
| MmugDNA.38558.1.S1_at   | MmugDNA.38558.1 | 12.68 | 12.31 | 0.04 | 0.04 | 1.29   | 0.000403 | 0.00132  | 0.12978  | 0.055996 |
| MmugDNA.38562.1.S1_at   | MmugDNA.38562.1 | 5.73  | 5.77  | 0.28 | 0.14 | -1.03  | 0.741425 | 0.722262 | 0.889293 | 0.839137 |
| MmugDNA.38563.1.S1_at   | MmugDNA.38563.1 | 5.85  | 9.71  | 1.65 | 1.72 | -14.52 | 0.104121 | 0.072337 | 0.464201 | 0.315103 |
| MmugDNA.38565.1.S1_at   | MmugDNA.38565.1 | 12.77 | 10.46 | 0.63 | 0.77 | 4.95   | 0.016085 | 0.00642  | 0.262631 | 0.108813 |
| MmugDNA.38579.1.S1_at   | MmugDNA.38579.1 | 8.44  | 8.14  | 0.54 | 0.22 | 1.23   | 0.368658 | 0.330356 | 0.680126 | 0.579112 |
| MmugDNA.38581.1.S1_at   | MmugDNA.38581.1 | 10.44 | 10.68 | 0.17 | 0.05 | -1.18  | 0.080228 | 0.09821  | 0.430341 | 0.356253 |
| MmugDNA.38595.1.S1_at   | MmugDNA.38595.1 | 7.37  | 7.33  | 0.18 | 0.04 | 1.03   | 0.517614 | 0.445143 | 0.768927 | 0.662309 |
| MmugDNA.38599.1.S1_at   | MmugDNA.38599.1 | 10.61 | 10.43 | 0.28 | 0.23 | 1.13   | 0.549308 | 0.752096 | 0.787247 | 0.855744 |
| MmugDNA.386.1.S1_at     | MmugDNA.386.1   | 5.47  | 5.61  | 0.03 | 0.16 | -1.1   | 0.167339 | 0.171463 | 0.531441 | 0.447895 |
| MmugDNA.38600.1.S1_at   | MmugDNA.38600.1 | 9.88  | 8.96  | 0.11 | 0.21 | 1.89   | 0.002234 | 0.00068  | 0.160286 | 0.04413  |
| MmugDNA.38601.1.S1_at   | MmugDNA.38601.1 | 9.1   | 8.91  | 0.38 | 0.36 | 1.14   | 0.523447 | 0.656222 | 0.77253  | 0.798968 |
| MmugDNA.38602.1.S1_at   | MmugDNA.38602.1 | 6.13  | 4.72  | 0.65 | 0.63 | 2.65   | 0.026825 | 0.037949 | 0.304842 | 0.239302 |
| MmugDNA.38606.1.S1_at   | MmugDNA.38606.1 | 8.9   | 9.16  | 0.31 | 0.24 | -1.2   | 0.53954  | 0.191634 | 0.78115  | 0.466918 |
| MmugDNA.38611.1.S1_at   | MmugDNA.38611.1 | 7.11  | 7.07  | 0.17 | 0.04 | 1.03   | 0.56029  | 0.761985 | 0.794209 | 0.861597 |
| MmugDNA.38615.1.S1_s_at | MmugDNA.38615.1 | 8.03  | 9.06  | 0.13 | 0.5  | -2.04  | 0.011353 | 0.005946 | 0.235384 | 0.105482 |
| MmugDNA.38618.1.S1_at   | MmugDNA.38618.1 | 13.44 | 13.41 | 0.29 | 0.24 | 1.02   | 0.90637  | 0.967253 | 0.962792 | 0.981908 |
| MmugDNA.38626.1.S1_at   | MmugDNA.38626.1 | 8.14  | 8.1   | 0.68 | 0.13 | 1.03   | 0.440386 | 0.215874 | 0.724272 | 0.489536 |
| MmugDNA.38628.1.S1_at   | MmugDNA.38628.1 | 9.37  | 9.26  | 0.03 | 0.18 | 1.08   | 0.556564 | 0.533856 | 0.791892 | 0.71991  |
| MmugDNA.38630.1.S1_at   | MmugDNA.38630.1 | 12.44 | 10.89 | 0.22 | 0.95 | 2.92   | 0.049652 | 0.041515 | 0.37169  | 0.24862  |
| MmugDNA.38638.1.S1_at   | MmugDNA.38638.1 | 9.7   | 9.75  | 0.04 | 0.23 | -1.04  | 0.668976 | 0.6692   | 0.851986 | 0.806492 |
| MmugDNA.38640.1.S1_at   | MmugDNA.38640.1 | 8.47  | 8.41  | 0.37 | 0.67 | 1.04   | 0.291713 | 0.433082 | 0.629042 | 0.653448 |
| MmugDNA.38641.1.S1_at   | MmugDNA.38641.1 | 12.38 | 12.29 | 0.06 | 0.05 | 1.07   | 0.260666 | 0.185596 | 0.607375 | 0.461566 |
| MmugDNA.38644.1.S1_at   | MmugDNA.38644.1 | 8.93  | 10.57 | 0.35 | 0.14 | -3.1   | 0.001967 | 0.00043  | 0.155636 | 0.038359 |
| MmugDNA.38654.1.S1_at   | MmugDNA.38654.1 | 11.02 | 10.4  | 0.15 | 0.46 | 1.54   | 0.080844 | 0.137581 | 0.431352 | 0.410555 |
| MmugDNA.38658.1.S1_at   | MmugDNA.38658.1 | 5.85  | 7.58  | 0.43 | 0.91 | -3.33  | 0.040496 | 0.027485 | 0.349461 | 0.207144 |
| MmugDNA.38660.1.S1_at   | MmugDNA.38660.1 | 6.61  | 6.52  | 0.08 | 0.19 | 1.07   | 0.760647 | 0.438458 | 0.899102 | 0.65742  |
| MmugDNA.38661.1.S1_at   | MmugDNA.38661.1 | 9.15  | 9.31  | 0.15 | 0.16 | -1.11  | 0.388282 | 0.342866 | 0.69241  | 0.588712 |
| MmugDNA.38662.1.S1_at   | MmugDNA.38662.1 | 6.68  | 6.68  | 0.15 | 0.15 | 1      | 0.267645 | 0.314445 | 0.612672 | 0.568319 |

|                         |                 |       |       |      |      |       |          |          |          |          |
|-------------------------|-----------------|-------|-------|------|------|-------|----------|----------|----------|----------|
| MmugDNA.38663.1.S1_at   | MmugDNA.38663.1 | 9.53  | 8.64  | 0.32 | 0.28 | 1.85  | 0.039718 | 0.024037 | 0.347969 | 0.194358 |
| MmugDNA.38664.1.S1_at   | MmugDNA.38664.1 | 12.61 | 12.64 | 0.15 | 0.14 | -1.02 | 0.653302 | 0.808503 | 0.844065 | 0.889757 |
| MmugDNA.38666.1.S1_at   | MmugDNA.38666.1 | 12.07 | 12.06 | 0.13 | 0.75 | 1     | 0.947644 | 0.996087 | 0.979939 | 0.997616 |
| MmugDNA.38675.1.S1_at   | MmugDNA.38675.1 | 4.77  | 3.46  | 1.16 | 0.37 | 2.47  | 0.100346 | 0.083124 | 0.460878 | 0.332999 |
| MmugDNA.38675.1.S1_s_at | MmugDNA.38675.1 | 12.68 | 12.06 | 0.12 | 0.13 | 1.53  | 0.004288 | 0.001889 | 0.18216  | 0.065004 |
| MmugDNA.38679.1.S1_at   | MmugDNA.38679.1 | 9.99  | 8.39  | 0.74 | 0.57 | 3.04  | 0.083778 | 0.068021 | 0.436133 | 0.307083 |
| MmugDNA.38686.1.S1_at   | MmugDNA.38686.1 | 12.44 | 12.59 | 0.12 | 0.12 | -1.11 | 0.309161 | 0.353981 | 0.641361 | 0.596951 |
| MmugDNA.38688.1.S1_at   | MmugDNA.38688.1 | 11.09 | 11.11 | 0.15 | 0.15 | -1.01 | 0.96224  | 0.977991 | 0.985505 | 0.988027 |
| MmugDNA.38690.1.S1_at   | MmugDNA.38690.1 | 8.03  | 8.48  | 1.08 | 0.78 | -1.37 | 0.765741 | 0.479335 | 0.901439 | 0.685088 |
| MmugDNA.38692.1.S1_at   | MmugDNA.38692.1 | 6.55  | 6.64  | 0.23 | 0.09 | -1.06 | 0.36371  | 0.414874 | 0.676849 | 0.64049  |
| MmugDNA.38693.1.S1_at   | MmugDNA.38693.1 | 11.91 | 11.22 | 0.12 | 0.4  | 1.61  | 0.098619 | 0.054423 | 0.458486 | 0.278814 |
| MmugDNA.38694.1.S1_at   | MmugDNA.38694.1 | 12.99 | 12.74 | 0.04 | 0.11 | 1.18  | 0.022629 | 0.01342  | 0.287448 | 0.148424 |
| MmugDNA.38697.1.S1_at   | MmugDNA.38697.1 | 9.48  | 9.09  | 0.17 | 0.09 | 1.31  | 0.012067 | 0.000405 | 0.239918 | 0.03749  |
| MmugDNA.38698.1.S1_at   | MmugDNA.38698.1 | 10.64 | 11.49 | 0.65 | 1.47 | -1.8  | 0.73102  | 0.532042 | 0.883468 | 0.718995 |
| MmugDNA.38699.1.S1_at   | MmugDNA.38699.1 | 5.56  | 4.52  | 0.79 | 0.06 | 2.05  | 0.103686 | 0.090188 | 0.463383 | 0.344588 |
| MmugDNA.38700.1.S1_at   | MmugDNA.38700.1 | 6.52  | 7.99  | 0.63 | 1.7  | -2.77 | 0.266988 | 0.230005 | 0.612291 | 0.501865 |
| MmugDNA.38701.1.S1_at   | MmugDNA.38701.1 | 9.51  | 9.1   | 0.15 | 0.16 | 1.33  | 0.070569 | 0.015642 | 0.414439 | 0.158535 |
| MmugDNA.38706.1.S1_s_at | MmugDNA.38706.1 | 11.01 | 11.31 | 0.09 | 0.19 | -1.23 | 0.032223 | 0.015498 | 0.3244   | 0.158044 |
| MmugDNA.3871.1.S1_at    | MmugDNA.3871.1  | 4.77  | 4.98  | 0.27 | 0.31 | -1.15 | 0.507361 | 0.176126 | 0.762788 | 0.452581 |
| MmugDNA.38710.1.S1_at   | MmugDNA.38710.1 | 13.61 | 13.63 | 0.14 | 0.05 | -1.02 | 0.924784 | 0.970915 | 0.970893 | 0.984133 |
| MmugDNA.38714.1.S1_at   | MmugDNA.38714.1 | 3.01  | 3.11  | 0.02 | 0.11 | -1.08 | 0.159276 | 0.005082 | 0.524174 | 0.099108 |
| MmugDNA.38715.1.S1_at   | MmugDNA.38715.1 | 5.58  | 5.57  | 0.55 | 0.58 | 1.01  | 0.842146 | 0.701097 | 0.936318 | 0.826646 |
| MmugDNA.38722.1.S1_at   | MmugDNA.38722.1 | 8.63  | 9.69  | 0.17 | 0.11 | -2.07 | 0.001043 | 0.002033 | 0.142738 | 0.066885 |
| MmugDNA.38723.1.S1_at   | MmugDNA.38723.1 | 3.71  | 6.38  | 0.75 | 2.03 | -6.35 | 0.182655 | 0.234896 | 0.546869 | 0.506125 |
| MmugDNA.38725.1.S1_at   | MmugDNA.38725.1 | 6.22  | 6.19  | 0.05 | 0.01 | 1.02  | 0.815164 | 0.055303 | 0.924856 | 0.280981 |
| MmugDNA.38729.1.S1_at   | MmugDNA.38729.1 | 6.35  | 6.55  | 0.27 | 0.1  | -1.15 | 0.552567 | 0.750182 | 0.78961  | 0.854731 |
| MmugDNA.3873.1.S1_at    | MmugDNA.3873.1  | 4.68  | 4.88  | 0.32 | 0.36 | -1.14 | 0.217063 | 0.281833 | 0.576631 | 0.544844 |
| MmugDNA.38733.1.S1_at   | MmugDNA.38733.1 | 4.51  | 4.47  | 0.26 | 0.04 | 1.03  | 0.660962 | 0.871659 | 0.847956 | 0.926963 |
| MmugDNA.38736.1.S1_at   | MmugDNA.38736.1 | 11.8  | 11.56 | 0.09 | 0.37 | 1.18  | 0.11852  | 0.128772 | 0.48294  | 0.400248 |
| MmugDNA.38747.1.S1_at   | MmugDNA.38747.1 | 12.26 | 11.48 | 0.2  | 0.19 | 1.72  | 0.006875 | 0.001845 | 0.202005 | 0.064452 |
| MmugDNA.38752.1.A1_at   | MmugDNA.38752.1 | 6.85  | 6.74  | 0.11 | 0.01 | 1.08  | 0.483449 | 0.175292 | 0.749882 | 0.452061 |
| MmugDNA.38752.1.S1_at   | MmugDNA.38752.1 | 5.05  | 5     | 0.07 | 0.04 | 1.03  | 0.32647  | 0.0199   | 0.653184 | 0.177357 |
| MmugDNA.38756.1.S1_at   | MmugDNA.38756.1 | 10.85 | 10.86 | 0.23 | 0.4  | -1    | 0.649607 | 0.854206 | 0.842493 | 0.916964 |
| MmugDNA.38761.1.S1_at   | MmugDNA.38761.1 | 6.51  | 6.87  | 0.25 | 0.12 | -1.29 | 0.325659 | 0.389274 | 0.652943 | 0.623403 |
| MmugDNA.38761.1.S1_x_at | MmugDNA.38761.1 | 6.66  | 7.03  | 0.11 | 0.04 | -1.29 | 0.004429 | 0.001573 | 0.183441 | 0.060185 |
| MmugDNA.38770.1.S1_at   | MmugDNA.38770.1 | 3.24  | 3.27  | 0.07 | 0.05 | -1.03 | 0.778207 | 0.891935 | 0.907397 | 0.938407 |
| MmugDNA.38778.1.S1_at   | MmugDNA.38778.1 | 8.53  | 7.24  | 0.16 | 0.29 | 2.45  | 0.002343 | 0.000939 | 0.162    | 0.049026 |
| MmugDNA.38779.1.S1_at   | MmugDNA.38779.1 | 11.66 | 11.98 | 0.09 | 0.14 | -1.25 | 0.122982 | 0.111454 | 0.488429 | 0.376126 |
| MmugDNA.38780.1.S1_at   | MmugDNA.38780.1 | 6.46  | 6.47  | 0.14 | 0.06 | -1.01 | 0.881979 | 0.237304 | 0.952617 | 0.508027 |
| MmugDNA.38786.1.S1_at   | MmugDNA.38786.1 | 12.17 | 12.79 | 0.1  | 0.38 | -1.53 | 0.19163  | 0.085137 | 0.554671 | 0.336972 |
| MmugDNA.38791.1.S1_at   | MmugDNA.38791.1 | 5.04  | 5.13  | 0.14 | 0.1  | -1.06 | 0.435292 | 0.614923 | 0.721198 | 0.771627 |

|                         |                 |       |       |      |      |       |          |          |          |          |
|-------------------------|-----------------|-------|-------|------|------|-------|----------|----------|----------|----------|
| MmugDNA.38793.1.S1_at   | MmugDNA.38793.1 | 5.98  | 6.05  | 0.2  | 0.43 | -1.05 | 0.633132 | 0.780449 | 0.833528 | 0.872614 |
| MmugDNA.38799.1.S1_at   | MmugDNA.38799.1 | 10.97 | 10.98 | 0.62 | 0.93 | -1    | 0.613682 | 0.808237 | 0.822845 | 0.889636 |
| MmugDNA.38800.1.S1_at   | MmugDNA.38800.1 | 14.14 | 14.15 | 0.06 | 0.17 | -1.01 | 0.45605  | 0.626809 | 0.734235 | 0.779995 |
| MmugDNA.38801.1.S1_at   | MmugDNA.38801.1 | 7.9   | 7.66  | 0.12 | 0.59 | 1.18  | 0.330559 | 0.354794 | 0.655845 | 0.597445 |
| MmugDNA.38810.1.S1_at   | MmugDNA.38810.1 | 7.9   | 8.38  | 0.34 | 0.82 | -1.4  | 0.346687 | 0.28127  | 0.666013 | 0.544385 |
| MmugDNA.38813.1.S1_at   | MmugDNA.38813.1 | 8.78  | 7.92  | 0.34 | 0.63 | 1.81  | 0.067107 | 0.057713 | 0.407071 | 0.2866   |
| MmugDNA.38816.1.S1_at   | MmugDNA.38816.1 | 9.21  | 9.55  | 0.08 | 0.1  | -1.27 | 0.008797 | 0.018742 | 0.221033 | 0.171985 |
| MmugDNA.38818.1.S1_at   | MmugDNA.38818.1 | 11.54 | 10.83 | 0.08 | 0.3  | 1.63  | 0.053482 | 0.046874 | 0.380257 | 0.261272 |
| MmugDNA.3882.1.S1_at    | MmugDNA.3882.1  | 8.32  | 8.55  | 0.09 | 0.17 | -1.17 | 0.11997  | 0.057189 | 0.48448  | 0.285009 |
| MmugDNA.3883.1.S1_at    | MmugDNA.3883.1  | 10.58 | 11.99 | 1.03 | 0.64 | -2.66 | 0.079997 | 0.073073 | 0.430176 | 0.316017 |
| MmugDNA.38830.1.S1_s_at | MmugDNA.38830.1 | 6.82  | 6.72  | 0.06 | 0.1  | 1.07  | 0.23424  | 0.191413 | 0.588653 | 0.466776 |
| MmugDNA.38831.1.S1_at   | MmugDNA.38831.1 | 8.49  | 8.2   | 0.1  | 0.13 | 1.22  | 0.021499 | 0.022553 | 0.282524 | 0.187981 |
| MmugDNA.38831.1.S1_s_at | MmugDNA.38831.1 | 9.82  | 9.55  | 0.07 | 0.08 | 1.21  | 0.008941 | 0.022743 | 0.221598 | 0.188834 |
| MmugDNA.38833.1.S1_at   | MmugDNA.38833.1 | 12.39 | 12.56 | 0.06 | 0.27 | -1.13 | 0.419199 | 0.325751 | 0.711701 | 0.57602  |
| MmugDNA.38839.1.S1_at   | MmugDNA.38839.1 | 10.68 | 11.26 | 0.14 | 0.47 | -1.5  | 0.325355 | 0.419507 | 0.652673 | 0.643507 |
| MmugDNA.38840.1.S1_at   | MmugDNA.38840.1 | 4.25  | 4.38  | 0.06 | 0.14 | -1.1  | 0.194599 | 0.462243 | 0.558002 | 0.673608 |
| MmugDNA.38841.1.S1_at   | MmugDNA.38841.1 | 4.87  | 4.96  | 0.4  | 0.11 | -1.06 | 0.593702 | 0.463601 | 0.811568 | 0.674537 |
| MmugDNA.38845.1.S1_s_at | MmugDNA.38845.1 | 7.12  | 8.28  | 0.25 | 0.98 | -2.24 | 0.142839 | 0.158597 | 0.509783 | 0.434597 |
| MmugDNA.38851.1.S1_at   | MmugDNA.38851.1 | 8.91  | 8.91  | 0.19 | 0.84 | 1.01  | 0.781776 | 0.766894 | 0.908921 | 0.864635 |
| MmugDNA.38856.1.S1_at   | MmugDNA.38856.1 | 6.59  | 6.85  | 0.18 | 0.06 | -1.2  | 0.067121 | 0.046296 | 0.407071 | 0.25959  |
| MmugDNA.38870.1.S1_at   | MmugDNA.38870.1 | 8.93  | 10.64 | 0.32 | 0.17 | -3.28 | 0.001302 | 0.000208 | 0.145684 | 0.032262 |
| MmugDNA.38875.1.S1_at   | MmugDNA.38875.1 | 5.42  | 5.66  | 0.12 | 0.2  | -1.18 | 0.149354 | 0.152958 | 0.514001 | 0.42777  |
| MmugDNA.38879.1.S1_at   | MmugDNA.38879.1 | 4.31  | 4.32  | 0.11 | 0.12 | -1.01 | 0.855957 | 0.603908 | 0.94179  | 0.764392 |
| MmugDNA.38885.1.S1_at   | MmugDNA.38885.1 | 5.62  | 5.52  | 0.73 | 0.49 | 1.08  | 0.368211 | 0.561008 | 0.679785 | 0.737076 |
| MmugDNA.38886.1.S1_at   | MmugDNA.38886.1 | 5.6   | 6.34  | 0.12 | 0.25 | -1.67 | 0.016651 | 0.004018 | 0.26475  | 0.090008 |
| MmugDNA.38887.1.S1_s_at | MmugDNA.38887.1 | 5.31  | 5.83  | 0.13 | 0.32 | -1.43 | 0.052107 | 0.033818 | 0.376989 | 0.227489 |
| MmugDNA.38889.1.S1_at   | MmugDNA.38889.1 | 12.75 | 11.82 | 0.11 | 0.95 | 1.9   | 0.173972 | 0.216763 | 0.537538 | 0.490311 |
| MmugDNA.38892.1.S1_at   | MmugDNA.38892.1 | 8.85  | 7.77  | 1.08 | 0.94 | 2.12  | 0.294786 | 0.120308 | 0.631442 | 0.38925  |
| MmugDNA.38899.1.S1_at   | MmugDNA.38899.1 | 7.84  | 8.19  | 0.22 | 0.36 | -1.27 | 0.424359 | 0.567885 | 0.714453 | 0.741693 |
| MmugDNA.38900.1.S1_at   | MmugDNA.38900.1 | 5.98  | 6.07  | 0.19 | 0.15 | -1.07 | 0.566908 | 0.755921 | 0.797859 | 0.8579   |
| MmugDNA.3891.1.S1_at    | MmugDNA.3891.1  | 7.31  | 7.06  | 0.2  | 0.51 | 1.19  | 0.156306 | 0.2193   | 0.521002 | 0.493094 |
| MmugDNA.38910.1.S1_at   | MmugDNA.38910.1 | 8.09  | 8.26  | 0.34 | 0.32 | -1.12 | 0.330385 | 0.47327  | 0.655656 | 0.680582 |
| MmugDNA.38911.1.S1_at   | MmugDNA.38911.1 | 8.53  | 9.25  | 0.3  | 0.7  | -1.66 | 0.301931 | 0.175808 | 0.636792 | 0.4524   |
| MmugDNA.38914.1.S1_at   | MmugDNA.38914.1 | 8.13  | 7.12  | 0.25 | 0.74 | 2.01  | 0.236722 | 0.117664 | 0.590504 | 0.385372 |
| MmugDNA.38919.1.S1_at   | MmugDNA.38919.1 | 12.81 | 13.38 | 0.25 | 0.28 | -1.48 | 0.06139  | 0.039301 | 0.395682 | 0.243338 |
| MmugDNA.3892.1.S1_s_at  | MmugDNA.3892.1  | 10.53 | 10.4  | 0.22 | 0.37 | 1.1   | 0.302989 | 0.353323 | 0.637233 | 0.596477 |
| MmugDNA.38920.1.S1_at   | MmugDNA.38920.1 | 4.73  | 4.44  | 0.08 | 0.47 | 1.22  | 0.399157 | 0.373694 | 0.699163 | 0.612403 |
| MmugDNA.38923.1.S1_at   | MmugDNA.38923.1 | 4.46  | 4.19  | 0.31 | 0.03 | 1.2   | 0.230172 | 0.151516 | 0.587112 | 0.426239 |
| MmugDNA.3893.1.S1_at    | MmugDNA.3893.1  | 4.82  | 4.76  | 0.04 | 0.02 | 1.04  | 0.09731  | 0.088794 | 0.456299 | 0.342534 |
| MmugDNA.38930.1.S1_at   | MmugDNA.38930.1 | 6.29  | 6.09  | 0.04 | 0.22 | 1.15  | 0.596016 | 0.506141 | 0.812742 | 0.702359 |
| MmugDNA.38939.1.S1_at   | MmugDNA.38939.1 | 11.77 | 11.39 | 0.06 | 0.13 | 1.3   | 0.006536 | 0.001282 | 0.199625 | 0.05538  |

|                       |                 |       |       |      |      |       |          |          |          |          |
|-----------------------|-----------------|-------|-------|------|------|-------|----------|----------|----------|----------|
| MmugDNA.38940.1.S1_at | MmugDNA.38940.1 | 9.76  | 9.69  | 0.47 | 0.35 | 1.05  | 0.646603 | 0.27499  | 0.840949 | 0.539402 |
| MmugDNA.38945.1.S1_at | MmugDNA.38945.1 | 6.85  | 6.91  | 0.09 | 0.62 | -1.04 | 0.880364 | 0.720919 | 0.951847 | 0.838368 |
| MmugDNA.38953.1.S1_at | MmugDNA.38953.1 | 6.41  | 6.44  | 0.05 | 0.12 | -1.02 | 0.153797 | 0.202163 | 0.518459 | 0.476559 |
| MmugDNA.38956.1.S1_at | MmugDNA.38956.1 | 12.75 | 11.9  | 0.16 | 0.2  | 1.8   | 0.002207 | 0.001223 | 0.159615 | 0.054593 |
| MmugDNA.38959.1.S1_at | MmugDNA.38959.1 | 10.77 | 10.81 | 0.06 | 0.32 | -1.03 | 0.511238 | 0.41267  | 0.765295 | 0.639042 |
| MmugDNA.38960.1.S1_at | MmugDNA.38960.1 | 2.98  | 3.14  | 0.08 | 0.07 | -1.12 | 0.26182  | 0.103639 | 0.608401 | 0.364433 |
| MmugDNA.38962.1.S1_at | MmugDNA.38962.1 | 11.49 | 11.18 | 0.17 | 0.19 | 1.24  | 0.191518 | 0.12273  | 0.554528 | 0.392719 |
| MmugDNA.38963.1.S1_at | MmugDNA.38963.1 | 7.79  | 7.18  | 0.35 | 0.54 | 1.53  | 0.161249 | 0.069502 | 0.526306 | 0.309848 |
| MmugDNA.38966.1.S1_at | MmugDNA.38966.1 | 4.82  | 4.61  | 0.08 | 0.33 | 1.16  | 0.868156 | 0.980655 | 0.947326 | 0.989424 |
| MmugDNA.38968.1.S1_at | MmugDNA.38968.1 | 13.7  | 13.72 | 0.03 | 0.59 | -1.01 | 0.395963 | 0.347891 | 0.696669 | 0.592196 |
| MmugDNA.38971.1.S1_at | MmugDNA.38971.1 | 6.9   | 6.74  | 0.14 | 0.31 | 1.12  | 0.605996 | 0.669227 | 0.818673 | 0.806499 |
| MmugDNA.38972.1.S1_at | MmugDNA.38972.1 | 11.55 | 11.4  | 0.16 | 0.3  | 1.11  | 0.419598 | 0.53481  | 0.712008 | 0.720557 |
| MmugDNA.38981.1.S1_at | MmugDNA.38981.1 | 3.76  | 3.93  | 1.06 | 0.42 | -1.13 | 0.366721 | 0.506787 | 0.679209 | 0.702575 |
| MmugDNA.38984.1.S1_at | MmugDNA.38984.1 | 7.43  | 7.62  | 0.24 | 0.06 | -1.14 | 0.67496  | 0.002682 | 0.854345 | 0.076408 |
| MmugDNA.38987.1.S1_at | MmugDNA.38987.1 | 7.79  | 7.64  | 0.16 | 0.22 | 1.11  | 0.226832 | 0.053751 | 0.584769 | 0.277384 |
| MmugDNA.39000.1.S1_at | MmugDNA.39000.1 | 12.55 | 13.19 | 0.01 | 0.32 | -1.56 | 0.025449 | 0.008621 | 0.299437 | 0.123117 |
| MmugDNA.39004.1.S1_at | MmugDNA.39004.1 | 6.55  | 6.45  | 0.12 | 0.11 | 1.07  | 0.259436 | 0.206524 | 0.606548 | 0.480571 |
| MmugDNA.39009.1.S1_at | MmugDNA.39009.1 | 6.04  | 6.14  | 0.04 | 0.14 | -1.07 | 0.250117 | 0.065304 | 0.600389 | 0.301249 |
| MmugDNA.39012.1.S1_at | MmugDNA.39012.1 | 10.36 | 10.37 | 0.14 | 0.94 | -1    | 0.530905 | 0.607072 | 0.776921 | 0.766185 |
| MmugDNA.39014.1.S1_at | MmugDNA.39014.1 | 4.9   | 5.15  | 0.15 | 0.1  | -1.19 | 0.08185  | 0.041864 | 0.432959 | 0.249172 |
| MmugDNA.39015.1.S1_at | MmugDNA.39015.1 | 5.29  | 5.3   | 0.06 | 0.03 | -1.01 | 0.538694 | 0.402572 | 0.780733 | 0.631493 |
| MmugDNA.39016.1.S1_at | MmugDNA.39016.1 | 4.93  | 4.77  | 0.17 | 0.31 | 1.12  | 0.589752 | 0.065398 | 0.809598 | 0.301415 |
| MmugDNA.39018.1.S1_at | MmugDNA.39018.1 | 5.08  | 5.25  | 0.1  | 0.18 | -1.13 | 0.186081 | 0.084382 | 0.549625 | 0.335713 |
| MmugDNA.3902.1.S1_at  | MmugDNA.3902.1  | 9.17  | 9.21  | 0.14 | 0.22 | -1.02 | 0.63949  | 0.826278 | 0.837212 | 0.900217 |
| MmugDNA.39022.1.S1_at | MmugDNA.39022.1 | 11.68 | 11.22 | 0.07 | 0.15 | 1.37  | 0.009945 | 0.004261 | 0.226899 | 0.09182  |
| MmugDNA.39025.1.S1_at | MmugDNA.39025.1 | 11.36 | 11.91 | 0.02 | 0.22 | -1.47 | 0.022147 | 0.011304 | 0.284595 | 0.138076 |
| MmugDNA.39029.1.S1_at | MmugDNA.39029.1 | 11.97 | 11.71 | 0.01 | 0.3  | 1.19  | 0.65288  | 0.79564  | 0.843896 | 0.882255 |
| MmugDNA.39031.1.S1_at | MmugDNA.39031.1 | 4.4   | 4.16  | 0.22 | 0.42 | 1.18  | 0.754297 | 0.756674 | 0.895323 | 0.858329 |
| MmugDNA.39034.1.S1_at | MmugDNA.39034.1 | 8.54  | 8.31  | 0.34 | 0.09 | 1.17  | 0.145721 | 0.107814 | 0.511596 | 0.370945 |
| MmugDNA.39036.1.S1_at | MmugDNA.39036.1 | 10.72 | 10.53 | 0.04 | 0.64 | 1.14  | 0.714787 | 0.881067 | 0.874968 | 0.932111 |
| MmugDNA.39049.1.S1_at | MmugDNA.39049.1 | 10.58 | 10.65 | 0.06 | 0.1  | -1.05 | 0.635873 | 0.060513 | 0.835187 | 0.292656 |
| MmugDNA.3906.1.S1_at  | MmugDNA.3906.1  | 8.02  | 8.34  | 0.28 | 0.32 | -1.25 | 0.190155 | 0.207868 | 0.552944 | 0.482049 |
| MmugDNA.39061.1.S1_at | MmugDNA.39061.1 | 10.45 | 9.82  | 0.1  | 0.04 | 1.55  | 0.000371 | 0.000047 | 0.12925  | 0.025273 |
| MmugDNA.39062.1.S1_at | MmugDNA.39062.1 | 6.71  | 6.48  | 0.24 | 0.43 | 1.17  | 0.60621  | 0.753933 | 0.818776 | 0.856764 |
| MmugDNA.39068.1.S1_at | MmugDNA.39068.1 | 4.82  | 4.24  | 0.81 | 0.5  | 1.49  | 0.387509 | 0.540791 | 0.691999 | 0.724559 |
| MmugDNA.39070.1.S1_at | MmugDNA.39070.1 | 11.87 | 12.01 | 0.18 | 0.02 | -1.1  | 0.169448 | 0.232703 | 0.533686 | 0.504359 |
| MmugDNA.39074.1.S1_at | MmugDNA.39074.1 | 3.39  | 3.38  | 0.04 | 0.05 | 1.01  | 0.456531 | 0.470912 | 0.734509 | 0.679128 |
| MmugDNA.39085.1.S1_at | MmugDNA.39085.1 | 10.59 | 11.62 | 0.16 | 0.2  | -2.04 | 0.00308  | 0.000832 | 0.172102 | 0.046851 |
| MmugDNA.39090.1.S1_at | MmugDNA.39090.1 | 11.43 | 11.39 | 0.1  | 0.35 | 1.03  | 0.677016 | 0.851248 | 0.855271 | 0.915366 |
| MmugDNA.39092.1.S1_at | MmugDNA.39092.1 | 8.16  | 8.29  | 0.23 | 0.03 | -1.09 | 0.318826 | 0.431442 | 0.648688 | 0.652371 |
| MmugDNA.39093.1.S1_at | MmugDNA.39093.1 | 10.98 | 10.58 | 0.26 | 0.27 | 1.32  | 0.08349  | 0.069825 | 0.43582  | 0.310353 |

|                         |                 |       |       |      |      |       |          |          |          |          |
|-------------------------|-----------------|-------|-------|------|------|-------|----------|----------|----------|----------|
| MmugDNA.39094.1.S1_at   | MmugDNA.39094.1 | 12.58 | 12.38 | 0.06 | 0.17 | 1.15  | 0.171415 | 0.023364 | 0.535166 | 0.19158  |
| MmugDNA.39094.1.S1_s_at | MmugDNA.39094.1 | 10.84 | 10.67 | 0.17 | 0.24 | 1.12  | 0.429631 | 0.143501 | 0.717667 | 0.417442 |
| MmugDNA.39095.1.S1_at   | MmugDNA.39095.1 | 4.47  | 4.78  | 0.28 | 0.1  | -1.24 | 0.162865 | 0.233621 | 0.527275 | 0.50492  |
| MmugDNA.391.1.S1_at     | MmugDNA.391.1   | 6.12  | 6.01  | 0.15 | 0.19 | 1.08  | 0.558312 | 0.39914  | 0.793134 | 0.62969  |
| MmugDNA.39100.1.S1_s_at | MmugDNA.39100.1 | 12.44 | 12.59 | 0.02 | 0.12 | -1.11 | 0.141819 | 0.164768 | 0.509205 | 0.441104 |
| MmugDNA.39112.1.S1_at   | MmugDNA.39112.1 | 10.72 | 11.47 | 0.23 | 0.1  | -1.68 | 0.003916 | 0.001703 | 0.180728 | 0.062505 |
| MmugDNA.39121.1.S1_at   | MmugDNA.39121.1 | 11.56 | 11.16 | 0.12 | 0.28 | 1.32  | 0.098527 | 0.099184 | 0.458486 | 0.357379 |
| MmugDNA.39122.1.S1_at   | MmugDNA.39122.1 | 10.92 | 10.58 | 0.11 | 0.37 | 1.27  | 0.187448 | 0.195371 | 0.550505 | 0.470253 |
| MmugDNA.39131.1.S1_at   | MmugDNA.39131.1 | 4.04  | 3.74  | 0.54 | 0.14 | 1.23  | 0.386317 | 0.546826 | 0.691258 | 0.728203 |
| MmugDNA.39132.1.S1_at   | MmugDNA.39132.1 | 11.57 | 11.7  | 0.02 | 0.08 | -1.09 | 0.189076 | 0.004122 | 0.552208 | 0.090887 |
| MmugDNA.39133.1.S1_at   | MmugDNA.39133.1 | 12.24 | 11.96 | 0.1  | 0.19 | 1.22  | 0.12324  | 0.105345 | 0.488828 | 0.367182 |
| MmugDNA.39136.1.S1_at   | MmugDNA.39136.1 | 12.52 | 12.36 | 0.17 | 0.01 | 1.12  | 0.245359 | 0.416026 | 0.597013 | 0.641342 |
| MmugDNA.39138.1.S1_at   | MmugDNA.39138.1 | 12.14 | 12.46 | 0.06 | 0.26 | -1.24 | 0.369039 | 0.063783 | 0.680428 | 0.29906  |
| MmugDNA.39139.1.S1_at   | MmugDNA.39139.1 | 11.78 | 11.8  | 0.18 | 0.21 | -1.01 | 0.939624 | 0.2778   | 0.977013 | 0.541664 |
| MmugDNA.39141.1.S1_at   | MmugDNA.39141.1 | 8.23  | 7.03  | 0.57 | 0.38 | 2.31  | 0.165963 | 0.198541 | 0.529863 | 0.473391 |
| MmugDNA.39149.1.S1_at   | MmugDNA.39149.1 | 12.45 | 12.57 | 0.07 | 0.16 | -1.09 | 0.25774  | 0.221708 | 0.605259 | 0.494901 |
| MmugDNA.39149.1.S1_s_at | MmugDNA.39149.1 | 12.34 | 12.49 | 0.16 | 0.2  | -1.11 | 0.249042 | 0.163742 | 0.599743 | 0.439924 |
| MmugDNA.39154.1.S1_at   | MmugDNA.39154.1 | 3.71  | 4.06  | 0.6  | 0.33 | -1.28 | 0.627299 | 0.804133 | 0.830029 | 0.887336 |
| MmugDNA.39157.1.S1_at   | MmugDNA.39157.1 | 7.26  | 7.37  | 0.21 | 0.03 | -1.07 | 0.488303 | 0.168717 | 0.752862 | 0.445379 |
| MmugDNA.39158.1.S1_at   | MmugDNA.39158.1 | 7.28  | 7.53  | 0.25 | 0.07 | -1.18 | 0.153514 | 0.193535 | 0.517902 | 0.468785 |
| MmugDNA.39159.1.S1_s_at | MmugDNA.39159.1 | 8.55  | 8.74  | 0.1  | 0.29 | -1.14 | 0.237499 | 0.309647 | 0.591065 | 0.564991 |
| MmugDNA.39160.1.S1_at   | MmugDNA.39160.1 | 11.83 | 11.49 | 0.13 | 0.03 | 1.27  | 0.010387 | 0.003269 | 0.229439 | 0.082312 |
| MmugDNA.39163.1.S1_at   | MmugDNA.39163.1 | 11.28 | 10.72 | 0.19 | 0.53 | 1.47  | 0.239133 | 0.250692 | 0.592277 | 0.51941  |
| MmugDNA.39166.1.S1_at   | MmugDNA.39166.1 | 5.71  | 5.84  | 0.11 | 0.06 | -1.09 | 0.060236 | 0.100331 | 0.393081 | 0.359424 |
| MmugDNA.39167.1.S1_at   | MmugDNA.39167.1 | 12.2  | 12.26 | 0.09 | 0.23 | -1.04 | 0.361367 | 0.421987 | 0.675185 | 0.645406 |
| MmugDNA.39168.1.S1_at   | MmugDNA.39168.1 | 13.03 | 12.81 | 0.17 | 0.32 | 1.16  | 0.131628 | 0.155893 | 0.498041 | 0.431279 |
| MmugDNA.39170.1.S1_at   | MmugDNA.39170.1 | 10.44 | 10.68 | 0.1  | 0.31 | -1.18 | 0.359702 | 0.465    | 0.673991 | 0.675534 |
| MmugDNA.39170.1.S1_s_at | MmugDNA.39170.1 | 11.03 | 11.46 | 0.13 | 0.24 | -1.35 | 0.046033 | 0.075212 | 0.362198 | 0.319389 |
| MmugDNA.39171.1.S1_at   | MmugDNA.39171.1 | 10.48 | 10.68 | 0.03 | 0.03 | -1.14 | 0.001342 | 0.0122   | 0.146228 | 0.142876 |
| MmugDNA.3918.1.S1_at    | MmugDNA.3918.1  | 9.96  | 9.02  | 0.12 | 0.64 | 1.92  | 0.175131 | 0.189659 | 0.538831 | 0.465297 |
| MmugDNA.39180.1.S1_at   | MmugDNA.39180.1 | 6.28  | 6.06  | 0.83 | 0.94 | 1.16  | 0.505005 | 0.539047 | 0.761548 | 0.723487 |
| MmugDNA.39182.1.S1_at   | MmugDNA.39182.1 | 5.2   | 5.25  | 0.05 | 0.08 | -1.03 | 0.51359  | 0.061168 | 0.766403 | 0.293981 |
| MmugDNA.39187.1.S1_at   | MmugDNA.39187.1 | 10.6  | 10.63 | 0.28 | 0.19 | -1.02 | 0.494984 | 0.644264 | 0.756991 | 0.791506 |
| MmugDNA.39188.1.S1_at   | MmugDNA.39188.1 | 4.07  | 4.11  | 0.16 | 0.28 | -1.03 | 0.75404  | 0.911532 | 0.895143 | 0.950138 |
| MmugDNA.39189.1.S1_at   | MmugDNA.39189.1 | 11.17 | 10.57 | 0.22 | 0.09 | 1.51  | 0.00912  | 0.006942 | 0.222023 | 0.112568 |
| MmugDNA.39192.1.S1_at   | MmugDNA.39192.1 | 6.82  | 6.97  | 0.08 | 0.1  | -1.11 | 0.118678 | 0.027755 | 0.482944 | 0.208032 |
| MmugDNA.39208.1.S1_at   | MmugDNA.39208.1 | 4.1   | 4.06  | 0.08 | 0.06 | 1.03  | 0.465975 | 0.68627  | 0.740195 | 0.816907 |
| MmugDNA.3921.1.S1_at    | MmugDNA.3921.1  | 6.05  | 5.96  | 0.29 | 0.08 | 1.06  | 0.505402 | 0.634218 | 0.761643 | 0.78472  |
| MmugDNA.39211.1.S1_at   | MmugDNA.39211.1 | 9.87  | 11.89 | 0.31 | 0.59 | -4.06 | 0.017929 | 0.01458  | 0.26813  | 0.153966 |
| MmugDNA.39216.1.S1_at   | MmugDNA.39216.1 | 9.86  | 9.78  | 0.2  | 0.43 | 1.06  | 0.69321  | 0.868947 | 0.863846 | 0.925568 |
| MmugDNA.39217.1.S1_at   | MmugDNA.39217.1 | 6.62  | 6.75  | 0.15 | 0.26 | -1.1  | 0.2312   | 0.206055 | 0.587369 | 0.480273 |



|                         |                 |       |       |      |      |        |          |          |          |          |
|-------------------------|-----------------|-------|-------|------|------|--------|----------|----------|----------|----------|
| MmugDNA.39221.1.S1_at   | MmugDNA.39221.1 | 6.15  | 9.87  | 2.05 | 2.24 | -13.14 | 0.290256 | 0.208763 | 0.628072 | 0.482608 |
| MmugDNA.39223.1.S1_at   | MmugDNA.39223.1 | 6.8   | 6.89  | 0.11 | 0.04 | -1.06  | 0.644351 | 0.839667 | 0.839729 | 0.908582 |
| MmugDNA.39227.1.S1_at   | MmugDNA.39227.1 | 6.74  | 6.85  | 0.3  | 0.19 | -1.08  | 0.849689 | 0.693959 | 0.939645 | 0.822006 |
| MmugDNA.39241.1.S1_at   | MmugDNA.39241.1 | 7.16  | 6.91  | 0.25 | 0.66 | 1.19   | 0.767166 | 0.098267 | 0.902171 | 0.356328 |
| MmugDNA.39243.1.S1_at   | MmugDNA.39243.1 | 5.78  | 5.99  | 0.08 | 0.1  | -1.15  | 0.051615 | 0.023162 | 0.376072 | 0.190579 |
| MmugDNA.39243.1.S1_x_at | MmugDNA.39243.1 | 5.97  | 6.05  | 0.06 | 0.11 | -1.06  | 0.06758  | 0.039091 | 0.408063 | 0.242995 |
| MmugDNA.39244.1.S1_at   | MmugDNA.39244.1 | 5.24  | 5.45  | 0.3  | 0.58 | -1.16  | 0.87677  | 0.979171 | 0.950675 | 0.988766 |
| MmugDNA.39247.1.S1_at   | MmugDNA.39247.1 | 13.63 | 13.75 | 0.16 | 0.1  | -1.08  | 0.494625 | 0.680649 | 0.756791 | 0.813542 |
| MmugDNA.39251.1.S1_at   | MmugDNA.39251.1 | 8.6   | 8.63  | 0.2  | 0.25 | -1.02  | 0.197536 | 0.242504 | 0.560564 | 0.51284  |
| MmugDNA.39253.1.S1_at   | MmugDNA.39253.1 | 7.76  | 7.94  | 0.11 | 0.31 | -1.13  | 0.196919 | 0.226376 | 0.559926 | 0.498806 |
| MmugDNA.39257.1.S1_at   | MmugDNA.39257.1 | 4.62  | 4.21  | 0.54 | 1.15 | 1.33   | 0.840042 | 0.873019 | 0.935512 | 0.927822 |
| MmugDNA.39263.1.S1_at   | MmugDNA.39263.1 | 7.01  | 7.19  | 0.18 | 0.15 | -1.13  | 0.44249  | 0.458129 | 0.72561  | 0.671077 |
| MmugDNA.39263.1.S1_s_at | MmugDNA.39263.1 | 6.77  | 6.91  | 0.13 | 0.07 | -1.1   | 0.241792 | 0.207812 | 0.593977 | 0.482031 |
| MmugDNA.39265.1.S1_at   | MmugDNA.39265.1 | 9.97  | 10.13 | 0.69 | 0.1  | -1.12  | 0.768382 | 0.870197 | 0.902719 | 0.926372 |
| MmugDNA.39273.1.S1_at   | MmugDNA.39273.1 | 6.05  | 6.41  | 0.32 | 0.29 | -1.28  | 0.133957 | 0.118669 | 0.500505 | 0.386699 |
| MmugDNA.39278.1.S1_at   | MmugDNA.39278.1 | 4.4   | 3.68  | 0.23 | 0.18 | 1.65   | 0.01824  | 0.036177 | 0.269591 | 0.234778 |
| MmugDNA.39281.1.S1_at   | MmugDNA.39281.1 | 4.67  | 4.81  | 0.12 | 0.18 | -1.1   | 0.317787 | 0.125595 | 0.64802  | 0.396226 |
| MmugDNA.39282.1.S1_at   | MmugDNA.39282.1 | 5.13  | 9.48  | 1.05 | 3.35 | -20.38 | 0.31807  | 0.375037 | 0.64802  | 0.613186 |
| MmugDNA.39283.1.S1_at   | MmugDNA.39283.1 | 4.04  | 4.27  | 0.06 | 0.04 | -1.18  | 0.007082 | 0.006862 | 0.20404  | 0.111933 |
| MmugDNA.39285.1.S1_at   | MmugDNA.39285.1 | 7.5   | 8.86  | 1.36 | 0.62 | -2.57  | 0.665284 | 0.583126 | 0.849897 | 0.751565 |
| MmugDNA.39291.1.S1_at   | MmugDNA.39291.1 | 8.14  | 7.1   | 0.52 | 0.37 | 2.05   | 0.036946 | 0.02205  | 0.340513 | 0.185911 |
| MmugDNA.39297.1.S1_at   | MmugDNA.39297.1 | 7.34  | 7.6   | 0.17 | 0.1  | -1.19  | 0.427181 | 0.205643 | 0.716168 | 0.479969 |
| MmugDNA.39298.1.S1_at   | MmugDNA.39298.1 | 8.12  | 9.43  | 0.44 | 0.47 | -2.48  | 0.053674 | 0.032922 | 0.38074  | 0.22466  |
| MmugDNA.39300.1.S1_at   | MmugDNA.39300.1 | 9.53  | 8.35  | 0.4  | 0.52 | 2.25   | 0.022925 | 0.007414 | 0.288967 | 0.115758 |
| MmugDNA.39305.1.S1_at   | MmugDNA.39305.1 | 7.56  | 7.08  | 0.29 | 0.57 | 1.4    | 0.317465 | 0.447908 | 0.647924 | 0.663881 |
| MmugDNA.39306.1.S1_at   | MmugDNA.39306.1 | 10.83 | 10.24 | 0.19 | 0.18 | 1.5    | 0.011497 | 0.006571 | 0.23613  | 0.109922 |
| MmugDNA.39307.1.S1_s_at | MmugDNA.39307.1 | 8.75  | 7.8   | 0.1  | 0.58 | 1.94   | 0.039266 | 0.03258  | 0.346898 | 0.223585 |
| MmugDNA.39309.1.S1_at   | MmugDNA.39309.1 | 11.01 | 11.11 | 0.06 | 0.19 | -1.07  | 0.709167 | 0.670645 | 0.872343 | 0.807453 |
| MmugDNA.39310.1.S1_at   | MmugDNA.39310.1 | 10.02 | 9.19  | 0.38 | 0.58 | 1.79   | 0.064504 | 0.021939 | 0.402975 | 0.185351 |
| MmugDNA.39312.1.S1_at   | MmugDNA.39312.1 | 11.94 | 11.49 | 0.14 | 0.16 | 1.37   | 0.042949 | 0.053248 | 0.355764 | 0.276449 |
| MmugDNA.39316.1.S1_s_at | MmugDNA.39316.1 | 3.17  | 3.08  | 0.48 | 0.16 | 1.06   | 0.40199  | 0.51797  | 0.701106 | 0.710053 |
| MmugDNA.39317.1.S1_at   | MmugDNA.39317.1 | 4.08  | 4.25  | 0.12 | 0.11 | -1.12  | 0.063366 | 0.035552 | 0.400486 | 0.232812 |
| MmugDNA.39320.1.S1_at   | MmugDNA.39320.1 | 6.64  | 6.67  | 0.14 | 0.06 | -1.02  | 0.853415 | 0.213498 | 0.940833 | 0.487394 |
| MmugDNA.39325.1.S1_at   | MmugDNA.39325.1 | 10.86 | 11.77 | 0.17 | 0.72 | -1.88  | 0.157585 | 0.110477 | 0.5225   | 0.374684 |
| MmugDNA.39328.1.S1_at   | MmugDNA.39328.1 | 3.31  | 7.19  | 1.37 | 2.29 | -14.77 | 0.157167 | 0.121041 | 0.521923 | 0.390053 |
| MmugDNA.3933.1.S1_at    | MmugDNA.3933.1  | 7.85  | 8.08  | 0.19 | 0.73 | -1.17  | 0.666595 | 0.772906 | 0.85048  | 0.867952 |
| MmugDNA.39331.1.S1_s_at | MmugDNA.39331.1 | 7.72  | 7.71  | 0.32 | 0.04 | 1.01   | 0.996582 | 0.984328 | 0.998586 | 0.991284 |
| MmugDNA.39336.1.S1_at   | MmugDNA.39336.1 | 5.8   | 5.86  | 0.43 | 0.18 | -1.05  | 0.706775 | 0.59483  | 0.870867 | 0.758675 |
| MmugDNA.39345.1.S1_at   | MmugDNA.39345.1 | 9.49  | 9.86  | 0.13 | 0.14 | -1.29  | 0.032993 | 0.125383 | 0.326925 | 0.396008 |
| MmugDNA.39352.1.S1_at   | MmugDNA.39352.1 | 11.48 | 11.69 | 0.16 | 0.27 | -1.16  | 0.061039 | 0.004931 | 0.394911 | 0.097846 |
| MmugDNA.39356.1.S1_at   | MmugDNA.39356.1 | 9.99  | 9.77  | 0.07 | 0.9  | 1.16   | 0.41745  | 0.46864  | 0.710512 | 0.677755 |

|                         |                 |       |       |      |      |        |          |          |          |          |
|-------------------------|-----------------|-------|-------|------|------|--------|----------|----------|----------|----------|
| MmugDNA.3936.1.S1_at    | MmugDNA.3936.1  | 3.18  | 3.13  | 0.02 | 0.11 | 1.04   | 0.659822 | 0.584862 | 0.847358 | 0.75256  |
| MmugDNA.39366.1.S1_at   | MmugDNA.39366.1 | 4.64  | 8.55  | 1.02 | 2.81 | -15.04 | 0.207382 | 0.158136 | 0.569552 | 0.433962 |
| MmugDNA.39367.1.S1_at   | MmugDNA.39367.1 | 7.51  | 7.72  | 0.15 | 0.23 | -1.16  | 0.1789   | 0.168583 | 0.543331 | 0.445206 |
| MmugDNA.39371.1.S1_at   | MmugDNA.39371.1 | 8.15  | 7.42  | 0.16 | 0.64 | 1.66   | 0.100641 | 0.105385 | 0.461009 | 0.367262 |
| MmugDNA.39375.1.S1_at   | MmugDNA.39375.1 | 10.59 | 10.76 | 0.27 | 0.52 | -1.12  | 0.777932 | 0.930538 | 0.907224 | 0.960527 |
| MmugDNA.39377.1.S1_s_at | MmugDNA.39377.1 | 10.08 | 10.53 | 0.09 | 0.06 | -1.37  | 0.001892 | 0.000375 | 0.155636 | 0.037273 |
| MmugDNA.39378.1.S1_at   | MmugDNA.39378.1 | 11.22 | 10.38 | 0.19 | 0.24 | 1.78   | 0.004296 | 0.000747 | 0.18216  | 0.045119 |
| MmugDNA.3938.1.S1_at    | MmugDNA.3938.1  | 4.23  | 4.09  | 0.05 | 0.08 | 1.11   | 0.021638 | 0.010834 | 0.283201 | 0.135705 |
| MmugDNA.39382.1.S1_at   | MmugDNA.39382.1 | 6.1   | 6.14  | 0.08 | 0.07 | -1.03  | 0.317846 | 0.140238 | 0.64802  | 0.413405 |
| MmugDNA.39392.1.S1_at   | MmugDNA.39392.1 | 7.25  | 8.26  | 0.47 | 0.5  | -2.01  | 0.117624 | 0.120318 | 0.48184  | 0.38925  |
| MmugDNA.39396.1.S1_at   | MmugDNA.39396.1 | 6.35  | 6.49  | 0.19 | 0.1  | -1.11  | 0.693471 | 0.829018 | 0.864073 | 0.901696 |
| MmugDNA.39397.1.S1_at   | MmugDNA.39397.1 | 10.86 | 10.92 | 0.17 | 0.13 | -1.04  | 0.664968 | 0.830475 | 0.849774 | 0.902724 |
| MmugDNA.39401.1.S1_at   | MmugDNA.39401.1 | 6.68  | 6.87  | 0.2  | 0.52 | -1.14  | 0.819453 | 0.219781 | 0.926528 | 0.493388 |
| MmugDNA.39404.1.S1_at   | MmugDNA.39404.1 | 4.24  | 4.23  | 0    | 0.11 | 1      | 0.415316 | 0.808692 | 0.70946  | 0.889895 |
| MmugDNA.39405.1.S1_at   | MmugDNA.39405.1 | 7.42  | 7.31  | 0.33 | 0.05 | 1.08   | 0.341158 | 0.556967 | 0.662308 | 0.734853 |
| MmugDNA.39412.1.S1_at   | MmugDNA.39412.1 | 3.38  | 3.39  | 0.08 | 0.15 | -1     | 0.454715 | 0.29495  | 0.733351 | 0.5545   |
| MmugDNA.39414.1.S1_at   | MmugDNA.39414.1 | 11.94 | 11.88 | 0.17 | 0.33 | 1.04   | 0.289609 | 0.00901  | 0.627563 | 0.125499 |
| MmugDNA.39415.1.S1_at   | MmugDNA.39415.1 | 5.16  | 5.94  | 0.59 | 0.72 | -1.71  | 0.234975 | 0.327961 | 0.58922  | 0.577785 |
| MmugDNA.39416.1.S1_at   | MmugDNA.39416.1 | 8.5   | 9.39  | 0.53 | 1.25 | -1.86  | 0.327845 | 0.347799 | 0.654144 | 0.592154 |
| MmugDNA.39422.1.S1_at   | MmugDNA.39422.1 | 10.58 | 9.1   | 0.09 | 0.19 | 2.79   | 0.00031  | 0.000131 | 0.12562  | 0.029087 |
| MmugDNA.39424.1.S1_at   | MmugDNA.39424.1 | 11.79 | 11.32 | 0.04 | 0.07 | 1.38   | 0.000844 | 0.000734 | 0.138925 | 0.04476  |
| MmugDNA.39425.1.S1_at   | MmugDNA.39425.1 | 8.04  | 7.99  | 0.08 | 0.34 | 1.04   | 0.797048 | 0.618376 | 0.915839 | 0.774031 |
| MmugDNA.39427.1.S1_at   | MmugDNA.39427.1 | 5.97  | 6.12  | 0.05 | 0.21 | -1.11  | 0.264493 | 0.303973 | 0.610188 | 0.561344 |
| MmugDNA.39430.1.S1_at   | MmugDNA.39430.1 | 6.54  | 6.78  | 0.1  | 0.27 | -1.18  | 0.186812 | 0.231347 | 0.550106 | 0.503029 |
| MmugDNA.3944.1.S1_at    | MmugDNA.3944.1  | 9.75  | 8.75  | 0.15 | 0.57 | 2      | 0.101215 | 0.126556 | 0.461009 | 0.397149 |
| MmugDNA.39440.1.S1_at   | MmugDNA.39440.1 | 8.66  | 8.3   | 0.3  | 0.58 | 1.28   | 0.356414 | 0.21816  | 0.671555 | 0.491731 |
| MmugDNA.39443.1.S1_at   | MmugDNA.39443.1 | 6.47  | 6.54  | 0.23 | 0.07 | -1.05  | 0.573126 | 0.767085 | 0.801055 | 0.864712 |
| MmugDNA.39446.1.S1_at   | MmugDNA.39446.1 | 9.47  | 9.35  | 0.17 | 0.38 | 1.08   | 0.57766  | 0.713207 | 0.803559 | 0.833655 |
| MmugDNA.39450.1.S1_at   | MmugDNA.39450.1 | 10.42 | 9.79  | 0.53 | 0.69 | 1.55   | 0.659468 | 0.832282 | 0.847196 | 0.903796 |
| MmugDNA.39455.1.S1_at   | MmugDNA.39455.1 | 6.42  | 6.39  | 0.19 | 0.21 | 1.02   | 0.945148 | 0.907071 | 0.979067 | 0.947374 |
| MmugDNA.39457.1.S1_at   | MmugDNA.39457.1 | 8.31  | 8.79  | 0.43 | 1.37 | -1.39  | 0.547065 | 0.618977 | 0.785936 | 0.774229 |
| MmugDNA.39460.1.S1_at   | MmugDNA.39460.1 | 11.5  | 11.22 | 0.36 | 0.28 | 1.22   | 0.657715 | 0.597888 | 0.846091 | 0.760468 |
| MmugDNA.39465.1.S1_at   | MmugDNA.39465.1 | 8.98  | 8.91  | 0.06 | 0.33 | 1.05   | 0.305833 | 0.124185 | 0.639227 | 0.394496 |
| MmugDNA.39476.1.S1_s_at | MmugDNA.39476.1 | 10.31 | 10.86 | 0.78 | 0.85 | -1.47  | 0.300705 | 0.374533 | 0.635955 | 0.6129   |
| MmugDNA.39477.1.S1_at   | MmugDNA.39477.1 | 8.02  | 9.01  | 0.24 | 0.91 | -1.99  | 0.125521 | 0.112959 | 0.491351 | 0.378763 |
| MmugDNA.39487.1.S1_at   | MmugDNA.39487.1 | 9.45  | 9.88  | 0.24 | 0.34 | -1.35  | 0.064635 | 0.055623 | 0.403175 | 0.281649 |
| MmugDNA.39490.1.S1_at   | MmugDNA.39490.1 | 7.18  | 6.57  | 0.21 | 0.86 | 1.53   | 0.076667 | 0.082915 | 0.425333 | 0.332446 |
| MmugDNA.39494.1.S1_at   | MmugDNA.39494.1 | 5.77  | 5.62  | 0.1  | 0.02 | 1.11   | 0.143038 | 0.057227 | 0.509977 | 0.285059 |
| MmugDNA.395.1.S1_at     | MmugDNA.395.1   | 10.22 | 11.47 | 0.36 | 0.31 | -2.38  | 0.011424 | 0.016051 | 0.235747 | 0.160532 |
| MmugDNA.39501.1.S1_at   | MmugDNA.39501.1 | 11.52 | 11.49 | 0.11 | 0.31 | 1.02   | 0.711661 | 0.634978 | 0.873649 | 0.785108 |
| MmugDNA.39503.1.S1_at   | MmugDNA.39503.1 | 11.9  | 11.44 | 0.03 | 0.22 | 1.38   | 0.052052 | 0.059093 | 0.376952 | 0.289985 |

|                         |                 |       |       |      |      |       |          |          |          |          |
|-------------------------|-----------------|-------|-------|------|------|-------|----------|----------|----------|----------|
| MmugDNA.39507.1.S1_at   | MmugDNA.39507.1 | 4.75  | 4.74  | 0.22 | 0.23 | 1.01  | 0.864808 | 0.333045 | 0.945683 | 0.581374 |
| MmugDNA.3951.1.S1_at    | MmugDNA.3951.1  | 7.47  | 7.59  | 0.25 | 0.84 | -1.08 | 0.723009 | 0.070995 | 0.878961 | 0.312604 |
| MmugDNA.39510.1.S1_at   | MmugDNA.39510.1 | 11.15 | 11.07 | 0.07 | 0.34 | 1.05  | 0.873819 | 0.161051 | 0.949428 | 0.437227 |
| MmugDNA.39525.1.S1_at   | MmugDNA.39525.1 | 7.57  | 6.5   | 0.26 | 0.2  | 2.1   | 0.006475 | 0.002101 | 0.199625 | 0.067779 |
| MmugDNA.39529.1.S1_at   | MmugDNA.39529.1 | 13.14 | 13.28 | 0.11 | 0.08 | -1.1  | 0.276611 | 0.235959 | 0.618796 | 0.507056 |
| MmugDNA.39530.1.S1_at   | MmugDNA.39530.1 | 5.51  | 5.38  | 0.37 | 0.1  | 1.1   | 0.144228 | 0.107133 | 0.510664 | 0.369808 |
| MmugDNA.39532.1.S1_at   | MmugDNA.39532.1 | 8.13  | 8.95  | 0.44 | 0.38 | -1.77 | 0.314007 | 0.266551 | 0.645488 | 0.532301 |
| MmugDNA.39534.1.S1_at   | MmugDNA.39534.1 | 6.18  | 6.75  | 0.16 | 0.49 | -1.48 | 0.095259 | 0.05526  | 0.453089 | 0.280809 |
| MmugDNA.39536.1.S1_at   | MmugDNA.39536.1 | 9.07  | 9.43  | 0.13 | 0.42 | -1.28 | 0.546124 | 0.608041 | 0.785337 | 0.766741 |
| MmugDNA.39539.1.S1_at   | MmugDNA.39539.1 | 6.52  | 5.85  | 0.49 | 0.53 | 1.59  | 0.504554 | 0.284657 | 0.76127  | 0.546877 |
| MmugDNA.39540.1.S1_at   | MmugDNA.39540.1 | 3.85  | 4.67  | 0.17 | 0.67 | -1.76 | 0.164751 | 0.180013 | 0.528656 | 0.456552 |
| MmugDNA.39542.1.S1_at   | MmugDNA.39542.1 | 9.74  | 9.76  | 0.11 | 0.56 | -1.02 | 0.448194 | 0.079931 | 0.729488 | 0.327258 |
| MmugDNA.39545.1.S1_at   | MmugDNA.39545.1 | 6.75  | 6.98  | 0.38 | 0.09 | -1.17 | 0.351686 | 0.470834 | 0.669126 | 0.679124 |
| MmugDNA.39547.1.S1_at   | MmugDNA.39547.1 | 11.67 | 11.47 | 0.06 | 0.12 | 1.15  | 0.096634 | 0.02055  | 0.455428 | 0.179861 |
| MmugDNA.39548.1.S1_at   | MmugDNA.39548.1 | 4.06  | 4.29  | 0.07 | 0.16 | -1.17 | 0.097821 | 0.116375 | 0.457014 | 0.383671 |
| MmugDNA.39555.1.S1_at   | MmugDNA.39555.1 | 10.11 | 10.88 | 0.4  | 0.85 | -1.71 | 0.178018 | 0.164982 | 0.542263 | 0.44123  |
| MmugDNA.39559.1.S1_at   | MmugDNA.39559.1 | 11.91 | 11.2  | 0.22 | 0.74 | 1.63  | 0.258403 | 0.343611 | 0.60566  | 0.589322 |
| MmugDNA.3956.1.S1_at    | MmugDNA.3956.1  | 2.82  | 2.87  | 0.05 | 0.19 | -1.03 | 0.263208 | 0.34978  | 0.609297 | 0.593578 |
| MmugDNA.39560.1.S1_at   | MmugDNA.39560.1 | 4.2   | 4.14  | 0.39 | 0.24 | 1.05  | 0.434484 | 0.390901 | 0.720505 | 0.624603 |
| MmugDNA.39571.1.S1_at   | MmugDNA.39571.1 | 5.09  | 4.08  | 0.5  | 0.11 | 2.02  | 0.071527 | 0.080505 | 0.415505 | 0.328159 |
| MmugDNA.39574.1.S1_at   | MmugDNA.39574.1 | 8.45  | 8.63  | 0.19 | 0.27 | -1.13 | 0.337427 | 0.136415 | 0.659935 | 0.408839 |
| MmugDNA.39580.1.S1_at   | MmugDNA.39580.1 | 4.48  | 4.16  | 0.28 | 0.13 | 1.25  | 0.162269 | 0.29042  | 0.526638 | 0.551169 |
| MmugDNA.39582.1.S1_at   | MmugDNA.39582.1 | 10.05 | 11.44 | 0.23 | 1.05 | -2.61 | 0.074906 | 0.067647 | 0.421394 | 0.306199 |
| MmugDNA.39584.1.S1_at   | MmugDNA.39584.1 | 5.33  | 5.3   | 0.19 | 0.22 | 1.02  | 0.935327 | 0.45969  | 0.975003 | 0.671948 |
| MmugDNA.39588.1.S1_at   | MmugDNA.39588.1 | 8.85  | 7.96  | 0.73 | 1.76 | 1.86  | 0.436505 | 0.559693 | 0.721751 | 0.736365 |
| MmugDNA.396.1.S1_at     | MmugDNA.396.1   | 10.47 | 10.49 | 0.26 | 0.45 | -1.02 | 0.516151 | 0.603824 | 0.767807 | 0.764323 |
| MmugDNA.39606.1.S1_at   | MmugDNA.39606.1 | 10.25 | 9.68  | 0.17 | 0.67 | 1.49  | 0.171274 | 0.127427 | 0.535163 | 0.398274 |
| MmugDNA.39607.1.S1_at   | MmugDNA.39607.1 | 3.88  | 3.7   | 0.2  | 0.24 | 1.14  | 0.438279 | 0.289794 | 0.722942 | 0.55082  |
| MmugDNA.39609.1.S1_at   | MmugDNA.39609.1 | 5.44  | 8.31  | 0.94 | 2.28 | -7.35 | 0.217904 | 0.245572 | 0.577569 | 0.515348 |
| MmugDNA.39616.1.S1_at   | MmugDNA.39616.1 | 11.32 | 10.82 | 0.13 | 0.01 | 1.41  | 0.004385 | 0.001761 | 0.183061 | 0.063161 |
| MmugDNA.39618.1.S1_at   | MmugDNA.39618.1 | 4.75  | 4.13  | 0.4  | 0.22 | 1.53  | 0.137356 | 0.067339 | 0.504518 | 0.305492 |
| MmugDNA.39619.1.S1_at   | MmugDNA.39619.1 | 7.63  | 8.45  | 1.2  | 0.77 | -1.77 | 0.36349  | 0.022062 | 0.676738 | 0.185927 |
| MmugDNA.3962.1.S1_at    | MmugDNA.3962.1  | 7.05  | 6.85  | 0.09 | 0.13 | 1.15  | 0.168601 | 0.130177 | 0.532849 | 0.40188  |
| MmugDNA.39621.1.S1_at   | MmugDNA.39621.1 | 5.26  | 5.1   | 0.5  | 0.49 | 1.12  | 0.897605 | 0.373627 | 0.95917  | 0.612389 |
| MmugDNA.39626.1.S1_at   | MmugDNA.39626.1 | 10.43 | 8.93  | 0.18 | 1.01 | 2.83  | 0.044751 | 0.018337 | 0.359043 | 0.170279 |
| MmugDNA.39627.1.S1_at   | MmugDNA.39627.1 | 3.19  | 3.18  | 0.09 | 0.31 | 1.01  | 0.330241 | 0.642382 | 0.655613 | 0.790178 |
| MmugDNA.3963.1.S1_at    | MmugDNA.3963.1  | 9.59  | 8.49  | 0.34 | 0.55 | 2.14  | 0.037892 | 0.024395 | 0.343205 | 0.19551  |
| MmugDNA.39631.1.S1_at   | MmugDNA.39631.1 | 9.79  | 9.59  | 0.06 | 0.14 | 1.15  | 0.043376 | 0.053125 | 0.356711 | 0.276232 |
| MmugDNA.39632.1.S1_at   | MmugDNA.39632.1 | 3.3   | 3.51  | 0.24 | 0.2  | -1.16 | 0.66214  | 0.625544 | 0.848422 | 0.779222 |
| MmugDNA.39634.1.S1_s_at | MmugDNA.39634.1 | 3.56  | 3.65  | 0.14 | 0.13 | -1.06 | 0.606056 | 0.486562 | 0.818704 | 0.689898 |
| MmugDNA.39637.1.S1_at   | MmugDNA.39637.1 | 9.75  | 8.49  | 0.17 | 0.35 | 2.4   | 0.009652 | 0.006967 | 0.226235 | 0.112743 |

|                         |                 |       |       |      |      |        |          |          |          |          |
|-------------------------|-----------------|-------|-------|------|------|--------|----------|----------|----------|----------|
| MmugDNA.39645.1.S1_at   | MmugDNA.39645.1 | 6.33  | 5.82  | 0.26 | 0.03 | 1.43   | 0.073585 | 0.199401 | 0.419024 | 0.474002 |
| MmugDNA.3965.1.S1_at    | MmugDNA.3965.1  | 12.04 | 11.81 | 0.14 | 0.14 | 1.17   | 0.054634 | 0.044758 | 0.382043 | 0.256009 |
| MmugDNA.39652.1.S1_at   | MmugDNA.39652.1 | 7.55  | 7.22  | 0.12 | 0.13 | 1.26   | 0.063479 | 0.049238 | 0.400654 | 0.266752 |
| MmugDNA.39653.1.S1_at   | MmugDNA.39653.1 | 11.99 | 11.98 | 0.13 | 0.25 | 1.01   | 0.422956 | 0.492706 | 0.713789 | 0.693724 |
| MmugDNA.3966.1.S1_at    | MmugDNA.3966.1  | 7.42  | 7.04  | 0.38 | 0.13 | 1.3    | 0.52889  | 0.752011 | 0.775764 | 0.855739 |
| MmugDNA.39663.1.S1_at   | MmugDNA.39663.1 | 10.95 | 10.91 | 0.14 | 0.17 | 1.03   | 0.212252 | 0.272974 | 0.572552 | 0.53761  |
| MmugDNA.39664.1.S1_at   | MmugDNA.39664.1 | 2.96  | 3.09  | 0.04 | 0.12 | -1.1   | 0.087508 | 0.206728 | 0.441877 | 0.480825 |
| MmugDNA.39669.1.S1_at   | MmugDNA.39669.1 | 7.45  | 7.17  | 0.17 | 0.09 | 1.21   | 0.308186 | 0.048077 | 0.640608 | 0.26428  |
| MmugDNA.39678.1.S1_at   | MmugDNA.39678.1 | 6.87  | 6.85  | 0.13 | 0.54 | 1.01   | 0.821848 | 0.779751 | 0.927464 | 0.872303 |
| MmugDNA.39679.1.S1_at   | MmugDNA.39679.1 | 7.47  | 7.2   | 0.28 | 0.54 | 1.2    | 0.136585 | 0.146252 | 0.503737 | 0.420241 |
| MmugDNA.39699.1.S1_at   | MmugDNA.39699.1 | 8.87  | 7.94  | 0.29 | 0.69 | 1.91   | 0.071651 | 0.020085 | 0.415639 | 0.178007 |
| MmugDNA.39701.1.S1_at   | MmugDNA.39701.1 | 4.95  | 5.09  | 0.26 | 0.26 | -1.1   | 0.263004 | 0.332604 | 0.609142 | 0.580982 |
| MmugDNA.39708.1.S1_s_at | MmugDNA.39708.1 | 9.93  | 10.74 | 0.16 | 0.7  | -1.76  | 0.136148 | 0.2098   | 0.503003 | 0.483538 |
| MmugDNA.39709.1.S1_at   | MmugDNA.39709.1 | 5.03  | 5.52  | 0.67 | 0.65 | -1.41  | 0.76285  | 0.062749 | 0.900046 | 0.297193 |
| MmugDNA.3971.1.S1_at    | MmugDNA.3971.1  | 10.12 | 10.4  | 0.2  | 0.94 | -1.21  | 0.544139 | 0.688208 | 0.784268 | 0.817998 |
| MmugDNA.39714.1.S1_at   | MmugDNA.39714.1 | 5.46  | 8.82  | 1.51 | 2.11 | -10.23 | 0.221276 | 0.157549 | 0.580161 | 0.433131 |
| MmugDNA.3972.1.S1_at    | MmugDNA.3972.1  | 10.17 | 9.97  | 0.16 | 0.29 | 1.15   | 0.502134 | 0.562471 | 0.760244 | 0.738025 |
| MmugDNA.3973.1.S1_at    | MmugDNA.3973.1  | 12.61 | 12.2  | 0.09 | 0.4  | 1.33   | 0.066446 | 0.060242 | 0.406564 | 0.292091 |
| MmugDNA.39744.1.S1_at   | MmugDNA.39744.1 | 9.15  | 8.46  | 0.18 | 0.4  | 1.61   | 0.145269 | 0.137522 | 0.511329 | 0.410484 |
| MmugDNA.39763.1.S1_at   | MmugDNA.39763.1 | 8.82  | 10.7  | 0.39 | 0.51 | -3.7   | 0.009853 | 0.003853 | 0.226637 | 0.08832  |
| MmugDNA.39772.1.S1_at   | MmugDNA.39772.1 | 9.46  | 9.83  | 0.03 | 0.41 | -1.29  | 0.065075 | 0.055454 | 0.403867 | 0.281393 |
| MmugDNA.39774.1.S1_at   | MmugDNA.39774.1 | 8.95  | 8.49  | 0.39 | 0.67 | 1.38   | 0.156783 | 0.143944 | 0.521541 | 0.417867 |
| MmugDNA.39776.1.S1_at   | MmugDNA.39776.1 | 10.28 | 10.31 | 0.55 | 0.59 | -1.02  | 0.567536 | 0.590778 | 0.798174 | 0.756448 |
| MmugDNA.39779.1.S1_at   | MmugDNA.39779.1 | 5.38  | 4.87  | 0.35 | 0.04 | 1.42   | 0.068513 | 0.080816 | 0.410201 | 0.32873  |
| MmugDNA.39782.1.S1_at   | MmugDNA.39782.1 | 10.15 | 10.29 | 0.18 | 0.22 | -1.11  | 0.161145 | 0.134899 | 0.526204 | 0.406878 |
| MmugDNA.39789.1.S1_at   | MmugDNA.39789.1 | 6.38  | 7     | 0.22 | 0.09 | -1.54  | 0.011426 | 0.005678 | 0.235747 | 0.103959 |
| MmugDNA.39791.1.S1_at   | MmugDNA.39791.1 | 11.81 | 11.51 | 0.09 | 0.14 | 1.22   | 0.033501 | 0.008097 | 0.329295 | 0.119551 |
| MmugDNA.39796.1.S1_at   | MmugDNA.39796.1 | 7.11  | 9.32  | 0.36 | 0.44 | -4.63  | 0.005934 | 0.001736 | 0.193916 | 0.062895 |
| MmugDNA.39807.1.S1_at   | MmugDNA.39807.1 | 6.74  | 7.31  | 0.38 | 0.11 | -1.48  | 0.078454 | 0.08775  | 0.428503 | 0.341027 |
| MmugDNA.39811.1.S1_at   | MmugDNA.39811.1 | 7.92  | 8.08  | 0.11 | 0.2  | -1.12  | 0.768475 | 0.58095  | 0.902719 | 0.750041 |
| MmugDNA.39813.1.S1_at   | MmugDNA.39813.1 | 6.3   | 6.52  | 0.43 | 0.34 | -1.16  | 0.621429 | 0.115641 | 0.82667  | 0.382714 |
| MmugDNA.39821.1.S1_at   | MmugDNA.39821.1 | 10.61 | 10.81 | 0.08 | 0.36 | -1.15  | 0.15887  | 0.212225 | 0.524099 | 0.486124 |
| MmugDNA.39823.1.S1_at   | MmugDNA.39823.1 | 4.82  | 6.43  | 0.33 | 1.79 | -3.06  | 0.19342  | 0.081148 | 0.556894 | 0.329333 |
| MmugDNA.39828.1.S1_at   | MmugDNA.39828.1 | 8.39  | 8.36  | 0.4  | 0.47 | 1.02   | 0.867474 | 0.939738 | 0.947135 | 0.965752 |
| MmugDNA.3983.1.S1_at    | MmugDNA.3983.1  | 12.42 | 12.32 | 0.14 | 0.17 | 1.07   | 0.73943  | 0.634295 | 0.888141 | 0.784742 |
| MmugDNA.39834.1.S1_s_at | MmugDNA.39834.1 | 9.39  | 9.74  | 0.25 | 0.67 | -1.28  | 0.995897 | 0.999694 | 0.998446 | 0.999883 |
| MmugDNA.39839.1.S1_at   | MmugDNA.39839.1 | 10.12 | 10.32 | 0.18 | 0.27 | -1.15  | 0.299614 | 0.407135 | 0.634993 | 0.634753 |
| MmugDNA.39842.1.S1_at   | MmugDNA.39842.1 | 11.94 | 11.95 | 0.29 | 0.06 | -1.01  | 0.823448 | 0.93159  | 0.928164 | 0.961152 |
| MmugDNA.39842.1.S1_s_at | MmugDNA.39842.1 | 11.29 | 11.5  | 0.14 | 0.05 | -1.15  | 0.04684  | 0.053527 | 0.364195 | 0.277016 |
| MmugDNA.39847.1.S1_at   | MmugDNA.39847.1 | 10.52 | 9.64  | 0.07 | 0.45 | 1.85   | 0.07534  | 0.065661 | 0.422257 | 0.301631 |
| MmugDNA.39849.1.S1_at   | MmugDNA.39849.1 | 4.69  | 4.11  | 0.04 | 0.03 | 1.49   | 0.00005  | 0.000225 | 0.112653 | 0.032385 |

|                         |                 |       |       |      |      |       |          |          |          |          |
|-------------------------|-----------------|-------|-------|------|------|-------|----------|----------|----------|----------|
| MmugDNA.39851.1.S1_at   | MmugDNA.39851.1 | 10.33 | 10.11 | 0.25 | 0.54 | 1.16  | 0.569134 | 0.276065 | 0.798992 | 0.540086 |
| MmugDNA.39858.1.S1_at   | MmugDNA.39858.1 | 6.53  | 6.75  | 0.05 | 0.18 | -1.16 | 0.051947 | 0.043714 | 0.376805 | 0.253804 |
| MmugDNA.39859.1.S1_at   | MmugDNA.39859.1 | 11.91 | 11.89 | 0.06 | 0.27 | 1.02  | 0.319608 | 0.513215 | 0.649068 | 0.706851 |
| MmugDNA.39861.1.S1_at   | MmugDNA.39861.1 | 12.09 | 11.64 | 0.1  | 0.03 | 1.36  | 0.001775 | 0.000632 | 0.154452 | 0.042882 |
| MmugDNA.39864.1.S1_at   | MmugDNA.39864.1 | 3.03  | 2.98  | 0.17 | 0.11 | 1.03  | 0.539299 | 0.789999 | 0.781011 | 0.878631 |
| MmugDNA.39874.1.S1_at   | MmugDNA.39874.1 | 5.93  | 6.35  | 0.61 | 0.42 | -1.33 | 0.4206   | 0.391305 | 0.712569 | 0.625    |
| MmugDNA.39876.1.S1_at   | MmugDNA.39876.1 | 4.26  | 4.3   | 0.07 | 0.31 | -1.02 | 0.483318 | 0.572431 | 0.749882 | 0.744497 |
| MmugDNA.39881.1.S1_at   | MmugDNA.39881.1 | 6.9   | 6.7   | 0.32 | 1.59 | 1.15  | 0.566419 | 0.389092 | 0.797591 | 0.623345 |
| MmugDNA.39890.1.S1_at   | MmugDNA.39890.1 | 5.32  | 5.48  | 0.09 | 0.07 | -1.12 | 0.348674 | 0.027322 | 0.667173 | 0.206625 |
| MmugDNA.39898.1.S1_at   | MmugDNA.39898.1 | 10.13 | 10.52 | 0.18 | 0.58 | -1.31 | 0.836332 | 0.24266  | 0.933742 | 0.513025 |
| MmugDNA.399.1.S1_at     | MmugDNA.399.1   | 7.6   | 7.55  | 0.17 | 0.14 | 1.04  | 0.815751 | 0.191572 | 0.925151 | 0.466896 |
| MmugDNA.3990.1.S1_at    | MmugDNA.3990.1  | 7.2   | 7.22  | 0.09 | 0.06 | -1.01 | 0.822173 | 0.071554 | 0.927592 | 0.313714 |
| MmugDNA.39907.1.S1_at   | MmugDNA.39907.1 | 3.33  | 3.27  | 0.09 | 0.03 | 1.05  | 0.720822 | 0.666172 | 0.877822 | 0.804415 |
| MmugDNA.39913.1.S1_at   | MmugDNA.39913.1 | 14.09 | 14.38 | 0.21 | 0.25 | -1.22 | 0.227143 | 0.172272 | 0.584952 | 0.448666 |
| MmugDNA.39914.1.S1_at   | MmugDNA.39914.1 | 11.74 | 11.87 | 0.15 | 0.4  | -1.09 | 0.777801 | 0.348695 | 0.907111 | 0.592707 |
| MmugDNA.39919.1.S1_at   | MmugDNA.39919.1 | 10.85 | 10.87 | 0.8  | 1.77 | -1.01 | 0.930646 | 0.342143 | 0.973196 | 0.588322 |
| MmugDNA.39924.1.S1_at   | MmugDNA.39924.1 | 14.1  | 14.08 | 0.15 | 0.19 | 1.02  | 0.780773 | 0.907961 | 0.908616 | 0.947889 |
| MmugDNA.39925.1.S1_at   | MmugDNA.39925.1 | 4.65  | 4.58  | 0.1  | 0.05 | 1.05  | 0.283266 | 0.152155 | 0.623353 | 0.426919 |
| MmugDNA.39927.1.S1_s_at | MmugDNA.39927.1 | 10.75 | 9.63  | 0.13 | 0.7  | 2.17  | 0.047823 | 0.035851 | 0.367233 | 0.233788 |
| MmugDNA.39935.1.S1_at   | MmugDNA.39935.1 | 8.43  | 8.46  | 0.21 | 0.16 | -1.02 | 0.379554 | 0.045266 | 0.687061 | 0.257084 |
| MmugDNA.39939.1.S1_at   | MmugDNA.39939.1 | 13.13 | 12.84 | 0.28 | 0.27 | 1.23  | 0.206141 | 0.137864 | 0.568474 | 0.410833 |
| MmugDNA.3994.1.S1_at    | MmugDNA.3994.1  | 10.86 | 10.74 | 0.05 | 0.3  | 1.09  | 0.22901  | 0.2657   | 0.586303 | 0.531561 |
| MmugDNA.39948.1.S1_at   | MmugDNA.39948.1 | 9.11  | 8.74  | 0.24 | 0.1  | 1.29  | 0.075852 | 0.072735 | 0.423746 | 0.31565  |
| MmugDNA.39957.1.S1_at   | MmugDNA.39957.1 | 5.63  | 6.49  | 0.39 | 0.51 | -1.82 | 0.097422 | 0.063464 | 0.45638  | 0.298441 |
| MmugDNA.39958.1.S1_at   | MmugDNA.39958.1 | 11.4  | 10.81 | 0.19 | 1.21 | 1.5   | 0.14868  | 0.13207  | 0.51391  | 0.404046 |
| MmugDNA.3996.1.S1_at    | MmugDNA.3996.1  | 11.28 | 11.41 | 0.05 | 0.23 | -1.1  | 0.25055  | 0.312469 | 0.600389 | 0.567211 |
| MmugDNA.39967.1.S1_at   | MmugDNA.39967.1 | 3.13  | 3.12  | 0.28 | 0.02 | 1.01  | 0.366916 | 0.260267 | 0.679214 | 0.526809 |
| MmugDNA.39969.1.S1_at   | MmugDNA.39969.1 | 4.39  | 4.3   | 0.06 | 0.09 | 1.07  | 0.51601  | 0.525103 | 0.76772  | 0.714766 |
| MmugDNA.39974.1.S1_at   | MmugDNA.39974.1 | 6.37  | 8.62  | 0.79 | 1.44 | -4.78 | 0.132594 | 0.067201 | 0.49874  | 0.305204 |
| MmugDNA.39975.1.S1_at   | MmugDNA.39975.1 | 5.28  | 6.32  | 0.31 | 1.64 | -2.05 | 0.385272 | 0.101665 | 0.690421 | 0.361562 |
| MmugDNA.3998.1.S1_at    | MmugDNA.3998.1  | 3.67  | 4.49  | 0.06 | 0.8  | -1.77 | 0.137224 | 0.163306 | 0.504356 | 0.439468 |
| MmugDNA.39985.1.S1_at   | MmugDNA.39985.1 | 6.6   | 5.86  | 0.41 | 0.23 | 1.66  | 0.041679 | 0.010299 | 0.352383 | 0.132854 |
| MmugDNA.39994.1.S1_at   | MmugDNA.39994.1 | 5.84  | 5.47  | 0.5  | 0.27 | 1.3   | 0.107202 | 0.105973 | 0.467913 | 0.368302 |
| MmugDNA.39996.1.S1_at   | MmugDNA.39996.1 | 7.49  | 7.34  | 0.84 | 0.63 | 1.11  | 0.962042 | 0.142201 | 0.985456 | 0.415754 |
| MmugDNA.40001.1.S1_at   | MmugDNA.40001.1 | 10.12 | 10.11 | 0.12 | 0.81 | 1.01  | 0.938294 | 0.502495 | 0.976372 | 0.700192 |
| MmugDNA.40017.1.S1_at   | MmugDNA.40017.1 | 6.23  | 6.2   | 0.09 | 0.03 | 1.02  | 0.712906 | 0.502298 | 0.874274 | 0.700078 |
| MmugDNA.4002.1.S1_at    | MmugDNA.4002.1  | 7.62  | 8.76  | 0.53 | 0.05 | -2.2  | 0.054976 | 0.063615 | 0.382822 | 0.298759 |
| MmugDNA.40026.1.S1_at   | MmugDNA.40026.1 | 10.83 | 10.46 | 0.02 | 0.21 | 1.29  | 0.036471 | 0.021543 | 0.339388 | 0.183828 |
| MmugDNA.40045.1.S1_at   | MmugDNA.40045.1 | 7.8   | 7.46  | 0.03 | 0.12 | 1.27  | 0.004861 | 0.005013 | 0.185154 | 0.09867  |
| MmugDNA.40047.1.S1_at   | MmugDNA.40047.1 | 7.42  | 7.48  | 0.16 | 0.08 | -1.04 | 0.37781  | 0.475326 | 0.686095 | 0.682032 |
| MmugDNA.40058.1.S1_at   | MmugDNA.40058.1 | 10.19 | 9.56  | 0.07 | 0.57 | 1.55  | 0.402352 | 0.4474   | 0.701375 | 0.66348  |

|                         |                 |       |       |      |      |       |          |          |          |          |
|-------------------------|-----------------|-------|-------|------|------|-------|----------|----------|----------|----------|
| MmugDNA.40059.1.S1_at   | MmugDNA.40059.1 | 9.05  | 9.69  | 0.34 | 0.15 | -1.56 | 0.020342 | 0.010257 | 0.277448 | 0.132655 |
| MmugDNA.4006.1.S1_at    | MmugDNA.4006.1  | 10.86 | 10.45 | 0.16 | 0.16 | 1.33  | 0.028003 | 0.017179 | 0.309449 | 0.166059 |
| MmugDNA.40060.1.S1_s_at | MmugDNA.40060.1 | 4.94  | 6.28  | 0.73 | 1.21 | -2.53 | 0.323309 | 0.425778 | 0.651535 | 0.648089 |
| MmugDNA.40061.1.S1_at   | MmugDNA.40061.1 | 5.13  | 5.33  | 0.03 | 0.23 | -1.15 | 0.124807 | 0.091754 | 0.49077  | 0.346977 |
| MmugDNA.40066.1.S1_at   | MmugDNA.40066.1 | 10.13 | 8.69  | 0.14 | 0.19 | 2.72  | 0.000805 | 0.00008  | 0.136818 | 0.027016 |
| MmugDNA.40077.1.S1_at   | MmugDNA.40077.1 | 11.31 | 10.99 | 0.13 | 0.25 | 1.25  | 0.029905 | 0.020608 | 0.315938 | 0.180131 |
| MmugDNA.40078.1.S1_at   | MmugDNA.40078.1 | 6.12  | 6.17  | 0.2  | 0.07 | -1.04 | 0.479766 | 0.231797 | 0.747835 | 0.503592 |
| MmugDNA.40080.1.S1_at   | MmugDNA.40080.1 | 6.78  | 7.95  | 0.41 | 0.45 | -2.25 | 0.040431 | 0.024484 | 0.349277 | 0.195845 |
| MmugDNA.40085.1.S1_at   | MmugDNA.40085.1 | 5.95  | 5.93  | 0.2  | 0.13 | 1.02  | 0.37045  | 0.161136 | 0.681485 | 0.437288 |
| MmugDNA.40088.1.S1_at   | MmugDNA.40088.1 | 3.42  | 3.5   | 0.15 | 0.06 | -1.06 | 0.543163 | 0.537729 | 0.783788 | 0.722664 |
| MmugDNA.40088.1.S1_x_at | MmugDNA.40088.1 | 4     | 3.64  | 0.31 | 0.1  | 1.28  | 0.14931  | 0.100415 | 0.514001 | 0.359541 |
| MmugDNA.40090.1.S1_at   | MmugDNA.40090.1 | 10.21 | 9.81  | 0.25 | 0.22 | 1.32  | 0.241698 | 0.252746 | 0.593941 | 0.521174 |
| MmugDNA.40091.1.S1_at   | MmugDNA.40091.1 | 8.01  | 8.2   | 0.09 | 0.88 | -1.14 | 0.566496 | 0.418831 | 0.797591 | 0.643118 |
| MmugDNA.40097.1.S1_at   | MmugDNA.40097.1 | 9.86  | 10.15 | 0.26 | 0.81 | -1.22 | 0.231859 | 0.172515 | 0.587568 | 0.448864 |
| MmugDNA.40105.1.S1_at   | MmugDNA.40105.1 | 8.77  | 10.26 | 0.11 | 0.14 | -2.81 | 0.000174 | 0.000044 | 0.118376 | 0.025273 |
| MmugDNA.40109.1.S1_at   | MmugDNA.40109.1 | 9.78  | 9.58  | 0.21 | 0.08 | 1.14  | 0.109837 | 0.120478 | 0.470963 | 0.38925  |
| MmugDNA.40113.1.S1_at   | MmugDNA.40113.1 | 7.21  | 7.04  | 0.34 | 0.19 | 1.12  | 0.242068 | 0.114625 | 0.594277 | 0.381156 |
| MmugDNA.40118.1.S1_at   | MmugDNA.40118.1 | 6.65  | 6.37  | 0.14 | 0.17 | 1.22  | 0.211858 | 0.336434 | 0.572347 | 0.583831 |
| MmugDNA.40124.1.S1_at   | MmugDNA.40124.1 | 9.55  | 9.56  | 0.12 | 0.59 | -1.01 | 0.590531 | 0.784462 | 0.809851 | 0.875181 |
| MmugDNA.40124.1.S1_s_at | MmugDNA.40124.1 | 10.92 | 10.95 | 0.11 | 0.55 | -1.02 | 0.670466 | 0.850992 | 0.852391 | 0.915265 |
| MmugDNA.40134.1.S1_at   | MmugDNA.40134.1 | 12.09 | 11.29 | 0.11 | 0.35 | 1.74  | 0.024051 | 0.01131  | 0.294041 | 0.138076 |
| MmugDNA.40137.1.S1_at   | MmugDNA.40137.1 | 10.6  | 11.54 | 0.45 | 0.62 | -1.92 | 0.123972 | 0.146179 | 0.489701 | 0.420124 |
| MmugDNA.40138.1.S1_at   | MmugDNA.40138.1 | 10.3  | 10.46 | 0.77 | 0.97 | -1.11 | 0.676692 | 0.859818 | 0.8552   | 0.920108 |
| MmugDNA.40139.1.S1_at   | MmugDNA.40139.1 | 3.27  | 3.42  | 0.07 | 0.09 | -1.11 | 0.040455 | 0.088435 | 0.349277 | 0.341877 |
| MmugDNA.40144.1.S1_at   | MmugDNA.40144.1 | 10    | 10.43 | 0.38 | 1.05 | -1.35 | 0.899706 | 0.309601 | 0.959957 | 0.564987 |
| MmugDNA.40146.1.S1_at   | MmugDNA.40146.1 | 8.92  | 8.41  | 0.15 | 0.23 | 1.43  | 0.138315 | 0.156513 | 0.505707 | 0.431885 |
| MmugDNA.40147.1.S1_at   | MmugDNA.40147.1 | 11.82 | 11.89 | 0.06 | 0.15 | -1.05 | 0.402446 | 0.46744  | 0.701415 | 0.677085 |
| MmugDNA.40153.1.S1_at   | MmugDNA.40153.1 | 11.09 | 10.03 | 0.09 | 0.72 | 2.09  | 0.184814 | 0.207511 | 0.548357 | 0.481819 |
| MmugDNA.40164.1.S1_at   | MmugDNA.40164.1 | 6.58  | 7.52  | 0.68 | 2.49 | -1.91 | 0.6555   | 0.52815  | 0.844995 | 0.716456 |
| MmugDNA.40170.1.S1_s_at | MmugDNA.40170.1 | 4.81  | 5.99  | 0.39 | 0.6  | -2.26 | 0.03477  | 0.000769 | 0.333943 | 0.04544  |
| MmugDNA.40178.1.S1_at   | MmugDNA.40178.1 | 11.29 | 11.06 | 0.15 | 0.26 | 1.18  | 0.539716 | 0.087084 | 0.781249 | 0.340056 |
| MmugDNA.4019.1.S1_at    | MmugDNA.4019.1  | 9.17  | 8.8   | 0.16 | 0.42 | 1.29  | 0.34019  | 0.133815 | 0.661654 | 0.405813 |
| MmugDNA.4019.1.S1_s_at  | MmugDNA.4019.1  | 9.21  | 8.56  | 0.1  | 0.53 | 1.57  | 0.302727 | 0.218143 | 0.63706  | 0.491731 |
| MmugDNA.40192.1.S1_at   | MmugDNA.40192.1 | 11.93 | 11.48 | 0.07 | 0.17 | 1.37  | 0.017723 | 0.004266 | 0.267612 | 0.091847 |
| MmugDNA.40193.1.S1_at   | MmugDNA.40193.1 | 6.01  | 5.95  | 0.2  | 0.17 | 1.04  | 0.892945 | 0.823842 | 0.957322 | 0.898803 |
| MmugDNA.40198.1.S1_at   | MmugDNA.40198.1 | 8.3   | 8.34  | 0.17 | 0.21 | -1.03 | 0.426634 | 0.564596 | 0.715865 | 0.739382 |
| MmugDNA.40204.1.S1_at   | MmugDNA.40204.1 | 12.23 | 12.34 | 0.26 | 0.35 | -1.08 | 0.700297 | 0.043823 | 0.867396 | 0.253914 |
| MmugDNA.40206.1.S1_at   | MmugDNA.40206.1 | 9.77  | 9.84  | 0.29 | 0.1  | -1.05 | 0.538402 | 0.45729  | 0.780589 | 0.670746 |
| MmugDNA.40208.1.S1_at   | MmugDNA.40208.1 | 8.96  | 8.68  | 0.1  | 0.04 | 1.21  | 0.014433 | 0.054074 | 0.252393 | 0.277914 |
| MmugDNA.40213.1.S1_s_at | MmugDNA.40213.1 | 12.5  | 12.48 | 0.11 | 0.06 | 1.02  | 0.836011 | 0.10109  | 0.933635 | 0.360724 |
| MmugDNA.40218.1.S1_at   | MmugDNA.40218.1 | 7.79  | 6.66  | 0.11 | 0.27 | 2.17  | 0.002047 | 0.002765 | 0.155636 | 0.077756 |

|                         |                 |       |       |      |      |       |          |          |          |          |
|-------------------------|-----------------|-------|-------|------|------|-------|----------|----------|----------|----------|
| MmugDNA.40218.1.S1_x_at | MmugDNA.40218.1 | 7.69  | 6.72  | 0.16 | 0.12 | 1.95  | 0.001082 | 0.002433 | 0.144025 | 0.073093 |
| MmugDNA.40219.1.S1_s_at | MmugDNA.40219.1 | 11.18 | 10.69 | 0.09 | 0.46 | 1.41  | 0.183514 | 0.141748 | 0.547696 | 0.415331 |
| MmugDNA.40225.1.S1_at   | MmugDNA.40225.1 | 10.2  | 10.29 | 0.03 | 0.25 | -1.06 | 0.462495 | 0.03917  | 0.738248 | 0.243072 |
| MmugDNA.40227.1.S1_at   | MmugDNA.40227.1 | 7.67  | 7.83  | 0.1  | 0.12 | -1.11 | 0.132671 | 0.150389 | 0.49874  | 0.424934 |
| MmugDNA.40227.1.S1_s_at | MmugDNA.40227.1 | 9.03  | 9.82  | 0.23 | 0.53 | -1.73 | 0.05377  | 0.010509 | 0.380879 | 0.133936 |
| MmugDNA.40228.1.S1_at   | MmugDNA.40228.1 | 7.53  | 8.32  | 0.21 | 0.82 | -1.73 | 0.140779 | 0.073371 | 0.508448 | 0.316469 |
| MmugDNA.40230.1.S1_at   | MmugDNA.40230.1 | 4.59  | 4.43  | 0.02 | 0.14 | 1.12  | 0.047329 | 0.047759 | 0.365873 | 0.26344  |
| MmugDNA.40232.1.S1_at   | MmugDNA.40232.1 | 5.7   | 5.65  | 0.18 | 0.67 | 1.04  | 0.340786 | 0.498589 | 0.662186 | 0.697641 |
| MmugDNA.40233.1.S1_at   | MmugDNA.40233.1 | 11.93 | 11.19 | 0.25 | 0.16 | 1.67  | 0.01515  | 0.030184 | 0.257529 | 0.215679 |
| MmugDNA.40236.1.S1_at   | MmugDNA.40236.1 | 10.25 | 9.44  | 0.21 | 0.26 | 1.75  | 0.022087 | 0.013198 | 0.28446  | 0.147385 |
| MmugDNA.40254.1.S1_at   | MmugDNA.40254.1 | 8.57  | 8.11  | 0.31 | 1.25 | 1.38  | 0.513566 | 0.626401 | 0.766403 | 0.77972  |
| MmugDNA.40258.1.S1_at   | MmugDNA.40258.1 | 11.26 | 10.68 | 0.23 | 0.5  | 1.5   | 0.055591 | 0.012483 | 0.384246 | 0.144302 |
| MmugDNA.40259.1.S1_at   | MmugDNA.40259.1 | 4.09  | 4.5   | 0.35 | 0.74 | -1.33 | 0.560407 | 0.462918 | 0.794218 | 0.674149 |
| MmugDNA.4026.1.S1_s_at  | MmugDNA.4026.1  | 9.75  | 9.98  | 0.46 | 0.3  | -1.17 | 0.190866 | 0.073761 | 0.553627 | 0.317123 |
| MmugDNA.40261.1.S1_at   | MmugDNA.40261.1 | 5.72  | 6     | 0.19 | 0.02 | -1.22 | 0.096349 | 0.05484  | 0.454857 | 0.279675 |
| MmugDNA.40264.1.S1_at   | MmugDNA.40264.1 | 11.66 | 11.79 | 0.11 | 0.06 | -1.1  | 0.688249 | 0.080419 | 0.860922 | 0.328057 |
| MmugDNA.40274.1.S1_at   | MmugDNA.40274.1 | 3.65  | 5.8   | 1.22 | 1.1  | -4.43 | 0.249517 | 0.166606 | 0.600196 | 0.443115 |
| MmugDNA.40274.1.S1_s_at | MmugDNA.40274.1 | 3.77  | 4.79  | 0.66 | 0.95 | -2.03 | 0.150955 | 0.139075 | 0.515667 | 0.412165 |
| MmugDNA.40283.1.S1_at   | MmugDNA.40283.1 | 4.45  | 4.56  | 0.04 | 0.28 | -1.08 | 0.513598 | 0.545641 | 0.766403 | 0.727579 |
| MmugDNA.40288.1.S1_at   | MmugDNA.40288.1 | 4.75  | 4.76  | 0.48 | 0.19 | -1    | 0.425077 | 0.241018 | 0.714956 | 0.511657 |
| MmugDNA.4029.1.S1_at    | MmugDNA.4029.1  | 13.05 | 12.83 | 0.06 | 0.19 | 1.17  | 0.111388 | 0.081303 | 0.473544 | 0.329355 |
| MmugDNA.40291.1.S1_at   | MmugDNA.40291.1 | 7.65  | 7.01  | 0.64 | 0.19 | 1.56  | 0.170516 | 0.148858 | 0.534277 | 0.42322  |
| MmugDNA.40292.1.S1_at   | MmugDNA.40292.1 | 10.69 | 9.95  | 0.16 | 0.23 | 1.67  | 0.009117 | 0.003297 | 0.222023 | 0.082571 |
| MmugDNA.40294.1.S1_at   | MmugDNA.40294.1 | 6.44  | 6.49  | 0.2  | 0.03 | -1.04 | 0.25233  | 0.236614 | 0.601282 | 0.50743  |
| MmugDNA.403.1.S1_s_at   | MmugDNA.403.1   | 8.63  | 9.34  | 0.33 | 1.16 | -1.63 | 0.980361 | 0.852694 | 0.992907 | 0.916254 |
| MmugDNA.40305.1.S1_at   | MmugDNA.40305.1 | 11.25 | 11.04 | 0.25 | 0.7  | 1.16  | 0.89986  | 0.878466 | 0.960044 | 0.930638 |
| MmugDNA.40307.1.S1_at   | MmugDNA.40307.1 | 6.08  | 6.07  | 0.1  | 0.08 | 1.01  | 0.367386 | 0.072077 | 0.67949  | 0.314519 |
| MmugDNA.40309.1.S1_at   | MmugDNA.40309.1 | 6.55  | 6.61  | 0.07 | 0.09 | -1.04 | 0.467313 | 0.749955 | 0.74068  | 0.85465  |
| MmugDNA.4031.1.S1_at    | MmugDNA.4031.1  | 10.53 | 11.07 | 0.08 | 0.65 | -1.46 | 0.430711 | 0.592982 | 0.718237 | 0.757985 |
| MmugDNA.40310.1.S1_at   | MmugDNA.40310.1 | 6.32  | 6.4   | 0.23 | 0.85 | -1.05 | 0.94246  | 0.270358 | 0.977979 | 0.535681 |
| MmugDNA.40311.1.S1_at   | MmugDNA.40311.1 | 6     | 6.15  | 0.05 | 0.14 | -1.11 | 0.129403 | 0.004671 | 0.495588 | 0.095314 |
| MmugDNA.40314.1.S1_at   | MmugDNA.40314.1 | 5.89  | 7.47  | 0.27 | 0.64 | -2.99 | 0.016765 | 0.024553 | 0.265281 | 0.196073 |
| MmugDNA.40315.1.S1_at   | MmugDNA.40315.1 | 5.89  | 6.05  | 0.13 | 0.22 | -1.12 | 0.476131 | 0.622884 | 0.746145 | 0.777391 |
| MmugDNA.40319.1.S1_at   | MmugDNA.40319.1 | 8.12  | 8.14  | 0.21 | 0.32 | -1.01 | 0.477747 | 0.656375 | 0.746913 | 0.799062 |
| MmugDNA.4032.1.S1_at    | MmugDNA.4032.1  | 11.93 | 12.51 | 0.38 | 0.24 | -1.49 | 0.253284 | 0.198514 | 0.6019   | 0.473391 |
| MmugDNA.40329.1.S1_at   | MmugDNA.40329.1 | 11.6  | 11.61 | 0.04 | 0.2  | -1    | 0.9419   | 0.895001 | 0.977821 | 0.940055 |
| MmugDNA.40331.1.S1_at   | MmugDNA.40331.1 | 8.97  | 8.19  | 0.19 | 0.3  | 1.72  | 0.009279 | 0.003287 | 0.223832 | 0.082551 |
| MmugDNA.40333.1.S1_at   | MmugDNA.40333.1 | 11.24 | 11.16 | 0.22 | 0.11 | 1.06  | 0.492714 | 0.569026 | 0.755881 | 0.742233 |
| MmugDNA.40334.1.S1_at   | MmugDNA.40334.1 | 6.2   | 6.52  | 0.21 | 0.11 | -1.25 | 0.230374 | 0.369151 | 0.587222 | 0.608669 |
| MmugDNA.40337.1.S1_at   | MmugDNA.40337.1 | 11.8  | 11.91 | 0.14 | 0.11 | -1.08 | 0.350641 | 0.166914 | 0.668568 | 0.443394 |
| MmugDNA.40338.1.S1_s_at | MmugDNA.40338.1 | 11.81 | 11.66 | 0.16 | 0.67 | 1.11  | 0.922923 | 0.709423 | 0.970083 | 0.831622 |

|                         |                 |       |       |      |      |       |          |          |          |          |
|-------------------------|-----------------|-------|-------|------|------|-------|----------|----------|----------|----------|
| MmugDNA.40357.1.S1_at   | MmugDNA.40357.1 | 5.27  | 5.54  | 0.63 | 0.42 | -1.2  | 0.887223 | 0.207037 | 0.954863 | 0.481115 |
| MmugDNA.40359.1.S1_at   | MmugDNA.40359.1 | 9.55  | 9.64  | 0.14 | 0.39 | -1.06 | 0.837939 | 0.923077 | 0.934549 | 0.956739 |
| MmugDNA.40361.1.S1_at   | MmugDNA.40361.1 | 12.08 | 12    | 0.16 | 0.16 | 1.05  | 0.34151  | 0.550638 | 0.662603 | 0.730605 |
| MmugDNA.40364.1.S1_at   | MmugDNA.40364.1 | 6.12  | 6.29  | 0.17 | 0.46 | -1.12 | 0.212706 | 0.153126 | 0.573067 | 0.428011 |
| MmugDNA.40365.1.S1_at   | MmugDNA.40365.1 | 3.28  | 3.27  | 0.14 | 0.03 | 1     | 0.815078 | 0.592939 | 0.924824 | 0.757956 |
| MmugDNA.40366.1.S1_at   | MmugDNA.40366.1 | 9.16  | 9.2   | 0.41 | 0.39 | -1.03 | 0.878775 | 0.085255 | 0.95134  | 0.337096 |
| MmugDNA.40371.1.S1_at   | MmugDNA.40371.1 | 7.17  | 6.56  | 0.05 | 0.34 | 1.52  | 0.097652 | 0.096527 | 0.456709 | 0.354096 |
| MmugDNA.40381.1.S1_at   | MmugDNA.40381.1 | 7.35  | 8.69  | 0.34 | 0.33 | -2.54 | 0.019384 | 0.067199 | 0.273874 | 0.305204 |
| MmugDNA.40383.1.S1_at   | MmugDNA.40383.1 | 5.41  | 4.5   | 0.51 | 0.45 | 1.89  | 0.087819 | 0.049472 | 0.442117 | 0.267334 |
| MmugDNA.40384.1.S1_at   | MmugDNA.40384.1 | 9.07  | 8.78  | 0.63 | 0.66 | 1.22  | 0.344909 | 0.269878 | 0.664855 | 0.53515  |
| MmugDNA.40386.1.S1_at   | MmugDNA.40386.1 | 6.3   | 7.1   | 0.15 | 0.38 | -1.74 | 0.038668 | 0.027885 | 0.345054 | 0.208455 |
| MmugDNA.40388.1.S1_at   | MmugDNA.40388.1 | 7.06  | 7.02  | 0.04 | 0.09 | 1.03  | 0.907043 | 0.097361 | 0.963023 | 0.35507  |
| MmugDNA.40391.1.S1_at   | MmugDNA.40391.1 | 7.05  | 6.99  | 0.28 | 0.14 | 1.04  | 0.627291 | 0.505479 | 0.830029 | 0.702161 |
| MmugDNA.40392.1.S1_at   | MmugDNA.40392.1 | 10.61 | 5.35  | 0.51 | 0.79 | 38.43 | 0.000635 | 0.000229 | 0.136818 | 0.032385 |
| MmugDNA.40394.1.S1_at   | MmugDNA.40394.1 | 10.16 | 9.63  | 0.51 | 0.22 | 1.44  | 0.275281 | 0.341885 | 0.617789 | 0.587972 |
| MmugDNA.40397.1.S1_at   | MmugDNA.40397.1 | 11.11 | 11.84 | 0.41 | 0.46 | -1.66 | 0.115367 | 0.067247 | 0.478773 | 0.30531  |
| MmugDNA.40400.1.S1_at   | MmugDNA.40400.1 | 5.28  | 5.6   | 0.07 | 0.15 | -1.24 | 0.021654 | 0.091906 | 0.283214 | 0.347243 |
| MmugDNA.40403.1.S1_at   | MmugDNA.40403.1 | 11.24 | 10.84 | 0.03 | 0.33 | 1.32  | 0.085788 | 0.077133 | 0.439856 | 0.322675 |
| MmugDNA.40405.1.S1_at   | MmugDNA.40405.1 | 4.42  | 4.88  | 0.13 | 0.45 | -1.37 | 0.515093 | 0.202315 | 0.767272 | 0.476691 |
| MmugDNA.40406.1.S1_at   | MmugDNA.40406.1 | 6.45  | 6.61  | 0.14 | 0.21 | -1.12 | 0.435311 | 0.596273 | 0.721198 | 0.759456 |
| MmugDNA.40407.1.S1_at   | MmugDNA.40407.1 | 7.89  | 7.87  | 0.74 | 0.43 | 1.01  | 0.454163 | 0.51005  | 0.733184 | 0.704549 |
| MmugDNA.40408.1.S1_at   | MmugDNA.40408.1 | 3.49  | 3.61  | 0.21 | 0.03 | -1.09 | 0.229754 | 0.072649 | 0.586987 | 0.315579 |
| MmugDNA.40410.1.S1_at   | MmugDNA.40410.1 | 3.92  | 3.99  | 0.13 | 0.21 | -1.05 | 0.238136 | 0.290112 | 0.591535 | 0.551128 |
| MmugDNA.40417.1.S1_at   | MmugDNA.40417.1 | 5.79  | 5.79  | 0.16 | 0.1  | 1     | 0.699591 | 0.121337 | 0.866955 | 0.390364 |
| MmugDNA.4042.1.S1_at    | MmugDNA.4042.1  | 8.97  | 8.7   | 0.01 | 0.23 | 1.2   | 0.408739 | 0.225613 | 0.705493 | 0.498155 |
| MmugDNA.40424.1.S1_at   | MmugDNA.40424.1 | 11.03 | 10.95 | 0.12 | 0.32 | 1.06  | 0.209601 | 0.062218 | 0.570957 | 0.296307 |
| MmugDNA.40427.1.S1_at   | MmugDNA.40427.1 | 12.13 | 11.85 | 0.25 | 0.13 | 1.21  | 0.199938 | 0.001365 | 0.562997 | 0.056835 |
| MmugDNA.40429.1.S1_at   | MmugDNA.40429.1 | 9.95  | 11.09 | 0.43 | 0.18 | -2.21 | 0.020053 | 0.011453 | 0.276484 | 0.13846  |
| MmugDNA.40431.1.S1_at   | MmugDNA.40431.1 | 7.75  | 7.27  | 0.09 | 0.09 | 1.4   | 0.004431 | 0.001797 | 0.183441 | 0.063638 |
| MmugDNA.40438.1.S1_at   | MmugDNA.40438.1 | 5.74  | 5.81  | 0.5  | 0.54 | -1.05 | 0.629575 | 0.728605 | 0.831563 | 0.843115 |
| MmugDNA.40449.1.S1_at   | MmugDNA.40449.1 | 6.35  | 6.96  | 0.19 | 0.66 | -1.52 | 0.154578 | 0.190172 | 0.519173 | 0.465826 |
| MmugDNA.40451.1.S1_at   | MmugDNA.40451.1 | 9.71  | 9.78  | 0.22 | 0.59 | -1.05 | 0.804446 | 0.279514 | 0.919555 | 0.543055 |
| MmugDNA.40456.1.S1_at   | MmugDNA.40456.1 | 6.25  | 6.56  | 0.22 | 0.17 | -1.24 | 0.169687 | 0.284995 | 0.533894 | 0.547087 |
| MmugDNA.40457.1.S1_at   | MmugDNA.40457.1 | 11.74 | 11.48 | 0.14 | 0.09 | 1.2   | 0.019119 | 0.007901 | 0.273018 | 0.11849  |
| MmugDNA.40459.1.S1_at   | MmugDNA.40459.1 | 3.5   | 3.49  | 0.14 | 0.04 | 1     | 0.868846 | 0.259616 | 0.947765 | 0.526525 |
| MmugDNA.40462.1.S1_at   | MmugDNA.40462.1 | 11.29 | 11.11 | 0.17 | 0.31 | 1.13  | 0.528979 | 0.68177  | 0.775777 | 0.81413  |
| MmugDNA.40470.1.S1_at   | MmugDNA.40470.1 | 4.61  | 5.19  | 0.21 | 0.58 | -1.5  | 0.143658 | 0.159383 | 0.510312 | 0.435442 |
| MmugDNA.40481.1.S1_at   | MmugDNA.40481.1 | 11.92 | 11.91 | 0.16 | 0.1  | 1.01  | 0.620481 | 0.212148 | 0.826026 | 0.486036 |
| MmugDNA.40482.1.S1_at   | MmugDNA.40482.1 | 3.99  | 4.08  | 0.24 | 0.17 | -1.07 | 0.760496 | 0.629075 | 0.899008 | 0.781597 |
| MmugDNA.40485.1.S1_x_at | MmugDNA.40485.1 | 10.77 | 10.46 | 0.4  | 0.18 | 1.24  | 0.217518 | 0.299691 | 0.577141 | 0.558037 |
| MmugDNA.40486.1.S1_s_at | MmugDNA.40486.1 | 7.76  | 7.88  | 0.23 | 0.27 | -1.09 | 0.212534 | 0.22677  | 0.572826 | 0.499176 |



|                         |                 |       |       |      |      |       |          |          |          |          |
|-------------------------|-----------------|-------|-------|------|------|-------|----------|----------|----------|----------|
| MmugDNA.40487.1.S1_at   | MmugDNA.40487.1 | 5.45  | 5.68  | 0.17 | 0.12 | -1.17 | 0.254445 | 0.164351 | 0.602414 | 0.44061  |
| MmugDNA.40488.1.S1_at   | MmugDNA.40488.1 | 3.11  | 3.5   | 0.24 | 0.34 | -1.31 | 0.760764 | 0.003142 | 0.899135 | 0.081652 |
| MmugDNA.40489.1.S1_at   | MmugDNA.40489.1 | 9.68  | 9.73  | 0.46 | 0.1  | -1.04 | 0.845504 | 0.334349 | 0.93804  | 0.582352 |
| MmugDNA.40492.1.S1_at   | MmugDNA.40492.1 | 3.68  | 3.59  | 0.14 | 0.08 | 1.07  | 0.516428 | 0.244001 | 0.768067 | 0.514069 |
| MmugDNA.40495.1.S1_at   | MmugDNA.40495.1 | 4.88  | 4.95  | 0.2  | 0.1  | -1.05 | 0.911809 | 0.789336 | 0.965151 | 0.878316 |
| MmugDNA.40504.1.S1_at   | MmugDNA.40504.1 | 11.26 | 11.01 | 0.37 | 0.55 | 1.19  | 0.335659 | 0.231242 | 0.659165 | 0.502925 |
| MmugDNA.40506.1.S1_at   | MmugDNA.40506.1 | 10.51 | 10.15 | 0.09 | 0.18 | 1.28  | 0.116245 | 0.088277 | 0.479808 | 0.341721 |
| MmugDNA.40509.1.S1_at   | MmugDNA.40509.1 | 11.24 | 10.76 | 0.27 | 0.42 | 1.4   | 0.175159 | 0.210913 | 0.538831 | 0.484934 |
| MmugDNA.40512.1.S1_at   | MmugDNA.40512.1 | 10.25 | 10.52 | 0.16 | 0.13 | -1.21 | 0.418085 | 0.033804 | 0.711128 | 0.227489 |
| MmugDNA.40513.1.S1_at   | MmugDNA.40513.1 | 6.04  | 6.32  | 0.05 | 0.1  | -1.21 | 0.026287 | 0.030547 | 0.302386 | 0.216711 |
| MmugDNA.4052.1.S1_at    | MmugDNA.4052.1  | 6.57  | 7.28  | 0.93 | 1.29 | -1.63 | 0.445618 | 0.391765 | 0.727844 | 0.625301 |
| MmugDNA.40527.1.S1_at   | MmugDNA.40527.1 | 10.61 | 10.7  | 0.32 | 0.34 | -1.06 | 0.747581 | 0.827728 | 0.891945 | 0.901127 |
| MmugDNA.40531.1.A1_at   | MmugDNA.40531.1 | 5.8   | 6.1   | 0.09 | 0.28 | -1.23 | 0.168751 | 0.201523 | 0.533113 | 0.476036 |
| MmugDNA.40531.1.S1_at   | MmugDNA.40531.1 | 6.36  | 6.34  | 0.13 | 0.08 | 1.01  | 0.883443 | 0.594741 | 0.953146 | 0.758628 |
| MmugDNA.40532.1.S1_at   | MmugDNA.40532.1 | 5.11  | 5.58  | 0.11 | 0.26 | -1.38 | 0.05444  | 0.052586 | 0.381851 | 0.274848 |
| MmugDNA.40536.1.S1_at   | MmugDNA.40536.1 | 9.79  | 9.93  | 0.17 | 0.32 | -1.1  | 0.438501 | 0.344886 | 0.72304  | 0.590208 |
| MmugDNA.40551.1.S1_s_at | MmugDNA.40551.1 | 5.25  | 5.23  | 0.15 | 0.09 | 1.02  | 0.9629   | 0.470859 | 0.985684 | 0.679124 |
| MmugDNA.40551.1.S1_x_at | MmugDNA.40551.1 | 3.81  | 3.82  | 0.15 | 0.22 | -1    | 0.521012 | 0.612326 | 0.771067 | 0.76996  |
| MmugDNA.40552.1.S1_at   | MmugDNA.40552.1 | 10.63 | 10.35 | 0.21 | 0.79 | 1.22  | 0.932389 | 0.48162  | 0.973802 | 0.686557 |
| MmugDNA.40554.1.S1_at   | MmugDNA.40554.1 | 4.5   | 4.33  | 0.07 | 0.28 | 1.13  | 0.945009 | 0.928244 | 0.97903  | 0.959217 |
| MmugDNA.40569.1.S1_at   | MmugDNA.40569.1 | 11.03 | 10.98 | 0.01 | 0.04 | 1.03  | 0.041546 | 0.177143 | 0.352031 | 0.453611 |
| MmugDNA.40572.1.S1_at   | MmugDNA.40572.1 | 11.98 | 13.33 | 0.18 | 1.38 | -2.54 | 0.377843 | 0.417344 | 0.686109 | 0.642147 |
| MmugDNA.40581.1.S1_at   | MmugDNA.40581.1 | 11.64 | 11.42 | 0.1  | 0.15 | 1.16  | 0.19686  | 0.12408  | 0.559876 | 0.394389 |
| MmugDNA.40584.1.S1_at   | MmugDNA.40584.1 | 9.01  | 7.93  | 0.26 | 0.29 | 2.11  | 0.016765 | 0.010222 | 0.265281 | 0.132544 |
| MmugDNA.4059.1.S1_at    | MmugDNA.4059.1  | 3.25  | 3.09  | 0.3  | 0.04 | 1.11  | 0.967845 | 0.78575  | 0.987919 | 0.875936 |
| MmugDNA.40592.1.S1_at   | MmugDNA.40592.1 | 5.96  | 6.73  | 0.26 | 0.1  | -1.7  | 0.007853 | 0.002897 | 0.213677 | 0.079107 |
| MmugDNA.40598.1.S1_at   | MmugDNA.40598.1 | 6.7   | 8.76  | 0.66 | 1.7  | -4.17 | 0.195597 | 0.245396 | 0.558901 | 0.515213 |
| MmugDNA.406.1.S1_s_at   | MmugDNA.406.1   | 14.02 | 13.96 | 0.06 | 0.08 | 1.04  | 0.31809  | 0.401799 | 0.64802  | 0.631068 |
| MmugDNA.40603.1.S1_x_at | MmugDNA.40603.1 | 11.11 | 10.93 | 0.62 | 0.16 | 1.13  | 0.26801  | 0.300694 | 0.612875 | 0.558959 |
| MmugDNA.40607.1.S1_at   | MmugDNA.40607.1 | 4.56  | 4.33  | 0.3  | 0.06 | 1.17  | 0.630735 | 0.769946 | 0.832305 | 0.866376 |
| MmugDNA.40610.1.S1_at   | MmugDNA.40610.1 | 8.04  | 7.86  | 0.28 | 0.82 | 1.13  | 0.263825 | 0.056337 | 0.609674 | 0.283348 |
| MmugDNA.40614.1.S1_at   | MmugDNA.40614.1 | 8.97  | 8.15  | 0.23 | 0.6  | 1.76  | 0.418875 | 0.065303 | 0.711627 | 0.301249 |
| MmugDNA.40615.1.S1_at   | MmugDNA.40615.1 | 10.74 | 10.91 | 0.08 | 0.23 | -1.13 | 0.408503 | 0.454512 | 0.705205 | 0.668664 |
| MmugDNA.40616.1.S1_at   | MmugDNA.40616.1 | 6.82  | 6.93  | 0.1  | 0.12 | -1.09 | 0.493176 | 0.256954 | 0.756013 | 0.524777 |
| MmugDNA.40623.1.S1_at   | MmugDNA.40623.1 | 8.14  | 9.67  | 0.56 | 0.72 | -2.88 | 0.036343 | 0.02948  | 0.339201 | 0.213368 |
| MmugDNA.40625.1.S1_at   | MmugDNA.40625.1 | 10.41 | 11.87 | 0.25 | 0.56 | -2.76 | 0.014744 | 0.006968 | 0.254893 | 0.112743 |
| MmugDNA.40626.1.S1_at   | MmugDNA.40626.1 | 3.55  | 4.25  | 0.14 | 0.49 | -1.63 | 0.029748 | 0.018182 | 0.31528  | 0.169673 |
| MmugDNA.40628.1.S1_at   | MmugDNA.40628.1 | 7.8   | 7.87  | 0.11 | 0.36 | -1.04 | 0.969121 | 0.127922 | 0.98825  | 0.398878 |
| MmugDNA.40630.1.S1_at   | MmugDNA.40630.1 | 5.17  | 4.51  | 0.35 | 0.23 | 1.59  | 0.0657   | 0.058734 | 0.404984 | 0.28904  |
| MmugDNA.40633.1.S1_at   | MmugDNA.40633.1 | 8.5   | 7.95  | 0.22 | 0.32 | 1.47  | 0.057324 | 0.042798 | 0.387873 | 0.251394 |
| MmugDNA.40640.1.S1_at   | MmugDNA.40640.1 | 11.06 | 10.87 | 0.21 | 0.38 | 1.15  | 0.298764 | 0.153164 | 0.634253 | 0.428011 |

|                         |                 |       |       |      |      |       |          |          |          |          |
|-------------------------|-----------------|-------|-------|------|------|-------|----------|----------|----------|----------|
| MmugDNA.40644.1.S1_at   | MmugDNA.40644.1 | 11.98 | 11.73 | 0.04 | 0.05 | 1.19  | 0.003579 | 0.000459 | 0.179515 | 0.038572 |
| MmugDNA.40645.1.S1_at   | MmugDNA.40645.1 | 6.62  | 6.3   | 0.1  | 0.16 | 1.24  | 0.031929 | 0.023872 | 0.323433 | 0.193495 |
| MmugDNA.40647.1.S1_at   | MmugDNA.40647.1 | 5.98  | 5.98  | 0.29 | 0.43 | -1    | 0.895462 | 0.803022 | 0.958155 | 0.886557 |
| MmugDNA.40648.1.S1_at   | MmugDNA.40648.1 | 9.63  | 9.35  | 0.27 | 0.69 | 1.22  | 0.483257 | 0.197982 | 0.749882 | 0.472936 |
| MmugDNA.40649.1.S1_at   | MmugDNA.40649.1 | 9.67  | 10.6  | 0.26 | 0.4  | -1.92 | 0.016501 | 0.021794 | 0.264265 | 0.184765 |
| MmugDNA.40661.1.S1_at   | MmugDNA.40661.1 | 8.54  | 8.76  | 0.09 | 0.1  | -1.16 | 0.066548 | 0.041328 | 0.406564 | 0.247995 |
| MmugDNA.40662.1.S1_at   | MmugDNA.40662.1 | 5.68  | 8.18  | 0.87 | 0.86 | -5.69 | 0.023941 | 0.016269 | 0.293447 | 0.161649 |
| MmugDNA.40663.1.S1_at   | MmugDNA.40663.1 | 11.77 | 11.57 | 0.59 | 0.26 | 1.16  | 0.666436 | 0.717625 | 0.850439 | 0.836506 |
| MmugDNA.40668.1.S1_at   | MmugDNA.40668.1 | 11.91 | 11.25 | 0.13 | 0.33 | 1.58  | 0.017516 | 0.007279 | 0.267445 | 0.114488 |
| MmugDNA.40669.1.S1_at   | MmugDNA.40669.1 | 5.28  | 5.66  | 0.4  | 0.45 | -1.3  | 0.912843 | 0.658921 | 0.965477 | 0.800473 |
| MmugDNA.40670.1.S1_at   | MmugDNA.40670.1 | 8.41  | 7.67  | 0.37 | 0.48 | 1.66  | 0.089242 | 0.112216 | 0.444908 | 0.377537 |
| MmugDNA.40671.1.S1_at   | MmugDNA.40671.1 | 6.58  | 6.61  | 0.06 | 0.26 | -1.02 | 0.815532 | 0.94784  | 0.925055 | 0.970378 |
| MmugDNA.40672.1.S1_at   | MmugDNA.40672.1 | 6.72  | 7.04  | 0.11 | 0.23 | -1.25 | 0.065775 | 0.032508 | 0.405134 | 0.223271 |
| MmugDNA.40673.1.S1_at   | MmugDNA.40673.1 | 3.55  | 3.63  | 0.17 | 0.11 | -1.05 | 0.507358 | 0.470074 | 0.762788 | 0.678572 |
| MmugDNA.40686.1.S1_at   | MmugDNA.40686.1 | 3.39  | 3.42  | 0.14 | 0.13 | -1.02 | 0.86311  | 0.865927 | 0.944982 | 0.923766 |
| MmugDNA.40688.1.S1_at   | MmugDNA.40688.1 | 8.42  | 7.54  | 0.07 | 0.08 | 1.84  | 0.000144 | 0.000015 | 0.112653 | 0.018485 |
| MmugDNA.40690.1.S1_at   | MmugDNA.40690.1 | 7.89  | 7.12  | 0.09 | 0.37 | 1.7   | 0.031795 | 0.02045  | 0.32289  | 0.179597 |
| MmugDNA.40693.1.S1_s_at | MmugDNA.40693.1 | 6.03  | 6.06  | 0.09 | 0.27 | -1.02 | 0.476749 | 0.352479 | 0.746293 | 0.595743 |
| MmugDNA.40703.1.S1_at   | MmugDNA.40703.1 | 3.28  | 3.31  | 0.2  | 0.1  | -1.02 | 0.781313 | 0.754302 | 0.908722 | 0.857018 |
| MmugDNA.40704.1.S1_at   | MmugDNA.40704.1 | 9.09  | 9.35  | 0.23 | 0.15 | -1.19 | 0.039824 | 0.008883 | 0.34828  | 0.124698 |
| MmugDNA.40707.1.S1_at   | MmugDNA.40707.1 | 11.13 | 12.22 | 0.1  | 0.75 | -2.13 | 0.201248 | 0.251521 | 0.563892 | 0.520274 |
| MmugDNA.40707.1.S1_s_at | MmugDNA.40707.1 | 9.65  | 11.07 | 0.14 | 0.95 | -2.68 | 0.211487 | 0.254305 | 0.572267 | 0.522613 |
| MmugDNA.40709.1.S1_at   | MmugDNA.40709.1 | 7.18  | 6.52  | 0.31 | 0.99 | 1.58  | 0.757725 | 0.836257 | 0.897317 | 0.906346 |
| MmugDNA.40711.1.S1_at   | MmugDNA.40711.1 | 5     | 5.09  | 0.07 | 0.11 | -1.06 | 0.232784 | 0.019899 | 0.587881 | 0.177357 |
| MmugDNA.40714.1.S1_at   | MmugDNA.40714.1 | 10.87 | 12.16 | 0.38 | 0.21 | -2.46 | 0.011308 | 0.017987 | 0.235384 | 0.169137 |
| MmugDNA.40717.1.S1_at   | MmugDNA.40717.1 | 8.99  | 9.33  | 0.3  | 0.38 | -1.27 | 0.214511 | 0.213527 | 0.575054 | 0.48741  |
| MmugDNA.40718.1.S1_at   | MmugDNA.40718.1 | 5.34  | 5.21  | 0.17 | 0.26 | 1.1   | 0.438491 | 0.446336 | 0.72304  | 0.662773 |
| MmugDNA.40719.1.S1_at   | MmugDNA.40719.1 | 8.07  | 8.68  | 0.12 | 0.38 | -1.53 | 0.07025  | 0.035311 | 0.413849 | 0.232207 |
| MmugDNA.40720.1.S1_at   | MmugDNA.40720.1 | 4.46  | 4.63  | 0.16 | 0.19 | -1.13 | 0.274842 | 0.203218 | 0.617628 | 0.477415 |
| MmugDNA.40722.1.S1_at   | MmugDNA.40722.1 | 10.91 | 9.85  | 0.1  | 0.6  | 2.07  | 0.056583 | 0.04028  | 0.386709 | 0.245902 |
| MmugDNA.4073.1.S1_at    | MmugDNA.4073.1  | 10.1  | 9.52  | 0.54 | 0.23 | 1.49  | 0.1446   | 0.179422 | 0.511015 | 0.455908 |
| MmugDNA.40734.1.S1_at   | MmugDNA.40734.1 | 5.81  | 5.99  | 0.17 | 0.62 | -1.14 | 0.212886 | 0.206897 | 0.57334  | 0.481052 |
| MmugDNA.40737.1.S1_s_at | MmugDNA.40737.1 | 13.57 | 13.6  | 0.27 | 0.27 | -1.02 | 0.979468 | 0.699399 | 0.99244  | 0.825344 |
| MmugDNA.40739.1.S1_at   | MmugDNA.40739.1 | 12.39 | 12.42 | 0.11 | 0.13 | -1.03 | 0.367994 | 0.382574 | 0.679739 | 0.61876  |
| MmugDNA.4074.1.S1_at    | MmugDNA.4074.1  | 10.66 | 10.01 | 0.15 | 0.22 | 1.57  | 0.020947 | 0.018308 | 0.28163  | 0.170154 |
| MmugDNA.40742.1.S1_at   | MmugDNA.40742.1 | 11.85 | 11.09 | 0.14 | 0.28 | 1.69  | 0.005577 | 0.001016 | 0.191807 | 0.050814 |
| MmugDNA.40743.1.S1_at   | MmugDNA.40743.1 | 7.07  | 3.94  | 1.09 | 3.09 | 8.79  | 0.421661 | 0.189942 | 0.713202 | 0.4655   |
| MmugDNA.40744.1.S1_at   | MmugDNA.40744.1 | 4.77  | 4.59  | 0.14 | 0.09 | 1.13  | 0.142739 | 0.675531 | 0.509765 | 0.810383 |
| MmugDNA.40745.1.S1_at   | MmugDNA.40745.1 | 7.68  | 8.22  | 0.23 | 1.08 | -1.45 | 0.48064  | 0.370187 | 0.748535 | 0.609371 |
| MmugDNA.40753.1.S1_at   | MmugDNA.40753.1 | 11.8  | 11.07 | 0.15 | 0.18 | 1.66  | 0.011276 | 0.004561 | 0.235343 | 0.094371 |
| MmugDNA.40760.1.S1_at   | MmugDNA.40760.1 | 7.95  | 6.91  | 0.27 | 0.41 | 2.06  | 0.018115 | 0.017824 | 0.268849 | 0.168645 |

|                         |                 |       |       |      |      |        |          |          |          |          |
|-------------------------|-----------------|-------|-------|------|------|--------|----------|----------|----------|----------|
| MmugDNA.40763.1.S1_at   | MmugDNA.40763.1 | 6.27  | 6.3   | 0.13 | 0.02 | -1.02  | 0.762775 | 0.672443 | 0.900031 | 0.808568 |
| MmugDNA.40764.1.S1_at   | MmugDNA.40764.1 | 4.87  | 6.53  | 1.38 | 1.46 | -3.16  | 0.2383   | 0.205842 | 0.591578 | 0.480094 |
| MmugDNA.40764.1.S1_s_at | MmugDNA.40764.1 | 6.71  | 7.9   | 0.54 | 0.66 | -2.28  | 0.090099 | 0.063431 | 0.445566 | 0.298441 |
| MmugDNA.40765.1.S1_at   | MmugDNA.40765.1 | 10.99 | 11.1  | 0.06 | 0.03 | -1.08  | 0.117965 | 0.026971 | 0.482063 | 0.205423 |
| MmugDNA.4077.1.S1_at    | MmugDNA.4077.1  | 9.31  | 7.85  | 0.33 | 0.49 | 2.75   | 0.045563 | 0.028129 | 0.36126  | 0.209306 |
| MmugDNA.40770.1.S1_at   | MmugDNA.40770.1 | 7.87  | 7.93  | 0.07 | 0.33 | -1.04  | 0.269577 | 0.089807 | 0.614187 | 0.34404  |
| MmugDNA.40798.1.S1_at   | MmugDNA.40798.1 | 4.12  | 4.09  | 0.04 | 0.28 | 1.02   | 0.692033 | 0.709602 | 0.863204 | 0.831691 |
| MmugDNA.4080.1.S1_at    | MmugDNA.4080.1  | 12.74 | 12.31 | 0.08 | 0.36 | 1.34   | 0.461142 | 0.308569 | 0.737457 | 0.564575 |
| MmugDNA.40800.1.S1_at   | MmugDNA.40800.1 | 5.24  | 5.24  | 0.04 | 0.06 | -1     | 0.234345 | 0.300489 | 0.588656 | 0.55882  |
| MmugDNA.40802.1.S1_at   | MmugDNA.40802.1 | 6.72  | 6.73  | 0.18 | 0.05 | -1.01  | 0.775422 | 0.940764 | 0.905735 | 0.966468 |
| MmugDNA.40803.1.S1_at   | MmugDNA.40803.1 | 5.29  | 5.4   | 0.05 | 0.24 | -1.08  | 0.206578 | 0.10902  | 0.568816 | 0.372792 |
| MmugDNA.40811.1.S1_at   | MmugDNA.40811.1 | 7.76  | 7.77  | 0.15 | 0.37 | -1.01  | 0.580357 | 0.393645 | 0.804567 | 0.626522 |
| MmugDNA.40814.1.S1_at   | MmugDNA.40814.1 | 10.36 | 10.68 | 0.19 | 0.32 | -1.25  | 0.155316 | 0.29307  | 0.520164 | 0.552978 |
| MmugDNA.40816.1.S1_at   | MmugDNA.40816.1 | 5.28  | 9.52  | 1    | 3.11 | -18.94 | 0.160277 | 0.18761  | 0.525269 | 0.463631 |
| MmugDNA.40819.1.S1_at   | MmugDNA.40819.1 | 6.42  | 6.63  | 0.22 | 0.19 | -1.16  | 0.309747 | 0.4193   | 0.641716 | 0.643445 |
| MmugDNA.4084.1.S1_at    | MmugDNA.4084.1  | 6.31  | 6.42  | 0.27 | 0.11 | -1.07  | 0.686553 | 0.870522 | 0.85983  | 0.926446 |
| MmugDNA.40846.1.S1_at   | MmugDNA.40846.1 | 9.17  | 8.05  | 0.11 | 1.41 | 2.18   | 0.732134 | 0.5438   | 0.884251 | 0.726362 |
| MmugDNA.4085.1.S1_at    | MmugDNA.4085.1  | 11.24 | 10.73 | 0.2  | 0.01 | 1.42   | 0.010571 | 0.005276 | 0.230404 | 0.100659 |
| MmugDNA.40855.1.S1_s_at | MmugDNA.40855.1 | 8.61  | 8.54  | 0.16 | 0.28 | 1.05   | 0.644396 | 0.774446 | 0.839747 | 0.868766 |
| MmugDNA.40858.1.S1_at   | MmugDNA.40858.1 | 3.19  | 3.05  | 0.01 | 0.14 | 1.1    | 0.517488 | 0.548349 | 0.768822 | 0.729086 |
| MmugDNA.40868.1.S1_at   | MmugDNA.40868.1 | 4.99  | 5.14  | 0.15 | 0.07 | -1.1   | 0.666591 | 0.294461 | 0.85048  | 0.554212 |
| MmugDNA.40871.1.S1_at   | MmugDNA.40871.1 | 3.36  | 3.36  | 0.19 | 0.12 | 1      | 0.423513 | 0.469224 | 0.71414  | 0.678155 |
| MmugDNA.40872.1.S1_at   | MmugDNA.40872.1 | 8.95  | 7.35  | 0.27 | 0.76 | 3.03   | 0.036115 | 0.023767 | 0.338812 | 0.193002 |
| MmugDNA.40876.1.S1_at   | MmugDNA.40876.1 | 8.8   | 8.56  | 0.11 | 0.32 | 1.19   | 0.183888 | 0.23524  | 0.547947 | 0.50629  |
| MmugDNA.4088.1.S1_at    | MmugDNA.4088.1  | 7.38  | 7.35  | 0.54 | 0.5  | 1.02   | 0.828626 | 0.958064 | 0.930484 | 0.976273 |
| MmugDNA.40882.1.S1_at   | MmugDNA.40882.1 | 9.62  | 9.18  | 0.07 | 0.33 | 1.36   | 0.207413 | 0.307465 | 0.56957  | 0.563734 |
| MmugDNA.40885.1.S1_at   | MmugDNA.40885.1 | 3.28  | 3.32  | 0.1  | 0.2  | -1.03  | 0.538508 | 0.422565 | 0.780615 | 0.645762 |
| MmugDNA.40886.1.S1_at   | MmugDNA.40886.1 | 5.11  | 5.01  | 0.13 | 0.09 | 1.07   | 0.651388 | 0.169995 | 0.843142 | 0.446725 |
| MmugDNA.4089.1.S1_at    | MmugDNA.4089.1  | 9.98  | 9.88  | 0.1  | 0.43 | 1.07   | 0.92896  | 0.664921 | 0.972607 | 0.803709 |
| MmugDNA.40893.1.S1_at   | MmugDNA.40893.1 | 4.54  | 5.1   | 0.25 | 0.18 | -1.47  | 0.028631 | 0.013743 | 0.312031 | 0.150134 |
| MmugDNA.40899.1.S1_at   | MmugDNA.40899.1 | 6.59  | 6.47  | 0.36 | 0.27 | 1.09   | 0.626123 | 0.795447 | 0.829387 | 0.882189 |
| MmugDNA.4090.1.S1_at    | MmugDNA.4090.1  | 6.5   | 6.35  | 0.95 | 1.01 | 1.1    | 0.898405 | 0.503053 | 0.959401 | 0.700559 |
| MmugDNA.40909.1.S1_at   | MmugDNA.40909.1 | 4.78  | 4.74  | 0.2  | 0.8  | 1.03   | 0.556949 | 0.598875 | 0.792226 | 0.761193 |
| MmugDNA.4091.1.S1_at    | MmugDNA.4091.1  | 10.98 | 10.7  | 0.18 | 0.14 | 1.22   | 0.184553 | 0.0985   | 0.548202 | 0.356636 |
| MmugDNA.40917.1.S1_at   | MmugDNA.40917.1 | 5.68  | 5.74  | 0.01 | 0.1  | -1.04  | 0.319285 | 0.585415 | 0.648794 | 0.752846 |
| MmugDNA.4092.1.S1_at    | MmugDNA.4092.1  | 8.67  | 8.3   | 0.39 | 0.19 | 1.29   | 0.097478 | 0.021718 | 0.456478 | 0.184333 |
| MmugDNA.4092.1.S1_s_at  | MmugDNA.4092.1  | 8.56  | 8.54  | 0.29 | 0.08 | 1.01   | 0.255463 | 0.118436 | 0.603226 | 0.386431 |
| MmugDNA.40922.1.S1_at   | MmugDNA.40922.1 | 10.71 | 10.97 | 0.24 | 0.25 | -1.2   | 0.272316 | 0.148435 | 0.616016 | 0.423007 |
| MmugDNA.40926.1.S1_at   | MmugDNA.40926.1 | 5.7   | 5.81  | 0.25 | 0.06 | -1.08  | 0.592303 | 0.54524  | 0.810875 | 0.727441 |
| MmugDNA.4093.1.S1_at    | MmugDNA.4093.1  | 6.74  | 7.1   | 0.17 | 0.17 | -1.28  | 0.126948 | 0.176559 | 0.493136 | 0.452965 |
| MmugDNA.40937.1.S1_at   | MmugDNA.40937.1 | 10.19 | 10.42 | 0.2  | 0.24 | -1.17  | 0.885328 | 0.845014 | 0.954051 | 0.911799 |

|                         |                 |       |       |      |      |        |          |          |          |          |
|-------------------------|-----------------|-------|-------|------|------|--------|----------|----------|----------|----------|
| MmugDNA.40943.1.S1_at   | MmugDNA.40943.1 | 2.79  | 2.91  | 0.1  | 0.09 | -1.09  | 0.303582 | 0.131963 | 0.63777  | 0.404024 |
| MmugDNA.40945.1.S1_at   | MmugDNA.40945.1 | 11.27 | 11.88 | 0.03 | 0.42 | -1.53  | 0.037471 | 0.027867 | 0.3415   | 0.208453 |
| MmugDNA.40954.1.S1_at   | MmugDNA.40954.1 | 6.14  | 9.4   | 1.13 | 2.4  | -9.58  | 0.205526 | 0.150449 | 0.568054 | 0.424978 |
| MmugDNA.40954.1.S1_x_at | MmugDNA.40954.1 | 5.77  | 9.38  | 1.31 | 2.35 | -12.26 | 0.181661 | 0.130147 | 0.546264 | 0.401835 |
| MmugDNA.40957.1.S1_at   | MmugDNA.40957.1 | 4.11  | 4.22  | 0.06 | 0.05 | -1.07  | 0.137116 | 0.115628 | 0.504356 | 0.382714 |
| MmugDNA.40962.1.S1_at   | MmugDNA.40962.1 | 11.89 | 10.28 | 0.47 | 0.6  | 3.06   | 0.01804  | 0.025336 | 0.268431 | 0.199522 |
| MmugDNA.40973.1.S1_at   | MmugDNA.40973.1 | 11.27 | 11    | 0.09 | 0.26 | 1.21   | 0.162627 | 0.108026 | 0.526897 | 0.37124  |
| MmugDNA.40975.1.S1_at   | MmugDNA.40975.1 | 9.3   | 9.11  | 0.32 | 0.2  | 1.14   | 0.633427 | 0.277868 | 0.833692 | 0.541664 |
| MmugDNA.40977.1.S1_at   | MmugDNA.40977.1 | 10.43 | 9.66  | 0.16 | 0.7  | 1.71   | 0.141652 | 0.142576 | 0.509159 | 0.416239 |
| MmugDNA.40979.1.S1_at   | MmugDNA.40979.1 | 10.7  | 10.55 | 0.24 | 0.65 | 1.11   | 0.484327 | 0.630228 | 0.750299 | 0.782181 |
| MmugDNA.40981.1.S1_at   | MmugDNA.40981.1 | 5.71  | 5.78  | 0.1  | 0.04 | -1.05  | 0.185059 | 0.120749 | 0.548475 | 0.389579 |
| MmugDNA.40984.1.S1_at   | MmugDNA.40984.1 | 8.76  | 8.23  | 0.21 | 0.15 | 1.45   | 0.039486 | 0.008012 | 0.347288 | 0.118982 |
| MmugDNA.40987.1.S1_at   | MmugDNA.40987.1 | 9.58  | 8.97  | 0.25 | 0.16 | 1.53   | 0.023744 | 0.01675  | 0.292771 | 0.163916 |
| MmugDNA.40987.1.S1_s_at | MmugDNA.40987.1 | 9.19  | 8.6   | 0.27 | 0.22 | 1.5    | 0.048149 | 0.039911 | 0.367807 | 0.244852 |
| MmugDNA.40999.1.S1_at   | MmugDNA.40999.1 | 11.49 | 11.31 | 0.13 | 0.34 | 1.13   | 0.477331 | 0.512326 | 0.746589 | 0.706198 |
| MmugDNA.41000.1.S1_at   | MmugDNA.41000.1 | 5.34  | 5.23  | 0.25 | 0.49 | 1.08   | 0.89256  | 0.809411 | 0.957245 | 0.890131 |
| MmugDNA.41001.1.S1_at   | MmugDNA.41001.1 | 10.11 | 10.57 | 0.01 | 0.11 | -1.37  | 0.002559 | 0.000485 | 0.164386 | 0.038753 |
| MmugDNA.41003.1.S1_s_at | MmugDNA.41003.1 | 8.43  | 8.71  | 0.11 | 0.09 | -1.22  | 0.058634 | 0.055478 | 0.390868 | 0.281404 |
| MmugDNA.4101.1.S1_at    | MmugDNA.4101.1  | 2.89  | 2.87  | 0.28 | 0.11 | 1.02   | 0.32694  | 0.300034 | 0.653374 | 0.558262 |
| MmugDNA.41012.1.S1_at   | MmugDNA.41012.1 | 11.25 | 10.9  | 0.24 | 0.34 | 1.27   | 0.138809 | 0.121274 | 0.505917 | 0.390351 |
| MmugDNA.41014.1.S1_at   | MmugDNA.41014.1 | 11.42 | 11.58 | 0.09 | 0.21 | -1.11  | 0.96653  | 0.089895 | 0.987317 | 0.344073 |
| MmugDNA.41018.1.S1_at   | MmugDNA.41018.1 | 5.78  | 6.01  | 0.02 | 0.06 | -1.17  | 0.006154 | 0.064921 | 0.196493 | 0.300818 |
| MmugDNA.41026.1.S1_at   | MmugDNA.41026.1 | 7.98  | 6.85  | 0.26 | 0.71 | 2.19   | 0.126173 | 0.065111 | 0.492332 | 0.301119 |
| MmugDNA.41042.1.S1_at   | MmugDNA.41042.1 | 3.15  | 3.39  | 0.05 | 0.19 | -1.18  | 0.073927 | 0.067661 | 0.419507 | 0.306199 |
| MmugDNA.41046.1.S1_at   | MmugDNA.41046.1 | 10.61 | 10.95 | 0.18 | 0.17 | -1.27  | 0.137679 | 0.130865 | 0.504937 | 0.403037 |
| MmugDNA.41046.1.S1_s_at | MmugDNA.41046.1 | 14.08 | 14.07 | 0.05 | 0.05 | 1.01   | 0.61251  | 0.392229 | 0.822191 | 0.625652 |
| MmugDNA.41051.1.S1_at   | MmugDNA.41051.1 | 11.69 | 11.88 | 0.15 | 0.14 | -1.13  | 0.219912 | 0.201674 | 0.579133 | 0.476208 |
| MmugDNA.41055.1.S1_at   | MmugDNA.41055.1 | 8.77  | 8.3   | 0.06 | 0.09 | 1.39   | 0.004201 | 0.003483 | 0.181739 | 0.084834 |
| MmugDNA.41056.1.S1_s_at | MmugDNA.41056.1 | 11.32 | 10.82 | 0.26 | 0.31 | 1.42   | 0.05121  | 0.039483 | 0.376001 | 0.243642 |
| MmugDNA.41066.1.S1_at   | MmugDNA.41066.1 | 6.26  | 6.28  | 0.59 | 0.4  | -1.02  | 0.9673   | 0.948829 | 0.987802 | 0.97077  |
| MmugDNA.41067.1.S1_at   | MmugDNA.41067.1 | 6.56  | 6.25  | 1.3  | 1.54 | 1.24   | 0.449389 | 0.505783 | 0.73019  | 0.702218 |
| MmugDNA.41076.1.S1_at   | MmugDNA.41076.1 | 7.26  | 7.31  | 0.3  | 0.16 | -1.04  | 0.953687 | 0.798055 | 0.982865 | 0.883728 |
| MmugDNA.41079.1.S1_at   | MmugDNA.41079.1 | 7.92  | 8.23  | 0.21 | 0.37 | -1.24  | 0.269987 | 0.195511 | 0.614574 | 0.470351 |
| MmugDNA.41082.1.S1_at   | MmugDNA.41082.1 | 11.44 | 10.8  | 0.03 | 0.59 | 1.56   | 0.096555 | 0.08811  | 0.455338 | 0.341641 |
| MmugDNA.41087.1.S1_at   | MmugDNA.41087.1 | 3.74  | 3.75  | 0.05 | 0.13 | -1.01  | 0.359554 | 0.103573 | 0.673945 | 0.364346 |
| MmugDNA.41090.1.S1_at   | MmugDNA.41090.1 | 4.47  | 4.32  | 0.17 | 0.07 | 1.11   | 0.225565 | 0.279702 | 0.583668 | 0.543228 |
| MmugDNA.41091.1.S1_at   | MmugDNA.41091.1 | 8.94  | 8.68  | 0.15 | 0.14 | 1.2    | 0.23964  | 0.239489 | 0.592634 | 0.510162 |
| MmugDNA.41093.1.S1_at   | MmugDNA.41093.1 | 5.87  | 7.88  | 1.17 | 2.14 | -4.02  | 0.475718 | 0.161214 | 0.745946 | 0.437386 |
| MmugDNA.41094.1.S1_at   | MmugDNA.41094.1 | 5.04  | 5.38  | 0.09 | 0.15 | -1.26  | 0.10101  | 0.11736  | 0.461009 | 0.384998 |
| MmugDNA.41097.1.S1_at   | MmugDNA.41097.1 | 7.69  | 7.57  | 0.15 | 0.48 | 1.09   | 0.548623 | 0.49824  | 0.786804 | 0.697383 |
| MmugDNA.41100.1.S1_at   | MmugDNA.41100.1 | 5.23  | 5.48  | 0.11 | 0.15 | -1.19  | 0.098625 | 0.08392  | 0.458486 | 0.334824 |

|                         |                 |       |       |      |      |       |          |          |          |          |
|-------------------------|-----------------|-------|-------|------|------|-------|----------|----------|----------|----------|
| MmugDNA.41101.1.S1_at   | MmugDNA.41101.1 | 12.86 | 12.82 | 0.06 | 0.04 | 1.03  | 0.56221  | 0.778063 | 0.795196 | 0.871097 |
| MmugDNA.41102.1.S1_at   | MmugDNA.41102.1 | 11.48 | 11.37 | 0.04 | 0.3  | 1.08  | 0.413532 | 0.044042 | 0.70853  | 0.254195 |
| MmugDNA.41102.1.S1_x_at | MmugDNA.41102.1 | 11.65 | 11.53 | 0.06 | 0.27 | 1.09  | 0.321682 | 0.035005 | 0.650336 | 0.231203 |
| MmugDNA.41105.1.S1_s_at | MmugDNA.41105.1 | 6.56  | 6.58  | 0.12 | 0.14 | -1.02 | 0.7896   | 0.930587 | 0.912637 | 0.960549 |
| MmugDNA.41106.1.S1_at   | MmugDNA.41106.1 | 3.66  | 3.75  | 0.03 | 0.16 | -1.07 | 0.95256  | 0.84486  | 0.9823   | 0.911705 |
| MmugDNA.41110.1.S1_s_at | MmugDNA.41110.1 | 11.7  | 11.73 | 0.22 | 0.08 | -1.02 | 0.384035 | 0.548813 | 0.689677 | 0.72944  |
| MmugDNA.41111.1.S1_at   | MmugDNA.41111.1 | 11.11 | 10.35 | 1.01 | 0.1  | 1.69  | 0.079958 | 0.069213 | 0.430176 | 0.309372 |
| MmugDNA.41114.1.S1_at   | MmugDNA.41114.1 | 10.97 | 10.27 | 0.04 | 0.33 | 1.62  | 0.05372  | 0.009648 | 0.380746 | 0.129267 |
| MmugDNA.41119.1.S1_at   | MmugDNA.41119.1 | 4.2   | 4.42  | 0.3  | 0.24 | -1.17 | 0.652659 | 0.871364 | 0.843828 | 0.926844 |
| MmugDNA.41122.1.S1_at   | MmugDNA.41122.1 | 7.5   | 8.65  | 0.51 | 0.25 | -2.23 | 0.023526 | 0.006693 | 0.291638 | 0.110702 |
| MmugDNA.41128.1.S1_at   | MmugDNA.41128.1 | 6.6   | 6.93  | 0.13 | 0.21 | -1.26 | 0.124159 | 0.100473 | 0.489863 | 0.359615 |
| MmugDNA.4113.1.S1_at    | MmugDNA.4113.1  | 7.35  | 8.2   | 0.27 | 0.56 | -1.8  | 0.022801 | 0.010404 | 0.288178 | 0.133414 |
| MmugDNA.41134.1.S1_at   | MmugDNA.41134.1 | 3.77  | 4.05  | 0.09 | 0.14 | -1.21 | 0.087137 | 0.091986 | 0.441151 | 0.347348 |
| MmugDNA.41136.1.S1_at   | MmugDNA.41136.1 | 11.65 | 11.61 | 0.05 | 0.34 | 1.03  | 0.844137 | 0.370032 | 0.937436 | 0.609286 |
| MmugDNA.41138.1.S1_at   | MmugDNA.41138.1 | 4.68  | 4.34  | 0.18 | 0.53 | 1.27  | 0.697603 | 0.693152 | 0.865694 | 0.821511 |
| MmugDNA.41148.1.S1_at   | MmugDNA.41148.1 | 3.08  | 3.51  | 0.12 | 0.21 | -1.34 | 0.066923 | 0.418903 | 0.406999 | 0.643141 |
| MmugDNA.41149.1.S1_at   | MmugDNA.41149.1 | 4.27  | 3.88  | 0.68 | 0.05 | 1.32  | 0.319828 | 0.281375 | 0.649198 | 0.544411 |
| MmugDNA.41155.1.S1_at   | MmugDNA.41155.1 | 10.95 | 10.53 | 0.32 | 0.28 | 1.33  | 0.307481 | 0.406776 | 0.639999 | 0.634497 |
| MmugDNA.41156.1.S1_at   | MmugDNA.41156.1 | 5.45  | 5.4   | 0.22 | 0.09 | 1.03  | 0.291175 | 0.601165 | 0.628725 | 0.762545 |
| MmugDNA.41157.1.S1_at   | MmugDNA.41157.1 | 10.2  | 11.56 | 1.29 | 1.37 | -2.57 | 0.316685 | 0.215725 | 0.647624 | 0.489503 |
| MmugDNA.41164.1.S1_at   | MmugDNA.41164.1 | 8.84  | 8.05  | 0.18 | 0.51 | 1.72  | 0.073912 | 0.036602 | 0.419468 | 0.235884 |
| MmugDNA.41170.1.S1_at   | MmugDNA.41170.1 | 12.46 | 12.35 | 0.08 | 0.26 | 1.08  | 0.841308 | 0.972973 | 0.936191 | 0.985389 |
| MmugDNA.41172.1.S1_at   | MmugDNA.41172.1 | 9.59  | 9.9   | 0.53 | 0.44 | -1.24 | 0.25558  | 0.125069 | 0.603396 | 0.395506 |
| MmugDNA.41173.1.S1_at   | MmugDNA.41173.1 | 10.48 | 11.18 | 0.21 | 0.41 | -1.62 | 0.08609  | 0.031441 | 0.440066 | 0.219107 |
| MmugDNA.41174.1.S1_at   | MmugDNA.41174.1 | 10.95 | 10.74 | 0.17 | 0.41 | 1.16  | 0.143625 | 0.045488 | 0.510312 | 0.2575   |
| MmugDNA.41175.1.S1_at   | MmugDNA.41175.1 | 12.3  | 12.1  | 0.28 | 0.17 | 1.15  | 0.612848 | 0.243036 | 0.822443 | 0.513356 |
| MmugDNA.41188.1.S1_at   | MmugDNA.41188.1 | 6.59  | 6.26  | 0.4  | 0.32 | 1.26  | 0.349993 | 0.037107 | 0.668245 | 0.237165 |
| MmugDNA.41189.1.S1_at   | MmugDNA.41189.1 | 5.97  | 5.99  | 0.18 | 0.11 | -1.01 | 0.200178 | 0.320814 | 0.563133 | 0.572849 |
| MmugDNA.41192.1.S1_at   | MmugDNA.41192.1 | 10.4  | 10.13 | 0.21 | 0.04 | 1.2   | 0.16253  | 0.123894 | 0.526802 | 0.3942   |
| MmugDNA.41194.1.S1_at   | MmugDNA.41194.1 | 7.39  | 7.56  | 0.25 | 0.48 | -1.12 | 0.647368 | 0.825989 | 0.841333 | 0.900031 |
| MmugDNA.41197.1.S1_at   | MmugDNA.41197.1 | 12.73 | 11.94 | 0.11 | 0.2  | 1.73  | 0.009925 | 0.00335  | 0.226899 | 0.083346 |
| MmugDNA.41198.1.S1_at   | MmugDNA.41198.1 | 7.32  | 7.48  | 0.07 | 0.14 | -1.12 | 0.161572 | 0.047381 | 0.526481 | 0.262418 |
| MmugDNA.4120.1.S1_at    | MmugDNA.4120.1  | 4.11  | 4.1   | 0.18 | 0.06 | 1     | 0.307704 | 0.20939  | 0.640092 | 0.483069 |
| MmugDNA.41203.1.S1_at   | MmugDNA.41203.1 | 4.75  | 5     | 0.19 | 0.13 | -1.19 | 0.365386 | 0.499504 | 0.678257 | 0.69832  |
| MmugDNA.41205.1.S1_at   | MmugDNA.41205.1 | 8.8   | 8.65  | 0.14 | 0.59 | 1.11  | 0.301482 | 0.120389 | 0.636394 | 0.38925  |
| MmugDNA.41211.1.S1_at   | MmugDNA.41211.1 | 10.35 | 10.25 | 0.25 | 0.19 | 1.07  | 0.642469 | 0.280255 | 0.838763 | 0.543514 |
| MmugDNA.41217.1.S1_at   | MmugDNA.41217.1 | 11.65 | 11.83 | 0.13 | 0.2  | -1.13 | 0.260899 | 0.374983 | 0.60749  | 0.613186 |
| MmugDNA.41220.1.S1_at   | MmugDNA.41220.1 | 5.55  | 5.46  | 0.56 | 0.92 | 1.07  | 0.566097 | 0.586475 | 0.797485 | 0.753512 |
| MmugDNA.4124.1.S1_at    | MmugDNA.4124.1  | 10.43 | 8.78  | 0.18 | 0.28 | 3.13  | 0.000923 | 0.000155 | 0.139813 | 0.030072 |
| MmugDNA.41244.1.S1_at   | MmugDNA.41244.1 | 11.66 | 12.05 | 0.33 | 0.64 | -1.3  | 0.202785 | 0.125254 | 0.565382 | 0.395813 |
| MmugDNA.41250.1.S1_at   | MmugDNA.41250.1 | 9.7   | 9.75  | 0.25 | 0.51 | -1.03 | 0.710291 | 0.506231 | 0.872981 | 0.702368 |

|                       |                 |       |       |      |      |        |          |          |          |          |
|-----------------------|-----------------|-------|-------|------|------|--------|----------|----------|----------|----------|
| MmugDNA.41252.1.S1_at | MmugDNA.41252.1 | 9.1   | 8.71  | 0.28 | 0.55 | 1.31   | 0.257227 | 0.222575 | 0.60459  | 0.495615 |
| MmugDNA.41254.1.S1_at | MmugDNA.41254.1 | 10.72 | 9.85  | 0.06 | 0.6  | 1.82   | 0.22582  | 0.32263  | 0.583854 | 0.574024 |
| MmugDNA.41258.1.S1_at | MmugDNA.41258.1 | 4.26  | 4.31  | 0.08 | 0.09 | -1.03  | 0.618281 | 0.063291 | 0.825111 | 0.298244 |
| MmugDNA.41264.1.S1_at | MmugDNA.41264.1 | 2.88  | 2.96  | 0.11 | 0.16 | -1.06  | 0.370117 | 0.306478 | 0.681113 | 0.563029 |
| MmugDNA.41265.1.S1_at | MmugDNA.41265.1 | 4.01  | 3.99  | 0.23 | 0.1  | 1.02   | 0.476922 | 0.550338 | 0.746355 | 0.73039  |
| MmugDNA.41267.1.S1_at | MmugDNA.41267.1 | 11.02 | 11.23 | 0.35 | 0.93 | -1.16  | 0.736707 | 0.908832 | 0.88677  | 0.948389 |
| MmugDNA.41286.1.S1_at | MmugDNA.41286.1 | 8.47  | 8.5   | 1.26 | 0.4  | -1.02  | 0.63599  | 0.266715 | 0.835236 | 0.53241  |
| MmugDNA.41293.1.S1_at | MmugDNA.41293.1 | 11    | 11.01 | 0.12 | 0.21 | -1.01  | 0.961603 | 0.43403  | 0.985216 | 0.654207 |
| MmugDNA.41296.1.S1_at | MmugDNA.41296.1 | 7.61  | 7.4   | 0.19 | 0.33 | 1.15   | 0.275157 | 0.13585  | 0.617694 | 0.408027 |
| MmugDNA.41299.1.S1_at | MmugDNA.41299.1 | 3.99  | 4.24  | 0.05 | 0.28 | -1.19  | 0.154574 | 0.183622 | 0.519173 | 0.459681 |
| MmugDNA.4130.1.S1_at  | MmugDNA.4130.1  | 11.54 | 11.82 | 0.06 | 0.06 | -1.21  | 0.014667 | 0.004823 | 0.254553 | 0.096904 |
| MmugDNA.41308.1.S1_at | MmugDNA.41308.1 | 13.42 | 13.14 | 0.1  | 0.46 | 1.22   | 0.278724 | 0.324188 | 0.620785 | 0.57488  |
| MmugDNA.41310.1.S1_at | MmugDNA.41310.1 | 8.3   | 7.98  | 0.18 | 0.36 | 1.25   | 0.487391 | 0.098026 | 0.752093 | 0.355964 |
| MmugDNA.41311.1.S1_at | MmugDNA.41311.1 | 6.22  | 6.43  | 0.21 | 0.63 | -1.16  | 0.590147 | 0.056366 | 0.809773 | 0.283382 |
| MmugDNA.41312.1.S1_at | MmugDNA.41312.1 | 13.57 | 13.33 | 0.07 | 0.17 | 1.18   | 0.058755 | 0.027372 | 0.390921 | 0.206695 |
| MmugDNA.41313.1.S1_at | MmugDNA.41313.1 | 5.98  | 6.8   | 0.26 | 0.42 | -1.77  | 0.04773  | 0.059682 | 0.367068 | 0.290919 |
| MmugDNA.41314.1.S1_at | MmugDNA.41314.1 | 7.3   | 6.57  | 0.16 | 1.39 | 1.65   | 0.580705 | 0.715384 | 0.804783 | 0.835018 |
| MmugDNA.41315.1.S1_at | MmugDNA.41315.1 | 9.36  | 10.83 | 0.66 | 0.56 | -2.77  | 0.037026 | 0.028644 | 0.340567 | 0.210901 |
| MmugDNA.41318.1.S1_at | MmugDNA.41318.1 | 3.58  | 3.39  | 0.87 | 0.02 | 1.14   | 0.247972 | 0.311979 | 0.599052 | 0.566838 |
| MmugDNA.41334.1.S1_at | MmugDNA.41334.1 | 10.07 | 9.18  | 0.2  | 0.31 | 1.86   | 0.009868 | 0.004015 | 0.226668 | 0.089976 |
| MmugDNA.41336.1.S1_at | MmugDNA.41336.1 | 6.32  | 6.76  | 0.21 | 0.17 | -1.35  | 0.117791 | 0.146347 | 0.481968 | 0.420368 |
| MmugDNA.41339.1.S1_at | MmugDNA.41339.1 | 9.06  | 10.15 | 0.05 | 0.29 | -2.13  | 0.002029 | 0.000779 | 0.155636 | 0.045626 |
| MmugDNA.41345.1.S1_at | MmugDNA.41345.1 | 7.95  | 7.99  | 0.19 | 0.08 | -1.02  | 0.911063 | 0.498596 | 0.964869 | 0.697641 |
| MmugDNA.41347.1.S1_at | MmugDNA.41347.1 | 5.15  | 5.09  | 0.12 | 0.09 | 1.04   | 0.317222 | 0.068036 | 0.647889 | 0.307124 |
| MmugDNA.41356.1.S1_at | MmugDNA.41356.1 | 4.55  | 4.43  | 0.42 | 0.19 | 1.09   | 0.472631 | 0.453148 | 0.743886 | 0.667568 |
| MmugDNA.41357.1.S1_at | MmugDNA.41357.1 | 12.62 | 12.63 | 0.28 | 0.14 | -1.01  | 0.996212 | 0.732362 | 0.99849  | 0.844986 |
| MmugDNA.41359.1.S1_at | MmugDNA.41359.1 | 11.98 | 11.41 | 0.1  | 0.17 | 1.48   | 0.009748 | 0.020764 | 0.226235 | 0.180781 |
| MmugDNA.41361.1.S1_at | MmugDNA.41361.1 | 4.96  | 4.9   | 0.34 | 0.1  | 1.04   | 0.809293 | 0.92323  | 0.922228 | 0.956822 |
| MmugDNA.41364.1.S1_at | MmugDNA.41364.1 | 12.09 | 12.99 | 0.45 | 0.49 | -1.88  | 0.120707 | 0.083608 | 0.48574  | 0.334212 |
| MmugDNA.41371.1.S1_at | MmugDNA.41371.1 | 10.06 | 9.6   | 0.26 | 0.49 | 1.37   | 0.126345 | 0.136356 | 0.49264  | 0.408804 |
| MmugDNA.41374.1.S1_at | MmugDNA.41374.1 | 6.57  | 6.74  | 0.53 | 0.52 | -1.13  | 0.279901 | 0.044032 | 0.621287 | 0.254195 |
| MmugDNA.41376.1.S1_at | MmugDNA.41376.1 | 4.33  | 4.34  | 0.13 | 0.12 | -1.01  | 0.614731 | 0.029715 | 0.823258 | 0.214029 |
| MmugDNA.41379.1.S1_at | MmugDNA.41379.1 | 6.14  | 5.92  | 0.24 | 0.3  | 1.16   | 0.868645 | 0.980882 | 0.947624 | 0.989478 |
| MmugDNA.4138.1.S1_at  | MmugDNA.4138.1  | 11.11 | 10.78 | 0.06 | 0.19 | 1.25   | 0.067514 | 0.030707 | 0.407949 | 0.217148 |
| MmugDNA.41383.1.S1_at | MmugDNA.41383.1 | 7.36  | 7.69  | 0.59 | 0.8  | -1.25  | 0.564392 | 0.700468 | 0.796512 | 0.826162 |
| MmugDNA.41384.1.S1_at | MmugDNA.41384.1 | 6.01  | 9.58  | 0.96 | 2.87 | -11.91 | 0.201161 | 0.170755 | 0.563821 | 0.447316 |
| MmugDNA.4139.1.S1_at  | MmugDNA.4139.1  | 8.94  | 8.52  | 0.16 | 0.25 | 1.34   | 0.125874 | 0.231882 | 0.491928 | 0.503594 |
| MmugDNA.41391.1.S1_at | MmugDNA.41391.1 | 3.87  | 3.78  | 0.04 | 0.04 | 1.06   | 0.0288   | 0.013909 | 0.312166 | 0.151286 |
| MmugDNA.41395.1.S1_at | MmugDNA.41395.1 | 3.29  | 3.16  | 0.11 | 0.02 | 1.1    | 0.129321 | 0.087761 | 0.495439 | 0.341027 |
| MmugDNA.41402.1.S1_at | MmugDNA.41402.1 | 6.88  | 6.95  | 0.06 | 0.07 | -1.06  | 0.142888 | 0.234302 | 0.509839 | 0.505553 |
| MmugDNA.41405.1.S1_at | MmugDNA.41405.1 | 9.74  | 8.91  | 0.1  | 0.27 | 1.77   | 0.00494  | 0.001402 | 0.185837 | 0.057117 |

|                         |                 |       |       |      |      |       |          |          |          |          |
|-------------------------|-----------------|-------|-------|------|------|-------|----------|----------|----------|----------|
| MmugDNA.41412.1.S1_at   | MmugDNA.41412.1 | 6.18  | 5.78  | 0.34 | 0.57 | 1.32  | 0.142592 | 0.185091 | 0.509727 | 0.460961 |
| MmugDNA.41413.1.S1_at   | MmugDNA.41413.1 | 12.03 | 11.66 | 0.15 | 0.26 | 1.29  | 0.343268 | 0.258773 | 0.663541 | 0.525949 |
| MmugDNA.41414.1.S1_at   | MmugDNA.41414.1 | 4.6   | 4.83  | 0.29 | 0.24 | -1.18 | 0.78218  | 0.126119 | 0.909138 | 0.39672  |
| MmugDNA.41417.1.S1_at   | MmugDNA.41417.1 | 7.61  | 7.52  | 0.31 | 0.18 | 1.06  | 0.645239 | 0.18127  | 0.840224 | 0.457809 |
| MmugDNA.41418.1.S1_at   | MmugDNA.41418.1 | 12.17 | 12.18 | 0.06 | 0.14 | -1.01 | 0.888883 | 0.228767 | 0.955505 | 0.501005 |
| MmugDNA.41418.1.S1_s_at | MmugDNA.41418.1 | 12.08 | 12.14 | 0.01 | 0.24 | -1.04 | 0.566931 | 0.730113 | 0.797859 | 0.843808 |
| MmugDNA.41419.1.S1_at   | MmugDNA.41419.1 | 12.32 | 12.34 | 0.06 | 0.19 | -1.01 | 0.963187 | 0.520806 | 0.985784 | 0.711942 |
| MmugDNA.41420.1.S1_at   | MmugDNA.41420.1 | 5.24  | 4.72  | 0.27 | 0.29 | 1.43  | 0.144523 | 0.07863  | 0.511015 | 0.32546  |
| MmugDNA.41424.1.S1_at   | MmugDNA.41424.1 | 9.86  | 10.29 | 0.08 | 0.34 | -1.35 | 0.039433 | 0.029425 | 0.347202 | 0.213368 |
| MmugDNA.41424.1.S1_s_at | MmugDNA.41424.1 | 10.37 | 10.82 | 0.07 | 0.43 | -1.36 | 0.067709 | 0.063474 | 0.408357 | 0.298441 |
| MmugDNA.41430.1.S1_at   | MmugDNA.41430.1 | 10.09 | 10.41 | 0.03 | 0.1  | -1.25 | 0.015538 | 0.013786 | 0.259126 | 0.150462 |
| MmugDNA.41434.1.S1_at   | MmugDNA.41434.1 | 8.7   | 9.13  | 0.43 | 0.49 | -1.35 | 0.33551  | 0.443128 | 0.659165 | 0.661003 |
| MmugDNA.41447.1.S1_at   | MmugDNA.41447.1 | 5.34  | 5.54  | 0.3  | 0.12 | -1.15 | 0.96962  | 0.527578 | 0.98841  | 0.716154 |
| MmugDNA.41448.1.S1_at   | MmugDNA.41448.1 | 3.64  | 3.7   | 0.1  | 0.03 | -1.04 | 0.123678 | 0.099986 | 0.489492 | 0.3588   |
| MmugDNA.41452.1.S1_at   | MmugDNA.41452.1 | 9.6   | 8.36  | 0.17 | 1.15 | 2.37  | 0.121133 | 0.184278 | 0.48594  | 0.460412 |
| MmugDNA.41453.1.S1_at   | MmugDNA.41453.1 | 8.13  | 9.16  | 0.71 | 1.73 | -2.04 | 0.433758 | 0.378644 | 0.720251 | 0.61568  |
| MmugDNA.41454.1.S1_at   | MmugDNA.41454.1 | 5.35  | 5.44  | 0.15 | 0.12 | -1.07 | 0.980226 | 0.372937 | 0.992808 | 0.611783 |
| MmugDNA.4146.1.S1_at    | MmugDNA.4146.1  | 10.85 | 10.56 | 0.09 | 0.11 | 1.22  | 0.027224 | 0.047187 | 0.307021 | 0.261793 |
| MmugDNA.41461.1.S1_at   | MmugDNA.41461.1 | 9.37  | 8.23  | 0.17 | 0.21 | 2.21  | 0.002537 | 0.001008 | 0.164386 | 0.050657 |
| MmugDNA.41462.1.S1_at   | MmugDNA.41462.1 | 9.97  | 9.65  | 0.17 | 0.45 | 1.25  | 0.209306 | 0.250675 | 0.570957 | 0.51941  |
| MmugDNA.41468.1.S1_at   | MmugDNA.41468.1 | 11.18 | 11.34 | 0.1  | 0.17 | -1.11 | 0.269837 | 0.088785 | 0.614491 | 0.342524 |
| MmugDNA.41469.1.S1_at   | MmugDNA.41469.1 | 9.58  | 9.25  | 0.27 | 0.39 | 1.26  | 0.154377 | 0.02368  | 0.518958 | 0.19268  |
| MmugDNA.41472.1.S1_at   | MmugDNA.41472.1 | 6.01  | 5.91  | 0.37 | 0.78 | 1.07  | 0.539367 | 0.718193 | 0.781046 | 0.836902 |
| MmugDNA.41475.1.S1_at   | MmugDNA.41475.1 | 8.53  | 9.15  | 0.29 | 0.38 | -1.54 | 0.117935 | 0.125638 | 0.482063 | 0.396249 |
| MmugDNA.41481.1.S1_at   | MmugDNA.41481.1 | 5.61  | 6.09  | 0.18 | 0.25 | -1.39 | 0.06062  | 0.058943 | 0.39384  | 0.28962  |
| MmugDNA.41486.1.S1_at   | MmugDNA.41486.1 | 11.02 | 10.83 | 0.38 | 0.69 | 1.14  | 0.590337 | 0.771052 | 0.809851 | 0.86692  |
| MmugDNA.41486.1.S1_s_at | MmugDNA.41486.1 | 12.06 | 11.91 | 0.38 | 0.57 | 1.11  | 0.642587 | 0.799786 | 0.838763 | 0.884885 |
| MmugDNA.41487.1.S1_at   | MmugDNA.41487.1 | 9.99  | 10.17 | 0.35 | 0.19 | -1.14 | 0.535184 | 0.59674  | 0.778933 | 0.759776 |
| MmugDNA.41488.1.S1_s_at | MmugDNA.41488.1 | 12.32 | 12.28 | 0.13 | 0.22 | 1.03  | 0.84253  | 0.945408 | 0.936474 | 0.968942 |
| MmugDNA.41491.1.S1_at   | MmugDNA.41491.1 | 4.44  | 4.5   | 0.16 | 0.15 | -1.04 | 0.452027 | 0.611602 | 0.731815 | 0.769451 |
| MmugDNA.41502.1.S1_at   | MmugDNA.41502.1 | 3.96  | 3.94  | 0.32 | 0.1  | 1.01  | 0.367434 | 0.337609 | 0.679502 | 0.584788 |
| MmugDNA.41506.1.S1_at   | MmugDNA.41506.1 | 7.51  | 7.93  | 0.24 | 0.43 | -1.34 | 0.250177 | 0.188091 | 0.600389 | 0.464169 |
| MmugDNA.41507.1.S1_at   | MmugDNA.41507.1 | 8.75  | 8.17  | 0.18 | 0.42 | 1.49  | 0.059485 | 0.039145 | 0.3923   | 0.243072 |
| MmugDNA.41509.1.S1_at   | MmugDNA.41509.1 | 7.2   | 6.9   | 0.16 | 0.02 | 1.23  | 0.03123  | 0.005168 | 0.32089  | 0.099727 |
| MmugDNA.41515.1.S1_s_at | MmugDNA.41515.1 | 4.32  | 4.35  | 0.08 | 0.07 | -1.02 | 0.771546 | 0.899567 | 0.903868 | 0.942903 |
| MmugDNA.4152.1.S1_at    | MmugDNA.4152.1  | 9.16  | 10.1  | 0.49 | 0.37 | -1.92 | 0.135766 | 0.257038 | 0.502654 | 0.524781 |
| MmugDNA.41522.1.S1_at   | MmugDNA.41522.1 | 5.22  | 5.19  | 0.1  | 0.16 | 1.02  | 0.567376 | 0.142552 | 0.798083 | 0.416206 |
| MmugDNA.41532.1.S1_at   | MmugDNA.41532.1 | 6.17  | 6.25  | 0.68 | 0.33 | -1.05 | 0.968854 | 0.728388 | 0.98822  | 0.842993 |
| MmugDNA.4154.1.S1_at    | MmugDNA.4154.1  | 9.03  | 9.06  | 0.3  | 0.26 | -1.02 | 0.869896 | 0.387027 | 0.947952 | 0.621935 |
| MmugDNA.41540.1.S1_at   | MmugDNA.41540.1 | 6.69  | 7.26  | 0.96 | 1.02 | -1.48 | 0.354428 | 0.318148 | 0.670585 | 0.571046 |
| MmugDNA.41546.1.S1_at   | MmugDNA.41546.1 | 3.23  | 3.09  | 0.07 | 0.31 | 1.1   | 0.97802  | 0.810135 | 0.991752 | 0.890539 |

|                         |                 |       |       |      |      |        |          |          |          |          |
|-------------------------|-----------------|-------|-------|------|------|--------|----------|----------|----------|----------|
| MmugDNA.41547.1.S1_at   | MmugDNA.41547.1 | 11.26 | 9.84  | 0.08 | 0.38 | 2.69   | 0.002685 | 0.000816 | 0.164386 | 0.046361 |
| MmugDNA.41548.1.S1_at   | MmugDNA.41548.1 | 3.97  | 5     | 0.2  | 0.51 | -2.03  | 0.025057 | 0.025876 | 0.297733 | 0.201696 |
| MmugDNA.41559.1.S1_at   | MmugDNA.41559.1 | 3.45  | 3.44  | 0.04 | 0.07 | 1      | 0.37118  | 0.448019 | 0.681855 | 0.663986 |
| MmugDNA.4156.1.S1_at    | MmugDNA.4156.1  | 9.02  | 8.53  | 0.12 | 0.14 | 1.4    | 0.018185 | 0.025681 | 0.269512 | 0.200834 |
| MmugDNA.41562.1.S1_at   | MmugDNA.41562.1 | 3.3   | 3.47  | 0.12 | 0.12 | -1.12  | 0.162172 | 0.202348 | 0.526638 | 0.4767   |
| MmugDNA.41568.1.S1_at   | MmugDNA.41568.1 | 4.15  | 4.04  | 0.15 | 0.6  | 1.08   | 0.773707 | 0.656476 | 0.90499  | 0.799097 |
| MmugDNA.4157.1.S1_at    | MmugDNA.4157.1  | 4.85  | 5.18  | 0.35 | 0.39 | -1.25  | 0.27987  | 0.315688 | 0.621287 | 0.569119 |
| MmugDNA.41570.1.S1_at   | MmugDNA.41570.1 | 5.94  | 5.56  | 1.12 | 0.43 | 1.29   | 0.416762 | 0.600452 | 0.710179 | 0.762128 |
| MmugDNA.41572.1.S1_at   | MmugDNA.41572.1 | 11.16 | 11.21 | 0.12 | 0.63 | -1.04  | 0.567995 | 0.450506 | 0.798358 | 0.665705 |
| MmugDNA.41576.1.S1_at   | MmugDNA.41576.1 | 9.25  | 9.59  | 0.31 | 0.12 | -1.27  | 0.624743 | 0.692418 | 0.828409 | 0.821009 |
| MmugDNA.41579.1.S1_at   | MmugDNA.41579.1 | 5.97  | 6.54  | 0.26 | 0.63 | -1.48  | 0.144997 | 0.167398 | 0.511188 | 0.443785 |
| MmugDNA.4158.1.S1_at    | MmugDNA.4158.1  | 13.53 | 13.75 | 0.11 | 0.07 | -1.17  | 0.049531 | 0.027578 | 0.371515 | 0.207355 |
| MmugDNA.41581.1.S1_at   | MmugDNA.41581.1 | 7.23  | 7.01  | 0.24 | 0.32 | 1.17   | 0.314627 | 0.21857  | 0.646024 | 0.492172 |
| MmugDNA.41582.1.S1_at   | MmugDNA.41582.1 | 11.49 | 10.81 | 0.15 | 0.11 | 1.61   | 0.002624 | 0.000519 | 0.164386 | 0.039636 |
| MmugDNA.41588.1.S1_at   | MmugDNA.41588.1 | 4.98  | 5.53  | 0.19 | 0.61 | -1.47  | 0.296192 | 0.065747 | 0.632176 | 0.301766 |
| MmugDNA.41594.1.S1_at   | MmugDNA.41594.1 | 7.09  | 7.02  | 0.66 | 0.52 | 1.05   | 0.281823 | 0.369896 | 0.62238  | 0.609138 |
| MmugDNA.41595.1.S1_at   | MmugDNA.41595.1 | 2.97  | 2.99  | 0.14 | 0.16 | -1.02  | 0.287312 | 0.402514 | 0.625926 | 0.631481 |
| MmugDNA.41601.1.S1_at   | MmugDNA.41601.1 | 8.16  | 8.65  | 0.35 | 0.85 | -1.4   | 0.135944 | 0.155767 | 0.502782 | 0.431134 |
| MmugDNA.41606.1.S1_at   | MmugDNA.41606.1 | 12.38 | 12.23 | 0.01 | 0.1  | 1.11   | 0.049354 | 0.07941  | 0.371317 | 0.326766 |
| MmugDNA.4162.1.S1_s_at  | MmugDNA.4162.1  | 5.73  | 5.42  | 0.66 | 0.51 | 1.24   | 0.658211 | 0.252688 | 0.8464   | 0.521174 |
| MmugDNA.41626.1.S1_at   | MmugDNA.41626.1 | 8.41  | 8.6   | 0.2  | 0.16 | -1.14  | 0.125852 | 0.072319 | 0.491881 | 0.31505  |
| MmugDNA.41632.1.S1_at   | MmugDNA.41632.1 | 10.46 | 11.85 | 0.83 | 0.5  | -2.63  | 0.064517 | 0.060232 | 0.402975 | 0.292091 |
| MmugDNA.41633.1.S1_at   | MmugDNA.41633.1 | 13.56 | 13.51 | 0.09 | 0.05 | 1.04   | 0.573884 | 0.738103 | 0.801395 | 0.848202 |
| MmugDNA.41636.1.S1_at   | MmugDNA.41636.1 | 8.52  | 8.33  | 0.02 | 0.16 | 1.14   | 0.043314 | 0.019387 | 0.3567   | 0.175012 |
| MmugDNA.41640.1.S1_at   | MmugDNA.41640.1 | 3.26  | 3.29  | 0.02 | 0.07 | -1.02  | 0.205801 | 0.210928 | 0.568366 | 0.484934 |
| MmugDNA.41641.1.S1_at   | MmugDNA.41641.1 | 8     | 12.36 | 1.35 | 3.43 | -20.58 | 0.354014 | 0.195097 | 0.670282 | 0.470241 |
| MmugDNA.41647.1.S1_s_at | MmugDNA.41647.1 | 6.54  | 7.17  | 0.2  | 0.47 | -1.54  | 0.076989 | 0.05417  | 0.426048 | 0.27811  |
| MmugDNA.41648.1.S1_at   | MmugDNA.41648.1 | 11.73 | 11.37 | 0.29 | 0.47 | 1.29   | 0.169006 | 0.113683 | 0.533243 | 0.379818 |
| MmugDNA.41661.1.S1_at   | MmugDNA.41661.1 | 4.14  | 4.42  | 0.17 | 0.04 | -1.22  | 0.179319 | 0.226361 | 0.543593 | 0.498806 |
| MmugDNA.4167.1.S1_at    | MmugDNA.4167.1  | 3.06  | 3.14  | 0.34 | 0.14 | -1.06  | 0.820016 | 0.5322   | 0.926819 | 0.718995 |
| MmugDNA.41672.1.S1_at   | MmugDNA.41672.1 | 4.82  | 4.93  | 0.11 | 0.09 | -1.07  | 0.125062 | 0.150605 | 0.491138 | 0.425171 |
| MmugDNA.41674.1.S1_at   | MmugDNA.41674.1 | 13.9  | 13.76 | 0.1  | 0.27 | 1.1    | 0.103536 | 0.115572 | 0.46326  | 0.382674 |
| MmugDNA.41674.1.S1_x_at | MmugDNA.41674.1 | 13.81 | 13.6  | 0.14 | 0.34 | 1.16   | 0.15255  | 0.163985 | 0.517312 | 0.440128 |
| MmugDNA.41683.1.S1_at   | MmugDNA.41683.1 | 8.94  | 9.53  | 0.36 | 0.78 | -1.5   | 0.539765 | 0.712103 | 0.781258 | 0.833156 |
| MmugDNA.41685.1.S1_at   | MmugDNA.41685.1 | 4.39  | 4.41  | 0.1  | 0.04 | -1.01  | 0.983689 | 0.843295 | 0.994239 | 0.910767 |
| MmugDNA.41689.1.S1_at   | MmugDNA.41689.1 | 11.41 | 12.09 | 0.13 | 0.32 | -1.61  | 0.077691 | 0.071801 | 0.427714 | 0.314082 |
| MmugDNA.4169.1.S1_at    | MmugDNA.4169.1  | 3.56  | 3.63  | 0.11 | 0.2  | -1.05  | 0.745391 | 0.890794 | 0.891065 | 0.937722 |
| MmugDNA.41691.1.S1_at   | MmugDNA.41691.1 | 8.95  | 7.74  | 0.11 | 0.72 | 2.31   | 0.112635 | 0.115974 | 0.475099 | 0.383164 |
| MmugDNA.41701.1.S1_at   | MmugDNA.41701.1 | 6.82  | 6.91  | 0.16 | 0.05 | -1.07  | 0.200978 | 0.190807 | 0.563821 | 0.466228 |
| MmugDNA.41710.1.S1_at   | MmugDNA.41710.1 | 7.45  | 7.16  | 0.13 | 0.2  | 1.22   | 0.071982 | 0.050411 | 0.416109 | 0.269746 |
| MmugDNA.4172.1.S1_at    | MmugDNA.4172.1  | 12.6  | 12.2  | 0.64 | 0.18 | 1.32   | 0.865605 | 0.124606 | 0.946163 | 0.394995 |



|                         |                 |       |       |      |      |       |          |          |          |          |
|-------------------------|-----------------|-------|-------|------|------|-------|----------|----------|----------|----------|
| MmugDNA.41726.1.S1_at   | MmugDNA.41726.1 | 4.69  | 4.47  | 0.2  | 0.1  | 1.17  | 0.169698 | 0.076198 | 0.533899 | 0.321076 |
| MmugDNA.41728.1.S1_at   | MmugDNA.41728.1 | 7.66  | 10.46 | 1.49 | 3.13 | -6.93 | 0.630999 | 0.293402 | 0.832434 | 0.553341 |
| MmugDNA.41731.1.S1_at   | MmugDNA.41731.1 | 9.11  | 9.06  | 0.13 | 0.23 | 1.03  | 0.286772 | 0.457581 | 0.625572 | 0.670864 |
| MmugDNA.41732.1.S1_at   | MmugDNA.41732.1 | 3.49  | 3.56  | 0.05 | 0.06 | -1.05 | 0.086396 | 0.561688 | 0.440232 | 0.73751  |
| MmugDNA.41734.1.S1_at   | MmugDNA.41734.1 | 8.77  | 7.84  | 0.21 | 0.24 | 1.9   | 0.004595 | 0.001665 | 0.1844   | 0.061711 |
| MmugDNA.41738.1.S1_at   | MmugDNA.41738.1 | 11.8  | 11.33 | 0.02 | 0.12 | 1.39  | 0.002552 | 0.000435 | 0.164386 | 0.038359 |
| MmugDNA.41741.1.S1_at   | MmugDNA.41741.1 | 5.7   | 5.6   | 0.22 | 0.32 | 1.07  | 0.733073 | 0.730726 | 0.88483  | 0.844055 |
| MmugDNA.41750.1.S1_at   | MmugDNA.41750.1 | 9.55  | 9.52  | 0.34 | 0.27 | 1.02  | 0.684178 | 0.867949 | 0.858637 | 0.925008 |
| MmugDNA.41752.1.S1_at   | MmugDNA.41752.1 | 6.24  | 6.37  | 0.14 | 0.09 | -1.09 | 0.305686 | 0.472664 | 0.639223 | 0.68007  |
| MmugDNA.41752.1.S1_s_at | MmugDNA.41752.1 | 6.4   | 6.44  | 0.14 | 0.04 | -1.02 | 0.663287 | 0.394544 | 0.848941 | 0.627068 |
| MmugDNA.41756.1.S1_at   | MmugDNA.41756.1 | 10.17 | 10.04 | 0.28 | 0.79 | 1.09  | 0.200866 | 0.219794 | 0.563681 | 0.493388 |
| MmugDNA.41768.1.S1_at   | MmugDNA.41768.1 | 11.12 | 11.31 | 0.1  | 0.73 | -1.14 | 0.656484 | 0.670539 | 0.845392 | 0.807399 |
| MmugDNA.41774.1.S1_at   | MmugDNA.41774.1 | 5.57  | 5.13  | 0.6  | 0.66 | 1.36  | 0.46821  | 0.529274 | 0.741049 | 0.717233 |
| MmugDNA.41776.1.S1_at   | MmugDNA.41776.1 | 7.7   | 6.02  | 0.65 | 0.57 | 3.22  | 0.033443 | 0.013329 | 0.328861 | 0.148042 |
| MmugDNA.41782.1.S1_at   | MmugDNA.41782.1 | 12.7  | 12.45 | 0.15 | 0.12 | 1.19  | 0.03589  | 0.015877 | 0.338042 | 0.15984  |
| MmugDNA.41783.1.S1_at   | MmugDNA.41783.1 | 10.85 | 10.82 | 0.14 | 0.2  | 1.02  | 0.531214 | 0.156325 | 0.777112 | 0.43161  |
| MmugDNA.41791.1.S1_at   | MmugDNA.41791.1 | 6.73  | 7.05  | 0.42 | 0.51 | -1.24 | 0.416413 | 0.421922 | 0.709947 | 0.645378 |
| MmugDNA.41792.1.S1_at   | MmugDNA.41792.1 | 5.31  | 5.38  | 0.1  | 0.24 | -1.05 | 0.86522  | 0.978292 | 0.94589  | 0.988124 |
| MmugDNA.41794.1.S1_at   | MmugDNA.41794.1 | 12.55 | 12.98 | 0.14 | 0.34 | -1.35 | 0.166913 | 0.091622 | 0.530917 | 0.346716 |
| MmugDNA.41799.1.S1_at   | MmugDNA.41799.1 | 4.57  | 4.35  | 0.15 | 0.14 | 1.16  | 0.314122 | 0.099692 | 0.645522 | 0.358226 |
| MmugDNA.418.1.S1_at     | MmugDNA.418.1   | 6.83  | 7.95  | 0.55 | 1.28 | -2.17 | 0.369695 | 0.275495 | 0.68083  | 0.539709 |
| MmugDNA.41809.1.S1_at   | MmugDNA.41809.1 | 10.12 | 10.31 | 0.57 | 0.24 | -1.14 | 0.623291 | 0.490358 | 0.827917 | 0.692363 |
| MmugDNA.41811.1.S1_at   | MmugDNA.41811.1 | 13.1  | 12.99 | 0.03 | 0.03 | 1.08  | 0.00625  | 0.002625 | 0.197349 | 0.075772 |
| MmugDNA.41812.1.S1_at   | MmugDNA.41812.1 | 9.33  | 9.18  | 1.05 | 1.46 | 1.11  | 0.780946 | 0.44833  | 0.908679 | 0.66421  |
| MmugDNA.41818.1.S1_at   | MmugDNA.41818.1 | 6.38  | 6.17  | 0.22 | 0.22 | 1.16  | 0.172498 | 0.375423 | 0.536116 | 0.613405 |
| MmugDNA.41819.1.S1_at   | MmugDNA.41819.1 | 7.43  | 7.65  | 0.69 | 1.11 | -1.17 | 0.898923 | 0.199915 | 0.959627 | 0.474603 |
| MmugDNA.41821.1.S1_at   | MmugDNA.41821.1 | 6.95  | 7.16  | 0.67 | 0.24 | -1.16 | 0.817979 | 0.94676  | 0.926181 | 0.96978  |
| MmugDNA.4183.1.S1_at    | MmugDNA.4183.1  | 3.88  | 3.95  | 0.13 | 0.04 | -1.05 | 0.38889  | 0.55178  | 0.692804 | 0.73122  |
| MmugDNA.41832.1.S1_at   | MmugDNA.41832.1 | 5.16  | 5.24  | 0.07 | 0.27 | -1.06 | 0.261707 | 0.27023  | 0.608352 | 0.535587 |
| MmugDNA.41833.1.S1_at   | MmugDNA.41833.1 | 11.76 | 11.66 | 0.25 | 0.17 | 1.08  | 0.78054  | 0.818181 | 0.90855  | 0.89514  |
| MmugDNA.41835.1.S1_at   | MmugDNA.41835.1 | 11.18 | 10.03 | 0.11 | 0.31 | 2.21  | 0.005293 | 0.000505 | 0.191107 | 0.039158 |
| MmugDNA.41837.1.S1_at   | MmugDNA.41837.1 | 11.78 | 11.77 | 0.05 | 0.12 | 1.01  | 0.8346   | 0.063481 | 0.932931 | 0.298441 |
| MmugDNA.41838.1.S1_at   | MmugDNA.41838.1 | 11.47 | 11.85 | 0.2  | 0.72 | -1.3  | 0.638146 | 0.286163 | 0.836489 | 0.5477   |
| MmugDNA.41838.1.S1_x_at | MmugDNA.41838.1 | 11.07 | 11.52 | 0.16 | 0.71 | -1.36 | 0.513717 | 0.251109 | 0.766429 | 0.519792 |
| MmugDNA.41840.1.S1_at   | MmugDNA.41840.1 | 10.45 | 10.11 | 0.14 | 0.33 | 1.27  | 0.318917 | 0.344892 | 0.648688 | 0.590208 |
| MmugDNA.41842.1.S1_at   | MmugDNA.41842.1 | 10.16 | 9.44  | 0.19 | 0.15 | 1.64  | 0.004135 | 0.004987 | 0.181739 | 0.09844  |
| MmugDNA.41843.1.S1_at   | MmugDNA.41843.1 | 11.36 | 11.35 | 0.31 | 0.09 | 1.01  | 0.933042 | 0.623099 | 0.973979 | 0.777513 |
| MmugDNA.41844.1.S1_at   | MmugDNA.41844.1 | 8.22  | 7.96  | 0.74 | 0.21 | 1.19  | 0.451152 | 0.378145 | 0.731475 | 0.615438 |
| MmugDNA.41848.1.S1_at   | MmugDNA.41848.1 | 10.53 | 10.84 | 0.18 | 0.57 | -1.24 | 0.823452 | 0.429543 | 0.928164 | 0.650961 |
| MmugDNA.41849.1.S1_s_at | MmugDNA.41849.1 | 13.51 | 13.22 | 0.04 | 0.39 | 1.23  | 0.224677 | 0.235916 | 0.58277  | 0.507056 |
| MmugDNA.4185.1.S1_at    | MmugDNA.4185.1  | 7.15  | 6.77  | 0.07 | 0.07 | 1.3   | 0.002402 | 0.000528 | 0.163555 | 0.040039 |

|                         |                 |       |       |      |      |       |          |          |          |          |
|-------------------------|-----------------|-------|-------|------|------|-------|----------|----------|----------|----------|
| MmugDNA.41858.1.S1_at   | MmugDNA.41858.1 | 5.51  | 6.28  | 0.23 | 0.74 | -1.71 | 0.392475 | 0.330569 | 0.694657 | 0.579307 |
| MmugDNA.41863.1.S1_at   | MmugDNA.41863.1 | 12.32 | 12.26 | 0.12 | 0.15 | 1.04  | 0.582532 | 0.21599  | 0.805828 | 0.48965  |
| MmugDNA.41865.1.S1_at   | MmugDNA.41865.1 | 11.15 | 10.27 | 0.42 | 0.59 | 1.83  | 0.518827 | 0.677564 | 0.769664 | 0.81168  |
| MmugDNA.41866.1.S1_at   | MmugDNA.41866.1 | 5.07  | 5.22  | 0.29 | 0.45 | -1.11 | 0.526124 | 0.626329 | 0.773971 | 0.779698 |
| MmugDNA.41868.1.S1_at   | MmugDNA.41868.1 | 6.55  | 6.65  | 0.19 | 0.1  | -1.08 | 0.40951  | 0.222569 | 0.70588  | 0.495615 |
| MmugDNA.41870.1.S1_at   | MmugDNA.41870.1 | 4.66  | 6.87  | 0.92 | 1.72 | -4.64 | 0.242032 | 0.308873 | 0.594277 | 0.564656 |
| MmugDNA.41882.1.S1_at   | MmugDNA.41882.1 | 8.51  | 9.23  | 0.56 | 0.63 | -1.65 | 0.31698  | 0.178483 | 0.647775 | 0.454778 |
| MmugDNA.41887.1.S1_at   | MmugDNA.41887.1 | 9.73  | 9.12  | 0.09 | 0.3  | 1.53  | 0.012747 | 0.000562 | 0.243626 | 0.041049 |
| MmugDNA.41890.1.S1_at   | MmugDNA.41890.1 | 9.05  | 9.02  | 0.19 | 0.5  | 1.02  | 0.327119 | 0.480293 | 0.653601 | 0.68574  |
| MmugDNA.41900.1.S1_at   | MmugDNA.41900.1 | 6.14  | 6.07  | 0.83 | 1.19 | 1.04  | 0.574475 | 0.599528 | 0.801702 | 0.761473 |
| MmugDNA.41909.1.S1_at   | MmugDNA.41909.1 | 8.03  | 8.12  | 0.46 | 1.14 | -1.06 | 0.908671 | 0.109088 | 0.963816 | 0.372869 |
| MmugDNA.41913.1.S1_at   | MmugDNA.41913.1 | 7.82  | 6.86  | 0.65 | 0.61 | 1.95  | 0.128189 | 0.136321 | 0.494307 | 0.408746 |
| MmugDNA.41914.1.S1_at   | MmugDNA.41914.1 | 8.9   | 8.51  | 0.29 | 0.23 | 1.31  | 0.132345 | 0.14404  | 0.498572 | 0.417912 |
| MmugDNA.4192.1.S1_at    | MmugDNA.4192.1  | 5.3   | 4.92  | 0.66 | 0.19 | 1.3   | 0.349393 | 0.347025 | 0.667703 | 0.59181  |
| MmugDNA.41922.1.S1_at   | MmugDNA.41922.1 | 11.07 | 10.6  | 0.09 | 0.41 | 1.38  | 0.191741 | 0.253686 | 0.554781 | 0.522037 |
| MmugDNA.41926.1.S1_at   | MmugDNA.41926.1 | 11.41 | 10.38 | 0.18 | 0.31 | 2.04  | 0.013824 | 0.005033 | 0.249758 | 0.098963 |
| MmugDNA.41934.1.S1_at   | MmugDNA.41934.1 | 5.4   | 5.56  | 0.17 | 0.3  | -1.12 | 0.187233 | 0.150741 | 0.550364 | 0.4253   |
| MmugDNA.41946.1.S1_at   | MmugDNA.41946.1 | 4.46  | 4.86  | 0.87 | 0.4  | -1.32 | 0.873819 | 0.750643 | 0.949428 | 0.854991 |
| MmugDNA.41949.1.S1_at   | MmugDNA.41949.1 | 7.51  | 7.33  | 0.32 | 0.55 | 1.13  | 0.692142 | 0.871909 | 0.863299 | 0.927098 |
| MmugDNA.41953.1.S1_at   | MmugDNA.41953.1 | 4.18  | 4.13  | 0.03 | 0.02 | 1.04  | 0.125319 | 0.478005 | 0.49131  | 0.684037 |
| MmugDNA.41963.1.S1_at   | MmugDNA.41963.1 | 6.89  | 6.89  | 0.29 | 0.13 | -1    | 0.832564 | 0.96427  | 0.932173 | 0.98014  |
| MmugDNA.41963.1.S1_s_at | MmugDNA.41963.1 | 11.79 | 11.57 | 0.06 | 0.29 | 1.17  | 0.495702 | 0.083875 | 0.757268 | 0.334771 |
| MmugDNA.41966.1.S1_at   | MmugDNA.41966.1 | 4.31  | 4.71  | 0.15 | 0.96 | -1.32 | 0.197614 | 0.162308 | 0.560605 | 0.438447 |
| MmugDNA.4197.1.S1_at    | MmugDNA.4197.1  | 8.15  | 8.39  | 0.07 | 0.21 | -1.19 | 0.380752 | 0.480635 | 0.687588 | 0.685926 |
| MmugDNA.41984.1.S1_at   | MmugDNA.41984.1 | 9.43  | 9.26  | 0.3  | 1.11 | 1.13  | 0.959485 | 0.886066 | 0.984648 | 0.935136 |
| MmugDNA.41986.1.S1_at   | MmugDNA.41986.1 | 4.14  | 4.34  | 0.12 | 0.16 | -1.15 | 0.454455 | 0.635021 | 0.733188 | 0.785143 |
| MmugDNA.41994.1.S1_at   | MmugDNA.41994.1 | 7.3   | 7.5   | 0.11 | 0.39 | -1.15 | 0.252228 | 0.258209 | 0.601282 | 0.52558  |
| MmugDNA.42006.1.S1_at   | MmugDNA.42006.1 | 6.89  | 6.84  | 0.08 | 0.08 | 1.03  | 0.357454 | 0.219601 | 0.672437 | 0.49321  |
| MmugDNA.42009.1.S1_at   | MmugDNA.42009.1 | 6.58  | 6.93  | 0.18 | 0.38 | -1.27 | 0.073607 | 0.065408 | 0.419045 | 0.301415 |
| MmugDNA.4201.1.S1_at    | MmugDNA.4201.1  | 9.88  | 9.25  | 0.21 | 0.79 | 1.54  | 0.31798  | 0.440656 | 0.64802  | 0.659046 |
| MmugDNA.42015.1.S1_at   | MmugDNA.42015.1 | 11.29 | 12.13 | 0.18 | 0.59 | -1.78 | 0.32856  | 0.181954 | 0.654375 | 0.458483 |
| MmugDNA.42018.1.S1_at   | MmugDNA.42018.1 | 11.55 | 11.81 | 0.09 | 0.08 | -1.2  | 0.017806 | 0.025536 | 0.267882 | 0.200461 |
| MmugDNA.42019.1.S1_at   | MmugDNA.42019.1 | 7.03  | 6.93  | 0.15 | 0.17 | 1.08  | 0.869566 | 0.392512 | 0.947917 | 0.625813 |
| MmugDNA.42026.1.S1_at   | MmugDNA.42026.1 | 5.65  | 8.3   | 1.29 | 2.25 | -6.26 | 0.336093 | 0.126169 | 0.659229 | 0.396742 |
| MmugDNA.42027.1.S1_at   | MmugDNA.42027.1 | 10.87 | 10.75 | 0.18 | 0.57 | 1.08  | 0.748743 | 0.85498  | 0.892559 | 0.917383 |
| MmugDNA.42036.1.S1_at   | MmugDNA.42036.1 | 11.54 | 11.33 | 0.39 | 0.81 | 1.15  | 0.692268 | 0.828084 | 0.863369 | 0.901214 |
| MmugDNA.42044.1.S1_at   | MmugDNA.42044.1 | 12.69 | 13.33 | 0.28 | 0.24 | -1.56 | 0.042783 | 0.036673 | 0.355382 | 0.235973 |
| MmugDNA.42046.1.S1_at   | MmugDNA.42046.1 | 5.23  | 5.51  | 0.12 | 0.11 | -1.21 | 0.065432 | 0.035064 | 0.404567 | 0.231425 |
| MmugDNA.42049.1.S1_at   | MmugDNA.42049.1 | 7.98  | 7.11  | 0.19 | 0.29 | 1.82  | 0.005377 | 0.037437 | 0.191107 | 0.237777 |
| MmugDNA.42051.1.S1_at   | MmugDNA.42051.1 | 7.98  | 8.49  | 0.3  | 0.15 | -1.42 | 0.052287 | 0.042535 | 0.377309 | 0.250848 |
| MmugDNA.42058.1.S1_at   | MmugDNA.42058.1 | 3.35  | 4.05  | 0.64 | 0.7  | -1.63 | 0.186591 | 0.290702 | 0.550106 | 0.551382 |

|                         |                 |       |       |      |      |       |          |          |          |          |
|-------------------------|-----------------|-------|-------|------|------|-------|----------|----------|----------|----------|
| MmugDNA.42064.1.S1_at   | MmugDNA.42064.1 | 8.09  | 8.54  | 0.36 | 0.56 | -1.37 | 0.755505 | 0.926159 | 0.896094 | 0.95813  |
| MmugDNA.42065.1.S1_at   | MmugDNA.42065.1 | 6.11  | 5.44  | 0.83 | 0.58 | 1.6   | 0.579055 | 0.563298 | 0.804078 | 0.738523 |
| MmugDNA.42069.1.S1_s_at | MmugDNA.42069.1 | 6.23  | 6.37  | 0.21 | 0.11 | -1.1  | 0.549218 | 0.27574  | 0.787203 | 0.540008 |
| MmugDNA.42070.1.S1_at   | MmugDNA.42070.1 | 11.21 | 10.51 | 0.18 | 0.32 | 1.62  | 0.050814 | 0.043332 | 0.375491 | 0.252847 |
| MmugDNA.42071.1.S1_at   | MmugDNA.42071.1 | 10.09 | 10.41 | 0.05 | 0.51 | -1.25 | 0.905243 | 0.331329 | 0.962162 | 0.58006  |
| MmugDNA.4208.1.S1_at    | MmugDNA.4208.1  | 5.01  | 4.99  | 0.24 | 0.07 | 1.01  | 0.904049 | 0.552781 | 0.96164  | 0.732052 |
| MmugDNA.42088.1.S1_at   | MmugDNA.42088.1 | 7.17  | 6.93  | 0.17 | 0.52 | 1.18  | 0.382545 | 0.573434 | 0.688825 | 0.745125 |
| MmugDNA.42100.1.S1_at   | MmugDNA.42100.1 | 12.39 | 12.73 | 0.29 | 0.02 | -1.26 | 0.071892 | 0.084919 | 0.415896 | 0.336523 |
| MmugDNA.42107.1.S1_at   | MmugDNA.42107.1 | 12.46 | 12.47 | 0.13 | 0.24 | -1.01 | 0.760764 | 0.101361 | 0.899135 | 0.36112  |
| MmugDNA.4211.1.S1_s_at  | MmugDNA.4211.1  | 10.47 | 10.69 | 0.14 | 0.06 | -1.17 | 0.180376 | 0.288587 | 0.544672 | 0.549827 |
| MmugDNA.42128.1.S1_at   | MmugDNA.42128.1 | 11.08 | 10.14 | 0.63 | 0.43 | 1.93  | 0.271009 | 0.353763 | 0.615322 | 0.596815 |
| MmugDNA.42129.1.S1_at   | MmugDNA.42129.1 | 5.97  | 6.68  | 0.23 | 0.15 | -1.63 | 0.02077  | 0.014825 | 0.280388 | 0.154895 |
| MmugDNA.42130.1.S1_at   | MmugDNA.42130.1 | 5.48  | 3.48  | 0.96 | 0.27 | 4.01  | 0.064165 | 0.072071 | 0.40238  | 0.314519 |
| MmugDNA.42139.1.S1_at   | MmugDNA.42139.1 | 5.63  | 5.95  | 0.25 | 0.27 | -1.24 | 0.16476  | 0.102363 | 0.528656 | 0.362527 |
| MmugDNA.42141.1.S1_at   | MmugDNA.42141.1 | 5.84  | 5.95  | 0.23 | 0.07 | -1.07 | 0.427932 | 0.562293 | 0.716519 | 0.737938 |
| MmugDNA.42143.1.S1_at   | MmugDNA.42143.1 | 10.61 | 10.41 | 0.02 | 0.34 | 1.15  | 0.969658 | 0.931    | 0.98841  | 0.960769 |
| MmugDNA.42149.1.S1_at   | MmugDNA.42149.1 | 10.09 | 10.68 | 0.17 | 0.14 | -1.5  | 0.014929 | 0.007401 | 0.256467 | 0.115643 |
| MmugDNA.4215.1.S1_at    | MmugDNA.4215.1  | 7.91  | 8.21  | 0.08 | 0.19 | -1.23 | 0.060891 | 0.003836 | 0.394641 | 0.088143 |
| MmugDNA.42153.1.S1_at   | MmugDNA.42153.1 | 10.65 | 11.25 | 0.17 | 0.22 | -1.52 | 0.027355 | 0.012569 | 0.307422 | 0.144568 |
| MmugDNA.42162.1.S1_at   | MmugDNA.42162.1 | 5.12  | 5.01  | 0.12 | 0.02 | 1.08  | 0.416791 | 0.244467 | 0.710179 | 0.514295 |
| MmugDNA.42175.1.S1_at   | MmugDNA.42175.1 | 4.65  | 4.91  | 0.12 | 0.01 | -1.2  | 0.021551 | 0.104826 | 0.282635 | 0.366341 |
| MmugDNA.42177.1.S1_at   | MmugDNA.42177.1 | 10.67 | 11.34 | 0.03 | 0.33 | -1.59 | 0.026056 | 0.014272 | 0.30146  | 0.152546 |
| MmugDNA.42181.1.S1_at   | MmugDNA.42181.1 | 11.18 | 10.13 | 0.17 | 0.73 | 2.06  | 0.269128 | 0.056159 | 0.613808 | 0.282888 |
| MmugDNA.42186.1.S1_at   | MmugDNA.42186.1 | 11    | 11.01 | 0.06 | 0.19 | -1    | 0.372845 | 0.255614 | 0.683086 | 0.523608 |
| MmugDNA.42189.1.S1_at   | MmugDNA.42189.1 | 13.22 | 13.16 | 0.05 | 0.04 | 1.04  | 0.253856 | 0.254052 | 0.60233  | 0.522387 |
| MmugDNA.4219.1.S1_at    | MmugDNA.4219.1  | 11.48 | 12.09 | 0.38 | 0.81 | -1.52 | 0.335546 | 0.302356 | 0.659165 | 0.560109 |
| MmugDNA.42196.1.S1_at   | MmugDNA.42196.1 | 9.57  | 11.45 | 0.98 | 2.35 | -3.68 | 0.630299 | 0.448166 | 0.832004 | 0.664096 |
| MmugDNA.42198.1.S1_at   | MmugDNA.42198.1 | 7.88  | 7.48  | 0.09 | 0.28 | 1.32  | 0.074426 | 0.059457 | 0.420129 | 0.290548 |
| MmugDNA.422.1.S1_at     | MmugDNA.422.1   | 6.71  | 6.75  | 0.25 | 0.12 | -1.03 | 0.505699 | 0.770936 | 0.761733 | 0.866807 |
| MmugDNA.42202.1.S1_at   | MmugDNA.42202.1 | 9.9   | 9.59  | 0.36 | 0.95 | 1.25  | 0.64106  | 0.695703 | 0.837981 | 0.823132 |
| MmugDNA.42203.1.S1_at   | MmugDNA.42203.1 | 10.82 | 10.41 | 0.12 | 1.08 | 1.33  | 0.157323 | 0.132035 | 0.522148 | 0.404043 |
| MmugDNA.42205.1.S1_at   | MmugDNA.42205.1 | 9.51  | 8.38  | 0.24 | 0.63 | 2.18  | 0.105846 | 0.111481 | 0.466636 | 0.376193 |
| MmugDNA.42206.1.S1_at   | MmugDNA.42206.1 | 7.81  | 8.19  | 0.46 | 1.14 | -1.3  | 0.505881 | 0.674262 | 0.761855 | 0.809716 |
| MmugDNA.42215.1.S1_at   | MmugDNA.42215.1 | 10.12 | 10.19 | 0.04 | 0.54 | -1.05 | 0.451986 | 0.574578 | 0.731815 | 0.745995 |
| MmugDNA.42222.1.S1_at   | MmugDNA.42222.1 | 7.99  | 7.67  | 0.1  | 0.23 | 1.25  | 0.114674 | 0.215469 | 0.478025 | 0.489168 |
| MmugDNA.42230.1.S1_s_at | MmugDNA.42230.1 | 10.83 | 11.07 | 0.15 | 1.03 | -1.19 | 0.514081 | 0.567291 | 0.766736 | 0.741185 |
| MmugDNA.4224.1.S1_at    | MmugDNA.4224.1  | 11.36 | 12.01 | 0.02 | 0.1  | -1.56 | 0.000574 | 0.004597 | 0.136818 | 0.094706 |
| MmugDNA.42240.1.S1_at   | MmugDNA.42240.1 | 7.36  | 7.37  | 0.14 | 0.12 | -1    | 0.547812 | 0.447548 | 0.78636  | 0.663579 |
| MmugDNA.42241.1.S1_at   | MmugDNA.42241.1 | 5.62  | 5.57  | 0.03 | 0.08 | 1.03  | 0.552955 | 0.472214 | 0.789712 | 0.679876 |
| MmugDNA.42243.1.S1_at   | MmugDNA.42243.1 | 12.63 | 12.68 | 0.07 | 0.1  | -1.03 | 0.987365 | 0.918181 | 0.995543 | 0.954096 |
| MmugDNA.42245.1.S1_at   | MmugDNA.42245.1 | 11.06 | 11.56 | 0.22 | 0.96 | -1.42 | 0.463503 | 0.504015 | 0.738845 | 0.701269 |

|                         |                 |       |       |      |      |       |          |          |          |          |
|-------------------------|-----------------|-------|-------|------|------|-------|----------|----------|----------|----------|
| MmugDNA.42247.1.S1_at   | MmugDNA.42247.1 | 9.72  | 9.71  | 0.05 | 0.23 | 1.01  | 0.38676  | 0.233059 | 0.691633 | 0.50445  |
| MmugDNA.42249.1.S1_at   | MmugDNA.42249.1 | 7.23  | 7.36  | 0.56 | 0.27 | -1.1  | 0.997556 | 0.641192 | 0.998992 | 0.789487 |
| MmugDNA.42250.1.S1_at   | MmugDNA.42250.1 | 9.64  | 9.41  | 0.07 | 0.19 | 1.18  | 0.121602 | 0.135106 | 0.486508 | 0.407128 |
| MmugDNA.42251.1.S1_at   | MmugDNA.42251.1 | 8.77  | 9.15  | 0.28 | 1.19 | -1.3  | 0.651382 | 0.492481 | 0.843142 | 0.693583 |
| MmugDNA.42255.1.S1_at   | MmugDNA.42255.1 | 10.76 | 11.06 | 0.05 | 0.43 | -1.23 | 0.824002 | 0.513896 | 0.928526 | 0.707322 |
| MmugDNA.42257.1.S1_at   | MmugDNA.42257.1 | 5.84  | 5.75  | 0.1  | 0.23 | 1.07  | 0.118853 | 0.144834 | 0.483396 | 0.418716 |
| MmugDNA.42265.1.S1_at   | MmugDNA.42265.1 | 5.94  | 6.16  | 0.05 | 0.21 | -1.17 | 0.586303 | 0.814412 | 0.808037 | 0.892923 |
| MmugDNA.42269.1.S1_at   | MmugDNA.42269.1 | 7.52  | 7.97  | 0.75 | 1.51 | -1.36 | 0.584528 | 0.68309  | 0.80707  | 0.815134 |
| MmugDNA.4227.1.S1_at    | MmugDNA.4227.1  | 4.38  | 3.9   | 0.53 | 0.06 | 1.39  | 0.114474 | 0.070805 | 0.477887 | 0.31231  |
| MmugDNA.42270.1.S1_at   | MmugDNA.42270.1 | 13.36 | 12.42 | 0.35 | 0.6  | 1.92  | 0.149738 | 0.166476 | 0.51433  | 0.442916 |
| MmugDNA.42283.1.S1_at   | MmugDNA.42283.1 | 5.45  | 5.43  | 0.11 | 0.07 | 1.01  | 0.691754 | 0.528216 | 0.863006 | 0.716462 |
| MmugDNA.42284.1.S1_at   | MmugDNA.42284.1 | 12.77 | 12.36 | 0.19 | 0.03 | 1.34  | 0.021474 | 0.002847 | 0.282524 | 0.078601 |
| MmugDNA.42284.1.S1_s_at | MmugDNA.42284.1 | 8.6   | 8.03  | 0.45 | 0.12 | 1.49  | 0.132021 | 0.019341 | 0.498128 | 0.174785 |
| MmugDNA.42287.1.S1_at   | MmugDNA.42287.1 | 5.76  | 6.1   | 0.14 | 0.23 | -1.27 | 0.067256 | 0.123608 | 0.407273 | 0.393646 |
| MmugDNA.42302.1.S1_at   | MmugDNA.42302.1 | 12.6  | 12.36 | 0.16 | 0.29 | 1.18  | 0.183567 | 0.109471 | 0.54773  | 0.373337 |
| MmugDNA.42304.1.S1_at   | MmugDNA.42304.1 | 6.49  | 7.57  | 0.39 | 1.1  | -2.12 | 0.235343 | 0.173336 | 0.589342 | 0.449791 |
| MmugDNA.4231.1.S1_at    | MmugDNA.4231.1  | 4.72  | 4.72  | 0.09 | 0.18 | -1    | 0.810861 | 0.916137 | 0.922872 | 0.953065 |
| MmugDNA.42323.1.S1_at   | MmugDNA.42323.1 | 9.34  | 9.9   | 0.22 | 0.16 | -1.48 | 0.046437 | 0.014436 | 0.363009 | 0.153335 |
| MmugDNA.42326.1.S1_at   | MmugDNA.42326.1 | 9.84  | 9.61  | 0.18 | 0.17 | 1.17  | 0.157679 | 0.168456 | 0.522549 | 0.445092 |
| MmugDNA.42327.1.S1_at   | MmugDNA.42327.1 | 13.31 | 12.89 | 0.05 | 0.47 | 1.34  | 0.173762 | 0.215049 | 0.537255 | 0.488898 |
| MmugDNA.42328.1.S1_at   | MmugDNA.42328.1 | 11.73 | 11.49 | 0.19 | 0.27 | 1.18  | 0.238824 | 0.296469 | 0.592015 | 0.555528 |
| MmugDNA.42336.1.S1_s_at | MmugDNA.42336.1 | 10.72 | 10.4  | 0.21 | 0.05 | 1.25  | 0.023014 | 0.015371 | 0.28954  | 0.157415 |
| MmugDNA.42341.1.S1_at   | MmugDNA.42341.1 | 9.14  | 8.89  | 0.22 | 0.87 | 1.19  | 0.440599 | 0.594666 | 0.724412 | 0.758623 |
| MmugDNA.42345.1.S1_at   | MmugDNA.42345.1 | 7.95  | 7.84  | 0.11 | 0.51 | 1.08  | 0.705276 | 0.885007 | 0.870004 | 0.934484 |
| MmugDNA.42355.1.S1_at   | MmugDNA.42355.1 | 9.46  | 9.53  | 0.34 | 0.4  | -1.05 | 0.800788 | 0.946743 | 0.917863 | 0.96978  |
| MmugDNA.42361.1.S1_at   | MmugDNA.42361.1 | 5.44  | 5.72  | 0.67 | 0.72 | -1.21 | 0.268322 | 0.328935 | 0.613133 | 0.578482 |
| MmugDNA.42375.1.S1_at   | MmugDNA.42375.1 | 4.17  | 5.24  | 0.46 | 0.86 | -2.1  | 0.157395 | 0.199822 | 0.522164 | 0.474491 |
| MmugDNA.42376.1.S1_at   | MmugDNA.42376.1 | 12.25 | 12.26 | 0.21 | 0.47 | -1.01 | 0.338641 | 0.520573 | 0.660988 | 0.711831 |
| MmugDNA.42378.1.S1_at   | MmugDNA.42378.1 | 5.94  | 5.93  | 0.38 | 0.27 | 1.01  | 0.658854 | 0.855478 | 0.846726 | 0.9176   |
| MmugDNA.42380.1.S1_at   | MmugDNA.42380.1 | 6.05  | 6.25  | 0.16 | 0.21 | -1.14 | 0.243228 | 0.26149  | 0.594876 | 0.527999 |
| MmugDNA.42381.1.S1_at   | MmugDNA.42381.1 | 5.29  | 5.06  | 0.68 | 0.58 | 1.18  | 0.968378 | 0.647699 | 0.988097 | 0.793691 |
| MmugDNA.42382.1.S1_at   | MmugDNA.42382.1 | 8.75  | 7.28  | 0.33 | 0.83 | 2.76  | 0.124388 | 0.129629 | 0.49029  | 0.401242 |
| MmugDNA.42383.1.S1_s_at | MmugDNA.42383.1 | 9.19  | 10.02 | 0.14 | 0.85 | -1.77 | 0.208352 | 0.149569 | 0.570251 | 0.424095 |
| MmugDNA.42385.1.S1_at   | MmugDNA.42385.1 | 5.49  | 5.1   | 0.62 | 0.64 | 1.31  | 0.73082  | 0.572068 | 0.883369 | 0.744208 |
| MmugDNA.42399.1.S1_at   | MmugDNA.42399.1 | 11.83 | 11.93 | 0.05 | 0.2  | -1.07 | 0.413305 | 0.385908 | 0.70838  | 0.621161 |
| MmugDNA.42401.1.S1_at   | MmugDNA.42401.1 | 11.62 | 11.21 | 0.24 | 0.11 | 1.34  | 0.138556 | 0.178013 | 0.505769 | 0.45438  |
| MmugDNA.42405.1.S1_at   | MmugDNA.42405.1 | 10.57 | 10.5  | 0.13 | 0.27 | 1.06  | 0.405706 | 0.031437 | 0.703322 | 0.219107 |
| MmugDNA.42410.1.S1_at   | MmugDNA.42410.1 | 11.28 | 11.18 | 0.09 | 0.04 | 1.07  | 0.081641 | 0.072176 | 0.432665 | 0.314715 |
| MmugDNA.42411.1.S1_at   | MmugDNA.42411.1 | 2.99  | 3.06  | 0.07 | 0.09 | -1.04 | 0.161595 | 0.30321  | 0.526484 | 0.560717 |
| MmugDNA.42412.1.S1_at   | MmugDNA.42412.1 | 4.59  | 4.56  | 0.14 | 0.02 | 1.02  | 0.771222 | 0.467323 | 0.903674 | 0.677035 |
| MmugDNA.42418.1.S1_at   | MmugDNA.42418.1 | 8.52  | 8.95  | 0.13 | 0.52 | -1.34 | 0.711784 | 0.891417 | 0.873712 | 0.938143 |

|                         |                 |       |       |      |      |        |          |          |          |          |
|-------------------------|-----------------|-------|-------|------|------|--------|----------|----------|----------|----------|
| MmugDNA.42423.1.S1_at   | MmugDNA.42423.1 | 9.04  | 8.46  | 0.24 | 0.51 | 1.5    | 0.675051 | 0.419069 | 0.8544   | 0.643266 |
| MmugDNA.42442.1.S1_at   | MmugDNA.42442.1 | 6.25  | 6.37  | 0.09 | 0.06 | -1.09  | 0.110706 | 0.299595 | 0.472545 | 0.557956 |
| MmugDNA.42446.1.S1_at   | MmugDNA.42446.1 | 7.69  | 7.22  | 0.43 | 0.17 | 1.39   | 0.134749 | 0.033643 | 0.501726 | 0.227006 |
| MmugDNA.4245.1.S1_at    | MmugDNA.4245.1  | 5.3   | 5.22  | 0.14 | 0.06 | 1.06   | 0.763844 | 0.620301 | 0.900476 | 0.775303 |
| MmugDNA.42454.1.S1_at   | MmugDNA.42454.1 | 12.72 | 12.65 | 0.24 | 0.4  | 1.04   | 0.773808 | 0.355511 | 0.90499  | 0.597777 |
| MmugDNA.42458.1.S1_at   | MmugDNA.42458.1 | 6.85  | 7     | 0.17 | 0.13 | -1.11  | 0.253172 | 0.374176 | 0.60185  | 0.612678 |
| MmugDNA.42468.1.S1_at   | MmugDNA.42468.1 | 4.08  | 5.25  | 0.17 | 1    | -2.25  | 0.130038 | 0.119012 | 0.496209 | 0.387269 |
| MmugDNA.42469.1.S1_at   | MmugDNA.42469.1 | 12.51 | 12.47 | 0.12 | 0.34 | 1.03   | 0.637727 | 0.786388 | 0.836256 | 0.876296 |
| MmugDNA.42476.1.S1_at   | MmugDNA.42476.1 | 9.29  | 9.39  | 0.55 | 0.6  | -1.08  | 0.645143 | 0.816582 | 0.840202 | 0.894202 |
| MmugDNA.42480.1.S1_at   | MmugDNA.42480.1 | 8.15  | 7.74  | 0.22 | 0.25 | 1.32   | 0.221937 | 0.248886 | 0.580625 | 0.517964 |
| MmugDNA.42481.1.S1_at   | MmugDNA.42481.1 | 11.84 | 11.28 | 0.14 | 0.19 | 1.47   | 0.04768  | 0.063478 | 0.367037 | 0.298441 |
| MmugDNA.42482.1.S1_at   | MmugDNA.42482.1 | 10.49 | 9.41  | 0.21 | 0.51 | 2.12   | 0.017687 | 0.008806 | 0.267454 | 0.124117 |
| MmugDNA.42484.1.S1_at   | MmugDNA.42484.1 | 10.11 | 9.7   | 0.2  | 0.52 | 1.34   | 0.269878 | 0.363049 | 0.614511 | 0.603503 |
| MmugDNA.42485.1.S1_at   | MmugDNA.42485.1 | 11.8  | 11.56 | 0.06 | 0.13 | 1.18   | 0.101827 | 0.079153 | 0.461313 | 0.326338 |
| MmugDNA.42489.1.S1_at   | MmugDNA.42489.1 | 4.44  | 3.99  | 0.08 | 0.25 | 1.37   | 0.041592 | 0.030087 | 0.352305 | 0.215257 |
| MmugDNA.4249.1.S1_at    | MmugDNA.4249.1  | 8.32  | 9.08  | 0.08 | 0.45 | -1.69  | 0.047234 | 0.007704 | 0.365679 | 0.117294 |
| MmugDNA.42499.1.S1_at   | MmugDNA.42499.1 | 4.6   | 8.74  | 2.36 | 2.62 | -17.72 | 0.33223  | 0.35116  | 0.656683 | 0.594851 |
| MmugDNA.42505.1.S1_at   | MmugDNA.42505.1 | 10.2  | 10.22 | 0.22 | 0.51 | -1.01  | 0.544182 | 0.746272 | 0.784268 | 0.85272  |
| MmugDNA.42506.1.S1_at   | MmugDNA.42506.1 | 7.76  | 7.47  | 0.12 | 0.18 | 1.23   | 0.113584 | 0.181778 | 0.476938 | 0.458373 |
| MmugDNA.42507.1.S1_at   | MmugDNA.42507.1 | 13.07 | 13.07 | 0.06 | 0.06 | -1     | 0.586472 | 0.544122 | 0.808146 | 0.726618 |
| MmugDNA.42511.1.S1_at   | MmugDNA.42511.1 | 5.36  | 5.47  | 0.03 | 0.09 | -1.08  | 0.076474 | 0.0808   | 0.425064 | 0.328703 |
| MmugDNA.42517.1.S1_at   | MmugDNA.42517.1 | 6.48  | 6.65  | 0.22 | 0.08 | -1.13  | 0.547993 | 0.47197  | 0.786449 | 0.679799 |
| MmugDNA.42519.1.S1_at   | MmugDNA.42519.1 | 6.58  | 6.59  | 0.18 | 0.04 | -1.01  | 0.630911 | 0.394743 | 0.832393 | 0.627208 |
| MmugDNA.42521.1.S1_at   | MmugDNA.42521.1 | 12.93 | 12.82 | 0.03 | 0.08 | 1.08   | 0.078893 | 0.05974  | 0.428609 | 0.29107  |
| MmugDNA.42522.1.S1_at   | MmugDNA.42522.1 | 12.97 | 12.77 | 0.08 | 0.09 | 1.14   | 0.094569 | 0.048679 | 0.452166 | 0.265631 |
| MmugDNA.42525.1.S1_at   | MmugDNA.42525.1 | 11.51 | 11.43 | 0.18 | 0.05 | 1.05   | 0.385874 | 0.527234 | 0.690905 | 0.715896 |
| MmugDNA.42528.1.S1_at   | MmugDNA.42528.1 | 4.79  | 4.97  | 0.14 | 0.23 | -1.13  | 0.400009 | 0.488715 | 0.699692 | 0.691325 |
| MmugDNA.42530.1.S1_at   | MmugDNA.42530.1 | 12.7  | 12.53 | 0.15 | 0.03 | 1.12   | 0.039223 | 0.024527 | 0.346898 | 0.196012 |
| MmugDNA.42544.1.S1_at   | MmugDNA.42544.1 | 11    | 11.26 | 0.38 | 0.38 | -1.2   | 0.803974 | 0.947672 | 0.919355 | 0.970284 |
| MmugDNA.42544.1.S1_s_at | MmugDNA.42544.1 | 12.19 | 12.27 | 0.24 | 0.33 | -1.05  | 0.991907 | 0.999816 | 0.997194 | 0.999948 |
| MmugDNA.42547.1.S1_at   | MmugDNA.42547.1 | 9.99  | 9.6   | 0.12 | 0.01 | 1.31   | 0.004161 | 0.000845 | 0.181739 | 0.047038 |
| MmugDNA.42549.1.S1_at   | MmugDNA.42549.1 | 8.95  | 9.73  | 0.28 | 0.64 | -1.72  | 0.031491 | 0.018711 | 0.321943 | 0.171763 |
| MmugDNA.4255.1.S1_at    | MmugDNA.4255.1  | 7.1   | 7.19  | 0    | 0.09 | -1.06  | 0.181917 | 0.528526 | 0.546458 | 0.716664 |
| MmugDNA.42553.1.S1_at   | MmugDNA.42553.1 | 7.87  | 7.26  | 0.4  | 0.19 | 1.53   | 0.064498 | 0.041987 | 0.402975 | 0.249463 |
| MmugDNA.42562.1.S1_at   | MmugDNA.42562.1 | 3.93  | 4.39  | 0.44 | 0.49 | -1.38  | 0.891483 | 0.402048 | 0.956763 | 0.631153 |
| MmugDNA.42571.1.S1_at   | MmugDNA.42571.1 | 11.11 | 11.87 | 0.17 | 0.36 | -1.69  | 0.014146 | 0.009108 | 0.251402 | 0.125983 |
| MmugDNA.42575.1.S1_at   | MmugDNA.42575.1 | 6.08  | 6.11  | 0.09 | 0.08 | -1.02  | 0.86679  | 0.910391 | 0.946842 | 0.949416 |
| MmugDNA.4258.1.S1_at    | MmugDNA.4258.1  | 4.2   | 4.07  | 0.03 | 0.09 | 1.1    | 0.077255 | 0.218041 | 0.426761 | 0.491683 |
| MmugDNA.42588.1.S1_at   | MmugDNA.42588.1 | 7.42  | 8.82  | 0.21 | 0.59 | -2.64  | 0.018241 | 0.009721 | 0.269591 | 0.129718 |
| MmugDNA.4260.1.S1_at    | MmugDNA.4260.1  | 7.99  | 7.95  | 0.12 | 0.19 | 1.03   | 0.640335 | 0.81068  | 0.837613 | 0.890836 |
| MmugDNA.42607.1.S1_at   | MmugDNA.42607.1 | 9.33  | 8.59  | 0.09 | 0.61 | 1.67   | 0.060967 | 0.047693 | 0.394705 | 0.263323 |

|                         |                 |       |       |      |      |       |          |          |          |          |
|-------------------------|-----------------|-------|-------|------|------|-------|----------|----------|----------|----------|
| MmugDNA.42613.1.S1_at   | MmugDNA.42613.1 | 4.84  | 5.38  | 0.57 | 1.33 | -1.46 | 0.797723 | 0.540941 | 0.916116 | 0.724649 |
| MmugDNA.42615.1.S1_at   | MmugDNA.42615.1 | 9.85  | 10.65 | 0.35 | 0.16 | -1.74 | 0.057014 | 0.023162 | 0.387418 | 0.190579 |
| MmugDNA.42624.1.S1_at   | MmugDNA.42624.1 | 4.94  | 5.23  | 0.29 | 0.49 | -1.22 | 0.302563 | 0.432882 | 0.636951 | 0.653221 |
| MmugDNA.42634.1.S1_at   | MmugDNA.42634.1 | 3.25  | 3.18  | 0.16 | 0.05 | 1.06  | 0.478201 | 0.399259 | 0.747114 | 0.629735 |
| MmugDNA.42635.1.S1_at   | MmugDNA.42635.1 | 7.72  | 8.1   | 0.5  | 0.25 | -1.31 | 0.116845 | 0.13198  | 0.480756 | 0.404024 |
| MmugDNA.42638.1.S1_at   | MmugDNA.42638.1 | 12.18 | 12.13 | 0.12 | 0.16 | 1.03  | 0.86471  | 0.074912 | 0.945595 | 0.318845 |
| MmugDNA.42657.1.S1_s_at | MmugDNA.42657.1 | 11.11 | 10.74 | 0.06 | 0.02 | 1.29  | 0.001021 | 0.000101 | 0.141717 | 0.027996 |
| MmugDNA.42663.1.S1_at   | MmugDNA.42663.1 | 10.58 | 10.41 | 0.88 | 1.15 | 1.12  | 0.51869  | 0.607521 | 0.769592 | 0.766417 |
| MmugDNA.42664.1.S1_at   | MmugDNA.42664.1 | 8.42  | 7.8   | 0.58 | 0.73 | 1.53  | 0.776171 | 0.933611 | 0.906231 | 0.962229 |
| MmugDNA.42668.1.S1_at   | MmugDNA.42668.1 | 5.54  | 5.52  | 0.15 | 0.2  | 1.01  | 0.37587  | 0.200962 | 0.684808 | 0.475426 |
| MmugDNA.4267.1.S1_at    | MmugDNA.4267.1  | 9.83  | 10.19 | 0.2  | 0.15 | -1.28 | 0.068186 | 0.022877 | 0.409575 | 0.189288 |
| MmugDNA.42682.1.S1_at   | MmugDNA.42682.1 | 10.34 | 11.17 | 0.28 | 0.51 | -1.78 | 0.098908 | 0.094205 | 0.458711 | 0.350889 |
| MmugDNA.42683.1.S1_at   | MmugDNA.42683.1 | 7.35  | 8.86  | 0.2  | 0.54 | -2.84 | 0.009668 | 0.006914 | 0.226235 | 0.112399 |
| MmugDNA.42684.1.S1_at   | MmugDNA.42684.1 | 9.01  | 8.5   | 0.17 | 0.24 | 1.43  | 0.028478 | 0.002742 | 0.311384 | 0.077231 |
| MmugDNA.42694.1.S1_at   | MmugDNA.42694.1 | 7.12  | 7.19  | 0.32 | 0.57 | -1.05 | 0.976854 | 0.995679 | 0.991141 | 0.997321 |
| MmugDNA.42698.1.S1_at   | MmugDNA.42698.1 | 10.09 | 9.35  | 0.25 | 0.46 | 1.67  | 0.10597  | 0.070199 | 0.466831 | 0.311194 |
| MmugDNA.42699.1.S1_at   | MmugDNA.42699.1 | 7.83  | 6.74  | 0.26 | 0.58 | 2.13  | 0.036315 | 0.022005 | 0.339201 | 0.18564  |
| MmugDNA.427.1.S1_at     | MmugDNA.427.1   | 7.29  | 7.41  | 0.63 | 0.42 | -1.09 | 0.888639 | 0.978919 | 0.95536  | 0.988587 |
| MmugDNA.42705.1.S1_at   | MmugDNA.42705.1 | 10.15 | 10.98 | 0.29 | 0.25 | -1.77 | 0.041311 | 0.032877 | 0.35151  | 0.224478 |
| MmugDNA.42706.1.S1_at   | MmugDNA.42706.1 | 12.66 | 12.63 | 0.05 | 0.27 | 1.02  | 0.742849 | 0.895267 | 0.890068 | 0.940185 |
| MmugDNA.4271.1.S1_at    | MmugDNA.4271.1  | 10.08 | 9.83  | 0.07 | 0.2  | 1.19  | 0.52848  | 0.552124 | 0.775649 | 0.731511 |
| MmugDNA.42717.1.S1_at   | MmugDNA.42717.1 | 3.2   | 2.92  | 0.33 | 0.18 | 1.22  | 0.163989 | 0.217951 | 0.528211 | 0.491553 |
| MmugDNA.42724.1.S1_at   | MmugDNA.42724.1 | 4.99  | 4.98  | 0.08 | 0.11 | 1.01  | 0.466915 | 0.868671 | 0.740422 | 0.925405 |
| MmugDNA.42726.1.S1_at   | MmugDNA.42726.1 | 9.05  | 7.19  | 0.23 | 0.22 | 3.64  | 0.000681 | 0.000104 | 0.136818 | 0.028099 |
| MmugDNA.42739.1.S1_at   | MmugDNA.42739.1 | 9.5   | 8.55  | 0.28 | 0.27 | 1.93  | 0.025003 | 0.0013   | 0.297503 | 0.055602 |
| MmugDNA.4274.1.S1_at    | MmugDNA.4274.1  | 7.36  | 7.49  | 1.28 | 1.77 | -1.1  | 0.889944 | 0.713077 | 0.955994 | 0.833638 |
| MmugDNA.42742.1.S1_at   | MmugDNA.42742.1 | 11    | 9.95  | 0.44 | 0.48 | 2.07  | 0.032327 | 0.041366 | 0.324641 | 0.247995 |
| MmugDNA.42748.1.S1_at   | MmugDNA.42748.1 | 12.14 | 11.52 | 0.17 | 1.48 | 1.54  | 0.45879  | 0.175109 | 0.735659 | 0.451787 |
| MmugDNA.42749.1.S1_at   | MmugDNA.42749.1 | 3.66  | 3.54  | 0.09 | 0.09 | 1.08  | 0.340674 | 0.421682 | 0.662123 | 0.645222 |
| MmugDNA.4275.1.S1_at    | MmugDNA.4275.1  | 9.1   | 8.79  | 0.1  | 0.26 | 1.24  | 0.1288   | 0.097743 | 0.494664 | 0.355598 |
| MmugDNA.42752.1.S1_at   | MmugDNA.42752.1 | 7.92  | 7.73  | 0.14 | 0.35 | 1.15  | 0.452633 | 0.230154 | 0.732213 | 0.502007 |
| MmugDNA.42754.1.S1_at   | MmugDNA.42754.1 | 10.06 | 9.63  | 0.29 | 0.4  | 1.35  | 0.219157 | 0.298266 | 0.578562 | 0.556931 |
| MmugDNA.42755.1.S1_at   | MmugDNA.42755.1 | 5.95  | 5.69  | 0.17 | 0.1  | 1.2   | 0.200469 | 0.119012 | 0.563327 | 0.387269 |
| MmugDNA.42762.1.S1_at   | MmugDNA.42762.1 | 11.35 | 12.06 | 0.16 | 0.37 | -1.64 | 0.036983 | 0.026274 | 0.340567 | 0.203033 |
| MmugDNA.42768.1.S1_at   | MmugDNA.42768.1 | 10.47 | 10.39 | 0.16 | 0.19 | 1.05  | 0.619497 | 0.087485 | 0.825636 | 0.340617 |
| MmugDNA.42769.1.S1_at   | MmugDNA.42769.1 | 7.13  | 6.22  | 0.89 | 0.47 | 1.88  | 0.138551 | 0.124865 | 0.505769 | 0.395219 |
| MmugDNA.42770.1.S1_at   | MmugDNA.42770.1 | 4.96  | 5.11  | 0.1  | 0.12 | -1.11 | 0.143462 | 0.377552 | 0.510312 | 0.615012 |
| MmugDNA.42772.1.S1_at   | MmugDNA.42772.1 | 10.53 | 10.55 | 0.18 | 0.27 | -1.01 | 0.538908 | 0.113431 | 0.780873 | 0.379509 |
| MmugDNA.42775.1.S1_at   | MmugDNA.42775.1 | 6.82  | 6.67  | 0.38 | 0.27 | 1.11  | 0.47452  | 0.331667 | 0.745215 | 0.580237 |
| MmugDNA.42776.1.S1_at   | MmugDNA.42776.1 | 8.07  | 8.07  | 0.08 | 0.16 | -1    | 0.424299 | 0.60734  | 0.714453 | 0.766359 |
| MmugDNA.42778.1.S1_at   | MmugDNA.42778.1 | 12.81 | 12.57 | 0.11 | 0.09 | 1.18  | 0.027832 | 0.036808 | 0.309107 | 0.236386 |

|                         |                 |       |       |      |      |       |          |          |          |          |
|-------------------------|-----------------|-------|-------|------|------|-------|----------|----------|----------|----------|
| MmugDNA.42779.1.S1_at   | MmugDNA.42779.1 | 9.22  | 9.4   | 0.28 | 0.55 | -1.13 | 0.317633 | 0.071597 | 0.648004 | 0.313714 |
| MmugDNA.42780.1.S1_at   | MmugDNA.42780.1 | 8.25  | 8.25  | 0.26 | 0.19 | -1    | 0.462568 | 0.398619 | 0.738289 | 0.629458 |
| MmugDNA.42783.1.S1_at   | MmugDNA.42783.1 | 11.81 | 10.27 | 0.14 | 0.1  | 2.91  | 0.000074 | 0.000003 | 0.112653 | 0.013386 |
| MmugDNA.42793.1.S1_at   | MmugDNA.42793.1 | 6.51  | 7.65  | 0.73 | 0.7  | -2.2  | 0.137201 | 0.107217 | 0.504356 | 0.369902 |
| MmugDNA.42794.1.S1_at   | MmugDNA.42794.1 | 4.74  | 4.46  | 0.29 | 0.79 | 1.21  | 0.530454 | 0.583506 | 0.776893 | 0.751817 |
| MmugDNA.42795.1.S1_s_at | MmugDNA.42795.1 | 10.99 | 10.04 | 0.28 | 0.3  | 1.93  | 0.013566 | 0.006181 | 0.24799  | 0.106774 |
| MmugDNA.42796.1.S1_at   | MmugDNA.42796.1 | 9.16  | 9.48  | 0.08 | 0.27 | -1.26 | 0.143127 | 0.152276 | 0.510004 | 0.42706  |
| MmugDNA.42799.1.S1_at   | MmugDNA.42799.1 | 12.54 | 12.71 | 0.04 | 0.06 | -1.12 | 0.013482 | 0.0106   | 0.24708  | 0.134272 |
| MmugDNA.42801.1.S1_at   | MmugDNA.42801.1 | 7.11  | 6.61  | 0.09 | 0.52 | 1.4   | 0.236592 | 0.339237 | 0.590504 | 0.585918 |
| MmugDNA.42810.1.S1_at   | MmugDNA.42810.1 | 9.77  | 9.35  | 0.13 | 0.18 | 1.34  | 0.06007  | 0.052289 | 0.393081 | 0.27415  |
| MmugDNA.42815.1.S1_at   | MmugDNA.42815.1 | 8.32  | 6.8   | 1.18 | 0.29 | 2.87  | 0.113388 | 0.087209 | 0.476642 | 0.340194 |
| MmugDNA.42816.1.S1_at   | MmugDNA.42816.1 | 10.38 | 10.36 | 0.07 | 0.47 | 1.02  | 0.877741 | 0.953203 | 0.951009 | 0.973457 |
| MmugDNA.4282.1.S1_at    | MmugDNA.4282.1  | 11.26 | 12.31 | 0.52 | 0.22 | -2.08 | 0.013409 | 0.005786 | 0.246639 | 0.104502 |
| MmugDNA.42823.1.S1_at   | MmugDNA.42823.1 | 8.66  | 9.66  | 0.59 | 1.53 | -2    | 0.395661 | 0.41628  | 0.696523 | 0.641518 |
| MmugDNA.42828.1.S1_at   | MmugDNA.42828.1 | 5.79  | 6.08  | 0.2  | 0.09 | -1.22 | 0.246688 | 0.011451 | 0.597836 | 0.13846  |
| MmugDNA.42829.1.S1_s_at | MmugDNA.42829.1 | 8.26  | 7.97  | 0.21 | 0.16 | 1.22  | 0.532348 | 0.151641 | 0.777633 | 0.426383 |
| MmugDNA.42832.1.S1_at   | MmugDNA.42832.1 | 7.79  | 8.47  | 0.34 | 0.33 | -1.6  | 0.092201 | 0.068842 | 0.448698 | 0.308714 |
| MmugDNA.42838.1.S1_at   | MmugDNA.42838.1 | 9.38  | 9.79  | 0.16 | 0.06 | -1.32 | 0.053143 | 0.092465 | 0.379463 | 0.34836  |
| MmugDNA.42847.1.S1_at   | MmugDNA.42847.1 | 11.22 | 11.54 | 0.29 | 0.11 | -1.25 | 0.60073  | 0.431021 | 0.815446 | 0.651995 |
| MmugDNA.42847.1.S1_s_at | MmugDNA.42847.1 | 10.37 | 10.65 | 0.25 | 0.08 | -1.22 | 0.203402 | 0.287872 | 0.566041 | 0.549161 |
| MmugDNA.42851.1.S1_at   | MmugDNA.42851.1 | 6.48  | 6.56  | 0.15 | 0.05 | -1.06 | 0.815989 | 0.736853 | 0.925276 | 0.847693 |
| MmugDNA.42852.1.S1_at   | MmugDNA.42852.1 | 4.96  | 5.16  | 0.35 | 0.12 | -1.15 | 0.61495  | 0.110978 | 0.823328 | 0.375405 |
| MmugDNA.42852.1.S1_s_at | MmugDNA.42852.1 | 12.67 | 12.98 | 0.11 | 0.19 | -1.24 | 0.19186  | 0.057097 | 0.55488  | 0.284945 |
| MmugDNA.42859.1.S1_at   | MmugDNA.42859.1 | 8.32  | 8.29  | 0.33 | 0.12 | 1.02  | 0.656821 | 0.853399 | 0.845614 | 0.916579 |
| MmugDNA.42860.1.S1_at   | MmugDNA.42860.1 | 5.12  | 5.38  | 0.07 | 0.22 | -1.2  | 0.265811 | 0.320191 | 0.611413 | 0.572551 |
| MmugDNA.42870.1.S1_at   | MmugDNA.42870.1 | 11.49 | 11.62 | 0.11 | 0.29 | -1.1  | 0.441483 | 0.356728 | 0.724949 | 0.598529 |
| MmugDNA.42872.1.S1_at   | MmugDNA.42872.1 | 6.27  | 6.16  | 0.11 | 0.11 | 1.08  | 0.673423 | 0.316185 | 0.853546 | 0.569645 |
| MmugDNA.42873.1.S1_at   | MmugDNA.42873.1 | 5.91  | 5.32  | 0.52 | 0.32 | 1.51  | 0.231566 | 0.27333  | 0.587471 | 0.537788 |
| MmugDNA.42876.1.S1_at   | MmugDNA.42876.1 | 3.46  | 4.87  | 0.1  | 0.52 | -2.65 | 0.020452 | 0.007031 | 0.278215 | 0.113112 |
| MmugDNA.42877.1.S1_at   | MmugDNA.42877.1 | 9.96  | 9.09  | 0.12 | 0.35 | 1.82  | 0.020295 | 0.0117   | 0.277443 | 0.140174 |
| MmugDNA.42880.1.S1_at   | MmugDNA.42880.1 | 4.68  | 4.67  | 0.18 | 0.22 | 1.01  | 0.977622 | 0.985287 | 0.991534 | 0.991665 |
| MmugDNA.42881.1.S1_at   | MmugDNA.42881.1 | 10.95 | 11.2  | 0.03 | 0.06 | -1.19 | 0.002649 | 0.000477 | 0.164386 | 0.038572 |
| MmugDNA.42883.1.S1_at   | MmugDNA.42883.1 | 6.73  | 7.08  | 0.24 | 0.06 | -1.27 | 0.179902 | 0.290861 | 0.544019 | 0.551436 |
| MmugDNA.42885.1.S1_at   | MmugDNA.42885.1 | 8.03  | 8.34  | 0.3  | 1.17 | -1.23 | 0.571144 | 0.417227 | 0.7999   | 0.642079 |
| MmugDNA.42889.1.S1_at   | MmugDNA.42889.1 | 11.28 | 10.82 | 0.13 | 0.22 | 1.38  | 0.078725 | 0.051214 | 0.428609 | 0.271799 |
| MmugDNA.42890.1.S1_at   | MmugDNA.42890.1 | 13.07 | 13.2  | 0.1  | 0.12 | -1.1  | 0.11764  | 0.000995 | 0.48184  | 0.050459 |
| MmugDNA.42891.1.S1_at   | MmugDNA.42891.1 | 3.88  | 3.74  | 0.08 | 0.03 | 1.11  | 0.041208 | 0.05319  | 0.351136 | 0.276445 |
| MmugDNA.42897.1.S1_at   | MmugDNA.42897.1 | 6.78  | 6.97  | 0.44 | 0.56 | -1.14 | 0.306532 | 0.268493 | 0.639593 | 0.534123 |
| MmugDNA.42899.1.S1_at   | MmugDNA.42899.1 | 13.21 | 13.31 | 0.05 | 0.05 | -1.07 | 0.086058 | 0.12045  | 0.440066 | 0.38925  |
| MmugDNA.42901.1.S1_at   | MmugDNA.42901.1 | 10.38 | 9.41  | 0.07 | 0.26 | 1.97  | 0.003116 | 0.000221 | 0.172335 | 0.032385 |
| MmugDNA.42902.1.S1_at   | MmugDNA.42902.1 | 12.88 | 12.97 | 0.17 | 0.35 | -1.06 | 0.719676 | 0.818465 | 0.877054 | 0.895358 |

|                         |                 |       |       |      |      |       |          |          |          |          |
|-------------------------|-----------------|-------|-------|------|------|-------|----------|----------|----------|----------|
| MmugDNA.42903.1.S1_at   | MmugDNA.42903.1 | 8.2   | 7.57  | 0.28 | 0.14 | 1.56  | 0.015969 | 0.00724  | 0.262019 | 0.114286 |
| MmugDNA.42905.1.S1_at   | MmugDNA.42905.1 | 6.7   | 7.76  | 0.42 | 0.29 | -2.08 | 0.04102  | 0.119477 | 0.35051  | 0.388113 |
| MmugDNA.42910.1.S1_at   | MmugDNA.42910.1 | 8.53  | 8.49  | 0.2  | 0.59 | 1.03  | 0.676449 | 0.73705  | 0.854962 | 0.847791 |
| MmugDNA.42913.1.S1_s_at | MmugDNA.42913.1 | 3.3   | 3.31  | 0.12 | 0.09 | -1.01 | 0.647341 | 0.829047 | 0.841323 | 0.901709 |
| MmugDNA.42921.1.S1_at   | MmugDNA.42921.1 | 12.06 | 12.29 | 0.24 | 0.24 | -1.18 | 0.129084 | 0.136738 | 0.495114 | 0.409301 |
| MmugDNA.42924.1.S1_at   | MmugDNA.42924.1 | 9.62  | 10.35 | 0.06 | 0.28 | -1.65 | 0.015292 | 0.015923 | 0.257781 | 0.160155 |
| MmugDNA.42925.1.S1_at   | MmugDNA.42925.1 | 8.43  | 9.17  | 0.6  | 0.4  | -1.67 | 0.087718 | 0.063957 | 0.442061 | 0.29906  |
| MmugDNA.42926.1.S1_at   | MmugDNA.42926.1 | 10.98 | 10.45 | 0.11 | 0.15 | 1.45  | 0.014959 | 0.008287 | 0.256514 | 0.120788 |
| MmugDNA.42928.1.S1_at   | MmugDNA.42928.1 | 6.86  | 6.85  | 0.29 | 0.19 | 1.01  | 0.866498 | 0.488397 | 0.946759 | 0.691144 |
| MmugDNA.42934.1.S1_s_at | MmugDNA.42934.1 | 11.02 | 11.52 | 0.18 | 0.24 | -1.41 | 0.105558 | 0.119706 | 0.46647  | 0.388402 |
| MmugDNA.42938.1.S1_at   | MmugDNA.42938.1 | 11.75 | 11.4  | 0.07 | 0.16 | 1.27  | 0.044182 | 0.012261 | 0.358244 | 0.14321  |
| MmugDNA.42939.1.S1_at   | MmugDNA.42939.1 | 7.72  | 7.09  | 0.37 | 0.06 | 1.54  | 0.063756 | 0.016052 | 0.401553 | 0.160532 |
| MmugDNA.42942.1.S1_at   | MmugDNA.42942.1 | 9.95  | 9.63  | 0.08 | 0.2  | 1.24  | 0.063894 | 0.006777 | 0.401767 | 0.111388 |
| MmugDNA.42957.1.S1_at   | MmugDNA.42957.1 | 6.65  | 7.08  | 0.23 | 0.12 | -1.34 | 0.054392 | 0.034792 | 0.381851 | 0.230686 |
| MmugDNA.42960.1.S1_at   | MmugDNA.42960.1 | 7.47  | 6.97  | 0.65 | 0.17 | 1.42  | 0.351809 | 0.065141 | 0.669189 | 0.301205 |
| MmugDNA.42968.1.S1_at   | MmugDNA.42968.1 | 3.45  | 3.42  | 0.58 | 0.13 | 1.02  | 0.274019 | 0.317567 | 0.617262 | 0.570774 |
| MmugDNA.4297.1.S1_at    | MmugDNA.4297.1  | 12.62 | 12.42 | 0.05 | 0.14 | 1.15  | 0.173274 | 0.212095 | 0.536967 | 0.486036 |
| MmugDNA.4297.1.S1_s_at  | MmugDNA.4297.1  | 12.23 | 12.07 | 0.06 | 0.16 | 1.11  | 0.385916 | 0.532502 | 0.690942 | 0.719065 |
| MmugDNA.42977.1.S1_at   | MmugDNA.42977.1 | 11.22 | 11.43 | 0.07 | 0.2  | -1.16 | 0.348566 | 0.117187 | 0.667173 | 0.384646 |
| MmugDNA.4298.1.S1_at    | MmugDNA.4298.1  | 5.36  | 5.59  | 0.14 | 0.04 | -1.18 | 0.062505 | 0.057027 | 0.398319 | 0.284893 |
| MmugDNA.43.1.S1_at      | MmugDNA.43.1    | 10.7  | 10.26 | 0.07 | 0.51 | 1.35  | 0.323904 | 0.258758 | 0.651789 | 0.525949 |
| MmugDNA.43001.1.S1_s_at | MmugDNA.43001.1 | 9.96  | 10.27 | 0.12 | 0.04 | -1.24 | 0.012668 | 0.000218 | 0.243163 | 0.032385 |
| MmugDNA.43009.1.S1_at   | MmugDNA.43009.1 | 11.81 | 11.35 | 0.08 | 0.24 | 1.37  | 0.032332 | 0.024431 | 0.324641 | 0.195601 |
| MmugDNA.43010.1.S1_at   | MmugDNA.43010.1 | 11.38 | 10.78 | 0.2  | 0.53 | 1.52  | 0.040429 | 0.030819 | 0.349277 | 0.217376 |
| MmugDNA.43012.1.S1_at   | MmugDNA.43012.1 | 7.17  | 7.21  | 0.18 | 0.13 | -1.03 | 0.714907 | 0.78703  | 0.875005 | 0.876809 |
| MmugDNA.43019.1.S1_at   | MmugDNA.43019.1 | 10.64 | 10.47 | 0.23 | 0.17 | 1.12  | 0.722521 | 0.066753 | 0.878757 | 0.304215 |
| MmugDNA.43024.1.S1_s_at | MmugDNA.43024.1 | 10.43 | 10.89 | 0.29 | 0.45 | -1.37 | 0.045825 | 0.023347 | 0.361845 | 0.19156  |
| MmugDNA.43027.1.S1_s_at | MmugDNA.43027.1 | 8.37  | 8.44  | 0.08 | 0.19 | -1.05 | 0.285287 | 0.323695 | 0.624811 | 0.57456  |
| MmugDNA.43033.1.S1_at   | MmugDNA.43033.1 | 7.79  | 6.69  | 0.34 | 0.06 | 2.14  | 0.00743  | 0.00311  | 0.208164 | 0.081305 |
| MmugDNA.43035.1.S1_at   | MmugDNA.43035.1 | 12.52 | 11.62 | 0.05 | 0.28 | 1.87  | 0.005323 | 0.000942 | 0.191107 | 0.049026 |
| MmugDNA.43037.1.S1_at   | MmugDNA.43037.1 | 11.62 | 10.92 | 0.12 | 0.35 | 1.63  | 0.044584 | 0.036239 | 0.358786 | 0.234952 |
| MmugDNA.43038.1.S1_s_at | MmugDNA.43038.1 | 13.17 | 12.91 | 0.07 | 0.41 | 1.2   | 0.267622 | 0.248658 | 0.612672 | 0.517917 |
| MmugDNA.43040.1.S1_at   | MmugDNA.43040.1 | 11.72 | 11.58 | 0.16 | 0.45 | 1.1   | 0.693089 | 0.326449 | 0.863807 | 0.576576 |
| MmugDNA.43041.1.S1_at   | MmugDNA.43041.1 | 6.1   | 6.07  | 0.1  | 0.11 | 1.02  | 0.434352 | 0.140589 | 0.720416 | 0.413822 |
| MmugDNA.43050.1.S1_at   | MmugDNA.43050.1 | 5.92  | 6.03  | 0.34 | 0.44 | -1.08 | 0.74446  | 0.380695 | 0.890646 | 0.617363 |
| MmugDNA.43054.1.S1_at   | MmugDNA.43054.1 | 11.26 | 11.47 | 0.28 | 0.17 | -1.16 | 0.352691 | 0.065771 | 0.669719 | 0.301767 |
| MmugDNA.43055.1.S1_at   | MmugDNA.43055.1 | 9.2   | 9.16  | 0.07 | 0.55 | 1.03  | 0.498948 | 0.319363 | 0.758785 | 0.571724 |
| MmugDNA.43060.1.S1_at   | MmugDNA.43060.1 | 4.24  | 4.12  | 0.07 | 0.2  | 1.08  | 0.782138 | 0.683341 | 0.909138 | 0.815238 |
| MmugDNA.43065.1.S1_at   | MmugDNA.43065.1 | 7.31  | 8.3   | 0.3  | 0.34 | -1.97 | 0.042194 | 0.016455 | 0.354509 | 0.162441 |
| MmugDNA.43070.1.S1_at   | MmugDNA.43070.1 | 9.01  | 9.19  | 0.2  | 0.12 | -1.13 | 0.49791  | 0.594605 | 0.758109 | 0.758623 |
| MmugDNA.43085.1.S1_at   | MmugDNA.43085.1 | 6.69  | 6.59  | 0.09 | 0.28 | 1.07  | 0.749401 | 0.70424  | 0.892711 | 0.828375 |



|                         |                 |       |       |      |      |        |          |          |          |          |
|-------------------------|-----------------|-------|-------|------|------|--------|----------|----------|----------|----------|
| MmugDNA.43094.1.S1_at   | MmugDNA.43094.1 | 7.41  | 8.29  | 0.54 | 1.22 | -1.85  | 0.258081 | 0.109289 | 0.605415 | 0.37308  |
| MmugDNA.43096.1.S1_at   | MmugDNA.43096.1 | 10.07 | 10.39 | 0.13 | 0.42 | -1.25  | 0.119872 | 0.138959 | 0.484448 | 0.412048 |
| MmugDNA.43098.1.S1_at   | MmugDNA.43098.1 | 7.56  | 8.17  | 0.58 | 1.13 | -1.53  | 0.549809 | 0.207362 | 0.787481 | 0.481579 |
| MmugDNA.43099.1.S1_at   | MmugDNA.43099.1 | 5.96  | 5.98  | 0.16 | 0.21 | -1.01  | 0.986483 | 0.283898 | 0.995218 | 0.546237 |
| MmugDNA.4310.1.S1_at    | MmugDNA.4310.1  | 12.51 | 12.84 | 0.05 | 0.1  | -1.25  | 0.0047   | 0.000905 | 0.184492 | 0.048084 |
| MmugDNA.43107.1.S1_at   | MmugDNA.43107.1 | 3.15  | 3.25  | 0.16 | 0.1  | -1.07  | 0.233074 | 0.203813 | 0.587988 | 0.478081 |
| MmugDNA.43109.1.S1_at   | MmugDNA.43109.1 | 10.31 | 9.87  | 0.13 | 0.35 | 1.36   | 0.227604 | 0.261372 | 0.585103 | 0.527867 |
| MmugDNA.43112.1.S1_at   | MmugDNA.43112.1 | 3.67  | 4.09  | 0.07 | 0.16 | -1.34  | 0.026998 | 0.085853 | 0.305815 | 0.337972 |
| MmugDNA.43113.1.S1_at   | MmugDNA.43113.1 | 4.93  | 5.87  | 0.31 | 0.87 | -1.92  | 0.076867 | 0.021809 | 0.425685 | 0.184765 |
| MmugDNA.43116.1.S1_at   | MmugDNA.43116.1 | 10.25 | 13.83 | 2.06 | 2.4  | -12    | 0.449762 | 0.253639 | 0.730493 | 0.52198  |
| MmugDNA.43117.1.S1_at   | MmugDNA.43117.1 | 3.98  | 4.05  | 0.15 | 0.07 | -1.05  | 0.251719 | 0.508779 | 0.601018 | 0.703824 |
| MmugDNA.43120.1.S1_at   | MmugDNA.43120.1 | 14.02 | 13.97 | 0.09 | 0.08 | 1.04   | 0.659253 | 0.465867 | 0.847039 | 0.675982 |
| MmugDNA.43121.1.S1_at   | MmugDNA.43121.1 | 8.38  | 12.18 | 1.25 | 2.48 | -13.91 | 0.354897 | 0.164721 | 0.670686 | 0.441043 |
| MmugDNA.43126.1.S1_at   | MmugDNA.43126.1 | 5.05  | 5.13  | 0.29 | 0.22 | -1.05  | 0.778245 | 0.383989 | 0.907397 | 0.619866 |
| MmugDNA.43128.1.S1_at   | MmugDNA.43128.1 | 8.53  | 9.73  | 0.33 | 0.97 | -2.3   | 0.480177 | 0.237568 | 0.748124 | 0.508196 |
| MmugDNA.4313.1.S1_at    | MmugDNA.4313.1  | 10.99 | 12.01 | 0.23 | 0.38 | -2.03  | 0.014208 | 0.006925 | 0.251566 | 0.112445 |
| MmugDNA.43131.1.S1_s_at | MmugDNA.43131.1 | 7.35  | 7.52  | 0.38 | 0.01 | -1.12  | 0.811784 | 0.895528 | 0.92334  | 0.940298 |
| MmugDNA.43132.1.S1_at   | MmugDNA.43132.1 | 2.7   | 2.81  | 0.04 | 0.06 | -1.08  | 0.144481 | 0.607076 | 0.511015 | 0.766185 |
| MmugDNA.43133.1.S1_at   | MmugDNA.43133.1 | 8.59  | 8.15  | 0.39 | 1.42 | 1.36   | 0.458035 | 0.653095 | 0.735139 | 0.79718  |
| MmugDNA.43158.1.S1_at   | MmugDNA.43158.1 | 9.67  | 8.88  | 0.23 | 0.35 | 1.73   | 0.017062 | 0.011138 | 0.266622 | 0.137313 |
| MmugDNA.43167.1.S1_s_at | MmugDNA.43167.1 | 13.51 | 12.92 | 0.08 | 0.42 | 1.51   | 0.076462 | 0.073088 | 0.425064 | 0.316057 |
| MmugDNA.43169.1.S1_at   | MmugDNA.43169.1 | 6.39  | 7.3   | 0.78 | 1.33 | -1.88  | 0.712493 | 0.634876 | 0.874062 | 0.785042 |
| MmugDNA.43172.1.S1_at   | MmugDNA.43172.1 | 5.45  | 5.76  | 0.1  | 0.09 | -1.25  | 0.02993  | 0.008678 | 0.316121 | 0.12355  |
| MmugDNA.4318.1.S1_at    | MmugDNA.4318.1  | 9.55  | 9.17  | 0.1  | 0.33 | 1.3    | 0.035399 | 0.013595 | 0.336288 | 0.149236 |
| MmugDNA.43184.1.S1_at   | MmugDNA.43184.1 | 6.03  | 6.11  | 0.49 | 0.17 | -1.05  | 0.37815  | 0.333067 | 0.686315 | 0.581374 |
| MmugDNA.43187.1.S1_at   | MmugDNA.43187.1 | 11.99 | 10.68 | 0.18 | 0.42 | 2.48   | 0.010677 | 0.005132 | 0.230991 | 0.099446 |
| MmugDNA.4319.1.S1_at    | MmugDNA.4319.1  | 9.87  | 10.38 | 0.25 | 0.33 | -1.42  | 0.080804 | 0.091175 | 0.431352 | 0.346097 |
| MmugDNA.43190.1.S1_at   | MmugDNA.43190.1 | 5.26  | 5.38  | 0.03 | 0.12 | -1.09  | 0.154274 | 0.103897 | 0.518796 | 0.364564 |
| MmugDNA.43193.1.S1_at   | MmugDNA.43193.1 | 11.51 | 11.58 | 0.25 | 0.52 | -1.05  | 0.960874 | 0.98079  | 0.984964 | 0.989478 |
| MmugDNA.43195.1.S1_at   | MmugDNA.43195.1 | 5.3   | 7.5   | 0.9  | 0.97 | -4.6   | 0.046563 | 0.018532 | 0.363306 | 0.171243 |
| MmugDNA.43195.1.S1_s_at | MmugDNA.43195.1 | 5.74  | 7.84  | 0.52 | 0.86 | -4.28  | 0.020289 | 0.008935 | 0.277443 | 0.125013 |
| MmugDNA.4320.1.S1_at    | MmugDNA.4320.1  | 7.84  | 7.52  | 0.19 | 0.13 | 1.25   | 0.029935 | 0.111758 | 0.316121 | 0.376793 |
| MmugDNA.43201.1.S1_at   | MmugDNA.43201.1 | 5.19  | 5.83  | 0.26 | 0.12 | -1.56  | 0.009668 | 0.007078 | 0.226235 | 0.113284 |
| MmugDNA.43206.1.S1_at   | MmugDNA.43206.1 | 5.52  | 5.6   | 0.13 | 0.1  | -1.06  | 0.151286 | 0.182167 | 0.516026 | 0.458671 |
| MmugDNA.43209.1.S1_at   | MmugDNA.43209.1 | 6.33  | 6.99  | 0.88 | 0.92 | -1.57  | 0.183577 | 0.137747 | 0.54773  | 0.410738 |
| MmugDNA.43210.1.S1_at   | MmugDNA.43210.1 | 9.85  | 9.66  | 0.1  | 0.61 | 1.15   | 0.554299 | 0.631236 | 0.790679 | 0.782734 |
| MmugDNA.43211.1.S1_at   | MmugDNA.43211.1 | 7.84  | 8.21  | 0.06 | 0.36 | -1.29  | 0.169564 | 0.248128 | 0.533686 | 0.517567 |
| MmugDNA.43213.1.S1_at   | MmugDNA.43213.1 | 10.64 | 11.21 | 0.35 | 0.4  | -1.48  | 0.268447 | 0.227983 | 0.613168 | 0.500211 |
| MmugDNA.43217.1.S1_at   | MmugDNA.43217.1 | 12.29 | 12.8  | 0.13 | 0.05 | -1.42  | 0.004038 | 0.001027 | 0.181739 | 0.051145 |
| MmugDNA.43219.1.S1_at   | MmugDNA.43219.1 | 8.7   | 7.74  | 0.03 | 0.45 | 1.95   | 0.019504 | 0.00817  | 0.274949 | 0.119886 |
| MmugDNA.43225.1.S1_at   | MmugDNA.43225.1 | 7.75  | 6.96  | 0.59 | 0.39 | 1.74   | 0.092072 | 0.130547 | 0.448698 | 0.402412 |

|                       |                 |       |       |      |      |       |          |          |          |          |
|-----------------------|-----------------|-------|-------|------|------|-------|----------|----------|----------|----------|
| MmugDNA.43233.1.S1_at | MmugDNA.43233.1 | 6.39  | 6.76  | 0.4  | 0.24 | -1.29 | 0.052796 | 0.044159 | 0.378449 | 0.254547 |
| MmugDNA.43237.1.S1_at | MmugDNA.43237.1 | 10.32 | 9.9   | 0.12 | 0.19 | 1.34  | 0.04715  | 0.021639 | 0.365429 | 0.184333 |
| MmugDNA.43238.1.S1_at | MmugDNA.43238.1 | 6.19  | 6.03  | 0.18 | 0.11 | 1.12  | 0.999458 | 0.091777 | 0.999874 | 0.346977 |
| MmugDNA.43239.1.S1_at | MmugDNA.43239.1 | 10.31 | 10.04 | 0.22 | 0.45 | 1.2   | 0.553928 | 0.730486 | 0.790503 | 0.844017 |
| MmugDNA.4324.1.S1_at  | MmugDNA.4324.1  | 9.19  | 8.5   | 0.13 | 0.33 | 1.62  | 0.031564 | 0.022199 | 0.322068 | 0.186482 |
| MmugDNA.43242.1.S1_at | MmugDNA.43242.1 | 6.05  | 6.05  | 0.22 | 0.71 | -1    | 0.99827  | 0.982012 | 0.999306 | 0.99016  |
| MmugDNA.43244.1.S1_at | MmugDNA.43244.1 | 9.43  | 9.49  | 0.32 | 0.73 | -1.04 | 0.758474 | 0.864015 | 0.897862 | 0.922844 |
| MmugDNA.43246.1.S1_at | MmugDNA.43246.1 | 10.61 | 10.66 | 0.19 | 0.33 | -1.03 | 0.231052 | 0.294851 | 0.587369 | 0.554412 |
| MmugDNA.43248.1.S1_at | MmugDNA.43248.1 | 7.25  | 9.18  | 0.82 | 0.86 | -3.81 | 0.097568 | 0.06912  | 0.456658 | 0.309162 |
| MmugDNA.43249.1.S1_at | MmugDNA.43249.1 | 12.59 | 12.74 | 0.06 | 0.22 | -1.11 | 0.506618 | 0.503397 | 0.762432 | 0.700871 |
| MmugDNA.43251.1.S1_at | MmugDNA.43251.1 | 10.42 | 10.11 | 0.11 | 0.25 | 1.24  | 0.076957 | 0.047858 | 0.425961 | 0.263679 |
| MmugDNA.43253.1.S1_at | MmugDNA.43253.1 | 10.41 | 10.78 | 0.54 | 0.4  | -1.29 | 0.759598 | 0.681148 | 0.898448 | 0.813797 |
| MmugDNA.43254.1.S1_at | MmugDNA.43254.1 | 5.9   | 7.18  | 0.84 | 0.85 | -2.43 | 0.184775 | 0.152332 | 0.548357 | 0.427072 |
| MmugDNA.43255.1.S1_at | MmugDNA.43255.1 | 9.96  | 10    | 0.09 | 0.5  | -1.03 | 0.888456 | 0.64128  | 0.955266 | 0.789506 |
| MmugDNA.43260.1.S1_at | MmugDNA.43260.1 | 14.43 | 14.45 | 0.04 | 0.01 | -1.02 | 0.919956 | 0.70309  | 0.968811 | 0.827866 |
| MmugDNA.43265.1.S1_at | MmugDNA.43265.1 | 5.15  | 5.12  | 0.03 | 0.03 | 1.02  | 0.613825 | 0.116193 | 0.822933 | 0.383524 |
| MmugDNA.43266.1.S1_at | MmugDNA.43266.1 | 11.4  | 11.79 | 0.24 | 0.23 | -1.31 | 0.081149 | 0.079747 | 0.431848 | 0.327009 |
| MmugDNA.43267.1.S1_at | MmugDNA.43267.1 | 7.45  | 6.96  | 0.1  | 0.28 | 1.4   | 0.045472 | 0.088341 | 0.361049 | 0.341767 |
| MmugDNA.43273.1.S1_at | MmugDNA.43273.1 | 4.83  | 4.73  | 0.27 | 0.9  | 1.07  | 0.588898 | 0.775765 | 0.809161 | 0.869526 |
| MmugDNA.4328.1.S1_at  | MmugDNA.4328.1  | 5.2   | 5.18  | 0.13 | 0.32 | 1.02  | 0.968042 | 0.779325 | 0.987964 | 0.872047 |
| MmugDNA.43283.1.S1_at | MmugDNA.43283.1 | 8.33  | 8.81  | 0.24 | 0.27 | -1.39 | 0.42359  | 0.461522 | 0.714199 | 0.673152 |
| MmugDNA.43286.1.S1_at | MmugDNA.43286.1 | 6.79  | 7     | 0.07 | 0.25 | -1.16 | 0.444305 | 0.582721 | 0.726941 | 0.751337 |
| MmugDNA.43290.1.S1_at | MmugDNA.43290.1 | 9.64  | 9.43  | 0.28 | 0.35 | 1.15  | 0.912173 | 0.541612 | 0.96522  | 0.725033 |
| MmugDNA.43291.1.S1_at | MmugDNA.43291.1 | 3     | 3.15  | 0.11 | 0.18 | -1.11 | 0.377042 | 0.387316 | 0.685542 | 0.622027 |
| MmugDNA.43297.1.S1_at | MmugDNA.43297.1 | 4.7   | 5.23  | 0.27 | 0.39 | -1.44 | 0.064402 | 0.162616 | 0.402975 | 0.43872  |
| MmugDNA.43308.1.S1_at | MmugDNA.43308.1 | 10.56 | 11.44 | 0.36 | 0.27 | -1.84 | 0.031869 | 0.007521 | 0.32312  | 0.116291 |
| MmugDNA.43310.1.S1_at | MmugDNA.43310.1 | 9.19  | 9.26  | 0.01 | 0.75 | -1.05 | 0.891934 | 0.980494 | 0.956956 | 0.989333 |
| MmugDNA.43313.1.S1_at | MmugDNA.43313.1 | 5.64  | 5.59  | 0.13 | 0.09 | 1.03  | 0.633822 | 0.551335 | 0.83402  | 0.730922 |
| MmugDNA.43316.1.S1_at | MmugDNA.43316.1 | 11.85 | 11.78 | 0.08 | 0.13 | 1.05  | 0.776646 | 0.908648 | 0.906454 | 0.948282 |
| MmugDNA.43318.1.S1_at | MmugDNA.43318.1 | 8.87  | 7.73  | 0.31 | 1    | 2.19  | 0.119955 | 0.123393 | 0.48448  | 0.393391 |
| MmugDNA.43327.1.S1_at | MmugDNA.43327.1 | 9.8   | 10.86 | 0.57 | 0.22 | -2.09 | 0.066032 | 0.052966 | 0.405773 | 0.275787 |
| MmugDNA.4334.1.S1_at  | MmugDNA.4334.1  | 4.63  | 5.15  | 0.47 | 1.01 | -1.43 | 0.274201 | 0.277224 | 0.617262 | 0.54117  |
| MmugDNA.43340.1.S1_at | MmugDNA.43340.1 | 11.83 | 11.61 | 0.08 | 0    | 1.16  | 0.009024 | 0.005162 | 0.222023 | 0.0997   |
| MmugDNA.43343.1.S1_at | MmugDNA.43343.1 | 12.09 | 11.59 | 0.06 | 0.16 | 1.41  | 0.006443 | 0.001278 | 0.199625 | 0.055351 |
| MmugDNA.43354.1.S1_at | MmugDNA.43354.1 | 8.85  | 8.78  | 0.14 | 0.18 | 1.05  | 0.94395  | 0.983436 | 0.978546 | 0.99078  |
| MmugDNA.43368.1.S1_at | MmugDNA.43368.1 | 11.22 | 10.8  | 0.1  | 0.44 | 1.34  | 0.251754 | 0.012087 | 0.601071 | 0.142211 |
| MmugDNA.4337.1.S1_at  | MmugDNA.4337.1  | 6.19  | 6.33  | 0.17 | 0.11 | -1.11 | 0.717157 | 0.506767 | 0.875719 | 0.702575 |
| MmugDNA.43374.1.S1_at | MmugDNA.43374.1 | 6.98  | 7.24  | 0.13 | 0.27 | -1.2  | 0.107873 | 0.134721 | 0.468553 | 0.406763 |
| MmugDNA.43402.1.S1_at | MmugDNA.43402.1 | 10.79 | 10.33 | 0.25 | 0.29 | 1.38  | 0.048694 | 0.024419 | 0.369426 | 0.195563 |
| MmugDNA.43404.1.S1_at | MmugDNA.43404.1 | 8.42  | 8.1   | 0.12 | 0.45 | 1.25  | 0.746141 | 0.727253 | 0.891286 | 0.84224  |
| MmugDNA.43407.1.S1_at | MmugDNA.43407.1 | 7.58  | 6.62  | 1.31 | 1.18 | 1.94  | 0.750722 | 0.825245 | 0.893366 | 0.899591 |

|                         |                 |       |       |      |      |       |          |          |          |          |
|-------------------------|-----------------|-------|-------|------|------|-------|----------|----------|----------|----------|
| MmugDNA.43409.1.S1_at   | MmugDNA.43409.1 | 6.16  | 6.16  | 0.15 | 0.32 | 1     | 0.263148 | 0.353117 | 0.609265 | 0.596383 |
| MmugDNA.43412.1.S1_at   | MmugDNA.43412.1 | 13.35 | 13.44 | 0.09 | 0.07 | -1.06 | 0.243025 | 0.097837 | 0.594744 | 0.355639 |
| MmugDNA.43424.1.S1_at   | MmugDNA.43424.1 | 12.38 | 12.07 | 0.14 | 0.73 | 1.23  | 0.135414 | 0.139982 | 0.502243 | 0.413309 |
| MmugDNA.43429.1.S1_at   | MmugDNA.43429.1 | 4.26  | 4.85  | 0.62 | 0.58 | -1.5  | 0.309285 | 0.308439 | 0.641417 | 0.564482 |
| MmugDNA.43431.1.S1_at   | MmugDNA.43431.1 | 10.92 | 10.17 | 0.22 | 0.27 | 1.69  | 0.017253 | 0.004228 | 0.26697  | 0.091435 |
| MmugDNA.43433.1.S1_at   | MmugDNA.43433.1 | 9.31  | 8.77  | 0.22 | 0.4  | 1.46  | 0.193257 | 0.244347 | 0.556738 | 0.514188 |
| MmugDNA.43436.1.S1_at   | MmugDNA.43436.1 | 5.94  | 5.5   | 0.08 | 0.58 | 1.36  | 0.201209 | 0.142156 | 0.563821 | 0.41575  |
| MmugDNA.43458.1.S1_at   | MmugDNA.43458.1 | 6.31  | 6.48  | 0.08 | 0.1  | -1.12 | 0.090295 | 0.087111 | 0.445754 | 0.340073 |
| MmugDNA.43461.1.S1_at   | MmugDNA.43461.1 | 7.65  | 6.95  | 0.33 | 0.62 | 1.62  | 0.250373 | 0.277989 | 0.600389 | 0.541684 |
| MmugDNA.43464.1.S1_at   | MmugDNA.43464.1 | 13.45 | 13.4  | 0.03 | 0.09 | 1.04  | 0.255067 | 0.183309 | 0.603072 | 0.459553 |
| MmugDNA.43466.1.S1_at   | MmugDNA.43466.1 | 11.18 | 6.69  | 0.35 | 1.07 | 22.49 | 0.002191 | 0.009117 | 0.159615 | 0.125994 |
| MmugDNA.43469.1.S1_at   | MmugDNA.43469.1 | 9.63  | 9.16  | 0.17 | 0.71 | 1.39  | 0.269589 | 0.182232 | 0.614187 | 0.458762 |
| MmugDNA.4347.1.S1_at    | MmugDNA.4347.1  | 10.09 | 10.37 | 0.42 | 0.24 | -1.22 | 0.13952  | 0.147477 | 0.506993 | 0.421765 |
| MmugDNA.43477.1.S1_at   | MmugDNA.43477.1 | 5.47  | 7.14  | 0.12 | 0.77 | -3.17 | 0.016239 | 0.009025 | 0.263592 | 0.125557 |
| MmugDNA.43478.1.S1_at   | MmugDNA.43478.1 | 5.84  | 6.89  | 0.37 | 0.89 | -2.07 | 0.209702 | 0.248666 | 0.571042 | 0.517917 |
| MmugDNA.43487.1.S1_at   | MmugDNA.43487.1 | 3.86  | 3.87  | 0.02 | 0.06 | -1    | 0.308264 | 0.577655 | 0.64064  | 0.748038 |
| MmugDNA.43498.1.S1_at   | MmugDNA.43498.1 | 10.35 | 10.27 | 0.61 | 0.42 | 1.06  | 0.920202 | 0.201073 | 0.96888  | 0.475509 |
| MmugDNA.43500.1.S1_at   | MmugDNA.43500.1 | 7.33  | 6.7   | 0.3  | 0.39 | 1.55  | 0.109718 | 0.175497 | 0.470963 | 0.452157 |
| MmugDNA.43510.1.S1_at   | MmugDNA.43510.1 | 7.12  | 7.97  | 0.17 | 0.44 | -1.81 | 0.087245 | 0.031849 | 0.441276 | 0.220909 |
| MmugDNA.43511.1.S1_at   | MmugDNA.43511.1 | 12.72 | 12.85 | 0.16 | 0.11 | -1.09 | 0.448102 | 0.560166 | 0.729435 | 0.736517 |
| MmugDNA.43513.1.S1_at   | MmugDNA.43513.1 | 10.68 | 10.62 | 0.29 | 0.7  | 1.04  | 0.956536 | 0.760708 | 0.98359  | 0.860984 |
| MmugDNA.43514.1.S1_at   | MmugDNA.43514.1 | 3.43  | 4.04  | 0.31 | 0.86 | -1.52 | 0.372183 | 0.057158 | 0.682724 | 0.284972 |
| MmugDNA.43518.1.S1_s_at | MmugDNA.43518.1 | 12.09 | 12.23 | 0.11 | 0.2  | -1.1  | 0.385967 | 0.522529 | 0.690975 | 0.713196 |
| MmugDNA.43519.1.S1_at   | MmugDNA.43519.1 | 10.49 | 10.5  | 0.04 | 0.01 | -1    | 0.453283 | 0.061901 | 0.7325   | 0.295668 |
| MmugDNA.4352.1.S1_at    | MmugDNA.4352.1  | 7.78  | 8.19  | 0.11 | 0.69 | -1.32 | 0.13819  | 0.166507 | 0.505618 | 0.442933 |
| MmugDNA.43521.1.S1_at   | MmugDNA.43521.1 | 10.97 | 10.8  | 0.3  | 0.17 | 1.12  | 0.093346 | 0.011492 | 0.450557 | 0.138678 |
| MmugDNA.43526.1.S1_at   | MmugDNA.43526.1 | 9.82  | 10.29 | 0.28 | 0.57 | -1.39 | 0.19659  | 0.149255 | 0.559808 | 0.42373  |
| MmugDNA.43529.1.S1_at   | MmugDNA.43529.1 | 8.7   | 9.21  | 0.22 | 0.14 | -1.42 | 0.025132 | 0.00744  | 0.297733 | 0.115858 |
| MmugDNA.4353.1.S1_at    | MmugDNA.4353.1  | 11.59 | 11.36 | 0.01 | 0.18 | 1.17  | 0.121932 | 0.065627 | 0.486957 | 0.301554 |
| MmugDNA.43532.1.S1_at   | MmugDNA.43532.1 | 6.42  | 6.53  | 0.36 | 0.15 | -1.08 | 0.363344 | 0.566752 | 0.676615 | 0.74076  |
| MmugDNA.43533.1.S1_at   | MmugDNA.43533.1 | 7.12  | 7.24  | 0.19 | 0.2  | -1.09 | 0.506322 | 0.731279 | 0.762259 | 0.84425  |
| MmugDNA.43536.1.S1_at   | MmugDNA.43536.1 | 3.8   | 3.66  | 0.28 | 0.02 | 1.1   | 0.589065 | 0.143479 | 0.809191 | 0.417442 |
| MmugDNA.43537.1.S1_at   | MmugDNA.43537.1 | 8.45  | 7.85  | 0.08 | 0.29 | 1.51  | 0.029642 | 0.019847 | 0.314985 | 0.177189 |
| MmugDNA.43546.1.S1_at   | MmugDNA.43546.1 | 9.09  | 9.11  | 0.23 | 0.22 | -1.01 | 0.320756 | 0.427977 | 0.64956  | 0.649602 |
| MmugDNA.43551.1.S1_at   | MmugDNA.43551.1 | 5.81  | 5.83  | 0.21 | 0.08 | -1.02 | 0.598691 | 0.305834 | 0.814059 | 0.562731 |
| MmugDNA.43556.1.S1_at   | MmugDNA.43556.1 | 9.75  | 9.76  | 0.57 | 1.24 | -1    | 0.608928 | 0.561066 | 0.820226 | 0.737097 |
| MmugDNA.43557.1.S1_s_at | MmugDNA.43557.1 | 7.64  | 8.17  | 0.17 | 0.58 | -1.45 | 0.148336 | 0.168049 | 0.513732 | 0.444641 |
| MmugDNA.43560.1.S1_at   | MmugDNA.43560.1 | 9.9   | 10.2  | 0.08 | 0.18 | -1.23 | 0.051535 | 0.033641 | 0.376072 | 0.227006 |
| MmugDNA.43579.1.S1_at   | MmugDNA.43579.1 | 10.02 | 8.66  | 0.21 | 0.2  | 2.56  | 0.001554 | 0.000049 | 0.151907 | 0.025273 |
| MmugDNA.43585.1.S1_at   | MmugDNA.43585.1 | 6.8   | 6.62  | 0.14 | 0.03 | 1.13  | 0.147253 | 0.0049   | 0.513087 | 0.097632 |
| MmugDNA.43588.1.S1_at   | MmugDNA.43588.1 | 11.55 | 10.85 | 0.15 | 0.12 | 1.62  | 0.003441 | 0.007829 | 0.17833  | 0.117929 |

|                        |                 |       |       |      |      |       |          |          |          |          |
|------------------------|-----------------|-------|-------|------|------|-------|----------|----------|----------|----------|
| MmugDNA.43589.1.S1_at  | MmugDNA.43589.1 | 9.08  | 7.98  | 0.14 | 0.31 | 2.14  | 0.004846 | 0.000924 | 0.185106 | 0.048724 |
| MmugDNA.4359.1.S1_at   | MmugDNA.4359.1  | 7.6   | 7.45  | 0.12 | 0.61 | 1.11  | 0.334563 | 0.443635 | 0.658444 | 0.66135  |
| MmugDNA.43591.1.S1_at  | MmugDNA.43591.1 | 4.69  | 4.62  | 0.33 | 0.2  | 1.05  | 0.960872 | 0.918566 | 0.984964 | 0.954327 |
| MmugDNA.4360.1.S1_at   | MmugDNA.4360.1  | 11.9  | 11.65 | 0.05 | 0.22 | 1.19  | 0.045704 | 0.016965 | 0.361537 | 0.165103 |
| MmugDNA.43604.1.S1_at  | MmugDNA.43604.1 | 10.35 | 9.54  | 0.28 | 0.66 | 1.75  | 0.079828 | 0.006731 | 0.430147 | 0.110984 |
| MmugDNA.43613.1.S1_at  | MmugDNA.43613.1 | 7.97  | 8.15  | 0.13 | 0.12 | -1.13 | 0.114288 | 0.122277 | 0.477541 | 0.391973 |
| MmugDNA.4364.1.S1_at   | MmugDNA.4364.1  | 7.1   | 6.58  | 0.18 | 0.51 | 1.44  | 0.200645 | 0.211667 | 0.5634   | 0.485688 |
| MmugDNA.4368.1.S1_at   | MmugDNA.4368.1  | 8.84  | 8.79  | 0.27 | 0.67 | 1.03  | 0.847394 | 0.552833 | 0.938816 | 0.732102 |
| MmugDNA.4368.1.S1_s_at | MmugDNA.4368.1  | 8.26  | 8.35  | 0.25 | 0.61 | -1.07 | 0.828777 | 0.958997 | 0.930517 | 0.976777 |
| MmugDNA.4370.1.S1_at   | MmugDNA.4370.1  | 8.46  | 8.76  | 0.12 | 0.36 | -1.23 | 0.193602 | 0.318522 | 0.557178 | 0.571239 |
| MmugDNA.4374.1.S1_at   | MmugDNA.4374.1  | 9.75  | 10.15 | 0.12 | 0.15 | -1.32 | 0.052893 | 0.051039 | 0.378593 | 0.271214 |
| MmugDNA.4379.1.S1_at   | MmugDNA.4379.1  | 12.11 | 12.18 | 0.03 | 0.14 | -1.05 | 0.267881 | 0.274008 | 0.612836 | 0.538517 |
| MmugDNA.4385.1.S1_at   | MmugDNA.4385.1  | 12.32 | 12.2  | 0.06 | 0.1  | 1.08  | 0.371384 | 0.359171 | 0.682064 | 0.600528 |
| MmugDNA.4389.1.S1_at   | MmugDNA.4389.1  | 5     | 5.03  | 0.13 | 0.09 | -1.02 | 0.837611 | 0.307892 | 0.934401 | 0.563992 |
| MmugDNA.4395.1.S1_at   | MmugDNA.4395.1  | 11.27 | 10.15 | 0.29 | 0.42 | 2.16  | 0.006665 | 0.002546 | 0.201219 | 0.07453  |
| MmugDNA.440.1.S1_at    | MmugDNA.440.1   | 11.69 | 11.46 | 0.07 | 0.32 | 1.17  | 0.237931 | 0.196674 | 0.591305 | 0.47172  |
| MmugDNA.4404.1.S1_at   | MmugDNA.4404.1  | 7.76  | 9.53  | 0.94 | 1.63 | -3.41 | 0.299245 | 0.224697 | 0.634789 | 0.497614 |
| MmugDNA.4405.1.S1_at   | MmugDNA.4405.1  | 12.08 | 12.06 | 0.04 | 0.31 | 1.02  | 0.363037 | 0.589414 | 0.676437 | 0.755652 |
| MmugDNA.4406.1.S1_at   | MmugDNA.4406.1  | 3.8   | 4.06  | 0.33 | 0.22 | -1.19 | 0.821277 | 0.481481 | 0.927293 | 0.686469 |
| MmugDNA.4409.1.S1_at   | MmugDNA.4409.1  | 10.61 | 10.52 | 0.1  | 0.23 | 1.06  | 0.466546 | 0.337755 | 0.740215 | 0.584925 |
| MmugDNA.4416.1.S1_at   | MmugDNA.4416.1  | 8.56  | 8.5   | 0.2  | 0.15 | 1.04  | 0.823603 | 0.906758 | 0.928234 | 0.947216 |
| MmugDNA.4419.1.S1_at   | MmugDNA.4419.1  | 6.74  | 6.38  | 0.18 | 0.27 | 1.28  | 0.158278 | 0.256183 | 0.523156 | 0.524069 |
| MmugDNA.442.1.S1_at    | MmugDNA.442.1   | 7.05  | 7.36  | 0.16 | 0.64 | -1.24 | 0.202265 | 0.256444 | 0.564606 | 0.524201 |
| MmugDNA.4420.1.S1_at   | MmugDNA.4420.1  | 4.19  | 4.89  | 1.02 | 0.59 | -1.63 | 0.911486 | 0.292115 | 0.965026 | 0.552273 |
| MmugDNA.4422.1.S1_s_at | MmugDNA.4422.1  | 4.88  | 5.03  | 0.06 | 0.14 | -1.11 | 0.17253  | 0.451241 | 0.536116 | 0.666095 |
| MmugDNA.4427.1.S1_at   | MmugDNA.4427.1  | 3.33  | 3.48  | 0.04 | 0.09 | -1.11 | 0.225857 | 0.045846 | 0.583918 | 0.258382 |
| MmugDNA.4430.1.S1_at   | MmugDNA.4430.1  | 11.07 | 11.1  | 0.14 | 0.14 | -1.02 | 0.341397 | 0.45799  | 0.662564 | 0.670999 |
| MmugDNA.4433.1.S1_at   | MmugDNA.4433.1  | 8.35  | 7.57  | 0.12 | 0.52 | 1.72  | 0.179194 | 0.164136 | 0.543494 | 0.440346 |
| MmugDNA.4434.1.S1_at   | MmugDNA.4434.1  | 9.34  | 9.34  | 0.24 | 0.07 | 1     | 0.662008 | 0.807175 | 0.848414 | 0.888967 |
| MmugDNA.4438.1.S1_at   | MmugDNA.4438.1  | 8.26  | 7.75  | 0.34 | 0.07 | 1.42  | 0.05395  | 0.053216 | 0.381209 | 0.276445 |
| MmugDNA.4449.1.S1_at   | MmugDNA.4449.1  | 4.07  | 4.03  | 0.03 | 0.11 | 1.02  | 0.527662 | 0.604541 | 0.775008 | 0.764663 |
| MmugDNA.4461.1.S1_at   | MmugDNA.4461.1  | 10.92 | 10.65 | 0.33 | 0.3  | 1.2   | 0.212812 | 0.27749  | 0.573216 | 0.541411 |
| MmugDNA.4463.1.S1_at   | MmugDNA.4463.1  | 10.56 | 10.15 | 0.19 | 0.23 | 1.33  | 0.088486 | 0.096094 | 0.44331  | 0.353322 |
| MmugDNA.4478.1.S1_at   | MmugDNA.4478.1  | 6.51  | 8.8   | 1.3  | 1.69 | -4.9  | 0.209803 | 0.143487 | 0.571042 | 0.417442 |
| MmugDNA.4479.1.S1_at   | MmugDNA.4479.1  | 5.58  | 6.26  | 0.44 | 0.69 | -1.61 | 0.21666  | 0.206431 | 0.576287 | 0.480571 |
| MmugDNA.4487.1.S1_at   | MmugDNA.4487.1  | 3.33  | 3.26  | 0.07 | 0.05 | 1.05  | 0.513803 | 0.08864  | 0.766515 | 0.342167 |
| MmugDNA.4496.1.S1_at   | MmugDNA.4496.1  | 7.08  | 7.17  | 0.2  | 0.12 | -1.07 | 0.203476 | 0.257041 | 0.566041 | 0.524781 |
| MmugDNA.45.1.S1_at     | MmugDNA.45.1    | 5.9   | 6.17  | 0.15 | 0.17 | -1.2  | 0.33125  | 0.391466 | 0.656225 | 0.625086 |
| MmugDNA.4501.1.S1_at   | MmugDNA.4501.1  | 6.12  | 6.16  | 0.14 | 0.16 | -1.03 | 0.401234 | 0.553424 | 0.700758 | 0.732583 |
| MmugDNA.4510.1.S1_at   | MmugDNA.4510.1  | 9.55  | 8.92  | 0.42 | 0.22 | 1.55  | 0.052809 | 0.040521 | 0.378449 | 0.246264 |
| MmugDNA.4515.1.S1_at   | MmugDNA.4515.1  | 5.29  | 5.12  | 0.15 | 0.19 | 1.13  | 0.802286 | 0.915629 | 0.918464 | 0.952718 |

|                        |                |       |       |      |      |       |          |          |          |          |
|------------------------|----------------|-------|-------|------|------|-------|----------|----------|----------|----------|
| MmugDNA.452.1.S1_at    | MmugDNA.452.1  | 7.57  | 7.52  | 0.28 | 0.11 | 1.03  | 0.907872 | 0.767381 | 0.963458 | 0.864926 |
| MmugDNA.4531.1.S1_at   | MmugDNA.4531.1 | 10.57 | 10.02 | 0.13 | 0.35 | 1.47  | 0.07181  | 0.055822 | 0.415886 | 0.282127 |
| MmugDNA.4547.1.S1_at   | MmugDNA.4547.1 | 8.49  | 8     | 0.36 | 0.35 | 1.4   | 0.141771 | 0.146226 | 0.509159 | 0.420213 |
| MmugDNA.4552.1.S1_at   | MmugDNA.4552.1 | 8.83  | 8.6   | 0.3  | 0.24 | 1.17  | 0.439169 | 0.343204 | 0.723488 | 0.588959 |
| MmugDNA.4554.1.S1_at   | MmugDNA.4554.1 | 7.31  | 6.8   | 0.15 | 0.37 | 1.42  | 0.090406 | 0.110057 | 0.445834 | 0.374179 |
| MmugDNA.456.1.S1_at    | MmugDNA.456.1  | 11.29 | 12.09 | 0.16 | 0.22 | -1.74 | 0.004487 | 0.00315  | 0.183586 | 0.081739 |
| MmugDNA.456.1.S1_x_at  | MmugDNA.456.1  | 10.42 | 11.27 | 0.16 | 0.23 | -1.8  | 0.004582 | 0.002469 | 0.1844   | 0.073576 |
| MmugDNA.4562.1.S1_at   | MmugDNA.4562.1 | 7.64  | 8.27  | 0.3  | 0.92 | -1.55 | 0.10872  | 0.103291 | 0.470218 | 0.364143 |
| MmugDNA.4567.1.S1_at   | MmugDNA.4567.1 | 4.25  | 4.84  | 0.13 | 1.14 | -1.51 | 0.38363  | 0.427216 | 0.689442 | 0.649175 |
| MmugDNA.457.1.S1_at    | MmugDNA.457.1  | 11.29 | 11.31 | 0.12 | 0.13 | -1.02 | 0.338196 | 0.418676 | 0.660664 | 0.643036 |
| MmugDNA.4573.1.S1_s_at | MmugDNA.4573.1 | 9.72  | 9.94  | 0.1  | 0.51 | -1.17 | 0.274089 | 0.270284 | 0.617262 | 0.535654 |
| MmugDNA.4574.1.S1_at   | MmugDNA.4574.1 | 7.31  | 7.78  | 0.31 | 0.17 | -1.38 | 0.181191 | 0.20638  | 0.54572  | 0.480546 |
| MmugDNA.4578.1.S1_at   | MmugDNA.4578.1 | 8.13  | 7.72  | 0.13 | 0.08 | 1.33  | 0.014091 | 0.009073 | 0.250983 | 0.125944 |
| MmugDNA.4581.1.S1_at   | MmugDNA.4581.1 | 11.35 | 10.69 | 0.09 | 0.15 | 1.58  | 0.002748 | 0.0004   | 0.165355 | 0.037471 |
| MmugDNA.4584.1.S1_at   | MmugDNA.4584.1 | 8.97  | 8.69  | 0.22 | 0.22 | 1.22  | 0.117799 | 0.026642 | 0.481968 | 0.204089 |
| MmugDNA.4589.1.S1_at   | MmugDNA.4589.1 | 4.18  | 3.96  | 0.3  | 0.1  | 1.16  | 0.174892 | 0.15158  | 0.538538 | 0.426333 |
| MmugDNA.4592.1.A1_at   | MmugDNA.4592.1 | 5.47  | 5.54  | 0.22 | 0.32 | -1.05 | 0.349723 | 0.129216 | 0.667941 | 0.400635 |
| MmugDNA.4592.1.S1_at   | MmugDNA.4592.1 | 5.82  | 5.8   | 0.15 | 0.25 | 1.02  | 0.857872 | 0.516195 | 0.942522 | 0.708757 |
| MmugDNA.4594.1.S1_at   | MmugDNA.4594.1 | 5.8   | 5.77  | 0.08 | 0.21 | 1.02  | 0.595774 | 0.941868 | 0.812601 | 0.967076 |
| MmugDNA.4609.1.S1_at   | MmugDNA.4609.1 | 8.1   | 8.59  | 0.6  | 0.62 | -1.41 | 0.331661 | 0.113427 | 0.656464 | 0.379509 |
| MmugDNA.4615.1.S1_at   | MmugDNA.4615.1 | 13.77 | 13.68 | 0.08 | 0.08 | 1.07  | 0.06623  | 0.047724 | 0.406371 | 0.263325 |
| MmugDNA.4618.1.S1_s_at | MmugDNA.4618.1 | 10.57 | 10.25 | 0.12 | 0.58 | 1.25  | 0.813806 | 0.658273 | 0.924404 | 0.800244 |
| MmugDNA.4622.1.S1_at   | MmugDNA.4622.1 | 6.78  | 6.91  | 0.14 | 0.07 | -1.09 | 0.313546 | 0.440572 | 0.645195 | 0.659029 |
| MmugDNA.4630.1.S1_at   | MmugDNA.4630.1 | 6.26  | 6.32  | 0.17 | 0.07 | -1.04 | 0.314398 | 0.180515 | 0.645738 | 0.457128 |
| MmugDNA.4645.1.S1_at   | MmugDNA.4645.1 | 9.36  | 9     | 0.13 | 0.28 | 1.28  | 0.106187 | 0.112124 | 0.466831 | 0.377398 |
| MmugDNA.4646.1.S1_at   | MmugDNA.4646.1 | 8.51  | 8.02  | 0.15 | 0.6  | 1.41  | 0.68433  | 0.211655 | 0.858719 | 0.485681 |
| MmugDNA.4647.1.S1_at   | MmugDNA.4647.1 | 7.3   | 7.59  | 0.57 | 0.36 | -1.22 | 0.275337 | 0.32135  | 0.617789 | 0.57319  |
| MmugDNA.4651.1.S1_at   | MmugDNA.4651.1 | 6.42  | 6.55  | 0.07 | 0.08 | -1.09 | 0.113472 | 0.280169 | 0.47686  | 0.543469 |
| MmugDNA.4657.1.S1_at   | MmugDNA.4657.1 | 3.26  | 3.18  | 0.17 | 0.03 | 1.06  | 0.913368 | 0.777563 | 0.965684 | 0.870732 |
| MmugDNA.4664.1.S1_at   | MmugDNA.4664.1 | 6.62  | 6.75  | 0.11 | 0.12 | -1.1  | 0.076784 | 0.047891 | 0.425652 | 0.263751 |
| MmugDNA.4667.1.S1_at   | MmugDNA.4667.1 | 9.85  | 9.95  | 0.13 | 0.43 | -1.07 | 0.80557  | 0.90519  | 0.920271 | 0.946213 |
| MmugDNA.467.1.S1_at    | MmugDNA.467.1  | 5.58  | 6.02  | 0.22 | 0.36 | -1.35 | 0.117163 | 0.124824 | 0.481176 | 0.395219 |
| MmugDNA.4670.1.S1_at   | MmugDNA.4670.1 | 12.51 | 12.22 | 0.06 | 0.11 | 1.22  | 0.006648 | 0.017507 | 0.201043 | 0.167516 |
| MmugDNA.4671.1.S1_at   | MmugDNA.4671.1 | 11.93 | 12.13 | 0.08 | 0.2  | -1.15 | 0.149283 | 0.076797 | 0.514001 | 0.322252 |
| MmugDNA.4679.1.S1_at   | MmugDNA.4679.1 | 5.95  | 6.04  | 0.22 | 0.04 | -1.07 | 0.771999 | 0.812251 | 0.903991 | 0.891561 |
| MmugDNA.468.1.S1_at    | MmugDNA.468.1  | 5.16  | 5.22  | 0.2  | 0.12 | -1.04 | 0.453411 | 0.588716 | 0.732603 | 0.755137 |
| MmugDNA.4681.1.S1_at   | MmugDNA.4681.1 | 6.86  | 6.88  | 0.24 | 0.02 | -1.01 | 0.99437  | 0.926516 | 0.998033 | 0.958312 |
| MmugDNA.4693.1.S1_at   | MmugDNA.4693.1 | 9.17  | 9.23  | 0.23 | 0.36 | -1.05 | 0.858636 | 0.414731 | 0.942899 | 0.640456 |
| MmugDNA.4696.1.S1_at   | MmugDNA.4696.1 | 2.83  | 2.88  | 0.15 | 0.1  | -1.03 | 0.489696 | 0.573353 | 0.754042 | 0.745072 |
| MmugDNA.4698.1.S1_at   | MmugDNA.4698.1 | 11.58 | 11.15 | 0.12 | 0.13 | 1.35  | 0.021321 | 0.007687 | 0.282524 | 0.117153 |
| MmugDNA.4703.1.S1_at   | MmugDNA.4703.1 | 8.51  | 9.07  | 0.62 | 0.89 | -1.48 | 0.958962 | 0.898916 | 0.984402 | 0.942467 |

|                        |                |       |       |      |      |        |          |          |          |          |
|------------------------|----------------|-------|-------|------|------|--------|----------|----------|----------|----------|
| MmugDNA.4707.1.S1_at   | MmugDNA.4707.1 | 6.85  | 6.86  | 0.15 | 0.06 | -1.01  | 0.533049 | 0.733492 | 0.777969 | 0.845679 |
| MmugDNA.4719.1.S1_at   | MmugDNA.4719.1 | 5.66  | 5.33  | 0.18 | 0.19 | 1.26   | 0.096768 | 0.101181 | 0.455737 | 0.360831 |
| MmugDNA.4725.1.S1_at   | MmugDNA.4725.1 | 7.28  | 7.27  | 0.12 | 0.15 | 1.01   | 0.383537 | 0.520247 | 0.689416 | 0.711569 |
| MmugDNA.4728.1.S1_at   | MmugDNA.4728.1 | 9.63  | 9.36  | 0.18 | 0.32 | 1.21   | 0.257146 | 0.349024 | 0.604509 | 0.593037 |
| MmugDNA.4731.1.S1_at   | MmugDNA.4731.1 | 4.66  | 4.7   | 0.08 | 0.03 | -1.03  | 0.596139 | 0.343111 | 0.812808 | 0.588883 |
| MmugDNA.4732.1.S1_at   | MmugDNA.4732.1 | 9.21  | 9.17  | 0.2  | 0.5  | 1.03   | 0.938822 | 0.022728 | 0.976723 | 0.188771 |
| MmugDNA.474.1.S1_at    | MmugDNA.474.1  | 9.01  | 8.86  | 0.35 | 0.57 | 1.11   | 0.900776 | 0.758088 | 0.960386 | 0.859252 |
| MmugDNA.4740.1.S1_at   | MmugDNA.4740.1 | 9.29  | 9.36  | 0.05 | 0.73 | -1.05  | 0.881765 | 0.88818  | 0.952522 | 0.936226 |
| MmugDNA.4742.1.S1_at   | MmugDNA.4742.1 | 11.76 | 11.23 | 0.26 | 0.22 | 1.45   | 0.053744 | 0.032694 | 0.380818 | 0.223883 |
| MmugDNA.4745.1.S1_at   | MmugDNA.4745.1 | 7.56  | 7.77  | 0.1  | 0.23 | -1.16  | 0.259958 | 0.343061 | 0.606878 | 0.588878 |
| MmugDNA.4749.1.S1_at   | MmugDNA.4749.1 | 9.4   | 10.03 | 0.27 | 0.8  | -1.54  | 0.278019 | 0.340716 | 0.620121 | 0.586899 |
| MmugDNA.4752.1.S1_at   | MmugDNA.4752.1 | 7.03  | 10.77 | 1.76 | 2.7  | -13.33 | 0.439023 | 0.347488 | 0.72347  | 0.592019 |
| MmugDNA.4757.1.S1_at   | MmugDNA.4757.1 | 7.51  | 7.72  | 0.17 | 0.07 | -1.16  | 0.318456 | 0.288798 | 0.648431 | 0.549936 |
| MmugDNA.476.1.S1_s_at  | MmugDNA.476.1  | 10.77 | 10.26 | 0.17 | 0.35 | 1.43   | 0.053407 | 0.03015  | 0.380257 | 0.215504 |
| MmugDNA.4760.1.S1_s_at | MmugDNA.4760.1 | 11.63 | 12.15 | 0.08 | 0.05 | -1.43  | 0.000987 | 0.012468 | 0.139813 | 0.14417  |
| MmugDNA.4761.1.S1_at   | MmugDNA.4761.1 | 6.86  | 7.02  | 0.72 | 0.19 | -1.11  | 0.56648  | 0.741064 | 0.797591 | 0.850126 |
| MmugDNA.4762.1.S1_at   | MmugDNA.4762.1 | 5.58  | 5.85  | 0.13 | 0.31 | -1.21  | 0.134237 | 0.107912 | 0.500737 | 0.370945 |
| MmugDNA.4766.1.S1_at   | MmugDNA.4766.1 | 8.77  | 8.24  | 0.26 | 0.22 | 1.44   | 0.047703 | 0.028134 | 0.367063 | 0.209306 |
| MmugDNA.477.1.S1_at    | MmugDNA.477.1  | 3.48  | 3.75  | 0.06 | 0.12 | -1.21  | 0.087882 | 0.106765 | 0.442238 | 0.369349 |
| MmugDNA.4773.1.S1_a_at | MmugDNA.4773.1 | 5.23  | 5.06  | 0.26 | 0.11 | 1.12   | 0.194262 | 0.134793 | 0.557805 | 0.406854 |
| MmugDNA.4773.1.S1_at   | MmugDNA.4773.1 | 5.23  | 5.37  | 0.07 | 0.07 | -1.11  | 0.017805 | 0.006323 | 0.267882 | 0.107969 |
| MmugDNA.4778.1.S1_at   | MmugDNA.4778.1 | 6.94  | 6.47  | 0.41 | 0.31 | 1.38   | 0.452638 | 0.045523 | 0.732213 | 0.257526 |
| MmugDNA.4784.1.S1_at   | MmugDNA.4784.1 | 8.59  | 9.98  | 0.25 | 1.64 | -2.61  | 0.662334 | 0.801993 | 0.84852  | 0.885995 |
| MmugDNA.4789.1.S1_at   | MmugDNA.4789.1 | 10.46 | 10.48 | 0.22 | 0.38 | -1.01  | 0.446174 | 0.166802 | 0.728173 | 0.443274 |
| MmugDNA.4791.1.S1_at   | MmugDNA.4791.1 | 12.31 | 12.76 | 0.26 | 0.13 | -1.36  | 0.037789 | 0.036931 | 0.342901 | 0.236659 |
| MmugDNA.480.1.S1_at    | MmugDNA.480.1  | 6.71  | 8.85  | 1.68 | 1.63 | -4.41  | 0.479002 | 0.517069 | 0.747575 | 0.709425 |
| MmugDNA.4801.1.S1_at   | MmugDNA.4801.1 | 4.03  | 3.88  | 0.43 | 0.36 | 1.1    | 0.451765 | 0.533831 | 0.73168  | 0.719904 |
| MmugDNA.4804.1.S1_at   | MmugDNA.4804.1 | 4.06  | 4.16  | 0.01 | 0.08 | -1.07  | 0.034809 | 0.086975 | 0.333964 | 0.33984  |
| MmugDNA.4806.1.S1_at   | MmugDNA.4806.1 | 8.69  | 7.88  | 0.2  | 0.46 | 1.75   | 0.079369 | 0.047619 | 0.429376 | 0.262996 |
| MmugDNA.4815.1.S1_at   | MmugDNA.4815.1 | 11.83 | 11.95 | 0.34 | 0.57 | -1.09  | 0.453586 | 0.229462 | 0.73276  | 0.501527 |
| MmugDNA.4818.1.S1_at   | MmugDNA.4818.1 | 6.24  | 6.01  | 0.4  | 0.12 | 1.17   | 0.171343 | 0.061178 | 0.535166 | 0.293981 |
| MmugDNA.4820.1.S1_at   | MmugDNA.4820.1 | 10.53 | 10.17 | 0.31 | 0.22 | 1.28   | 0.303766 | 0.333446 | 0.63803  | 0.581683 |
| MmugDNA.4822.1.S1_at   | MmugDNA.4822.1 | 8.83  | 9.32  | 0.07 | 1.16 | -1.41  | 0.537174 | 0.646387 | 0.779857 | 0.792839 |
| MmugDNA.4823.1.S1_at   | MmugDNA.4823.1 | 10.75 | 11.31 | 0.1  | 0.22 | -1.48  | 0.012424 | 0.005322 | 0.241557 | 0.100928 |
| MmugDNA.4827.1.S1_at   | MmugDNA.4827.1 | 8.13  | 6.91  | 0.11 | 0.24 | 2.34   | 0.001078 | 0.000674 | 0.144025 | 0.04413  |
| MmugDNA.4828.1.S1_at   | MmugDNA.4828.1 | 9.12  | 9.28  | 0.17 | 0.26 | -1.11  | 0.888414 | 0.964941 | 0.955254 | 0.980546 |
| MmugDNA.483.1.S1_at    | MmugDNA.483.1  | 10.46 | 9.77  | 0.26 | 0.15 | 1.62   | 0.05287  | 0.047856 | 0.378593 | 0.263679 |
| MmugDNA.4830.1.S1_at   | MmugDNA.4830.1 | 11.8  | 11.12 | 0.02 | 0.26 | 1.61   | 0.014497 | 0.006528 | 0.253191 | 0.109613 |
| MmugDNA.4834.1.S1_at   | MmugDNA.4834.1 | 10.47 | 9.79  | 0.24 | 0.16 | 1.61   | 0.036832 | 0.003508 | 0.34044  | 0.08503  |
| MmugDNA.4837.1.S1_at   | MmugDNA.4837.1 | 12.71 | 12.32 | 0.04 | 0.26 | 1.31   | 0.021    | 0.008604 | 0.281947 | 0.123072 |
| MmugDNA.484.1.S1_at    | MmugDNA.484.1  | 4.16  | 4.13  | 0.15 | 0.15 | 1.02   | 0.601269 | 0.218106 | 0.815685 | 0.491693 |

|                        |                |       |       |      |      |        |          |          |          |          |
|------------------------|----------------|-------|-------|------|------|--------|----------|----------|----------|----------|
| MmugDNA.4849.1.S1_at   | MmugDNA.4849.1 | 7.43  | 6.96  | 0.27 | 0.14 | 1.39   | 0.03234  | 0.006161 | 0.324641 | 0.106774 |
| MmugDNA.4850.1.S1_at   | MmugDNA.4850.1 | 7.4   | 8.2   | 0.92 | 1.05 | -1.75  | 0.40998  | 0.173348 | 0.706179 | 0.449791 |
| MmugDNA.4857.1.S1_at   | MmugDNA.4857.1 | 10.18 | 9.47  | 0.24 | 0.19 | 1.63   | 0.035313 | 0.003554 | 0.335876 | 0.085408 |
| MmugDNA.4859.1.S1_at   | MmugDNA.4859.1 | 10.42 | 9.58  | 0.07 | 0.38 | 1.79   | 0.020733 | 0.011326 | 0.28003  | 0.138076 |
| MmugDNA.486.1.S1_at    | MmugDNA.486.1  | 9.27  | 9.16  | 0.03 | 0.35 | 1.08   | 0.728434 | 0.048137 | 0.881972 | 0.264417 |
| MmugDNA.4866.1.S1_at   | MmugDNA.4866.1 | 12.8  | 12.68 | 0.07 | 0.17 | 1.09   | 0.423243 | 0.521604 | 0.713966 | 0.712505 |
| MmugDNA.4871.1.S1_at   | MmugDNA.4871.1 | 7.11  | 10.96 | 1.42 | 2.87 | -14.38 | 0.325475 | 0.209    | 0.65274  | 0.482795 |
| MmugDNA.4872.1.S1_at   | MmugDNA.4872.1 | 10.99 | 10.74 | 0.09 | 0.25 | 1.19   | 0.063341 | 0.000729 | 0.400486 | 0.044699 |
| MmugDNA.4874.1.S1_at   | MmugDNA.4874.1 | 6.75  | 8.59  | 0.92 | 2.3  | -3.59  | 0.412987 | 0.150306 | 0.708252 | 0.424877 |
| MmugDNA.4878.1.S1_at   | MmugDNA.4878.1 | 7.04  | 7.08  | 0.11 | 0.06 | -1.03  | 0.723536 | 0.828806 | 0.879208 | 0.901577 |
| MmugDNA.488.1.S1_at    | MmugDNA.488.1  | 3.3   | 3.22  | 0.09 | 0.13 | 1.06   | 0.95746  | 0.940369 | 0.983882 | 0.966182 |
| MmugDNA.4888.1.S1_at   | MmugDNA.4888.1 | 5.55  | 5.78  | 0.1  | 0.09 | -1.17  | 0.189445 | 0.198073 | 0.552479 | 0.473057 |
| MmugDNA.4895.1.S1_at   | MmugDNA.4895.1 | 5.84  | 6.11  | 0.24 | 0.09 | -1.21  | 0.409658 | 0.30199  | 0.705909 | 0.559929 |
| MmugDNA.4896.1.S1_at   | MmugDNA.4896.1 | 10.01 | 10.23 | 0.34 | 0.35 | -1.16  | 0.47514  | 0.376003 | 0.745579 | 0.613815 |
| MmugDNA.4899.1.S1_at   | MmugDNA.4899.1 | 8.78  | 9.14  | 0.18 | 0.38 | -1.28  | 0.133752 | 0.137604 | 0.500334 | 0.410562 |
| MmugDNA.49.1.S1_at     | MmugDNA.49.1   | 2.97  | 3.02  | 0.17 | 0.12 | -1.03  | 0.758997 | 0.651894 | 0.898179 | 0.796505 |
| MmugDNA.4909.1.S1_at   | MmugDNA.4909.1 | 6.09  | 6.15  | 0.08 | 0.1  | -1.05  | 0.133706 | 0.057098 | 0.500334 | 0.284945 |
| MmugDNA.4912.1.S1_at   | MmugDNA.4912.1 | 3.94  | 4.47  | 0.28 | 0.15 | -1.45  | 0.034934 | 0.030941 | 0.334102 | 0.217717 |
| MmugDNA.4913.1.S1_at   | MmugDNA.4913.1 | 9.53  | 8.08  | 0.2  | 0.26 | 2.72   | 0.002292 | 0.000318 | 0.161798 | 0.035423 |
| MmugDNA.4916.1.S1_at   | MmugDNA.4916.1 | 12.88 | 12.65 | 0.06 | 0.13 | 1.17   | 0.05159  | 0.028558 | 0.376072 | 0.210768 |
| MmugDNA.4918.1.S1_x_at | MmugDNA.4918.1 | 11.1  | 10.78 | 0.77 | 0.28 | 1.24   | 0.192271 | 0.264769 | 0.555342 | 0.530791 |
| MmugDNA.4919.1.S1_at   | MmugDNA.4919.1 | 3.89  | 4.16  | 0.98 | 0.14 | -1.2   | 0.627277 | 0.664938 | 0.830029 | 0.803712 |
| MmugDNA.4926.1.S1_at   | MmugDNA.4926.1 | 10.86 | 11.27 | 0.13 | 0.16 | -1.33  | 0.023843 | 0.007629 | 0.292853 | 0.116869 |
| MmugDNA.4927.1.S1_at   | MmugDNA.4927.1 | 11.29 | 11.01 | 0.59 | 0.7  | 1.21   | 0.691898 | 0.384902 | 0.863115 | 0.620513 |
| MmugDNA.4930.1.S1_at   | MmugDNA.4930.1 | 9.21  | 9.15  | 1.5  | 0.56 | 1.04   | 0.967543 | 0.630298 | 0.987874 | 0.782213 |
| MmugDNA.4938.1.S1_at   | MmugDNA.4938.1 | 5.65  | 5.53  | 0.4  | 0.16 | 1.09   | 0.815644 | 0.646533 | 0.925109 | 0.792953 |
| MmugDNA.4939.1.S1_at   | MmugDNA.4939.1 | 4.91  | 5.1   | 0.23 | 0.22 | -1.14  | 0.748289 | 0.879735 | 0.892364 | 0.93128  |
| MmugDNA.494.1.S1_at    | MmugDNA.494.1  | 12.25 | 12.12 | 0.18 | 0.23 | 1.09   | 0.343915 | 0.431365 | 0.664147 | 0.65231  |
| MmugDNA.4940.1.S1_at   | MmugDNA.4940.1 | 3.74  | 3.77  | 0.13 | 0.07 | -1.02  | 0.97643  | 0.814389 | 0.9909   | 0.892923 |
| MmugDNA.4944.1.S1_at   | MmugDNA.4944.1 | 6.39  | 5.8   | 0.18 | 0.11 | 1.51   | 0.006318 | 0.073142 | 0.197861 | 0.316064 |
| MmugDNA.4948.1.S1_at   | MmugDNA.4948.1 | 11.53 | 11.26 | 0.14 | 0.27 | 1.21   | 0.263604 | 0.365343 | 0.609546 | 0.605468 |
| MmugDNA.4954.1.S1_at   | MmugDNA.4954.1 | 8.42  | 9.11  | 0.23 | 0.1  | -1.61  | 0.014847 | 0.004644 | 0.255626 | 0.095    |
| MmugDNA.4962.1.S1_at   | MmugDNA.4962.1 | 4.53  | 4.44  | 0.07 | 0.04 | 1.07   | 0.231954 | 0.04274  | 0.587671 | 0.251216 |
| MmugDNA.4967.1.S1_at   | MmugDNA.4967.1 | 12.04 | 12.53 | 0.05 | 0.06 | -1.4   | 0.000449 | 0.000739 | 0.133116 | 0.044895 |
| MmugDNA.4969.1.S1_at   | MmugDNA.4969.1 | 3.91  | 4.73  | 0.31 | 0.42 | -1.76  | 0.155758 | 0.120638 | 0.520384 | 0.389476 |
| MmugDNA.497.1.S1_at    | MmugDNA.497.1  | 11.41 | 10.85 | 0.1  | 0.38 | 1.48   | 0.086509 | 0.061247 | 0.440232 | 0.294161 |
| MmugDNA.4973.1.S1_at   | MmugDNA.4973.1 | 7.79  | 6.21  | 0.19 | 0.51 | 2.99   | 0.01974  | 0.010894 | 0.275549 | 0.135939 |
| MmugDNA.4974.1.S1_at   | MmugDNA.4974.1 | 3.52  | 3.57  | 0.09 | 0.01 | -1.04  | 0.255909 | 0.338288 | 0.603662 | 0.585417 |
| MmugDNA.4983.1.S1_at   | MmugDNA.4983.1 | 10.25 | 9.61  | 0.17 | 0.13 | 1.56   | 0.006223 | 0.003934 | 0.197039 | 0.089223 |
| MmugDNA.4986.1.S1_at   | MmugDNA.4986.1 | 6.28  | 6.42  | 0.3  | 0.16 | -1.1   | 0.587097 | 0.654865 | 0.808418 | 0.798179 |
| MmugDNA.4993.1.S1_at   | MmugDNA.4993.1 | 13.28 | 13.32 | 0.05 | 0.05 | -1.03  | 0.084561 | 0.072957 | 0.437266 | 0.315986 |

|                        |                |       |       |      |      |       |          |          |          |          |
|------------------------|----------------|-------|-------|------|------|-------|----------|----------|----------|----------|
| MmugDNA.4996.1.S1_at   | MmugDNA.4996.1 | 5.08  | 4.38  | 0.69 | 0.5  | 1.62  | 0.17322  | 0.292292 | 0.536894 | 0.552389 |
| MmugDNA.4997.1.S1_at   | MmugDNA.4997.1 | 6.8   | 6.86  | 0.16 | 0.06 | -1.04 | 0.459381 | 0.280439 | 0.736116 | 0.543648 |
| MmugDNA.4998.1.S1_at   | MmugDNA.4998.1 | 9.03  | 8.84  | 0.09 | 0.31 | 1.14  | 0.490093 | 0.231916 | 0.754288 | 0.503604 |
| MmugDNA.4999.1.S1_at   | MmugDNA.4999.1 | 9.44  | 9.29  | 0.2  | 0.41 | 1.11  | 0.504289 | 0.602609 | 0.761197 | 0.763534 |
| MmugDNA.50.1.S1_at     | MmugDNA.50.1   | 10.91 | 10.53 | 0.22 | 0.36 | 1.3   | 0.474698 | 0.361296 | 0.74537  | 0.602104 |
| MmugDNA.5012.1.S1_at   | MmugDNA.5012.1 | 3.98  | 3.92  | 0.13 | 0.29 | 1.05  | 0.933471 | 0.67645  | 0.974159 | 0.81095  |
| MmugDNA.5018.1.S1_at   | MmugDNA.5018.1 | 9.14  | 9.36  | 0.12 | 0.69 | -1.17 | 0.381931 | 0.514528 | 0.688307 | 0.707757 |
| MmugDNA.5023.1.S1_at   | MmugDNA.5023.1 | 8.02  | 7.13  | 0.14 | 0.52 | 1.85  | 0.038466 | 0.021053 | 0.344376 | 0.181869 |
| MmugDNA.5024.1.S1_at   | MmugDNA.5024.1 | 9.18  | 8.99  | 0.09 | 0.08 | 1.14  | 0.043245 | 0.139854 | 0.3567   | 0.413131 |
| MmugDNA.5028.1.S1_at   | MmugDNA.5028.1 | 8.09  | 9.51  | 0.33 | 1.22 | -2.69 | 0.13998  | 0.163328 | 0.50786  | 0.43947  |
| MmugDNA.503.1.S1_at    | MmugDNA.503.1  | 5.42  | 5.4   | 0.18 | 0.2  | 1.01  | 0.962291 | 0.763495 | 0.985519 | 0.862471 |
| MmugDNA.5045.1.S1_at   | MmugDNA.5045.1 | 9.04  | 6.82  | 0.21 | 0.67 | 4.66  | 0.010114 | 0.005038 | 0.228193 | 0.098963 |
| MmugDNA.505.1.S1_at    | MmugDNA.505.1  | 8.73  | 8.67  | 0.09 | 0.09 | 1.04  | 0.739014 | 0.010815 | 0.888088 | 0.135641 |
| MmugDNA.5051.1.S1_at   | MmugDNA.5051.1 | 13.03 | 12.72 | 0.03 | 0.23 | 1.24  | 0.078965 | 0.066276 | 0.428609 | 0.303058 |
| MmugDNA.5051.1.S1_s_at | MmugDNA.5051.1 | 12.54 | 12.2  | 0.07 | 0.26 | 1.26  | 0.09765  | 0.080764 | 0.456709 | 0.328634 |
| MmugDNA.5052.1.S1_at   | MmugDNA.5052.1 | 7.46  | 7.33  | 0.21 | 0.04 | 1.1   | 0.292777 | 0.304196 | 0.63012  | 0.561558 |
| MmugDNA.5058.1.S1_at   | MmugDNA.5058.1 | 11.61 | 11.45 | 0.06 | 0.04 | 1.11  | 0.040993 | 0.030859 | 0.35051  | 0.217427 |
| MmugDNA.5059.1.S1_at   | MmugDNA.5059.1 | 9.48  | 9.57  | 0.33 | 0.56 | -1.06 | 0.824763 | 0.317063 | 0.928991 | 0.570334 |
| MmugDNA.5063.1.S1_s_at | MmugDNA.5063.1 | 12.46 | 12.39 | 0.08 | 0.11 | 1.05  | 0.20255  | 0.08829  | 0.564967 | 0.341721 |
| MmugDNA.5064.1.S1_at   | MmugDNA.5064.1 | 9.61  | 11.93 | 1.39 | 2.38 | -5.02 | 0.570295 | 0.393656 | 0.799452 | 0.626522 |
| MmugDNA.5075.1.S1_at   | MmugDNA.5075.1 | 5.95  | 6.6   | 0.24 | 0.35 | -1.57 | 0.060939 | 0.027509 | 0.394705 | 0.207161 |
| MmugDNA.5077.1.S1_at   | MmugDNA.5077.1 | 10.84 | 10.03 | 0.09 | 0.41 | 1.76  | 0.078263 | 0.085217 | 0.428221 | 0.337096 |
| MmugDNA.5086.1.S1_at   | MmugDNA.5086.1 | 10.47 | 10.34 | 0.24 | 0.04 | 1.09  | 0.442005 | 0.493276 | 0.725332 | 0.694018 |
| MmugDNA.5087.1.S1_at   | MmugDNA.5087.1 | 9.48  | 9.03  | 0.11 | 0.21 | 1.37  | 0.023805 | 0.012464 | 0.292771 | 0.14417  |
| MmugDNA.5090.1.S1_at   | MmugDNA.5090.1 | 7.21  | 6.65  | 0.44 | 0.34 | 1.48  | 0.077372 | 0.061517 | 0.427094 | 0.294835 |
| MmugDNA.5091.1.S1_at   | MmugDNA.5091.1 | 6.99  | 5.88  | 0.37 | 0.44 | 2.16  | 0.027446 | 0.020371 | 0.308057 | 0.179158 |
| MmugDNA.5094.1.S1_at   | MmugDNA.5094.1 | 9.6   | 8.98  | 0.24 | 0.2  | 1.53  | 0.025708 | 0.020227 | 0.300275 | 0.178641 |
| MmugDNA.5095.1.S1_at   | MmugDNA.5095.1 | 11.43 | 11.5  | 0.31 | 0.44 | -1.05 | 0.716944 | 0.626624 | 0.875702 | 0.779896 |
| MmugDNA.5098.1.S1_at   | MmugDNA.5098.1 | 5.88  | 5.89  | 0.09 | 0.11 | -1.01 | 0.347904 | 0.126258 | 0.666761 | 0.39678  |
| MmugDNA.510.1.S1_at    | MmugDNA.510.1  | 11.12 | 11.24 | 0.13 | 0.4  | -1.08 | 0.470495 | 0.636317 | 0.742448 | 0.786047 |
| MmugDNA.5101.1.S1_at   | MmugDNA.5101.1 | 11.46 | 11.17 | 0.11 | 0.06 | 1.23  | 0.012473 | 0.015415 | 0.241976 | 0.157687 |
| MmugDNA.5103.1.S1_at   | MmugDNA.5103.1 | 5.84  | 5.93  | 0.17 | 0.03 | -1.06 | 0.535206 | 0.298528 | 0.778933 | 0.557175 |
| MmugDNA.511.1.S1_at    | MmugDNA.511.1  | 12.93 | 12.97 | 0.11 | 0.05 | -1.03 | 0.129577 | 0.390032 | 0.495744 | 0.624002 |
| MmugDNA.5112.1.S1_at   | MmugDNA.5112.1 | 5.68  | 5.75  | 0.14 | 0.15 | -1.05 | 0.778825 | 0.635871 | 0.907745 | 0.785716 |
| MmugDNA.512.1.S1_at    | MmugDNA.512.1  | 6.51  | 6.85  | 0.16 | 0.43 | -1.26 | 0.60797  | 0.751566 | 0.819718 | 0.855508 |
| MmugDNA.5125.1.S1_at   | MmugDNA.5125.1 | 6.28  | 6.47  | 0.09 | 0.03 | -1.13 | 0.070826 | 0.092218 | 0.414661 | 0.347969 |
| MmugDNA.5126.1.S1_at   | MmugDNA.5126.1 | 10.82 | 11.08 | 0.16 | 0.52 | -1.19 | 0.419627 | 0.151398 | 0.712008 | 0.426104 |
| MmugDNA.5129.1.S1_at   | MmugDNA.5129.1 | 8.4   | 8.54  | 0.18 | 0.36 | -1.1  | 0.661622 | 0.157861 | 0.848148 | 0.433522 |
| MmugDNA.5130.1.S1_at   | MmugDNA.5130.1 | 11.31 | 11.1  | 0.1  | 0.6  | 1.16  | 0.560869 | 0.717198 | 0.794476 | 0.836322 |
| MmugDNA.5134.1.S1_at   | MmugDNA.5134.1 | 8.34  | 8.7   | 0.94 | 0.99 | -1.28 | 0.838501 | 0.091793 | 0.934694 | 0.346977 |
| MmugDNA.5139.1.S1_at   | MmugDNA.5139.1 | 5.42  | 5.36  | 0.07 | 0.07 | 1.04  | 0.320198 | 0.377955 | 0.64942  | 0.615264 |



|                        |                |       |       |      |      |       |          |          |          |          |
|------------------------|----------------|-------|-------|------|------|-------|----------|----------|----------|----------|
| MmugDNA.514.1.S1_at    | MmugDNA.514.1  | 5.08  | 5.08  | 0.11 | 0.32 | 1     | 0.348507 | 0.327133 | 0.667173 | 0.577136 |
| MmugDNA.5146.1.S1_at   | MmugDNA.5146.1 | 8.42  | 8.25  | 0.09 | 0.11 | 1.12  | 0.081157 | 0.106936 | 0.431848 | 0.369499 |
| MmugDNA.515.1.S1_at    | MmugDNA.515.1  | 11.01 | 11.23 | 0.48 | 0.16 | -1.17 | 0.845762 | 0.758893 | 0.93814  | 0.859892 |
| MmugDNA.5153.1.S1_at   | MmugDNA.5153.1 | 5.72  | 5.85  | 0.14 | 0.11 | -1.09 | 0.28406  | 0.29157  | 0.623933 | 0.551953 |
| MmugDNA.5155.1.S1_at   | MmugDNA.5155.1 | 9.62  | 10.76 | 0.15 | 0.8  | -2.2  | 0.17593  | 0.19258  | 0.53945  | 0.468079 |
| MmugDNA.5160.1.S1_at   | MmugDNA.5160.1 | 11.31 | 11.26 | 0.04 | 0.08 | 1.04  | 0.911282 | 0.577985 | 0.965013 | 0.748204 |
| MmugDNA.5165.1.S1_at   | MmugDNA.5165.1 | 11.06 | 10.06 | 0.17 | 0.11 | 2     | 0.00088  | 0.000246 | 0.139813 | 0.032859 |
| MmugDNA.5167.1.S1_at   | MmugDNA.5167.1 | 5.62  | 6.34  | 0.22 | 0.26 | -1.64 | 0.03702  | 0.062657 | 0.340567 | 0.297022 |
| MmugDNA.5169.1.S1_at   | MmugDNA.5169.1 | 9.12  | 8.69  | 0.34 | 0.22 | 1.35  | 0.054503 | 0.04218  | 0.381851 | 0.249842 |
| MmugDNA.5170.1.S1_at   | MmugDNA.5170.1 | 3.35  | 3.33  | 0.13 | 0.22 | 1.02  | 0.874585 | 0.606263 | 0.949695 | 0.765727 |
| MmugDNA.5174.1.S1_at   | MmugDNA.5174.1 | 8.19  | 7.45  | 0.16 | 0.24 | 1.67  | 0.005029 | 0.001429 | 0.187868 | 0.057607 |
| MmugDNA.5179.1.S1_at   | MmugDNA.5179.1 | 8.79  | 7.03  | 0.2  | 0.42 | 3.39  | 0.002709 | 0.000776 | 0.164826 | 0.045626 |
| MmugDNA.518.1.S1_at    | MmugDNA.518.1  | 7.45  | 7.46  | 0.06 | 0.36 | -1.01 | 0.356627 | 0.30957  | 0.671685 | 0.564987 |
| MmugDNA.5183.1.S1_at   | MmugDNA.5183.1 | 5.78  | 5.81  | 0.43 | 0.19 | -1.02 | 0.943557 | 0.640984 | 0.978535 | 0.789322 |
| MmugDNA.5186.1.S1_at   | MmugDNA.5186.1 | 10.31 | 10.01 | 0.13 | 0.22 | 1.22  | 0.119325 | 0.132896 | 0.484049 | 0.404544 |
| MmugDNA.5195.1.S1_at   | MmugDNA.5195.1 | 7.67  | 7.56  | 0.02 | 0.27 | 1.08  | 0.570769 | 0.666219 | 0.799645 | 0.804419 |
| MmugDNA.5196.1.S1_at   | MmugDNA.5196.1 | 7.16  | 7.32  | 0.1  | 0.64 | -1.12 | 0.587505 | 0.336262 | 0.808576 | 0.583736 |
| MmugDNA.5197.1.S1_at   | MmugDNA.5197.1 | 8.24  | 8.82  | 0.07 | 0.67 | -1.5  | 0.102933 | 0.112105 | 0.46254  | 0.377398 |
| MmugDNA.5201.1.S1_at   | MmugDNA.5201.1 | 10.84 | 10.18 | 0.07 | 0.22 | 1.57  | 0.012128 | 0.006293 | 0.240312 | 0.107725 |
| MmugDNA.5209.1.S1_at   | MmugDNA.5209.1 | 7.3   | 6.71  | 0.61 | 0.93 | 1.51  | 0.697712 | 0.270522 | 0.865733 | 0.535835 |
| MmugDNA.5218.1.S1_at   | MmugDNA.5218.1 | 8.26  | 7.92  | 0.22 | 1.35 | 1.27  | 0.624539 | 0.730056 | 0.828315 | 0.843796 |
| MmugDNA.522.1.S1_at    | MmugDNA.522.1  | 7.92  | 8.14  | 0.16 | 0.24 | -1.16 | 0.054568 | 0.025065 | 0.381936 | 0.198332 |
| MmugDNA.5222.1.S1_at   | MmugDNA.5222.1 | 7.25  | 7.25  | 0.16 | 0.17 | -1    | 0.94942  | 0.704085 | 0.980754 | 0.828326 |
| MmugDNA.5231.1.S1_at   | MmugDNA.5231.1 | 5.97  | 6.19  | 0.02 | 0.33 | -1.17 | 0.236295 | 0.388144 | 0.590342 | 0.622607 |
| MmugDNA.5238.1.S1_at   | MmugDNA.5238.1 | 9.93  | 9.64  | 0.08 | 0.3  | 1.22  | 0.303413 | 0.244644 | 0.63767  | 0.514463 |
| MmugDNA.5239.1.S1_at   | MmugDNA.5239.1 | 11.84 | 12.18 | 0.24 | 0.42 | -1.27 | 0.301209 | 0.244179 | 0.636299 | 0.514164 |
| MmugDNA.5250.1.S1_at   | MmugDNA.5250.1 | 10.13 | 10.11 | 0.19 | 0.08 | 1.02  | 0.838599 | 0.242658 | 0.934745 | 0.513025 |
| MmugDNA.5253.1.S1_s_at | MmugDNA.5253.1 | 11.28 | 11.01 | 0.34 | 0.05 | 1.2   | 0.248633 | 0.254101 | 0.599428 | 0.522439 |
| MmugDNA.526.1.S1_at    | MmugDNA.526.1  | 4.92  | 4.85  | 0.16 | 0.22 | 1.05  | 0.284588 | 0.381091 | 0.624327 | 0.617478 |
| MmugDNA.5261.1.S1_at   | MmugDNA.5261.1 | 12.15 | 11.43 | 0.12 | 0.7  | 1.65  | 0.161768 | 0.0831   | 0.526573 | 0.332962 |
| MmugDNA.5264.1.S1_at   | MmugDNA.5264.1 | 12.01 | 11.83 | 0.11 | 0.3  | 1.13  | 0.949525 | 0.280074 | 0.980806 | 0.543369 |
| MmugDNA.5265.1.S1_at   | MmugDNA.5265.1 | 7.8   | 6.47  | 0.36 | 0.58 | 2.51  | 0.016487 | 0.005988 | 0.264215 | 0.1058   |
| MmugDNA.5277.1.S1_at   | MmugDNA.5277.1 | 10.51 | 9.92  | 0.25 | 0.33 | 1.5   | 0.08265  | 0.078204 | 0.434282 | 0.324752 |
| MmugDNA.5278.1.S1_at   | MmugDNA.5278.1 | 6.87  | 6.71  | 0.12 | 0.14 | 1.12  | 0.400076 | 0.172855 | 0.699692 | 0.449424 |
| MmugDNA.5279.1.S1_at   | MmugDNA.5279.1 | 10.35 | 10.55 | 0.29 | 0.07 | -1.15 | 0.842455 | 0.949461 | 0.936474 | 0.971102 |
| MmugDNA.5281.1.S1_at   | MmugDNA.5281.1 | 6.36  | 6.23  | 0.12 | 0.06 | 1.09  | 0.129254 | 0.007676 | 0.495325 | 0.117153 |
| MmugDNA.5286.1.S1_at   | MmugDNA.5286.1 | 6.59  | 7.08  | 0.08 | 0.26 | -1.4  | 0.040882 | 0.029134 | 0.350506 | 0.212747 |
| MmugDNA.5288.1.S1_at   | MmugDNA.5288.1 | 10.84 | 10.55 | 0.23 | 0.13 | 1.22  | 0.227299 | 0.145607 | 0.585089 | 0.419505 |
| MmugDNA.5290.1.S1_at   | MmugDNA.5290.1 | 12.34 | 11.87 | 0.17 | 0.18 | 1.39  | 0.039074 | 0.012337 | 0.346298 | 0.143659 |
| MmugDNA.5293.1.S1_at   | MmugDNA.5293.1 | 7.56  | 7.36  | 0.13 | 0.24 | 1.15  | 0.443638 | 0.119958 | 0.726292 | 0.388671 |
| MmugDNA.5294.1.S1_at   | MmugDNA.5294.1 | 3.95  | 4.08  | 0.23 | 0.92 | -1.1  | 0.404486 | 0.552315 | 0.702746 | 0.731658 |

|                        |                |       |       |      |      |       |          |          |          |          |
|------------------------|----------------|-------|-------|------|------|-------|----------|----------|----------|----------|
| MmugDNA.5299.1.S1_at   | MmugDNA.5299.1 | 13.25 | 12.85 | 0.14 | 0.56 | 1.32  | 0.220674 | 0.197203 | 0.579701 | 0.472213 |
| MmugDNA.53.1.S1_at     | MmugDNA.53.1   | 9.98  | 9.38  | 0.21 | 0.16 | 1.52  | 0.017492 | 0.010382 | 0.267445 | 0.133312 |
| MmugDNA.530.1.S1_at    | MmugDNA.530.1  | 12.09 | 11.96 | 0.12 | 0.25 | 1.09  | 0.300393 | 0.364951 | 0.635821 | 0.60517  |
| MmugDNA.5307.1.S1_at   | MmugDNA.5307.1 | 4.75  | 4.39  | 0.23 | 0.14 | 1.28  | 0.091127 | 0.07454  | 0.4471   | 0.318173 |
| MmugDNA.531.1.S1_at    | MmugDNA.531.1  | 8.51  | 9.57  | 1.04 | 0.23 | -2.08 | 0.181822 | 0.175184 | 0.546458 | 0.45196  |
| MmugDNA.5311.1.S1_at   | MmugDNA.5311.1 | 11.29 | 10.75 | 0.26 | 0.39 | 1.46  | 0.196782 | 0.173827 | 0.559808 | 0.450128 |
| MmugDNA.5318.1.S1_at   | MmugDNA.5318.1 | 8.64  | 8.41  | 0.2  | 0.21 | 1.17  | 0.515781 | 0.642914 | 0.767629 | 0.79054  |
| MmugDNA.5326.1.S1_at   | MmugDNA.5326.1 | 7.7   | 7.06  | 0.03 | 0.26 | 1.56  | 0.01179  | 0.005046 | 0.237691 | 0.09901  |
| MmugDNA.5327.1.S1_at   | MmugDNA.5327.1 | 12.11 | 12.13 | 0.05 | 0.17 | -1.01 | 0.326671 | 0.038805 | 0.653184 | 0.241916 |
| MmugDNA.5331.1.S1_at   | MmugDNA.5331.1 | 7.59  | 7.92  | 0.08 | 0.17 | -1.25 | 0.079473 | 0.083699 | 0.429617 | 0.334399 |
| MmugDNA.5338.1.S1_at   | MmugDNA.5338.1 | 9.93  | 9.53  | 0.2  | 0.31 | 1.32  | 0.03028  | 0.030306 | 0.317775 | 0.215977 |
| MmugDNA.5341.1.S1_at   | MmugDNA.5341.1 | 6.09  | 6.22  | 0.57 | 1.21 | -1.09 | 0.213872 | 0.261242 | 0.574137 | 0.527724 |
| MmugDNA.5343.1.S1_at   | MmugDNA.5343.1 | 7.73  | 7.74  | 0.61 | 0.16 | -1.01 | 0.796755 | 0.927414 | 0.915701 | 0.958778 |
| MmugDNA.5344.1.S1_at   | MmugDNA.5344.1 | 10.05 | 10.34 | 0.13 | 0.74 | -1.22 | 0.626707 | 0.818384 | 0.829786 | 0.895287 |
| MmugDNA.5345.1.S1_at   | MmugDNA.5345.1 | 4.79  | 4.69  | 0.08 | 0.09 | 1.07  | 0.122827 | 0.363183 | 0.488168 | 0.603574 |
| MmugDNA.5347.1.S1_at   | MmugDNA.5347.1 | 11.11 | 12.92 | 0.11 | 0.14 | -3.49 | 0.000074 | 0.00015  | 0.112653 | 0.029832 |
| MmugDNA.5353.1.S1_at   | MmugDNA.5353.1 | 9.12  | 8.63  | 0.31 | 0.72 | 1.41  | 0.871513 | 0.067677 | 0.948541 | 0.306208 |
| MmugDNA.5357.1.S1_at   | MmugDNA.5357.1 | 12.46 | 12.96 | 0.08 | 0.12 | -1.42 | 0.00571  | 0.001755 | 0.191956 | 0.063111 |
| MmugDNA.5362.1.S1_at   | MmugDNA.5362.1 | 8.03  | 8.31  | 0.27 | 0.08 | -1.22 | 0.246506 | 0.266715 | 0.597777 | 0.53241  |
| MmugDNA.5366.1.S1_at   | MmugDNA.5366.1 | 4.44  | 4.63  | 0.05 | 0.27 | -1.14 | 0.210057 | 0.266384 | 0.571256 | 0.532173 |
| MmugDNA.5382.1.S1_at   | MmugDNA.5382.1 | 12.38 | 12.62 | 0.13 | 0.02 | -1.18 | 0.028473 | 0.020901 | 0.311384 | 0.181404 |
| MmugDNA.5386.1.S1_at   | MmugDNA.5386.1 | 8.82  | 8     | 0.45 | 0.55 | 1.76  | 0.100811 | 0.134518 | 0.461009 | 0.406629 |
| MmugDNA.5388.1.S1_at   | MmugDNA.5388.1 | 3.52  | 3.59  | 0.04 | 0.08 | -1.05 | 0.166033 | 0.235882 | 0.529882 | 0.507056 |
| MmugDNA.5388.1.S1_x_at | MmugDNA.5388.1 | 4.3   | 4.39  | 0.02 | 0.04 | -1.07 | 0.016326 | 0.038667 | 0.263592 | 0.24169  |
| MmugDNA.5389.1.S1_at   | MmugDNA.5389.1 | 11.57 | 11.46 | 0.07 | 0.35 | 1.08  | 0.389292 | 0.523967 | 0.692956 | 0.714099 |
| MmugDNA.539.1.S1_at    | MmugDNA.539.1  | 8.05  | 8.08  | 0.08 | 0.23 | -1.03 | 0.900331 | 0.057106 | 0.960269 | 0.284945 |
| MmugDNA.5391.1.S1_at   | MmugDNA.5391.1 | 12.18 | 12.02 | 0.12 | 0.1  | 1.12  | 0.089354 | 0.08252  | 0.445032 | 0.331642 |
| MmugDNA.54.1.S1_at     | MmugDNA.54.1   | 10.89 | 10.37 | 0.07 | 0.57 | 1.44  | 0.171693 | 0.197595 | 0.535284 | 0.472564 |
| MmugDNA.5404.1.S1_at   | MmugDNA.5404.1 | 9.59  | 9.92  | 0.17 | 0.39 | -1.26 | 0.878322 | 0.142073 | 0.951178 | 0.415655 |
| MmugDNA.5406.1.S1_at   | MmugDNA.5406.1 | 4.29  | 5.52  | 0.65 | 0.34 | -2.35 | 0.170497 | 0.090503 | 0.534249 | 0.345015 |
| MmugDNA.5408.1.S1_at   | MmugDNA.5408.1 | 11.98 | 11.37 | 0.26 | 0.12 | 1.53  | 0.015157 | 0.001901 | 0.257561 | 0.065038 |
| MmugDNA.5409.1.S1_at   | MmugDNA.5409.1 | 8.57  | 8.83  | 0.2  | 0.51 | -1.2  | 0.367861 | 0.475602 | 0.679656 | 0.68228  |
| MmugDNA.5410.1.S1_at   | MmugDNA.5410.1 | 5.3   | 5.16  | 0.18 | 0.6  | 1.1   | 0.266891 | 0.394886 | 0.612291 | 0.627216 |
| MmugDNA.5413.1.S1_at   | MmugDNA.5413.1 | 9.21  | 8.76  | 0.16 | 0.74 | 1.36  | 0.451752 | 0.624521 | 0.73168  | 0.778707 |
| MmugDNA.5415.1.S1_at   | MmugDNA.5415.1 | 6.8   | 6.61  | 0.42 | 0.96 | 1.14  | 0.264082 | 0.384478 | 0.609857 | 0.620142 |
| MmugDNA.5429.1.S1_at   | MmugDNA.5429.1 | 10.51 | 10.28 | 0.02 | 0.28 | 1.18  | 0.232634 | 0.23917  | 0.587814 | 0.509902 |
| MmugDNA.5430.1.S1_at   | MmugDNA.5430.1 | 9.99  | 9.56  | 0.14 | 0.47 | 1.35  | 0.152442 | 0.108648 | 0.517115 | 0.372171 |
| MmugDNA.5432.1.S1_at   | MmugDNA.5432.1 | 2.71  | 2.73  | 0.06 | 0.09 | -1.01 | 0.629859 | 0.674295 | 0.831779 | 0.809716 |
| MmugDNA.5435.1.S1_at   | MmugDNA.5435.1 | 7.51  | 7.4   | 0.21 | 0.21 | 1.08  | 0.477662 | 0.607003 | 0.74689  | 0.766181 |
| MmugDNA.5435.1.S1_s_at | MmugDNA.5435.1 | 7.77  | 9.33  | 0.41 | 0.13 | -2.94 | 0.002002 | 0.000385 | 0.155636 | 0.037273 |
| MmugDNA.5438.1.S1_at   | MmugDNA.5438.1 | 5.3   | 5.48  | 0.06 | 0.17 | -1.13 | 0.30897  | 0.200256 | 0.641293 | 0.474689 |

|                        |                |       |       |      |      |       |          |          |          |          |
|------------------------|----------------|-------|-------|------|------|-------|----------|----------|----------|----------|
| MmugDNA.5445.1.S1_at   | MmugDNA.5445.1 | 10.06 | 9.22  | 0.77 | 0.71 | 1.8   | 0.215671 | 0.257717 | 0.575945 | 0.525343 |
| MmugDNA.5448.1.S1_at   | MmugDNA.5448.1 | 11.09 | 11.04 | 0.15 | 0.17 | 1.04  | 0.855877 | 0.599271 | 0.941741 | 0.761384 |
| MmugDNA.5453.1.S1_at   | MmugDNA.5453.1 | 5.88  | 5.97  | 0.15 | 0.07 | -1.06 | 0.154011 | 0.209345 | 0.518553 | 0.483065 |
| MmugDNA.5457.1.S1_at   | MmugDNA.5457.1 | 3.6   | 3.54  | 0.31 | 0.15 | 1.05  | 0.459661 | 0.326562 | 0.736386 | 0.576612 |
| MmugDNA.5459.1.S1_at   | MmugDNA.5459.1 | 3.61  | 3.65  | 0.08 | 0.14 | -1.03 | 0.939506 | 0.54199  | 0.976986 | 0.725169 |
| MmugDNA.5460.1.S1_at   | MmugDNA.5460.1 | 13.18 | 12.77 | 0.05 | 0.24 | 1.33  | 0.036197 | 0.023926 | 0.339036 | 0.19376  |
| MmugDNA.5461.1.S1_at   | MmugDNA.5461.1 | 11.81 | 11.61 | 0.35 | 0.04 | 1.15  | 0.418883 | 0.335556 | 0.711627 | 0.583326 |
| MmugDNA.5464.1.S1_at   | MmugDNA.5464.1 | 10.19 | 9.91  | 0.27 | 0.16 | 1.22  | 0.086108 | 0.025313 | 0.440066 | 0.199522 |
| MmugDNA.5464.1.S1_s_at | MmugDNA.5464.1 | 9.79  | 9.35  | 0.23 | 0.22 | 1.35  | 0.073259 | 0.025954 | 0.418483 | 0.20198  |
| MmugDNA.5466.1.S1_s_at | MmugDNA.5466.1 | 10.47 | 10.72 | 0.08 | 0.19 | -1.19 | 0.439338 | 0.495939 | 0.72354  | 0.695811 |
| MmugDNA.5467.1.S1_at   | MmugDNA.5467.1 | 13.75 | 13.92 | 0.11 | 0.19 | -1.12 | 0.672879 | 0.82923  | 0.853295 | 0.901815 |
| MmugDNA.5472.1.S1_at   | MmugDNA.5472.1 | 6.23  | 6.37  | 0.38 | 0.25 | -1.1  | 0.946266 | 0.256208 | 0.979359 | 0.524069 |
| MmugDNA.5473.1.S1_at   | MmugDNA.5473.1 | 5.87  | 5.81  | 0.19 | 0.47 | 1.04  | 0.316673 | 0.344347 | 0.647624 | 0.589762 |
| MmugDNA.5482.1.S1_at   | MmugDNA.5482.1 | 9.95  | 10.11 | 0.27 | 0.84 | -1.12 | 0.958424 | 0.982283 | 0.984324 | 0.990339 |
| MmugDNA.5485.1.S1_at   | MmugDNA.5485.1 | 6.53  | 7.25  | 0.27 | 0.76 | -1.65 | 0.161062 | 0.173214 | 0.526189 | 0.449779 |
| MmugDNA.5486.1.S1_at   | MmugDNA.5486.1 | 8.43  | 8.52  | 0.1  | 0.43 | -1.07 | 0.366466 | 0.403237 | 0.679053 | 0.631996 |
| MmugDNA.5488.1.S1_at   | MmugDNA.5488.1 | 10.66 | 11.98 | 0.26 | 0.19 | -2.51 | 0.004511 | 0.000955 | 0.183797 | 0.049326 |
| MmugDNA.549.1.S1_at    | MmugDNA.549.1  | 3.73  | 3.59  | 0.06 | 0.04 | 1.1   | 0.054369 | 0.064318 | 0.381851 | 0.299804 |
| MmugDNA.5492.1.S1_at   | MmugDNA.5492.1 | 12.35 | 12.43 | 0.16 | 0.65 | -1.06 | 0.87118  | 0.892154 | 0.948463 | 0.938526 |
| MmugDNA.5506.1.S1_at   | MmugDNA.5506.1 | 3.78  | 3.23  | 0.58 | 0.08 | 1.47  | 0.197816 | 0.194697 | 0.560816 | 0.469765 |
| MmugDNA.5508.1.S1_at   | MmugDNA.5508.1 | 3.38  | 3.31  | 0.05 | 0.08 | 1.05  | 0.703362 | 0.498013 | 0.868993 | 0.697194 |
| MmugDNA.5510.1.S1_s_at | MmugDNA.5510.1 | 7.56  | 10.1  | 1.15 | 2.48 | -5.8  | 0.325706 | 0.331778 | 0.652981 | 0.580372 |
| MmugDNA.5514.1.S1_at   | MmugDNA.5514.1 | 7.16  | 7.36  | 0.21 | 0.16 | -1.15 | 0.280558 | 0.214952 | 0.621702 | 0.488897 |
| MmugDNA.5517.1.S1_at   | MmugDNA.5517.1 | 13.07 | 13.14 | 0.04 | 0.02 | -1.05 | 0.020483 | 0.00648  | 0.278215 | 0.109342 |
| MmugDNA.5518.1.S1_at   | MmugDNA.5518.1 | 7.79  | 6.85  | 0.04 | 0.56 | 1.92  | 0.036092 | 0.032881 | 0.338781 | 0.224478 |
| MmugDNA.5519.1.S1_at   | MmugDNA.5519.1 | 13.28 | 12.94 | 0.04 | 0.15 | 1.26  | 0.019365 | 0.009806 | 0.273874 | 0.130166 |
| MmugDNA.5522.1.S1_at   | MmugDNA.5522.1 | 3.21  | 3.34  | 0.22 | 0.08 | -1.1  | 0.481931 | 0.320265 | 0.749333 | 0.572605 |
| MmugDNA.553.1.S1_at    | MmugDNA.553.1  | 9.24  | 7.98  | 0.19 | 0.21 | 2.39  | 0.001951 | 0.000386 | 0.155636 | 0.037273 |
| MmugDNA.5534.1.S1_at   | MmugDNA.5534.1 | 3.42  | 4.33  | 0.27 | 0.15 | -1.87 | 0.020887 | 0.012626 | 0.28132  | 0.144972 |
| MmugDNA.5536.1.S1_at   | MmugDNA.5536.1 | 10.95 | 11.14 | 0.12 | 0.21 | -1.14 | 0.322814 | 0.307639 | 0.651245 | 0.563799 |
| MmugDNA.5537.1.S1_at   | MmugDNA.5537.1 | 4.1   | 4     | 0.49 | 0.15 | 1.07  | 0.35322  | 0.207963 | 0.670093 | 0.482049 |
| MmugDNA.5539.1.S1_at   | MmugDNA.5539.1 | 3.73  | 3.85  | 0.11 | 0.21 | -1.09 | 0.521176 | 0.141556 | 0.771131 | 0.415063 |
| MmugDNA.5542.1.S1_at   | MmugDNA.5542.1 | 8.99  | 8.65  | 0.05 | 0.27 | 1.26  | 0.137841 | 0.137754 | 0.505265 | 0.410738 |
| MmugDNA.5552.1.S1_at   | MmugDNA.5552.1 | 10.91 | 10.66 | 0.18 | 0.19 | 1.19  | 0.14508  | 0.082144 | 0.511209 | 0.330937 |
| MmugDNA.5553.1.S1_at   | MmugDNA.5553.1 | 4.91  | 6.58  | 0.76 | 0.77 | -3.17 | 0.043719 | 0.034584 | 0.357051 | 0.230061 |
| MmugDNA.5558.1.S1_at   | MmugDNA.5558.1 | 9.13  | 8.67  | 0.26 | 0.43 | 1.38  | 0.20231  | 0.253336 | 0.564612 | 0.521662 |
| MmugDNA.556.1.S1_at    | MmugDNA.556.1  | 7.28  | 8.59  | 0.59 | 0.92 | -2.48 | 0.11946  | 0.094228 | 0.484135 | 0.350889 |
| MmugDNA.5565.1.S1_at   | MmugDNA.5565.1 | 6.04  | 6.16  | 0.15 | 0.07 | -1.08 | 0.918636 | 0.537607 | 0.96831  | 0.722616 |
| MmugDNA.5581.1.S1_s_at | MmugDNA.5581.1 | 12.66 | 12.85 | 0.14 | 0.21 | -1.14 | 0.274539 | 0.188958 | 0.617491 | 0.464854 |
| MmugDNA.5583.1.S1_at   | MmugDNA.5583.1 | 7.23  | 7.22  | 0.04 | 0.25 | 1     | 0.488768 | 0.65946  | 0.753271 | 0.800788 |
| MmugDNA.5584.1.S1_at   | MmugDNA.5584.1 | 10.75 | 10.99 | 0.04 | 0.26 | -1.18 | 0.616966 | 0.156798 | 0.824363 | 0.432353 |

|                        |                |       |       |      |      |       |          |          |          |          |
|------------------------|----------------|-------|-------|------|------|-------|----------|----------|----------|----------|
| MmugDNA.5594.1.S1_at   | MmugDNA.5594.1 | 5.27  | 4.11  | 1.07 | 0.25 | 2.25  | 0.076349 | 0.113641 | 0.424774 | 0.379775 |
| MmugDNA.5600.1.S1_at   | MmugDNA.5600.1 | 12.51 | 12.39 | 0.11 | 0.08 | 1.09  | 0.091616 | 0.023311 | 0.447666 | 0.191355 |
| MmugDNA.5601.1.S1_at   | MmugDNA.5601.1 | 12.5  | 12.74 | 0.05 | 0.34 | -1.18 | 0.292686 | 0.391227 | 0.630053 | 0.624922 |
| MmugDNA.5610.1.S1_at   | MmugDNA.5610.1 | 9.23  | 10.2  | 0.54 | 0.4  | -1.96 | 0.037242 | 0.01676  | 0.341151 | 0.163986 |
| MmugDNA.5612.1.S1_at   | MmugDNA.5612.1 | 4.33  | 4.53  | 0.29 | 0.28 | -1.15 | 0.934648 | 0.870458 | 0.974715 | 0.926446 |
| MmugDNA.5614.1.S1_at   | MmugDNA.5614.1 | 10.16 | 9.48  | 0.22 | 0.29 | 1.61  | 0.02324  | 0.014315 | 0.29045  | 0.152756 |
| MmugDNA.5620.1.S1_at   | MmugDNA.5620.1 | 6.76  | 5.45  | 1.92 | 0.62 | 2.48  | 0.444652 | 0.265064 | 0.72708  | 0.531    |
| MmugDNA.5628.1.S1_at   | MmugDNA.5628.1 | 13.98 | 14.2  | 0.03 | 0.17 | -1.16 | 0.135881 | 0.055655 | 0.502782 | 0.28174  |
| MmugDNA.563.1.S1_at    | MmugDNA.563.1  | 4.74  | 5.66  | 0.1  | 0.7  | -1.89 | 0.087861 | 0.024516 | 0.442191 | 0.196001 |
| MmugDNA.5631.1.S1_at   | MmugDNA.5631.1 | 11.71 | 12.32 | 0.12 | 0.07 | -1.53 | 0.002046 | 0.001092 | 0.155636 | 0.052283 |
| MmugDNA.564.1.S1_at    | MmugDNA.564.1  | 11.29 | 11.53 | 0.19 | 0.39 | -1.19 | 0.24607  | 0.296579 | 0.597459 | 0.555566 |
| MmugDNA.5642.1.S1_at   | MmugDNA.5642.1 | 8.68  | 8.68  | 0.34 | 1.28 | 1.01  | 0.938219 | 0.547506 | 0.976338 | 0.728479 |
| MmugDNA.5643.1.S1_at   | MmugDNA.5643.1 | 6.16  | 5.6   | 0.34 | 0.21 | 1.48  | 0.126993 | 0.111915 | 0.493205 | 0.377006 |
| MmugDNA.5645.1.S1_at   | MmugDNA.5645.1 | 9.72  | 10.11 | 0.25 | 0.28 | -1.32 | 0.053934 | 0.03632  | 0.381209 | 0.235105 |
| MmugDNA.5654.1.S1_at   | MmugDNA.5654.1 | 8.09  | 7.83  | 0.03 | 0.27 | 1.19  | 0.56644  | 0.195304 | 0.797591 | 0.470253 |
| MmugDNA.5655.1.S1_at   | MmugDNA.5655.1 | 9.39  | 9.18  | 0.29 | 0.13 | 1.16  | 0.179008 | 0.231426 | 0.543331 | 0.503138 |
| MmugDNA.5656.1.S1_at   | MmugDNA.5656.1 | 9.88  | 10.47 | 0.14 | 0.2  | -1.5  | 0.008829 | 0.003311 | 0.221301 | 0.082825 |
| MmugDNA.5657.1.S1_at   | MmugDNA.5657.1 | 7.58  | 8.37  | 0.24 | 1.03 | -1.73 | 0.177666 | 0.233894 | 0.541818 | 0.505169 |
| MmugDNA.5658.1.S1_at   | MmugDNA.5658.1 | 8.12  | 10.59 | 1.99 | 2.2  | -5.55 | 0.293381 | 0.400993 | 0.630419 | 0.630658 |
| MmugDNA.5661.1.S1_at   | MmugDNA.5661.1 | 10.7  | 10.07 | 0.05 | 0.27 | 1.54  | 0.012304 | 0.006166 | 0.240734 | 0.106774 |
| MmugDNA.5662.1.S1_at   | MmugDNA.5662.1 | 10.42 | 10.49 | 0.16 | 0.15 | -1.05 | 0.842506 | 0.140448 | 0.936474 | 0.413627 |
| MmugDNA.5663.1.S1_at   | MmugDNA.5663.1 | 13.04 | 12.88 | 0.13 | 0.15 | 1.11  | 0.506726 | 0.445337 | 0.762448 | 0.662338 |
| MmugDNA.5665.1.S1_at   | MmugDNA.5665.1 | 12.53 | 12.4  | 0.1  | 0    | 1.09  | 0.101193 | 0.113606 | 0.461009 | 0.379726 |
| MmugDNA.5669.1.S1_at   | MmugDNA.5669.1 | 7.91  | 7.91  | 0.04 | 0.29 | -1    | 0.976084 | 0.930547 | 0.990729 | 0.960527 |
| MmugDNA.567.1.S1_s_at  | MmugDNA.567.1  | 6.6   | 6.5   | 0.19 | 0.05 | 1.07  | 0.315484 | 0.24254  | 0.646683 | 0.512875 |
| MmugDNA.5671.1.S1_at   | MmugDNA.5671.1 | 4.99  | 4.29  | 0.58 | 0.32 | 1.62  | 0.033812 | 0.020737 | 0.33023  | 0.180661 |
| MmugDNA.5683.1.S1_s_at | MmugDNA.5683.1 | 8.16  | 8.05  | 0.29 | 0.14 | 1.08  | 0.993119 | 0.265553 | 0.997652 | 0.531418 |
| MmugDNA.5685.1.S1_at   | MmugDNA.5685.1 | 3.76  | 3.7   | 0.05 | 0.43 | 1.04  | 0.458034 | 0.560869 | 0.735139 | 0.736993 |
| MmugDNA.5688.1.S1_at   | MmugDNA.5688.1 | 6.96  | 7.6   | 1.29 | 0.25 | -1.57 | 0.944042 | 0.937678 | 0.978622 | 0.964687 |
| MmugDNA.5694.1.S1_at   | MmugDNA.5694.1 | 6.11  | 4.19  | 0.12 | 1.31 | 3.8   | 0.195313 | 0.159162 | 0.558845 | 0.435217 |
| MmugDNA.5702.1.S1_at   | MmugDNA.5702.1 | 9.33  | 9.7   | 0.19 | 0.01 | -1.3  | 0.024279 | 0.022488 | 0.294535 | 0.187631 |
| MmugDNA.5704.1.S1_at   | MmugDNA.5704.1 | 5.36  | 5.64  | 0.01 | 0.22 | -1.21 | 0.318007 | 0.44002  | 0.64802  | 0.658635 |
| MmugDNA.5704.1.S1_x_at | MmugDNA.5704.1 | 4.62  | 4.93  | 0.18 | 0.18 | -1.24 | 0.145838 | 0.135353 | 0.511704 | 0.40745  |
| MmugDNA.5705.1.S1_at   | MmugDNA.5705.1 | 11.06 | 10.34 | 0.14 | 0.13 | 1.65  | 0.002876 | 0.000647 | 0.169151 | 0.043083 |
| MmugDNA.5711.1.S1_at   | MmugDNA.5711.1 | 5.38  | 6.42  | 1.34 | 0.66 | -2.06 | 0.259687 | 0.33786  | 0.606733 | 0.585031 |
| MmugDNA.5714.1.S1_at   | MmugDNA.5714.1 | 10.13 | 8.53  | 0.13 | 0.34 | 3.03  | 0.001604 | 0.000255 | 0.152612 | 0.033475 |
| MmugDNA.5715.1.S1_at   | MmugDNA.5715.1 | 13.69 | 13.92 | 0.16 | 0.34 | -1.17 | 0.410053 | 0.331825 | 0.706179 | 0.580397 |
| MmugDNA.5716.1.S1_at   | MmugDNA.5716.1 | 13.61 | 13.61 | 0.1  | 0.04 | -1    | 0.863236 | 0.482598 | 0.944982 | 0.687368 |
| MmugDNA.5720.1.S1_at   | MmugDNA.5720.1 | 6.63  | 6.65  | 0.15 | 0.11 | -1.02 | 0.918449 | 0.557537 | 0.96831  | 0.73509  |
| MmugDNA.5725.1.S1_at   | MmugDNA.5725.1 | 5.21  | 5.98  | 0.08 | 0.2  | -1.71 | 0.004332 | 0.001497 | 0.182633 | 0.058967 |
| MmugDNA.5729.1.S1_at   | MmugDNA.5729.1 | 8.8   | 9.74  | 0.06 | 0.19 | -1.93 | 0.000817 | 0.000175 | 0.136818 | 0.030511 |

|                        |                |       |       |      |      |       |          |          |          |          |
|------------------------|----------------|-------|-------|------|------|-------|----------|----------|----------|----------|
| MmugDNA.573.1.S1_at    | MmugDNA.573.1  | 9.44  | 9.56  | 0.08 | 0.14 | -1.08 | 0.846826 | 0.296787 | 0.93848  | 0.555779 |
| MmugDNA.5731.1.S1_at   | MmugDNA.5731.1 | 8.31  | 8.36  | 0.34 | 0.33 | -1.03 | 0.998143 | 0.052953 | 0.999291 | 0.275774 |
| MmugDNA.5733.1.S1_at   | MmugDNA.5733.1 | 9.04  | 9.45  | 0.27 | 0.28 | -1.33 | 0.241112 | 0.189061 | 0.593741 | 0.464897 |
| MmugDNA.5734.1.S1_at   | MmugDNA.5734.1 | 8.11  | 8.14  | 0.12 | 0.11 | -1.02 | 0.941364 | 0.168889 | 0.977687 | 0.445458 |
| MmugDNA.5736.1.S1_at   | MmugDNA.5736.1 | 11.72 | 11.3  | 0.24 | 0.17 | 1.34  | 0.14298  | 0.050087 | 0.509942 | 0.268916 |
| MmugDNA.5738.1.S1_at   | MmugDNA.5738.1 | 9.33  | 9.49  | 0.16 | 0.43 | -1.11 | 0.926935 | 0.208646 | 0.971923 | 0.482544 |
| MmugDNA.5742.1.S1_at   | MmugDNA.5742.1 | 7.82  | 7.23  | 0.19 | 0.25 | 1.5   | 0.034748 | 0.025772 | 0.33381  | 0.201218 |
| MmugDNA.5746.1.S1_at   | MmugDNA.5746.1 | 8.72  | 8.17  | 0.24 | 0.18 | 1.46  | 0.022434 | 0.001899 | 0.286745 | 0.065035 |
| MmugDNA.5747.1.S1_at   | MmugDNA.5747.1 | 11.98 | 12.27 | 0.1  | 0.34 | -1.22 | 0.067133 | 0.071695 | 0.407071 | 0.313904 |
| MmugDNA.575.1.S1_at    | MmugDNA.575.1  | 5.13  | 5.01  | 0.06 | 0.3  | 1.08  | 0.976149 | 0.866022 | 0.990729 | 0.923791 |
| MmugDNA.5754.1.S1_at   | MmugDNA.5754.1 | 7     | 6.76  | 1.05 | 0.64 | 1.18  | 0.844517 | 0.157636 | 0.937554 | 0.433131 |
| MmugDNA.5757.1.S1_at   | MmugDNA.5757.1 | 11.08 | 10.28 | 0.31 | 0.45 | 1.74  | 0.076789 | 0.070397 | 0.425652 | 0.311676 |
| MmugDNA.5759.1.S1_at   | MmugDNA.5759.1 | 9.51  | 8.16  | 0.25 | 0.18 | 2.56  | 0.001717 | 0.000111 | 0.154452 | 0.028099 |
| MmugDNA.5761.1.S1_at   | MmugDNA.5761.1 | 9.94  | 8.9   | 0.24 | 0.68 | 2.06  | 0.02732  | 0.019286 | 0.307317 | 0.174698 |
| MmugDNA.5768.1.S1_at   | MmugDNA.5768.1 | 12.39 | 11.95 | 0.06 | 0.14 | 1.36  | 0.011102 | 0.004421 | 0.234203 | 0.092904 |
| MmugDNA.5769.1.S1_at   | MmugDNA.5769.1 | 8.35  | 7.7   | 0.33 | 0.32 | 1.57  | 0.27661  | 0.308112 | 0.618796 | 0.564219 |
| MmugDNA.5778.1.S1_at   | MmugDNA.5778.1 | 11.16 | 10.83 | 0.24 | 0.19 | 1.26  | 0.11337  | 0.067165 | 0.476642 | 0.305174 |
| MmugDNA.5781.1.S1_at   | MmugDNA.5781.1 | 7.48  | 8.18  | 0.34 | 0.98 | -1.63 | 0.241617 | 0.32651  | 0.593941 | 0.576576 |
| MmugDNA.5783.1.S1_at   | MmugDNA.5783.1 | 4.79  | 4.83  | 0.4  | 0.21 | -1.03 | 0.940075 | 0.984422 | 0.977192 | 0.991287 |
| MmugDNA.5784.1.S1_at   | MmugDNA.5784.1 | 8.37  | 8.83  | 0.28 | 1.11 | -1.37 | 0.852999 | 0.954998 | 0.940695 | 0.974501 |
| MmugDNA.5788.1.S1_s_at | MmugDNA.5788.1 | 5.74  | 6     | 0.07 | 0.09 | -1.2  | 0.018869 | 0.011392 | 0.272039 | 0.13824  |
| MmugDNA.579.1.S1_at    | MmugDNA.579.1  | 9.15  | 9.7   | 0.43 | 0.2  | -1.47 | 0.21297  | 0.120441 | 0.573396 | 0.38925  |
| MmugDNA.5793.1.S1_at   | MmugDNA.5793.1 | 2.95  | 2.97  | 0.03 | 0.11 | -1.01 | 0.263261 | 0.430002 | 0.609337 | 0.65111  |
| MmugDNA.5794.1.S1_at   | MmugDNA.5794.1 | 12.38 | 13.65 | 0.59 | 0.31 | -2.42 | 0.038315 | 0.03056  | 0.34385  | 0.216739 |
| MmugDNA.5803.1.S1_at   | MmugDNA.5803.1 | 6.61  | 6.53  | 0.24 | 0.29 | 1.06  | 0.898193 | 0.951598 | 0.959278 | 0.972522 |
| MmugDNA.5807.1.S1_at   | MmugDNA.5807.1 | 9.91  | 8.67  | 0.12 | 0.12 | 2.36  | 0.000213 | 0.000178 | 0.120316 | 0.030511 |
| MmugDNA.5809.1.S1_at   | MmugDNA.5809.1 | 3.6   | 3.67  | 0.16 | 0.03 | -1.05 | 0.380269 | 0.454539 | 0.68724  | 0.668668 |
| MmugDNA.5812.1.S1_at   | MmugDNA.5812.1 | 11.18 | 11.01 | 0.09 | 0.1  | 1.13  | 0.038096 | 0.011062 | 0.343554 | 0.136934 |
| MmugDNA.5819.1.S1_at   | MmugDNA.5819.1 | 6.7   | 6.32  | 0.39 | 0.15 | 1.3   | 0.4795   | 0.603853 | 0.747663 | 0.764341 |
| MmugDNA.5825.1.A1_at   | MmugDNA.5825.1 | 3.99  | 4.04  | 0.15 | 0.01 | -1.04 | 0.909564 | 0.771199 | 0.964209 | 0.866992 |
| MmugDNA.5825.1.S1_at   | MmugDNA.5825.1 | 6.09  | 6.02  | 0.18 | 0.1  | 1.05  | 0.850473 | 0.845908 | 0.939983 | 0.912277 |
| MmugDNA.5827.1.S1_at   | MmugDNA.5827.1 | 8.86  | 9.46  | 0.86 | 1.61 | -1.52 | 0.407473 | 0.167146 | 0.704692 | 0.443629 |
| MmugDNA.5830.1.S1_at   | MmugDNA.5830.1 | 7.93  | 8.67  | 0.2  | 0.24 | -1.67 | 0.019822 | 0.025978 | 0.275549 | 0.202105 |
| MmugDNA.5833.1.S1_at   | MmugDNA.5833.1 | 9.39  | 8.92  | 0.28 | 0.2  | 1.39  | 0.073502 | 0.067007 | 0.418798 | 0.304872 |
| MmugDNA.5837.1.S1_at   | MmugDNA.5837.1 | 4.27  | 4.36  | 0.11 | 0.06 | -1.06 | 0.167262 | 0.046011 | 0.531441 | 0.258956 |
| MmugDNA.584.1.S1_at    | MmugDNA.584.1  | 6.33  | 5.77  | 0.36 | 0.84 | 1.47  | 0.42368  | 0.431623 | 0.714199 | 0.652439 |
| MmugDNA.5841.1.S1_at   | MmugDNA.5841.1 | 11.83 | 11.44 | 0.2  | 0.24 | 1.31  | 0.240537 | 0.318602 | 0.593456 | 0.571258 |
| MmugDNA.5842.1.S1_at   | MmugDNA.5842.1 | 8.43  | 8.14  | 0.12 | 0.13 | 1.22  | 0.042764 | 0.080215 | 0.355382 | 0.32783  |
| MmugDNA.585.1.S1_at    | MmugDNA.585.1  | 6.05  | 6.21  | 0.11 | 0.07 | -1.11 | 0.118253 | 0.089615 | 0.482489 | 0.343811 |
| MmugDNA.5856.1.S1_at   | MmugDNA.5856.1 | 8.7   | 8.81  | 0.78 | 0.94 | -1.08 | 0.679403 | 0.570805 | 0.856586 | 0.74337  |
| MmugDNA.5867.1.S1_at   | MmugDNA.5867.1 | 3.96  | 4.1   | 0.23 | 0.13 | -1.1  | 0.71339  | 0.67077  | 0.874492 | 0.807475 |

|                        |                |       |       |      |      |       |          |          |          |          |
|------------------------|----------------|-------|-------|------|------|-------|----------|----------|----------|----------|
| MmugDNA.5868.1.S1_at   | MmugDNA.5868.1 | 9.94  | 9.67  | 0.33 | 0.28 | 1.21  | 0.104926 | 0.092782 | 0.465307 | 0.348989 |
| MmugDNA.5872.1.S1_at   | MmugDNA.5872.1 | 3.45  | 3.22  | 0.02 | 0.12 | 1.17  | 0.032431 | 0.011379 | 0.324971 | 0.138214 |
| MmugDNA.5873.1.S1_at   | MmugDNA.5873.1 | 11.5  | 10.28 | 0.54 | 0.37 | 2.33  | 0.029053 | 0.006535 | 0.312556 | 0.109634 |
| MmugDNA.5875.1.S1_at   | MmugDNA.5875.1 | 6.49  | 7.09  | 0.27 | 0.34 | -1.52 | 0.319235 | 0.297736 | 0.648717 | 0.556393 |
| MmugDNA.5876.1.S1_at   | MmugDNA.5876.1 | 11.03 | 10.05 | 0.23 | 0.24 | 1.97  | 0.006921 | 0.009416 | 0.202257 | 0.127871 |
| MmugDNA.5877.1.S1_at   | MmugDNA.5877.1 | 11.32 | 11.49 | 0.13 | 0.06 | -1.13 | 0.201434 | 0.010129 | 0.563988 | 0.131974 |
| MmugDNA.5879.1.S1_at   | MmugDNA.5879.1 | 3.52  | 3.63  | 0.16 | 0.25 | -1.08 | 0.508721 | 0.094697 | 0.763905 | 0.351482 |
| MmugDNA.588.1.S1_at    | MmugDNA.588.1  | 4.23  | 5.42  | 0.38 | 0.16 | -2.27 | 0.005889 | 0.001557 | 0.19355  | 0.059701 |
| MmugDNA.5880.1.S1_at   | MmugDNA.5880.1 | 8.04  | 9.52  | 0.09 | 0.07 | -2.79 | 0.000032 | 0.000105 | 0.112653 | 0.028099 |
| MmugDNA.5881.1.S1_at   | MmugDNA.5881.1 | 8.39  | 7.83  | 0.32 | 0.28 | 1.47  | 0.191593 | 0.148978 | 0.554624 | 0.423313 |
| MmugDNA.5885.1.S1_at   | MmugDNA.5885.1 | 10.26 | 10.9  | 0.62 | 0.18 | -1.56 | 0.442147 | 0.407887 | 0.725394 | 0.635288 |
| MmugDNA.5901.1.S1_at   | MmugDNA.5901.1 | 9.2   | 9.35  | 0.05 | 0.79 | -1.11 | 0.623334 | 0.756176 | 0.827933 | 0.858114 |
| MmugDNA.5904.1.S1_at   | MmugDNA.5904.1 | 9.04  | 8.19  | 0.31 | 1.04 | 1.79  | 0.759788 | 0.779751 | 0.898613 | 0.872303 |
| MmugDNA.5905.1.S1_at   | MmugDNA.5905.1 | 3.73  | 3.48  | 0.39 | 0.19 | 1.19  | 0.232509 | 0.19999  | 0.587814 | 0.474603 |
| MmugDNA.5912.1.S1_at   | MmugDNA.5912.1 | 6.56  | 6.63  | 0.19 | 0.14 | -1.05 | 0.533851 | 0.612256 | 0.778436 | 0.769908 |
| MmugDNA.5929.1.S1_at   | MmugDNA.5929.1 | 11.3  | 10.61 | 0.22 | 0.17 | 1.61  | 0.008194 | 0.003207 | 0.216841 | 0.082023 |
| MmugDNA.5930.1.S1_at   | MmugDNA.5930.1 | 8.86  | 8.7   | 1.2  | 0.2  | 1.11  | 0.445384 | 0.558561 | 0.727625 | 0.735725 |
| MmugDNA.5933.1.S1_at   | MmugDNA.5933.1 | 12.15 | 11.45 | 0.23 | 0.19 | 1.61  | 0.022839 | 0.01297  | 0.288292 | 0.14654  |
| MmugDNA.5939.1.S1_at   | MmugDNA.5939.1 | 8.79  | 9.44  | 0.13 | 0.36 | -1.57 | 0.017104 | 0.018036 | 0.266719 | 0.169372 |
| MmugDNA.5940.1.S1_at   | MmugDNA.5940.1 | 9.2   | 9.09  | 0.19 | 0.14 | 1.07  | 0.396386 | 0.295085 | 0.696939 | 0.554551 |
| MmugDNA.5943.1.S1_at   | MmugDNA.5943.1 | 10.62 | 10.69 | 0.16 | 0.34 | -1.04 | 0.506925 | 0.69461  | 0.762591 | 0.822427 |
| MmugDNA.5943.1.S1_s_at | MmugDNA.5943.1 | 10.17 | 10.3  | 0.12 | 0.35 | -1.09 | 0.945186 | 0.848678 | 0.979067 | 0.914071 |
| MmugDNA.5950.1.S1_at   | MmugDNA.5950.1 | 8.2   | 8.2   | 0.13 | 0.04 | 1     | 0.501218 | 0.4291   | 0.759855 | 0.65062  |
| MmugDNA.5954.1.S1_at   | MmugDNA.5954.1 | 9.49  | 9.5   | 0.19 | 0.24 | -1.01 | 0.502743 | 0.029474 | 0.760493 | 0.213368 |
| MmugDNA.5963.1.S1_at   | MmugDNA.5963.1 | 4.18  | 4.2   | 0.25 | 0.06 | -1.01 | 0.343503 | 0.17888  | 0.663676 | 0.455208 |
| MmugDNA.5968.1.S1_at   | MmugDNA.5968.1 | 10.79 | 10.23 | 0.13 | 0.05 | 1.47  | 0.001273 | 0.000481 | 0.145267 | 0.038665 |
| MmugDNA.5971.1.S1_at   | MmugDNA.5971.1 | 8.47  | 7.52  | 0.04 | 0.53 | 1.93  | 0.023249 | 0.016126 | 0.290458 | 0.160936 |
| MmugDNA.5976.1.S1_at   | MmugDNA.5976.1 | 10.94 | 10.16 | 0.19 | 0.33 | 1.71  | 0.02125  | 0.01178  | 0.282524 | 0.140575 |
| MmugDNA.5988.1.S1_at   | MmugDNA.5988.1 | 7.55  | 7.62  | 0.18 | 0.23 | -1.05 | 0.296865 | 0.435188 | 0.632758 | 0.655058 |
| MmugDNA.5990.1.S1_at   | MmugDNA.5990.1 | 4.29  | 4.47  | 0.15 | 0.11 | -1.13 | 0.345692 | 0.40174  | 0.665264 | 0.631068 |
| MmugDNA.5992.1.S1_at   | MmugDNA.5992.1 | 5.19  | 5.43  | 0.02 | 0.15 | -1.18 | 0.130427 | 0.06982  | 0.496851 | 0.310353 |
| MmugDNA.5996.1.S1_at   | MmugDNA.5996.1 | 10.94 | 11.23 | 0.38 | 0.46 | -1.22 | 0.477264 | 0.1341   | 0.746589 | 0.406351 |
| MmugDNA.5997.1.S1_at   | MmugDNA.5997.1 | 9.91  | 9.81  | 0.07 | 0.25 | 1.07  | 0.495208 | 0.66281  | 0.757115 | 0.80259  |
| MmugDNA.6.1.S1_at      | MmugDNA.6.1    | 7.4   | 6.41  | 0.99 | 0.71 | 1.98  | 0.994635 | 0.999395 | 0.998128 | 0.999773 |
| MmugDNA.6002.1.S1_at   | MmugDNA.6002.1 | 11.5  | 11.36 | 0.57 | 0.22 | 1.1   | 0.949954 | 0.87759  | 0.981093 | 0.930173 |
| MmugDNA.6007.1.S1_at   | MmugDNA.6007.1 | 4.5   | 4.58  | 0.17 | 0.1  | -1.05 | 0.577306 | 0.260964 | 0.803468 | 0.527351 |
| MmugDNA.601.1.S1_at    | MmugDNA.601.1  | 8.14  | 7.98  | 0.68 | 1.44 | 1.12  | 0.3209   | 0.429461 | 0.649662 | 0.650931 |
| MmugDNA.6010.1.S1_at   | MmugDNA.6010.1 | 3.11  | 3.09  | 0.16 | 0.29 | 1.01  | 0.441613 | 0.627371 | 0.725028 | 0.780374 |
| MmugDNA.6010.1.S1_s_at | MmugDNA.6010.1 | 11.5  | 11.33 | 0.37 | 0.36 | 1.13  | 0.566725 | 0.593602 | 0.797715 | 0.758334 |
| MmugDNA.6015.1.S1_at   | MmugDNA.6015.1 | 4.26  | 4.63  | 0.49 | 0.1  | -1.29 | 0.81214  | 0.702292 | 0.923545 | 0.827417 |
| MmugDNA.6017.1.S1_at   | MmugDNA.6017.1 | 9.09  | 8.87  | 0.09 | 0.16 | 1.16  | 0.185913 | 0.221972 | 0.549412 | 0.495044 |

|                        |                |       |       |      |      |       |          |          |          |          |
|------------------------|----------------|-------|-------|------|------|-------|----------|----------|----------|----------|
| MmugDNA.602.1.S1_at    | MmugDNA.602.1  | 7.99  | 7.94  | 0.28 | 0.47 | 1.03  | 0.612643 | 0.798005 | 0.822286 | 0.883691 |
| MmugDNA.6021.1.A1_at   | MmugDNA.6021.1 | 3.95  | 3.97  | 0.31 | 0.28 | -1.01 | 0.892049 | 0.508402 | 0.957027 | 0.703597 |
| MmugDNA.6021.1.S1_at   | MmugDNA.6021.1 | 4.7   | 4.69  | 0.25 | 0.19 | 1.01  | 0.98461  | 0.854175 | 0.994541 | 0.916964 |
| MmugDNA.603.1.S1_at    | MmugDNA.603.1  | 9.54  | 9.61  | 0.25 | 0.72 | -1.05 | 0.817762 | 0.199237 | 0.926038 | 0.473931 |
| MmugDNA.6032.1.S1_at   | MmugDNA.6032.1 | 11.96 | 11.64 | 0.17 | 0.1  | 1.25  | 0.066941 | 0.064465 | 0.406999 | 0.300076 |
| MmugDNA.6036.1.S1_at   | MmugDNA.6036.1 | 3.87  | 4     | 0.64 | 0.16 | -1.09 | 0.765349 | 0.712734 | 0.901258 | 0.8335   |
| MmugDNA.6042.1.S1_s_at | MmugDNA.6042.1 | 10.57 | 10.48 | 0.27 | 0.54 | 1.06  | 0.856222 | 0.495352 | 0.941925 | 0.695433 |
| MmugDNA.6048.1.S1_at   | MmugDNA.6048.1 | 9.56  | 8.95  | 0.02 | 0.23 | 1.53  | 0.017632 | 0.017719 | 0.267454 | 0.168367 |
| MmugDNA.6051.1.S1_at   | MmugDNA.6051.1 | 11.23 | 12.08 | 0.15 | 0.2  | -1.81 | 0.008929 | 0.003026 | 0.221598 | 0.0803   |
| MmugDNA.6063.1.S1_at   | MmugDNA.6063.1 | 8.38  | 8.46  | 0.06 | 0.23 | -1.06 | 0.630885 | 0.734402 | 0.832393 | 0.846131 |
| MmugDNA.607.1.S1_at    | MmugDNA.607.1  | 8.98  | 10.66 | 0.48 | 0.2  | -3.21 | 0.009403 | 0.003667 | 0.224725 | 0.086563 |
| MmugDNA.6070.1.S1_at   | MmugDNA.6070.1 | 11.17 | 10.61 | 0.12 | 0.1  | 1.47  | 0.004533 | 0.000374 | 0.184109 | 0.037273 |
| MmugDNA.6073.1.S1_at   | MmugDNA.6073.1 | 12.44 | 12.07 | 0.08 | 0.14 | 1.29  | 0.017158 | 0.003686 | 0.266906 | 0.086591 |
| MmugDNA.6074.1.S1_at   | MmugDNA.6074.1 | 7.52  | 7.07  | 0.75 | 0.31 | 1.37  | 0.209191 | 0.231179 | 0.570833 | 0.5029   |
| MmugDNA.6080.1.S1_at   | MmugDNA.6080.1 | 10.67 | 10.16 | 0.15 | 0.45 | 1.43  | 0.40558  | 0.494787 | 0.703284 | 0.695092 |
| MmugDNA.6083.1.S1_at   | MmugDNA.6083.1 | 5.9   | 6     | 0.07 | 0.1  | -1.07 | 0.542961 | 0.196225 | 0.783716 | 0.471236 |
| MmugDNA.6091.1.S1_at   | MmugDNA.6091.1 | 8.9   | 8.87  | 0.16 | 0.3  | 1.02  | 0.596361 | 0.672909 | 0.812857 | 0.80887  |
| MmugDNA.6095.1.S1_at   | MmugDNA.6095.1 | 9.67  | 9.83  | 0.27 | 0.09 | -1.12 | 0.558355 | 0.825061 | 0.793139 | 0.899488 |
| MmugDNA.6097.1.S1_at   | MmugDNA.6097.1 | 7.91  | 10.96 | 0.99 | 2.67 | -8.25 | 0.499627 | 0.40859  | 0.759272 | 0.635757 |
| MmugDNA.6100.1.S1_at   | MmugDNA.6100.1 | 5.48  | 5.81  | 0.01 | 0.13 | -1.25 | 0.011821 | 0.057852 | 0.237777 | 0.286898 |
| MmugDNA.6102.1.S1_at   | MmugDNA.6102.1 | 4.22  | 4.17  | 0.13 | 0.22 | 1.04  | 0.674391 | 0.919184 | 0.854157 | 0.954612 |
| MmugDNA.6107.1.S1_at   | MmugDNA.6107.1 | 10.94 | 10.47 | 0.17 | 0.65 | 1.38  | 0.305777 | 0.32553  | 0.639223 | 0.575827 |
| MmugDNA.6108.1.S1_at   | MmugDNA.6108.1 | 7.14  | 9     | 0.78 | 0.67 | -3.62 | 0.045538 | 0.033395 | 0.36126  | 0.226396 |
| MmugDNA.6110.1.S1_at   | MmugDNA.6110.1 | 9.79  | 9.48  | 0.11 | 0.21 | 1.24  | 0.044803 | 0.03721  | 0.359043 | 0.237285 |
| MmugDNA.6111.1.S1_at   | MmugDNA.6111.1 | 8.18  | 8.26  | 0.9  | 0.52 | -1.06 | 0.684208 | 0.259358 | 0.858637 | 0.526418 |
| MmugDNA.6115.1.S1_at   | MmugDNA.6115.1 | 4.85  | 4.76  | 0.1  | 0.07 | 1.06  | 0.280726 | 0.450444 | 0.62183  | 0.665643 |
| MmugDNA.6116.1.S1_at   | MmugDNA.6116.1 | 6.52  | 6.63  | 0.13 | 0.16 | -1.08 | 0.361962 | 0.327987 | 0.675579 | 0.577794 |
| MmugDNA.612.1.S1_s_at  | MmugDNA.612.1  | 13.3  | 13.19 | 0.04 | 0.05 | 1.08  | 0.014607 | 0.007038 | 0.254235 | 0.113112 |
| MmugDNA.6120.1.S1_at   | MmugDNA.6120.1 | 7.23  | 7.57  | 0.13 | 0.11 | -1.27 | 0.047819 | 0.049809 | 0.367233 | 0.268277 |
| MmugDNA.6125.1.S1_at   | MmugDNA.6125.1 | 11.19 | 11.51 | 0.22 | 0.31 | -1.24 | 0.183045 | 0.115773 | 0.547134 | 0.382814 |
| MmugDNA.613.1.S1_at    | MmugDNA.613.1  | 11.44 | 11.15 | 0.09 | 0.92 | 1.23  | 0.206776 | 0.252481 | 0.568816 | 0.521077 |
| MmugDNA.6133.1.S1_at   | MmugDNA.6133.1 | 3.67  | 4.26  | 0.09 | 0.4  | -1.51 | 0.147918 | 0.086576 | 0.513442 | 0.33911  |
| MmugDNA.6138.1.S1_at   | MmugDNA.6138.1 | 11.25 | 10.37 | 0.26 | 0.18 | 1.84  | 0.021187 | 0.021575 | 0.282524 | 0.18405  |
| MmugDNA.6143.1.S1_at   | MmugDNA.6143.1 | 5.3   | 8.14  | 1.51 | 2.69 | -7.13 | 0.351385 | 0.404014 | 0.669126 | 0.632558 |
| MmugDNA.6144.1.S1_at   | MmugDNA.6144.1 | 8.79  | 10.6  | 0.8  | 0.62 | -3.51 | 0.033066 | 0.024082 | 0.327027 | 0.194487 |
| MmugDNA.6146.1.S1_at   | MmugDNA.6146.1 | 7.25  | 7.31  | 0.12 | 0.12 | -1.04 | 0.99628  | 0.555222 | 0.99849  | 0.733759 |
| MmugDNA.6148.1.S1_at   | MmugDNA.6148.1 | 3.83  | 3.85  | 0.74 | 0.08 | -1.01 | 0.447565 | 0.535758 | 0.729106 | 0.72127  |
| MmugDNA.615.1.S1_at    | MmugDNA.615.1  | 7.16  | 9.19  | 0.15 | 0.07 | -4.09 | 0.000042 | 0.000004 | 0.112653 | 0.014484 |
| MmugDNA.615.1.S1_s_at  | MmugDNA.615.1  | 9.38  | 10.54 | 0.22 | 0.1  | -2.23 | 0.000966 | 0.000163 | 0.139813 | 0.030506 |
| MmugDNA.6150.1.S1_at   | MmugDNA.6150.1 | 6     | 5.44  | 0.28 | 0.98 | 1.48  | 0.389912 | 0.307181 | 0.693353 | 0.563487 |
| MmugDNA.6151.1.S1_at   | MmugDNA.6151.1 | 8.65  | 8.32  | 0.05 | 0.42 | 1.26  | 0.265096 | 0.102239 | 0.610804 | 0.36236  |

|                        |                |       |       |      |      |        |          |          |          |          |
|------------------------|----------------|-------|-------|------|------|--------|----------|----------|----------|----------|
| MmugDNA.6159.1.S1_at   | MmugDNA.6159.1 | 6.01  | 5.84  | 0.13 | 0.35 | 1.12   | 0.469461 | 0.445329 | 0.741717 | 0.662338 |
| MmugDNA.616.1.S1_at    | MmugDNA.616.1  | 8.13  | 13.62 | 4.45 | 5.71 | -44.96 | 0.631006 | 0.378786 | 0.832434 | 0.615795 |
| MmugDNA.6161.1.S1_at   | MmugDNA.6161.1 | 10.98 | 10.34 | 0.24 | 0.21 | 1.56   | 0.02881  | 0.015234 | 0.312166 | 0.156807 |
| MmugDNA.6167.1.S1_at   | MmugDNA.6167.1 | 11.65 | 12.14 | 0.25 | 0.78 | -1.4   | 0.853685 | 0.627867 | 0.940935 | 0.780845 |
| MmugDNA.617.1.S1_at    | MmugDNA.617.1  | 11.93 | 9.76  | 0.32 | 1.03 | 4.5    | 0.016973 | 0.008624 | 0.266367 | 0.123123 |
| MmugDNA.6170.1.S1_at   | MmugDNA.6170.1 | 10.41 | 11.5  | 0.06 | 0.5  | -2.14  | 0.01344  | 0.013129 | 0.246872 | 0.147338 |
| MmugDNA.6176.1.S1_at   | MmugDNA.6176.1 | 6.67  | 6.74  | 0.26 | 0.14 | -1.05  | 0.695724 | 0.884684 | 0.865007 | 0.934321 |
| MmugDNA.6178.1.S1_at   | MmugDNA.6178.1 | 3.83  | 3.73  | 0.09 | 0.31 | 1.07   | 0.801419 | 0.892996 | 0.918115 | 0.938982 |
| MmugDNA.6179.1.S1_at   | MmugDNA.6179.1 | 4.53  | 4.41  | 0.22 | 0.15 | 1.09   | 0.615264 | 0.232794 | 0.823342 | 0.504426 |
| MmugDNA.6182.1.S1_at   | MmugDNA.6182.1 | 12.3  | 12.51 | 0.08 | 0.24 | -1.16  | 0.227579 | 0.264011 | 0.585103 | 0.530183 |
| MmugDNA.6187.1.S1_at   | MmugDNA.6187.1 | 10.87 | 10.41 | 0.15 | 0.28 | 1.37   | 0.096766 | 0.002955 | 0.455737 | 0.079945 |
| MmugDNA.6188.1.S1_at   | MmugDNA.6188.1 | 12.58 | 12.41 | 0.08 | 0.06 | 1.13   | 0.017337 | 0.011111 | 0.267196 | 0.137209 |
| MmugDNA.6199.1.S1_at   | MmugDNA.6199.1 | 5.22  | 5.38  | 0.03 | 0.09 | -1.12  | 0.162154 | 0.126892 | 0.526638 | 0.397591 |
| MmugDNA.6202.1.S1_at   | MmugDNA.6202.1 | 4.7   | 4.79  | 0.11 | 0.34 | -1.06  | 0.695051 | 0.812307 | 0.864725 | 0.891561 |
| MmugDNA.6203.1.S1_at   | MmugDNA.6203.1 | 9.4   | 9.59  | 0.35 | 0.29 | -1.14  | 0.647048 | 0.722167 | 0.841212 | 0.839044 |
| MmugDNA.6205.1.S1_at   | MmugDNA.6205.1 | 2.88  | 2.78  | 0.12 | 0.09 | 1.08   | 0.372525 | 0.618281 | 0.682813 | 0.774002 |
| MmugDNA.6206.1.S1_at   | MmugDNA.6206.1 | 6.69  | 7.28  | 0.18 | 0.35 | -1.5   | 0.05073  | 0.034949 | 0.375294 | 0.231062 |
| MmugDNA.6206.1.S1_s_at | MmugDNA.6206.1 | 8.24  | 8.95  | 0.26 | 0.27 | -1.63  | 0.022625 | 0.010896 | 0.287448 | 0.135939 |
| MmugDNA.6210.1.S1_at   | MmugDNA.6210.1 | 9.32  | 10.11 | 0.39 | 0.8  | -1.73  | 0.170884 | 0.102877 | 0.534858 | 0.363508 |
| MmugDNA.6212.1.S1_at   | MmugDNA.6212.1 | 8.4   | 7.96  | 0.16 | 0.69 | 1.36   | 0.813046 | 0.938637 | 0.924072 | 0.965105 |
| MmugDNA.6221.1.S1_at   | MmugDNA.6221.1 | 10.68 | 10.64 | 0.34 | 0.17 | 1.03   | 0.799373 | 0.818975 | 0.916962 | 0.895712 |
| MmugDNA.6224.1.S1_at   | MmugDNA.6224.1 | 4.7   | 4.25  | 0.61 | 0.23 | 1.37   | 0.421279 | 0.548645 | 0.712907 | 0.729318 |
| MmugDNA.6229.1.S1_at   | MmugDNA.6229.1 | 10.9  | 10.27 | 0.01 | 0.27 | 1.56   | 0.012911 | 0.001899 | 0.244747 | 0.065035 |
| MmugDNA.6235.1.S1_at   | MmugDNA.6235.1 | 11.55 | 11.09 | 0.14 | 0.3  | 1.38   | 0.068035 | 0.047042 | 0.409262 | 0.261469 |
| MmugDNA.6239.1.S1_at   | MmugDNA.6239.1 | 5.81  | 5.81  | 0.06 | 0.14 | -1     | 0.795954 | 0.21586  | 0.915358 | 0.489536 |
| MmugDNA.6241.1.S1_at   | MmugDNA.6241.1 | 9.28  | 9.47  | 0.17 | 0.11 | -1.14  | 0.268696 | 0.251738 | 0.613394 | 0.520444 |
| MmugDNA.6242.1.S1_at   | MmugDNA.6242.1 | 10.83 | 11.13 | 0.18 | 0.47 | -1.23  | 0.195916 | 0.135845 | 0.558998 | 0.408027 |
| MmugDNA.6242.1.S1_s_at | MmugDNA.6242.1 | 9.06  | 9.47  | 0.18 | 0.62 | -1.33  | 0.174558 | 0.131839 | 0.538195 | 0.403891 |
| MmugDNA.6245.1.S1_s_at | MmugDNA.6245.1 | 9.63  | 9.49  | 0.05 | 0.38 | 1.1    | 0.817265 | 0.941282 | 0.925925 | 0.966729 |
| MmugDNA.6247.1.S1_at   | MmugDNA.6247.1 | 11.1  | 11.13 | 0.06 | 0.05 | -1.02  | 0.750194 | 0.948632 | 0.89292  | 0.970666 |
| MmugDNA.6250.1.S1_at   | MmugDNA.6250.1 | 9.57  | 9.03  | 0.16 | 0.17 | 1.45   | 0.011327 | 0.006197 | 0.235384 | 0.106818 |
| MmugDNA.6260.1.S1_at   | MmugDNA.6260.1 | 6.93  | 7.07  | 0.08 | 0.1  | -1.1   | 0.159226 | 0.210159 | 0.52416  | 0.483994 |
| MmugDNA.6263.1.S1_at   | MmugDNA.6263.1 | 6.22  | 5.63  | 0.08 | 0.48 | 1.5    | 0.031862 | 0.026213 | 0.32312  | 0.202891 |
| MmugDNA.6263.1.S1_x_at | MmugDNA.6263.1 | 7.4   | 6.49  | 0.09 | 0.31 | 1.88   | 0.006963 | 0.007536 | 0.202577 | 0.116358 |
| MmugDNA.6264.1.S1_at   | MmugDNA.6264.1 | 8.54  | 8.26  | 0.19 | 0.15 | 1.21   | 0.164823 | 0.315278 | 0.528755 | 0.568939 |
| MmugDNA.6267.1.S1_at   | MmugDNA.6267.1 | 6.31  | 6.57  | 0.1  | 0.48 | -1.2   | 0.297154 | 0.414649 | 0.632996 | 0.640456 |
| MmugDNA.6269.1.S1_at   | MmugDNA.6269.1 | 10.99 | 10.29 | 0.28 | 0.24 | 1.62   | 0.035127 | 0.0253   | 0.335011 | 0.199522 |
| MmugDNA.6270.1.S1_at   | MmugDNA.6270.1 | 9.4   | 8.9   | 0.39 | 0.7  | 1.42   | 0.476185 | 0.328968 | 0.746145 | 0.578482 |
| MmugDNA.6277.1.S1_at   | MmugDNA.6277.1 | 11.47 | 9.99  | 0.17 | 0.32 | 2.79   | 0.002049 | 0.00044  | 0.155636 | 0.038359 |
| MmugDNA.6284.1.S1_at   | MmugDNA.6284.1 | 12.52 | 12.46 | 0.05 | 0.08 | 1.04   | 0.167785 | 0.184587 | 0.532027 | 0.460617 |
| MmugDNA.6286.1.S1_at   | MmugDNA.6286.1 | 8.3   | 7.93  | 0.48 | 0.73 | 1.3    | 0.532133 | 0.71837  | 0.777626 | 0.837024 |



|                      |                |       |       |      |      |       |          |          |          |          |
|----------------------|----------------|-------|-------|------|------|-------|----------|----------|----------|----------|
| MmugDNA.6287.1.S1_at | MmugDNA.6287.1 | 7.87  | 8.02  | 0.09 | 0.56 | -1.11 | 0.735782 | 0.425482 | 0.886439 | 0.647866 |
| MmugDNA.6295.1.S1_at | MmugDNA.6295.1 | 2.86  | 2.98  | 0.06 | 0.14 | -1.09 | 0.461472 | 0.505003 | 0.737655 | 0.70197  |
| MmugDNA.6302.1.S1_at | MmugDNA.6302.1 | 8.91  | 9.5   | 0.28 | 0.36 | -1.5  | 0.104121 | 0.094269 | 0.464201 | 0.350889 |
| MmugDNA.6306.1.S1_at | MmugDNA.6306.1 | 8.94  | 8.68  | 0.2  | 0.36 | 1.2   | 0.074354 | 0.075627 | 0.419963 | 0.320061 |
| MmugDNA.6310.1.S1_at | MmugDNA.6310.1 | 11.47 | 11.07 | 0.16 | 0.09 | 1.32  | 0.053497 | 0.003979 | 0.380257 | 0.089708 |
| MmugDNA.6313.1.S1_at | MmugDNA.6313.1 | 10.11 | 10.14 | 0.19 | 0.24 | -1.02 | 0.440477 | 0.547607 | 0.724353 | 0.728557 |
| MmugDNA.6314.1.S1_at | MmugDNA.6314.1 | 10.78 | 11.07 | 0.14 | 0.42 | -1.22 | 0.344599 | 0.246357 | 0.664643 | 0.515899 |
| MmugDNA.6316.1.S1_at | MmugDNA.6316.1 | 13    | 13.06 | 0.12 | 0.04 | -1.05 | 0.256966 | 0.286363 | 0.604435 | 0.547791 |
| MmugDNA.6318.1.S1_at | MmugDNA.6318.1 | 3.62  | 3.66  | 0.32 | 0.16 | -1.03 | 0.860278 | 0.477204 | 0.943599 | 0.683299 |
| MmugDNA.6328.1.S1_at | MmugDNA.6328.1 | 8.24  | 6.89  | 0.28 | 0.4  | 2.55  | 0.01455  | 0.046959 | 0.253768 | 0.261341 |
| MmugDNA.633.1.S1_at  | MmugDNA.633.1  | 9.15  | 8.79  | 0.15 | 0.64 | 1.28  | 0.377623 | 0.516635 | 0.685995 | 0.709087 |
| MmugDNA.6332.1.S1_at | MmugDNA.6332.1 | 10.3  | 9.6   | 0.63 | 0.04 | 1.62  | 0.148316 | 0.220153 | 0.513732 | 0.493612 |
| MmugDNA.6342.1.S1_at | MmugDNA.6342.1 | 10.34 | 11.31 | 0.12 | 0.57 | -1.95 | 0.039916 | 0.022456 | 0.34828  | 0.187518 |
| MmugDNA.6343.1.S1_at | MmugDNA.6343.1 | 5.3   | 6.82  | 0.66 | 1.33 | -2.86 | 0.154483 | 0.145281 | 0.51902  | 0.419322 |
| MmugDNA.6344.1.S1_at | MmugDNA.6344.1 | 3.94  | 5.32  | 0.25 | 1.13 | -2.61 | 0.14717  | 0.165737 | 0.513067 | 0.442014 |
| MmugDNA.6345.1.S1_at | MmugDNA.6345.1 | 9.04  | 8.09  | 0.44 | 0.55 | 1.92  | 0.198474 | 0.116319 | 0.561628 | 0.383671 |
| MmugDNA.6346.1.S1_at | MmugDNA.6346.1 | 9.04  | 8.47  | 0.07 | 0.42 | 1.48  | 0.272222 | 0.392208 | 0.616016 | 0.625652 |
| MmugDNA.6347.1.S1_at | MmugDNA.6347.1 | 5.9   | 7.9   | 0.87 | 2.04 | -4.01 | 0.182468 | 0.200708 | 0.546756 | 0.47524  |
| MmugDNA.6349.1.S1_at | MmugDNA.6349.1 | 11.25 | 10.4  | 0.1  | 0.9  | 1.8   | 0.233029 | 0.167241 | 0.587988 | 0.443684 |
| MmugDNA.6350.1.S1_at | MmugDNA.6350.1 | 5.15  | 5.34  | 0.04 | 0.07 | -1.14 | 0.030908 | 0.001891 | 0.320207 | 0.065004 |
| MmugDNA.6360.1.S1_at | MmugDNA.6360.1 | 8.86  | 9.31  | 0.13 | 0.28 | -1.36 | 0.055346 | 0.020209 | 0.383689 | 0.178561 |
| MmugDNA.6368.1.S1_at | MmugDNA.6368.1 | 12.82 | 12.58 | 0.11 | 0.18 | 1.19  | 0.067234 | 0.073057 | 0.407273 | 0.316017 |
| MmugDNA.6372.1.S1_at | MmugDNA.6372.1 | 11.05 | 10.57 | 0.05 | 0.05 | 1.4   | 0.000447 | 0.000931 | 0.133116 | 0.048955 |
| MmugDNA.6380.1.S1_at | MmugDNA.6380.1 | 11.22 | 11.68 | 0.42 | 0.61 | -1.38 | 0.5704   | 0.715049 | 0.799483 | 0.834792 |
| MmugDNA.6381.1.S1_at | MmugDNA.6381.1 | 6.3   | 7.22  | 0.82 | 1.12 | -1.89 | 0.500875 | 0.672765 | 0.759735 | 0.808768 |
| MmugDNA.6382.1.S1_at | MmugDNA.6382.1 | 7.07  | 8.35  | 0.54 | 1.29 | -2.44 | 0.182395 | 0.056619 | 0.546756 | 0.284037 |
| MmugDNA.6385.1.S1_at | MmugDNA.6385.1 | 9.39  | 10.5  | 0.4  | 0.82 | -2.15 | 0.11796  | 0.030674 | 0.482063 | 0.217148 |
| MmugDNA.6388.1.S1_at | MmugDNA.6388.1 | 13.09 | 13.07 | 0.17 | 0.16 | 1.01  | 0.74372  | 0.349682 | 0.890194 | 0.593563 |
| MmugDNA.6389.1.S1_at | MmugDNA.6389.1 | 8.01  | 8.28  | 0.51 | 1.74 | -1.21 | 0.574941 | 0.693617 | 0.80198  | 0.821804 |
| MmugDNA.6393.1.S1_at | MmugDNA.6393.1 | 11.81 | 10.83 | 0.09 | 0.38 | 1.96  | 0.013024 | 0.00509  | 0.245262 | 0.099108 |
| MmugDNA.6398.1.S1_at | MmugDNA.6398.1 | 6.64  | 6.52  | 0.23 | 0.24 | 1.08  | 0.56484  | 0.160549 | 0.796834 | 0.436708 |
| MmugDNA.6402.1.S1_at | MmugDNA.6402.1 | 11.71 | 11.52 | 0.12 | 0.24 | 1.14  | 0.553371 | 0.096073 | 0.790092 | 0.353322 |
| MmugDNA.641.1.S1_at  | MmugDNA.641.1  | 3.88  | 3.72  | 0.91 | 0.14 | 1.11  | 0.427038 | 0.564135 | 0.716065 | 0.738997 |
| MmugDNA.6412.1.S1_at | MmugDNA.6412.1 | 9.88  | 10.12 | 0.16 | 0.45 | -1.18 | 0.927611 | 0.24781  | 0.972015 | 0.517219 |
| MmugDNA.6413.1.S1_at | MmugDNA.6413.1 | 8.46  | 8.51  | 0.3  | 0.22 | -1.04 | 0.993975 | 0.030237 | 0.997929 | 0.215784 |
| MmugDNA.6416.1.S1_at | MmugDNA.6416.1 | 8.37  | 8.82  | 0.69 | 0.17 | -1.37 | 0.10765  | 0.094008 | 0.468121 | 0.350575 |
| MmugDNA.6418.1.S1_at | MmugDNA.6418.1 | 9.82  | 9.76  | 0.44 | 0.5  | 1.04  | 0.425084 | 0.605013 | 0.714956 | 0.764917 |
| MmugDNA.6426.1.S1_at | MmugDNA.6426.1 | 8.57  | 9.14  | 0.24 | 0.39 | -1.49 | 0.030706 | 0.020619 | 0.319646 | 0.180141 |
| MmugDNA.6428.1.S1_at | MmugDNA.6428.1 | 11.91 | 12.14 | 0.15 | 0.08 | -1.17 | 0.095855 | 0.081268 | 0.453861 | 0.329351 |
| MmugDNA.6430.1.S1_at | MmugDNA.6430.1 | 9.9   | 11.73 | 0.95 | 0.91 | -3.55 | 0.170304 | 0.155986 | 0.534249 | 0.431398 |
| MmugDNA.6431.1.S1_at | MmugDNA.6431.1 | 11.21 | 10.72 | 0.21 | 0.17 | 1.41  | 0.018518 | 0.007109 | 0.270581 | 0.113555 |

|                        |                |       |       |      |      |       |          |          |          |          |
|------------------------|----------------|-------|-------|------|------|-------|----------|----------|----------|----------|
| MmugDNA.6435.1.S1_at   | MmugDNA.6435.1 | 8.86  | 9.29  | 0.3  | 0.27 | -1.34 | 0.152783 | 0.13975  | 0.517325 | 0.413109 |
| MmugDNA.6436.1.S1_at   | MmugDNA.6436.1 | 10.21 | 10.24 | 0.18 | 0.09 | -1.02 | 0.776437 | 0.733921 | 0.90634  | 0.845896 |
| MmugDNA.644.1.S1_at    | MmugDNA.644.1  | 10.51 | 10.8  | 0.18 | 0.31 | -1.22 | 0.352418 | 0.51332  | 0.669611 | 0.706881 |
| MmugDNA.6440.1.S1_at   | MmugDNA.6440.1 | 7.98  | 7.12  | 0.75 | 0.37 | 1.81  | 0.145335 | 0.282811 | 0.511407 | 0.545524 |
| MmugDNA.6443.1.S1_at   | MmugDNA.6443.1 | 11.09 | 11.39 | 0.24 | 0.21 | -1.23 | 0.338883 | 0.433879 | 0.661    | 0.654054 |
| MmugDNA.6450.1.S1_at   | MmugDNA.6450.1 | 6.54  | 6.93  | 0.18 | 0.11 | -1.31 | 0.054451 | 0.036966 | 0.381851 | 0.236733 |
| MmugDNA.6452.1.S1_s_at | MmugDNA.6452.1 | 13.25 | 13.17 | 0.18 | 0.04 | 1.06  | 0.121826 | 0.021694 | 0.486761 | 0.184333 |
| MmugDNA.6453.1.S1_at   | MmugDNA.6453.1 | 8.6   | 8.17  | 0.25 | 0.2  | 1.34  | 0.12789  | 0.070985 | 0.494071 | 0.312602 |
| MmugDNA.6456.1.S1_at   | MmugDNA.6456.1 | 6.43  | 6.67  | 0.11 | 0.56 | -1.18 | 0.458381 | 0.338623 | 0.735428 | 0.585641 |
| MmugDNA.6457.1.S1_at   | MmugDNA.6457.1 | 2.93  | 2.72  | 0.08 | 0.09 | 1.16  | 0.065836 | 0.076005 | 0.405296 | 0.320676 |
| MmugDNA.6457.1.S1_x_at | MmugDNA.6457.1 | 3.12  | 3.07  | 0.15 | 0.11 | 1.04  | 0.306468 | 0.385238 | 0.639593 | 0.620709 |
| MmugDNA.6458.1.S1_at   | MmugDNA.6458.1 | 12.58 | 12.85 | 0.11 | 0.31 | -1.2  | 0.645687 | 0.526942 | 0.840435 | 0.715708 |
| MmugDNA.646.1.S1_at    | MmugDNA.646.1  | 9.59  | 8.62  | 0.08 | 0.37 | 1.96  | 0.02127  | 0.011213 | 0.282524 | 0.137948 |
| MmugDNA.6468.1.S1_at   | MmugDNA.6468.1 | 10.49 | 10.19 | 0.05 | 0.3  | 1.24  | 0.136563 | 0.15261  | 0.503691 | 0.427435 |
| MmugDNA.6472.1.S1_at   | MmugDNA.6472.1 | 9.34  | 8.58  | 0.26 | 0.14 | 1.7   | 0.017035 | 0.011224 | 0.266551 | 0.137995 |
| MmugDNA.6477.1.S1_at   | MmugDNA.6477.1 | 6.41  | 6.28  | 0.05 | 0.37 | 1.1   | 0.804216 | 0.815904 | 0.91948  | 0.893781 |
| MmugDNA.6478.1.S1_at   | MmugDNA.6478.1 | 7.41  | 6.71  | 0.16 | 0.65 | 1.62  | 0.458195 | 0.54248  | 0.735299 | 0.725516 |
| MmugDNA.6482.1.S1_at   | MmugDNA.6482.1 | 6.19  | 6.58  | 0.6  | 0.21 | -1.31 | 0.844998 | 0.706357 | 0.937773 | 0.829634 |
| MmugDNA.6494.1.S1_at   | MmugDNA.6494.1 | 6.89  | 7.06  | 0.3  | 0.71 | -1.13 | 0.773933 | 0.891057 | 0.904999 | 0.937894 |
| MmugDNA.6498.1.S1_at   | MmugDNA.6498.1 | 12.58 | 11.71 | 0.37 | 0.83 | 1.83  | 0.097159 | 0.108632 | 0.456142 | 0.372171 |
| MmugDNA.6505.1.S1_at   | MmugDNA.6505.1 | 5.34  | 5.38  | 0.15 | 0.23 | -1.03 | 0.546426 | 0.519393 | 0.785501 | 0.711008 |
| MmugDNA.6506.1.S1_at   | MmugDNA.6506.1 | 11.43 | 10.7  | 0.11 | 0.09 | 1.66  | 0.000891 | 0.000067 | 0.139813 | 0.025805 |
| MmugDNA.6512.1.S1_at   | MmugDNA.6512.1 | 10.54 | 10.68 | 0.51 | 0.14 | -1.1  | 0.217247 | 0.298464 | 0.576846 | 0.557143 |
| MmugDNA.6517.1.S1_at   | MmugDNA.6517.1 | 5.66  | 5.72  | 0.13 | 0.08 | -1.04 | 0.86708  | 0.586832 | 0.946953 | 0.753843 |
| MmugDNA.6520.1.S1_at   | MmugDNA.6520.1 | 3.93  | 3.95  | 0.11 | 0.05 | -1.01 | 0.931221 | 0.737175 | 0.973424 | 0.847854 |
| MmugDNA.6539.1.S1_at   | MmugDNA.6539.1 | 12.02 | 9.96  | 0.84 | 0.85 | 4.17  | 0.046118 | 0.065108 | 0.362498 | 0.301119 |
| MmugDNA.6540.1.S1_at   | MmugDNA.6540.1 | 2.83  | 2.75  | 0.04 | 0.05 | 1.05  | 0.22002  | 0.695156 | 0.579194 | 0.822797 |
| MmugDNA.6542.1.S1_at   | MmugDNA.6542.1 | 10.95 | 11.38 | 0.23 | 0.35 | -1.34 | 0.159237 | 0.166634 | 0.52416  | 0.443133 |
| MmugDNA.6553.1.S1_at   | MmugDNA.6553.1 | 3.61  | 3.66  | 0.11 | 0.27 | -1.04 | 0.711051 | 0.763498 | 0.873387 | 0.862471 |
| MmugDNA.6554.1.S1_at   | MmugDNA.6554.1 | 7.09  | 7.42  | 0.1  | 0.07 | -1.26 | 0.004753 | 0.003211 | 0.184674 | 0.082023 |
| MmugDNA.6559.1.S1_at   | MmugDNA.6559.1 | 12.05 | 11.34 | 0.21 | 0.23 | 1.63  | 0.017005 | 0.011523 | 0.266512 | 0.138822 |
| MmugDNA.656.1.S1_at    | MmugDNA.656.1  | 8.81  | 5.99  | 0.47 | 1.58 | 7.02  | 0.043935 | 0.031434 | 0.35746  | 0.219107 |
| MmugDNA.6560.1.S1_at   | MmugDNA.6560.1 | 11.76 | 11.91 | 0.16 | 0.17 | -1.11 | 0.175935 | 0.027146 | 0.53945  | 0.205893 |
| MmugDNA.6561.1.S1_at   | MmugDNA.6561.1 | 5.18  | 8.27  | 1.57 | 2.65 | -8.54 | 0.393427 | 0.189832 | 0.695216 | 0.465403 |
| MmugDNA.6568.1.S1_at   | MmugDNA.6568.1 | 6.25  | 6.3   | 0.55 | 0.52 | -1.04 | 0.569307 | 0.743801 | 0.79903  | 0.851528 |
| MmugDNA.6571.1.S1_at   | MmugDNA.6571.1 | 11.29 | 10.31 | 0.24 | 0.53 | 1.97  | 0.034836 | 0.032726 | 0.333964 | 0.223957 |
| MmugDNA.6572.1.S1_at   | MmugDNA.6572.1 | 6.47  | 5.85  | 0.51 | 0.18 | 1.54  | 0.123681 | 0.189219 | 0.489492 | 0.464997 |
| MmugDNA.658.1.S1_at    | MmugDNA.658.1  | 10.28 | 9.61  | 0.24 | 0.49 | 1.6   | 0.025739 | 0.021003 | 0.300376 | 0.181715 |
| MmugDNA.6580.1.S1_at   | MmugDNA.6580.1 | 5.02  | 5.15  | 0.02 | 0.25 | -1.1  | 0.200709 | 0.220209 | 0.5634   | 0.493655 |
| MmugDNA.6583.1.S1_at   | MmugDNA.6583.1 | 12.92 | 12.93 | 0.05 | 0.06 | -1    | 0.987934 | 0.745489 | 0.995732 | 0.852409 |
| MmugDNA.6586.1.S1_at   | MmugDNA.6586.1 | 6.35  | 6.43  | 0.31 | 0.48 | -1.06 | 0.36322  | 0.433153 | 0.676579 | 0.653513 |

|                        |                |       |       |      |      |       |          |          |          |          |
|------------------------|----------------|-------|-------|------|------|-------|----------|----------|----------|----------|
| MmugDNA.659.1.S1_at    | MmugDNA.659.1  | 9.05  | 8.52  | 0.34 | 0.81 | 1.44  | 0.891184 | 0.981218 | 0.95657  | 0.989624 |
| MmugDNA.6590.1.S1_at   | MmugDNA.6590.1 | 11.5  | 11.29 | 0.08 | 0.06 | 1.15  | 0.013651 | 0.007159 | 0.248684 | 0.113788 |
| MmugDNA.66.1.S1_at     | MmugDNA.66.1   | 8.56  | 7.81  | 0.23 | 0.21 | 1.68  | 0.016681 | 0.016817 | 0.264879 | 0.164298 |
| MmugDNA.6601.1.S1_at   | MmugDNA.6601.1 | 4.54  | 4.42  | 0.16 | 0.15 | 1.08  | 0.835939 | 0.132236 | 0.933618 | 0.404274 |
| MmugDNA.6605.1.S1_at   | MmugDNA.6605.1 | 10.45 | 8.42  | 0.83 | 0.71 | 4.06  | 0.063192 | 0.040438 | 0.400458 | 0.24621  |
| MmugDNA.6607.1.S1_at   | MmugDNA.6607.1 | 12.23 | 12.28 | 0.07 | 0.2  | -1.03 | 0.259516 | 0.327423 | 0.606648 | 0.577284 |
| MmugDNA.6608.1.S1_at   | MmugDNA.6608.1 | 9.83  | 8.92  | 0.11 | 0.31 | 1.88  | 0.017217 | 0.008536 | 0.266942 | 0.122563 |
| MmugDNA.6614.1.S1_at   | MmugDNA.6614.1 | 9.64  | 9.01  | 0.1  | 0.26 | 1.56  | 0.013874 | 0.006427 | 0.249758 | 0.108896 |
| MmugDNA.6621.1.S1_at   | MmugDNA.6621.1 | 13.42 | 13.62 | 0.08 | 0.18 | -1.15 | 0.231754 | 0.030498 | 0.587568 | 0.216644 |
| MmugDNA.6623.1.S1_at   | MmugDNA.6623.1 | 8.98  | 8.71  | 0.23 | 0.21 | 1.2   | 0.18917  | 0.326628 | 0.552337 | 0.576649 |
| MmugDNA.6623.1.S1_s_at | MmugDNA.6623.1 | 10.15 | 9.74  | 0.23 | 0.16 | 1.33  | 0.049119 | 0.124112 | 0.37077  | 0.394389 |
| MmugDNA.6626.1.S1_at   | MmugDNA.6626.1 | 7.29  | 6.58  | 0.03 | 0.31 | 1.64  | 0.021721 | 0.019924 | 0.283391 | 0.177443 |
| MmugDNA.6627.1.S1_at   | MmugDNA.6627.1 | 10.65 | 10.64 | 0.11 | 0.35 | 1     | 0.993602 | 0.761682 | 0.997754 | 0.861459 |
| MmugDNA.6634.1.S1_at   | MmugDNA.6634.1 | 7.64  | 9.16  | 0.18 | 0.36 | -2.86 | 0.006953 | 0.001281 | 0.202507 | 0.055351 |
| MmugDNA.6635.1.S1_at   | MmugDNA.6635.1 | 5.6   | 5.41  | 0.8  | 0.19 | 1.14  | 0.266053 | 0.264853 | 0.611558 | 0.530861 |
| MmugDNA.6640.1.S1_at   | MmugDNA.6640.1 | 10.05 | 9.78  | 0.28 | 0.19 | 1.21  | 0.288712 | 0.414409 | 0.626793 | 0.640293 |
| MmugDNA.6641.1.S1_at   | MmugDNA.6641.1 | 10.6  | 10.32 | 0.08 | 0.23 | 1.22  | 0.109773 | 0.011878 | 0.470963 | 0.141097 |
| MmugDNA.6642.1.S1_at   | MmugDNA.6642.1 | 12.05 | 12.07 | 0.08 | 0.27 | -1.01 | 0.734924 | 0.18422  | 0.885934 | 0.460382 |
| MmugDNA.6650.1.S1_at   | MmugDNA.6650.1 | 10.86 | 10.61 | 0.11 | 0.43 | 1.2   | 0.127863 | 0.124868 | 0.494071 | 0.395219 |
| MmugDNA.6650.1.S1_s_at | MmugDNA.6650.1 | 10.78 | 10.42 | 0.06 | 0.43 | 1.29  | 0.081226 | 0.076468 | 0.431908 | 0.321562 |
| MmugDNA.6653.1.S1_at   | MmugDNA.6653.1 | 9.4   | 9.68  | 0.09 | 0.26 | -1.22 | 0.144712 | 0.198753 | 0.511058 | 0.473391 |
| MmugDNA.6655.1.S1_at   | MmugDNA.6655.1 | 7.63  | 7.44  | 0.14 | 0.16 | 1.14  | 0.154098 | 0.176136 | 0.518614 | 0.452581 |
| MmugDNA.6656.1.S1_at   | MmugDNA.6656.1 | 3.51  | 3.39  | 0.72 | 0.73 | 1.09  | 0.801068 | 0.911084 | 0.917983 | 0.949839 |
| MmugDNA.6657.1.S1_at   | MmugDNA.6657.1 | 5.96  | 5.79  | 0.35 | 0.81 | 1.12  | 0.717903 | 0.845607 | 0.876185 | 0.912157 |
| MmugDNA.6659.1.S1_at   | MmugDNA.6659.1 | 11.24 | 10.8  | 0.25 | 0.24 | 1.36  | 0.089268 | 0.06489  | 0.444908 | 0.30078  |
| MmugDNA.6660.1.S1_at   | MmugDNA.6660.1 | 8.63  | 7.18  | 0.24 | 0.28 | 2.74  | 0.002417 | 0.000835 | 0.163555 | 0.046851 |
| MmugDNA.6662.1.S1_at   | MmugDNA.6662.1 | 11.41 | 11.43 | 0.15 | 0.06 | -1.01 | 0.222098 | 0.001771 | 0.580671 | 0.063359 |
| MmugDNA.6664.1.S1_at   | MmugDNA.6664.1 | 10.3  | 9.45  | 0.22 | 0.44 | 1.8   | 0.032707 | 0.019142 | 0.325991 | 0.174115 |
| MmugDNA.6668.1.S1_at   | MmugDNA.6668.1 | 10.13 | 8.89  | 0.64 | 1.64 | 2.36  | 0.274692 | 0.424775 | 0.617599 | 0.64727  |
| MmugDNA.6669.1.S1_at   | MmugDNA.6669.1 | 5.33  | 5.52  | 0.16 | 0.1  | -1.14 | 0.059733 | 0.106371 | 0.39273  | 0.368933 |
| MmugDNA.6674.1.S1_at   | MmugDNA.6674.1 | 6.69  | 6.01  | 0.14 | 0.36 | 1.6   | 0.024577 | 0.020976 | 0.295214 | 0.181633 |
| MmugDNA.6675.1.S1_at   | MmugDNA.6675.1 | 6.07  | 5.63  | 0.34 | 1    | 1.36  | 0.58915  | 0.182816 | 0.809203 | 0.459321 |
| MmugDNA.6677.1.S1_at   | MmugDNA.6677.1 | 10.27 | 10.51 | 0.37 | 0.22 | -1.18 | 0.190328 | 0.113392 | 0.553031 | 0.379509 |
| MmugDNA.6678.1.S1_at   | MmugDNA.6678.1 | 13.45 | 13.16 | 0.19 | 0.21 | 1.23  | 0.340245 | 0.150786 | 0.661654 | 0.425322 |
| MmugDNA.6679.1.S1_at   | MmugDNA.6679.1 | 10.45 | 10.17 | 0.26 | 0.38 | 1.21  | 0.478487 | 0.322197 | 0.747273 | 0.573769 |
| MmugDNA.6681.1.S1_at   | MmugDNA.6681.1 | 2.77  | 2.96  | 0.15 | 0.19 | -1.14 | 0.205682 | 0.175023 | 0.568157 | 0.451676 |
| MmugDNA.6681.1.S1_s_at | MmugDNA.6681.1 | 2.99  | 3.08  | 0.03 | 0.08 | -1.07 | 0.467819 | 0.810781 | 0.740845 | 0.890845 |
| MmugDNA.6683.1.S1_at   | MmugDNA.6683.1 | 8.44  | 8.04  | 0.07 | 0.97 | 1.32  | 0.162196 | 0.199816 | 0.526638 | 0.474491 |
| MmugDNA.6685.1.S1_at   | MmugDNA.6685.1 | 9.48  | 8.87  | 0.01 | 0.19 | 1.52  | 0.004224 | 0.000743 | 0.181739 | 0.044964 |
| MmugDNA.6687.1.S1_at   | MmugDNA.6687.1 | 12.14 | 11.97 | 0.04 | 0.17 | 1.13  | 0.12469  | 0.085256 | 0.49075  | 0.337096 |
| MmugDNA.6695.1.S1_at   | MmugDNA.6695.1 | 3.3   | 3.25  | 0.72 | 0.16 | 1.03  | 0.433993 | 0.424356 | 0.720302 | 0.646929 |

|                        |                |       |       |      |      |       |          |          |          |          |
|------------------------|----------------|-------|-------|------|------|-------|----------|----------|----------|----------|
| MmugDNA.6702.1.S1_at   | MmugDNA.6702.1 | 5.75  | 5.35  | 0.06 | 0.22 | 1.32  | 0.08104  | 0.230606 | 0.431775 | 0.502307 |
| MmugDNA.6706.1.S1_at   | MmugDNA.6706.1 | 12.71 | 11.85 | 0.14 | 0.4  | 1.82  | 0.015288 | 0.006738 | 0.257781 | 0.110984 |
| MmugDNA.6709.1.S1_at   | MmugDNA.6709.1 | 8.45  | 7.65  | 0.11 | 0.22 | 1.74  | 0.004297 | 0.001518 | 0.18216  | 0.059307 |
| MmugDNA.671.1.S1_at    | MmugDNA.671.1  | 4.4   | 4.72  | 0.45 | 0.41 | -1.24 | 0.538491 | 0.556447 | 0.780615 | 0.734507 |
| MmugDNA.6714.1.S1_at   | MmugDNA.6714.1 | 8.7   | 8.69  | 0.15 | 0.16 | 1.01  | 0.56512  | 0.654955 | 0.796922 | 0.7982   |
| MmugDNA.6717.1.S1_at   | MmugDNA.6717.1 | 9.08  | 8.83  | 0.18 | 0.27 | 1.19  | 0.287527 | 0.0156   | 0.625987 | 0.158262 |
| MmugDNA.6724.1.S1_at   | MmugDNA.6724.1 | 11.32 | 10.92 | 0.33 | 0.22 | 1.32  | 0.341801 | 0.314013 | 0.662882 | 0.568178 |
| MmugDNA.6728.1.S1_at   | MmugDNA.6728.1 | 5.1   | 5.11  | 0.43 | 0.64 | -1    | 0.954829 | 0.791586 | 0.983073 | 0.879621 |
| MmugDNA.6730.1.S1_at   | MmugDNA.6730.1 | 8.03  | 7.43  | 0.37 | 0.27 | 1.52  | 0.120022 | 0.13872  | 0.48457  | 0.411807 |
| MmugDNA.6731.1.S1_at   | MmugDNA.6731.1 | 3.61  | 3.7   | 0.1  | 0.08 | -1.06 | 0.183484 | 0.059684 | 0.547675 | 0.290919 |
| MmugDNA.6734.1.S1_at   | MmugDNA.6734.1 | 5.6   | 6.58  | 0.3  | 0.78 | -1.97 | 0.076139 | 0.033497 | 0.424738 | 0.226577 |
| MmugDNA.6735.1.S1_at   | MmugDNA.6735.1 | 8.89  | 8.17  | 0.24 | 0.76 | 1.65  | 0.682976 | 0.719915 | 0.858255 | 0.837957 |
| MmugDNA.6739.1.S1_at   | MmugDNA.6739.1 | 11.81 | 11.34 | 0.22 | 0.17 | 1.38  | 0.129506 | 0.081044 | 0.495744 | 0.329189 |
| MmugDNA.674.1.S1_at    | MmugDNA.674.1  | 5.14  | 5.75  | 0.83 | 1.27 | -1.52 | 0.504558 | 0.029214 | 0.76127  | 0.212898 |
| MmugDNA.6745.1.S1_at   | MmugDNA.6745.1 | 10.29 | 10.71 | 0.12 | 0.26 | -1.34 | 0.215856 | 0.275391 | 0.575954 | 0.539663 |
| MmugDNA.6753.1.S1_at   | MmugDNA.6753.1 | 3.75  | 3.6   | 0.07 | 0.14 | 1.11  | 0.185652 | 0.410162 | 0.548972 | 0.637086 |
| MmugDNA.6756.1.S1_at   | MmugDNA.6756.1 | 12.23 | 12.09 | 0.08 | 0.07 | 1.1   | 0.283656 | 0.527853 | 0.623679 | 0.71629  |
| MmugDNA.6757.1.S1_at   | MmugDNA.6757.1 | 6.47  | 6.6   | 0.34 | 0.09 | -1.1  | 0.961369 | 0.801275 | 0.985091 | 0.88568  |
| MmugDNA.6760.1.S1_at   | MmugDNA.6760.1 | 5.51  | 5.36  | 0.44 | 0.16 | 1.11  | 0.211348 | 0.226242 | 0.572137 | 0.498698 |
| MmugDNA.6761.1.S1_at   | MmugDNA.6761.1 | 12.49 | 12.24 | 0.15 | 0.12 | 1.19  | 0.280466 | 0.02288  | 0.62167  | 0.189288 |
| MmugDNA.6761.1.S1_x_at | MmugDNA.6761.1 | 12.34 | 12.14 | 0.16 | 0.15 | 1.15  | 0.36073  | 0.065513 | 0.674646 | 0.301415 |
| MmugDNA.6764.1.S1_at   | MmugDNA.6764.1 | 8.08  | 8.01  | 0.05 | 0.1  | 1.05  | 0.749647 | 0.146413 | 0.89273  | 0.420454 |
| MmugDNA.6766.1.S1_at   | MmugDNA.6766.1 | 6.48  | 5.7   | 0.42 | 0.01 | 1.71  | 0.026194 | 0.006172 | 0.301758 | 0.106774 |
| MmugDNA.6768.1.S1_at   | MmugDNA.6768.1 | 7.55  | 7.34  | 0.34 | 0.47 | 1.16  | 0.498075 | 0.580515 | 0.758234 | 0.74976  |
| MmugDNA.6772.1.S1_at   | MmugDNA.6772.1 | 10.81 | 10.6  | 0.12 | 0.31 | 1.16  | 0.235818 | 0.244511 | 0.589657 | 0.51432  |
| MmugDNA.6778.1.S1_at   | MmugDNA.6778.1 | 11.31 | 11.22 | 0.23 | 0.13 | 1.06  | 0.67734  | 0.096717 | 0.855453 | 0.354171 |
| MmugDNA.6782.1.S1_at   | MmugDNA.6782.1 | 10.5  | 10.01 | 0.04 | 1.37 | 1.41  | 0.186134 | 0.146004 | 0.549657 | 0.420006 |
| MmugDNA.6783.1.S1_at   | MmugDNA.6783.1 | 3.14  | 3.26  | 0.04 | 0.09 | -1.09 | 0.102013 | 0.356933 | 0.461412 | 0.5987   |
| MmugDNA.6786.1.S1_at   | MmugDNA.6786.1 | 4.98  | 5.01  | 0.03 | 0.11 | -1.02 | 0.444333 | 0.608591 | 0.726942 | 0.767142 |
| MmugDNA.6790.1.S1_at   | MmugDNA.6790.1 | 9.11  | 11.94 | 1.25 | 1.93 | -7.13 | 0.336804 | 0.295196 | 0.659663 | 0.554568 |
| MmugDNA.6793.1.S1_at   | MmugDNA.6793.1 | 11.7  | 10.68 | 0.13 | 0.19 | 2.02  | 0.001795 | 0.000329 | 0.154452 | 0.035806 |
| MmugDNA.68.1.S1_at     | MmugDNA.68.1   | 9.89  | 9.88  | 0.08 | 0.31 | 1     | 0.518714 | 0.316592 | 0.769592 | 0.569952 |
| MmugDNA.6805.1.S1_at   | MmugDNA.6805.1 | 5.63  | 4.31  | 0.3  | 0.46 | 2.48  | 0.013946 | 0.005102 | 0.250089 | 0.099108 |
| MmugDNA.6808.1.S1_at   | MmugDNA.6808.1 | 9.83  | 9.61  | 0.26 | 0.27 | 1.16  | 0.79148  | 0.923793 | 0.91338  | 0.957119 |
| MmugDNA.6809.1.S1_at   | MmugDNA.6809.1 | 11.71 | 11.74 | 0.1  | 0.13 | -1.02 | 0.445844 | 0.094618 | 0.728005 | 0.351374 |
| MmugDNA.6811.1.S1_at   | MmugDNA.6811.1 | 8.72  | 8.58  | 0.23 | 0.37 | 1.1   | 0.672673 | 0.526666 | 0.853193 | 0.715627 |
| MmugDNA.6812.1.S1_at   | MmugDNA.6812.1 | 11.76 | 11.48 | 0.19 | 0.49 | 1.21  | 0.560296 | 0.747159 | 0.794209 | 0.853124 |
| MmugDNA.6815.1.S1_at   | MmugDNA.6815.1 | 3.43  | 3.3   | 0.19 | 0.04 | 1.09  | 0.31586  | 0.132835 | 0.646713 | 0.404544 |
| MmugDNA.6818.1.S1_at   | MmugDNA.6818.1 | 7.74  | 7.12  | 0.64 | 0.44 | 1.54  | 0.611687 | 0.161501 | 0.821755 | 0.437651 |
| MmugDNA.6819.1.S1_at   | MmugDNA.6819.1 | 3.22  | 3.29  | 0.07 | 0.04 | -1.05 | 0.22608  | 0.371478 | 0.584142 | 0.610204 |
| MmugDNA.6820.1.S1_at   | MmugDNA.6820.1 | 3.38  | 3.46  | 0.16 | 0.23 | -1.06 | 0.443715 | 0.658958 | 0.726381 | 0.800473 |

|                        |                |       |       |      |      |       |          |          |          |          |
|------------------------|----------------|-------|-------|------|------|-------|----------|----------|----------|----------|
| MmugDNA.6823.1.S1_s_at | MmugDNA.6823.1 | 7.49  | 7.98  | 0.4  | 0.21 | -1.4  | 0.337327 | 0.087019 | 0.659871 | 0.339889 |
| MmugDNA.6828.1.S1_at   | MmugDNA.6828.1 | 6.38  | 6.64  | 0.28 | 1.27 | -1.2  | 0.470192 | 0.620033 | 0.74218  | 0.775207 |
| MmugDNA.683.1.S1_at    | MmugDNA.683.1  | 6.2   | 6.16  | 0.88 | 0.01 | 1.03  | 0.465235 | 0.506323 | 0.739822 | 0.702371 |
| MmugDNA.6836.1.S1_at   | MmugDNA.6836.1 | 6.4   | 6.53  | 0.1  | 0.13 | -1.09 | 0.149982 | 0.096912 | 0.514522 | 0.354311 |
| MmugDNA.684.1.S1_at    | MmugDNA.684.1  | 5.99  | 6.42  | 0.09 | 0.24 | -1.35 | 0.078199 | 0.003813 | 0.428221 | 0.08794  |
| MmugDNA.6840.1.S1_at   | MmugDNA.6840.1 | 10.57 | 10.16 | 0.14 | 0.19 | 1.33  | 0.158442 | 0.208022 | 0.523338 | 0.482049 |
| MmugDNA.6842.1.S1_at   | MmugDNA.6842.1 | 11.71 | 11.68 | 0.01 | 0.24 | 1.02  | 0.85181  | 0.928822 | 0.940397 | 0.959449 |
| MmugDNA.6845.1.S1_at   | MmugDNA.6845.1 | 9.02  | 9.21  | 0.07 | 0.2  | -1.14 | 0.065164 | 0.034794 | 0.404019 | 0.230686 |
| MmugDNA.6846.1.S1_at   | MmugDNA.6846.1 | 4.84  | 4.72  | 0.06 | 0.07 | 1.08  | 0.039916 | 0.012151 | 0.34828  | 0.142648 |
| MmugDNA.6849.1.S1_at   | MmugDNA.6849.1 | 7.11  | 7.31  | 0.03 | 0.11 | -1.15 | 0.098637 | 0.042081 | 0.458486 | 0.249638 |
| MmugDNA.6852.1.S1_at   | MmugDNA.6852.1 | 6.22  | 6.4   | 0.05 | 0.24 | -1.13 | 0.089265 | 0.131243 | 0.444908 | 0.403263 |
| MmugDNA.6854.1.S1_at   | MmugDNA.6854.1 | 9.93  | 9.12  | 0.34 | 0.5  | 1.75  | 0.108514 | 0.088677 | 0.469866 | 0.342234 |
| MmugDNA.6858.1.S1_at   | MmugDNA.6858.1 | 6.88  | 7.01  | 0.25 | 0.6  | -1.09 | 0.700615 | 0.733853 | 0.86753  | 0.845891 |
| MmugDNA.6859.1.S1_at   | MmugDNA.6859.1 | 8.61  | 6.12  | 0.23 | 0.82 | 5.64  | 0.014753 | 0.008941 | 0.254953 | 0.125013 |
| MmugDNA.6864.1.S1_at   | MmugDNA.6864.1 | 11.01 | 11.54 | 0.5  | 0.3  | -1.45 | 0.096973 | 0.096493 | 0.45597  | 0.35409  |
| MmugDNA.6866.1.S1_at   | MmugDNA.6866.1 | 6.21  | 5.84  | 0.24 | 0.51 | 1.3   | 0.862272 | 0.907869 | 0.944609 | 0.947871 |
| MmugDNA.6867.1.S1_at   | MmugDNA.6867.1 | 12.08 | 12.46 | 0.1  | 0.49 | -1.3  | 0.224156 | 0.199739 | 0.582619 | 0.47438  |
| MmugDNA.6869.1.S1_at   | MmugDNA.6869.1 | 9.01  | 8.14  | 0.31 | 0.23 | 1.83  | 0.011287 | 0.003909 | 0.235353 | 0.088806 |
| MmugDNA.6873.1.S1_at   | MmugDNA.6873.1 | 6.37  | 6.46  | 0.25 | 0.11 | -1.06 | 0.670644 | 0.300098 | 0.852442 | 0.558262 |
| MmugDNA.6875.1.S1_at   | MmugDNA.6875.1 | 7.15  | 5.76  | 1.69 | 1.17 | 2.62  | 0.61112  | 0.630654 | 0.821498 | 0.782345 |
| MmugDNA.6876.1.S1_at   | MmugDNA.6876.1 | 3.96  | 3.99  | 0.15 | 0.04 | -1.02 | 0.576067 | 0.562381 | 0.802704 | 0.738016 |
| MmugDNA.6880.1.S1_at   | MmugDNA.6880.1 | 8.11  | 8.48  | 0.46 | 0.66 | -1.3  | 0.987809 | 0.498625 | 0.995662 | 0.697648 |
| MmugDNA.6884.1.S1_at   | MmugDNA.6884.1 | 10.19 | 10.62 | 0.08 | 0.3  | -1.35 | 0.023167 | 0.021306 | 0.290295 | 0.182727 |
| MmugDNA.6887.1.S1_at   | MmugDNA.6887.1 | 6.19  | 6.32  | 0.1  | 0.08 | -1.1  | 0.11807  | 0.033243 | 0.482198 | 0.225803 |
| MmugDNA.6890.1.S1_at   | MmugDNA.6890.1 | 4.45  | 4.36  | 0.06 | 0.25 | 1.07  | 0.655896 | 0.856454 | 0.845225 | 0.917996 |
| MmugDNA.6891.1.S1_s_at | MmugDNA.6891.1 | 12.81 | 12.78 | 0.16 | 0.06 | 1.02  | 0.709996 | 0.911407 | 0.87278  | 0.950063 |
| MmugDNA.6892.1.S1_at   | MmugDNA.6892.1 | 6.25  | 6.33  | 0.2  | 0.19 | -1.06 | 0.613401 | 0.536583 | 0.8227   | 0.721903 |
| MmugDNA.6898.1.S1_at   | MmugDNA.6898.1 | 10.68 | 10.17 | 0.14 | 0.33 | 1.43  | 0.08569  | 0.057173 | 0.439704 | 0.284974 |
| MmugDNA.6899.1.S1_at   | MmugDNA.6899.1 | 10.39 | 9.73  | 0.15 | 0.27 | 1.58  | 0.05342  | 0.021191 | 0.380257 | 0.182325 |
| MmugDNA.6901.1.S1_at   | MmugDNA.6901.1 | 7.23  | 7.91  | 0.08 | 0.3  | -1.6  | 0.021813 | 0.014165 | 0.28382  | 0.152135 |
| MmugDNA.6908.1.S1_at   | MmugDNA.6908.1 | 5.46  | 5.5   | 0.15 | 0.09 | -1.03 | 0.814498 | 0.108294 | 0.924758 | 0.371557 |
| MmugDNA.6910.1.S1_at   | MmugDNA.6910.1 | 12.16 | 12.15 | 0.1  | 0.12 | 1.01  | 0.578018 | 0.532312 | 0.803619 | 0.719017 |
| MmugDNA.6911.1.S1_at   | MmugDNA.6911.1 | 4.45  | 4.65  | 0.07 | 0.19 | -1.15 | 0.146634 | 0.185952 | 0.512668 | 0.461778 |
| MmugDNA.6912.1.S1_at   | MmugDNA.6912.1 | 8.99  | 10.02 | 1.1  | 1.76 | -2.04 | 0.287855 | 0.362677 | 0.626282 | 0.603206 |
| MmugDNA.6915.1.S1_at   | MmugDNA.6915.1 | 3.46  | 3.57  | 0.09 | 0.21 | -1.08 | 0.810414 | 0.920559 | 0.922733 | 0.955234 |
| MmugDNA.6919.1.S1_at   | MmugDNA.6919.1 | 9.23  | 7.91  | 0.21 | 1.28 | 2.48  | 0.05202  | 0.042535 | 0.376952 | 0.250848 |
| MmugDNA.6931.1.S1_at   | MmugDNA.6931.1 | 8.37  | 9.79  | 0.18 | 0.94 | -2.68 | 0.069141 | 0.05633  | 0.411264 | 0.283348 |
| MmugDNA.6932.1.S1_at   | MmugDNA.6932.1 | 3.56  | 3.55  | 0.11 | 0.11 | 1.01  | 0.875758 | 0.741416 | 0.950257 | 0.850285 |
| MmugDNA.6939.1.S1_at   | MmugDNA.6939.1 | 4.91  | 4.92  | 0.07 | 0.05 | -1    | 0.267282 | 0.550626 | 0.612416 | 0.730605 |
| MmugDNA.6941.1.S1_at   | MmugDNA.6941.1 | 10.11 | 9.92  | 0.17 | 0.43 | 1.14  | 0.420826 | 0.584874 | 0.712776 | 0.75256  |
| MmugDNA.6944.1.S1_at   | MmugDNA.6944.1 | 8.52  | 9.12  | 0.08 | 0.3  | -1.52 | 0.094356 | 0.081941 | 0.451866 | 0.330521 |

|                        |                |       |       |      |      |        |          |          |          |          |
|------------------------|----------------|-------|-------|------|------|--------|----------|----------|----------|----------|
| MmugDNA.6948.1.S1_at   | MmugDNA.6948.1 | 7.64  | 9.45  | 0.36 | 0.39 | -3.5   | 0.003353 | 0.00107  | 0.177442 | 0.051873 |
| MmugDNA.6954.1.S1_at   | MmugDNA.6954.1 | 11.21 | 10.78 | 0.08 | 0.11 | 1.35   | 0.009783 | 0.003159 | 0.22634  | 0.081739 |
| MmugDNA.6956.1.S1_at   | MmugDNA.6956.1 | 8.68  | 7.88  | 0.19 | 0.2  | 1.74   | 0.010201 | 0.00602  | 0.228247 | 0.106089 |
| MmugDNA.6959.1.S1_at   | MmugDNA.6959.1 | 8.15  | 8.49  | 0.13 | 0.75 | -1.27  | 0.483636 | 0.588336 | 0.749945 | 0.754874 |
| MmugDNA.6962.1.S1_at   | MmugDNA.6962.1 | 6.27  | 6.73  | 0.15 | 0.26 | -1.38  | 0.046803 | 0.108737 | 0.364126 | 0.372257 |
| MmugDNA.6963.1.S1_at   | MmugDNA.6963.1 | 8.76  | 9.13  | 0.4  | 0.36 | -1.3   | 0.267558 | 0.177875 | 0.612632 | 0.454182 |
| MmugDNA.6971.1.S1_at   | MmugDNA.6971.1 | 11.15 | 10.66 | 0.16 | 0.53 | 1.4    | 0.215641 | 0.262433 | 0.575924 | 0.528697 |
| MmugDNA.6974.1.S1_at   | MmugDNA.6974.1 | 6.95  | 7.05  | 0.14 | 0.07 | -1.07  | 0.681756 | 0.775772 | 0.857635 | 0.869526 |
| MmugDNA.6975.1.S1_at   | MmugDNA.6975.1 | 5.05  | 4.52  | 0.28 | 0.02 | 1.44   | 0.081515 | 0.059329 | 0.432522 | 0.29054  |
| MmugDNA.6976.1.S1_at   | MmugDNA.6976.1 | 6.7   | 6.55  | 0.18 | 0.19 | 1.11   | 0.417724 | 0.171644 | 0.710734 | 0.448044 |
| MmugDNA.6978.1.S1_at   | MmugDNA.6978.1 | 4.78  | 5.04  | 0.11 | 0.07 | -1.2   | 0.040739 | 0.282376 | 0.350262 | 0.545076 |
| MmugDNA.6979.1.S1_at   | MmugDNA.6979.1 | 9.47  | 8.24  | 0.47 | 0.35 | 2.36   | 0.025869 | 0.015219 | 0.301024 | 0.156741 |
| MmugDNA.6980.1.S1_at   | MmugDNA.6980.1 | 12.53 | 12.64 | 0.04 | 0.14 | -1.08  | 0.329821 | 0.456375 | 0.655349 | 0.670155 |
| MmugDNA.6983.1.S1_at   | MmugDNA.6983.1 | 11.39 | 11.83 | 0.11 | 0.32 | -1.35  | 0.025143 | 0.012613 | 0.297733 | 0.144864 |
| MmugDNA.699.1.S1_at    | MmugDNA.699.1  | 6.37  | 5.48  | 0.09 | 0.38 | 1.86   | 0.049244 | 0.030363 | 0.370998 | 0.216116 |
| MmugDNA.6997.1.S1_at   | MmugDNA.6997.1 | 9.2   | 9.12  | 0.19 | 0.26 | 1.05   | 0.37986  | 0.385876 | 0.68708  | 0.621161 |
| MmugDNA.6998.1.S1_at   | MmugDNA.6998.1 | 14.34 | 14.31 | 0.02 | 0.05 | 1.02   | 0.190042 | 0.190461 | 0.552832 | 0.465906 |
| MmugDNA.70.1.S1_at     | MmugDNA.70.1   | 9.58  | 10.86 | 0.22 | 0.42 | -2.43  | 0.009768 | 0.010296 | 0.22625  | 0.132854 |
| MmugDNA.7002.1.S1_s_at | MmugDNA.7002.1 | 14.38 | 14.36 | 0.04 | 0.07 | 1.02   | 0.523986 | 0.569047 | 0.772859 | 0.742233 |
| MmugDNA.7007.1.S1_at   | MmugDNA.7007.1 | 10.22 | 10.09 | 0.03 | 0.37 | 1.1    | 0.63963  | 0.576293 | 0.837251 | 0.747148 |
| MmugDNA.701.1.S1_at    | MmugDNA.701.1  | 2.8   | 2.82  | 0.01 | 0.01 | -1.01  | 0.132994 | 0.613229 | 0.499254 | 0.770484 |
| MmugDNA.7018.1.S1_at   | MmugDNA.7018.1 | 5.56  | 6.3   | 0.8  | 1.17 | -1.66  | 0.429196 | 0.241728 | 0.717363 | 0.512306 |
| MmugDNA.7021.1.S1_at   | MmugDNA.7021.1 | 12.62 | 12.55 | 0.03 | 0.01 | 1.04   | 0.063339 | 0.087642 | 0.400486 | 0.340903 |
| MmugDNA.7023.1.S1_at   | MmugDNA.7023.1 | 8.74  | 9.31  | 0.17 | 0.51 | -1.48  | 0.171021 | 0.175222 | 0.534989 | 0.452011 |
| MmugDNA.7024.1.S1_at   | MmugDNA.7024.1 | 7.22  | 7.45  | 0.44 | 0.27 | -1.17  | 0.183011 | 0.21527  | 0.547134 | 0.489011 |
| MmugDNA.7027.1.S1_at   | MmugDNA.7027.1 | 10.51 | 10.49 | 0.05 | 0.07 | 1.01   | 0.926046 | 0.137249 | 0.971587 | 0.410155 |
| MmugDNA.7029.1.S1_at   | MmugDNA.7029.1 | 6.5   | 6.91  | 0.26 | 0.79 | -1.32  | 0.218766 | 0.205269 | 0.578251 | 0.479599 |
| MmugDNA.703.1.S1_at    | MmugDNA.703.1  | 6.96  | 6.72  | 0.34 | 0.17 | 1.19   | 0.633316 | 0.621613 | 0.83363  | 0.776191 |
| MmugDNA.7034.1.S1_at   | MmugDNA.7034.1 | 9.16  | 9.61  | 0.25 | 0.33 | -1.37  | 0.032668 | 0.01202  | 0.325817 | 0.141889 |
| MmugDNA.7037.1.S1_at   | MmugDNA.7037.1 | 4.68  | 4.89  | 0.1  | 0.31 | -1.16  | 0.217895 | 0.001687 | 0.577569 | 0.062186 |
| MmugDNA.7038.1.S1_at   | MmugDNA.7038.1 | 7.72  | 12.47 | 1.76 | 4.15 | -26.84 | 0.62231  | 0.357336 | 0.827345 | 0.598949 |
| MmugDNA.7044.1.S1_at   | MmugDNA.7044.1 | 11.79 | 11.76 | 0.18 | 0.69 | 1.02   | 0.935035 | 0.94317  | 0.974886 | 0.967774 |
| MmugDNA.7046.1.S1_at   | MmugDNA.7046.1 | 7.7   | 7.13  | 0.07 | 0.48 | 1.49   | 0.08147  | 0.088926 | 0.432455 | 0.34275  |
| MmugDNA.705.1.S1_at    | MmugDNA.705.1  | 4.18  | 4.29  | 0.1  | 0.15 | -1.08  | 0.453964 | 0.145093 | 0.733035 | 0.419053 |
| MmugDNA.7052.1.S1_at   | MmugDNA.7052.1 | 11.51 | 12.07 | 0.14 | 0.46 | -1.47  | 0.098134 | 0.066438 | 0.457443 | 0.303406 |
| MmugDNA.7057.1.S1_s_at | MmugDNA.7057.1 | 11.79 | 11.81 | 0.06 | 0.24 | -1.01  | 0.358663 | 0.456989 | 0.673345 | 0.670592 |
| MmugDNA.7058.1.S1_at   | MmugDNA.7058.1 | 10.99 | 10.29 | 0.3  | 0.22 | 1.63   | 0.049682 | 0.038395 | 0.37181  | 0.240833 |
| MmugDNA.7059.1.S1_at   | MmugDNA.7059.1 | 12.92 | 12.95 | 0.13 | 0.05 | -1.02  | 0.745285 | 0.92953  | 0.891048 | 0.959757 |
| MmugDNA.7060.1.S1_at   | MmugDNA.7060.1 | 8.04  | 7.95  | 0.32 | 0.27 | 1.06   | 0.378832 | 0.359082 | 0.68656  | 0.600438 |
| MmugDNA.7066.1.S1_at   | MmugDNA.7066.1 | 9.33  | 9.36  | 0.46 | 0.37 | -1.02  | 0.855003 | 0.147998 | 0.941387 | 0.422406 |
| MmugDNA.7071.1.S1_at   | MmugDNA.7071.1 | 3.85  | 3.86  | 0.43 | 0.08 | -1.01  | 0.743367 | 0.764579 | 0.890141 | 0.863128 |

|                        |                |       |       |      |      |       |          |          |          |          |
|------------------------|----------------|-------|-------|------|------|-------|----------|----------|----------|----------|
| MmugDNA.7072.1.S1_at   | MmugDNA.7072.1 | 8.94  | 8.86  | 0.2  | 0.48 | 1.06  | 0.878991 | 0.681567 | 0.951455 | 0.814092 |
| MmugDNA.7088.1.S1_at   | MmugDNA.7088.1 | 12.92 | 12.89 | 0.11 | 0.09 | 1.02  | 0.255788 | 0.411751 | 0.603643 | 0.638434 |
| MmugDNA.7099.1.S1_at   | MmugDNA.7099.1 | 12.05 | 11.84 | 0.07 | 0.28 | 1.15  | 0.310496 | 0.212068 | 0.642516 | 0.486036 |
| MmugDNA.7099.1.S1_s_at | MmugDNA.7099.1 | 12.59 | 12.58 | 0.12 | 0.2  | 1.01  | 0.587364 | 0.494079 | 0.808571 | 0.694663 |
| MmugDNA.71.1.S1_at     | MmugDNA.71.1   | 5.2   | 4.76  | 0.1  | 0.35 | 1.36  | 0.089041 | 0.091693 | 0.444447 | 0.346934 |
| MmugDNA.7103.1.S1_at   | MmugDNA.7103.1 | 7.38  | 7.22  | 0.49 | 0.33 | 1.11  | 0.44073  | 0.602123 | 0.724464 | 0.763172 |
| MmugDNA.7106.1.S1_at   | MmugDNA.7106.1 | 8.62  | 8.04  | 0.03 | 0.46 | 1.5   | 0.052722 | 0.037399 | 0.378449 | 0.237776 |
| MmugDNA.7107.1.S1_at   | MmugDNA.7107.1 | 10.62 | 10.19 | 0.54 | 0.54 | 1.35  | 0.306705 | 0.329866 | 0.639659 | 0.578874 |
| MmugDNA.7107.1.S1_s_at | MmugDNA.7107.1 | 9.38  | 8.99  | 0.67 | 0.66 | 1.31  | 0.498276 | 0.47244  | 0.75837  | 0.67999  |
| MmugDNA.7108.1.S1_at   | MmugDNA.7108.1 | 5.69  | 6.92  | 0.87 | 0.72 | -2.35 | 0.091729 | 0.09513  | 0.447969 | 0.352151 |
| MmugDNA.7109.1.S1_at   | MmugDNA.7109.1 | 6.6   | 7.49  | 0.8  | 1    | -1.85 | 0.242948 | 0.219325 | 0.594744 | 0.493094 |
| MmugDNA.7115.1.S1_at   | MmugDNA.7115.1 | 10.62 | 10.16 | 0.05 | 0.27 | 1.38  | 0.037515 | 0.024862 | 0.341524 | 0.197552 |
| MmugDNA.7117.1.S1_at   | MmugDNA.7117.1 | 4     | 3.98  | 0.17 | 0.07 | 1.01  | 0.736023 | 0.958735 | 0.886439 | 0.976654 |
| MmugDNA.7118.1.S1_at   | MmugDNA.7118.1 | 7.33  | 7.77  | 0.2  | 0.78 | -1.36 | 0.303876 | 0.407458 | 0.638083 | 0.635032 |
| MmugDNA.712.1.S1_at    | MmugDNA.712.1  | 9.23  | 8.45  | 0.15 | 0.07 | 1.72  | 0.000931 | 0.001292 | 0.139813 | 0.055585 |
| MmugDNA.7121.1.S1_at   | MmugDNA.7121.1 | 7.24  | 6.99  | 0.06 | 0.01 | 1.19  | 0.0031   | 0.000601 | 0.172102 | 0.041985 |
| MmugDNA.7127.1.S1_at   | MmugDNA.7127.1 | 7.54  | 6.74  | 0.41 | 0.7  | 1.74  | 0.260111 | 0.301861 | 0.606964 | 0.559788 |
| MmugDNA.7128.1.S1_at   | MmugDNA.7128.1 | 7.82  | 7.92  | 0.41 | 1.32 | -1.07 | 0.904747 | 0.831781 | 0.961899 | 0.903503 |
| MmugDNA.7129.1.S1_at   | MmugDNA.7129.1 | 7.1   | 7.02  | 0.48 | 0.41 | 1.05  | 0.395911 | 0.304051 | 0.696652 | 0.561388 |
| MmugDNA.7136.1.S1_at   | MmugDNA.7136.1 | 7.27  | 7.05  | 0.06 | 0.08 | 1.17  | 0.03152  | 0.022787 | 0.321992 | 0.18908  |
| MmugDNA.7140.1.S1_at   | MmugDNA.7140.1 | 12.07 | 11.09 | 0.13 | 0.15 | 1.98  | 0.000993 | 0.000097 | 0.139813 | 0.0278   |
| MmugDNA.7146.1.S1_at   | MmugDNA.7146.1 | 5.79  | 6.09  | 0.21 | 0.13 | -1.23 | 0.128741 | 0.18593  | 0.494664 | 0.461772 |
| MmugDNA.7147.1.S1_at   | MmugDNA.7147.1 | 10.77 | 10.71 | 0.17 | 0.55 | 1.05  | 0.587455 | 0.358623 | 0.808576 | 0.600139 |
| MmugDNA.7157.1.S1_s_at | MmugDNA.7157.1 | 5.88  | 6.04  | 0.22 | 0.25 | -1.11 | 0.221583 | 0.23653  | 0.580303 | 0.507364 |
| MmugDNA.7159.1.S1_at   | MmugDNA.7159.1 | 7.06  | 6.83  | 0.14 | 0.35 | 1.18  | 0.886561 | 0.777073 | 0.954601 | 0.870505 |
| MmugDNA.7167.1.S1_at   | MmugDNA.7167.1 | 12.1  | 12.13 | 0.42 | 0.34 | -1.02 | 0.462662 | 0.02292  | 0.738289 | 0.189403 |
| MmugDNA.7170.1.S1_at   | MmugDNA.7170.1 | 11.23 | 11.7  | 0.13 | 0.21 | -1.39 | 0.023208 | 0.016097 | 0.290295 | 0.160775 |
| MmugDNA.7171.1.S1_at   | MmugDNA.7171.1 | 11.1  | 11    | 0.11 | 0.05 | 1.07  | 0.216564 | 0.18067  | 0.576206 | 0.457245 |
| MmugDNA.7172.1.S1_at   | MmugDNA.7172.1 | 11.36 | 10.85 | 0.09 | 0.15 | 1.43  | 0.005289 | 0.006413 | 0.191107 | 0.108813 |
| MmugDNA.7177.1.S1_at   | MmugDNA.7177.1 | 8.28  | 8.56  | 0.3  | 0.22 | -1.21 | 0.282747 | 0.336338 | 0.623095 | 0.583813 |
| MmugDNA.7178.1.S1_at   | MmugDNA.7178.1 | 11.61 | 11.92 | 0.1  | 0.19 | -1.24 | 0.040285 | 0.006071 | 0.349277 | 0.106175 |
| MmugDNA.7181.1.S1_at   | MmugDNA.7181.1 | 7.87  | 8.26  | 0.56 | 0.29 | -1.31 | 0.501044 | 0.511094 | 0.759772 | 0.705383 |
| MmugDNA.7183.1.S1_at   | MmugDNA.7183.1 | 12.78 | 13.2  | 0.14 | 0.28 | -1.33 | 0.125498 | 0.086773 | 0.491333 | 0.339521 |
| MmugDNA.7187.1.S1_at   | MmugDNA.7187.1 | 10.49 | 10.45 | 0.02 | 0.14 | 1.02  | 0.282782 | 0.41104  | 0.62312  | 0.637874 |
| MmugDNA.7190.1.S1_at   | MmugDNA.7190.1 | 9.68  | 8.56  | 0.29 | 0.61 | 2.18  | 0.190127 | 0.199451 | 0.552925 | 0.474035 |
| MmugDNA.7204.1.S1_at   | MmugDNA.7204.1 | 12.81 | 13.18 | 0.06 | 0.22 | -1.29 | 0.085652 | 0.026181 | 0.439698 | 0.202791 |
| MmugDNA.7205.1.S1_at   | MmugDNA.7205.1 | 6.94  | 6.93  | 1.04 | 0.6  | 1     | 0.451893 | 0.575787 | 0.731768 | 0.746767 |
| MmugDNA.7206.1.S1_at   | MmugDNA.7206.1 | 10.69 | 10.62 | 0.17 | 0.27 | 1.05  | 0.715969 | 0.241362 | 0.875256 | 0.511961 |
| MmugDNA.7208.1.S1_at   | MmugDNA.7208.1 | 5.42  | 5.4   | 0.08 | 0.46 | 1.02  | 0.420875 | 0.428432 | 0.712776 | 0.649993 |
| MmugDNA.7220.1.S1_at   | MmugDNA.7220.1 | 4.92  | 5.06  | 0.3  | 0.33 | -1.1  | 0.529225 | 0.782084 | 0.775959 | 0.873766 |
| MmugDNA.7222.1.S1_at   | MmugDNA.7222.1 | 8.51  | 7.61  | 0.57 | 0.6  | 1.87  | 0.044769 | 0.024295 | 0.359043 | 0.195069 |

|                        |                |       |       |      |      |       |          |          |          |          |
|------------------------|----------------|-------|-------|------|------|-------|----------|----------|----------|----------|
| MmugDNA.7232.1.S1_at   | MmugDNA.7232.1 | 11.63 | 11.34 | 0.26 | 0.61 | 1.23  | 0.280565 | 0.068794 | 0.621702 | 0.308711 |
| MmugDNA.7239.1.S1_at   | MmugDNA.7239.1 | 11.68 | 11.42 | 0.03 | 0.24 | 1.19  | 0.058437 | 0.029462 | 0.390361 | 0.213368 |
| MmugDNA.724.1.S1_at    | MmugDNA.724.1  | 12.56 | 12.29 | 0.08 | 0.45 | 1.21  | 0.13869  | 0.079791 | 0.505884 | 0.327113 |
| MmugDNA.725.1.S1_at    | MmugDNA.725.1  | 5.42  | 6.5   | 0.4  | 0.42 | -2.11 | 0.017424 | 0.014018 | 0.267445 | 0.151595 |
| MmugDNA.7250.1.S1_at   | MmugDNA.7250.1 | 4.93  | 4.73  | 0.17 | 0.16 | 1.15  | 0.217749 | 0.257677 | 0.577354 | 0.525332 |
| MmugDNA.7254.1.S1_at   | MmugDNA.7254.1 | 4.81  | 5.19  | 0.19 | 0.33 | -1.31 | 0.211711 | 0.136146 | 0.572347 | 0.408473 |
| MmugDNA.726.1.S1_at    | MmugDNA.726.1  | 12.61 | 12.77 | 0.16 | 0.05 | -1.11 | 0.088291 | 0.093019 | 0.442948 | 0.349177 |
| MmugDNA.7262.1.S1_at   | MmugDNA.7262.1 | 3.79  | 3.78  | 0.46 | 0.08 | 1.01  | 0.912775 | 0.739518 | 0.965461 | 0.849052 |
| MmugDNA.7275.1.S1_at   | MmugDNA.7275.1 | 11.05 | 11.25 | 0.11 | 0.12 | -1.15 | 0.088485 | 0.155477 | 0.44331  | 0.430848 |
| MmugDNA.7278.1.S1_at   | MmugDNA.7278.1 | 8.34  | 7.34  | 0.47 | 0.57 | 1.99  | 0.130712 | 0.019927 | 0.497065 | 0.177443 |
| MmugDNA.7279.1.S1_at   | MmugDNA.7279.1 | 7.08  | 6.53  | 0.45 | 0.25 | 1.46  | 0.125164 | 0.163186 | 0.491224 | 0.439316 |
| MmugDNA.7280.1.S1_at   | MmugDNA.7280.1 | 10.83 | 11.14 | 0.19 | 0.09 | -1.24 | 0.255193 | 0.19404  | 0.603094 | 0.469151 |
| MmugDNA.729.1.S1_at    | MmugDNA.729.1  | 10.19 | 9.49  | 0.13 | 0.1  | 1.62  | 0.001669 | 0.000561 | 0.15365  | 0.041049 |
| MmugDNA.7291.1.S1_at   | MmugDNA.7291.1 | 5.19  | 5.73  | 0.17 | 0.39 | -1.45 | 0.143745 | 0.234492 | 0.510387 | 0.505674 |
| MmugDNA.7301.1.S1_s_at | MmugDNA.7301.1 | 11.08 | 12.65 | 0.86 | 0.16 | -2.98 | 0.0325   | 0.015038 | 0.325032 | 0.155766 |
| MmugDNA.731.1.S1_at    | MmugDNA.731.1  | 4.65  | 4.7   | 0.02 | 0.17 | -1.03 | 0.225817 | 0.251766 | 0.583854 | 0.520444 |
| MmugDNA.7316.1.S1_at   | MmugDNA.7316.1 | 12.27 | 11.94 | 0.16 | 0.15 | 1.26  | 0.034    | 0.01523  | 0.330829 | 0.156798 |
| MmugDNA.7319.1.S1_at   | MmugDNA.7319.1 | 4.92  | 4.97  | 0.15 | 0.1  | -1.04 | 0.50116  | 0.260242 | 0.759789 | 0.526807 |
| MmugDNA.732.1.S1_at    | MmugDNA.732.1  | 11.48 | 12.75 | 0.5  | 0.89 | -2.41 | 0.176446 | 0.14032  | 0.540055 | 0.413498 |
| MmugDNA.7320.1.S1_at   | MmugDNA.7320.1 | 4.94  | 5.07  | 0.1  | 0.2  | -1.1  | 0.374369 | 0.378211 | 0.683612 | 0.615438 |
| MmugDNA.7322.1.S1_at   | MmugDNA.7322.1 | 5.31  | 5.35  | 0.27 | 0.18 | -1.03 | 0.763025 | 0.955986 | 0.900081 | 0.97502  |
| MmugDNA.7325.1.S1_at   | MmugDNA.7325.1 | 8.18  | 7.82  | 0.02 | 0.19 | 1.28  | 0.032215 | 0.022097 | 0.3244   | 0.185973 |
| MmugDNA.7329.1.S1_s_at | MmugDNA.7329.1 | 8.98  | 9.49  | 0.31 | 0.17 | -1.43 | 0.02512  | 0.012176 | 0.297733 | 0.142754 |
| MmugDNA.7330.1.S1_at   | MmugDNA.7330.1 | 8.29  | 9.13  | 0.41 | 1.46 | -1.78 | 0.527963 | 0.27133  | 0.775293 | 0.53644  |
| MmugDNA.7332.1.S1_at   | MmugDNA.7332.1 | 5.25  | 5.2   | 0.13 | 0.1  | 1.03  | 0.582573 | 0.31789  | 0.805828 | 0.571044 |
| MmugDNA.7337.1.S1_at   | MmugDNA.7337.1 | 4.58  | 4.5   | 0.1  | 0.39 | 1.06  | 0.823956 | 0.915864 | 0.928494 | 0.952836 |
| MmugDNA.7339.1.S1_at   | MmugDNA.7339.1 | 3.68  | 3.96  | 0.23 | 0.24 | -1.21 | 0.733028 | 0.162949 | 0.884807 | 0.4391   |
| MmugDNA.7348.1.S1_at   | MmugDNA.7348.1 | 6.93  | 7.12  | 0.22 | 0.14 | -1.13 | 0.348736 | 0.310135 | 0.667219 | 0.565354 |
| MmugDNA.7349.1.S1_at   | MmugDNA.7349.1 | 10.57 | 10.66 | 0.19 | 0.53 | -1.06 | 0.940351 | 0.574963 | 0.977383 | 0.746216 |
| MmugDNA.7359.1.S1_s_at | MmugDNA.7359.1 | 10.09 | 12.93 | 1.17 | 2.32 | -7.14 | 0.491475 | 0.228184 | 0.755082 | 0.500351 |
| MmugDNA.7361.1.S1_at   | MmugDNA.7361.1 | 11.54 | 11.84 | 0.3  | 0.24 | -1.23 | 0.212372 | 0.069533 | 0.572605 | 0.309848 |
| MmugDNA.7363.1.S1_at   | MmugDNA.7363.1 | 3.24  | 3.08  | 0.05 | 0.12 | 1.12  | 0.278666 | 0.177595 | 0.620751 | 0.453962 |
| MmugDNA.7371.1.S1_at   | MmugDNA.7371.1 | 11.74 | 11.87 | 0.19 | 0.61 | -1.09 | 0.997333 | 0.426607 | 0.99892  | 0.648739 |
| MmugDNA.7372.1.S1_at   | MmugDNA.7372.1 | 4     | 3.98  | 0.17 | 0.01 | 1.01  | 0.62126  | 0.593155 | 0.826507 | 0.758096 |
| MmugDNA.7382.1.S1_at   | MmugDNA.7382.1 | 6.6   | 5.7   | 0.24 | 0.27 | 1.87  | 0.012779 | 0.007727 | 0.243715 | 0.117463 |
| MmugDNA.7383.1.S1_at   | MmugDNA.7383.1 | 6.22  | 6.35  | 0.07 | 0.09 | -1.09 | 0.359928 | 0.38444  | 0.674068 | 0.620107 |
| MmugDNA.7384.1.S1_at   | MmugDNA.7384.1 | 11.91 | 12.31 | 0.12 | 0.89 | -1.32 | 0.998364 | 0.573618 | 0.999366 | 0.745229 |
| MmugDNA.7385.1.S1_at   | MmugDNA.7385.1 | 12.22 | 12.41 | 0.48 | 0.24 | -1.14 | 0.544152 | 0.549414 | 0.784268 | 0.729841 |
| MmugDNA.7386.1.S1_at   | MmugDNA.7386.1 | 12.56 | 12.24 | 0.04 | 0.14 | 1.25  | 0.019709 | 0.011652 | 0.275549 | 0.139826 |
| MmugDNA.7390.1.S1_at   | MmugDNA.7390.1 | 8.96  | 8.84  | 0.11 | 0.13 | 1.09  | 0.596055 | 0.037557 | 0.812756 | 0.238211 |
| MmugDNA.7393.1.S1_at   | MmugDNA.7393.1 | 3.15  | 3.11  | 0.06 | 0.06 | 1.03  | 0.224685 | 0.392941 | 0.58277  | 0.625917 |



|                        |                |       |       |      |      |       |          |          |          |          |
|------------------------|----------------|-------|-------|------|------|-------|----------|----------|----------|----------|
| MmugDNA.7395.1.S1_at   | MmugDNA.7395.1 | 6.73  | 7.48  | 0.25 | 0.75 | -1.68 | 0.167115 | 0.129492 | 0.531273 | 0.400938 |
| MmugDNA.7397.1.S1_at   | MmugDNA.7397.1 | 7.93  | 7.72  | 0.24 | 0.26 | 1.16  | 0.438023 | 0.589809 | 0.722717 | 0.755973 |
| MmugDNA.7403.1.S1_at   | MmugDNA.7403.1 | 5.75  | 6.21  | 0.53 | 0.6  | -1.38 | 0.762837 | 0.60048  | 0.900046 | 0.762128 |
| MmugDNA.7405.1.S1_at   | MmugDNA.7405.1 | 11.33 | 10.79 | 0.15 | 0.03 | 1.45  | 0.002686 | 0.000637 | 0.164386 | 0.042882 |
| MmugDNA.7407.1.S1_at   | MmugDNA.7407.1 | 9.32  | 9.64  | 0.37 | 0.35 | -1.25 | 0.526295 | 0.064537 | 0.77404  | 0.300255 |
| MmugDNA.7408.1.S1_at   | MmugDNA.7408.1 | 10.96 | 10.63 | 0.07 | 0.27 | 1.26  | 0.111267 | 0.024544 | 0.473372 | 0.196058 |
| MmugDNA.7413.1.S1_at   | MmugDNA.7413.1 | 13.05 | 12.82 | 0.15 | 0.03 | 1.17  | 0.051344 | 0.034327 | 0.376001 | 0.229241 |
| MmugDNA.742.1.S1_at    | MmugDNA.742.1  | 10.82 | 10.26 | 0.2  | 0.34 | 1.47  | 0.329323 | 0.377971 | 0.654942 | 0.615264 |
| MmugDNA.7423.1.S1_at   | MmugDNA.7423.1 | 8.89  | 8.72  | 0.15 | 0.25 | 1.13  | 0.361912 | 0.231681 | 0.675509 | 0.503506 |
| MmugDNA.7429.1.S1_at   | MmugDNA.7429.1 | 9.94  | 9.31  | 0.12 | 0.19 | 1.54  | 0.023711 | 0.014444 | 0.292734 | 0.153383 |
| MmugDNA.743.1.S1_at    | MmugDNA.743.1  | 7.28  | 6.72  | 0.24 | 0.03 | 1.47  | 0.018529 | 0.009111 | 0.270581 | 0.125983 |
| MmugDNA.7430.1.S1_at   | MmugDNA.7430.1 | 5.61  | 5.87  | 0.47 | 0.51 | -1.19 | 0.171204 | 0.158537 | 0.535126 | 0.434453 |
| MmugDNA.7432.1.S1_at   | MmugDNA.7432.1 | 6.34  | 6.77  | 0.37 | 0.31 | -1.34 | 0.46951  | 0.224333 | 0.741757 | 0.497249 |
| MmugDNA.7448.1.S1_at   | MmugDNA.7448.1 | 9.81  | 8.03  | 0.28 | 0.05 | 3.43  | 0.000274 | 0.000018 | 0.12562  | 0.019635 |
| MmugDNA.7451.1.S1_at   | MmugDNA.7451.1 | 7     | 7.2   | 0.28 | 0.37 | -1.15 | 0.815058 | 0.890624 | 0.924824 | 0.937649 |
| MmugDNA.7463.1.S1_at   | MmugDNA.7463.1 | 10.45 | 10.45 | 0.12 | 0.2  | -1    | 0.698222 | 0.508689 | 0.866049 | 0.703791 |
| MmugDNA.7468.1.S1_at   | MmugDNA.7468.1 | 10.53 | 10.46 | 0.3  | 0.23 | 1.05  | 0.557305 | 0.144425 | 0.792388 | 0.418323 |
| MmugDNA.7471.1.S1_s_at | MmugDNA.7471.1 | 11.45 | 11.04 | 0.13 | 0.24 | 1.33  | 0.046427 | 0.028704 | 0.363009 | 0.211165 |
| MmugDNA.7478.1.S1_at   | MmugDNA.7478.1 | 12.29 | 12.44 | 0.07 | 0.11 | -1.12 | 0.06021  | 0.048776 | 0.393081 | 0.2658   |
| MmugDNA.7479.1.S1_at   | MmugDNA.7479.1 | 7.42  | 8.25  | 0.46 | 0.78 | -1.78 | 0.15938  | 0.195201 | 0.524241 | 0.470253 |
| MmugDNA.7483.1.S1_at   | MmugDNA.7483.1 | 11.82 | 11.44 | 0.09 | 0.24 | 1.3   | 0.045977 | 0.016903 | 0.362069 | 0.164899 |
| MmugDNA.7486.1.S1_at   | MmugDNA.7486.1 | 4.19  | 3.64  | 0.69 | 0.1  | 1.46  | 0.259749 | 0.201366 | 0.606733 | 0.47589  |
| MmugDNA.7493.1.S1_at   | MmugDNA.7493.1 | 8.22  | 7.58  | 0.27 | 0.13 | 1.56  | 0.060759 | 0.048541 | 0.394325 | 0.265534 |
| MmugDNA.7494.1.S1_at   | MmugDNA.7494.1 | 7.29  | 6.94  | 0.18 | 0.23 | 1.27  | 0.179029 | 0.164952 | 0.543331 | 0.44123  |
| MmugDNA.7495.1.S1_at   | MmugDNA.7495.1 | 7.41  | 6.36  | 1.12 | 0.35 | 2.07  | 0.155595 | 0.164258 | 0.520357 | 0.440539 |
| MmugDNA.7497.1.S1_at   | MmugDNA.7497.1 | 4.25  | 3.7   | 0.41 | 0.56 | 1.46  | 0.699468 | 0.527122 | 0.866854 | 0.715861 |
| MmugDNA.7499.1.S1_at   | MmugDNA.7499.1 | 4.23  | 4.31  | 0.1  | 0.03 | -1.06 | 0.660022 | 0.708478 | 0.847435 | 0.830919 |
| MmugDNA.7502.1.S1_at   | MmugDNA.7502.1 | 10.34 | 10.27 | 0.29 | 0.58 | 1.05  | 0.763689 | 0.595372 | 0.900406 | 0.759091 |
| MmugDNA.7503.1.S1_at   | MmugDNA.7503.1 | 7.36  | 6.46  | 0.8  | 0.8  | 1.87  | 0.981549 | 0.999431 | 0.993316 | 0.999791 |
| MmugDNA.7504.1.S1_at   | MmugDNA.7504.1 | 13.65 | 13.61 | 0.01 | 0.1  | 1.03  | 0.413583 | 0.523416 | 0.70853  | 0.713713 |
| MmugDNA.7508.1.S1_s_at | MmugDNA.7508.1 | 10.03 | 9.83  | 0.17 | 0.06 | 1.15  | 0.122834 | 0.122221 | 0.488168 | 0.391921 |
| MmugDNA.751.1.S1_at    | MmugDNA.751.1  | 3.99  | 3.82  | 0.15 | 0.07 | 1.12  | 0.098958 | 0.267168 | 0.458711 | 0.532773 |
| MmugDNA.7512.1.S1_at   | MmugDNA.7512.1 | 9.96  | 9.61  | 0.25 | 0.2  | 1.28  | 0.266426 | 0.012923 | 0.611901 | 0.146343 |
| MmugDNA.7516.1.S1_at   | MmugDNA.7516.1 | 11.84 | 11.32 | 0.09 | 0.08 | 1.43  | 0.002324 | 0.00035  | 0.161798 | 0.037097 |
| MmugDNA.7521.1.S1_at   | MmugDNA.7521.1 | 6.39  | 6.41  | 0.19 | 0.13 | -1.01 | 0.510882 | 0.179578 | 0.765151 | 0.45603  |
| MmugDNA.7522.1.S1_at   | MmugDNA.7522.1 | 8.72  | 8.22  | 0.38 | 0.64 | 1.42  | 0.746262 | 0.764595 | 0.89137  | 0.863128 |
| MmugDNA.7524.1.S1_at   | MmugDNA.7524.1 | 5.15  | 6.04  | 0.05 | 0.77 | -1.85 | 0.095677 | 0.061449 | 0.453501 | 0.294704 |
| MmugDNA.7526.1.S1_at   | MmugDNA.7526.1 | 5.72  | 6.14  | 0.15 | 1.16 | -1.34 | 0.46908  | 0.422472 | 0.741431 | 0.645729 |
| MmugDNA.7527.1.S1_at   | MmugDNA.7527.1 | 13.32 | 13.58 | 0.12 | 0.04 | -1.19 | 0.021331 | 0.015367 | 0.282524 | 0.157403 |
| MmugDNA.7528.1.S1_at   | MmugDNA.7528.1 | 6.01  | 5.93  | 0.27 | 0.71 | 1.05  | 0.533901 | 0.292988 | 0.778436 | 0.552954 |
| MmugDNA.7533.1.S1_at   | MmugDNA.7533.1 | 7.23  | 7.7   | 0.24 | 0.41 | -1.39 | 0.132945 | 0.105407 | 0.499193 | 0.367279 |

|                        |                |       |       |      |      |       |          |          |          |          |
|------------------------|----------------|-------|-------|------|------|-------|----------|----------|----------|----------|
| MmugDNA.7534.1.S1_at   | MmugDNA.7534.1 | 11.38 | 11.78 | 0.23 | 0.45 | -1.31 | 0.201849 | 0.249457 | 0.564113 | 0.518532 |
| MmugDNA.7535.1.S1_at   | MmugDNA.7535.1 | 6.16  | 6.36  | 0.19 | 0.26 | -1.15 | 0.298716 | 0.272118 | 0.634211 | 0.536934 |
| MmugDNA.7536.1.S1_at   | MmugDNA.7536.1 | 10.73 | 10.74 | 0.06 | 0.12 | -1.01 | 0.612618 | 0.23468  | 0.822286 | 0.505897 |
| MmugDNA.754.1.S1_at    | MmugDNA.754.1  | 9.31  | 9.92  | 0.24 | 0.44 | -1.53 | 0.27612  | 0.366937 | 0.618148 | 0.606583 |
| MmugDNA.7540.1.S1_at   | MmugDNA.7540.1 | 7.21  | 7.23  | 0.09 | 0.35 | -1.02 | 0.848346 | 0.891636 | 0.939211 | 0.938242 |
| MmugDNA.7542.1.S1_at   | MmugDNA.7542.1 | 12.1  | 11.08 | 0.17 | 0.04 | 2.03  | 0.000564 | 0.000068 | 0.136818 | 0.025805 |
| MmugDNA.7544.1.S1_at   | MmugDNA.7544.1 | 11.05 | 10.51 | 0.15 | 0.15 | 1.45  | 0.007266 | 0.002474 | 0.206404 | 0.073576 |
| MmugDNA.7548.1.S1_s_at | MmugDNA.7548.1 | 5.87  | 5.87  | 0.15 | 0.31 | -1    | 0.790802 | 0.859145 | 0.913189 | 0.919754 |
| MmugDNA.7549.1.S1_s_at | MmugDNA.7549.1 | 12.07 | 12.22 | 0.11 | 0.12 | -1.11 | 0.128356 | 0.183412 | 0.494376 | 0.459553 |
| MmugDNA.7550.1.S1_at   | MmugDNA.7550.1 | 8.5   | 8.89  | 0.08 | 0.14 | -1.31 | 0.01723  | 0.041137 | 0.266964 | 0.247659 |
| MmugDNA.7551.1.S1_at   | MmugDNA.7551.1 | 5.99  | 6.4   | 0.13 | 0.27 | -1.33 | 0.057278 | 0.047049 | 0.387873 | 0.261469 |
| MmugDNA.7562.1.S1_at   | MmugDNA.7562.1 | 4.33  | 4.38  | 0.09 | 0.18 | -1.04 | 0.587847 | 0.740435 | 0.808759 | 0.849662 |
| MmugDNA.7566.1.S1_at   | MmugDNA.7566.1 | 9.22  | 9.37  | 0.65 | 0.53 | -1.11 | 0.164098 | 0.203536 | 0.528211 | 0.477767 |
| MmugDNA.7569.1.S1_at   | MmugDNA.7569.1 | 12.61 | 12.75 | 0.08 | 0.16 | -1.1  | 0.187269 | 0.226713 | 0.550364 | 0.499176 |
| MmugDNA.7569.1.S1_s_at | MmugDNA.7569.1 | 11.17 | 11.57 | 0.17 | 0.33 | -1.32 | 0.081981 | 0.049354 | 0.433268 | 0.267081 |
| MmugDNA.7573.1.S1_at   | MmugDNA.7573.1 | 3.93  | 3.75  | 0.46 | 0.82 | 1.13  | 0.573556 | 0.530519 | 0.801305 | 0.71804  |
| MmugDNA.7582.1.S1_at   | MmugDNA.7582.1 | 6.69  | 6.61  | 0.35 | 0.47 | 1.05  | 0.539447 | 0.719723 | 0.781119 | 0.837881 |
| MmugDNA.7589.1.S1_at   | MmugDNA.7589.1 | 7.35  | 7.12  | 0.13 | 0.31 | 1.17  | 0.288531 | 0.088156 | 0.626714 | 0.341721 |
| MmugDNA.7590.1.S1_at   | MmugDNA.7590.1 | 11.52 | 11.25 | 0.27 | 0.63 | 1.21  | 0.384094 | 0.499442 | 0.689712 | 0.698289 |
| MmugDNA.7599.1.S1_at   | MmugDNA.7599.1 | 11.87 | 11.92 | 0.16 | 0.21 | -1.04 | 0.704402 | 0.029122 | 0.869588 | 0.212733 |
| MmugDNA.7602.1.S1_at   | MmugDNA.7602.1 | 10.85 | 10.3  | 0.19 | 0.09 | 1.47  | 0.011202 | 0.004686 | 0.234717 | 0.095363 |
| MmugDNA.7608.1.S1_at   | MmugDNA.7608.1 | 10.97 | 10.87 | 0.24 | 0.07 | 1.07  | 0.432254 | 0.167693 | 0.718878 | 0.444209 |
| MmugDNA.7613.1.S1_at   | MmugDNA.7613.1 | 6.22  | 7.01  | 0.67 | 0.68 | -1.73 | 0.142548 | 0.171134 | 0.509726 | 0.447694 |
| MmugDNA.7614.1.S1_at   | MmugDNA.7614.1 | 8.66  | 7.91  | 0.1  | 0.39 | 1.68  | 0.064359 | 0.108505 | 0.402966 | 0.372066 |
| MmugDNA.7619.1.S1_at   | MmugDNA.7619.1 | 4.38  | 4.46  | 0.02 | 0.15 | -1.06 | 0.902801 | 0.831518 | 0.961281 | 0.903392 |
| MmugDNA.7629.1.S1_at   | MmugDNA.7629.1 | 5.06  | 7.01  | 0.5  | 1.38 | -3.86 | 0.144812 | 0.176134 | 0.511163 | 0.452581 |
| MmugDNA.7635.1.S1_at   | MmugDNA.7635.1 | 5.23  | 4.84  | 0.2  | 0.21 | 1.31  | 0.387135 | 0.413183 | 0.691895 | 0.639484 |
| MmugDNA.7636.1.S1_at   | MmugDNA.7636.1 | 10.54 | 10.01 | 0.24 | 0.5  | 1.45  | 0.468413 | 0.6292   | 0.741049 | 0.781712 |
| MmugDNA.7639.1.S1_at   | MmugDNA.7639.1 | 5.52  | 5.42  | 0.3  | 0.25 | 1.08  | 0.990216 | 0.448659 | 0.996531 | 0.664492 |
| MmugDNA.764.1.S1_at    | MmugDNA.764.1  | 7.97  | 7.33  | 0.15 | 0.41 | 1.56  | 0.097222 | 0.085947 | 0.456142 | 0.338116 |
| MmugDNA.7642.1.S1_at   | MmugDNA.7642.1 | 5.97  | 5.85  | 0.22 | 0.15 | 1.09  | 0.179238 | 0.120524 | 0.543544 | 0.38929  |
| MmugDNA.7646.1.S1_at   | MmugDNA.7646.1 | 6.19  | 6     | 0.56 | 0.2  | 1.14  | 0.570331 | 0.532204 | 0.799474 | 0.718995 |
| MmugDNA.7649.1.S1_at   | MmugDNA.7649.1 | 6.12  | 6.11  | 0.11 | 0.07 | 1     | 0.819166 | 0.727936 | 0.926528 | 0.842707 |
| MmugDNA.7655.1.S1_at   | MmugDNA.7655.1 | 6.41  | 7.52  | 0.32 | 1.34 | -2.16 | 0.248638 | 0.229596 | 0.599428 | 0.501574 |
| MmugDNA.7656.1.S1_at   | MmugDNA.7656.1 | 3.83  | 3.97  | 0.26 | 0.13 | -1.1  | 0.415636 | 0.480169 | 0.709528 | 0.685723 |
| MmugDNA.7657.1.S1_at   | MmugDNA.7657.1 | 12.07 | 11.94 | 0.04 | 0.08 | 1.1   | 0.017775 | 0.009932 | 0.267882 | 0.130838 |
| MmugDNA.7664.1.S1_at   | MmugDNA.7664.1 | 7.36  | 7.47  | 0.12 | 0.34 | -1.09 | 0.806388 | 0.872381 | 0.920614 | 0.92745  |
| MmugDNA.7669.1.S1_at   | MmugDNA.7669.1 | 11.57 | 11.65 | 0.1  | 0.21 | -1.05 | 0.751398 | 0.913721 | 0.893728 | 0.951474 |
| MmugDNA.7683.1.S1_at   | MmugDNA.7683.1 | 13.37 | 13.5  | 0.13 | 0.13 | -1.09 | 0.547496 | 0.468873 | 0.786248 | 0.677906 |
| MmugDNA.7691.1.S1_at   | MmugDNA.7691.1 | 10.68 | 10.37 | 0.69 | 0.04 | 1.24  | 0.885377 | 0.664206 | 0.954084 | 0.803247 |
| MmugDNA.7698.1.S1_at   | MmugDNA.7698.1 | 11.49 | 11.04 | 0.22 | 0.2  | 1.36  | 0.034536 | 0.032722 | 0.333289 | 0.223956 |

|                        |                |       |       |      |      |       |          |          |          |          |
|------------------------|----------------|-------|-------|------|------|-------|----------|----------|----------|----------|
| MmugDNA.7706.1.S1_at   | MmugDNA.7706.1 | 5.28  | 5.43  | 0.2  | 0.43 | -1.11 | 0.392156 | 0.442799 | 0.69454  | 0.660759 |
| MmugDNA.7713.1.S1_at   | MmugDNA.7713.1 | 4.69  | 4.56  | 0.25 | 0.1  | 1.1   | 0.494177 | 0.075119 | 0.756533 | 0.319301 |
| MmugDNA.7717.1.S1_at   | MmugDNA.7717.1 | 9.34  | 8.34  | 0.85 | 0.04 | 1.99  | 0.040079 | 0.0006   | 0.348787 | 0.041985 |
| MmugDNA.7720.1.S1_at   | MmugDNA.7720.1 | 10.05 | 10.31 | 0.12 | 0.22 | -1.19 | 0.173082 | 0.244892 | 0.536812 | 0.514728 |
| MmugDNA.7721.1.S1_at   | MmugDNA.7721.1 | 4.42  | 4.44  | 0.25 | 0.16 | -1.01 | 0.92921  | 0.828373 | 0.972668 | 0.901365 |
| MmugDNA.7726.1.S1_at   | MmugDNA.7726.1 | 10.98 | 10.95 | 0.13 | 0.05 | 1.02  | 0.662031 | 0.690779 | 0.848422 | 0.819875 |
| MmugDNA.7729.1.S1_at   | MmugDNA.7729.1 | 11.69 | 12.36 | 0.65 | 0.41 | -1.59 | 0.072449 | 0.037705 | 0.416971 | 0.23859  |
| MmugDNA.7737.1.S1_at   | MmugDNA.7737.1 | 5.5   | 5.54  | 0.08 | 0.14 | -1.03 | 0.298323 | 0.491535 | 0.633851 | 0.693026 |
| MmugDNA.7739.1.S1_x_at | MmugDNA.7739.1 | 8.31  | 8.18  | 0.25 | 0.11 | 1.1   | 0.156167 | 0.171029 | 0.520803 | 0.447573 |
| MmugDNA.7743.1.S1_at   | MmugDNA.7743.1 | 8.34  | 7.9   | 0.21 | 0.53 | 1.36  | 0.693136 | 0.41288  | 0.863807 | 0.639186 |
| MmugDNA.7745.1.S1_at   | MmugDNA.7745.1 | 9.66  | 8.99  | 0.14 | 0.49 | 1.59  | 0.361714 | 0.445878 | 0.6754   | 0.662593 |
| MmugDNA.7746.1.S1_at   | MmugDNA.7746.1 | 3.85  | 4.16  | 0.04 | 0.19 | -1.24 | 0.073894 | 0.07559  | 0.419443 | 0.32003  |
| MmugDNA.7746.1.S1_s_at | MmugDNA.7746.1 | 5.33  | 5.29  | 0.22 | 0.58 | 1.02  | 0.38942  | 0.117927 | 0.692994 | 0.385837 |
| MmugDNA.7748.1.S1_s_at | MmugDNA.7748.1 | 11.17 | 11.01 | 0.22 | 0.05 | 1.12  | 0.782365 | 0.74197  | 0.909165 | 0.850556 |
| MmugDNA.7749.1.S1_at   | MmugDNA.7749.1 | 10.43 | 11.19 | 0.48 | 0.17 | -1.7  | 0.024296 | 0.013849 | 0.294535 | 0.150924 |
| MmugDNA.7752.1.S1_at   | MmugDNA.7752.1 | 9.15  | 8.95  | 0.24 | 0.27 | 1.15  | 0.413369 | 0.569857 | 0.708424 | 0.742702 |
| MmugDNA.7754.1.S1_at   | MmugDNA.7754.1 | 13.46 | 13.1  | 0.06 | 0.11 | 1.28  | 0.009507 | 0.001374 | 0.225957 | 0.05691  |
| MmugDNA.7756.1.S1_at   | MmugDNA.7756.1 | 10.24 | 11.21 | 0.16 | 0.12 | -1.96 | 0.000792 | 0.000087 | 0.136818 | 0.027016 |
| MmugDNA.776.1.S1_at    | MmugDNA.776.1  | 11.9  | 11.9  | 0.06 | 0.21 | -1    | 0.994753 | 0.308193 | 0.998151 | 0.564324 |
| MmugDNA.776.1.S1_s_at  | MmugDNA.776.1  | 11.89 | 11.74 | 0.18 | 0.22 | 1.12  | 0.534569 | 0.579839 | 0.778781 | 0.74931  |
| MmugDNA.7765.1.S1_at   | MmugDNA.7765.1 | 4.95  | 4.96  | 0.18 | 0.06 | -1.01 | 0.650403 | 0.772071 | 0.842789 | 0.867474 |
| MmugDNA.7768.1.S1_at   | MmugDNA.7768.1 | 7.76  | 8.35  | 0.47 | 0.57 | -1.51 | 0.149751 | 0.143438 | 0.51433  | 0.417442 |
| MmugDNA.7769.1.S1_at   | MmugDNA.7769.1 | 7.59  | 6.41  | 0.18 | 0.53 | 2.26  | 0.039396 | 0.047746 | 0.347108 | 0.263394 |
| MmugDNA.777.1.S1_at    | MmugDNA.777.1  | 3.63  | 3.74  | 0.1  | 0.05 | -1.08 | 0.290148 | 0.091283 | 0.628012 | 0.346281 |
| MmugDNA.7772.1.S1_at   | MmugDNA.7772.1 | 6.83  | 9.06  | 0.26 | 1.44 | -4.69 | 0.058643 | 0.053223 | 0.390868 | 0.276445 |
| MmugDNA.7776.1.S1_at   | MmugDNA.7776.1 | 12.16 | 11.65 | 0.05 | 0.14 | 1.42  | 0.006759 | 0.001044 | 0.20158  | 0.051426 |
| MmugDNA.7777.1.S1_s_at | MmugDNA.7777.1 | 11.87 | 11.83 | 0.32 | 0.38 | 1.03  | 0.845244 | 0.864257 | 0.937902 | 0.922977 |
| MmugDNA.7779.1.S1_at   | MmugDNA.7779.1 | 11.2  | 11.46 | 0.23 | 0.15 | -1.2  | 0.089595 | 0.050077 | 0.44526  | 0.268916 |
| MmugDNA.7782.1.S1_at   | MmugDNA.7782.1 | 6.42  | 6.29  | 0.64 | 0.81 | 1.09  | 0.312928 | 0.269497 | 0.644798 | 0.534796 |
| MmugDNA.7784.1.S1_at   | MmugDNA.7784.1 | 12.16 | 12.05 | 0.09 | 0.09 | 1.08  | 0.093188 | 0.1494   | 0.450408 | 0.423825 |
| MmugDNA.7790.1.S1_at   | MmugDNA.7790.1 | 9.03  | 8.69  | 0.29 | 0.52 | 1.27  | 0.187097 | 0.226824 | 0.550167 | 0.499232 |
| MmugDNA.7797.1.S1_at   | MmugDNA.7797.1 | 5.3   | 8.6   | 1.97 | 2.6  | -9.88 | 0.446423 | 0.109331 | 0.7283   | 0.373129 |
| MmugDNA.7806.1.S1_at   | MmugDNA.7806.1 | 10.68 | 10.73 | 0.18 | 0.23 | -1.04 | 0.243748 | 0.391538 | 0.595541 | 0.625149 |
| MmugDNA.7807.1.S1_at   | MmugDNA.7807.1 | 12.49 | 12.4  | 0.15 | 0.06 | 1.06  | 0.270217 | 0.233121 | 0.614663 | 0.504458 |
| MmugDNA.7808.1.S1_s_at | MmugDNA.7808.1 | 11.01 | 10.44 | 0.24 | 0.12 | 1.48  | 0.020056 | 0.004947 | 0.276484 | 0.097981 |
| MmugDNA.7810.1.S1_at   | MmugDNA.7810.1 | 4.53  | 4.08  | 0.58 | 0.3  | 1.37  | 0.379255 | 0.317634 | 0.68682  | 0.570802 |
| MmugDNA.7811.1.S1_at   | MmugDNA.7811.1 | 9.15  | 8.8   | 0.16 | 0.64 | 1.28  | 0.391138 | 0.426987 | 0.693921 | 0.649087 |
| MmugDNA.7812.1.S1_at   | MmugDNA.7812.1 | 10.3  | 10.89 | 0.18 | 0.16 | -1.5  | 0.014047 | 0.006613 | 0.250965 | 0.110163 |
| MmugDNA.7815.1.S1_at   | MmugDNA.7815.1 | 9.97  | 9.54  | 0.21 | 0.04 | 1.35  | 0.072745 | 0.068948 | 0.41769  | 0.308945 |
| MmugDNA.7820.1.S1_at   | MmugDNA.7820.1 | 9.08  | 9.97  | 0.33 | 0.21 | -1.85 | 0.015996 | 0.008599 | 0.262202 | 0.123072 |
| MmugDNA.7821.1.S1_at   | MmugDNA.7821.1 | 11.05 | 11.35 | 0.12 | 0.18 | -1.23 | 0.075329 | 0.001449 | 0.422257 | 0.057999 |

|                        |                |       |       |      |      |       |          |          |          |          |
|------------------------|----------------|-------|-------|------|------|-------|----------|----------|----------|----------|
| MmugDNA.7826.1.S1_at   | MmugDNA.7826.1 | 6.67  | 6.68  | 0.16 | 0.18 | -1.01 | 0.851049 | 0.20944  | 0.940172 | 0.483069 |
| MmugDNA.7828.1.S1_at   | MmugDNA.7828.1 | 10.82 | 10.84 | 0.22 | 0.14 | -1.01 | 0.628815 | 0.030491 | 0.831022 | 0.216644 |
| MmugDNA.783.1.S1_s_at  | MmugDNA.783.1  | 10.85 | 11.96 | 0.45 | 0.32 | -2.15 | 0.103201 | 0.10172  | 0.462888 | 0.361581 |
| MmugDNA.7830.1.S1_at   | MmugDNA.7830.1 | 5.03  | 5.01  | 0.14 | 0.05 | 1.01  | 0.401676 | 0.30785  | 0.700992 | 0.56397  |
| MmugDNA.7831.1.S1_at   | MmugDNA.7831.1 | 3.23  | 3.28  | 0.07 | 0.16 | -1.04 | 0.379589 | 0.662099 | 0.687061 | 0.802107 |
| MmugDNA.7832.1.S1_at   | MmugDNA.7832.1 | 7.3   | 7.39  | 0.32 | 1.35 | -1.06 | 0.768577 | 0.928218 | 0.902719 | 0.959209 |
| MmugDNA.7833.1.S1_at   | MmugDNA.7833.1 | 9.47  | 8.36  | 0.16 | 0.41 | 2.16  | 0.006914 | 0.003058 | 0.202257 | 0.080621 |
| MmugDNA.7834.1.S1_at   | MmugDNA.7834.1 | 6.07  | 4.94  | 0.44 | 0.18 | 2.19  | 0.015025 | 0.011481 | 0.257013 | 0.138627 |
| MmugDNA.7839.1.S1_at   | MmugDNA.7839.1 | 12.17 | 12.22 | 0.1  | 0.21 | -1.04 | 0.353903 | 0.278591 | 0.670266 | 0.542329 |
| MmugDNA.7840.1.S1_at   | MmugDNA.7840.1 | 7.03  | 6.96  | 0.18 | 0.26 | 1.05  | 0.911395 | 0.002966 | 0.965013 | 0.079958 |
| MmugDNA.7841.1.S1_at   | MmugDNA.7841.1 | 5.11  | 5.14  | 0.59 | 0.1  | -1.02 | 0.430697 | 0.565808 | 0.718237 | 0.740112 |
| MmugDNA.7849.1.S1_at   | MmugDNA.7849.1 | 4.31  | 4.32  | 0.09 | 0.11 | -1.01 | 0.983315 | 0.688709 | 0.993968 | 0.818296 |
| MmugDNA.7852.1.S1_at   | MmugDNA.7852.1 | 7.04  | 7.04  | 0.16 | 0.47 | -1    | 0.296639 | 0.224903 | 0.632686 | 0.497657 |
| MmugDNA.7856.1.S1_at   | MmugDNA.7856.1 | 8.94  | 8.95  | 0.09 | 0.1  | -1.01 | 0.274705 | 0.357223 | 0.617601 | 0.598864 |
| MmugDNA.7857.1.S1_at   | MmugDNA.7857.1 | 11.16 | 11.17 | 0.08 | 0.19 | -1.01 | 0.871304 | 0.749361 | 0.948463 | 0.854379 |
| MmugDNA.7860.1.S1_at   | MmugDNA.7860.1 | 3.5   | 3.4   | 0.15 | 0.06 | 1.07  | 0.175788 | 0.228788 | 0.539441 | 0.501011 |
| MmugDNA.7861.1.S1_at   | MmugDNA.7861.1 | 10    | 9.61  | 0.11 | 0.23 | 1.31  | 0.135524 | 0.073288 | 0.502419 | 0.316241 |
| MmugDNA.7862.1.S1_at   | MmugDNA.7862.1 | 5.21  | 5.2   | 0.07 | 0.1  | 1.01  | 0.792378 | 0.839663 | 0.913837 | 0.908582 |
| MmugDNA.7864.1.S1_at   | MmugDNA.7864.1 | 8.45  | 9.24  | 0.45 | 0.5  | -1.72 | 0.13936  | 0.14377  | 0.506801 | 0.41759  |
| MmugDNA.7866.1.S1_at   | MmugDNA.7866.1 | 8.04  | 7.23  | 0.13 | 0.39 | 1.76  | 0.073628 | 0.034282 | 0.419073 | 0.22906  |
| MmugDNA.7874.1.S1_at   | MmugDNA.7874.1 | 8.87  | 7.85  | 0.3  | 0.17 | 2.03  | 0.016543 | 0.010845 | 0.264616 | 0.135758 |
| MmugDNA.7878.1.S1_at   | MmugDNA.7878.1 | 7.13  | 6.79  | 0.45 | 0.25 | 1.27  | 0.078775 | 0.034461 | 0.428609 | 0.229704 |
| MmugDNA.7880.1.S1_at   | MmugDNA.7880.1 | 6.81  | 7.27  | 0.06 | 0.14 | -1.38 | 0.008196 | 0.003046 | 0.216841 | 0.080462 |
| MmugDNA.7881.1.S1_at   | MmugDNA.7881.1 | 4.44  | 4.41  | 0.44 | 0.46 | 1.02  | 0.558992 | 0.747356 | 0.793628 | 0.853149 |
| MmugDNA.7883.1.S1_at   | MmugDNA.7883.1 | 11.25 | 10.77 | 0.2  | 0.69 | 1.39  | 0.434977 | 0.604486 | 0.72094  | 0.764647 |
| MmugDNA.7889.1.S1_at   | MmugDNA.7889.1 | 7.38  | 7.27  | 0.17 | 0.33 | 1.08  | 0.889989 | 0.787235 | 0.956014 | 0.876889 |
| MmugDNA.7890.1.S1_at   | MmugDNA.7890.1 | 10.71 | 10.29 | 0.14 | 0.09 | 1.33  | 0.018306 | 0.045415 | 0.269791 | 0.257437 |
| MmugDNA.7893.1.S1_at   | MmugDNA.7893.1 | 6.53  | 6.47  | 0.33 | 0.19 | 1.04  | 0.854617 | 0.971897 | 0.941248 | 0.984807 |
| MmugDNA.790.1.S1_at    | MmugDNA.790.1  | 10.03 | 10.46 | 0.05 | 0.14 | -1.35 | 0.007689 | 0.004528 | 0.211086 | 0.093974 |
| MmugDNA.7903.1.S1_at   | MmugDNA.7903.1 | 11.52 | 11.78 | 0.33 | 1.73 | -1.2  | 0.670042 | 0.772815 | 0.852318 | 0.867905 |
| MmugDNA.7910.1.S1_at   | MmugDNA.7910.1 | 8.84  | 8.4   | 0.15 | 0.3  | 1.36  | 0.150124 | 0.183237 | 0.514719 | 0.459553 |
| MmugDNA.7913.1.S1_at   | MmugDNA.7913.1 | 7.96  | 7.25  | 0.3  | 0.52 | 1.64  | 0.106134 | 0.110495 | 0.466831 | 0.374684 |
| MmugDNA.7916.1.S1_at   | MmugDNA.7916.1 | 6.95  | 7.01  | 0.11 | 1.1  | -1.04 | 0.930121 | 0.949555 | 0.972987 | 0.971159 |
| MmugDNA.7917.1.S1_at   | MmugDNA.7917.1 | 11.6  | 11.25 | 0.1  | 0.43 | 1.27  | 0.168399 | 0.185023 | 0.532644 | 0.460856 |
| MmugDNA.792.1.S1_at    | MmugDNA.792.1  | 7.62  | 8.46  | 0.43 | 0.26 | -1.8  | 0.095068 | 0.099064 | 0.452775 | 0.357208 |
| MmugDNA.7924.1.S1_at   | MmugDNA.7924.1 | 13.62 | 13.73 | 0.17 | 0.12 | -1.08 | 0.492031 | 0.263262 | 0.755423 | 0.529531 |
| MmugDNA.793.1.S1_at    | MmugDNA.793.1  | 5.25  | 5.33  | 0.28 | 0.09 | -1.06 | 0.866761 | 0.493187 | 0.946842 | 0.694004 |
| MmugDNA.7930.1.S1_at   | MmugDNA.7930.1 | 10.25 | 10.29 | 0.29 | 0.34 | -1.03 | 0.835303 | 0.634044 | 0.933205 | 0.784615 |
| MmugDNA.7932.1.S1_at   | MmugDNA.7932.1 | 9.38  | 9.52  | 0.12 | 0.63 | -1.1  | 0.365765 | 0.308503 | 0.678485 | 0.564541 |
| MmugDNA.7933.1.S1_s_at | MmugDNA.7933.1 | 9.08  | 8.6   | 0.22 | 0.12 | 1.39  | 0.017631 | 0.01407  | 0.267454 | 0.151858 |
| MmugDNA.794.1.S1_s_at  | MmugDNA.794.1  | 5.31  | 5.45  | 0.15 | 0.52 | -1.1  | 0.764306 | 0.845862 | 0.900711 | 0.912246 |

|                        |                |       |       |      |      |       |          |          |          |          |
|------------------------|----------------|-------|-------|------|------|-------|----------|----------|----------|----------|
| MmugDNA.794.1.S1_x_at  | MmugDNA.794.1  | 5.95  | 6.24  | 0.22 | 0.39 | -1.22 | 0.135444 | 0.122841 | 0.502264 | 0.392861 |
| MmugDNA.7940.1.S1_at   | MmugDNA.7940.1 | 11.56 | 11.32 | 0.06 | 0.06 | 1.17  | 0.005422 | 0.001046 | 0.191107 | 0.051426 |
| MmugDNA.7948.1.S1_at   | MmugDNA.7948.1 | 10.78 | 10.64 | 0.22 | 0.43 | 1.1   | 0.924456 | 0.773814 | 0.97071  | 0.868485 |
| MmugDNA.7950.1.S1_at   | MmugDNA.7950.1 | 11.88 | 11.6  | 0.19 | 0.2  | 1.21  | 0.439316 | 0.280772 | 0.723526 | 0.543952 |
| MmugDNA.7951.1.S1_at   | MmugDNA.7951.1 | 5.14  | 5.14  | 0.51 | 0.21 | 1     | 0.41498  | 0.506532 | 0.709338 | 0.702503 |
| MmugDNA.7955.1.S1_at   | MmugDNA.7955.1 | 8.4   | 8.02  | 0.22 | 0.75 | 1.3   | 0.466481 | 0.550827 | 0.740215 | 0.730625 |
| MmugDNA.7959.1.S1_at   | MmugDNA.7959.1 | 11.37 | 10.81 | 0.11 | 0.08 | 1.48  | 0.001757 | 0.000303 | 0.154452 | 0.034907 |
| MmugDNA.7962.1.S1_at   | MmugDNA.7962.1 | 6.38  | 6.06  | 0.13 | 0.1  | 1.24  | 0.03215  | 0.004996 | 0.3244   | 0.098484 |
| MmugDNA.7964.1.S1_at   | MmugDNA.7964.1 | 7.27  | 6.41  | 0.21 | 0.3  | 1.82  | 0.015549 | 0.007137 | 0.259136 | 0.113735 |
| MmugDNA.7965.1.S1_at   | MmugDNA.7965.1 | 10.86 | 10.97 | 0.12 | 0.09 | -1.08 | 0.054725 | 0.053345 | 0.382169 | 0.276533 |
| MmugDNA.797.1.S1_at    | MmugDNA.797.1  | 13.04 | 13.23 | 0.12 | 0.07 | -1.14 | 0.198449 | 0.045546 | 0.561587 | 0.257596 |
| MmugDNA.7974.1.S1_at   | MmugDNA.7974.1 | 7.4   | 6.84  | 0.12 | 0.42 | 1.48  | 0.361421 | 0.242255 | 0.67519  | 0.512683 |
| MmugDNA.7984.1.S1_at   | MmugDNA.7984.1 | 4.57  | 4.5   | 0.57 | 0.2  | 1.05  | 0.843239 | 0.406666 | 0.936941 | 0.634475 |
| MmugDNA.7988.1.S1_at   | MmugDNA.7988.1 | 11.17 | 11.01 | 0.14 | 0.59 | 1.11  | 0.458054 | 0.420871 | 0.735148 | 0.644535 |
| MmugDNA.7993.1.S1_at   | MmugDNA.7993.1 | 6.91  | 6.71  | 0.15 | 0.14 | 1.15  | 0.250192 | 0.230887 | 0.600389 | 0.502546 |
| MmugDNA.7996.1.S1_at   | MmugDNA.7996.1 | 8.36  | 8.41  | 0.23 | 1.64 | -1.03 | 0.919742 | 0.765092 | 0.968755 | 0.863431 |
| MmugDNA.800.1.S1_at    | MmugDNA.800.1  | 9.7   | 11.05 | 0.13 | 1.16 | -2.54 | 0.122877 | 0.125772 | 0.488265 | 0.396313 |
| MmugDNA.8000.1.S1_at   | MmugDNA.8000.1 | 4.68  | 4.66  | 0.18 | 0.06 | 1.01  | 0.339756 | 0.407038 | 0.661432 | 0.634713 |
| MmugDNA.8002.1.S1_at   | MmugDNA.8002.1 | 3.27  | 3.1   | 0.13 | 0.07 | 1.13  | 0.324418 | 0.158949 | 0.651941 | 0.435111 |
| MmugDNA.8002.1.S1_x_at | MmugDNA.8002.1 | 3.4   | 3.43  | 0.02 | 0.05 | -1.02 | 0.317979 | 0.056027 | 0.64802  | 0.2826   |
| MmugDNA.8022.1.S1_at   | MmugDNA.8022.1 | 4.33  | 4.62  | 0.11 | 0.27 | -1.22 | 0.099375 | 0.113536 | 0.459235 | 0.379632 |
| MmugDNA.803.1.S1_at    | MmugDNA.803.1  | 12.62 | 11.94 | 0.01 | 0.07 | 1.6   | 0.000084 | 0.000005 | 0.112653 | 0.015647 |
| MmugDNA.8038.1.S1_at   | MmugDNA.8038.1 | 4.91  | 4.95  | 0.22 | 0.11 | -1.03 | 0.359195 | 0.469975 | 0.673869 | 0.678572 |
| MmugDNA.804.1.S1_at    | MmugDNA.804.1  | 4.22  | 4.32  | 0.19 | 0.56 | -1.07 | 0.721253 | 0.602135 | 0.878023 | 0.763172 |
| MmugDNA.8043.1.S1_at   | MmugDNA.8043.1 | 4.02  | 4.04  | 0.09 | 0.08 | -1.01 | 0.684746 | 0.892146 | 0.858795 | 0.938526 |
| MmugDNA.8044.1.S1_at   | MmugDNA.8044.1 | 3.5   | 3.35  | 0.15 | 0.1  | 1.11  | 0.915975 | 0.962749 | 0.966921 | 0.979103 |
| MmugDNA.8048.1.S1_at   | MmugDNA.8048.1 | 8.88  | 10.19 | 0.73 | 0.24 | -2.48 | 0.037892 | 0.023698 | 0.343205 | 0.192768 |
| MmugDNA.8049.1.S1_at   | MmugDNA.8049.1 | 12.35 | 12.5  | 0.39 | 0.51 | -1.11 | 0.375648 | 0.0752   | 0.684803 | 0.319384 |
| MmugDNA.8056.1.S1_at   | MmugDNA.8056.1 | 4.47  | 4.42  | 0.31 | 0.29 | 1.03  | 0.913142 | 0.751536 | 0.965594 | 0.855508 |
| MmugDNA.8057.1.S1_s_at | MmugDNA.8057.1 | 11.83 | 10.61 | 0.38 | 0.47 | 2.33  | 0.088516 | 0.03037  | 0.443335 | 0.216116 |
| MmugDNA.8062.1.S1_at   | MmugDNA.8062.1 | 6.03  | 7.69  | 0.46 | 1.24 | -3.16 | 0.184841 | 0.239853 | 0.548357 | 0.510611 |
| MmugDNA.8064.1.S1_at   | MmugDNA.8064.1 | 6.19  | 6.12  | 0.16 | 0.22 | 1.05  | 0.903848 | 0.550119 | 0.961578 | 0.730241 |
| MmugDNA.807.1.S1_at    | MmugDNA.807.1  | 9.96  | 9.63  | 0.24 | 0.17 | 1.26  | 0.177477 | 0.231168 | 0.541506 | 0.5029   |
| MmugDNA.8070.1.S1_at   | MmugDNA.8070.1 | 8.95  | 9.72  | 0.14 | 0.05 | -1.71 | 0.001296 | 0.000266 | 0.145684 | 0.033786 |
| MmugDNA.8072.1.S1_at   | MmugDNA.8072.1 | 9.59  | 11.02 | 0.11 | 0.11 | -2.69 | 0.00012  | 0.000032 | 0.112653 | 0.022097 |
| MmugDNA.8075.1.S1_at   | MmugDNA.8075.1 | 12.48 | 12.82 | 0.07 | 0.11 | -1.26 | 0.028926 | 0.019053 | 0.312442 | 0.173688 |
| MmugDNA.8076.1.S1_at   | MmugDNA.8076.1 | 6.27  | 7.55  | 0.21 | 0.33 | -2.43 | 0.00518  | 0.004208 | 0.190313 | 0.091368 |
| MmugDNA.8077.1.S1_at   | MmugDNA.8077.1 | 6.54  | 6.49  | 0.18 | 0.39 | 1.03  | 0.512474 | 0.661097 | 0.765612 | 0.801683 |
| MmugDNA.8084.1.S1_s_at | MmugDNA.8084.1 | 6.03  | 5.99  | 0.19 | 0.15 | 1.03  | 0.714935 | 0.882272 | 0.875005 | 0.932845 |
| MmugDNA.8088.1.S1_at   | MmugDNA.8088.1 | 5.73  | 5.98  | 0.1  | 0.13 | -1.19 | 0.054254 | 0.031079 | 0.381807 | 0.218117 |
| MmugDNA.8093.1.S1_at   | MmugDNA.8093.1 | 12.19 | 12.31 | 0.07 | 0.13 | -1.08 | 0.271213 | 0.361342 | 0.615378 | 0.602122 |

|                        |                |       |       |      |      |        |          |          |          |          |
|------------------------|----------------|-------|-------|------|------|--------|----------|----------|----------|----------|
| MmugDNA.8100.1.S1_at   | MmugDNA.8100.1 | 9.44  | 8.08  | 0.23 | 0.33 | 2.55   | 0.005496 | 0.000499 | 0.191409 | 0.038955 |
| MmugDNA.8102.1.S1_at   | MmugDNA.8102.1 | 8.9   | 8.18  | 0.16 | 0.56 | 1.65   | 0.291444 | 0.271133 | 0.628798 | 0.536259 |
| MmugDNA.8106.1.S1_at   | MmugDNA.8106.1 | 3.09  | 3.24  | 0.07 | 0.1  | -1.1   | 0.097697 | 0.173334 | 0.456776 | 0.449791 |
| MmugDNA.8107.1.S1_at   | MmugDNA.8107.1 | 4.91  | 6.18  | 0.5  | 0.97 | -2.41  | 0.099027 | 0.06078  | 0.458733 | 0.29326  |
| MmugDNA.8111.1.S1_at   | MmugDNA.8111.1 | 10.21 | 9.9   | 0.01 | 0.19 | 1.24   | 0.046421 | 0.008672 | 0.363009 | 0.123535 |
| MmugDNA.813.1.S1_at    | MmugDNA.813.1  | 8.25  | 8.73  | 0.18 | 0.18 | -1.39  | 0.014194 | 0.007106 | 0.251566 | 0.113555 |
| MmugDNA.8132.1.S1_at   | MmugDNA.8132.1 | 4.45  | 4.46  | 0.06 | 0.2  | -1.01  | 0.655056 | 0.39898  | 0.84477  | 0.629665 |
| MmugDNA.8133.1.S1_at   | MmugDNA.8133.1 | 6.79  | 6.15  | 0.26 | 0.35 | 1.56   | 0.080244 | 0.038955 | 0.430341 | 0.242449 |
| MmugDNA.8134.1.S1_at   | MmugDNA.8134.1 | 7.36  | 6.22  | 0.25 | 0.18 | 2.2    | 0.003465 | 0.000871 | 0.178436 | 0.047471 |
| MmugDNA.8140.1.S1_at   | MmugDNA.8140.1 | 9.53  | 8.99  | 0.17 | 0.25 | 1.45   | 0.016468 | 0.013371 | 0.264205 | 0.14827  |
| MmugDNA.8141.1.S1_at   | MmugDNA.8141.1 | 7.66  | 10.08 | 0.71 | 1.2  | -5.35  | 0.067637 | 0.059739 | 0.408318 | 0.29107  |
| MmugDNA.8145.1.S1_at   | MmugDNA.8145.1 | 6.98  | 6.74  | 0.71 | 1.69 | 1.18   | 0.77517  | 0.242152 | 0.905562 | 0.512652 |
| MmugDNA.8146.1.S1_at   | MmugDNA.8146.1 | 5.98  | 6.69  | 0.79 | 0.88 | -1.64  | 0.314961 | 0.133851 | 0.646263 | 0.405875 |
| MmugDNA.8160.1.S1_at   | MmugDNA.8160.1 | 12.23 | 12.07 | 0.14 | 0.23 | 1.12   | 0.375058 | 0.313012 | 0.684319 | 0.567594 |
| MmugDNA.8167.1.S1_at   | MmugDNA.8167.1 | 9.85  | 10.52 | 0.67 | 0.7  | -1.59  | 0.320545 | 0.416925 | 0.649472 | 0.641838 |
| MmugDNA.8172.1.S1_x_at | MmugDNA.8172.1 | 9.26  | 8.99  | 0.97 | 0.28 | 1.21   | 0.236691 | 0.310558 | 0.590504 | 0.565771 |
| MmugDNA.8183.1.S1_at   | MmugDNA.8183.1 | 12.07 | 11.59 | 0.12 | 0.21 | 1.39   | 0.07316  | 0.078332 | 0.418452 | 0.324964 |
| MmugDNA.819.1.S1_at    | MmugDNA.819.1  | 11.77 | 11.57 | 0.13 | 0.1  | 1.15   | 0.146635 | 0.053098 | 0.512668 | 0.276147 |
| MmugDNA.8190.1.S1_at   | MmugDNA.8190.1 | 7.05  | 7.32  | 0.13 | 0.14 | -1.2   | 0.082779 | 0.137035 | 0.434442 | 0.409836 |
| MmugDNA.8197.1.S1_at   | MmugDNA.8197.1 | 9.53  | 9.91  | 0.28 | 0.28 | -1.3   | 0.194063 | 0.239031 | 0.557718 | 0.509798 |
| MmugDNA.8198.1.S1_at   | MmugDNA.8198.1 | 3.62  | 4.53  | 0.13 | 0.77 | -1.88  | 0.078471 | 0.06169  | 0.42855  | 0.295135 |
| MmugDNA.8199.1.S1_at   | MmugDNA.8199.1 | 11.39 | 11.63 | 0.33 | 0.14 | -1.18  | 0.489935 | 0.207003 | 0.754234 | 0.481115 |
| MmugDNA.8200.1.S1_at   | MmugDNA.8200.1 | 7.77  | 7.38  | 0.29 | 0.3  | 1.31   | 0.826654 | 0.097286 | 0.929572 | 0.354959 |
| MmugDNA.8201.1.S1_at   | MmugDNA.8201.1 | 5.62  | 5.53  | 0.67 | 0.58 | 1.06   | 0.417381 | 0.223252 | 0.710512 | 0.496078 |
| MmugDNA.8202.1.S1_at   | MmugDNA.8202.1 | 4.36  | 6.59  | 0.17 | 2.39 | -4.7   | 0.178739 | 0.245034 | 0.543018 | 0.514813 |
| MmugDNA.8208.1.S1_at   | MmugDNA.8208.1 | 8.26  | 9.16  | 0.33 | 0.73 | -1.87  | 0.146162 | 0.181536 | 0.512187 | 0.458087 |
| MmugDNA.8209.1.S1_at   | MmugDNA.8209.1 | 4.39  | 4.36  | 0.03 | 0.11 | 1.02   | 0.960261 | 0.636037 | 0.98486  | 0.78583  |
| MmugDNA.821.1.S1_at    | MmugDNA.821.1  | 4.54  | 4.34  | 0.33 | 0.18 | 1.15   | 0.096211 | 0.083147 | 0.454369 | 0.332999 |
| MmugDNA.8210.1.S1_at   | MmugDNA.8210.1 | 4.61  | 4.44  | 0.47 | 1.87 | 1.13   | 0.729841 | 0.875483 | 0.88278  | 0.929259 |
| MmugDNA.8211.1.S1_at   | MmugDNA.8211.1 | 7.28  | 8.67  | 0.8  | 0.67 | -2.62  | 0.198734 | 0.232158 | 0.561773 | 0.503874 |
| MmugDNA.8217.1.S1_s_at | MmugDNA.8217.1 | 11.23 | 11.49 | 0.27 | 0.47 | -1.2   | 0.581428 | 0.762784 | 0.805124 | 0.862041 |
| MmugDNA.8221.1.S1_at   | MmugDNA.8221.1 | 6.63  | 7.01  | 0.34 | 0.48 | -1.3   | 0.25166  | 0.288651 | 0.601007 | 0.549827 |
| MmugDNA.8231.1.S1_at   | MmugDNA.8231.1 | 7.53  | 7.69  | 0.27 | 0.1  | -1.11  | 0.392983 | 0.126171 | 0.694934 | 0.396742 |
| MmugDNA.8242.1.S1_at   | MmugDNA.8242.1 | 7.35  | 6.85  | 0.36 | 0.33 | 1.41   | 0.160729 | 0.189064 | 0.525832 | 0.464897 |
| MmugDNA.8245.1.S1_at   | MmugDNA.8245.1 | 11.58 | 11.28 | 0.1  | 0.13 | 1.24   | 0.031099 | 0.021506 | 0.320481 | 0.18373  |
| MmugDNA.8247.1.S1_at   | MmugDNA.8247.1 | 8.16  | 6.44  | 1.03 | 1.48 | 3.3    | 0.797584 | 0.639206 | 0.916116 | 0.788125 |
| MmugDNA.8253.1.S1_at   | MmugDNA.8253.1 | 7.25  | 6.54  | 0.41 | 0.62 | 1.64   | 0.038119 | 0.047319 | 0.343587 | 0.262262 |
| MmugDNA.8254.1.S1_at   | MmugDNA.8254.1 | 6.54  | 7.07  | 0.27 | 0.67 | -1.44  | 0.277733 | 0.330468 | 0.619903 | 0.579193 |
| MmugDNA.8256.1.S1_at   | MmugDNA.8256.1 | 4.03  | 7.57  | 1.34 | 2.17 | -11.64 | 0.165423 | 0.121539 | 0.529362 | 0.390665 |
| MmugDNA.8257.1.S1_at   | MmugDNA.8257.1 | 11.7  | 11.43 | 0.06 | 0.07 | 1.2    | 0.00817  | 0.001074 | 0.216841 | 0.051908 |
| MmugDNA.8259.1.S1_at   | MmugDNA.8259.1 | 8.68  | 8.43  | 0.09 | 0.1  | 1.19   | 0.15961  | 0.00436  | 0.524504 | 0.092464 |

|                        |                |       |       |      |      |       |          |          |          |          |
|------------------------|----------------|-------|-------|------|------|-------|----------|----------|----------|----------|
| MmugDNA.8261.1.S1_at   | MmugDNA.8261.1 | 4.41  | 4.46  | 0.12 | 0.08 | -1.04 | 0.28995  | 0.149737 | 0.627922 | 0.424351 |
| MmugDNA.8263.1.S1_at   | MmugDNA.8263.1 | 4.06  | 4.25  | 0.23 | 0.13 | -1.14 | 0.332091 | 0.115933 | 0.656667 | 0.383147 |
| MmugDNA.8265.1.S1_at   | MmugDNA.8265.1 | 6.02  | 6.23  | 0.27 | 0.3  | -1.16 | 0.515619 | 0.197299 | 0.767629 | 0.472213 |
| MmugDNA.8268.1.S1_at   | MmugDNA.8268.1 | 5.19  | 5.17  | 0.07 | 0.15 | 1.01  | 0.761532 | 0.144468 | 0.899581 | 0.418323 |
| MmugDNA.8275.1.S1_at   | MmugDNA.8275.1 | 5.46  | 5.9   | 0.19 | 0.84 | -1.36 | 0.189216 | 0.224819 | 0.552372 | 0.497617 |
| MmugDNA.8279.1.S1_at   | MmugDNA.8279.1 | 5.43  | 5.53  | 0.44 | 0.26 | -1.07 | 0.717325 | 0.397791 | 0.875782 | 0.629114 |
| MmugDNA.8283.1.S1_at   | MmugDNA.8283.1 | 5.32  | 5.29  | 0.44 | 0.22 | 1.02  | 0.299174 | 0.287948 | 0.634742 | 0.549227 |
| MmugDNA.8285.1.S1_at   | MmugDNA.8285.1 | 6.37  | 6.47  | 0.14 | 0.04 | -1.08 | 0.34533  | 0.199941 | 0.665135 | 0.474603 |
| MmugDNA.8287.1.S1_at   | MmugDNA.8287.1 | 8.43  | 8.78  | 0.1  | 0.19 | -1.27 | 0.03482  | 0.022387 | 0.333964 | 0.187228 |
| MmugDNA.8296.1.S1_at   | MmugDNA.8296.1 | 3.8   | 3.72  | 0.07 | 0.18 | 1.06  | 0.642571 | 0.014961 | 0.838763 | 0.155453 |
| MmugDNA.8299.1.S1_at   | MmugDNA.8299.1 | 5.38  | 5.38  | 0.23 | 0.07 | 1     | 0.645648 | 0.201633 | 0.840425 | 0.476208 |
| MmugDNA.83.1.S1_at     | MmugDNA.83.1   | 9     | 9.18  | 0.07 | 0.34 | -1.13 | 0.636191 | 0.348413 | 0.835356 | 0.592591 |
| MmugDNA.8300.1.S1_at   | MmugDNA.8300.1 | 7.8   | 7.6   | 0.1  | 0.15 | 1.15  | 0.193738 | 0.248537 | 0.557435 | 0.51783  |
| MmugDNA.8308.1.S1_at   | MmugDNA.8308.1 | 11.24 | 11.03 | 0.2  | 0.33 | 1.16  | 0.415898 | 0.679704 | 0.70957  | 0.812998 |
| MmugDNA.8308.1.S1_x_at | MmugDNA.8308.1 | 11.02 | 10.79 | 0.23 | 0.3  | 1.18  | 0.41551  | 0.683608 | 0.709528 | 0.815387 |
| MmugDNA.8316.1.S1_at   | MmugDNA.8316.1 | 11.85 | 12.21 | 0.23 | 0.22 | -1.28 | 0.119812 | 0.067878 | 0.484387 | 0.306745 |
| MmugDNA.8318.1.S1_at   | MmugDNA.8318.1 | 7.98  | 7.81  | 0.13 | 0.37 | 1.12  | 0.350658 | 0.454982 | 0.668568 | 0.669026 |
| MmugDNA.8321.1.S1_at   | MmugDNA.8321.1 | 13.66 | 13.65 | 0.11 | 0.04 | 1.01  | 0.903136 | 0.440051 | 0.961412 | 0.658651 |
| MmugDNA.8324.1.S1_at   | MmugDNA.8324.1 | 8.74  | 8.17  | 0.6  | 0.18 | 1.48  | 0.247596 | 0.323481 | 0.5988   | 0.574473 |
| MmugDNA.8326.1.S1_at   | MmugDNA.8326.1 | 7.28  | 6.43  | 0.78 | 0.88 | 1.81  | 0.273252 | 0.36903  | 0.616697 | 0.608583 |
| MmugDNA.8327.1.S1_at   | MmugDNA.8327.1 | 8.09  | 8.44  | 0.46 | 0.4  | -1.28 | 0.504692 | 0.5383   | 0.761366 | 0.723028 |
| MmugDNA.8347.1.S1_at   | MmugDNA.8347.1 | 6.76  | 6.72  | 0.21 | 0.1  | 1.03  | 0.809067 | 0.614256 | 0.922174 | 0.77118  |
| MmugDNA.8348.1.S1_at   | MmugDNA.8348.1 | 2.97  | 3.14  | 0.16 | 0.05 | -1.13 | 0.363827 | 0.493132 | 0.676981 | 0.694001 |
| MmugDNA.8349.1.S1_at   | MmugDNA.8349.1 | 9.38  | 8.62  | 0.34 | 0.36 | 1.69  | 0.051803 | 0.04259  | 0.376487 | 0.251035 |
| MmugDNA.8354.1.S1_at   | MmugDNA.8354.1 | 7.92  | 8.61  | 0.33 | 0.71 | -1.61 | 0.073189 | 0.016481 | 0.418452 | 0.162551 |
| MmugDNA.8358.1.S1_at   | MmugDNA.8358.1 | 5.16  | 5.48  | 0.29 | 0.27 | -1.25 | 0.16393  | 0.197205 | 0.528211 | 0.472213 |
| MmugDNA.8380.1.S1_at   | MmugDNA.8380.1 | 3.66  | 3.58  | 0.33 | 0.05 | 1.06  | 0.654118 | 0.902944 | 0.844551 | 0.944917 |
| MmugDNA.8384.1.S1_at   | MmugDNA.8384.1 | 5.03  | 4.88  | 0.17 | 0.26 | 1.1   | 0.790492 | 0.241565 | 0.913061 | 0.512166 |
| MmugDNA.8387.1.S1_at   | MmugDNA.8387.1 | 2.84  | 3.14  | 0.1  | 0.16 | -1.23 | 0.115224 | 0.058585 | 0.478689 | 0.288747 |
| MmugDNA.8389.1.S1_at   | MmugDNA.8389.1 | 8.42  | 10.41 | 1.02 | 1.97 | -3.96 | 0.28687  | 0.127687 | 0.625572 | 0.398581 |
| MmugDNA.8391.1.S1_at   | MmugDNA.8391.1 | 7.42  | 6.58  | 0.97 | 0.98 | 1.79  | 0.359021 | 0.418011 | 0.673754 | 0.642537 |
| MmugDNA.8393.1.S1_at   | MmugDNA.8393.1 | 6.66  | 6.91  | 0.13 | 0.51 | -1.19 | 0.30745  | 0.440018 | 0.639999 | 0.658635 |
| MmugDNA.8397.1.S1_at   | MmugDNA.8397.1 | 8.88  | 8.46  | 0.11 | 0.14 | 1.34  | 0.008399 | 0.00366  | 0.218293 | 0.086526 |
| MmugDNA.840.1.S1_at    | MmugDNA.840.1  | 10.52 | 10.26 | 0.24 | 1.03 | 1.19  | 0.850275 | 0.585062 | 0.9399   | 0.752684 |
| MmugDNA.8403.1.S1_at   | MmugDNA.8403.1 | 5.61  | 6.05  | 0.23 | 0.15 | -1.36 | 0.241394 | 0.256194 | 0.593941 | 0.524069 |
| MmugDNA.8405.1.S1_at   | MmugDNA.8405.1 | 11.16 | 11.09 | 0.23 | 0.48 | 1.05  | 0.996317 | 0.191447 | 0.998506 | 0.466812 |
| MmugDNA.8406.1.S1_at   | MmugDNA.8406.1 | 9.33  | 8.83  | 0.23 | 0.45 | 1.42  | 0.163664 | 0.18431  | 0.527992 | 0.460458 |
| MmugDNA.8407.1.S1_at   | MmugDNA.8407.1 | 9.57  | 9.96  | 0.07 | 0.53 | -1.31 | 0.889156 | 0.698085 | 0.955644 | 0.824603 |
| MmugDNA.8408.1.S1_at   | MmugDNA.8408.1 | 5.08  | 5.08  | 0.11 | 0.02 | -1    | 0.861286 | 0.400277 | 0.944077 | 0.630158 |
| MmugDNA.8413.1.S1_at   | MmugDNA.8413.1 | 9.29  | 9.28  | 0.4  | 0.51 | 1.01  | 0.242123 | 0.315891 | 0.594305 | 0.569327 |
| MmugDNA.8414.1.S1_at   | MmugDNA.8414.1 | 9.45  | 8.51  | 0.17 | 0.66 | 1.91  | 0.058851 | 0.054068 | 0.390921 | 0.277914 |

|                        |                |       |       |      |      |       |          |          |          |          |
|------------------------|----------------|-------|-------|------|------|-------|----------|----------|----------|----------|
| MmugDNA.8418.1.S1_at   | MmugDNA.8418.1 | 7.39  | 6.92  | 0.1  | 0.16 | 1.39  | 0.015394 | 0.007039 | 0.258258 | 0.113112 |
| MmugDNA.8420.1.S1_at   | MmugDNA.8420.1 | 9.49  | 9.04  | 0.14 | 0.21 | 1.36  | 0.070042 | 0.008677 | 0.413492 | 0.12355  |
| MmugDNA.8421.1.S1_at   | MmugDNA.8421.1 | 11.25 | 10.59 | 0.19 | 0.14 | 1.58  | 0.012918 | 0.000664 | 0.244747 | 0.0439   |
| MmugDNA.8422.1.S1_at   | MmugDNA.8422.1 | 6.81  | 6.99  | 0.21 | 0.06 | -1.14 | 0.12286  | 0.153723 | 0.488235 | 0.428413 |
| MmugDNA.8423.1.S1_at   | MmugDNA.8423.1 | 6.53  | 6.8   | 0.09 | 0.12 | -1.2  | 0.028401 | 0.051841 | 0.311113 | 0.273151 |
| MmugDNA.8431.1.S1_at   | MmugDNA.8431.1 | 9.7   | 8.72  | 0.14 | 0.5  | 1.96  | 0.084053 | 0.043876 | 0.436619 | 0.254088 |
| MmugDNA.8435.1.S1_at   | MmugDNA.8435.1 | 10.77 | 11.23 | 0.2  | 0.16 | -1.38 | 0.032807 | 0.009971 | 0.326124 | 0.131094 |
| MmugDNA.844.1.S1_at    | MmugDNA.844.1  | 11.68 | 11.78 | 0.13 | 0.47 | -1.07 | 0.558246 | 0.402666 | 0.793068 | 0.631543 |
| MmugDNA.8447.1.S1_at   | MmugDNA.8447.1 | 9.57  | 9.25  | 0.18 | 1.25 | 1.25  | 0.706494 | 0.464736 | 0.870694 | 0.675398 |
| MmugDNA.8449.1.S1_at   | MmugDNA.8449.1 | 6.52  | 6.61  | 0.1  | 0.27 | -1.07 | 0.510243 | 0.693287 | 0.764853 | 0.821612 |
| MmugDNA.8450.1.S1_at   | MmugDNA.8450.1 | 4.86  | 4.68  | 0.21 | 0.06 | 1.14  | 0.287118 | 0.077121 | 0.625773 | 0.322673 |
| MmugDNA.8455.1.S1_at   | MmugDNA.8455.1 | 9.3   | 8.69  | 0.02 | 0.21 | 1.53  | 0.003626 | 0.002089 | 0.179515 | 0.067534 |
| MmugDNA.8456.1.S1_at   | MmugDNA.8456.1 | 11.66 | 11.1  | 0.21 | 0.1  | 1.47  | 0.016998 | 0.002353 | 0.266496 | 0.07161  |
| MmugDNA.8458.1.S1_at   | MmugDNA.8458.1 | 10.78 | 10.79 | 0.56 | 0.28 | -1    | 0.667387 | 0.044399 | 0.850975 | 0.255192 |
| MmugDNA.8460.1.S1_at   | MmugDNA.8460.1 | 11.77 | 11.43 | 0.12 | 0.38 | 1.26  | 0.330316 | 0.454809 | 0.655613 | 0.668859 |
| MmugDNA.8461.1.S1_at   | MmugDNA.8461.1 | 13.52 | 13.03 | 0.13 | 0.99 | 1.4   | 0.142083 | 0.157859 | 0.509437 | 0.433522 |
| MmugDNA.8462.1.S1_at   | MmugDNA.8462.1 | 5.21  | 5.25  | 0.09 | 0.07 | -1.03 | 0.132124 | 0.122266 | 0.498325 | 0.391971 |
| MmugDNA.8463.1.S1_at   | MmugDNA.8463.1 | 9.05  | 7.84  | 0.21 | 0.66 | 2.31  | 0.047852 | 0.032641 | 0.367313 | 0.223694 |
| MmugDNA.8468.1.S1_at   | MmugDNA.8468.1 | 10.12 | 10.11 | 0.05 | 0.42 | 1     | 0.343055 | 0.445812 | 0.663407 | 0.66252  |
| MmugDNA.8475.1.S1_at   | MmugDNA.8475.1 | 8.32  | 7.85  | 0.19 | 0.73 | 1.39  | 0.292182 | 0.270908 | 0.629464 | 0.536026 |
| MmugDNA.8481.1.S1_at   | MmugDNA.8481.1 | 9.48  | 9.54  | 0.44 | 0.71 | -1.04 | 0.209079 | 0.087166 | 0.570667 | 0.340133 |
| MmugDNA.8488.1.S1_at   | MmugDNA.8488.1 | 8.23  | 8.32  | 0.42 | 0.81 | -1.06 | 0.664563 | 0.759309 | 0.849598 | 0.860036 |
| MmugDNA.8496.1.S1_at   | MmugDNA.8496.1 | 5.8   | 6.02  | 0.2  | 0.44 | -1.16 | 0.295297 | 0.435799 | 0.631605 | 0.655528 |
| MmugDNA.8497.1.S1_at   | MmugDNA.8497.1 | 11.76 | 11.46 | 0.07 | 0.2  | 1.23  | 0.048472 | 0.020874 | 0.368878 | 0.181318 |
| MmugDNA.8498.1.S1_at   | MmugDNA.8498.1 | 4.63  | 4.78  | 0.21 | 0.02 | -1.11 | 0.305546 | 0.336588 | 0.639223 | 0.583937 |
| MmugDNA.8502.1.S1_at   | MmugDNA.8502.1 | 4.23  | 4.61  | 0.64 | 0.49 | -1.31 | 0.597584 | 0.182109 | 0.813537 | 0.45859  |
| MmugDNA.8502.1.S1_x_at | MmugDNA.8502.1 | 4.32  | 4.81  | 0.52 | 0.42 | -1.4  | 0.895955 | 0.49229  | 0.958489 | 0.693485 |
| MmugDNA.8503.1.S1_at   | MmugDNA.8503.1 | 11.63 | 11.65 | 0.16 | 0.21 | -1.01 | 0.275541 | 0.38167  | 0.617878 | 0.617883 |
| MmugDNA.8506.1.S1_at   | MmugDNA.8506.1 | 11.74 | 12.36 | 0.15 | 0.15 | -1.54 | 0.00803  | 0.001547 | 0.215156 | 0.05949  |
| MmugDNA.8509.1.S1_at   | MmugDNA.8509.1 | 11.41 | 11.86 | 0.16 | 0.08 | -1.37 | 0.023988 | 0.017319 | 0.293798 | 0.166509 |
| MmugDNA.851.1.S1_at    | MmugDNA.851.1  | 9.93  | 10.25 | 0.2  | 0.18 | -1.25 | 0.133192 | 0.157616 | 0.499568 | 0.433131 |
| MmugDNA.8510.1.S1_s_at | MmugDNA.8510.1 | 7.9   | 8.66  | 0.63 | 0.7  | -1.69 | 0.221389 | 0.189865 | 0.580218 | 0.465403 |
| MmugDNA.8511.1.S1_at   | MmugDNA.8511.1 | 7.96  | 8.02  | 0.74 | 1.04 | -1.04 | 0.86908  | 0.309091 | 0.947856 | 0.564787 |
| MmugDNA.8530.1.S1_at   | MmugDNA.8530.1 | 8.42  | 8.28  | 0.21 | 0.42 | 1.1   | 0.545112 | 0.415961 | 0.784779 | 0.641288 |
| MmugDNA.8534.1.S1_at   | MmugDNA.8534.1 | 4.77  | 5.05  | 0.02 | 0.2  | -1.21 | 0.028297 | 0.018225 | 0.31042  | 0.169777 |
| MmugDNA.8538.1.S1_at   | MmugDNA.8538.1 | 4.46  | 4.49  | 0.09 | 0.09 | -1.02 | 0.138775 | 0.152762 | 0.505884 | 0.427571 |
| MmugDNA.8540.1.S1_at   | MmugDNA.8540.1 | 5.51  | 4.78  | 1.46 | 0.23 | 1.66  | 0.416026 | 0.614509 | 0.709619 | 0.771283 |
| MmugDNA.8543.1.S1_at   | MmugDNA.8543.1 | 8.06  | 7.21  | 0.22 | 0.17 | 1.81  | 0.003794 | 0.046074 | 0.179914 | 0.258977 |
| MmugDNA.8545.1.S1_at   | MmugDNA.8545.1 | 7.21  | 6.44  | 0.13 | 0.71 | 1.7   | 0.181414 | 0.234245 | 0.545967 | 0.505485 |
| MmugDNA.8550.1.S1_at   | MmugDNA.8550.1 | 6.49  | 6.51  | 0.16 | 0.09 | -1.02 | 0.759176 | 0.253806 | 0.898249 | 0.52217  |
| MmugDNA.8552.1.S1_at   | MmugDNA.8552.1 | 4.7   | 5.18  | 0.12 | 0.15 | -1.4  | 0.012618 | 0.014628 | 0.242681 | 0.154176 |



|                        |                |       |       |      |      |       |          |          |          |          |
|------------------------|----------------|-------|-------|------|------|-------|----------|----------|----------|----------|
| MmugDNA.8572.1.S1_at   | MmugDNA.8572.1 | 8.22  | 8.33  | 0.13 | 0.07 | -1.08 | 0.475861 | 0.569034 | 0.746015 | 0.742233 |
| MmugDNA.8574.1.S1_at   | MmugDNA.8574.1 | 6.52  | 6.58  | 0.12 | 0.16 | -1.04 | 0.189149 | 0.321817 | 0.552328 | 0.57348  |
| MmugDNA.8578.1.S1_at   | MmugDNA.8578.1 | 7.64  | 8.04  | 0.08 | 0.53 | -1.32 | 0.369465 | 0.495618 | 0.680716 | 0.695576 |
| MmugDNA.8580.1.S1_at   | MmugDNA.8580.1 | 8.19  | 8.46  | 0.41 | 0.6  | -1.21 | 0.707613 | 0.883715 | 0.871168 | 0.933691 |
| MmugDNA.8589.1.S1_at   | MmugDNA.8589.1 | 5.55  | 5.85  | 0.77 | 0.95 | -1.23 | 0.321763 | 0.259041 | 0.650384 | 0.526234 |
| MmugDNA.8591.1.S1_at   | MmugDNA.8591.1 | 8.3   | 8.3   | 0.09 | 0.31 | 1.01  | 0.564951 | 0.596041 | 0.796834 | 0.759325 |
| MmugDNA.8592.1.S1_at   | MmugDNA.8592.1 | 9.63  | 9.01  | 0.42 | 0.92 | 1.54  | 0.295899 | 0.262057 | 0.632176 | 0.528374 |
| MmugDNA.8593.1.S1_at   | MmugDNA.8593.1 | 11.97 | 12.45 | 0.06 | 0.32 | -1.39 | 0.086106 | 0.078018 | 0.440066 | 0.324416 |
| MmugDNA.8595.1.S1_at   | MmugDNA.8595.1 | 8.32  | 8.24  | 0.3  | 0.55 | 1.06  | 0.788954 | 0.023319 | 0.912329 | 0.191394 |
| MmugDNA.8597.1.S1_at   | MmugDNA.8597.1 | 9.57  | 8.23  | 0.07 | 0.77 | 2.54  | 0.109766 | 0.135553 | 0.470963 | 0.407655 |
| MmugDNA.8598.1.S1_at   | MmugDNA.8598.1 | 8.8   | 9.37  | 0.31 | 0.39 | -1.48 | 0.08427  | 0.012743 | 0.436922 | 0.145496 |
| MmugDNA.8599.1.S1_at   | MmugDNA.8599.1 | 7.87  | 8.69  | 0.32 | 0.26 | -1.77 | 0.026561 | 0.006303 | 0.303505 | 0.107813 |
| MmugDNA.86.1.S1_at     | MmugDNA.86.1   | 6.98  | 7.78  | 0.85 | 0.37 | -1.74 | 0.275633 | 0.150553 | 0.617878 | 0.425106 |
| MmugDNA.8603.1.S1_at   | MmugDNA.8603.1 | 4.28  | 5.97  | 0.94 | 1.52 | -3.22 | 0.332266 | 0.230322 | 0.656683 | 0.502102 |
| MmugDNA.8605.1.S1_at   | MmugDNA.8605.1 | 6.08  | 6.22  | 0.28 | 0.21 | -1.11 | 0.822549 | 0.046877 | 0.927767 | 0.261272 |
| MmugDNA.8612.1.S1_at   | MmugDNA.8612.1 | 6.81  | 6.64  | 0.27 | 0.2  | 1.12  | 0.301416 | 0.317607 | 0.636366 | 0.570787 |
| MmugDNA.8617.1.S1_at   | MmugDNA.8617.1 | 8.77  | 9.08  | 0.29 | 0.28 | -1.24 | 0.309209 | 0.111098 | 0.641384 | 0.375667 |
| MmugDNA.8618.1.S1_at   | MmugDNA.8618.1 | 9.28  | 10.75 | 0.89 | 2.18 | -2.76 | 0.494962 | 0.454756 | 0.756991 | 0.668859 |
| MmugDNA.8619.1.S1_at   | MmugDNA.8619.1 | 11.09 | 11.19 | 0.04 | 0.14 | -1.07 | 0.329242 | 0.008764 | 0.654879 | 0.124009 |
| MmugDNA.8621.1.S1_at   | MmugDNA.8621.1 | 11.65 | 11.86 | 0.03 | 0.23 | -1.16 | 0.07455  | 0.084247 | 0.420428 | 0.335371 |
| MmugDNA.8622.1.S1_at   | MmugDNA.8622.1 | 10.74 | 8.85  | 0.45 | 0.06 | 3.71  | 0.003432 | 0.000385 | 0.17833  | 0.037273 |
| MmugDNA.8625.1.S1_at   | MmugDNA.8625.1 | 10.89 | 10.7  | 0.26 | 0.21 | 1.15  | 0.467911 | 0.437178 | 0.740847 | 0.656591 |
| MmugDNA.8626.1.S1_at   | MmugDNA.8626.1 | 5.74  | 6     | 0.31 | 0.07 | -1.2  | 0.304449 | 0.127377 | 0.638542 | 0.398205 |
| MmugDNA.863.1.S1_at    | MmugDNA.863.1  | 3.66  | 3.71  | 0.07 | 0.07 | -1.04 | 0.198612 | 0.187588 | 0.561669 | 0.463628 |
| MmugDNA.8630.1.S1_at   | MmugDNA.8630.1 | 6.54  | 6.29  | 0.09 | 0.16 | 1.19  | 0.096337 | 0.097858 | 0.454844 | 0.355649 |
| MmugDNA.8634.1.S1_at   | MmugDNA.8634.1 | 10.2  | 10.03 | 0.15 | 0.33 | 1.12  | 0.722445 | 0.879446 | 0.878706 | 0.931144 |
| MmugDNA.8639.1.S1_at   | MmugDNA.8639.1 | 12.21 | 12.6  | 0.12 | 0.15 | -1.31 | 0.017288 | 0.004909 | 0.267101 | 0.097662 |
| MmugDNA.8640.1.S1_at   | MmugDNA.8640.1 | 4.09  | 3.94  | 0.06 | 0.14 | 1.11  | 0.230591 | 0.203515 | 0.587222 | 0.477767 |
| MmugDNA.8645.1.S1_at   | MmugDNA.8645.1 | 8.77  | 9.63  | 0.63 | 2.92 | -1.82 | 0.681196 | 0.02801  | 0.85748  | 0.208903 |
| MmugDNA.8645.1.S1_x_at | MmugDNA.8645.1 | 8.62  | 9.47  | 0.71 | 2.04 | -1.8  | 0.838799 | 0.041161 | 0.934877 | 0.247723 |
| MmugDNA.8646.1.S1_at   | MmugDNA.8646.1 | 10.46 | 10.39 | 0.03 | 0.28 | 1.05  | 0.897689 | 0.937594 | 0.95917  | 0.964687 |
| MmugDNA.8648.1.S1_at   | MmugDNA.8648.1 | 10.42 | 10.69 | 0.14 | 0.67 | -1.2  | 0.917794 | 0.983175 | 0.968032 | 0.990726 |
| MmugDNA.8649.1.S1_at   | MmugDNA.8649.1 | 11.64 | 11.23 | 0.32 | 0.64 | 1.32  | 0.500103 | 0.671099 | 0.759402 | 0.80765  |
| MmugDNA.865.1.S1_at    | MmugDNA.865.1  | 12.91 | 12.43 | 0.1  | 0.13 | 1.39  | 0.007017 | 0.003396 | 0.203382 | 0.083974 |
| MmugDNA.8650.1.S1_at   | MmugDNA.8650.1 | 6.52  | 6.72  | 0.15 | 0.1  | -1.15 | 0.318268 | 0.332792 | 0.648221 | 0.58121  |
| MmugDNA.8652.1.S1_at   | MmugDNA.8652.1 | 9.4   | 9.49  | 0.14 | 0.49 | -1.06 | 0.800811 | 0.175509 | 0.917868 | 0.452159 |
| MmugDNA.8653.1.S1_at   | MmugDNA.8653.1 | 12.75 | 12.69 | 0.05 | 0.06 | 1.04  | 0.356663 | 0.003194 | 0.671685 | 0.08199  |
| MmugDNA.8656.1.S1_at   | MmugDNA.8656.1 | 4.26  | 5.57  | 0.04 | 0.77 | -2.48 | 0.057991 | 0.046959 | 0.389637 | 0.261341 |
| MmugDNA.8658.1.S1_at   | MmugDNA.8658.1 | 3.84  | 3.84  | 0.08 | 0.15 | 1     | 0.877359 | 0.483334 | 0.95087  | 0.687887 |
| MmugDNA.8660.1.S1_at   | MmugDNA.8660.1 | 10.34 | 10.35 | 0.33 | 0.22 | -1.01 | 0.242298 | 0.134883 | 0.594307 | 0.406878 |
| MmugDNA.8663.1.S1_at   | MmugDNA.8663.1 | 7.65  | 7.36  | 0.08 | 0.23 | 1.22  | 0.101088 | 0.064339 | 0.461009 | 0.29983  |

|                        |                |       |       |      |      |       |          |          |          |          |
|------------------------|----------------|-------|-------|------|------|-------|----------|----------|----------|----------|
| MmugDNA.8667.1.S1_at   | MmugDNA.8667.1 | 7.05  | 7.15  | 0.17 | 0.11 | -1.07 | 0.206952 | 0.289239 | 0.56893  | 0.550293 |
| MmugDNA.8668.1.S1_at   | MmugDNA.8668.1 | 8.26  | 7.85  | 0.2  | 0.27 | 1.33  | 0.130271 | 0.173893 | 0.496613 | 0.450211 |
| MmugDNA.8670.1.S1_at   | MmugDNA.8670.1 | 10.03 | 9.93  | 0.22 | 0.14 | 1.07  | 0.433685 | 0.282139 | 0.720174 | 0.544937 |
| MmugDNA.8671.1.S1_at   | MmugDNA.8671.1 | 3.99  | 4     | 0.24 | 0.2  | -1.01 | 0.743398 | 0.355894 | 0.890141 | 0.597869 |
| MmugDNA.8676.1.S1_at   | MmugDNA.8676.1 | 8.12  | 8.66  | 0.2  | 0.27 | -1.45 | 0.073231 | 0.055326 | 0.418482 | 0.281024 |
| MmugDNA.8677.1.S1_at   | MmugDNA.8677.1 | 7.88  | 7.74  | 0.55 | 0.24 | 1.1   | 0.423024 | 0.16461  | 0.713793 | 0.440881 |
| MmugDNA.8691.1.S1_at   | MmugDNA.8691.1 | 6.54  | 5.31  | 0.51 | 0.32 | 2.34  | 0.04612  | 0.129865 | 0.362498 | 0.401509 |
| MmugDNA.8695.1.S1_at   | MmugDNA.8695.1 | 11.54 | 9.59  | 0.41 | 0.42 | 3.88  | 0.003143 | 0.00079  | 0.173241 | 0.045969 |
| MmugDNA.8697.1.S1_at   | MmugDNA.8697.1 | 3.61  | 3.27  | 0.27 | 0.21 | 1.27  | 0.140159 | 0.100672 | 0.508065 | 0.360037 |
| MmugDNA.87.1.S1_at     | MmugDNA.87.1   | 6.57  | 6.79  | 0.11 | 0.14 | -1.17 | 0.056103 | 0.053985 | 0.385762 | 0.27777  |
| MmugDNA.8700.1.S1_at   | MmugDNA.8700.1 | 6     | 6.12  | 0.2  | 0.04 | -1.09 | 0.940573 | 0.147694 | 0.97745  | 0.422007 |
| MmugDNA.8702.1.S1_at   | MmugDNA.8702.1 | 11.83 | 11.98 | 0.08 | 0.23 | -1.11 | 0.079384 | 0.045502 | 0.429386 | 0.2575   |
| MmugDNA.8704.1.S1_at   | MmugDNA.8704.1 | 5.69  | 7.15  | 0.61 | 0.76 | -2.74 | 0.14176  | 0.17862  | 0.509159 | 0.454847 |
| MmugDNA.871.1.S1_at    | MmugDNA.871.1  | 7.11  | 7.81  | 0.22 | 2.63 | -1.63 | 0.762712 | 0.877536 | 0.900005 | 0.930162 |
| MmugDNA.8711.1.S1_at   | MmugDNA.8711.1 | 12.55 | 12.44 | 0.07 | 0.06 | 1.08  | 0.315471 | 0.006018 | 0.646683 | 0.106089 |
| MmugDNA.8714.1.S1_at   | MmugDNA.8714.1 | 11.68 | 11.63 | 0.24 | 0.06 | 1.04  | 0.955165 | 0.043218 | 0.983189 | 0.252653 |
| MmugDNA.8714.1.S1_s_at | MmugDNA.8714.1 | 9.08  | 9.18  | 0.34 | 0.09 | -1.07 | 0.668748 | 0.442826 | 0.851986 | 0.660759 |
| MmugDNA.8719.1.S1_at   | MmugDNA.8719.1 | 10.91 | 10.81 | 0.2  | 0.34 | 1.07  | 0.588446 | 0.653652 | 0.808972 | 0.797546 |
| MmugDNA.8721.1.S1_at   | MmugDNA.8721.1 | 8.94  | 8.19  | 0.43 | 0.24 | 1.68  | 0.041652 | 0.033159 | 0.352383 | 0.225374 |
| MmugDNA.8722.1.S1_at   | MmugDNA.8722.1 | 7.98  | 7.66  | 0.02 | 0.22 | 1.24  | 0.057777 | 0.043303 | 0.388999 | 0.252847 |
| MmugDNA.8723.1.S1_at   | MmugDNA.8723.1 | 12.04 | 12.08 | 0.06 | 0.18 | -1.03 | 0.531268 | 0.470113 | 0.77713  | 0.678572 |
| MmugDNA.8725.1.S1_at   | MmugDNA.8725.1 | 11.26 | 11.06 | 0.4  | 1.5  | 1.15  | 0.38338  | 0.480444 | 0.689296 | 0.685781 |
| MmugDNA.8732.1.S1_at   | MmugDNA.8732.1 | 6.66  | 8.31  | 0.84 | 1.91 | -3.15 | 0.304022 | 0.13797  | 0.638244 | 0.410912 |
| MmugDNA.8734.1.S1_s_at | MmugDNA.8734.1 | 12.9  | 12.58 | 0.19 | 0.09 | 1.25  | 0.040511 | 0.023355 | 0.349482 | 0.191568 |
| MmugDNA.8735.1.S1_at   | MmugDNA.8735.1 | 7.53  | 7.98  | 0.94 | 1.08 | -1.37 | 0.555761 | 0.521108 | 0.791477 | 0.712212 |
| MmugDNA.8741.1.S1_at   | MmugDNA.8741.1 | 3.18  | 3.41  | 0.28 | 0.29 | -1.18 | 0.751477 | 0.912689 | 0.893762 | 0.950818 |
| MmugDNA.8743.1.S1_at   | MmugDNA.8743.1 | 11.54 | 11.15 | 0.27 | 0.41 | 1.32  | 0.377503 | 0.035365 | 0.685962 | 0.232348 |
| MmugDNA.875.1.S1_at    | MmugDNA.875.1  | 6.57  | 7.74  | 0.52 | 1.88 | -2.24 | 0.387684 | 0.274862 | 0.692115 | 0.539335 |
| MmugDNA.8756.1.S1_at   | MmugDNA.8756.1 | 5.88  | 5.87  | 0.19 | 0.13 | 1.01  | 0.642627 | 0.813708 | 0.838764 | 0.892425 |
| MmugDNA.8758.1.S1_at   | MmugDNA.8758.1 | 5.22  | 5.37  | 0.34 | 0.11 | -1.12 | 0.870134 | 0.303877 | 0.948096 | 0.561243 |
| MmugDNA.876.1.S1_at    | MmugDNA.876.1  | 10.65 | 9.12  | 0.06 | 0.67 | 2.87  | 0.021951 | 0.016581 | 0.28441  | 0.163023 |
| MmugDNA.8761.1.S1_at   | MmugDNA.8761.1 | 7.25  | 7.97  | 0.12 | 0.59 | -1.65 | 0.279867 | 0.104485 | 0.621287 | 0.36573  |
| MmugDNA.8765.1.S1_at   | MmugDNA.8765.1 | 8.13  | 7.41  | 0.44 | 0.43 | 1.66  | 0.18569  | 0.075398 | 0.549052 | 0.319693 |
| MmugDNA.877.1.S1_at    | MmugDNA.877.1  | 8.92  | 9.73  | 1.29 | 0.47 | -1.76 | 0.26228  | 0.05038  | 0.608902 | 0.269722 |
| MmugDNA.8778.1.S1_at   | MmugDNA.8778.1 | 11.15 | 11.65 | 0.17 | 0.32 | -1.42 | 0.120707 | 0.079987 | 0.48574  | 0.327352 |
| MmugDNA.8781.1.S1_at   | MmugDNA.8781.1 | 8.59  | 7.94  | 0.67 | 1.08 | 1.57  | 0.307454 | 0.409425 | 0.639999 | 0.636503 |
| MmugDNA.8789.1.S1_at   | MmugDNA.8789.1 | 13.35 | 13.14 | 0.12 | 0.39 | 1.16  | 0.161843 | 0.134031 | 0.526573 | 0.406234 |
| MmugDNA.879.1.S1_at    | MmugDNA.879.1  | 8.18  | 8.07  | 0.18 | 0.34 | 1.08  | 0.758155 | 0.438883 | 0.897606 | 0.657753 |
| MmugDNA.8790.1.S1_at   | MmugDNA.8790.1 | 7.24  | 6.51  | 0.02 | 0.76 | 1.66  | 0.538445 | 0.199987 | 0.780609 | 0.474603 |
| MmugDNA.8791.1.S1_at   | MmugDNA.8791.1 | 8.74  | 8.05  | 0.1  | 0.13 | 1.6   | 0.002133 | 0.000449 | 0.157946 | 0.038539 |
| MmugDNA.8793.1.S1_at   | MmugDNA.8793.1 | 4.9   | 4.94  | 0.04 | 0.11 | -1.03 | 0.47275  | 0.465746 | 0.743963 | 0.6759   |

|                        |                |       |       |      |      |       |          |          |          |          |
|------------------------|----------------|-------|-------|------|------|-------|----------|----------|----------|----------|
| MmugDNA.8794.1.S1_at   | MmugDNA.8794.1 | 6.99  | 6.86  | 0.43 | 0.29 | 1.09  | 0.78659  | 0.898931 | 0.91125  | 0.942467 |
| MmugDNA.8804.1.S1_at   | MmugDNA.8804.1 | 8.75  | 8.54  | 0.12 | 0.34 | 1.16  | 0.444461 | 0.652968 | 0.726992 | 0.797125 |
| MmugDNA.8811.1.S1_at   | MmugDNA.8811.1 | 10.45 | 10.42 | 0.04 | 0.2  | 1.02  | 0.714311 | 0.765269 | 0.87477  | 0.863539 |
| MmugDNA.8812.1.S1_at   | MmugDNA.8812.1 | 7.41  | 7.07  | 0.13 | 0.16 | 1.27  | 0.031987 | 0.02738  | 0.32376  | 0.206695 |
| MmugDNA.8817.1.S1_at   | MmugDNA.8817.1 | 5.84  | 5.94  | 0.07 | 0.06 | -1.07 | 0.680063 | 0.033664 | 0.857026 | 0.227052 |
| MmugDNA.8819.1.S1_at   | MmugDNA.8819.1 | 13.02 | 12.86 | 0.07 | 0.36 | 1.12  | 0.504792 | 0.589102 | 0.76146  | 0.755393 |
| MmugDNA.8820.1.S1_at   | MmugDNA.8820.1 | 12.88 | 13.17 | 0.05 | 0.01 | -1.22 | 0.000571 | 0.000072 | 0.136818 | 0.02644  |
| MmugDNA.8823.1.S1_at   | MmugDNA.8823.1 | 8.8   | 8.81  | 0.13 | 0.14 | -1.01 | 0.610287 | 0.065249 | 0.821014 | 0.301239 |
| MmugDNA.8826.1.S1_at   | MmugDNA.8826.1 | 11.16 | 12.59 | 0.37 | 0.61 | -2.69 | 0.075293 | 0.07444  | 0.422217 | 0.318062 |
| MmugDNA.8832.1.S1_s_at | MmugDNA.8832.1 | 10.34 | 9.55  | 0.18 | 0.36 | 1.73  | 0.064221 | 0.038783 | 0.402521 | 0.241916 |
| MmugDNA.8845.1.S1_at   | MmugDNA.8845.1 | 11.01 | 10.71 | 0.08 | 0.72 | 1.22  | 0.477355 | 0.198472 | 0.746589 | 0.47339  |
| MmugDNA.8850.1.S1_s_at | MmugDNA.8850.1 | 4.23  | 4.28  | 0.08 | 0.13 | -1.04 | 0.378462 | 0.046092 | 0.686482 | 0.259052 |
| MmugDNA.8851.1.S1_at   | MmugDNA.8851.1 | 10.87 | 8.93  | 0.3  | 0.74 | 3.82  | 0.023107 | 0.008445 | 0.290224 | 0.121922 |
| MmugDNA.8863.1.S1_at   | MmugDNA.8863.1 | 10.94 | 10.65 | 0.16 | 0.16 | 1.23  | 0.218682 | 0.004486 | 0.578242 | 0.093544 |
| MmugDNA.8866.1.S1_at   | MmugDNA.8866.1 | 8.34  | 8.76  | 0.15 | 0.61 | -1.34 | 0.124425 | 0.11554  | 0.490326 | 0.38267  |
| MmugDNA.8868.1.S1_at   | MmugDNA.8868.1 | 6.2   | 6.57  | 0.78 | 1.11 | -1.3  | 0.6456   | 0.834559 | 0.840383 | 0.905227 |
| MmugDNA.8870.1.S1_at   | MmugDNA.8870.1 | 7.15  | 8.03  | 0.35 | 1.09 | -1.85 | 0.249684 | 0.20043  | 0.600196 | 0.474805 |
| MmugDNA.8872.1.S1_at   | MmugDNA.8872.1 | 7.38  | 7.82  | 0.12 | 0.22 | -1.35 | 0.028831 | 0.034262 | 0.312166 | 0.228981 |
| MmugDNA.8879.1.S1_at   | MmugDNA.8879.1 | 8.58  | 8.95  | 0.15 | 0.67 | -1.29 | 0.973831 | 0.465862 | 0.989688 | 0.675982 |
| MmugDNA.8882.1.S1_at   | MmugDNA.8882.1 | 10.27 | 10.06 | 0.05 | 0.27 | 1.16  | 0.217624 | 0.227935 | 0.577214 | 0.500211 |
| MmugDNA.8886.1.S1_at   | MmugDNA.8886.1 | 10.11 | 10.93 | 0.51 | 0.22 | -1.77 | 0.050158 | 0.04391  | 0.373452 | 0.254098 |
| MmugDNA.8887.1.S1_at   | MmugDNA.8887.1 | 6.44  | 6.32  | 0.15 | 0.1  | 1.08  | 0.137386 | 0.244935 | 0.504538 | 0.514752 |
| MmugDNA.8888.1.S1_at   | MmugDNA.8888.1 | 7.1   | 7.45  | 0.17 | 0.16 | -1.28 | 0.16899  | 0.195598 | 0.533243 | 0.470441 |
| MmugDNA.8895.1.S1_at   | MmugDNA.8895.1 | 3.63  | 3.58  | 0.06 | 0.07 | 1.03  | 0.342048 | 0.685074 | 0.663038 | 0.816309 |
| MmugDNA.8896.1.S1_at   | MmugDNA.8896.1 | 5.97  | 5.79  | 0.07 | 0.12 | 1.13  | 0.195561 | 0.286093 | 0.558901 | 0.547586 |
| MmugDNA.8903.1.S1_at   | MmugDNA.8903.1 | 8.47  | 7.73  | 0.36 | 0.75 | 1.67  | 0.213008 | 0.268731 | 0.573413 | 0.534138 |
| MmugDNA.8906.1.S1_at   | MmugDNA.8906.1 | 11.1  | 10.89 | 0.16 | 0.11 | 1.16  | 0.178938 | 0.140545 | 0.543331 | 0.413807 |
| MmugDNA.8913.1.S1_at   | MmugDNA.8913.1 | 4.93  | 5.07  | 0.14 | 0.44 | -1.11 | 0.638444 | 0.467075 | 0.836621 | 0.676825 |
| MmugDNA.8918.1.S1_at   | MmugDNA.8918.1 | 7.25  | 7.19  | 0.16 | 0.33 | 1.04  | 0.611857 | 0.796357 | 0.821861 | 0.882625 |
| MmugDNA.8921.1.S1_at   | MmugDNA.8921.1 | 10.02 | 9.05  | 0.3  | 0.45 | 1.96  | 0.07651  | 0.058467 | 0.425086 | 0.288549 |
| MmugDNA.8927.1.S1_at   | MmugDNA.8927.1 | 4.94  | 5.02  | 0.07 | 0.06 | -1.05 | 0.162265 | 0.301321 | 0.526638 | 0.559356 |
| MmugDNA.8933.1.S1_at   | MmugDNA.8933.1 | 12.63 | 12.86 | 0.07 | 0.21 | -1.17 | 0.144849 | 0.184394 | 0.511188 | 0.460458 |
| MmugDNA.8935.1.S1_at   | MmugDNA.8935.1 | 5.49  | 4.44  | 0.65 | 0.61 | 2.06  | 0.231443 | 0.245838 | 0.587406 | 0.515519 |
| MmugDNA.8936.1.S1_x_at | MmugDNA.8936.1 | 6.67  | 6.77  | 0.26 | 0.03 | -1.07 | 0.704712 | 0.829842 | 0.869745 | 0.902225 |
| MmugDNA.8950.1.S1_at   | MmugDNA.8950.1 | 2.95  | 2.9   | 0.08 | 0.1  | 1.03  | 0.594052 | 0.696007 | 0.811686 | 0.82338  |
| MmugDNA.8954.1.S1_at   | MmugDNA.8954.1 | 4.73  | 4.85  | 0.07 | 0.27 | -1.09 | 0.214584 | 0.307488 | 0.575095 | 0.563757 |
| MmugDNA.8958.1.S1_at   | MmugDNA.8958.1 | 3.09  | 3.13  | 0.21 | 0.03 | -1.02 | 0.559332 | 0.488981 | 0.793801 | 0.691529 |
| MmugDNA.896.1.S1_at    | MmugDNA.896.1  | 11.13 | 11.22 | 0.31 | 0.47 | -1.06 | 0.353234 | 0.428124 | 0.670093 | 0.649676 |
| MmugDNA.8963.1.S1_at   | MmugDNA.8963.1 | 5.85  | 5.8   | 0.41 | 0.41 | 1.04  | 0.640266 | 0.483118 | 0.837612 | 0.687725 |
| MmugDNA.8964.1.S1_at   | MmugDNA.8964.1 | 10.23 | 9.52  | 0.23 | 0.83 | 1.64  | 0.353195 | 0.197962 | 0.670093 | 0.472936 |
| MmugDNA.8964.1.S1_s_at | MmugDNA.8964.1 | 9.59  | 8.62  | 0.23 | 0.74 | 1.97  | 0.28321  | 0.174799 | 0.623314 | 0.451407 |

|                       |                |       |       |      |      |       |          |          |          |          |
|-----------------------|----------------|-------|-------|------|------|-------|----------|----------|----------|----------|
| MmugDNA.8970.1.S1_at  | MmugDNA.8970.1 | 10.66 | 9.88  | 0.15 | 0.52 | 1.72  | 0.144648 | 0.186263 | 0.511015 | 0.462138 |
| MmugDNA.8974.1.S1_at  | MmugDNA.8974.1 | 11.47 | 11.55 | 0.05 | 0.06 | -1.06 | 0.051301 | 0.18197  | 0.376001 | 0.458503 |
| MmugDNA.8975.1.S1_at  | MmugDNA.8975.1 | 5.49  | 5.58  | 0.01 | 0.12 | -1.07 | 0.716625 | 0.473865 | 0.875506 | 0.681082 |
| MmugDNA.899.1.S1_at   | MmugDNA.899.1  | 10.98 | 10.98 | 0.1  | 0.13 | -1    | 0.474936 | 0.653878 | 0.745455 | 0.797692 |
| MmugDNA.8996.1.S1_at  | MmugDNA.8996.1 | 8.78  | 8.33  | 0.15 | 0.2  | 1.36  | 0.046459 | 0.023835 | 0.363009 | 0.193372 |
| MmugDNA.900.1.S1_at   | MmugDNA.900.1  | 4.77  | 4.8   | 0.21 | 0.02 | -1.02 | 0.508745 | 0.664203 | 0.763905 | 0.803247 |
| MmugDNA.9000.1.S1_at  | MmugDNA.9000.1 | 11.56 | 10.93 | 0.86 | 0.62 | 1.54  | 0.296739 | 0.154137 | 0.632686 | 0.42887  |
| MmugDNA.9001.1.S1_at  | MmugDNA.9001.1 | 7.62  | 7.52  | 0.47 | 0.09 | 1.07  | 0.542098 | 0.728442 | 0.783075 | 0.843019 |
| MmugDNA.9002.1.S1_at  | MmugDNA.9002.1 | 9.73  | 9.82  | 0.29 | 0.24 | -1.07 | 0.666211 | 0.425488 | 0.850305 | 0.647866 |
| MmugDNA.9004.1.S1_at  | MmugDNA.9004.1 | 4.05  | 4.15  | 0.4  | 0.05 | -1.07 | 0.617399 | 0.682373 | 0.824674 | 0.814526 |
| MmugDNA.9006.1.S1_at  | MmugDNA.9006.1 | 6.74  | 6.42  | 0.17 | 1.06 | 1.24  | 0.688397 | 0.86168  | 0.860965 | 0.921392 |
| MmugDNA.902.1.S1_at   | MmugDNA.902.1  | 10.88 | 10.19 | 0.08 | 0.04 | 1.61  | 0.000216 | 0.007017 | 0.120316 | 0.113044 |
| MmugDNA.9020.1.S1_at  | MmugDNA.9020.1 | 10.43 | 9.98  | 0.19 | 0.22 | 1.36  | 0.046288 | 0.042656 | 0.362954 | 0.251037 |
| MmugDNA.9022.1.S1_at  | MmugDNA.9022.1 | 7.19  | 7.54  | 0.16 | 0.23 | -1.27 | 0.1853   | 0.228365 | 0.548759 | 0.50054  |
| MmugDNA.9025.1.S1_at  | MmugDNA.9025.1 | 2.83  | 2.84  | 0.02 | 0.04 | -1.01 | 0.313064 | 0.250851 | 0.644926 | 0.51956  |
| MmugDNA.903.1.S1_at   | MmugDNA.903.1  | 5.52  | 5.94  | 0.7  | 0.77 | -1.35 | 0.226449 | 0.339295 | 0.584429 | 0.58598  |
| MmugDNA.9030.1.S1_at  | MmugDNA.9030.1 | 10.09 | 10.74 | 0.32 | 1.46 | -1.57 | 0.446957 | 0.50965  | 0.728687 | 0.704273 |
| MmugDNA.9031.1.S1_at  | MmugDNA.9031.1 | 7.23  | 6.96  | 0.2  | 0.19 | 1.21  | 0.078793 | 0.234987 | 0.428609 | 0.506162 |
| MmugDNA.9032.1.S1_at  | MmugDNA.9032.1 | 12.18 | 12.34 | 0.04 | 0.12 | -1.12 | 0.035718 | 0.021081 | 0.337483 | 0.181869 |
| MmugDNA.9033.1.S1_at  | MmugDNA.9033.1 | 11.57 | 12.59 | 0.3  | 0.61 | -2.02 | 0.219709 | 0.276034 | 0.579133 | 0.540071 |
| MmugDNA.9035.1.S1_at  | MmugDNA.9035.1 | 5.75  | 5.86  | 0.02 | 0.17 | -1.08 | 0.293513 | 0.30921  | 0.630627 | 0.564807 |
| MmugDNA.9040.1.S1_at  | MmugDNA.9040.1 | 6.71  | 6.76  | 0.29 | 0.08 | -1.03 | 0.701531 | 0.485978 | 0.868043 | 0.689551 |
| MmugDNA.9044.1.S1_at  | MmugDNA.9044.1 | 11.19 | 11.25 | 0.29 | 0.39 | -1.05 | 0.227593 | 0.272792 | 0.585103 | 0.537505 |
| MmugDNA.9047.1.S1_at  | MmugDNA.9047.1 | 8.58  | 7.78  | 0.1  | 0.17 | 1.75  | 0.002755 | 0.001011 | 0.165355 | 0.050657 |
| MmugDNA.9049.1.S1_at  | MmugDNA.9049.1 | 5.51  | 5.77  | 0.28 | 0.11 | -1.2  | 0.299577 | 0.417836 | 0.634993 | 0.642449 |
| MmugDNA.9051.1.S1_at  | MmugDNA.9051.1 | 9.55  | 9.52  | 0.16 | 0.2  | 1.02  | 0.935725 | 0.055501 | 0.975129 | 0.281404 |
| MmugDNA.9052.1.S1_at  | MmugDNA.9052.1 | 9.35  | 9.02  | 0.47 | 0.67 | 1.26  | 0.887165 | 0.942014 | 0.954863 | 0.967113 |
| MmugDNA.9055.1.S1_at  | MmugDNA.9055.1 | 4.15  | 3.97  | 0.42 | 0.45 | 1.13  | 0.740935 | 0.246936 | 0.888924 | 0.516238 |
| MmugDNA.9056.1.S1_at  | MmugDNA.9056.1 | 9.39  | 10.11 | 0.18 | 0.27 | -1.65 | 0.046034 | 0.011742 | 0.362198 | 0.140342 |
| MmugDNA.906.1.S1_at   | MmugDNA.906.1  | 9.64  | 9     | 0.22 | 0.38 | 1.55  | 0.078129 | 0.071582 | 0.428221 | 0.313714 |
| MmugDNA.9062.1.S1_at  | MmugDNA.9062.1 | 4.6   | 4.29  | 0.19 | 0.46 | 1.24  | 0.23309  | 0.181672 | 0.587988 | 0.458271 |
| MmugDNA.9066.1.S1_at  | MmugDNA.9066.1 | 12.33 | 11.81 | 0.25 | 0.1  | 1.43  | 0.021838 | 0.01726  | 0.283865 | 0.166393 |
| MmugDNA.9069.1.S1_at  | MmugDNA.9069.1 | 9.07  | 9.34  | 0.54 | 0.41 | -1.2  | 0.220873 | 0.024458 | 0.579765 | 0.195724 |
| MmugDNA.9078.1.S1_at  | MmugDNA.9078.1 | 9.71  | 9.43  | 0.2  | 0.66 | 1.21  | 0.645595 | 0.865352 | 0.840383 | 0.923563 |
| MmugDNA.9079.1.S1_at  | MmugDNA.9079.1 | 5.2   | 5.26  | 0.06 | 0.15 | -1.04 | 0.921506 | 0.978652 | 0.969404 | 0.988411 |
| MmugDNA.908.1.S1_at   | MmugDNA.908.1  | 7.31  | 7.36  | 0.66 | 0.09 | -1.04 | 0.439048 | 0.394046 | 0.72347  | 0.626734 |
| MmugDNA.908.1.S1_x_at | MmugDNA.908.1  | 7.45  | 7.2   | 0.45 | 0.14 | 1.19  | 0.248881 | 0.232702 | 0.599659 | 0.504359 |
| MmugDNA.9083.1.S1_at  | MmugDNA.9083.1 | 6.48  | 5.75  | 0.83 | 0.49 | 1.67  | 0.384235 | 0.328359 | 0.689804 | 0.578045 |
| MmugDNA.9088.1.S1_at  | MmugDNA.9088.1 | 5.46  | 4.82  | 0.88 | 0.21 | 1.56  | 0.152921 | 0.155443 | 0.517325 | 0.430802 |
| MmugDNA.9095.1.S1_at  | MmugDNA.9095.1 | 3.59  | 3.45  | 0.36 | 0.07 | 1.1   | 0.306181 | 0.410699 | 0.639463 | 0.637509 |
| MmugDNA.91.1.S1_at    | MmugDNA.91.1   | 11.58 | 11.45 | 0.05 | 0.17 | 1.09  | 0.912193 | 0.366725 | 0.96522  | 0.606498 |

|                        |                |       |       |      |      |       |          |          |          |          |
|------------------------|----------------|-------|-------|------|------|-------|----------|----------|----------|----------|
| MmugDNA.910.1.S1_at    | MmugDNA.910.1  | 6.14  | 5.79  | 0.82 | 0.72 | 1.28  | 0.288625 | 0.428443 | 0.626746 | 0.649993 |
| MmugDNA.9100.1.S1_at   | MmugDNA.9100.1 | 7.6   | 7.56  | 0.08 | 0.15 | 1.03  | 0.407525 | 0.534158 | 0.704692 | 0.720143 |
| MmugDNA.9101.1.S1_at   | MmugDNA.9101.1 | 8.11  | 8.78  | 0.49 | 0.79 | -1.59 | 0.099477 | 0.059833 | 0.459387 | 0.291286 |
| MmugDNA.9106.1.S1_at   | MmugDNA.9106.1 | 8.81  | 9.32  | 0.33 | 0.59 | -1.42 | 0.25934  | 0.377284 | 0.606422 | 0.614869 |
| MmugDNA.9113.1.S1_at   | MmugDNA.9113.1 | 8.13  | 9.12  | 0.03 | 0.44 | -1.99 | 0.027589 | 0.017811 | 0.308386 | 0.168588 |
| MmugDNA.912.1.S1_at    | MmugDNA.912.1  | 9.45  | 9.41  | 0.65 | 0.48 | 1.03  | 0.432281 | 0.408365 | 0.718882 | 0.635639 |
| MmugDNA.9127.1.S1_at   | MmugDNA.9127.1 | 7.62  | 7.01  | 0.2  | 0.16 | 1.53  | 0.011029 | 0.00769  | 0.233671 | 0.117153 |
| MmugDNA.9128.1.S1_at   | MmugDNA.9128.1 | 4.15  | 4.15  | 0.11 | 0.31 | 1     | 0.410256 | 0.444343 | 0.706234 | 0.66198  |
| MmugDNA.9129.1.S1_at   | MmugDNA.9129.1 | 10    | 9.77  | 0.25 | 0.31 | 1.17  | 0.729316 | 0.643902 | 0.882512 | 0.791202 |
| MmugDNA.9131.1.S1_at   | MmugDNA.9131.1 | 9.65  | 9.05  | 0.23 | 0.31 | 1.51  | 0.015846 | 0.005864 | 0.261451 | 0.104856 |
| MmugDNA.9133.1.S1_s_at | MmugDNA.9133.1 | 4.15  | 4.19  | 0.09 | 0.22 | -1.03 | 0.441269 | 0.673898 | 0.724743 | 0.809483 |
| MmugDNA.9137.1.S1_at   | MmugDNA.9137.1 | 4.93  | 4.78  | 0.18 | 0.32 | 1.11  | 0.959916 | 0.948844 | 0.984842 | 0.97077  |
| MmugDNA.914.1.S1_at    | MmugDNA.914.1  | 6.05  | 6.21  | 0.24 | 0.14 | -1.12 | 0.344095 | 0.467879 | 0.664205 | 0.677386 |
| MmugDNA.9141.1.S1_at   | MmugDNA.9141.1 | 5.77  | 4.99  | 0.88 | 0.22 | 1.72  | 0.162608 | 0.135342 | 0.526894 | 0.40745  |
| MmugDNA.9141.1.S1_x_at | MmugDNA.9141.1 | 6.38  | 6.03  | 0.96 | 0.23 | 1.27  | 0.205938 | 0.230077 | 0.568403 | 0.50194  |
| MmugDNA.9147.1.S1_at   | MmugDNA.9147.1 | 9.49  | 9.05  | 0.24 | 0.92 | 1.35  | 0.298625 | 0.289837 | 0.63411  | 0.550831 |
| MmugDNA.9151.1.S1_at   | MmugDNA.9151.1 | 10.87 | 10.97 | 0.3  | 0.12 | -1.07 | 0.564174 | 0.41338  | 0.796418 | 0.63964  |
| MmugDNA.9158.1.S1_at   | MmugDNA.9158.1 | 12.27 | 11.64 | 0.21 | 0.24 | 1.55  | 0.0509   | 0.033067 | 0.37568  | 0.225068 |
| MmugDNA.916.1.S1_at    | MmugDNA.916.1  | 10.83 | 10.72 | 0.14 | 0.48 | 1.08  | 0.56972  | 0.741783 | 0.79916  | 0.850508 |
| MmugDNA.9164.1.S1_at   | MmugDNA.9164.1 | 4.02  | 4.13  | 0.11 | 0.18 | -1.07 | 0.26547  | 0.320664 | 0.611089 | 0.572758 |
| MmugDNA.9172.1.S1_at   | MmugDNA.9172.1 | 13.15 | 13.2  | 0.03 | 0.15 | -1.03 | 0.754255 | 0.487752 | 0.895293 | 0.690658 |
| MmugDNA.9177.1.S1_at   | MmugDNA.9177.1 | 8.14  | 8.07  | 0.2  | 0.63 | 1.05  | 0.765512 | 0.926915 | 0.901309 | 0.958424 |
| MmugDNA.9179.1.S1_at   | MmugDNA.9179.1 | 9.66  | 9.45  | 0.2  | 0.29 | 1.15  | 0.244785 | 0.319274 | 0.596422 | 0.571722 |
| MmugDNA.9192.1.S1_at   | MmugDNA.9192.1 | 8.03  | 8.1   | 0.24 | 0.07 | -1.05 | 0.533695 | 0.693316 | 0.778431 | 0.821612 |
| MmugDNA.9195.1.S1_at   | MmugDNA.9195.1 | 6.05  | 5.7   | 0.13 | 0.43 | 1.28  | 0.229539 | 0.244776 | 0.586637 | 0.514629 |
| MmugDNA.9199.1.S1_at   | MmugDNA.9199.1 | 8.02  | 9.23  | 0.76 | 0.82 | -2.31 | 0.232196 | 0.239424 | 0.587814 | 0.510101 |
| MmugDNA.9206.1.S1_at   | MmugDNA.9206.1 | 6.01  | 6.15  | 0.07 | 0.29 | -1.1  | 0.386973 | 0.151933 | 0.691724 | 0.426597 |
| MmugDNA.9209.1.S1_at   | MmugDNA.9209.1 | 8.73  | 8.97  | 0.21 | 0.4  | -1.18 | 0.364147 | 0.126928 | 0.677244 | 0.397655 |
| MmugDNA.9210.1.S1_at   | MmugDNA.9210.1 | 8.57  | 8.2   | 0.49 | 1.05 | 1.29  | 0.512897 | 0.548822 | 0.765832 | 0.72944  |
| MmugDNA.9218.1.S1_at   | MmugDNA.9218.1 | 9.51  | 9.1   | 0.31 | 0.03 | 1.33  | 0.041672 | 0.018586 | 0.352383 | 0.171539 |
| MmugDNA.9219.1.S1_at   | MmugDNA.9219.1 | 11.32 | 10.92 | 0.18 | 0.27 | 1.32  | 0.050478 | 0.037457 | 0.374371 | 0.23783  |
| MmugDNA.9222.1.A1_at   | MmugDNA.9222.1 | 4.24  | 4.04  | 0.28 | 0.36 | 1.15  | 0.639981 | 0.692617 | 0.837503 | 0.821061 |
| MmugDNA.9222.1.S1_at   | MmugDNA.9222.1 | 3.47  | 3.5   | 0.18 | 0.2  | -1.02 | 0.284397 | 0.416704 | 0.624232 | 0.64167  |
| MmugDNA.9225.1.S1_at   | MmugDNA.9225.1 | 6.05  | 6.13  | 0.16 | 0.28 | -1.06 | 0.866126 | 0.497381 | 0.946575 | 0.696715 |
| MmugDNA.9227.1.S1_at   | MmugDNA.9227.1 | 8.96  | 9.19  | 0.04 | 0.04 | -1.17 | 0.002159 | 0.00223  | 0.159051 | 0.069565 |
| MmugDNA.9234.1.S1_at   | MmugDNA.9234.1 | 9.48  | 8.72  | 0.1  | 0.27 | 1.69  | 0.022984 | 0.006525 | 0.289363 | 0.10961  |
| MmugDNA.9235.1.S1_s_at | MmugDNA.9235.1 | 12.24 | 12    | 0.06 | 0.06 | 1.19  | 0.005446 | 0.002371 | 0.191107 | 0.071964 |
| MmugDNA.9238.1.S1_at   | MmugDNA.9238.1 | 9.02  | 9.15  | 0.27 | 0.49 | -1.1  | 0.17334  | 0.174749 | 0.537006 | 0.451302 |
| MmugDNA.9241.1.S1_at   | MmugDNA.9241.1 | 8.92  | 8.67  | 0.31 | 0.23 | 1.19  | 0.778989 | 0.913815 | 0.907836 | 0.951523 |
| MmugDNA.9248.1.S1_at   | MmugDNA.9248.1 | 10.75 | 10.42 | 0.24 | 0.12 | 1.26  | 0.221978 | 0.280227 | 0.580625 | 0.543487 |
| MmugDNA.9251.1.S1_at   | MmugDNA.9251.1 | 5.98  | 6.11  | 0.05 | 0.08 | -1.09 | 0.033742 | 0.024531 | 0.330119 | 0.196012 |

|                        |                |       |       |      |      |       |          |          |          |          |
|------------------------|----------------|-------|-------|------|------|-------|----------|----------|----------|----------|
| MmugDNA.9253.1.S1_at   | MmugDNA.9253.1 | 6.74  | 7.1   | 0.4  | 0.48 | -1.29 | 0.32496  | 0.433674 | 0.652259 | 0.65392  |
| MmugDNA.9257.1.S1_at   | MmugDNA.9257.1 | 6.97  | 7.44  | 0.57 | 0.46 | -1.39 | 0.957666 | 0.812206 | 0.983925 | 0.891555 |
| MmugDNA.9262.1.S1_at   | MmugDNA.9262.1 | 4.58  | 4.73  | 0.16 | 0.08 | -1.1  | 0.29424  | 0.723094 | 0.631204 | 0.839592 |
| MmugDNA.9266.1.S1_at   | MmugDNA.9266.1 | 7.5   | 7.62  | 0.17 | 0.05 | -1.09 | 0.505221 | 0.711124 | 0.761548 | 0.832417 |
| MmugDNA.928.1.S1_at    | MmugDNA.928.1  | 7.69  | 8.22  | 0.68 | 0.89 | -1.45 | 0.727979 | 0.682327 | 0.881704 | 0.814506 |
| MmugDNA.9282.1.S1_at   | MmugDNA.9282.1 | 9.96  | 10.1  | 0.62 | 0.56 | -1.1  | 0.684214 | 0.712754 | 0.858637 | 0.8335   |
| MmugDNA.9284.1.S1_at   | MmugDNA.9284.1 | 13.27 | 13.23 | 0.18 | 0.22 | 1.02  | 0.818855 | 0.939421 | 0.926498 | 0.965611 |
| MmugDNA.9285.1.S1_at   | MmugDNA.9285.1 | 3.68  | 3.89  | 0.33 | 0.13 | -1.16 | 0.842918 | 0.142447 | 0.936723 | 0.416035 |
| MmugDNA.9287.1.S1_at   | MmugDNA.9287.1 | 4.24  | 4.14  | 0.7  | 0.11 | 1.07  | 0.34504  | 0.381701 | 0.66494  | 0.617895 |
| MmugDNA.9291.1.S1_at   | MmugDNA.9291.1 | 3.59  | 3.54  | 0.06 | 0.11 | 1.03  | 0.509529 | 0.528155 | 0.764387 | 0.716456 |
| MmugDNA.9293.1.S1_at   | MmugDNA.9293.1 | 4.56  | 4.65  | 0.07 | 0.12 | -1.07 | 0.259333 | 0.139316 | 0.606422 | 0.412518 |
| MmugDNA.9294.1.S1_at   | MmugDNA.9294.1 | 8.49  | 7.84  | 0.19 | 0.18 | 1.57  | 0.03272  | 0.038815 | 0.325998 | 0.241916 |
| MmugDNA.9295.1.S1_at   | MmugDNA.9295.1 | 12.8  | 12.69 | 0.34 | 0.76 | 1.08  | 0.681517 | 0.832451 | 0.857635 | 0.903893 |
| MmugDNA.9301.1.S1_at   | MmugDNA.9301.1 | 8.15  | 8.6   | 0.09 | 0.33 | -1.36 | 0.095898 | 0.097624 | 0.453944 | 0.355473 |
| MmugDNA.9302.1.S1_at   | MmugDNA.9302.1 | 6.3   | 6.17  | 0.07 | 0.22 | 1.09  | 0.651378 | 0.365747 | 0.843142 | 0.605685 |
| MmugDNA.9304.1.S1_at   | MmugDNA.9304.1 | 6.12  | 8.5   | 1.25 | 2.29 | -5.17 | 0.383924 | 0.271328 | 0.689646 | 0.53644  |
| MmugDNA.9311.1.S1_at   | MmugDNA.9311.1 | 3.64  | 3.66  | 0.2  | 0.04 | -1.01 | 0.476562 | 0.38268  | 0.746273 | 0.618843 |
| MmugDNA.9313.1.S1_at   | MmugDNA.9313.1 | 6.57  | 6.33  | 0.11 | 0.21 | 1.18  | 0.097635 | 0.1004   | 0.456709 | 0.359541 |
| MmugDNA.9315.1.S1_at   | MmugDNA.9315.1 | 6.99  | 6.7   | 0.12 | 0.09 | 1.23  | 0.021054 | 0.025448 | 0.281947 | 0.200043 |
| MmugDNA.9322.1.S1_s_at | MmugDNA.9322.1 | 11.03 | 11.09 | 0.25 | 0.06 | -1.04 | 0.253857 | 0.285333 | 0.60233  | 0.547198 |
| MmugDNA.9325.1.S1_s_at | MmugDNA.9325.1 | 10.92 | 10.45 | 0.33 | 0.3  | 1.39  | 0.311216 | 0.446637 | 0.643201 | 0.66287  |
| MmugDNA.9326.1.S1_at   | MmugDNA.9326.1 | 11.49 | 11.84 | 0.41 | 0.41 | -1.27 | 0.350994 | 0.164448 | 0.6689   | 0.440678 |
| MmugDNA.9329.1.S1_at   | MmugDNA.9329.1 | 6.61  | 6.49  | 0.05 | 0.22 | 1.09  | 0.431409 | 0.240295 | 0.71858  | 0.510871 |
| MmugDNA.933.1.S1_at    | MmugDNA.933.1  | 9.26  | 9.14  | 0.1  | 0.21 | 1.09  | 0.268769 | 0.401312 | 0.613438 | 0.630922 |
| MmugDNA.9333.1.S1_at   | MmugDNA.9333.1 | 12.34 | 12.13 | 0.05 | 0.3  | 1.16  | 0.176556 | 0.217822 | 0.540178 | 0.491385 |
| MmugDNA.9335.1.S1_at   | MmugDNA.9335.1 | 7.24  | 6.08  | 0.23 | 0.4  | 2.24  | 0.020127 | 0.022926 | 0.27674  | 0.189403 |
| MmugDNA.9336.1.S1_at   | MmugDNA.9336.1 | 12.66 | 12.99 | 0.14 | 0.05 | -1.25 | 0.032052 | 0.056547 | 0.323986 | 0.283835 |
| MmugDNA.9338.1.S1_at   | MmugDNA.9338.1 | 10.95 | 10.94 | 0.22 | 0.21 | 1.01  | 0.926045 | 0.812166 | 0.971587 | 0.89155  |
| MmugDNA.9339.1.S1_at   | MmugDNA.9339.1 | 6.31  | 6.84  | 0.56 | 0.44 | -1.44 | 0.064543 | 0.084703 | 0.402975 | 0.336196 |
| MmugDNA.934.1.S1_at    | MmugDNA.934.1  | 6.28  | 6.26  | 0.03 | 0.08 | 1.01  | 0.799639 | 0.435905 | 0.917102 | 0.655618 |
| MmugDNA.9342.1.S1_at   | MmugDNA.9342.1 | 5.17  | 6.97  | 0.71 | 1.52 | -3.5  | 0.224063 | 0.265568 | 0.582526 | 0.531428 |
| MmugDNA.9347.1.S1_at   | MmugDNA.9347.1 | 6.6   | 6.62  | 0.02 | 0.12 | -1.01 | 0.267696 | 0.036357 | 0.612723 | 0.235105 |
| MmugDNA.9349.1.S1_at   | MmugDNA.9349.1 | 11.09 | 10.84 | 0.22 | 0.31 | 1.19  | 0.099802 | 0.07812  | 0.459718 | 0.324578 |
| MmugDNA.9351.1.S1_at   | MmugDNA.9351.1 | 12.09 | 12.16 | 0.34 | 1.58 | -1.05 | 0.813241 | 0.74573  | 0.924167 | 0.85256  |
| MmugDNA.9352.1.S1_at   | MmugDNA.9352.1 | 11.45 | 11.5  | 0.1  | 0.12 | -1.04 | 0.405791 | 0.224731 | 0.703348 | 0.497614 |
| MmugDNA.9356.1.S1_at   | MmugDNA.9356.1 | 6.29  | 5.5   | 0.14 | 0.25 | 1.73  | 0.004896 | 0.000927 | 0.185557 | 0.048858 |
| MmugDNA.9363.1.S1_at   | MmugDNA.9363.1 | 4.8   | 4.75  | 0.17 | 0.12 | 1.03  | 0.925837 | 0.986756 | 0.97147  | 0.992539 |
| MmugDNA.9364.1.S1_at   | MmugDNA.9364.1 | 11.19 | 10.89 | 0.18 | 0.14 | 1.23  | 0.115014 | 0.101677 | 0.478345 | 0.361562 |
| MmugDNA.9368.1.S1_at   | MmugDNA.9368.1 | 7.69  | 8.37  | 0.24 | 0.95 | -1.6  | 0.221479 | 0.250088 | 0.580261 | 0.519139 |
| MmugDNA.9394.1.S1_at   | MmugDNA.9394.1 | 5     | 5.24  | 0.25 | 0.12 | -1.18 | 0.45038  | 0.518988 | 0.730948 | 0.710813 |
| MmugDNA.9395.1.S1_at   | MmugDNA.9395.1 | 6.97  | 6.9   | 0.22 | 0.06 | 1.05  | 0.936293 | 0.995604 | 0.975294 | 0.997264 |

|                       |                |       |       |      |      |       |          |          |          |          |
|-----------------------|----------------|-------|-------|------|------|-------|----------|----------|----------|----------|
| MmugDNA.94.1.S1_at    | MmugDNA.94.1   | 6.01  | 6.21  | 0.11 | 0.18 | -1.14 | 0.238891 | 0.310798 | 0.59202  | 0.565832 |
| MmugDNA.9400.1.S1_at  | MmugDNA.9400.1 | 4.8   | 5.53  | 0.4  | 1.01 | -1.65 | 0.381182 | 0.275931 | 0.687774 | 0.540035 |
| MmugDNA.9401.1.S1_at  | MmugDNA.9401.1 | 10.41 | 10.25 | 0.19 | 0.17 | 1.12  | 0.40476  | 0.558375 | 0.703014 | 0.735578 |
| MmugDNA.9403.1.S1_at  | MmugDNA.9403.1 | 7.89  | 6.82  | 0.53 | 1.14 | 2.1   | 0.228394 | 0.290424 | 0.585843 | 0.551169 |
| MmugDNA.9404.1.S1_at  | MmugDNA.9404.1 | 10.02 | 9.25  | 0.3  | 0.17 | 1.7   | 0.023909 | 0.036771 | 0.293263 | 0.236291 |
| MmugDNA.941.1.S1_at   | MmugDNA.941.1  | 9.14  | 7.67  | 1.36 | 0.22 | 2.76  | 0.512945 | 0.46947  | 0.765869 | 0.678248 |
| MmugDNA.9413.1.S1_at  | MmugDNA.9413.1 | 13.07 | 12.88 | 0.06 | 0.06 | 1.14  | 0.022258 | 0.018601 | 0.285183 | 0.171539 |
| MmugDNA.9415.1.S1_at  | MmugDNA.9415.1 | 9.15  | 9.61  | 0.2  | 0.05 | -1.38 | 0.039256 | 0.050774 | 0.346898 | 0.270472 |
| MmugDNA.9417.1.S1_at  | MmugDNA.9417.1 | 10.33 | 9.72  | 0.04 | 0.36 | 1.53  | 0.135043 | 0.114753 | 0.501995 | 0.381297 |
| MmugDNA.9420.1.S1_at  | MmugDNA.9420.1 | 8     | 7.61  | 0.31 | 0.22 | 1.32  | 0.058322 | 0.049374 | 0.39029  | 0.267126 |
| MmugDNA.9422.1.S1_at  | MmugDNA.9422.1 | 10.31 | 10.24 | 0.27 | 0.39 | 1.05  | 0.681922 | 0.427929 | 0.857635 | 0.649602 |
| MmugDNA.9424.1.S1_at  | MmugDNA.9424.1 | 11.82 | 11.2  | 0.09 | 0.4  | 1.54  | 0.053349 | 0.006071 | 0.380173 | 0.106175 |
| MmugDNA.9433.1.S1_at  | MmugDNA.9433.1 | 7.44  | 7.59  | 0.04 | 0.07 | -1.11 | 0.012048 | 0.01919  | 0.239875 | 0.174282 |
| MmugDNA.9434.1.S1_at  | MmugDNA.9434.1 | 10.85 | 10.5  | 0.16 | 0.23 | 1.27  | 0.163631 | 0.028765 | 0.527992 | 0.211466 |
| MmugDNA.9435.1.S1_at  | MmugDNA.9435.1 | 6.01  | 5.55  | 0.31 | 0.28 | 1.38  | 0.231828 | 0.207676 | 0.587568 | 0.481906 |
| MmugDNA.9438.1.S1_at  | MmugDNA.9438.1 | 11.03 | 11.58 | 0.09 | 0.56 | -1.47 | 0.393549 | 0.490016 | 0.695331 | 0.692076 |
| MmugDNA.9440.1.S1_at  | MmugDNA.9440.1 | 9.56  | 9.53  | 0.13 | 0.37 | 1.02  | 0.85852  | 0.953799 | 0.942856 | 0.973691 |
| MmugDNA.9442.1.S1_at  | MmugDNA.9442.1 | 6.2   | 6.55  | 0.48 | 0.62 | -1.28 | 0.455075 | 0.152461 | 0.733646 | 0.42728  |
| MmugDNA.9452.1.S1_at  | MmugDNA.9452.1 | 6.7   | 6.68  | 0.06 | 0.15 | 1.01  | 0.330149 | 0.015186 | 0.655613 | 0.156614 |
| MmugDNA.9462.1.S1_at  | MmugDNA.9462.1 | 13.08 | 12.95 | 0.07 | 0.08 | 1.09  | 0.073861 | 0.12351  | 0.419443 | 0.393572 |
| MmugDNA.9465.1.S1_at  | MmugDNA.9465.1 | 8.63  | 8.76  | 0.09 | 0.38 | -1.1  | 0.690961 | 0.772004 | 0.862535 | 0.867436 |
| MmugDNA.9466.1.S1_at  | MmugDNA.9466.1 | 11.96 | 12.01 | 0.13 | 0.28 | -1.03 | 0.844303 | 0.353582 | 0.937482 | 0.59664  |
| MmugDNA.9469.1.S1_at  | MmugDNA.9469.1 | 12.64 | 12.4  | 0.08 | 0.29 | 1.19  | 0.298465 | 0.359192 | 0.633981 | 0.600528 |
| MmugDNA.9470.1.S1_at  | MmugDNA.9470.1 | 12.06 | 12.1  | 0.14 | 0.04 | -1.03 | 0.217465 | 0.111133 | 0.577095 | 0.375714 |
| MmugDNA.9471.1.S1_at  | MmugDNA.9471.1 | 9.95  | 9.03  | 0.32 | 0.19 | 1.89  | 0.017445 | 0.009127 | 0.267445 | 0.125994 |
| MmugDNA.9479.1.S1_at  | MmugDNA.9479.1 | 5.2   | 5.03  | 0.37 | 0.07 | 1.13  | 0.480563 | 0.097879 | 0.748477 | 0.355678 |
| MmugDNA.948.1.S1_at   | MmugDNA.948.1  | 4.69  | 4.71  | 0.08 | 0.09 | -1.01 | 0.184177 | 0.421549 | 0.548032 | 0.645162 |
| MmugDNA.948.1.S1_x_at | MmugDNA.948.1  | 4.39  | 4.51  | 0.05 | 0.09 | -1.09 | 0.141785 | 0.297134 | 0.509159 | 0.555996 |
| MmugDNA.9481.1.S1_at  | MmugDNA.9481.1 | 3.88  | 3.66  | 0.55 | 0.2  | 1.16  | 0.444214 | 0.377863 | 0.726859 | 0.615263 |
| MmugDNA.9488.1.S1_at  | MmugDNA.9488.1 | 12.66 | 12.69 | 0.23 | 0.14 | -1.02 | 0.845125 | 0.952675 | 0.937854 | 0.973147 |
| MmugDNA.9491.1.S1_at  | MmugDNA.9491.1 | 9.46  | 8.67  | 0.22 | 0.46 | 1.74  | 0.094198 | 0.070101 | 0.451714 | 0.310998 |
| MmugDNA.9495.1.S1_at  | MmugDNA.9495.1 | 9.22  | 8.82  | 0.4  | 0.47 | 1.33  | 0.324136 | 0.393112 | 0.651854 | 0.626102 |
| MmugDNA.9496.1.S1_at  | MmugDNA.9496.1 | 5.36  | 5.53  | 0.12 | 0.09 | -1.12 | 0.055125 | 0.138375 | 0.383547 | 0.411244 |
| MmugDNA.9497.1.S1_at  | MmugDNA.9497.1 | 9.61  | 8.85  | 0.27 | 0.63 | 1.69  | 0.203913 | 0.02771  | 0.566394 | 0.207873 |
| MmugDNA.950.1.S1_at   | MmugDNA.950.1  | 3.22  | 3.36  | 0.16 | 0.08 | -1.1  | 0.656474 | 0.435186 | 0.845392 | 0.655058 |
| MmugDNA.9500.1.S1_at  | MmugDNA.9500.1 | 6.91  | 7.25  | 0.3  | 0.7  | -1.26 | 0.23686  | 0.29893  | 0.590574 | 0.557561 |
| MmugDNA.9513.1.S1_at  | MmugDNA.9513.1 | 11.8  | 11.2  | 0.04 | 0.22 | 1.52  | 0.010852 | 0.005973 | 0.232239 | 0.105716 |
| MmugDNA.9517.1.S1_at  | MmugDNA.9517.1 | 4.76  | 4.68  | 0.17 | 0.07 | 1.06  | 0.856791 | 0.983007 | 0.942171 | 0.990691 |
| MmugDNA.9521.1.S1_at  | MmugDNA.9521.1 | 7.47  | 8.46  | 0.87 | 1.07 | -1.98 | 0.501459 | 0.457143 | 0.75998  | 0.670743 |
| MmugDNA.9522.1.S1_at  | MmugDNA.9522.1 | 7.38  | 7.04  | 0.31 | 0.32 | 1.26  | 0.622437 | 0.327263 | 0.827386 | 0.577173 |
| MmugDNA.9523.1.S1_at  | MmugDNA.9523.1 | 3.44  | 3.36  | 0.06 | 0.05 | 1.05  | 0.087997 | 0.381139 | 0.442265 | 0.617478 |

|                        |                |       |       |      |      |       |          |          |          |          |
|------------------------|----------------|-------|-------|------|------|-------|----------|----------|----------|----------|
| MmugDNA.9524.1.S1_at   | MmugDNA.9524.1 | 10.11 | 9.47  | 0.32 | 0.35 | 1.56  | 0.180791 | 0.135394 | 0.545241 | 0.407478 |
| MmugDNA.9526.1.S1_at   | MmugDNA.9526.1 | 12.07 | 12.09 | 0.21 | 1.18 | -1.01 | 0.40323  | 0.327183 | 0.701948 | 0.577156 |
| MmugDNA.9528.1.S1_at   | MmugDNA.9528.1 | 12.86 | 12.96 | 0.11 | 0.01 | -1.08 | 0.49891  | 0.603791 | 0.758768 | 0.764299 |
| MmugDNA.9529.1.S1_at   | MmugDNA.9529.1 | 11.98 | 11.78 | 0.13 | 0.26 | 1.15  | 0.193097 | 0.17711  | 0.556449 | 0.453611 |
| MmugDNA.9537.1.S1_at   | MmugDNA.9537.1 | 13.89 | 13.92 | 0.1  | 0.12 | -1.02 | 0.74886  | 0.772642 | 0.892618 | 0.867785 |
| MmugDNA.9537.1.S1_s_at | MmugDNA.9537.1 | 14.48 | 14.46 | 0.02 | 0.02 | 1.01  | 0.210018 | 0.042328 | 0.571234 | 0.250324 |
| MmugDNA.954.1.S1_at    | MmugDNA.954.1  | 11.15 | 10.4  | 0.26 | 0.18 | 1.68  | 0.019791 | 0.012281 | 0.275549 | 0.143352 |
| MmugDNA.9545.1.S1_at   | MmugDNA.9545.1 | 5.37  | 5.31  | 0.33 | 0.4  | 1.05  | 0.817527 | 0.692512 | 0.925948 | 0.821061 |
| MmugDNA.9546.1.S1_s_at | MmugDNA.9546.1 | 12.28 | 12.11 | 0.19 | 0.17 | 1.12  | 0.600328 | 0.303686 | 0.815194 | 0.561113 |
| MmugDNA.9548.1.S1_at   | MmugDNA.9548.1 | 7.53  | 9.04  | 1.09 | 0.72 | -2.85 | 0.096936 | 0.077105 | 0.455899 | 0.322673 |
| MmugDNA.9553.1.S1_at   | MmugDNA.9553.1 | 11.56 | 11.88 | 0.05 | 0.28 | -1.25 | 0.131795 | 0.109817 | 0.498041 | 0.373758 |
| MmugDNA.9555.1.S1_at   | MmugDNA.9555.1 | 7.42  | 6.94  | 0.02 | 0.45 | 1.4   | 0.147281 | 0.086371 | 0.513087 | 0.338805 |
| MmugDNA.9556.1.S1_at   | MmugDNA.9556.1 | 10.11 | 10.08 | 0.14 | 0.21 | 1.02  | 0.784718 | 0.310652 | 0.910286 | 0.565787 |
| MmugDNA.9558.1.S1_at   | MmugDNA.9558.1 | 4.86  | 4.87  | 0.31 | 0.02 | -1    | 0.417416 | 0.537989 | 0.710512 | 0.72281  |
| MmugDNA.9559.1.S1_at   | MmugDNA.9559.1 | 6.53  | 6.96  | 0.13 | 0.29 | -1.34 | 0.122587 | 0.139832 | 0.487859 | 0.413131 |
| MmugDNA.9560.1.S1_at   | MmugDNA.9560.1 | 8     | 7.29  | 0.18 | 0.06 | 1.63  | 0.002564 | 0.008279 | 0.164386 | 0.12078  |
| MmugDNA.9572.1.S1_at   | MmugDNA.9572.1 | 6.28  | 6.46  | 0.09 | 0.46 | -1.14 | 0.840935 | 0.176023 | 0.936034 | 0.452526 |
| MmugDNA.9575.1.S1_at   | MmugDNA.9575.1 | 8.48  | 9.75  | 0.41 | 2.35 | -2.42 | 0.857123 | 0.882962 | 0.942171 | 0.933236 |
| MmugDNA.9578.1.S1_at   | MmugDNA.9578.1 | 9.37  | 10.15 | 0.18 | 0.44 | -1.72 | 0.079629 | 0.033494 | 0.430004 | 0.226577 |
| MmugDNA.9580.1.S1_at   | MmugDNA.9580.1 | 9.31  | 9.37  | 0.16 | 0.45 | -1.04 | 0.392524 | 0.476359 | 0.694657 | 0.682695 |
| MmugDNA.9581.1.S1_at   | MmugDNA.9581.1 | 11.88 | 12.32 | 0.16 | 0.24 | -1.36 | 0.065674 | 0.069156 | 0.404886 | 0.30917  |
| MmugDNA.9582.1.S1_at   | MmugDNA.9582.1 | 3.76  | 3.87  | 0.35 | 0.22 | -1.08 | 0.990119 | 0.899014 | 0.996509 | 0.942524 |
| MmugDNA.9588.1.S1_s_at | MmugDNA.9588.1 | 10.67 | 10.71 | 0.08 | 1.06 | -1.03 | 0.982068 | 0.891736 | 0.993449 | 0.938272 |
| MmugDNA.9591.1.S1_at   | MmugDNA.9591.1 | 8     | 9.82  | 0.71 | 0.14 | -3.53 | 0.006731 | 0.002085 | 0.20158  | 0.067486 |
| MmugDNA.9592.1.S1_at   | MmugDNA.9592.1 | 9.43  | 9.27  | 0.06 | 0.06 | 1.12  | 0.015964 | 0.003159 | 0.262019 | 0.081739 |
| MmugDNA.9595.1.S1_at   | MmugDNA.9595.1 | 5.05  | 5     | 0.05 | 0.01 | 1.03  | 0.165382 | 0.109301 | 0.529362 | 0.37308  |
| MmugDNA.9597.1.S1_at   | MmugDNA.9597.1 | 7.39  | 7.48  | 0.08 | 0.43 | -1.07 | 0.343023 | 0.388466 | 0.663407 | 0.622858 |
| MmugDNA.9600.1.S1_at   | MmugDNA.9600.1 | 7.88  | 6.81  | 0.91 | 0.32 | 2.1   | 0.384799 | 0.390285 | 0.690114 | 0.624128 |
| MmugDNA.9601.1.S1_at   | MmugDNA.9601.1 | 5.28  | 5.24  | 0.19 | 0.37 | 1.03  | 0.336192 | 0.198141 | 0.659374 | 0.473135 |
| MmugDNA.9603.1.S1_at   | MmugDNA.9603.1 | 9.39  | 9.16  | 0.14 | 0.22 | 1.17  | 0.130244 | 0.040648 | 0.496613 | 0.246539 |
| MmugDNA.9604.1.S1_at   | MmugDNA.9604.1 | 13.84 | 13.69 | 0.04 | 0.07 | 1.11  | 0.020679 | 0.012603 | 0.279379 | 0.144807 |
| MmugDNA.9605.1.S1_at   | MmugDNA.9605.1 | 12.23 | 12.44 | 0.22 | 0.28 | -1.15 | 0.574292 | 0.777112 | 0.801619 | 0.870511 |
| MmugDNA.9607.1.S1_at   | MmugDNA.9607.1 | 13.64 | 13.67 | 0.03 | 0.08 | -1.02 | 0.590519 | 0.585321 | 0.809851 | 0.752844 |
| MmugDNA.9612.1.S1_s_at | MmugDNA.9612.1 | 12.8  | 13.21 | 0.17 | 0.07 | -1.32 | 0.027647 | 0.018521 | 0.308507 | 0.171238 |
| MmugDNA.9614.1.S1_at   | MmugDNA.9614.1 | 4.69  | 4.66  | 0.52 | 0.49 | 1.02  | 0.913232 | 0.603451 | 0.965637 | 0.76418  |
| MmugDNA.9615.1.S1_at   | MmugDNA.9615.1 | 4.96  | 4.77  | 0.17 | 0.13 | 1.14  | 0.84819  | 0.049639 | 0.939186 | 0.267876 |
| MmugDNA.9623.1.S1_at   | MmugDNA.9623.1 | 8.56  | 7.55  | 0.17 | 0.41 | 2.01  | 0.017444 | 0.00751  | 0.267445 | 0.116291 |
| MmugDNA.9629.1.S1_at   | MmugDNA.9629.1 | 10.72 | 10.41 | 0.14 | 0.45 | 1.24  | 0.103472 | 0.107123 | 0.463014 | 0.369808 |
| MmugDNA.9631.1.S1_at   | MmugDNA.9631.1 | 9.32  | 9.72  | 0.03 | 0.2  | -1.32 | 0.011334 | 0.001271 | 0.235384 | 0.055241 |
| MmugDNA.9632.1.S1_at   | MmugDNA.9632.1 | 6.19  | 6.27  | 0.38 | 1.17 | -1.06 | 0.81068  | 0.451814 | 0.922872 | 0.66662  |
| MmugDNA.9634.1.S1_at   | MmugDNA.9634.1 | 4.87  | 4.88  | 0.07 | 0.11 | -1.01 | 0.445636 | 0.663489 | 0.727844 | 0.803016 |



|                        |                |       |       |      |      |       |          |          |          |          |
|------------------------|----------------|-------|-------|------|------|-------|----------|----------|----------|----------|
| MmugDNA.9639.1.S1_at   | MmugDNA.9639.1 | 11.09 | 11.07 | 0.06 | 0.04 | 1.01  | 0.844961 | 0.051345 | 0.937773 | 0.272052 |
| MmugDNA.964.1.S1_at    | MmugDNA.964.1  | 6.52  | 7.27  | 0.25 | 0.4  | -1.69 | 0.086479 | 0.06124  | 0.440232 | 0.294151 |
| MmugDNA.9642.1.S1_at   | MmugDNA.9642.1 | 5.55  | 5.72  | 0.02 | 0.16 | -1.13 | 0.164148 | 0.056835 | 0.528211 | 0.284531 |
| MmugDNA.9646.1.S1_at   | MmugDNA.9646.1 | 7.98  | 9.06  | 0.22 | 0.35 | -2.12 | 0.015606 | 0.013554 | 0.259527 | 0.149001 |
| MmugDNA.9648.1.S1_at   | MmugDNA.9648.1 | 3.26  | 3.18  | 0.28 | 0.07 | 1.06  | 0.293941 | 0.260929 | 0.631033 | 0.527351 |
| MmugDNA.9649.1.S1_at   | MmugDNA.9649.1 | 11.61 | 11.84 | 0.13 | 0.1  | -1.17 | 0.360419 | 0.079196 | 0.674462 | 0.32639  |
| MmugDNA.9650.1.S1_at   | MmugDNA.9650.1 | 11.37 | 11.52 | 0.13 | 0.22 | -1.1  | 0.547337 | 0.494429 | 0.786191 | 0.694864 |
| MmugDNA.9652.1.S1_at   | MmugDNA.9652.1 | 6.52  | 5.99  | 0.29 | 0.26 | 1.45  | 0.343298 | 0.123413 | 0.663541 | 0.393429 |
| MmugDNA.9659.1.S1_at   | MmugDNA.9659.1 | 6.34  | 6.47  | 0.16 | 0.13 | -1.09 | 0.398918 | 0.546599 | 0.698999 | 0.728105 |
| MmugDNA.9662.1.S1_at   | MmugDNA.9662.1 | 10.96 | 11.37 | 0.27 | 0.42 | -1.33 | 0.336064 | 0.417154 | 0.65921  | 0.642042 |
| MmugDNA.9668.1.S1_at   | MmugDNA.9668.1 | 8.11  | 7.9   | 0.32 | 0.6  | 1.16  | 0.7827   | 0.887859 | 0.909285 | 0.936094 |
| MmugDNA.9682.1.S1_at   | MmugDNA.9682.1 | 5.46  | 5.58  | 0.1  | 0.16 | -1.09 | 0.202162 | 0.245495 | 0.564479 | 0.515269 |
| MmugDNA.9683.1.S1_at   | MmugDNA.9683.1 | 6.07  | 6.01  | 0.1  | 0.17 | 1.04  | 0.98581  | 0.489395 | 0.994843 | 0.691792 |
| MmugDNA.9689.1.S1_at   | MmugDNA.9689.1 | 12.35 | 11.18 | 0.26 | 1.22 | 2.24  | 0.152754 | 0.175067 | 0.517325 | 0.451724 |
| MmugDNA.9701.1.S1_at   | MmugDNA.9701.1 | 9.33  | 9.11  | 0.49 | 0.5  | 1.16  | 0.548294 | 0.728668 | 0.786665 | 0.843151 |
| MmugDNA.9703.1.S1_at   | MmugDNA.9703.1 | 7.3   | 11.83 | 2.63 | 3.83 | -23.1 | 0.492999 | 0.463512 | 0.755892 | 0.674472 |
| MmugDNA.9705.1.S1_at   | MmugDNA.9705.1 | 10.32 | 8.97  | 0.27 | 1.07 | 2.55  | 0.311967 | 0.407281 | 0.643771 | 0.634867 |
| MmugDNA.971.1.S1_at    | MmugDNA.971.1  | 5.23  | 5.3   | 0.13 | 0.04 | -1.06 | 0.727083 | 0.143749 | 0.88121  | 0.417583 |
| MmugDNA.9713.1.S1_at   | MmugDNA.9713.1 | 5.38  | 5.04  | 0.19 | 0.49 | 1.27  | 0.466057 | 0.496353 | 0.740195 | 0.695995 |
| MmugDNA.9720.1.S1_at   | MmugDNA.9720.1 | 7.94  | 7.25  | 0.09 | 0.38 | 1.61  | 0.042428 | 0.010433 | 0.355014 | 0.133551 |
| MmugDNA.9725.1.S1_at   | MmugDNA.9725.1 | 11.04 | 11.12 | 0.08 | 0.14 | -1.06 | 0.585379 | 0.152921 | 0.807548 | 0.42777  |
| MmugDNA.9728.1.S1_s_at | MmugDNA.9728.1 | 12.24 | 12.07 | 0.2  | 0.05 | 1.12  | 0.083556 | 0.096036 | 0.43582  | 0.353302 |
| MmugDNA.9730.1.S1_at   | MmugDNA.9730.1 | 7.53  | 7.68  | 0.61 | 0.23 | -1.11 | 0.830983 | 0.760865 | 0.931586 | 0.86105  |
| MmugDNA.9731.1.S1_s_at | MmugDNA.9731.1 | 5.23  | 5.12  | 0.12 | 0.2  | 1.08  | 0.60127  | 0.6093   | 0.815685 | 0.767713 |
| MmugDNA.9737.1.S1_at   | MmugDNA.9737.1 | 5.19  | 5.28  | 0.14 | 0.06 | -1.07 | 0.221083 | 0.219088 | 0.580027 | 0.49285  |
| MmugDNA.9737.1.S1_x_at | MmugDNA.9737.1 | 5.59  | 5.69  | 0.36 | 0.12 | -1.07 | 0.844563 | 0.933616 | 0.937584 | 0.962229 |
| MmugDNA.9740.1.S1_at   | MmugDNA.9740.1 | 5.74  | 5.6   | 0.21 | 0.22 | 1.1   | 0.439287 | 0.650333 | 0.723526 | 0.795586 |
| MmugDNA.9741.1.S1_at   | MmugDNA.9741.1 | 3.55  | 3.54  | 0.28 | 0.09 | 1.01  | 0.530546 | 0.625445 | 0.776893 | 0.779175 |
| MmugDNA.9742.1.S1_at   | MmugDNA.9742.1 | 9.59  | 9.83  | 0.26 | 0.56 | -1.19 | 0.302958 | 0.359941 | 0.637233 | 0.601191 |
| MmugDNA.9742.1.S1_s_at | MmugDNA.9742.1 | 9.99  | 10.15 | 0.22 | 0.45 | -1.12 | 0.364245 | 0.503581 | 0.677295 | 0.700979 |
| MmugDNA.9744.1.S1_at   | MmugDNA.9744.1 | 12.18 | 11.81 | 0.14 | 0.23 | 1.29  | 0.036078 | 0.015327 | 0.338781 | 0.157179 |
| MmugDNA.9745.1.S1_at   | MmugDNA.9745.1 | 9.53  | 10.88 | 0.55 | 0.91 | -2.55 | 0.173868 | 0.105668 | 0.53739  | 0.367776 |
| MmugDNA.975.1.S1_at    | MmugDNA.975.1  | 5.62  | 5.63  | 0.19 | 0.04 | -1.01 | 0.545073 | 0.735403 | 0.784751 | 0.846919 |
| MmugDNA.9750.1.S1_at   | MmugDNA.9750.1 | 2.63  | 2.66  | 0.06 | 0.05 | -1.02 | 0.966698 | 0.847822 | 0.987429 | 0.91354  |
| MmugDNA.9750.1.S1_s_at | MmugDNA.9750.1 | 8.32  | 8.43  | 0.68 | 0.52 | -1.08 | 0.719255 | 0.066395 | 0.876813 | 0.303314 |
| MmugDNA.9755.1.S1_at   | MmugDNA.9755.1 | 6.54  | 6.36  | 0.15 | 0.08 | 1.13  | 0.181155 | 0.043145 | 0.545715 | 0.252421 |
| MmugDNA.9760.1.S1_at   | MmugDNA.9760.1 | 5.9   | 5.58  | 0.21 | 0.12 | 1.25  | 0.042887 | 0.03471  | 0.355489 | 0.230506 |
| MmugDNA.9766.1.S1_at   | MmugDNA.9766.1 | 7.03  | 7.04  | 0.46 | 0.12 | -1.01 | 0.417709 | 0.543945 | 0.710734 | 0.726502 |
| MmugDNA.9768.1.S1_at   | MmugDNA.9768.1 | 8.77  | 8.32  | 0.26 | 0.3  | 1.37  | 0.362691 | 0.295724 | 0.676176 | 0.555146 |
| MmugDNA.9768.1.S1_s_at | MmugDNA.9768.1 | 10.15 | 9.61  | 0.04 | 0.45 | 1.45  | 0.317336 | 0.208134 | 0.64789  | 0.482082 |
| MmugDNA.977.1.S1_at    | MmugDNA.977.1  | 12.1  | 12.47 | 0.02 | 0.15 | -1.29 | 0.031085 | 0.053641 | 0.32048  | 0.277224 |

|                        |                |       |       |      |      |       |          |          |          |          |
|------------------------|----------------|-------|-------|------|------|-------|----------|----------|----------|----------|
| MmugDNA.9774.1.S1_at   | MmugDNA.9774.1 | 6.65  | 7.39  | 0.22 | 0.41 | -1.67 | 0.045506 | 0.051051 | 0.361188 | 0.271214 |
| MmugDNA.9774.1.S1_s_at | MmugDNA.9774.1 | 12.29 | 12.23 | 0.07 | 0.06 | 1.05  | 0.141075 | 0.132946 | 0.50864  | 0.404616 |
| MmugDNA.9779.1.S1_at   | MmugDNA.9779.1 | 11.58 | 11.32 | 0.22 | 0.14 | 1.19  | 0.471758 | 0.654517 | 0.743353 | 0.798087 |
| MmugDNA.9782.1.S1_at   | MmugDNA.9782.1 | 10.49 | 9.87  | 0.25 | 0.14 | 1.53  | 0.018554 | 0.007141 | 0.270581 | 0.113735 |
| MmugDNA.9783.1.S1_at   | MmugDNA.9783.1 | 11.16 | 10.66 | 0.23 | 0.17 | 1.42  | 0.02036  | 0.010031 | 0.277623 | 0.131295 |
| MmugDNA.9787.1.S1_s_at | MmugDNA.9787.1 | 11.89 | 12.05 | 0.01 | 0.23 | -1.12 | 0.318016 | 0.359702 | 0.64802  | 0.600963 |
| MmugDNA.979.1.S1_at    | MmugDNA.979.1  | 5.12  | 5.47  | 0.17 | 0.6  | -1.28 | 0.286134 | 0.407967 | 0.625397 | 0.635339 |
| MmugDNA.9793.1.S1_at   | MmugDNA.9793.1 | 3.9   | 3.88  | 0.07 | 0.11 | 1.02  | 0.448299 | 0.58655  | 0.72957  | 0.753589 |
| MmugDNA.9799.1.S1_at   | MmugDNA.9799.1 | 6.89  | 6.3   | 0.53 | 0.24 | 1.5   | 0.044421 | 0.012451 | 0.358591 | 0.14417  |
| MmugDNA.9802.1.S1_at   | MmugDNA.9802.1 | 6.64  | 6.79  | 0.13 | 0.09 | -1.1  | 0.163751 | 0.196163 | 0.528049 | 0.471236 |
| MmugDNA.9802.1.S1_s_at | MmugDNA.9802.1 | 6.13  | 6.25  | 0.07 | 0.13 | -1.09 | 0.045674 | 0.046531 | 0.361416 | 0.260221 |
| MmugDNA.9807.1.S1_at   | MmugDNA.9807.1 | 7.07  | 7.17  | 0.11 | 0.23 | -1.07 | 0.973426 | 0.449509 | 0.9896   | 0.665109 |
| MmugDNA.9809.1.S1_at   | MmugDNA.9809.1 | 11.26 | 12.06 | 0.77 | 0.24 | -1.75 | 0.080423 | 0.07327  | 0.430491 | 0.316233 |
| MmugDNA.9809.1.S1_s_at | MmugDNA.9809.1 | 10.65 | 12.14 | 1.13 | 0.23 | -2.8  | 0.079008 | 0.070509 | 0.428609 | 0.311777 |
| MmugDNA.9822.1.S1_at   | MmugDNA.9822.1 | 5.1   | 5.21  | 0.14 | 0.33 | -1.08 | 0.361363 | 0.499863 | 0.675185 | 0.698564 |
| MmugDNA.9823.1.S1_at   | MmugDNA.9823.1 | 11.44 | 11.38 | 0.07 | 0.19 | 1.04  | 0.339526 | 0.071505 | 0.661307 | 0.313706 |
| MmugDNA.9824.1.S1_at   | MmugDNA.9824.1 | 5.95  | 5.99  | 0.28 | 0.39 | -1.03 | 0.56655  | 0.769547 | 0.797608 | 0.866185 |
| MmugDNA.9827.1.S1_at   | MmugDNA.9827.1 | 10.24 | 9.69  | 0.14 | 0.06 | 1.47  | 0.001967 | 0.000157 | 0.155636 | 0.030199 |
| MmugDNA.9829.1.S1_at   | MmugDNA.9829.1 | 7.97  | 8.84  | 0.17 | 1.7  | -1.83 | 0.468562 | 0.358058 | 0.741077 | 0.599613 |
| MmugDNA.9845.1.S1_at   | MmugDNA.9845.1 | 10.88 | 10.63 | 0.1  | 0.32 | 1.19  | 0.277603 | 0.288639 | 0.619765 | 0.549827 |
| MmugDNA.9849.1.S1_at   | MmugDNA.9849.1 | 6.85  | 8.18  | 0.66 | 1.19 | -2.52 | 0.453407 | 0.622901 | 0.732603 | 0.777394 |
| MmugDNA.9851.1.S1_at   | MmugDNA.9851.1 | 5.18  | 5.45  | 0.13 | 0.55 | -1.21 | 0.434645 | 0.392928 | 0.72066  | 0.625917 |
| MmugDNA.9853.1.S1_at   | MmugDNA.9853.1 | 5.41  | 6.86  | 1.32 | 1.24 | -2.72 | 0.479485 | 0.611588 | 0.747663 | 0.769451 |
| MmugDNA.9854.1.S1_at   | MmugDNA.9854.1 | 8.17  | 10.06 | 1.11 | 2.13 | -3.72 | 0.52344  | 0.467295 | 0.77253  | 0.677032 |
| MmugDNA.9856.1.S1_at   | MmugDNA.9856.1 | 11.49 | 10.8  | 0.14 | 0.11 | 1.61  | 0.001505 | 0.005834 | 0.151412 | 0.104669 |
| MmugDNA.9860.1.S1_at   | MmugDNA.9860.1 | 10.51 | 8.67  | 0.41 | 0.56 | 3.58  | 0.018794 | 0.010224 | 0.2715   | 0.132544 |
| MmugDNA.9863.1.S1_at   | MmugDNA.9863.1 | 11.12 | 11.59 | 0.15 | 0.2  | -1.38 | 0.037136 | 0.029361 | 0.340777 | 0.213234 |
| MmugDNA.9872.1.S1_at   | MmugDNA.9872.1 | 12.02 | 12.51 | 0.22 | 0.54 | -1.4  | 0.346352 | 0.470852 | 0.665788 | 0.679124 |
| MmugDNA.9872.1.S1_s_at | MmugDNA.9872.1 | 12.44 | 12.97 | 0.26 | 0.58 | -1.45 | 0.367114 | 0.503147 | 0.679287 | 0.700633 |
| MmugDNA.9873.1.S1_at   | MmugDNA.9873.1 | 5.63  | 5.77  | 0.19 | 0.02 | -1.1  | 0.243097 | 0.197715 | 0.594744 | 0.472633 |
| MmugDNA.9874.1.S1_at   | MmugDNA.9874.1 | 11.97 | 11.66 | 0.13 | 0.53 | 1.24  | 0.117431 | 0.007744 | 0.481525 | 0.117619 |
| MmugDNA.9878.1.S1_at   | MmugDNA.9878.1 | 3.72  | 3.73  | 0.12 | 0.1  | -1    | 0.554877 | 0.588806 | 0.791099 | 0.755149 |
| MmugDNA.9883.1.S1_at   | MmugDNA.9883.1 | 7.85  | 7.61  | 0.13 | 0.33 | 1.18  | 0.231618 | 0.294655 | 0.587487 | 0.55432  |
| MmugDNA.9887.1.S1_at   | MmugDNA.9887.1 | 5.34  | 5.34  | 0.01 | 0.09 | 1     | 0.390838 | 0.245473 | 0.693845 | 0.515244 |
| MmugDNA.9889.1.S1_s_at | MmugDNA.9889.1 | 9.88  | 10.09 | 0.59 | 1.16 | -1.16 | 0.599169 | 0.745726 | 0.81451  | 0.85256  |
| MmugDNA.9892.1.S1_at   | MmugDNA.9892.1 | 7.73  | 8.04  | 0.19 | 0.07 | -1.25 | 0.156738 | 0.227544 | 0.521541 | 0.499841 |
| MmugDNA.9898.1.S1_at   | MmugDNA.9898.1 | 6.18  | 6.23  | 0.13 | 0.21 | -1.03 | 0.982183 | 0.006114 | 0.993449 | 0.10649  |
| MmugDNA.99.1.S1_at     | MmugDNA.99.1   | 4.58  | 4.53  | 0.32 | 0.1  | 1.03  | 0.420009 | 0.68334  | 0.712178 | 0.815238 |
| MmugDNA.990.1.S1_at    | MmugDNA.990.1  | 9.4   | 9.18  | 0.25 | 0.16 | 1.16  | 0.060467 | 0.052122 | 0.393715 | 0.273899 |
| MmugDNA.9906.1.S1_at   | MmugDNA.9906.1 | 8.1   | 7.53  | 0.05 | 0.31 | 1.48  | 0.032747 | 0.021715 | 0.326023 | 0.184333 |
| MmugDNA.9909.1.S1_at   | MmugDNA.9909.1 | 5.05  | 5.34  | 0.01 | 0.21 | -1.22 | 0.114583 | 0.107388 | 0.477887 | 0.370219 |

|                         |                 |       |       |      |      |       |          |          |          |          |
|-------------------------|-----------------|-------|-------|------|------|-------|----------|----------|----------|----------|
| MmugDNA.9910.1.S1_at    | MmugDNA.9910.1  | 5.98  | 6.13  | 0.05 | 0.23 | -1.11 | 0.090363 | 0.254848 | 0.445788 | 0.523051 |
| MmugDNA.9920.1.S1_at    | MmugDNA.9920.1  | 11.2  | 11.96 | 0.41 | 0.45 | -1.69 | 0.217253 | 0.186963 | 0.576846 | 0.462875 |
| MmugDNA.9922.1.S1_at    | MmugDNA.9922.1  | 11.32 | 11.74 | 0.18 | 0.11 | -1.34 | 0.016955 | 0.006736 | 0.266211 | 0.110984 |
| MmugDNA.9925.1.S1_at    | MmugDNA.9925.1  | 7.98  | 9.06  | 0.67 | 0.78 | -2.11 | 0.050009 | 0.041477 | 0.372883 | 0.248517 |
| MmugDNA.9930.1.S1_s_at  | MmugDNA.9930.1  | 8.78  | 8.82  | 0.45 | 0.31 | -1.03 | 0.995146 | 0.554356 | 0.998262 | 0.733168 |
| MmugDNA.9933.1.S1_at    | MmugDNA.9933.1  | 11.41 | 11.17 | 0.26 | 0.46 | 1.17  | 0.320436 | 0.031865 | 0.649472 | 0.220909 |
| MmugDNA.9939.1.S1_at    | MmugDNA.9939.1  | 4.16  | 4.23  | 0.12 | 0.06 | -1.05 | 0.090579 | 0.082884 | 0.446017 | 0.332423 |
| MmugDNA.9940.1.S1_s_at  | MmugDNA.9940.1  | 7.4   | 7.77  | 0.47 | 0.52 | -1.29 | 0.197159 | 0.227235 | 0.560096 | 0.499574 |
| MmugDNA.9942.1.S1_at    | MmugDNA.9942.1  | 12.6  | 12.47 | 0.03 | 0.23 | 1.09  | 0.274213 | 0.195401 | 0.617262 | 0.470253 |
| MmugDNA.9944.1.S1_at    | MmugDNA.9944.1  | 6.61  | 6.72  | 0.2  | 0.06 | -1.08 | 0.739189 | 0.905842 | 0.888118 | 0.946727 |
| MmugDNA.9951.1.S1_at    | MmugDNA.9951.1  | 7.47  | 7.58  | 0.22 | 0.33 | -1.08 | 0.721685 | 0.160516 | 0.878248 | 0.436686 |
| MmugDNA.9958.1.S1_at    | MmugDNA.9958.1  | 7.18  | 6.99  | 0.89 | 1.01 | 1.14  | 0.954396 | 0.241516 | 0.983073 | 0.512152 |
| MmugDNA.9967.1.S1_s_at  | MmugDNA.9967.1  | 9.39  | 8.81  | 0.09 | 0.2  | 1.49  | 0.008158 | 0.002792 | 0.216841 | 0.077966 |
| MmugDNA.9968.1.S1_at    | MmugDNA.9968.1  | 11.67 | 11.61 | 0.09 | 0.05 | 1.04  | 0.693903 | 0.434445 | 0.864293 | 0.654569 |
| MmugDNA.9968.1.S1_s_at  | MmugDNA.9968.1  | 11.11 | 11.2  | 0.06 | 0.09 | -1.06 | 0.524356 | 0.186868 | 0.773181 | 0.462707 |
| MmugDNA.9969.1.S1_at    | MmugDNA.9969.1  | 13.86 | 13.74 | 0.07 | 0.01 | 1.09  | 0.093117 | 0.001331 | 0.450362 | 0.056205 |
| MmugDNA.9970.1.S1_at    | MmugDNA.9970.1  | 5.39  | 5.53  | 0.17 | 0.07 | -1.1  | 0.841689 | 0.098852 | 0.936215 | 0.357002 |
| MmugDNA.9973.1.S1_at    | MmugDNA.9973.1  | 12.14 | 12.37 | 0.1  | 0.1  | -1.18 | 0.231975 | 0.200776 | 0.587692 | 0.475282 |
| MmugDNA.9977.1.S1_at    | MmugDNA.9977.1  | 8.44  | 9.43  | 0.27 | 0.48 | -1.99 | 0.152865 | 0.178504 | 0.517325 | 0.454778 |
| MmugDNA.9978.1.S1_at    | MmugDNA.9978.1  | 6.03  | 6.07  | 0    | 0.05 | -1.03 | 0.077409 | 0.506664 | 0.427131 | 0.702542 |
| MmugDNA.9992.1.S1_at    | MmugDNA.9992.1  | 4.92  | 4.95  | 0.17 | 0.12 | -1.02 | 0.529599 | 0.63183  | 0.77625  | 0.782971 |
| MmugDNA.9994.1.S1_at    | MmugDNA.9994.1  | 12.07 | 12.57 | 0.18 | 0.16 | -1.41 | 0.016857 | 0.004035 | 0.266096 | 0.090281 |
| MmunewRS.1.1.S1_at      | MmunewRS.1.1    | 6.77  | 6.74  | 0.14 | 0.06 | 1.03  | 0.436262 | 0.634815 | 0.721644 | 0.785036 |
| MmunewRS.10.1.S1_at     | MmunewRS.10.1   | 2.9   | 2.89  | 0.03 | 0.14 | 1.01  | 0.719198 | 0.807303 | 0.876813 | 0.889071 |
| MmunewRS.100.1.S1_at    | MmunewRS.100.1  | 5.99  | 6.03  | 0.01 | 0.12 | -1.03 | 0.298602 | 0.113612 | 0.63411  | 0.379726 |
| MmunewRS.1000.1.S1_s_at | MmunewRS.1000.1 | 9.16  | 9.05  | 0.17 | 0.57 | 1.08  | 0.939925 | 0.545224 | 0.977113 | 0.727441 |
| MmunewRS.1001.1.S1_at   | MmunewRS.1001.1 | 5.3   | 5.58  | 0.21 | 0.22 | -1.21 | 0.09195  | 0.081801 | 0.448512 | 0.330183 |
| MmunewRS.1002.1.S1_at   | MmunewRS.1002.1 | 7.1   | 6.98  | 0.19 | 0.42 | 1.08  | 0.588863 | 0.738972 | 0.809161 | 0.848701 |
| MmunewRS.1003.1.S1_at   | MmunewRS.1003.1 | 4.2   | 4.3   | 0.08 | 0.2  | -1.08 | 0.677638 | 0.829357 | 0.855562 | 0.901879 |
| MmunewRS.1004.1.S1_at   | MmunewRS.1004.1 | 3.51  | 3.62  | 0.07 | 0.6  | -1.08 | 0.230663 | 0.212386 | 0.587222 | 0.486325 |
| MmunewRS.1005.1.S1_at   | MmunewRS.1005.1 | 3.93  | 3.94  | 0.16 | 0.25 | -1.01 | 0.264109 | 0.321945 | 0.609857 | 0.573573 |
| MmunewRS.1006.1.S1_s_at | MmunewRS.1006.1 | 3.6   | 3.75  | 0.09 | 0.09 | -1.11 | 0.090824 | 0.088275 | 0.446466 | 0.341721 |
| MmunewRS.1007.1.S1_at   | MmunewRS.1007.1 | 3.93  | 3.69  | 0.23 | 0.22 | 1.18  | 0.119544 | 0.129061 | 0.484145 | 0.400548 |
| MmunewRS.1008.1.S1_at   | MmunewRS.1008.1 | 3.24  | 3.28  | 0.24 | 0.07 | -1.02 | 0.639195 | 0.590272 | 0.837052 | 0.756124 |
| MmunewRS.1009.1.S1_at   | MmunewRS.1009.1 | 3.34  | 3.53  | 0.3  | 0.1  | -1.14 | 0.329438 | 0.333046 | 0.655089 | 0.581374 |
| MmunewRS.101.1.S1_at    | MmunewRS.101.1  | 4.88  | 4.85  | 0.23 | 0.23 | 1.02  | 0.762292 | 0.795511 | 0.899996 | 0.882189 |
| MmunewRS.1010.1.S1_at   | MmunewRS.1010.1 | 6.81  | 7     | 0.15 | 0.15 | -1.14 | 0.179497 | 0.199381 | 0.543633 | 0.474002 |
| MmunewRS.1011.1.S1_at   | MmunewRS.1011.1 | 5.41  | 5.43  | 0.13 | 0.15 | -1.02 | 0.72334  | 0.179833 | 0.879114 | 0.45636  |
| MmunewRS.1012.1.S1_at   | MmunewRS.1012.1 | 4.13  | 4.07  | 0.03 | 0.05 | 1.04  | 0.568036 | 0.156037 | 0.798395 | 0.43145  |
| MmunewRS.1013.1.S1_at   | MmunewRS.1013.1 | 2.99  | 3.02  | 0.02 | 0.17 | -1.02 | 0.282558 | 0.314723 | 0.622929 | 0.568449 |
| MmunewRS.1014.1.S1_at   | MmunewRS.1014.1 | 7.27  | 7.25  | 0.46 | 0.15 | 1.01  | 0.301618 | 0.462997 | 0.636509 | 0.674149 |

|                         |                 |       |       |      |      |       |          |          |          |          |
|-------------------------|-----------------|-------|-------|------|------|-------|----------|----------|----------|----------|
| MmunewRS.1014.1.S1_s_at | MmunewRS.1014.1 | 7.74  | 7.87  | 0.46 | 0.15 | -1.09 | 0.273326 | 0.358692 | 0.616784 | 0.600178 |
| MmunewRS.1015.1.S1_at   | MmunewRS.1015.1 | 11.17 | 10.35 | 0.17 | 0.79 | 1.77  | 0.145349 | 0.100608 | 0.511407 | 0.359897 |
| MmunewRS.1016.1.S1_at   | MmunewRS.1016.1 | 7.26  | 7.4   | 0.31 | 0.23 | -1.1  | 0.944777 | 0.265337 | 0.978994 | 0.531314 |
| MmunewRS.1017.1.S1_at   | MmunewRS.1017.1 | 5.89  | 6.02  | 0.09 | 0.06 | -1.09 | 0.161348 | 0.115775 | 0.526364 | 0.382814 |
| MmunewRS.1018.1.S1_at   | MmunewRS.1018.1 | 8.19  | 8.07  | 0.35 | 0.54 | 1.09  | 0.759192 | 0.912685 | 0.898249 | 0.950818 |
| MmunewRS.1019.1.S1_at   | MmunewRS.1019.1 | 4.43  | 4.54  | 0.1  | 0.1  | -1.08 | 0.125489 | 0.228255 | 0.491333 | 0.500443 |
| MmunewRS.102.1.S1_at    | MmunewRS.102.1  | 6.49  | 6.15  | 0.71 | 0.67 | 1.27  | 0.837083 | 0.282746 | 0.934152 | 0.545473 |
| MmunewRS.1020.1.S1_at   | MmunewRS.1020.1 | 4.58  | 4.6   | 0.08 | 0.17 | -1.01 | 0.545442 | 0.81664  | 0.784962 | 0.89423  |
| MmunewRS.1021.1.S1_at   | MmunewRS.1021.1 | 3.88  | 3.97  | 0.13 | 0.03 | -1.06 | 0.127216 | 0.150536 | 0.493599 | 0.42509  |
| MmunewRS.1022.1.S1_at   | MmunewRS.1022.1 | 6.16  | 6.25  | 0.15 | 0.04 | -1.07 | 0.204783 | 0.22416  | 0.567387 | 0.497157 |
| MmunewRS.1023.1.S1_at   | MmunewRS.1023.1 | 8.78  | 8.2   | 0.21 | 0.89 | 1.49  | 0.119492 | 0.036431 | 0.484145 | 0.235383 |
| MmunewRS.1023.1.S1_s_at | MmunewRS.1023.1 | 8.52  | 8.13  | 0.06 | 0.78 | 1.3   | 0.150706 | 0.040305 | 0.515411 | 0.245928 |
| MmunewRS.1024.1.S1_at   | MmunewRS.1024.1 | 6.55  | 6.65  | 0.07 | 0.13 | -1.08 | 0.185583 | 0.282933 | 0.548924 | 0.545692 |
| MmunewRS.1025.1.S1_at   | MmunewRS.1025.1 | 3.16  | 3.08  | 0.14 | 0.1  | 1.06  | 0.832115 | 0.938652 | 0.931955 | 0.965105 |
| MmunewRS.1026.1.S1_at   | MmunewRS.1026.1 | 3.17  | 3.01  | 0.66 | 0.24 | 1.11  | 0.360175 | 0.56568  | 0.674243 | 0.740066 |
| MmunewRS.1027.1.S1_at   | MmunewRS.1027.1 | 14.35 | 14.32 | 0.02 | 0.04 | 1.02  | 0.187413 | 0.190815 | 0.550505 | 0.466228 |
| MmunewRS.1028.1.S1_at   | MmunewRS.1028.1 | 9.56  | 8.58  | 0.52 | 1.67 | 1.98  | 0.268293 | 0.181356 | 0.613118 | 0.457872 |
| MmunewRS.1029.1.S1_at   | MmunewRS.1029.1 | 4.58  | 4.78  | 0.07 | 0.12 | -1.15 | 0.043405 | 0.09577  | 0.356711 | 0.352753 |
| MmunewRS.103.1.S1_at    | MmunewRS.103.1  | 6.65  | 6.7   | 0.33 | 0.68 | -1.03 | 0.795009 | 0.002125 | 0.914948 | 0.06817  |
| MmunewRS.1030.1.S1_at   | MmunewRS.1030.1 | 6.89  | 6.89  | 0.16 | 0.02 | 1     | 0.926217 | 0.74115  | 0.971707 | 0.850135 |
| MmunewRS.1031.1.S1_at   | MmunewRS.1031.1 | 4.47  | 4.43  | 0.1  | 0.23 | 1.03  | 0.615162 | 0.718535 | 0.823342 | 0.837072 |
| MmunewRS.1032.1.S1_at   | MmunewRS.1032.1 | 12.04 | 11.62 | 0.17 | 0.09 | 1.34  | 0.008609 | 0.004301 | 0.219553 | 0.092019 |
| MmunewRS.1033.1.S1_at   | MmunewRS.1033.1 | 3.32  | 3.36  | 0.15 | 0.11 | -1.03 | 0.489592 | 0.647429 | 0.753948 | 0.793471 |
| MmunewRS.1034.1.S1_at   | MmunewRS.1034.1 | 5.03  | 5.02  | 0.13 | 0.09 | 1.01  | 0.457026 | 0.442796 | 0.734657 | 0.660759 |
| MmunewRS.1035.1.S1_s_at | MmunewRS.1035.1 | 7.8   | 8.65  | 0.19 | 0.46 | -1.8  | 0.054479 | 0.052532 | 0.381851 | 0.274771 |
| MmunewRS.1037.1.S1_at   | MmunewRS.1037.1 | 7.25  | 7.29  | 0.2  | 0.1  | -1.03 | 0.624549 | 0.696152 | 0.828315 | 0.823455 |
| MmunewRS.1038.1.S1_at   | MmunewRS.1038.1 | 5.43  | 5.41  | 0.22 | 0.55 | 1.01  | 0.287347 | 0.365714 | 0.625978 | 0.605684 |
| MmunewRS.1039.1.S1_at   | MmunewRS.1039.1 | 8.32  | 9.26  | 0.94 | 0.53 | -1.92 | 0.164307 | 0.194652 | 0.528238 | 0.469765 |
| MmunewRS.104.1.S1_s_at  | MmunewRS.104.1  | 4.93  | 4.96  | 0.08 | 0.05 | -1.02 | 0.254537 | 0.586942 | 0.602465 | 0.75391  |
| MmunewRS.1040.1.S1_at   | MmunewRS.1040.1 | 5.31  | 5.51  | 0.13 | 0.09 | -1.15 | 0.255382 | 0.276801 | 0.603198 | 0.540725 |
| MmunewRS.1041.1.S1_at   | MmunewRS.1041.1 | 5.66  | 5.61  | 0.19 | 0.17 | 1.04  | 0.679763 | 0.852348 | 0.856815 | 0.916102 |
| MmunewRS.1042.1.S1_at   | MmunewRS.1042.1 | 4.64  | 4.83  | 0.14 | 0.1  | -1.14 | 0.117651 | 0.122802 | 0.48184  | 0.392784 |
| MmunewRS.1045.1.S1_at   | MmunewRS.1045.1 | 4.43  | 4.52  | 0.05 | 0.09 | -1.06 | 0.19986  | 0.067967 | 0.562928 | 0.306909 |
| MmunewRS.1046.1.S1_at   | MmunewRS.1046.1 | 4     | 4.04  | 0.13 | 0.2  | -1.03 | 0.368962 | 0.272221 | 0.680384 | 0.536976 |
| MmunewRS.1047.1.S1_at   | MmunewRS.1047.1 | 5.52  | 5.6   | 0.04 | 0.14 | -1.06 | 0.444453 | 0.382758 | 0.726992 | 0.618887 |
| MmunewRS.1048.1.S1_s_at | MmunewRS.1048.1 | 3.61  | 3.48  | 0.01 | 0.22 | 1.09  | 0.95741  | 0.955168 | 0.983882 | 0.9746   |
| MmunewRS.105.1.S1_at    | MmunewRS.105.1  | 4.34  | 4.33  | 0.15 | 0.05 | 1.01  | 0.659445 | 0.865889 | 0.847196 | 0.923757 |
| MmunewRS.1051.1.S1_at   | MmunewRS.1051.1 | 4.52  | 4.51  | 0.12 | 0.33 | 1.01  | 0.626264 | 0.64705  | 0.82949  | 0.793279 |
| MmunewRS.1052.1.S1_at   | MmunewRS.1052.1 | 4.06  | 4.12  | 0.07 | 0.05 | -1.04 | 0.392602 | 0.527769 | 0.694693 | 0.716271 |
| MmunewRS.1054.1.S1_at   | MmunewRS.1054.1 | 3.65  | 3.66  | 0.03 | 0.1  | -1.01 | 0.205041 | 0.205416 | 0.567483 | 0.479757 |
| MmunewRS.1055.1.S1_at   | MmunewRS.1055.1 | 13.39 | 13.41 | 0.21 | 0.09 | -1.01 | 0.601135 | 0.297555 | 0.815683 | 0.556192 |

|                         |                 |       |       |      |      |       |          |          |          |          |
|-------------------------|-----------------|-------|-------|------|------|-------|----------|----------|----------|----------|
| MmunewRS.1056.1.S1_at   | MmunewRS.1056.1 | 4.19  | 4.26  | 0.14 | 0.13 | -1.05 | 0.191895 | 0.33256  | 0.554902 | 0.580954 |
| MmunewRS.1057.1.S1_at   | MmunewRS.1057.1 | 3.67  | 3.67  | 0.09 | 0.12 | 1     | 0.549725 | 0.695976 | 0.787481 | 0.823362 |
| MmunewRS.1058.1.S1_at   | MmunewRS.1058.1 | 5.23  | 5.32  | 0.01 | 0.09 | -1.06 | 0.161985 | 0.460064 | 0.526638 | 0.671989 |
| MmunewRS.106.1.S1_at    | MmunewRS.106.1  | 8.2   | 7.27  | 0.98 | 0.98 | 1.9   | 0.327466 | 0.499845 | 0.65384  | 0.698557 |
| MmunewRS.1060.1.S1_at   | MmunewRS.1060.1 | 9.58  | 9.33  | 0.2  | 0.14 | 1.19  | 0.119821 | 0.074315 | 0.484387 | 0.318046 |
| MmunewRS.1061.1.S1_at   | MmunewRS.1061.1 | 5.13  | 5.24  | 0.07 | 0.1  | -1.08 | 0.100932 | 0.040175 | 0.461009 | 0.245709 |
| MmunewRS.1062.1.S1_at   | MmunewRS.1062.1 | 4.18  | 4.17  | 0.18 | 0.13 | 1.01  | 0.740492 | 0.219939 | 0.888654 | 0.49344  |
| MmunewRS.1063.1.S1_at   | MmunewRS.1063.1 | 7.9   | 6.5   | 0.62 | 0.26 | 2.65  | 0.021014 | 0.008165 | 0.281947 | 0.119874 |
| MmunewRS.1064.1.S1_at   | MmunewRS.1064.1 | 3.65  | 3.69  | 0.17 | 0.21 | -1.02 | 0.766652 | 0.83502  | 0.901901 | 0.905549 |
| MmunewRS.1065.1.S1_at   | MmunewRS.1065.1 | 4.35  | 4.33  | 0.57 | 0.12 | 1.01  | 0.668723 | 0.731116 | 0.851986 | 0.844198 |
| MmunewRS.1066.1.S1_s_at | MmunewRS.1066.1 | 3.42  | 3.36  | 0.12 | 0.05 | 1.04  | 0.624213 | 0.65885  | 0.828178 | 0.800473 |
| MmunewRS.1067.1.S1_at   | MmunewRS.1067.1 | 3.94  | 3.83  | 0.16 | 0.06 | 1.08  | 0.373439 | 0.384122 | 0.683245 | 0.619926 |
| MmunewRS.1068.1.S1_at   | MmunewRS.1068.1 | 3.55  | 3.56  | 0.08 | 0.1  | -1.01 | 0.489635 | 0.471109 | 0.75397  | 0.679173 |
| MmunewRS.1069.1.S1_s_at | MmunewRS.1069.1 | 5.21  | 5.56  | 0.09 | 0.17 | -1.28 | 0.057425 | 0.034971 | 0.388306 | 0.231149 |
| MmunewRS.107.1.S1_at    | MmunewRS.107.1  | 3.64  | 3.46  | 0.16 | 0.11 | 1.13  | 0.299917 | 0.405343 | 0.635282 | 0.633693 |
| MmunewRS.1070.1.S1_at   | MmunewRS.1070.1 | 10.75 | 12.11 | 0.67 | 0.45 | -2.56 | 0.064469 | 0.024222 | 0.402975 | 0.194904 |
| MmunewRS.1071.1.S1_at   | MmunewRS.1071.1 | 3.53  | 3.54  | 0.06 | 0.01 | -1.01 | 0.546172 | 0.220378 | 0.785337 | 0.493783 |
| MmunewRS.1073.1.S1_at   | MmunewRS.1073.1 | 13.25 | 12.94 | 0.16 | 0.41 | 1.24  | 0.303896 | 0.331394 | 0.638087 | 0.580076 |
| MmunewRS.1074.1.S1_at   | MmunewRS.1074.1 | 6.78  | 6.97  | 0.2  | 0.07 | -1.14 | 0.442033 | 0.537149 | 0.725347 | 0.722316 |
| MmunewRS.1075.1.S1_at   | MmunewRS.1075.1 | 5.7   | 5.57  | 0.11 | 0.21 | 1.09  | 0.999868 | 0.090818 | 0.999967 | 0.345355 |
| MmunewRS.1076.1.S1_at   | MmunewRS.1076.1 | 7.31  | 7.26  | 0.12 | 0.1  | 1.03  | 0.751683 | 0.9194   | 0.893893 | 0.954743 |
| MmunewRS.1077.1.S1_at   | MmunewRS.1077.1 | 4.34  | 4.32  | 0.22 | 0.03 | 1.02  | 0.482894 | 0.545602 | 0.749661 | 0.727579 |
| MmunewRS.1078.1.S1_at   | MmunewRS.1078.1 | 5.17  | 5.18  | 0.15 | 0.05 | -1.01 | 0.972021 | 0.988793 | 0.989313 | 0.993611 |
| MmunewRS.1079.1.S1_at   | MmunewRS.1079.1 | 5.94  | 5.95  | 0.2  | 0.01 | -1.01 | 0.358766 | 0.358031 | 0.673467 | 0.599604 |
| MmunewRS.108.1.S1_at    | MmunewRS.108.1  | 9.75  | 9.93  | 0.2  | 0.18 | -1.13 | 0.290966 | 0.190152 | 0.628652 | 0.465798 |
| MmunewRS.1080.1.S1_at   | MmunewRS.1080.1 | 9.57  | 9.99  | 0.15 | 0.77 | -1.34 | 0.46807  | 0.292219 | 0.740986 | 0.552363 |
| MmunewRS.1081.1.S1_at   | MmunewRS.1081.1 | 3.97  | 4.15  | 0.09 | 0.18 | -1.14 | 0.114393 | 0.123679 | 0.477827 | 0.393778 |
| MmunewRS.1082.1.S1_at   | MmunewRS.1082.1 | 5.6   | 5.62  | 0.11 | 0.17 | -1.02 | 0.703523 | 0.698794 | 0.869081 | 0.824997 |
| MmunewRS.1083.1.S1_at   | MmunewRS.1083.1 | 3.89  | 4.02  | 0.16 | 0.05 | -1.09 | 0.172673 | 0.229489 | 0.536277 | 0.501527 |
| MmunewRS.1084.1.S1_at   | MmunewRS.1084.1 | 5.32  | 5.29  | 0.04 | 0.03 | 1.02  | 0.242203 | 0.710218 | 0.594305 | 0.831904 |
| MmunewRS.1085.1.S1_at   | MmunewRS.1085.1 | 5.5   | 5.73  | 0.25 | 0.28 | -1.17 | 0.353914 | 0.474836 | 0.670266 | 0.681736 |
| MmunewRS.1086.1.S1_at   | MmunewRS.1086.1 | 5.28  | 5.3   | 0.13 | 0.07 | -1.01 | 0.784709 | 0.906819 | 0.910286 | 0.947238 |
| MmunewRS.1087.1.S1_at   | MmunewRS.1087.1 | 5.32  | 5.82  | 0.17 | 0.32 | -1.41 | 0.073324 | 0.105399 | 0.418512 | 0.367275 |
| MmunewRS.1088.1.S1_at   | MmunewRS.1088.1 | 4.13  | 4.07  | 0.1  | 0.17 | 1.04  | 0.790958 | 0.637867 | 0.913202 | 0.787216 |
| MmunewRS.1089.1.S1_at   | MmunewRS.1089.1 | 11.56 | 11.5  | 0.13 | 0.13 | 1.04  | 0.127619 | 0.13607  | 0.493916 | 0.408363 |
| MmunewRS.1090.1.S1_at   | MmunewRS.1090.1 | 4.46  | 4.62  | 0.02 | 0.11 | -1.11 | 0.02595  | 0.056287 | 0.301242 | 0.283274 |
| MmunewRS.1091.1.S1_at   | MmunewRS.1091.1 | 5.16  | 5.3   | 0.51 | 0.42 | -1.1  | 0.368764 | 0.171114 | 0.680234 | 0.447686 |
| MmunewRS.1092.1.S1_at   | MmunewRS.1092.1 | 6.7   | 6.76  | 0.57 | 0.72 | -1.04 | 0.939706 | 0.269175 | 0.977013 | 0.534497 |
| MmunewRS.1093.1.S1_at   | MmunewRS.1093.1 | 4.43  | 4.63  | 0.1  | 0.19 | -1.15 | 0.23053  | 0.277408 | 0.587222 | 0.54133  |
| MmunewRS.1094.1.S1_at   | MmunewRS.1094.1 | 8.8   | 9.83  | 0.29 | 0.86 | -2.05 | 0.340045 | 0.194875 | 0.661611 | 0.469963 |
| MmunewRS.1095.1.S1_at   | MmunewRS.1095.1 | 5.31  | 5.47  | 0.02 | 0.05 | -1.11 | 0.012969 | 0.024789 | 0.245045 | 0.197269 |

|                        |                 |       |       |      |      |       |          |          |          |          |
|------------------------|-----------------|-------|-------|------|------|-------|----------|----------|----------|----------|
| MmunewRS.1096.1.S1_at  | MmunewRS.1096.1 | 4.35  | 4.3   | 0.19 | 0.06 | 1.03  | 0.92248  | 0.885334 | 0.969946 | 0.934774 |
| MmunewRS.1097.1.S1_at  | MmunewRS.1097.1 | 5.41  | 5.55  | 0.17 | 0.03 | -1.1  | 0.760948 | 0.775679 | 0.899201 | 0.869477 |
| MmunewRS.1098.1.S1_at  | MmunewRS.1098.1 | 3.31  | 3.38  | 0.08 | 0.15 | -1.05 | 0.324456 | 0.392664 | 0.651941 | 0.625813 |
| MmunewRS.11.1.S1_at    | MmunewRS.11.1   | 3.67  | 3.81  | 0.1  | 0.14 | -1.1  | 0.179601 | 0.259627 | 0.543818 | 0.526525 |
| MmunewRS.110.1.S1_at   | MmunewRS.110.1  | 5.12  | 5.29  | 0.1  | 0.05 | -1.13 | 0.035758 | 0.02424  | 0.33757  | 0.194936 |
| MmunewRS.111.1.S1_at   | MmunewRS.111.1  | 3.56  | 3.65  | 1.27 | 0.25 | -1.07 | 0.443809 | 0.446824 | 0.726422 | 0.663037 |
| MmunewRS.112.1.S1_at   | MmunewRS.112.1  | 9.88  | 9.54  | 0.09 | 0.21 | 1.27  | 0.065839 | 0.080746 | 0.405296 | 0.328632 |
| MmunewRS.113.1.S1_at   | MmunewRS.113.1  | 4.05  | 3.99  | 0.26 | 0.29 | 1.04  | 0.370102 | 0.570897 | 0.681113 | 0.743422 |
| MmunewRS.114.1.S1_at   | MmunewRS.114.1  | 3.35  | 3.45  | 0.16 | 0.03 | -1.07 | 0.954494 | 0.664983 | 0.983073 | 0.803726 |
| MmunewRS.116.1.S1_at   | MmunewRS.116.1  | 6.03  | 6.21  | 0.14 | 0.12 | -1.14 | 0.151934 | 0.157907 | 0.516573 | 0.433583 |
| MmunewRS.117.1.S1_at   | MmunewRS.117.1  | 3.45  | 3.62  | 0.06 | 0.06 | -1.13 | 0.071075 | 0.255486 | 0.414673 | 0.523505 |
| MmunewRS.118.1.S1_at   | MmunewRS.118.1  | 2.6   | 2.62  | 0.03 | 0.12 | -1.01 | 0.379939 | 0.611898 | 0.68708  | 0.769622 |
| MmunewRS.119.1.S1_at   | MmunewRS.119.1  | 4.72  | 4.77  | 0.01 | 0.12 | -1.04 | 0.911566 | 0.944525 | 0.965046 | 0.968614 |
| MmunewRS.120.1.S1_at   | MmunewRS.120.1  | 3.7   | 3.92  | 0.08 | 0.24 | -1.17 | 0.075958 | 0.085286 | 0.42407  | 0.337119 |
| MmunewRS.121.1.S1_at   | MmunewRS.121.1  | 3.39  | 3.32  | 0.03 | 0.1  | 1.05  | 0.650577 | 0.834174 | 0.842789 | 0.904977 |
| MmunewRS.123.1.S1_at   | MmunewRS.123.1  | 3.76  | 3.97  | 0.06 | 0.41 | -1.15 | 0.36432  | 0.508609 | 0.677295 | 0.703719 |
| MmunewRS.126.1.S1_at   | MmunewRS.126.1  | 3.91  | 3.79  | 0.18 | 0.05 | 1.09  | 0.862773 | 0.267479 | 0.944816 | 0.533213 |
| MmunewRS.127.1.S1_at   | MmunewRS.127.1  | 8.76  | 7.96  | 0.29 | 0.59 | 1.74  | 0.155322 | 0.196313 | 0.520164 | 0.47127  |
| MmunewRS.128.1.S1_at   | MmunewRS.128.1  | 6.65  | 5.96  | 0.19 | 0.27 | 1.61  | 0.037894 | 0.070094 | 0.343205 | 0.310995 |
| MmunewRS.129.1.S1_at   | MmunewRS.129.1  | 5.92  | 5.93  | 0.09 | 0.04 | -1.01 | 0.552667 | 0.239698 | 0.789643 | 0.510405 |
| MmunewRS.13.1.S1_at    | MmunewRS.13.1   | 4.01  | 4.07  | 0.16 | 0.16 | -1.04 | 0.854686 | 0.780085 | 0.941248 | 0.872491 |
| MmunewRS.131.1.S1_at   | MmunewRS.131.1  | 3.24  | 3.32  | 0.14 | 0.18 | -1.05 | 0.888289 | 0.941366 | 0.955159 | 0.966767 |
| MmunewRS.132.1.S1_at   | MmunewRS.132.1  | 7.82  | 8.85  | 0.68 | 0.59 | -2.04 | 0.261175 | 0.150709 | 0.607754 | 0.425281 |
| MmunewRS.133.1.S1_at   | MmunewRS.133.1  | 5.16  | 5.3   | 0.18 | 0.13 | -1.1  | 0.338521 | 0.222622 | 0.660967 | 0.495617 |
| MmunewRS.134.1.S1_at   | MmunewRS.134.1  | 8.14  | 8.3   | 0.29 | 0.12 | -1.11 | 0.2719   | 0.156233 | 0.615834 | 0.43161  |
| MmunewRS.136.1.S1_at   | MmunewRS.136.1  | 4.7   | 4.49  | 0.18 | 0.2  | 1.15  | 0.731959 | 0.81926  | 0.884095 | 0.895838 |
| MmunewRS.137.1.S1_at   | MmunewRS.137.1  | 3.93  | 3.99  | 0.07 | 0.13 | -1.04 | 0.255299 | 0.27258  | 0.603158 | 0.537323 |
| MmunewRS.138.1.S1_at   | MmunewRS.138.1  | 6.16  | 6.54  | 0.19 | 0.17 | -1.3  | 0.052242 | 0.04347  | 0.377238 | 0.253142 |
| MmunewRS.138.1.S1_s_at | MmunewRS.138.1  | 6.83  | 6.94  | 0.12 | 0.03 | -1.08 | 0.196964 | 0.154919 | 0.559962 | 0.429909 |
| MmunewRS.139.1.S1_at   | MmunewRS.139.1  | 5.08  | 5.26  | 0.07 | 0.03 | -1.13 | 0.009426 | 0.004177 | 0.225039 | 0.091064 |
| MmunewRS.140.1.S1_at   | MmunewRS.140.1  | 4.1   | 3.81  | 0.32 | 0.64 | 1.22  | 0.820506 | 0.850294 | 0.926918 | 0.914874 |
| MmunewRS.141.1.S1_at   | MmunewRS.141.1  | 5.32  | 5.35  | 0.02 | 0.11 | -1.02 | 0.238442 | 0.268505 | 0.591767 | 0.534123 |
| MmunewRS.142.1.S1_at   | MmunewRS.142.1  | 5.2   | 5.47  | 0.16 | 0.23 | -1.21 | 0.157162 | 0.136583 | 0.521923 | 0.409084 |
| MmunewRS.143.1.S1_at   | MmunewRS.143.1  | 4.61  | 4.89  | 0.07 | 0.44 | -1.22 | 0.241655 | 0.232552 | 0.593941 | 0.504341 |
| MmunewRS.144.1.S1_at   | MmunewRS.144.1  | 3.19  | 3.14  | 0.07 | 0.11 | 1.03  | 0.856082 | 0.971663 | 0.941848 | 0.984608 |
| MmunewRS.144.1.S1_s_at | MmunewRS.144.1  | 3.19  | 3.24  | 0.16 | 0.17 | -1.04 | 0.495573 | 0.679297 | 0.757268 | 0.81275  |
| MmunewRS.145.1.S1_at   | MmunewRS.145.1  | 4.91  | 5.13  | 0.16 | 0.05 | -1.17 | 0.169355 | 0.137205 | 0.533675 | 0.410063 |
| MmunewRS.147.1.S1_at   | MmunewRS.147.1  | 6.73  | 6.72  | 0.17 | 0.25 | 1.01  | 0.372113 | 0.47648  | 0.682724 | 0.682725 |
| MmunewRS.149.1.S1_at   | MmunewRS.149.1  | 11.65 | 11.35 | 0.13 | 0.38 | 1.23  | 0.5127   | 0.570662 | 0.765738 | 0.743269 |
| MmunewRS.15.1.S1_at    | MmunewRS.15.1   | 5.31  | 5.26  | 0.08 | 0.1  | 1.04  | 0.529908 | 0.754062 | 0.776366 | 0.856837 |
| MmunewRS.150.1.S1_at   | MmunewRS.150.1  | 4.93  | 4.98  | 0.16 | 0.08 | -1.04 | 0.599526 | 0.796561 | 0.814615 | 0.882721 |

|                        |                |       |       |      |      |       |          |          |          |          |
|------------------------|----------------|-------|-------|------|------|-------|----------|----------|----------|----------|
| MmunewRS.151.1.S1_at   | MmunewRS.151.1 | 3.53  | 3.47  | 0.23 | 0.15 | 1.04  | 0.368517 | 0.48969  | 0.67994  | 0.691862 |
| MmunewRS.152.1.S1_at   | MmunewRS.152.1 | 3.04  | 2.86  | 0.21 | 0.14 | 1.14  | 0.919987 | 0.819531 | 0.968811 | 0.896039 |
| MmunewRS.153.1.S1_at   | MmunewRS.153.1 | 4.1   | 3.91  | 0.06 | 0.29 | 1.14  | 0.923057 | 0.555689 | 0.970098 | 0.734    |
| MmunewRS.154.1.S1_at   | MmunewRS.154.1 | 6.95  | 7.07  | 0.15 | 0.12 | -1.08 | 0.547124 | 0.062631 | 0.785952 | 0.297022 |
| MmunewRS.154.1.S1_s_at | MmunewRS.154.1 | 3.91  | 4.11  | 0.16 | 0.11 | -1.15 | 0.141069 | 0.079404 | 0.50864  | 0.326766 |
| MmunewRS.155.1.S1_at   | MmunewRS.155.1 | 5.76  | 5.95  | 0.1  | 0.12 | -1.14 | 0.469098 | 0.073254 | 0.741438 | 0.316233 |
| MmunewRS.156.1.S1_at   | MmunewRS.156.1 | 5.33  | 5.43  | 0.03 | 0.24 | -1.07 | 0.691556 | 0.808482 | 0.862864 | 0.889757 |
| MmunewRS.157.1.S1_at   | MmunewRS.157.1 | 4.42  | 4.47  | 0.04 | 0.18 | -1.03 | 0.360595 | 0.7021   | 0.674645 | 0.827304 |
| MmunewRS.158.1.S1_at   | MmunewRS.158.1 | 3.09  | 3.11  | 0.15 | 0.13 | -1.02 | 0.925162 | 0.526514 | 0.971045 | 0.715583 |
| MmunewRS.159.1.S1_at   | MmunewRS.159.1 | 10.53 | 10.79 | 0.29 | 0.08 | -1.2  | 0.257787 | 0.273528 | 0.605259 | 0.53793  |
| MmunewRS.16.1.S1_at    | MmunewRS.16.1  | 7.95  | 7.52  | 0.17 | 0.16 | 1.35  | 0.037013 | 0.025737 | 0.340567 | 0.201029 |
| MmunewRS.161.1.S1_at   | MmunewRS.161.1 | 4.67  | 4.58  | 0.13 | 0.02 | 1.06  | 0.291345 | 0.602876 | 0.628798 | 0.763762 |
| MmunewRS.163.1.S1_at   | MmunewRS.163.1 | 3.77  | 3.82  | 0.19 | 0.02 | -1.04 | 0.562933 | 0.75822  | 0.795601 | 0.859308 |
| MmunewRS.164.1.S1_s_at | MmunewRS.164.1 | 3.53  | 3.72  | 0.03 | 0.13 | -1.14 | 0.10566  | 0.363551 | 0.466487 | 0.603957 |
| MmunewRS.165.1.S1_at   | MmunewRS.165.1 | 4.3   | 4.07  | 0.7  | 0.34 | 1.18  | 0.337534 | 0.370117 | 0.660048 | 0.609369 |
| MmunewRS.167.1.S1_s_at | MmunewRS.167.1 | 5.88  | 5.76  | 0.11 | 0.04 | 1.08  | 0.175812 | 0.100299 | 0.539441 | 0.359368 |
| MmunewRS.169.1.S1_at   | MmunewRS.169.1 | 2.91  | 2.85  | 0.12 | 0.07 | 1.04  | 0.539126 | 0.887259 | 0.780929 | 0.935815 |
| MmunewRS.17.1.S1_at    | MmunewRS.17.1  | 10.58 | 9.67  | 0.09 | 0.27 | 1.89  | 0.0056   | 0.000697 | 0.191807 | 0.04424  |
| MmunewRS.170.1.S1_at   | MmunewRS.170.1 | 7.38  | 7.26  | 0.27 | 0.25 | 1.09  | 0.993517 | 0.846288 | 0.997754 | 0.91252  |
| MmunewRS.171.1.S1_x_at | MmunewRS.171.1 | 8.45  | 8.6   | 0.4  | 0.99 | -1.11 | 0.654025 | 0.105596 | 0.844488 | 0.367621 |
| MmunewRS.172.1.S1_at   | MmunewRS.172.1 | 6.66  | 6.84  | 0.11 | 0.11 | -1.13 | 0.15758  | 0.178359 | 0.5225   | 0.454714 |
| MmunewRS.173.1.S1_at   | MmunewRS.173.1 | 6.87  | 7.35  | 0.16 | 0.64 | -1.4  | 0.196698 | 0.114211 | 0.559808 | 0.380761 |
| MmunewRS.174.1.S1_s_at | MmunewRS.174.1 | 4.29  | 4.33  | 0.11 | 0.09 | -1.03 | 0.751359 | 0.345635 | 0.893728 | 0.590854 |
| MmunewRS.175.1.S1_at   | MmunewRS.175.1 | 3.41  | 3.47  | 0.08 | 0.06 | -1.04 | 0.25089  | 0.25724  | 0.600476 | 0.525017 |
| MmunewRS.177.1.S1_at   | MmunewRS.177.1 | 5.67  | 5.66  | 0.14 | 0.01 | 1.01  | 0.99738  | 0.100503 | 0.998929 | 0.359698 |
| MmunewRS.179.1.S1_at   | MmunewRS.179.1 | 6.46  | 6.64  | 0.15 | 0.17 | -1.13 | 0.246982 | 0.295248 | 0.598082 | 0.554627 |
| MmunewRS.18.1.S1_at    | MmunewRS.18.1  | 3.41  | 3.47  | 0.05 | 0.09 | -1.05 | 0.814528 | 0.854384 | 0.924758 | 0.91705  |
| MmunewRS.180.1.S1_at   | MmunewRS.180.1 | 5.46  | 5.6   | 0.14 | 0.2  | -1.1  | 0.213295 | 0.255383 | 0.573596 | 0.52343  |
| MmunewRS.181.1.S1_at   | MmunewRS.181.1 | 7.76  | 7.38  | 0.23 | 0.53 | 1.3   | 0.230956 | 0.301601 | 0.587369 | 0.55955  |
| MmunewRS.182.1.S1_at   | MmunewRS.182.1 | 7.25  | 7.38  | 0.34 | 0.13 | -1.09 | 0.6978   | 0.811982 | 0.865781 | 0.891493 |
| MmunewRS.183.1.S1_at   | MmunewRS.183.1 | 3.58  | 3.6   | 0.12 | 0.07 | -1.02 | 0.815114 | 0.737537 | 0.924824 | 0.847993 |
| MmunewRS.184.1.S1_at   | MmunewRS.184.1 | 6.08  | 5.96  | 0.05 | 0.07 | 1.09  | 0.128124 | 0.431286 | 0.494307 | 0.652249 |
| MmunewRS.185.1.S1_at   | MmunewRS.185.1 | 3.09  | 3.2   | 0.04 | 0.06 | -1.08 | 0.071684 | 0.278562 | 0.415695 | 0.542327 |
| MmunewRS.186.1.S1_at   | MmunewRS.186.1 | 8.38  | 7.84  | 0.22 | 0.7  | 1.45  | 0.308522 | 0.459981 | 0.640924 | 0.671989 |
| MmunewRS.187.1.S1_at   | MmunewRS.187.1 | 3.55  | 3.54  | 0.22 | 0.15 | 1.01  | 0.652583 | 0.385917 | 0.843781 | 0.621161 |
| MmunewRS.188.1.S1_at   | MmunewRS.188.1 | 2.91  | 3.02  | 0.1  | 0.1  | -1.08 | 0.224654 | 0.450719 | 0.58277  | 0.665844 |
| MmunewRS.189.1.S1_at   | MmunewRS.189.1 | 6.28  | 5.87  | 0.55 | 0.4  | 1.33  | 0.146343 | 0.169813 | 0.512489 | 0.446515 |
| MmunewRS.19.1.S1_at    | MmunewRS.19.1  | 3.33  | 3.53  | 0.12 | 0.08 | -1.15 | 0.114749 | 0.058244 | 0.478025 | 0.287992 |
| MmunewRS.190.1.S1_at   | MmunewRS.190.1 | 13.31 | 13.07 | 0.07 | 0.06 | 1.18  | 0.014284 | 0.073011 | 0.251885 | 0.316017 |
| MmunewRS.191.1.S1_at   | MmunewRS.191.1 | 3.64  | 3.6   | 0.02 | 0.14 | 1.03  | 0.515142 | 0.721833 | 0.767288 | 0.838859 |
| MmunewRS.192.1.S1_at   | MmunewRS.192.1 | 3.31  | 3.21  | 0.09 | 0.18 | 1.07  | 0.736057 | 0.450349 | 0.886439 | 0.665643 |

|                        |                |       |       |      |      |       |          |          |          |          |
|------------------------|----------------|-------|-------|------|------|-------|----------|----------|----------|----------|
| MmunewRS.193.1.S1_at   | MmunewRS.193.1 | 6.5   | 6.63  | 0.13 | 0.15 | -1.09 | 0.276965 | 0.37696  | 0.619155 | 0.614682 |
| MmunewRS.196.1.S1_at   | MmunewRS.196.1 | 3.96  | 4.14  | 0.05 | 0.09 | -1.13 | 0.033793 | 0.011601 | 0.330218 | 0.139446 |
| MmunewRS.197.1.S1_at   | MmunewRS.197.1 | 4.66  | 4.82  | 0.13 | 0.15 | -1.12 | 0.975953 | 0.320535 | 0.990702 | 0.572648 |
| MmunewRS.198.1.S1_at   | MmunewRS.198.1 | 5.61  | 4.95  | 0.28 | 0.05 | 1.59  | 0.028673 | 0.018182 | 0.312031 | 0.169673 |
| MmunewRS.199.1.S1_at   | MmunewRS.199.1 | 3.25  | 3.23  | 0.07 | 0.15 | 1.01  | 0.830284 | 0.875763 | 0.931421 | 0.929439 |
| MmunewRS.2.1.S1_at     | MmunewRS.2.1   | 8.41  | 8.8   | 0.5  | 0.19 | -1.31 | 0.16574  | 0.12891  | 0.529716 | 0.400331 |
| MmunewRS.20.1.S1_at    | MmunewRS.20.1  | 9.3   | 10.82 | 0.59 | 0.81 | -2.86 | 0.0692   | 0.05898  | 0.411409 | 0.289669 |
| MmunewRS.200.1.S1_at   | MmunewRS.200.1 | 5.27  | 5.2   | 0.09 | 0.03 | 1.05  | 0.990572 | 0.921279 | 0.996699 | 0.9557   |
| MmunewRS.202.1.S1_at   | MmunewRS.202.1 | 6.92  | 6.72  | 0.23 | 0.16 | 1.14  | 0.674063 | 0.541985 | 0.853952 | 0.725169 |
| MmunewRS.203.1.S1_at   | MmunewRS.203.1 | 7.05  | 6.37  | 0.31 | 0.68 | 1.6   | 0.096204 | 0.043763 | 0.454369 | 0.25387  |
| MmunewRS.203.1.S1_x_at | MmunewRS.203.1 | 7.47  | 6.66  | 0.31 | 0.83 | 1.75  | 0.107892 | 0.068807 | 0.468553 | 0.308711 |
| MmunewRS.204.1.S1_at   | MmunewRS.204.1 | 6.52  | 6.84  | 0.14 | 0.08 | -1.25 | 0.092108 | 0.112253 | 0.448698 | 0.37755  |
| MmunewRS.205.1.S1_at   | MmunewRS.205.1 | 5.54  | 6.61  | 0.33 | 1.04 | -2.1  | 0.1938   | 0.213792 | 0.557488 | 0.487564 |
| MmunewRS.206.1.S1_at   | MmunewRS.206.1 | 4.38  | 4.17  | 0.43 | 0.31 | 1.16  | 0.572315 | 0.264868 | 0.800678 | 0.530872 |
| MmunewRS.207.1.S1_at   | MmunewRS.207.1 | 3.11  | 3.13  | 0.56 | 0.03 | -1.01 | 0.416134 | 0.43872  | 0.709692 | 0.657639 |
| MmunewRS.208.1.S1_s_at | MmunewRS.208.1 | 11.58 | 10.94 | 0.08 | 0.29 | 1.56  | 0.024358 | 0.012703 | 0.294535 | 0.145329 |
| MmunewRS.21.1.S1_at    | MmunewRS.21.1  | 4.77  | 4.7   | 0.14 | 0.02 | 1.05  | 0.376346 | 0.636755 | 0.685178 | 0.78635  |
| MmunewRS.210.1.S1_at   | MmunewRS.210.1 | 3.89  | 3.98  | 0.67 | 0.09 | -1.06 | 0.414686 | 0.423866 | 0.709338 | 0.646555 |
| MmunewRS.211.1.S1_at   | MmunewRS.211.1 | 4.01  | 4.25  | 0.12 | 0.03 | -1.18 | 0.032289 | 0.022924 | 0.324516 | 0.189403 |
| MmunewRS.212.1.S1_at   | MmunewRS.212.1 | 3.91  | 4.08  | 0.16 | 0.12 | -1.13 | 0.419403 | 0.418389 | 0.711796 | 0.642783 |
| MmunewRS.213.1.S1_at   | MmunewRS.213.1 | 4.87  | 5     | 0.06 | 0.17 | -1.09 | 0.363569 | 0.236122 | 0.676763 | 0.507179 |
| MmunewRS.214.1.S1_at   | MmunewRS.214.1 | 3.76  | 3.83  | 0.02 | 0.04 | -1.05 | 0.064251 | 0.072123 | 0.402624 | 0.314611 |
| MmunewRS.215.1.S1_s_at | MmunewRS.215.1 | 4.29  | 4.4   | 0.09 | 0.09 | -1.08 | 0.183659 | 0.146996 | 0.54773  | 0.421098 |
| MmunewRS.216.1.S1_at   | MmunewRS.216.1 | 3.92  | 4.06  | 0.04 | 0.15 | -1.1  | 0.258328 | 0.330163 | 0.605637 | 0.578987 |
| MmunewRS.217.1.S1_at   | MmunewRS.217.1 | 4.14  | 3.87  | 0.3  | 0.48 | 1.21  | 0.661887 | 0.455039 | 0.848299 | 0.66903  |
| MmunewRS.219.1.S1_at   | MmunewRS.219.1 | 4.53  | 4.36  | 0.17 | 0.4  | 1.12  | 0.860401 | 0.534852 | 0.943655 | 0.720564 |
| MmunewRS.220.1.S1_at   | MmunewRS.220.1 | 4.57  | 4.76  | 0.28 | 0.01 | -1.14 | 0.777692 | 0.812916 | 0.907092 | 0.891875 |
| MmunewRS.221.1.S1_at   | MmunewRS.221.1 | 4.39  | 4.72  | 0.31 | 0.26 | -1.25 | 0.639711 | 0.768192 | 0.837316 | 0.865415 |
| MmunewRS.222.1.S1_at   | MmunewRS.222.1 | 4.32  | 4.29  | 0.07 | 0.43 | 1.03  | 0.827686 | 0.842672 | 0.930084 | 0.910333 |
| MmunewRS.223.1.S1_at   | MmunewRS.223.1 | 5.87  | 6.06  | 0.17 | 0.15 | -1.14 | 0.52166  | 0.710309 | 0.771464 | 0.831912 |
| MmunewRS.224.1.S1_at   | MmunewRS.224.1 | 8.12  | 7.83  | 0.22 | 0.42 | 1.22  | 0.504538 | 0.402627 | 0.76127  | 0.631506 |
| MmunewRS.225.1.S1_at   | MmunewRS.225.1 | 6.78  | 5.96  | 0.49 | 0.82 | 1.77  | 0.116222 | 0.114252 | 0.479808 | 0.380761 |
| MmunewRS.226.1.S1_at   | MmunewRS.226.1 | 9.51  | 9.81  | 0.29 | 0.24 | -1.23 | 0.150749 | 0.203408 | 0.515411 | 0.477634 |
| MmunewRS.227.1.S1_at   | MmunewRS.227.1 | 10.53 | 10.51 | 0.12 | 0.28 | 1.01  | 0.58545  | 0.781659 | 0.807583 | 0.87342  |
| MmunewRS.228.1.S1_at   | MmunewRS.228.1 | 4.45  | 4.43  | 0.04 | 0.06 | 1.01  | 0.508618 | 0.391465 | 0.763888 | 0.625086 |
| MmunewRS.229.1.S1_at   | MmunewRS.229.1 | 7.3   | 7.17  | 0.2  | 0.53 | 1.09  | 0.273179 | 0.045593 | 0.616648 | 0.257674 |
| MmunewRS.23.1.S1_at    | MmunewRS.23.1  | 3.42  | 3.65  | 0.1  | 0.16 | -1.17 | 0.084166 | 0.120867 | 0.436855 | 0.389753 |
| MmunewRS.230.1.S1_at   | MmunewRS.230.1 | 6.26  | 6.51  | 0.19 | 0.04 | -1.19 | 0.116265 | 0.005984 | 0.479808 | 0.1058   |
| MmunewRS.232.1.S1_at   | MmunewRS.232.1 | 4.92  | 4.9   | 0.06 | 0.1  | 1.01  | 0.534784 | 0.295145 | 0.778804 | 0.554551 |
| MmunewRS.233.1.S1_at   | MmunewRS.233.1 | 3.48  | 3.43  | 0.08 | 0.11 | 1.04  | 0.609858 | 0.15701  | 0.820716 | 0.432467 |
| MmunewRS.234.1.S1_at   | MmunewRS.234.1 | 7.82  | 6.39  | 0.38 | 0.25 | 2.68  | 0.002434 | 0.001003 | 0.163555 | 0.050657 |



|                        |                |       |       |      |      |       |          |          |          |          |
|------------------------|----------------|-------|-------|------|------|-------|----------|----------|----------|----------|
| MmunewRS.235.1.S1_at   | MmunewRS.235.1 | 3.51  | 3.71  | 0.11 | 0.26 | -1.15 | 0.355482 | 0.186722 | 0.671091 | 0.462497 |
| MmunewRS.236.1.S1_at   | MmunewRS.236.1 | 4.15  | 4.35  | 0.25 | 0.16 | -1.14 | 0.759171 | 0.924418 | 0.898249 | 0.95736  |
| MmunewRS.237.1.S1_at   | MmunewRS.237.1 | 3     | 3.09  | 0.04 | 0.16 | -1.07 | 0.809628 | 0.640343 | 0.922256 | 0.788874 |
| MmunewRS.238.1.S1_at   | MmunewRS.238.1 | 3.58  | 3.46  | 0.97 | 0.46 | 1.09  | 0.541155 | 0.438683 | 0.782498 | 0.65762  |
| MmunewRS.24.1.S1_at    | MmunewRS.24.1  | 6.63  | 6.22  | 0.34 | 0.1  | 1.33  | 0.125687 | 0.087931 | 0.491732 | 0.341336 |
| MmunewRS.240.1.S1_at   | MmunewRS.240.1 | 13.76 | 13.73 | 0.07 | 0.05 | 1.02  | 0.520758 | 0.582123 | 0.771038 | 0.750784 |
| MmunewRS.241.1.S1_at   | MmunewRS.241.1 | 3.78  | 3.91  | 0.08 | 0.23 | -1.09 | 0.146771 | 0.242235 | 0.512699 | 0.51267  |
| MmunewRS.242.1.S1_at   | MmunewRS.242.1 | 3.36  | 3.27  | 0.15 | 0.04 | 1.06  | 0.451217 | 0.449911 | 0.731503 | 0.665343 |
| MmunewRS.412.1.S1_s_at | MmunewRS.412.1 | 5.23  | 4.72  | 0.86 | 0.38 | 1.43  | 0.148118 | 0.1699   | 0.513463 | 0.446569 |
| MmunewRS.412.1.S1_x_at | MmunewRS.412.1 | 3.01  | 2.91  | 0.22 | 0.1  | 1.07  | 0.436153 | 0.377378 | 0.721644 | 0.6149   |
| MmunewRS.244.1.S1_at   | MmunewRS.244.1 | 3.35  | 3.5   | 0.08 | 0.11 | -1.11 | 0.097611 | 0.098541 | 0.456709 | 0.356636 |
| MmunewRS.245.1.S1_at   | MmunewRS.245.1 | 4.84  | 5.07  | 0.14 | 0.16 | -1.18 | 0.349661 | 0.436232 | 0.667907 | 0.655899 |
| MmunewRS.246.1.S1_at   | MmunewRS.246.1 | 2.93  | 2.95  | 0.01 | 0.04 | -1.02 | 0.504119 | 0.763594 | 0.761109 | 0.862496 |
| MmunewRS.247.1.S1_at   | MmunewRS.247.1 | 4.1   | 4.24  | 0.04 | 0.12 | -1.1  | 0.299157 | 0.46633  | 0.634742 | 0.67624  |
| MmunewRS.248.1.S1_at   | MmunewRS.248.1 | 3.27  | 3.16  | 0.13 | 0.09 | 1.08  | 0.430136 | 0.547386 | 0.717956 | 0.728447 |
| MmunewRS.249.1.S1_at   | MmunewRS.249.1 | 4.03  | 4.29  | 0.23 | 0.12 | -1.19 | 0.552698 | 0.741447 | 0.789664 | 0.850285 |
| MmunewRS.25.1.S1_at    | MmunewRS.25.1  | 3.57  | 3.65  | 0.18 | 0.06 | -1.06 | 0.467022 | 0.202373 | 0.740525 | 0.476737 |
| MmunewRS.250.1.S1_at   | MmunewRS.250.1 | 7.85  | 8.08  | 0.15 | 1.25 | -1.17 | 0.262516 | 0.094995 | 0.609006 | 0.352071 |
| MmunewRS.251.1.S1_at   | MmunewRS.251.1 | 4.48  | 4.68  | 0.18 | 0.12 | -1.15 | 0.425459 | 0.588768 | 0.715096 | 0.755137 |
| MmunewRS.252.1.S1_at   | MmunewRS.252.1 | 8.61  | 8.13  | 0.56 | 0.21 | 1.39  | 0.07184  | 0.060012 | 0.415886 | 0.291649 |
| MmunewRS.253.1.S1_at   | MmunewRS.253.1 | 7.2   | 7.09  | 0.51 | 0.1  | 1.08  | 0.564381 | 0.614384 | 0.796512 | 0.771226 |
| MmunewRS.254.1.S1_at   | MmunewRS.254.1 | 12.96 | 13.5  | 0.43 | 0.23 | -1.46 | 0.170286 | 0.08085  | 0.534249 | 0.328803 |
| MmunewRS.255.1.S1_at   | MmunewRS.255.1 | 5     | 4.49  | 0.19 | 0.71 | 1.42  | 0.912456 | 0.637135 | 0.965278 | 0.786653 |
| MmunewRS.257.1.S1_at   | MmunewRS.257.1 | 3.99  | 3.97  | 0.11 | 0.16 | 1.01  | 0.539366 | 0.093152 | 0.781046 | 0.349303 |
| MmunewRS.258.1.S1_at   | MmunewRS.258.1 | 4.82  | 4.85  | 0.26 | 0.11 | -1.02 | 0.528904 | 0.471939 | 0.775764 | 0.679793 |
| MmunewRS.259.1.S1_at   | MmunewRS.259.1 | 5.86  | 5.61  | 0.31 | 0.49 | 1.18  | 0.81984  | 0.008536 | 0.926758 | 0.122563 |
| MmunewRS.26.1.S1_s_at  | MmunewRS.26.1  | 4.56  | 4.68  | 0.23 | 0.11 | -1.09 | 0.483696 | 0.643998 | 0.749945 | 0.791265 |
| MmunewRS.260.1.S1_at   | MmunewRS.260.1 | 3.34  | 3.34  | 0.09 | 0.05 | -1    | 0.792876 | 0.483931 | 0.914102 | 0.688243 |
| MmunewRS.261.1.S1_at   | MmunewRS.261.1 | 5.82  | 5.98  | 0.01 | 0.18 | -1.11 | 0.091301 | 0.110294 | 0.447137 | 0.374403 |
| MmunewRS.262.1.S1_at   | MmunewRS.262.1 | 2.97  | 3.04  | 0.03 | 0.17 | -1.05 | 0.497721 | 0.554868 | 0.758068 | 0.733544 |
| MmunewRS.263.1.S1_at   | MmunewRS.263.1 | 4.96  | 4.93  | 1.08 | 0.35 | 1.02  | 0.808522 | 0.041184 | 0.921949 | 0.247733 |
| MmunewRS.264.1.S1_s_at | MmunewRS.264.1 | 6.07  | 6.31  | 0.13 | 0.2  | -1.18 | 0.138966 | 0.195158 | 0.506234 | 0.470241 |
| MmunewRS.265.1.S1_at   | MmunewRS.265.1 | 6.66  | 5.57  | 0.45 | 0.83 | 2.14  | 0.330343 | 0.376721 | 0.655613 | 0.614539 |
| MmunewRS.267.1.S1_at   | MmunewRS.267.1 | 7.69  | 7.87  | 0.19 | 0.09 | -1.14 | 0.34251  | 0.21181  | 0.663271 | 0.485784 |
| MmunewRS.268.1.S1_s_at | MmunewRS.268.1 | 12.55 | 12.3  | 0.17 | 0.17 | 1.19  | 0.392255 | 0.044903 | 0.694576 | 0.256424 |
| MmunewRS.269.1.S1_at   | MmunewRS.269.1 | 6.04  | 5.82  | 0.34 | 0.2  | 1.17  | 0.264505 | 0.370289 | 0.610188 | 0.609406 |
| MmunewRS.270.1.S1_at   | MmunewRS.270.1 | 5.43  | 5.45  | 0.24 | 0.16 | -1.02 | 0.284905 | 0.35583  | 0.62455  | 0.597864 |
| MmunewRS.271.1.S1_at   | MmunewRS.271.1 | 4.74  | 4.9   | 0.13 | 0.23 | -1.12 | 0.487407 | 0.569094 | 0.752094 | 0.742239 |
| MmunewRS.272.1.S1_at   | MmunewRS.272.1 | 6.69  | 6.68  | 0.14 | 0.26 | 1.01  | 0.660026 | 0.184949 | 0.847435 | 0.460776 |
| MmunewRS.273.1.S1_at   | MmunewRS.273.1 | 4.48  | 4.5   | 0.05 | 0.17 | -1.01 | 0.985363 | 0.926629 | 0.99475  | 0.958372 |
| MmunewRS.274.1.S1_at   | MmunewRS.274.1 | 3.3   | 3.07  | 0.24 | 0.6  | 1.18  | 0.76054  | 0.605118 | 0.89904  | 0.764917 |

|                        |                |       |       |      |      |       |          |          |          |          |
|------------------------|----------------|-------|-------|------|------|-------|----------|----------|----------|----------|
| MmunewRS.275.1.S1_at   | MmunewRS.275.1 | 3.31  | 3.09  | 0.05 | 0.14 | 1.16  | 0.067561 | 0.406868 | 0.408063 | 0.634579 |
| MmunewRS.276.1.S1_at   | MmunewRS.276.1 | 4.57  | 4.56  | 0.03 | 0.3  | 1.01  | 0.454333 | 0.519884 | 0.733184 | 0.711367 |
| MmunewRS.277.1.S1_at   | MmunewRS.277.1 | 10.02 | 10.41 | 0.05 | 0.32 | -1.32 | 0.097422 | 0.097973 | 0.45638  | 0.355872 |
| MmunewRS.278.1.S1_at   | MmunewRS.278.1 | 3.28  | 3.42  | 0.07 | 0.09 | -1.1  | 0.277374 | 0.531842 | 0.619545 | 0.718957 |
| MmunewRS.279.1.S1_at   | MmunewRS.279.1 | 3.8   | 3.76  | 0.18 | 0.17 | 1.02  | 0.783865 | 0.795878 | 0.909806 | 0.882408 |
| MmunewRS.280.1.S1_at   | MmunewRS.280.1 | 5.06  | 4.96  | 0.06 | 0.12 | 1.07  | 0.782514 | 0.166247 | 0.909218 | 0.442797 |
| MmunewRS.281.1.S1_at   | MmunewRS.281.1 | 4.51  | 4.67  | 0.07 | 0.04 | -1.12 | 0.066011 | 0.680234 | 0.405731 | 0.813311 |
| MmunewRS.283.1.S1_at   | MmunewRS.283.1 | 6.92  | 6.43  | 0.32 | 0.35 | 1.4   | 0.16383  | 0.240963 | 0.528071 | 0.511648 |
| MmunewRS.284.1.S1_at   | MmunewRS.284.1 | 3.93  | 3.9   | 0.11 | 0.07 | 1.03  | 0.505574 | 0.312261 | 0.761685 | 0.566963 |
| MmunewRS.286.1.S1_at   | MmunewRS.286.1 | 4.69  | 4.77  | 0.27 | 0.13 | -1.06 | 0.363261 | 0.43856  | 0.676613 | 0.657511 |
| MmunewRS.287.1.S1_at   | MmunewRS.287.1 | 6.55  | 6.76  | 0.18 | 0.08 | -1.16 | 0.144643 | 0.166642 | 0.511015 | 0.443133 |
| MmunewRS.288.1.S1_at   | MmunewRS.288.1 | 4.61  | 4.83  | 0.28 | 0.08 | -1.17 | 0.286902 | 0.396687 | 0.625576 | 0.628434 |
| MmunewRS.289.1.S1_at   | MmunewRS.289.1 | 5.73  | 5.8   | 0.05 | 0.04 | -1.05 | 0.057696 | 0.043609 | 0.388935 | 0.253501 |
| MmunewRS.290.1.S1_at   | MmunewRS.290.1 | 4.33  | 4.54  | 0.22 | 0.02 | -1.16 | 0.51683  | 0.463207 | 0.768276 | 0.674269 |
| MmunewRS.291.1.S1_at   | MmunewRS.291.1 | 8.6   | 8.49  | 0.32 | 0.14 | 1.08  | 0.291764 | 0.282102 | 0.629048 | 0.544937 |
| MmunewRS.292.1.S1_at   | MmunewRS.292.1 | 5.64  | 5.75  | 0.19 | 0.11 | -1.08 | 0.655044 | 0.807422 | 0.84477  | 0.889121 |
| MmunewRS.293.1.S1_at   | MmunewRS.293.1 | 5.96  | 5.73  | 1.34 | 1.4  | 1.18  | 0.75084  | 0.617543 | 0.893432 | 0.773477 |
| MmunewRS.294.1.S1_at   | MmunewRS.294.1 | 5.07  | 5.08  | 0.15 | 0.04 | -1.01 | 0.953828 | 0.887785 | 0.982872 | 0.936048 |
| MmunewRS.295.1.S1_at   | MmunewRS.295.1 | 4.99  | 5.02  | 0.09 | 0.05 | -1.02 | 0.545876 | 0.279648 | 0.785219 | 0.543212 |
| MmunewRS.296.1.S1_at   | MmunewRS.296.1 | 4.29  | 4.28  | 0.08 | 0.09 | 1     | 0.44026  | 0.134372 | 0.724158 | 0.406603 |
| MmunewRS.297.1.S1_at   | MmunewRS.297.1 | 3.09  | 3.1   | 0.04 | 0.19 | -1.01 | 0.41728  | 0.59401  | 0.710451 | 0.75851  |
| MmunewRS.298.1.S1_at   | MmunewRS.298.1 | 7.86  | 8.88  | 0.87 | 0.69 | -2.03 | 0.442347 | 0.579653 | 0.725508 | 0.749254 |
| MmunewRS.299.1.S1_at   | MmunewRS.299.1 | 4.07  | 3.54  | 0.62 | 0.28 | 1.44  | 0.116856 | 0.100439 | 0.480756 | 0.359541 |
| MmunewRS.300.1.S1_at   | MmunewRS.300.1 | 6.27  | 6.25  | 0.1  | 0.44 | 1.02  | 0.946187 | 0.988722 | 0.979359 | 0.993595 |
| MmunewRS.301.1.S1_a_at | MmunewRS.301.1 | 8.01  | 8.32  | 0.1  | 0.07 | -1.24 | 0.019529 | 0.009081 | 0.27501  | 0.125944 |
| MmunewRS.301.1.S1_at   | MmunewRS.301.1 | 5.32  | 5.27  | 0.09 | 0.03 | 1.04  | 0.35094  | 0.180516 | 0.66887  | 0.457128 |
| MmunewRS.302.1.S1_at   | MmunewRS.302.1 | 2.96  | 3.01  | 0.14 | 0.11 | -1.03 | 0.343663 | 0.488785 | 0.663808 | 0.691362 |
| MmunewRS.304.1.S1_at   | MmunewRS.304.1 | 3.19  | 3.2   | 0.07 | 0.06 | -1    | 0.515209 | 0.44041  | 0.767334 | 0.658939 |
| MmunewRS.306.1.S1_at   | MmunewRS.306.1 | 7.22  | 7.17  | 0.23 | 0.5  | 1.03  | 0.568551 | 0.72885  | 0.798666 | 0.843269 |
| MmunewRS.307.1.S1_at   | MmunewRS.307.1 | 13.71 | 13.64 | 0.06 | 0.14 | 1.05  | 0.502856 | 0.101576 | 0.760569 | 0.361433 |
| MmunewRS.308.1.S1_at   | MmunewRS.308.1 | 11.48 | 10.48 | 0.38 | 0.21 | 1.99  | 0.019681 | 0.011748 | 0.275549 | 0.140378 |
| MmunewRS.309.1.S1_at   | MmunewRS.309.1 | 3.82  | 3.89  | 0.27 | 0.1  | -1.05 | 0.686603 | 0.728013 | 0.85983  | 0.842711 |
| MmunewRS.31.1.S1_at    | MmunewRS.31.1  | 5.66  | 6.28  | 0.12 | 0.66 | -1.54 | 0.21021  | 0.002301 | 0.571368 | 0.070694 |
| MmunewRS.310.1.S1_at   | MmunewRS.310.1 | 11.28 | 11.28 | 0.03 | 0.13 | -1    | 0.56575  | 0.613347 | 0.797313 | 0.770518 |
| MmunewRS.311.1.S1_at   | MmunewRS.311.1 | 4.03  | 3.97  | 0.31 | 0.04 | 1.04  | 0.610108 | 0.805365 | 0.820905 | 0.888121 |
| MmunewRS.312.1.S1_s_at | MmunewRS.312.1 | 3.33  | 3.37  | 0.04 | 0.06 | -1.03 | 0.133673 | 0.020046 | 0.500334 | 0.177855 |
| MmunewRS.313.1.S1_at   | MmunewRS.313.1 | 3.91  | 3.76  | 0.75 | 0.16 | 1.11  | 0.201202 | 0.219493 | 0.563821 | 0.493168 |
| MmunewRS.314.1.S1_s_at | MmunewRS.314.1 | 11.46 | 11.04 | 0.03 | 0.54 | 1.34  | 0.079454 | 0.072698 | 0.42957  | 0.31561  |
| MmunewRS.315.1.S1_at   | MmunewRS.315.1 | 12.86 | 12.44 | 0.21 | 0.43 | 1.34  | 0.164034 | 0.085369 | 0.528211 | 0.337246 |
| MmunewRS.316.1.S1_at   | MmunewRS.316.1 | 2.86  | 3.17  | 0.08 | 0.05 | -1.24 | 0.005867 | 0.003934 | 0.19355  | 0.089223 |
| MmunewRS.317.1.S1_at   | MmunewRS.317.1 | 3.55  | 3.53  | 0.06 | 0.19 | 1.01  | 0.887419 | 0.843938 | 0.954863 | 0.9111   |

|                        |                |       |       |      |      |        |          |          |          |          |
|------------------------|----------------|-------|-------|------|------|--------|----------|----------|----------|----------|
| MmunewRS.318.1.S1_at   | MmunewRS.318.1 | 5.86  | 5.98  | 0.12 | 0.07 | -1.09  | 0.132392 | 0.146143 | 0.498604 | 0.420099 |
| MmunewRS.319.1.S1_at   | MmunewRS.319.1 | 6.45  | 6.41  | 0.11 | 0.15 | 1.03   | 0.766284 | 0.924968 | 0.901717 | 0.957573 |
| MmunewRS.32.1.S1_at    | MmunewRS.32.1  | 4.82  | 5.29  | 1.03 | 0.99 | -1.39  | 0.61151  | 0.291021 | 0.821704 | 0.551574 |
| MmunewRS.320.1.S1_at   | MmunewRS.320.1 | 4.8   | 4.9   | 0.07 | 0.04 | -1.07  | 0.073793 | 0.032101 | 0.419423 | 0.221776 |
| MmunewRS.321.1.S1_at   | MmunewRS.321.1 | 4.4   | 4.5   | 0.09 | 0.12 | -1.07  | 0.325    | 0.294797 | 0.652259 | 0.55437  |
| MmunewRS.322.1.S1_at   | MmunewRS.322.1 | 5.71  | 5.86  | 0.13 | 0.11 | -1.1   | 0.186309 | 0.143162 | 0.549928 | 0.417029 |
| MmunewRS.323.1.S1_at   | MmunewRS.323.1 | 6.21  | 6.13  | 0.19 | 0.07 | 1.06   | 0.831737 | 0.334608 | 0.931835 | 0.582581 |
| MmunewRS.324.1.S1_at   | MmunewRS.324.1 | 3.64  | 3.73  | 0.08 | 0.24 | -1.06  | 0.751962 | 0.853388 | 0.894058 | 0.916579 |
| MmunewRS.325.1.S1_at   | MmunewRS.325.1 | 4.71  | 4.72  | 0.12 | 0.11 | -1.01  | 0.659584 | 0.600566 | 0.847196 | 0.76217  |
| MmunewRS.326.1.S1_at   | MmunewRS.326.1 | 3.06  | 3.19  | 0.16 | 0.12 | -1.09  | 0.802078 | 0.339235 | 0.918358 | 0.585918 |
| MmunewRS.328.1.S1_at   | MmunewRS.328.1 | 7.02  | 5.84  | 0.52 | 0.65 | 2.27   | 0.138368 | 0.110465 | 0.505745 | 0.374684 |
| MmunewRS.329.1.S1_at   | MmunewRS.329.1 | 4.93  | 4.9   | 0.07 | 0.11 | 1.02   | 0.832977 | 0.918944 | 0.93227  | 0.954477 |
| MmunewRS.330.1.S1_at   | MmunewRS.330.1 | 5.51  | 5.68  | 0.11 | 0.04 | -1.13  | 0.098799 | 0.063441 | 0.458711 | 0.298441 |
| MmunewRS.331.1.S1_at   | MmunewRS.331.1 | 4.44  | 4.48  | 0.66 | 0.11 | -1.03  | 0.436891 | 0.397955 | 0.722073 | 0.629138 |
| MmunewRS.332.1.S1_at   | MmunewRS.332.1 | 3.93  | 3.91  | 0.36 | 0.06 | 1.01   | 0.415758 | 0.231253 | 0.709528 | 0.502929 |
| MmunewRS.333.1.S1_at   | MmunewRS.333.1 | 6.09  | 5.71  | 0.32 | 1.07 | 1.3    | 0.676918 | 0.459236 | 0.85524  | 0.671669 |
| MmunewRS.334.1.S1_at   | MmunewRS.334.1 | 2.9   | 3.08  | 0.01 | 0.14 | -1.13  | 0.120847 | 0.050887 | 0.48574  | 0.270882 |
| MmunewRS.335.1.S1_at   | MmunewRS.335.1 | 7.09  | 7.63  | 0.37 | 0.34 | -1.46  | 0.147232 | 0.131549 | 0.513087 | 0.403665 |
| MmunewRS.338.1.S1_at   | MmunewRS.338.1 | 7.96  | 7.95  | 0.21 | 0.68 | 1      | 0.839407 | 0.868091 | 0.935102 | 0.925106 |
| MmunewRS.339.1.S1_at   | MmunewRS.339.1 | 3.29  | 3.39  | 0.07 | 0.09 | -1.07  | 0.308181 | 0.534793 | 0.640608 | 0.720557 |
| MmunewRS.340.1.S1_at   | MmunewRS.340.1 | 5.2   | 5.18  | 0.07 | 0.07 | 1.01   | 0.338814 | 0.37566  | 0.660988 | 0.613577 |
| MmunewRS.341.1.S1_at   | MmunewRS.341.1 | 5.73  | 5.71  | 0.12 | 0.22 | 1.01   | 0.948662 | 0.715184 | 0.980329 | 0.834894 |
| MmunewRS.342.1.S1_at   | MmunewRS.342.1 | 6.56  | 6.63  | 0.26 | 0.07 | -1.05  | 0.765662 | 0.203202 | 0.901388 | 0.477415 |
| MmunewRS.344.1.S1_at   | MmunewRS.344.1 | 4.38  | 4.38  | 0.06 | 0    | 1      | 0.950448 | 0.973166 | 0.981318 | 0.985431 |
| MmunewRS.345.1.S1_at   | MmunewRS.345.1 | 2.95  | 3.01  | 0.05 | 0.04 | -1.04  | 0.252144 | 0.078072 | 0.601255 | 0.324575 |
| MmunewRS.346.1.S1_at   | MmunewRS.346.1 | 3.89  | 3.89  | 0.11 | 0.21 | -1.01  | 0.915654 | 0.972011 | 0.966683 | 0.984884 |
| MmunewRS.347.1.S1_at   | MmunewRS.347.1 | 6.85  | 5.21  | 0.71 | 0.56 | 3.11   | 0.060583 | 0.027908 | 0.393743 | 0.208529 |
| MmunewRS.348.1.S1_at   | MmunewRS.348.1 | 3.42  | 3.4   | 0    | 0.03 | 1.01   | 0.220532 | 0.386376 | 0.57959  | 0.621593 |
| MmunewRS.35.1.S1_at    | MmunewRS.35.1  | 7.68  | 11.12 | 3.04 | 3.44 | -10.85 | 0.539575 | 0.573927 | 0.781154 | 0.745476 |
| MmunewRS.350.1.S1_at   | MmunewRS.350.1 | 5.6   | 5.55  | 0.14 | 0.17 | 1.03   | 0.737657 | 0.765811 | 0.887266 | 0.86393  |
| MmunewRS.351.1.S1_at   | MmunewRS.351.1 | 4.5   | 4.63  | 0.12 | 0.1  | -1.09  | 0.225353 | 0.216807 | 0.583384 | 0.490373 |
| MmunewRS.352.1.S1_at   | MmunewRS.352.1 | 5.92  | 6.08  | 0.04 | 0.15 | -1.12  | 0.110194 | 0.099707 | 0.471834 | 0.358256 |
| MmunewRS.353.1.S1_at   | MmunewRS.353.1 | 6.41  | 6.43  | 0.16 | 0.07 | -1.01  | 0.213301 | 0.338548 | 0.573596 | 0.58555  |
| MmunewRS.354.1.S1_at   | MmunewRS.354.1 | 4.12  | 4.31  | 0.1  | 0.09 | -1.14  | 0.045997 | 0.049243 | 0.362169 | 0.266752 |
| MmunewRS.355.1.S1_at   | MmunewRS.355.1 | 3.82  | 3.75  | 0.08 | 0.07 | 1.05   | 0.053519 | 0.198418 | 0.380283 | 0.473302 |
| MmunewRS.356.1.S1_s_at | MmunewRS.356.1 | 10.06 | 10.72 | 1.12 | 1.3  | -1.58  | 0.638408 | 0.828188 | 0.836621 | 0.901235 |
| MmunewRS.358.1.S1_at   | MmunewRS.358.1 | 7     | 7.3   | 0.46 | 0.12 | -1.23  | 0.582448 | 0.359186 | 0.805787 | 0.600528 |
| MmunewRS.359.1.S1_at   | MmunewRS.359.1 | 2.99  | 3.19  | 0.03 | 0.32 | -1.15  | 0.335859 | 0.421839 | 0.65921  | 0.645364 |
| MmunewRS.36.1.S1_at    | MmunewRS.36.1  | 13.36 | 13.48 | 0.3  | 0.09 | -1.09  | 0.449813 | 0.615956 | 0.730493 | 0.772359 |
| MmunewRS.360.1.S1_at   | MmunewRS.360.1 | 4.6   | 4.61  | 0.03 | 0.07 | -1.01  | 0.49514  | 0.015944 | 0.75708  | 0.160254 |
| MmunewRS.361.1.S1_at   | MmunewRS.361.1 | 3.61  | 3.67  | 0.06 | 0.07 | -1.04  | 0.299696 | 0.100431 | 0.635057 | 0.359541 |

|                        |                |       |       |      |      |       |          |          |          |          |
|------------------------|----------------|-------|-------|------|------|-------|----------|----------|----------|----------|
| MmunewRS.362.1.S1_at   | MmunewRS.362.1 | 3.66  | 3.75  | 0.09 | 0.12 | -1.06 | 0.337448 | 0.408219 | 0.659935 | 0.635527 |
| MmunewRS.363.1.S1_at   | MmunewRS.363.1 | 3.1   | 3.02  | 0.13 | 0.14 | 1.06  | 0.84111  | 0.208728 | 0.936131 | 0.482608 |
| MmunewRS.365.1.S1_at   | MmunewRS.365.1 | 12.22 | 12.81 | 0.15 | 0.24 | -1.51 | 0.039778 | 0.035133 | 0.348096 | 0.231645 |
| MmunewRS.366.1.S1_at   | MmunewRS.366.1 | 9.43  | 8.93  | 0.03 | 0.47 | 1.42  | 0.063286 | 0.063801 | 0.400486 | 0.29906  |
| MmunewRS.367.1.S1_at   | MmunewRS.367.1 | 5.22  | 5.59  | 0.1  | 0.54 | -1.29 | 0.095195 | 0.101637 | 0.453011 | 0.361529 |
| MmunewRS.368.1.S1_at   | MmunewRS.368.1 | 5.18  | 5.27  | 0.12 | 0.04 | -1.06 | 0.098536 | 0.062857 | 0.458486 | 0.297418 |
| MmunewRS.369.1.S1_at   | MmunewRS.369.1 | 5.42  | 5.68  | 0.14 | 0.08 | -1.2  | 0.123587 | 0.153461 | 0.489327 | 0.42827  |
| MmunewRS.37.1.S1_at    | MmunewRS.37.1  | 7.26  | 5.63  | 0.29 | 0.26 | 3.09  | 0.001534 | 0.000441 | 0.151506 | 0.038359 |
| MmunewRS.371.1.S1_at   | MmunewRS.371.1 | 6.64  | 6.22  | 0.07 | 0.08 | 1.34  | 0.003554 | 0.002685 | 0.179515 | 0.076408 |
| MmunewRS.371.1.S1_x_at | MmunewRS.371.1 | 7.01  | 6.65  | 0.07 | 0.11 | 1.28  | 0.012499 | 0.012582 | 0.242029 | 0.14463  |
| MmunewRS.372.1.S1_at   | MmunewRS.372.1 | 5.33  | 5.48  | 0.05 | 0.08 | -1.11 | 0.082539 | 0.063052 | 0.434069 | 0.297772 |
| MmunewRS.373.1.S1_at   | MmunewRS.373.1 | 6.48  | 6.42  | 0.33 | 0.09 | 1.04  | 0.89674  | 0.645374 | 0.958845 | 0.792219 |
| MmunewRS.374.1.S1_at   | MmunewRS.374.1 | 3.3   | 3.36  | 0.05 | 0.09 | -1.04 | 0.109804 | 0.561513 | 0.470963 | 0.737449 |
| MmunewRS.375.1.S1_at   | MmunewRS.375.1 | 5.68  | 5.73  | 0.14 | 0.15 | -1.03 | 0.31376  | 0.463176 | 0.645381 | 0.674261 |
| MmunewRS.377.1.S1_at   | MmunewRS.377.1 | 4.26  | 4.25  | 0.07 | 0.13 | 1.01  | 0.969641 | 0.931644 | 0.98841  | 0.961188 |
| MmunewRS.378.1.S1_at   | MmunewRS.378.1 | 9     | 8.06  | 0.14 | 0.82 | 1.92  | 0.102206 | 0.101995 | 0.461767 | 0.362071 |
| MmunewRS.379.1.S1_at   | MmunewRS.379.1 | 5.28  | 4.3   | 0.56 | 0.09 | 1.98  | 0.107944 | 0.076436 | 0.468662 | 0.321464 |
| MmunewRS.38.1.S1_at    | MmunewRS.38.1  | 5.91  | 8.09  | 0.62 | 2.53 | -4.54 | 0.297441 | 0.317246 | 0.633201 | 0.570488 |
| MmunewRS.380.1.S1_at   | MmunewRS.380.1 | 5.23  | 5.41  | 0.12 | 0.14 | -1.13 | 0.087453 | 0.08126  | 0.441819 | 0.329351 |
| MmunewRS.381.1.S1_at   | MmunewRS.381.1 | 2.85  | 2.97  | 0.02 | 0.09 | -1.08 | 0.252358 | 0.502547 | 0.601295 | 0.700192 |
| MmunewRS.382.1.S1_at   | MmunewRS.382.1 | 8.83  | 8.05  | 0.17 | 0.43 | 1.71  | 0.025796 | 0.028261 | 0.300646 | 0.209854 |
| MmunewRS.383.1.S1_at   | MmunewRS.383.1 | 11.32 | 11.03 | 0.75 | 0.61 | 1.22  | 0.276077 | 0.291175 | 0.618148 | 0.551659 |
| MmunewRS.384.1.S1_at   | MmunewRS.384.1 | 5.27  | 4.98  | 0.28 | 0.53 | 1.23  | 0.408042 | 0.538614 | 0.70497  | 0.723301 |
| MmunewRS.385.1.S1_at   | MmunewRS.385.1 | 3.58  | 3.56  | 0.04 | 0.02 | 1.01  | 0.305816 | 0.72997  | 0.639227 | 0.843733 |
| MmunewRS.387.1.S1_at   | MmunewRS.387.1 | 9.53  | 10.15 | 0.22 | 0.27 | -1.54 | 0.01721  | 0.009599 | 0.266942 | 0.129123 |
| MmunewRS.388.1.S1_s_at | MmunewRS.388.1 | 6.97  | 6.55  | 0.26 | 0.21 | 1.34  | 0.329855 | 0.298249 | 0.655349 | 0.556931 |
| MmunewRS.389.1.S1_at   | MmunewRS.389.1 | 4.47  | 4.45  | 0.08 | 0.1  | 1.01  | 0.571458 | 0.78508  | 0.800183 | 0.875577 |
| MmunewRS.39.1.S1_at    | MmunewRS.39.1  | 4.34  | 4.54  | 0.07 | 0.04 | -1.15 | 0.016574 | 0.008802 | 0.26475  | 0.124117 |
| MmunewRS.390.1.S1_x_at | MmunewRS.390.1 | 10.78 | 10.59 | 0.77 | 0.31 | 1.14  | 0.263024 | 0.353494 | 0.609142 | 0.596547 |
| MmunewRS.391.1.S1_at   | MmunewRS.391.1 | 8.94  | 9.02  | 0.11 | 0.16 | -1.06 | 0.980606 | 0.672578 | 0.992987 | 0.808638 |
| MmunewRS.392.1.S1_at   | MmunewRS.392.1 | 5.11  | 5.13  | 0.15 | 0.18 | -1.01 | 0.550358 | 0.422001 | 0.787855 | 0.645406 |
| MmunewRS.393.1.S1_at   | MmunewRS.393.1 | 6.26  | 6.16  | 0.36 | 0.7  | 1.07  | 0.843289 | 0.131563 | 0.936953 | 0.403665 |
| MmunewRS.394.1.S1_at   | MmunewRS.394.1 | 10.34 | 9.67  | 0.24 | 0.54 | 1.59  | 0.342206 | 0.465862 | 0.663129 | 0.675982 |
| MmunewRS.395.1.S1_at   | MmunewRS.395.1 | 2.91  | 2.99  | 0.07 | 0.09 | -1.06 | 0.144362 | 0.194153 | 0.510892 | 0.469266 |
| MmunewRS.396.1.S1_at   | MmunewRS.396.1 | 3.41  | 3.39  | 0.04 | 0.17 | 1.01  | 0.496351 | 0.632218 | 0.757473 | 0.783289 |
| MmunewRS.397.1.S1_at   | MmunewRS.397.1 | 4.08  | 4.33  | 0.17 | 0.15 | -1.2  | 0.055047 | 0.034196 | 0.383153 | 0.228773 |
| MmunewRS.398.1.S1_at   | MmunewRS.398.1 | 14.42 | 14.44 | 0.07 | 0.03 | -1.01 | 0.585003 | 0.438988 | 0.807262 | 0.657798 |
| MmunewRS.399.1.S1_at   | MmunewRS.399.1 | 3.38  | 3.32  | 0.47 | 0.03 | 1.04  | 0.678892 | 0.737371 | 0.8563   | 0.847889 |
| MmunewRS.4.1.S1_at     | MmunewRS.4.1   | 6.85  | 6.96  | 0.15 | 0.07 | -1.08 | 0.732598 | 0.208407 | 0.884502 | 0.482316 |
| MmunewRS.40.1.S1_at    | MmunewRS.40.1  | 4.54  | 4.6   | 0.05 | 0.24 | -1.04 | 0.671711 | 0.759451 | 0.852716 | 0.860113 |
| MmunewRS.400.1.S1_at   | MmunewRS.400.1 | 12.61 | 12.3  | 0.11 | 0.64 | 1.24  | 0.275572 | 0.324487 | 0.617878 | 0.57507  |

|                        |                |       |       |      |      |       |          |          |          |          |
|------------------------|----------------|-------|-------|------|------|-------|----------|----------|----------|----------|
| MmunewRS.401.1.S1_at   | MmunewRS.401.1 | 6.63  | 6.78  | 0.29 | 0.13 | -1.1  | 0.380769 | 0.479953 | 0.687592 | 0.685569 |
| MmunewRS.402.1.S1_at   | MmunewRS.402.1 | 4.26  | 4.13  | 0.13 | 0.09 | 1.1   | 0.209514 | 0.095581 | 0.570957 | 0.352645 |
| MmunewRS.403.1.S1_at   | MmunewRS.403.1 | 3.44  | 3.52  | 0.13 | 0.16 | -1.06 | 0.333941 | 0.750009 | 0.658024 | 0.854656 |
| MmunewRS.405.1.S1_at   | MmunewRS.405.1 | 4.63  | 4.62  | 0.12 | 0.11 | 1     | 0.957951 | 0.705111 | 0.984068 | 0.828994 |
| MmunewRS.406.1.S1_at   | MmunewRS.406.1 | 4.29  | 5.02  | 1.3  | 0.89 | -1.66 | 0.884275 | 0.490208 | 0.953655 | 0.692262 |
| MmunewRS.407.1.S1_at   | MmunewRS.407.1 | 11.78 | 11.83 | 0.1  | 0.13 | -1.03 | 0.612635 | 0.438549 | 0.822286 | 0.657511 |
| MmunewRS.408.1.S1_at   | MmunewRS.408.1 | 3.64  | 3.54  | 0.07 | 0.17 | 1.07  | 0.758835 | 0.905056 | 0.89809  | 0.946165 |
| MmunewRS.409.1.S1_at   | MmunewRS.409.1 | 5.46  | 5.53  | 0.1  | 0.05 | -1.05 | 0.17098  | 0.269128 | 0.534989 | 0.534447 |
| MmunewRS.410.1.S1_at   | MmunewRS.410.1 | 5.99  | 7.07  | 0.7  | 1.38 | -2.11 | 0.324552 | 0.381176 | 0.651941 | 0.617518 |
| MmunewRS.411.1.S1_at   | MmunewRS.411.1 | 3.33  | 3.29  | 0.48 | 1.03 | 1.02  | 0.503896 | 0.237353 | 0.761034 | 0.508084 |
| MmunewRS.413.1.S1_at   | MmunewRS.413.1 | 12.93 | 13.25 | 0.05 | 0.09 | -1.25 | 0.008276 | 0.004445 | 0.217127 | 0.092958 |
| MmunewRS.414.1.S1_at   | MmunewRS.414.1 | 10.74 | 10.87 | 0.26 | 0.04 | -1.09 | 0.168355 | 0.184169 | 0.532644 | 0.460382 |
| MmunewRS.415.1.S1_at   | MmunewRS.415.1 | 6.32  | 5.9   | 0.25 | 0.49 | 1.35  | 0.427332 | 0.585147 | 0.716187 | 0.752757 |
| MmunewRS.416.1.S1_at   | MmunewRS.416.1 | 4.95  | 5.27  | 0.15 | 0.08 | -1.25 | 0.091123 | 0.072462 | 0.4471   | 0.315294 |
| MmunewRS.417.1.S1_at   | MmunewRS.417.1 | 5.06  | 5.49  | 0.24 | 0.28 | -1.35 | 0.226163 | 0.249814 | 0.584223 | 0.518876 |
| MmunewRS.418.1.S1_at   | MmunewRS.418.1 | 3.35  | 3.39  | 0.11 | 0.12 | -1.02 | 0.910833 | 0.922725 | 0.96477  | 0.956468 |
| MmunewRS.419.1.S1_at   | MmunewRS.419.1 | 4.03  | 4.91  | 0.15 | 0.52 | -1.84 | 0.044906 | 0.078958 | 0.359175 | 0.325977 |
| MmunewRS.42.1.S1_at    | MmunewRS.42.1  | 4.54  | 4.52  | 0.15 | 0.26 | 1.01  | 0.405191 | 0.552544 | 0.703082 | 0.731829 |
| MmunewRS.420.1.S1_at   | MmunewRS.420.1 | 5.15  | 5.34  | 0.15 | 0.12 | -1.14 | 0.161644 | 0.491055 | 0.526573 | 0.692753 |
| MmunewRS.421.1.S1_at   | MmunewRS.421.1 | 9.08  | 9.03  | 0.26 | 0.1  | 1.04  | 0.207921 | 0.058477 | 0.569864 | 0.288549 |
| MmunewRS.423.1.S1_at   | MmunewRS.423.1 | 3.3   | 3.14  | 0.12 | 0.14 | 1.12  | 0.54134  | 0.511828 | 0.782638 | 0.705797 |
| MmunewRS.423.1.S1_s_at | MmunewRS.423.1 | 3.75  | 3.74  | 0.04 | 0.2  | 1.01  | 0.873177 | 0.974871 | 0.94924  | 0.986264 |
| MmunewRS.424.1.S1_s_at | MmunewRS.424.1 | 3.55  | 3.68  | 0.13 | 0.08 | -1.09 | 0.421232 | 0.72795  | 0.712907 | 0.842707 |
| MmunewRS.425.1.S1_at   | MmunewRS.425.1 | 3.84  | 3.74  | 0.12 | 0.07 | 1.07  | 0.656999 | 0.299852 | 0.845684 | 0.558138 |
| MmunewRS.426.1.S1_at   | MmunewRS.426.1 | 5.81  | 5.7   | 0.68 | 0.38 | 1.08  | 0.341065 | 0.411096 | 0.662243 | 0.63788  |
| MmunewRS.427.1.S1_at   | MmunewRS.427.1 | 10.24 | 9.77  | 0.24 | 0.21 | 1.39  | 0.150651 | 0.026616 | 0.515411 | 0.204008 |
| MmunewRS.428.1.S1_at   | MmunewRS.428.1 | 3.1   | 3.14  | 0.09 | 0.04 | -1.03 | 0.183911 | 0.145196 | 0.547947 | 0.41919  |
| MmunewRS.429.1.S1_at   | MmunewRS.429.1 | 6.39  | 6.7   | 0.13 | 0.07 | -1.24 | 0.022055 | 0.013654 | 0.28446  | 0.149597 |
| MmunewRS.43.1.S1_at    | MmunewRS.43.1  | 3.72  | 3.72  | 0.29 | 0.12 | 1     | 0.900794 | 0.36198  | 0.960386 | 0.602725 |
| MmunewRS.430.1.S1_at   | MmunewRS.430.1 | 4.58  | 4.48  | 0.1  | 0.06 | 1.07  | 0.275691 | 0.22324  | 0.617878 | 0.496073 |
| MmunewRS.431.1.S1_at   | MmunewRS.431.1 | 10.6  | 11.08 | 1.49 | 0.37 | -1.4  | 0.232666 | 0.168425 | 0.587814 | 0.445092 |
| MmunewRS.432.1.S1_at   | MmunewRS.432.1 | 10.04 | 10.27 | 0.16 | 0.34 | -1.17 | 0.806581 | 0.933439 | 0.920772 | 0.962195 |
| MmunewRS.433.1.S1_at   | MmunewRS.433.1 | 3.59  | 3.82  | 0.33 | 0.06 | -1.17 | 0.98989  | 0.973871 | 0.996411 | 0.98573  |
| MmunewRS.434.1.S1_at   | MmunewRS.434.1 | 3.66  | 3.66  | 0.06 | 0.14 | -1    | 0.980518 | 0.586988 | 0.992974 | 0.753933 |
| MmunewRS.435.1.S1_at   | MmunewRS.435.1 | 8.93  | 6.96  | 0.67 | 0.34 | 3.94  | 0.03174  | 0.016783 | 0.322685 | 0.164091 |
| MmunewRS.435.1.S1_s_at | MmunewRS.435.1 | 12.36 | 12.02 | 0.2  | 0.23 | 1.26  | 0.220191 | 0.258742 | 0.579297 | 0.525949 |
| MmunewRS.436.1.S1_s_at | MmunewRS.436.1 | 10.48 | 13.19 | 1.27 | 2.15 | -6.55 | 0.508439 | 0.207303 | 0.763706 | 0.481485 |
| MmunewRS.438.1.S1_at   | MmunewRS.438.1 | 2.81  | 2.77  | 0.04 | 0.04 | 1.03  | 0.440002 | 0.678513 | 0.724069 | 0.81221  |
| MmunewRS.439.1.S1_at   | MmunewRS.439.1 | 9.09  | 9.93  | 0.3  | 0.3  | -1.79 | 0.033834 | 0.004446 | 0.330248 | 0.092958 |
| MmunewRS.44.1.S1_at    | MmunewRS.44.1  | 4.87  | 4.62  | 0.27 | 0.14 | 1.19  | 0.205951 | 0.168282 | 0.568403 | 0.444935 |
| MmunewRS.440.1.S1_at   | MmunewRS.440.1 | 3.21  | 3.47  | 0.13 | 0.02 | -1.19 | 0.065575 | 0.064385 | 0.404648 | 0.299968 |

|                        |                |       |       |      |      |       |          |          |          |          |
|------------------------|----------------|-------|-------|------|------|-------|----------|----------|----------|----------|
| MmunewRS.441.1.S1_at   | MmunewRS.441.1 | 3.63  | 4.37  | 0.35 | 0.11 | -1.67 | 0.043495 | 0.076005 | 0.356765 | 0.320676 |
| MmunewRS.442.1.S1_at   | MmunewRS.442.1 | 3.65  | 3.44  | 0.06 | 0.07 | 1.16  | 0.049623 | 0.068768 | 0.371625 | 0.308711 |
| MmunewRS.443.1.S1_at   | MmunewRS.443.1 | 3.41  | 3.45  | 0.11 | 0.28 | -1.03 | 0.315577 | 0.483916 | 0.646683 | 0.688243 |
| MmunewRS.444.1.S1_at   | MmunewRS.444.1 | 3.27  | 3.14  | 0.34 | 0.2  | 1.09  | 0.947791 | 0.710358 | 0.980005 | 0.831943 |
| MmunewRS.445.1.S1_at   | MmunewRS.445.1 | 5.9   | 5.95  | 0.17 | 0.05 | -1.04 | 0.468509 | 0.523516 | 0.741077 | 0.713769 |
| MmunewRS.446.1.S1_at   | MmunewRS.446.1 | 7.26  | 7.48  | 0.22 | 0.14 | -1.16 | 0.539145 | 0.480362 | 0.780929 | 0.68574  |
| MmunewRS.447.1.S1_at   | MmunewRS.447.1 | 4.88  | 4.86  | 0.52 | 0.02 | 1.02  | 0.342437 | 0.420005 | 0.663209 | 0.643787 |
| MmunewRS.448.1.S1_at   | MmunewRS.448.1 | 6.55  | 6.79  | 0.11 | 0.23 | -1.18 | 0.379131 | 0.496187 | 0.686752 | 0.695883 |
| MmunewRS.449.1.S1_at   | MmunewRS.449.1 | 4.75  | 5.02  | 0.11 | 0.14 | -1.21 | 0.043258 | 0.063772 | 0.3567   | 0.29906  |
| MmunewRS.450.1.S1_at   | MmunewRS.450.1 | 5.7   | 5.88  | 0.11 | 0.17 | -1.13 | 0.079509 | 0.124911 | 0.429636 | 0.395313 |
| MmunewRS.451.1.S1_at   | MmunewRS.451.1 | 6.35  | 6.42  | 0.18 | 0.14 | -1.05 | 0.94227  | 0.004942 | 0.977916 | 0.097917 |
| MmunewRS.452.1.S1_at   | MmunewRS.452.1 | 9.82  | 7.83  | 0.62 | 0.95 | 3.97  | 0.069452 | 0.059964 | 0.412306 | 0.291576 |
| MmunewRS.453.1.S1_at   | MmunewRS.453.1 | 4.12  | 4.42  | 0.08 | 0.12 | -1.23 | 0.021643 | 0.007299 | 0.283201 | 0.114662 |
| MmunewRS.454.1.S1_at   | MmunewRS.454.1 | 3.57  | 3.4   | 0.21 | 0.17 | 1.13  | 0.467859 | 0.609215 | 0.740845 | 0.767677 |
| MmunewRS.455.1.S1_at   | MmunewRS.455.1 | 6.89  | 7.01  | 0.1  | 0.14 | -1.08 | 0.75204  | 0.604581 | 0.89411  | 0.764695 |
| MmunewRS.456.1.S1_at   | MmunewRS.456.1 | 7.36  | 8.23  | 0.29 | 0.84 | -1.83 | 0.36666  | 0.524225 | 0.679209 | 0.71422  |
| MmunewRS.458.1.S1_at   | MmunewRS.458.1 | 3.68  | 3.71  | 0.03 | 0.07 | -1.03 | 0.214933 | 0.419109 | 0.57547  | 0.643308 |
| MmunewRS.46.1.S1_at    | MmunewRS.46.1  | 5.65  | 5.35  | 0.15 | 1.03 | 1.23  | 0.715366 | 0.851967 | 0.875007 | 0.91585  |
| MmunewRS.460.1.S1_at   | MmunewRS.460.1 | 2.75  | 2.75  | 0.07 | 0.03 | 1     | 0.992223 | 0.302898 | 0.997355 | 0.560356 |
| MmunewRS.461.1.S1_at   | MmunewRS.461.1 | 5.07  | 5.53  | 0.18 | 0.6  | -1.37 | 0.417501 | 0.488072 | 0.710553 | 0.690889 |
| MmunewRS.462.1.S1_s_at | MmunewRS.462.1 | 4.65  | 4.68  | 0.46 | 0.08 | -1.02 | 0.737817 | 0.276683 | 0.887357 | 0.540615 |
| MmunewRS.463.1.S1_at   | MmunewRS.463.1 | 8.73  | 8.69  | 0.07 | 0.33 | 1.03  | 0.97914  | 0.933654 | 0.992334 | 0.962249 |
| MmunewRS.464.1.S1_at   | MmunewRS.464.1 | 2.99  | 3.09  | 0.08 | 0.18 | -1.07 | 0.42399  | 0.530456 | 0.714238 | 0.717991 |
| MmunewRS.465.1.S1_at   | MmunewRS.465.1 | 6.26  | 6.7   | 0.12 | 0.15 | -1.35 | 0.016548 | 0.006333 | 0.264616 | 0.108074 |
| MmunewRS.466.1.S1_at   | MmunewRS.466.1 | 4.19  | 4.11  | 0.37 | 0.17 | 1.06  | 0.169977 | 0.142455 | 0.534161 | 0.416035 |
| MmunewRS.467.1.S1_at   | MmunewRS.467.1 | 6     | 5.95  | 0.1  | 0.17 | 1.04  | 0.991511 | 0.97594  | 0.99695  | 0.986856 |
| MmunewRS.468.1.S1_at   | MmunewRS.468.1 | 7.19  | 7.44  | 0.09 | 0.22 | -1.19 | 0.423009 | 0.654132 | 0.713793 | 0.79789  |
| MmunewRS.469.1.S1_at   | MmunewRS.469.1 | 8.03  | 7.81  | 0.29 | 0.43 | 1.16  | 0.452189 | 0.721889 | 0.731949 | 0.838904 |
| MmunewRS.47.1.S1_at    | MmunewRS.47.1  | 10.17 | 9.84  | 0.08 | 0.3  | 1.25  | 0.124845 | 0.125936 | 0.490774 | 0.396461 |
| MmunewRS.47.1.S1_s_at  | MmunewRS.47.1  | 10.53 | 10.27 | 0.09 | 0.27 | 1.2   | 0.236867 | 0.308244 | 0.590574 | 0.564378 |
| MmunewRS.470.1.S1_x_at | MmunewRS.470.1 | 9.17  | 8.8   | 0.4  | 0.2  | 1.3   | 0.25253  | 0.373289 | 0.601373 | 0.612113 |
| MmunewRS.471.1.S1_at   | MmunewRS.471.1 | 4     | 3.56  | 0.24 | 0.18 | 1.36  | 0.083881 | 0.048313 | 0.436311 | 0.264916 |
| MmunewRS.472.1.S1_at   | MmunewRS.472.1 | 3.12  | 3.1   | 0.37 | 0.02 | 1.01  | 0.323653 | 0.257967 | 0.65165  | 0.525548 |
| MmunewRS.473.1.S1_at   | MmunewRS.473.1 | 4.95  | 4.99  | 0.07 | 0.21 | -1.03 | 0.45929  | 0.662384 | 0.736044 | 0.802294 |
| MmunewRS.474.1.S1_at   | MmunewRS.474.1 | 11.01 | 10.98 | 0.19 | 0.31 | 1.02  | 0.654859 | 0.752519 | 0.84477  | 0.855912 |
| MmunewRS.475.1.S1_at   | MmunewRS.475.1 | 7.82  | 6.32  | 0.28 | 1.12 | 2.83  | 0.220611 | 0.213171 | 0.579681 | 0.487068 |
| MmunewRS.476.1.S1_at   | MmunewRS.476.1 | 3.08  | 3     | 0.13 | 0.14 | 1.05  | 0.520158 | 0.525868 | 0.770623 | 0.715223 |
| MmunewRS.478.1.S1_at   | MmunewRS.478.1 | 2.64  | 2.52  | 0.3  | 0.1  | 1.09  | 0.266811 | 0.210912 | 0.612291 | 0.484934 |
| MmunewRS.48.1.S1_at    | MmunewRS.48.1  | 7.08  | 8.02  | 0.48 | 2.12 | -1.92 | 0.563913 | 0.745379 | 0.796337 | 0.852384 |
| MmunewRS.480.1.S1_at   | MmunewRS.480.1 | 5.11  | 5.06  | 0.17 | 0.24 | 1.03  | 0.959558 | 0.76538  | 0.984651 | 0.863627 |
| MmunewRS.481.1.S1_at   | MmunewRS.481.1 | 6.61  | 7.15  | 0.19 | 0.23 | -1.45 | 0.079845 | 0.074327 | 0.430147 | 0.318046 |

|                        |                |       |       |      |      |       |          |          |          |          |
|------------------------|----------------|-------|-------|------|------|-------|----------|----------|----------|----------|
| MmunewRS.482.1.S1_at   | MmunewRS.482.1 | 3.23  | 3.27  | 0.06 | 0.04 | -1.03 | 0.488631 | 0.702141 | 0.753196 | 0.827304 |
| MmunewRS.483.1.S1_at   | MmunewRS.483.1 | 7.8   | 8.57  | 0.23 | 0.78 | -1.7  | 0.11584  | 0.059581 | 0.479325 | 0.290619 |
| MmunewRS.484.1.S1_at   | MmunewRS.484.1 | 8.29  | 9     | 0.41 | 0.16 | -1.64 | 0.050771 | 0.029237 | 0.375333 | 0.212898 |
| MmunewRS.485.1.S1_at   | MmunewRS.485.1 | 3.18  | 3.2   | 0.1  | 0.03 | -1.02 | 0.251951 | 0.27478  | 0.601195 | 0.539228 |
| MmunewRS.486.1.S1_at   | MmunewRS.486.1 | 5.09  | 5     | 0.22 | 0.26 | 1.07  | 0.88456  | 0.958015 | 0.953771 | 0.976273 |
| MmunewRS.487.1.S1_at   | MmunewRS.487.1 | 5.85  | 6.03  | 0.8  | 0.14 | -1.13 | 0.684434 | 0.283062 | 0.858788 | 0.545692 |
| MmunewRS.488.1.S1_at   | MmunewRS.488.1 | 4.39  | 4.3   | 1.07 | 0.61 | 1.06  | 0.773211 | 0.425263 | 0.904749 | 0.647679 |
| MmunewRS.489.1.S1_at   | MmunewRS.489.1 | 12.22 | 12.81 | 0.24 | 0.55 | -1.51 | 0.17414  | 0.202976 | 0.537761 | 0.477343 |
| MmunewRS.49.1.S1_at    | MmunewRS.49.1  | 8.73  | 8.06  | 0.13 | 0.58 | 1.58  | 0.042778 | 0.081181 | 0.355382 | 0.329351 |
| MmunewRS.490.1.S1_x_at | MmunewRS.490.1 | 7.22  | 7.25  | 0.7  | 0.15 | -1.02 | 0.386645 | 0.464305 | 0.691563 | 0.674993 |
| MmunewRS.491.1.S1_at   | MmunewRS.491.1 | 6.07  | 6.06  | 0.13 | 0.26 | 1.01  | 0.430503 | 0.491807 | 0.718071 | 0.693275 |
| MmunewRS.492.1.S1_at   | MmunewRS.492.1 | 3.1   | 3.06  | 0.13 | 0.03 | 1.03  | 0.561933 | 0.497675 | 0.795052 | 0.696997 |
| MmunewRS.493.1.S1_at   | MmunewRS.493.1 | 3.24  | 3.09  | 0    | 0.21 | 1.12  | 0.652935 | 0.475948 | 0.843896 | 0.682387 |
| MmunewRS.494.1.S1_at   | MmunewRS.494.1 | 11.41 | 11.21 | 0.13 | 0.12 | 1.15  | 0.221688 | 0.061266 | 0.580397 | 0.294225 |
| MmunewRS.495.1.S1_at   | MmunewRS.495.1 | 3.53  | 3.51  | 0.08 | 0.13 | 1.02  | 0.804052 | 0.873212 | 0.919371 | 0.92788  |
| MmunewRS.496.1.S1_at   | MmunewRS.496.1 | 7.72  | 9.04  | 0.2  | 0.81 | -2.49 | 0.041091 | 0.014728 | 0.350569 | 0.154415 |
| MmunewRS.497.1.S1_at   | MmunewRS.497.1 | 4.76  | 4.7   | 0.48 | 0.82 | 1.04  | 0.813251 | 0.87647  | 0.924167 | 0.929683 |
| MmunewRS.498.1.S1_at   | MmunewRS.498.1 | 8.3   | 10.22 | 0.86 | 0.67 | -3.77 | 0.036722 | 0.024945 | 0.340163 | 0.197799 |
| MmunewRS.499.1.S1_at   | MmunewRS.499.1 | 3.6   | 3.54  | 0.44 | 0.19 | 1.05  | 0.498374 | 0.582137 | 0.75837  | 0.750784 |
| MmunewRS.5.1.S1_at     | MmunewRS.5.1   | 4.4   | 4.5   | 0.2  | 0.26 | -1.07 | 0.129139 | 0.122875 | 0.495114 | 0.392923 |
| MmunewRS.50.1.S1_at    | MmunewRS.50.1  | 6.17  | 5.99  | 0.03 | 0.15 | 1.14  | 0.038225 | 0.034539 | 0.343727 | 0.229979 |
| MmunewRS.500.1.S1_at   | MmunewRS.500.1 | 12.3  | 13.66 | 0.67 | 0.67 | -2.56 | 0.229306 | 0.197605 | 0.586472 | 0.472564 |
| MmunewRS.501.1.S1_at   | MmunewRS.501.1 | 5.15  | 4.99  | 0.26 | 0.3  | 1.12  | 0.73947  | 0.932942 | 0.888154 | 0.961911 |
| MmunewRS.502.1.S1_at   | MmunewRS.502.1 | 4.49  | 4.65  | 0.05 | 0.15 | -1.11 | 0.067717 | 0.064617 | 0.408357 | 0.300314 |
| MmunewRS.503.1.S1_at   | MmunewRS.503.1 | 8.45  | 7.81  | 0.15 | 0.39 | 1.56  | 0.017165 | 0.007135 | 0.266906 | 0.113735 |
| MmunewRS.504.1.S1_at   | MmunewRS.504.1 | 3.52  | 3.33  | 0.21 | 0.27 | 1.14  | 0.957487 | 0.271759 | 0.983882 | 0.536577 |
| MmunewRS.505.1.S1_x_at | MmunewRS.505.1 | 7.77  | 7.76  | 0.49 | 0.2  | 1.01  | 0.678812 | 0.812201 | 0.856249 | 0.891555 |
| MmunewRS.506.1.S1_at   | MmunewRS.506.1 | 8.43  | 8.49  | 0.38 | 0.39 | -1.04 | 0.419303 | 0.495145 | 0.711174 | 0.695319 |
| MmunewRS.507.1.S1_at   | MmunewRS.507.1 | 6.67  | 9.9   | 1.32 | 2.47 | -9.39 | 0.329201 | 0.229549 | 0.654879 | 0.501534 |
| MmunewRS.508.1.S1_at   | MmunewRS.508.1 | 3.16  | 3.32  | 0.18 | 0.04 | -1.11 | 0.616247 | 0.848788 | 0.824102 | 0.914134 |
| MmunewRS.509.1.S1_at   | MmunewRS.509.1 | 3.54  | 3.53  | 0.26 | 0.5  | 1     | 0.985977 | 0.958856 | 0.994954 | 0.976695 |
| MmunewRS.510.1.S1_at   | MmunewRS.510.1 | 4.1   | 4.25  | 0.17 | 0.02 | -1.11 | 0.330887 | 0.120149 | 0.656063 | 0.388911 |
| MmunewRS.511.1.S1_at   | MmunewRS.511.1 | 4.25  | 4.24  | 0.06 | 0.17 | 1     | 0.93465  | 0.493035 | 0.974715 | 0.693975 |
| MmunewRS.512.1.S1_at   | MmunewRS.512.1 | 6.6   | 6.25  | 0.26 | 0.07 | 1.28  | 0.064697 | 0.01948  | 0.403239 | 0.175288 |
| MmunewRS.513.1.S1_at   | MmunewRS.513.1 | 4.03  | 3.96  | 0.5  | 0.1  | 1.04  | 0.303135 | 0.401909 | 0.637386 | 0.63109  |
| MmunewRS.514.1.S1_at   | MmunewRS.514.1 | 3.48  | 3.19  | 0.74 | 0.32 | 1.23  | 0.658739 | 0.694294 | 0.846726 | 0.822254 |
| MmunewRS.515.1.S1_at   | MmunewRS.515.1 | 3.71  | 3.72  | 0.13 | 0.03 | -1.01 | 0.528194 | 0.210213 | 0.775373 | 0.484033 |
| MmunewRS.517.1.S1_at   | MmunewRS.517.1 | 2.79  | 2.79  | 0.04 | 0.08 | -1    | 0.251706 | 0.335563 | 0.601014 | 0.583326 |
| MmunewRS.518.1.S1_at   | MmunewRS.518.1 | 3.67  | 3.53  | 0.26 | 0.05 | 1.1   | 0.162745 | 0.149714 | 0.527145 | 0.42433  |
| MmunewRS.519.1.S1_at   | MmunewRS.519.1 | 6.39  | 6.34  | 0.04 | 0.25 | 1.03  | 0.867949 | 0.061351 | 0.947274 | 0.29448  |
| MmunewRS.52.1.S1_s_at  | MmunewRS.52.1  | 13.52 | 13.32 | 0.07 | 0.3  | 1.15  | 0.131488 | 0.148455 | 0.498041 | 0.423009 |

|                        |                |       |       |      |      |        |          |          |          |          |
|------------------------|----------------|-------|-------|------|------|--------|----------|----------|----------|----------|
| MmunewRS.520.1.S1_at   | MmunewRS.520.1 | 6.3   | 7.73  | 0.15 | 0.26 | -2.69  | 0.001238 | 0.000778 | 0.145267 | 0.045626 |
| MmunewRS.521.1.S1_at   | MmunewRS.521.1 | 6.47  | 6.52  | 0.09 | 0.12 | -1.03  | 0.852495 | 0.278177 | 0.940647 | 0.541811 |
| MmunewRS.522.1.S1_s_at | MmunewRS.522.1 | 14.21 | 14.18 | 0.11 | 0.08 | 1.02   | 0.758665 | 0.442831 | 0.898014 | 0.660759 |
| MmunewRS.523.1.S1_x_at | MmunewRS.523.1 | 8.36  | 8.22  | 0.77 | 0.22 | 1.1    | 0.379785 | 0.344325 | 0.687063 | 0.589762 |
| MmunewRS.524.1.S1_at   | MmunewRS.524.1 | 6.99  | 7.14  | 0.08 | 0.07 | -1.11  | 0.178132 | 0.387524 | 0.542418 | 0.622163 |
| MmunewRS.525.1.S1_at   | MmunewRS.525.1 | 3.31  | 3.28  | 0.24 | 0.08 | 1.02   | 0.465874 | 0.577589 | 0.74017  | 0.748013 |
| MmunewRS.527.1.S1_at   | MmunewRS.527.1 | 4.25  | 4.32  | 0.18 | 0.12 | -1.05  | 0.751392 | 0.544618 | 0.893728 | 0.726978 |
| MmunewRS.528.1.S1_at   | MmunewRS.528.1 | 5.32  | 5.44  | 0.2  | 0.09 | -1.09  | 0.495149 | 0.625448 | 0.75708  | 0.779175 |
| MmunewRS.53.1.S1_at    | MmunewRS.53.1  | 12.56 | 12.41 | 0.75 | 0.16 | 1.11   | 0.631938 | 0.543225 | 0.832937 | 0.726012 |
| MmunewRS.531.1.S1_at   | MmunewRS.531.1 | 2.55  | 2.61  | 0.06 | 0.07 | -1.04  | 0.288203 | 0.38026  | 0.626502 | 0.616942 |
| MmunewRS.531.1.S1_s_at | MmunewRS.531.1 | 3.9   | 3.88  | 0.12 | 0.11 | 1.01   | 0.630912 | 0.838004 | 0.832393 | 0.907512 |
| MmunewRS.532.1.S1_at   | MmunewRS.532.1 | 4.93  | 5.08  | 0.04 | 0.09 | -1.11  | 0.09517  | 0.082745 | 0.452984 | 0.332206 |
| MmunewRS.533.1.S1_at   | MmunewRS.533.1 | 3.09  | 3.33  | 0.37 | 0.14 | -1.18  | 0.825591 | 0.639109 | 0.929243 | 0.788078 |
| MmunewRS.534.1.S1_at   | MmunewRS.534.1 | 9.25  | 9.61  | 0.08 | 0.6  | -1.28  | 0.112162 | 0.108629 | 0.474673 | 0.372171 |
| MmunewRS.535.1.S1_at   | MmunewRS.535.1 | 4.38  | 4.15  | 0.25 | 0.11 | 1.17   | 0.496954 | 0.069071 | 0.757692 | 0.30905  |
| MmunewRS.536.1.S1_at   | MmunewRS.536.1 | 11.54 | 13.88 | 1.42 | 1.59 | -5.08  | 0.321054 | 0.190112 | 0.649764 | 0.465774 |
| MmunewRS.537.1.S1_at   | MmunewRS.537.1 | 3.97  | 3.96  | 0.17 | 0.18 | 1.01   | 0.611119 | 0.382963 | 0.821498 | 0.61903  |
| MmunewRS.538.1.S1_at   | MmunewRS.538.1 | 2.85  | 2.93  | 0.71 | 0.08 | -1.05  | 0.522061 | 0.352199 | 0.771756 | 0.595568 |
| MmunewRS.539.1.S1_at   | MmunewRS.539.1 | 2.74  | 2.85  | 0.14 | 0.05 | -1.08  | 0.472544 | 0.497948 | 0.743816 | 0.697158 |
| MmunewRS.54.1.S1_at    | MmunewRS.54.1  | 4.15  | 4.23  | 0.04 | 0.04 | -1.05  | 0.230165 | 0.460012 | 0.587112 | 0.671989 |
| MmunewRS.540.1.S1_at   | MmunewRS.540.1 | 4.71  | 4.56  | 0.26 | 0.04 | 1.11   | 0.646185 | 0.477556 | 0.840752 | 0.683599 |
| MmunewRS.541.1.S1_at   | MmunewRS.541.1 | 7.1   | 5.21  | 1.3  | 0.2  | 3.7    | 0.123233 | 0.091595 | 0.488828 | 0.346713 |
| MmunewRS.543.1.S1_at   | MmunewRS.543.1 | 3.3   | 3.36  | 0.09 | 0.02 | -1.05  | 0.27628  | 0.077166 | 0.618355 | 0.322751 |
| MmunewRS.544.1.S1_at   | MmunewRS.544.1 | 3.5   | 3.63  | 0.16 | 0.06 | -1.09  | 0.089692 | 0.102965 | 0.445334 | 0.363685 |
| MmunewRS.545.1.S1_at   | MmunewRS.545.1 | 4.74  | 4.82  | 0.13 | 0.05 | -1.05  | 0.353333 | 0.568949 | 0.670121 | 0.742178 |
| MmunewRS.546.1.S1_at   | MmunewRS.546.1 | 6.01  | 6.04  | 0.22 | 0.4  | -1.02  | 0.818496 | 0.957764 | 0.926289 | 0.976118 |
| MmunewRS.547.1.S1_at   | MmunewRS.547.1 | 5.74  | 5.92  | 0.1  | 0.13 | -1.13  | 0.151092 | 0.460287 | 0.51582  | 0.672148 |
| MmunewRS.548.1.S1_at   | MmunewRS.548.1 | 2.93  | 3.1   | 0.06 | 0.15 | -1.12  | 0.409954 | 0.2665   | 0.706179 | 0.532235 |
| MmunewRS.549.1.S1_at   | MmunewRS.549.1 | 7.05  | 6.55  | 0.81 | 0.48 | 1.42   | 0.905927 | 0.310851 | 0.962563 | 0.565879 |
| MmunewRS.55.1.S1_at    | MmunewRS.55.1  | 9.95  | 13.53 | 1.74 | 2.69 | -11.88 | 0.607482 | 0.355452 | 0.819336 | 0.597738 |
| MmunewRS.550.1.S1_at   | MmunewRS.550.1 | 5.21  | 4.73  | 0.3  | 0.49 | 1.4    | 0.595606 | 0.243735 | 0.812393 | 0.513899 |
| MmunewRS.551.1.S1_at   | MmunewRS.551.1 | 5.27  | 3.59  | 1.18 | 0.63 | 3.19   | 0.284147 | 0.426765 | 0.624022 | 0.648862 |
| MmunewRS.552.1.S1_at   | MmunewRS.552.1 | 4.82  | 3.84  | 0.94 | 0.07 | 1.96   | 0.138964 | 0.086887 | 0.506234 | 0.339688 |
| MmunewRS.553.1.S1_at   | MmunewRS.553.1 | 4.21  | 4.39  | 0.12 | 0.03 | -1.13  | 0.049974 | 0.030851 | 0.372721 | 0.217427 |
| MmunewRS.555.1.S1_at   | MmunewRS.555.1 | 4.31  | 4.31  | 0.16 | 0.28 | 1      | 0.431328 | 0.599717 | 0.71858  | 0.761544 |
| MmunewRS.556.1.S1_at   | MmunewRS.556.1 | 4.61  | 4.48  | 0.56 | 0.1  | 1.09   | 0.240884 | 0.25072  | 0.593628 | 0.51941  |
| MmunewRS.557.1.S1_s_at | MmunewRS.557.1 | 14.31 | 14.35 | 0.03 | 0.05 | -1.03  | 0.855517 | 0.713638 | 0.941542 | 0.833863 |
| MmunewRS.559.1.S1_at   | MmunewRS.559.1 | 5.53  | 5.7   | 0.06 | 0.07 | -1.12  | 0.044831 | 0.009011 | 0.359043 | 0.125499 |
| MmunewRS.56.1.S1_at    | MmunewRS.56.1  | 4.04  | 3.97  | 0.41 | 0.06 | 1.05   | 0.271645 | 0.365493 | 0.615767 | 0.605587 |
| MmunewRS.560.1.S1_at   | MmunewRS.560.1 | 4.54  | 4.53  | 0.16 | 0.01 | 1.01   | 0.962746 | 0.918118 | 0.985642 | 0.954068 |
| MmunewRS.561.1.S1_at   | MmunewRS.561.1 | 5.44  | 5.39  | 0.23 | 0.09 | 1.03   | 0.750284 | 0.880837 | 0.892986 | 0.93198  |



|                        |                |       |       |      |      |       |          |          |          |          |
|------------------------|----------------|-------|-------|------|------|-------|----------|----------|----------|----------|
| MmunewRS.562.1.S1_at   | MmunewRS.562.1 | 3.58  | 3.56  | 0.07 | 0.07 | 1.01  | 0.72008  | 0.139703 | 0.877262 | 0.41303  |
| MmunewRS.563.1.S1_at   | MmunewRS.563.1 | 7.47  | 7.27  | 0.06 | 0.1  | 1.15  | 0.01633  | 0.012544 | 0.263592 | 0.144478 |
| MmunewRS.564.1.S1_at   | MmunewRS.564.1 | 6.11  | 6.06  | 0.05 | 0.13 | 1.03  | 0.684868 | 0.799245 | 0.858795 | 0.884448 |
| MmunewRS.565.1.S1_at   | MmunewRS.565.1 | 4.11  | 4.25  | 0.02 | 0.15 | -1.1  | 0.185432 | 0.189801 | 0.548882 | 0.465403 |
| MmunewRS.566.1.S1_at   | MmunewRS.566.1 | 3.97  | 4.05  | 0.12 | 0.07 | -1.06 | 0.583963 | 0.014698 | 0.806804 | 0.154371 |
| MmunewRS.567.1.S1_at   | MmunewRS.567.1 | 6.1   | 6.25  | 0.1  | 0.07 | -1.11 | 0.121835 | 0.108941 | 0.486761 | 0.372637 |
| MmunewRS.569.1.S1_at   | MmunewRS.569.1 | 5.37  | 5.45  | 0.15 | 0.03 | -1.06 | 0.892083 | 0.4609   | 0.957027 | 0.672763 |
| MmunewRS.57.1.S1_s_at  | MmunewRS.57.1  | 9.08  | 9.69  | 0.04 | 1.03 | -1.52 | 0.349667 | 0.285609 | 0.667907 | 0.547395 |
| MmunewRS.570.1.S1_at   | MmunewRS.570.1 | 4.25  | 3.89  | 0.23 | 0.15 | 1.28  | 0.089916 | 0.25742  | 0.44539  | 0.52521  |
| MmunewRS.571.1.S1_at   | MmunewRS.571.1 | 4.18  | 4.33  | 0.08 | 0.16 | -1.11 | 0.116627 | 0.099456 | 0.48034  | 0.357827 |
| MmunewRS.572.1.S1_at   | MmunewRS.572.1 | 3.37  | 3.46  | 0.05 | 0.08 | -1.07 | 0.41595  | 0.076801 | 0.709583 | 0.322252 |
| MmunewRS.573.1.S1_at   | MmunewRS.573.1 | 7.41  | 5.92  | 0.25 | 0.31 | 2.8   | 0.007039 | 0.022689 | 0.203774 | 0.188685 |
| MmunewRS.575.1.S1_at   | MmunewRS.575.1 | 8.03  | 8.54  | 0.29 | 0.44 | -1.42 | 0.786607 | 0.477662 | 0.91125  | 0.683695 |
| MmunewRS.576.1.S1_at   | MmunewRS.576.1 | 8.44  | 8.61  | 0.03 | 0.25 | -1.13 | 0.287649 | 0.300047 | 0.626102 | 0.558262 |
| MmunewRS.577.1.S1_s_at | MmunewRS.577.1 | 8.44  | 8.26  | 0.15 | 0.67 | 1.14  | 0.542465 | 0.643338 | 0.783321 | 0.79084  |
| MmunewRS.578.1.S1_at   | MmunewRS.578.1 | 5.16  | 5.14  | 0.06 | 0.18 | 1.01  | 0.650161 | 0.874078 | 0.842727 | 0.928468 |
| MmunewRS.579.1.S1_at   | MmunewRS.579.1 | 7.59  | 7.5   | 0.47 | 0.43 | 1.07  | 0.638689 | 0.514057 | 0.836696 | 0.707422 |
| MmunewRS.58.1.S1_at    | MmunewRS.58.1  | 4.52  | 4.66  | 0.12 | 0.06 | -1.1  | 0.418117 | 0.157807 | 0.711143 | 0.433475 |
| MmunewRS.580.1.S1_at   | MmunewRS.580.1 | 4.97  | 4.93  | 0.08 | 0.12 | 1.03  | 0.586113 | 0.128159 | 0.807886 | 0.399148 |
| MmunewRS.581.1.S1_at   | MmunewRS.581.1 | 3.22  | 3.22  | 0.16 | 0.13 | 1     | 0.95218  | 0.536175 | 0.982156 | 0.721547 |
| MmunewRS.582.1.S1_at   | MmunewRS.582.1 | 3.89  | 3.99  | 0.31 | 0.11 | -1.07 | 0.718648 | 0.805105 | 0.876527 | 0.887962 |
| MmunewRS.583.1.S1_at   | MmunewRS.583.1 | 6.2   | 6.31  | 0.19 | 0.24 | -1.08 | 0.601106 | 0.225739 | 0.815683 | 0.498159 |
| MmunewRS.584.1.S1_at   | MmunewRS.584.1 | 4.53  | 4.6   | 0.12 | 0.07 | -1.05 | 0.695399 | 0.732452 | 0.864936 | 0.845013 |
| MmunewRS.585.1.S1_at   | MmunewRS.585.1 | 5.3   | 5.35  | 0.05 | 0.05 | -1.04 | 0.128208 | 0.005649 | 0.494307 | 0.103804 |
| MmunewRS.586.1.S1_at   | MmunewRS.586.1 | 4.83  | 4.87  | 0.12 | 0.07 | -1.03 | 0.880965 | 0.397228 | 0.952105 | 0.628763 |
| MmunewRS.587.1.S1_at   | MmunewRS.587.1 | 7.83  | 7.54  | 0.43 | 0.48 | 1.23  | 0.462234 | 0.076096 | 0.738226 | 0.320848 |
| MmunewRS.588.1.S1_at   | MmunewRS.588.1 | 10.79 | 10.75 | 0.36 | 0.2  | 1.03  | 0.545231 | 0.734519 | 0.784786 | 0.84619  |
| MmunewRS.589.1.S1_at   | MmunewRS.589.1 | 3.14  | 3.2   | 0.13 | 0.05 | -1.04 | 0.431514 | 0.605606 | 0.718592 | 0.76535  |
| MmunewRS.59.1.S1_at    | MmunewRS.59.1  | 4.63  | 4.76  | 0.05 | 0.08 | -1.1  | 0.074981 | 0.137976 | 0.421695 | 0.410912 |
| MmunewRS.590.1.S1_at   | MmunewRS.590.1 | 10.5  | 11    | 0.48 | 0.13 | -1.42 | 0.159913 | 0.05127  | 0.524745 | 0.271825 |
| MmunewRS.591.1.S1_at   | MmunewRS.591.1 | 5.13  | 5.13  | 0.24 | 0.2  | -1    | 0.973507 | 0.974593 | 0.989603 | 0.986197 |
| MmunewRS.592.1.S1_at   | MmunewRS.592.1 | 3.26  | 3.4   | 0.28 | 0.02 | -1.1  | 0.873478 | 0.616199 | 0.949273 | 0.772513 |
| MmunewRS.593.1.S1_at   | MmunewRS.593.1 | 3.72  | 3.75  | 0.05 | 0.17 | -1.02 | 0.873227 | 0.760673 | 0.94924  | 0.860963 |
| MmunewRS.594.1.S1_at   | MmunewRS.594.1 | 5.21  | 5.17  | 0.01 | 0.16 | 1.03  | 0.582025 | 0.439493 | 0.805507 | 0.6582   |
| MmunewRS.597.1.S1_at   | MmunewRS.597.1 | 5.69  | 5.98  | 0.32 | 0.21 | -1.22 | 0.126117 | 0.401502 | 0.492228 | 0.631068 |
| MmunewRS.599.1.S1_s_at | MmunewRS.599.1 | 3.79  | 3.6   | 0.19 | 0.09 | 1.14  | 0.119166 | 0.255583 | 0.48378  | 0.523597 |
| MmunewRS.6.1.S1_at     | MmunewRS.6.1   | 7.35  | 7.35  | 0.16 | 0.06 | 1     | 0.814354 | 0.375114 | 0.92475  | 0.613186 |
| MmunewRS.60.1.S1_at    | MmunewRS.60.1  | 3.37  | 3.43  | 1.53 | 0.27 | -1.04 | 0.433293 | 0.449119 | 0.719896 | 0.664892 |
| MmunewRS.600.1.S1_at   | MmunewRS.600.1 | 3.93  | 3.97  | 0.12 | 0.13 | -1.03 | 0.715803 | 0.611777 | 0.875256 | 0.769583 |
| MmunewRS.601.1.S1_at   | MmunewRS.601.1 | 4.05  | 4.36  | 0.15 | 0.22 | -1.24 | 0.342944 | 0.095324 | 0.663407 | 0.35236  |
| MmunewRS.602.1.S1_at   | MmunewRS.602.1 | 4.51  | 4.89  | 0.1  | 0.15 | -1.3  | 0.038466 | 0.017572 | 0.344376 | 0.167721 |

|                        |                |       |       |      |      |       |          |          |          |          |
|------------------------|----------------|-------|-------|------|------|-------|----------|----------|----------|----------|
| MmunewRS.603.1.S1_at   | MmunewRS.603.1 | 5.7   | 5.69  | 0.06 | 0    | 1.01  | 0.288055 | 0.493898 | 0.626381 | 0.69445  |
| MmunewRS.604.1.S1_at   | MmunewRS.604.1 | 4.37  | 4.32  | 0.04 | 0.04 | 1.04  | 0.50639  | 0.187082 | 0.762318 | 0.462997 |
| MmunewRS.605.1.S1_at   | MmunewRS.605.1 | 4.82  | 4.91  | 0.19 | 0.11 | -1.06 | 0.410993 | 0.587804 | 0.706804 | 0.75454  |
| MmunewRS.606.1.S1_at   | MmunewRS.606.1 | 5.23  | 5.15  | 0.18 | 0.4  | 1.06  | 0.220482 | 0.269295 | 0.579485 | 0.534534 |
| MmunewRS.607.1.S1_s_at | MmunewRS.607.1 | 2.98  | 3.09  | 0.25 | 1.09 | -1.07 | 0.270673 | 0.361049 | 0.614969 | 0.602069 |
| MmunewRS.608.1.S1_at   | MmunewRS.608.1 | 2.81  | 2.9   | 0.03 | 0.04 | -1.07 | 0.012795 | 0.012217 | 0.24376  | 0.142932 |
| MmunewRS.609.1.S1_at   | MmunewRS.609.1 | 4.71  | 4.99  | 0.19 | 0.19 | -1.21 | 0.113577 | 0.112639 | 0.476938 | 0.378183 |
| MmunewRS.61.1.S1_at    | MmunewRS.61.1  | 6.29  | 6.3   | 0.16 | 0.09 | -1.01 | 0.547852 | 0.85654  | 0.786375 | 0.918032 |
| MmunewRS.610.1.S1_at   | MmunewRS.610.1 | 3.8   | 3.88  | 0.08 | 0.16 | -1.05 | 0.786479 | 0.603262 | 0.911182 | 0.764037 |
| MmunewRS.611.1.S1_s_at | MmunewRS.611.1 | 12.76 | 12.48 | 0.07 | 0.07 | 1.21  | 0.006259 | 0.003448 | 0.197417 | 0.084511 |
| MmunewRS.612.1.S1_at   | MmunewRS.612.1 | 3.21  | 3.21  | 0.02 | 0.01 | -1    | 0.183938 | 0.830312 | 0.547947 | 0.902639 |
| MmunewRS.615.1.S1_at   | MmunewRS.615.1 | 3.26  | 3.25  | 0.02 | 0.17 | 1.01  | 0.447018 | 0.768759 | 0.72871  | 0.865653 |
| MmunewRS.616.1.S1_at   | MmunewRS.616.1 | 6.21  | 5.67  | 0.12 | 0.63 | 1.46  | 0.227957 | 0.269522 | 0.585346 | 0.534806 |
| MmunewRS.617.1.S1_at   | MmunewRS.617.1 | 6.15  | 6.06  | 0.15 | 0.16 | 1.07  | 0.793333 | 0.394809 | 0.914348 | 0.627216 |
| MmunewRS.618.1.S1_at   | MmunewRS.618.1 | 3.34  | 3.25  | 0.25 | 0.13 | 1.06  | 0.611756 | 0.789933 | 0.821826 | 0.878631 |
| MmunewRS.619.1.S1_at   | MmunewRS.619.1 | 4.77  | 4.87  | 0.3  | 0.02 | -1.07 | 0.855174 | 0.975387 | 0.941454 | 0.986565 |
| MmunewRS.62.1.S1_at    | MmunewRS.62.1  | 5.95  | 5.98  | 0.08 | 0.14 | -1.03 | 0.156109 | 0.176727 | 0.520741 | 0.453171 |
| MmunewRS.620.1.S1_at   | MmunewRS.620.1 | 4.06  | 4.02  | 0.09 | 0.16 | 1.02  | 0.511699 | 0.40349  | 0.765318 | 0.632164 |
| MmunewRS.621.1.S1_at   | MmunewRS.621.1 | 3.43  | 3.61  | 0.11 | 0.16 | -1.14 | 0.071027 | 0.048206 | 0.414673 | 0.264671 |
| MmunewRS.623.1.S1_at   | MmunewRS.623.1 | 3.35  | 3.47  | 0.05 | 0.11 | -1.09 | 0.077072 | 0.127228 | 0.426373 | 0.397935 |
| MmunewRS.624.1.S1_s_at | MmunewRS.624.1 | 14.26 | 14.31 | 0.05 | 0.09 | -1.03 | 0.706607 | 0.853705 | 0.870741 | 0.916773 |
| MmunewRS.625.1.S1_at   | MmunewRS.625.1 | 3.7   | 3.74  | 0.22 | 0.21 | -1.02 | 0.908725 | 0.698655 | 0.963816 | 0.824932 |
| MmunewRS.626.1.S1_at   | MmunewRS.626.1 | 10.57 | 11.21 | 0.2  | 0.2  | -1.56 | 0.035042 | 0.034554 | 0.334571 | 0.229979 |
| MmunewRS.627.1.S1_at   | MmunewRS.627.1 | 3.64  | 3.94  | 0.06 | 0.11 | -1.23 | 0.017825 | 0.020236 | 0.268082 | 0.178669 |
| MmunewRS.628.1.S1_at   | MmunewRS.628.1 | 4.96  | 5.16  | 0.12 | 0.01 | -1.15 | 0.019164 | 0.026567 | 0.273043 | 0.203931 |
| MmunewRS.629.1.S1_at   | MmunewRS.629.1 | 4.68  | 4.69  | 0.04 | 0.23 | -1.01 | 0.727022 | 0.747179 | 0.88121  | 0.853124 |
| MmunewRS.630.1.S1_at   | MmunewRS.630.1 | 3.17  | 3.21  | 0.11 | 0.08 | -1.03 | 0.752488 | 0.236948 | 0.894361 | 0.507675 |
| MmunewRS.631.1.S1_at   | MmunewRS.631.1 | 9.11  | 8.46  | 0.75 | 1.56 | 1.57  | 0.379689 | 0.266655 | 0.687063 | 0.532407 |
| MmunewRS.632.1.S1_at   | MmunewRS.632.1 | 4.17  | 4.14  | 0.13 | 0.29 | 1.02  | 0.970375 | 0.802646 | 0.988617 | 0.886398 |
| MmunewRS.633.1.S1_s_at | MmunewRS.633.1 | 7.19  | 8.02  | 0.26 | 0.53 | -1.77 | 0.074074 | 0.06769  | 0.419667 | 0.306219 |
| MmunewRS.634.1.S1_at   | MmunewRS.634.1 | 3.97  | 4.4   | 0.33 | 0.05 | -1.35 | 0.071248 | 0.154873 | 0.414953 | 0.429849 |
| MmunewRS.636.1.S1_at   | MmunewRS.636.1 | 3     | 2.93  | 0.07 | 0.02 | 1.04  | 0.138556 | 0.188428 | 0.505769 | 0.464416 |
| MmunewRS.637.1.S1_s_at | MmunewRS.637.1 | 6.74  | 6.77  | 0.17 | 0.05 | -1.02 | 0.766494 | 0.433858 | 0.901843 | 0.654041 |
| MmunewRS.638.1.S1_at   | MmunewRS.638.1 | 11.5  | 11.32 | 0.09 | 0.12 | 1.13  | 0.12748  | 0.104062 | 0.493834 | 0.364998 |
| MmunewRS.639.1.S1_at   | MmunewRS.639.1 | 7.36  | 7.34  | 0.26 | 0.11 | 1.01  | 0.299745 | 0.416336 | 0.635078 | 0.641553 |
| MmunewRS.64.1.S1_at    | MmunewRS.64.1  | 12.6  | 12.35 | 0.22 | 0.14 | 1.19  | 0.096912 | 0.150923 | 0.455899 | 0.425523 |
| MmunewRS.640.1.S1_at   | MmunewRS.640.1 | 3.96  | 4.15  | 0.19 | 0.15 | -1.14 | 0.575374 | 0.880865 | 0.80225  | 0.931991 |
| MmunewRS.641.1.S1_at   | MmunewRS.641.1 | 5.94  | 7.54  | 0.16 | 0.38 | -3.03 | 0.002631 | 0.000566 | 0.164386 | 0.041049 |
| MmunewRS.642.1.S1_at   | MmunewRS.642.1 | 4.32  | 4.42  | 0.12 | 0.1  | -1.07 | 0.115026 | 0.134559 | 0.478354 | 0.406629 |
| MmunewRS.644.1.S1_at   | MmunewRS.644.1 | 3.17  | 3.09  | 0.49 | 0.06 | 1.06  | 0.445777 | 0.316371 | 0.727984 | 0.569809 |
| MmunewRS.645.1.S1_at   | MmunewRS.645.1 | 4.7   | 4.93  | 0.06 | 0.19 | -1.17 | 0.284815 | 0.19034  | 0.62445  | 0.465906 |

|                        |                |       |       |      |      |       |          |          |          |          |
|------------------------|----------------|-------|-------|------|------|-------|----------|----------|----------|----------|
| MmunewRS.646.1.S1_s_at | MmunewRS.646.1 | 2.99  | 3.3   | 0.07 | 0.33 | -1.24 | 0.106813 | 0.134185 | 0.467551 | 0.406421 |
| MmunewRS.647.1.S1_at   | MmunewRS.647.1 | 6.32  | 5.02  | 0.31 | 0.86 | 2.47  | 0.205431 | 0.254647 | 0.567958 | 0.522936 |
| MmunewRS.648.1.S1_at   | MmunewRS.648.1 | 6.45  | 6.62  | 0.11 | 0.1  | -1.12 | 0.164699 | 0.167588 | 0.528645 | 0.443998 |
| MmunewRS.649.1.S1_at   | MmunewRS.649.1 | 4.35  | 4.34  | 0.08 | 0.11 | 1     | 0.225807 | 0.162509 | 0.583854 | 0.438649 |
| MmunewRS.65.1.S1_at    | MmunewRS.65.1  | 3.43  | 3.81  | 0.24 | 0.15 | -1.3  | 0.11726  | 0.128356 | 0.481321 | 0.399618 |
| MmunewRS.650.1.S1_at   | MmunewRS.650.1 | 4.39  | 4.37  | 0.14 | 0.09 | 1.01  | 0.554381 | 0.365375 | 0.79068  | 0.605483 |
| MmunewRS.651.1.S1_at   | MmunewRS.651.1 | 5.11  | 4.58  | 0.38 | 0.11 | 1.45  | 0.057117 | 0.062151 | 0.387418 | 0.296237 |
| MmunewRS.651.1.S1_x_at | MmunewRS.651.1 | 5.32  | 5.01  | 0.41 | 0.16 | 1.24  | 0.26106  | 0.086906 | 0.607554 | 0.339713 |
| MmunewRS.652.1.S1_at   | MmunewRS.652.1 | 13.54 | 13.42 | 0.02 | 0.05 | 1.09  | 0.069147 | 0.090647 | 0.411264 | 0.345151 |
| MmunewRS.653.1.S1_at   | MmunewRS.653.1 | 3.85  | 3.81  | 0.13 | 0.18 | 1.03  | 0.648312 | 0.850544 | 0.84182  | 0.914981 |
| MmunewRS.654.1.S1_at   | MmunewRS.654.1 | 3.55  | 3.44  | 0.11 | 0.25 | 1.08  | 0.901449 | 0.717538 | 0.960634 | 0.836463 |
| MmunewRS.655.1.S1_at   | MmunewRS.655.1 | 4.86  | 3.77  | 0.4  | 0.44 | 2.12  | 0.035687 | 0.026114 | 0.337317 | 0.202544 |
| MmunewRS.656.1.S1_at   | MmunewRS.656.1 | 8.82  | 8.73  | 0.3  | 0.16 | 1.07  | 0.764823 | 0.933903 | 0.900939 | 0.962375 |
| MmunewRS.658.1.S1_at   | MmunewRS.658.1 | 8.04  | 8.11  | 0.16 | 0.12 | -1.05 | 0.593406 | 0.578703 | 0.811443 | 0.748611 |
| MmunewRS.66.1.S1_at    | MmunewRS.66.1  | 11.6  | 11.9  | 0.13 | 0.14 | -1.23 | 0.119643 | 0.130605 | 0.484149 | 0.402568 |
| MmunewRS.660.1.S1_at   | MmunewRS.660.1 | 3.41  | 3.48  | 0.09 | 0.02 | -1.05 | 0.214374 | 0.009005 | 0.574864 | 0.125499 |
| MmunewRS.661.1.S1_at   | MmunewRS.661.1 | 8.29  | 7.97  | 0.41 | 0.5  | 1.25  | 0.526169 | 0.238953 | 0.773996 | 0.509678 |
| MmunewRS.662.1.S1_at   | MmunewRS.662.1 | 4.41  | 4.55  | 0.09 | 0.13 | -1.1  | 0.845581 | 0.539688 | 0.938085 | 0.72391  |
| MmunewRS.664.1.S1_at   | MmunewRS.664.1 | 4.75  | 4.75  | 0.08 | 0.04 | 1     | 0.632198 | 0.566769 | 0.833071 | 0.74076  |
| MmunewRS.665.1.S1_at   | MmunewRS.665.1 | 4.87  | 4.85  | 0.14 | 0.11 | 1.02  | 0.30275  | 0.408021 | 0.63706  | 0.635378 |
| MmunewRS.666.1.S1_at   | MmunewRS.666.1 | 3.91  | 3.78  | 0.06 | 0.12 | 1.09  | 0.09985  | 0.136077 | 0.459804 | 0.408363 |
| MmunewRS.667.1.S1_at   | MmunewRS.667.1 | 5.58  | 5.71  | 0.07 | 0.08 | -1.1  | 0.246673 | 0.058421 | 0.597836 | 0.288459 |
| MmunewRS.669.1.S1_at   | MmunewRS.669.1 | 3.62  | 3.64  | 0.09 | 0.07 | -1.01 | 0.353061 | 0.086399 | 0.669964 | 0.33887  |
| MmunewRS.67.1.S1_at    | MmunewRS.67.1  | 11.89 | 11.89 | 0.34 | 0.08 | -1    | 0.430974 | 0.229118 | 0.718433 | 0.501438 |
| MmunewRS.670.1.S1_at   | MmunewRS.670.1 | 3.12  | 3.12  | 0.07 | 0.09 | -1    | 0.971524 | 0.996764 | 0.989102 | 0.998142 |
| MmunewRS.671.1.S1_at   | MmunewRS.671.1 | 8.35  | 7.52  | 0.13 | 0.68 | 1.78  | 0.108433 | 0.106892 | 0.469671 | 0.369499 |
| MmunewRS.673.1.S1_at   | MmunewRS.673.1 | 7.92  | 7.2   | 0.03 | 0.45 | 1.65  | 0.147135 | 0.099644 | 0.51306  | 0.358128 |
| MmunewRS.674.1.S1_at   | MmunewRS.674.1 | 4.24  | 4.25  | 0.29 | 0.12 | -1.01 | 0.666282 | 0.521488 | 0.850305 | 0.712474 |
| MmunewRS.675.1.S1_at   | MmunewRS.675.1 | 3.31  | 3.39  | 0.06 | 0.18 | -1.06 | 0.457174 | 0.316412 | 0.734738 | 0.569809 |
| MmunewRS.677.1.S1_at   | MmunewRS.677.1 | 4.82  | 3.98  | 0.35 | 0.07 | 1.79  | 0.030865 | 0.033382 | 0.32011  | 0.226396 |
| MmunewRS.679.1.S1_at   | MmunewRS.679.1 | 3.86  | 3.95  | 0.08 | 0.1  | -1.06 | 0.167812 | 0.344041 | 0.532081 | 0.58962  |
| MmunewRS.681.1.S1_at   | MmunewRS.681.1 | 5.39  | 4.43  | 0.24 | 0.33 | 1.94  | 0.030946 | 0.000515 | 0.320347 | 0.039579 |
| MmunewRS.682.1.S1_at   | MmunewRS.682.1 | 4.67  | 4.05  | 0.52 | 0.57 | 1.53  | 0.209755 | 0.202405 | 0.571042 | 0.476765 |
| MmunewRS.685.1.S1_at   | MmunewRS.685.1 | 7.41  | 7.45  | 0.19 | 0.17 | -1.03 | 0.945217 | 0.365561 | 0.979067 | 0.605602 |
| MmunewRS.686.1.S1_at   | MmunewRS.686.1 | 3.18  | 3.12  | 0.06 | 0.37 | 1.04  | 0.511113 | 0.674609 | 0.765243 | 0.809902 |
| MmunewRS.687.1.S1_at   | MmunewRS.687.1 | 3.01  | 2.9   | 0.09 | 0.08 | 1.08  | 0.894183 | 0.806667 | 0.957854 | 0.888775 |
| MmunewRS.688.1.S1_x_at | MmunewRS.688.1 | 5.1   | 5.25  | 0.59 | 0.11 | -1.11 | 0.766231 | 0.787006 | 0.901717 | 0.8768   |
| MmunewRS.689.1.S1_at   | MmunewRS.689.1 | 3.92  | 3.95  | 0.15 | 0.04 | -1.02 | 0.770396 | 0.227469 | 0.90333  | 0.499777 |
| MmunewRS.690.1.S1_at   | MmunewRS.690.1 | 4.17  | 4.18  | 0.11 | 0.06 | -1    | 0.864513 | 0.382855 | 0.94556  | 0.61893  |
| MmunewRS.692.1.S1_at   | MmunewRS.692.1 | 11.06 | 10.93 | 0.3  | 0.75 | 1.1   | 0.490863 | 0.413759 | 0.754675 | 0.63976  |
| MmunewRS.693.1.S1_at   | MmunewRS.693.1 | 3.12  | 3.36  | 0.08 | 0.13 | -1.18 | 0.141059 | 0.264347 | 0.50864  | 0.530385 |

|                        |                |       |       |      |      |       |          |          |          |          |
|------------------------|----------------|-------|-------|------|------|-------|----------|----------|----------|----------|
| MmunewRS.695.1.S1_at   | MmunewRS.695.1 | 2.97  | 2.98  | 0.54 | 0.07 | -1.01 | 0.409962 | 0.517204 | 0.706179 | 0.709435 |
| MmunewRS.697.1.S1_at   | MmunewRS.697.1 | 3.47  | 3.34  | 0.22 | 0.18 | 1.09  | 0.98841  | 0.918434 | 0.995927 | 0.95425  |
| MmunewRS.698.1.S1_at   | MmunewRS.698.1 | 3.05  | 3.05  | 0.23 | 0.12 | 1     | 0.772734 | 0.739888 | 0.904375 | 0.849294 |
| MmunewRS.698.1.S1_s_at | MmunewRS.698.1 | 3.66  | 3.62  | 0.02 | 0.12 | 1.03  | 0.69981  | 0.488134 | 0.867114 | 0.690902 |
| MmunewRS.699.1.S1_at   | MmunewRS.699.1 | 5.12  | 7.4   | 0.49 | 2.19 | -4.88 | 0.171128 | 0.179899 | 0.535105 | 0.456453 |
| MmunewRS.70.1.S1_at    | MmunewRS.70.1  | 4.55  | 4.91  | 0.12 | 0.15 | -1.28 | 0.037096 | 0.092578 | 0.340697 | 0.348529 |
| MmunewRS.701.1.S1_at   | MmunewRS.701.1 | 7.12  | 6.17  | 0.73 | 1.14 | 1.93  | 0.375734 | 0.496446 | 0.684803 | 0.69607  |
| MmunewRS.702.1.S1_s_at | MmunewRS.702.1 | 4.62  | 4.93  | 0.08 | 0.2  | -1.24 | 0.104805 | 0.095937 | 0.465197 | 0.35321  |
| MmunewRS.703.1.S1_at   | MmunewRS.703.1 | 3.94  | 3.97  | 0.08 | 0.09 | -1.02 | 0.703388 | 0.893017 | 0.868993 | 0.938985 |
| MmunewRS.704.1.S1_at   | MmunewRS.704.1 | 3     | 3.12  | 0.03 | 0.19 | -1.09 | 0.959679 | 0.625079 | 0.984695 | 0.778973 |
| MmunewRS.705.1.S1_at   | MmunewRS.705.1 | 3.29  | 3.21  | 0.11 | 0.17 | 1.06  | 0.853865 | 0.924011 | 0.940937 | 0.957162 |
| MmunewRS.706.1.S1_at   | MmunewRS.706.1 | 4.69  | 4.64  | 0.22 | 0.12 | 1.04  | 0.87528  | 0.461338 | 0.949951 | 0.672994 |
| MmunewRS.707.1.S1_at   | MmunewRS.707.1 | 7.14  | 7.2   | 0.37 | 0.18 | -1.04 | 0.796861 | 0.165562 | 0.915745 | 0.441885 |
| MmunewRS.708.1.S1_at   | MmunewRS.708.1 | 3.7   | 3.68  | 0.07 | 0.14 | 1.02  | 0.846568 | 0.172141 | 0.938393 | 0.448529 |
| MmunewRS.709.1.S1_at   | MmunewRS.709.1 | 6.51  | 5.91  | 0.77 | 0.31 | 1.52  | 0.420658 | 0.510885 | 0.712622 | 0.70525  |
| MmunewRS.71.1.S1_at    | MmunewRS.71.1  | 3.44  | 3.34  | 0.27 | 0.48 | 1.07  | 0.967098 | 0.601673 | 0.987726 | 0.763001 |
| MmunewRS.710.1.S1_at   | MmunewRS.710.1 | 3.6   | 3.64  | 0.15 | 0.12 | -1.03 | 0.462766 | 0.37499  | 0.738356 | 0.613186 |
| MmunewRS.710.1.S1_s_at | MmunewRS.710.1 | 3.15  | 3.14  | 0.04 | 0.12 | 1     | 0.955583 | 0.991802 | 0.983295 | 0.995392 |
| MmunewRS.711.1.S1_at   | MmunewRS.711.1 | 13.13 | 12.86 | 0.02 | 0.73 | 1.2   | 0.18326  | 0.217569 | 0.547309 | 0.491172 |
| MmunewRS.712.1.S1_at   | MmunewRS.712.1 | 5.56  | 5.58  | 0.43 | 0.41 | -1.02 | 0.886063 | 0.226117 | 0.954376 | 0.49859  |
| MmunewRS.713.1.S1_at   | MmunewRS.713.1 | 3.61  | 3.69  | 0.04 | 0.04 | -1.05 | 0.036169 | 0.006867 | 0.339036 | 0.111982 |
| MmunewRS.714.1.S1_at   | MmunewRS.714.1 | 4.56  | 4.4   | 0.17 | 0.07 | 1.11  | 0.126506 | 0.176443 | 0.492798 | 0.45282  |
| MmunewRS.715.1.S1_at   | MmunewRS.715.1 | 3.59  | 3.66  | 0.08 | 0.18 | -1.05 | 0.427002 | 0.44926  | 0.716026 | 0.664972 |
| MmunewRS.717.1.S1_at   | MmunewRS.717.1 | 3.36  | 3.31  | 0.14 | 0.11 | 1.03  | 0.773706 | 0.942669 | 0.90499  | 0.967498 |
| MmunewRS.718.1.S1_at   | MmunewRS.718.1 | 3.11  | 3.19  | 0.09 | 0.07 | -1.06 | 0.327704 | 0.398687 | 0.654066 | 0.629458 |
| MmunewRS.719.1.S1_at   | MmunewRS.719.1 | 4.28  | 4.8   | 0.16 | 0.18 | -1.44 | 0.02299  | 0.059499 | 0.289368 | 0.290548 |
| MmunewRS.72.1.S1_at    | MmunewRS.72.1  | 6.33  | 6.42  | 0.12 | 0.08 | -1.06 | 0.456037 | 0.036456 | 0.734235 | 0.235423 |
| MmunewRS.720.1.S1_at   | MmunewRS.720.1 | 4.62  | 4.44  | 0.28 | 0.58 | 1.13  | 0.820382 | 0.869859 | 0.926891 | 0.926148 |
| MmunewRS.721.1.S1_at   | MmunewRS.721.1 | 3.98  | 3.94  | 0.21 | 0.02 | 1.03  | 0.606239 | 0.570435 | 0.818776 | 0.743121 |
| MmunewRS.722.1.S1_at   | MmunewRS.722.1 | 4.58  | 4.5   | 0.11 | 0.08 | 1.06  | 0.55529  | 0.141889 | 0.791316 | 0.415403 |
| MmunewRS.723.1.S1_at   | MmunewRS.723.1 | 12.9  | 12.53 | 0.05 | 0.2  | 1.29  | 0.098101 | 0.051467 | 0.457358 | 0.272242 |
| MmunewRS.724.1.S1_at   | MmunewRS.724.1 | 4.22  | 4.06  | 0.26 | 0.03 | 1.11  | 0.274091 | 0.298247 | 0.617262 | 0.556931 |
| MmunewRS.725.1.S1_at   | MmunewRS.725.1 | 5.48  | 5.63  | 0.12 | 0.05 | -1.1  | 0.106702 | 0.116217 | 0.467457 | 0.38353  |
| MmunewRS.726.1.S1_at   | MmunewRS.726.1 | 12.88 | 12.86 | 0.07 | 0.04 | 1.01  | 0.639872 | 0.822144 | 0.837401 | 0.897673 |
| MmunewRS.728.1.S1_at   | MmunewRS.728.1 | 4.08  | 4.25  | 0.05 | 0.11 | -1.13 | 0.082591 | 0.074642 | 0.434145 | 0.318322 |
| MmunewRS.73.1.S1_at    | MmunewRS.73.1  | 6.04  | 6.08  | 0.05 | 0.1  | -1.03 | 0.728563 | 0.237174 | 0.882027 | 0.507908 |
| MmunewRS.730.1.S1_at   | MmunewRS.730.1 | 4.27  | 5.43  | 0.35 | 0.63 | -2.24 | 0.021823 | 0.016261 | 0.283865 | 0.161621 |
| MmunewRS.731.1.S1_a_at | MmunewRS.731.1 | 2.73  | 2.87  | 0.09 | 0.09 | -1.1  | 0.312814 | 0.37837  | 0.644715 | 0.615443 |
| MmunewRS.731.1.S1_at   | MmunewRS.731.1 | 2.8   | 2.85  | 0.06 | 0.09 | -1.04 | 0.417818 | 0.537212 | 0.710795 | 0.72233  |
| MmunewRS.732.1.S1_at   | MmunewRS.732.1 | 5.7   | 5.8   | 0.1  | 0.13 | -1.07 | 0.199472 | 0.406737 | 0.562465 | 0.634487 |
| MmunewRS.733.1.S1_at   | MmunewRS.733.1 | 3.85  | 3.82  | 0.03 | 0.12 | 1.02  | 0.591706 | 0.770036 | 0.810588 | 0.86644  |

|                        |                |       |       |      |      |        |          |          |          |          |
|------------------------|----------------|-------|-------|------|------|--------|----------|----------|----------|----------|
| MmunewRS.734.1.S1_at   | MmunewRS.734.1 | 4.59  | 4.52  | 0.08 | 0.32 | 1.04   | 0.726713 | 0.905033 | 0.881115 | 0.946165 |
| MmunewRS.735.1.S1_at   | MmunewRS.735.1 | 5.24  | 5.25  | 0.02 | 0.08 | -1.01  | 0.394178 | 0.428874 | 0.695705 | 0.650408 |
| MmunewRS.736.1.S1_at   | MmunewRS.736.1 | 10.7  | 10.42 | 0.2  | 0.27 | 1.22   | 0.335321 | 0.447033 | 0.659098 | 0.663235 |
| MmunewRS.737.1.S1_at   | MmunewRS.737.1 | 4.28  | 4.51  | 0.07 | 0.11 | -1.17  | 0.091992 | 0.036509 | 0.448673 | 0.235526 |
| MmunewRS.738.1.S1_at   | MmunewRS.738.1 | 5.05  | 4.92  | 0.16 | 0.16 | 1.1    | 0.79557  | 0.552382 | 0.915216 | 0.731707 |
| MmunewRS.739.1.S1_at   | MmunewRS.739.1 | 4.92  | 4.52  | 0.56 | 0.27 | 1.31   | 0.23274  | 0.151333 | 0.587827 | 0.426087 |
| MmunewRS.74.1.S1_at    | MmunewRS.74.1  | 3.52  | 3.39  | 0.06 | 0.26 | 1.09   | 0.731771 | 0.808541 | 0.884008 | 0.889768 |
| MmunewRS.740.1.S1_at   | MmunewRS.740.1 | 6.58  | 6.25  | 0.12 | 0.23 | 1.26   | 0.09941  | 0.091322 | 0.459261 | 0.346281 |
| MmunewRS.743.1.S1_at   | MmunewRS.743.1 | 10.29 | 10.08 | 0.12 | 0.23 | 1.15   | 0.169966 | 0.395273 | 0.534161 | 0.62738  |
| MmunewRS.744.1.S1_at   | MmunewRS.744.1 | 2.97  | 2.94  | 0.11 | 0.08 | 1.03   | 0.742509 | 0.512772 | 0.889888 | 0.7065   |
| MmunewRS.745.1.S1_at   | MmunewRS.745.1 | 7.79  | 7.42  | 0.37 | 0.24 | 1.28   | 0.235095 | 0.314661 | 0.589325 | 0.56843  |
| MmunewRS.746.1.S1_at   | MmunewRS.746.1 | 5.17  | 5.2   | 0.15 | 0.65 | -1.02  | 0.271661 | 0.133641 | 0.615767 | 0.405587 |
| MmunewRS.747.1.S1_at   | MmunewRS.747.1 | 3.52  | 3.48  | 0.16 | 0.12 | 1.03   | 0.759996 | 0.826404 | 0.898719 | 0.900298 |
| MmunewRS.748.1.S1_at   | MmunewRS.748.1 | 6.3   | 6.37  | 0.12 | 0.28 | -1.05  | 0.429027 | 0.589139 | 0.717239 | 0.755393 |
| MmunewRS.749.1.S1_at   | MmunewRS.749.1 | 3.38  | 3.45  | 0.17 | 0.05 | -1.05  | 0.484798 | 0.294542 | 0.750677 | 0.554265 |
| MmunewRS.75.1.S1_at    | MmunewRS.75.1  | 3.87  | 3.88  | 0.25 | 0.09 | -1     | 0.281538 | 0.65841  | 0.622236 | 0.800323 |
| MmunewRS.750.1.S1_at   | MmunewRS.750.1 | 14.35 | 14.43 | 0.05 | 0.06 | -1.05  | 0.842419 | 0.163727 | 0.936474 | 0.43992  |
| MmunewRS.751.1.S1_at   | MmunewRS.751.1 | 3.81  | 4.07  | 0.06 | 0.09 | -1.2   | 0.016607 | 0.011577 | 0.26475  | 0.139225 |
| MmunewRS.752.1.S1_at   | MmunewRS.752.1 | 4.33  | 5.75  | 0.43 | 0.62 | -2.66  | 0.025503 | 0.016716 | 0.299597 | 0.163766 |
| MmunewRS.755.1.S1_at   | MmunewRS.755.1 | 9.73  | 8.82  | 0.18 | 0.18 | 1.88   | 0.005803 | 0.004732 | 0.193191 | 0.095831 |
| MmunewRS.756.1.S1_at   | MmunewRS.756.1 | 11.3  | 10.31 | 0.27 | 0.11 | 2      | 0.009983 | 0.005287 | 0.226899 | 0.100736 |
| MmunewRS.757.1.S1_at   | MmunewRS.757.1 | 5.08  | 5.22  | 0.16 | 0.11 | -1.1   | 0.576973 | 0.144874 | 0.80331  | 0.418762 |
| MmunewRS.759.1.S1_at   | MmunewRS.759.1 | 5.84  | 5.85  | 0.17 | 0.24 | -1.01  | 0.95087  | 0.695141 | 0.981504 | 0.822797 |
| MmunewRS.76.1.S1_at    | MmunewRS.76.1  | 7     | 6.48  | 0.23 | 0.55 | 1.43   | 0.270519 | 0.200084 | 0.614805 | 0.474603 |
| MmunewRS.760.1.S1_at   | MmunewRS.760.1 | 8.99  | 12.8  | 1.8  | 1.46 | -13.97 | 0.198143 | 0.114261 | 0.561111 | 0.380761 |
| MmunewRS.761.1.S1_at   | MmunewRS.761.1 | 3.48  | 3.54  | 0.1  | 0.11 | -1.04  | 0.635128 | 0.176051 | 0.83483  | 0.452526 |
| MmunewRS.762.1.S1_s_at | MmunewRS.762.1 | 4.36  | 4.29  | 0.1  | 0.1  | 1.05   | 0.302835 | 0.249382 | 0.637138 | 0.518496 |
| MmunewRS.764.1.S1_at   | MmunewRS.764.1 | 6.34  | 6.5   | 0.18 | 0.03 | -1.11  | 0.227272 | 0.258237 | 0.585089 | 0.52558  |
| MmunewRS.765.1.S1_at   | MmunewRS.765.1 | 4.08  | 4.07  | 0.05 | 0.2  | 1      | 0.406738 | 0.089777 | 0.703859 | 0.34404  |
| MmunewRS.766.1.S1_at   | MmunewRS.766.1 | 4.62  | 4.62  | 0.3  | 0.72 | 1      | 0.98381  | 0.862892 | 0.994286 | 0.922054 |
| MmunewRS.767.1.S1_at   | MmunewRS.767.1 | 5.84  | 5.94  | 0.06 | 0.13 | -1.07  | 0.119352 | 0.043012 | 0.484049 | 0.252029 |
| MmunewRS.768.1.S1_at   | MmunewRS.768.1 | 7.17  | 7.37  | 0.19 | 0.05 | -1.15  | 0.34403  | 0.46695  | 0.6642   | 0.676718 |
| MmunewRS.769.1.S1_at   | MmunewRS.769.1 | 5.13  | 5.31  | 0.08 | 0.09 | -1.13  | 0.122822 | 0.401701 | 0.488168 | 0.631068 |
| MmunewRS.770.1.S1_at   | MmunewRS.770.1 | 5.94  | 4.42  | 0.74 | 0.84 | 2.86   | 0.09829  | 0.017392 | 0.457881 | 0.16699  |
| MmunewRS.771.1.S1_at   | MmunewRS.771.1 | 7.35  | 7.27  | 0.21 | 0.1  | 1.06   | 0.641907 | 0.09256  | 0.838598 | 0.348519 |
| MmunewRS.772.1.S1_x_at | MmunewRS.772.1 | 8.82  | 7.95  | 0.22 | 0.7  | 1.82   | 0.142381 | 0.162936 | 0.509648 | 0.43909  |
| MmunewRS.773.1.S1_at   | MmunewRS.773.1 | 4.55  | 4.67  | 0.19 | 0.22 | -1.09  | 0.424846 | 0.567371 | 0.714838 | 0.741271 |
| MmunewRS.774.1.S1_at   | MmunewRS.774.1 | 5.76  | 5.48  | 0.76 | 0.35 | 1.21   | 0.74579  | 0.094504 | 0.891243 | 0.35126  |
| MmunewRS.775.1.S1_at   | MmunewRS.775.1 | 3.19  | 3.21  | 0.05 | 0.1  | -1.01  | 0.199277 | 0.163918 | 0.56224  | 0.440105 |
| MmunewRS.775.1.S1_x_at | MmunewRS.775.1 | 3.11  | 3.14  | 0.06 | 0.14 | -1.02  | 0.608294 | 0.191324 | 0.819872 | 0.466637 |
| MmunewRS.776.1.S1_at   | MmunewRS.776.1 | 3.73  | 3.63  | 0.13 | 0.05 | 1.08   | 0.388634 | 0.238955 | 0.692689 | 0.509678 |

|                        |                |       |       |      |      |       |          |          |          |          |
|------------------------|----------------|-------|-------|------|------|-------|----------|----------|----------|----------|
| MmunewRS.777.1.S1_at   | MmunewRS.777.1 | 6.46  | 6.39  | 0.26 | 0.11 | 1.06  | 0.674131 | 0.521268 | 0.853988 | 0.712339 |
| MmunewRS.779.1.S1_at   | MmunewRS.779.1 | 6.27  | 6.23  | 0.2  | 0.13 | 1.03  | 0.833358 | 0.483458 | 0.932336 | 0.687931 |
| MmunewRS.78.1.S1_at    | MmunewRS.78.1  | 13.19 | 13.24 | 0.05 | 0.23 | -1.04 | 0.505245 | 0.277947 | 0.761548 | 0.541664 |
| MmunewRS.784.1.S1_at   | MmunewRS.784.1 | 6.04  | 5.02  | 0.3  | 0.56 | 2.03  | 0.053713 | 0.053775 | 0.380746 | 0.27744  |
| MmunewRS.785.1.S1_at   | MmunewRS.785.1 | 4.11  | 4.11  | 0.1  | 0.14 | 1.01  | 0.663439 | 0.847735 | 0.84899  | 0.913501 |
| MmunewRS.786.1.S1_at   | MmunewRS.786.1 | 3.65  | 3.6   | 0.13 | 0.06 | 1.04  | 0.250579 | 0.380926 | 0.600389 | 0.617426 |
| MmunewRS.788.1.S1_x_at | MmunewRS.788.1 | 3.21  | 3.32  | 0.08 | 0.17 | -1.08 | 0.126122 | 0.173529 | 0.492228 | 0.449938 |
| MmunewRS.79.1.S1_at    | MmunewRS.79.1  | 3.83  | 4.82  | 0.31 | 0.79 | -1.99 | 0.180513 | 0.125382 | 0.544845 | 0.396008 |
| MmunewRS.790.1.S1_at   | MmunewRS.790.1 | 8.1   | 9.5   | 0.44 | 1.15 | -2.65 | 0.142704 | 0.108541 | 0.509765 | 0.372091 |
| MmunewRS.790.1.S1_x_at | MmunewRS.790.1 | 8.24  | 9.6   | 0.5  | 1.16 | -2.58 | 0.173769 | 0.124614 | 0.537255 | 0.394995 |
| MmunewRS.791.1.S1_at   | MmunewRS.791.1 | 3.82  | 4.28  | 1.09 | 0.37 | -1.37 | 0.605659 | 0.87444  | 0.818439 | 0.928687 |
| MmunewRS.791.1.S1_s_at | MmunewRS.791.1 | 4.19  | 3.95  | 0.74 | 0.44 | 1.18  | 0.447982 | 0.526491 | 0.729382 | 0.715574 |
| MmunewRS.793.1.S1_at   | MmunewRS.793.1 | 8.37  | 7.91  | 0.05 | 0.15 | 1.38  | 0.005699 | 0.003243 | 0.191943 | 0.082187 |
| MmunewRS.795.1.S1_at   | MmunewRS.795.1 | 3.24  | 3.41  | 0.09 | 0.14 | -1.13 | 0.125147 | 0.186278 | 0.491199 | 0.462155 |
| MmunewRS.796.1.S1_at   | MmunewRS.796.1 | 3.65  | 3.82  | 0    | 0.11 | -1.13 | 0.17736  | 0.219767 | 0.541472 | 0.493388 |
| MmunewRS.797.1.S1_at   | MmunewRS.797.1 | 2.91  | 2.93  | 0.04 | 0.08 | -1.01 | 0.227091 | 0.445508 | 0.584952 | 0.662422 |
| MmunewRS.798.1.S1_at   | MmunewRS.798.1 | 4.87  | 4.69  | 0.13 | 0.18 | 1.13  | 0.555446 | 0.543177 | 0.791387 | 0.725996 |
| MmunewRS.799.1.S1_at   | MmunewRS.799.1 | 3.7   | 3.69  | 0.09 | 0.07 | 1     | 0.271393 | 0.054975 | 0.61568  | 0.279898 |
| MmunewRS.8.1.S1_at     | MmunewRS.8.1   | 7.32  | 7.34  | 0.13 | 0.12 | -1.01 | 0.550605 | 0.192889 | 0.787967 | 0.468379 |
| MmunewRS.80.1.S1_at    | MmunewRS.80.1  | 7.58  | 7.18  | 0.17 | 0.29 | 1.32  | 0.084371 | 0.037398 | 0.436943 | 0.237776 |
| MmunewRS.800.1.S1_at   | MmunewRS.800.1 | 5     | 5.01  | 0.08 | 0.11 | -1.01 | 0.982364 | 0.732431 | 0.993449 | 0.845008 |
| MmunewRS.801.1.S1_at   | MmunewRS.801.1 | 3.39  | 3.52  | 0.02 | 0.12 | -1.09 | 0.155833 | 0.195412 | 0.520478 | 0.470253 |
| MmunewRS.803.1.S1_at   | MmunewRS.803.1 | 3.51  | 3.61  | 0.04 | 0.11 | -1.07 | 0.621022 | 0.818765 | 0.826295 | 0.895556 |
| MmunewRS.804.1.S1_at   | MmunewRS.804.1 | 4.18  | 4.33  | 0.08 | 0.14 | -1.1  | 0.131619 | 0.151725 | 0.498041 | 0.426383 |
| MmunewRS.805.1.S1_at   | MmunewRS.805.1 | 7.08  | 7.43  | 0.38 | 0.21 | -1.27 | 0.201377 | 0.106544 | 0.563974 | 0.369099 |
| MmunewRS.806.1.S1_at   | MmunewRS.806.1 | 4.42  | 4.34  | 0.33 | 0.15 | 1.05  | 0.957354 | 0.295129 | 0.983882 | 0.554551 |
| MmunewRS.807.1.S1_at   | MmunewRS.807.1 | 3.81  | 3.9   | 0.06 | 0.15 | -1.06 | 0.970889 | 0.524138 | 0.988751 | 0.714207 |
| MmunewRS.808.1.S1_at   | MmunewRS.808.1 | 12.76 | 13.27 | 0.23 | 0.22 | -1.42 | 0.118087 | 0.081824 | 0.482198 | 0.330204 |
| MmunewRS.809.1.S1_at   | MmunewRS.809.1 | 5.86  | 5.93  | 0.34 | 0.17 | -1.05 | 0.668447 | 0.725706 | 0.851853 | 0.841142 |
| MmunewRS.81.1.S1_at    | MmunewRS.81.1  | 11.25 | 11.16 | 0.67 | 0.5  | 1.07  | 0.954659 | 0.522428 | 0.983073 | 0.713139 |
| MmunewRS.810.1.S1_at   | MmunewRS.810.1 | 10.25 | 10.22 | 0.15 | 0.41 | 1.02  | 0.316127 | 0.385794 | 0.646952 | 0.621079 |
| MmunewRS.811.1.S1_at   | MmunewRS.811.1 | 7.8   | 7.8   | 0.07 | 0.25 | 1     | 0.908422 | 0.89842  | 0.963748 | 0.942211 |
| MmunewRS.812.1.S1_at   | MmunewRS.812.1 | 5.55  | 5.55  | 0.03 | 0.14 | 1     | 0.504532 | 0.304538 | 0.76127  | 0.561803 |
| MmunewRS.813.1.S1_at   | MmunewRS.813.1 | 3.91  | 3.74  | 0.4  | 0.31 | 1.13  | 0.849879 | 0.849258 | 0.939737 | 0.914453 |
| MmunewRS.814.1.S1_at   | MmunewRS.814.1 | 3.77  | 3.98  | 0.17 | 0.1  | -1.16 | 0.620093 | 0.41118  | 0.826014 | 0.637937 |
| MmunewRS.815.1.S1_at   | MmunewRS.815.1 | 4.57  | 4.6   | 0.05 | 0.03 | -1.02 | 0.208199 | 0.618629 | 0.570088 | 0.774185 |
| MmunewRS.817.1.S1_at   | MmunewRS.817.1 | 4.37  | 3.76  | 0.37 | 0.19 | 1.53  | 0.102513 | 0.268791 | 0.462361 | 0.534218 |
| MmunewRS.818.1.S1_at   | MmunewRS.818.1 | 6.95  | 4.91  | 0.86 | 1.19 | 4.1   | 0.139747 | 0.123333 | 0.507376 | 0.393386 |
| MmunewRS.819.1.S1_at   | MmunewRS.819.1 | 4.34  | 4.42  | 0.1  | 0.03 | -1.06 | 0.080241 | 0.092843 | 0.430341 | 0.349024 |
| MmunewRS.82.1.S1_at    | MmunewRS.82.1  | 5.59  | 7.91  | 0.91 | 1.75 | -4.99 | 0.236916 | 0.117917 | 0.590615 | 0.385837 |
| MmunewRS.820.1.S1_at   | MmunewRS.820.1 | 4.15  | 4.35  | 0.13 | 1.47 | -1.14 | 0.294162 | 0.415856 | 0.631154 | 0.641182 |

|                        |                |       |       |      |      |       |          |          |          |          |
|------------------------|----------------|-------|-------|------|------|-------|----------|----------|----------|----------|
| MmunewRS.821.1.S1_at   | MmunewRS.821.1 | 4.27  | 4.42  | 0.02 | 0.14 | -1.11 | 0.058004 | 0.075981 | 0.389637 | 0.320676 |
| MmunewRS.822.1.S1_at   | MmunewRS.822.1 | 3.92  | 3.79  | 0.09 | 0.2  | 1.1   | 0.481681 | 0.595748 | 0.749268 | 0.759208 |
| MmunewRS.823.1.S1_at   | MmunewRS.823.1 | 6.78  | 6.91  | 0.06 | 0.09 | -1.09 | 0.300715 | 0.225307 | 0.635955 | 0.497892 |
| MmunewRS.824.1.S1_at   | MmunewRS.824.1 | 3.19  | 3.25  | 0.09 | 0.05 | -1.04 | 0.58589  | 0.203928 | 0.80779  | 0.478164 |
| MmunewRS.825.1.S1_at   | MmunewRS.825.1 | 5.83  | 5.17  | 0.96 | 0.47 | 1.58  | 0.245512 | 0.17223  | 0.597122 | 0.448609 |
| MmunewRS.829.1.S1_at   | MmunewRS.829.1 | 7.9   | 9.83  | 0.73 | 1.27 | -3.83 | 0.164268 | 0.114936 | 0.528238 | 0.381665 |
| MmunewRS.83.1.S1_at    | MmunewRS.83.1  | 5.37  | 4.29  | 1.25 | 0.36 | 2.13  | 0.223494 | 0.122579 | 0.581963 | 0.39249  |
| MmunewRS.830.1.S1_at   | MmunewRS.830.1 | 3.84  | 3.94  | 0.08 | 0.1  | -1.07 | 0.253788 | 0.488176 | 0.602284 | 0.690944 |
| MmunewRS.831.1.S1_at   | MmunewRS.831.1 | 4.89  | 5.01  | 0.15 | 0.14 | -1.09 | 0.806745 | 0.260129 | 0.920809 | 0.526776 |
| MmunewRS.833.1.S1_at   | MmunewRS.833.1 | 4.23  | 3.96  | 0.4  | 0.02 | 1.2   | 0.320217 | 0.222179 | 0.64942  | 0.495178 |
| MmunewRS.834.1.S1_at   | MmunewRS.834.1 | 4.48  | 4.66  | 0.54 | 0.4  | -1.14 | 0.492973 | 0.671841 | 0.755892 | 0.808157 |
| MmunewRS.835.1.S1_at   | MmunewRS.835.1 | 5.08  | 5.12  | 0.14 | 0.05 | -1.03 | 0.775033 | 0.113835 | 0.905462 | 0.380062 |
| MmunewRS.836.1.S1_at   | MmunewRS.836.1 | 9.57  | 8.94  | 0.07 | 0.56 | 1.54  | 0.12406  | 0.106977 | 0.489763 | 0.369557 |
| MmunewRS.837.1.S1_at   | MmunewRS.837.1 | 4.3   | 4.39  | 0.17 | 0.12 | -1.07 | 0.434231 | 0.332118 | 0.720352 | 0.580584 |
| MmunewRS.838.1.S1_at   | MmunewRS.838.1 | 7.14  | 6.51  | 0.28 | 0.79 | 1.54  | 0.135336 | 0.164274 | 0.502159 | 0.440539 |
| MmunewRS.84.1.S1_at    | MmunewRS.84.1  | 3.16  | 3.38  | 0.16 | 0.17 | -1.16 | 0.429114 | 0.603652 | 0.717334 | 0.764215 |
| MmunewRS.840.1.S1_at   | MmunewRS.840.1 | 5.06  | 5.15  | 0.09 | 0.17 | -1.06 | 0.768257 | 0.817433 | 0.902612 | 0.894694 |
| MmunewRS.841.1.S1_at   | MmunewRS.841.1 | 3.22  | 3.09  | 0.2  | 0.18 | 1.09  | 0.507214 | 0.626714 | 0.762788 | 0.779962 |
| MmunewRS.842.1.S1_at   | MmunewRS.842.1 | 9.88  | 8.1   | 0.31 | 0.99 | 3.44  | 0.145776 | 0.095072 | 0.511613 | 0.352124 |
| MmunewRS.843.1.S1_at   | MmunewRS.843.1 | 5.77  | 6.61  | 0.3  | 0.62 | -1.79 | 0.140652 | 0.016551 | 0.508385 | 0.162881 |
| MmunewRS.844.1.S1_at   | MmunewRS.844.1 | 3.69  | 3.6   | 0.56 | 0.19 | 1.06  | 0.8187   | 0.775845 | 0.926433 | 0.869553 |
| MmunewRS.845.1.S1_at   | MmunewRS.845.1 | 4.44  | 4.5   | 0.15 | 0.19 | -1.04 | 0.54809  | 0.726107 | 0.786546 | 0.841422 |
| MmunewRS.846.1.S1_at   | MmunewRS.846.1 | 3.66  | 3.17  | 0.25 | 0.21 | 1.4   | 0.103335 | 0.151131 | 0.462888 | 0.425795 |
| MmunewRS.847.1.S1_at   | MmunewRS.847.1 | 3.42  | 3.45  | 0.54 | 0.31 | -1.02 | 0.770112 | 0.486781 | 0.90333  | 0.690091 |
| MmunewRS.848.1.S1_at   | MmunewRS.848.1 | 3.31  | 3.29  | 0.1  | 0.19 | 1.01  | 0.206127 | 0.3739   | 0.568474 | 0.612508 |
| MmunewRS.849.1.S1_at   | MmunewRS.849.1 | 14.34 | 14.34 | 0.04 | 0.06 | -1    | 0.280458 | 0.070403 | 0.62167  | 0.311676 |
| MmunewRS.849.1.S1_s_at | MmunewRS.849.1 | 14.16 | 14.14 | 0.07 | 0.07 | 1.02  | 0.259432 | 0.139008 | 0.606548 | 0.412152 |
| MmunewRS.85.1.S1_at    | MmunewRS.85.1  | 6.62  | 6.71  | 0.13 | 0.17 | -1.06 | 0.63296  | 0.737995 | 0.833431 | 0.848158 |
| MmunewRS.850.1.S1_at   | MmunewRS.850.1 | 4.69  | 4.82  | 0.2  | 0.07 | -1.09 | 0.341194 | 0.4637   | 0.66233  | 0.674615 |
| MmunewRS.851.1.S1_at   | MmunewRS.851.1 | 7.84  | 7.99  | 0.25 | 0.1  | -1.1  | 0.885855 | 0.715962 | 0.954212 | 0.835339 |
| MmunewRS.852.1.S1_at   | MmunewRS.852.1 | 3.57  | 3.54  | 0.03 | 0.13 | 1.02  | 0.788534 | 0.706274 | 0.91217  | 0.829634 |
| MmunewRS.853.1.S1_at   | MmunewRS.853.1 | 6.47  | 6.7   | 0.09 | 0.14 | -1.17 | 0.13597  | 0.078326 | 0.502802 | 0.324964 |
| MmunewRS.854.1.S1_s_at | MmunewRS.854.1 | 3.22  | 3.21  | 0.09 | 0.03 | 1.01  | 0.666039 | 0.736407 | 0.85026  | 0.847487 |
| MmunewRS.855.1.S1_at   | MmunewRS.855.1 | 4.52  | 4.66  | 0.2  | 0.15 | -1.1  | 0.191628 | 0.116383 | 0.554671 | 0.383671 |
| MmunewRS.856.1.S1_at   | MmunewRS.856.1 | 5.49  | 5.51  | 0.07 | 0.23 | -1.02 | 0.317882 | 0.343312 | 0.64802  | 0.58905  |
| MmunewRS.857.1.S1_at   | MmunewRS.857.1 | 3.7   | 3.93  | 0.09 | 0.05 | -1.17 | 0.052204 | 0.011175 | 0.377155 | 0.137551 |
| MmunewRS.858.1.S1_at   | MmunewRS.858.1 | 6.7   | 6.01  | 0.35 | 0.42 | 1.62  | 0.080947 | 0.073056 | 0.431601 | 0.316017 |
| MmunewRS.859.1.S1_s_at | MmunewRS.859.1 | 10.89 | 11.32 | 0.15 | 0.15 | -1.35 | 0.023647 | 0.099896 | 0.292354 | 0.358618 |
| MmunewRS.859.1.S1_x_at | MmunewRS.859.1 | 10.95 | 11.5  | 0.14 | 0.31 | -1.46 | 0.077462 | 0.133251 | 0.427142 | 0.40503  |
| MmunewRS.86.1.S1_at    | MmunewRS.86.1  | 3.57  | 3.55  | 0.14 | 0.1  | 1.01  | 0.596625 | 0.634669 | 0.813111 | 0.784965 |
| MmunewRS.860.1.S1_at   | MmunewRS.860.1 | 3.14  | 3.25  | 0.12 | 0.11 | -1.08 | 0.164672 | 0.181023 | 0.528638 | 0.457529 |

|                        |                |       |       |      |      |       |          |          |          |          |
|------------------------|----------------|-------|-------|------|------|-------|----------|----------|----------|----------|
| MmunewRS.861.1.S1_at   | MmunewRS.861.1 | 4.38  | 4.52  | 0.06 | 0.19 | -1.1  | 0.976986 | 0.928423 | 0.991218 | 0.959349 |
| MmunewRS.864.1.S1_at   | MmunewRS.864.1 | 7.89  | 6.17  | 0.09 | 0.27 | 3.29  | 0.000395 | 0.000089 | 0.12978  | 0.027016 |
| MmunewRS.865.1.S1_at   | MmunewRS.865.1 | 5.89  | 5.61  | 0.05 | 0.18 | 1.21  | 0.061242 | 0.013779 | 0.395362 | 0.150434 |
| MmunewRS.866.1.S1_at   | MmunewRS.866.1 | 3.06  | 2.97  | 0.03 | 0.09 | 1.07  | 0.515803 | 0.294997 | 0.767629 | 0.554551 |
| MmunewRS.867.1.S1_at   | MmunewRS.867.1 | 9.78  | 9.24  | 0.36 | 0.33 | 1.46  | 0.124368 | 0.053185 | 0.490249 | 0.276445 |
| MmunewRS.868.1.S1_at   | MmunewRS.868.1 | 11.64 | 10.6  | 0.3  | 0.19 | 2.05  | 0.010665 | 0.003746 | 0.230991 | 0.087236 |
| MmunewRS.869.1.S1_at   | MmunewRS.869.1 | 6.69  | 6.69  | 0.17 | 0.09 | -1    | 0.939783 | 0.742316 | 0.977013 | 0.850749 |
| MmunewRS.87.1.S1_at    | MmunewRS.87.1  | 8.29  | 7.79  | 0.3  | 0.55 | 1.41  | 0.738403 | 0.154845 | 0.887676 | 0.429849 |
| MmunewRS.87.1.S1_x_at  | MmunewRS.87.1  | 8.34  | 7.89  | 0.28 | 0.53 | 1.37  | 0.779897 | 0.189585 | 0.908334 | 0.465297 |
| MmunewRS.870.1.S1_at   | MmunewRS.870.1 | 4.74  | 4.68  | 0.1  | 0.1  | 1.04  | 0.780246 | 0.290149 | 0.908487 | 0.551134 |
| MmunewRS.871.1.S1_at   | MmunewRS.871.1 | 3.72  | 3.66  | 0.22 | 0.11 | 1.04  | 0.473191 | 0.600596 | 0.744128 | 0.762183 |
| MmunewRS.872.1.S1_at   | MmunewRS.872.1 | 4.82  | 5.02  | 0.08 | 0.09 | -1.15 | 0.044042 | 0.105439 | 0.357647 | 0.367279 |
| MmunewRS.873.1.S1_at   | MmunewRS.873.1 | 7.39  | 7.62  | 0.22 | 0.08 | -1.17 | 0.295965 | 0.249175 | 0.632176 | 0.518302 |
| MmunewRS.874.1.S1_at   | MmunewRS.874.1 | 4.75  | 3.38  | 0.77 | 0.65 | 2.59  | 0.382109 | 0.55368  | 0.688507 | 0.732777 |
| MmunewRS.875.1.S1_at   | MmunewRS.875.1 | 5.68  | 4.92  | 0.57 | 1.06 | 1.7   | 0.846362 | 0.516455 | 0.93835  | 0.709006 |
| MmunewRS.876.1.S1_at   | MmunewRS.876.1 | 6.56  | 6.64  | 0.2  | 0.02 | -1.05 | 0.783951 | 0.872716 | 0.909868 | 0.927621 |
| MmunewRS.878.1.S1_at   | MmunewRS.878.1 | 4.17  | 4.18  | 0.05 | 0.12 | -1    | 0.863677 | 0.457956 | 0.945247 | 0.670999 |
| MmunewRS.880.1.S1_at   | MmunewRS.880.1 | 7.19  | 7.27  | 0.24 | 0.68 | -1.05 | 0.932336 | 0.965052 | 0.973784 | 0.980558 |
| MmunewRS.881.1.S1_at   | MmunewRS.881.1 | 11.55 | 11.77 | 0.13 | 0.14 | -1.17 | 0.24965  | 0.090252 | 0.600196 | 0.344664 |
| MmunewRS.882.1.S1_at   | MmunewRS.882.1 | 3.84  | 3.98  | 0.21 | 0.31 | -1.1  | 0.600602 | 0.744949 | 0.815337 | 0.852232 |
| MmunewRS.883.1.S1_at   | MmunewRS.883.1 | 5.75  | 5.89  | 0.2  | 0.15 | -1.1  | 0.16601  | 0.18014  | 0.529882 | 0.456743 |
| MmunewRS.884.1.S1_at   | MmunewRS.884.1 | 5.46  | 5.42  | 0.32 | 0.2  | 1.03  | 0.508258 | 0.55895  | 0.76363  | 0.735944 |
| MmunewRS.885.1.S1_at   | MmunewRS.885.1 | 6.21  | 6.25  | 0.09 | 0.19 | -1.03 | 0.511375 | 0.615607 | 0.765295 | 0.772101 |
| MmunewRS.886.1.S1_at   | MmunewRS.886.1 | 3.65  | 3.46  | 0.67 | 0.03 | 1.15  | 0.438764 | 0.604609 | 0.723309 | 0.764711 |
| MmunewRS.887.1.S1_at   | MmunewRS.887.1 | 3.56  | 3.22  | 0.25 | 0.5  | 1.26  | 0.719294 | 0.245102 | 0.876813 | 0.514861 |
| MmunewRS.888.1.S1_s_at | MmunewRS.888.1 | 3.33  | 3.59  | 0    | 0.08 | -1.2  | 0.010138 | 0.008055 | 0.228247 | 0.119277 |
| MmunewRS.89.1.S1_s_at  | MmunewRS.89.1  | 13.99 | 14.03 | 0.03 | 0.03 | -1.03 | 0.405937 | 0.005232 | 0.7035   | 0.100211 |
| MmunewRS.890.1.S1_at   | MmunewRS.890.1 | 6.17  | 5.81  | 0.5  | 0.35 | 1.28  | 0.481123 | 0.411972 | 0.748945 | 0.638434 |
| MmunewRS.891.1.S1_x_at | MmunewRS.891.1 | 11.01 | 10.67 | 0.48 | 0.27 | 1.27  | 0.186253 | 0.263956 | 0.549871 | 0.530153 |
| MmunewRS.893.1.S1_at   | MmunewRS.893.1 | 6.33  | 5.73  | 0.59 | 0.25 | 1.52  | 0.248918 | 0.365021 | 0.599669 | 0.605222 |
| MmunewRS.893.1.S1_x_at | MmunewRS.893.1 | 6.59  | 6.1   | 0.43 | 0.05 | 1.41  | 0.17063  | 0.147378 | 0.534444 | 0.421554 |
| MmunewRS.894.1.S1_at   | MmunewRS.894.1 | 7.26  | 7.55  | 0.3  | 0.15 | -1.23 | 0.318096 | 0.275062 | 0.64802  | 0.539481 |
| MmunewRS.896.1.S1_at   | MmunewRS.896.1 | 11.14 | 10.74 | 0.15 | 0.98 | 1.31  | 0.486712 | 0.243659 | 0.751702 | 0.513803 |
| MmunewRS.897.1.S1_x_at | MmunewRS.897.1 | 7.79  | 7.76  | 0.28 | 0.1  | 1.02  | 0.986344 | 0.968545 | 0.995151 | 0.982645 |
| MmunewRS.898.1.S1_at   | MmunewRS.898.1 | 4.45  | 4.5   | 0.02 | 0.08 | -1.03 | 0.688149 | 0.766217 | 0.860858 | 0.864166 |
| MmunewRS.899.1.S1_at   | MmunewRS.899.1 | 7.71  | 7.15  | 0.08 | 0.27 | 1.48  | 0.023614 | 0.008656 | 0.292083 | 0.12341  |
| MmunewRS.9.1.S1_at     | MmunewRS.9.1   | 3.51  | 3.48  | 0.2  | 0.08 | 1.02  | 0.380256 | 0.530799 | 0.68724  | 0.718143 |
| MmunewRS.90.1.S1_at    | MmunewRS.90.1  | 3.26  | 3.28  | 0.14 | 0.08 | -1.01 | 0.594161 | 0.690421 | 0.811686 | 0.81956  |
| MmunewRS.900.1.S1_at   | MmunewRS.900.1 | 9.28  | 9.56  | 0.59 | 0.67 | -1.21 | 0.455078 | 0.400125 | 0.733646 | 0.630158 |
| MmunewRS.901.1.S1_at   | MmunewRS.901.1 | 6.86  | 6.28  | 0.04 | 0.81 | 1.49  | 0.857361 | 0.972978 | 0.942256 | 0.985389 |
| MmunewRS.902.1.S1_at   | MmunewRS.902.1 | 4.66  | 6.72  | 0.75 | 1.13 | -4.18 | 0.076237 | 0.077599 | 0.424738 | 0.323548 |



|                        |                |       |       |      |      |       |          |          |          |          |
|------------------------|----------------|-------|-------|------|------|-------|----------|----------|----------|----------|
| MmunewRS.903.1.S1_at   | MmunewRS.903.1 | 2.92  | 2.99  | 0.03 | 0.14 | -1.05 | 0.19675  | 0.27048  | 0.559808 | 0.535821 |
| MmunewRS.904.1.S1_at   | MmunewRS.904.1 | 3.47  | 3.43  | 0.07 | 0.04 | 1.03  | 0.250855 | 0.665117 | 0.600445 | 0.803733 |
| MmunewRS.905.1.S1_at   | MmunewRS.905.1 | 3.99  | 3.68  | 0.1  | 0.09 | 1.23  | 0.068146 | 0.100697 | 0.409384 | 0.360078 |
| MmunewRS.906.1.S1_at   | MmunewRS.906.1 | 4.93  | 5.11  | 0.12 | 0.12 | -1.14 | 0.317432 | 0.063855 | 0.647902 | 0.29906  |
| MmunewRS.907.1.S1_at   | MmunewRS.907.1 | 5.49  | 5.49  | 0.02 | 0.02 | -1    | 0.258621 | 0.918648 | 0.605843 | 0.954356 |
| MmunewRS.908.1.S1_at   | MmunewRS.908.1 | 7.78  | 7.65  | 0.15 | 0.19 | 1.1   | 0.696877 | 0.716057 | 0.86551  | 0.835415 |
| MmunewRS.909.1.S1_at   | MmunewRS.909.1 | 9.6   | 9.87  | 0.63 | 0.71 | -1.21 | 0.473214 | 0.651619 | 0.744128 | 0.796299 |
| MmunewRS.91.1.S1_at    | MmunewRS.91.1  | 5.02  | 5.15  | 0.11 | 0.13 | -1.09 | 0.378782 | 0.510181 | 0.68656  | 0.704711 |
| MmunewRS.910.1.S1_at   | MmunewRS.910.1 | 8.15  | 7.24  | 0.17 | 0.19 | 1.87  | 0.002476 | 0.000368 | 0.163555 | 0.037273 |
| MmunewRS.911.1.S1_at   | MmunewRS.911.1 | 3.45  | 3.44  | 0.03 | 0.05 | 1.01  | 0.422248 | 0.507134 | 0.71345  | 0.70278  |
| MmunewRS.912.1.S1_x_at | MmunewRS.912.1 | 7.43  | 7.4   | 0.11 | 0.06 | 1.02  | 0.401067 | 0.312672 | 0.700559 | 0.567299 |
| MmunewRS.914.1.S1_at   | MmunewRS.914.1 | 7.4   | 7.46  | 0.22 | 0.04 | -1.04 | 0.946817 | 0.677527 | 0.979482 | 0.811672 |
| MmunewRS.914.1.S1_x_at | MmunewRS.914.1 | 7.13  | 7.42  | 0.27 | 0.2  | -1.23 | 0.494673 | 0.366132 | 0.756812 | 0.605941 |
| MmunewRS.915.1.S1_s_at | MmunewRS.915.1 | 4.48  | 4.68  | 0.19 | 0.14 | -1.15 | 0.237242 | 0.235919 | 0.590811 | 0.507056 |
| MmunewRS.916.1.S1_at   | MmunewRS.916.1 | 8.19  | 8.19  | 0.39 | 0.09 | -1    | 0.840173 | 0.938371 | 0.93556  | 0.965059 |
| MmunewRS.918.1.S1_at   | MmunewRS.918.1 | 3.81  | 3.59  | 0.3  | 0.28 | 1.16  | 0.212991 | 0.252191 | 0.573396 | 0.520864 |
| MmunewRS.92.1.S1_at    | MmunewRS.92.1  | 5.6   | 5.52  | 0.03 | 0.15 | 1.06  | 0.985371 | 0.86547  | 0.99475  | 0.923596 |
| MmunewRS.920.1.S1_at   | MmunewRS.920.1 | 3.72  | 3.63  | 0.16 | 0.08 | 1.06  | 0.459773 | 0.716694 | 0.736497 | 0.835937 |
| MmunewRS.921.1.S1_at   | MmunewRS.921.1 | 6.63  | 6.61  | 0.17 | 0.17 | 1.01  | 0.841453 | 0.969971 | 0.936191 | 0.983571 |
| MmunewRS.922.1.S1_at   | MmunewRS.922.1 | 9.84  | 9.61  | 0.04 | 0.16 | 1.17  | 0.069601 | 0.005701 | 0.412634 | 0.104102 |
| MmunewRS.923.1.S1_at   | MmunewRS.923.1 | 4.14  | 6.08  | 0.42 | 0.7  | -3.83 | 0.021878 | 0.026689 | 0.284037 | 0.204241 |
| MmunewRS.924.1.S1_at   | MmunewRS.924.1 | 4.55  | 4.69  | 0.15 | 0.03 | -1.1  | 0.614791 | 0.896951 | 0.823258 | 0.941193 |
| MmunewRS.925.1.S1_at   | MmunewRS.925.1 | 4.43  | 4.3   | 0.13 | 0.2  | 1.1   | 0.404905 | 0.53031  | 0.703082 | 0.71787  |
| MmunewRS.926.1.S1_at   | MmunewRS.926.1 | 4.94  | 4.84  | 0.09 | 0.05 | 1.07  | 0.207976 | 0.04294  | 0.569894 | 0.251776 |
| MmunewRS.927.1.S1_at   | MmunewRS.927.1 | 12.28 | 12.14 | 0.07 | 0.08 | 1.1   | 0.042032 | 0.039288 | 0.353882 | 0.243338 |
| MmunewRS.928.1.S1_at   | MmunewRS.928.1 | 3.03  | 3.03  | 0.05 | 0.06 | -1    | 0.810407 | 0.887105 | 0.922733 | 0.93569  |
| MmunewRS.929.1.S1_at   | MmunewRS.929.1 | 6.73  | 6.73  | 0.35 | 0.05 | 1     | 0.439514 | 0.325169 | 0.723648 | 0.575591 |
| MmunewRS.929.1.S1_x_at | MmunewRS.929.1 | 7.07  | 7.31  | 0.19 | 0.11 | -1.18 | 0.63164  | 0.450086 | 0.832775 | 0.665505 |
| MmunewRS.930.1.S1_at   | MmunewRS.930.1 | 6.04  | 7.25  | 0.14 | 1.16 | -2.31 | 0.072565 | 0.001966 | 0.417185 | 0.065838 |
| MmunewRS.931.1.S1_at   | MmunewRS.931.1 | 5.58  | 5.58  | 0.07 | 0.11 | 1     | 0.90424  | 0.937563 | 0.961669 | 0.964687 |
| MmunewRS.932.1.S1_at   | MmunewRS.932.1 | 3.02  | 3     | 0.12 | 0.03 | 1.02  | 0.363336 | 0.60707  | 0.676615 | 0.766185 |
| MmunewRS.934.1.S1_at   | MmunewRS.934.1 | 6.55  | 7.05  | 0.82 | 1.02 | -1.41 | 0.458703 | 0.416315 | 0.735608 | 0.641553 |
| MmunewRS.935.1.S1_at   | MmunewRS.935.1 | 9.05  | 8.37  | 0.88 | 0.83 | 1.61  | 0.155763 | 0.192141 | 0.520384 | 0.467614 |
| MmunewRS.935.1.S1_x_at | MmunewRS.935.1 | 8.87  | 8.18  | 0.89 | 0.83 | 1.62  | 0.152765 | 0.175448 | 0.517325 | 0.452157 |
| MmunewRS.936.1.S1_at   | MmunewRS.936.1 | 8.71  | 9.1   | 0.26 | 0.77 | -1.31 | 0.252114 | 0.020474 | 0.601255 | 0.179641 |
| MmunewRS.937.1.S1_at   | MmunewRS.937.1 | 5.4   | 5.8   | 0.11 | 0.32 | -1.32 | 0.080729 | 0.09603  | 0.431239 | 0.353302 |
| MmunewRS.938.1.S1_at   | MmunewRS.938.1 | 12    | 12.2  | 0.11 | 0.37 | -1.14 | 0.549389 | 0.44837  | 0.787299 | 0.664212 |
| MmunewRS.939.1.S1_at   | MmunewRS.939.1 | 4.56  | 4.6   | 0.05 | 0.08 | -1.03 | 0.405214 | 0.40619  | 0.703082 | 0.634213 |
| MmunewRS.94.1.S1_at    | MmunewRS.94.1  | 3.18  | 3.15  | 0.18 | 0.1  | 1.02  | 0.478257 | 0.543933 | 0.747114 | 0.726502 |
| MmunewRS.940.1.S1_s_at | MmunewRS.940.1 | 14.44 | 14.44 | 0.04 | 0.02 | -1    | 0.621574 | 0.72083  | 0.8268   | 0.838368 |
| MmunewRS.942.1.S1_at   | MmunewRS.942.1 | 7.51  | 7.88  | 0.15 | 0.32 | -1.29 | 0.232455 | 0.302672 | 0.587814 | 0.560269 |

|                        |                |       |       |      |      |       |          |          |          |          |
|------------------------|----------------|-------|-------|------|------|-------|----------|----------|----------|----------|
| MmunewRS.942.1.S1_x_at | MmunewRS.942.1 | 8.29  | 8.52  | 0.12 | 0.26 | -1.18 | 0.17103  | 0.168637 | 0.534989 | 0.445303 |
| MmunewRS.943.1.S1_at   | MmunewRS.943.1 | 7.96  | 7.9   | 0.23 | 0.19 | 1.04  | 0.911717 | 0.925071 | 0.965098 | 0.957602 |
| MmunewRS.945.1.S1_at   | MmunewRS.945.1 | 9.78  | 9.63  | 0.18 | 0.4  | 1.11  | 0.308897 | 0.099167 | 0.641266 | 0.357379 |
| MmunewRS.946.1.S1_at   | MmunewRS.946.1 | 7.3   | 8.92  | 0.3  | 0.59 | -3.08 | 0.021614 | 0.020069 | 0.283041 | 0.177952 |
| MmunewRS.947.1.S1_at   | MmunewRS.947.1 | 3.27  | 3.22  | 0.13 | 0.32 | 1.04  | 0.57709  | 0.395618 | 0.803432 | 0.627583 |
| MmunewRS.948.1.S1_at   | MmunewRS.948.1 | 6.02  | 6.14  | 0.11 | 0.15 | -1.08 | 0.247841 | 0.318509 | 0.599052 | 0.571239 |
| MmunewRS.949.1.S1_at   | MmunewRS.949.1 | 11.25 | 10.43 | 0.82 | 0.77 | 1.77  | 0.33532  | 0.250602 | 0.659098 | 0.51941  |
| MmunewRS.95.1.S1_at    | MmunewRS.95.1  | 6.43  | 6.26  | 1.04 | 0.35 | 1.12  | 0.41503  | 0.422459 | 0.709338 | 0.645729 |
| MmunewRS.950.1.S1_at   | MmunewRS.950.1 | 2.98  | 3.09  | 0.11 | 0.08 | -1.08 | 0.24664  | 0.388568 | 0.597806 | 0.622897 |
| MmunewRS.951.1.S1_at   | MmunewRS.951.1 | 5.46  | 5.6   | 0.29 | 0.47 | -1.1  | 0.264744 | 0.331559 | 0.610545 | 0.580182 |
| MmunewRS.952.1.S1_s_at | MmunewRS.952.1 | 10.71 | 10.62 | 0.07 | 0.27 | 1.07  | 0.606184 | 0.06759  | 0.818772 | 0.306076 |
| MmunewRS.953.1.S1_at   | MmunewRS.953.1 | 2.82  | 2.82  | 0.01 | 0.11 | -1    | 0.309005 | 0.460931 | 0.641339 | 0.672772 |
| MmunewRS.953.1.S1_x_at | MmunewRS.953.1 | 3.88  | 3.82  | 0.13 | 0.06 | 1.04  | 0.534152 | 0.840382 | 0.778613 | 0.909015 |
| MmunewRS.954.1.S1_at   | MmunewRS.954.1 | 9.31  | 7.64  | 0.15 | 0.49 | 3.18  | 0.004663 | 0.007417 | 0.1844   | 0.115764 |
| MmunewRS.955.1.S1_at   | MmunewRS.955.1 | 4.07  | 3.99  | 0.14 | 0.22 | 1.06  | 0.794377 | 0.775325 | 0.914639 | 0.869227 |
| MmunewRS.956.1.S1_at   | MmunewRS.956.1 | 8.01  | 7.45  | 0.22 | 0.23 | 1.48  | 0.043774 | 0.029219 | 0.357051 | 0.212898 |
| MmunewRS.956.1.S1_s_at | MmunewRS.956.1 | 9.85  | 9.05  | 0.21 | 0.48 | 1.73  | 0.078868 | 0.076987 | 0.428609 | 0.322421 |
| MmunewRS.957.1.S1_at   | MmunewRS.957.1 | 6.29  | 6.39  | 0.05 | 0.26 | -1.07 | 0.643382 | 0.250714 | 0.839349 | 0.51941  |
| MmunewRS.959.1.S1_at   | MmunewRS.959.1 | 5.42  | 5.42  | 0.13 | 0.1  | -1    | 0.625623 | 0.309373 | 0.829059 | 0.564912 |
| MmunewRS.960.1.S1_at   | MmunewRS.960.1 | 5.37  | 5.36  | 0.11 | 0.08 | 1.01  | 0.868019 | 0.184238 | 0.947274 | 0.460382 |
| MmunewRS.961.1.S1_at   | MmunewRS.961.1 | 5.66  | 5.64  | 0.18 | 0.13 | 1.01  | 0.782344 | 0.829708 | 0.909165 | 0.902187 |
| MmunewRS.962.1.S1_at   | MmunewRS.962.1 | 9.75  | 10.06 | 0.34 | 0.34 | -1.23 | 0.332008 | 0.195981 | 0.656625 | 0.470976 |
| MmunewRS.963.1.S1_at   | MmunewRS.963.1 | 3.72  | 3.6   | 0.23 | 0.11 | 1.09  | 0.241077 | 0.228088 | 0.593741 | 0.500265 |
| MmunewRS.964.1.S1_at   | MmunewRS.964.1 | 5.22  | 5.04  | 0.06 | 0.37 | 1.13  | 0.980567 | 0.615016 | 0.992987 | 0.771689 |
| MmunewRS.965.1.S1_at   | MmunewRS.965.1 | 5.76  | 5.78  | 0.07 | 0.1  | -1.02 | 0.15821  | 0.263592 | 0.523042 | 0.529881 |
| MmunewRS.966.1.S1_at   | MmunewRS.966.1 | 7.47  | 7.39  | 0.14 | 0.02 | 1.06  | 0.352649 | 0.058353 | 0.669719 | 0.288356 |
| MmunewRS.967.1.S1_at   | MmunewRS.967.1 | 4.87  | 6.39  | 0.95 | 1.48 | -2.85 | 0.409467 | 0.226212 | 0.705878 | 0.498692 |
| MmunewRS.968.1.S1_at   | MmunewRS.968.1 | 3.81  | 3.66  | 0.54 | 0.06 | 1.11  | 0.330312 | 0.462716 | 0.655613 | 0.674056 |
| MmunewRS.969.1.S1_at   | MmunewRS.969.1 | 8.33  | 6.88  | 0.57 | 0.47 | 2.74  | 0.02655  | 0.010635 | 0.303505 | 0.134593 |
| MmunewRS.97.1.S1_at    | MmunewRS.97.1  | 3.42  | 3.42  | 0.02 | 0.01 | -1    | 0.510338 | 0.691581 | 0.764971 | 0.820606 |
| MmunewRS.970.1.S1_at   | MmunewRS.970.1 | 8.23  | 8.61  | 0.44 | 1.37 | -1.31 | 0.174334 | 0.210964 | 0.537982 | 0.484938 |
| MmunewRS.971.1.S1_at   | MmunewRS.971.1 | 10.71 | 10    | 0.22 | 0.09 | 1.63  | 0.006843 | 0.001143 | 0.201708 | 0.053342 |
| MmunewRS.972.1.S1_at   | MmunewRS.972.1 | 3.46  | 3.48  | 0.05 | 0.12 | -1.02 | 0.764642 | 0.876786 | 0.900894 | 0.929829 |
| MmunewRS.973.1.S1_at   | MmunewRS.973.1 | 4.43  | 4.74  | 0.13 | 0.24 | -1.25 | 0.367094 | 0.098897 | 0.679287 | 0.357049 |
| MmunewRS.974.1.S1_s_at | MmunewRS.974.1 | 4.61  | 4.81  | 0.01 | 0.11 | -1.15 | 0.084967 | 0.219132 | 0.438065 | 0.492868 |
| MmunewRS.975.1.S1_at   | MmunewRS.975.1 | 7.63  | 6.33  | 0.34 | 0.54 | 2.46  | 0.068384 | 0.068635 | 0.410019 | 0.308537 |
| MmunewRS.977.1.S1_s_at | MmunewRS.977.1 | 8.29  | 9.98  | 0.24 | 0.63 | -3.23 | 0.012438 | 0.005347 | 0.241605 | 0.101089 |
| MmunewRS.978.1.S1_at   | MmunewRS.978.1 | 4.03  | 4.03  | 0.23 | 0.05 | -1    | 0.414843 | 0.559575 | 0.709338 | 0.736365 |
| MmunewRS.978.1.S1_s_at | MmunewRS.978.1 | 4.89  | 4.68  | 0.29 | 0.09 | 1.16  | 0.290967 | 0.549028 | 0.628652 | 0.729531 |
| MmunewRS.98.1.S1_at    | MmunewRS.98.1  | 4.36  | 4.38  | 0.16 | 0.13 | -1.02 | 0.595484 | 0.759881 | 0.812365 | 0.86049  |
| MmunewRS.980.1.S1_at   | MmunewRS.980.1 | 3.72  | 3.71  | 0.03 | 0.08 | 1.01  | 0.7215   | 0.432286 | 0.87812  | 0.652778 |

|                      |                |       |       |      |      |       |          |          |          |          |
|----------------------|----------------|-------|-------|------|------|-------|----------|----------|----------|----------|
| MmunewRS.981.1.S1_at | MmunewRS.981.1 | 3.38  | 3.5   | 0.05 | 0.1  | -1.08 | 0.166243 | 0.127408 | 0.529929 | 0.398249 |
| MmunewRS.982.1.S1_at | MmunewRS.982.1 | 4.48  | 5.18  | 0.43 | 0.64 | -1.63 | 0.17109  | 0.185773 | 0.535105 | 0.461631 |
| MmunewRS.983.1.S1_at | MmunewRS.983.1 | 5.96  | 6.37  | 0.08 | 0.24 | -1.33 | 0.08331  | 0.07675  | 0.435702 | 0.322168 |
| MmunewRS.984.1.S1_at | MmunewRS.984.1 | 3.72  | 3.26  | 0.44 | 0.02 | 1.37  | 0.113321 | 0.061882 | 0.476474 | 0.295625 |
| MmunewRS.985.1.S1_at | MmunewRS.985.1 | 4.97  | 4.9   | 0.11 | 0.15 | 1.05  | 0.483843 | 0.290445 | 0.749945 | 0.551169 |
| MmunewRS.986.1.S1_at | MmunewRS.986.1 | 3.73  | 3.36  | 0.23 | 0.13 | 1.29  | 0.107239 | 0.243031 | 0.467913 | 0.513356 |
| MmunewRS.987.1.S1_at | MmunewRS.987.1 | 3.59  | 3.6   | 0.02 | 0.16 | -1.01 | 0.370696 | 0.23249  | 0.681582 | 0.504249 |
| MmunewRS.988.1.S1_at | MmunewRS.988.1 | 6.54  | 6.46  | 0.26 | 0.59 | 1.06  | 0.673483 | 0.856117 | 0.8536   | 0.917842 |
| MmunewRS.989.1.S1_at | MmunewRS.989.1 | 3.21  | 3.49  | 0.05 | 0.09 | -1.21 | 0.033955 | 0.376772 | 0.330623 | 0.614547 |
| MmunewRS.99.1.S1_at  | MmunewRS.99.1  | 9.02  | 9.64  | 0.11 | 0.27 | -1.54 | 0.031325 | 0.0252   | 0.321361 | 0.199043 |
| MmunewRS.990.1.S1_at | MmunewRS.990.1 | 11.82 | 11.54 | 0.16 | 0.11 | 1.22  | 0.044928 | 0.029882 | 0.35922  | 0.21455  |
| MmunewRS.991.1.S1_at | MmunewRS.991.1 | 3.98  | 3.76  | 0.35 | 0.32 | 1.16  | 0.500138 | 0.006614 | 0.759402 | 0.110163 |
| MmunewRS.992.1.S1_at | MmunewRS.992.1 | 5.64  | 5.85  | 0.58 | 0.38 | -1.16 | 0.434363 | 0.668674 | 0.720416 | 0.806111 |
| MmunewRS.993.1.S1_at | MmunewRS.993.1 | 5.56  | 5.63  | 0.22 | 0.11 | -1.05 | 0.704907 | 0.649264 | 0.869843 | 0.794724 |
| MmunewRS.994.1.S1_at | MmunewRS.994.1 | 3.64  | 3.68  | 0.34 | 0.17 | -1.03 | 0.948843 | 0.574837 | 0.980457 | 0.746142 |
| MmunewRS.995.1.S1_at | MmunewRS.995.1 | 5.63  | 5.64  | 0.07 | 0.11 | -1    | 0.415261 | 0.209945 | 0.709433 | 0.48371  |
| MmunewRS.996.1.S1_at | MmunewRS.996.1 | 10.06 | 10.4  | 0.02 | 0.39 | -1.27 | 0.145269 | 0.144296 | 0.511329 | 0.418196 |
| MmunewRS.997.1.S1_at | MmunewRS.997.1 | 5.45  | 5.41  | 0.1  | 0.2  | 1.03  | 0.932517 | 0.964416 | 0.973874 | 0.980213 |
| MmunewRS.998.1.S1_at | MmunewRS.998.1 | 10.85 | 11.63 | 0.14 | 0.26 | -1.72 | 0.006823 | 0.001793 | 0.201708 | 0.063586 |
| MmunewRS.999.1.S1_at | MmunewRS.999.1 | 3.88  | 3.96  | 0.18 | 0.05 | -1.06 | 0.51975  | 0.497398 | 0.77032  | 0.696721 |

| Transcript Cluster ID | Transcript ID(Array Design) | SAF Control                 |                                   | SAF Control        |                          | Fold Change (linear) (SAF Control vs. WSD+T) | ANOVA p-value (SAF Control vs. WSD+T) | ANOVA p-value (All Conditions) | FDR p-value (SAF Control vs. WSD+T) | FDR p-value (All Conditions) |
|-----------------------|-----------------------------|-----------------------------|-----------------------------------|--------------------|--------------------------|----------------------------------------------|---------------------------------------|--------------------------------|-------------------------------------|------------------------------|
|                       |                             | Bi-weight Avg Signal (log2) | WSD+T Bi-weight Avg Signal (log2) | Standard Deviation | WSD+T Standard Deviation |                                              |                                       |                                |                                     |                              |
| AFFX-BioB-5_at        | AFFX-BioB-5                 | 10.47                       | 10.48                             | 0.18               | 0.09                     | -1.01                                        | 0.975749                              | 0.895706                       | 0.990389                            | 0.940372                     |
| AFFX-BioB-M_at        | AFFX-BioB-M                 | 11.13                       | 11.17                             | 0.19               | 0.06                     | -1.03                                        | 0.847156                              | 0.886674                       | 0.93333                             | 0.935519                     |
| AFFX-BioB-3_at        | AFFX-BioB-3                 | 10.98                       | 11.04                             | 0.21               | 0.08                     | -1.05                                        | 0.921483                              | 0.910341                       | 0.966402                            | 0.949414                     |
| AFFX-BioC-5_at        | AFFX-BioC-5                 | 11.72                       | 11.75                             | 0.19               | 0.09                     | -1.02                                        | 0.843668                              | 0.959002                       | 0.931554                            | 0.976777                     |
| AFFX-BioC-3_at        | AFFX-BioC-3                 | 11.87                       | 11.91                             | 0.18               | 0.08                     | -1.03                                        | 0.797302                              | 0.938204                       | 0.90845                             | 0.964949                     |
| AFFX-BioDn-5_at       | AFFX-BioDn-5                | 12.96                       | 12.93                             | 0.14               | 0.07                     | 1.02                                         | 0.77119                               | 0.924374                       | 0.895194                            | 0.957351                     |
| AFFX-BioDn-3_at       | AFFX-BioDn-3                | 13.75                       | 13.7                              | 0.07               | 0.04                     | 1.04                                         | 0.353503                              | 0.67327                        | 0.630667                            | 0.809084                     |
| AFFX-CreX-5_at        | AFFX-CreX-5                 | 14.49                       | 14.46                             | 0.04               | 0.01                     | 1.02                                         | 0.203811                              | 0.440588                       | 0.501441                            | 0.659029                     |
| AFFX-CreX-3_at        | AFFX-CreX-3                 | 14.71                       | 14.65                             | 0.03               | 0.02                     | 1.05                                         | 0.034864                              | 0.167944                       | 0.241212                            | 0.444517                     |
| AFFX-DapX-5_at        | AFFX-DapX-5                 | 4.01                        | 4.01                              | 0.09               | 0.06                     | -1                                           | 0.797061                              | 0.441131                       | 0.9083                              | 0.659375                     |
| AFFX-DapX-M_at        | AFFX-DapX-M                 | 3.47                        | 3.34                              | 0.04               | 0.19                     | 1.09                                         | 0.581854                              | 0.299868                       | 0.786843                            | 0.558148                     |
| AFFX-DapX-3_at        | AFFX-DapX-3                 | 3.98                        | 3.98                              | 0.01               | 0.06                     | 1                                            | 0.695339                              | 0.465035                       | 0.854801                            | 0.675534                     |
| AFFX-LysX-5_at        | AFFX-LysX-5                 | 3                           | 3.15                              | 0.07               | 0.02                     | -1.11                                        | 0.085405                              | 0.067931                       | 0.349723                            | 0.306839                     |
| AFFX-LysX-M_at        | AFFX-LysX-M                 | 3.69                        | 3.73                              | 0.06               | 0.07                     | -1.02                                        | 0.820546                              | 0.57511                        | 0.919941                            | 0.746329                     |
| AFFX-LysX-3_at        | AFFX-LysX-3                 | 3.18                        | 3.24                              | 0.07               | 0.06                     | -1.04                                        | 0.301305                              | 0.054681                       | 0.589246                            | 0.27934                      |
| AFFX-PheX-5_at        | AFFX-PheX-5                 | 3.83                        | 3.79                              | 0.16               | 0.1                      | 1.03                                         | 0.991546                              | 0.901615                       | 0.996906                            | 0.944007                     |
| AFFX-PheX-M_at        | AFFX-PheX-M                 | 3.75                        | 3.75                              | 0.14               | 0.05                     | 1                                            | 0.432553                              | 0.620651                       | 0.688358                            | 0.775525                     |
| AFFX-PheX-3_at        | AFFX-PheX-3                 | 4.9                         | 4.93                              | 0.22               | 0.02                     | -1.02                                        | 0.961267                              | 0.29563                        | 0.984145                            | 0.555108                     |
| AFFX-ThrX-5_at        | AFFX-ThrX-5                 | 4.67                        | 4.75                              | 0.05               | 0.09                     | -1.06                                        | 0.237311                              | 0.250276                       | 0.534725                            | 0.519282                     |
| AFFX-ThrX-M_at        | AFFX-ThrX-M                 | 4.03                        | 4.03                              | 0.04               | 0.04                     | 1                                            | 0.407013                              | 0.679699                       | 0.670199                            | 0.812998                     |
| AFFX-ThrX-3_at        | AFFX-ThrX-3                 | 6.17                        | 6.09                              | 0.11               | 0.05                     | 1.06                                         | 0.655851                              | 0.291408                       | 0.83356                             | 0.551823                     |
| AFFX-TrpnX-5_at       | AFFX-TrpnX-5                | 3.43                        | 3.46                              | 0.03               | 0.06                     | -1.02                                        | 0.485214                              | 0.138164                       | 0.724739                            | 0.411086                     |
| AFFX-TrpnX-M_at       | AFFX-TrpnX-M                | 4.48                        | 4.48                              | 0.02               | 0.01                     | 1                                            | 0.93673                               | 0.089969                       | 0.973607                            | 0.34423                      |
| AFFX-TrpnX-3_at       | AFFX-TrpnX-3                | 3.35                        | 3.4                               | 0.06               | 0.04                     | -1.04                                        | 0.574234                              | 0.007857                       | 0.781758                            | 0.118059                     |
| AFFX-r2-Ec-bioB-5_at  | AFFX-r2-Ec-bioB-5           | 11.05                       | 11.15                             | 0.18               | 0.09                     | -1.07                                        | 0.878344                              | 0.890195                       | 0.948095                            | 0.937473                     |
| AFFX-r2-Ec-bioB-M_at  | AFFX-r2-Ec-bioB-M           | 11.2                        | 11.25                             | 0.21               | 0.07                     | -1.04                                        | 0.921983                              | 0.90393                        | 0.966597                            | 0.945472                     |
| AFFX-r2-Ec-bioB-3_at  | AFFX-r2-Ec-bioB-3           | 11.19                       | 11.23                             | 0.22               | 0.11                     | -1.03                                        | 0.933104                              | 0.896628                       | 0.971968                            | 0.940929                     |
| AFFX-r2-Ec-bioC-5_at  | AFFX-r2-Ec-bioC-5           | 12.43                       | 12.44                             | 0.15               | 0.07                     | -1.01                                        | 0.757806                              | 0.929291                       | 0.88891                             | 0.959661                     |
| AFFX-r2-Ec-bioC-3_at  | AFFX-r2-Ec-bioC-3           | 12.55                       | 12.54                             | 0.15               | 0.08                     | 1.01                                         | 0.977275                              | 0.960131                       | 0.991128                            | 0.977408                     |
| AFFX-r2-Ec-bioD-5_at  | AFFX-r2-Ec-bioD-5           | 13.76                       | 13.67                             | 0.06               | 0.02                     | 1.06                                         | 0.309006                              | 0.576551                       | 0.595457                            | 0.747267                     |
| AFFX-r2-Ec-bioD-3_at  | AFFX-r2-Ec-bioD-3           | 14.05                       | 13.99                             | 0.03               | 0.02                     | 1.04                                         | 0.101279                              | 0.408622                       | 0.372655                            | 0.635777                     |
| AFFX-r2-P1-cre-5_at   | AFFX-r2-P1-cre-5            | 14.81                       | 14.76                             | 0.02               | 0.01                     | 1.04                                         | 0.030086                              | 0.285154                       | 0.226596                            | 0.547098                     |
| AFFX-r2-P1-cre-3_at   | AFFX-r2-P1-cre-3            | 14.87                       | 14.85                             | 0.02               | 0.02                     | 1.02                                         | 0.329245                              | 0.425534                       | 0.611528                            | 0.647884                     |
| AFFX-r2-Bs-dap-5_at   | AFFX-r2-Bs-dap-5            | 3.64                        | 3.71                              | 0.05               | 0.05                     | -1.04                                        | 0.085019                              | 0.007783                       | 0.349036                            | 0.117732                     |
| AFFX-r2-Bs-dap-M_at   | AFFX-r2-Bs-dap-M            | 3.02                        | 3.03                              | 0.08               | 0.09                     | -1.01                                        | 0.18068                               | 0.342394                       | 0.475809                            | 0.588448                     |
| AFFX-r2-Bs-dap-3_at   | AFFX-r2-Bs-dap-3            | 2.93                        | 3                                 | 0.11               | 0.05                     | -1.05                                        | 0.813742                              | 0.935387                       | 0.916696                            | 0.963529                     |
| AFFX-r2-Bs-lys-5_at   | AFFX-r2-Bs-lys-5            | 3.14                        | 3                                 | 0.03               | 0.14                     | 1.1                                          | 0.487244                              | 0.266814                       | 0.726032                            | 0.53241                      |
| AFFX-r2-Bs-lys-M_at   | AFFX-r2-Bs-lys-M            | 3.2                         | 3.16                              | 0.09               | 0.03                     | 1.03                                         | 0.733716                              | 0.307542                       | 0.87586                             | 0.563781                     |

|                          |                  |       |       |      |      |       |          |          |          |          |
|--------------------------|------------------|-------|-------|------|------|-------|----------|----------|----------|----------|
| AFFX-r2-Bs-lys-3_at      | AFFX-r2-Bs-lys-3 | 3.46  | 3.66  | 0.08 | 0.13 | -1.14 | 0.301492 | 0.388134 | 0.589355 | 0.622607 |
| AFFX-r2-Bs-phe-5_at      | AFFX-r2-Bs-phe-5 | 3.17  | 3.14  | 0.16 | 0.08 | 1.02  | 0.374693 | 0.624769 | 0.645606 | 0.77888  |
| AFFX-r2-Bs-phe-M_at      | AFFX-r2-Bs-phe-M | 2.96  | 2.96  | 0.06 | 0.05 | 1     | 0.786096 | 0.933377 | 0.902353 | 0.96217  |
| AFFX-r2-Bs-phe-3_at      | AFFX-r2-Bs-phe-3 | 3.22  | 3.29  | 0.05 | 0    | -1.05 | 0.129591 | 0.454286 | 0.412005 | 0.66849  |
| AFFX-r2-Bs-thr-5_s_at    | AFFX-r2-Bs-thr-5 | 3.53  | 3.67  | 0.12 | 0    | -1.1  | 0.118927 | 0.038833 | 0.396589 | 0.242002 |
| AFFX-r2-Bs-thr-M_s_at    | AFFX-r2-Bs-thr-M | 4.72  | 4.82  | 0.18 | 0.1  | -1.07 | 0.206626 | 0.056822 | 0.504284 | 0.284531 |
| AFFX-r2-Bs-thr-3_s_at    | AFFX-r2-Bs-thr-3 | 4.98  | 5     | 0.05 | 0.11 | -1.01 | 0.397214 | 0.045947 | 0.662965 | 0.258786 |
| AFFX-r2-TagA_at          | AFFX-TagA        | 3.39  | 3.3   | 0.04 | 0.04 | 1.06  | 0.071229 | 0.088425 | 0.324822 | 0.341877 |
| AFFX-r2-TagB_at          | AFFX-TagB        | 3.91  | 3.91  | 0.05 | 0.26 | 1.01  | 0.284569 | 0.299018 | 0.574495 | 0.557628 |
| AFFX-r2-TagC_at          | AFFX-TagC        | 3.17  | 3.26  | 0.1  | 0.09 | -1.07 | 0.498774 | 0.121659 | 0.733923 | 0.39084  |
| AFFX-r2-TagD_at          | AFFX-TagD        | 3.6   | 3.43  | 0.11 | 0.1  | 1.13  | 0.413461 | 0.014386 | 0.674789 | 0.153115 |
| AFFX-r2-TagE_at          | AFFX-TagE        | 3.37  | 3.54  | 0.13 | 0.1  | -1.13 | 0.150849 | 0.212888 | 0.440052 | 0.486799 |
| AFFX-r2-TagF_at          | AFFX-TagF        | 3.75  | 3.85  | 0.07 | 0.14 | -1.07 | 0.548853 | 0.434679 | 0.766747 | 0.654756 |
| AFFX-r2-TagG_at          | AFFX-TagG        | 4.1   | 4.12  | 0.05 | 0.22 | -1.01 | 0.738864 | 0.919071 | 0.878998 | 0.954533 |
| AFFX-r2-TagH_at          | AFFX-TagH        | 4.37  | 4.37  | 0.07 | 0.11 | 1     | 0.741513 | 0.354535 | 0.880248 | 0.59726  |
| AFFX-r2-TagI-3_at        | AFFX-TagI        | 4.57  | 4.54  | 0.13 | 0.04 | 1.02  | 0.633476 | 0.369381 | 0.820437 | 0.608783 |
| AFFX-r2-TagI-5_at        | AFFX-TagI        | 3.4   | 3.29  | 0.16 | 0.07 | 1.08  | 0.206868 | 0.341099 | 0.504571 | 0.587233 |
| AFFX-r2-TagO-3_at        | AFFX-TagO        | 3.97  | 3.91  | 0.18 | 0.02 | 1.04  | 0.637167 | 0.231802 | 0.822365 | 0.503592 |
| AFFX-r2-TagO-5_at        | AFFX-TagO        | 4.4   | 4.36  | 0.05 | 0.33 | 1.03  | 0.862732 | 0.455704 | 0.940274 | 0.669654 |
| AFFX-r2-TagQ-3_at        | AFFX-TagQ        | 4.22  | 4.16  | 0    | 0.04 | 1.04  | 0.157672 | 0.132046 | 0.448497 | 0.404043 |
| AFFX-r2-TagQ-5_at        | AFFX-TagQ        | 3.58  | 3.65  | 0.1  | 0.03 | -1.06 | 0.1643   | 0.101043 | 0.457239 | 0.3607   |
| AFFX-r2-TagIN-3_at       | AFFX-TagIN       | 4.93  | 4.83  | 0.07 | 0.13 | 1.07  | 0.889053 | 0.417368 | 0.952724 | 0.642165 |
| AFFX-r2-TagIN-M_at       | AFFX-TagIN       | 4.08  | 4.16  | 0.06 | 0.08 | -1.06 | 0.184662 | 0.448893 | 0.480751 | 0.664672 |
| AFFX-r2-TagIN-5_at       | AFFX-TagIN       | 3.33  | 3.32  | 0.07 | 0.12 | 1     | 0.899021 | 0.483755 | 0.957024 | 0.688112 |
| AFFX-Mmu-r2-Bs-dap-3_at  | AFFX-Bs-dap      | 3.46  | 3.53  | 0.05 | 0.07 | -1.05 | 0.189905 | 0.075554 | 0.486238 | 0.319982 |
| AFFX-Mmu-r2-Bs-dap-5_at  | AFFX-Bs-dap      | 3.61  | 3.55  | 0.2  | 0.04 | 1.04  | 0.52076  | 0.074092 | 0.748953 | 0.317745 |
| AFFX-Mmu-r2-Bs-dap-M_at  | AFFX-Bs-dap      | 3.46  | 3.64  | 0.11 | 0.07 | -1.13 | 0.080207 | 0.189171 | 0.340626 | 0.464997 |
| AFFX-Mmu-r2-Bs-lys-3_at  | AFFX-Bs-lys      | 3.83  | 3.79  | 0.06 | 0.04 | 1.03  | 0.877401 | 0.063983 | 0.947604 | 0.299066 |
| AFFX-Mmu-r2-Bs-lys-5_at  | AFFX-Bs-lys      | 3.56  | 3.51  | 0    | 0.05 | 1.03  | 0.164206 | 0.466185 | 0.457122 | 0.676147 |
| AFFX-Mmu-r2-Bs-lys-M_at  | AFFX-Bs-lys      | 3.82  | 3.78  | 0.05 | 0.02 | 1.02  | 0.145701 | 0.401601 | 0.433202 | 0.631068 |
| AFFX-Mmu-r2-Bs-phe-3_at  | AFFX-Bs-phe      | 4.36  | 4.38  | 0.2  | 0.07 | -1.01 | 0.449538 | 0.509191 | 0.700883 | 0.704028 |
| AFFX-Mmu-r2-Bs-phe-5_at  | AFFX-Bs-phe      | 4.48  | 4.44  | 0.24 | 0.25 | 1.02  | 0.94698  | 0.995025 | 0.977699 | 0.996929 |
| AFFX-Mmu-r2-Bs-phe-M_at  | AFFX-Bs-phe      | 3.24  | 3.27  | 0.16 | 0.07 | -1.02 | 0.479203 | 0.405236 | 0.720456 | 0.633604 |
| AFFX-Mmu-TrpnX-3_at      | AFFX-Bs-trp      | 3.72  | 3.63  | 0.06 | 0.05 | 1.06  | 0.111837 | 0.772168 | 0.387954 | 0.867565 |
| AFFX-Mmu-TrpnX-5_at      | AFFX-Bs-trp      | 4.29  | 4.21  | 0.05 | 0.15 | 1.06  | 0.755543 | 0.926457 | 0.887352 | 0.958307 |
| AFFX-Mmu-TrpnX-M_at      | AFFX-Bs-trp      | 4.18  | 4.28  | 0.1  | 0.11 | -1.07 | 0.585494 | 0.879465 | 0.789262 | 0.931144 |
| AFFX-Mmu-r2-Ec-bioB-3_at | AFFX-Ec-bioB     | 11.38 | 11.43 | 0.18 | 0.09 | -1.03 | 0.884629 | 0.945118 | 0.950933 | 0.968852 |
| AFFX-Mmu-r2-Ec-bioB-5_at | AFFX-Ec-bioB     | 10.68 | 10.75 | 0.23 | 0.09 | -1.05 | 0.980546 | 0.917226 | 0.992769 | 0.953758 |
| AFFX-Mmu-r2-Ec-bioB-M_at | AFFX-Ec-bioB     | 11.12 | 11.19 | 0.17 | 0.07 | -1.06 | 0.964218 | 0.89801  | 0.985543 | 0.941931 |
| AFFX-Mmu-r2-Ec-bioC-3_at | AFFX-Ec-bioC     | 12.43 | 12.4  | 0.17 | 0.04 | 1.02  | 0.901029 | 0.983251 | 0.958105 | 0.990726 |
| AFFX-Mmu-r2-Ec-bioC-5_at | AFFX-Ec-bioC     | 12.22 | 12.19 | 0.18 | 0.06 | 1.02  | 0.811006 | 0.951636 | 0.915344 | 0.972522 |
| AFFX-Mmu-r2-Ec-bioD-3_at | AFFX-Ec-bioD     | 14.28 | 14.19 | 0.04 | 0.02 | 1.06  | 0.088268 | 0.405519 | 0.354311 | 0.633803 |
| AFFX-Mmu-r2-Ec-bioD-5_at | AFFX-Ec-bioD     | 13.5  | 13.44 | 0.08 | 0.04 | 1.04  | 0.393795 | 0.655944 | 0.66051  | 0.798758 |

|                           |                |       |       |      |      |       |          |          |          |          |
|---------------------------|----------------|-------|-------|------|------|-------|----------|----------|----------|----------|
| AFFX-Mmu-r2-P1-cre-3_s_at | AFFX-P1-cre    | 14.85 | 14.83 | 0.01 | 0.01 | 1.01  | 0.139785 | 0.171954 | 0.425357 | 0.448352 |
| AFFX-Mmu-r2-P1-cre-5_s_at | AFFX-P1-cre    | 14.79 | 14.75 | 0    | 0.01 | 1.03  | 0.040717 | 0.106843 | 0.25837  | 0.369467 |
| AFFX-Mmu-r2-Bs-thr-3_s_at | AFFX-Bs-thr-r2 | 6.18  | 6.25  | 0.05 | 0.06 | -1.05 | 0.275138 | 0.015603 | 0.566776 | 0.158262 |
| AFFX-Mmu-r2-Bs-thr-5_s_at | AFFX-Bs-thr-r2 | 4.03  | 4.07  | 0.07 | 0.08 | -1.03 | 0.667853 | 0.053988 | 0.840528 | 0.27777  |
| AFFX-Mmu-r2-Bs-thr-M_s_at | AFFX-Bs-thr-r2 | 4.24  | 4.25  | 0.07 | 0.1  | -1.01 | 0.655677 | 0.794461 | 0.833512 | 0.881455 |
| RPTR-Mmu-AY342347_at      | AY342347       | 5.01  | 5     | 0.05 | 0.13 | 1.01  | 0.98853  | 0.014192 | 0.995934 | 0.152173 |
| RPTR-Mmu-U43284-1_s_at    | U43284-1       | 7.31  | 7.25  | 0.09 | 0.06 | 1.04  | 0.686902 | 0.086308 | 0.850752 | 0.338771 |
| RPTR-Mmu-AJ002682-1_s_at  | AJ002682-1     | 3.88  | 3.92  | 0.16 | 0.06 | -1.03 | 0.232683 | 0.114245 | 0.531068 | 0.380761 |
| RPTR-Mmu-AJ002682-2_s_at  | AJ002682-2     | 4.54  | 4.73  | 0.07 | 0.08 | -1.14 | 0.139744 | 0.526704 | 0.425257 | 0.715627 |
| RPTR-Mmu-X58791-1_s_at    | X58791-1       | 3.19  | 3.26  | 0.07 | 0.05 | -1.05 | 0.228217 | 0.285532 | 0.526419 | 0.547395 |
| RPTR-Mmu-X58791-2_s_at    | X58791-2       | 4.43  | 4.47  | 0.17 | 0.17 | -1.03 | 0.500065 | 0.668207 | 0.734537 | 0.805834 |
| RPTR-Mmu-M10961-1_at      | M10961-1       | 3.58  | 3.54  | 0.17 | 0.07 | 1.03  | 0.743903 | 0.437505 | 0.881384 | 0.656769 |
| RPTR-Mmu-M10961-2_at      | M10961-2       | 2.54  | 2.57  | 0.04 | 0.09 | -1.02 | 0.610158 | 0.22081  | 0.805697 | 0.494262 |
| RPTR-Mmu-M10961-4_at      | M10961-4       | 3.39  | 3.39  | 0.09 | 0.05 | -1    | 0.266516 | 0.53757  | 0.558859 | 0.722606 |
| RPTR-Mmu-A00196-1_s_at    | A00196-1       | 5.39  | 5.31  | 0    | 0.14 | 1.06  | 0.409956 | 0.074374 | 0.672197 | 0.318053 |
| RPTR-Mmu-M15077-1_at      | M15077-1       | 3.35  | 3.26  | 0.02 | 0.06 | 1.07  | 0.066891 | 0.017217 | 0.316296 | 0.166245 |
| RPTR-Mmu-M15077-1_s_at    | M15077-1       | 3.96  | 4.03  | 0.1  | 0.08 | -1.05 | 0.393519 | 0.035905 | 0.660319 | 0.234002 |
| RPTR-Mmu-M62653-1_at      | M62653-1       | 2.95  | 2.98  | 0.14 | 0.16 | -1.02 | 0.327321 | 0.336646 | 0.609976 | 0.583999 |
| RPTR-Mmu-M62653-1_s_at    | M62653-1       | 3.36  | 3.33  | 0.16 | 0.02 | 1.02  | 0.697213 | 0.795561 | 0.855892 | 0.882205 |
| RPTR-Mmu-U47295-1_at      | U47295-1       | 5.18  | 5.07  | 0.03 | 0.1  | 1.08  | 0.110477 | 0.346156 | 0.385807 | 0.591195 |
| RPTR-Mmu-AJ132968-1_at    | AJ132968-1     | 4.54  | 4.49  | 0.03 | 0.09 | 1.03  | 0.412136 | 0.25074  | 0.673932 | 0.519419 |
| RPTR-Mmu-NM_131175-1_at   | NM_131175-1    | 4.68  | 4.7   | 0.21 | 0.01 | -1.02 | 0.613193 | 0.525581 | 0.807283 | 0.715132 |
| RPTR-Mmu-J01636-1_at      | J01636-1       | 6.2   | 6.44  | 0.08 | 0.08 | -1.18 | 0.066876 | 0.185567 | 0.316281 | 0.461566 |
| RPTR-Mmu-E00696-1_s_at    | E00696-1       | 5.23  | 5.11  | 0.09 | 0.06 | 1.09  | 0.160642 | 0.339237 | 0.452231 | 0.585918 |
| RPTR-Mmu-J01636-3_at      | J01636-3       | 3.49  | 3.61  | 0.07 | 0.09 | -1.08 | 0.139709 | 0.1328   | 0.42522  | 0.404544 |
| RPTR-Mmu-J01636-4_at      | J01636-4       | 3.49  | 3.57  | 0.16 | 0.32 | -1.06 | 0.430657 | 0.185155 | 0.686902 | 0.461034 |
| RPTR-Mmu-ECOLOXB_at       | ECOLOXB        | 2.57  | 2.57  | 0    | 0.06 | 1     | 0.373901 | 0.68758  | 0.645118 | 0.81762  |
| RPTR-Mmu-K01486-1_at      | K01486-1       | 3.52  | 3.53  | 0.05 | 0.17 | -1.01 | 0.703279 | 0.693786 | 0.85919  | 0.821912 |
| RPTR-Mmu-X03453-1_at      | X03453-1       | 3.84  | 3.89  | 0.03 | 0.12 | -1.04 | 0.836155 | 0.137782 | 0.928174 | 0.410757 |
| RPTR-Mmu-AY056050-1_at    | AY056050-1     | 5.86  | 5.74  | 0.15 | 0.09 | 1.09  | 0.309592 | 0.277938 | 0.595886 | 0.541664 |
| RPTR-Mmu-AF298789-1_at    | AF298789-1     | 3.56  | 3.5   | 0.11 | 0.14 | 1.04  | 0.643382 | 0.866966 | 0.826158 | 0.924408 |
| RPTR-Mmu-J01347-1_s_at    | J01347-1       | 3.08  | 3.07  | 0.02 | 0.11 | 1.01  | 0.897527 | 0.557396 | 0.956515 | 0.735031 |
| RPTR-Mmu-J01347-2_at      | J01347-2       | 3.14  | 3.13  | 0.07 | 0.02 | 1     | 0.37382  | 0.02052  | 0.645118 | 0.179779 |
| RPTR-Mmu-J01347-3_at      | J01347-3       | 3.48  | 3.53  | 0.09 | 0.09 | -1.03 | 0.575369 | 0.140774 | 0.782823 | 0.414137 |
| RPTR-Mmu-J01347-4_at      | J01347-4       | 3.73  | 3.82  | 0.08 | 0.27 | -1.07 | 0.751958 | 0.257046 | 0.885488 | 0.524781 |
| RPTR-Mmu-U46493-1_s_at    | U46493-1       | 3.15  | 2.94  | 0    | 0.24 | 1.16  | 0.396857 | 0.381197 | 0.662712 | 0.617534 |
| RPTR-Mmu-U57609-2_s_at    | U57609-2       | 4.01  | 3.87  | 0.13 | 0.27 | 1.1   | 0.486413 | 0.649956 | 0.725652 | 0.795295 |
| RPTR-Mmu-AB076373-1_at    | AB076373-1     | 5.29  | 5.19  | 0.1  | 0.06 | 1.07  | 0.442259 | 0.208199 | 0.695688 | 0.482086 |
| RPTR-Mmu-AF323980-1_at    | AF323980-1     | 3.03  | 3.02  | 0.02 | 0.08 | 1     | 0.456333 | 0.787193 | 0.705738 | 0.876889 |
| RPTR-Mmu-AF292559-1_at    | AF292559-1     | 3.01  | 2.9   | 0.12 | 0.06 | 1.07  | 0.79891  | 0.941114 | 0.909361 | 0.96664  |
| RPTR-Mmu-AF292559-2_s_at  | AF292559-2     | 2.91  | 2.9   | 0    | 0.09 | 1     | 0.959191 | 0.449362 | 0.983335 | 0.665021 |
| RPTR-Mmu-AF292559-3_s_at  | AF292559-3     | 3.52  | 3.52  | 0.02 | 0.09 | -1    | 0.495722 | 0.006944 | 0.73183  | 0.112568 |
| RPTR-Mmu-AF292559-4_s_at  | AF292559-4     | 5.43  | 5.41  | 0.06 | 0.13 | 1.01  | 0.846713 | 0.483028 | 0.933119 | 0.687687 |

|                           |                 |       |       |      |      |       |          |          |          |          |
|---------------------------|-----------------|-------|-------|------|------|-------|----------|----------|----------|----------|
| RPTR-Mmu-AF292560-1_s_at  | AF292560-1      | 3.11  | 3.2   | 0.08 | 0.04 | -1.07 | 0.241012 | 0.485112 | 0.538371 | 0.688913 |
| RPTR-Mmu-U89963-1_at      | U89963-1        | 4.07  | 4.18  | 0.14 | 0.19 | -1.08 | 0.311912 | 0.462202 | 0.598095 | 0.673601 |
| RPTR-Mmu-U89963-1_s_at    | U89963-1        | 4.53  | 4.56  | 0    | 0.24 | -1.02 | 0.484789 | 0.171847 | 0.724478 | 0.44825  |
| RPTR-Mmu-U89963-1_x_at    | U89963-1        | 3.51  | 3.43  | 0.03 | 0.1  | 1.05  | 0.318756 | 0.066064 | 0.603482 | 0.302431 |
| RPTR-Mmu-U55943-1_at      | U55943-1        | 4.06  | 4.13  | 0.1  | 0    | -1.05 | 0.387664 | 0.615278 | 0.655741 | 0.771908 |
| RPTR-Mmu-U55943-1_x_at    | U55943-1        | 3.69  | 3.62  | 0.05 | 0.26 | 1.05  | 0.519758 | 0.622257 | 0.748244 | 0.776775 |
| NC-001798.CDS51.S1_s_at   | NC-001798.CDS51 | 4.72  | 4.94  | 0.19 | 0.22 | -1.16 | 0.680583 | 0.20874  | 0.847662 | 0.482608 |
| RPTR-Mmu-NC_001669-1_s_at | NC_001669-1     | 4.16  | 4.15  | 0.06 | 0    | 1     | 0.796971 | 0.823591 | 0.908267 | 0.898664 |
| RPTR-Mmu-NC_001669-2_s_at | NC_001669-2     | 3.77  | 3.51  | 0.09 | 0.08 | 1.2   | 0.050933 | 0.170465 | 0.283396 | 0.447103 |
| RPTR-Mmu-AF403737-1_at    | AF403737-1      | 3.35  | 3.35  | 0.22 | 0.08 | -1    | 0.671513 | 0.854209 | 0.842415 | 0.916964 |
| RPTR-Mmu-L36849-1_at      | L36849-1        | 6.54  | 6.55  | 0.17 | 0.1  | -1.01 | 0.947387 | 0.391911 | 0.97794  | 0.625419 |
| RPTR-Mmu-AF062997-1_at    | AF062997-1      | 5.76  | 5.73  | 0.22 | 0.02 | 1.02  | 0.743965 | 0.51218  | 0.881384 | 0.706087 |
| NC-001345.CDS50.S1_s_at   | NC-001345.CDS50 | 4.36  | 4.46  | 0.15 | 0.06 | -1.07 | 0.356955 | 0.16561  | 0.633214 | 0.441901 |
| RPTR-Mmu-X17220-1_at      | X17220-1        | 6.05  | 5.97  | 0.31 | 0.11 | 1.05  | 0.732878 | 0.585743 | 0.875334 | 0.753011 |
| RPTR-Mmu-K01193-1_at      | K01193-1        | 4.15  | 4.24  | 0.07 | 0.03 | -1.07 | 0.085237 | 0.053948 | 0.34932  | 0.277769 |
| RPTR-Mmu-XXU09476-1_at    | XXU09476-1      | 3.47  | 3.41  | 0.11 | 0.14 | 1.04  | 0.324508 | 0.542873 | 0.60819  | 0.725834 |
| RPTR-Mmu-NC_002086-1_at   | NC_002086-1     | 6.47  | 6.46  | 0.08 | 0.13 | 1.01  | 0.861189 | 0.183664 | 0.939687 | 0.459681 |
| RPTR-Mmu-J03196-1_at      | J03196-1        | 5.69  | 5.59  | 0.05 | 0.06 | 1.07  | 0.0474   | 0.047443 | 0.275072 | 0.262486 |
| RPTR-Mmu-A12338-1_at      | A12338-1        | 5.79  | 5.83  | 0.04 | 0.21 | -1.03 | 0.921615 | 0.0366   | 0.966422 | 0.235884 |
| RPTR-Mmu-A06498-1_at      | A06498-1        | 3.9   | 3.81  | 0.18 | 0.12 | 1.06  | 0.694232 | 0.502195 | 0.854058 | 0.70006  |
| RPTR-Mmu-CVE247372-1_at   | CVE247372-1     | 4.96  | 4.81  | 0.16 | 0.16 | 1.11  | 0.503854 | 0.038114 | 0.73721  | 0.239867 |
| RPTR-Mmu-AE009032-1_at    | AE009032-1      | 5.26  | 5.07  | 0.11 | 0.27 | 1.14  | 0.88933  | 0.348497 | 0.952884 | 0.592599 |
| RPTR-Mmu-AY125353_at      | AY125353        | 5.03  | 5.11  | 0.06 | 0    | -1.06 | 0.175741 | 0.506894 | 0.470151 | 0.702649 |
| MmurRNA.1.1.S1_at         | MmurRNA.1.1     | 8.73  | 8.62  | 0.31 | 0.26 | 1.08  | 0.776625 | 0.555175 | 0.897857 | 0.733715 |
| MmurRNA.2.1.S1_at         | MmurRNA.2.1     | 6.56  | 9.34  | 0.62 | 0.09 | -6.88 | 0.001384 | 0.116645 | 0.079595 | 0.383843 |
| MmurRNA.2.1.S1_s_at       | MmurRNA.2.1     | 11    | 12.46 | 0.89 | 0.17 | -2.76 | 0.019657 | 0.252277 | 0.193139 | 0.520953 |
| MmurRNA.3.1.S1_at         | MmurRNA.3.1     | 8.72  | 10.07 | 0.1  | 0.09 | -2.56 | 0.000084 | 0.203655 | 0.051196 | 0.477904 |
| AFFX-Mmu-actin-5_at       | Mmu.4662.1      | 13.14 | 13.2  | 0.15 | 0.08 | -1.05 | 0.787338 | 0.339189 | 0.903077 | 0.585918 |
| AFFX-Mmu-actin-M_at       | Mmu.4662.1      | 13.88 | 13.99 | 0.12 | 0.08 | -1.08 | 0.975326 | 0.384077 | 0.99019  | 0.619926 |
| AFFX-Mmu-actin-M_x_at     | Mmu.4662.1      | 13.69 | 13.81 | 0.12 | 0.08 | -1.09 | 0.997405 | 0.359207 | 0.999087 | 0.600533 |
| AFFX-Mmu-actin-3_s_at     | Mmu.4662.1      | 14.34 | 14.42 | 0.05 | 0.04 | -1.06 | 0.247983 | 0.146659 | 0.543336 | 0.420683 |
| MmugDNA.28776.1.S1_s_at   | MmugDNA.28776.1 | 14.58 | 14.62 | 0.04 | 0.03 | -1.02 | 0.296455 | 0.257423 | 0.58519  | 0.52521  |
| AFFX-Mmu-ef1a-5_s_at      | Mmu.12098.2     | 14.41 | 14.4  | 0.02 | 0.03 | 1.01  | 0.415255 | 0.535323 | 0.676055 | 0.720887 |
| AFFX-Mmu-ef1a-M_s_at      | Mmu.12098.2     | 14.6  | 14.58 | 0.02 | 0.02 | 1.01  | 0.102352 | 0.086239 | 0.374399 | 0.338635 |
| AFFX-Mmu-ef1a-M_x_at      | Mmu.12098.2     | 14.51 | 14.5  | 0.01 | 0.03 | 1.01  | 0.419369 | 0.698444 | 0.67873  | 0.82482  |
| AFFX-Mmu-ef1a-3_x_at      | Mmu.12098.2     | 14.33 | 14.33 | 0.02 | 0.01 | 1     | 0.362672 | 0.647342 | 0.63739  | 0.793415 |
| AFFX-Mmu-gapdh-5_at       | Mmu.6661.1      | 13.42 | 13.1  | 0.05 | 0.04 | 1.25  | 0.000889 | 0.081089 | 0.075114 | 0.32927  |
| AFFX-Mmu-gapdh-M_s_at     | Mmu.6661.1      | 13.51 | 13.19 | 0.05 | 0.03 | 1.24  | 0.001198 | 0.076696 | 0.077857 | 0.322093 |
| AFFX-Mmu-gapdh-M_x_at     | Mmu.6661.1      | 13.27 | 13.03 | 0.06 | 0.04 | 1.18  | 0.003572 | 0.086875 | 0.104895 | 0.339667 |
| AFFX-Mmu-gapdh-3_at       | Mmu.6661.1      | 14.31 | 14.16 | 0.05 | 0.03 | 1.11  | 0.01084  | 0.182158 | 0.153877 | 0.45867  |
| AFFX-Mmu-gapdh-3_x_at     | Mmu.6661.1      | 14.19 | 14.13 | 0.03 | 0.03 | 1.05  | 0.021013 | 0.296103 | 0.198347 | 0.555339 |
| Mmu.10002.1.S1_at         | Mmu.10002.1     | 10.5  | 10.75 | 0.32 | 0.14 | -1.19 | 0.909652 | 0.015305 | 0.961647 | 0.157071 |
| Mmu.10002.1.S1_s_at       | Mmu.10002.1     | 11.41 | 11.59 | 0.29 | 0.11 | -1.13 | 0.680324 | 0.010391 | 0.8475   | 0.133359 |

|                        |                |       |       |      |      |        |          |          |          |          |
|------------------------|----------------|-------|-------|------|------|--------|----------|----------|----------|----------|
| Mmu.10014.1.S1_at      | Mmu.10014.1    | 10.42 | 10.46 | 0.31 | 0.15 | -1.03  | 0.798271 | 0.534643 | 0.908928 | 0.720477 |
| Mmu.10025.1.S1_at      | Mmu.10025.1    | 7.99  | 9.97  | 0.62 | 0.25 | -3.94  | 0.009946 | 0.182838 | 0.149006 | 0.459354 |
| Mmu.10030.1.S1_at      | Mmu.10030.1    | 11.15 | 11.93 | 0.44 | 0.21 | -1.72  | 0.059016 | 0.106558 | 0.30011  | 0.369099 |
| Mmu.10039.1.S1_at      | Mmu.10039.1    | 9.93  | 9.6   | 0.29 | 0.19 | 1.25   | 0.38836  | 0.204789 | 0.656369 | 0.479203 |
| Mmu.10045.2.S1_at      | Mmu.10045.2    | 8.25  | 11.81 | 0.79 | 0.15 | -11.77 | 0.002936 | 0.02172  | 0.099331 | 0.184333 |
| Mmu.10045.2.S1_x_at    | Mmu.10045.2    | 7.99  | 11.75 | 0.87 | 0.17 | -13.49 | 0.003316 | 0.011063 | 0.102407 | 0.136934 |
| Mmu.10062.1.S1_s_at    | Mmu.10062.1    | 13.67 | 13.68 | 0.05 | 0.08 | -1.01  | 0.455551 | 0.40588  | 0.705182 | 0.634037 |
| Mmu.10083.1.A1_at      | Mmu.10083.1    | 7.67  | 8.05  | 1.05 | 0.24 | -1.3   | 0.930357 | 0.19041  | 0.970717 | 0.465906 |
| Mmu.10083.1.S1_s_at    | Mmu.10083.1    | 7.14  | 7.59  | 1    | 0.14 | -1.37  | 0.920841 | 0.219849 | 0.966204 | 0.493388 |
| Mmu.10088.2.S1_at      | Mmu.10088.2    | 5.63  | 7.88  | 1.18 | 0.2  | -4.78  | 0.079751 | 0.229849 | 0.339935 | 0.501802 |
| Mmu.101.1.S1_at        | Mmu.101.1      | 9.79  | 9.24  | 0.13 | 0.18 | 1.46   | 0.021126 | 0.004468 | 0.198834 | 0.093294 |
| Mmu.10114.1.S1_at      | Mmu.10114.1    | 9.49  | 9.04  | 0.14 | 0.16 | 1.36   | 0.007262 | 0.005823 | 0.13284  | 0.104661 |
| Mmu.10116.1.S1_at      | Mmu.10116.1    | 11.05 | 11.19 | 0.17 | 0.21 | -1.1   | 0.667579 | 0.003799 | 0.840426 | 0.087835 |
| Mmu.10122.1.S1_at      | Mmu.10122.1    | 7.52  | 10.96 | 1.36 | 0.27 | -10.89 | 0.024208 | 0.17808  | 0.208762 | 0.454462 |
| Mmu.10126.1.S1_at      | Mmu.10126.1    | 9.8   | 9.79  | 0.07 | 0.14 | 1.01   | 0.61255  | 0.156564 | 0.806905 | 0.43196  |
| Mmu.10134.1.S1_at      | Mmu.10134.1    | 10.2  | 10.19 | 0.26 | 0.07 | 1      | 0.461887 | 0.442076 | 0.709191 | 0.660148 |
| Mmu.10135.1.S1_at      | Mmu.10135.1    | 11.05 | 11.03 | 0.16 | 0.15 | 1.02   | 0.645013 | 0.001238 | 0.827097 | 0.05478  |
| Mmu.10139.2.S1_at      | Mmu.10139.2    | 12.37 | 12.25 | 0.05 | 0.02 | 1.09   | 0.051935 | 0.34771  | 0.285355 | 0.592082 |
| Mmu.1015.1.S1_s_at     | Mmu.1015.1     | 14.3  | 14.31 | 0.05 | 0.02 | -1.01  | 0.508174 | 0.299821 | 0.740293 | 0.5581   |
| Mmu.10150.1.S1_at      | Mmu.10150.1    | 9.21  | 8.83  | 0.02 | 0.17 | 1.3    | 0.011568 | 0.000911 | 0.157417 | 0.048322 |
| Mmu.10158.1.S1_at      | Mmu.10158.1    | 8.85  | 8.82  | 0.18 | 0.25 | 1.03   | 0.658423 | 0.41455  | 0.834958 | 0.64042  |
| Mmu.10176.1.S1_at      | Mmu.10176.1    | 5.33  | 5.36  | 0.11 | 0.06 | -1.02  | 0.692984 | 0.31699  | 0.853277 | 0.570298 |
| Mmu.10185.1.S1_at      | Mmu.10185.1    | 6.19  | 6.23  | 0.25 | 0.11 | -1.02  | 0.829141 | 0.921565 | 0.924609 | 0.955761 |
| Mmu.10185.1.S1_s_at    | Mmu.10185.1    | 4.16  | 4.15  | 0.1  | 0.08 | 1.01   | 0.357744 | 0.221109 | 0.633636 | 0.494497 |
| Mmu.10186.1.S1_at      | Mmu.10186.1    | 4.8   | 4.88  | 0.12 | 0.08 | -1.06  | 0.785679 | 0.158436 | 0.902158 | 0.434313 |
| Mmu.10187.1.S1_at      | Mmu.10187.1    | 5.93  | 6     | 0.03 | 0.02 | -1.05  | 0.024259 | 0.017596 | 0.208861 | 0.167721 |
| Mmu.10195.2.S1_x_at    | Mmu.10195.2    | 12.47 | 12.9  | 0.29 | 0.09 | -1.34  | 0.103958 | 0.261778 | 0.377277 | 0.528227 |
| Mmu.2177.1.S1_x_at     | Mmu.2177.1     | 10.92 | 11.78 | 0.29 | 0.21 | -1.82  | 0.013239 | 0.161672 | 0.165657 | 0.437771 |
| Mmu.10197.1.S1_at      | Mmu.10197.1    | 12.05 | 12.24 | 0.15 | 0.06 | -1.14  | 0.080292 | 0.041712 | 0.34088  | 0.248886 |
| Mmu.2935.3.S1_s_at     | Mmu.2935.3     | 7.15  | 7.26  | 0.21 | 0.06 | -1.08  | 0.255289 | 0.084243 | 0.549716 | 0.335371 |
| Mmu.1020.1.S1_s_at     | Mmu.1020.1     | 9.52  | 9.65  | 0.1  | 0.19 | -1.09  | 0.762789 | 0.82489  | 0.891334 | 0.899427 |
| Mmu.10202.1.S1_at      | Mmu.10202.1    | 9.74  | 9.75  | 0.04 | 0.12 | -1.01  | 0.791001 | 0.041061 | 0.905036 | 0.247375 |
| Mmu.10209.1.S1_s_at    | Mmu.10209.1    | 13.7  | 14.53 | 1.08 | 0.02 | -1.77  | 0.223071 | 0.220435 | 0.52097  | 0.493818 |
| Mmu.10209.2.S1_at      | Mmu.10209.2    | 7.24  | 12.05 | 4.02 | 0.42 | -28.11 | 0.150268 | 0.124996 | 0.439399 | 0.395386 |
| MmugDNA.6969.1.S1_at   | MmugDNA.6969.1 | 10.29 | 10.29 | 0.03 | 0.04 | 1      | 0.860986 | 0.764112 | 0.939567 | 0.862852 |
| MmugDNA.6969.1.S1_s_at | MmugDNA.6969.1 | 9.59  | 9.33  | 0.07 | 0.17 | 1.19   | 0.186606 | 0.779729 | 0.48274  | 0.872303 |
| Mmu.10212.1.S1_at      | Mmu.10212.1    | 6.96  | 8.12  | 2.18 | 0.35 | -2.24  | 0.508077 | 0.669206 | 0.740216 | 0.806492 |
| Mmu.10214.1.S1_at      | Mmu.10214.1    | 8.9   | 8.95  | 0.2  | 0.23 | -1.03  | 0.491641 | 0.044669 | 0.729331 | 0.255759 |
| Mmu.10221.1.S1_at      | Mmu.10221.1    | 10.18 | 10.28 | 0.19 | 0.06 | -1.07  | 0.759315 | 0.3817   | 0.889659 | 0.617895 |
| Mmu.10229.1.S1_at      | Mmu.10229.1    | 7.99  | 8.65  | 0.57 | 0.05 | -1.59  | 0.124026 | 0.008431 | 0.403956 | 0.121874 |
| Mmu.10237.1.S1_at      | Mmu.10237.1    | 2.84  | 2.85  | 0.15 | 0.03 | -1.01  | 0.536586 | 0.406085 | 0.759061 | 0.634197 |
| Mmu.10239.1.S1_at      | Mmu.10239.1    | 8.36  | 8.02  | 0.14 | 0.15 | 1.27   | 0.021032 | 0.042391 | 0.198437 | 0.250533 |
| Mmu.10240.1.S1_at      | Mmu.10240.1    | 10.78 | 10.74 | 0.12 | 0.05 | 1.03   | 0.579958 | 0.435527 | 0.785464 | 0.655267 |



|                        |                |       |       |      |      |       |          |          |          |          |
|------------------------|----------------|-------|-------|------|------|-------|----------|----------|----------|----------|
| Mmu.10246.2.A1_x_at    | Mmu.10246.2    | 7.39  | 8.73  | 1.3  | 0.19 | -2.54 | 0.488002 | 0.683144 | 0.726629 | 0.815168 |
| Mmu.10246.2.S1_x_at    | Mmu.10246.2    | 8.91  | 10.79 | 1.38 | 0.18 | -3.67 | 0.246903 | 0.590187 | 0.542575 | 0.756117 |
| Mmu.10266.1.A1_at      | Mmu.10266.1    | 11.03 | 10.98 | 0.14 | 0.08 | 1.03  | 0.918482 | 0.061672 | 0.965302 | 0.295135 |
| Mmu.1028.1.S1_at       | Mmu.1028.1     | 7.73  | 8.49  | 0.19 | 0.12 | -1.69 | 0.004072 | 0.110313 | 0.108999 | 0.374403 |
| Mmu.10293.1.S1_s_at    | Mmu.10293.1    | 13.02 | 12.98 | 0.03 | 0.08 | 1.02  | 0.856191 | 0.033325 | 0.937385 | 0.226207 |
| Mmu.10300.2.S1_at      | Mmu.10300.2    | 11.83 | 12.05 | 0.08 | 0.14 | -1.17 | 0.074322 | 0.22385  | 0.330856 | 0.496802 |
| Mmu.10318.1.S1_at      | Mmu.10318.1    | 8.71  | 8.45  | 0.05 | 0.13 | 1.2   | 0.065115 | 0.289751 | 0.311972 | 0.550776 |
| Mmu.10318.1.S1_s_at    | Mmu.10318.1    | 12.95 | 12.76 | 0.02 | 0.14 | 1.15  | 0.025171 | 0.024714 | 0.211683 | 0.19685  |
| Mmu.1032.1.S1_at       | Mmu.1032.1     | 7.24  | 7.23  | 0.33 | 0.1  | 1.01  | 0.821546 | 0.026247 | 0.920441 | 0.202991 |
| Mmu.10327.1.S1_at      | Mmu.10327.1    | 8.61  | 8.25  | 0.3  | 0.07 | 1.29  | 0.333247 | 0.134507 | 0.614682 | 0.406629 |
| Mmu.10346.1.S1_at      | Mmu.10346.1    | 10.99 | 10.9  | 0.09 | 0.12 | 1.06  | 0.281236 | 0.046158 | 0.572137 | 0.259257 |
| Mmu.1036.1.S1_at       | Mmu.1036.1     | 11.93 | 11.99 | 0.34 | 0.23 | -1.04 | 0.500006 | 0.002811 | 0.734497 | 0.078181 |
| Mmu.10362.1.S1_at      | Mmu.10362.1    | 9.17  | 9.89  | 0.07 | 0.17 | -1.65 | 0.002528 | 0.032311 | 0.094413 | 0.22253  |
| Mmu.10377.1.S1_x_at    | Mmu.10377.1    | 8.42  | 8.52  | 0.3  | 0.02 | -1.07 | 0.684546 | 0.356152 | 0.84962  | 0.59815  |
| MmugDNA.7415.1.S1_s_at | MmugDNA.7415.1 | 12.23 | 12.42 | 0.12 | 0.07 | -1.14 | 0.106555 | 0.016176 | 0.380675 | 0.161214 |
| Mmu.10380.1.S1_at      | Mmu.10380.1    | 12.08 | 12.55 | 0.23 | 0.14 | -1.39 | 0.067147 | 0.458803 | 0.31683  | 0.671427 |
| Mmu.10380.2.S1_s_at    | Mmu.10380.2    | 10.53 | 10.9  | 0.14 | 0.15 | -1.29 | 0.068477 | 0.605645 | 0.319482 | 0.765377 |
| Mmu.10383.1.S1_at      | Mmu.10383.1    | 6.36  | 6.91  | 0.42 | 0.57 | -1.46 | 0.414934 | 0.107199 | 0.675832 | 0.36989  |
| Mmu.10390.1.S1_at      | Mmu.10390.1    | 5.46  | 5.95  | 1.28 | 0.17 | -1.41 | 0.706072 | 0.227343 | 0.86081  | 0.499659 |
| Mmu.10393.1.S1_x_at    | Mmu.10393.1    | 14.44 | 14.41 | 0.03 | 0.03 | 1.02  | 0.743963 | 0.122793 | 0.881384 | 0.392777 |
| Mmu.10420.1.S1_at      | Mmu.10420.1    | 8.58  | 8.53  | 0.06 | 0.08 | 1.04  | 0.404019 | 0.494131 | 0.667926 | 0.694703 |
| Mmu.10433.1.S1_at      | Mmu.10433.1    | 12.32 | 12.29 | 0.28 | 0.02 | 1.02  | 0.774736 | 0.437118 | 0.897014 | 0.656547 |
| Mmu.10436.1.S1_at      | Mmu.10436.1    | 10.29 | 10.23 | 0.17 | 0.09 | 1.04  | 0.634401 | 0.004499 | 0.820733 | 0.093593 |
| Mmu.10443.1.S1_at      | Mmu.10443.1    | 10.57 | 9.8   | 0.2  | 0.14 | 1.7   | 0.006401 | 0.004425 | 0.126645 | 0.092904 |
| Mmu.10451.1.S1_at      | Mmu.10451.1    | 7.31  | 7.49  | 0.52 | 0.28 | -1.13 | 0.697507 | 0.613269 | 0.856015 | 0.770491 |
| Mmu.10452.1.A1_at      | Mmu.10452.1    | 5.4   | 5.5   | 0.07 | 0.09 | -1.08 | 0.588132 | 0.222391 | 0.790874 | 0.495456 |
| Mmu.10452.1.S1_at      | Mmu.10452.1    | 5.52  | 5.68  | 0.2  | 0.08 | -1.12 | 0.231418 | 0.610125 | 0.53018  | 0.768398 |
| Mmu.10472.1.S1_at      | Mmu.10472.1    | 7.61  | 9.05  | 0.74 | 0.3  | -2.71 | 0.053411 | 0.078469 | 0.288383 | 0.325226 |
| Mmu.10481.1.S1_at      | Mmu.10481.1    | 2.69  | 2.67  | 0.12 | 0.03 | 1.01  | 0.590155 | 0.77506  | 0.791777 | 0.869035 |
| Mmu.10483.1.S1_x_at    | Mmu.10483.1    | 7.22  | 7.1   | 0.12 | 0.03 | 1.08  | 0.223757 | 0.217361 | 0.521788 | 0.490978 |
| Mmu.10484.1.A1_at      | Mmu.10484.1    | 4.09  | 4.23  | 0.08 | 0    | -1.1  | 0.084114 | 0.400878 | 0.34741  | 0.630658 |
| Mmu.10484.1.S1_at      | Mmu.10484.1    | 3.63  | 3.59  | 0.06 | 0.04 | 1.03  | 0.887163 | 0.230209 | 0.951902 | 0.502084 |
| Mmu.10484.2.A1_at      | Mmu.10484.2    | 3.06  | 3.07  | 0.12 | 0    | -1.01 | 0.320386 | 0.258028 | 0.60498  | 0.52557  |
| Mmu.10484.2.S1_x_at    | Mmu.10484.2    | 6.22  | 6.18  | 0.11 | 0.03 | 1.03  | 0.499292 | 0.593549 | 0.734113 | 0.758329 |
| Mmu.10488.1.S1_at      | Mmu.10488.1    | 4.1   | 4.47  | 0.05 | 0.36 | -1.29 | 0.235786 | 0.244398 | 0.533475 | 0.514233 |
| Mmu.105.1.S1_at        | Mmu.105.1      | 10.44 | 10.47 | 0.15 | 0.07 | -1.02 | 0.575788 | 0.211031 | 0.78295  | 0.485047 |
| Mmu.105.1.S1_s_at      | Mmu.105.1      | 9.88  | 9.97  | 0.23 | 0    | -1.06 | 0.806721 | 0.773389 | 0.913434 | 0.868269 |
| Mmu.105.1.S1_x_at      | Mmu.105.1      | 10.49 | 10.46 | 0.19 | 0.07 | 1.02  | 0.366439 | 0.286448 | 0.640771 | 0.547829 |
| Mmu.10506.1.S1_at      | Mmu.10506.1    | 11.46 | 11.45 | 0.26 | 0.23 | 1     | 0.518622 | 0.308899 | 0.747601 | 0.564656 |
| Mmu.10506.1.S1_s_at    | Mmu.10506.1    | 12.58 | 12.45 | 0.28 | 0.24 | 1.09  | 0.352619 | 0.27299  | 0.630029 | 0.53761  |
| Mmu.10507.1.S1_at      | Mmu.10507.1    | 12.94 | 13.1  | 0.16 | 0.03 | -1.12 | 0.3683   | 0.484455 | 0.642051 | 0.688478 |
| Mmu.1051.1.S1_at       | Mmu.1051.1     | 4.6   | 4.59  | 0.18 | 0.07 | 1.01  | 0.851129 | 0.875861 | 0.935277 | 0.929487 |
| Mmu.6048.1.S1_s_at     | Mmu.6048.1     | 13.42 | 13.89 | 0.33 | 0.11 | -1.38 | 0.169963 | 0.208541 | 0.463459 | 0.482453 |

|                         |                 |       |       |      |      |       |          |          |          |          |
|-------------------------|-----------------|-------|-------|------|------|-------|----------|----------|----------|----------|
| Mmu.10533.2.S1_s_at     | Mmu.10533.2     | 13.93 | 13.91 | 0.1  | 0.04 | 1.01  | 0.762178 | 0.544527 | 0.890955 | 0.726929 |
| Mmu.10543.1.S1_at       | Mmu.10543.1     | 11.96 | 11.53 | 0.12 | 0.05 | 1.35  | 0.008891 | 0.0141   | 0.144    | 0.15195  |
| Mmu.10543.1.S1_x_at     | Mmu.10543.1     | 12.06 | 11.8  | 0.11 | 0.07 | 1.2   | 0.019238 | 0.014358 | 0.192035 | 0.15294  |
| Mmu.10544.1.S1_at       | Mmu.10544.1     | 9.84  | 9.04  | 0.2  | 0.08 | 1.73  | 0.00522  | 0.006653 | 0.117353 | 0.110505 |
| Mmu.10545.1.S1_at       | Mmu.10545.1     | 9.79  | 10.09 | 0.1  | 0.13 | -1.23 | 0.147919 | 0.086402 | 0.436126 | 0.33887  |
| Mmu.10556.1.S1_at       | Mmu.10556.1     | 2.98  | 4.31  | 0.79 | 0.13 | -2.5  | 0.126588 | 0.235449 | 0.408002 | 0.506491 |
| Mmu.10556.1.S1_s_at     | Mmu.10556.1     | 7.21  | 10.39 | 1.07 | 0.32 | -9.09 | 0.011115 | 0.141559 | 0.155073 | 0.415063 |
| Mmu.10570.1.S1_at       | Mmu.10570.1     | 7.34  | 7.43  | 0.12 | 0    | -1.06 | 0.317696 | 0.084886 | 0.602424 | 0.336468 |
| Mmu.10576.1.S1_at       | Mmu.10576.1     | 11.16 | 11.23 | 0.26 | 0.05 | -1.05 | 0.288066 | 0.203144 | 0.577826 | 0.477415 |
| Mmu.10576.1.S1_s_at     | Mmu.10576.1     | 10.17 | 10.21 | 0.29 | 0.06 | -1.03 | 0.237493 | 0.292468 | 0.534988 | 0.552545 |
| Mmu.10581.1.S2_at       | Mmu.10581.1     | 5.31  | 4.89  | 0.35 | 0.34 | 1.34  | 0.212256 | 0.457209 | 0.510205 | 0.670746 |
| Mmu.10602.2.S1_at       | Mmu.10602.2     | 10.11 | 10    | 0.04 | 0.03 | 1.08  | 0.018735 | 0.344422 | 0.19025  | 0.589813 |
| MmugDNA.37553.1.S1_at   | MmugDNA.37553.1 | 12.36 | 12.27 | 0.05 | 0.01 | 1.07  | 0.086787 | 0.692194 | 0.351991 | 0.82091  |
| MmugDNA.37553.1.S1_s_at | MmugDNA.37553.1 | 9.89  | 9.57  | 0.09 | 0.07 | 1.25  | 0.010476 | 0.137051 | 0.152277 | 0.409836 |
| MmugDNA.37553.1.S1_x_at | MmugDNA.37553.1 | 11.65 | 11.49 | 0.09 | 0.03 | 1.12  | 0.04914  | 0.393153 | 0.27921  | 0.626102 |
| Mmu.10608.1.S1_s_at     | Mmu.10608.1     | 3.42  | 3.49  | 0.19 | 0.11 | -1.05 | 0.656523 | 0.8149   | 0.833833 | 0.893213 |
| Mmu.10608.1.S1_x_at     | Mmu.10608.1     | 3.15  | 3.37  | 0.1  | 0.12 | -1.16 | 0.119047 | 0.202506 | 0.396713 | 0.476819 |
| Mmu.10626.1.S1_at       | Mmu.10626.1     | 10.29 | 10.36 | 0.16 | 0.19 | -1.05 | 0.413758 | 0.72564  | 0.675081 | 0.84112  |
| Mmu.10627.1.S1_at       | Mmu.10627.1     | 10.22 | 11    | 0.2  | 0.3  | -1.72 | 0.034746 | 0.004077 | 0.241036 | 0.090418 |
| Mmu.1063.2.S1_at        | Mmu.1063.2      | 7.19  | 6.92  | 0.1  | 0.13 | 1.21  | 0.052463 | 0.050689 | 0.286213 | 0.270317 |
| Mmu.10646.1.S1_at       | Mmu.10646.1     | 7.54  | 7.56  | 0.12 | 0.15 | -1.02 | 0.642197 | 0.433355 | 0.825502 | 0.653656 |
| Mmu.10665.1.S1_at       | Mmu.10665.1     | 9.76  | 9.12  | 0.03 | 0.14 | 1.56  | 0.002741 | 0.026004 | 0.09702  | 0.202179 |
| Mmu.10677.1.S1_at       | Mmu.10677.1     | 3.66  | 4.11  | 1.03 | 0.21 | -1.37 | 0.791001 | 0.807122 | 0.905036 | 0.888946 |
| Mmu.10706.1.S1_at       | Mmu.10706.1     | 5.37  | 5.37  | 0.21 | 0.15 | -1    | 0.401399 | 0.408271 | 0.666016 | 0.635568 |
| Mmu.1071.1.S1_at        | Mmu.1071.1      | 10.27 | 9.47  | 0.2  | 0.14 | 1.74  | 0.006919 | 0.103672 | 0.130303 | 0.364465 |
| Mmu.4786.2.S1_at        | Mmu.4786.2      | 11.7  | 11.38 | 0.38 | 0.13 | 1.24  | 0.221687 | 0.458491 | 0.519652 | 0.671192 |
| Mmu.4786.2.S1_s_at      | Mmu.4786.2      | 12.92 | 12.61 | 0.24 | 0.08 | 1.24  | 0.121953 | 0.323976 | 0.400622 | 0.574672 |
| Mmu.10769.1.S1_at       | Mmu.10769.1     | 9.81  | 9.73  | 0.17 | 0.06 | 1.06  | 0.168602 | 0.621364 | 0.461894 | 0.775982 |
| Mmu.10771.1.S1_at       | Mmu.10771.1     | 10.31 | 9.61  | 0.17 | 0.15 | 1.62  | 0.005781 | 0.221624 | 0.121942 | 0.494901 |
| Mmu.10780.1.S1_at       | Mmu.10780.1     | 8.9   | 8.3   | 0.35 | 0.19 | 1.52  | 0.038492 | 0.408815 | 0.2521   | 0.6359   |
| MmugDNA.6439.1.S1_s_at  | MmugDNA.6439.1  | 5.44  | 4.67  | 0.05 | 0.27 | 1.7   | 0.007397 | 0.011322 | 0.134211 | 0.138076 |
| Mmu.10797.1.S1_at       | Mmu.10797.1     | 11.6  | 11.45 | 0.13 | 0.02 | 1.12  | 0.251013 | 0.02207  | 0.54571  | 0.185927 |
| Mmu.10798.1.S1_at       | Mmu.10798.1     | 3.39  | 3.38  | 0.12 | 0.12 | 1.01  | 0.861192 | 0.959197 | 0.939687 | 0.976862 |
| Mmu.10798.1.S1_s_at     | Mmu.10798.1     | 11.88 | 11.81 | 0.13 | 0.06 | 1.05  | 0.598839 | 0.019795 | 0.797662 | 0.176951 |
| Mmu.1081.1.S1_at        | Mmu.1081.1      | 7.87  | 8.19  | 0.58 | 0.12 | -1.24 | 0.963688 | 0.72906  | 0.98529  | 0.843401 |
| Mmu.10820.1.S1_at       | Mmu.10820.1     | 8.77  | 8.36  | 0.11 | 0.21 | 1.32  | 0.026642 | 0.157646 | 0.216412 | 0.433137 |
| Mmu.10820.1.S1_s_at     | Mmu.10820.1     | 12.08 | 11.76 | 0.14 | 0.19 | 1.25  | 0.034784 | 0.229869 | 0.241036 | 0.501802 |
| Mmu.10830.1.S1_at       | Mmu.10830.1     | 6.72  | 6.78  | 0.11 | 0.06 | -1.05 | 0.152536 | 0.00581  | 0.442239 | 0.104646 |
| Mmu.10843.1.S1_at       | Mmu.10843.1     | 9.24  | 8.32  | 0.4  | 0.19 | 1.88  | 0.020201 | 0.012706 | 0.195767 | 0.145332 |
| Mmu.10853.1.S1_at       | Mmu.10853.1     | 6.97  | 6.98  | 0.45 | 0.13 | -1.01 | 0.670275 | 0.853299 | 0.841785 | 0.916546 |
| Mmu.10858.1.S1_s_at     | Mmu.10858.1     | 12.2  | 12.25 | 0.19 | 0.32 | -1.04 | 0.919862 | 0.279323 | 0.96576  | 0.542962 |
| Mmu.10874.1.S1_at       | Mmu.10874.1     | 8.33  | 8.47  | 0.47 | 0.31 | -1.11 | 0.279671 | 0.202921 | 0.57097  | 0.477343 |
| Mmu.10885.1.S1_at       | Mmu.10885.1     | 12.54 | 12.39 | 0.11 | 0.01 | 1.11  | 0.027597 | 0.037796 | 0.21866  | 0.238765 |

|                     |             |       |       |      |      |       |          |          |          |          |
|---------------------|-------------|-------|-------|------|------|-------|----------|----------|----------|----------|
| Mmu.10886.1.S1_at   | Mmu.10886.1 | 8.47  | 8.55  | 0.08 | 0.22 | -1.05 | 0.744829 | 0.000641 | 0.881702 | 0.042928 |
| Mmu.10905.1.S1_at   | Mmu.10905.1 | 6.83  | 6.86  | 0.06 | 0.15 | -1.02 | 0.431604 | 0.592144 | 0.687582 | 0.757536 |
| Mmu.10913.1.S1_at   | Mmu.10913.1 | 6.63  | 6.38  | 0.47 | 0.21 | 1.19  | 0.440464 | 0.593184 | 0.694477 | 0.758097 |
| Mmu.10924.1.S1_a_at | Mmu.10924.1 | 4.34  | 4.26  | 0.1  | 0.09 | 1.05  | 0.368652 | 0.652475 | 0.642282 | 0.796793 |
| Mmu.10938.1.S1_at   | Mmu.10938.1 | 7.39  | 8.67  | 0.93 | 0.2  | -2.42 | 0.147897 | 0.333076 | 0.436085 | 0.581374 |
| Mmu.10939.1.S1_at   | Mmu.10939.1 | 11.06 | 10.78 | 0.18 | 0.04 | 1.21  | 0.03955  | 0.051937 | 0.255411 | 0.273337 |
| Mmu.10941.2.S1_at   | Mmu.10941.2 | 7.08  | 9.38  | 0.93 | 0.24 | -4.9  | 0.019909 | 0.191935 | 0.194406 | 0.467295 |
| Mmu.10947.1.A1_at   | Mmu.10947.1 | 9.49  | 9.59  | 0.35 | 0.22 | -1.07 | 0.300383 | 0.016629 | 0.588556 | 0.163189 |
| Mmu.10973.1.S1_at   | Mmu.10973.1 | 10.71 | 10.97 | 0.34 | 0.04 | -1.2  | 0.682479 | 0.875488 | 0.848621 | 0.929259 |
| Mmu.10979.1.S1_at   | Mmu.10979.1 | 6.68  | 6.48  | 0.07 | 0.26 | 1.15  | 0.14594  | 0.154071 | 0.433654 | 0.428867 |
| Mmu.1098.1.A1_at    | Mmu.1098.1  | 3.94  | 3.93  | 0.47 | 0.13 | 1     | 0.486601 | 0.580591 | 0.725773 | 0.749782 |
| Mmu.10988.1.S1_at   | Mmu.10988.1 | 4.14  | 4.04  | 0.22 | 0.07 | 1.07  | 0.159843 | 0.263179 | 0.451208 | 0.529492 |
| Mmu.10994.1.S1_at   | Mmu.10994.1 | 8.38  | 9.17  | 0.32 | 0.25 | -1.72 | 0.0532   | 0.000613 | 0.287986 | 0.042275 |
| Mmu.11000.1.S1_at   | Mmu.11000.1 | 10.36 | 10.41 | 0.52 | 0.09 | -1.04 | 0.834072 | 0.066023 | 0.926972 | 0.302361 |
| Mmu.6085.1.S1_x_at  | Mmu.6085.1  | 12.75 | 13.57 | 0.37 | 0.06 | -1.77 | 0.048186 | 0.109759 | 0.276908 | 0.373701 |
| Mmu.11032.1.A1_at   | Mmu.11032.1 | 6.77  | 5.87  | 0.36 | 0.33 | 1.87  | 0.071647 | 0.296611 | 0.325611 | 0.555606 |
| Mmu.11047.2.S1_s_at | Mmu.11047.2 | 6.09  | 7.05  | 0.16 | 0.15 | -1.94 | 0.001882 | 0.000168 | 0.087741 | 0.030511 |
| Mmu.11049.1.S1_s_at | Mmu.11049.1 | 14.25 | 14.23 | 0.07 | 0.01 | 1.02  | 0.944322 | 0.984843 | 0.976561 | 0.991445 |
| Mmu.11053.1.S1_s_at | Mmu.11053.1 | 10.18 | 10.9  | 0.45 | 0.29 | -1.65 | 0.087874 | 0.122255 | 0.353994 | 0.39196  |
| Mmu.11074.1.S1_at   | Mmu.11074.1 | 12.13 | 11.7  | 0.22 | 0.05 | 1.35  | 0.085179 | 0.078819 | 0.349307 | 0.325757 |
| Mmu.11077.2.S1_at   | Mmu.11077.2 | 12.2  | 12.57 | 0.18 | 0.04 | -1.29 | 0.027723 | 0.037211 | 0.21894  | 0.237285 |
| Mmu.11093.1.S1_at   | Mmu.11093.1 | 11.46 | 11.71 | 0.15 | 0.03 | -1.19 | 0.044082 | 0.091026 | 0.267012 | 0.345819 |
| Mmu.11097.1.S1_at   | Mmu.11097.1 | 10.54 | 10.28 | 0.09 | 0.12 | 1.2   | 0.038483 | 0.058607 | 0.2521   | 0.288819 |
| Mmu.11135.1.S1_at   | Mmu.11135.1 | 11.11 | 10.52 | 0.05 | 0.07 | 1.51  | 0.00023  | 0.015797 | 0.054608 | 0.15934  |
| Mmu.11137.1.S1_x_at | Mmu.11137.1 | 4.61  | 4.59  | 0.71 | 0.35 | 1.01  | 0.467762 | 0.62467  | 0.713184 | 0.778812 |
| Mmu.11137.2.S1_at   | Mmu.11137.2 | 3.5   | 3.51  | 0.17 | 0.12 | -1.01 | 0.603223 | 0.815776 | 0.800879 | 0.893766 |
| Mmu.11141.1.S1_at   | Mmu.11141.1 | 10.25 | 10.25 | 0.06 | 0.2  | -1    | 0.477049 | 0.036747 | 0.719234 | 0.236287 |
| Mmu.11151.1.S1_at   | Mmu.11151.1 | 11.85 | 11.37 | 0.22 | 0.14 | 1.39  | 0.030714 | 0.014044 | 0.228035 | 0.15177  |
| Mmu.11151.1.S1_s_at | Mmu.11151.1 | 12.09 | 11.8  | 0.15 | 0.1  | 1.22  | 0.025657 | 0.010589 | 0.212966 | 0.134213 |
| Mmu.11154.1.A1_at   | Mmu.11154.1 | 5.15  | 7.06  | 1.97 | 0.44 | -3.75 | 0.248289 | 0.450187 | 0.543691 | 0.665542 |
| Mmu.11154.2.S1_at   | Mmu.11154.2 | 6.04  | 6.09  | 0.9  | 0.23 | -1.03 | 0.996503 | 0.638262 | 0.99877  | 0.787493 |
| Mmu.11164.1.S1_at   | Mmu.11164.1 | 5.92  | 5.9   | 0.08 | 0.04 | 1.01  | 0.541941 | 0.541101 | 0.762538 | 0.72475  |
| Mmu.11165.2.S1_at   | Mmu.11165.2 | 4.74  | 4.86  | 0.12 | 0.17 | -1.09 | 0.191018 | 0.184655 | 0.487243 | 0.460645 |
| Mmu.11167.1.A1_at   | Mmu.11167.1 | 6.88  | 7.2   | 0.18 | 0.04 | -1.24 | 0.047053 | 0.013625 | 0.274584 | 0.149406 |
| Mmu.1117.1.S1_at    | Mmu.1117.1  | 5.26  | 4.48  | 0.37 | 0.08 | 1.72  | 0.023205 | 0.009645 | 0.205385 | 0.129267 |
| Mmu.11179.1.S1_at   | Mmu.11179.1 | 8.36  | 8.06  | 0.14 | 0.23 | 1.23  | 0.091994 | 0.085502 | 0.360023 | 0.337495 |
| Mmu.11185.2.S1_at   | Mmu.11185.2 | 5.06  | 4.99  | 0.44 | 0.03 | 1.05  | 0.517598 | 0.574235 | 0.746802 | 0.745688 |
| Mmu.11188.1.S1_at   | Mmu.11188.1 | 11.52 | 11.81 | 0.03 | 0.07 | -1.23 | 0.003429 | 0.016487 | 0.103309 | 0.162562 |
| Mmu.11192.1.S1_at   | Mmu.11192.1 | 6.63  | 6.86  | 0.15 | 0.22 | -1.17 | 0.265198 | 0.11344  | 0.557962 | 0.379509 |
| Mmu.11195.1.S1_at   | Mmu.11195.1 | 11.61 | 10.01 | 0.12 | 0.14 | 3.03  | 0.000122 | 0.05157  | 0.051196 | 0.272544 |
| Mmu.11197.1.S1_at   | Mmu.11197.1 | 3.56  | 3.65  | 0.17 | 0.13 | -1.07 | 0.647286 | 0.933344 | 0.828637 | 0.962162 |
| Mmu.11201.1.S1_at   | Mmu.11201.1 | 4.36  | 4.53  | 0.62 | 0.29 | -1.12 | 0.647961 | 0.775993 | 0.829095 | 0.869682 |
| Mmu.11204.1.S1_s_at | Mmu.11204.1 | 13.34 | 12.52 | 0.05 | 0.28 | 1.76  | 0.006802 | 0.008453 | 0.129204 | 0.121922 |

|                        |                |       |       |      |      |       |          |          |          |          |
|------------------------|----------------|-------|-------|------|------|-------|----------|----------|----------|----------|
| Mmu.11208.1.S1_at      | Mmu.11208.1    | 6.99  | 7.72  | 0.82 | 0.19 | -1.65 | 0.266802 | 0.177981 | 0.559325 | 0.454339 |
| Mmu.11220.1.S1_at      | Mmu.11220.1    | 10.1  | 9.95  | 0.18 | 0.12 | 1.11  | 0.140369 | 0.073188 | 0.426075 | 0.316064 |
| Mmu.11224.1.S1_at      | Mmu.11224.1    | 7.92  | 8.13  | 0.24 | 0.13 | -1.16 | 0.429236 | 0.004823 | 0.685711 | 0.096904 |
| Mmu.11229.1.S1_at      | Mmu.11229.1    | 11.08 | 11.1  | 0.06 | 0.06 | -1.01 | 0.867047 | 0.04075  | 0.942519 | 0.246735 |
| Mmu.11231.1.A1_at      | Mmu.11231.1    | 7.39  | 7.37  | 0.21 | 0.03 | 1.01  | 0.760257 | 0.877671 | 0.890146 | 0.930219 |
| Mmu.11231.1.S1_at      | Mmu.11231.1    | 8.25  | 8.28  | 0.14 | 0.07 | -1.03 | 0.829905 | 0.958854 | 0.92516  | 0.976695 |
| Mmu.11243.2.S1_at      | Mmu.11243.2    | 10.12 | 9.61  | 0.06 | 0.04 | 1.42  | 0.000185 | 0.254129 | 0.053494 | 0.522439 |
| Mmu.11250.2.S1_at      | Mmu.11250.2    | 6.42  | 6.45  | 0.15 | 0.08 | -1.02 | 0.368562 | 0.077352 | 0.642232 | 0.323153 |
| Mmu.11268.1.S1_at      | Mmu.11268.1    | 9.63  | 9.81  | 0.51 | 0.23 | -1.14 | 0.403929 | 0.311281 | 0.667867 | 0.566351 |
| Mmu.11289.1.S1_at      | Mmu.11289.1    | 5.13  | 5.94  | 0.66 | 0.45 | -1.75 | 0.401212 | 0.402731 | 0.665958 | 0.631543 |
| Mmu.11306.1.S1_at      | Mmu.11306.1    | 7.3   | 7.92  | 0.48 | 0.24 | -1.54 | 0.204498 | 0.295479 | 0.502244 | 0.554921 |
| Mmu.11314.1.S1_x_at    | Mmu.11314.1    | 14.05 | 14.18 | 0.89 | 0.07 | -1.09 | 0.432127 | 0.563931 | 0.687947 | 0.738913 |
| MmunewRS.816.1.S1_s_at | MmunewRS.816.1 | 4.86  | 7.88  | 1.28 | 0.18 | -8.15 | 0.036104 | 0.11331  | 0.244978 | 0.379388 |
| Mmu.11342.1.S1_at      | Mmu.11342.1    | 7.29  | 6.91  | 0.23 | 0.21 | 1.3   | 0.037136 | 0.142036 | 0.247978 | 0.415633 |
| Mmu.11343.1.S1_at      | Mmu.11343.1    | 10.39 | 10.08 | 0.07 | 0.17 | 1.24  | 0.017478 | 0.007288 | 0.185974 | 0.114596 |
| Mmu.11358.1.S1_at      | Mmu.11358.1    | 4.04  | 4.17  | 0.11 | 0.16 | -1.09 | 0.128286 | 0.196189 | 0.410227 | 0.471236 |
| Mmu.11363.1.S1_at      | Mmu.11363.1    | 5.16  | 6.16  | 1.28 | 0.5  | -2    | 0.408793 | 0.410077 | 0.671414 | 0.637065 |
| Mmu.11366.1.S1_at      | Mmu.11366.1    | 3.4   | 3.7   | 0.08 | 0.11 | -1.23 | 0.007951 | 0.042982 | 0.138304 | 0.251882 |
| Mmu.11367.1.S1_at      | Mmu.11367.1    | 11.36 | 10.96 | 0.22 | 0.07 | 1.33  | 0.036097 | 0.183082 | 0.244978 | 0.459493 |
| Mmu.11369.1.S1_at      | Mmu.11369.1    | 10.64 | 10.2  | 0.12 | 0.23 | 1.36  | 0.027756 | 0.069133 | 0.219092 | 0.30917  |
| Mmu.1137.1.S1_at       | Mmu.1137.1     | 3.6   | 3.73  | 0.27 | 0.1  | -1.09 | 0.859883 | 0.650122 | 0.939228 | 0.795406 |
| Mmu.1137.1.S1_s_at     | Mmu.1137.1     | 4.88  | 5.85  | 0.5  | 0.18 | -1.96 | 0.087151 | 0.468587 | 0.352835 | 0.677755 |
| Mmu.11373.1.S1_at      | Mmu.11373.1    | 9.76  | 9.79  | 0.29 | 0.24 | -1.02 | 0.811788 | 0.054806 | 0.915719 | 0.279635 |
| Mmu.1138.1.S1_at       | Mmu.1138.1     | 3.36  | 3.36  | 0.28 | 0.09 | 1     | 0.970438 | 0.939876 | 0.98833  | 0.96581  |
| Mmu.11384.1.S1_at      | Mmu.11384.1    | 10.64 | 10.55 | 0.08 | 0.2  | 1.06  | 0.183203 | 0.146856 | 0.479198 | 0.42088  |
| Mmu.3044.12.S1_s_at    | Mmu.3044.12    | 12.87 | 14.27 | 0.84 | 0.06 | -2.64 | 0.120539 | 0.091507 | 0.398904 | 0.346552 |
| Mmu.11403.1.S1_at      | Mmu.11403.1    | 8.13  | 8.59  | 0.44 | 0.15 | -1.38 | 0.061356 | 0.02     | 0.304438 | 0.177634 |
| Mmu.11403.1.S1_x_at    | Mmu.11403.1    | 8.54  | 9.03  | 0.42 | 0.13 | -1.41 | 0.060871 | 0.01077  | 0.303716 | 0.135471 |
| Mmu.11412.1.S1_at      | Mmu.11412.1    | 10.07 | 9.7   | 0.07 | 0.1  | 1.29  | 0.008134 | 0.017409 | 0.138956 | 0.166995 |
| Mmu.11413.1.S1_at      | Mmu.11413.1    | 7.12  | 7.24  | 0.15 | 0.1  | -1.09 | 0.302746 | 0.227421 | 0.5904   | 0.499693 |
| Mmu.11414.1.S1_a_at    | Mmu.11414.1    | 4.54  | 4.67  | 0.1  | 0.2  | -1.1  | 0.125048 | 0.613858 | 0.405516 | 0.770884 |
| Mmu.11416.1.A1_at      | Mmu.11416.1    | 3.4   | 3.36  | 0.11 | 0.32 | 1.03  | 0.358617 | 0.439778 | 0.634396 | 0.658439 |
| Mmu.11416.1.S1_at      | Mmu.11416.1    | 4.01  | 4.08  | 0.18 | 0.3  | -1.05 | 0.865203 | 0.223097 | 0.94146  | 0.49588  |
| Mmu.11417.1.S1_at      | Mmu.11417.1    | 6.49  | 6.52  | 0.21 | 0    | -1.02 | 0.278959 | 0.250521 | 0.570291 | 0.519391 |
| Mmu.11419.1.S1_at      | Mmu.11419.1    | 5.82  | 5.69  | 0.13 | 0.2  | 1.1   | 0.346883 | 0.054498 | 0.625079 | 0.278959 |
| Mmu.11420.1.S1_at      | Mmu.11420.1    | 5     | 5.01  | 0.14 | 0.21 | -1.01 | 0.985467 | 0.189792 | 0.99479  | 0.465403 |
| Mmu.11421.1.S1_a_at    | Mmu.11421.1    | 4.49  | 4.55  | 0.07 | 0.08 | -1.04 | 0.452603 | 0.289632 | 0.703007 | 0.5507   |
| Mmu.11423.1.S1_a_at    | Mmu.11423.1    | 4.57  | 4.75  | 0.17 | 0.16 | -1.14 | 0.491542 | 0.620057 | 0.729291 | 0.775218 |
| Mmu.11429.1.A1_at      | Mmu.11429.1    | 4.27  | 5.57  | 0.87 | 0.09 | -2.46 | 0.189901 | 0.14557  | 0.486238 | 0.419456 |
| Mmu.11473.1.S1_at      | Mmu.11473.1    | 2.86  | 2.8   | 0.1  | 0.06 | 1.05  | 0.885919 | 0.241321 | 0.951314 | 0.511952 |
| Mmu.11473.1.S1_s_at    | Mmu.11473.1    | 11.79 | 12.27 | 0.06 | 0.13 | -1.39 | 0.010626 | 0.032858 | 0.152818 | 0.224478 |
| Mmu.11492.1.S1_x_at    | Mmu.11492.1    | 8     | 7.9   | 0.46 | 0.14 | 1.07  | 0.264326 | 0.218124 | 0.557597 | 0.491711 |
| Mmu.11516.1.S1_at      | Mmu.11516.1    | 12.14 | 12.13 | 0.16 | 0.08 | 1.01  | 0.568435 | 0.802766 | 0.77836  | 0.886441 |

|                         |                 |       |       |      |      |       |          |          |          |          |
|-------------------------|-----------------|-------|-------|------|------|-------|----------|----------|----------|----------|
| Mmu.11526.1.S1_at       | Mmu.11526.1     | 5.66  | 5.74  | 0.58 | 0.12 | -1.05 | 0.621343 | 0.668038 | 0.812589 | 0.805709 |
| Mmu.11557.1.S1_at       | Mmu.11557.1     | 8.63  | 8.59  | 0.32 | 0.03 | 1.03  | 0.262867 | 0.193623 | 0.556683 | 0.468785 |
| Mmu.11562.1.S1_at       | Mmu.11562.1     | 7.77  | 7.53  | 0.23 | 0.21 | 1.18  | 0.424494 | 0.04017  | 0.682218 | 0.245709 |
| Mmu.11565.1.S1_at       | Mmu.11565.1     | 9.94  | 9.82  | 0.15 | 0.2  | 1.08  | 0.590034 | 0.011938 | 0.791771 | 0.141357 |
| Mmu.11584.1.S1_at       | Mmu.11584.1     | 10.96 | 11.05 | 0.32 | 0.1  | -1.07 | 0.869182 | 0.746068 | 0.943687 | 0.852688 |
| Mmu.116.1.S1_s_at       | Mmu.116.1       | 12.46 | 12.58 | 0.28 | 0.12 | -1.09 | 0.2486   | 0.171651 | 0.544012 | 0.448044 |
| Mmu.11607.1.S1_at       | Mmu.11607.1     | 9.44  | 9.07  | 0.11 | 0.16 | 1.3   | 0.014461 | 0.120016 | 0.171923 | 0.388672 |
| Mmu.1161.1.S1_at        | Mmu.1161.1      | 5.83  | 6.74  | 0.63 | 0.29 | -1.88 | 0.054148 | 0.355174 | 0.289903 | 0.597552 |
| Mmu.1162.1.S1_at        | Mmu.1162.1      | 10.58 | 10.3  | 0.14 | 0.02 | 1.22  | 0.009989 | 0.545074 | 0.149294 | 0.727313 |
| Mmu.11635.1.S1_at       | Mmu.11635.1     | 9.03  | 8.83  | 0.13 | 0.15 | 1.15  | 0.069511 | 0.117574 | 0.322002 | 0.38531  |
| Mmu.11636.1.S1_at       | Mmu.11636.1     | 6.13  | 6.1   | 0.05 | 0.1  | 1.02  | 0.463408 | 0.772928 | 0.710048 | 0.867957 |
| Mmu.11638.2.S1_at       | Mmu.11638.2     | 9.5   | 9.82  | 0.78 | 0.18 | -1.25 | 0.212563 | 0.058825 | 0.510654 | 0.289228 |
| Mmu.11640.1.S1_at       | Mmu.11640.1     | 12.86 | 12.87 | 0.11 | 0.03 | -1.01 | 0.83334  | 0.523787 | 0.926598 | 0.714028 |
| Mmu.11645.2.S1_at       | Mmu.11645.2     | 3.71  | 3.7   | 0.16 | 0.02 | 1.01  | 0.909296 | 0.138931 | 0.961553 | 0.412037 |
| Mmu.11646.1.S1_at       | Mmu.11646.1     | 4.99  | 4.9   | 0.1  | 0.02 | 1.06  | 0.177092 | 0.390147 | 0.471728 | 0.624002 |
| Mmu.11647.1.A1_at       | Mmu.11647.1     | 9.52  | 8.06  | 0.34 | 0.42 | 2.76  | 0.008759 | 0.006132 | 0.14333  | 0.106665 |
| Mmu.11662.1.S1_at       | Mmu.11662.1     | 10.9  | 10.61 | 0.14 | 0.35 | 1.22  | 0.063761 | 0.019939 | 0.308957 | 0.177457 |
| Mmu.11663.1.S1_at       | Mmu.11663.1     | 9.55  | 9.89  | 0.09 | 0.17 | -1.27 | 0.038208 | 0.14755  | 0.251526 | 0.421872 |
| Mmu.11667.1.S1_at       | Mmu.11667.1     | 11.95 | 12.04 | 0.13 | 0.06 | -1.06 | 0.23446  | 0.379275 | 0.532579 | 0.616251 |
| Mmu.11667.1.S1_x_at     | Mmu.11667.1     | 11.92 | 11.96 | 0.15 | 0.04 | -1.03 | 0.8869   | 0.411952 | 0.951794 | 0.638434 |
| Mmu.11668.1.S1_at       | Mmu.11668.1     | 4.52  | 5.69  | 0.91 | 0.47 | -2.25 | 0.522713 | 0.04391  | 0.749925 | 0.254098 |
| Mmu.1167.1.S1_at        | Mmu.1167.1      | 5.3   | 5.61  | 0.01 | 0.24 | -1.24 | 0.096199 | 0.174393 | 0.365761 | 0.450842 |
| Mmu.11672.1.S1_at       | Mmu.11672.1     | 11.98 | 12.13 | 0.13 | 0.03 | -1.11 | 0.038932 | 0.073038 | 0.253692 | 0.316017 |
| Mmu.11693.1.S1_at       | Mmu.11693.1     | 8.29  | 7.95  | 0.59 | 0.15 | 1.26  | 0.666541 | 0.326951 | 0.839889 | 0.576911 |
| Mmu.11695.1.S1_at       | Mmu.11695.1     | 7.85  | 7.6   | 0.64 | 0.47 | 1.19  | 0.167792 | 0.233946 | 0.461083 | 0.505211 |
| Mmu.11700.1.S1_at       | Mmu.11700.1     | 5.54  | 5.74  | 0.2  | 0.09 | -1.15 | 0.475882 | 0.197398 | 0.718459 | 0.472311 |
| Mmu.11707.1.S1_at       | Mmu.11707.1     | 9.1   | 8.16  | 0.19 | 0.2  | 1.92  | 0.003115 | 0.058372 | 0.100877 | 0.288369 |
| Mmu.11727.1.S1_at       | Mmu.11727.1     | 6.88  | 8.21  | 0.44 | 0.28 | -2.51 | 0.036468 | 0.006675 | 0.246058 | 0.110612 |
| Mmu.11729.1.S1_s_at     | Mmu.11729.1     | 12.82 | 12.79 | 0.19 | 0.05 | 1.02  | 0.303141 | 0.471657 | 0.590608 | 0.679552 |
| MmugDNA.28319.1.S1_s_at | MmugDNA.28319.1 | 14.41 | 14.41 | 0.06 | 0.01 | 1     | 0.991527 | 0.785224 | 0.996906 | 0.875672 |
| Mmu.11739.1.S1_at       | Mmu.11739.1     | 11.71 | 10.97 | 0.43 | 0.24 | 1.67  | 0.029922 | 0.028171 | 0.226288 | 0.209433 |
| Mmu.11741.1.S1_at       | Mmu.11741.1     | 8.39  | 8.53  | 0.37 | 0.09 | -1.1  | 0.251189 | 0.378657 | 0.545994 | 0.615681 |
| Mmu.11741.2.S1_a_at     | Mmu.11741.2     | 3.36  | 3.4   | 0.25 | 0.1  | -1.03 | 0.774144 | 0.914135 | 0.896596 | 0.951725 |
| Mmu.11745.1.A1_at       | Mmu.11745.1     | 8.56  | 8.6   | 0.04 | 0.17 | -1.03 | 0.767559 | 0.353819 | 0.893334 | 0.596829 |
| Mmu.11775.1.S1_at       | Mmu.11775.1     | 11.33 | 11.44 | 0.09 | 0.1  | -1.08 | 0.12261  | 0.227792 | 0.401398 | 0.500072 |
| Mmu.11792.1.S1_at       | Mmu.11792.1     | 9.18  | 9.88  | 0.12 | 0.27 | -1.63 | 0.046779 | 0.089372 | 0.273922 | 0.343635 |
| Mmu.11804.2.S1_at       | Mmu.11804.2     | 12.73 | 12.63 | 0.06 | 0.07 | 1.08  | 0.056856 | 0.230523 | 0.295838 | 0.502251 |
| Mmu.1181.1.S1_at        | Mmu.1181.1      | 5.35  | 5.38  | 0.13 | 0.04 | -1.02 | 0.231244 | 0.34059  | 0.530005 | 0.586789 |
| Mmu.11815.1.S1_s_at     | Mmu.11815.1     | 10.41 | 10.1  | 0.28 | 0.03 | 1.24  | 0.096579 | 0.130328 | 0.366453 | 0.402172 |
| Mmu.11819.2.S1_at       | Mmu.11819.2     | 9.91  | 10.47 | 0.79 | 0.16 | -1.47 | 0.29036  | 0.390882 | 0.579851 | 0.624592 |
| Mmu.11820.13.S1_a_at    | Mmu.11820.13    | 13.66 | 12.88 | 0.18 | 0.08 | 1.72  | 0.004059 | 0.222239 | 0.108999 | 0.495265 |
| Mmu.11826.1.S1_at       | Mmu.11826.1     | 12.68 | 12.68 | 0.25 | 0.17 | 1     | 0.373417 | 0.515063 | 0.645118 | 0.70805  |
| Mmu.11827.1.A1_at       | Mmu.11827.1     | 4.52  | 4.64  | 0.07 | 0.13 | -1.09 | 0.921707 | 0.193607 | 0.96646  | 0.468785 |

|                         |                 |       |       |      |      |       |          |          |          |          |
|-------------------------|-----------------|-------|-------|------|------|-------|----------|----------|----------|----------|
| Mmu.11827.1.S1_at       | Mmu.11827.1     | 3.95  | 3.72  | 0.1  | 0.11 | 1.17  | 0.063743 | 0.047072 | 0.308957 | 0.261469 |
| Mmu.11828.1.S1_at       | Mmu.11828.1     | 4.05  | 4.03  | 0.15 | 0.11 | 1.01  | 0.501406 | 0.514694 | 0.735287 | 0.707841 |
| Mmu.1183.2.S1_at        | Mmu.1183.2      | 9.7   | 11.77 | 1.23 | 0.11 | -4.22 | 0.061252 | 0.282828 | 0.304305 | 0.545524 |
| Mmu.1183.4.A1_at        | Mmu.1183.4      | 3.26  | 3.33  | 0.23 | 0.21 | -1.05 | 0.147473 | 0.156859 | 0.435407 | 0.432372 |
| Mmu.1183.4.S1_at        | Mmu.1183.4      | 3.19  | 3.29  | 0.17 | 0.05 | -1.07 | 0.118165 | 0.210829 | 0.39564  | 0.484902 |
| Mmu.11837.1.S1_at       | Mmu.11837.1     | 8.28  | 8.09  | 0.17 | 0.12 | 1.14  | 0.093248 | 0.106009 | 0.361736 | 0.36838  |
| Mmu.11839.1.S1_at       | Mmu.11839.1     | 8.91  | 8.86  | 0.11 | 0.1  | 1.03  | 0.502206 | 0.131825 | 0.735922 | 0.403891 |
| Mmu.1184.1.S1_at        | Mmu.1184.1      | 8.96  | 8.96  | 0.04 | 0.12 | -1    | 0.795979 | 0.008228 | 0.907823 | 0.120459 |
| Mmu.11841.1.S1_s_at     | Mmu.11841.1     | 10.87 | 10.96 | 0.16 | 0.16 | -1.07 | 0.245198 | 0.323249 | 0.541279 | 0.574408 |
| Mmu.11859.1.S1_at       | Mmu.11859.1     | 6.79  | 7.82  | 0.67 | 0.37 | -2.04 | 0.053443 | 0.603516 | 0.288494 | 0.764189 |
| Mmu.11863.1.S1_at       | Mmu.11863.1     | 9.49  | 9.43  | 0.06 | 0.07 | 1.04  | 0.630786 | 0.016375 | 0.818647 | 0.16199  |
| Mmu.11884.1.S1_at       | Mmu.11884.1     | 3.78  | 3.92  | 0.11 | 0.11 | -1.1  | 0.280639 | 0.323754 | 0.571731 | 0.574607 |
| Mmu.11885.2.S1_at       | Mmu.11885.2     | 8.74  | 8.62  | 0.18 | 0.25 | 1.09  | 0.729803 | 0.068808 | 0.873803 | 0.308711 |
| Mmu.1189.5.S1_x_at      | Mmu.1189.5      | 11.21 | 11    | 0.63 | 0.05 | 1.15  | 0.665867 | 0.360411 | 0.839439 | 0.601462 |
| Mmu.11893.1.S1_at       | Mmu.11893.1     | 3.6   | 3.61  | 0.02 | 0.1  | -1.01 | 0.899187 | 0.864604 | 0.957065 | 0.923249 |
| Mmu.11899.1.S1_at       | Mmu.11899.1     | 4.94  | 8.34  | 1.51 | 0.39 | -10.6 | 0.027615 | 0.221686 | 0.21866  | 0.494901 |
| Mmu.11912.1.S1_at       | Mmu.11912.1     | 6.07  | 7.73  | 1.19 | 0.08 | -3.14 | 0.108282 | 0.25244  | 0.382964 | 0.521061 |
| Mmu.11914.1.S1_at       | Mmu.11914.1     | 6.11  | 6.19  | 0.08 | 0.06 | -1.05 | 0.30332  | 0.0555   | 0.590738 | 0.281404 |
| MmugDNA.27313.1.S1_at   | MmugDNA.27313.1 | 6.32  | 6.17  | 0.09 | 0.06 | 1.1   | 0.068627 | 0.104554 | 0.319786 | 0.365805 |
| MmugDNA.27313.1.S1_s_at | MmugDNA.27313.1 | 7.07  | 7.06  | 0.12 | 0.08 | 1.01  | 0.560475 | 0.40663  | 0.773879 | 0.634468 |
| Mmu.11943.1.S1_at       | Mmu.11943.1     | 7.91  | 7.83  | 0.19 | 0.3  | 1.05  | 0.844086 | 0.007747 | 0.931715 | 0.117619 |
| Mmu.11959.1.A1_at       | Mmu.11959.1     | 3.74  | 3.73  | 0.13 | 0.07 | 1     | 0.379224 | 0.353324 | 0.649212 | 0.596477 |
| Mmu.11960.1.S1_at       | Mmu.11960.1     | 7.64  | 8.55  | 0.31 | 0.31 | -1.88 | 0.038981 | 0.018968 | 0.253751 | 0.173308 |
| Mmu.11960.1.S1_x_at     | Mmu.11960.1     | 7.55  | 8.53  | 0.3  | 0.31 | -1.97 | 0.030646 | 0.012865 | 0.227993 | 0.146025 |
| Mmu.11961.1.S1_at       | Mmu.11961.1     | 5.4   | 5.84  | 0.49 | 0.39 | -1.36 | 0.180712 | 0.02346  | 0.475859 | 0.191956 |
| Mmu.11961.1.S1_x_at     | Mmu.11961.1     | 6.8   | 7.3   | 0.42 | 0.36 | -1.41 | 0.160264 | 0.023741 | 0.451617 | 0.192893 |
| Mmu.11962.1.S1_at       | Mmu.11962.1     | 10.43 | 10.5  | 0.19 | 0.21 | -1.05 | 0.629961 | 0.845179 | 0.818285 | 0.9119   |
| Mmu.1198.1.S1_at        | Mmu.1198.1      | 7.49  | 7.38  | 0.17 | 0.25 | 1.08  | 0.536882 | 0.324669 | 0.759199 | 0.575208 |
| Mmu.11980.1.S1_at       | Mmu.11980.1     | 7.53  | 8.46  | 0.24 | 0.27 | -1.91 | 0.011341 | 0.001808 | 0.156666 | 0.063723 |
| Mmu.11986.2.S1_at       | Mmu.11986.2     | 6.85  | 7.47  | 0.63 | 0.15 | -1.54 | 0.256848 | 0.518333 | 0.551407 | 0.71038  |
| Mmu.11987.1.S1_at       | Mmu.11987.1     | 4.7   | 4.61  | 0.03 | 0.18 | 1.06  | 0.189892 | 0.313235 | 0.486238 | 0.567753 |
| Mmu.11995.1.S1_at       | Mmu.11995.1     | 4.92  | 4.91  | 0.21 | 0.07 | 1.01  | 0.752393 | 0.986243 | 0.885576 | 0.992174 |
| Mmu.11997.1.S1_at       | Mmu.11997.1     | 12    | 12.26 | 0.19 | 0.09 | -1.2  | 0.164552 | 0.529663 | 0.457688 | 0.717463 |
| Mmu.12.1.S1_at          | Mmu.12.1        | 9.99  | 9.99  | 0.13 | 0.06 | 1     | 0.9071   | 0.006803 | 0.960691 | 0.111444 |
| Mmu.12003.1.S1_s_at     | Mmu.12003.1     | 14.53 | 14.54 | 0.04 | 0.03 | -1.01 | 0.520299 | 0.019311 | 0.74869  | 0.174723 |
| Mmu.12005.1.S1_at       | Mmu.12005.1     | 3.15  | 3.18  | 0.1  | 0.06 | -1.02 | 0.352264 | 0.225971 | 0.629838 | 0.498391 |
| Mmu.12007.1.S1_s_at     | Mmu.12007.1     | 7.64  | 7.51  | 0.16 | 0.23 | 1.09  | 0.840133 | 0.357154 | 0.929875 | 0.598825 |
| Mmu.12009.1.S1_at       | Mmu.12009.1     | 4.39  | 4.4   | 0.13 | 0.09 | -1.01 | 0.210352 | 0.392357 | 0.507935 | 0.625756 |
| Mmu.12027.2.S1_at       | Mmu.12027.2     | 5.55  | 5.55  | 0.07 | 0    | 1     | 0.373901 | 0.504258 | 0.645118 | 0.701474 |
| Mmu.12027.3.S1_at       | Mmu.12027.3     | 12    | 11.63 | 0.11 | 0.13 | 1.3   | 0.020189 | 0.039597 | 0.195721 | 0.244002 |
| Mmu.12045.1.S1_at       | Mmu.12045.1     | 9.79  | 9.09  | 0.16 | 0.13 | 1.62  | 0.00513  | 0.01034  | 0.116951 | 0.133123 |
| Mmu.12046.1.S1_at       | Mmu.12046.1     | 4.99  | 5.32  | 0.12 | 0.09 | -1.26 | 0.032381 | 0.178487 | 0.234176 | 0.454778 |
| Mmu.12059.1.S1_at       | Mmu.12059.1     | 11.62 | 11.66 | 0.1  | 0.1  | -1.02 | 0.281802 | 0.055935 | 0.572644 | 0.282317 |

|                         |                 |       |       |      |      |        |          |          |          |          |
|-------------------------|-----------------|-------|-------|------|------|--------|----------|----------|----------|----------|
| MmugDNA.29332.1.S1_at   | MmugDNA.29332.1 | 7.35  | 7.22  | 0.2  | 0.02 | 1.09   | 0.497843 | 0.895302 | 0.73333  | 0.940185 |
| MmugDNA.29332.1.S1_s_at | MmugDNA.29332.1 | 10.28 | 10.17 | 0.21 | 0.02 | 1.08   | 0.904242 | 0.994256 | 0.959379 | 0.996461 |
| MmugDNA.30012.1.S1_s_at | MmugDNA.30012.1 | 9.9   | 10.3  | 0.1  | 0.27 | -1.32  | 0.335519 | 0.150746 | 0.616435 | 0.4253   |
| Mmu.12077.1.S1_at       | Mmu.12077.1     | 8.6   | 8.65  | 0.15 | 0.07 | -1.03  | 0.788902 | 0.295976 | 0.904019 | 0.555264 |
| Mmu.12078.1.S1_at       | Mmu.12078.1     | 10.19 | 9.59  | 0.23 | 0.15 | 1.51   | 0.016535 | 0.007711 | 0.181539 | 0.117372 |
| Mmu.12079.1.A1_at       | Mmu.12079.1     | 6.89  | 6.9   | 0.09 | 0.06 | -1.01  | 0.590237 | 0.704089 | 0.791777 | 0.828326 |
| Mmu.12087.1.S1_x_at     | Mmu.12087.1     | 6.14  | 6.13  | 0.18 | 0.03 | 1.01   | 0.761685 | 0.94507  | 0.890644 | 0.968834 |
| Mmu.12088.1.S1_at       | Mmu.12088.1     | 4.27  | 4.59  | 0.66 | 0.27 | -1.24  | 0.921774 | 0.752739 | 0.966512 | 0.855968 |
| Mmu.12088.1.S1_x_at     | Mmu.12088.1     | 5.02  | 5     | 0.24 | 0.19 | 1.01   | 0.40628  | 0.581982 | 0.669617 | 0.750784 |
| Mmu.12088.2.A1_s_at     | Mmu.12088.2     | 3.93  | 3.92  | 1.12 | 0.25 | 1.01   | 0.477909 | 0.564413 | 0.719648 | 0.739252 |
| Mmu.12088.2.S1_s_at     | Mmu.12088.2     | 3.83  | 3.97  | 0.52 | 0.16 | -1.11  | 0.862744 | 0.903189 | 0.940274 | 0.944982 |
| Mmu.12088.3.A1_at       | Mmu.12088.3     | 3.25  | 3.59  | 0.21 | 0.05 | -1.26  | 0.13306  | 0.15782  | 0.416546 | 0.433475 |
| Mmu.12088.3.A1_x_at     | Mmu.12088.3     | 3.72  | 3.82  | 0.23 | 0.01 | -1.07  | 0.45837  | 0.284793 | 0.706979 | 0.546966 |
| Mmu.12088.3.S1_at       | Mmu.12088.3     | 3.47  | 3.36  | 0.1  | 0.05 | 1.08   | 0.098571 | 0.229392 | 0.369311 | 0.501527 |
| Mmu.12088.3.S1_x_at     | Mmu.12088.3     | 4.2   | 4.12  | 0.08 | 0.09 | 1.05   | 0.141713 | 0.117599 | 0.427634 | 0.38531  |
| Mmu.12088.4.A1_at       | Mmu.12088.4     | 3.58  | 3.73  | 0.07 | 0.07 | -1.11  | 0.146711 | 0.371764 | 0.434723 | 0.610541 |
| Mmu.12088.4.A1_x_at     | Mmu.12088.4     | 4.22  | 4.18  | 0.16 | 0.12 | 1.03   | 0.330627 | 0.457243 | 0.612597 | 0.670746 |
| Mmu.12088.4.S1_at       | Mmu.12088.4     | 3.7   | 3.7   | 0.19 | 0.09 | 1      | 0.934857 | 0.453209 | 0.972743 | 0.66762  |
| Mmu.12088.4.S1_x_at     | Mmu.12088.4     | 3.48  | 3.21  | 0.15 | 0.05 | 1.21   | 0.042967 | 0.02427  | 0.264494 | 0.194957 |
| Mmu.12089.1.S1_at       | Mmu.12089.1     | 2.74  | 2.73  | 0.06 | 0.01 | 1      | 0.570323 | 0.423389 | 0.779298 | 0.646277 |
| Mmu.12089.1.S1_x_at     | Mmu.12089.1     | 3.16  | 3.15  | 0.16 | 0.02 | 1      | 0.738561 | 0.640061 | 0.878825 | 0.788682 |
| Mmu.1209.5.S1_x_at      | Mmu.1209.5      | 3.34  | 3.45  | 0.17 | 0.06 | -1.08  | 0.329797 | 0.177592 | 0.611916 | 0.453962 |
| Mmu.12090.1.S1_at       | Mmu.12090.1     | 8.91  | 9.46  | 0.18 | 0.19 | -1.46  | 0.012184 | 0.200381 | 0.160718 | 0.47478  |
| Mmu.12096.1.S1_at       | Mmu.12096.1     | 4.63  | 8.84  | 2.3  | 0.23 | -18.52 | 0.09677  | 0.437824 | 0.366759 | 0.656977 |
| Mmu.12098.1.S1_x_at     | Mmu.12098.1     | 14.62 | 14.63 | 0.01 | 0.02 | -1.01  | 0.959454 | 0.807706 | 0.98349  | 0.889292 |
| Mmu.12098.2.S1_x_at     | Mmu.12098.2     | 14.47 | 14.45 | 0.01 | 0.03 | 1.01   | 0.499849 | 0.878146 | 0.734381 | 0.930474 |
| Mmu.12104.1.A1_at       | Mmu.12104.1     | 4.85  | 4.59  | 0.52 | 0.2  | 1.2    | 0.335985 | 0.42335  | 0.616626 | 0.646277 |
| Mmu.12104.1.S1_at       | Mmu.12104.1     | 6.47  | 5.71  | 0.59 | 0.06 | 1.69   | 0.280389 | 0.373422 | 0.571521 | 0.612236 |
| Mmu.12105.1.S1_a_at     | Mmu.12105.1     | 4.59  | 4.82  | 0.09 | 0.11 | -1.18  | 0.02867  | 0.043497 | 0.221856 | 0.25316  |
| Mmu.12110.1.S1_at       | Mmu.12110.1     | 7.8   | 9.2   | 0.62 | 0.06 | -2.64  | 0.025071 | 0.11157  | 0.211247 | 0.376407 |
| Mmu.12129.1.S1_at       | Mmu.12129.1     | 3.79  | 3.79  | 0.29 | 0.21 | 1      | 0.458235 | 0.512977 | 0.706883 | 0.706653 |
| Mmu.12135.1.S1_at       | Mmu.12135.1     | 9.74  | 10.01 | 0.04 | 0.07 | -1.2   | 0.004013 | 0.055193 | 0.108676 | 0.280555 |
| Mmu.12136.2.S1_at       | Mmu.12136.2     | 10.5  | 10.82 | 0.3  | 0.05 | -1.25  | 0.040809 | 0.045196 | 0.258464 | 0.256979 |
| Mmu.12145.1.S1_at       | Mmu.12145.1     | 6.23  | 6.28  | 0.14 | 0.06 | -1.04  | 0.276225 | 0.548539 | 0.567865 | 0.729266 |
| Mmu.12145.1.S1_s_at     | Mmu.12145.1     | 14.41 | 14.41 | 0.04 | 0.03 | 1      | 0.253579 | 0.559669 | 0.547878 | 0.736365 |
| Mmu.1215.1.S1_at        | Mmu.1215.1      | 7.74  | 7.17  | 0.39 | 0.2  | 1.48   | 0.275944 | 0.321837 | 0.567563 | 0.573496 |
| Mmu.12174.1.S1_at       | Mmu.12174.1     | 4.91  | 4.08  | 0.09 | 0.15 | 1.78   | 0.001667 | 0.000443 | 0.084462 | 0.038359 |
| Mmu.1218.1.S1_at        | Mmu.1218.1      | 6.59  | 6.62  | 0.15 | 0.06 | -1.02  | 0.670729 | 0.407426 | 0.842035 | 0.63502  |
| Mmu.12187.1.S1_at       | Mmu.12187.1     | 10.85 | 11.1  | 0.54 | 0.04 | -1.19  | 0.374834 | 0.599406 | 0.64574  | 0.76144  |
| Mmu.12196.1.S1_at       | Mmu.12196.1     | 9.9   | 9.86  | 0.25 | 0.18 | 1.03   | 0.725563 | 0.697109 | 0.871206 | 0.824045 |
| Mmu.12206.2.S1_at       | Mmu.12206.2     | 12.34 | 11.99 | 0.16 | 0.05 | 1.28   | 0.026654 | 0.044875 | 0.216417 | 0.256424 |
| Mmu.12206.3.S1_at       | Mmu.12206.3     | 5.99  | 5.51  | 0.18 | 0.08 | 1.39   | 0.026194 | 0.041879 | 0.21487  | 0.249202 |
| Mmu.12206.3.S1_x_at     | Mmu.12206.3     | 11.52 | 11.07 | 0.13 | 0.09 | 1.36   | 0.00925  | 0.039902 | 0.145977 | 0.244852 |

|                         |                 |       |       |      |      |       |          |          |          |          |
|-------------------------|-----------------|-------|-------|------|------|-------|----------|----------|----------|----------|
| Mmu.12211.1.A1_at       | Mmu.12211.1     | 8.81  | 6.83  | 0.16 | 0.07 | 3.97  | 0.00004  | 0.000356 | 0.045594 | 0.037229 |
| Mmu.12211.1.S1_at       | Mmu.12211.1     | 7.68  | 5.7   | 0.16 | 0.06 | 3.93  | 0.000039 | 0.000442 | 0.045594 | 0.038359 |
| Mmu.12227.1.S1_at       | Mmu.12227.1     | 3.4   | 3.4   | 0.09 | 0.04 | 1.01  | 0.491834 | 0.114195 | 0.729417 | 0.380758 |
| Mmu.12235.2.S1_at       | Mmu.12235.2     | 5.21  | 5.64  | 0.21 | 0.13 | -1.35 | 0.040805 | 0.002622 | 0.258464 | 0.075772 |
| Mmu.12240.1.S1_at       | Mmu.12240.1     | 5.69  | 6.2   | 1.21 | 0.37 | -1.42 | 0.625308 | 0.857071 | 0.815334 | 0.91834  |
| Mmu.12241.1.S1_at       | Mmu.12241.1     | 4.18  | 4.08  | 0.07 | 0.05 | 1.07  | 0.218407 | 0.525152 | 0.516059 | 0.714766 |
| Mmu.12242.1.S1_at       | Mmu.12242.1     | 6.3   | 6.07  | 0.22 | 0.1  | 1.17  | 0.754984 | 0.590743 | 0.887035 | 0.756437 |
| Mmu.12242.1.S1_x_at     | Mmu.12242.1     | 5.87  | 5.78  | 0.14 | 0.16 | 1.06  | 0.414282 | 0.166374 | 0.675541 | 0.442884 |
| Mmu.12243.1.A1_at       | Mmu.12243.1     | 4.93  | 4.94  | 0.14 | 0.07 | -1.01 | 0.822554 | 0.973419 | 0.921047 | 0.985537 |
| Mmu.12243.1.S1_at       | Mmu.12243.1     | 5.71  | 5.84  | 0.21 | 0.08 | -1.1  | 0.402203 | 0.556833 | 0.666556 | 0.734831 |
| Mmu.12249.1.S1_at       | Mmu.12249.1     | 13.89 | 13.75 | 0.3  | 0.03 | 1.1   | 0.865975 | 0.990535 | 0.941971 | 0.994656 |
| MmugDNA.41518.1.S1_s_at | MmugDNA.41518.1 | 13.83 | 13.66 | 0.5  | 0.09 | 1.13  | 0.841701 | 0.958057 | 0.930405 | 0.976273 |
| Mmu.12251.1.S1_s_at     | Mmu.12251.1     | 13.42 | 13    | 0.13 | 0.21 | 1.34  | 0.080441 | 0.366048 | 0.341026 | 0.605891 |
| Mmu.12263.1.S1_at       | Mmu.12263.1     | 11.25 | 11.12 | 0.17 | 0.06 | 1.1   | 0.092421 | 0.072684 | 0.360527 | 0.31561  |
| Mmu.12264.1.S1_at       | Mmu.12264.1     | 12.14 | 12.19 | 0.13 | 0.04 | -1.03 | 0.892464 | 0.130711 | 0.954212 | 0.402799 |
| Mmu.12266.1.S1_at       | Mmu.12266.1     | 11.56 | 11.66 | 0.21 | 0.01 | -1.07 | 0.778468 | 0.459734 | 0.898788 | 0.671948 |
| Mmu.12268.1.S1_at       | Mmu.12268.1     | 10.11 | 10.63 | 0.28 | 0.14 | -1.43 | 0.073017 | 0.255469 | 0.327873 | 0.523505 |
| Mmu.12272.2.A1_at       | Mmu.12272.2     | 4.79  | 4.76  | 0.11 | 0.06 | 1.02  | 0.770777 | 0.560868 | 0.894865 | 0.736993 |
| Mmu.12272.2.S1_at       | Mmu.12272.2     | 3.78  | 3.92  | 0.17 | 0.21 | -1.1  | 0.759047 | 0.393513 | 0.889596 | 0.626447 |
| Mmu.12281.1.S1_at       | Mmu.12281.1     | 11.49 | 11.48 | 0.08 | 0.12 | 1.01  | 0.406854 | 0.362283 | 0.670124 | 0.602931 |
| Mmu.12285.1.S1_at       | Mmu.12285.1     | 7.38  | 9.35  | 0.6  | 0.29 | -3.91 | 0.019189 | 0.287079 | 0.191978 | 0.548379 |
| Mmu.12305.1.S1_at       | Mmu.12305.1     | 8.2   | 8.14  | 0.11 | 0.07 | 1.04  | 0.665822 | 0.426611 | 0.839433 | 0.648739 |
| Mmu.12307.1.S1_at       | Mmu.12307.1     | 7.42  | 7.46  | 0.56 | 0.13 | -1.03 | 0.955072 | 0.349774 | 0.981568 | 0.593578 |
| Mmu.12320.1.S1_at       | Mmu.12320.1     | 10.46 | 10.28 | 0.35 | 0.13 | 1.13  | 0.596382 | 0.789618 | 0.795793 | 0.87847  |
| Mmu.12324.1.S1_at       | Mmu.12324.1     | 8.77  | 8.55  | 0.2  | 0.05 | 1.17  | 0.086476 | 0.001327 | 0.351333 | 0.056164 |
| Mmu.12330.1.S1_at       | Mmu.12330.1     | 13.46 | 13.2  | 0.02 | 0.11 | 1.2   | 0.00728  | 0.00413  | 0.132985 | 0.090891 |
| Mmu.12345.2.S1_at       | Mmu.12345.2     | 10.67 | 10.54 | 0.18 | 0.11 | 1.09  | 0.078405 | 0.094195 | 0.338082 | 0.350889 |
| Mmu.12356.1.S1_at       | Mmu.12356.1     | 5.62  | 4.8   | 0.91 | 0.15 | 1.77  | 0.165868 | 0.447889 | 0.458849 | 0.663881 |
| Mmu.12356.1.S1_s_at     | Mmu.12356.1     | 5.28  | 5.65  | 0.54 | 0.09 | -1.29 | 0.36602  | 0.640857 | 0.640526 | 0.789221 |
| Mmu.12364.1.S1_at       | Mmu.12364.1     | 7.17  | 7.32  | 0.17 | 0.09 | -1.12 | 0.377551 | 0.646124 | 0.648027 | 0.792676 |
| Mmu.12364.1.S1_x_at     | Mmu.12364.1     | 6.95  | 7.09  | 0.19 | 0.2  | -1.1  | 0.631243 | 0.867484 | 0.8189   | 0.924699 |
| Mmu.12381.1.S1_at       | Mmu.12381.1     | 9.66  | 10.16 | 0.06 | 0.2  | -1.41 | 0.014971 | 0.039907 | 0.174543 | 0.244852 |
| Mmu.12382.1.S1_s_at     | Mmu.12382.1     | 11.4  | 11.25 | 0.24 | 0.27 | 1.11  | 0.960027 | 0.654876 | 0.983565 | 0.798179 |
| Mmu.12383.1.S1_at       | Mmu.12383.1     | 11.59 | 11.25 | 0.21 | 0.22 | 1.26  | 0.129826 | 0.043754 | 0.41207  | 0.25387  |
| Mmu.12385.2.S1_x_at     | Mmu.12385.2     | 12.2  | 12.96 | 0.67 | 0.12 | -1.7  | 0.133537 | 0.257049 | 0.41701  | 0.524781 |
| Mmu.12385.4.S1_x_at     | Mmu.12385.4     | 12.07 | 12.87 | 0.62 | 0.14 | -1.74 | 0.118272 | 0.237003 | 0.395751 | 0.507675 |
| Mmu.12385.5.S1_x_at     | Mmu.12385.5     | 8.85  | 9.16  | 0.23 | 0.08 | -1.23 | 0.076529 | 0.138334 | 0.334818 | 0.411244 |
| Mmu.12391.1.S1_at       | Mmu.12391.1     | 7.62  | 7.61  | 0.2  | 0.1  | 1.01  | 0.535129 | 0.875314 | 0.758211 | 0.929211 |
| Mmu.12394.1.S1_at       | Mmu.12394.1     | 5.96  | 5.7   | 0.06 | 0.11 | 1.2   | 0.016808 | 0.026601 | 0.182872 | 0.204008 |
| Mmu.12401.1.S1_at       | Mmu.12401.1     | 10.21 | 10.2  | 0.09 | 0.16 | 1     | 0.417902 | 0.134583 | 0.67793  | 0.406629 |
| Mmu.12401.1.S1_s_at     | Mmu.12401.1     | 10.23 | 10.43 | 0.12 | 0.22 | -1.15 | 0.974448 | 0.13183  | 0.989763 | 0.403891 |
| Mmu.12405.1.S1_at       | Mmu.12405.1     | 6.95  | 7.01  | 0.45 | 0.12 | -1.04 | 0.706552 | 0.159956 | 0.861067 | 0.436061 |
| Mmu.12407.1.S1_at       | Mmu.12407.1     | 6.67  | 6.46  | 0.17 | 0.2  | 1.16  | 0.511969 | 0.140067 | 0.742836 | 0.413394 |



|                         |                 |       |       |      |      |       |          |          |          |          |
|-------------------------|-----------------|-------|-------|------|------|-------|----------|----------|----------|----------|
| Mmu.12414.1.S1_at       | Mmu.12414.1     | 7.55  | 7.54  | 0.01 | 0.11 | 1.01  | 0.905522 | 0.885605 | 0.960065 | 0.934982 |
| Mmu.12423.1.S1_at       | Mmu.12423.1     | 6.54  | 5.89  | 0.14 | 0.17 | 1.57  | 0.011018 | 0.005871 | 0.154661 | 0.104856 |
| Mmu.12425.1.S1_at       | Mmu.12425.1     | 5.78  | 5.89  | 0.13 | 0    | -1.08 | 0.197836 | 0.393359 | 0.49515  | 0.626258 |
| Mmu.12426.1.S1_at       | Mmu.12426.1     | 3.72  | 3.98  | 0.15 | 0.45 | -1.19 | 0.192669 | 0.259057 | 0.48926  | 0.526246 |
| Mmu.12439.1.S1_s_at     | Mmu.12439.1     | 12.77 | 12.57 | 0.17 | 0.13 | 1.15  | 0.180534 | 0.080039 | 0.475675 | 0.327429 |
| Mmu.12441.1.S1_at       | Mmu.12441.1     | 13.79 | 13.53 | 0.06 | 0.06 | 1.2   | 0.00481  | 0.045761 | 0.115098 | 0.258277 |
| MmugDNA.31343.1.S1_at   | MmugDNA.31343.1 | 13.93 | 13.8  | 0.04 | 0.04 | 1.09  | 0.025823 | 0.037039 | 0.213432 | 0.236886 |
| MmugDNA.31343.1.S1_s_at | MmugDNA.31343.1 | 13.48 | 13.35 | 0.04 | 0.06 | 1.09  | 0.030392 | 0.072488 | 0.227249 | 0.315339 |
| Mmu.12449.1.S1_at       | Mmu.12449.1     | 6.77  | 6.84  | 0.2  | 0.1  | -1.04 | 0.483742 | 0.159687 | 0.723753 | 0.435785 |
| Mmu.12457.1.S1_at       | Mmu.12457.1     | 11.76 | 11.74 | 0.02 | 0.07 | 1.02  | 0.141403 | 0.620995 | 0.427329 | 0.775745 |
| Mmu.12457.1.S1_s_at     | Mmu.12457.1     | 12.82 | 12.81 | 0.03 | 0.01 | 1     | 0.478065 | 0.297353 | 0.719801 | 0.556071 |
| Mmu.12458.2.S1_at       | Mmu.12458.2     | 12.11 | 12.56 | 0.18 | 0.05 | -1.37 | 0.01444  | 0.02002  | 0.171859 | 0.177698 |
| Mmu.12458.2.S1_x_at     | Mmu.12458.2     | 12.56 | 13.01 | 0.18 | 0.05 | -1.37 | 0.014849 | 0.022647 | 0.17402  | 0.188488 |
| Mmu.12467.1.S1_at       | Mmu.12467.1     | 9.53  | 7.93  | 0.34 | 0.06 | 3.02  | 0.001534 | 0.006218 | 0.081678 | 0.106916 |
| Mmu.12468.1.S1_at       | Mmu.12468.1     | 7.21  | 7.5   | 0.66 | 0.31 | -1.22 | 0.312868 | 0.119393 | 0.598797 | 0.387887 |
| Mmu.12476.2.S1_a_at     | Mmu.12476.2     | 4.93  | 4.9   | 0.4  | 0.11 | 1.02  | 0.248923 | 0.18257  | 0.544234 | 0.459065 |
| Mmu.1249.1.S1_at        | Mmu.1249.1      | 8.47  | 7.83  | 0.07 | 0.11 | 1.56  | 0.000616 | 0.309596 | 0.070727 | 0.564987 |
| Mmu.12497.1.S1_at       | Mmu.12497.1     | 11.91 | 11.96 | 0.13 | 0.05 | -1.03 | 0.55453  | 0.763462 | 0.770723 | 0.862471 |
| Mmu.125.1.S1_at         | Mmu.125.1       | 4.42  | 4.57  | 0.23 | 0.09 | -1.11 | 0.541253 | 0.178522 | 0.762026 | 0.454778 |
| Mmu.12516.1.A1_at       | Mmu.12516.1     | 3.83  | 3.95  | 0.08 | 0.14 | -1.08 | 0.190173 | 0.554085 | 0.486547 | 0.732953 |
| Mmu.12516.1.S1_at       | Mmu.12516.1     | 4.16  | 4.24  | 0.28 | 0.37 | -1.06 | 0.85034  | 0.485464 | 0.934986 | 0.68914  |
| Mmu.12522.1.S1_at       | Mmu.12522.1     | 12.39 | 12.5  | 0.06 | 0.03 | -1.07 | 0.076252 | 0.429945 | 0.334375 | 0.65111  |
| Mmu.12522.1.S1_x_at     | Mmu.12522.1     | 12.31 | 12.4  | 0.02 | 0.04 | -1.07 | 0.051706 | 0.70329  | 0.284675 | 0.827958 |
| Mmu.12524.1.S1_at       | Mmu.12524.1     | 8.48  | 8.26  | 0.18 | 0.13 | 1.17  | 0.134236 | 0.524467 | 0.417818 | 0.714384 |
| Mmu.1257.1.S1_at        | Mmu.1257.1      | 3.92  | 3.66  | 0.14 | 0.31 | 1.2   | 0.206736 | 0.036676 | 0.50439  | 0.235973 |
| Mmu.12585.1.S1_at       | Mmu.12585.1     | 9.12  | 9.37  | 0.23 | 0.11 | -1.19 | 0.122957 | 0.148441 | 0.40206  | 0.423007 |
| Mmu.12596.1.S1_at       | Mmu.12596.1     | 7.93  | 7.65  | 0.13 | 0.09 | 1.21  | 0.042547 | 0.129554 | 0.263346 | 0.401081 |
| Mmu.126.1.S1_a_at       | Mmu.126.1       | 4.09  | 4.08  | 0.04 | 0.13 | 1.01  | 0.935448 | 0.336783 | 0.972982 | 0.584093 |
| Mmu.126.2.A1_at         | Mmu.126.2       | 4     | 4.14  | 0.06 | 0.06 | -1.11 | 0.031007 | 0.340044 | 0.229092 | 0.586516 |
| Mmu.12603.1.S1_a_at     | Mmu.12603.1     | 11.09 | 10.96 | 0.45 | 0.37 | 1.1   | 0.448202 | 0.037618 | 0.699844 | 0.238384 |
| Mmu.12603.1.S1_at       | Mmu.12603.1     | 11.08 | 11.04 | 0.38 | 0.31 | 1.03  | 0.586337 | 0.020663 | 0.789745 | 0.180392 |
| Mmu.12603.2.S1_at       | Mmu.12603.2     | 2.92  | 3.04  | 0.06 | 0.03 | -1.08 | 0.02571  | 0.013322 | 0.212966 | 0.148042 |
| Mmu.1261.1.S1_at        | Mmu.1261.1      | 3.61  | 3.6   | 0    | 0.14 | 1.01  | 0.877477 | 0.942371 | 0.947619 | 0.967292 |
| Mmu.2120.1.S1_s_at      | Mmu.2120.1      | 14.18 | 14.73 | 0.36 | 0.02 | -1.46 | 0.167139 | 0.149626 | 0.460327 | 0.424172 |
| Mmu.12611.1.S1_at       | Mmu.12611.1     | 9.49  | 9.4   | 0.21 | 0.06 | 1.06  | 0.840081 | 0.378812 | 0.929875 | 0.615795 |
| Mmu.1262.1.A1_at        | Mmu.1262.1      | 12.14 | 12.01 | 0.12 | 0.07 | 1.1   | 0.443435 | 0.34797  | 0.696562 | 0.592215 |
| Mmu.12628.1.S1_at       | Mmu.12628.1     | 10.38 | 9.8   | 0.14 | 0.22 | 1.5   | 0.015092 | 0.029915 | 0.174809 | 0.214643 |
| Mmu.12633.1.S1_at       | Mmu.12633.1     | 9.01  | 9.59  | 0.09 | 0.27 | -1.49 | 0.033363 | 0.001551 | 0.236556 | 0.059602 |
| Mmu.12638.1.S1_at       | Mmu.12638.1     | 9.96  | 9.46  | 0.05 | 0.24 | 1.41  | 0.010809 | 0.005271 | 0.153859 | 0.100589 |
| Mmu.12642.1.S1_at       | Mmu.12642.1     | 6.52  | 6.57  | 0.12 | 0.2  | -1.03 | 0.373435 | 0.141012 | 0.645118 | 0.414507 |
| Mmu.12644.1.S1_at       | Mmu.12644.1     | 6.4   | 7.47  | 0.38 | 0.08 | -2.1  | 0.018218 | 0.208066 | 0.187996 | 0.482049 |
| Mmu.12647.1.S1_at       | Mmu.12647.1     | 8.52  | 8.44  | 0.06 | 0.16 | 1.06  | 0.624877 | 0.902436 | 0.815077 | 0.944564 |
| Mmu.1265.1.S1_at        | Mmu.1265.1      | 9.89  | 10    | 0.19 | 0.06 | -1.08 | 0.178314 | 0.123116 | 0.473054 | 0.393123 |

|                         |                 |       |       |      |      |       |          |          |          |          |
|-------------------------|-----------------|-------|-------|------|------|-------|----------|----------|----------|----------|
| Mmu.12651.3.S1_at       | Mmu.12651.3     | 7.58  | 8.93  | 0.54 | 0.28 | -2.54 | 0.025638 | 0.000626 | 0.212966 | 0.042692 |
| Mmu.12653.1.S1_at       | Mmu.12653.1     | 10.6  | 10.55 | 0.21 | 0.05 | 1.03  | 0.592846 | 0.109755 | 0.793684 | 0.373701 |
| Mmu.12672.1.S1_at       | Mmu.12672.1     | 3     | 3.04  | 0.07 | 0.17 | -1.03 | 0.813708 | 0.612043 | 0.916696 | 0.76972  |
| Mmu.12672.1.S1_s_at     | Mmu.12672.1     | 10.75 | 10.9  | 0.07 | 0.12 | -1.11 | 0.140124 | 0.33902  | 0.425829 | 0.585891 |
| Mmu.7460.2.S1_x_at      | Mmu.7460.2      | 4.18  | 4.41  | 0.18 | 0.23 | -1.17 | 0.124701 | 0.062476 | 0.404982 | 0.296745 |
| Mmu.127.1.A1_at         | Mmu.127.1       | 2.9   | 2.81  | 0.08 | 0.08 | 1.06  | 0.648993 | 0.325122 | 0.829482 | 0.575547 |
| Mmu.127.1.S1_at         | Mmu.127.1       | 3.34  | 3.41  | 0.17 | 0.02 | -1.05 | 0.596954 | 0.76878  | 0.79623  | 0.865653 |
| Mmu.12708.1.S1_at       | Mmu.12708.1     | 5.22  | 5.15  | 0.04 | 0.11 | 1.05  | 0.270854 | 0.223988 | 0.562863 | 0.497025 |
| Mmu.12740.1.S1_at       | Mmu.12740.1     | 10.38 | 10.29 | 0.22 | 0.27 | 1.06  | 0.323303 | 0.419699 | 0.607132 | 0.643616 |
| Mmu.12743.1.S1_at       | Mmu.12743.1     | 9.3   | 8.75  | 0.04 | 0.1  | 1.46  | 0.000708 | 0.008926 | 0.071903 | 0.124951 |
| Mmu.12751.1.S1_at       | Mmu.12751.1     | 9.02  | 9.08  | 0.12 | 0.2  | -1.04 | 0.268731 | 0.00101  | 0.561276 | 0.050657 |
| Mmu.12759.1.S1_at       | Mmu.12759.1     | 6.84  | 6.47  | 0.28 | 0.05 | 1.29  | 0.279456 | 0.436442 | 0.570786 | 0.65599  |
| Mmu.1276.1.S1_at        | Mmu.1276.1      | 10.56 | 10.23 | 0.37 | 0.1  | 1.26  | 0.25091  | 0.788244 | 0.545589 | 0.877514 |
| Mmu.1278.1.S1_s_at      | Mmu.1278.1      | 14.84 | 14.84 | 0.01 | 0.01 | 1     | 0.248956 | 0.26336  | 0.544234 | 0.529635 |
| Mmu.12784.1.S1_at       | Mmu.12784.1     | 10.84 | 10.97 | 0.13 | 0.19 | -1.09 | 0.700232 | 0.000428 | 0.857647 | 0.038359 |
| Mmu.128.1.S1_at         | Mmu.128.1       | 14.16 | 14.31 | 0.09 | 0.03 | -1.11 | 0.155957 | 0.053796 | 0.446335 | 0.277457 |
| MmugDNA.2157.1.S1_s_at  | MmugDNA.2157.1  | 13.2  | 13.35 | 0.2  | 0.09 | -1.11 | 0.237542 | 0.034627 | 0.535006 | 0.230247 |
| Mmu.12802.1.S1_at       | Mmu.12802.1     | 12.84 | 12.85 | 0.05 | 0.06 | -1.01 | 0.991848 | 0.996932 | 0.997004 | 0.99822  |
| Mmu.12802.2.S1_a_at     | Mmu.12802.2     | 11.91 | 12.08 | 0.14 | 0.09 | -1.12 | 0.496521 | 0.900504 | 0.732382 | 0.943447 |
| Mmu.12802.2.S1_at       | Mmu.12802.2     | 4.98  | 5.14  | 0.37 | 0.1  | -1.12 | 0.385392 | 0.047167 | 0.654158 | 0.261755 |
| Mmu.12806.1.S1_at       | Mmu.12806.1     | 10.11 | 10.02 | 0.37 | 0.07 | 1.07  | 0.887122 | 0.219654 | 0.951902 | 0.493246 |
| Mmu.12819.1.S1_at       | Mmu.12819.1     | 7.27  | 7.29  | 0.14 | 0.03 | -1.02 | 0.996856 | 0.863729 | 0.998972 | 0.922638 |
| Mmu.12819.1.S1_s_at     | Mmu.12819.1     | 5.29  | 5.33  | 0.04 | 0.03 | -1.03 | 0.169633 | 0.070938 | 0.462919 | 0.312444 |
| Mmu.12831.2.S1_at       | Mmu.12831.2     | 10.58 | 10.41 | 0.21 | 0.15 | 1.13  | 0.110051 | 0.205902 | 0.385287 | 0.480109 |
| Mmu.12852.1.S1_at       | Mmu.12852.1     | 11.64 | 11.08 | 0.14 | 0.04 | 1.47  | 0.001841 | 0.105418 | 0.086764 | 0.367279 |
| Mmu.12860.1.S1_at       | Mmu.12860.1     | 9.94  | 10.09 | 0.53 | 0.06 | -1.11 | 0.641449 | 0.546558 | 0.824838 | 0.728079 |
| Mmu.12861.1.S1_at       | Mmu.12861.1     | 12.54 | 12.56 | 0.05 | 0.06 | -1.01 | 0.343532 | 0.32261  | 0.622989 | 0.574023 |
| Mmu.12861.2.S1_at       | Mmu.12861.2     | 10.96 | 10.82 | 0.03 | 0.04 | 1.1   | 0.008732 | 0.515849 | 0.14316  | 0.708504 |
| MmugDNA.41416.1.S1_s_at | MmugDNA.41416.1 | 10.83 | 10.75 | 0.12 | 0.05 | 1.06  | 0.072383 | 0.558025 | 0.327    | 0.735346 |
| Mmu.12863.1.S1_at       | Mmu.12863.1     | 10.86 | 10.92 | 0.19 | 0.14 | -1.04 | 0.697411 | 0.016014 | 0.855967 | 0.160458 |
| Mmu.12864.1.S1_at       | Mmu.12864.1     | 10.31 | 10.07 | 0.04 | 0.05 | 1.18  | 0.005136 | 0.009448 | 0.116966 | 0.128022 |
| Mmu.12865.1.S1_s_at     | Mmu.12865.1     | 8.94  | 8.94  | 0.08 | 0.3  | -1    | 0.392527 | 0.183531 | 0.659451 | 0.459681 |
| Mmu.12870.1.S1_at       | Mmu.12870.1     | 11.98 | 12.27 | 0.21 | 0.03 | -1.23 | 0.082173 | 0.117328 | 0.343676 | 0.384947 |
| Mmu.12873.1.S1_at       | Mmu.12873.1     | 7.33  | 7.41  | 0.32 | 0.05 | -1.06 | 0.479336 | 0.780193 | 0.720564 | 0.872539 |
| Mmu.12875.1.S1_at       | Mmu.12875.1     | 8.92  | 9.78  | 0.65 | 0.26 | -1.82 | 0.115997 | 0.138705 | 0.393014 | 0.411807 |
| Mmu.12880.1.S1_at       | Mmu.12880.1     | 10.47 | 10.01 | 0.13 | 0.06 | 1.38  | 0.004795 | 0.128534 | 0.115098 | 0.39989  |
| Mmu.12897.1.A1_at       | Mmu.12897.1     | 11.85 | 12.03 | 0.03 | 0.14 | -1.13 | 0.21259  | 0.079217 | 0.510654 | 0.326399 |
| Mmu.12897.1.S1_at       | Mmu.12897.1     | 11.35 | 11.76 | 0.05 | 0.18 | -1.32 | 0.032421 | 0.026212 | 0.234344 | 0.202891 |
| Mmu.12899.1.S1_at       | Mmu.12899.1     | 12.81 | 12.36 | 0.03 | 0.06 | 1.37  | 0.000363 | 0.197594 | 0.06234  | 0.472564 |
| Mmu.12915.1.A1_at       | Mmu.12915.1     | 3.37  | 3.37  | 0.13 | 0.04 | 1     | 0.419741 | 0.419347 | 0.679035 | 0.643449 |
| Mmu.12915.1.S1_at       | Mmu.12915.1     | 4     | 3.99  | 0.05 | 0.04 | 1.01  | 0.822179 | 0.050283 | 0.920839 | 0.269566 |
| Mmu.12921.1.S1_at       | Mmu.12921.1     | 7.68  | 7.64  | 0.21 | 0.08 | 1.02  | 0.832935 | 0.946001 | 0.926447 | 0.969324 |
| Mmu.12925.2.S1_at       | Mmu.12925.2     | 3.43  | 3.51  | 0.09 | 0.1  | -1.06 | 0.365173 | 0.008764 | 0.639828 | 0.124009 |

|                      |              |       |       |      |      |       |          |          |          |          |
|----------------------|--------------|-------|-------|------|------|-------|----------|----------|----------|----------|
| Mmu.12935.1.S1_at    | Mmu.12935.1  | 5.16  | 5.14  | 0.27 | 0.06 | 1.02  | 0.947531 | 0.977407 | 0.977941 | 0.987721 |
| Mmu.12948.1.S1_at    | Mmu.12948.1  | 10.15 | 9.51  | 0.22 | 0.26 | 1.57  | 0.025991 | 0.029649 | 0.214184 | 0.213852 |
| Mmu.12952.1.S1_at    | Mmu.12952.1  | 9.32  | 10.9  | 0.97 | 0.26 | -2.98 | 0.060876 | 0.458422 | 0.303716 | 0.671165 |
| Mmu.12953.1.A1_at    | Mmu.12953.1  | 11.12 | 11.04 | 0.16 | 0.21 | 1.05  | 0.333542 | 0.416818 | 0.614935 | 0.641749 |
| Mmu.12959.1.S1_at    | Mmu.12959.1  | 12.78 | 12.57 | 0.08 | 0.03 | 1.16  | 0.030558 | 0.16151  | 0.227713 | 0.437651 |
| Mmu.12966.1.S1_at    | Mmu.12966.1  | 8.49  | 8.21  | 0.33 | 0.22 | 1.22  | 0.403293 | 0.1331   | 0.667463 | 0.404734 |
| Mmu.12981.1.S1_at    | Mmu.12981.1  | 11.99 | 12.56 | 0.3  | 0.05 | -1.48 | 0.076889 | 0.204197 | 0.335345 | 0.478507 |
| Mmu.12981.1.S1_s_at  | Mmu.12981.1  | 12.71 | 13.06 | 0.2  | 0.02 | -1.27 | 0.054614 | 0.137645 | 0.290604 | 0.410618 |
| Mmu.12987.1.S1_at    | Mmu.12987.1  | 9.57  | 9.39  | 0.11 | 0.2  | 1.13  | 0.178494 | 0.005904 | 0.47327  | 0.105118 |
| Mmu.12990.1.S1_x_at  | Mmu.12990.1  | 8.62  | 8.11  | 0.3  | 0.16 | 1.42  | 0.032088 | 0.052059 | 0.232919 | 0.273754 |
| Mmu.12999.1.S1_at    | Mmu.12999.1  | 7.12  | 6.76  | 0.36 | 0.16 | 1.29  | 0.102091 | 0.264126 | 0.373939 | 0.530214 |
| Mmu.1300.1.S1_at     | Mmu.1300.1   | 5.82  | 5.74  | 0.23 | 0.22 | 1.06  | 0.916894 | 0.028927 | 0.964647 | 0.211953 |
| Mmu.15247.37.S1_s_at | Mmu.15247.37 | 2.84  | 2.93  | 0.19 | 0.17 | -1.06 | 0.877157 | 0.914319 | 0.947466 | 0.951823 |
| Mmu.15247.37.S1_x_at | Mmu.15247.37 | 2.93  | 2.94  | 0.02 | 0.1  | -1.01 | 0.755045 | 0.877599 | 0.887035 | 0.930173 |
| Mmu.13011.1.S1_at    | Mmu.13011.1  | 7.77  | 7.53  | 0.01 | 0.22 | 1.18  | 0.048562 | 0.005071 | 0.277767 | 0.09907  |
| Mmu.13012.1.S1_at    | Mmu.13012.1  | 4.79  | 4.01  | 1.1  | 0.18 | 1.71  | 0.208307 | 0.230294 | 0.506049 | 0.502102 |
| Mmu.13013.1.S1_at    | Mmu.13013.1  | 7.94  | 8.05  | 0.13 | 0.06 | -1.08 | 0.085134 | 0.268165 | 0.349307 | 0.533876 |
| Mmu.13013.1.S1_x_at  | Mmu.13013.1  | 7.37  | 7.39  | 0.1  | 0.08 | -1.01 | 0.865028 | 0.246433 | 0.941423 | 0.515899 |
| Mmu.13018.1.S1_at    | Mmu.13018.1  | 7.39  | 7.51  | 0.28 | 0.04 | -1.09 | 0.739476 | 0.296371 | 0.879245 | 0.555492 |
| Mmu.13018.2.S1_a_at  | Mmu.13018.2  | 8.6   | 8.65  | 0.24 | 0.06 | -1.04 | 0.718095 | 0.154835 | 0.866934 | 0.429849 |
| Mmu.13021.1.S1_at    | Mmu.13021.1  | 6.3   | 6.47  | 0.37 | 0.23 | -1.13 | 0.61779  | 0.002828 | 0.810207 | 0.078363 |
| Mmu.1303.1.A1_at     | Mmu.1303.1   | 6.18  | 6.22  | 0.06 | 0.11 | -1.03 | 0.418967 | 0.289448 | 0.678626 | 0.55046  |
| Mmu.1303.1.S1_at     | Mmu.1303.1   | 6.19  | 6.22  | 0.1  | 0.07 | -1.02 | 0.45228  | 0.940908 | 0.702807 | 0.966553 |
| Mmu.13051.1.S1_at    | Mmu.13051.1  | 5.08  | 5.19  | 0.07 | 0.11 | -1.08 | 0.21435  | 0.722162 | 0.511995 | 0.839044 |
| Mmu.13059.1.S1_at    | Mmu.13059.1  | 10.35 | 10.27 | 0.14 | 0.17 | 1.06  | 0.112213 | 0.007952 | 0.388358 | 0.118702 |
| Mmu.13079.1.S1_at    | Mmu.13079.1  | 3.38  | 3.39  | 0.12 | 0.02 | -1.01 | 0.615993 | 0.863632 | 0.809258 | 0.922638 |
| Mmu.13079.1.S1_s_at  | Mmu.13079.1  | 13.27 | 12.87 | 0.01 | 0.07 | 1.32  | 0.000638 | 0.000062 | 0.070727 | 0.025666 |
| Mmu.13084.1.S1_x_at  | Mmu.13084.1  | 3.48  | 3.74  | 0.16 | 0.11 | -1.19 | 0.062232 | 0.506292 | 0.306122 | 0.702368 |
| Mmu.1309.1.S1_at     | Mmu.1309.1   | 12.15 | 11.9  | 0.11 | 0.07 | 1.19  | 0.050501 | 0.343018 | 0.282539 | 0.58885  |
| Mmu.13092.1.S1_s_at  | Mmu.13092.1  | 12.85 | 12.85 | 0.16 | 0.01 | -1    | 0.40456  | 0.106252 | 0.668263 | 0.368669 |
| Mmu.13096.1.S1_at    | Mmu.13096.1  | 9.77  | 10.02 | 0.29 | 0.16 | -1.19 | 0.362663 | 0.169718 | 0.63739  | 0.446287 |
| Mmu.1310.2.S1_at     | Mmu.1310.2   | 10.9  | 10.32 | 0.15 | 0.14 | 1.5   | 0.010181 | 0.008534 | 0.150739 | 0.122563 |
| Mmu.13104.1.S1_at    | Mmu.13104.1  | 11.75 | 11.57 | 0.11 | 0.13 | 1.14  | 0.050839 | 0.114301 | 0.283144 | 0.380835 |
| Mmu.13105.1.S1_at    | Mmu.13105.1  | 13.28 | 13.14 | 0.06 | 0.01 | 1.1   | 0.014738 | 0.007192 | 0.173341 | 0.114057 |
| Mmu.13110.1.S1_at    | Mmu.13110.1  | 10.38 | 10.1  | 0.08 | 0.14 | 1.22  | 0.034766 | 0.030501 | 0.241036 | 0.216644 |
| Mmu.13110.1.S1_s_at  | Mmu.13110.1  | 9.61  | 9.19  | 0.12 | 0.19 | 1.34  | 0.04564  | 0.021693 | 0.271064 | 0.184333 |
| Mmu.13111.1.S1_at    | Mmu.13111.1  | 7.04  | 7.09  | 0.09 | 0.13 | -1.03 | 0.823323 | 0.114244 | 0.921475 | 0.380761 |
| Mmu.1314.2.S1_a_at   | Mmu.1314.2   | 6.75  | 9.38  | 0.96 | 0.23 | -6.21 | 0.02638  | 0.035687 | 0.215478 | 0.233314 |
| Mmu.13156.2.A1_x_at  | Mmu.13156.2  | 7.46  | 6.05  | 2.21 | 0.1  | 2.64  | 0.268784 | 0.429979 | 0.561284 | 0.65111  |
| Mmu.13156.2.S1_x_at  | Mmu.13156.2  | 7.69  | 7.35  | 1.67 | 0.04 | 1.26  | 0.298312 | 0.487523 | 0.586678 | 0.690559 |
| Mmu.13156.3.A1_at    | Mmu.13156.3  | 3.86  | 4.01  | 0.61 | 0.06 | -1.11 | 0.244387 | 0.330269 | 0.540909 | 0.579044 |
| Mmu.13156.3.S1_at    | Mmu.13156.3  | 5.73  | 6.06  | 0.38 | 0.13 | -1.26 | 0.250794 | 0.332305 | 0.545404 | 0.580738 |
| Mmu.13156.4.S1_x_at  | Mmu.13156.4  | 8.62  | 10.57 | 0.34 | 0.16 | -3.87 | 0.001211 | 0.090491 | 0.07828  | 0.345002 |

|                         |                 |       |       |      |      |       |          |          |          |          |
|-------------------------|-----------------|-------|-------|------|------|-------|----------|----------|----------|----------|
| Mmu.13156.5.A1_x_at     | Mmu.13156.5     | 8.03  | 9.42  | 0.93 | 0.18 | -2.63 | 0.061824 | 0.251606 | 0.30514  | 0.520349 |
| Mmu.13156.5.S1_x_at     | Mmu.13156.5     | 8.25  | 10.86 | 1.35 | 0.29 | -6.12 | 0.048971 | 0.149338 | 0.278936 | 0.423811 |
| Mmu.13168.1.S1_at       | Mmu.13168.1     | 11    | 10.18 | 0.26 | 0.14 | 1.76  | 0.011332 | 0.001731 | 0.156654 | 0.062895 |
| Mmu.13168.2.S1_at       | Mmu.13168.2     | 9.26  | 8.18  | 0.3  | 0.14 | 2.1   | 0.009043 | 0.00253  | 0.144777 | 0.074291 |
| Mmu.13181.1.S1_at       | Mmu.13181.1     | 8.32  | 8.51  | 0.28 | 0.12 | -1.14 | 0.356287 | 0.273973 | 0.632563 | 0.538503 |
| Mmu.13184.1.S1_x_at     | Mmu.13184.1     | 10    | 9.92  | 0.06 | 0.09 | 1.06  | 0.26643  | 0.243265 | 0.558813 | 0.513356 |
| Mmu.13185.1.S1_s_at     | Mmu.13185.1     | 13.29 | 13.31 | 0.14 | 0.05 | -1.02 | 0.72834  | 0.508587 | 0.873011 | 0.703719 |
| Mmu.132.1.S1_at         | Mmu.132.1       | 8.03  | 8.04  | 0.45 | 0.19 | -1.01 | 0.578014 | 0.024553 | 0.783846 | 0.196073 |
| Mmu.13251.1.A1_at       | Mmu.13251.1     | 5.27  | 5.69  | 0.15 | 0.05 | -1.34 | 0.019132 | 0.009115 | 0.191749 | 0.125994 |
| Mmu.13254.1.S1_at       | Mmu.13254.1     | 7.66  | 7.65  | 0.09 | 0.07 | 1.01  | 0.874136 | 0.004329 | 0.945969 | 0.092251 |
| Mmu.13271.1.S1_s_at     | Mmu.13271.1     | 6.44  | 6.44  | 0.12 | 0.06 | 1.01  | 0.593512 | 0.376117 | 0.794024 | 0.613952 |
| Mmu.13281.1.S1_at       | Mmu.13281.1     | 9.49  | 9.6   | 0.12 | 0.12 | -1.08 | 0.291343 | 0.762804 | 0.580647 | 0.862045 |
| Mmu.13282.1.A1_at       | Mmu.13282.1     | 4.92  | 4.88  | 0.09 | 0.07 | 1.03  | 0.46443  | 0.173583 | 0.710646 | 0.449956 |
| Mmu.13282.1.S1_at       | Mmu.13282.1     | 3.39  | 3.3   | 0.02 | 0.05 | 1.06  | 0.064483 | 0.037662 | 0.310463 | 0.23853  |
| Mmu.13291.1.S1_at       | Mmu.13291.1     | 11.44 | 10.54 | 0.15 | 0.14 | 1.88  | 0.001515 | 0.030222 | 0.081668 | 0.21576  |
| Mmu.13294.1.S1_at       | Mmu.13294.1     | 9.47  | 9.47  | 0.22 | 0.09 | -1    | 0.346002 | 0.53089  | 0.624806 | 0.718247 |
| Mmu.13324.1.S1_at       | Mmu.13324.1     | 9.35  | 9.15  | 0.15 | 0.14 | 1.15  | 0.102108 | 0.140671 | 0.37396  | 0.41397  |
| Mmu.13335.1.S1_at       | Mmu.13335.1     | 8.81  | 8.3   | 0.23 | 0.16 | 1.43  | 0.032481 | 0.011325 | 0.234482 | 0.138076 |
| Mmu.13339.1.S1_at       | Mmu.13339.1     | 7.48  | 7.44  | 0.11 | 0.12 | 1.03  | 0.669968 | 0.478653 | 0.84164  | 0.684657 |
| Mmu.13340.1.S1_at       | Mmu.13340.1     | 7.71  | 7.17  | 0.11 | 0.28 | 1.45  | 0.043961 | 0.209607 | 0.266638 | 0.483271 |
| Mmu.13354.1.A1_at       | Mmu.13354.1     | 9.3   | 9.62  | 0.23 | 0.18 | -1.25 | 0.39077  | 0.046361 | 0.65836  | 0.259844 |
| Mmu.13354.1.S1_at       | Mmu.13354.1     | 9.98  | 10.22 | 0.18 | 0.18 | -1.18 | 0.435381 | 0.054811 | 0.690435 | 0.279637 |
| Mmu.13356.1.S1_at       | Mmu.13356.1     | 10.38 | 10.22 | 0.12 | 0.14 | 1.12  | 0.087701 | 0.439133 | 0.353783 | 0.657885 |
| Mmu.13360.1.S1_at       | Mmu.13360.1     | 5.82  | 5.77  | 0.37 | 0.18 | 1.04  | 0.606409 | 0.82409  | 0.803128 | 0.898903 |
| Mmu.13368.1.S1_at       | Mmu.13368.1     | 11.4  | 11.14 | 0.05 | 0.05 | 1.2   | 0.001947 | 0.077662 | 0.08845  | 0.323709 |
| Mmu.13380.2.S1_at       | Mmu.13380.2     | 3.8   | 3.87  | 0.17 | 0.01 | -1.05 | 0.773771 | 0.572064 | 0.896356 | 0.744208 |
| Mmu.13384.1.S1_at       | Mmu.13384.1     | 7.93  | 8.05  | 0.24 | 0.11 | -1.09 | 0.725513 | 0.783439 | 0.871194 | 0.874577 |
| Mmu.13405.1.S1_at       | Mmu.13405.1     | 6.77  | 7.09  | 0.13 | 0.16 | -1.25 | 0.055516 | 0.041501 | 0.292577 | 0.248606 |
| MmugDNA.19759.1.S1_s_at | MmugDNA.19759.1 | 12.57 | 12.46 | 0.03 | 0.06 | 1.08  | 0.036877 | 0.046442 | 0.247118 | 0.260042 |
| Mmu.13435.1.S1_at       | Mmu.13435.1     | 13.89 | 13.84 | 0.27 | 0.04 | 1.04  | 0.579539 | 0.796818 | 0.785166 | 0.882803 |
| Mmu.13445.1.S1_at       | Mmu.13445.1     | 13.18 | 13.2  | 0.13 | 0.04 | -1.01 | 0.350244 | 0.581369 | 0.628033 | 0.750417 |
| Mmu.13450.1.S1_s_at     | Mmu.13450.1     | 14.51 | 14.5  | 0.03 | 0.01 | 1.01  | 0.312853 | 0.140916 | 0.598797 | 0.414394 |
| Mmu.13463.1.S1_at       | Mmu.13463.1     | 3.09  | 3.08  | 0.04 | 0.06 | 1     | 0.516772 | 0.370897 | 0.746037 | 0.609874 |
| Mmu.13476.1.A1_at       | Mmu.13476.1     | 5.52  | 5.07  | 0.28 | 0.09 | 1.36  | 0.049269 | 0.034148 | 0.279456 | 0.228692 |
| Mmu.13476.1.S1_at       | Mmu.13476.1     | 6.45  | 5.96  | 0.11 | 0.13 | 1.41  | 0.009627 | 0.002909 | 0.14832  | 0.079157 |
| Mmu.13482.1.S1_at       | Mmu.13482.1     | 7.56  | 7.65  | 0.11 | 0.27 | -1.06 | 0.613266 | 0.305257 | 0.807314 | 0.562255 |
| Mmu.13488.1.S1_at       | Mmu.13488.1     | 3.87  | 3.98  | 0.22 | 0.18 | -1.08 | 0.722871 | 0.904288 | 0.869766 | 0.945683 |
| Mmu.13493.1.S1_at       | Mmu.13493.1     | 7.24  | 7.38  | 0.13 | 0.36 | -1.1  | 0.792315 | 0.263825 | 0.905814 | 0.530086 |
| Mmu.1351.1.S1_at        | Mmu.1351.1      | 6.2   | 7.02  | 0.76 | 0.08 | -1.77 | 0.152471 | 0.152251 | 0.442149 | 0.427045 |
| Mmu.13511.1.S1_at       | Mmu.13511.1     | 7.73  | 7.57  | 0.27 | 0.13 | 1.11  | 0.997496 | 0.454774 | 0.999096 | 0.668859 |
| Mmu.13514.1.S1_s_at     | Mmu.13514.1     | 10.71 | 11.19 | 0.29 | 0.11 | -1.39 | 0.054539 | 0.007403 | 0.290603 | 0.115643 |
| Mmu.13516.1.S1_at       | Mmu.13516.1     | 7.63  | 8.7   | 0.53 | 0.29 | -2.1  | 0.104144 | 0.279602 | 0.377457 | 0.543186 |
| Mmu.1995.1.S1_s_at      | Mmu.1995.1      | 13.92 | 13.61 | 0.06 | 0.06 | 1.23  | 0.003663 | 0.000084 | 0.105789 | 0.027016 |

|                     |             |       |       |      |      |       |          |          |          |          |
|---------------------|-------------|-------|-------|------|------|-------|----------|----------|----------|----------|
| Mmu.13540.1.A1_at   | Mmu.13540.1 | 6.88  | 7.02  | 0.19 | 0.07 | -1.1  | 0.303193 | 0.375093 | 0.590648 | 0.613186 |
| Mmu.13540.1.S1_at   | Mmu.13540.1 | 6.44  | 6.45  | 0.05 | 0.03 | -1    | 0.583726 | 0.615945 | 0.788335 | 0.772359 |
| Mmu.1356.2.S1_at    | Mmu.1356.2  | 7.58  | 7.54  | 0.23 | 0.05 | 1.03  | 0.271806 | 0.033395 | 0.563734 | 0.226396 |
| Mmu.13562.1.S1_at   | Mmu.13562.1 | 11.5  | 11.36 | 0.24 | 0.08 | 1.1   | 0.399555 | 0.216    | 0.664835 | 0.48965  |
| Mmu.13562.1.S1_x_at | Mmu.13562.1 | 11.58 | 11.49 | 0.22 | 0.06 | 1.07  | 0.365916 | 0.151394 | 0.640407 | 0.426104 |
| Mmu.13564.1.S1_at   | Mmu.13564.1 | 4.93  | 4.75  | 0.3  | 0.16 | 1.13  | 0.420616 | 0.039385 | 0.679563 | 0.243406 |
| Mmu.13566.1.A1_at   | Mmu.13566.1 | 6.15  | 6.23  | 0.06 | 0.11 | -1.05 | 0.146195 | 0.157281 | 0.434019 | 0.432782 |
| Mmu.13566.1.S1_at   | Mmu.13566.1 | 5.6   | 5.37  | 0.16 | 0.16 | 1.17  | 0.250437 | 0.551248 | 0.54512  | 0.730863 |
| Mmu.13573.1.S1_at   | Mmu.13573.1 | 11.89 | 11.89 | 0.22 | 0.08 | 1     | 0.784751 | 0.359556 | 0.901788 | 0.600813 |
| Mmu.1358.2.S1_at    | Mmu.1358.2  | 13.26 | 13.26 | 0.05 | 0    | 1     | 0.392284 | 0.794192 | 0.659275 | 0.881296 |
| Mmu.13595.1.S1_at   | Mmu.13595.1 | 10.02 | 9.76  | 0.28 | 0.04 | 1.2   | 0.546637 | 0.66167  | 0.765406 | 0.801903 |
| Mmu.13611.1.S1_at   | Mmu.13611.1 | 8.47  | 8.19  | 0.07 | 0.24 | 1.22  | 0.116399 | 0.2001   | 0.393578 | 0.474603 |
| Mmu.13628.1.S1_s_at | Mmu.13628.1 | 9.74  | 10.33 | 0.25 | 0.11 | -1.5  | 0.024914 | 0.130508 | 0.211036 | 0.402373 |
| Mmu.13628.1.S1_x_at | Mmu.13628.1 | 7.29  | 7.76  | 0.42 | 0.11 | -1.38 | 0.052957 | 0.453617 | 0.287165 | 0.668054 |
| Mmu.13644.1.A1_at   | Mmu.13644.1 | 5.19  | 5.87  | 0.88 | 0.14 | -1.6  | 0.351989 | 0.041065 | 0.629589 | 0.247375 |
| Mmu.13644.1.S1_at   | Mmu.13644.1 | 4.79  | 5.65  | 0.92 | 0.45 | -1.82 | 0.361304 | 0.03686  | 0.636743 | 0.23648  |
| Mmu.13651.1.S1_s_at | Mmu.13651.1 | 9.21  | 8.79  | 0.12 | 0.21 | 1.34  | 0.028797 | 0.027607 | 0.222466 | 0.207455 |
| Mmu.13667.1.S1_s_at | Mmu.13667.1 | 13.2  | 13.09 | 0.07 | 0.03 | 1.08  | 0.089818 | 0.084802 | 0.356705 | 0.336325 |
| Mmu.1367.1.S1_at    | Mmu.1367.1  | 3.73  | 3.86  | 0.04 | 0.17 | -1.09 | 0.270516 | 0.157173 | 0.562706 | 0.432623 |
| Mmu.1367.1.S1_x_at  | Mmu.1367.1  | 4.21  | 4.21  | 0.03 | 0.09 | 1     | 0.594874 | 0.270577 | 0.795002 | 0.535837 |
| Mmu.13672.1.S1_s_at | Mmu.13672.1 | 13.53 | 13.1  | 0.14 | 0.22 | 1.34  | 0.027227 | 0.085585 | 0.217941 | 0.33757  |
| Mmu.13676.1.S1_at   | Mmu.13676.1 | 9.55  | 8.96  | 0.17 | 0.17 | 1.5   | 0.012749 | 0.0016   | 0.16307  | 0.060468 |
| Mmu.13676.1.S1_s_at | Mmu.13676.1 | 11.33 | 10.74 | 0.13 | 0.15 | 1.51  | 0.013454 | 0.002037 | 0.166741 | 0.066885 |
| Mmu.13692.1.S1_at   | Mmu.13692.1 | 11.14 | 11.33 | 0.24 | 0.09 | -1.14 | 0.305323 | 0.393594 | 0.592348 | 0.626497 |
| Mmu.13696.1.S1_at   | Mmu.13696.1 | 10.28 | 10.07 | 0.43 | 0.07 | 1.16  | 0.42355  | 0.583584 | 0.681488 | 0.751826 |
| Mmu.13707.1.S1_at   | Mmu.13707.1 | 10.21 | 10.29 | 0.06 | 0.11 | -1.06 | 0.781784 | 0.814987 | 0.900329 | 0.893221 |
| Mmu.13713.1.S1_s_at | Mmu.13713.1 | 12.9  | 12.94 | 0.09 | 0.02 | -1.03 | 0.311733 | 0.706267 | 0.597884 | 0.829634 |
| Mmu.13716.1.S1_at   | Mmu.13716.1 | 9.55  | 9.78  | 0.06 | 0.29 | -1.18 | 0.498369 | 0.271969 | 0.733594 | 0.53674  |
| Mmu.13728.1.S1_a_at | Mmu.13728.1 | 6.42  | 6.45  | 0.19 | 0.06 | -1.02 | 0.721742 | 0.958589 | 0.86896  | 0.976525 |
| Mmu.13729.1.S1_at   | Mmu.13729.1 | 3.1   | 3.47  | 0.06 | 0.21 | -1.3  | 0.03367  | 0.45038  | 0.237582 | 0.665643 |
| Mmu.13736.1.S1_at   | Mmu.13736.1 | 9.99  | 8.96  | 0.4  | 0.16 | 2.05  | 0.034744 | 0.063575 | 0.241036 | 0.298666 |
| Mmu.13746.1.S1_at   | Mmu.13746.1 | 7.44  | 7.22  | 0.14 | 0.14 | 1.16  | 0.24582  | 0.025006 | 0.541732 | 0.198121 |
| Mmu.13750.1.S1_at   | Mmu.13750.1 | 9.23  | 9.09  | 0.04 | 0.07 | 1.1   | 0.075262 | 0.368925 | 0.332504 | 0.608449 |
| Mmu.13764.1.S1_s_at | Mmu.13764.1 | 7.92  | 7.84  | 0.11 | 0.1  | 1.06  | 0.171507 | 0.360116 | 0.465492 | 0.601254 |
| Mmu.13773.1.S1_at   | Mmu.13773.1 | 9.97  | 9.66  | 0.15 | 0.12 | 1.24  | 0.094037 | 0.007213 | 0.363011 | 0.11412  |
| Mmu.13782.1.S1_at   | Mmu.13782.1 | 11.51 | 11.55 | 0.1  | 0.08 | -1.03 | 0.886647 | 0.002713 | 0.951767 | 0.076643 |
| Mmu.13787.1.S1_at   | Mmu.13787.1 | 11.84 | 11.58 | 0.23 | 0.06 | 1.19  | 0.129961 | 0.482546 | 0.412127 | 0.68734  |
| Mmu.1379.1.S1_at    | Mmu.1379.1  | 3.35  | 3.35  | 0.07 | 0.04 | 1     | 0.244051 | 0.776016 | 0.540818 | 0.869689 |
| Mmu.13791.1.S1_at   | Mmu.13791.1 | 12.13 | 12.5  | 0.27 | 0.07 | -1.29 | 0.131301 | 0.163712 | 0.414104 | 0.439902 |
| Mmu.13792.1.S1_at   | Mmu.13792.1 | 12.37 | 12.47 | 0.19 | 0.03 | -1.07 | 0.19108  | 0.51921  | 0.487272 | 0.710878 |
| Mmu.13799.1.S1_at   | Mmu.13799.1 | 10.13 | 10.02 | 0.24 | 0.2  | 1.08  | 0.555447 | 0.218267 | 0.771267 | 0.491804 |
| Mmu.13800.1.S1_at   | Mmu.13800.1 | 10.69 | 10.57 | 0.28 | 0.07 | 1.08  | 0.584569 | 0.374421 | 0.78865  | 0.612886 |
| Mmu.13804.1.S1_s_at | Mmu.13804.1 | 13.52 | 13.54 | 0.04 | 0.03 | -1.01 | 0.625498 | 0.872431 | 0.815436 | 0.927467 |

|                       |               |       |       |      |      |       |          |          |          |          |
|-----------------------|---------------|-------|-------|------|------|-------|----------|----------|----------|----------|
| Mmu.1384.2.S1_at      | Mmu.1384.2    | 3.74  | 3.68  | 0.03 | 0.08 | 1.04  | 0.412469 | 0.536078 | 0.674115 | 0.721462 |
| Mmu.13843.2.S1_s_at   | Mmu.13843.2   | 3.15  | 2.63  | 0.39 | 0.04 | 1.44  | 0.027525 | 0.011093 | 0.218484 | 0.137051 |
| Mmu.13854.1.S1_at     | Mmu.13854.1   | 6.35  | 6.11  | 0.16 | 0.12 | 1.18  | 0.266068 | 0.11231  | 0.558596 | 0.377592 |
| Mmu.13858.1.S1_at     | Mmu.13858.1   | 6.56  | 7.23  | 0.41 | 0.28 | -1.59 | 0.356169 | 0.186511 | 0.632499 | 0.462364 |
| Mmu.13865.1.S1_s_at   | Mmu.13865.1   | 13.46 | 13.66 | 2.52 | 0.09 | -1.15 | 0.310852 | 0.344647 | 0.597114 | 0.590018 |
| Mmu.13868.1.S1_at     | Mmu.13868.1   | 7.76  | 7.65  | 0.24 | 0.08 | 1.07  | 0.575481 | 0.049968 | 0.782845 | 0.268752 |
| Mmu.1387.1.A1_at      | Mmu.1387.1    | 9.09  | 8.89  | 0.3  | 0.19 | 1.14  | 0.284372 | 0.09908  | 0.574388 | 0.357215 |
| Mmu.13876.1.S1_at     | Mmu.13876.1   | 8.3   | 8.41  | 0.39 | 0.33 | -1.08 | 0.699185 | 0.78588  | 0.857139 | 0.875989 |
| Mmu.13883.1.S1_s_at   | Mmu.13883.1   | 9.22  | 9.13  | 0.19 | 0.03 | 1.07  | 0.357886 | 0.887215 | 0.633697 | 0.935788 |
| Mmu.13908.1.S1_at     | Mmu.13908.1   | 4.84  | 4.8   | 0.28 | 0.19 | 1.03  | 0.650768 | 0.787222 | 0.830365 | 0.876889 |
| Mmu.13908.2.A1_at     | Mmu.13908.2   | 2.63  | 2.7   | 0.08 | 0.02 | -1.05 | 0.305827 | 0.053054 | 0.592848 | 0.276025 |
| Mmu.13917.1.S1_at     | Mmu.13917.1   | 8.9   | 8.08  | 0.35 | 0.15 | 1.77  | 0.045708 | 0.20331  | 0.271256 | 0.477517 |
| Mmu.13923.1.S1_at     | Mmu.13923.1   | 6.64  | 6.33  | 0.03 | 0.09 | 1.24  | 0.00454  | 0.001039 | 0.11347  | 0.051426 |
| Mmu.1393.1.S1_s_at    | Mmu.1393.1    | 13.46 | 13.46 | 0.2  | 0.04 | -1    | 0.820293 | 0.965376 | 0.919875 | 0.980661 |
| Mmu.13937.1.S1_s_at   | Mmu.13937.1   | 14.17 | 13.88 | 0.1  | 0.11 | 1.22  | 0.040516 | 0.089447 | 0.257685 | 0.343748 |
| Mmu.1394.1.S1_s_at    | Mmu.1394.1    | 11.78 | 11.92 | 0.03 | 0.02 | -1.1  | 0.003183 | 0.050647 | 0.10146  | 0.270317 |
| Mmu.13944.1.A1_at     | Mmu.13944.1   | 9.96  | 9.96  | 0.4  | 0.37 | -1    | 0.962459 | 0.003841 | 0.98468  | 0.088205 |
| Mmu.13944.1.S1_at     | Mmu.13944.1   | 6.01  | 5.79  | 0.42 | 0.21 | 1.17  | 0.362627 | 0.466342 | 0.63739  | 0.67624  |
| MmuSTS.1922.1.S1_at   | MmuSTS.1922.1 | 12.28 | 12.52 | 0.14 | 0.07 | -1.18 | 0.064477 | 0.006523 | 0.310463 | 0.10961  |
| MmuSTS.1922.1.S1_s_at | MmuSTS.1922.1 | 10.2  | 10.37 | 0.33 | 0.24 | -1.12 | 0.411126 | 0.003689 | 0.673114 | 0.086591 |
| Mmu.13947.1.S1_at     | Mmu.13947.1   | 7.38  | 7.33  | 0.14 | 0.44 | 1.04  | 0.218527 | 0.261139 | 0.516172 | 0.527538 |
| Mmu.13948.1.S1_at     | Mmu.13948.1   | 4.7   | 4.58  | 0.02 | 0.22 | 1.09  | 0.518535 | 0.405502 | 0.747593 | 0.633795 |
| Mmu.13956.1.S1_at     | Mmu.13956.1   | 9.79  | 9.84  | 0.25 | 0.07 | -1.04 | 0.93577  | 0.911453 | 0.973047 | 0.950093 |
| Mmu.13959.1.S1_at     | Mmu.13959.1   | 7.88  | 7.36  | 0.21 | 0.29 | 1.43  | 0.032271 | 0.02386  | 0.233644 | 0.193489 |
| Mmu.1396.1.S1_at      | Mmu.1396.1    | 10.88 | 10.78 | 0.05 | 0.06 | 1.08  | 0.033251 | 0.02256  | 0.236446 | 0.187982 |
| Mmu.13961.1.S1_at     | Mmu.13961.1   | 10.3  | 9.88  | 0.36 | 0.07 | 1.34  | 0.12179  | 0.045232 | 0.400504 | 0.257005 |
| Mmu.13982.2.S1_at     | Mmu.13982.2   | 7.55  | 7.7   | 0.41 | 0.09 | -1.12 | 0.347809 | 0.452028 | 0.625959 | 0.666754 |
| Mmu.13989.1.S1_at     | Mmu.13989.1   | 9.27  | 9.88  | 0.18 | 0.26 | -1.52 | 0.050589 | 0.146066 | 0.282639 | 0.420074 |
| Mmu.13993.1.S1_at     | Mmu.13993.1   | 3.93  | 3.94  | 0.27 | 0.12 | -1    | 0.647707 | 0.87435  | 0.828879 | 0.928629 |
| Mmu.13995.1.A1_at     | Mmu.13995.1   | 9.96  | 9.61  | 0.12 | 0.04 | 1.28  | 0.011426 | 0.002692 | 0.157067 | 0.076455 |
| Mmu.14024.1.S1_at     | Mmu.14024.1   | 8.39  | 8.02  | 0.14 | 0.28 | 1.29  | 0.167785 | 0.133206 | 0.461083 | 0.404941 |
| Mmu.14035.1.S1_at     | Mmu.14035.1   | 9.22  | 9.16  | 0.44 | 0.13 | 1.04  | 0.631473 | 0.90359  | 0.819049 | 0.945251 |
| Mmu.14041.1.S1_at     | Mmu.14041.1   | 8.78  | 9.28  | 0.25 | 0.1  | -1.41 | 0.107858 | 0.302414 | 0.382472 | 0.560109 |
| Mmu.14057.1.S1_at     | Mmu.14057.1   | 5.17  | 5.17  | 0.04 | 0.07 | -1    | 0.278726 | 0.661887 | 0.570036 | 0.802004 |
| Mmu.14060.1.A1_at     | Mmu.14060.1   | 12.06 | 12.39 | 0.24 | 0.05 | -1.25 | 0.20827  | 0.566986 | 0.505983 | 0.740935 |
| Mmu.14063.1.S1_at     | Mmu.14063.1   | 8.43  | 8.37  | 0.42 | 0.22 | 1.04  | 0.568707 | 0.040026 | 0.778556 | 0.245244 |
| Mmu.14068.1.S1_at     | Mmu.14068.1   | 5.82  | 7.49  | 0.6  | 0.48 | -3.18 | 0.042294 | 0.174132 | 0.26264  | 0.45044  |
| Mmu.14068.2.A1_at     | Mmu.14068.2   | 7.55  | 10.01 | 1.84 | 0.52 | -5.52 | 0.09263  | 0.218161 | 0.360982 | 0.491731 |
| Mmu.14082.1.S1_at     | Mmu.14082.1   | 10.53 | 10.33 | 0.1  | 0.07 | 1.15  | 0.035821 | 0.10387  | 0.244259 | 0.364519 |
| Mmu.14100.1.S1_at     | Mmu.14100.1   | 10.5  | 9.86  | 0.09 | 0.08 | 1.55  | 0.000755 | 0.001295 | 0.072567 | 0.055585 |
| Mmu.1412.1.S1_at      | Mmu.1412.1    | 9.7   | 9.37  | 0.13 | 0.16 | 1.26  | 0.08526  | 0.101248 | 0.34932  | 0.360971 |
| Mmu.14121.1.S1_at     | Mmu.14121.1   | 7.33  | 7.07  | 0.13 | 0.16 | 1.2   | 0.094813 | 0.006637 | 0.363741 | 0.110446 |
| Mmu.14152.1.S1_at     | Mmu.14152.1   | 5.1   | 7.83  | 1.77 | 0.36 | -6.61 | 0.063422 | 0.155808 | 0.308549 | 0.431211 |

|                         |                 |       |       |      |      |        |          |          |          |          |
|-------------------------|-----------------|-------|-------|------|------|--------|----------|----------|----------|----------|
| Mmu.14166.1.S1_at       | Mmu.14166.1     | 7.11  | 6.9   | 0.14 | 0.11 | 1.16   | 0.074224 | 0.045616 | 0.330639 | 0.257766 |
| Mmu.14167.1.S1_at       | Mmu.14167.1     | 9.7   | 9.33  | 0.05 | 0.16 | 1.3    | 0.007709 | 0.002073 | 0.136673 | 0.067389 |
| Mmu.14173.1.S1_at       | Mmu.14173.1     | 11.35 | 11.36 | 0.05 | 0.11 | -1.01  | 0.812797 | 0.531612 | 0.916222 | 0.718783 |
| Mmu.14174.1.S1_at       | Mmu.14174.1     | 9.61  | 9.38  | 0.33 | 0.06 | 1.17   | 0.72414  | 0.489029 | 0.870433 | 0.691559 |
| Mmu.14177.1.S1_at       | Mmu.14177.1     | 9.28  | 9.4   | 0.29 | 0.28 | -1.08  | 0.766988 | 0.204189 | 0.893101 | 0.478507 |
| Mmu.14179.2.S1_at       | Mmu.14179.2     | 9.99  | 10.04 | 0.13 | 0.16 | -1.04  | 0.690707 | 0.607935 | 0.85214  | 0.76668  |
| Mmu.14179.2.S1_x_at     | Mmu.14179.2     | 10.15 | 10.14 | 0.02 | 0.15 | 1.01   | 0.472801 | 0.562688 | 0.716343 | 0.7381   |
| Mmu.14180.1.S1_at       | Mmu.14180.1     | 8.1   | 8.28  | 0.05 | 0.17 | -1.13  | 0.623627 | 0.246508 | 0.814327 | 0.515917 |
| Mmu.14181.1.S1_at       | Mmu.14181.1     | 10.56 | 10.17 | 0.14 | 0.02 | 1.31   | 0.019034 | 0.019534 | 0.19148  | 0.175505 |
| Mmu.14202.1.S1_at       | Mmu.14202.1     | 12.29 | 12.27 | 0.09 | 0.17 | 1.02   | 0.475393 | 0.004451 | 0.718106 | 0.092997 |
| Mmu.14209.1.A1_at       | Mmu.14209.1     | 4.12  | 3.87  | 0.12 | 0.65 | 1.19   | 0.679302 | 0.872492 | 0.84701  | 0.927494 |
| Mmu.14209.1.S1_at       | Mmu.14209.1     | 3.18  | 3.12  | 0.14 | 0.51 | 1.04   | 0.66682  | 0.70263  | 0.840039 | 0.827641 |
| Mmu.14221.2.S1_at       | Mmu.14221.2     | 7.88  | 8.29  | 0.75 | 0.21 | -1.33  | 0.150659 | 0.243801 | 0.439741 | 0.513949 |
| Mmu.14247.1.S1_at       | Mmu.14247.1     | 3.62  | 4.07  | 0.21 | 0.26 | -1.36  | 0.147475 | 0.263881 | 0.435407 | 0.530118 |
| Mmu.14249.1.S1_at       | Mmu.14249.1     | 4.19  | 7.66  | 1.37 | 0.35 | -11.03 | 0.031364 | 0.118447 | 0.23018  | 0.386431 |
| Mmu.1425.1.S1_at        | Mmu.1425.1      | 9.88  | 7.13  | 0.77 | 0.38 | 6.71   | 0.006779 | 0.008842 | 0.129089 | 0.124493 |
| Mmu.1426.1.S1_at        | Mmu.1426.1      | 10.91 | 8.27  | 0.76 | 0.4  | 6.24   | 0.004928 | 0.008277 | 0.115175 | 0.12078  |
| Mmu.14263.2.S1_at       | Mmu.14263.2     | 8.14  | 8.55  | 0.12 | 0    | -1.33  | 0.007263 | 0.002341 | 0.13284  | 0.071588 |
| MmugDNA.26809.1.S1_s_at | MmugDNA.26809.1 | 13.73 | 13.63 | 0.08 | 0.03 | 1.08   | 0.105094 | 0.282192 | 0.378837 | 0.544949 |
| Mmu.14275.1.S1_at       | Mmu.14275.1     | 10.97 | 10.47 | 0.18 | 0.08 | 1.42   | 0.01621  | 0.094417 | 0.17999  | 0.351036 |
| Mmu.14298.1.S1_at       | Mmu.14298.1     | 5.21  | 5.09  | 0.17 | 0.13 | 1.09   | 0.824525 | 0.086424 | 0.922021 | 0.338882 |
| Mmu.14306.1.S1_s_at     | Mmu.14306.1     | 11.24 | 11.3  | 0.11 | 0.33 | -1.05  | 0.780699 | 0.144537 | 0.899918 | 0.418408 |
| Mmu.14311.1.S1_at       | Mmu.14311.1     | 6.07  | 7.6   | 0.44 | 0.27 | -2.9   | 0.013972 | 0.167842 | 0.169288 | 0.444426 |
| Mmu.14315.1.S1_at       | Mmu.14315.1     | 7.42  | 7.28  | 0.27 | 0.14 | 1.11   | 0.695747 | 0.735426 | 0.855027 | 0.846919 |
| Mmu.14317.2.S1_at       | Mmu.14317.2     | 9.89  | 9.89  | 0.25 | 0.11 | 1      | 0.704998 | 0.62185  | 0.860057 | 0.776413 |
| Mmu.14327.1.S1_at       | Mmu.14327.1     | 11.77 | 11.26 | 0.09 | 0.02 | 1.42   | 0.000482 | 0.004406 | 0.067773 | 0.092846 |
| Mmu.14341.1.S1_at       | Mmu.14341.1     | 7.2   | 6.98  | 0.36 | 0.07 | 1.17   | 0.898196 | 0.822113 | 0.956732 | 0.897658 |
| Mmu.14369.1.S1_at       | Mmu.14369.1     | 4.64  | 4.61  | 0.16 | 0.24 | 1.02   | 0.778207 | 0.10346  | 0.89867  | 0.364346 |
| Mmu.14389.1.S1_at       | Mmu.14389.1     | 7.52  | 7.61  | 0.16 | 0.08 | -1.06  | 0.171252 | 0.121029 | 0.465154 | 0.390038 |
| Mmu.14395.1.S1_at       | Mmu.14395.1     | 11.62 | 11.25 | 0.33 | 0.07 | 1.3    | 0.041491 | 0.081629 | 0.260097 | 0.329824 |
| Mmu.14396.1.S1_at       | Mmu.14396.1     | 11.1  | 10.65 | 0.18 | 0.1  | 1.36   | 0.081516 | 0.087606 | 0.342512 | 0.340846 |
| Mmu.1440.1.S1_at        | Mmu.1440.1      | 9.17  | 9.12  | 0.1  | 0.05 | 1.03   | 0.86795  | 0.993824 | 0.943108 | 0.996274 |
| Mmu.14402.2.A1_at       | Mmu.14402.2     | 5.07  | 6.48  | 0.16 | 0.17 | -2.65  | 0.000652 | 0.01058  | 0.071241 | 0.134213 |
| Mmu.14402.2.S1_at       | Mmu.14402.2     | 5.52  | 5.52  | 0.12 | 0.04 | 1      | 0.729182 | 0.417727 | 0.873455 | 0.642382 |
| Mmu.14426.1.S1_at       | Mmu.14426.1     | 4.07  | 4.38  | 0.27 | 0.1  | -1.23  | 0.61522  | 0.681316 | 0.808763 | 0.813957 |
| Mmu.14429.1.A1_at       | Mmu.14429.1     | 5.6   | 5.76  | 0.18 | 0.35 | -1.12  | 0.306473 | 0.50329  | 0.593297 | 0.700767 |
| Mmu.14429.1.S1_at       | Mmu.14429.1     | 3.95  | 4.34  | 0.17 | 0.35 | -1.31  | 0.106616 | 0.145852 | 0.380827 | 0.419888 |
| Mmu.14431.1.S1_at       | Mmu.14431.1     | 4.37  | 4.43  | 0    | 0.09 | -1.05  | 0.194386 | 0.792911 | 0.491028 | 0.880392 |
| Mmu.14436.1.S1_at       | Mmu.14436.1     | 6.12  | 10.85 | 2.15 | 0.27 | -26.49 | 0.052242 | 0.269616 | 0.285979 | 0.534868 |
| Mmu.14440.1.S1_at       | Mmu.14440.1     | 7.5   | 7.71  | 0.32 | 0.13 | -1.16  | 0.411744 | 0.352246 | 0.673646 | 0.595568 |
| Mmu.14441.1.S1_at       | Mmu.14441.1     | 10.26 | 9.86  | 0.14 | 0.12 | 1.32   | 0.03343  | 0.024472 | 0.236786 | 0.195777 |
| Mmu.14442.2.S1_at       | Mmu.14442.2     | 5.9   | 6.07  | 0.17 | 0.11 | -1.13  | 0.111873 | 0.304533 | 0.387979 | 0.561803 |
| Mmu.14456.1.S1_at       | Mmu.14456.1     | 10.43 | 10.12 | 0.11 | 0.14 | 1.24   | 0.033691 | 0.020305 | 0.237697 | 0.178871 |

|                         |                 |       |       |      |      |       |          |          |          |          |
|-------------------------|-----------------|-------|-------|------|------|-------|----------|----------|----------|----------|
| Mmu.14457.1.S1_at       | Mmu.14457.1     | 8.49  | 8.35  | 0.36 | 0.14 | 1.1   | 0.352291 | 0.085574 | 0.629865 | 0.337567 |
| Mmu.1447.1.A1_at        | Mmu.1447.1      | 5.78  | 5.85  | 0.03 | 0.08 | -1.04 | 0.436521 | 0.014014 | 0.691456 | 0.151595 |
| Mmu.1447.1.S1_at        | Mmu.1447.1      | 6.58  | 6.51  | 0.2  | 0.07 | 1.05  | 0.518013 | 0.124132 | 0.747127 | 0.394389 |
| Mmu.14488.1.S1_x_at     | Mmu.14488.1     | 5.77  | 5.79  | 0.09 | 0.55 | -1.01 | 0.699804 | 0.282174 | 0.857461 | 0.544937 |
| Mmu.14495.1.S1_at       | Mmu.14495.1     | 11.41 | 11.1  | 0.09 | 0.06 | 1.25  | 0.007651 | 0.001677 | 0.136051 | 0.061994 |
| Mmu.14509.2.S1_at       | Mmu.14509.2     | 11.55 | 10.94 | 0.26 | 0.08 | 1.53  | 0.01187  | 0.015816 | 0.159011 | 0.159476 |
| Mmu.1451.1.S1_at        | Mmu.1451.1      | 13.1  | 13.05 | 0.07 | 0.05 | 1.04  | 0.4061   | 0.006601 | 0.669551 | 0.110088 |
| Mmu.14510.1.S2_at       | Mmu.14510.1     | 2.62  | 2.76  | 0.12 | 0.06 | -1.1  | 0.64115  | 0.288843 | 0.824661 | 0.549981 |
| MmuSTS.4665.1.S1_at     | MmuSTS.4665.1   | 6.12  | 6.15  | 0.31 | 0.02 | -1.02 | 0.888429 | 0.93371  | 0.952422 | 0.962289 |
| MmuSTS.4665.1.S1_s_at   | MmuSTS.4665.1   | 8.5   | 8.62  | 0.19 | 0.07 | -1.09 | 0.609789 | 0.980106 | 0.805498 | 0.989236 |
| Mmu.14519.1.S1_at       | Mmu.14519.1     | 9.64  | 10.49 | 0.22 | 0.05 | -1.81 | 0.004713 | 0.001442 | 0.115008 | 0.057912 |
| Mmu.14534.1.S1_at       | Mmu.14534.1     | 5.48  | 5.05  | 0.42 | 0.12 | 1.35  | 0.245758 | 0.156686 | 0.541732 | 0.432182 |
| Mmu.14535.1.S1_at       | Mmu.14535.1     | 12.05 | 11.98 | 0.1  | 0.01 | 1.05  | 0.913238 | 0.00357  | 0.963343 | 0.085525 |
| MmugDNA.29503.1.S1_s_at | MmugDNA.29503.1 | 11.26 | 11.27 | 0.11 | 0.05 | -1.01 | 0.745022 | 0.004041 | 0.881771 | 0.090281 |
| Mmu.14551.1.S1_at       | Mmu.14551.1     | 5.17  | 5.02  | 0.15 | 0.19 | 1.11  | 0.58135  | 0.743538 | 0.786474 | 0.851395 |
| Mmu.14552.1.S1_a_at     | Mmu.14552.1     | 3.11  | 3.17  | 0.09 | 0.21 | -1.04 | 0.267439 | 0.483878 | 0.560259 | 0.688227 |
| Mmu.15973.50.S1_x_at    | Mmu.15973.50    | 5.88  | 5.88  | 0.35 | 0.23 | 1     | 0.897865 | 0.541913 | 0.956621 | 0.725146 |
| Mmu.14560.3.S1_at       | Mmu.14560.3     | 5.83  | 5.9   | 0.1  | 0.09 | -1.04 | 0.942113 | 0.820544 | 0.975589 | 0.896648 |
| Mmu.14562.1.S1_at       | Mmu.14562.1     | 9.71  | 8.39  | 0.66 | 0.2  | 2.5   | 0.030943 | 0.021243 | 0.229015 | 0.182465 |
| Mmu.1457.1.S1_at        | Mmu.1457.1      | 5.11  | 5.25  | 0.27 | 0.19 | -1.1  | 0.778342 | 0.736608 | 0.89874  | 0.847627 |
| Mmu.1457.1.S1_x_at      | Mmu.1457.1      | 5.11  | 5.18  | 0.1  | 0.14 | -1.05 | 0.866918 | 0.975955 | 0.942483 | 0.986856 |
| Mmu.14571.1.S1_at       | Mmu.14571.1     | 3.1   | 3.09  | 0.13 | 0.06 | 1.01  | 0.616714 | 0.754861 | 0.80962  | 0.857323 |
| Mmu.14583.1.S1_at       | Mmu.14583.1     | 10.12 | 9.85  | 0.17 | 0.11 | 1.2   | 0.122272 | 0.019028 | 0.40112  | 0.173644 |
| Mmu.14589.1.A1_at       | Mmu.14589.1     | 10.33 | 10.53 | 0.06 | 0.13 | -1.15 | 0.036198 | 0.058548 | 0.245335 | 0.288669 |
| Mmu.14593.1.S1_at       | Mmu.14593.1     | 9.81  | 10.62 | 0.14 | 0.09 | -1.75 | 0.001818 | 0.074434 | 0.08633  | 0.318062 |
| Mmu.6867.1.S1_at        | Mmu.6867.1      | 2.8   | 2.86  | 0.2  | 0.07 | -1.04 | 0.66009  | 0.721604 | 0.836024 | 0.838759 |
| Mmu.6867.1.S1_s_at      | Mmu.6867.1      | 14.02 | 13.92 | 0.96 | 0.09 | 1.07  | 0.424314 | 0.53423  | 0.682074 | 0.720204 |
| Mmu.14635.1.S1_s_at     | Mmu.14635.1     | 5.28  | 5.1   | 0.65 | 0.27 | 1.14  | 0.429558 | 0.609219 | 0.685945 | 0.767677 |
| Mmu.14640.1.S1_x_at     | Mmu.14640.1     | 8.66  | 8.41  | 0.21 | 0.15 | 1.19  | 0.389966 | 0.592555 | 0.657614 | 0.757844 |
| Mmu.14669.1.S1_at       | Mmu.14669.1     | 8.16  | 8.02  | 0.11 | 0.2  | 1.1   | 0.147135 | 0.255895 | 0.435192 | 0.523862 |
| Mmu.14676.1.S1_at       | Mmu.14676.1     | 5.43  | 5.43  | 0.27 | 0.05 | 1     | 0.396109 | 0.644368 | 0.662207 | 0.791566 |
| Mmu.14695.1.A1_at       | Mmu.14695.1     | 7.36  | 7.21  | 0.08 | 0.11 | 1.1   | 0.116944 | 0.650539 | 0.394034 | 0.795663 |
| Mmu.14710.1.S1_at       | Mmu.14710.1     | 4.71  | 4.78  | 0.09 | 0    | -1.05 | 0.190826 | 0.031283 | 0.486998 | 0.218752 |
| Mmu.14712.1.S1_at       | Mmu.14712.1     | 12.65 | 12.7  | 0.08 | 0.07 | -1.03 | 0.570455 | 0.515395 | 0.779298 | 0.708274 |
| Mmu.14715.2.S1_at       | Mmu.14715.2     | 3.54  | 3.62  | 0.14 | 0.07 | -1.06 | 0.65953  | 0.095485 | 0.835568 | 0.352525 |
| Mmu.14728.1.S1_at       | Mmu.14728.1     | 9.32  | 9.68  | 0.31 | 0.13 | -1.29 | 0.065957 | 0.468288 | 0.314271 | 0.6777   |
| Mmu.14737.1.S1_s_at     | Mmu.14737.1     | 13.93 | 13.97 | 0.05 | 0.05 | -1.03 | 0.846107 | 0.934986 | 0.932777 | 0.96319  |
| Mmu.14749.1.S1_s_at     | Mmu.14749.1     | 8.13  | 7.56  | 0.13 | 0.11 | 1.48  | 0.002764 | 0.041354 | 0.097385 | 0.247995 |
| Mmu.1477.1.S1_at        | Mmu.1477.1      | 9.42  | 9.91  | 0.58 | 0.11 | -1.41 | 0.446521 | 0.740046 | 0.698755 | 0.849396 |
| Mmu.14771.1.S1_at       | Mmu.14771.1     | 8.89  | 9.91  | 0.61 | 0.52 | -2.03 | 0.268603 | 0.014157 | 0.561154 | 0.152107 |
| Mmu.14774.1.S1_at       | Mmu.14774.1     | 10.57 | 10.61 | 0.37 | 0.1  | -1.03 | 0.487499 | 0.633017 | 0.726309 | 0.783894 |
| Mmu.14785.1.S1_at       | Mmu.14785.1     | 7.99  | 7.93  | 0.14 | 0.19 | 1.04  | 0.254386 | 0.078552 | 0.54882  | 0.325285 |
| Mmu.14786.1.S1_at       | Mmu.14786.1     | 10.14 | 9.81  | 0.15 | 0.23 | 1.26  | 0.047708 | 0.068103 | 0.275878 | 0.307142 |



|                         |                 |       |       |      |      |        |          |          |          |          |
|-------------------------|-----------------|-------|-------|------|------|--------|----------|----------|----------|----------|
| Mmu.14787.1.S1_at       | Mmu.14787.1     | 8.53  | 8.31  | 0.09 | 0.12 | 1.17   | 0.088196 | 0.224656 | 0.354244 | 0.497613 |
| Mmu.14792.1.S1_at       | Mmu.14792.1     | 9.68  | 11.07 | 0.4  | 0.12 | -2.62  | 0.008781 | 0.140105 | 0.143445 | 0.413394 |
| Mmu.14795.1.S1_at       | Mmu.14795.1     | 11.51 | 11.28 | 0.13 | 0.07 | 1.17   | 0.032722 | 0.141148 | 0.234993 | 0.414665 |
| Mmu.14798.1.S1_s_at     | Mmu.14798.1     | 8.95  | 9.05  | 0.19 | 0.19 | -1.07  | 0.607248 | 0.914541 | 0.803617 | 0.95196  |
| Mmu.14801.1.S1_at       | Mmu.14801.1     | 12.3  | 12.24 | 0.14 | 0.05 | 1.04   | 0.47683  | 0.417721 | 0.719108 | 0.642382 |
| MmugDNA.37414.1.S1_s_at | MmugDNA.37414.1 | 12.25 | 12.3  | 0.16 | 0.07 | -1.04  | 0.764045 | 0.301298 | 0.891902 | 0.559356 |
| Mmu.14807.1.S1_s_at     | Mmu.14807.1     | 12.46 | 12.2  | 0.09 | 0.07 | 1.19   | 0.011056 | 0.006609 | 0.154821 | 0.110149 |
| Mmu.14809.1.S1_at       | Mmu.14809.1     | 6.57  | 6.71  | 0.09 | 0.11 | -1.11  | 0.219672 | 0.368052 | 0.51742  | 0.607669 |
| Mmu.1481.2.S1_at        | Mmu.1481.2      | 5.42  | 5.16  | 0.15 | 0.11 | 1.2    | 0.09241  | 0.056446 | 0.360509 | 0.283516 |
| Mmu.1481.2.S1_s_at      | Mmu.1481.2      | 8.85  | 9.42  | 0.41 | 0.16 | -1.48  | 0.164535 | 0.000096 | 0.457688 | 0.027665 |
| Mmu.14814.1.S1_at       | Mmu.14814.1     | 9.12  | 10.13 | 0.34 | 0.16 | -2.01  | 0.024918 | 0.042628 | 0.211036 | 0.251037 |
| Mmu.14836.1.S1_at       | Mmu.14836.1     | 10.91 | 11.21 | 0.1  | 0.18 | -1.23  | 0.30507  | 0.452472 | 0.592048 | 0.667111 |
| Mmu.14838.1.S1_at       | Mmu.14838.1     | 12.05 | 12    | 0.18 | 0.15 | 1.03   | 0.397833 | 0.104443 | 0.66332  | 0.365719 |
| Mmu.1485.1.S1_at        | Mmu.1485.1      | 8.15  | 11.8  | 1.7  | 0.22 | -12.51 | 0.061672 | 0.294046 | 0.30493  | 0.553912 |
| Mmu.14856.1.A1_at       | Mmu.14856.1     | 11.27 | 12.05 | 0.24 | 0.18 | -1.72  | 0.020407 | 0.057151 | 0.1964   | 0.284972 |
| Mmu.14866.1.S1_at       | Mmu.14866.1     | 10.93 | 11.1  | 0.39 | 0.14 | -1.12  | 0.189791 | 0.008784 | 0.486228 | 0.124066 |
| Mmu.14874.1.S1_at       | Mmu.14874.1     | 6.57  | 6.83  | 0.36 | 0.11 | -1.2   | 0.391148 | 0.84206  | 0.658623 | 0.910022 |
| MmugDNA.40586.1.S1_s_at | MmugDNA.40586.1 | 6.74  | 8.12  | 0.65 | 0.23 | -2.61  | 0.011896 | 0.008914 | 0.159207 | 0.12491  |
| Mmu.14893.1.S1_x_at     | Mmu.14893.1     | 3.21  | 3.91  | 0.82 | 0.32 | -1.62  | 0.615161 | 0.722074 | 0.808746 | 0.838998 |
| Mmu.14901.1.S1_at       | Mmu.14901.1     | 7.06  | 6.97  | 0.37 | 0.28 | 1.07   | 0.383848 | 0.240197 | 0.65303  | 0.51084  |
| Mmu.14917.1.S1_s_at     | Mmu.14917.1     | 4.27  | 5.93  | 0.38 | 0.32 | -3.16  | 0.00676  | 0.001497 | 0.128994 | 0.058967 |
| Mmu.14917.2.S1_at       | Mmu.14917.2     | 2.99  | 3.03  | 0.09 | 0.04 | -1.03  | 0.501576 | 0.012966 | 0.735407 | 0.146523 |
| Mmu.14931.1.A1_at       | Mmu.14931.1     | 13.3  | 12.98 | 0.01 | 0.07 | 1.25   | 0.001523 | 0.000009 | 0.081668 | 0.016421 |
| Mmu.14932.1.S1_at       | Mmu.14932.1     | 8.45  | 8.68  | 0.09 | 0.22 | -1.17  | 0.483255 | 0.46882  | 0.723431 | 0.677906 |
| Mmu.14942.1.S1_at       | Mmu.14942.1     | 3.91  | 4.01  | 0.1  | 0.16 | -1.07  | 0.091956 | 0.052597 | 0.359946 | 0.274853 |
| Mmu.7847.1.S1_s_at      | Mmu.7847.1      | 10.06 | 10.21 | 0.22 | 0.12 | -1.1   | 0.345378 | 0.329903 | 0.624372 | 0.578874 |
| Mmu.14945.2.S1_at       | Mmu.14945.2     | 9.3   | 9.6   | 0.13 | 0.18 | -1.23  | 0.181412 | 0.096701 | 0.476893 | 0.35417  |
| Mmu.14958.1.S1_at       | Mmu.14958.1     | 9.44  | 9.37  | 0.08 | 0.2  | 1.05   | 0.264572 | 0.010506 | 0.557815 | 0.133936 |
| Mmu.14962.1.S1_at       | Mmu.14962.1     | 9.7   | 9.43  | 0.04 | 0.04 | 1.2    | 0.001382 | 0.000037 | 0.079595 | 0.023051 |
| Mmu.14966.1.S1_at       | Mmu.14966.1     | 9.17  | 8.92  | 0.3  | 0.16 | 1.19   | 0.126153 | 0.141183 | 0.407197 | 0.414709 |
| Mmu.1499.1.S1_at        | Mmu.1499.1      | 6.69  | 7.31  | 0.29 | 0.16 | -1.54  | 0.041907 | 0.13349  | 0.261591 | 0.405385 |
| Mmu.14994.1.S1_at       | Mmu.14994.1     | 4.47  | 4.57  | 0.23 | 0.05 | -1.07  | 0.610466 | 0.355793 | 0.805859 | 0.597864 |
| Mmu.150.1.S1_at         | Mmu.150.1       | 10.85 | 10.81 | 0.3  | 0.03 | 1.03   | 0.851718 | 0.412361 | 0.935451 | 0.638793 |
| Mmu.15003.1.S1_at       | Mmu.15003.1     | 10.45 | 10.15 | 0.08 | 0.07 | 1.24   | 0.010543 | 0.127296 | 0.152509 | 0.398032 |
| Mmu.15003.1.S1_s_at     | Mmu.15003.1     | 11.07 | 10.82 | 0.07 | 0.08 | 1.19   | 0.013264 | 0.165715 | 0.165811 | 0.441982 |
| Mmu.15003.1.S1_x_at     | Mmu.15003.1     | 10.56 | 10.35 | 0.09 | 0.08 | 1.16   | 0.042598 | 0.357797 | 0.263508 | 0.599418 |
| Mmu.15008.1.S1_at       | Mmu.15008.1     | 10.35 | 11.11 | 0.59 | 0.13 | -1.7   | 0.042569 | 0.006509 | 0.263399 | 0.109521 |
| Mmu.15009.1.S1_at       | Mmu.15009.1     | 6.94  | 7.1   | 0.14 | 0.04 | -1.12  | 0.07201  | 0.010545 | 0.326234 | 0.134072 |
| Mmu.15028.1.S1_at       | Mmu.15028.1     | 4.98  | 5.09  | 0.41 | 0.21 | -1.08  | 0.9898   | 0.981069 | 0.996439 | 0.989567 |
| Mmu.15029.1.A1_at       | Mmu.15029.1     | 3.36  | 3.23  | 0.2  | 0.15 | 1.09   | 0.684961 | 0.906217 | 0.849869 | 0.94693  |
| Mmu.15029.1.S1_at       | Mmu.15029.1     | 3.22  | 3.24  | 0.22 | 0.11 | -1.02  | 0.971247 | 0.541349 | 0.988525 | 0.724874 |
| Mmu.15032.1.S1_at       | Mmu.15032.1     | 11.97 | 11.75 | 0.1  | 0.22 | 1.16   | 0.052888 | 0.389299 | 0.287028 | 0.623403 |
| Mmu.15035.1.S1_at       | Mmu.15035.1     | 5.41  | 6.72  | 0.52 | 0.18 | -2.48  | 0.013346 | 0.200402 | 0.166276 | 0.474782 |

|                         |                 |       |       |      |      |       |          |          |          |          |
|-------------------------|-----------------|-------|-------|------|------|-------|----------|----------|----------|----------|
| Mmu.15041.1.S1_at       | Mmu.15041.1     | 9.35  | 9.8   | 0.76 | 0.13 | -1.37 | 0.300985 | 0.0857   | 0.589056 | 0.337761 |
| Mmu.15054.1.S1_at       | Mmu.15054.1     | 11.26 | 11.62 | 0.15 | 0.08 | -1.28 | 0.02327  | 0.062656 | 0.205562 | 0.297022 |
| Mmu.15056.1.S2_at       | Mmu.15056.1     | 4.31  | 4.87  | 0.26 | 0.07 | -1.47 | 0.076699 | 0.205753 | 0.335042 | 0.48007  |
| Mmu.15059.1.S1_at       | Mmu.15059.1     | 8.49  | 8.35  | 0.07 | 0.24 | 1.1   | 0.134631 | 0.1679   | 0.418463 | 0.444485 |
| Mmu.15062.1.S1_at       | Mmu.15062.1     | 9.12  | 9.21  | 0.02 | 0.06 | -1.07 | 0.099297 | 0.277141 | 0.370274 | 0.541154 |
| Mmu.15077.1.S1_at       | Mmu.15077.1     | 11.65 | 11.51 | 0.07 | 0.03 | 1.11  | 0.009346 | 0.018069 | 0.146531 | 0.169379 |
| Mmu.15102.1.S1_at       | Mmu.15102.1     | 9.32  | 9.31  | 0.09 | 0.04 | 1     | 0.650675 | 0.046473 | 0.830313 | 0.260113 |
| Mmu.15103.2.A1_at       | Mmu.15103.2     | 4.03  | 4.03  | 0.07 | 0.08 | 1.01  | 0.458444 | 0.183288 | 0.707032 | 0.459553 |
| Mmu.15103.2.S1_at       | Mmu.15103.2     | 5.37  | 5.41  | 0.1  | 0.07 | -1.02 | 0.419785 | 0.204653 | 0.679042 | 0.479012 |
| MmugDNA.13086.1.S1_s_at | MmugDNA.13086.1 | 10.34 | 11.02 | 0.51 | 0.34 | -1.6  | 0.125607 | 0.171133 | 0.406238 | 0.447694 |
| Mmu.15115.1.S1_at       | Mmu.15115.1     | 10.94 | 10.57 | 0.03 | 0.07 | 1.29  | 0.001406 | 0.017283 | 0.07964  | 0.166461 |
| MmugDNA.35753.1.S1_at   | MmugDNA.35753.1 | 4.5   | 4.3   | 0.38 | 0.18 | 1.15  | 0.224289 | 0.322168 | 0.522499 | 0.573758 |
| MmugDNA.35753.1.S1_s_at | MmugDNA.35753.1 | 10.66 | 10.27 | 0.22 | 0.21 | 1.31  | 0.07916  | 0.069071 | 0.338971 | 0.30905  |
| Mmu.15125.1.S1_at       | Mmu.15125.1     | 7.55  | 6.87  | 0.1  | 0.02 | 1.61  | 0.000246 | 0.096121 | 0.054642 | 0.353345 |
| Mmu.15143.1.S1_at       | Mmu.15143.1     | 8.78  | 8.9   | 0.25 | 0.24 | -1.08 | 0.326085 | 0.67728  | 0.609284 | 0.811578 |
| Mmu.15145.1.A1_at       | Mmu.15145.1     | 6.07  | 6.15  | 0.11 | 0.04 | -1.06 | 0.217148 | 0.755511 | 0.514939 | 0.857658 |
| Mmu.15145.1.A1_x_at     | Mmu.15145.1     | 6.08  | 6.12  | 0.05 | 0.29 | -1.02 | 0.249616 | 0.481326 | 0.544677 | 0.686365 |
| Mmu.15162.1.S1_at       | Mmu.15162.1     | 6.37  | 6.29  | 0.19 | 0.11 | 1.06  | 0.513696 | 0.364683 | 0.743872 | 0.605001 |
| Mmu.1520.2.S1_at        | Mmu.1520.2      | 11.39 | 11.22 | 0.11 | 0.17 | 1.12  | 0.157028 | 0.092372 | 0.447872 | 0.348294 |
| Mmu.15219.1.S1_at       | Mmu.15219.1     | 6.72  | 7.32  | 1.55 | 0.18 | -1.52 | 0.810783 | 0.982359 | 0.91525  | 0.990358 |
| Mmu.15231.1.S1_at       | Mmu.15231.1     | 9.39  | 9.34  | 0.03 | 0.1  | 1.04  | 0.386476 | 0.002898 | 0.654936 | 0.079107 |
| Mmu.15242.1.S1_at       | Mmu.15242.1     | 9.98  | 9.34  | 0.04 | 0.1  | 1.56  | 0.000436 | 0.062238 | 0.064996 | 0.296307 |
| Mmu.15247.1.S1_s_at     | Mmu.15247.1     | 4.87  | 4.63  | 0.26 | 0.1  | 1.18  | 0.173942 | 0.099044 | 0.468349 | 0.357183 |
| Mmu.15247.26.S1_x_at    | Mmu.15247.26    | 3.7   | 3.87  | 0.14 | 0.52 | -1.13 | 0.223145 | 0.501993 | 0.520981 | 0.699986 |
| Mmu.15247.11.S1_s_at    | Mmu.15247.11    | 2.95  | 2.82  | 0.13 | 0.1  | 1.09  | 0.325019 | 0.50903  | 0.608497 | 0.703967 |
| Mmu.15247.13.S1_at      | Mmu.15247.13    | 3.28  | 3.29  | 0.05 | 0.11 | -1.01 | 0.666258 | 0.103728 | 0.839607 | 0.364519 |
| Mmu.15247.13.S1_x_at    | Mmu.15247.13    | 3.19  | 3.22  | 0.22 | 0    | -1.02 | 0.459942 | 0.805912 | 0.707972 | 0.888395 |
| Mmu.15247.15.S1_x_at    | Mmu.15247.15    | 3.72  | 4.06  | 0.2  | 0.43 | -1.26 | 0.175632 | 0.196984 | 0.470125 | 0.472099 |
| Mmu.15247.16.S1_x_at    | Mmu.15247.16    | 5.55  | 5.55  | 0    | 0.08 | 1     | 0.391954 | 0.489497 | 0.658975 | 0.691824 |
| Mmu.15247.18.S1_at      | Mmu.15247.18    | 3.64  | 3.56  | 0.2  | 0.28 | 1.06  | 0.692738 | 0.864312 | 0.853153 | 0.923012 |
| Mmu.15247.23.S1_x_at    | Mmu.15247.23    | 4.3   | 4.41  | 0.11 | 0.22 | -1.08 | 0.341277 | 0.463805 | 0.621204 | 0.674656 |
| Mmu.9242.6.S1_x_at      | Mmu.9242.6      | 6.05  | 6.18  | 0.08 | 0.23 | -1.1  | 0.95307  | 0.144723 | 0.980674 | 0.418549 |
| Mmu.15247.21.S1_x_at    | Mmu.15247.21    | 4.42  | 3.42  | 0.93 | 0.36 | 2     | 0.302399 | 0.234032 | 0.590249 | 0.505312 |
| Mmu.15247.25.S1_x_at    | Mmu.15247.25    | 6.33  | 5.99  | 0.54 | 0.41 | 1.27  | 0.429053 | 0.599181 | 0.685584 | 0.761359 |
| Mmu.15247.3.S1_x_at     | Mmu.15247.3     | 6.06  | 5.91  | 0.64 | 0.47 | 1.11  | 0.683917 | 0.919867 | 0.849274 | 0.954947 |
| Mmu.15247.33.S1_at      | Mmu.15247.33    | 5.14  | 5.65  | 0.14 | 0.25 | -1.42 | 0.035192 | 0.080871 | 0.242214 | 0.328841 |
| Mmu.15247.40.S1_at      | Mmu.15247.40    | 7.82  | 8.06  | 0.72 | 0.35 | -1.19 | 0.726742 | 0.368217 | 0.871856 | 0.607811 |
| Mmu.15247.8.S1_x_at     | Mmu.15247.8     | 2.56  | 2.62  | 0.05 | 0.02 | -1.04 | 0.417168 | 0.770264 | 0.677384 | 0.866566 |
| Mmu.15247.42.S1_s_at    | Mmu.15247.42    | 2.73  | 2.71  | 0.16 | 0.05 | 1.01  | 0.544567 | 0.483619 | 0.764148 | 0.688067 |
| Mmu.15247.43.S1_at      | Mmu.15247.43    | 2.84  | 2.82  | 0.1  | 0.09 | 1.02  | 0.831692 | 0.731087 | 0.925994 | 0.844197 |
| Mmu.15247.44.S1_x_at    | Mmu.15247.44    | 3.27  | 3.18  | 0.13 | 0.05 | 1.06  | 0.225995 | 0.220732 | 0.523718 | 0.494199 |
| Mmu.15247.45.S1_x_at    | Mmu.15247.45    | 7.76  | 7.34  | 0.07 | 0.1  | 1.33  | 0.00798  | 0.013907 | 0.138394 | 0.151286 |
| Mmu.15247.7.S1_s_at     | Mmu.15247.7     | 3.18  | 3.02  | 0.07 | 0.18 | 1.12  | 0.183023 | 0.250416 | 0.478868 | 0.519391 |

|                         |                 |       |       |      |      |       |          |          |          |          |
|-------------------------|-----------------|-------|-------|------|------|-------|----------|----------|----------|----------|
| Mmu.15249.2.S1_at       | Mmu.15249.2     | 12.42 | 12.12 | 0.12 | 0.11 | 1.24  | 0.019456 | 0.009247 | 0.192344 | 0.126966 |
| MmugDNA.41786.1.S1_s_at | MmugDNA.41786.1 | 13.71 | 13.61 | 0.11 | 0.03 | 1.08  | 0.073975 | 0.079091 | 0.330014 | 0.326184 |
| Mmu.1526.1.S1_a_at      | Mmu.1526.1      | 5.43  | 5.79  | 0.13 | 0.12 | -1.28 | 0.013676 | 0.134299 | 0.167855 | 0.406573 |
| Mmu.1527.1.S1_at        | Mmu.1527.1      | 7.68  | 7.21  | 0.16 | 0.1  | 1.38  | 0.011361 | 0.064934 | 0.156784 | 0.300855 |
| Mmu.15276.1.S1_s_at     | Mmu.15276.1     | 12.31 | 10.52 | 0.47 | 0.16 | 3.45  | 0.003234 | 0.008105 | 0.101775 | 0.119551 |
| Mmu.15280.1.S1_at       | Mmu.15280.1     | 8.29  | 9.19  | 0.4  | 0.23 | -1.86 | 0.018602 | 0.000281 | 0.189654 | 0.03453  |
| Mmu.15281.1.S1_at       | Mmu.15281.1     | 10.66 | 10.63 | 0.23 | 0.08 | 1.02  | 0.884953 | 0.025078 | 0.951005 | 0.198405 |
| Mmu.15288.1.S1_at       | Mmu.15288.1     | 6.46  | 6.5   | 0.06 | 0.07 | -1.03 | 0.972427 | 0.290285 | 0.988877 | 0.551169 |
| Mmu.15288.1.S1_s_at     | Mmu.15288.1     | 14.03 | 13.96 | 0.06 | 0.03 | 1.05  | 0.610026 | 0.853548 | 0.805602 | 0.916683 |
| Mmu.1530.1.S1_at        | Mmu.1530.1      | 9.07  | 8.92  | 0.51 | 0.11 | 1.11  | 0.548537 | 0.012996 | 0.766578 | 0.146803 |
| MmugDNA.31308.1.S1_s_at | MmugDNA.31308.1 | 13    | 12.89 | 0.1  | 0.03 | 1.08  | 0.126935 | 0.449603 | 0.40851  | 0.665143 |
| Mmu.15331.1.S1_at       | Mmu.15331.1     | 7.13  | 7.11  | 0.05 | 0.16 | 1.01  | 0.461689 | 0.294015 | 0.709041 | 0.553909 |
| Mmu.15347.1.S1_s_at     | Mmu.15347.1     | 12.55 | 12.28 | 0.11 | 0.04 | 1.21  | 0.014498 | 0.191679 | 0.172193 | 0.466942 |
| Mmu.15352.1.S1_at       | Mmu.15352.1     | 9.67  | 9.77  | 0.34 | 0.05 | -1.07 | 0.639525 | 0.52778  | 0.823589 | 0.716271 |
| Mmu.15359.1.S1_s_at     | Mmu.15359.1     | 6.21  | 5.6   | 0.32 | 0.57 | 1.53  | 0.105713 | 0.124535 | 0.379811 | 0.394987 |
| MmugDNA.3842.1.S1_at    | MmugDNA.3842.1  | 7.78  | 7.94  | 0.21 | 0.06 | -1.12 | 0.386813 | 0.35225  | 0.655097 | 0.595568 |
| MmugDNA.3842.1.S1_s_at  | MmugDNA.3842.1  | 14.63 | 14.6  | 0.05 | 0.03 | 1.02  | 0.945813 | 0.95195  | 0.977159 | 0.972743 |
| Mmu.1538.1.S1_at        | Mmu.1538.1      | 9.18  | 9.08  | 0.25 | 0.18 | 1.07  | 0.585526 | 0.64572  | 0.789262 | 0.792516 |
| Mmu.15402.1.A1_at       | Mmu.15402.1     | 13.91 | 14.66 | 0.44 | 0.01 | -1.68 | 0.117845 | 0.093591 | 0.395308 | 0.349952 |
| Mmu.15402.10.S1_s_at    | Mmu.15402.10    | 14.82 | 14.86 | 0.2  | 0.03 | -1.02 | 0.343573 | 0.466048 | 0.622989 | 0.676096 |
| Mmu.15402.11.S1_at      | Mmu.15402.11    | 2.98  | 2.97  | 0.03 | 0.07 | 1.01  | 0.519546 | 0.768439 | 0.748102 | 0.865527 |
| Mmu.15433.1.S1_at       | Mmu.15433.1     | 5.55  | 5.57  | 0.05 | 0.03 | -1.01 | 0.608138 | 0.073578 | 0.804287 | 0.316905 |
| Mmu.15440.1.S1_at       | Mmu.15440.1     | 9.26  | 9.21  | 0.3  | 0.1  | 1.04  | 0.299875 | 0.270921 | 0.588212 | 0.536033 |
| Mmu.15443.1.S1_x_at     | Mmu.15443.1     | 6.1   | 7.66  | 0.2  | 0.33 | -2.94 | 0.003169 | 0.027001 | 0.101357 | 0.2055   |
| Mmu.15490.1.A1_at       | Mmu.15490.1     | 6.46  | 6.05  | 0.65 | 0.22 | 1.33  | 0.91816  | 0.364487 | 0.965131 | 0.604846 |
| Mmu.15491.1.S1_s_at     | Mmu.15491.1     | 7.6   | 7.48  | 0.16 | 0.02 | 1.09  | 0.266534 | 0.184934 | 0.558873 | 0.460776 |
| Mmu.15494.1.S1_at       | Mmu.15494.1     | 11.51 | 11.55 | 0.14 | 0.05 | -1.03 | 0.917926 | 0.879389 | 0.964965 | 0.931144 |
| Mmu.15499.1.S1_s_at     | Mmu.15499.1     | 10.94 | 11.43 | 0.11 | 0.14 | -1.4  | 0.010642 | 0.000145 | 0.152845 | 0.029509 |
| Mmu.15501.1.S1_s_at     | Mmu.15501.1     | 11.54 | 12.51 | 0.08 | 0.06 | -1.96 | 0.000117 | 0.022765 | 0.051196 | 0.188931 |
| Mmu.15507.1.A1_at       | Mmu.15507.1     | 4.36  | 5.17  | 0.24 | 0.35 | -1.76 | 0.017085 | 0.02842  | 0.184179 | 0.210385 |
| Mmu.15507.1.S1_x_at     | Mmu.15507.1     | 5.48  | 6.44  | 0.43 | 0.01 | -1.95 | 0.017877 | 0.01266  | 0.187064 | 0.145089 |
| Mmu.15516.1.S1_at       | Mmu.15516.1     | 5.63  | 5.45  | 0.23 | 0.02 | 1.13  | 0.241612 | 0.23371  | 0.538732 | 0.505032 |
| Mmu.15516.1.S1_x_at     | Mmu.15516.1     | 7.17  | 6.76  | 0.07 | 0.08 | 1.33  | 0.003692 | 0.000324 | 0.106124 | 0.035587 |
| Mmu.3361.2.S1_s_at      | Mmu.3361.2      | 13.91 | 13.94 | 0.06 | 0.05 | -1.02 | 0.331497 | 0.325759 | 0.613456 | 0.57602  |
| Mmu.15555.1.S1_at       | Mmu.15555.1     | 10.74 | 9.66  | 0.36 | 0.05 | 2.11  | 0.003596 | 0.044373 | 0.105384 | 0.255144 |
| Mmu.15572.1.S1_at       | Mmu.15572.1     | 9.47  | 9.46  | 0.21 | 0.05 | 1.01  | 0.84234  | 0.235436 | 0.930778 | 0.506489 |
| Mmu.15592.2.S1_at       | Mmu.15592.2     | 10.87 | 10.44 | 0.21 | 0.14 | 1.34  | 0.041186 | 0.056467 | 0.259407 | 0.283516 |
| Mmu.8286.1.S1_s_at      | Mmu.8286.1      | 13.84 | 13.84 | 0.06 | 0.03 | 1     | 0.882586 | 0.005185 | 0.950089 | 0.099739 |
| Mmu.156.2.S1_at         | Mmu.156.2       | 13.33 | 13.3  | 0.1  | 0.1  | 1.02  | 0.159403 | 0.108619 | 0.450703 | 0.372171 |
| Mmu.156.2.S1_x_at       | Mmu.156.2       | 13.14 | 13.09 | 0.08 | 0.09 | 1.03  | 0.174121 | 0.127434 | 0.468351 | 0.398274 |
| Mmu.15601.1.S2_at       | Mmu.15601.1     | 2.77  | 2.78  | 0.09 | 0.04 | -1.01 | 0.573278 | 0.634608 | 0.781077 | 0.784946 |
| Mmu.15601.1.S2_s_at     | Mmu.15601.1     | 3.94  | 4.13  | 0.11 | 0.27 | -1.14 | 0.246338 | 0.126141 | 0.542125 | 0.396734 |
| Mmu.15609.1.S1_at       | Mmu.15609.1     | 11.65 | 11.21 | 0.07 | 0.3  | 1.36  | 0.059537 | 0.031854 | 0.301148 | 0.220909 |

|                     |             |       |       |      |      |        |          |          |          |          |
|---------------------|-------------|-------|-------|------|------|--------|----------|----------|----------|----------|
| Mmu.15616.1.S1_at   | Mmu.15616.1 | 3.8   | 3.47  | 0.39 | 0.38 | 1.26   | 0.764088 | 0.851424 | 0.891902 | 0.915468 |
| Mmu.15616.1.S1_x_at | Mmu.15616.1 | 3.08  | 2.94  | 0.45 | 0.29 | 1.1    | 0.950883 | 0.914967 | 0.979624 | 0.952272 |
| Mmu.15620.1.S1_at   | Mmu.15620.1 | 6.91  | 7.52  | 0.41 | 0.17 | -1.52  | 0.200423 | 0.494961 | 0.497869 | 0.695223 |
| Mmu.1563.1.S1_at    | Mmu.1563.1  | 9.62  | 9.67  | 0.08 | 0.13 | -1.04  | 0.828498 | 0.292098 | 0.924195 | 0.552261 |
| Mmu.15662.1.S1_at   | Mmu.15662.1 | 9.35  | 9.38  | 0.34 | 0.23 | -1.02  | 0.501415 | 0.250744 | 0.735287 | 0.519419 |
| Mmu.15690.2.S1_at   | Mmu.15690.2 | 8.37  | 8.92  | 0.58 | 0.18 | -1.46  | 0.561781 | 0.029992 | 0.77459  | 0.214956 |
| Mmu.15700.2.S1_at   | Mmu.15700.2 | 9.68  | 11.05 | 0.83 | 0.32 | -2.59  | 0.061934 | 0.242163 | 0.305394 | 0.512652 |
| Mmu.15708.2.S1_at   | Mmu.15708.2 | 13.57 | 13.64 | 0.06 | 0.03 | -1.05  | 0.244825 | 0.153055 | 0.541082 | 0.427928 |
| Mmu.15723.1.S1_s_at | Mmu.15723.1 | 11.54 | 11.89 | 0.05 | 0.05 | -1.27  | 0.00096  | 0.001605 | 0.076054 | 0.060501 |
| Mmu.15723.2.S1_at   | Mmu.15723.2 | 8.45  | 8.76  | 0.1  | 0.04 | -1.24  | 0.008504 | 0.03416  | 0.141379 | 0.228708 |
| Mmu.15730.2.S1_at   | Mmu.15730.2 | 7.61  | 7.59  | 0.02 | 0.08 | 1.01   | 0.198492 | 0.188878 | 0.495668 | 0.464789 |
| Mmu.15738.1.S1_at   | Mmu.15738.1 | 4.76  | 8.43  | 1.4  | 0.6  | -12.69 | 0.034532 | 0.180667 | 0.24039  | 0.457245 |
| Mmu.15748.1.S1_s_at | Mmu.15748.1 | 4.17  | 4.14  | 0.24 | 0.17 | 1.02   | 0.793547 | 0.921    | 0.906633 | 0.955491 |
| Mmu.15752.2.S1_at   | Mmu.15752.2 | 7.59  | 7.59  | 0.03 | 0.03 | -1     | 0.438961 | 0.303851 | 0.693384 | 0.561225 |
| Mmu.15755.1.S1_at   | Mmu.15755.1 | 9.47  | 9.31  | 0.09 | 0.18 | 1.12   | 0.356896 | 0.027839 | 0.633132 | 0.208365 |
| Mmu.15770.1.S1_at   | Mmu.15770.1 | 5.82  | 5.72  | 0.21 | 0.24 | 1.07   | 0.240795 | 0.367534 | 0.538182 | 0.607197 |
| Mmu.15774.1.S1_at   | Mmu.15774.1 | 8.33  | 8.36  | 0.17 | 0.07 | -1.02  | 0.878739 | 0.919697 | 0.948303 | 0.954878 |
| Mmu.15814.5.S1_at   | Mmu.15814.5 | 4.17  | 4.42  | 0.13 | 0.15 | -1.19  | 0.053706 | 0.038786 | 0.288946 | 0.241916 |
| Mmu.15827.1.S1_at   | Mmu.15827.1 | 7.15  | 7.08  | 0.03 | 0.06 | 1.05   | 0.099538 | 0.414836 | 0.370438 | 0.640469 |
| Mmu.15835.1.S1_at   | Mmu.15835.1 | 7.84  | 8.11  | 0.32 | 0.18 | -1.21  | 0.328168 | 0.47497  | 0.61059  | 0.681837 |
| Mmu.15843.1.S1_at   | Mmu.15843.1 | 10.43 | 10.86 | 0.16 | 0.13 | -1.35  | 0.044541 | 0.356217 | 0.268214 | 0.598166 |
| Mmu.15848.1.S1_at   | Mmu.15848.1 | 10.21 | 9.73  | 0.39 | 0.08 | 1.4    | 0.087648 | 0.18594  | 0.353675 | 0.461772 |
| Mmu.15849.1.S1_a_at | Mmu.15849.1 | 10.35 | 9.78  | 0.53 | 0.15 | 1.48   | 0.138026 | 0.241499 | 0.423185 | 0.512152 |
| Mmu.15849.1.S1_at   | Mmu.15849.1 | 9.39  | 8.69  | 0.49 | 0.16 | 1.62   | 0.065239 | 0.11392  | 0.312313 | 0.38018  |
| Mmu.15849.2.S1_at   | Mmu.15849.2 | 6.25  | 5.49  | 1.06 | 0.28 | 1.69   | 0.299912 | 0.472577 | 0.588233 | 0.68007  |
| Mmu.15852.1.S1_s_at | Mmu.15852.1 | 11.94 | 11.89 | 0.03 | 0.01 | 1.04   | 0.051512 | 0.315503 | 0.284376 | 0.569004 |
| Mmu.15853.1.S1_s_at | Mmu.15853.1 | 11.71 | 11.86 | 0.23 | 0.08 | -1.11  | 0.435152 | 0.719412 | 0.690293 | 0.837629 |
| Mmu.15853.1.S1_x_at | Mmu.15853.1 | 12.12 | 12.24 | 0.16 | 0.18 | -1.08  | 0.217492 | 0.503492 | 0.515377 | 0.700892 |
| Mmu.15859.1.S1_at   | Mmu.15859.1 | 9.14  | 9.38  | 0.26 | 0.03 | -1.18  | 0.19252  | 0.208887 | 0.489105 | 0.482717 |
| Mmu.1586.1.S1_at    | Mmu.1586.1  | 8.73  | 8.48  | 0.27 | 0.22 | 1.19   | 0.211773 | 0.054399 | 0.509668 | 0.278799 |
| Mmu.15886.1.S1_s_at | Mmu.15886.1 | 13.42 | 12.93 | 0.12 | 0.05 | 1.41   | 0.001258 | 0.041999 | 0.078631 | 0.249463 |
| Mmu.15890.1.S1_s_at | Mmu.15890.1 | 8     | 8.51  | 0.71 | 0.05 | -1.43  | 0.514452 | 0.065427 | 0.744385 | 0.301415 |
| Mmu.15894.3.S1_at   | Mmu.15894.3 | 10.92 | 11.02 | 0.3  | 0.41 | -1.07  | 0.750659 | 0.903025 | 0.884846 | 0.944941 |
| Mmu.15897.1.S1_at   | Mmu.15897.1 | 11.49 | 11.14 | 0.09 | 0.09 | 1.27   | 0.006109 | 0.041339 | 0.124422 | 0.247995 |
| Mmu.15902.2.S1_at   | Mmu.15902.2 | 5.48  | 5.51  | 0.15 | 0.2  | -1.03  | 0.646697 | 0.300493 | 0.828301 | 0.55882  |
| Mmu.15921.1.S1_at   | Mmu.15921.1 | 11.42 | 11.45 | 0.1  | 0.29 | -1.02  | 0.570367 | 0.086767 | 0.779298 | 0.339521 |
| Mmu.15931.1.S1_at   | Mmu.15931.1 | 8.43  | 8.45  | 0.12 | 0.15 | -1.01  | 0.861179 | 0.00332  | 0.939687 | 0.082861 |
| Mmu.15937.1.S1_at   | Mmu.15937.1 | 10.24 | 10.18 | 0.11 | 0.11 | 1.04   | 0.562011 | 0.823358 | 0.774793 | 0.898479 |
| Mmu.15939.2.S1_at   | Mmu.15939.2 | 4.52  | 3.91  | 0.13 | 0.42 | 1.52   | 0.147371 | 0.099193 | 0.435407 | 0.357379 |
| Mmu.1595.1.S1_at    | Mmu.1595.1  | 5.12  | 5.34  | 0.22 | 0.14 | -1.16  | 0.07604  | 0.076353 | 0.334071 | 0.321368 |
| Mmu.15951.1.A1_at   | Mmu.15951.1 | 4.05  | 4.05  | 0.04 | 0.02 | -1     | 0.672538 | 0.125914 | 0.843261 | 0.396452 |
| Mmu.15951.1.S1_at   | Mmu.15951.1 | 3.65  | 3.56  | 0.18 | 0.2  | 1.06   | 0.848521 | 0.957058 | 0.934016 | 0.975699 |
| Mmu.15952.1.A1_at   | Mmu.15952.1 | 3.78  | 3.9   | 0.06 | 0.03 | -1.08  | 0.01829  | 0.08894  | 0.1882   | 0.342771 |

|                         |                 |       |       |      |      |       |          |          |          |          |
|-------------------------|-----------------|-------|-------|------|------|-------|----------|----------|----------|----------|
| Mmu.15952.1.S1_at       | Mmu.15952.1     | 3.62  | 3.61  | 0.09 | 0.07 | 1     | 0.843993 | 0.019333 | 0.93165  | 0.174785 |
| Mmu.15953.1.A1_at       | Mmu.15953.1     | 4.82  | 4.87  | 0.03 | 0.15 | -1.04 | 0.68747  | 0.85964  | 0.850804 | 0.92003  |
| Mmu.15953.1.S1_at       | Mmu.15953.1     | 6.15  | 6.25  | 0.23 | 0.23 | -1.07 | 0.92155  | 0.137345 | 0.966402 | 0.41029  |
| Mmu.15956.1.A1_at       | Mmu.15956.1     | 3.77  | 3.76  | 0.07 | 0.05 | 1.01  | 0.98298  | 0.460806 | 0.993693 | 0.672749 |
| Mmu.15956.1.S1_at       | Mmu.15956.1     | 3.37  | 3.71  | 0.16 | 0.14 | -1.27 | 0.245454 | 0.104175 | 0.541518 | 0.365297 |
| Mmu.15966.1.S1_at       | Mmu.15966.1     | 9.47  | 8.93  | 0.3  | 0.12 | 1.46  | 0.045807 | 0.463295 | 0.271515 | 0.674323 |
| MmugDNA.11221.1.S1_s_at | MmugDNA.11221.1 | 8.41  | 8.03  | 0.46 | 0.14 | 1.3   | 0.252209 | 0.393012 | 0.546816 | 0.625971 |
| Mmu.15973.1.S1_a_at     | Mmu.15973.1     | 3.56  | 3.56  | 0.07 | 0.05 | -1    | 0.509563 | 0.770832 | 0.741152 | 0.866807 |
| Mmu.15973.17.S1_x_at    | Mmu.15973.17    | 4.72  | 4.78  | 0.14 | 0.05 | -1.04 | 0.578945 | 0.254626 | 0.784767 | 0.522912 |
| Mmu.15973.14.S1_at      | Mmu.15973.14    | 5.44  | 5.56  | 0.2  | 0.03 | -1.09 | 0.324447 | 0.302841 | 0.608158 | 0.560356 |
| Mmu.15973.16.S1_at      | Mmu.15973.16    | 4.96  | 5     | 0.22 | 0.15 | -1.02 | 0.534141 | 0.537475 | 0.75744  | 0.722606 |
| Mmu.15973.16.S1_x_at    | Mmu.15973.16    | 4.85  | 4.88  | 0.09 | 0.08 | -1.02 | 0.610815 | 0.657434 | 0.805939 | 0.799704 |
| Mmu.15973.19.S1_at      | Mmu.15973.19    | 5.21  | 5.23  | 0.11 | 0.15 | -1.02 | 0.313174 | 0.247884 | 0.598964 | 0.517326 |
| Mmu.15973.19.S1_x_at    | Mmu.15973.19    | 5.58  | 5.57  | 0.15 | 0.08 | 1.01  | 0.654757 | 0.461664 | 0.832889 | 0.673228 |
| Mmu.15973.2.S1_x_at     | Mmu.15973.2     | 4.85  | 4.84  | 0.15 | 0.15 | 1.01  | 0.758887 | 0.946077 | 0.889547 | 0.969369 |
| Mmu.15976.1.S1_at       | Mmu.15976.1     | 8.17  | 8.01  | 0.11 | 0.08 | 1.11  | 0.344864 | 0.32167  | 0.624058 | 0.573346 |
| Mmu.15983.1.S1_at       | Mmu.15983.1     | 7.45  | 7.45  | 0.22 | 0.19 | 1.01  | 0.783434 | 0.612872 | 0.901128 | 0.770261 |
| Mmu.15987.2.S1_at       | Mmu.15987.2     | 8.79  | 8.58  | 0.24 | 0.16 | 1.16  | 0.391969 | 0.38798  | 0.658975 | 0.62253  |
| Mmu.15993.1.S1_s_at     | Mmu.15993.1     | 13.43 | 13.3  | 0.25 | 0.09 | 1.09  | 0.535183 | 0.658887 | 0.758211 | 0.800473 |
| MmugDNA.11151.1.S1_s_at | MmugDNA.11151.1 | 9.11  | 8.84  | 0.06 | 0.07 | 1.21  | 0.003818 | 0.000768 | 0.107015 | 0.04544  |
| Mmu.15999.1.S1_at       | Mmu.15999.1     | 10.29 | 10.31 | 0.17 | 0.16 | -1.01 | 0.668181 | 0.044544 | 0.840653 | 0.255417 |
| Mmu.16001.1.S1_at       | Mmu.16001.1     | 6.68  | 6.11  | 0.42 | 0.11 | 1.48  | 0.238621 | 0.615111 | 0.535974 | 0.771754 |
| Mmu.16022.1.S1_at       | Mmu.16022.1     | 4.48  | 4.81  | 0.14 | 0.09 | -1.25 | 0.030278 | 0.002774 | 0.227112 | 0.077892 |
| Mmu.16023.1.S1_at       | Mmu.16023.1     | 9.04  | 8.94  | 0.24 | 0.25 | 1.07  | 0.422956 | 0.183377 | 0.681092 | 0.459553 |
| Mmu.16024.1.S1_at       | Mmu.16024.1     | 9.44  | 9.41  | 0.14 | 0.06 | 1.02  | 0.407693 | 0.587265 | 0.670697 | 0.754106 |
| Mmu.16030.2.S1_a_at     | Mmu.16030.2     | 9.43  | 8.6   | 0.82 | 0.05 | 1.78  | 0.129333 | 0.251962 | 0.411654 | 0.520646 |
| Mmu.16043.1.S1_at       | Mmu.16043.1     | 5.2   | 5.25  | 0.11 | 0.02 | -1.04 | 0.315568 | 0.258676 | 0.600423 | 0.525937 |
| Mmu.1605.1.S1_at        | Mmu.1605.1      | 6.68  | 9.37  | 2.16 | 0.35 | -6.45 | 0.132049 | 0.4175   | 0.415191 | 0.642252 |
| Mmu.16061.1.S1_at       | Mmu.16061.1     | 7.6   | 9.76  | 1.02 | 0.38 | -4.48 | 0.043596 | 0.116411 | 0.265765 | 0.383671 |
| MmugDNA.33134.1.S1_at   | MmugDNA.33134.1 | 6.55  | 6.45  | 0.08 | 0.08 | 1.08  | 0.131654 | 0.296014 | 0.414491 | 0.555295 |
| MmugDNA.33134.1.S1_s_at | MmugDNA.33134.1 | 11.03 | 10.87 | 0.13 | 0.03 | 1.12  | 0.044408 | 0.06114  | 0.267911 | 0.293981 |
| Mmu.16078.1.S1_at       | Mmu.16078.1     | 7.3   | 7.41  | 0.39 | 0.26 | -1.07 | 0.485175 | 0.711678 | 0.724739 | 0.832794 |
| Mmu.16091.1.A1_at       | Mmu.16091.1     | 9.04  | 8.87  | 0.09 | 0.22 | 1.12  | 0.100192 | 0.006058 | 0.370983 | 0.106152 |
| Mmu.16091.1.S1_at       | Mmu.16091.1     | 12.82 | 12.78 | 0.04 | 0.05 | 1.03  | 0.5848   | 0.16166  | 0.7888   | 0.437771 |
| Mmu.16093.1.S1_at       | Mmu.16093.1     | 5.93  | 5.93  | 0.1  | 0.23 | -1    | 0.271945 | 0.299798 | 0.563869 | 0.558081 |
| Mmu.16103.1.S1_s_at     | Mmu.16103.1     | 13.72 | 13.91 | 0.12 | 0.07 | -1.14 | 0.378937 | 0.175753 | 0.64901  | 0.452344 |
| Mmu.16106.1.S1_at       | Mmu.16106.1     | 10.94 | 11.14 | 0.04 | 0.07 | -1.15 | 0.019771 | 0.306955 | 0.193572 | 0.563427 |
| Mmu.16109.1.S1_at       | Mmu.16109.1     | 11.62 | 10.59 | 0.27 | 0.12 | 2.04  | 0.004646 | 0.003504 | 0.114622 | 0.08503  |
| Mmu.16110.1.S1_s_at     | Mmu.16110.1     | 12    | 12.15 | 0.12 | 0.07 | -1.11 | 0.267742 | 0.063386 | 0.560475 | 0.298439 |
| Mmu.16117.1.S1_at       | Mmu.16117.1     | 4.37  | 5.32  | 0.41 | 0.38 | -1.93 | 0.077278 | 0.098919 | 0.335964 | 0.357049 |
| Mmu.1612.1.S1_at        | Mmu.1612.1      | 9.36  | 9.41  | 0.28 | 0.14 | -1.04 | 0.848514 | 0.135973 | 0.934016 | 0.408258 |
| Mmu.16121.1.S1_at       | Mmu.16121.1     | 3.95  | 3.81  | 0.12 | 0.12 | 1.1   | 0.263349 | 0.278059 | 0.556921 | 0.541754 |
| Mmu.16121.1.S1_s_at     | Mmu.16121.1     | 9.6   | 9.35  | 0.04 | 0.14 | 1.19  | 0.050448 | 0.30964  | 0.282425 | 0.564991 |

|                         |                 |       |       |      |      |        |          |          |          |          |
|-------------------------|-----------------|-------|-------|------|------|--------|----------|----------|----------|----------|
| Mmu.16123.2.S1_at       | Mmu.16123.2     | 9.87  | 10.11 | 0.18 | 0.26 | -1.18  | 0.552175 | 0.014393 | 0.768986 | 0.153146 |
| Mmu.16124.1.S1_at       | Mmu.16124.1     | 4.27  | 7.02  | 0.99 | 0.84 | -6.75  | 0.067139 | 0.198242 | 0.31683  | 0.473234 |
| Mmu.16174.1.S1_at       | Mmu.16174.1     | 9.51  | 9.32  | 0.14 | 0.2  | 1.14   | 0.099749 | 0.060114 | 0.370728 | 0.291847 |
| Mmu.16174.1.S1_x_at     | Mmu.16174.1     | 9.73  | 9.5   | 0.17 | 0.26 | 1.17   | 0.198331 | 0.134637 | 0.495518 | 0.406629 |
| Mmu.16175.1.S1_at       | Mmu.16175.1     | 6.6   | 10.49 | 1.95 | 0.28 | -14.81 | 0.076171 | 0.329401 | 0.334238 | 0.578733 |
| Mmu.16205.1.S1_at       | Mmu.16205.1     | 10.46 | 10.14 | 0.75 | 0.06 | 1.25   | 0.554199 | 0.745075 | 0.770567 | 0.852267 |
| Mmu.16211.1.S1_at       | Mmu.16211.1     | 10.39 | 10.05 | 0.29 | 0.14 | 1.27   | 0.438843 | 0.170786 | 0.693348 | 0.447359 |
| Mmu.16215.1.S1_at       | Mmu.16215.1     | 8.71  | 10.08 | 0.82 | 0.31 | -2.58  | 0.059365 | 0.146727 | 0.300839 | 0.42078  |
| Mmu.16226.1.S1_at       | Mmu.16226.1     | 5.65  | 5.38  | 0.15 | 0.09 | 1.21   | 0.126294 | 0.106044 | 0.407515 | 0.368427 |
| Mmu.16226.1.S1_x_at     | Mmu.16226.1     | 5.87  | 5.71  | 0.09 | 0.12 | 1.12   | 0.382194 | 0.431591 | 0.651645 | 0.652439 |
| Mmu.16227.2.S1_at       | Mmu.16227.2     | 2.86  | 2.82  | 0.09 | 0.06 | 1.03   | 0.383035 | 0.393785 | 0.652427 | 0.626565 |
| Mmu.16227.3.S1_at       | Mmu.16227.3     | 4.98  | 5     | 0.09 | 0.04 | -1.01  | 0.266556 | 0.081069 | 0.558898 | 0.329249 |
| Mmu.16235.1.S1_at       | Mmu.16235.1     | 12.21 | 12.27 | 0.14 | 0.03 | -1.04  | 0.310043 | 0.006806 | 0.596339 | 0.111444 |
| Mmu.16242.1.S1_at       | Mmu.16242.1     | 7.42  | 8.11  | 0.41 | 0.24 | -1.61  | 0.077812 | 0.001743 | 0.336917 | 0.062895 |
| Mmu.16242.1.S1_s_at     | Mmu.16242.1     | 7.52  | 8.06  | 0.2  | 0.16 | -1.46  | 0.039999 | 0.038799 | 0.256645 | 0.241916 |
| Mmu.16247.1.S1_at       | Mmu.16247.1     | 10.61 | 10.25 | 0.2  | 0.08 | 1.28   | 0.086106 | 0.012856 | 0.350603 | 0.145997 |
| Mmu.1625.1.S1_at        | Mmu.1625.1      | 9.19  | 10.14 | 0.15 | 0.32 | -1.94  | 0.018689 | 0.013185 | 0.189894 | 0.14735  |
| Mmu.16255.1.S1_at       | Mmu.16255.1     | 9.02  | 8.9   | 0.16 | 0.08 | 1.08   | 0.21812  | 0.624153 | 0.51594  | 0.778457 |
| Mmu.16260.1.S1_at       | Mmu.16260.1     | 10.02 | 10.24 | 0.37 | 0.16 | -1.16  | 0.190798 | 0.250695 | 0.486967 | 0.51941  |
| Mmu.16261.1.S1_at       | Mmu.16261.1     | 10.21 | 10.12 | 0.02 | 0.07 | 1.06   | 0.136472 | 0.543453 | 0.421019 | 0.726138 |
| Mmu.16278.1.S1_at       | Mmu.16278.1     | 12.54 | 12.03 | 0.44 | 0.01 | 1.43   | 0.351087 | 0.469376 | 0.628776 | 0.678207 |
| Mmu.16285.1.A1_at       | Mmu.16285.1     | 13.11 | 12.77 | 0.03 | 0.05 | 1.26   | 0.001285 | 0.002707 | 0.078631 | 0.07652  |
| Mmu.16290.1.S1_at       | Mmu.16290.1     | 12.21 | 11.38 | 0.35 | 0.18 | 1.78   | 0.055458 | 0.363471 | 0.292419 | 0.6039   |
| Mmu.16292.1.S1_at       | Mmu.16292.1     | 9.28  | 9.01  | 0.14 | 0.13 | 1.21   | 0.118564 | 0.282627 | 0.396229 | 0.545355 |
| Mmu.16297.1.S1_s_at     | Mmu.16297.1     | 9.54  | 9.85  | 0.4  | 0.15 | -1.23  | 0.915622 | 0.2448   | 0.964127 | 0.514644 |
| Mmu.16299.1.S1_at       | Mmu.16299.1     | 13.01 | 13.04 | 0.06 | 0.04 | -1.02  | 0.911103 | 0.28194  | 0.962223 | 0.544868 |
| MmugDNA.10121.1.S1_s_at | MmugDNA.10121.1 | 12.67 | 12.57 | 0.13 | 0.05 | 1.08   | 0.285955 | 0.048258 | 0.575799 | 0.264727 |
| Mmu.16305.1.S1_at       | Mmu.16305.1     | 6.99  | 7.02  | 0.16 | 0.13 | -1.02  | 0.939712 | 0.593245 | 0.974537 | 0.758138 |
| Mmu.16311.1.S1_at       | Mmu.16311.1     | 8.99  | 8.96  | 0.07 | 0.13 | 1.02   | 0.570761 | 0.001477 | 0.779429 | 0.058628 |
| Mmu.16317.1.S1_at       | Mmu.16317.1     | 9.97  | 9.23  | 0.09 | 0.13 | 1.67   | 0.001306 | 0.00808  | 0.078631 | 0.119476 |
| Mmu.16324.1.S1_at       | Mmu.16324.1     | 12.03 | 11.79 | 0.22 | 0.02 | 1.18   | 0.064532 | 0.099752 | 0.310585 | 0.358296 |
| Mmu.16330.1.S1_at       | Mmu.16330.1     | 8.81  | 7.83  | 0.19 | 0.1  | 1.98   | 0.002235 | 0.009718 | 0.091055 | 0.129718 |
| Mmu.16335.1.S1_at       | Mmu.16335.1     | 7.98  | 8.03  | 0.27 | 0.03 | -1.04  | 0.809709 | 0.831951 | 0.914781 | 0.90356  |
| Mmu.16349.1.S1_at       | Mmu.16349.1     | 8.89  | 9.12  | 0.39 | 0.07 | -1.17  | 0.114006 | 0.222537 | 0.390776 | 0.495594 |
| Mmu.16352.2.S1_at       | Mmu.16352.2     | 2.79  | 2.86  | 0.03 | 0.2  | -1.05  | 0.538398 | 0.781152 | 0.760296 | 0.873038 |
| Mmu.16352.3.S1_at       | Mmu.16352.3     | 4.07  | 4.19  | 0.25 | 0.96 | -1.09  | 0.4049   | 0.551366 | 0.66851  | 0.730922 |
| Mmu.16358.1.S1_at       | Mmu.16358.1     | 9.98  | 9.86  | 0.11 | 0.03 | 1.09   | 0.174614 | 0.836326 | 0.468862 | 0.906363 |
| Mmu.16365.1.S1_at       | Mmu.16365.1     | 8.69  | 8.69  | 0.05 | 0.09 | -1     | 0.870128 | 0.191004 | 0.944195 | 0.46629  |
| Mmu.16379.1.S1_at       | Mmu.16379.1     | 12.68 | 12.61 | 0.24 | 0.05 | 1.05   | 0.289151 | 0.42596  | 0.578755 | 0.648141 |
| Mmu.16380.2.S1_at       | Mmu.16380.2     | 9.59  | 9.56  | 0.61 | 0.23 | 1.02   | 0.82274  | 0.158864 | 0.921129 | 0.434967 |
| Mmu.16385.1.S1_a_at     | Mmu.16385.1     | 7.94  | 7.98  | 0.04 | 0.23 | -1.03  | 0.690375 | 0.392221 | 0.851986 | 0.625652 |
| Mmu.16385.1.S1_at       | Mmu.16385.1     | 7.42  | 7.41  | 0.21 | 0.16 | 1.01   | 0.622371 | 0.475292 | 0.813229 | 0.682031 |
| Mmu.16385.2.S1_at       | Mmu.16385.2     | 2.98  | 3.02  | 0.01 | 0.13 | -1.03  | 0.215984 | 0.240498 | 0.513655 | 0.511123 |

|                         |                 |       |       |      |      |       |          |          |          |          |
|-------------------------|-----------------|-------|-------|------|------|-------|----------|----------|----------|----------|
| Mmu.1639.1.S1_at        | Mmu.1639.1      | 4.68  | 5.34  | 0.53 | 0.22 | -1.58 | 0.334513 | 0.09007  | 0.61561  | 0.344402 |
| Mmu.16390.2.S1_at       | Mmu.16390.2     | 9.47  | 9.06  | 0.08 | 0.32 | 1.32  | 0.044921 | 0.174846 | 0.269298 | 0.451505 |
| Mmu.16391.1.S1_at       | Mmu.16391.1     | 10.3  | 10.27 | 0.17 | 0.05 | 1.01  | 0.700994 | 0.18528  | 0.857901 | 0.461194 |
| Mmu.16393.1.S1_at       | Mmu.16393.1     | 7.13  | 8.98  | 0.58 | 0.39 | -3.6  | 0.013497 | 0.059171 | 0.167019 | 0.290203 |
| Mmu.16400.1.S1_at       | Mmu.16400.1     | 9.57  | 9.57  | 0.22 | 0.09 | 1.01  | 0.464364 | 0.315641 | 0.710598 | 0.569053 |
| Mmu.16411.1.S1_at       | Mmu.16411.1     | 3.85  | 3.84  | 0.14 | 0.03 | 1.01  | 0.906883 | 0.461109 | 0.960577 | 0.672855 |
| Mmu.16415.2.S1_at       | Mmu.16415.2     | 8.26  | 8.73  | 0.28 | 0.51 | -1.38 | 0.411996 | 0.506382 | 0.673787 | 0.702371 |
| Mmu.16418.1.A1_at       | Mmu.16418.1     | 12.05 | 12    | 0.1  | 0.11 | 1.03  | 0.665999 | 0.661408 | 0.839495 | 0.801755 |
| Mmu.16421.1.S1_at       | Mmu.16421.1     | 6.78  | 7.14  | 0.19 | 0.17 | -1.28 | 0.154525 | 0.413464 | 0.444802 | 0.639648 |
| Mmu.16432.1.S1_at       | Mmu.16432.1     | 7.04  | 6.94  | 0.2  | 0.04 | 1.07  | 0.49586  | 0.826431 | 0.731898 | 0.900309 |
| Mmu.16433.2.S1_at       | Mmu.16433.2     | 12.89 | 13.11 | 0.19 | 0.03 | -1.17 | 0.310725 | 0.260782 | 0.59698  | 0.52721  |
| Mmu.16444.1.S1_at       | Mmu.16444.1     | 3.68  | 3.6   | 0.27 | 0.29 | 1.05  | 0.472397 | 0.664884 | 0.716189 | 0.803709 |
| Mmu.16444.2.S1_a_at     | Mmu.16444.2     | 3.35  | 3.26  | 0.09 | 0.07 | 1.06  | 0.119559 | 0.43603  | 0.397441 | 0.655726 |
| Mmu.16445.1.S1_at       | Mmu.16445.1     | 3.07  | 2.92  | 1.4  | 0.14 | 1.11  | 0.313046 | 0.421594 | 0.598916 | 0.645173 |
| Mmu.16454.1.S1_at       | Mmu.16454.1     | 8.74  | 8.67  | 0.17 | 0.03 | 1.05  | 0.680708 | 0.659592 | 0.847721 | 0.800802 |
| Mmu.16454.1.S2_at       | Mmu.16454.1     | 10.87 | 11.01 | 0.22 | 0.14 | -1.11 | 0.400403 | 0.806197 | 0.665436 | 0.888575 |
| MmugDNA.34165.1.S1_at   | MmugDNA.34165.1 | 10.44 | 10.55 | 0.22 | 0.14 | -1.08 | 0.51352  | 0.817784 | 0.743718 | 0.894834 |
| MmugDNA.34165.1.S1_s_at | MmugDNA.34165.1 | 9.1   | 9.18  | 0.14 | 0.07 | -1.05 | 0.769818 | 0.701494 | 0.894412 | 0.826875 |
| Mmu.16465.1.S1_at       | Mmu.16465.1     | 10.31 | 9.98  | 0.12 | 0.06 | 1.26  | 0.007958 | 0.178334 | 0.138304 | 0.454672 |
| Mmu.16468.1.S1_at       | Mmu.16468.1     | 11.04 | 10.74 | 0.11 | 0.04 | 1.23  | 0.007502 | 0.012197 | 0.134856 | 0.142872 |
| Mmu.16475.1.S1_at       | Mmu.16475.1     | 9.77  | 9.67  | 0.11 | 0.07 | 1.07  | 0.459502 | 0.889895 | 0.707635 | 0.937287 |
| Mmu.16489.1.S1_at       | Mmu.16489.1     | 3.61  | 3.47  | 0.11 | 0.03 | 1.1   | 0.396782 | 0.203004 | 0.662694 | 0.477343 |
| Mmu.16497.1.S1_at       | Mmu.16497.1     | 5.27  | 5.24  | 0.16 | 0.15 | 1.02  | 0.326884 | 0.272407 | 0.609778 | 0.537122 |
| Mmu.16501.1.S1_at       | Mmu.16501.1     | 8.44  | 8.44  | 0.28 | 0.43 | -1    | 0.91363  | 0.945896 | 0.963382 | 0.969245 |
| Mmu.16504.1.S1_at       | Mmu.16504.1     | 10.34 | 10.33 | 0.37 | 0.16 | 1.01  | 0.243599 | 0.061041 | 0.54025  | 0.29389  |
| Mmu.1653.1.S1_at        | Mmu.1653.1      | 11.23 | 10.9  | 0.23 | 0.09 | 1.26  | 0.344231 | 0.419217 | 0.623575 | 0.643398 |
| Mmu.16530.1.S1_at       | Mmu.16530.1     | 8.29  | 8.14  | 0.18 | 0.36 | 1.11  | 0.501355 | 0.729413 | 0.735287 | 0.843541 |
| Mmu.16536.10.S1_at      | Mmu.16536.10    | 10.91 | 11.1  | 0.27 | 0.06 | -1.14 | 0.848675 | 0.970399 | 0.934034 | 0.983873 |
| Mmu.16547.1.S1_at       | Mmu.16547.1     | 3.83  | 4.28  | 0.17 | 0.23 | -1.37 | 0.116437 | 0.220637 | 0.393596 | 0.494069 |
| MmugDNA.19689.1.S1_s_at | MmugDNA.19689.1 | 4.7   | 4.69  | 0.15 | 0.11 | 1.01  | 0.222798 | 0.41348  | 0.520677 | 0.639648 |
| Mmu.16551.1.S1_at       | Mmu.16551.1     | 11.64 | 11.94 | 0.29 | 0.04 | -1.23 | 0.50712  | 0.787343 | 0.739495 | 0.876973 |
| Mmu.16556.1.S1_at       | Mmu.16556.1     | 5.62  | 5.6   | 0.08 | 0.3  | 1.01  | 0.400809 | 0.49691  | 0.665577 | 0.696273 |
| Mmu.1671.1.S1_at        | Mmu.1671.1      | 9.94  | 9.48  | 0.1  | 0.12 | 1.37  | 0.005465 | 0.021806 | 0.119451 | 0.184765 |
| Mmu.1700.1.S1_x_at      | Mmu.1700.1      | 11.77 | 11.54 | 1.31 | 0.31 | 1.17  | 0.799512 | 0.247089 | 0.909612 | 0.516259 |
| Mmu.1716.2.S1_at        | Mmu.1716.2      | 5.24  | 5.21  | 0.13 | 0.09 | 1.02  | 0.356025 | 0.254506 | 0.632435 | 0.522829 |
| Mmu.1719.1.S1_at        | Mmu.1719.1      | 5.64  | 5.34  | 0.24 | 0.13 | 1.23  | 0.203923 | 0.505117 | 0.501449 | 0.70197  |
| Mmu.1726.1.S1_at        | Mmu.1726.1      | 10.63 | 11.24 | 0.17 | 0.03 | -1.52 | 0.008116 | 0.433212 | 0.138956 | 0.653533 |
| Mmu.1730.1.S1_at        | Mmu.1730.1      | 11.37 | 11.74 | 0.44 | 0.05 | -1.3  | 0.47294  | 0.297133 | 0.716389 | 0.555996 |
| Mmu.1734.1.S1_at        | Mmu.1734.1      | 11.08 | 11.01 | 0.82 | 0.37 | 1.05  | 0.812178 | 0.252274 | 0.915983 | 0.520953 |
| Mmu.1738.2.S1_at        | Mmu.1738.2      | 5.71  | 5.09  | 0.35 | 0.11 | 1.53  | 0.114763 | 0.185585 | 0.391813 | 0.461566 |
| Mmu.1748.1.A1_at        | Mmu.1748.1      | 3.04  | 3.03  | 0.07 | 0.08 | 1.01  | 0.650339 | 0.298457 | 0.830259 | 0.557143 |
| Mmu.1748.1.S1_at        | Mmu.1748.1      | 2.91  | 2.91  | 0.07 | 0.13 | -1    | 0.991875 | 0.974029 | 0.997004 | 0.985833 |
| Mmu.175.1.A1_at         | Mmu.175.1       | 2.74  | 2.79  | 0.07 | 0.06 | -1.03 | 0.152333 | 0.171293 | 0.441909 | 0.447809 |

|                     |             |       |       |      |      |       |          |          |          |          |
|---------------------|-------------|-------|-------|------|------|-------|----------|----------|----------|----------|
| Mmu.175.1.A1_x_at   | Mmu.175.1   | 3.16  | 3.15  | 0.1  | 0    | 1.01  | 0.853605 | 0.948174 | 0.936335 | 0.97046  |
| Mmu.175.1.S1_at     | Mmu.175.1   | 6.48  | 6.44  | 0.11 | 0.09 | 1.02  | 0.750438 | 0.318951 | 0.88467  | 0.571532 |
| Mmu.1757.2.S1_at    | Mmu.1757.2  | 11.45 | 11.62 | 0.05 | 0.09 | -1.13 | 0.079997 | 0.003293 | 0.340254 | 0.082571 |
| Mmu.1773.1.S1_at    | Mmu.1773.1  | 5.87  | 5.86  | 0.12 | 0.08 | 1     | 0.397672 | 0.291088 | 0.663192 | 0.551574 |
| Mmu.1775.1.S1_at    | Mmu.1775.1  | 10.49 | 11.04 | 0.33 | 0.11 | -1.47 | 0.02712  | 0.089269 | 0.217361 | 0.343391 |
| Mmu.181.1.S1_at     | Mmu.181.1   | 11.71 | 11.39 | 0.14 | 0.05 | 1.25  | 0.013947 | 0.03975  | 0.169182 | 0.244402 |
| Mmu.1815.1.S1_at    | Mmu.1815.1  | 13.62 | 13.65 | 0.09 | 0.05 | -1.03 | 0.817029 | 0.745118 | 0.918222 | 0.852267 |
| Mmu.1817.1.S1_at    | Mmu.1817.1  | 8.96  | 8.75  | 0.28 | 0.32 | 1.16  | 0.187979 | 0.426813 | 0.484308 | 0.648894 |
| Mmu.1818.1.S1_at    | Mmu.1818.1  | 4.6   | 4.58  | 0.24 | 0.21 | 1.01  | 0.297602 | 0.48899  | 0.586058 | 0.691529 |
| Mmu.1819.1.S1_at    | Mmu.1819.1  | 8.47  | 10.06 | 0.77 | 0.33 | -3    | 0.034621 | 0.155331 | 0.240605 | 0.430693 |
| Mmu.1836.1.S1_at    | Mmu.1836.1  | 6.22  | 6.79  | 0.25 | 0.18 | -1.48 | 0.036735 | 0.068425 | 0.24673  | 0.308011 |
| Mmu.1837.2.S1_at    | Mmu.1837.2  | 8.32  | 7.88  | 0.13 | 0.29 | 1.36  | 0.046622 | 0.17053  | 0.273564 | 0.447177 |
| Mmu.1854.1.S1_at    | Mmu.1854.1  | 7.98  | 7.88  | 0.44 | 0.1  | 1.07  | 0.898331 | 0.989646 | 0.956759 | 0.994102 |
| Mmu.1855.1.S1_at    | Mmu.1855.1  | 10.57 | 10.44 | 0.07 | 0.06 | 1.09  | 0.045765 | 0.208217 | 0.271429 | 0.482104 |
| Mmu.1884.1.S1_at    | Mmu.1884.1  | 6.6   | 6.42  | 0.04 | 0.03 | 1.13  | 0.004149 | 0.000013 | 0.109961 | 0.017532 |
| Mmu.19.1.S1_at      | Mmu.19.1    | 8.94  | 8.82  | 0.22 | 0.05 | 1.08  | 0.198625 | 0.000471 | 0.495811 | 0.038572 |
| Mmu.190.1.S1_at     | Mmu.190.1   | 9.41  | 9.62  | 0.09 | 0.06 | -1.16 | 0.030018 | 0.000217 | 0.226527 | 0.032385 |
| Mmu.190.2.S1_at     | Mmu.190.2   | 7.79  | 8.06  | 0.09 | 0.04 | -1.2  | 0.0106   | 0.002241 | 0.152762 | 0.069683 |
| Mmu.1900.1.S1_s_at  | Mmu.1900.1  | 12.64 | 12.56 | 0.21 | 0.05 | 1.06  | 0.890538 | 0.946771 | 0.953316 | 0.96978  |
| Mmu.1903.1.S1_at    | Mmu.1903.1  | 12.99 | 12.86 | 0.14 | 0.09 | 1.09  | 0.991862 | 0.679934 | 0.997004 | 0.8131   |
| Mmu.1906.10.S1_a_at | Mmu.1906.10 | 3.21  | 4.37  | 0.26 | 0.27 | -2.23 | 0.017118 | 0.043501 | 0.184186 | 0.25316  |
| Mmu.1906.10.S1_s_at | Mmu.1906.10 | 3.95  | 3.72  | 0.18 | 0.14 | 1.17  | 0.16114  | 0.455694 | 0.452688 | 0.669654 |
| Mmu.1906.11.S1_a_at | Mmu.1906.11 | 3.62  | 4.99  | 0.11 | 0.12 | -2.6  | 0.000135 | 0.008888 | 0.051196 | 0.124698 |
| Mmu.1906.11.S1_x_at | Mmu.1906.11 | 3.97  | 4.56  | 0.17 | 0.08 | -1.5  | 0.005778 | 0.015447 | 0.121938 | 0.157803 |
| Mmu.1906.13.S1_at   | Mmu.1906.13 | 3.51  | 3.46  | 0.13 | 0.06 | 1.04  | 0.852881 | 0.541806 | 0.935956 | 0.725074 |
| Mmu.1906.3.S1_x_at  | Mmu.1906.3  | 2.75  | 2.76  | 0.07 | 0.05 | -1    | 0.868726 | 0.374526 | 0.943559 | 0.6129   |
| Mmu.1906.5.S1_s_at  | Mmu.1906.5  | 3.5   | 3.58  | 0.04 | 0.13 | -1.06 | 0.351357 | 0.527239 | 0.628948 | 0.715896 |
| Mmu.1906.7.S1_at    | Mmu.1906.7  | 5.14  | 6.5   | 0.26 | 0.08 | -2.57 | 0.001027 | 0.000214 | 0.076321 | 0.032361 |
| Mmu.1906.9.S1_s_at  | Mmu.1906.9  | 3.49  | 3.6   | 0.21 | 0.06 | -1.08 | 0.959024 | 0.883493 | 0.983307 | 0.933594 |
| Mmu.1907.1.S1_at    | Mmu.1907.1  | 4.03  | 4.04  | 0.35 | 0.04 | -1.01 | 0.970684 | 0.982082 | 0.988376 | 0.990211 |
| Mmu.1914.1.S1_s_at  | Mmu.1914.1  | 11.64 | 11.69 | 0.4  | 0.44 | -1.03 | 0.453813 | 0.613368 | 0.703872 | 0.770518 |
| Mmu.1942.1.S1_at    | Mmu.1942.1  | 14.18 | 14.22 | 0.18 | 0.06 | -1.03 | 0.688876 | 0.769894 | 0.851433 | 0.866376 |
| Mmu.1942.1.S1_x_at  | Mmu.1942.1  | 14.16 | 14.21 | 0.18 | 0.07 | -1.03 | 0.500066 | 0.645047 | 0.734537 | 0.791993 |
| Mmu.1943.1.S1_at    | Mmu.1943.1  | 11.35 | 11.2  | 0.02 | 0.33 | 1.11  | 0.13982  | 0.008022 | 0.425392 | 0.119047 |
| Mmu.1946.1.S1_at    | Mmu.1946.1  | 9.35  | 9.21  | 0.12 | 0.14 | 1.1   | 0.288937 | 0.069973 | 0.578669 | 0.31072  |
| Mmu.1956.1.S1_at    | Mmu.1956.1  | 11.9  | 11.83 | 0.08 | 0.02 | 1.05  | 0.220871 | 0.040232 | 0.518833 | 0.245805 |
| Mmu.1976.1.A1_at    | Mmu.1976.1  | 10.58 | 10.44 | 0.15 | 0.1  | 1.1   | 0.245647 | 0.491316 | 0.541668 | 0.692931 |
| Mmu.1976.1.S1_at    | Mmu.1976.1  | 10.13 | 9.79  | 0.07 | 0.05 | 1.27  | 0.003308 | 0.064672 | 0.102315 | 0.300314 |
| Mmu.2010.1.S1_s_at  | Mmu.2010.1  | 4.79  | 4.59  | 0.29 | 0.12 | 1.15  | 0.200197 | 0.229286 | 0.497733 | 0.501527 |
| Mmu.2013.1.S1_at    | Mmu.2013.1  | 9.11  | 9.47  | 0.06 | 0.15 | -1.28 | 0.060121 | 0.02873  | 0.302405 | 0.211301 |
| Mmu.2018.1.S1_at    | Mmu.2018.1  | 7.85  | 10.35 | 0.7  | 0.18 | -5.68 | 0.008628 | 0.204967 | 0.142375 | 0.479296 |
| Mmu.2031.1.S1_at    | Mmu.2031.1  | 10.41 | 10.04 | 0.38 | 0.1  | 1.3   | 0.244894 | 0.558937 | 0.541101 | 0.735944 |
| Mmu.2033.2.S1_at    | Mmu.2033.2  | 5.06  | 5.05  | 0.21 | 0.06 | 1     | 0.74031  | 0.470215 | 0.879531 | 0.678572 |



|                    |            |       |       |      |      |       |          |          |          |          |
|--------------------|------------|-------|-------|------|------|-------|----------|----------|----------|----------|
| Mmu.2043.1.S1_at   | Mmu.2043.1 | 6.61  | 6.44  | 0.01 | 0.08 | 1.12  | 0.019362 | 0.007955 | 0.192255 | 0.118702 |
| Mmu.2046.1.S1_at   | Mmu.2046.1 | 10.62 | 10.41 | 0.05 | 0.16 | 1.16  | 0.05597  | 0.003473 | 0.293506 | 0.084834 |
| Mmu.2048.1.S1_at   | Mmu.2048.1 | 6.49  | 6.3   | 0.25 | 0.06 | 1.14  | 0.093944 | 0.052192 | 0.362824 | 0.274036 |
| Mmu.2050.1.S1_s_at | Mmu.2050.1 | 9.56  | 9.97  | 0.13 | 0.25 | -1.33 | 0.180435 | 0.00434  | 0.475556 | 0.092354 |
| Mmu.2053.1.S1_s_at | Mmu.2053.1 | 8.1   | 9.14  | 1.95 | 0.17 | -2.06 | 0.386028 | 0.543556 | 0.654544 | 0.726202 |
| Mmu.2056.1.S1_at   | Mmu.2056.1 | 3.03  | 3.02  | 0.07 | 0.06 | 1     | 0.467295 | 0.212144 | 0.712842 | 0.486036 |
| Mmu.2057.1.S1_at   | Mmu.2057.1 | 3.19  | 3.08  | 0.05 | 0.07 | 1.08  | 0.185052 | 0.13272  | 0.481174 | 0.404544 |
| Mmu.2057.1.S1_s_at | Mmu.2057.1 | 10.08 | 10.05 | 0.15 | 0.03 | 1.03  | 0.805771 | 0.959227 | 0.912905 | 0.976875 |
| Mmu.2059.1.S1_at   | Mmu.2059.1 | 7.77  | 7.47  | 0.23 | 0.07 | 1.23  | 0.165829 | 0.090198 | 0.45879  | 0.344588 |
| Mmu.2066.1.A1_at   | Mmu.2066.1 | 13.42 | 13.29 | 0.21 | 0.01 | 1.09  | 0.994992 | 0.999568 | 0.997971 | 0.999859 |
| Mmu.2074.1.S1_at   | Mmu.2074.1 | 7.68  | 7.66  | 0.07 | 0.03 | 1.02  | 0.699731 | 0.440485 | 0.857391 | 0.658967 |
| Mmu.2083.1.S1_at   | Mmu.2083.1 | 3.35  | 3.33  | 0.06 | 0.2  | 1.01  | 0.992256 | 0.736836 | 0.99716  | 0.847693 |
| Mmu.2088.1.S1_at   | Mmu.2088.1 | 8.08  | 6.99  | 0.47 | 0.13 | 2.13  | 0.014464 | 0.006636 | 0.171923 | 0.110446 |
| Mmu.2091.1.S1_x_at | Mmu.2091.1 | 13.22 | 13.43 | 0.63 | 0.02 | -1.16 | 0.199282 | 0.185749 | 0.496613 | 0.461631 |
| Mmu.2091.3.S1_at   | Mmu.2091.3 | 7.05  | 7.77  | 0.65 | 0.09 | -1.65 | 0.048228 | 0.012054 | 0.276915 | 0.142044 |
| Mmu.2091.3.S1_x_at | Mmu.2091.3 | 7.18  | 7.92  | 0.61 | 0.12 | -1.67 | 0.084324 | 0.035439 | 0.347695 | 0.232561 |
| Mmu.2091.5.S1_a_at | Mmu.2091.5 | 5.29  | 5.76  | 0.11 | 0.01 | -1.38 | 0.001705 | 0.000821 | 0.085027 | 0.046565 |
| Mmu.2091.5.S1_x_at | Mmu.2091.5 | 6.6   | 6.63  | 0.15 | 0.02 | -1.02 | 0.225839 | 0.026349 | 0.523593 | 0.203321 |
| Mmu.2104.1.S1_at   | Mmu.2104.1 | 6.89  | 6.9   | 0.15 | 0.04 | -1    | 0.910738 | 0.098964 | 0.962201 | 0.357049 |
| Mmu.2107.1.S1_at   | Mmu.2107.1 | 7.61  | 7.73  | 0.13 | 0.07 | -1.08 | 0.325613 | 0.01619  | 0.608811 | 0.161274 |
| Mmu.211.1.S1_at    | Mmu.211.1  | 13.4  | 13.42 | 0.06 | 0.06 | -1.01 | 0.330464 | 0.636032 | 0.612509 | 0.78583  |
| Mmu.2114.1.A1_at   | Mmu.2114.1 | 4.99  | 5.27  | 0.12 | 0.28 | -1.22 | 0.063233 | 0.128644 | 0.308134 | 0.400083 |
| Mmu.2114.1.S1_at   | Mmu.2114.1 | 5.52  | 5.98  | 0.22 | 0.05 | -1.37 | 0.030519 | 0.020396 | 0.227625 | 0.179286 |
| Mmu.2120.1.A1_at   | Mmu.2120.1 | 14.17 | 14.45 | 0.2  | 0.02 | -1.21 | 0.113385 | 0.121788 | 0.390192 | 0.391074 |
| Mmu.2126.1.S1_at   | Mmu.2126.1 | 13.1  | 12.8  | 0.04 | 0.08 | 1.23  | 0.003159 | 0.001358 | 0.101284 | 0.056687 |
| Mmu.2126.1.S1_s_at | Mmu.2126.1 | 13.38 | 13.06 | 0.03 | 0.1  | 1.25  | 0.004799 | 0.001301 | 0.115098 | 0.055613 |
| Mmu.2128.1.S1_x_at | Mmu.2128.1 | 6.98  | 6.88  | 0.36 | 0.35 | 1.08  | 0.348583 | 0.384982 | 0.626521 | 0.620583 |
| Mmu.2136.1.S1_at   | Mmu.2136.1 | 7.84  | 8.21  | 0.3  | 0.02 | -1.29 | 0.171744 | 0.223118 | 0.465674 | 0.49588  |
| Mmu.2142.1.S1_at   | Mmu.2142.1 | 7.8   | 9.39  | 0.45 | 0.2  | -3.02 | 0.005389 | 0.019861 | 0.118569 | 0.177189 |
| Mmu.2143.1.S1_x_at | Mmu.2143.1 | 7.24  | 7.16  | 0.28 | 0.44 | 1.05  | 0.491902 | 0.584661 | 0.729428 | 0.752482 |
| Mmu.2174.1.S1_at   | Mmu.2174.1 | 7.95  | 8.18  | 0.28 | 0.26 | -1.17 | 0.899955 | 0.279152 | 0.957478 | 0.542814 |
| Mmu.2196.1.A1_at   | Mmu.2196.1 | 9.57  | 9.2   | 0.16 | 0.23 | 1.29  | 0.044049 | 0.013023 | 0.266926 | 0.146821 |
| Mmu.2196.1.S1_at   | Mmu.2196.1 | 9.77  | 9.31  | 0.18 | 0.26 | 1.38  | 0.058019 | 0.010891 | 0.297981 | 0.135939 |
| Mmu.22.2.S1_at     | Mmu.22.2   | 11.67 | 11.35 | 0.16 | 0.11 | 1.24  | 0.0383   | 0.051692 | 0.251799 | 0.272892 |
| Mmu.2224.1.A1_at   | Mmu.2224.1 | 11.35 | 10.27 | 0.11 | 0.03 | 2.11  | 0.000076 | 0.004247 | 0.051196 | 0.091685 |
| Mmu.2226.2.S1_at   | Mmu.2226.2 | 10.61 | 10.55 | 0.13 | 0.07 | 1.04  | 0.561392 | 0.004696 | 0.774384 | 0.095363 |
| Mmu.2231.1.S1_at   | Mmu.2231.1 | 8.68  | 7.14  | 1.18 | 0.04 | 2.92  | 0.274835 | 0.303174 | 0.566556 | 0.56067  |
| Mmu.2238.1.S1_at   | Mmu.2238.1 | 12.61 | 12.55 | 0.04 | 0.09 | 1.05  | 0.253675 | 0.411228 | 0.547927 | 0.637954 |
| Mmu.2240.1.A1_at   | Mmu.2240.1 | 2.77  | 2.89  | 0.06 | 0.08 | -1.09 | 0.273607 | 0.354424 | 0.565728 | 0.59721  |
| Mmu.2243.1.S1_at   | Mmu.2243.1 | 12.72 | 12.56 | 0.12 | 0.01 | 1.12  | 0.149346 | 0.173422 | 0.438222 | 0.449918 |
| Mmu.225.1.S1_at    | Mmu.225.1  | 10.39 | 10.48 | 0.06 | 0.1  | -1.07 | 0.289435 | 0.766985 | 0.578968 | 0.864663 |
| Mmu.2250.1.S1_at   | Mmu.2250.1 | 4.05  | 3.96  | 0.15 | 0.06 | 1.07  | 0.393393 | 0.30521  | 0.660249 | 0.562255 |
| Mmu.2252.1.S1_at   | Mmu.2252.1 | 8.75  | 8.64  | 0.04 | 0.06 | 1.08  | 0.059422 | 0.118494 | 0.300867 | 0.386469 |

|                        |                |       |       |      |      |       |          |          |          |          |
|------------------------|----------------|-------|-------|------|------|-------|----------|----------|----------|----------|
| Mmu.2256.2.S1_at       | Mmu.2256.2     | 5.91  | 5.9   | 0.31 | 0.51 | 1     | 0.647552 | 0.755186 | 0.828766 | 0.857488 |
| Mmu.2276.1.S1_at       | Mmu.2276.1     | 5.07  | 6.27  | 0.51 | 0.1  | -2.31 | 0.016102 | 0.193314 | 0.179436 | 0.468656 |
| Mmu.2277.1.S1_at       | Mmu.2277.1     | 10.91 | 10.7  | 0.56 | 0.08 | 1.15  | 0.211931 | 0.339342 | 0.509822 | 0.585984 |
| Mmu.2297.1.S1_at       | Mmu.2297.1     | 8.37  | 6.8   | 0.14 | 0.07 | 2.97  | 0.000053 | 0.002344 | 0.045594 | 0.07161  |
| Mmu.2302.1.S1_at       | Mmu.2302.1     | 6.3   | 6.77  | 0.19 | 0.22 | -1.39 | 0.039972 | 0.045686 | 0.256645 | 0.258049 |
| Mmu.2304.1.S1_at       | Mmu.2304.1     | 6.69  | 8.45  | 0.9  | 0.26 | -3.37 | 0.038832 | 0.369424 | 0.253345 | 0.608816 |
| Mmu.2305.1.S1_at       | Mmu.2305.1     | 8.85  | 10.75 | 1.08 | 0.35 | -3.73 | 0.052387 | 0.274087 | 0.28616  | 0.538565 |
| Mmu.2313.1.S1_at       | Mmu.2313.1     | 10.06 | 9.8   | 0.26 | 0.17 | 1.2   | 0.220236 | 0.005381 | 0.517778 | 0.101199 |
| Mmu.2323.2.S1_at       | Mmu.2323.2     | 7.3   | 7.22  | 0.11 | 0.09 | 1.06  | 0.479606 | 0.012158 | 0.720786 | 0.142648 |
| Mmu.2333.1.S1_at       | Mmu.2333.1     | 9.23  | 9.12  | 0.18 | 0.08 | 1.08  | 0.293532 | 0.014135 | 0.582499 | 0.15208  |
| Mmu.234.1.A1_at        | Mmu.234.1      | 7.55  | 7.82  | 1.09 | 0.11 | -1.21 | 0.633331 | 0.792023 | 0.820372 | 0.879813 |
| Mmu.2342.1.S1_at       | Mmu.2342.1     | 6.97  | 6.54  | 0.37 | 0.27 | 1.35  | 0.117665 | 0.004115 | 0.39507  | 0.090887 |
| Mmu.2344.1.A1_at       | Mmu.2344.1     | 5.77  | 5.66  | 0.15 | 0.19 | 1.08  | 0.386274 | 0.538231 | 0.654709 | 0.72298  |
| Mmu.2344.1.S1_at       | Mmu.2344.1     | 4.49  | 4.5   | 0.05 | 0.03 | -1    | 0.930754 | 0.957425 | 0.970878 | 0.975899 |
| Mmu.235.1.S1_at        | Mmu.235.1      | 5.04  | 4.91  | 0.08 | 0.2  | 1.09  | 0.26584  | 0.29867  | 0.558436 | 0.557252 |
| Mmu.2375.1.S1_at       | Mmu.2375.1     | 6.5   | 6.6   | 0.21 | 0.07 | -1.07 | 0.924501 | 0.056729 | 0.967892 | 0.284291 |
| Mmu.2391.1.S1_at       | Mmu.2391.1     | 5.54  | 5.51  | 0.04 | 0.05 | 1.02  | 0.887352 | 0.111912 | 0.951911 | 0.377006 |
| Mmu.2392.1.S1_at       | Mmu.2392.1     | 5.71  | 5.76  | 0.14 | 0.07 | -1.04 | 0.660515 | 0.991757 | 0.83613  | 0.995392 |
| Mmu.2411.1.S1_at       | Mmu.2411.1     | 11.36 | 11.34 | 0.26 | 0.04 | 1.01  | 0.805403 | 0.869175 | 0.9127   | 0.925755 |
| Mmu.2416.1.S1_at       | Mmu.2416.1     | 9.64  | 9.56  | 0.22 | 0.05 | 1.06  | 0.654063 | 0.056558 | 0.832505 | 0.283838 |
| Mmu.2442.1.S1_at       | Mmu.2442.1     | 8.27  | 10.28 | 0.64 | 0.14 | -4.04 | 0.013366 | 0.026667 | 0.16632  | 0.20423  |
| Mmu.245.1.S1_x_at      | Mmu.245.1      | 13.17 | 13.11 | 0.01 | 0.02 | 1.04  | 0.014444 | 0.684001 | 0.171859 | 0.81565  |
| Mmu.2452.1.S1_at       | Mmu.2452.1     | 9.78  | 10.7  | 0.36 | 0.23 | -1.88 | 0.041434 | 0.000484 | 0.259966 | 0.038753 |
| Mmu.2461.3.S1_at       | Mmu.2461.3     | 3.94  | 3.95  | 0.17 | 0.11 | -1.01 | 0.375853 | 0.618868 | 0.646605 | 0.774212 |
| Mmu.2484.1.S1_at       | Mmu.2484.1     | 5.76  | 5.71  | 0.12 | 0.04 | 1.04  | 0.237038 | 0.293897 | 0.534591 | 0.553878 |
| Mmu.249.1.S1_at        | Mmu.249.1      | 9.67  | 9.94  | 0.45 | 0.24 | -1.2  | 0.700691 | 0.708937 | 0.857852 | 0.831181 |
| MmugDNA.7350.1.S1_s_at | MmugDNA.7350.1 | 10.96 | 11.3  | 0.22 | 0.23 | -1.26 | 0.193162 | 0.638382 | 0.489738 | 0.787623 |
| Mmu.2499.1.S1_at       | Mmu.2499.1     | 13.7  | 13.69 | 0.09 | 0.01 | 1.01  | 0.811777 | 0.883799 | 0.915719 | 0.933691 |
| Mmu.2514.1.S1_at       | Mmu.2514.1     | 9.24  | 9.41  | 0.04 | 0.13 | -1.13 | 0.37861  | 0.727013 | 0.648732 | 0.842084 |
| Mmu.2523.1.S1_at       | Mmu.2523.1     | 9.04  | 12.12 | 1.44 | 0.22 | -8.43 | 0.052238 | 0.239095 | 0.285979 | 0.509827 |
| Mmu.2524.1.S1_at       | Mmu.2524.1     | 6.43  | 6.8   | 0.31 | 0.1  | -1.29 | 0.046282 | 0.038486 | 0.272946 | 0.241138 |
| Mmu.2541.1.S1_at       | Mmu.2541.1     | 11.52 | 11.39 | 0.13 | 0.09 | 1.09  | 0.249351 | 0.56584  | 0.544534 | 0.740112 |
| Mmu.2554.1.A1_at       | Mmu.2554.1     | 5.82  | 5.91  | 0.09 | 0.14 | -1.06 | 0.349549 | 0.676397 | 0.627316 | 0.810935 |
| Mmu.2556.1.S1_at       | Mmu.2556.1     | 11.28 | 11.12 | 0.18 | 0.04 | 1.12  | 0.209407 | 0.742884 | 0.506906 | 0.851074 |
| Mmu.2571.1.S1_at       | Mmu.2571.1     | 3.35  | 3.33  | 0.13 | 0.06 | 1.01  | 0.441679 | 0.585258 | 0.695145 | 0.752837 |
| Mmu.2576.1.S1_at       | Mmu.2576.1     | 10.33 | 10.33 | 0.14 | 0.08 | 1.01  | 0.380736 | 0.004856 | 0.650323 | 0.09727  |
| Mmu.258.1.S1_s_at      | Mmu.258.1      | 11.79 | 11.49 | 0.04 | 0.14 | 1.23  | 0.092591 | 0.035472 | 0.360911 | 0.232564 |
| Mmu.2594.1.S1_at       | Mmu.2594.1     | 14    | 13.95 | 0.06 | 0.02 | 1.03  | 0.206651 | 0.675334 | 0.504305 | 0.81026  |
| Mmu.2601.1.S1_at       | Mmu.2601.1     | 11.97 | 11.83 | 0.05 | 0.12 | 1.11  | 0.180398 | 0.002378 | 0.475556 | 0.072042 |
| Mmu.2604.1.S1_s_at     | Mmu.2604.1     | 12.38 | 12.33 | 0.18 | 0.03 | 1.03  | 0.489155 | 0.775244 | 0.727587 | 0.869162 |
| Mmu.2612.1.S1_at       | Mmu.2612.1     | 5.14  | 4.76  | 0.15 | 0.14 | 1.29  | 0.035592 | 0.070063 | 0.243518 | 0.310966 |
| Mmu.2615.1.S1_at       | Mmu.2615.1     | 6.25  | 6.26  | 0.21 | 0.01 | -1    | 0.729298 | 0.363517 | 0.873534 | 0.603941 |
| Mmu.2633.1.S1_at       | Mmu.2633.1     | 4.64  | 4.13  | 0.16 | 0.47 | 1.43  | 0.414762 | 0.603109 | 0.675681 | 0.763947 |

|                         |                 |       |       |      |      |       |          |          |          |          |
|-------------------------|-----------------|-------|-------|------|------|-------|----------|----------|----------|----------|
| Mmu.2659.1.S1_at        | Mmu.2659.1      | 5.84  | 5.71  | 0.15 | 0.06 | 1.1   | 0.6159   | 0.654861 | 0.809225 | 0.798179 |
| Mmu.2665.1.S1_at        | Mmu.2665.1      | 5.44  | 5.34  | 0.09 | 0.08 | 1.07  | 0.114514 | 0.062342 | 0.391576 | 0.296503 |
| Mmu.2673.1.S1_at        | Mmu.2673.1      | 5.67  | 5.7   | 0.23 | 0.02 | -1.02 | 0.266014 | 0.186311 | 0.558581 | 0.462172 |
| Mmu.2694.1.S1_at        | Mmu.2694.1      | 12.29 | 12.36 | 0.02 | 0.06 | -1.05 | 0.269832 | 0.03797  | 0.562082 | 0.239302 |
| Mmu.2694.1.S1_s_at      | Mmu.2694.1      | 10.65 | 10.64 | 0.08 | 0.03 | 1.01  | 0.389895 | 0.134418 | 0.657536 | 0.406603 |
| Mmu.2695.1.S1_at        | Mmu.2695.1      | 8.16  | 8.13  | 0.24 | 0.08 | 1.02  | 0.306764 | 0.513691 | 0.593597 | 0.707212 |
| Mmu.2704.1.S1_at        | Mmu.2704.1      | 9.26  | 8.58  | 0.35 | 0.4  | 1.6   | 0.050363 | 0.11725  | 0.282317 | 0.384781 |
| Mmu.2718.1.S1_at        | Mmu.2718.1      | 12.02 | 11.43 | 0.18 | 0.21 | 1.51  | 0.018261 | 0.019671 | 0.188157 | 0.176276 |
| MmugDNA.1323.1.S1_s_at  | MmugDNA.1323.1  | 12.6  | 12.58 | 0.2  | 0.07 | 1.01  | 0.663969 | 0.752508 | 0.838166 | 0.855912 |
| Mmu.2721.1.S1_at        | Mmu.2721.1      | 6.69  | 6.63  | 0.3  | 0.22 | 1.04  | 0.562016 | 0.634062 | 0.774793 | 0.784619 |
| Mmu.2724.1.S1_at        | Mmu.2724.1      | 9.25  | 9.52  | 0.55 | 0.14 | -1.2  | 0.445255 | 0.234636 | 0.697742 | 0.505853 |
| Mmu.2746.2.S1_at        | Mmu.2746.2      | 5.35  | 5.52  | 0.17 | 0.04 | -1.12 | 0.06558  | 0.084829 | 0.313465 | 0.336352 |
| Mmu.2749.1.S1_at        | Mmu.2749.1      | 9.76  | 9.49  | 0.25 | 0.09 | 1.2   | 0.644885 | 0.0501   | 0.827097 | 0.268916 |
| Mmu.2756.1.S1_at        | Mmu.2756.1      | 7.94  | 8.61  | 0.13 | 0.12 | -1.58 | 0.002918 | 0.009047 | 0.099212 | 0.1257   |
| MmugDNA.23929.1.S1_at   | MmugDNA.23929.1 | 12.12 | 12.62 | 0.17 | 0.14 | -1.42 | 0.026346 | 0.149221 | 0.215438 | 0.423728 |
| MmugDNA.23929.1.S1_s_at | MmugDNA.23929.1 | 11.75 | 12.38 | 0.21 | 0.14 | -1.55 | 0.043197 | 0.177515 | 0.265109 | 0.453888 |
| Mmu.2761.1.S1_at        | Mmu.2761.1      | 4.68  | 4.7   | 0.18 | 0.17 | -1.02 | 0.889621 | 0.676994 | 0.953043 | 0.811292 |
| Mmu.2763.1.S1_at        | Mmu.2763.1      | 3.87  | 3.65  | 0.23 | 0.22 | 1.16  | 0.76144  | 0.669046 | 0.890604 | 0.806427 |
| Mmu.2776.1.S1_at        | Mmu.2776.1      | 11.72 | 10.19 | 0.17 | 0.36 | 2.9   | 0.00475  | 0.002928 | 0.115098 | 0.079497 |
| Mmu.2787.1.S1_at        | Mmu.2787.1      | 11.46 | 11.87 | 0.38 | 0.06 | -1.33 | 0.08432  | 0.054229 | 0.347695 | 0.278278 |
| Mmu.2787.1.S1_x_at      | Mmu.2787.1      | 11.64 | 11.98 | 0.33 | 0.07 | -1.27 | 0.071934 | 0.04856  | 0.326139 | 0.265572 |
| Mmu.2788.1.S1_at        | Mmu.2788.1      | 5.88  | 6.17  | 0.34 | 0.14 | -1.23 | 0.343908 | 0.32993  | 0.623214 | 0.578874 |
| Mmu.2788.1.S1_s_at      | Mmu.2788.1      | 9.38  | 9.53  | 0.26 | 0.1  | -1.11 | 0.157526 | 0.062482 | 0.448227 | 0.296749 |
| Mmu.2800.1.S1_at        | Mmu.2800.1      | 9.08  | 9.12  | 0.31 | 0.17 | -1.03 | 0.416688 | 0.66671  | 0.67708  | 0.804734 |
| Mmu.2804.1.S1_at        | Mmu.2804.1      | 7.66  | 7.68  | 0.16 | 0.06 | -1.01 | 0.761977 | 0.220478 | 0.890799 | 0.493818 |
| Mmu.2810.1.S1_at        | Mmu.2810.1      | 8.13  | 7.8   | 0.08 | 0.25 | 1.26  | 0.03281  | 0.067657 | 0.235221 | 0.306199 |
| Mmu.2851.1.S1_at        | Mmu.2851.1      | 5.55  | 6.26  | 0.25 | 0.26 | -1.63 | 0.053562 | 0.159151 | 0.288667 | 0.435217 |
| Mmu.2852.1.S1_at        | Mmu.2852.1      | 3.27  | 3.29  | 0.04 | 0.14 | -1.01 | 0.82392  | 0.932567 | 0.921717 | 0.961739 |
| Mmu.2852.1.S1_x_at      | Mmu.2852.1      | 3.39  | 3.49  | 0.03 | 0.13 | -1.08 | 0.165351 | 0.232026 | 0.458328 | 0.503761 |
| Mmu.2856.1.S1_at        | Mmu.2856.1      | 7.65  | 7.45  | 0.48 | 0.09 | 1.15  | 0.140073 | 0.056973 | 0.425792 | 0.284811 |
| Mmu.2860.1.S1_at        | Mmu.2860.1      | 4.78  | 4.77  | 0.09 | 0    | 1.01  | 0.736866 | 0.755687 | 0.877727 | 0.85776  |
| Mmu.2868.1.S1_at        | Mmu.2868.1      | 3.39  | 3.4   | 0.11 | 0.07 | -1.01 | 0.732022 | 0.731049 | 0.874717 | 0.844197 |
| Mmu.2883.1.S1_at        | Mmu.2883.1      | 8.16  | 7.38  | 1.44 | 0.38 | 1.73  | 0.101741 | 0.035363 | 0.373208 | 0.232348 |
| Mmu.2887.1.S1_at        | Mmu.2887.1      | 12.04 | 11.92 | 0.25 | 0.17 | 1.09  | 0.251789 | 0.105102 | 0.546475 | 0.366755 |
| Mmu.289.1.S1_at         | Mmu.289.1       | 7.94  | 8.58  | 0.14 | 0.15 | -1.56 | 0.006315 | 0.001503 | 0.125881 | 0.059065 |
| MmugDNA.15562.1.S1_s_at | MmugDNA.15562.1 | 14.29 | 14.32 | 0.03 | 0.05 | -1.02 | 0.304588 | 0.244213 | 0.591726 | 0.514167 |
| Mmu.2918.1.S1_at        | Mmu.2918.1      | 9.43  | 9.62  | 0.27 | 0.16 | -1.14 | 0.130824 | 0.104735 | 0.41337  | 0.366144 |
| Mmu.2925.1.S1_at        | Mmu.2925.1      | 9.9   | 10.16 | 0.14 | 0.11 | -1.2  | 0.056438 | 0.056919 | 0.294998 | 0.284712 |
| Mmu.2935.3.A1_a_at      | Mmu.2935.3      | 8.28  | 9.03  | 0.18 | 0.16 | -1.68 | 0.007834 | 0.050073 | 0.137244 | 0.268916 |
| Mmu.2935.1.S1_at        | Mmu.2935.1      | 5.71  | 5.81  | 0.15 | 0.21 | -1.07 | 0.5402   | 0.866655 | 0.761304 | 0.924203 |
| Mmu.2935.2.S1_at        | Mmu.2935.2      | 6.51  | 6.93  | 0.2  | 0.1  | -1.34 | 0.03909  | 0.016928 | 0.254137 | 0.164991 |
| Mmu.2935.4.S1_x_at      | Mmu.2935.4      | 12.21 | 13.04 | 0.36 | 0.06 | -1.77 | 0.029067 | 0.1692   | 0.223234 | 0.445812 |
| MmunewRS.781.1.S1_s_at  | MmunewRS.781.1  | 13.48 | 13.06 | 0.09 | 0.02 | 1.34  | 0.000997 | 0.017816 | 0.076321 | 0.168612 |

|                          |                  |       |       |      |      |        |          |          |          |          |
|--------------------------|------------------|-------|-------|------|------|--------|----------|----------|----------|----------|
| Mmu.2975.1.S1_at         | Mmu.2975.1       | 8.36  | 8.42  | 0.33 | 0.11 | -1.04  | 0.577088 | 0.642861 | 0.783459 | 0.790529 |
| Mmu.2976.1.S1_at         | Mmu.2976.1       | 8.15  | 9.59  | 1.06 | 0.26 | -2.72  | 0.163569 | 0.030353 | 0.455974 | 0.216116 |
| Mmu.2984.1.S1_at         | Mmu.2984.1       | 10.95 | 10.89 | 0.32 | 0.11 | 1.04   | 0.69362  | 0.505044 | 0.853583 | 0.70197  |
| Mmu.2985.1.S1_at         | Mmu.2985.1       | 13.3  | 13.29 | 0.07 | 0.01 | 1.01   | 0.956487 | 0.542434 | 0.982106 | 0.725516 |
| Mmu.2989.1.S1_s_at       | Mmu.2989.1       | 13.89 | 13.84 | 0.07 | 0.03 | 1.04   | 0.227412 | 0.66654  | 0.525446 | 0.804636 |
| Mmu.3027.1.S1_at         | Mmu.3027.1       | 11.47 | 11.55 | 0.12 | 0.03 | -1.06  | 0.886232 | 0.895412 | 0.951475 | 0.940218 |
| Mmu.303.1.S1_at          | Mmu.303.1        | 8.31  | 6.9   | 0.2  | 0.27 | 2.66   | 0.002411 | 0.000696 | 0.093606 | 0.044237 |
| Mmu.3035.1.S1_x_at       | Mmu.3035.1       | 3.34  | 3.49  | 0.44 | 0.04 | -1.11  | 0.585228 | 0.751835 | 0.789075 | 0.855698 |
| Mmu.3041.1.S1_at         | Mmu.3041.1       | 3.64  | 3.63  | 0.22 | 0.18 | 1.01   | 0.465282 | 0.70118  | 0.711393 | 0.826707 |
| Mmu.3044.1.S1_x_at       | Mmu.3044.1       | 13.26 | 14.46 | 1.27 | 0.04 | -2.31  | 0.166132 | 0.143463 | 0.459217 | 0.417442 |
| Mmu.3044.13.S1_x_at      | Mmu.3044.13      | 11.93 | 14.46 | 3.67 | 0.03 | -5.76  | 0.217625 | 0.203008 | 0.515458 | 0.477343 |
| Mmu.3044.15.S1_at        | Mmu.3044.15      | 7.39  | 7.6   | 0.25 | 0.15 | -1.16  | 0.14982  | 0.177786 | 0.438771 | 0.454111 |
| Mmu.3044.17.S1_x_at      | Mmu.3044.17      | 14.59 | 14.57 | 1.37 | 0.03 | 1.01   | 0.37611  | 0.434456 | 0.646788 | 0.654569 |
| Mmu.3044.6.S1_at         | Mmu.3044.6       | 3.01  | 3.02  | 0.09 | 0.1  | -1     | 0.88242  | 0.950128 | 0.949987 | 0.971594 |
| Mmu.3053.1.S1_at         | Mmu.3053.1       | 5.27  | 5.21  | 0.04 | 0.07 | 1.04   | 0.369396 | 0.204135 | 0.642818 | 0.478458 |
| Mmu.3054.2.S1_at         | Mmu.3054.2       | 11.25 | 11.04 | 0.06 | 0.22 | 1.16   | 0.06084  | 0.011924 | 0.303684 | 0.141304 |
| MmuMitochon.12.1.S1_s_at | MmuMitochon.12.1 | 13.76 | 13.7  | 0.14 | 0.08 | 1.04   | 0.736511 | 0.890041 | 0.877553 | 0.937384 |
| Mmu.3058.1.S1_at         | Mmu.3058.1       | 6.81  | 7.74  | 0.26 | 0.28 | -1.91  | 0.026462 | 0.000657 | 0.215747 | 0.043559 |
| Mmu.3064.1.S1_s_at       | Mmu.3064.1       | 13.97 | 14.55 | 0.77 | 0.03 | -1.49  | 0.225557 | 0.231193 | 0.523395 | 0.5029   |
| Mmu.3064.4.S1_s_at       | Mmu.3064.4       | 8.41  | 14.44 | 3.53 | 0.03 | -65.14 | 0.121305 | 0.086904 | 0.400024 | 0.339713 |
| Mmu.3073.1.A1_s_at       | Mmu.3073.1       | 5.98  | 6.24  | 0.39 | 0.08 | -1.2   | 0.137176 | 0.207847 | 0.422016 | 0.482049 |
| Mmu.3073.1.S1_x_at       | Mmu.3073.1       | 5.46  | 5.55  | 0.15 | 0.03 | -1.06  | 0.146649 | 0.180005 | 0.434585 | 0.456552 |
| Mmu.3075.1.S1_at         | Mmu.3075.1       | 3.2   | 3.36  | 0.02 | 0.16 | -1.12  | 0.138888 | 0.246925 | 0.424543 | 0.516238 |
| Mmu.3079.1.S1_at         | Mmu.3079.1       | 10.49 | 9.87  | 0.11 | 0.07 | 1.54   | 0.001517 | 0.011247 | 0.081668 | 0.138014 |
| Mmu.309.1.S1_s_at        | Mmu.309.1        | 6.88  | 7.05  | 0.19 | 0.21 | -1.13  | 0.377854 | 0.121167 | 0.648273 | 0.390223 |
| Mmu.3094.1.S1_at         | Mmu.3094.1       | 13.89 | 14.32 | 0.53 | 0.05 | -1.35  | 0.172406 | 0.175541 | 0.466621 | 0.452174 |
| Mmu.3117.1.S1_at         | Mmu.3117.1       | 8.3   | 13.87 | 4.37 | 0.08 | -47.27 | 0.118805 | 0.084859 | 0.396589 | 0.336411 |
| Mmu.312.1.S1_at          | Mmu.312.1        | 11.3  | 11.24 | 0.27 | 0.03 | 1.04   | 0.951571 | 0.78546  | 0.979984 | 0.875798 |
| Mmu.3126.6.S1_x_at       | Mmu.3126.6       | 14.31 | 14.38 | 0.49 | 0.04 | -1.04  | 0.331009 | 0.429297 | 0.612975 | 0.650754 |
| Mmu.3126.23.S1_at        | Mmu.3126.23      | 3.67  | 3.72  | 0.05 | 0    | -1.03  | 0.180048 | 0.768598 | 0.475153 | 0.865637 |
| Mmu.3126.28.S1_at        | Mmu.3126.28      | 3.71  | 3.7   | 0.07 | 0.06 | 1.01   | 0.611912 | 0.678452 | 0.80658  | 0.812209 |
| Mmu.3126.4.S1_at         | Mmu.3126.4       | 3.38  | 3.4   | 0    | 0.04 | -1.01  | 0.737858 | 0.736344 | 0.878434 | 0.847451 |
| Mmu.3127.1.S1_at         | Mmu.3127.1       | 2.85  | 2.85  | 0.07 | 0.05 | -1.01  | 0.452325 | 0.683736 | 0.702807 | 0.815491 |
| Mmu.313.1.S1_at          | Mmu.313.1        | 10.9  | 10.56 | 0.07 | 0.11 | 1.26   | 0.012361 | 0.006178 | 0.161592 | 0.106774 |
| Mmu.3131.1.S1_at         | Mmu.3131.1       | 6.17  | 6.06  | 0.11 | 0.19 | 1.08   | 0.299802 | 0.608467 | 0.588111 | 0.767077 |
| Mmu.3131.1.S1_x_at       | Mmu.3131.1       | 6.2   | 6.21  | 0.18 | 0    | -1.01  | 0.596525 | 0.792279 | 0.795864 | 0.879986 |
| Mmu.3132.1.S1_at         | Mmu.3132.1       | 4.76  | 4.76  | 0.04 | 0.06 | -1     | 0.544028 | 0.247581 | 0.763753 | 0.516939 |
| Mmu.3140.1.A1_at         | Mmu.3140.1       | 2.93  | 2.86  | 0.03 | 0.16 | 1.05   | 0.566499 | 0.692567 | 0.777384 | 0.821061 |
| Mmu.3140.1.S1_at         | Mmu.3140.1       | 3.29  | 2.82  | 0.15 | 0.14 | 1.39   | 0.029758 | 0.030697 | 0.225738 | 0.217148 |
| Mmu.3149.1.S1_at         | Mmu.3149.1       | 12.66 | 12.5  | 0.31 | 0.07 | 1.11   | 0.898584 | 0.681115 | 0.956888 | 0.813791 |
| Mmu.3173.1.S1_at         | Mmu.3173.1       | 8.24  | 8.26  | 0.12 | 0.15 | -1.01  | 0.838404 | 0.977268 | 0.92909  | 0.987637 |
| Mmu.3176.1.S1_at         | Mmu.3176.1       | 3.26  | 3.63  | 0.1  | 0.02 | -1.29  | 0.004823 | 0.02737  | 0.115098 | 0.206695 |
| Mmu.3186.1.S1_s_at       | Mmu.3186.1       | 14.34 | 14.51 | 0.19 | 0.04 | -1.13  | 0.232425 | 0.279047 | 0.530886 | 0.542782 |

|                    |            |       |       |      |      |       |          |          |          |          |
|--------------------|------------|-------|-------|------|------|-------|----------|----------|----------|----------|
| Mmu.3186.3.S1_at   | Mmu.3186.3 | 3.27  | 3.57  | 0.29 | 0.04 | -1.24 | 0.128921 | 0.071986 | 0.41116  | 0.314305 |
| Mmu.3186.4.S1_at   | Mmu.3186.4 | 3.27  | 3.27  | 0    | 0.03 | 1     | 0.373901 | 0.954172 | 0.645118 | 0.973959 |
| Mmu.3186.4.S1_x_at | Mmu.3186.4 | 2.84  | 2.93  | 0.26 | 0    | -1.06 | 0.783458 | 0.929974 | 0.901128 | 0.960154 |
| Mmu.3187.1.S1_at   | Mmu.3187.1 | 6.16  | 5.49  | 0.94 | 0.32 | 1.59  | 0.283146 | 0.286401 | 0.573595 | 0.547817 |
| Mmu.3193.1.S1_at   | Mmu.3193.1 | 8.33  | 8.2   | 0.71 | 0.11 | 1.09  | 0.680977 | 0.825405 | 0.847834 | 0.899709 |
| Mmu.3203.2.S1_at   | Mmu.3203.2 | 10.79 | 10.6  | 0.23 | 0.15 | 1.14  | 0.116089 | 0.15739  | 0.393074 | 0.432859 |
| Mmu.3223.1.S1_at   | Mmu.3223.1 | 9.49  | 9.37  | 0.28 | 0.24 | 1.09  | 0.700577 | 0.013984 | 0.857793 | 0.151585 |
| Mmu.3224.1.S1_at   | Mmu.3224.1 | 10.31 | 8.49  | 0.66 | 0.14 | 3.54  | 0.016726 | 0.022237 | 0.182634 | 0.18659  |
| Mmu.3235.1.S1_at   | Mmu.3235.1 | 5.86  | 5.52  | 0.36 | 0.16 | 1.27  | 0.143226 | 0.331347 | 0.429519 | 0.58006  |
| Mmu.3243.1.S1_at   | Mmu.3243.1 | 7.56  | 7.56  | 0.11 | 0.05 | 1     | 0.431771 | 0.024123 | 0.687662 | 0.1945   |
| Mmu.3265.1.S1_at   | Mmu.3265.1 | 11.17 | 11.07 | 0.12 | 0.13 | 1.07  | 0.146534 | 0.275219 | 0.434441 | 0.539628 |
| Mmu.3265.1.S1_s_at | Mmu.3265.1 | 12.32 | 12.08 | 0.11 | 0.09 | 1.18  | 0.033021 | 0.051266 | 0.236089 | 0.271825 |
| Mmu.3271.1.A1_at   | Mmu.3271.1 | 8.41  | 8.29  | 0.03 | 0.15 | 1.09  | 0.089971 | 0.028268 | 0.356863 | 0.209859 |
| Mmu.3271.1.S1_at   | Mmu.3271.1 | 7.14  | 7.1   | 0.24 | 0.06 | 1.03  | 0.985494 | 0.997916 | 0.99479  | 0.998971 |
| Mmu.3274.1.S1_at   | Mmu.3274.1 | 11.99 | 12.19 | 0.29 | 0.05 | -1.15 | 0.748825 | 0.571091 | 0.883748 | 0.743541 |
| Mmu.3276.1.S1_at   | Mmu.3276.1 | 2.78  | 3.34  | 0.01 | 0.28 | -1.48 | 0.067958 | 0.092901 | 0.318434 | 0.349024 |
| Mmu.328.1.S1_at    | Mmu.328.1  | 9.22  | 9.21  | 0.08 | 0.19 | 1.01  | 0.410823 | 0.349579 | 0.672785 | 0.593539 |
| Mmu.3280.1.S1_at   | Mmu.3280.1 | 8.89  | 8.62  | 0.17 | 0.05 | 1.2   | 0.041705 | 0.288967 | 0.260729 | 0.550098 |
| Mmu.3285.1.S1_s_at | Mmu.3285.1 | 9.92  | 8.92  | 0.18 | 0.26 | 1.99  | 0.008359 | 0.032365 | 0.140516 | 0.222725 |
| Mmu.3298.1.S1_at   | Mmu.3298.1 | 12.38 | 12.61 | 0.18 | 0.02 | -1.18 | 0.204672 | 0.145984 | 0.502423 | 0.419998 |
| Mmu.3308.1.S1_at   | Mmu.3308.1 | 4.72  | 4.86  | 0.14 | 0.2  | -1.1  | 0.384264 | 0.738017 | 0.653292 | 0.848158 |
| Mmu.3320.1.S1_at   | Mmu.3320.1 | 5.96  | 5.17  | 0.31 | 0.19 | 1.73  | 0.030434 | 0.035249 | 0.227311 | 0.231974 |
| Mmu.3343.2.S1_at   | Mmu.3343.2 | 10.41 | 10.01 | 0.11 | 0.06 | 1.32  | 0.010765 | 0.004561 | 0.153553 | 0.094371 |
| Mmu.3346.2.S1_at   | Mmu.3346.2 | 3.68  | 3.47  | 0.09 | 0.07 | 1.15  | 0.055274 | 0.04706  | 0.292072 | 0.261469 |
| Mmu.335.1.S1_at    | Mmu.335.1  | 6.42  | 6.71  | 0.53 | 0.17 | -1.22 | 0.535411 | 0.244588 | 0.758305 | 0.514387 |
| Mmu.3350.1.S1_at   | Mmu.3350.1 | 7.49  | 7.26  | 0.09 | 0.18 | 1.17  | 0.066097 | 0.068756 | 0.314442 | 0.308711 |
| Mmu.3375.1.S1_at   | Mmu.3375.1 | 8.39  | 8.28  | 0.36 | 0.13 | 1.08  | 0.676012 | 0.283403 | 0.845314 | 0.545936 |
| Mmu.3378.1.S1_at   | Mmu.3378.1 | 5.28  | 5.35  | 0.07 | 0.11 | -1.05 | 0.997741 | 0.005093 | 0.999199 | 0.099108 |
| Mmu.3384.1.S1_at   | Mmu.3384.1 | 10.8  | 10.71 | 0.13 | 0.01 | 1.07  | 0.074976 | 0.071281 | 0.331989 | 0.313318 |
| Mmu.3395.1.S1_at   | Mmu.3395.1 | 13.02 | 13.04 | 0.22 | 0.02 | -1.02 | 0.293611 | 0.282123 | 0.582604 | 0.544937 |
| Mmu.3395.1.S1_s_at | Mmu.3395.1 | 13.48 | 13.55 | 0.13 | 0.03 | -1.05 | 0.336613 | 0.405862 | 0.61717  | 0.634037 |
| Mmu.3404.1.S1_at   | Mmu.3404.1 | 8.59  | 9.48  | 0.31 | 0.18 | -1.86 | 0.018405 | 0.507018 | 0.18871  | 0.702701 |
| Mmu.3412.1.A1_at   | Mmu.3412.1 | 9.79  | 9.78  | 0.11 | 0.09 | 1.01  | 0.98514  | 0.999855 | 0.99466  | 0.999954 |
| Mmu.3418.2.S1_at   | Mmu.3418.2 | 10.08 | 10.25 | 0.47 | 0.21 | -1.13 | 0.587189 | 0.003847 | 0.790409 | 0.088232 |
| Mmu.3422.1.A1_at   | Mmu.3422.1 | 5.62  | 8.83  | 1.13 | 0.32 | -9.29 | 0.019204 | 0.232871 | 0.19202  | 0.50445  |
| Mmu.3422.1.S1_at   | Mmu.3422.1 | 6.52  | 8.81  | 0.66 | 0.35 | -4.9  | 0.006988 | 0.22046  | 0.130898 | 0.493818 |
| Mmu.3435.1.S1_at   | Mmu.3435.1 | 8.17  | 7.88  | 0.31 | 0.03 | 1.22  | 0.573431 | 0.148842 | 0.781098 | 0.423218 |
| Mmu.3463.1.S1_at   | Mmu.3463.1 | 8.91  | 8.39  | 0.41 | 0.44 | 1.43  | 0.240885 | 0.06908  | 0.538254 | 0.309061 |
| Mmu.3466.1.S1_at   | Mmu.3466.1 | 3.76  | 4.38  | 0.23 | 0.35 | -1.54 | 0.049864 | 0.148464 | 0.280969 | 0.423011 |
| Mmu.3474.1.S1_at   | Mmu.3474.1 | 8.47  | 9.16  | 0.28 | 0.1  | -1.62 | 0.013587 | 0.314398 | 0.167335 | 0.56831  |
| Mmu.3483.1.S1_at   | Mmu.3483.1 | 6.12  | 6.38  | 0.13 | 0.19 | -1.2  | 0.111475 | 0.414419 | 0.387457 | 0.640293 |
| Mmu.3486.1.S1_at   | Mmu.3486.1 | 7.89  | 7.91  | 0.94 | 0.21 | -1.02 | 0.766601 | 0.517209 | 0.892926 | 0.709435 |
| Mmu.3486.2.S1_at   | Mmu.3486.2 | 8.93  | 9.27  | 0.71 | 0.13 | -1.27 | 0.927107 | 0.94946  | 0.969143 | 0.971102 |

|                         |                 |       |       |      |      |       |          |          |          |          |
|-------------------------|-----------------|-------|-------|------|------|-------|----------|----------|----------|----------|
| Mmu.3500.1.S1_at        | Mmu.3500.1      | 8.33  | 7.61  | 0.25 | 0.15 | 1.64  | 0.041271 | 0.282302 | 0.259648 | 0.545046 |
| Mmu.3505.2.S1_s_at      | Mmu.3505.2      | 12.4  | 12.69 | 0.09 | 0.07 | -1.23 | 0.007125 | 0.000748 | 0.131745 | 0.045119 |
| Mmu.3513.1.S1_at        | Mmu.3513.1      | 10.21 | 10.28 | 0.23 | 0.05 | -1.06 | 0.610858 | 0.139104 | 0.805959 | 0.412205 |
| Mmu.3521.1.A1_at        | Mmu.3521.1      | 9.6   | 8.62  | 0.17 | 0.34 | 1.98  | 0.012837 | 0.205404 | 0.163726 | 0.479751 |
| Mmu.3521.1.S1_at        | Mmu.3521.1      | 9.86  | 8.63  | 0.15 | 0.34 | 2.34  | 0.009668 | 0.152789 | 0.14832  | 0.427601 |
| Mmu.3524.1.S1_at        | Mmu.3524.1      | 6.51  | 7     | 0.32 | 0.19 | -1.4  | 0.07934  | 0.018845 | 0.339289 | 0.172686 |
| Mmu.3529.1.S1_at        | Mmu.3529.1      | 11.2  | 10.99 | 0.24 | 0.12 | 1.16  | 0.242834 | 0.074179 | 0.539589 | 0.317916 |
| Mmu.3531.1.A1_at        | Mmu.3531.1      | 5.34  | 5.34  | 0.05 | 0.08 | -1    | 0.583578 | 0.363372 | 0.788218 | 0.603755 |
| Mmu.3531.1.S1_at        | Mmu.3531.1      | 4.57  | 4.75  | 0.13 | 0.04 | -1.13 | 0.189497 | 0.162797 | 0.485955 | 0.438915 |
| Mmu.3541.1.S1_at        | Mmu.3541.1      | 11.25 | 11.12 | 0.24 | 0.16 | 1.1   | 0.207935 | 0.256425 | 0.505791 | 0.524183 |
| Mmu.3553.1.A1_at        | Mmu.3553.1      | 10.72 | 10.8  | 0.12 | 0.16 | -1.06 | 0.195848 | 0.002185 | 0.492743 | 0.069035 |
| Mmu.3554.1.S1_at        | Mmu.3554.1      | 9.89  | 10.12 | 0.07 | 0.14 | -1.17 | 0.098521 | 0.00195  | 0.3692   | 0.065813 |
| Mmu.3556.1.S1_s_at      | Mmu.3556.1      | 11.95 | 11.83 | 0.12 | 0.03 | 1.09  | 0.188335 | 0.079453 | 0.484633 | 0.326766 |
| Mmu.3567.1.S1_at        | Mmu.3567.1      | 9.39  | 9.42  | 0.19 | 0.2  | -1.02 | 0.567611 | 0.295917 | 0.777821 | 0.555241 |
| MmugDNA.19826.1.S1_at   | MmugDNA.19826.1 | 9.26  | 9.43  | 0.18 | 0.07 | -1.12 | 0.821469 | 0.284729 | 0.920411 | 0.546934 |
| MmugDNA.19826.1.S1_s_at | MmugDNA.19826.1 | 9.29  | 9.43  | 0.16 | 0.06 | -1.11 | 0.604954 | 0.233746 | 0.802092 | 0.50505  |
| Mmu.357.1.S1_at         | Mmu.357.1       | 5.24  | 5.64  | 0.47 | 0.31 | -1.32 | 0.246924 | 0.501333 | 0.542575 | 0.69951  |
| Mmu.357.1.S1_x_at       | Mmu.357.1       | 8.09  | 8.1   | 0.49 | 0.11 | -1.01 | 0.986824 | 0.783222 | 0.995228 | 0.874547 |
| Mmu.3573.1.S1_at        | Mmu.3573.1      | 9.66  | 9.65  | 0.11 | 0.24 | 1.01  | 0.29936  | 0.38464  | 0.587689 | 0.620255 |
| Mmu.359.1.S1_at         | Mmu.359.1       | 7.22  | 7.19  | 0.45 | 0.09 | 1.02  | 0.768231 | 0.549401 | 0.893506 | 0.729841 |
| Mmu.3604.1.S1_s_at      | Mmu.3604.1      | 9.44  | 12.47 | 1.34 | 0.25 | -8.18 | 0.054783 | 0.103023 | 0.290829 | 0.363839 |
| Mmu.3605.1.S1_at        | Mmu.3605.1      | 10.66 | 10.64 | 0.09 | 0.06 | 1.01  | 0.476107 | 0.00058  | 0.718656 | 0.041447 |
| Mmu.3605.1.S1_s_at      | Mmu.3605.1      | 10.27 | 10.34 | 0.13 | 0.07 | -1.05 | 0.609722 | 0.002029 | 0.805462 | 0.066885 |
| MmunewRS.789.1.S1_s_at  | MmunewRS.789.1  | 3.52  | 3.54  | 0.09 | 0.1  | -1.01 | 0.484032 | 0.269614 | 0.723999 | 0.534868 |
| Mmu.3611.1.S1_at        | Mmu.3611.1      | 7.01  | 7.11  | 0.13 | 0.05 | -1.07 | 0.330914 | 0.13043  | 0.612891 | 0.402262 |
| Mmu.3625.1.S1_at        | Mmu.3625.1      | 5.15  | 5     | 0.24 | 0.23 | 1.11  | 0.184911 | 0.234447 | 0.481046 | 0.505674 |
| Mmu.3626.1.S1_at        | Mmu.3626.1      | 6.35  | 6.22  | 0.27 | 0.05 | 1.09  | 0.577927 | 0.772745 | 0.783846 | 0.867844 |
| Mmu.3634.1.S1_at        | Mmu.3634.1      | 8.35  | 7.9   | 0.2  | 0.37 | 1.37  | 0.08157  | 0.061013 | 0.342646 | 0.293811 |
| Mmu.364.1.S1_at         | Mmu.364.1       | 9.11  | 9.7   | 0.27 | 0.13 | -1.5  | 0.079449 | 0.006491 | 0.339535 | 0.109489 |
| Mmu.367.1.S1_at         | Mmu.367.1       | 12.14 | 12.94 | 0.19 | 0.23 | -1.74 | 0.033042 | 0.180406 | 0.236091 | 0.457077 |
| Mmu.3675.1.S1_at        | Mmu.3675.1      | 8.59  | 8     | 0.35 | 0.02 | 1.51  | 0.128258 | 0.594591 | 0.410227 | 0.758623 |
| Mmu.3690.1.S1_x_at      | Mmu.3690.1      | 6.35  | 6.32  | 0.19 | 0.07 | 1.02  | 0.584024 | 0.415769 | 0.788478 | 0.641104 |
| Mmu.3691.1.A1_at        | Mmu.3691.1      | 5.84  | 5.73  | 0.2  | 0.06 | 1.08  | 0.193014 | 0.272232 | 0.489582 | 0.536977 |
| Mmu.3691.1.S1_at        | Mmu.3691.1      | 4.74  | 4.74  | 0.04 | 0.01 | 1     | 0.280647 | 0.505795 | 0.571731 | 0.702218 |
| Mmu.3692.1.S1_at        | Mmu.3692.1      | 5.83  | 5.72  | 0.25 | 0.06 | 1.08  | 0.644625 | 0.216037 | 0.827017 | 0.48965  |
| Mmu.3693.1.A1_at        | Mmu.3693.1      | 10.26 | 9.73  | 0.44 | 0.12 | 1.44  | 0.127163 | 0.159504 | 0.408754 | 0.43566  |
| Mmu.3693.1.S1_at        | Mmu.3693.1      | 9.2   | 9.17  | 0.24 | 0.07 | 1.02  | 0.681763 | 0.079157 | 0.848213 | 0.326338 |
| Mmu.3695.1.S1_s_at      | Mmu.3695.1      | 12.88 | 12.94 | 0.04 | 0.04 | -1.05 | 0.158235 | 0.153614 | 0.44918  | 0.428341 |
| Mmu.3696.1.S1_at        | Mmu.3696.1      | 4.49  | 4.54  | 0.09 | 0.28 | -1.03 | 0.522388 | 0.388331 | 0.749806 | 0.62274  |
| Mmu.3708.1.S1_at        | Mmu.3708.1      | 9.73  | 10.74 | 0.16 | 0.3  | -2.02 | 0.018767 | 0.044019 | 0.190348 | 0.254195 |
| Mmu.3718.1.S1_at        | Mmu.3718.1      | 10.82 | 10.6  | 0.09 | 0.14 | 1.17  | 0.060024 | 0.051877 | 0.302259 | 0.273151 |
| Mmu.3719.1.S1_at        | Mmu.3719.1      | 9.48  | 9.28  | 0.16 | 0.13 | 1.15  | 0.085976 | 0.091928 | 0.350379 | 0.347267 |
| Mmu.374.1.S1_at         | Mmu.374.1       | 8.67  | 8.37  | 0.22 | 0.23 | 1.23  | 0.078108 | 0.043691 | 0.3376   | 0.253732 |

|                         |                 |       |       |      |      |       |          |          |          |          |
|-------------------------|-----------------|-------|-------|------|------|-------|----------|----------|----------|----------|
| Mmu.3743.1.S1_s_at      | Mmu.3743.1      | 11.95 | 11.74 | 0.11 | 0.02 | 1.16  | 0.022613 | 0.022901 | 0.203479 | 0.189371 |
| Mmu.3745.1.S1_at        | Mmu.3745.1      | 3.49  | 3.62  | 0.16 | 0.16 | -1.1  | 0.241582 | 0.290653 | 0.538688 | 0.551363 |
| MmugDNA.23135.1.S1_s_at | MmugDNA.23135.1 | 11.27 | 11.93 | 0.29 | 0.11 | -1.58 | 0.028029 | 0.312723 | 0.219906 | 0.567299 |
| Mmu.3750.1.S1_at        | Mmu.3750.1      | 7.02  | 7.29  | 0.11 | 0.07 | -1.2  | 0.023435 | 0.000237 | 0.206175 | 0.03241  |
| Mmu.3756.1.S1_at        | Mmu.3756.1      | 6.12  | 6.04  | 0.18 | 0.08 | 1.06  | 0.592324 | 0.726949 | 0.793342 | 0.84203  |
| Mmu.3779.1.S1_at        | Mmu.3779.1      | 9.31  | 9.84  | 0.23 | 0.22 | -1.44 | 0.170508 | 0.166859 | 0.46418  | 0.443311 |
| Mmu.3782.2.S1_a_at      | Mmu.3782.2      | 6.22  | 7.15  | 0.55 | 0.22 | -1.9  | 0.077965 | 0.015812 | 0.337203 | 0.159466 |
| Mmu.3793.1.S1_at        | Mmu.3793.1      | 11.18 | 11.33 | 0.24 | 0.03 | -1.11 | 0.483131 | 0.166525 | 0.72337  | 0.442958 |
| Mmu.3794.1.S1_at        | Mmu.3794.1      | 7.87  | 10.21 | 0.69 | 0.15 | -5.09 | 0.009219 | 0.007808 | 0.145865 | 0.117858 |
| Mmu.3795.1.S1_at        | Mmu.3795.1      | 8.8   | 9.85  | 0.26 | 0.29 | -2.08 | 0.012215 | 0.27161  | 0.160818 | 0.536577 |
| Mmu.3798.1.S1_at        | Mmu.3798.1      | 9.32  | 9.25  | 0.14 | 0.11 | 1.05  | 0.234653 | 0.023527 | 0.532768 | 0.192231 |
| Mmu.380.1.S1_at         | Mmu.380.1       | 9.5   | 8.76  | 0.03 | 0.16 | 1.67  | 0.000823 | 0.011452 | 0.07338  | 0.13846  |
| Mmu.3806.2.S1_at        | Mmu.3806.2      | 4.21  | 4.07  | 0.11 | 0.21 | 1.1   | 0.466463 | 0.266839 | 0.712251 | 0.53241  |
| Mmu.3811.1.S1_at        | Mmu.3811.1      | 10.4  | 10.7  | 0.09 | 0.21 | -1.23 | 0.310655 | 0.743941 | 0.596946 | 0.851597 |
| Mmu.3814.1.S1_at        | Mmu.3814.1      | 11.24 | 11.3  | 0.21 | 0.08 | -1.04 | 0.627439 | 0.050931 | 0.816843 | 0.270955 |
| Mmu.3820.1.S1_at        | Mmu.3820.1      | 5.99  | 6.09  | 0.18 | 0.2  | -1.07 | 0.933703 | 0.282984 | 0.972136 | 0.545692 |
| Mmu.3845.1.S1_at        | Mmu.3845.1      | 5.99  | 5.57  | 0.31 | 0.05 | 1.34  | 0.073559 | 0.064339 | 0.328967 | 0.29983  |
| Mmu.3845.1.S1_x_at      | Mmu.3845.1      | 6.01  | 5.31  | 0.51 | 0.18 | 1.63  | 0.088974 | 0.099077 | 0.355552 | 0.357215 |
| Mmu.3847.1.S1_at        | Mmu.3847.1      | 9.47  | 8.43  | 0.19 | 0.07 | 2.06  | 0.000724 | 0.000417 | 0.072183 | 0.038093 |
| Mmu.3853.1.S1_at        | Mmu.3853.1      | 7.13  | 7.23  | 0.17 | 0.35 | -1.07 | 0.680508 | 0.292343 | 0.847608 | 0.552408 |
| Mmu.3865.1.A1_at        | Mmu.3865.1      | 9.59  | 9.44  | 0.2  | 0.14 | 1.11  | 0.17908  | 0.053164 | 0.474018 | 0.276383 |
| Mmu.3886.1.S1_at        | Mmu.3886.1      | 6.09  | 6.12  | 0.1  | 0.11 | -1.03 | 0.336621 | 0.410113 | 0.61717  | 0.637065 |
| Mmu.3898.1.A1_at        | Mmu.3898.1      | 8.64  | 7.9   | 0.19 | 0.17 | 1.67  | 0.011612 | 0.049148 | 0.157638 | 0.266534 |
| Mmu.3902.1.S1_at        | Mmu.3902.1      | 13.57 | 13.34 | 0.02 | 0.05 | 1.17  | 0.001179 | 0.000183 | 0.077718 | 0.030511 |
| Mmu.3906.1.S1_at        | Mmu.3906.1      | 11.97 | 11.74 | 0.15 | 0.03 | 1.17  | 0.061722 | 0.199505 | 0.304962 | 0.4741   |
| Mmu.3907.1.S1_at        | Mmu.3907.1      | 10.42 | 10.58 | 0.22 | 0.21 | -1.11 | 0.448804 | 0.035402 | 0.700193 | 0.232488 |
| Mmu.3908.1.S1_s_at      | Mmu.3908.1      | 10.69 | 10.65 | 0.16 | 0.11 | 1.02  | 0.874655 | 0.601443 | 0.946214 | 0.762787 |
| Mmu.3911.1.S1_at        | Mmu.3911.1      | 12.58 | 12.38 | 0.26 | 0.19 | 1.15  | 0.43897  | 0.373689 | 0.693384 | 0.612403 |
| Mmu.3918.1.S1_at        | Mmu.3918.1      | 5.91  | 5.92  | 0.04 | 0    | -1    | 0.391543 | 0.178792 | 0.658723 | 0.455095 |
| Mmu.3931.1.S1_at        | Mmu.3931.1      | 7.54  | 7.31  | 0.36 | 0.11 | 1.17  | 0.352466 | 0.008771 | 0.630029 | 0.124009 |
| Mmu.3936.1.S1_at        | Mmu.3936.1      | 8.54  | 8.3   | 0.13 | 0.06 | 1.18  | 0.046214 | 0.031885 | 0.272717 | 0.220977 |
| Mmu.3937.1.S1_at        | Mmu.3937.1      | 2.97  | 2.97  | 0.07 | 0.06 | -1    | 0.4927   | 0.313042 | 0.729903 | 0.567601 |
| MmugDNA.15042.1.S1_s_at | MmugDNA.15042.1 | 10.86 | 10.87 | 0.13 | 0.05 | -1.01 | 0.657545 | 0.550414 | 0.834589 | 0.730421 |
| Mmu.394.1.S1_at         | Mmu.394.1       | 10.79 | 11.16 | 0.26 | 0.19 | -1.29 | 0.205553 | 0.027885 | 0.503307 | 0.208455 |
| Mmu.3952.1.A1_at        | Mmu.3952.1      | 5.62  | 5.3   | 0.67 | 0.19 | 1.25  | 0.324801 | 0.327511 | 0.608366 | 0.577321 |
| Mmu.3952.1.S1_at        | Mmu.3952.1      | 2.9   | 2.78  | 0.13 | 0.11 | 1.09  | 0.728559 | 0.191924 | 0.873093 | 0.467295 |
| Mmu.3978.1.S1_at        | Mmu.3978.1      | 5.54  | 5.38  | 0.11 | 0.3  | 1.12  | 0.882405 | 0.899316 | 0.949987 | 0.942758 |
| Mmu.4005.1.S1_s_at      | Mmu.4005.1      | 13.43 | 13.37 | 0.08 | 0.1  | 1.05  | 0.086048 | 0.086993 | 0.350539 | 0.339851 |
| Mmu.4013.1.S1_at        | Mmu.4013.1      | 7.06  | 7.46  | 0.59 | 0.16 | -1.32 | 0.078744 | 0.062767 | 0.338573 | 0.297193 |
| Mmu.4026.1.S1_at        | Mmu.4026.1      | 9.24  | 8.86  | 0.15 | 0.11 | 1.3   | 0.009078 | 0.213058 | 0.144991 | 0.48702  |
| Mmu.4039.1.S1_at        | Mmu.4039.1      | 9.62  | 10.24 | 0.35 | 0.31 | -1.53 | 0.116515 | 0.09896  | 0.393658 | 0.357049 |
| Mmu.4060.1.S1_at        | Mmu.4060.1      | 6.73  | 7.03  | 0.26 | 0.05 | -1.23 | 0.05421  | 0.238808 | 0.289903 | 0.509485 |
| Mmu.408.1.S1_at         | Mmu.408.1       | 2.66  | 2.89  | 0.06 | 0.04 | -1.17 | 0.005544 | 0.013076 | 0.119965 | 0.147079 |

|                    |            |       |       |      |      |       |          |          |          |          |
|--------------------|------------|-------|-------|------|------|-------|----------|----------|----------|----------|
| Mmu.4085.1.A1_x_at | Mmu.4085.1 | 3.66  | 3.84  | 0.1  | 0.09 | -1.13 | 0.098298 | 0.110717 | 0.368888 | 0.374854 |
| Mmu.4088.1.S1_at   | Mmu.4088.1 | 10.32 | 10.75 | 0.12 | 0.18 | -1.35 | 0.089364 | 0.001847 | 0.356355 | 0.064494 |
| Mmu.4098.1.S1_at   | Mmu.4098.1 | 7.69  | 8.77  | 1.28 | 0.39 | -2.12 | 0.320344 | 0.173591 | 0.604951 | 0.449956 |
| Mmu.4110.1.S1_s_at | Mmu.4110.1 | 14.38 | 14.4  | 0.03 | 0.01 | -1.01 | 0.487214 | 0.33407  | 0.726032 | 0.582104 |
| Mmu.4117.1.S1_at   | Mmu.4117.1 | 3.46  | 3.45  | 0.11 | 0.11 | 1     | 0.238277 | 0.734128 | 0.53577  | 0.845896 |
| Mmu.4119.2.S1_a_at | Mmu.4119.2 | 3.04  | 3.24  | 0.13 | 0.25 | -1.15 | 0.234385 | 0.209129 | 0.532479 | 0.482939 |
| Mmu.4119.2.S1_s_at | Mmu.4119.2 | 6.04  | 6.04  | 0.03 | 0.06 | 1     | 0.63401  | 0.50424  | 0.820633 | 0.701473 |
| Mmu.4118.1.S1_s_at | Mmu.4118.1 | 3.25  | 3.34  | 0.1  | 0.07 | -1.06 | 0.423974 | 0.095432 | 0.681838 | 0.352453 |
| Mmu.4118.1.S1_x_at | Mmu.4118.1 | 5.35  | 5.3   | 0.04 | 0.16 | 1.03  | 0.330013 | 0.161854 | 0.612081 | 0.437937 |
| Mmu.4119.1.S1_x_at | Mmu.4119.1 | 2.93  | 3.07  | 0.15 | 0.18 | -1.11 | 0.301264 | 0.340394 | 0.589242 | 0.586725 |
| Mmu.4119.3.S1_a_at | Mmu.4119.3 | 2.61  | 2.76  | 0.26 | 0.06 | -1.11 | 0.97323  | 0.992777 | 0.989282 | 0.995715 |
| Mmu.4119.3.S1_at   | Mmu.4119.3 | 3.16  | 3.14  | 0.02 | 0.19 | 1.01  | 0.868082 | 0.975874 | 0.943157 | 0.986856 |
| Mmu.4119.3.S1_x_at | Mmu.4119.3 | 2.89  | 2.96  | 0.2  | 0.04 | -1.05 | 0.83097  | 0.948053 | 0.925596 | 0.970446 |
| Mmu.4120.1.S1_x_at | Mmu.4120.1 | 4.79  | 4.67  | 0.08 | 0.12 | 1.09  | 0.394696 | 0.098088 | 0.661142 | 0.356166 |
| Mmu.4122.1.A1_at   | Mmu.4122.1 | 3.52  | 3.61  | 0.14 | 0.11 | -1.06 | 0.159994 | 0.2546   | 0.451279 | 0.522879 |
| Mmu.4122.1.S1_x_at | Mmu.4122.1 | 3.28  | 3.31  | 0.1  | 0.09 | -1.03 | 0.506068 | 0.487539 | 0.738797 | 0.690559 |
| Mmu.4123.1.S1_x_at | Mmu.4123.1 | 3.36  | 3.28  | 0.07 | 0.23 | 1.06  | 0.285034 | 0.100218 | 0.575053 | 0.359205 |
| Mmu.4124.1.S1_a_at | Mmu.4124.1 | 4.62  | 4.6   | 0.09 | 0.03 | 1.02  | 0.71448  | 0.031413 | 0.86508  | 0.219107 |
| Mmu.4125.1.A1_at   | Mmu.4125.1 | 7.21  | 7.32  | 0.17 | 0.08 | -1.08 | 0.49625  | 0.073962 | 0.732208 | 0.317472 |
| Mmu.4125.1.S1_at   | Mmu.4125.1 | 6.87  | 6.62  | 0.16 | 0.07 | 1.19  | 0.186435 | 0.238432 | 0.482612 | 0.50907  |
| Mmu.4125.1.S1_x_at | Mmu.4125.1 | 6.95  | 6.87  | 0.2  | 0.23 | 1.06  | 0.350725 | 0.481058 | 0.628576 | 0.686122 |
| Mmu.4129.1.S1_at   | Mmu.4129.1 | 9.28  | 9.19  | 0.07 | 0.09 | 1.06  | 0.303307 | 0.000815 | 0.590736 | 0.046302 |
| Mmu.414.1.S1_at    | Mmu.414.1  | 8.79  | 10.26 | 1.03 | 0.24 | -2.76 | 0.091234 | 0.20375  | 0.358687 | 0.478011 |
| Mmu.4140.1.S1_at   | Mmu.4140.1 | 9.76  | 9.65  | 0.29 | 0.11 | 1.08  | 0.44804  | 0.824315 | 0.699768 | 0.899073 |
| Mmu.4152.2.S1_at   | Mmu.4152.2 | 12.78 | 12.67 | 0.06 | 0.08 | 1.08  | 0.161263 | 0.006781 | 0.452791 | 0.111388 |
| Mmu.4154.1.S1_at   | Mmu.4154.1 | 3.2   | 3.31  | 0.07 | 0.03 | -1.08 | 0.055231 | 0.575919 | 0.291993 | 0.746847 |
| Mmu.4184.1.A1_at   | Mmu.4184.1 | 3.74  | 3.84  | 0.25 | 0.07 | -1.07 | 0.990907 | 0.882087 | 0.996666 | 0.932794 |
| Mmu.4184.1.S1_at   | Mmu.4184.1 | 3.3   | 3.4   | 0.35 | 0.26 | -1.07 | 0.857659 | 0.820189 | 0.938117 | 0.896372 |
| Mmu.4189.1.S1_at   | Mmu.4189.1 | 3.18  | 3.25  | 0.16 | 0.15 | -1.05 | 0.642562 | 0.751088 | 0.82562  | 0.855314 |
| Mmu.4194.1.S1_at   | Mmu.4194.1 | 3.98  | 4.05  | 0.17 | 0.17 | -1.05 | 0.731856 | 0.681729 | 0.874712 | 0.814123 |
| Mmu.4204.1.S1_at   | Mmu.4204.1 | 8.74  | 9.5   | 0.22 | 0.2  | -1.69 | 0.040207 | 0.031047 | 0.25702  | 0.218115 |
| Mmu.421.1.S1_at    | Mmu.421.1  | 12.1  | 11.69 | 0.03 | 0.03 | 1.32  | 0.000054 | 0.016044 | 0.045594 | 0.160532 |
| Mmu.4246.1.S1_at   | Mmu.4246.1 | 5.18  | 5.11  | 0.17 | 0.04 | 1.05  | 0.644768 | 0.71895  | 0.82702  | 0.83732  |
| Mmu.4246.1.S1_s_at | Mmu.4246.1 | 10.18 | 10.21 | 0.21 | 0.31 | -1.02 | 0.801142 | 0.753193 | 0.910607 | 0.856365 |
| Mmu.4266.1.S1_at   | Mmu.4266.1 | 11.15 | 11.06 | 0.22 | 0.11 | 1.07  | 0.130352 | 0.272975 | 0.412711 | 0.53761  |
| Mmu.4269.1.S1_at   | Mmu.4269.1 | 8.01  | 7.21  | 0.22 | 0.1  | 1.75  | 0.005055 | 0.015363 | 0.116282 | 0.157392 |
| Mmu.4271.1.S1_at   | Mmu.4271.1 | 10.1  | 9.86  | 0.09 | 0.05 | 1.18  | 0.045015 | 0.093717 | 0.269448 | 0.350192 |
| Mmu.4290.1.S1_at   | Mmu.4290.1 | 5.05  | 5.16  | 0.11 | 0.13 | -1.08 | 0.747626 | 0.9781   | 0.883101 | 0.988066 |
| Mmu.4305.1.S1_at   | Mmu.4305.1 | 5.78  | 5.85  | 0.2  | 0.13 | -1.05 | 0.23174  | 0.280877 | 0.530389 | 0.544054 |
| Mmu.4317.1.S1_at   | Mmu.4317.1 | 5.92  | 6.02  | 0.06 | 0.03 | -1.08 | 0.024066 | 0.009019 | 0.208287 | 0.125502 |
| Mmu.4317.2.S1_s_at | Mmu.4317.2 | 12.01 | 12.1  | 0.03 | 0.07 | -1.06 | 0.095993 | 0.049471 | 0.365529 | 0.267334 |
| Mmu.4328.1.S1_at   | Mmu.4328.1 | 5.61  | 5.62  | 0.03 | 0.12 | -1    | 0.823842 | 0.588635 | 0.921686 | 0.755131 |
| Mmu.4331.1.S1_s_at | Mmu.4331.1 | 11.97 | 11.98 | 0.09 | 0.1  | -1    | 0.239954 | 0.260192 | 0.537484 | 0.526807 |



|                        |                |       |       |      |      |       |          |          |          |          |
|------------------------|----------------|-------|-------|------|------|-------|----------|----------|----------|----------|
| Mmu.4348.1.S1_at       | Mmu.4348.1     | 11.29 | 11.12 | 0.04 | 0.09 | 1.12  | 0.024326 | 0.342172 | 0.209024 | 0.588334 |
| Mmu.436.1.S1_at        | Mmu.436.1      | 10.88 | 10.78 | 0.15 | 0.08 | 1.07  | 0.128647 | 0.145808 | 0.410774 | 0.419833 |
| MmugDNA.5037.1.S1_s_at | MmugDNA.5037.1 | 5.89  | 6.2   | 0.09 | 0.15 | -1.24 | 0.092114 | 0.062944 | 0.360155 | 0.297579 |
| Mmu.4374.2.S1_s_at     | Mmu.4374.2     | 11.95 | 11.26 | 0.29 | 0.05 | 1.61  | 0.031027 | 0.448361 | 0.229114 | 0.664212 |
| Mmu.4374.2.S1_x_at     | Mmu.4374.2     | 11.37 | 10.87 | 0.27 | 0.09 | 1.42  | 0.082607 | 0.519956 | 0.344435 | 0.71141  |
| Mmu.4376.1.A1_at       | Mmu.4376.1     | 6.92  | 6.56  | 0.15 | 0.16 | 1.28  | 0.068915 | 0.138885 | 0.320539 | 0.412037 |
| Mmu.4376.1.S1_at       | Mmu.4376.1     | 7.07  | 6.85  | 0.07 | 0.1  | 1.17  | 0.060615 | 0.050685 | 0.303237 | 0.270317 |
| Mmu.4380.1.S1_at       | Mmu.4380.1     | 2.91  | 2.8   | 0.13 | 0.07 | 1.08  | 0.623627 | 0.189696 | 0.814327 | 0.465328 |
| Mmu.4380.1.S1_s_at     | Mmu.4380.1     | 12.1  | 11.95 | 0.16 | 0.03 | 1.11  | 0.272635 | 0.860198 | 0.564701 | 0.920292 |
| Mmu.4385.1.S1_at       | Mmu.4385.1     | 5.7   | 5.65  | 0.17 | 0.16 | 1.04  | 0.151489 | 0.230729 | 0.440961 | 0.50243  |
| Mmu.439.1.S1_x_at      | Mmu.439.1      | 6.24  | 5.97  | 0.05 | 0.22 | 1.21  | 0.151448 | 0.178164 | 0.440961 | 0.454527 |
| Mmu.4390.1.S1_at       | Mmu.4390.1     | 5.27  | 5.04  | 0.41 | 0.28 | 1.17  | 0.454634 | 0.293815 | 0.704426 | 0.553823 |
| Mmu.4398.1.S1_s_at     | Mmu.4398.1     | 11.41 | 11.66 | 0.11 | 0.1  | -1.19 | 0.125064 | 0.0034   | 0.405516 | 0.083992 |
| Mmu.4403.1.S1_at       | Mmu.4403.1     | 10.13 | 10.35 | 0.21 | 0.19 | -1.17 | 0.977407 | 0.95226  | 0.991176 | 0.972946 |
| Mmu.4413.1.S1_at       | Mmu.4413.1     | 7.1   | 6.93  | 0.14 | 0.09 | 1.12  | 0.063345 | 0.274346 | 0.308295 | 0.538779 |
| Mmu.4422.1.S1_s_at     | Mmu.4422.1     | 11.76 | 11.08 | 0.14 | 0.05 | 1.61  | 0.001383 | 0.07778  | 0.079595 | 0.323933 |
| Mmu.4423.1.S1_at       | Mmu.4423.1     | 8.64  | 8.41  | 0.46 | 0.2  | 1.17  | 0.686917 | 0.618691 | 0.850752 | 0.774185 |
| Mmu.4425.1.S1_at       | Mmu.4425.1     | 5.77  | 5.55  | 0.13 | 0.11 | 1.17  | 0.043274 | 0.025938 | 0.265331 | 0.201919 |
| Mmu.443.1.S1_at        | Mmu.443.1      | 8     | 7.52  | 0.15 | 0.12 | 1.4   | 0.007932 | 0.026864 | 0.138279 | 0.205049 |
| Mmu.4434.1.S1_at       | Mmu.4434.1     | 10.92 | 11.06 | 0.09 | 0.17 | -1.1  | 0.89901  | 0.962109 | 0.957024 | 0.978697 |
| Mmu.4437.1.S1_at       | Mmu.4437.1     | 5.95  | 6.3   | 0.24 | 0.31 | -1.27 | 0.270508 | 0.520039 | 0.562706 | 0.711472 |
| Mmu.4440.1.S1_at       | Mmu.4440.1     | 4.74  | 4.23  | 0.19 | 0.29 | 1.42  | 0.068211 | 0.173763 | 0.318984 | 0.450128 |
| Mmu.4442.1.S1_at       | Mmu.4442.1     | 11.46 | 10.17 | 0.91 | 0.18 | 2.45  | 0.074048 | 0.083075 | 0.330086 | 0.332911 |
| Mmu.4442.1.S1_s_at     | Mmu.4442.1     | 12.28 | 11.56 | 0.77 | 0.15 | 1.65  | 0.118904 | 0.138513 | 0.396589 | 0.411492 |
| MmuAffx.23.16.S1_s_at  | MmuAffx.23.16  | 13.99 | 14.06 | 0.85 | 0.05 | -1.05 | 0.320225 | 0.402364 | 0.60479  | 0.631393 |
| Mmu.4443.6.S1_at       | Mmu.4443.6     | 5.04  | 5.03  | 0.04 | 0.08 | 1     | 0.770494 | 0.338315 | 0.894701 | 0.585417 |
| Mmu.4443.8.S1_at       | Mmu.4443.8     | 2.59  | 2.59  | 0.12 | 0.08 | 1     | 0.655848 | 0.644094 | 0.83356  | 0.791328 |
| Mmu.4443.9.S1_at       | Mmu.4443.9     | 4.14  | 4.09  | 0.16 | 0.04 | 1.03  | 0.518021 | 0.771156 | 0.747127 | 0.866992 |
| Mmu.4443.9.S1_x_at     | Mmu.4443.9     | 4.93  | 5     | 0.07 | 0.03 | -1.05 | 0.211489 | 0.404913 | 0.509263 | 0.633399 |
| Mmu.4444.2.S1_at       | Mmu.4444.2     | 4.15  | 4.21  | 0.03 | 0.04 | -1.04 | 0.244656 | 0.590204 | 0.540961 | 0.756117 |
| Mmu.4448.1.S1_at       | Mmu.4448.1     | 5.38  | 5.75  | 0.1  | 0.27 | -1.29 | 0.327126 | 0.269281 | 0.609783 | 0.534534 |
| Mmu.4450.1.S1_x_at     | Mmu.4450.1     | 3.03  | 3.07  | 0.02 | 0.07 | -1.03 | 0.562433 | 0.799704 | 0.774894 | 0.884812 |
| Mmu.4459.1.S1_at       | Mmu.4459.1     | 11.37 | 11.25 | 0.04 | 0.16 | 1.09  | 0.154989 | 0.244583 | 0.445174 | 0.514387 |
| Mmu.4460.1.S1_at       | Mmu.4460.1     | 8.14  | 7.61  | 0.5  | 0.23 | 1.44  | 0.28513  | 0.191893 | 0.57512  | 0.46727  |
| Mmu.4465.1.S1_s_at     | Mmu.4465.1     | 10.82 | 10.68 | 0.14 | 0.16 | 1.1   | 0.131558 | 0.61752  | 0.414397 | 0.773477 |
| Mmu.4493.1.S1_at       | Mmu.4493.1     | 8.31  | 7.84  | 0.44 | 0.25 | 1.38  | 0.505167 | 0.419528 | 0.738175 | 0.643507 |
| Mmu.4504.1.S1_at       | Mmu.4504.1     | 12.17 | 12.03 | 0.03 | 0.04 | 1.11  | 0.007611 | 0.484363 | 0.135757 | 0.688478 |
| Mmu.4512.2.S1_at       | Mmu.4512.2     | 11.11 | 10.93 | 0.13 | 0.06 | 1.13  | 0.266592 | 0.09416  | 0.558952 | 0.350859 |
| Mmu.4519.1.S1_x_at     | Mmu.4519.1     | 6.63  | 6.55  | 0.12 | 0.09 | 1.06  | 0.739437 | 0.891023 | 0.879245 | 0.937877 |
| Mmu.452.1.S1_at        | Mmu.452.1      | 7.6   | 9.6   | 1.27 | 0.24 | -4.01 | 0.051769 | 0.132234 | 0.284844 | 0.404274 |
| Mmu.4523.1.S1_at       | Mmu.4523.1     | 6.34  | 6.13  | 0.18 | 0.17 | 1.15  | 0.11578  | 0.340229 | 0.392933 | 0.586637 |
| Mmu.4529.1.S1_at       | Mmu.4529.1     | 6.24  | 6.66  | 1.02 | 0.43 | -1.34 | 0.699452 | 0.82429  | 0.857288 | 0.899073 |
| Mmu.4533.1.S1_at       | Mmu.4533.1     | 6.7   | 9.46  | 1    | 0.28 | -6.79 | 0.022032 | 0.20145  | 0.201692 | 0.475963 |

|                         |                 |       |       |      |      |       |          |          |          |          |
|-------------------------|-----------------|-------|-------|------|------|-------|----------|----------|----------|----------|
| Mmu.4535.1.S1_at        | Mmu.4535.1      | 3.93  | 4.02  | 0.35 | 0.07 | -1.07 | 0.924239 | 0.853253 | 0.967791 | 0.916534 |
| Mmu.4542.1.A1_at        | Mmu.4542.1      | 3.14  | 3.21  | 0.12 | 0.13 | -1.05 | 0.559006 | 0.266911 | 0.77314  | 0.532461 |
| Mmu.4542.1.S1_at        | Mmu.4542.1      | 3.71  | 3.78  | 0.04 | 0.04 | -1.05 | 0.028288 | 0.146092 | 0.220734 | 0.420092 |
| Mmu.4542.2.A1_s_at      | Mmu.4542.2      | 3.13  | 3.36  | 0.14 | 0.25 | -1.17 | 0.098823 | 0.102863 | 0.369716 | 0.363492 |
| Mmu.4542.2.A1_x_at      | Mmu.4542.2      | 6.36  | 6.46  | 0.15 | 0.12 | -1.07 | 0.645594 | 0.280098 | 0.827498 | 0.543369 |
| Mmu.4542.2.S1_s_at      | Mmu.4542.2      | 3.64  | 4.2   | 0.06 | 0.34 | -1.47 | 0.051559 | 0.054694 | 0.284457 | 0.279343 |
| Mmu.4542.2.S1_x_at      | Mmu.4542.2      | 5.95  | 5.97  | 0.2  | 0.01 | -1.01 | 0.609617 | 0.80637  | 0.805383 | 0.888642 |
| Mmu.4580.1.S1_at        | Mmu.4580.1      | 12.86 | 12.71 | 0.16 | 0.05 | 1.11  | 0.208601 | 0.151692 | 0.506194 | 0.426383 |
| Mmu.4582.1.S1_at        | Mmu.4582.1      | 3.21  | 3.14  | 0.08 | 0.12 | 1.05  | 0.81111  | 0.493658 | 0.915384 | 0.694288 |
| Mmu.4582.2.S1_x_at      | Mmu.4582.2      | 7.17  | 6.86  | 0.19 | 0.15 | 1.24  | 0.092755 | 0.104446 | 0.361198 | 0.365719 |
| Mmu.4582.3.S1_s_at      | Mmu.4582.3      | 4.06  | 3.63  | 0.46 | 0.34 | 1.34  | 0.935296 | 0.842949 | 0.972947 | 0.910554 |
| Mmu.4582.4.S1_at        | Mmu.4582.4      | 3.58  | 3.58  | 0    | 0.08 | 1     | 0.373901 | 0.50662  | 0.645118 | 0.702509 |
| Mmu.4594.1.S1_s_at      | Mmu.4594.1      | 14.74 | 14.74 | 0.04 | 0.01 | -1    | 0.788738 | 0.350788 | 0.904012 | 0.594515 |
| Mmu.460.1.S1_s_at       | Mmu.460.1       | 13.52 | 13.59 | 0.1  | 0.03 | -1.05 | 0.271052 | 0.544196 | 0.562988 | 0.726643 |
| Mmu.4602.1.S1_at        | Mmu.4602.1      | 11.08 | 11.03 | 0.11 | 0.14 | 1.04  | 0.58835  | 0.027078 | 0.790985 | 0.20576  |
| Mmu.4615.1.S1_s_at      | Mmu.4615.1      | 9.79  | 10.21 | 0.78 | 0.22 | -1.34 | 0.897642 | 0.065988 | 0.956545 | 0.302293 |
| MmugDNA.8926.1.S1_s_at  | MmugDNA.8926.1  | 10.58 | 10.84 | 0.6  | 0.07 | -1.2  | 0.81995  | 0.14082  | 0.919687 | 0.414202 |
| Mmu.4627.1.S1_at        | Mmu.4627.1      | 5.87  | 5.41  | 1.01 | 0.6  | 1.38  | 0.362714 | 0.468834 | 0.63739  | 0.677906 |
| MmugDNA.22652.1.S1_s_at | MmugDNA.22652.1 | 7.96  | 8.17  | 0.12 | 0.04 | -1.16 | 0.116743 | 0.188966 | 0.39382  | 0.464854 |
| Mmu.4647.4.S1_s_at      | Mmu.4647.4      | 3.74  | 3.74  | 0.4  | 0.07 | 1     | 0.468562 | 0.650441 | 0.713637 | 0.79565  |
| Mmu.4660.1.A1_at        | Mmu.4660.1      | 4.08  | 4.04  | 0.08 | 0.18 | 1.03  | 0.830868 | 0.907416 | 0.92555  | 0.947622 |
| Mmu.4662.5.S1_at        | Mmu.4662.5      | 10.73 | 10.2  | 0.16 | 0.15 | 1.44  | 0.041676 | 0.274865 | 0.260641 | 0.539335 |
| Mmu.4677.1.S1_s_at      | Mmu.4677.1      | 9.4   | 9.39  | 0.11 | 0.1  | 1.01  | 0.794834 | 0.63284  | 0.907378 | 0.783788 |
| Mmu.4682.1.S1_at        | Mmu.4682.1      | 9.29  | 9.38  | 0.02 | 0.15 | -1.06 | 0.428821 | 0.346349 | 0.685525 | 0.59124  |
| Mmu.4689.1.S1_at        | Mmu.4689.1      | 9.93  | 9.87  | 0.08 | 0.07 | 1.04  | 0.529279 | 0.147239 | 0.754166 | 0.421464 |
| Mmu.4690.1.S1_at        | Mmu.4690.1      | 8.43  | 8.51  | 0.04 | 0.15 | -1.06 | 0.402974 | 0.326051 | 0.667108 | 0.576285 |
| Mmu.4697.1.S1_at        | Mmu.4697.1      | 7.96  | 7.9   | 0.36 | 0.17 | 1.04  | 0.789446 | 0.682435 | 0.904411 | 0.814526 |
| Mmu.4703.1.S1_at        | Mmu.4703.1      | 10.51 | 10.67 | 0.46 | 0.15 | -1.12 | 0.618085 | 0.418052 | 0.810474 | 0.642569 |
| Mmu.4705.1.S1_at        | Mmu.4705.1      | 12.31 | 12.35 | 0.04 | 0.09 | -1.03 | 0.749627 | 0.140564 | 0.884066 | 0.413822 |
| Mmu.4707.1.S1_at        | Mmu.4707.1      | 6.47  | 6.66  | 0.8  | 0.35 | -1.14 | 0.731701 | 0.853206 | 0.87461  | 0.916521 |
| Mmu.4717.1.S1_at        | Mmu.4717.1      | 5.37  | 5.23  | 0.22 | 0.16 | 1.1   | 0.178791 | 0.121312 | 0.473583 | 0.390351 |
| Mmu.4722.1.S1_at        | Mmu.4722.1      | 9.26  | 8.62  | 0.23 | 0.3  | 1.57  | 0.125637 | 0.032621 | 0.406302 | 0.223644 |
| Mmu.4737.1.S1_at        | Mmu.4737.1      | 8.31  | 8.12  | 0.36 | 0.16 | 1.14  | 0.249615 | 0.123562 | 0.544677 | 0.393637 |
| Mmu.4754.1.S1_at        | Mmu.4754.1      | 10.35 | 10.69 | 0.09 | 0.09 | -1.26 | 0.009996 | 0.044546 | 0.149356 | 0.255417 |
| Mmu.4761.1.S1_at        | Mmu.4761.1      | 9.48  | 9.89  | 0.13 | 0.03 | -1.33 | 0.005714 | 0.000716 | 0.121179 | 0.044419 |
| Mmu.4778.1.S1_at        | Mmu.4778.1      | 9.17  | 9.51  | 0.06 | 0.14 | -1.26 | 0.020485 | 0.004186 | 0.196615 | 0.091107 |
| Mmu.4813.1.S1_at        | Mmu.4813.1      | 5.18  | 5.12  | 0.44 | 0.03 | 1.04  | 0.810821 | 0.640483 | 0.915259 | 0.788963 |
| Mmu.4815.2.S1_at        | Mmu.4815.2      | 2.67  | 2.82  | 0.17 | 0.04 | -1.11 | 0.199849 | 0.283592 | 0.497351 | 0.546021 |
| Mmu.483.1.S1_at         | Mmu.483.1       | 4.1   | 3.85  | 0.23 | 0.14 | 1.19  | 0.828292 | 0.853748 | 0.924024 | 0.916773 |
| Mmu.4846.1.S1_at        | Mmu.4846.1      | 9.71  | 9.06  | 0.11 | 0.18 | 1.57  | 0.005261 | 0.198995 | 0.117461 | 0.473569 |
| Mmu.4846.2.S1_at        | Mmu.4846.2      | 10.63 | 10.1  | 0.14 | 0.15 | 1.44  | 0.006234 | 0.104555 | 0.125218 | 0.365805 |
| Mmu.4853.1.S1_at        | Mmu.4853.1      | 11.51 | 11.48 | 0.16 | 0.04 | 1.02  | 0.849313 | 0.934649 | 0.934382 | 0.962994 |
| Mmu.488.1.S1_at         | Mmu.488.1       | 9.65  | 9.19  | 0.22 | 0.05 | 1.38  | 0.015872 | 0.028257 | 0.178371 | 0.209854 |

|                         |                 |       |       |      |      |        |          |          |          |          |
|-------------------------|-----------------|-------|-------|------|------|--------|----------|----------|----------|----------|
| Mmu.4882.1.S1_at        | Mmu.4882.1      | 10.52 | 10.4  | 0.16 | 0.1  | 1.09   | 0.488251 | 0.003484 | 0.726793 | 0.084834 |
| Mmu.4888.1.S1_at        | Mmu.4888.1      | 11.41 | 10.22 | 0.37 | 0.2  | 2.28   | 0.010589 | 0.00306  | 0.152762 | 0.080641 |
| Mmu.4889.1.S1_at        | Mmu.4889.1      | 5.17  | 5.12  | 0.02 | 0.14 | 1.04   | 0.661267 | 0.671096 | 0.836453 | 0.80765  |
| Mmu.4898.1.S1_at        | Mmu.4898.1      | 10.83 | 10.61 | 0.06 | 0.24 | 1.17   | 0.160699 | 0.073191 | 0.452305 | 0.316064 |
| Mmu.4904.1.S1_at        | Mmu.4904.1      | 10.42 | 10.15 | 0.16 | 0.12 | 1.21   | 0.075926 | 0.37421  | 0.333899 | 0.612711 |
| Mmu.4923.1.S1_at        | Mmu.4923.1      | 3.77  | 3.6   | 0.06 | 0.06 | 1.13   | 0.04934  | 0.367823 | 0.279507 | 0.607466 |
| Mmu.4926.1.S1_at        | Mmu.4926.1      | 8.59  | 8.4   | 0.16 | 0.19 | 1.14   | 0.152332 | 0.370816 | 0.441909 | 0.609797 |
| Mmu.4940.1.S1_at        | Mmu.4940.1      | 8.9   | 8.83  | 0.17 | 0.13 | 1.05   | 0.626638 | 0.745126 | 0.816168 | 0.852267 |
| Mmu.4943.1.S1_at        | Mmu.4943.1      | 10.04 | 10.55 | 0.38 | 0.18 | -1.43  | 0.099925 | 0.065904 | 0.370858 | 0.302129 |
| Mmu.4946.1.S1_at        | Mmu.4946.1      | 9.89  | 10.6  | 0.38 | 0.23 | -1.64  | 0.137441 | 0.190514 | 0.422407 | 0.465906 |
| Mmu.4947.1.S1_at        | Mmu.4947.1      | 7.06  | 6.93  | 0.05 | 0.16 | 1.09   | 0.258135 | 0.415645 | 0.552415 | 0.641007 |
| Mmu.4949.1.A1_at        | Mmu.4949.1      | 6.2   | 6.65  | 0.32 | 0.16 | -1.37  | 0.059247 | 0.365252 | 0.30044  | 0.605412 |
| Mmu.4957.1.S1_at        | Mmu.4957.1      | 4.28  | 4.29  | 0.11 | 0.03 | -1.01  | 0.335118 | 0.488022 | 0.616117 | 0.690855 |
| Mmu.4958.1.S1_at        | Mmu.4958.1      | 4.03  | 4.06  | 0.07 | 0.04 | -1.02  | 0.989845 | 0.975643 | 0.996439 | 0.98673  |
| Mmu.4959.1.S1_at        | Mmu.4959.1      | 7.53  | 7.14  | 0.14 | 0.34 | 1.31   | 0.478856 | 0.791371 | 0.720315 | 0.879472 |
| Mmu.497.1.A1_at         | Mmu.497.1       | 3.12  | 3.16  | 0.15 | 0.01 | -1.03  | 0.560132 | 0.310637 | 0.773651 | 0.565787 |
| MmugDNA.19865.1.S1_s_at | MmugDNA.19865.1 | 13.71 | 13.92 | 0.09 | 0.04 | -1.16  | 0.096208 | 0.730792 | 0.365761 | 0.844057 |
| MmugDNA.19865.1.S1_x_at | MmugDNA.19865.1 | 13.06 | 13.27 | 0.1  | 0.04 | -1.16  | 0.051389 | 0.672776 | 0.284155 | 0.808768 |
| Mmu.4984.1.S1_at        | Mmu.4984.1      | 7.5   | 7.17  | 0.18 | 0.32 | 1.26   | 0.277162 | 0.26049  | 0.568672 | 0.527026 |
| Mmu.4985.1.S1_at        | Mmu.4985.1      | 8.3   | 8.08  | 0.42 | 0.12 | 1.17   | 0.854289 | 0.882556 | 0.936621 | 0.933072 |
| Mmu.4997.1.S1_at        | Mmu.4997.1      | 6.74  | 6.86  | 0.03 | 0.35 | -1.09  | 0.775657 | 0.012658 | 0.89744  | 0.145088 |
| Mmu.5019.1.S1_s_at      | Mmu.5019.1      | 8.87  | 9.17  | 0.19 | 0.26 | -1.23  | 0.101156 | 0.256965 | 0.372334 | 0.524779 |
| Mmu.5026.1.S1_at        | Mmu.5026.1      | 4.67  | 4.89  | 0.11 | 0.06 | -1.17  | 0.011991 | 0.01553  | 0.159499 | 0.158053 |
| MmugDNA.33122.1.S1_at   | MmugDNA.33122.1 | 11.23 | 11.61 | 0.13 | 0.14 | -1.3   | 0.013281 | 0.127249 | 0.165902 | 0.397935 |
| MmugDNA.33122.1.S1_s_at | MmugDNA.33122.1 | 11.74 | 12.37 | 0.18 | 0.11 | -1.55  | 0.018273 | 0.252143 | 0.1882   | 0.520828 |
| Mmu.5028.1.S1_at        | Mmu.5028.1      | 4.07  | 4.07  | 0.16 | 0.05 | 1      | 0.335663 | 0.707314 | 0.616542 | 0.830236 |
| Mmu.5034.1.A1_at        | Mmu.5034.1      | 7.26  | 7     | 0.49 | 0.07 | 1.2    | 0.827136 | 0.963117 | 0.923472 | 0.97942  |
| Mmu.5034.1.S1_s_at      | Mmu.5034.1      | 10.98 | 10.91 | 0.31 | 0.03 | 1.05   | 0.559874 | 0.774003 | 0.773554 | 0.868608 |
| Mmu.5034.1.S1_x_at      | Mmu.5034.1      | 11.38 | 11.46 | 0.23 | 0.02 | -1.06  | 0.473117 | 0.748865 | 0.716479 | 0.853944 |
| Mmu.506.1.A1_at         | Mmu.506.1       | 6.51  | 9.12  | 0.9  | 0.28 | -6.11  | 0.023744 | 0.147242 | 0.207099 | 0.421464 |
| Mmu.506.1.S1_at         | Mmu.506.1       | 4.69  | 8.35  | 1.44 | 0.41 | -12.62 | 0.039346 | 0.177794 | 0.254835 | 0.454111 |
| Mmu.5060.1.S1_at        | Mmu.5060.1      | 8.8   | 8.61  | 0.53 | 0.17 | 1.14   | 0.139567 | 0.153854 | 0.42511  | 0.428506 |
| MmugDNA.19825.1.S1_at   | MmugDNA.19825.1 | 4.96  | 5.06  | 0.11 | 0.03 | -1.07  | 0.12749  | 0.034496 | 0.409437 | 0.229879 |
| MmugDNA.19825.1.S1_s_at | MmugDNA.19825.1 | 9.31  | 8.89  | 0.5  | 0.22 | 1.34   | 0.056902 | 0.043449 | 0.295858 | 0.253079 |
| Mmu.5062.1.S1_at        | Mmu.5062.1      | 4.59  | 4.68  | 0.06 | 0.14 | -1.06  | 0.360666 | 0.75346  | 0.636187 | 0.856527 |
| Mmu.5066.1.S1_at        | Mmu.5066.1      | 9.66  | 9.3   | 0.08 | 0.11 | 1.28   | 0.008613 | 0.219567 | 0.142375 | 0.493192 |
| Mmu.5073.1.S1_at        | Mmu.5073.1      | 8.68  | 8.59  | 0.21 | 0.19 | 1.06   | 0.933375 | 0.48957  | 0.972051 | 0.691824 |
| Mmu.5090.1.S1_at        | Mmu.5090.1      | 9.26  | 8.87  | 0.11 | 0.1  | 1.31   | 0.008369 | 0.002984 | 0.140536 | 0.079958 |
| Mmu.5094.1.S1_at        | Mmu.5094.1      | 6.66  | 5.95  | 0.41 | 0.15 | 1.64   | 0.080958 | 0.04179  | 0.341786 | 0.248986 |
| Mmu.511.1.S1_at         | Mmu.511.1       | 4.36  | 4.42  | 0.06 | 0.01 | -1.04  | 0.163445 | 0.004169 | 0.455676 | 0.091036 |
| Mmu.512.1.S1_at         | Mmu.512.1       | 12.74 | 12.42 | 0.03 | 0.02 | 1.25   | 0.000078 | 0.134578 | 0.051196 | 0.406629 |
| Mmu.5124.1.S1_at        | Mmu.5124.1      | 12.5  | 12.61 | 0.05 | 0.12 | -1.08  | 0.071197 | 0.081172 | 0.324758 | 0.329351 |
| Mmu.5133.1.S1_at        | Mmu.5133.1      | 6.98  | 6.84  | 0.23 | 0.2  | 1.1    | 0.379155 | 0.718392 | 0.649178 | 0.837031 |

|                         |                 |       |       |      |      |       |          |          |          |          |
|-------------------------|-----------------|-------|-------|------|------|-------|----------|----------|----------|----------|
| Mmu.5150.1.A1_at        | Mmu.5150.1      | 6.27  | 6.07  | 0.13 | 0.05 | 1.15  | 0.350561 | 0.623211 | 0.62841  | 0.777635 |
| Mmu.5150.1.S1_at        | Mmu.5150.1      | 6.15  | 6.17  | 0.08 | 0.12 | -1.02 | 0.684014 | 0.794984 | 0.849355 | 0.881864 |
| Mmu.5151.1.S1_s_at      | Mmu.5151.1      | 6.63  | 6.25  | 0.92 | 0.31 | 1.31  | 0.435683 | 0.319519 | 0.690719 | 0.571872 |
| Mmu.5152.1.S1_at        | Mmu.5152.1      | 3.24  | 3.23  | 0.17 | 0.06 | 1.01  | 0.561887 | 0.445251 | 0.774676 | 0.662338 |
| Mmu.5152.1.S1_x_at      | Mmu.5152.1      | 4.98  | 4.8   | 0.15 | 0.09 | 1.13  | 0.087348 | 0.054024 | 0.353109 | 0.277914 |
| Mmu.5155.1.S1_s_at      | Mmu.5155.1      | 8.31  | 9.14  | 0.22 | 0.17 | -1.77 | 0.00667  | 0.027515 | 0.128128 | 0.207161 |
| Mmu.5166.1.S1_at        | Mmu.5166.1      | 10.14 | 10.51 | 0.24 | 0.17 | -1.29 | 0.479336 | 0.047411 | 0.720564 | 0.262476 |
| Mmu.518.1.S1_at         | Mmu.518.1       | 3.61  | 3.75  | 0.09 | 0.2  | -1.1  | 0.664321 | 0.559111 | 0.838381 | 0.736046 |
| Mmu.5186.1.S1_at        | Mmu.5186.1      | 3.82  | 3.55  | 0.1  | 0.1  | 1.21  | 0.019315 | 0.019512 | 0.192077 | 0.175439 |
| Mmu.5207.1.S1_at        | Mmu.5207.1      | 6.68  | 6.71  | 0.15 | 0.07 | -1.02 | 0.69696  | 0.04221  | 0.855721 | 0.24989  |
| Mmu.5234.1.S1_at        | Mmu.5234.1      | 8.33  | 7.57  | 0.11 | 0.41 | 1.69  | 0.0533   | 0.098729 | 0.287986 | 0.356811 |
| Mmu.524.1.S1_at         | Mmu.524.1       | 3.56  | 3.56  | 0.04 | 0.38 | 1     | 0.56357  | 0.652905 | 0.77558  | 0.797125 |
| Mmu.5240.1.S1_at        | Mmu.5240.1      | 6.44  | 6.56  | 0.16 | 0.05 | -1.09 | 0.064093 | 0.086325 | 0.309716 | 0.338771 |
| Mmu.5247.1.A1_at        | Mmu.5247.1      | 8.29  | 9.33  | 0.12 | 0.38 | -2.06 | 0.022518 | 0.044254 | 0.20332  | 0.25493  |
| Mmu.5251.1.S1_at        | Mmu.5251.1      | 7.53  | 8.1   | 0.47 | 0.04 | -1.49 | 0.101578 | 0.480098 | 0.372935 | 0.685659 |
| Mmu.5257.1.S1_at        | Mmu.5257.1      | 12.78 | 12.76 | 0.08 | 0.02 | 1.01  | 0.714961 | 0.267196 | 0.865381 | 0.532809 |
| Mmu.5288.1.S1_at        | Mmu.5288.1      | 11.54 | 12.4  | 0.51 | 0.1  | -1.81 | 0.145465 | 0.145704 | 0.432776 | 0.419653 |
| Mmu.53.1.S1_at          | Mmu.53.1        | 11.21 | 11.19 | 0.04 | 0.13 | 1.02  | 0.671076 | 0.504903 | 0.842222 | 0.701947 |
| Mmu.5300.1.S1_at        | Mmu.5300.1      | 5.55  | 5.15  | 0.23 | 0.32 | 1.32  | 0.263879 | 0.22242  | 0.557419 | 0.495479 |
| Mmu.5303.1.S1_at        | Mmu.5303.1      | 11.13 | 5.5   | 0.53 | 0.05 | 49.31 | 0.000047 | 0.069717 | 0.045594 | 0.310183 |
| MmugDNA.15798.1.S1_s_at | MmugDNA.15798.1 | 9.12  | 10.81 | 1.44 | 0.13 | -3.21 | 0.166449 | 0.325716 | 0.45963  | 0.57602  |
| Mmu.5321.1.S1_at        | Mmu.5321.1      | 7.59  | 7.07  | 0.17 | 0.17 | 1.43  | 0.016981 | 0.013206 | 0.18377  | 0.147409 |
| Mmu.5328.1.S1_x_at      | Mmu.5328.1      | 13.8  | 13.81 | 0.06 | 0.01 | -1.01 | 0.885164 | 0.955745 | 0.951028 | 0.974924 |
| Mmu.5329.1.S1_at        | Mmu.5329.1      | 10.99 | 10.8  | 0.54 | 0.05 | 1.14  | 0.728486 | 0.471785 | 0.873057 | 0.679681 |
| Mmu.5333.1.S1_at        | Mmu.5333.1      | 9.15  | 9.07  | 0.17 | 0.11 | 1.06  | 0.313861 | 0.304107 | 0.599699 | 0.561453 |
| Mmu.5339.1.S1_at        | Mmu.5339.1      | 10.94 | 10.85 | 0.09 | 0.13 | 1.06  | 0.302183 | 0.001539 | 0.590132 | 0.05949  |
| Mmu.534.1.S1_at         | Mmu.534.1       | 8.17  | 8.79  | 0.29 | 0.12 | -1.54 | 0.022913 | 0.001894 | 0.204267 | 0.065004 |
| Mmu.535.1.S1_at         | Mmu.535.1       | 9.8   | 9.47  | 0.11 | 0.08 | 1.26  | 0.014432 | 0.044032 | 0.171859 | 0.254195 |
| Mmu.5354.1.S1_at        | Mmu.5354.1      | 10.48 | 10.53 | 0.11 | 0.14 | -1.03 | 0.978564 | 0.450318 | 0.991753 | 0.665643 |
| Mmu.5356.1.S1_at        | Mmu.5356.1      | 12.15 | 12.19 | 0.13 | 0.06 | -1.03 | 0.484204 | 0.890297 | 0.724135 | 0.937505 |
| Mmu.5357.1.S1_at        | Mmu.5357.1      | 8.95  | 8.9   | 0.09 | 0.04 | 1.04  | 0.325125 | 0.413145 | 0.608545 | 0.639461 |
| Mmu.5363.1.S1_at        | Mmu.5363.1      | 10.1  | 10    | 0.3  | 0.16 | 1.07  | 0.24748  | 0.835075 | 0.542973 | 0.905549 |
| Mmu.5373.1.S1_s_at      | Mmu.5373.1      | 12.54 | 12.72 | 0.07 | 0.04 | -1.14 | 0.026139 | 0.01124  | 0.214757 | 0.138014 |
| Mmu.5386.1.S1_at        | Mmu.5386.1      | 7.84  | 7.2   | 0.46 | 0.41 | 1.56  | 0.154576 | 0.128785 | 0.444838 | 0.400248 |
| Mmu.5392.1.S1_at        | Mmu.5392.1      | 4.08  | 4.06  | 0.09 | 0.06 | 1.01  | 0.735773 | 0.832653 | 0.877005 | 0.904017 |
| Mmu.5406.1.S1_at        | Mmu.5406.1      | 5.48  | 5.53  | 0.23 | 0    | -1.03 | 0.265426 | 0.125143 | 0.558032 | 0.395577 |
| Mmu.5409.1.S1_at        | Mmu.5409.1      | 7.57  | 7.7   | 0.23 | 0.11 | -1.09 | 0.674951 | 0.75715  | 0.844854 | 0.858648 |
| Mmu.5423.1.S1_at        | Mmu.5423.1      | 12.07 | 11.77 | 0.2  | 0.08 | 1.23  | 0.068009 | 0.009777 | 0.318434 | 0.130028 |
| Mmu.5427.1.S1_at        | Mmu.5427.1      | 4.94  | 4.96  | 0.12 | 0.17 | -1.01 | 0.290209 | 0.39902  | 0.579662 | 0.62969  |
| Mmu.5431.1.S1_at        | Mmu.5431.1      | 9.01  | 8.96  | 0.03 | 0.13 | 1.04  | 0.292674 | 0.472916 | 0.58175  | 0.680236 |
| Mmu.5435.1.S1_at        | Mmu.5435.1      | 7.22  | 8.6   | 0.42 | 0.15 | -2.6  | 0.004919 | 0.014939 | 0.115175 | 0.155342 |
| Mmu.5448.1.S1_at        | Mmu.5448.1      | 8.11  | 7.82  | 0.23 | 0.18 | 1.22  | 0.185848 | 0.046883 | 0.482036 | 0.261276 |
| Mmu.5468.1.S1_at        | Mmu.5468.1      | 9.03  | 9.02  | 0.24 | 0.04 | 1.01  | 0.898373 | 0.426285 | 0.956764 | 0.648468 |

|                         |                 |       |       |      |      |       |          |          |          |          |
|-------------------------|-----------------|-------|-------|------|------|-------|----------|----------|----------|----------|
| Mmu.5484.1.S1_s_at      | Mmu.5484.1      | 12.12 | 12.01 | 0.12 | 0.08 | 1.08  | 0.290848 | 0.162254 | 0.580217 | 0.438447 |
| Mmu.549.1.S1_x_at       | Mmu.549.1       | 3.15  | 3.15  | 0.43 | 0.06 | 1.01  | 0.395652 | 0.56016  | 0.661945 | 0.736517 |
| Mmu.5491.1.S1_at        | Mmu.5491.1      | 9.34  | 9.78  | 0.45 | 0.28 | -1.35 | 0.257152 | 0.336694 | 0.551586 | 0.584037 |
| Mmu.5499.1.S1_at        | Mmu.5499.1      | 12.88 | 12.9  | 0.11 | 0.07 | -1.01 | 0.779505 | 0.402207 | 0.899278 | 0.631247 |
| Mmu.5502.1.S1_at        | Mmu.5502.1      | 5.88  | 5.87  | 0.11 | 0    | 1     | 0.593341 | 0.906789 | 0.79394  | 0.947229 |
| Mmu.5514.1.S1_at        | Mmu.5514.1      | 5.22  | 5.25  | 0.21 | 0.06 | -1.02 | 0.23325  | 0.3808   | 0.53152  | 0.617426 |
| Mmu.5523.1.S1_at        | Mmu.5523.1      | 9.05  | 8.82  | 0.2  | 0.09 | 1.17  | 0.079496 | 0.221836 | 0.339662 | 0.49495  |
| Mmu.5524.1.S1_at        | Mmu.5524.1      | 9.51  | 9.48  | 0.08 | 0.34 | 1.02  | 0.350308 | 0.231342 | 0.628126 | 0.503029 |
| Mmu.5534.1.S1_at        | Mmu.5534.1      | 5.59  | 5.72  | 0.09 | 0.14 | -1.09 | 0.201583 | 0.111494 | 0.499145 | 0.376205 |
| Mmu.5541.2.S1_at        | Mmu.5541.2      | 3.69  | 4.1   | 0.15 | 0.27 | -1.33 | 0.219963 | 0.454458 | 0.517641 | 0.668603 |
| Mmu.5569.1.S1_at        | Mmu.5569.1      | 4.93  | 5.07  | 0.08 | 0.12 | -1.1  | 0.117274 | 0.49772  | 0.39452  | 0.697025 |
| Mmu.5587.1.S1_at        | Mmu.5587.1      | 8.83  | 8.86  | 0.19 | 0.17 | -1.02 | 0.877208 | 0.68447  | 0.947466 | 0.815959 |
| Mmu.5593.1.S1_at        | Mmu.5593.1      | 9.94  | 9.7   | 0.23 | 0.02 | 1.18  | 0.367112 | 0.377093 | 0.641269 | 0.614795 |
| Mmu.5631.1.A1_at        | Mmu.5631.1      | 6.82  | 6.79  | 0.18 | 0.06 | 1.02  | 0.761552 | 0.944091 | 0.890633 | 0.968306 |
| Mmu.5646.1.A1_at        | Mmu.5646.1      | 3.19  | 3.27  | 0.09 | 0.04 | -1.05 | 0.901123 | 0.139606 | 0.958162 | 0.41286  |
| Mmu.5654.1.S1_at        | Mmu.5654.1      | 7.74  | 7.41  | 0.44 | 0.21 | 1.26  | 0.318849 | 0.371343 | 0.603528 | 0.610172 |
| Mmu.5655.1.S1_s_at      | Mmu.5655.1      | 13.3  | 13.1  | 0.08 | 0.08 | 1.15  | 0.038356 | 0.082721 | 0.251853 | 0.332171 |
| Mmu.5673.1.S1_at        | Mmu.5673.1      | 7.49  | 8.34  | 0.21 | 0.18 | -1.81 | 0.005672 | 0.134385 | 0.120889 | 0.406603 |
| Mmu.5674.1.A1_at        | Mmu.5674.1      | 3.85  | 3.72  | 0.15 | 0.16 | 1.09  | 0.300864 | 0.210821 | 0.58899  | 0.484902 |
| Mmu.5674.1.S1_at        | Mmu.5674.1      | 4.14  | 4.04  | 0.18 | 0.15 | 1.08  | 0.097362 | 0.085996 | 0.367528 | 0.338156 |
| Mmu.5677.4.S1_at        | Mmu.5677.4      | 7.74  | 6.85  | 0.38 | 0.46 | 1.86  | 0.193309 | 0.473146 | 0.489851 | 0.68048  |
| Mmu.5680.1.S1_at        | Mmu.5680.1      | 8.05  | 8.42  | 0.66 | 0.06 | -1.29 | 0.412477 | 0.146249 | 0.674115 | 0.420241 |
| Mmu.5689.1.S1_at        | Mmu.5689.1      | 11.72 | 11.12 | 0.28 | 0.13 | 1.52  | 0.053271 | 0.457852 | 0.287986 | 0.670983 |
| Mmu.5691.1.S1_at        | Mmu.5691.1      | 7.05  | 6.76  | 0.13 | 0.26 | 1.22  | 0.102928 | 0.051187 | 0.37552  | 0.271771 |
| Mmu.5692.1.S1_at        | Mmu.5692.1      | 12.39 | 12.27 | 0.11 | 0.04 | 1.08  | 0.123753 | 0.188169 | 0.40344  | 0.464251 |
| MmugDNA.25237.1.S1_s_at | MmugDNA.25237.1 | 12.02 | 11.75 | 0.12 | 0.06 | 1.21  | 0.051655 | 0.055795 | 0.284589 | 0.282044 |
| Mmu.5693.1.S1_at        | Mmu.5693.1      | 4.71  | 4.85  | 0.06 | 0.05 | -1.1  | 0.053582 | 0.000395 | 0.288683 | 0.037471 |
| Mmu.5696.1.S1_at        | Mmu.5696.1      | 5.93  | 5.87  | 0.15 | 0.17 | 1.04  | 0.291725 | 0.46174  | 0.581131 | 0.673302 |
| Mmu.5709.1.S1_x_at      | Mmu.5709.1      | 14.23 | 14.23 | 0.03 | 0.05 | -1    | 0.892621 | 0.828984 | 0.954283 | 0.901691 |
| Mmu.5709.2.S1_s_at      | Mmu.5709.2      | 12.03 | 12.43 | 0.2  | 0.12 | -1.32 | 0.069746 | 0.093315 | 0.322494 | 0.349412 |
| Mmu.5714.1.S1_at        | Mmu.5714.1      | 5.87  | 5.88  | 0.07 | 0.05 | -1.01 | 0.556449 | 0.703837 | 0.771669 | 0.828251 |
| Mmu.5725.1.S1_at        | Mmu.5725.1      | 3.9   | 3.94  | 0.34 | 0.15 | -1.02 | 0.337345 | 0.083206 | 0.617824 | 0.333184 |
| Mmu.5727.1.S1_at        | Mmu.5727.1      | 11.55 | 10.78 | 0.4  | 0.04 | 1.71  | 0.012567 | 0.229078 | 0.162519 | 0.501396 |
| Mmu.5757.1.S1_at        | Mmu.5757.1      | 7.49  | 8.56  | 0.45 | 0.21 | -2.1  | 0.036234 | 0.147592 | 0.245424 | 0.421901 |
| Mmu.5766.1.S1_at        | Mmu.5766.1      | 9.76  | 9.93  | 0.1  | 0.29 | -1.13 | 0.693273 | 0.538871 | 0.853387 | 0.723368 |
| Mmu.5767.1.A1_at        | Mmu.5767.1      | 4.67  | 4.65  | 0.23 | 0.07 | 1.01  | 0.439091 | 0.558978 | 0.693448 | 0.735963 |
| Mmu.577.1.S1_at         | Mmu.577.1       | 7.59  | 8.26  | 0.54 | 0.36 | -1.59 | 0.405727 | 0.309781 | 0.669103 | 0.565044 |
| Mmu.5782.1.S1_at        | Mmu.5782.1      | 11.19 | 11.12 | 0.24 | 0.03 | 1.05  | 0.587584 | 0.768706 | 0.790498 | 0.865653 |
| Mmu.5802.2.S1_at        | Mmu.5802.2      | 11.68 | 11.62 | 0.15 | 0.04 | 1.04  | 0.634363 | 0.177692 | 0.820718 | 0.454073 |
| Mmu.5808.1.S1_at        | Mmu.5808.1      | 8.22  | 8.66  | 0.28 | 0.25 | -1.36 | 0.097381 | 0.70827  | 0.367528 | 0.830841 |
| Mmu.5811.1.A1_at        | Mmu.5811.1      | 7.31  | 7.06  | 0.24 | 0.07 | 1.19  | 0.138052 | 0.065527 | 0.423225 | 0.301415 |
| Mmu.5814.1.S1_at        | Mmu.5814.1      | 4.73  | 4.78  | 0.16 | 0.19 | -1.04 | 0.594968 | 0.489871 | 0.795071 | 0.691972 |
| Mmu.5825.1.S1_s_at      | Mmu.5825.1      | 12.54 | 12.26 | 0.19 | 0.05 | 1.21  | 0.136173 | 0.323393 | 0.420583 | 0.574453 |

|                       |               |       |       |      |      |        |          |          |          |          |
|-----------------------|---------------|-------|-------|------|------|--------|----------|----------|----------|----------|
| Mmu.5849.1.S1_at      | Mmu.5849.1    | 4.01  | 4.03  | 0.18 | 0.25 | -1.02  | 0.942116 | 0.232753 | 0.975589 | 0.504385 |
| Mmu.586.1.S1_at       | Mmu.586.1     | 8.5   | 9.02  | 0.03 | 0.18 | -1.43  | 0.017923 | 0.062911 | 0.187151 | 0.297501 |
| Mmu.586.2.S1_at       | Mmu.586.2     | 9.19  | 10.28 | 0.22 | 0.32 | -2.12  | 0.025487 | 0.145393 | 0.212784 | 0.419421 |
| Mmu.5870.1.S1_at      | Mmu.5870.1    | 6.16  | 6.18  | 0.28 | 0.15 | -1.02  | 0.340737 | 0.489145 | 0.620859 | 0.691629 |
| Mmu.5871.1.S1_x_at    | Mmu.5871.1    | 14.38 | 14.33 | 0.03 | 0.01 | 1.03   | 0.149857 | 0.144537 | 0.43879  | 0.418408 |
| Mmu.5875.1.S1_at      | Mmu.5875.1    | 3.11  | 3.15  | 0.3  | 0.25 | -1.03  | 0.613173 | 0.80221  | 0.807283 | 0.886112 |
| Mmu.5879.1.S1_at      | Mmu.5879.1    | 12.54 | 12.53 | 0.16 | 0.03 | 1      | 0.495754 | 0.80541  | 0.73183  | 0.888152 |
| Mmu.5899.1.S1_at      | Mmu.5899.1    | 12.4  | 12.43 | 0.03 | 0.09 | -1.02  | 0.619311 | 0.171625 | 0.811116 | 0.448044 |
| Mmu.5967.1.S1_s_at    | Mmu.5967.1    | 11.53 | 11.58 | 0.11 | 0.08 | -1.03  | 0.458532 | 0.174515 | 0.707108 | 0.450998 |
| Mmu.5901.1.S1_at      | Mmu.5901.1    | 7.49  | 7.41  | 0.25 | 0.19 | 1.06   | 0.448849 | 0.09789  | 0.700211 | 0.355679 |
| Mmu.5908.1.S1_at      | Mmu.5908.1    | 10.24 | 10.24 | 0.21 | 0.3  | -1     | 0.840074 | 0.482894 | 0.929875 | 0.68765  |
| Mmu.5912.1.S1_at      | Mmu.5912.1    | 5.46  | 5.47  | 0.14 | 0.1  | -1.01  | 0.801279 | 0.08227  | 0.910725 | 0.331165 |
| Mmu.5921.1.S1_at      | Mmu.5921.1    | 11.79 | 11.82 | 0.16 | 0.07 | -1.02  | 0.481171 | 0.635223 | 0.72184  | 0.785279 |
| Mmu.5974.1.S1_at      | Mmu.5974.1    | 7.15  | 7.22  | 0.09 | 0.24 | -1.05  | 0.529604 | 0.853748 | 0.754386 | 0.916773 |
| Mmu.5978.1.S1_at      | Mmu.5978.1    | 9.26  | 9.42  | 0.27 | 0.19 | -1.12  | 0.254431 | 0.471861 | 0.548842 | 0.679772 |
| Mmu.5991.1.S1_at      | Mmu.5991.1    | 5.97  | 6.03  | 0.05 | 0.09 | -1.04  | 0.146903 | 0.581438 | 0.434901 | 0.750451 |
| Mmu.5996.1.S1_s_at    | Mmu.5996.1    | 3.59  | 3.56  | 0.19 | 0.19 | 1.02   | 0.27769  | 0.42404  | 0.569172 | 0.646666 |
| Mmu.5996.1.S1_x_at    | Mmu.5996.1    | 4.41  | 4.24  | 0.13 | 0.08 | 1.12   | 0.168569 | 0.330018 | 0.46188  | 0.578915 |
| Mmu.5996.2.S1_at      | Mmu.5996.2    | 4.13  | 4.19  | 0.02 | 0.17 | -1.04  | 0.529341 | 0.160626 | 0.754208 | 0.436745 |
| Mmu.5996.2.S1_x_at    | Mmu.5996.2    | 4.64  | 4.54  | 0.03 | 0.12 | 1.07   | 0.162429 | 0.063491 | 0.454494 | 0.298444 |
| Mmu.6007.1.S1_at      | Mmu.6007.1    | 7.26  | 7.31  | 0.28 | 0.05 | -1.04  | 0.926615 | 0.951643 | 0.968958 | 0.972522 |
| Mmu.6016.1.S1_at      | Mmu.6016.1    | 12.25 | 12.44 | 0.34 | 0.08 | -1.14  | 0.276264 | 0.459507 | 0.5679   | 0.671805 |
| Mmu.6025.1.S1_at      | Mmu.6025.1    | 6.86  | 11.67 | 2.7  | 0.23 | -28.09 | 0.096418 | 0.06171  | 0.366176 | 0.295166 |
| MmuAffx.23.18.S1_s_at | MmuAffx.23.18 | 14.12 | 14.16 | 0.07 | 0.05 | -1.03  | 0.429271 | 0.576143 | 0.685718 | 0.747028 |
| Mmu.6027.1.S1_at      | Mmu.6027.1    | 8.35  | 8.41  | 0.69 | 0.27 | -1.04  | 0.628556 | 0.254842 | 0.817472 | 0.523051 |
| Mmu.6042.1.S1_at      | Mmu.6042.1    | 4.74  | 5.04  | 0.21 | 0.32 | -1.23  | 0.316694 | 0.216959 | 0.601415 | 0.490571 |
| Mmu.6048.2.S1_at      | Mmu.6048.2    | 6.61  | 8.13  | 1.17 | 0.22 | -2.86  | 0.118457 | 0.092902 | 0.396104 | 0.349024 |
| Mmu.6050.1.S1_at      | Mmu.6050.1    | 10.59 | 10.19 | 0.16 | 0.05 | 1.32   | 0.006207 | 0.019142 | 0.125037 | 0.174115 |
| Mmu.6053.1.S1_at      | Mmu.6053.1    | 7.34  | 7.75  | 0.44 | 0.37 | -1.33  | 0.98687  | 0.067762 | 0.995228 | 0.306425 |
| Mmu.6061.1.A1_at      | Mmu.6061.1    | 3.32  | 3.33  | 0.07 | 0.14 | -1     | 0.368543 | 0.511371 | 0.642226 | 0.705534 |
| Mmu.6061.1.S1_at      | Mmu.6061.1    | 3.29  | 3.27  | 0.14 | 0.08 | 1.02   | 0.56094  | 0.826209 | 0.774101 | 0.900203 |
| Mmu.6083.1.S1_at      | Mmu.6083.1    | 12.46 | 12.73 | 0.13 | 0.09 | -1.21  | 0.061233 | 0.006222 | 0.304296 | 0.106937 |
| Mmu.6085.2.S1_x_at    | Mmu.6085.2    | 11.75 | 11.87 | 0.26 | 0.03 | -1.09  | 0.133334 | 0.357868 | 0.416886 | 0.599493 |
| Mmu.6118.1.S1_at      | Mmu.6118.1    | 8.83  | 9.43  | 0.24 | 0.2  | -1.51  | 0.017865 | 0.359485 | 0.187044 | 0.600754 |
| Mmu.6125.1.A1_at      | Mmu.6125.1    | 5.58  | 5.84  | 0.05 | 0.05 | -1.2   | 0.002456 | 0.072369 | 0.093953 | 0.315164 |
| Mmu.6125.1.S1_at      | Mmu.6125.1    | 5.76  | 5.76  | 0    | 0.06 | 1      | 0.373901 | 0.931661 | 0.645118 | 0.961188 |
| Mmu.6135.1.S1_at      | Mmu.6135.1    | 11.36 | 11.46 | 0.12 | 0.08 | -1.07  | 0.458645 | 0.018364 | 0.707171 | 0.170406 |
| Mmu.6139.1.S1_s_at    | Mmu.6139.1    | 9.81  | 10.05 | 0.31 | 0.04 | -1.18  | 0.213237 | 0.299129 | 0.511046 | 0.557663 |
| Mmu.6141.1.A1_at      | Mmu.6141.1    | 9.47  | 9.15  | 0.14 | 0.07 | 1.25   | 0.050779 | 0.01256  | 0.283078 | 0.144501 |
| Mmu.6141.1.S1_at      | Mmu.6141.1    | 9.6   | 9.3   | 0.17 | 0.05 | 1.23   | 0.076721 | 0.008848 | 0.335112 | 0.124493 |
| Mmu.616.1.S1_at       | Mmu.616.1     | 9.74  | 9.78  | 0.09 | 0.08 | -1.02  | 0.599292 | 0.037767 | 0.797984 | 0.238746 |
| Mmu.6177.1.A1_at      | Mmu.6177.1    | 8.06  | 11.36 | 1.56 | 0.28 | -9.81  | 0.070557 | 0.067865 | 0.324039 | 0.306744 |
| Mmu.6180.1.S1_s_at    | Mmu.6180.1    | 12.6  | 12.66 | 0.07 | 0.18 | -1.05  | 0.886269 | 0.034941 | 0.951496 | 0.231062 |

|                         |                 |       |       |      |      |        |          |          |          |          |
|-------------------------|-----------------|-------|-------|------|------|--------|----------|----------|----------|----------|
| Mmu.6187.1.S1_at        | Mmu.6187.1      | 9.36  | 7.84  | 0.65 | 0.14 | 2.86   | 0.016444 | 0.008466 | 0.181069 | 0.122057 |
| Mmu.6201.1.S1_at        | Mmu.6201.1      | 12.16 | 11.76 | 0.09 | 0.05 | 1.32   | 0.002775 | 0.645274 | 0.097672 | 0.792151 |
| Mmu.6263.1.S1_s_at      | Mmu.6263.1      | 14.08 | 14.12 | 0.07 | 0.01 | -1.03  | 0.467798 | 0.566889 | 0.713187 | 0.740843 |
| Mmu.6269.1.S1_at        | Mmu.6269.1      | 4.83  | 4.67  | 0.34 | 0.14 | 1.12   | 0.415826 | 0.618784 | 0.676431 | 0.774185 |
| Mmu.6271.1.S1_at        | Mmu.6271.1      | 5.76  | 9.55  | 1.36 | 0.34 | -13.91 | 0.024    | 0.300844 | 0.208141 | 0.55906  |
| Mmu.6271.2.S1_a_at      | Mmu.6271.2      | 6.91  | 9.41  | 0.96 | 0.29 | -5.65  | 0.015002 | 0.362329 | 0.174543 | 0.60295  |
| Mmu.6272.2.S1_at        | Mmu.6272.2      | 6.89  | 10.55 | 1.27 | 0.25 | -12.6  | 0.017165 | 0.175321 | 0.184254 | 0.45207  |
| Mmu.6282.1.S1_at        | Mmu.6282.1      | 5.1   | 6.34  | 1.19 | 0.1  | -2.37  | 0.453726 | 0.275266 | 0.703831 | 0.539641 |
| Mmu.629.1.S1_s_at       | Mmu.629.1       | 10.76 | 12.48 | 0.52 | 0.15 | -3.31  | 0.008479 | 0.123958 | 0.141304 | 0.394261 |
| Mmu.629.2.S1_a_at       | Mmu.629.2       | 8.95  | 11.57 | 0.78 | 0.27 | -6.14  | 0.010928 | 0.128502 | 0.154341 | 0.399838 |
| Mmu.629.2.S1_at         | Mmu.629.2       | 8.41  | 11.01 | 0.58 | 0.32 | -6.06  | 0.005641 | 0.128903 | 0.120879 | 0.400331 |
| Mmu.6308.1.S1_at        | Mmu.6308.1      | 10.84 | 10.76 | 0.03 | 0.18 | 1.06   | 0.189993 | 0.214197 | 0.486315 | 0.487851 |
| Mmu.6310.1.S1_at        | Mmu.6310.1      | 11.52 | 11.72 | 0.11 | 0.04 | -1.14  | 0.013404 | 0.024238 | 0.166531 | 0.194936 |
| Mmu.6311.1.S1_at        | Mmu.6311.1      | 7.99  | 9.21  | 0.27 | 0.13 | -2.33  | 0.003754 | 0.021537 | 0.106678 | 0.183818 |
| Mmu.6318.1.S1_at        | Mmu.6318.1      | 9.13  | 9.13  | 0.19 | 0.01 | -1     | 0.880993 | 0.99066  | 0.949398 | 0.994725 |
| Mmu.6342.1.S1_at        | Mmu.6342.1      | 10.61 | 10.49 | 0.07 | 0.05 | 1.08   | 0.147395 | 0.00004  | 0.435407 | 0.02409  |
| Mmu.6352.1.S1_at        | Mmu.6352.1      | 8.34  | 8.36  | 0.18 | 0.23 | -1.01  | 0.642236 | 0.533962 | 0.825502 | 0.720008 |
| Mmu.6387.1.S1_s_at      | Mmu.6387.1      | 11.29 | 11.18 | 0.13 | 0.08 | 1.08   | 0.091808 | 0.157477 | 0.359608 | 0.432985 |
| Mmu.6397.2.S1_at        | Mmu.6397.2      | 9.73  | 9.66  | 0.18 | 0.16 | 1.05   | 0.981905 | 0.232692 | 0.993299 | 0.504359 |
| Mmu.6399.1.S1_at        | Mmu.6399.1      | 10.18 | 10.18 | 0.24 | 0.06 | 1      | 0.395961 | 0.248142 | 0.662119 | 0.517567 |
| Mmu.6412.1.S1_at        | Mmu.6412.1      | 11.51 | 11.21 | 0.14 | 0.03 | 1.24   | 0.019962 | 0.202096 | 0.194588 | 0.476545 |
| Mmu.6416.1.S1_at        | Mmu.6416.1      | 9.29  | 9.21  | 0.22 | 0.05 | 1.06   | 0.670485 | 0.822681 | 0.841859 | 0.898006 |
| Mmu.6423.1.S1_at        | Mmu.6423.1      | 9.07  | 9.31  | 0.15 | 0.1  | -1.18  | 0.435341 | 0.251487 | 0.690435 | 0.520246 |
| Mmu.6425.1.S1_at        | Mmu.6425.1      | 7.1   | 6.77  | 0.41 | 0.32 | 1.26   | 0.161932 | 0.229279 | 0.453731 | 0.501527 |
| Mmu.6430.2.S1_at        | Mmu.6430.2      | 7.1   | 7.04  | 0.21 | 0.09 | 1.04   | 0.715156 | 0.386881 | 0.865467 | 0.621935 |
| Mmu.6446.1.S1_at        | Mmu.6446.1      | 10.87 | 11.12 | 0.11 | 0.04 | -1.19  | 0.015575 | 0.017517 | 0.177262 | 0.167516 |
| Mmu.6446.1.S1_x_at      | Mmu.6446.1      | 10.81 | 11.09 | 0.15 | 0.07 | -1.21  | 0.039205 | 0.049223 | 0.254458 | 0.266697 |
| Mmu.6455.1.S1_at        | Mmu.6455.1      | 6.57  | 7.06  | 0.23 | 0.17 | -1.4   | 0.086596 | 0.480815 | 0.351634 | 0.686    |
| Mmu.6457.1.A1_at        | Mmu.6457.1      | 7.7   | 8.05  | 0.21 | 0.07 | -1.27  | 0.062831 | 0.382684 | 0.307336 | 0.618843 |
| Mmu.6457.1.S1_at        | Mmu.6457.1      | 7.67  | 7.93  | 0.13 | 0.05 | -1.2   | 0.043822 | 0.444836 | 0.266406 | 0.662072 |
| Mmu.6469.1.S1_at        | Mmu.6469.1      | 5.87  | 5.47  | 1.13 | 0.18 | 1.32   | 0.838046 | 0.575667 | 0.929038 | 0.746703 |
| Mmu.6470.1.S1_at        | Mmu.6470.1      | 6.7   | 12.46 | 3.18 | 0.15 | -54.13 | 0.073078 | 0.260422 | 0.328008 | 0.526995 |
| Mmu.6471.1.S1_at        | Mmu.6471.1      | 8.4   | 8.18  | 1.04 | 0.12 | 1.16   | 0.607174 | 0.494789 | 0.803563 | 0.695092 |
| Mmu.6471.1.S1_x_at      | Mmu.6471.1      | 8.85  | 9.24  | 1.3  | 0.08 | -1.31  | 0.529694 | 0.585451 | 0.754473 | 0.752852 |
| Mmu.6481.1.S1_at        | Mmu.6481.1      | 3.87  | 3.8   | 0.17 | 0.04 | 1.05   | 0.444539 | 0.455023 | 0.697428 | 0.66903  |
| MmugDNA.22710.1.S1_at   | MmugDNA.22710.1 | 5.61  | 5.75  | 0.06 | 0.09 | -1.11  | 0.102606 | 0.042089 | 0.374931 | 0.249638 |
| MmugDNA.22710.1.S1_s_at | MmugDNA.22710.1 | 8.64  | 8.19  | 0.16 | 0.19 | 1.36   | 0.03275  | 0.045591 | 0.234993 | 0.257674 |
| Mmu.6504.1.S1_at        | Mmu.6504.1      | 10.47 | 10.65 | 0.19 | 0.14 | -1.13  | 0.346783 | 0.064009 | 0.62507  | 0.299139 |
| Mmu.6513.1.S1_at        | Mmu.6513.1      | 8.3   | 7.41  | 0.17 | 0.05 | 1.84   | 0.000618 | 0.017629 | 0.070727 | 0.167839 |
| Mmu.6514.1.S1_at        | Mmu.6514.1      | 8.38  | 8.16  | 0.32 | 0.12 | 1.16   | 0.183328 | 0.230511 | 0.479273 | 0.502251 |
| Mmu.6522.1.S1_at        | Mmu.6522.1      | 9.74  | 10.27 | 0.17 | 0.09 | -1.44  | 0.02793  | 0.045498 | 0.219721 | 0.2575   |
| Mmu.6550.1.S1_at        | Mmu.6550.1      | 3.19  | 3.27  | 0.19 | 0.12 | -1.06  | 0.917281 | 0.990812 | 0.964746 | 0.99482  |
| Mmu.6551.1.S1_at        | Mmu.6551.1      | 10.86 | 10.78 | 0.2  | 0.1  | 1.06   | 0.116599 | 0.263969 | 0.393692 | 0.530153 |

|                        |                |       |       |      |      |        |          |          |          |          |
|------------------------|----------------|-------|-------|------|------|--------|----------|----------|----------|----------|
| Mmu.6554.1.S1_at       | Mmu.6554.1     | 10.94 | 11.12 | 0.03 | 0.14 | -1.14  | 0.295337 | 0.152211 | 0.58412  | 0.427012 |
| Mmu.6556.1.S1_at       | Mmu.6556.1     | 7.62  | 10.36 | 0.92 | 0.18 | -6.67  | 0.017442 | 0.11963  | 0.185718 | 0.388275 |
| Mmu.6559.1.S1_s_at     | Mmu.6559.1     | 9.46  | 10.25 | 1.6  | 0.34 | -1.73  | 0.377815 | 0.06523  | 0.648249 | 0.301239 |
| Mmu.656.1.S1_at        | Mmu.656.1      | 10.18 | 10.27 | 0.14 | 0.04 | -1.06  | 0.719171 | 0.019431 | 0.867519 | 0.175133 |
| Mmu.6573.1.S1_at       | Mmu.6573.1     | 8.93  | 9.25  | 0.07 | 0.11 | -1.24  | 0.017413 | 0.000211 | 0.185515 | 0.032262 |
| Mmu.6593.2.S1_x_at     | Mmu.6593.2     | 6.13  | 6.06  | 0.08 | 0.21 | 1.06   | 0.505222 | 0.863724 | 0.738234 | 0.922638 |
| Mmu.6609.1.S1_at       | Mmu.6609.1     | 5.77  | 7.37  | 0.9  | 0.26 | -3.03  | 0.118921 | 0.113027 | 0.396589 | 0.378888 |
| Mmu.6623.1.S1_at       | Mmu.6623.1     | 6.6   | 6.98  | 0.1  | 0.14 | -1.31  | 0.018291 | 0.233898 | 0.1882   | 0.505169 |
| MmugDNA.1902.1.S1_s_at | MmugDNA.1902.1 | 12.94 | 13    | 0.12 | 0.01 | -1.05  | 0.271971 | 0.054979 | 0.563899 | 0.279898 |
| Mmu.6637.1.S1_at       | Mmu.6637.1     | 3.27  | 3.18  | 0.11 | 0.09 | 1.07   | 0.14604  | 0.34913  | 0.433778 | 0.593178 |
| Mmu.6642.1.S1_at       | Mmu.6642.1     | 5.6   | 5.2   | 0.31 | 0.09 | 1.32   | 0.081481 | 0.082575 | 0.342512 | 0.331761 |
| Mmu.6646.1.S1_at       | Mmu.6646.1     | 8.07  | 7.85  | 0.26 | 0.15 | 1.17   | 0.087118 | 0.13921  | 0.352778 | 0.412358 |
| Mmu.666.1.S1_at        | Mmu.666.1      | 4.18  | 4.17  | 0.2  | 0.16 | 1.01   | 0.920427 | 0.002796 | 0.965991 | 0.077966 |
| Mmu.6678.1.S1_at       | Mmu.6678.1     | 6.86  | 10.14 | 0.27 | 0.34 | -9.76  | 0.000241 | 0.07169  | 0.054642 | 0.313904 |
| Mmu.6678.1.S1_x_at     | Mmu.6678.1     | 8.7   | 10.67 | 0.21 | 0.23 | -3.9   | 0.000557 | 0.039713 | 0.070119 | 0.244271 |
| Mmu.6687.1.S1_at       | Mmu.6687.1     | 12.78 | 12.94 | 0.06 | 0.04 | -1.12  | 0.01482  | 0.005676 | 0.173867 | 0.103959 |
| Mmu.6716.1.S1_at       | Mmu.6716.1     | 9.09  | 12.61 | 1.5  | 0.21 | -11.46 | 0.032984 | 0.159202 | 0.235988 | 0.435217 |
| Mmu.6730.1.S1_at       | Mmu.6730.1     | 7.54  | 11.91 | 2    | 0.26 | -20.74 | 0.025218 | 0.193342 | 0.211843 | 0.46866  |
| Mmu.6738.1.S1_at       | Mmu.6738.1     | 8.66  | 8.65  | 0.19 | 0.22 | 1.01   | 0.559193 | 0.030322 | 0.773199 | 0.216032 |
| Mmu.6738.1.S1_s_at     | Mmu.6738.1     | 8.68  | 8.54  | 0.19 | 0.17 | 1.1    | 0.470503 | 0.034132 | 0.71497  | 0.228692 |
| Mmu.6739.1.S1_at       | Mmu.6739.1     | 5.28  | 5.33  | 0.07 | 0.11 | -1.04  | 0.196258 | 0.740369 | 0.493346 | 0.849623 |
| Mmu.6744.2.S1_at       | Mmu.6744.2     | 12.68 | 12.44 | 0.13 | 0.03 | 1.17   | 0.037324 | 0.094536 | 0.248625 | 0.351296 |
| Mmu.6763.1.S1_at       | Mmu.6763.1     | 8.57  | 9.27  | 0.37 | 0.19 | -1.63  | 0.075092 | 0.673055 | 0.332226 | 0.808955 |
| Mmu.6769.1.S1_at       | Mmu.6769.1     | 3.25  | 2.98  | 0.09 | 0.03 | 1.21   | 0.023665 | 0.042885 | 0.207081 | 0.251731 |
| Mmu.6773.1.S1_at       | Mmu.6773.1     | 7.94  | 7.76  | 0.24 | 0.03 | 1.13   | 0.789092 | 0.270865 | 0.904104 | 0.536026 |
| Mmu.6776.1.A1_at       | Mmu.6776.1     | 6.78  | 7.09  | 0.28 | 0.09 | -1.24  | 0.051269 | 0.010236 | 0.283802 | 0.1326   |
| Mmu.6776.1.S1_at       | Mmu.6776.1     | 5.62  | 6.32  | 0.45 | 0.27 | -1.62  | 0.064871 | 0.018077 | 0.311366 | 0.169379 |
| Mmu.6784.1.S1_at       | Mmu.6784.1     | 9.97  | 9.57  | 0.09 | 0.15 | 1.32   | 0.016426 | 0.05815  | 0.181069 | 0.287812 |
| Mmu.6788.1.S1_at       | Mmu.6788.1     | 12    | 11.95 | 0.21 | 0.05 | 1.04   | 0.775532 | 0.432014 | 0.897437 | 0.652738 |
| Mmu.6796.1.S1_at       | Mmu.6796.1     | 6.21  | 6.16  | 0.33 | 0.08 | 1.04   | 0.87132  | 0.976842 | 0.944612 | 0.987413 |
| Mmu.6800.1.S1_at       | Mmu.6800.1     | 11.91 | 11.65 | 0.2  | 0.09 | 1.2    | 0.065996 | 0.110375 | 0.314318 | 0.374541 |
| Mmu.6832.1.S1_at       | Mmu.6832.1     | 12.77 | 12.36 | 0.09 | 0.08 | 1.33   | 0.002837 | 0.023285 | 0.098188 | 0.191274 |
| Mmu.6835.1.S1_at       | Mmu.6835.1     | 5.35  | 5.45  | 0.08 | 0.13 | -1.07  | 0.749559 | 0.041485 | 0.884066 | 0.24854  |
| Mmu.6867.1.A1_at       | Mmu.6867.1     | 12.01 | 14.1  | 1.91 | 0.07 | -4.27  | 0.151586 | 0.129816 | 0.441094 | 0.40147  |
| Mmu.6867.2.S1_at       | Mmu.6867.2     | 2.99  | 3.01  | 0.1  | 0.03 | -1.01  | 0.209463 | 0.31956  | 0.506995 | 0.571875 |
| Mmu.6867.3.S1_s_at     | Mmu.6867.3     | 14.15 | 13.8  | 0.23 | 0.54 | 1.27   | 0.299203 | 0.207858 | 0.58757  | 0.482049 |
| Mmu.6887.1.S1_at       | Mmu.6887.1     | 11.26 | 11.42 | 0.12 | 0.08 | -1.12  | 0.120263 | 0.219801 | 0.39866  | 0.493388 |
| Mmu.6892.1.S1_at       | Mmu.6892.1     | 5.89  | 6.23  | 0.19 | 0.02 | -1.27  | 0.050238 | 0.172836 | 0.281968 | 0.449424 |
| Mmu.6898.1.S1_at       | Mmu.6898.1     | 4.15  | 3.93  | 0.15 | 0.13 | 1.17   | 0.589261 | 0.022143 | 0.791577 | 0.186249 |
| Mmu.6922.1.A1_at       | Mmu.6922.1     | 6.52  | 6.5   | 0.1  | 0.04 | 1.02   | 0.206429 | 0.347914 | 0.504097 | 0.592196 |
| Mmu.6922.1.S1_at       | Mmu.6922.1     | 3.64  | 3.76  | 0.04 | 0.18 | -1.09  | 0.173106 | 0.142556 | 0.467303 | 0.416206 |
| Mmu.6936.1.S1_at       | Mmu.6936.1     | 4.72  | 5.13  | 0.14 | 0.08 | -1.33  | 0.01286  | 0.007832 | 0.163931 | 0.117929 |
| Mmu.6961.1.S1_at       | Mmu.6961.1     | 9.35  | 9.14  | 0.13 | 0.14 | 1.15   | 0.110848 | 0.518881 | 0.386352 | 0.710789 |



|                         |                 |       |       |      |      |       |          |          |          |          |
|-------------------------|-----------------|-------|-------|------|------|-------|----------|----------|----------|----------|
| Mmu.6961.1.S1_s_at      | Mmu.6961.1      | 9.03  | 8.75  | 0.14 | 0.12 | 1.21  | 0.063207 | 0.530576 | 0.308086 | 0.718042 |
| Mmu.6977.1.S1_at        | Mmu.6977.1      | 7.87  | 7.54  | 0.24 | 0.08 | 1.26  | 0.383328 | 0.012731 | 0.652666 | 0.145429 |
| Mmu.6979.1.S1_at        | Mmu.6979.1      | 10.85 | 9.89  | 0.19 | 0.03 | 1.94  | 0.001534 | 0.000597 | 0.081678 | 0.041941 |
| Mmu.6994.1.S1_at        | Mmu.6994.1      | 8.74  | 8.02  | 0.25 | 0.34 | 1.66  | 0.040374 | 0.173178 | 0.257247 | 0.44977  |
| Mmu.7027.1.S1_at        | Mmu.7027.1      | 10.97 | 10.65 | 0.09 | 0.13 | 1.24  | 0.031247 | 0.010352 | 0.229951 | 0.133191 |
| Mmu.7028.1.S1_at        | Mmu.7028.1      | 12.92 | 12.9  | 0.03 | 0.01 | 1.01  | 0.384632 | 0.697405 | 0.653612 | 0.824183 |
| Mmu.7032.1.S1_s_at      | Mmu.7032.1      | 13.78 | 13.56 | 0.07 | 0.06 | 1.17  | 0.005163 | 0.006982 | 0.116998 | 0.112771 |
| Mmu.7046.1.S1_at        | Mmu.7046.1      | 4.55  | 5.01  | 0.59 | 0.26 | -1.38 | 0.306358 | 0.007    | 0.593269 | 0.112958 |
| Mmu.7053.1.S1_at        | Mmu.7053.1      | 8.14  | 9.08  | 1.01 | 0.41 | -1.92 | 0.154666 | 0.309955 | 0.444927 | 0.565222 |
| Mmu.7057.1.S1_at        | Mmu.7057.1      | 8.41  | 8.13  | 0.61 | 0.29 | 1.22  | 0.692094 | 0.134446 | 0.852876 | 0.406605 |
| Mmu.7075.1.S1_at        | Mmu.7075.1      | 4.76  | 4.51  | 0.17 | 0.02 | 1.19  | 0.179697 | 0.264719 | 0.474837 | 0.530753 |
| Mmu.7075.1.S2_s_at      | Mmu.7075.1      | 2.83  | 2.73  | 0.08 | 0.03 | 1.08  | 0.061884 | 0.248276 | 0.305263 | 0.517596 |
| Mmu.7078.1.S1_s_at      | Mmu.7078.1      | 13.5  | 13.56 | 0.11 | 0.09 | -1.04 | 0.328191 | 0.565153 | 0.61059  | 0.739748 |
| Mmu.7081.1.S1_at        | Mmu.7081.1      | 10.97 | 10.8  | 0.07 | 0.18 | 1.13  | 0.07091  | 0.166283 | 0.324335 | 0.442825 |
| Mmu.7083.1.S1_at        | Mmu.7083.1      | 6.93  | 8.36  | 0.49 | 0.4  | -2.71 | 0.03473  | 0.404821 | 0.241036 | 0.63333  |
| Mmu.7088.1.S1_at        | Mmu.7088.1      | 10.02 | 10.06 | 0.18 | 0.05 | -1.03 | 0.593956 | 0.107181 | 0.794361 | 0.36989  |
| Mmu.7098.1.S1_at        | Mmu.7098.1      | 5.37  | 5.34  | 0.23 | 0.24 | 1.02  | 0.774985 | 0.267687 | 0.897172 | 0.533467 |
| Mmu.7120.1.S1_at        | Mmu.7120.1      | 10.1  | 10.01 | 0.3  | 0.06 | 1.06  | 0.516504 | 0.649477 | 0.7459   | 0.794911 |
| Mmu.7135.1.S1_at        | Mmu.7135.1      | 9.77  | 9.29  | 0.16 | 0.04 | 1.39  | 0.004407 | 0.002975 | 0.1125   | 0.079958 |
| Mmu.7150.1.S1_at        | Mmu.7150.1      | 12.52 | 11.89 | 0.1  | 0.18 | 1.55  | 0.003777 | 0.001094 | 0.106813 | 0.052283 |
| Mmu.7164.1.S1_at        | Mmu.7164.1      | 10.76 | 10.01 | 0.23 | 0.4  | 1.68  | 0.034762 | 0.029495 | 0.241036 | 0.213423 |
| Mmu.7173.1.S1_at        | Mmu.7173.1      | 3.74  | 3.72  | 0.14 | 0.14 | 1.01  | 0.984332 | 0.038532 | 0.994148 | 0.241292 |
| Mmu.7179.1.S1_at        | Mmu.7179.1      | 7.54  | 7.57  | 0.21 | 0.06 | -1.02 | 0.949344 | 0.153669 | 0.978859 | 0.428413 |
| Mmu.7190.1.A1_at        | Mmu.7190.1      | 9.68  | 9.87  | 0.15 | 0.24 | -1.14 | 0.198231 | 0.003318 | 0.495463 | 0.082861 |
| Mmu.7191.1.S1_at        | Mmu.7191.1      | 7.68  | 8.17  | 0.39 | 0.33 | -1.41 | 0.111286 | 0.315002 | 0.387302 | 0.568759 |
| Mmu.7193.1.S1_at        | Mmu.7193.1      | 3.59  | 3.39  | 0.26 | 0.22 | 1.15  | 0.569728 | 0.770794 | 0.779025 | 0.866807 |
| Mmu.7205.1.A1_at        | Mmu.7205.1      | 6.42  | 6.26  | 0.39 | 0.09 | 1.12  | 0.355273 | 0.060154 | 0.632097 | 0.291882 |
| Mmu.7207.1.S1_at        | Mmu.7207.1      | 10.43 | 11.09 | 0.46 | 0.1  | -1.58 | 0.053069 | 0.040575 | 0.287654 | 0.246296 |
| Mmu.7208.1.S1_at        | Mmu.7208.1      | 10.69 | 10.55 | 0.06 | 0.12 | 1.1   | 0.101147 | 0.038426 | 0.372334 | 0.240918 |
| Mmu.722.1.S1_at         | Mmu.722.1       | 3.13  | 3.19  | 0.04 | 0.03 | -1.04 | 0.531766 | 0.833674 | 0.755933 | 0.90462  |
| Mmu.7225.1.S1_at        | Mmu.7225.1      | 10.42 | 10.31 | 0.07 | 0.14 | 1.08  | 0.28097  | 0.001776 | 0.57186  | 0.0634   |
| Mmu.7236.1.S1_at        | Mmu.7236.1      | 6.01  | 6.74  | 0.57 | 0.22 | -1.66 | 0.075053 | 0.250116 | 0.332117 | 0.519168 |
| Mmu.7236.1.S1_s_at      | Mmu.7236.1      | 11.46 | 12.52 | 0.49 | 0.2  | -2.09 | 0.022535 | 0.097681 | 0.203331 | 0.355554 |
| MmugDNA.14187.1.S1_at   | MmugDNA.14187.1 | 5.34  | 5.19  | 0.17 | 0.06 | 1.11  | 0.155034 | 0.460045 | 0.445174 | 0.671989 |
| MmugDNA.14187.1.S1_s_at | MmugDNA.14187.1 | 13.07 | 12.96 | 0.25 | 0.16 | 1.08  | 0.981054 | 0.727454 | 0.992909 | 0.842336 |
| Mmu.7267.1.S1_at        | Mmu.7267.1      | 8.15  | 7.59  | 0.48 | 0.3  | 1.48  | 0.151143 | 0.480743 | 0.44069  | 0.686    |
| Mmu.7278.1.A1_at        | Mmu.7278.1      | 5.67  | 5.72  | 0.2  | 0.05 | -1.03 | 0.712441 | 0.16614  | 0.864309 | 0.442694 |
| Mmu.7278.1.S1_at        | Mmu.7278.1      | 5.13  | 5.23  | 0.29 | 0.08 | -1.07 | 0.944703 | 0.49184  | 0.976696 | 0.693275 |
| Mmu.7280.1.S1_at        | Mmu.7280.1      | 9.96  | 9.77  | 0.12 | 0.02 | 1.14  | 0.083027 | 0.008233 | 0.34531  | 0.120504 |
| Mmu.7281.1.S1_s_at      | Mmu.7281.1      | 9.79  | 9.9   | 0.42 | 0.12 | -1.08 | 0.871607 | 0.320457 | 0.944734 | 0.572648 |
| Mmu.7287.1.S1_at        | Mmu.7287.1      | 6.22  | 6.94  | 0.61 | 0.32 | -1.65 | 0.191785 | 0.132225 | 0.488259 | 0.404274 |
| Mmu.729.1.S1_at         | Mmu.729.1       | 4.79  | 4.7   | 0.04 | 0.12 | 1.07  | 0.535855 | 0.104307 | 0.75867  | 0.365518 |
| Mmu.7319.1.S1_at        | Mmu.7319.1      | 10.39 | 10.44 | 0.14 | 0.05 | -1.03 | 0.569085 | 0.240826 | 0.778679 | 0.511521 |

|                        |                |       |       |      |      |       |          |          |          |          |
|------------------------|----------------|-------|-------|------|------|-------|----------|----------|----------|----------|
| Mmu.7346.1.S1_at       | Mmu.7346.1     | 4.93  | 5.33  | 0.11 | 0.19 | -1.32 | 0.144781 | 0.115105 | 0.431713 | 0.381985 |
| Mmu.7348.2.S1_a_at     | Mmu.7348.2     | 11.31 | 10.89 | 0.42 | 0.17 | 1.34  | 0.337203 | 0.682272 | 0.617723 | 0.814486 |
| Mmu.7348.2.S1_at       | Mmu.7348.2     | 11.45 | 11.03 | 0.56 | 0.27 | 1.34  | 0.49893  | 0.809277 | 0.73397  | 0.890102 |
| Mmu.737.1.S1_s_at      | Mmu.737.1      | 13.51 | 13.58 | 0.06 | 0.01 | -1.05 | 0.37091  | 0.691247 | 0.643729 | 0.820338 |
| Mmu.7379.1.A1_at       | Mmu.7379.1     | 6.32  | 6.32  | 0.06 | 0.03 | -1    | 0.293137 | 0.61912  | 0.58211  | 0.774377 |
| Mmu.7380.1.S1_at       | Mmu.7380.1     | 8.03  | 8.22  | 0.12 | 0.14 | -1.15 | 0.342506 | 0.35226  | 0.622219 | 0.595568 |
| Mmu.7385.1.S1_at       | Mmu.7385.1     | 12.66 | 12.44 | 0.05 | 0.1  | 1.16  | 0.021532 | 0.047081 | 0.200513 | 0.261469 |
| Mmu.7390.1.S1_at       | Mmu.7390.1     | 9.21  | 8.9   | 0.13 | 0.14 | 1.24  | 0.245819 | 0.138449 | 0.541732 | 0.411392 |
| Mmu.7394.1.A1_at       | Mmu.7394.1     | 8.05  | 8.8   | 0.53 | 0.24 | -1.68 | 0.272868 | 0.00564  | 0.564984 | 0.103751 |
| Mmu.7399.1.S1_at       | Mmu.7399.1     | 13.55 | 13.44 | 0.08 | 0.03 | 1.08  | 0.124228 | 0.161094 | 0.404242 | 0.437279 |
| Mmu.7434.1.S1_at       | Mmu.7434.1     | 9.28  | 9.52  | 0.12 | 0.05 | -1.18 | 0.063134 | 0.528085 | 0.307954 | 0.716432 |
| Mmu.7445.1.S1_at       | Mmu.7445.1     | 13.62 | 13.63 | 0.13 | 0.03 | -1.01 | 0.967928 | 0.715953 | 0.987302 | 0.835339 |
| MmugDNA.5580.1.S1_at   | MmugDNA.5580.1 | 13.52 | 13.69 | 0.03 | 0.06 | -1.13 | 0.031462 | 0.35651  | 0.230684 | 0.598459 |
| MmugDNA.5580.1.S1_s_at | MmugDNA.5580.1 | 13.29 | 13.27 | 0.15 | 0.02 | 1.01  | 0.824494 | 0.564759 | 0.922007 | 0.739427 |
| Mmu.7448.1.S1_at       | Mmu.7448.1     | 12.88 | 12.5  | 0.08 | 0.05 | 1.3   | 0.001815 | 0.308109 | 0.08633  | 0.564219 |
| Mmu.7453.1.S1_at       | Mmu.7453.1     | 10.4  | 10.7  | 0.08 | 0.05 | -1.23 | 0.00757  | 0.083874 | 0.135292 | 0.334771 |
| Mmu.7454.1.S1_at       | Mmu.7454.1     | 9.45  | 9.25  | 0.16 | 0.1  | 1.15  | 0.041337 | 0.012325 | 0.259688 | 0.143659 |
| Mmu.7458.1.S1_at       | Mmu.7458.1     | 12.16 | 12.26 | 0.07 | 0.06 | -1.08 | 0.537162 | 0.826503 | 0.759433 | 0.90035  |
| Mmu.7460.1.S1_x_at     | Mmu.7460.1     | 6.58  | 8.77  | 2.02 | 0.18 | -4.55 | 0.163709 | 0.512152 | 0.456316 | 0.706087 |
| Mmu.7460.10.S1_x_at    | Mmu.7460.10    | 4.8   | 4.68  | 0.15 | 0.11 | 1.09  | 0.644973 | 0.041352 | 0.827097 | 0.247995 |
| Mmu.7460.12.S1_at      | Mmu.7460.12    | 4.77  | 4.77  | 0.17 | 0.08 | -1    | 0.926618 | 0.117094 | 0.968958 | 0.384548 |
| Mmu.7460.12.S1_x_at    | Mmu.7460.12    | 4.06  | 4.01  | 0.16 | 0.03 | 1.04  | 0.729296 | 0.078987 | 0.873534 | 0.325995 |
| Mmu.7460.14.S1_s_at    | Mmu.7460.14    | 6.41  | 8.5   | 2.12 | 0.18 | -4.27 | 0.177078 | 0.524654 | 0.471716 | 0.714472 |
| Mmu.7460.14.S1_x_at    | Mmu.7460.14    | 6.78  | 8.02  | 0.86 | 0.15 | -2.36 | 0.157796 | 0.32485  | 0.448605 | 0.575375 |
| Mmu.7460.15.S1_x_at    | Mmu.7460.15    | 4.41  | 4.58  | 0.06 | 0.08 | -1.12 | 0.106484 | 0.092072 | 0.380663 | 0.34762  |
| Mmu.7460.17.S1_s_at    | Mmu.7460.17    | 2.86  | 2.91  | 0.1  | 0.09 | -1.03 | 0.291233 | 0.338415 | 0.580618 | 0.585432 |
| Mmu.7460.17.S1_x_at    | Mmu.7460.17    | 3.56  | 3.45  | 0.11 | 0.18 | 1.08  | 0.687658 | 0.161933 | 0.850807 | 0.438029 |
| Mmu.7460.18.S1_x_at    | Mmu.7460.18    | 4.21  | 4.09  | 0.09 | 0.02 | 1.08  | 0.093706 | 0.193412 | 0.362354 | 0.468711 |
| Mmu.7460.4.S1_a_at     | Mmu.7460.4     | 2.89  | 2.92  | 0.16 | 0.04 | -1.02 | 0.226244 | 0.333633 | 0.523981 | 0.581808 |
| Mmu.7460.4.S1_x_at     | Mmu.7460.4     | 3.26  | 3.37  | 0.15 | 0.02 | -1.08 | 0.076325 | 0.126349 | 0.334426 | 0.396852 |
| Mmu.7460.6.S1_x_at     | Mmu.7460.6     | 3.92  | 4.14  | 0.11 | 0.04 | -1.17 | 0.016678 | 0.067358 | 0.182519 | 0.305525 |
| Mmu.7460.7.S1_x_at     | Mmu.7460.7     | 4.14  | 4.16  | 0.21 | 0.09 | -1.02 | 0.516182 | 0.094948 | 0.745613 | 0.352054 |
| Mmu.7469.1.S1_at       | Mmu.7469.1     | 13.26 | 13.26 | 0.05 | 0.06 | -1    | 0.856666 | 0.217361 | 0.93773  | 0.490978 |
| Mmu.7474.1.S1_at       | Mmu.7474.1     | 12.22 | 12.44 | 0.1  | 0.05 | -1.16 | 0.035373 | 0.270728 | 0.242908 | 0.53602  |
| Mmu.7474.1.S1_x_at     | Mmu.7474.1     | 11.99 | 12.25 | 0.09 | 0.09 | -1.2  | 0.017126 | 0.218888 | 0.184186 | 0.492656 |
| Mmu.7476.1.S1_s_at     | Mmu.7476.1     | 14.56 | 14.46 | 0.08 | 0.05 | 1.07  | 0.416931 | 0.523398 | 0.677228 | 0.713713 |
| Mmu.7481.1.A1_at       | Mmu.7481.1     | 8.99  | 8.81  | 0.09 | 0.18 | 1.13  | 0.197528 | 0.551402 | 0.494763 | 0.730925 |
| Mmu.749.1.S1_at        | Mmu.749.1      | 10.81 | 10.94 | 0.09 | 0.07 | -1.1  | 0.025593 | 0.371602 | 0.212928 | 0.610389 |
| Mmu.7507.2.S1_at       | Mmu.7507.2     | 11.27 | 12.12 | 0.31 | 0.15 | -1.8  | 0.01494  | 0.063319 | 0.174306 | 0.298315 |
| Mmu.7520.1.S1_x_at     | Mmu.7520.1     | 5.7   | 5.16  | 0.44 | 0.15 | 1.45  | 0.237181 | 0.335744 | 0.534591 | 0.583489 |
| Mmu.7528.1.S1_at       | Mmu.7528.1     | 9.88  | 9.88  | 0.03 | 0.04 | -1    | 0.356721 | 0.529345 | 0.633012 | 0.717257 |
| Mmu.7531.1.S1_at       | Mmu.7531.1     | 8.12  | 7.55  | 0.72 | 0.22 | 1.48  | 0.147174 | 0.146336 | 0.435239 | 0.420368 |
| Mmu.7535.1.S1_at       | Mmu.7535.1     | 5.06  | 5.09  | 0.09 | 0.04 | -1.02 | 0.29212  | 0.204103 | 0.581449 | 0.478418 |

|                    |            |       |       |      |      |       |          |          |          |          |
|--------------------|------------|-------|-------|------|------|-------|----------|----------|----------|----------|
| Mmu.7543.1.S1_at   | Mmu.7543.1 | 9.84  | 9.81  | 0.28 | 0.27 | 1.02  | 0.895176 | 0.570944 | 0.955278 | 0.743422 |
| Mmu.7546.1.S1_at   | Mmu.7546.1 | 9.03  | 8.58  | 0.08 | 0.22 | 1.36  | 0.0193   | 0.110404 | 0.192036 | 0.374614 |
| Mmu.7561.1.S1_at   | Mmu.7561.1 | 8.09  | 8.23  | 0.42 | 0.13 | -1.1  | 0.601043 | 0.00449  | 0.799309 | 0.093558 |
| Mmu.7599.1.S1_at   | Mmu.7599.1 | 10.82 | 10.66 | 0.3  | 0.12 | 1.11  | 0.76436  | 0.023658 | 0.89193  | 0.192574 |
| Mmu.7601.1.S1_at   | Mmu.7601.1 | 3.21  | 3.18  | 0.16 | 0.2  | 1.02  | 0.645663 | 0.484281 | 0.827528 | 0.688434 |
| Mmu.7605.1.S1_at   | Mmu.7605.1 | 12.86 | 12.45 | 0.18 | 0.07 | 1.33  | 0.009789 | 0.002477 | 0.148542 | 0.073576 |
| Mmu.7638.1.S1_at   | Mmu.7638.1 | 8.5   | 8.71  | 0.05 | 0.25 | -1.16 | 0.661139 | 0.345478 | 0.836453 | 0.590746 |
| Mmu.7639.1.S1_at   | Mmu.7639.1 | 10.68 | 11.03 | 0.15 | 0.13 | -1.27 | 0.07582  | 0.190396 | 0.333731 | 0.465906 |
| Mmu.7643.1.S1_at   | Mmu.7643.1 | 3.15  | 3.5   | 0.11 | 0.33 | -1.27 | 0.183785 | 0.236456 | 0.479745 | 0.507314 |
| Mmu.7649.1.S1_at   | Mmu.7649.1 | 4.93  | 6     | 0.35 | 0.1  | -2.1  | 0.008951 | 0.054617 | 0.144305 | 0.279211 |
| Mmu.7660.1.S1_at   | Mmu.7660.1 | 8.47  | 8.66  | 0.06 | 0.13 | -1.14 | 0.154387 | 0.010438 | 0.444671 | 0.133573 |
| Mmu.7663.1.S1_at   | Mmu.7663.1 | 10.08 | 10.37 | 0.1  | 0.07 | -1.22 | 0.013031 | 0.006089 | 0.164922 | 0.106327 |
| Mmu.7667.1.S1_at   | Mmu.7667.1 | 4.35  | 4.31  | 0.2  | 0.08 | 1.02  | 0.414469 | 0.529935 | 0.675678 | 0.71758  |
| Mmu.7673.1.S1_at   | Mmu.7673.1 | 11.24 | 10.95 | 0.27 | 0.08 | 1.22  | 0.35263  | 0.783341 | 0.630029 | 0.874571 |
| Mmu.7683.1.S1_at   | Mmu.7683.1 | 12.45 | 12.32 | 0.38 | 0.05 | 1.09  | 0.54722  | 0.729921 | 0.765823 | 0.843733 |
| Mmu.7710.1.S1_at   | Mmu.7710.1 | 8.33  | 8.72  | 0.1  | 0.29 | -1.32 | 0.17295  | 0.003255 | 0.467041 | 0.082277 |
| Mmu.7716.1.S1_at   | Mmu.7716.1 | 9.42  | 9.27  | 0.46 | 0.2  | 1.11  | 0.175204 | 0.35453  | 0.469551 | 0.59726  |
| Mmu.7717.1.S1_at   | Mmu.7717.1 | 9.03  | 8.9   | 0.15 | 0.14 | 1.09  | 0.165087 | 0.033582 | 0.458078 | 0.226848 |
| Mmu.7730.1.S1_at   | Mmu.7730.1 | 7.14  | 8.19  | 0.57 | 0.04 | -2.08 | 0.091568 | 0.055792 | 0.359262 | 0.282044 |
| Mmu.7746.1.S1_at   | Mmu.7746.1 | 9.11  | 8.61  | 0.22 | 0.24 | 1.41  | 0.11169  | 0.021232 | 0.38771  | 0.182449 |
| Mmu.7752.1.S1_at   | Mmu.7752.1 | 10.02 | 10.39 | 0.51 | 0.13 | -1.3  | 0.092192 | 0.049148 | 0.360155 | 0.266534 |
| Mmu.7758.1.S1_at   | Mmu.7758.1 | 12.07 | 11.99 | 0.04 | 0.04 | 1.06  | 0.052751 | 0.080349 | 0.286693 | 0.327965 |
| Mmu.7792.1.S1_at   | Mmu.7792.1 | 11.58 | 11.42 | 0.07 | 0.11 | 1.12  | 0.399208 | 0.570571 | 0.664717 | 0.743175 |
| Mmu.7801.1.S1_at   | Mmu.7801.1 | 11.1  | 10.76 | 0.35 | 0.1  | 1.27  | 0.089675 | 0.212969 | 0.356602 | 0.4869   |
| Mmu.7805.1.S1_at   | Mmu.7805.1 | 10.96 | 10.36 | 0.22 | 0.05 | 1.52  | 0.009679 | 0.045507 | 0.14832  | 0.2575   |
| Mmu.7831.2.S1_at   | Mmu.7831.2 | 8.86  | 8.61  | 0.11 | 0.02 | 1.2   | 0.024008 | 0.003012 | 0.208141 | 0.08009  |
| Mmu.7836.1.S1_at   | Mmu.7836.1 | 7.89  | 8.28  | 0.18 | 0.24 | -1.31 | 0.123541 | 0.003909 | 0.402973 | 0.088806 |
| Mmu.7836.1.S1_x_at | Mmu.7836.1 | 7.45  | 8.07  | 0.33 | 0.26 | -1.54 | 0.216191 | 0.006113 | 0.513942 | 0.10649  |
| Mmu.7841.1.S1_at   | Mmu.7841.1 | 6.42  | 6.53  | 0.22 | 0.07 | -1.08 | 0.444838 | 0.569413 | 0.697566 | 0.742382 |
| Mmu.7842.1.S1_at   | Mmu.7842.1 | 11.85 | 12.19 | 0.18 | 0.08 | -1.27 | 0.177933 | 0.083638 | 0.472709 | 0.334255 |
| Mmu.7855.1.S1_at   | Mmu.7855.1 | 9.3   | 9.17  | 0.08 | 0.25 | 1.1   | 0.1447   | 0.121127 | 0.431664 | 0.390187 |
| Mmu.7856.1.S1_at   | Mmu.7856.1 | 6.78  | 6.78  | 0.13 | 0.02 | 1     | 0.445829 | 0.289963 | 0.69823  | 0.550984 |
| Mmu.7863.1.S1_at   | Mmu.7863.1 | 2.53  | 2.53  | 0.08 | 0.1  | 1     | 0.862569 | 0.341123 | 0.940257 | 0.587233 |
| Mmu.7865.1.S1_at   | Mmu.7865.1 | 5.48  | 5.94  | 0.19 | 0.22 | -1.38 | 0.081792 | 0.464776 | 0.343087 | 0.675419 |
| Mmu.7878.1.S1_at   | Mmu.7878.1 | 11.69 | 11.78 | 0.3  | 0.08 | -1.07 | 0.551943 | 0.751577 | 0.76879  | 0.855508 |
| Mmu.7883.1.S1_x_at | Mmu.7883.1 | 14.68 | 14.63 | 0.02 | 0.03 | 1.03  | 0.303382 | 0.15094  | 0.590824 | 0.425525 |
| Mmu.7886.1.S1_at   | Mmu.7886.1 | 9.43  | 10.09 | 0.26 | 0.06 | -1.58 | 0.027636 | 0.031117 | 0.21868  | 0.218175 |
| Mmu.7889.1.S1_at   | Mmu.7889.1 | 4.66  | 4.51  | 0.11 | 0.19 | 1.11  | 0.648878 | 0.616099 | 0.829435 | 0.772461 |
| Mmu.789.1.S1_at    | Mmu.789.1  | 8.15  | 8.17  | 0.12 | 0.06 | -1.01 | 0.995494 | 0.167016 | 0.998175 | 0.443466 |
| Mmu.7914.1.S1_at   | Mmu.7914.1 | 8.14  | 8.14  | 0.14 | 0.17 | 1     | 0.506894 | 0.661884 | 0.739358 | 0.802004 |
| Mmu.792.1.S1_at    | Mmu.792.1  | 6.7   | 6.98  | 0.07 | 0.14 | -1.21 | 0.100765 | 0.135234 | 0.371886 | 0.407303 |
| Mmu.7922.1.S1_at   | Mmu.7922.1 | 4.03  | 4.05  | 0.07 | 0.19 | -1.02 | 0.829008 | 0.926743 | 0.92457  | 0.958404 |
| Mmu.7922.1.S1_x_at | Mmu.7922.1 | 4.28  | 4.24  | 0.01 | 0.02 | 1.02  | 0.089263 | 0.093495 | 0.356089 | 0.349846 |

|                        |                |       |       |      |      |       |          |          |          |          |
|------------------------|----------------|-------|-------|------|------|-------|----------|----------|----------|----------|
| Mmu.7935.1.S1_at       | Mmu.7935.1     | 10.41 | 10.05 | 0.25 | 0.06 | 1.28  | 0.062932 | 0.402539 | 0.307612 | 0.631481 |
| Mmu.7940.1.A1_at       | Mmu.7940.1     | 4.19  | 4.21  | 0.02 | 0.18 | -1.02 | 0.730788 | 0.618957 | 0.874211 | 0.774229 |
| Mmu.7944.1.S1_at       | Mmu.7944.1     | 9.95  | 10.35 | 0.28 | 0.09 | -1.32 | 0.09592  | 0.096158 | 0.365529 | 0.353432 |
| Mmu.7947.1.S1_at       | Mmu.7947.1     | 7.14  | 7.12  | 0.13 | 0.37 | 1.01  | 0.578728 | 0.878305 | 0.784534 | 0.93053  |
| Mmu.7958.1.S1_at       | Mmu.7958.1     | 8.89  | 8.87  | 0.56 | 0.13 | 1.01  | 0.766755 | 0.79878  | 0.892938 | 0.884072 |
| Mmu.7958.1.S1_s_at     | Mmu.7958.1     | 9.84  | 9.83  | 0.13 | 0.2  | 1     | 0.920627 | 0.49785  | 0.966056 | 0.697071 |
| Mmu.7978.1.S1_at       | Mmu.7978.1     | 3.31  | 3.29  | 0.05 | 0.03 | 1.02  | 0.69105  | 0.134227 | 0.852289 | 0.406456 |
| MmugDNA.7764.1.S1_at   | MmugDNA.7764.1 | 7.66  | 7.3   | 0.15 | 0.08 | 1.29  | 0.021791 | 0.016461 | 0.200878 | 0.162471 |
| MmugDNA.7764.1.S1_s_at | MmugDNA.7764.1 | 11.87 | 11.44 | 0.19 | 0.16 | 1.35  | 0.017976 | 0.005861 | 0.187151 | 0.104856 |
| Mmu.799.1.S1_at        | Mmu.799.1      | 12.48 | 12.1  | 0.22 | 0.11 | 1.3   | 0.11034  | 0.398524 | 0.385646 | 0.629458 |
| Mmu.800.1.S1_at        | Mmu.800.1      | 11.69 | 11.71 | 0.16 | 0.16 | -1.01 | 0.84244  | 0.351145 | 0.930859 | 0.594844 |
| Mmu.8008.1.S1_at       | Mmu.8008.1     | 9     | 9.3   | 0.22 | 0.06 | -1.23 | 0.135437 | 0.077226 | 0.419372 | 0.322852 |
| Mmu.8044.1.S1_at       | Mmu.8044.1     | 5.74  | 5.64  | 0.14 | 0.09 | 1.07  | 0.196435 | 0.316563 | 0.493531 | 0.569938 |
| Mmu.8046.1.S1_at       | Mmu.8046.1     | 6.75  | 7.04  | 0.14 | 0.07 | -1.23 | 0.023947 | 0.470449 | 0.207872 | 0.678756 |
| Mmu.8048.1.S1_at       | Mmu.8048.1     | 9.76  | 10.14 | 0.18 | 0.09 | -1.3  | 0.078142 | 0.522349 | 0.337673 | 0.713115 |
| Mmu.8051.1.S1_at       | Mmu.8051.1     | 10.25 | 9.77  | 0.25 | 0.35 | 1.39  | 0.063035 | 0.029014 | 0.307836 | 0.212267 |
| Mmu.8060.2.S1_at       | Mmu.8060.2     | 12.42 | 13.3  | 0.66 | 0.11 | -1.83 | 0.106453 | 0.059986 | 0.380607 | 0.291599 |
| Mmu.8061.1.S1_at       | Mmu.8061.1     | 10.8  | 11.99 | 0.91 | 0.16 | -2.29 | 0.118288 | 0.063981 | 0.395779 | 0.299066 |
| Mmu.8065.1.S1_at       | Mmu.8065.1     | 6.71  | 6.72  | 0.18 | 0.08 | -1.01 | 0.851711 | 0.521472 | 0.935451 | 0.71247  |
| Mmu.8073.1.S1_at       | Mmu.8073.1     | 8.9   | 8.53  | 0.22 | 0.22 | 1.29  | 0.108761 | 0.098122 | 0.383665 | 0.356218 |
| Mmu.8078.2.S1_at       | Mmu.8078.2     | 12.46 | 12.35 | 0.23 | 0.06 | 1.08  | 0.89744  | 0.992076 | 0.956478 | 0.995515 |
| Mmu.8081.1.S1_at       | Mmu.8081.1     | 12.38 | 10.7  | 0.49 | 0.18 | 3.21  | 0.005105 | 0.014056 | 0.116736 | 0.151841 |
| Mmu.8081.1.S1_x_at     | Mmu.8081.1     | 12.44 | 10.8  | 0.51 | 0.17 | 3.11  | 0.006136 | 0.014994 | 0.12462  | 0.155662 |
| Mmu.8084.1.S1_at       | Mmu.8084.1     | 4.94  | 5.55  | 0.28 | 0.27 | -1.53 | 0.061418 | 0.01657  | 0.304438 | 0.163004 |
| Mmu.8090.1.S1_at       | Mmu.8090.1     | 11.74 | 11.37 | 0.27 | 0.08 | 1.28  | 0.125346 | 0.648988 | 0.405812 | 0.794525 |
| MmuSTS.2072.1.S1_s_at  | MmuSTS.2072.1  | 12.14 | 11.77 | 0.21 | 0.14 | 1.3   | 0.064121 | 0.663143 | 0.309726 | 0.80284  |
| Mmu.8100.1.S1_at       | Mmu.8100.1     | 5.06  | 5.55  | 0.27 | 0.17 | -1.4  | 0.025017 | 0.013174 | 0.211194 | 0.14735  |
| Mmu.8117.1.S1_at       | Mmu.8117.1     | 6.16  | 6.28  | 0.12 | 0    | -1.09 | 0.158189 | 0.08144  | 0.449156 | 0.329632 |
| Mmu.8122.1.A1_at       | Mmu.8122.1     | 11.2  | 11.5  | 0.11 | 0.04 | -1.23 | 0.011394 | 0.276034 | 0.157022 | 0.540071 |
| Mmu.8122.1.S1_at       | Mmu.8122.1     | 11.21 | 11.51 | 0.17 | 0.06 | -1.23 | 0.055272 | 0.31667  | 0.292072 | 0.569995 |
| Mmu.8123.1.S1_at       | Mmu.8123.1     | 6.3   | 6.1   | 0.15 | 0.08 | 1.15  | 0.287526 | 0.262288 | 0.577444 | 0.528605 |
| Mmu.8137.1.S1_at       | Mmu.8137.1     | 6.88  | 7.28  | 0.21 | 0.14 | -1.33 | 0.033967 | 0.239108 | 0.238912 | 0.509827 |
| Mmu.8143.1.S1_at       | Mmu.8143.1     | 4.27  | 4.24  | 0.17 | 0.01 | 1.02  | 0.98594  | 0.019451 | 0.994999 | 0.175136 |
| Mmu.8145.1.S1_at       | Mmu.8145.1     | 9.48  | 10.01 | 0.38 | 0.23 | -1.44 | 0.094627 | 0.002789 | 0.363573 | 0.077966 |
| Mmu.8147.1.A1_at       | Mmu.8147.1     | 5.43  | 5.21  | 0.23 | 0.04 | 1.17  | 0.069172 | 0.029084 | 0.321108 | 0.212721 |
| Mmu.8149.1.S1_s_at     | Mmu.8149.1     | 9.91  | 9.93  | 0.11 | 0.14 | -1.02 | 0.657783 | 0.470628 | 0.834762 | 0.67894  |
| Mmu.8156.1.S1_at       | Mmu.8156.1     | 8.72  | 8.15  | 0.22 | 0.16 | 1.49  | 0.022165 | 0.320131 | 0.201977 | 0.572472 |
| Mmu.8163.1.S1_at       | Mmu.8163.1     | 10    | 9.44  | 0.02 | 0.05 | 1.48  | 0.000047 | 0.001075 | 0.045594 | 0.051908 |
| Mmu.8192.1.S1_at       | Mmu.8192.1     | 6.94  | 7.28  | 0.28 | 0.15 | -1.27 | 0.385597 | 0.549572 | 0.65436  | 0.729956 |
| Mmu.8197.1.S1_at       | Mmu.8197.1     | 8.57  | 8.55  | 0.34 | 0.12 | 1.02  | 0.702159 | 0.365268 | 0.858655 | 0.605413 |
| Mmu.8209.1.S1_at       | Mmu.8209.1     | 10.08 | 9.64  | 0.26 | 0.03 | 1.35  | 0.040338 | 0.154369 | 0.257247 | 0.429245 |
| Mmu.8218.1.S1_at       | Mmu.8218.1     | 7.52  | 7.04  | 0.3  | 0.2  | 1.39  | 0.241544 | 0.046996 | 0.538648 | 0.261469 |
| Mmu.8222.1.S1_at       | Mmu.8222.1     | 11.95 | 11.33 | 0.29 | 0.03 | 1.53  | 0.010052 | 0.183374 | 0.149859 | 0.459553 |

|                    |            |       |       |      |      |       |          |          |          |          |
|--------------------|------------|-------|-------|------|------|-------|----------|----------|----------|----------|
| Mmu.8245.1.S1_at   | Mmu.8245.1 | 4.95  | 5     | 0.12 | 0.05 | -1.03 | 0.478014 | 0.484652 | 0.719745 | 0.688591 |
| Mmu.826.1.S1_at    | Mmu.826.1  | 8.11  | 7.87  | 0.13 | 0.14 | 1.18  | 0.219002 | 0.315252 | 0.516662 | 0.568939 |
| Mmu.8262.1.S1_at   | Mmu.8262.1 | 8.91  | 8.84  | 0.06 | 0.04 | 1.05  | 0.775252 | 0.16163  | 0.897348 | 0.437771 |
| Mmu.8265.1.S1_at   | Mmu.8265.1 | 9.91  | 9.73  | 0.02 | 0.32 | 1.13  | 0.167184 | 0.01394  | 0.460394 | 0.151391 |
| Mmu.8273.1.S1_at   | Mmu.8273.1 | 4.16  | 4.27  | 0.11 | 0.21 | -1.07 | 0.752698 | 0.570399 | 0.885782 | 0.743103 |
| Mmu.8277.1.S1_at   | Mmu.8277.1 | 8.45  | 8.08  | 0.3  | 0.28 | 1.29  | 0.448692 | 0.130803 | 0.700155 | 0.40299  |
| Mmu.8277.2.S1_at   | Mmu.8277.2 | 8.08  | 8.12  | 0.26 | 0.1  | -1.03 | 0.699858 | 0.867089 | 0.857467 | 0.924465 |
| Mmu.828.1.S1_at    | Mmu.828.1  | 8.44  | 8.75  | 0.28 | 0.25 | -1.24 | 0.477698 | 0.721717 | 0.719543 | 0.838808 |
| Mmu.8299.1.S1_at   | Mmu.8299.1 | 8.49  | 8.98  | 0.35 | 0.08 | -1.4  | 0.308687 | 0.122473 | 0.595227 | 0.392348 |
| Mmu.8299.1.S1_s_at | Mmu.8299.1 | 9.74  | 9.99  | 0.26 | 0.02 | -1.19 | 0.249746 | 0.37267  | 0.544804 | 0.611617 |
| Mmu.8323.1.S1_at   | Mmu.8323.1 | 8.81  | 8.17  | 0.44 | 0.15 | 1.57  | 0.298231 | 0.532001 | 0.586575 | 0.718995 |
| Mmu.8324.2.S1_at   | Mmu.8324.2 | 8.15  | 8.57  | 0.35 | 0.13 | -1.34 | 0.115915 | 0.018154 | 0.392991 | 0.169673 |
| Mmu.8324.2.S1_s_at | Mmu.8324.2 | 10.01 | 10.45 | 0.21 | 0.13 | -1.36 | 0.144931 | 0.051364 | 0.431989 | 0.272082 |
| Mmu.8335.1.S1_s_at | Mmu.8335.1 | 11.37 | 11.42 | 0.21 | 0.05 | -1.04 | 0.600815 | 0.285474 | 0.799166 | 0.547351 |
| Mmu.8339.1.S1_at   | Mmu.8339.1 | 3.05  | 3.04  | 0.14 | 0.13 | 1     | 0.857378 | 0.568231 | 0.938062 | 0.741866 |
| Mmu.8361.1.S1_at   | Mmu.8361.1 | 6.08  | 6.2   | 0.22 | 0.26 | -1.08 | 0.832447 | 0.088624 | 0.926157 | 0.342167 |
| Mmu.8365.1.S1_at   | Mmu.8365.1 | 12.49 | 11.98 | 0.13 | 0.05 | 1.43  | 0.003337 | 0.01396  | 0.102526 | 0.151509 |
| Mmu.8365.1.S1_s_at | Mmu.8365.1 | 12.37 | 11.87 | 0.09 | 0.07 | 1.42  | 0.003094 | 0.019556 | 0.100824 | 0.175563 |
| Mmu.8378.1.S1_at   | Mmu.8378.1 | 5     | 4.99  | 0.04 | 0.06 | 1     | 0.729496 | 0.550749 | 0.873673 | 0.730611 |
| Mmu.8380.1.S1_at   | Mmu.8380.1 | 3.27  | 3.33  | 0.06 | 0.07 | -1.04 | 0.372192 | 0.222978 | 0.644813 | 0.495821 |
| Mmu.8395.1.S1_at   | Mmu.8395.1 | 3.37  | 3.16  | 0.16 | 0.06 | 1.15  | 0.209741 | 0.260613 | 0.507182 | 0.527118 |
| Mmu.8402.1.S1_at   | Mmu.8402.1 | 11.16 | 10.75 | 0.16 | 0.06 | 1.33  | 0.026899 | 0.019624 | 0.217016 | 0.176044 |
| Mmu.8410.1.S1_at   | Mmu.8410.1 | 9.51  | 10.06 | 0.05 | 0.06 | -1.46 | 0.000233 | 0.000319 | 0.054608 | 0.035423 |
| Mmu.8428.1.S1_at   | Mmu.8428.1 | 9.72  | 8.98  | 0.31 | 0.11 | 1.67  | 0.024774 | 0.137042 | 0.210464 | 0.409836 |
| Mmu.8473.1.A1_at   | Mmu.8473.1 | 3.06  | 3.35  | 0.16 | 0.16 | -1.23 | 0.419132 | 0.388162 | 0.678626 | 0.622617 |
| Mmu.8473.1.S1_x_at | Mmu.8473.1 | 3.37  | 3.51  | 0.11 | 0.11 | -1.1  | 0.196527 | 0.00514  | 0.493604 | 0.099496 |
| Mmu.8487.1.S1_at   | Mmu.8487.1 | 11.21 | 10.93 | 0.05 | 0.16 | 1.21  | 0.042219 | 0.021948 | 0.262423 | 0.185352 |
| Mmu.849.1.S1_at    | Mmu.849.1  | 4.71  | 4.85  | 0.21 | 0.21 | -1.1  | 0.352606 | 0.487429 | 0.630029 | 0.690508 |
| Mmu.85.1.S1_at     | Mmu.85.1   | 5.72  | 5.99  | 0.06 | 0.35 | -1.21 | 0.366975 | 0.487935 | 0.641157 | 0.690787 |
| Mmu.8527.2.A1_at   | Mmu.8527.2 | 6.09  | 9.33  | 1.18 | 0.32 | -9.47 | 0.019801 | 0.155946 | 0.193775 | 0.431357 |
| Mmu.8527.2.A1_s_at | Mmu.8527.2 | 8.41  | 10.17 | 0.93 | 0.14 | -3.38 | 0.02891  | 0.339411 | 0.222919 | 0.586066 |
| Mmu.8548.1.S1_at   | Mmu.8548.1 | 8.9   | 9.3   | 0.18 | 0.17 | -1.32 | 0.013936 | 0.071383 | 0.169182 | 0.313478 |
| Mmu.8566.2.S1_at   | Mmu.8566.2 | 10.68 | 10.61 | 0.31 | 0.07 | 1.06  | 0.650572 | 0.289341 | 0.830275 | 0.550378 |
| Mmu.8574.2.S1_at   | Mmu.8574.2 | 8.29  | 8.15  | 0.5  | 0.18 | 1.1   | 0.830771 | 0.379515 | 0.925496 | 0.616433 |
| Mmu.8581.1.A1_at   | Mmu.8581.1 | 12.91 | 13    | 0.25 | 0.07 | -1.06 | 0.986315 | 0.119363 | 0.995212 | 0.387887 |
| Mmu.8587.1.S1_at   | Mmu.8587.1 | 11.41 | 11.32 | 0.12 | 0.2  | 1.06  | 0.356154 | 0.296515 | 0.632499 | 0.555528 |
| Mmu.8604.1.A1_at   | Mmu.8604.1 | 9.49  | 9.7   | 0.23 | 0.03 | -1.16 | 0.643076 | 0.329369 | 0.825973 | 0.578733 |
| Mmu.8608.1.S2_at   | Mmu.8608.1 | 6.4   | 6.21  | 0.3  | 0.02 | 1.14  | 0.355035 | 0.109277 | 0.631887 | 0.37308  |
| Mmu.8637.1.S1_at   | Mmu.8637.1 | 11.35 | 12.57 | 0.47 | 0.04 | -2.33 | 0.010698 | 0.006506 | 0.15326  | 0.109521 |
| Mmu.865.1.S1_at    | Mmu.865.1  | 6.26  | 6.55  | 0.35 | 0.14 | -1.22 | 0.277913 | 0.474399 | 0.569352 | 0.681423 |
| Mmu.8677.1.S1_at   | Mmu.8677.1 | 3.91  | 3.78  | 0.11 | 0.03 | 1.09  | 0.120487 | 0.128849 | 0.398819 | 0.400277 |
| Mmu.8707.1.S1_s_at | Mmu.8707.1 | 9.72  | 9.37  | 0.18 | 0.11 | 1.27  | 0.028612 | 0.059641 | 0.221685 | 0.290838 |
| Mmu.8713.1.S1_at   | Mmu.8713.1 | 7.47  | 7.62  | 0.28 | 0.57 | -1.11 | 0.584754 | 0.044759 | 0.788759 | 0.256009 |

|                    |            |       |       |      |      |       |          |          |          |          |
|--------------------|------------|-------|-------|------|------|-------|----------|----------|----------|----------|
| Mmu.8713.1.S1_s_at | Mmu.8713.1 | 9.22  | 9.25  | 0.28 | 0.31 | -1.02 | 0.615908 | 0.013191 | 0.809225 | 0.147352 |
| Mmu.8716.1.S1_at   | Mmu.8716.1 | 7.79  | 7.92  | 0.37 | 0.04 | -1.1  | 0.189964 | 0.044449 | 0.486315 | 0.25521  |
| Mmu.8731.1.S1_at   | Mmu.8731.1 | 11.04 | 11.04 | 0.29 | 0.03 | 1     | 0.962117 | 0.24407  | 0.984578 | 0.514116 |
| Mmu.8731.1.S1_x_at | Mmu.8731.1 | 11.19 | 11.16 | 0.26 | 0.06 | 1.02  | 0.938192 | 0.15208  | 0.973844 | 0.426827 |
| Mmu.8739.1.S1_at   | Mmu.8739.1 | 10.73 | 12.02 | 0.38 | 0.16 | -2.45 | 0.00989  | 0.061442 | 0.148933 | 0.294704 |
| Mmu.874.1.S1_at    | Mmu.874.1  | 7.12  | 6.2   | 0.45 | 0.17 | 1.9   | 0.071736 | 0.146598 | 0.32569  | 0.420619 |
| Mmu.8747.1.S1_at   | Mmu.8747.1 | 3.31  | 4.81  | 0.13 | 0.49 | -2.84 | 0.013386 | 0.005269 | 0.166356 | 0.100589 |
| Mmu.8757.1.S1_at   | Mmu.8757.1 | 9.82  | 10.31 | 0.13 | 0.22 | -1.4  | 0.045739 | 0.04202  | 0.271378 | 0.249463 |
| Mmu.8766.1.S1_at   | Mmu.8766.1 | 8.4   | 8.49  | 0.07 | 0.18 | -1.06 | 0.455604 | 0.111797 | 0.705224 | 0.376856 |
| Mmu.8769.1.S1_s_at | Mmu.8769.1 | 9.98  | 9.94  | 0.19 | 0.29 | 1.02  | 0.950879 | 0.000874 | 0.979624 | 0.047471 |
| Mmu.8777.1.S1_s_at | Mmu.8777.1 | 14.55 | 14.49 | 0.04 | 0.02 | 1.04  | 0.132194 | 0.204211 | 0.415434 | 0.478507 |
| Mmu.8778.1.S1_at   | Mmu.8778.1 | 2.63  | 2.77  | 0.17 | 0.02 | -1.1  | 0.637902 | 0.800646 | 0.822605 | 0.885317 |
| Mmu.8787.1.S1_at   | Mmu.8787.1 | 9.99  | 10.69 | 0.15 | 0.16 | -1.63 | 0.014895 | 0.328232 | 0.174171 | 0.577956 |
| Mmu.8794.2.S1_s_at | Mmu.8794.2 | 13.1  | 13.26 | 0.08 | 0.02 | -1.11 | 0.029054 | 0.044884 | 0.223234 | 0.256424 |
| Mmu.8798.1.S1_at   | Mmu.8798.1 | 10.56 | 9.47  | 0.05 | 0.27 | 2.13  | 0.001742 | 0.017233 | 0.085035 | 0.166331 |
| Mmu.8798.1.S1_s_at | Mmu.8798.1 | 11.07 | 10.06 | 0.21 | 0.28 | 2.01  | 0.006605 | 0.034184 | 0.127762 | 0.228728 |
| Mmu.8810.2.S1_at   | Mmu.8810.2 | 9.87  | 9.66  | 0.05 | 0.03 | 1.16  | 0.001403 | 0.088486 | 0.07964  | 0.341946 |
| Mmu.8849.1.S1_at   | Mmu.8849.1 | 10.98 | 10.81 | 0.22 | 0.17 | 1.12  | 0.279758 | 0.003569 | 0.571041 | 0.085525 |
| Mmu.8855.1.S1_at   | Mmu.8855.1 | 7.97  | 7.37  | 0.1  | 0.07 | 1.51  | 0.000654 | 0.003508 | 0.071248 | 0.08503  |
| Mmu.8859.1.S1_at   | Mmu.8859.1 | 6.13  | 7.15  | 0.19 | 0.47 | -2.02 | 0.031364 | 0.14558  | 0.23018  | 0.419456 |
| Mmu.886.1.S1_at    | Mmu.886.1  | 4.86  | 4.84  | 0.1  | 0.25 | 1.01  | 0.942208 | 0.96856  | 0.975611 | 0.982645 |
| Mmu.8876.1.S1_at   | Mmu.8876.1 | 8.5   | 8.24  | 0.1  | 0.1  | 1.19  | 0.069678 | 0.101938 | 0.322324 | 0.361967 |
| Mmu.8887.1.S1_at   | Mmu.8887.1 | 4.25  | 4.6   | 0.15 | 0.26 | -1.27 | 0.210344 | 0.100272 | 0.507935 | 0.359318 |
| Mmu.8893.1.S1_s_at | Mmu.8893.1 | 12.1  | 12.21 | 0.1  | 0.05 | -1.08 | 0.166796 | 0.141904 | 0.460006 | 0.415427 |
| Mmu.8901.1.S1_at   | Mmu.8901.1 | 7.15  | 7.03  | 0.21 | 0.19 | 1.09  | 0.372329 | 0.408166 | 0.64489  | 0.635498 |
| Mmu.8905.1.S1_at   | Mmu.8905.1 | 6.7   | 6.89  | 0.15 | 0.03 | -1.14 | 0.127189 | 0.153127 | 0.408795 | 0.428011 |
| Mmu.891.1.S1_at    | Mmu.891.1  | 4.43  | 4.42  | 0.13 | 0.14 | 1.01  | 0.48818  | 0.689811 | 0.726709 | 0.819112 |
| Mmu.8925.1.S1_at   | Mmu.8925.1 | 4.82  | 6.34  | 1.01 | 0.18 | -2.88 | 0.152576 | 0.173999 | 0.442239 | 0.450247 |
| Mmu.8934.1.S1_at   | Mmu.8934.1 | 10    | 9.8   | 0.26 | 0.33 | 1.15  | 0.183325 | 0.124725 | 0.479273 | 0.39513  |
| Mmu.8939.2.S1_at   | Mmu.8939.2 | 10.16 | 9.97  | 0.1  | 0.06 | 1.14  | 0.153146 | 0.398066 | 0.44282  | 0.629148 |
| Mmu.8945.1.S1_at   | Mmu.8945.1 | 10.17 | 8.9   | 0.23 | 0.11 | 2.41  | 0.000825 | 0.012544 | 0.07338  | 0.144478 |
| Mmu.8948.1.S1_at   | Mmu.8948.1 | 13.35 | 13.28 | 0.14 | 0.12 | 1.04  | 0.124766 | 0.155146 | 0.40507  | 0.430291 |
| Mmu.8970.1.S1_at   | Mmu.8970.1 | 8.44  | 8.17  | 0.05 | 0.28 | 1.2   | 0.062763 | 0.053541 | 0.307182 | 0.277021 |
| Mmu.8971.1.S1_at   | Mmu.8971.1 | 12.75 | 12.62 | 0.16 | 0.03 | 1.09  | 0.873512 | 0.885634 | 0.945655 | 0.934982 |
| Mmu.8980.1.S1_at   | Mmu.8980.1 | 14.34 | 14.31 | 0.04 | 0    | 1.03  | 0.280256 | 0.521334 | 0.571426 | 0.712346 |
| Mmu.8980.1.S1_s_at | Mmu.8980.1 | 14.01 | 14.01 | 0.05 | 0.01 | 1.01  | 0.672885 | 0.656564 | 0.843427 | 0.799163 |
| Mmu.8984.1.S1_at   | Mmu.8984.1 | 7.11  | 7.08  | 0.38 | 0.23 | 1.02  | 0.208851 | 0.183239 | 0.506325 | 0.459553 |
| Mmu.8988.1.S1_at   | Mmu.8988.1 | 4.31  | 4.15  | 0.15 | 0.07 | 1.12  | 0.21597  | 0.558823 | 0.513655 | 0.735887 |
| Mmu.8999.1.S1_at   | Mmu.8999.1 | 11.25 | 11.35 | 0.16 | 0.03 | -1.07 | 0.17096  | 0.524427 | 0.464717 | 0.714366 |
| Mmu.90.1.S1_at     | Mmu.90.1   | 11.99 | 12.01 | 0.08 | 0.12 | -1.01 | 0.298477 | 0.552073 | 0.586754 | 0.73147  |
| Mmu.9008.1.S1_at   | Mmu.9008.1 | 7.9   | 8.12  | 0.54 | 0.05 | -1.16 | 0.857271 | 0.294016 | 0.937984 | 0.553909 |
| Mmu.9015.1.S1_at   | Mmu.9015.1 | 7.64  | 6.85  | 0.33 | 0.1  | 1.73  | 0.015196 | 0.020464 | 0.175324 | 0.179619 |
| Mmu.9017.1.S1_at   | Mmu.9017.1 | 5.34  | 5.33  | 0.18 | 0.17 | 1     | 0.531669 | 0.835833 | 0.755921 | 0.90607  |

|                     |             |       |       |      |      |       |          |          |          |          |
|---------------------|-------------|-------|-------|------|------|-------|----------|----------|----------|----------|
| Mmu.9020.1.S1_at    | Mmu.9020.1  | 6.29  | 6.69  | 0.18 | 0.09 | -1.33 | 0.014602 | 0.000464 | 0.172727 | 0.038572 |
| Mmu.9040.1.S1_at    | Mmu.9040.1  | 8.69  | 9.06  | 0.25 | 0.27 | -1.29 | 0.22724  | 0.000884 | 0.525252 | 0.047602 |
| Mmu.9070.1.S1_at    | Mmu.9070.1  | 3.01  | 3.03  | 0.13 | 0.08 | -1.01 | 0.395343 | 0.736196 | 0.661847 | 0.847336 |
| Mmu.9097.1.S1_at    | Mmu.9097.1  | 6.78  | 7.2   | 0.39 | 0.09 | -1.34 | 0.123923 | 0.126692 | 0.403747 | 0.397363 |
| Mmu.9109.1.A1_at    | Mmu.9109.1  | 4.91  | 4.81  | 0.33 | 0.15 | 1.08  | 0.230761 | 0.295909 | 0.529522 | 0.555241 |
| Mmu.9109.1.A1_x_at  | Mmu.9109.1  | 5.48  | 5.23  | 0.62 | 0.22 | 1.19  | 0.280047 | 0.170996 | 0.571256 | 0.447561 |
| Mmu.9109.1.S1_at    | Mmu.9109.1  | 7.47  | 7.18  | 0.71 | 0.48 | 1.22  | 0.293702 | 0.332129 | 0.582695 | 0.580584 |
| Mmu.9118.1.S1_at    | Mmu.9118.1  | 10.37 | 10.23 | 0.17 | 0.13 | 1.11  | 0.270597 | 0.190982 | 0.562765 | 0.46629  |
| Mmu.912.1.S1_at     | Mmu.912.1   | 7.52  | 5.45  | 0.53 | 0.76 | 4.2   | 0.022044 | 0.00013  | 0.201692 | 0.029087 |
| Mmu.9127.1.S1_a_at  | Mmu.9127.1  | 5.38  | 5.24  | 0.33 | 0.16 | 1.1   | 0.215474 | 0.235238 | 0.513156 | 0.50629  |
| Mmu.915.1.S1_at     | Mmu.915.1   | 10.3  | 10.05 | 0.17 | 0.29 | 1.19  | 0.216709 | 0.250276 | 0.514567 | 0.519282 |
| Mmu.9154.1.S1_at    | Mmu.9154.1  | 8.72  | 8.78  | 0.15 | 0.04 | -1.05 | 0.946474 | 0.969146 | 0.977402 | 0.983055 |
| Mmu.9155.1.S1_at    | Mmu.9155.1  | 9.05  | 8.57  | 0.07 | 0.07 | 1.39  | 0.00076  | 0.000135 | 0.072567 | 0.029087 |
| Mmu.919.1.S1_at     | Mmu.919.1   | 7.04  | 8.2   | 0.35 | 0.09 | -2.23 | 0.004908 | 0.068522 | 0.115126 | 0.308267 |
| Mmu.9198.1.S1_at    | Mmu.9198.1  | 9.08  | 8.95  | 0.2  | 0.09 | 1.09  | 0.196895 | 0.380065 | 0.494061 | 0.61674  |
| Mmu.92.1.S1_at      | Mmu.92.1    | 8.14  | 8.56  | 0.27 | 0.11 | -1.34 | 0.201462 | 0.18108  | 0.49907  | 0.457577 |
| Mmu.923.1.S1_at     | Mmu.923.1   | 9.51  | 8.72  | 0.24 | 0.07 | 1.73  | 0.004709 | 0.010887 | 0.115008 | 0.135939 |
| Mmu.9230.1.S1_at    | Mmu.9230.1  | 7.88  | 7.37  | 0.32 | 0.17 | 1.42  | 0.031691 | 0.02354  | 0.231432 | 0.192231 |
| Mmu.9231.1.S1_s_at  | Mmu.9231.1  | 10.95 | 10.93 | 0.1  | 0.05 | 1.01  | 0.807653 | 0.386608 | 0.913902 | 0.621765 |
| Mmu.9239.1.S1_at    | Mmu.9239.1  | 4.55  | 4.55  | 0.06 | 0.1  | 1     | 0.951716 | 0.790256 | 0.980033 | 0.878754 |
| Mmu.924.1.S1_at     | Mmu.924.1   | 11.26 | 11.06 | 0.07 | 0    | 1.15  | 0.012609 | 0.062205 | 0.162521 | 0.296296 |
| Mmu.9241.2.S1_at    | Mmu.9241.2  | 10.88 | 13.54 | 1.27 | 0.09 | -6.33 | 0.061135 | 0.226531 | 0.304069 | 0.499001 |
| Mmu.9242.1.S1_x_at  | Mmu.9242.1  | 4.14  | 4.22  | 0.04 | 0.03 | -1.06 | 0.133022 | 0.793747 | 0.41649  | 0.881039 |
| Mmu.9242.10.S1_x_at | Mmu.9242.10 | 2.95  | 2.94  | 0.01 | 0.09 | 1     | 0.980451 | 0.702683 | 0.992732 | 0.827658 |
| Mmu.9242.11.S1_x_at | Mmu.9242.11 | 3.15  | 3.19  | 0.1  | 0.08 | -1.03 | 0.82202  | 0.488451 | 0.920741 | 0.691147 |
| Mmu.9242.12.S1_at   | Mmu.9242.12 | 3.19  | 3.38  | 0.11 | 0.21 | -1.14 | 0.090822 | 0.097431 | 0.357863 | 0.355097 |
| Mmu.9242.12.S1_x_at | Mmu.9242.12 | 3.18  | 3.21  | 0.06 | 0.2  | -1.02 | 0.203291 | 0.186363 | 0.501192 | 0.46221  |
| Mmu.9242.2.S1_at    | Mmu.9242.2  | 2.8   | 2.72  | 0.09 | 0.04 | 1.06  | 0.076646 | 0.13375  | 0.334938 | 0.405732 |
| Mmu.9242.2.S1_x_at  | Mmu.9242.2  | 3.02  | 3.12  | 0.11 | 0.09 | -1.07 | 0.294759 | 0.252638 | 0.583722 | 0.521174 |
| Mmu.9242.8.S1_at    | Mmu.9242.8  | 3.12  | 3.22  | 0.18 | 0.06 | -1.07 | 0.739713 | 0.832691 | 0.879336 | 0.904017 |
| Mmu.9244.1.S1_at    | Mmu.9244.1  | 11.6  | 11.3  | 0.08 | 0.06 | 1.23  | 0.010031 | 0.12378  | 0.149637 | 0.393908 |
| Mmu.926.1.S1_at     | Mmu.926.1   | 12.14 | 11.96 | 0.11 | 0.05 | 1.13  | 0.10925  | 0.14979  | 0.384375 | 0.424394 |
| Mmu.9266.1.S1_x_at  | Mmu.9266.1  | 4.8   | 4.06  | 0.3  | 0.07 | 1.66  | 0.032165 | 0.029406 | 0.233272 | 0.213363 |
| Mmu.9306.1.S1_at    | Mmu.9306.1  | 10.05 | 9.82  | 0.91 | 0.17 | 1.17  | 0.735298 | 0.862599 | 0.876788 | 0.92189  |
| Mmu.9308.1.S1_at    | Mmu.9308.1  | 9.48  | 9.34  | 0.35 | 0.05 | 1.1   | 0.467626 | 0.504057 | 0.713039 | 0.701301 |
| Mmu.9309.1.S1_at    | Mmu.9309.1  | 12    | 12.09 | 0.06 | 0.02 | -1.06 | 0.026822 | 0.011912 | 0.216925 | 0.141283 |
| Mmu.9314.1.S1_at    | Mmu.9314.1  | 9.97  | 9.63  | 0.26 | 0.16 | 1.26  | 0.055877 | 0.267114 | 0.293434 | 0.532727 |
| Mmu.9316.1.S1_at    | Mmu.9316.1  | 11.5  | 11.31 | 0.36 | 0.12 | 1.14  | 0.763917 | 0.590431 | 0.891841 | 0.756223 |
| Mmu.9324.1.S1_at    | Mmu.9324.1  | 11.68 | 11.4  | 0.14 | 0.08 | 1.22  | 0.02053  | 0.035174 | 0.196807 | 0.231708 |
| Mmu.9324.2.S1_a_at  | Mmu.9324.2  | 11.86 | 11.41 | 0.2  | 0.04 | 1.37  | 0.007727 | 0.018355 | 0.13671  | 0.170357 |
| Mmu.9324.2.S1_at    | Mmu.9324.2  | 10.98 | 10.3  | 0.18 | 0.1  | 1.6   | 0.002738 | 0.003906 | 0.09702  | 0.088806 |
| Mmu.9329.1.S1_at    | Mmu.9329.1  | 5.26  | 4.96  | 0.25 | 0.18 | 1.23  | 0.164882 | 0.319531 | 0.457897 | 0.571873 |
| Mmu.9335.1.S1_at    | Mmu.9335.1  | 10.73 | 10.47 | 0.29 | 0.19 | 1.2   | 0.354518 | 0.518095 | 0.631732 | 0.710138 |

|                        |                |       |       |      |      |       |          |          |          |          |
|------------------------|----------------|-------|-------|------|------|-------|----------|----------|----------|----------|
| Mmu.9362.1.S1_at       | Mmu.9362.1     | 5.89  | 5.89  | 0.11 | 0.03 | -1    | 0.357761 | 0.492806 | 0.633636 | 0.6938   |
| Mmu.937.1.S1_at        | Mmu.937.1      | 9.21  | 8.83  | 0.22 | 0.12 | 1.3   | 0.033515 | 0.042129 | 0.237028 | 0.249753 |
| Mmu.9375.1.S1_at       | Mmu.9375.1     | 4.76  | 5.17  | 0.92 | 0.13 | -1.32 | 0.16021  | 0.193233 | 0.451575 | 0.468578 |
| Mmu.9409.1.S1_at       | Mmu.9409.1     | 9.2   | 9.65  | 0.23 | 0.11 | -1.37 | 0.024347 | 0.436538 | 0.209146 | 0.656048 |
| Mmu.9420.1.S1_at       | Mmu.9420.1     | 11.51 | 11.27 | 0.03 | 0.07 | 1.18  | 0.004765 | 0.007839 | 0.115098 | 0.118    |
| Mmu.9425.2.S1_at       | Mmu.9425.2     | 5.42  | 5.65  | 0.08 | 0.13 | -1.17 | 0.113658 | 0.234267 | 0.390367 | 0.505511 |
| Mmu.9437.1.S1_at       | Mmu.9437.1     | 10.95 | 10.72 | 0.17 | 0.11 | 1.18  | 0.026454 | 0.072062 | 0.21572  | 0.314519 |
| Mmu.9444.1.S1_at       | Mmu.9444.1     | 8.75  | 8.56  | 0.2  | 0.02 | 1.15  | 0.098099 | 0.102492 | 0.368627 | 0.362765 |
| Mmu.9460.1.S1_s_at     | Mmu.9460.1     | 12.33 | 12.3  | 0.04 | 0.11 | 1.02  | 0.885077 | 0.718123 | 0.951023 | 0.836865 |
| Mmu.9470.1.A1_x_at     | Mmu.9470.1     | 8.48  | 9.24  | 1.13 | 0.2  | -1.7  | 0.083101 | 0.106403 | 0.345372 | 0.36895  |
| Mmu.9470.1.S1_x_at     | Mmu.9470.1     | 6.87  | 9.12  | 0.99 | 0.28 | -4.76 | 0.007406 | 0.137538 | 0.134211 | 0.410509 |
| Mmu.9470.2.A1_at       | Mmu.9470.2     | 3.89  | 4.3   | 0.07 | 0.2  | -1.32 | 0.013151 | 0.006141 | 0.1653   | 0.10676  |
| Mmu.9470.2.S1_at       | Mmu.9470.2     | 4.81  | 5.49  | 0.37 | 0.23 | -1.6  | 0.095986 | 0.098193 | 0.365529 | 0.356253 |
| Mmu.9470.4.A1_x_at     | Mmu.9470.4     | 7.17  | 8.01  | 0.24 | 0.15 | -1.79 | 0.011924 | 0.392642 | 0.159288 | 0.625813 |
| Mmu.9470.4.S1_x_at     | Mmu.9470.4     | 8.36  | 8.55  | 0.07 | 0.15 | -1.13 | 0.035936 | 0.50778  | 0.244591 | 0.703325 |
| Mmu.9481.2.S1_a_at     | Mmu.9481.2     | 7.4   | 7.41  | 0.53 | 0.01 | -1.01 | 0.355385 | 0.906282 | 0.632189 | 0.946953 |
| Mmu.9497.1.S1_at       | Mmu.9497.1     | 11.51 | 11.37 | 0.42 | 0.2  | 1.1   | 0.932629 | 0.987743 | 0.971784 | 0.993169 |
| Mmu.9501.1.S1_at       | Mmu.9501.1     | 10.82 | 11.81 | 0.31 | 0.19 | -1.98 | 0.027521 | 0.283022 | 0.218484 | 0.545692 |
| MmugDNA.7045.1.S1_s_at | MmugDNA.7045.1 | 10.75 | 10.51 | 0.08 | 0.03 | 1.18  | 0.004171 | 0.010059 | 0.110227 | 0.13156  |
| Mmu.952.1.S1_at        | Mmu.952.1      | 7.84  | 7.68  | 0.23 | 0.11 | 1.12  | 0.348349 | 0.62833  | 0.626353 | 0.781112 |
| Mmu.9527.1.S1_s_at     | Mmu.9527.1     | 7.45  | 6.73  | 1.11 | 0.32 | 1.65  | 0.547237 | 0.740201 | 0.765823 | 0.849504 |
| Mmu.954.1.S1_at        | Mmu.954.1      | 9.83  | 9.7   | 0.23 | 0.05 | 1.1   | 0.385488 | 0.588961 | 0.654257 | 0.755275 |
| Mmu.9543.1.S1_at       | Mmu.9543.1     | 7.62  | 8.78  | 0.46 | 0.3  | -2.23 | 0.024835 | 0.008257 | 0.210668 | 0.12078  |
| Mmu.9549.1.S1_at       | Mmu.9549.1     | 7.56  | 7.75  | 0.35 | 0.28 | -1.14 | 0.858198 | 0.001257 | 0.938377 | 0.055042 |
| Mmu.9550.1.S1_at       | Mmu.9550.1     | 6.65  | 6.34  | 0.36 | 0.06 | 1.24  | 0.315342 | 0.199568 | 0.600287 | 0.474208 |
| Mmu.9550.2.S1_at       | Mmu.9550.2     | 9.47  | 9.12  | 0.13 | 0.22 | 1.27  | 0.06354  | 0.011903 | 0.308742 | 0.141251 |
| Mmu.9557.1.S1_at       | Mmu.9557.1     | 11.47 | 11.65 | 0.38 | 0.16 | -1.13 | 0.941127 | 0.137208 | 0.975266 | 0.410063 |
| Mmu.9567.1.S1_at       | Mmu.9567.1     | 12.1  | 12.08 | 0.02 | 0.08 | 1.01  | 0.570428 | 0.002433 | 0.779298 | 0.073093 |
| Mmu.9589.1.S1_at       | Mmu.9589.1     | 3.89  | 3.53  | 0.41 | 0.03 | 1.28  | 0.171547 | 0.108558 | 0.465521 | 0.372125 |
| Mmu.9596.1.S1_at       | Mmu.9596.1     | 7.38  | 8.16  | 0.42 | 0.23 | -1.71 | 0.134241 | 0.044045 | 0.417818 | 0.254195 |
| Mmu.9614.1.A1_at       | Mmu.9614.1     | 4.59  | 4.5   | 0.13 | 0.1  | 1.07  | 0.318068 | 0.288763 | 0.602848 | 0.549927 |
| Mmu.9614.1.S1_at       | Mmu.9614.1     | 2.81  | 2.82  | 0.01 | 0.13 | -1    | 0.932144 | 0.381072 | 0.971481 | 0.617478 |
| Mmu.9632.1.A1_at       | Mmu.9632.1     | 10.35 | 10.29 | 0.32 | 0.02 | 1.04  | 0.532411 | 0.652333 | 0.756478 | 0.796688 |
| Mmu.964.1.S1_at        | Mmu.964.1      | 13.21 | 13.14 | 0.08 | 0.02 | 1.05  | 0.200074 | 0.118683 | 0.49762  | 0.38672  |
| MmugDNA.4836.1.S1_s_at | MmugDNA.4836.1 | 10.69 | 10.66 | 0.16 | 0.1  | 1.02  | 0.264373 | 0.18849  | 0.557661 | 0.464458 |
| Mmu.9654.1.S1_at       | Mmu.9654.1     | 7.65  | 7.79  | 0.24 | 0.11 | -1.1  | 0.230359 | 0.096583 | 0.529175 | 0.354126 |
| Mmu.9655.1.S1_at       | Mmu.9655.1     | 12.08 | 12.44 | 0.1  | 0.16 | -1.28 | 0.119077 | 0.030933 | 0.396713 | 0.217705 |
| Mmu.967.1.S1_s_at      | Mmu.967.1      | 10.05 | 10.23 | 0.15 | 0.19 | -1.13 | 0.553116 | 0.046511 | 0.769696 | 0.260216 |
| Mmu.9670.2.S1_at       | Mmu.9670.2     | 11.76 | 12.59 | 0.18 | 0.12 | -1.77 | 0.0017   | 0.000809 | 0.084891 | 0.046123 |
| Mmu.9670.2.S1_x_at     | Mmu.9670.2     | 10.95 | 11.93 | 0.17 | 0.13 | -1.97 | 0.001311 | 0.000471 | 0.078631 | 0.038572 |
| Mmu.9683.1.S1_at       | Mmu.9683.1     | 8.59  | 8.55  | 0    | 0.27 | 1.03  | 0.790187 | 0.516511 | 0.904554 | 0.709034 |
| Mmu.9686.1.S1_at       | Mmu.9686.1     | 7.52  | 7.88  | 0.31 | 0.17 | -1.28 | 0.097898 | 0.442298 | 0.368354 | 0.660336 |
| Mmu.9689.2.S1_at       | Mmu.9689.2     | 3.72  | 3.78  | 0.06 | 0.05 | -1.05 | 0.593977 | 0.028742 | 0.794369 | 0.211357 |



|                         |                 |       |       |      |      |       |          |          |          |          |
|-------------------------|-----------------|-------|-------|------|------|-------|----------|----------|----------|----------|
| MmugDNA.34564.1.S1_s_at | MmugDNA.34564.1 | 12.88 | 12.98 | 0.16 | 0.05 | -1.07 | 0.448558 | 0.248374 | 0.700097 | 0.517634 |
| Mmu.971.2.S1_at         | Mmu.971.2       | 8.3   | 8.21  | 0.31 | 0.09 | 1.06  | 0.679489 | 0.975645 | 0.847107 | 0.98673  |
| Mmu.9711.1.S1_at        | Mmu.9711.1      | 9.08  | 8.92  | 0.15 | 0.26 | 1.12  | 0.127617 | 0.160187 | 0.409544 | 0.436308 |
| Mmu.9720.1.S1_at        | Mmu.9720.1      | 11.97 | 12.08 | 0.13 | 0.09 | -1.08 | 0.687063 | 0.095136 | 0.850763 | 0.352151 |
| Mmu.9731.1.S1_at        | Mmu.9731.1      | 5.91  | 6.23  | 0.21 | 0.18 | -1.25 | 0.05576  | 0.17453  | 0.29328  | 0.450998 |
| Mmu.9738.1.S1_at        | Mmu.9738.1      | 3.68  | 3.78  | 0.26 | 0.04 | -1.07 | 0.74206  | 0.871764 | 0.880524 | 0.927056 |
| Mmu.9738.1.S1_s_at      | Mmu.9738.1      | 4.04  | 3.97  | 0.01 | 0.2  | 1.05  | 0.615612 | 0.453124 | 0.809058 | 0.667551 |
| Mmu.9769.1.S1_s_at      | Mmu.9769.1      | 12.73 | 12.62 | 0.08 | 0.08 | 1.08  | 0.203492 | 0.299077 | 0.501192 | 0.557663 |
| Mmu.9771.1.S1_at        | Mmu.9771.1      | 6.95  | 8.31  | 0.12 | 0.2  | -2.58 | 0.000636 | 0.005216 | 0.070727 | 0.100105 |
| Mmu.9773.1.S1_at        | Mmu.9773.1      | 9.33  | 10.28 | 0.17 | 0.15 | -1.93 | 0.002145 | 0.060175 | 0.090208 | 0.291882 |
| Mmu.9777.1.S1_a_at      | Mmu.9777.1      | 4.27  | 4.4   | 0.29 | 0.36 | -1.1  | 0.797302 | 0.370222 | 0.90845  | 0.609392 |
| Mmu.9792.1.S1_at        | Mmu.9792.1      | 11.51 | 11.79 | 0.06 | 0.1  | -1.21 | 0.030814 | 0.144005 | 0.228471 | 0.417912 |
| Mmu.9793.1.S1_at        | Mmu.9793.1      | 6.7   | 8.5   | 0.69 | 0.18 | -3.5  | 0.026961 | 0.105668 | 0.217062 | 0.367776 |
| Mmu.9798.1.S1_at        | Mmu.9798.1      | 10.02 | 9.3   | 0.16 | 0.05 | 1.64  | 0.001551 | 0.006094 | 0.081983 | 0.106327 |
| Mmu.9802.1.S1_at        | Mmu.9802.1      | 6.86  | 6.81  | 0.16 | 0.3  | 1.03  | 0.892009 | 0.400404 | 0.95392  | 0.630187 |
| Mmu.9805.1.S1_at        | Mmu.9805.1      | 7.03  | 8.04  | 0.57 | 0.43 | -2.02 | 0.179712 | 0.064723 | 0.474837 | 0.300314 |
| Mmu.9808.1.S1_s_at      | Mmu.9808.1      | 10.98 | 11.04 | 0.03 | 0.08 | -1.05 | 0.134405 | 0.146362 | 0.418082 | 0.420368 |
| Mmu.9831.1.S1_at        | Mmu.9831.1      | 7.04  | 7.67  | 0.19 | 0.42 | -1.54 | 0.107544 | 0.669774 | 0.382272 | 0.806882 |
| Mmu.9837.1.S1_at        | Mmu.9837.1      | 8.85  | 8.32  | 0.11 | 0.06 | 1.45  | 0.002032 | 0.041888 | 0.089887 | 0.249206 |
| Mmu.9862.2.S1_at        | Mmu.9862.2      | 8.97  | 8.04  | 0.33 | 0.04 | 1.91  | 0.008357 | 0.059356 | 0.140512 | 0.29054  |
| Mmu.9866.1.S1_s_at      | Mmu.9866.1      | 10.89 | 11.49 | 0.23 | 0.23 | -1.51 | 0.068936 | 0.226946 | 0.320591 | 0.499276 |
| MmugDNA.19922.1.S1_at   | MmugDNA.19922.1 | 11.02 | 10.91 | 0.26 | 0.03 | 1.08  | 0.86284  | 0.340383 | 0.940301 | 0.586725 |
| MmugDNA.19922.1.S1_s_at | MmugDNA.19922.1 | 10.74 | 10.72 | 0.2  | 0.09 | 1.01  | 0.740462 | 0.339811 | 0.879633 | 0.586394 |
| Mmu.9876.2.S1_at        | Mmu.9876.2      | 7.35  | 7.76  | 0.65 | 0.16 | -1.33 | 0.247489 | 0.493848 | 0.542973 | 0.694433 |
| Mmu.9888.1.S1_at        | Mmu.9888.1      | 11.25 | 11.32 | 0.26 | 0.07 | -1.05 | 0.551492 | 0.117388 | 0.7685   | 0.38505  |
| Mmu.9888.1.S1_s_at      | Mmu.9888.1      | 12.09 | 12.21 | 0.21 | 0.08 | -1.09 | 0.364133 | 0.164829 | 0.638745 | 0.441152 |
| Mmu.9951.1.S1_at        | Mmu.9951.1      | 12.25 | 12.07 | 0.12 | 0.16 | 1.14  | 0.041994 | 0.046897 | 0.261908 | 0.261281 |
| Mmu.9961.1.S1_at        | Mmu.9961.1      | 5.66  | 7.68  | 0.92 | 0.33 | -4.04 | 0.061131 | 0.156565 | 0.304069 | 0.43196  |
| Mmu.9964.1.S1_at        | Mmu.9964.1      | 4.31  | 5.61  | 0.86 | 0.17 | -2.48 | 0.133623 | 0.361155 | 0.41701  | 0.60207  |
| Mmu.9975.10.S1_x_at     | Mmu.9975.10     | 3.74  | 3.72  | 0.17 | 0.18 | 1.01  | 0.617678 | 0.805739 | 0.81012  | 0.888331 |
| Mmu.9975.17.S1_at       | Mmu.9975.17     | 2.62  | 2.66  | 0.12 | 0.06 | -1.02 | 0.680427 | 0.894942 | 0.847548 | 0.940055 |
| Mmu.9989.1.S1_s_at      | Mmu.9989.1      | 10.38 | 10.53 | 0.1  | 0.1  | -1.11 | 0.263339 | 0.460672 | 0.556921 | 0.672598 |
| MmuAffx.1.1.S1_at       | MmuAffx.1.1     | 4.14  | 4.15  | 0.1  | 0.04 | -1.01 | 0.618263 | 0.707706 | 0.810647 | 0.830472 |
| MmuAffx.10.1.A1_x_at    | MmuAffx.10.1    | 8.37  | 7.96  | 0.31 | 0.24 | 1.33  | 0.177159 | 0.149645 | 0.471804 | 0.424181 |
| MmuAffx.1008.1.S1_at    | MmuAffx.1008.1  | 6.83  | 6.92  | 0.36 | 0.16 | -1.07 | 0.837706 | 0.744562 | 0.928861 | 0.852091 |
| MmuAffx.11.1.A1_at      | MmuAffx.11.1    | 2.59  | 2.63  | 0.07 | 0.16 | -1.03 | 0.39608  | 0.463828 | 0.662207 | 0.674663 |
| MmuAffx.11.1.S1_x_at    | MmuAffx.11.1    | 2.56  | 2.52  | 0    | 0.07 | 1.03  | 0.442492 | 0.791888 | 0.695931 | 0.87976  |
| MmuAffx.1125.1.S1_at    | MmuAffx.1125.1  | 3.84  | 3.84  | 0.11 | 0.01 | 1     | 0.347205 | 0.395001 | 0.625341 | 0.627229 |
| MmuAffx.1186.1.S1_at    | MmuAffx.1186.1  | 3.11  | 3.11  | 0.01 | 0    | 1     | 0.373901 | 0.998605 | 0.645118 | 0.999247 |
| MmuAffx.12.1.A1_at      | MmuAffx.12.1    | 6.8   | 8.02  | 0.09 | 0.08 | -2.32 | 0.000058 | 0.011868 | 0.047886 | 0.141016 |
| MmuAffx.12.1.S1_x_at    | MmuAffx.12.1    | 7.44  | 8.01  | 0.29 | 0.16 | -1.49 | 0.059132 | 0.290391 | 0.300346 | 0.551169 |
| MmuAffx.1252.1.A1_at    | MmuAffx.1252.1  | 5.66  | 6.25  | 0.88 | 0.27 | -1.5  | 0.129727 | 0.419874 | 0.412052 | 0.643733 |
| MmuAffx.1533.1.S1_at    | MmuAffx.1533.1  | 8.62  | 8.84  | 0.29 | 0.24 | -1.17 | 0.93573  | 0.980468 | 0.973043 | 0.989333 |

|                         |                 |       |       |      |      |        |          |          |          |          |
|-------------------------|-----------------|-------|-------|------|------|--------|----------|----------|----------|----------|
| MmuAffx.161.1.S1_at     | MmuAffx.161.1   | 11.82 | 12.33 | 0.26 | 0.05 | -1.42  | 0.02909  | 0.281258 | 0.223265 | 0.544385 |
| MmuAffx.18.1.A1_at      | MmuAffx.18.1    | 6     | 6.28  | 0.15 | 0.06 | -1.22  | 0.095493 | 0.033798 | 0.364961 | 0.227489 |
| MmuAffx.18.1.S1_x_at    | MmuAffx.18.1    | 6.19  | 6.37  | 0.04 | 0.12 | -1.13  | 0.041004 | 0.147298 | 0.258927 | 0.421493 |
| MmuAffx.19.1.A1_at      | MmuAffx.19.1    | 6.32  | 6.61  | 0.19 | 0.13 | -1.22  | 0.193785 | 0.459074 | 0.490333 | 0.671544 |
| MmuAffx.19.1.S1_s_at    | MmuAffx.19.1    | 7.6   | 7.65  | 0.12 | 0.19 | -1.03  | 0.41934  | 0.208287 | 0.67873  | 0.48217  |
| MmuAffx.2.1.S1_at       | MmuAffx.2.1     | 4.6   | 4.5   | 0.14 | 0.22 | 1.07   | 0.521553 | 0.733084 | 0.749379 | 0.845503 |
| MmuAffx.204.1.A1_at     | MmuAffx.204.1   | 4.45  | 4.12  | 0.28 | 0.38 | 1.26   | 0.252008 | 0.411027 | 0.546694 | 0.637874 |
| MmuAffx.204.1.S1_at     | MmuAffx.204.1   | 4.67  | 4.26  | 0.4  | 0.47 | 1.33   | 0.112908 | 0.119749 | 0.389487 | 0.388496 |
| MmuAffx.2095.1.S1_at    | MmuAffx.2095.1  | 4.36  | 4.43  | 0.11 | 0.05 | -1.05  | 0.412057 | 0.658256 | 0.673833 | 0.800244 |
| MmuAffx.21.1.A1_at      | MmuAffx.21.1    | 5.43  | 5.31  | 0.19 | 0.04 | 1.09   | 0.306445 | 0.420722 | 0.593297 | 0.644381 |
| MmuAffx.21.1.S1_at      | MmuAffx.21.1    | 5     | 5.14  | 0.17 | 0.04 | -1.1   | 0.255296 | 0.103587 | 0.549716 | 0.364346 |
| MmuAffx.2165.1.A1_at    | MmuAffx.2165.1  | 3.75  | 4.65  | 0.06 | 0.13 | -1.86  | 0.00062  | 0.000091 | 0.070727 | 0.027225 |
| MmuAffx.2165.1.S1_at    | MmuAffx.2165.1  | 3.88  | 5.01  | 0.29 | 0.12 | -2.2   | 0.004367 | 0.001712 | 0.112174 | 0.062657 |
| MmuAffx.2166.1.A1_a_at  | MmuAffx.2166.1  | 3.58  | 3.58  | 0.07 | 0.05 | 1      | 0.580416 | 0.783333 | 0.785854 | 0.874571 |
| MmuAffx.2166.1.S1_at    | MmuAffx.2166.1  | 5.92  | 5.84  | 0.08 | 0.2  | 1.05   | 0.740284 | 0.335097 | 0.879531 | 0.582853 |
| MmugDNA.38587.1.S1_at   | MmugDNA.38587.1 | 2.6   | 2.54  | 0.07 | 0.04 | 1.04   | 0.483783 | 0.285722 | 0.723753 | 0.54744  |
| MmugDNA.38587.1.S1_s_at | MmugDNA.38587.1 | 3.58  | 3.59  | 0    | 0.07 | -1.01  | 0.72025  | 0.395995 | 0.868039 | 0.627823 |
| MmuAffx.2166.1.S1_x_at  | MmuAffx.2166.1  | 4.01  | 4     | 0.08 | 0.16 | 1.01   | 0.939445 | 0.699633 | 0.974436 | 0.825545 |
| MmuAffx.2166.2.S1_at    | MmuAffx.2166.2  | 3.96  | 3.96  | 0.03 | 0.04 | 1      | 0.729691 | 0.152651 | 0.873728 | 0.427483 |
| MmuAffx.2166.2.S1_x_at  | MmuAffx.2166.2  | 3.52  | 3.51  | 0.08 | 0.11 | 1      | 0.406745 | 0.152318 | 0.67005  | 0.427072 |
| MmuAffx.2168.1.A1_at    | MmuAffx.2168.1  | 4.7   | 4.78  | 0.14 | 0.18 | -1.06  | 0.384107 | 0.550914 | 0.653221 | 0.730659 |
| MmuAffx.2168.1.S1_at    | MmuAffx.2168.1  | 5.92  | 5.62  | 0.21 | 0.09 | 1.23   | 0.104842 | 0.165289 | 0.378397 | 0.441488 |
| MmuAffx.2168.1.S1_x_at  | MmuAffx.2168.1  | 5.85  | 5.7   | 0.35 | 0.03 | 1.12   | 0.304551 | 0.350448 | 0.591677 | 0.594161 |
| MmuAffx.2169.1.S1_at    | MmuAffx.2169.1  | 2.69  | 2.76  | 0.22 | 0.01 | -1.05  | 0.61594  | 0.828777 | 0.809244 | 0.901565 |
| MmuAffx.2170.1.A1_at    | MmuAffx.2170.1  | 3.29  | 3.48  | 0.08 | 0.17 | -1.14  | 0.451219 | 0.372731 | 0.702075 | 0.611661 |
| MmuAffx.2170.1.S1_at    | MmuAffx.2170.1  | 3.74  | 3.97  | 0.06 | 0.11 | -1.17  | 0.07772  | 0.082386 | 0.336667 | 0.331354 |
| MmuAffx.2181.1.S1_s_at  | MmuAffx.2181.1  | 7.84  | 8.95  | 0.13 | 0.05 | -2.15  | 0.000201 | 0.000023 | 0.053494 | 0.019635 |
| MmuAffx.22.1.S1_at      | MmuAffx.22.1    | 5.85  | 6.11  | 0.17 | 0.11 | -1.2   | 0.126288 | 0.041132 | 0.407515 | 0.247659 |
| MmuAffx.225.1.A1_x_at   | MmuAffx.225.1   | 3.27  | 3.27  | 0    | 0.02 | 1      | 0.586684 | 0.876295 | 0.789991 | 0.929668 |
| MmuAffx.225.1.S1_at     | MmuAffx.225.1   | 3.07  | 3.31  | 0.17 | 0.1  | -1.19  | 0.302224 | 0.357934 | 0.590132 | 0.599532 |
| MmuAffx.228.1.A1_at     | MmuAffx.228.1   | 4.61  | 4.39  | 0.24 | 0.25 | 1.16   | 0.567768 | 0.270326 | 0.777973 | 0.535676 |
| MmuAffx.228.1.S1_x_at   | MmuAffx.228.1   | 4.45  | 4.62  | 0.16 | 0.29 | -1.13  | 0.849471 | 0.15262  | 0.934478 | 0.427435 |
| MmuAffx.23.12.S1_at     | MmuAffx.23.12   | 11.6  | 11.22 | 0.19 | 0.12 | 1.3    | 0.024239 | 0.423705 | 0.20883  | 0.646515 |
| MmuAffx.23.12.S1_x_at   | MmuAffx.23.12   | 12.02 | 11.68 | 0.15 | 0.1  | 1.26   | 0.016593 | 0.457761 | 0.182064 | 0.670897 |
| MmuAffx.23.13.S1_s_at   | MmuAffx.23.13   | 13.98 | 13.66 | 0.25 | 0.02 | 1.25   | 0.102226 | 0.099965 | 0.374232 | 0.358768 |
| MmuAffx.23.14.S1_at     | MmuAffx.23.14   | 3.14  | 3.29  | 0.08 | 0.27 | -1.11  | 0.180108 | 0.271689 | 0.475216 | 0.536577 |
| MmuAffx.23.14.S1_s_at   | MmuAffx.23.14   | 14.06 | 14.68 | 0.38 | 0.02 | -1.54  | 0.141499 | 0.12057  | 0.427475 | 0.389378 |
| MmuAffx.23.21.S1_s_at   | MmuAffx.23.21   | 13.23 | 13.02 | 0.12 | 0.04 | 1.16   | 0.019503 | 0.446282 | 0.192394 | 0.662743 |
| MmuAffx.23.22.S1_at     | MmuAffx.23.22   | 3.09  | 3.15  | 0.04 | 0.05 | -1.05  | 0.246679 | 0.302437 | 0.54248  | 0.560109 |
| MmuAffx.23.23.S1_s_at   | MmuAffx.23.23   | 4.67  | 9.7   | 2    | 0.36 | -32.63 | 0.030368 | 0.217757 | 0.227199 | 0.491309 |
| MmuAffx.23.3.S1_s_at    | MmuAffx.23.3    | 13.41 | 14.35 | 0.84 | 0.01 | -1.91  | 0.143276 | 0.110598 | 0.429577 | 0.374854 |
| MmuAffx.23.30.S1_at     | MmuAffx.23.30   | 2.74  | 2.84  | 0.03 | 0.08 | -1.07  | 0.039804 | 0.048225 | 0.256213 | 0.264682 |
| MmuAffx.23.31.S1_at     | MmuAffx.23.31   | 2.81  | 2.81  | 0.02 | 0.06 | 1      | 0.270056 | 0.299268 | 0.562292 | 0.557769 |

|                         |                 |       |       |      |      |       |          |          |          |          |
|-------------------------|-----------------|-------|-------|------|------|-------|----------|----------|----------|----------|
| MmuAffx.23.32.S1_at     | MmuAffx.23.32   | 7.84  | 7.63  | 0.2  | 0.19 | 1.16  | 0.346672 | 0.637656 | 0.625    | 0.787067 |
| MmuAffx.23.33.S1_at     | MmuAffx.23.33   | 4.38  | 4.51  | 0.15 | 0    | -1.09 | 0.194174 | 0.063617 | 0.490738 | 0.298759 |
| MmuAffx.23.35.S1_at     | MmuAffx.23.35   | 3.27  | 3.31  | 0.2  | 0.05 | -1.03 | 0.26353  | 0.54154  | 0.557015 | 0.725015 |
| MmuAffx.23.8.S1_s_at    | MmuAffx.23.8    | 14.35 | 14.12 | 0.06 | 0.01 | 1.17  | 0.004305 | 0.282706 | 0.111813 | 0.545448 |
| MmuAffx.259.1.A1_at     | MmuAffx.259.1   | 6.38  | 6.54  | 0.28 | 0.15 | -1.12 | 0.324517 | 0.307059 | 0.60819  | 0.563427 |
| MmuAffx.259.1.S1_x_at   | MmuAffx.259.1   | 6.51  | 6.33  | 0.29 | 0.14 | 1.13  | 0.300091 | 0.156329 | 0.588392 | 0.43161  |
| MmuAffx.396.1.A1_at     | MmuAffx.396.1   | 4.19  | 4.1   | 0.18 | 0.1  | 1.06  | 0.32323  | 0.219081 | 0.607062 | 0.49285  |
| MmuAffx.52.1.A1_at      | MmuAffx.52.1    | 9.3   | 9.6   | 0.79 | 0.14 | -1.23 | 0.586444 | 0.842761 | 0.789808 | 0.910388 |
| MmuAffx.52.1.S1_s_at    | MmuAffx.52.1    | 8.54  | 8.76  | 0.68 | 0.14 | -1.17 | 0.622623 | 0.794816 | 0.813423 | 0.881767 |
| MmuAffx.730.1.A1_at     | MmuAffx.730.1   | 3.19  | 3.11  | 0.05 | 0.07 | 1.06  | 0.434156 | 0.148733 | 0.68945  | 0.423201 |
| MmuAffx.738.1.S1_at     | MmuAffx.738.1   | 2.6   | 2.65  | 0.05 | 0.03 | -1.04 | 0.834093 | 0.092285 | 0.926972 | 0.348128 |
| MmuAffx.78.1.S1_s_at    | MmuAffx.78.1    | 11.46 | 13.38 | 2.03 | 0.25 | -3.78 | 0.155935 | 0.14095  | 0.446335 | 0.414469 |
| MmuAffx.8.1.A1_at       | MmuAffx.8.1     | 4.83  | 4.72  | 0.26 | 0.09 | 1.08  | 0.717278 | 0.707293 | 0.866489 | 0.83023  |
| MmuAffx.8.1.S1_at       | MmuAffx.8.1     | 3.81  | 4.06  | 0.2  | 0.18 | -1.18 | 0.090074 | 0.096718 | 0.356863 | 0.354171 |
| MmuAffx.84.1.S1_at      | MmuAffx.84.1    | 8.04  | 9.21  | 0.23 | 0.07 | -2.25 | 0.001649 | 0.597803 | 0.084462 | 0.760411 |
| MmuAffx.873.1.A1_at     | MmuAffx.873.1   | 8.11  | 7.93  | 0.17 | 0.05 | 1.14  | 0.110667 | 0.088634 | 0.386038 | 0.342167 |
| MmuAffx.873.1.S1_at     | MmuAffx.873.1   | 8.64  | 8.52  | 0.12 | 0.02 | 1.09  | 0.0523   | 0.258175 | 0.28598  | 0.525574 |
| MmuAffx.885.1.S1_at     | MmuAffx.885.1   | 8.41  | 8.92  | 0.02 | 0.02 | -1.42 | 0.000007 | 0.000067 | 0.045594 | 0.025805 |
| MmuAffx.888.1.A1_at     | MmuAffx.888.1   | 6.11  | 6.11  | 0.2  | 0.1  | -1    | 0.681035 | 0.040348 | 0.847885 | 0.245984 |
| MmuAffx.888.1.S1_at     | MmuAffx.888.1   | 6.09  | 6.23  | 0.08 | 0    | -1.1  | 0.115838 | 0.381076 | 0.392964 | 0.617478 |
| MmuAffx.914.1.S1_at     | MmuAffx.914.1   | 14.05 | 12.48 | 1.93 | 0.52 | 2.96  | 0.899509 | 0.948947 | 0.957234 | 0.97078  |
| MmuAffx.949.1.A1_at     | MmuAffx.949.1   | 10.91 | 9.46  | 0.3  | 0.33 | 2.73  | 0.004526 | 0.000882 | 0.113436 | 0.047602 |
| MmuAffx.949.1.S1_x_at   | MmuAffx.949.1   | 10.32 | 8.97  | 0.32 | 0.33 | 2.54  | 0.007221 | 0.001547 | 0.132536 | 0.05949  |
| MmuAffx.951.1.S1_at     | MmuAffx.951.1   | 2.8   | 3.03  | 0.02 | 0.05 | -1.17 | 0.001454 | 0.022353 | 0.079991 | 0.187159 |
| MmuAffx.951.1.S1_x_at   | MmuAffx.951.1   | 2.8   | 2.86  | 0.05 | 0.08 | -1.04 | 0.404695 | 0.154341 | 0.668358 | 0.429208 |
| MmuAffx.956.1.S1_at     | MmuAffx.956.1   | 13.14 | 13.15 | 0.09 | 0.06 | -1.01 | 0.295124 | 0.532203 | 0.584039 | 0.718995 |
| MmugDNA.1.1.S1_at       | MmugDNA.1.1     | 6.18  | 6.6   | 0.35 | 0.16 | -1.33 | 0.12146  | 0.577795 | 0.400293 | 0.748124 |
| MmugDNA.1000.1.S1_at    | MmugDNA.1000.1  | 2.9   | 2.91  | 0    | 0.09 | -1    | 0.406714 | 0.569332 | 0.67002  | 0.742375 |
| MmugDNA.10002.1.S1_at   | MmugDNA.10002.1 | 4.03  | 3.52  | 0.57 | 0.58 | 1.43  | 0.411799 | 0.563835 | 0.673678 | 0.73888  |
| MmugDNA.10003.1.S1_at   | MmugDNA.10003.1 | 4.65  | 4.57  | 0.37 | 0.21 | 1.06  | 0.727033 | 0.092567 | 0.872066 | 0.348519 |
| MmugDNA.10005.1.S1_at   | MmugDNA.10005.1 | 7.29  | 7.49  | 0.06 | 0.13 | -1.15 | 0.086209 | 0.206006 | 0.350788 | 0.480243 |
| MmugDNA.10007.1.S1_at   | MmugDNA.10007.1 | 4.63  | 4.52  | 0.18 | 0.17 | 1.08  | 0.213687 | 0.274307 | 0.51163  | 0.538751 |
| MmugDNA.10009.1.S1_at   | MmugDNA.10009.1 | 8.06  | 8.18  | 0.19 | 0.02 | -1.09 | 0.267395 | 0.562357 | 0.560235 | 0.738004 |
| MmugDNA.1001.1.S1_s_at  | MmugDNA.1001.1  | 5.36  | 5.61  | 0.29 | 0.34 | -1.19 | 0.152796 | 0.434914 | 0.442495 | 0.654901 |
| MmugDNA.10010.1.S1_at   | MmugDNA.10010.1 | 3.3   | 3.36  | 0.19 | 0    | -1.04 | 0.565023 | 0.707792 | 0.776489 | 0.830472 |
| MmugDNA.10013.1.S1_s_at | MmugDNA.10013.1 | 5.74  | 5.75  | 0.18 | 0.19 | -1.01 | 0.565793 | 0.50252  | 0.776859 | 0.700192 |
| MmugDNA.10015.1.S1_at   | MmugDNA.10015.1 | 8.43  | 8     | 0.42 | 0.28 | 1.35  | 0.270679 | 0.368342 | 0.562838 | 0.607917 |
| MmugDNA.10016.1.S1_at   | MmugDNA.10016.1 | 7.47  | 7.37  | 0.16 | 0.09 | 1.07  | 0.194549 | 0.082909 | 0.491206 | 0.332446 |
| MmugDNA.10017.1.S1_at   | MmugDNA.10017.1 | 9.42  | 8.7   | 0.23 | 0.19 | 1.64  | 0.034908 | 0.163851 | 0.241359 | 0.440054 |
| MmugDNA.10019.1.S1_at   | MmugDNA.10019.1 | 11.86 | 11.61 | 0.07 | 0.21 | 1.19  | 0.10947  | 0.02733  | 0.384538 | 0.206625 |
| MmugDNA.1002.1.S1_at    | MmugDNA.1002.1  | 7.51  | 7.15  | 0.34 | 0.01 | 1.28  | 0.151763 | 0.059771 | 0.441235 | 0.291114 |
| MmugDNA.10020.1.S1_at   | MmugDNA.10020.1 | 3.92  | 3.22  | 0.22 | 0.1  | 1.62  | 0.012746 | 0.01011  | 0.16307  | 0.131859 |
| MmugDNA.10021.1.S1_at   | MmugDNA.10021.1 | 3.53  | 3.57  | 0.07 | 0.02 | -1.03 | 0.723466 | 0.864952 | 0.870006 | 0.923415 |

|                         |                 |       |       |      |      |       |          |          |          |          |
|-------------------------|-----------------|-------|-------|------|------|-------|----------|----------|----------|----------|
| MmugDNA.10022.1.S1_at   | MmugDNA.10022.1 | 3.46  | 3.37  | 0.01 | 0.13 | 1.06  | 0.350913 | 0.444517 | 0.628649 | 0.662072 |
| MmugDNA.10023.1.S1_at   | MmugDNA.10023.1 | 3.51  | 3.48  | 0.1  | 0.04 | 1.02  | 0.629559 | 0.359833 | 0.818032 | 0.601086 |
| MmugDNA.10024.1.S1_at   | MmugDNA.10024.1 | 5.09  | 4.64  | 0.03 | 0.08 | 1.37  | 0.000829 | 0.137652 | 0.07338  | 0.410618 |
| MmugDNA.10026.1.S1_at   | MmugDNA.10026.1 | 3.89  | 3.99  | 0.31 | 0.09 | -1.08 | 0.61371  | 0.50459  | 0.807582 | 0.701719 |
| MmugDNA.10027.1.S1_at   | MmugDNA.10027.1 | 3.69  | 3.25  | 0.52 | 0.11 | 1.35  | 0.188456 | 0.105442 | 0.484854 | 0.367279 |
| MmugDNA.10028.1.S1_s_at | MmugDNA.10028.1 | 8.24  | 8.14  | 0.22 | 0.08 | 1.07  | 0.237704 | 0.291476 | 0.535124 | 0.551848 |
| MmugDNA.10029.1.S1_at   | MmugDNA.10029.1 | 7.39  | 7.14  | 0.39 | 0.14 | 1.19  | 0.907618 | 0.962195 | 0.960932 | 0.978747 |
| MmugDNA.1003.1.S1_at    | MmugDNA.1003.1  | 9.38  | 9.26  | 0.45 | 0.06 | 1.09  | 0.608692 | 0.862244 | 0.804644 | 0.921663 |
| MmugDNA.10030.1.S1_at   | MmugDNA.10030.1 | 3.45  | 3.46  | 0.07 | 0.11 | -1.01 | 0.469011 | 0.087238 | 0.713915 | 0.340233 |
| MmugDNA.10034.1.S1_at   | MmugDNA.10034.1 | 4.13  | 4.38  | 0.18 | 0.13 | -1.19 | 0.425832 | 0.311045 | 0.683102 | 0.566076 |
| MmugDNA.10035.1.S1_at   | MmugDNA.10035.1 | 3.21  | 8.27  | 2.61 | 0.29 | -33.2 | 0.079117 | 0.240877 | 0.338884 | 0.511584 |
| MmugDNA.10035.1.S1_s_at | MmugDNA.10035.1 | 5.38  | 6.97  | 0.88 | 0.18 | -3.02 | 0.055042 | 0.22116  | 0.291637 | 0.494506 |
| MmugDNA.10036.1.S1_at   | MmugDNA.10036.1 | 6.78  | 6.78  | 0.14 | 0.24 | 1     | 0.956868 | 0.649254 | 0.982318 | 0.794724 |
| MmugDNA.10037.1.S1_at   | MmugDNA.10037.1 | 3.2   | 3.09  | 0.22 | 0.11 | 1.08  | 0.273541 | 0.376146 | 0.565699 | 0.613978 |
| MmugDNA.10038.1.S1_at   | MmugDNA.10038.1 | 6.45  | 5.83  | 1.6  | 0.37 | 1.54  | 0.830041 | 0.755348 | 0.92519  | 0.857558 |
| MmugDNA.1004.1.S1_at    | MmugDNA.1004.1  | 3.81  | 3.54  | 0.05 | 0.11 | 1.2   | 0.02832  | 0.08665  | 0.220853 | 0.339212 |
| MmugDNA.10041.1.S1_at   | MmugDNA.10041.1 | 5.39  | 5.08  | 0.48 | 0.08 | 1.24  | 0.219997 | 0.276158 | 0.517654 | 0.540169 |
| MmugDNA.10042.1.S1_at   | MmugDNA.10042.1 | 3.61  | 3.25  | 0.2  | 0.08 | 1.29  | 0.070612 | 0.128725 | 0.324085 | 0.400135 |
| MmugDNA.10043.1.S1_at   | MmugDNA.10043.1 | 3.93  | 3.95  | 0.13 | 0.22 | -1.01 | 0.295998 | 0.444474 | 0.584702 | 0.662072 |
| MmugDNA.10045.1.S1_at   | MmugDNA.10045.1 | 3.52  | 3.44  | 0.31 | 0.11 | 1.06  | 0.37531  | 0.379211 | 0.646174 | 0.616197 |
| MmugDNA.10046.1.S1_s_at | MmugDNA.10046.1 | 8.24  | 7.95  | 0.29 | 0.29 | 1.22  | 0.079117 | 0.154376 | 0.338884 | 0.429245 |
| MmugDNA.10047.1.S1_at   | MmugDNA.10047.1 | 8.12  | 8.04  | 0.09 | 0.04 | 1.05  | 0.137433 | 0.31453  | 0.422407 | 0.568372 |
| MmugDNA.10048.1.S1_at   | MmugDNA.10048.1 | 5.35  | 5.36  | 0.21 | 0.34 | -1.01 | 0.463132 | 0.04643  | 0.709925 | 0.260036 |
| MmugDNA.10049.1.S1_at   | MmugDNA.10049.1 | 3.58  | 2.97  | 0.45 | 0.12 | 1.53  | 0.121641 | 0.122716 | 0.400481 | 0.392719 |
| MmugDNA.1005.1.S1_at    | MmugDNA.1005.1  | 3.51  | 3.42  | 0.05 | 0.27 | 1.07  | 0.766844 | 0.966053 | 0.893012 | 0.980991 |
| MmugDNA.10050.1.S1_at   | MmugDNA.10050.1 | 5.39  | 5.34  | 0.23 | 0.05 | 1.03  | 0.51591  | 0.764759 | 0.745546 | 0.863203 |
| MmugDNA.10051.1.S1_at   | MmugDNA.10051.1 | 3.86  | 3.87  | 0.18 | 0.22 | -1.01 | 0.942325 | 0.824102 | 0.975651 | 0.898903 |
| MmugDNA.10052.1.S1_at   | MmugDNA.10052.1 | 10.13 | 9.64  | 0.21 | 0.18 | 1.41  | 0.023247 | 0.013093 | 0.205562 | 0.14718  |
| MmugDNA.10053.1.S1_at   | MmugDNA.10053.1 | 3.95  | 3.89  | 0.09 | 0.12 | 1.04  | 0.869296 | 0.266736 | 0.943687 | 0.53241  |
| MmugDNA.10054.1.S1_at   | MmugDNA.10054.1 | 7.76  | 7.6   | 0.13 | 0.03 | 1.12  | 0.110414 | 0.052817 | 0.385766 | 0.275444 |
| MmugDNA.10055.1.S1_at   | MmugDNA.10055.1 | 3.41  | 3.12  | 0.18 | 0.17 | 1.22  | 0.092757 | 0.103776 | 0.361198 | 0.364519 |
| MmugDNA.10056.1.S1_at   | MmugDNA.10056.1 | 5.98  | 5.75  | 0.58 | 0.45 | 1.17  | 0.873649 | 0.233941 | 0.945706 | 0.505211 |
| MmugDNA.10057.1.S1_at   | MmugDNA.10057.1 | 10.23 | 10.41 | 0.22 | 0.09 | -1.13 | 0.23876  | 0.416497 | 0.536007 | 0.641647 |
| MmugDNA.10058.1.S1_at   | MmugDNA.10058.1 | 9.77  | 9.81  | 0.24 | 0.12 | -1.03 | 0.414746 | 0.698364 | 0.675681 | 0.82478  |
| MmugDNA.1006.1.S1_at    | MmugDNA.1006.1  | 5.92  | 5.72  | 0.22 | 0.14 | 1.15  | 0.228188 | 0.183035 | 0.526409 | 0.459493 |
| MmugDNA.10060.1.S1_at   | MmugDNA.10060.1 | 10.71 | 10.77 | 0.19 | 0.08 | -1.04 | 0.384523 | 0.656493 | 0.653565 | 0.799097 |
| MmugDNA.10060.1.S1_s_at | MmugDNA.10060.1 | 11.2  | 11.23 | 0.19 | 0.09 | -1.02 | 0.357805 | 0.575397 | 0.63366  | 0.746486 |
| MmugDNA.10061.1.S1_s_at | MmugDNA.10061.1 | 8.02  | 6.87  | 0.28 | 0.4  | 2.22  | 0.033719 | 0.156327 | 0.237829 | 0.43161  |
| MmugDNA.10062.1.S1_at   | MmugDNA.10062.1 | 7.54  | 7.61  | 0.3  | 0.11 | -1.05 | 0.682461 | 0.651372 | 0.848621 | 0.796212 |
| MmugDNA.10063.1.S1_at   | MmugDNA.10063.1 | 6.43  | 6.11  | 0.19 | 0.3  | 1.25  | 0.221701 | 0.110464 | 0.519652 | 0.374684 |
| MmugDNA.10065.1.S1_at   | MmugDNA.10065.1 | 4.21  | 4.17  | 0.06 | 0.11 | 1.03  | 0.651486 | 0.908397 | 0.83072  | 0.948141 |
| MmugDNA.10066.1.S1_at   | MmugDNA.10066.1 | 10.58 | 10.42 | 0.08 | 0.02 | 1.12  | 0.06692  | 0.010712 | 0.316392 | 0.135227 |
| MmugDNA.10067.1.S1_at   | MmugDNA.10067.1 | 4.64  | 4.38  | 0.35 | 0.26 | 1.2   | 0.382731 | 0.29639  | 0.652112 | 0.555508 |

|                         |                 |       |       |      |      |       |          |          |          |          |
|-------------------------|-----------------|-------|-------|------|------|-------|----------|----------|----------|----------|
| MmugDNA.10068.1.S1_at   | MmugDNA.10068.1 | 3.22  | 3.03  | 0.11 | 0.03 | 1.13  | 0.047411 | 0.218972 | 0.275072 | 0.492722 |
| MmugDNA.1007.1.S1_at    | MmugDNA.1007.1  | 5.56  | 5.55  | 0.21 | 0.09 | 1.01  | 0.682989 | 0.742061 | 0.848839 | 0.850608 |
| MmugDNA.10070.1.S1_at   | MmugDNA.10070.1 | 8.68  | 8.82  | 0.26 | 0.31 | -1.1  | 0.463814 | 0.007145 | 0.710237 | 0.113735 |
| MmugDNA.10071.1.S1_at   | MmugDNA.10071.1 | 5.58  | 5.82  | 0.28 | 0.18 | -1.18 | 0.125161 | 0.082316 | 0.405579 | 0.331257 |
| MmugDNA.10072.1.S1_at   | MmugDNA.10072.1 | 3.43  | 3.63  | 0.15 | 0.73 | -1.15 | 0.287568 | 0.563469 | 0.577473 | 0.738692 |
| MmugDNA.10074.1.S1_at   | MmugDNA.10074.1 | 6.27  | 5.99  | 0.04 | 0.29 | 1.22  | 0.096254 | 0.091606 | 0.365841 | 0.346715 |
| MmugDNA.10075.1.S1_at   | MmugDNA.10075.1 | 10.02 | 9.79  | 0.22 | 0.05 | 1.17  | 0.443924 | 0.201992 | 0.696899 | 0.476444 |
| MmugDNA.10076.1.S1_at   | MmugDNA.10076.1 | 9.89  | 9.9   | 0.1  | 0.03 | -1.01 | 0.312064 | 0.001783 | 0.598188 | 0.063434 |
| MmugDNA.10077.1.S1_at   | MmugDNA.10077.1 | 6.41  | 5.5   | 0.45 | 0.28 | 1.88  | 0.112271 | 0.149808 | 0.388406 | 0.424394 |
| MmugDNA.10079.1.S1_at   | MmugDNA.10079.1 | 3.12  | 3.02  | 0.41 | 0.08 | 1.07  | 0.278002 | 0.365136 | 0.569395 | 0.605316 |
| MmugDNA.1008.1.S1_at    | MmugDNA.1008.1  | 3.88  | 3.84  | 0.38 | 0.07 | 1.03  | 0.65588  | 0.652027 | 0.83356  | 0.796529 |
| MmugDNA.10080.1.S1_at   | MmugDNA.10080.1 | 6.1   | 6.44  | 0.61 | 0.04 | -1.26 | 0.92444  | 0.639247 | 0.967863 | 0.788125 |
| MmugDNA.10081.1.S1_at   | MmugDNA.10081.1 | 8.08  | 7.93  | 0.05 | 0.1  | 1.11  | 0.092865 | 0.045391 | 0.361387 | 0.257395 |
| MmugDNA.10082.1.S1_s_at | MmugDNA.10082.1 | 9.53  | 9.58  | 0.3  | 0.04 | -1.03 | 0.860772 | 0.739972 | 0.939561 | 0.849334 |
| MmugDNA.10083.1.S1_at   | MmugDNA.10083.1 | 3.61  | 3.6   | 0.1  | 0.06 | 1     | 0.395326 | 0.56396  | 0.661847 | 0.738913 |
| MmugDNA.10085.1.S1_at   | MmugDNA.10085.1 | 9.06  | 9.43  | 1.01 | 0.11 | -1.3  | 0.28635  | 0.380843 | 0.576174 | 0.617426 |
| MmugDNA.10086.1.S1_at   | MmugDNA.10086.1 | 8.34  | 8.06  | 0.24 | 0.04 | 1.21  | 0.386771 | 0.091773 | 0.655097 | 0.346977 |
| MmugDNA.10087.1.S1_at   | MmugDNA.10087.1 | 4.28  | 4.39  | 0.49 | 0.13 | -1.08 | 0.552557 | 0.426594 | 0.769193 | 0.648739 |
| MmugDNA.10088.1.S1_at   | MmugDNA.10088.1 | 8.71  | 8.89  | 0.3  | 0.05 | -1.14 | 0.194435 | 0.457417 | 0.491056 | 0.670829 |
| MmugDNA.10089.1.S1_at   | MmugDNA.10089.1 | 8.98  | 8.73  | 0.13 | 0.02 | 1.19  | 0.082446 | 0.796962 | 0.344191 | 0.882822 |
| MmugDNA.1009.1.S1_at    | MmugDNA.1009.1  | 7.58  | 7.41  | 0.13 | 0.13 | 1.13  | 0.037783 | 0.067971 | 0.250111 | 0.306909 |
| MmugDNA.10090.1.S1_at   | MmugDNA.10090.1 | 6.18  | 6.26  | 0.64 | 0.25 | -1.06 | 0.74407  | 0.575401 | 0.881384 | 0.746486 |
| MmugDNA.10091.1.S1_at   | MmugDNA.10091.1 | 3.3   | 3.3   | 0.13 | 0.01 | -1    | 0.357848 | 0.718082 | 0.633693 | 0.836855 |
| MmugDNA.10092.1.S1_at   | MmugDNA.10092.1 | 4     | 4.08  | 0.1  | 0.09 | -1.06 | 0.289153 | 0.380372 | 0.578755 | 0.61703  |
| MmugDNA.10093.1.S1_at   | MmugDNA.10093.1 | 6.02  | 5.02  | 0.74 | 0.35 | 2     | 0.093625 | 0.413637 | 0.362277 | 0.639688 |
| MmugDNA.10094.1.S1_at   | MmugDNA.10094.1 | 5.15  | 4.81  | 0.08 | 0.19 | 1.26  | 0.067413 | 0.077403 | 0.31729  | 0.323204 |
| MmugDNA.10095.1.S1_at   | MmugDNA.10095.1 | 4.67  | 4.63  | 0.04 | 0.09 | 1.03  | 0.317638 | 0.677493 | 0.602401 | 0.81167  |
| MmugDNA.10097.1.S1_at   | MmugDNA.10097.1 | 4.05  | 3.99  | 0.35 | 0.02 | 1.04  | 0.506136 | 0.71338  | 0.738814 | 0.833698 |
| MmugDNA.10098.1.S1_at   | MmugDNA.10098.1 | 5.11  | 5.1   | 0.1  | 0.1  | 1.01  | 0.622504 | 0.666765 | 0.813343 | 0.804779 |
| MmugDNA.10099.1.S1_at   | MmugDNA.10099.1 | 4.6   | 4.13  | 0.06 | 0.09 | 1.38  | 0.001217 | 0.002685 | 0.078338 | 0.076408 |
| MmugDNA.101.1.S1_at     | MmugDNA.101.1   | 6.67  | 6.66  | 0.06 | 0.03 | 1.01  | 0.298013 | 0.784409 | 0.586466 | 0.87518  |
| MmugDNA.1010.1.S1_at    | MmugDNA.1010.1  | 3.76  | 3.63  | 0.16 | 0.03 | 1.09  | 0.538493 | 0.54709  | 0.760315 | 0.728283 |
| MmugDNA.10100.1.S1_at   | MmugDNA.10100.1 | 6.97  | 6.98  | 0.1  | 0.05 | -1.01 | 0.527488 | 0.079395 | 0.753093 | 0.32676  |
| MmugDNA.10102.1.S1_s_at | MmugDNA.10102.1 | 14.2  | 14.02 | 0.06 | 0.02 | 1.13  | 0.019754 | 0.000077 | 0.1935   | 0.027016 |
| MmugDNA.10103.1.S1_at   | MmugDNA.10103.1 | 11.23 | 11.34 | 0.12 | 0.01 | -1.09 | 0.355032 | 0.198939 | 0.631887 | 0.473521 |
| MmugDNA.10104.1.S1_at   | MmugDNA.10104.1 | 2.89  | 2.76  | 0.03 | 0.01 | 1.1   | 0.002447 | 0.044003 | 0.093816 | 0.254195 |
| MmugDNA.10105.1.S1_at   | MmugDNA.10105.1 | 4.5   | 4.49  | 0.05 | 0.08 | 1.01  | 0.314451 | 0.392668 | 0.599959 | 0.625813 |
| MmugDNA.10106.1.S1_at   | MmugDNA.10106.1 | 3.12  | 3.15  | 0.33 | 0.03 | -1.03 | 0.421764 | 0.473301 | 0.680125 | 0.680586 |
| MmugDNA.10107.1.S1_at   | MmugDNA.10107.1 | 4.57  | 4.59  | 0.01 | 0.02 | -1.01 | 0.080799 | 0.768345 | 0.341497 | 0.865493 |
| MmugDNA.10108.1.S1_at   | MmugDNA.10108.1 | 5.98  | 5.93  | 0.12 | 0.05 | 1.04  | 0.841568 | 0.06464  | 0.930364 | 0.300314 |
| MmugDNA.10109.1.S1_at   | MmugDNA.10109.1 | 7.99  | 7.8   | 0.04 | 0.02 | 1.15  | 0.001932 | 0.002856 | 0.088277 | 0.078756 |
| MmugDNA.1011.1.S1_at    | MmugDNA.1011.1  | 7.24  | 7.33  | 0.58 | 0.44 | -1.07 | 0.912607 | 0.2441   | 0.963089 | 0.514121 |
| MmugDNA.10111.1.S1_at   | MmugDNA.10111.1 | 10.56 | 10.33 | 0.18 | 0.11 | 1.17  | 0.14769  | 0.050092 | 0.43567  | 0.268916 |

|                         |                 |       |       |      |      |       |          |          |          |          |
|-------------------------|-----------------|-------|-------|------|------|-------|----------|----------|----------|----------|
| MmugDNA.10112.1.S1_at   | MmugDNA.10112.1 | 9.19  | 9.19  | 0.28 | 0.09 | -1    | 0.551134 | 0.367747 | 0.768269 | 0.607416 |
| MmugDNA.10112.1.S1_s_at | MmugDNA.10112.1 | 10.15 | 10.29 | 0.16 | 0.1  | -1.1  | 0.315192 | 0.070564 | 0.600287 | 0.311781 |
| MmugDNA.10113.1.S1_at   | MmugDNA.10113.1 | 5.08  | 4.88  | 0.42 | 0.23 | 1.16  | 0.160245 | 0.186866 | 0.451608 | 0.462707 |
| MmugDNA.10115.1.S1_at   | MmugDNA.10115.1 | 10.68 | 10.69 | 0.26 | 0.05 | -1.01 | 0.375162 | 0.379461 | 0.646002 | 0.616406 |
| MmugDNA.10117.1.S1_s_at | MmugDNA.10117.1 | 7.92  | 6.92  | 0.16 | 0.07 | 1.99  | 0.000724 | 0.008312 | 0.072183 | 0.120929 |
| MmugDNA.10118.1.S1_at   | MmugDNA.10118.1 | 5.57  | 5.46  | 0.08 | 0.05 | 1.08  | 0.360625 | 0.575871 | 0.63616  | 0.746841 |
| MmugDNA.10120.1.S1_at   | MmugDNA.10120.1 | 6.73  | 6.78  | 0.96 | 0.19 | -1.04 | 0.348372 | 0.515257 | 0.626353 | 0.708226 |
| MmugDNA.10123.1.S1_at   | MmugDNA.10123.1 | 3.65  | 3.36  | 0.17 | 0.17 | 1.23  | 0.089505 | 0.306266 | 0.356406 | 0.562907 |
| MmugDNA.10124.1.S1_at   | MmugDNA.10124.1 | 4.88  | 4.93  | 0.08 | 0.13 | -1.03 | 0.268065 | 0.477121 | 0.560779 | 0.683217 |
| MmugDNA.10125.1.S1_at   | MmugDNA.10125.1 | 4.93  | 4.44  | 0.28 | 0.21 | 1.41  | 0.121034 | 0.263921 | 0.399514 | 0.530153 |
| MmugDNA.10126.1.S1_s_at | MmugDNA.10126.1 | 4.38  | 4.29  | 0.5  | 0.06 | 1.06  | 0.30868  | 0.450432 | 0.595227 | 0.665643 |
| MmugDNA.10127.1.S1_at   | MmugDNA.10127.1 | 8.92  | 9.64  | 0.59 | 0.26 | -1.65 | 0.12845  | 0.092757 | 0.410425 | 0.34896  |
| MmugDNA.10128.1.S1_at   | MmugDNA.10128.1 | 10.28 | 10.94 | 0.37 | 0.42 | -1.59 | 0.124466 | 0.004445 | 0.404646 | 0.092958 |
| MmugDNA.10129.1.S1_at   | MmugDNA.10129.1 | 5.57  | 5.52  | 0.16 | 0.05 | 1.03  | 0.460164 | 0.533297 | 0.708089 | 0.719552 |
| MmugDNA.1013.1.S1_at    | MmugDNA.1013.1  | 7.05  | 7.03  | 0.67 | 0.21 | 1.01  | 0.999421 | 0.846201 | 0.999837 | 0.912444 |
| MmugDNA.10131.1.S1_at   | MmugDNA.10131.1 | 6.8   | 6.79  | 0.12 | 0.11 | 1.01  | 0.618288 | 0.127471 | 0.81065  | 0.398349 |
| MmugDNA.10132.1.S1_at   | MmugDNA.10132.1 | 4.74  | 4.58  | 0.16 | 0.03 | 1.12  | 0.282717 | 0.42819  | 0.573338 | 0.64972  |
| MmugDNA.10133.1.S1_at   | MmugDNA.10133.1 | 4.14  | 4.15  | 0.42 | 0.2  | -1.01 | 0.270755 | 0.390281 | 0.56285  | 0.624128 |
| MmugDNA.10135.1.S1_at   | MmugDNA.10135.1 | 7.8   | 7.51  | 0.15 | 0.04 | 1.22  | 0.031811 | 0.132876 | 0.231861 | 0.404544 |
| MmugDNA.10136.1.S1_at   | MmugDNA.10136.1 | 8.76  | 8.52  | 0.18 | 0.22 | 1.19  | 0.174936 | 0.015189 | 0.469252 | 0.15662  |
| MmugDNA.10139.1.S1_at   | MmugDNA.10139.1 | 10.22 | 9.55  | 0.24 | 0.26 | 1.59  | 0.015696 | 0.054306 | 0.177718 | 0.278539 |
| MmugDNA.1014.1.S1_at    | MmugDNA.1014.1  | 5.95  | 5.98  | 0.09 | 0.22 | -1.02 | 0.584492 | 0.735901 | 0.788586 | 0.847202 |
| MmugDNA.10140.1.S1_at   | MmugDNA.10140.1 | 9.9   | 11.08 | 0.26 | 0.18 | -2.26 | 0.002037 | 0.00188  | 0.089976 | 0.064979 |
| MmugDNA.10141.1.S1_at   | MmugDNA.10141.1 | 3.29  | 3.4   | 0.04 | 0.05 | -1.08 | 0.037319 | 0.007816 | 0.248625 | 0.117908 |
| MmugDNA.10142.1.S1_s_at | MmugDNA.10142.1 | 9.56  | 9.19  | 0.29 | 0.11 | 1.3   | 0.091331 | 0.313018 | 0.358885 | 0.567594 |
| MmugDNA.10143.1.S1_at   | MmugDNA.10143.1 | 5.65  | 5.02  | 0.12 | 0.14 | 1.55  | 0.006512 | 0.128547 | 0.127373 | 0.399908 |
| MmugDNA.10144.1.S1_at   | MmugDNA.10144.1 | 6.51  | 6.3   | 0.34 | 0.1  | 1.16  | 0.876324 | 0.967937 | 0.947031 | 0.982248 |
| MmugDNA.10145.1.S1_at   | MmugDNA.10145.1 | 3.14  | 3.17  | 0.04 | 0.03 | -1.02 | 0.123389 | 0.400325 | 0.402711 | 0.630169 |
| MmugDNA.10146.1.S1_at   | MmugDNA.10146.1 | 10.86 | 11.14 | 0.42 | 0.05 | -1.22 | 0.940322 | 0.747079 | 0.974842 | 0.853124 |
| MmugDNA.10147.1.S1_at   | MmugDNA.10147.1 | 8.04  | 8.05  | 0.23 | 0.06 | -1.01 | 0.866259 | 0.648413 | 0.942202 | 0.794235 |
| MmugDNA.10148.1.S1_at   | MmugDNA.10148.1 | 11.56 | 11.4  | 0.23 | 0.09 | 1.11  | 0.429037 | 0.719462 | 0.685579 | 0.837651 |
| MmugDNA.10149.1.S1_at   | MmugDNA.10149.1 | 6.53  | 6.49  | 0.27 | 0.02 | 1.03  | 0.56069  | 0.735437 | 0.773974 | 0.846919 |
| MmugDNA.1015.1.S1_at    | MmugDNA.1015.1  | 3.66  | 3.73  | 0.08 | 0.06 | -1.05 | 0.712349 | 0.643741 | 0.864309 | 0.791112 |
| MmugDNA.10151.1.S1_at   | MmugDNA.10151.1 | 4.84  | 5.16  | 0.56 | 0.23 | -1.25 | 0.605129 | 0.400551 | 0.802261 | 0.630361 |
| MmugDNA.10152.1.S1_at   | MmugDNA.10152.1 | 6.96  | 5.51  | 2.27 | 0.91 | 2.75  | 0.341258 | 0.35101  | 0.62119  | 0.594736 |
| MmugDNA.10154.1.S1_at   | MmugDNA.10154.1 | 4.32  | 4.27  | 0.18 | 0.19 | 1.03  | 0.271604 | 0.246317 | 0.563425 | 0.515889 |
| MmugDNA.10155.1.S1_at   | MmugDNA.10155.1 | 3.31  | 3.32  | 0.15 | 0.03 | -1.01 | 0.963493 | 0.317867 | 0.985204 | 0.571042 |
| MmugDNA.10157.1.S1_at   | MmugDNA.10157.1 | 3.7   | 3.65  | 0.49 | 0.19 | 1.04  | 0.280309 | 0.444732 | 0.571439 | 0.662072 |
| MmugDNA.10159.1.S1_at   | MmugDNA.10159.1 | 8.79  | 8.46  | 0.04 | 0.32 | 1.25  | 0.140461 | 0.191672 | 0.426202 | 0.466942 |
| MmugDNA.1016.1.S1_at    | MmugDNA.1016.1  | 5.46  | 5.46  | 1.05 | 0.34 | 1     | 0.556721 | 0.275969 | 0.771861 | 0.540057 |
| MmugDNA.10160.1.S1_at   | MmugDNA.10160.1 | 8.18  | 8.81  | 0.53 | 0.12 | -1.55 | 0.139355 | 0.037336 | 0.424947 | 0.237659 |
| MmugDNA.10161.1.S1_s_at | MmugDNA.10161.1 | 11.06 | 11.12 | 0.13 | 0.21 | -1.04 | 0.73014  | 0.37819  | 0.873891 | 0.615438 |
| MmugDNA.10161.1.S1_x_at | MmugDNA.10161.1 | 10.91 | 11.02 | 0.13 | 0.15 | -1.08 | 0.84334  | 0.237844 | 0.931427 | 0.508341 |

|                       |                 |       |       |      |      |       |          |          |          |          |
|-----------------------|-----------------|-------|-------|------|------|-------|----------|----------|----------|----------|
| MmugDNA.10163.1.S1_at | MmugDNA.10163.1 | 6.27  | 5.91  | 0.21 | 0.17 | 1.29  | 0.061226 | 0.432203 | 0.304296 | 0.652775 |
| MmugDNA.10164.1.S1_at | MmugDNA.10164.1 | 3.75  | 4.18  | 0.17 | 0.38 | -1.35 | 0.413277 | 0.654077 | 0.67463  | 0.797844 |
| MmugDNA.10165.1.S1_at | MmugDNA.10165.1 | 6.85  | 7.3   | 0.4  | 0.3  | -1.37 | 0.535496 | 0.318743 | 0.758374 | 0.571373 |
| MmugDNA.10166.1.S1_at | MmugDNA.10166.1 | 4.77  | 4.58  | 0.69 | 0.63 | 1.15  | 0.858785 | 0.440456 | 0.938801 | 0.658967 |
| MmugDNA.10167.1.S1_at | MmugDNA.10167.1 | 7.19  | 8.22  | 0.29 | 0.2  | -2.04 | 0.015323 | 0.064798 | 0.176072 | 0.300493 |
| MmugDNA.10168.1.S1_at | MmugDNA.10168.1 | 7.61  | 7.17  | 0.22 | 0.02 | 1.35  | 0.020576 | 0.024399 | 0.196874 | 0.19551  |
| MmugDNA.10169.1.S1_at | MmugDNA.10169.1 | 3.14  | 3.15  | 0.05 | 0    | -1    | 0.490039 | 0.82702  | 0.728246 | 0.900672 |
| MmugDNA.1017.1.S1_at  | MmugDNA.1017.1  | 5.4   | 7.36  | 0.45 | 0.62 | -3.89 | 0.005714 | 0.002545 | 0.121179 | 0.07453  |
| MmugDNA.10170.1.S1_at | MmugDNA.10170.1 | 5.83  | 5.79  | 0.08 | 0.06 | 1.03  | 0.10275  | 0.047189 | 0.375129 | 0.261793 |
| MmugDNA.10171.1.S1_at | MmugDNA.10171.1 | 9.35  | 9.07  | 0.39 | 0.18 | 1.22  | 0.263462 | 0.476442 | 0.556984 | 0.682725 |
| MmugDNA.10172.1.S1_at | MmugDNA.10172.1 | 9.06  | 10.55 | 0.36 | 0.1  | -2.81 | 0.002195 | 0.039916 | 0.090721 | 0.244857 |
| MmugDNA.10173.1.S1_at | MmugDNA.10173.1 | 5.06  | 4.81  | 0.21 | 0.09 | 1.19  | 0.550182 | 0.824982 | 0.767708 | 0.899487 |
| MmugDNA.10174.1.S1_at | MmugDNA.10174.1 | 4.66  | 4.65  | 0.14 | 0.05 | 1     | 0.61924  | 0.695544 | 0.811061 | 0.823054 |
| MmugDNA.10175.1.S1_at | MmugDNA.10175.1 | 5.83  | 5.48  | 0.41 | 0.19 | 1.28  | 0.233702 | 0.346328 | 0.531845 | 0.59124  |
| MmugDNA.10176.1.S1_at | MmugDNA.10176.1 | 3.41  | 3.33  | 0.3  | 0.04 | 1.06  | 0.5495   | 0.711213 | 0.767202 | 0.832484 |
| MmugDNA.10178.1.S1_at | MmugDNA.10178.1 | 7.92  | 8.03  | 0.21 | 0.15 | -1.08 | 0.222201 | 0.167926 | 0.520231 | 0.444493 |
| MmugDNA.10179.1.S1_at | MmugDNA.10179.1 | 3.4   | 3.36  | 0.29 | 0.06 | 1.03  | 0.966686 | 0.788894 | 0.986533 | 0.878011 |
| MmugDNA.1018.1.S1_at  | MmugDNA.1018.1  | 3.76  | 3.29  | 0.41 | 0.06 | 1.38  | 0.149292 | 0.124351 | 0.43817  | 0.394826 |
| MmugDNA.10180.1.S1_at | MmugDNA.10180.1 | 5.12  | 4.75  | 0.14 | 0.14 | 1.29  | 0.064195 | 0.054386 | 0.309807 | 0.278784 |
| MmugDNA.10181.1.S1_at | MmugDNA.10181.1 | 6.92  | 6.83  | 0.05 | 0.44 | 1.07  | 0.247267 | 0.199667 | 0.542869 | 0.474335 |
| MmugDNA.10183.1.S1_at | MmugDNA.10183.1 | 3.42  | 3.48  | 0.21 | 0.09 | -1.04 | 0.627195 | 0.863254 | 0.816748 | 0.922329 |
| MmugDNA.10184.1.S1_at | MmugDNA.10184.1 | 3.9   | 3.93  | 0.17 | 0.07 | -1.02 | 0.853686 | 0.78048  | 0.936342 | 0.872614 |
| MmugDNA.10185.1.S1_at | MmugDNA.10185.1 | 4.18  | 4.05  | 0.06 | 0.04 | 1.09  | 0.059408 | 0.269421 | 0.300867 | 0.534742 |
| MmugDNA.10187.1.S1_at | MmugDNA.10187.1 | 8.04  | 8.27  | 0.13 | 0.24 | -1.18 | 0.120682 | 0.087188 | 0.399064 | 0.340135 |
| MmugDNA.10188.1.S1_at | MmugDNA.10188.1 | 3.3   | 3.4   | 0.08 | 0.02 | -1.07 | 0.112994 | 0.171524 | 0.389499 | 0.447895 |
| MmugDNA.10189.1.S1_at | MmugDNA.10189.1 | 4.75  | 4.63  | 0.18 | 0.11 | 1.09  | 0.167581 | 0.110942 | 0.46081  | 0.375376 |
| MmugDNA.1019.1.S1_at  | MmugDNA.1019.1  | 6.04  | 6.01  | 0.04 | 0.03 | 1.02  | 0.212078 | 0.26788  | 0.509983 | 0.533607 |
| MmugDNA.10190.1.S1_at | MmugDNA.10190.1 | 4.73  | 5.42  | 0.53 | 0.03 | -1.62 | 0.076205 | 0.466424 | 0.334238 | 0.676289 |
| MmugDNA.10191.1.S1_at | MmugDNA.10191.1 | 3.73  | 3.82  | 0.66 | 0.33 | -1.06 | 0.593121 | 0.63465  | 0.793867 | 0.784964 |
| MmugDNA.10192.1.S1_at | MmugDNA.10192.1 | 4.05  | 4.16  | 0.17 | 0.28 | -1.08 | 0.259243 | 0.323647 | 0.55362  | 0.574525 |
| MmugDNA.10193.1.S1_at | MmugDNA.10193.1 | 10.67 | 10.57 | 0.26 | 0.04 | 1.07  | 0.776151 | 0.981443 | 0.897623 | 0.989775 |
| MmugDNA.10194.1.S1_at | MmugDNA.10194.1 | 8.71  | 9.22  | 0.44 | 0.15 | -1.42 | 0.209516 | 0.306945 | 0.50704  | 0.563427 |
| MmugDNA.10198.1.S1_at | MmugDNA.10198.1 | 7.39  | 7.54  | 0.11 | 0.07 | -1.11 | 0.344662 | 0.065279 | 0.623971 | 0.301239 |
| MmugDNA.10199.1.S1_at | MmugDNA.10199.1 | 4.12  | 4.04  | 0    | 0.06 | 1.06  | 0.072476 | 0.164795 | 0.327132 | 0.441106 |
| MmugDNA.102.1.S1_at   | MmugDNA.102.1   | 9.81  | 9.74  | 0.08 | 0.09 | 1.04  | 0.242897 | 0.439162 | 0.539651 | 0.657909 |
| MmugDNA.1020.1.S1_at  | MmugDNA.1020.1  | 8.95  | 9.72  | 0.28 | 0.21 | -1.71 | 0.022546 | 0.380833 | 0.203331 | 0.617426 |
| MmugDNA.10201.1.S1_at | MmugDNA.10201.1 | 4.81  | 5.08  | 0.18 | 0.1  | -1.2  | 0.249201 | 0.330742 | 0.54447  | 0.57952  |
| MmugDNA.10202.1.S1_at | MmugDNA.10202.1 | 5.37  | 5.36  | 0.04 | 0.1  | 1.01  | 0.337799 | 0.031216 | 0.618171 | 0.218485 |
| MmugDNA.10203.1.S1_at | MmugDNA.10203.1 | 6.78  | 6.33  | 0.35 | 0.11 | 1.37  | 0.217977 | 0.338425 | 0.515795 | 0.585432 |
| MmugDNA.10204.1.S1_at | MmugDNA.10204.1 | 6.14  | 5.41  | 0.83 | 0.28 | 1.67  | 0.241729 | 0.392666 | 0.538882 | 0.625813 |
| MmugDNA.10205.1.S1_at | MmugDNA.10205.1 | 2.92  | 2.91  | 0.03 | 0.05 | 1     | 0.587123 | 0.802432 | 0.790341 | 0.886217 |
| MmugDNA.10206.1.S1_at | MmugDNA.10206.1 | 3.87  | 3.9   | 0.43 | 0.18 | -1.02 | 0.461499 | 0.556212 | 0.708889 | 0.734449 |
| MmugDNA.10207.1.S1_at | MmugDNA.10207.1 | 5.97  | 5.99  | 0.23 | 0.15 | -1.02 | 0.284155 | 0.456853 | 0.574388 | 0.670521 |

|                         |                 |       |       |      |      |       |          |          |          |          |
|-------------------------|-----------------|-------|-------|------|------|-------|----------|----------|----------|----------|
| MmugDNA.10208.1.S1_s_at | MmugDNA.10208.1 | 7.38  | 7.15  | 0.24 | 0.28 | 1.17  | 0.10943  | 0.104694 | 0.384489 | 0.366073 |
| MmugDNA.1021.1.S1_at    | MmugDNA.1021.1  | 3.54  | 3.46  | 0.07 | 0.16 | 1.06  | 0.172868 | 0.288237 | 0.466937 | 0.5495   |
| MmugDNA.10210.1.S1_at   | MmugDNA.10210.1 | 3.71  | 3.73  | 0.08 | 0.03 | -1.01 | 0.880034 | 0.480705 | 0.948926 | 0.68597  |
| MmugDNA.10211.1.S1_at   | MmugDNA.10211.1 | 6.21  | 6.11  | 0.06 | 0.1  | 1.08  | 0.198585 | 0.053657 | 0.495759 | 0.277225 |
| MmugDNA.10213.1.S1_at   | MmugDNA.10213.1 | 5.94  | 7.36  | 1.09 | 0.27 | -2.67 | 0.09809  | 0.277966 | 0.368627 | 0.541664 |
| MmugDNA.10215.1.S1_at   | MmugDNA.10215.1 | 8.59  | 8.45  | 0.11 | 0.03 | 1.1   | 0.034847 | 0.004051 | 0.241137 | 0.090281 |
| MmugDNA.10217.1.S1_at   | MmugDNA.10217.1 | 6.69  | 6.94  | 0.14 | 0.05 | -1.19 | 0.092172 | 0.151598 | 0.360155 | 0.426333 |
| MmugDNA.10219.1.S1_at   | MmugDNA.10219.1 | 5.36  | 5.35  | 0.18 | 0.13 | 1     | 0.474215 | 0.702419 | 0.717416 | 0.827522 |
| MmugDNA.1022.1.S1_s_at  | MmugDNA.1022.1  | 3.6   | 6.75  | 0.41 | 0.27 | -8.86 | 0.000402 | 0.077607 | 0.063095 | 0.323558 |
| MmugDNA.10221.1.S1_at   | MmugDNA.10221.1 | 5.82  | 5.45  | 0.13 | 0.24 | 1.29  | 0.271519 | 0.417133 | 0.563425 | 0.642029 |
| MmugDNA.10224.1.S1_at   | MmugDNA.10224.1 | 5.79  | 5.8   | 0.46 | 0.18 | -1.01 | 0.954741 | 0.214232 | 0.981406 | 0.487856 |
| MmugDNA.10225.1.S1_at   | MmugDNA.10225.1 | 6.18  | 5.79  | 0.76 | 0.39 | 1.31  | 0.234071 | 0.383786 | 0.532201 | 0.619734 |
| MmugDNA.10226.1.S1_at   | MmugDNA.10226.1 | 8.34  | 8.04  | 0.34 | 0.37 | 1.23  | 0.696589 | 0.654267 | 0.855534 | 0.797979 |
| MmugDNA.10228.1.S1_at   | MmugDNA.10228.1 | 5.74  | 5.73  | 0.04 | 0.12 | 1.01  | 0.245799 | 0.544452 | 0.541732 | 0.726849 |
| MmugDNA.10229.1.S1_at   | MmugDNA.10229.1 | 5.66  | 4.36  | 1.26 | 0.43 | 2.46  | 0.252871 | 0.14597  | 0.547459 | 0.419981 |
| MmugDNA.1023.1.S1_at    | MmugDNA.1023.1  | 7.26  | 7.03  | 0.69 | 0.21 | 1.17  | 0.505132 | 0.342833 | 0.738175 | 0.588712 |
| MmugDNA.10230.1.S1_at   | MmugDNA.10230.1 | 4.87  | 4.99  | 0.24 | 0.12 | -1.09 | 0.921178 | 0.166098 | 0.966268 | 0.442669 |
| MmugDNA.10231.1.S1_at   | MmugDNA.10231.1 | 6.35  | 6.78  | 0.22 | 0.17 | -1.35 | 0.091643 | 0.324965 | 0.3594   | 0.575512 |
| MmugDNA.10232.1.S1_at   | MmugDNA.10232.1 | 5.73  | 5.65  | 0.34 | 0.19 | 1.06  | 0.371282 | 0.060309 | 0.643999 | 0.292254 |
| MmugDNA.10233.1.S1_s_at | MmugDNA.10233.1 | 6.76  | 6.68  | 0.1  | 0.11 | 1.06  | 0.150076 | 0.091109 | 0.439059 | 0.345945 |
| MmugDNA.10234.1.S1_at   | MmugDNA.10234.1 | 6.32  | 6.26  | 0.29 | 0.1  | 1.04  | 0.630652 | 0.039694 | 0.818647 | 0.244271 |
| MmugDNA.10235.1.S1_at   | MmugDNA.10235.1 | 11.02 | 10.8  | 0.19 | 0.09 | 1.16  | 0.11946  | 0.248201 | 0.397337 | 0.517574 |
| MmugDNA.10237.1.S1_at   | MmugDNA.10237.1 | 7.32  | 7.21  | 0.14 | 0.15 | 1.08  | 0.244141 | 0.089524 | 0.540834 | 0.343811 |
| MmugDNA.10238.1.S1_at   | MmugDNA.10238.1 | 7.87  | 7.63  | 0.21 | 0.24 | 1.18  | 0.254893 | 0.49664  | 0.549392 | 0.696119 |
| MmugDNA.10239.1.S1_at   | MmugDNA.10239.1 | 5.08  | 5.06  | 0.31 | 0.24 | 1.01  | 0.844919 | 0.749989 | 0.932176 | 0.854652 |
| MmugDNA.1024.1.S1_s_at  | MmugDNA.1024.1  | 7.25  | 8.4   | 0.02 | 0.12 | -2.22 | 0.000059 | 0.124052 | 0.047886 | 0.394349 |
| MmugDNA.10241.1.S1_at   | MmugDNA.10241.1 | 3.75  | 3.61  | 0.14 | 0.06 | 1.1   | 0.512656 | 0.721713 | 0.743099 | 0.838808 |
| MmugDNA.10244.1.S1_at   | MmugDNA.10244.1 | 3.72  | 3.72  | 0.02 | 0    | 1     | 0.46942  | 0.823839 | 0.714166 | 0.898803 |
| MmugDNA.10245.1.S1_at   | MmugDNA.10245.1 | 6.06  | 5.49  | 0.09 | 0.8  | 1.49  | 0.794715 | 0.762578 | 0.907322 | 0.861882 |
| MmugDNA.10246.1.S1_at   | MmugDNA.10246.1 | 9.53  | 9.78  | 0.14 | 0.13 | -1.19 | 0.132814 | 0.140309 | 0.416223 | 0.413498 |
| MmugDNA.10247.1.S1_at   | MmugDNA.10247.1 | 4.15  | 3.84  | 0.28 | 0.28 | 1.24  | 0.383216 | 0.339205 | 0.652517 | 0.585918 |
| MmugDNA.10248.1.S1_at   | MmugDNA.10248.1 | 7.52  | 7.1   | 0.93 | 0.15 | 1.34  | 0.375581 | 0.386889 | 0.646358 | 0.621935 |
| MmugDNA.1025.1.S1_at    | MmugDNA.1025.1  | 6.37  | 6.11  | 0.18 | 0.25 | 1.2   | 0.415148 | 0.195778 | 0.676032 | 0.470637 |
| MmugDNA.10250.1.S1_at   | MmugDNA.10250.1 | 3.1   | 3.22  | 0.12 | 0.1  | -1.08 | 0.523288 | 0.886712 | 0.750302 | 0.935519 |
| MmugDNA.10251.1.S1_at   | MmugDNA.10251.1 | 9.87  | 10.19 | 0.57 | 0.19 | -1.24 | 0.999885 | 0.889474 | 1        | 0.937014 |
| MmugDNA.10252.1.S1_at   | MmugDNA.10252.1 | 3.6   | 3.74  | 0.11 | 0.29 | -1.1  | 0.644732 | 0.849422 | 0.82702  | 0.914533 |
| MmugDNA.10254.1.S1_at   | MmugDNA.10254.1 | 4.86  | 5.01  | 0.15 | 0.18 | -1.11 | 0.294606 | 0.238475 | 0.583572 | 0.509084 |
| MmugDNA.10255.1.S1_at   | MmugDNA.10255.1 | 6.13  | 5.59  | 0.26 | 0.25 | 1.45  | 0.298375 | 0.292601 | 0.586705 | 0.552659 |
| MmugDNA.10256.1.S1_at   | MmugDNA.10256.1 | 7.52  | 7.3   | 0.04 | 0.2  | 1.17  | 0.042411 | 0.044606 | 0.26312  | 0.255589 |
| MmugDNA.10258.1.S1_at   | MmugDNA.10258.1 | 7.51  | 7.35  | 0.19 | 0.07 | 1.12  | 0.238645 | 0.283642 | 0.53598  | 0.546058 |
| MmugDNA.1026.1.S1_at    | MmugDNA.1026.1  | 3.39  | 3.39  | 0.15 | 0.04 | -1    | 0.302529 | 0.329379 | 0.590329 | 0.578733 |
| MmugDNA.10263.1.S1_at   | MmugDNA.10263.1 | 4.86  | 4.5   | 0.27 | 0.17 | 1.28  | 0.176526 | 0.219955 | 0.470959 | 0.49344  |
| MmugDNA.10264.1.S1_at   | MmugDNA.10264.1 | 6.6   | 6.55  | 0.24 | 0.06 | 1.04  | 0.719865 | 0.635173 | 0.867794 | 0.785258 |



|                         |                 |       |       |      |      |       |          |          |          |          |
|-------------------------|-----------------|-------|-------|------|------|-------|----------|----------|----------|----------|
| MmugDNA.10265.1.S1_at   | MmugDNA.10265.1 | 7.51  | 6.29  | 0.25 | 0.17 | 2.33  | 0.002105 | 0.000316 | 0.090208 | 0.035358 |
| MmugDNA.10266.1.S1_at   | MmugDNA.10266.1 | 3.53  | 3.19  | 0.12 | 0.31 | 1.27  | 0.422821 | 0.571318 | 0.680915 | 0.743642 |
| MmugDNA.10270.1.S1_at   | MmugDNA.10270.1 | 5.74  | 5.73  | 0.22 | 0.12 | 1.01  | 0.376524 | 0.452691 | 0.647252 | 0.667253 |
| MmugDNA.10273.1.S1_at   | MmugDNA.10273.1 | 11.1  | 10.81 | 0.11 | 0.09 | 1.22  | 0.019662 | 0.000477 | 0.193139 | 0.038572 |
| MmugDNA.10275.1.S1_x_at | MmugDNA.10275.1 | 7.7   | 7.36  | 0.88 | 0.23 | 1.26  | 0.216403 | 0.172922 | 0.514187 | 0.449546 |
| MmugDNA.10276.1.S1_at   | MmugDNA.10276.1 | 7.85  | 8.98  | 0.32 | 0.21 | -2.2  | 0.02038  | 0.014552 | 0.196305 | 0.153907 |
| MmugDNA.10277.1.S1_at   | MmugDNA.10277.1 | 5.88  | 5.83  | 0.06 | 0.19 | 1.04  | 0.758079 | 0.251687 | 0.889024 | 0.520444 |
| MmugDNA.10279.1.S1_at   | MmugDNA.10279.1 | 4.44  | 4.42  | 0.12 | 0    | 1.01  | 0.755427 | 0.885834 | 0.887301 | 0.93508  |
| MmugDNA.10280.1.S1_at   | MmugDNA.10280.1 | 4.96  | 5.36  | 0.31 | 0.13 | -1.32 | 0.255195 | 0.467511 | 0.549651 | 0.677091 |
| MmugDNA.10281.1.S1_s_at | MmugDNA.10281.1 | 3.29  | 3.06  | 0.69 | 0.23 | 1.17  | 0.305912 | 0.304624 | 0.592904 | 0.561838 |
| MmugDNA.10282.1.S1_at   | MmugDNA.10282.1 | 4.48  | 4.78  | 0.24 | 0.29 | -1.23 | 0.408111 | 0.114782 | 0.671004 | 0.381311 |
| MmugDNA.10285.1.S1_at   | MmugDNA.10285.1 | 3.58  | 3.52  | 1.52 | 0.06 | 1.04  | 0.333882 | 0.467631 | 0.615174 | 0.677203 |
| MmugDNA.10289.1.S1_at   | MmugDNA.10289.1 | 9.38  | 9.25  | 0.02 | 0.09 | 1.1   | 0.085763 | 0.003645 | 0.350079 | 0.086526 |
| MmugDNA.1029.1.S1_at    | MmugDNA.1029.1  | 4.05  | 4.33  | 0.19 | 0.42 | -1.22 | 0.555185 | 0.577691 | 0.771139 | 0.748038 |
| MmugDNA.10290.1.S1_at   | MmugDNA.10290.1 | 8.51  | 8.27  | 0.17 | 0.13 | 1.19  | 0.24757  | 0.249585 | 0.543025 | 0.518645 |
| MmugDNA.10291.1.S1_at   | MmugDNA.10291.1 | 3.32  | 3.32  | 0.16 | 0.06 | -1.01 | 0.659839 | 0.751846 | 0.835807 | 0.855698 |
| MmugDNA.10292.1.S1_at   | MmugDNA.10292.1 | 4.09  | 4.16  | 0.16 | 0.12 | -1.05 | 0.814127 | 0.103407 | 0.916927 | 0.3643   |
| MmugDNA.10293.1.S1_at   | MmugDNA.10293.1 | 4.92  | 4.51  | 0.34 | 0.18 | 1.32  | 0.164932 | 0.50274  | 0.457897 | 0.700289 |
| MmugDNA.10294.1.S1_at   | MmugDNA.10294.1 | 5.76  | 5.78  | 0.35 | 0.12 | -1.01 | 0.941922 | 0.838729 | 0.975589 | 0.908041 |
| MmugDNA.10295.1.S1_at   | MmugDNA.10295.1 | 4.1   | 3.93  | 0.16 | 0.15 | 1.12  | 0.123174 | 0.044275 | 0.402347 | 0.254941 |
| MmugDNA.10296.1.S1_at   | MmugDNA.10296.1 | 4.5   | 4.37  | 0.04 | 0.6  | 1.1   | 0.786086 | 0.47235  | 0.902353 | 0.679977 |
| MmugDNA.10297.1.S1_at   | MmugDNA.10297.1 | 9.83  | 9.33  | 0.2  | 0.12 | 1.42  | 0.069017 | 0.280723 | 0.320813 | 0.543924 |
| MmugDNA.10298.1.S1_at   | MmugDNA.10298.1 | 3.84  | 3.52  | 0.28 | 0.14 | 1.25  | 0.252209 | 0.336555 | 0.546816 | 0.58391  |
| MmugDNA.10299.1.S1_at   | MmugDNA.10299.1 | 3.61  | 3.86  | 0.27 | 0.19 | -1.19 | 0.118565 | 0.142856 | 0.396229 | 0.416786 |
| MmugDNA.103.1.S1_at     | MmugDNA.103.1   | 9.3   | 9.22  | 0.18 | 0.13 | 1.05  | 0.605884 | 0.959175 | 0.802758 | 0.976862 |
| MmugDNA.1030.1.S1_at    | MmugDNA.1030.1  | 10.23 | 10.23 | 0.31 | 0.03 | 1     | 0.8872   | 0.841483 | 0.951902 | 0.909663 |
| MmugDNA.10300.1.S1_at   | MmugDNA.10300.1 | 4.8   | 4.75  | 0.14 | 0.14 | 1.04  | 0.608434 | 0.794349 | 0.804503 | 0.881371 |
| MmugDNA.10301.1.S1_at   | MmugDNA.10301.1 | 7.31  | 7.07  | 0.24 | 0.27 | 1.18  | 0.723542 | 0.010572 | 0.87002  | 0.134182 |
| MmugDNA.10303.1.S1_at   | MmugDNA.10303.1 | 4.51  | 7.15  | 1.16 | 0.19 | -6.24 | 0.022357 | 0.21336  | 0.2028   | 0.487226 |
| MmugDNA.10304.1.S1_at   | MmugDNA.10304.1 | 7.47  | 7.32  | 0.23 | 0.06 | 1.11  | 0.56743  | 0.504172 | 0.77778  | 0.701433 |
| MmugDNA.10304.1.S1_s_at | MmugDNA.10304.1 | 6.34  | 6.47  | 0.07 | 0.02 | -1.09 | 0.098475 | 0.00489  | 0.369125 | 0.097632 |
| MmugDNA.10305.1.S1_at   | MmugDNA.10305.1 | 10.65 | 10.76 | 0.09 | 0.02 | -1.08 | 0.130841 | 0.259489 | 0.41337  | 0.526418 |
| MmugDNA.10308.1.S1_at   | MmugDNA.10308.1 | 4.28  | 3.84  | 0.11 | 0.22 | 1.35  | 0.157828 | 0.044    | 0.448605 | 0.254195 |
| MmugDNA.10309.1.S1_at   | MmugDNA.10309.1 | 5.68  | 5.56  | 0.04 | 0.05 | 1.08  | 0.029943 | 0.006373 | 0.226315 | 0.108546 |
| MmugDNA.1031.1.S1_at    | MmugDNA.1031.1  | 5.76  | 5.72  | 1.08 | 0.64 | 1.03  | 0.397385 | 0.323275 | 0.663    | 0.574408 |
| MmugDNA.10310.1.S1_at   | MmugDNA.10310.1 | 7.4   | 7     | 0.5  | 0.23 | 1.31  | 0.741566 | 0.289596 | 0.880267 | 0.550661 |
| MmugDNA.10312.1.S1_at   | MmugDNA.10312.1 | 10.63 | 10.12 | 0.34 | 0.24 | 1.42  | 0.161609 | 0.05694  | 0.453257 | 0.284726 |
| MmugDNA.10313.1.S1_at   | MmugDNA.10313.1 | 3.26  | 3.25  | 0.18 | 0.08 | 1.01  | 0.915245 | 0.772329 | 0.963939 | 0.867672 |
| MmugDNA.10314.1.S1_at   | MmugDNA.10314.1 | 7.67  | 7.47  | 0.14 | 0.03 | 1.15  | 0.210751 | 0.279721 | 0.508406 | 0.543228 |
| MmugDNA.10315.1.S1_at   | MmugDNA.10315.1 | 3.68  | 3.89  | 0.19 | 0.02 | -1.15 | 0.41539  | 0.676322 | 0.676117 | 0.810904 |
| MmugDNA.10316.1.S1_s_at | MmugDNA.10316.1 | 8.59  | 8.35  | 0.17 | 0.07 | 1.18  | 0.105846 | 0.159749 | 0.379859 | 0.435871 |
| MmugDNA.10317.1.S1_at   | MmugDNA.10317.1 | 8.98  | 9.07  | 0.02 | 0.05 | -1.06 | 0.10348  | 0.000427 | 0.376635 | 0.038359 |
| MmugDNA.10318.1.S1_at   | MmugDNA.10318.1 | 10.86 | 10.58 | 0.06 | 0.11 | 1.21  | 0.015984 | 0.168903 | 0.178971 | 0.445458 |

|                         |                 |       |       |      |      |       |          |          |          |          |
|-------------------------|-----------------|-------|-------|------|------|-------|----------|----------|----------|----------|
| MmugDNA.10319.1.S1_at   | MmugDNA.10319.1 | 3.33  | 3.29  | 0.14 | 0.06 | 1.03  | 0.883557 | 0.913811 | 0.950515 | 0.951523 |
| MmugDNA.1032.1.S1_at    | MmugDNA.1032.1  | 5.87  | 5.86  | 0.08 | 0.29 | 1     | 0.501807 | 0.232622 | 0.735541 | 0.504359 |
| MmugDNA.10321.1.S1_at   | MmugDNA.10321.1 | 12.61 | 12.56 | 0.11 | 0.04 | 1.03  | 0.698149 | 0.154411 | 0.856385 | 0.429288 |
| MmugDNA.10323.1.S1_s_at | MmugDNA.10323.1 | 12.24 | 11.85 | 0.13 | 0.03 | 1.31  | 0.009064 | 0.021106 | 0.144922 | 0.181869 |
| MmugDNA.10325.1.S1_at   | MmugDNA.10325.1 | 12.01 | 11.36 | 0.36 | 0.13 | 1.57  | 0.037469 | 0.00706  | 0.249007 | 0.113278 |
| MmugDNA.10326.1.S1_at   | MmugDNA.10326.1 | 10.77 | 10.17 | 0.32 | 0.12 | 1.52  | 0.036748 | 0.076102 | 0.246752 | 0.320848 |
| MmugDNA.10329.1.S1_at   | MmugDNA.10329.1 | 8.42  | 8.13  | 0.91 | 0.23 | 1.22  | 0.409616 | 0.588738 | 0.671953 | 0.755137 |
| MmugDNA.1033.1.S1_at    | MmugDNA.1033.1  | 5.27  | 4.79  | 0.13 | 0.24 | 1.39  | 0.168656 | 0.175519 | 0.461921 | 0.452161 |
| MmugDNA.10330.1.S1_at   | MmugDNA.10330.1 | 5.3   | 5.33  | 0.16 | 0.09 | -1.02 | 0.189044 | 0.318679 | 0.485678 | 0.571315 |
| MmugDNA.10332.1.S1_at   | MmugDNA.10332.1 | 4.93  | 4.38  | 0.05 | 0.13 | 1.46  | 0.004739 | 0.01946  | 0.115067 | 0.175136 |
| MmugDNA.10336.1.S1_at   | MmugDNA.10336.1 | 6.19  | 5.72  | 0.18 | 0.03 | 1.39  | 0.02805  | 0.040837 | 0.219909 | 0.246981 |
| MmugDNA.10337.1.S1_at   | MmugDNA.10337.1 | 7.63  | 7.68  | 0.43 | 0.12 | -1.04 | 0.75367  | 0.777811 | 0.886419 | 0.870888 |
| MmugDNA.10339.1.S1_at   | MmugDNA.10339.1 | 4.47  | 4.37  | 0.05 | 0.11 | 1.08  | 0.109135 | 0.318172 | 0.384284 | 0.571046 |
| MmugDNA.1034.1.S1_at    | MmugDNA.1034.1  | 7.36  | 7.69  | 0.49 | 0.21 | -1.26 | 0.873605 | 0.970636 | 0.945678 | 0.984019 |
| MmugDNA.10340.1.S1_at   | MmugDNA.10340.1 | 8.8   | 8.77  | 0.32 | 0.07 | 1.02  | 0.406996 | 0.57129  | 0.670192 | 0.743642 |
| MmugDNA.10341.1.S1_at   | MmugDNA.10341.1 | 5.57  | 5.54  | 0.31 | 0.14 | 1.02  | 0.43969  | 0.100839 | 0.693899 | 0.360364 |
| MmugDNA.10342.1.S1_at   | MmugDNA.10342.1 | 7.9   | 8.86  | 0.18 | 0.5  | -1.94 | 0.111995 | 0.016946 | 0.388221 | 0.165073 |
| MmugDNA.10343.1.S1_at   | MmugDNA.10343.1 | 6.03  | 5.98  | 0.19 | 0.1  | 1.03  | 0.673092 | 0.468487 | 0.84356  | 0.677738 |
| MmugDNA.10344.1.S1_at   | MmugDNA.10344.1 | 3.91  | 3.37  | 0.35 | 0.12 | 1.45  | 0.066429 | 0.058411 | 0.31527  | 0.288454 |
| MmugDNA.10346.1.S1_at   | MmugDNA.10346.1 | 5.4   | 5.39  | 0.2  | 0.02 | 1     | 0.396866 | 0.366259 | 0.662712 | 0.606019 |
| MmugDNA.10348.1.S1_s_at | MmugDNA.10348.1 | 11.96 | 11.94 | 0.26 | 0.3  | 1.02  | 0.831661 | 0.008422 | 0.925994 | 0.121844 |
| MmugDNA.1035.1.S1_at    | MmugDNA.1035.1  | 3.14  | 3.11  | 0.02 | 0.08 | 1.02  | 0.672966 | 0.91578  | 0.843462 | 0.952836 |
| MmugDNA.15783.1.S1_s_at | MmugDNA.15783.1 | 3.89  | 4     | 0.12 | 0.01 | -1.08 | 0.719833 | 0.335104 | 0.867793 | 0.582853 |
| MmugDNA.10351.1.S1_at   | MmugDNA.10351.1 | 4.95  | 4.89  | 0.24 | 0.28 | 1.04  | 0.290197 | 0.366088 | 0.57966  | 0.605906 |
| MmugDNA.10352.1.S1_at   | MmugDNA.10352.1 | 13.99 | 13.99 | 0.03 | 0.01 | 1     | 0.924371 | 0.012211 | 0.967845 | 0.142932 |
| MmugDNA.10353.1.S1_at   | MmugDNA.10353.1 | 5.99  | 6.05  | 0.04 | 0.23 | -1.04 | 0.625616 | 0.258502 | 0.815474 | 0.525786 |
| MmugDNA.10354.1.S1_at   | MmugDNA.10354.1 | 11.6  | 11.29 | 0.11 | 0.17 | 1.24  | 0.046834 | 0.168506 | 0.274122 | 0.445136 |
| MmugDNA.10355.1.S1_at   | MmugDNA.10355.1 | 8.3   | 8.51  | 0.2  | 0.26 | -1.16 | 0.300127 | 0.331822 | 0.588392 | 0.580397 |
| MmugDNA.10358.1.S1_at   | MmugDNA.10358.1 | 6.85  | 6.79  | 0.3  | 0.04 | 1.04  | 0.298093 | 0.39004  | 0.5865   | 0.624002 |
| MmugDNA.10359.1.S1_at   | MmugDNA.10359.1 | 9.97  | 9.68  | 0.06 | 0.01 | 1.22  | 0.001041 | 0.188309 | 0.076321 | 0.46433  |
| MmugDNA.10359.1.S1_s_at | MmugDNA.10359.1 | 9.71  | 9.47  | 0.07 | 0.07 | 1.18  | 0.008901 | 0.131902 | 0.144048 | 0.403927 |
| MmugDNA.1036.1.S1_at    | MmugDNA.1036.1  | 5.43  | 5.33  | 0.16 | 0.03 | 1.07  | 0.273331 | 0.225003 | 0.565478 | 0.49773  |
| MmugDNA.10360.1.S1_at   | MmugDNA.10360.1 | 7.45  | 7.5   | 0.35 | 0.15 | -1.04 | 0.800597 | 0.593806 | 0.910296 | 0.758418 |
| MmugDNA.10361.1.S1_at   | MmugDNA.10361.1 | 3.89  | 3.65  | 0.08 | 0.12 | 1.18  | 0.133634 | 0.283636 | 0.41701  | 0.546058 |
| MmugDNA.10362.1.S1_at   | MmugDNA.10362.1 | 7.69  | 7.79  | 0.49 | 0.19 | -1.07 | 0.655976 | 0.00139  | 0.83356  | 0.057005 |
| MmugDNA.20020.1.S1_s_at | MmugDNA.20020.1 | 7.7   | 7.05  | 1.01 | 0.12 | 1.57  | 0.330361 | 0.500949 | 0.612383 | 0.69936  |
| MmugDNA.10365.1.S1_at   | MmugDNA.10365.1 | 5.29  | 5.58  | 0.38 | 0.17 | -1.22 | 0.463603 | 0.053434 | 0.710141 | 0.276777 |
| MmugDNA.10366.1.S1_at   | MmugDNA.10366.1 | 6.96  | 6.3   | 0.59 | 0.27 | 1.58  | 0.11395  | 0.169377 | 0.390682 | 0.445989 |
| MmugDNA.10367.1.S1_at   | MmugDNA.10367.1 | 4.72  | 4.7   | 0.36 | 0.24 | 1.02  | 0.735285 | 0.433168 | 0.876788 | 0.653513 |
| MmugDNA.10368.1.S1_at   | MmugDNA.10368.1 | 4.86  | 4.92  | 0.07 | 0.68 | -1.04 | 0.935522 | 0.995292 | 0.972982 | 0.997046 |
| MmugDNA.10372.1.S1_at   | MmugDNA.10372.1 | 10.12 | 10.14 | 0.16 | 0.12 | -1.01 | 0.578726 | 0.87883  | 0.784534 | 0.930872 |
| MmugDNA.10373.1.S1_at   | MmugDNA.10373.1 | 12.13 | 11.91 | 0.17 | 0.03 | 1.17  | 0.307674 | 0.07454  | 0.594485 | 0.318173 |
| MmugDNA.10374.1.S1_at   | MmugDNA.10374.1 | 6.82  | 6.64  | 0.35 | 0.43 | 1.14  | 0.244063 | 0.561843 | 0.540822 | 0.737659 |

|                         |                 |       |       |      |      |       |          |          |          |          |
|-------------------------|-----------------|-------|-------|------|------|-------|----------|----------|----------|----------|
| MmugDNA.29281.1.S1_s_at | MmugDNA.29281.1 | 13.78 | 13.52 | 0.16 | 0.06 | 1.19  | 0.026377 | 0.130962 | 0.215478 | 0.403037 |
| MmugDNA.10376.1.S1_at   | MmugDNA.10376.1 | 5.68  | 5.78  | 0.12 | 0.07 | -1.08 | 0.122374 | 0.144945 | 0.40112  | 0.418862 |
| MmugDNA.10377.1.S1_at   | MmugDNA.10377.1 | 7.26  | 6.64  | 0.56 | 0.45 | 1.54  | 0.474255 | 0.718762 | 0.717417 | 0.837241 |
| MmugDNA.10378.1.S1_at   | MmugDNA.10378.1 | 3.25  | 3.31  | 0.09 | 0.11 | -1.04 | 0.393621 | 0.120435 | 0.660389 | 0.38925  |
| MmugDNA.10379.1.S1_at   | MmugDNA.10379.1 | 12.42 | 12.45 | 0.17 | 0.01 | -1.02 | 0.529365 | 0.070645 | 0.754208 | 0.311975 |
| MmugDNA.1038.1.S1_at    | MmugDNA.1038.1  | 6.42  | 6.39  | 0.31 | 0.13 | 1.02  | 0.614487 | 0.83968  | 0.808202 | 0.908582 |
| MmugDNA.10380.1.S1_at   | MmugDNA.10380.1 | 10.25 | 9.78  | 0.5  | 0.3  | 1.38  | 0.447935 | 0.16503  | 0.699731 | 0.44123  |
| MmugDNA.10381.1.S1_at   | MmugDNA.10381.1 | 5.1   | 5.19  | 0.53 | 0.21 | -1.06 | 0.290454 | 0.266465 | 0.57991  | 0.532234 |
| MmugDNA.10382.1.S1_at   | MmugDNA.10382.1 | 3.72  | 3.53  | 0.37 | 0.17 | 1.14  | 0.169793 | 0.438189 | 0.463186 | 0.657196 |
| MmugDNA.10384.1.S1_at   | MmugDNA.10384.1 | 8.29  | 7.1   | 0.12 | 0.53 | 2.28  | 0.037476 | 0.044327 | 0.249007 | 0.255035 |
| MmugDNA.10388.1.S1_at   | MmugDNA.10388.1 | 3.58  | 3.51  | 0.01 | 0.12 | 1.05  | 0.344737 | 0.409474 | 0.624009 | 0.636521 |
| MmugDNA.1039.1.S1_at    | MmugDNA.1039.1  | 3.17  | 3.35  | 0.28 | 0.08 | -1.14 | 0.694731 | 0.845432 | 0.854354 | 0.912071 |
| MmugDNA.10391.1.S1_at   | MmugDNA.10391.1 | 3.11  | 3.29  | 0.35 | 0.17 | -1.14 | 0.97581  | 0.998296 | 0.990391 | 0.999091 |
| MmugDNA.10393.1.S1_at   | MmugDNA.10393.1 | 5.94  | 5.87  | 0.06 | 0.13 | 1.05  | 0.599086 | 0.5387   | 0.797851 | 0.723315 |
| MmugDNA.10396.1.S1_at   | MmugDNA.10396.1 | 9.16  | 8.63  | 0.42 | 0.11 | 1.44  | 0.320818 | 0.357074 | 0.605304 | 0.59875  |
| MmugDNA.104.1.S1_at     | MmugDNA.104.1   | 7.34  | 7     | 0.53 | 0.1  | 1.26  | 0.474239 | 0.064548 | 0.717417 | 0.300255 |
| MmugDNA.10400.1.S1_at   | MmugDNA.10400.1 | 6.96  | 6.85  | 0.91 | 0.16 | 1.08  | 0.963344 | 0.638502 | 0.985147 | 0.78765  |
| MmugDNA.10401.1.S1_at   | MmugDNA.10401.1 | 10.24 | 10.53 | 0.07 | 0.17 | -1.22 | 0.040103 | 0.008803 | 0.256783 | 0.124117 |
| MmugDNA.10402.1.S1_at   | MmugDNA.10402.1 | 5.18  | 5.18  | 0.52 | 0.12 | -1    | 0.579322 | 0.769608 | 0.785017 | 0.866216 |
| MmugDNA.10404.1.S1_at   | MmugDNA.10404.1 | 10.17 | 10.22 | 0.16 | 0.15 | -1.04 | 0.882041 | 0.000904 | 0.949792 | 0.048084 |
| MmugDNA.10406.1.S1_at   | MmugDNA.10406.1 | 8.27  | 7.41  | 0.33 | 0.16 | 1.81  | 0.015653 | 0.01138  | 0.177578 | 0.138214 |
| MmugDNA.10407.1.S1_at   | MmugDNA.10407.1 | 5.03  | 5.02  | 0.2  | 0.1  | 1.01  | 0.47246  | 0.739568 | 0.716189 | 0.849084 |
| MmugDNA.10408.1.S1_at   | MmugDNA.10408.1 | 10.76 | 9.85  | 0.21 | 0.14 | 1.88  | 0.00284  | 0.052668 | 0.098196 | 0.27502  |
| MmugDNA.10409.1.S1_at   | MmugDNA.10409.1 | 3.7   | 3.7   | 0.06 | 0.1  | -1    | 0.584519 | 0.73786  | 0.788602 | 0.848106 |
| MmugDNA.1041.1.S1_s_at  | MmugDNA.1041.1  | 9.97  | 10.1  | 0.06 | 0.23 | -1.1  | 0.809761 | 0.007375 | 0.914781 | 0.115315 |
| MmugDNA.10412.1.S1_at   | MmugDNA.10412.1 | 4.64  | 4.91  | 0.27 | 0.2  | -1.21 | 0.433358 | 0.558778 | 0.68886  | 0.735887 |
| MmugDNA.10412.1.S1_x_at | MmugDNA.10412.1 | 4.76  | 4.95  | 0.35 | 0.2  | -1.14 | 0.667578 | 0.800375 | 0.840426 | 0.885129 |
| MmugDNA.10413.1.S1_at   | MmugDNA.10413.1 | 5.26  | 5.5   | 0.39 | 0.04 | -1.18 | 0.353157 | 0.52301  | 0.630353 | 0.713429 |
| MmugDNA.10414.1.S1_at   | MmugDNA.10414.1 | 7.65  | 7.73  | 0.24 | 0.11 | -1.06 | 0.431841 | 0.530452 | 0.687712 | 0.717991 |
| MmugDNA.10416.1.S1_at   | MmugDNA.10416.1 | 4.37  | 4.35  | 0.07 | 0.09 | 1.01  | 0.579524 | 0.267276 | 0.785166 | 0.532909 |
| MmugDNA.10418.1.S1_at   | MmugDNA.10418.1 | 3.8   | 3.69  | 0.2  | 0.49 | 1.08  | 0.980639 | 0.926338 | 0.992776 | 0.958277 |
| MmugDNA.10419.1.S1_at   | MmugDNA.10419.1 | 7.43  | 9.04  | 0.88 | 0.21 | -3.04 | 0.04286  | 0.047205 | 0.264168 | 0.26183  |
| MmugDNA.10420.1.S1_at   | MmugDNA.10420.1 | 3.54  | 3.4   | 0.26 | 0.13 | 1.11  | 0.148834 | 0.184995 | 0.437337 | 0.460814 |
| MmugDNA.10427.1.S1_at   | MmugDNA.10427.1 | 9.3   | 9.14  | 0.24 | 0.12 | 1.12  | 0.12798  | 0.077717 | 0.409866 | 0.323851 |
| MmugDNA.10428.1.S1_at   | MmugDNA.10428.1 | 6.22  | 6.02  | 0.14 | 0.09 | 1.14  | 0.567262 | 0.785722 | 0.77771  | 0.875928 |
| MmugDNA.10430.1.S1_at   | MmugDNA.10430.1 | 8.32  | 8.35  | 0.23 | 0.1  | -1.02 | 0.514142 | 0.577689 | 0.744131 | 0.748038 |
| MmugDNA.10431.1.S1_at   | MmugDNA.10431.1 | 8.23  | 8.03  | 0.17 | 0.23 | 1.15  | 0.196671 | 0.370187 | 0.493731 | 0.609371 |
| MmugDNA.10433.1.S1_at   | MmugDNA.10433.1 | 3.32  | 3.27  | 0.1  | 0.07 | 1.04  | 0.693412 | 0.091337 | 0.853446 | 0.346281 |
| MmugDNA.10434.1.S1_at   | MmugDNA.10434.1 | 10.41 | 10.63 | 0.21 | 0.45 | -1.17 | 0.166294 | 0.013384 | 0.459523 | 0.14827  |
| MmugDNA.10436.1.S1_at   | MmugDNA.10436.1 | 3.61  | 3.58  | 0.03 | 0.07 | 1.02  | 0.30017  | 0.432661 | 0.588392 | 0.653054 |
| MmugDNA.10437.1.S1_at   | MmugDNA.10437.1 | 8.34  | 8.18  | 0.1  | 0.02 | 1.12  | 0.15428  | 0.001425 | 0.44462  | 0.057604 |
| MmugDNA.10438.1.S1_at   | MmugDNA.10438.1 | 4.83  | 4.89  | 0.08 | 0.09 | -1.04 | 0.18675  | 0.015471 | 0.482843 | 0.157908 |
| MmugDNA.10439.1.S1_at   | MmugDNA.10439.1 | 6.24  | 6.21  | 0.12 | 0.08 | 1.02  | 0.673298 | 0.189345 | 0.843758 | 0.465092 |

|                         |                 |       |       |      |      |       |          |          |          |          |
|-------------------------|-----------------|-------|-------|------|------|-------|----------|----------|----------|----------|
| MmugDNA.1044.1.S1_at    | MmugDNA.1044.1  | 9.59  | 9.66  | 0.01 | 0.04 | -1.05 | 0.181823 | 0.612809 | 0.47739  | 0.770218 |
| MmugDNA.10440.1.S1_at   | MmugDNA.10440.1 | 8.38  | 7.97  | 0.12 | 0.16 | 1.33  | 0.045138 | 0.32254  | 0.269875 | 0.573991 |
| MmugDNA.10441.1.S1_at   | MmugDNA.10441.1 | 8.99  | 8.84  | 0.2  | 0.13 | 1.11  | 0.369421 | 0.042142 | 0.642818 | 0.249753 |
| MmugDNA.10442.1.S1_s_at | MmugDNA.10442.1 | 7.51  | 8.48  | 0.41 | 0.34 | -1.96 | 0.056872 | 0.55164  | 0.295858 | 0.731126 |
| MmugDNA.10447.1.S1_at   | MmugDNA.10447.1 | 4.17  | 4.22  | 0.15 | 0.17 | -1.04 | 0.644746 | 0.692525 | 0.82702  | 0.821061 |
| MmugDNA.10449.1.S1_at   | MmugDNA.10449.1 | 11.54 | 11.79 | 0.27 | 0.11 | -1.19 | 0.595292 | 0.618926 | 0.795142 | 0.774229 |
| MmugDNA.1045.1.S1_at    | MmugDNA.1045.1  | 6.67  | 6.61  | 0.04 | 0.02 | 1.05  | 0.112395 | 0.307734 | 0.388604 | 0.563932 |
| MmugDNA.10451.1.S1_at   | MmugDNA.10451.1 | 7.61  | 9.56  | 2.16 | 0.4  | -3.84 | 0.231874 | 0.383337 | 0.530482 | 0.619368 |
| MmugDNA.10454.1.S1_at   | MmugDNA.10454.1 | 3.96  | 3.88  | 0.14 | 0.4  | 1.06  | 0.524714 | 0.319718 | 0.751511 | 0.572054 |
| MmugDNA.10455.1.S1_at   | MmugDNA.10455.1 | 6.25  | 6.22  | 0.06 | 0.03 | 1.02  | 0.263584 | 0.80098  | 0.557084 | 0.885538 |
| MmugDNA.10456.1.S1_at   | MmugDNA.10456.1 | 6.59  | 6.48  | 0.1  | 0.42 | 1.08  | 0.284979 | 0.533027 | 0.574971 | 0.71937  |
| MmugDNA.10457.1.S1_at   | MmugDNA.10457.1 | 5.01  | 5.07  | 0.11 | 0.2  | -1.04 | 0.950158 | 0.663442 | 0.979278 | 0.803016 |
| MmugDNA.1046.1.S1_at    | MmugDNA.1046.1  | 11.57 | 13.82 | 1.03 | 0.05 | -4.76 | 0.048943 | 0.151152 | 0.278842 | 0.425805 |
| MmugDNA.1046.1.S1_s_at  | MmugDNA.1046.1  | 11.56 | 14.02 | 1.11 | 0.1  | -5.47 | 0.051142 | 0.150378 | 0.283595 | 0.424934 |
| MmugDNA.10460.1.S1_at   | MmugDNA.10460.1 | 5.71  | 4.95  | 0.09 | 0.06 | 1.69  | 0.000344 | 0.008338 | 0.061415 | 0.121147 |
| MmugDNA.10461.1.S1_at   | MmugDNA.10461.1 | 5.83  | 6.02  | 0.08 | 0.05 | -1.14 | 0.054633 | 0.107474 | 0.290604 | 0.370311 |
| MmugDNA.10462.1.S1_at   | MmugDNA.10462.1 | 8.53  | 6.26  | 0.69 | 0.66 | 4.83  | 0.036606 | 0.307894 | 0.246333 | 0.563992 |
| MmugDNA.10465.1.S1_at   | MmugDNA.10465.1 | 7.74  | 8.58  | 0.46 | 0.15 | -1.8  | 0.022308 | 0.065462 | 0.202621 | 0.301415 |
| MmugDNA.10466.1.S1_at   | MmugDNA.10466.1 | 13.18 | 13.09 | 0.12 | 0.05 | 1.06  | 0.136913 | 0.006306 | 0.421691 | 0.107813 |
| MmugDNA.10469.1.S1_at   | MmugDNA.10469.1 | 4.17  | 4.21  | 1.16 | 0.39 | -1.03 | 0.423385 | 0.712961 | 0.681371 | 0.83357  |
| MmugDNA.1047.1.S1_at    | MmugDNA.1047.1  | 4.66  | 4.57  | 0.35 | 0.29 | 1.07  | 0.569944 | 0.798198 | 0.77922  | 0.883849 |
| MmugDNA.10470.1.S1_at   | MmugDNA.10470.1 | 3.78  | 4.45  | 0.32 | 0.42 | -1.6  | 0.03599  | 0.020574 | 0.244738 | 0.179964 |
| MmugDNA.10471.1.S1_at   | MmugDNA.10471.1 | 4.01  | 4.15  | 0.23 | 0.12 | -1.1  | 0.961749 | 0.270308 | 0.984403 | 0.535676 |
| MmugDNA.10472.1.S1_at   | MmugDNA.10472.1 | 6.14  | 5.8   | 0.4  | 0.16 | 1.26  | 0.778018 | 0.687099 | 0.898504 | 0.817434 |
| MmugDNA.10473.1.S1_at   | MmugDNA.10473.1 | 5.61  | 5.73  | 0.29 | 0.08 | -1.09 | 0.692937 | 0.635817 | 0.853254 | 0.785669 |
| MmugDNA.11511.1.S1_s_at | MmugDNA.11511.1 | 9.35  | 8.9   | 0.4  | 0.34 | 1.37  | 0.25369  | 0.431964 | 0.547938 | 0.652723 |
| MmugDNA.10476.1.S1_at   | MmugDNA.10476.1 | 5.21  | 5.8   | 0.18 | 0.26 | -1.51 | 0.026959 | 0.092841 | 0.217062 | 0.349024 |
| MmugDNA.10478.1.S1_at   | MmugDNA.10478.1 | 5.17  | 5.07  | 0.21 | 0.08 | 1.08  | 0.442223 | 0.283283 | 0.695653 | 0.545836 |
| MmugDNA.10479.1.S1_at   | MmugDNA.10479.1 | 6.21  | 6.35  | 0.15 | 0.31 | -1.1  | 0.534231 | 0.700854 | 0.757483 | 0.826525 |
| MmugDNA.1048.1.S1_at    | MmugDNA.1048.1  | 4.17  | 4.21  | 0.07 | 0.08 | -1.03 | 0.600644 | 0.808066 | 0.799059 | 0.889504 |
| MmugDNA.10480.1.S1_at   | MmugDNA.10480.1 | 9.58  | 9.38  | 0.26 | 0.01 | 1.15  | 0.677675 | 0.926809 | 0.846284 | 0.958404 |
| MmugDNA.10483.1.S1_at   | MmugDNA.10483.1 | 7.08  | 6.43  | 0.91 | 0.13 | 1.58  | 0.187638 | 0.146306 | 0.483874 | 0.420306 |
| MmugDNA.10484.1.S1_at   | MmugDNA.10484.1 | 4.12  | 4.04  | 0.08 | 0.13 | 1.06  | 0.38449  | 0.330541 | 0.65355  | 0.579302 |
| MmugDNA.10485.1.S1_at   | MmugDNA.10485.1 | 4.1   | 4.09  | 0.12 | 0    | 1.01  | 0.427336 | 0.80194  | 0.684657 | 0.885989 |
| MmugDNA.10486.1.S1_at   | MmugDNA.10486.1 | 7.3   | 7.31  | 0.07 | 0.02 | -1.01 | 0.775882 | 0.874655 | 0.897461 | 0.928837 |
| MmugDNA.10487.1.S1_at   | MmugDNA.10487.1 | 6.9   | 6.7   | 0.2  | 0.15 | 1.15  | 0.189082 | 0.205522 | 0.48573  | 0.479794 |
| MmugDNA.10488.1.S1_at   | MmugDNA.10488.1 | 5.84  | 5.78  | 0.08 | 0.08 | 1.04  | 0.41492  | 0.798512 | 0.675831 | 0.884012 |
| MmugDNA.10489.1.S1_at   | MmugDNA.10489.1 | 5.85  | 5.58  | 0.17 | 0.07 | 1.2   | 0.08976  | 0.038693 | 0.356705 | 0.24169  |
| MmugDNA.10489.1.S1_s_at | MmugDNA.10489.1 | 6.51  | 6.59  | 0.33 | 0.04 | -1.06 | 0.529837 | 0.611073 | 0.7545   | 0.769031 |
| MmugDNA.1049.1.S1_at    | MmugDNA.1049.1  | 4.59  | 4.35  | 0.19 | 0.27 | 1.18  | 0.246814 | 0.316844 | 0.542546 | 0.570212 |
| MmugDNA.10490.1.S1_at   | MmugDNA.10490.1 | 3.39  | 3.34  | 0.17 | 0.04 | 1.03  | 0.641099 | 0.191981 | 0.824661 | 0.467377 |
| MmugDNA.10492.1.S1_at   | MmugDNA.10492.1 | 3.51  | 4.09  | 0.1  | 0.3  | -1.5  | 0.015886 | 0.16697  | 0.17843  | 0.44345  |
| MmugDNA.10493.1.S1_at   | MmugDNA.10493.1 | 4.01  | 4     | 0.1  | 0.03 | 1.01  | 0.253762 | 0.321856 | 0.548026 | 0.57351  |

|                         |                 |       |       |      |      |       |          |          |          |          |
|-------------------------|-----------------|-------|-------|------|------|-------|----------|----------|----------|----------|
| MmugDNA.10495.1.S1_at   | MmugDNA.10495.1 | 9.13  | 8.91  | 0.3  | 0.05 | 1.17  | 0.431004 | 0.165715 | 0.687225 | 0.441982 |
| MmugDNA.10496.1.S1_at   | MmugDNA.10496.1 | 11.1  | 10.76 | 0.15 | 0.11 | 1.27  | 0.10634  | 0.058806 | 0.380319 | 0.289228 |
| MmugDNA.10497.1.S1_at   | MmugDNA.10497.1 | 5.85  | 5.86  | 0.13 | 0.09 | -1.01 | 0.512078 | 0.684848 | 0.742866 | 0.816189 |
| MmugDNA.10498.1.S1_at   | MmugDNA.10498.1 | 4.38  | 4.37  | 0.21 | 0    | 1.01  | 0.834322 | 0.985535 | 0.927112 | 0.991808 |
| MmugDNA.10499.1.S1_at   | MmugDNA.10499.1 | 5.28  | 5.27  | 0.16 | 0.68 | 1     | 0.296406 | 0.38798  | 0.585141 | 0.62253  |
| MmugDNA.105.1.S1_at     | MmugDNA.105.1   | 5.36  | 5.59  | 0.27 | 0.28 | -1.18 | 0.200527 | 0.418673 | 0.497869 | 0.643036 |
| MmugDNA.10500.1.S1_at   | MmugDNA.10500.1 | 8.04  | 9.02  | 0.02 | 0.23 | -1.98 | 0.003197 | 0.129933 | 0.101477 | 0.401515 |
| MmugDNA.10501.1.S1_at   | MmugDNA.10501.1 | 4.01  | 3.88  | 0.07 | 0.1  | 1.09  | 0.26365  | 0.200849 | 0.557138 | 0.475369 |
| MmugDNA.10502.1.S1_at   | MmugDNA.10502.1 | 6.21  | 6.69  | 0.49 | 0.15 | -1.39 | 0.385939 | 0.492106 | 0.654498 | 0.693442 |
| MmugDNA.10503.1.S1_at   | MmugDNA.10503.1 | 5.24  | 5.21  | 0.16 | 0.39 | 1.02  | 0.383643 | 0.44483  | 0.652919 | 0.662072 |
| MmugDNA.10504.1.S1_at   | MmugDNA.10504.1 | 11.49 | 11.1  | 0.71 | 0.1  | 1.32  | 0.964727 | 0.028544 | 0.985755 | 0.210754 |
| MmugDNA.10505.1.S1_at   | MmugDNA.10505.1 | 8.88  | 8.62  | 0.35 | 0.03 | 1.2   | 0.257136 | 0.264435 | 0.551586 | 0.530385 |
| MmugDNA.10505.1.S1_s_at | MmugDNA.10505.1 | 8.16  | 7.86  | 0.32 | 0.09 | 1.23  | 0.148864 | 0.0501   | 0.437372 | 0.268916 |
| MmugDNA.10507.1.S1_at   | MmugDNA.10507.1 | 5.23  | 5.21  | 0.2  | 0.12 | 1.01  | 0.857035 | 0.50802  | 0.937933 | 0.703358 |
| MmugDNA.10508.1.S1_at   | MmugDNA.10508.1 | 3.29  | 3.46  | 0.03 | 0.03 | -1.12 | 0.005176 | 0.014776 | 0.116998 | 0.154617 |
| MmugDNA.10509.1.S1_s_at | MmugDNA.10509.1 | 3.01  | 2.98  | 0.11 | 0.01 | 1.02  | 0.203703 | 0.110422 | 0.501439 | 0.374651 |
| MmugDNA.10510.1.S1_at   | MmugDNA.10510.1 | 5.61  | 5.38  | 0.12 | 0.14 | 1.18  | 0.116774 | 0.233914 | 0.39382  | 0.505183 |
| MmugDNA.10511.1.S1_at   | MmugDNA.10511.1 | 4.32  | 4.44  | 0.16 | 0.04 | -1.09 | 0.303948 | 0.145476 | 0.591303 | 0.419424 |
| MmugDNA.10513.1.S1_at   | MmugDNA.10513.1 | 5.13  | 4.57  | 0.65 | 0.11 | 1.47  | 0.246092 | 0.149459 | 0.541875 | 0.423928 |
| MmugDNA.10514.1.S1_at   | MmugDNA.10514.1 | 3.06  | 3.18  | 0.04 | 0.1  | -1.08 | 0.16499  | 0.483254 | 0.457897 | 0.687881 |
| MmugDNA.10515.1.S1_at   | MmugDNA.10515.1 | 4.02  | 3.9   | 0.04 | 0.22 | 1.09  | 0.128951 | 0.053777 | 0.41116  | 0.27744  |
| MmugDNA.10516.1.S1_at   | MmugDNA.10516.1 | 7.45  | 6.23  | 0.25 | 0    | 2.32  | 0.001366 | 0.000944 | 0.079595 | 0.049054 |
| MmugDNA.10517.1.S1_at   | MmugDNA.10517.1 | 8.7   | 8.72  | 0.41 | 0.14 | -1.02 | 0.794401 | 0.94652  | 0.90713  | 0.969668 |
| MmugDNA.10518.1.S1_at   | MmugDNA.10518.1 | 3.28  | 3.1   | 0.16 | 0.02 | 1.14  | 0.107442 | 0.206872 | 0.382148 | 0.481034 |
| MmugDNA.10519.1.S1_at   | MmugDNA.10519.1 | 4.75  | 4.55  | 0.14 | 0.11 | 1.15  | 0.227118 | 0.33634  | 0.525116 | 0.583813 |
| MmugDNA.1052.1.S1_at    | MmugDNA.1052.1  | 3.71  | 3.66  | 0.14 | 0.12 | 1.03  | 0.581172 | 0.69853  | 0.786395 | 0.824852 |
| MmugDNA.10520.1.S1_at   | MmugDNA.10520.1 | 9.02  | 9.12  | 0.38 | 0.32 | -1.07 | 0.536197 | 0.198247 | 0.75885  | 0.473234 |
| MmugDNA.10521.1.S1_at   | MmugDNA.10521.1 | 3.06  | 3.08  | 0.13 | 0.1  | -1.01 | 0.380868 | 0.529256 | 0.650427 | 0.717233 |
| MmugDNA.10522.1.S1_at   | MmugDNA.10522.1 | 4.01  | 4.04  | 0.23 | 0.08 | -1.02 | 0.497039 | 0.579732 | 0.73286  | 0.74927  |
| MmugDNA.10523.1.S1_at   | MmugDNA.10523.1 | 8.51  | 8.4   | 0.05 | 0.06 | 1.08  | 0.053263 | 0.029528 | 0.287986 | 0.213512 |
| MmugDNA.10524.1.S1_at   | MmugDNA.10524.1 | 6.64  | 6.09  | 0.65 | 0.15 | 1.47  | 0.213131 | 0.175619 | 0.511046 | 0.45218  |
| MmugDNA.10527.1.S1_at   | MmugDNA.10527.1 | 5.57  | 5.23  | 0.93 | 0.22 | 1.27  | 0.406251 | 0.452481 | 0.669594 | 0.667111 |
| MmugDNA.10529.1.S1_at   | MmugDNA.10529.1 | 3.71  | 4.63  | 0.1  | 0.59 | -1.9  | 0.086463 | 0.094839 | 0.351333 | 0.35185  |
| MmugDNA.1053.1.S1_at    | MmugDNA.1053.1  | 10.79 | 11.39 | 0.28 | 0.18 | -1.51 | 0.027279 | 0.048594 | 0.218067 | 0.265572 |
| MmugDNA.10532.1.S1_s_at | MmugDNA.10532.1 | 10.32 | 10.47 | 0.38 | 0.04 | -1.11 | 0.818845 | 0.944304 | 0.919247 | 0.968468 |
| MmugDNA.10533.1.S1_at   | MmugDNA.10533.1 | 4.29  | 4.31  | 0.34 | 0.03 | -1.02 | 0.476251 | 0.377187 | 0.718743 | 0.614825 |
| MmugDNA.10534.1.S1_at   | MmugDNA.10534.1 | 7.63  | 7.9   | 0.37 | 0.12 | -1.2  | 0.275674 | 0.522762 | 0.567274 | 0.713367 |
| MmugDNA.11916.1.S1_s_at | MmugDNA.11916.1 | 13.99 | 13.98 | 0.01 | 0.05 | 1.01  | 0.280239 | 0.000303 | 0.571426 | 0.034907 |
| MmugDNA.10536.1.S1_at   | MmugDNA.10536.1 | 8.74  | 8.71  | 0.23 | 0.25 | 1.02  | 0.389747 | 0.568817 | 0.657497 | 0.74211  |
| MmugDNA.10537.1.S1_at   | MmugDNA.10537.1 | 7.23  | 6.67  | 0.37 | 0.17 | 1.48  | 0.12448  | 0.098588 | 0.404663 | 0.356709 |
| MmugDNA.10538.1.S1_at   | MmugDNA.10538.1 | 8.01  | 7.97  | 0.08 | 0.05 | 1.02  | 0.132916 | 0.013044 | 0.416351 | 0.14696  |
| MmugDNA.10538.1.S1_s_at | MmugDNA.10538.1 | 6.82  | 6.61  | 0.07 | 0.17 | 1.15  | 0.124514 | 0.207113 | 0.404711 | 0.481191 |
| MmugDNA.1054.1.S1_at    | MmugDNA.1054.1  | 3.51  | 3.46  | 0.06 | 0.06 | 1.04  | 0.723549 | 0.093183 | 0.87002  | 0.34931  |

|                         |                 |       |       |      |      |       |          |          |          |          |
|-------------------------|-----------------|-------|-------|------|------|-------|----------|----------|----------|----------|
| MmugDNA.10540.1.S1_at   | MmugDNA.10540.1 | 4.11  | 4.14  | 0.03 | 0.1  | -1.02 | 0.339608 | 0.459074 | 0.619844 | 0.671544 |
| MmugDNA.10541.1.S1_at   | MmugDNA.10541.1 | 3.34  | 3.25  | 0.26 | 0.17 | 1.06  | 0.85971  | 0.6273   | 0.939203 | 0.780361 |
| MmugDNA.10543.1.S1_at   | MmugDNA.10543.1 | 4.83  | 4.63  | 0.31 | 0.66 | 1.15  | 0.739662 | 0.844107 | 0.879315 | 0.911246 |
| MmugDNA.10544.1.S1_at   | MmugDNA.10544.1 | 3.41  | 3.46  | 0.39 | 0.03 | -1.04 | 0.525559 | 0.737072 | 0.75199  | 0.847791 |
| MmugDNA.10545.1.S1_at   | MmugDNA.10545.1 | 4.21  | 4.46  | 0.6  | 0.3  | -1.19 | 0.818166 | 0.806482 | 0.918797 | 0.888651 |
| MmugDNA.10546.1.S1_at   | MmugDNA.10546.1 | 6.93  | 5.91  | 0.3  | 0.4  | 2.04  | 0.008425 | 0.035841 | 0.140949 | 0.233777 |
| MmugDNA.10547.1.S1_at   | MmugDNA.10547.1 | 6.91  | 6.8   | 0.2  | 0.26 | 1.08  | 0.882983 | 0.53993  | 0.95022  | 0.723995 |
| MmugDNA.1055.1.S1_at    | MmugDNA.1055.1  | 5.55  | 5.12  | 0.38 | 0.24 | 1.35  | 0.130453 | 0.112566 | 0.412859 | 0.377995 |
| MmugDNA.10550.1.S1_at   | MmugDNA.10550.1 | 5.37  | 4.25  | 1.17 | 0.49 | 2.17  | 0.185503 | 0.222999 | 0.481731 | 0.495821 |
| MmugDNA.10551.1.S1_at   | MmugDNA.10551.1 | 9.53  | 9.43  | 0.15 | 0.12 | 1.07  | 0.641224 | 0.000028 | 0.824717 | 0.021152 |
| MmugDNA.10552.1.S1_at   | MmugDNA.10552.1 | 3.43  | 3.36  | 0.04 | 0.1  | 1.05  | 0.291129 | 0.313894 | 0.58049  | 0.568094 |
| MmugDNA.10553.1.S1_at   | MmugDNA.10553.1 | 4.8   | 5.01  | 0.16 | 0.06 | -1.15 | 0.148285 | 0.217286 | 0.436869 | 0.490911 |
| MmugDNA.10554.1.S1_at   | MmugDNA.10554.1 | 4.61  | 4.41  | 0.18 | 0.16 | 1.15  | 0.240818 | 0.225766 | 0.538187 | 0.498159 |
| MmugDNA.10555.1.S1_at   | MmugDNA.10555.1 | 7.26  | 7.2   | 0.51 | 0.17 | 1.04  | 0.306463 | 0.420771 | 0.593297 | 0.64442  |
| MmugDNA.10556.1.S1_at   | MmugDNA.10556.1 | 3.74  | 3.61  | 0.13 | 0.13 | 1.09  | 0.240158 | 0.149635 | 0.537781 | 0.424175 |
| MmugDNA.10557.1.S1_at   | MmugDNA.10557.1 | 6.54  | 6.49  | 0    | 0.13 | 1.03  | 0.696613 | 0.862226 | 0.855534 | 0.921663 |
| MmugDNA.10558.1.S1_at   | MmugDNA.10558.1 | 10.4  | 10.32 | 0.05 | 0.13 | 1.06  | 0.101132 | 0.077044 | 0.372334 | 0.322481 |
| MmugDNA.10559.1.S1_at   | MmugDNA.10559.1 | 3.92  | 3.75  | 0.26 | 0.2  | 1.12  | 0.180856 | 0.288008 | 0.476095 | 0.549277 |
| MmugDNA.10560.1.S1_at   | MmugDNA.10560.1 | 10.85 | 11.29 | 0.11 | 0.16 | -1.36 | 0.021324 | 0.00116  | 0.199623 | 0.053615 |
| MmugDNA.10561.1.S1_at   | MmugDNA.10561.1 | 5.54  | 5.29  | 0.13 | 0.22 | 1.19  | 0.297049 | 0.234823 | 0.585548 | 0.506125 |
| MmugDNA.10562.1.S1_at   | MmugDNA.10562.1 | 9.83  | 10.25 | 0.38 | 0.25 | -1.33 | 0.227489 | 0.576533 | 0.525599 | 0.747267 |
| MmugDNA.10564.1.S1_at   | MmugDNA.10564.1 | 12.55 | 11.19 | 0.29 | 0.15 | 2.58  | 0.002294 | 0.00061  | 0.092325 | 0.042176 |
| MmugDNA.10565.1.S1_at   | MmugDNA.10565.1 | 4.67  | 4.65  | 0.11 | 0.07 | 1.02  | 0.977721 | 0.988381 | 0.991259 | 0.993461 |
| MmugDNA.10566.1.S1_at   | MmugDNA.10566.1 | 2.95  | 3.07  | 0.12 | 0.07 | -1.08 | 0.19512  | 0.462908 | 0.491683 | 0.674149 |
| MmugDNA.10567.1.S1_at   | MmugDNA.10567.1 | 7.66  | 6.95  | 0.24 | 0.28 | 1.64  | 0.037975 | 0.015745 | 0.25063  | 0.158972 |
| MmugDNA.10568.1.S1_at   | MmugDNA.10568.1 | 6.62  | 7.99  | 0.35 | 0.26 | -2.59 | 0.011941 | 0.260157 | 0.159288 | 0.5268   |
| MmugDNA.10569.1.S1_at   | MmugDNA.10569.1 | 8.77  | 8.74  | 0.27 | 0.17 | 1.02  | 0.389395 | 0.182257 | 0.657321 | 0.458766 |
| MmugDNA.1057.1.S1_at    | MmugDNA.1057.1  | 12.09 | 11.92 | 0.38 | 0.07 | 1.13  | 0.643486 | 0.019555 | 0.826158 | 0.175563 |
| MmugDNA.10571.1.S1_at   | MmugDNA.10571.1 | 5.14  | 5.25  | 0.4  | 0.4  | -1.08 | 0.976702 | 0.035408 | 0.990824 | 0.232497 |
| MmugDNA.10572.1.S1_at   | MmugDNA.10572.1 | 11.11 | 10.09 | 0.44 | 0.19 | 2.03  | 0.012379 | 0.019828 | 0.161664 | 0.177124 |
| MmugDNA.10573.1.S1_at   | MmugDNA.10573.1 | 8.29  | 8.17  | 0.18 | 0.05 | 1.09  | 0.704678 | 0.394762 | 0.859786 | 0.627208 |
| MmugDNA.10576.1.S1_at   | MmugDNA.10576.1 | 6.22  | 6.35  | 0.15 | 0.05 | -1.1  | 0.851473 | 0.986887 | 0.935336 | 0.992589 |
| MmugDNA.10577.1.S1_at   | MmugDNA.10577.1 | 5.61  | 5.99  | 0.71 | 0.02 | -1.31 | 0.959989 | 0.942682 | 0.983565 | 0.967498 |
| MmugDNA.10579.1.S1_at   | MmugDNA.10579.1 | 8.6   | 8.15  | 0.6  | 0.11 | 1.37  | 0.110425 | 0.37536  | 0.38578  | 0.613359 |
| MmugDNA.1058.1.S1_at    | MmugDNA.1058.1  | 5.14  | 4.65  | 1.42 | 0.19 | 1.4   | 0.222436 | 0.255121 | 0.52037  | 0.52317  |
| MmugDNA.10580.1.S1_at   | MmugDNA.10580.1 | 9.8   | 9.58  | 0.18 | 0.02 | 1.17  | 0.072066 | 0.202304 | 0.326375 | 0.476691 |
| MmugDNA.10581.1.S1_s_at | MmugDNA.10581.1 | 6.31  | 6.4   | 0.15 | 0.09 | -1.07 | 0.696078 | 0.279269 | 0.855244 | 0.542937 |
| MmugDNA.10582.1.S1_at   | MmugDNA.10582.1 | 5.67  | 5.72  | 0.13 | 0.17 | -1.04 | 0.50695  | 0.743384 | 0.739369 | 0.851291 |
| MmugDNA.10583.1.S1_at   | MmugDNA.10583.1 | 4.75  | 4.64  | 0.22 | 0.12 | 1.08  | 0.946682 | 0.692195 | 0.977558 | 0.82091  |
| MmugDNA.10584.1.S1_s_at | MmugDNA.10584.1 | 11.34 | 11.55 | 0.23 | 0.06 | -1.15 | 0.074945 | 0.136429 | 0.331988 | 0.408839 |
| MmugDNA.10585.1.S1_at   | MmugDNA.10585.1 | 10.44 | 10.35 | 0.11 | 0.05 | 1.07  | 0.283898 | 0.54155  | 0.574172 | 0.725015 |
| MmugDNA.10586.1.S1_at   | MmugDNA.10586.1 | 5.87  | 5.87  | 0.04 | 0.09 | -1    | 0.623209 | 0.065747 | 0.813983 | 0.301766 |
| MmugDNA.1059.1.S1_at    | MmugDNA.1059.1  | 7.81  | 8.89  | 0.18 | 0.19 | -2.12 | 0.002217 | 0.029703 | 0.090954 | 0.214029 |

|                         |                 |       |       |      |      |       |          |          |          |          |
|-------------------------|-----------------|-------|-------|------|------|-------|----------|----------|----------|----------|
| MmugDNA.10590.1.S1_at   | MmugDNA.10590.1 | 7.51  | 7.07  | 0.4  | 0.16 | 1.36  | 0.080243 | 0.139156 | 0.340727 | 0.412266 |
| MmugDNA.10591.1.S1_at   | MmugDNA.10591.1 | 2.94  | 2.98  | 0.04 | 0.06 | -1.03 | 0.880398 | 0.005431 | 0.949144 | 0.101706 |
| MmugDNA.10592.1.S1_at   | MmugDNA.10592.1 | 6.43  | 7.02  | 0.97 | 0.23 | -1.5  | 0.116036 | 0.203718 | 0.393069 | 0.477966 |
| MmugDNA.10593.1.S1_at   | MmugDNA.10593.1 | 9.26  | 9.13  | 0.14 | 0.11 | 1.09  | 0.245718 | 0.006529 | 0.54172  | 0.109613 |
| MmugDNA.10595.1.S1_at   | MmugDNA.10595.1 | 9.9   | 10.16 | 0.17 | 0.08 | -1.2  | 0.198892 | 0.704876 | 0.496017 | 0.828846 |
| MmugDNA.10596.1.S1_s_at | MmugDNA.10596.1 | 12.47 | 12.97 | 0.23 | 0.1  | -1.41 | 0.039345 | 0.067774 | 0.254835 | 0.30644  |
| MmugDNA.10597.1.S1_at   | MmugDNA.10597.1 | 6.25  | 6.86  | 1.44 | 0.19 | -1.53 | 0.742272 | 0.750706 | 0.880654 | 0.855009 |
| MmugDNA.10598.1.S1_s_at | MmugDNA.10598.1 | 6.09  | 6.05  | 0.22 | 0.03 | 1.03  | 0.724422 | 0.881316 | 0.870565 | 0.932281 |
| MmugDNA.106.1.S1_at     | MmugDNA.106.1   | 4.71  | 4.66  | 0.24 | 0.31 | 1.04  | 0.730395 | 0.831195 | 0.873958 | 0.903172 |
| MmugDNA.1060.1.S1_at    | MmugDNA.1060.1  | 6.8   | 6.63  | 0.22 | 0.61 | 1.12  | 0.606919 | 0.031183 | 0.803387 | 0.21838  |
| MmugDNA.10600.1.S1_at   | MmugDNA.10600.1 | 5.68  | 5.82  | 0.33 | 0.03 | -1.1  | 0.79996  | 0.323327 | 0.909832 | 0.57443  |
| MmugDNA.10601.1.S1_at   | MmugDNA.10601.1 | 10.34 | 10.76 | 0.16 | 0.3  | -1.34 | 0.265766 | 0.353114 | 0.558371 | 0.596383 |
| MmugDNA.10601.1.S1_s_at | MmugDNA.10601.1 | 10.19 | 10.59 | 0.24 | 0.21 | -1.32 | 0.1109   | 0.163293 | 0.386468 | 0.439468 |
| MmugDNA.10602.1.S1_at   | MmugDNA.10602.1 | 8.92  | 9.38  | 0.26 | 0.11 | -1.37 | 0.218249 | 0.034851 | 0.515982 | 0.230897 |
| MmugDNA.10603.1.S1_at   | MmugDNA.10603.1 | 5.11  | 5.01  | 0.1  | 0.09 | 1.07  | 0.244974 | 0.05184  | 0.541139 | 0.273151 |
| MmugDNA.10604.1.S1_at   | MmugDNA.10604.1 | 3.73  | 3.76  | 0.46 | 0.11 | -1.02 | 0.573206 | 0.586973 | 0.781077 | 0.753932 |
| MmugDNA.35526.1.S1_s_at | MmugDNA.35526.1 | 11.04 | 10.9  | 0.16 | 0.09 | 1.11  | 0.230177 | 0.036134 | 0.529077 | 0.234582 |
| MmugDNA.10606.1.S1_at   | MmugDNA.10606.1 | 9.58  | 10.03 | 0.41 | 0.18 | -1.37 | 0.099776 | 0.174155 | 0.3708   | 0.450451 |
| MmugDNA.10607.1.S1_s_at | MmugDNA.10607.1 | 11.11 | 11.5  | 0.07 | 0.05 | -1.31 | 0.002079 | 0.023753 | 0.090206 | 0.192931 |
| MmugDNA.10608.1.S1_s_at | MmugDNA.10608.1 | 10.59 | 10.23 | 0.28 | 0.23 | 1.28  | 0.225418 | 0.297331 | 0.523271 | 0.556071 |
| MmugDNA.10609.1.S1_at   | MmugDNA.10609.1 | 3.24  | 3.26  | 0.23 | 0.04 | -1.01 | 0.548225 | 0.599727 | 0.766433 | 0.761544 |
| MmugDNA.1061.1.S1_at    | MmugDNA.1061.1  | 6.1   | 5.85  | 0.21 | 0.11 | 1.19  | 0.12561  | 0.138726 | 0.406238 | 0.411807 |
| MmugDNA.10612.1.S1_at   | MmugDNA.10612.1 | 3.41  | 4.04  | 0.23 | 0.3  | -1.54 | 0.124453 | 0.167983 | 0.404646 | 0.444576 |
| MmugDNA.10613.1.S1_at   | MmugDNA.10613.1 | 4.23  | 3.94  | 0.04 | 0.15 | 1.22  | 0.044589 | 0.054637 | 0.268352 | 0.279266 |
| MmugDNA.10615.1.S1_at   | MmugDNA.10615.1 | 6.49  | 6.47  | 0.13 | 0.03 | 1.02  | 0.259444 | 0.580564 | 0.553789 | 0.749782 |
| MmugDNA.10616.1.S1_at   | MmugDNA.10616.1 | 5.41  | 5.07  | 0.46 | 0.58 | 1.26  | 0.133501 | 0.365841 | 0.416989 | 0.605763 |
| MmugDNA.10617.1.S1_s_at | MmugDNA.10617.1 | 3.86  | 3.91  | 0.22 | 0.08 | -1.03 | 0.978864 | 0.884813 | 0.991961 | 0.934373 |
| MmugDNA.10618.1.S1_at   | MmugDNA.10618.1 | 10.54 | 11.29 | 0.25 | 0.19 | -1.68 | 0.015747 | 0.016619 | 0.177875 | 0.163117 |
| MmugDNA.10619.1.S1_at   | MmugDNA.10619.1 | 4.15  | 4.09  | 0.22 | 0.4  | 1.04  | 0.810834 | 0.90781  | 0.915259 | 0.947847 |
| MmugDNA.1062.1.S1_at    | MmugDNA.1062.1  | 3.77  | 3.77  | 0.03 | 0.05 | 1     | 0.250672 | 0.560144 | 0.545228 | 0.736517 |
| MmugDNA.10620.1.S1_at   | MmugDNA.10620.1 | 7.94  | 8.5   | 0.37 | 0.25 | -1.48 | 0.071656 | 0.045434 | 0.325611 | 0.2575   |
| MmugDNA.10621.1.S1_at   | MmugDNA.10621.1 | 10.71 | 10.85 | 0.13 | 0.11 | -1.1  | 0.867068 | 0.028845 | 0.942519 | 0.211661 |
| MmugDNA.10622.1.S1_at   | MmugDNA.10622.1 | 5.56  | 5.59  | 0.23 | 0.1  | -1.02 | 0.777503 | 0.712805 | 0.898365 | 0.833516 |
| MmugDNA.10623.1.S1_at   | MmugDNA.10623.1 | 4.5   | 4.59  | 0.09 | 0.07 | -1.07 | 0.460661 | 0.084909 | 0.708331 | 0.336511 |
| MmugDNA.10624.1.S1_at   | MmugDNA.10624.1 | 6.46  | 6.55  | 0.72 | 0.28 | -1.06 | 0.535364 | 0.74607  | 0.75828  | 0.852688 |
| MmugDNA.10625.1.S1_at   | MmugDNA.10625.1 | 5.98  | 5.74  | 0.36 | 0.17 | 1.18  | 0.313001 | 0.073672 | 0.598892 | 0.317014 |
| MmugDNA.10626.1.S1_at   | MmugDNA.10626.1 | 6.2   | 4.49  | 0.95 | 0.74 | 3.29  | 0.139664 | 0.053906 | 0.42522  | 0.277699 |
| MmugDNA.10627.1.S1_at   | MmugDNA.10627.1 | 10.12 | 10.5  | 0.32 | 0.16 | -1.31 | 0.169254 | 0.227104 | 0.462574 | 0.499432 |
| MmugDNA.10629.1.S1_at   | MmugDNA.10629.1 | 11.15 | 11    | 0.11 | 0.08 | 1.11  | 0.319727 | 0.155417 | 0.604318 | 0.430802 |
| MmugDNA.1063.1.S1_at    | MmugDNA.1063.1  | 7.95  | 7.19  | 0.26 | 0.32 | 1.69  | 0.064066 | 0.023639 | 0.309671 | 0.192555 |
| MmugDNA.10630.1.S1_s_at | MmugDNA.10630.1 | 11.66 | 10.75 | 0.14 | 0.14 | 1.87  | 0.002511 | 0.12649  | 0.094326 | 0.397038 |
| MmugDNA.10631.1.S1_at   | MmugDNA.10631.1 | 10.52 | 9.46  | 0.18 | 0.22 | 2.09  | 0.0036   | 0.036193 | 0.105385 | 0.234827 |
| MmugDNA.10632.1.S1_at   | MmugDNA.10632.1 | 5.11  | 6.23  | 0.58 | 0.63 | -2.17 | 0.094281 | 0.352429 | 0.363294 | 0.595722 |

|                         |                 |       |       |      |      |        |          |          |          |          |
|-------------------------|-----------------|-------|-------|------|------|--------|----------|----------|----------|----------|
| MmugDNA.10633.1.S1_s_at | MmugDNA.10633.1 | 5.68  | 6.01  | 0.31 | 0.43 | -1.26  | 0.346446 | 0.014933 | 0.624993 | 0.155342 |
| MmugDNA.10634.1.S1_at   | MmugDNA.10634.1 | 7.11  | 7.05  | 0.07 | 0.05 | 1.04   | 0.210262 | 0.83748  | 0.507866 | 0.907127 |
| MmugDNA.10635.1.S1_at   | MmugDNA.10635.1 | 9.67  | 10.23 | 0.27 | 0.11 | -1.48  | 0.041101 | 0.030242 | 0.259223 | 0.215784 |
| MmugDNA.10639.1.S1_at   | MmugDNA.10639.1 | 9.38  | 9     | 0.27 | 0.08 | 1.3    | 0.092307 | 0.121009 | 0.360355 | 0.389997 |
| MmugDNA.10641.1.S1_at   | MmugDNA.10641.1 | 9.38  | 9.69  | 1.41 | 0.1  | -1.24  | 0.904294 | 0.906497 | 0.959379 | 0.947112 |
| MmugDNA.10642.1.S1_at   | MmugDNA.10642.1 | 3.47  | 3.51  | 0.04 | 0.05 | -1.03  | 0.122354 | 0.014467 | 0.40112  | 0.153478 |
| MmugDNA.10644.1.S1_at   | MmugDNA.10644.1 | 8.01  | 7.57  | 0.69 | 0.4  | 1.36   | 0.391227 | 0.564733 | 0.658623 | 0.739425 |
| MmugDNA.10645.1.S1_at   | MmugDNA.10645.1 | 6.46  | 6.33  | 0.16 | 0.12 | 1.1    | 0.13409  | 0.128558 | 0.417577 | 0.399918 |
| MmugDNA.10646.1.S1_at   | MmugDNA.10646.1 | 3.55  | 3.16  | 0.18 | 0.1  | 1.31   | 0.042808 | 0.05646  | 0.264078 | 0.283516 |
| MmugDNA.10648.1.S1_at   | MmugDNA.10648.1 | 5.59  | 5.93  | 0.31 | 0.13 | -1.26  | 0.664383 | 0.624456 | 0.838389 | 0.778655 |
| MmugDNA.1065.1.S1_at    | MmugDNA.1065.1  | 5.11  | 4.46  | 0.72 | 0.15 | 1.57   | 0.184099 | 0.168306 | 0.480042 | 0.444942 |
| MmugDNA.10650.1.S1_at   | MmugDNA.10650.1 | 5.36  | 5.29  | 0.84 | 0.65 | 1.05   | 0.448889 | 0.35592  | 0.700243 | 0.597894 |
| MmugDNA.10651.1.S1_at   | MmugDNA.10651.1 | 2.9   | 3.08  | 0.02 | 0.14 | -1.13  | 0.248776 | 0.153512 | 0.544151 | 0.42827  |
| MmugDNA.10652.1.S1_at   | MmugDNA.10652.1 | 4.05  | 3.87  | 0.22 | 0.08 | 1.13   | 0.658017 | 0.696951 | 0.834845 | 0.824002 |
| MmugDNA.10653.1.S1_at   | MmugDNA.10653.1 | 3.68  | 3.69  | 0.25 | 0.19 | -1.01  | 0.514085 | 0.281732 | 0.744131 | 0.544807 |
| MmugDNA.10654.1.S1_at   | MmugDNA.10654.1 | 6     | 5.66  | 0.65 | 0.46 | 1.27   | 0.481235 | 0.525722 | 0.72184  | 0.715217 |
| MmugDNA.10655.1.S1_at   | MmugDNA.10655.1 | 3.7   | 3.63  | 0.64 | 0.37 | 1.05   | 0.57017  | 0.662933 | 0.779298 | 0.802665 |
| MmugDNA.10656.1.S1_at   | MmugDNA.10656.1 | 9.66  | 9.74  | 0.47 | 0.04 | -1.06  | 0.690599 | 0.910855 | 0.852093 | 0.949709 |
| MmugDNA.10657.1.S1_at   | MmugDNA.10657.1 | 5.18  | 5.14  | 0.06 | 0.11 | 1.02   | 0.845376 | 0.218743 | 0.932457 | 0.492438 |
| MmugDNA.10658.1.S1_at   | MmugDNA.10658.1 | 4.72  | 4.48  | 0.17 | 0.03 | 1.17   | 0.299926 | 0.436621 | 0.588233 | 0.656124 |
| MmugDNA.10659.1.S1_at   | MmugDNA.10659.1 | 7.77  | 12.12 | 2.2  | 0.27 | -20.42 | 0.075132 | 0.113679 | 0.332294 | 0.379818 |
| MmugDNA.1066.1.S1_at    | MmugDNA.1066.1  | 8.66  | 8.74  | 0.06 | 0.1  | -1.06  | 0.964867 | 0.002159 | 0.98581  | 0.068763 |
| MmugDNA.10660.1.S1_at   | MmugDNA.10660.1 | 11.26 | 11.16 | 0.22 | 0.07 | 1.07   | 0.476823 | 0.036769 | 0.719108 | 0.236291 |
| MmugDNA.10661.1.S1_at   | MmugDNA.10661.1 | 5.65  | 5.52  | 0.35 | 0.04 | 1.09   | 0.179631 | 0.248446 | 0.474837 | 0.517727 |
| MmugDNA.10662.1.S1_at   | MmugDNA.10662.1 | 5.26  | 5.31  | 0.18 | 0.01 | -1.04  | 0.923891 | 0.364985 | 0.967657 | 0.605199 |
| MmugDNA.10664.1.S1_at   | MmugDNA.10664.1 | 7.2   | 7.29  | 0.67 | 0.2  | -1.06  | 0.425252 | 0.644377 | 0.68271  | 0.791566 |
| MmugDNA.10665.1.S1_at   | MmugDNA.10665.1 | 12.5  | 12.51 | 0.2  | 0.02 | -1     | 0.760208 | 0.006161 | 0.890109 | 0.106774 |
| MmugDNA.10667.1.S1_at   | MmugDNA.10667.1 | 12.63 | 12.41 | 0.11 | 0.07 | 1.17   | 0.040914 | 0.304208 | 0.258691 | 0.561558 |
| MmugDNA.10670.1.S1_at   | MmugDNA.10670.1 | 4.94  | 4.78  | 0.21 | 0.41 | 1.11   | 0.227875 | 0.284228 | 0.525965 | 0.546461 |
| MmugDNA.10671.1.S1_at   | MmugDNA.10671.1 | 5.32  | 6.52  | 1.52 | 0.58 | -2.3   | 0.511798 | 0.682954 | 0.742752 | 0.815033 |
| MmugDNA.10672.1.S1_at   | MmugDNA.10672.1 | 7.16  | 6.65  | 0.38 | 0.12 | 1.43   | 0.17801  | 0.004357 | 0.472794 | 0.092421 |
| MmugDNA.10673.1.S1_at   | MmugDNA.10673.1 | 5.52  | 5.8   | 0.07 | 0.24 | -1.21  | 0.097497 | 0.045076 | 0.367708 | 0.256789 |
| MmugDNA.10674.1.S1_at   | MmugDNA.10674.1 | 11.23 | 11.06 | 0.13 | 0.18 | 1.12   | 0.473276 | 0.751903 | 0.716569 | 0.855714 |
| MmugDNA.10677.1.S1_at   | MmugDNA.10677.1 | 9.73  | 9.55  | 0.12 | 0.06 | 1.13   | 0.078931 | 0.704081 | 0.338745 | 0.828326 |
| MmugDNA.10678.1.S1_at   | MmugDNA.10678.1 | 6.53  | 6.24  | 0.36 | 0.12 | 1.23   | 0.200325 | 0.098942 | 0.497792 | 0.357049 |
| MmugDNA.10681.1.S1_at   | MmugDNA.10681.1 | 5.79  | 5.64  | 0.29 | 0.1  | 1.1    | 0.489333 | 0.328581 | 0.727626 | 0.578148 |
| MmugDNA.10683.1.S1_at   | MmugDNA.10683.1 | 7.86  | 8.25  | 0.15 | 0.18 | -1.31  | 0.129941 | 0.020747 | 0.412108 | 0.180721 |
| MmugDNA.10686.1.S1_at   | MmugDNA.10686.1 | 6     | 5.88  | 0.74 | 0.21 | 1.08   | 0.213264 | 0.239122 | 0.511046 | 0.509827 |
| MmugDNA.10689.1.S1_at   | MmugDNA.10689.1 | 3.27  | 3.92  | 0.19 | 0.22 | -1.57  | 0.016995 | 0.016392 | 0.183806 | 0.162128 |
| MmugDNA.1069.1.S1_at    | MmugDNA.1069.1  | 8.4   | 8.48  | 0.44 | 0.15 | -1.06  | 0.689192 | 0.538819 | 0.851576 | 0.723368 |
| MmugDNA.10690.1.S1_at   | MmugDNA.10690.1 | 4.55  | 4.55  | 0.07 | 0.18 | -1     | 0.251972 | 0.596483 | 0.546684 | 0.759596 |
| MmugDNA.10691.1.S1_at   | MmugDNA.10691.1 | 7.45  | 9.51  | 1.31 | 0.42 | -4.18  | 0.084921 | 0.16013  | 0.348867 | 0.436296 |
| MmugDNA.10693.1.S1_at   | MmugDNA.10693.1 | 6.11  | 6.29  | 0.21 | 0.1  | -1.14  | 0.391966 | 0.427293 | 0.658975 | 0.649175 |



|                         |                 |       |       |      |      |       |          |          |          |          |
|-------------------------|-----------------|-------|-------|------|------|-------|----------|----------|----------|----------|
| MmugDNA.10694.1.S1_at   | MmugDNA.10694.1 | 3.49  | 3.22  | 0.6  | 0.11 | 1.21  | 0.5709   | 0.429758 | 0.779514 | 0.651032 |
| MmugDNA.10696.1.S1_at   | MmugDNA.10696.1 | 6.63  | 6.88  | 0.13 | 0.01 | -1.19 | 0.048082 | 0.046336 | 0.276678 | 0.25979  |
| MmugDNA.10697.1.S1_at   | MmugDNA.10697.1 | 3.9   | 3.9   | 0.1  | 0.02 | 1     | 0.444754 | 0.532817 | 0.697566 | 0.719235 |
| MmugDNA.1070.1.S1_at    | MmugDNA.1070.1  | 6.99  | 9.2   | 0.94 | 0.24 | -4.62 | 0.052032 | 0.045188 | 0.285663 | 0.256979 |
| MmugDNA.1070.1.S1_s_at  | MmugDNA.1070.1  | 10.78 | 10.87 | 0.02 | 0.23 | -1.06 | 0.289107 | 0.552935 | 0.578755 | 0.732201 |
| MmugDNA.10700.1.S1_at   | MmugDNA.10700.1 | 8.75  | 9.49  | 0.23 | 0.01 | -1.68 | 0.00482  | 0.0038   | 0.115098 | 0.087835 |
| MmugDNA.10701.1.S1_at   | MmugDNA.10701.1 | 5.33  | 5.26  | 0.32 | 0.04 | 1.05  | 0.255774 | 0.318031 | 0.550344 | 0.571046 |
| MmugDNA.10702.1.S1_at   | MmugDNA.10702.1 | 6.82  | 6.74  | 0.4  | 0.21 | 1.06  | 0.314657 | 0.251249 | 0.600041 | 0.519984 |
| MmugDNA.10703.1.S1_at   | MmugDNA.10703.1 | 6.6   | 6.49  | 0.11 | 0.02 | 1.08  | 0.103033 | 0.112205 | 0.375707 | 0.377537 |
| MmugDNA.10704.1.S1_at   | MmugDNA.10704.1 | 4.66  | 4.54  | 0.2  | 0.06 | 1.09  | 0.377716 | 0.478802 | 0.648163 | 0.684733 |
| MmugDNA.10705.1.S1_at   | MmugDNA.10705.1 | 7.96  | 7.96  | 0.03 | 0.13 | 1     | 0.316806 | 0.880245 | 0.60152  | 0.931571 |
| MmugDNA.10706.1.S1_at   | MmugDNA.10706.1 | 7.29  | 7.68  | 0.66 | 0.11 | -1.3  | 0.995739 | 0.702113 | 0.998383 | 0.827304 |
| MmugDNA.10709.1.S1_at   | MmugDNA.10709.1 | 5.7   | 5.7   | 0    | 0.12 | 1     | 0.373901 | 0.174919 | 0.645118 | 0.451595 |
| MmugDNA.1071.1.S1_s_at  | MmugDNA.1071.1  | 13.18 | 13.09 | 0.11 | 0.02 | 1.07  | 0.065239 | 0.058324 | 0.312313 | 0.288292 |
| MmugDNA.10711.1.S1_s_at | MmugDNA.10711.1 | 11.89 | 11.84 | 0.03 | 0.02 | 1.03  | 0.087213 | 0.662108 | 0.352892 | 0.802107 |
| MmugDNA.10713.1.S1_at   | MmugDNA.10713.1 | 4.79  | 5.54  | 0.61 | 0.16 | -1.69 | 0.323906 | 0.33867  | 0.60764  | 0.585703 |
| MmugDNA.10714.1.S1_at   | MmugDNA.10714.1 | 4.32  | 4.39  | 0.24 | 0.44 | -1.04 | 0.493963 | 0.771744 | 0.730873 | 0.867344 |
| MmugDNA.10715.1.S1_at   | MmugDNA.10715.1 | 3.34  | 3.35  | 0.1  | 0.19 | -1    | 0.777773 | 0.94365  | 0.898434 | 0.967966 |
| MmugDNA.10716.1.S1_at   | MmugDNA.10716.1 | 10.6  | 10.33 | 0.18 | 0.11 | 1.2   | 0.060023 | 0.196592 | 0.302259 | 0.471608 |
| MmugDNA.10717.1.S1_at   | MmugDNA.10717.1 | 5.92  | 5.86  | 0.06 | 0.15 | 1.04  | 0.756028 | 0.812128 | 0.887592 | 0.89155  |
| MmugDNA.10718.1.S1_at   | MmugDNA.10718.1 | 11.45 | 12.07 | 0.31 | 0.08 | -1.54 | 0.081716 | 0.096666 | 0.342963 | 0.35417  |
| MmugDNA.10718.1.S1_s_at | MmugDNA.10718.1 | 9.46  | 9.62  | 0.21 | 0.04 | -1.12 | 0.316681 | 0.637561 | 0.601415 | 0.787033 |
| MmugDNA.10719.1.S1_at   | MmugDNA.10719.1 | 5.99  | 6.6   | 0.53 | 0.1  | -1.53 | 0.315173 | 0.461319 | 0.600287 | 0.672984 |
| MmugDNA.1072.1.S1_at    | MmugDNA.1072.1  | 6.5   | 6.57  | 0.22 | 0.13 | -1.05 | 0.906508 | 0.094689 | 0.960391 | 0.351481 |
| MmugDNA.10720.1.S1_at   | MmugDNA.10720.1 | 7.26  | 6.79  | 0.3  | 0.14 | 1.39  | 0.069478 | 0.108284 | 0.322002 | 0.371557 |
| MmugDNA.10721.1.S1_at   | MmugDNA.10721.1 | 5.16  | 4.75  | 0.13 | 0.33 | 1.33  | 0.105975 | 0.34565  | 0.379981 | 0.590854 |
| MmugDNA.10722.1.S1_at   | MmugDNA.10722.1 | 3.44  | 3.06  | 0.21 | 0.53 | 1.3   | 0.906868 | 0.982314 | 0.960577 | 0.990348 |
| MmugDNA.10723.1.S1_at   | MmugDNA.10723.1 | 5.32  | 5.81  | 0.59 | 0.27 | -1.4  | 0.39578  | 0.34611  | 0.662054 | 0.591182 |
| MmugDNA.10724.1.S1_at   | MmugDNA.10724.1 | 3.86  | 3.79  | 0.94 | 0.1  | 1.05  | 0.364492 | 0.323943 | 0.639104 | 0.57466  |
| MmugDNA.2695.1.S1_x_at  | MmugDNA.2695.1  | 12.49 | 12.4  | 0.28 | 0.17 | 1.06  | 0.727245 | 0.256305 | 0.872202 | 0.524079 |
| MmugDNA.10726.1.S1_at   | MmugDNA.10726.1 | 8.07  | 7.92  | 0.17 | 0.17 | 1.11  | 0.250024 | 0.39858  | 0.544879 | 0.629458 |
| MmugDNA.10729.1.S1_at   | MmugDNA.10729.1 | 3.91  | 3.61  | 0.16 | 0.09 | 1.23  | 0.055748 | 0.049854 | 0.293273 | 0.268412 |
| MmugDNA.1073.1.S1_at    | MmugDNA.1073.1  | 11.23 | 11.24 | 0.1  | 0.04 | -1.01 | 0.851639 | 0.738258 | 0.935423 | 0.84825  |
| MmugDNA.10730.1.S1_at   | MmugDNA.10730.1 | 9.53  | 9.44  | 0.4  | 0.28 | 1.07  | 0.926721 | 0.076369 | 0.969008 | 0.321368 |
| MmugDNA.10731.1.S1_at   | MmugDNA.10731.1 | 2.73  | 2.77  | 0.07 | 0.08 | -1.02 | 0.557662 | 0.70357  | 0.772315 | 0.828139 |
| MmugDNA.10732.1.S1_at   | MmugDNA.10732.1 | 3.46  | 3.51  | 0.13 | 0.11 | -1.03 | 0.764179 | 0.890128 | 0.891902 | 0.937438 |
| MmugDNA.10733.1.S1_s_at | MmugDNA.10733.1 | 10.2  | 10.29 | 0.21 | 0.04 | -1.06 | 0.508485 | 0.759225 | 0.740423 | 0.860036 |
| MmugDNA.10735.1.S1_at   | MmugDNA.10735.1 | 10.19 | 10.91 | 0.45 | 0.02 | -1.66 | 0.044435 | 0.17755  | 0.267911 | 0.453943 |
| MmugDNA.10737.1.S1_at   | MmugDNA.10737.1 | 10.09 | 9.74  | 0.22 | 0.21 | 1.27  | 0.289729 | 0.698391 | 0.579272 | 0.82478  |
| MmugDNA.10738.1.S1_s_at | MmugDNA.10738.1 | 8.96  | 8.38  | 0.88 | 0.07 | 1.49  | 0.316262 | 0.491415 | 0.601042 | 0.693004 |
| MmugDNA.10739.1.S1_at   | MmugDNA.10739.1 | 4.67  | 4.44  | 0.03 | 0.12 | 1.17  | 0.048978 | 0.309101 | 0.278936 | 0.564787 |
| MmugDNA.1074.1.S1_at    | MmugDNA.1074.1  | 4.41  | 4.66  | 0.11 | 0.07 | -1.19 | 0.061649 | 0.103281 | 0.304886 | 0.364143 |
| MmugDNA.10740.1.S1_at   | MmugDNA.10740.1 | 4.34  | 4.31  | 0.28 | 0.05 | 1.02  | 0.325144 | 0.667339 | 0.608559 | 0.805297 |

|                         |                 |       |       |      |      |       |          |          |          |          |
|-------------------------|-----------------|-------|-------|------|------|-------|----------|----------|----------|----------|
| MmugDNA.10742.1.S1_at   | MmugDNA.10742.1 | 10.84 | 9.71  | 0.44 | 0.12 | 2.19  | 0.014371 | 0.046373 | 0.171567 | 0.259844 |
| MmugDNA.10746.1.S1_at   | MmugDNA.10746.1 | 8.72  | 8.83  | 0.21 | 0.08 | -1.08 | 0.370251 | 0.036425 | 0.643267 | 0.235375 |
| MmugDNA.10747.1.S1_at   | MmugDNA.10747.1 | 6.08  | 6.22  | 0.03 | 0.16 | -1.1  | 0.441011 | 0.742593 | 0.694685 | 0.850976 |
| MmugDNA.10748.1.S1_at   | MmugDNA.10748.1 | 4.52  | 4.37  | 0.04 | 0.22 | 1.11  | 0.824458 | 0.347181 | 0.922007 | 0.591815 |
| MmugDNA.10749.1.S1_at   | MmugDNA.10749.1 | 4.65  | 4.69  | 0.1  | 0.18 | -1.02 | 0.52773  | 0.030023 | 0.753238 | 0.215056 |
| MmugDNA.1075.1.S1_at    | MmugDNA.1075.1  | 5.7   | 5.61  | 0    | 0.25 | 1.07  | 0.634707 | 0.65274  | 0.820892 | 0.796986 |
| MmugDNA.10750.1.S1_at   | MmugDNA.10750.1 | 8.65  | 9.6   | 0.33 | 0.18 | -1.94 | 0.020128 | 0.012453 | 0.19531  | 0.14417  |
| MmugDNA.10750.1.S1_s_at | MmugDNA.10750.1 | 8.71  | 9.6   | 0.48 | 0.17 | -1.86 | 0.050951 | 0.044983 | 0.283415 | 0.256531 |
| MmugDNA.10751.1.S1_at   | MmugDNA.10751.1 | 5.12  | 4.51  | 0.39 | 0.15 | 1.52  | 0.163404 | 0.246083 | 0.455676 | 0.515827 |
| MmugDNA.10752.1.S1_at   | MmugDNA.10752.1 | 4.73  | 6.93  | 0.9  | 0.42 | -4.6  | 0.029957 | 0.156206 | 0.22635  | 0.43161  |
| MmugDNA.10753.1.S1_at   | MmugDNA.10753.1 | 4.86  | 5.09  | 0.57 | 0.04 | -1.17 | 0.840339 | 0.964854 | 0.929916 | 0.980489 |
| MmugDNA.10755.1.S1_at   | MmugDNA.10755.1 | 3.22  | 3.13  | 0.13 | 0.16 | 1.06  | 0.126514 | 0.138056 | 0.407915 | 0.410919 |
| MmugDNA.10756.1.S1_at   | MmugDNA.10756.1 | 2.89  | 2.81  | 0.06 | 0.04 | 1.05  | 0.090415 | 0.130642 | 0.357185 | 0.402634 |
| MmugDNA.10757.1.S1_at   | MmugDNA.10757.1 | 4.56  | 3.75  | 0.64 | 1.16 | 1.76  | 0.893834 | 0.631842 | 0.954747 | 0.782971 |
| MmugDNA.10758.1.S1_at   | MmugDNA.10758.1 | 6.11  | 6.01  | 0.32 | 0.02 | 1.07  | 0.569177 | 0.752736 | 0.778726 | 0.855968 |
| MmugDNA.10759.1.S1_at   | MmugDNA.10759.1 | 5.95  | 5.96  | 0.19 | 0.04 | -1.01 | 0.761488 | 0.671895 | 0.89062  | 0.808166 |
| MmugDNA.10760.1.S1_at   | MmugDNA.10760.1 | 4.32  | 3.89  | 0.38 | 0.14 | 1.34  | 0.15702  | 0.162507 | 0.447872 | 0.438649 |
| MmugDNA.10761.1.S1_at   | MmugDNA.10761.1 | 7.34  | 7.32  | 0.03 | 0.17 | 1.02  | 0.675058 | 0.761246 | 0.844902 | 0.861279 |
| MmugDNA.10762.1.S1_at   | MmugDNA.10762.1 | 6.19  | 6.15  | 0.04 | 0.13 | 1.03  | 0.882397 | 0.959251 | 0.949987 | 0.97688  |
| MmugDNA.10765.1.S1_at   | MmugDNA.10765.1 | 5.83  | 5.83  | 0.04 | 0.12 | -1    | 0.992363 | 0.183792 | 0.997173 | 0.459871 |
| MmugDNA.10766.1.S1_at   | MmugDNA.10766.1 | 3.52  | 3.52  | 0.04 | 0    | 1     | 0.417009 | 0.140135 | 0.677282 | 0.413394 |
| MmugDNA.10767.1.S1_at   | MmugDNA.10767.1 | 9.6   | 9.53  | 0.29 | 0.16 | 1.05  | 0.503133 | 0.943279 | 0.736728 | 0.967814 |
| MmugDNA.10768.1.S1_at   | MmugDNA.10768.1 | 3.54  | 3.68  | 0.04 | 0.22 | -1.1  | 0.532741 | 0.785867 | 0.756693 | 0.875989 |
| MmugDNA.10770.1.S1_at   | MmugDNA.10770.1 | 3.85  | 3.84  | 0.14 | 0.09 | 1.01  | 0.533978 | 0.590282 | 0.757384 | 0.756124 |
| MmugDNA.10772.1.S1_at   | MmugDNA.10772.1 | 7.62  | 8.16  | 0.6  | 0.28 | -1.46 | 0.128211 | 0.164001 | 0.410227 | 0.440128 |
| MmugDNA.10774.1.S1_at   | MmugDNA.10774.1 | 4.79  | 4.68  | 0.08 | 0.1  | 1.08  | 0.44633  | 0.027107 | 0.69858  | 0.205797 |
| MmugDNA.10775.1.S1_at   | MmugDNA.10775.1 | 7.04  | 7.98  | 0.31 | 0.36 | -1.92 | 0.078846 | 0.041541 | 0.338712 | 0.248704 |
| MmugDNA.10775.1.S1_s_at | MmugDNA.10775.1 | 7.17  | 7.89  | 0.16 | 0.24 | -1.64 | 0.040169 | 0.028594 | 0.256871 | 0.210901 |
| MmugDNA.10779.1.S1_at   | MmugDNA.10779.1 | 13.89 | 13.94 | 0.15 | 0.04 | -1.03 | 0.520296 | 0.724309 | 0.74869  | 0.840433 |
| MmugDNA.1078.1.S1_at    | MmugDNA.1078.1  | 4.22  | 4.07  | 0.07 | 0.09 | 1.11  | 0.089608 | 0.04444  | 0.356523 | 0.25521  |
| MmugDNA.10780.1.S1_at   | MmugDNA.10780.1 | 5.71  | 5.31  | 0.12 | 0.14 | 1.32  | 0.029169 | 0.05062  | 0.223643 | 0.270317 |
| MmugDNA.10781.1.S1_at   | MmugDNA.10781.1 | 10.19 | 10.32 | 0.2  | 0.18 | -1.09 | 0.292157 | 0.283434 | 0.581449 | 0.545955 |
| MmugDNA.10782.1.S1_at   | MmugDNA.10782.1 | 6.17  | 6.68  | 0.69 | 0.54 | -1.43 | 0.927493 | 0.61055  | 0.969315 | 0.768734 |
| MmugDNA.10784.1.S1_at   | MmugDNA.10784.1 | 4.18  | 4.3   | 0.06 | 0.11 | -1.09 | 0.109384 | 0.057    | 0.384456 | 0.284868 |
| MmugDNA.10785.1.S1_at   | MmugDNA.10785.1 | 4.51  | 3.91  | 0.76 | 0.22 | 1.51  | 0.195153 | 0.437541 | 0.491724 | 0.656769 |
| MmugDNA.10786.1.S1_at   | MmugDNA.10786.1 | 10.83 | 10    | 0.18 | 0.35 | 1.78  | 0.048147 | 0.080482 | 0.276908 | 0.328159 |
| MmugDNA.10787.1.S1_at   | MmugDNA.10787.1 | 8.44  | 8.4   | 0.16 | 0.33 | 1.02  | 0.703036 | 0.189733 | 0.859071 | 0.465396 |
| MmugDNA.10788.1.S1_at   | MmugDNA.10788.1 | 5.69  | 5.7   | 0.21 | 0.13 | -1    | 0.831819 | 0.286872 | 0.925994 | 0.548182 |
| MmugDNA.10789.1.S1_at   | MmugDNA.10789.1 | 4.37  | 4.82  | 0.61 | 0.43 | -1.36 | 0.399974 | 0.856348 | 0.665139 | 0.917938 |
| MmugDNA.1079.1.S1_at    | MmugDNA.1079.1  | 4.93  | 4.53  | 0.2  | 0.15 | 1.32  | 0.094142 | 0.170007 | 0.363139 | 0.446736 |
| MmugDNA.10792.1.S1_at   | MmugDNA.10792.1 | 11.16 | 10.11 | 0.09 | 0.11 | 2.08  | 0.000187 | 0.000105 | 0.053494 | 0.028099 |
| MmugDNA.10793.1.S1_at   | MmugDNA.10793.1 | 7.66  | 7.47  | 0.29 | 0.17 | 1.15  | 0.152486 | 0.127537 | 0.442168 | 0.398407 |
| MmugDNA.10794.1.S1_at   | MmugDNA.10794.1 | 4.86  | 4.79  | 0.12 | 0.12 | 1.05  | 0.815685 | 0.380998 | 0.917707 | 0.617476 |

|                         |                 |       |       |      |      |       |          |          |          |          |
|-------------------------|-----------------|-------|-------|------|------|-------|----------|----------|----------|----------|
| MmugDNA.10795.1.S1_at   | MmugDNA.10795.1 | 9.86  | 9.95  | 0.43 | 0.09 | -1.07 | 0.580748 | 0.08956  | 0.786042 | 0.343811 |
| MmugDNA.10797.1.S1_at   | MmugDNA.10797.1 | 11.64 | 11.89 | 0.12 | 0.04 | -1.19 | 0.041569 | 0.001459 | 0.260296 | 0.058204 |
| MmugDNA.10798.1.S1_at   | MmugDNA.10798.1 | 3.31  | 3.17  | 0.23 | 0    | 1.1   | 0.987598 | 0.940989 | 0.995514 | 0.966568 |
| MmugDNA.10799.1.S1_at   | MmugDNA.10799.1 | 3.79  | 3.62  | 0.2  | 0.1  | 1.12  | 0.651596 | 0.509395 | 0.830755 | 0.704159 |
| MmugDNA.108.1.S1_at     | MmugDNA.108.1   | 5.66  | 4.79  | 0.52 | 0.65 | 1.83  | 0.232246 | 0.354311 | 0.530743 | 0.597164 |
| MmugDNA.1080.1.S1_at    | MmugDNA.1080.1  | 5.9   | 5.77  | 0.72 | 0.17 | 1.1   | 0.85236  | 0.951343 | 0.93587  | 0.972417 |
| MmugDNA.10800.1.S1_at   | MmugDNA.10800.1 | 4.21  | 4.29  | 0.21 | 0.08 | -1.05 | 0.618804 | 0.389986 | 0.810809 | 0.624002 |
| MmugDNA.10801.1.S1_s_at | MmugDNA.10801.1 | 3.09  | 2.96  | 0.13 | 0.11 | 1.09  | 0.297364 | 0.106769 | 0.585786 | 0.369349 |
| MmugDNA.10802.1.S1_at   | MmugDNA.10802.1 | 4.44  | 4.54  | 0.21 | 0.06 | -1.07 | 0.667293 | 0.864499 | 0.840276 | 0.923174 |
| MmugDNA.10803.1.S1_s_at | MmugDNA.10803.1 | 9.1   | 10    | 0.3  | 0.31 | -1.87 | 0.027497 | 0.544693 | 0.218484 | 0.727041 |
| MmugDNA.10804.1.S1_at   | MmugDNA.10804.1 | 3.17  | 3.34  | 0.09 | 0.28 | -1.13 | 0.284722 | 0.12532  | 0.574629 | 0.395949 |
| MmugDNA.10805.1.S1_at   | MmugDNA.10805.1 | 7.3   | 7.2   | 0.23 | 0.21 | 1.07  | 0.559991 | 0.07612  | 0.773635 | 0.320899 |
| MmugDNA.10805.1.S1_s_at | MmugDNA.10805.1 | 7.92  | 7.74  | 0.14 | 0.13 | 1.13  | 0.14408  | 0.044474 | 0.430916 | 0.255242 |
| MmugDNA.10806.1.S1_at   | MmugDNA.10806.1 | 5.46  | 5.36  | 0    | 0.19 | 1.07  | 0.235743 | 0.09981  | 0.533475 | 0.358431 |
| MmugDNA.10808.1.S1_at   | MmugDNA.10808.1 | 4.09  | 4.28  | 0.08 | 0.1  | -1.14 | 0.14507  | 0.226812 | 0.432307 | 0.499232 |
| MmugDNA.10809.1.S1_at   | MmugDNA.10809.1 | 5.22  | 5.07  | 0.32 | 0.1  | 1.11  | 0.133774 | 0.153461 | 0.417199 | 0.42827  |
| MmugDNA.10810.1.S1_at   | MmugDNA.10810.1 | 5.55  | 5.58  | 0.07 | 0.14 | -1.02 | 0.399411 | 0.578675 | 0.664771 | 0.748603 |
| MmugDNA.10813.1.S1_at   | MmugDNA.10813.1 | 8.8   | 8.51  | 0.23 | 0.2  | 1.22  | 0.061226 | 0.072751 | 0.304296 | 0.315651 |
| MmugDNA.10814.1.S1_at   | MmugDNA.10814.1 | 3.28  | 3.08  | 0.15 | 0.08 | 1.15  | 0.148445 | 0.275926 | 0.436978 | 0.540035 |
| MmugDNA.10815.1.S1_at   | MmugDNA.10815.1 | 9.14  | 8.06  | 1.22 | 0.2  | 2.13  | 0.156211 | 0.165828 | 0.446794 | 0.442152 |
| MmugDNA.10816.1.S1_at   | MmugDNA.10816.1 | 6.17  | 6.45  | 0.6  | 0.27 | -1.21 | 0.576741 | 0.07351  | 0.783377 | 0.316778 |
| MmugDNA.10817.1.S1_at   | MmugDNA.10817.1 | 5.79  | 5.84  | 0.13 | 0.38 | -1.04 | 0.45136  | 0.053636 | 0.702207 | 0.277224 |
| MmugDNA.10818.1.S1_at   | MmugDNA.10818.1 | 5.73  | 5.54  | 0.12 | 0.13 | 1.14  | 0.155941 | 0.601801 | 0.446335 | 0.763113 |
| MmugDNA.1082.1.S1_at    | MmugDNA.1082.1  | 3.81  | 3.34  | 0.36 | 0.05 | 1.38  | 0.094285 | 0.115359 | 0.363294 | 0.382394 |
| MmugDNA.10820.1.S1_at   | MmugDNA.10820.1 | 5.77  | 8.37  | 0.92 | 0.31 | -6.09 | 0.017578 | 0.051643 | 0.186259 | 0.272698 |
| MmugDNA.10821.1.S1_at   | MmugDNA.10821.1 | 3.13  | 3.11  | 0.35 | 0.38 | 1.02  | 0.746465 | 0.913372 | 0.88254  | 0.95123  |
| MmugDNA.10822.1.S1_at   | MmugDNA.10822.1 | 5.47  | 5.57  | 1.27 | 0.5  | -1.07 | 0.696803 | 0.43974  | 0.855668 | 0.65842  |
| MmugDNA.10824.1.S1_at   | MmugDNA.10824.1 | 4.57  | 4.69  | 0.15 | 0.53 | -1.09 | 0.192196 | 0.513584 | 0.488778 | 0.707103 |
| MmugDNA.10825.1.S1_at   | MmugDNA.10825.1 | 3.21  | 3.11  | 0.11 | 0.09 | 1.07  | 0.465864 | 0.403651 | 0.71181  | 0.632266 |
| MmugDNA.10826.1.S1_at   | MmugDNA.10826.1 | 3.66  | 3.9   | 0.14 | 0.01 | -1.18 | 0.108122 | 0.060584 | 0.38286  | 0.292769 |
| MmugDNA.10827.1.S1_at   | MmugDNA.10827.1 | 8.87  | 9.42  | 0.64 | 0.1  | -1.46 | 0.258485 | 0.119089 | 0.552539 | 0.387386 |
| MmugDNA.10828.1.S1_at   | MmugDNA.10828.1 | 9.85  | 10.22 | 0.16 | 0.19 | -1.3  | 0.055694 | 0.156677 | 0.293105 | 0.432179 |
| MmugDNA.1083.1.S1_at    | MmugDNA.1083.1  | 5.58  | 6.14  | 1.04 | 0.17 | -1.48 | 0.364089 | 0.560967 | 0.638714 | 0.737076 |
| MmugDNA.10830.1.S1_at   | MmugDNA.10830.1 | 4.23  | 4.36  | 0.18 | 0.04 | -1.09 | 0.350867 | 0.077743 | 0.628649 | 0.323869 |
| MmugDNA.10831.1.S1_at   | MmugDNA.10831.1 | 9.24  | 10.01 | 0.21 | 0.24 | -1.71 | 0.027784 | 0.113252 | 0.219124 | 0.379287 |
| MmugDNA.10832.1.S1_at   | MmugDNA.10832.1 | 7.23  | 6.49  | 0.15 | 0.19 | 1.67  | 0.009404 | 0.014716 | 0.146817 | 0.154415 |
| MmugDNA.10833.1.S1_at   | MmugDNA.10833.1 | 7.59  | 7.75  | 0.09 | 0.21 | -1.12 | 0.348331 | 0.812973 | 0.626353 | 0.891895 |
| MmugDNA.10834.1.S1_at   | MmugDNA.10834.1 | 9.86  | 13.17 | 1.41 | 0.11 | -9.87 | 0.027721 | 0.224819 | 0.21894  | 0.497617 |
| MmugDNA.10835.1.S1_at   | MmugDNA.10835.1 | 3.22  | 3.2   | 0.18 | 0.03 | 1.01  | 0.76406  | 0.660871 | 0.891902 | 0.801618 |
| MmugDNA.10836.1.S1_at   | MmugDNA.10836.1 | 4.87  | 4.8   | 0.07 | 0.12 | 1.05  | 0.527437 | 0.484255 | 0.753064 | 0.688416 |
| MmugDNA.10837.1.S1_at   | MmugDNA.10837.1 | 7.63  | 8.09  | 0.34 | 0.1  | -1.37 | 0.085184 | 0.532279 | 0.349307 | 0.719017 |
| MmugDNA.10838.1.S1_at   | MmugDNA.10838.1 | 4.86  | 3.55  | 0.79 | 0.2  | 2.48  | 0.148023 | 0.17229  | 0.436309 | 0.448666 |
| MmugDNA.10839.1.S1_at   | MmugDNA.10839.1 | 10.96 | 11.95 | 0.06 | 0.21 | -1.99 | 0.002111 | 0.134606 | 0.090208 | 0.406629 |

|                         |                 |       |       |      |      |       |          |          |          |          |
|-------------------------|-----------------|-------|-------|------|------|-------|----------|----------|----------|----------|
| MmugDNA.1084.1.S1_at    | MmugDNA.1084.1  | 6.58  | 6.42  | 0.12 | 0.02 | 1.11  | 0.058576 | 0.137178 | 0.299193 | 0.410045 |
| MmugDNA.10841.1.S1_at   | MmugDNA.10841.1 | 4.95  | 5.1   | 0.22 | 0.16 | -1.11 | 0.14736  | 0.269224 | 0.435407 | 0.534534 |
| MmugDNA.10842.1.S1_at   | MmugDNA.10842.1 | 6.8   | 6.55  | 0.07 | 0.12 | 1.19  | 0.107497 | 0.141847 | 0.382242 | 0.41535  |
| MmugDNA.10843.1.S1_at   | MmugDNA.10843.1 | 4.24  | 4.85  | 0.22 | 0.05 | -1.52 | 0.018651 | 0.01073  | 0.189742 | 0.135287 |
| MmugDNA.10845.1.S1_at   | MmugDNA.10845.1 | 6.77  | 6.66  | 0.18 | 0.01 | 1.08  | 0.608738 | 0.257451 | 0.804644 | 0.52521  |
| MmugDNA.10846.1.S1_at   | MmugDNA.10846.1 | 5.68  | 5.87  | 0.11 | 0.22 | -1.14 | 0.487218 | 0.95322  | 0.726032 | 0.973457 |
| MmugDNA.10847.1.S1_at   | MmugDNA.10847.1 | 7.57  | 7.47  | 0.22 | 0.1  | 1.07  | 0.513103 | 0.394948 | 0.743476 | 0.627216 |
| MmugDNA.10848.1.S1_at   | MmugDNA.10848.1 | 5.59  | 5.51  | 0.09 | 0.08 | 1.06  | 0.123109 | 0.135906 | 0.402209 | 0.408103 |
| MmugDNA.10849.1.S1_at   | MmugDNA.10849.1 | 5.89  | 5.83  | 0.01 | 0.11 | 1.04  | 0.450603 | 0.868743 | 0.701557 | 0.925426 |
| MmugDNA.1085.1.S1_at    | MmugDNA.1085.1  | 3.4   | 3.33  | 0.07 | 0.01 | 1.05  | 0.050963 | 0.153184 | 0.283415 | 0.428017 |
| MmugDNA.10851.1.S1_at   | MmugDNA.10851.1 | 3.01  | 3.06  | 0.41 | 0.19 | -1.03 | 0.795051 | 0.577788 | 0.907466 | 0.748124 |
| MmugDNA.10852.1.S1_at   | MmugDNA.10852.1 | 5.29  | 5.29  | 0.06 | 0.03 | 1     | 0.252558 | 0.45919  | 0.547204 | 0.67164  |
| MmugDNA.10853.1.S1_at   | MmugDNA.10853.1 | 8.24  | 7.78  | 0.19 | 0.2  | 1.38  | 0.051257 | 0.094217 | 0.28377  | 0.350889 |
| MmugDNA.10854.1.S1_at   | MmugDNA.10854.1 | 5.03  | 4.35  | 0.59 | 0.22 | 1.6   | 0.42348  | 0.61593  | 0.681441 | 0.772359 |
| MmugDNA.10856.1.S1_at   | MmugDNA.10856.1 | 6.33  | 6.27  | 0.12 | 0.1  | 1.05  | 0.457707 | 0.3412   | 0.706513 | 0.587312 |
| MmugDNA.10857.1.S1_at   | MmugDNA.10857.1 | 6.21  | 5.61  | 0.16 | 0.15 | 1.52  | 0.020087 | 0.020347 | 0.195301 | 0.179112 |
| MmugDNA.10858.1.S1_at   | MmugDNA.10858.1 | 4.5   | 4.5   | 0.05 | 0.11 | 1     | 0.916785 | 0.554407 | 0.964555 | 0.733195 |
| MmugDNA.10859.1.S1_at   | MmugDNA.10859.1 | 3.15  | 3.15  | 0.03 | 0.14 | -1    | 0.288987 | 0.318476 | 0.578686 | 0.571239 |
| MmugDNA.1086.1.S1_at    | MmugDNA.1086.1  | 7.97  | 7.81  | 0.66 | 0.13 | 1.11  | 0.462011 | 0.5281   | 0.709297 | 0.716435 |
| MmugDNA.10860.1.S1_s_at | MmugDNA.10860.1 | 8.55  | 8.09  | 0.15 | 0.14 | 1.37  | 0.018934 | 0.122535 | 0.19119  | 0.392427 |
| MmugDNA.10861.1.S1_at   | MmugDNA.10861.1 | 3.87  | 3.86  | 0.11 | 0.15 | 1     | 0.412729 | 0.490859 | 0.674256 | 0.692666 |
| MmugDNA.10862.1.S1_at   | MmugDNA.10862.1 | 3.8   | 3.65  | 0.11 | 0.16 | 1.11  | 0.203879 | 0.303287 | 0.501449 | 0.560748 |
| MmugDNA.10864.1.S1_at   | MmugDNA.10864.1 | 7.03  | 6.97  | 0.1  | 0.07 | 1.04  | 0.35011  | 0.826273 | 0.62792  | 0.900217 |
| MmugDNA.10864.1.S1_s_at | MmugDNA.10864.1 | 7.29  | 7.46  | 0.23 | 0.04 | -1.12 | 0.093432 | 0.104981 | 0.361985 | 0.36659  |
| MmugDNA.10865.1.S1_at   | MmugDNA.10865.1 | 11.64 | 11.79 | 0.2  | 0.1  | -1.1  | 0.355077 | 0.454382 | 0.631919 | 0.668576 |
| MmugDNA.10866.1.S1_at   | MmugDNA.10866.1 | 3.67  | 3.75  | 0.11 | 0.07 | -1.06 | 0.285221 | 0.001381 | 0.575153 | 0.056947 |
| MmugDNA.10867.1.S1_at   | MmugDNA.10867.1 | 4.16  | 4.02  | 0.51 | 0.05 | 1.1   | 0.632824 | 0.614186 | 0.820038 | 0.771143 |
| MmugDNA.10868.1.S1_at   | MmugDNA.10868.1 | 4.1   | 4.32  | 0.16 | 0.08 | -1.16 | 0.472658 | 0.154534 | 0.716236 | 0.429405 |
| MmugDNA.1087.1.S1_at    | MmugDNA.1087.1  | 9.54  | 9.37  | 0.17 | 0.04 | 1.13  | 0.201693 | 0.508008 | 0.499203 | 0.703358 |
| MmugDNA.10870.1.S1_at   | MmugDNA.10870.1 | 5.13  | 4.78  | 0.14 | 0.29 | 1.27  | 0.658195 | 0.570496 | 0.834894 | 0.743151 |
| MmugDNA.10871.1.S1_at   | MmugDNA.10871.1 | 4.83  | 4.63  | 0.28 | 0.02 | 1.14  | 0.237051 | 0.37731  | 0.534591 | 0.614891 |
| MmugDNA.10873.1.S1_at   | MmugDNA.10873.1 | 5.13  | 5.27  | 0.1  | 0.08 | -1.1  | 0.101652 | 0.112782 | 0.373027 | 0.37844  |
| MmugDNA.10877.1.S1_at   | MmugDNA.10877.1 | 10.24 | 7.91  | 0.22 | 0.17 | 5.01  | 0.000123 | 0.034638 | 0.051196 | 0.230247 |
| MmugDNA.10879.1.S1_at   | MmugDNA.10879.1 | 5.29  | 5.08  | 0.19 | 0.06 | 1.16  | 0.548005 | 0.892634 | 0.766338 | 0.938769 |
| MmugDNA.1088.1.S1_at    | MmugDNA.1088.1  | 5.29  | 5.42  | 0.16 | 0.08 | -1.1  | 0.184014 | 0.109236 | 0.480011 | 0.37308  |
| MmugDNA.10880.1.S1_at   | MmugDNA.10880.1 | 10.21 | 10.27 | 0.19 | 0.13 | -1.04 | 0.951613 | 0.01774  | 0.979995 | 0.168367 |
| MmugDNA.10881.1.S1_at   | MmugDNA.10881.1 | 11.14 | 10.81 | 0.31 | 0.06 | 1.26  | 0.442779 | 0.084554 | 0.696155 | 0.335953 |
| MmugDNA.10882.1.S1_at   | MmugDNA.10882.1 | 11.87 | 11.54 | 0.43 | 0.32 | 1.25  | 0.409559 | 0.568185 | 0.671922 | 0.741859 |
| MmugDNA.10885.1.S1_at   | MmugDNA.10885.1 | 9.7   | 9.48  | 0.06 | 0.09 | 1.17  | 0.024973 | 0.005818 | 0.211192 | 0.104661 |
| MmugDNA.10886.1.S1_at   | MmugDNA.10886.1 | 5.56  | 5.81  | 0.18 | 0.04 | -1.19 | 0.219616 | 0.208712 | 0.517403 | 0.482595 |
| MmugDNA.10887.1.S1_at   | MmugDNA.10887.1 | 5.58  | 5.51  | 0.14 | 0.06 | 1.05  | 0.567238 | 0.775846 | 0.77771  | 0.869553 |
| MmugDNA.10888.1.S1_at   | MmugDNA.10888.1 | 6.73  | 7.03  | 0.67 | 0.21 | -1.23 | 0.238405 | 0.047487 | 0.535783 | 0.262539 |
| MmugDNA.1089.1.S1_at    | MmugDNA.1089.1  | 10.03 | 9.87  | 0.27 | 0.1  | 1.11  | 0.419584 | 0.022422 | 0.67893  | 0.187403 |

|                         |                 |       |       |      |      |       |          |          |          |          |
|-------------------------|-----------------|-------|-------|------|------|-------|----------|----------|----------|----------|
| MmugDNA.1089.1.S1_s_at  | MmugDNA.1089.1  | 9.51  | 9.31  | 0.3  | 0.11 | 1.15  | 0.391096 | 0.038136 | 0.658575 | 0.239923 |
| MmugDNA.10890.1.S1_at   | MmugDNA.10890.1 | 5.58  | 5.51  | 0.36 | 0.08 | 1.05  | 0.309129 | 0.300737 | 0.59558  | 0.558959 |
| MmugDNA.10891.1.S1_at   | MmugDNA.10891.1 | 3.42  | 3.15  | 0.25 | 0.15 | 1.2   | 0.110378 | 0.162294 | 0.385692 | 0.438447 |
| MmugDNA.10892.1.S1_at   | MmugDNA.10892.1 | 5.64  | 4.91  | 1.52 | 0.7  | 1.65  | 0.758805 | 0.895786 | 0.88951  | 0.940438 |
| MmugDNA.10894.1.S1_at   | MmugDNA.10894.1 | 5.26  | 4.93  | 0.05 | 0.24 | 1.25  | 0.079335 | 0.183444 | 0.339289 | 0.459574 |
| MmugDNA.10895.1.S1_at   | MmugDNA.10895.1 | 2.87  | 2.89  | 0.01 | 0.16 | -1.01 | 0.671088 | 0.869743 | 0.842222 | 0.926118 |
| MmugDNA.10897.1.S1_at   | MmugDNA.10897.1 | 8.66  | 8.63  | 0.19 | 0.02 | 1.02  | 0.460973 | 0.541061 | 0.708576 | 0.724737 |
| MmugDNA.10897.1.S1_s_at | MmugDNA.10897.1 | 9.53  | 9.66  | 0.04 | 0.16 | -1.1  | 0.176832 | 0.089129 | 0.471327 | 0.343152 |
| MmugDNA.10898.1.S1_at   | MmugDNA.10898.1 | 7.5   | 8.06  | 0.31 | 0.19 | -1.47 | 0.074403 | 0.359483 | 0.331004 | 0.600754 |
| MmugDNA.109.1.S1_at     | MmugDNA.109.1   | 3.3   | 3.06  | 0.64 | 0.13 | 1.17  | 0.242459 | 0.302899 | 0.539382 | 0.560356 |
| MmugDNA.1090.1.S1_at    | MmugDNA.1090.1  | 9.94  | 10.02 | 0.17 | 0.04 | -1.06 | 0.144136 | 0.283086 | 0.430943 | 0.545692 |
| MmugDNA.10901.1.S1_at   | MmugDNA.10901.1 | 3.95  | 3.93  | 0.09 | 0.23 | 1.02  | 0.676164 | 0.932719 | 0.845327 | 0.961786 |
| MmugDNA.10902.1.S1_at   | MmugDNA.10902.1 | 4.81  | 4.58  | 0.13 | 0.28 | 1.18  | 0.8813   | 0.080136 | 0.949601 | 0.327639 |
| MmugDNA.10903.1.S1_at   | MmugDNA.10903.1 | 8.07  | 7.92  | 0.67 | 0.23 | 1.11  | 0.263099 | 0.37414  | 0.556907 | 0.612678 |
| MmugDNA.10905.1.S1_at   | MmugDNA.10905.1 | 9.25  | 9.03  | 0.21 | 0.02 | 1.16  | 0.298702 | 0.599443 | 0.586964 | 0.761455 |
| MmugDNA.10909.1.S1_at   | MmugDNA.10909.1 | 8.96  | 7.53  | 0.98 | 0.54 | 2.71  | 0.288424 | 0.317351 | 0.578153 | 0.570599 |
| MmugDNA.10910.1.S1_at   | MmugDNA.10910.1 | 2.94  | 2.99  | 0.13 | 0.15 | -1.04 | 0.730375 | 0.780992 | 0.873954 | 0.872934 |
| MmugDNA.10913.1.S1_at   | MmugDNA.10913.1 | 6.14  | 5.98  | 0.29 | 0.13 | 1.12  | 0.160596 | 0.161475 | 0.452144 | 0.437616 |
| MmugDNA.10914.1.S1_at   | MmugDNA.10914.1 | 3.02  | 3.05  | 0.08 | 0.08 | -1.02 | 0.687558 | 0.685185 | 0.850804 | 0.816369 |
| MmugDNA.10915.1.S1_at   | MmugDNA.10915.1 | 5.08  | 5.22  | 1.28 | 0.49 | -1.1  | 0.521498 | 0.49828  | 0.749377 | 0.697403 |
| MmugDNA.10916.1.S1_at   | MmugDNA.10916.1 | 6.14  | 6.19  | 0.34 | 0.09 | -1.04 | 0.750242 | 0.435131 | 0.884572 | 0.655026 |
| MmugDNA.10917.1.S1_at   | MmugDNA.10917.1 | 4.58  | 4.59  | 0.12 | 0.12 | -1.01 | 0.385456 | 0.518688 | 0.654225 | 0.710613 |
| MmugDNA.10918.1.S1_at   | MmugDNA.10918.1 | 3     | 3.07  | 0.11 | 0.2  | -1.05 | 0.783405 | 0.902658 | 0.901128 | 0.944707 |
| MmugDNA.10919.1.S1_at   | MmugDNA.10919.1 | 5.6   | 5.61  | 0.16 | 0.07 | -1.01 | 0.670801 | 0.702022 | 0.842083 | 0.827276 |
| MmugDNA.10920.1.S1_at   | MmugDNA.10920.1 | 3.08  | 2.96  | 0.12 | 0.17 | 1.09  | 0.677724 | 0.886055 | 0.846305 | 0.935136 |
| MmugDNA.10924.1.S1_at   | MmugDNA.10924.1 | 5.28  | 5.55  | 0.07 | 0.07 | -1.2  | 0.013307 | 0.022712 | 0.166188 | 0.188723 |
| MmugDNA.10927.1.S1_at   | MmugDNA.10927.1 | 4.53  | 4.91  | 0.47 | 0.11 | -1.3  | 0.701318 | 0.602414 | 0.858142 | 0.763396 |
| MmugDNA.10929.1.S1_at   | MmugDNA.10929.1 | 8.51  | 9.1   | 0.3  | 0.07 | -1.5  | 0.027524 | 0.022687 | 0.218484 | 0.188685 |
| MmugDNA.10930.1.S1_s_at | MmugDNA.10930.1 | 6.8   | 6.91  | 0.19 | 0.05 | -1.08 | 0.993561 | 0.449914 | 0.997413 | 0.665343 |
| MmugDNA.10932.1.S1_at   | MmugDNA.10932.1 | 3.15  | 3.24  | 0.1  | 0.18 | -1.06 | 0.359291 | 0.511132 | 0.634887 | 0.705399 |
| MmugDNA.10933.1.S1_at   | MmugDNA.10933.1 | 11.42 | 11.3  | 0.13 | 0.01 | 1.09  | 0.190561 | 0.004641 | 0.486767 | 0.095    |
| MmugDNA.10934.1.S1_at   | MmugDNA.10934.1 | 5.11  | 4.95  | 1.54 | 0.27 | 1.12  | 0.341197 | 0.452396 | 0.621119 | 0.667073 |
| MmugDNA.10935.1.S1_at   | MmugDNA.10935.1 | 4.34  | 4.66  | 0.56 | 0.15 | -1.24 | 0.622475 | 0.893923 | 0.813326 | 0.939452 |
| MmugDNA.10936.1.S1_at   | MmugDNA.10936.1 | 3.67  | 3.65  | 0.09 | 0.22 | 1.02  | 0.493185 | 0.576381 | 0.730253 | 0.747202 |
| MmugDNA.10938.1.S1_at   | MmugDNA.10938.1 | 4.93  | 4.84  | 0.16 | 0.12 | 1.06  | 0.220217 | 0.188366 | 0.517758 | 0.46435  |
| MmugDNA.10939.1.S1_at   | MmugDNA.10939.1 | 5.62  | 5.48  | 0.07 | 0.1  | 1.1   | 0.092198 | 0.134371 | 0.360155 | 0.406603 |
| MmugDNA.10941.1.S1_at   | MmugDNA.10941.1 | 4.63  | 4.29  | 0.72 | 0.29 | 1.26  | 0.492285 | 0.288038 | 0.729633 | 0.54928  |
| MmugDNA.10944.1.S1_at   | MmugDNA.10944.1 | 10.59 | 10.67 | 0.21 | 0.11 | -1.05 | 0.638719 | 0.097259 | 0.823257 | 0.354912 |
| MmugDNA.35889.1.S1_at   | MmugDNA.35889.1 | 8.38  | 7.84  | 0.25 | 0.04 | 1.45  | 0.059931 | 0.055607 | 0.30217  | 0.281649 |
| MmugDNA.35889.1.S1_s_at | MmugDNA.35889.1 | 8.11  | 7.37  | 0.53 | 0.07 | 1.67  | 0.093872 | 0.090558 | 0.362691 | 0.345026 |
| MmugDNA.10947.1.S1_at   | MmugDNA.10947.1 | 3.6   | 3.48  | 0.33 | 0.18 | 1.08  | 0.908511 | 0.565471 | 0.961215 | 0.739886 |
| MmugDNA.10948.1.S1_at   | MmugDNA.10948.1 | 7.34  | 6.93  | 0.29 | 0.11 | 1.33  | 0.08766  | 0.235313 | 0.353698 | 0.506346 |
| MmugDNA.10949.1.S1_at   | MmugDNA.10949.1 | 11.41 | 11.6  | 0.37 | 0.06 | -1.14 | 0.905812 | 0.626354 | 0.960077 | 0.779698 |

|                       |                 |       |       |      |      |       |          |          |          |          |
|-----------------------|-----------------|-------|-------|------|------|-------|----------|----------|----------|----------|
| MmugDNA.1095.1.S1_at  | MmugDNA.1095.1  | 7.92  | 8.37  | 0.08 | 0.12 | -1.37 | 0.006107 | 0.00138  | 0.124422 | 0.056947 |
| MmugDNA.10950.1.S1_at | MmugDNA.10950.1 | 9.25  | 9.59  | 0.38 | 0.03 | -1.27 | 0.529835 | 0.809047 | 0.7545   | 0.889981 |
| MmugDNA.10951.1.S1_at | MmugDNA.10951.1 | 4.62  | 4.54  | 0.3  | 0.09 | 1.05  | 0.353146 | 0.27974  | 0.630353 | 0.543232 |
| MmugDNA.10952.1.S1_at | MmugDNA.10952.1 | 5.67  | 5.6   | 0.08 | 0.1  | 1.05  | 0.198746 | 0.01077  | 0.495887 | 0.135471 |
| MmugDNA.10953.1.S1_at | MmugDNA.10953.1 | 10.46 | 10.54 | 0.18 | 0.21 | -1.06 | 0.689864 | 0.105793 | 0.851884 | 0.368018 |
| MmugDNA.10954.1.S1_at | MmugDNA.10954.1 | 9.17  | 9.05  | 0.19 | 0.18 | 1.08  | 0.212401 | 0.328654 | 0.510459 | 0.578213 |
| MmugDNA.10955.1.S1_at | MmugDNA.10955.1 | 9.54  | 10.12 | 0.38 | 0.07 | -1.5  | 0.133442 | 0.050976 | 0.416977 | 0.271055 |
| MmugDNA.10956.1.S1_at | MmugDNA.10956.1 | 9.03  | 8.98  | 0.95 | 0.2  | 1.04  | 0.909251 | 0.840568 | 0.961553 | 0.909134 |
| MmugDNA.10958.1.S1_at | MmugDNA.10958.1 | 8.74  | 8.69  | 0.29 | 0.14 | 1.04  | 0.718586 | 0.851211 | 0.867276 | 0.915364 |
| MmugDNA.10959.1.S1_at | MmugDNA.10959.1 | 3.19  | 3.08  | 0.28 | 0.21 | 1.08  | 0.565111 | 0.709591 | 0.776513 | 0.831691 |
| MmugDNA.10960.1.S1_at | MmugDNA.10960.1 | 7.68  | 7.76  | 0.15 | 0.13 | -1.06 | 0.562805 | 0.87368  | 0.775133 | 0.928169 |
| MmugDNA.10961.1.S1_at | MmugDNA.10961.1 | 4.57  | 4.55  | 0.16 | 0.03 | 1.02  | 0.26984  | 0.375782 | 0.562082 | 0.613689 |
| MmugDNA.10962.1.S1_at | MmugDNA.10962.1 | 5.65  | 5.51  | 0.29 | 0.05 | 1.1   | 0.864506 | 0.210865 | 0.941361 | 0.484934 |
| MmugDNA.10963.1.S1_at | MmugDNA.10963.1 | 4.04  | 4.02  | 0.04 | 0.17 | 1.01  | 0.593336 | 0.564732 | 0.79394  | 0.739425 |
| MmugDNA.10964.1.S1_at | MmugDNA.10964.1 | 6.34  | 6.14  | 0.09 | 0.12 | 1.15  | 0.076542 | 0.084157 | 0.334818 | 0.335181 |
| MmugDNA.10965.1.S1_at | MmugDNA.10965.1 | 5.94  | 5.69  | 0.24 | 0.07 | 1.19  | 0.114024 | 0.07091  | 0.390801 | 0.312439 |
| MmugDNA.10966.1.S1_at | MmugDNA.10966.1 | 5.41  | 5.72  | 0.21 | 0.2  | -1.24 | 0.14888  | 0.145505 | 0.437372 | 0.419441 |
| MmugDNA.10967.1.S1_at | MmugDNA.10967.1 | 6.18  | 6.13  | 0.02 | 0.09 | 1.03  | 0.586544 | 0.03761  | 0.789902 | 0.238384 |
| MmugDNA.10968.1.S1_at | MmugDNA.10968.1 | 5.4   | 5.45  | 0.03 | 0.01 | -1.04 | 0.095319 | 0.502649 | 0.364763 | 0.700236 |
| MmugDNA.10969.1.S1_at | MmugDNA.10969.1 | 3.49  | 3.65  | 0.29 | 0.08 | -1.12 | 0.58554  | 0.626353 | 0.789262 | 0.779698 |
| MmugDNA.1097.1.S1_at  | MmugDNA.1097.1  | 8.41  | 9.01  | 1.34 | 0.06 | -1.52 | 0.877852 | 0.392097 | 0.947831 | 0.625588 |
| MmugDNA.10970.1.S1_at | MmugDNA.10970.1 | 11.83 | 12.34 | 0.29 | 0.18 | -1.42 | 0.028353 | 0.00914  | 0.220912 | 0.126119 |
| MmugDNA.10971.1.S1_at | MmugDNA.10971.1 | 11.76 | 11.77 | 0.26 | 0.07 | -1.01 | 0.4827   | 0.101385 | 0.72298  | 0.36112  |
| MmugDNA.10972.1.S1_at | MmugDNA.10972.1 | 5.08  | 5.09  | 0.08 | 0    | -1.01 | 0.742062 | 0.504433 | 0.880524 | 0.701557 |
| MmugDNA.10973.1.S1_at | MmugDNA.10973.1 | 5.09  | 4.84  | 0.14 | 0.03 | 1.19  | 0.043818 | 0.227889 | 0.266406 | 0.500201 |
| MmugDNA.10974.1.S1_at | MmugDNA.10974.1 | 4.92  | 4.94  | 0.08 | 0.05 | -1.02 | 0.879059 | 0.500611 | 0.948523 | 0.699165 |
| MmugDNA.10978.1.S1_at | MmugDNA.10978.1 | 3.87  | 4.01  | 0.27 | 0.04 | -1.1  | 0.830099 | 0.670398 | 0.92519  | 0.807285 |
| MmugDNA.1098.1.S1_at  | MmugDNA.1098.1  | 5.04  | 5.31  | 0.16 | 0.17 | -1.21 | 0.1234   | 0.159714 | 0.402713 | 0.435828 |
| MmugDNA.10980.1.S1_at | MmugDNA.10980.1 | 9.63  | 9.3   | 0.33 | 0.21 | 1.26  | 0.092991 | 0.132306 | 0.361523 | 0.404294 |
| MmugDNA.10982.1.S1_at | MmugDNA.10982.1 | 7.75  | 8.02  | 0.33 | 0.18 | -1.21 | 0.245138 | 0.840133 | 0.541279 | 0.908905 |
| MmugDNA.10983.1.S1_at | MmugDNA.10983.1 | 10.95 | 10.49 | 0.07 | 0.09 | 1.38  | 0.001401 | 0.290198 | 0.07964  | 0.551169 |
| MmugDNA.10984.1.S1_at | MmugDNA.10984.1 | 3.81  | 3.89  | 0.23 | 0.05 | -1.06 | 0.722517 | 0.308558 | 0.869499 | 0.564575 |
| MmugDNA.10985.1.S1_at | MmugDNA.10985.1 | 5.68  | 5.52  | 0.6  | 0.03 | 1.12  | 0.35492  | 0.191268 | 0.631851 | 0.466553 |
| MmugDNA.10987.1.S1_at | MmugDNA.10987.1 | 5.74  | 5.73  | 0.05 | 0.08 | 1.01  | 0.552955 | 0.87502  | 0.769566 | 0.929098 |
| MmugDNA.10988.1.S1_at | MmugDNA.10988.1 | 4.32  | 4.68  | 0.04 | 0.39 | -1.28 | 0.568674 | 0.020394 | 0.778531 | 0.179286 |
| MmugDNA.10989.1.S1_at | MmugDNA.10989.1 | 3.71  | 3.71  | 0.08 | 0.19 | 1     | 0.637484 | 0.52898  | 0.822534 | 0.71703  |
| MmugDNA.10991.1.S1_at | MmugDNA.10991.1 | 3.32  | 3.35  | 0.27 | 0.38 | -1.02 | 0.573391 | 0.696791 | 0.781098 | 0.823939 |
| MmugDNA.10992.1.S1_at | MmugDNA.10992.1 | 3.81  | 3.74  | 0.4  | 0.19 | 1.05  | 0.506574 | 0.437965 | 0.739179 | 0.657057 |
| MmugDNA.10993.1.S1_at | MmugDNA.10993.1 | 7.79  | 7.81  | 0.61 | 0.49 | -1.01 | 0.591747 | 0.23667  | 0.79283  | 0.507459 |
| MmugDNA.10994.1.S1_at | MmugDNA.10994.1 | 6.12  | 6.06  | 0.91 | 0.35 | 1.04  | 0.996046 | 0.983097 | 0.998482 | 0.990726 |
| MmugDNA.10996.1.S1_at | MmugDNA.10996.1 | 2.95  | 2.96  | 0.09 | 0.12 | -1.01 | 0.351208 | 0.513368 | 0.628865 | 0.706881 |
| MmugDNA.10997.1.S1_at | MmugDNA.10997.1 | 11.08 | 10.82 | 0.04 | 0.04 | 1.19  | 0.001531 | 0.162386 | 0.081678 | 0.438575 |
| MmugDNA.10999.1.S1_at | MmugDNA.10999.1 | 8     | 6.98  | 0.72 | 0.26 | 2.03  | 0.124496 | 0.424231 | 0.404689 | 0.646833 |

|                         |                 |       |       |      |      |       |          |          |          |          |
|-------------------------|-----------------|-------|-------|------|------|-------|----------|----------|----------|----------|
| MmugDNA.11.1.S1_at      | MmugDNA.11.1    | 5.41  | 5.31  | 0.01 | 0.1  | 1.07  | 0.16399  | 0.138322 | 0.45681  | 0.411244 |
| MmugDNA.110.1.S1_at     | MmugDNA.110.1   | 5.12  | 4.96  | 0.08 | 0.05 | 1.12  | 0.06121  | 0.167259 | 0.304296 | 0.443684 |
| MmugDNA.1100.1.S1_at    | MmugDNA.1100.1  | 6.57  | 5.98  | 0.35 | 0.42 | 1.5   | 0.285283 | 0.383524 | 0.575167 | 0.619481 |
| MmugDNA.11000.1.S1_at   | MmugDNA.11000.1 | 4.56  | 4.6   | 0.11 | 0.15 | -1.03 | 0.186376 | 0.251276 | 0.482577 | 0.519984 |
| MmugDNA.11005.1.S1_at   | MmugDNA.11005.1 | 5.4   | 5.35  | 0.12 | 0.03 | 1.04  | 0.645101 | 0.23512  | 0.827188 | 0.50629  |
| MmugDNA.11006.1.S1_at   | MmugDNA.11006.1 | 8.61  | 8.63  | 0.26 | 0.09 | -1.01 | 0.880167 | 0.959075 | 0.949028 | 0.976813 |
| MmugDNA.11007.1.S1_at   | MmugDNA.11007.1 | 8.2   | 8.9   | 0.38 | 0.09 | -1.62 | 0.043947 | 0.159228 | 0.266638 | 0.435217 |
| MmugDNA.11008.1.S1_at   | MmugDNA.11008.1 | 4.09  | 4.33  | 0.19 | 0.16 | -1.18 | 0.411026 | 0.5736   | 0.673012 | 0.745228 |
| MmugDNA.1101.1.S1_at    | MmugDNA.1101.1  | 5.67  | 5.97  | 1.56 | 0.58 | -1.24 | 0.72418  | 0.921573 | 0.870462 | 0.955761 |
| MmugDNA.11010.1.S1_at   | MmugDNA.11010.1 | 3.63  | 3.74  | 0.65 | 0.24 | -1.08 | 0.556455 | 0.590914 | 0.771669 | 0.756512 |
| MmugDNA.11011.1.S1_at   | MmugDNA.11011.1 | 3.95  | 4.06  | 0.2  | 0.07 | -1.08 | 0.894155 | 0.640102 | 0.954822 | 0.788696 |
| MmugDNA.11012.1.S1_at   | MmugDNA.11012.1 | 3.42  | 3.27  | 0.2  | 0.08 | 1.11  | 0.809364 | 0.876112 | 0.914585 | 0.92958  |
| MmugDNA.11013.1.S1_at   | MmugDNA.11013.1 | 8.6   | 8.64  | 0.13 | 0.08 | -1.03 | 0.743787 | 0.148318 | 0.881384 | 0.422869 |
| MmugDNA.11014.1.S1_at   | MmugDNA.11014.1 | 7.02  | 7.42  | 0.35 | 0.17 | -1.32 | 0.26564  | 0.012508 | 0.558238 | 0.144302 |
| MmugDNA.11015.1.S1_at   | MmugDNA.11015.1 | 5.43  | 5.59  | 0.24 | 0.2  | -1.12 | 0.416533 | 0.114035 | 0.676976 | 0.380416 |
| MmugDNA.11016.1.S1_at   | MmugDNA.11016.1 | 4.64  | 4.52  | 0.61 | 0.2  | 1.08  | 0.821465 | 0.790397 | 0.920411 | 0.878857 |
| MmugDNA.11017.1.S1_at   | MmugDNA.11017.1 | 4.27  | 4.23  | 0.54 | 0.25 | 1.03  | 0.357614 | 0.420652 | 0.633636 | 0.644323 |
| MmugDNA.11018.1.S1_at   | MmugDNA.11018.1 | 4.23  | 4.29  | 0.5  | 0.22 | -1.04 | 0.508634 | 0.474429 | 0.740531 | 0.68143  |
| MmugDNA.1102.1.S1_at    | MmugDNA.1102.1  | 6.3   | 6.35  | 0.06 | 0.01 | -1.03 | 0.080103 | 0.002627 | 0.340456 | 0.075772 |
| MmugDNA.11021.1.S1_at   | MmugDNA.11021.1 | 4.17  | 4.37  | 1.56 | 0.35 | -1.15 | 0.510883 | 0.622719 | 0.742178 | 0.777232 |
| MmugDNA.11022.1.S1_at   | MmugDNA.11022.1 | 10.11 | 9.68  | 0.46 | 0.28 | 1.36  | 0.153415 | 0.544285 | 0.443218 | 0.726717 |
| MmugDNA.11023.1.S1_at   | MmugDNA.11023.1 | 10.21 | 10.55 | 0.13 | 0.17 | -1.27 | 0.053539 | 0.008953 | 0.288636 | 0.125082 |
| MmugDNA.11024.1.S1_at   | MmugDNA.11024.1 | 8.52  | 7.47  | 0.53 | 0.46 | 2.07  | 0.200173 | 0.430882 | 0.497725 | 0.651894 |
| MmugDNA.11025.1.S1_at   | MmugDNA.11025.1 | 11.87 | 11.55 | 0.14 | 0.07 | 1.25  | 0.018952 | 0.00379  | 0.191192 | 0.087708 |
| MmugDNA.11028.1.S1_at   | MmugDNA.11028.1 | 7.5   | 7.08  | 0.18 | 0.1  | 1.33  | 0.061575 | 0.048289 | 0.30471  | 0.264814 |
| MmugDNA.11029.1.S1_at   | MmugDNA.11029.1 | 6.2   | 6.93  | 0.68 | 0.13 | -1.66 | 0.444032 | 0.487099 | 0.696964 | 0.69025  |
| MmugDNA.1103.1.S1_at    | MmugDNA.1103.1  | 9.42  | 9.55  | 0.23 | 0.14 | -1.09 | 0.31454  | 0.46443  | 0.599987 | 0.675068 |
| MmugDNA.11030.1.S1_s_at | MmugDNA.11030.1 | 6.36  | 6.24  | 0.68 | 0.24 | 1.09  | 0.686422 | 0.746298 | 0.850595 | 0.85272  |
| MmugDNA.11031.1.S1_at   | MmugDNA.11031.1 | 5.23  | 5.12  | 0.13 | 0.05 | 1.08  | 0.148642 | 0.154986 | 0.437221 | 0.429984 |
| MmugDNA.11033.1.S1_at   | MmugDNA.11033.1 | 8.07  | 8.67  | 0.14 | 0.12 | -1.52 | 0.011379 | 0.262844 | 0.156934 | 0.529182 |
| MmugDNA.11034.1.S1_at   | MmugDNA.11034.1 | 4.58  | 6.18  | 0.41 | 0.29 | -3.01 | 0.009867 | 0.011713 | 0.148832 | 0.140206 |
| MmugDNA.11037.1.S1_at   | MmugDNA.11037.1 | 6.33  | 6.19  | 0.26 | 0.1  | 1.11  | 0.150548 | 0.151403 | 0.439612 | 0.426104 |
| MmugDNA.11037.1.S1_s_at | MmugDNA.11037.1 | 3.01  | 3.05  | 0.13 | 0.06 | -1.03 | 0.394323 | 0.612646 | 0.660956 | 0.770123 |
| MmugDNA.11038.1.S1_at   | MmugDNA.11038.1 | 7.68  | 7.77  | 0.08 | 0.01 | -1.07 | 0.098095 | 0.070126 | 0.368627 | 0.311029 |
| MmugDNA.11038.1.S1_s_at | MmugDNA.11038.1 | 7.16  | 7.28  | 0.16 | 0.02 | -1.09 | 0.399238 | 0.043384 | 0.664726 | 0.25294  |
| MmugDNA.11039.1.S1_at   | MmugDNA.11039.1 | 5.24  | 5.22  | 0.17 | 0.18 | 1.02  | 0.715027 | 0.901442 | 0.865422 | 0.943931 |
| MmugDNA.1104.1.S1_at    | MmugDNA.1104.1  | 4.87  | 4.83  | 0    | 0.05 | 1.03  | 0.203904 | 0.24809  | 0.501449 | 0.517567 |
| MmugDNA.11041.1.S1_at   | MmugDNA.11041.1 | 2.9   | 2.9   | 0.07 | 0.05 | 1     | 0.696586 | 0.597326 | 0.855534 | 0.760137 |
| MmugDNA.11042.1.S1_at   | MmugDNA.11042.1 | 6.2   | 7.17  | 0.33 | 0.18 | -1.96 | 0.028587 | 0.093728 | 0.221622 | 0.350198 |
| MmugDNA.11043.1.S1_at   | MmugDNA.11043.1 | 3.28  | 3.52  | 0.2  | 0.14 | -1.18 | 0.230706 | 0.087962 | 0.529522 | 0.341368 |
| MmugDNA.11043.1.S1_s_at | MmugDNA.11043.1 | 4.83  | 4.65  | 0.2  | 0.09 | 1.13  | 0.652128 | 0.04549  | 0.831118 | 0.2575   |
| MmugDNA.1105.1.S1_at    | MmugDNA.1105.1  | 5.02  | 5     | 0.08 | 0.12 | 1.02  | 0.737875 | 0.132253 | 0.878434 | 0.404294 |
| MmugDNA.11050.1.S1_at   | MmugDNA.11050.1 | 6.89  | 7.4   | 1.2  | 0.42 | -1.42 | 0.927544 | 0.873662 | 0.969315 | 0.928169 |

|                         |                 |       |       |      |      |       |          |          |          |          |
|-------------------------|-----------------|-------|-------|------|------|-------|----------|----------|----------|----------|
| MmugDNA.11053.1.S1_at   | MmugDNA.11053.1 | 5.18  | 5.87  | 0.15 | 0.4  | -1.62 | 0.048541 | 0.073815 | 0.277767 | 0.317146 |
| MmugDNA.11054.1.S1_at   | MmugDNA.11054.1 | 7.42  | 7.38  | 0.22 | 0.15 | 1.03  | 0.771829 | 0.501677 | 0.895465 | 0.6998   |
| MmugDNA.11055.1.S1_at   | MmugDNA.11055.1 | 9.61  | 10.6  | 0.4  | 0.11 | -2    | 0.014996 | 0.1877   | 0.174543 | 0.46368  |
| MmugDNA.11056.1.S1_at   | MmugDNA.11056.1 | 4.06  | 4.1   | 0.13 | 0.17 | -1.03 | 0.462019 | 0.236759 | 0.709297 | 0.507512 |
| MmugDNA.11057.1.S1_at   | MmugDNA.11057.1 | 5.86  | 5.58  | 0.16 | 0.1  | 1.21  | 0.082651 | 0.302982 | 0.344451 | 0.560452 |
| MmugDNA.11059.1.S1_at   | MmugDNA.11059.1 | 4.68  | 4.69  | 0.1  | 0    | -1.01 | 0.481926 | 0.846115 | 0.722245 | 0.912389 |
| MmugDNA.11060.1.S1_at   | MmugDNA.11060.1 | 8.21  | 8.36  | 0.37 | 0.13 | -1.11 | 0.303138 | 0.61342  | 0.590608 | 0.770528 |
| MmugDNA.11061.1.S1_at   | MmugDNA.11061.1 | 6.09  | 6.16  | 0.6  | 0.14 | -1.05 | 0.628861 | 0.79316  | 0.817507 | 0.880576 |
| MmugDNA.11062.1.S1_at   | MmugDNA.11062.1 | 8.34  | 8.45  | 0.23 | 0.17 | -1.07 | 0.873753 | 0.175536 | 0.945733 | 0.452174 |
| MmugDNA.11063.1.S1_at   | MmugDNA.11063.1 | 10.84 | 11.42 | 0.19 | 0.15 | -1.5  | 0.024782 | 0.005341 | 0.210464 | 0.101089 |
| MmugDNA.11065.1.S1_at   | MmugDNA.11065.1 | 3.33  | 3.42  | 0.12 | 0.19 | -1.07 | 0.515198 | 0.784845 | 0.745048 | 0.875432 |
| MmugDNA.11067.1.S1_at   | MmugDNA.11067.1 | 6.71  | 6.55  | 0.8  | 0.84 | 1.12  | 0.753109 | 0.859883 | 0.885933 | 0.92016  |
| MmugDNA.11068.1.S1_at   | MmugDNA.11068.1 | 5.39  | 5.39  | 0.17 | 0.01 | -1    | 0.556508 | 0.430277 | 0.771669 | 0.651316 |
| MmugDNA.11069.1.S1_at   | MmugDNA.11069.1 | 5.2   | 5.31  | 0.09 | 0.09 | -1.08 | 0.468646 | 0.070545 | 0.713689 | 0.311777 |
| MmugDNA.1107.1.S1_at    | MmugDNA.1107.1  | 3.84  | 4.71  | 0.3  | 0.2  | -1.83 | 0.047174 | 0.126806 | 0.274594 | 0.397446 |
| MmugDNA.11070.1.S1_at   | MmugDNA.11070.1 | 3.17  | 3.23  | 1.15 | 0.17 | -1.04 | 0.445064 | 0.439456 | 0.697712 | 0.6582   |
| MmugDNA.11071.1.S1_at   | MmugDNA.11071.1 | 7.38  | 7.27  | 0.68 | 0.25 | 1.08  | 0.751824 | 0.715839 | 0.885488 | 0.83529  |
| MmugDNA.11074.1.S1_at   | MmugDNA.11074.1 | 10.63 | 10.72 | 0.13 | 0.06 | -1.06 | 0.839062 | 0.000212 | 0.92941  | 0.032262 |
| MmugDNA.11076.1.S1_at   | MmugDNA.11076.1 | 9.22  | 8.97  | 0.42 | 0.23 | 1.19  | 0.686921 | 0.004206 | 0.850752 | 0.091368 |
| MmugDNA.11077.1.S1_at   | MmugDNA.11077.1 | 5.72  | 5.67  | 0.24 | 0.09 | 1.03  | 0.740213 | 0.496775 | 0.879526 | 0.696198 |
| MmugDNA.1108.1.S1_at    | MmugDNA.1108.1  | 10.05 | 10    | 0.14 | 0.11 | 1.04  | 0.129698 | 0.334727 | 0.412027 | 0.582615 |
| MmugDNA.11080.1.S1_at   | MmugDNA.11080.1 | 5.68  | 5.88  | 0.4  | 0.22 | -1.15 | 0.747469 | 0.530305 | 0.883065 | 0.71787  |
| MmugDNA.11081.1.S1_at   | MmugDNA.11081.1 | 7.05  | 7.24  | 0.19 | 0.05 | -1.14 | 0.659421 | 0.256078 | 0.835676 | 0.524052 |
| MmugDNA.11081.1.S1_x_at | MmugDNA.11081.1 | 6.99  | 7.31  | 0.25 | 0.15 | -1.25 | 0.427576 | 0.460895 | 0.684843 | 0.672763 |
| MmugDNA.11082.1.S1_at   | MmugDNA.11082.1 | 9.16  | 9.21  | 0.11 | 0.04 | -1.04 | 0.895169 | 0.009611 | 0.955278 | 0.129157 |
| MmugDNA.11083.1.S1_at   | MmugDNA.11083.1 | 6.39  | 5.99  | 1.86 | 0.64 | 1.32  | 0.924455 | 0.991412 | 0.967863 | 0.995196 |
| MmugDNA.11085.1.S1_at   | MmugDNA.11085.1 | 4.24  | 4.58  | 0.08 | 0.3  | -1.26 | 0.446852 | 0.585361 | 0.698901 | 0.752844 |
| MmugDNA.11086.1.S1_at   | MmugDNA.11086.1 | 6.72  | 6.83  | 0.22 | 0    | -1.08 | 0.897649 | 0.9627   | 0.956545 | 0.979091 |
| MmugDNA.11087.1.S1_s_at | MmugDNA.11087.1 | 11.98 | 11.61 | 0.17 | 0.03 | 1.29  | 0.046086 | 0.131153 | 0.272397 | 0.403153 |
| MmugDNA.11089.1.S1_s_at | MmugDNA.11089.1 | 7.55  | 7.49  | 0.03 | 0.04 | 1.04  | 0.350928 | 0.223054 | 0.628649 | 0.49588  |
| MmugDNA.1109.1.S1_at    | MmugDNA.1109.1  | 8.32  | 8.63  | 0.12 | 0.2  | -1.23 | 0.395409 | 0.31433  | 0.661874 | 0.568273 |
| MmugDNA.11090.1.S1_at   | MmugDNA.11090.1 | 5.47  | 5.48  | 0.06 | 0.14 | -1.01 | 0.903029 | 0.941292 | 0.958896 | 0.966729 |
| MmugDNA.11091.1.S1_at   | MmugDNA.11091.1 | 4.79  | 4.24  | 0.47 | 0.26 | 1.46  | 0.129984 | 0.129935 | 0.412127 | 0.401515 |
| MmugDNA.11093.1.S1_at   | MmugDNA.11093.1 | 3.94  | 3.94  | 0.16 | 0.09 | 1.01  | 0.265267 | 0.061355 | 0.557962 | 0.29448  |
| MmugDNA.11094.1.S1_at   | MmugDNA.11094.1 | 4.1   | 4.02  | 0.29 | 0.37 | 1.05  | 0.653818 | 0.855612 | 0.832423 | 0.917679 |
| MmugDNA.11096.1.S1_at   | MmugDNA.11096.1 | 7.68  | 8.06  | 0.4  | 0.24 | -1.3  | 0.358821 | 0.208864 | 0.634504 | 0.482717 |
| MmugDNA.11097.1.S1_at   | MmugDNA.11097.1 | 8.31  | 8.79  | 0.43 | 0.09 | -1.39 | 0.134534 | 0.634316 | 0.418347 | 0.78475  |
| MmugDNA.11098.1.S1_at   | MmugDNA.11098.1 | 6.82  | 6.67  | 0.17 | 0.03 | 1.1   | 0.675787 | 0.207209 | 0.845233 | 0.48136  |
| MmugDNA.11099.1.S1_at   | MmugDNA.11099.1 | 6.27  | 6.38  | 1.29 | 0.17 | -1.08 | 0.971963 | 0.973932 | 0.98874  | 0.985754 |
| MmugDNA.1110.1.S1_at    | MmugDNA.1110.1  | 4.39  | 4.18  | 0.37 | 0.13 | 1.15  | 0.586385 | 0.507918 | 0.789769 | 0.703358 |
| MmugDNA.11100.1.S1_at   | MmugDNA.11100.1 | 4.55  | 4.08  | 0.28 | 0.11 | 1.39  | 0.023659 | 0.025328 | 0.207074 | 0.199522 |
| MmugDNA.11102.1.S1_at   | MmugDNA.11102.1 | 8.09  | 7.53  | 0.37 | 0.25 | 1.48  | 0.159496 | 0.03664  | 0.450798 | 0.235943 |
| MmugDNA.11103.1.S1_at   | MmugDNA.11103.1 | 4.26  | 4.58  | 0.13 | 0.11 | -1.25 | 0.073044 | 0.13197  | 0.327938 | 0.404024 |



|                         |                 |       |       |      |      |       |          |          |          |          |
|-------------------------|-----------------|-------|-------|------|------|-------|----------|----------|----------|----------|
| MmugDNA.11104.1.S1_at   | MmugDNA.11104.1 | 7.02  | 6.87  | 0.15 | 0.14 | 1.11  | 0.261089 | 0.59753  | 0.555232 | 0.760237 |
| MmugDNA.11106.1.S1_at   | MmugDNA.11106.1 | 6.53  | 6.68  | 0.46 | 0.34 | -1.11 | 0.81641  | 0.495795 | 0.917994 | 0.695734 |
| MmugDNA.11107.1.S1_at   | MmugDNA.11107.1 | 8.97  | 8.43  | 0.39 | 0.25 | 1.45  | 0.189168 | 0.48126  | 0.485784 | 0.686318 |
| MmugDNA.11109.1.S1_at   | MmugDNA.11109.1 | 4.03  | 4.17  | 0.11 | 0.04 | -1.11 | 0.254487 | 0.124126 | 0.548941 | 0.394389 |
| MmugDNA.1111.1.S1_at    | MmugDNA.1111.1  | 5.98  | 6.19  | 0.11 | 0.12 | -1.16 | 0.193712 | 0.280938 | 0.490322 | 0.544102 |
| MmugDNA.11110.1.S1_at   | MmugDNA.11110.1 | 10.87 | 11.07 | 0.11 | 0.2  | -1.15 | 0.529586 | 0.050971 | 0.75438  | 0.271055 |
| MmugDNA.11111.1.S1_at   | MmugDNA.11111.1 | 8.94  | 8.67  | 0.05 | 0.05 | 1.21  | 0.003215 | 0.017904 | 0.101676 | 0.168922 |
| MmugDNA.11113.1.S1_at   | MmugDNA.11113.1 | 9.77  | 9.86  | 0.24 | 0.09 | -1.07 | 0.189485 | 0.304714 | 0.485955 | 0.561921 |
| MmugDNA.11114.1.S1_s_at | MmugDNA.11114.1 | 10.05 | 10.06 | 0.24 | 0.22 | -1.01 | 0.570602 | 0.28727  | 0.779362 | 0.548526 |
| MmugDNA.11116.1.S1_at   | MmugDNA.11116.1 | 5.57  | 5.68  | 0.1  | 0.05 | -1.08 | 0.21054  | 0.075806 | 0.5081   | 0.320402 |
| MmugDNA.11118.1.S1_at   | MmugDNA.11118.1 | 4.03  | 4.17  | 0.16 | 0.03 | -1.11 | 0.218227 | 0.059463 | 0.515982 | 0.290548 |
| MmugDNA.11119.1.S1_at   | MmugDNA.11119.1 | 3.47  | 3.29  | 0.05 | 0.1  | 1.13  | 0.072593 | 0.036549 | 0.327359 | 0.235649 |
| MmugDNA.1112.1.S1_at    | MmugDNA.1112.1  | 5.17  | 5.28  | 0.13 | 0.11 | -1.08 | 0.180684 | 0.336081 | 0.475809 | 0.583652 |
| MmugDNA.11120.1.S1_at   | MmugDNA.11120.1 | 6.33  | 6.35  | 0.18 | 0.12 | -1.01 | 0.991977 | 0.921556 | 0.997006 | 0.955761 |
| MmugDNA.11121.1.S1_at   | MmugDNA.11121.1 | 3.93  | 3.9   | 0.23 | 0.03 | 1.02  | 0.459479 | 0.58658  | 0.707635 | 0.753592 |
| MmugDNA.11122.1.S1_at   | MmugDNA.11122.1 | 3.94  | 4.03  | 1    | 0    | -1.07 | 0.461941 | 0.586794 | 0.709239 | 0.753819 |
| MmugDNA.11123.1.S1_at   | MmugDNA.11123.1 | 5.14  | 5.13  | 0.06 | 0.04 | 1.01  | 0.381845 | 0.063005 | 0.651337 | 0.297656 |
| MmugDNA.11124.1.S1_at   | MmugDNA.11124.1 | 4.61  | 4.59  | 0.2  | 0.08 | 1.01  | 0.236367 | 0.346368 | 0.533999 | 0.59124  |
| MmugDNA.11125.1.S1_at   | MmugDNA.11125.1 | 4.33  | 4.17  | 0.11 | 0.14 | 1.11  | 0.319517 | 0.250176 | 0.604166 | 0.519199 |
| MmugDNA.11126.1.S1_at   | MmugDNA.11126.1 | 5.24  | 4.65  | 0.43 | 0.22 | 1.51  | 0.168011 | 0.239205 | 0.461204 | 0.509902 |
| MmugDNA.11127.1.S1_at   | MmugDNA.11127.1 | 5.19  | 5.13  | 0.17 | 0.07 | 1.04  | 0.895346 | 0.347072 | 0.95534  | 0.591815 |
| MmugDNA.11128.1.S1_at   | MmugDNA.11128.1 | 5.83  | 5.69  | 0.11 | 0.17 | 1.1   | 0.501259 | 0.392658 | 0.735287 | 0.625813 |
| MmugDNA.11129.1.S1_at   | MmugDNA.11129.1 | 7.92  | 7.97  | 0.31 | 0.07 | -1.03 | 0.971599 | 0.706344 | 0.98857  | 0.829634 |
| MmugDNA.1113.1.S1_at    | MmugDNA.1113.1  | 4.12  | 4.08  | 0.02 | 0.08 | 1.03  | 0.164711 | 0.359021 | 0.45778  | 0.600412 |
| MmugDNA.11130.1.S1_at   | MmugDNA.11130.1 | 6.95  | 7.35  | 0.24 | 0.13 | -1.32 | 0.100137 | 0.594437 | 0.37088  | 0.758623 |
| MmugDNA.11131.1.S1_at   | MmugDNA.11131.1 | 4.45  | 4.43  | 0.17 | 0.04 | 1.02  | 0.340056 | 0.457545 | 0.620242 | 0.670864 |
| MmugDNA.11133.1.S1_at   | MmugDNA.11133.1 | 3.2   | 3.1   | 0.44 | 0.11 | 1.07  | 0.565389 | 0.678151 | 0.776688 | 0.812015 |
| MmugDNA.11135.1.S1_at   | MmugDNA.11135.1 | 10.56 | 10.17 | 0.27 | 0.03 | 1.3   | 0.248109 | 0.004343 | 0.543465 | 0.092354 |
| MmugDNA.11136.1.S1_at   | MmugDNA.11136.1 | 6.53  | 6.24  | 0.02 | 0.09 | 1.23  | 0.011175 | 0.150484 | 0.15539  | 0.42501  |
| MmugDNA.11137.1.S1_at   | MmugDNA.11137.1 | 5.02  | 5.07  | 0.04 | 0.15 | -1.04 | 0.972399 | 0.034409 | 0.988877 | 0.229473 |
| MmugDNA.11138.1.S1_at   | MmugDNA.11138.1 | 4.69  | 4.82  | 0.11 | 0.18 | -1.09 | 0.759377 | 0.212305 | 0.889659 | 0.486202 |
| MmugDNA.11139.1.S1_at   | MmugDNA.11139.1 | 3.11  | 3.09  | 0.47 | 0.15 | 1.02  | 0.383748 | 0.291392 | 0.652982 | 0.551823 |
| MmugDNA.11140.1.S1_at   | MmugDNA.11140.1 | 3.12  | 2.94  | 0.21 | 0.18 | 1.13  | 0.659672 | 0.574981 | 0.835757 | 0.746216 |
| MmugDNA.11141.1.S1_at   | MmugDNA.11141.1 | 9.01  | 9.94  | 0.54 | 0.18 | -1.91 | 0.129418 | 0.395171 | 0.411702 | 0.627379 |
| MmugDNA.11142.1.S1_at   | MmugDNA.11142.1 | 4.68  | 4.67  | 0.06 | 0.04 | 1     | 0.247516 | 0.241044 | 0.542974 | 0.511657 |
| MmugDNA.11144.1.S1_s_at | MmugDNA.11144.1 | 6.85  | 6.88  | 0.3  | 0.05 | -1.02 | 0.879896 | 0.631008 | 0.948855 | 0.782599 |
| MmugDNA.11145.1.S1_at   | MmugDNA.11145.1 | 4.01  | 3.99  | 0.18 | 0.09 | 1.02  | 0.20047  | 0.298034 | 0.497869 | 0.556695 |
| MmugDNA.11146.1.S1_at   | MmugDNA.11146.1 | 6.32  | 6.16  | 0.11 | 0.3  | 1.11  | 0.435924 | 0.533589 | 0.690925 | 0.719808 |
| MmugDNA.11146.1.S1_s_at | MmugDNA.11146.1 | 6.5   | 6.26  | 1.09 | 0.56 | 1.18  | 0.365611 | 0.519004 | 0.640052 | 0.710813 |
| MmugDNA.11147.1.S1_at   | MmugDNA.11147.1 | 3.38  | 3.33  | 0.09 | 0.22 | 1.04  | 0.744498 | 0.779354 | 0.881518 | 0.872061 |
| MmugDNA.11148.1.S1_at   | MmugDNA.11148.1 | 4.46  | 4.42  | 0.05 | 0.08 | 1.02  | 0.917678 | 0.243886 | 0.96488  | 0.514055 |
| MmugDNA.11149.1.S1_at   | MmugDNA.11149.1 | 5.03  | 4.94  | 0.2  | 0.07 | 1.07  | 0.464372 | 0.468761 | 0.710598 | 0.677885 |
| MmugDNA.1115.1.S1_at    | MmugDNA.1115.1  | 3.4   | 3.4   | 0.07 | 0    | 1     | 0.347897 | 0.495091 | 0.626054 | 0.695319 |

|                         |                 |       |       |      |      |       |          |          |          |          |
|-------------------------|-----------------|-------|-------|------|------|-------|----------|----------|----------|----------|
| MmugDNA.11150.1.S1_at   | MmugDNA.11150.1 | 3.63  | 3.55  | 0.24 | 0.06 | 1.06  | 0.633549 | 0.595896 | 0.820437 | 0.759258 |
| MmugDNA.11152.1.S1_at   | MmugDNA.11152.1 | 4.82  | 4.54  | 0.14 | 0.13 | 1.21  | 0.316109 | 0.424701 | 0.600905 | 0.647232 |
| MmugDNA.11153.1.S1_at   | MmugDNA.11153.1 | 5.78  | 4.23  | 0.29 | 0.24 | 2.93  | 0.0016   | 0.002349 | 0.083581 | 0.07161  |
| MmugDNA.11154.1.S1_at   | MmugDNA.11154.1 | 3.15  | 3.13  | 0.23 | 0.13 | 1.01  | 0.917572 | 0.955216 | 0.964862 | 0.97461  |
| MmugDNA.11155.1.S1_at   | MmugDNA.11155.1 | 5.29  | 4.81  | 0.35 | 0.16 | 1.4   | 0.12692  | 0.092876 | 0.408502 | 0.349024 |
| MmugDNA.11156.1.S1_at   | MmugDNA.11156.1 | 3.98  | 4     | 0.36 | 0.23 | -1.01 | 0.901713 | 0.70013  | 0.958307 | 0.825967 |
| MmugDNA.11158.1.S1_at   | MmugDNA.11158.1 | 4.01  | 3.84  | 0.03 | 0.13 | 1.13  | 0.094608 | 0.050005 | 0.363543 | 0.268843 |
| MmugDNA.11159.1.S1_at   | MmugDNA.11159.1 | 5.5   | 5.21  | 0.37 | 0.15 | 1.22  | 0.785614 | 0.291659 | 0.902153 | 0.552042 |
| MmugDNA.1116.1.S1_at    | MmugDNA.1116.1  | 6.57  | 6.34  | 0.64 | 0.6  | 1.17  | 0.609989 | 0.733975 | 0.805589 | 0.845896 |
| MmugDNA.11160.1.S1_at   | MmugDNA.11160.1 | 4.73  | 5.42  | 0.18 | 0.61 | -1.61 | 0.530248 | 0.000447 | 0.754826 | 0.038539 |
| MmugDNA.11161.1.S1_at   | MmugDNA.11161.1 | 3.66  | 3.67  | 0.24 | 0.02 | -1    | 0.349065 | 0.413998 | 0.62702  | 0.639979 |
| MmugDNA.11162.1.S1_at   | MmugDNA.11162.1 | 5.22  | 5.09  | 0.04 | 0.12 | 1.1   | 0.083773 | 0.033753 | 0.346539 | 0.227395 |
| MmugDNA.11164.1.S1_at   | MmugDNA.11164.1 | 5.56  | 5.62  | 0.22 | 0.14 | -1.05 | 0.719009 | 0.744307 | 0.867436 | 0.851942 |
| MmugDNA.11167.1.S1_at   | MmugDNA.11167.1 | 7.18  | 7.47  | 0.03 | 0.26 | -1.22 | 0.143087 | 0.184863 | 0.429349 | 0.460776 |
| MmugDNA.11169.1.S1_at   | MmugDNA.11169.1 | 8.63  | 7.41  | 0.22 | 0.08 | 2.34  | 0.001059 | 0.000186 | 0.076562 | 0.030511 |
| MmugDNA.1117.1.S1_at    | MmugDNA.1117.1  | 4.52  | 4.85  | 0.56 | 0.36 | -1.26 | 0.645186 | 0.81806  | 0.82722  | 0.895063 |
| MmugDNA.11170.1.S1_at   | MmugDNA.11170.1 | 4.96  | 5.32  | 1.15 | 0.49 | -1.28 | 0.892671 | 0.943892 | 0.954299 | 0.968158 |
| MmugDNA.11173.1.S1_at   | MmugDNA.11173.1 | 5.98  | 6.46  | 0.48 | 0.06 | -1.39 | 0.505998 | 0.557434 | 0.738796 | 0.735031 |
| MmugDNA.11174.1.S1_at   | MmugDNA.11174.1 | 4.42  | 4.44  | 0.44 | 0.27 | -1.01 | 0.919835 | 0.678761 | 0.96576  | 0.812378 |
| MmugDNA.11175.1.S1_at   | MmugDNA.11175.1 | 3.89  | 3.67  | 0.94 | 0.12 | 1.17  | 0.259721 | 0.409078 | 0.554037 | 0.63613  |
| MmugDNA.11177.1.S1_at   | MmugDNA.11177.1 | 3.08  | 2.99  | 0.11 | 0.21 | 1.07  | 0.556703 | 0.747508 | 0.771861 | 0.853149 |
| MmugDNA.11178.1.S1_at   | MmugDNA.11178.1 | 5.66  | 5.66  | 0.3  | 0.16 | 1     | 0.96     | 0.751994 | 0.983565 | 0.855739 |
| MmugDNA.11179.1.S1_at   | MmugDNA.11179.1 | 10.84 | 10.62 | 0.29 | 0.09 | 1.17  | 0.720399 | 0.618939 | 0.868039 | 0.774229 |
| MmugDNA.1118.1.S1_at    | MmugDNA.1118.1  | 5.22  | 5.2   | 0.21 | 0.02 | 1.01  | 0.454196 | 0.555268 | 0.704125 | 0.733767 |
| MmugDNA.11180.1.S1_at   | MmugDNA.11180.1 | 5.98  | 5.79  | 0.35 | 0.13 | 1.15  | 0.570498 | 0.370611 | 0.779323 | 0.609664 |
| MmugDNA.11181.1.S1_at   | MmugDNA.11181.1 | 5.99  | 4.8   | 1.06 | 0.86 | 2.29  | 0.236387 | 0.329841 | 0.53402  | 0.578874 |
| MmugDNA.11182.1.S1_at   | MmugDNA.11182.1 | 3.87  | 3.44  | 0.21 | 0.14 | 1.35  | 0.056161 | 0.030774 | 0.294169 | 0.217323 |
| MmugDNA.11183.1.S1_at   | MmugDNA.11183.1 | 6.5   | 6.32  | 1.17 | 0.14 | 1.14  | 0.281561 | 0.255243 | 0.572486 | 0.523284 |
| MmugDNA.11184.1.S1_at   | MmugDNA.11184.1 | 4.97  | 4.86  | 0.07 | 0.21 | 1.08  | 0.533669 | 0.746931 | 0.757177 | 0.853062 |
| MmugDNA.11185.1.S1_at   | MmugDNA.11185.1 | 8.77  | 9.1   | 0.24 | 0.1  | -1.25 | 0.452972 | 0.104899 | 0.703333 | 0.366451 |
| MmugDNA.11186.1.S1_at   | MmugDNA.11186.1 | 5.29  | 5.94  | 0.28 | 0.21 | -1.57 | 0.034986 | 0.166738 | 0.241699 | 0.443215 |
| MmugDNA.11186.1.S1_s_at | MmugDNA.11186.1 | 6.19  | 6.49  | 0.1  | 0.1  | -1.23 | 0.023215 | 0.260458 | 0.205385 | 0.527006 |
| MmugDNA.11187.1.S1_at   | MmugDNA.11187.1 | 4.72  | 4.72  | 0.14 | 0.03 | 1     | 0.387787 | 0.49092  | 0.655868 | 0.692666 |
| MmugDNA.11188.1.S1_at   | MmugDNA.11188.1 | 8.01  | 8.11  | 0.17 | 0.19 | -1.07 | 0.241062 | 0.381486 | 0.538459 | 0.617691 |
| MmugDNA.11189.1.S1_at   | MmugDNA.11189.1 | 8.01  | 7.41  | 0.17 | 0.17 | 1.52  | 0.023725 | 0.444655 | 0.207099 | 0.662072 |
| MmugDNA.1119.1.S1_at    | MmugDNA.1119.1  | 4.79  | 5.44  | 0.4  | 0.25 | -1.57 | 0.076206 | 0.563277 | 0.334238 | 0.738514 |
| MmugDNA.11190.1.S1_at   | MmugDNA.11190.1 | 4.49  | 4.34  | 0.06 | 0.23 | 1.11  | 0.31734  | 0.043252 | 0.602095 | 0.252708 |
| MmugDNA.11191.1.S1_at   | MmugDNA.11191.1 | 5.47  | 5.4   | 0.05 | 0.12 | 1.05  | 0.314546 | 0.466804 | 0.599987 | 0.676543 |
| MmugDNA.11193.1.S1_s_at | MmugDNA.11193.1 | 7.79  | 8.5   | 0.47 | 0.14 | -1.64 | 0.060872 | 0.011126 | 0.303716 | 0.137286 |
| MmugDNA.11194.1.S1_at   | MmugDNA.11194.1 | 5.83  | 5.77  | 0.06 | 0.1  | 1.04  | 0.505318 | 0.169635 | 0.738313 | 0.446221 |
| MmugDNA.11195.1.S1_at   | MmugDNA.11195.1 | 5.56  | 4.26  | 0.32 | 0.31 | 2.46  | 0.012626 | 0.001593 | 0.162521 | 0.06044  |
| MmugDNA.11196.1.S1_at   | MmugDNA.11196.1 | 6.92  | 6.86  | 0.22 | 0.07 | 1.04  | 0.478155 | 0.407265 | 0.719818 | 0.634862 |
| MmugDNA.11198.1.S1_at   | MmugDNA.11198.1 | 6.09  | 5.5   | 0.4  | 0.1  | 1.5   | 0.201925 | 0.290869 | 0.499426 | 0.551436 |

|                         |                 |       |       |      |      |       |          |          |          |          |
|-------------------------|-----------------|-------|-------|------|------|-------|----------|----------|----------|----------|
| MmugDNA.11199.1.S1_at   | MmugDNA.11199.1 | 5.17  | 5.18  | 0.14 | 0.06 | -1.01 | 0.472862 | 0.654308 | 0.716353 | 0.797979 |
| MmugDNA.112.1.S1_at     | MmugDNA.112.1   | 7.76  | 8.38  | 0.17 | 0.25 | -1.54 | 0.013702 | 0.125842 | 0.167949 | 0.396315 |
| MmugDNA.11200.1.S1_at   | MmugDNA.11200.1 | 6.61  | 6.67  | 0.25 | 0    | -1.04 | 0.585196 | 0.51851  | 0.789052 | 0.710477 |
| MmugDNA.11201.1.S1_at   | MmugDNA.11201.1 | 3.74  | 3.62  | 0.05 | 0.2  | 1.09  | 0.184452 | 0.262153 | 0.480429 | 0.528414 |
| MmugDNA.11202.1.S1_at   | MmugDNA.11202.1 | 4.29  | 4.26  | 0.12 | 0.14 | 1.02  | 0.409035 | 0.57719  | 0.671625 | 0.747688 |
| MmugDNA.39039.1.S1_s_at | MmugDNA.39039.1 | 14.34 | 14.34 | 0.1  | 0.02 | -1    | 0.954447 | 0.947487 | 0.981307 | 0.970206 |
| MmugDNA.11205.1.S1_at   | MmugDNA.11205.1 | 3.98  | 3.71  | 0.38 | 0.47 | 1.21  | 0.700066 | 0.724878 | 0.857518 | 0.840716 |
| MmugDNA.11208.1.S1_at   | MmugDNA.11208.1 | 10.91 | 10.37 | 0.14 | 0.04 | 1.45  | 0.004531 | 0.003153 | 0.113436 | 0.081739 |
| MmugDNA.11208.1.S1_s_at | MmugDNA.11208.1 | 12.28 | 11.98 | 0.09 | 0.09 | 1.24  | 0.01011  | 0.005648 | 0.150262 | 0.103804 |
| MmugDNA.11209.1.S1_at   | MmugDNA.11209.1 | 4.35  | 4.39  | 0.12 | 0.26 | -1.03 | 0.761389 | 0.686127 | 0.890581 | 0.81681  |
| MmugDNA.1121.1.S1_at    | MmugDNA.1121.1  | 3.88  | 3.78  | 0.83 | 0.1  | 1.07  | 0.311323 | 0.475785 | 0.597475 | 0.682376 |
| MmugDNA.11211.1.S1_at   | MmugDNA.11211.1 | 10.6  | 10.36 | 0.2  | 0.13 | 1.18  | 0.439311 | 0.308461 | 0.693612 | 0.564504 |
| MmugDNA.11212.1.S1_s_at | MmugDNA.11212.1 | 10.18 | 10.08 | 0.21 | 0.12 | 1.07  | 0.322351 | 0.503106 | 0.606349 | 0.700595 |
| MmugDNA.11213.1.S1_at   | MmugDNA.11213.1 | 5.05  | 4.89  | 0.63 | 0.23 | 1.12  | 0.25347  | 0.320507 | 0.547829 | 0.572648 |
| MmugDNA.11214.1.S1_at   | MmugDNA.11214.1 | 9.88  | 10.29 | 0.22 | 0.04 | -1.33 | 0.037378 | 0.344512 | 0.248711 | 0.589905 |
| MmugDNA.11215.1.S1_at   | MmugDNA.11215.1 | 5.64  | 5.47  | 1.75 | 0.51 | 1.12  | 0.692623 | 0.595807 | 0.853103 | 0.759258 |
| MmugDNA.11217.1.S1_at   | MmugDNA.11217.1 | 11.61 | 11.58 | 0.19 | 0.03 | 1.02  | 0.757747 | 0.138769 | 0.888869 | 0.411885 |
| MmugDNA.11218.1.S1_at   | MmugDNA.11218.1 | 9.82  | 8.76  | 0.33 | 0.08 | 2.08  | 0.006936 | 0.016214 | 0.130411 | 0.161389 |
| MmugDNA.1122.1.S1_at    | MmugDNA.1122.1  | 5.96  | 5.66  | 0.11 | 0.14 | 1.22  | 0.05281  | 0.032745 | 0.286837 | 0.224042 |
| MmugDNA.1122.1.S1_s_at  | MmugDNA.1122.1  | 7.09  | 7.22  | 0.14 | 0.01 | -1.1  | 0.187309 | 0.029399 | 0.483405 | 0.213352 |
| MmugDNA.11220.1.S1_at   | MmugDNA.11220.1 | 6.48  | 6.27  | 0.64 | 0.27 | 1.16  | 0.475181 | 0.172007 | 0.717952 | 0.448404 |
| MmugDNA.11222.1.S1_at   | MmugDNA.11222.1 | 4.93  | 4.54  | 0.19 | 0.12 | 1.31  | 0.09116  | 0.083094 | 0.358544 | 0.332962 |
| MmugDNA.11224.1.S1_at   | MmugDNA.11224.1 | 9.02  | 8.57  | 0.1  | 0.04 | 1.37  | 0.002895 | 0.021727 | 0.098914 | 0.184348 |
| MmugDNA.11225.1.S1_s_at | MmugDNA.11225.1 | 11.93 | 11.96 | 0.24 | 0.17 | -1.02 | 0.655731 | 0.619984 | 0.833526 | 0.775163 |
| MmugDNA.11226.1.S1_at   | MmugDNA.11226.1 | 3.73  | 3.72  | 0.03 | 0.07 | 1.01  | 0.580526 | 0.598257 | 0.785928 | 0.760715 |
| MmugDNA.11227.1.S1_at   | MmugDNA.11227.1 | 3.9   | 3.4   | 0.4  | 0.09 | 1.42  | 0.304447 | 0.327499 | 0.59162  | 0.57732  |
| MmugDNA.11228.1.S1_at   | MmugDNA.11228.1 | 10.35 | 10.34 | 0.12 | 0.17 | 1.01  | 0.763901 | 0.523651 | 0.891841 | 0.713879 |
| MmugDNA.11229.1.S1_at   | MmugDNA.11229.1 | 4.1   | 3.91  | 0.32 | 0.4  | 1.13  | 0.984818 | 0.405116 | 0.994468 | 0.633482 |
| MmugDNA.1123.1.S1_at    | MmugDNA.1123.1  | 5.79  | 5.79  | 0.13 | 0.03 | 1     | 0.925326 | 0.983243 | 0.968315 | 0.990726 |
| MmugDNA.11230.1.S1_at   | MmugDNA.11230.1 | 5.36  | 5.33  | 0.31 | 0.14 | 1.03  | 0.475645 | 0.53181  | 0.718263 | 0.718955 |
| MmugDNA.11231.1.S1_at   | MmugDNA.11231.1 | 3.37  | 3.21  | 0.19 | 0.13 | 1.12  | 0.202325 | 0.198185 | 0.499903 | 0.473153 |
| MmugDNA.11232.1.S1_at   | MmugDNA.11232.1 | 4.52  | 4.54  | 0.05 | 0.05 | -1.01 | 0.62495  | 0.185351 | 0.815109 | 0.461323 |
| MmugDNA.11233.1.S1_at   | MmugDNA.11233.1 | 5.23  | 5.3   | 0.07 | 0.06 | -1.05 | 0.101744 | 0.127277 | 0.373208 | 0.397996 |
| MmugDNA.11234.1.S1_at   | MmugDNA.11234.1 | 3.07  | 3.14  | 0.04 | 0.08 | -1.05 | 0.287213 | 0.059391 | 0.576969 | 0.290548 |
| MmugDNA.11236.1.S1_at   | MmugDNA.11236.1 | 3.35  | 3.27  | 0.16 | 0.04 | 1.06  | 0.314594 | 0.512567 | 0.599987 | 0.706419 |
| MmugDNA.11239.1.S1_at   | MmugDNA.11239.1 | 3.93  | 3.7   | 0.36 | 0.18 | 1.17  | 0.176047 | 0.162351 | 0.470426 | 0.438518 |
| MmugDNA.1124.1.S1_at    | MmugDNA.1124.1  | 3.32  | 3.51  | 0.11 | 0.07 | -1.14 | 0.335257 | 0.247261 | 0.616208 | 0.516473 |
| MmugDNA.11240.1.S1_at   | MmugDNA.11240.1 | 4.42  | 4.37  | 0.35 | 0.14 | 1.03  | 0.853066 | 0.922891 | 0.936077 | 0.956603 |
| MmugDNA.11241.1.S1_at   | MmugDNA.11241.1 | 5.55  | 5.66  | 0.16 | 0.11 | -1.08 | 0.429737 | 0.768389 | 0.686118 | 0.865508 |
| MmugDNA.11242.1.S1_at   | MmugDNA.11242.1 | 6.26  | 6.49  | 0.3  | 0.06 | -1.18 | 0.091138 | 0.03518  | 0.358509 | 0.231723 |
| MmugDNA.11244.1.S1_at   | MmugDNA.11244.1 | 3.26  | 3.4   | 0.16 | 0.07 | -1.1  | 0.212897 | 0.072695 | 0.510861 | 0.31561  |
| MmugDNA.11245.1.S1_at   | MmugDNA.11245.1 | 4.9   | 4.79  | 0.37 | 0.36 | 1.08  | 0.151326 | 0.313726 | 0.440914 | 0.568083 |
| MmugDNA.11246.1.S1_at   | MmugDNA.11246.1 | 3.95  | 3.99  | 0.26 | 0.19 | -1.03 | 0.327517 | 0.301367 | 0.610213 | 0.559391 |

|                         |                 |       |       |      |      |       |          |          |          |          |
|-------------------------|-----------------|-------|-------|------|------|-------|----------|----------|----------|----------|
| MmugDNA.11247.1.S1_at   | MmugDNA.11247.1 | 2.85  | 2.8   | 0.06 | 0.13 | 1.03  | 0.914489 | 0.993173 | 0.963657 | 0.995946 |
| MmugDNA.11248.1.S1_s_at | MmugDNA.11248.1 | 7.46  | 9.2   | 1.35 | 0.39 | -3.33 | 0.160138 | 0.586349 | 0.451479 | 0.753442 |
| MmugDNA.11249.1.S1_at   | MmugDNA.11249.1 | 8.44  | 10.56 | 0.81 | 0.33 | -4.33 | 0.044007 | 0.046463 | 0.266824 | 0.260089 |
| MmugDNA.1125.1.S1_at    | MmugDNA.1125.1  | 6.58  | 6.89  | 0.37 | 0.35 | -1.24 | 0.171069 | 0.016783 | 0.464894 | 0.164091 |
| MmugDNA.11250.1.S1_at   | MmugDNA.11250.1 | 4.42  | 4.41  | 0.27 | 0.43 | 1     | 0.903224 | 0.937629 | 0.959024 | 0.964687 |
| MmugDNA.11252.1.S1_at   | MmugDNA.11252.1 | 8.29  | 8.48  | 0.05 | 0.13 | -1.14 | 0.078423 | 0.374123 | 0.338116 | 0.612678 |
| MmugDNA.11252.1.S1_s_at | MmugDNA.11252.1 | 8.25  | 8.4   | 0.11 | 0.1  | -1.11 | 0.379386 | 0.467428 | 0.649328 | 0.677085 |
| MmugDNA.11253.1.S1_at   | MmugDNA.11253.1 | 5.96  | 5.89  | 0.26 | 0.28 | 1.05  | 0.593117 | 0.279712 | 0.793867 | 0.543228 |
| MmugDNA.11255.1.S1_at   | MmugDNA.11255.1 | 8.23  | 8.54  | 0.3  | 0.19 | -1.24 | 0.096005 | 0.002105 | 0.365529 | 0.067867 |
| MmugDNA.11258.1.S1_at   | MmugDNA.11258.1 | 3.04  | 3.73  | 0.58 | 0.18 | -1.61 | 0.254391 | 0.160661 | 0.54882  | 0.436745 |
| MmugDNA.1126.1.S1_at    | MmugDNA.1126.1  | 5.84  | 4.32  | 0.24 | 0.47 | 2.87  | 0.010523 | 0.026831 | 0.15243  | 0.204912 |
| MmugDNA.11260.1.S1_at   | MmugDNA.11260.1 | 4.25  | 4.02  | 0.15 | 0.16 | 1.17  | 0.175186 | 0.182454 | 0.469543 | 0.459043 |
| MmugDNA.11261.1.S1_at   | MmugDNA.11261.1 | 4.9   | 5.38  | 0.9  | 0.21 | -1.4  | 0.346493 | 0.393989 | 0.624998 | 0.626733 |
| MmugDNA.11262.1.S1_at   | MmugDNA.11262.1 | 9.74  | 9.94  | 0.04 | 0.01 | -1.15 | 0.00084  | 0.005536 | 0.07338  | 0.102661 |
| MmugDNA.11264.1.S1_at   | MmugDNA.11264.1 | 5.23  | 5.18  | 0.12 | 0.06 | 1.04  | 0.750357 | 0.759972 | 0.884653 | 0.860514 |
| MmugDNA.11265.1.S1_at   | MmugDNA.11265.1 | 6.77  | 6.04  | 0.02 | 0.34 | 1.66  | 0.047242 | 0.079468 | 0.274594 | 0.326781 |
| MmugDNA.11266.1.S1_s_at | MmugDNA.11266.1 | 10.46 | 10.5  | 0.06 | 0.05 | -1.03 | 0.677494 | 0.279571 | 0.846248 | 0.543146 |
| MmugDNA.11267.1.S1_at   | MmugDNA.11267.1 | 5.38  | 5.4   | 0.21 | 0.07 | -1.02 | 0.485161 | 0.497812 | 0.724739 | 0.697071 |
| MmugDNA.11268.1.S1_at   | MmugDNA.11268.1 | 5.67  | 5.83  | 0.1  | 0.13 | -1.12 | 0.179529 | 0.215896 | 0.474704 | 0.489536 |
| MmugDNA.11269.1.S1_at   | MmugDNA.11269.1 | 7.66  | 7.79  | 0.14 | 0.16 | -1.1  | 0.36252  | 0.135832 | 0.637372 | 0.408019 |
| MmugDNA.1127.1.S1_at    | MmugDNA.1127.1  | 5.19  | 5.11  | 0.1  | 0.06 | 1.06  | 0.360593 | 0.854406 | 0.63616  | 0.91705  |
| MmugDNA.11270.1.S1_at   | MmugDNA.11270.1 | 8.3   | 8.29  | 0.13 | 0.22 | 1     | 0.403475 | 0.784652 | 0.667618 | 0.875304 |
| MmugDNA.11271.1.S1_at   | MmugDNA.11271.1 | 10.91 | 10.52 | 0.29 | 0.27 | 1.31  | 0.363879 | 0.704564 | 0.638487 | 0.828608 |
| MmugDNA.11272.1.S1_at   | MmugDNA.11272.1 | 3.33  | 3.39  | 0.03 | 0.01 | -1.04 | 0.045677 | 0.175778 | 0.271157 | 0.452344 |
| MmugDNA.11274.1.S1_at   | MmugDNA.11274.1 | 6.8   | 6.94  | 0.01 | 0.01 | -1.1  | 0.000203 | 0.000722 | 0.053494 | 0.044531 |
| MmugDNA.11275.1.S1_at   | MmugDNA.11275.1 | 6.8   | 6.71  | 0.07 | 0.11 | 1.07  | 0.056288 | 0.227873 | 0.294475 | 0.500201 |
| MmugDNA.11276.1.S1_at   | MmugDNA.11276.1 | 8.89  | 9.34  | 0.12 | 0.03 | -1.37 | 0.006051 | 0.016003 | 0.124182 | 0.160458 |
| MmugDNA.11277.1.S1_at   | MmugDNA.11277.1 | 6.93  | 6.9   | 0.08 | 0.12 | 1.02  | 0.628772 | 0.235235 | 0.817507 | 0.50629  |
| MmugDNA.11278.1.S1_at   | MmugDNA.11278.1 | 4.76  | 5.16  | 0.55 | 0.25 | -1.32 | 0.21651  | 0.21427  | 0.514322 | 0.487891 |
| MmugDNA.1128.1.S1_at    | MmugDNA.1128.1  | 10.91 | 11.19 | 0.32 | 0.06 | -1.21 | 0.1464   | 0.051047 | 0.434238 | 0.271214 |
| MmugDNA.11280.1.S1_at   | MmugDNA.11280.1 | 4.76  | 4.7   | 0.06 | 0.23 | 1.04  | 0.524205 | 0.758381 | 0.751005 | 0.859454 |
| MmugDNA.11282.1.S1_at   | MmugDNA.11282.1 | 8.04  | 8.47  | 0.57 | 0.03 | -1.35 | 0.280642 | 0.003034 | 0.571731 | 0.080386 |
| MmugDNA.11283.1.S1_at   | MmugDNA.11283.1 | 4.76  | 4.82  | 0.05 | 0.2  | -1.04 | 0.23349  | 0.053247 | 0.53162  | 0.276449 |
| MmugDNA.11284.1.S1_s_at | MmugDNA.11284.1 | 13.03 | 13.07 | 0.04 | 0.05 | -1.02 | 0.978455 | 0.196228 | 0.99168  | 0.471236 |
| MmugDNA.11285.1.S1_at   | MmugDNA.11285.1 | 3.35  | 3.44  | 0.03 | 0.07 | -1.07 | 0.421209 | 0.964743 | 0.679846 | 0.980422 |
| MmugDNA.11288.1.S1_s_at | MmugDNA.11288.1 | 7.12  | 7.12  | 0.21 | 0.05 | -1    | 0.8619   | 0.401558 | 0.940083 | 0.631068 |
| MmugDNA.11289.1.S1_at   | MmugDNA.11289.1 | 5.31  | 5.27  | 0.25 | 0.1  | 1.03  | 0.893519 | 0.95948  | 0.954549 | 0.977017 |
| MmugDNA.1129.1.S1_at    | MmugDNA.1129.1  | 4.53  | 4.53  | 0.14 | 0.2  | 1.01  | 0.940076 | 0.976084 | 0.974759 | 0.98693  |
| MmugDNA.11290.1.S1_at   | MmugDNA.11290.1 | 11.41 | 11.1  | 0.18 | 0.13 | 1.23  | 0.053803 | 0.083803 | 0.289082 | 0.334647 |
| MmugDNA.11291.1.S1_s_at | MmugDNA.11291.1 | 11.66 | 11.61 | 0.04 | 0.02 | 1.04  | 0.038941 | 0.163473 | 0.253692 | 0.439707 |
| MmugDNA.11291.1.S1_x_at | MmugDNA.11291.1 | 3.36  | 3.26  | 0.13 | 0.11 | 1.07  | 0.323048 | 0.592341 | 0.606913 | 0.757716 |
| MmugDNA.6252.1.S1_s_at  | MmugDNA.6252.1  | 7.53  | 8.04  | 0.12 | 0.13 | -1.42 | 0.013369 | 0.004824 | 0.16632  | 0.096904 |
| MmugDNA.11293.1.S1_at   | MmugDNA.11293.1 | 10.27 | 9.25  | 0.29 | 0.17 | 2.02  | 0.008642 | 0.034581 | 0.142384 | 0.230061 |

|                         |                 |       |       |      |      |       |          |          |          |          |
|-------------------------|-----------------|-------|-------|------|------|-------|----------|----------|----------|----------|
| MmugDNA.11295.1.S1_at   | MmugDNA.11295.1 | 5.16  | 5.11  | 0.01 | 0.08 | 1.04  | 0.909723 | 0.243219 | 0.961697 | 0.513356 |
| MmugDNA.11296.1.S1_at   | MmugDNA.11296.1 | 11.84 | 11.67 | 0.19 | 0.1  | 1.12  | 0.186286 | 0.841586 | 0.482508 | 0.909677 |
| MmugDNA.11297.1.S1_at   | MmugDNA.11297.1 | 6.43  | 6.32  | 0.24 | 0.13 | 1.08  | 0.18647  | 0.305505 | 0.482628 | 0.562461 |
| MmugDNA.11299.1.S1_at   | MmugDNA.11299.1 | 11.23 | 11.51 | 0.18 | 0.09 | -1.22 | 0.132023 | 0.502366 | 0.415154 | 0.700134 |
| MmugDNA.1130.1.S1_at    | MmugDNA.1130.1  | 6.03  | 6.21  | 0.19 | 0.13 | -1.13 | 0.634524 | 0.715553 | 0.820812 | 0.835123 |
| MmugDNA.11302.1.S1_at   | MmugDNA.11302.1 | 5.62  | 5.71  | 0.28 | 0.39 | -1.07 | 0.702817 | 0.062127 | 0.85894  | 0.296182 |
| MmugDNA.11304.1.S1_at   | MmugDNA.11304.1 | 7.09  | 7.18  | 0.17 | 0.16 | -1.06 | 0.654054 | 0.715445 | 0.832505 | 0.835033 |
| MmugDNA.11305.1.S1_at   | MmugDNA.11305.1 | 2.9   | 2.92  | 0.14 | 0.06 | -1.02 | 0.546271 | 0.519047 | 0.765159 | 0.710813 |
| MmugDNA.11306.1.S1_at   | MmugDNA.11306.1 | 2.89  | 2.99  | 0.08 | 0.06 | -1.07 | 0.208638 | 0.261558 | 0.506196 | 0.52802  |
| MmugDNA.11307.1.S1_at   | MmugDNA.11307.1 | 11.79 | 11.54 | 0.14 | 0    | 1.18  | 0.030808 | 0.00058  | 0.228455 | 0.041447 |
| MmugDNA.11308.1.S1_at   | MmugDNA.11308.1 | 3.82  | 3.84  | 0.04 | 0.31 | -1.01 | 0.939792 | 0.252108 | 0.974579 | 0.520787 |
| MmugDNA.1131.1.S1_at    | MmugDNA.1131.1  | 4.77  | 4.99  | 0.54 | 0.32 | -1.16 | 0.827258 | 0.039376 | 0.923507 | 0.243406 |
| MmugDNA.11312.1.S1_at   | MmugDNA.11312.1 | 4.03  | 3.48  | 0.25 | 0.47 | 1.46  | 0.682339 | 0.411982 | 0.84853  | 0.638434 |
| MmugDNA.11313.1.S1_at   | MmugDNA.11313.1 | 7.66  | 7.58  | 0.29 | 0.07 | 1.05  | 0.570372 | 0.730615 | 0.779298 | 0.844055 |
| MmugDNA.11317.1.S1_at   | MmugDNA.11317.1 | 5.42  | 5.42  | 0.08 | 0.05 | 1     | 0.786528 | 0.193131 | 0.902673 | 0.468554 |
| MmugDNA.11318.1.S1_at   | MmugDNA.11318.1 | 8.84  | 8.7   | 0.2  | 0.19 | 1.1   | 0.250096 | 0.40055  | 0.544879 | 0.630361 |
| MmugDNA.11319.1.S1_at   | MmugDNA.11319.1 | 11.25 | 11.48 | 0.07 | 0.06 | -1.17 | 0.010985 | 0.00019  | 0.154584 | 0.030754 |
| MmugDNA.1132.1.S1_at    | MmugDNA.1132.1  | 4.62  | 4.86  | 0.07 | 0.1  | -1.19 | 0.020294 | 0.098829 | 0.196136 | 0.357002 |
| MmugDNA.26114.1.S1_s_at | MmugDNA.26114.1 | 4.2   | 4.2   | 0.01 | 0    | 1     | 0.794572 | 0.434231 | 0.907212 | 0.654422 |
| MmugDNA.11322.1.S1_at   | MmugDNA.11322.1 | 4.76  | 4.95  | 0.15 | 0.09 | -1.14 | 0.100818 | 0.38449  | 0.371905 | 0.620142 |
| MmugDNA.11323.1.S1_at   | MmugDNA.11323.1 | 3.23  | 3.32  | 0.05 | 0.03 | -1.07 | 0.120319 | 0.034852 | 0.398774 | 0.230897 |
| MmugDNA.11324.1.S1_at   | MmugDNA.11324.1 | 11.1  | 10.54 | 0.05 | 0.04 | 1.48  | 0.000109 | 0.041944 | 0.051196 | 0.249397 |
| MmugDNA.11325.1.S1_at   | MmugDNA.11325.1 | 4.28  | 4.17  | 0.01 | 0.02 | 1.07  | 0.005129 | 0.083955 | 0.116951 | 0.334877 |
| MmugDNA.11326.1.S1_at   | MmugDNA.11326.1 | 6.59  | 6.5   | 0.12 | 0.11 | 1.07  | 0.460396 | 0.000459 | 0.708167 | 0.038572 |
| MmugDNA.11329.1.S1_at   | MmugDNA.11329.1 | 4.6   | 4.23  | 0.37 | 0.09 | 1.29  | 0.06009  | 0.148215 | 0.302405 | 0.422745 |
| MmugDNA.1133.1.S1_at    | MmugDNA.1133.1  | 4.51  | 4.79  | 0.72 | 0.84 | -1.21 | 0.659544 | 0.816946 | 0.83568  | 0.894418 |
| MmugDNA.11330.1.S1_at   | MmugDNA.11330.1 | 5.56  | 5.56  | 0.12 | 0.05 | -1    | 0.665072 | 0.67075  | 0.838958 | 0.807469 |
| MmugDNA.11331.1.S1_at   | MmugDNA.11331.1 | 3.66  | 3.77  | 0.39 | 0.16 | -1.08 | 0.812611 | 0.613308 | 0.916193 | 0.770498 |
| MmugDNA.11333.1.S1_at   | MmugDNA.11333.1 | 4.38  | 4.55  | 0.21 | 0.06 | -1.13 | 0.355595 | 0.713205 | 0.632237 | 0.833655 |
| MmugDNA.11334.1.S1_at   | MmugDNA.11334.1 | 3.13  | 3.3   | 0.05 | 0.1  | -1.12 | 0.070593 | 0.704285 | 0.324085 | 0.828392 |
| MmugDNA.11335.1.S1_at   | MmugDNA.11335.1 | 3.87  | 3.73  | 0.28 | 0.16 | 1.1   | 0.233147 | 0.326255 | 0.531371 | 0.576452 |
| MmugDNA.11337.1.S1_at   | MmugDNA.11337.1 | 4.38  | 4.36  | 0.15 | 0.1  | 1.02  | 0.855252 | 0.198733 | 0.93691  | 0.473391 |
| MmugDNA.11339.1.S1_at   | MmugDNA.11339.1 | 11.3  | 10.89 | 0.18 | 0.06 | 1.33  | 0.066517 | 0.138019 | 0.315401 | 0.410919 |
| MmugDNA.1134.1.S1_at    | MmugDNA.1134.1  | 4.75  | 4.94  | 0.28 | 0.07 | -1.14 | 0.251972 | 0.367163 | 0.546684 | 0.606832 |
| MmugDNA.11340.1.S1_at   | MmugDNA.11340.1 | 6.06  | 6.01  | 0.07 | 0.25 | 1.04  | 0.607976 | 0.731602 | 0.804139 | 0.844457 |
| MmugDNA.11343.1.S1_s_at | MmugDNA.11343.1 | 8.5   | 8.52  | 0.09 | 0.04 | -1.02 | 0.661767 | 0.137063 | 0.836805 | 0.409836 |
| MmugDNA.11344.1.S1_at   | MmugDNA.11344.1 | 4.38  | 4.37  | 0.11 | 0.08 | 1.01  | 0.986824 | 0.270846 | 0.995228 | 0.536026 |
| MmugDNA.11345.1.S1_at   | MmugDNA.11345.1 | 5.64  | 5.89  | 0.38 | 0.37 | -1.19 | 0.468099 | 0.246197 | 0.713381 | 0.515883 |
| MmugDNA.11348.1.S1_at   | MmugDNA.11348.1 | 5.37  | 4.76  | 0.69 | 0.37 | 1.52  | 0.30442  | 0.408472 | 0.591617 | 0.635694 |
| MmugDNA.1135.1.S1_at    | MmugDNA.1135.1  | 9.23  | 9.44  | 0.13 | 0.12 | -1.16 | 0.263829 | 0.000017 | 0.557349 | 0.019635 |
| MmugDNA.11354.1.S1_at   | MmugDNA.11354.1 | 3.1   | 3.18  | 0.21 | 0.13 | -1.06 | 0.647555 | 0.636839 | 0.828766 | 0.786404 |
| MmugDNA.11356.1.S1_at   | MmugDNA.11356.1 | 9.85  | 9.6   | 0.29 | 0.05 | 1.19  | 0.694379 | 0.836117 | 0.85409  | 0.906284 |
| MmugDNA.11357.1.S1_at   | MmugDNA.11357.1 | 3.81  | 3.91  | 0.26 | 0.17 | -1.07 | 0.485519 | 0.506401 | 0.725036 | 0.702371 |

|                         |                 |       |       |      |      |       |          |          |          |          |
|-------------------------|-----------------|-------|-------|------|------|-------|----------|----------|----------|----------|
| MmugDNA.11359.1.S1_at   | MmugDNA.11359.1 | 3.24  | 3.35  | 0.23 | 0.14 | -1.08 | 0.741759 | 0.89494  | 0.880351 | 0.940055 |
| MmugDNA.11361.1.S1_at   | MmugDNA.11361.1 | 3.76  | 3.42  | 0.12 | 0.05 | 1.27  | 0.018573 | 0.089815 | 0.189513 | 0.34404  |
| MmugDNA.11363.1.S1_at   | MmugDNA.11363.1 | 3.04  | 3.12  | 0.06 | 0.05 | -1.05 | 0.208632 | 0.620109 | 0.506196 | 0.775227 |
| MmugDNA.11367.1.S1_at   | MmugDNA.11367.1 | 5.07  | 5.08  | 0.55 | 0.14 | -1    | 0.993718 | 0.998329 | 0.997454 | 0.999091 |
| MmugDNA.1137.1.S1_at    | MmugDNA.1137.1  | 5.63  | 5.64  | 0.05 | 0.09 | -1.01 | 0.419259 | 0.622868 | 0.67873  | 0.77739  |
| MmugDNA.11370.1.S1_at   | MmugDNA.11370.1 | 5.55  | 5.57  | 0.19 | 0.01 | -1.02 | 0.311103 | 0.08712  | 0.597314 | 0.340073 |
| MmugDNA.11371.1.S1_at   | MmugDNA.11371.1 | 4.54  | 4.55  | 0.19 | 0.02 | -1    | 0.959733 | 0.996699 | 0.983565 | 0.998097 |
| MmugDNA.11372.1.S1_at   | MmugDNA.11372.1 | 5.89  | 4.82  | 0.23 | 0.26 | 2.1   | 0.013949 | 0.001699 | 0.169182 | 0.062399 |
| MmugDNA.11373.1.S1_at   | MmugDNA.11373.1 | 4.43  | 4.32  | 0.34 | 0.04 | 1.08  | 0.547676 | 0.796899 | 0.766193 | 0.882822 |
| MmugDNA.11374.1.S1_at   | MmugDNA.11374.1 | 4.39  | 4.73  | 0.07 | 0.12 | -1.27 | 0.017962 | 0.503893 | 0.187151 | 0.701193 |
| MmugDNA.11374.1.S1_s_at | MmugDNA.11374.1 | 7.31  | 8.34  | 0.3  | 0.23 | -2.04 | 0.011908 | 0.288565 | 0.159222 | 0.549827 |
| MmugDNA.11376.1.S1_at   | MmugDNA.11376.1 | 5.82  | 5.29  | 0.03 | 0.56 | 1.45  | 0.168763 | 0.38895  | 0.462083 | 0.623255 |
| MmugDNA.11377.1.S1_s_at | MmugDNA.11377.1 | 4.65  | 5.89  | 0.27 | 0.2  | -2.36 | 0.004055 | 0.196611 | 0.108999 | 0.471632 |
| MmugDNA.1138.1.S1_at    | MmugDNA.1138.1  | 4.29  | 3.66  | 0.42 | 0.54 | 1.55  | 0.211268 | 0.274769 | 0.509057 | 0.539225 |
| MmugDNA.11381.1.S1_at   | MmugDNA.11381.1 | 4.27  | 3.85  | 0.27 | 0.16 | 1.34  | 0.197381 | 0.389957 | 0.494527 | 0.624002 |
| MmugDNA.11383.1.S1_at   | MmugDNA.11383.1 | 7     | 7.31  | 0.15 | 0.17 | -1.24 | 0.107619 | 0.460336 | 0.382296 | 0.672182 |
| MmugDNA.11384.1.S1_at   | MmugDNA.11384.1 | 5.47  | 5.41  | 0.59 | 0.4  | 1.04  | 0.397173 | 0.246594 | 0.662936 | 0.515917 |
| MmugDNA.11385.1.S1_at   | MmugDNA.11385.1 | 3.78  | 3.76  | 0.04 | 0.03 | 1.01  | 0.955641 | 0.96904  | 0.981771 | 0.982966 |
| MmugDNA.11388.1.S1_at   | MmugDNA.11388.1 | 10.75 | 10.67 | 0.12 | 0.11 | 1.05  | 0.136393 | 0.219137 | 0.420898 | 0.492868 |
| MmugDNA.1139.1.S1_at    | MmugDNA.1139.1  | 9.06  | 7.99  | 0.2  | 0.13 | 2.11  | 0.002363 | 0.087443 | 0.092906 | 0.340617 |
| MmugDNA.11390.1.S1_at   | MmugDNA.11390.1 | 4.48  | 4.29  | 0.13 | 0.27 | 1.14  | 0.197478 | 0.257667 | 0.494677 | 0.525332 |
| MmugDNA.11391.1.S1_at   | MmugDNA.11391.1 | 7.69  | 7.47  | 0.08 | 0.34 | 1.16  | 0.266344 | 0.4101   | 0.558799 | 0.637065 |
| MmugDNA.11392.1.S1_at   | MmugDNA.11392.1 | 6.7   | 6.42  | 0.26 | 0.16 | 1.22  | 0.457505 | 0.661085 | 0.706421 | 0.801683 |
| MmugDNA.11393.1.S1_at   | MmugDNA.11393.1 | 6.86  | 7.08  | 0.85 | 0.01 | -1.16 | 0.601825 | 0.805238 | 0.799861 | 0.888036 |
| MmugDNA.11394.1.S1_at   | MmugDNA.11394.1 | 3.27  | 3.02  | 0.18 | 0.1  | 1.19  | 0.183275 | 0.091425 | 0.479242 | 0.34639  |
| MmugDNA.11395.1.S1_at   | MmugDNA.11395.1 | 7.87  | 7.38  | 1.55 | 0.65 | 1.4   | 0.608651 | 0.611043 | 0.804644 | 0.769023 |
| MmugDNA.11396.1.S1_s_at | MmugDNA.11396.1 | 7.16  | 7.25  | 0.47 | 0.11 | -1.07 | 0.994572 | 0.89084  | 0.997781 | 0.937722 |
| MmugDNA.11397.1.S1_at   | MmugDNA.11397.1 | 3.75  | 3.58  | 0.38 | 0.08 | 1.13  | 0.153688 | 0.518535 | 0.443756 | 0.710477 |
| MmugDNA.11399.1.S1_at   | MmugDNA.11399.1 | 8.04  | 7.99  | 0.1  | 0.4  | 1.04  | 0.37246  | 0.591919 | 0.64495  | 0.757386 |
| MmugDNA.114.1.S1_at     | MmugDNA.114.1   | 2.81  | 2.91  | 0.06 | 0.01 | -1.07 | 0.105396 | 0.406256 | 0.379375 | 0.634225 |
| MmugDNA.1140.1.S1_at    | MmugDNA.1140.1  | 4.62  | 3.87  | 0.2  | 0.13 | 1.69  | 0.00991  | 0.060273 | 0.148933 | 0.292164 |
| MmugDNA.11400.1.S1_at   | MmugDNA.11400.1 | 7.3   | 6.25  | 0.88 | 0.58 | 2.08  | 0.217209 | 0.365022 | 0.515015 | 0.605222 |
| MmugDNA.11401.1.S1_at   | MmugDNA.11401.1 | 6.98  | 7     | 0.1  | 0.09 | -1.01 | 0.787175 | 0.727928 | 0.902963 | 0.842707 |
| MmugDNA.11402.1.S1_at   | MmugDNA.11402.1 | 7.42  | 7.23  | 0.12 | 0.15 | 1.14  | 0.389759 | 0.33422  | 0.657497 | 0.582266 |
| MmugDNA.11403.1.S1_at   | MmugDNA.11403.1 | 5.02  | 4.96  | 0.27 | 0.21 | 1.04  | 0.373562 | 0.61343  | 0.645118 | 0.770528 |
| MmugDNA.11404.1.S1_at   | MmugDNA.11404.1 | 5.03  | 4.79  | 0.17 | 0.09 | 1.18  | 0.117001 | 0.092919 | 0.394143 | 0.349024 |
| MmugDNA.11405.1.S1_s_at | MmugDNA.11405.1 | 8.9   | 8.56  | 0.22 | 0.2  | 1.27  | 0.057324 | 0.006204 | 0.296809 | 0.106825 |
| MmugDNA.11407.1.S1_at   | MmugDNA.11407.1 | 5.2   | 5.36  | 0.03 | 0.31 | -1.11 | 0.336489 | 0.05713  | 0.617078 | 0.284945 |
| MmugDNA.11408.1.S1_at   | MmugDNA.11408.1 | 3.96  | 3.95  | 0.07 | 0.1  | 1.01  | 0.337422 | 0.61753  | 0.617875 | 0.773477 |
| MmugDNA.11409.1.S1_at   | MmugDNA.11409.1 | 3.18  | 2.9   | 0.29 | 0.23 | 1.21  | 0.321103 | 0.202847 | 0.60541  | 0.477312 |
| MmugDNA.1141.1.S1_at    | MmugDNA.1141.1  | 5.39  | 5.47  | 0.3  | 0.02 | -1.06 | 0.61434  | 0.625624 | 0.808108 | 0.779265 |
| MmugDNA.11410.1.S1_at   | MmugDNA.11410.1 | 10.31 | 10.24 | 0.07 | 0.11 | 1.05  | 0.188306 | 0.353349 | 0.484627 | 0.596477 |
| MmugDNA.11411.1.S1_at   | MmugDNA.11411.1 | 12.53 | 12.13 | 0.03 | 0.11 | 1.32  | 0.004183 | 0.015866 | 0.11023  | 0.159789 |

|                         |                 |       |       |      |      |       |          |          |          |          |
|-------------------------|-----------------|-------|-------|------|------|-------|----------|----------|----------|----------|
| MmugDNA.11412.1.S1_at   | MmugDNA.11412.1 | 12.44 | 12.45 | 0.09 | 0.04 | -1.01 | 0.485657 | 0.274514 | 0.725109 | 0.538987 |
| MmugDNA.11413.1.S1_at   | MmugDNA.11413.1 | 4.28  | 4.09  | 0.24 | 0.3  | 1.14  | 0.424662 | 0.476563 | 0.682288 | 0.682787 |
| MmugDNA.11413.1.S1_s_at | MmugDNA.11413.1 | 6.37  | 6.35  | 0.04 | 0.06 | 1.01  | 0.652201 | 0.239951 | 0.831156 | 0.510627 |
| MmugDNA.11414.1.S1_at   | MmugDNA.11414.1 | 3.86  | 4.71  | 0.19 | 0.19 | -1.8  | 0.009082 | 0.106982 | 0.145006 | 0.369557 |
| MmugDNA.11415.1.S1_at   | MmugDNA.11415.1 | 4.85  | 5.15  | 0.24 | 0.11 | -1.24 | 0.543568 | 0.604672 | 0.763476 | 0.764769 |
| MmugDNA.11415.1.S1_s_at | MmugDNA.11415.1 | 6.17  | 6.21  | 0.29 | 0.17 | -1.03 | 0.514877 | 0.475967 | 0.744766 | 0.682397 |
| MmugDNA.11416.1.S1_at   | MmugDNA.11416.1 | 9.27  | 10.03 | 0.58 | 0.07 | -1.7  | 0.198777 | 0.122771 | 0.495887 | 0.392755 |
| MmugDNA.11417.1.S1_at   | MmugDNA.11417.1 | 8.8   | 8.98  | 0.45 | 0.05 | -1.13 | 0.802619 | 0.052428 | 0.911366 | 0.274496 |
| MmugDNA.11418.1.S1_at   | MmugDNA.11418.1 | 3.32  | 3.29  | 0.05 | 0.09 | 1.02  | 0.236456 | 0.91413  | 0.534108 | 0.951725 |
| MmugDNA.1142.1.S1_at    | MmugDNA.1142.1  | 6.89  | 8.04  | 0.8  | 0.13 | -2.22 | 0.161184 | 0.071263 | 0.452738 | 0.313318 |
| MmugDNA.11420.1.S1_at   | MmugDNA.11420.1 | 5.61  | 5.75  | 0.47 | 0.16 | -1.11 | 0.969225 | 0.651286 | 0.98776  | 0.796167 |
| MmugDNA.11421.1.S1_at   | MmugDNA.11421.1 | 5.84  | 5.95  | 0.15 | 0.06 | -1.08 | 0.297085 | 0.05833  | 0.585548 | 0.288296 |
| MmugDNA.11422.1.S1_at   | MmugDNA.11422.1 | 6.83  | 6.49  | 0.47 | 0.33 | 1.27  | 0.177821 | 0.081851 | 0.472553 | 0.330284 |
| MmugDNA.11423.1.S1_at   | MmugDNA.11423.1 | 3.46  | 3.18  | 0.13 | 0.13 | 1.21  | 0.067633 | 0.065542 | 0.317871 | 0.301415 |
| MmugDNA.11425.1.S1_at   | MmugDNA.11425.1 | 4.52  | 4.38  | 0.24 | 0.14 | 1.11  | 0.622122 | 0.082318 | 0.813025 | 0.331257 |
| MmugDNA.11428.1.S1_at   | MmugDNA.11428.1 | 8.37  | 8     | 0.66 | 0.17 | 1.29  | 0.962755 | 0.993151 | 0.984869 | 0.995946 |
| MmugDNA.11429.1.S1_at   | MmugDNA.11429.1 | 6.66  | 7.59  | 0.5  | 0.03 | -1.9  | 0.04789  | 0.460815 | 0.276267 | 0.672749 |
| MmugDNA.1143.1.S1_at    | MmugDNA.1143.1  | 8.76  | 8.75  | 0.1  | 0.21 | 1.01  | 0.442977 | 0.265832 | 0.696392 | 0.531695 |
| MmugDNA.11431.1.S1_at   | MmugDNA.11431.1 | 4.55  | 4.36  | 0.25 | 0.13 | 1.14  | 0.203001 | 0.282212 | 0.50073  | 0.544952 |
| MmugDNA.11432.1.S1_at   | MmugDNA.11432.1 | 12.71 | 12.46 | 0.03 | 0.09 | 1.19  | 0.015397 | 0.061162 | 0.176257 | 0.293981 |
| MmugDNA.11433.1.S1_at   | MmugDNA.11433.1 | 3.34  | 3.34  | 0.1  | 0.1  | 1     | 0.231462 | 0.664126 | 0.530229 | 0.803247 |
| MmugDNA.11434.1.S1_at   | MmugDNA.11434.1 | 9.85  | 9.8   | 0.18 | 0.05 | 1.03  | 0.694814 | 0.454424 | 0.854418 | 0.66859  |
| MmugDNA.11435.1.S1_at   | MmugDNA.11435.1 | 6.23  | 6.52  | 0.15 | 0.07 | -1.22 | 0.054162 | 0.050687 | 0.289903 | 0.270317 |
| MmugDNA.11436.1.S1_at   | MmugDNA.11436.1 | 11.65 | 11.94 | 0.08 | 0.02 | -1.23 | 0.003445 | 0.033025 | 0.103385 | 0.224983 |
| MmugDNA.11437.1.S1_at   | MmugDNA.11437.1 | 3.59  | 3.7   | 0.06 | 0.03 | -1.08 | 0.07733  | 0.379819 | 0.335992 | 0.616587 |
| MmugDNA.11439.1.S1_at   | MmugDNA.11439.1 | 5.24  | 5.39  | 0.16 | 0.11 | -1.11 | 0.525469 | 0.01009  | 0.75194  | 0.131767 |
| MmugDNA.1144.1.S1_at    | MmugDNA.1144.1  | 5.17  | 4.66  | 0.59 | 0.23 | 1.43  | 0.1757   | 0.457544 | 0.470151 | 0.670864 |
| MmugDNA.11440.1.S1_at   | MmugDNA.11440.1 | 5.61  | 5.45  | 0.07 | 0.12 | 1.12  | 0.186543 | 0.138049 | 0.482692 | 0.410919 |
| MmugDNA.11441.1.S1_at   | MmugDNA.11441.1 | 9.61  | 8.32  | 0.74 | 0.03 | 2.46  | 0.038572 | 0.012822 | 0.252331 | 0.145864 |
| MmugDNA.11442.1.S1_at   | MmugDNA.11442.1 | 4.76  | 4.93  | 0.49 | 0.16 | -1.13 | 0.537428 | 0.688533 | 0.759637 | 0.818201 |
| MmugDNA.11443.1.S1_at   | MmugDNA.11443.1 | 6.49  | 6.32  | 0.43 | 0.33 | 1.13  | 0.698767 | 0.361759 | 0.856806 | 0.602476 |
| MmugDNA.11444.1.S1_at   | MmugDNA.11444.1 | 3.63  | 3.79  | 0.09 | 0.1  | -1.12 | 0.267351 | 0.093201 | 0.560186 | 0.34931  |
| MmugDNA.11445.1.S1_at   | MmugDNA.11445.1 | 11.99 | 12.02 | 0.08 | 0.01 | -1.03 | 0.476474 | 0.419567 | 0.71885  | 0.643528 |
| MmugDNA.11446.1.S1_at   | MmugDNA.11446.1 | 4.51  | 5.39  | 0.54 | 0.26 | -1.84 | 0.034577 | 0.039786 | 0.24053  | 0.244453 |
| MmugDNA.11447.1.S1_at   | MmugDNA.11447.1 | 8.37  | 8.33  | 0.54 | 0.34 | 1.03  | 0.280015 | 0.275446 | 0.571213 | 0.539693 |
| MmugDNA.11448.1.S1_at   | MmugDNA.11448.1 | 6.19  | 6.09  | 0.21 | 0.22 | 1.07  | 0.5879   | 0.31472  | 0.790722 | 0.568449 |
| MmugDNA.11449.1.S1_at   | MmugDNA.11449.1 | 9.22  | 11.39 | 0.48 | 0.29 | -4.48 | 0.002692 | 0.05441  | 0.096689 | 0.278799 |
| MmugDNA.1145.1.S1_at    | MmugDNA.1145.1  | 3.15  | 3.14  | 0.06 | 0.01 | 1.01  | 0.810294 | 0.938417 | 0.915049 | 0.965059 |
| MmugDNA.1145.1.S1_x_at  | MmugDNA.1145.1  | 4.85  | 4.68  | 0.04 | 0.03 | 1.13  | 0.006544 | 0.060433 | 0.127373 | 0.292482 |
| MmugDNA.11450.1.S1_at   | MmugDNA.11450.1 | 11.63 | 11.88 | 0.25 | 0.06 | -1.19 | 0.170243 | 0.506256 | 0.46391  | 0.702368 |
| MmugDNA.11451.1.S1_at   | MmugDNA.11451.1 | 4.89  | 4.9   | 0.22 | 0.13 | -1.01 | 0.95807  | 0.759335 | 0.982796 | 0.860037 |
| MmugDNA.11452.1.S1_at   | MmugDNA.11452.1 | 3.93  | 3.93  | 0.26 | 0.25 | -1    | 0.992783 | 0.948565 | 0.997263 | 0.970655 |
| MmugDNA.11453.1.S1_at   | MmugDNA.11453.1 | 4.82  | 4.4   | 0.5  | 0.06 | 1.34  | 0.22455  | 0.318614 | 0.522686 | 0.571258 |

|                         |                 |       |       |      |      |       |          |          |          |          |
|-------------------------|-----------------|-------|-------|------|------|-------|----------|----------|----------|----------|
| MmugDNA.11454.1.S1_at   | MmugDNA.11454.1 | 6.25  | 5.49  | 0.49 | 0.5  | 1.69  | 0.283106 | 0.362892 | 0.573595 | 0.603393 |
| MmugDNA.11455.1.S1_s_at | MmugDNA.11455.1 | 3.47  | 3.25  | 0.18 | 0.11 | 1.17  | 0.032654 | 0.013204 | 0.234993 | 0.147409 |
| MmugDNA.11457.1.S1_at   | MmugDNA.11457.1 | 9.8   | 9.95  | 0.25 | 0.19 | -1.11 | 0.160827 | 0.229239 | 0.452392 | 0.501527 |
| MmugDNA.11458.1.S1_at   | MmugDNA.11458.1 | 11.65 | 11.08 | 0.04 | 0.02 | 1.49  | 0.000034 | 0.493368 | 0.045594 | 0.694092 |
| MmugDNA.11459.1.S1_at   | MmugDNA.11459.1 | 2.99  | 3.35  | 0.18 | 0.35 | -1.28 | 0.232355 | 0.35421  | 0.530886 | 0.597105 |
| MmugDNA.11460.1.S1_at   | MmugDNA.11460.1 | 5.67  | 5.42  | 0.85 | 0.12 | 1.19  | 0.362065 | 0.449633 | 0.637175 | 0.665152 |
| MmugDNA.11464.1.S1_at   | MmugDNA.11464.1 | 4.53  | 4.71  | 0.26 | 0.07 | -1.13 | 0.314937 | 0.014182 | 0.600177 | 0.152173 |
| MmugDNA.11467.1.S1_at   | MmugDNA.11467.1 | 3.27  | 2.97  | 0.12 | 0.1  | 1.24  | 0.039649 | 0.037019 | 0.255709 | 0.236867 |
| MmugDNA.11469.1.S1_at   | MmugDNA.11469.1 | 5.42  | 5.11  | 0.28 | 0.05 | 1.24  | 0.045835 | 0.035151 | 0.271553 | 0.231645 |
| MmugDNA.1147.1.S1_at    | MmugDNA.1147.1  | 5.98  | 5.87  | 0.18 | 0.23 | 1.08  | 0.62192  | 0.204044 | 0.812905 | 0.478372 |
| MmugDNA.11470.1.S1_at   | MmugDNA.11470.1 | 12.41 | 12.62 | 0.16 | 0.05 | -1.16 | 0.032755 | 0.053234 | 0.234993 | 0.276445 |
| MmugDNA.11470.1.S1_s_at | MmugDNA.11470.1 | 13.8  | 13.83 | 0.02 | 0.02 | -1.02 | 0.207281 | 0.648058 | 0.505017 | 0.793977 |
| MmugDNA.11471.1.S1_at   | MmugDNA.11471.1 | 9.24  | 8.84  | 0.14 | 0.13 | 1.32  | 0.028707 | 0.429656 | 0.222036 | 0.650973 |
| MmugDNA.11472.1.S1_at   | MmugDNA.11472.1 | 10.21 | 10.53 | 0.15 | 0.19 | -1.25 | 0.395384 | 0.045325 | 0.661853 | 0.257202 |
| MmugDNA.11473.1.S1_at   | MmugDNA.11473.1 | 4.09  | 4.09  | 0.04 | 0.04 | 1     | 0.968989 | 0.082137 | 0.987691 | 0.330937 |
| MmugDNA.11474.1.S1_at   | MmugDNA.11474.1 | 3.49  | 3.5   | 0.14 | 0.01 | -1.01 | 0.327047 | 0.397741 | 0.609778 | 0.629105 |
| MmugDNA.11475.1.S1_at   | MmugDNA.11475.1 | 10.81 | 10.9  | 0.06 | 0.06 | -1.06 | 0.08976  | 0.489212 | 0.356705 | 0.691706 |
| MmugDNA.11476.1.S1_at   | MmugDNA.11476.1 | 4.33  | 4.2   | 0.07 | 0.05 | 1.1   | 0.044521 | 0.203883 | 0.26817  | 0.478102 |
| MmugDNA.11477.1.S1_at   | MmugDNA.11477.1 | 7.44  | 7.31  | 0.38 | 0.1  | 1.09  | 0.202704 | 0.258727 | 0.500419 | 0.525949 |
| MmugDNA.11478.1.S1_at   | MmugDNA.11478.1 | 7.26  | 6.57  | 0.18 | 0.19 | 1.62  | 0.011188 | 0.013003 | 0.155446 | 0.146803 |
| MmugDNA.11479.1.S1_at   | MmugDNA.11479.1 | 5.68  | 5.75  | 0.39 | 0.02 | -1.05 | 0.256281 | 0.375313 | 0.550823 | 0.613336 |
| MmugDNA.1148.1.S1_at    | MmugDNA.1148.1  | 9.86  | 9.81  | 0.08 | 0.18 | 1.03  | 0.559334 | 0.578661 | 0.773275 | 0.748603 |
| MmugDNA.11480.1.S1_at   | MmugDNA.11480.1 | 4.47  | 4.35  | 0.01 | 0.07 | 1.08  | 0.101869 | 0.074326 | 0.373468 | 0.318046 |
| MmugDNA.11481.1.S1_at   | MmugDNA.11481.1 | 7.18  | 6.65  | 0.47 | 0.36 | 1.44  | 0.302479 | 0.47004  | 0.590318 | 0.678572 |
| MmugDNA.11482.1.S1_at   | MmugDNA.11482.1 | 8.18  | 6.67  | 0.64 | 0.24 | 2.85  | 0.018913 | 0.03155  | 0.191115 | 0.219708 |
| MmugDNA.11483.1.S1_at   | MmugDNA.11483.1 | 7.59  | 8.72  | 0.8  | 0.25 | -2.2  | 0.063208 | 0.435273 | 0.308086 | 0.655127 |
| MmugDNA.11484.1.S1_at   | MmugDNA.11484.1 | 5.42  | 5.29  | 0.07 | 0.07 | 1.09  | 0.11219  | 0.193785 | 0.388304 | 0.468847 |
| MmugDNA.11485.1.S1_at   | MmugDNA.11485.1 | 6.94  | 7.6   | 0.52 | 0.15 | -1.57 | 0.352676 | 0.492873 | 0.630029 | 0.693817 |
| MmugDNA.11487.1.S1_at   | MmugDNA.11487.1 | 7.23  | 6.48  | 0.17 | 0.27 | 1.68  | 0.011359 | 0.040608 | 0.156784 | 0.246364 |
| MmugDNA.11488.1.S1_at   | MmugDNA.11488.1 | 5.34  | 5.43  | 0.36 | 0.39 | -1.07 | 0.686231 | 0.495898 | 0.850508 | 0.695781 |
| MmugDNA.11489.1.S1_at   | MmugDNA.11489.1 | 6.01  | 5.28  | 0.66 | 0.25 | 1.66  | 0.070342 | 0.130088 | 0.323556 | 0.401724 |
| MmugDNA.1149.1.S1_at    | MmugDNA.1149.1  | 6.3   | 6.42  | 0.17 | 0.36 | -1.09 | 0.796165 | 0.07197  | 0.907954 | 0.314305 |
| MmugDNA.11490.1.S1_at   | MmugDNA.11490.1 | 6.78  | 7.66  | 0.5  | 0.09 | -1.84 | 0.040829 | 0.380314 | 0.258464 | 0.616984 |
| MmugDNA.11491.1.S1_at   | MmugDNA.11491.1 | 6.55  | 5.98  | 0.33 | 0.15 | 1.49  | 0.223263 | 0.24831  | 0.521117 | 0.5176   |
| MmugDNA.11492.1.S1_at   | MmugDNA.11492.1 | 5.51  | 5.8   | 0.4  | 0.24 | -1.22 | 0.33877  | 0.054877 | 0.619177 | 0.279748 |
| MmugDNA.11493.1.S1_at   | MmugDNA.11493.1 | 4.84  | 4.53  | 0.28 | 0.35 | 1.24  | 0.275616 | 0.39623  | 0.567274 | 0.628068 |
| MmugDNA.11495.1.S1_at   | MmugDNA.11495.1 | 3.79  | 3.58  | 0.29 | 0.06 | 1.16  | 0.595133 | 0.73119  | 0.795091 | 0.84424  |
| MmugDNA.11496.1.S1_at   | MmugDNA.11496.1 | 9.31  | 9.78  | 0.15 | 0.24 | -1.38 | 0.099384 | 0.689405 | 0.370316 | 0.818813 |
| MmugDNA.11497.1.S1_at   | MmugDNA.11497.1 | 4.86  | 3.7   | 0.82 | 0.3  | 2.23  | 0.251592 | 0.240801 | 0.546344 | 0.511521 |
| MmugDNA.11498.1.S1_at   | MmugDNA.11498.1 | 9.61  | 9.33  | 0.52 | 0.64 | 1.22  | 0.318009 | 0.213598 | 0.60278  | 0.487432 |
| MmugDNA.11499.1.S1_at   | MmugDNA.11499.1 | 3.83  | 3.69  | 0.26 | 0.08 | 1.1   | 0.611487 | 0.132179 | 0.806289 | 0.404274 |
| MmugDNA.115.1.S1_at     | MmugDNA.115.1   | 4.84  | 4.78  | 0.17 | 0.13 | 1.04  | 0.339628 | 0.195389 | 0.619844 | 0.470253 |
| MmugDNA.38313.1.S1_at   | MmugDNA.38313.1 | 6.75  | 6.49  | 0.1  | 0.07 | 1.2   | 0.028402 | 0.028788 | 0.221039 | 0.211521 |



|                         |                 |       |       |      |      |       |          |          |          |          |
|-------------------------|-----------------|-------|-------|------|------|-------|----------|----------|----------|----------|
| MmugDNA.38313.1.S1_s_at | MmugDNA.38313.1 | 6.84  | 6.65  | 0.12 | 0.03 | 1.14  | 0.120524 | 0.181082 | 0.398904 | 0.457577 |
| MmugDNA.11500.1.S1_at   | MmugDNA.11500.1 | 6.54  | 6.01  | 0.38 | 0.43 | 1.45  | 0.434793 | 0.117808 | 0.689966 | 0.385702 |
| MmugDNA.11501.1.S1_at   | MmugDNA.11501.1 | 5.13  | 4.82  | 0.27 | 0.16 | 1.24  | 0.544386 | 0.261844 | 0.764016 | 0.528265 |
| MmugDNA.11502.1.S1_at   | MmugDNA.11502.1 | 4.58  | 4.68  | 0.34 | 0.14 | -1.07 | 0.847751 | 0.955859 | 0.933674 | 0.975006 |
| MmugDNA.11503.1.S1_at   | MmugDNA.11503.1 | 5.11  | 4.98  | 0.14 | 0.07 | 1.09  | 0.997626 | 0.108247 | 0.999129 | 0.371557 |
| MmugDNA.11504.1.S1_at   | MmugDNA.11504.1 | 2.92  | 2.78  | 0.12 | 0.02 | 1.11  | 0.428876 | 0.443293 | 0.685557 | 0.661138 |
| MmugDNA.11505.1.S1_at   | MmugDNA.11505.1 | 8.86  | 8.66  | 0.1  | 0.02 | 1.15  | 0.032257 | 0.023658 | 0.233644 | 0.192574 |
| MmugDNA.11506.1.S1_at   | MmugDNA.11506.1 | 7.97  | 7.92  | 0.3  | 0.08 | 1.04  | 0.708684 | 0.911224 | 0.862048 | 0.949929 |
| MmugDNA.11507.1.S1_at   | MmugDNA.11507.1 | 7.01  | 6.05  | 0.36 | 0.16 | 1.94  | 0.00976  | 0.041751 | 0.148542 | 0.248933 |
| MmugDNA.1151.1.S1_at    | MmugDNA.1151.1  | 7.22  | 7.25  | 0.03 | 0.01 | -1.03 | 0.093293 | 0.076482 | 0.361736 | 0.32158  |
| MmugDNA.11510.1.S1_at   | MmugDNA.11510.1 | 8.08  | 8.79  | 0.46 | 0.06 | -1.63 | 0.060912 | 0.120663 | 0.303761 | 0.389476 |
| MmugDNA.11512.1.S1_at   | MmugDNA.11512.1 | 6.69  | 7.18  | 1.48 | 0.33 | -1.41 | 0.682762 | 0.679533 | 0.84871  | 0.812884 |
| MmugDNA.11513.1.S1_at   | MmugDNA.11513.1 | 8.9   | 8.96  | 0.32 | 0.21 | -1.04 | 0.591548 | 0.972734 | 0.792688 | 0.985334 |
| MmugDNA.11514.1.S1_at   | MmugDNA.11514.1 | 7.42  | 7     | 1.04 | 0.94 | 1.34  | 0.985367 | 0.492234 | 0.994776 | 0.693477 |
| MmugDNA.11515.1.S1_at   | MmugDNA.11515.1 | 10.36 | 10.33 | 0.16 | 0.16 | 1.02  | 0.473321 | 0.12181  | 0.716576 | 0.3911   |
| MmugDNA.11517.1.S1_at   | MmugDNA.11517.1 | 3.95  | 3.73  | 0.27 | 0.17 | 1.17  | 0.289038 | 0.226061 | 0.578735 | 0.498529 |
| MmugDNA.11518.1.S1_at   | MmugDNA.11518.1 | 7.78  | 8.98  | 1.54 | 0.15 | -2.3  | 0.297069 | 0.044357 | 0.585548 | 0.255109 |
| MmugDNA.11518.1.S1_s_at | MmugDNA.11518.1 | 7.34  | 8.35  | 1.56 | 0.21 | -2.02 | 0.415237 | 0.050472 | 0.676055 | 0.26998  |
| MmugDNA.1152.1.S1_at    | MmugDNA.1152.1  | 5.67  | 5.86  | 0.1  | 0.05 | -1.14 | 0.076416 | 0.079095 | 0.334699 | 0.326184 |
| MmugDNA.11520.1.S1_at   | MmugDNA.11520.1 | 5.1   | 5.3   | 0.35 | 0.17 | -1.15 | 0.454072 | 0.370304 | 0.704064 | 0.609407 |
| MmugDNA.11521.1.S1_at   | MmugDNA.11521.1 | 8.21  | 7.69  | 0.34 | 0.06 | 1.43  | 0.064726 | 0.057314 | 0.311151 | 0.285275 |
| MmugDNA.11522.1.S1_at   | MmugDNA.11522.1 | 5.39  | 5.18  | 0.14 | 0.34 | 1.16  | 0.122002 | 0.132889 | 0.400661 | 0.404544 |
| MmugDNA.11523.1.S1_at   | MmugDNA.11523.1 | 6.3   | 6.25  | 0.14 | 0.1  | 1.03  | 0.559629 | 0.499038 | 0.773439 | 0.697964 |
| MmugDNA.11524.1.S1_at   | MmugDNA.11524.1 | 7.67  | 7.38  | 0.05 | 0.07 | 1.22  | 0.00799  | 0.007565 | 0.138394 | 0.116437 |
| MmugDNA.11525.1.S1_at   | MmugDNA.11525.1 | 7.74  | 8.21  | 0.41 | 0.03 | -1.39 | 0.13179  | 0.007953 | 0.414807 | 0.118702 |
| MmugDNA.11526.1.S1_at   | MmugDNA.11526.1 | 5.38  | 5.34  | 0.14 | 0.15 | 1.03  | 0.692505 | 0.840872 | 0.853103 | 0.909295 |
| MmugDNA.11528.1.S1_at   | MmugDNA.11528.1 | 8.29  | 8.12  | 0.16 | 0.15 | 1.13  | 0.340935 | 0.074423 | 0.620931 | 0.318058 |
| MmugDNA.11529.1.S1_at   | MmugDNA.11529.1 | 6.56  | 6.38  | 0.23 | 0.06 | 1.13  | 0.191022 | 0.763762 | 0.487243 | 0.862648 |
| MmugDNA.1153.1.S1_at    | MmugDNA.1153.1  | 9.6   | 9.85  | 0.19 | 0.14 | -1.19 | 0.074232 | 0.142129 | 0.330639 | 0.415728 |
| MmugDNA.11530.1.S1_at   | MmugDNA.11530.1 | 5.07  | 5.16  | 0.1  | 0.17 | -1.07 | 0.535203 | 0.30286  | 0.758211 | 0.560356 |
| MmugDNA.11531.1.S1_at   | MmugDNA.11531.1 | 9.24  | 9.29  | 0.12 | 0.11 | -1.03 | 0.79995  | 0.009339 | 0.909832 | 0.127598 |
| MmugDNA.11534.1.S1_at   | MmugDNA.11534.1 | 10.06 | 9.57  | 0.15 | 0.18 | 1.41  | 0.013589 | 0.362501 | 0.167335 | 0.603066 |
| MmugDNA.11536.1.S1_at   | MmugDNA.11536.1 | 9.21  | 9.09  | 0.18 | 0.07 | 1.09  | 0.58277  | 0.001371 | 0.787488 | 0.05691  |
| MmugDNA.11537.1.S1_at   | MmugDNA.11537.1 | 5.91  | 5.94  | 0.14 | 0.03 | -1.02 | 0.309174 | 0.10606  | 0.5956   | 0.368438 |
| MmugDNA.11538.1.S1_at   | MmugDNA.11538.1 | 6.19  | 6.39  | 0.13 | 0.23 | -1.15 | 0.346142 | 0.494341 | 0.624868 | 0.694829 |
| MmugDNA.11542.1.S1_at   | MmugDNA.11542.1 | 7.42  | 7.4   | 0.24 | 0.04 | 1.02  | 0.921145 | 0.229923 | 0.966268 | 0.501802 |
| MmugDNA.11543.1.S1_at   | MmugDNA.11543.1 | 3.19  | 3.15  | 0.1  | 0.01 | 1.02  | 0.716881 | 0.945274 | 0.866434 | 0.968942 |
| MmugDNA.11544.1.S1_at   | MmugDNA.11544.1 | 4.49  | 4.16  | 0.16 | 0.25 | 1.26  | 0.097643 | 0.189823 | 0.368021 | 0.465403 |
| MmugDNA.11545.1.S1_at   | MmugDNA.11545.1 | 8.67  | 9.49  | 0.36 | 0.14 | -1.77 | 0.019458 | 0.007661 | 0.192344 | 0.117089 |
| MmugDNA.11546.1.S1_at   | MmugDNA.11546.1 | 7.32  | 7.38  | 0.28 | 0.04 | -1.04 | 0.571492 | 0.740752 | 0.779965 | 0.849915 |
| MmugDNA.11547.1.S1_at   | MmugDNA.11547.1 | 10.11 | 10.46 | 0.08 | 0.04 | -1.27 | 0.003329 | 0.563682 | 0.102526 | 0.7388   |
| MmugDNA.11548.1.S1_at   | MmugDNA.11548.1 | 3.91  | 3.79  | 0.15 | 0.1  | 1.09  | 0.249837 | 0.086913 | 0.544804 | 0.339715 |
| MmugDNA.1155.1.S1_at    | MmugDNA.1155.1  | 7.01  | 7.04  | 0.09 | 0.03 | -1.02 | 0.926439 | 0.205385 | 0.968882 | 0.479751 |

|                         |                 |       |       |      |      |        |          |          |          |          |
|-------------------------|-----------------|-------|-------|------|------|--------|----------|----------|----------|----------|
| MmugDNA.11550.1.S1_at   | MmugDNA.11550.1 | 4.9   | 4.76  | 0.11 | 0.19 | 1.1    | 0.156772 | 0.138916 | 0.447358 | 0.412037 |
| MmugDNA.11551.1.S1_at   | MmugDNA.11551.1 | 9.29  | 9.95  | 0.96 | 0.18 | -1.58  | 0.124142 | 0.192492 | 0.40411  | 0.467952 |
| MmugDNA.11552.1.S1_at   | MmugDNA.11552.1 | 5.33  | 5.81  | 1.12 | 0.3  | -1.4   | 0.638056 | 0.396255 | 0.822703 | 0.628074 |
| MmugDNA.11553.1.S1_at   | MmugDNA.11553.1 | 3.45  | 3.48  | 0.07 | 0.05 | -1.02  | 0.733132 | 0.221528 | 0.875528 | 0.494849 |
| MmugDNA.11554.1.S1_at   | MmugDNA.11554.1 | 7.94  | 7.94  | 0.11 | 0.15 | 1      | 0.564279 | 0.545587 | 0.776011 | 0.727579 |
| MmugDNA.11556.1.S1_at   | MmugDNA.11556.1 | 4.05  | 3.8   | 0.24 | 0.02 | 1.19   | 0.137101 | 0.056779 | 0.421956 | 0.284379 |
| MmugDNA.11558.1.S1_at   | MmugDNA.11558.1 | 3.99  | 3.84  | 0.08 | 0.05 | 1.11   | 0.048906 | 0.177154 | 0.278728 | 0.453611 |
| MmugDNA.11559.1.S1_at   | MmugDNA.11559.1 | 3.34  | 3.55  | 0.12 | 0.14 | -1.16  | 0.133021 | 0.152249 | 0.41649  | 0.427045 |
| MmugDNA.11560.1.S1_at   | MmugDNA.11560.1 | 8.78  | 8.44  | 0.33 | 0.14 | 1.27   | 0.06075  | 0.039175 | 0.303425 | 0.243072 |
| MmugDNA.11561.1.S1_at   | MmugDNA.11561.1 | 4.06  | 3.81  | 0.45 | 0.03 | 1.19   | 0.365033 | 0.495147 | 0.639725 | 0.695319 |
| MmugDNA.11562.1.S1_at   | MmugDNA.11562.1 | 6.74  | 6.43  | 0.12 | 0.24 | 1.24   | 0.070631 | 0.036885 | 0.324085 | 0.236506 |
| MmugDNA.11563.1.S1_at   | MmugDNA.11563.1 | 4.18  | 6.69  | 0.26 | 0.35 | -5.71  | 0.000634 | 0.068299 | 0.070727 | 0.307706 |
| MmugDNA.11565.1.S1_at   | MmugDNA.11565.1 | 4.28  | 4.44  | 0.06 | 0.29 | -1.11  | 0.466055 | 0.631345 | 0.711999 | 0.78278  |
| MmugDNA.11566.1.S1_at   | MmugDNA.11566.1 | 3.52  | 3.78  | 0.17 | 0.02 | -1.2   | 0.150037 | 0.175904 | 0.439035 | 0.452486 |
| MmugDNA.11567.1.S1_s_at | MmugDNA.11567.1 | 9.6   | 10.03 | 0.3  | 0.11 | -1.35  | 0.035066 | 0.117267 | 0.241969 | 0.384813 |
| MmugDNA.11568.1.S1_at   | MmugDNA.11568.1 | 5.21  | 5.13  | 0.05 | 0.13 | 1.06   | 0.541213 | 0.868093 | 0.762011 | 0.925106 |
| MmugDNA.11569.1.S1_at   | MmugDNA.11569.1 | 7.1   | 7.07  | 0.12 | 0.04 | 1.02   | 0.547384 | 0.576934 | 0.765933 | 0.747521 |
| MmugDNA.1157.1.S1_at    | MmugDNA.1157.1  | 5.27  | 5.18  | 0.26 | 0.08 | 1.06   | 0.359212 | 0.09533  | 0.634811 | 0.35236  |
| MmugDNA.11571.1.S1_at   | MmugDNA.11571.1 | 8.73  | 8.81  | 0.2  | 0.04 | -1.06  | 0.513818 | 0.989524 | 0.743967 | 0.994037 |
| MmugDNA.11572.1.S1_at   | MmugDNA.11572.1 | 10.42 | 11.58 | 0.53 | 0.04 | -2.23  | 0.052289 | 0.129071 | 0.285979 | 0.400548 |
| MmugDNA.11573.1.S1_at   | MmugDNA.11573.1 | 6.29  | 6.34  | 0.15 | 0.21 | -1.04  | 0.630648 | 0.869722 | 0.818647 | 0.926114 |
| MmugDNA.11574.1.S1_at   | MmugDNA.11574.1 | 3.4   | 3.92  | 0.24 | 0.14 | -1.44  | 0.067154 | 0.034148 | 0.31683  | 0.228692 |
| MmugDNA.11576.1.S1_at   | MmugDNA.11576.1 | 7.97  | 7.59  | 0.59 | 0.43 | 1.31   | 0.908041 | 0.500006 | 0.961071 | 0.698744 |
| MmugDNA.11577.1.S1_at   | MmugDNA.11577.1 | 4.54  | 3.99  | 1.15 | 0.34 | 1.46   | 0.52201  | 0.704378 | 0.749514 | 0.828445 |
| MmugDNA.11578.1.S1_at   | MmugDNA.11578.1 | 5.39  | 5.3   | 0.2  | 0.43 | 1.07   | 0.628837 | 0.358279 | 0.817507 | 0.599779 |
| MmugDNA.11579.1.S1_at   | MmugDNA.11579.1 | 5.46  | 5.5   | 0.14 | 0.13 | -1.02  | 0.752201 | 0.859169 | 0.885542 | 0.919754 |
| MmugDNA.1158.1.S1_at    | MmugDNA.1158.1  | 5.65  | 9.85  | 2.25 | 0.74 | -18.42 | 0.141387 | 0.35162  | 0.427329 | 0.595114 |
| MmugDNA.11581.1.S1_at   | MmugDNA.11581.1 | 7.33  | 6.65  | 0.09 | 0.13 | 1.6    | 0.002705 | 0.024638 | 0.096803 | 0.196442 |
| MmugDNA.11584.1.S1_at   | MmugDNA.11584.1 | 8.28  | 7.57  | 0.15 | 0.25 | 1.63   | 0.026831 | 0.003462 | 0.216925 | 0.084734 |
| MmugDNA.11586.1.S1_at   | MmugDNA.11586.1 | 3.25  | 4.3   | 0.6  | 0.52 | -2.08  | 0.086375 | 0.161602 | 0.351219 | 0.43777  |
| MmugDNA.11587.1.S1_at   | MmugDNA.11587.1 | 4.34  | 4.28  | 0.46 | 0.21 | 1.04   | 0.765232 | 0.494083 | 0.892335 | 0.694663 |
| MmugDNA.11588.1.S1_at   | MmugDNA.11588.1 | 9.24  | 9.29  | 0.08 | 0.19 | -1.04  | 0.930157 | 0.422606 | 0.970565 | 0.64577  |
| MmugDNA.1159.1.S1_at    | MmugDNA.1159.1  | 6.01  | 6.16  | 0.18 | 0.11 | -1.11  | 0.730579 | 0.111907 | 0.87404  | 0.377006 |
| MmugDNA.11590.1.S1_at   | MmugDNA.11590.1 | 8.6   | 8.46  | 0.29 | 0.29 | 1.1    | 0.738853 | 0.978154 | 0.878998 | 0.988066 |
| MmugDNA.11592.1.S1_at   | MmugDNA.11592.1 | 2.7   | 2.68  | 0.03 | 0.07 | 1.01   | 0.2131   | 0.43067  | 0.511046 | 0.651688 |
| MmugDNA.11592.1.S1_s_at | MmugDNA.11592.1 | 3.2   | 3.23  | 0.12 | 0.05 | -1.02  | 0.221448 | 0.67094  | 0.519474 | 0.807629 |
| MmugDNA.11593.1.S1_at   | MmugDNA.11593.1 | 11.24 | 10.98 | 0.07 | 0.07 | 1.19   | 0.010986 | 0.013513 | 0.154584 | 0.148824 |
| MmugDNA.11596.1.S1_at   | MmugDNA.11596.1 | 7.64  | 8.46  | 0.36 | 0.24 | -1.76  | 0.024536 | 0.028748 | 0.209655 | 0.211372 |
| MmugDNA.11597.1.S1_at   | MmugDNA.11597.1 | 4.99  | 4.7   | 0.07 | 0.28 | 1.23   | 0.145712 | 0.333975 | 0.433202 | 0.582063 |
| MmugDNA.11598.1.S1_at   | MmugDNA.11598.1 | 3.45  | 3.51  | 0.06 | 0.11 | -1.04  | 0.695817 | 0.11555  | 0.855072 | 0.38267  |
| MmugDNA.11599.1.S1_at   | MmugDNA.11599.1 | 4.49  | 4.32  | 1.49 | 0.2  | 1.12   | 0.464909 | 0.670197 | 0.711025 | 0.807153 |
| MmugDNA.116.1.S1_at     | MmugDNA.116.1   | 8.56  | 8.25  | 0.24 | 0.11 | 1.25   | 0.098239 | 0.020473 | 0.368849 | 0.179641 |
| MmugDNA.11600.1.S1_at   | MmugDNA.11600.1 | 6.08  | 6.03  | 0.31 | 0.09 | 1.04   | 0.205243 | 0.251017 | 0.50316  | 0.519638 |

|                         |                 |       |       |      |      |       |          |          |          |          |
|-------------------------|-----------------|-------|-------|------|------|-------|----------|----------|----------|----------|
| MmugDNA.11602.1.S1_at   | MmugDNA.11602.1 | 8.26  | 7.71  | 0.18 | 0.17 | 1.47  | 0.016489 | 0.032993 | 0.181374 | 0.224886 |
| MmugDNA.11603.1.S1_at   | MmugDNA.11603.1 | 6.73  | 6.74  | 0.04 | 0.05 | -1.01 | 0.602189 | 0.396823 | 0.800043 | 0.628452 |
| MmugDNA.11603.1.S1_s_at | MmugDNA.11603.1 | 10.81 | 10.1  | 0.47 | 0.21 | 1.63  | 0.231067 | 0.404219 | 0.52984  | 0.632691 |
| MmugDNA.11604.1.S1_at   | MmugDNA.11604.1 | 7.46  | 7.54  | 0.28 | 0.1  | -1.06 | 0.908438 | 0.377408 | 0.961215 | 0.6149   |
| MmugDNA.11606.1.S1_at   | MmugDNA.11606.1 | 6.1   | 6.34  | 0.11 | 0.1  | -1.18 | 0.033308 | 0.026956 | 0.236556 | 0.205395 |
| MmugDNA.11607.1.S1_at   | MmugDNA.11607.1 | 4.23  | 4.22  | 0.08 | 0    | 1.01  | 0.721924 | 0.810977 | 0.869054 | 0.890949 |
| MmugDNA.11608.1.S1_at   | MmugDNA.11608.1 | 3.44  | 3.44  | 0.54 | 0.13 | -1    | 0.311484 | 0.412575 | 0.597553 | 0.638941 |
| MmugDNA.11609.1.S1_at   | MmugDNA.11609.1 | 3.24  | 3.23  | 0.05 | 0.03 | 1     | 0.655989 | 0.574766 | 0.83356  | 0.746142 |
| MmugDNA.1161.1.S1_at    | MmugDNA.1161.1  | 3.66  | 3.72  | 0.1  | 0.09 | -1.04 | 0.215735 | 0.364957 | 0.513483 | 0.60517  |
| MmugDNA.11611.1.S1_at   | MmugDNA.11611.1 | 4.46  | 4.31  | 0.27 | 0.17 | 1.11  | 0.372169 | 0.193425 | 0.644798 | 0.468711 |
| MmugDNA.11612.1.S1_at   | MmugDNA.11612.1 | 3.5   | 3.31  | 0.12 | 0.11 | 1.14  | 0.142975 | 0.615866 | 0.429137 | 0.772353 |
| MmugDNA.11613.1.S1_at   | MmugDNA.11613.1 | 2.94  | 2.85  | 0.38 | 0.04 | 1.07  | 0.430748 | 0.511163 | 0.686984 | 0.705422 |
| MmugDNA.11615.1.S1_at   | MmugDNA.11615.1 | 3.59  | 3.6   | 1.34 | 0.11 | -1.01 | 0.401386 | 0.556423 | 0.666016 | 0.734507 |
| MmugDNA.11616.1.S1_at   | MmugDNA.11616.1 | 8.89  | 8.46  | 0.41 | 0.08 | 1.35  | 0.174733 | 0.045818 | 0.468968 | 0.258337 |
| MmugDNA.11617.1.S1_at   | MmugDNA.11617.1 | 10.5  | 10.54 | 0.07 | 0.08 | -1.03 | 0.635066 | 0.521379 | 0.821123 | 0.712376 |
| MmugDNA.11619.1.S1_at   | MmugDNA.11619.1 | 4.41  | 4.05  | 0.23 | 0.02 | 1.29  | 0.046646 | 0.03355  | 0.273564 | 0.226764 |
| MmugDNA.11620.1.S1_at   | MmugDNA.11620.1 | 6.16  | 6.31  | 0.09 | 0.14 | -1.11 | 0.865133 | 0.072407 | 0.941423 | 0.31528  |
| MmugDNA.11621.1.S1_at   | MmugDNA.11621.1 | 4.11  | 4.16  | 0.1  | 0.09 | -1.03 | 0.542201 | 0.825651 | 0.762647 | 0.899784 |
| MmugDNA.11628.1.S1_at   | MmugDNA.11628.1 | 7.39  | 7.4   | 0.08 | 0.04 | -1.01 | 0.295286 | 0.017504 | 0.584116 | 0.167516 |
| MmugDNA.11629.1.S1_at   | MmugDNA.11629.1 | 4.55  | 4.73  | 0.38 | 0.34 | -1.13 | 0.48065  | 0.527912 | 0.721474 | 0.716345 |
| MmugDNA.1163.1.S1_a_at  | MmugDNA.1163.1  | 8.73  | 8.62  | 0.31 | 0.08 | 1.08  | 0.902646 | 0.985806 | 0.958703 | 0.991942 |
| MmugDNA.1163.1.S1_at    | MmugDNA.1163.1  | 5.11  | 5.09  | 0.2  | 0.09 | 1.01  | 0.851083 | 0.829746 | 0.935277 | 0.902191 |
| MmugDNA.11632.1.S1_at   | MmugDNA.11632.1 | 6.97  | 6.73  | 0.65 | 0.14 | 1.19  | 0.53717  | 0.851876 | 0.759433 | 0.915799 |
| MmugDNA.11633.1.S1_at   | MmugDNA.11633.1 | 3.87  | 3.84  | 0.23 | 0.05 | 1.02  | 0.521955 | 0.774726 | 0.749488 | 0.868833 |
| MmugDNA.11634.1.S1_at   | MmugDNA.11634.1 | 9.15  | 8.8   | 0.21 | 0.23 | 1.28  | 0.609705 | 0.133825 | 0.805459 | 0.405819 |
| MmugDNA.11636.1.S1_at   | MmugDNA.11636.1 | 3.42  | 3.35  | 0.23 | 0.11 | 1.06  | 0.281438 | 0.185715 | 0.572327 | 0.46163  |
| MmugDNA.11638.1.S1_at   | MmugDNA.11638.1 | 5.1   | 4.93  | 0.26 | 0.27 | 1.13  | 0.743674 | 0.355751 | 0.881384 | 0.597864 |
| MmugDNA.1164.1.S1_at    | MmugDNA.1164.1  | 9.33  | 9.13  | 0.36 | 0.23 | 1.15  | 0.171964 | 0.291639 | 0.465983 | 0.552025 |
| MmugDNA.11640.1.S1_at   | MmugDNA.11640.1 | 5.79  | 5.52  | 0.29 | 0.07 | 1.21  | 0.184382 | 0.186762 | 0.480429 | 0.46257  |
| MmugDNA.11641.1.S1_s_at | MmugDNA.11641.1 | 8.66  | 8.93  | 0.22 | 0.16 | -1.2  | 0.080388 | 0.144144 | 0.341026 | 0.418024 |
| MmugDNA.11642.1.S1_at   | MmugDNA.11642.1 | 6.05  | 5.49  | 0.43 | 0.09 | 1.48  | 0.200796 | 0.3684   | 0.498149 | 0.607932 |
| MmugDNA.11643.1.S1_at   | MmugDNA.11643.1 | 12.42 | 12.69 | 0.08 | 0.07 | -1.2  | 0.036357 | 0.482021 | 0.245737 | 0.686939 |
| MmugDNA.11644.1.S1_at   | MmugDNA.11644.1 | 8.57  | 7.91  | 0.09 | 0.25 | 1.58  | 0.008426 | 0.2856   | 0.140949 | 0.547395 |
| MmugDNA.11645.1.S1_at   | MmugDNA.11645.1 | 7.45  | 6.48  | 0.34 | 0.3  | 1.96  | 0.028288 | 0.026505 | 0.220734 | 0.203897 |
| MmugDNA.11646.1.S1_at   | MmugDNA.11646.1 | 3.88  | 3.89  | 0.1  | 0.12 | -1.01 | 0.595117 | 0.125903 | 0.795091 | 0.396452 |
| MmugDNA.1165.1.S1_at    | MmugDNA.1165.1  | 6.34  | 6.54  | 0.12 | 0.36 | -1.15 | 0.502285 | 0.641506 | 0.735996 | 0.789578 |
| MmugDNA.11651.1.S1_at   | MmugDNA.11651.1 | 4.56  | 4.59  | 0.15 | 0.02 | -1.02 | 0.638843 | 0.705533 | 0.823276 | 0.829287 |
| MmugDNA.11656.1.S1_at   | MmugDNA.11656.1 | 8.78  | 8.69  | 0.66 | 0.01 | 1.07  | 0.380004 | 0.413645 | 0.649769 | 0.639688 |
| MmugDNA.11657.1.S1_at   | MmugDNA.11657.1 | 3.78  | 3.76  | 0.23 | 0.07 | 1.02  | 0.508283 | 0.673516 | 0.740303 | 0.809257 |
| MmugDNA.11658.1.S1_at   | MmugDNA.11658.1 | 11.17 | 11.3  | 0.03 | 0.05 | -1.1  | 0.031532 | 0.612448 | 0.231006 | 0.770057 |
| MmugDNA.11659.1.S1_s_at | MmugDNA.11659.1 | 12.27 | 11.71 | 0.04 | 0.06 | 1.47  | 0.000176 | 0.11534  | 0.053494 | 0.382394 |
| MmugDNA.1166.1.S1_at    | MmugDNA.1166.1  | 6.5   | 6.7   | 0.24 | 0.41 | -1.15 | 0.631525 | 0.27001  | 0.819097 | 0.535312 |
| MmugDNA.11663.1.S1_at   | MmugDNA.11663.1 | 3.33  | 3.35  | 0.19 | 0.35 | -1.01 | 0.798876 | 0.765249 | 0.909361 | 0.863535 |

|                         |                 |       |       |      |      |        |          |          |          |          |
|-------------------------|-----------------|-------|-------|------|------|--------|----------|----------|----------|----------|
| MmugDNA.11664.1.S1_at   | MmugDNA.11664.1 | 8.09  | 9.3   | 0.13 | 0.11 | -2.32  | 0.000181 | 0.050921 | 0.053494 | 0.270955 |
| MmugDNA.11665.1.S1_at   | MmugDNA.11665.1 | 9.19  | 9.36  | 0.14 | 0.14 | -1.12  | 0.217207 | 0.060162 | 0.515015 | 0.291882 |
| MmugDNA.11666.1.S1_at   | MmugDNA.11666.1 | 3.71  | 3.78  | 0.1  | 0.03 | -1.05  | 0.669361 | 0.936839 | 0.841414 | 0.964385 |
| MmugDNA.11667.1.S1_at   | MmugDNA.11667.1 | 6.49  | 6.62  | 0.29 | 0.04 | -1.09  | 0.341403 | 0.463469 | 0.621325 | 0.674446 |
| MmugDNA.11668.1.S1_at   | MmugDNA.11668.1 | 4.62  | 4.67  | 0.11 | 0.05 | -1.04  | 0.232435 | 0.297287 | 0.530886 | 0.556071 |
| MmugDNA.11669.1.S1_at   | MmugDNA.11669.1 | 4.47  | 4.24  | 0.43 | 0.12 | 1.17   | 0.142151 | 0.188938 | 0.428166 | 0.464854 |
| MmugDNA.11670.1.S1_at   | MmugDNA.11670.1 | 5.89  | 5.85  | 0.06 | 0.08 | 1.03   | 0.659109 | 0.01473  | 0.835451 | 0.154415 |
| MmugDNA.11671.1.S1_at   | MmugDNA.11671.1 | 4.74  | 4.89  | 0.03 | 0.29 | -1.11  | 0.459229 | 0.288573 | 0.707418 | 0.549827 |
| MmugDNA.11674.1.S1_at   | MmugDNA.11674.1 | 5.52  | 5.09  | 0.39 | 0.04 | 1.35   | 0.129255 | 0.211582 | 0.411589 | 0.485681 |
| MmugDNA.11675.1.S1_at   | MmugDNA.11675.1 | 3.99  | 4.24  | 0.28 | 0.07 | -1.19  | 0.493834 | 0.188657 | 0.730764 | 0.464569 |
| MmugDNA.11676.1.S1_at   | MmugDNA.11676.1 | 4.75  | 4.7   | 0.23 | 0.13 | 1.04   | 0.586758 | 0.770274 | 0.79005  | 0.866566 |
| MmugDNA.11677.1.S1_at   | MmugDNA.11677.1 | 5.24  | 5.45  | 0.21 | 0.19 | -1.16  | 0.11499  | 0.311822 | 0.392013 | 0.566807 |
| MmugDNA.11678.1.S1_at   | MmugDNA.11678.1 | 8.18  | 11.77 | 0.66 | 0.25 | -12.03 | 0.00114  | 0.090217 | 0.077306 | 0.344604 |
| MmugDNA.11679.1.S1_at   | MmugDNA.11679.1 | 3.87  | 3.76  | 0.24 | 0.13 | 1.08   | 0.105146 | 0.13762  | 0.3789   | 0.410568 |
| MmugDNA.1168.1.S1_at    | MmugDNA.1168.1  | 7.09  | 6.45  | 0.41 | 0.1  | 1.56   | 0.162991 | 0.193609 | 0.455131 | 0.468785 |
| MmugDNA.1168.1.S1_s_at  | MmugDNA.1168.1  | 6.24  | 5.86  | 0.81 | 0.27 | 1.3    | 0.54874  | 0.73727  | 0.766646 | 0.847869 |
| MmugDNA.11682.1.S1_at   | MmugDNA.11682.1 | 3.08  | 2.84  | 0.12 | 0.09 | 1.18   | 0.101867 | 0.022404 | 0.373468 | 0.187311 |
| MmugDNA.11683.1.S1_at   | MmugDNA.11683.1 | 5.46  | 5.9   | 0.26 | 0.35 | -1.36  | 0.399569 | 0.373999 | 0.664835 | 0.612612 |
| MmugDNA.11686.1.S1_at   | MmugDNA.11686.1 | 10.52 | 9.97  | 0.24 | 0.15 | 1.46   | 0.017082 | 0.022542 | 0.184179 | 0.187965 |
| MmugDNA.15822.1.S1_s_at | MmugDNA.15822.1 | 9.88  | 9.14  | 0.21 | 0.07 | 1.67   | 0.005486 | 0.01016  | 0.119547 | 0.1321   |
| MmugDNA.11687.1.S1_at   | MmugDNA.11687.1 | 3.92  | 3.9   | 0.25 | 0.09 | 1.02   | 0.230216 | 0.373195 | 0.529091 | 0.612036 |
| MmugDNA.11688.1.S1_at   | MmugDNA.11688.1 | 7.76  | 6.4   | 0.14 | 0.22 | 2.58   | 0.001132 | 0.001254 | 0.077306 | 0.055001 |
| MmugDNA.11689.1.S1_at   | MmugDNA.11689.1 | 4.25  | 3.74  | 0.56 | 0.2  | 1.42   | 0.194867 | 0.315929 | 0.49141  | 0.569358 |
| MmugDNA.1169.1.S1_at    | MmugDNA.1169.1  | 4.97  | 4.9   | 0.19 | 0.01 | 1.05   | 0.177902 | 0.259023 | 0.47265  | 0.526218 |
| MmugDNA.11690.1.S1_at   | MmugDNA.11690.1 | 3.56  | 3.35  | 0.13 | 0.12 | 1.16   | 0.205744 | 0.143538 | 0.503526 | 0.41747  |
| MmugDNA.11695.1.S1_at   | MmugDNA.11695.1 | 5.09  | 5.07  | 0.1  | 0.02 | 1.01   | 0.825467 | 0.259492 | 0.922469 | 0.526418 |
| MmugDNA.11696.1.S1_at   | MmugDNA.11696.1 | 5.11  | 5.18  | 0.16 | 0.25 | -1.05  | 0.146824 | 0.214033 | 0.434827 | 0.487633 |
| MmugDNA.11697.1.S1_at   | MmugDNA.11697.1 | 5.31  | 5.36  | 0.42 | 0.08 | -1.04  | 0.397029 | 0.693357 | 0.662823 | 0.821643 |
| MmugDNA.11698.1.S1_at   | MmugDNA.11698.1 | 6.88  | 6.91  | 0.03 | 0.05 | -1.02  | 0.146017 | 0.224718 | 0.433778 | 0.497614 |
| MmugDNA.117.1.S1_at     | MmugDNA.117.1   | 9.8   | 9.35  | 0.17 | 0.26 | 1.37   | 0.054765 | 0.078128 | 0.290805 | 0.324578 |
| MmugDNA.11700.1.S1_at   | MmugDNA.11700.1 | 10.59 | 10.4  | 0.08 | 0.07 | 1.14   | 0.031738 | 0.301003 | 0.231584 | 0.559198 |
| MmugDNA.11703.1.S1_at   | MmugDNA.11703.1 | 5.67  | 5.7   | 0.12 | 0.2  | -1.02  | 0.780843 | 0.300757 | 0.899978 | 0.558976 |
| MmugDNA.11704.1.S1_at   | MmugDNA.11704.1 | 4.31  | 4.99  | 1.15 | 0.18 | -1.59  | 0.982635 | 0.664154 | 0.993625 | 0.803247 |
| MmugDNA.11705.1.S1_at   | MmugDNA.11705.1 | 5.31  | 5.24  | 0.29 | 0.51 | 1.05   | 0.717793 | 0.305187 | 0.866693 | 0.562255 |
| MmugDNA.11706.1.S1_at   | MmugDNA.11706.1 | 4     | 4.01  | 0.23 | 0.01 | -1.01  | 0.986667 | 0.68147  | 0.995228 | 0.81409  |
| MmugDNA.11707.1.S1_at   | MmugDNA.11707.1 | 3.03  | 3.06  | 0.12 | 0.09 | -1.02  | 0.812963 | 0.235106 | 0.916282 | 0.50629  |
| MmugDNA.11709.1.S1_at   | MmugDNA.11709.1 | 3.58  | 3.59  | 0.47 | 0.21 | -1.01  | 0.713511 | 0.743287 | 0.864716 | 0.851281 |
| MmugDNA.1171.1.S1_at    | MmugDNA.1171.1  | 6.56  | 6.23  | 0.24 | 0.07 | 1.25   | 0.098097 | 0.106777 | 0.368627 | 0.369349 |
| MmugDNA.11710.1.S1_at   | MmugDNA.11710.1 | 7.1   | 8.07  | 0.5  | 0.19 | -1.96  | 0.102393 | 0.348482 | 0.374447 | 0.592593 |
| MmugDNA.11713.1.S1_at   | MmugDNA.11713.1 | 4.24  | 4.29  | 0.13 | 0.04 | -1.03  | 0.272775 | 0.095535 | 0.564857 | 0.352627 |
| MmugDNA.11714.1.S1_at   | MmugDNA.11714.1 | 9.02  | 10.13 | 0.3  | 0.1  | -2.16  | 0.004412 | 0.015988 | 0.11257  | 0.160458 |
| MmugDNA.11715.1.S1_at   | MmugDNA.11715.1 | 5.12  | 5.11  | 0.1  | 0.04 | 1      | 0.760468 | 0.70759  | 0.890254 | 0.830424 |
| MmugDNA.11717.1.S1_at   | MmugDNA.11717.1 | 3.19  | 3.2   | 0.03 | 0.01 | -1.01  | 0.994386 | 0.896073 | 0.997657 | 0.940608 |

|                         |                 |       |       |      |      |       |          |          |          |          |
|-------------------------|-----------------|-------|-------|------|------|-------|----------|----------|----------|----------|
| MmugDNA.11718.1.S1_at   | MmugDNA.11718.1 | 6.09  | 6.11  | 1.08 | 0.47 | -1.01 | 0.464689 | 0.577111 | 0.710874 | 0.74764  |
| MmugDNA.11719.1.S1_at   | MmugDNA.11719.1 | 4.58  | 4.65  | 0.12 | 0    | -1.05 | 0.983292 | 0.998275 | 0.99383  | 0.999091 |
| MmugDNA.1172.1.S1_at    | MmugDNA.1172.1  | 4.73  | 4.7   | 0.25 | 0.13 | 1.02  | 0.850801 | 0.935706 | 0.935218 | 0.963725 |
| MmugDNA.11721.1.S1_a_at | MmugDNA.11721.1 | 2.49  | 2.56  | 0.04 | 0.1  | -1.05 | 0.157207 | 0.298484 | 0.447994 | 0.557161 |
| MmugDNA.11722.1.S1_at   | MmugDNA.11722.1 | 11.11 | 10.84 | 0.11 | 0.03 | 1.21  | 0.010869 | 0.002084 | 0.153933 | 0.067486 |
| MmugDNA.11723.1.S1_at   | MmugDNA.11723.1 | 5.18  | 5.15  | 0.12 | 0.12 | 1.02  | 0.762102 | 0.930265 | 0.890906 | 0.960382 |
| MmugDNA.11724.1.S1_at   | MmugDNA.11724.1 | 8.18  | 8.49  | 0.21 | 0.15 | -1.24 | 0.370648 | 0.077789 | 0.643513 | 0.323933 |
| MmugDNA.11725.1.S1_at   | MmugDNA.11725.1 | 5.42  | 5.49  | 0.07 | 0.31 | -1.05 | 0.890286 | 0.958    | 0.953253 | 0.976273 |
| MmugDNA.11726.1.S1_at   | MmugDNA.11726.1 | 10.39 | 10.33 | 0.21 | 0.09 | 1.05  | 0.586973 | 0.948585 | 0.790259 | 0.970655 |
| MmugDNA.11727.1.S1_at   | MmugDNA.11727.1 | 3.59  | 3.37  | 0.23 | 0.07 | 1.16  | 0.145665 | 0.131973 | 0.433153 | 0.404024 |
| MmugDNA.1173.1.S1_at    | MmugDNA.1173.1  | 4.37  | 4.34  | 0.12 | 0.07 | 1.02  | 0.708612 | 0.720907 | 0.86198  | 0.838368 |
| MmugDNA.11730.1.S1_at   | MmugDNA.11730.1 | 7.08  | 4.83  | 1.63 | 1.07 | 4.76  | 0.400735 | 0.53881  | 0.665557 | 0.723368 |
| MmugDNA.11731.1.S1_at   | MmugDNA.11731.1 | 5.43  | 5.42  | 0.25 | 0.05 | 1.01  | 0.919665 | 0.990909 | 0.965621 | 0.994898 |
| MmugDNA.11732.1.S1_at   | MmugDNA.11732.1 | 5     | 4.26  | 0.43 | 0.11 | 1.67  | 0.024081 | 0.008743 | 0.208287 | 0.123975 |
| MmugDNA.11733.1.S1_at   | MmugDNA.11733.1 | 3.79  | 3.6   | 0.24 | 0.21 | 1.13  | 0.163402 | 0.178076 | 0.455676 | 0.454462 |
| MmugDNA.11734.1.S1_at   | MmugDNA.11734.1 | 3.71  | 3.84  | 0.12 | 0.03 | -1.1  | 0.133868 | 0.277664 | 0.417214 | 0.541636 |
| MmugDNA.11736.1.S1_at   | MmugDNA.11736.1 | 6.16  | 5.22  | 0.3  | 0.48 | 1.92  | 0.054548 | 0.073021 | 0.290603 | 0.316017 |
| MmugDNA.11737.1.S1_at   | MmugDNA.11737.1 | 5.04  | 4.56  | 0.8  | 0.57 | 1.4   | 0.111396 | 0.120301 | 0.387378 | 0.38925  |
| MmugDNA.11738.1.S1_at   | MmugDNA.11738.1 | 13.96 | 13.79 | 0.06 | 0.02 | 1.12  | 0.01449  | 0.094985 | 0.172143 | 0.352071 |
| MmugDNA.11739.1.S1_s_at | MmugDNA.11739.1 | 13.51 | 13.49 | 0.03 | 0.03 | 1.01  | 0.559812 | 0.199136 | 0.773535 | 0.473735 |
| MmugDNA.1174.1.S1_at    | MmugDNA.1174.1  | 6.18  | 6.14  | 0.04 | 0.1  | 1.03  | 0.544889 | 0.531124 | 0.764357 | 0.718416 |
| MmugDNA.11740.1.S1_at   | MmugDNA.11740.1 | 8.17  | 8.36  | 0.31 | 0.14 | -1.14 | 0.56602  | 0.137812 | 0.77703  | 0.41077  |
| MmugDNA.11742.1.S1_at   | MmugDNA.11742.1 | 4.53  | 3.57  | 0.48 | 0.17 | 1.94  | 0.113103 | 0.055264 | 0.389701 | 0.280809 |
| MmugDNA.11743.1.S1_at   | MmugDNA.11743.1 | 6.4   | 6.45  | 0.07 | 0.22 | -1.03 | 0.42279  | 0.86243  | 0.680908 | 0.921766 |
| MmugDNA.11744.1.S1_at   | MmugDNA.11744.1 | 4.99  | 4.62  | 0.37 | 0.08 | 1.29  | 0.146822 | 0.173216 | 0.434827 | 0.449779 |
| MmugDNA.11745.1.S1_at   | MmugDNA.11745.1 | 9.02  | 9.1   | 0.31 | 0.14 | -1.06 | 0.928433 | 0.079681 | 0.969772 | 0.326981 |
| MmugDNA.11747.1.S1_at   | MmugDNA.11747.1 | 11.41 | 10.13 | 0.22 | 0.17 | 2.42  | 0.001821 | 0.001123 | 0.08633  | 0.052924 |
| MmugDNA.11749.1.S1_at   | MmugDNA.11749.1 | 8.08  | 7.02  | 0.38 | 0.21 | 2.08  | 0.010651 | 0.0033   | 0.152845 | 0.082611 |
| MmugDNA.11750.1.S1_at   | MmugDNA.11750.1 | 4.71  | 4.76  | 0.08 | 0.1  | -1.03 | 0.467148 | 0.667484 | 0.71268  | 0.805333 |
| MmugDNA.11751.1.S1_at   | MmugDNA.11751.1 | 4.5   | 4.27  | 0.28 | 0.11 | 1.17  | 0.290706 | 0.351552 | 0.580172 | 0.595094 |
| MmugDNA.11752.1.S1_at   | MmugDNA.11752.1 | 10.05 | 9.79  | 0.08 | 0.21 | 1.2   | 0.189422 | 0.002997 | 0.485933 | 0.079958 |
| MmugDNA.11753.1.S1_at   | MmugDNA.11753.1 | 3.57  | 3.61  | 0.12 | 0.1  | -1.03 | 0.650476 | 0.12863  | 0.830274 | 0.400072 |
| MmugDNA.11757.1.S1_at   | MmugDNA.11757.1 | 3.09  | 3.07  | 0.2  | 0.18 | 1.01  | 0.424858 | 0.323328 | 0.682288 | 0.57443  |
| MmugDNA.1176.1.S1_at    | MmugDNA.1176.1  | 8.44  | 8.42  | 0.58 | 0.13 | 1.01  | 0.994558 | 0.812485 | 0.997781 | 0.891676 |
| MmugDNA.11760.1.S1_at   | MmugDNA.11760.1 | 5.41  | 5.43  | 0.02 | 0.12 | -1.01 | 0.57031  | 0.8501   | 0.779298 | 0.914709 |
| MmugDNA.11761.1.S1_at   | MmugDNA.11761.1 | 12.37 | 10.45 | 0.69 | 0.22 | 3.77  | 0.026447 | 0.137695 | 0.21571  | 0.410701 |
| MmugDNA.11762.1.S1_at   | MmugDNA.11762.1 | 5.35  | 5.32  | 0.27 | 0.04 | 1.03  | 0.333028 | 0.346232 | 0.614568 | 0.591201 |
| MmugDNA.11764.1.S1_at   | MmugDNA.11764.1 | 4.83  | 4.84  | 0.67 | 0.24 | -1    | 0.714298 | 0.361988 | 0.865055 | 0.602725 |
| MmugDNA.11766.1.S1_at   | MmugDNA.11766.1 | 6.32  | 6.07  | 0.03 | 0.1  | 1.2   | 0.006599 | 0.004212 | 0.127762 | 0.091368 |
| MmugDNA.11767.1.S1_at   | MmugDNA.11767.1 | 12.38 | 12.74 | 0.34 | 0.08 | -1.28 | 0.089546 | 0.09682  | 0.356406 | 0.354213 |
| MmugDNA.11768.1.S1_at   | MmugDNA.11768.1 | 4.28  | 4.66  | 0.14 | 0.16 | -1.31 | 0.044219 | 0.107112 | 0.267305 | 0.369808 |
| MmugDNA.11769.1.S1_at   | MmugDNA.11769.1 | 6.46  | 5.57  | 0.24 | 0.28 | 1.85  | 0.02862  | 0.09241  | 0.221687 | 0.348296 |
| MmugDNA.1177.1.S1_at    | MmugDNA.1177.1  | 5.59  | 5.61  | 0.2  | 0.02 | -1.02 | 0.95298  | 0.918509 | 0.980618 | 0.954287 |

|                         |                 |       |       |      |      |       |          |          |          |          |
|-------------------------|-----------------|-------|-------|------|------|-------|----------|----------|----------|----------|
| MmugDNA.11771.1.S1_at   | MmugDNA.11771.1 | 4.26  | 4.5   | 0.21 | 0.11 | -1.18 | 0.400083 | 0.286417 | 0.665231 | 0.547829 |
| MmugDNA.11772.1.S1_at   | MmugDNA.11772.1 | 5.88  | 5.95  | 0.58 | 0.23 | -1.05 | 0.926305 | 0.993608 | 0.968841 | 0.996218 |
| MmugDNA.11774.1.S1_at   | MmugDNA.11774.1 | 3.55  | 3.56  | 0.08 | 0.03 | -1.01 | 0.537973 | 0.248909 | 0.759999 | 0.517972 |
| MmugDNA.11775.1.S1_at   | MmugDNA.11775.1 | 7.26  | 6.19  | 0.57 | 0.08 | 2.11  | 0.104418 | 0.156005 | 0.377773 | 0.431431 |
| MmugDNA.11776.1.S1_at   | MmugDNA.11776.1 | 7.99  | 7.51  | 0.74 | 0.09 | 1.39  | 0.12629  | 0.106128 | 0.407515 | 0.368499 |
| MmugDNA.11776.1.S1_x_at | MmugDNA.11776.1 | 7.68  | 7.64  | 0.8  | 0.07 | 1.03  | 0.309419 | 0.339128 | 0.59582  | 0.585891 |
| MmugDNA.11777.1.S1_at   | MmugDNA.11777.1 | 9.58  | 9.05  | 0.41 | 0.03 | 1.44  | 0.089979 | 0.159863 | 0.356863 | 0.435986 |
| MmugDNA.11778.1.S1_at   | MmugDNA.11778.1 | 7.76  | 8.59  | 0.46 | 0.23 | -1.77 | 0.06807  | 0.373567 | 0.318571 | 0.612361 |
| MmugDNA.1178.1.S1_at    | MmugDNA.1178.1  | 4.81  | 4.79  | 0.14 | 0.1  | 1.01  | 0.885339 | 0.146935 | 0.951028 | 0.421008 |
| MmugDNA.11782.1.S1_s_at | MmugDNA.11782.1 | 4.42  | 4.42  | 0.1  | 0.41 | 1     | 0.823267 | 0.65892  | 0.921472 | 0.800473 |
| MmugDNA.11785.1.S1_at   | MmugDNA.11785.1 | 4.21  | 4.21  | 0.22 | 0.1  | 1     | 0.297048 | 0.194267 | 0.585548 | 0.469384 |
| MmugDNA.11786.1.S1_at   | MmugDNA.11786.1 | 8.34  | 9.51  | 1.41 | 0.13 | -2.24 | 0.22689  | 0.308286 | 0.524811 | 0.564425 |
| MmugDNA.11789.1.S1_at   | MmugDNA.11789.1 | 8.37  | 7.98  | 0.11 | 0.12 | 1.31  | 0.021801 | 0.096331 | 0.200878 | 0.35382  |
| MmugDNA.11790.1.S1_at   | MmugDNA.11790.1 | 4.9   | 5.04  | 0.08 | 0.17 | -1.11 | 0.649343 | 0.589555 | 0.829674 | 0.755724 |
| MmugDNA.11792.1.S1_at   | MmugDNA.11792.1 | 7.53  | 7.58  | 0.12 | 0.08 | -1.04 | 0.330948 | 0.355766 | 0.612912 | 0.597864 |
| MmugDNA.11794.1.S1_at   | MmugDNA.11794.1 | 4.58  | 4.49  | 0.12 | 0.1  | 1.06  | 0.603346 | 0.24909  | 0.80093  | 0.51821  |
| MmugDNA.11796.1.S1_at   | MmugDNA.11796.1 | 6.56  | 6.34  | 0.17 | 0.04 | 1.16  | 0.244469 | 0.289761 | 0.540909 | 0.550776 |
| MmugDNA.11798.1.S1_at   | MmugDNA.11798.1 | 5.34  | 4.68  | 0.08 | 0.21 | 1.58  | 0.013679 | 0.013021 | 0.167855 | 0.146821 |
| MmugDNA.118.1.S1_at     | MmugDNA.118.1   | 3.65  | 3.52  | 0.22 | 0.11 | 1.09  | 0.431019 | 0.589491 | 0.687225 | 0.755691 |
| MmugDNA.1180.1.S1_at    | MmugDNA.1180.1  | 5.18  | 4.64  | 0.32 | 0.05 | 1.45  | 0.047196 | 0.038546 | 0.274594 | 0.241322 |
| MmugDNA.11800.1.S1_at   | MmugDNA.11800.1 | 4.72  | 4.22  | 0.58 | 0.15 | 1.41  | 0.735573 | 0.387974 | 0.876915 | 0.62253  |
| MmugDNA.11802.1.S1_at   | MmugDNA.11802.1 | 5.15  | 4.66  | 0.55 | 0.07 | 1.4   | 0.325865 | 0.320955 | 0.609046 | 0.572948 |
| MmugDNA.11803.1.S1_at   | MmugDNA.11803.1 | 4.72  | 4.84  | 0.03 | 0.32 | -1.09 | 0.483062 | 0.636753 | 0.723327 | 0.78635  |
| MmugDNA.11804.1.S1_at   | MmugDNA.11804.1 | 10.95 | 11.07 | 0.05 | 0.14 | -1.08 | 0.218724 | 0.77525  | 0.51636  | 0.869162 |
| MmugDNA.11805.1.S1_at   | MmugDNA.11805.1 | 3.86  | 3.79  | 0.05 | 0.17 | 1.05  | 0.715491 | 0.817686 | 0.865726 | 0.894805 |
| MmugDNA.11806.1.S1_at   | MmugDNA.11806.1 | 3.57  | 3.62  | 0.23 | 0.22 | -1.04 | 0.942872 | 0.458393 | 0.975935 | 0.671165 |
| MmugDNA.11807.1.S1_at   | MmugDNA.11807.1 | 11.12 | 11.32 | 0.1  | 0.07 | -1.15 | 0.053228 | 0.377592 | 0.287986 | 0.61503  |
| MmugDNA.11807.1.S1_s_at | MmugDNA.11807.1 | 12.38 | 12.72 | 0.14 | 0.06 | -1.26 | 0.016807 | 0.142961 | 0.182872 | 0.416854 |
| MmugDNA.11808.1.S1_at   | MmugDNA.11808.1 | 8.99  | 8.97  | 0.28 | 0.1  | 1.02  | 0.684045 | 0.696907 | 0.849373 | 0.824002 |
| MmugDNA.1181.1.S1_at    | MmugDNA.1181.1  | 8.36  | 8.68  | 0.66 | 0.02 | -1.25 | 0.555977 | 0.782955 | 0.771459 | 0.87441  |
| MmugDNA.11810.1.S1_at   | MmugDNA.11810.1 | 10.13 | 9.54  | 0.28 | 0.11 | 1.51  | 0.071343 | 0.134068 | 0.324993 | 0.406276 |
| MmugDNA.11812.1.S1_x_at | MmugDNA.11812.1 | 12.65 | 12.62 | 0.41 | 0.15 | 1.02  | 0.477616 | 0.185569 | 0.719533 | 0.461566 |
| MmugDNA.11813.1.S1_at   | MmugDNA.11813.1 | 3.53  | 3.34  | 0.13 | 0.16 | 1.13  | 0.233481 | 0.347375 | 0.53162  | 0.591967 |
| MmugDNA.11815.1.S1_at   | MmugDNA.11815.1 | 4.71  | 4.69  | 0.15 | 0.05 | 1.02  | 0.786807 | 0.684917 | 0.902753 | 0.816234 |
| MmugDNA.11816.1.S1_at   | MmugDNA.11816.1 | 4.34  | 4.15  | 0.12 | 0.21 | 1.14  | 0.075828 | 0.282158 | 0.333731 | 0.544937 |
| MmugDNA.11819.1.S1_at   | MmugDNA.11819.1 | 10.96 | 10.99 | 0.21 | 0.1  | -1.02 | 0.782304 | 0.539019 | 0.90064  | 0.723468 |
| MmugDNA.1182.1.S1_at    | MmugDNA.1182.1  | 7.39  | 7.38  | 0.16 | 0.08 | 1.01  | 0.707097 | 0.117062 | 0.861311 | 0.384494 |
| MmugDNA.11821.1.S1_at   | MmugDNA.11821.1 | 7.03  | 6.97  | 0.41 | 0.21 | 1.04  | 0.852886 | 0.751795 | 0.935956 | 0.855696 |
| MmugDNA.11822.1.S1_at   | MmugDNA.11822.1 | 3.9   | 4.1   | 0.26 | 0.27 | -1.15 | 0.394046 | 0.552234 | 0.660765 | 0.731602 |
| MmugDNA.11823.1.S1_at   | MmugDNA.11823.1 | 4.13  | 4.15  | 0.22 | 0.05 | -1.01 | 0.481223 | 0.638711 | 0.72184  | 0.787808 |
| MmugDNA.11826.1.S1_at   | MmugDNA.11826.1 | 5.16  | 5.55  | 0.5  | 1.54 | -1.32 | 0.325297 | 0.600934 | 0.608663 | 0.762424 |
| MmugDNA.11827.1.S1_at   | MmugDNA.11827.1 | 4.46  | 4.5   | 0.11 | 0.2  | -1.03 | 0.359668 | 0.256751 | 0.635313 | 0.524607 |
| MmugDNA.11829.1.S1_at   | MmugDNA.11829.1 | 7.11  | 7.09  | 0.03 | 0.05 | 1.01  | 0.201201 | 0.295491 | 0.498709 | 0.554925 |

|                         |                 |       |       |      |      |       |          |          |          |          |
|-------------------------|-----------------|-------|-------|------|------|-------|----------|----------|----------|----------|
| MmugDNA.11830.1.S1_at   | MmugDNA.11830.1 | 8.15  | 7.73  | 0.25 | 0.04 | 1.34  | 0.146855 | 0.060475 | 0.434827 | 0.292553 |
| MmugDNA.11831.1.S1_at   | MmugDNA.11831.1 | 5.58  | 4.39  | 0.51 | 0.55 | 2.28  | 0.067204 | 0.236986 | 0.316868 | 0.507675 |
| MmugDNA.11832.1.S1_at   | MmugDNA.11832.1 | 6.26  | 5.96  | 1.07 | 0.11 | 1.23  | 0.735892 | 0.599456 | 0.877081 | 0.761455 |
| MmugDNA.11833.1.S1_at   | MmugDNA.11833.1 | 5.54  | 5.77  | 0.37 | 0.06 | -1.17 | 0.969774 | 0.640955 | 0.987995 | 0.789319 |
| MmugDNA.11834.1.S1_at   | MmugDNA.11834.1 | 8.86  | 8.72  | 0.12 | 0.11 | 1.1   | 0.521375 | 0.031058 | 0.749308 | 0.218115 |
| MmugDNA.11835.1.S1_at   | MmugDNA.11835.1 | 5.58  | 5.55  | 0    | 0.13 | 1.02  | 0.816057 | 0.844236 | 0.917929 | 0.911327 |
| MmugDNA.11836.1.S1_at   | MmugDNA.11836.1 | 7.3   | 7.35  | 0.18 | 0.04 | -1.04 | 0.824938 | 0.765435 | 0.922259 | 0.863671 |
| MmugDNA.11838.1.S1_at   | MmugDNA.11838.1 | 4.76  | 4.94  | 0.36 | 0.22 | -1.13 | 0.732916 | 0.947286 | 0.875334 | 0.970103 |
| MmugDNA.11839.1.S1_at   | MmugDNA.11839.1 | 3.58  | 3.31  | 0.19 | 0.11 | 1.21  | 0.131944 | 0.290797 | 0.415087 | 0.551399 |
| MmugDNA.11840.1.S1_at   | MmugDNA.11840.1 | 6.47  | 6.42  | 0.91 | 0.1  | 1.04  | 0.991941 | 0.441933 | 0.997006 | 0.66004  |
| MmugDNA.11841.1.S1_at   | MmugDNA.11841.1 | 4.35  | 3.66  | 0.22 | 0.15 | 1.61  | 0.030559 | 0.016354 | 0.227713 | 0.161943 |
| MmugDNA.11842.1.S1_at   | MmugDNA.11842.1 | 7.64  | 8.02  | 0.06 | 0.33 | -1.3  | 0.169188 | 0.180186 | 0.462429 | 0.456751 |
| MmugDNA.11844.1.S1_at   | MmugDNA.11844.1 | 6.39  | 5.95  | 0.32 | 0.42 | 1.36  | 0.058671 | 0.016276 | 0.299387 | 0.161661 |
| MmugDNA.11845.1.S1_at   | MmugDNA.11845.1 | 3.75  | 3.8   | 1.22 | 0.2  | -1.04 | 0.41725  | 0.557951 | 0.677455 | 0.735306 |
| MmugDNA.11847.1.S1_at   | MmugDNA.11847.1 | 3.43  | 3.18  | 0.29 | 0.04 | 1.19  | 0.13084  | 0.151467 | 0.41337  | 0.426214 |
| MmugDNA.11849.1.S1_at   | MmugDNA.11849.1 | 7.69  | 7.67  | 0.18 | 0.02 | 1.02  | 0.53473  | 0.643324 | 0.757913 | 0.79084  |
| MmugDNA.1185.1.S1_at    | MmugDNA.1185.1  | 5.6   | 5.82  | 0.14 | 0.07 | -1.16 | 0.082281 | 0.028448 | 0.343885 | 0.210466 |
| MmugDNA.11850.1.S1_at   | MmugDNA.11850.1 | 6.42  | 6.32  | 1.19 | 0.06 | 1.07  | 0.806694 | 0.947911 | 0.913434 | 0.970378 |
| MmugDNA.11851.1.S1_at   | MmugDNA.11851.1 | 5.78  | 5.45  | 0.8  | 0.33 | 1.25  | 0.30411  | 0.302768 | 0.59132  | 0.560307 |
| MmugDNA.11851.1.S1_x_at | MmugDNA.11851.1 | 6.06  | 5.89  | 0.78 | 0.26 | 1.12  | 0.28609  | 0.219526 | 0.575961 | 0.493168 |
| MmugDNA.11852.1.S1_at   | MmugDNA.11852.1 | 10.89 | 10.73 | 0.26 | 0.17 | 1.11  | 0.958933 | 0.27089  | 0.983299 | 0.536026 |
| MmugDNA.11854.1.S1_at   | MmugDNA.11854.1 | 3.14  | 3.15  | 0.1  | 0.09 | -1.01 | 0.666563 | 0.949936 | 0.839896 | 0.971436 |
| MmugDNA.11855.1.S1_at   | MmugDNA.11855.1 | 6.97  | 6.76  | 0.21 | 0.14 | 1.16  | 0.357153 | 0.083137 | 0.633338 | 0.332999 |
| MmugDNA.11856.1.S1_at   | MmugDNA.11856.1 | 3.34  | 3.32  | 0.7  | 0.07 | 1.02  | 0.4109   | 0.472394 | 0.672849 | 0.679986 |
| MmugDNA.11857.1.S1_at   | MmugDNA.11857.1 | 5.19  | 4.94  | 0.41 | 0.24 | 1.19  | 0.172893 | 0.203416 | 0.46697  | 0.477634 |
| MmugDNA.11859.1.S1_at   | MmugDNA.11859.1 | 10.25 | 10.05 | 0.24 | 0.01 | 1.15  | 0.068106 | 0.074747 | 0.318708 | 0.318471 |
| MmugDNA.1186.1.S1_at    | MmugDNA.1186.1  | 4.54  | 4.43  | 0.14 | 0.05 | 1.08  | 0.155861 | 0.366037 | 0.446227 | 0.605891 |
| MmugDNA.11860.1.S1_at   | MmugDNA.11860.1 | 4.01  | 4     | 0.07 | 0.03 | 1.01  | 0.542213 | 0.452337 | 0.762647 | 0.667046 |
| MmugDNA.11861.1.S1_at   | MmugDNA.11861.1 | 11.41 | 11.16 | 0.17 | 0.11 | 1.18  | 0.079536 | 0.030695 | 0.339662 | 0.217148 |
| MmugDNA.11862.1.S1_at   | MmugDNA.11862.1 | 7.22  | 7.21  | 0.23 | 0.2  | 1.01  | 0.215985 | 0.447548 | 0.513655 | 0.663579 |
| MmugDNA.11865.1.S1_at   | MmugDNA.11865.1 | 5.92  | 5.92  | 0.01 | 0.06 | 1     | 0.331167 | 0.297158 | 0.61306  | 0.556022 |
| MmugDNA.11866.1.S1_at   | MmugDNA.11866.1 | 5.67  | 5.61  | 0.21 | 0.09 | 1.05  | 0.600985 | 0.893218 | 0.799309 | 0.939141 |
| MmugDNA.11867.1.S1_at   | MmugDNA.11867.1 | 5.73  | 5.72  | 0.01 | 0.11 | 1.01  | 0.538179 | 0.78947  | 0.760149 | 0.87838  |
| MmugDNA.11869.1.S1_at   | MmugDNA.11869.1 | 10.58 | 10.31 | 0.14 | 0.15 | 1.21  | 0.125993 | 0.058822 | 0.406931 | 0.289228 |
| MmugDNA.1187.1.S1_at    | MmugDNA.1187.1  | 7.87  | 6.4   | 0.65 | 0.66 | 2.78  | 0.161306 | 0.0679   | 0.452845 | 0.306745 |
| MmugDNA.11870.1.S1_at   | MmugDNA.11870.1 | 4.21  | 3.39  | 0.41 | 0.08 | 1.77  | 0.033509 | 0.12769  | 0.237028 | 0.398581 |
| MmugDNA.11871.1.S1_at   | MmugDNA.11871.1 | 10.65 | 10.61 | 0.1  | 0.09 | 1.03  | 0.316536 | 0.462831 | 0.601238 | 0.674149 |
| MmugDNA.11872.1.S1_at   | MmugDNA.11872.1 | 7.33  | 7.72  | 0.7  | 0.41 | -1.31 | 0.980608 | 0.530497 | 0.992776 | 0.718028 |
| MmugDNA.11874.1.S1_at   | MmugDNA.11874.1 | 4.76  | 4.37  | 0.2  | 0.24 | 1.3   | 0.081729 | 0.511961 | 0.342963 | 0.705897 |
| MmugDNA.11875.1.S1_at   | MmugDNA.11875.1 | 4.94  | 4.83  | 0.2  | 0.15 | 1.08  | 0.489306 | 0.609436 | 0.727626 | 0.767768 |
| MmugDNA.11876.1.S1_at   | MmugDNA.11876.1 | 7.18  | 6.67  | 0.42 | 0.05 | 1.42  | 0.340737 | 0.436815 | 0.620859 | 0.65629  |
| MmugDNA.11877.1.S1_at   | MmugDNA.11877.1 | 7.9   | 7.63  | 0.23 | 0.05 | 1.21  | 0.091041 | 0.066531 | 0.358313 | 0.303705 |
| MmugDNA.11878.1.S1_at   | MmugDNA.11878.1 | 6.87  | 6.38  | 0.3  | 0.14 | 1.41  | 0.094271 | 0.1571   | 0.363294 | 0.432579 |

|                         |                 |       |       |      |      |       |          |          |          |          |
|-------------------------|-----------------|-------|-------|------|------|-------|----------|----------|----------|----------|
| MmugDNA.1188.1.S1_at    | MmugDNA.1188.1  | 5.93  | 5.97  | 1.74 | 0.78 | -1.03 | 0.665711 | 0.443338 | 0.839403 | 0.661168 |
| MmugDNA.11880.1.S1_at   | MmugDNA.11880.1 | 4.9   | 4.87  | 0.24 | 0.25 | 1.02  | 0.842095 | 0.313551 | 0.930723 | 0.56796  |
| MmugDNA.11881.1.S1_at   | MmugDNA.11881.1 | 6.95  | 7     | 0.03 | 0.13 | -1.04 | 0.667853 | 0.012321 | 0.840528 | 0.143659 |
| MmugDNA.11882.1.S1_at   | MmugDNA.11882.1 | 7.08  | 7.21  | 0.21 | 0.06 | -1.09 | 0.635463 | 0.180119 | 0.821448 | 0.456712 |
| MmugDNA.11883.1.S1_at   | MmugDNA.11883.1 | 5.94  | 5.72  | 0.05 | 0.02 | 1.16  | 0.003463 | 0.001425 | 0.103385 | 0.057604 |
| MmugDNA.11885.1.S1_at   | MmugDNA.11885.1 | 8.79  | 9.44  | 0.6  | 0.04 | -1.56 | 0.133592 | 0.384805 | 0.41701  | 0.620432 |
| MmugDNA.11887.1.S1_at   | MmugDNA.11887.1 | 5.88  | 6.08  | 0.47 | 0.22 | -1.15 | 0.715916 | 0.594645 | 0.86597  | 0.758623 |
| MmugDNA.11888.1.S1_at   | MmugDNA.11888.1 | 6.89  | 6.16  | 0.54 | 0.4  | 1.67  | 0.154884 | 0.158508 | 0.445083 | 0.434442 |
| MmugDNA.1189.1.S1_at    | MmugDNA.1189.1  | 7.29  | 7.64  | 0.78 | 0.48 | -1.27 | 0.362491 | 0.747387 | 0.637348 | 0.853149 |
| MmugDNA.11892.1.S1_at   | MmugDNA.11892.1 | 7.33  | 7.12  | 0.5  | 0.15 | 1.15  | 0.408159 | 0.502127 | 0.67102  | 0.70006  |
| MmugDNA.11894.1.S1_at   | MmugDNA.11894.1 | 3.38  | 3.17  | 0.27 | 0.19 | 1.16  | 0.288326 | 0.21666  | 0.57804  | 0.490307 |
| MmugDNA.11897.1.S1_at   | MmugDNA.11897.1 | 4.38  | 4.75  | 0.28 | 0.06 | -1.3  | 0.108293 | 0.006118 | 0.382964 | 0.106503 |
| MmugDNA.11899.1.S1_at   | MmugDNA.11899.1 | 10.17 | 9.66  | 0.03 | 0.07 | 1.42  | 0.000385 | 0.069565 | 0.062479 | 0.309848 |
| MmugDNA.1190.1.S1_at    | MmugDNA.1190.1  | 5.09  | 4.85  | 0.58 | 0.16 | 1.18  | 0.651997 | 0.513373 | 0.831042 | 0.706881 |
| MmugDNA.11900.1.S1_at   | MmugDNA.11900.1 | 7.7   | 6.55  | 0.48 | 0.22 | 2.22  | 0.030634 | 0.134913 | 0.227949 | 0.406878 |
| MmugDNA.11901.1.S1_at   | MmugDNA.11901.1 | 12.45 | 12.46 | 0.12 | 0.03 | -1.01 | 0.723918 | 0.047279 | 0.870325 | 0.262158 |
| MmugDNA.11902.1.S1_at   | MmugDNA.11902.1 | 6.57  | 6.37  | 0.15 | 0.19 | 1.15  | 0.157717 | 0.059462 | 0.44853  | 0.290548 |
| MmugDNA.11903.1.S1_at   | MmugDNA.11903.1 | 9.65  | 9.05  | 0.43 | 0.27 | 1.52  | 0.077542 | 0.341856 | 0.336282 | 0.587944 |
| MmugDNA.11904.1.S1_at   | MmugDNA.11904.1 | 4.76  | 4.76  | 0.23 | 0.07 | 1     | 0.897985 | 0.835078 | 0.956685 | 0.905549 |
| MmugDNA.11905.1.S1_at   | MmugDNA.11905.1 | 5.21  | 5.39  | 0.91 | 0.16 | -1.13 | 0.556821 | 0.630457 | 0.771968 | 0.782237 |
| MmugDNA.11906.1.S1_at   | MmugDNA.11906.1 | 6.02  | 5.98  | 0.13 | 0.18 | 1.03  | 0.915042 | 0.630814 | 0.963913 | 0.78245  |
| MmugDNA.11907.1.S1_s_at | MmugDNA.11907.1 | 9.12  | 8.57  | 1.06 | 0.19 | 1.46  | 0.889814 | 0.33615  | 0.953112 | 0.583675 |
| MmugDNA.11908.1.S1_s_at | MmugDNA.11908.1 | 12.51 | 12.5  | 0.1  | 0.11 | 1     | 0.903307 | 0.13097  | 0.959027 | 0.403037 |
| MmugDNA.11909.1.S1_s_at | MmugDNA.11909.1 | 9.17  | 9.54  | 0.11 | 0.07 | -1.29 | 0.012148 | 0.001341 | 0.160493 | 0.056396 |
| MmugDNA.1191.1.S1_at    | MmugDNA.1191.1  | 4.56  | 5.14  | 0.12 | 0.26 | -1.49 | 0.068008 | 0.295958 | 0.318434 | 0.555249 |
| MmugDNA.11912.1.S1_at   | MmugDNA.11912.1 | 6.06  | 6.09  | 0.09 | 0.22 | -1.02 | 0.773306 | 0.375112 | 0.896046 | 0.613186 |
| MmugDNA.11914.1.S1_at   | MmugDNA.11914.1 | 10.68 | 10.82 | 0.18 | 0.03 | -1.11 | 0.209954 | 0.252437 | 0.507392 | 0.521061 |
| MmugDNA.11919.1.S1_at   | MmugDNA.11919.1 | 5.37  | 5.11  | 0.24 | 0.26 | 1.2   | 0.234791 | 0.268268 | 0.532874 | 0.533981 |
| MmugDNA.1192.1.S1_at    | MmugDNA.1192.1  | 4.16  | 4.19  | 0.08 | 0.27 | -1.02 | 0.831696 | 0.656962 | 0.925994 | 0.799401 |
| MmugDNA.11920.1.S1_at   | MmugDNA.11920.1 | 5.95  | 5.92  | 0.28 | 0.27 | 1.02  | 0.774425 | 0.524371 | 0.896823 | 0.714309 |
| MmugDNA.11921.1.S1_at   | MmugDNA.11921.1 | 9.02  | 8.9   | 0.2  | 0.12 | 1.09  | 0.211009 | 0.031739 | 0.508779 | 0.22057  |
| MmugDNA.11922.1.S1_at   | MmugDNA.11922.1 | 3.17  | 3.02  | 0.09 | 0.16 | 1.11  | 0.643885 | 0.00007  | 0.826478 | 0.025812 |
| MmugDNA.11923.1.S1_at   | MmugDNA.11923.1 | 9.89  | 9.86  | 0.05 | 0.04 | 1.02  | 0.398166 | 0.021259 | 0.663652 | 0.182504 |
| MmugDNA.11924.1.S1_at   | MmugDNA.11924.1 | 3.28  | 2.9   | 0.3  | 0.11 | 1.3   | 0.239242 | 0.311174 | 0.53651  | 0.566215 |
| MmugDNA.11925.1.S1_at   | MmugDNA.11925.1 | 13.62 | 13.59 | 0.08 | 0.06 | 1.02  | 0.152913 | 0.067932 | 0.44263  | 0.306839 |
| MmugDNA.11926.1.S1_at   | MmugDNA.11926.1 | 5.63  | 5.3   | 0.21 | 0.21 | 1.26  | 0.043152 | 0.000332 | 0.26497  | 0.036036 |
| MmugDNA.11927.1.S1_at   | MmugDNA.11927.1 | 6     | 5.73  | 0.35 | 0.11 | 1.2   | 0.1432   | 0.122723 | 0.429494 | 0.392719 |
| MmugDNA.11928.1.S1_at   | MmugDNA.11928.1 | 3.78  | 3.81  | 0.23 | 0.25 | -1.02 | 0.667954 | 0.663357 | 0.840528 | 0.802976 |
| MmugDNA.11929.1.S1_at   | MmugDNA.11929.1 | 4.79  | 5.84  | 0.58 | 0.21 | -2.07 | 0.166313 | 0.123319 | 0.459528 | 0.393386 |
| MmugDNA.1193.1.S1_at    | MmugDNA.1193.1  | 6.17  | 6.18  | 0.05 | 0.32 | -1.01 | 0.546156 | 0.691857 | 0.765159 | 0.820749 |
| MmugDNA.11930.1.S1_at   | MmugDNA.11930.1 | 5.17  | 4.38  | 1.1  | 0.14 | 1.73  | 0.237002 | 0.162989 | 0.534591 | 0.439145 |
| MmugDNA.11931.1.S1_at   | MmugDNA.11931.1 | 4.7   | 4.71  | 0.13 | 0.21 | -1    | 0.240201 | 0.176959 | 0.537832 | 0.453374 |
| MmugDNA.11932.1.S1_at   | MmugDNA.11932.1 | 5.77  | 5.15  | 0.62 | 0.13 | 1.54  | 0.252287 | 0.398727 | 0.546837 | 0.629464 |



|                         |                 |       |       |      |      |       |          |          |          |          |
|-------------------------|-----------------|-------|-------|------|------|-------|----------|----------|----------|----------|
| MmugDNA.11933.1.S1_at   | MmugDNA.11933.1 | 6.72  | 6.98  | 0.31 | 0.07 | -1.2  | 0.681259 | 0.563691 | 0.847984 | 0.7388   |
| MmugDNA.11935.1.S1_x_at | MmugDNA.11935.1 | 7.03  | 7.05  | 0.32 | 0.22 | -1.01 | 0.528243 | 0.247054 | 0.753543 | 0.516247 |
| MmugDNA.11936.1.S1_at   | MmugDNA.11936.1 | 6.91  | 7.88  | 0.88 | 0.35 | -1.97 | 0.148338 | 0.142841 | 0.436972 | 0.416786 |
| MmugDNA.11938.1.S1_at   | MmugDNA.11938.1 | 5.82  | 5.87  | 0.05 | 0.08 | -1.03 | 0.427674 | 0.298853 | 0.684918 | 0.557455 |
| MmugDNA.11939.1.S1_at   | MmugDNA.11939.1 | 5.38  | 5.24  | 0.49 | 0.19 | 1.1   | 0.158445 | 0.245769 | 0.449548 | 0.515519 |
| MmugDNA.1194.1.S1_at    | MmugDNA.1194.1  | 3.33  | 3.48  | 0.06 | 0.37 | -1.11 | 0.719338 | 0.501622 | 0.867628 | 0.699764 |
| MmugDNA.11940.1.S1_at   | MmugDNA.11940.1 | 10.33 | 9.92  | 0.15 | 0.1  | 1.33  | 0.016685 | 0.032866 | 0.182519 | 0.224478 |
| MmugDNA.11941.1.S1_at   | MmugDNA.11941.1 | 7.28  | 7.31  | 0.12 | 0.08 | -1.02 | 0.571136 | 0.870608 | 0.779886 | 0.926446 |
| MmugDNA.11942.1.S1_at   | MmugDNA.11942.1 | 5.68  | 5.62  | 0.11 | 0.04 | 1.04  | 0.971189 | 0.038498 | 0.988523 | 0.241139 |
| MmugDNA.11943.1.S1_at   | MmugDNA.11943.1 | 5.94  | 5.87  | 0.24 | 0.17 | 1.05  | 0.193344 | 0.277269 | 0.489917 | 0.541239 |
| MmugDNA.11944.1.S1_at   | MmugDNA.11944.1 | 10.23 | 10.38 | 0.18 | 0.2  | -1.12 | 0.875627 | 0.000845 | 0.946675 | 0.047038 |
| MmugDNA.11946.1.S1_at   | MmugDNA.11946.1 | 4.31  | 4.31  | 0.16 | 0.14 | -1    | 0.2424   | 0.293977 | 0.539382 | 0.553909 |
| MmugDNA.11947.1.S1_at   | MmugDNA.11947.1 | 5.44  | 5.46  | 0.2  | 0.13 | -1.02 | 0.912117 | 0.811407 | 0.962783 | 0.891158 |
| MmugDNA.11948.1.S1_at   | MmugDNA.11948.1 | 4.45  | 4.42  | 0.16 | 0.1  | 1.03  | 0.723308 | 0.826042 | 0.869971 | 0.900052 |
| MmugDNA.11949.1.S1_at   | MmugDNA.11949.1 | 3.16  | 3.14  | 0.11 | 0.21 | 1.01  | 0.910205 | 0.653269 | 0.961936 | 0.797337 |
| MmugDNA.1195.1.S1_at    | MmugDNA.1195.1  | 6.56  | 6.05  | 0.34 | 0.13 | 1.42  | 0.246261 | 0.244224 | 0.542013 | 0.514167 |
| MmugDNA.11950.1.S1_at   | MmugDNA.11950.1 | 6.45  | 6.32  | 0.18 | 0.04 | 1.09  | 0.107707 | 0.106738 | 0.382296 | 0.369337 |
| MmugDNA.11951.1.S1_at   | MmugDNA.11951.1 | 5.65  | 5.54  | 0.06 | 0.03 | 1.08  | 0.020799 | 0.132198 | 0.197815 | 0.404274 |
| MmugDNA.11952.1.S1_at   | MmugDNA.11952.1 | 10.14 | 10.05 | 0.28 | 0.07 | 1.06  | 0.493594 | 0.878788 | 0.730511 | 0.930855 |
| MmugDNA.11953.1.S1_at   | MmugDNA.11953.1 | 12    | 12.41 | 0.18 | 0.14 | -1.33 | 0.06612  | 0.012655 | 0.31448  | 0.145088 |
| MmugDNA.11954.1.S1_at   | MmugDNA.11954.1 | 4.09  | 4.44  | 0.32 | 0.14 | -1.27 | 0.686682 | 0.675256 | 0.850709 | 0.81026  |
| MmugDNA.11955.1.S1_at   | MmugDNA.11955.1 | 7.61  | 7.59  | 0.11 | 0.17 | 1.01  | 0.454485 | 0.166499 | 0.704378 | 0.442933 |
| MmugDNA.11956.1.S1_at   | MmugDNA.11956.1 | 3.5   | 3.51  | 0.3  | 0.05 | -1    | 0.904319 | 0.845699 | 0.959379 | 0.912219 |
| MmugDNA.11957.1.S1_at   | MmugDNA.11957.1 | 9.5   | 9.89  | 0.3  | 0.11 | -1.31 | 0.124685 | 0.01349  | 0.404982 | 0.148728 |
| MmugDNA.11958.1.S1_at   | MmugDNA.11958.1 | 7.65  | 7.72  | 0.08 | 0.04 | -1.05 | 0.183536 | 0.111062 | 0.479427 | 0.375588 |
| MmugDNA.11959.1.S1_at   | MmugDNA.11959.1 | 6.28  | 6.36  | 0.3  | 0.15 | -1.05 | 0.616327 | 0.787101 | 0.809431 | 0.876832 |
| MmugDNA.1196.1.S1_s_at  | MmugDNA.1196.1  | 13.35 | 13.45 | 0.13 | 0.13 | -1.07 | 0.456378 | 0.685742 | 0.70576  | 0.816612 |
| MmugDNA.11960.1.S1_at   | MmugDNA.11960.1 | 5.41  | 5.39  | 0.51 | 0.11 | 1.02  | 0.3637   | 0.454083 | 0.638304 | 0.668398 |
| MmugDNA.11961.1.S1_at   | MmugDNA.11961.1 | 3.32  | 3.27  | 0.5  | 0.22 | 1.04  | 0.592642 | 0.7979   | 0.793595 | 0.88363  |
| MmugDNA.11962.1.S1_at   | MmugDNA.11962.1 | 4.04  | 4     | 0.2  | 0.07 | 1.03  | 0.921106 | 0.805701 | 0.966268 | 0.888324 |
| MmugDNA.11964.1.S1_at   | MmugDNA.11964.1 | 4.53  | 4.28  | 0.09 | 0.41 | 1.18  | 0.973529 | 0.445308 | 0.989336 | 0.662338 |
| MmugDNA.11965.1.S1_x_at | MmugDNA.11965.1 | 10.63 | 10.76 | 0.42 | 0.19 | -1.09 | 0.704107 | 0.346314 | 0.859616 | 0.59124  |
| MmugDNA.11967.1.S1_at   | MmugDNA.11967.1 | 7.88  | 7.59  | 0.75 | 0.32 | 1.22  | 0.52764  | 0.623935 | 0.753222 | 0.77828  |
| MmugDNA.11968.1.S1_at   | MmugDNA.11968.1 | 5.45  | 4.97  | 0.49 | 0.29 | 1.4   | 0.327364 | 0.610302 | 0.609992 | 0.768529 |
| MmugDNA.11969.1.S1_at   | MmugDNA.11969.1 | 7.23  | 7.27  | 0.17 | 0.11 | -1.03 | 0.269531 | 0.308185 | 0.561872 | 0.564324 |
| MmugDNA.1197.1.S1_at    | MmugDNA.1197.1  | 7.65  | 8.45  | 0.3  | 0.21 | -1.75 | 0.015338 | 0.009091 | 0.176072 | 0.125944 |
| MmugDNA.11971.1.S1_at   | MmugDNA.11971.1 | 3.49  | 3.57  | 0.31 | 0.03 | -1.05 | 0.54524  | 0.760785 | 0.764504 | 0.861028 |
| MmugDNA.11972.1.S1_at   | MmugDNA.11972.1 | 7.57  | 7.67  | 0.22 | 0.05 | -1.08 | 0.447869 | 0.462893 | 0.699731 | 0.674149 |
| MmugDNA.11973.1.S1_at   | MmugDNA.11973.1 | 3.96  | 4.03  | 0.28 | 0.06 | -1.05 | 0.914233 | 0.855564 | 0.963616 | 0.917669 |
| MmugDNA.11975.1.S1_at   | MmugDNA.11975.1 | 9.43  | 8.55  | 0.05 | 0.22 | 1.83  | 0.002189 | 0.000433 | 0.090693 | 0.038359 |
| MmugDNA.11976.1.S1_s_at | MmugDNA.11976.1 | 6.81  | 7.22  | 0.22 | 0.16 | -1.33 | 0.048681 | 0.220988 | 0.278061 | 0.494389 |
| MmugDNA.11977.1.S1_at   | MmugDNA.11977.1 | 5.41  | 5.13  | 0.13 | 0.05 | 1.21  | 0.030988 | 0.021245 | 0.229092 | 0.182465 |
| MmugDNA.11980.1.S1_at   | MmugDNA.11980.1 | 5.66  | 5.73  | 0.77 | 0.46 | -1.05 | 0.807182 | 0.91848  | 0.913663 | 0.954275 |

|                         |                 |       |       |      |      |       |          |          |          |          |
|-------------------------|-----------------|-------|-------|------|------|-------|----------|----------|----------|----------|
| MmugDNA.11981.1.S1_x_at | MmugDNA.11981.1 | 10.74 | 10.84 | 0.91 | 0.15 | -1.07 | 0.473121 | 0.394899 | 0.716479 | 0.627216 |
| MmugDNA.11982.1.S1_at   | MmugDNA.11982.1 | 3.39  | 3.55  | 0.02 | 0.03 | -1.12 | 0.001014 | 0.000472 | 0.076321 | 0.038572 |
| MmugDNA.11983.1.S1_s_at | MmugDNA.11983.1 | 6.05  | 7.49  | 0.66 | 0.55 | -2.71 | 0.129329 | 0.42703  | 0.411654 | 0.649087 |
| MmugDNA.11984.1.S1_at   | MmugDNA.11984.1 | 3.69  | 3.62  | 0.09 | 0.17 | 1.05  | 0.183454 | 0.44304  | 0.479356 | 0.660947 |
| MmugDNA.11986.1.S1_at   | MmugDNA.11986.1 | 4.53  | 4.52  | 0.11 | 0.08 | 1.01  | 0.973478 | 0.97816  | 0.989336 | 0.988066 |
| MmugDNA.11987.1.S1_at   | MmugDNA.11987.1 | 8.78  | 8.41  | 1.38 | 0.21 | 1.29  | 0.625043 | 0.752265 | 0.815156 | 0.855787 |
| MmugDNA.11988.1.S1_at   | MmugDNA.11988.1 | 5.09  | 5     | 0.07 | 0.21 | 1.06  | 0.600257 | 0.349634 | 0.798746 | 0.593541 |
| MmugDNA.1199.1.S1_at    | MmugDNA.1199.1  | 5.63  | 5.64  | 0.13 | 0.14 | -1    | 0.547045 | 0.754274 | 0.765708 | 0.857004 |
| MmugDNA.11990.1.S1_at   | MmugDNA.11990.1 | 9.93  | 9.28  | 0.33 | 0.04 | 1.57  | 0.020757 | 0.300392 | 0.197677 | 0.55871  |
| MmugDNA.11991.1.S1_at   | MmugDNA.11991.1 | 6.69  | 7.62  | 0.5  | 0.22 | -1.91 | 0.109599 | 0.011447 | 0.3847   | 0.13846  |
| MmugDNA.11992.1.S1_at   | MmugDNA.11992.1 | 11.11 | 11.06 | 0.28 | 0.03 | 1.03  | 0.280902 | 0.356834 | 0.571843 | 0.59863  |
| MmugDNA.11994.1.S1_at   | MmugDNA.11994.1 | 3.08  | 3     | 0.36 | 0.09 | 1.05  | 0.669409 | 0.706093 | 0.841414 | 0.829633 |
| MmugDNA.11995.1.S1_at   | MmugDNA.11995.1 | 3.36  | 3.54  | 0.15 | 0.15 | -1.14 | 0.413036 | 0.575289 | 0.674478 | 0.74643  |
| MmugDNA.11996.1.S1_at   | MmugDNA.11996.1 | 6.42  | 6.69  | 0.14 | 0.08 | -1.2  | 0.069484 | 0.04784  | 0.322002 | 0.263679 |
| MmugDNA.11996.1.S1_s_at | MmugDNA.11996.1 | 5.08  | 5.19  | 0.11 | 0.04 | -1.08 | 0.104048 | 0.085118 | 0.377336 | 0.336936 |
| MmugDNA.11997.1.S1_at   | MmugDNA.11997.1 | 9.07  | 8.86  | 0.6  | 0.17 | 1.16  | 0.647901 | 0.855979 | 0.829089 | 0.917783 |
| MmugDNA.11999.1.S1_at   | MmugDNA.11999.1 | 3.84  | 3.9   | 0.05 | 0.13 | -1.05 | 0.864606 | 0.094172 | 0.941377 | 0.350865 |
| MmugDNA.12.1.S1_at      | MmugDNA.12.1    | 4.32  | 4.29  | 0.1  | 0.14 | 1.02  | 0.388886 | 0.647072 | 0.656881 | 0.793279 |
| MmugDNA.120.1.S1_at     | MmugDNA.120.1   | 7.19  | 7.33  | 0.27 | 0.27 | -1.11 | 0.890599 | 0.843302 | 0.953318 | 0.910767 |
| MmugDNA.1200.1.S1_at    | MmugDNA.1200.1  | 3.33  | 3.2   | 0.06 | 0.1  | 1.09  | 0.22695  | 0.539435 | 0.52488  | 0.723763 |
| MmugDNA.12000.1.S1_at   | MmugDNA.12000.1 | 5.58  | 5.42  | 0.22 | 0.1  | 1.12  | 0.147421 | 0.118358 | 0.435407 | 0.386398 |
| MmugDNA.12001.1.S1_at   | MmugDNA.12001.1 | 4.22  | 4.56  | 0.86 | 0.2  | -1.26 | 0.917388 | 0.84104  | 0.964764 | 0.909421 |
| MmugDNA.12002.1.S1_at   | MmugDNA.12002.1 | 9.07  | 9.81  | 0.3  | 0.19 | -1.66 | 0.067875 | 0.565985 | 0.318295 | 0.740174 |
| MmugDNA.12004.1.S1_at   | MmugDNA.12004.1 | 5.46  | 5.4   | 0.25 | 0.25 | 1.04  | 0.404784 | 0.606922 | 0.668424 | 0.766134 |
| MmugDNA.12005.1.S1_at   | MmugDNA.12005.1 | 3.97  | 3.8   | 0.23 | 0.05 | 1.12  | 0.657169 | 0.85033  | 0.834252 | 0.914874 |
| MmugDNA.12006.1.S1_at   | MmugDNA.12006.1 | 7.98  | 7.71  | 0.07 | 0.07 | 1.2   | 0.018621 | 0.1083   | 0.189686 | 0.371557 |
| MmugDNA.12009.1.S1_at   | MmugDNA.12009.1 | 3.01  | 3.05  | 0.15 | 0.14 | -1.03 | 0.374838 | 0.279813 | 0.64574  | 0.543276 |
| MmugDNA.12010.1.S1_at   | MmugDNA.12010.1 | 4.74  | 4.56  | 0.28 | 0.38 | 1.14  | 0.926899 | 0.988921 | 0.969096 | 0.993666 |
| MmugDNA.25123.1.S1_s_at | MmugDNA.25123.1 | 4.12  | 6.62  | 1.43 | 0.19 | -5.66 | 0.115097 | 0.273253 | 0.392115 | 0.537788 |
| MmugDNA.12012.1.S1_at   | MmugDNA.12012.1 | 3.33  | 3.33  | 0.03 | 0.1  | 1     | 0.28077  | 0.387157 | 0.571782 | 0.621935 |
| MmugDNA.12014.1.S1_at   | MmugDNA.12014.1 | 4.41  | 4.4   | 0    | 0.16 | 1.01  | 0.869707 | 0.807854 | 0.943932 | 0.8894   |
| MmugDNA.12015.1.S1_at   | MmugDNA.12015.1 | 4.03  | 4.06  | 0.31 | 0.09 | -1.02 | 0.881381 | 0.795362 | 0.949601 | 0.882132 |
| MmugDNA.12017.1.S1_at   | MmugDNA.12017.1 | 8.06  | 8.09  | 0.35 | 0    | -1.02 | 0.444048 | 0.806366 | 0.696968 | 0.888642 |
| MmugDNA.12018.1.S1_at   | MmugDNA.12018.1 | 4.46  | 4.56  | 0.19 | 0.09 | -1.07 | 0.952929 | 0.059045 | 0.980585 | 0.289904 |
| MmugDNA.1202.1.S1_at    | MmugDNA.1202.1  | 4.72  | 4.75  | 0.11 | 0.16 | -1.02 | 0.183412 | 0.407403 | 0.47934  | 0.635002 |
| MmugDNA.12020.1.S1_at   | MmugDNA.12020.1 | 7.59  | 7.82  | 0.17 | 0.34 | -1.17 | 0.647124 | 0.053023 | 0.828495 | 0.27592  |
| MmugDNA.12022.1.S1_at   | MmugDNA.12022.1 | 7.25  | 7.24  | 0.15 | 0.18 | 1.01  | 0.789655 | 0.044624 | 0.904456 | 0.255589 |
| MmugDNA.12023.1.S1_at   | MmugDNA.12023.1 | 6.34  | 6.34  | 0.14 | 0.04 | 1     | 0.751314 | 0.820604 | 0.885256 | 0.896677 |
| MmugDNA.12023.1.S1_s_at | MmugDNA.12023.1 | 6.91  | 6.9   | 0.18 | 0.16 | 1.01  | 0.922306 | 0.870581 | 0.966743 | 0.926446 |
| MmugDNA.12024.1.S1_s_at | MmugDNA.12024.1 | 3.97  | 4.22  | 0.17 | 0.12 | -1.19 | 0.288426 | 0.234015 | 0.578153 | 0.505312 |
| MmugDNA.12025.1.S1_at   | MmugDNA.12025.1 | 12.28 | 12.29 | 0.03 | 0.05 | -1.01 | 0.271307 | 0.023299 | 0.563207 | 0.191315 |
| MmugDNA.12027.1.S1_at   | MmugDNA.12027.1 | 4.89  | 5.12  | 0.31 | 0.32 | -1.17 | 0.481976 | 0.507912 | 0.722245 | 0.703358 |
| MmugDNA.12028.1.S1_at   | MmugDNA.12028.1 | 4.93  | 5.42  | 0.53 | 0.09 | -1.4  | 0.191446 | 0.014674 | 0.48775  | 0.15428  |

|                         |                 |       |       |      |      |       |          |          |          |          |
|-------------------------|-----------------|-------|-------|------|------|-------|----------|----------|----------|----------|
| MmugDNA.12029.1.S1_at   | MmugDNA.12029.1 | 7.49  | 7.32  | 0.11 | 0.17 | 1.13  | 0.2681   | 0.203173 | 0.560779 | 0.477415 |
| MmugDNA.1203.1.S1_s_at  | MmugDNA.1203.1  | 4.51  | 4.44  | 0.78 | 0.24 | 1.05  | 0.233936 | 0.281654 | 0.532168 | 0.54471  |
| MmugDNA.12030.1.S1_at   | MmugDNA.12030.1 | 8.08  | 8.11  | 0.59 | 0.24 | -1.02 | 0.963942 | 0.839282 | 0.985358 | 0.908393 |
| MmugDNA.12031.1.S1_at   | MmugDNA.12031.1 | 6.35  | 6.17  | 0.12 | 0.1  | 1.13  | 0.227758 | 0.175579 | 0.525852 | 0.45218  |
| MmugDNA.36977.1.S1_at   | MmugDNA.36977.1 | 6.59  | 6.93  | 0.14 | 0.37 | -1.27 | 0.198143 | 0.44482  | 0.495381 | 0.662072 |
| MmugDNA.36977.1.S1_s_at | MmugDNA.36977.1 | 11.13 | 11.59 | 0.28 | 0.08 | -1.38 | 0.020126 | 0.250351 | 0.19531  | 0.519362 |
| MmugDNA.12034.1.S1_at   | MmugDNA.12034.1 | 3.36  | 3.46  | 0.05 | 0.08 | -1.07 | 0.768765 | 0.047533 | 0.893807 | 0.262712 |
| MmugDNA.12035.1.S1_at   | MmugDNA.12035.1 | 9.62  | 9.49  | 0.06 | 0.17 | 1.1   | 0.263255 | 0.076993 | 0.556921 | 0.322421 |
| MmugDNA.12036.1.S1_at   | MmugDNA.12036.1 | 4.24  | 5.53  | 0.86 | 0.09 | -2.45 | 0.060539 | 0.17033  | 0.303127 | 0.447103 |
| MmugDNA.12037.1.S1_at   | MmugDNA.12037.1 | 6.96  | 6.44  | 0.3  | 0.3  | 1.43  | 0.104075 | 0.047366 | 0.377336 | 0.262362 |
| MmugDNA.12038.1.S1_at   | MmugDNA.12038.1 | 5.61  | 5.44  | 0.06 | 0.13 | 1.13  | 0.196364 | 0.584425 | 0.493451 | 0.752435 |
| MmugDNA.12038.1.S1_x_at | MmugDNA.12038.1 | 5.68  | 5.7   | 0.51 | 0.13 | -1.02 | 0.496745 | 0.513835 | 0.73259  | 0.707281 |
| MmugDNA.12039.1.S1_at   | MmugDNA.12039.1 | 4.01  | 4.27  | 0.25 | 0.21 | -1.2  | 0.49485  | 0.693929 | 0.731438 | 0.821989 |
| MmugDNA.1204.1.S1_at    | MmugDNA.1204.1  | 4.19  | 3.5   | 0.52 | 0.11 | 1.61  | 0.107903 | 0.14783  | 0.382524 | 0.42217  |
| MmugDNA.12040.1.S1_at   | MmugDNA.12040.1 | 3.58  | 3.46  | 0.09 | 0.13 | 1.08  | 0.219122 | 0.396267 | 0.516816 | 0.628074 |
| MmugDNA.12041.1.S1_at   | MmugDNA.12041.1 | 7.68  | 7.73  | 0.76 | 0.14 | -1.04 | 0.982241 | 0.401089 | 0.993444 | 0.630684 |
| MmugDNA.12042.1.S1_at   | MmugDNA.12042.1 | 4.28  | 4.21  | 0.04 | 0.27 | 1.05  | 0.851231 | 0.470215 | 0.935334 | 0.678572 |
| MmugDNA.12043.1.S1_at   | MmugDNA.12043.1 | 7.39  | 8.35  | 0.27 | 0.23 | -1.94 | 0.024549 | 0.446478 | 0.209655 | 0.662842 |
| MmugDNA.12044.1.S1_at   | MmugDNA.12044.1 | 5.13  | 5.01  | 0.06 | 0.27 | 1.09  | 0.929108 | 0.558226 | 0.969943 | 0.735467 |
| MmugDNA.12045.1.S1_at   | MmugDNA.12045.1 | 7.45  | 7.73  | 0.25 | 0.23 | -1.22 | 0.069126 | 0.008104 | 0.321019 | 0.119551 |
| MmugDNA.12047.1.S1_at   | MmugDNA.12047.1 | 5.91  | 7.79  | 1.39 | 0.38 | -3.67 | 0.192529 | 0.321273 | 0.489105 | 0.573168 |
| MmugDNA.12048.1.S1_at   | MmugDNA.12048.1 | 4.07  | 4.1   | 0.41 | 0.03 | -1.02 | 0.479846 | 0.551006 | 0.720921 | 0.730751 |
| MmugDNA.12049.1.S1_at   | MmugDNA.12049.1 | 4.66  | 4.08  | 0.35 | 0.12 | 1.49  | 0.059719 | 0.135764 | 0.30159  | 0.407932 |
| MmugDNA.1205.1.S1_at    | MmugDNA.1205.1  | 9.61  | 9.31  | 1.01 | 0.19 | 1.23  | 0.623415 | 0.546294 | 0.814191 | 0.727896 |
| MmugDNA.12050.1.S1_at   | MmugDNA.12050.1 | 12.13 | 12.16 | 0.01 | 0.02 | -1.02 | 0.042804 | 0.288652 | 0.264078 | 0.549827 |
| MmugDNA.12051.1.S1_at   | MmugDNA.12051.1 | 4.98  | 4.28  | 0.41 | 0.38 | 1.62  | 0.201074 | 0.284832 | 0.498557 | 0.546966 |
| MmugDNA.12052.1.S1_at   | MmugDNA.12052.1 | 8.14  | 8.35  | 0.2  | 0.19 | -1.16 | 0.590103 | 0.764637 | 0.791771 | 0.863158 |
| MmugDNA.12053.1.S1_at   | MmugDNA.12053.1 | 4.71  | 4.5   | 0.25 | 0.24 | 1.15  | 0.390193 | 0.253832 | 0.657914 | 0.522173 |
| MmugDNA.12054.1.S1_at   | MmugDNA.12054.1 | 4.42  | 4.48  | 0.2  | 0.11 | -1.05 | 0.80061  | 0.622443 | 0.910296 | 0.776933 |
| MmugDNA.12055.1.S1_at   | MmugDNA.12055.1 | 7.07  | 7.01  | 0.1  | 0.43 | 1.04  | 0.636327 | 0.811437 | 0.822077 | 0.891158 |
| MmugDNA.12056.1.S1_at   | MmugDNA.12056.1 | 5.61  | 5.48  | 0.1  | 0.03 | 1.1   | 0.171368 | 0.025052 | 0.465251 | 0.198316 |
| MmugDNA.12057.1.S1_at   | MmugDNA.12057.1 | 5.71  | 4.88  | 0.3  | 0.16 | 1.78  | 0.021654 | 0.020388 | 0.20067  | 0.179281 |
| MmugDNA.12058.1.S1_at   | MmugDNA.12058.1 | 6.53  | 6.52  | 0.05 | 0.09 | 1     | 0.885019 | 0.017187 | 0.951005 | 0.166089 |
| MmugDNA.12059.1.S1_at   | MmugDNA.12059.1 | 5.53  | 5.36  | 0.43 | 0.13 | 1.13  | 0.252239 | 0.290402 | 0.546828 | 0.551169 |
| MmugDNA.12061.1.S1_at   | MmugDNA.12061.1 | 6.44  | 6.61  | 0.24 | 0.23 | -1.13 | 0.175911 | 0.478102 | 0.470262 | 0.684103 |
| MmugDNA.12062.1.S1_at   | MmugDNA.12062.1 | 4.02  | 4.42  | 0.18 | 0.1  | -1.32 | 0.061854 | 0.186453 | 0.305226 | 0.462306 |
| MmugDNA.12063.1.S1_at   | MmugDNA.12063.1 | 3.31  | 3.31  | 0.13 | 0.13 | -1    | 0.871418 | 0.186499 | 0.944625 | 0.462364 |
| MmugDNA.12064.1.S1_at   | MmugDNA.12064.1 | 6.11  | 6.14  | 0.07 | 0.08 | -1.02 | 0.780254 | 0.881402 | 0.89973  | 0.932335 |
| MmugDNA.12064.1.S1_s_at | MmugDNA.12064.1 | 6.31  | 6.45  | 0.09 | 0.14 | -1.1  | 0.909328 | 0.047618 | 0.961565 | 0.262996 |
| MmugDNA.12066.1.S1_at   | MmugDNA.12066.1 | 4.35  | 4.4   | 0.15 | 0.19 | -1.04 | 0.851855 | 0.972971 | 0.935563 | 0.985389 |
| MmugDNA.12068.1.S1_at   | MmugDNA.12068.1 | 4.37  | 4.16  | 0.24 | 0.23 | 1.16  | 0.139702 | 0.274106 | 0.42522  | 0.538565 |
| MmugDNA.1207.1.S1_at    | MmugDNA.1207.1  | 7.34  | 7.21  | 0.6  | 0.11 | 1.09  | 0.695504 | 0.923791 | 0.854867 | 0.957119 |
| MmugDNA.12072.1.S1_at   | MmugDNA.12072.1 | 3.34  | 3.27  | 0.04 | 0.04 | 1.05  | 0.258418 | 0.052528 | 0.552539 | 0.274771 |

|                         |                 |       |       |      |      |       |          |          |          |          |
|-------------------------|-----------------|-------|-------|------|------|-------|----------|----------|----------|----------|
| MmugDNA.12074.1.S1_at   | MmugDNA.12074.1 | 3.2   | 3.09  | 0.1  | 0.06 | 1.08  | 0.805457 | 0.242888 | 0.912706 | 0.513274 |
| MmugDNA.12076.1.S1_at   | MmugDNA.12076.1 | 4.92  | 4.94  | 0.21 | 0.02 | -1.02 | 0.958609 | 0.290434 | 0.983135 | 0.551169 |
| MmugDNA.12077.1.S1_at   | MmugDNA.12077.1 | 6.65  | 6.53  | 0.63 | 0.1  | 1.08  | 0.877178 | 0.259078 | 0.947466 | 0.526263 |
| MmugDNA.12077.1.S1_s_at | MmugDNA.12077.1 | 5.41  | 6.06  | 1.39 | 0.18 | -1.57 | 0.802031 | 0.485419 | 0.911109 | 0.68914  |
| MmugDNA.12078.1.S1_at   | MmugDNA.12078.1 | 3.73  | 4.19  | 1.05 | 0.18 | -1.37 | 0.954876 | 0.708885 | 0.98151  | 0.831167 |
| MmugDNA.12079.1.S1_at   | MmugDNA.12079.1 | 5.47  | 5.41  | 0.18 | 0.1  | 1.04  | 0.131968 | 0.215532 | 0.415087 | 0.489269 |
| MmugDNA.1208.1.S1_at    | MmugDNA.1208.1  | 10.36 | 10.43 | 0.12 | 0.21 | -1.05 | 0.713837 | 0.444784 | 0.864758 | 0.662072 |
| MmugDNA.12080.1.S1_at   | MmugDNA.12080.1 | 5.14  | 5.19  | 0.2  | 0.08 | -1.03 | 0.658836 | 0.595145 | 0.835253 | 0.758988 |
| MmugDNA.12081.1.S1_at   | MmugDNA.12081.1 | 8.26  | 8.41  | 0.37 | 0.19 | -1.11 | 0.518202 | 0.2401   | 0.747346 | 0.5108   |
| MmugDNA.12083.1.S1_at   | MmugDNA.12083.1 | 2.96  | 2.97  | 0.07 | 0.19 | -1.01 | 0.32183  | 0.538219 | 0.606128 | 0.72298  |
| MmugDNA.12084.1.S1_at   | MmugDNA.12084.1 | 5.72  | 5.77  | 0.11 | 0.28 | -1.04 | 0.245313 | 0.508196 | 0.541364 | 0.703422 |
| MmugDNA.12085.1.S1_at   | MmugDNA.12085.1 | 4.86  | 4.82  | 0.15 | 0.03 | 1.03  | 0.773189 | 0.322554 | 0.89602  | 0.573991 |
| MmugDNA.12086.1.S1_at   | MmugDNA.12086.1 | 3.24  | 3.03  | 0.23 | 0.18 | 1.16  | 0.331558 | 0.509642 | 0.613465 | 0.704273 |
| MmugDNA.12088.1.S1_at   | MmugDNA.12088.1 | 4.4   | 4.55  | 0.11 | 0.16 | -1.11 | 0.19866  | 0.312096 | 0.495836 | 0.566904 |
| MmugDNA.12089.1.S1_at   | MmugDNA.12089.1 | 7.22  | 6.8   | 0.08 | 0.12 | 1.34  | 0.005508 | 0.071688 | 0.119641 | 0.313904 |
| MmugDNA.1209.1.S1_at    | MmugDNA.1209.1  | 5.48  | 5.43  | 0.22 | 0.09 | 1.04  | 0.569703 | 0.300724 | 0.779023 | 0.558959 |
| MmugDNA.12092.1.S1_at   | MmugDNA.12092.1 | 11.15 | 11.46 | 0.19 | 0.08 | -1.24 | 0.259894 | 0.314161 | 0.554139 | 0.568185 |
| MmugDNA.12093.1.S1_s_at | MmugDNA.12093.1 | 7.78  | 7.43  | 0.13 | 0.13 | 1.27  | 0.038146 | 0.001396 | 0.2513   | 0.057005 |
| MmugDNA.12095.1.S1_at   | MmugDNA.12095.1 | 4.59  | 4.44  | 0.07 | 0.02 | 1.11  | 0.026928 | 0.029992 | 0.217059 | 0.214956 |
| MmugDNA.12096.1.S1_at   | MmugDNA.12096.1 | 5.46  | 5.47  | 0.54 | 0.12 | -1.01 | 0.417028 | 0.311985 | 0.677282 | 0.566838 |
| MmugDNA.12097.1.S1_at   | MmugDNA.12097.1 | 5.62  | 5.42  | 0.15 | 0    | 1.15  | 0.238324 | 0.415789 | 0.53577  | 0.641116 |
| MmugDNA.12098.1.S1_at   | MmugDNA.12098.1 | 3.08  | 3.14  | 0.16 | 0.09 | -1.05 | 0.897169 | 0.900364 | 0.956401 | 0.94344  |
| MmugDNA.12099.1.S1_at   | MmugDNA.12099.1 | 9.2   | 9.21  | 0.36 | 0.35 | -1.01 | 0.764713 | 0.658118 | 0.892064 | 0.800181 |
| MmugDNA.121.1.S1_at     | MmugDNA.121.1   | 9.46  | 9.1   | 0.4  | 0.13 | 1.28  | 0.546769 | 0.509349 | 0.765531 | 0.704113 |
| MmugDNA.121.1.S1_s_at   | MmugDNA.121.1   | 9.8   | 9.46  | 0.35 | 0.1  | 1.26  | 0.511155 | 0.492203 | 0.742366 | 0.693477 |
| MmugDNA.1210.1.S1_at    | MmugDNA.1210.1  | 3.64  | 3.6   | 0.09 | 0.03 | 1.03  | 0.426381 | 0.805952 | 0.683755 | 0.888397 |
| MmugDNA.12100.1.S1_at   | MmugDNA.12100.1 | 3.97  | 3.77  | 0.29 | 0.06 | 1.15  | 0.388775 | 0.544353 | 0.656749 | 0.726752 |
| MmugDNA.12101.1.S1_at   | MmugDNA.12101.1 | 5.16  | 4.9   | 0.38 | 0.14 | 1.2   | 0.118891 | 0.081099 | 0.396589 | 0.329276 |
| MmugDNA.12102.1.S1_at   | MmugDNA.12102.1 | 5.64  | 5.22  | 0.47 | 0.72 | 1.34  | 0.404173 | 0.242747 | 0.66805  | 0.5131   |
| MmugDNA.12103.1.S1_at   | MmugDNA.12103.1 | 3.85  | 3.84  | 0.25 | 0.09 | 1.01  | 0.671267 | 0.590264 | 0.842316 | 0.756124 |
| MmugDNA.17454.1.S1_s_at | MmugDNA.17454.1 | 4.43  | 4.43  | 0.09 | 0.07 | 1     | 0.594803 | 0.056039 | 0.794991 | 0.2826   |
| MmugDNA.12104.1.S1_at   | MmugDNA.12104.1 | 10.05 | 10.08 | 0.21 | 0.1  | -1.02 | 0.484491 | 0.001799 | 0.724318 | 0.063652 |
| MmugDNA.12104.1.S1_s_at | MmugDNA.12104.1 | 10.54 | 10.68 | 0.25 | 0.11 | -1.1  | 0.726306 | 0.008712 | 0.871526 | 0.123746 |
| MmugDNA.12105.1.S1_at   | MmugDNA.12105.1 | 7.21  | 6.52  | 0.11 | 0.36 | 1.61  | 0.08822  | 0.134888 | 0.354244 | 0.406878 |
| MmugDNA.12106.1.S1_at   | MmugDNA.12106.1 | 9.28  | 9.38  | 0.29 | 0.08 | -1.08 | 0.781697 | 0.770208 | 0.900275 | 0.86656  |
| MmugDNA.12107.1.S1_at   | MmugDNA.12107.1 | 5.16  | 5.16  | 0.07 | 0.14 | -1    | 0.421221 | 0.348936 | 0.679846 | 0.592945 |
| MmugDNA.12108.1.S1_at   | MmugDNA.12108.1 | 4.45  | 3.97  | 0.36 | 0.26 | 1.4   | 0.065045 | 0.05796  | 0.31189  | 0.287221 |
| MmugDNA.1211.1.S1_s_at  | MmugDNA.1211.1  | 12.84 | 13.04 | 0.13 | 0.13 | -1.15 | 0.131488 | 0.062647 | 0.41434  | 0.297022 |
| MmugDNA.1211.1.S1_x_at  | MmugDNA.1211.1  | 12.74 | 12.98 | 0.18 | 0.14 | -1.18 | 0.122368 | 0.051457 | 0.40112  | 0.272242 |
| MmugDNA.12111.1.S1_at   | MmugDNA.12111.1 | 5.19  | 5.05  | 0.11 | 0.17 | 1.1   | 0.12918  | 0.404931 | 0.411529 | 0.633408 |
| MmugDNA.12112.1.S1_at   | MmugDNA.12112.1 | 5.6   | 5.26  | 0.07 | 0.31 | 1.26  | 0.331763 | 0.267598 | 0.613669 | 0.53333  |
| MmugDNA.12113.1.S1_s_at | MmugDNA.12113.1 | 9.23  | 8.53  | 0.36 | 0.15 | 1.63  | 0.103087 | 0.059447 | 0.375737 | 0.290548 |
| MmugDNA.12115.1.S1_at   | MmugDNA.12115.1 | 3.27  | 3.26  | 0.16 | 0.05 | 1     | 0.87447  | 0.819494 | 0.94618  | 0.89602  |

|                         |                 |       |       |      |      |       |          |          |          |          |
|-------------------------|-----------------|-------|-------|------|------|-------|----------|----------|----------|----------|
| MmugDNA.12116.1.S1_at   | MmugDNA.12116.1 | 5.76  | 5.6   | 0    | 0.13 | 1.11  | 0.381273 | 0.014112 | 0.650865 | 0.15195  |
| MmugDNA.12117.1.S1_at   | MmugDNA.12117.1 | 4.11  | 4.1   | 0.26 | 0.14 | 1.01  | 0.750776 | 0.843816 | 0.884885 | 0.911025 |
| MmugDNA.12118.1.S1_at   | MmugDNA.12118.1 | 7.72  | 8.24  | 0.86 | 0.21 | -1.44 | 0.114074 | 0.219422 | 0.39084  | 0.493156 |
| MmugDNA.12119.1.S1_s_at | MmugDNA.12119.1 | 11.84 | 11.51 | 0.11 | 0.04 | 1.26  | 0.006017 | 0.044027 | 0.124151 | 0.254195 |
| MmugDNA.1212.1.S1_at    | MmugDNA.1212.1  | 2.81  | 2.81  | 0.25 | 0.06 | 1     | 0.837861 | 0.930016 | 0.928975 | 0.960166 |
| MmugDNA.12120.1.S1_at   | MmugDNA.12120.1 | 2.72  | 2.76  | 0.05 | 0.05 | -1.03 | 0.317478 | 0.419469 | 0.602251 | 0.643488 |
| MmugDNA.12121.1.S1_at   | MmugDNA.12121.1 | 6     | 6.53  | 0.82 | 0.48 | -1.44 | 0.916341 | 0.287377 | 0.964411 | 0.548636 |
| MmugDNA.12122.1.S1_s_at | MmugDNA.12122.1 | 10.46 | 10.26 | 0.04 | 0.1  | 1.15  | 0.093855 | 0.025347 | 0.362667 | 0.199552 |
| MmugDNA.12123.1.S1_at   | MmugDNA.12123.1 | 10.77 | 11.05 | 0.29 | 0.06 | -1.22 | 0.285288 | 0.065784 | 0.575167 | 0.301802 |
| MmugDNA.12125.1.S1_at   | MmugDNA.12125.1 | 3.86  | 3.78  | 0.23 | 0.26 | 1.06  | 0.751492 | 0.58321  | 0.885332 | 0.751637 |
| MmugDNA.12126.1.S1_at   | MmugDNA.12126.1 | 4.83  | 4.28  | 0.16 | 0.19 | 1.46  | 0.050063 | 0.040099 | 0.28146  | 0.245388 |
| MmugDNA.12127.1.S1_at   | MmugDNA.12127.1 | 4.95  | 5.51  | 0.33 | 0.39 | -1.47 | 0.071123 | 0.0761   | 0.324551 | 0.320848 |
| MmugDNA.12129.1.S1_at   | MmugDNA.12129.1 | 5.56  | 5.7   | 0.17 | 0.1  | -1.1  | 0.977061 | 0.402209 | 0.99097  | 0.631247 |
| MmugDNA.1213.1.S1_at    | MmugDNA.1213.1  | 4.42  | 3.92  | 0.67 | 0.2  | 1.42  | 0.231965 | 0.296713 | 0.530597 | 0.555718 |
| MmugDNA.12130.1.S1_at   | MmugDNA.12130.1 | 5.74  | 5.83  | 0.14 | 0.12 | -1.06 | 0.443272 | 0.563524 | 0.696549 | 0.738718 |
| MmugDNA.12131.1.S1_at   | MmugDNA.12131.1 | 6.26  | 6.16  | 0.18 | 0.06 | 1.07  | 0.896952 | 0.390942 | 0.956246 | 0.624649 |
| MmugDNA.12132.1.S1_at   | MmugDNA.12132.1 | 9.91  | 10.8  | 0.43 | 0.11 | -1.85 | 0.033254 | 0.021704 | 0.236446 | 0.184333 |
| MmugDNA.12133.1.S1_at   | MmugDNA.12133.1 | 5.96  | 6.4   | 0.09 | 0.24 | -1.35 | 0.062927 | 0.218066 | 0.307612 | 0.491683 |
| MmugDNA.12133.1.S1_s_at | MmugDNA.12133.1 | 7.38  | 7.5   | 0.11 | 0.11 | -1.09 | 0.136459 | 0.162147 | 0.421005 | 0.438282 |
| MmugDNA.12135.1.S1_at   | MmugDNA.12135.1 | 11.54 | 11.43 | 0.12 | 0.05 | 1.08  | 0.172532 | 0.084972 | 0.466621 | 0.336607 |
| MmugDNA.12137.1.S1_at   | MmugDNA.12137.1 | 3.5   | 3.46  | 0.27 | 0.09 | 1.03  | 0.406996 | 0.586283 | 0.670192 | 0.753427 |
| MmugDNA.12138.1.S1_at   | MmugDNA.12138.1 | 9.02  | 8.9   | 0.14 | 0.08 | 1.09  | 0.452273 | 0.688768 | 0.702807 | 0.818332 |
| MmugDNA.1214.1.S1_at    | MmugDNA.1214.1  | 2.9   | 2.94  | 0.03 | 0.07 | -1.02 | 0.236224 | 0.362227 | 0.533857 | 0.602875 |
| MmugDNA.12142.1.S1_s_at | MmugDNA.12142.1 | 7.31  | 7.05  | 0.23 | 0.15 | 1.2   | 0.464403 | 0.023464 | 0.710625 | 0.191956 |
| MmugDNA.12143.1.S1_at   | MmugDNA.12143.1 | 4.64  | 4.98  | 0.5  | 0.36 | -1.26 | 0.685067 | 0.533775 | 0.849923 | 0.719866 |
| MmugDNA.12144.1.S1_at   | MmugDNA.12144.1 | 3.59  | 3.33  | 0.1  | 0.13 | 1.2   | 0.043586 | 0.056101 | 0.265765 | 0.282723 |
| MmugDNA.12145.1.S1_at   | MmugDNA.12145.1 | 3.68  | 3.52  | 0.17 | 0.07 | 1.12  | 0.142848 | 0.285715 | 0.428949 | 0.54744  |
| MmugDNA.12146.1.S1_at   | MmugDNA.12146.1 | 8.42  | 9.24  | 0.46 | 0.19 | -1.78 | 0.03563  | 0.033706 | 0.243635 | 0.227194 |
| MmugDNA.12147.1.S1_at   | MmugDNA.12147.1 | 5.94  | 5.76  | 0.16 | 0.26 | 1.13  | 0.254714 | 0.646173 | 0.549255 | 0.792676 |
| MmugDNA.12149.1.S1_at   | MmugDNA.12149.1 | 6.79  | 6.58  | 0.45 | 0.17 | 1.16  | 0.558014 | 0.550761 | 0.772539 | 0.730611 |
| MmugDNA.1215.1.S1_at    | MmugDNA.1215.1  | 7.32  | 6.42  | 0.64 | 0.25 | 1.86  | 0.257231 | 0.468988 | 0.551586 | 0.67798  |
| MmugDNA.12152.1.S1_at   | MmugDNA.12152.1 | 3.4   | 3.14  | 0.11 | 0.09 | 1.2   | 0.091344 | 0.213963 | 0.358885 | 0.487596 |
| MmugDNA.12154.1.S1_at   | MmugDNA.12154.1 | 7.13  | 7.09  | 0.55 | 0.2  | 1.03  | 0.410757 | 0.362575 | 0.672759 | 0.603132 |
| MmugDNA.12155.1.S1_at   | MmugDNA.12155.1 | 4.95  | 5.14  | 0.01 | 0.1  | -1.14 | 0.078009 | 0.610163 | 0.337305 | 0.768419 |
| MmugDNA.12157.1.S1_at   | MmugDNA.12157.1 | 5.5   | 5.58  | 0.05 | 0.03 | -1.06 | 0.169656 | 0.243761 | 0.462958 | 0.513899 |
| MmugDNA.12158.1.S1_at   | MmugDNA.12158.1 | 5.92  | 6.21  | 0.55 | 0.14 | -1.22 | 0.863728 | 0.554195 | 0.940843 | 0.73306  |
| MmugDNA.12159.1.S1_at   | MmugDNA.12159.1 | 6.11  | 6.1   | 0.12 | 0.1  | 1.01  | 0.554365 | 0.788052 | 0.77064  | 0.877426 |
| MmugDNA.1216.1.S1_at    | MmugDNA.1216.1  | 3.83  | 3.7   | 0.07 | 0.16 | 1.1   | 0.317381 | 0.355795 | 0.602108 | 0.597864 |
| MmugDNA.12160.1.S1_at   | MmugDNA.12160.1 | 6.37  | 6.43  | 1.1  | 0.51 | -1.05 | 0.861527 | 0.857421 | 0.939844 | 0.918603 |
| MmugDNA.12162.1.S1_s_at | MmugDNA.12162.1 | 7.15  | 7.99  | 0.96 | 0.08 | -1.79 | 0.660352 | 0.180943 | 0.83613  | 0.457418 |
| MmugDNA.12163.1.S1_at   | MmugDNA.12163.1 | 4.23  | 4.18  | 0.29 | 0.27 | 1.04  | 0.17748  | 0.307634 | 0.472186 | 0.563799 |
| MmugDNA.12164.1.S1_at   | MmugDNA.12164.1 | 4.71  | 4.71  | 0.13 | 0.03 | 1     | 0.507283 | 0.176412 | 0.739609 | 0.45282  |
| MmugDNA.12164.1.S1_s_at | MmugDNA.12164.1 | 7.78  | 8.39  | 0.31 | 0.22 | -1.53 | 0.091711 | 0.087658 | 0.359438 | 0.340938 |

|                         |                 |       |       |      |      |       |          |          |          |          |
|-------------------------|-----------------|-------|-------|------|------|-------|----------|----------|----------|----------|
| MmugDNA.12167.1.S1_at   | MmugDNA.12167.1 | 4.95  | 4.69  | 0.15 | 0.07 | 1.2   | 0.027512 | 0.011276 | 0.218484 | 0.138076 |
| MmugDNA.12168.1.S1_at   | MmugDNA.12168.1 | 7.63  | 8.81  | 0.18 | 0.12 | -2.26 | 0.000578 | 0.025632 | 0.070727 | 0.200834 |
| MmugDNA.12169.1.S1_at   | MmugDNA.12169.1 | 6.24  | 5.85  | 0.04 | 0.24 | 1.31  | 0.018103 | 0.178413 | 0.18753  | 0.454778 |
| MmugDNA.12170.1.S1_at   | MmugDNA.12170.1 | 3.51  | 3.62  | 0.04 | 0.06 | -1.08 | 0.082629 | 0.064319 | 0.344435 | 0.299804 |
| MmugDNA.12171.1.S1_at   | MmugDNA.12171.1 | 3.55  | 3.3   | 0.19 | 0.16 | 1.19  | 0.093238 | 0.325441 | 0.361736 | 0.575807 |
| MmugDNA.12172.1.S1_at   | MmugDNA.12172.1 | 8.2   | 9.2   | 0.35 | 0.25 | -2    | 0.026788 | 0.087295 | 0.216901 | 0.340327 |
| MmugDNA.12173.1.S1_at   | MmugDNA.12173.1 | 8.81  | 10.19 | 0.64 | 0.19 | -2.6  | 0.021442 | 0.024242 | 0.199988 | 0.194936 |
| MmugDNA.12174.1.S1_at   | MmugDNA.12174.1 | 4.68  | 4.71  | 0.18 | 0.05 | -1.02 | 0.655191 | 0.665033 | 0.833154 | 0.803733 |
| MmugDNA.12176.1.S1_at   | MmugDNA.12176.1 | 4.98  | 4.37  | 0.08 | 0.25 | 1.53  | 0.020956 | 0.042641 | 0.198328 | 0.251037 |
| MmugDNA.12177.1.S1_at   | MmugDNA.12177.1 | 5.8   | 5.89  | 0.09 | 0.22 | -1.06 | 0.870863 | 0.696953 | 0.944458 | 0.824002 |
| MmugDNA.12178.1.S1_s_at | MmugDNA.12178.1 | 8.46  | 8.46  | 0.43 | 0.02 | 1     | 0.370473 | 0.51838  | 0.643441 | 0.71038  |
| MmugDNA.12179.1.S1_at   | MmugDNA.12179.1 | 9.03  | 9.2   | 0.07 | 0.16 | -1.13 | 0.091553 | 0.234859 | 0.359232 | 0.506125 |
| MmugDNA.1218.1.S1_at    | MmugDNA.1218.1  | 5.27  | 5.29  | 0.11 | 0.12 | -1.02 | 0.908819 | 0.83247  | 0.961349 | 0.903893 |
| MmugDNA.12180.1.S1_at   | MmugDNA.12180.1 | 7.99  | 7.28  | 0.39 | 0.08 | 1.63  | 0.107838 | 0.499751 | 0.382472 | 0.698494 |
| MmugDNA.12181.1.S1_at   | MmugDNA.12181.1 | 11.85 | 11.89 | 0.13 | 0.07 | -1.03 | 0.887241 | 0.364136 | 0.951902 | 0.604488 |
| MmugDNA.12182.1.S1_at   | MmugDNA.12182.1 | 2.7   | 2.68  | 0.04 | 0.11 | 1.02  | 0.889195 | 0.713557 | 0.95279  | 0.83382  |
| MmugDNA.12183.1.S1_at   | MmugDNA.12183.1 | 5.1   | 5.53  | 0.19 | 0.16 | -1.34 | 0.099414 | 0.451034 | 0.370342 | 0.665993 |
| MmugDNA.12185.1.S1_at   | MmugDNA.12185.1 | 5.37  | 5.22  | 0.21 | 0.48 | 1.11  | 0.32577  | 0.305875 | 0.608932 | 0.562731 |
| MmugDNA.12186.1.S1_at   | MmugDNA.12186.1 | 8.8   | 10.03 | 0.24 | 0.2  | -2.35 | 0.003939 | 0.010984 | 0.108453 | 0.136546 |
| MmugDNA.12187.1.S1_at   | MmugDNA.12187.1 | 4.78  | 4.81  | 0.19 | 0.06 | -1.02 | 0.874476 | 0.265494 | 0.94618  | 0.531381 |
| MmugDNA.12188.1.S1_at   | MmugDNA.12188.1 | 9.4   | 10.11 | 0.51 | 0.23 | -1.64 | 0.090925 | 0.596071 | 0.358153 | 0.759339 |
| MmugDNA.12189.1.S1_at   | MmugDNA.12189.1 | 10.09 | 10.04 | 0.12 | 0.11 | 1.03  | 0.62838  | 0.919783 | 0.817431 | 0.954906 |
| MmugDNA.1219.1.S1_at    | MmugDNA.1219.1  | 5.2   | 5.11  | 0.73 | 0.33 | 1.06  | 0.417659 | 0.656857 | 0.67772  | 0.799401 |
| MmugDNA.12191.1.S1_at   | MmugDNA.12191.1 | 3.46  | 3.46  | 0.1  | 0.14 | -1.01 | 0.546427 | 0.690513 | 0.765236 | 0.819604 |
| MmugDNA.12192.1.S1_at   | MmugDNA.12192.1 | 6.47  | 6.46  | 0.19 | 0.04 | 1.01  | 0.664346 | 0.354133 | 0.838381 | 0.597059 |
| MmugDNA.12195.1.S1_at   | MmugDNA.12195.1 | 5.14  | 5.01  | 0.4  | 0.28 | 1.1   | 0.557768 | 0.004407 | 0.772387 | 0.092846 |
| MmugDNA.12196.1.S1_at   | MmugDNA.12196.1 | 2.79  | 2.78  | 0.29 | 0.11 | 1.01  | 0.35686  | 0.47431  | 0.633124 | 0.68135  |
| MmugDNA.12197.1.S1_at   | MmugDNA.12197.1 | 5.89  | 5.74  | 0.18 | 0.09 | 1.11  | 0.411692 | 0.553778 | 0.673582 | 0.732802 |
| MmugDNA.12198.1.S1_at   | MmugDNA.12198.1 | 5.14  | 5.03  | 0.12 | 0.11 | 1.08  | 0.248462 | 0.333181 | 0.543868 | 0.581467 |
| MmugDNA.12199.1.S1_at   | MmugDNA.12199.1 | 7.32  | 7.22  | 0.13 | 0.05 | 1.07  | 0.088364 | 0.185621 | 0.354457 | 0.461586 |
| MmugDNA.122.1.S1_at     | MmugDNA.122.1   | 3.97  | 3.75  | 0.34 | 0.42 | 1.17  | 0.790011 | 0.290797 | 0.90449  | 0.551399 |
| MmugDNA.1220.1.S1_at    | MmugDNA.1220.1  | 5.43  | 5.38  | 1.13 | 0.17 | 1.04  | 0.346683 | 0.368275 | 0.625    | 0.60787  |
| MmugDNA.12201.1.S1_at   | MmugDNA.12201.1 | 6.76  | 7.07  | 0.23 | 0.2  | -1.24 | 0.351079 | 0.044527 | 0.628776 | 0.255364 |
| MmugDNA.12203.1.S1_at   | MmugDNA.12203.1 | 9.18  | 9.13  | 0.06 | 0.13 | 1.04  | 0.189348 | 0.00961  | 0.485822 | 0.129157 |
| MmugDNA.12204.1.S1_x_at | MmugDNA.12204.1 | 8.37  | 8.15  | 0.84 | 0.39 | 1.16  | 0.276779 | 0.289406 | 0.568296 | 0.550439 |
| MmugDNA.12205.1.S1_at   | MmugDNA.12205.1 | 4.81  | 4.31  | 0.59 | 0.24 | 1.41  | 0.384713 | 0.642891 | 0.653656 | 0.790529 |
| MmugDNA.12207.1.S1_at   | MmugDNA.12207.1 | 7     | 6.82  | 0.11 | 0.1  | 1.14  | 0.103451 | 0.037138 | 0.376571 | 0.2372   |
| MmugDNA.12208.1.S1_at   | MmugDNA.12208.1 | 3.16  | 3.21  | 0.05 | 0.03 | -1.03 | 0.403195 | 0.873636 | 0.667341 | 0.928169 |
| MmugDNA.12209.1.S1_at   | MmugDNA.12209.1 | 3.83  | 3.95  | 0.11 | 0.05 | -1.09 | 0.260879 | 0.106394 | 0.555006 | 0.36895  |
| MmugDNA.1221.1.S1_at    | MmugDNA.1221.1  | 12.08 | 11.74 | 0.12 | 0.13 | 1.26  | 0.022547 | 0.022499 | 0.203331 | 0.187696 |
| MmugDNA.1221.1.S1_s_at  | MmugDNA.1221.1  | 12.65 | 12.28 | 0.11 | 0.04 | 1.29  | 0.009064 | 0.010721 | 0.144922 | 0.135271 |
| MmugDNA.12210.1.S1_at   | MmugDNA.12210.1 | 8.75  | 8.42  | 0.35 | 0.05 | 1.26  | 0.154653 | 0.636538 | 0.444927 | 0.786247 |
| MmugDNA.12211.1.S1_at   | MmugDNA.12211.1 | 5.35  | 4.83  | 0.46 | 0.12 | 1.43  | 0.292192 | 0.463275 | 0.581469 | 0.674323 |

|                         |                 |       |       |      |      |       |          |          |          |          |
|-------------------------|-----------------|-------|-------|------|------|-------|----------|----------|----------|----------|
| MmugDNA.12212.1.S1_at   | MmugDNA.12212.1 | 8.76  | 8.51  | 0.14 | 0.07 | 1.18  | 0.024557 | 0.092366 | 0.209655 | 0.348294 |
| MmugDNA.12213.1.S1_at   | MmugDNA.12213.1 | 6.45  | 6.3   | 0.37 | 0.13 | 1.12  | 0.787375 | 0.943583 | 0.903077 | 0.967955 |
| MmugDNA.12214.1.S1_at   | MmugDNA.12214.1 | 4.31  | 4.14  | 0.94 | 0.12 | 1.13  | 0.248196 | 0.349483 | 0.543534 | 0.593473 |
| MmugDNA.12216.1.S1_at   | MmugDNA.12216.1 | 5.73  | 5.63  | 0.31 | 0.01 | 1.07  | 0.492668 | 0.605089 | 0.729895 | 0.764917 |
| MmugDNA.12217.1.S1_at   | MmugDNA.12217.1 | 10.78 | 10.7  | 0.11 | 0.07 | 1.06  | 0.141783 | 0.70535  | 0.427769 | 0.829145 |
| MmugDNA.12220.1.S1_at   | MmugDNA.12220.1 | 10.17 | 10.14 | 0.07 | 0.12 | 1.02  | 0.381539 | 0.168032 | 0.651152 | 0.444641 |
| MmugDNA.12221.1.S1_at   | MmugDNA.12221.1 | 5.88  | 5.88  | 0.12 | 0.08 | 1     | 0.874142 | 0.452497 | 0.945969 | 0.667111 |
| MmugDNA.12223.1.S1_at   | MmugDNA.12223.1 | 10.92 | 11.17 | 0.29 | 0.21 | -1.19 | 0.522058 | 0.010912 | 0.749514 | 0.136002 |
| MmugDNA.12224.1.S1_at   | MmugDNA.12224.1 | 5.94  | 5.13  | 0.62 | 0    | 1.75  | 0.127537 | 0.00787  | 0.409503 | 0.118132 |
| MmugDNA.12225.1.S1_at   | MmugDNA.12225.1 | 7.33  | 7.11  | 0.31 | 0.11 | 1.16  | 0.238666 | 0.230778 | 0.53598  | 0.502452 |
| MmugDNA.12227.1.S1_at   | MmugDNA.12227.1 | 9.91  | 9.32  | 0.56 | 0.09 | 1.51  | 0.449205 | 0.422028 | 0.70055  | 0.645422 |
| MmugDNA.12230.1.S1_at   | MmugDNA.12230.1 | 3.58  | 3.48  | 0.51 | 0.09 | 1.07  | 0.365302 | 0.472782 | 0.639887 | 0.680117 |
| MmugDNA.12230.1.S1_x_at | MmugDNA.12230.1 | 3.25  | 2.9   | 0.49 | 0.38 | 1.28  | 0.301517 | 0.302247 | 0.589355 | 0.560092 |
| MmugDNA.12231.1.S1_at   | MmugDNA.12231.1 | 6.67  | 6.7   | 0.26 | 0.11 | -1.02 | 0.60861  | 0.78399  | 0.804636 | 0.874963 |
| MmugDNA.12231.1.S1_s_at | MmugDNA.12231.1 | 10.14 | 10.31 | 0.12 | 0.1  | -1.12 | 0.228151 | 0.004277 | 0.526367 | 0.091847 |
| MmugDNA.12232.1.S1_at   | MmugDNA.12232.1 | 10.97 | 11.15 | 0.11 | 0.06 | -1.13 | 0.056519 | 0.008155 | 0.295242 | 0.119759 |
| MmugDNA.12233.1.S1_at   | MmugDNA.12233.1 | 4.28  | 4.43  | 0.07 | 0.16 | -1.1  | 0.239088 | 0.359545 | 0.536362 | 0.600813 |
| MmugDNA.12235.1.S1_at   | MmugDNA.12235.1 | 3.07  | 3.15  | 0.04 | 0.04 | -1.06 | 0.159568 | 0.333871 | 0.450901 | 0.582011 |
| MmugDNA.12236.1.S1_at   | MmugDNA.12236.1 | 3.66  | 3.65  | 0.08 | 0.14 | 1.01  | 0.662799 | 0.842241 | 0.83726  | 0.910143 |
| MmugDNA.12237.1.S1_at   | MmugDNA.12237.1 | 4.33  | 4.08  | 0.43 | 0.45 | 1.19  | 0.304413 | 0.595568 | 0.591617 | 0.759091 |
| MmugDNA.12238.1.S1_at   | MmugDNA.12238.1 | 4.41  | 4.41  | 0.12 | 0.21 | 1     | 0.638463 | 0.932883 | 0.823011 | 0.961886 |
| MmugDNA.1224.1.S1_s_at  | MmugDNA.1224.1  | 6.45  | 6.77  | 0.45 | 0.11 | -1.25 | 0.583941 | 0.64784  | 0.788447 | 0.793789 |
| MmugDNA.12240.1.S1_at   | MmugDNA.12240.1 | 7.63  | 8     | 0.78 | 0.19 | -1.3  | 0.506914 | 0.290971 | 0.739358 | 0.551525 |
| MmugDNA.12241.1.S1_at   | MmugDNA.12241.1 | 4.38  | 4.32  | 0.02 | 0.31 | 1.04  | 0.494087 | 0.679933 | 0.730933 | 0.8131   |
| MmugDNA.12242.1.S1_at   | MmugDNA.12242.1 | 6.82  | 6.77  | 0.13 | 0.06 | 1.04  | 0.94821  | 0.097237 | 0.978281 | 0.3549   |
| MmugDNA.12243.1.S1_at   | MmugDNA.12243.1 | 11.35 | 11.52 | 0.09 | 0.02 | -1.12 | 0.033279 | 0.391736 | 0.236493 | 0.625301 |
| MmugDNA.12244.1.S1_at   | MmugDNA.12244.1 | 3.52  | 3.56  | 0.11 | 0.05 | -1.03 | 0.801859 | 0.302604 | 0.911061 | 0.560201 |
| MmugDNA.12245.1.S1_at   | MmugDNA.12245.1 | 11.33 | 11.2  | 0.13 | 0.03 | 1.1   | 0.098181 | 0.00109  | 0.36881  | 0.052283 |
| MmugDNA.12246.1.S1_at   | MmugDNA.12246.1 | 7.17  | 7.18  | 0.09 | 0.28 | -1.01 | 0.384    | 0.677494 | 0.653159 | 0.81167  |
| MmugDNA.12247.1.S1_at   | MmugDNA.12247.1 | 12.26 | 12    | 0.13 | 0.05 | 1.19  | 0.08431  | 0.536016 | 0.347695 | 0.721454 |
| MmugDNA.12248.1.S1_at   | MmugDNA.12248.1 | 3.37  | 3.27  | 0.23 | 0.14 | 1.07  | 0.773499 | 0.394915 | 0.896169 | 0.627216 |
| MmugDNA.12249.1.S1_at   | MmugDNA.12249.1 | 7.76  | 7.62  | 0.89 | 0.16 | 1.1   | 0.534754 | 0.669683 | 0.757913 | 0.806827 |
| MmugDNA.12249.1.S1_s_at | MmugDNA.12249.1 | 9.75  | 9.75  | 0.29 | 0.05 | -1.01 | 0.472045 | 0.917891 | 0.71594  | 0.954027 |
| MmugDNA.12250.1.S1_at   | MmugDNA.12250.1 | 7.79  | 7.97  | 0.1  | 0.11 | -1.13 | 0.025031 | 0.098285 | 0.211194 | 0.356337 |
| MmugDNA.12252.1.S1_at   | MmugDNA.12252.1 | 5.43  | 5.37  | 0.16 | 0.03 | 1.04  | 0.448113 | 0.284009 | 0.699793 | 0.546246 |
| MmugDNA.12253.1.S1_at   | MmugDNA.12253.1 | 12.17 | 12.02 | 0.08 | 0    | 1.1   | 0.032407 | 0.163167 | 0.234328 | 0.439303 |
| MmugDNA.12254.1.S1_at   | MmugDNA.12254.1 | 4.93  | 5.08  | 0.1  | 0.31 | -1.11 | 0.887193 | 0.876799 | 0.951902 | 0.929829 |
| MmugDNA.12255.1.S1_at   | MmugDNA.12255.1 | 10.6  | 10.73 | 0.16 | 0.14 | -1.1  | 0.791365 | 0.001513 | 0.905298 | 0.059188 |
| MmugDNA.12256.1.S1_at   | MmugDNA.12256.1 | 6.62  | 6.63  | 0.05 | 0.05 | -1    | 0.967037 | 0.998984 | 0.986743 | 0.999494 |
| MmugDNA.12256.1.S1_s_at | MmugDNA.12256.1 | 7.39  | 7.21  | 0.09 | 0.04 | 1.13  | 0.050631 | 0.182506 | 0.282699 | 0.459065 |
| MmugDNA.12257.1.S1_at   | MmugDNA.12257.1 | 8.1   | 8.04  | 0.19 | 0.02 | 1.04  | 0.627696 | 0.234855 | 0.816953 | 0.506125 |
| MmugDNA.12259.1.S1_at   | MmugDNA.12259.1 | 4.33  | 4.22  | 0.04 | 0.14 | 1.07  | 0.207044 | 0.586572 | 0.504797 | 0.753592 |
| MmugDNA.1226.1.S1_at    | MmugDNA.1226.1  | 3.92  | 3.89  | 0.23 | 0.25 | 1.02  | 0.854218 | 0.717556 | 0.936616 | 0.836463 |

|                         |                 |       |       |      |      |       |          |          |          |          |
|-------------------------|-----------------|-------|-------|------|------|-------|----------|----------|----------|----------|
| MmugDNA.12260.1.S1_at   | MmugDNA.12260.1 | 5.89  | 7.81  | 0.61 | 0.38 | -3.79 | 0.030027 | 0.115169 | 0.226543 | 0.382079 |
| MmugDNA.12261.1.S1_at   | MmugDNA.12261.1 | 4.08  | 4.11  | 0.1  | 0.14 | -1.02 | 0.71963  | 0.932464 | 0.867731 | 0.961716 |
| MmugDNA.12263.1.S1_at   | MmugDNA.12263.1 | 3.08  | 3.16  | 0.1  | 0.09 | -1.06 | 0.819971 | 0.9802   | 0.919687 | 0.989257 |
| MmugDNA.12265.1.S1_at   | MmugDNA.12265.1 | 5.61  | 5.35  | 0.05 | 0.17 | 1.19  | 0.089151 | 0.094675 | 0.355884 | 0.351481 |
| MmugDNA.12266.1.S1_at   | MmugDNA.12266.1 | 3.75  | 3.8   | 0.35 | 0.05 | -1.03 | 0.988351 | 0.532371 | 0.995829 | 0.719017 |
| MmugDNA.12267.1.S1_at   | MmugDNA.12267.1 | 3.34  | 3.2   | 0.05 | 0.04 | 1.1   | 0.035109 | 0.460948 | 0.242052 | 0.672778 |
| MmugDNA.12268.1.S1_at   | MmugDNA.12268.1 | 4.75  | 4.63  | 0.21 | 0    | 1.08  | 0.410137 | 0.500756 | 0.6723   | 0.699257 |
| MmugDNA.12269.1.S1_s_at | MmugDNA.12269.1 | 4.73  | 4.73  | 0.09 | 0.11 | 1     | 0.450557 | 0.804626 | 0.70154  | 0.88762  |
| MmugDNA.12270.1.S1_at   | MmugDNA.12270.1 | 4.45  | 4.31  | 0.08 | 0.09 | 1.1   | 0.05567  | 0.063166 | 0.293068 | 0.298071 |
| MmugDNA.12271.1.S1_at   | MmugDNA.12271.1 | 6.89  | 6.78  | 0.25 | 0.03 | 1.08  | 0.285185 | 0.394595 | 0.575141 | 0.627112 |
| MmugDNA.12272.1.S1_at   | MmugDNA.12272.1 | 4.37  | 4.36  | 0.22 | 0.12 | 1     | 0.629617 | 0.812919 | 0.818047 | 0.891875 |
| MmugDNA.12273.1.S1_at   | MmugDNA.12273.1 | 12.8  | 11.31 | 0.14 | 0.27 | 2.82  | 0.001768 | 0.002337 | 0.085481 | 0.071533 |
| MmugDNA.12274.1.S1_at   | MmugDNA.12274.1 | 6.04  | 6.63  | 0.68 | 0.13 | -1.51 | 0.198006 | 0.78419  | 0.495297 | 0.875049 |
| MmugDNA.12275.1.S1_at   | MmugDNA.12275.1 | 4.98  | 5.01  | 0.31 | 0.03 | -1.02 | 0.443331 | 0.608658 | 0.696549 | 0.767185 |
| MmugDNA.12276.1.S1_at   | MmugDNA.12276.1 | 7.81  | 6.55  | 0.69 | 0.28 | 2.41  | 0.126741 | 0.118095 | 0.408224 | 0.385973 |
| MmugDNA.12278.1.S1_at   | MmugDNA.12278.1 | 3.7   | 3.55  | 0.25 | 0.08 | 1.11  | 0.169284 | 0.485471 | 0.462574 | 0.68914  |
| MmugDNA.12279.1.S1_at   | MmugDNA.12279.1 | 5.9   | 5.7   | 0.18 | 0.13 | 1.15  | 0.342424 | 0.34891  | 0.622192 | 0.592939 |
| MmugDNA.1228.1.S1_at    | MmugDNA.1228.1  | 3.63  | 3.34  | 0.32 | 0.29 | 1.23  | 0.836318 | 0.772377 | 0.928245 | 0.867685 |
| MmugDNA.12280.1.S1_at   | MmugDNA.12280.1 | 8.75  | 9.01  | 0.11 | 0.06 | -1.19 | 0.087247 | 0.100275 | 0.352917 | 0.359318 |
| MmugDNA.12281.1.S1_at   | MmugDNA.12281.1 | 5.96  | 5.98  | 0.4  | 0.34 | -1.01 | 0.679544 | 0.731227 | 0.847107 | 0.84425  |
| MmugDNA.12281.1.S1_x_at | MmugDNA.12281.1 | 6.45  | 6.11  | 0.31 | 0.13 | 1.26  | 0.291391 | 0.407806 | 0.580662 | 0.63521  |
| MmugDNA.12282.1.S1_at   | MmugDNA.12282.1 | 5.93  | 6.27  | 0.19 | 0.1  | -1.26 | 0.061687 | 0.058822 | 0.304942 | 0.289228 |
| MmugDNA.12283.1.S1_at   | MmugDNA.12283.1 | 3.78  | 3.85  | 1.22 | 0.37 | -1.05 | 0.551946 | 0.417551 | 0.76879  | 0.642252 |
| MmugDNA.12284.1.S1_at   | MmugDNA.12284.1 | 6.83  | 6.4   | 0.04 | 0.11 | 1.35  | 0.002946 | 0.002584 | 0.099445 | 0.075213 |
| MmugDNA.12285.1.S1_at   | MmugDNA.12285.1 | 3.4   | 3.4   | 0.07 | 0.02 | -1    | 0.434836 | 0.889757 | 0.689966 | 0.937198 |
| MmugDNA.12286.1.S1_at   | MmugDNA.12286.1 | 3.51  | 3.46  | 0.36 | 0.05 | 1.04  | 0.462677 | 0.51243  | 0.70975  | 0.706299 |
| MmugDNA.12287.1.S1_at   | MmugDNA.12287.1 | 8.46  | 8.36  | 0.17 | 0.38 | 1.07  | 0.45001  | 0.720582 | 0.701214 | 0.838346 |
| MmugDNA.12288.1.S1_at   | MmugDNA.12288.1 | 10.14 | 9.87  | 0.27 | 0.07 | 1.2   | 0.064785 | 0.077657 | 0.311265 | 0.323709 |
| MmugDNA.12289.1.S1_at   | MmugDNA.12289.1 | 4.93  | 4.42  | 0.64 | 0.17 | 1.42  | 0.085523 | 0.037795 | 0.349921 | 0.238765 |
| MmugDNA.1229.1.S1_s_at  | MmugDNA.1229.1  | 12.74 | 13.16 | 0.18 | 0.07 | -1.34 | 0.022581 | 0.52184  | 0.203363 | 0.712654 |
| MmugDNA.12291.1.S1_at   | MmugDNA.12291.1 | 7.86  | 8.07  | 0.15 | 0.08 | -1.16 | 0.265222 | 0.031084 | 0.557962 | 0.218117 |
| MmugDNA.12292.1.S1_at   | MmugDNA.12292.1 | 6.9   | 5.62  | 0.68 | 0.17 | 2.43  | 0.038793 | 0.071937 | 0.253262 | 0.314293 |
| MmugDNA.12294.1.S1_at   | MmugDNA.12294.1 | 5.41  | 5.46  | 0.14 | 0.02 | -1.03 | 0.18324  | 0.404954 | 0.479221 | 0.633415 |
| MmugDNA.12295.1.S1_at   | MmugDNA.12295.1 | 5.32  | 5.2   | 0.06 | 0.19 | 1.09  | 0.45731  | 0.579644 | 0.706272 | 0.749254 |
| MmugDNA.12297.1.S1_at   | MmugDNA.12297.1 | 5.41  | 4.95  | 0.68 | 0.39 | 1.37  | 0.833972 | 0.356407 | 0.926957 | 0.598396 |
| MmugDNA.12298.1.S1_x_at | MmugDNA.12298.1 | 3.49  | 3.75  | 0.14 | 0.04 | -1.19 | 0.118897 | 0.048368 | 0.396589 | 0.265081 |
| MmugDNA.12299.1.S1_at   | MmugDNA.12299.1 | 6.05  | 6.87  | 0.12 | 0.15 | -1.76 | 0.002541 | 0.278612 | 0.094413 | 0.542329 |
| MmugDNA.123.1.S1_at     | MmugDNA.123.1   | 7.12  | 7.85  | 0.48 | 0.16 | -1.66 | 0.06917  | 0.206207 | 0.321108 | 0.480377 |
| MmugDNA.1230.1.S1_at    | MmugDNA.1230.1  | 4.54  | 4.27  | 0.17 | 0.04 | 1.21  | 0.074422 | 0.075309 | 0.331004 | 0.319475 |
| MmugDNA.12300.1.S1_at   | MmugDNA.12300.1 | 4.68  | 4.53  | 1.55 | 0.44 | 1.11  | 0.525999 | 0.616632 | 0.75223  | 0.772837 |
| MmugDNA.12301.1.S1_at   | MmugDNA.12301.1 | 3.57  | 3.49  | 0.28 | 0.08 | 1.05  | 0.568401 | 0.501984 | 0.77836  | 0.699986 |
| MmugDNA.12303.1.S1_at   | MmugDNA.12303.1 | 5.42  | 6.36  | 1.33 | 0.34 | -1.91 | 0.828186 | 0.865444 | 0.923964 | 0.923596 |
| MmugDNA.12304.1.S1_at   | MmugDNA.12304.1 | 6.78  | 7.78  | 0.52 | 0.5  | -1.99 | 0.206381 | 0.148542 | 0.504034 | 0.423074 |



|                         |                 |       |       |      |      |       |          |          |          |          |
|-------------------------|-----------------|-------|-------|------|------|-------|----------|----------|----------|----------|
| MmugDNA.12306.1.S1_at   | MmugDNA.12306.1 | 5.85  | 5.77  | 0.63 | 0.21 | 1.06  | 0.697255 | 0.73047  | 0.855904 | 0.844017 |
| MmugDNA.9265.1.S1_s_at  | MmugDNA.9265.1  | 11.86 | 11.57 | 0.22 | 0.23 | 1.22  | 0.745279 | 0.164269 | 0.881818 | 0.440539 |
| MmugDNA.12308.1.S1_at   | MmugDNA.12308.1 | 6.66  | 8.31  | 0.67 | 0.04 | -3.14 | 0.029506 | 0.036969 | 0.224759 | 0.236733 |
| MmugDNA.12309.1.S1_at   | MmugDNA.12309.1 | 3.53  | 3.5   | 0.42 | 0.07 | 1.02  | 0.399392 | 0.588016 | 0.664771 | 0.754703 |
| MmugDNA.1231.1.S1_at    | MmugDNA.1231.1  | 6.85  | 6.27  | 0.68 | 0.16 | 1.5   | 0.51776  | 0.714968 | 0.746932 | 0.834753 |
| MmugDNA.12310.1.S1_at   | MmugDNA.12310.1 | 12.25 | 11.38 | 0.08 | 0.1  | 1.83  | 0.000364 | 0.006793 | 0.06234  | 0.111388 |
| MmugDNA.12311.1.S1_at   | MmugDNA.12311.1 | 5.56  | 5.18  | 1.05 | 0.25 | 1.3   | 0.389426 | 0.611013 | 0.657321 | 0.769004 |
| MmugDNA.12312.1.S1_at   | MmugDNA.12312.1 | 7.65  | 7.68  | 0.34 | 0.05 | -1.02 | 0.456667 | 0.563429 | 0.705897 | 0.738659 |
| MmugDNA.12313.1.S1_at   | MmugDNA.12313.1 | 6.86  | 6.68  | 0.37 | 0.27 | 1.14  | 0.234229 | 0.567862 | 0.532289 | 0.741693 |
| MmugDNA.12316.1.S1_at   | MmugDNA.12316.1 | 5.53  | 5.69  | 0.21 | 0.33 | -1.12 | 0.337313 | 0.058526 | 0.617824 | 0.288646 |
| MmugDNA.12317.1.S1_at   | MmugDNA.12317.1 | 4.85  | 4.93  | 0.15 | 0.12 | -1.06 | 0.583659 | 0.718925 | 0.788267 | 0.83732  |
| MmugDNA.12318.1.S1_at   | MmugDNA.12318.1 | 10.39 | 12.3  | 0.9  | 0.14 | -3.76 | 0.025773 | 0.01222  | 0.213153 | 0.142932 |
| MmugDNA.12319.1.S1_at   | MmugDNA.12319.1 | 5.42  | 5.42  | 0.11 | 0.05 | -1    | 0.797507 | 0.787571 | 0.908527 | 0.877098 |
| MmugDNA.1232.1.S1_at    | MmugDNA.1232.1  | 5.78  | 6.12  | 0.22 | 0.11 | -1.26 | 0.085718 | 0.049301 | 0.350079 | 0.266927 |
| MmugDNA.12320.1.S1_at   | MmugDNA.12320.1 | 2.93  | 2.93  | 0.16 | 0.04 | 1     | 0.356091 | 0.537193 | 0.632435 | 0.72233  |
| MmugDNA.12322.1.S1_at   | MmugDNA.12322.1 | 4.86  | 4.84  | 0.36 | 0.17 | 1.01  | 0.789879 | 0.626325 | 0.90449  | 0.779698 |
| MmugDNA.12323.1.S1_at   | MmugDNA.12323.1 | 13.17 | 13.05 | 0.12 | 0.03 | 1.08  | 0.560789 | 0.045828 | 0.774029 | 0.258354 |
| MmugDNA.12324.1.S1_at   | MmugDNA.12324.1 | 5.25  | 5.09  | 0.06 | 0.16 | 1.12  | 0.115846 | 0.186124 | 0.392964 | 0.461946 |
| MmugDNA.12325.1.S1_at   | MmugDNA.12325.1 | 5.91  | 5.85  | 0.26 | 0.02 | 1.05  | 0.58466  | 0.810823 | 0.788712 | 0.890845 |
| MmugDNA.12326.1.S1_at   | MmugDNA.12326.1 | 3.77  | 3.84  | 0.08 | 0.04 | -1.05 | 0.389732 | 0.764417 | 0.657497 | 0.863093 |
| MmugDNA.12327.1.S1_at   | MmugDNA.12327.1 | 9.28  | 9.17  | 0.29 | 0.19 | 1.07  | 0.499026 | 0.715347 | 0.734029 | 0.834994 |
| MmugDNA.12329.1.S1_at   | MmugDNA.12329.1 | 11.48 | 12.08 | 0.13 | 0.24 | -1.52 | 0.026417 | 0.290135 | 0.215579 | 0.551134 |
| MmugDNA.1233.1.S1_at    | MmugDNA.1233.1  | 11.45 | 11.32 | 0.09 | 0.06 | 1.09  | 0.050764 | 0.001442 | 0.283078 | 0.057912 |
| MmugDNA.12330.1.S1_at   | MmugDNA.12330.1 | 5.26  | 5.09  | 0.26 | 0.15 | 1.13  | 0.162942 | 0.295815 | 0.45504  | 0.555199 |
| MmugDNA.12331.1.S1_x_at | MmugDNA.12331.1 | 10.64 | 10.58 | 0.35 | 0.2  | 1.05  | 0.442715 | 0.255646 | 0.696133 | 0.523619 |
| MmugDNA.12332.1.S1_at   | MmugDNA.12332.1 | 10.04 | 9.27  | 0.18 | 0.08 | 1.71  | 0.00231  | 0.250861 | 0.092457 | 0.51956  |
| MmugDNA.12333.1.S1_at   | MmugDNA.12333.1 | 8.09  | 7.81  | 0.15 | 0.13 | 1.21  | 0.092396 | 0.088955 | 0.360481 | 0.342807 |
| MmugDNA.12335.1.S1_at   | MmugDNA.12335.1 | 6.19  | 7.01  | 0.4  | 0.33 | -1.77 | 0.069469 | 0.08414  | 0.322002 | 0.335181 |
| MmugDNA.12336.1.S1_at   | MmugDNA.12336.1 | 4.54  | 4.55  | 0.2  | 0.09 | -1.01 | 0.857985 | 0.599676 | 0.938213 | 0.761533 |
| MmugDNA.12337.1.S1_at   | MmugDNA.12337.1 | 5.16  | 3.6   | 0.77 | 0.18 | 2.95  | 0.022569 | 0.012382 | 0.203331 | 0.143958 |
| MmugDNA.12338.1.S1_at   | MmugDNA.12338.1 | 10.58 | 10.24 | 0.18 | 0.24 | 1.26  | 0.107673 | 0.025338 | 0.382296 | 0.199522 |
| MmugDNA.12339.1.S1_at   | MmugDNA.12339.1 | 5.9   | 5.43  | 0.5  | 0.14 | 1.38  | 0.140587 | 0.127712 | 0.426348 | 0.398581 |
| MmugDNA.1234.1.S1_at    | MmugDNA.1234.1  | 5.55  | 5.1   | 0.67 | 0.25 | 1.37  | 0.381946 | 0.256269 | 0.651488 | 0.524079 |
| MmugDNA.12340.1.S1_at   | MmugDNA.12340.1 | 4.67  | 4.63  | 0.58 | 0.12 | 1.03  | 0.470367 | 0.6016   | 0.71493  | 0.762951 |
| MmugDNA.12341.1.S1_at   | MmugDNA.12341.1 | 6.22  | 5.7   | 0.39 | 0.33 | 1.44  | 0.062212 | 0.131713 | 0.306081 | 0.403854 |
| MmugDNA.12343.1.S1_at   | MmugDNA.12343.1 | 6.09  | 6.34  | 0.12 | 0.17 | -1.19 | 0.27075  | 0.11765  | 0.56285  | 0.385352 |
| MmugDNA.12344.1.S1_at   | MmugDNA.12344.1 | 5.8   | 5.8   | 0.07 | 0.07 | 1     | 0.53338  | 0.662345 | 0.75697  | 0.802265 |
| MmugDNA.12345.1.S1_at   | MmugDNA.12345.1 | 10.73 | 11.32 | 0.25 | 0.07 | -1.5  | 0.016278 | 0.022911 | 0.180371 | 0.189395 |
| MmugDNA.12346.1.S1_at   | MmugDNA.12346.1 | 3.97  | 4.36  | 0.43 | 0.64 | -1.31 | 0.478574 | 0.720823 | 0.720081 | 0.838368 |
| MmugDNA.12347.1.S1_at   | MmugDNA.12347.1 | 4.73  | 4.33  | 0.09 | 0.26 | 1.31  | 0.073385 | 0.065501 | 0.328797 | 0.301415 |
| MmugDNA.12348.1.S1_at   | MmugDNA.12348.1 | 6.74  | 7.02  | 0.8  | 0.17 | -1.21 | 0.990818 | 0.964126 | 0.996662 | 0.980052 |
| MmugDNA.1235.1.S1_at    | MmugDNA.1235.1  | 4.07  | 4.08  | 0    | 0.07 | -1.01 | 0.504592 | 0.80566  | 0.737762 | 0.888316 |
| MmugDNA.12351.1.S1_at   | MmugDNA.12351.1 | 5.28  | 5.57  | 0.48 | 0.07 | -1.22 | 0.955164 | 0.495126 | 0.981605 | 0.695319 |

|                         |                 |       |       |      |      |       |          |          |          |          |
|-------------------------|-----------------|-------|-------|------|------|-------|----------|----------|----------|----------|
| MmugDNA.12355.1.S1_at   | MmugDNA.12355.1 | 4.05  | 4.02  | 0.17 | 0.21 | 1.02  | 0.795075 | 0.512816 | 0.907466 | 0.70653  |
| MmugDNA.12356.1.S1_at   | MmugDNA.12356.1 | 7.96  | 7.89  | 0.35 | 0.13 | 1.05  | 0.711782 | 0.942747 | 0.864026 | 0.967499 |
| MmugDNA.12357.1.S1_at   | MmugDNA.12357.1 | 3.62  | 3.43  | 0.11 | 0.1  | 1.14  | 0.206801 | 0.261879 | 0.504487 | 0.528284 |
| MmugDNA.12358.1.S1_at   | MmugDNA.12358.1 | 3.4   | 3.4   | 0.11 | 0.04 | 1     | 0.608771 | 0.565763 | 0.804668 | 0.740112 |
| MmugDNA.12359.1.S1_at   | MmugDNA.12359.1 | 6.63  | 6.63  | 0.04 | 0.06 | 1     | 0.410332 | 0.385352 | 0.672397 | 0.620818 |
| MmugDNA.1236.1.S1_at    | MmugDNA.1236.1  | 10.95 | 10.67 | 0.06 | 0.04 | 1.21  | 0.00279  | 0.003387 | 0.097799 | 0.083858 |
| MmugDNA.12360.1.S1_at   | MmugDNA.12360.1 | 4.15  | 4.04  | 0.04 | 0.16 | 1.08  | 0.420268 | 0.096864 | 0.679364 | 0.354275 |
| MmugDNA.12362.1.S1_at   | MmugDNA.12362.1 | 5.98  | 6.37  | 0.71 | 0.04 | -1.31 | 0.962747 | 0.989762 | 0.984869 | 0.994108 |
| MmugDNA.12363.1.S1_at   | MmugDNA.12363.1 | 12.29 | 12.23 | 0.2  | 0.05 | 1.04  | 0.569092 | 0.869903 | 0.778679 | 0.926177 |
| MmugDNA.12364.1.S1_at   | MmugDNA.12364.1 | 11.16 | 11.1  | 0.15 | 0.07 | 1.05  | 0.701237 | 0.030603 | 0.858102 | 0.216887 |
| MmugDNA.12366.1.S1_at   | MmugDNA.12366.1 | 3.63  | 3.64  | 0.29 | 0.06 | -1.01 | 0.902524 | 0.75804  | 0.958703 | 0.859249 |
| MmugDNA.12367.1.S1_at   | MmugDNA.12367.1 | 7.09  | 6.09  | 0.28 | 0.19 | 2     | 0.007669 | 0.118551 | 0.13621  | 0.38654  |
| MmugDNA.12368.1.S1_at   | MmugDNA.12368.1 | 4.81  | 4.41  | 0.36 | 0.15 | 1.32  | 0.094633 | 0.067247 | 0.363573 | 0.30531  |
| MmugDNA.12369.1.S1_at   | MmugDNA.12369.1 | 3.39  | 3.17  | 0.16 | 0.1  | 1.17  | 0.113993 | 0.162444 | 0.390757 | 0.438575 |
| MmugDNA.1237.1.S1_at    | MmugDNA.1237.1  | 5.82  | 5.32  | 0.66 | 0.09 | 1.41  | 0.326943 | 0.262097 | 0.609778 | 0.528382 |
| MmugDNA.12370.1.S1_at   | MmugDNA.12370.1 | 3.74  | 3.75  | 0.05 | 0.08 | -1.01 | 0.790635 | 0.509889 | 0.904916 | 0.704492 |
| MmugDNA.12372.1.S1_at   | MmugDNA.12372.1 | 4.63  | 4.73  | 0.08 | 0.24 | -1.08 | 0.686917 | 0.658756 | 0.850752 | 0.800473 |
| MmugDNA.12375.1.S1_at   | MmugDNA.12375.1 | 11.85 | 11.79 | 0.14 | 0.08 | 1.04  | 0.512177 | 0.014139 | 0.742874 | 0.15208  |
| MmugDNA.12377.1.S1_at   | MmugDNA.12377.1 | 6.23  | 6.55  | 0.14 | 0.11 | -1.24 | 0.042981 | 0.1833   | 0.264508 | 0.459553 |
| MmugDNA.12378.1.S1_at   | MmugDNA.12378.1 | 6.4   | 5.31  | 0.21 | 0.24 | 2.13  | 0.005933 | 0.1831   | 0.123542 | 0.459493 |
| MmugDNA.12379.1.S1_at   | MmugDNA.12379.1 | 5.04  | 5.04  | 0.09 | 0.05 | 1     | 0.658706 | 0.93878  | 0.835196 | 0.965181 |
| MmugDNA.1238.1.S1_at    | MmugDNA.1238.1  | 3.53  | 3.51  | 0.44 | 0.1  | 1.01  | 0.950632 | 0.982187 | 0.979576 | 0.990279 |
| MmugDNA.12380.1.S1_at   | MmugDNA.12380.1 | 5.13  | 5.13  | 0.15 | 0.03 | 1     | 0.830691 | 0.980943 | 0.925496 | 0.989478 |
| MmugDNA.12381.1.S1_s_at | MmugDNA.12381.1 | 6.8   | 6.98  | 0.43 | 0.09 | -1.13 | 0.702831 | 0.928207 | 0.85894  | 0.959209 |
| MmugDNA.12384.1.S1_at   | MmugDNA.12384.1 | 7.01  | 7.26  | 0.28 | 0.23 | -1.19 | 0.437487 | 0.019773 | 0.692365 | 0.176901 |
| MmugDNA.12385.1.S1_at   | MmugDNA.12385.1 | 12.05 | 12.13 | 0.17 | 0.09 | -1.06 | 0.662671 | 0.094491 | 0.837251 | 0.35125  |
| MmugDNA.12387.1.S1_at   | MmugDNA.12387.1 | 10.66 | 10.62 | 0.2  | 0.13 | 1.03  | 0.572615 | 0.027827 | 0.780716 | 0.208337 |
| MmugDNA.12388.1.S1_at   | MmugDNA.12388.1 | 11    | 11.33 | 0.1  | 0.01 | -1.26 | 0.006028 | 0.002027 | 0.124151 | 0.066885 |
| MmugDNA.12389.1.S1_at   | MmugDNA.12389.1 | 5.24  | 5.3   | 0.14 | 0.14 | -1.04 | 0.799754 | 0.013686 | 0.909656 | 0.149772 |
| MmugDNA.1239.1.S1_at    | MmugDNA.1239.1  | 4.44  | 4.17  | 0.08 | 0.05 | 1.2   | 0.005425 | 0.017853 | 0.118857 | 0.168774 |
| MmugDNA.12392.1.S1_at   | MmugDNA.12392.1 | 3.6   | 3.51  | 0.15 | 0.18 | 1.06  | 0.370064 | 0.513715 | 0.643241 | 0.707217 |
| MmugDNA.12394.1.S1_at   | MmugDNA.12394.1 | 11.13 | 11.09 | 0.12 | 0.08 | 1.03  | 0.678944 | 0.858233 | 0.846857 | 0.919151 |
| MmugDNA.12395.1.S1_s_at | MmugDNA.12395.1 | 10.67 | 10.46 | 0.08 | 0.1  | 1.16  | 0.012042 | 0.010946 | 0.159683 | 0.13621  |
| MmugDNA.12396.1.S1_at   | MmugDNA.12396.1 | 8.33  | 7.9   | 3.25 | 0.2  | 1.35  | 0.906365 | 0.892085 | 0.960316 | 0.938526 |
| MmugDNA.12397.1.S1_at   | MmugDNA.12397.1 | 3.52  | 3.42  | 0.12 | 0.19 | 1.08  | 0.348356 | 0.637878 | 0.626353 | 0.787216 |
| MmugDNA.12398.1.S1_at   | MmugDNA.12398.1 | 10.66 | 10.03 | 0.17 | 0.11 | 1.55  | 0.008016 | 0.038491 | 0.138479 | 0.241138 |
| MmugDNA.124.1.S1_at     | MmugDNA.124.1   | 8.82  | 7.93  | 0.3  | 0.18 | 1.86  | 0.039211 | 0.04578  | 0.254466 | 0.258303 |
| MmugDNA.1240.1.S1_at    | MmugDNA.1240.1  | 10.89 | 10.68 | 0.21 | 0.03 | 1.16  | 0.128506 | 0.103839 | 0.410529 | 0.364519 |
| MmugDNA.12400.1.S1_at   | MmugDNA.12400.1 | 5.96  | 5.93  | 0.1  | 0.15 | 1.02  | 0.657954 | 0.121642 | 0.834819 | 0.39083  |
| MmugDNA.12401.1.S1_at   | MmugDNA.12401.1 | 6.13  | 5.95  | 0.12 | 0.18 | 1.13  | 0.140752 | 0.192488 | 0.426482 | 0.467952 |
| MmugDNA.12402.1.S1_at   | MmugDNA.12402.1 | 3.08  | 3.05  | 0.05 | 0.01 | 1.03  | 0.385959 | 0.161013 | 0.654511 | 0.437161 |
| MmugDNA.12403.1.S1_at   | MmugDNA.12403.1 | 9.48  | 10    | 0.39 | 0.1  | -1.43 | 0.067937 | 0.057882 | 0.318434 | 0.28702  |
| MmugDNA.12404.1.S1_at   | MmugDNA.12404.1 | 3.94  | 3.54  | 0.98 | 0.18 | 1.32  | 0.1741   | 0.181257 | 0.468351 | 0.457798 |

|                         |                 |       |       |      |      |       |          |          |          |          |
|-------------------------|-----------------|-------|-------|------|------|-------|----------|----------|----------|----------|
| MmugDNA.12405.1.S1_at   | MmugDNA.12405.1 | 11.9  | 12.02 | 0.12 | 0.02 | -1.09 | 0.132396 | 0.206834 | 0.415753 | 0.481008 |
| MmugDNA.12405.1.S1_s_at | MmugDNA.12405.1 | 11.36 | 11.39 | 0.15 | 0.02 | -1.02 | 0.846676 | 0.201501 | 0.933119 | 0.476036 |
| MmugDNA.12406.1.S1_s_at | MmugDNA.12406.1 | 6.79  | 6.76  | 0.07 | 0.1  | 1.02  | 0.609616 | 0.912994 | 0.805383 | 0.951043 |
| MmugDNA.12407.1.S1_at   | MmugDNA.12407.1 | 4.22  | 4.15  | 0.02 | 0.07 | 1.05  | 0.129776 | 0.100136 | 0.412052 | 0.359064 |
| MmugDNA.12409.1.S1_at   | MmugDNA.12409.1 | 5.58  | 5.64  | 0.07 | 0.05 | -1.04 | 0.241761 | 0.401457 | 0.538882 | 0.631018 |
| MmugDNA.1241.1.S1_at    | MmugDNA.1241.1  | 4.89  | 4.89  | 0.21 | 0.14 | -1    | 0.768835 | 0.716921 | 0.893815 | 0.836147 |
| MmugDNA.12410.1.S1_at   | MmugDNA.12410.1 | 3.99  | 3.92  | 0.16 | 0.16 | 1.05  | 0.416178 | 0.528026 | 0.676628 | 0.716426 |
| MmugDNA.12411.1.S1_at   | MmugDNA.12411.1 | 4.42  | 4.18  | 0    | 0.19 | 1.18  | 0.284176 | 0.274283 | 0.574388 | 0.538751 |
| MmugDNA.12412.1.S1_s_at | MmugDNA.12412.1 | 10.94 | 10.43 | 0.09 | 0.03 | 1.43  | 0.000619 | 0.080343 | 0.070727 | 0.327965 |
| MmugDNA.12413.1.S1_at   | MmugDNA.12413.1 | 6.07  | 6.63  | 0.42 | 0.25 | -1.48 | 0.260428 | 0.709509 | 0.554556 | 0.831686 |
| MmugDNA.12414.1.S1_at   | MmugDNA.12414.1 | 4.75  | 4.89  | 0.28 | 0.16 | -1.1  | 0.893309 | 0.688278 | 0.954498 | 0.818009 |
| MmugDNA.12415.1.S1_at   | MmugDNA.12415.1 | 7.38  | 8.18  | 0.35 | 0.04 | -1.74 | 0.017916 | 0.198735 | 0.187151 | 0.473391 |
| MmugDNA.12416.1.S1_at   | MmugDNA.12416.1 | 8.6   | 8.21  | 0.13 | 0.05 | 1.31  | 0.007812 | 0.005375 | 0.137244 | 0.101199 |
| MmugDNA.12417.1.S1_at   | MmugDNA.12417.1 | 9.14  | 9.12  | 0.05 | 0.19 | 1.01  | 0.992118 | 0.458186 | 0.997078 | 0.671077 |
| MmugDNA.12418.1.S1_at   | MmugDNA.12418.1 | 8.33  | 7.6   | 0.13 | 0.1  | 1.66  | 0.001277 | 0.02348  | 0.078631 | 0.192031 |
| MmugDNA.12419.1.S1_at   | MmugDNA.12419.1 | 9.07  | 9.77  | 0.08 | 0.09 | -1.63 | 0.00088  | 0.000609 | 0.074796 | 0.042176 |
| MmugDNA.1242.1.S1_at    | MmugDNA.1242.1  | 6.24  | 6.49  | 0.13 | 0.08 | -1.19 | 0.066789 | 0.313897 | 0.316181 | 0.568094 |
| MmugDNA.12420.1.S1_at   | MmugDNA.12420.1 | 10.53 | 10.69 | 0.14 | 0.04 | -1.11 | 0.080091 | 0.100027 | 0.340456 | 0.3589   |
| MmugDNA.12421.1.S1_at   | MmugDNA.12421.1 | 6.21  | 6.16  | 0.03 | 0.18 | 1.03  | 0.257179 | 0.585266 | 0.551586 | 0.752837 |
| MmugDNA.12422.1.S1_at   | MmugDNA.12422.1 | 11.95 | 12.17 | 0.12 | 0.08 | -1.17 | 0.052608 | 0.041284 | 0.286356 | 0.247995 |
| MmugDNA.12422.1.S1_s_at | MmugDNA.12422.1 | 12.11 | 12.33 | 0.14 | 0.04 | -1.16 | 0.055859 | 0.05416  | 0.293434 | 0.278084 |
| MmugDNA.12423.1.S1_at   | MmugDNA.12423.1 | 4.29  | 3.79  | 0.36 | 0.19 | 1.42  | 0.458986 | 0.5198   | 0.70731  | 0.71135  |
| MmugDNA.12424.1.S1_at   | MmugDNA.12424.1 | 5.8   | 5.86  | 0.16 | 0.09 | -1.04 | 0.62886  | 0.546297 | 0.817507 | 0.727896 |
| MmugDNA.12425.1.S1_at   | MmugDNA.12425.1 | 3.3   | 3.67  | 0.04 | 0.25 | -1.29 | 0.032616 | 0.05776  | 0.234926 | 0.286677 |
| MmugDNA.12427.1.S1_at   | MmugDNA.12427.1 | 4.78  | 4.73  | 0.18 | 0.12 | 1.03  | 0.824055 | 0.219964 | 0.921772 | 0.49344  |
| MmugDNA.12428.1.S1_at   | MmugDNA.12428.1 | 4.25  | 4.65  | 0.78 | 0.33 | -1.32 | 0.766011 | 0.952539 | 0.89269  | 0.973066 |
| MmugDNA.12429.1.S1_at   | MmugDNA.12429.1 | 3.32  | 3.54  | 0.19 | 0.16 | -1.17 | 0.843774 | 0.629764 | 0.931554 | 0.781989 |
| MmugDNA.1243.1.S1_at    | MmugDNA.1243.1  | 3.53  | 3.59  | 0.07 | 0.06 | -1.04 | 0.133991 | 0.164427 | 0.417435 | 0.440678 |
| MmugDNA.12430.1.S1_at   | MmugDNA.12430.1 | 9.88  | 9.53  | 0.45 | 0.13 | 1.27  | 0.352507 | 0.186338 | 0.630029 | 0.46218  |
| MmugDNA.12431.1.S1_at   | MmugDNA.12431.1 | 10.61 | 10.58 | 0.17 | 0.04 | 1.03  | 0.672347 | 0.012524 | 0.843165 | 0.144385 |
| MmugDNA.12432.1.S1_at   | MmugDNA.12432.1 | 3.49  | 4.21  | 0.26 | 0.37 | -1.65 | 0.038968 | 0.04527  | 0.253733 | 0.257084 |
| MmugDNA.12433.1.S1_s_at | MmugDNA.12433.1 | 7.07  | 6.65  | 0.32 | 0.04 | 1.34  | 0.153203 | 0.047173 | 0.442887 | 0.261761 |
| MmugDNA.12434.1.S1_at   | MmugDNA.12434.1 | 3.76  | 3.95  | 0.11 | 0.02 | -1.13 | 0.143006 | 0.055785 | 0.429205 | 0.282044 |
| MmugDNA.12435.1.S1_at   | MmugDNA.12435.1 | 2.76  | 3.29  | 0.16 | 0.05 | -1.44 | 0.009873 | 0.02284  | 0.148832 | 0.189246 |
| MmugDNA.12437.1.S1_at   | MmugDNA.12437.1 | 6.06  | 7.12  | 0.73 | 0.35 | -2.08 | 0.083699 | 0.192955 | 0.346423 | 0.468455 |
| MmugDNA.12438.1.S1_at   | MmugDNA.12438.1 | 10.85 | 10.32 | 0.16 | 0.08 | 1.44  | 0.010065 | 0.022055 | 0.149964 | 0.185927 |
| MmugDNA.12439.1.S1_at   | MmugDNA.12439.1 | 10.58 | 10.4  | 0.21 | 0.34 | 1.14  | 0.233505 | 0.152048 | 0.53162  | 0.42682  |
| MmugDNA.12440.1.S1_s_at | MmugDNA.12440.1 | 4.07  | 4.07  | 0.27 | 0.27 | -1    | 0.484563 | 0.619582 | 0.72436  | 0.774788 |
| MmugDNA.12441.1.S1_at   | MmugDNA.12441.1 | 4.7   | 4.74  | 0.13 | 0.1  | -1.03 | 0.708594 | 0.635496 | 0.86198  | 0.785405 |
| MmugDNA.12442.1.S1_at   | MmugDNA.12442.1 | 6.97  | 7.81  | 1.01 | 0.17 | -1.78 | 0.262865 | 0.080586 | 0.556683 | 0.328361 |
| MmugDNA.12444.1.S1_at   | MmugDNA.12444.1 | 5.8   | 5.77  | 0.2  | 0.17 | 1.02  | 0.690265 | 0.553826 | 0.851973 | 0.732843 |
| MmugDNA.12445.1.S1_at   | MmugDNA.12445.1 | 3.52  | 3.46  | 0.2  | 0.09 | 1.04  | 0.545589 | 0.697143 | 0.764812 | 0.824045 |
| MmugDNA.12447.1.S1_at   | MmugDNA.12447.1 | 4.12  | 3.62  | 0.46 | 0.03 | 1.41  | 0.081393 | 0.056642 | 0.342343 | 0.284094 |

|                         |                 |       |       |      |      |       |          |          |          |          |
|-------------------------|-----------------|-------|-------|------|------|-------|----------|----------|----------|----------|
| MmugDNA.12448.1.S1_at   | MmugDNA.12448.1 | 3.67  | 3.3   | 0.31 | 0.17 | 1.3   | 0.376895 | 0.301219 | 0.64749  | 0.559356 |
| MmugDNA.12449.1.S1_at   | MmugDNA.12449.1 | 4.4   | 4.38  | 0.06 | 0.09 | 1.01  | 0.634374 | 0.007443 | 0.820718 | 0.115858 |
| MmugDNA.1245.1.S1_at    | MmugDNA.1245.1  | 11.04 | 11.05 | 0.09 | 0.15 | -1.01 | 0.848207 | 0.968352 | 0.933904 | 0.982571 |
| MmugDNA.12451.1.S1_at   | MmugDNA.12451.1 | 4.37  | 4.03  | 0.22 | 0.37 | 1.26  | 0.984872 | 0.998025 | 0.994484 | 0.999008 |
| MmugDNA.12452.1.S1_at   | MmugDNA.12452.1 | 10.99 | 11.14 | 0.02 | 0.07 | -1.11 | 0.044951 | 0.465671 | 0.26933  | 0.675863 |
| MmugDNA.12453.1.S1_at   | MmugDNA.12453.1 | 10.42 | 10.32 | 0.05 | 0.11 | 1.07  | 0.061801 | 0.21533  | 0.305078 | 0.489062 |
| MmugDNA.12454.1.S1_at   | MmugDNA.12454.1 | 7.87  | 7.03  | 0.68 | 0.1  | 1.79  | 0.113962 | 0.119951 | 0.390682 | 0.388671 |
| MmugDNA.12455.1.S1_at   | MmugDNA.12455.1 | 3.17  | 3.09  | 0.09 | 0.02 | 1.06  | 0.596087 | 0.253079 | 0.795628 | 0.521415 |
| MmugDNA.12456.1.S1_at   | MmugDNA.12456.1 | 11.42 | 11.23 | 0.27 | 0.16 | 1.14  | 0.404388 | 0.000851 | 0.668151 | 0.047111 |
| MmugDNA.12457.1.S1_at   | MmugDNA.12457.1 | 5.13  | 6.38  | 0.72 | 0.49 | -2.38 | 0.08478  | 0.156265 | 0.348731 | 0.43161  |
| MmugDNA.12458.1.S1_at   | MmugDNA.12458.1 | 6.27  | 6.24  | 0.09 | 0.04 | 1.02  | 0.943054 | 0.881434 | 0.976009 | 0.93235  |
| MmugDNA.1246.1.S1_at    | MmugDNA.1246.1  | 8.77  | 8.17  | 0.12 | 0.1  | 1.52  | 0.002226 | 0.000584 | 0.091055 | 0.041486 |
| MmugDNA.12462.1.S1_at   | MmugDNA.12462.1 | 5.02  | 5     | 0.1  | 0.03 | 1.01  | 0.87379  | 0.251171 | 0.945743 | 0.519897 |
| MmugDNA.12463.1.S1_at   | MmugDNA.12463.1 | 6.12  | 4.76  | 0.76 | 0.45 | 2.56  | 0.060597 | 0.079969 | 0.303194 | 0.327352 |
| MmugDNA.12464.1.S1_at   | MmugDNA.12464.1 | 5.52  | 5.51  | 0.09 | 0.05 | 1.01  | 0.198823 | 0.449823 | 0.49596  | 0.665284 |
| MmugDNA.12466.1.S1_at   | MmugDNA.12466.1 | 6.52  | 6.53  | 0.02 | 0.07 | -1.01 | 0.35658  | 0.445047 | 0.632868 | 0.66224  |
| MmugDNA.12467.1.S1_at   | MmugDNA.12467.1 | 11.03 | 11.04 | 0.06 | 0.11 | -1.01 | 0.690731 | 0.001355 | 0.852142 | 0.056687 |
| MmugDNA.12468.1.S1_s_at | MmugDNA.12468.1 | 11.56 | 11.85 | 0.2  | 0.06 | -1.23 | 0.145275 | 0.002951 | 0.432576 | 0.079945 |
| MmugDNA.1247.1.S1_s_at  | MmugDNA.1247.1  | 6.43  | 6.09  | 1.03 | 0.22 | 1.26  | 0.342373 | 0.438746 | 0.622192 | 0.657658 |
| MmugDNA.12470.1.S1_at   | MmugDNA.12470.1 | 11.87 | 11.68 | 0.18 | 0.07 | 1.14  | 0.117746 | 0.000279 | 0.395125 | 0.03453  |
| MmugDNA.12471.1.S1_at   | MmugDNA.12471.1 | 5.68  | 5.37  | 0.85 | 0.55 | 1.24  | 0.617865 | 0.789745 | 0.810245 | 0.878519 |
| MmugDNA.12472.1.S1_at   | MmugDNA.12472.1 | 4.42  | 4.43  | 0.1  | 0.06 | -1.01 | 0.875637 | 0.316629 | 0.946675 | 0.569963 |
| MmugDNA.12473.1.S1_at   | MmugDNA.12473.1 | 7.21  | 8.76  | 0.45 | 0.24 | -2.94 | 0.008544 | 0.014504 | 0.141777 | 0.153682 |
| MmugDNA.12474.1.S1_at   | MmugDNA.12474.1 | 7.41  | 7.22  | 0.65 | 0.45 | 1.15  | 0.99433  | 0.574491 | 0.997657 | 0.745928 |
| MmugDNA.12475.1.S1_s_at | MmugDNA.12475.1 | 9.89  | 8.75  | 0.15 | 0.14 | 2.2   | 0.000749 | 0.001475 | 0.072567 | 0.058588 |
| MmugDNA.12476.1.S1_at   | MmugDNA.12476.1 | 3.47  | 3.23  | 0.21 | 0.12 | 1.19  | 0.402952 | 0.504794 | 0.667108 | 0.701855 |
| MmugDNA.12477.1.S1_at   | MmugDNA.12477.1 | 2.95  | 2.91  | 0.24 | 0.11 | 1.03  | 0.764798 | 0.930701 | 0.892078 | 0.960648 |
| MmugDNA.12479.1.S1_at   | MmugDNA.12479.1 | 6.55  | 8.38  | 0.69 | 0.19 | -3.56 | 0.01135  | 0.012234 | 0.156747 | 0.142996 |
| MmugDNA.12481.1.S1_at   | MmugDNA.12481.1 | 4.47  | 3.74  | 0.41 | 0.21 | 1.67  | 0.070012 | 0.100198 | 0.323079 | 0.359195 |
| MmugDNA.12482.1.S1_at   | MmugDNA.12482.1 | 4.16  | 4.15  | 0.09 | 0.15 | 1.01  | 0.68206  | 0.900738 | 0.848343 | 0.943538 |
| MmugDNA.12485.1.S1_at   | MmugDNA.12485.1 | 10.97 | 10.31 | 0.16 | 0.1  | 1.58  | 0.002941 | 0.048503 | 0.099331 | 0.265472 |
| MmugDNA.12486.1.S1_at   | MmugDNA.12486.1 | 4.16  | 4.14  | 0.72 | 0.56 | 1.02  | 0.493118 | 0.557436 | 0.730197 | 0.735031 |
| MmugDNA.12488.1.S1_at   | MmugDNA.12488.1 | 12.12 | 12.51 | 0.26 | 0.09 | -1.31 | 0.067847 | 0.151103 | 0.318295 | 0.425782 |
| MmugDNA.12489.1.S1_at   | MmugDNA.12489.1 | 10.51 | 10.1  | 0.23 | 0.08 | 1.33  | 0.061982 | 0.000831 | 0.305504 | 0.046851 |
| MmugDNA.1249.1.S1_at    | MmugDNA.1249.1  | 4.06  | 4.34  | 0.17 | 0.13 | -1.21 | 0.102634 | 0.145864 | 0.37496  | 0.419888 |
| MmugDNA.12491.1.S1_at   | MmugDNA.12491.1 | 9.74  | 9.61  | 0.46 | 0.17 | 1.09  | 0.428039 | 0.614613 | 0.68508  | 0.771367 |
| MmugDNA.12492.1.S1_at   | MmugDNA.12492.1 | 5.57  | 5.7   | 0.36 | 0.14 | -1.1  | 0.991664 | 0.211422 | 0.996963 | 0.485559 |
| MmugDNA.12493.1.S1_at   | MmugDNA.12493.1 | 6.66  | 7.02  | 0.36 | 0.27 | -1.29 | 0.13895  | 0.215847 | 0.424626 | 0.489536 |
| MmugDNA.12494.1.S1_at   | MmugDNA.12494.1 | 6.4   | 6.54  | 0.14 | 0.22 | -1.1  | 0.61731  | 0.576042 | 0.810009 | 0.746951 |
| MmugDNA.12495.1.S1_at   | MmugDNA.12495.1 | 7.39  | 7.39  | 0.04 | 0.12 | 1     | 0.2515   | 0.280431 | 0.546309 | 0.543648 |
| MmugDNA.12496.1.S1_at   | MmugDNA.12496.1 | 7.12  | 6.96  | 0.18 | 0.22 | 1.12  | 0.210099 | 0.148964 | 0.507651 | 0.423294 |
| MmugDNA.12497.1.S1_at   | MmugDNA.12497.1 | 6.64  | 6.65  | 0.16 | 0.04 | -1.01 | 0.959276 | 0.663676 | 0.983355 | 0.803086 |
| MmugDNA.12498.1.S1_at   | MmugDNA.12498.1 | 4.21  | 4.09  | 0.3  | 0.03 | 1.09  | 0.530656 | 0.685022 | 0.755172 | 0.816304 |

|                         |                 |       |       |      |      |       |          |          |          |          |
|-------------------------|-----------------|-------|-------|------|------|-------|----------|----------|----------|----------|
| MmugDNA.24190.1.S1_s_at | MmugDNA.24190.1 | 10.75 | 10.48 | 0.61 | 0.35 | 1.21  | 0.363296 | 0.39611  | 0.637977 | 0.627916 |
| MmugDNA.1250.1.S1_at    | MmugDNA.1250.1  | 5.61  | 5.59  | 0.1  | 0.16 | 1.02  | 0.73201  | 0.339439 | 0.874717 | 0.586093 |
| MmugDNA.12500.1.S1_at   | MmugDNA.12500.1 | 3.25  | 3.04  | 0.11 | 0.22 | 1.16  | 0.160004 | 0.196718 | 0.451279 | 0.471783 |
| MmugDNA.12502.1.S1_at   | MmugDNA.12502.1 | 3.55  | 3.61  | 0.12 | 0.17 | -1.04 | 0.308856 | 0.272922 | 0.595336 | 0.53761  |
| MmugDNA.12504.1.S1_at   | MmugDNA.12504.1 | 11.14 | 10.73 | 0.12 | 0.19 | 1.33  | 0.058622 | 0.005087 | 0.299229 | 0.099108 |
| MmugDNA.12506.1.S1_at   | MmugDNA.12506.1 | 4.9   | 4.9   | 0.01 | 0.13 | -1    | 0.337111 | 0.482401 | 0.617686 | 0.687259 |
| MmugDNA.12507.1.S1_at   | MmugDNA.12507.1 | 10.36 | 10.44 | 0.07 | 0.14 | -1.05 | 0.369935 | 0.013045 | 0.643182 | 0.14696  |
| MmugDNA.12508.1.S1_at   | MmugDNA.12508.1 | 5.51  | 5.62  | 0.16 | 0.35 | -1.08 | 0.716073 | 0.328119 | 0.866043 | 0.577873 |
| MmugDNA.12509.1.S1_at   | MmugDNA.12509.1 | 5.76  | 5.46  | 0.27 | 0.32 | 1.23  | 0.294305 | 0.324782 | 0.583302 | 0.575311 |
| MmugDNA.12510.1.S1_at   | MmugDNA.12510.1 | 7.85  | 7.8   | 0.24 | 0.29 | 1.03  | 0.798803 | 0.298426 | 0.909337 | 0.557131 |
| MmugDNA.12512.1.S1_at   | MmugDNA.12512.1 | 2.97  | 2.9   | 0.04 | 0.04 | 1.05  | 0.046873 | 0.563214 | 0.274229 | 0.738468 |
| MmugDNA.12513.1.S1_at   | MmugDNA.12513.1 | 6.52  | 6.61  | 0.05 | 0.01 | -1.07 | 0.081323 | 0.061345 | 0.342222 | 0.29448  |
| MmugDNA.12514.1.S1_at   | MmugDNA.12514.1 | 3.99  | 3.94  | 0.08 | 0.11 | 1.03  | 0.41078  | 0.522953 | 0.672759 | 0.713429 |
| MmugDNA.12517.1.S1_at   | MmugDNA.12517.1 | 3.8   | 3.63  | 0.48 | 0.21 | 1.13  | 0.29529  | 0.402454 | 0.584116 | 0.631481 |
| MmugDNA.12518.1.S1_at   | MmugDNA.12518.1 | 4.7   | 5.08  | 0.44 | 0.65 | -1.3  | 0.330144 | 0.3587   | 0.612186 | 0.600178 |
| MmugDNA.12519.1.S1_at   | MmugDNA.12519.1 | 5.31  | 5.37  | 0.07 | 0.05 | -1.04 | 0.34911  | 0.855894 | 0.62702  | 0.917744 |
| MmugDNA.1252.1.S1_at    | MmugDNA.1252.1  | 4.37  | 4.5   | 0.26 | 0.5  | -1.1  | 0.911681 | 0.582684 | 0.962593 | 0.751307 |
| MmugDNA.1252.1.S1_s_at  | MmugDNA.1252.1  | 3.7   | 3.64  | 0.3  | 0.38 | 1.04  | 0.696841 | 0.429468 | 0.855674 | 0.650931 |
| MmugDNA.12520.1.S1_at   | MmugDNA.12520.1 | 6.71  | 7.95  | 0.56 | 0.11 | -2.37 | 0.028387 | 0.087893 | 0.221039 | 0.341301 |
| MmugDNA.12521.1.S1_at   | MmugDNA.12521.1 | 8.88  | 9.17  | 0.38 | 0.13 | -1.22 | 0.261654 | 0.44509  | 0.555806 | 0.662281 |
| MmugDNA.12522.1.S1_at   | MmugDNA.12522.1 | 7.69  | 7.33  | 0.11 | 0.17 | 1.28  | 0.038375 | 0.051223 | 0.251895 | 0.271799 |
| MmugDNA.12523.1.S1_at   | MmugDNA.12523.1 | 4.5   | 4.73  | 0.57 | 0.24 | -1.17 | 0.956922 | 0.528987 | 0.98233  | 0.71703  |
| MmugDNA.12525.1.S1_at   | MmugDNA.12525.1 | 5.43  | 5.87  | 0.01 | 0.2  | -1.35 | 0.054284 | 0.022327 | 0.290066 | 0.187022 |
| MmugDNA.12526.1.S1_at   | MmugDNA.12526.1 | 5.04  | 4.92  | 0.25 | 0.1  | 1.08  | 0.494662 | 0.871146 | 0.731294 | 0.92679  |
| MmugDNA.12527.1.S1_at   | MmugDNA.12527.1 | 5.87  | 5.85  | 0.14 | 0.12 | 1.01  | 0.906053 | 0.175282 | 0.960217 | 0.452061 |
| MmugDNA.12528.1.S1_at   | MmugDNA.12528.1 | 12.24 | 12.14 | 0.11 | 0.03 | 1.07  | 0.214916 | 0.321531 | 0.51252  | 0.573226 |
| MmugDNA.1253.1.S1_at    | MmugDNA.1253.1  | 10.52 | 10.2  | 0.17 | 0.11 | 1.25  | 0.144663 | 0.010235 | 0.43164  | 0.1326   |
| MmugDNA.12531.1.S1_at   | MmugDNA.12531.1 | 3.81  | 3.86  | 0.04 | 0.06 | -1.03 | 0.388042 | 0.821194 | 0.656101 | 0.8971   |
| MmugDNA.12532.1.S1_at   | MmugDNA.12532.1 | 4.36  | 4.21  | 0.11 | 0.13 | 1.11  | 0.221326 | 0.348261 | 0.519357 | 0.592446 |
| MmugDNA.12534.1.S1_at   | MmugDNA.12534.1 | 5.7   | 6.06  | 0.14 | 0.36 | -1.29 | 0.20392  | 0.280017 | 0.501449 | 0.543369 |
| MmugDNA.12536.1.S1_at   | MmugDNA.12536.1 | 5.29  | 6.15  | 0.41 | 0.27 | -1.82 | 0.032053 | 0.070566 | 0.232887 | 0.311781 |
| MmugDNA.12537.1.S1_at   | MmugDNA.12537.1 | 3.18  | 3.13  | 0.09 | 0.1  | 1.03  | 0.767092 | 0.968015 | 0.893102 | 0.982304 |
| MmugDNA.12538.1.S1_at   | MmugDNA.12538.1 | 4.51  | 4.43  | 0.01 | 0.09 | 1.06  | 0.188757 | 0.029507 | 0.485343 | 0.213475 |
| MmugDNA.1254.1.S1_at    | MmugDNA.1254.1  | 7.36  | 6.72  | 0.01 | 0.16 | 1.56  | 0.002635 | 0.000382 | 0.095417 | 0.037273 |
| MmugDNA.12541.1.S1_at   | MmugDNA.12541.1 | 3.07  | 3.27  | 0.01 | 0.07 | -1.15 | 0.023214 | 0.054274 | 0.205385 | 0.278456 |
| MmugDNA.12542.1.S1_at   | MmugDNA.12542.1 | 6.39  | 6.84  | 0.34 | 0.06 | -1.36 | 0.077468 | 0.022238 | 0.336173 | 0.18659  |
| MmugDNA.12545.1.S1_at   | MmugDNA.12545.1 | 3.9   | 3.91  | 0.03 | 0.02 | -1.01 | 0.18226  | 0.650416 | 0.478038 | 0.795636 |
| MmugDNA.12547.1.S1_at   | MmugDNA.12547.1 | 4.74  | 4.21  | 1.3  | 0.4  | 1.44  | 0.4712   | 0.46191  | 0.715413 | 0.673419 |
| MmugDNA.1255.1.S1_at    | MmugDNA.1255.1  | 6.99  | 6.91  | 0.15 | 0.07 | 1.06  | 0.289386 | 0.176315 | 0.578963 | 0.452752 |
| MmugDNA.12552.1.S1_at   | MmugDNA.12552.1 | 5.11  | 4.61  | 0.18 | 0.16 | 1.41  | 0.05393  | 0.091591 | 0.28932  | 0.346713 |
| MmugDNA.12553.1.S1_at   | MmugDNA.12553.1 | 3.58  | 3.69  | 0.16 | 0.17 | -1.08 | 0.387009 | 0.537068 | 0.655325 | 0.722261 |
| MmugDNA.12553.1.S1_s_at | MmugDNA.12553.1 | 5     | 5     | 0.18 | 0.13 | 1     | 0.235113 | 0.522682 | 0.533056 | 0.713295 |
| MmugDNA.12554.1.S1_at   | MmugDNA.12554.1 | 4.66  | 4.49  | 0.14 | 0.07 | 1.12  | 0.110973 | 0.173113 | 0.386642 | 0.449765 |

|                         |                 |       |       |      |      |       |          |          |          |          |
|-------------------------|-----------------|-------|-------|------|------|-------|----------|----------|----------|----------|
| MmugDNA.12558.1.S1_at   | MmugDNA.12558.1 | 6.38  | 6.75  | 0.45 | 0.25 | -1.29 | 0.101526 | 0.00145  | 0.372929 | 0.057999 |
| MmugDNA.1256.1.S1_at    | MmugDNA.1256.1  | 5.16  | 5.08  | 0.25 | 0.17 | 1.05  | 0.86378  | 0.734967 | 0.940861 | 0.846604 |
| MmugDNA.12561.1.S1_at   | MmugDNA.12561.1 | 5.95  | 5.7   | 0.26 | 0.15 | 1.19  | 0.348491 | 0.124188 | 0.626397 | 0.394496 |
| MmugDNA.12562.1.S1_at   | MmugDNA.12562.1 | 6     | 5.9   | 0.22 | 0.18 | 1.07  | 0.88821  | 0.983288 | 0.952297 | 0.990726 |
| MmugDNA.12565.1.S1_at   | MmugDNA.12565.1 | 4.74  | 4.81  | 0.16 | 0.04 | -1.05 | 0.726058 | 0.26616  | 0.87144  | 0.531988 |
| MmugDNA.12566.1.S1_at   | MmugDNA.12566.1 | 5.98  | 5.94  | 0.27 | 0.02 | 1.03  | 0.425376 | 0.612551 | 0.682786 | 0.770077 |
| MmugDNA.12569.1.S1_at   | MmugDNA.12569.1 | 6.28  | 5.35  | 0.88 | 0.34 | 1.91  | 0.311797 | 0.08549  | 0.597915 | 0.337495 |
| MmugDNA.12572.1.S1_at   | MmugDNA.12572.1 | 5.21  | 5.25  | 0.43 | 0.17 | -1.03 | 0.703257 | 0.393564 | 0.859182 | 0.626497 |
| MmugDNA.12575.1.S1_at   | MmugDNA.12575.1 | 9.32  | 9.1   | 0.08 | 0.1  | 1.16  | 0.07873  | 0.213131 | 0.338559 | 0.487054 |
| MmugDNA.17018.1.S1_s_at | MmugDNA.17018.1 | 9.55  | 9.42  | 0.12 | 0.11 | 1.1   | 0.103107 | 0.131999 | 0.375783 | 0.404036 |
| MmugDNA.12576.1.S1_at   | MmugDNA.12576.1 | 3.97  | 3.72  | 0.69 | 0.05 | 1.18  | 0.169616 | 0.127615 | 0.462918 | 0.398557 |
| MmugDNA.12578.1.S1_at   | MmugDNA.12578.1 | 3.28  | 2.96  | 0.19 | 0.07 | 1.25  | 0.055597 | 0.056816 | 0.292866 | 0.284531 |
| MmugDNA.12579.1.S1_at   | MmugDNA.12579.1 | 11.27 | 10.16 | 0.07 | 0.1  | 2.17  | 0.000076 | 0.056037 | 0.051196 | 0.2826   |
| MmugDNA.1258.1.S1_at    | MmugDNA.1258.1  | 7.69  | 7.55  | 0.28 | 0.07 | 1.1   | 0.230697 | 0.496105 | 0.529522 | 0.695877 |
| MmugDNA.12580.1.S1_at   | MmugDNA.12580.1 | 3.74  | 3.69  | 0.23 | 0.06 | 1.03  | 0.714386 | 0.428227 | 0.86508  | 0.649721 |
| MmugDNA.12581.1.S1_at   | MmugDNA.12581.1 | 7.13  | 7.08  | 0.08 | 0.03 | 1.04  | 0.527001 | 0.052716 | 0.752848 | 0.275218 |
| MmugDNA.12581.1.S1_s_at | MmugDNA.12581.1 | 5.89  | 5.71  | 0.09 | 0.14 | 1.13  | 0.095343 | 0.132071 | 0.364765 | 0.404046 |
| MmugDNA.12582.1.S1_at   | MmugDNA.12582.1 | 3.9   | 3.95  | 0.1  | 0.02 | -1.04 | 0.191238 | 0.081043 | 0.487454 | 0.329189 |
| MmugDNA.12583.1.S1_at   | MmugDNA.12583.1 | 10.75 | 10.57 | 0.21 | 0.15 | 1.13  | 0.678403 | 0.867463 | 0.846605 | 0.924699 |
| MmugDNA.12584.1.S1_at   | MmugDNA.12584.1 | 10.26 | 9.69  | 0.25 | 0.34 | 1.48  | 0.078635 | 0.164454 | 0.338496 | 0.440678 |
| MmugDNA.12585.1.S1_at   | MmugDNA.12585.1 | 3.31  | 3.44  | 0.1  | 0.14 | -1.1  | 0.556964 | 0.773539 | 0.771975 | 0.868348 |
| MmugDNA.12586.1.S1_at   | MmugDNA.12586.1 | 11.3  | 11.15 | 0.27 | 0.14 | 1.11  | 0.478568 | 0.743555 | 0.720081 | 0.851395 |
| MmugDNA.12588.1.S1_at   | MmugDNA.12588.1 | 9.57  | 9.3   | 0.23 | 0.04 | 1.2   | 0.351188 | 0.003461 | 0.628851 | 0.084734 |
| MmugDNA.12589.1.S1_at   | MmugDNA.12589.1 | 9.25  | 9.28  | 0.51 | 0.27 | -1.03 | 0.925867 | 0.239552 | 0.968632 | 0.510209 |
| MmugDNA.1259.1.S1_at    | MmugDNA.1259.1  | 12.29 | 11.67 | 0.16 | 0.16 | 1.54  | 0.008554 | 0.001122 | 0.141834 | 0.052924 |
| MmugDNA.1259.1.S1_s_at  | MmugDNA.1259.1  | 12.54 | 12.18 | 0.06 | 0.04 | 1.28  | 0.001224 | 0.000455 | 0.078538 | 0.038572 |
| MmugDNA.12590.1.S1_at   | MmugDNA.12590.1 | 7.34  | 7.24  | 0.9  | 0.34 | 1.07  | 0.378127 | 0.28443  | 0.648422 | 0.546637 |
| MmugDNA.12591.1.S1_s_at | MmugDNA.12591.1 | 11.27 | 11.3  | 0.05 | 0.04 | -1.02 | 0.987872 | 0.823674 | 0.995612 | 0.898726 |
| MmugDNA.12594.1.S1_at   | MmugDNA.12594.1 | 5.45  | 5.56  | 0.07 | 0.06 | -1.08 | 0.093181 | 0.46842  | 0.361736 | 0.677714 |
| MmugDNA.12597.1.S1_at   | MmugDNA.12597.1 | 4.63  | 4.4   | 0.05 | 0.13 | 1.18  | 0.04676  | 0.004899 | 0.273839 | 0.097632 |
| MmugDNA.12600.1.S1_at   | MmugDNA.12600.1 | 4.46  | 5.53  | 0.6  | 0.56 | -2.1  | 0.216167 | 0.256174 | 0.513926 | 0.524069 |
| MmugDNA.12601.1.S1_at   | MmugDNA.12601.1 | 9.78  | 9.33  | 0.02 | 0.15 | 1.37  | 0.00745  | 0.106661 | 0.134678 | 0.369213 |
| MmugDNA.12603.1.S1_at   | MmugDNA.12603.1 | 3.99  | 3.74  | 1.4  | 0.02 | 1.19  | 0.26919  | 0.342347 | 0.561608 | 0.588413 |
| MmugDNA.12605.1.S1_at   | MmugDNA.12605.1 | 7.06  | 7.17  | 0.22 | 0.1  | -1.08 | 0.182805 | 0.251641 | 0.478557 | 0.520387 |
| MmugDNA.12606.1.S1_at   | MmugDNA.12606.1 | 3.79  | 3.91  | 0.11 | 0.14 | -1.09 | 0.31031  | 0.285777 | 0.596571 | 0.547484 |
| MmugDNA.12607.1.S1_at   | MmugDNA.12607.1 | 7.58  | 7.53  | 0.25 | 0.16 | 1.03  | 0.414968 | 0.232826 | 0.675867 | 0.504441 |
| MmugDNA.12607.1.S1_x_at | MmugDNA.12607.1 | 7.67  | 7.66  | 0.18 | 0.11 | 1.01  | 0.575637 | 0.578555 | 0.782893 | 0.748589 |
| MmugDNA.12608.1.S1_at   | MmugDNA.12608.1 | 4.37  | 4.36  | 0.19 | 0.04 | 1.01  | 0.759273 | 0.738313 | 0.889659 | 0.848258 |
| MmugDNA.12609.1.S1_at   | MmugDNA.12609.1 | 8.72  | 8.77  | 0.35 | 0.12 | -1.03 | 0.289861 | 0.359793 | 0.579405 | 0.601077 |
| MmugDNA.1261.1.S1_at    | MmugDNA.1261.1  | 7.26  | 7.68  | 0.39 | 0.23 | -1.35 | 0.201755 | 0.478643 | 0.49925  | 0.684657 |
| MmugDNA.12612.1.S1_s_at | MmugDNA.12612.1 | 7.34  | 7.47  | 0.46 | 0.24 | -1.09 | 0.512102 | 0.692382 | 0.742866 | 0.820984 |
| MmugDNA.12613.1.S1_at   | MmugDNA.12613.1 | 7.21  | 7.2   | 0.35 | 0.14 | 1     | 0.723705 | 0.850482 | 0.870187 | 0.91497  |
| MmugDNA.12614.1.S1_at   | MmugDNA.12614.1 | 11.89 | 12.42 | 0.61 | 0.05 | -1.45 | 0.067423 | 0.020092 | 0.317306 | 0.178033 |

|                         |                 |       |       |      |      |       |          |          |          |          |
|-------------------------|-----------------|-------|-------|------|------|-------|----------|----------|----------|----------|
| MmugDNA.12615.1.S1_at   | MmugDNA.12615.1 | 5.3   | 5.56  | 0.24 | 0.56 | -1.2  | 0.500392 | 0.014019 | 0.73465  | 0.151595 |
| MmugDNA.12616.1.S1_at   | MmugDNA.12616.1 | 8.39  | 8.39  | 0.2  | 0.11 | 1     | 0.988553 | 0.917329 | 0.995938 | 0.953807 |
| MmugDNA.12618.1.S1_at   | MmugDNA.12618.1 | 3     | 3.21  | 0.08 | 0.18 | -1.16 | 0.367414 | 0.308078 | 0.641394 | 0.564219 |
| MmugDNA.12619.1.S1_at   | MmugDNA.12619.1 | 3.6   | 3.6   | 0.07 | 0.1  | 1     | 0.715562 | 0.032169 | 0.865789 | 0.222069 |
| MmugDNA.12620.1.S1_at   | MmugDNA.12620.1 | 2.59  | 2.63  | 0.05 | 0.05 | -1.03 | 0.755612 | 0.973041 | 0.887352 | 0.985401 |
| MmugDNA.12621.1.S1_at   | MmugDNA.12621.1 | 4.69  | 4.53  | 0.21 | 0.48 | 1.12  | 0.588643 | 0.355801 | 0.791219 | 0.597864 |
| MmugDNA.12626.1.S1_s_at | MmugDNA.12626.1 | 9.33  | 9.26  | 0.26 | 0.08 | 1.05  | 0.4887   | 0.540237 | 0.727095 | 0.724221 |
| MmugDNA.12629.1.S1_at   | MmugDNA.12629.1 | 4.07  | 3.95  | 0.13 | 0.13 | 1.09  | 0.680658 | 0.114549 | 0.847721 | 0.381098 |
| MmugDNA.1263.1.S1_at    | MmugDNA.1263.1  | 7.75  | 7.7   | 0.12 | 0.04 | 1.03  | 0.799007 | 0.092951 | 0.909393 | 0.349044 |
| MmugDNA.12630.1.S1_at   | MmugDNA.12630.1 | 3.1   | 3     | 0.43 | 0.07 | 1.07  | 0.203905 | 0.306697 | 0.501449 | 0.563264 |
| MmugDNA.12631.1.S1_at   | MmugDNA.12631.1 | 4.42  | 4.15  | 0.14 | 0.27 | 1.21  | 0.538799 | 0.377629 | 0.760398 | 0.615071 |
| MmugDNA.12632.1.S1_at   | MmugDNA.12632.1 | 5.26  | 5.43  | 0.09 | 0.07 | -1.12 | 0.147443 | 0.057463 | 0.435407 | 0.285751 |
| MmugDNA.12633.1.S1_at   | MmugDNA.12633.1 | 7.47  | 7.45  | 0.14 | 0    | 1.01  | 0.726426 | 0.285279 | 0.871635 | 0.547192 |
| MmugDNA.12635.1.S1_at   | MmugDNA.12635.1 | 4.42  | 4.38  | 0.25 | 0.01 | 1.03  | 0.525089 | 0.617175 | 0.75172  | 0.773242 |
| MmugDNA.12636.1.S1_at   | MmugDNA.12636.1 | 7.28  | 6.93  | 0.32 | 0.04 | 1.27  | 0.040866 | 0.053309 | 0.25855  | 0.276463 |
| MmugDNA.12637.1.S1_at   | MmugDNA.12637.1 | 8.23  | 7.52  | 0.13 | 0.12 | 1.64  | 0.002382 | 0.000593 | 0.093326 | 0.041912 |
| MmugDNA.12638.1.S1_at   | MmugDNA.12638.1 | 5.43  | 5.62  | 0.06 | 0.61 | -1.14 | 0.679081 | 0.604271 | 0.846949 | 0.764558 |
| MmugDNA.12639.1.S1_at   | MmugDNA.12639.1 | 6.14  | 5.8   | 0.17 | 0.2  | 1.26  | 0.157889 | 0.212113 | 0.448694 | 0.486036 |
| MmugDNA.1264.1.S1_at    | MmugDNA.1264.1  | 3.53  | 3.49  | 0.3  | 0.09 | 1.03  | 0.330476 | 0.318351 | 0.612509 | 0.571192 |
| MmugDNA.12641.1.S1_at   | MmugDNA.12641.1 | 6     | 5.8   | 0.56 | 0.06 | 1.15  | 0.773081 | 0.935725 | 0.89602  | 0.963726 |
| MmugDNA.12642.1.S1_at   | MmugDNA.12642.1 | 2.9   | 2.86  | 0.02 | 0.14 | 1.03  | 0.707067 | 0.907728 | 0.861311 | 0.94778  |
| MmugDNA.12643.1.S1_at   | MmugDNA.12643.1 | 5.74  | 4.69  | 0.56 | 0.4  | 2.07  | 0.069726 | 0.067544 | 0.322433 | 0.305949 |
| MmugDNA.12644.1.S1_at   | MmugDNA.12644.1 | 11.18 | 11.34 | 0.12 | 0.08 | -1.12 | 0.107835 | 0.04507  | 0.382472 | 0.256789 |
| MmugDNA.12645.1.S1_at   | MmugDNA.12645.1 | 8.4   | 8.27  | 0.3  | 0.27 | 1.1   | 0.459021 | 0.012074 | 0.707345 | 0.142158 |
| MmugDNA.12646.1.S1_at   | MmugDNA.12646.1 | 9.65  | 9.54  | 0.1  | 0.06 | 1.08  | 0.118234 | 0.020208 | 0.395722 | 0.178561 |
| MmugDNA.12647.1.S1_at   | MmugDNA.12647.1 | 10.11 | 9.64  | 0.43 | 0.23 | 1.38  | 0.051899 | 0.046205 | 0.285232 | 0.259359 |
| MmugDNA.12649.1.S1_at   | MmugDNA.12649.1 | 3.18  | 3.03  | 0.11 | 0.09 | 1.11  | 0.091574 | 0.162871 | 0.359262 | 0.438966 |
| MmugDNA.12650.1.S1_at   | MmugDNA.12650.1 | 7.62  | 7.59  | 0.07 | 0.18 | 1.02  | 0.514099 | 0.956219 | 0.744131 | 0.975088 |
| MmugDNA.12651.1.S1_at   | MmugDNA.12651.1 | 6.72  | 6.66  | 0.29 | 0.08 | 1.04  | 0.610419 | 0.260595 | 0.805839 | 0.527103 |
| MmugDNA.12652.1.S1_at   | MmugDNA.12652.1 | 3.57  | 3.59  | 0.13 | 0.06 | -1.02 | 0.605313 | 0.884507 | 0.802363 | 0.934199 |
| MmugDNA.12654.1.S1_at   | MmugDNA.12654.1 | 3.69  | 3.32  | 0.15 | 0.19 | 1.3   | 0.136253 | 0.149573 | 0.420638 | 0.424095 |
| MmugDNA.12655.1.S1_at   | MmugDNA.12655.1 | 3.97  | 3.79  | 0.22 | 0.13 | 1.13  | 0.284615 | 0.209427 | 0.574565 | 0.483069 |
| MmugDNA.12656.1.S1_at   | MmugDNA.12656.1 | 8.82  | 8.42  | 0.48 | 0.08 | 1.32  | 0.20345  | 0.816413 | 0.501192 | 0.89413  |
| MmugDNA.12658.1.S1_at   | MmugDNA.12658.1 | 2.89  | 2.78  | 0.02 | 0.06 | 1.08  | 0.059554 | 0.401763 | 0.30116  | 0.631068 |
| MmugDNA.1266.1.S1_at    | MmugDNA.1266.1  | 5.02  | 4.94  | 0.17 | 0.18 | 1.06  | 0.560988 | 0.773963 | 0.774122 | 0.868585 |
| MmugDNA.12660.1.S1_at   | MmugDNA.12660.1 | 9.08  | 9.84  | 0.35 | 0.06 | -1.69 | 0.019414 | 0.026968 | 0.192344 | 0.205423 |
| MmugDNA.12661.1.S1_at   | MmugDNA.12661.1 | 5.54  | 5.32  | 0.23 | 0.12 | 1.17  | 0.354657 | 0.470592 | 0.631745 | 0.678925 |
| MmugDNA.12662.1.S1_at   | MmugDNA.12662.1 | 7.69  | 7.25  | 0.31 | 0.33 | 1.36  | 0.217665 | 0.64746  | 0.515507 | 0.793487 |
| MmugDNA.12663.1.S1_at   | MmugDNA.12663.1 | 7.34  | 7.52  | 0.29 | 0.09 | -1.13 | 0.115768 | 0.163059 | 0.392917 | 0.439224 |
| MmugDNA.12664.1.S1_at   | MmugDNA.12664.1 | 8.55  | 8.42  | 0.41 | 0.51 | 1.1   | 0.911817 | 0.019038 | 0.962655 | 0.173644 |
| MmugDNA.12665.1.S1_at   | MmugDNA.12665.1 | 5.25  | 5.29  | 0.04 | 0.37 | -1.03 | 0.937734 | 0.994605 | 0.973782 | 0.99666  |
| MmugDNA.12667.1.S1_at   | MmugDNA.12667.1 | 4.48  | 4.56  | 0.28 | 0.12 | -1.05 | 0.996772 | 0.729365 | 0.998936 | 0.843541 |
| MmugDNA.12668.1.S1_at   | MmugDNA.12668.1 | 5.13  | 5.68  | 0.33 | 0.19 | -1.46 | 0.069441 | 0.328577 | 0.321905 | 0.578148 |

|                         |                 |      |      |      |      |       |          |          |          |          |
|-------------------------|-----------------|------|------|------|------|-------|----------|----------|----------|----------|
| MmugDNA.12668.1.S1_s_at | MmugDNA.12668.1 | 5.75 | 6.2  | 0.28 | 0.23 | -1.36 | 0.062429 | 0.315579 | 0.306597 | 0.569053 |
| MmugDNA.12669.1.S1_at   | MmugDNA.12669.1 | 5.86 | 5.94 | 0.11 | 0.23 | -1.06 | 0.170395 | 0.343964 | 0.46404  | 0.58962  |
| MmugDNA.1267.1.S1_s_at  | MmugDNA.1267.1  | 4.7  | 5.35 | 0.48 | 0.09 | -1.58 | 0.250437 | 0.033836 | 0.54512  | 0.227575 |
| MmugDNA.12670.1.S1_at   | MmugDNA.12670.1 | 3.84 | 3.66 | 0.32 | 0.19 | 1.13  | 0.265284 | 0.367876 | 0.557962 | 0.607469 |
| MmugDNA.12671.1.S1_at   | MmugDNA.12671.1 | 6.49 | 7.11 | 0.47 | 0.13 | -1.54 | 0.293489 | 0.536836 | 0.582468 | 0.722119 |
| MmugDNA.12672.1.S1_s_at | MmugDNA.12672.1 | 4.87 | 5.07 | 0.13 | 0.22 | -1.15 | 0.356035 | 0.351954 | 0.632435 | 0.595336 |
| MmugDNA.12673.1.S1_at   | MmugDNA.12673.1 | 4.7  | 4.65 | 0.2  | 0.25 | 1.04  | 0.405726 | 0.558944 | 0.669103 | 0.735944 |
| MmugDNA.12674.1.S1_at   | MmugDNA.12674.1 | 4.64 | 4.63 | 0.09 | 0.13 | 1.01  | 0.907871 | 0.283139 | 0.961007 | 0.545694 |
| MmugDNA.12675.1.S1_at   | MmugDNA.12675.1 | 4.64 | 4.65 | 0.06 | 0.05 | -1.01 | 0.709923 | 0.888413 | 0.862704 | 0.93636  |
| MmugDNA.12676.1.S1_at   | MmugDNA.12676.1 | 4.67 | 4.6  | 0.04 | 0.15 | 1.04  | 0.56015  | 0.522392 | 0.773651 | 0.713139 |
| MmugDNA.12677.1.S1_at   | MmugDNA.12677.1 | 4.26 | 4.4  | 0.25 | 0.13 | -1.1  | 0.367503 | 0.59844  | 0.641471 | 0.760839 |
| MmugDNA.12678.1.S1_at   | MmugDNA.12678.1 | 4.69 | 4.69 | 0.14 | 0.1  | -1    | 0.531763 | 0.678269 | 0.755933 | 0.812064 |
| MmugDNA.12679.1.S1_at   | MmugDNA.12679.1 | 3.8  | 3.68 | 0.21 | 0.21 | 1.09  | 0.554549 | 0.439726 | 0.770723 | 0.65842  |
| MmugDNA.1268.1.S1_at    | MmugDNA.1268.1  | 6.01 | 6.1  | 0.52 | 0.13 | -1.07 | 0.358903 | 0.065427 | 0.634562 | 0.301415 |
| MmugDNA.12680.1.S1_at   | MmugDNA.12680.1 | 4.08 | 4.11 | 0.01 | 0.15 | -1.02 | 0.287603 | 0.344226 | 0.577473 | 0.589762 |
| MmugDNA.12681.1.S1_at   | MmugDNA.12681.1 | 4.47 | 4.17 | 0.9  | 0.24 | 1.23  | 0.276965 | 0.230228 | 0.568475 | 0.502084 |
| MmugDNA.12682.1.S1_at   | MmugDNA.12682.1 | 7.23 | 7.34 | 0.06 | 0.09 | -1.08 | 0.118952 | 0.325065 | 0.396643 | 0.575545 |
| MmugDNA.12683.1.S1_at   | MmugDNA.12683.1 | 4.97 | 5.16 | 0.14 | 0.2  | -1.14 | 0.179389 | 0.169858 | 0.474478 | 0.446544 |
| MmugDNA.12684.1.S1_at   | MmugDNA.12684.1 | 4.35 | 4.53 | 0.28 | 0.6  | -1.14 | 0.54147  | 0.649006 | 0.762191 | 0.794525 |
| MmugDNA.12685.1.S1_at   | MmugDNA.12685.1 | 8.41 | 8.3  | 0.3  | 0.25 | 1.08  | 0.400216 | 0.564648 | 0.665349 | 0.739414 |
| MmugDNA.12686.1.S1_at   | MmugDNA.12686.1 | 3.37 | 3.19 | 0.16 | 0.15 | 1.13  | 0.975337 | 0.868665 | 0.99019  | 0.925405 |
| MmugDNA.12687.1.S1_at   | MmugDNA.12687.1 | 7.57 | 7.33 | 0.11 | 0.09 | 1.18  | 0.075896 | 0.252512 | 0.333853 | 0.521079 |
| MmugDNA.12689.1.S1_at   | MmugDNA.12689.1 | 3.44 | 3.34 | 0.14 | 0.18 | 1.07  | 0.570262 | 0.330854 | 0.779298 | 0.57958  |
| MmugDNA.12690.1.S1_at   | MmugDNA.12690.1 | 6.93 | 6.91 | 0.21 | 0.08 | 1.01  | 0.934419 | 0.122467 | 0.972505 | 0.392348 |
| MmugDNA.12692.1.S1_at   | MmugDNA.12692.1 | 8.86 | 9.17 | 0.5  | 0.23 | -1.24 | 0.908033 | 0.380644 | 0.961071 | 0.6173   |
| MmugDNA.12693.1.S1_at   | MmugDNA.12693.1 | 7.67 | 7.71 | 0.31 | 0.05 | -1.03 | 0.542249 | 0.943355 | 0.762647 | 0.967832 |
| MmugDNA.12694.1.S1_at   | MmugDNA.12694.1 | 5.14 | 5.75 | 0.49 | 0.27 | -1.53 | 0.113829 | 0.102345 | 0.390524 | 0.362527 |
| MmugDNA.12696.1.S1_at   | MmugDNA.12696.1 | 5.38 | 5.09 | 0.2  | 0.17 | 1.22  | 0.636329 | 0.516133 | 0.822077 | 0.70873  |
| MmugDNA.12697.1.S1_at   | MmugDNA.12697.1 | 5.21 | 5.2  | 0.32 | 0.14 | 1.01  | 0.430092 | 0.182136 | 0.686476 | 0.458636 |
| MmugDNA.12698.1.S1_at   | MmugDNA.12698.1 | 4.19 | 4.06 | 0.11 | 0.18 | 1.1   | 0.464281 | 0.372125 | 0.710598 | 0.610981 |
| MmugDNA.12699.1.S1_at   | MmugDNA.12699.1 | 3.84 | 3.92 | 0.02 | 0.15 | -1.06 | 0.818461 | 0.197295 | 0.918952 | 0.472213 |
| MmugDNA.127.1.S1_at     | MmugDNA.127.1   | 6.35 | 6.4  | 0.57 | 0.09 | -1.03 | 0.374647 | 0.555688 | 0.645606 | 0.734    |
| MmugDNA.127.1.S1_x_at   | MmugDNA.127.1   | 9.03 | 8.59 | 0.18 | 0.18 | 1.36  | 0.020997 | 0.001995 | 0.198347 | 0.066264 |
| MmugDNA.12700.1.S1_at   | MmugDNA.12700.1 | 4.12 | 4.03 | 0.04 | 0.1  | 1.07  | 0.54386  | 0.276159 | 0.763667 | 0.540169 |
| MmugDNA.12701.1.S1_at   | MmugDNA.12701.1 | 4.88 | 4.77 | 1.04 | 0.27 | 1.07  | 0.242736 | 0.209293 | 0.539526 | 0.48303  |
| MmugDNA.12702.1.S1_at   | MmugDNA.12702.1 | 4.05 | 3.97 | 0.11 | 0.01 | 1.06  | 0.098226 | 0.05955  | 0.368826 | 0.290548 |
| MmugDNA.12704.1.S1_s_at | MmugDNA.12704.1 | 7.54 | 7.5  | 0.11 | 0.06 | 1.02  | 0.146599 | 0.047146 | 0.434564 | 0.261745 |
| MmugDNA.12705.1.S1_at   | MmugDNA.12705.1 | 5.21 | 5.52 | 0.11 | 0.12 | -1.24 | 0.059158 | 0.094725 | 0.30037  | 0.351535 |
| MmugDNA.12706.1.S1_at   | MmugDNA.12706.1 | 9.21 | 9.48 | 0.21 | 0.3  | -1.21 | 0.345355 | 0.156923 | 0.624372 | 0.432372 |
| MmugDNA.12707.1.S1_at   | MmugDNA.12707.1 | 5.58 | 5.22 | 0.41 | 0.37 | 1.28  | 0.365727 | 0.037136 | 0.640183 | 0.2372   |
| MmugDNA.12708.1.S1_at   | MmugDNA.12708.1 | 8.88 | 7.55 | 0.08 | 0.57 | 2.52  | 0.033102 | 0.011826 | 0.236157 | 0.140866 |
| MmugDNA.12709.1.S1_at   | MmugDNA.12709.1 | 6.85 | 6.69 | 0.41 | 0.27 | 1.11  | 0.472077 | 0.702558 | 0.71594  | 0.827615 |
| MmugDNA.1271.1.S1_at    | MmugDNA.1271.1  | 4.91 | 5.04 | 0.29 | 0.1  | -1.09 | 0.894184 | 0.489954 | 0.954822 | 0.692051 |



|                         |                 |       |       |      |      |       |          |          |          |          |
|-------------------------|-----------------|-------|-------|------|------|-------|----------|----------|----------|----------|
| MmugDNA.12710.1.S1_at   | MmugDNA.12710.1 | 4.29  | 4.06  | 0.16 | 0.41 | 1.18  | 0.179942 | 0.236554 | 0.475023 | 0.507364 |
| MmugDNA.12712.1.S1_s_at | MmugDNA.12712.1 | 10.62 | 10.53 | 0.35 | 0.15 | 1.07  | 0.830703 | 0.840308 | 0.925496 | 0.909001 |
| MmugDNA.12713.1.S1_at   | MmugDNA.12713.1 | 5.89  | 5.66  | 0.3  | 0.16 | 1.17  | 0.187256 | 0.228881 | 0.483386 | 0.501124 |
| MmugDNA.12714.1.S1_at   | MmugDNA.12714.1 | 9.43  | 8.82  | 0.11 | 0.06 | 1.53  | 0.001361 | 0.019976 | 0.079595 | 0.177532 |
| MmugDNA.12715.1.S1_s_at | MmugDNA.12715.1 | 10.88 | 11.09 | 0.24 | 0.07 | -1.16 | 0.098018 | 0.198993 | 0.368597 | 0.473569 |
| MmugDNA.12716.1.S1_at   | MmugDNA.12716.1 | 7.68  | 7.63  | 0.06 | 0.02 | 1.03  | 0.379306 | 0.102156 | 0.649287 | 0.362212 |
| MmugDNA.12717.1.S1_at   | MmugDNA.12717.1 | 5.79  | 5.79  | 0.17 | 0.05 | 1     | 0.758869 | 0.011004 | 0.889547 | 0.136623 |
| MmugDNA.12718.1.S1_at   | MmugDNA.12718.1 | 7.72  | 7.72  | 0.13 | 0.09 | -1    | 0.534804 | 0.542282 | 0.757917 | 0.725385 |
| MmugDNA.12719.1.S1_at   | MmugDNA.12719.1 | 3.82  | 3.94  | 0.21 | 0.28 | -1.08 | 0.843385 | 0.843493 | 0.931427 | 0.910881 |
| MmugDNA.1272.1.S1_at    | MmugDNA.1272.1  | 6.69  | 6.58  | 0.21 | 0.15 | 1.09  | 0.904959 | 0.709882 | 0.95977  | 0.831863 |
| MmugDNA.17946.1.S1_s_at | MmugDNA.17946.1 | 8.35  | 8.22  | 0.24 | 0.09 | 1.1   | 0.766373 | 0.332232 | 0.892818 | 0.580686 |
| MmugDNA.12721.1.S1_at   | MmugDNA.12721.1 | 4.46  | 4.42  | 0.22 | 0.08 | 1.03  | 0.182459 | 0.256278 | 0.478149 | 0.524079 |
| MmugDNA.12722.1.S1_at   | MmugDNA.12722.1 | 3.23  | 3.22  | 0.2  | 0.09 | 1.01  | 0.954947 | 0.865163 | 0.98151  | 0.923491 |
| MmugDNA.12723.1.S1_at   | MmugDNA.12723.1 | 5.41  | 5.27  | 0.15 | 0.04 | 1.1   | 0.181503 | 0.073811 | 0.47696  | 0.317146 |
| MmugDNA.12724.1.S1_at   | MmugDNA.12724.1 | 5     | 5.04  | 0.05 | 0.19 | -1.03 | 0.574761 | 0.101835 | 0.782184 | 0.361805 |
| MmugDNA.12726.1.S1_at   | MmugDNA.12726.1 | 5.88  | 5.92  | 0.39 | 0.07 | -1.03 | 0.941716 | 0.783692 | 0.975589 | 0.87473  |
| MmugDNA.12727.1.S1_at   | MmugDNA.12727.1 | 10.54 | 9.69  | 0.44 | 0.13 | 1.81  | 0.035742 | 0.002021 | 0.243972 | 0.066833 |
| MmugDNA.12729.1.S1_at   | MmugDNA.12729.1 | 3.7   | 3.72  | 0.13 | 0.04 | -1.01 | 0.748878 | 0.5517   | 0.883751 | 0.731155 |
| MmugDNA.1273.1.S1_at    | MmugDNA.1273.1  | 4.39  | 4.38  | 0.13 | 0.08 | 1.01  | 0.741167 | 0.638491 | 0.880016 | 0.78765  |
| MmugDNA.12730.1.S1_at   | MmugDNA.12730.1 | 6.76  | 6.66  | 0.06 | 0.11 | 1.08  | 0.211225 | 0.018705 | 0.509003 | 0.171763 |
| MmugDNA.12731.1.S1_at   | MmugDNA.12731.1 | 4.43  | 4.44  | 0.06 | 0.09 | -1    | 0.928523 | 0.135254 | 0.969772 | 0.407325 |
| MmugDNA.12732.1.S1_at   | MmugDNA.12732.1 | 4.28  | 3.97  | 0.12 | 0.09 | 1.24  | 0.052627 | 0.1621   | 0.286374 | 0.438244 |
| MmugDNA.12733.1.S1_at   | MmugDNA.12733.1 | 4.44  | 4.49  | 0.02 | 0.21 | -1.04 | 0.609263 | 0.684574 | 0.805097 | 0.816019 |
| MmugDNA.12734.1.S1_at   | MmugDNA.12734.1 | 6.42  | 6.05  | 0.25 | 0.24 | 1.29  | 0.089259 | 0.796469 | 0.356089 | 0.882693 |
| MmugDNA.12735.1.S1_at   | MmugDNA.12735.1 | 6.99  | 6.99  | 0.24 | 0.16 | 1     | 0.989653 | 0.929986 | 0.99638  | 0.960154 |
| MmugDNA.12739.1.S1_at   | MmugDNA.12739.1 | 10.86 | 10.78 | 0.34 | 0.07 | 1.06  | 0.304522 | 0.2447   | 0.591677 | 0.514521 |
| MmugDNA.1274.1.S1_at    | MmugDNA.1274.1  | 5.55  | 5.71  | 0.31 | 0.3  | -1.11 | 0.291257 | 0.289115 | 0.580618 | 0.55027  |
| MmugDNA.31816.1.S1_s_at | MmugDNA.31816.1 | 12.39 | 12.42 | 0.1  | 0.09 | -1.02 | 0.411194 | 0.02833  | 0.673163 | 0.210111 |
| MmugDNA.12742.1.S1_at   | MmugDNA.12742.1 | 3.47  | 3.48  | 0.1  | 0.13 | -1.01 | 0.791471 | 0.774715 | 0.905298 | 0.868833 |
| MmugDNA.12744.1.S1_at   | MmugDNA.12744.1 | 3.33  | 3.38  | 0.02 | 0.05 | -1.03 | 0.136454 | 0.810821 | 0.421005 | 0.890845 |
| MmugDNA.12746.1.S1_at   | MmugDNA.12746.1 | 11.67 | 11.51 | 0.07 | 0.14 | 1.12  | 0.142575 | 0.000644 | 0.428642 | 0.042928 |
| MmugDNA.27345.1.S1_at   | MmugDNA.27345.1 | 12.38 | 12.3  | 0.09 | 0.07 | 1.06  | 0.164598 | 0.123452 | 0.457706 | 0.393482 |
| MmugDNA.27345.1.S1_s_at | MmugDNA.27345.1 | 12.86 | 12.69 | 0.11 | 0.11 | 1.13  | 0.272175 | 0.107318 | 0.564146 | 0.370219 |
| MmugDNA.12747.1.S1_at   | MmugDNA.12747.1 | 3.83  | 3.9   | 0.24 | 0.17 | -1.05 | 0.40057  | 0.60686  | 0.665527 | 0.766111 |
| MmugDNA.1275.1.S1_at    | MmugDNA.1275.1  | 7.97  | 8.28  | 0.34 | 0.12 | -1.24 | 0.680349 | 0.015997 | 0.847511 | 0.160458 |
| MmugDNA.1275.1.S1_x_at  | MmugDNA.1275.1  | 7.84  | 8.14  | 0.25 | 0.09 | -1.23 | 0.405597 | 0.007075 | 0.669035 | 0.113284 |
| MmugDNA.12750.1.S1_at   | MmugDNA.12750.1 | 4.84  | 5.08  | 0.37 | 0.21 | -1.19 | 0.17472  | 0.187414 | 0.468957 | 0.46345  |
| MmugDNA.12752.1.S1_s_at | MmugDNA.12752.1 | 12.27 | 11.82 | 0.09 | 0.03 | 1.37  | 0.001686 | 0.044892 | 0.084735 | 0.256424 |
| MmugDNA.12753.1.S1_at   | MmugDNA.12753.1 | 6.23  | 6.07  | 0.15 | 0.18 | 1.12  | 0.440117 | 0.152478 | 0.694199 | 0.427287 |
| MmugDNA.12754.1.S1_s_at | MmugDNA.12754.1 | 4.39  | 4.04  | 0.27 | 0.04 | 1.27  | 0.110232 | 0.048758 | 0.385589 | 0.265764 |
| MmugDNA.12755.1.S1_s_at | MmugDNA.12755.1 | 7.77  | 7.86  | 0.17 | 0.07 | -1.07 | 0.406548 | 0.260993 | 0.669808 | 0.527363 |
| MmugDNA.12756.1.S1_at   | MmugDNA.12756.1 | 5.67  | 5.76  | 0.13 | 0.07 | -1.06 | 0.669206 | 0.877461 | 0.841311 | 0.930158 |
| MmugDNA.12758.1.S1_at   | MmugDNA.12758.1 | 6.9   | 6.92  | 0.27 | 0.09 | -1.01 | 0.927128 | 0.249473 | 0.969146 | 0.518532 |

|                         |                 |       |       |      |      |       |          |          |          |          |
|-------------------------|-----------------|-------|-------|------|------|-------|----------|----------|----------|----------|
| MmugDNA.1276.1.S1_at    | MmugDNA.1276.1  | 4.67  | 3.58  | 0.74 | 0.57 | 2.14  | 0.333544 | 0.165903 | 0.614935 | 0.442326 |
| MmugDNA.12760.1.S1_at   | MmugDNA.12760.1 | 7.77  | 6.62  | 0.95 | 0.14 | 2.22  | 0.037131 | 0.020105 | 0.247978 | 0.178091 |
| MmugDNA.12761.1.S1_at   | MmugDNA.12761.1 | 6.71  | 6.14  | 0.3  | 0.86 | 1.49  | 0.324291 | 0.368259 | 0.607951 | 0.607863 |
| MmugDNA.12762.1.S1_s_at | MmugDNA.12762.1 | 10.65 | 9.79  | 0.18 | 0.09 | 1.82  | 0.002259 | 0.000497 | 0.091423 | 0.038955 |
| MmugDNA.12763.1.S1_at   | MmugDNA.12763.1 | 10.83 | 10.37 | 0.28 | 0.01 | 1.38  | 0.076514 | 0.242216 | 0.334818 | 0.51267  |
| MmugDNA.12764.1.S1_at   | MmugDNA.12764.1 | 4.21  | 4.21  | 0.09 | 0.03 | 1     | 0.439794 | 0.325443 | 0.693902 | 0.575807 |
| MmugDNA.12765.1.S1_at   | MmugDNA.12765.1 | 8.05  | 7.91  | 0.09 | 0.18 | 1.11  | 0.452136 | 0.126678 | 0.702737 | 0.397363 |
| MmugDNA.12766.1.S1_at   | MmugDNA.12766.1 | 4.54  | 5.29  | 0.11 | 0.52 | -1.68 | 0.028156 | 0.12632  | 0.220253 | 0.396787 |
| MmugDNA.12766.1.S1_s_at | MmugDNA.12766.1 | 5.92  | 6.06  | 0.07 | 0.1  | -1.11 | 0.113818 | 0.520217 | 0.390524 | 0.711546 |
| MmugDNA.12767.1.S1_at   | MmugDNA.12767.1 | 6.2   | 5.44  | 0.46 | 0.5  | 1.69  | 0.042219 | 0.0418   | 0.262423 | 0.249015 |
| MmugDNA.12768.1.S1_at   | MmugDNA.12768.1 | 6.92  | 6.94  | 0.08 | 0.07 | -1.01 | 0.330296 | 0.843279 | 0.612348 | 0.910767 |
| MmugDNA.12769.1.S1_at   | MmugDNA.12769.1 | 7.17  | 7.29  | 0.41 | 0.33 | -1.09 | 0.692591 | 0.615244 | 0.853103 | 0.771884 |
| MmugDNA.1277.1.S1_at    | MmugDNA.1277.1  | 4.14  | 4.06  | 0.45 | 0.09 | 1.06  | 0.489802 | 0.67074  | 0.727998 | 0.807469 |
| MmugDNA.12770.1.S1_at   | MmugDNA.12770.1 | 4.69  | 4.69  | 0.12 | 0.07 | 1     | 0.743284 | 0.419899 | 0.881285 | 0.643737 |
| MmugDNA.12771.1.S1_at   | MmugDNA.12771.1 | 4.28  | 4.28  | 0.09 | 0.04 | 1     | 0.460413 | 0.481496 | 0.708167 | 0.686469 |
| MmugDNA.12772.1.S1_at   | MmugDNA.12772.1 | 9.94  | 10.69 | 0.18 | 0.22 | -1.68 | 0.034485 | 0.575989 | 0.240323 | 0.746919 |
| MmugDNA.12773.1.S1_at   | MmugDNA.12773.1 | 5.76  | 6.49  | 0.12 | 0.06 | -1.66 | 0.000586 | 0.366155 | 0.070727 | 0.605941 |
| MmugDNA.12774.1.S1_at   | MmugDNA.12774.1 | 10.52 | 10.34 | 0.25 | 0.11 | 1.13  | 0.322281 | 0.166989 | 0.606311 | 0.443466 |
| MmugDNA.12775.1.S1_at   | MmugDNA.12775.1 | 13.64 | 13.48 | 0.05 | 0.13 | 1.12  | 0.198248 | 0.003587 | 0.495463 | 0.085687 |
| MmugDNA.12775.1.S1_x_at | MmugDNA.12775.1 | 13.56 | 13.34 | 0.08 | 0.13 | 1.17  | 0.291303 | 0.005568 | 0.580618 | 0.103069 |
| MmugDNA.12776.1.S1_at   | MmugDNA.12776.1 | 9.26  | 8.79  | 0.22 | 0    | 1.38  | 0.060326 | 0.28296  | 0.302774 | 0.545692 |
| MmugDNA.12777.1.S1_at   | MmugDNA.12777.1 | 3.86  | 3.84  | 0.42 | 0.17 | 1.01  | 0.77705  | 0.952225 | 0.898158 | 0.972929 |
| MmugDNA.12778.1.S1_at   | MmugDNA.12778.1 | 10.04 | 9.96  | 0.47 | 0.41 | 1.06  | 0.965483 | 0.040609 | 0.986001 | 0.246364 |
| MmugDNA.12779.1.S1_at   | MmugDNA.12779.1 | 9.63  | 9.15  | 0.03 | 0.1  | 1.39  | 0.001127 | 0.031711 | 0.077306 | 0.220493 |
| MmugDNA.1278.1.S1_at    | MmugDNA.1278.1  | 8.15  | 9.1   | 0.44 | 0.15 | -1.94 | 0.050768 | 0.146958 | 0.283078 | 0.421011 |
| MmugDNA.12781.1.S1_at   | MmugDNA.12781.1 | 3.52  | 3.55  | 0.24 | 0.32 | -1.02 | 0.94369  | 0.992211 | 0.976335 | 0.995563 |
| MmugDNA.12782.1.S1_at   | MmugDNA.12782.1 | 8.54  | 8.2   | 0.21 | 0.16 | 1.26  | 0.176875 | 0.014741 | 0.471391 | 0.15446  |
| MmugDNA.12783.1.S1_at   | MmugDNA.12783.1 | 8.32  | 7.9   | 0.29 | 0.16 | 1.33  | 0.060052 | 0.044448 | 0.302267 | 0.25521  |
| MmugDNA.12784.1.S1_at   | MmugDNA.12784.1 | 6.41  | 6.47  | 0.15 | 0.03 | -1.04 | 0.763184 | 0.790735 | 0.8915   | 0.878973 |
| MmugDNA.12785.1.S1_at   | MmugDNA.12785.1 | 3.99  | 4.06  | 0.04 | 0.1  | -1.04 | 0.675938 | 0.360901 | 0.845302 | 0.60194  |
| MmugDNA.12787.1.S1_at   | MmugDNA.12787.1 | 11    | 11.7  | 0.15 | 0.03 | -1.63 | 0.00172  | 0.026636 | 0.085035 | 0.204075 |
| MmugDNA.12788.1.S1_at   | MmugDNA.12788.1 | 8.89  | 9.19  | 0.14 | 0.18 | -1.23 | 0.237184 | 0.329678 | 0.534591 | 0.578874 |
| MmugDNA.1279.1.S1_at    | MmugDNA.1279.1  | 6.01  | 6.85  | 0.2  | 0.56 | -1.79 | 0.194631 | 0.289175 | 0.491247 | 0.550293 |
| MmugDNA.12790.1.S1_at   | MmugDNA.12790.1 | 7.39  | 6.85  | 0.11 | 0.21 | 1.46  | 0.038793 | 0.004651 | 0.253262 | 0.095108 |
| MmugDNA.12793.1.S1_at   | MmugDNA.12793.1 | 6.54  | 6.62  | 0.07 | 0.14 | -1.06 | 0.78544  | 0.208521 | 0.90204  | 0.482453 |
| MmugDNA.12796.1.S1_at   | MmugDNA.12796.1 | 4.04  | 4.01  | 0.23 | 0.09 | 1.03  | 0.76692  | 0.284976 | 0.893062 | 0.547071 |
| MmugDNA.12798.1.S1_at   | MmugDNA.12798.1 | 5.88  | 6.37  | 1.41 | 0.25 | -1.4  | 0.676074 | 0.793893 | 0.845327 | 0.881131 |
| MmugDNA.12799.1.S1_at   | MmugDNA.12799.1 | 5.02  | 5.09  | 0.04 | 0.05 | -1.05 | 0.104362 | 0.102581 | 0.377773 | 0.362933 |
| MmugDNA.1280.1.S1_at    | MmugDNA.1280.1  | 5.21  | 4.34  | 0.62 | 0.21 | 1.83  | 0.079668 | 0.160003 | 0.33985  | 0.436167 |
| MmugDNA.12800.1.S1_at   | MmugDNA.12800.1 | 5.05  | 4.7   | 0.37 | 0.12 | 1.28  | 0.187683 | 0.139964 | 0.483923 | 0.413309 |
| MmugDNA.12802.1.S1_at   | MmugDNA.12802.1 | 6.23  | 6.18  | 0.06 | 0.06 | 1.03  | 0.877211 | 0.001617 | 0.947466 | 0.06074  |
| MmugDNA.12804.1.S1_at   | MmugDNA.12804.1 | 2.89  | 3.06  | 0.56 | 0.28 | -1.12 | 0.699515 | 0.767105 | 0.857319 | 0.864712 |
| MmugDNA.12805.1.S1_at   | MmugDNA.12805.1 | 3.87  | 3.73  | 0.09 | 0.09 | 1.1   | 0.138516 | 0.163139 | 0.423985 | 0.4393   |

|                         |                 |       |       |      |      |       |          |          |          |          |
|-------------------------|-----------------|-------|-------|------|------|-------|----------|----------|----------|----------|
| MmugDNA.12806.1.S1_at   | MmugDNA.12806.1 | 6.37  | 6.36  | 0.07 | 0.11 | 1.01  | 0.206708 | 0.749322 | 0.504346 | 0.854352 |
| MmugDNA.12807.1.S1_at   | MmugDNA.12807.1 | 3.42  | 3.7   | 0.21 | 0.13 | -1.21 | 0.577597 | 0.796355 | 0.783696 | 0.882625 |
| MmugDNA.12808.1.S1_at   | MmugDNA.12808.1 | 7.97  | 8.61  | 0.97 | 0.19 | -1.55 | 0.106512 | 0.10938  | 0.380675 | 0.373156 |
| MmugDNA.12809.1.S1_at   | MmugDNA.12809.1 | 5.27  | 5.26  | 0.1  | 0.04 | 1.01  | 0.440014 | 0.592262 | 0.694079 | 0.757652 |
| MmugDNA.1281.1.S1_at    | MmugDNA.1281.1  | 5     | 4.97  | 0.05 | 0.19 | 1.02  | 0.654666 | 0.952677 | 0.832889 | 0.973147 |
| MmugDNA.12812.1.S1_at   | MmugDNA.12812.1 | 12.04 | 11.88 | 0.04 | 0.07 | 1.12  | 0.040309 | 0.139409 | 0.257247 | 0.412691 |
| MmugDNA.12813.1.S1_at   | MmugDNA.12813.1 | 3.16  | 3.2   | 0.16 | 0.11 | -1.03 | 0.418541 | 0.589246 | 0.678425 | 0.755509 |
| MmugDNA.12814.1.S1_at   | MmugDNA.12814.1 | 4.59  | 4.65  | 0.06 | 0.08 | -1.05 | 0.332441 | 0.365924 | 0.614085 | 0.605798 |
| MmugDNA.12815.1.S1_at   | MmugDNA.12815.1 | 3.74  | 3.66  | 0.05 | 0.32 | 1.06  | 0.653876 | 0.492273 | 0.832423 | 0.693485 |
| MmugDNA.12816.1.S1_at   | MmugDNA.12816.1 | 7.69  | 7.18  | 0.2  | 0.31 | 1.42  | 0.062833 | 0.017883 | 0.307336 | 0.168819 |
| MmugDNA.12817.1.S1_at   | MmugDNA.12817.1 | 10.78 | 10.74 | 0.09 | 0.04 | 1.03  | 0.190114 | 0.00096  | 0.486473 | 0.049342 |
| MmugDNA.12818.1.S1_at   | MmugDNA.12818.1 | 5.13  | 5.25  | 0.3  | 0.24 | -1.08 | 0.636273 | 0.92914  | 0.822077 | 0.959637 |
| MmugDNA.12819.1.S1_at   | MmugDNA.12819.1 | 3.73  | 3.65  | 0.24 | 0.11 | 1.06  | 0.838639 | 0.7834   | 0.929155 | 0.874571 |
| MmugDNA.1282.1.S1_at    | MmugDNA.1282.1  | 4.54  | 4.45  | 0.08 | 0.11 | 1.07  | 0.819572 | 0.766403 | 0.919644 | 0.864265 |
| MmugDNA.12820.1.S1_at   | MmugDNA.12820.1 | 3.95  | 3.87  | 0.34 | 0.11 | 1.06  | 0.260249 | 0.238702 | 0.554444 | 0.509385 |
| MmugDNA.12821.1.S1_at   | MmugDNA.12821.1 | 10.76 | 11.34 | 0.41 | 0.03 | -1.5  | 0.02767  | 0.014292 | 0.21885  | 0.152639 |
| MmugDNA.12822.1.S1_at   | MmugDNA.12822.1 | 4.39  | 4.67  | 0.15 | 0.35 | -1.22 | 0.142631 | 0.148387 | 0.428696 | 0.422996 |
| MmugDNA.12824.1.S1_at   | MmugDNA.12824.1 | 6.34  | 6.22  | 0.27 | 0.22 | 1.08  | 0.836098 | 0.060334 | 0.92813  | 0.292254 |
| MmugDNA.12825.1.S1_at   | MmugDNA.12825.1 | 3.33  | 3.31  | 0.05 | 0.15 | 1.01  | 0.520339 | 0.823001 | 0.748693 | 0.898312 |
| MmugDNA.12826.1.S1_x_at | MmugDNA.12826.1 | 9.6   | 9.62  | 0.21 | 0.05 | -1.01 | 0.847901 | 0.247813 | 0.933781 | 0.517219 |
| MmugDNA.12827.1.S1_at   | MmugDNA.12827.1 | 5.01  | 5.12  | 0.18 | 0.08 | -1.08 | 0.961044 | 0.686964 | 0.984082 | 0.817365 |
| MmugDNA.12829.1.S1_at   | MmugDNA.12829.1 | 4.99  | 4.85  | 0.13 | 0.09 | 1.1   | 0.881387 | 0.000234 | 0.949601 | 0.03241  |
| MmugDNA.1283.1.S1_at    | MmugDNA.1283.1  | 4.18  | 3.37  | 0.92 | 0.19 | 1.76  | 0.204381 | 0.260236 | 0.502114 | 0.526807 |
| MmugDNA.12830.1.S1_at   | MmugDNA.12830.1 | 6.38  | 6.25  | 0.16 | 0.13 | 1.1   | 0.393532 | 0.425615 | 0.660319 | 0.647989 |
| MmugDNA.24441.1.S1_s_at | MmugDNA.24441.1 | 10.78 | 11.19 | 0.72 | 0.03 | -1.33 | 0.328946 | 0.298001 | 0.611239 | 0.556695 |
| MmugDNA.12832.1.S1_at   | MmugDNA.12832.1 | 5.03  | 5     | 0.2  | 0.14 | 1.02  | 0.344791 | 0.162235 | 0.624027 | 0.438447 |
| MmugDNA.12833.1.S1_at   | MmugDNA.12833.1 | 7.52  | 7.53  | 0.25 | 0.16 | -1.01 | 0.834768 | 0.584431 | 0.927335 | 0.752435 |
| MmugDNA.12834.1.S1_at   | MmugDNA.12834.1 | 5.82  | 6.33  | 1.12 | 0.09 | -1.41 | 0.846953 | 0.832877 | 0.933208 | 0.904108 |
| MmugDNA.12837.1.S1_at   | MmugDNA.12837.1 | 3.84  | 4     | 0.17 | 0.23 | -1.12 | 0.494949 | 0.187076 | 0.731451 | 0.462997 |
| MmugDNA.12838.1.S1_at   | MmugDNA.12838.1 | 7.49  | 8.07  | 1.47 | 0.14 | -1.5  | 0.719692 | 0.758164 | 0.867731 | 0.8593   |
| MmugDNA.12839.1.S1_at   | MmugDNA.12839.1 | 6.92  | 6.16  | 0.61 | 0.38 | 1.69  | 0.37258  | 0.259691 | 0.645023 | 0.526583 |
| MmugDNA.1284.1.S1_s_at  | MmugDNA.1284.1  | 8.03  | 7.95  | 0.15 | 0.11 | 1.06  | 0.189294 | 0.360149 | 0.485819 | 0.601268 |
| MmugDNA.12840.1.S1_at   | MmugDNA.12840.1 | 3.58  | 3.63  | 0.46 | 0.11 | -1.04 | 0.604159 | 0.822381 | 0.801436 | 0.897821 |
| MmugDNA.12840.1.S1_s_at | MmugDNA.12840.1 | 4.36  | 3.97  | 1.11 | 0.17 | 1.31  | 0.216348 | 0.255786 | 0.514109 | 0.523727 |
| MmugDNA.12842.1.S1_at   | MmugDNA.12842.1 | 7.94  | 7.1   | 0.36 | 0.11 | 1.79  | 0.044275 | 0.000263 | 0.267433 | 0.033786 |
| MmugDNA.12843.1.S1_at   | MmugDNA.12843.1 | 5.2   | 4.55  | 0.34 | 0.29 | 1.57  | 0.15314  | 0.183575 | 0.44282  | 0.459681 |
| MmugDNA.12844.1.S1_at   | MmugDNA.12844.1 | 6.02  | 6.37  | 0.42 | 0.66 | -1.27 | 0.35483  | 0.619175 | 0.631821 | 0.774408 |
| MmugDNA.12845.1.S1_at   | MmugDNA.12845.1 | 3.45  | 3.13  | 0.13 | 0.3  | 1.25  | 0.577289 | 0.224215 | 0.783527 | 0.497164 |
| MmugDNA.12846.1.S1_s_at | MmugDNA.12846.1 | 9.64  | 9.69  | 0.29 | 0.2  | -1.03 | 0.338434 | 0.381494 | 0.618777 | 0.617691 |
| MmugDNA.12848.1.S1_at   | MmugDNA.12848.1 | 7.39  | 6.89  | 0.62 | 0.04 | 1.42  | 0.207598 | 0.38749  | 0.50535  | 0.622163 |
| MmugDNA.12849.1.S1_at   | MmugDNA.12849.1 | 8.72  | 8.89  | 0.21 | 0.08 | -1.12 | 0.171042 | 0.008807 | 0.464851 | 0.124117 |
| MmugDNA.1285.1.S1_at    | MmugDNA.1285.1  | 7.82  | 7.87  | 0.23 | 0.09 | -1.03 | 0.817928 | 0.375805 | 0.918705 | 0.613697 |
| MmugDNA.12850.1.S1_at   | MmugDNA.12850.1 | 6.58  | 6.26  | 0.34 | 0.05 | 1.25  | 0.159643 | 0.166059 | 0.450943 | 0.442653 |

|                         |                 |       |       |      |      |       |          |          |          |          |
|-------------------------|-----------------|-------|-------|------|------|-------|----------|----------|----------|----------|
| MmugDNA.12852.1.S1_at   | MmugDNA.12852.1 | 3.92  | 3.7   | 0.18 | 0.02 | 1.17  | 0.09737  | 0.065101 | 0.367528 | 0.301119 |
| MmugDNA.12853.1.S1_at   | MmugDNA.12853.1 | 5.25  | 6.39  | 0.4  | 0.33 | -2.2  | 0.019787 | 0.097363 | 0.193671 | 0.35507  |
| MmugDNA.12856.1.S1_at   | MmugDNA.12856.1 | 5.7   | 5.34  | 1.47 | 0.72 | 1.28  | 0.418864 | 0.529536 | 0.678622 | 0.717341 |
| MmugDNA.12858.1.S1_at   | MmugDNA.12858.1 | 4.89  | 4.81  | 0.13 | 0.35 | 1.06  | 0.716647 | 0.890353 | 0.866324 | 0.937508 |
| MmugDNA.12859.1.S1_at   | MmugDNA.12859.1 | 5.53  | 5.55  | 0.14 | 0.03 | -1.01 | 0.421183 | 0.655453 | 0.679846 | 0.798546 |
| MmugDNA.12860.1.S1_at   | MmugDNA.12860.1 | 7.84  | 8.36  | 0.17 | 0.16 | -1.43 | 0.014636 | 0.114581 | 0.172862 | 0.381131 |
| MmugDNA.12861.1.S1_at   | MmugDNA.12861.1 | 6.47  | 6.6   | 0.14 | 0.02 | -1.09 | 0.2395   | 0.116039 | 0.536855 | 0.383257 |
| MmugDNA.12862.1.S1_at   | MmugDNA.12862.1 | 10.59 | 10.64 | 0.26 | 0.28 | -1.03 | 0.469999 | 0.04976  | 0.714636 | 0.268151 |
| MmugDNA.12864.1.S1_x_at | MmugDNA.12864.1 | 8.74  | 9     | 0.56 | 0.13 | -1.2  | 0.885472 | 0.67526  | 0.95111  | 0.81026  |
| MmugDNA.12867.1.S1_at   | MmugDNA.12867.1 | 12.28 | 11.93 | 0.12 | 0.06 | 1.27  | 0.027741 | 0.108877 | 0.219012 | 0.372496 |
| MmugDNA.12868.1.S1_at   | MmugDNA.12868.1 | 10.19 | 10.17 | 0.13 | 0.09 | 1.01  | 0.710622 | 0.053882 | 0.863193 | 0.277682 |
| MmugDNA.12869.1.S1_at   | MmugDNA.12869.1 | 11.26 | 11.21 | 0.22 | 0.13 | 1.04  | 0.649435 | 0.524529 | 0.829674 | 0.714395 |
| MmugDNA.1287.1.S1_s_at  | MmugDNA.1287.1  | 7.14  | 8.22  | 0.42 | 0.22 | -2.12 | 0.035429 | 0.327382 | 0.243018 | 0.577284 |
| MmugDNA.12870.1.S1_at   | MmugDNA.12870.1 | 3.53  | 3.57  | 0.14 | 0    | -1.02 | 0.238509 | 0.270061 | 0.535882 | 0.535338 |
| MmugDNA.12871.1.S1_at   | MmugDNA.12871.1 | 5.14  | 4.96  | 0.21 | 0.04 | 1.13  | 0.059184 | 0.054085 | 0.30037  | 0.277914 |
| MmugDNA.12872.1.S1_at   | MmugDNA.12872.1 | 7.69  | 6.84  | 0.04 | 0.11 | 1.81  | 0.000324 | 0.001381 | 0.0594   | 0.056947 |
| MmugDNA.12874.1.S1_at   | MmugDNA.12874.1 | 6.71  | 6.55  | 0.45 | 0.11 | 1.12  | 0.765388 | 0.848502 | 0.892409 | 0.914012 |
| MmugDNA.12876.1.S1_at   | MmugDNA.12876.1 | 5.73  | 5.47  | 0.3  | 0.06 | 1.2   | 0.116893 | 0.200159 | 0.393977 | 0.474603 |
| MmugDNA.12877.1.S1_at   | MmugDNA.12877.1 | 2.81  | 2.79  | 0.09 | 0.02 | 1.01  | 0.27991  | 0.535206 | 0.571191 | 0.720821 |
| MmugDNA.12879.1.S1_at   | MmugDNA.12879.1 | 5.21  | 4.83  | 0.56 | 0.07 | 1.3   | 0.112995 | 0.042463 | 0.389499 | 0.250702 |
| MmugDNA.1288.1.S1_at    | MmugDNA.1288.1  | 8.05  | 9.56  | 0.97 | 0.21 | -2.86 | 0.058821 | 0.257682 | 0.299626 | 0.525332 |
| MmugDNA.12882.1.S1_at   | MmugDNA.12882.1 | 5.94  | 5.94  | 0.06 | 0.02 | 1     | 0.595963 | 0.354371 | 0.795524 | 0.597166 |
| MmugDNA.12883.1.S1_at   | MmugDNA.12883.1 | 4.66  | 4.72  | 0.09 | 0.11 | -1.04 | 0.941431 | 0.027897 | 0.975495 | 0.208505 |
| MmugDNA.12884.1.S1_at   | MmugDNA.12884.1 | 4.54  | 4.54  | 0.05 | 0.06 | 1     | 0.946072 | 0.084961 | 0.977211 | 0.336592 |
| MmugDNA.12886.1.S1_at   | MmugDNA.12886.1 | 3     | 3.09  | 0.03 | 0.08 | -1.07 | 0.042738 | 0.026493 | 0.263901 | 0.203897 |
| MmugDNA.12887.1.S1_at   | MmugDNA.12887.1 | 5.51  | 5.63  | 0.12 | 0.05 | -1.08 | 0.297414 | 0.09249  | 0.585842 | 0.348429 |
| MmugDNA.12888.1.S1_at   | MmugDNA.12888.1 | 8.84  | 8.75  | 0.91 | 0.14 | 1.07  | 0.899121 | 0.398191 | 0.957051 | 0.629257 |
| MmugDNA.1289.1.S1_at    | MmugDNA.1289.1  | 4.94  | 5.16  | 0.37 | 0.03 | -1.16 | 0.960791 | 0.796945 | 0.983983 | 0.882822 |
| MmugDNA.12890.1.S1_at   | MmugDNA.12890.1 | 6.72  | 8.06  | 0.81 | 0.34 | -2.54 | 0.081444 | 0.236485 | 0.342467 | 0.507336 |
| MmugDNA.12891.1.S1_at   | MmugDNA.12891.1 | 5.78  | 5.71  | 0.14 | 0.38 | 1.05  | 0.420887 | 0.236741 | 0.67979  | 0.507512 |
| MmugDNA.12892.1.S1_at   | MmugDNA.12892.1 | 10.38 | 10.26 | 0.44 | 0.16 | 1.09  | 0.479508 | 0.713274 | 0.720709 | 0.833666 |
| MmugDNA.12893.1.S1_at   | MmugDNA.12893.1 | 5.47  | 5.77  | 0.25 | 0.45 | -1.23 | 0.211181 | 0.432018 | 0.509003 | 0.652738 |
| MmugDNA.12894.1.S1_at   | MmugDNA.12894.1 | 9.84  | 11.16 | 0.35 | 0.17 | -2.49 | 0.010305 | 0.280057 | 0.151336 | 0.543369 |
| MmugDNA.12897.1.S1_at   | MmugDNA.12897.1 | 10.28 | 9.76  | 0.14 | 0.07 | 1.43  | 0.004133 | 0.001905 | 0.109692 | 0.065139 |
| MmugDNA.12898.1.S1_at   | MmugDNA.12898.1 | 3.23  | 3.27  | 0.2  | 0.07 | -1.02 | 0.889854 | 0.451965 | 0.953112 | 0.666717 |
| MmugDNA.12899.1.S1_at   | MmugDNA.12899.1 | 8.61  | 8.97  | 0.43 | 0.29 | -1.29 | 0.87475  | 0.984379 | 0.946258 | 0.991287 |
| MmugDNA.129.1.S1_s_at   | MmugDNA.129.1   | 5.87  | 5.24  | 0.81 | 0.28 | 1.55  | 0.253009 | 0.24329  | 0.547557 | 0.513356 |
| MmugDNA.12901.1.S1_at   | MmugDNA.12901.1 | 3.29  | 2.9   | 0.33 | 0.11 | 1.31  | 0.182866 | 0.200072 | 0.478646 | 0.474603 |
| MmugDNA.12902.1.S1_at   | MmugDNA.12902.1 | 6.04  | 6.92  | 0.6  | 0.22 | -1.84 | 0.070814 | 0.232001 | 0.324317 | 0.503726 |
| MmugDNA.12903.1.S1_at   | MmugDNA.12903.1 | 3.78  | 3.8   | 0.27 | 0.25 | -1.02 | 0.200519 | 0.313429 | 0.497869 | 0.567879 |
| MmugDNA.12903.1.S1_s_at | MmugDNA.12903.1 | 6.04  | 6.27  | 0.45 | 0.44 | -1.17 | 0.119672 | 0.171948 | 0.397626 | 0.448352 |
| MmugDNA.12905.1.S1_at   | MmugDNA.12905.1 | 3.69  | 3.3   | 0.49 | 0.12 | 1.31  | 0.241854 | 0.188344 | 0.538882 | 0.46433  |
| MmugDNA.12906.1.S1_at   | MmugDNA.12906.1 | 8.09  | 7.68  | 0.62 | 0.34 | 1.33  | 0.488119 | 0.270882 | 0.726687 | 0.536026 |

|                         |                 |       |       |      |      |       |          |          |          |          |
|-------------------------|-----------------|-------|-------|------|------|-------|----------|----------|----------|----------|
| MmugDNA.12907.1.S1_at   | MmugDNA.12907.1 | 4.8   | 4.84  | 0.01 | 0.51 | -1.03 | 0.319334 | 0.354565 | 0.603948 | 0.597269 |
| MmugDNA.12909.1.S1_at   | MmugDNA.12909.1 | 4.09  | 4.08  | 0.06 | 0.2  | 1.01  | 0.318147 | 0.45821  | 0.602917 | 0.671077 |
| MmugDNA.1291.1.S1_at    | MmugDNA.1291.1  | 6.02  | 6     | 1.48 | 0.18 | 1.02  | 0.675211 | 0.578986 | 0.845013 | 0.748791 |
| MmugDNA.12910.1.S1_at   | MmugDNA.12910.1 | 6.74  | 6.86  | 0.14 | 0.04 | -1.09 | 0.180223 | 0.149002 | 0.475353 | 0.423337 |
| MmugDNA.12911.1.S1_at   | MmugDNA.12911.1 | 8.22  | 8.1   | 0.22 | 0.13 | 1.08  | 0.111796 | 0.07481  | 0.387904 | 0.318603 |
| MmugDNA.12912.1.S1_at   | MmugDNA.12912.1 | 11.08 | 10.63 | 0.15 | 0.17 | 1.37  | 0.02312  | 0.689727 | 0.20514  | 0.819049 |
| MmugDNA.12913.1.S1_at   | MmugDNA.12913.1 | 6.39  | 6.38  | 0.16 | 0.25 | 1     | 0.423895 | 0.194739 | 0.681773 | 0.469774 |
| MmugDNA.12915.1.S1_at   | MmugDNA.12915.1 | 3.41  | 3.41  | 0.04 | 0.01 | 1     | 0.508506 | 0.436487 | 0.740425 | 0.656022 |
| MmugDNA.12916.1.S1_at   | MmugDNA.12916.1 | 9.95  | 9.25  | 0.23 | 0.17 | 1.62  | 0.028997 | 0.028788 | 0.223068 | 0.211521 |
| MmugDNA.12917.1.S1_at   | MmugDNA.12917.1 | 10.65 | 10.97 | 0.19 | 0.07 | -1.24 | 0.215531 | 0.036459 | 0.513223 | 0.235423 |
| MmugDNA.25653.1.S1_s_at | MmugDNA.25653.1 | 9.48  | 9.49  | 0.11 | 0.07 | -1.01 | 0.87027  | 0.28376  | 0.944208 | 0.546185 |
| MmugDNA.12919.1.S1_s_at | MmugDNA.12919.1 | 10.16 | 10.22 | 0.24 | 0.15 | -1.04 | 0.443467 | 0.295885 | 0.696562 | 0.555241 |
| MmugDNA.1292.1.S1_at    | MmugDNA.1292.1  | 3.87  | 4.11  | 0.02 | 0.09 | -1.18 | 0.011289 | 0.013181 | 0.156304 | 0.14735  |
| MmugDNA.12920.1.S1_at   | MmugDNA.12920.1 | 5.76  | 4.88  | 0.35 | 0.17 | 1.84  | 0.018154 | 0.134543 | 0.187719 | 0.406629 |
| MmugDNA.12921.1.S1_at   | MmugDNA.12921.1 | 5.19  | 4.84  | 0.53 | 0.12 | 1.27  | 0.221028 | 0.329508 | 0.519014 | 0.578781 |
| MmugDNA.12922.1.S1_at   | MmugDNA.12922.1 | 3.08  | 3.04  | 0.13 | 0.16 | 1.02  | 0.384209 | 0.54043  | 0.653283 | 0.724383 |
| MmugDNA.12925.1.S1_at   | MmugDNA.12925.1 | 4.49  | 4.47  | 0.09 | 0.15 | 1.02  | 0.918795 | 0.275352 | 0.96536  | 0.539663 |
| MmugDNA.12926.1.S1_at   | MmugDNA.12926.1 | 7.58  | 7.67  | 0.19 | 0.13 | -1.06 | 0.522813 | 0.683006 | 0.750008 | 0.815061 |
| MmugDNA.12927.1.S1_at   | MmugDNA.12927.1 | 6.92  | 6.26  | 0.3  | 0.05 | 1.58  | 0.053533 | 0.024521 | 0.288636 | 0.196001 |
| MmugDNA.12928.1.S1_at   | MmugDNA.12928.1 | 5.54  | 5.52  | 0.06 | 0.22 | 1.01  | 0.760157 | 0.483031 | 0.890106 | 0.687687 |
| MmugDNA.12929.1.S1_at   | MmugDNA.12929.1 | 7.22  | 7.18  | 0.07 | 0.12 | 1.03  | 0.127943 | 0.23912  | 0.409866 | 0.509827 |
| MmugDNA.9943.1.S1_at    | MmugDNA.9943.1  | 8.74  | 8.23  | 0.16 | 0.13 | 1.43  | 0.012007 | 0.010489 | 0.159603 | 0.133872 |
| MmugDNA.9943.1.S1_s_at  | MmugDNA.9943.1  | 9.93  | 9.57  | 0.18 | 0.15 | 1.28  | 0.046333 | 0.053747 | 0.272999 | 0.277384 |
| MmugDNA.12930.1.S1_at   | MmugDNA.12930.1 | 6     | 5.94  | 0.39 | 0.05 | 1.04  | 0.615538 | 0.807899 | 0.80898  | 0.889413 |
| MmugDNA.12931.1.S1_at   | MmugDNA.12931.1 | 5.27  | 5.47  | 0.02 | 0.08 | -1.15 | 0.010126 | 0.01032  | 0.150375 | 0.132962 |
| MmugDNA.12932.1.S1_at   | MmugDNA.12932.1 | 3.95  | 4.11  | 0.24 | 0.05 | -1.12 | 0.884171 | 0.819395 | 0.950691 | 0.895966 |
| MmugDNA.12933.1.S1_at   | MmugDNA.12933.1 | 3.37  | 3.02  | 0.32 | 0.15 | 1.27  | 0.262261 | 0.323395 | 0.556402 | 0.574453 |
| MmugDNA.12934.1.S1_at   | MmugDNA.12934.1 | 6.32  | 6.86  | 0.16 | 0.14 | -1.45 | 0.00581  | 0.369973 | 0.122172 | 0.609208 |
| MmugDNA.12935.1.S1_at   | MmugDNA.12935.1 | 4.77  | 4.64  | 0.16 | 0    | 1.09  | 0.229696 | 0.196264 | 0.528686 | 0.471236 |
| MmugDNA.12936.1.S1_at   | MmugDNA.12936.1 | 3.86  | 3.78  | 0.1  | 0.24 | 1.06  | 0.2406   | 0.48085  | 0.538088 | 0.686    |
| MmugDNA.12937.1.S1_at   | MmugDNA.12937.1 | 4.4   | 4.49  | 0.35 | 0.62 | -1.07 | 0.816314 | 0.948609 | 0.917994 | 0.970661 |
| MmugDNA.12938.1.S1_at   | MmugDNA.12938.1 | 4.99  | 4.95  | 0.12 | 0.09 | 1.03  | 0.889433 | 0.893621 | 0.9529   | 0.939284 |
| MmugDNA.12939.1.S1_at   | MmugDNA.12939.1 | 10.33 | 10.46 | 0.02 | 0.1  | -1.1  | 0.08665  | 0.31223  | 0.351711 | 0.566963 |
| MmugDNA.12940.1.S1_at   | MmugDNA.12940.1 | 10.14 | 10.18 | 0.01 | 0.2  | -1.03 | 0.668992 | 0.272371 | 0.841208 | 0.537122 |
| MmugDNA.12941.1.S1_at   | MmugDNA.12941.1 | 10.12 | 10.19 | 0.07 | 0.18 | -1.05 | 0.256648 | 0.451206 | 0.551177 | 0.666085 |
| MmugDNA.12942.1.S1_at   | MmugDNA.12942.1 | 4.18  | 3.8   | 0.18 | 0.12 | 1.3   | 0.030668 | 0.015566 | 0.228035 | 0.15814  |
| MmugDNA.12945.1.S1_at   | MmugDNA.12945.1 | 7.5   | 7.93  | 0.66 | 0.2  | -1.35 | 0.399625 | 0.479647 | 0.664842 | 0.685331 |
| MmugDNA.12946.1.S1_at   | MmugDNA.12946.1 | 6.92  | 7.46  | 0.11 | 0.17 | -1.44 | 0.008624 | 0.10659  | 0.142375 | 0.369136 |
| MmugDNA.12947.1.S1_at   | MmugDNA.12947.1 | 5.96  | 5.9   | 0.04 | 0.15 | 1.04  | 0.745249 | 0.537835 | 0.881818 | 0.722758 |
| MmugDNA.12948.1.S1_at   | MmugDNA.12948.1 | 9.9   | 9.73  | 0.2  | 0.15 | 1.12  | 0.697852 | 0.126807 | 0.85622  | 0.397446 |
| MmugDNA.12949.1.S1_at   | MmugDNA.12949.1 | 10.97 | 10.93 | 0.11 | 0.08 | 1.03  | 0.674433 | 0.54913  | 0.844514 | 0.729611 |
| MmugDNA.12950.1.S1_at   | MmugDNA.12950.1 | 7.27  | 7.55  | 0.2  | 0.14 | -1.22 | 0.098392 | 0.086824 | 0.369057 | 0.339594 |
| MmugDNA.12953.1.S1_at   | MmugDNA.12953.1 | 8.46  | 7.84  | 0.15 | 0.02 | 1.53  | 0.001467 | 0.004896 | 0.080429 | 0.097632 |

|                         |                 |       |       |      |      |       |          |          |          |          |
|-------------------------|-----------------|-------|-------|------|------|-------|----------|----------|----------|----------|
| MmugDNA.12956.1.S1_at   | MmugDNA.12956.1 | 4.07  | 3.95  | 0.23 | 0.09 | 1.08  | 0.760551 | 0.049098 | 0.890254 | 0.266518 |
| MmugDNA.12957.1.S1_at   | MmugDNA.12957.1 | 4.06  | 4.08  | 0.17 | 0.03 | -1.01 | 0.372434 | 0.039895 | 0.64495  | 0.244852 |
| MmugDNA.12959.1.S1_at   | MmugDNA.12959.1 | 4.9   | 4.84  | 0.06 | 0.1  | 1.04  | 0.17407  | 0.125939 | 0.468351 | 0.396461 |
| MmugDNA.12960.1.S1_at   | MmugDNA.12960.1 | 5.09  | 4.69  | 0.29 | 0.25 | 1.32  | 0.208241 | 0.103388 | 0.505958 | 0.3643   |
| MmugDNA.12961.1.S1_at   | MmugDNA.12961.1 | 3.45  | 3.34  | 0.18 | 0.13 | 1.08  | 0.934482 | 0.189652 | 0.972505 | 0.465297 |
| MmugDNA.12962.1.S1_at   | MmugDNA.12962.1 | 6.04  | 6.15  | 0.07 | 0.04 | -1.07 | 0.164268 | 0.095061 | 0.457197 | 0.352124 |
| MmugDNA.12962.1.S1_s_at | MmugDNA.12962.1 | 8.84  | 8.96  | 0.13 | 0.19 | -1.09 | 0.444926 | 0.634849 | 0.6976   | 0.785041 |
| MmugDNA.12963.1.S1_at   | MmugDNA.12963.1 | 3.68  | 3.54  | 0.44 | 0.22 | 1.1   | 0.250535 | 0.349599 | 0.545199 | 0.593539 |
| MmugDNA.12964.1.S1_at   | MmugDNA.12964.1 | 6.3   | 6.54  | 0.05 | 0.25 | -1.18 | 0.120256 | 0.075985 | 0.39866  | 0.320676 |
| MmugDNA.12965.1.S1_at   | MmugDNA.12965.1 | 10.65 | 10.77 | 0.03 | 0.05 | -1.09 | 0.018398 | 0.068065 | 0.188709 | 0.307142 |
| MmugDNA.12966.1.S1_at   | MmugDNA.12966.1 | 4.12  | 3.64  | 0.13 | 0.28 | 1.4   | 0.081323 | 0.090232 | 0.342222 | 0.344636 |
| MmugDNA.12967.1.S1_at   | MmugDNA.12967.1 | 4.3   | 4.25  | 0.05 | 0.02 | 1.03  | 0.063516 | 0.061521 | 0.308717 | 0.294835 |
| MmugDNA.12970.1.S1_at   | MmugDNA.12970.1 | 4.82  | 5.04  | 0.55 | 0.24 | -1.16 | 0.749172 | 0.814947 | 0.883862 | 0.893221 |
| MmugDNA.12972.1.S1_at   | MmugDNA.12972.1 | 3.42  | 6.41  | 1.18 | 0.42 | -7.96 | 0.040049 | 0.172715 | 0.256781 | 0.449206 |
| MmugDNA.12974.1.S1_at   | MmugDNA.12974.1 | 3.8   | 3.76  | 0.06 | 0.25 | 1.03  | 0.487418 | 0.625938 | 0.726209 | 0.7794   |
| MmugDNA.12976.1.S1_at   | MmugDNA.12976.1 | 4.72  | 4.66  | 0.19 | 0.09 | 1.05  | 0.614164 | 0.701672 | 0.807938 | 0.826974 |
| MmugDNA.12978.1.S1_at   | MmugDNA.12978.1 | 6.88  | 7.57  | 0.46 | 0.28 | -1.6  | 0.088199 | 0.012119 | 0.354244 | 0.142442 |
| MmugDNA.12979.1.S1_s_at | MmugDNA.12979.1 | 10.9  | 10.76 | 0.01 | 0.06 | 1.1   | 0.023642 | 0.108849 | 0.207074 | 0.37247  |
| MmugDNA.1298.1.S1_at    | MmugDNA.1298.1  | 11.92 | 12.06 | 0.07 | 0.05 | -1.1  | 0.0559   | 0.438005 | 0.293434 | 0.657058 |
| MmugDNA.12981.1.S1_at   | MmugDNA.12981.1 | 4.98  | 4.28  | 0.17 | 0.6  | 1.62  | 0.425952 | 0.293066 | 0.683232 | 0.552978 |
| MmugDNA.12982.1.S1_at   | MmugDNA.12982.1 | 8.87  | 8.44  | 0.11 | 0.09 | 1.35  | 0.006668 | 0.144454 | 0.128128 | 0.418323 |
| MmugDNA.12983.1.S1_at   | MmugDNA.12983.1 | 8.58  | 8.4   | 0.24 | 0.29 | 1.13  | 0.495534 | 0.278897 | 0.731829 | 0.542633 |
| MmugDNA.12984.1.S1_at   | MmugDNA.12984.1 | 13.09 | 13.29 | 0.05 | 0.09 | -1.15 | 0.027846 | 0.480624 | 0.219388 | 0.685926 |
| MmugDNA.12985.1.S1_at   | MmugDNA.12985.1 | 5.51  | 5.26  | 0.27 | 0.1  | 1.19  | 0.398386 | 0.454949 | 0.663859 | 0.669021 |
| MmugDNA.12986.1.S1_at   | MmugDNA.12986.1 | 5.75  | 5.69  | 0.35 | 0.41 | 1.04  | 0.377145 | 0.580167 | 0.64767  | 0.749524 |
| MmugDNA.12987.1.S1_at   | MmugDNA.12987.1 | 10.62 | 10.76 | 0.2  | 0.07 | -1.1  | 0.433576 | 0.530641 | 0.688989 | 0.718094 |
| MmugDNA.12988.1.S1_s_at | MmugDNA.12988.1 | 10.73 | 10.81 | 0.2  | 0.08 | -1.06 | 0.520841 | 0.747815 | 0.749004 | 0.853252 |
| MmugDNA.1299.1.S1_at    | MmugDNA.1299.1  | 9.65  | 9.73  | 0.1  | 0.03 | -1.06 | 0.573992 | 0.0429   | 0.781504 | 0.251759 |
| MmugDNA.12990.1.S1_at   | MmugDNA.12990.1 | 4.17  | 4.07  | 0.26 | 0.16 | 1.07  | 0.887824 | 0.237764 | 0.952082 | 0.50826  |
| MmugDNA.12991.1.S1_at   | MmugDNA.12991.1 | 4.25  | 4.06  | 0.12 | 0.11 | 1.14  | 0.098627 | 0.234377 | 0.369387 | 0.505646 |
| MmugDNA.12992.1.S1_at   | MmugDNA.12992.1 | 4.05  | 4.03  | 0.64 | 0.16 | 1.01  | 0.394256 | 0.443683 | 0.660949 | 0.661384 |
| MmugDNA.12993.1.S1_at   | MmugDNA.12993.1 | 8.25  | 7.57  | 0.44 | 0.32 | 1.61  | 0.122322 | 0.01934  | 0.40112  | 0.174785 |
| MmugDNA.12995.1.S1_at   | MmugDNA.12995.1 | 6.22  | 6.03  | 0.26 | 0.14 | 1.14  | 0.311237 | 0.533638 | 0.597394 | 0.719846 |
| MmugDNA.12998.1.S1_at   | MmugDNA.12998.1 | 8.67  | 9.76  | 0.86 | 0.03 | -2.13 | 0.110143 | 0.076083 | 0.385429 | 0.320848 |
| MmugDNA.13.1.S1_at      | MmugDNA.13.1    | 4.5   | 4.52  | 0.09 | 0.13 | -1.02 | 0.390599 | 0.217872 | 0.658157 | 0.491408 |
| MmugDNA.1300.1.S1_at    | MmugDNA.1300.1  | 5.96  | 5.83  | 0.38 | 0.4  | 1.09  | 0.548579 | 0.131065 | 0.766578 | 0.403084 |
| MmugDNA.13000.1.S1_at   | MmugDNA.13000.1 | 6.68  | 6.53  | 0.11 | 0.16 | 1.11  | 0.543499 | 0.091058 | 0.763461 | 0.345842 |
| MmugDNA.13002.1.S1_at   | MmugDNA.13002.1 | 8.82  | 7.68  | 0.45 | 0.24 | 2.2   | 0.041082 | 0.265491 | 0.259179 | 0.531381 |
| MmugDNA.13003.1.S1_at   | MmugDNA.13003.1 | 3.15  | 2.97  | 0.01 | 0.13 | 1.13  | 0.070492 | 0.225128 | 0.323891 | 0.497779 |
| MmugDNA.13004.1.S1_at   | MmugDNA.13004.1 | 9.27  | 8.98  | 0.02 | 0.02 | 1.23  | 0.000109 | 0.025859 | 0.051196 | 0.201654 |
| MmugDNA.13005.1.S1_at   | MmugDNA.13005.1 | 6.51  | 6.61  | 1    | 0.25 | -1.08 | 0.93218  | 0.885679 | 0.971481 | 0.934982 |
| MmugDNA.13006.1.S1_at   | MmugDNA.13006.1 | 3.2   | 3.15  | 0.01 | 0.09 | 1.03  | 0.224231 | 0.563568 | 0.522386 | 0.738718 |
| MmugDNA.13007.1.S1_at   | MmugDNA.13007.1 | 5.88  | 5.92  | 0.07 | 0.01 | -1.03 | 0.715722 | 0.883902 | 0.86589  | 0.933747 |

|                         |                 |       |       |      |      |       |          |          |          |          |
|-------------------------|-----------------|-------|-------|------|------|-------|----------|----------|----------|----------|
| MmugDNA.13008.1.S1_at   | MmugDNA.13008.1 | 4.91  | 4.93  | 0.53 | 0.38 | -1.01 | 0.494461 | 0.313291 | 0.731233 | 0.567753 |
| MmugDNA.6104.1.S1_s_at  | MmugDNA.6104.1  | 9.89  | 9.71  | 0.11 | 0.06 | 1.13  | 0.047144 | 0.027999 | 0.274594 | 0.208898 |
| MmugDNA.13012.1.S1_at   | MmugDNA.13012.1 | 5.92  | 5.41  | 0.15 | 0.39 | 1.42  | 0.097684 | 0.105561 | 0.368048 | 0.367526 |
| MmugDNA.13013.1.S1_at   | MmugDNA.13013.1 | 9.21  | 8.85  | 0.13 | 0.12 | 1.28  | 0.047043 | 0.594438 | 0.274555 | 0.758623 |
| MmugDNA.13014.1.S1_at   | MmugDNA.13014.1 | 5.74  | 5.75  | 0.16 | 0.05 | -1    | 0.974078 | 0.671518 | 0.989627 | 0.807948 |
| MmugDNA.13015.1.S1_at   | MmugDNA.13015.1 | 9.3   | 9.26  | 0.14 | 0.11 | 1.02  | 0.894029 | 0.005327 | 0.954786 | 0.100928 |
| MmugDNA.13015.1.S1_s_at | MmugDNA.13015.1 | 8.53  | 8.65  | 0.12 | 0.2  | -1.08 | 0.993328 | 0.005479 | 0.997386 | 0.102081 |
| MmugDNA.13016.1.S1_at   | MmugDNA.13016.1 | 4.3   | 4.27  | 0.19 | 0.07 | 1.02  | 0.8122   | 0.921526 | 0.915989 | 0.955761 |
| MmugDNA.13017.1.S1_at   | MmugDNA.13017.1 | 5.77  | 5.44  | 0.08 | 0.21 | 1.26  | 0.059473 | 0.049486 | 0.300954 | 0.267375 |
| MmugDNA.13018.1.S1_at   | MmugDNA.13018.1 | 4.88  | 5.84  | 0.32 | 0.6  | -1.95 | 0.328495 | 0.263873 | 0.610835 | 0.530118 |
| MmugDNA.1302.1.S1_at    | MmugDNA.1302.1  | 10.75 | 10.59 | 0.12 | 0.08 | 1.12  | 0.610404 | 0.298378 | 0.805838 | 0.557061 |
| MmugDNA.13020.1.S1_at   | MmugDNA.13020.1 | 8.54  | 8.56  | 0.35 | 0.09 | -1.02 | 0.87187  | 0.971648 | 0.944903 | 0.984608 |
| MmugDNA.13021.1.S1_at   | MmugDNA.13021.1 | 3.29  | 3.78  | 0.27 | 0.19 | -1.4  | 0.3072   | 0.280643 | 0.593941 | 0.543828 |
| MmugDNA.13022.1.S1_at   | MmugDNA.13022.1 | 3.91  | 4.11  | 0.3  | 0.03 | -1.15 | 0.859604 | 0.436015 | 0.939196 | 0.655722 |
| MmugDNA.13024.1.S1_at   | MmugDNA.13024.1 | 3.34  | 3.48  | 0.82 | 0.23 | -1.1  | 0.401734 | 0.291065 | 0.666287 | 0.551574 |
| MmugDNA.13026.1.S1_at   | MmugDNA.13026.1 | 3.54  | 3.63  | 0.08 | 0.02 | -1.06 | 0.1755   | 0.757096 | 0.46998  | 0.858642 |
| MmugDNA.13027.1.S1_at   | MmugDNA.13027.1 | 4.45  | 4.4   | 0.05 | 0.06 | 1.03  | 0.475636 | 0.281234 | 0.718263 | 0.544374 |
| MmugDNA.13028.1.S1_at   | MmugDNA.13028.1 | 6.03  | 6.58  | 0.33 | 0.12 | -1.47 | 0.04376  | 0.076784 | 0.266264 | 0.322252 |
| MmugDNA.13029.1.S1_at   | MmugDNA.13029.1 | 6.92  | 7.25  | 0.32 | 0.25 | -1.26 | 0.165385 | 0.184339 | 0.458328 | 0.460458 |
| MmugDNA.13031.1.S1_at   | MmugDNA.13031.1 | 4.34  | 4.29  | 0.26 | 0.13 | 1.04  | 0.544494 | 0.788844 | 0.764107 | 0.877997 |
| MmugDNA.13033.1.S1_at   | MmugDNA.13033.1 | 9.47  | 9.61  | 0.43 | 0.18 | -1.11 | 0.97508  | 0.127769 | 0.990082 | 0.398627 |
| MmugDNA.13038.1.S1_at   | MmugDNA.13038.1 | 4.42  | 4.25  | 0.67 | 0.01 | 1.13  | 0.227413 | 0.293907 | 0.525446 | 0.553878 |
| MmugDNA.1304.1.S1_at    | MmugDNA.1304.1  | 12.88 | 12.73 | 0.08 | 0.08 | 1.11  | 0.359355 | 0.014421 | 0.634935 | 0.153273 |
| MmugDNA.13041.1.S1_s_at | MmugDNA.13041.1 | 5.24  | 5.21  | 0.08 | 0.11 | 1.02  | 0.263998 | 0.230319 | 0.557422 | 0.502102 |
| MmugDNA.13042.1.S1_at   | MmugDNA.13042.1 | 6.83  | 6.45  | 0.24 | 0.19 | 1.3   | 0.048959 | 0.052529 | 0.2789   | 0.274771 |
| MmugDNA.13043.1.S1_at   | MmugDNA.13043.1 | 10.3  | 9.28  | 0.2  | 0.15 | 2.03  | 0.00308  | 0.055631 | 0.100578 | 0.281649 |
| MmugDNA.13045.1.S1_at   | MmugDNA.13045.1 | 5.82  | 5.57  | 0.1  | 0.16 | 1.19  | 0.42703  | 0.285441 | 0.684339 | 0.547307 |
| MmugDNA.13047.1.S1_at   | MmugDNA.13047.1 | 6.06  | 5.9   | 0.44 | 0.43 | 1.12  | 0.374678 | 0.678094 | 0.645606 | 0.811973 |
| MmugDNA.13048.1.S1_at   | MmugDNA.13048.1 | 5.52  | 6.25  | 0.75 | 0.07 | -1.66 | 0.57981  | 0.226213 | 0.785371 | 0.498692 |
| MmugDNA.13049.1.S1_at   | MmugDNA.13049.1 | 6.65  | 6.82  | 0.07 | 0.21 | -1.13 | 0.387797 | 0.182757 | 0.655868 | 0.459215 |
| MmugDNA.1305.1.S1_x_at  | MmugDNA.1305.1  | 5.66  | 5.64  | 0.51 | 0.09 | 1.02  | 0.427373 | 0.522966 | 0.684668 | 0.713429 |
| MmugDNA.13050.1.S1_at   | MmugDNA.13050.1 | 4.97  | 4.87  | 0.11 | 0.1  | 1.07  | 0.296882 | 0.55862  | 0.585528 | 0.735766 |
| MmugDNA.13051.1.S1_at   | MmugDNA.13051.1 | 4.88  | 4.9   | 0.23 | 0.01 | -1.02 | 0.6876   | 0.699731 | 0.850807 | 0.825643 |
| MmugDNA.13054.1.S1_at   | MmugDNA.13054.1 | 5.68  | 5.56  | 0.04 | 0.29 | 1.09  | 0.707835 | 0.902585 | 0.86155  | 0.944668 |
| MmugDNA.13055.1.S1_at   | MmugDNA.13055.1 | 3.33  | 3.27  | 0.06 | 0.03 | 1.04  | 0.115509 | 0.131826 | 0.392694 | 0.403891 |
| MmugDNA.13056.1.S1_at   | MmugDNA.13056.1 | 8.73  | 8.18  | 0.2  | 0.17 | 1.47  | 0.023772 | 0.192725 | 0.207137 | 0.468231 |
| MmugDNA.13059.1.S1_at   | MmugDNA.13059.1 | 3.96  | 4.12  | 0.21 | 0.13 | -1.12 | 0.939632 | 0.43545  | 0.974509 | 0.655208 |
| MmugDNA.13060.1.S1_at   | MmugDNA.13060.1 | 5     | 5.27  | 0.18 | 0.12 | -1.21 | 0.040075 | 0.02344  | 0.256783 | 0.191956 |
| MmugDNA.13062.1.S1_at   | MmugDNA.13062.1 | 5.69  | 6.02  | 0.25 | 0.04 | -1.26 | 0.131486 | 0.098325 | 0.41434  | 0.356397 |
| MmugDNA.13063.1.S1_at   | MmugDNA.13063.1 | 4.37  | 4.16  | 0.47 | 0.13 | 1.16  | 0.302977 | 0.45036  | 0.590448 | 0.665643 |
| MmugDNA.13065.1.S1_at   | MmugDNA.13065.1 | 5.82  | 7.38  | 0.17 | 0.18 | -2.95 | 0.000388 | 0.008846 | 0.062519 | 0.124493 |
| MmugDNA.13066.1.S1_at   | MmugDNA.13066.1 | 4.44  | 4.35  | 0.36 | 0.45 | 1.07  | 0.425647 | 0.746074 | 0.682976 | 0.852688 |
| MmugDNA.13067.1.S1_at   | MmugDNA.13067.1 | 6.16  | 6.1   | 0.74 | 0.44 | 1.04  | 0.943884 | 0.744631 | 0.976384 | 0.852121 |

|                         |                 |       |       |      |      |       |          |          |          |          |
|-------------------------|-----------------|-------|-------|------|------|-------|----------|----------|----------|----------|
| MmugDNA.13068.1.S1_at   | MmugDNA.13068.1 | 6.53  | 6.34  | 0.24 | 0.2  | 1.14  | 0.138313 | 0.154498 | 0.423592 | 0.429395 |
| MmugDNA.13069.1.S1_at   | MmugDNA.13069.1 | 3.27  | 3.12  | 0.28 | 0.14 | 1.11  | 0.259885 | 0.279908 | 0.554139 | 0.543342 |
| MmugDNA.2307.1.S1_at    | MmugDNA.2307.1  | 4     | 4     | 0.06 | 0.17 | -1.01 | 0.981857 | 0.744964 | 0.993299 | 0.852232 |
| MmugDNA.2307.1.S1_s_at  | MmugDNA.2307.1  | 7.32  | 7.27  | 0.12 | 0.12 | 1.04  | 0.631664 | 0.416148 | 0.819177 | 0.641371 |
| MmugDNA.13070.1.S1_s_at | MmugDNA.13070.1 | 9.42  | 9.17  | 0.1  | 0.05 | 1.19  | 0.008916 | 0.001495 | 0.144138 | 0.058967 |
| MmugDNA.13071.1.S1_at   | MmugDNA.13071.1 | 4.06  | 3.95  | 0.21 | 0.2  | 1.08  | 0.502696 | 0.51731  | 0.736322 | 0.709435 |
| MmugDNA.13072.1.S1_at   | MmugDNA.13072.1 | 4.31  | 4.3   | 0.16 | 0.17 | 1.01  | 0.70773  | 0.779511 | 0.861542 | 0.872163 |
| MmugDNA.13073.1.S1_at   | MmugDNA.13073.1 | 6.58  | 6.56  | 0.07 | 0.1  | 1.02  | 0.295891 | 0.184113 | 0.584649 | 0.460323 |
| MmugDNA.13075.1.S1_at   | MmugDNA.13075.1 | 7.34  | 6.9   | 0.57 | 0.34 | 1.36  | 0.421224 | 0.225281 | 0.679846 | 0.497892 |
| MmugDNA.13078.1.S1_at   | MmugDNA.13078.1 | 5.72  | 5.61  | 0.91 | 0.89 | 1.08  | 0.433884 | 0.466564 | 0.689223 | 0.676398 |
| MmugDNA.8372.1.S1_s_at  | MmugDNA.8372.1  | 10.77 | 10.81 | 0.17 | 0.07 | -1.03 | 0.880717 | 0.141521 | 0.949283 | 0.415063 |
| MmugDNA.1308.1.S1_at    | MmugDNA.1308.1  | 4.93  | 4.54  | 0.17 | 0.18 | 1.32  | 0.058805 | 0.049869 | 0.299609 | 0.268436 |
| MmugDNA.13080.1.S1_at   | MmugDNA.13080.1 | 5.53  | 5.1   | 0.27 | 0.54 | 1.34  | 0.330057 | 0.347923 | 0.612141 | 0.592196 |
| MmugDNA.13081.1.S1_at   | MmugDNA.13081.1 | 3.6   | 3.63  | 0.03 | 0.2  | -1.02 | 0.536213 | 0.706187 | 0.758852 | 0.829634 |
| MmugDNA.13082.1.S1_at   | MmugDNA.13082.1 | 5.77  | 5.69  | 0.23 | 0.09 | 1.06  | 0.374246 | 0.537521 | 0.645448 | 0.722606 |
| MmugDNA.13083.1.S1_at   | MmugDNA.13083.1 | 6.64  | 5.91  | 0.31 | 0.4  | 1.66  | 0.044254 | 0.030024 | 0.267399 | 0.215056 |
| MmugDNA.13084.1.S1_at   | MmugDNA.13084.1 | 4.21  | 4.28  | 0.12 | 0.12 | -1.05 | 0.501171 | 0.725664 | 0.735283 | 0.841129 |
| MmugDNA.13087.1.S1_at   | MmugDNA.13087.1 | 7.41  | 5.38  | 0.39 | 1.22 | 4.1   | 0.127868 | 0.101211 | 0.409729 | 0.360863 |
| MmugDNA.13088.1.S1_at   | MmugDNA.13088.1 | 4.49  | 4.36  | 0.95 | 0.13 | 1.1   | 0.28421  | 0.440789 | 0.574388 | 0.659136 |
| MmugDNA.13089.1.S1_at   | MmugDNA.13089.1 | 6.91  | 6.64  | 0.18 | 0.11 | 1.21  | 0.083172 | 0.026087 | 0.345425 | 0.202477 |
| MmugDNA.13089.1.S1_x_at | MmugDNA.13089.1 | 7.01  | 6.84  | 0.1  | 0.08 | 1.12  | 0.083748 | 0.035167 | 0.34648  | 0.231696 |
| MmugDNA.1309.1.S1_at    | MmugDNA.1309.1  | 4.25  | 4.49  | 0.32 | 0.05 | -1.18 | 0.812892 | 0.625815 | 0.916222 | 0.779339 |
| MmugDNA.13090.1.S1_at   | MmugDNA.13090.1 | 6.99  | 7.08  | 0.29 | 0.23 | -1.07 | 0.542051 | 0.069537 | 0.762582 | 0.309848 |
| MmugDNA.13091.1.S1_at   | MmugDNA.13091.1 | 5.79  | 5.58  | 0.06 | 0.09 | 1.16  | 0.032746 | 0.053716 | 0.234993 | 0.277384 |
| MmugDNA.13092.1.S1_at   | MmugDNA.13092.1 | 9.6   | 9.79  | 0.11 | 0.08 | -1.14 | 0.030923 | 0.039529 | 0.228986 | 0.243753 |
| MmugDNA.13093.1.S1_at   | MmugDNA.13093.1 | 4.82  | 4.71  | 0.21 | 0.15 | 1.08  | 0.525355 | 0.536925 | 0.751919 | 0.722124 |
| MmugDNA.13094.1.S1_at   | MmugDNA.13094.1 | 7.08  | 5.67  | 1.09 | 1.04 | 2.64  | 0.38213  | 0.566786 | 0.651635 | 0.740763 |
| MmugDNA.13095.1.S1_at   | MmugDNA.13095.1 | 4.51  | 4.42  | 0.1  | 0.06 | 1.06  | 0.315607 | 0.840607 | 0.600423 | 0.909157 |
| MmugDNA.13098.1.S1_at   | MmugDNA.13098.1 | 3.8   | 4.02  | 0.08 | 0.14 | -1.16 | 0.200327 | 0.392284 | 0.497792 | 0.625694 |
| MmugDNA.13100.1.S1_at   | MmugDNA.13100.1 | 10.27 | 9.95  | 0.16 | 0.16 | 1.24  | 0.024512 | 0.123542 | 0.209655 | 0.393629 |
| MmugDNA.13101.1.S1_at   | MmugDNA.13101.1 | 3.19  | 3.2   | 0.23 | 0.14 | -1.01 | 0.27739  | 0.40157  | 0.568909 | 0.631068 |
| MmugDNA.13103.1.S1_at   | MmugDNA.13103.1 | 5.23  | 5.11  | 0.18 | 0.56 | 1.08  | 0.521367 | 0.573069 | 0.749308 | 0.744941 |
| MmugDNA.13105.1.S1_at   | MmugDNA.13105.1 | 2.97  | 2.97  | 0.33 | 0.05 | 1     | 0.438518 | 0.671877 | 0.693058 | 0.808164 |
| MmugDNA.13106.1.S1_at   | MmugDNA.13106.1 | 6.51  | 6.31  | 0.23 | 0.13 | 1.16  | 0.625866 | 0.766095 | 0.81559  | 0.864102 |
| MmugDNA.13107.1.S1_at   | MmugDNA.13107.1 | 6.73  | 6.75  | 0.13 | 0.08 | -1.02 | 0.993978 | 0.138412 | 0.997578 | 0.41133  |
| MmugDNA.13108.1.S1_at   | MmugDNA.13108.1 | 10.21 | 9.81  | 0.08 | 0.13 | 1.32  | 0.036875 | 0.048657 | 0.247118 | 0.265613 |
| MmugDNA.13109.1.S1_at   | MmugDNA.13109.1 | 8.76  | 8.71  | 0.38 | 0.05 | 1.04  | 0.747848 | 0.526725 | 0.883182 | 0.715627 |
| MmugDNA.1311.1.S1_at    | MmugDNA.1311.1  | 5.81  | 5.51  | 0.31 | 0.18 | 1.23  | 0.454841 | 0.50602  | 0.704641 | 0.702337 |
| MmugDNA.13110.1.S1_at   | MmugDNA.13110.1 | 3.43  | 3.21  | 0.26 | 0.07 | 1.17  | 0.361245 | 0.492522 | 0.636739 | 0.693604 |
| MmugDNA.13111.1.S1_at   | MmugDNA.13111.1 | 3.51  | 3.34  | 0.08 | 0.16 | 1.13  | 0.208724 | 0.253471 | 0.506255 | 0.521768 |
| MmugDNA.13112.1.S1_at   | MmugDNA.13112.1 | 4.55  | 4.84  | 0.22 | 0.04 | -1.22 | 0.108958 | 0.118259 | 0.383909 | 0.386244 |
| MmugDNA.13113.1.S1_at   | MmugDNA.13113.1 | 3.14  | 3.32  | 0.2  | 0.13 | -1.14 | 0.364131 | 0.2907   | 0.638745 | 0.551382 |
| MmugDNA.13114.1.S1_at   | MmugDNA.13114.1 | 4.05  | 4.05  | 0.06 | 0.02 | 1     | 0.477421 | 0.500224 | 0.719417 | 0.698951 |



|                         |                 |       |       |      |      |       |          |          |          |          |
|-------------------------|-----------------|-------|-------|------|------|-------|----------|----------|----------|----------|
| MmugDNA.13115.1.S1_at   | MmugDNA.13115.1 | 9.09  | 9.33  | 0.38 | 0.05 | -1.18 | 0.389889 | 0.706856 | 0.657536 | 0.829968 |
| MmugDNA.13116.1.S1_at   | MmugDNA.13116.1 | 7.03  | 6.67  | 0.66 | 0.27 | 1.29  | 0.743727 | 0.82632  | 0.881384 | 0.900243 |
| MmugDNA.13117.1.S1_at   | MmugDNA.13117.1 | 9.12  | 9.09  | 0.33 | 0.25 | 1.02  | 0.918972 | 0.784384 | 0.965374 | 0.87518  |
| MmugDNA.13118.1.S1_at   | MmugDNA.13118.1 | 7.87  | 7.8   | 0.28 | 0.26 | 1.05  | 0.727727 | 0.148232 | 0.872524 | 0.422745 |
| MmugDNA.13119.1.S1_at   | MmugDNA.13119.1 | 5.98  | 5.86  | 0.22 | 0.13 | 1.09  | 0.38005  | 0.292525 | 0.649803 | 0.55258  |
| MmugDNA.1312.1.S1_at    | MmugDNA.1312.1  | 6.13  | 6.01  | 0.1  | 0.13 | 1.08  | 0.646981 | 0.074419 | 0.828492 | 0.318058 |
| MmugDNA.13123.1.S1_at   | MmugDNA.13123.1 | 4.98  | 4.79  | 0.71 | 0.2  | 1.14  | 0.67301  | 0.784756 | 0.84348  | 0.875383 |
| MmugDNA.13124.1.S1_at   | MmugDNA.13124.1 | 6.1   | 6.12  | 0.79 | 0.1  | -1.01 | 0.949853 | 0.850921 | 0.979097 | 0.91522  |
| MmugDNA.13125.1.S1_at   | MmugDNA.13125.1 | 5.73  | 5.72  | 0.24 | 0.34 | 1.01  | 0.611875 | 0.676831 | 0.806572 | 0.811172 |
| MmugDNA.13126.1.S1_at   | MmugDNA.13126.1 | 6     | 6.09  | 0.05 | 0.12 | -1.06 | 0.361575 | 0.506382 | 0.637008 | 0.702371 |
| MmugDNA.13128.1.S1_at   | MmugDNA.13128.1 | 12.29 | 12.13 | 0.09 | 0.03 | 1.12  | 0.033019 | 0.173981 | 0.236089 | 0.450247 |
| MmugDNA.13129.1.S1_at   | MmugDNA.13129.1 | 4.09  | 3.93  | 0.05 | 0.1  | 1.12  | 0.111916 | 0.011265 | 0.388091 | 0.138076 |
| MmugDNA.1313.1.S1_at    | MmugDNA.1313.1  | 11.26 | 11.58 | 0.23 | 0.08 | -1.25 | 0.129556 | 0.017698 | 0.411943 | 0.168304 |
| MmugDNA.13130.1.S1_s_at | MmugDNA.13130.1 | 5.64  | 5.65  | 0.5  | 0.05 | -1.01 | 0.512225 | 0.634967 | 0.742899 | 0.785108 |
| MmugDNA.13131.1.S1_at   | MmugDNA.13131.1 | 7.54  | 6.98  | 0.77 | 0.64 | 1.47  | 0.29421  | 0.349909 | 0.583201 | 0.593668 |
| MmugDNA.13132.1.S1_at   | MmugDNA.13132.1 | 9.8   | 9.74  | 0.27 | 0.21 | 1.04  | 0.917354 | 0.081327 | 0.964764 | 0.329427 |
| MmugDNA.13133.1.S1_at   | MmugDNA.13133.1 | 9.55  | 9.63  | 0.17 | 0.17 | -1.06 | 0.576918 | 0.894494 | 0.783459 | 0.939772 |
| MmugDNA.13134.1.S1_at   | MmugDNA.13134.1 | 7.98  | 8.01  | 0.37 | 0.05 | -1.03 | 0.956309 | 0.367891 | 0.982055 | 0.607469 |
| MmugDNA.13135.1.S1_at   | MmugDNA.13135.1 | 9.49  | 8.56  | 0.14 | 0.3  | 1.9   | 0.006421 | 0.006181 | 0.126742 | 0.106774 |
| MmugDNA.13136.1.S1_at   | MmugDNA.13136.1 | 3.95  | 3.94  | 0.23 | 0.15 | 1.01  | 0.647619 | 0.525816 | 0.828827 | 0.715217 |
| MmugDNA.13137.1.S1_at   | MmugDNA.13137.1 | 7.38  | 7.14  | 0.15 | 0.19 | 1.19  | 0.419306 | 0.003355 | 0.67873  | 0.083359 |
| MmugDNA.13138.1.S1_at   | MmugDNA.13138.1 | 4.46  | 4.44  | 0.05 | 0.23 | 1.02  | 0.973198 | 0.900462 | 0.989282 | 0.943447 |
| MmugDNA.13139.1.S1_at   | MmugDNA.13139.1 | 3.53  | 3.91  | 0.18 | 0.13 | -1.3  | 0.089519 | 0.078915 | 0.356406 | 0.325912 |
| MmugDNA.1314.1.S1_at    | MmugDNA.1314.1  | 4.17  | 4.11  | 0.25 | 0.18 | 1.04  | 0.35367  | 0.515697 | 0.63089  | 0.708451 |
| MmugDNA.13141.1.S1_at   | MmugDNA.13141.1 | 2.95  | 2.95  | 0.3  | 0.03 | -1    | 0.709694 | 0.906234 | 0.86264  | 0.94693  |
| MmugDNA.13141.1.S1_x_at | MmugDNA.13141.1 | 3.51  | 3.51  | 0.06 | 0.03 | -1    | 0.812676 | 0.56879  | 0.916193 | 0.74211  |
| MmugDNA.13142.1.S1_at   | MmugDNA.13142.1 | 3.23  | 3.31  | 0.05 | 0.12 | -1.06 | 0.437678 | 0.474756 | 0.69248  | 0.681695 |
| MmugDNA.13143.1.S1_at   | MmugDNA.13143.1 | 5.28  | 5.07  | 0.03 | 0.14 | 1.15  | 0.175877 | 0.062453 | 0.470216 | 0.296717 |
| MmugDNA.13144.1.S1_at   | MmugDNA.13144.1 | 7.07  | 7.2   | 0.24 | 0.22 | -1.09 | 0.760131 | 0.009456 | 0.890106 | 0.12804  |
| MmugDNA.13145.1.S1_at   | MmugDNA.13145.1 | 3.61  | 3.75  | 0.04 | 0.2  | -1.1  | 0.289211 | 0.220011 | 0.578805 | 0.49344  |
| MmugDNA.13146.1.S1_at   | MmugDNA.13146.1 | 5.26  | 5.36  | 0.15 | 0.26 | -1.07 | 0.942662 | 0.351715 | 0.975833 | 0.595164 |
| MmugDNA.13147.1.S1_at   | MmugDNA.13147.1 | 5.24  | 4.74  | 0.15 | 0.11 | 1.42  | 0.026355 | 0.026525 | 0.215464 | 0.203899 |
| MmugDNA.13148.1.S1_at   | MmugDNA.13148.1 | 4.51  | 4.71  | 0.71 | 0.02 | -1.15 | 0.898197 | 0.93344  | 0.956732 | 0.962195 |
| MmugDNA.13149.1.S1_at   | MmugDNA.13149.1 | 3.51  | 3.57  | 0.22 | 0.15 | -1.05 | 0.937712 | 0.771526 | 0.973782 | 0.867249 |
| MmugDNA.1315.1.S1_at    | MmugDNA.1315.1  | 4.43  | 5.05  | 0.72 | 0.03 | -1.53 | 0.679307 | 0.876145 | 0.84701  | 0.929583 |
| MmugDNA.13150.1.S1_at   | MmugDNA.13150.1 | 6.22  | 6.53  | 0.1  | 0.12 | -1.24 | 0.030352 | 0.007961 | 0.227199 | 0.118702 |
| MmugDNA.13152.1.S1_at   | MmugDNA.13152.1 | 7.89  | 6.67  | 0.14 | 0.09 | 2.32  | 0.000244 | 0.011108 | 0.054642 | 0.137198 |
| MmugDNA.13153.1.S1_at   | MmugDNA.13153.1 | 8.16  | 7.87  | 0.11 | 0.22 | 1.23  | 0.089775 | 0.816002 | 0.356705 | 0.893865 |
| MmugDNA.13154.1.S1_at   | MmugDNA.13154.1 | 7.05  | 5.91  | 0.34 | 0.14 | 2.21  | 0.005024 | 0.026622 | 0.116192 | 0.204028 |
| MmugDNA.13155.1.S1_at   | MmugDNA.13155.1 | 13.3  | 12.93 | 0.06 | 0.03 | 1.3   | 0.000688 | 0.018465 | 0.071248 | 0.170923 |
| MmugDNA.13157.1.S1_s_at | MmugDNA.13157.1 | 3.6   | 3.3   | 0.17 | 0.19 | 1.23  | 0.094208 | 0.098986 | 0.363234 | 0.357049 |
| MmugDNA.13158.1.S1_at   | MmugDNA.13158.1 | 2.99  | 2.99  | 0.13 | 0.02 | -1    | 0.649137 | 0.940246 | 0.829585 | 0.966105 |
| MmugDNA.13159.1.S1_at   | MmugDNA.13159.1 | 5.99  | 6.21  | 0.18 | 0.14 | -1.16 | 0.146513 | 0.525079 | 0.434403 | 0.714766 |

|                         |                 |       |       |      |      |       |          |          |          |          |
|-------------------------|-----------------|-------|-------|------|------|-------|----------|----------|----------|----------|
| MmugDNA.1316.1.S1_at    | MmugDNA.1316.1  | 3.04  | 3     | 0.14 | 0.05 | 1.03  | 0.248489 | 0.189498 | 0.543881 | 0.465237 |
| MmugDNA.13160.1.S1_at   | MmugDNA.13160.1 | 3.33  | 3.48  | 0.12 | 0.16 | -1.11 | 0.805731 | 0.355544 | 0.9129   | 0.597801 |
| MmugDNA.13164.1.S1_at   | MmugDNA.13164.1 | 5.26  | 5.28  | 0.16 | 0.01 | -1.01 | 0.545713 | 0.284458 | 0.764894 | 0.546637 |
| MmugDNA.13166.1.S1_at   | MmugDNA.13166.1 | 3.48  | 3.41  | 0.12 | 0.03 | 1.05  | 0.4482   | 0.673268 | 0.699844 | 0.809084 |
| MmugDNA.13167.1.S1_at   | MmugDNA.13167.1 | 4.17  | 4.23  | 0.32 | 0.08 | -1.05 | 0.571599 | 0.764726 | 0.780017 | 0.863203 |
| MmugDNA.13168.1.S1_at   | MmugDNA.13168.1 | 7.78  | 8.3   | 0.07 | 0.29 | -1.43 | 0.125738 | 0.140222 | 0.406504 | 0.413405 |
| MmugDNA.13169.1.S1_at   | MmugDNA.13169.1 | 6.63  | 6.67  | 0.19 | 0.05 | -1.03 | 0.633118 | 0.177362 | 0.820198 | 0.453742 |
| MmugDNA.1317.1.S1_at    | MmugDNA.1317.1  | 3.93  | 4.17  | 0.06 | 0.23 | -1.19 | 0.332405 | 0.346007 | 0.614085 | 0.59115  |
| MmugDNA.13170.1.S1_at   | MmugDNA.13170.1 | 3.63  | 3.55  | 0.16 | 0.16 | 1.06  | 0.996004 | 0.978055 | 0.998476 | 0.988066 |
| MmugDNA.13171.1.S1_at   | MmugDNA.13171.1 | 4.55  | 4.57  | 0.26 | 0.09 | -1.02 | 0.248417 | 0.202336 | 0.543837 | 0.476691 |
| MmugDNA.13174.1.S1_at   | MmugDNA.13174.1 | 10.61 | 10.81 | 0.18 | 0.21 | -1.15 | 0.282189 | 0.049265 | 0.572951 | 0.266828 |
| MmugDNA.13175.1.S1_at   | MmugDNA.13175.1 | 4.57  | 4.9   | 1.25 | 0.3  | -1.26 | 0.657541 | 0.49068  | 0.834589 | 0.692652 |
| MmugDNA.13176.1.S1_at   | MmugDNA.13176.1 | 4.19  | 4.1   | 0.03 | 0.16 | 1.07  | 0.232489 | 0.160626 | 0.530886 | 0.436745 |
| MmugDNA.1318.1.S1_at    | MmugDNA.1318.1  | 6.33  | 6.3   | 0.31 | 0.06 | 1.02  | 0.718455 | 0.85034  | 0.867219 | 0.914874 |
| MmugDNA.13180.1.S1_at   | MmugDNA.13180.1 | 6.05  | 5.84  | 0.12 | 0.13 | 1.16  | 0.548637 | 0.216281 | 0.766613 | 0.489844 |
| MmugDNA.13181.1.S1_at   | MmugDNA.13181.1 | 6.07  | 6.16  | 0.09 | 0.05 | -1.07 | 0.115888 | 0.151262 | 0.392991 | 0.426    |
| MmugDNA.13182.1.S1_at   | MmugDNA.13182.1 | 6.8   | 9.98  | 1.54 | 0.26 | -9.06 | 0.042152 | 0.331515 | 0.262198 | 0.580163 |
| MmugDNA.13183.1.S1_at   | MmugDNA.13183.1 | 6.21  | 6.17  | 0.24 | 0.29 | 1.03  | 0.425579 | 0.537933 | 0.682976 | 0.722799 |
| MmugDNA.30742.1.S1_s_at | MmugDNA.30742.1 | 7.83  | 7.77  | 0.09 | 0.11 | 1.04  | 0.511849 | 0.664182 | 0.742785 | 0.803247 |
| MmugDNA.13187.1.S1_at   | MmugDNA.13187.1 | 4.73  | 4.68  | 0.25 | 0.31 | 1.04  | 0.48427  | 0.34624  | 0.724151 | 0.591201 |
| MmugDNA.1319.1.S1_at    | MmugDNA.1319.1  | 6.81  | 6.83  | 0.18 | 0.13 | -1.02 | 0.505865 | 0.72026  | 0.738724 | 0.838202 |
| MmugDNA.13190.1.S1_at   | MmugDNA.13190.1 | 4.32  | 3.78  | 0.39 | 0.5  | 1.45  | 0.591334 | 0.400278 | 0.792481 | 0.630158 |
| MmugDNA.13191.1.S1_at   | MmugDNA.13191.1 | 6.17  | 6.44  | 0.15 | 0.11 | -1.2  | 0.186762 | 0.095225 | 0.482843 | 0.35218  |
| MmugDNA.13192.1.S1_s_at | MmugDNA.13192.1 | 10.12 | 10.05 | 0.35 | 0.07 | 1.05  | 0.264584 | 0.30554  | 0.557815 | 0.562486 |
| MmugDNA.13193.1.S1_at   | MmugDNA.13193.1 | 7.39  | 7.22  | 0.15 | 0.07 | 1.13  | 0.049363 | 0.067485 | 0.279575 | 0.305811 |
| MmugDNA.13194.1.S1_at   | MmugDNA.13194.1 | 4.94  | 4.8   | 0.09 | 0.2  | 1.1   | 0.810613 | 0.233347 | 0.915155 | 0.504701 |
| MmugDNA.13194.1.S1_s_at | MmugDNA.13194.1 | 6.3   | 6.37  | 0.12 | 0.25 | -1.05 | 0.663445 | 0.783659 | 0.837777 | 0.874712 |
| MmugDNA.13195.1.S1_at   | MmugDNA.13195.1 | 5.28  | 5.79  | 0.56 | 0.43 | -1.42 | 0.712538 | 0.145243 | 0.864309 | 0.419256 |
| MmugDNA.13196.1.S1_at   | MmugDNA.13196.1 | 4.37  | 4.47  | 0.37 | 0.15 | -1.07 | 0.297818 | 0.188772 | 0.586265 | 0.464761 |
| MmugDNA.13198.1.S1_at   | MmugDNA.13198.1 | 2.67  | 2.67  | 0.03 | 0.08 | -1    | 0.314428 | 0.363639 | 0.599959 | 0.604046 |
| MmugDNA.13199.1.S1_at   | MmugDNA.13199.1 | 3.18  | 2.98  | 0.1  | 0.08 | 1.15  | 0.042268 | 0.038655 | 0.262598 | 0.24169  |
| MmugDNA.1320.1.S1_at    | MmugDNA.1320.1  | 4.7   | 4.62  | 0.01 | 0.02 | 1.06  | 0.002316 | 0.048556 | 0.092561 | 0.265572 |
| MmugDNA.13200.1.S1_at   | MmugDNA.13200.1 | 4.82  | 4.34  | 0.87 | 0.24 | 1.4   | 0.129293 | 0.475545 | 0.411628 | 0.682235 |
| MmugDNA.13202.1.S1_at   | MmugDNA.13202.1 | 5.55  | 5.07  | 0.17 | 0.45 | 1.39  | 0.296283 | 0.383169 | 0.585001 | 0.619153 |
| MmugDNA.13203.1.S1_at   | MmugDNA.13203.1 | 8.97  | 8.68  | 0.28 | 0.08 | 1.22  | 0.230596 | 0.464163 | 0.529468 | 0.674918 |
| MmugDNA.13204.1.S1_at   | MmugDNA.13204.1 | 8.05  | 7.03  | 0.35 | 0.47 | 2.03  | 0.024097 | 0.035825 | 0.208357 | 0.233727 |
| MmugDNA.13205.1.S1_at   | MmugDNA.13205.1 | 4.23  | 3.79  | 0.53 | 0.26 | 1.35  | 0.296007 | 0.176793 | 0.584702 | 0.45321  |
| MmugDNA.13206.1.S1_at   | MmugDNA.13206.1 | 3.66  | 3.72  | 0.16 | 0.17 | -1.04 | 0.43221  | 0.315185 | 0.688051 | 0.568899 |
| MmugDNA.13207.1.S1_at   | MmugDNA.13207.1 | 7.81  | 8.22  | 0.45 | 0.07 | -1.32 | 0.588235 | 0.025484 | 0.790932 | 0.200302 |
| MmugDNA.13208.1.S1_at   | MmugDNA.13208.1 | 3.98  | 3.94  | 0.56 | 0.18 | 1.03  | 0.523411 | 0.594133 | 0.750397 | 0.758517 |
| MmugDNA.13209.1.S1_at   | MmugDNA.13209.1 | 4.12  | 3.95  | 0.32 | 0.1  | 1.13  | 0.283261 | 0.215847 | 0.573695 | 0.489536 |
| MmugDNA.1321.1.S1_at    | MmugDNA.1321.1  | 3.67  | 3.65  | 0.52 | 0.1  | 1.01  | 0.3522   | 0.471614 | 0.629767 | 0.679537 |
| MmugDNA.13210.1.S1_at   | MmugDNA.13210.1 | 3.88  | 3.58  | 0.14 | 0.22 | 1.23  | 0.129671 | 0.240317 | 0.412005 | 0.510874 |

|                         |                 |       |       |      |      |       |          |          |          |          |
|-------------------------|-----------------|-------|-------|------|------|-------|----------|----------|----------|----------|
| MmugDNA.13211.1.S1_at   | MmugDNA.13211.1 | 4.8   | 4.79  | 0.53 | 0.33 | 1     | 0.509382 | 0.037656 | 0.741015 | 0.23852  |
| MmugDNA.13212.1.S1_at   | MmugDNA.13212.1 | 3.69  | 3.35  | 0.24 | 0.36 | 1.27  | 0.161443 | 0.237746 | 0.453006 | 0.50826  |
| MmugDNA.13213.1.S1_at   | MmugDNA.13213.1 | 2.87  | 2.94  | 0.05 | 0.15 | -1.05 | 0.41088  | 0.343468 | 0.672836 | 0.58924  |
| MmugDNA.13214.1.S1_at   | MmugDNA.13214.1 | 3.94  | 3.95  | 0.16 | 0.29 | -1.01 | 0.669539 | 0.627663 | 0.841491 | 0.780629 |
| MmugDNA.13215.1.S1_at   | MmugDNA.13215.1 | 6.13  | 7.4   | 0.19 | 0.36 | -2.41 | 0.008133 | 0.00869  | 0.138956 | 0.123663 |
| MmugDNA.13216.1.S1_at   | MmugDNA.13216.1 | 5.28  | 5.29  | 0.11 | 0    | -1.01 | 0.49552  | 0.597134 | 0.731829 | 0.760094 |
| MmugDNA.13217.1.S1_at   | MmugDNA.13217.1 | 10.84 | 10.67 | 0.27 | 0.04 | 1.13  | 0.546916 | 0.289261 | 0.765616 | 0.550293 |
| MmugDNA.13219.1.S1_at   | MmugDNA.13219.1 | 7.15  | 7     | 0.18 | 0.01 | 1.1   | 0.431835 | 0.617594 | 0.687712 | 0.773511 |
| MmugDNA.1322.1.S1_at    | MmugDNA.1322.1  | 6.42  | 6.41  | 0.03 | 0.09 | 1     | 0.509827 | 0.194713 | 0.741274 | 0.469765 |
| MmugDNA.1322.1.S1_s_at  | MmugDNA.1322.1  | 7.89  | 8.04  | 0.02 | 0.09 | -1.11 | 0.047172 | 0.000699 | 0.274594 | 0.04424  |
| MmugDNA.13220.1.S1_at   | MmugDNA.13220.1 | 2.86  | 2.91  | 0.18 | 0.05 | -1.04 | 0.558805 | 0.656712 | 0.773051 | 0.79927  |
| MmugDNA.13221.1.S1_at   | MmugDNA.13221.1 | 10.82 | 11.12 | 0.25 | 0.07 | -1.23 | 0.088188 | 0.451404 | 0.354244 | 0.666186 |
| MmugDNA.13222.1.S1_s_at | MmugDNA.13222.1 | 5.29  | 5.22  | 0.32 | 0.11 | 1.05  | 0.893538 | 0.250948 | 0.954549 | 0.519618 |
| MmugDNA.13223.1.S1_at   | MmugDNA.13223.1 | 4.1   | 4.03  | 0.07 | 0.14 | 1.05  | 0.630548 | 0.000162 | 0.818647 | 0.030478 |
| MmugDNA.13225.1.S1_at   | MmugDNA.13225.1 | 8.64  | 7.83  | 0.27 | 0.1  | 1.75  | 0.02413  | 0.358859 | 0.208473 | 0.600291 |
| MmugDNA.13226.1.S1_at   | MmugDNA.13226.1 | 6.99  | 6.63  | 0.21 | 0.34 | 1.28  | 0.621222 | 0.113862 | 0.81255  | 0.380084 |
| MmugDNA.13228.1.S1_at   | MmugDNA.13228.1 | 6.26  | 6.07  | 1.35 | 0.05 | 1.14  | 0.751343 | 0.774101 | 0.885256 | 0.868685 |
| MmugDNA.13229.1.S1_at   | MmugDNA.13229.1 | 4.7   | 4.52  | 0.19 | 0.08 | 1.13  | 0.066036 | 0.081878 | 0.314399 | 0.330339 |
| MmugDNA.13232.1.S1_at   | MmugDNA.13232.1 | 6.81  | 6.77  | 0.06 | 0.03 | 1.02  | 0.149148 | 0.673909 | 0.437947 | 0.809483 |
| MmugDNA.13232.1.S1_s_at | MmugDNA.13232.1 | 7.85  | 7.84  | 0.06 | 0.07 | 1.01  | 0.56495  | 0.183067 | 0.776448 | 0.459493 |
| MmugDNA.41625.1.S1_s_at | MmugDNA.41625.1 | 5.63  | 5.38  | 0.2  | 0.06 | 1.19  | 0.203804 | 0.333356 | 0.501441 | 0.581668 |
| MmugDNA.13235.1.S1_at   | MmugDNA.13235.1 | 8.82  | 7.83  | 0.24 | 0.08 | 1.99  | 0.002581 | 0.000189 | 0.094992 | 0.030754 |
| MmugDNA.13236.1.S1_at   | MmugDNA.13236.1 | 6.24  | 6.67  | 0.27 | 0.19 | -1.35 | 0.428458 | 0.001125 | 0.685384 | 0.052924 |
| MmugDNA.13237.1.S1_s_at | MmugDNA.13237.1 | 11.37 | 11.47 | 0.11 | 0.11 | -1.07 | 0.759953 | 0.005107 | 0.890066 | 0.099116 |
| MmugDNA.13238.1.S1_at   | MmugDNA.13238.1 | 6.61  | 6.32  | 0.28 | 0.11 | 1.22  | 0.306988 | 0.485627 | 0.593746 | 0.68924  |
| MmugDNA.13239.1.S1_at   | MmugDNA.13239.1 | 7.67  | 7.52  | 0.37 | 0.08 | 1.12  | 0.168829 | 0.013966 | 0.462083 | 0.151509 |
| MmugDNA.1324.1.S1_s_at  | MmugDNA.1324.1  | 6.51  | 6.71  | 0.54 | 0.67 | -1.15 | 0.511628 | 0.711589 | 0.742545 | 0.832761 |
| MmugDNA.13240.1.S1_at   | MmugDNA.13240.1 | 4     | 3.99  | 0.1  | 0.02 | 1.01  | 0.60441  | 0.558475 | 0.801649 | 0.735631 |
| MmugDNA.13241.1.S1_at   | MmugDNA.13241.1 | 6.37  | 6.44  | 0.17 | 0.07 | -1.05 | 0.18777  | 0.751248 | 0.48403  | 0.855385 |
| MmugDNA.13243.1.S1_at   | MmugDNA.13243.1 | 4.9   | 4.72  | 1.52 | 0.27 | 1.14  | 0.37236  | 0.235184 | 0.644917 | 0.50629  |
| MmugDNA.13244.1.S1_at   | MmugDNA.13244.1 | 3.37  | 3.36  | 0.38 | 0.28 | 1.01  | 0.918945 | 0.629714 | 0.965374 | 0.781989 |
| MmugDNA.13245.1.S1_at   | MmugDNA.13245.1 | 5.19  | 4.89  | 0.58 | 0.06 | 1.23  | 0.318471 | 0.356978 | 0.603161 | 0.598736 |
| MmugDNA.13246.1.S1_at   | MmugDNA.13246.1 | 4.53  | 4.33  | 0.61 | 0.13 | 1.15  | 0.204893 | 0.280686 | 0.502676 | 0.543874 |
| MmugDNA.13247.1.S1_at   | MmugDNA.13247.1 | 4.67  | 4.43  | 0.12 | 0.17 | 1.19  | 0.100417 | 0.100314 | 0.371304 | 0.359386 |
| MmugDNA.13248.1.S1_at   | MmugDNA.13248.1 | 4.91  | 4.88  | 0.1  | 0.1  | 1.02  | 0.388421 | 0.298777 | 0.656432 | 0.557392 |
| MmugDNA.13249.1.S1_at   | MmugDNA.13249.1 | 7.15  | 6.62  | 0.58 | 0.31 | 1.44  | 0.74427  | 0.946081 | 0.881397 | 0.969369 |
| MmugDNA.1325.1.S1_at    | MmugDNA.1325.1  | 4.37  | 4.54  | 0.14 | 0.09 | -1.12 | 0.09445  | 0.089592 | 0.363371 | 0.343811 |
| MmugDNA.13250.1.S1_at   | MmugDNA.13250.1 | 9.44  | 9.57  | 0.17 | 0.07 | -1.09 | 0.200607 | 0.550417 | 0.497869 | 0.730421 |
| MmugDNA.13251.1.S1_at   | MmugDNA.13251.1 | 5.53  | 5.41  | 0.24 | 0.03 | 1.08  | 0.829031 | 0.725414 | 0.924575 | 0.841043 |
| MmugDNA.13253.1.S1_at   | MmugDNA.13253.1 | 4.4   | 4.14  | 0.75 | 0.15 | 1.19  | 0.235398 | 0.446271 | 0.533284 | 0.662743 |
| MmugDNA.13253.1.S1_x_at | MmugDNA.13253.1 | 5.04  | 5.09  | 0.55 | 0.08 | -1.04 | 0.46615  | 0.671118 | 0.712041 | 0.807655 |
| MmugDNA.13254.1.S1_at   | MmugDNA.13254.1 | 4.01  | 4.09  | 0.8  | 0.08 | -1.06 | 0.523259 | 0.336468 | 0.75028  | 0.583831 |
| MmugDNA.13255.1.S1_at   | MmugDNA.13255.1 | 5.29  | 5.31  | 0.04 | 0.19 | -1.01 | 0.724765 | 0.592642 | 0.870848 | 0.757854 |

|                         |                 |       |       |      |      |       |          |          |          |          |
|-------------------------|-----------------|-------|-------|------|------|-------|----------|----------|----------|----------|
| MmugDNA.13256.1.S1_at   | MmugDNA.13256.1 | 7.74  | 8.94  | 0.73 | 0.17 | -2.29 | 0.132026 | 0.425497 | 0.415154 | 0.647866 |
| MmugDNA.13257.1.S1_at   | MmugDNA.13257.1 | 4.72  | 4.62  | 0.07 | 0.05 | 1.07  | 0.148412 | 0.159678 | 0.436978 | 0.435785 |
| MmugDNA.13258.1.S1_at   | MmugDNA.13258.1 | 5.69  | 6.48  | 1.08 | 0.19 | -1.73 | 0.27801  | 0.345289 | 0.569395 | 0.590593 |
| MmugDNA.13259.1.S1_at   | MmugDNA.13259.1 | 12.34 | 12.03 | 0.03 | 0.06 | 1.24  | 0.001654 | 0.008241 | 0.084462 | 0.12058  |
| MmugDNA.1326.1.S1_at    | MmugDNA.1326.1  | 4.04  | 4.92  | 0.96 | 0.37 | -1.84 | 0.553965 | 0.542311 | 0.770349 | 0.725385 |
| MmugDNA.13260.1.S1_at   | MmugDNA.13260.1 | 3.96  | 3.86  | 0.07 | 0.34 | 1.07  | 0.722901 | 0.898329 | 0.869766 | 0.942152 |
| MmugDNA.13261.1.S1_at   | MmugDNA.13261.1 | 6.12  | 6.23  | 0.22 | 0.18 | -1.08 | 0.893552 | 0.402131 | 0.954549 | 0.631232 |
| MmugDNA.13262.1.S1_at   | MmugDNA.13262.1 | 5.66  | 5.7   | 0.04 | 0.02 | -1.03 | 0.325686 | 0.232608 | 0.608885 | 0.504359 |
| MmugDNA.13263.1.S1_at   | MmugDNA.13263.1 | 3.25  | 3.2   | 0.27 | 0.05 | 1.04  | 0.307147 | 0.493357 | 0.593881 | 0.694092 |
| MmugDNA.13264.1.S1_at   | MmugDNA.13264.1 | 5.8   | 5.77  | 0.04 | 0.24 | 1.02  | 0.806113 | 0.118477 | 0.913156 | 0.386457 |
| MmugDNA.13265.1.S1_at   | MmugDNA.13265.1 | 4.94  | 4.91  | 0.11 | 0.23 | 1.02  | 0.208115 | 0.218057 | 0.505909 | 0.491683 |
| MmugDNA.13267.1.S1_at   | MmugDNA.13267.1 | 9.61  | 9.6   | 0.25 | 0.2  | 1.01  | 0.854014 | 0.626709 | 0.936533 | 0.779962 |
| MmugDNA.13268.1.S1_at   | MmugDNA.13268.1 | 10.52 | 10.91 | 0.19 | 0.03 | -1.31 | 0.040446 | 0.006738 | 0.257428 | 0.110984 |
| MmugDNA.13271.1.S1_at   | MmugDNA.13271.1 | 5.19  | 5.21  | 0.05 | 0.12 | -1.01 | 0.200547 | 0.457712 | 0.497869 | 0.670897 |
| MmugDNA.13272.1.S1_at   | MmugDNA.13272.1 | 4.24  | 4.27  | 0.41 | 0.16 | -1.03 | 0.838391 | 0.022099 | 0.92909  | 0.185973 |
| MmugDNA.13274.1.S1_at   | MmugDNA.13274.1 | 5.36  | 5.41  | 0.13 | 0.13 | -1.04 | 0.627271 | 0.948079 | 0.816769 | 0.970446 |
| MmugDNA.13275.1.S1_at   | MmugDNA.13275.1 | 4.87  | 4.8   | 0.49 | 0.34 | 1.05  | 0.561859 | 0.778356 | 0.774657 | 0.871276 |
| MmugDNA.13276.1.S1_at   | MmugDNA.13276.1 | 2.94  | 2.82  | 0.11 | 0.12 | 1.08  | 0.11039  | 0.242466 | 0.38571  | 0.512835 |
| MmugDNA.13278.1.S1_at   | MmugDNA.13278.1 | 10.65 | 10.54 | 0.13 | 0.12 | 1.08  | 0.551107 | 0.259926 | 0.768269 | 0.52675  |
| MmugDNA.13279.1.S1_at   | MmugDNA.13279.1 | 10.02 | 9.78  | 0.01 | 0.03 | 1.18  | 0.000278 | 0.138288 | 0.056985 | 0.411198 |
| MmugDNA.1328.1.S1_at    | MmugDNA.1328.1  | 8.1   | 7.54  | 0.09 | 0.17 | 1.48  | 0.011523 | 0.094082 | 0.15722  | 0.350727 |
| MmugDNA.13280.1.S1_at   | MmugDNA.13280.1 | 5.45  | 5.62  | 0.28 | 0.12 | -1.13 | 0.922472 | 0.970482 | 0.96686  | 0.983936 |
| MmugDNA.13281.1.S1_at   | MmugDNA.13281.1 | 6.16  | 5.77  | 0.23 | 0.08 | 1.31  | 0.063303 | 0.098534 | 0.308234 | 0.356636 |
| MmugDNA.13282.1.S1_at   | MmugDNA.13282.1 | 6.32  | 6.27  | 0.07 | 0.03 | 1.04  | 0.381825 | 0.439869 | 0.651337 | 0.658468 |
| MmugDNA.13283.1.S1_at   | MmugDNA.13283.1 | 3.81  | 3.81  | 0.13 | 0.05 | 1     | 0.583364 | 0.690052 | 0.788015 | 0.819235 |
| MmugDNA.13286.1.S1_at   | MmugDNA.13286.1 | 8.13  | 10.84 | 1.02 | 0.23 | -6.52 | 0.030444 | 0.366792 | 0.227311 | 0.606502 |
| MmugDNA.22482.1.S1_s_at | MmugDNA.22482.1 | 10.03 | 9.76  | 0.14 | 0.06 | 1.21  | 0.011488 | 0.022371 | 0.15722  | 0.187176 |
| MmugDNA.13288.1.S1_s_at | MmugDNA.13288.1 | 13.45 | 13.59 | 0.11 | 0.02 | -1.1  | 0.256457 | 0.538447 | 0.550997 | 0.723141 |
| MmugDNA.13289.1.S1_at   | MmugDNA.13289.1 | 8     | 8.12  | 0.2  | 0.22 | -1.08 | 0.464452 | 0.930762 | 0.710659 | 0.960673 |
| MmugDNA.1329.1.S1_at    | MmugDNA.1329.1  | 5.01  | 4.99  | 0.09 | 0.16 | 1.01  | 0.799254 | 0.085267 | 0.909484 | 0.337096 |
| MmugDNA.13291.1.S1_at   | MmugDNA.13291.1 | 3.87  | 4.2   | 0.39 | 0.32 | -1.25 | 0.537174 | 0.661322 | 0.759433 | 0.801687 |
| MmugDNA.13292.1.S1_at   | MmugDNA.13292.1 | 3.03  | 3.03  | 0.07 | 0.02 | -1    | 0.30685  | 0.27736  | 0.593617 | 0.541302 |
| MmugDNA.13294.1.S1_at   | MmugDNA.13294.1 | 3.95  | 3.73  | 0.08 | 0.13 | 1.16  | 0.090271 | 0.07723  | 0.356872 | 0.322852 |
| MmugDNA.13295.1.S1_at   | MmugDNA.13295.1 | 4.04  | 4.16  | 0.18 | 0.15 | -1.09 | 0.657159 | 0.412383 | 0.834252 | 0.6388   |
| MmugDNA.13296.1.S1_at   | MmugDNA.13296.1 | 5.63  | 5.68  | 0.2  | 0    | -1.03 | 0.771899 | 0.692366 | 0.895526 | 0.820984 |
| MmugDNA.13297.1.S1_at   | MmugDNA.13297.1 | 4.86  | 4.93  | 0.93 | 0.27 | -1.05 | 0.763011 | 0.932638 | 0.891457 | 0.961739 |
| MmugDNA.13298.1.S1_at   | MmugDNA.13298.1 | 8.18  | 7.87  | 0.27 | 0.16 | 1.24  | 0.243583 | 0.043036 | 0.54025  | 0.252089 |
| MmugDNA.1330.1.S1_at    | MmugDNA.1330.1  | 4.39  | 4.51  | 0.48 | 0.31 | -1.09 | 0.726896 | 0.831594 | 0.871961 | 0.903439 |
| MmugDNA.13301.1.S1_at   | MmugDNA.13301.1 | 12.41 | 12.39 | 0.02 | 0.13 | 1.02  | 0.535014 | 0.003021 | 0.758108 | 0.080204 |
| MmugDNA.13305.1.S1_at   | MmugDNA.13305.1 | 4.92  | 4.93  | 0.09 | 0.15 | -1.01 | 0.453918 | 0.556854 | 0.703934 | 0.734831 |
| MmugDNA.13307.1.S1_at   | MmugDNA.13307.1 | 3.95  | 3.87  | 0.11 | 0.17 | 1.06  | 0.45043  | 0.554974 | 0.701508 | 0.733559 |
| MmugDNA.13309.1.S1_at   | MmugDNA.13309.1 | 6.3   | 6.18  | 0.06 | 0.16 | 1.09  | 0.417451 | 0.081125 | 0.677557 | 0.32931  |
| MmugDNA.1331.1.S1_at    | MmugDNA.1331.1  | 5.34  | 5.38  | 0.06 | 0.2  | -1.03 | 0.51277  | 0.074634 | 0.743203 | 0.318314 |

|                         |                 |       |       |      |      |        |          |          |          |          |
|-------------------------|-----------------|-------|-------|------|------|--------|----------|----------|----------|----------|
| MmugDNA.13310.1.S1_at   | MmugDNA.13310.1 | 4.29  | 4.23  | 0.11 | 0.08 | 1.04   | 0.311398 | 0.741405 | 0.597508 | 0.850285 |
| MmugDNA.13311.1.S1_at   | MmugDNA.13311.1 | 3.62  | 3.67  | 0.07 | 0.16 | -1.03  | 0.563759 | 0.776248 | 0.775658 | 0.86982  |
| MmugDNA.13313.1.S1_at   | MmugDNA.13313.1 | 6.51  | 6.37  | 0.19 | 0.12 | 1.1    | 0.497926 | 0.682279 | 0.733373 | 0.814486 |
| MmugDNA.13314.1.S1_at   | MmugDNA.13314.1 | 4     | 4.19  | 0.25 | 0.19 | -1.14  | 0.374741 | 0.588071 | 0.645656 | 0.754719 |
| MmugDNA.13315.1.S1_at   | MmugDNA.13315.1 | 5.76  | 5.98  | 0.23 | 0.14 | -1.17  | 0.572947 | 0.306471 | 0.780942 | 0.563029 |
| MmugDNA.13316.1.S1_at   | MmugDNA.13316.1 | 4.6   | 4.53  | 0.18 | 0.46 | 1.05   | 0.534984 | 0.654879 | 0.758086 | 0.798179 |
| MmugDNA.13317.1.S1_at   | MmugDNA.13317.1 | 3.66  | 3.63  | 0.11 | 0.09 | 1.02   | 0.697659 | 0.483937 | 0.856022 | 0.688243 |
| MmugDNA.13318.1.S1_at   | MmugDNA.13318.1 | 3.08  | 3.1   | 0.09 | 0.17 | -1.02  | 0.606447 | 0.317748 | 0.803128 | 0.570922 |
| MmugDNA.13319.1.S1_at   | MmugDNA.13319.1 | 3.61  | 3.85  | 0.09 | 0.39 | -1.18  | 0.145203 | 0.107533 | 0.432533 | 0.370389 |
| MmugDNA.1332.1.S1_at    | MmugDNA.1332.1  | 3.53  | 3.72  | 0.31 | 0.33 | -1.15  | 0.936513 | 0.70349  | 0.973489 | 0.828101 |
| MmugDNA.13321.1.S1_at   | MmugDNA.13321.1 | 11.62 | 11.76 | 0.13 | 0.09 | -1.1   | 0.178577 | 0.388661 | 0.473373 | 0.622949 |
| MmugDNA.13322.1.S1_at   | MmugDNA.13322.1 | 8.69  | 9.56  | 0.11 | 0.08 | -1.84  | 0.000538 | 0.007058 | 0.069927 | 0.113278 |
| MmugDNA.13323.1.S1_at   | MmugDNA.13323.1 | 4.04  | 4.46  | 0.05 | 0.44 | -1.34  | 0.202092 | 0.189694 | 0.499672 | 0.465328 |
| MmugDNA.13324.1.S1_at   | MmugDNA.13324.1 | 12.11 | 11.95 | 0.07 | 0.07 | 1.12   | 0.020113 | 0.015793 | 0.195301 | 0.159334 |
| MmugDNA.13326.1.S1_at   | MmugDNA.13326.1 | 6.03  | 5.97  | 0.02 | 0.03 | 1.04   | 0.066776 | 0.296291 | 0.31618  | 0.555423 |
| MmugDNA.13328.1.S1_at   | MmugDNA.13328.1 | 9.75  | 9.39  | 0.23 | 0.07 | 1.28   | 0.064524 | 0.017701 | 0.310585 | 0.168304 |
| MmugDNA.1333.1.S1_at    | MmugDNA.1333.1  | 6.88  | 6.81  | 0.15 | 0.06 | 1.05   | 0.51065  | 0.648857 | 0.742023 | 0.794491 |
| MmugDNA.13330.1.S1_at   | MmugDNA.13330.1 | 3.86  | 3.31  | 0.17 | 0.03 | 1.47   | 0.004293 | 0.000961 | 0.111625 | 0.049342 |
| MmugDNA.13331.1.S1_at   | MmugDNA.13331.1 | 5.01  | 4.8   | 0.11 | 0.09 | 1.16   | 0.151964 | 0.0655   | 0.441526 | 0.301415 |
| MmugDNA.13333.1.S1_at   | MmugDNA.13333.1 | 3.65  | 3.65  | 0.04 | 0.1  | -1     | 0.667883 | 0.569822 | 0.840528 | 0.742694 |
| MmugDNA.13334.1.S1_at   | MmugDNA.13334.1 | 4.47  | 4.47  | 0.17 | 0.1  | -1     | 0.67113  | 0.893856 | 0.842238 | 0.939437 |
| MmugDNA.13335.1.S1_at   | MmugDNA.13335.1 | 9.85  | 10.48 | 0.35 | 0.11 | -1.55  | 0.015266 | 0.069689 | 0.175866 | 0.310164 |
| MmugDNA.13336.1.S1_at   | MmugDNA.13336.1 | 7.53  | 6.46  | 0.98 | 0.48 | 2.1    | 0.157182 | 0.047896 | 0.447994 | 0.263751 |
| MmugDNA.13337.1.S1_at   | MmugDNA.13337.1 | 6.42  | 6.02  | 0.1  | 0.11 | 1.32   | 0.006115 | 0.002125 | 0.124422 | 0.06817  |
| MmugDNA.1334.1.S1_at    | MmugDNA.1334.1  | 5.99  | 5.88  | 0.09 | 0.06 | 1.08   | 0.060816 | 0.212017 | 0.30365  | 0.486006 |
| MmugDNA.13340.1.S1_at   | MmugDNA.13340.1 | 3.88  | 3.84  | 0.17 | 0.08 | 1.02   | 0.194617 | 0.381495 | 0.491247 | 0.617691 |
| MmugDNA.13341.1.S1_at   | MmugDNA.13341.1 | 3.14  | 3.27  | 0.13 | 0.03 | -1.09  | 0.060735 | 0.132013 | 0.303419 | 0.404043 |
| MmugDNA.13342.1.S1_s_at | MmugDNA.13342.1 | 11.64 | 11.54 | 0.25 | 0.28 | 1.08   | 0.77109  | 0.089164 | 0.895131 | 0.343188 |
| MmugDNA.13343.1.S1_at   | MmugDNA.13343.1 | 10.56 | 10.35 | 0.09 | 0.09 | 1.16   | 0.05987  | 0.639958 | 0.301975 | 0.788592 |
| MmugDNA.13344.1.S1_at   | MmugDNA.13344.1 | 5.16  | 5.38  | 0.46 | 0.05 | -1.16  | 0.968536 | 0.980725 | 0.987529 | 0.989447 |
| MmugDNA.13345.1.S1_at   | MmugDNA.13345.1 | 6.11  | 6.2   | 0.23 | 0.05 | -1.07  | 0.595542 | 0.376996 | 0.795312 | 0.614702 |
| MmugDNA.13347.1.S1_at   | MmugDNA.13347.1 | 4.84  | 5.48  | 0.97 | 0.79 | -1.56  | 0.880948 | 0.443567 | 0.949388 | 0.661336 |
| MmugDNA.13348.1.S1_at   | MmugDNA.13348.1 | 4.63  | 4.61  | 0.12 | 0.1  | 1.01   | 0.598449 | 0.404498 | 0.797444 | 0.633004 |
| MmugDNA.13350.1.S1_at   | MmugDNA.13350.1 | 4.74  | 4.7   | 0.12 | 0.08 | 1.03   | 0.491346 | 0.554824 | 0.729201 | 0.733508 |
| MmugDNA.13351.1.S1_at   | MmugDNA.13351.1 | 3.39  | 3.53  | 0.24 | 0.13 | -1.1   | 0.632183 | 0.7547   | 0.819633 | 0.85732  |
| MmugDNA.13353.1.S1_at   | MmugDNA.13353.1 | 7.36  | 7.72  | 0.14 | 0.07 | -1.28  | 0.018083 | 0.418754 | 0.18753  | 0.643101 |
| MmugDNA.13354.1.S1_at   | MmugDNA.13354.1 | 3.12  | 8.14  | 1.51 | 0.61 | -32.37 | 0.015759 | 0.174037 | 0.177898 | 0.450275 |
| MmugDNA.13357.1.S1_at   | MmugDNA.13357.1 | 10.35 | 10    | 0.29 | 0.03 | 1.28   | 0.193489 | 0.216322 | 0.490073 | 0.489884 |
| MmugDNA.13358.1.S1_at   | MmugDNA.13358.1 | 4.8   | 4.67  | 0.24 | 0.08 | 1.1    | 0.594805 | 0.28117  | 0.794991 | 0.544312 |
| MmugDNA.13359.1.S1_at   | MmugDNA.13359.1 | 7.12  | 7.16  | 0.24 | 0.03 | -1.03  | 0.316365 | 0.371271 | 0.601116 | 0.610135 |
| MmugDNA.1336.1.S1_at    | MmugDNA.1336.1  | 7.96  | 7.7   | 0.33 | 0.17 | 1.2    | 0.314897 | 0.772546 | 0.600177 | 0.867784 |
| MmugDNA.13360.1.S1_at   | MmugDNA.13360.1 | 10.22 | 9.82  | 0.26 | 0.14 | 1.33   | 0.175459 | 0.305087 | 0.469926 | 0.562255 |
| MmugDNA.13361.1.S1_at   | MmugDNA.13361.1 | 7.75  | 7.56  | 0.29 | 0.17 | 1.14   | 0.85434  | 0.345502 | 0.936628 | 0.590747 |

|                         |                 |       |       |      |      |       |          |          |          |          |
|-------------------------|-----------------|-------|-------|------|------|-------|----------|----------|----------|----------|
| MmugDNA.13363.1.S1_at   | MmugDNA.13363.1 | 4.06  | 3.7   | 0.26 | 0.23 | 1.29  | 0.304774 | 0.446112 | 0.591803 | 0.662706 |
| MmugDNA.13364.1.S1_at   | MmugDNA.13364.1 | 3.54  | 3.73  | 0.47 | 0.09 | -1.14 | 0.825065 | 0.824859 | 0.922292 | 0.899427 |
| MmugDNA.13365.1.S1_at   | MmugDNA.13365.1 | 4.07  | 4.15  | 0.45 | 0.06 | -1.06 | 0.542794 | 0.770227 | 0.762997 | 0.866562 |
| MmugDNA.13368.1.S1_at   | MmugDNA.13368.1 | 6.84  | 6.99  | 0.13 | 0    | -1.12 | 0.338347 | 0.315346 | 0.61869  | 0.568939 |
| MmugDNA.13369.1.S1_at   | MmugDNA.13369.1 | 3.85  | 3.62  | 0.26 | 0.28 | 1.17  | 0.15413  | 0.192704 | 0.44445  | 0.468219 |
| MmugDNA.1337.1.S1_at    | MmugDNA.1337.1  | 12.26 | 11.83 | 0.12 | 0.08 | 1.35  | 0.005824 | 0.021969 | 0.122207 | 0.185463 |
| MmugDNA.13370.1.S1_at   | MmugDNA.13370.1 | 3.44  | 3.45  | 0.21 | 0.06 | -1.01 | 0.458906 | 0.715573 | 0.707292 | 0.835127 |
| MmugDNA.13371.1.S1_at   | MmugDNA.13371.1 | 3.07  | 3.07  | 0.22 | 0.26 | 1     | 0.495512 | 0.339881 | 0.731829 | 0.586417 |
| MmugDNA.13372.1.S1_at   | MmugDNA.13372.1 | 5.81  | 5.76  | 0.07 | 0.07 | 1.03  | 0.463518 | 0.224888 | 0.710092 | 0.497657 |
| MmugDNA.13373.1.S1_at   | MmugDNA.13373.1 | 5.74  | 5.79  | 0.18 | 0.6  | -1.03 | 0.879086 | 0.210422 | 0.948523 | 0.484303 |
| MmugDNA.13374.1.S1_at   | MmugDNA.13374.1 | 4.44  | 4.37  | 0.24 | 0.18 | 1.05  | 0.755742 | 0.679303 | 0.887435 | 0.81275  |
| MmugDNA.13375.1.S1_at   | MmugDNA.13375.1 | 10.43 | 11.04 | 0.18 | 0.14 | -1.52 | 0.030922 | 0.019962 | 0.228986 | 0.17752  |
| MmugDNA.13376.1.S1_at   | MmugDNA.13376.1 | 4.53  | 4.42  | 0.13 | 0.04 | 1.08  | 0.088533 | 0.28023  | 0.354709 | 0.543487 |
| MmugDNA.13377.1.S1_at   | MmugDNA.13377.1 | 4.02  | 3.24  | 1.21 | 0.19 | 1.73  | 0.179093 | 0.23282  | 0.474028 | 0.504441 |
| MmugDNA.13378.1.S1_at   | MmugDNA.13378.1 | 4.24  | 4.22  | 0.21 | 0.09 | 1.02  | 0.549344 | 0.733067 | 0.767114 | 0.845503 |
| MmugDNA.13379.1.S1_at   | MmugDNA.13379.1 | 7.19  | 7.11  | 0.09 | 0.03 | 1.06  | 0.14332  | 0.100582 | 0.42964  | 0.359845 |
| MmugDNA.1338.1.S1_at    | MmugDNA.1338.1  | 5.7   | 5.65  | 0.05 | 0    | 1.03  | 0.156944 | 0.132699 | 0.447681 | 0.404544 |
| MmugDNA.13383.1.S1_at   | MmugDNA.13383.1 | 2.93  | 2.81  | 0.28 | 0    | 1.08  | 0.438263 | 0.685971 | 0.692887 | 0.816691 |
| MmugDNA.13384.1.S1_at   | MmugDNA.13384.1 | 8.01  | 7.37  | 0.26 | 0.12 | 1.56  | 0.013015 | 0.001084 | 0.164853 | 0.05215  |
| MmugDNA.13385.1.S1_at   | MmugDNA.13385.1 | 5.34  | 5.22  | 0.86 | 0.23 | 1.09  | 0.516595 | 0.534733 | 0.745961 | 0.720524 |
| MmugDNA.13387.1.S1_at   | MmugDNA.13387.1 | 6.21  | 7.26  | 0.18 | 0.08 | -2.07 | 0.000957 | 0.013384 | 0.076054 | 0.14827  |
| MmugDNA.13388.1.S1_at   | MmugDNA.13388.1 | 6.22  | 6.11  | 0.24 | 0.01 | 1.08  | 0.387239 | 0.69712  | 0.655462 | 0.824045 |
| MmugDNA.13389.1.S1_s_at | MmugDNA.13389.1 | 7.23  | 7.14  | 0.2  | 0.29 | 1.07  | 0.141765 | 0.418593 | 0.42774  | 0.642999 |
| MmugDNA.1339.1.S1_at    | MmugDNA.1339.1  | 11.79 | 11.42 | 0.27 | 0.14 | 1.29  | 0.04     | 0.024159 | 0.256645 | 0.194601 |
| MmugDNA.13390.1.S1_at   | MmugDNA.13390.1 | 3.33  | 3.34  | 0.17 | 0.27 | -1.01 | 0.633777 | 0.667329 | 0.8205   | 0.805297 |
| MmugDNA.13392.1.S1_at   | MmugDNA.13392.1 | 10.88 | 10.62 | 0.7  | 0.6  | 1.2   | 0.783404 | 0.42334  | 0.901128 | 0.646277 |
| MmugDNA.13393.1.S1_at   | MmugDNA.13393.1 | 8.55  | 8.87  | 0.39 | 0.22 | -1.25 | 0.17311  | 0.030693 | 0.467303 | 0.217148 |
| MmugDNA.13395.1.S1_at   | MmugDNA.13395.1 | 9.72  | 10.83 | 0.54 | 0.14 | -2.15 | 0.029726 | 0.09585  | 0.225633 | 0.352962 |
| MmugDNA.13396.1.S1_at   | MmugDNA.13396.1 | 5.18  | 5.34  | 0.19 | 0.03 | -1.11 | 0.669263 | 0.504655 | 0.841353 | 0.701754 |
| MmugDNA.13399.1.S1_at   | MmugDNA.13399.1 | 11.16 | 11.88 | 0.29 | 0.15 | -1.64 | 0.052247 | 0.113532 | 0.285979 | 0.379632 |
| MmugDNA.1340.1.S1_at    | MmugDNA.1340.1  | 10.98 | 11.26 | 0.4  | 0.05 | -1.22 | 0.080906 | 0.036356 | 0.341702 | 0.235105 |
| MmugDNA.13401.1.S1_s_at | MmugDNA.13401.1 | 9.7   | 10.11 | 0.25 | 0.06 | -1.32 | 0.156925 | 0.449315 | 0.447666 | 0.665015 |
| MmugDNA.13404.1.S1_at   | MmugDNA.13404.1 | 4.15  | 4.15  | 0.06 | 0.13 | -1    | 0.721747 | 0.732351 | 0.86896  | 0.844986 |
| MmugDNA.13405.1.S1_at   | MmugDNA.13405.1 | 7.77  | 7.76  | 0.47 | 0.16 | 1.01  | 0.993376 | 0.590161 | 0.997386 | 0.756117 |
| MmugDNA.13409.1.S1_at   | MmugDNA.13409.1 | 5.3   | 5.41  | 0.09 | 0.05 | -1.08 | 0.235436 | 0.293679 | 0.533329 | 0.553665 |
| MmugDNA.13410.1.S1_at   | MmugDNA.13410.1 | 3.46  | 3.85  | 0.06 | 0.44 | -1.31 | 0.176729 | 0.144296 | 0.471201 | 0.418196 |
| MmugDNA.13411.1.S1_at   | MmugDNA.13411.1 | 4.61  | 4.5   | 0.31 | 0.23 | 1.08  | 0.640446 | 0.667346 | 0.824302 | 0.805297 |
| MmugDNA.13412.1.S1_at   | MmugDNA.13412.1 | 6.06  | 5.67  | 0.03 | 0.08 | 1.3   | 0.001625 | 0.000171 | 0.08405  | 0.030511 |
| MmugDNA.13413.1.S1_at   | MmugDNA.13413.1 | 7.35  | 5.62  | 1.19 | 0.31 | 3.32  | 0.041964 | 0.026336 | 0.261852 | 0.203321 |
| MmugDNA.13414.1.S1_at   | MmugDNA.13414.1 | 3     | 2.92  | 0.29 | 0.12 | 1.05  | 0.245111 | 0.252923 | 0.541279 | 0.521258 |
| MmugDNA.13415.1.S1_at   | MmugDNA.13415.1 | 5.15  | 4.86  | 0.26 | 0.07 | 1.22  | 0.202397 | 0.159571 | 0.500034 | 0.435774 |
| MmugDNA.13415.1.S1_s_at | MmugDNA.13415.1 | 7.16  | 7.01  | 0.08 | 0.06 | 1.12  | 0.216978 | 0.729988 | 0.51486  | 0.843736 |
| MmugDNA.13416.1.S1_at   | MmugDNA.13416.1 | 3.21  | 2.92  | 0.77 | 0.05 | 1.22  | 0.231491 | 0.446513 | 0.530229 | 0.662842 |

|                         |                 |       |       |      |      |       |          |          |          |          |
|-------------------------|-----------------|-------|-------|------|------|-------|----------|----------|----------|----------|
| MmugDNA.13419.1.S1_at   | MmugDNA.13419.1 | 7.07  | 6.67  | 0.14 | 0.28 | 1.32  | 0.041541 | 0.069446 | 0.260199 | 0.309778 |
| MmugDNA.1342.1.S1_at    | MmugDNA.1342.1  | 4.93  | 5.05  | 0.16 | 0.16 | -1.09 | 0.186548 | 0.186632 | 0.482692 | 0.462425 |
| MmugDNA.13420.1.S1_at   | MmugDNA.13420.1 | 11.1  | 10.95 | 0.09 | 0.11 | 1.11  | 0.123162 | 0.000228 | 0.402333 | 0.032385 |
| MmugDNA.13421.1.S1_at   | MmugDNA.13421.1 | 8.38  | 9.36  | 0.13 | 0.11 | -1.98 | 0.000622 | 0.055136 | 0.070727 | 0.280429 |
| MmugDNA.13423.1.S1_at   | MmugDNA.13423.1 | 10.93 | 11.29 | 0.16 | 0.06 | -1.28 | 0.030575 | 0.021936 | 0.227751 | 0.185351 |
| MmugDNA.13425.1.S1_at   | MmugDNA.13425.1 | 5.6   | 5.61  | 0.24 | 0.12 | -1.01 | 0.392464 | 0.583001 | 0.659407 | 0.751495 |
| MmugDNA.13427.1.S1_at   | MmugDNA.13427.1 | 6.55  | 6.42  | 0.28 | 0.01 | 1.09  | 0.147555 | 0.409922 | 0.43548  | 0.636956 |
| MmugDNA.13429.1.S1_at   | MmugDNA.13429.1 | 3.33  | 3.28  | 0.07 | 0.04 | 1.04  | 0.314992 | 0.334281 | 0.600177 | 0.582323 |
| MmugDNA.1343.1.S1_at    | MmugDNA.1343.1  | 4.58  | 4.57  | 0.22 | 0.09 | 1.01  | 0.673511 | 0.679032 | 0.843844 | 0.812591 |
| MmugDNA.13430.1.S1_at   | MmugDNA.13430.1 | 4.56  | 4.2   | 0.2  | 0.11 | 1.29  | 0.110199 | 0.129707 | 0.385551 | 0.401344 |
| MmugDNA.13431.1.S1_at   | MmugDNA.13431.1 | 5.3   | 5.16  | 0.07 | 0.05 | 1.1   | 0.056199 | 0.340503 | 0.294294 | 0.586776 |
| MmugDNA.13433.1.S1_at   | MmugDNA.13433.1 | 4.37  | 4.37  | 0.05 | 0.14 | 1     | 0.266401 | 0.335997 | 0.558813 | 0.583601 |
| MmugDNA.13434.1.S1_at   | MmugDNA.13434.1 | 6.85  | 7.45  | 0.43 | 0.16 | -1.52 | 0.199602 | 0.282749 | 0.497007 | 0.545473 |
| MmugDNA.13435.1.S1_at   | MmugDNA.13435.1 | 5.97  | 6.03  | 0.09 | 0.06 | -1.04 | 0.860032 | 0.705283 | 0.939228 | 0.829122 |
| MmugDNA.13437.1.S1_at   | MmugDNA.13437.1 | 10    | 10.01 | 0.21 | 0.08 | -1    | 0.775294 | 0.584613 | 0.897377 | 0.752482 |
| MmugDNA.13438.1.S1_at   | MmugDNA.13438.1 | 9.93  | 9.49  | 0.2  | 0.2  | 1.35  | 0.034523 | 0.07373  | 0.24039  | 0.317071 |
| MmugDNA.13440.1.S1_at   | MmugDNA.13440.1 | 10.05 | 9.42  | 0.1  | 0.31 | 1.55  | 0.049771 | 0.003331 | 0.280592 | 0.083001 |
| MmugDNA.13441.1.S1_at   | MmugDNA.13441.1 | 3.88  | 3.79  | 0.2  | 0.11 | 1.06  | 0.764342 | 0.973332 | 0.89193  | 0.985515 |
| MmugDNA.13442.1.S1_at   | MmugDNA.13442.1 | 10.74 | 10.87 | 0.3  | 0.05 | -1.1  | 0.235525 | 0.610235 | 0.533339 | 0.768481 |
| MmugDNA.13443.1.S1_at   | MmugDNA.13443.1 | 6.38  | 6.49  | 0.06 | 0.13 | -1.08 | 0.992487 | 0.122511 | 0.997203 | 0.392423 |
| MmugDNA.13446.1.S1_at   | MmugDNA.13446.1 | 5.53  | 5.75  | 0.06 | 0.23 | -1.16 | 0.205423 | 0.109689 | 0.503171 | 0.373675 |
| MmugDNA.13447.1.S1_at   | MmugDNA.13447.1 | 5.22  | 5.48  | 0.36 | 0.15 | -1.19 | 0.879806 | 0.923534 | 0.948813 | 0.956997 |
| MmugDNA.13448.1.S1_at   | MmugDNA.13448.1 | 10.02 | 10.23 | 0.4  | 0.26 | -1.16 | 0.222284 | 0.106324 | 0.520257 | 0.368819 |
| MmugDNA.13449.1.S1_at   | MmugDNA.13449.1 | 3.46  | 3.32  | 0.12 | 0.08 | 1.1   | 0.133057 | 0.133781 | 0.416546 | 0.405778 |
| MmugDNA.1345.1.S1_at    | MmugDNA.1345.1  | 4.05  | 3.99  | 0.11 | 0.05 | 1.04  | 0.095941 | 0.631759 | 0.365529 | 0.782957 |
| MmugDNA.1345.1.S1_s_at  | MmugDNA.1345.1  | 5.18  | 5.18  | 0.27 | 0.09 | 1     | 0.850884 | 0.818845 | 0.935254 | 0.895606 |
| MmugDNA.13450.1.S1_at   | MmugDNA.13450.1 | 12.4  | 11.66 | 0.28 | 0.04 | 1.68  | 0.011071 | 0.475521 | 0.154915 | 0.682219 |
| MmugDNA.13451.1.S1_at   | MmugDNA.13451.1 | 6.75  | 6.74  | 0.37 | 0.05 | 1     | 0.380865 | 0.278521 | 0.650427 | 0.542311 |
| MmugDNA.13452.1.S1_at   | MmugDNA.13452.1 | 6.53  | 6.51  | 0.03 | 0.12 | 1.02  | 0.510326 | 0.053303 | 0.741715 | 0.276463 |
| MmugDNA.13453.1.S1_at   | MmugDNA.13453.1 | 6.82  | 6.84  | 0.07 | 0.09 | -1.02 | 0.704522 | 0.060907 | 0.859743 | 0.293514 |
| MmugDNA.13454.1.S1_at   | MmugDNA.13454.1 | 6.48  | 6.71  | 0.35 | 0.08 | -1.17 | 0.294203 | 0.243136 | 0.583201 | 0.513356 |
| MmugDNA.13456.1.S1_at   | MmugDNA.13456.1 | 3.52  | 3.23  | 0.91 | 0.19 | 1.22  | 0.2424   | 0.271435 | 0.539382 | 0.536512 |
| MmugDNA.13457.1.S1_at   | MmugDNA.13457.1 | 4.67  | 4.44  | 0.85 | 0.25 | 1.17  | 0.312637 | 0.358939 | 0.598694 | 0.600333 |
| MmugDNA.13458.1.S1_at   | MmugDNA.13458.1 | 10.78 | 10.95 | 0.01 | 0.04 | -1.13 | 0.00208  | 0.471711 | 0.090206 | 0.679612 |
| MmugDNA.13458.1.S1_s_at | MmugDNA.13458.1 | 11.22 | 11.59 | 0.08 | 0.05 | -1.3  | 0.006483 | 0.261893 | 0.127306 | 0.528287 |
| MmugDNA.13459.1.S1_at   | MmugDNA.13459.1 | 2.77  | 2.87  | 0.33 | 0.21 | -1.08 | 0.870828 | 0.954561 | 0.944458 | 0.974203 |
| MmugDNA.1346.1.S1_at    | MmugDNA.1346.1  | 4.1   | 4.15  | 0.07 | 0.05 | -1.04 | 0.160705 | 0.210049 | 0.452305 | 0.483835 |
| MmugDNA.13460.1.S1_at   | MmugDNA.13460.1 | 13.21 | 12.94 | 0.12 | 0.04 | 1.2   | 0.01586  | 0.003412 | 0.178315 | 0.084071 |
| MmugDNA.13460.1.S1_s_at | MmugDNA.13460.1 | 12.95 | 12.67 | 0.09 | 0.08 | 1.21  | 0.02738  | 0.035065 | 0.218317 | 0.231425 |
| MmugDNA.13462.1.S1_at   | MmugDNA.13462.1 | 12.53 | 12.37 | 0.09 | 0.11 | 1.12  | 0.139296 | 0.297612 | 0.424942 | 0.55624  |
| MmugDNA.13463.1.S1_at   | MmugDNA.13463.1 | 12.62 | 12.38 | 0.15 | 0.02 | 1.18  | 0.020475 | 0.011251 | 0.196586 | 0.138039 |
| MmugDNA.13465.1.S1_s_at | MmugDNA.13465.1 | 7.76  | 6.6   | 0.65 | 0.1  | 2.24  | 0.038252 | 0.070425 | 0.251651 | 0.311729 |
| MmugDNA.13466.1.S1_at   | MmugDNA.13466.1 | 10.03 | 10.07 | 0.14 | 0.1  | -1.03 | 0.432807 | 0.651987 | 0.688464 | 0.796529 |

|                         |                 |       |       |      |      |       |          |          |          |          |
|-------------------------|-----------------|-------|-------|------|------|-------|----------|----------|----------|----------|
| MmugDNA.13468.1.S1_at   | MmugDNA.13468.1 | 8.71  | 9.35  | 0.16 | 0.04 | -1.55 | 0.00145  | 0.059366 | 0.079991 | 0.29054  |
| MmugDNA.13469.1.S1_at   | MmugDNA.13469.1 | 6.6   | 6.59  | 0.07 | 0.23 | 1.01  | 0.754658 | 0.682017 | 0.886879 | 0.814299 |
| MmugDNA.1347.1.S1_at    | MmugDNA.1347.1  | 6     | 5.96  | 0.26 | 0.06 | 1.03  | 0.23977  | 0.331077 | 0.53725  | 0.5798   |
| MmugDNA.13470.1.S1_at   | MmugDNA.13470.1 | 5.71  | 4.55  | 0.61 | 0.96 | 2.23  | 0.258479 | 0.171397 | 0.552539 | 0.447862 |
| MmugDNA.13471.1.S1_at   | MmugDNA.13471.1 | 7.29  | 7.33  | 0.04 | 0.22 | -1.03 | 0.72709  | 0.044442 | 0.872076 | 0.25521  |
| MmugDNA.13473.1.S1_at   | MmugDNA.13473.1 | 3.18  | 3.19  | 0.13 | 0    | -1.01 | 0.961746 | 0.390723 | 0.984403 | 0.624501 |
| MmugDNA.13474.1.S1_at   | MmugDNA.13474.1 | 3.17  | 3.27  | 0.12 | 0.21 | -1.07 | 0.351937 | 0.432672 | 0.629553 | 0.653054 |
| MmugDNA.13475.1.S1_at   | MmugDNA.13475.1 | 5.14  | 4.98  | 0.28 | 0.12 | 1.12  | 0.405043 | 0.478848 | 0.668621 | 0.684745 |
| MmugDNA.13476.1.S1_at   | MmugDNA.13476.1 | 3.76  | 3.87  | 0.26 | 0.1  | -1.08 | 0.852061 | 0.914235 | 0.93566  | 0.951773 |
| MmugDNA.13477.1.S1_at   | MmugDNA.13477.1 | 3.61  | 3.24  | 0.63 | 0.16 | 1.29  | 0.550401 | 0.727876 | 0.767803 | 0.842703 |
| MmugDNA.13478.1.S1_at   | MmugDNA.13478.1 | 10.6  | 10.81 | 0.1  | 0.07 | -1.16 | 0.0342   | 0.681642 | 0.239624 | 0.814092 |
| MmugDNA.13479.1.S1_at   | MmugDNA.13479.1 | 4.03  | 3.92  | 0.48 | 0.23 | 1.08  | 0.486155 | 0.173976 | 0.725575 | 0.450247 |
| MmugDNA.1348.1.S1_at    | MmugDNA.1348.1  | 6.26  | 6.17  | 0.8  | 0.33 | 1.06  | 0.745956 | 0.811333 | 0.882206 | 0.891133 |
| MmugDNA.13480.1.S1_at   | MmugDNA.13480.1 | 5.62  | 5.79  | 0.2  | 0.1  | -1.12 | 0.448819 | 0.279993 | 0.700195 | 0.543369 |
| MmugDNA.13483.1.S1_at   | MmugDNA.13483.1 | 8.49  | 8.48  | 0.19 | 0.26 | 1.01  | 0.251664 | 0.153146 | 0.546375 | 0.428011 |
| MmugDNA.13484.1.S1_at   | MmugDNA.13484.1 | 9.81  | 10.05 | 0.17 | 0.17 | -1.18 | 0.33893  | 0.50295  | 0.619313 | 0.700471 |
| MmugDNA.13485.1.S1_s_at | MmugDNA.13485.1 | 8.63  | 8.74  | 0.22 | 0.11 | -1.08 | 0.477471 | 0.605025 | 0.719439 | 0.764917 |
| MmugDNA.13487.1.S1_at   | MmugDNA.13487.1 | 3.33  | 3.29  | 0.06 | 0.09 | 1.03  | 0.94431  | 0.47658  | 0.976561 | 0.682787 |
| MmugDNA.13489.1.S1_at   | MmugDNA.13489.1 | 9.62  | 9.81  | 0.14 | 0.05 | -1.14 | 0.040573 | 0.084148 | 0.257923 | 0.335181 |
| MmugDNA.1349.1.S1_at    | MmugDNA.1349.1  | 6.01  | 6.06  | 0.03 | 0.16 | -1.04 | 0.668584 | 0.653882 | 0.84096  | 0.797692 |
| MmugDNA.13491.1.S1_at   | MmugDNA.13491.1 | 9.08  | 8.98  | 0.12 | 0.09 | 1.07  | 0.812009 | 0.048743 | 0.915832 | 0.265744 |
| MmugDNA.13492.1.S1_at   | MmugDNA.13492.1 | 5.77  | 5.73  | 0.36 | 0.37 | 1.03  | 0.417158 | 0.542609 | 0.677384 | 0.725615 |
| MmugDNA.13494.1.S1_at   | MmugDNA.13494.1 | 4.5   | 4.55  | 0.3  | 0.41 | -1.04 | 0.359075 | 0.324611 | 0.634671 | 0.575163 |
| MmugDNA.13495.1.S1_at   | MmugDNA.13495.1 | 6.05  | 5.85  | 0.84 | 0.12 | 1.15  | 0.216115 | 0.146146 | 0.513872 | 0.420099 |
| MmugDNA.13496.1.S1_at   | MmugDNA.13496.1 | 3.97  | 3.86  | 0.09 | 0.18 | 1.08  | 0.421289 | 0.509155 | 0.679877 | 0.704028 |
| MmugDNA.13497.1.S1_at   | MmugDNA.13497.1 | 6.55  | 6.7   | 0.41 | 0.06 | -1.11 | 0.154419 | 0.242208 | 0.444671 | 0.51267  |
| MmugDNA.13499.1.S1_at   | MmugDNA.13499.1 | 9.08  | 8.92  | 0.21 | 0.04 | 1.12  | 0.682703 | 0.178739 | 0.848688 | 0.455039 |
| MmugDNA.135.1.S1_at     | MmugDNA.135.1   | 7.61  | 5.07  | 0.74 | 0.36 | 5.79  | 0.003564 | 0.000522 | 0.104895 | 0.039743 |
| MmugDNA.13500.1.S1_at   | MmugDNA.13500.1 | 3.21  | 3.24  | 0.26 | 0.16 | -1.02 | 0.548055 | 0.749166 | 0.766347 | 0.854211 |
| MmugDNA.13501.1.S1_at   | MmugDNA.13501.1 | 6.3   | 6.38  | 0.09 | 0.1  | -1.06 | 0.477259 | 0.30522  | 0.719345 | 0.562255 |
| MmugDNA.13502.1.S1_at   | MmugDNA.13502.1 | 10.8  | 10.98 | 0.07 | 0.12 | -1.13 | 0.074878 | 0.713178 | 0.331829 | 0.833655 |
| MmugDNA.13503.1.S1_at   | MmugDNA.13503.1 | 3.16  | 3.1   | 0.16 | 0.06 | 1.04  | 0.764603 | 0.73566  | 0.892005 | 0.847033 |
| MmugDNA.13504.1.S1_at   | MmugDNA.13504.1 | 6.43  | 6.28  | 0.76 | 0.26 | 1.11  | 0.39745  | 0.572635 | 0.663022 | 0.744597 |
| MmugDNA.13504.1.S1_x_at | MmugDNA.13504.1 | 7.47  | 7.49  | 0.69 | 0.08 | -1.01 | 0.352045 | 0.532442 | 0.629611 | 0.719059 |
| MmugDNA.13505.1.S1_at   | MmugDNA.13505.1 | 3.59  | 3.64  | 0.15 | 0.19 | -1.04 | 0.886682 | 0.833648 | 0.95177  | 0.904613 |
| MmugDNA.13506.1.S1_at   | MmugDNA.13506.1 | 10.88 | 10.52 | 0.09 | 0.06 | 1.29  | 0.003116 | 0.120729 | 0.100877 | 0.389579 |
| MmugDNA.13507.1.S1_at   | MmugDNA.13507.1 | 12.61 | 12.63 | 0.04 | 0.06 | -1.01 | 0.717121 | 0.030257 | 0.866448 | 0.215828 |
| MmugDNA.13508.1.S1_at   | MmugDNA.13508.1 | 2.81  | 2.81  | 0.03 | 0.03 | 1     | 0.983645 | 0.313749 | 0.993891 | 0.568083 |
| MmugDNA.13509.1.S1_at   | MmugDNA.13509.1 | 11.43 | 11.27 | 0.11 | 0.08 | 1.11  | 0.155884 | 0.051505 | 0.446245 | 0.272373 |
| MmugDNA.1351.1.S1_at    | MmugDNA.1351.1  | 4.92  | 5.18  | 0.15 | 0.12 | -1.2  | 0.388317 | 0.047215 | 0.656369 | 0.261855 |
| MmugDNA.13511.1.S1_at   | MmugDNA.13511.1 | 4.09  | 4.09  | 0.11 | 0.25 | 1     | 0.256914 | 0.38454  | 0.55141  | 0.620194 |
| MmugDNA.13512.1.S1_at   | MmugDNA.13512.1 | 3.15  | 3.04  | 0.16 | 0.08 | 1.07  | 0.519606 | 0.461955 | 0.748147 | 0.673467 |
| MmugDNA.13514.1.S1_at   | MmugDNA.13514.1 | 6.38  | 6.08  | 0.28 | 0.02 | 1.23  | 0.124565 | 0.043803 | 0.404741 | 0.25387  |



|                         |                 |       |       |      |      |       |          |          |          |          |
|-------------------------|-----------------|-------|-------|------|------|-------|----------|----------|----------|----------|
| MmugDNA.13515.1.S1_at   | MmugDNA.13515.1 | 8.14  | 7.65  | 0.12 | 0.43 | 1.41  | 0.153309 | 0.257728 | 0.443048 | 0.525344 |
| MmugDNA.13516.1.S1_at   | MmugDNA.13516.1 | 4     | 3.91  | 0.16 | 0.1  | 1.06  | 0.509234 | 0.481828 | 0.740907 | 0.686795 |
| MmugDNA.13517.1.S1_at   | MmugDNA.13517.1 | 10.93 | 10.74 | 0.42 | 0.07 | 1.15  | 0.752086 | 0.288226 | 0.885541 | 0.5495   |
| MmugDNA.13518.1.S1_at   | MmugDNA.13518.1 | 3.12  | 3.14  | 0.06 | 0.22 | -1.01 | 0.358936 | 0.428552 | 0.634581 | 0.650098 |
| MmugDNA.13519.1.S1_at   | MmugDNA.13519.1 | 11.76 | 11.69 | 0.12 | 0.01 | 1.05  | 0.218695 | 0.132792 | 0.516351 | 0.404544 |
| MmugDNA.13521.1.S1_at   | MmugDNA.13521.1 | 4.95  | 4     | 0.44 | 0.13 | 1.93  | 0.032566 | 0.023812 | 0.234816 | 0.193276 |
| MmugDNA.13522.1.S1_at   | MmugDNA.13522.1 | 4.38  | 4.05  | 0.17 | 0.24 | 1.26  | 0.17918  | 0.206459 | 0.474118 | 0.480571 |
| MmugDNA.13523.1.S1_at   | MmugDNA.13523.1 | 9.88  | 9.69  | 0.31 | 0.1  | 1.14  | 0.593883 | 0.942873 | 0.794312 | 0.967564 |
| MmugDNA.13525.1.S1_at   | MmugDNA.13525.1 | 3.51  | 3.51  | 0.15 | 0    | 1     | 0.373901 | 0.513844 | 0.645118 | 0.707281 |
| MmugDNA.13526.1.S1_at   | MmugDNA.13526.1 | 4.47  | 4.6   | 0.26 | 0.29 | -1.1  | 0.317662 | 0.52667  | 0.602424 | 0.715627 |
| MmugDNA.13527.1.S1_at   | MmugDNA.13527.1 | 7.81  | 7.59  | 0.21 | 0.13 | 1.17  | 0.164044 | 0.090311 | 0.456843 | 0.3447   |
| MmugDNA.13529.1.S1_at   | MmugDNA.13529.1 | 8.79  | 4.47  | 2.34 | 1.28 | 19.93 | 0.216744 | 0.278457 | 0.514582 | 0.542235 |
| MmugDNA.13530.1.S1_at   | MmugDNA.13530.1 | 3.22  | 3.19  | 0.18 | 0.13 | 1.03  | 0.706004 | 0.934748 | 0.860759 | 0.963039 |
| MmugDNA.13533.1.S1_at   | MmugDNA.13533.1 | 7.2   | 7.14  | 0.17 | 0.02 | 1.04  | 0.728468 | 0.845812 | 0.873055 | 0.912246 |
| MmugDNA.13534.1.S1_at   | MmugDNA.13534.1 | 8.81  | 9.64  | 0.56 | 0.2  | -1.78 | 0.10526  | 0.137782 | 0.379136 | 0.410757 |
| MmugDNA.13535.1.S1_at   | MmugDNA.13535.1 | 11.97 | 11.46 | 0.34 | 0.04 | 1.42  | 0.024287 | 0.01886  | 0.208905 | 0.172765 |
| MmugDNA.13539.1.S1_at   | MmugDNA.13539.1 | 6.08  | 6.26  | 0.86 | 0.25 | -1.14 | 0.642426 | 0.692367 | 0.825599 | 0.820984 |
| MmugDNA.1354.1.S1_at    | MmugDNA.1354.1  | 4.08  | 4     | 0.34 | 0.58 | 1.06  | 0.642676 | 0.494809 | 0.825679 | 0.695103 |
| MmugDNA.13540.1.S1_at   | MmugDNA.13540.1 | 9.06  | 8.62  | 0.25 | 0.01 | 1.36  | 0.049136 | 0.000649 | 0.27921  | 0.04316  |
| MmugDNA.13541.1.S1_at   | MmugDNA.13541.1 | 3.87  | 4.01  | 0.26 | 0.07 | -1.1  | 0.424627 | 0.662912 | 0.682288 | 0.802665 |
| MmugDNA.13542.1.S1_at   | MmugDNA.13542.1 | 4.8   | 4.78  | 0.12 | 0.17 | 1.01  | 0.274801 | 0.605188 | 0.566556 | 0.764968 |
| MmugDNA.13543.1.S1_at   | MmugDNA.13543.1 | 7.63  | 8.89  | 0.22 | 0.37 | -2.41 | 0.020999 | 0.149349 | 0.198347 | 0.423811 |
| MmugDNA.13545.1.S1_at   | MmugDNA.13545.1 | 7.92  | 7.8   | 0.08 | 0.17 | 1.09  | 0.810275 | 0.703399 | 0.915047 | 0.828011 |
| MmugDNA.13546.1.S1_at   | MmugDNA.13546.1 | 4.13  | 3.72  | 0.38 | 0.23 | 1.33  | 0.133624 | 0.292046 | 0.41701  | 0.552201 |
| MmugDNA.13547.1.S1_at   | MmugDNA.13547.1 | 5.83  | 5.79  | 0.04 | 0.16 | 1.03  | 0.324435 | 0.03233  | 0.608157 | 0.222602 |
| MmugDNA.13548.1.S1_at   | MmugDNA.13548.1 | 8.23  | 7.96  | 0.14 | 0.09 | 1.2   | 0.028247 | 0.123738 | 0.2207   | 0.393883 |
| MmugDNA.13549.1.S1_at   | MmugDNA.13549.1 | 4.13  | 4.03  | 0.45 | 0.2  | 1.07  | 0.418989 | 0.69402  | 0.678626 | 0.82206  |
| MmugDNA.1355.1.S1_at    | MmugDNA.1355.1  | 4.65  | 3.98  | 1.24 | 0.37 | 1.59  | 0.326572 | 0.444636 | 0.609612 | 0.662072 |
| MmugDNA.13550.1.S1_at   | MmugDNA.13550.1 | 8.65  | 9.17  | 0.4  | 0.08 | -1.43 | 0.106539 | 0.551011 | 0.380675 | 0.730751 |
| MmugDNA.13551.1.S1_at   | MmugDNA.13551.1 | 5.87  | 5.7   | 0.24 | 0.2  | 1.13  | 0.189663 | 0.547994 | 0.486064 | 0.72884  |
| MmugDNA.13552.1.S1_at   | MmugDNA.13552.1 | 5.63  | 6.6   | 0.58 | 0.13 | -1.95 | 0.051837 | 0.308295 | 0.285036 | 0.564425 |
| MmugDNA.13553.1.S1_at   | MmugDNA.13553.1 | 4.88  | 4.9   | 0.47 | 0.03 | -1.02 | 0.593236 | 0.540917 | 0.793939 | 0.724649 |
| MmugDNA.13554.1.S1_at   | MmugDNA.13554.1 | 3.35  | 3.39  | 0.25 | 0.03 | -1.02 | 0.446105 | 0.647093 | 0.698352 | 0.793279 |
| MmugDNA.13555.1.S1_at   | MmugDNA.13555.1 | 3.68  | 4.09  | 0.28 | 0.39 | -1.33 | 0.244014 | 0.345455 | 0.54078  | 0.590746 |
| MmugDNA.13556.1.S1_at   | MmugDNA.13556.1 | 6.71  | 6.88  | 0.19 | 0.05 | -1.12 | 0.271219 | 0.223203 | 0.563126 | 0.496011 |
| MmugDNA.13556.1.S1_s_at | MmugDNA.13556.1 | 7.36  | 7.15  | 0.29 | 0.21 | 1.15  | 0.415911 | 0.577681 | 0.676502 | 0.748038 |
| MmugDNA.13557.1.S1_at   | MmugDNA.13557.1 | 5.53  | 5.28  | 0.49 | 0.08 | 1.19  | 0.259928 | 0.273062 | 0.554139 | 0.537644 |
| MmugDNA.13558.1.S1_at   | MmugDNA.13558.1 | 4.94  | 4.86  | 0.17 | 0.08 | 1.06  | 0.494501 | 0.509022 | 0.731238 | 0.703967 |
| MmugDNA.1356.1.S1_at    | MmugDNA.1356.1  | 6.85  | 6.83  | 0.17 | 0.15 | 1.01  | 0.388911 | 0.547217 | 0.656881 | 0.728342 |
| MmugDNA.27184.1.S1_s_at | MmugDNA.27184.1 | 14.3  | 14.3  | 0.04 | 0.01 | -1    | 0.420038 | 0.747999 | 0.679269 | 0.853341 |
| MmugDNA.13562.1.S1_at   | MmugDNA.13562.1 | 6.71  | 6.41  | 0.19 | 0.12 | 1.22  | 0.048477 | 0.31193  | 0.277562 | 0.566833 |
| MmugDNA.13563.1.S1_at   | MmugDNA.13563.1 | 4.8   | 4.42  | 0.55 | 0.33 | 1.3   | 0.486216 | 0.682415 | 0.725583 | 0.814526 |
| MmugDNA.13564.1.S1_at   | MmugDNA.13564.1 | 6.19  | 6.1   | 0.04 | 0.09 | 1.07  | 0.040303 | 0.069531 | 0.257247 | 0.309848 |

|                         |                 |       |       |      |      |       |          |          |          |          |
|-------------------------|-----------------|-------|-------|------|------|-------|----------|----------|----------|----------|
| MmugDNA.13566.1.S1_at   | MmugDNA.13566.1 | 6.85  | 7.31  | 0.88 | 0.13 | -1.37 | 0.443798 | 0.249799 | 0.696813 | 0.518876 |
| MmugDNA.13567.1.S1_at   | MmugDNA.13567.1 | 7.21  | 7.16  | 0.07 | 0.05 | 1.03  | 0.775312 | 0.321089 | 0.897378 | 0.57307  |
| MmugDNA.1357.1.S1_at    | MmugDNA.1357.1  | 5.57  | 5.23  | 0.16 | 0.08 | 1.27  | 0.046032 | 0.134026 | 0.272172 | 0.406234 |
| MmugDNA.13570.1.S1_at   | MmugDNA.13570.1 | 4.93  | 4.97  | 0.36 | 0.13 | -1.02 | 0.634984 | 0.753649 | 0.821102 | 0.856589 |
| MmugDNA.13572.1.S1_at   | MmugDNA.13572.1 | 9.51  | 9.26  | 0.18 | 0.1  | 1.19  | 0.057244 | 0.001048 | 0.296612 | 0.051466 |
| MmugDNA.13573.1.S1_at   | MmugDNA.13573.1 | 3.49  | 3.11  | 0.32 | 0.02 | 1.3   | 0.101871 | 0.060328 | 0.373468 | 0.292254 |
| MmugDNA.13574.1.S1_at   | MmugDNA.13574.1 | 3.87  | 3.95  | 0.06 | 0.11 | -1.05 | 0.309828 | 0.316964 | 0.596102 | 0.570275 |
| MmugDNA.13575.1.S1_at   | MmugDNA.13575.1 | 4.09  | 4.1   | 0.1  | 0.08 | -1.01 | 0.45876  | 0.082102 | 0.707207 | 0.330917 |
| MmugDNA.13576.1.S1_at   | MmugDNA.13576.1 | 10.76 | 10.5  | 0.19 | 0.09 | 1.2   | 0.120762 | 0.194169 | 0.399159 | 0.469266 |
| MmugDNA.13577.1.S1_at   | MmugDNA.13577.1 | 6.86  | 6.58  | 0.19 | 0.23 | 1.21  | 0.153125 | 0.163566 | 0.442808 | 0.439765 |
| MmugDNA.13578.1.S1_at   | MmugDNA.13578.1 | 4.82  | 4.98  | 0.51 | 0.27 | -1.11 | 0.860579 | 0.228656 | 0.939526 | 0.500887 |
| MmugDNA.13579.1.S1_at   | MmugDNA.13579.1 | 6.16  | 5.39  | 0.84 | 0.43 | 1.7   | 0.630832 | 0.756919 | 0.818647 | 0.858495 |
| MmugDNA.13579.1.S1_s_at | MmugDNA.13579.1 | 6.81  | 6.24  | 0.46 | 0.13 | 1.48  | 0.336299 | 0.263138 | 0.616965 | 0.529465 |
| MmugDNA.1358.1.S1_at    | MmugDNA.1358.1  | 5.34  | 6.17  | 0.46 | 0.17 | -1.78 | 0.119159 | 0.398123 | 0.396724 | 0.6292   |
| MmugDNA.13580.1.S1_at   | MmugDNA.13580.1 | 4.39  | 4.44  | 0.68 | 0.14 | -1.04 | 0.954699 | 0.920972 | 0.981394 | 0.955491 |
| MmugDNA.13581.1.S1_at   | MmugDNA.13581.1 | 3.66  | 3.62  | 0.23 | 0.3  | 1.03  | 0.826103 | 0.756497 | 0.922809 | 0.858223 |
| MmugDNA.13582.1.S1_at   | MmugDNA.13582.1 | 4.53  | 4.2   | 0.54 | 0.36 | 1.25  | 0.667137 | 0.87429  | 0.8402   | 0.928616 |
| MmugDNA.13583.1.S1_at   | MmugDNA.13583.1 | 3.51  | 3.52  | 0.01 | 0.09 | -1.01 | 0.26345  | 0.310649 | 0.556984 | 0.565787 |
| MmugDNA.13585.1.S1_at   | MmugDNA.13585.1 | 6.77  | 7.01  | 0.75 | 0.19 | -1.18 | 0.634008 | 0.721519 | 0.820633 | 0.838734 |
| MmugDNA.13586.1.S1_at   | MmugDNA.13586.1 | 8.08  | 4.08  | 2.35 | 1.1  | 16.05 | 0.246719 | 0.380108 | 0.54248  | 0.616791 |
| MmugDNA.13587.1.S1_at   | MmugDNA.13587.1 | 3.75  | 3.72  | 0.15 | 0.07 | 1.02  | 0.450068 | 0.246115 | 0.701214 | 0.51585  |
| MmugDNA.13588.1.S1_at   | MmugDNA.13588.1 | 5.16  | 5.1   | 0.15 | 0.08 | 1.04  | 0.213063 | 0.314805 | 0.51103  | 0.568554 |
| MmugDNA.13589.1.S1_at   | MmugDNA.13589.1 | 5.35  | 5.29  | 0.31 | 0.17 | 1.04  | 0.317738 | 0.432753 | 0.602462 | 0.653101 |
| MmugDNA.1359.1.S1_at    | MmugDNA.1359.1  | 7.3   | 7.14  | 0.11 | 0.3  | 1.12  | 0.366772 | 0.024444 | 0.640964 | 0.195642 |
| MmugDNA.13591.1.S1_at   | MmugDNA.13591.1 | 11.66 | 11.6  | 0.19 | 0.08 | 1.04  | 0.853715 | 0.282003 | 0.936342 | 0.544886 |
| MmugDNA.13592.1.S1_at   | MmugDNA.13592.1 | 5.85  | 5.13  | 0.26 | 0.23 | 1.64  | 0.025386 | 0.018875 | 0.21227  | 0.172814 |
| MmugDNA.13594.1.S1_at   | MmugDNA.13594.1 | 5.14  | 8.13  | 1.45 | 0.33 | -7.98 | 0.070266 | 0.169227 | 0.323459 | 0.445815 |
| MmugDNA.13595.1.S1_at   | MmugDNA.13595.1 | 6.66  | 7.98  | 0.81 | 0.13 | -2.51 | 0.049648 | 0.022959 | 0.280318 | 0.189548 |
| MmugDNA.13595.1.S1_s_at | MmugDNA.13595.1 | 9.21  | 9.66  | 0.84 | 0.05 | -1.36 | 0.129644 | 0.063417 | 0.412005 | 0.298441 |
| MmugDNA.13597.1.S1_at   | MmugDNA.13597.1 | 3.1   | 3.11  | 0.17 | 0.12 | -1.01 | 0.63767  | 0.234847 | 0.82257  | 0.506125 |
| MmugDNA.13598.1.S1_at   | MmugDNA.13598.1 | 8     | 7.86  | 0.25 | 0.13 | 1.1   | 0.269418 | 0.012497 | 0.561757 | 0.144302 |
| MmugDNA.13599.1.S1_at   | MmugDNA.13599.1 | 6.3   | 5.87  | 0.18 | 0.08 | 1.35  | 0.017978 | 0.012926 | 0.187151 | 0.146343 |
| MmugDNA.136.1.S1_at     | MmugDNA.136.1   | 5.37  | 3.58  | 0.81 | 0.17 | 3.45  | 0.0111   | 0.009726 | 0.155073 | 0.129723 |
| MmugDNA.136.1.S1_s_at   | MmugDNA.136.1   | 8.3   | 5.27  | 0.45 | 0.38 | 8.16  | 0.000856 | 0.007648 | 0.073702 | 0.117015 |
| MmugDNA.1360.1.S1_at    | MmugDNA.1360.1  | 4.55  | 4.69  | 0.14 | 0.13 | -1.1  | 0.264281 | 0.188315 | 0.557554 | 0.46433  |
| MmugDNA.13600.1.S1_at   | MmugDNA.13600.1 | 5.3   | 5.62  | 0.05 | 0.2  | -1.25 | 0.065163 | 0.258829 | 0.312117 | 0.525985 |
| MmugDNA.13601.1.S1_at   | MmugDNA.13601.1 | 9.78  | 10.13 | 0.18 | 0.14 | -1.27 | 0.230345 | 0.363985 | 0.529167 | 0.60434  |
| MmugDNA.5372.1.S1_at    | MmugDNA.5372.1  | 10.34 | 10.51 | 0.1  | 0.13 | -1.12 | 0.297336 | 0.814568 | 0.585786 | 0.892959 |
| MmugDNA.5372.1.S1_s_at  | MmugDNA.5372.1  | 10.84 | 11.07 | 0.09 | 0.09 | -1.17 | 0.078197 | 0.455496 | 0.337763 | 0.669479 |
| MmugDNA.13602.1.S1_at   | MmugDNA.13602.1 | 4.41  | 3.79  | 1.22 | 0.1  | 1.54  | 0.321075 | 0.276045 | 0.605394 | 0.540071 |
| MmugDNA.13604.1.S1_s_at | MmugDNA.13604.1 | 6.37  | 6.75  | 0.21 | 0.09 | -1.3  | 0.061509 | 0.000462 | 0.30458  | 0.038572 |
| MmugDNA.13606.1.S1_at   | MmugDNA.13606.1 | 2.77  | 2.9   | 0.15 | 0.13 | -1.1  | 0.25905  | 0.273156 | 0.553321 | 0.537776 |
| MmugDNA.13607.1.S1_at   | MmugDNA.13607.1 | 4.02  | 4.04  | 0.27 | 0.08 | -1.01 | 0.532745 | 0.515771 | 0.756693 | 0.708485 |

|                         |                 |       |       |      |      |       |          |          |          |          |
|-------------------------|-----------------|-------|-------|------|------|-------|----------|----------|----------|----------|
| MmugDNA.13609.1.S1_at   | MmugDNA.13609.1 | 5.3   | 5.1   | 0.1  | 0.17 | 1.15  | 0.314346 | 0.306744 | 0.599959 | 0.5633   |
| MmugDNA.1361.1.S1_at    | MmugDNA.1361.1  | 3.37  | 3.59  | 0.06 | 0.03 | -1.17 | 0.009066 | 0.02608  | 0.144922 | 0.202453 |
| MmugDNA.13610.1.S1_at   | MmugDNA.13610.1 | 10.7  | 11.18 | 0.25 | 0.1  | -1.4  | 0.021353 | 0.029541 | 0.199722 | 0.213535 |
| MmugDNA.13611.1.S1_at   | MmugDNA.13611.1 | 4.33  | 4.48  | 0.05 | 0.11 | -1.11 | 0.102718 | 0.273424 | 0.375107 | 0.537863 |
| MmugDNA.13614.1.S1_s_at | MmugDNA.13614.1 | 10.13 | 10.2  | 0.04 | 0.11 | -1.05 | 0.769831 | 0.291437 | 0.894412 | 0.551823 |
| MmugDNA.13615.1.S1_at   | MmugDNA.13615.1 | 6.17  | 6.13  | 0.09 | 0.02 | 1.03  | 0.519362 | 0.1896   | 0.747997 | 0.465297 |
| MmugDNA.13616.1.S1_at   | MmugDNA.13616.1 | 5.05  | 5.04  | 0.2  | 0.08 | 1.01  | 0.920271 | 0.88406  | 0.965927 | 0.933894 |
| MmugDNA.13618.1.S1_at   | MmugDNA.13618.1 | 6.61  | 6.76  | 0.28 | 0.17 | -1.11 | 0.325452 | 0.368194 | 0.608731 | 0.607793 |
| MmugDNA.1362.1.S1_at    | MmugDNA.1362.1  | 2.94  | 2.91  | 0.14 | 0.13 | 1.02  | 0.720711 | 0.796188 | 0.868227 | 0.88253  |
| MmugDNA.13621.1.S1_at   | MmugDNA.13621.1 | 11.79 | 11.76 | 0.09 | 0.05 | 1.02  | 0.595048 | 0.02734  | 0.795076 | 0.206637 |
| MmugDNA.13623.1.S1_at   | MmugDNA.13623.1 | 4.1   | 4.07  | 0.06 | 0.03 | 1.02  | 0.16153  | 0.673537 | 0.453132 | 0.809257 |
| MmugDNA.13624.1.S1_at   | MmugDNA.13624.1 | 7.35  | 7.14  | 0.69 | 0.13 | 1.16  | 0.274399 | 0.491461 | 0.566281 | 0.693004 |
| MmugDNA.1363.1.S1_at    | MmugDNA.1363.1  | 2.84  | 2.8   | 0.02 | 0.06 | 1.03  | 0.361758 | 0.066943 | 0.637071 | 0.304713 |
| MmugDNA.13632.1.S1_at   | MmugDNA.13632.1 | 7.24  | 6.22  | 1.05 | 0.43 | 2.03  | 0.21552  | 0.185682 | 0.513219 | 0.46163  |
| MmugDNA.13633.1.S1_at   | MmugDNA.13633.1 | 11.04 | 11.24 | 0.09 | 0.02 | -1.14 | 0.02191  | 0.00506  | 0.201211 | 0.09907  |
| MmugDNA.13636.1.S1_at   | MmugDNA.13636.1 | 12.13 | 12.06 | 0.14 | 0.08 | 1.04  | 0.36776  | 0.329612 | 0.641588 | 0.578813 |
| MmugDNA.13637.1.S1_at   | MmugDNA.13637.1 | 9.17  | 9.42  | 0.19 | 0.07 | -1.2  | 0.191186 | 0.634213 | 0.487409 | 0.78472  |
| MmugDNA.13639.1.S1_at   | MmugDNA.13639.1 | 6.56  | 6.67  | 0.28 | 0.07 | -1.08 | 0.58381  | 0.217314 | 0.788356 | 0.490953 |
| MmugDNA.1364.1.S1_at    | MmugDNA.1364.1  | 10.45 | 10.33 | 0.14 | 0.04 | 1.09  | 0.656859 | 0.181858 | 0.834022 | 0.458395 |
| MmugDNA.13641.1.S1_at   | MmugDNA.13641.1 | 6.78  | 6.74  | 0    | 0.13 | 1.02  | 0.549206 | 0.166069 | 0.76701  | 0.442658 |
| MmugDNA.13642.1.S1_at   | MmugDNA.13642.1 | 12.55 | 13    | 0.18 | 0.08 | -1.37 | 0.039924 | 0.105898 | 0.256607 | 0.368187 |
| MmugDNA.13643.1.S1_at   | MmugDNA.13643.1 | 3.2   | 3.07  | 0.11 | 0.12 | 1.1   | 0.206296 | 0.29858  | 0.503944 | 0.557183 |
| MmugDNA.13645.1.S1_at   | MmugDNA.13645.1 | 4.3   | 4.3   | 0.12 | 0.08 | -1    | 0.878902 | 0.055793 | 0.948402 | 0.282044 |
| MmugDNA.13646.1.S1_at   | MmugDNA.13646.1 | 3.38  | 3.39  | 0.12 | 0.04 | -1    | 0.403611 | 0.5591   | 0.667695 | 0.736046 |
| MmugDNA.13647.1.S1_at   | MmugDNA.13647.1 | 5.92  | 5.89  | 0.26 | 0.11 | 1.02  | 0.588433 | 0.819652 | 0.791036 | 0.896119 |
| MmugDNA.13649.1.S1_at   | MmugDNA.13649.1 | 3.15  | 3.13  | 0.07 | 0.14 | 1.02  | 0.443315 | 0.607316 | 0.696549 | 0.766358 |
| MmugDNA.1365.1.S1_at    | MmugDNA.1365.1  | 4.91  | 4.67  | 0.52 | 0.47 | 1.18  | 0.589269 | 0.407756 | 0.791577 | 0.635158 |
| MmugDNA.13650.1.S1_at   | MmugDNA.13650.1 | 7.3   | 7.68  | 0.48 | 0.25 | -1.29 | 0.106218 | 0.049495 | 0.380284 | 0.267375 |
| MmugDNA.13651.1.S1_at   | MmugDNA.13651.1 | 5.92  | 5.9   | 0.11 | 0.05 | 1.02  | 0.40946  | 0.060093 | 0.671822 | 0.291828 |
| MmugDNA.13652.1.S1_at   | MmugDNA.13652.1 | 9.34  | 10.08 | 0.84 | 0.21 | -1.67 | 0.659305 | 0.10923  | 0.835571 | 0.37308  |
| MmugDNA.13653.1.S1_at   | MmugDNA.13653.1 | 4.34  | 3.7   | 0.76 | 0.95 | 1.55  | 0.599638 | 0.688958 | 0.798286 | 0.818449 |
| MmugDNA.13656.1.S1_at   | MmugDNA.13656.1 | 5.34  | 5.34  | 0.14 | 0.33 | 1     | 0.255941 | 0.563966 | 0.55053  | 0.738913 |
| MmugDNA.13657.1.S1_at   | MmugDNA.13657.1 | 3.99  | 4.28  | 0.37 | 0.13 | -1.22 | 0.216647 | 0.048148 | 0.514443 | 0.264422 |
| MmugDNA.13658.1.S1_at   | MmugDNA.13658.1 | 7.02  | 6.65  | 0.48 | 0.03 | 1.29  | 0.246564 | 0.114467 | 0.542456 | 0.381021 |
| MmugDNA.13659.1.S1_at   | MmugDNA.13659.1 | 3.86  | 4     | 0.11 | 0.07 | -1.1  | 0.234589 | 0.61594  | 0.532712 | 0.772359 |
| MmugDNA.1366.1.S1_at    | MmugDNA.1366.1  | 5.45  | 5.52  | 0.09 | 0.14 | -1.05 | 0.371705 | 0.508757 | 0.644331 | 0.703811 |
| MmugDNA.13660.1.S1_at   | MmugDNA.13660.1 | 5     | 4.82  | 0.06 | 0.1  | 1.13  | 0.062511 | 0.048592 | 0.306608 | 0.265572 |
| MmugDNA.13661.1.S1_at   | MmugDNA.13661.1 | 5.99  | 6.21  | 0.38 | 0.17 | -1.16 | 0.47568  | 0.45541  | 0.718263 | 0.66939  |
| MmugDNA.13665.1.S1_at   | MmugDNA.13665.1 | 4.72  | 5     | 0.04 | 0.15 | -1.21 | 0.039837 | 0.032678 | 0.256266 | 0.223827 |
| MmugDNA.13665.1.S1_s_at | MmugDNA.13665.1 | 9.93  | 10.06 | 0.18 | 0.08 | -1.09 | 0.183459 | 0.15903  | 0.479356 | 0.435217 |
| MmugDNA.13669.1.S1_at   | MmugDNA.13669.1 | 4.09  | 4.13  | 0.21 | 0.07 | -1.02 | 0.366755 | 0.324222 | 0.640964 | 0.57488  |
| MmugDNA.1367.1.S1_at    | MmugDNA.1367.1  | 5.83  | 5.82  | 0.37 | 0.06 | 1.01  | 0.356083 | 0.398294 | 0.632435 | 0.629324 |
| MmugDNA.13671.1.S1_s_at | MmugDNA.13671.1 | 9.02  | 10.33 | 0.51 | 0.02 | -2.48 | 0.025768 | 0.110802 | 0.213153 | 0.375076 |

|                         |                 |       |       |      |      |       |          |          |          |          |
|-------------------------|-----------------|-------|-------|------|------|-------|----------|----------|----------|----------|
| MmugDNA.13672.1.S1_at   | MmugDNA.13672.1 | 3.58  | 3.56  | 0    | 0.17 | 1.02  | 0.524621 | 0.487592 | 0.751479 | 0.690565 |
| MmugDNA.13673.1.S1_s_at | MmugDNA.13673.1 | 6.71  | 6.76  | 0.12 | 0.09 | -1.03 | 0.948534 | 0.993628 | 0.978472 | 0.996218 |
| MmugDNA.13675.1.S1_at   | MmugDNA.13675.1 | 4.57  | 4.54  | 0.01 | 0.04 | 1.03  | 0.119996 | 0.116699 | 0.398291 | 0.383878 |
| MmugDNA.13676.1.S1_at   | MmugDNA.13676.1 | 5.58  | 4.13  | 0.55 | 0.25 | 2.73  | 0.045423 | 0.136428 | 0.270752 | 0.408839 |
| MmugDNA.13677.1.S1_at   | MmugDNA.13677.1 | 3.41  | 3.28  | 0.12 | 0.05 | 1.09  | 0.146086 | 0.645243 | 0.433854 | 0.792131 |
| MmugDNA.13678.1.S1_at   | MmugDNA.13678.1 | 5.83  | 5.98  | 0.07 | 0.13 | -1.11 | 0.122325 | 0.167198 | 0.40112  | 0.443675 |
| MmugDNA.1368.1.S1_at    | MmugDNA.1368.1  | 3.42  | 3.39  | 0.28 | 0.02 | 1.02  | 0.319981 | 0.431153 | 0.60457  | 0.652158 |
| MmugDNA.13680.1.S1_at   | MmugDNA.13680.1 | 5.47  | 5.24  | 0.29 | 0.06 | 1.18  | 0.360816 | 0.421893 | 0.636328 | 0.645369 |
| MmugDNA.13681.1.S1_at   | MmugDNA.13681.1 | 4.54  | 4.51  | 0.38 | 0.12 | 1.03  | 0.327167 | 0.616307 | 0.609783 | 0.772571 |
| MmugDNA.13682.1.S1_at   | MmugDNA.13682.1 | 5.57  | 5.53  | 0.25 | 0.06 | 1.03  | 0.688612 | 0.412192 | 0.851289 | 0.638588 |
| MmugDNA.13683.1.S1_at   | MmugDNA.13683.1 | 5.62  | 5.62  | 0.26 | 0.11 | 1     | 0.688877 | 0.780725 | 0.851433 | 0.872765 |
| MmugDNA.13684.1.S1_at   | MmugDNA.13684.1 | 3.32  | 3.4   | 0.38 | 0.09 | -1.05 | 0.96521  | 0.665803 | 0.985924 | 0.804188 |
| MmugDNA.13685.1.S1_at   | MmugDNA.13685.1 | 4.8   | 4.42  | 0.12 | 0.1  | 1.3   | 0.048437 | 0.137584 | 0.277485 | 0.410555 |
| MmugDNA.13686.1.S1_at   | MmugDNA.13686.1 | 8.43  | 8.25  | 0.23 | 0.16 | 1.13  | 0.432703 | 0.071735 | 0.688399 | 0.313981 |
| MmugDNA.13687.1.S1_at   | MmugDNA.13687.1 | 5.08  | 4.93  | 0.26 | 0.09 | 1.1   | 0.988594 | 0.808796 | 0.99596  | 0.889895 |
| MmugDNA.13688.1.S1_at   | MmugDNA.13688.1 | 6.62  | 5.93  | 0.21 | 0.11 | 1.61  | 0.021104 | 0.031786 | 0.198834 | 0.220723 |
| MmugDNA.13689.1.S1_at   | MmugDNA.13689.1 | 7.77  | 8.08  | 0.13 | 0.35 | -1.24 | 0.496889 | 0.67405  | 0.7327   | 0.809506 |
| MmugDNA.1369.1.S1_at    | MmugDNA.1369.1  | 5.31  | 5.28  | 0.21 | 0.16 | 1.02  | 0.450064 | 0.391117 | 0.701214 | 0.624833 |
| MmugDNA.13691.1.S1_at   | MmugDNA.13691.1 | 4.64  | 4.77  | 0.74 | 0.53 | -1.09 | 0.958782 | 0.980297 | 0.983221 | 0.989317 |
| MmugDNA.13692.1.S1_at   | MmugDNA.13692.1 | 6.41  | 6.51  | 0.11 | 0.19 | -1.07 | 0.184967 | 0.240195 | 0.481096 | 0.51084  |
| MmugDNA.13695.1.S1_at   | MmugDNA.13695.1 | 5.63  | 5.87  | 0.6  | 0.01 | -1.18 | 0.822073 | 0.764906 | 0.920741 | 0.863324 |
| MmugDNA.13697.1.S1_at   | MmugDNA.13697.1 | 13.33 | 13.24 | 0.08 | 0.04 | 1.06  | 0.53523  | 0.309088 | 0.758211 | 0.564787 |
| MmugDNA.13698.1.S1_at   | MmugDNA.13698.1 | 6.47  | 6.42  | 0.12 | 0.06 | 1.03  | 0.674989 | 0.065528 | 0.844855 | 0.301415 |
| MmugDNA.1370.1.S1_at    | MmugDNA.1370.1  | 5.62  | 5.39  | 0.16 | 0.06 | 1.17  | 0.23381  | 0.360303 | 0.532017 | 0.601339 |
| MmugDNA.13700.1.S1_at   | MmugDNA.13700.1 | 3.46  | 3.33  | 0.07 | 0.04 | 1.1   | 0.055059 | 0.334927 | 0.291673 | 0.58275  |
| MmugDNA.13703.1.S1_at   | MmugDNA.13703.1 | 6.63  | 6.42  | 0.11 | 0.09 | 1.16  | 0.067766 | 0.101388 | 0.318135 | 0.36112  |
| MmugDNA.13704.1.S1_at   | MmugDNA.13704.1 | 6.87  | 6.92  | 0.29 | 0.16 | -1.04 | 0.679809 | 0.493214 | 0.847268 | 0.694005 |
| MmugDNA.13705.1.S1_at   | MmugDNA.13705.1 | 12.68 | 10.75 | 0.66 | 0.38 | 3.82  | 0.024328 | 0.03599  | 0.209024 | 0.234165 |
| MmugDNA.18778.1.S1_at   | MmugDNA.18778.1 | 11.54 | 9.55  | 0.55 | 0.47 | 3.99  | 0.018497 | 0.041684 | 0.189141 | 0.24887  |
| MmugDNA.18778.1.S1_s_at | MmugDNA.18778.1 | 12.47 | 10.45 | 0.65 | 0.45 | 4.07  | 0.021794 | 0.025685 | 0.200878 | 0.200834 |
| MmugDNA.13706.1.S1_at   | MmugDNA.13706.1 | 4.99  | 4.93  | 0.22 | 0.06 | 1.04  | 0.773202 | 0.249858 | 0.89602  | 0.518876 |
| MmugDNA.13707.1.S1_at   | MmugDNA.13707.1 | 3.2   | 3.1   | 0.01 | 0.06 | 1.07  | 0.106786 | 0.799964 | 0.381023 | 0.884989 |
| MmugDNA.13709.1.S1_at   | MmugDNA.13709.1 | 5.22  | 4.89  | 0.11 | 0.23 | 1.25  | 0.09212  | 0.127736 | 0.360155 | 0.398581 |
| MmugDNA.13710.1.S1_at   | MmugDNA.13710.1 | 7.03  | 7.43  | 0.37 | 0.16 | -1.32 | 0.460802 | 0.517205 | 0.708419 | 0.709435 |
| MmugDNA.13711.1.S1_at   | MmugDNA.13711.1 | 3.9   | 3.41  | 0.44 | 0.02 | 1.4   | 0.165442 | 0.166954 | 0.458367 | 0.443429 |
| MmugDNA.13712.1.S1_at   | MmugDNA.13712.1 | 3.71  | 3.69  | 0.04 | 0.12 | 1.01  | 0.539722 | 0.604698 | 0.76104  | 0.764769 |
| MmugDNA.13714.1.S1_at   | MmugDNA.13714.1 | 10.03 | 12.01 | 0.74 | 0.23 | -3.94 | 0.021821 | 0.042025 | 0.200931 | 0.249463 |
| MmugDNA.13715.1.S1_at   | MmugDNA.13715.1 | 3.61  | 3.8   | 0.35 | 0.12 | -1.14 | 0.743959 | 0.239901 | 0.881384 | 0.510627 |
| MmugDNA.13717.1.S1_at   | MmugDNA.13717.1 | 9.54  | 9.11  | 0.21 | 0.02 | 1.35  | 0.026196 | 0.16201  | 0.21487  | 0.438108 |
| MmugDNA.1372.1.S1_at    | MmugDNA.1372.1  | 5.36  | 5.12  | 0.25 | 0.27 | 1.18  | 0.132245 | 0.037559 | 0.415489 | 0.238211 |
| MmugDNA.13720.1.S1_at   | MmugDNA.13720.1 | 3.59  | 3.53  | 0.04 | 0.03 | 1.04  | 0.097179 | 0.137666 | 0.367275 | 0.410637 |
| MmugDNA.13721.1.S1_at   | MmugDNA.13721.1 | 4.89  | 5.16  | 0.89 | 0.32 | -1.2  | 0.726887 | 0.693761 | 0.871961 | 0.8219   |
| MmugDNA.13722.1.S1_at   | MmugDNA.13722.1 | 8.02  | 7.61  | 0.25 | 0.16 | 1.33  | 0.038945 | 0.176322 | 0.253692 | 0.452752 |

|                         |                 |       |       |      |      |       |          |          |          |          |
|-------------------------|-----------------|-------|-------|------|------|-------|----------|----------|----------|----------|
| MmugDNA.13724.1.S1_at   | MmugDNA.13724.1 | 8.89  | 9.56  | 0.13 | 0.05 | -1.6  | 0.001633 | 0.004214 | 0.084217 | 0.091368 |
| MmugDNA.13725.1.S1_at   | MmugDNA.13725.1 | 9.2   | 8     | 0.35 | 0.09 | 2.3   | 0.003333 | 0.001092 | 0.102526 | 0.052283 |
| MmugDNA.13726.1.S1_at   | MmugDNA.13726.1 | 3.59  | 5.74  | 0.2  | 0.14 | -4.44 | 0.000126 | 0.001342 | 0.051196 | 0.056396 |
| MmugDNA.13728.1.S1_at   | MmugDNA.13728.1 | 5.25  | 5.25  | 0.23 | 0.02 | -1    | 0.954931 | 0.727666 | 0.98151  | 0.842508 |
| MmugDNA.1373.1.S1_at    | MmugDNA.1373.1  | 4.47  | 4.42  | 0.07 | 0.04 | 1.03  | 0.172024 | 0.17848  | 0.466112 | 0.454778 |
| MmugDNA.13730.1.S1_at   | MmugDNA.13730.1 | 4.09  | 4.49  | 0.22 | 0.53 | -1.32 | 0.491568 | 0.531783 | 0.72931  | 0.718951 |
| MmugDNA.13731.1.S1_at   | MmugDNA.13731.1 | 7.86  | 8.02  | 0.12 | 0.44 | -1.11 | 0.905807 | 0.000225 | 0.960077 | 0.032385 |
| MmugDNA.13732.1.S1_at   | MmugDNA.13732.1 | 8.71  | 8     | 0.12 | 0.22 | 1.63  | 0.008664 | 0.234402 | 0.142597 | 0.505674 |
| MmugDNA.13733.1.S1_at   | MmugDNA.13733.1 | 9.06  | 9.05  | 0.17 | 0.15 | 1.01  | 0.419469 | 0.73367  | 0.678807 | 0.845792 |
| MmugDNA.13735.1.S1_at   | MmugDNA.13735.1 | 3.7   | 3.58  | 0.22 | 0.15 | 1.08  | 0.360381 | 0.617311 | 0.635954 | 0.773333 |
| MmugDNA.13736.1.S1_at   | MmugDNA.13736.1 | 4.91  | 4.64  | 0.36 | 0.08 | 1.2   | 0.653438 | 0.200875 | 0.832146 | 0.475369 |
| MmugDNA.13737.1.S1_at   | MmugDNA.13737.1 | 5.71  | 5.54  | 0.15 | 0.2  | 1.12  | 0.253457 | 0.005408 | 0.547829 | 0.10146  |
| MmugDNA.13738.1.S1_at   | MmugDNA.13738.1 | 6.1   | 5.82  | 0.47 | 0.25 | 1.21  | 0.260019 | 0.344563 | 0.554204 | 0.589932 |
| MmugDNA.1374.1.S1_at    | MmugDNA.1374.1  | 4.77  | 4.66  | 0.49 | 0.08 | 1.08  | 0.37666  | 0.290269 | 0.647297 | 0.551169 |
| MmugDNA.13741.1.S1_at   | MmugDNA.13741.1 | 3.46  | 3.65  | 0    | 0.1  | -1.14 | 0.076255 | 0.031029 | 0.334375 | 0.218074 |
| MmugDNA.13743.1.S1_at   | MmugDNA.13743.1 | 8.05  | 8     | 0.09 | 0.04 | 1.03  | 0.317735 | 0.263534 | 0.602462 | 0.529826 |
| MmugDNA.13745.1.S1_at   | MmugDNA.13745.1 | 3.81  | 3.79  | 0.17 | 0.09 | 1.01  | 0.514141 | 0.452809 | 0.744131 | 0.667356 |
| MmugDNA.13746.1.S1_s_at | MmugDNA.13746.1 | 5.24  | 4.96  | 0.19 | 0.07 | 1.21  | 0.08328  | 0.143466 | 0.345546 | 0.417442 |
| MmugDNA.13747.1.S1_at   | MmugDNA.13747.1 | 12.39 | 12.57 | 0.15 | 0.02 | -1.13 | 0.3158   | 0.641292 | 0.600596 | 0.789506 |
| MmugDNA.13748.1.S1_at   | MmugDNA.13748.1 | 5.68  | 5.67  | 0.41 | 0.02 | 1.01  | 0.974501 | 0.66987  | 0.98978  | 0.806933 |
| MmugDNA.13749.1.S1_s_at | MmugDNA.13749.1 | 8.78  | 8.48  | 0.19 | 0.05 | 1.24  | 0.036887 | 0.012927 | 0.247118 | 0.146343 |
| MmugDNA.1375.1.S1_at    | MmugDNA.1375.1  | 6.23  | 6.13  | 0.26 | 0.03 | 1.07  | 0.656127 | 0.150574 | 0.833605 | 0.425106 |
| MmugDNA.13751.1.S1_at   | MmugDNA.13751.1 | 8.44  | 9.15  | 0.4  | 0.17 | -1.64 | 0.100551 | 0.490634 | 0.371591 | 0.692642 |
| MmugDNA.13755.1.S1_at   | MmugDNA.13755.1 | 5.86  | 5.99  | 0.08 | 0.22 | -1.09 | 0.991094 | 0.300374 | 0.99675  | 0.558696 |
| MmugDNA.13756.1.S1_at   | MmugDNA.13756.1 | 12.16 | 12.2  | 0.04 | 0.08 | -1.03 | 0.499748 | 0.003775 | 0.734372 | 0.08749  |
| MmugDNA.13759.1.S1_at   | MmugDNA.13759.1 | 6.43  | 6.47  | 0.11 | 0.22 | -1.03 | 0.908327 | 0.466361 | 0.961181 | 0.67624  |
| MmugDNA.1376.1.S1_at    | MmugDNA.1376.1  | 3.03  | 2.81  | 0.22 | 0.03 | 1.16  | 0.189251 | 0.162767 | 0.485811 | 0.438913 |
| MmugDNA.13761.1.S1_at   | MmugDNA.13761.1 | 4.21  | 4.19  | 0.02 | 0.08 | 1.01  | 0.459323 | 0.870612 | 0.707471 | 0.926446 |
| MmugDNA.13763.1.S1_at   | MmugDNA.13763.1 | 7.04  | 7.02  | 0.13 | 0.03 | 1.02  | 0.757679 | 0.353582 | 0.888862 | 0.59664  |
| MmugDNA.13764.1.S1_at   | MmugDNA.13764.1 | 5.83  | 6.33  | 0.08 | 0.28 | -1.42 | 0.040715 | 0.038374 | 0.25837  | 0.240795 |
| MmugDNA.13765.1.S1_at   | MmugDNA.13765.1 | 7.09  | 6.91  | 0.31 | 0.07 | 1.14  | 0.390742 | 0.149264 | 0.658335 | 0.42373  |
| MmugDNA.13766.1.S1_at   | MmugDNA.13766.1 | 8.16  | 7.69  | 0.13 | 0.27 | 1.38  | 0.109812 | 0.110277 | 0.385011 | 0.374403 |
| MmugDNA.13768.1.S1_at   | MmugDNA.13768.1 | 7.82  | 8.31  | 0.8  | 0.51 | -1.4  | 0.893303 | 0.083569 | 0.954498 | 0.334152 |
| MmugDNA.13769.1.S1_at   | MmugDNA.13769.1 | 8.12  | 8.2   | 0.09 | 0.05 | -1.06 | 0.874524 | 0.161352 | 0.94618  | 0.437519 |
| MmugDNA.1377.1.S1_at    | MmugDNA.1377.1  | 4.66  | 4.46  | 0.69 | 0.14 | 1.15  | 0.278258 | 0.336483 | 0.569585 | 0.583831 |
| MmugDNA.13770.1.S1_at   | MmugDNA.13770.1 | 8.23  | 6.59  | 0.34 | 0.09 | 3.12  | 0.001297 | 0.014809 | 0.078631 | 0.154838 |
| MmugDNA.13771.1.S1_at   | MmugDNA.13771.1 | 3.63  | 3.19  | 0.23 | 0.22 | 1.35  | 0.034994 | 0.030804 | 0.241699 | 0.217376 |
| MmugDNA.13772.1.S1_at   | MmugDNA.13772.1 | 3.94  | 4.05  | 0.06 | 0.11 | -1.08 | 0.191431 | 0.23565  | 0.48775  | 0.506737 |
| MmugDNA.13773.1.S1_at   | MmugDNA.13773.1 | 5.14  | 4.47  | 0.73 | 0.42 | 1.59  | 0.111389 | 0.067049 | 0.387378 | 0.304872 |
| MmugDNA.13775.1.S1_at   | MmugDNA.13775.1 | 4.2   | 5.74  | 0.93 | 0.35 | -2.9  | 0.063885 | 0.014905 | 0.309277 | 0.155167 |
| MmugDNA.13778.1.S1_at   | MmugDNA.13778.1 | 4.33  | 4.42  | 0.11 | 0.07 | -1.07 | 0.86573  | 0.016364 | 0.941862 | 0.161973 |
| MmugDNA.13778.1.S1_s_at | MmugDNA.13778.1 | 3.62  | 3.6   | 0.18 | 0.08 | 1.02  | 0.648556 | 0.746106 | 0.829244 | 0.852688 |
| MmugDNA.13779.1.S1_at   | MmugDNA.13779.1 | 5.76  | 5.76  | 0.12 | 0.03 | 1     | 0.292779 | 0.191472 | 0.581833 | 0.466821 |

|                         |                 |       |       |      |      |       |          |          |          |          |
|-------------------------|-----------------|-------|-------|------|------|-------|----------|----------|----------|----------|
| MmugDNA.13780.1.S1_at   | MmugDNA.13780.1 | 3.53  | 3.26  | 0.29 | 0.15 | 1.2   | 0.27082  | 0.610388 | 0.56285  | 0.768582 |
| MmugDNA.13781.1.S1_at   | MmugDNA.13781.1 | 12.97 | 13.04 | 0.18 | 0.08 | -1.05 | 0.856913 | 0.067311 | 0.937845 | 0.305414 |
| MmugDNA.13782.1.S1_at   | MmugDNA.13782.1 | 5.77  | 5.75  | 0.36 | 0.05 | 1.01  | 0.531777 | 0.562715 | 0.755933 | 0.738107 |
| MmugDNA.13784.1.S1_at   | MmugDNA.13784.1 | 5.94  | 7.11  | 0.7  | 0.31 | -2.25 | 0.156413 | 0.062016 | 0.446993 | 0.295892 |
| MmugDNA.13785.1.S1_at   | MmugDNA.13785.1 | 9.79  | 9.56  | 0.22 | 0.17 | 1.17  | 0.202246 | 0.006312 | 0.499812 | 0.107847 |
| MmugDNA.13786.1.S1_at   | MmugDNA.13786.1 | 3.21  | 2.96  | 0.25 | 0.04 | 1.19  | 0.44169  | 0.562249 | 0.695145 | 0.737898 |
| MmugDNA.13787.1.S1_at   | MmugDNA.13787.1 | 10.32 | 10.84 | 0.34 | 0.21 | -1.43 | 0.142456 | 0.163323 | 0.428502 | 0.43947  |
| MmugDNA.13788.1.S1_s_at | MmugDNA.13788.1 | 5.54  | 5.35  | 0.44 | 0.23 | 1.14  | 0.511116 | 0.693312 | 0.742366 | 0.821612 |
| MmugDNA.13789.1.S1_at   | MmugDNA.13789.1 | 11.03 | 11.12 | 0.07 | 0.07 | -1.07 | 0.486705 | 0.958029 | 0.725795 | 0.976273 |
| MmugDNA.1379.1.S1_at    | MmugDNA.1379.1  | 10.01 | 9.58  | 0.37 | 0.06 | 1.35  | 0.34317  | 0.13999  | 0.622848 | 0.413309 |
| MmugDNA.13793.1.S1_at   | MmugDNA.13793.1 | 5.84  | 5.84  | 0.26 | 0.41 | -1.01 | 0.774868 | 0.141519 | 0.8971   | 0.415063 |
| MmugDNA.13794.1.S1_at   | MmugDNA.13794.1 | 3.1   | 3.03  | 0.05 | 0.04 | 1.05  | 0.289377 | 0.224351 | 0.578963 | 0.497266 |
| MmugDNA.13795.1.S1_at   | MmugDNA.13795.1 | 11.35 | 11.37 | 0.15 | 0.05 | -1.02 | 0.700977 | 0.205467 | 0.857901 | 0.479764 |
| MmugDNA.13796.1.S1_at   | MmugDNA.13796.1 | 5.48  | 5.62  | 0.2  | 0.07 | -1.1  | 0.556053 | 0.237269 | 0.771459 | 0.508008 |
| MmugDNA.13797.1.S1_at   | MmugDNA.13797.1 | 7.43  | 7.72  | 0.27 | 0.1  | -1.23 | 0.248389 | 0.02814  | 0.543799 | 0.209306 |
| MmugDNA.13797.1.S1_s_at | MmugDNA.13797.1 | 7.07  | 7.44  | 0.32 | 0.02 | -1.29 | 0.388531 | 0.249226 | 0.656523 | 0.518313 |
| MmugDNA.13798.1.S1_at   | MmugDNA.13798.1 | 11.35 | 11.42 | 0.19 | 0.23 | -1.05 | 0.784353 | 0.246757 | 0.901638 | 0.516094 |
| MmugDNA.13798.1.S1_s_at | MmugDNA.13798.1 | 11.04 | 11.09 | 0.12 | 0.2  | -1.04 | 0.834108 | 0.200649 | 0.926972 | 0.475195 |
| MmugDNA.13799.1.S1_at   | MmugDNA.13799.1 | 5.95  | 6     | 0.5  | 0.17 | -1.03 | 0.680518 | 0.70325  | 0.847608 | 0.827928 |
| MmugDNA.138.1.S1_at     | MmugDNA.138.1   | 4.46  | 4.55  | 0.03 | 0.09 | -1.07 | 0.142646 | 0.05197  | 0.428696 | 0.273453 |
| MmugDNA.1380.1.S1_at    | MmugDNA.1380.1  | 3.04  | 3.09  | 0.17 | 0.13 | -1.04 | 0.804579 | 0.500237 | 0.91222  | 0.698951 |
| MmugDNA.13800.1.S1_at   | MmugDNA.13800.1 | 10.08 | 10.55 | 0.07 | 0.16 | -1.38 | 0.012439 | 0.299391 | 0.161851 | 0.557857 |
| MmugDNA.13801.1.S1_at   | MmugDNA.13801.1 | 5.8   | 5.76  | 0.27 | 0    | 1.03  | 0.636687 | 0.876889 | 0.822222 | 0.929855 |
| MmugDNA.13803.1.S1_at   | MmugDNA.13803.1 | 7.67  | 6.13  | 1.06 | 0.89 | 2.91  | 0.085263 | 0.036019 | 0.34932  | 0.234255 |
| MmugDNA.13804.1.S1_at   | MmugDNA.13804.1 | 7.45  | 7.44  | 0.05 | 0.17 | 1.01  | 0.46137  | 0.230884 | 0.708826 | 0.502546 |
| MmugDNA.13805.1.S1_at   | MmugDNA.13805.1 | 6.66  | 7.82  | 0.55 | 0.18 | -2.24 | 0.065821 | 0.058562 | 0.314024 | 0.288686 |
| MmugDNA.13807.1.S1_at   | MmugDNA.13807.1 | 7.26  | 7.1   | 0.16 | 0.09 | 1.11  | 0.915855 | 0.258614 | 0.964226 | 0.52584  |
| MmugDNA.13808.1.S1_at   | MmugDNA.13808.1 | 4.51  | 4.56  | 1.2  | 0.34 | -1.04 | 0.905261 | 0.559739 | 0.959993 | 0.736365 |
| MmugDNA.13809.1.S1_at   | MmugDNA.13809.1 | 4.08  | 3.77  | 0.53 | 0.32 | 1.24  | 0.997274 | 0.958551 | 0.999086 | 0.976506 |
| MmugDNA.1381.1.S1_at    | MmugDNA.1381.1  | 5.08  | 4.78  | 0.29 | 0.25 | 1.23  | 0.574562 | 0.114366 | 0.781995 | 0.380871 |
| MmugDNA.13811.1.S1_at   | MmugDNA.13811.1 | 5.15  | 5.3   | 0.28 | 0.15 | -1.11 | 0.725814 | 0.89234  | 0.871346 | 0.938624 |
| MmugDNA.13812.1.S1_at   | MmugDNA.13812.1 | 8.78  | 8.89  | 0.44 | 0.21 | -1.08 | 0.280282 | 0.606545 | 0.57143  | 0.765811 |
| MmugDNA.13813.1.S1_at   | MmugDNA.13813.1 | 4.07  | 4     | 0.27 | 0.05 | 1.05  | 0.641407 | 0.66577  | 0.824827 | 0.804165 |
| MmugDNA.13814.1.S1_at   | MmugDNA.13814.1 | 6.9   | 7.04  | 0.48 | 0.43 | -1.11 | 0.767766 | 0.514468 | 0.893378 | 0.707693 |
| MmugDNA.13816.1.S1_at   | MmugDNA.13816.1 | 9.56  | 10.52 | 0.32 | 0.08 | -1.95 | 0.007808 | 0.018182 | 0.137244 | 0.169673 |
| MmugDNA.13817.1.S1_at   | MmugDNA.13817.1 | 9.61  | 9.73  | 0.23 | 0.28 | -1.09 | 0.55544  | 0.039382 | 0.771267 | 0.243406 |
| MmugDNA.13818.1.S1_at   | MmugDNA.13818.1 | 6.01  | 6.08  | 0.1  | 0.23 | -1.05 | 0.731667 | 0.149964 | 0.874589 | 0.424608 |
| MmugDNA.13819.1.S1_at   | MmugDNA.13819.1 | 3.45  | 3.82  | 0.06 | 0.28 | -1.3  | 0.259762 | 0.399413 | 0.554058 | 0.629798 |
| MmugDNA.1382.1.S1_at    | MmugDNA.1382.1  | 4.31  | 4.47  | 0.57 | 0.65 | -1.11 | 0.829767 | 0.598165 | 0.925054 | 0.760674 |
| MmugDNA.13820.1.S1_at   | MmugDNA.13820.1 | 4.52  | 4.4   | 0.27 | 0.34 | 1.09  | 0.643344 | 0.808223 | 0.826158 | 0.889636 |
| MmugDNA.13821.1.S1_s_at | MmugDNA.13821.1 | 12.56 | 10.36 | 1.72 | 1.04 | 4.6   | 0.448027 | 0.526055 | 0.699768 | 0.715374 |
| MmugDNA.13821.1.S1_x_at | MmugDNA.13821.1 | 7.37  | 5.46  | 1.58 | 0.8  | 3.76  | 0.451822 | 0.506147 | 0.702516 | 0.702359 |
| MmugDNA.30269.1.S1_s_at | MmugDNA.30269.1 | 10.4  | 10.06 | 0.13 | 0.17 | 1.27  | 0.053947 | 0.375065 | 0.289357 | 0.613186 |

|                         |                 |       |       |      |      |       |          |          |          |          |
|-------------------------|-----------------|-------|-------|------|------|-------|----------|----------|----------|----------|
| MmugDNA.13823.1.S1_at   | MmugDNA.13823.1 | 3.72  | 3.73  | 0.08 | 0.01 | -1    | 0.785731 | 0.681939 | 0.902158 | 0.81424  |
| MmugDNA.13824.1.S1_at   | MmugDNA.13824.1 | 9.31  | 9.14  | 0.11 | 0.1  | 1.12  | 0.346077 | 0.217537 | 0.624849 | 0.491121 |
| MmugDNA.13825.1.S1_at   | MmugDNA.13825.1 | 5.62  | 4.55  | 0.8  | 0.32 | 2.11  | 0.110291 | 0.11793  | 0.385603 | 0.385837 |
| MmugDNA.13826.1.S1_at   | MmugDNA.13826.1 | 3.39  | 3.42  | 0.17 | 0.03 | -1.02 | 0.281712 | 0.330247 | 0.572546 | 0.579044 |
| MmugDNA.13827.1.S1_at   | MmugDNA.13827.1 | 5.89  | 6.19  | 0.31 | 0.54 | -1.23 | 0.892558 | 0.159859 | 0.954255 | 0.435986 |
| MmugDNA.13829.1.S1_s_at | MmugDNA.13829.1 | 7.75  | 7.88  | 0.19 | 0.04 | -1.09 | 0.743474 | 0.955252 | 0.88138  | 0.974611 |
| MmugDNA.1383.1.S1_at    | MmugDNA.1383.1  | 4.97  | 4.93  | 0.13 | 0.08 | 1.03  | 0.243301 | 0.157999 | 0.539969 | 0.433744 |
| MmugDNA.13830.1.S1_at   | MmugDNA.13830.1 | 10.32 | 10.41 | 0.01 | 0.06 | -1.06 | 0.090041 | 0.809591 | 0.356863 | 0.890236 |
| MmugDNA.13831.1.S1_at   | MmugDNA.13831.1 | 10.31 | 9.84  | 0.05 | 0.13 | 1.38  | 0.002423 | 0.008529 | 0.093606 | 0.122563 |
| MmugDNA.13834.1.S1_at   | MmugDNA.13834.1 | 7.83  | 7.87  | 0.15 | 0.04 | -1.03 | 0.224851 | 0.131825 | 0.522793 | 0.403891 |
| MmugDNA.13835.1.S1_at   | MmugDNA.13835.1 | 7.93  | 7.81  | 0.22 | 0.01 | 1.09  | 0.412061 | 0.188302 | 0.673833 | 0.46433  |
| MmugDNA.13837.1.S1_at   | MmugDNA.13837.1 | 8.88  | 7.84  | 0.13 | 0.16 | 2.07  | 0.000906 | 0.000111 | 0.07546  | 0.028099 |
| MmugDNA.13839.1.S1_at   | MmugDNA.13839.1 | 5.16  | 5.18  | 0.03 | 0.02 | -1.01 | 0.153499 | 0.140244 | 0.443379 | 0.413405 |
| MmugDNA.1384.1.S1_at    | MmugDNA.1384.1  | 4.81  | 5.37  | 1.22 | 0.2  | -1.47 | 0.631922 | 0.6012   | 0.819395 | 0.762571 |
| MmugDNA.13840.1.S1_at   | MmugDNA.13840.1 | 4.8   | 4.81  | 1.01 | 0.23 | -1.01 | 0.308207 | 0.358995 | 0.594866 | 0.600389 |
| MmugDNA.13841.1.S1_at   | MmugDNA.13841.1 | 3.03  | 2.98  | 0.09 | 0.05 | 1.03  | 0.237505 | 0.228072 | 0.53499  | 0.500249 |
| MmugDNA.13843.1.S1_at   | MmugDNA.13843.1 | 3.89  | 3.88  | 0.1  | 0.14 | 1.01  | 0.956345 | 0.724036 | 0.982055 | 0.840274 |
| MmugDNA.13844.1.S1_at   | MmugDNA.13844.1 | 3.38  | 3.4   | 0.22 | 0    | -1.01 | 0.875264 | 0.976626 | 0.946453 | 0.987237 |
| MmugDNA.13845.1.S1_at   | MmugDNA.13845.1 | 5.67  | 4.69  | 0.63 | 0.39 | 1.97  | 0.361232 | 0.358875 | 0.636739 | 0.600291 |
| MmugDNA.13846.1.S1_at   | MmugDNA.13846.1 | 9.72  | 11.57 | 0.88 | 0.32 | -3.6  | 0.027105 | 0.003657 | 0.217323 | 0.086526 |
| MmugDNA.13847.1.S1_at   | MmugDNA.13847.1 | 3.03  | 2.99  | 0.08 | 0.05 | 1.03  | 0.904661 | 0.004337 | 0.959549 | 0.092354 |
| MmugDNA.13849.1.S1_at   | MmugDNA.13849.1 | 4.18  | 4.88  | 0.58 | 0.56 | -1.62 | 0.367368 | 0.669202 | 0.641394 | 0.806492 |
| MmugDNA.1385.1.S1_at    | MmugDNA.1385.1  | 7.73  | 7.05  | 0.08 | 0.33 | 1.6   | 0.085239 | 0.238955 | 0.34932  | 0.509678 |
| MmugDNA.13850.1.S1_at   | MmugDNA.13850.1 | 5.19  | 5.11  | 0.32 | 0.2  | 1.05  | 0.872858 | 0.965353 | 0.945492 | 0.980657 |
| MmugDNA.13851.1.S1_at   | MmugDNA.13851.1 | 4.55  | 4.53  | 0.25 | 0.22 | 1.02  | 0.783336 | 0.70954  | 0.901128 | 0.831686 |
| MmugDNA.13853.1.S1_at   | MmugDNA.13853.1 | 5.39  | 5.07  | 0.38 | 0.36 | 1.25  | 0.143389 | 0.198414 | 0.429719 | 0.473302 |
| MmugDNA.13854.1.S1_at   | MmugDNA.13854.1 | 6.04  | 6     | 0.05 | 0.16 | 1.03  | 0.96631  | 0.831791 | 0.986387 | 0.903503 |
| MmugDNA.13855.1.S1_at   | MmugDNA.13855.1 | 3.03  | 3.04  | 0.14 | 0.11 | -1.01 | 0.837654 | 0.896984 | 0.928861 | 0.941205 |
| MmugDNA.13856.1.S1_at   | MmugDNA.13856.1 | 6.18  | 6.09  | 0.15 | 0.09 | 1.07  | 0.436184 | 0.586246 | 0.69113  | 0.7534   |
| MmugDNA.13857.1.S1_at   | MmugDNA.13857.1 | 3.82  | 3.7   | 0.09 | 0.07 | 1.08  | 0.610121 | 0.150671 | 0.805686 | 0.42522  |
| MmugDNA.13858.1.S1_at   | MmugDNA.13858.1 | 8.44  | 7.87  | 0.44 | 0.12 | 1.49  | 0.096348 | 0.17316  | 0.366014 | 0.449765 |
| MmugDNA.13859.1.S1_at   | MmugDNA.13859.1 | 3.68  | 3.91  | 0.58 | 0.37 | -1.17 | 0.79715  | 0.814657 | 0.908355 | 0.893021 |
| MmugDNA.1386.1.S1_at    | MmugDNA.1386.1  | 5.79  | 5.31  | 0.56 | 0.3  | 1.4   | 0.115572 | 0.140585 | 0.392723 | 0.413822 |
| MmugDNA.13860.1.S1_at   | MmugDNA.13860.1 | 10.24 | 10.61 | 0.79 | 0.34 | -1.29 | 0.941742 | 0.623968 | 0.975589 | 0.778285 |
| MmugDNA.13862.1.S1_at   | MmugDNA.13862.1 | 10.9  | 10.91 | 0.04 | 0.18 | -1.01 | 0.345603 | 0.011683 | 0.624534 | 0.140078 |
| MmugDNA.13863.1.S1_at   | MmugDNA.13863.1 | 7.48  | 7.76  | 0.1  | 0.03 | -1.22 | 0.008947 | 0.014189 | 0.144294 | 0.152173 |
| MmugDNA.13864.1.S1_at   | MmugDNA.13864.1 | 6.74  | 6.68  | 0.19 | 0.47 | 1.04  | 0.7882   | 0.320954 | 0.903684 | 0.572948 |
| MmugDNA.13865.1.S1_at   | MmugDNA.13865.1 | 8.13  | 8.98  | 0.64 | 0.09 | -1.8  | 0.046682 | 0.387097 | 0.273611 | 0.621935 |
| MmugDNA.13866.1.S1_at   | MmugDNA.13866.1 | 7.15  | 7.06  | 0.32 | 0.05 | 1.07  | 0.68743  | 0.42605  | 0.850804 | 0.648241 |
| MmugDNA.13867.1.S1_at   | MmugDNA.13867.1 | 4.18  | 4.2   | 0.13 | 0    | -1.01 | 0.526507 | 0.371032 | 0.752631 | 0.609964 |
| MmugDNA.13868.1.S1_at   | MmugDNA.13868.1 | 3.68  | 3.69  | 0.15 | 0.21 | -1.01 | 0.951372 | 0.901935 | 0.979913 | 0.944174 |
| MmugDNA.1387.1.S1_at    | MmugDNA.1387.1  | 4.07  | 3.86  | 0.29 | 0.13 | 1.15  | 0.329693 | 0.510699 | 0.611807 | 0.705114 |
| MmugDNA.13870.1.S1_at   | MmugDNA.13870.1 | 3.72  | 3.7   | 0.15 | 0.01 | 1.02  | 0.679516 | 0.876485 | 0.847107 | 0.929683 |

|                         |                 |       |       |      |      |       |          |          |          |          |
|-------------------------|-----------------|-------|-------|------|------|-------|----------|----------|----------|----------|
| MmugDNA.13871.1.S1_at   | MmugDNA.13871.1 | 6.84  | 6.36  | 0.66 | 0.14 | 1.4   | 0.208201 | 0.195595 | 0.505958 | 0.470441 |
| MmugDNA.13876.1.S1_at   | MmugDNA.13876.1 | 5.19  | 4.73  | 0.31 | 0.13 | 1.38  | 0.074545 | 0.128778 | 0.331249 | 0.400248 |
| MmugDNA.13877.1.S1_at   | MmugDNA.13877.1 | 3.02  | 2.91  | 0.25 | 0.04 | 1.08  | 0.145438 | 0.129897 | 0.43277  | 0.401509 |
| MmugDNA.13878.1.S1_at   | MmugDNA.13878.1 | 3.6   | 3.71  | 0.32 | 0.22 | -1.08 | 0.788375 | 0.865901 | 0.903792 | 0.923757 |
| MmugDNA.13879.1.S1_at   | MmugDNA.13879.1 | 9.73  | 9.21  | 0.13 | 0.1  | 1.43  | 0.0054   | 0.039463 | 0.118701 | 0.243642 |
| MmugDNA.1388.1.S1_at    | MmugDNA.1388.1  | 4.21  | 4.04  | 0.15 | 0.07 | 1.13  | 0.230549 | 0.653295 | 0.529462 | 0.79735  |
| MmugDNA.13880.1.S1_at   | MmugDNA.13880.1 | 3.08  | 2.93  | 0.13 | 0.07 | 1.11  | 0.150259 | 0.224138 | 0.439399 | 0.497129 |
| MmugDNA.13884.1.S1_at   | MmugDNA.13884.1 | 9.4   | 9.16  | 0.19 | 0.19 | 1.18  | 0.843041 | 0.074709 | 0.931219 | 0.318465 |
| MmugDNA.13885.1.S1_at   | MmugDNA.13885.1 | 5.24  | 4.94  | 0.63 | 0.01 | 1.23  | 0.447897 | 0.332397 | 0.699731 | 0.580841 |
| MmugDNA.13885.1.S1_x_at | MmugDNA.13885.1 | 4.74  | 4.8   | 0.74 | 0.15 | -1.04 | 0.425215 | 0.520624 | 0.682686 | 0.711831 |
| MmugDNA.13887.1.S1_s_at | MmugDNA.13887.1 | 5.74  | 5.98  | 0.11 | 0.01 | -1.19 | 0.014583 | 0.468866 | 0.172694 | 0.677906 |
| MmugDNA.13887.1.S1_x_at | MmugDNA.13887.1 | 5.36  | 5.37  | 0.19 | 0.19 | -1.01 | 0.485889 | 0.329839 | 0.725341 | 0.578874 |
| MmugDNA.13888.1.S1_at   | MmugDNA.13888.1 | 8.95  | 9.01  | 0.19 | 0.17 | -1.05 | 0.692701 | 0.457376 | 0.853127 | 0.670806 |
| MmugDNA.13889.1.S1_at   | MmugDNA.13889.1 | 4.3   | 4.3   | 0.22 | 0.04 | 1     | 0.555705 | 0.451555 | 0.771444 | 0.666372 |
| MmugDNA.1389.1.S1_at    | MmugDNA.1389.1  | 9.21  | 9.42  | 0.22 | 0.29 | -1.16 | 0.428143 | 0.01925  | 0.685123 | 0.174522 |
| MmugDNA.13890.1.S1_at   | MmugDNA.13890.1 | 4.56  | 4.4   | 0.23 | 0.16 | 1.11  | 0.46411  | 0.427072 | 0.710505 | 0.649087 |
| MmugDNA.13891.1.S1_at   | MmugDNA.13891.1 | 4.49  | 4.41  | 0.41 | 0.01 | 1.06  | 0.88315  | 0.59856  | 0.950338 | 0.760958 |
| MmugDNA.13892.1.S1_at   | MmugDNA.13892.1 | 5.36  | 5.45  | 0.2  | 0.12 | -1.07 | 0.941025 | 0.838151 | 0.975231 | 0.907587 |
| MmugDNA.13894.1.S1_at   | MmugDNA.13894.1 | 4.65  | 4.66  | 0.18 | 0.04 | -1    | 0.42151  | 0.355548 | 0.679956 | 0.597801 |
| MmugDNA.13895.1.S1_at   | MmugDNA.13895.1 | 6.56  | 6.15  | 0.07 | 0.19 | 1.32  | 0.037225 | 0.379039 | 0.248282 | 0.616011 |
| MmugDNA.13896.1.S1_at   | MmugDNA.13896.1 | 5.14  | 4.3   | 0.47 | 0.25 | 1.79  | 0.071611 | 0.028012 | 0.325611 | 0.208903 |
| MmugDNA.13897.1.S1_s_at | MmugDNA.13897.1 | 8.49  | 8.16  | 0.95 | 0.09 | 1.25  | 0.66085  | 0.14827  | 0.836326 | 0.422777 |
| MmugDNA.13898.1.S1_at   | MmugDNA.13898.1 | 8.9   | 8.47  | 0.79 | 0.28 | 1.35  | 0.838662 | 0.242272 | 0.929155 | 0.512697 |
| MmugDNA.13899.1.S1_at   | MmugDNA.13899.1 | 5.94  | 5.72  | 0.11 | 0.1  | 1.16  | 0.038254 | 0.260673 | 0.251651 | 0.527199 |
| MmugDNA.1390.1.S1_at    | MmugDNA.1390.1  | 3.7   | 4     | 0.59 | 0.5  | -1.23 | 0.568628 | 0.834524 | 0.778487 | 0.905227 |
| MmugDNA.13901.1.S1_at   | MmugDNA.13901.1 | 8.08  | 8     | 0.06 | 0.08 | 1.06  | 0.207952 | 0.37738  | 0.505791 | 0.6149   |
| MmugDNA.13902.1.S1_at   | MmugDNA.13902.1 | 6.99  | 6.77  | 0.09 | 0.16 | 1.16  | 0.397077 | 0.194672 | 0.662881 | 0.469765 |
| MmugDNA.13903.1.S1_at   | MmugDNA.13903.1 | 3.91  | 3.66  | 0.6  | 0.09 | 1.19  | 0.241542 | 0.274205 | 0.538648 | 0.538698 |
| MmugDNA.13904.1.S1_at   | MmugDNA.13904.1 | 5.25  | 5.22  | 0.51 | 0.69 | 1.02  | 0.966913 | 0.239491 | 0.986678 | 0.510162 |
| MmugDNA.13905.1.S1_at   | MmugDNA.13905.1 | 8.14  | 7.3   | 0.37 | 0.17 | 1.79  | 0.061099 | 0.101437 | 0.30403  | 0.361205 |
| MmugDNA.13906.1.S1_at   | MmugDNA.13906.1 | 4.82  | 4.77  | 0.26 | 0.13 | 1.03  | 0.519163 | 0.42196  | 0.747956 | 0.645406 |
| MmugDNA.13907.1.S1_at   | MmugDNA.13907.1 | 9.04  | 8.99  | 0.3  | 0.1  | 1.03  | 0.919044 | 0.007309 | 0.965387 | 0.114792 |
| MmugDNA.13908.1.S1_at   | MmugDNA.13908.1 | 7.84  | 7.72  | 0.39 | 0.03 | 1.08  | 0.239289 | 0.163173 | 0.536536 | 0.439303 |
| MmugDNA.13909.1.S1_at   | MmugDNA.13909.1 | 10.33 | 10.35 | 0.25 | 0.08 | -1.01 | 0.933021 | 0.589645 | 0.971923 | 0.755803 |
| MmugDNA.13910.1.S1_at   | MmugDNA.13910.1 | 4.94  | 4.9   | 0.18 | 0.03 | 1.02  | 0.645355 | 0.845754 | 0.827328 | 0.912241 |
| MmugDNA.13912.1.S1_at   | MmugDNA.13912.1 | 3.42  | 3.43  | 0.03 | 0.15 | -1.01 | 0.994049 | 0.714433 | 0.997578 | 0.834313 |
| MmugDNA.13915.1.S1_at   | MmugDNA.13915.1 | 3.31  | 3.49  | 0.08 | 0.27 | -1.13 | 0.320025 | 0.562999 | 0.604608 | 0.738314 |
| MmugDNA.13918.1.S1_at   | MmugDNA.13918.1 | 6.16  | 6.33  | 0.12 | 0.09 | -1.13 | 0.094525 | 0.844997 | 0.363527 | 0.911799 |
| MmugDNA.13919.1.S1_at   | MmugDNA.13919.1 | 5.06  | 4.98  | 0.12 | 0.08 | 1.06  | 0.529558 | 0.719212 | 0.75438  | 0.837526 |
| MmugDNA.1392.1.S1_at    | MmugDNA.1392.1  | 9.42  | 9.88  | 0.46 | 0.04 | -1.37 | 0.09601  | 0.10715  | 0.365529 | 0.369817 |
| MmugDNA.13920.1.S1_at   | MmugDNA.13920.1 | 6.31  | 6.41  | 0.21 | 0.12 | -1.08 | 0.536615 | 0.581867 | 0.759061 | 0.750784 |
| MmugDNA.13921.1.S1_at   | MmugDNA.13921.1 | 5.3   | 4.15  | 1.31 | 0.85 | 2.22  | 0.485599 | 0.505027 | 0.725109 | 0.70197  |
| MmugDNA.13922.1.S1_at   | MmugDNA.13922.1 | 5.27  | 4.95  | 0.28 | 0.03 | 1.26  | 0.208218 | 0.236424 | 0.505958 | 0.507314 |



|                         |                 |       |       |      |      |       |          |          |          |          |
|-------------------------|-----------------|-------|-------|------|------|-------|----------|----------|----------|----------|
| MmugDNA.13924.1.S1_at   | MmugDNA.13924.1 | 11.52 | 13.03 | 0.41 | 0.09 | -2.84 | 0.007075 | 0.01492  | 0.1316   | 0.155285 |
| MmugDNA.13925.1.S1_at   | MmugDNA.13925.1 | 11.58 | 11.81 | 0.11 | 0.01 | -1.18 | 0.029696 | 0.357873 | 0.225528 | 0.599493 |
| MmugDNA.13926.1.S1_at   | MmugDNA.13926.1 | 12.08 | 12.24 | 0.05 | 0.04 | -1.11 | 0.015364 | 0.321485 | 0.176222 | 0.573226 |
| MmugDNA.13927.1.S1_at   | MmugDNA.13927.1 | 7.77  | 7.79  | 0.16 | 0.15 | -1.01 | 0.540436 | 0.03645  | 0.761465 | 0.235423 |
| MmugDNA.13927.1.S1_x_at | MmugDNA.13927.1 | 7.79  | 7.65  | 0.14 | 0.17 | 1.1   | 0.490672 | 0.089649 | 0.728737 | 0.343842 |
| MmugDNA.13928.1.S1_at   | MmugDNA.13928.1 | 4.93  | 5.08  | 0.11 | 0.05 | -1.11 | 0.092289 | 0.088856 | 0.360355 | 0.342698 |
| MmugDNA.13929.1.S1_at   | MmugDNA.13929.1 | 3.46  | 3.44  | 0.06 | 0.1  | 1.01  | 0.691184 | 0.697249 | 0.85233  | 0.824057 |
| MmugDNA.1393.1.S1_at    | MmugDNA.1393.1  | 7.94  | 7.93  | 0.68 | 0.17 | 1.01  | 0.800935 | 0.722382 | 0.910474 | 0.839202 |
| MmugDNA.13930.1.S1_at   | MmugDNA.13930.1 | 3.91  | 3.83  | 0.19 | 0.1  | 1.06  | 0.215156 | 0.301434 | 0.512891 | 0.559467 |
| MmugDNA.13931.1.S1_at   | MmugDNA.13931.1 | 11.04 | 11.03 | 0.14 | 0.07 | 1     | 0.599631 | 0.407079 | 0.798286 | 0.634722 |
| MmugDNA.13934.1.S1_at   | MmugDNA.13934.1 | 6.14  | 6.22  | 0.18 | 0.13 | -1.06 | 0.868177 | 0.169399 | 0.943202 | 0.446024 |
| MmugDNA.13935.1.S1_at   | MmugDNA.13935.1 | 6.36  | 6.37  | 0.25 | 0.04 | -1.01 | 0.780976 | 0.472599 | 0.900006 | 0.68007  |
| MmugDNA.13936.1.S1_at   | MmugDNA.13936.1 | 4.6   | 4.53  | 0.22 | 0.03 | 1.05  | 0.577927 | 0.819067 | 0.783846 | 0.895738 |
| MmugDNA.13937.1.S1_at   | MmugDNA.13937.1 | 6     | 5.52  | 0.17 | 0    | 1.39  | 0.004595 | 0.000211 | 0.11389  | 0.032262 |
| MmugDNA.13938.1.S1_at   | MmugDNA.13938.1 | 11.87 | 11.93 | 0.62 | 0.12 | -1.04 | 0.618612 | 0.603491 | 0.810696 | 0.764189 |
| MmugDNA.13939.1.S1_s_at | MmugDNA.13939.1 | 10.7  | 10.48 | 0.11 | 0.08 | 1.16  | 0.074057 | 0.000119 | 0.330086 | 0.028664 |
| MmugDNA.13940.1.S1_at   | MmugDNA.13940.1 | 4.04  | 3.79  | 0.44 | 0.18 | 1.19  | 0.224121 | 0.218536 | 0.522245 | 0.492142 |
| MmugDNA.13941.1.S1_at   | MmugDNA.13941.1 | 4.4   | 4.43  | 0.05 | 0.12 | -1.02 | 0.983769 | 0.363925 | 0.99394  | 0.604293 |
| MmugDNA.13942.1.S1_at   | MmugDNA.13942.1 | 6.21  | 5.34  | 0.05 | 0.08 | 1.82  | 0.000096 | 0.000838 | 0.051196 | 0.046968 |
| MmugDNA.13943.1.S1_at   | MmugDNA.13943.1 | 5.19  | 4.97  | 0.37 | 0.07 | 1.16  | 0.280112 | 0.447031 | 0.571301 | 0.663235 |
| MmugDNA.13944.1.S1_at   | MmugDNA.13944.1 | 3.31  | 3.29  | 0.16 | 0.05 | 1.02  | 0.885832 | 0.516168 | 0.951295 | 0.708757 |
| MmugDNA.13947.1.S1_at   | MmugDNA.13947.1 | 3.85  | 3.9   | 0.19 | 0.06 | -1.03 | 0.375536 | 0.308331 | 0.646358 | 0.564425 |
| MmugDNA.13948.1.S1_at   | MmugDNA.13948.1 | 3.2   | 3.12  | 0.18 | 0.03 | 1.05  | 0.141105 | 0.41953  | 0.426942 | 0.643507 |
| MmugDNA.13949.1.S1_at   | MmugDNA.13949.1 | 6.55  | 6.37  | 0.21 | 0.11 | 1.13  | 0.453012 | 0.062892 | 0.703354 | 0.297494 |
| MmugDNA.13950.1.S1_at   | MmugDNA.13950.1 | 4.15  | 3.79  | 0.06 | 0.2  | 1.29  | 0.031022 | 0.010879 | 0.229114 | 0.135926 |
| MmugDNA.13951.1.S1_at   | MmugDNA.13951.1 | 4.53  | 3.89  | 0.49 | 0.15 | 1.56  | 0.159246 | 0.229418 | 0.450505 | 0.501527 |
| MmugDNA.13952.1.S1_at   | MmugDNA.13952.1 | 5.98  | 5.49  | 0.24 | 0.14 | 1.4   | 0.042727 | 0.22498  | 0.263882 | 0.49773  |
| MmugDNA.13956.1.S1_at   | MmugDNA.13956.1 | 4.92  | 4.95  | 0.08 | 0.07 | -1.02 | 0.175819 | 0.27632  | 0.470151 | 0.540303 |
| MmugDNA.13959.1.S1_at   | MmugDNA.13959.1 | 5.25  | 5.22  | 0.1  | 0.05 | 1.02  | 0.840986 | 0.489653 | 0.930107 | 0.691862 |
| MmugDNA.1396.1.S1_at    | MmugDNA.1396.1  | 5.92  | 5.98  | 0.09 | 0.02 | -1.04 | 0.99199  | 0.785995 | 0.997006 | 0.876026 |
| MmugDNA.13960.1.S1_at   | MmugDNA.13960.1 | 5.66  | 7.69  | 0.91 | 0.1  | -4.09 | 0.038003 | 0.086309 | 0.250711 | 0.338771 |
| MmugDNA.13961.1.S1_at   | MmugDNA.13961.1 | 4.87  | 4.85  | 0.04 | 0.03 | 1.02  | 0.836377 | 0.299782 | 0.928245 | 0.558081 |
| MmugDNA.13962.1.S1_at   | MmugDNA.13962.1 | 8.61  | 8.52  | 0.14 | 0.27 | 1.07  | 0.477253 | 0.655696 | 0.719345 | 0.7987   |
| MmugDNA.13963.1.S1_at   | MmugDNA.13963.1 | 5.65  | 5.49  | 0.53 | 0.11 | 1.12  | 0.664117 | 0.095515 | 0.838292 | 0.352588 |
| MmugDNA.13964.1.S1_at   | MmugDNA.13964.1 | 5.77  | 7.13  | 0.39 | 0.48 | -2.56 | 0.012641 | 0.030975 | 0.162521 | 0.217853 |
| MmugDNA.13965.1.S1_at   | MmugDNA.13965.1 | 7.08  | 7.13  | 0.34 | 0.06 | -1.04 | 0.428465 | 0.76454  | 0.685384 | 0.863128 |
| MmugDNA.13966.1.S1_s_at | MmugDNA.13966.1 | 8.14  | 7.89  | 1    | 0.27 | 1.18  | 0.382186 | 0.04823  | 0.651645 | 0.264684 |
| MmugDNA.13967.1.S1_at   | MmugDNA.13967.1 | 5.64  | 7.23  | 1.61 | 0.32 | -3.01 | 0.153155 | 0.248895 | 0.442821 | 0.517964 |
| MmugDNA.13968.1.S1_at   | MmugDNA.13968.1 | 13.36 | 12.69 | 0.03 | 0.07 | 1.59  | 0.000115 | 0.283989 | 0.051196 | 0.546237 |
| MmugDNA.13969.1.S1_at   | MmugDNA.13969.1 | 4.7   | 4.51  | 0.17 | 0.09 | 1.14  | 0.098103 | 0.556681 | 0.368627 | 0.734714 |
| MmugDNA.1397.1.S1_at    | MmugDNA.1397.1  | 5.47  | 5.33  | 0.1  | 0.05 | 1.1   | 0.09274  | 0.152735 | 0.361198 | 0.427571 |
| MmugDNA.13970.1.S1_at   | MmugDNA.13970.1 | 9.36  | 8.72  | 0.26 | 0.12 | 1.55  | 0.027503 | 0.01091  | 0.218484 | 0.136002 |
| MmugDNA.13971.1.S1_at   | MmugDNA.13971.1 | 5.97  | 5.82  | 0.12 | 0.1  | 1.11  | 0.177659 | 0.170049 | 0.472303 | 0.446789 |

|                         |                 |       |       |      |      |       |          |          |          |          |
|-------------------------|-----------------|-------|-------|------|------|-------|----------|----------|----------|----------|
| MmugDNA.13972.1.S1_at   | MmugDNA.13972.1 | 3.96  | 4.02  | 0.18 | 0.27 | -1.04 | 0.905083 | 0.294533 | 0.959862 | 0.554265 |
| MmugDNA.32487.1.S1_s_at | MmugDNA.32487.1 | 5.58  | 5.57  | 0.06 | 0.12 | 1.01  | 0.962522 | 0.411364 | 0.984726 | 0.638108 |
| MmugDNA.13975.1.S1_at   | MmugDNA.13975.1 | 3.91  | 3.94  | 0.12 | 0.14 | -1.02 | 0.498648 | 0.842108 | 0.733846 | 0.910036 |
| MmugDNA.13977.1.S1_at   | MmugDNA.13977.1 | 4.9   | 4.92  | 0.01 | 0.07 | -1.01 | 0.687534 | 0.220108 | 0.850804 | 0.493552 |
| MmugDNA.13978.1.S1_at   | MmugDNA.13978.1 | 10.88 | 10.78 | 0.3  | 0.12 | 1.07  | 0.40271  | 0.711608 | 0.666996 | 0.832761 |
| MmugDNA.1398.1.S1_at    | MmugDNA.1398.1  | 10.19 | 8.41  | 0.11 | 0.63 | 3.44  | 0.010098 | 0.007006 | 0.150153 | 0.112986 |
| MmugDNA.13980.1.S1_at   | MmugDNA.13980.1 | 11.14 | 11.34 | 0.62 | 0.12 | -1.15 | 0.253955 | 0.059559 | 0.54824  | 0.290568 |
| MmugDNA.13981.1.S1_at   | MmugDNA.13981.1 | 5.12  | 5.17  | 0.08 | 0.07 | -1.04 | 0.499458 | 0.016552 | 0.734175 | 0.162881 |
| MmugDNA.13985.1.S1_s_at | MmugDNA.13985.1 | 9.25  | 9.06  | 0.31 | 0.1  | 1.15  | 0.161819 | 0.03222  | 0.453605 | 0.222159 |
| MmugDNA.26902.1.S1_at   | MmugDNA.26902.1 | 4.04  | 4.28  | 0.07 | 0.21 | -1.18 | 0.185482 | 0.186241 | 0.481726 | 0.462127 |
| MmugDNA.26902.1.S1_s_at | MmugDNA.26902.1 | 9.79  | 9.75  | 0.16 | 0.05 | 1.03  | 0.72516  | 0.972244 | 0.871012 | 0.985011 |
| MmugDNA.13987.1.S1_at   | MmugDNA.13987.1 | 5.89  | 5.26  | 0.42 | 0.39 | 1.56  | 0.114255 | 0.094863 | 0.391072 | 0.351901 |
| MmugDNA.13988.1.S1_at   | MmugDNA.13988.1 | 3.18  | 3.13  | 0.24 | 0    | 1.04  | 0.529107 | 0.722656 | 0.754044 | 0.839355 |
| MmugDNA.13989.1.S1_at   | MmugDNA.13989.1 | 3.93  | 3.91  | 0.19 | 0.12 | 1.01  | 0.236522 | 0.27979  | 0.534169 | 0.543251 |
| MmugDNA.1399.1.S1_at    | MmugDNA.1399.1  | 3.87  | 3.7   | 0.83 | 0.08 | 1.12  | 0.259061 | 0.300592 | 0.553321 | 0.558885 |
| MmugDNA.13990.1.S1_at   | MmugDNA.13990.1 | 4.55  | 4.57  | 0.25 | 0.05 | -1.01 | 0.34548  | 0.524949 | 0.624468 | 0.714672 |
| MmugDNA.13991.1.S1_at   | MmugDNA.13991.1 | 6.48  | 6.62  | 0.77 | 0.61 | -1.1  | 0.957667 | 0.203001 | 0.982604 | 0.477343 |
| MmugDNA.13993.1.S1_at   | MmugDNA.13993.1 | 9.23  | 9.31  | 0.2  | 0.13 | -1.06 | 0.586558 | 0.012221 | 0.789902 | 0.142932 |
| MmugDNA.13994.1.S1_at   | MmugDNA.13994.1 | 4.06  | 3.99  | 0.24 | 0.06 | 1.05  | 0.219597 | 0.284483 | 0.517388 | 0.546642 |
| MmugDNA.13995.1.S1_at   | MmugDNA.13995.1 | 4.59  | 4.6   | 0.18 | 0.05 | -1    | 0.428093 | 0.545646 | 0.685092 | 0.727579 |
| MmugDNA.13996.1.S1_at   | MmugDNA.13996.1 | 6.94  | 6.55  | 0.66 | 0.28 | 1.31  | 0.367229 | 0.315371 | 0.641323 | 0.568939 |
| MmugDNA.13997.1.S1_at   | MmugDNA.13997.1 | 7.29  | 6.94  | 0.23 | 0.19 | 1.28  | 0.049874 | 0.039373 | 0.280974 | 0.243406 |
| MmugDNA.13997.1.S1_s_at | MmugDNA.13997.1 | 6.37  | 5.8   | 0.18 | 0.28 | 1.48  | 0.102356 | 0.111366 | 0.374399 | 0.376087 |
| MmugDNA.13998.1.S1_at   | MmugDNA.13998.1 | 6.72  | 7.24  | 0.55 | 0.04 | -1.43 | 0.606384 | 0.728016 | 0.803119 | 0.842711 |
| MmugDNA.14.1.S1_at      | MmugDNA.14.1    | 3.72  | 3.65  | 0.06 | 0.01 | 1.04  | 0.454656 | 0.124394 | 0.704436 | 0.394857 |
| MmugDNA.140.1.S1_at     | MmugDNA.140.1   | 5.68  | 5.65  | 0.15 | 0.11 | 1.02  | 0.981061 | 0.99833  | 0.992909 | 0.999091 |
| MmugDNA.1400.1.S1_at    | MmugDNA.1400.1  | 4.87  | 3.78  | 1.56 | 0.58 | 2.13  | 0.319962 | 0.355393 | 0.60457  | 0.597738 |
| MmugDNA.14000.1.S1_at   | MmugDNA.14000.1 | 4.81  | 4.4   | 0.23 | 0.17 | 1.33  | 0.062936 | 0.059379 | 0.307612 | 0.290548 |
| MmugDNA.14001.1.S1_at   | MmugDNA.14001.1 | 10.11 | 10.53 | 0.01 | 0.1  | -1.34 | 0.001947 | 0.47194  | 0.08845  | 0.679793 |
| MmugDNA.14002.1.S1_at   | MmugDNA.14002.1 | 7.62  | 7.4   | 0.09 | 0.08 | 1.17  | 0.016679 | 0.039966 | 0.182519 | 0.245076 |
| MmugDNA.14003.1.S1_at   | MmugDNA.14003.1 | 9.47  | 9.61  | 0.13 | 0.03 | -1.09 | 0.295454 | 0.000078 | 0.584245 | 0.027016 |
| MmugDNA.14004.1.S1_at   | MmugDNA.14004.1 | 10.33 | 11.15 | 0.12 | 0.27 | -1.77 | 0.009703 | 0.246455 | 0.148419 | 0.515899 |
| MmugDNA.14005.1.S1_at   | MmugDNA.14005.1 | 3.02  | 2.99  | 0.12 | 0.13 | 1.02  | 0.614043 | 0.492675 | 0.807838 | 0.693708 |
| MmugDNA.14007.1.S1_at   | MmugDNA.14007.1 | 3.75  | 3.59  | 0.37 | 0.13 | 1.12  | 0.562151 | 0.826343 | 0.774838 | 0.900249 |
| MmugDNA.14008.1.S1_s_at | MmugDNA.14008.1 | 8.1   | 8.09  | 0.13 | 0.16 | 1     | 0.426131 | 0.004289 | 0.683437 | 0.091951 |
| MmugDNA.1401.1.S1_at    | MmugDNA.1401.1  | 3.44  | 3.51  | 0.07 | 0.04 | -1.05 | 0.108027 | 0.266832 | 0.382689 | 0.53241  |
| MmugDNA.14010.1.S1_at   | MmugDNA.14010.1 | 3.04  | 2.93  | 0.11 | 0.14 | 1.08  | 0.84382  | 0.528386 | 0.931558 | 0.716583 |
| MmugDNA.14012.1.S1_at   | MmugDNA.14012.1 | 3.23  | 3.18  | 0.34 | 0.07 | 1.03  | 0.362284 | 0.570297 | 0.637219 | 0.743056 |
| MmugDNA.14013.1.S1_at   | MmugDNA.14013.1 | 5.72  | 4.65  | 0.48 | 0.55 | 2.11  | 0.062063 | 0.126013 | 0.305634 | 0.396648 |
| MmugDNA.14014.1.S1_at   | MmugDNA.14014.1 | 3.42  | 3.39  | 0.55 | 0.13 | 1.02  | 0.331631 | 0.302538 | 0.613532 | 0.560201 |
| MmugDNA.14015.1.S1_at   | MmugDNA.14015.1 | 7.72  | 7.17  | 0.17 | 0.1  | 1.46  | 0.01612  | 0.232324 | 0.17952  | 0.504054 |
| MmugDNA.14016.1.S1_at   | MmugDNA.14016.1 | 4.42  | 4.23  | 0.07 | 0.21 | 1.14  | 0.332799 | 0.18113  | 0.61438  | 0.457582 |
| MmugDNA.14017.1.S1_at   | MmugDNA.14017.1 | 6.34  | 6.19  | 0.34 | 0.19 | 1.11  | 0.474845 | 0.328521 | 0.717692 | 0.578137 |

|                         |                 |       |       |      |      |       |          |          |          |          |
|-------------------------|-----------------|-------|-------|------|------|-------|----------|----------|----------|----------|
| MmugDNA.14018.1.S1_at   | MmugDNA.14018.1 | 5.09  | 4.7   | 0.31 | 0.22 | 1.3   | 0.210573 | 0.242222 | 0.5081   | 0.51267  |
| MmugDNA.14019.1.S1_at   | MmugDNA.14019.1 | 7     | 4.97  | 1.18 | 0.19 | 4.08  | 0.038473 | 0.025051 | 0.2521   | 0.198316 |
| MmugDNA.1402.1.S1_at    | MmugDNA.1402.1  | 4.83  | 4.72  | 1.15 | 0.15 | 1.08  | 0.366168 | 0.345089 | 0.640626 | 0.590354 |
| MmugDNA.14021.1.S1_at   | MmugDNA.14021.1 | 4.77  | 4.97  | 0.49 | 0.15 | -1.15 | 0.618497 | 0.812663 | 0.810674 | 0.891778 |
| MmugDNA.14023.1.S1_at   | MmugDNA.14023.1 | 12.77 | 12.73 | 0.08 | 0.1  | 1.03  | 0.23479  | 0.363729 | 0.532874 | 0.604138 |
| MmugDNA.14024.1.S1_at   | MmugDNA.14024.1 | 3.88  | 4.09  | 0.13 | 0.2  | -1.16 | 0.136558 | 0.047848 | 0.421212 | 0.263679 |
| MmugDNA.14025.1.S1_at   | MmugDNA.14025.1 | 4.7   | 4.64  | 0.04 | 0.1  | 1.05  | 0.280934 | 0.393264 | 0.571853 | 0.626183 |
| MmugDNA.14026.1.S1_at   | MmugDNA.14026.1 | 5.19  | 5.42  | 0.33 | 0.12 | -1.17 | 0.106505 | 0.074527 | 0.380675 | 0.318173 |
| MmugDNA.14027.1.S1_at   | MmugDNA.14027.1 | 3.69  | 3.4   | 0.41 | 0.18 | 1.23  | 0.328343 | 0.496544 | 0.610675 | 0.696119 |
| MmugDNA.14028.1.S1_at   | MmugDNA.14028.1 | 3.68  | 3.7   | 0.02 | 0.13 | -1.01 | 0.677557 | 0.745419 | 0.846252 | 0.852384 |
| MmugDNA.14029.1.S1_at   | MmugDNA.14029.1 | 4.42  | 4.4   | 0.09 | 0.08 | 1.01  | 0.668386 | 0.594634 | 0.84081  | 0.758623 |
| MmugDNA.1403.1.S1_at    | MmugDNA.1403.1  | 7.17  | 7.61  | 0.02 | 0.09 | -1.35 | 0.001134 | 0.270897 | 0.077306 | 0.536026 |
| MmugDNA.14030.1.S1_at   | MmugDNA.14030.1 | 5.09  | 5.13  | 0.36 | 0.08 | -1.03 | 0.647405 | 0.757844 | 0.828696 | 0.859085 |
| MmugDNA.14032.1.S1_at   | MmugDNA.14032.1 | 5.37  | 5.12  | 0.8  | 0.17 | 1.19  | 0.26969  | 0.340905 | 0.562001 | 0.587035 |
| MmugDNA.14034.1.S1_at   | MmugDNA.14034.1 | 3.62  | 3.67  | 0.62 | 0.08 | -1.04 | 0.446372 | 0.595887 | 0.698625 | 0.759258 |
| MmugDNA.14035.1.S1_at   | MmugDNA.14035.1 | 4.31  | 4.6   | 0.12 | 0.14 | -1.22 | 0.050957 | 0.038796 | 0.283415 | 0.241916 |
| MmugDNA.14036.1.S1_at   | MmugDNA.14036.1 | 4.3   | 4.14  | 0.11 | 0.13 | 1.12  | 0.322601 | 0.631541 | 0.606572 | 0.782845 |
| MmugDNA.14038.1.S1_at   | MmugDNA.14038.1 | 5.64  | 5.49  | 0.21 | 0.09 | 1.11  | 0.184995 | 0.068684 | 0.4811   | 0.308653 |
| MmugDNA.14039.1.S1_at   | MmugDNA.14039.1 | 5.68  | 5.63  | 0.55 | 0.58 | 1.03  | 0.382031 | 0.271547 | 0.65157  | 0.536547 |
| MmugDNA.1404.1.S1_at    | MmugDNA.1404.1  | 8.25  | 8.73  | 0.03 | 0.32 | -1.4  | 0.135469 | 0.61783  | 0.419375 | 0.773715 |
| MmugDNA.14040.1.S1_at   | MmugDNA.14040.1 | 3.64  | 3.64  | 0.03 | 0.06 | -1    | 0.588742 | 0.271806 | 0.791231 | 0.536577 |
| MmugDNA.14041.1.S1_at   | MmugDNA.14041.1 | 4.51  | 4.65  | 0.03 | 0.29 | -1.11 | 0.190829 | 0.093648 | 0.486998 | 0.350047 |
| MmugDNA.14042.1.S1_at   | MmugDNA.14042.1 | 7.75  | 8.68  | 0.5  | 0.26 | -1.9  | 0.197166 | 0.170911 | 0.494294 | 0.447561 |
| MmugDNA.14043.1.S1_at   | MmugDNA.14043.1 | 10.97 | 10.83 | 0.69 | 0.27 | 1.1   | 0.638785 | 0.847    | 0.823276 | 0.913045 |
| MmugDNA.14044.1.S1_at   | MmugDNA.14044.1 | 5.64  | 5.42  | 0.33 | 0.13 | 1.17  | 0.876751 | 0.975517 | 0.947299 | 0.986659 |
| MmugDNA.14047.1.S1_at   | MmugDNA.14047.1 | 4.57  | 4.36  | 0.24 | 0.07 | 1.16  | 0.172467 | 0.107851 | 0.466621 | 0.370945 |
| MmugDNA.14049.1.S1_at   | MmugDNA.14049.1 | 3.89  | 3.7   | 0.72 | 0.24 | 1.14  | 0.449627 | 0.615369 | 0.700971 | 0.771962 |
| MmugDNA.1405.1.S1_at    | MmugDNA.1405.1  | 6.72  | 6.57  | 1.21 | 0.1  | 1.11  | 0.720146 | 0.833556 | 0.867967 | 0.904566 |
| MmugDNA.14050.1.S1_at   | MmugDNA.14050.1 | 5.23  | 5.38  | 0.06 | 0.09 | -1.11 | 0.060132 | 0.107367 | 0.302405 | 0.370219 |
| MmugDNA.14051.1.S1_at   | MmugDNA.14051.1 | 5.92  | 5.93  | 0.24 | 0.38 | -1.01 | 0.433745 | 0.357961 | 0.689165 | 0.59955  |
| MmugDNA.14053.1.S1_at   | MmugDNA.14053.1 | 6.67  | 6.61  | 0.86 | 0.09 | 1.04  | 0.491623 | 0.725464 | 0.729331 | 0.841043 |
| MmugDNA.14055.1.S1_at   | MmugDNA.14055.1 | 7.69  | 7.35  | 0.17 | 0.24 | 1.26  | 0.051475 | 0.241917 | 0.284348 | 0.512489 |
| MmugDNA.14056.1.S1_at   | MmugDNA.14056.1 | 6.52  | 6.55  | 0.1  | 0.05 | -1.02 | 0.770271 | 0.887411 | 0.894561 | 0.935867 |
| MmugDNA.14057.1.S1_at   | MmugDNA.14057.1 | 4.04  | 4.1   | 0.17 | 0.08 | -1.04 | 0.899057 | 0.321374 | 0.957029 | 0.573207 |
| MmugDNA.14058.1.S1_at   | MmugDNA.14058.1 | 7.4   | 8.45  | 0.02 | 0.16 | -2.07 | 0.000491 | 0.02118  | 0.068271 | 0.182297 |
| MmugDNA.14059.1.S1_at   | MmugDNA.14059.1 | 10.27 | 10.54 | 0.03 | 0.04 | -1.21 | 0.000613 | 0.114785 | 0.070727 | 0.381311 |
| MmugDNA.1406.1.S1_at    | MmugDNA.1406.1  | 8.57  | 7.73  | 0.23 | 0.14 | 1.78  | 0.015706 | 0.021891 | 0.177791 | 0.185194 |
| MmugDNA.14060.1.S1_at   | MmugDNA.14060.1 | 6.89  | 6.24  | 0.27 | 0.09 | 1.56  | 0.025231 | 0.052743 | 0.211843 | 0.275315 |
| MmugDNA.22926.1.S1_s_at | MmugDNA.22926.1 | 11.28 | 11.49 | 0.11 | 0.06 | -1.16 | 0.103889 | 0.104622 | 0.377205 | 0.365941 |
| MmugDNA.14063.1.S1_at   | MmugDNA.14063.1 | 3.63  | 3.4   | 0.11 | 0.04 | 1.17  | 0.076533 | 0.649442 | 0.334818 | 0.794887 |
| MmugDNA.14064.1.S1_at   | MmugDNA.14064.1 | 5.2   | 5.37  | 0.05 | 0.08 | -1.12 | 0.028418 | 0.29178  | 0.221039 | 0.552054 |
| MmugDNA.14065.1.S1_at   | MmugDNA.14065.1 | 6.95  | 7.45  | 0.66 | 0.26 | -1.41 | 0.927589 | 0.245577 | 0.969321 | 0.515348 |
| MmugDNA.14066.1.S1_at   | MmugDNA.14066.1 | 5.34  | 5.58  | 0.21 | 0.22 | -1.18 | 0.959954 | 0.996936 | 0.983565 | 0.99822  |

|                         |                 |       |       |      |      |       |          |          |          |          |
|-------------------------|-----------------|-------|-------|------|------|-------|----------|----------|----------|----------|
| MmugDNA.14069.1.S1_at   | MmugDNA.14069.1 | 4.62  | 4.64  | 0.19 | 0.05 | -1.01 | 0.683474 | 0.421732 | 0.849083 | 0.645254 |
| MmugDNA.1407.1.S1_at    | MmugDNA.1407.1  | 4.48  | 4.09  | 0.38 | 0.07 | 1.31  | 0.299441 | 0.347581 | 0.58771  | 0.592019 |
| MmugDNA.14070.1.S1_at   | MmugDNA.14070.1 | 4.19  | 4.56  | 0.2  | 0.18 | -1.29 | 0.106967 | 0.156321 | 0.38134  | 0.43161  |
| MmugDNA.14071.1.S1_at   | MmugDNA.14071.1 | 5.23  | 5.52  | 0.66 | 0.02 | -1.22 | 0.800228 | 0.910836 | 0.909999 | 0.949709 |
| MmugDNA.14072.1.S1_at   | MmugDNA.14072.1 | 3.33  | 3.45  | 0.11 | 0.06 | -1.08 | 0.327656 | 0.084649 | 0.610321 | 0.33618  |
| MmugDNA.14073.1.S1_at   | MmugDNA.14073.1 | 6.2   | 7.04  | 0.58 | 0.33 | -1.79 | 0.132343 | 0.280311 | 0.415679 | 0.543544 |
| MmugDNA.14074.1.S1_at   | MmugDNA.14074.1 | 4.29  | 4.46  | 0.51 | 0.1  | -1.13 | 0.665276 | 0.725951 | 0.839098 | 0.841316 |
| MmugDNA.14077.1.S1_at   | MmugDNA.14077.1 | 4.56  | 4.6   | 0.15 | 0.39 | -1.03 | 0.736179 | 0.736044 | 0.877285 | 0.847309 |
| MmugDNA.14079.1.S1_at   | MmugDNA.14079.1 | 6.44  | 6.65  | 0.11 | 0.09 | -1.16 | 0.04956  | 0.233737 | 0.280028 | 0.50505  |
| MmugDNA.1408.1.S1_at    | MmugDNA.1408.1  | 9.17  | 8.8   | 0.19 | 0.14 | 1.29  | 0.044618 | 0.35085  | 0.268404 | 0.594572 |
| MmugDNA.14082.1.S1_at   | MmugDNA.14082.1 | 6.91  | 6.79  | 0    | 0.1  | 1.09  | 0.127074 | 0.063657 | 0.408596 | 0.298815 |
| MmugDNA.33264.1.S1_at   | MmugDNA.33264.1 | 5.32  | 5.22  | 0.64 | 0.31 | 1.08  | 0.501672 | 0.583056 | 0.735487 | 0.75153  |
| MmugDNA.33264.1.S1_s_at | MmugDNA.33264.1 | 12.5  | 12.52 | 0.2  | 0.04 | -1.01 | 0.320487 | 0.331234 | 0.605112 | 0.579978 |
| MmugDNA.14084.1.S1_at   | MmugDNA.14084.1 | 2.96  | 3     | 0.36 | 0.21 | -1.02 | 0.517789 | 0.34926  | 0.746932 | 0.593267 |
| MmugDNA.14085.1.S1_at   | MmugDNA.14085.1 | 10.26 | 10.2  | 0.17 | 0.02 | 1.05  | 0.151826 | 0.120744 | 0.441295 | 0.389579 |
| MmugDNA.14086.1.S1_at   | MmugDNA.14086.1 | 5.46  | 7.42  | 1.17 | 0.55 | -3.89 | 0.054753 | 0.251918 | 0.290791 | 0.520632 |
| MmugDNA.14087.1.S1_at   | MmugDNA.14087.1 | 7.73  | 7.76  | 0.17 | 0.16 | -1.02 | 0.664023 | 0.86972  | 0.838215 | 0.926114 |
| MmugDNA.1409.1.S1_at    | MmugDNA.1409.1  | 6.27  | 6.21  | 0.56 | 0.09 | 1.05  | 0.698705 | 0.641583 | 0.856789 | 0.789618 |
| MmugDNA.37584.1.S1_s_at | MmugDNA.37584.1 | 9.13  | 9.18  | 0.13 | 0.05 | -1.03 | 0.476329 | 0.900202 | 0.718743 | 0.943313 |
| MmugDNA.14092.1.S1_s_at | MmugDNA.14092.1 | 9.05  | 8.87  | 0.56 | 0.1  | 1.13  | 0.649229 | 0.703038 | 0.829606 | 0.827866 |
| MmugDNA.14094.1.S1_at   | MmugDNA.14094.1 | 5.34  | 5.16  | 0.11 | 0    | 1.13  | 0.16577  | 0.237758 | 0.458756 | 0.50826  |
| MmugDNA.14095.1.S1_at   | MmugDNA.14095.1 | 3.5   | 3.53  | 0.01 | 0.01 | -1.02 | 0.062588 | 0.465011 | 0.306862 | 0.675534 |
| MmugDNA.14097.1.S1_at   | MmugDNA.14097.1 | 5.31  | 5.31  | 0.02 | 0.09 | -1    | 0.964383 | 0.99174  | 0.985636 | 0.995392 |
| MmugDNA.14098.1.S1_at   | MmugDNA.14098.1 | 10.95 | 11.52 | 0.2  | 0.2  | -1.48 | 0.058111 | 0.056112 | 0.298185 | 0.282751 |
| MmugDNA.141.1.S1_at     | MmugDNA.141.1   | 3.77  | 3.93  | 0.26 | 0.18 | -1.12 | 0.777574 | 0.807234 | 0.898391 | 0.889014 |
| MmugDNA.14100.1.S1_at   | MmugDNA.14100.1 | 9.75  | 9.13  | 0.62 | 0.13 | 1.54  | 0.1362   | 0.200448 | 0.420589 | 0.474826 |
| MmugDNA.14101.1.S1_at   | MmugDNA.14101.1 | 11.02 | 10.89 | 0.08 | 0.07 | 1.1   | 0.092641 | 0.048955 | 0.360982 | 0.266062 |
| MmugDNA.14102.1.S1_at   | MmugDNA.14102.1 | 3.67  | 3.32  | 0.2  | 0.19 | 1.28  | 0.084026 | 0.046802 | 0.347198 | 0.261073 |
| MmugDNA.14103.1.S1_at   | MmugDNA.14103.1 | 3.39  | 3.39  | 0.19 | 0.1  | 1     | 0.247532 | 0.342845 | 0.542977 | 0.588712 |
| MmugDNA.14104.1.S1_at   | MmugDNA.14104.1 | 10.69 | 10.94 | 0.41 | 0.18 | -1.19 | 0.711503 | 0.726181 | 0.863886 | 0.84147  |
| MmugDNA.14105.1.S1_at   | MmugDNA.14105.1 | 3.35  | 3.38  | 0.04 | 0.12 | -1.02 | 0.550906 | 0.076383 | 0.76817  | 0.321368 |
| MmugDNA.14106.1.S1_at   | MmugDNA.14106.1 | 4.75  | 4.98  | 0.39 | 0.09 | -1.17 | 0.829712 | 0.861078 | 0.925023 | 0.920972 |
| MmugDNA.14107.1.S1_at   | MmugDNA.14107.1 | 4.66  | 4.54  | 0.13 | 0.12 | 1.08  | 0.149487 | 0.160988 | 0.438403 | 0.437116 |
| MmugDNA.14108.1.S1_at   | MmugDNA.14108.1 | 3.84  | 3.9   | 0.09 | 0    | -1.04 | 0.459855 | 0.329159 | 0.707907 | 0.578548 |
| MmugDNA.1411.1.S1_at    | MmugDNA.1411.1  | 3.7   | 3.72  | 0.13 | 0.04 | -1.01 | 0.385098 | 0.666665 | 0.653973 | 0.804716 |
| MmugDNA.14111.1.S1_at   | MmugDNA.14111.1 | 5.98  | 5.79  | 0.53 | 0.02 | 1.14  | 0.180549 | 0.132853 | 0.475689 | 0.404544 |
| MmugDNA.14112.1.S1_at   | MmugDNA.14112.1 | 10.88 | 10.71 | 0.43 | 0.07 | 1.13  | 0.854906 | 0.153615 | 0.93686  | 0.428341 |
| MmugDNA.14113.1.S1_at   | MmugDNA.14113.1 | 4.83  | 4.81  | 0.21 | 0.03 | 1.02  | 0.869307 | 0.759936 | 0.943687 | 0.860511 |
| MmugDNA.14114.1.S1_at   | MmugDNA.14114.1 | 5.29  | 5.08  | 1    | 0.23 | 1.15  | 0.203406 | 0.255072 | 0.501192 | 0.52317  |
| MmugDNA.14115.1.S1_at   | MmugDNA.14115.1 | 5.03  | 4.99  | 0.19 | 0.02 | 1.03  | 0.233499 | 0.40981  | 0.53162  | 0.636825 |
| MmugDNA.14116.1.S1_at   | MmugDNA.14116.1 | 6.2   | 6.07  | 0.02 | 0.11 | 1.09  | 0.119164 | 0.318786 | 0.396724 | 0.571379 |
| MmugDNA.14117.1.S1_at   | MmugDNA.14117.1 | 5.13  | 4.95  | 0.06 | 0.06 | 1.14  | 0.038479 | 0.379783 | 0.2521   | 0.616576 |
| MmugDNA.14119.1.S1_at   | MmugDNA.14119.1 | 3.49  | 3.47  | 0.11 | 0.09 | 1.02  | 0.36047  | 0.237521 | 0.636035 | 0.508178 |

|                         |                 |       |       |      |      |       |          |          |          |          |
|-------------------------|-----------------|-------|-------|------|------|-------|----------|----------|----------|----------|
| MmugDNA.14120.1.S1_at   | MmugDNA.14120.1 | 10.66 | 10.61 | 0.51 | 0.13 | 1.04  | 0.490434 | 0.696843 | 0.728506 | 0.823975 |
| MmugDNA.14122.1.S1_at   | MmugDNA.14122.1 | 5.63  | 5.72  | 0.12 | 0.06 | -1.06 | 0.642399 | 0.099384 | 0.825599 | 0.357673 |
| MmugDNA.14125.1.S1_at   | MmugDNA.14125.1 | 5.38  | 5.88  | 0.17 | 0.32 | -1.41 | 0.057689 | 0.004692 | 0.297451 | 0.095363 |
| MmugDNA.14126.1.S1_at   | MmugDNA.14126.1 | 8.12  | 7.7   | 0.4  | 0.06 | 1.34  | 0.243989 | 0.017423 | 0.540748 | 0.167044 |
| MmugDNA.14127.1.S1_at   | MmugDNA.14127.1 | 6.45  | 6.48  | 0.1  | 0.04 | -1.02 | 0.844429 | 0.892498 | 0.931888 | 0.938696 |
| MmugDNA.14129.1.S1_at   | MmugDNA.14129.1 | 11.75 | 11.56 | 0.28 | 0.17 | 1.14  | 0.582999 | 0.807463 | 0.787708 | 0.889121 |
| MmugDNA.14129.1.S1_x_at | MmugDNA.14129.1 | 12.04 | 11.88 | 0.27 | 0.15 | 1.12  | 0.690679 | 0.880274 | 0.852126 | 0.931571 |
| MmugDNA.1413.1.S1_at    | MmugDNA.1413.1  | 6.53  | 6.24  | 0.92 | 0.29 | 1.22  | 0.318717 | 0.297216 | 0.603452 | 0.556067 |
| MmugDNA.14130.1.S1_at   | MmugDNA.14130.1 | 11.26 | 11.53 | 0.29 | 0.06 | -1.21 | 0.173702 | 0.041287 | 0.468149 | 0.247995 |
| MmugDNA.14131.1.S1_at   | MmugDNA.14131.1 | 7.46  | 7.32  | 0.16 | 0.06 | 1.1   | 0.320575 | 0.526089 | 0.605112 | 0.715376 |
| MmugDNA.14133.1.S1_at   | MmugDNA.14133.1 | 6.89  | 7.19  | 0.01 | 0.11 | -1.23 | 0.010619 | 0.001232 | 0.152801 | 0.05478  |
| MmugDNA.14134.1.S1_at   | MmugDNA.14134.1 | 6.98  | 6.94  | 0.11 | 0.05 | 1.03  | 0.172046 | 0.135728 | 0.466112 | 0.407917 |
| MmugDNA.14135.1.S1_at   | MmugDNA.14135.1 | 6.55  | 5.78  | 1.05 | 0.4  | 1.7   | 0.38904  | 0.427328 | 0.656975 | 0.649175 |
| MmugDNA.14136.1.S1_at   | MmugDNA.14136.1 | 3.95  | 5.05  | 0.5  | 0.62 | -2.15 | 0.108783 | 0.039214 | 0.383665 | 0.243173 |
| MmugDNA.14138.1.S1_at   | MmugDNA.14138.1 | 5     | 4.69  | 0.24 | 0.1  | 1.25  | 0.059044 | 0.103613 | 0.30011  | 0.36439  |
| MmugDNA.14140.1.S1_at   | MmugDNA.14140.1 | 4.65  | 4.56  | 0.21 | 0.05 | 1.06  | 0.164631 | 0.198617 | 0.457714 | 0.473391 |
| MmugDNA.14141.1.S1_at   | MmugDNA.14141.1 | 3.81  | 3.86  | 0.15 | 0.12 | -1.04 | 0.918614 | 0.462092 | 0.965313 | 0.673537 |
| MmugDNA.14142.1.S1_at   | MmugDNA.14142.1 | 5.22  | 5.19  | 0.28 | 0.19 | 1.03  | 0.49712  | 0.452216 | 0.73289  | 0.666957 |
| MmugDNA.14143.1.S1_at   | MmugDNA.14143.1 | 5.42  | 4.72  | 0.34 | 0.21 | 1.62  | 0.107463 | 0.116467 | 0.382148 | 0.383671 |
| MmugDNA.14144.1.S1_s_at | MmugDNA.14144.1 | 6.36  | 6.57  | 0.13 | 0.08 | -1.16 | 0.049297 | 0.051229 | 0.279474 | 0.271799 |
| MmugDNA.14148.1.S1_at   | MmugDNA.14148.1 | 3.97  | 4.07  | 0.22 | 0.02 | -1.08 | 0.215291 | 0.166454 | 0.512975 | 0.442903 |
| MmugDNA.14149.1.S1_at   | MmugDNA.14149.1 | 6.56  | 6.56  | 0.08 | 0.07 | -1    | 0.971455 | 0.067424 | 0.98857  | 0.305664 |
| MmugDNA.1415.1.S1_at    | MmugDNA.1415.1  | 4.43  | 4.45  | 0.4  | 0.04 | -1.01 | 0.442725 | 0.4955   | 0.696133 | 0.695527 |
| MmugDNA.14150.1.S1_at   | MmugDNA.14150.1 | 6.91  | 6.94  | 0.14 | 0.08 | -1.02 | 0.28516  | 0.031908 | 0.57512  | 0.221018 |
| MmugDNA.14150.1.S1_s_at | MmugDNA.14150.1 | 7.5   | 7.72  | 0.1  | 0.08 | -1.16 | 0.040667 | 0.583107 | 0.258252 | 0.751559 |
| MmugDNA.14152.1.S1_at   | MmugDNA.14152.1 | 7.92  | 7.85  | 0.69 | 0.32 | 1.05  | 0.498445 | 0.440905 | 0.733645 | 0.659138 |
| MmugDNA.14153.1.S1_at   | MmugDNA.14153.1 | 10.75 | 10.8  | 0.33 | 0.06 | -1.04 | 0.810398 | 0.92851  | 0.915074 | 0.95936  |
| MmugDNA.14156.1.S1_at   | MmugDNA.14156.1 | 6.29  | 6.24  | 0.11 | 0.16 | 1.04  | 0.635831 | 0.644596 | 0.821718 | 0.791686 |
| MmugDNA.14157.1.S1_at   | MmugDNA.14157.1 | 5.59  | 5.28  | 0.29 | 0.16 | 1.24  | 0.108151 | 0.148684 | 0.382895 | 0.423201 |
| MmugDNA.14158.1.S1_at   | MmugDNA.14158.1 | 11.63 | 11.63 | 0.13 | 0.01 | 1     | 0.983513 | 0.005763 | 0.99383  | 0.104378 |
| MmugDNA.14158.1.S1_s_at | MmugDNA.14158.1 | 11.86 | 11.89 | 0.09 | 0.03 | -1.02 | 0.873313 | 0.000426 | 0.945619 | 0.038359 |
| MmugDNA.14159.1.S1_at   | MmugDNA.14159.1 | 5.23  | 5.22  | 0.72 | 0.17 | 1     | 0.497926 | 0.664898 | 0.733373 | 0.803709 |
| MmugDNA.14160.1.S1_at   | MmugDNA.14160.1 | 10.87 | 11.03 | 0.11 | 0.17 | -1.11 | 0.122316 | 0.211911 | 0.40112  | 0.485931 |
| MmugDNA.14161.1.S1_at   | MmugDNA.14161.1 | 3.55  | 3.59  | 0.09 | 0.13 | -1.02 | 0.299837 | 0.522566 | 0.588158 | 0.713227 |
| MmugDNA.14162.1.S1_at   | MmugDNA.14162.1 | 10.26 | 10.23 | 0.1  | 0.06 | 1.02  | 0.279345 | 0.642878 | 0.57071  | 0.790529 |
| MmugDNA.14162.1.S1_s_at | MmugDNA.14162.1 | 12.06 | 12.04 | 0.08 | 0.05 | 1.01  | 0.825574 | 0.21773  | 0.922496 | 0.491309 |
| MmugDNA.14163.1.S1_at   | MmugDNA.14163.1 | 9.32  | 9     | 0.13 | 0.26 | 1.25  | 0.050815 | 0.309448 | 0.283144 | 0.564979 |
| MmugDNA.14164.1.S1_at   | MmugDNA.14164.1 | 8.41  | 8.37  | 0.51 | 0.23 | 1.02  | 0.232856 | 0.481491 | 0.531142 | 0.686469 |
| MmugDNA.14165.1.S1_at   | MmugDNA.14165.1 | 6.1   | 5.86  | 0.44 | 0.07 | 1.18  | 0.498181 | 0.307274 | 0.733521 | 0.56352  |
| MmugDNA.14166.1.S1_at   | MmugDNA.14166.1 | 4.2   | 4.15  | 0.26 | 0.13 | 1.03  | 0.187195 | 0.16727  | 0.483367 | 0.443684 |
| MmugDNA.14167.1.S1_at   | MmugDNA.14167.1 | 6.37  | 6.31  | 0.36 | 0.11 | 1.04  | 0.91358  | 0.803711 | 0.963382 | 0.887094 |
| MmugDNA.14169.1.S1_at   | MmugDNA.14169.1 | 7.63  | 8.37  | 0.3  | 0.46 | -1.67 | 0.187633 | 0.0728   | 0.483874 | 0.315651 |
| MmugDNA.1417.1.S1_at    | MmugDNA.1417.1  | 9.74  | 9.75  | 0.29 | 0.17 | -1.01 | 0.840256 | 0.005689 | 0.929894 | 0.104021 |

|                         |                 |       |       |      |      |       |          |          |          |          |
|-------------------------|-----------------|-------|-------|------|------|-------|----------|----------|----------|----------|
| MmugDNA.14170.1.S1_at   | MmugDNA.14170.1 | 8.76  | 8.29  | 0.51 | 0.21 | 1.38  | 0.256906 | 0.385021 | 0.55141  | 0.620609 |
| MmugDNA.14173.1.S1_at   | MmugDNA.14173.1 | 4.34  | 4.46  | 0.31 | 0.11 | -1.09 | 0.75041  | 0.912392 | 0.88467  | 0.950641 |
| MmugDNA.14175.1.S1_at   | MmugDNA.14175.1 | 4.87  | 5.04  | 0.15 | 0.12 | -1.12 | 0.077147 | 0.189033 | 0.335779 | 0.464897 |
| MmugDNA.14176.1.S1_s_at | MmugDNA.14176.1 | 4.96  | 4.62  | 0.4  | 0.44 | 1.26  | 0.57792  | 0.420683 | 0.783846 | 0.64434  |
| MmugDNA.14179.1.S1_at   | MmugDNA.14179.1 | 5.35  | 5.07  | 0.12 | 0.27 | 1.21  | 0.186622 | 0.243291 | 0.48274  | 0.513356 |
| MmugDNA.1418.1.S1_at    | MmugDNA.1418.1  | 5.35  | 5.22  | 0.35 | 0.01 | 1.1   | 0.18145  | 0.19414  | 0.476903 | 0.469266 |
| MmugDNA.14180.1.S1_at   | MmugDNA.14180.1 | 3.76  | 3.77  | 0.16 | 0.13 | -1.01 | 0.208891 | 0.013322 | 0.506356 | 0.148042 |
| MmugDNA.14181.1.S1_at   | MmugDNA.14181.1 | 11.54 | 12.02 | 0.69 | 0.05 | -1.39 | 0.384253 | 0.391737 | 0.653292 | 0.625301 |
| MmugDNA.14182.1.S1_at   | MmugDNA.14182.1 | 5.14  | 5.03  | 0.3  | 0.5  | 1.08  | 0.832028 | 0.866579 | 0.926042 | 0.924174 |
| MmugDNA.14183.1.S1_at   | MmugDNA.14183.1 | 6.88  | 7.09  | 0.59 | 0.38 | -1.16 | 0.759316 | 0.906984 | 0.889659 | 0.947344 |
| MmugDNA.14184.1.S1_x_at | MmugDNA.14184.1 | 14.43 | 14.47 | 0.03 | 0.04 | -1.03 | 0.863264 | 0.724577 | 0.94057  | 0.840552 |
| MmugDNA.14186.1.S1_at   | MmugDNA.14186.1 | 5.18  | 4.76  | 0.52 | 0.08 | 1.34  | 0.227604 | 0.282334 | 0.525712 | 0.545076 |
| MmugDNA.14189.1.S1_at   | MmugDNA.14189.1 | 5.53  | 5.56  | 0.09 | 0.2  | -1.03 | 0.673388 | 0.521815 | 0.843815 | 0.712654 |
| MmugDNA.1419.1.S1_at    | MmugDNA.1419.1  | 6.86  | 7.19  | 0.17 | 0.31 | -1.25 | 0.062634 | 0.235858 | 0.306899 | 0.50704  |
| MmugDNA.14190.1.S1_at   | MmugDNA.14190.1 | 7.69  | 6.69  | 0.43 | 0.14 | 2     | 0.019464 | 0.023011 | 0.192357 | 0.189778 |
| MmugDNA.14191.1.S1_at   | MmugDNA.14191.1 | 10.32 | 11.65 | 0.29 | 0.17 | -2.52 | 0.004246 | 0.203809 | 0.111028 | 0.478081 |
| MmugDNA.14195.1.S1_at   | MmugDNA.14195.1 | 3.61  | 3.67  | 0.22 | 0.2  | -1.04 | 0.606773 | 0.768811 | 0.803313 | 0.86567  |
| MmugDNA.14196.1.S1_at   | MmugDNA.14196.1 | 3.64  | 3.58  | 0.06 | 0.05 | 1.04  | 0.11131  | 0.002083 | 0.387337 | 0.067486 |
| MmugDNA.14197.1.S1_at   | MmugDNA.14197.1 | 8.01  | 8.41  | 0.62 | 0.12 | -1.33 | 0.387119 | 0.503766 | 0.655426 | 0.701126 |
| MmugDNA.14198.1.S1_at   | MmugDNA.14198.1 | 6.36  | 6.63  | 0.32 | 0.22 | -1.21 | 0.215318 | 0.324978 | 0.513001 | 0.575512 |
| MmugDNA.14199.1.S1_at   | MmugDNA.14199.1 | 3.55  | 3.05  | 0.4  | 0.13 | 1.41  | 0.104384 | 0.070929 | 0.377773 | 0.312444 |
| MmugDNA.142.1.S1_at     | MmugDNA.142.1   | 4.84  | 4.82  | 0.25 | 0.07 | 1.02  | 0.952526 | 0.9926   | 0.980442 | 0.995715 |
| MmugDNA.1420.1.S1_s_at  | MmugDNA.1420.1  | 5.7   | 6.1   | 0.25 | 0.41 | -1.32 | 0.395582 | 0.020665 | 0.661945 | 0.180392 |
| MmugDNA.14200.1.S1_at   | MmugDNA.14200.1 | 2.96  | 3.15  | 0.09 | 0.07 | -1.14 | 0.097702 | 0.172741 | 0.368089 | 0.449252 |
| MmugDNA.14201.1.S1_at   | MmugDNA.14201.1 | 5.59  | 5.6   | 0.14 | 0.04 | -1.01 | 0.996128 | 0.422322 | 0.99851  | 0.645653 |
| MmugDNA.14202.1.S1_at   | MmugDNA.14202.1 | 6.61  | 6.64  | 0.3  | 0.14 | -1.02 | 0.511068 | 0.349836 | 0.742323 | 0.593595 |
| MmugDNA.14205.1.S1_at   | MmugDNA.14205.1 | 5.98  | 5.94  | 0.25 | 0.05 | 1.03  | 0.281878 | 0.3308   | 0.572738 | 0.579563 |
| MmugDNA.14207.1.S1_at   | MmugDNA.14207.1 | 5.17  | 5     | 0.44 | 0.28 | 1.13  | 0.770446 | 0.499348 | 0.894671 | 0.698217 |
| MmugDNA.14208.1.S1_at   | MmugDNA.14208.1 | 4.34  | 4.27  | 0.25 | 0.11 | 1.05  | 0.795812 | 0.104863 | 0.907711 | 0.366397 |
| MmugDNA.14212.1.S1_at   | MmugDNA.14212.1 | 6.06  | 6.14  | 0.25 | 0    | -1.06 | 0.190537 | 0.17891  | 0.486767 | 0.455241 |
| MmugDNA.14214.1.S1_at   | MmugDNA.14214.1 | 4.5   | 4.5   | 0.28 | 0.24 | -1    | 0.292018 | 0.164296 | 0.581449 | 0.440539 |
| MmugDNA.14215.1.S1_at   | MmugDNA.14215.1 | 7.89  | 8.68  | 0.17 | 0.11 | -1.73 | 0.003464 | 0.006725 | 0.103385 | 0.110963 |
| MmugDNA.14216.1.S1_at   | MmugDNA.14216.1 | 3.17  | 3.25  | 0.19 | 0.21 | -1.05 | 0.521621 | 0.031647 | 0.749394 | 0.220165 |
| MmugDNA.14217.1.S1_at   | MmugDNA.14217.1 | 5.79  | 5.68  | 0.1  | 0.16 | 1.08  | 0.233482 | 0.50392  | 0.53162  | 0.701193 |
| MmugDNA.14219.1.S1_at   | MmugDNA.14219.1 | 4.91  | 4.91  | 0.33 | 0.04 | 1     | 0.34459  | 0.37647  | 0.623904 | 0.614293 |
| MmugDNA.1422.1.S1_at    | MmugDNA.1422.1  | 3.1   | 2.97  | 0.09 | 0.07 | 1.1   | 0.250255 | 0.20579  | 0.544972 | 0.480072 |
| MmugDNA.14220.1.S1_s_at | MmugDNA.14220.1 | 5.28  | 5.2   | 0.11 | 0.1  | 1.06  | 0.409142 | 0.378857 | 0.671657 | 0.615818 |
| MmugDNA.14221.1.S1_at   | MmugDNA.14221.1 | 3.48  | 3.33  | 0.86 | 0.08 | 1.12  | 0.236079 | 0.305774 | 0.5337   | 0.562731 |
| MmugDNA.14222.1.S1_at   | MmugDNA.14222.1 | 3.55  | 3.56  | 0.13 | 0.2  | -1.01 | 0.835653 | 0.147721 | 0.927786 | 0.422007 |
| MmugDNA.14224.1.S1_at   | MmugDNA.14224.1 | 10.2  | 10.37 | 0.04 | 0.1  | -1.13 | 0.051791 | 0.517314 | 0.284933 | 0.709435 |
| MmugDNA.14225.1.S1_at   | MmugDNA.14225.1 | 3.33  | 3.05  | 0.06 | 0.17 | 1.21  | 0.059697 | 0.033738 | 0.30151  | 0.227376 |
| MmugDNA.14226.1.S1_at   | MmugDNA.14226.1 | 12.24 | 12.08 | 0.11 | 0.02 | 1.12  | 0.040081 | 0.027405 | 0.256783 | 0.206752 |
| MmugDNA.14228.1.S1_at   | MmugDNA.14228.1 | 5.24  | 5.24  | 0.19 | 0.08 | 1     | 0.436836 | 0.526829 | 0.691728 | 0.715627 |

|                         |                 |       |       |      |      |        |          |          |          |          |
|-------------------------|-----------------|-------|-------|------|------|--------|----------|----------|----------|----------|
| MmugDNA.14229.1.S1_at   | MmugDNA.14229.1 | 6.71  | 6.55  | 0.16 | 0.07 | 1.12   | 0.079276 | 0.181627 | 0.339237 | 0.458228 |
| MmugDNA.1423.1.S1_at    | MmugDNA.1423.1  | 4.96  | 5.07  | 0.26 | 0.17 | -1.08  | 0.181214 | 0.220971 | 0.476563 | 0.494389 |
| MmugDNA.14232.1.S1_at   | MmugDNA.14232.1 | 4.28  | 4.31  | 0.13 | 0.02 | -1.02  | 0.610778 | 0.656641 | 0.805939 | 0.799221 |
| MmugDNA.14235.1.S1_at   | MmugDNA.14235.1 | 9.08  | 9.49  | 0.59 | 0.11 | -1.33  | 0.395433 | 0.477049 | 0.661893 | 0.683188 |
| MmugDNA.14236.1.S1_at   | MmugDNA.14236.1 | 3.9   | 3.81  | 0    | 0.05 | 1.06   | 0.117036 | 0.158127 | 0.394182 | 0.433959 |
| MmugDNA.14237.1.S1_at   | MmugDNA.14237.1 | 6.36  | 6.35  | 0.1  | 0.05 | 1.01   | 0.796422 | 0.905406 | 0.908112 | 0.946384 |
| MmugDNA.14238.1.S1_at   | MmugDNA.14238.1 | 6.12  | 6.12  | 0.06 | 0.27 | 1      | 0.509079 | 0.432187 | 0.74088  | 0.652775 |
| MmugDNA.14239.1.S1_at   | MmugDNA.14239.1 | 6.27  | 6.02  | 0.04 | 0.14 | 1.19   | 0.146928 | 0.008445 | 0.434902 | 0.121922 |
| MmugDNA.14240.1.S1_at   | MmugDNA.14240.1 | 7.5   | 8.48  | 0.41 | 0.07 | -1.97  | 0.042905 | 0.205235 | 0.264232 | 0.479596 |
| MmugDNA.14241.1.S1_at   | MmugDNA.14241.1 | 5.21  | 5.07  | 0.08 | 0.1  | 1.1    | 0.128123 | 0.28647  | 0.410174 | 0.54785  |
| MmugDNA.14242.1.S1_at   | MmugDNA.14242.1 | 4.15  | 4.03  | 0.1  | 0.07 | 1.09   | 0.121689 | 0.178422 | 0.400504 | 0.454778 |
| MmugDNA.14244.1.S1_at   | MmugDNA.14244.1 | 11.36 | 11.54 | 0.1  | 0.14 | -1.14  | 0.283457 | 0.523323 | 0.573857 | 0.713653 |
| MmugDNA.4378.1.S1_s_at  | MmugDNA.4378.1  | 8.48  | 8.23  | 0.28 | 0.1  | 1.19   | 0.207386 | 0.161782 | 0.505111 | 0.437876 |
| MmugDNA.14247.1.S1_at   | MmugDNA.14247.1 | 8.18  | 8.04  | 0.18 | 0.03 | 1.11   | 0.405183 | 0.313362 | 0.668706 | 0.567811 |
| MmugDNA.14248.1.S1_at   | MmugDNA.14248.1 | 5.91  | 5.87  | 0.29 | 0.05 | 1.03   | 0.667944 | 0.84818  | 0.840528 | 0.913817 |
| MmugDNA.1425.1.S1_at    | MmugDNA.1425.1  | 11.77 | 10.14 | 0.25 | 0.77 | 3.09   | 0.068824 | 0.440056 | 0.32045  | 0.658651 |
| MmugDNA.14250.1.S1_at   | MmugDNA.14250.1 | 10.34 | 10.15 | 0.05 | 0.02 | 1.15   | 0.003754 | 0.001698 | 0.106678 | 0.062399 |
| MmugDNA.14251.1.S1_at   | MmugDNA.14251.1 | 3.57  | 3.42  | 0.06 | 0.07 | 1.11   | 0.076875 | 0.357729 | 0.335339 | 0.599352 |
| MmugDNA.14252.1.S1_at   | MmugDNA.14252.1 | 6.52  | 6.31  | 0.24 | 0.19 | 1.16   | 0.252044 | 0.135111 | 0.546696 | 0.407128 |
| MmugDNA.14254.1.S1_at   | MmugDNA.14254.1 | 7.24  | 7.08  | 0.07 | 0.16 | 1.12   | 0.633524 | 0.889026 | 0.820437 | 0.936779 |
| MmugDNA.14259.1.S1_at   | MmugDNA.14259.1 | 9.91  | 9.33  | 0.27 | 0.05 | 1.49   | 0.015766 | 0.199124 | 0.177937 | 0.473727 |
| MmugDNA.14262.1.S1_at   | MmugDNA.14262.1 | 4.82  | 4.54  | 0.11 | 0.21 | 1.21   | 0.318484 | 0.233574 | 0.603161 | 0.50492  |
| MmugDNA.14263.1.S1_at   | MmugDNA.14263.1 | 12.06 | 11.92 | 0.02 | 0.15 | 1.1    | 0.138084 | 0.001294 | 0.423226 | 0.055585 |
| MmugDNA.14264.1.S1_at   | MmugDNA.14264.1 | 3.05  | 3.1   | 0.15 | 0.23 | -1.03  | 0.907423 | 0.988691 | 0.960894 | 0.993595 |
| MmugDNA.14265.1.S1_at   | MmugDNA.14265.1 | 4.54  | 4.39  | 0.48 | 0.09 | 1.11   | 0.405227 | 0.594977 | 0.668717 | 0.758829 |
| MmugDNA.14266.1.S1_at   | MmugDNA.14266.1 | 9.35  | 8.89  | 0.13 | 0.14 | 1.37   | 0.026545 | 0.085959 | 0.216097 | 0.338116 |
| MmugDNA.14267.1.S1_at   | MmugDNA.14267.1 | 4.24  | 6.07  | 0.88 | 0.22 | -3.56  | 0.06456  | 0.249758 | 0.310686 | 0.518876 |
| MmugDNA.14269.1.S1_at   | MmugDNA.14269.1 | 3.77  | 3.64  | 0.06 | 0.13 | 1.1    | 0.128199 | 0.368551 | 0.410227 | 0.608079 |
| MmugDNA.1427.1.S1_at    | MmugDNA.1427.1  | 4.52  | 4.45  | 0.53 | 0.29 | 1.05   | 0.759644 | 0.7876   | 0.889819 | 0.877111 |
| MmugDNA.14270.1.S1_at   | MmugDNA.14270.1 | 3.11  | 3.04  | 0.47 | 0.05 | 1.05   | 0.280702 | 0.21693  | 0.571782 | 0.490566 |
| MmugDNA.14271.1.S1_at   | MmugDNA.14271.1 | 3.81  | 3.66  | 0.22 | 0.07 | 1.11   | 0.260057 | 0.221349 | 0.55424  | 0.494644 |
| MmugDNA.14273.1.S1_at   | MmugDNA.14273.1 | 4.95  | 4.86  | 0.14 | 0.07 | 1.06   | 0.289067 | 0.366891 | 0.578735 | 0.606566 |
| MmugDNA.14274.1.S1_at   | MmugDNA.14274.1 | 4.38  | 4.22  | 0.56 | 0.1  | 1.11   | 0.407758 | 0.768771 | 0.670757 | 0.865653 |
| MmugDNA.14275.1.S1_at   | MmugDNA.14275.1 | 3.41  | 3.06  | 0.43 | 0.85 | 1.28   | 0.931891 | 0.702074 | 0.971398 | 0.827304 |
| MmugDNA.14276.1.S1_at   | MmugDNA.14276.1 | 4.45  | 4.31  | 0.14 | 0.04 | 1.1    | 0.122663 | 0.275474 | 0.401475 | 0.539697 |
| MmugDNA.14277.1.S1_at   | MmugDNA.14277.1 | 4.55  | 5.61  | 0.75 | 0.1  | -2.07  | 0.062604 | 0.31088  | 0.306866 | 0.565881 |
| MmugDNA.14278.1.S1_at   | MmugDNA.14278.1 | 5.29  | 5.74  | 0.2  | 0.15 | -1.36  | 0.084269 | 0.079981 | 0.347682 | 0.327352 |
| MmugDNA.14279.1.S1_at   | MmugDNA.14279.1 | 5.02  | 5.12  | 0.42 | 0.48 | -1.07  | 0.20963  | 0.370391 | 0.507107 | 0.609478 |
| MmugDNA.1428.1.S1_at    | MmugDNA.1428.1  | 11.85 | 12.08 | 0.15 | 0.16 | -1.18  | 0.178403 | 0.054535 | 0.473151 | 0.279042 |
| MmugDNA.14280.1.S1_at   | MmugDNA.14280.1 | 12.42 | 11.05 | 0.38 | 0.1  | 2.6    | 0.003191 | 0.017826 | 0.101477 | 0.168645 |
| MmugDNA.14281.1.S1_at   | MmugDNA.14281.1 | 5.18  | 5.33  | 0.14 | 0.1  | -1.11  | 0.130395 | 0.0722   | 0.41275  | 0.31474  |
| MmugDNA.14281.1.S1_s_at | MmugDNA.14281.1 | 10.6  | 10.54 | 0.18 | 0.1  | 1.05   | 0.804309 | 0.196585 | 0.912045 | 0.471608 |
| MmugDNA.14283.1.S1_at   | MmugDNA.14283.1 | 4.76  | 8.87  | 1.93 | 0.38 | -17.25 | 0.069136 | 0.304646 | 0.321027 | 0.561859 |

|                         |                 |       |       |      |      |        |          |          |          |          |
|-------------------------|-----------------|-------|-------|------|------|--------|----------|----------|----------|----------|
| MmugDNA.14284.1.S1_at   | MmugDNA.14284.1 | 8.3   | 9.3   | 0.53 | 0.06 | -2.01  | 0.013439 | 0.01219  | 0.16669  | 0.14287  |
| MmugDNA.14286.1.S1_at   | MmugDNA.14286.1 | 11.9  | 11.98 | 0.21 | 0.1  | -1.06  | 0.470793 | 0.147267 | 0.715134 | 0.421464 |
| MmugDNA.14288.1.S1_at   | MmugDNA.14288.1 | 9.97  | 9.29  | 0.13 | 0.08 | 1.6    | 0.001757 | 0.000934 | 0.085202 | 0.048962 |
| MmugDNA.1429.1.S1_at    | MmugDNA.1429.1  | 11.18 | 11.04 | 0.15 | 0.11 | 1.1    | 0.957557 | 0.116467 | 0.982588 | 0.383671 |
| MmugDNA.14291.1.S1_at   | MmugDNA.14291.1 | 7.02  | 7.02  | 0.16 | 0.07 | 1      | 0.630473 | 0.015519 | 0.818647 | 0.158053 |
| MmugDNA.14292.1.S1_at   | MmugDNA.14292.1 | 7.7   | 7.65  | 0.29 | 0.19 | 1.04   | 0.871585 | 0.106007 | 0.944731 | 0.36838  |
| MmugDNA.14294.1.S1_at   | MmugDNA.14294.1 | 5.14  | 5.25  | 0.22 | 0.03 | -1.07  | 0.845374 | 0.960193 | 0.932457 | 0.977425 |
| MmugDNA.14295.1.S1_at   | MmugDNA.14295.1 | 5.81  | 5.5   | 0.42 | 0.35 | 1.24   | 0.905629 | 0.965603 | 0.960065 | 0.980751 |
| MmugDNA.14296.1.S1_at   | MmugDNA.14296.1 | 8.83  | 8.51  | 0.46 | 0.17 | 1.26   | 0.257264 | 0.026893 | 0.551586 | 0.205149 |
| MmugDNA.14299.1.S1_at   | MmugDNA.14299.1 | 10    | 9.93  | 0.17 | 0.13 | 1.05   | 0.827923 | 0.302126 | 0.923804 | 0.560071 |
| MmugDNA.143.1.S1_at     | MmugDNA.143.1   | 5.17  | 4.59  | 0.29 | 0.25 | 1.49   | 0.030606 | 0.026922 | 0.227883 | 0.205227 |
| MmugDNA.1430.1.S1_at    | MmugDNA.1430.1  | 5.07  | 5.03  | 0.12 | 0.06 | 1.03   | 0.844454 | 0.240463 | 0.931888 | 0.51108  |
| MmugDNA.14301.1.S1_at   | MmugDNA.14301.1 | 12.12 | 12.05 | 0.13 | 0.07 | 1.05   | 0.33498  | 0.467395 | 0.615998 | 0.677085 |
| MmugDNA.14302.1.S1_at   | MmugDNA.14302.1 | 9.81  | 10.02 | 0.07 | 0.07 | -1.16  | 0.057342 | 0.229237 | 0.296814 | 0.501527 |
| MmugDNA.14304.1.S1_x_at | MmugDNA.14304.1 | 3.02  | 2.99  | 0.04 | 0.03 | 1.02   | 0.408661 | 0.002038 | 0.671406 | 0.066885 |
| MmugDNA.14305.1.S1_at   | MmugDNA.14305.1 | 6.73  | 6.41  | 0.16 | 0.07 | 1.25   | 0.01828  | 0.004054 | 0.1882   | 0.090288 |
| MmugDNA.14309.1.S1_at   | MmugDNA.14309.1 | 9.51  | 9.95  | 0.48 | 0.3  | -1.35  | 0.369363 | 0.157162 | 0.642818 | 0.432616 |
| MmugDNA.1431.1.S1_at    | MmugDNA.1431.1  | 3.84  | 3.91  | 0.43 | 0.11 | -1.06  | 0.99915  | 0.94107  | 0.999708 | 0.966632 |
| MmugDNA.33663.1.S1_s_at | MmugDNA.33663.1 | 4.59  | 4.54  | 0.01 | 0.04 | 1.03   | 0.026631 | 0.561413 | 0.216412 | 0.737397 |
| MmugDNA.14311.1.S1_at   | MmugDNA.14311.1 | 5.44  | 5.41  | 0.09 | 0.01 | 1.02   | 0.269661 | 0.621315 | 0.562001 | 0.775946 |
| MmugDNA.14312.1.S1_at   | MmugDNA.14312.1 | 4.95  | 5.04  | 0.07 | 0.14 | -1.06  | 0.972748 | 0.836161 | 0.989086 | 0.9063   |
| MmugDNA.14313.1.S1_at   | MmugDNA.14313.1 | 7.37  | 7.35  | 0.74 | 0.29 | 1.01   | 0.937171 | 0.783186 | 0.973667 | 0.874547 |
| MmugDNA.14315.1.S1_at   | MmugDNA.14315.1 | 4.54  | 5.06  | 0.29 | 0.37 | -1.43  | 0.073917 | 0.190906 | 0.329924 | 0.466269 |
| MmugDNA.14316.1.S1_at   | MmugDNA.14316.1 | 5.13  | 5.19  | 0.07 | 0.11 | -1.04  | 0.606905 | 0.207666 | 0.803387 | 0.481906 |
| MmugDNA.14317.1.S1_at   | MmugDNA.14317.1 | 3.45  | 3.46  | 0.08 | 0.03 | -1     | 0.915588 | 0.901886 | 0.964127 | 0.944161 |
| MmugDNA.1432.1.S1_at    | MmugDNA.1432.1  | 5.54  | 5.91  | 1.57 | 0.25 | -1.29  | 0.723212 | 0.923623 | 0.869931 | 0.957057 |
| MmugDNA.14320.1.S1_at   | MmugDNA.14320.1 | 4.38  | 4.23  | 0.78 | 0.52 | 1.11   | 0.43939  | 0.274279 | 0.693654 | 0.538751 |
| MmugDNA.14321.1.S1_at   | MmugDNA.14321.1 | 7.87  | 9.02  | 0.15 | 0.18 | -2.23  | 0.001192 | 0.062717 | 0.077857 | 0.297117 |
| MmugDNA.14322.1.S1_at   | MmugDNA.14322.1 | 8.49  | 8.77  | 0.3  | 0.35 | -1.22  | 0.885541 | 0.015446 | 0.951139 | 0.157803 |
| MmugDNA.14323.1.S1_at   | MmugDNA.14323.1 | 3.19  | 3.27  | 0.16 | 0.05 | -1.06  | 0.538661 | 0.597005 | 0.760315 | 0.759993 |
| MmugDNA.14323.1.S1_s_at | MmugDNA.14323.1 | 3.8   | 4.01  | 0.31 | 0.08 | -1.15  | 0.107312 | 0.115745 | 0.381866 | 0.382814 |
| MmugDNA.14324.1.S1_at   | MmugDNA.14324.1 | 6.74  | 6.51  | 0.19 | 0.21 | 1.17   | 0.197299 | 0.10677  | 0.494392 | 0.369349 |
| MmugDNA.14325.1.S1_at   | MmugDNA.14325.1 | 5.22  | 5.09  | 0.7  | 0.53 | 1.09   | 0.753893 | 0.893542 | 0.886602 | 0.939277 |
| MmugDNA.14325.1.S1_x_at | MmugDNA.14325.1 | 6     | 6.01  | 0.91 | 0.86 | -1.01  | 0.832723 | 0.867898 | 0.926328 | 0.924973 |
| MmugDNA.14328.1.S1_at   | MmugDNA.14328.1 | 6.96  | 6.83  | 0.2  | 0.1  | 1.1    | 0.568006 | 0.70723  | 0.77808  | 0.830225 |
| MmugDNA.14330.1.S1_at   | MmugDNA.14330.1 | 8.05  | 7.65  | 0.33 | 0.09 | 1.31   | 0.032592 | 0.054475 | 0.234863 | 0.278959 |
| MmugDNA.14331.1.S1_at   | MmugDNA.14331.1 | 9.54  | 9.63  | 0.04 | 0.13 | -1.06  | 0.07424  | 0.445757 | 0.330639 | 0.662505 |
| MmugDNA.14332.1.S1_at   | MmugDNA.14332.1 | 4.73  | 4.75  | 0.25 | 0.07 | -1.01  | 0.76667  | 0.53207  | 0.892936 | 0.718995 |
| MmugDNA.14334.1.S1_at   | MmugDNA.14334.1 | 3.27  | 3.13  | 0.04 | 0.16 | 1.1    | 0.152767 | 0.209241 | 0.442472 | 0.48303  |
| MmugDNA.14336.1.S1_at   | MmugDNA.14336.1 | 5.44  | 10.43 | 2.27 | 0.26 | -31.72 | 0.054676 | 0.250485 | 0.290604 | 0.519391 |
| MmugDNA.14337.1.S1_at   | MmugDNA.14337.1 | 5.11  | 5.17  | 0.79 | 0.2  | -1.04  | 0.398866 | 0.532035 | 0.664389 | 0.718995 |
| MmugDNA.14339.1.S1_at   | MmugDNA.14339.1 | 8.08  | 7.86  | 0.69 | 0.15 | 1.16   | 0.572478 | 0.84247  | 0.780625 | 0.910315 |
| MmugDNA.1434.1.S1_at    | MmugDNA.1434.1  | 6.01  | 5.99  | 0.13 | 0.29 | 1.02   | 0.483597 | 0.669306 | 0.723664 | 0.806539 |



|                         |                 |       |       |      |      |       |          |          |          |          |
|-------------------------|-----------------|-------|-------|------|------|-------|----------|----------|----------|----------|
| MmugDNA.14340.1.S1_at   | MmugDNA.14340.1 | 10.09 | 10.07 | 0.1  | 0.11 | 1.02  | 0.719595 | 0.018661 | 0.867731 | 0.171716 |
| MmugDNA.14340.1.S1_s_at | MmugDNA.14340.1 | 8.96  | 8.93  | 0.07 | 0.05 | 1.02  | 0.601799 | 0.000216 | 0.799852 | 0.032385 |
| MmugDNA.14343.1.S1_at   | MmugDNA.14343.1 | 4.77  | 4.62  | 0.3  | 0.15 | 1.11  | 0.294109 | 0.393291 | 0.583157 | 0.626189 |
| MmugDNA.14344.1.S1_at   | MmugDNA.14344.1 | 5.93  | 5.92  | 0.26 | 0.18 | 1.01  | 0.567986 | 0.79913  | 0.77808  | 0.884363 |
| MmugDNA.14345.1.S1_at   | MmugDNA.14345.1 | 10.92 | 11.05 | 0.12 | 0.06 | -1.1  | 0.179551 | 0.067046 | 0.474716 | 0.304872 |
| MmugDNA.14345.1.S1_s_at | MmugDNA.14345.1 | 10.18 | 10.45 | 0.15 | 0.08 | -1.2  | 0.203772 | 0.106732 | 0.501439 | 0.369337 |
| MmugDNA.14346.1.S1_at   | MmugDNA.14346.1 | 6.67  | 6.56  | 1.22 | 0.72 | 1.08  | 0.980227 | 0.53629  | 0.992563 | 0.721629 |
| MmugDNA.14348.1.S1_at   | MmugDNA.14348.1 | 11.51 | 11.71 | 0.08 | 0.06 | -1.15 | 0.024412 | 0.408508 | 0.209245 | 0.635694 |
| MmugDNA.14349.1.S1_at   | MmugDNA.14349.1 | 7.9   | 7.8   | 0.19 | 0.16 | 1.08  | 0.157935 | 0.802809 | 0.448708 | 0.886441 |
| MmugDNA.1435.1.S1_at    | MmugDNA.1435.1  | 6.83  | 6.83  | 0.07 | 0.04 | -1    | 0.938142 | 0.25809  | 0.973844 | 0.525574 |
| MmugDNA.15990.1.S1_s_at | MmugDNA.15990.1 | 2.94  | 2.95  | 0.07 | 0.07 | -1.01 | 0.34557  | 0.554215 | 0.624523 | 0.733069 |
| MmugDNA.14354.1.S1_at   | MmugDNA.14354.1 | 2.89  | 2.9   | 0    | 0.08 | -1    | 0.447696 | 0.692017 | 0.699609 | 0.82091  |
| MmugDNA.14357.1.S1_at   | MmugDNA.14357.1 | 4.42  | 4.26  | 0.07 | 0.04 | 1.12  | 0.04293  | 0.238933 | 0.264327 | 0.509678 |
| MmugDNA.14358.1.S1_at   | MmugDNA.14358.1 | 4.66  | 4.52  | 0.27 | 0.16 | 1.1   | 0.719523 | 0.525232 | 0.867725 | 0.714809 |
| MmugDNA.1436.1.S1_at    | MmugDNA.1436.1  | 10.43 | 10.48 | 0.14 | 0.03 | -1.03 | 0.993308 | 0.97991  | 0.997386 | 0.989228 |
| MmugDNA.14360.1.S1_at   | MmugDNA.14360.1 | 11.56 | 11.91 | 0.17 | 0.13 | -1.27 | 0.101215 | 0.034103 | 0.372483 | 0.2286   |
| MmugDNA.14362.1.S1_at   | MmugDNA.14362.1 | 3.71  | 3.69  | 0.57 | 0.31 | 1.02  | 0.733211 | 0.895277 | 0.875603 | 0.940185 |
| MmugDNA.14363.1.S1_at   | MmugDNA.14363.1 | 6.23  | 6.05  | 0.16 | 0.09 | 1.14  | 0.146983 | 0.217058 | 0.434942 | 0.490668 |
| MmugDNA.14364.1.S1_at   | MmugDNA.14364.1 | 3.24  | 3.03  | 0.08 | 0.02 | 1.16  | 0.010909 | 0.117772 | 0.154239 | 0.385631 |
| MmugDNA.14365.1.S1_at   | MmugDNA.14365.1 | 8.94  | 8.91  | 0.17 | 0.14 | 1.02  | 0.512166 | 0.072365 | 0.742874 | 0.315164 |
| MmugDNA.14366.1.S1_at   | MmugDNA.14366.1 | 8.43  | 8.31  | 0.13 | 0.04 | 1.09  | 0.121982 | 0.256643 | 0.400631 | 0.524447 |
| MmugDNA.14367.1.S1_at   | MmugDNA.14367.1 | 8.61  | 7.65  | 0.31 | 0.2  | 1.94  | 0.023409 | 0.01504  | 0.20598  | 0.155766 |
| MmugDNA.14368.1.S1_at   | MmugDNA.14368.1 | 8.11  | 8.38  | 0.36 | 0.06 | -1.21 | 0.798883 | 0.060338 | 0.909361 | 0.292254 |
| MmugDNA.14369.1.S1_at   | MmugDNA.14369.1 | 3.46  | 3.5   | 0.23 | 0.15 | -1.03 | 0.746603 | 0.91446  | 0.882643 | 0.951914 |
| MmugDNA.1437.1.S1_at    | MmugDNA.1437.1  | 3.4   | 3.36  | 0.11 | 0.1  | 1.03  | 0.431652 | 0.494171 | 0.687592 | 0.694704 |
| MmugDNA.14371.1.S1_at   | MmugDNA.14371.1 | 10.73 | 11.13 | 0.25 | 0.1  | -1.32 | 0.171165 | 0.034149 | 0.465064 | 0.228692 |
| MmugDNA.14374.1.S1_at   | MmugDNA.14374.1 | 6.26  | 6.79  | 0.68 | 0.28 | -1.44 | 0.319686 | 0.568202 | 0.604291 | 0.741862 |
| MmugDNA.14376.1.S1_at   | MmugDNA.14376.1 | 6.58  | 6.93  | 0.18 | 0.29 | -1.27 | 0.164879 | 0.101984 | 0.457897 | 0.362058 |
| MmugDNA.14378.1.S1_at   | MmugDNA.14378.1 | 3.46  | 3.46  | 0.12 | 0.12 | -1    | 0.555637 | 0.731966 | 0.77141  | 0.844751 |
| MmugDNA.14379.1.S1_at   | MmugDNA.14379.1 | 3.58  | 3.51  | 0.07 | 0.08 | 1.05  | 0.292919 | 0.242336 | 0.581951 | 0.512793 |
| MmugDNA.14381.1.S1_at   | MmugDNA.14381.1 | 6.5   | 6.6   | 0.09 | 0.04 | -1.07 | 0.051035 | 0.020284 | 0.283564 | 0.178761 |
| MmugDNA.14381.1.S1_x_at | MmugDNA.14381.1 | 6.7   | 6.62  | 0    | 0.05 | 1.06  | 0.074214 | 0.05006  | 0.330637 | 0.268916 |
| MmugDNA.14383.1.S1_at   | MmugDNA.14383.1 | 2.66  | 2.69  | 0.32 | 0.45 | -1.03 | 0.890933 | 0.808086 | 0.95346  | 0.889507 |
| MmugDNA.14384.1.S1_at   | MmugDNA.14384.1 | 4.02  | 4.06  | 0.15 | 0.09 | -1.02 | 0.553421 | 0.779036 | 0.76997  | 0.871798 |
| MmugDNA.14386.1.S1_s_at | MmugDNA.14386.1 | 10.86 | 11.28 | 0.28 | 0.13 | -1.33 | 0.127055 | 0.693731 | 0.408591 | 0.8219   |
| MmugDNA.14389.1.S1_at   | MmugDNA.14389.1 | 11.38 | 11.55 | 0.06 | 0.06 | -1.13 | 0.027772 | 0.042203 | 0.2191   | 0.24989  |
| MmugDNA.1439.1.S1_at    | MmugDNA.1439.1  | 7.93  | 7.88  | 0.34 | 0.11 | 1.04  | 0.723913 | 0.904767 | 0.870325 | 0.946059 |
| MmugDNA.14390.1.S1_at   | MmugDNA.14390.1 | 3.59  | 3.62  | 0.3  | 0.24 | -1.02 | 0.552857 | 0.385647 | 0.769491 | 0.621079 |
| MmugDNA.14391.1.S1_at   | MmugDNA.14391.1 | 4.58  | 4.76  | 0.22 | 0.32 | -1.14 | 0.858918 | 0.96634  | 0.938853 | 0.981226 |
| MmugDNA.14392.1.S1_at   | MmugDNA.14392.1 | 11.87 | 11.67 | 0.46 | 0.2  | 1.15  | 0.554941 | 0.529306 | 0.770944 | 0.717233 |
| MmugDNA.14393.1.S1_at   | MmugDNA.14393.1 | 10.17 | 10.2  | 0.01 | 0.09 | -1.02 | 0.740715 | 0.039093 | 0.879814 | 0.242995 |
| MmugDNA.14395.1.S1_at   | MmugDNA.14395.1 | 6.04  | 5.85  | 0.1  | 0.07 | 1.14  | 0.297754 | 0.277733 | 0.586227 | 0.541648 |
| MmugDNA.14397.1.S1_at   | MmugDNA.14397.1 | 3.66  | 3.57  | 0.24 | 0.1  | 1.06  | 0.327317 | 0.310782 | 0.609976 | 0.565832 |

|                         |                 |       |       |      |      |        |          |          |          |          |
|-------------------------|-----------------|-------|-------|------|------|--------|----------|----------|----------|----------|
| MmugDNA.11784.1.S1_s_at | MmugDNA.11784.1 | 5.28  | 5.11  | 0.16 | 0.19 | 1.13   | 0.436579 | 0.180516 | 0.691507 | 0.457128 |
| MmugDNA.14399.1.S1_at   | MmugDNA.14399.1 | 6.16  | 6.14  | 0.06 | 0.08 | 1.02   | 0.271048 | 0.186375 | 0.562988 | 0.46221  |
| MmugDNA.1440.1.S1_at    | MmugDNA.1440.1  | 4.98  | 4.87  | 0.33 | 0.06 | 1.08   | 0.208562 | 0.29415  | 0.506194 | 0.553962 |
| MmugDNA.14402.1.S1_at   | MmugDNA.14402.1 | 6.77  | 6.76  | 0.08 | 0.11 | 1      | 0.358047 | 0.89003  | 0.633833 | 0.937384 |
| MmugDNA.14403.1.S1_at   | MmugDNA.14403.1 | 5.32  | 5.46  | 0.42 | 0.26 | -1.1   | 0.541988 | 0.611192 | 0.762538 | 0.769136 |
| MmugDNA.14405.1.S1_at   | MmugDNA.14405.1 | 2.99  | 3.03  | 0.04 | 0.11 | -1.03  | 0.338807 | 0.465996 | 0.619181 | 0.676077 |
| MmugDNA.14406.1.S1_at   | MmugDNA.14406.1 | 3.37  | 3.45  | 0.25 | 0.06 | -1.06  | 0.901905 | 0.638046 | 0.958434 | 0.787332 |
| MmugDNA.14409.1.S1_at   | MmugDNA.14409.1 | 7.07  | 5.93  | 0.46 | 1.06 | 2.21   | 0.208411 | 0.273213 | 0.506128 | 0.537788 |
| MmugDNA.1441.1.S1_at    | MmugDNA.1441.1  | 11.92 | 12.04 | 0.18 | 0.01 | -1.09  | 0.249488 | 0.38053  | 0.544627 | 0.617172 |
| MmugDNA.14411.1.S1_at   | MmugDNA.14411.1 | 4.02  | 4.15  | 0.25 | 0.02 | -1.09  | 0.765913 | 0.236965 | 0.892637 | 0.507675 |
| MmugDNA.14413.1.S1_at   | MmugDNA.14413.1 | 5.85  | 5.85  | 0.04 | 0.07 | 1      | 0.71664  | 0.293759 | 0.866324 | 0.553758 |
| MmugDNA.14414.1.S1_at   | MmugDNA.14414.1 | 4.55  | 4.55  | 0    | 0.05 | -1     | 0.832464 | 0.718956 | 0.926157 | 0.83732  |
| MmugDNA.14415.1.S1_at   | MmugDNA.14415.1 | 3.4   | 3.53  | 0.14 | 0.07 | -1.09  | 0.311742 | 0.478894 | 0.597884 | 0.684774 |
| MmugDNA.14417.1.S1_at   | MmugDNA.14417.1 | 3.57  | 3.49  | 0.02 | 0.04 | 1.05   | 0.027536 | 0.012417 | 0.218489 | 0.144079 |
| MmugDNA.14418.1.S1_at   | MmugDNA.14418.1 | 5.99  | 6.18  | 0.16 | 0.09 | -1.14  | 0.182445 | 0.354105 | 0.478137 | 0.597048 |
| MmugDNA.14419.1.S1_at   | MmugDNA.14419.1 | 3.57  | 3.57  | 0.09 | 0.09 | 1      | 0.927899 | 0.138654 | 0.96955  | 0.411705 |
| MmugDNA.1442.1.S1_at    | MmugDNA.1442.1  | 3.87  | 3.22  | 0.21 | 0.13 | 1.57   | 0.015208 | 0.016897 | 0.17535  | 0.164869 |
| MmugDNA.14420.1.S1_at   | MmugDNA.14420.1 | 6.35  | 4.98  | 0.5  | 0.18 | 2.59   | 0.013201 | 0.039345 | 0.16538  | 0.243406 |
| MmugDNA.14421.1.S1_at   | MmugDNA.14421.1 | 7.34  | 7.24  | 0.05 | 0.02 | 1.08   | 0.060354 | 0.749853 | 0.302859 | 0.854631 |
| MmugDNA.14422.1.S1_at   | MmugDNA.14422.1 | 3.69  | 3.83  | 0.09 | 0.05 | -1.11  | 0.071644 | 0.321982 | 0.325611 | 0.57358  |
| MmugDNA.14423.1.S1_at   | MmugDNA.14423.1 | 8.12  | 8.01  | 0.1  | 0.06 | 1.08   | 0.186493 | 0.625008 | 0.482642 | 0.778973 |
| MmugDNA.14424.1.S1_at   | MmugDNA.14424.1 | 3.93  | 3.92  | 0.27 | 0.03 | 1.01   | 0.761119 | 0.869778 | 0.890544 | 0.926118 |
| MmugDNA.14425.1.S1_at   | MmugDNA.14425.1 | 5.07  | 4.5   | 0.58 | 0.5  | 1.48   | 0.296821 | 0.335869 | 0.585524 | 0.583533 |
| MmugDNA.14426.1.S1_at   | MmugDNA.14426.1 | 5.49  | 5.77  | 0.41 | 0.45 | -1.21  | 0.558467 | 0.30123  | 0.772919 | 0.559356 |
| MmugDNA.14427.1.S1_at   | MmugDNA.14427.1 | 5.16  | 5.16  | 0.1  | 0.24 | 1      | 0.605011 | 0.440901 | 0.802144 | 0.659138 |
| MmugDNA.14428.1.S1_s_at | MmugDNA.14428.1 | 8.2   | 8.99  | 0.25 | 0.01 | -1.73  | 0.003023 | 0.000237 | 0.100006 | 0.03241  |
| MmugDNA.14429.1.S1_at   | MmugDNA.14429.1 | 5.11  | 5.28  | 0.08 | 0.33 | -1.12  | 0.876878 | 0.397215 | 0.947378 | 0.628763 |
| MmugDNA.1443.1.S1_at    | MmugDNA.1443.1  | 4.8   | 4.28  | 0.23 | 0.16 | 1.44   | 0.053159 | 0.054034 | 0.287847 | 0.277914 |
| MmugDNA.14430.1.S1_at   | MmugDNA.14430.1 | 5.42  | 5.71  | 0.91 | 0.13 | -1.22  | 0.702324 | 0.557057 | 0.858737 | 0.73493  |
| MmugDNA.14431.1.S1_at   | MmugDNA.14431.1 | 6.69  | 6.84  | 0.05 | 0.03 | -1.11  | 0.011784 | 0.011121 | 0.158421 | 0.137271 |
| MmugDNA.14432.1.S1_at   | MmugDNA.14432.1 | 3.7   | 3.37  | 0.13 | 0.1  | 1.26   | 0.05216  | 0.031848 | 0.285921 | 0.220909 |
| MmugDNA.14433.1.S1_at   | MmugDNA.14433.1 | 6.78  | 7.13  | 1.04 | 0.2  | -1.27  | 0.583368 | 0.215554 | 0.788015 | 0.489297 |
| MmugDNA.14434.1.S1_at   | MmugDNA.14434.1 | 11.81 | 12.02 | 0.07 | 0.03 | -1.16  | 0.010451 | 0.026857 | 0.152221 | 0.205049 |
| MmugDNA.14435.1.S1_at   | MmugDNA.14435.1 | 6.04  | 5.28  | 0.29 | 0.03 | 1.7    | 0.005121 | 0.002352 | 0.116889 | 0.07161  |
| MmugDNA.14436.1.S1_at   | MmugDNA.14436.1 | 6.04  | 5.86  | 0.87 | 0.15 | 1.13   | 0.555814 | 0.289847 | 0.771458 | 0.550831 |
| MmugDNA.14437.1.S1_at   | MmugDNA.14437.1 | 12.84 | 12.69 | 0.09 | 0    | 1.11   | 0.062847 | 0.179792 | 0.307372 | 0.456321 |
| MmugDNA.14439.1.S1_at   | MmugDNA.14439.1 | 4.67  | 4.67  | 0.25 | 0.16 | 1      | 0.789793 | 0.044677 | 0.904456 | 0.255776 |
| MmugDNA.1444.1.S1_s_at  | MmugDNA.1444.1  | 9.97  | 9.98  | 0.1  | 0.08 | -1.01  | 0.918104 | 0.333954 | 0.965095 | 0.582063 |
| MmugDNA.14441.1.S1_at   | MmugDNA.14441.1 | 5.01  | 5.11  | 0.69 | 0.34 | -1.07  | 0.49639  | 0.232212 | 0.732272 | 0.503916 |
| MmugDNA.14442.1.S1_at   | MmugDNA.14442.1 | 5.25  | 5.31  | 0.43 | 0.2  | -1.04  | 0.812846 | 0.340893 | 0.916222 | 0.587035 |
| MmugDNA.14444.1.S1_at   | MmugDNA.14444.1 | 5.03  | 4.84  | 0.2  | 0.07 | 1.14   | 0.256861 | 0.130914 | 0.551407 | 0.403037 |
| MmugDNA.14445.1.S1_at   | MmugDNA.14445.1 | 7.02  | 10.92 | 2.29 | 0.33 | -14.94 | 0.103991 | 0.319564 | 0.377283 | 0.571875 |
| MmugDNA.14446.1.S1_at   | MmugDNA.14446.1 | 4.43  | 4.43  | 0.12 | 0.17 | -1     | 0.848801 | 0.673385 | 0.93413  | 0.809168 |

|                         |                 |       |       |      |      |       |          |          |          |          |
|-------------------------|-----------------|-------|-------|------|------|-------|----------|----------|----------|----------|
| MmugDNA.14447.1.S1_at   | MmugDNA.14447.1 | 4.64  | 4.67  | 0.23 | 0.22 | -1.02 | 0.440619 | 0.664369 | 0.694602 | 0.803354 |
| MmugDNA.14448.1.S1_at   | MmugDNA.14448.1 | 4.65  | 3.31  | 0.64 | 0.31 | 2.53  | 0.076138 | 0.073168 | 0.334238 | 0.316064 |
| MmugDNA.14449.1.S1_at   | MmugDNA.14449.1 | 5.82  | 5.62  | 0.24 | 0.06 | 1.15  | 0.737436 | 0.683821 | 0.878129 | 0.815571 |
| MmugDNA.1445.1.S1_at    | MmugDNA.1445.1  | 3.33  | 2.86  | 0.93 | 0.25 | 1.38  | 0.254728 | 0.239332 | 0.549259 | 0.510029 |
| MmugDNA.14450.1.S1_at   | MmugDNA.14450.1 | 5.35  | 5.23  | 0.38 | 0.09 | 1.09  | 0.470645 | 0.635361 | 0.715063 | 0.785362 |
| MmugDNA.14451.1.S1_at   | MmugDNA.14451.1 | 4.21  | 4.22  | 0.18 | 0.03 | -1    | 0.975835 | 0.982494 | 0.990391 | 0.99036  |
| MmugDNA.14452.1.S1_at   | MmugDNA.14452.1 | 7.65  | 5.42  | 0.36 | 0.42 | 4.7   | 0.00404  | 0.001306 | 0.108999 | 0.055656 |
| MmugDNA.14454.1.S1_at   | MmugDNA.14454.1 | 4.9   | 4.84  | 0.09 | 0.08 | 1.04  | 0.226226 | 0.348028 | 0.523981 | 0.59222  |
| MmugDNA.14457.1.S1_at   | MmugDNA.14457.1 | 5.97  | 6.19  | 0.36 | 0.13 | -1.16 | 0.864095 | 0.216597 | 0.941107 | 0.490237 |
| MmugDNA.1446.1.S1_at    | MmugDNA.1446.1  | 4.15  | 4.21  | 0.07 | 0.13 | -1.04 | 0.880626 | 0.193659 | 0.949265 | 0.468785 |
| MmugDNA.14460.1.S1_at   | MmugDNA.14460.1 | 12.34 | 12.57 | 0.06 | 0.07 | -1.17 | 0.017265 | 0.091475 | 0.184559 | 0.346505 |
| MmugDNA.14462.1.S1_at   | MmugDNA.14462.1 | 12.73 | 13.05 | 0.31 | 0.03 | -1.25 | 0.054668 | 0.277959 | 0.290604 | 0.541664 |
| MmugDNA.14466.1.S1_at   | MmugDNA.14466.1 | 4.45  | 4.37  | 0.08 | 0.07 | 1.06  | 0.095671 | 0.310036 | 0.365173 | 0.565253 |
| MmugDNA.14467.1.S1_at   | MmugDNA.14467.1 | 4.16  | 4.03  | 0.52 | 0.21 | 1.1   | 0.269785 | 0.280859 | 0.562034 | 0.544047 |
| MmugDNA.14468.1.S1_at   | MmugDNA.14468.1 | 5.82  | 5.59  | 0.14 | 0.18 | 1.17  | 0.417342 | 0.353839 | 0.677553 | 0.596845 |
| MmugDNA.14469.1.S1_at   | MmugDNA.14469.1 | 5.53  | 5.52  | 0.2  | 0.04 | 1.01  | 0.284192 | 0.333817 | 0.574388 | 0.581974 |
| MmugDNA.1447.1.S1_at    | MmugDNA.1447.1  | 7.83  | 7.97  | 0.14 | 0.07 | -1.1  | 0.684906 | 0.186605 | 0.849863 | 0.462401 |
| MmugDNA.14470.1.S1_at   | MmugDNA.14470.1 | 5.96  | 6.08  | 0.17 | 0.13 | -1.08 | 0.683152 | 0.202612 | 0.848902 | 0.477003 |
| MmugDNA.14471.1.S1_at   | MmugDNA.14471.1 | 3.56  | 3.7   | 0.11 | 0.02 | -1.11 | 0.166594 | 0.006416 | 0.459786 | 0.108813 |
| MmugDNA.14472.1.S1_at   | MmugDNA.14472.1 | 5.21  | 5.25  | 0.25 | 0.16 | -1.03 | 0.973245 | 0.983323 | 0.989282 | 0.990726 |
| MmugDNA.14473.1.S1_at   | MmugDNA.14473.1 | 5.57  | 5.48  | 0.02 | 0.34 | 1.06  | 0.553171 | 0.817653 | 0.769696 | 0.894802 |
| MmugDNA.14474.1.S1_s_at | MmugDNA.14474.1 | 6.71  | 6.66  | 0.22 | 0.06 | 1.03  | 0.472772 | 0.625411 | 0.716319 | 0.779175 |
| MmugDNA.14475.1.S1_at   | MmugDNA.14475.1 | 5.38  | 5.45  | 0.15 | 0.03 | -1.05 | 0.817545 | 0.977153 | 0.918474 | 0.987577 |
| MmugDNA.14476.1.S1_s_at | MmugDNA.14476.1 | 5.88  | 6.04  | 0.23 | 0.07 | -1.12 | 0.643332 | 0.772294 | 0.826158 | 0.867651 |
| MmugDNA.14477.1.S1_at   | MmugDNA.14477.1 | 4.61  | 3.59  | 0.6  | 0.2  | 2.02  | 0.054648 | 0.02671  | 0.290604 | 0.204348 |
| MmugDNA.14478.1.S1_at   | MmugDNA.14478.1 | 9.15  | 7.36  | 0.23 | 0.43 | 3.46  | 0.00511  | 0.001238 | 0.116747 | 0.05478  |
| MmugDNA.14479.1.S1_at   | MmugDNA.14479.1 | 8.88  | 9.99  | 0.43 | 0.17 | -2.16 | 0.010097 | 0.017964 | 0.150153 | 0.169043 |
| MmugDNA.1448.1.S1_s_at  | MmugDNA.1448.1  | 8.12  | 7.94  | 0.12 | 0.13 | 1.13  | 0.270415 | 0.008066 | 0.562614 | 0.119402 |
| MmugDNA.14481.1.S1_at   | MmugDNA.14481.1 | 4.72  | 4.59  | 0.15 | 0.13 | 1.09  | 0.758105 | 0.359067 | 0.889024 | 0.600433 |
| MmugDNA.14482.1.S1_at   | MmugDNA.14482.1 | 11.61 | 11.42 | 0.06 | 0.06 | 1.14  | 0.015505 | 0.000454 | 0.176763 | 0.038572 |
| MmugDNA.14485.1.S1_at   | MmugDNA.14485.1 | 8.09  | 7.19  | 0.66 | 0.28 | 1.86  | 0.431453 | 0.687778 | 0.687507 | 0.817671 |
| MmugDNA.14486.1.S1_at   | MmugDNA.14486.1 | 11.92 | 12.14 | 0.35 | 0.15 | -1.17 | 0.306276 | 0.004707 | 0.593261 | 0.095489 |
| MmugDNA.14487.1.S1_at   | MmugDNA.14487.1 | 9.86  | 9.63  | 0.08 | 0.08 | 1.17  | 0.008486 | 0.005795 | 0.141304 | 0.104597 |
| MmugDNA.14488.1.S1_at   | MmugDNA.14488.1 | 10.59 | 9.12  | 0.21 | 0.16 | 2.77  | 0.000783 | 0.000056 | 0.072818 | 0.025666 |
| MmugDNA.14489.1.S1_at   | MmugDNA.14489.1 | 8.16  | 8.2   | 0.41 | 0.07 | -1.03 | 0.752207 | 0.954932 | 0.885542 | 0.974471 |
| MmugDNA.1449.1.S1_at    | MmugDNA.1449.1  | 8.1   | 8.11  | 0.21 | 0.03 | -1.01 | 0.825085 | 0.164691 | 0.922295 | 0.441008 |
| MmugDNA.14490.1.S1_at   | MmugDNA.14490.1 | 3.38  | 3.33  | 0.05 | 0.07 | 1.03  | 0.213161 | 0.207024 | 0.511046 | 0.481115 |
| MmugDNA.14491.1.S1_at   | MmugDNA.14491.1 | 5.56  | 5.57  | 0.01 | 0.08 | -1.01 | 0.73964  | 0.279847 | 0.879308 | 0.543321 |
| MmugDNA.14492.1.S1_at   | MmugDNA.14492.1 | 6.8   | 6.87  | 0.21 | 0.14 | -1.05 | 0.379264 | 0.288619 | 0.649238 | 0.549827 |
| MmugDNA.14493.1.S1_at   | MmugDNA.14493.1 | 8.73  | 7.56  | 1.44 | 0.64 | 2.25  | 0.386249 | 0.619506 | 0.654688 | 0.774712 |
| MmugDNA.14494.1.S1_at   | MmugDNA.14494.1 | 4.02  | 3.72  | 0.97 | 0.29 | 1.24  | 0.174086 | 0.180908 | 0.468351 | 0.457397 |
| MmugDNA.14495.1.S1_at   | MmugDNA.14495.1 | 4.32  | 4.36  | 0.14 | 0.24 | -1.02 | 0.590908 | 0.56252  | 0.792099 | 0.738055 |
| MmugDNA.14496.1.S1_at   | MmugDNA.14496.1 | 4     | 4.08  | 0.2  | 0.14 | -1.05 | 0.803155 | 0.86211  | 0.911681 | 0.921635 |

|                         |                 |       |       |      |      |       |          |          |          |          |
|-------------------------|-----------------|-------|-------|------|------|-------|----------|----------|----------|----------|
| MmugDNA.14497.1.S1_at   | MmugDNA.14497.1 | 4.14  | 3.75  | 0.05 | 0.29 | 1.31  | 0.217906 | 0.459414 | 0.51576  | 0.671741 |
| MmugDNA.14498.1.S1_at   | MmugDNA.14498.1 | 7.03  | 7.14  | 0.1  | 0.13 | -1.07 | 0.429894 | 0.676627 | 0.686234 | 0.811009 |
| MmugDNA.145.1.S1_at     | MmugDNA.145.1   | 5.99  | 6.05  | 0.14 | 0.04 | -1.04 | 0.205605 | 0.208893 | 0.503372 | 0.482717 |
| MmugDNA.14500.1.S1_at   | MmugDNA.14500.1 | 5.69  | 5.7   | 0.06 | 0.11 | -1.01 | 0.884015 | 0.985392 | 0.950645 | 0.991752 |
| MmugDNA.14504.1.S1_at   | MmugDNA.14504.1 | 7.86  | 7.93  | 0.58 | 0.09 | -1.05 | 0.281128 | 0.187975 | 0.572037 | 0.464078 |
| MmugDNA.14509.1.S1_at   | MmugDNA.14509.1 | 3.68  | 3.68  | 0.08 | 0.09 | 1     | 0.211096 | 0.401756 | 0.508897 | 0.631068 |
| MmugDNA.1451.1.S1_at    | MmugDNA.1451.1  | 10.58 | 10.68 | 0.21 | 0.04 | -1.08 | 0.92725  | 0.892935 | 0.969216 | 0.938954 |
| MmugDNA.14510.1.S1_at   | MmugDNA.14510.1 | 6.74  | 5.87  | 0.29 | 0.48 | 1.82  | 0.088308 | 0.074121 | 0.35442  | 0.317794 |
| MmugDNA.14534.1.S1_s_at | MmugDNA.14534.1 | 6.02  | 6.28  | 0.24 | 0.07 | -1.19 | 0.302916 | 0.661106 | 0.590429 | 0.801683 |
| MmugDNA.14512.1.S1_at   | MmugDNA.14512.1 | 3.44  | 3.24  | 0.18 | 0.09 | 1.15  | 0.173752 | 0.091223 | 0.468211 | 0.346173 |
| MmugDNA.14513.1.S1_at   | MmugDNA.14513.1 | 6.98  | 6.99  | 0.06 | 0.08 | -1.01 | 0.98403  | 0.818899 | 0.994033 | 0.895647 |
| MmugDNA.14514.1.S1_at   | MmugDNA.14514.1 | 4.36  | 4.23  | 0.21 | 0.12 | 1.1   | 0.362274 | 0.313863 | 0.637219 | 0.568094 |
| MmugDNA.14515.1.S1_at   | MmugDNA.14515.1 | 2.95  | 2.9   | 0.35 | 0.07 | 1.03  | 0.804124 | 0.860906 | 0.912015 | 0.920825 |
| MmugDNA.14517.1.S1_at   | MmugDNA.14517.1 | 9.85  | 9.88  | 0.32 | 0.12 | -1.02 | 0.691426 | 0.183294 | 0.85245  | 0.459553 |
| MmugDNA.14518.1.S1_at   | MmugDNA.14518.1 | 7.28  | 6.77  | 0.64 | 0.08 | 1.42  | 0.692089 | 0.835962 | 0.852876 | 0.906135 |
| MmugDNA.14519.1.S1_s_at | MmugDNA.14519.1 | 5.83  | 5.36  | 0.41 | 0.48 | 1.38  | 0.338354 | 0.454332 | 0.61869  | 0.66853  |
| MmugDNA.1452.1.S1_at    | MmugDNA.1452.1  | 5.42  | 5.36  | 0.01 | 0.09 | 1.04  | 0.252595 | 0.119588 | 0.547204 | 0.388247 |
| MmugDNA.14522.1.S1_at   | MmugDNA.14522.1 | 3.5   | 3.29  | 0.24 | 0.23 | 1.15  | 0.308475 | 0.441616 | 0.595066 | 0.659754 |
| MmugDNA.14523.1.S1_at   | MmugDNA.14523.1 | 8.2   | 8.68  | 0.26 | 0.11 | -1.4  | 0.099519 | 0.188779 | 0.370394 | 0.464761 |
| MmugDNA.14524.1.S1_at   | MmugDNA.14524.1 | 10.33 | 9.68  | 0.29 | 0.47 | 1.57  | 0.116221 | 0.44283  | 0.393335 | 0.660759 |
| MmugDNA.14524.1.S1_x_at | MmugDNA.14524.1 | 9.91  | 9.27  | 0.23 | 0.47 | 1.56  | 0.098847 | 0.407845 | 0.369716 | 0.635242 |
| MmugDNA.14525.1.S1_at   | MmugDNA.14525.1 | 10.81 | 10.97 | 0.27 | 0.03 | -1.12 | 0.404618 | 0.005812 | 0.668308 | 0.104646 |
| MmugDNA.14526.1.S1_at   | MmugDNA.14526.1 | 3.64  | 3.81  | 0.04 | 0.16 | -1.12 | 0.141639 | 0.14132  | 0.427605 | 0.414874 |
| MmugDNA.14528.1.S1_s_at | MmugDNA.14528.1 | 13.17 | 13.27 | 0.11 | 0.11 | -1.07 | 0.07073  | 0.197784 | 0.324274 | 0.472721 |
| MmugDNA.14529.1.S1_at   | MmugDNA.14529.1 | 6.25  | 6.26  | 0.2  | 0.06 | -1    | 0.266888 | 0.411699 | 0.559479 | 0.638422 |
| MmugDNA.14533.1.S1_at   | MmugDNA.14533.1 | 3.21  | 3.21  | 0.39 | 0.08 | 1     | 0.550087 | 0.755361 | 0.767635 | 0.857558 |
| MmugDNA.14535.1.S1_s_at | MmugDNA.14535.1 | 5.98  | 5.87  | 0.15 | 0.11 | 1.07  | 0.75505  | 0.927803 | 0.887035 | 0.959005 |
| MmugDNA.14536.1.S1_at   | MmugDNA.14536.1 | 5.5   | 5.28  | 0.5  | 0.13 | 1.16  | 0.647519 | 0.224722 | 0.82876  | 0.497614 |
| MmugDNA.14537.1.S1_s_at | MmugDNA.14537.1 | 8.25  | 6.49  | 0.84 | 0.4  | 3.38  | 0.029138 | 0.009836 | 0.223501 | 0.130274 |
| MmugDNA.14538.1.S1_at   | MmugDNA.14538.1 | 5.32  | 5.69  | 0.26 | 0.25 | -1.3  | 0.120146 | 0.135448 | 0.398476 | 0.407535 |
| MmugDNA.14539.1.S1_at   | MmugDNA.14539.1 | 10.43 | 10.99 | 0.24 | 0.14 | -1.48 | 0.023653 | 0.008153 | 0.207074 | 0.119754 |
| MmugDNA.14540.1.S1_s_at | MmugDNA.14540.1 | 11.86 | 11.98 | 0.08 | 0.04 | -1.09 | 0.074476 | 0.431594 | 0.331161 | 0.652439 |
| MmugDNA.14541.1.S1_at   | MmugDNA.14541.1 | 10.93 | 11.22 | 0.07 | 0.18 | -1.23 | 0.133653 | 0.018953 | 0.417043 | 0.173197 |
| MmugDNA.14542.1.S1_at   | MmugDNA.14542.1 | 5.37  | 4.98  | 0.39 | 0.53 | 1.31  | 0.387041 | 0.630892 | 0.655358 | 0.782527 |
| MmugDNA.14545.1.S1_at   | MmugDNA.14545.1 | 5.86  | 5.28  | 0.36 | 0.31 | 1.49  | 0.118923 | 0.123924 | 0.396589 | 0.394201 |
| MmugDNA.14547.1.S1_at   | MmugDNA.14547.1 | 4.9   | 4.97  | 0.87 | 0.61 | -1.05 | 0.809429 | 0.167332 | 0.914638 | 0.443785 |
| MmugDNA.14548.1.S1_at   | MmugDNA.14548.1 | 5.44  | 5.73  | 0.6  | 0.12 | -1.22 | 0.964773 | 0.468075 | 0.985755 | 0.677568 |
| MmugDNA.14549.1.S1_at   | MmugDNA.14549.1 | 3.48  | 3.36  | 0.17 | 0.22 | 1.09  | 0.566547 | 0.620769 | 0.77743  | 0.775593 |
| MmugDNA.1455.1.S1_at    | MmugDNA.1455.1  | 4.83  | 4.83  | 0.01 | 0.06 | 1     | 0.861178 | 0.775456 | 0.939687 | 0.869338 |
| MmugDNA.14550.1.S1_at   | MmugDNA.14550.1 | 5.55  | 5.48  | 0.19 | 0.08 | 1.05  | 0.710991 | 0.802515 | 0.863523 | 0.88629  |
| MmugDNA.14552.1.S1_at   | MmugDNA.14552.1 | 6.04  | 5.91  | 0.1  | 0.06 | 1.09  | 0.150645 | 0.259903 | 0.439728 | 0.52675  |
| MmugDNA.14553.1.S1_at   | MmugDNA.14553.1 | 4.24  | 4.11  | 0.2  | 0.09 | 1.1   | 0.576249 | 0.679726 | 0.783164 | 0.812998 |
| MmugDNA.14554.1.S1_at   | MmugDNA.14554.1 | 6.25  | 6.38  | 0.07 | 0.53 | -1.1  | 0.235955 | 0.089543 | 0.533569 | 0.343811 |

|                         |                 |       |       |      |      |       |          |          |          |          |
|-------------------------|-----------------|-------|-------|------|------|-------|----------|----------|----------|----------|
| MmugDNA.14556.1.S1_at   | MmugDNA.14556.1 | 3.63  | 3.52  | 0.07 | 0.2  | 1.08  | 0.998332 | 0.867017 | 0.999391 | 0.924444 |
| MmugDNA.14557.1.S1_at   | MmugDNA.14557.1 | 10.17 | 9.55  | 0.24 | 0.1  | 1.54  | 0.021228 | 0.08254  | 0.199432 | 0.331672 |
| MmugDNA.14559.1.S1_at   | MmugDNA.14559.1 | 3.58  | 3.55  | 0.18 | 0.39 | 1.02  | 0.519051 | 0.662739 | 0.747877 | 0.802558 |
| MmugDNA.14560.1.S1_at   | MmugDNA.14560.1 | 7.4   | 7.01  | 0.27 | 0.31 | 1.31  | 0.132815 | 0.012502 | 0.416223 | 0.144302 |
| MmugDNA.14561.1.S1_at   | MmugDNA.14561.1 | 5.88  | 5.72  | 0.07 | 0.13 | 1.12  | 0.336415 | 0.657445 | 0.617028 | 0.799704 |
| MmugDNA.14564.1.S1_at   | MmugDNA.14564.1 | 8.63  | 8.64  | 0.11 | 0.08 | -1.01 | 0.268855 | 0.00725  | 0.561335 | 0.114309 |
| MmugDNA.14565.1.S1_at   | MmugDNA.14565.1 | 6.25  | 6.45  | 0.31 | 0.04 | -1.15 | 0.463631 | 0.338983 | 0.710143 | 0.585891 |
| MmugDNA.14566.1.S1_at   | MmugDNA.14566.1 | 3.28  | 3.44  | 0.28 | 0.18 | -1.12 | 0.443804 | 0.618544 | 0.696813 | 0.77415  |
| MmugDNA.14567.1.S1_at   | MmugDNA.14567.1 | 6.91  | 6.93  | 0.27 | 0.12 | -1.01 | 0.993612 | 0.906221 | 0.997413 | 0.94693  |
| MmugDNA.14568.1.S1_at   | MmugDNA.14568.1 | 4.8   | 4.8   | 0    | 0    | 1     | 0.373901 | 0.917464 | 0.645118 | 0.953838 |
| MmugDNA.14569.1.S1_at   | MmugDNA.14569.1 | 3.64  | 3.63  | 0.35 | 0.09 | 1.01  | 0.274642 | 0.565773 | 0.566523 | 0.740112 |
| MmugDNA.1457.1.S1_at    | MmugDNA.1457.1  | 5.91  | 6.48  | 0.25 | 0.2  | -1.48 | 0.021513 | 0.266015 | 0.200467 | 0.531815 |
| MmugDNA.14570.1.S1_at   | MmugDNA.14570.1 | 7.31  | 6.85  | 0.17 | 0.1  | 1.37  | 0.027483 | 0.028062 | 0.218484 | 0.209031 |
| MmugDNA.14574.1.S1_at   | MmugDNA.14574.1 | 11.2  | 10.43 | 0.24 | 0.09 | 1.7   | 0.008264 | 0.014699 | 0.139927 | 0.154371 |
| MmugDNA.14575.1.S1_at   | MmugDNA.14575.1 | 10.21 | 10.96 | 0.61 | 0.15 | -1.69 | 0.100815 | 0.121396 | 0.371905 | 0.390485 |
| MmugDNA.14576.1.S1_at   | MmugDNA.14576.1 | 5.18  | 5.14  | 0.23 | 0.25 | 1.03  | 0.760039 | 0.258183 | 0.890079 | 0.525574 |
| MmugDNA.14578.1.S1_at   | MmugDNA.14578.1 | 5.63  | 5.5   | 0.01 | 0.15 | 1.09  | 0.187029 | 0.688871 | 0.483107 | 0.818363 |
| MmugDNA.14579.1.S1_at   | MmugDNA.14579.1 | 4.11  | 3.74  | 0.37 | 0.14 | 1.29  | 0.31405  | 0.408574 | 0.599771 | 0.635757 |
| MmugDNA.1458.1.S1_at    | MmugDNA.1458.1  | 8.84  | 8.96  | 0.36 | 0.04 | -1.09 | 0.70281  | 0.906833 | 0.85894  | 0.947238 |
| MmugDNA.14580.1.S1_at   | MmugDNA.14580.1 | 3.26  | 3.14  | 0.25 | 0.13 | 1.08  | 0.498254 | 0.283519 | 0.733567 | 0.545959 |
| MmugDNA.14581.1.S1_at   | MmugDNA.14581.1 | 7.15  | 7.1   | 0.03 | 0.04 | 1.03  | 0.110584 | 0.089813 | 0.385979 | 0.34404  |
| MmugDNA.14582.1.S1_x_at | MmugDNA.14582.1 | 6     | 5.97  | 0.08 | 0.07 | 1.02  | 0.519485 | 0.730211 | 0.748059 | 0.843882 |
| MmugDNA.14584.1.S1_at   | MmugDNA.14584.1 | 7.92  | 7.78  | 0.03 | 0.08 | 1.1   | 0.103265 | 0.230905 | 0.376179 | 0.502548 |
| MmugDNA.14585.1.S1_s_at | MmugDNA.14585.1 | 6.05  | 6.05  | 0.13 | 0.07 | -1    | 0.971584 | 0.525998 | 0.98857  | 0.715326 |
| MmugDNA.14586.1.S1_s_at | MmugDNA.14586.1 | 7.3   | 7.34  | 0.06 | 0.09 | -1.03 | 0.781984 | 0.000618 | 0.900409 | 0.042444 |
| MmugDNA.5639.1.S1_s_at  | MmugDNA.5639.1  | 5.77  | 6.24  | 0.63 | 0.27 | -1.39 | 0.102645 | 0.160946 | 0.37496  | 0.437116 |
| MmugDNA.14589.1.S1_at   | MmugDNA.14589.1 | 6.7   | 7.73  | 0.35 | 0.23 | -2.05 | 0.018497 | 0.021906 | 0.189141 | 0.185235 |
| MmugDNA.14589.1.S1_s_at | MmugDNA.14589.1 | 6.47  | 7.23  | 0.05 | 0.09 | -1.69 | 0.00025  | 0.015013 | 0.054642 | 0.155736 |
| MmugDNA.1459.1.S1_s_at  | MmugDNA.1459.1  | 10.53 | 10.9  | 0.22 | 0.13 | -1.29 | 0.320447 | 0.393649 | 0.605058 | 0.626522 |
| MmugDNA.14590.1.S1_at   | MmugDNA.14590.1 | 3.82  | 4.03  | 0.31 | 0.07 | -1.15 | 0.084854 | 0.11582  | 0.34881  | 0.382867 |
| MmugDNA.14591.1.S1_at   | MmugDNA.14591.1 | 6.2   | 6.36  | 0.08 | 0.53 | -1.12 | 0.402342 | 0.287155 | 0.666681 | 0.548447 |
| MmugDNA.14594.1.S1_at   | MmugDNA.14594.1 | 4.47  | 4.22  | 0.12 | 0.05 | 1.19  | 0.069508 | 0.221095 | 0.322002 | 0.494487 |
| MmugDNA.14595.1.S1_at   | MmugDNA.14595.1 | 6.58  | 6.66  | 0.45 | 0.28 | -1.06 | 0.583634 | 0.469341 | 0.788267 | 0.678197 |
| MmugDNA.14596.1.S1_at   | MmugDNA.14596.1 | 5.31  | 5.13  | 0.17 | 0.16 | 1.13  | 0.583231 | 0.312685 | 0.78787  | 0.567299 |
| MmugDNA.14597.1.S1_at   | MmugDNA.14597.1 | 10.74 | 10.54 | 0.19 | 0.07 | 1.15  | 0.171934 | 0.160377 | 0.46595  | 0.436528 |
| MmugDNA.22825.1.S1_s_at | MmugDNA.22825.1 | 11.24 | 10.75 | 0.16 | 0.1  | 1.41  | 0.022525 | 0.013539 | 0.203331 | 0.148928 |
| MmugDNA.14598.1.S1_s_at | MmugDNA.14598.1 | 9.65  | 9.23  | 0.99 | 0.15 | 1.34  | 0.392413 | 0.697556 | 0.6594   | 0.824244 |
| MmugDNA.14599.1.S1_at   | MmugDNA.14599.1 | 5.09  | 5.12  | 0.03 | 0.14 | -1.02 | 0.904189 | 0.448017 | 0.959379 | 0.663986 |
| MmugDNA.14600.1.S1_at   | MmugDNA.14600.1 | 3.05  | 3.14  | 0.17 | 0.18 | -1.06 | 0.33903  | 0.086977 | 0.619372 | 0.33984  |
| MmugDNA.14602.1.S1_at   | MmugDNA.14602.1 | 7.46  | 8.04  | 0.64 | 0.15 | -1.5  | 0.123796 | 0.044623 | 0.403548 | 0.255589 |
| MmugDNA.14603.1.S1_at   | MmugDNA.14603.1 | 8.58  | 8.9   | 0.28 | 0.03 | -1.25 | 0.41326  | 0.908793 | 0.674622 | 0.948367 |
| MmugDNA.14604.1.S1_s_at | MmugDNA.14604.1 | 7.09  | 7.19  | 0.04 | 0.22 | -1.08 | 0.384634 | 0.515114 | 0.653612 | 0.708103 |
| MmugDNA.14605.1.S1_at   | MmugDNA.14605.1 | 12.96 | 12.88 | 0.12 | 0.03 | 1.05  | 0.348318 | 0.031759 | 0.626353 | 0.220651 |

|                         |                 |       |       |      |      |       |          |          |          |          |
|-------------------------|-----------------|-------|-------|------|------|-------|----------|----------|----------|----------|
| MmugDNA.14606.1.S1_at   | MmugDNA.14606.1 | 12.19 | 12.28 | 0.28 | 0.08 | -1.07 | 0.8975   | 0.573111 | 0.956515 | 0.744941 |
| MmugDNA.14606.1.S1_s_at | MmugDNA.14606.1 | 12.09 | 12.18 | 0.3  | 0.1  | -1.06 | 0.867932 | 0.535797 | 0.943108 | 0.721304 |
| MmugDNA.14607.1.S1_at   | MmugDNA.14607.1 | 12.04 | 11.84 | 0.13 | 0.07 | 1.15  | 0.037234 | 0.062634 | 0.248291 | 0.297022 |
| MmugDNA.14608.1.S1_at   | MmugDNA.14608.1 | 12.28 | 11.68 | 0.3  | 0.09 | 1.51  | 0.055818 | 0.268088 | 0.293385 | 0.533862 |
| MmugDNA.1461.1.S1_at    | MmugDNA.1461.1  | 3.46  | 3.46  | 0.09 | 0    | 1     | 0.416259 | 0.39272  | 0.676738 | 0.62583  |
| MmugDNA.14610.1.S1_at   | MmugDNA.14610.1 | 4.1   | 4.07  | 0.12 | 0.24 | 1.02  | 0.520409 | 0.048575 | 0.748753 | 0.265572 |
| MmugDNA.14611.1.S1_at   | MmugDNA.14611.1 | 7.32  | 7.46  | 0.96 | 0.03 | -1.1  | 0.673408 | 0.777769 | 0.843815 | 0.87086  |
| MmugDNA.14612.1.S1_at   | MmugDNA.14612.1 | 11.02 | 10.32 | 0.23 | 0.11 | 1.62  | 0.011546 | 0.003534 | 0.157286 | 0.085312 |
| MmugDNA.14613.1.S1_at   | MmugDNA.14613.1 | 10.2  | 9.62  | 0.04 | 0.03 | 1.5   | 0.000043 | 0.000166 | 0.045594 | 0.030511 |
| MmugDNA.14614.1.S1_at   | MmugDNA.14614.1 | 5.01  | 5.25  | 0.39 | 0.04 | -1.18 | 0.980876 | 0.658607 | 0.992889 | 0.800452 |
| MmugDNA.14615.1.S1_s_at | MmugDNA.14615.1 | 8.38  | 7.67  | 0.22 | 0.22 | 1.63  | 0.029317 | 0.093502 | 0.224074 | 0.349846 |
| MmugDNA.14616.1.S1_at   | MmugDNA.14616.1 | 4.53  | 4.5   | 0.04 | 0.03 | 1.02  | 0.217091 | 0.269058 | 0.51492  | 0.534425 |
| MmugDNA.14618.1.S1_at   | MmugDNA.14618.1 | 9.22  | 9.78  | 0.05 | 0.18 | -1.47 | 0.014797 | 0.124682 | 0.173786 | 0.39513  |
| MmugDNA.14619.1.S1_at   | MmugDNA.14619.1 | 8.12  | 8.88  | 0.13 | 0.24 | -1.7  | 0.024525 | 0.074677 | 0.209655 | 0.318424 |
| MmugDNA.1462.1.S1_at    | MmugDNA.1462.1  | 5.16  | 4.05  | 0.71 | 0.28 | 2.16  | 0.108008 | 0.070489 | 0.382645 | 0.311777 |
| MmugDNA.15219.1.S1_at   | MmugDNA.15219.1 | 6.28  | 6.29  | 0.42 | 0.21 | -1.01 | 0.314884 | 0.292803 | 0.600177 | 0.552823 |
| MmugDNA.15219.1.S1_s_at | MmugDNA.15219.1 | 11.64 | 11.72 | 0.17 | 0.02 | -1.06 | 0.154538 | 0.156707 | 0.444802 | 0.432216 |
| MmugDNA.14622.1.S1_at   | MmugDNA.14622.1 | 4.15  | 6.04  | 0.74 | 0.41 | -3.72 | 0.050419 | 0.224035 | 0.282381 | 0.497046 |
| MmugDNA.14624.1.S1_at   | MmugDNA.14624.1 | 8.29  | 8.09  | 0.16 | 0.22 | 1.14  | 0.17067  | 0.101335 | 0.464374 | 0.361111 |
| MmugDNA.14625.1.S1_at   | MmugDNA.14625.1 | 9.7   | 9.66  | 0.28 | 0.03 | 1.02  | 0.321254 | 0.170966 | 0.605501 | 0.447561 |
| MmugDNA.14627.1.S1_at   | MmugDNA.14627.1 | 10.22 | 10.2  | 0.18 | 0.1  | 1.01  | 0.624238 | 0.3088   | 0.814749 | 0.56463  |
| MmugDNA.14628.1.S1_at   | MmugDNA.14628.1 | 12.7  | 13.18 | 0.15 | 0.11 | -1.39 | 0.019123 | 0.158088 | 0.191749 | 0.433875 |
| MmugDNA.14629.1.S1_at   | MmugDNA.14629.1 | 7.2   | 7.15  | 0.02 | 0.22 | 1.04  | 0.997946 | 0.026483 | 0.999236 | 0.203897 |
| MmugDNA.1463.1.S1_s_at  | MmugDNA.1463.1  | 7.92  | 7.96  | 0.15 | 0.1  | -1.03 | 0.553724 | 0.244245 | 0.77019  | 0.514176 |
| MmugDNA.14630.1.S1_at   | MmugDNA.14630.1 | 4.76  | 4.36  | 0.06 | 0.34 | 1.32  | 0.083662 | 0.183281 | 0.346369 | 0.459553 |
| MmugDNA.4900.1.S1_at    | MmugDNA.4900.1  | 5.75  | 6.27  | 0.5  | 0.4  | -1.44 | 0.322274 | 0.262074 | 0.606311 | 0.528374 |
| MmugDNA.4900.1.S1_s_at  | MmugDNA.4900.1  | 6.45  | 6.82  | 0.36 | 0.37 | -1.3  | 0.345706 | 0.235798 | 0.624565 | 0.506953 |
| MmugDNA.14633.1.S1_at   | MmugDNA.14633.1 | 3.81  | 3.66  | 0.21 | 0.62 | 1.11  | 0.686528 | 0.675089 | 0.850618 | 0.810146 |
| MmugDNA.8966.1.S1_s_at  | MmugDNA.8966.1  | 6.8   | 6.78  | 0.42 | 0.3  | 1.01  | 0.577981 | 0.055158 | 0.783846 | 0.280487 |
| MmugDNA.8966.1.S1_x_at  | MmugDNA.8966.1  | 6.52  | 6.62  | 0.43 | 0.16 | -1.08 | 0.604914 | 0.027745 | 0.802092 | 0.208003 |
| MmugDNA.14634.1.S1_at   | MmugDNA.14634.1 | 3.9   | 3.87  | 0.11 | 0.15 | 1.01  | 0.304718 | 0.68754  | 0.591803 | 0.817614 |
| MmugDNA.14635.1.S1_at   | MmugDNA.14635.1 | 3.27  | 3.24  | 0.07 | 0.09 | 1.02  | 0.724909 | 0.959495 | 0.870922 | 0.977017 |
| MmugDNA.14636.1.S1_at   | MmugDNA.14636.1 | 5.54  | 5.48  | 0.32 | 0.11 | 1.04  | 0.246044 | 0.354866 | 0.541827 | 0.597466 |
| MmugDNA.14638.1.S1_at   | MmugDNA.14638.1 | 6.22  | 6.21  | 0.16 | 0.07 | 1.01  | 0.383182 | 0.182876 | 0.652502 | 0.459362 |
| MmugDNA.31136.1.S1_s_at | MmugDNA.31136.1 | 12.26 | 11.83 | 0.42 | 0.06 | 1.35  | 0.27581  | 0.171765 | 0.567364 | 0.448191 |
| MmugDNA.1464.1.S1_at    | MmugDNA.1464.1  | 10.62 | 10.74 | 0.16 | 0.27 | -1.09 | 0.820382 | 0.903961 | 0.919887 | 0.945472 |
| MmugDNA.14640.1.S1_at   | MmugDNA.14640.1 | 6.26  | 6.23  | 0.31 | 0.02 | 1.02  | 0.488062 | 0.69345  | 0.726687 | 0.821713 |
| MmugDNA.14641.1.S1_at   | MmugDNA.14641.1 | 4.52  | 4.58  | 0.08 | 0.07 | -1.04 | 0.145223 | 0.183589 | 0.432542 | 0.459681 |
| MmugDNA.14642.1.S1_at   | MmugDNA.14642.1 | 7.01  | 7.12  | 0.33 | 0.17 | -1.08 | 0.857487 | 0.165592 | 0.938079 | 0.44189  |
| MmugDNA.14643.1.S1_at   | MmugDNA.14643.1 | 4.12  | 3.73  | 0.54 | 0.22 | 1.31  | 0.148431 | 0.026795 | 0.436978 | 0.204733 |
| MmugDNA.14645.1.S1_at   | MmugDNA.14645.1 | 6.42  | 6.52  | 0.11 | 0.04 | -1.07 | 0.309492 | 0.160043 | 0.595823 | 0.436208 |
| MmugDNA.14645.1.S1_s_at | MmugDNA.14645.1 | 5.68  | 5.53  | 0.09 | 0.08 | 1.1   | 0.219869 | 0.089156 | 0.517629 | 0.343188 |
| MmugDNA.14646.1.S1_at   | MmugDNA.14646.1 | 7.52  | 7.22  | 0.14 | 0.1  | 1.23  | 0.022872 | 0.259535 | 0.204235 | 0.526448 |

|                         |                 |       |       |      |      |       |          |          |          |          |
|-------------------------|-----------------|-------|-------|------|------|-------|----------|----------|----------|----------|
| MmugDNA.14647.1.S1_at   | MmugDNA.14647.1 | 4.51  | 4.2   | 0.39 | 0.39 | 1.23  | 0.411631 | 0.584789 | 0.673566 | 0.752534 |
| MmugDNA.14648.1.S1_at   | MmugDNA.14648.1 | 6.16  | 6.33  | 0.04 | 0.34 | -1.13 | 0.140483 | 0.213384 | 0.426202 | 0.48726  |
| MmugDNA.14649.1.S1_at   | MmugDNA.14649.1 | 7.13  | 7.19  | 0.16 | 0.07 | -1.04 | 0.494908 | 0.111675 | 0.731451 | 0.376631 |
| MmugDNA.14650.1.S1_at   | MmugDNA.14650.1 | 3.85  | 4.18  | 0.34 | 0.26 | -1.26 | 0.144359 | 0.041351 | 0.431234 | 0.247995 |
| MmugDNA.14652.1.S1_at   | MmugDNA.14652.1 | 5.17  | 5.14  | 0.04 | 0.13 | 1.03  | 0.760051 | 0.564563 | 0.890079 | 0.739366 |
| MmugDNA.14653.1.S1_at   | MmugDNA.14653.1 | 5.41  | 4.9   | 0.42 | 0.36 | 1.43  | 0.094997 | 0.058655 | 0.364047 | 0.288901 |
| MmugDNA.14654.1.S1_at   | MmugDNA.14654.1 | 3.84  | 3.84  | 0.06 | 0.03 | 1     | 0.41261  | 0.841539 | 0.674202 | 0.909663 |
| MmugDNA.14655.1.S1_at   | MmugDNA.14655.1 | 3.97  | 3.91  | 0.02 | 0.21 | 1.04  | 0.648035 | 0.314855 | 0.829118 | 0.568619 |
| MmugDNA.14657.1.S1_at   | MmugDNA.14657.1 | 3     | 2.99  | 0.29 | 0.35 | 1.01  | 0.875676 | 0.680496 | 0.946699 | 0.813477 |
| MmugDNA.1466.1.S1_at    | MmugDNA.1466.1  | 9.21  | 9.35  | 0.25 | 0.08 | -1.1  | 0.987765 | 0.546743 | 0.995569 | 0.728159 |
| MmugDNA.14661.1.S1_at   | MmugDNA.14661.1 | 6.06  | 6.05  | 0.19 | 0.11 | 1.01  | 0.226527 | 0.640609 | 0.524344 | 0.789026 |
| MmugDNA.14662.1.S1_at   | MmugDNA.14662.1 | 4.38  | 4.76  | 0.67 | 0.09 | -1.3  | 0.908039 | 0.983227 | 0.961071 | 0.990726 |
| MmugDNA.14663.1.S1_at   | MmugDNA.14663.1 | 3.59  | 3.46  | 0.08 | 0.05 | 1.1   | 0.161179 | 0.184705 | 0.452738 | 0.460645 |
| MmugDNA.14664.1.S1_at   | MmugDNA.14664.1 | 11.08 | 10.98 | 0.06 | 0.07 | 1.07  | 0.191135 | 0.337352 | 0.487332 | 0.584572 |
| MmugDNA.14665.1.S1_at   | MmugDNA.14665.1 | 3.27  | 3.21  | 0.16 | 0.1  | 1.04  | 0.653178 | 0.437601 | 0.831994 | 0.656798 |
| MmugDNA.14666.1.S1_at   | MmugDNA.14666.1 | 5.23  | 5.13  | 0.19 | 0.06 | 1.07  | 0.540989 | 0.603318 | 0.761865 | 0.764049 |
| MmugDNA.14667.1.S1_at   | MmugDNA.14667.1 | 3.5   | 3.52  | 0.22 | 0.11 | -1.01 | 0.971127 | 0.977573 | 0.988523 | 0.987812 |
| MmugDNA.15185.1.S1_s_at | MmugDNA.15185.1 | 12.24 | 12.23 | 0.08 | 0.05 | 1.01  | 0.564699 | 0.013455 | 0.776286 | 0.148623 |
| MmugDNA.14669.1.S1_at   | MmugDNA.14669.1 | 3.86  | 3.26  | 0.7  | 0.08 | 1.51  | 0.237316 | 0.349612 | 0.534725 | 0.593539 |
| MmugDNA.1467.1.S1_at    | MmugDNA.1467.1  | 6.53  | 5.74  | 0.7  | 0.43 | 1.73  | 0.056601 | 0.07756  | 0.295477 | 0.323421 |
| MmugDNA.14672.1.S1_at   | MmugDNA.14672.1 | 5.35  | 5.7   | 0.24 | 0.03 | -1.27 | 0.142833 | 0.098403 | 0.42893  | 0.356531 |
| MmugDNA.14674.1.S1_at   | MmugDNA.14674.1 | 3.99  | 4.04  | 0.12 | 0.11 | -1.04 | 0.361663 | 0.197365 | 0.637014 | 0.472304 |
| MmugDNA.14674.1.S1_s_at | MmugDNA.14674.1 | 6.12  | 6.17  | 0.02 | 0.1  | -1.04 | 0.975665 | 0.928712 | 0.990389 | 0.959449 |
| MmugDNA.14676.1.S1_at   | MmugDNA.14676.1 | 3.11  | 3.2   | 0.15 | 0.08 | -1.06 | 0.630771 | 0.763708 | 0.818647 | 0.862607 |
| MmugDNA.14677.1.S1_at   | MmugDNA.14677.1 | 7.75  | 7.74  | 0.14 | 0.06 | 1.01  | 0.823814 | 0.097604 | 0.921686 | 0.355473 |
| MmugDNA.7699.1.S1_s_at  | MmugDNA.7699.1  | 7.38  | 7.48  | 0.17 | 0.03 | -1.07 | 0.395644 | 0.086133 | 0.661945 | 0.338467 |
| MmugDNA.14679.1.S1_at   | MmugDNA.14679.1 | 10.33 | 10.25 | 0.23 | 0.08 | 1.05  | 0.750483 | 0.897113 | 0.884678 | 0.941305 |
| MmugDNA.1468.1.S1_at    | MmugDNA.1468.1  | 7.56  | 7.44  | 0.38 | 0.14 | 1.09  | 0.709851 | 0.026218 | 0.862704 | 0.202901 |
| MmugDNA.14680.1.S1_at   | MmugDNA.14680.1 | 6.22  | 6.12  | 0.12 | 0.1  | 1.07  | 0.385249 | 0.202102 | 0.65405  | 0.476545 |
| MmugDNA.14681.1.S1_at   | MmugDNA.14681.1 | 5.99  | 6.32  | 0.37 | 0.1  | -1.26 | 0.151853 | 0.009091 | 0.441347 | 0.125944 |
| MmugDNA.14682.1.S1_at   | MmugDNA.14682.1 | 8.81  | 8.48  | 0.48 | 0.14 | 1.26  | 0.589606 | 0.247775 | 0.791627 | 0.517199 |
| MmugDNA.14683.1.S1_at   | MmugDNA.14683.1 | 4.16  | 4.23  | 0.69 | 0.2  | -1.05 | 0.383426 | 0.483028 | 0.652791 | 0.687687 |
| MmugDNA.14685.1.S1_at   | MmugDNA.14685.1 | 5.75  | 6.01  | 0.1  | 0.21 | -1.2  | 0.418957 | 0.002949 | 0.678626 | 0.079945 |
| MmugDNA.14687.1.S1_at   | MmugDNA.14687.1 | 7.12  | 7.13  | 1.15 | 0.34 | -1.01 | 0.390288 | 0.437202 | 0.657953 | 0.656591 |
| MmugDNA.14688.1.S1_at   | MmugDNA.14688.1 | 5.82  | 5.69  | 0.22 | 0.08 | 1.09  | 0.994306 | 0.934951 | 0.997657 | 0.963177 |
| MmugDNA.14689.1.S1_at   | MmugDNA.14689.1 | 4.69  | 5.13  | 0.22 | 0.26 | -1.35 | 0.249013 | 0.343251 | 0.544308 | 0.589001 |
| MmugDNA.1469.1.S1_at    | MmugDNA.1469.1  | 3.32  | 3.26  | 0.11 | 0.06 | 1.05  | 0.773857 | 0.984599 | 0.896381 | 0.991331 |
| MmugDNA.14690.1.S1_at   | MmugDNA.14690.1 | 7.83  | 9.57  | 1.09 | 0.35 | -3.33 | 0.083791 | 0.076922 | 0.346549 | 0.322421 |
| MmugDNA.14690.1.S1_s_at | MmugDNA.14690.1 | 7.45  | 9.06  | 1.16 | 0.2  | -3.06 | 0.095402 | 0.091785 | 0.364909 | 0.346977 |
| MmugDNA.14692.1.S1_at   | MmugDNA.14692.1 | 9.09  | 9.04  | 0.15 | 0.13 | 1.04  | 0.538539 | 0.807551 | 0.760315 | 0.889177 |
| MmugDNA.14692.1.S1_s_at | MmugDNA.14692.1 | 8.74  | 8.64  | 0.11 | 0.13 | 1.07  | 0.301451 | 0.571424 | 0.589355 | 0.743737 |
| MmugDNA.14693.1.S1_at   | MmugDNA.14693.1 | 6.16  | 6.3   | 0.34 | 0.3  | -1.1  | 0.701457 | 0.330143 | 0.858213 | 0.578987 |
| MmugDNA.33837.1.S1_s_at | MmugDNA.33837.1 | 9.06  | 8.89  | 0.13 | 0.08 | 1.13  | 0.091456 | 0.172944 | 0.359119 | 0.449582 |

|                         |                 |       |       |      |      |       |          |          |          |          |
|-------------------------|-----------------|-------|-------|------|------|-------|----------|----------|----------|----------|
| MmugDNA.14695.1.S1_at   | MmugDNA.14695.1 | 5.97  | 5.88  | 0.16 | 0.07 | 1.07  | 0.582239 | 0.776323 | 0.787134 | 0.869885 |
| MmugDNA.14696.1.S1_at   | MmugDNA.14696.1 | 8.63  | 7.89  | 0.24 | 0.17 | 1.67  | 0.01755  | 0.22709  | 0.186083 | 0.499423 |
| MmugDNA.14697.1.S1_at   | MmugDNA.14697.1 | 9.61  | 9.32  | 0.22 | 0.08 | 1.23  | 0.28181  | 0.188329 | 0.572644 | 0.46433  |
| MmugDNA.14698.1.S1_at   | MmugDNA.14698.1 | 10.27 | 10.75 | 0.15 | 0.14 | -1.39 | 0.013116 | 0.165829 | 0.165173 | 0.442152 |
| MmugDNA.14699.1.S1_at   | MmugDNA.14699.1 | 3.43  | 3.45  | 0.11 | 0.03 | -1.01 | 0.94413  | 0.084355 | 0.976486 | 0.335672 |
| MmugDNA.1470.1.S1_at    | MmugDNA.1470.1  | 6.86  | 6.86  | 0.04 | 0.11 | -1.01 | 0.801852 | 0.077428 | 0.911061 | 0.323236 |
| MmugDNA.14701.1.S1_at   | MmugDNA.14701.1 | 8.82  | 9.02  | 0.24 | 0.41 | -1.15 | 0.913277 | 0.015101 | 0.963353 | 0.156008 |
| MmugDNA.14703.1.S1_at   | MmugDNA.14703.1 | 8.31  | 8.57  | 0.46 | 0.12 | -1.2  | 0.166432 | 0.292164 | 0.45963  | 0.552327 |
| MmugDNA.14705.1.S1_at   | MmugDNA.14705.1 | 3.78  | 3.19  | 0.3  | 0.16 | 1.5   | 0.118008 | 0.127735 | 0.395593 | 0.398581 |
| MmugDNA.14706.1.S1_at   | MmugDNA.14706.1 | 8.08  | 8.06  | 0.21 | 0.12 | 1.01  | 0.381374 | 0.162783 | 0.650973 | 0.438915 |
| MmugDNA.14707.1.S1_at   | MmugDNA.14707.1 | 5.88  | 5.9   | 0.13 | 0.07 | -1.01 | 0.881899 | 0.974563 | 0.949737 | 0.986197 |
| MmugDNA.14708.1.S1_at   | MmugDNA.14708.1 | 6     | 6     | 0    | 0.07 | -1.01 | 0.479479 | 0.680843 | 0.720709 | 0.813597 |
| MmugDNA.14709.1.S1_at   | MmugDNA.14709.1 | 4.77  | 4.65  | 0.99 | 0.56 | 1.09  | 0.610714 | 0.805618 | 0.805939 | 0.888307 |
| MmugDNA.1471.1.S1_at    | MmugDNA.1471.1  | 5.71  | 5.7   | 0.2  | 0.02 | 1     | 0.40612  | 0.46907  | 0.669555 | 0.67808  |
| MmugDNA.14710.1.S1_at   | MmugDNA.14710.1 | 7.59  | 7.61  | 0.41 | 0.19 | -1.01 | 0.750446 | 0.948875 | 0.88467  | 0.97078  |
| MmugDNA.8169.1.S1_at    | MmugDNA.8169.1  | 12.37 | 12.37 | 0.21 | 0.01 | -1.01 | 0.902491 | 0.873033 | 0.958703 | 0.927822 |
| MmugDNA.8169.1.S1_s_at  | MmugDNA.8169.1  | 13    | 13.01 | 0.12 | 0.02 | -1.01 | 0.88177  | 0.865326 | 0.949726 | 0.923554 |
| MmugDNA.14714.1.S1_at   | MmugDNA.14714.1 | 5.04  | 5.18  | 0.11 | 0.11 | -1.1  | 0.57554  | 0.300916 | 0.782881 | 0.559173 |
| MmugDNA.14715.1.S1_s_at | MmugDNA.14715.1 | 7.63  | 7.67  | 0.19 | 0.44 | -1.03 | 0.541681 | 0.719227 | 0.762352 | 0.837526 |
| MmugDNA.14716.1.S1_at   | MmugDNA.14716.1 | 7.47  | 7.48  | 0.27 | 0.13 | -1    | 0.973352 | 0.550114 | 0.989318 | 0.730241 |
| MmugDNA.14717.1.S1_at   | MmugDNA.14717.1 | 12.69 | 13.08 | 0.21 | 0.1  | -1.31 | 0.029054 | 0.007649 | 0.223234 | 0.117015 |
| MmugDNA.14718.1.S1_at   | MmugDNA.14718.1 | 5.94  | 5.87  | 0.13 | 0.07 | 1.05  | 0.154219 | 0.178634 | 0.444562 | 0.454847 |
| MmugDNA.14719.1.S1_at   | MmugDNA.14719.1 | 3.69  | 3.45  | 0.36 | 0.06 | 1.18  | 0.320925 | 0.390807 | 0.605315 | 0.624547 |
| MmugDNA.14723.1.S1_at   | MmugDNA.14723.1 | 6.39  | 7.48  | 0.22 | 0.11 | -2.13 | 0.001966 | 0.005413 | 0.088979 | 0.101507 |
| MmugDNA.14724.1.S1_at   | MmugDNA.14724.1 | 7.28  | 7.23  | 0.02 | 0.13 | 1.04  | 0.214233 | 0.184887 | 0.51193  | 0.460776 |
| MmugDNA.14727.1.S1_at   | MmugDNA.14727.1 | 5.01  | 4.7   | 0.13 | 0.1  | 1.24  | 0.024541 | 0.02864  | 0.209655 | 0.210901 |
| MmugDNA.14728.1.S1_at   | MmugDNA.14728.1 | 5.83  | 5.7   | 0.21 | 0.26 | 1.09  | 0.782676 | 0.926809 | 0.900843 | 0.958404 |
| MmugDNA.14731.1.S1_at   | MmugDNA.14731.1 | 7.23  | 6.98  | 0.1  | 0.16 | 1.19  | 0.045959 | 0.055052 | 0.272011 | 0.280138 |
| MmugDNA.14732.1.S1_at   | MmugDNA.14732.1 | 4.45  | 4.48  | 0.6  | 0.23 | -1.02 | 0.527709 | 0.660141 | 0.753229 | 0.801083 |
| MmugDNA.14734.1.S1_at   | MmugDNA.14734.1 | 10.96 | 11.2  | 0.09 | 0.09 | -1.18 | 0.027626 | 0.38798  | 0.21866  | 0.62253  |
| MmugDNA.14735.1.S1_at   | MmugDNA.14735.1 | 12.51 | 12.49 | 0.16 | 0.22 | 1.01  | 0.827935 | 0.38099  | 0.923804 | 0.617476 |
| MmugDNA.14736.1.S1_at   | MmugDNA.14736.1 | 6.14  | 5.64  | 0.62 | 0.41 | 1.41  | 0.194884 | 0.441138 | 0.49141  | 0.659375 |
| MmugDNA.14738.1.S1_at   | MmugDNA.14738.1 | 10.26 | 10.12 | 0.46 | 0.08 | 1.1   | 0.830902 | 0.541908 | 0.925569 | 0.725146 |
| MmugDNA.14739.1.S1_at   | MmugDNA.14739.1 | 12.12 | 12.11 | 0.24 | 0.08 | 1.01  | 0.424912 | 0.077008 | 0.682288 | 0.322457 |
| MmugDNA.1474.1.S1_at    | MmugDNA.1474.1  | 5.29  | 5.57  | 1.28 | 0    | -1.21 | 0.56753  | 0.650603 | 0.77779  | 0.795663 |
| MmugDNA.14740.1.S1_at   | MmugDNA.14740.1 | 3.66  | 3.59  | 0.01 | 0.14 | 1.05  | 0.517491 | 0.218174 | 0.746708 | 0.49174  |
| MmugDNA.14741.1.S1_at   | MmugDNA.14741.1 | 3.8   | 3.81  | 0.51 | 0.16 | -1.01 | 0.787375 | 0.890349 | 0.903077 | 0.937508 |
| MmugDNA.14742.1.S1_at   | MmugDNA.14742.1 | 5.19  | 5.27  | 0.1  | 0.07 | -1.05 | 0.139427 | 0.172628 | 0.425003 | 0.449068 |
| MmugDNA.14744.1.S1_at   | MmugDNA.14744.1 | 5.1   | 5.12  | 0.12 | 0.17 | -1.01 | 0.691988 | 0.872795 | 0.852845 | 0.927686 |
| MmugDNA.14745.1.S1_at   | MmugDNA.14745.1 | 12.9  | 12.81 | 0.14 | 0.07 | 1.07  | 0.649424 | 0.003191 | 0.829674 | 0.08199  |
| MmugDNA.14746.1.S1_at   | MmugDNA.14746.1 | 6.17  | 6.1   | 0.42 | 0.05 | 1.05  | 0.644287 | 0.714104 | 0.826785 | 0.834149 |
| MmugDNA.14747.1.S1_at   | MmugDNA.14747.1 | 6.19  | 6.14  | 0.46 | 0.04 | 1.04  | 0.295321 | 0.285155 | 0.58412  | 0.547098 |
| MmugDNA.14748.1.S1_at   | MmugDNA.14748.1 | 7.05  | 7.42  | 0.68 | 0.34 | -1.29 | 0.461461 | 0.354904 | 0.708883 | 0.597466 |



|                         |                 |       |       |      |      |        |          |          |          |          |
|-------------------------|-----------------|-------|-------|------|------|--------|----------|----------|----------|----------|
| MmugDNA.14749.1.S1_at   | MmugDNA.14749.1 | 7.49  | 6.69  | 0.67 | 0.16 | 1.75   | 0.15175  | 0.188206 | 0.441235 | 0.464251 |
| MmugDNA.14750.1.S1_at   | MmugDNA.14750.1 | 3.9   | 3.89  | 0.12 | 0.04 | 1.01   | 0.728558 | 0.378045 | 0.873093 | 0.615351 |
| MmugDNA.14751.1.S1_at   | MmugDNA.14751.1 | 6.54  | 7.79  | 0.82 | 0.5  | -2.38  | 0.308999 | 0.68424  | 0.595457 | 0.815842 |
| MmugDNA.14752.1.S1_at   | MmugDNA.14752.1 | 4.57  | 4.54  | 0.11 | 0.07 | 1.02   | 0.244759 | 0.429495 | 0.541082 | 0.650934 |
| MmugDNA.14754.1.S1_at   | MmugDNA.14754.1 | 10.96 | 11.02 | 0.05 | 0.1  | -1.04  | 0.846209 | 0.038627 | 0.932845 | 0.241627 |
| MmugDNA.14755.1.S1_at   | MmugDNA.14755.1 | 4.6   | 4.49  | 0.07 | 0.06 | 1.08   | 0.217618 | 0.325916 | 0.515458 | 0.576181 |
| MmugDNA.14756.1.S1_at   | MmugDNA.14756.1 | 9.39  | 9.07  | 0.15 | 0.05 | 1.24   | 0.034013 | 0.294519 | 0.239011 | 0.554265 |
| MmugDNA.14757.1.S1_at   | MmugDNA.14757.1 | 4.75  | 4.47  | 0.82 | 0.26 | 1.21   | 0.493517 | 0.68185  | 0.730437 | 0.814175 |
| MmugDNA.14758.1.S1_at   | MmugDNA.14758.1 | 7.45  | 7.47  | 0.36 | 0.25 | -1.01  | 0.819308 | 0.205552 | 0.919512 | 0.47981  |
| MmugDNA.14759.1.S1_at   | MmugDNA.14759.1 | 11.78 | 11.68 | 0.21 | 0.05 | 1.08   | 0.149176 | 0.339658 | 0.437947 | 0.586242 |
| MmugDNA.14759.1.S1_s_at | MmugDNA.14759.1 | 10.54 | 10.65 | 0.04 | 0.06 | -1.08  | 0.267453 | 0.595201 | 0.560267 | 0.759023 |
| MmugDNA.1476.1.S1_at    | MmugDNA.1476.1  | 4.47  | 4.45  | 0.05 | 0.1  | 1.02   | 0.40637  | 0.52134  | 0.669705 | 0.712346 |
| MmugDNA.14760.1.S1_at   | MmugDNA.14760.1 | 5.1   | 4.53  | 0.19 | 0.18 | 1.48   | 0.033534 | 0.032874 | 0.237037 | 0.224478 |
| MmugDNA.14761.1.S1_at   | MmugDNA.14761.1 | 6.65  | 6.38  | 0.41 | 0.32 | 1.21   | 0.589823 | 0.059346 | 0.791747 | 0.29054  |
| MmugDNA.14763.1.S1_at   | MmugDNA.14763.1 | 3.44  | 3.61  | 0.13 | 0.14 | -1.12  | 0.485705 | 0.534888 | 0.725149 | 0.720595 |
| MmugDNA.14764.1.S1_at   | MmugDNA.14764.1 | 3.46  | 3.27  | 0.57 | 0.21 | 1.14   | 0.317566 | 0.314518 | 0.602329 | 0.568372 |
| MmugDNA.14766.1.S1_at   | MmugDNA.14766.1 | 5     | 8.81  | 0.9  | 0.4  | -14.08 | 0.004315 | 0.045032 | 0.111813 | 0.256697 |
| MmugDNA.14768.1.S1_at   | MmugDNA.14768.1 | 3.7   | 3.74  | 0.1  | 0.08 | -1.03  | 0.956136 | 0.99212  | 0.981989 | 0.995515 |
| MmugDNA.1477.1.S1_at    | MmugDNA.1477.1  | 6.14  | 5.73  | 0.2  | 0.1  | 1.33   | 0.033939 | 0.032129 | 0.238811 | 0.221941 |
| MmugDNA.1477.1.S1_s_at  | MmugDNA.1477.1  | 7.82  | 7.32  | 0.28 | 0.06 | 1.41   | 0.042087 | 0.037144 | 0.262198 | 0.237211 |
| MmugDNA.14771.1.S1_s_at | MmugDNA.14771.1 | 5.83  | 7.48  | 0.79 | 0.15 | -3.14  | 0.058542 | 0.094285 | 0.299106 | 0.350889 |
| MmugDNA.14774.1.S1_at   | MmugDNA.14774.1 | 4.93  | 4.59  | 0.1  | 0.09 | 1.27   | 0.019289 | 0.008041 | 0.192035 | 0.119166 |
| MmugDNA.14775.1.S1_at   | MmugDNA.14775.1 | 5.42  | 4.89  | 1.46 | 0.27 | 1.44   | 0.575965 | 0.748134 | 0.783032 | 0.853384 |
| MmugDNA.14776.1.S1_at   | MmugDNA.14776.1 | 10.71 | 10.69 | 0.25 | 0.06 | 1.01   | 0.781928 | 0.075698 | 0.900384 | 0.320271 |
| MmugDNA.14777.1.S1_at   | MmugDNA.14777.1 | 6.55  | 5.63  | 0.66 | 0.3  | 1.89   | 0.044046 | 0.029475 | 0.266926 | 0.213368 |
| MmugDNA.14779.1.S1_at   | MmugDNA.14779.1 | 3.84  | 3.76  | 0.06 | 0.09 | 1.06   | 0.073518 | 0.051936 | 0.328947 | 0.273337 |
| MmugDNA.1478.1.S1_at    | MmugDNA.1478.1  | 6.67  | 6.16  | 0.14 | 0.19 | 1.43   | 0.016627 | 0.108947 | 0.182325 | 0.372637 |
| MmugDNA.14780.1.S1_at   | MmugDNA.14780.1 | 7.23  | 5.86  | 0.17 | 0.34 | 2.58   | 0.003173 | 0.023297 | 0.101357 | 0.191315 |
| MmugDNA.14781.1.S1_at   | MmugDNA.14781.1 | 3.38  | 3.42  | 0.07 | 0.04 | -1.03  | 0.25771  | 0.176992 | 0.551942 | 0.453416 |
| MmugDNA.14782.1.S1_at   | MmugDNA.14782.1 | 9.44  | 9.65  | 0.06 | 0.01 | -1.15  | 0.006311 | 0.004198 | 0.125873 | 0.091319 |
| MmugDNA.14783.1.S1_s_at | MmugDNA.14783.1 | 3.95  | 3.77  | 0.05 | 0.08 | 1.14   | 0.060025 | 0.297455 | 0.302259 | 0.556105 |
| MmugDNA.14784.1.S1_at   | MmugDNA.14784.1 | 5.83  | 5.68  | 0.6  | 0.25 | 1.1    | 0.777299 | 0.924479 | 0.898237 | 0.957385 |
| MmugDNA.14785.1.S1_at   | MmugDNA.14785.1 | 3.69  | 3.59  | 0.33 | 0.28 | 1.08   | 0.433183 | 0.614172 | 0.68877  | 0.771143 |
| MmugDNA.14786.1.S1_at   | MmugDNA.14786.1 | 6.13  | 5.92  | 0.1  | 0.17 | 1.15   | 0.113553 | 0.496921 | 0.390238 | 0.696273 |
| MmugDNA.14787.1.S1_at   | MmugDNA.14787.1 | 8.4   | 9.21  | 0.37 | 0.08 | -1.75  | 0.01975  | 0.077795 | 0.1935   | 0.323933 |
| MmugDNA.14788.1.S1_at   | MmugDNA.14788.1 | 8.02  | 7.99  | 0.29 | 0.06 | 1.02   | 0.374958 | 0.679274 | 0.645792 | 0.81275  |
| MmugDNA.14789.1.S1_at   | MmugDNA.14789.1 | 5.13  | 4.99  | 0.17 | 0.22 | 1.1    | 0.429029 | 0.576672 | 0.685579 | 0.74731  |
| MmugDNA.1479.1.S1_s_at  | MmugDNA.1479.1  | 9.25  | 9.44  | 0.15 | 0.13 | -1.14  | 0.1556   | 0.000532 | 0.445915 | 0.0402   |
| MmugDNA.14790.1.S1_at   | MmugDNA.14790.1 | 5.29  | 5.58  | 0.11 | 0.13 | -1.22  | 0.058161 | 0.093594 | 0.298244 | 0.349952 |
| MmugDNA.14792.1.S1_at   | MmugDNA.14792.1 | 3.42  | 3.46  | 0.2  | 0    | -1.02  | 0.840544 | 0.351339 | 0.930008 | 0.59502  |
| MmugDNA.14793.1.S1_at   | MmugDNA.14793.1 | 5.04  | 5.67  | 0.89 | 0.23 | -1.55  | 0.80826  | 0.872398 | 0.914178 | 0.92745  |
| MmugDNA.14794.1.S1_at   | MmugDNA.14794.1 | 4.82  | 4.94  | 0.25 | 0.33 | -1.09  | 0.274416 | 0.460271 | 0.566281 | 0.672148 |
| MmugDNA.14795.1.S1_at   | MmugDNA.14795.1 | 5.85  | 5.69  | 0.63 | 0.09 | 1.12   | 0.2594   | 0.345486 | 0.553776 | 0.590746 |

|                         |                 |       |       |      |      |       |          |          |          |          |
|-------------------------|-----------------|-------|-------|------|------|-------|----------|----------|----------|----------|
| MmugDNA.14796.1.S1_at   | MmugDNA.14796.1 | 3.34  | 3.21  | 0.05 | 0.11 | 1.09  | 0.163795 | 0.105855 | 0.456411 | 0.368111 |
| MmugDNA.14797.1.S1_at   | MmugDNA.14797.1 | 4.67  | 4.62  | 0.31 | 0.07 | 1.03  | 0.249154 | 0.309602 | 0.544437 | 0.564987 |
| MmugDNA.14798.1.S1_at   | MmugDNA.14798.1 | 4.26  | 4.15  | 0.07 | 0.12 | 1.09  | 0.656461 | 0.813412 | 0.833833 | 0.892156 |
| MmugDNA.14799.1.S1_at   | MmugDNA.14799.1 | 4.21  | 4.21  | 0.14 | 0.03 | 1     | 0.377954 | 0.388137 | 0.648321 | 0.622607 |
| MmugDNA.148.1.S1_at     | MmugDNA.148.1   | 6.61  | 6.33  | 0.13 | 0.08 | 1.22  | 0.032505 | 0.042324 | 0.234621 | 0.250324 |
| MmugDNA.1480.1.S1_at    | MmugDNA.1480.1  | 4.75  | 4.85  | 0.51 | 0.33 | -1.08 | 0.974314 | 0.70021  | 0.989741 | 0.825987 |
| MmugDNA.14801.1.S1_at   | MmugDNA.14801.1 | 5.74  | 5.96  | 0.24 | 0.29 | -1.16 | 0.445126 | 0.895329 | 0.697715 | 0.940185 |
| MmugDNA.14802.1.S1_at   | MmugDNA.14802.1 | 4.6   | 4.57  | 0.14 | 0.08 | 1.02  | 0.781104 | 0.889476 | 0.900025 | 0.937014 |
| MmugDNA.14804.1.S1_at   | MmugDNA.14804.1 | 8.85  | 8.75  | 0.02 | 0.07 | 1.08  | 0.083725 | 0.330862 | 0.346423 | 0.57958  |
| MmugDNA.14805.1.S1_at   | MmugDNA.14805.1 | 5.17  | 5.17  | 0.43 | 0.07 | 1     | 0.993492 | 0.930823 | 0.997388 | 0.960718 |
| MmugDNA.14806.1.S1_at   | MmugDNA.14806.1 | 4.16  | 3.94  | 0.15 | 0.32 | 1.16  | 0.968108 | 0.255988 | 0.987364 | 0.523919 |
| MmugDNA.14807.1.S1_at   | MmugDNA.14807.1 | 4.16  | 4.15  | 0.17 | 0    | 1.01  | 0.594403 | 0.749605 | 0.794717 | 0.854505 |
| MmugDNA.14808.1.S1_at   | MmugDNA.14808.1 | 4.47  | 4.9   | 0.14 | 0.13 | -1.35 | 0.039061 | 0.113215 | 0.254032 | 0.379229 |
| MmugDNA.14809.1.S1_at   | MmugDNA.14809.1 | 3.67  | 4.01  | 0.22 | 0.08 | -1.26 | 0.234826 | 0.335995 | 0.532896 | 0.583601 |
| MmugDNA.14811.1.S1_at   | MmugDNA.14811.1 | 5.86  | 6.01  | 0.9  | 0.28 | -1.11 | 0.526215 | 0.629551 | 0.752424 | 0.781928 |
| MmugDNA.14812.1.S1_at   | MmugDNA.14812.1 | 7.82  | 7.94  | 0.27 | 0.03 | -1.09 | 0.588261 | 0.720782 | 0.790946 | 0.838368 |
| MmugDNA.14813.1.S1_at   | MmugDNA.14813.1 | 4.32  | 4.37  | 0.22 | 0    | -1.03 | 0.952636 | 0.993809 | 0.980494 | 0.996274 |
| MmugDNA.14814.1.S1_at   | MmugDNA.14814.1 | 5.37  | 5.42  | 0.12 | 0.18 | -1.03 | 0.585439 | 0.85274  | 0.789219 | 0.916281 |
| MmugDNA.14816.1.S1_at   | MmugDNA.14816.1 | 11.96 | 12.14 | 0.08 | 0.06 | -1.14 | 0.062483 | 0.5868   | 0.306597 | 0.753819 |
| MmugDNA.14816.1.S1_x_at | MmugDNA.14816.1 | 11.78 | 11.96 | 0.11 | 0.11 | -1.13 | 0.214708 | 0.667457 | 0.512314 | 0.805333 |
| MmugDNA.14818.1.S1_at   | MmugDNA.14818.1 | 5.05  | 5.21  | 0.21 | 0.13 | -1.12 | 0.529636 | 0.640833 | 0.75441  | 0.78921  |
| MmugDNA.1482.1.S1_at    | MmugDNA.1482.1  | 4.74  | 5.07  | 0.16 | 0.08 | -1.26 | 0.068528 | 0.086859 | 0.319606 | 0.339651 |
| MmugDNA.14820.1.S1_at   | MmugDNA.14820.1 | 2.84  | 2.86  | 0.33 | 0.25 | -1.01 | 0.663966 | 0.875656 | 0.838166 | 0.929374 |
| MmugDNA.14823.1.S1_at   | MmugDNA.14823.1 | 9.56  | 9.06  | 0.32 | 0.05 | 1.41  | 0.066784 | 0.002266 | 0.316181 | 0.07013  |
| MmugDNA.14827.1.S1_at   | MmugDNA.14827.1 | 4.56  | 5.56  | 0.44 | 0.47 | -2.01 | 0.107234 | 0.190484 | 0.381693 | 0.465906 |
| MmugDNA.14828.1.S1_at   | MmugDNA.14828.1 | 12.95 | 12.52 | 0.07 | 0.01 | 1.35  | 0.000414 | 0.000151 | 0.063209 | 0.029832 |
| MmugDNA.14829.1.S1_at   | MmugDNA.14829.1 | 10.46 | 10.05 | 0.06 | 0.14 | 1.33  | 0.014247 | 0.767879 | 0.171056 | 0.865256 |
| MmugDNA.14833.1.S1_at   | MmugDNA.14833.1 | 11.2  | 11.13 | 0.2  | 0.07 | 1.05  | 0.940505 | 0.098203 | 0.974955 | 0.356253 |
| MmugDNA.15123.1.S1_s_at | MmugDNA.15123.1 | 9.82  | 9.7   | 0.27 | 0.1  | 1.09  | 0.924273 | 0.643754 | 0.967807 | 0.791112 |
| MmugDNA.14834.1.S1_at   | MmugDNA.14834.1 | 11.67 | 10.92 | 0.67 | 0.11 | 1.68  | 0.08524  | 0.361409 | 0.34932  | 0.602196 |
| MmugDNA.14836.1.S1_at   | MmugDNA.14836.1 | 3.33  | 3.24  | 0.13 | 0.04 | 1.06  | 0.105363 | 0.090268 | 0.379299 | 0.344674 |
| MmugDNA.14837.1.S1_at   | MmugDNA.14837.1 | 4.15  | 4.15  | 0.03 | 0.05 | 1     | 0.609829 | 0.389011 | 0.805512 | 0.623288 |
| MmugDNA.1484.1.S1_at    | MmugDNA.1484.1  | 6.39  | 6.2   | 0.94 | 0.08 | 1.15  | 0.274324 | 0.287773 | 0.566281 | 0.549052 |
| MmugDNA.14840.1.S1_at   | MmugDNA.14840.1 | 3.69  | 3.7   | 0    | 0.14 | -1    | 0.935539 | 0.952542 | 0.972982 | 0.973066 |
| MmugDNA.14841.1.S1_at   | MmugDNA.14841.1 | 5.17  | 5.05  | 0.24 | 0.19 | 1.09  | 0.750361 | 0.901504 | 0.884653 | 0.943947 |
| MmugDNA.14843.1.S1_at   | MmugDNA.14843.1 | 9.03  | 9.53  | 0.33 | 0.19 | -1.41 | 0.100132 | 0.00607  | 0.37088  | 0.106175 |
| MmugDNA.14845.1.S1_at   | MmugDNA.14845.1 | 2.59  | 2.6   | 0.09 | 0.08 | -1.01 | 0.865158 | 0.721442 | 0.941431 | 0.838713 |
| MmugDNA.14845.1.S1_s_at | MmugDNA.14845.1 | 2.51  | 2.47  | 0.11 | 0.06 | 1.03  | 0.555779 | 0.718807 | 0.771458 | 0.837257 |
| MmugDNA.14846.1.S1_at   | MmugDNA.14846.1 | 8.93  | 9.08  | 0.25 | 0.12 | -1.11 | 0.444879 | 0.66396  | 0.697568 | 0.803246 |
| MmugDNA.14847.1.S1_at   | MmugDNA.14847.1 | 5.24  | 5.18  | 0.14 | 0.14 | 1.04  | 0.287768 | 0.399704 | 0.577473 | 0.629951 |
| MmugDNA.14848.1.S1_at   | MmugDNA.14848.1 | 5.79  | 5.65  | 0.53 | 0.05 | 1.1   | 0.612126 | 0.699354 | 0.806682 | 0.825344 |
| MmugDNA.14850.1.S1_at   | MmugDNA.14850.1 | 6.57  | 7.56  | 1.24 | 0.42 | -1.98 | 0.272694 | 0.419294 | 0.564775 | 0.643445 |
| MmugDNA.14851.1.S1_at   | MmugDNA.14851.1 | 4.1   | 4.02  | 0.03 | 0.22 | 1.06  | 0.769105 | 0.87645  | 0.893978 | 0.929683 |

|                         |                 |       |       |      |      |       |          |          |          |          |
|-------------------------|-----------------|-------|-------|------|------|-------|----------|----------|----------|----------|
| MmugDNA.14854.1.S1_at   | MmugDNA.14854.1 | 10.2  | 10.5  | 0.1  | 0.02 | -1.24 | 0.006213 | 0.001006 | 0.125037 | 0.050657 |
| MmugDNA.14855.1.S1_at   | MmugDNA.14855.1 | 11.53 | 11.63 | 0.26 | 0.01 | -1.07 | 0.549676 | 0.820339 | 0.767346 | 0.89648  |
| MmugDNA.14856.1.S1_at   | MmugDNA.14856.1 | 10.4  | 10.05 | 0.07 | 0.18 | 1.27  | 0.035147 | 0.273529 | 0.242214 | 0.53793  |
| MmugDNA.14859.1.S1_at   | MmugDNA.14859.1 | 6.3   | 5.95  | 0.12 | 0.24 | 1.27  | 0.093827 | 0.119606 | 0.362619 | 0.388247 |
| MmugDNA.1486.1.S1_at    | MmugDNA.1486.1  | 3.33  | 3.41  | 0.07 | 0.19 | -1.06 | 0.663284 | 0.8606   | 0.837641 | 0.920573 |
| MmugDNA.14863.1.S1_at   | MmugDNA.14863.1 | 3.76  | 3.86  | 0    | 0.11 | -1.07 | 0.16075  | 0.279679 | 0.452359 | 0.543228 |
| MmugDNA.14864.1.S1_s_at | MmugDNA.14864.1 | 9.94  | 10.17 | 0.22 | 0.05 | -1.17 | 0.344024 | 0.872854 | 0.623312 | 0.927711 |
| MmugDNA.14865.1.S1_at   | MmugDNA.14865.1 | 10.44 | 10.82 | 0.17 | 0.17 | -1.3  | 0.124138 | 0.597842 | 0.40411  | 0.760428 |
| MmugDNA.14867.1.S1_at   | MmugDNA.14867.1 | 6.75  | 6.6   | 0.9  | 0.18 | 1.11  | 0.636411 | 0.738237 | 0.822111 | 0.848245 |
| MmugDNA.14868.1.S1_at   | MmugDNA.14868.1 | 6.13  | 5.91  | 0.05 | 0.21 | 1.16  | 0.088085 | 0.141772 | 0.354244 | 0.415331 |
| MmugDNA.14869.1.S1_at   | MmugDNA.14869.1 | 3.03  | 3.14  | 0.05 | 0.14 | -1.08 | 0.31821  | 0.211636 | 0.602917 | 0.485681 |
| MmugDNA.1487.1.S1_at    | MmugDNA.1487.1  | 3.69  | 3.82  | 0.31 | 0.12 | -1.1  | 0.882711 | 0.876928 | 0.950145 | 0.929868 |
| MmugDNA.14870.1.S1_at   | MmugDNA.14870.1 | 5.41  | 5.42  | 0.06 | 0.08 | -1.01 | 0.393265 | 0.796622 | 0.660139 | 0.882754 |
| MmugDNA.14871.1.S1_at   | MmugDNA.14871.1 | 4.39  | 4.49  | 0.53 | 0.19 | -1.07 | 0.734933 | 0.213765 | 0.876604 | 0.487564 |
| MmugDNA.14873.1.S1_at   | MmugDNA.14873.1 | 7.71  | 6.49  | 0.1  | 0.33 | 2.33  | 0.002513 | 0.000152 | 0.094326 | 0.029832 |
| MmugDNA.34050.1.S1_s_at | MmugDNA.34050.1 | 6.12  | 6.11  | 0.15 | 0.28 | 1.01  | 0.721338 | 0.110215 | 0.868685 | 0.374349 |
| MmugDNA.14875.1.S1_at   | MmugDNA.14875.1 | 3.6   | 3.59  | 0.2  | 0.26 | 1.01  | 0.719131 | 0.872964 | 0.867509 | 0.927791 |
| MmugDNA.14877.1.S1_at   | MmugDNA.14877.1 | 6.03  | 6.04  | 0.26 | 0.14 | -1.01 | 0.752268 | 0.31638  | 0.885542 | 0.569809 |
| MmugDNA.14878.1.S1_at   | MmugDNA.14878.1 | 6.71  | 5.86  | 0.87 | 0.23 | 1.8   | 0.153497 | 0.095765 | 0.443379 | 0.352753 |
| MmugDNA.14879.1.S1_at   | MmugDNA.14879.1 | 5.55  | 5.11  | 0.97 | 0.24 | 1.35  | 0.235921 | 0.337146 | 0.533552 | 0.584348 |
| MmugDNA.1488.1.S1_at    | MmugDNA.1488.1  | 4.42  | 4.33  | 0.01 | 0.13 | 1.06  | 0.329868 | 0.082878 | 0.611952 | 0.332423 |
| MmugDNA.14880.1.S1_at   | MmugDNA.14880.1 | 3.94  | 3.87  | 0.05 | 0.04 | 1.05  | 0.100623 | 0.52337  | 0.371612 | 0.713698 |
| MmugDNA.14881.1.S1_at   | MmugDNA.14881.1 | 6.22  | 6.1   | 0.17 | 0.13 | 1.08  | 0.754453 | 0.015376 | 0.886787 | 0.157432 |
| MmugDNA.14882.1.S1_s_at | MmugDNA.14882.1 | 12.79 | 12.52 | 0.09 | 0.08 | 1.2   | 0.016089 | 0.046115 | 0.179398 | 0.259152 |
| MmugDNA.14883.1.S1_at   | MmugDNA.14883.1 | 4.41  | 4.17  | 0.04 | 0.05 | 1.18  | 0.003244 | 0.029227 | 0.101778 | 0.212898 |
| MmugDNA.14883.1.S1_s_at | MmugDNA.14883.1 | 10.63 | 10.7  | 0.27 | 0.12 | -1.04 | 0.901614 | 0.980022 | 0.958288 | 0.989229 |
| MmugDNA.14884.1.S1_at   | MmugDNA.14884.1 | 4.03  | 4.46  | 0.04 | 0.3  | -1.35 | 0.122806 | 0.318491 | 0.401766 | 0.571239 |
| MmugDNA.14885.1.S1_at   | MmugDNA.14885.1 | 12.15 | 12.2  | 0.09 | 0.18 | -1.04 | 0.933418 | 0.217997 | 0.97207  | 0.491614 |
| MmugDNA.14887.1.S1_at   | MmugDNA.14887.1 | 9.55  | 9.24  | 0.12 | 0.06 | 1.24  | 0.017807 | 0.132683 | 0.187001 | 0.404544 |
| MmugDNA.14888.1.S1_at   | MmugDNA.14888.1 | 7.52  | 6.68  | 0.4  | 0.47 | 1.79  | 0.085287 | 0.031734 | 0.34932  | 0.220562 |
| MmugDNA.14889.1.S1_at   | MmugDNA.14889.1 | 6.03  | 5.94  | 0.13 | 0.04 | 1.07  | 0.143233 | 0.152289 | 0.429519 | 0.427072 |
| MmugDNA.1489.1.S1_s_at  | MmugDNA.1489.1  | 7.77  | 7.59  | 0.24 | 0.13 | 1.13  | 0.452258 | 0.708475 | 0.702807 | 0.830919 |
| MmugDNA.14890.1.S1_at   | MmugDNA.14890.1 | 8.62  | 8.55  | 0.36 | 0.09 | 1.06  | 0.905367 | 0.078719 | 0.960065 | 0.325673 |
| MmugDNA.14891.1.S1_at   | MmugDNA.14891.1 | 6.06  | 6.35  | 0.92 | 0.03 | -1.22 | 0.663317 | 0.626757 | 0.837643 | 0.779979 |
| MmugDNA.14892.1.S1_at   | MmugDNA.14892.1 | 7.63  | 8.42  | 0.15 | 0.1  | -1.73 | 0.001373 | 0.018667 | 0.079595 | 0.171716 |
| MmugDNA.14894.1.S1_at   | MmugDNA.14894.1 | 3.14  | 3.27  | 0.07 | 0.23 | -1.09 | 0.353892 | 0.445268 | 0.631084 | 0.662338 |
| MmugDNA.14895.1.S1_at   | MmugDNA.14895.1 | 6.24  | 6.2   | 0.44 | 0.03 | 1.03  | 0.834219 | 0.96394  | 0.927018 | 0.979994 |
| MmugDNA.14896.1.S1_at   | MmugDNA.14896.1 | 12.35 | 12.02 | 0.15 | 0.12 | 1.25  | 0.052461 | 0.066419 | 0.286213 | 0.303385 |
| MmugDNA.14898.1.S1_at   | MmugDNA.14898.1 | 5.61  | 5.52  | 0.95 | 0.03 | 1.07  | 0.309593 | 0.355015 | 0.595886 | 0.597466 |
| MmugDNA.149.1.S1_at     | MmugDNA.149.1   | 7     | 6.87  | 0.15 | 0.2  | 1.1   | 0.917195 | 0.487033 | 0.964746 | 0.690176 |
| MmugDNA.1490.1.S1_at    | MmugDNA.1490.1  | 6.09  | 6.03  | 0.22 | 0.09 | 1.04  | 0.651294 | 0.872816 | 0.830638 | 0.92769  |
| MmugDNA.14900.1.S1_at   | MmugDNA.14900.1 | 2.89  | 2.95  | 0.04 | 0.08 | -1.04 | 0.543873 | 0.405563 | 0.763667 | 0.633804 |
| MmugDNA.14901.1.S1_at   | MmugDNA.14901.1 | 5.62  | 5.03  | 0.44 | 0.94 | 1.5   | 0.548563 | 0.212561 | 0.766578 | 0.486502 |

|                         |                 |       |       |      |      |       |          |          |          |          |
|-------------------------|-----------------|-------|-------|------|------|-------|----------|----------|----------|----------|
| MmugDNA.14902.1.S1_at   | MmugDNA.14902.1 | 6.46  | 6.32  | 0.15 | 0.04 | 1.1   | 0.078511 | 0.284556 | 0.338261 | 0.546721 |
| MmugDNA.14903.1.S1_at   | MmugDNA.14903.1 | 12.91 | 12.8  | 0.13 | 0.03 | 1.08  | 0.626346 | 0.717977 | 0.815943 | 0.836769 |
| MmugDNA.14904.1.S1_at   | MmugDNA.14904.1 | 10.57 | 10.95 | 0.31 | 0.07 | -1.3  | 0.085934 | 0.0028   | 0.350263 | 0.078022 |
| MmugDNA.14905.1.S1_at   | MmugDNA.14905.1 | 3.87  | 3.38  | 0.34 | 0.08 | 1.4   | 0.221691 | 0.283046 | 0.519652 | 0.545692 |
| MmugDNA.14906.1.S1_s_at | MmugDNA.14906.1 | 5.65  | 5.58  | 0.17 | 0.03 | 1.05  | 0.157315 | 0.271777 | 0.448021 | 0.536577 |
| MmugDNA.14907.1.S1_at   | MmugDNA.14907.1 | 5.24  | 4.82  | 0.28 | 0.41 | 1.34  | 0.438387 | 0.665732 | 0.692967 | 0.804156 |
| MmugDNA.1491.1.S1_at    | MmugDNA.1491.1  | 3.34  | 3.26  | 0.06 | 0.13 | 1.06  | 0.542163 | 0.733342 | 0.762647 | 0.845598 |
| MmugDNA.14910.1.S1_at   | MmugDNA.14910.1 | 6.68  | 7.59  | 0.3  | 0.33 | -1.88 | 0.023837 | 0.129165 | 0.207466 | 0.400611 |
| MmugDNA.14911.1.S1_at   | MmugDNA.14911.1 | 7.29  | 7.55  | 0.17 | 0.06 | -1.2  | 0.24507  | 0.003183 | 0.541271 | 0.081924 |
| MmugDNA.14914.1.S1_at   | MmugDNA.14914.1 | 3.89  | 3.94  | 0.06 | 0.07 | -1.03 | 0.651633 | 0.751383 | 0.830755 | 0.855447 |
| MmugDNA.14915.1.S1_at   | MmugDNA.14915.1 | 3.19  | 3.32  | 0.08 | 0.19 | -1.1  | 0.854832 | 0.933455 | 0.93686  | 0.962195 |
| MmugDNA.14916.1.S1_at   | MmugDNA.14916.1 | 3.72  | 3.57  | 0.1  | 0.09 | 1.11  | 0.105892 | 0.148783 | 0.379885 | 0.423201 |
| MmugDNA.14917.1.S1_at   | MmugDNA.14917.1 | 5.09  | 5.13  | 0.22 | 0.02 | -1.03 | 0.732796 | 0.581871 | 0.875306 | 0.750784 |
| MmugDNA.14918.1.S1_at   | MmugDNA.14918.1 | 11.6  | 10.38 | 0.67 | 0.2  | 2.33  | 0.040482 | 0.016157 | 0.257596 | 0.161102 |
| MmugDNA.14919.1.S1_at   | MmugDNA.14919.1 | 5.43  | 5.28  | 0.28 | 0.18 | 1.11  | 0.401706 | 0.607642 | 0.666287 | 0.766457 |
| MmugDNA.1492.1.S1_at    | MmugDNA.1492.1  | 8.58  | 8.76  | 0.06 | 0.15 | -1.14 | 0.101456 | 0.11518  | 0.372928 | 0.38209  |
| MmugDNA.14921.1.S1_at   | MmugDNA.14921.1 | 9.2   | 9.21  | 0.24 | 0.59 | -1.01 | 0.803574 | 0.582136 | 0.911852 | 0.750784 |
| MmugDNA.14922.1.S1_at   | MmugDNA.14922.1 | 4.75  | 4.72  | 0.14 | 0.07 | 1.02  | 0.835715 | 0.720327 | 0.927795 | 0.838252 |
| MmugDNA.14923.1.S1_at   | MmugDNA.14923.1 | 6.22  | 6.42  | 0.43 | 0.05 | -1.15 | 0.126674 | 0.233034 | 0.408085 | 0.50445  |
| MmugDNA.14924.1.S1_at   | MmugDNA.14924.1 | 4.53  | 3.91  | 0.97 | 1.06 | 1.53  | 0.987031 | 0.652206 | 0.995278 | 0.796592 |
| MmugDNA.14926.1.S1_at   | MmugDNA.14926.1 | 4.06  | 3.92  | 0.57 | 0.12 | 1.1   | 0.637584 | 0.809516 | 0.822536 | 0.890191 |
| MmugDNA.14927.1.S1_at   | MmugDNA.14927.1 | 5.06  | 5.12  | 0.13 | 0.11 | -1.05 | 0.519231 | 0.114254 | 0.747956 | 0.380761 |
| MmugDNA.14928.1.S1_at   | MmugDNA.14928.1 | 3.25  | 3.23  | 0.73 | 0.07 | 1.02  | 0.314729 | 0.350258 | 0.600113 | 0.594012 |
| MmugDNA.14930.1.S1_at   | MmugDNA.14930.1 | 8.46  | 10.73 | 0.53 | 0.21 | -4.83 | 0.002125 | 0.001729 | 0.090208 | 0.062895 |
| MmugDNA.14931.1.S1_at   | MmugDNA.14931.1 | 6.27  | 6.26  | 0.15 | 0.06 | 1.01  | 0.561697 | 0.49957  | 0.774555 | 0.698394 |
| MmugDNA.14932.1.S1_at   | MmugDNA.14932.1 | 5.04  | 5.09  | 0.17 | 0.15 | -1.04 | 0.244801 | 0.661699 | 0.541082 | 0.801903 |
| MmugDNA.14933.1.S1_at   | MmugDNA.14933.1 | 10.64 | 10.43 | 0.14 | 0.17 | 1.16  | 0.253466 | 0.3558   | 0.547829 | 0.597864 |
| MmugDNA.22780.1.S1_s_at | MmugDNA.22780.1 | 11.98 | 11.82 | 0.08 | 0.08 | 1.12  | 0.072569 | 0.067032 | 0.327336 | 0.304872 |
| MmugDNA.14934.1.S1_at   | MmugDNA.14934.1 | 6.2   | 6.99  | 0.26 | 0.06 | -1.73 | 0.004886 | 0.019421 | 0.115123 | 0.175117 |
| MmugDNA.14935.1.S1_at   | MmugDNA.14935.1 | 4.27  | 4.15  | 0.1  | 0.39 | 1.09  | 0.490359 | 0.802366 | 0.728455 | 0.886163 |
| MmugDNA.14937.1.S1_at   | MmugDNA.14937.1 | 7.76  | 7.38  | 0.53 | 0.26 | 1.3   | 0.808279 | 0.959497 | 0.914178 | 0.977017 |
| MmugDNA.14938.1.S1_at   | MmugDNA.14938.1 | 4.33  | 4.22  | 1.19 | 0.12 | 1.08  | 0.284229 | 0.459552 | 0.574388 | 0.671854 |
| MmugDNA.14939.1.S1_at   | MmugDNA.14939.1 | 5.4   | 5.12  | 0.44 | 0.13 | 1.22  | 0.08321  | 0.526416 | 0.345461 | 0.715557 |
| MmugDNA.14940.1.S1_at   | MmugDNA.14940.1 | 6.03  | 6.23  | 0.12 | 0.21 | -1.15 | 0.140675 | 0.786444 | 0.426401 | 0.87634  |
| MmugDNA.14941.1.S1_at   | MmugDNA.14941.1 | 3.64  | 3.65  | 0.15 | 0.1  | -1    | 0.629013 | 0.609428 | 0.817604 | 0.767768 |
| MmugDNA.14942.1.S1_at   | MmugDNA.14942.1 | 8.77  | 8.73  | 0.08 | 0.13 | 1.03  | 0.903333 | 0.168987 | 0.959027 | 0.445561 |
| MmugDNA.14943.1.S1_at   | MmugDNA.14943.1 | 3.57  | 3.56  | 0.25 | 0.15 | 1.01  | 0.432655 | 0.480626 | 0.688365 | 0.685926 |
| MmugDNA.14948.1.S1_at   | MmugDNA.14948.1 | 3.68  | 3.81  | 0.15 | 0.17 | -1.09 | 0.165782 | 0.208646 | 0.458756 | 0.482544 |
| MmugDNA.1495.1.S1_at    | MmugDNA.1495.1  | 6.13  | 6.08  | 0.11 | 0.05 | 1.04  | 0.764782 | 0.111133 | 0.892078 | 0.375714 |
| MmugDNA.14952.1.S1_at   | MmugDNA.14952.1 | 10.5  | 10.19 | 0.33 | 0.07 | 1.24  | 0.624021 | 0.31499  | 0.814567 | 0.568759 |
| MmugDNA.14952.1.S1_s_at | MmugDNA.14952.1 | 10.28 | 9.86  | 0.29 | 0.13 | 1.34  | 0.229862 | 0.173487 | 0.528728 | 0.449938 |
| MmugDNA.14953.1.S1_at   | MmugDNA.14953.1 | 3.01  | 3.09  | 0.15 | 0.21 | -1.05 | 0.868617 | 0.888085 | 0.943544 | 0.936183 |
| MmugDNA.14956.1.S1_at   | MmugDNA.14956.1 | 8.6   | 7.08  | 0.24 | 0.15 | 2.87  | 0.00073  | 0.000175 | 0.072318 | 0.030511 |

|                         |                 |       |       |      |      |       |          |          |          |          |
|-------------------------|-----------------|-------|-------|------|------|-------|----------|----------|----------|----------|
| MmugDNA.14957.1.S1_at   | MmugDNA.14957.1 | 4.42  | 4.22  | 0.27 | 0.07 | 1.14  | 0.095469 | 0.191041 | 0.364961 | 0.466313 |
| MmugDNA.14958.1.S1_at   | MmugDNA.14958.1 | 7.77  | 7.25  | 0.05 | 0.14 | 1.44  | 0.003961 | 0.020579 | 0.108453 | 0.179964 |
| MmugDNA.1496.1.S1_at    | MmugDNA.1496.1  | 6.86  | 7.56  | 0.25 | 0.11 | -1.63 | 0.014281 | 0.029576 | 0.171355 | 0.213628 |
| MmugDNA.1496.1.S1_s_at  | MmugDNA.1496.1  | 7.5   | 8.45  | 0.25 | 0.09 | -1.93 | 0.003666 | 0.021075 | 0.105789 | 0.181869 |
| MmugDNA.14960.1.S1_at   | MmugDNA.14960.1 | 3.27  | 3.33  | 0.1  | 0.05 | -1.04 | 0.595132 | 0.159644 | 0.795091 | 0.435785 |
| MmugDNA.14961.1.S1_at   | MmugDNA.14961.1 | 4.99  | 5.25  | 0.15 | 0.16 | -1.19 | 0.319761 | 0.489536 | 0.604318 | 0.691824 |
| MmugDNA.14963.1.S1_at   | MmugDNA.14963.1 | 6.95  | 7.05  | 0.11 | 0.06 | -1.07 | 0.175952 | 0.05792  | 0.470305 | 0.287131 |
| MmugDNA.14965.1.S1_at   | MmugDNA.14965.1 | 10.12 | 9.7   | 0.25 | 0.35 | 1.34  | 0.335721 | 0.121095 | 0.616567 | 0.390109 |
| MmugDNA.14966.1.S1_at   | MmugDNA.14966.1 | 8.53  | 8.65  | 0.1  | 0.28 | -1.09 | 0.691442 | 0.618137 | 0.85245  | 0.773929 |
| MmugDNA.14968.1.S1_at   | MmugDNA.14968.1 | 5.09  | 4.92  | 0.19 | 0.86 | 1.12  | 0.870862 | 0.822239 | 0.944458 | 0.897741 |
| MmugDNA.14969.1.S1_at   | MmugDNA.14969.1 | 6.76  | 6.76  | 0.17 | 0.11 | -1    | 0.884924 | 0.088527 | 0.951005 | 0.341947 |
| MmugDNA.1497.1.S1_at    | MmugDNA.1497.1  | 8.52  | 8.29  | 0.13 | 0.16 | 1.17  | 0.148693 | 0.002557 | 0.437305 | 0.074768 |
| MmugDNA.14971.1.S1_at   | MmugDNA.14971.1 | 7.95  | 6.14  | 0.75 | 0.48 | 3.51  | 0.039169 | 0.049454 | 0.25435  | 0.267334 |
| MmugDNA.14972.1.S1_at   | MmugDNA.14972.1 | 7.85  | 7.76  | 0.36 | 0.14 | 1.06  | 0.765582 | 0.061654 | 0.892487 | 0.295098 |
| MmugDNA.14974.1.S1_at   | MmugDNA.14974.1 | 10.77 | 11.01 | 0.13 | 0.04 | -1.18 | 0.0279   | 0.048759 | 0.219644 | 0.265764 |
| MmugDNA.14975.1.S1_at   | MmugDNA.14975.1 | 4.15  | 4.05  | 0.19 | 0.11 | 1.07  | 0.236635 | 0.429586 | 0.534328 | 0.650961 |
| MmugDNA.14976.1.S1_at   | MmugDNA.14976.1 | 10.2  | 10.14 | 0.54 | 0.05 | 1.05  | 0.480252 | 0.795244 | 0.721244 | 0.882019 |
| MmugDNA.14977.1.S1_at   | MmugDNA.14977.1 | 6.7   | 7.07  | 0.24 | 0.06 | -1.29 | 0.056654 | 0.226679 | 0.295485 | 0.49914  |
| MmugDNA.2806.1.S1_s_at  | MmugDNA.2806.1  | 6.84  | 7.86  | 0.41 | 0.16 | -2.03 | 0.045599 | 0.252283 | 0.271011 | 0.520953 |
| MmugDNA.14979.1.S1_at   | MmugDNA.14979.1 | 6.27  | 6.47  | 0.13 | 0.08 | -1.15 | 0.443473 | 0.380641 | 0.696562 | 0.6173   |
| MmugDNA.14980.1.S1_at   | MmugDNA.14980.1 | 4.74  | 4.81  | 0.15 | 0.19 | -1.05 | 0.4566   | 0.471553 | 0.705861 | 0.679515 |
| MmugDNA.14981.1.S1_at   | MmugDNA.14981.1 | 2.99  | 3.03  | 0.05 | 0.04 | -1.03 | 0.854366 | 0.952402 | 0.936628 | 0.973038 |
| MmugDNA.14983.1.S1_at   | MmugDNA.14983.1 | 4.86  | 5.37  | 1.21 | 0.23 | -1.42 | 0.633866 | 0.640661 | 0.820543 | 0.789053 |
| MmugDNA.14984.1.S1_s_at | MmugDNA.14984.1 | 7.8   | 7.67  | 0.07 | 0.1  | 1.1   | 0.051092 | 0.029119 | 0.283595 | 0.212733 |
| MmugDNA.14986.1.S1_at   | MmugDNA.14986.1 | 3.15  | 3.3   | 0.14 | 0.07 | -1.1  | 0.520212 | 0.420322 | 0.74869  | 0.644086 |
| MmugDNA.14987.1.S1_at   | MmugDNA.14987.1 | 10.58 | 9.89  | 0.29 | 0.22 | 1.62  | 0.036077 | 0.235365 | 0.244978 | 0.506412 |
| MmugDNA.14988.1.S1_at   | MmugDNA.14988.1 | 8.52  | 8.47  | 0.63 | 0.2  | 1.04  | 0.466492 | 0.229455 | 0.712253 | 0.501527 |
| MmugDNA.14990.1.S1_at   | MmugDNA.14990.1 | 5.27  | 4.12  | 1.43 | 1.07 | 2.23  | 0.521902 | 0.697023 | 0.749453 | 0.824045 |
| MmugDNA.14991.1.S1_at   | MmugDNA.14991.1 | 3.65  | 3.28  | 0.42 | 0.18 | 1.29  | 0.272946 | 0.329407 | 0.5651   | 0.578733 |
| MmugDNA.14993.1.S1_at   | MmugDNA.14993.1 | 3.46  | 3.19  | 0.16 | 0.14 | 1.21  | 0.132955 | 0.200866 | 0.416366 | 0.475369 |
| MmugDNA.14994.1.S1_at   | MmugDNA.14994.1 | 5.68  | 5.62  | 0.26 | 0.01 | 1.05  | 0.678202 | 0.674164 | 0.846511 | 0.809624 |
| MmugDNA.14996.1.S1_at   | MmugDNA.14996.1 | 12.39 | 12.35 | 0.16 | 0.04 | 1.03  | 0.820501 | 0.143351 | 0.919941 | 0.417349 |
| MmugDNA.14997.1.S1_at   | MmugDNA.14997.1 | 12.02 | 12.04 | 0.15 | 0.04 | -1.02 | 0.211382 | 0.362977 | 0.509163 | 0.603471 |
| MmugDNA.14998.1.S1_at   | MmugDNA.14998.1 | 5.38  | 5.12  | 0.37 | 0.23 | 1.2   | 0.353696 | 0.480233 | 0.63089  | 0.68574  |
| MmugDNA.15.1.S1_at      | MmugDNA.15.1    | 7.99  | 7.68  | 0.59 | 0.26 | 1.24  | 0.312812 | 0.24934  | 0.598778 | 0.518461 |
| MmugDNA.1500.1.S1_at    | MmugDNA.1500.1  | 4.05  | 3.68  | 0.35 | 0.55 | 1.29  | 0.393556 | 0.574331 | 0.660319 | 0.745794 |
| MmugDNA.15000.1.S1_at   | MmugDNA.15000.1 | 4.54  | 4.44  | 0.36 | 0.34 | 1.07  | 0.754603 | 0.405271 | 0.886871 | 0.63364  |
| MmugDNA.15001.1.S1_at   | MmugDNA.15001.1 | 3.77  | 3.78  | 0.09 | 0.05 | -1.01 | 0.539065 | 0.281965 | 0.760526 | 0.544868 |
| MmugDNA.15003.1.S1_at   | MmugDNA.15003.1 | 8.71  | 10.22 | 0.53 | 0.11 | -2.84 | 0.008079 | 0.068618 | 0.138956 | 0.308486 |
| MmugDNA.15005.1.S1_at   | MmugDNA.15005.1 | 8.6   | 8.93  | 0.14 | 0.46 | -1.26 | 0.959108 | 0.758876 | 0.983307 | 0.859892 |
| MmugDNA.15006.1.S1_at   | MmugDNA.15006.1 | 9.39  | 9.16  | 0.33 | 0.15 | 1.17  | 0.547842 | 0.648599 | 0.766242 | 0.794369 |
| MmugDNA.15007.1.S1_at   | MmugDNA.15007.1 | 5.6   | 5.94  | 0.94 | 0.22 | -1.27 | 0.548649 | 0.570524 | 0.766613 | 0.743151 |
| MmugDNA.15008.1.S1_at   | MmugDNA.15008.1 | 5.09  | 5.1   | 0.11 | 0.21 | -1    | 0.498358 | 0.8708   | 0.733594 | 0.926571 |

|                         |                 |       |       |      |      |       |          |          |          |          |
|-------------------------|-----------------|-------|-------|------|------|-------|----------|----------|----------|----------|
| MmugDNA.15009.1.S1_at   | MmugDNA.15009.1 | 6.11  | 6.01  | 0.06 | 0.08 | 1.08  | 0.089496 | 0.13997  | 0.356406 | 0.413309 |
| MmugDNA.15011.1.S1_at   | MmugDNA.15011.1 | 4.66  | 5.51  | 0.27 | 0.2  | -1.8  | 0.012213 | 0.032051 | 0.160818 | 0.221603 |
| MmugDNA.15012.1.S1_at   | MmugDNA.15012.1 | 7.47  | 6.88  | 0.63 | 0.07 | 1.51  | 0.295858 | 0.047468 | 0.584638 | 0.262486 |
| MmugDNA.15013.1.S1_at   | MmugDNA.15013.1 | 4.15  | 4.17  | 0.15 | 0.06 | -1.01 | 0.960822 | 0.55838  | 0.983986 | 0.735578 |
| MmugDNA.15015.1.S1_at   | MmugDNA.15015.1 | 3.07  | 3.17  | 0.28 | 0.1  | -1.07 | 0.747592 | 0.355067 | 0.883101 | 0.59749  |
| MmugDNA.15016.1.S1_at   | MmugDNA.15016.1 | 6.19  | 6.2   | 0.1  | 0.11 | -1.01 | 0.603989 | 0.050021 | 0.801436 | 0.268897 |
| MmugDNA.15017.1.S1_s_at | MmugDNA.15017.1 | 3.09  | 3.12  | 0.27 | 0.39 | -1.02 | 0.214602 | 0.192708 | 0.512256 | 0.468219 |
| MmugDNA.15018.1.S1_at   | MmugDNA.15018.1 | 4.27  | 3.78  | 0.21 | 0.03 | 1.41  | 0.01435  | 0.006495 | 0.171567 | 0.109521 |
| MmugDNA.15019.1.S1_at   | MmugDNA.15019.1 | 4.5   | 4.47  | 0.16 | 0.1  | 1.02  | 0.345515 | 0.33648  | 0.624476 | 0.583831 |
| MmugDNA.1502.1.S1_at    | MmugDNA.1502.1  | 3.51  | 3.28  | 0.08 | 0.15 | 1.17  | 0.113958 | 0.261503 | 0.390682 | 0.527999 |
| MmugDNA.15021.1.S1_at   | MmugDNA.15021.1 | 8.04  | 8.23  | 0.52 | 0.12 | -1.14 | 0.462388 | 0.71879  | 0.709639 | 0.837255 |
| MmugDNA.15021.1.S1_s_at | MmugDNA.15021.1 | 6.95  | 6.92  | 0.17 | 0.09 | 1.02  | 0.59597  | 0.514118 | 0.795524 | 0.707434 |
| MmugDNA.15023.1.S1_at   | MmugDNA.15023.1 | 8.39  | 7.36  | 1.39 | 0.5  | 2.04  | 0.346081 | 0.575273 | 0.624849 | 0.74643  |
| MmugDNA.15024.1.S1_at   | MmugDNA.15024.1 | 2.84  | 2.88  | 0.25 | 0.19 | -1.03 | 0.851486 | 0.981723 | 0.935336 | 0.989984 |
| MmugDNA.15025.1.S1_at   | MmugDNA.15025.1 | 3.98  | 3.81  | 0.24 | 0.17 | 1.13  | 0.662018 | 0.754863 | 0.836881 | 0.857323 |
| MmugDNA.15026.1.S1_at   | MmugDNA.15026.1 | 11.8  | 11.79 | 0.06 | 0.07 | 1.01  | 0.879464 | 0.731122 | 0.948738 | 0.844198 |
| MmugDNA.15027.1.S1_s_at | MmugDNA.15027.1 | 5.8   | 5.81  | 0.35 | 0.03 | -1.01 | 0.401939 | 0.745139 | 0.666434 | 0.852267 |
| MmugDNA.15028.1.S1_at   | MmugDNA.15028.1 | 3.06  | 2.78  | 0.15 | 0.06 | 1.21  | 0.110372 | 0.133764 | 0.385692 | 0.405752 |
| MmugDNA.15029.1.S1_at   | MmugDNA.15029.1 | 7.2   | 6.78  | 0.22 | 0.3  | 1.34  | 0.212651 | 0.592741 | 0.510654 | 0.75786  |
| MmugDNA.1503.1.S1_at    | MmugDNA.1503.1  | 4.84  | 4.87  | 0.32 | 0.06 | -1.02 | 0.840252 | 0.798769 | 0.929894 | 0.884072 |
| MmugDNA.15030.1.S1_at   | MmugDNA.15030.1 | 7.2   | 7.16  | 0.11 | 0.04 | 1.03  | 0.603597 | 0.209196 | 0.801114 | 0.483016 |
| MmugDNA.15031.1.S1_s_at | MmugDNA.15031.1 | 4.6   | 4.94  | 0.14 | 0.52 | -1.27 | 0.306822 | 0.413528 | 0.593617 | 0.639648 |
| MmugDNA.15032.1.S1_at   | MmugDNA.15032.1 | 10.91 | 10.92 | 0.38 | 0.1  | -1.01 | 0.994411 | 0.359957 | 0.997657 | 0.601195 |
| MmugDNA.33540.1.S1_s_at | MmugDNA.33540.1 | 3.44  | 3.38  | 0.12 | 0.14 | 1.04  | 0.504629 | 0.59446  | 0.737776 | 0.758623 |
| MmugDNA.15034.1.S1_at   | MmugDNA.15034.1 | 4.26  | 4.55  | 0.09 | 0.22 | -1.22 | 0.125435 | 0.186254 | 0.405922 | 0.462138 |
| MmugDNA.15035.1.S1_at   | MmugDNA.15035.1 | 3.92  | 3.76  | 0.25 | 0.07 | 1.12  | 0.706954 | 0.83961  | 0.861311 | 0.908582 |
| MmugDNA.15036.1.S1_at   | MmugDNA.15036.1 | 7.76  | 7.26  | 0.06 | 0.04 | 1.42  | 0.000208 | 0.259849 | 0.053494 | 0.526735 |
| MmugDNA.15038.1.S1_at   | MmugDNA.15038.1 | 3.64  | 3.85  | 1.03 | 0.56 | -1.15 | 0.623482 | 0.579366 | 0.814223 | 0.749058 |
| MmugDNA.15039.1.S1_at   | MmugDNA.15039.1 | 6.75  | 6.75  | 0.32 | 0.02 | -1    | 0.368621 | 0.093198 | 0.642282 | 0.34931  |
| MmugDNA.1504.1.S1_at    | MmugDNA.1504.1  | 7.06  | 6.55  | 0.32 | 0.29 | 1.42  | 0.270864 | 0.436917 | 0.562863 | 0.656357 |
| MmugDNA.15040.1.S1_at   | MmugDNA.15040.1 | 12.62 | 13.11 | 0.17 | 0.14 | -1.4  | 0.044761 | 0.004909 | 0.268899 | 0.097662 |
| MmugDNA.15041.1.S1_at   | MmugDNA.15041.1 | 5.81  | 5.68  | 0.31 | 0.11 | 1.1   | 0.820003 | 0.493711 | 0.919687 | 0.694316 |
| MmugDNA.15043.1.S1_at   | MmugDNA.15043.1 | 8.7   | 11.07 | 0.88 | 0.27 | -5.17 | 0.027932 | 0.327404 | 0.219721 | 0.577284 |
| MmugDNA.15047.1.S1_s_at | MmugDNA.15047.1 | 12.87 | 12.67 | 0.09 | 0.03 | 1.15  | 0.018048 | 0.118012 | 0.187335 | 0.385881 |
| MmugDNA.15048.1.S1_at   | MmugDNA.15048.1 | 9.34  | 9.09  | 0.14 | 0.05 | 1.19  | 0.019599 | 0.201514 | 0.192909 | 0.476036 |
| MmugDNA.15049.1.S1_at   | MmugDNA.15049.1 | 11.74 | 11.87 | 0.23 | 0.03 | -1.09 | 0.987313 | 0.101319 | 0.995376 | 0.361094 |
| MmugDNA.15050.1.S1_at   | MmugDNA.15050.1 | 9.62  | 9.66  | 0.18 | 0.14 | -1.03 | 0.523697 | 0.007559 | 0.750563 | 0.116437 |
| MmugDNA.15050.1.S1_x_at | MmugDNA.15050.1 | 9.8   | 9.84  | 0.15 | 0.18 | -1.03 | 0.560976 | 0.010264 | 0.774122 | 0.132661 |
| MmugDNA.15051.1.S1_at   | MmugDNA.15051.1 | 9.85  | 10.12 | 0.1  | 0.13 | -1.2  | 0.0896   | 0.685925 | 0.356523 | 0.81668  |
| MmugDNA.15053.1.S1_at   | MmugDNA.15053.1 | 3.51  | 3.52  | 0.3  | 0.14 | -1.01 | 0.303483 | 0.323913 | 0.590969 | 0.574658 |
| MmugDNA.15056.1.S1_at   | MmugDNA.15056.1 | 5.87  | 5.8   | 0.18 | 0.2  | 1.05  | 0.806259 | 0.887464 | 0.913185 | 0.935867 |
| MmugDNA.15057.1.S1_at   | MmugDNA.15057.1 | 4.08  | 3.5   | 0.17 | 0.06 | 1.49  | 0.009622 | 0.005205 | 0.14832  | 0.100027 |
| MmugDNA.15059.1.S1_at   | MmugDNA.15059.1 | 7.3   | 6.94  | 0.28 | 0.05 | 1.29  | 0.09893  | 0.000946 | 0.369803 | 0.049071 |

|                         |                 |       |       |      |      |       |          |          |          |          |
|-------------------------|-----------------|-------|-------|------|------|-------|----------|----------|----------|----------|
| MmugDNA.1506.1.S1_at    | MmugDNA.1506.1  | 8.46  | 9.08  | 0.5  | 0.21 | -1.53 | 0.064703 | 0.2079   | 0.31107  | 0.482049 |
| MmugDNA.15060.1.S1_at   | MmugDNA.15060.1 | 7.08  | 7.24  | 0.39 | 0.12 | -1.12 | 0.132587 | 0.323542 | 0.415892 | 0.574497 |
| MmugDNA.15061.1.S1_at   | MmugDNA.15061.1 | 5.87  | 7.28  | 0.49 | 0.13 | -2.66 | 0.010123 | 0.016313 | 0.150362 | 0.161818 |
| MmugDNA.15065.1.S1_at   | MmugDNA.15065.1 | 3.54  | 3.25  | 0.24 | 0.02 | 1.22  | 0.110833 | 0.294283 | 0.386338 | 0.55407  |
| MmugDNA.15066.1.S1_at   | MmugDNA.15066.1 | 6.3   | 6.26  | 0.2  | 0.04 | 1.03  | 0.625781 | 0.885969 | 0.815566 | 0.935119 |
| MmugDNA.15067.1.S1_at   | MmugDNA.15067.1 | 5.44  | 5.12  | 0.17 | 0.18 | 1.25  | 0.08317  | 0.022358 | 0.345425 | 0.187169 |
| MmugDNA.15068.1.S1_at   | MmugDNA.15068.1 | 4.8   | 4.73  | 0.24 | 0.58 | 1.05  | 0.838395 | 0.469709 | 0.92909  | 0.678355 |
| MmugDNA.15069.1.S1_at   | MmugDNA.15069.1 | 6.75  | 6.2   | 0.34 | 0.19 | 1.46  | 0.144098 | 0.152982 | 0.430916 | 0.427792 |
| MmugDNA.1507.1.S1_at    | MmugDNA.1507.1  | 3.16  | 3.17  | 0.84 | 0.29 | -1.01 | 0.817885 | 0.901928 | 0.918696 | 0.944174 |
| MmugDNA.15070.1.S1_at   | MmugDNA.15070.1 | 4.52  | 4.37  | 0.37 | 0.08 | 1.11  | 0.183588 | 0.420144 | 0.47949  | 0.643963 |
| MmugDNA.15071.1.S1_at   | MmugDNA.15071.1 | 4.45  | 4.43  | 0.16 | 0.13 | 1.01  | 0.655423 | 0.800996 | 0.833327 | 0.885538 |
| MmugDNA.15072.1.S1_at   | MmugDNA.15072.1 | 5.6   | 5.36  | 0.26 | 0.08 | 1.18  | 0.31119  | 0.554904 | 0.597373 | 0.733553 |
| MmugDNA.15073.1.S1_at   | MmugDNA.15073.1 | 7.86  | 7.72  | 0.11 | 0.06 | 1.1   | 0.375621 | 0.956128 | 0.646373 | 0.975053 |
| MmugDNA.15074.1.S1_at   | MmugDNA.15074.1 | 6.17  | 6.27  | 0.18 | 0.03 | -1.07 | 0.963852 | 0.058553 | 0.985358 | 0.288669 |
| MmugDNA.15077.1.S1_at   | MmugDNA.15077.1 | 3.89  | 3.94  | 0.04 | 0.13 | -1.04 | 0.58955  | 0.205693 | 0.791613 | 0.480043 |
| MmugDNA.15078.1.S1_at   | MmugDNA.15078.1 | 8.61  | 7.67  | 0.31 | 0.26 | 1.91  | 0.022904 | 0.4107   | 0.204235 | 0.637509 |
| MmugDNA.1508.1.S1_at    | MmugDNA.1508.1  | 5.94  | 5.92  | 0.2  | 0.04 | 1.01  | 0.928316 | 0.800845 | 0.969727 | 0.885464 |
| MmugDNA.15080.1.S1_at   | MmugDNA.15080.1 | 7.31  | 7.11  | 0.27 | 0.11 | 1.14  | 0.348145 | 0.046408 | 0.62632  | 0.259974 |
| MmugDNA.15081.1.S1_at   | MmugDNA.15081.1 | 5.83  | 5.84  | 0.21 | 0.07 | -1.01 | 0.341897 | 0.634744 | 0.621647 | 0.785012 |
| MmugDNA.15082.1.S1_at   | MmugDNA.15082.1 | 5.22  | 4.7   | 0.67 | 0.7  | 1.44  | 0.623968 | 0.050353 | 0.814557 | 0.269642 |
| MmugDNA.15083.1.S1_at   | MmugDNA.15083.1 | 5.17  | 7.11  | 0.48 | 0.06 | -3.85 | 0.002862 | 0.005835 | 0.098428 | 0.104669 |
| MmugDNA.15085.1.S1_at   | MmugDNA.15085.1 | 4.64  | 4.76  | 0.29 | 0.22 | -1.09 | 0.461968 | 0.357337 | 0.70926  | 0.598949 |
| MmugDNA.15087.1.S1_at   | MmugDNA.15087.1 | 3.5   | 3.58  | 0.08 | 0.04 | -1.05 | 0.521224 | 0.129758 | 0.749292 | 0.401362 |
| MmugDNA.15088.1.S1_at   | MmugDNA.15088.1 | 3.46  | 3.5   | 0.06 | 0.19 | -1.03 | 0.910055 | 0.759222 | 0.961883 | 0.860036 |
| MmugDNA.15090.1.S1_at   | MmugDNA.15090.1 | 3.59  | 3.5   | 0.34 | 0.12 | 1.06  | 0.40589  | 0.471633 | 0.669288 | 0.679537 |
| MmugDNA.15091.1.S1_at   | MmugDNA.15091.1 | 3.46  | 3.45  | 0.16 | 0.06 | 1.01  | 0.910569 | 0.482334 | 0.962148 | 0.687201 |
| MmugDNA.15093.1.S1_at   | MmugDNA.15093.1 | 5.22  | 5.29  | 0.36 | 0.25 | -1.04 | 0.655543 | 0.164004 | 0.833421 | 0.440128 |
| MmugDNA.15094.1.S1_at   | MmugDNA.15094.1 | 10.98 | 10.89 | 0.08 | 0.17 | 1.06  | 0.758178 | 0.221604 | 0.889051 | 0.494901 |
| MmugDNA.15094.1.S1_s_at | MmugDNA.15094.1 | 10.24 | 10.07 | 0.14 | 0.26 | 1.12  | 0.731928 | 0.112535 | 0.874717 | 0.377928 |
| MmugDNA.15095.1.S1_at   | MmugDNA.15095.1 | 6.66  | 6.54  | 0.26 | 0.22 | 1.08  | 0.560142 | 0.910509 | 0.773651 | 0.949465 |
| MmugDNA.15096.1.S1_at   | MmugDNA.15096.1 | 7.99  | 6.95  | 0.27 | 0.27 | 2.06  | 0.028022 | 0.01861  | 0.219887 | 0.171539 |
| MmugDNA.15097.1.S1_at   | MmugDNA.15097.1 | 6.01  | 6.57  | 0.22 | 0.03 | -1.47 | 0.024445 | 0.01539  | 0.209409 | 0.15752  |
| MmugDNA.15099.1.S1_at   | MmugDNA.15099.1 | 5.65  | 5.67  | 0.11 | 0.07 | -1.01 | 0.382666 | 0.201965 | 0.652064 | 0.476412 |
| MmugDNA.151.1.S1_at     | MmugDNA.151.1   | 11.48 | 11.83 | 0.15 | 0.03 | -1.28 | 0.013161 | 0.061542 | 0.165301 | 0.294865 |
| MmugDNA.36776.1.S1_at   | MmugDNA.36776.1 | 6.02  | 5.96  | 0.22 | 0.05 | 1.04  | 0.687553 | 0.326892 | 0.850804 | 0.576848 |
| MmugDNA.36776.1.S1_s_at | MmugDNA.36776.1 | 6.6   | 6.64  | 0.21 | 0.06 | -1.03 | 0.551145 | 0.825421 | 0.768269 | 0.899709 |
| MmugDNA.15100.1.S1_at   | MmugDNA.15100.1 | 9.46  | 8.28  | 0.9  | 0.3  | 2.27  | 0.117363 | 0.07694  | 0.394682 | 0.322421 |
| MmugDNA.15102.1.S1_at   | MmugDNA.15102.1 | 7.56  | 7.03  | 0.05 | 0.08 | 1.45  | 0.000533 | 0.055119 | 0.069726 | 0.280367 |
| MmugDNA.15103.1.S1_at   | MmugDNA.15103.1 | 3.79  | 3.84  | 0.61 | 0.21 | -1.04 | 0.321385 | 0.422761 | 0.605662 | 0.645932 |
| MmugDNA.15104.1.S1_at   | MmugDNA.15104.1 | 3.33  | 3.11  | 0.05 | 0.04 | 1.17  | 0.004783 | 0.008816 | 0.115098 | 0.124217 |
| MmugDNA.15105.1.S1_at   | MmugDNA.15105.1 | 3.94  | 4.22  | 0.32 | 0.54 | -1.21 | 0.376433 | 0.394729 | 0.647138 | 0.627208 |
| MmugDNA.15106.1.S1_at   | MmugDNA.15106.1 | 5.11  | 5.04  | 0.91 | 0.53 | 1.04  | 0.754612 | 0.64314  | 0.886871 | 0.79068  |
| MmugDNA.15107.1.S1_at   | MmugDNA.15107.1 | 9.96  | 10.5  | 0.45 | 0.13 | -1.46 | 0.081853 | 0.152069 | 0.343125 | 0.42682  |

|                         |                 |       |       |      |      |       |          |          |          |          |
|-------------------------|-----------------|-------|-------|------|------|-------|----------|----------|----------|----------|
| MmugDNA.15108.1.S1_at   | MmugDNA.15108.1 | 3.19  | 3.21  | 0.08 | 0.09 | -1.02 | 0.669407 | 0.859075 | 0.841414 | 0.919754 |
| MmugDNA.15111.1.S1_at   | MmugDNA.15111.1 | 7.08  | 6.8   | 1.04 | 0.72 | 1.22  | 0.816613 | 0.290934 | 0.918047 | 0.551499 |
| MmugDNA.15110.1.S1_at   | MmugDNA.15110.1 | 11.25 | 10.51 | 0.07 | 0.13 | 1.67  | 0.001158 | 0.000164 | 0.077718 | 0.030506 |
| MmugDNA.15111.1.S1_at   | MmugDNA.15111.1 | 5.74  | 5.54  | 0.25 | 0.15 | 1.15  | 0.22588  | 0.183461 | 0.52362  | 0.459586 |
| MmugDNA.15112.1.S1_at   | MmugDNA.15112.1 | 3.63  | 3.93  | 0.06 | 0.14 | -1.23 | 0.062205 | 0.273985 | 0.306073 | 0.538507 |
| MmugDNA.15115.1.S1_at   | MmugDNA.15115.1 | 7.99  | 8.11  | 0.35 | 0.07 | -1.09 | 0.250848 | 0.480853 | 0.545477 | 0.686    |
| MmugDNA.15115.1.S1_s_at | MmugDNA.15115.1 | 10.04 | 10.15 | 0.43 | 0.17 | -1.07 | 0.465561 | 0.58642  | 0.711552 | 0.753459 |
| MmugDNA.15116.1.S1_at   | MmugDNA.15116.1 | 4.07  | 3.81  | 0.09 | 0.24 | 1.2   | 0.14948  | 0.053612 | 0.438403 | 0.277182 |
| MmugDNA.15117.1.S1_at   | MmugDNA.15117.1 | 10.36 | 9.87  | 0.09 | 0.12 | 1.4   | 0.004531 | 0.009251 | 0.113436 | 0.126966 |
| MmugDNA.15118.1.S1_at   | MmugDNA.15118.1 | 10.44 | 10.36 | 0.02 | 0.05 | 1.06  | 0.023385 | 0.002576 | 0.205907 | 0.075148 |
| MmugDNA.15119.1.S1_at   | MmugDNA.15119.1 | 4.79  | 4.54  | 0.22 | 0.14 | 1.19  | 0.29608  | 0.415507 | 0.584803 | 0.64091  |
| MmugDNA.1512.1.S1_at    | MmugDNA.1512.1  | 6.66  | 6.71  | 0.07 | 0.04 | -1.03 | 0.580246 | 0.021081 | 0.785725 | 0.181869 |
| MmugDNA.15121.1.S1_s_at | MmugDNA.15121.1 | 5.07  | 5.08  | 0.26 | 0.11 | -1.01 | 0.397613 | 0.599758 | 0.663187 | 0.761564 |
| MmugDNA.15098.1.S1_s_at | MmugDNA.15098.1 | 9.37  | 8.76  | 0.14 | 0.22 | 1.52  | 0.0378   | 0.078178 | 0.250131 | 0.324684 |
| MmugDNA.15128.1.S1_at   | MmugDNA.15128.1 | 12.17 | 11.92 | 0.15 | 0.12 | 1.19  | 0.094376 | 0.15394  | 0.363345 | 0.428633 |
| MmugDNA.15129.1.S1_at   | MmugDNA.15129.1 | 4.74  | 4.62  | 0.12 | 0.14 | 1.08  | 0.311327 | 0.733728 | 0.597475 | 0.845822 |
| MmugDNA.1513.1.S1_at    | MmugDNA.1513.1  | 6.2   | 6     | 0.34 | 0.17 | 1.15  | 0.689686 | 0.457757 | 0.851884 | 0.670897 |
| MmugDNA.15130.1.S1_at   | MmugDNA.15130.1 | 4.62  | 4.67  | 0.09 | 0.19 | -1.04 | 0.670525 | 0.459426 | 0.841859 | 0.671741 |
| MmugDNA.15131.1.S1_at   | MmugDNA.15131.1 | 8.86  | 9.37  | 0.21 | 0.09 | -1.43 | 0.033729 | 0.140323 | 0.237868 | 0.413498 |
| MmugDNA.15133.1.S1_at   | MmugDNA.15133.1 | 3.88  | 4.07  | 0.25 | 0.42 | -1.14 | 0.178605 | 0.158194 | 0.473376 | 0.433986 |
| MmugDNA.15134.1.S1_at   | MmugDNA.15134.1 | 6.68  | 6.57  | 0.36 | 0.2  | 1.08  | 0.512088 | 0.142096 | 0.742866 | 0.415685 |
| MmugDNA.15136.1.S1_at   | MmugDNA.15136.1 | 9.34  | 8.7   | 0.13 | 0.28 | 1.57  | 0.065412 | 0.524578 | 0.312971 | 0.714424 |
| MmugDNA.15137.1.S1_at   | MmugDNA.15137.1 | 9.21  | 10.23 | 0.4  | 0.12 | -2.03 | 0.017291 | 0.123577 | 0.184699 | 0.393637 |
| MmugDNA.15138.1.S1_at   | MmugDNA.15138.1 | 4.59  | 4.6   | 0.22 | 0.13 | -1.01 | 0.221472 | 0.38388  | 0.519474 | 0.61978  |
| MmugDNA.15139.1.S1_at   | MmugDNA.15139.1 | 7.64  | 7.74  | 0.14 | 0.13 | -1.07 | 0.584101 | 0.431925 | 0.788484 | 0.652709 |
| MmugDNA.1514.1.S1_at    | MmugDNA.1514.1  | 5.14  | 5.28  | 0.35 | 0.23 | -1.1  | 0.984363 | 0.516556 | 0.994161 | 0.709034 |
| MmugDNA.15140.1.S1_at   | MmugDNA.15140.1 | 4.55  | 4.45  | 0.2  | 0.05 | 1.07  | 0.285275 | 0.385514 | 0.575167 | 0.621007 |
| MmugDNA.15142.1.S1_at   | MmugDNA.15142.1 | 5.79  | 5.68  | 0.09 | 0.1  | 1.08  | 0.210768 | 0.14358  | 0.508406 | 0.41751  |
| MmugDNA.15144.1.S1_at   | MmugDNA.15144.1 | 5.12  | 4.89  | 0.27 | 0.07 | 1.18  | 0.457766 | 0.664054 | 0.706543 | 0.803247 |
| MmugDNA.15145.1.S1_at   | MmugDNA.15145.1 | 4.69  | 4.77  | 0.14 | 0    | -1.05 | 0.480419 | 0.790654 | 0.721309 | 0.878957 |
| MmugDNA.15146.1.S1_at   | MmugDNA.15146.1 | 8.46  | 8.62  | 0.36 | 0.42 | -1.12 | 0.42761  | 0.620782 | 0.684873 | 0.775593 |
| MmugDNA.15147.1.S1_at   | MmugDNA.15147.1 | 4.07  | 4.02  | 0.18 | 0.07 | 1.03  | 0.264333 | 0.478461 | 0.557597 | 0.684481 |
| MmugDNA.15149.1.S1_at   | MmugDNA.15149.1 | 4.48  | 5.07  | 0.33 | 0.25 | -1.51 | 0.018109 | 0.416948 | 0.18753  | 0.641855 |
| MmugDNA.15173.1.S1_s_at | MmugDNA.15173.1 | 5.98  | 6.08  | 0.18 | 0.09 | -1.08 | 0.352937 | 0.315102 | 0.630232 | 0.568838 |
| MmugDNA.15154.1.S1_at   | MmugDNA.15154.1 | 8.43  | 8.22  | 0.14 | 0.15 | 1.16  | 0.498285 | 0.606422 | 0.733585 | 0.765747 |
| MmugDNA.15156.1.S1_at   | MmugDNA.15156.1 | 10.16 | 11.37 | 0.92 | 0.15 | -2.3  | 0.032634 | 0.137784 | 0.234971 | 0.410757 |
| MmugDNA.15157.1.S1_at   | MmugDNA.15157.1 | 4.19  | 3.97  | 0.56 | 0.24 | 1.17  | 0.202288 | 0.229531 | 0.499835 | 0.501534 |
| MmugDNA.15158.1.S1_at   | MmugDNA.15158.1 | 10.58 | 9.19  | 0.3  | 0.22 | 2.63  | 0.00204  | 0.00173  | 0.09     | 0.062895 |
| MmugDNA.15159.1.S1_at   | MmugDNA.15159.1 | 3.77  | 3.36  | 0.54 | 0.18 | 1.32  | 0.329874 | 0.204888 | 0.611952 | 0.479227 |
| MmugDNA.1516.1.S1_at    | MmugDNA.1516.1  | 8.2   | 7.1   | 0.17 | 0.11 | 2.14  | 0.000883 | 0.006216 | 0.074796 | 0.106916 |
| MmugDNA.15160.1.S1_at   | MmugDNA.15160.1 | 4.08  | 5.39  | 0.48 | 0.36 | -2.48 | 0.073438 | 0.051528 | 0.328846 | 0.27241  |
| MmugDNA.15160.1.S1_s_at | MmugDNA.15160.1 | 4.69  | 5.25  | 0.38 | 0.48 | -1.47 | 0.194589 | 0.20364  | 0.491247 | 0.47789  |
| MmugDNA.15161.1.S1_at   | MmugDNA.15161.1 | 12.22 | 12.03 | 0.15 | 0.02 | 1.14  | 0.285924 | 0.041649 | 0.575761 | 0.24887  |



|                         |                 |       |       |      |      |       |          |          |          |          |
|-------------------------|-----------------|-------|-------|------|------|-------|----------|----------|----------|----------|
| MmugDNA.15163.1.S1_at   | MmugDNA.15163.1 | 3.72  | 3.44  | 0.17 | 0.22 | 1.21  | 0.094747 | 0.148127 | 0.36369  | 0.422667 |
| MmugDNA.15164.1.S1_s_at | MmugDNA.15164.1 | 10.46 | 10.55 | 0.19 | 0.12 | -1.06 | 0.546498 | 0.163832 | 0.765294 | 0.440054 |
| MmugDNA.15165.1.S1_at   | MmugDNA.15165.1 | 4.2   | 4.11  | 0.3  | 0.3  | 1.07  | 0.847224 | 0.953753 | 0.933366 | 0.973663 |
| MmugDNA.15166.1.S1_at   | MmugDNA.15166.1 | 7.36  | 7.46  | 0.23 | 0.25 | -1.07 | 0.86905  | 0.071513 | 0.943649 | 0.313706 |
| MmugDNA.15168.1.S1_at   | MmugDNA.15168.1 | 4.18  | 4.2   | 0.16 | 0.23 | -1.01 | 0.82032  | 0.712209 | 0.919886 | 0.833243 |
| MmugDNA.15169.1.S1_at   | MmugDNA.15169.1 | 3.49  | 3.56  | 0.08 | 0.1  | -1.05 | 0.708742 | 0.161326 | 0.862079 | 0.437494 |
| MmugDNA.1517.1.S1_at    | MmugDNA.1517.1  | 12.68 | 12.23 | 0.08 | 0.02 | 1.36  | 0.000844 | 0.000119 | 0.07338  | 0.028664 |
| MmugDNA.15171.1.S1_at   | MmugDNA.15171.1 | 3.75  | 3.73  | 0.36 | 0.18 | 1.01  | 0.618419 | 0.822073 | 0.810674 | 0.897651 |
| MmugDNA.15172.1.S1_at   | MmugDNA.15172.1 | 4.8   | 4.85  | 0.22 | 0.01 | -1.03 | 0.392032 | 0.387391 | 0.659024 | 0.622065 |
| MmugDNA.15174.1.S1_at   | MmugDNA.15174.1 | 6.7   | 6.8   | 0.09 | 0.24 | -1.07 | 0.831481 | 0.107716 | 0.925902 | 0.370779 |
| MmugDNA.15177.1.S1_at   | MmugDNA.15177.1 | 7.84  | 7.74  | 0.77 | 0.24 | 1.07  | 0.39289  | 0.740869 | 0.659767 | 0.849975 |
| MmugDNA.15179.1.S1_at   | MmugDNA.15179.1 | 9.62  | 9.32  | 0.24 | 0.26 | 1.23  | 0.208112 | 0.17174  | 0.505909 | 0.448148 |
| MmugDNA.1518.1.S1_at    | MmugDNA.1518.1  | 12.49 | 12.22 | 0.06 | 0.01 | 1.2   | 0.002451 | 0.011357 | 0.093896 | 0.138214 |
| MmugDNA.15180.1.S1_at   | MmugDNA.15180.1 | 3.31  | 3.25  | 0.07 | 0.07 | 1.04  | 0.322004 | 0.674931 | 0.606199 | 0.810089 |
| MmugDNA.15181.1.S1_at   | MmugDNA.15181.1 | 11.9  | 12.27 | 0.09 | 0.12 | -1.29 | 0.012461 | 0.00536  | 0.161927 | 0.101092 |
| MmugDNA.15182.1.S1_at   | MmugDNA.15182.1 | 6.01  | 5.39  | 0.29 | 0.53 | 1.53  | 0.645134 | 0.461457 | 0.82721  | 0.673131 |
| MmugDNA.15183.1.S1_at   | MmugDNA.15183.1 | 6.52  | 6.36  | 0.74 | 0.24 | 1.12  | 0.378757 | 0.456593 | 0.648853 | 0.670289 |
| MmugDNA.15184.1.S1_at   | MmugDNA.15184.1 | 6.1   | 5.84  | 0.1  | 0.74 | 1.2   | 0.737871 | 0.919017 | 0.878434 | 0.954495 |
| MmugDNA.15186.1.S1_at   | MmugDNA.15186.1 | 5.82  | 5.8   | 0.41 | 0.22 | 1.01  | 0.382591 | 0.5886   | 0.652037 | 0.755104 |
| MmugDNA.15187.1.S1_at   | MmugDNA.15187.1 | 3.93  | 4.11  | 0.25 | 0.27 | -1.13 | 0.674376 | 0.807098 | 0.844507 | 0.888946 |
| MmugDNA.15188.1.S1_at   | MmugDNA.15188.1 | 7.8   | 7.78  | 0.73 | 0.15 | 1.01  | 0.899062 | 0.950378 | 0.957029 | 0.971738 |
| MmugDNA.15189.1.S1_at   | MmugDNA.15189.1 | 5.65  | 5.88  | 0.92 | 0.27 | -1.17 | 0.660478 | 0.570705 | 0.83613  | 0.743295 |
| MmugDNA.1519.1.S1_at    | MmugDNA.1519.1  | 4.24  | 4.24  | 0.13 | 0    | 1     | 0.373901 | 0.184401 | 0.645118 | 0.460458 |
| MmugDNA.15190.1.S1_at   | MmugDNA.15190.1 | 7.97  | 7.55  | 0.29 | 0.33 | 1.33  | 0.532825 | 0.227935 | 0.756693 | 0.500211 |
| MmugDNA.15191.1.S1_at   | MmugDNA.15191.1 | 5.69  | 6     | 0.91 | 0.61 | -1.24 | 0.743251 | 0.31809  | 0.881285 | 0.571046 |
| MmugDNA.15192.1.S1_at   | MmugDNA.15192.1 | 6.73  | 7.31  | 0.53 | 0.13 | -1.49 | 0.423361 | 0.254349 | 0.681371 | 0.522647 |
| MmugDNA.15196.1.S1_at   | MmugDNA.15196.1 | 4.82  | 4.74  | 0.08 | 0    | 1.06  | 0.151524 | 0.123368 | 0.440974 | 0.393391 |
| MmugDNA.15197.1.S1_at   | MmugDNA.15197.1 | 5.16  | 5.31  | 0.1  | 0.12 | -1.11 | 0.324033 | 0.178384 | 0.607761 | 0.454755 |
| MmugDNA.15198.1.S1_at   | MmugDNA.15198.1 | 2.95  | 3.11  | 0.16 | 0    | -1.12 | 0.151864 | 0.07642  | 0.441347 | 0.321419 |
| MmugDNA.15199.1.S1_at   | MmugDNA.15199.1 | 6.07  | 5.11  | 0.95 | 0.74 | 1.95  | 0.212169 | 0.258245 | 0.510087 | 0.52558  |
| MmugDNA.152.1.S1_at     | MmugDNA.152.1   | 11.73 | 12.16 | 0.08 | 0.1  | -1.34 | 0.005185 | 0.018164 | 0.116998 | 0.169673 |
| MmugDNA.1520.1.S1_at    | MmugDNA.1520.1  | 7.01  | 7.04  | 0.21 | 0.07 | -1.02 | 0.548195 | 0.00229  | 0.766412 | 0.07045  |
| MmugDNA.15200.1.S1_at   | MmugDNA.15200.1 | 3.87  | 3.9   | 0.27 | 0.04 | -1.02 | 0.400229 | 0.315633 | 0.665349 | 0.569053 |
| MmugDNA.15201.1.S1_at   | MmugDNA.15201.1 | 5.77  | 5.95  | 0.59 | 0.43 | -1.13 | 0.801356 | 0.554805 | 0.910753 | 0.733501 |
| MmugDNA.15202.1.S1_at   | MmugDNA.15202.1 | 8.22  | 8.43  | 0.37 | 0.27 | -1.16 | 0.198099 | 0.030847 | 0.495359 | 0.217427 |
| MmugDNA.15203.1.S1_at   | MmugDNA.15203.1 | 4.77  | 4.33  | 0.52 | 0.26 | 1.36  | 0.138998 | 0.24194  | 0.424645 | 0.512489 |
| MmugDNA.15204.1.S1_at   | MmugDNA.15204.1 | 3.8   | 3.8   | 0.34 | 0.2  | -1    | 0.432016 | 0.540661 | 0.687889 | 0.724476 |
| MmugDNA.15206.1.S1_at   | MmugDNA.15206.1 | 5.48  | 5.37  | 0.04 | 0.07 | 1.08  | 0.20995  | 0.010208 | 0.507392 | 0.132467 |
| MmugDNA.15207.1.S1_at   | MmugDNA.15207.1 | 6.06  | 6.4   | 0.8  | 0.34 | -1.26 | 0.604042 | 0.853293 | 0.801436 | 0.916546 |
| MmugDNA.1521.1.S1_s_at  | MmugDNA.1521.1  | 6.91  | 6.41  | 0.22 | 0.11 | 1.41  | 0.034166 | 0.028911 | 0.239537 | 0.211894 |
| MmugDNA.15210.1.S1_at   | MmugDNA.15210.1 | 4.81  | 4.99  | 0.13 | 0.04 | -1.13 | 0.269098 | 0.191136 | 0.561488 | 0.4664   |
| MmugDNA.15211.1.S1_at   | MmugDNA.15211.1 | 3.74  | 3.89  | 0.11 | 0.24 | -1.11 | 0.369393 | 0.168869 | 0.642818 | 0.445458 |
| MmugDNA.15213.1.S1_at   | MmugDNA.15213.1 | 13.21 | 13.09 | 0.15 | 0.01 | 1.09  | 0.25133  | 0.135421 | 0.546147 | 0.407515 |

|                         |                 |       |       |      |      |        |          |          |          |          |
|-------------------------|-----------------|-------|-------|------|------|--------|----------|----------|----------|----------|
| MmugDNA.15214.1.S1_s_at | MmugDNA.15214.1 | 7.09  | 7.04  | 0.36 | 0.03 | 1.03   | 0.870297 | 0.861804 | 0.944208 | 0.92146  |
| MmugDNA.15215.1.S1_s_at | MmugDNA.15215.1 | 10.18 | 10.1  | 0.35 | 0.01 | 1.06   | 0.567605 | 0.911914 | 0.777821 | 0.950311 |
| MmugDNA.15216.1.S1_at   | MmugDNA.15216.1 | 6.06  | 6.29  | 1.45 | 0.23 | -1.17  | 0.748726 | 0.920455 | 0.883741 | 0.955182 |
| MmugDNA.15217.1.S1_at   | MmugDNA.15217.1 | 4.87  | 4.68  | 0.07 | 0.13 | 1.14   | 0.221124 | 0.150523 | 0.519102 | 0.425074 |
| MmugDNA.1522.1.S1_at    | MmugDNA.1522.1  | 4.33  | 4.42  | 0.15 | 0.21 | -1.06  | 0.86687  | 0.05428  | 0.942479 | 0.278459 |
| MmugDNA.15220.1.S1_s_at | MmugDNA.15220.1 | 8.98  | 8.32  | 0.14 | 0.11 | 1.58   | 0.004795 | 0.035759 | 0.115098 | 0.233437 |
| MmugDNA.15221.1.S1_at   | MmugDNA.15221.1 | 7.69  | 9.3   | 0.36 | 0.18 | -3.06  | 0.00282  | 0.175368 | 0.098001 | 0.452114 |
| MmugDNA.15223.1.S1_at   | MmugDNA.15223.1 | 5.12  | 5.13  | 0.08 | 0.25 | -1     | 0.951086 | 0.710011 | 0.979738 | 0.831887 |
| MmugDNA.15224.1.S1_at   | MmugDNA.15224.1 | 4.15  | 4.14  | 0.31 | 0.21 | 1.01   | 0.391896 | 0.475736 | 0.658914 | 0.682332 |
| MmugDNA.15226.1.S1_at   | MmugDNA.15226.1 | 4.49  | 4.55  | 0.17 | 0.1  | -1.04  | 0.629605 | 0.955898 | 0.818047 | 0.975006 |
| MmugDNA.15228.1.S1_at   | MmugDNA.15228.1 | 4.46  | 4.21  | 0.12 | 0.1  | 1.19   | 0.080495 | 0.081926 | 0.341026 | 0.330487 |
| MmugDNA.1523.1.S1_at    | MmugDNA.1523.1  | 4.8   | 4.97  | 0.59 | 0.23 | -1.12  | 0.665757 | 0.252312 | 0.839433 | 0.52096  |
| MmugDNA.15230.1.S1_at   | MmugDNA.15230.1 | 7.27  | 6.65  | 0.07 | 0.11 | 1.53   | 0.001275 | 0.00086  | 0.078631 | 0.047371 |
| MmugDNA.15231.1.S1_at   | MmugDNA.15231.1 | 7.18  | 7     | 0.16 | 0.08 | 1.13   | 0.207756 | 0.727619 | 0.50564  | 0.842488 |
| MmugDNA.15232.1.S1_at   | MmugDNA.15232.1 | 11.78 | 10.69 | 0.05 | 0.16 | 2.12   | 0.000357 | 0.006845 | 0.062105 | 0.111782 |
| MmugDNA.15235.1.S1_at   | MmugDNA.15235.1 | 3     | 3.04  | 0.11 | 0.1  | -1.03  | 0.565518 | 0.669397 | 0.776724 | 0.806626 |
| MmugDNA.15237.1.S1_at   | MmugDNA.15237.1 | 5.96  | 5.53  | 1.04 | 0.59 | 1.35   | 0.256416 | 0.470902 | 0.550944 | 0.679128 |
| MmugDNA.1524.1.S1_at    | MmugDNA.1524.1  | 7.82  | 7.82  | 0.15 | 0.07 | 1      | 0.648323 | 0.546605 | 0.829161 | 0.728105 |
| MmugDNA.15242.1.S1_at   | MmugDNA.15242.1 | 4.84  | 5.06  | 0.14 | 0.25 | -1.16  | 0.392565 | 0.464893 | 0.659492 | 0.675496 |
| MmugDNA.15243.1.S1_at   | MmugDNA.15243.1 | 6.54  | 7.03  | 0.14 | 0.15 | -1.41  | 0.01384  | 0.000861 | 0.168627 | 0.047371 |
| MmugDNA.15246.1.S1_at   | MmugDNA.15246.1 | 4.22  | 4.21  | 0.25 | 0.18 | 1.01   | 0.934021 | 0.736122 | 0.972331 | 0.84733  |
| MmugDNA.15247.1.S1_at   | MmugDNA.15247.1 | 4.73  | 4.65  | 0.09 | 0.16 | 1.05   | 0.229143 | 0.379668 | 0.527871 | 0.616523 |
| MmugDNA.32984.1.S1_at   | MmugDNA.32984.1 | 10.59 | 9.46  | 0.18 | 0.24 | 2.19   | 0.004072 | 0.000632 | 0.108999 | 0.042882 |
| MmugDNA.32984.1.S1_s_at | MmugDNA.32984.1 | 11.1  | 10.18 | 0.2  | 0.31 | 1.89   | 0.016529 | 0.002447 | 0.181539 | 0.073228 |
| MmugDNA.1525.1.S1_at    | MmugDNA.1525.1  | 5     | 4.45  | 0.43 | 0.29 | 1.46   | 0.056835 | 0.045114 | 0.295812 | 0.256956 |
| MmugDNA.1525.1.S1_x_at  | MmugDNA.1525.1  | 5.66  | 4.93  | 0.33 | 0.09 | 1.65   | 0.020883 | 0.010305 | 0.198205 | 0.132897 |
| MmugDNA.15252.1.S1_at   | MmugDNA.15252.1 | 3.76  | 3.26  | 0.43 | 0.11 | 1.41   | 0.167243 | 0.159611 | 0.460436 | 0.435785 |
| MmugDNA.15253.1.S1_at   | MmugDNA.15253.1 | 6.98  | 7.78  | 0.54 | 0.32 | -1.74  | 0.30752  | 0.294333 | 0.594278 | 0.55407  |
| MmugDNA.15254.1.S1_at   | MmugDNA.15254.1 | 5.72  | 6.68  | 0.65 | 0.17 | -1.95  | 0.0875   | 0.533708 | 0.353349 | 0.719849 |
| MmugDNA.15255.1.S1_at   | MmugDNA.15255.1 | 3.17  | 3.15  | 0.07 | 0.12 | 1.01   | 0.560424 | 0.923543 | 0.773879 | 0.956997 |
| MmugDNA.15256.1.S1_at   | MmugDNA.15256.1 | 5.33  | 5.17  | 0.13 | 0.04 | 1.12   | 0.079249 | 0.046933 | 0.339176 | 0.261301 |
| MmugDNA.15257.1.S1_at   | MmugDNA.15257.1 | 4.93  | 4.91  | 0.17 | 0.16 | 1.02   | 0.816757 | 0.352217 | 0.918114 | 0.595568 |
| MmugDNA.15262.1.S1_at   | MmugDNA.15262.1 | 9.85  | 10.67 | 0.18 | 0.2  | -1.77  | 0.006479 | 0.289072 | 0.127306 | 0.550238 |
| MmugDNA.15264.1.S1_at   | MmugDNA.15264.1 | 6.7   | 7.66  | 0.53 | 0.28 | -1.94  | 0.127412 | 0.12763  | 0.409311 | 0.398571 |
| MmugDNA.15265.1.S1_at   | MmugDNA.15265.1 | 3.66  | 8.61  | 1.92 | 0.23 | -30.84 | 0.025342 | 0.12159  | 0.212251 | 0.390723 |
| MmugDNA.15266.1.S1_at   | MmugDNA.15266.1 | 6.9   | 6.98  | 0.27 | 0.19 | -1.06  | 0.688179 | 0.190923 | 0.851067 | 0.466269 |
| MmugDNA.15268.1.S1_s_at | MmugDNA.15268.1 | 5.46  | 9.35  | 1.85 | 0.31 | -14.81 | 0.023172 | 0.208965 | 0.205362 | 0.482756 |
| MmugDNA.15269.1.S1_at   | MmugDNA.15269.1 | 8.59  | 9.21  | 0.5  | 0.17 | -1.54  | 0.29276  | 0.195312 | 0.581832 | 0.470253 |
| MmugDNA.1527.1.S1_at    | MmugDNA.1527.1  | 7.44  | 7.35  | 0.19 | 0.08 | 1.06   | 0.934323 | 0.16419  | 0.972475 | 0.440466 |
| MmugDNA.15270.1.S1_at   | MmugDNA.15270.1 | 3.11  | 3.03  | 0.08 | 0.06 | 1.05   | 0.734058 | 0.345604 | 0.876041 | 0.590833 |
| MmugDNA.15272.1.S1_at   | MmugDNA.15272.1 | 7.77  | 8.01  | 0.43 | 0.36 | -1.18  | 0.619044 | 0.232992 | 0.810987 | 0.50445  |
| MmugDNA.15273.1.S1_at   | MmugDNA.15273.1 | 4.35  | 4.18  | 0.07 | 0.11 | 1.13   | 0.061948 | 0.180211 | 0.305406 | 0.456777 |
| MmugDNA.15274.1.S1_at   | MmugDNA.15274.1 | 5.35  | 4.96  | 0.27 | 0.2  | 1.32   | 0.554937 | 0.311879 | 0.770944 | 0.566833 |

|                         |                 |       |       |      |      |       |          |          |          |          |
|-------------------------|-----------------|-------|-------|------|------|-------|----------|----------|----------|----------|
| MmugDNA.15275.1.S1_at   | MmugDNA.15275.1 | 8.72  | 8.8   | 0.26 | 0.22 | -1.05 | 0.806965 | 0.062257 | 0.913559 | 0.296325 |
| MmugDNA.15276.1.S1_at   | MmugDNA.15276.1 | 7.31  | 6.17  | 0.24 | 0.42 | 2.19  | 0.011103 | 0.033544 | 0.155073 | 0.226764 |
| MmugDNA.15277.1.S1_at   | MmugDNA.15277.1 | 5.84  | 6.21  | 0.39 | 0.07 | -1.29 | 0.139322 | 0.176653 | 0.424942 | 0.453138 |
| MmugDNA.15278.1.S1_at   | MmugDNA.15278.1 | 3.9   | 3.87  | 0    | 0.22 | 1.02  | 0.835325 | 0.616562 | 0.927563 | 0.772767 |
| MmugDNA.15280.1.S1_at   | MmugDNA.15280.1 | 5.83  | 6.09  | 0.11 | 0.11 | -1.2  | 0.049668 | 0.019928 | 0.280343 | 0.177443 |
| MmugDNA.15282.1.S1_at   | MmugDNA.15282.1 | 11.21 | 10.96 | 0.4  | 0.11 | 1.18  | 0.279936 | 0.415375 | 0.571191 | 0.640852 |
| MmugDNA.15283.1.S1_at   | MmugDNA.15283.1 | 5.88  | 6.06  | 0.25 | 0.02 | -1.13 | 0.099327 | 0.130465 | 0.370274 | 0.4023   |
| MmugDNA.15284.1.S1_at   | MmugDNA.15284.1 | 8.32  | 7.99  | 0.09 | 0.23 | 1.25  | 0.082882 | 0.199615 | 0.344979 | 0.474255 |
| MmugDNA.15287.1.S1_at   | MmugDNA.15287.1 | 9.92  | 9.57  | 0.09 | 0.05 | 1.27  | 0.00328  | 0.003579 | 0.102069 | 0.085582 |
| MmugDNA.15289.1.S1_at   | MmugDNA.15289.1 | 13.34 | 13.19 | 0.04 | 0.04 | 1.1   | 0.027412 | 0.024703 | 0.218407 | 0.196795 |
| MmugDNA.1529.1.S1_at    | MmugDNA.1529.1  | 6.26  | 5.91  | 0.35 | 0.13 | 1.27  | 0.229775 | 0.022302 | 0.528728 | 0.186842 |
| MmugDNA.15290.1.S1_at   | MmugDNA.15290.1 | 4.07  | 4.13  | 0.1  | 0.06 | -1.04 | 0.555317 | 0.263625 | 0.771201 | 0.529913 |
| MmugDNA.15291.1.S1_at   | MmugDNA.15291.1 | 6.45  | 6.35  | 0.24 | 0.01 | 1.07  | 0.540429 | 0.778286 | 0.761465 | 0.871272 |
| MmugDNA.15294.1.S1_at   | MmugDNA.15294.1 | 5.22  | 6.15  | 0.27 | 0.2  | -1.91 | 0.006271 | 0.159074 | 0.125436 | 0.435217 |
| MmugDNA.15295.1.S1_at   | MmugDNA.15295.1 | 6.15  | 6.35  | 0.09 | 0    | -1.15 | 0.007919 | 0.142382 | 0.138212 | 0.415965 |
| MmugDNA.15297.1.S1_at   | MmugDNA.15297.1 | 4.59  | 4.59  | 0    | 0.2  | 1     | 0.383762 | 0.205559 | 0.652984 | 0.47981  |
| MmugDNA.153.1.S1_at     | MmugDNA.153.1   | 9.94  | 10.07 | 0.13 | 0.16 | -1.1  | 0.735706 | 0.02565  | 0.877005 | 0.200834 |
| MmugDNA.153.1.S1_s_at   | MmugDNA.153.1   | 10.2  | 10.29 | 0.12 | 0.13 | -1.06 | 0.480105 | 0.072198 | 0.721146 | 0.31474  |
| MmugDNA.1530.1.S1_at    | MmugDNA.1530.1  | 4.91  | 4.77  | 0.22 | 0.08 | 1.1   | 0.386521 | 0.439659 | 0.654936 | 0.658393 |
| MmugDNA.15300.1.S1_at   | MmugDNA.15300.1 | 7.79  | 7.84  | 0.24 | 0.15 | -1.03 | 0.938708 | 0.017941 | 0.97419  | 0.168998 |
| MmugDNA.15301.1.S1_at   | MmugDNA.15301.1 | 4.47  | 4.54  | 0.17 | 0.21 | -1.05 | 0.893537 | 0.305982 | 0.954549 | 0.562732 |
| MmugDNA.15303.1.S1_at   | MmugDNA.15303.1 | 5.87  | 6.71  | 0.79 | 0.08 | -1.78 | 0.121295 | 0.0744   | 0.400017 | 0.318058 |
| MmugDNA.15303.1.S1_s_at | MmugDNA.15303.1 | 7.72  | 8.59  | 0.6  | 0.21 | -1.83 | 0.108782 | 0.285165 | 0.383665 | 0.547098 |
| MmugDNA.15306.1.S1_at   | MmugDNA.15306.1 | 4.04  | 3.93  | 0.36 | 0.09 | 1.08  | 0.3739   | 0.599622 | 0.645118 | 0.761524 |
| MmugDNA.15308.1.S1_at   | MmugDNA.15308.1 | 8.16  | 8.38  | 0.09 | 0.12 | -1.16 | 0.174512 | 0.280278 | 0.468709 | 0.543528 |
| MmugDNA.15308.1.S1_s_at | MmugDNA.15308.1 | 10.43 | 10.38 | 0.06 | 0.08 | 1.04  | 0.241744 | 0.314192 | 0.538882 | 0.568185 |
| MmugDNA.1531.1.S1_at    | MmugDNA.1531.1  | 6     | 6.03  | 0.73 | 0.1  | -1.02 | 0.371429 | 0.26656  | 0.644169 | 0.532301 |
| MmugDNA.15312.1.S1_at   | MmugDNA.15312.1 | 5.97  | 5.95  | 0.22 | 0.05 | 1.02  | 0.999306 | 0.941417 | 0.99979  | 0.966801 |
| MmugDNA.15313.1.S1_at   | MmugDNA.15313.1 | 6.09  | 6.02  | 0.73 | 0.16 | 1.05  | 0.788521 | 0.946378 | 0.903881 | 0.969598 |
| MmugDNA.15316.1.S1_at   | MmugDNA.15316.1 | 10.66 | 11.26 | 0.1  | 0.16 | -1.52 | 0.011567 | 0.168724 | 0.157417 | 0.445379 |
| MmugDNA.15318.1.S1_at   | MmugDNA.15318.1 | 7.18  | 7.13  | 0.18 | 0.05 | 1.04  | 0.716886 | 0.934955 | 0.866434 | 0.963177 |
| MmugDNA.1532.1.S1_at    | MmugDNA.1532.1  | 7.69  | 7.73  | 0.66 | 0.13 | -1.03 | 0.447873 | 0.12935  | 0.699731 | 0.400748 |
| MmugDNA.15320.1.S1_at   | MmugDNA.15320.1 | 7.1   | 6.43  | 0.34 | 0.48 | 1.59  | 0.371167 | 0.512655 | 0.643902 | 0.706448 |
| MmugDNA.15321.1.S1_at   | MmugDNA.15321.1 | 8.43  | 8.88  | 0.35 | 0.11 | -1.37 | 0.073745 | 0.041365 | 0.329399 | 0.247995 |
| MmugDNA.15322.1.S1_at   | MmugDNA.15322.1 | 4.67  | 5.95  | 0.78 | 0.44 | -2.43 | 0.057043 | 0.22504  | 0.296166 | 0.49773  |
| MmugDNA.15324.1.S1_at   | MmugDNA.15324.1 | 6.98  | 6.97  | 0.14 | 0.02 | 1.01  | 0.407301 | 0.046364 | 0.670391 | 0.259844 |
| MmugDNA.15325.1.S1_at   | MmugDNA.15325.1 | 7.81  | 8.02  | 0.11 | 0.08 | -1.16 | 0.097167 | 0.060583 | 0.367275 | 0.292769 |
| MmugDNA.15326.1.S1_at   | MmugDNA.15326.1 | 2.67  | 2.71  | 0.05 | 0.03 | -1.03 | 0.141326 | 0.395619 | 0.427323 | 0.627583 |
| MmugDNA.15327.1.S1_at   | MmugDNA.15327.1 | 4.09  | 4.09  | 0.06 | 0.02 | 1     | 0.608481 | 0.14955  | 0.804526 | 0.424095 |
| MmugDNA.15330.1.S1_at   | MmugDNA.15330.1 | 6.21  | 6.29  | 0.24 | 0.06 | -1.06 | 0.665677 | 0.706152 | 0.83938  | 0.829634 |
| MmugDNA.42233.1.S1_s_at | MmugDNA.42233.1 | 8.17  | 7.59  | 0.28 | 0.11 | 1.49  | 0.112948 | 0.249683 | 0.389499 | 0.518765 |
| MmugDNA.15335.1.S1_at   | MmugDNA.15335.1 | 3.82  | 3.94  | 0.24 | 0.2  | -1.09 | 0.501008 | 0.616405 | 0.735146 | 0.772626 |
| MmugDNA.15338.1.S1_at   | MmugDNA.15338.1 | 5.9   | 5.78  | 0.11 | 0.08 | 1.08  | 0.283558 | 0.317955 | 0.573936 | 0.571046 |

|                         |                 |       |       |      |      |        |          |          |          |          |
|-------------------------|-----------------|-------|-------|------|------|--------|----------|----------|----------|----------|
| MmugDNA.15339.1.S1_at   | MmugDNA.15339.1 | 10.59 | 9.82  | 0.21 | 0.14 | 1.7    | 0.01266  | 0.157247 | 0.162566 | 0.432729 |
| MmugDNA.1534.1.S1_at    | MmugDNA.1534.1  | 9.79  | 9.97  | 0.2  | 0.22 | -1.13  | 0.779173 | 0.871495 | 0.89919  | 0.926844 |
| MmugDNA.15340.1.S1_at   | MmugDNA.15340.1 | 4.03  | 3.86  | 0.31 | 0.18 | 1.12   | 0.104389 | 0.172122 | 0.377773 | 0.448529 |
| MmugDNA.15341.1.S1_at   | MmugDNA.15341.1 | 3.33  | 3.62  | 0.09 | 0.1  | -1.22  | 0.021416 | 0.016075 | 0.199957 | 0.160672 |
| MmugDNA.15342.1.S1_at   | MmugDNA.15342.1 | 10.92 | 8.51  | 1.43 | 1.15 | 5.32   | 0.198579 | 0.071608 | 0.495759 | 0.313717 |
| MmugDNA.15344.1.S1_at   | MmugDNA.15344.1 | 11.62 | 11.42 | 0.18 | 0.08 | 1.14   | 0.48564  | 0.073419 | 0.725109 | 0.316609 |
| MmugDNA.15346.1.S1_at   | MmugDNA.15346.1 | 6.76  | 6.04  | 0.42 | 0.2  | 1.65   | 0.244518 | 0.3022   | 0.540909 | 0.560092 |
| MmugDNA.15347.1.S1_at   | MmugDNA.15347.1 | 4.23  | 4.25  | 0.11 | 0.07 | -1.02  | 0.942371 | 0.839756 | 0.975651 | 0.908633 |
| MmugDNA.15349.1.S1_s_at | MmugDNA.15349.1 | 6.35  | 6.71  | 0.07 | 0.19 | -1.28  | 0.025198 | 0.500802 | 0.211801 | 0.699278 |
| MmugDNA.1535.1.S1_at    | MmugDNA.1535.1  | 4.37  | 5.36  | 0.74 | 0.91 | -1.98  | 0.26058  | 0.004902 | 0.554645 | 0.097649 |
| MmugDNA.15350.1.S1_at   | MmugDNA.15350.1 | 7.18  | 7.08  | 0.12 | 0.11 | 1.07   | 0.415304 | 0.759406 | 0.676059 | 0.860081 |
| MmugDNA.15351.1.S1_at   | MmugDNA.15351.1 | 4.98  | 5.33  | 0.45 | 0.07 | -1.28  | 0.856122 | 0.736858 | 0.937374 | 0.847693 |
| MmugDNA.15353.1.S1_at   | MmugDNA.15353.1 | 10.31 | 10.12 | 0.19 | 0.15 | 1.14   | 0.379705 | 0.882012 | 0.649467 | 0.932738 |
| MmugDNA.15355.1.S1_at   | MmugDNA.15355.1 | 10.39 | 11.05 | 0.17 | 0.17 | -1.58  | 0.03197  | 0.027446 | 0.232604 | 0.206953 |
| MmugDNA.15355.1.S1_s_at | MmugDNA.15355.1 | 12.09 | 12.41 | 0.08 | 0.09 | -1.25  | 0.023865 | 0.153044 | 0.207529 | 0.42792  |
| MmugDNA.15356.1.S1_at   | MmugDNA.15356.1 | 4.58  | 4.59  | 0.11 | 0.21 | -1.01  | 0.818837 | 0.959865 | 0.919247 | 0.977279 |
| MmugDNA.1536.1.S1_at    | MmugDNA.1536.1  | 4.92  | 4.74  | 0.25 | 0.48 | 1.14   | 0.304954 | 0.3526   | 0.591949 | 0.595856 |
| MmugDNA.15360.1.S1_at   | MmugDNA.15360.1 | 6.02  | 6.64  | 0.24 | 0.16 | -1.54  | 0.032191 | 0.300081 | 0.233341 | 0.558262 |
| MmugDNA.15360.1.S1_s_at | MmugDNA.15360.1 | 6.62  | 7.44  | 0.17 | 0.05 | -1.77  | 0.001739 | 0.157029 | 0.085035 | 0.432496 |
| MmugDNA.15362.1.S1_at   | MmugDNA.15362.1 | 12.94 | 13.05 | 0.1  | 0.09 | -1.08  | 0.272028 | 0.304464 | 0.563952 | 0.561738 |
| MmugDNA.25729.1.S1_s_at | MmugDNA.25729.1 | 5.2   | 8.8   | 1.62 | 0.29 | -12.17 | 0.054232 | 0.224078 | 0.289903 | 0.497059 |
| MmugDNA.15365.1.S1_at   | MmugDNA.15365.1 | 4.47  | 4.27  | 0.08 | 0.16 | 1.15   | 0.181513 | 0.252002 | 0.47696  | 0.520646 |
| MmugDNA.15366.1.S1_s_at | MmugDNA.15366.1 | 13.11 | 12.89 | 0.08 | 0.03 | 1.17   | 0.004803 | 0.072276 | 0.115098 | 0.314934 |
| MmugDNA.42295.1.S1_s_at | MmugDNA.42295.1 | 4.24  | 4.16  | 0.04 | 0.23 | 1.05   | 0.556091 | 0.745389 | 0.771459 | 0.852384 |
| MmugDNA.15368.1.S1_at   | MmugDNA.15368.1 | 3.63  | 3.41  | 0.42 | 0.12 | 1.16   | 0.345508 | 0.479969 | 0.624476 | 0.685569 |
| MmugDNA.15369.1.S1_at   | MmugDNA.15369.1 | 7.47  | 7.53  | 0.04 | 0.03 | -1.04  | 0.099321 | 0.049358 | 0.370274 | 0.267081 |
| MmugDNA.1537.1.S1_at    | MmugDNA.1537.1  | 7.21  | 6.81  | 0.33 | 0.1  | 1.32   | 0.355864 | 0.358498 | 0.632435 | 0.600012 |
| MmugDNA.15371.1.S1_at   | MmugDNA.15371.1 | 8.82  | 9.36  | 0.15 | 0.24 | -1.45  | 0.048724 | 0.189827 | 0.278193 | 0.465403 |
| MmugDNA.15372.1.S1_at   | MmugDNA.15372.1 | 3.88  | 3.96  | 0.35 | 0.12 | -1.06  | 0.486315 | 0.698873 | 0.725583 | 0.825026 |
| MmugDNA.15373.1.S1_at   | MmugDNA.15373.1 | 5.18  | 4.9   | 0.55 | 0.61 | 1.21   | 0.956454 | 0.783398 | 0.982106 | 0.874571 |
| MmugDNA.15375.1.S1_at   | MmugDNA.15375.1 | 5.6   | 5.38  | 0.15 | 0.13 | 1.16   | 0.076931 | 0.25444  | 0.335395 | 0.522732 |
| MmugDNA.15376.1.S1_at   | MmugDNA.15376.1 | 5.01  | 4.87  | 0.22 | 0.13 | 1.1    | 0.358794 | 0.347872 | 0.634504 | 0.592196 |
| MmugDNA.15377.1.S1_at   | MmugDNA.15377.1 | 6.04  | 6.07  | 0.16 | 0.07 | -1.02  | 0.339189 | 0.46339  | 0.619515 | 0.674383 |
| MmugDNA.15378.1.S1_at   | MmugDNA.15378.1 | 4.65  | 4.73  | 1.47 | 0.18 | -1.06  | 0.43388  | 0.505997 | 0.689223 | 0.702337 |
| MmugDNA.1538.1.S1_at    | MmugDNA.1538.1  | 10.16 | 10.01 | 0.12 | 0.19 | 1.11   | 0.752997 | 0.07258  | 0.885904 | 0.315511 |
| MmugDNA.15381.1.S1_at   | MmugDNA.15381.1 | 6.16  | 5.54  | 0.26 | 0.25 | 1.53   | 0.0402   | 0.107944 | 0.257003 | 0.371008 |
| MmugDNA.15382.1.S1_at   | MmugDNA.15382.1 | 3.9   | 3.81  | 0.26 | 0.05 | 1.06   | 0.588705 | 0.27241  | 0.791222 | 0.537122 |
| MmugDNA.15383.1.S1_at   | MmugDNA.15383.1 | 7.95  | 7.89  | 0.13 | 0.12 | 1.04   | 0.547997 | 0.192311 | 0.766338 | 0.467813 |
| MmugDNA.15383.1.S1_s_at | MmugDNA.15383.1 | 11.17 | 10.98 | 0.04 | 0.05 | 1.14   | 0.008774 | 0.013717 | 0.143445 | 0.150008 |
| MmugDNA.15384.1.S1_at   | MmugDNA.15384.1 | 6.6   | 6.74  | 0.18 | 0.07 | -1.1   | 0.969453 | 0.141352 | 0.987881 | 0.414874 |
| MmugDNA.15385.1.S1_at   | MmugDNA.15385.1 | 5.83  | 5.87  | 0.31 | 0.14 | -1.03  | 0.803281 | 0.831698 | 0.911765 | 0.903453 |
| MmugDNA.15386.1.S1_s_at | MmugDNA.15386.1 | 11.17 | 10.5  | 0.43 | 0.31 | 1.59   | 0.17777  | 0.119586 | 0.47249  | 0.388247 |
| MmugDNA.15387.1.S1_at   | MmugDNA.15387.1 | 6.48  | 6.07  | 0.66 | 0.43 | 1.33   | 0.16736  | 0.204089 | 0.460585 | 0.478413 |

|                         |                 |       |       |      |      |       |          |          |          |          |
|-------------------------|-----------------|-------|-------|------|------|-------|----------|----------|----------|----------|
| MmugDNA.15388.1.S1_at   | MmugDNA.15388.1 | 6.81  | 6.79  | 0.23 | 0.08 | 1.02  | 0.727928 | 0.871898 | 0.872684 | 0.927098 |
| MmugDNA.15389.1.S1_at   | MmugDNA.15389.1 | 13.06 | 13.19 | 0.04 | 0.04 | -1.09 | 0.009494 | 0.033005 | 0.147495 | 0.224908 |
| MmugDNA.1539.1.S1_at    | MmugDNA.1539.1  | 3.77  | 3.79  | 0.86 | 0.09 | -1.01 | 0.391779 | 0.565461 | 0.658822 | 0.739886 |
| MmugDNA.15390.1.S1_s_at | MmugDNA.15390.1 | 10.06 | 9.89  | 0.29 | 0.08 | 1.12  | 0.407071 | 0.012054 | 0.670235 | 0.142044 |
| MmugDNA.15391.1.S1_at   | MmugDNA.15391.1 | 4.26  | 4.38  | 0.14 | 0.1  | -1.08 | 0.141355 | 0.073504 | 0.427324 | 0.316778 |
| MmugDNA.15392.1.S1_at   | MmugDNA.15392.1 | 3.15  | 3.14  | 0.13 | 0.02 | 1.01  | 0.297885 | 0.496343 | 0.586352 | 0.695995 |
| MmugDNA.15393.1.S1_at   | MmugDNA.15393.1 | 4.91  | 4.9   | 0.05 | 0.19 | 1     | 0.379704 | 0.384363 | 0.649467 | 0.620041 |
| MmugDNA.15394.1.S1_at   | MmugDNA.15394.1 | 4.16  | 3.93  | 0.27 | 0.39 | 1.18  | 0.566764 | 0.728459 | 0.777544 | 0.843019 |
| MmugDNA.15395.1.S1_s_at | MmugDNA.15395.1 | 6.28  | 6.11  | 0.19 | 0.03 | 1.12  | 0.058627 | 0.351427 | 0.299229 | 0.595054 |
| MmugDNA.15396.1.S1_at   | MmugDNA.15396.1 | 7.4   | 7.34  | 0    | 0.09 | 1.04  | 0.300171 | 0.023566 | 0.588392 | 0.192289 |
| MmugDNA.15400.1.S1_at   | MmugDNA.15400.1 | 3.25  | 3.29  | 0.22 | 0.01 | -1.03 | 0.876063 | 0.26262  | 0.946958 | 0.528973 |
| MmugDNA.15401.1.S1_at   | MmugDNA.15401.1 | 7.55  | 7.63  | 0.08 | 0.16 | -1.06 | 0.795105 | 0.873785 | 0.907466 | 0.928234 |
| MmugDNA.15402.1.S1_at   | MmugDNA.15402.1 | 7.58  | 6.74  | 0.86 | 0.12 | 1.79  | 0.138936 | 0.206497 | 0.424608 | 0.480571 |
| MmugDNA.15403.1.S1_at   | MmugDNA.15403.1 | 4.3   | 4.18  | 0.16 | 0.2  | 1.08  | 0.469302 | 0.476054 | 0.714096 | 0.682475 |
| MmugDNA.15404.1.S1_at   | MmugDNA.15404.1 | 8.14  | 7.96  | 0.11 | 0.19 | 1.13  | 0.170828 | 0.192618 | 0.464646 | 0.468116 |
| MmugDNA.15404.1.S1_s_at | MmugDNA.15404.1 | 7.28  | 7.18  | 0.19 | 0.02 | 1.07  | 0.162166 | 0.086023 | 0.454027 | 0.33824  |
| MmugDNA.15406.1.S1_at   | MmugDNA.15406.1 | 5.82  | 6.8   | 0.72 | 0.2  | -1.98 | 0.262723 | 0.516036 | 0.556683 | 0.708688 |
| MmugDNA.15407.1.S1_at   | MmugDNA.15407.1 | 5.71  | 5.92  | 1.41 | 0.47 | -1.16 | 0.745928 | 0.697701 | 0.882206 | 0.824333 |
| MmugDNA.15407.1.S1_x_at | MmugDNA.15407.1 | 5.63  | 6.14  | 1.02 | 0.48 | -1.42 | 0.483762 | 0.477402 | 0.723753 | 0.683463 |
| MmugDNA.15408.1.S1_at   | MmugDNA.15408.1 | 5.31  | 5.38  | 0.14 | 0    | -1.05 | 0.458743 | 0.661264 | 0.707204 | 0.801687 |
| MmugDNA.1541.1.S1_at    | MmugDNA.1541.1  | 3.93  | 3.85  | 0.11 | 0.13 | 1.05  | 0.191946 | 0.281316 | 0.488504 | 0.544391 |
| MmugDNA.15410.1.S1_at   | MmugDNA.15410.1 | 10.09 | 9.85  | 0.35 | 0.09 | 1.18  | 0.669509 | 0.606109 | 0.841482 | 0.765674 |
| MmugDNA.15411.1.S1_at   | MmugDNA.15411.1 | 3.6   | 3.33  | 0.2  | 0.27 | 1.21  | 0.262538 | 0.228619 | 0.556605 | 0.500826 |
| MmugDNA.15412.1.S1_at   | MmugDNA.15412.1 | 5.02  | 5.01  | 0.05 | 0.06 | 1     | 0.601641 | 0.587373 | 0.799762 | 0.754171 |
| MmugDNA.15413.1.S1_s_at | MmugDNA.15413.1 | 7.49  | 7.61  | 0.17 | 0.05 | -1.08 | 0.856833 | 0.882774 | 0.937807 | 0.93317  |
| MmugDNA.15414.1.S1_at   | MmugDNA.15414.1 | 9.01  | 8.71  | 0.14 | 0.18 | 1.24  | 0.044309 | 0.568827 | 0.267611 | 0.74211  |
| MmugDNA.15415.1.S1_at   | MmugDNA.15415.1 | 8.65  | 9.2   | 0.51 | 0.33 | -1.46 | 0.282264 | 0.437985 | 0.573058 | 0.657058 |
| MmugDNA.15416.1.S1_at   | MmugDNA.15416.1 | 3.92  | 4.18  | 0.2  | 0.14 | -1.2  | 0.059442 | 0.029562 | 0.300941 | 0.213612 |
| MmugDNA.15417.1.S1_at   | MmugDNA.15417.1 | 9.79  | 9.51  | 0.1  | 0.13 | 1.21  | 0.030051 | 0.542282 | 0.226564 | 0.725385 |
| MmugDNA.15417.1.S1_s_at | MmugDNA.15417.1 | 12.3  | 12.15 | 0.09 | 0.04 | 1.11  | 0.094611 | 0.532807 | 0.363543 | 0.719235 |
| MmugDNA.1542.1.S1_at    | MmugDNA.1542.1  | 6.46  | 6.51  | 1.27 | 0.12 | -1.04 | 0.456423 | 0.607634 | 0.705768 | 0.766457 |
| MmugDNA.15420.1.S1_at   | MmugDNA.15420.1 | 5.35  | 5.3   | 0.11 | 0.02 | 1.04  | 0.207456 | 0.301229 | 0.505142 | 0.559356 |
| MmugDNA.15421.1.S1_at   | MmugDNA.15421.1 | 5.84  | 5.67  | 0.21 | 0.08 | 1.12  | 0.238705 | 0.257319 | 0.53598  | 0.525115 |
| MmugDNA.15423.1.S1_at   | MmugDNA.15423.1 | 8.21  | 8.43  | 0.37 | 0.07 | -1.17 | 0.440698 | 0.510891 | 0.694659 | 0.70525  |
| MmugDNA.15425.1.S1_at   | MmugDNA.15425.1 | 6.06  | 6     | 0.28 | 0.13 | 1.04  | 0.354281 | 0.54329  | 0.631471 | 0.726012 |
| MmugDNA.15426.1.S1_at   | MmugDNA.15426.1 | 10.5  | 10.45 | 0.04 | 0.06 | 1.03  | 0.100627 | 0.598027 | 0.371612 | 0.760536 |
| MmugDNA.15427.1.S1_at   | MmugDNA.15427.1 | 11.16 | 11.26 | 0.4  | 0.06 | -1.07 | 0.740814 | 0.947769 | 0.879855 | 0.970346 |
| MmugDNA.15429.1.S1_at   | MmugDNA.15429.1 | 4.26  | 3.87  | 0.37 | 0.23 | 1.31  | 0.302834 | 0.456743 | 0.590429 | 0.67043  |
| MmugDNA.15430.1.S1_at   | MmugDNA.15430.1 | 9.68  | 8.93  | 0.31 | 0.11 | 1.67  | 0.019633 | 0.007919 | 0.193067 | 0.11857  |
| MmugDNA.15431.1.S1_at   | MmugDNA.15431.1 | 5.75  | 5.99  | 0.27 | 0.2  | -1.18 | 0.292906 | 0.164961 | 0.581949 | 0.44123  |
| MmugDNA.15432.1.S1_at   | MmugDNA.15432.1 | 5.74  | 5.75  | 0.05 | 0.17 | -1.01 | 0.719312 | 0.293869 | 0.867628 | 0.553865 |
| MmugDNA.15433.1.S1_s_at | MmugDNA.15433.1 | 11.79 | 12.52 | 0.24 | 0.05 | -1.65 | 0.007273 | 0.036827 | 0.132956 | 0.236413 |
| MmugDNA.15434.1.S1_at   | MmugDNA.15434.1 | 6.26  | 5.86  | 0.65 | 0.29 | 1.32  | 0.606127 | 0.749894 | 0.802904 | 0.854631 |

|                         |                 |       |       |      |      |       |          |          |          |          |
|-------------------------|-----------------|-------|-------|------|------|-------|----------|----------|----------|----------|
| MmugDNA.15435.1.S1_at   | MmugDNA.15435.1 | 5.67  | 5.73  | 0.37 | 0.04 | -1.04 | 0.899861 | 0.923637 | 0.957435 | 0.957057 |
| MmugDNA.15436.1.S1_at   | MmugDNA.15436.1 | 8.48  | 8.36  | 0.26 | 0.04 | 1.08  | 0.561512 | 0.924305 | 0.774452 | 0.957351 |
| MmugDNA.15437.1.S1_at   | MmugDNA.15437.1 | 6.68  | 6.68  | 1.04 | 0.67 | 1     | 0.786421 | 0.931915 | 0.902599 | 0.9613   |
| MmugDNA.15438.1.S1_at   | MmugDNA.15438.1 | 3.25  | 3.2   | 0.08 | 0.1  | 1.03  | 0.625862 | 0.812015 | 0.81559  | 0.891493 |
| MmugDNA.15439.1.S1_at   | MmugDNA.15439.1 | 5.45  | 5.68  | 0.46 | 0.22 | -1.17 | 0.251677 | 0.038136 | 0.54638  | 0.239923 |
| MmugDNA.15440.1.S1_at   | MmugDNA.15440.1 | 5.15  | 5.49  | 0.82 | 0.08 | -1.26 | 0.443781 | 0.566631 | 0.696813 | 0.740707 |
| MmugDNA.15441.1.S1_at   | MmugDNA.15441.1 | 4.95  | 4.61  | 0.34 | 0.11 | 1.26  | 0.045243 | 0.036813 | 0.270226 | 0.236386 |
| MmugDNA.15442.1.S1_at   | MmugDNA.15442.1 | 4.1   | 3.91  | 0.15 | 0.07 | 1.14  | 0.188818 | 0.203216 | 0.485415 | 0.477415 |
| MmugDNA.15443.1.S1_at   | MmugDNA.15443.1 | 8.27  | 8.96  | 0.25 | 0.05 | -1.62 | 0.007947 | 0.008437 | 0.138304 | 0.121922 |
| MmugDNA.15447.1.S1_at   | MmugDNA.15447.1 | 5.66  | 5.67  | 0.17 | 0.09 | -1    | 0.45983  | 0.650382 | 0.70789  | 0.795614 |
| MmugDNA.15448.1.S1_at   | MmugDNA.15448.1 | 4.81  | 4.16  | 0.6  | 0.17 | 1.57  | 0.18007  | 0.48399  | 0.475161 | 0.688262 |
| MmugDNA.15449.1.S1_at   | MmugDNA.15449.1 | 10.4  | 10.36 | 0.11 | 0.11 | 1.03  | 0.752186 | 0.239531 | 0.885542 | 0.510206 |
| MmugDNA.1545.1.S1_at    | MmugDNA.1545.1  | 6.52  | 6.04  | 0.5  | 0.6  | 1.4   | 0.140046 | 0.251709 | 0.425735 | 0.520444 |
| MmugDNA.15450.1.S1_at   | MmugDNA.15450.1 | 3.08  | 2.98  | 0.03 | 0.08 | 1.07  | 0.102245 | 0.203198 | 0.374232 | 0.477415 |
| MmugDNA.15451.1.S1_at   | MmugDNA.15451.1 | 4.53  | 4.14  | 0.21 | 0.57 | 1.31  | 0.775658 | 0.906676 | 0.89744  | 0.947216 |
| MmugDNA.15452.1.S1_at   | MmugDNA.15452.1 | 6.16  | 6.23  | 0.05 | 0.1  | -1.05 | 0.743294 | 0.322543 | 0.881285 | 0.573991 |
| MmugDNA.15454.1.S1_at   | MmugDNA.15454.1 | 5.32  | 5.42  | 0.36 | 0.49 | -1.07 | 0.729384 | 0.827651 | 0.873618 | 0.901081 |
| MmugDNA.15456.1.S1_at   | MmugDNA.15456.1 | 4.08  | 4.1   | 0    | 0.21 | -1.02 | 0.689753 | 0.754921 | 0.851884 | 0.857334 |
| MmugDNA.15457.1.S1_at   | MmugDNA.15457.1 | 4.07  | 3.81  | 0.17 | 0.29 | 1.2   | 0.381063 | 0.485016 | 0.650611 | 0.688893 |
| MmugDNA.15458.1.S1_at   | MmugDNA.15458.1 | 10.24 | 10.73 | 0.11 | 0.28 | -1.4  | 0.125186 | 0.302162 | 0.405612 | 0.560092 |
| MmugDNA.15460.1.S1_at   | MmugDNA.15460.1 | 6.83  | 6.95  | 0.17 | 0.12 | -1.09 | 0.541994 | 0.730523 | 0.762538 | 0.844042 |
| MmugDNA.34659.1.S1_s_at | MmugDNA.34659.1 | 5.83  | 5.59  | 0.08 | 0.26 | 1.18  | 0.433571 | 0.625284 | 0.688989 | 0.779099 |
| MmugDNA.15462.1.S1_at   | MmugDNA.15462.1 | 8.45  | 8.95  | 0.28 | 0.08 | -1.42 | 0.133591 | 0.04993  | 0.41701  | 0.268603 |
| MmugDNA.15463.1.S1_at   | MmugDNA.15463.1 | 5.25  | 4.91  | 0.35 | 0.23 | 1.27  | 0.208751 | 0.380332 | 0.506255 | 0.616984 |
| MmugDNA.15464.1.S1_at   | MmugDNA.15464.1 | 4.7   | 4.61  | 0.2  | 0.57 | 1.06  | 0.526479 | 0.573153 | 0.752619 | 0.744941 |
| MmugDNA.15465.1.S1_at   | MmugDNA.15465.1 | 5.7   | 5.07  | 1.45 | 0.11 | 1.55  | 0.3168   | 0.584512 | 0.60152  | 0.752435 |
| MmugDNA.15466.1.S1_at   | MmugDNA.15466.1 | 8.12  | 8.14  | 0.29 | 0.2  | -1.01 | 0.937203 | 0.001972 | 0.973667 | 0.065871 |
| MmugDNA.15467.1.S1_at   | MmugDNA.15467.1 | 4.25  | 3.98  | 0.25 | 0.08 | 1.21  | 0.455624 | 0.402535 | 0.705234 | 0.631481 |
| MmugDNA.15468.1.S1_at   | MmugDNA.15468.1 | 6.91  | 6.81  | 0.37 | 0.05 | 1.07  | 0.877428 | 0.467697 | 0.947604 | 0.677207 |
| MmugDNA.1547.1.S1_at    | MmugDNA.1547.1  | 6.99  | 6.97  | 0.19 | 0.02 | 1.01  | 0.767702 | 0.967795 | 0.893373 | 0.982192 |
| MmugDNA.1547.1.S1_s_at  | MmugDNA.1547.1  | 11.32 | 10.78 | 0.2  | 0.35 | 1.46  | 0.095106 | 0.000741 | 0.364251 | 0.044929 |
| MmugDNA.15470.1.S1_at   | MmugDNA.15470.1 | 3.58  | 3.54  | 0.17 | 0    | 1.03  | 0.939903 | 0.40849  | 0.974637 | 0.635694 |
| MmugDNA.15471.1.S1_at   | MmugDNA.15471.1 | 4.24  | 4.59  | 0.09 | 0.17 | -1.27 | 0.100626 | 0.698951 | 0.371612 | 0.825058 |
| MmugDNA.15473.1.S1_at   | MmugDNA.15473.1 | 5.03  | 7.39  | 1.54 | 0.66 | -5.11 | 0.322348 | 0.296142 | 0.606349 | 0.555339 |
| MmugDNA.15474.1.S1_at   | MmugDNA.15474.1 | 11.2  | 10.71 | 0.13 | 0.05 | 1.4   | 0.004543 | 0.193306 | 0.113495 | 0.468656 |
| MmugDNA.15475.1.S1_at   | MmugDNA.15475.1 | 4.77  | 5.37  | 0.73 | 0.36 | -1.51 | 0.314985 | 0.417949 | 0.600177 | 0.642499 |
| MmugDNA.15477.1.S1_at   | MmugDNA.15477.1 | 5.66  | 5.29  | 0.57 | 0.4  | 1.3   | 0.338535 | 0.122993 | 0.61892  | 0.392923 |
| MmugDNA.15478.1.S1_at   | MmugDNA.15478.1 | 6.82  | 7.72  | 0.53 | 0.19 | -1.87 | 0.14618  | 0.020954 | 0.434    | 0.181537 |
| MmugDNA.15479.1.S1_at   | MmugDNA.15479.1 | 5.24  | 5.17  | 0.16 | 0    | 1.05  | 0.476368 | 0.925346 | 0.718756 | 0.957778 |
| MmugDNA.1548.1.S1_at    | MmugDNA.1548.1  | 3.49  | 3.51  | 0.3  | 0.05 | -1.02 | 0.431692 | 0.599246 | 0.687592 | 0.761382 |
| MmugDNA.15480.1.S1_at   | MmugDNA.15480.1 | 10.23 | 10.21 | 0.32 | 0.12 | 1.02  | 0.569311 | 0.939448 | 0.778786 | 0.965611 |
| MmugDNA.15483.1.S1_at   | MmugDNA.15483.1 | 3.18  | 2.82  | 0.25 | 0.48 | 1.29  | 0.908175 | 0.205803 | 0.961131 | 0.480072 |
| MmugDNA.15484.1.S1_at   | MmugDNA.15484.1 | 5.69  | 5.92  | 0.38 | 0.09 | -1.18 | 0.917602 | 0.960097 | 0.964873 | 0.977408 |

|                         |                 |       |       |      |      |       |          |          |          |          |
|-------------------------|-----------------|-------|-------|------|------|-------|----------|----------|----------|----------|
| MmugDNA.15486.1.S1_at   | MmugDNA.15486.1 | 7.29  | 7.11  | 0.08 | 0.11 | 1.14  | 0.034553 | 0.357535 | 0.240503 | 0.599179 |
| MmugDNA.15487.1.S1_at   | MmugDNA.15487.1 | 9.68  | 9.18  | 0.12 | 0.16 | 1.42  | 0.018275 | 0.05506  | 0.1882   | 0.280147 |
| MmugDNA.15488.1.S1_at   | MmugDNA.15488.1 | 10.93 | 10.7  | 0.26 | 0.09 | 1.17  | 0.493695 | 0.294592 | 0.730599 | 0.554282 |
| MmugDNA.15489.1.S1_at   | MmugDNA.15489.1 | 4.87  | 4.78  | 0.02 | 0.12 | 1.06  | 0.293084 | 0.283303 | 0.582105 | 0.545836 |
| MmugDNA.15489.1.S1_s_at | MmugDNA.15489.1 | 5.71  | 5.71  | 0.14 | 0.05 | 1     | 0.277167 | 0.32294  | 0.568672 | 0.574261 |
| MmugDNA.1549.1.S1_at    | MmugDNA.1549.1  | 7.4   | 7.37  | 0.1  | 0.16 | 1.02  | 0.594902 | 0.046415 | 0.795002 | 0.259982 |
| MmugDNA.15491.1.S1_at   | MmugDNA.15491.1 | 7.13  | 8.81  | 0.81 | 0.12 | -3.2  | 0.061473 | 0.050551 | 0.304484 | 0.270222 |
| MmugDNA.15493.1.S1_at   | MmugDNA.15493.1 | 6.13  | 6.05  | 1.07 | 0.18 | 1.06  | 0.326708 | 0.429585 | 0.609643 | 0.650961 |
| MmugDNA.15494.1.S1_at   | MmugDNA.15494.1 | 4.57  | 4.68  | 0.14 | 0.08 | -1.08 | 0.261149 | 0.294918 | 0.555269 | 0.554462 |
| MmugDNA.15495.1.S1_at   | MmugDNA.15495.1 | 5.3   | 5.05  | 0.15 | 0.07 | 1.19  | 0.167562 | 0.245025 | 0.46081  | 0.514813 |
| MmugDNA.15496.1.S1_at   | MmugDNA.15496.1 | 7.87  | 7.08  | 0.17 | 0.12 | 1.73  | 0.002083 | 0.033077 | 0.090206 | 0.225105 |
| MmugDNA.15497.1.S1_at   | MmugDNA.15497.1 | 8.67  | 8.54  | 0.23 | 0.1  | 1.1   | 0.783632 | 0.921503 | 0.901266 | 0.955761 |
| MmugDNA.15498.1.S1_at   | MmugDNA.15498.1 | 3.99  | 4.04  | 0.19 | 0.04 | -1.03 | 0.55118  | 0.449151 | 0.768269 | 0.664892 |
| MmugDNA.15499.1.S1_at   | MmugDNA.15499.1 | 4.63  | 4.83  | 0.37 | 0.02 | -1.14 | 0.938702 | 0.92645  | 0.97419  | 0.958307 |
| MmugDNA.155.1.S1_at     | MmugDNA.155.1   | 12.07 | 12.23 | 0.09 | 0.07 | -1.12 | 0.033257 | 0.023407 | 0.236446 | 0.191786 |
| MmugDNA.1550.1.S1_at    | MmugDNA.1550.1  | 4.29  | 4.32  | 0.37 | 0.23 | -1.02 | 0.638866 | 0.581159 | 0.823279 | 0.750237 |
| MmugDNA.15502.1.S1_at   | MmugDNA.15502.1 | 7.55  | 5.94  | 0.4  | 0.27 | 3.05  | 0.0066   | 0.002301 | 0.127762 | 0.070694 |
| MmugDNA.15503.1.S1_at   | MmugDNA.15503.1 | 6.18  | 6.52  | 0.21 | 0.28 | -1.26 | 0.096341 | 0.033037 | 0.366014 | 0.225008 |
| MmugDNA.15507.1.S1_at   | MmugDNA.15507.1 | 6.9   | 6.98  | 0.09 | 0.05 | -1.05 | 0.206219 | 0.004986 | 0.503848 | 0.09844  |
| MmugDNA.15508.1.S1_at   | MmugDNA.15508.1 | 4.09  | 3.95  | 0.09 | 0.2  | 1.1   | 0.853459 | 0.211788 | 0.936293 | 0.485777 |
| MmugDNA.1551.1.S1_at    | MmugDNA.1551.1  | 8.99  | 8.94  | 0.17 | 0.06 | 1.04  | 0.503996 | 0.564067 | 0.737278 | 0.738956 |
| MmugDNA.1551.1.S1_s_at  | MmugDNA.1551.1  | 9.59  | 9.52  | 0.15 | 0.02 | 1.04  | 0.603851 | 0.458072 | 0.801334 | 0.671038 |
| MmugDNA.15510.1.S1_s_at | MmugDNA.15510.1 | 11.72 | 11.98 | 0.12 | 0.07 | -1.2  | 0.0295   | 0.022922 | 0.224759 | 0.189403 |
| MmugDNA.15511.1.S1_s_at | MmugDNA.15511.1 | 11.19 | 11.28 | 0.13 | 0.02 | -1.07 | 0.095102 | 0.103302 | 0.364251 | 0.364143 |
| MmugDNA.15513.1.S1_at   | MmugDNA.15513.1 | 3.32  | 3.39  | 0.09 | 0.14 | -1.05 | 0.47905  | 0.203158 | 0.720421 | 0.477415 |
| MmugDNA.15514.1.S1_at   | MmugDNA.15514.1 | 4.75  | 4.87  | 0.91 | 0.36 | -1.09 | 0.903913 | 0.805872 | 0.959314 | 0.888395 |
| MmugDNA.15516.1.S1_at   | MmugDNA.15516.1 | 3.89  | 3.74  | 0.23 | 0.07 | 1.1   | 0.153587 | 0.249778 | 0.443559 | 0.518876 |
| MmugDNA.15517.1.S1_at   | MmugDNA.15517.1 | 9.52  | 11.68 | 0.76 | 0.09 | -4.47 | 0.012013 | 0.136282 | 0.159626 | 0.4087   |
| MmugDNA.15519.1.S1_at   | MmugDNA.15519.1 | 4.69  | 4.77  | 0.16 | 0.06 | -1.06 | 0.269749 | 0.309598 | 0.562025 | 0.564987 |
| MmugDNA.1552.1.S1_at    | MmugDNA.1552.1  | 12.87 | 12.9  | 0.07 | 0.05 | -1.02 | 0.827978 | 0.834085 | 0.923804 | 0.904936 |
| MmugDNA.15520.1.S1_at   | MmugDNA.15520.1 | 7.71  | 8.95  | 1.39 | 0.27 | -2.35 | 0.076989 | 0.346064 | 0.33549  | 0.591154 |
| MmugDNA.15520.1.S1_s_at | MmugDNA.15520.1 | 10.13 | 11.43 | 0.99 | 0.24 | -2.45 | 0.042606 | 0.329505 | 0.263529 | 0.578781 |
| MmugDNA.15521.1.S1_at   | MmugDNA.15521.1 | 3.53  | 3.33  | 0.09 | 0.07 | 1.15  | 0.072276 | 0.161999 | 0.326794 | 0.438108 |
| MmugDNA.15522.1.S1_at   | MmugDNA.15522.1 | 5.7   | 4.83  | 0.94 | 0.57 | 1.83  | 0.261819 | 0.409381 | 0.555977 | 0.636452 |
| MmugDNA.15524.1.S1_at   | MmugDNA.15524.1 | 4.92  | 4.11  | 0.37 | 0.16 | 1.75  | 0.064448 | 0.049659 | 0.31037  | 0.267882 |
| MmugDNA.15526.1.S1_at   | MmugDNA.15526.1 | 4.78  | 4.68  | 0.06 | 0.15 | 1.07  | 0.203928 | 0.285826 | 0.501449 | 0.547484 |
| MmugDNA.15527.1.S1_at   | MmugDNA.15527.1 | 5.49  | 5.26  | 0.97 | 0.44 | 1.17  | 0.282163 | 0.4019   | 0.572942 | 0.63109  |
| MmugDNA.15529.1.S1_at   | MmugDNA.15529.1 | 7.68  | 7.26  | 0.12 | 0.12 | 1.34  | 0.007107 | 0.001205 | 0.131735 | 0.054389 |
| MmugDNA.1553.1.S1_at    | MmugDNA.1553.1  | 5.24  | 5.8   | 0.36 | 0.35 | -1.47 | 0.284068 | 0.118474 | 0.574388 | 0.386457 |
| MmugDNA.15531.1.S1_at   | MmugDNA.15531.1 | 5.8   | 6.1   | 0.51 | 0.27 | -1.23 | 0.371659 | 0.024805 | 0.644295 | 0.197344 |
| MmugDNA.15532.1.S1_at   | MmugDNA.15532.1 | 5.95  | 6.35  | 1.36 | 0.11 | -1.32 | 0.94714  | 0.996445 | 0.97775  | 0.997918 |
| MmugDNA.15533.1.S1_at   | MmugDNA.15533.1 | 4.87  | 4.53  | 0.08 | 0.08 | 1.27  | 0.009076 | 0.00568  | 0.144991 | 0.103959 |
| MmugDNA.15534.1.S1_at   | MmugDNA.15534.1 | 2.9   | 3.03  | 0.11 | 0.26 | -1.09 | 0.173833 | 0.263031 | 0.468263 | 0.529397 |

|                         |                 |       |       |      |      |       |          |          |          |          |
|-------------------------|-----------------|-------|-------|------|------|-------|----------|----------|----------|----------|
| MmugDNA.15535.1.S1_at   | MmugDNA.15535.1 | 3.71  | 3.63  | 0.03 | 0.08 | 1.06  | 0.334805 | 0.700059 | 0.615826 | 0.825946 |
| MmugDNA.8824.1.S1_at    | MmugDNA.8824.1  | 10.67 | 11.66 | 0.14 | 0.04 | -1.98 | 0.000248 | 0.002977 | 0.054642 | 0.079958 |
| MmugDNA.8824.1.S1_s_at  | MmugDNA.8824.1  | 10.63 | 11.55 | 0.21 | 0.04 | -1.9  | 0.001079 | 0.002788 | 0.077048 | 0.077966 |
| MmugDNA.15539.1.S1_at   | MmugDNA.15539.1 | 10.74 | 11.79 | 0.32 | 0.24 | -2.08 | 0.03428  | 0.022231 | 0.239767 | 0.18659  |
| MmugDNA.15541.1.S1_at   | MmugDNA.15541.1 | 4.91  | 5.36  | 0.52 | 0.18 | -1.37 | 0.301504 | 0.24702  | 0.589355 | 0.516238 |
| MmugDNA.12653.1.S1_at   | MmugDNA.12653.1 | 9.81  | 9.75  | 0.02 | 0.12 | 1.04  | 0.389024 | 0.120325 | 0.656968 | 0.38925  |
| MmugDNA.12653.1.S1_s_at | MmugDNA.12653.1 | 12    | 12.04 | 0.16 | 0.1  | -1.03 | 0.716919 | 0.420475 | 0.866434 | 0.644171 |
| MmugDNA.15543.1.S1_at   | MmugDNA.15543.1 | 3.47  | 3.33  | 0.14 | 0.23 | 1.1   | 0.25205  | 0.325036 | 0.546696 | 0.575545 |
| MmugDNA.15545.1.S1_at   | MmugDNA.15545.1 | 4.13  | 4.24  | 0.25 | 0.05 | -1.08 | 0.830793 | 0.814505 | 0.925496 | 0.892948 |
| MmugDNA.15546.1.S1_at   | MmugDNA.15546.1 | 3.81  | 4.21  | 0.32 | 0.51 | -1.32 | 0.335848 | 0.515837 | 0.616625 | 0.708504 |
| MmugDNA.15547.1.S1_at   | MmugDNA.15547.1 | 5.38  | 5.33  | 0.19 | 0.09 | 1.04  | 0.41907  | 0.506996 | 0.678626 | 0.702699 |
| MmugDNA.15549.1.S1_s_at | MmugDNA.15549.1 | 8.19  | 8     | 0.19 | 0.13 | 1.14  | 0.226683 | 0.271405 | 0.524513 | 0.536507 |
| MmugDNA.15550.1.S1_at   | MmugDNA.15550.1 | 3.34  | 3.33  | 0.17 | 0.07 | 1.01  | 0.515763 | 0.731245 | 0.745426 | 0.84425  |
| MmugDNA.15551.1.S1_at   | MmugDNA.15551.1 | 5.42  | 5.18  | 0.11 | 0.2  | 1.18  | 0.100293 | 0.160396 | 0.371099 | 0.436528 |
| MmugDNA.15552.1.S1_at   | MmugDNA.15552.1 | 4.37  | 4.37  | 0.07 | 0.31 | -1    | 0.80787  | 0.901754 | 0.91403  | 0.944082 |
| MmugDNA.15553.1.S1_at   | MmugDNA.15553.1 | 7.77  | 7.7   | 0.23 | 0.03 | 1.05  | 0.657799 | 0.778338 | 0.834762 | 0.871276 |
| MmugDNA.15555.1.S1_at   | MmugDNA.15555.1 | 6.76  | 6.71  | 0.15 | 0.07 | 1.04  | 0.604715 | 0.521898 | 0.801933 | 0.712684 |
| MmugDNA.15557.1.S1_at   | MmugDNA.15557.1 | 6.45  | 6.2   | 0.1  | 0.05 | 1.2   | 0.022165 | 0.009556 | 0.201977 | 0.12881  |
| MmugDNA.15558.1.S1_at   | MmugDNA.15558.1 | 7.27  | 7.2   | 0.17 | 0.03 | 1.05  | 0.42031  | 0.519845 | 0.679364 | 0.71135  |
| MmugDNA.1556.1.S1_at    | MmugDNA.1556.1  | 12.02 | 11.59 | 0.03 | 0.05 | 1.35  | 0.000274 | 0.10622  | 0.056654 | 0.368604 |
| MmugDNA.15561.1.S1_at   | MmugDNA.15561.1 | 7.09  | 6.03  | 0.55 | 0.27 | 2.09  | 0.077422 | 0.097834 | 0.336144 | 0.355639 |
| MmugDNA.15564.1.S1_x_at | MmugDNA.15564.1 | 5.76  | 5.53  | 0.85 | 0.04 | 1.17  | 0.223418 | 0.188175 | 0.521227 | 0.464251 |
| MmugDNA.15569.1.S1_at   | MmugDNA.15569.1 | 4.23  | 4.21  | 0.27 | 0.03 | 1.01  | 0.656149 | 0.856502 | 0.833605 | 0.918027 |
| MmugDNA.1557.1.S1_at    | MmugDNA.1557.1  | 3.34  | 3.81  | 0.12 | 0.1  | -1.38 | 0.011706 | 0.04044  | 0.158005 | 0.24621  |
| MmugDNA.15570.1.S1_at   | MmugDNA.15570.1 | 4.28  | 4.26  | 0.07 | 0.1  | 1.01  | 0.990813 | 0.707279 | 0.996662 | 0.83023  |
| MmugDNA.15571.1.S1_at   | MmugDNA.15571.1 | 9.52  | 9.49  | 0.25 | 0.11 | 1.02  | 0.827521 | 0.855044 | 0.923667 | 0.917395 |
| MmugDNA.15572.1.S1_at   | MmugDNA.15572.1 | 5.04  | 4.98  | 0.05 | 0.04 | 1.04  | 0.160552 | 0.375219 | 0.452057 | 0.613261 |
| MmugDNA.15577.1.S1_s_at | MmugDNA.15577.1 | 8.73  | 7.89  | 0.16 | 0.14 | 1.78  | 0.002471 | 0.002779 | 0.094063 | 0.077966 |
| MmugDNA.15578.1.S1_at   | MmugDNA.15578.1 | 4.93  | 5.03  | 0.37 | 0.09 | -1.07 | 0.641518 | 0.192965 | 0.824894 | 0.468455 |
| MmugDNA.15579.1.S1_at   | MmugDNA.15579.1 | 6.24  | 6.3   | 0.21 | 0.11 | -1.05 | 0.911984 | 0.308572 | 0.962758 | 0.564575 |
| MmugDNA.1558.1.S1_at    | MmugDNA.1558.1  | 5.1   | 5.05  | 0.06 | 0.03 | 1.03  | 0.410713 | 0.803979 | 0.672751 | 0.887203 |
| MmugDNA.15580.1.S1_at   | MmugDNA.15580.1 | 6.5   | 6.46  | 0.27 | 0.21 | 1.02  | 0.689862 | 0.72966  | 0.851884 | 0.843634 |
| MmugDNA.15581.1.S1_at   | MmugDNA.15581.1 | 4.57  | 4.77  | 1.54 | 0.35 | -1.15 | 0.629235 | 0.408845 | 0.817792 | 0.6359   |
| MmugDNA.15582.1.S1_s_at | MmugDNA.15582.1 | 12.2  | 11.99 | 0.04 | 0.05 | 1.16  | 0.003804 | 0.000295 | 0.106923 | 0.034892 |
| MmugDNA.15584.1.S1_at   | MmugDNA.15584.1 | 7.18  | 7.33  | 0.07 | 0.12 | -1.11 | 0.081148 | 0.148727 | 0.342152 | 0.423201 |
| MmugDNA.15588.1.S1_at   | MmugDNA.15588.1 | 7.79  | 7.79  | 0.39 | 0.3  | -1    | 0.721013 | 0.816291 | 0.868452 | 0.894034 |
| MmugDNA.1559.1.S1_at    | MmugDNA.1559.1  | 5.1   | 5.1   | 0.12 | 0.06 | -1    | 0.332258 | 0.677846 | 0.614026 | 0.811833 |
| MmugDNA.36629.1.S1_at   | MmugDNA.36629.1 | 8.25  | 8.41  | 0.24 | 0.02 | -1.12 | 0.886907 | 0.414754 | 0.951794 | 0.640456 |
| MmugDNA.36629.1.S1_s_at | MmugDNA.36629.1 | 4.84  | 4.32  | 0.39 | 0.11 | 1.43  | 0.098623 | 0.26437  | 0.369387 | 0.530385 |
| MmugDNA.36629.1.S1_x_at | MmugDNA.36629.1 | 8.03  | 8.02  | 0.18 | 0.05 | 1.01  | 0.983416 | 0.876358 | 0.99383  | 0.929679 |
| MmugDNA.15590.1.S1_at   | MmugDNA.15590.1 | 5.4   | 4.84  | 0.19 | 0.16 | 1.48  | 0.012729 | 0.043945 | 0.163019 | 0.254098 |
| MmugDNA.15591.1.S1_at   | MmugDNA.15591.1 | 3.68  | 3.72  | 0.05 | 0.13 | -1.03 | 0.859094 | 0.118349 | 0.938949 | 0.386395 |
| MmugDNA.15595.1.S1_at   | MmugDNA.15595.1 | 8.59  | 10.62 | 1.53 | 0.1  | -4.07 | 0.089004 | 0.371355 | 0.355608 | 0.610172 |



|                         |                 |       |       |      |      |       |          |          |          |          |
|-------------------------|-----------------|-------|-------|------|------|-------|----------|----------|----------|----------|
| MmugDNA.15597.1.S1_s_at | MmugDNA.15597.1 | 6.4   | 5.41  | 0.26 | 0.26 | 1.99  | 0.004335 | 0.07258  | 0.111896 | 0.315511 |
| MmugDNA.15598.1.S1_at   | MmugDNA.15598.1 | 3.27  | 3.16  | 0.08 | 0.16 | 1.08  | 0.91945  | 0.069702 | 0.965499 | 0.310164 |
| MmugDNA.15599.1.S1_s_at | MmugDNA.15599.1 | 7.04  | 6.95  | 0.04 | 0.01 | 1.07  | 0.018881 | 0.169914 | 0.190967 | 0.446569 |
| MmugDNA.1560.1.S1_at    | MmugDNA.1560.1  | 10.63 | 10.02 | 0.27 | 0.27 | 1.53  | 0.051447 | 0.038473 | 0.284314 | 0.241096 |
| MmugDNA.15600.1.S1_at   | MmugDNA.15600.1 | 12.66 | 12.67 | 0.08 | 0.06 | -1.01 | 0.573692 | 0.92845  | 0.781268 | 0.959353 |
| MmugDNA.15601.1.S1_at   | MmugDNA.15601.1 | 8.61  | 8.01  | 0.38 | 0.24 | 1.51  | 0.055078 | 0.231947 | 0.291693 | 0.503631 |
| MmugDNA.15602.1.S1_at   | MmugDNA.15602.1 | 5.87  | 5.64  | 0.19 | 0.06 | 1.17  | 0.054468 | 0.034201 | 0.290603 | 0.228775 |
| MmugDNA.15606.1.S1_at   | MmugDNA.15606.1 | 3.99  | 3.5   | 0.1  | 0.25 | 1.4   | 0.093765 | 0.089518 | 0.362506 | 0.343811 |
| MmugDNA.15607.1.S1_at   | MmugDNA.15607.1 | 5.66  | 5.2   | 0.41 | 0.11 | 1.38  | 0.19583  | 0.304561 | 0.49272  | 0.561819 |
| MmugDNA.15609.1.S1_at   | MmugDNA.15609.1 | 11.88 | 11.84 | 0.18 | 0.1  | 1.03  | 0.789797 | 0.439028 | 0.904456 | 0.657802 |
| MmugDNA.1561.1.S1_at    | MmugDNA.1561.1  | 3.53  | 3.61  | 0.19 | 0.2  | -1.06 | 0.467425 | 0.618187 | 0.712919 | 0.77393  |
| MmugDNA.15612.1.S1_at   | MmugDNA.15612.1 | 3.54  | 3.28  | 0.19 | 0.11 | 1.2   | 0.143288 | 0.17128  | 0.429588 | 0.447809 |
| MmugDNA.15613.1.S1_at   | MmugDNA.15613.1 | 9.59  | 10.21 | 0.16 | 0.33 | -1.53 | 0.095144 | 0.03956  | 0.364346 | 0.243891 |
| MmugDNA.15614.1.S1_at   | MmugDNA.15614.1 | 8.63  | 8.26  | 0.28 | 0.08 | 1.29  | 0.03627  | 0.04269  | 0.245534 | 0.251049 |
| MmugDNA.15618.1.S1_s_at | MmugDNA.15618.1 | 3.14  | 3.63  | 0.04 | 0.25 | -1.4  | 0.01466  | 0.099215 | 0.172984 | 0.357394 |
| MmugDNA.15619.1.S1_at   | MmugDNA.15619.1 | 6.3   | 6.27  | 0.23 | 0.19 | 1.02  | 0.752537 | 0.938747 | 0.885704 | 0.965165 |
| MmugDNA.15619.1.S1_s_at | MmugDNA.15619.1 | 6.19  | 6.25  | 0.08 | 0.12 | -1.04 | 0.815666 | 0.23247  | 0.917707 | 0.504244 |
| MmugDNA.1562.1.S1_at    | MmugDNA.1562.1  | 5.39  | 5.39  | 0.09 | 0.02 | 1     | 0.498859 | 0.953003 | 0.733962 | 0.973367 |
| MmugDNA.15622.1.S1_at   | MmugDNA.15622.1 | 4.01  | 3.99  | 0.53 | 0.27 | 1.01  | 0.383135 | 0.511711 | 0.652484 | 0.705797 |
| MmugDNA.15623.1.S1_at   | MmugDNA.15623.1 | 4.3   | 4.17  | 0.1  | 0.15 | 1.09  | 0.139272 | 0.14249  | 0.424942 | 0.416082 |
| MmugDNA.15624.1.S1_at   | MmugDNA.15624.1 | 4.69  | 4.57  | 0.03 | 0.11 | 1.09  | 0.201198 | 0.129339 | 0.498709 | 0.400748 |
| MmugDNA.15627.1.S1_at   | MmugDNA.15627.1 | 4.49  | 4.48  | 0.28 | 0.05 | 1.01  | 0.715198 | 0.888936 | 0.86549  | 0.936725 |
| MmugDNA.15628.1.S1_at   | MmugDNA.15628.1 | 3.15  | 3.11  | 0.11 | 0.18 | 1.03  | 0.627421 | 0.796009 | 0.81684  | 0.882479 |
| MmugDNA.15629.1.S1_at   | MmugDNA.15629.1 | 6.46  | 6.41  | 0.26 | 0.25 | 1.03  | 0.31354  | 0.49474  | 0.59936  | 0.695061 |
| MmugDNA.15630.1.S1_at   | MmugDNA.15630.1 | 5.03  | 5.31  | 0.26 | 0.2  | -1.22 | 0.492453 | 0.450861 | 0.729741 | 0.665869 |
| MmugDNA.15632.1.S1_at   | MmugDNA.15632.1 | 4.55  | 4.71  | 0.19 | 0.05 | -1.12 | 0.604187 | 0.659963 | 0.801436 | 0.801008 |
| MmugDNA.15635.1.S1_at   | MmugDNA.15635.1 | 6.03  | 5.79  | 0.2  | 0    | 1.19  | 0.128387 | 0.114634 | 0.410319 | 0.381156 |
| MmugDNA.15636.1.S1_at   | MmugDNA.15636.1 | 4.15  | 4.04  | 0.95 | 0.29 | 1.08  | 0.305265 | 0.338318 | 0.592297 | 0.585417 |
| MmugDNA.15640.1.S1_at   | MmugDNA.15640.1 | 3.24  | 3.19  | 0.13 | 0.11 | 1.04  | 0.339783 | 0.182564 | 0.620001 | 0.459065 |
| MmugDNA.15643.1.S1_at   | MmugDNA.15643.1 | 7.57  | 7.56  | 0.76 | 0.15 | 1.01  | 0.354063 | 0.285343 | 0.631226 | 0.547198 |
| MmugDNA.15644.1.S1_at   | MmugDNA.15644.1 | 4.97  | 4.98  | 0.35 | 0.13 | -1.01 | 0.402969 | 0.57732  | 0.667108 | 0.747838 |
| MmugDNA.15645.1.S1_at   | MmugDNA.15645.1 | 5.27  | 5.18  | 0.25 | 0.03 | 1.06  | 0.643862 | 0.464245 | 0.826478 | 0.674983 |
| MmugDNA.15648.1.S1_at   | MmugDNA.15648.1 | 8.25  | 8     | 0.1  | 0.27 | 1.19  | 0.197203 | 0.665597 | 0.494323 | 0.804075 |
| MmugDNA.15649.1.S1_at   | MmugDNA.15649.1 | 9.03  | 7.73  | 0.27 | 0.22 | 2.46  | 0.002717 | 0.065261 | 0.096851 | 0.301239 |
| MmugDNA.1565.1.S1_at    | MmugDNA.1565.1  | 3.46  | 3.54  | 0.02 | 0.11 | -1.06 | 0.176585 | 0.345085 | 0.471046 | 0.590354 |
| MmugDNA.15650.1.S1_s_at | MmugDNA.15650.1 | 7.46  | 8.4   | 0.31 | 0.12 | -1.92 | 0.012819 | 0.00204  | 0.163608 | 0.066887 |
| MmugDNA.15651.1.S1_at   | MmugDNA.15651.1 | 8.98  | 7.18  | 0.54 | 0.41 | 3.48  | 0.011684 | 0.063231 | 0.157908 | 0.298187 |
| MmugDNA.15652.1.S1_at   | MmugDNA.15652.1 | 12.61 | 12.97 | 0.03 | 0.02 | -1.28 | 0.000104 | 0.000734 | 0.051196 | 0.04476  |
| MmugDNA.15653.1.S1_at   | MmugDNA.15653.1 | 3.56  | 3.52  | 0.11 | 0.19 | 1.02  | 0.376346 | 0.29231  | 0.647093 | 0.552389 |
| MmugDNA.15654.1.S1_at   | MmugDNA.15654.1 | 11.55 | 11.92 | 0.08 | 0.07 | -1.29 | 0.003499 | 0.021125 | 0.103967 | 0.181957 |
| MmugDNA.15655.1.S1_at   | MmugDNA.15655.1 | 6.4   | 7.04  | 0.26 | 0.1  | -1.55 | 0.034675 | 0.209143 | 0.240815 | 0.482939 |
| MmugDNA.15657.1.S1_at   | MmugDNA.15657.1 | 6.28  | 6.44  | 0.26 | 0.06 | -1.12 | 0.985853 | 0.20439  | 0.994969 | 0.478736 |
| MmugDNA.24833.1.S1_s_at | MmugDNA.24833.1 | 14.15 | 13.96 | 0    | 0.03 | 1.14  | 0.000427 | 0.024939 | 0.063883 | 0.197799 |

|                         |                 |       |       |      |      |       |          |          |          |          |
|-------------------------|-----------------|-------|-------|------|------|-------|----------|----------|----------|----------|
| MmugDNA.15659.1.S1_at   | MmugDNA.15659.1 | 3.84  | 3.88  | 0.56 | 0.18 | -1.03 | 0.437613 | 0.641737 | 0.69244  | 0.789698 |
| MmugDNA.15663.1.S1_at   | MmugDNA.15663.1 | 7.82  | 7.75  | 0.15 | 0.06 | 1.05  | 0.482694 | 0.015581 | 0.72298  | 0.158192 |
| MmugDNA.15668.1.S1_at   | MmugDNA.15668.1 | 4.27  | 4.37  | 0.09 | 0.06 | -1.07 | 0.177277 | 0.178837 | 0.471929 | 0.455141 |
| MmugDNA.15669.1.S1_at   | MmugDNA.15669.1 | 5.37  | 5.45  | 0.24 | 0.09 | -1.06 | 0.629178 | 0.39756  | 0.817738 | 0.628973 |
| MmugDNA.15670.1.S1_s_at | MmugDNA.15670.1 | 9.58  | 9.56  | 0.32 | 0.3  | 1.01  | 0.491725 | 0.406425 | 0.729361 | 0.634319 |
| MmugDNA.15672.1.S1_at   | MmugDNA.15672.1 | 6.39  | 6.34  | 0.18 | 0.17 | 1.03  | 0.718719 | 0.868711 | 0.867276 | 0.92541  |
| MmugDNA.15673.1.S1_at   | MmugDNA.15673.1 | 7.64  | 7.68  | 0.16 | 0.06 | -1.03 | 0.612844 | 0.203292 | 0.807098 | 0.477517 |
| MmugDNA.15674.1.S1_at   | MmugDNA.15674.1 | 2.97  | 3     | 0.03 | 0.05 | -1.02 | 0.931821 | 0.20781  | 0.971362 | 0.482031 |
| MmugDNA.15675.1.S1_at   | MmugDNA.15675.1 | 3.48  | 3.35  | 0.1  | 0.05 | 1.09  | 0.173407 | 0.1004   | 0.467689 | 0.359541 |
| MmugDNA.15676.1.S1_at   | MmugDNA.15676.1 | 4     | 4.13  | 0.22 | 0.1  | -1.1  | 0.459331 | 0.067176 | 0.707471 | 0.305198 |
| MmugDNA.15677.1.S1_at   | MmugDNA.15677.1 | 3.76  | 3.75  | 0.38 | 0.12 | 1     | 0.66159  | 0.83352  | 0.836661 | 0.904546 |
| MmugDNA.15678.1.S1_at   | MmugDNA.15678.1 | 4.76  | 4.94  | 0.08 | 0.09 | -1.14 | 0.11163  | 0.474022 | 0.387683 | 0.681177 |
| MmugDNA.15680.1.S1_at   | MmugDNA.15680.1 | 3.8   | 3.36  | 0.51 | 0.21 | 1.36  | 0.244608 | 0.462202 | 0.540942 | 0.673601 |
| MmugDNA.15681.1.S1_at   | MmugDNA.15681.1 | 8.55  | 7.77  | 0.29 | 0.16 | 1.72  | 0.017213 | 0.013062 | 0.184359 | 0.147014 |
| MmugDNA.15683.1.S1_at   | MmugDNA.15683.1 | 3.47  | 3.51  | 0.13 | 0.16 | -1.03 | 0.262287 | 0.33582  | 0.556406 | 0.583533 |
| MmugDNA.15684.1.S1_at   | MmugDNA.15684.1 | 6.49  | 5.76  | 0.75 | 0.64 | 1.65  | 0.237184 | 0.297238 | 0.534591 | 0.556067 |
| MmugDNA.15685.1.S1_at   | MmugDNA.15685.1 | 4.24  | 4.22  | 0.28 | 0.18 | 1.02  | 0.903146 | 0.69437  | 0.959001 | 0.822254 |
| MmugDNA.15686.1.S1_at   | MmugDNA.15686.1 | 10.96 | 10.89 | 0.11 | 0.07 | 1.05  | 0.268904 | 0.802219 | 0.561347 | 0.886112 |
| MmugDNA.15688.1.S1_at   | MmugDNA.15688.1 | 5.57  | 5.57  | 0.43 | 0.28 | -1    | 0.785486 | 0.581608 | 0.902048 | 0.750589 |
| MmugDNA.15689.1.S1_at   | MmugDNA.15689.1 | 9.69  | 9.48  | 0.3  | 0.25 | 1.16  | 0.329387 | 0.363    | 0.61165  | 0.603478 |
| MmugDNA.21048.1.S1_s_at | MmugDNA.21048.1 | 13.27 | 13.38 | 0.09 | 0.08 | -1.08 | 0.088231 | 0.185769 | 0.354244 | 0.461631 |
| MmugDNA.15690.1.S1_at   | MmugDNA.15690.1 | 3.33  | 3.36  | 0.54 | 0.24 | -1.02 | 0.28941  | 0.576454 | 0.578963 | 0.747241 |
| MmugDNA.15692.1.S1_at   | MmugDNA.15692.1 | 9.21  | 9.05  | 0.31 | 0.08 | 1.12  | 0.106351 | 0.102671 | 0.380319 | 0.363058 |
| MmugDNA.15694.1.S1_at   | MmugDNA.15694.1 | 9.95  | 10.24 | 0.03 | 0.11 | -1.22 | 0.008178 | 0.001938 | 0.139381 | 0.065795 |
| MmugDNA.15695.1.S1_at   | MmugDNA.15695.1 | 3.01  | 3.22  | 0.1  | 0.05 | -1.15 | 0.04115  | 0.074609 | 0.259372 | 0.318299 |
| MmugDNA.15695.1.S1_s_at | MmugDNA.15695.1 | 11.95 | 12.61 | 0.28 | 0.04 | -1.58 | 0.036974 | 0.063325 | 0.24755  | 0.298315 |
| MmugDNA.15697.1.S1_at   | MmugDNA.15697.1 | 5.39  | 5.28  | 0.1  | 0.11 | 1.07  | 0.122414 | 0.246443 | 0.401138 | 0.515899 |
| MmugDNA.15698.1.S1_at   | MmugDNA.15698.1 | 6.41  | 6.41  | 0.11 | 0.05 | -1    | 0.972009 | 0.037172 | 0.988768 | 0.237285 |
| MmugDNA.15699.1.S1_at   | MmugDNA.15699.1 | 11.85 | 11.94 | 0.2  | 0.19 | -1.07 | 0.918386 | 0.514395 | 0.965256 | 0.707675 |
| MmugDNA.157.1.S1_at     | MmugDNA.157.1   | 5.76  | 5.67  | 0.39 | 0.24 | 1.07  | 0.804765 | 0.013291 | 0.912379 | 0.147978 |
| MmugDNA.1570.1.S1_at    | MmugDNA.1570.1  | 3.33  | 3.35  | 0.05 | 0.03 | -1.01 | 0.446091 | 0.731992 | 0.698352 | 0.844751 |
| MmugDNA.15701.1.S1_s_at | MmugDNA.15701.1 | 3.14  | 3.1   | 0.06 | 0.06 | 1.03  | 0.924167 | 0.083411 | 0.967791 | 0.333699 |
| MmugDNA.15702.1.S1_at   | MmugDNA.15702.1 | 6.7   | 7.01  | 0.11 | 0.24 | -1.24 | 0.060965 | 0.118553 | 0.303842 | 0.38654  |
| MmugDNA.15705.1.S1_at   | MmugDNA.15705.1 | 5.73  | 5.77  | 0.2  | 0.08 | -1.03 | 0.577172 | 0.167424 | 0.783459 | 0.443785 |
| MmugDNA.15707.1.S1_at   | MmugDNA.15707.1 | 4.17  | 4.23  | 0.08 | 0.17 | -1.04 | 0.198709 | 0.316165 | 0.495861 | 0.56963  |
| MmugDNA.1571.1.S1_at    | MmugDNA.1571.1  | 8.83  | 6.62  | 0.1  | 0.15 | 4.62  | 0.000032 | 0.02833  | 0.045594 | 0.210111 |
| MmugDNA.15711.1.S1_at   | MmugDNA.15711.1 | 8.83  | 8.9   | 0.07 | 0.14 | -1.05 | 0.20706  | 0.862285 | 0.504797 | 0.921685 |
| MmugDNA.15712.1.S1_x_at | MmugDNA.15712.1 | 7.83  | 7.24  | 0.99 | 0.49 | 1.51  | 0.24294  | 0.261252 | 0.539672 | 0.527724 |
| MmugDNA.15713.1.S1_at   | MmugDNA.15713.1 | 5.86  | 6.16  | 0.2  | 0.18 | -1.23 | 0.32869  | 0.367245 | 0.611042 | 0.606869 |
| MmugDNA.15714.1.S1_at   | MmugDNA.15714.1 | 5.76  | 5.8   | 0.19 | 0.1  | -1.03 | 0.248787 | 0.337231 | 0.544151 | 0.584438 |
| MmugDNA.15716.1.S1_at   | MmugDNA.15716.1 | 10.52 | 10.42 | 0.18 | 0.23 | 1.07  | 0.18533  | 0.13425  | 0.48152  | 0.406457 |
| MmugDNA.15717.1.S1_at   | MmugDNA.15717.1 | 5.79  | 5.8   | 0.48 | 0.11 | -1.01 | 0.978266 | 0.347547 | 0.991561 | 0.592019 |
| MmugDNA.15718.1.S1_at   | MmugDNA.15718.1 | 4.7   | 4.72  | 0.09 | 0.03 | -1.01 | 0.443949 | 0.278434 | 0.696906 | 0.542212 |

|                         |                 |       |       |      |      |       |          |          |          |          |
|-------------------------|-----------------|-------|-------|------|------|-------|----------|----------|----------|----------|
| MmugDNA.1572.1.S1_at    | MmugDNA.1572.1  | 6.28  | 6.16  | 0.14 | 0.15 | 1.08  | 0.203972 | 0.254537 | 0.50149  | 0.522863 |
| MmugDNA.15720.1.S1_at   | MmugDNA.15720.1 | 6.23  | 5.98  | 0.15 | 0.11 | 1.19  | 0.079173 | 0.092852 | 0.338988 | 0.349024 |
| MmugDNA.15722.1.S1_at   | MmugDNA.15722.1 | 5.19  | 5.07  | 0.09 | 0.08 | 1.09  | 0.327956 | 0.157468 | 0.610549 | 0.432984 |
| MmugDNA.15724.1.S1_at   | MmugDNA.15724.1 | 6.92  | 6.74  | 0.35 | 0.1  | 1.13  | 0.624905 | 0.580879 | 0.815077 | 0.749967 |
| MmugDNA.15725.1.S1_at   | MmugDNA.15725.1 | 10.38 | 9.87  | 0.11 | 0.2  | 1.42  | 0.009659 | 0.012172 | 0.14832  | 0.142744 |
| MmugDNA.15727.1.S1_at   | MmugDNA.15727.1 | 6.98  | 6.91  | 0.23 | 0.11 | 1.05  | 0.665169 | 0.015501 | 0.839019 | 0.158044 |
| MmugDNA.15728.1.S1_at   | MmugDNA.15728.1 | 5.06  | 4.7   | 0.65 | 0.36 | 1.29  | 0.372993 | 0.217654 | 0.645118 | 0.491255 |
| MmugDNA.15729.1.S1_at   | MmugDNA.15729.1 | 6.33  | 6.14  | 0.13 | 0.11 | 1.14  | 0.555341 | 0.390868 | 0.771201 | 0.624588 |
| MmugDNA.1573.1.S1_at    | MmugDNA.1573.1  | 6.46  | 7.83  | 0.22 | 0.12 | -2.58 | 0.00093  | 0.000103 | 0.075729 | 0.028099 |
| MmugDNA.15730.1.S1_at   | MmugDNA.15730.1 | 6.24  | 5.96  | 0.24 | 0.12 | 1.22  | 0.035494 | 0.004412 | 0.243211 | 0.092879 |
| MmugDNA.15731.1.S1_at   | MmugDNA.15731.1 | 6.75  | 6.99  | 0.35 | 0.55 | -1.18 | 0.352988 | 0.207618 | 0.630239 | 0.481906 |
| MmugDNA.15734.1.S1_at   | MmugDNA.15734.1 | 4.64  | 4.57  | 0.33 | 0.14 | 1.05  | 0.270573 | 0.474322 | 0.562765 | 0.68135  |
| MmugDNA.15735.1.S1_at   | MmugDNA.15735.1 | 3.91  | 4.34  | 0.16 | 0.26 | -1.35 | 0.100387 | 0.197452 | 0.371218 | 0.472385 |
| MmugDNA.15736.1.S1_at   | MmugDNA.15736.1 | 7.57  | 7.37  | 0.28 | 0.2  | 1.15  | 0.276055 | 0.153232 | 0.5677   | 0.428062 |
| MmugDNA.15737.1.S1_s_at | MmugDNA.15737.1 | 7.35  | 7.73  | 0.22 | 0.49 | -1.3  | 0.525102 | 0.565413 | 0.75172  | 0.739886 |
| MmugDNA.15738.1.S1_at   | MmugDNA.15738.1 | 9.33  | 9.92  | 1.38 | 0.31 | -1.5  | 0.595698 | 0.355416 | 0.795406 | 0.597738 |
| MmugDNA.15739.1.S1_at   | MmugDNA.15739.1 | 9.28  | 9.32  | 0.43 | 0.11 | -1.03 | 0.969695 | 0.343831 | 0.987995 | 0.589516 |
| MmugDNA.1574.1.S1_at    | MmugDNA.1574.1  | 4.52  | 4.31  | 0.25 | 0.37 | 1.15  | 0.858607 | 0.976029 | 0.938746 | 0.986894 |
| MmugDNA.15741.1.S1_at   | MmugDNA.15741.1 | 5.38  | 5.33  | 0.1  | 0.07 | 1.04  | 0.493394 | 0.29485  | 0.730391 | 0.554412 |
| MmugDNA.15742.1.S1_at   | MmugDNA.15742.1 | 11.01 | 10.99 | 0.08 | 0.04 | 1.01  | 0.843354 | 0.950798 | 0.931427 | 0.972054 |
| MmugDNA.15743.1.S1_at   | MmugDNA.15743.1 | 5.38  | 5.18  | 0.16 | 0.17 | 1.15  | 0.46146  | 0.471497 | 0.708883 | 0.6795   |
| MmugDNA.15745.1.S1_at   | MmugDNA.15745.1 | 9.46  | 9.53  | 0.31 | 0.15 | -1.04 | 0.512864 | 0.64057  | 0.743298 | 0.789015 |
| MmugDNA.15748.1.S1_at   | MmugDNA.15748.1 | 7.39  | 7.37  | 0.29 | 0.04 | 1.01  | 0.675401 | 0.207441 | 0.845075 | 0.481698 |
| MmugDNA.15749.1.S1_at   | MmugDNA.15749.1 | 9.11  | 9.52  | 0.7  | 0.17 | -1.33 | 0.161026 | 0.557325 | 0.452489 | 0.735031 |
| MmugDNA.1575.1.S1_at    | MmugDNA.1575.1  | 8.72  | 8.82  | 0.12 | 0.09 | -1.07 | 0.646385 | 0.126791 | 0.828104 | 0.397446 |
| MmugDNA.15750.1.S1_at   | MmugDNA.15750.1 | 3.92  | 3.89  | 0.18 | 0.05 | 1.02  | 0.987679 | 0.99337  | 0.995514 | 0.996064 |
| MmugDNA.15753.1.S1_at   | MmugDNA.15753.1 | 3.05  | 3.08  | 0.21 | 0.2  | -1.03 | 0.94086  | 0.833186 | 0.975178 | 0.904313 |
| MmugDNA.15755.1.S1_at   | MmugDNA.15755.1 | 6.58  | 5.36  | 0.85 | 0.23 | 2.33  | 0.028365 | 0.032583 | 0.220937 | 0.223585 |
| MmugDNA.15756.1.S1_at   | MmugDNA.15756.1 | 8.63  | 8.17  | 0.3  | 0.14 | 1.38  | 0.11448  | 0.097059 | 0.391512 | 0.35455  |
| MmugDNA.15757.1.S1_at   | MmugDNA.15757.1 | 3.15  | 3.14  | 0.03 | 0.04 | 1.01  | 0.748167 | 0.18835  | 0.883325 | 0.46433  |
| MmugDNA.15758.1.S1_at   | MmugDNA.15758.1 | 6.51  | 6.32  | 0.23 | 0.15 | 1.14  | 0.322717 | 0.132237 | 0.606575 | 0.404274 |
| MmugDNA.1576.1.S1_at    | MmugDNA.1576.1  | 5.1   | 5.17  | 0.22 | 0.14 | -1.05 | 0.610561 | 0.643602 | 0.805938 | 0.791036 |
| MmugDNA.15761.1.S1_at   | MmugDNA.15761.1 | 5.66  | 5.59  | 0.14 | 0.11 | 1.05  | 0.256317 | 0.226717 | 0.550836 | 0.499176 |
| MmugDNA.15763.1.S1_at   | MmugDNA.15763.1 | 6.26  | 6.18  | 0.56 | 0.19 | 1.06  | 0.728331 | 0.554555 | 0.873011 | 0.733264 |
| MmugDNA.15764.1.S1_at   | MmugDNA.15764.1 | 6.57  | 6.47  | 0.18 | 0.03 | 1.07  | 0.285614 | 0.445605 | 0.575349 | 0.662468 |
| MmugDNA.15765.1.S1_at   | MmugDNA.15765.1 | 5.96  | 5.67  | 0.3  | 0.02 | 1.22  | 0.15274  | 0.103775 | 0.442472 | 0.364519 |
| MmugDNA.15766.1.S1_at   | MmugDNA.15766.1 | 8.61  | 8.17  | 0.19 | 0.18 | 1.36  | 0.046991 | 0.016137 | 0.27447  | 0.161012 |
| MmugDNA.15767.1.S1_at   | MmugDNA.15767.1 | 6.39  | 6.92  | 0.81 | 0.25 | -1.44 | 0.288445 | 0.372015 | 0.57817  | 0.61084  |
| MmugDNA.15768.1.S1_at   | MmugDNA.15768.1 | 5.04  | 4.49  | 1.05 | 0.17 | 1.46  | 0.371498 | 0.28886  | 0.64419  | 0.549994 |
| MmugDNA.15769.1.S1_at   | MmugDNA.15769.1 | 8.84  | 7.81  | 0.79 | 0.4  | 2.05  | 0.386668 | 0.0405   | 0.655041 | 0.246264 |
| MmugDNA.1577.1.S1_at    | MmugDNA.1577.1  | 3.16  | 3.28  | 1.23 | 0.23 | -1.09 | 0.379107 | 0.46827  | 0.649138 | 0.6777   |
| MmugDNA.15771.1.S1_at   | MmugDNA.15771.1 | 5.09  | 6.53  | 1.37 | 0.08 | -2.71 | 0.459201 | 0.703221 | 0.707418 | 0.827928 |
| MmugDNA.15772.1.S1_at   | MmugDNA.15772.1 | 8.62  | 8.1   | 0.34 | 0.08 | 1.43  | 0.083111 | 0.370568 | 0.345372 | 0.609618 |

|                         |                 |       |       |      |      |       |          |          |          |          |
|-------------------------|-----------------|-------|-------|------|------|-------|----------|----------|----------|----------|
| MmugDNA.15773.1.S1_at   | MmugDNA.15773.1 | 8.32  | 7.74  | 0.12 | 0.24 | 1.5   | 0.019019 | 0.016243 | 0.191367 | 0.161591 |
| MmugDNA.15774.1.S1_at   | MmugDNA.15774.1 | 8.84  | 8.41  | 0.19 | 0.11 | 1.34  | 0.027394 | 0.009196 | 0.218385 | 0.126573 |
| MmugDNA.15776.1.S1_at   | MmugDNA.15776.1 | 6.54  | 7.13  | 0.51 | 0.27 | -1.5  | 0.545185 | 0.086768 | 0.764467 | 0.339521 |
| MmugDNA.15777.1.S1_at   | MmugDNA.15777.1 | 9.53  | 8.6   | 0.22 | 0.4  | 1.9   | 0.034127 | 0.036343 | 0.239433 | 0.235105 |
| MmugDNA.15778.1.S1_at   | MmugDNA.15778.1 | 5.27  | 5.12  | 0.22 | 0.14 | 1.11  | 0.882923 | 0.242472 | 0.950199 | 0.512835 |
| MmugDNA.15779.1.S1_at   | MmugDNA.15779.1 | 7.53  | 7.98  | 0.07 | 0.16 | -1.37 | 0.022974 | 0.007679 | 0.204429 | 0.117153 |
| MmugDNA.1578.1.S1_s_at  | MmugDNA.1578.1  | 14.39 | 14.3  | 0.05 | 0.03 | 1.06  | 0.051769 | 0.095549 | 0.284844 | 0.352627 |
| MmugDNA.15781.1.S1_at   | MmugDNA.15781.1 | 6.45  | 9.04  | 0.96 | 0.21 | -6.01 | 0.025856 | 0.127848 | 0.213543 | 0.398767 |
| MmugDNA.15784.1.S1_at   | MmugDNA.15784.1 | 3.1   | 2.95  | 0.42 | 0.08 | 1.11  | 0.18238  | 0.245234 | 0.478109 | 0.515029 |
| MmugDNA.15785.1.S1_at   | MmugDNA.15785.1 | 3.52  | 2.89  | 0.28 | 0.08 | 1.54  | 0.051603 | 0.25443  | 0.284578 | 0.522732 |
| MmugDNA.15786.1.S1_at   | MmugDNA.15786.1 | 5.8   | 5.84  | 0.35 | 0.03 | -1.03 | 0.896213 | 0.692929 | 0.955786 | 0.821308 |
| MmugDNA.15787.1.S1_at   | MmugDNA.15787.1 | 6.86  | 6.5   | 0.69 | 0.46 | 1.29  | 0.489321 | 0.656897 | 0.727626 | 0.799401 |
| MmugDNA.15788.1.S1_at   | MmugDNA.15788.1 | 7.35  | 7.45  | 0.11 | 0.08 | -1.07 | 0.054472 | 0.030407 | 0.290603 | 0.216319 |
| MmugDNA.15789.1.S1_at   | MmugDNA.15789.1 | 4.37  | 4.23  | 0.09 | 0.13 | 1.1   | 0.338375 | 0.227564 | 0.61869  | 0.499841 |
| MmugDNA.1579.1.S1_at    | MmugDNA.1579.1  | 4.85  | 4.95  | 0.64 | 0.14 | -1.07 | 0.405159 | 0.32153  | 0.668706 | 0.573226 |
| MmugDNA.15790.1.S1_at   | MmugDNA.15790.1 | 5.87  | 6.14  | 0.23 | 0.12 | -1.21 | 0.075574 | 0.195232 | 0.333167 | 0.470253 |
| MmugDNA.15791.1.S1_x_at | MmugDNA.15791.1 | 4.45  | 4.26  | 0.08 | 0.14 | 1.14  | 0.292638 | 0.526112 | 0.581743 | 0.715385 |
| MmugDNA.15792.1.S1_at   | MmugDNA.15792.1 | 5.59  | 5.36  | 0.09 | 0.22 | 1.18  | 0.072644 | 0.069391 | 0.327505 | 0.309617 |
| MmugDNA.15794.1.S1_at   | MmugDNA.15794.1 | 4.54  | 4.53  | 0.15 | 0.13 | 1     | 0.49811  | 0.68203  | 0.733478 | 0.814299 |
| MmugDNA.15795.1.S1_at   | MmugDNA.15795.1 | 3.39  | 3.23  | 0.15 | 0.06 | 1.12  | 0.732104 | 0.439989 | 0.874767 | 0.658626 |
| MmugDNA.15796.1.S1_at   | MmugDNA.15796.1 | 3.25  | 3.13  | 0.37 | 0.07 | 1.09  | 0.241295 | 0.368962 | 0.538538 | 0.608491 |
| MmugDNA.15797.1.S1_at   | MmugDNA.15797.1 | 5.38  | 5.4   | 0.15 | 0.03 | -1.02 | 0.413054 | 0.579367 | 0.674478 | 0.749058 |
| MmugDNA.15799.1.S1_at   | MmugDNA.15799.1 | 5.29  | 6.78  | 1.44 | 0.09 | -2.81 | 0.455845 | 0.46402  | 0.705453 | 0.674785 |
| MmugDNA.158.1.S1_at     | MmugDNA.158.1   | 7.73  | 7.83  | 0.1  | 0.04 | -1.07 | 0.255907 | 0.06115  | 0.550522 | 0.293981 |
| MmugDNA.158.1.S1_s_at   | MmugDNA.158.1   | 11.6  | 11.89 | 0.12 | 0.1  | -1.23 | 0.045881 | 0.047057 | 0.271767 | 0.261469 |
| MmugDNA.1580.1.S1_at    | MmugDNA.1580.1  | 4.43  | 4.53  | 0.09 | 0.39 | -1.07 | 0.241462 | 0.392568 | 0.538602 | 0.625813 |
| MmugDNA.15800.1.S1_at   | MmugDNA.15800.1 | 7.51  | 7.73  | 0.18 | 0.17 | -1.17 | 0.132515 | 0.223094 | 0.415892 | 0.49588  |
| MmugDNA.15801.1.S1_at   | MmugDNA.15801.1 | 7.52  | 6.99  | 0.05 | 0.16 | 1.44  | 0.002936 | 0.002197 | 0.099331 | 0.069235 |
| MmugDNA.15803.1.S1_at   | MmugDNA.15803.1 | 6.23  | 5.88  | 0.29 | 0.19 | 1.27  | 0.286248 | 0.196844 | 0.576104 | 0.471968 |
| MmugDNA.2525.1.S1_s_at  | MmugDNA.2525.1  | 5.12  | 5.03  | 0.12 | 0.07 | 1.07  | 0.135582 | 0.203074 | 0.419473 | 0.477343 |
| MmugDNA.15805.1.S1_at   | MmugDNA.15805.1 | 4.25  | 4.05  | 0.14 | 0.07 | 1.15  | 0.095553 | 0.592755 | 0.365037 | 0.75786  |
| MmugDNA.15806.1.S1_at   | MmugDNA.15806.1 | 8.22  | 7.59  | 0.38 | 0.17 | 1.55  | 0.245876 | 0.756302 | 0.541732 | 0.858165 |
| MmugDNA.15807.1.S1_at   | MmugDNA.15807.1 | 4.73  | 4.54  | 0.21 | 0.09 | 1.14  | 0.084353 | 0.063372 | 0.347734 | 0.298403 |
| MmugDNA.15808.1.S1_s_at | MmugDNA.15808.1 | 13.25 | 13.22 | 0.1  | 0.08 | 1.02  | 0.830752 | 0.29377  | 0.925496 | 0.553758 |
| MmugDNA.1581.1.S1_at    | MmugDNA.1581.1  | 13.79 | 13.84 | 0.14 | 0.14 | -1.04 | 0.312567 | 0.514888 | 0.598615 | 0.707931 |
| MmugDNA.1581.1.S1_s_at  | MmugDNA.1581.1  | 13.84 | 13.88 | 0.18 | 0.14 | -1.03 | 0.404204 | 0.571522 | 0.66805  | 0.743824 |
| MmugDNA.15810.1.S1_at   | MmugDNA.15810.1 | 9.41  | 9.24  | 0.13 | 0.11 | 1.13  | 0.352514 | 0.891723 | 0.630029 | 0.938272 |
| MmugDNA.15812.1.S1_at   | MmugDNA.15812.1 | 4.6   | 5.01  | 0.21 | 0.25 | -1.32 | 0.136226 | 0.237164 | 0.420629 | 0.507906 |
| MmugDNA.15813.1.S1_at   | MmugDNA.15813.1 | 5.56  | 5.85  | 0.88 | 0.61 | -1.22 | 0.510929 | 0.290717 | 0.742219 | 0.551382 |
| MmugDNA.15814.1.S1_at   | MmugDNA.15814.1 | 4.91  | 4.9   | 0.06 | 0.02 | 1.01  | 0.272315 | 0.191531 | 0.564347 | 0.466841 |
| MmugDNA.15815.1.S1_at   | MmugDNA.15815.1 | 3.06  | 3.05  | 0.21 | 0.23 | 1.01  | 0.892638 | 0.329063 | 0.954283 | 0.578482 |
| MmugDNA.15816.1.S1_at   | MmugDNA.15816.1 | 10.48 | 10.13 | 0.14 | 0.05 | 1.27  | 0.041866 | 0.006518 | 0.261395 | 0.109602 |
| MmugDNA.1582.1.S1_at    | MmugDNA.1582.1  | 7.3   | 7.24  | 0.67 | 0.18 | 1.04  | 0.61413  | 0.812007 | 0.807913 | 0.891493 |

|                         |                 |       |       |      |      |        |          |          |          |          |
|-------------------------|-----------------|-------|-------|------|------|--------|----------|----------|----------|----------|
| MmugDNA.15823.1.S1_at   | MmugDNA.15823.1 | 6.94  | 6.94  | 0.09 | 0.16 | 1      | 0.416944 | 0.171833 | 0.677228 | 0.448237 |
| MmugDNA.15824.1.S1_at   | MmugDNA.15824.1 | 3.78  | 3.7   | 0.35 | 0.1  | 1.06   | 0.514337 | 0.572123 | 0.74429  | 0.744261 |
| MmugDNA.15825.1.S1_at   | MmugDNA.15825.1 | 4.15  | 3.9   | 0.69 | 0.3  | 1.19   | 0.147059 | 0.126075 | 0.435046 | 0.39672  |
| MmugDNA.15826.1.S1_at   | MmugDNA.15826.1 | 3.48  | 3.57  | 0.11 | 0.16 | -1.07  | 0.347325 | 0.288922 | 0.625472 | 0.550032 |
| MmugDNA.15827.1.S1_at   | MmugDNA.15827.1 | 5.98  | 5.45  | 0.47 | 0.15 | 1.45   | 0.151451 | 0.113214 | 0.440961 | 0.379229 |
| MmugDNA.15828.1.S1_at   | MmugDNA.15828.1 | 8.33  | 7.83  | 0.17 | 0.09 | 1.41   | 0.022293 | 0.082231 | 0.202621 | 0.331091 |
| MmugDNA.15829.1.S1_at   | MmugDNA.15829.1 | 8.31  | 8.38  | 0.14 | 0.23 | -1.05  | 0.991072 | 0.354001 | 0.996747 | 0.596966 |
| MmugDNA.15830.1.S1_at   | MmugDNA.15830.1 | 6.54  | 6.53  | 0.13 | 0.03 | 1      | 0.309018 | 0.317405 | 0.595457 | 0.570619 |
| MmugDNA.15831.1.S1_at   | MmugDNA.15831.1 | 6.8   | 6.75  | 0.53 | 0.21 | 1.04   | 0.34921  | 0.514821 | 0.627114 | 0.707919 |
| MmugDNA.15832.1.S1_at   | MmugDNA.15832.1 | 5.01  | 5.22  | 0.05 | 0.25 | -1.15  | 0.366712 | 0.687676 | 0.640955 | 0.81766  |
| MmugDNA.15833.1.S1_at   | MmugDNA.15833.1 | 5.97  | 5.87  | 0.39 | 0.2  | 1.07   | 0.377907 | 0.619442 | 0.648293 | 0.774669 |
| MmugDNA.15834.1.S1_at   | MmugDNA.15834.1 | 5.02  | 5.22  | 0.03 | 0.17 | -1.15  | 0.115871 | 0.561245 | 0.392988 | 0.737239 |
| MmugDNA.15836.1.S1_at   | MmugDNA.15836.1 | 7.79  | 8.21  | 0.42 | 0.1  | -1.33  | 0.298665 | 0.48872  | 0.586964 | 0.691325 |
| MmugDNA.15838.1.S1_at   | MmugDNA.15838.1 | 11.36 | 11.13 | 0.06 | 0.01 | 1.17   | 0.001885 | 0.066187 | 0.087741 | 0.302785 |
| MmugDNA.15839.1.S1_at   | MmugDNA.15839.1 | 6.6   | 6.61  | 0.02 | 0.13 | -1.01  | 0.378833 | 0.565088 | 0.648964 | 0.739714 |
| MmugDNA.1584.1.S1_at    | MmugDNA.1584.1  | 8.41  | 8.11  | 0.31 | 0.29 | 1.23   | 0.113509 | 0.190662 | 0.390238 | 0.466119 |
| MmugDNA.15840.1.S1_at   | MmugDNA.15840.1 | 3.54  | 3.39  | 0.07 | 0.05 | 1.11   | 0.07081  | 0.294837 | 0.324317 | 0.554412 |
| MmugDNA.15842.1.S1_at   | MmugDNA.15842.1 | 6.29  | 10.54 | 1.67 | 0.31 | -19.11 | 0.029503 | 0.201099 | 0.224759 | 0.475516 |
| MmugDNA.33376.1.S1_s_at | MmugDNA.33376.1 | 8.11  | 8.17  | 0.26 | 0.08 | -1.04  | 0.583201 | 0.546087 | 0.787869 | 0.727769 |
| MmugDNA.15844.1.S1_at   | MmugDNA.15844.1 | 6.05  | 5.79  | 0.22 | 0.14 | 1.2    | 0.378676 | 0.590077 | 0.64877  | 0.756117 |
| MmugDNA.15845.1.S1_at   | MmugDNA.15845.1 | 2.7   | 2.99  | 0.4  | 0.13 | -1.22  | 0.824983 | 0.958545 | 0.922259 | 0.976506 |
| MmugDNA.15846.1.S1_at   | MmugDNA.15846.1 | 10.21 | 10.58 | 0.21 | 0.19 | -1.29  | 0.129748 | 0.109625 | 0.412052 | 0.373602 |
| MmugDNA.15848.1.S1_at   | MmugDNA.15848.1 | 3.17  | 3.19  | 0.26 | 0.02 | -1.01  | 0.956608 | 0.875063 | 0.982173 | 0.929125 |
| MmugDNA.15849.1.S1_s_at | MmugDNA.15849.1 | 13.15 | 13.2  | 0.14 | 0.09 | -1.04  | 0.358782 | 0.599319 | 0.634504 | 0.761415 |
| MmugDNA.1585.1.S1_at    | MmugDNA.1585.1  | 4.85  | 4.81  | 0.8  | 0.31 | 1.03   | 0.542311 | 0.595174 | 0.762689 | 0.759007 |
| MmugDNA.15850.1.S1_at   | MmugDNA.15850.1 | 3.63  | 3.78  | 0.24 | 0.13 | -1.11  | 0.220692 | 0.394287 | 0.518493 | 0.626868 |
| MmugDNA.15852.1.S1_at   | MmugDNA.15852.1 | 5.21  | 4.55  | 0.45 | 0.23 | 1.58   | 0.136234 | 0.133095 | 0.420629 | 0.404734 |
| MmugDNA.15854.1.S1_at   | MmugDNA.15854.1 | 3.2   | 3.25  | 0.13 | 0.17 | -1.04  | 0.139229 | 0.1647   | 0.424942 | 0.44101  |
| MmugDNA.15855.1.S1_at   | MmugDNA.15855.1 | 5.28  | 4.87  | 0.14 | 0.27 | 1.33   | 0.214296 | 0.27945  | 0.511965 | 0.543049 |
| MmugDNA.15856.1.S1_at   | MmugDNA.15856.1 | 9.13  | 8.64  | 0.53 | 0.48 | 1.4    | 0.546263 | 0.320516 | 0.765159 | 0.572648 |
| MmugDNA.15858.1.S1_at   | MmugDNA.15858.1 | 3.73  | 4.28  | 0.5  | 0.07 | -1.46  | 0.447529 | 0.685175 | 0.69951  | 0.816369 |
| MmugDNA.15862.1.S1_at   | MmugDNA.15862.1 | 13.87 | 13.44 | 0.09 | 0.1  | 1.35   | 0.008858 | 0.01333  | 0.143995 | 0.148042 |
| MmugDNA.15863.1.S1_at   | MmugDNA.15863.1 | 10.05 | 10.12 | 0.14 | 0.12 | -1.05  | 0.446194 | 0.068751 | 0.698417 | 0.308711 |
| MmugDNA.15864.1.S1_at   | MmugDNA.15864.1 | 5.16  | 5.39  | 0.36 | 0.14 | -1.17  | 0.337347 | 0.462043 | 0.617824 | 0.673537 |
| MmugDNA.15866.1.S1_at   | MmugDNA.15866.1 | 4.13  | 4.09  | 0.08 | 0.12 | 1.03   | 0.435349 | 0.007599 | 0.690435 | 0.11661  |
| MmugDNA.15868.1.S1_at   | MmugDNA.15868.1 | 4.93  | 5     | 0.13 | 0.09 | -1.04  | 0.312002 | 0.52909  | 0.598156 | 0.717133 |
| MmugDNA.1587.1.S1_at    | MmugDNA.1587.1  | 6.77  | 6.38  | 0.43 | 0.23 | 1.31   | 0.138718 | 0.009999 | 0.42426  | 0.131262 |
| MmugDNA.15870.1.S1_at   | MmugDNA.15870.1 | 6.81  | 6.57  | 0.14 | 0.14 | 1.18   | 0.109117 | 0.023028 | 0.384258 | 0.189855 |
| MmugDNA.15871.1.S1_at   | MmugDNA.15871.1 | 8.52  | 8.53  | 0.07 | 0.05 | -1     | 0.699558 | 0.983515 | 0.857319 | 0.990825 |
| MmugDNA.15872.1.S1_at   | MmugDNA.15872.1 | 4.55  | 4.46  | 0.04 | 0.26 | 1.06   | 0.821772 | 0.821361 | 0.920616 | 0.897125 |
| MmugDNA.15873.1.S1_at   | MmugDNA.15873.1 | 4.78  | 4.75  | 0.24 | 0.08 | 1.02   | 0.921199 | 0.964621 | 0.966268 | 0.980347 |
| MmugDNA.15874.1.S1_at   | MmugDNA.15874.1 | 6.95  | 7.58  | 0.29 | 0.28 | -1.55  | 0.047475 | 0.065954 | 0.275186 | 0.302191 |
| MmugDNA.15875.1.S1_at   | MmugDNA.15875.1 | 8     | 7.8   | 0.35 | 0.16 | 1.15   | 0.276005 | 0.064663 | 0.567655 | 0.300314 |

|                       |                 |       |       |      |      |       |          |          |          |          |
|-----------------------|-----------------|-------|-------|------|------|-------|----------|----------|----------|----------|
| MmugDNA.15876.1.S1_at | MmugDNA.15876.1 | 6.67  | 6.05  | 1    | 0.28 | 1.54  | 0.855279 | 0.106193 | 0.93691  | 0.36856  |
| MmugDNA.15877.1.S1_at | MmugDNA.15877.1 | 5.96  | 5.72  | 0.21 | 0.01 | 1.18  | 0.381004 | 0.532126 | 0.65054  | 0.718995 |
| MmugDNA.15879.1.S1_at | MmugDNA.15879.1 | 8.45  | 8.5   | 0.12 | 0.05 | -1.04 | 0.507083 | 0.001524 | 0.739461 | 0.059307 |
| MmugDNA.1588.1.S1_at  | MmugDNA.1588.1  | 5.6   | 5.6   | 0.18 | 0.2  | -1.01 | 0.580174 | 0.772369 | 0.785687 | 0.867685 |
| MmugDNA.15880.1.S1_at | MmugDNA.15880.1 | 6.2   | 6.05  | 0.29 | 0.11 | 1.11  | 0.266129 | 0.519671 | 0.558644 | 0.711241 |
| MmugDNA.15882.1.S1_at | MmugDNA.15882.1 | 9.13  | 8.93  | 0.25 | 0.26 | 1.14  | 0.115299 | 0.021168 | 0.392357 | 0.182251 |
| MmugDNA.15883.1.S1_at | MmugDNA.15883.1 | 5.17  | 5.32  | 0.3  | 0.35 | -1.11 | 0.92857  | 0.28186  | 0.969791 | 0.544844 |
| MmugDNA.15885.1.S1_at | MmugDNA.15885.1 | 5.82  | 5.78  | 0.33 | 0.17 | 1.03  | 0.833709 | 0.895602 | 0.926824 | 0.940329 |
| MmugDNA.15886.1.S1_at | MmugDNA.15886.1 | 4.98  | 5.18  | 0.02 | 0.17 | -1.15 | 0.063724 | 0.02487  | 0.308957 | 0.19759  |
| MmugDNA.15889.1.S1_at | MmugDNA.15889.1 | 6.75  | 7.52  | 1.44 | 0.51 | -1.71 | 0.581108 | 0.373838 | 0.786393 | 0.61248  |
| MmugDNA.15891.1.S1_at | MmugDNA.15891.1 | 4.47  | 4.41  | 0.06 | 0.27 | 1.04  | 0.847973 | 0.486839 | 0.933822 | 0.690091 |
| MmugDNA.15892.1.S1_at | MmugDNA.15892.1 | 4.25  | 4.07  | 1.09 | 0.16 | 1.13  | 0.285699 | 0.344913 | 0.575435 | 0.590225 |
| MmugDNA.15893.1.S1_at | MmugDNA.15893.1 | 9.46  | 9.66  | 0.26 | 0.12 | -1.15 | 0.741616 | 0.271829 | 0.880267 | 0.536584 |
| MmugDNA.15894.1.S1_at | MmugDNA.15894.1 | 9.56  | 9.89  | 0.17 | 0.22 | -1.26 | 0.362311 | 0.04029  | 0.637219 | 0.245902 |
| MmugDNA.15895.1.S1_at | MmugDNA.15895.1 | 7.15  | 7.12  | 0.16 | 0.04 | 1.02  | 0.893957 | 0.238583 | 0.954747 | 0.509192 |
| MmugDNA.15896.1.S1_at | MmugDNA.15896.1 | 4.73  | 5.07  | 0.41 | 0.6  | -1.27 | 0.618816 | 0.818223 | 0.810809 | 0.895149 |
| MmugDNA.15897.1.S1_at | MmugDNA.15897.1 | 10.03 | 9.79  | 0.35 | 0.2  | 1.18  | 0.762787 | 0.839198 | 0.891334 | 0.908339 |
| MmugDNA.15899.1.S1_at | MmugDNA.15899.1 | 4.87  | 4.87  | 0.1  | 0.09 | -1    | 0.781671 | 0.434054 | 0.900264 | 0.654223 |
| MmugDNA.1590.1.S1_at  | MmugDNA.1590.1  | 4.37  | 3.66  | 0.86 | 0.11 | 1.64  | 0.135776 | 0.122575 | 0.419782 | 0.39249  |
| MmugDNA.15900.1.S1_at | MmugDNA.15900.1 | 3.5   | 3.5   | 0.07 | 0.06 | 1     | 0.53325  | 0.242407 | 0.756887 | 0.51282  |
| MmugDNA.15901.1.S1_at | MmugDNA.15901.1 | 10.59 | 10.43 | 0.23 | 0.16 | 1.12  | 0.160215 | 0.114746 | 0.451575 | 0.381295 |
| MmugDNA.15902.1.S1_at | MmugDNA.15902.1 | 2.86  | 2.81  | 0.07 | 0.06 | 1.03  | 0.715902 | 0.972369 | 0.86597  | 0.985097 |
| MmugDNA.15903.1.S1_at | MmugDNA.15903.1 | 3.96  | 3.76  | 0.36 | 0.16 | 1.16  | 0.704655 | 0.388872 | 0.859786 | 0.623206 |
| MmugDNA.15905.1.S1_at | MmugDNA.15905.1 | 4.79  | 4.84  | 0.54 | 0.3  | -1.04 | 0.824094 | 0.944093 | 0.921772 | 0.968306 |
| MmugDNA.15907.1.S1_at | MmugDNA.15907.1 | 4.29  | 4.29  | 0.29 | 0.09 | -1    | 0.385617 | 0.559426 | 0.654372 | 0.736296 |
| MmugDNA.15908.1.S1_at | MmugDNA.15908.1 | 3.71  | 3.71  | 0.03 | 0.02 | -1    | 0.239896 | 0.322538 | 0.537423 | 0.573991 |
| MmugDNA.15909.1.S1_at | MmugDNA.15909.1 | 7.22  | 7.45  | 0.04 | 0.16 | -1.17 | 0.237423 | 0.590984 | 0.534931 | 0.756566 |
| MmugDNA.1591.1.S1_at  | MmugDNA.1591.1  | 6.97  | 6.96  | 0.29 | 0.02 | 1     | 0.334462 | 0.465377 | 0.615598 | 0.675748 |
| MmugDNA.15910.1.S1_at | MmugDNA.15910.1 | 6.47  | 6.19  | 0.22 | 0.05 | 1.21  | 0.323616 | 0.564123 | 0.607387 | 0.738997 |
| MmugDNA.15914.1.S1_at | MmugDNA.15914.1 | 5.68  | 5.62  | 0.18 | 0.03 | 1.04  | 0.549239 | 0.243628 | 0.767019 | 0.513777 |
| MmugDNA.15915.1.S1_at | MmugDNA.15915.1 | 4.4   | 4.29  | 0.16 | 0.1  | 1.08  | 0.113525 | 0.212494 | 0.390238 | 0.486502 |
| MmugDNA.15919.1.S1_at | MmugDNA.15919.1 | 4.81  | 4.83  | 0.06 | 0.12 | -1.01 | 0.927976 | 0.115782 | 0.969567 | 0.382814 |
| MmugDNA.1592.1.S1_at  | MmugDNA.1592.1  | 3.34  | 3.19  | 0.09 | 0.06 | 1.11  | 0.115586 | 0.387239 | 0.392723 | 0.622004 |
| MmugDNA.15920.1.S1_at | MmugDNA.15920.1 | 5.3   | 5.23  | 0.69 | 0.24 | 1.05  | 0.31539  | 0.342352 | 0.600334 | 0.588413 |
| MmugDNA.15922.1.S1_at | MmugDNA.15922.1 | 3.36  | 3.33  | 0.25 | 0.05 | 1.02  | 0.937862 | 0.906147 | 0.973844 | 0.946915 |
| MmugDNA.15924.1.S1_at | MmugDNA.15924.1 | 3.81  | 3.83  | 0.44 | 0.19 | -1.01 | 0.889394 | 0.161428 | 0.952886 | 0.437604 |
| MmugDNA.15925.1.S1_at | MmugDNA.15925.1 | 4.02  | 3.81  | 0.06 | 0.21 | 1.16  | 0.070296 | 0.073043 | 0.323543 | 0.316017 |
| MmugDNA.15926.1.S1_at | MmugDNA.15926.1 | 4.29  | 4.28  | 0.13 | 0.1  | 1.01  | 0.642557 | 0.280108 | 0.82562  | 0.543369 |
| MmugDNA.15928.1.S1_at | MmugDNA.15928.1 | 5.8   | 5.73  | 0.66 | 0.32 | 1.05  | 0.925593 | 0.606219 | 0.96848  | 0.765727 |
| MmugDNA.15929.1.S1_at | MmugDNA.15929.1 | 8.01  | 9.1   | 0.16 | 0.22 | -2.13 | 0.002852 | 0.001291 | 0.098362 | 0.055585 |
| MmugDNA.1593.1.S1_at  | MmugDNA.1593.1  | 5.46  | 5.43  | 0.14 | 0.32 | 1.02  | 0.748927 | 0.857752 | 0.883751 | 0.918846 |
| MmugDNA.15930.1.S1_at | MmugDNA.15930.1 | 5.99  | 5.84  | 0.06 | 0.15 | 1.11  | 0.111641 | 0.014656 | 0.387695 | 0.154231 |
| MmugDNA.15931.1.S1_at | MmugDNA.15931.1 | 3.48  | 2.99  | 0.65 | 0.05 | 1.41  | 0.226227 | 0.513941 | 0.523981 | 0.707322 |

|                         |                 |       |       |      |      |       |          |          |          |          |
|-------------------------|-----------------|-------|-------|------|------|-------|----------|----------|----------|----------|
| MmugDNA.15933.1.S1_at   | MmugDNA.15933.1 | 8.42  | 8.24  | 0.16 | 0.11 | 1.13  | 0.478165 | 0.015672 | 0.719818 | 0.158598 |
| MmugDNA.17973.1.S1_s_at | MmugDNA.17973.1 | 10.33 | 10.05 | 0.36 | 0.07 | 1.21  | 0.378946 | 0.642124 | 0.64901  | 0.790028 |
| MmugDNA.15935.1.S1_s_at | MmugDNA.15935.1 | 5.61  | 5.23  | 0.27 | 0.24 | 1.3   | 0.163324 | 0.519305 | 0.455649 | 0.710961 |
| MmugDNA.15936.1.S1_at   | MmugDNA.15936.1 | 9.28  | 9.21  | 0.23 | 0.23 | 1.06  | 0.897369 | 0.418735 | 0.956476 | 0.643089 |
| MmugDNA.15936.1.S1_s_at | MmugDNA.15936.1 | 10.65 | 10.52 | 0.36 | 0.17 | 1.09  | 0.573516 | 0.125529 | 0.781153 | 0.396226 |
| MmugDNA.15937.1.S1_at   | MmugDNA.15937.1 | 5.85  | 5.76  | 0.21 | 0.08 | 1.06  | 0.433286 | 0.413104 | 0.68886  | 0.639419 |
| MmugDNA.15939.1.S1_at   | MmugDNA.15939.1 | 9.22  | 9.02  | 0.06 | 0.16 | 1.15  | 0.067289 | 0.042914 | 0.317043 | 0.251759 |
| MmugDNA.1594.1.S1_at    | MmugDNA.1594.1  | 12.31 | 11.81 | 0.29 | 0.04 | 1.41  | 0.046342 | 0.040934 | 0.272999 | 0.247161 |
| MmugDNA.15941.1.S1_at   | MmugDNA.15941.1 | 4.1   | 3.94  | 0.3  | 0.3  | 1.11  | 0.549986 | 0.499741 | 0.767535 | 0.698494 |
| MmugDNA.15942.1.S1_at   | MmugDNA.15942.1 | 6.44  | 6.58  | 0.11 | 0.04 | -1.1  | 0.040271 | 0.01924  | 0.257232 | 0.174494 |
| MmugDNA.15942.1.S1_s_at | MmugDNA.15942.1 | 5.58  | 5.58  | 0.07 | 0.1  | -1    | 0.492193 | 0.226905 | 0.72956  | 0.499276 |
| MmugDNA.15945.1.S1_at   | MmugDNA.15945.1 | 5.5   | 5.45  | 0.17 | 0.02 | 1.04  | 0.69833  | 0.592475 | 0.856508 | 0.757832 |
| MmugDNA.15946.1.S1_at   | MmugDNA.15946.1 | 5.66  | 5.92  | 0.73 | 0.28 | -1.19 | 0.883476 | 0.555166 | 0.950486 | 0.733715 |
| MmugDNA.15947.1.S1_at   | MmugDNA.15947.1 | 5.01  | 5.2   | 0.19 | 0.12 | -1.14 | 0.53134  | 0.663244 | 0.75568  | 0.802876 |
| MmugDNA.1595.1.S1_at    | MmugDNA.1595.1  | 3.64  | 3.78  | 0.27 | 0.04 | -1.1  | 0.937528 | 0.640673 | 0.973767 | 0.789053 |
| MmugDNA.15950.1.S1_at   | MmugDNA.15950.1 | 10.1  | 10.34 | 0.24 | 0.1  | -1.18 | 0.176191 | 0.067625 | 0.470588 | 0.306185 |
| MmugDNA.15951.1.S1_at   | MmugDNA.15951.1 | 11    | 11.68 | 0.09 | 0.23 | -1.6  | 0.020741 | 0.000754 | 0.1976   | 0.045364 |
| MmugDNA.15952.1.S1_at   | MmugDNA.15952.1 | 7.1   | 7.38  | 0.34 | 0.17 | -1.21 | 0.899137 | 0.270836 | 0.957051 | 0.536026 |
| MmugDNA.15953.1.S1_at   | MmugDNA.15953.1 | 4.79  | 4.85  | 0.1  | 0.08 | -1.04 | 0.68982  | 0.167915 | 0.851884 | 0.444485 |
| MmugDNA.15956.1.S1_at   | MmugDNA.15956.1 | 3.95  | 4.01  | 0.4  | 0.44 | -1.04 | 0.927989 | 0.374728 | 0.969567 | 0.613037 |
| MmugDNA.15958.1.S1_at   | MmugDNA.15958.1 | 5.34  | 5.27  | 0.07 | 0.05 | 1.05  | 0.102342 | 0.090561 | 0.374399 | 0.345026 |
| MmugDNA.15963.1.S1_at   | MmugDNA.15963.1 | 6.07  | 6.54  | 1.1  | 0.58 | -1.38 | 0.904981 | 0.98727  | 0.959773 | 0.992852 |
| MmugDNA.15964.1.S1_at   | MmugDNA.15964.1 | 5.28  | 4.48  | 0.52 | 0.2  | 1.74  | 0.088364 | 0.069736 | 0.354457 | 0.310191 |
| MmugDNA.28448.1.S1_s_at | MmugDNA.28448.1 | 7.63  | 7.62  | 0.23 | 0.07 | 1.01  | 0.362269 | 0.408846 | 0.637219 | 0.6359   |
| MmugDNA.15966.1.S1_at   | MmugDNA.15966.1 | 8.79  | 9.09  | 0.1  | 0.17 | -1.23 | 0.015179 | 0.009654 | 0.175242 | 0.129267 |
| MmugDNA.15967.1.S1_at   | MmugDNA.15967.1 | 6.55  | 6.7   | 1.46 | 0.15 | -1.11 | 0.903661 | 0.85425  | 0.959207 | 0.916971 |
| MmugDNA.15968.1.S1_at   | MmugDNA.15968.1 | 6.18  | 7.37  | 0.58 | 0.17 | -2.28 | 0.043883 | 0.027914 | 0.26644  | 0.208547 |
| MmugDNA.1597.1.S1_at    | MmugDNA.1597.1  | 3.96  | 3.9   | 0.04 | 0.06 | 1.04  | 0.956859 | 0.153731 | 0.982318 | 0.428413 |
| MmugDNA.15970.1.S1_at   | MmugDNA.15970.1 | 4.95  | 4.68  | 0.56 | 0.07 | 1.21  | 0.163133 | 0.184778 | 0.455309 | 0.460661 |
| MmugDNA.15971.1.S1_at   | MmugDNA.15971.1 | 3.95  | 3.95  | 0.08 | 0.08 | 1     | 0.674467 | 0.001361 | 0.844522 | 0.056687 |
| MmugDNA.15972.1.S1_at   | MmugDNA.15972.1 | 6.8   | 6.9   | 0.3  | 0.08 | -1.08 | 0.230973 | 0.894215 | 0.529768 | 0.939665 |
| MmugDNA.15973.1.S1_s_at | MmugDNA.15973.1 | 5.59  | 5.56  | 0.11 | 0.12 | 1.02  | 0.339489 | 0.252956 | 0.619769 | 0.521261 |
| MmugDNA.15975.1.S1_at   | MmugDNA.15975.1 | 6.39  | 6.14  | 0.13 | 0.05 | 1.19  | 0.13313  | 0.268067 | 0.416662 | 0.533841 |
| MmugDNA.15976.1.S1_at   | MmugDNA.15976.1 | 9.47  | 9.27  | 0.23 | 0.11 | 1.14  | 0.203509 | 0.555313 | 0.501202 | 0.733767 |
| MmugDNA.15977.1.S1_at   | MmugDNA.15977.1 | 5.81  | 6.19  | 0.05 | 0.12 | -1.3  | 0.005488 | 0.00876  | 0.119548 | 0.124009 |
| MmugDNA.15979.1.S1_at   | MmugDNA.15979.1 | 3.24  | 3.32  | 0.38 | 0.04 | -1.06 | 0.507281 | 0.651321 | 0.739609 | 0.796191 |
| MmugDNA.1598.1.S1_at    | MmugDNA.1598.1  | 6.22  | 6.19  | 0.24 | 0.24 | 1.02  | 0.887767 | 0.915466 | 0.952052 | 0.952567 |
| MmugDNA.15980.1.S1_at   | MmugDNA.15980.1 | 4     | 4.21  | 0.1  | 0.52 | -1.16 | 0.160862 | 0.224683 | 0.452392 | 0.497614 |
| MmugDNA.15981.1.S1_at   | MmugDNA.15981.1 | 11.6  | 11.35 | 0.05 | 0.11 | 1.19  | 0.018605 | 0.028384 | 0.189654 | 0.210319 |
| MmugDNA.15982.1.S1_at   | MmugDNA.15982.1 | 5.27  | 4.95  | 0.35 | 0.04 | 1.25  | 0.15401  | 0.058445 | 0.444262 | 0.288529 |
| MmugDNA.15985.1.S1_s_at | MmugDNA.15985.1 | 10.71 | 10.64 | 0.28 | 0.03 | 1.05  | 0.225019 | 0.32241  | 0.522977 | 0.573972 |
| MmugDNA.15988.1.S1_s_at | MmugDNA.15988.1 | 4.15  | 4.06  | 0.11 | 0.09 | 1.06  | 0.334978 | 0.375989 | 0.615998 | 0.613815 |
| MmugDNA.15989.1.S1_s_at | MmugDNA.15989.1 | 4.21  | 4.32  | 0.07 | 0.08 | -1.08 | 0.151595 | 0.404887 | 0.441094 | 0.633393 |

|                         |                 |       |       |      |      |       |          |          |          |          |
|-------------------------|-----------------|-------|-------|------|------|-------|----------|----------|----------|----------|
| MmugDNA.15991.1.S1_at   | MmugDNA.15991.1 | 3.15  | 3.31  | 0.09 | 0.05 | -1.11 | 0.0901   | 0.345424 | 0.356863 | 0.590736 |
| MmugDNA.15996.1.S1_s_at | MmugDNA.15996.1 | 13.94 | 13.79 | 0.08 | 0.02 | 1.11  | 0.049503 | 0.194408 | 0.279951 | 0.469481 |
| MmugDNA.15998.1.S1_at   | MmugDNA.15998.1 | 6.37  | 6.56  | 0.1  | 0.07 | -1.14 | 0.081994 | 0.405693 | 0.343272 | 0.633894 |
| MmugDNA.15999.1.S1_at   | MmugDNA.15999.1 | 10.92 | 10.09 | 0.07 | 0.1  | 1.78  | 0.000266 | 0.00031  | 0.056093 | 0.035135 |
| MmugDNA.160.1.S1_at     | MmugDNA.160.1   | 4.89  | 4.49  | 0.31 | 0.31 | 1.32  | 0.431714 | 0.227313 | 0.687592 | 0.499643 |
| MmugDNA.1600.1.S1_at    | MmugDNA.1600.1  | 3.59  | 3.56  | 0.39 | 0.01 | 1.02  | 0.319107 | 0.251921 | 0.603736 | 0.520632 |
| MmugDNA.16000.1.S1_at   | MmugDNA.16000.1 | 6.82  | 6.24  | 0.84 | 0.36 | 1.5   | 0.497088 | 0.546004 | 0.73289  | 0.727708 |
| MmugDNA.16001.1.S1_s_at | MmugDNA.16001.1 | 9.49  | 10.68 | 1.32 | 0.12 | -2.28 | 0.442795 | 0.406482 | 0.69616  | 0.634352 |
| MmugDNA.16003.1.S1_at   | MmugDNA.16003.1 | 5.17  | 5.43  | 0.28 | 0.13 | -1.19 | 0.356548 | 0.658259 | 0.632854 | 0.800244 |
| MmugDNA.16004.1.S1_at   | MmugDNA.16004.1 | 3.7   | 3.35  | 0.49 | 0.13 | 1.27  | 0.406932 | 0.569756 | 0.670191 | 0.742626 |
| MmugDNA.16005.1.S1_at   | MmugDNA.16005.1 | 3.2   | 3.12  | 0.06 | 0.07 | 1.06  | 0.197361 | 0.375101 | 0.494502 | 0.613186 |
| MmugDNA.16006.1.S1_at   | MmugDNA.16006.1 | 8.61  | 8.11  | 0.11 | 0.08 | 1.41  | 0.00391  | 0.000352 | 0.108275 | 0.037121 |
| MmugDNA.16007.1.S1_at   | MmugDNA.16007.1 | 3.11  | 3.22  | 0.16 | 0.16 | -1.08 | 0.892288 | 0.317404 | 0.954141 | 0.570619 |
| MmugDNA.16008.1.S1_at   | MmugDNA.16008.1 | 6.04  | 6.17  | 0.6  | 0.03 | -1.1  | 0.333171 | 0.48565  | 0.61466  | 0.68924  |
| MmugDNA.16009.1.S1_at   | MmugDNA.16009.1 | 5.19  | 5.07  | 0.01 | 0.2  | 1.08  | 0.131658 | 0.128821 | 0.414491 | 0.400277 |
| MmugDNA.16014.1.S1_at   | MmugDNA.16014.1 | 4.5   | 4.81  | 0.18 | 0.06 | -1.24 | 0.054989 | 0.032034 | 0.291487 | 0.221575 |
| MmugDNA.16015.1.S1_at   | MmugDNA.16015.1 | 6.92  | 6.89  | 0.21 | 0.1  | 1.02  | 0.819261 | 0.406633 | 0.919498 | 0.634468 |
| MmugDNA.16016.1.S1_at   | MmugDNA.16016.1 | 5.91  | 5.66  | 0.26 | 0.31 | 1.18  | 0.122384 | 0.527928 | 0.40112  | 0.716348 |
| MmugDNA.16017.1.S1_at   | MmugDNA.16017.1 | 3.09  | 2.99  | 0.02 | 0.2  | 1.07  | 0.830929 | 0.926815 | 0.925579 | 0.958404 |
| MmugDNA.16018.1.S1_at   | MmugDNA.16018.1 | 7.04  | 7.13  | 0.28 | 0.04 | -1.07 | 0.705194 | 0.78897  | 0.860193 | 0.878011 |
| MmugDNA.16019.1.S1_at   | MmugDNA.16019.1 | 5.23  | 5.14  | 0.04 | 0.08 | 1.07  | 0.033032 | 0.39523  | 0.236091 | 0.62738  |
| MmugDNA.1602.1.S1_at    | MmugDNA.1602.1  | 3.55  | 3.6   | 0.03 | 0.08 | -1.04 | 0.66805  | 0.21961  | 0.840528 | 0.49321  |
| MmugDNA.21938.1.S1_s_at | MmugDNA.21938.1 | 6.87  | 7.04  | 0.7  | 0.12 | -1.13 | 0.498829 | 0.782692 | 0.733944 | 0.874202 |
| MmugDNA.16023.1.S1_at   | MmugDNA.16023.1 | 9.77  | 10.04 | 0.28 | 0.05 | -1.21 | 0.424885 | 0.076804 | 0.682288 | 0.322252 |
| MmugDNA.16026.1.S1_at   | MmugDNA.16026.1 | 10.3  | 10.62 | 0.15 | 0.08 | -1.24 | 0.041442 | 0.497073 | 0.259966 | 0.696431 |
| MmugDNA.16027.1.S1_at   | MmugDNA.16027.1 | 8.15  | 8     | 0.1  | 0.12 | 1.11  | 0.034849 | 0.043922 | 0.241137 | 0.254098 |
| MmugDNA.16029.1.S1_at   | MmugDNA.16029.1 | 3.19  | 3.26  | 0.06 | 0.1  | -1.05 | 0.127972 | 0.123002 | 0.409866 | 0.392923 |
| MmugDNA.16030.1.S1_at   | MmugDNA.16030.1 | 3.58  | 3.43  | 0.15 | 0.13 | 1.11  | 0.310382 | 0.615669 | 0.596666 | 0.772141 |
| MmugDNA.16032.1.S1_at   | MmugDNA.16032.1 | 3.07  | 3.04  | 0.24 | 0.05 | 1.02  | 0.318679 | 0.423046 | 0.603411 | 0.646145 |
| MmugDNA.16033.1.S1_at   | MmugDNA.16033.1 | 12.06 | 12.19 | 0.03 | 0.08 | -1.09 | 0.066423 | 0.001882 | 0.31527  | 0.064979 |
| MmugDNA.16034.1.S1_at   | MmugDNA.16034.1 | 3.26  | 3.12  | 0.38 | 0.21 | 1.1   | 0.299951 | 0.373114 | 0.588233 | 0.61196  |
| MmugDNA.16035.1.S1_at   | MmugDNA.16035.1 | 5.65  | 5.62  | 0.67 | 0.08 | 1.02  | 0.952834 | 0.655871 | 0.980564 | 0.798739 |
| MmugDNA.16036.1.S1_at   | MmugDNA.16036.1 | 6.78  | 6.67  | 0.22 | 0.02 | 1.07  | 0.150836 | 0.176275 | 0.440039 | 0.452719 |
| MmugDNA.16037.1.S1_at   | MmugDNA.16037.1 | 3.61  | 3.62  | 0.08 | 0.09 | -1.01 | 0.4392   | 0.216364 | 0.69348  | 0.489938 |
| MmugDNA.16038.1.S1_at   | MmugDNA.16038.1 | 3.24  | 3.05  | 0.11 | 0.13 | 1.14  | 0.080162 | 0.090618 | 0.340547 | 0.345151 |
| MmugDNA.16039.1.S1_at   | MmugDNA.16039.1 | 6.55  | 5.85  | 0.13 | 0.11 | 1.62  | 0.002074 | 0.000339 | 0.090206 | 0.036516 |
| MmugDNA.1604.1.S1_at    | MmugDNA.1604.1  | 5.52  | 4.83  | 0.28 | 0.31 | 1.61  | 0.060406 | 0.037317 | 0.302968 | 0.237622 |
| MmugDNA.16042.1.S1_at   | MmugDNA.16042.1 | 6.68  | 6.83  | 0.23 | 0    | -1.11 | 0.420178 | 0.099745 | 0.679329 | 0.358295 |
| MmugDNA.16043.1.S1_at   | MmugDNA.16043.1 | 5.65  | 5.63  | 0.17 | 0.09 | 1.01  | 0.989323 | 0.291449 | 0.996277 | 0.551823 |
| MmugDNA.16044.1.S1_at   | MmugDNA.16044.1 | 5.42  | 5.37  | 0.14 | 0.04 | 1.03  | 0.514236 | 0.404853 | 0.744206 | 0.633361 |
| MmugDNA.16046.1.S1_at   | MmugDNA.16046.1 | 5.09  | 5.2   | 0.13 | 0.15 | -1.08 | 0.77613  | 0.309108 | 0.897623 | 0.564787 |
| MmugDNA.16047.1.S1_at   | MmugDNA.16047.1 | 11.08 | 11.11 | 0.02 | 0.04 | -1.02 | 0.208104 | 0.006466 | 0.505909 | 0.109304 |
| MmugDNA.1605.1.S1_at    | MmugDNA.1605.1  | 6.39  | 6.48  | 0.19 | 0.04 | -1.06 | 0.599234 | 0.743311 | 0.79793  | 0.851281 |



|                       |                 |       |       |      |      |       |          |          |          |          |
|-----------------------|-----------------|-------|-------|------|------|-------|----------|----------|----------|----------|
| MmugDNA.16055.1.S1_at | MmugDNA.16055.1 | 3.02  | 3.33  | 0.51 | 0.02 | -1.24 | 0.929148 | 0.933131 | 0.969943 | 0.962029 |
| MmugDNA.16056.1.S1_at | MmugDNA.16056.1 | 4.08  | 4.02  | 0.14 | 0.14 | 1.04  | 0.123679 | 0.09842  | 0.403307 | 0.356538 |
| MmugDNA.16061.1.S1_at | MmugDNA.16061.1 | 4.77  | 4.52  | 0.72 | 0.36 | 1.18  | 0.946369 | 0.789917 | 0.977354 | 0.878631 |
| MmugDNA.16064.1.S1_at | MmugDNA.16064.1 | 6.54  | 6.47  | 0.3  | 0.07 | 1.05  | 0.289059 | 0.502378 | 0.578735 | 0.700134 |
| MmugDNA.16065.1.S1_at | MmugDNA.16065.1 | 3.98  | 4.08  | 0.36 | 0.09 | -1.07 | 0.864318 | 0.462768 | 0.941253 | 0.674113 |
| MmugDNA.16066.1.S1_at | MmugDNA.16066.1 | 3.79  | 3.8   | 0.27 | 0.22 | -1.01 | 0.96517  | 0.811355 | 0.985924 | 0.891139 |
| MmugDNA.16067.1.S1_at | MmugDNA.16067.1 | 10.89 | 11.43 | 0.3  | 0    | -1.46 | 0.031789 | 0.00166  | 0.231796 | 0.061666 |
| MmugDNA.16068.1.S1_at | MmugDNA.16068.1 | 5.53  | 5.54  | 0.16 | 0.14 | -1    | 0.51905  | 0.55746  | 0.747877 | 0.735045 |
| MmugDNA.1607.1.S1_at  | MmugDNA.1607.1  | 7.12  | 7.91  | 0.37 | 0.29 | -1.74 | 0.093712 | 0.125589 | 0.362354 | 0.396226 |
| MmugDNA.16070.1.S1_at | MmugDNA.16070.1 | 7.09  | 7.93  | 1.25 | 0.26 | -1.8  | 0.951175 | 0.992849 | 0.979791 | 0.995769 |
| MmugDNA.16071.1.S1_at | MmugDNA.16071.1 | 8.87  | 8.57  | 0.05 | 0.08 | 1.23  | 0.005833 | 0.000048 | 0.122272 | 0.025273 |
| MmugDNA.16072.1.S1_at | MmugDNA.16072.1 | 6.1   | 5.98  | 0.3  | 0.2  | 1.08  | 0.733724 | 0.000808 | 0.87586  | 0.046123 |
| MmugDNA.16074.1.S1_at | MmugDNA.16074.1 | 5.65  | 5.7   | 0.28 | 0.03 | -1.04 | 0.496776 | 0.659697 | 0.732595 | 0.800854 |
| MmugDNA.16076.1.S1_at | MmugDNA.16076.1 | 4.6   | 4.52  | 0.17 | 0.28 | 1.05  | 0.687153 | 0.403873 | 0.850763 | 0.632446 |
| MmugDNA.16077.1.S1_at | MmugDNA.16077.1 | 3.4   | 3.4   | 0.24 | 0.26 | 1     | 0.876263 | 0.969614 | 0.94701  | 0.983359 |
| MmugDNA.16078.1.S1_at | MmugDNA.16078.1 | 6.95  | 6.88  | 0.28 | 0.51 | 1.05  | 0.912776 | 0.428689 | 0.963144 | 0.650253 |
| MmugDNA.16080.1.S1_at | MmugDNA.16080.1 | 5.68  | 5.71  | 0.06 | 0.13 | -1.02 | 0.501419 | 0.626994 | 0.735287 | 0.780117 |
| MmugDNA.16081.1.S1_at | MmugDNA.16081.1 | 4.68  | 4.71  | 0.2  | 0.09 | -1.02 | 0.509436 | 0.792309 | 0.741073 | 0.880001 |
| MmugDNA.16082.1.S1_at | MmugDNA.16082.1 | 6.22  | 6.21  | 0.24 | 0.11 | 1.01  | 0.224422 | 0.272403 | 0.522615 | 0.537122 |
| MmugDNA.16083.1.S1_at | MmugDNA.16083.1 | 10.13 | 9.73  | 0.33 | 0.04 | 1.32  | 0.145124 | 0.074003 | 0.432443 | 0.31757  |
| MmugDNA.16084.1.S1_at | MmugDNA.16084.1 | 4.91  | 4.93  | 0.06 | 0.02 | -1.01 | 0.616647 | 0.417222 | 0.809592 | 0.642079 |
| MmugDNA.16085.1.S1_at | MmugDNA.16085.1 | 4.74  | 4.42  | 0.4  | 0.23 | 1.25  | 0.131173 | 0.156232 | 0.413871 | 0.43161  |
| MmugDNA.16087.1.S1_at | MmugDNA.16087.1 | 4.22  | 3.93  | 0.62 | 0.04 | 1.22  | 0.44551  | 0.581948 | 0.697986 | 0.750784 |
| MmugDNA.16088.1.S1_at | MmugDNA.16088.1 | 4.81  | 4.73  | 0.1  | 0.07 | 1.06  | 0.174499 | 0.436347 | 0.468696 | 0.655923 |
| MmugDNA.16090.1.S1_at | MmugDNA.16090.1 | 7.51  | 10.06 | 0.73 | 0.25 | -5.88 | 0.00882  | 0.147917 | 0.14378  | 0.422296 |
| MmugDNA.16091.1.S1_at | MmugDNA.16091.1 | 9.86  | 9.55  | 0.24 | 0.11 | 1.24  | 0.056541 | 0.000495 | 0.29533  | 0.038955 |
| MmugDNA.16093.1.S1_at | MmugDNA.16093.1 | 6.96  | 6.41  | 0.48 | 0.1  | 1.47  | 0.155746 | 0.134599 | 0.446095 | 0.406629 |
| MmugDNA.16094.1.S1_at | MmugDNA.16094.1 | 12.51 | 12.78 | 0.26 | 0.04 | -1.21 | 0.088694 | 0.262791 | 0.355022 | 0.529136 |
| MmugDNA.16095.1.S1_at | MmugDNA.16095.1 | 10.28 | 10.12 | 0.1  | 0.02 | 1.12  | 0.176135 | 0.006933 | 0.470485 | 0.112493 |
| MmugDNA.16096.1.S1_at | MmugDNA.16096.1 | 4.46  | 4.22  | 0.42 | 0.06 | 1.18  | 0.326901 | 0.472501 | 0.609778 | 0.680025 |
| MmugDNA.16099.1.S1_at | MmugDNA.16099.1 | 3.52  | 3.65  | 0.33 | 0.06 | -1.09 | 0.811273 | 0.921828 | 0.91549  | 0.955932 |
| MmugDNA.161.1.S1_at   | MmugDNA.161.1   | 8.17  | 8.18  | 0.41 | 0.27 | -1    | 0.535686 | 0.006405 | 0.758533 | 0.108767 |
| MmugDNA.1610.1.S1_at  | MmugDNA.1610.1  | 7.64  | 8.53  | 0.49 | 0.15 | -1.85 | 0.048633 | 0.024905 | 0.278037 | 0.197692 |
| MmugDNA.16100.1.S1_at | MmugDNA.16100.1 | 6.09  | 6.21  | 0.22 | 0.04 | -1.08 | 0.710241 | 0.543728 | 0.86293  | 0.726303 |
| MmugDNA.16102.1.S1_at | MmugDNA.16102.1 | 3.51  | 3.49  | 0.56 | 0.28 | 1.02  | 0.414585 | 0.344826 | 0.675681 | 0.590153 |
| MmugDNA.16103.1.S1_at | MmugDNA.16103.1 | 9.45  | 9.3   | 0.22 | 0.04 | 1.11  | 0.342944 | 0.582316 | 0.622647 | 0.75096  |
| MmugDNA.16106.1.S1_at | MmugDNA.16106.1 | 8.1   | 7.77  | 0.28 | 0.06 | 1.26  | 0.152577 | 0.232478 | 0.442239 | 0.504244 |
| MmugDNA.16107.1.S1_at | MmugDNA.16107.1 | 8.14  | 9.05  | 0.16 | 0.06 | -1.88 | 0.001064 | 0.143095 | 0.0766   | 0.416995 |
| MmugDNA.16108.1.S1_at | MmugDNA.16108.1 | 4.59  | 4.44  | 0.08 | 0.15 | 1.11  | 0.367572 | 0.677868 | 0.641471 | 0.811841 |
| MmugDNA.1611.1.S1_at  | MmugDNA.1611.1  | 3.17  | 2.96  | 0    | 0.15 | 1.16  | 0.221965 | 0.288541 | 0.520064 | 0.549821 |
| MmugDNA.16110.1.S1_at | MmugDNA.16110.1 | 5.09  | 4.74  | 0.89 | 0.43 | 1.28  | 0.20848  | 0.385071 | 0.506143 | 0.620662 |
| MmugDNA.16111.1.S1_at | MmugDNA.16111.1 | 6.24  | 6.25  | 0.04 | 0.31 | -1.01 | 0.946946 | 0.884481 | 0.977699 | 0.93419  |
| MmugDNA.16112.1.S1_at | MmugDNA.16112.1 | 7.56  | 7.24  | 0.75 | 0.13 | 1.24  | 0.335857 | 0.669699 | 0.616625 | 0.806828 |

|                       |                 |       |       |      |      |       |          |          |          |          |
|-----------------------|-----------------|-------|-------|------|------|-------|----------|----------|----------|----------|
| MmugDNA.16114.1.S1_at | MmugDNA.16114.1 | 11.58 | 11.52 | 0.1  | 0.06 | 1.05  | 0.085663 | 0.214046 | 0.350076 | 0.487633 |
| MmugDNA.16115.1.S1_at | MmugDNA.16115.1 | 3.73  | 3.67  | 0.11 | 0.05 | 1.04  | 0.201222 | 0.309029 | 0.498715 | 0.564721 |
| MmugDNA.16117.1.S1_at | MmugDNA.16117.1 | 5.69  | 5.65  | 0.08 | 0.24 | 1.02  | 0.913536 | 0.134129 | 0.963382 | 0.406393 |
| MmugDNA.16119.1.S1_at | MmugDNA.16119.1 | 6.86  | 6.89  | 0.12 | 0.07 | -1.02 | 0.941994 | 0.039138 | 0.975589 | 0.243072 |
| MmugDNA.1612.1.S1_at  | MmugDNA.1612.1  | 5.31  | 5.22  | 0.14 | 0.11 | 1.07  | 0.435991 | 0.672128 | 0.690949 | 0.808318 |
| MmugDNA.16120.1.S1_at | MmugDNA.16120.1 | 9.74  | 9.91  | 0.05 | 0.2  | -1.12 | 0.494446 | 0.414402 | 0.731233 | 0.640293 |
| MmugDNA.16121.1.S1_at | MmugDNA.16121.1 | 4.39  | 4.37  | 0.46 | 0.14 | 1.02  | 0.45342  | 0.534684 | 0.703595 | 0.720504 |
| MmugDNA.16123.1.S1_at | MmugDNA.16123.1 | 4.47  | 4.04  | 0.29 | 0.13 | 1.35  | 0.202446 | 0.509973 | 0.500091 | 0.704535 |
| MmugDNA.16124.1.S1_at | MmugDNA.16124.1 | 4.98  | 4.6   | 0.16 | 0.2  | 1.3   | 0.128921 | 0.176247 | 0.41116  | 0.452718 |
| MmugDNA.16125.1.S1_at | MmugDNA.16125.1 | 3.39  | 3.36  | 0.03 | 0.24 | 1.02  | 0.437715 | 0.64364  | 0.692489 | 0.791063 |
| MmugDNA.16126.1.S1_at | MmugDNA.16126.1 | 4.34  | 4.61  | 0.4  | 0.09 | -1.21 | 0.327029 | 0.424193 | 0.609778 | 0.646793 |
| MmugDNA.16129.1.S1_at | MmugDNA.16129.1 | 10.38 | 9.84  | 0.25 | 0.38 | 1.45  | 0.046544 | 0.029677 | 0.273563 | 0.214008 |
| MmugDNA.1613.1.S1_at  | MmugDNA.1613.1  | 4.82  | 4.87  | 0.18 | 0.23 | -1.03 | 0.480438 | 0.584677 | 0.721309 | 0.752482 |
| MmugDNA.16130.1.S1_at | MmugDNA.16130.1 | 7.77  | 7.69  | 0.21 | 0.23 | 1.05  | 0.774733 | 0.476537 | 0.897014 | 0.682769 |
| MmugDNA.16133.1.S1_at | MmugDNA.16133.1 | 4.01  | 4     | 0.2  | 0.03 | 1     | 0.45306  | 0.546976 | 0.703407 | 0.728283 |
| MmugDNA.16134.1.S1_at | MmugDNA.16134.1 | 5.64  | 5.74  | 0.15 | 0.08 | -1.07 | 0.343584 | 0.19606  | 0.622989 | 0.471082 |
| MmugDNA.16135.1.S1_at | MmugDNA.16135.1 | 3.49  | 3.56  | 0.28 | 0.25 | -1.05 | 0.342416 | 0.281605 | 0.622192 | 0.544655 |
| MmugDNA.16136.1.S1_at | MmugDNA.16136.1 | 3.33  | 3.29  | 0.06 | 0.28 | 1.03  | 0.407976 | 0.336989 | 0.670905 | 0.58423  |
| MmugDNA.16138.1.S1_at | MmugDNA.16138.1 | 6.6   | 6.83  | 0.13 | 0.36 | -1.18 | 0.396543 | 0.098507 | 0.662576 | 0.356636 |
| MmugDNA.16139.1.S1_at | MmugDNA.16139.1 | 3.43  | 3.67  | 0.31 | 0.11 | -1.18 | 0.614028 | 0.243133 | 0.807838 | 0.513356 |
| MmugDNA.16145.1.S1_at | MmugDNA.16145.1 | 5.61  | 5.32  | 0.25 | 0.13 | 1.22  | 0.415327 | 0.606425 | 0.67607  | 0.765747 |
| MmugDNA.16146.1.S1_at | MmugDNA.16146.1 | 6.24  | 6.5   | 0.47 | 0.47 | -1.2  | 0.335918 | 0.901738 | 0.616626 | 0.944082 |
| MmugDNA.16147.1.S1_at | MmugDNA.16147.1 | 4.09  | 4.08  | 0.14 | 0.07 | 1.01  | 0.60614  | 0.808619 | 0.802904 | 0.889834 |
| MmugDNA.16149.1.S1_at | MmugDNA.16149.1 | 5.38  | 5     | 0.73 | 0.43 | 1.3   | 0.955249 | 0.36684  | 0.981655 | 0.606544 |
| MmugDNA.1615.1.S1_at  | MmugDNA.1615.1  | 4.08  | 4.18  | 0    | 0.26 | -1.07 | 0.574513 | 0.18329  | 0.781968 | 0.459553 |
| MmugDNA.16151.1.S1_at | MmugDNA.16151.1 | 6.76  | 6.76  | 0.1  | 0.1  | -1    | 0.666596 | 0.708471 | 0.839898 | 0.830919 |
| MmugDNA.16152.1.S1_at | MmugDNA.16152.1 | 9.87  | 9.96  | 0.19 | 0.03 | -1.06 | 0.144051 | 0.020174 | 0.430898 | 0.178414 |
| MmugDNA.16153.1.S1_at | MmugDNA.16153.1 | 3.9   | 3.9   | 0.02 | 0.01 | 1     | 0.267153 | 0.697187 | 0.559883 | 0.824045 |
| MmugDNA.16154.1.S1_at | MmugDNA.16154.1 | 10.14 | 9.25  | 0.54 | 0.11 | 1.85  | 0.10534  | 0.176063 | 0.379256 | 0.452526 |
| MmugDNA.16155.1.S1_at | MmugDNA.16155.1 | 4.21  | 4.33  | 0.07 | 0.04 | -1.09 | 0.291842 | 0.141399 | 0.581262 | 0.414874 |
| MmugDNA.16157.1.S1_at | MmugDNA.16157.1 | 4.61  | 4.47  | 0.2  | 0.1  | 1.1   | 0.391659 | 0.662758 | 0.658751 | 0.802564 |
| MmugDNA.1616.1.S1_at  | MmugDNA.1616.1  | 4.47  | 4.49  | 0.17 | 0.24 | -1.02 | 0.94761  | 0.669499 | 0.977941 | 0.806643 |
| MmugDNA.16161.1.S1_at | MmugDNA.16161.1 | 5.76  | 5.75  | 0.07 | 0.07 | 1.01  | 0.831916 | 0.337446 | 0.926006 | 0.584658 |
| MmugDNA.16163.1.S1_at | MmugDNA.16163.1 | 8.54  | 8.81  | 0.31 | 0.16 | -1.2  | 0.453667 | 0.188701 | 0.703813 | 0.464634 |
| MmugDNA.16164.1.S1_at | MmugDNA.16164.1 | 4.55  | 4.46  | 0.13 | 0.02 | 1.06  | 0.662756 | 0.190243 | 0.83726  | 0.46589  |
| MmugDNA.16167.1.S1_at | MmugDNA.16167.1 | 6.18  | 6.3   | 0.09 | 0.21 | -1.09 | 0.935245 | 0.911201 | 0.972947 | 0.949924 |
| MmugDNA.16171.1.S1_at | MmugDNA.16171.1 | 5.38  | 5.41  | 0.47 | 0.3  | -1.02 | 0.646593 | 0.7975   | 0.828276 | 0.883261 |
| MmugDNA.16172.1.S1_at | MmugDNA.16172.1 | 10.55 | 9.94  | 0.01 | 0.13 | 1.53  | 0.002029 | 0.013764 | 0.089887 | 0.150306 |
| MmugDNA.16174.1.S1_at | MmugDNA.16174.1 | 11.42 | 12.6  | 0.2  | 0.14 | -2.26 | 0.001169 | 0.271857 | 0.077718 | 0.536619 |
| MmugDNA.16175.1.S1_at | MmugDNA.16175.1 | 5.83  | 6.1   | 0.02 | 0.16 | -1.21 | 0.101345 | 0.083798 | 0.372727 | 0.334647 |
| MmugDNA.16176.1.S1_at | MmugDNA.16176.1 | 5.27  | 5.26  | 0.17 | 0.02 | 1.01  | 0.83055  | 0.198112 | 0.925496 | 0.473108 |
| MmugDNA.16177.1.S1_at | MmugDNA.16177.1 | 5.62  | 7.12  | 0.19 | 0.31 | -2.84 | 0.002697 | 0.125266 | 0.096803 | 0.395827 |
| MmugDNA.16178.1.S1_at | MmugDNA.16178.1 | 3.4   | 3.41  | 0.07 | 0.12 | -1    | 0.561373 | 0.756037 | 0.774384 | 0.857974 |

|                         |                 |       |       |      |      |       |          |          |          |          |
|-------------------------|-----------------|-------|-------|------|------|-------|----------|----------|----------|----------|
| MmugDNA.16180.1.S1_at   | MmugDNA.16180.1 | 9.81  | 10.11 | 0.21 | 0.22 | -1.23 | 0.170251 | 0.01425  | 0.46391  | 0.152403 |
| MmugDNA.16182.1.S1_at   | MmugDNA.16182.1 | 9.49  | 9.78  | 0.33 | 0.46 | -1.22 | 0.17167  | 0.02706  | 0.465636 | 0.205689 |
| MmugDNA.16184.1.S1_at   | MmugDNA.16184.1 | 7.05  | 7.07  | 0.7  | 0.27 | -1.01 | 0.274874 | 0.499652 | 0.566556 | 0.698453 |
| MmugDNA.1619.1.S1_at    | MmugDNA.1619.1  | 5.38  | 5.19  | 0.75 | 0.1  | 1.14  | 0.233886 | 0.400927 | 0.532099 | 0.630658 |
| MmugDNA.16190.1.S1_at   | MmugDNA.16190.1 | 3.75  | 4.1   | 1.21 | 0.17 | -1.27 | 0.667537 | 0.63765  | 0.840426 | 0.787067 |
| MmugDNA.16191.1.S1_at   | MmugDNA.16191.1 | 8.6   | 7.09  | 0.37 | 0.29 | 2.86  | 0.012496 | 0.271274 | 0.162106 | 0.536408 |
| MmugDNA.16192.1.S1_s_at | MmugDNA.16192.1 | 3.5   | 3.39  | 0.09 | 0.09 | 1.08  | 0.110267 | 0.121273 | 0.385603 | 0.390351 |
| MmugDNA.16194.1.S1_at   | MmugDNA.16194.1 | 5.31  | 5.21  | 0.08 | 0.12 | 1.07  | 0.397807 | 0.699249 | 0.663304 | 0.825277 |
| MmugDNA.16195.1.S1_at   | MmugDNA.16195.1 | 4.92  | 4.95  | 0.02 | 0.2  | -1.02 | 0.883818 | 0.361434 | 0.950628 | 0.602201 |
| MmugDNA.16196.1.S1_at   | MmugDNA.16196.1 | 7.67  | 7.66  | 0.09 | 0.06 | 1.01  | 0.242566 | 0.256529 | 0.539382 | 0.524275 |
| MmugDNA.16197.1.S1_at   | MmugDNA.16197.1 | 4.75  | 4.76  | 0.13 | 0.02 | -1.01 | 0.784684 | 0.985117 | 0.901788 | 0.991531 |
| MmugDNA.16197.1.S1_s_at | MmugDNA.16197.1 | 6.39  | 6.39  | 0.01 | 0.02 | 1     | 0.545735 | 0.369894 | 0.764895 | 0.609138 |
| MmugDNA.16198.1.S1_at   | MmugDNA.16198.1 | 6.54  | 5.62  | 0.35 | 0.47 | 1.9   | 0.150035 | 0.351095 | 0.439035 | 0.594778 |
| MmugDNA.16199.1.S1_at   | MmugDNA.16199.1 | 4.34  | 4.1   | 0.94 | 0.36 | 1.18  | 0.323538 | 0.325457 | 0.60732  | 0.575812 |
| MmugDNA.162.1.S1_at     | MmugDNA.162.1   | 4.59  | 4.55  | 0.39 | 0.07 | 1.02  | 0.407621 | 0.47872  | 0.670615 | 0.684691 |
| MmugDNA.16201.1.S1_at   | MmugDNA.16201.1 | 4.51  | 4.24  | 0.18 | 0.08 | 1.21  | 0.105315 | 0.219832 | 0.379205 | 0.493388 |
| MmugDNA.16203.1.S1_at   | MmugDNA.16203.1 | 5.62  | 5.53  | 0.21 | 0.07 | 1.06  | 0.478324 | 0.668448 | 0.719904 | 0.805964 |
| MmugDNA.16204.1.S1_at   | MmugDNA.16204.1 | 5.63  | 5.51  | 0.12 | 0.02 | 1.09  | 0.630725 | 0.387919 | 0.818647 | 0.622509 |
| MmugDNA.16205.1.S1_at   | MmugDNA.16205.1 | 3.03  | 3.01  | 0.13 | 0.02 | 1.01  | 0.612905 | 0.796491 | 0.807104 | 0.882699 |
| MmugDNA.16206.1.S1_at   | MmugDNA.16206.1 | 6.26  | 6.33  | 0.09 | 0.1  | -1.05 | 0.373415 | 0.042952 | 0.645118 | 0.251794 |
| MmugDNA.16207.1.S1_at   | MmugDNA.16207.1 | 3.48  | 3.82  | 0.08 | 0.37 | -1.27 | 0.165699 | 0.30706  | 0.458753 | 0.563427 |
| MmugDNA.16208.1.S1_at   | MmugDNA.16208.1 | 3.65  | 3.43  | 0.18 | 0.08 | 1.16  | 0.241317 | 0.296476 | 0.538538 | 0.555528 |
| MmugDNA.16209.1.S1_at   | MmugDNA.16209.1 | 5.67  | 5.47  | 0.17 | 0.17 | 1.15  | 0.282317 | 0.554323 | 0.573117 | 0.733158 |
| MmugDNA.16212.1.S1_at   | MmugDNA.16212.1 | 3.72  | 3.72  | 0.06 | 0    | -1    | 0.335847 | 0.534918 | 0.616625 | 0.720616 |
| MmugDNA.16215.1.S1_at   | MmugDNA.16215.1 | 10.27 | 10.05 | 0.39 | 0.14 | 1.17  | 0.273389 | 0.006727 | 0.565532 | 0.110963 |
| MmugDNA.16216.1.S1_at   | MmugDNA.16216.1 | 11.52 | 11.54 | 0.18 | 0.1  | -1.01 | 0.517376 | 0.23069  | 0.746589 | 0.502381 |
| MmugDNA.16219.1.S1_at   | MmugDNA.16219.1 | 4.96  | 4.89  | 0.22 | 0.16 | 1.05  | 0.200035 | 0.302415 | 0.49757  | 0.560109 |
| MmugDNA.1622.1.S1_at    | MmugDNA.1622.1  | 5.49  | 5.64  | 0.23 | 0.35 | -1.1  | 0.217939 | 0.351525 | 0.515773 | 0.595094 |
| MmugDNA.16220.1.S1_at   | MmugDNA.16220.1 | 11.19 | 11.19 | 0.09 | 0.02 | 1     | 0.990102 | 0.363057 | 0.996449 | 0.603503 |
| MmugDNA.16221.1.S1_at   | MmugDNA.16221.1 | 11.74 | 11.54 | 0.07 | 0.09 | 1.15  | 0.030143 | 0.128016 | 0.226716 | 0.398985 |
| MmugDNA.16222.1.S1_at   | MmugDNA.16222.1 | 4.8   | 5.2   | 0.55 | 0.35 | -1.32 | 0.251793 | 0.312565 | 0.546475 | 0.567268 |
| MmugDNA.16223.1.S1_at   | MmugDNA.16223.1 | 8.23  | 7.99  | 0.13 | 0.33 | 1.18  | 0.662379 | 0.779596 | 0.837065 | 0.872221 |
| MmugDNA.16224.1.S1_s_at | MmugDNA.16224.1 | 13.24 | 12.65 | 0.42 | 0.03 | 1.51  | 0.088938 | 0.218401 | 0.355552 | 0.491958 |
| MmugDNA.16225.1.S1_at   | MmugDNA.16225.1 | 5.24  | 5.51  | 0.23 | 0.22 | -1.21 | 0.895091 | 0.541704 | 0.955278 | 0.725057 |
| MmugDNA.16226.1.S1_at   | MmugDNA.16226.1 | 6.24  | 6.38  | 0.15 | 0.04 | -1.1  | 0.143158 | 0.76243  | 0.429392 | 0.861818 |
| MmugDNA.16227.1.S1_at   | MmugDNA.16227.1 | 4.38  | 4.35  | 0.21 | 0.14 | 1.02  | 0.508737 | 0.748131 | 0.740565 | 0.853384 |
| MmugDNA.16228.1.S1_at   | MmugDNA.16228.1 | 3.73  | 3.68  | 0.03 | 0.04 | 1.04  | 0.090104 | 0.428049 | 0.356863 | 0.649619 |
| MmugDNA.16229.1.S1_at   | MmugDNA.16229.1 | 8.59  | 7.55  | 0.27 | 0.05 | 2.06  | 0.002324 | 0.075243 | 0.092636 | 0.319434 |
| MmugDNA.1623.1.S1_at    | MmugDNA.1623.1  | 5.83  | 5.83  | 0.08 | 0.06 | -1    | 0.972992 | 0.781624 | 0.9892   | 0.873418 |
| MmugDNA.16230.1.S1_at   | MmugDNA.16230.1 | 9.07  | 9.59  | 0.15 | 0.07 | -1.43 | 0.011672 | 0.050418 | 0.157852 | 0.269746 |
| MmugDNA.16231.1.S1_at   | MmugDNA.16231.1 | 12.98 | 12.26 | 0.1  | 0.03 | 1.65  | 0.000258 | 0.129238 | 0.055264 | 0.400635 |
| MmugDNA.16232.1.S1_at   | MmugDNA.16232.1 | 5.36  | 5.9   | 0.24 | 0.08 | -1.46 | 0.025523 | 0.021191 | 0.212834 | 0.182325 |
| MmugDNA.16233.1.S1_at   | MmugDNA.16233.1 | 6.84  | 6.88  | 1.12 | 0.13 | -1.03 | 0.859695 | 0.927988 | 0.939203 | 0.959116 |

|                         |                 |       |       |      |      |       |          |          |          |          |
|-------------------------|-----------------|-------|-------|------|------|-------|----------|----------|----------|----------|
| MmugDNA.16235.1.S1_at   | MmugDNA.16235.1 | 3.89  | 3.88  | 0.08 | 0.1  | 1.01  | 0.823444 | 0.014889 | 0.921533 | 0.155096 |
| MmugDNA.16236.1.S1_at   | MmugDNA.16236.1 | 7     | 6.91  | 0.3  | 0.16 | 1.07  | 0.985487 | 0.925009 | 0.99479  | 0.957597 |
| MmugDNA.16237.1.S1_at   | MmugDNA.16237.1 | 3.48  | 3.61  | 0.09 | 0.54 | -1.09 | 0.36948  | 0.492021 | 0.642899 | 0.693403 |
| MmugDNA.16238.1.S1_at   | MmugDNA.16238.1 | 5.14  | 5.06  | 0.06 | 0.03 | 1.05  | 0.242184 | 0.050313 | 0.539189 | 0.269573 |
| MmugDNA.16239.1.S1_at   | MmugDNA.16239.1 | 10.25 | 10.53 | 0.52 | 0.21 | -1.21 | 0.099509 | 0.228554 | 0.370394 | 0.500752 |
| MmugDNA.16239.1.S1_s_at | MmugDNA.16239.1 | 9.31  | 9.76  | 0.72 | 0.25 | -1.36 | 0.123962 | 0.236375 | 0.403799 | 0.507308 |
| MmugDNA.1624.1.S1_at    | MmugDNA.1624.1  | 11.54 | 11.38 | 0.21 | 0.15 | 1.12  | 0.456987 | 0.672285 | 0.706061 | 0.808488 |
| MmugDNA.16241.1.S1_at   | MmugDNA.16241.1 | 7.37  | 7.19  | 0.06 | 0.14 | 1.13  | 0.028941 | 0.379243 | 0.22298  | 0.616218 |
| MmugDNA.16242.1.S1_at   | MmugDNA.16242.1 | 3.68  | 3.88  | 0.19 | 0.44 | -1.15 | 0.71451  | 0.896111 | 0.86508  | 0.940629 |
| MmugDNA.16244.1.S1_at   | MmugDNA.16244.1 | 6.46  | 8.45  | 1.33 | 0.18 | -3.98 | 0.060599 | 0.307806 | 0.303194 | 0.56397  |
| MmugDNA.16246.1.S1_at   | MmugDNA.16246.1 | 5.24  | 4.87  | 0.44 | 0.3  | 1.29  | 0.278644 | 0.428552 | 0.569962 | 0.650098 |
| MmugDNA.16247.1.S1_at   | MmugDNA.16247.1 | 3.07  | 3.13  | 0.11 | 0.04 | -1.04 | 0.139893 | 0.177626 | 0.425483 | 0.454005 |
| MmugDNA.16248.1.S1_at   | MmugDNA.16248.1 | 8.48  | 8.63  | 0.29 | 0.1  | -1.11 | 0.283345 | 0.033923 | 0.573777 | 0.227782 |
| MmugDNA.16248.1.S1_s_at | MmugDNA.16248.1 | 11.01 | 11.1  | 0.18 | 0.13 | -1.06 | 0.355822 | 0.01709  | 0.632435 | 0.165617 |
| MmugDNA.16249.1.S1_at   | MmugDNA.16249.1 | 4.82  | 4.8   | 0.17 | 0.01 | 1.01  | 0.461477 | 0.193913 | 0.708883 | 0.469013 |
| MmugDNA.1625.1.S1_at    | MmugDNA.1625.1  | 8.6   | 8.85  | 0.16 | 0.16 | -1.19 | 0.361972 | 0.135186 | 0.637175 | 0.407236 |
| MmugDNA.16250.1.S1_at   | MmugDNA.16250.1 | 6.32  | 6.32  | 0.08 | 0.01 | 1     | 0.448653 | 0.185823 | 0.700142 | 0.461654 |
| MmugDNA.16251.1.S1_at   | MmugDNA.16251.1 | 6.73  | 6.73  | 0.03 | 0.1  | 1     | 0.558799 | 0.254436 | 0.773051 | 0.522732 |
| MmugDNA.16252.1.S1_at   | MmugDNA.16252.1 | 8.44  | 7.35  | 0.48 | 0.24 | 2.13  | 0.026968 | 0.05449  | 0.217062 | 0.278959 |
| MmugDNA.16254.1.S1_at   | MmugDNA.16254.1 | 6.08  | 6.11  | 0.08 | 0.21 | -1.02 | 0.656975 | 0.116895 | 0.834097 | 0.384277 |
| MmugDNA.16256.1.S1_at   | MmugDNA.16256.1 | 4.25  | 4.42  | 0.24 | 0.02 | -1.13 | 0.457251 | 0.48726  | 0.706249 | 0.690367 |
| MmugDNA.16257.1.S1_at   | MmugDNA.16257.1 | 7.36  | 7.48  | 0.16 | 0.09 | -1.08 | 0.714458 | 0.575156 | 0.86508  | 0.746352 |
| MmugDNA.16258.1.S1_at   | MmugDNA.16258.1 | 3.61  | 3.61  | 0.04 | 0.07 | 1     | 0.728628 | 0.985724 | 0.873148 | 0.991878 |
| MmugDNA.16259.1.S1_at   | MmugDNA.16259.1 | 5.28  | 4.48  | 0.7  | 0.22 | 1.75  | 0.091817 | 0.064282 | 0.359608 | 0.299722 |
| MmugDNA.1626.1.S1_at    | MmugDNA.1626.1  | 3.13  | 3.15  | 0.09 | 0.11 | -1.01 | 0.445405 | 0.481525 | 0.697918 | 0.686493 |
| MmugDNA.16261.1.S1_at   | MmugDNA.16261.1 | 4.12  | 4.05  | 0.3  | 0.18 | 1.05  | 0.663075 | 0.846001 | 0.837461 | 0.912303 |
| MmugDNA.16263.1.S1_at   | MmugDNA.16263.1 | 10.16 | 10.18 | 0.03 | 0.11 | -1.01 | 0.968153 | 0.999925 | 0.987372 | 0.999968 |
| MmugDNA.16264.1.S1_at   | MmugDNA.16264.1 | 3.18  | 3.11  | 0.29 | 0.04 | 1.05  | 0.676849 | 0.824362 | 0.845801 | 0.899093 |
| MmugDNA.16265.1.S1_at   | MmugDNA.16265.1 | 3.06  | 3.01  | 0.08 | 0.14 | 1.04  | 0.82265  | 0.73214  | 0.921073 | 0.844852 |
| MmugDNA.16267.1.S1_at   | MmugDNA.16267.1 | 3.38  | 3.35  | 0.22 | 0.22 | 1.02  | 0.859999 | 0.980407 | 0.939228 | 0.989333 |
| MmugDNA.16269.1.S1_at   | MmugDNA.16269.1 | 5.67  | 5.48  | 0    | 0.08 | 1.14  | 0.028476 | 0.021919 | 0.22113  | 0.185265 |
| MmugDNA.16270.1.S1_at   | MmugDNA.16270.1 | 3.86  | 4.17  | 1.6  | 0.2  | -1.24 | 0.556342 | 0.580744 | 0.771647 | 0.749903 |
| MmugDNA.16270.1.S1_x_at | MmugDNA.16270.1 | 6.97  | 7.12  | 0.89 | 0.03 | -1.11 | 0.505034 | 0.569425 | 0.738131 | 0.742382 |
| MmugDNA.16271.1.S1_at   | MmugDNA.16271.1 | 4.4   | 4.46  | 0.04 | 0.18 | -1.04 | 0.326145 | 0.473278 | 0.60931  | 0.680582 |
| MmugDNA.16272.1.S1_at   | MmugDNA.16272.1 | 3.88  | 4.16  | 0.42 | 0.19 | -1.22 | 0.629289 | 0.851447 | 0.817842 | 0.915468 |
| MmugDNA.16273.1.S1_at   | MmugDNA.16273.1 | 4.64  | 4.59  | 0.08 | 0.02 | 1.04  | 0.541009 | 0.003287 | 0.761865 | 0.082551 |
| MmugDNA.16275.1.S1_at   | MmugDNA.16275.1 | 4.89  | 4.92  | 0.04 | 0.12 | -1.02 | 0.447546 | 0.694367 | 0.69951  | 0.822254 |
| MmugDNA.16276.1.S1_at   | MmugDNA.16276.1 | 8.21  | 8.22  | 0.07 | 0.09 | -1.01 | 0.322641 | 0.37979  | 0.606572 | 0.616576 |
| MmugDNA.16277.1.S1_at   | MmugDNA.16277.1 | 9.36  | 9.35  | 0.08 | 0.09 | 1.01  | 0.979737 | 0.974111 | 0.992265 | 0.98586  |
| MmugDNA.16278.1.S1_at   | MmugDNA.16278.1 | 11.82 | 11.77 | 0.1  | 0.05 | 1.03  | 0.691339 | 0.574403 | 0.852403 | 0.745847 |
| MmugDNA.1628.1.S1_at    | MmugDNA.1628.1  | 13.41 | 13.32 | 0.09 | 0.08 | 1.06  | 0.118505 | 0.154194 | 0.396177 | 0.428949 |
| MmugDNA.16281.1.S1_at   | MmugDNA.16281.1 | 3.51  | 3.43  | 0.23 | 0.07 | 1.06  | 0.178524 | 0.434986 | 0.47328  | 0.654901 |
| MmugDNA.16283.1.S1_s_at | MmugDNA.16283.1 | 4.88  | 5.05  | 0.22 | 0.15 | -1.13 | 0.421983 | 0.588243 | 0.680233 | 0.754847 |

|                         |                 |       |       |      |      |       |          |          |          |          |
|-------------------------|-----------------|-------|-------|------|------|-------|----------|----------|----------|----------|
| MmugDNA.16284.1.S1_at   | MmugDNA.16284.1 | 10.76 | 10.55 | 0.07 | 0.09 | 1.15  | 0.041458 | 0.319943 | 0.259966 | 0.572283 |
| MmugDNA.16285.1.S1_at   | MmugDNA.16285.1 | 3.65  | 3.64  | 0.22 | 0.18 | 1.01  | 0.212232 | 0.445392 | 0.51017  | 0.662343 |
| MmugDNA.16285.1.S1_s_at | MmugDNA.16285.1 | 4.89  | 5.02  | 0.21 | 0.06 | -1.09 | 0.953207 | 0.508003 | 0.980776 | 0.703358 |
| MmugDNA.16286.1.S1_at   | MmugDNA.16286.1 | 4.45  | 4.37  | 0.18 | 0.04 | 1.06  | 0.211745 | 0.302408 | 0.509648 | 0.560109 |
| MmugDNA.16287.1.S1_at   | MmugDNA.16287.1 | 4.39  | 4.22  | 0.44 | 0.23 | 1.13  | 0.999493 | 0.984461 | 0.999849 | 0.991287 |
| MmugDNA.16288.1.S1_at   | MmugDNA.16288.1 | 6.16  | 6.1   | 0.06 | 0.04 | 1.04  | 0.311158 | 0.595871 | 0.597352 | 0.759258 |
| MmugDNA.16289.1.S1_at   | MmugDNA.16289.1 | 5.1   | 4.87  | 0.74 | 0.54 | 1.18  | 0.296602 | 0.294317 | 0.585315 | 0.55407  |
| MmugDNA.1629.1.S1_at    | MmugDNA.1629.1  | 4.89  | 3.97  | 0.55 | 0.18 | 1.9   | 0.063826 | 0.020973 | 0.309173 | 0.181633 |
| MmugDNA.16290.1.S1_at   | MmugDNA.16290.1 | 7.65  | 7.85  | 0.32 | 0.24 | -1.14 | 0.745031 | 0.914375 | 0.881771 | 0.951844 |
| MmugDNA.16292.1.S1_at   | MmugDNA.16292.1 | 8.16  | 8.83  | 0.32 | 0.1  | -1.59 | 0.019053 | 0.208064 | 0.191521 | 0.482049 |
| MmugDNA.16293.1.S1_at   | MmugDNA.16293.1 | 3.25  | 3.54  | 0.2  | 0.32 | -1.22 | 0.432597 | 0.50117  | 0.688358 | 0.699449 |
| MmugDNA.16294.1.S1_at   | MmugDNA.16294.1 | 7     | 6.97  | 0.35 | 0.1  | 1.02  | 0.870462 | 0.907016 | 0.944238 | 0.947344 |
| MmugDNA.16295.1.S1_at   | MmugDNA.16295.1 | 9.71  | 9.96  | 0.26 | 0.1  | -1.19 | 0.215341 | 0.196473 | 0.513001 | 0.471516 |
| MmugDNA.16295.1.S1_s_at | MmugDNA.16295.1 | 6.4   | 5.79  | 0.72 | 0.25 | 1.53  | 0.09459  | 0.130214 | 0.363543 | 0.401949 |
| MmugDNA.16296.1.S1_at   | MmugDNA.16296.1 | 5.42  | 5.47  | 0.7  | 0.1  | -1.04 | 0.529434 | 0.511031 | 0.754256 | 0.705358 |
| MmugDNA.16298.1.S1_at   | MmugDNA.16298.1 | 4.6   | 4.34  | 0.06 | 0.15 | 1.19  | 0.083109 | 0.048793 | 0.345372 | 0.265812 |
| MmugDNA.16299.1.S1_at   | MmugDNA.16299.1 | 6.04  | 6.05  | 0.34 | 0.15 | -1.01 | 0.630599 | 0.153431 | 0.818647 | 0.42827  |
| MmugDNA.163.1.S1_at     | MmugDNA.163.1   | 3.43  | 3.39  | 0.37 | 0.06 | 1.03  | 0.643241 | 0.765941 | 0.826144 | 0.864021 |
| MmugDNA.1630.1.S1_at    | MmugDNA.1630.1  | 4.41  | 4.71  | 0.72 | 0.27 | -1.23 | 0.616785 | 0.749867 | 0.809664 | 0.854631 |
| MmugDNA.16300.1.S1_at   | MmugDNA.16300.1 | 8.61  | 7.76  | 0.37 | 0.06 | 1.8   | 0.025458 | 0.020801 | 0.212681 | 0.180908 |
| MmugDNA.35467.1.S1_at   | MmugDNA.35467.1 | 9.81  | 9.18  | 0.26 | 0.04 | 1.55  | 0.012765 | 0.0987   | 0.163162 | 0.356809 |
| MmugDNA.35467.1.S1_s_at | MmugDNA.35467.1 | 9.68  | 9.01  | 0.18 | 0.05 | 1.6   | 0.005767 | 0.096902 | 0.121843 | 0.354311 |
| MmugDNA.16301.1.S1_at   | MmugDNA.16301.1 | 5.25  | 5.24  | 0.1  | 0.12 | 1.01  | 0.443032 | 0.651485 | 0.696412 | 0.796226 |
| MmugDNA.16302.1.S1_at   | MmugDNA.16302.1 | 3.54  | 3.74  | 0.12 | 0.02 | -1.15 | 0.149868 | 0.067595 | 0.43879  | 0.306076 |
| MmugDNA.16303.1.S1_at   | MmugDNA.16303.1 | 10.74 | 10.76 | 0.09 | 0.16 | -1.01 | 0.863999 | 0.545918 | 0.941041 | 0.727697 |
| MmugDNA.16304.1.S1_at   | MmugDNA.16304.1 | 8.98  | 8.53  | 0.7  | 0.17 | 1.37  | 0.918702 | 0.122958 | 0.96532  | 0.392923 |
| MmugDNA.16305.1.S1_s_at | MmugDNA.16305.1 | 8.08  | 8.53  | 0.35 | 0.09 | -1.36 | 0.071925 | 0.26812  | 0.326129 | 0.533867 |
| MmugDNA.16306.1.S1_at   | MmugDNA.16306.1 | 5.62  | 5.57  | 0.14 | 0.08 | 1.03  | 0.232672 | 0.305791 | 0.531068 | 0.562731 |
| MmugDNA.16307.1.S1_at   | MmugDNA.16307.1 | 5.95  | 5.26  | 0.26 | 0.08 | 1.61  | 0.025652 | 0.017143 | 0.212966 | 0.165888 |
| MmugDNA.16308.1.S1_at   | MmugDNA.16308.1 | 5.81  | 4.83  | 0.42 | 0.37 | 1.98  | 0.106644 | 0.089444 | 0.380862 | 0.343748 |
| MmugDNA.16309.1.S1_at   | MmugDNA.16309.1 | 3.64  | 3.57  | 0.22 | 0.22 | 1.05  | 0.633366 | 0.796098 | 0.820372 | 0.882495 |
| MmugDNA.16309.1.S1_x_at | MmugDNA.16309.1 | 3.44  | 3.98  | 0.37 | 0.24 | -1.45 | 0.208824 | 0.26493  | 0.506325 | 0.530915 |
| MmugDNA.16310.1.S1_at   | MmugDNA.16310.1 | 3.63  | 3.61  | 0.34 | 0.07 | 1.01  | 0.365372 | 0.495946 | 0.639887 | 0.695811 |
| MmugDNA.16312.1.S1_at   | MmugDNA.16312.1 | 9.64  | 9.31  | 0.39 | 0.04 | 1.25  | 0.212627 | 0.283987 | 0.510654 | 0.546237 |
| MmugDNA.16313.1.S1_at   | MmugDNA.16313.1 | 4.71  | 4.9   | 0.16 | 0.17 | -1.14 | 0.218373 | 0.226534 | 0.516054 | 0.499001 |
| MmugDNA.16315.1.S1_at   | MmugDNA.16315.1 | 9.67  | 9.78  | 0.04 | 0.12 | -1.07 | 0.482596 | 0.010459 | 0.722916 | 0.133651 |
| MmugDNA.16316.1.S1_at   | MmugDNA.16316.1 | 4.35  | 4.38  | 0.08 | 0.12 | -1.02 | 0.356452 | 0.496666 | 0.632731 | 0.696119 |
| MmugDNA.16317.1.S1_at   | MmugDNA.16317.1 | 4.64  | 4.98  | 0.66 | 0.27 | -1.27 | 0.938428 | 0.358067 | 0.974005 | 0.599613 |
| MmugDNA.16319.1.S1_at   | MmugDNA.16319.1 | 10.13 | 10.15 | 0.15 | 0.15 | -1.02 | 0.304735 | 0.150308 | 0.591803 | 0.424877 |
| MmugDNA.16320.1.S1_at   | MmugDNA.16320.1 | 4.65  | 3.92  | 0.34 | 0.12 | 1.67  | 0.022822 | 0.023822 | 0.204235 | 0.193328 |
| MmugDNA.16322.1.S1_at   | MmugDNA.16322.1 | 9.96  | 11.19 | 0.38 | 0.08 | -2.35 | 0.007053 | 0.079458 | 0.131374 | 0.326766 |
| MmugDNA.16324.1.S1_at   | MmugDNA.16324.1 | 8.37  | 9.21  | 0.46 | 0.15 | -1.79 | 0.032069 | 0.159478 | 0.232919 | 0.435612 |
| MmugDNA.16325.1.S1_at   | MmugDNA.16325.1 | 4.44  | 4.39  | 0.12 | 0.08 | 1.04  | 0.460031 | 0.871416 | 0.708015 | 0.926844 |

|                         |                 |       |       |      |      |       |          |          |          |          |
|-------------------------|-----------------|-------|-------|------|------|-------|----------|----------|----------|----------|
| MmugDNA.16326.1.S1_at   | MmugDNA.16326.1 | 9.08  | 8.79  | 0.12 | 0.09 | 1.23  | 0.009086 | 0.026253 | 0.145026 | 0.202991 |
| MmugDNA.16328.1.S1_at   | MmugDNA.16328.1 | 9.74  | 9.51  | 0.11 | 0.04 | 1.17  | 0.028507 | 0.102803 | 0.22113  | 0.363328 |
| MmugDNA.16328.1.S1_s_at | MmugDNA.16328.1 | 9.05  | 8.69  | 0.13 | 0.14 | 1.28  | 0.017393 | 0.012757 | 0.185386 | 0.145496 |
| MmugDNA.16329.1.S1_at   | MmugDNA.16329.1 | 6.6   | 7.11  | 0.07 | 0.23 | -1.43 | 0.048812 | 0.000217 | 0.278488 | 0.032385 |
| MmugDNA.1633.1.S1_at    | MmugDNA.1633.1  | 5.79  | 5.62  | 0.1  | 0.21 | 1.13  | 0.544026 | 0.57934  | 0.763753 | 0.749058 |
| MmugDNA.16330.1.S1_at   | MmugDNA.16330.1 | 5.8   | 5.82  | 0.19 | 0.07 | -1.01 | 0.951046 | 0.988567 | 0.979735 | 0.993572 |
| MmugDNA.16331.1.S1_at   | MmugDNA.16331.1 | 3.25  | 3.24  | 0.45 | 0.27 | 1.01  | 0.878845 | 0.669184 | 0.948382 | 0.806492 |
| MmugDNA.16333.1.S1_at   | MmugDNA.16333.1 | 11.34 | 11.27 | 0.01 | 0.02 | 1.05  | 0.002106 | 0.110928 | 0.090208 | 0.375356 |
| MmugDNA.16334.1.S1_at   | MmugDNA.16334.1 | 12.41 | 12.43 | 0.11 | 0.03 | -1.01 | 0.279431 | 0.754104 | 0.570786 | 0.856848 |
| MmugDNA.16336.1.S1_at   | MmugDNA.16336.1 | 3.8   | 3.71  | 0.15 | 0.07 | 1.06  | 0.655944 | 0.665503 | 0.83356  | 0.804009 |
| MmugDNA.16338.1.S1_at   | MmugDNA.16338.1 | 12.63 | 12.81 | 0.11 | 0.09 | -1.13 | 0.116369 | 0.15693  | 0.39354  | 0.432372 |
| MmugDNA.16339.1.S1_at   | MmugDNA.16339.1 | 5.68  | 5.23  | 0.17 | 0.23 | 1.36  | 0.204735 | 0.316814 | 0.502496 | 0.570212 |
| MmugDNA.1634.1.S1_at    | MmugDNA.1634.1  | 6.48  | 7.31  | 0.46 | 0.44 | -1.77 | 0.044404 | 0.031829 | 0.267911 | 0.220909 |
| MmugDNA.16341.1.S1_at   | MmugDNA.16341.1 | 3.39  | 3.47  | 0.1  | 0.01 | -1.05 | 0.474553 | 0.044703 | 0.717519 | 0.255871 |
| MmugDNA.16342.1.S1_at   | MmugDNA.16342.1 | 4.54  | 4.82  | 0.29 | 0.38 | -1.22 | 0.214967 | 0.098642 | 0.512596 | 0.356743 |
| MmugDNA.16344.1.S1_at   | MmugDNA.16344.1 | 4.2   | 4.41  | 0.68 | 0.04 | -1.15 | 0.656684 | 0.812297 | 0.833948 | 0.891561 |
| MmugDNA.16346.1.S1_at   | MmugDNA.16346.1 | 8.43  | 7.93  | 0.21 | 0.09 | 1.41  | 0.049082 | 0.040531 | 0.279154 | 0.246264 |
| MmugDNA.16347.1.S1_at   | MmugDNA.16347.1 | 5.55  | 5.48  | 0.03 | 0.12 | 1.05  | 0.478665 | 0.211125 | 0.720191 | 0.485153 |
| MmugDNA.16348.1.S1_at   | MmugDNA.16348.1 | 3.39  | 3.4   | 0.14 | 0.05 | -1.01 | 0.801883 | 0.74797  | 0.911061 | 0.853341 |
| MmugDNA.1635.1.S1_at    | MmugDNA.1635.1  | 5.31  | 5.4   | 0.04 | 0.07 | -1.07 | 0.114752 | 0.886413 | 0.391807 | 0.93539  |
| MmugDNA.16350.1.S1_at   | MmugDNA.16350.1 | 6.98  | 7.38  | 0.53 | 0.17 | -1.32 | 0.133418 | 0.145449 | 0.416977 | 0.419421 |
| MmugDNA.16351.1.S1_at   | MmugDNA.16351.1 | 9.34  | 10.9  | 0.43 | 0.37 | -2.96 | 0.015452 | 0.06057  | 0.176435 | 0.292769 |
| MmugDNA.16352.1.S1_at   | MmugDNA.16352.1 | 3.36  | 3.2   | 0.21 | 0.13 | 1.11  | 0.321856 | 0.467253 | 0.606128 | 0.677016 |
| MmugDNA.16353.1.S1_at   | MmugDNA.16353.1 | 6.46  | 6.55  | 0.16 | 0.02 | -1.07 | 0.284636 | 0.505804 | 0.574565 | 0.702218 |
| MmugDNA.16354.1.S1_at   | MmugDNA.16354.1 | 3.45  | 3.46  | 0.03 | 0.13 | -1    | 0.315952 | 0.241824 | 0.600734 | 0.512386 |
| MmugDNA.16355.1.S1_at   | MmugDNA.16355.1 | 4.76  | 4.82  | 0.09 | 0.12 | -1.04 | 0.181837 | 0.246149 | 0.47739  | 0.515864 |
| MmugDNA.16357.1.S1_at   | MmugDNA.16357.1 | 5.71  | 5.36  | 0.17 | 0.28 | 1.28  | 0.050408 | 0.065536 | 0.282352 | 0.301415 |
| MmugDNA.16357.1.S1_s_at | MmugDNA.16357.1 | 7.05  | 6.65  | 0.12 | 0.25 | 1.31  | 0.081442 | 0.127509 | 0.342467 | 0.398403 |
| MmugDNA.16358.1.S1_at   | MmugDNA.16358.1 | 3.32  | 3.44  | 0.14 | 0.07 | -1.09 | 0.813883 | 0.925575 | 0.916771 | 0.957863 |
| MmugDNA.16359.1.S1_at   | MmugDNA.16359.1 | 5.33  | 6.14  | 0.36 | 0.51 | -1.75 | 0.316887 | 0.618343 | 0.601603 | 0.774009 |
| MmugDNA.1636.1.S1_at    | MmugDNA.1636.1  | 4.39  | 4.37  | 0.29 | 0.18 | 1.02  | 0.377033 | 0.583468 | 0.647622 | 0.751805 |
| MmugDNA.16360.1.S1_at   | MmugDNA.16360.1 | 3.98  | 4.05  | 0.07 | 0.22 | -1.05 | 0.638481 | 0.147762 | 0.823011 | 0.422056 |
| MmugDNA.16361.1.S1_at   | MmugDNA.16361.1 | 5.85  | 5.95  | 0.21 | 0.11 | -1.07 | 0.86691  | 0.200174 | 0.942483 | 0.474603 |
| MmugDNA.16363.1.S1_at   | MmugDNA.16363.1 | 7.16  | 6.99  | 0.1  | 0.16 | 1.13  | 0.396733 | 0.83915  | 0.662694 | 0.908325 |
| MmugDNA.16365.1.S1_at   | MmugDNA.16365.1 | 6.07  | 6.18  | 0.2  | 0.02 | -1.07 | 0.984606 | 0.739314 | 0.994336 | 0.848911 |
| MmugDNA.16369.1.S1_at   | MmugDNA.16369.1 | 10.75 | 10.46 | 0.03 | 0.03 | 1.22  | 0.000311 | 0.018265 | 0.058857 | 0.169975 |
| MmugDNA.1637.1.S1_at    | MmugDNA.1637.1  | 4.82  | 4.8   | 0.14 | 0.03 | 1.01  | 0.416011 | 0.042932 | 0.676502 | 0.251759 |
| MmugDNA.16371.1.S1_at   | MmugDNA.16371.1 | 4.04  | 3.75  | 0.66 | 0.06 | 1.22  | 0.445896 | 0.599416 | 0.698308 | 0.76144  |
| MmugDNA.16373.1.S1_at   | MmugDNA.16373.1 | 4.51  | 4.58  | 0.05 | 0.03 | -1.05 | 0.097982 | 0.134175 | 0.368558 | 0.406421 |
| MmugDNA.16374.1.S1_at   | MmugDNA.16374.1 | 3.91  | 3.97  | 0.13 | 0.07 | -1.04 | 0.85871  | 0.783041 | 0.938781 | 0.874447 |
| MmugDNA.16375.1.S1_at   | MmugDNA.16375.1 | 3.1   | 3.15  | 0.03 | 0.18 | -1.04 | 0.565258 | 0.31385  | 0.776568 | 0.568091 |
| MmugDNA.16376.1.S1_at   | MmugDNA.16376.1 | 7.77  | 8.27  | 1.09 | 0.33 | -1.42 | 0.762713 | 0.849945 | 0.891323 | 0.914673 |
| MmugDNA.16377.1.S1_at   | MmugDNA.16377.1 | 6.15  | 7.17  | 0.44 | 0.29 | -2.03 | 0.027495 | 0.385653 | 0.218484 | 0.621079 |

|                         |                 |       |       |      |      |       |          |          |          |          |
|-------------------------|-----------------|-------|-------|------|------|-------|----------|----------|----------|----------|
| MmugDNA.16378.1.S1_s_at | MmugDNA.16378.1 | 12.22 | 12.13 | 0.05 | 0.02 | 1.06  | 0.027439 | 0.263029 | 0.21846  | 0.529397 |
| MmugDNA.16379.1.S1_at   | MmugDNA.16379.1 | 3.46  | 3.3   | 0.33 | 0.17 | 1.11  | 0.403373 | 0.270739 | 0.667511 | 0.53602  |
| MmugDNA.1638.1.S1_at    | MmugDNA.1638.1  | 4.15  | 4.08  | 0    | 0.13 | 1.05  | 0.411423 | 0.431385 | 0.67335  | 0.652321 |
| MmugDNA.16380.1.S1_at   | MmugDNA.16380.1 | 5.41  | 5.51  | 0.06 | 0.04 | -1.07 | 0.409363 | 0.094495 | 0.671738 | 0.35125  |
| MmugDNA.16381.1.S1_at   | MmugDNA.16381.1 | 12.09 | 11.88 | 0.01 | 0.01 | 1.16  | 0.00003  | 0.000011 | 0.045594 | 0.016526 |
| MmugDNA.16383.1.S1_at   | MmugDNA.16383.1 | 4.74  | 4.35  | 0.48 | 0.08 | 1.31  | 0.191552 | 0.171695 | 0.487902 | 0.448078 |
| MmugDNA.16384.1.S1_at   | MmugDNA.16384.1 | 5.52  | 5.46  | 0.1  | 0.1  | 1.04  | 0.217456 | 0.47905  | 0.515345 | 0.684903 |
| MmugDNA.16385.1.S1_at   | MmugDNA.16385.1 | 5.14  | 4.97  | 0.29 | 0.15 | 1.12  | 0.440925 | 0.578341 | 0.694673 | 0.748428 |
| MmugDNA.16386.1.S1_at   | MmugDNA.16386.1 | 3.12  | 3.09  | 0.05 | 0.07 | 1.02  | 0.501988 | 0.09926  | 0.735664 | 0.357513 |
| MmugDNA.16388.1.S1_at   | MmugDNA.16388.1 | 4.55  | 4.46  | 0.54 | 0.12 | 1.06  | 0.484858 | 0.695033 | 0.724497 | 0.822716 |
| MmugDNA.16389.1.S1_at   | MmugDNA.16389.1 | 6.41  | 6.23  | 0.82 | 0.36 | 1.13  | 0.501231 | 0.194563 | 0.735287 | 0.46966  |
| MmugDNA.16391.1.S1_at   | MmugDNA.16391.1 | 7.15  | 7.21  | 0.13 | 0.05 | -1.05 | 0.903258 | 0.808376 | 0.959024 | 0.889697 |
| MmugDNA.16392.1.S1_at   | MmugDNA.16392.1 | 4.5   | 4.44  | 0.1  | 0.18 | 1.04  | 0.255303 | 0.494557 | 0.549716 | 0.694909 |
| MmugDNA.16393.1.S1_at   | MmugDNA.16393.1 | 6.73  | 7.24  | 0.53 | 0.12 | -1.42 | 0.063559 | 0.126538 | 0.308742 | 0.39714  |
| MmugDNA.16394.1.S1_s_at | MmugDNA.16394.1 | 5.1   | 5.1   | 0.11 | 0.12 | -1    | 0.65886  | 0.730386 | 0.835253 | 0.844012 |
| MmugDNA.16395.1.S1_at   | MmugDNA.16395.1 | 4.75  | 4.07  | 0.54 | 0.51 | 1.6   | 0.852756 | 0.641387 | 0.935952 | 0.789506 |
| MmugDNA.16396.1.S1_at   | MmugDNA.16396.1 | 10.1  | 9.78  | 0.41 | 0.05 | 1.25  | 0.178159 | 0.37425  | 0.472847 | 0.612738 |
| MmugDNA.16398.1.S1_at   | MmugDNA.16398.1 | 8.09  | 8.65  | 0.93 | 0.09 | -1.47 | 0.14457  | 0.088234 | 0.431571 | 0.341721 |
| MmugDNA.16399.1.S1_s_at | MmugDNA.16399.1 | 10.17 | 9.75  | 0.01 | 0.17 | 1.34  | 0.012601 | 0.019527 | 0.162521 | 0.175499 |
| MmugDNA.164.1.S1_at     | MmugDNA.164.1   | 5.43  | 5.31  | 0.13 | 0.08 | 1.09  | 0.096342 | 0.225455 | 0.366014 | 0.498127 |
| MmugDNA.1640.1.S1_at    | MmugDNA.1640.1  | 6.16  | 7.46  | 0.64 | 0.35 | -2.46 | 0.040724 | 0.041466 | 0.258388 | 0.248496 |
| MmugDNA.16402.1.S1_at   | MmugDNA.16402.1 | 8.22  | 8.1   | 0.14 | 0.23 | 1.09  | 0.195573 | 0.136562 | 0.49234  | 0.409076 |
| MmugDNA.16403.1.S1_at   | MmugDNA.16403.1 | 5.84  | 5.8   | 0.12 | 0.15 | 1.02  | 0.329324 | 0.16813  | 0.611618 | 0.444724 |
| MmugDNA.16405.1.S1_a_at | MmugDNA.16405.1 | 5.17  | 5.1   | 0.29 | 0.24 | 1.05  | 0.854938 | 0.877116 | 0.936866 | 0.92996  |
| MmugDNA.16405.1.S1_at   | MmugDNA.16405.1 | 3.88  | 3.84  | 0.09 | 0.09 | 1.03  | 0.180635 | 0.169538 | 0.475777 | 0.446167 |
| MmugDNA.16406.1.S1_at   | MmugDNA.16406.1 | 4.65  | 4.67  | 0.28 | 0.13 | -1.01 | 0.52069  | 0.714369 | 0.748943 | 0.834282 |
| MmugDNA.16408.1.S1_at   | MmugDNA.16408.1 | 4.36  | 4.42  | 0.62 | 0.22 | -1.05 | 0.403915 | 0.478474 | 0.667865 | 0.684481 |
| MmugDNA.16409.1.S1_at   | MmugDNA.16409.1 | 8.28  | 7.62  | 0.37 | 0.33 | 1.58  | 0.1163   | 0.200158 | 0.393384 | 0.474603 |
| MmugDNA.1641.1.S1_at    | MmugDNA.1641.1  | 6.41  | 6.3   | 0.53 | 0.23 | 1.08  | 0.344285 | 0.352405 | 0.62365  | 0.595722 |
| MmugDNA.16410.1.S1_at   | MmugDNA.16410.1 | 6.54  | 6.55  | 0.16 | 0.01 | -1.01 | 0.822413 | 0.010141 | 0.920984 | 0.131979 |
| MmugDNA.16411.1.S1_at   | MmugDNA.16411.1 | 6.15  | 6.2   | 0.06 | 0.21 | -1.04 | 0.690741 | 0.183057 | 0.852142 | 0.459493 |
| MmugDNA.16413.1.S1_at   | MmugDNA.16413.1 | 2.81  | 2.84  | 0.03 | 0.07 | -1.02 | 0.466774 | 0.458836 | 0.712397 | 0.671456 |
| MmugDNA.16414.1.S1_at   | MmugDNA.16414.1 | 7.75  | 6.94  | 0.15 | 0.06 | 1.76  | 0.001096 | 0.006787 | 0.077278 | 0.111388 |
| MmugDNA.35039.1.S1_s_at | MmugDNA.35039.1 | 10.05 | 9.9   | 0.13 | 0.05 | 1.11  | 0.298348 | 0.175772 | 0.586678 | 0.452344 |
| MmugDNA.16416.1.S1_at   | MmugDNA.16416.1 | 4.73  | 5.36  | 0.48 | 0.19 | -1.55 | 0.166    | 0.229311 | 0.459032 | 0.501527 |
| MmugDNA.16417.1.S1_at   | MmugDNA.16417.1 | 11    | 10.74 | 0.06 | 0.09 | 1.2   | 0.015421 | 0.133187 | 0.176267 | 0.40493  |
| MmugDNA.16418.1.S1_at   | MmugDNA.16418.1 | 4.28  | 4.28  | 0.17 | 0.03 | 1     | 0.314372 | 0.24656  | 0.599959 | 0.515917 |
| MmugDNA.16419.1.S1_at   | MmugDNA.16419.1 | 5.08  | 5.31  | 0.17 | 0.17 | -1.17 | 0.253314 | 0.30881  | 0.547684 | 0.56463  |
| MmugDNA.1642.1.S1_at    | MmugDNA.1642.1  | 4.54  | 4.46  | 0.3  | 0.15 | 1.06  | 0.488264 | 0.325234 | 0.726793 | 0.575648 |
| MmugDNA.16422.1.S1_at   | MmugDNA.16422.1 | 6.99  | 7     | 0.01 | 0.1  | -1.01 | 0.563406 | 0.36576  | 0.775443 | 0.605685 |
| MmugDNA.16423.1.S1_at   | MmugDNA.16423.1 | 2.47  | 2.51  | 0.12 | 0.03 | -1.03 | 0.604207 | 0.228966 | 0.801436 | 0.501254 |
| MmugDNA.16425.1.S1_at   | MmugDNA.16425.1 | 6.74  | 5.84  | 0.42 | 0.4  | 1.86  | 0.122311 | 0.001952 | 0.40112  | 0.065813 |
| MmugDNA.16428.1.S1_at   | MmugDNA.16428.1 | 4.1   | 3.99  | 0.06 | 0.06 | 1.08  | 0.117488 | 0.206161 | 0.394772 | 0.480351 |

|                         |                 |       |       |      |      |       |          |          |          |          |
|-------------------------|-----------------|-------|-------|------|------|-------|----------|----------|----------|----------|
| MmugDNA.16429.1.S1_at   | MmugDNA.16429.1 | 6.9   | 6.41  | 0.41 | 0.1  | 1.41  | 0.364414 | 0.737755 | 0.639064 | 0.848078 |
| MmugDNA.1643.1.S1_at    | MmugDNA.1643.1  | 6.43  | 6.05  | 0.29 | 0.07 | 1.3   | 0.058768 | 0.03666  | 0.299536 | 0.235973 |
| MmugDNA.16430.1.S1_at   | MmugDNA.16430.1 | 2.75  | 2.81  | 0.09 | 0.14 | -1.04 | 0.834809 | 0.360235 | 0.927337 | 0.601283 |
| MmugDNA.16430.1.S1_s_at | MmugDNA.16430.1 | 4.9   | 4.9   | 0    | 0.01 | 1     | 0.373901 | 0.76213  | 0.645118 | 0.861653 |
| MmugDNA.16434.1.S1_at   | MmugDNA.16434.1 | 8.96  | 9.1   | 0.19 | 0.06 | -1.1  | 0.782063 | 0.084831 | 0.900441 | 0.336352 |
| MmugDNA.16435.1.S1_at   | MmugDNA.16435.1 | 6.1   | 5.99  | 0.19 | 0.05 | 1.08  | 0.41995  | 0.664493 | 0.679193 | 0.803396 |
| MmugDNA.16436.1.S1_at   | MmugDNA.16436.1 | 6.01  | 5.85  | 0.14 | 0.11 | 1.11  | 0.226081 | 0.116563 | 0.523857 | 0.383705 |
| MmugDNA.16437.1.S1_at   | MmugDNA.16437.1 | 3.44  | 3.42  | 0.15 | 0.09 | 1.01  | 0.407868 | 0.769241 | 0.670854 | 0.866004 |
| MmugDNA.16438.1.S1_at   | MmugDNA.16438.1 | 7.7   | 7.44  | 0.08 | 0.13 | 1.19  | 0.014113 | 0.046463 | 0.170302 | 0.260089 |
| MmugDNA.16439.1.S1_at   | MmugDNA.16439.1 | 6.52  | 5.92  | 0.84 | 0.15 | 1.51  | 0.341365 | 0.412491 | 0.621277 | 0.638915 |
| MmugDNA.1644.1.S1_at    | MmugDNA.1644.1  | 10    | 10.1  | 0.31 | 0.03 | -1.07 | 0.649178 | 0.513944 | 0.829606 | 0.707322 |
| MmugDNA.16440.1.S1_at   | MmugDNA.16440.1 | 3.58  | 3.71  | 0.1  | 0.14 | -1.09 | 0.347379 | 0.557989 | 0.625483 | 0.735338 |
| MmugDNA.16441.1.S1_at   | MmugDNA.16441.1 | 4.84  | 4.89  | 0.13 | 0.21 | -1.04 | 0.628389 | 0.633295 | 0.817431 | 0.784071 |
| MmugDNA.16442.1.S1_at   | MmugDNA.16442.1 | 6.14  | 5.95  | 0.35 | 0.08 | 1.14  | 0.317114 | 0.447077 | 0.601817 | 0.663283 |
| MmugDNA.16443.1.S1_at   | MmugDNA.16443.1 | 10.25 | 9.98  | 0.13 | 0.09 | 1.2   | 0.025946 | 0.130421 | 0.213981 | 0.402257 |
| MmugDNA.16444.1.S1_at   | MmugDNA.16444.1 | 6.32  | 5.06  | 0.63 | 0.22 | 2.41  | 0.031716 | 0.056124 | 0.231523 | 0.282786 |
| MmugDNA.16445.1.S1_at   | MmugDNA.16445.1 | 3.51  | 3.63  | 0.83 | 0.06 | -1.09 | 0.514317 | 0.709587 | 0.74429  | 0.831691 |
| MmugDNA.16446.1.S1_at   | MmugDNA.16446.1 | 6.08  | 5.53  | 1.65 | 0.63 | 1.46  | 0.887484 | 0.98424  | 0.951969 | 0.991234 |
| MmugDNA.1645.1.S1_at    | MmugDNA.1645.1  | 5.08  | 7.17  | 0.79 | 0.67 | -4.27 | 0.0539   | 0.124249 | 0.289283 | 0.394547 |
| MmugDNA.16453.1.S1_at   | MmugDNA.16453.1 | 8.51  | 8.35  | 0.05 | 0.26 | 1.12  | 0.365066 | 0.00711  | 0.639741 | 0.113555 |
| MmugDNA.16453.1.S1_s_at | MmugDNA.16453.1 | 6.05  | 6.3   | 0.08 | 0.35 | -1.18 | 0.694318 | 0.118292 | 0.854084 | 0.386305 |
| MmugDNA.16455.1.S1_at   | MmugDNA.16455.1 | 5.7   | 5.61  | 0.1  | 0.09 | 1.06  | 0.385978 | 0.023685 | 0.654513 | 0.192689 |
| MmugDNA.16456.1.S1_at   | MmugDNA.16456.1 | 7.06  | 6.8   | 0.27 | 0.12 | 1.2   | 0.387187 | 0.506353 | 0.655438 | 0.702371 |
| MmugDNA.16457.1.S1_at   | MmugDNA.16457.1 | 3.07  | 3.19  | 0.69 | 0.03 | -1.09 | 0.500577 | 0.758216 | 0.734798 | 0.859308 |
| MmugDNA.1646.1.S1_at    | MmugDNA.1646.1  | 7.25  | 7.2   | 0.1  | 0.03 | 1.04  | 0.407463 | 0.362291 | 0.670508 | 0.602931 |
| MmugDNA.16460.1.S1_at   | MmugDNA.16460.1 | 6.61  | 6.49  | 0.18 | 0.03 | 1.09  | 0.486316 | 0.611698 | 0.725583 | 0.769516 |
| MmugDNA.16461.1.S1_at   | MmugDNA.16461.1 | 7.42  | 7.54  | 0.29 | 0.1  | -1.09 | 0.931127 | 0.276556 | 0.971037 | 0.540566 |
| MmugDNA.16462.1.S1_at   | MmugDNA.16462.1 | 5.44  | 5.94  | 0.07 | 0.1  | -1.41 | 0.001997 | 0.056252 | 0.089614 | 0.283133 |
| MmugDNA.16463.1.S1_at   | MmugDNA.16463.1 | 7.59  | 7.16  | 0.11 | 0.02 | 1.35  | 0.002729 | 0.006601 | 0.096899 | 0.110088 |
| MmugDNA.16465.1.S1_at   | MmugDNA.16465.1 | 5     | 4.9   | 0.05 | 0.06 | 1.07  | 0.071991 | 0.326373 | 0.326208 | 0.57656  |
| MmugDNA.16467.1.S1_at   | MmugDNA.16467.1 | 7.88  | 8.09  | 0.22 | 0.04 | -1.16 | 0.463401 | 0.848269 | 0.710048 | 0.913873 |
| MmugDNA.16468.1.S1_at   | MmugDNA.16468.1 | 6.23  | 6.08  | 0.21 | 0.03 | 1.11  | 0.250672 | 0.33281  | 0.545228 | 0.581217 |
| MmugDNA.1647.1.S1_at    | MmugDNA.1647.1  | 12.31 | 11.68 | 0.1  | 0.14 | 1.55  | 0.003426 | 0.069468 | 0.103309 | 0.309778 |
| MmugDNA.16470.1.S1_at   | MmugDNA.16470.1 | 3.52  | 3.16  | 1.43 | 0.17 | 1.28  | 0.233149 | 0.273355 | 0.531371 | 0.5378   |
| MmugDNA.16471.1.S1_at   | MmugDNA.16471.1 | 6.84  | 7.66  | 0.27 | 0.16 | -1.77 | 0.030061 | 0.043937 | 0.226565 | 0.254098 |
| MmugDNA.41646.1.S1_s_at | MmugDNA.41646.1 | 9.03  | 8.56  | 0.23 | 0.25 | 1.38  | 0.164752 | 0.013293 | 0.457847 | 0.147978 |
| MmugDNA.16473.1.S1_at   | MmugDNA.16473.1 | 5.59  | 5.64  | 0.12 | 0.18 | -1.04 | 0.383793 | 0.269616 | 0.653002 | 0.534868 |
| MmugDNA.16475.1.S1_at   | MmugDNA.16475.1 | 10.2  | 10.03 | 0.36 | 0.14 | 1.12  | 0.508768 | 0.613186 | 0.740566 | 0.770473 |
| MmugDNA.16479.1.S1_at   | MmugDNA.16479.1 | 3.69  | 3.66  | 0.22 | 0    | 1.02  | 0.837979 | 0.965795 | 0.929038 | 0.980824 |
| MmugDNA.1648.1.S1_at    | MmugDNA.1648.1  | 8.44  | 9.08  | 0.25 | 0.12 | -1.56 | 0.015846 | 0.084462 | 0.178312 | 0.33582  |
| MmugDNA.16481.1.S1_at   | MmugDNA.16481.1 | 4.98  | 4.85  | 0.07 | 0.06 | 1.09  | 0.468526 | 0.127773 | 0.713629 | 0.398627 |
| MmugDNA.16482.1.S1_at   | MmugDNA.16482.1 | 5.72  | 5.71  | 0.07 | 0.03 | 1.01  | 0.917719 | 0.1674   | 0.96488  | 0.443785 |
| MmugDNA.16483.1.S1_at   | MmugDNA.16483.1 | 4.47  | 4.14  | 0.31 | 0.1  | 1.26  | 0.276635 | 0.304938 | 0.568177 | 0.562064 |



|                         |                 |       |       |      |      |       |          |          |          |          |
|-------------------------|-----------------|-------|-------|------|------|-------|----------|----------|----------|----------|
| MmugDNA.16483.1.S1_s_at | MmugDNA.16483.1 | 3.8   | 3.74  | 0.19 | 0.11 | 1.05  | 0.893357 | 0.425304 | 0.954512 | 0.647696 |
| MmugDNA.16485.1.S1_at   | MmugDNA.16485.1 | 5.4   | 5.01  | 0.68 | 0.53 | 1.32  | 0.309156 | 0.205004 | 0.5956   | 0.479296 |
| MmugDNA.16486.1.S1_at   | MmugDNA.16486.1 | 10.41 | 10.28 | 0.17 | 0.05 | 1.1   | 0.273752 | 0.03967  | 0.56586  | 0.244271 |
| MmugDNA.16487.1.S1_at   | MmugDNA.16487.1 | 10.35 | 10.17 | 0.16 | 0.06 | 1.14  | 0.03262  | 0.151043 | 0.234926 | 0.425701 |
| MmugDNA.16488.1.S1_at   | MmugDNA.16488.1 | 10.95 | 10.98 | 0.02 | 0.08 | -1.02 | 0.478914 | 0.00386  | 0.720361 | 0.088378 |
| MmugDNA.16488.1.S1_s_at | MmugDNA.16488.1 | 12.16 | 12.15 | 0.2  | 0.02 | 1.01  | 0.534565 | 0.165296 | 0.757797 | 0.441488 |
| MmugDNA.16489.1.S1_at   | MmugDNA.16489.1 | 8.44  | 8.29  | 0.15 | 0.21 | 1.11  | 0.606463 | 0.002188 | 0.803128 | 0.0691   |
| MmugDNA.1649.1.S1_at    | MmugDNA.1649.1  | 6.23  | 6.72  | 0.24 | 0.3  | -1.4  | 0.325979 | 0.276387 | 0.609194 | 0.540334 |
| MmugDNA.16491.1.S1_at   | MmugDNA.16491.1 | 6.15  | 6.57  | 0.96 | 0.36 | -1.34 | 0.144615 | 0.130256 | 0.431609 | 0.402007 |
| MmugDNA.16492.1.S1_at   | MmugDNA.16492.1 | 5.71  | 5.73  | 0.16 | 0.09 | -1.01 | 0.554951 | 0.685829 | 0.770944 | 0.816612 |
| MmugDNA.16494.1.S1_s_at | MmugDNA.16494.1 | 7.82  | 7.59  | 0.23 | 0.11 | 1.17  | 0.182331 | 0.253652 | 0.478073 | 0.521986 |
| MmugDNA.16496.1.S1_at   | MmugDNA.16496.1 | 6.02  | 5.54  | 0.21 | 0.22 | 1.4   | 0.02616  | 0.13304  | 0.21478  | 0.404715 |
| MmugDNA.16498.1.S1_at   | MmugDNA.16498.1 | 5.42  | 5.1   | 0.17 | 0.35 | 1.25  | 0.250613 | 0.328511 | 0.545228 | 0.578137 |
| MmugDNA.16499.1.S1_at   | MmugDNA.16499.1 | 6.26  | 6.31  | 0.03 | 0    | -1.04 | 0.11812  | 0.007782 | 0.395593 | 0.117732 |
| MmugDNA.165.1.S1_at     | MmugDNA.165.1   | 4.32  | 4.63  | 0.04 | 0.34 | -1.23 | 0.246724 | 0.549624 | 0.54248  | 0.729956 |
| MmugDNA.16501.1.S1_at   | MmugDNA.16501.1 | 7.5   | 8     | 0.44 | 0.23 | -1.42 | 0.106673 | 0.29511  | 0.380862 | 0.554551 |
| MmugDNA.16502.1.S1_at   | MmugDNA.16502.1 | 4.94  | 5.22  | 0.34 | 0.14 | -1.21 | 0.087027 | 0.098704 | 0.352593 | 0.356809 |
| MmugDNA.16503.1.S1_at   | MmugDNA.16503.1 | 3     | 3     | 0.04 | 0.15 | 1     | 0.999031 | 0.649638 | 0.999637 | 0.795053 |
| MmugDNA.16504.1.S1_at   | MmugDNA.16504.1 | 3.15  | 3.43  | 0.15 | 0.22 | -1.21 | 0.076659 | 0.021545 | 0.334951 | 0.183828 |
| MmugDNA.16505.1.S1_at   | MmugDNA.16505.1 | 7.74  | 5.28  | 1.24 | 0.29 | 5.52  | 0.019257 | 0.140097 | 0.192035 | 0.413394 |
| MmugDNA.16506.1.S1_at   | MmugDNA.16506.1 | 6.3   | 6.18  | 0.12 | 0.08 | 1.09  | 0.516606 | 0.414149 | 0.745961 | 0.640063 |
| MmugDNA.16507.1.S1_at   | MmugDNA.16507.1 | 6.32  | 6.59  | 0.15 | 0.31 | -1.21 | 0.666915 | 0.962153 | 0.84008  | 0.978723 |
| MmugDNA.16508.1.S1_at   | MmugDNA.16508.1 | 6.18  | 5.47  | 0.48 | 0.08 | 1.63  | 0.072302 | 0.052325 | 0.326829 | 0.274201 |
| MmugDNA.16509.1.S1_at   | MmugDNA.16509.1 | 6     | 5.95  | 0.46 | 0.05 | 1.04  | 0.760804 | 0.92488  | 0.890353 | 0.9575   |
| MmugDNA.16510.1.S1_at   | MmugDNA.16510.1 | 4.08  | 4.04  | 0    | 0.05 | 1.03  | 0.20156  | 0.55152  | 0.499133 | 0.731023 |
| MmugDNA.16511.1.S1_at   | MmugDNA.16511.1 | 9.85  | 9.72  | 0.27 | 0.21 | 1.09  | 0.34153  | 0.484226 | 0.621347 | 0.688408 |
| MmugDNA.16512.1.S1_at   | MmugDNA.16512.1 | 4.5   | 4.34  | 0.32 | 0.21 | 1.12  | 0.101046 | 0.104923 | 0.372328 | 0.366485 |
| MmugDNA.16513.1.S1_at   | MmugDNA.16513.1 | 6.42  | 6.29  | 0.46 | 0.16 | 1.1   | 0.88395  | 0.494258 | 0.950642 | 0.694771 |
| MmugDNA.16514.1.S1_at   | MmugDNA.16514.1 | 4.86  | 5     | 0.18 | 0.08 | -1.1  | 0.090615 | 0.088195 | 0.357463 | 0.341721 |
| MmugDNA.16515.1.S1_at   | MmugDNA.16515.1 | 3.19  | 3.33  | 0.35 | 0.19 | -1.11 | 0.643782 | 0.870564 | 0.826406 | 0.926446 |
| MmugDNA.16516.1.S1_x_at | MmugDNA.16516.1 | 12.86 | 12.85 | 0.38 | 0.1  | 1.01  | 0.362216 | 0.251111 | 0.637219 | 0.519792 |
| MmugDNA.16517.1.S1_at   | MmugDNA.16517.1 | 9.21  | 9.49  | 0.16 | 0.04 | -1.21 | 0.01763  | 0.007228 | 0.186416 | 0.114199 |
| MmugDNA.16518.1.S1_at   | MmugDNA.16518.1 | 7.45  | 7.07  | 0.6  | 0.05 | 1.3   | 0.978275 | 0.418931 | 0.991561 | 0.643157 |
| MmugDNA.16519.1.S1_at   | MmugDNA.16519.1 | 6     | 6.49  | 0.55 | 0.12 | -1.4  | 0.151188 | 0.204262 | 0.440703 | 0.478541 |
| MmugDNA.1652.1.S1_at    | MmugDNA.1652.1  | 3.36  | 3.25  | 0.15 | 0.16 | 1.08  | 0.633577 | 0.84235  | 0.820437 | 0.910241 |
| MmugDNA.16521.1.S1_at   | MmugDNA.16521.1 | 5.27  | 5.31  | 0.1  | 0.23 | -1.03 | 0.185352 | 0.459939 | 0.48153  | 0.671989 |
| MmugDNA.16522.1.S1_at   | MmugDNA.16522.1 | 5.28  | 5.32  | 0.14 | 0.13 | -1.02 | 0.754377 | 0.941993 | 0.886774 | 0.96711  |
| MmugDNA.16523.1.S1_at   | MmugDNA.16523.1 | 3.79  | 3.8   | 0.15 | 0.37 | -1    | 0.481367 | 0.520574 | 0.721905 | 0.711831 |
| MmugDNA.16524.1.S1_at   | MmugDNA.16524.1 | 6.62  | 6.49  | 0.3  | 0.08 | 1.1   | 0.325733 | 0.374761 | 0.608885 | 0.613063 |
| MmugDNA.17744.1.S1_at   | MmugDNA.17744.1 | 7.48  | 7.42  | 0.09 | 0.05 | 1.04  | 0.289963 | 0.000693 | 0.57952  | 0.044166 |
| MmugDNA.17744.1.S1_s_at | MmugDNA.17744.1 | 7.23  | 7.01  | 0.04 | 0.07 | 1.16  | 0.023184 | 0.114393 | 0.205385 | 0.380938 |
| MmugDNA.16526.1.S1_at   | MmugDNA.16526.1 | 5.92  | 6.12  | 0.1  | 0.23 | -1.14 | 0.389882 | 0.465563 | 0.657536 | 0.675811 |
| MmugDNA.16527.1.S1_at   | MmugDNA.16527.1 | 4.13  | 4.14  | 1.21 | 0.08 | -1.01 | 0.374943 | 0.442945 | 0.645792 | 0.660842 |

|                         |                 |       |       |      |      |       |          |          |          |          |
|-------------------------|-----------------|-------|-------|------|------|-------|----------|----------|----------|----------|
| MmugDNA.16528.1.S1_at   | MmugDNA.16528.1 | 3.33  | 3.32  | 0    | 0.09 | 1.01  | 0.300459 | 0.258984 | 0.588647 | 0.5262   |
| MmugDNA.16531.1.S1_at   | MmugDNA.16531.1 | 6.46  | 6.32  | 0.14 | 0.17 | 1.1   | 0.18932  | 0.191519 | 0.485819 | 0.466833 |
| MmugDNA.16532.1.S1_at   | MmugDNA.16532.1 | 4.23  | 4.06  | 0.07 | 0.11 | 1.13  | 0.077417 | 0.114    | 0.336144 | 0.380349 |
| MmugDNA.16533.1.S1_at   | MmugDNA.16533.1 | 9.31  | 8.74  | 0.22 | 0.12 | 1.49  | 0.016377 | 0.014892 | 0.180807 | 0.1551   |
| MmugDNA.16534.1.S1_at   | MmugDNA.16534.1 | 11.49 | 11.19 | 0.27 | 0.11 | 1.23  | 0.058265 | 0.019436 | 0.298525 | 0.175133 |
| MmugDNA.16535.1.S1_at   | MmugDNA.16535.1 | 4.62  | 4.89  | 0.31 | 0.11 | -1.21 | 0.125392 | 0.205518 | 0.405837 | 0.479794 |
| MmugDNA.16536.1.S1_at   | MmugDNA.16536.1 | 8.42  | 10.09 | 0.54 | 0.25 | -3.17 | 0.024318 | 0.037844 | 0.209024 | 0.238912 |
| MmugDNA.16537.1.S1_at   | MmugDNA.16537.1 | 6.46  | 6.39  | 0.03 | 0.05 | 1.05  | 0.05384  | 0.451887 | 0.289169 | 0.666676 |
| MmugDNA.9780.1.S1_s_at  | MmugDNA.9780.1  | 10.51 | 10.49 | 0.13 | 0.09 | 1.01  | 0.834589 | 0.000295 | 0.927293 | 0.034892 |
| MmugDNA.41245.1.S1_at   | MmugDNA.41245.1 | 5.36  | 5.54  | 0.07 | 0.31 | -1.14 | 0.243435 | 0.346162 | 0.540139 | 0.591195 |
| MmugDNA.41245.1.S1_s_at | MmugDNA.41245.1 | 10.62 | 10.93 | 0.09 | 0.13 | -1.24 | 0.024503 | 0.312009 | 0.209655 | 0.566838 |
| MmugDNA.1654.1.S1_at    | MmugDNA.1654.1  | 3.28  | 2.82  | 0.61 | 0.14 | 1.38  | 0.296052 | 0.201885 | 0.584771 | 0.476373 |
| MmugDNA.16540.1.S1_at   | MmugDNA.16540.1 | 5.71  | 6.17  | 1.27 | 0.18 | -1.37 | 0.751089 | 0.912969 | 0.885096 | 0.951043 |
| MmugDNA.16542.1.S1_at   | MmugDNA.16542.1 | 4     | 5.13  | 0.05 | 0.12 | -2.18 | 0.000113 | 0.04055  | 0.051196 | 0.246264 |
| MmugDNA.16543.1.S1_x_at | MmugDNA.16543.1 | 13.06 | 13.02 | 0.48 | 0.16 | 1.03  | 0.347953 | 0.237164 | 0.626111 | 0.507906 |
| MmugDNA.16544.1.S1_at   | MmugDNA.16544.1 | 6.1   | 5.85  | 0.14 | 0.45 | 1.19  | 0.461472 | 0.340371 | 0.708883 | 0.586725 |
| MmugDNA.16545.1.S1_at   | MmugDNA.16545.1 | 6.89  | 7     | 0.2  | 0.06 | -1.08 | 0.380686 | 0.160662 | 0.650314 | 0.436745 |
| MmugDNA.16546.1.S1_at   | MmugDNA.16546.1 | 8.41  | 9.05  | 0.65 | 0.2  | -1.56 | 0.085541 | 0.139062 | 0.349924 | 0.412165 |
| MmugDNA.16547.1.S1_at   | MmugDNA.16547.1 | 8.62  | 8.31  | 0.17 | 0.09 | 1.24  | 0.096056 | 0.321174 | 0.365529 | 0.573111 |
| MmugDNA.16548.1.S1_at   | MmugDNA.16548.1 | 3.37  | 3.76  | 0.42 | 0.35 | -1.31 | 0.315269 | 0.603034 | 0.600287 | 0.763871 |
| MmugDNA.16549.1.S1_at   | MmugDNA.16549.1 | 6.18  | 6.49  | 0.4  | 0.14 | -1.24 | 0.282748 | 0.11398  | 0.573338 | 0.380304 |
| MmugDNA.1655.1.S1_at    | MmugDNA.1655.1  | 4.76  | 3.92  | 0.73 | 0.45 | 1.79  | 0.107632 | 0.112434 | 0.382296 | 0.377784 |
| MmugDNA.16550.1.S1_at   | MmugDNA.16550.1 | 7.28  | 6.05  | 0.9  | 0.87 | 2.36  | 0.206448 | 0.315752 | 0.504097 | 0.569157 |
| MmugDNA.16551.1.S1_at   | MmugDNA.16551.1 | 3.47  | 3.6   | 0.41 | 0.07 | -1.1  | 0.985423 | 0.980577 | 0.99479  | 0.989391 |
| MmugDNA.16552.1.S1_x_at | MmugDNA.16552.1 | 9.8   | 9.92  | 0.41 | 0.08 | -1.08 | 0.675476 | 0.903187 | 0.845076 | 0.944982 |
| MmugDNA.16553.1.S1_at   | MmugDNA.16553.1 | 2.98  | 2.9   | 0.17 | 0.12 | 1.06  | 0.536279 | 0.57819  | 0.758885 | 0.748359 |
| MmugDNA.16555.1.S1_at   | MmugDNA.16555.1 | 7.22  | 9.72  | 1.15 | 0.3  | -5.66 | 0.047959 | 0.149867 | 0.276361 | 0.424468 |
| MmugDNA.16557.1.S1_at   | MmugDNA.16557.1 | 6.64  | 6.71  | 0.23 | 0.02 | -1.05 | 0.923296 | 0.847706 | 0.967341 | 0.913501 |
| MmugDNA.16559.1.S1_at   | MmugDNA.16559.1 | 5.63  | 5.9   | 0.07 | 0.27 | -1.21 | 0.056711 | 0.22171  | 0.295663 | 0.494901 |
| MmugDNA.16561.1.S1_at   | MmugDNA.16561.1 | 4.05  | 4.13  | 0.3  | 0.42 | -1.05 | 0.922853 | 0.868325 | 0.967056 | 0.925242 |
| MmugDNA.16562.1.S1_at   | MmugDNA.16562.1 | 5.38  | 5.32  | 0.07 | 0.24 | 1.04  | 0.252774 | 0.126583 | 0.547383 | 0.397211 |
| MmugDNA.16564.1.S1_at   | MmugDNA.16564.1 | 5.07  | 5.11  | 0.52 | 0.06 | -1.03 | 0.383618 | 0.465664 | 0.652919 | 0.675863 |
| MmugDNA.16565.1.S1_at   | MmugDNA.16565.1 | 5.72  | 5.87  | 0.11 | 0.17 | -1.11 | 0.102382 | 0.069463 | 0.374434 | 0.309778 |
| MmugDNA.16566.1.S1_at   | MmugDNA.16566.1 | 5.04  | 5.18  | 0.4  | 0.31 | -1.1  | 0.447521 | 0.625421 | 0.69951  | 0.779175 |
| MmugDNA.16567.1.S1_at   | MmugDNA.16567.1 | 7.11  | 7.22  | 0.05 | 0.06 | -1.08 | 0.314371 | 0.22148  | 0.599959 | 0.494795 |
| MmugDNA.16568.1.S1_at   | MmugDNA.16568.1 | 5.38  | 6.4   | 0.68 | 0.6  | -2.03 | 0.089966 | 0.089497 | 0.356863 | 0.343811 |
| MmugDNA.16569.1.S1_s_at | MmugDNA.16569.1 | 10.21 | 10.03 | 0.11 | 0.2  | 1.13  | 0.524209 | 0.394923 | 0.751005 | 0.627216 |
| MmugDNA.1657.1.S1_at    | MmugDNA.1657.1  | 3.28  | 3.27  | 0.07 | 0.1  | 1     | 0.634817 | 0.824629 | 0.820985 | 0.899309 |
| MmugDNA.16570.1.S1_at   | MmugDNA.16570.1 | 8.35  | 8.16  | 0.19 | 0.14 | 1.14  | 0.395792 | 0.015295 | 0.662054 | 0.157071 |
| MmugDNA.16571.1.S1_at   | MmugDNA.16571.1 | 4.87  | 4.56  | 0.1  | 0.11 | 1.24  | 0.023207 | 0.1204   | 0.205385 | 0.38925  |
| MmugDNA.16572.1.S1_at   | MmugDNA.16572.1 | 11.01 | 11.46 | 0.32 | 0.25 | -1.37 | 0.137643 | 0.002621 | 0.422708 | 0.075772 |
| MmugDNA.16573.1.S1_s_at | MmugDNA.16573.1 | 11.77 | 13.26 | 0.78 | 0.13 | -2.82 | 0.033996 | 0.075083 | 0.238985 | 0.319283 |
| MmugDNA.16574.1.S1_at   | MmugDNA.16574.1 | 5.82  | 5.87  | 0.67 | 0.2  | -1.04 | 0.378279 | 0.146525 | 0.648513 | 0.420581 |

|                         |                 |       |       |      |      |       |          |          |          |          |
|-------------------------|-----------------|-------|-------|------|------|-------|----------|----------|----------|----------|
| MmugDNA.16576.1.S1_at   | MmugDNA.16576.1 | 8.43  | 8.88  | 0.47 | 0.1  | -1.37 | 0.088736 | 0.017629 | 0.35511  | 0.167839 |
| MmugDNA.16576.1.S1_s_at | MmugDNA.16576.1 | 7.85  | 7.83  | 0.51 | 0.16 | 1.01  | 0.435845 | 0.012715 | 0.690862 | 0.145369 |
| MmugDNA.16577.1.S1_at   | MmugDNA.16577.1 | 3.94  | 3.93  | 0.1  | 0.21 | 1.01  | 0.388044 | 0.308305 | 0.656101 | 0.564425 |
| MmugDNA.16578.1.S1_at   | MmugDNA.16578.1 | 3.9   | 4.15  | 0.33 | 0.28 | -1.19 | 0.756154 | 0.898042 | 0.887677 | 0.941946 |
| MmugDNA.1658.1.S1_at    | MmugDNA.1658.1  | 12.2  | 12.19 | 0.05 | 0.12 | 1.01  | 0.90272  | 0.440991 | 0.958703 | 0.659248 |
| MmugDNA.16580.1.S1_at   | MmugDNA.16580.1 | 6.38  | 6.71  | 0.97 | 0.25 | -1.26 | 0.928607 | 0.457364 | 0.969796 | 0.670806 |
| MmugDNA.16581.1.S1_at   | MmugDNA.16581.1 | 13.15 | 12.79 | 0.07 | 0.02 | 1.29  | 0.000837 | 0.136972 | 0.07338  | 0.409769 |
| MmugDNA.16583.1.S1_at   | MmugDNA.16583.1 | 3.65  | 3.84  | 0.41 | 0.33 | -1.14 | 0.669744 | 0.625196 | 0.841513 | 0.779045 |
| MmugDNA.16584.1.S1_at   | MmugDNA.16584.1 | 5.4   | 5.21  | 0.17 | 0.26 | 1.14  | 0.767064 | 0.067459 | 0.893102 | 0.305749 |
| MmugDNA.16585.1.S1_at   | MmugDNA.16585.1 | 6.17  | 5.96  | 0.13 | 0.08 | 1.16  | 0.169454 | 0.124032 | 0.462669 | 0.39431  |
| MmugDNA.16587.1.S1_at   | MmugDNA.16587.1 | 3.63  | 3.52  | 0.13 | 0.09 | 1.08  | 0.499594 | 0.658841 | 0.73432  | 0.800473 |
| MmugDNA.16588.1.S1_at   | MmugDNA.16588.1 | 5.13  | 5.08  | 0.04 | 0.12 | 1.03  | 0.490831 | 0.209478 | 0.728857 | 0.483118 |
| MmugDNA.16589.1.S1_at   | MmugDNA.16589.1 | 8.21  | 8.02  | 0.11 | 0.25 | 1.14  | 0.089692 | 0.169597 | 0.356645 | 0.446204 |
| MmugDNA.1659.1.S1_at    | MmugDNA.1659.1  | 5.49  | 5.13  | 0.79 | 0.34 | 1.29  | 0.236315 | 0.2754   | 0.533949 | 0.539663 |
| MmugDNA.16590.1.S1_at   | MmugDNA.16590.1 | 4.31  | 5.04  | 0.34 | 0.2  | -1.65 | 0.081235 | 0.329065 | 0.342222 | 0.578482 |
| MmugDNA.16591.1.S1_at   | MmugDNA.16591.1 | 11.42 | 11.34 | 0.08 | 0.04 | 1.06  | 0.784158 | 0.539639 | 0.901553 | 0.723878 |
| MmugDNA.16592.1.S1_at   | MmugDNA.16592.1 | 6.4   | 6.34  | 0.23 | 0.04 | 1.04  | 0.702653 | 0.743355 | 0.858882 | 0.85129  |
| MmugDNA.16594.1.S1_at   | MmugDNA.16594.1 | 5.09  | 5.09  | 0.08 | 0.02 | 1     | 0.467907 | 0.496313 | 0.713242 | 0.695976 |
| MmugDNA.16595.1.S1_at   | MmugDNA.16595.1 | 7.45  | 7.51  | 0.17 | 0.06 | -1.04 | 0.9983   | 0.071834 | 0.999378 | 0.314082 |
| MmugDNA.16596.1.S1_at   | MmugDNA.16596.1 | 6.41  | 6.44  | 0.34 | 0.2  | -1.02 | 0.772355 | 0.149946 | 0.895784 | 0.424602 |
| MmugDNA.16598.1.S1_at   | MmugDNA.16598.1 | 5.5   | 5.27  | 0.1  | 0.16 | 1.17  | 0.121701 | 0.117871 | 0.400504 | 0.38579  |
| MmugDNA.16598.1.S1_s_at | MmugDNA.16598.1 | 4.08  | 3.99  | 0    | 0.14 | 1.07  | 0.213064 | 0.573689 | 0.51103  | 0.745252 |
| MmugDNA.16599.1.S1_at   | MmugDNA.16599.1 | 11.08 | 10.43 | 0.6  | 0.08 | 1.58  | 0.486625 | 0.311634 | 0.725784 | 0.566602 |
| MmugDNA.166.1.S1_at     | MmugDNA.166.1   | 5.52  | 5.47  | 0.07 | 0.04 | 1.04  | 0.317013 | 0.207668 | 0.601691 | 0.481906 |
| MmugDNA.1660.1.S1_at    | MmugDNA.1660.1  | 3.59  | 3.54  | 0.54 | 0.03 | 1.03  | 0.313859 | 0.351567 | 0.599699 | 0.595101 |
| MmugDNA.16600.1.S1_at   | MmugDNA.16600.1 | 12.6  | 12.64 | 0.13 | 0.03 | -1.03 | 0.823541 | 0.14013  | 0.921555 | 0.413394 |
| MmugDNA.16601.1.S1_at   | MmugDNA.16601.1 | 10.36 | 10.55 | 0.26 | 0.03 | -1.15 | 0.273442 | 0.509086 | 0.565583 | 0.703993 |
| MmugDNA.16602.1.S1_at   | MmugDNA.16602.1 | 9.87  | 9.78  | 0.04 | 0.22 | 1.07  | 0.811962 | 0.106435 | 0.91581  | 0.368986 |
| MmugDNA.16604.1.S1_at   | MmugDNA.16604.1 | 8.38  | 7.81  | 0.5  | 0.22 | 1.48  | 0.416752 | 0.508725 | 0.677104 | 0.703792 |
| MmugDNA.16605.1.S1_at   | MmugDNA.16605.1 | 7.17  | 7.15  | 0.14 | 0.01 | 1.01  | 0.79117  | 0.258285 | 0.90517  | 0.525596 |
| MmugDNA.16606.1.S1_s_at | MmugDNA.16606.1 | 9.66  | 9.77  | 0.16 | 0.15 | -1.08 | 0.41236  | 0.700061 | 0.674115 | 0.825946 |
| MmugDNA.16607.1.S1_at   | MmugDNA.16607.1 | 10.95 | 11.11 | 0.14 | 0.06 | -1.12 | 0.215218 | 0.319372 | 0.512891 | 0.571724 |
| MmugDNA.16609.1.S1_at   | MmugDNA.16609.1 | 6.62  | 6.87  | 0.44 | 0    | -1.19 | 0.99749  | 0.307263 | 0.999096 | 0.56352  |
| MmugDNA.16611.1.S1_at   | MmugDNA.16611.1 | 4.75  | 4.35  | 0.29 | 0.13 | 1.33  | 0.390901 | 0.434601 | 0.658414 | 0.654747 |
| MmugDNA.16612.1.S1_at   | MmugDNA.16612.1 | 6.12  | 6.01  | 0.13 | 0.09 | 1.08  | 0.128938 | 0.10617  | 0.41116  | 0.36856  |
| MmugDNA.16613.1.S1_at   | MmugDNA.16613.1 | 4     | 4.19  | 0.42 | 0.14 | -1.14 | 0.830531 | 0.286699 | 0.925496 | 0.548077 |
| MmugDNA.16615.1.S1_at   | MmugDNA.16615.1 | 5.18  | 4.71  | 0.22 | 0.03 | 1.38  | 0.06399  | 0.028885 | 0.309389 | 0.211763 |
| MmugDNA.16616.1.S1_at   | MmugDNA.16616.1 | 6.09  | 5.47  | 0.89 | 0.88 | 1.53  | 0.944427 | 0.378305 | 0.976597 | 0.615438 |
| MmugDNA.16618.1.S1_at   | MmugDNA.16618.1 | 3.86  | 3.86  | 0.07 | 0.13 | 1     | 0.987423 | 0.988029 | 0.995444 | 0.993307 |
| MmugDNA.16619.1.S1_at   | MmugDNA.16619.1 | 3.95  | 4.07  | 0.07 | 0.05 | -1.09 | 0.093598 | 0.157305 | 0.362254 | 0.432782 |
| MmugDNA.1662.1.S1_at    | MmugDNA.1662.1  | 10.73 | 10.38 | 0.1  | 0.13 | 1.27  | 0.031761 | 0.002374 | 0.231669 | 0.072006 |
| MmugDNA.16621.1.S1_at   | MmugDNA.16621.1 | 4.03  | 4.02  | 0.25 | 0.07 | 1.01  | 0.735279 | 0.917242 | 0.876788 | 0.953758 |
| MmugDNA.16622.1.S1_at   | MmugDNA.16622.1 | 4.19  | 3.99  | 0.55 | 0.26 | 1.15  | 0.391377 | 0.60084  | 0.658629 | 0.762334 |

|                         |                 |       |       |      |      |       |          |          |          |          |
|-------------------------|-----------------|-------|-------|------|------|-------|----------|----------|----------|----------|
| MmugDNA.16623.1.S1_at   | MmugDNA.16623.1 | 5.6   | 5.19  | 0.63 | 0.41 | 1.33  | 0.24305  | 0.46596  | 0.539753 | 0.676055 |
| MmugDNA.16624.1.S1_at   | MmugDNA.16624.1 | 5.02  | 5     | 0.08 | 0.03 | 1.01  | 0.997357 | 0.241946 | 0.999086 | 0.512489 |
| MmugDNA.16627.1.S1_at   | MmugDNA.16627.1 | 4.34  | 4.31  | 0.07 | 0.04 | 1.02  | 0.747371 | 0.006379 | 0.883018 | 0.108551 |
| MmugDNA.16628.1.S1_at   | MmugDNA.16628.1 | 7.1   | 6.57  | 0.17 | 0.11 | 1.45  | 0.008839 | 0.532093 | 0.143863 | 0.718995 |
| MmugDNA.16629.1.S1_at   | MmugDNA.16629.1 | 9.3   | 9.3   | 0.09 | 0.03 | -1    | 0.425174 | 0.883196 | 0.682647 | 0.933411 |
| MmugDNA.1663.1.S1_at    | MmugDNA.1663.1  | 8.13  | 8.19  | 0.05 | 0.06 | -1.05 | 0.299117 | 0.002198 | 0.587444 | 0.069235 |
| MmugDNA.16630.1.S1_at   | MmugDNA.16630.1 | 4.35  | 4.5   | 0.26 | 0    | -1.11 | 0.121828 | 0.045403 | 0.400523 | 0.257427 |
| MmugDNA.16631.1.S1_at   | MmugDNA.16631.1 | 4.4   | 4.53  | 0.08 | 0.12 | -1.1  | 0.202976 | 0.193565 | 0.500693 | 0.468785 |
| MmugDNA.16632.1.S1_at   | MmugDNA.16632.1 | 8.74  | 8.34  | 0.25 | 0.14 | 1.32  | 0.044551 | 0.066545 | 0.268244 | 0.303711 |
| MmugDNA.16633.1.S1_at   | MmugDNA.16633.1 | 5.56  | 5.44  | 0.21 | 0.14 | 1.09  | 0.349294 | 0.432194 | 0.627222 | 0.652775 |
| MmugDNA.16634.1.S1_at   | MmugDNA.16634.1 | 3.83  | 4.16  | 0.52 | 0.43 | -1.26 | 0.624506 | 0.087869 | 0.814877 | 0.341233 |
| MmugDNA.16635.1.S1_at   | MmugDNA.16635.1 | 3.35  | 3.56  | 0.2  | 0.08 | -1.16 | 0.107972 | 0.390807 | 0.382543 | 0.624547 |
| MmugDNA.16636.1.S1_at   | MmugDNA.16636.1 | 6.3   | 6.4   | 0.19 | 0.09 | -1.07 | 0.982244 | 0.274613 | 0.993444 | 0.539059 |
| MmugDNA.16637.1.S1_at   | MmugDNA.16637.1 | 5.4   | 5.62  | 0.29 | 0.02 | -1.16 | 0.334671 | 0.448583 | 0.615774 | 0.664435 |
| MmugDNA.16638.1.S1_at   | MmugDNA.16638.1 | 5.95  | 5.82  | 0.37 | 0.21 | 1.09  | 0.252422 | 0.485311 | 0.54701  | 0.689049 |
| MmugDNA.16639.1.S1_at   | MmugDNA.16639.1 | 6.91  | 6.36  | 0.47 | 0.09 | 1.46  | 0.093626 | 0.043602 | 0.362277 | 0.253495 |
| MmugDNA.1664.1.S1_at    | MmugDNA.1664.1  | 4.82  | 4.83  | 0.25 | 0.2  | -1.01 | 0.549218 | 0.148569 | 0.76701  | 0.423127 |
| MmugDNA.16640.1.S1_at   | MmugDNA.16640.1 | 7.79  | 7.81  | 0.68 | 0.07 | -1.01 | 0.408976 | 0.575765 | 0.671548 | 0.746758 |
| MmugDNA.16641.1.S1_at   | MmugDNA.16641.1 | 4.24  | 4.35  | 0.16 | 0.05 | -1.07 | 0.400035 | 0.535198 | 0.665173 | 0.720821 |
| MmugDNA.16642.1.S1_at   | MmugDNA.16642.1 | 12    | 11.77 | 0.13 | 0.07 | 1.17  | 0.022347 | 0.022834 | 0.2028   | 0.189246 |
| MmugDNA.16644.1.S1_at   | MmugDNA.16644.1 | 5.8   | 5.57  | 0.33 | 0.13 | 1.17  | 0.937341 | 0.514696 | 0.973704 | 0.707841 |
| MmugDNA.16646.1.S1_at   | MmugDNA.16646.1 | 8.84  | 9.33  | 0.27 | 0.09 | -1.4  | 0.075134 | 0.458616 | 0.332294 | 0.671246 |
| MmugDNA.16647.1.S1_at   | MmugDNA.16647.1 | 5.96  | 5.75  | 0.11 | 0.07 | 1.16  | 0.058629 | 0.313537 | 0.299229 | 0.56796  |
| MmugDNA.16648.1.S1_at   | MmugDNA.16648.1 | 5.78  | 5.62  | 0.11 | 0.05 | 1.12  | 0.092309 | 0.222687 | 0.360355 | 0.495617 |
| MmugDNA.1665.1.S1_at    | MmugDNA.1665.1  | 3.79  | 3.92  | 0.05 | 0.13 | -1.09 | 0.629891 | 0.693109 | 0.818263 | 0.821479 |
| MmugDNA.16650.1.S1_at   | MmugDNA.16650.1 | 5.81  | 5.84  | 0.36 | 0.08 | -1.02 | 0.639098 | 0.845314 | 0.823331 | 0.911994 |
| MmugDNA.16651.1.S1_at   | MmugDNA.16651.1 | 5.65  | 5.52  | 0.49 | 0.23 | 1.09  | 0.932821 | 0.351739 | 0.97185  | 0.595164 |
| MmugDNA.16652.1.S1_at   | MmugDNA.16652.1 | 4.8   | 4.74  | 0.08 | 0.17 | 1.04  | 0.438908 | 0.481252 | 0.693369 | 0.686318 |
| MmugDNA.16653.1.S1_at   | MmugDNA.16653.1 | 3.94  | 3.91  | 0.25 | 0.04 | 1.02  | 0.414157 | 0.796346 | 0.675439 | 0.882625 |
| MmugDNA.16654.1.S1_at   | MmugDNA.16654.1 | 3.91  | 4.23  | 0.18 | 0.11 | -1.25 | 0.073578 | 0.107869 | 0.329021 | 0.370945 |
| MmugDNA.16655.1.S1_at   | MmugDNA.16655.1 | 3.86  | 3.73  | 0.98 | 0.5  | 1.1   | 0.628436 | 0.659257 | 0.817452 | 0.80063  |
| MmugDNA.16656.1.S1_at   | MmugDNA.16656.1 | 12.06 | 12.28 | 0.09 | 0.06 | -1.17 | 0.02676  | 0.22762  | 0.21683  | 0.499898 |
| MmugDNA.16658.1.S1_at   | MmugDNA.16658.1 | 4.98  | 5.12  | 0.19 | 0.49 | -1.11 | 0.696316 | 0.807355 | 0.855348 | 0.889109 |
| MmugDNA.16659.1.S1_at   | MmugDNA.16659.1 | 3.22  | 3.08  | 0.15 | 0.04 | 1.1   | 0.149388 | 0.167574 | 0.438257 | 0.443998 |
| MmugDNA.1666.1.S1_at    | MmugDNA.1666.1  | 4.24  | 4.52  | 0.06 | 0.11 | -1.21 | 0.042024 | 0.520095 | 0.261972 | 0.711472 |
| MmugDNA.16660.1.S1_at   | MmugDNA.16660.1 | 3.12  | 3.22  | 0.09 | 0.08 | -1.07 | 0.435733 | 0.33134  | 0.690747 | 0.58006  |
| MmugDNA.16661.1.S1_at   | MmugDNA.16661.1 | 3.49  | 3.41  | 0.3  | 0.18 | 1.05  | 0.895126 | 0.900773 | 0.955278 | 0.943556 |
| MmugDNA.16662.1.S1_at   | MmugDNA.16662.1 | 3.06  | 3.24  | 0.19 | 0    | -1.13 | 0.444144 | 0.544995 | 0.697037 | 0.727256 |
| MmugDNA.16664.1.S1_at   | MmugDNA.16664.1 | 4.99  | 4.9   | 0.31 | 0.06 | 1.06  | 0.52491  | 0.58871  | 0.751591 | 0.755137 |
| MmugDNA.16665.1.S1_s_at | MmugDNA.16665.1 | 4.32  | 4.25  | 0.09 | 0.14 | 1.05  | 0.37448  | 0.551186 | 0.645594 | 0.730837 |
| MmugDNA.16666.1.S1_at   | MmugDNA.16666.1 | 3.61  | 3.7   | 0.05 | 0.06 | -1.06 | 0.200217 | 0.056647 | 0.497733 | 0.284094 |
| MmugDNA.16667.1.S1_at   | MmugDNA.16667.1 | 3.03  | 3.05  | 0.06 | 0.13 | -1.01 | 0.965552 | 0.516285 | 0.986023 | 0.708827 |
| MmugDNA.16669.1.S1_at   | MmugDNA.16669.1 | 5.33  | 5.4   | 0.06 | 0.1  | -1.05 | 0.326804 | 0.17785  | 0.609723 | 0.454167 |

|                         |                 |       |       |      |      |       |          |          |          |          |
|-------------------------|-----------------|-------|-------|------|------|-------|----------|----------|----------|----------|
| MmugDNA.16670.1.S1_at   | MmugDNA.16670.1 | 9.05  | 8.52  | 0.13 | 0.16 | 1.45  | 0.008272 | 0.003755 | 0.139959 | 0.087343 |
| MmugDNA.16671.1.S1_at   | MmugDNA.16671.1 | 7.39  | 7.44  | 0.18 | 0.12 | -1.03 | 0.730227 | 0.905115 | 0.873915 | 0.94617  |
| MmugDNA.16673.1.S1_at   | MmugDNA.16673.1 | 4.18  | 3.79  | 0.16 | 0.06 | 1.31  | 0.011071 | 0.016001 | 0.154915 | 0.160458 |
| MmugDNA.16674.1.S1_at   | MmugDNA.16674.1 | 3.75  | 3.72  | 0.33 | 0.13 | 1.02  | 0.234521 | 0.310453 | 0.53265  | 0.565661 |
| MmugDNA.16675.1.S1_at   | MmugDNA.16675.1 | 4.87  | 4.93  | 0.14 | 0.19 | -1.04 | 0.560705 | 0.865509 | 0.773974 | 0.923598 |
| MmugDNA.16678.1.S1_at   | MmugDNA.16678.1 | 8.28  | 8.51  | 0.34 | 0.11 | -1.17 | 0.200524 | 0.406154 | 0.497869 | 0.634211 |
| MmugDNA.16679.1.S1_x_at | MmugDNA.16679.1 | 6.51  | 6.47  | 0.56 | 0.19 | 1.03  | 0.413464 | 0.549462 | 0.674789 | 0.729879 |
| MmugDNA.16681.1.S1_at   | MmugDNA.16681.1 | 6.34  | 6.01  | 0.7  | 0.4  | 1.25  | 0.295923 | 0.310971 | 0.584666 | 0.565962 |
| MmugDNA.16682.1.S1_at   | MmugDNA.16682.1 | 6.53  | 7.29  | 0.51 | 0.41 | -1.69 | 0.101616 | 0.302433 | 0.37296  | 0.560109 |
| MmugDNA.16684.1.S1_at   | MmugDNA.16684.1 | 11.3  | 11.45 | 0.18 | 0.12 | -1.11 | 0.867015 | 0.246283 | 0.942519 | 0.515889 |
| MmugDNA.16685.1.S1_at   | MmugDNA.16685.1 | 10.19 | 10.49 | 0.21 | 0.06 | -1.23 | 0.07015  | 0.027977 | 0.323175 | 0.208777 |
| MmugDNA.16687.1.S1_at   | MmugDNA.16687.1 | 5.74  | 5.84  | 0.14 | 0.09 | -1.08 | 0.503275 | 0.152572 | 0.736858 | 0.427435 |
| MmugDNA.16688.1.S1_at   | MmugDNA.16688.1 | 7.7   | 7.64  | 0.18 | 0.05 | 1.05  | 0.574914 | 0.306324 | 0.782347 | 0.56295  |
| MmugDNA.16689.1.S1_at   | MmugDNA.16689.1 | 6.05  | 6.65  | 0.71 | 0.09 | -1.51 | 0.650881 | 0.868593 | 0.830453 | 0.925383 |
| MmugDNA.1669.1.S1_s_at  | MmugDNA.1669.1  | 9.88  | 10.05 | 0.04 | 0.14 | -1.13 | 0.155747 | 0.886568 | 0.446095 | 0.935498 |
| MmugDNA.16690.1.S1_at   | MmugDNA.16690.1 | 9.86  | 9.65  | 0.27 | 0.08 | 1.16  | 0.213243 | 0.004825 | 0.511046 | 0.096904 |
| MmugDNA.16691.1.S1_at   | MmugDNA.16691.1 | 3.67  | 3.59  | 0.57 | 0.09 | 1.06  | 0.777279 | 0.923699 | 0.898237 | 0.957083 |
| MmugDNA.16692.1.S1_at   | MmugDNA.16692.1 | 3.12  | 3.14  | 0.1  | 0.17 | -1.01 | 0.784312 | 0.765126 | 0.901636 | 0.863452 |
| MmugDNA.16693.1.S1_at   | MmugDNA.16693.1 | 4.65  | 4.66  | 0.13 | 0.06 | -1    | 0.399145 | 0.590125 | 0.664655 | 0.756117 |
| MmugDNA.16695.1.S1_at   | MmugDNA.16695.1 | 3.15  | 3.09  | 0.24 | 0.1  | 1.05  | 0.857781 | 0.143555 | 0.938173 | 0.417484 |
| MmugDNA.16697.1.S1_at   | MmugDNA.16697.1 | 6.02  | 6.09  | 0.31 | 0.14 | -1.05 | 0.58429  | 0.620295 | 0.788555 | 0.775303 |
| MmugDNA.16699.1.S1_at   | MmugDNA.16699.1 | 8.76  | 8.73  | 0.16 | 0.05 | 1.02  | 0.850445 | 0.314298 | 0.935044 | 0.568263 |
| MmugDNA.16700.1.S1_at   | MmugDNA.16700.1 | 8.38  | 8.57  | 0.55 | 0.27 | -1.14 | 0.39035  | 0.281983 | 0.657982 | 0.544868 |
| MmugDNA.16700.1.S1_s_at | MmugDNA.16700.1 | 10.37 | 10.56 | 0.1  | 0.12 | -1.14 | 0.272909 | 0.03346  | 0.565047 | 0.226544 |
| MmugDNA.16702.1.S1_x_at | MmugDNA.16702.1 | 6.92  | 6.82  | 0.45 | 0.1  | 1.07  | 0.469393 | 0.575765 | 0.714166 | 0.746758 |
| MmugDNA.16703.1.S1_at   | MmugDNA.16703.1 | 6.71  | 6.52  | 0.09 | 0.07 | 1.14  | 0.088931 | 0.720436 | 0.355552 | 0.838261 |
| MmugDNA.16704.1.S1_at   | MmugDNA.16704.1 | 11.88 | 8.78  | 2.08 | 1.49 | 8.57  | 0.379548 | 0.203687 | 0.649328 | 0.477916 |
| MmugDNA.39322.1.S1_s_at | MmugDNA.39322.1 | 12.43 | 12.68 | 0.25 | 0.06 | -1.2  | 0.447287 | 0.571346 | 0.699312 | 0.743653 |
| MmugDNA.16705.1.S1_at   | MmugDNA.16705.1 | 8.29  | 8.1   | 0.24 | 0.06 | 1.13  | 0.761882 | 0.628031 | 0.890767 | 0.780921 |
| MmugDNA.16705.1.S1_s_at | MmugDNA.16705.1 | 6.05  | 6.18  | 0.08 | 0.03 | -1.09 | 0.265264 | 0.097202 | 0.557962 | 0.354886 |
| MmugDNA.16706.1.S1_at   | MmugDNA.16706.1 | 4.43  | 4.42  | 0.15 | 0.05 | 1     | 0.434445 | 0.329946 | 0.689698 | 0.578874 |
| MmugDNA.16708.1.S1_at   | MmugDNA.16708.1 | 7.76  | 7.59  | 0.43 | 0.03 | 1.12  | 0.467578 | 0.069333 | 0.713007 | 0.309558 |
| MmugDNA.1671.1.S1_at    | MmugDNA.1671.1  | 10.51 | 10.18 | 0.17 | 0.1  | 1.25  | 0.050373 | 0.102045 | 0.282317 | 0.362102 |
| MmugDNA.16711.1.S1_at   | MmugDNA.16711.1 | 4.74  | 4.51  | 0.04 | 0.27 | 1.17  | 0.333883 | 0.38127  | 0.615174 | 0.617595 |
| MmugDNA.16711.1.S1_x_at | MmugDNA.16711.1 | 4.15  | 4.04  | 0.26 | 0.2  | 1.08  | 0.306837 | 0.507051 | 0.593617 | 0.70272  |
| MmugDNA.16712.1.S1_at   | MmugDNA.16712.1 | 3.52  | 3.5   | 0.19 | 0.09 | 1.01  | 0.830107 | 0.921445 | 0.92519  | 0.955761 |
| MmugDNA.16713.1.S1_at   | MmugDNA.16713.1 | 5.36  | 6     | 0.12 | 0.43 | -1.56 | 0.033578 | 0.048132 | 0.237136 | 0.264417 |
| MmugDNA.16714.1.S1_at   | MmugDNA.16714.1 | 4.34  | 3.9   | 0.23 | 0.34 | 1.35  | 0.35595  | 0.549344 | 0.632435 | 0.729804 |
| MmugDNA.16715.1.S1_at   | MmugDNA.16715.1 | 4.58  | 4.59  | 0.21 | 0.08 | -1.01 | 0.720415 | 0.551238 | 0.868039 | 0.730863 |
| MmugDNA.16716.1.S1_at   | MmugDNA.16716.1 | 3.08  | 2.7   | 0.36 | 0.08 | 1.3   | 0.127551 | 0.133258 | 0.409503 | 0.40503  |
| MmugDNA.16717.1.S1_s_at | MmugDNA.16717.1 | 5.64  | 5.8   | 0.23 | 0.22 | -1.12 | 0.186006 | 0.23518  | 0.48218  | 0.50629  |
| MmugDNA.16718.1.S1_at   | MmugDNA.16718.1 | 2.92  | 2.8   | 0.05 | 0.6  | 1.08  | 0.503011 | 0.687425 | 0.736653 | 0.817583 |
| MmugDNA.16719.1.S1_at   | MmugDNA.16719.1 | 5.03  | 5.18  | 0.16 | 0    | -1.1  | 0.176117 | 0.058448 | 0.470461 | 0.288529 |

|                         |                 |       |       |      |      |       |          |          |          |          |
|-------------------------|-----------------|-------|-------|------|------|-------|----------|----------|----------|----------|
| MmugDNA.1672.1.S1_at    | MmugDNA.1672.1  | 6.98  | 8.06  | 1.06 | 0.61 | -2.11 | 0.357179 | 0.006719 | 0.633338 | 0.110963 |
| MmugDNA.16720.1.S1_at   | MmugDNA.16720.1 | 4.71  | 4.69  | 0.14 | 0.02 | 1.01  | 0.246771 | 0.311673 | 0.542524 | 0.566653 |
| MmugDNA.16721.1.S1_at   | MmugDNA.16721.1 | 7.01  | 7.01  | 0.15 | 0.06 | 1     | 0.382476 | 0.207948 | 0.65193  | 0.482049 |
| MmugDNA.16723.1.S1_at   | MmugDNA.16723.1 | 3.95  | 4     | 0.1  | 0.05 | -1.04 | 0.294489 | 0.482444 | 0.583448 | 0.687298 |
| MmugDNA.16724.1.S1_at   | MmugDNA.16724.1 | 9.72  | 9.72  | 0.14 | 0.2  | 1     | 0.744686 | 0.791552 | 0.881599 | 0.879606 |
| MmugDNA.16725.1.S1_at   | MmugDNA.16725.1 | 3.29  | 3.06  | 0.24 | 0.05 | 1.17  | 0.589438 | 0.603648 | 0.791592 | 0.764215 |
| MmugDNA.16726.1.S1_at   | MmugDNA.16726.1 | 3.01  | 2.92  | 0.14 | 0.08 | 1.06  | 0.240713 | 0.302172 | 0.538168 | 0.560092 |
| MmugDNA.16727.1.S1_at   | MmugDNA.16727.1 | 5.46  | 5.56  | 0.4  | 0.13 | -1.07 | 0.825656 | 0.328425 | 0.922504 | 0.578066 |
| MmugDNA.16728.1.S1_at   | MmugDNA.16728.1 | 9.71  | 10.23 | 0.18 | 0.09 | -1.44 | 0.007619 | 0.2528   | 0.135757 | 0.521174 |
| MmugDNA.16728.1.S1_s_at | MmugDNA.16728.1 | 10.29 | 10.82 | 0.15 | 0.05 | -1.45 | 0.00462  | 0.116734 | 0.11423  | 0.383945 |
| MmugDNA.16730.1.S1_at   | MmugDNA.16730.1 | 11.6  | 11.71 | 0.33 | 0.09 | -1.08 | 0.52492  | 0.708805 | 0.751591 | 0.831137 |
| MmugDNA.16731.1.S1_s_at | MmugDNA.16731.1 | 10.06 | 10.18 | 0.45 | 0.09 | -1.09 | 0.760793 | 0.540702 | 0.890353 | 0.724513 |
| MmugDNA.16734.1.S1_at   | MmugDNA.16734.1 | 13.31 | 13.08 | 0.1  | 0.02 | 1.17  | 0.019972 | 0.011465 | 0.194619 | 0.138504 |
| MmugDNA.16735.1.S1_at   | MmugDNA.16735.1 | 3.79  | 3.77  | 0.26 | 0.22 | 1.01  | 0.658985 | 0.875116 | 0.835345 | 0.929163 |
| MmugDNA.16737.1.S1_at   | MmugDNA.16737.1 | 6.69  | 6.84  | 1.12 | 0.06 | -1.11 | 0.98669  | 0.954572 | 0.995228 | 0.974203 |
| MmugDNA.16739.1.S1_at   | MmugDNA.16739.1 | 4.51  | 4.37  | 0.09 | 0.06 | 1.1   | 0.10838  | 0.24012  | 0.383016 | 0.510813 |
| MmugDNA.1674.1.S1_at    | MmugDNA.1674.1  | 6.58  | 6.27  | 0.42 | 0.24 | 1.24  | 0.334028 | 0.340353 | 0.615174 | 0.586725 |
| MmugDNA.16740.1.S1_at   | MmugDNA.16740.1 | 4.94  | 4.68  | 0.13 | 0.3  | 1.2   | 0.187292 | 0.458953 | 0.483405 | 0.671504 |
| MmugDNA.16741.1.S1_at   | MmugDNA.16741.1 | 6.18  | 6.16  | 0.14 | 0.02 | 1.01  | 0.601893 | 0.92637  | 0.799878 | 0.958291 |
| MmugDNA.16742.1.S1_at   | MmugDNA.16742.1 | 4.54  | 4.49  | 0.77 | 0.51 | 1.03  | 0.87037  | 0.964997 | 0.944208 | 0.980553 |
| MmugDNA.16743.1.S1_at   | MmugDNA.16743.1 | 4.04  | 3.92  | 0.12 | 0.02 | 1.09  | 0.193012 | 0.646018 | 0.489582 | 0.792676 |
| MmugDNA.16744.1.S1_at   | MmugDNA.16744.1 | 7.76  | 7.99  | 0.24 | 0.51 | -1.17 | 0.752184 | 0.058873 | 0.885542 | 0.289391 |
| MmugDNA.16745.1.S1_s_at | MmugDNA.16745.1 | 6.92  | 7.21  | 0.12 | 0.07 | -1.22 | 0.047252 | 0.180675 | 0.274623 | 0.457245 |
| MmugDNA.16746.1.S1_at   | MmugDNA.16746.1 | 3.35  | 4.18  | 0.06 | 0.5  | -1.78 | 0.046183 | 0.032205 | 0.272667 | 0.222139 |
| MmugDNA.16749.1.S1_at   | MmugDNA.16749.1 | 6.49  | 5.62  | 0.69 | 0.02 | 1.82  | 0.31818  | 0.315712 | 0.602917 | 0.569143 |
| MmugDNA.16752.1.S1_at   | MmugDNA.16752.1 | 5.54  | 5.7   | 0.07 | 0.11 | -1.12 | 0.07627  | 0.030131 | 0.334387 | 0.21543  |
| MmugDNA.16754.1.S1_at   | MmugDNA.16754.1 | 7.7   | 9.91  | 0.15 | 0.29 | -4.65 | 0.000253 | 0.012803 | 0.054642 | 0.145832 |
| MmugDNA.16754.1.S1_s_at | MmugDNA.16754.1 | 7.85  | 10.4  | 0.36 | 0.33 | -5.85 | 0.000918 | 0.006889 | 0.075607 | 0.112196 |
| MmugDNA.16757.1.S1_at   | MmugDNA.16757.1 | 9.44  | 11.22 | 0.35 | 0.23 | -3.43 | 0.003394 | 0.016355 | 0.102989 | 0.161943 |
| MmugDNA.16759.1.S1_at   | MmugDNA.16759.1 | 3.42  | 3.03  | 0.4  | 0.08 | 1.31  | 0.150089 | 0.259782 | 0.439066 | 0.526648 |
| MmugDNA.1676.1.S1_at    | MmugDNA.1676.1  | 3.42  | 3.39  | 0.99 | 0.09 | 1.03  | 0.391162 | 0.373867 | 0.658623 | 0.612492 |
| MmugDNA.16760.1.S1_at   | MmugDNA.16760.1 | 4.23  | 4.35  | 0.02 | 0.18 | -1.08 | 0.285427 | 0.427633 | 0.575167 | 0.649406 |
| MmugDNA.16761.1.S1_at   | MmugDNA.16761.1 | 4.7   | 4.7   | 0.29 | 0.19 | 1     | 0.848678 | 0.910186 | 0.934034 | 0.949342 |
| MmugDNA.16762.1.S1_at   | MmugDNA.16762.1 | 2.98  | 3.11  | 0.04 | 0.07 | -1.09 | 0.242157 | 0.575148 | 0.539178 | 0.746352 |
| MmugDNA.16764.1.S1_at   | MmugDNA.16764.1 | 9.18  | 10.35 | 0.83 | 0.25 | -2.24 | 0.059408 | 0.01236  | 0.300867 | 0.143761 |
| MmugDNA.16767.1.S1_at   | MmugDNA.16767.1 | 3.25  | 3.02  | 0.15 | 0.21 | 1.18  | 0.164502 | 0.299438 | 0.457655 | 0.557899 |
| MmugDNA.16768.1.S1_s_at | MmugDNA.16768.1 | 11.06 | 10.6  | 0.35 | 0.3  | 1.37  | 0.141473 | 0.550252 | 0.427458 | 0.730367 |
| MmugDNA.16769.1.S1_at   | MmugDNA.16769.1 | 3.09  | 3.04  | 0.06 | 0.04 | 1.03  | 0.868617 | 0.077552 | 0.943544 | 0.323421 |
| MmugDNA.16770.1.S1_at   | MmugDNA.16770.1 | 6.65  | 4.69  | 0.8  | 0.15 | 3.9   | 0.014642 | 0.017559 | 0.172898 | 0.167672 |
| MmugDNA.16771.1.S1_at   | MmugDNA.16771.1 | 6.37  | 6.09  | 0.04 | 0.16 | 1.21  | 0.096051 | 0.122418 | 0.365529 | 0.392267 |
| MmugDNA.16772.1.S1_at   | MmugDNA.16772.1 | 3.81  | 3.79  | 0.15 | 0.24 | 1.01  | 0.434471 | 0.338289 | 0.689698 | 0.585417 |
| MmugDNA.16774.1.S1_s_at | MmugDNA.16774.1 | 14.4  | 14.4  | 0.07 | 0.04 | -1    | 0.424001 | 0.653775 | 0.681839 | 0.79766  |
| MmugDNA.16775.1.S1_at   | MmugDNA.16775.1 | 3.66  | 3.57  | 0.29 | 0.22 | 1.07  | 0.553435 | 0.480858 | 0.76997  | 0.686    |

|                         |                 |       |       |      |      |       |          |          |          |          |
|-------------------------|-----------------|-------|-------|------|------|-------|----------|----------|----------|----------|
| MmugDNA.16777.1.S1_s_at | MmugDNA.16777.1 | 8.29  | 8.9   | 0.18 | 0.2  | -1.52 | 0.015557 | 0.000044 | 0.177138 | 0.025273 |
| MmugDNA.16778.1.S1_at   | MmugDNA.16778.1 | 5.58  | 6.65  | 1.21 | 0.15 | -2.1  | 0.6548   | 0.734116 | 0.832896 | 0.845896 |
| MmugDNA.1678.1.S1_at    | MmugDNA.1678.1  | 8.18  | 7.98  | 0.08 | 0.24 | 1.15  | 0.087488 | 0.041468 | 0.353327 | 0.248496 |
| MmugDNA.16780.1.S1_at   | MmugDNA.16780.1 | 8.8   | 8.7   | 0.25 | 0.33 | 1.08  | 0.336328 | 0.495646 | 0.616985 | 0.695576 |
| MmugDNA.16781.1.S1_at   | MmugDNA.16781.1 | 6.22  | 6.22  | 0.14 | 0.04 | -1.01 | 0.909979 | 0.604768 | 0.961851 | 0.764797 |
| MmugDNA.16782.1.S1_at   | MmugDNA.16782.1 | 4.3   | 4.26  | 0.09 | 0.03 | 1.02  | 0.668029 | 0.04249  | 0.840528 | 0.25075  |
| MmugDNA.16783.1.S1_at   | MmugDNA.16783.1 | 9.05  | 9.03  | 0.03 | 0.08 | 1.01  | 0.712559 | 0.017882 | 0.864314 | 0.168819 |
| MmugDNA.16784.1.S1_at   | MmugDNA.16784.1 | 4.16  | 4.16  | 0.19 | 0.12 | 1     | 0.716765 | 0.167975 | 0.866375 | 0.444576 |
| MmugDNA.16786.1.S1_at   | MmugDNA.16786.1 | 5.29  | 4.55  | 0.17 | 0.33 | 1.68  | 0.039456 | 0.026167 | 0.25509  | 0.202772 |
| MmugDNA.16787.1.S1_at   | MmugDNA.16787.1 | 5.61  | 5.51  | 0.21 | 0.07 | 1.07  | 0.178096 | 0.230697 | 0.472824 | 0.502381 |
| MmugDNA.16789.1.S1_at   | MmugDNA.16789.1 | 7.15  | 7.41  | 0.81 | 0.6  | -1.2  | 0.391311 | 0.279619 | 0.658623 | 0.543186 |
| MmugDNA.16790.1.S1_s_at | MmugDNA.16790.1 | 6.79  | 6.4   | 0.88 | 0.69 | 1.32  | 0.873385 | 0.336244 | 0.945619 | 0.583736 |
| MmugDNA.16792.1.S1_at   | MmugDNA.16792.1 | 6.32  | 6.86  | 1.57 | 0.56 | -1.45 | 0.842813 | 0.961832 | 0.931125 | 0.978471 |
| MmugDNA.16794.1.S1_at   | MmugDNA.16794.1 | 4.51  | 4.3   | 0.38 | 0.71 | 1.16  | 0.651333 | 0.592687 | 0.830645 | 0.757854 |
| MmugDNA.16795.1.S1_at   | MmugDNA.16795.1 | 4.01  | 4.23  | 0.18 | 0.05 | -1.16 | 0.070427 | 0.077955 | 0.323757 | 0.324291 |
| MmugDNA.16797.1.S1_at   | MmugDNA.16797.1 | 3.06  | 3.09  | 0.05 | 0.05 | -1.02 | 0.49774  | 0.512895 | 0.73333  | 0.706595 |
| MmugDNA.16798.1.S1_at   | MmugDNA.16798.1 | 4.18  | 4.23  | 0.04 | 0.15 | -1.03 | 0.717502 | 0.524712 | 0.866592 | 0.714514 |
| MmugDNA.16799.1.S1_at   | MmugDNA.16799.1 | 7.66  | 7.18  | 0.33 | 0.49 | 1.39  | 0.43978  | 0.063208 | 0.693902 | 0.298119 |
| MmugDNA.168.1.S1_at     | MmugDNA.168.1   | 4.43  | 4.18  | 0.32 | 0.24 | 1.19  | 0.36741  | 0.18433  | 0.641394 | 0.460458 |
| MmugDNA.1680.1.S1_at    | MmugDNA.1680.1  | 3.51  | 3.22  | 0.21 | 0.04 | 1.22  | 0.182443 | 0.323884 | 0.478137 | 0.574656 |
| MmugDNA.16800.1.S1_at   | MmugDNA.16800.1 | 3.03  | 3.2   | 0.26 | 0.05 | -1.13 | 0.843711 | 0.410982 | 0.931554 | 0.637835 |
| MmugDNA.16803.1.S1_at   | MmugDNA.16803.1 | 3.94  | 3.51  | 0.1  | 0.12 | 1.35  | 0.02475  | 0.03729  | 0.210464 | 0.237598 |
| MmugDNA.16804.1.S1_at   | MmugDNA.16804.1 | 7.52  | 7.39  | 1.08 | 0.47 | 1.09  | 0.323752 | 0.407575 | 0.607479 | 0.63505  |
| MmugDNA.16806.1.S1_at   | MmugDNA.16806.1 | 6.76  | 6.64  | 0.44 | 0.4  | 1.09  | 0.577979 | 0.440304 | 0.783846 | 0.658899 |
| MmugDNA.16809.1.S1_at   | MmugDNA.16809.1 | 7.72  | 7.74  | 0.24 | 0.01 | -1.01 | 0.432356 | 0.694837 | 0.68822  | 0.822623 |
| MmugDNA.1681.1.S1_at    | MmugDNA.1681.1  | 4.51  | 3.89  | 0.49 | 0.18 | 1.54  | 0.142619 | 0.164531 | 0.428696 | 0.44076  |
| MmugDNA.16811.1.S1_at   | MmugDNA.16811.1 | 11.52 | 11.06 | 0.13 | 0.18 | 1.37  | 0.027723 | 0.036282 | 0.21894  | 0.235026 |
| MmugDNA.16813.1.S1_at   | MmugDNA.16813.1 | 4.31  | 4.37  | 0.11 | 0.06 | -1.04 | 0.352803 | 0.847248 | 0.630102 | 0.91322  |
| MmugDNA.16815.1.S1_x_at | MmugDNA.16815.1 | 9.17  | 9.12  | 0.61 | 0.23 | 1.03  | 0.349351 | 0.388027 | 0.627286 | 0.622551 |
| MmugDNA.16817.1.S1_at   | MmugDNA.16817.1 | 5.67  | 5.66  | 0.25 | 0.13 | 1.01  | 0.298597 | 0.4225   | 0.586903 | 0.645729 |
| MmugDNA.16818.1.S1_at   | MmugDNA.16818.1 | 8.93  | 9.96  | 0.45 | 0.15 | -2.04 | 0.050081 | 0.381416 | 0.281479 | 0.617681 |
| MmugDNA.16819.1.S1_at   | MmugDNA.16819.1 | 5.63  | 5.55  | 0.1  | 0.19 | 1.06  | 0.186626 | 0.662097 | 0.48274  | 0.802107 |
| MmugDNA.16821.1.S1_at   | MmugDNA.16821.1 | 3.98  | 3.98  | 0.07 | 0.06 | 1     | 0.334246 | 0.814417 | 0.615415 | 0.892923 |
| MmugDNA.16822.1.S1_at   | MmugDNA.16822.1 | 7.08  | 7.07  | 0.13 | 0.08 | 1.01  | 0.982462 | 0.716196 | 0.99357  | 0.835515 |
| MmugDNA.16824.1.S1_at   | MmugDNA.16824.1 | 7.45  | 6.4   | 0.24 | 0.21 | 2.07  | 0.004896 | 0.003775 | 0.115126 | 0.08749  |
| MmugDNA.4637.1.S1_s_at  | MmugDNA.4637.1  | 12.56 | 12.43 | 0.07 | 0.04 | 1.09  | 0.122025 | 0.431509 | 0.400698 | 0.652415 |
| MmugDNA.16826.1.S1_at   | MmugDNA.16826.1 | 9.34  | 9.04  | 0.12 | 0.07 | 1.23  | 0.034295 | 0.512117 | 0.239767 | 0.706076 |
| MmugDNA.16826.1.S1_s_at | MmugDNA.16826.1 | 12.71 | 12.68 | 0.23 | 0.12 | 1.02  | 0.941717 | 0.436937 | 0.975589 | 0.656361 |
| MmugDNA.16827.1.S1_at   | MmugDNA.16827.1 | 9.84  | 9.08  | 0.04 | 0.25 | 1.69  | 0.012272 | 0.02305  | 0.161109 | 0.190012 |
| MmugDNA.16828.1.S1_at   | MmugDNA.16828.1 | 11.07 | 10.72 | 0.16 | 0.17 | 1.28  | 0.28253  | 0.755335 | 0.573225 | 0.857558 |
| MmugDNA.16829.1.S1_at   | MmugDNA.16829.1 | 5.11  | 5.12  | 0.33 | 0.08 | -1.01 | 0.937942 | 0.945325 | 0.973844 | 0.968942 |
| MmugDNA.1683.1.S1_at    | MmugDNA.1683.1  | 4.94  | 5.1   | 0.28 | 0.35 | -1.12 | 0.783524 | 0.800502 | 0.901181 | 0.885198 |
| MmugDNA.16830.1.S1_at   | MmugDNA.16830.1 | 3.38  | 3.38  | 0.02 | 0.02 | 1     | 0.230986 | 0.630671 | 0.529768 | 0.782345 |

|                         |                 |       |       |      |      |       |          |          |          |          |
|-------------------------|-----------------|-------|-------|------|------|-------|----------|----------|----------|----------|
| MmugDNA.16831.1.S1_s_at | MmugDNA.16831.1 | 7.61  | 7.56  | 0.06 | 0.04 | 1.04  | 0.284298 | 0.194361 | 0.574388 | 0.469464 |
| MmugDNA.16832.1.S1_s_at | MmugDNA.16832.1 | 4.42  | 3.69  | 0.7  | 0.31 | 1.66  | 0.097135 | 0.132272 | 0.367275 | 0.404294 |
| MmugDNA.16834.1.S1_at   | MmugDNA.16834.1 | 3.05  | 3.21  | 0.34 | 0.1  | -1.12 | 0.65665  | 0.522791 | 0.833925 | 0.713388 |
| MmugDNA.16835.1.S1_at   | MmugDNA.16835.1 | 6.85  | 6.91  | 0.13 | 0.13 | -1.04 | 0.458835 | 0.075312 | 0.707243 | 0.319475 |
| MmugDNA.16836.1.S1_at   | MmugDNA.16836.1 | 10.29 | 10.55 | 0.07 | 0.08 | -1.2  | 0.016037 | 0.292246 | 0.179208 | 0.552363 |
| MmugDNA.16837.1.S1_at   | MmugDNA.16837.1 | 12.56 | 12.35 | 0.08 | 0.02 | 1.16  | 0.011433 | 0.017984 | 0.157067 | 0.169137 |
| MmugDNA.16838.1.S1_at   | MmugDNA.16838.1 | 4.24  | 4.15  | 0.15 | 0.16 | 1.06  | 0.391079 | 0.518099 | 0.658569 | 0.710138 |
| MmugDNA.16839.1.S1_at   | MmugDNA.16839.1 | 8.92  | 9.3   | 1.32 | 0.28 | -1.3  | 0.903189 | 0.87657  | 0.959024 | 0.929709 |
| MmugDNA.1684.1.S1_at    | MmugDNA.1684.1  | 6.81  | 6.63  | 0.1  | 0.1  | 1.13  | 0.0929   | 0.036843 | 0.361459 | 0.236451 |
| MmugDNA.16841.1.S1_at   | MmugDNA.16841.1 | 4.47  | 4.53  | 0.18 | 0.15 | -1.04 | 0.385679 | 0.539293 | 0.654414 | 0.723688 |
| MmugDNA.16843.1.S1_at   | MmugDNA.16843.1 | 5.74  | 5.66  | 0.25 | 0.12 | 1.06  | 0.731787 | 0.407076 | 0.874673 | 0.634722 |
| MmugDNA.16844.1.S1_at   | MmugDNA.16844.1 | 4.55  | 4.54  | 0.17 | 0.2  | 1.01  | 0.948448 | 0.750382 | 0.978412 | 0.854787 |
| MmugDNA.16845.1.S1_at   | MmugDNA.16845.1 | 5.91  | 5.75  | 0.25 | 0.22 | 1.12  | 0.198384 | 0.253997 | 0.495518 | 0.522371 |
| MmugDNA.16846.1.S1_at   | MmugDNA.16846.1 | 5.79  | 5.68  | 0.3  | 0.22 | 1.08  | 0.49464  | 0.597213 | 0.73129  | 0.760127 |
| MmugDNA.16847.1.S1_at   | MmugDNA.16847.1 | 6.42  | 6.29  | 0.26 | 0.1  | 1.09  | 0.455677 | 0.847476 | 0.705295 | 0.913316 |
| MmugDNA.16848.1.S1_at   | MmugDNA.16848.1 | 5.14  | 5.72  | 0.77 | 0.12 | -1.49 | 0.77717  | 0.919529 | 0.898211 | 0.954822 |
| MmugDNA.16848.1.S1_s_at | MmugDNA.16848.1 | 7.67  | 7.38  | 0.03 | 0.04 | 1.23  | 0.000658 | 0.001166 | 0.071248 | 0.053615 |
| MmugDNA.1685.1.S1_at    | MmugDNA.1685.1  | 6.46  | 5.91  | 0.08 | 0.08 | 1.46  | 0.000806 | 0.080894 | 0.073056 | 0.328864 |
| MmugDNA.16851.1.S1_at   | MmugDNA.16851.1 | 4.64  | 5.2   | 0.94 | 0.6  | -1.48 | 0.431288 | 0.520616 | 0.687415 | 0.711831 |
| MmugDNA.16853.1.S1_at   | MmugDNA.16853.1 | 5.8   | 5.87  | 0.13 | 0.02 | -1.05 | 0.577748 | 0.358217 | 0.783728 | 0.599754 |
| MmugDNA.16854.1.S1_at   | MmugDNA.16854.1 | 7.34  | 6.97  | 0.17 | 0.25 | 1.29  | 0.178165 | 0.56157  | 0.472847 | 0.737502 |
| MmugDNA.16856.1.S1_at   | MmugDNA.16856.1 | 7.54  | 7.4   | 0.05 | 0.12 | 1.1   | 0.165775 | 0.090423 | 0.458756 | 0.344916 |
| MmugDNA.16858.1.S1_at   | MmugDNA.16858.1 | 8.15  | 8.47  | 0.43 | 0.13 | -1.24 | 0.2754   | 0.329928 | 0.567073 | 0.578874 |
| MmugDNA.16858.1.S1_s_at | MmugDNA.16858.1 | 9.5   | 9.8   | 0.32 | 0.06 | -1.23 | 0.216535 | 0.471744 | 0.51433  | 0.679641 |
| MmugDNA.16859.1.S1_at   | MmugDNA.16859.1 | 6.01  | 7.01  | 0.32 | 0.33 | -1.99 | 0.019495 | 0.115582 | 0.192357 | 0.382674 |
| MmugDNA.1686.1.S1_at    | MmugDNA.1686.1  | 3.81  | 3.72  | 0.27 | 0.06 | 1.07  | 0.439651 | 0.49046  | 0.693883 | 0.69247  |
| MmugDNA.16860.1.S1_at   | MmugDNA.16860.1 | 3.24  | 3.24  | 0.07 | 0.02 | 1     | 0.326412 | 0.349695 | 0.609572 | 0.593566 |
| MmugDNA.16861.1.S1_at   | MmugDNA.16861.1 | 7.6   | 6.76  | 0.33 | 0.1  | 1.79  | 0.0219   | 0.019095 | 0.201211 | 0.173864 |
| MmugDNA.16862.1.S1_at   | MmugDNA.16862.1 | 9.39  | 9.03  | 0.11 | 0.08 | 1.28  | 0.01167  | 0.014225 | 0.157852 | 0.152285 |
| MmugDNA.16864.1.S1_at   | MmugDNA.16864.1 | 9.29  | 9.48  | 0.25 | 0.11 | -1.14 | 0.657615 | 0.082476 | 0.834607 | 0.331542 |
| MmugDNA.16865.1.S1_at   | MmugDNA.16865.1 | 9.75  | 9.74  | 0.05 | 0.02 | 1     | 0.970966 | 0.000104 | 0.98847  | 0.028099 |
| MmugDNA.16866.1.S1_at   | MmugDNA.16866.1 | 6.5   | 8.71  | 0.59 | 0.24 | -4.6  | 0.006075 | 0.005749 | 0.124422 | 0.104378 |
| MmugDNA.9610.1.S1_s_at  | MmugDNA.9610.1  | 4.9   | 4.74  | 0.01 | 0.18 | 1.12  | 0.240832 | 0.013182 | 0.538198 | 0.14735  |
| MmugDNA.16868.1.S1_at   | MmugDNA.16868.1 | 7.47  | 6.39  | 0.5  | 0.7  | 2.11  | 0.073551 | 0.117643 | 0.328967 | 0.385352 |
| MmugDNA.1687.1.S1_at    | MmugDNA.1687.1  | 3.19  | 2.9   | 0.47 | 0.11 | 1.23  | 0.385205 | 0.153772 | 0.65405  | 0.42848  |
| MmugDNA.16870.1.S1_at   | MmugDNA.16870.1 | 8.02  | 7.99  | 0.04 | 0.13 | 1.02  | 0.594359 | 0.219083 | 0.794678 | 0.49285  |
| MmugDNA.16871.1.S1_at   | MmugDNA.16871.1 | 3.46  | 3.46  | 0.05 | 0.03 | 1     | 0.635546 | 0.402545 | 0.821491 | 0.631481 |
| MmugDNA.34483.1.S1_s_at | MmugDNA.34483.1 | 4.25  | 4.21  | 0.22 | 0.02 | 1.03  | 0.24486  | 0.2624   | 0.541091 | 0.528655 |
| MmugDNA.16875.1.S1_at   | MmugDNA.16875.1 | 5.7   | 5.59  | 0.05 | 0.08 | 1.08  | 0.069705 | 0.05793  | 0.32242  | 0.287149 |
| MmugDNA.16877.1.S1_at   | MmugDNA.16877.1 | 9.64  | 9.53  | 0.04 | 0.03 | 1.08  | 0.006332 | 0.654593 | 0.125881 | 0.798087 |
| MmugDNA.16879.1.S1_at   | MmugDNA.16879.1 | 4.96  | 5.09  | 0.12 | 0.02 | -1.09 | 0.046523 | 0.356025 | 0.273563 | 0.598012 |
| MmugDNA.1688.1.S1_at    | MmugDNA.1688.1  | 5.91  | 5.02  | 0.34 | 0.37 | 1.86  | 0.031203 | 0.078784 | 0.229712 | 0.325742 |
| MmugDNA.16880.1.S1_at   | MmugDNA.16880.1 | 7.04  | 7.12  | 0.12 | 0.04 | -1.06 | 0.938865 | 0.771178 | 0.974191 | 0.866992 |



|                       |                 |       |       |      |      |       |          |          |          |          |
|-----------------------|-----------------|-------|-------|------|------|-------|----------|----------|----------|----------|
| MmugDNA.16881.1.S1_at | MmugDNA.16881.1 | 4.76  | 5.27  | 0.14 | 0.26 | -1.43 | 0.088969 | 0.054916 | 0.355552 | 0.279778 |
| MmugDNA.16882.1.S1_at | MmugDNA.16882.1 | 5.35  | 5.49  | 0.08 | 0.38 | -1.1  | 0.749618 | 0.389587 | 0.884066 | 0.623668 |
| MmugDNA.16886.1.S1_at | MmugDNA.16886.1 | 7.39  | 6.52  | 0.79 | 0.38 | 1.83  | 0.276575 | 0.366392 | 0.568108 | 0.606087 |
| MmugDNA.16887.1.S1_at | MmugDNA.16887.1 | 5.21  | 5.15  | 0.39 | 0.12 | 1.04  | 0.641144 | 0.70861  | 0.824661 | 0.831    |
| MmugDNA.16888.1.S1_at | MmugDNA.16888.1 | 4.66  | 4.66  | 0.25 | 0.21 | 1     | 0.894849 | 0.845016 | 0.955185 | 0.911799 |
| MmugDNA.16889.1.S1_at | MmugDNA.16889.1 | 7.95  | 8.15  | 0.18 | 0.2  | -1.14 | 0.565498 | 0.002047 | 0.776724 | 0.066887 |
| MmugDNA.1689.1.S1_at  | MmugDNA.1689.1  | 3.44  | 3.35  | 0.1  | 0.08 | 1.07  | 0.132381 | 0.660452 | 0.415749 | 0.80135  |
| MmugDNA.16890.1.S1_at | MmugDNA.16890.1 | 5.91  | 5.44  | 0.57 | 0.14 | 1.39  | 0.22054  | 0.286954 | 0.518282 | 0.548246 |
| MmugDNA.16891.1.S1_at | MmugDNA.16891.1 | 12.6  | 11.64 | 0.11 | 0.26 | 1.93  | 0.006555 | 0.128387 | 0.127421 | 0.399645 |
| MmugDNA.16892.1.S1_at | MmugDNA.16892.1 | 4.38  | 4.33  | 0.09 | 0.06 | 1.03  | 0.450927 | 0.368545 | 0.701868 | 0.608079 |
| MmugDNA.16893.1.S1_at | MmugDNA.16893.1 | 6.71  | 6.2   | 1.99 | 0.47 | 1.42  | 0.726308 | 0.882757 | 0.871526 | 0.93317  |
| MmugDNA.16894.1.S1_at | MmugDNA.16894.1 | 3.49  | 3.38  | 0.06 | 0.11 | 1.08  | 0.247131 | 0.294604 | 0.542766 | 0.554282 |
| MmugDNA.16898.1.S1_at | MmugDNA.16898.1 | 5.8   | 5.83  | 0.4  | 0.02 | -1.02 | 0.909146 | 0.816061 | 0.961496 | 0.893893 |
| MmugDNA.16899.1.S1_at | MmugDNA.16899.1 | 8.96  | 9.21  | 0.54 | 0.13 | -1.19 | 0.688112 | 0.143012 | 0.851038 | 0.41689  |
| MmugDNA.169.1.S1_at   | MmugDNA.169.1   | 3.81  | 3.38  | 0.3  | 0.1  | 1.36  | 0.133852 | 0.157293 | 0.417214 | 0.432782 |
| MmugDNA.1690.1.S1_at  | MmugDNA.1690.1  | 7.05  | 6.35  | 0.59 | 0.18 | 1.62  | 0.061739 | 0.035292 | 0.304962 | 0.232143 |
| MmugDNA.16900.1.S1_at | MmugDNA.16900.1 | 11.14 | 10.88 | 0.14 | 0.01 | 1.2   | 0.013855 | 0.314552 | 0.168765 | 0.568389 |
| MmugDNA.16901.1.S1_at | MmugDNA.16901.1 | 6.56  | 6.57  | 0.48 | 0.15 | -1.01 | 0.885004 | 0.307572 | 0.951005 | 0.563785 |
| MmugDNA.16903.1.S1_at | MmugDNA.16903.1 | 10.35 | 10.6  | 0.26 | 0.06 | -1.19 | 0.543476 | 0.569652 | 0.763461 | 0.742564 |
| MmugDNA.16907.1.S1_at | MmugDNA.16907.1 | 6.8   | 7.06  | 0.26 | 0.26 | -1.19 | 0.125389 | 0.495512 | 0.405837 | 0.695527 |
| MmugDNA.1691.1.S1_at  | MmugDNA.1691.1  | 9.26  | 9.24  | 0.43 | 0.16 | 1.02  | 0.996302 | 0.920199 | 0.998607 | 0.95511  |
| MmugDNA.16911.1.S1_at | MmugDNA.16911.1 | 4.32  | 4.38  | 0.15 | 0.16 | -1.04 | 0.660036 | 0.855716 | 0.836016 | 0.917688 |
| MmugDNA.16914.1.S1_at | MmugDNA.16914.1 | 11.19 | 11.75 | 0.17 | 0.04 | -1.47 | 0.009491 | 0.033889 | 0.147487 | 0.227771 |
| MmugDNA.16915.1.S1_at | MmugDNA.16915.1 | 3.21  | 3.18  | 0.37 | 0.17 | 1.02  | 0.399648 | 0.124559 | 0.664842 | 0.394987 |
| MmugDNA.16916.1.S1_at | MmugDNA.16916.1 | 5.81  | 5.84  | 0.18 | 0.05 | -1.02 | 0.638321 | 0.976521 | 0.822964 | 0.987202 |
| MmugDNA.16917.1.S1_at | MmugDNA.16917.1 | 6.53  | 6.33  | 0.13 | 0.02 | 1.14  | 0.06622  | 0.287942 | 0.314835 | 0.549227 |
| MmugDNA.16918.1.S1_at | MmugDNA.16918.1 | 11.26 | 11.89 | 0.28 | 0.11 | -1.54 | 0.024005 | 0.009883 | 0.208141 | 0.130618 |
| MmugDNA.16919.1.S1_at | MmugDNA.16919.1 | 4.04  | 3.9   | 0.18 | 0.09 | 1.1   | 0.62266  | 0.795613 | 0.813435 | 0.882244 |
| MmugDNA.1692.1.S1_at  | MmugDNA.1692.1  | 3.11  | 3.03  | 0.21 | 0    | 1.06  | 0.392397 | 0.598453 | 0.6594   | 0.760839 |
| MmugDNA.16922.1.S1_at | MmugDNA.16922.1 | 5.26  | 4.62  | 0.39 | 0.18 | 1.56  | 0.1555   | 0.105176 | 0.445869 | 0.366971 |
| MmugDNA.16924.1.S1_at | MmugDNA.16924.1 | 5.04  | 5.14  | 0.32 | 0.09 | -1.07 | 0.648773 | 0.630052 | 0.829361 | 0.782128 |
| MmugDNA.16925.1.S1_at | MmugDNA.16925.1 | 5.37  | 5.6   | 1.13 | 0.15 | -1.18 | 0.702071 | 0.701357 | 0.858655 | 0.826814 |
| MmugDNA.16926.1.S1_at | MmugDNA.16926.1 | 3.26  | 3.26  | 0.09 | 0.2  | -1    | 0.667958 | 0.330577 | 0.840528 | 0.579307 |
| MmugDNA.16927.1.S1_at | MmugDNA.16927.1 | 9.93  | 10.22 | 0.19 | 0.3  | -1.22 | 0.183833 | 0.020587 | 0.479745 | 0.180009 |
| MmugDNA.16928.1.S1_at | MmugDNA.16928.1 | 11.27 | 11.22 | 0.04 | 0.07 | 1.04  | 0.316063 | 0.101392 | 0.600902 | 0.36112  |
| MmugDNA.16929.1.S1_at | MmugDNA.16929.1 | 9.14  | 8.84  | 0.04 | 0.16 | 1.22  | 0.03937  | 0.035891 | 0.25488  | 0.233956 |
| MmugDNA.1693.1.S1_at  | MmugDNA.1693.1  | 4.4   | 4.67  | 0.48 | 0.41 | -1.2  | 0.799675 | 0.164479 | 0.909612 | 0.440679 |
| MmugDNA.16931.1.S1_at | MmugDNA.16931.1 | 5.3   | 4.99  | 0.29 | 0.13 | 1.24  | 0.184899 | 0.161105 | 0.481039 | 0.437279 |
| MmugDNA.16932.1.S1_at | MmugDNA.16932.1 | 3.96  | 3.83  | 0.97 | 0.23 | 1.09  | 0.343574 | 0.357567 | 0.622989 | 0.599214 |
| MmugDNA.16933.1.S1_at | MmugDNA.16933.1 | 4.4   | 4.39  | 0.11 | 0.08 | 1.01  | 0.287385 | 0.281096 | 0.577247 | 0.544228 |
| MmugDNA.16934.1.S1_at | MmugDNA.16934.1 | 6.89  | 6.85  | 1.07 | 0.38 | 1.03  | 0.61216  | 0.780829 | 0.806707 | 0.872833 |
| MmugDNA.16935.1.S1_at | MmugDNA.16935.1 | 6.75  | 7.21  | 0.35 | 0.34 | -1.38 | 0.115498 | 0.499743 | 0.392682 | 0.698494 |
| MmugDNA.16936.1.S1_at | MmugDNA.16936.1 | 3.67  | 3.77  | 0.05 | 0.08 | -1.07 | 0.199119 | 0.335165 | 0.496436 | 0.582938 |

|                         |                 |       |       |      |      |       |          |          |          |          |
|-------------------------|-----------------|-------|-------|------|------|-------|----------|----------|----------|----------|
| MmugDNA.16937.1.S1_at   | MmugDNA.16937.1 | 9.79  | 10.06 | 0.04 | 0.08 | -1.2  | 0.003861 | 0.000566 | 0.107658 | 0.041049 |
| MmugDNA.16938.1.S1_at   | MmugDNA.16938.1 | 5.55  | 5.21  | 0.14 | 0.41 | 1.27  | 0.88811  | 0.708529 | 0.952254 | 0.830943 |
| MmugDNA.16939.1.S1_at   | MmugDNA.16939.1 | 4.03  | 3.85  | 0.15 | 0.06 | 1.13  | 0.059225 | 0.016412 | 0.300415 | 0.162199 |
| MmugDNA.1694.1.S1_at    | MmugDNA.1694.1  | 12.5  | 12.47 | 0.08 | 0.08 | 1.02  | 0.690046 | 0.195845 | 0.851894 | 0.470737 |
| MmugDNA.16940.1.S1_at   | MmugDNA.16940.1 | 11.4  | 11.06 | 0.19 | 0.16 | 1.26  | 0.075362 | 0.131613 | 0.332721 | 0.403716 |
| MmugDNA.16941.1.S1_at   | MmugDNA.16941.1 | 3.78  | 3.7   | 0.47 | 0.12 | 1.06  | 0.880669 | 0.349387 | 0.949282 | 0.593405 |
| MmugDNA.16942.1.S1_at   | MmugDNA.16942.1 | 6.07  | 5.77  | 0.59 | 0.21 | 1.23  | 0.853716 | 0.142975 | 0.936342 | 0.416854 |
| MmugDNA.16943.1.S1_at   | MmugDNA.16943.1 | 6.65  | 7.89  | 0.34 | 0.29 | -2.36 | 0.012927 | 0.121513 | 0.164364 | 0.39064  |
| MmugDNA.16944.1.S1_at   | MmugDNA.16944.1 | 9.95  | 10.03 | 0.16 | 0.19 | -1.06 | 0.352726 | 0.634436 | 0.630029 | 0.784787 |
| MmugDNA.16945.1.S1_at   | MmugDNA.16945.1 | 3.45  | 3.21  | 0.24 | 0.14 | 1.18  | 0.21379  | 0.279333 | 0.511664 | 0.542962 |
| MmugDNA.16946.1.S1_at   | MmugDNA.16946.1 | 6.94  | 6.79  | 0.34 | 0.07 | 1.11  | 0.777106 | 0.932501 | 0.898158 | 0.961723 |
| MmugDNA.16947.1.S1_at   | MmugDNA.16947.1 | 6.2   | 5.95  | 0.03 | 0.13 | 1.18  | 0.04531  | 0.026746 | 0.270318 | 0.204493 |
| MmugDNA.16948.1.S1_at   | MmugDNA.16948.1 | 4.42  | 4.42  | 0.31 | 0.28 | 1     | 0.236398 | 0.38257  | 0.534022 | 0.61876  |
| MmugDNA.16949.1.S1_at   | MmugDNA.16949.1 | 6.14  | 5.95  | 0.01 | 0.16 | 1.14  | 0.154852 | 0.036273 | 0.44505  | 0.235    |
| MmugDNA.1695.1.S1_at    | MmugDNA.1695.1  | 5.33  | 5.34  | 0.11 | 0.09 | -1    | 0.814318 | 0.65728  | 0.91702  | 0.799611 |
| MmugDNA.16951.1.S1_at   | MmugDNA.16951.1 | 6.01  | 6.25  | 0.26 | 0.1  | -1.18 | 0.655737 | 0.412008 | 0.833526 | 0.638434 |
| MmugDNA.16952.1.S1_at   | MmugDNA.16952.1 | 10.17 | 9.49  | 0.25 | 0.1  | 1.6   | 0.00894  | 0.025164 | 0.144294 | 0.198794 |
| MmugDNA.16954.1.S1_at   | MmugDNA.16954.1 | 8.29  | 8.15  | 0.21 | 0.24 | 1.11  | 0.262704 | 0.491664 | 0.556683 | 0.69317  |
| MmugDNA.16955.1.S1_at   | MmugDNA.16955.1 | 9.96  | 9.49  | 0.05 | 0.06 | 1.38  | 0.000691 | 0.022815 | 0.071248 | 0.189214 |
| MmugDNA.16955.1.S1_s_at | MmugDNA.16955.1 | 9.82  | 9.53  | 0.13 | 0.15 | 1.23  | 0.098862 | 0.072221 | 0.369716 | 0.31478  |
| MmugDNA.16956.1.S1_at   | MmugDNA.16956.1 | 8.76  | 9.33  | 0.86 | 0.25 | -1.49 | 0.124594 | 0.505763 | 0.404785 | 0.702218 |
| MmugDNA.16956.1.S1_s_at | MmugDNA.16956.1 | 9.67  | 10.65 | 0.9  | 0.22 | -1.97 | 0.105067 | 0.405555 | 0.378776 | 0.633804 |
| MmugDNA.16957.1.S1_at   | MmugDNA.16957.1 | 12.52 | 12.15 | 0.06 | 0.06 | 1.28  | 0.00231  | 0.145433 | 0.092457 | 0.419421 |
| MmugDNA.1696.1.S1_at    | MmugDNA.1696.1  | 9.5   | 9.22  | 1.02 | 0.32 | 1.21  | 0.404505 | 0.579517 | 0.668229 | 0.74918  |
| MmugDNA.16960.1.S1_at   | MmugDNA.16960.1 | 7.29  | 7.39  | 0.76 | 0.22 | -1.08 | 0.791262 | 0.643993 | 0.905237 | 0.791265 |
| MmugDNA.16961.1.S1_at   | MmugDNA.16961.1 | 6.16  | 5.87  | 0.38 | 0.08 | 1.22  | 0.266305 | 0.375321 | 0.558793 | 0.613336 |
| MmugDNA.16962.1.S1_at   | MmugDNA.16962.1 | 8.51  | 8.52  | 0.13 | 0.14 | -1.01 | 0.505168 | 0.687497 | 0.738175 | 0.817606 |
| MmugDNA.16963.1.S1_at   | MmugDNA.16963.1 | 4.22  | 4.06  | 1.92 | 0.83 | 1.12  | 0.350324 | 0.390097 | 0.628133 | 0.624002 |
| MmugDNA.16964.1.S1_at   | MmugDNA.16964.1 | 3.26  | 3.13  | 0.21 | 0.08 | 1.1   | 0.276842 | 0.283091 | 0.568332 | 0.545692 |
| MmugDNA.16966.1.S1_at   | MmugDNA.16966.1 | 4.63  | 4.64  | 0.07 | 0.27 | -1.01 | 0.860665 | 0.929231 | 0.939536 | 0.959644 |
| MmugDNA.16967.1.S1_at   | MmugDNA.16967.1 | 2.98  | 3.02  | 0.26 | 0.08 | -1.03 | 0.563851 | 0.58583  | 0.775724 | 0.753068 |
| MmugDNA.16968.1.S1_at   | MmugDNA.16968.1 | 6.6   | 6.57  | 0.13 | 0.06 | 1.02  | 0.48689  | 0.464275 | 0.725872 | 0.674987 |
| MmugDNA.16969.1.S1_at   | MmugDNA.16969.1 | 9.62  | 9.54  | 0.1  | 0.09 | 1.06  | 0.223185 | 0.38105  | 0.520981 | 0.617478 |
| MmugDNA.1697.1.S1_at    | MmugDNA.1697.1  | 11.44 | 11.89 | 0.1  | 0.18 | -1.37 | 0.043561 | 0.248495 | 0.265765 | 0.517769 |
| MmugDNA.16970.1.S1_at   | MmugDNA.16970.1 | 8.11  | 9.64  | 0.75 | 0.22 | -2.89 | 0.029912 | 0.056467 | 0.226288 | 0.283516 |
| MmugDNA.16973.1.S1_at   | MmugDNA.16973.1 | 4.56  | 4.27  | 0.22 | 0.13 | 1.22  | 0.128673 | 0.166264 | 0.410774 | 0.442798 |
| MmugDNA.16974.1.S1_at   | MmugDNA.16974.1 | 5.61  | 5.04  | 0.24 | 0.26 | 1.48  | 0.084504 | 0.129938 | 0.348139 | 0.401515 |
| MmugDNA.16975.1.S1_at   | MmugDNA.16975.1 | 8.59  | 8.39  | 0.09 | 0.25 | 1.15  | 0.401272 | 0.284822 | 0.665992 | 0.546966 |
| MmugDNA.16976.1.S1_at   | MmugDNA.16976.1 | 3.46  | 3.26  | 0.11 | 0.44 | 1.15  | 0.687217 | 0.854339 | 0.850791 | 0.91703  |
| MmugDNA.16977.1.S1_at   | MmugDNA.16977.1 | 4.8   | 4.68  | 0.22 | 0.14 | 1.09  | 0.611733 | 0.189666 | 0.806497 | 0.465297 |
| MmugDNA.16978.1.S1_at   | MmugDNA.16978.1 | 7.3   | 7.71  | 0.49 | 0.68 | -1.32 | 0.959708 | 0.099389 | 0.983565 | 0.357673 |
| MmugDNA.16979.1.S1_at   | MmugDNA.16979.1 | 5.23  | 4.8   | 0.35 | 0.25 | 1.35  | 0.035759 | 0.037316 | 0.24405  | 0.237622 |
| MmugDNA.1698.1.S1_at    | MmugDNA.1698.1  | 8.41  | 8.9   | 0.38 | 0.24 | -1.41 | 0.236997 | 0.498474 | 0.534591 | 0.697581 |

|                         |                 |       |       |      |      |       |          |          |          |          |
|-------------------------|-----------------|-------|-------|------|------|-------|----------|----------|----------|----------|
| MmugDNA.16981.1.S1_at   | MmugDNA.16981.1 | 3.52  | 3.5   | 0.11 | 0.11 | 1.01  | 0.236611 | 0.422724 | 0.534305 | 0.645895 |
| MmugDNA.16985.1.S1_at   | MmugDNA.16985.1 | 6.84  | 6.39  | 0.2  | 0.15 | 1.37  | 0.019496 | 0.055891 | 0.192357 | 0.282185 |
| MmugDNA.16986.1.S1_at   | MmugDNA.16986.1 | 3.03  | 2.98  | 0.12 | 0.08 | 1.04  | 0.16885  | 0.305278 | 0.462083 | 0.562255 |
| MmugDNA.16988.1.S1_at   | MmugDNA.16988.1 | 10.77 | 10.74 | 0.13 | 0.03 | 1.02  | 0.98421  | 0.240217 | 0.994129 | 0.510844 |
| MmugDNA.16989.1.S1_at   | MmugDNA.16989.1 | 5.8   | 6.74  | 0.82 | 0.64 | -1.92 | 0.10601  | 0.05751  | 0.380025 | 0.285898 |
| MmugDNA.16990.1.S1_at   | MmugDNA.16990.1 | 7.76  | 7.33  | 0.3  | 0.21 | 1.35  | 0.069261 | 0.065447 | 0.32135  | 0.301415 |
| MmugDNA.16991.1.S1_at   | MmugDNA.16991.1 | 6.04  | 6.22  | 0.07 | 0.05 | -1.13 | 0.041507 | 0.483384 | 0.260105 | 0.687904 |
| MmugDNA.16992.1.S1_at   | MmugDNA.16992.1 | 4.47  | 3.95  | 0.31 | 0.49 | 1.43  | 0.10745  | 0.215899 | 0.382148 | 0.489536 |
| MmugDNA.16993.1.S1_at   | MmugDNA.16993.1 | 9.78  | 9.83  | 0.6  | 0.01 | -1.04 | 0.577984 | 0.794359 | 0.783846 | 0.881371 |
| MmugDNA.16994.1.S1_at   | MmugDNA.16994.1 | 7.1   | 7.08  | 0.04 | 0.15 | 1.02  | 0.927535 | 0.353671 | 0.969315 | 0.596752 |
| MmugDNA.16995.1.S1_at   | MmugDNA.16995.1 | 4.79  | 4.58  | 0.32 | 0.17 | 1.16  | 0.29528  | 0.369197 | 0.584116 | 0.608669 |
| MmugDNA.16996.1.S1_at   | MmugDNA.16996.1 | 6.36  | 5.99  | 0.84 | 0.69 | 1.28  | 0.793398 | 0.845772 | 0.906582 | 0.912243 |
| MmugDNA.16997.1.S1_at   | MmugDNA.16997.1 | 5.57  | 5.11  | 0.46 | 0.85 | 1.38  | 0.531399 | 0.368089 | 0.75568  | 0.607669 |
| MmugDNA.16998.1.S1_at   | MmugDNA.16998.1 | 6.41  | 6.26  | 0.27 | 0.05 | 1.11  | 0.292973 | 0.291778 | 0.581994 | 0.552054 |
| MmugDNA.16999.1.S1_at   | MmugDNA.16999.1 | 4.62  | 4.69  | 0.18 | 0.05 | -1.05 | 0.703463 | 0.095137 | 0.859271 | 0.352151 |
| MmugDNA.17.1.S1_at      | MmugDNA.17.1    | 9.46  | 9.16  | 0.31 | 0.19 | 1.22  | 0.857578 | 0.51802  | 0.938079 | 0.710089 |
| MmugDNA.1700.1.S1_at    | MmugDNA.1700.1  | 11.78 | 11.92 | 0.1  | 0.07 | -1.1  | 0.392922 | 0.198714 | 0.659778 | 0.473391 |
| MmugDNA.17000.1.S1_at   | MmugDNA.17000.1 | 5.9   | 5.52  | 0.55 | 0.45 | 1.3   | 0.180602 | 0.197187 | 0.475759 | 0.472213 |
| MmugDNA.17001.1.S1_at   | MmugDNA.17001.1 | 9.12  | 8.87  | 0.29 | 0.24 | 1.19  | 0.117948 | 0.203544 | 0.395518 | 0.477767 |
| MmugDNA.17003.1.S1_at   | MmugDNA.17003.1 | 6.85  | 6.77  | 0.04 | 0.15 | 1.06  | 0.336732 | 0.085969 | 0.617287 | 0.338116 |
| MmugDNA.17007.1.S1_at   | MmugDNA.17007.1 | 3.93  | 4.06  | 0.17 | 0.12 | -1.09 | 0.717622 | 0.884729 | 0.866658 | 0.934321 |
| MmugDNA.17008.1.S1_at   | MmugDNA.17008.1 | 5.75  | 5.47  | 0.21 | 0.07 | 1.21  | 0.303665 | 0.461582 | 0.591084 | 0.673165 |
| MmugDNA.17009.1.S1_at   | MmugDNA.17009.1 | 12.11 | 12    | 0.06 | 0.03 | 1.08  | 0.082349 | 0.000146 | 0.34399  | 0.029509 |
| MmugDNA.17010.1.S1_at   | MmugDNA.17010.1 | 11.03 | 10.59 | 0.12 | 0.19 | 1.35  | 0.011028 | 0.007427 | 0.154669 | 0.115849 |
| MmugDNA.17011.1.S1_at   | MmugDNA.17011.1 | 2.97  | 2.98  | 0.12 | 0.19 | -1    | 0.713203 | 0.686911 | 0.864601 | 0.817365 |
| MmugDNA.17012.1.S1_at   | MmugDNA.17012.1 | 6.59  | 7     | 0.24 | 0.19 | -1.33 | 0.145288 | 0.18257  | 0.43259  | 0.459065 |
| MmugDNA.17014.1.S1_at   | MmugDNA.17014.1 | 3.04  | 2.99  | 0.15 | 0.21 | 1.03  | 0.560097 | 0.718553 | 0.773651 | 0.837072 |
| MmugDNA.17015.1.S1_at   | MmugDNA.17015.1 | 4.46  | 4.62  | 0.48 | 0.61 | -1.12 | 0.34917  | 0.316242 | 0.627063 | 0.56973  |
| MmugDNA.17019.1.S1_at   | MmugDNA.17019.1 | 4.66  | 4.66  | 0.33 | 0.35 | 1     | 0.686429 | 0.572585 | 0.850595 | 0.744568 |
| MmugDNA.17020.1.S1_at   | MmugDNA.17020.1 | 5.71  | 5.76  | 0.09 | 0.25 | -1.03 | 0.659784 | 0.062295 | 0.835796 | 0.296419 |
| MmugDNA.17022.1.S1_at   | MmugDNA.17022.1 | 6.73  | 7.44  | 1.01 | 0.11 | -1.64 | 0.379704 | 0.42066  | 0.649467 | 0.644323 |
| MmugDNA.17023.1.S1_at   | MmugDNA.17023.1 | 2.85  | 2.77  | 0.03 | 0.07 | 1.06  | 0.322707 | 0.21831  | 0.606575 | 0.491857 |
| MmugDNA.17024.1.S1_at   | MmugDNA.17024.1 | 3.5   | 3.57  | 0.21 | 0.15 | -1.05 | 0.802265 | 0.741184 | 0.911218 | 0.850135 |
| MmugDNA.17026.1.S1_at   | MmugDNA.17026.1 | 4.42  | 4.37  | 0.01 | 0.06 | 1.03  | 0.238963 | 0.877505 | 0.53622  | 0.930162 |
| MmugDNA.17027.1.S1_at   | MmugDNA.17027.1 | 11.29 | 11.76 | 0.24 | 0.05 | -1.39 | 0.030991 | 0.029642 | 0.229092 | 0.213852 |
| MmugDNA.17028.1.S1_s_at | MmugDNA.17028.1 | 8.49  | 8.96  | 0.22 | 0.01 | -1.38 | 0.021944 | 0.0099   | 0.201313 | 0.130713 |
| MmugDNA.1703.1.S1_at    | MmugDNA.1703.1  | 8.65  | 8.64  | 0.26 | 0.24 | 1     | 0.921024 | 0.439471 | 0.966268 | 0.6582   |
| MmugDNA.17030.1.S1_at   | MmugDNA.17030.1 | 6.7   | 6.78  | 0.01 | 0.12 | -1.06 | 0.896123 | 0.994418 | 0.955728 | 0.996586 |
| MmugDNA.17032.1.S1_at   | MmugDNA.17032.1 | 12.2  | 12.29 | 0.05 | 0.09 | -1.06 | 0.196701 | 0.236971 | 0.493784 | 0.507675 |
| MmugDNA.17033.1.S1_at   | MmugDNA.17033.1 | 9.85  | 8.67  | 0.5  | 0.16 | 2.27  | 0.029754 | 0.029314 | 0.225738 | 0.21321  |
| MmugDNA.17035.1.S1_at   | MmugDNA.17035.1 | 4.52  | 4.2   | 0.38 | 0.22 | 1.25  | 0.249593 | 0.35823  | 0.544677 | 0.599754 |
| MmugDNA.17037.1.S1_at   | MmugDNA.17037.1 | 3.16  | 3.01  | 0.07 | 0.03 | 1.11  | 0.021955 | 0.061282 | 0.201313 | 0.294247 |
| MmugDNA.1704.1.S1_at    | MmugDNA.1704.1  | 8.6   | 11.23 | 1.58 | 0.17 | -6.17 | 0.151248 | 0.540095 | 0.440803 | 0.724122 |

|                         |                 |       |       |      |      |       |          |          |          |          |
|-------------------------|-----------------|-------|-------|------|------|-------|----------|----------|----------|----------|
| MmugDNA.17040.1.S1_at   | MmugDNA.17040.1 | 7.39  | 7.39  | 0.38 | 0.16 | 1     | 0.283001 | 0.745374 | 0.573538 | 0.852384 |
| MmugDNA.17041.1.S1_at   | MmugDNA.17041.1 | 3.69  | 3.62  | 0.27 | 0.3  | 1.05  | 0.822607 | 0.953921 | 0.921047 | 0.97374  |
| MmugDNA.17042.1.S1_at   | MmugDNA.17042.1 | 9.01  | 8.8   | 0.15 | 0.12 | 1.16  | 0.111126 | 0.081767 | 0.3869   | 0.330121 |
| MmugDNA.17043.1.S1_at   | MmugDNA.17043.1 | 4     | 4.08  | 0.02 | 0.06 | -1.06 | 0.094673 | 0.637948 | 0.363621 | 0.787234 |
| MmugDNA.17045.1.S1_at   | MmugDNA.17045.1 | 4.92  | 4.69  | 0.25 | 0.15 | 1.17  | 0.582334 | 0.352232 | 0.78718  | 0.595568 |
| MmugDNA.17046.1.S1_at   | MmugDNA.17046.1 | 4.73  | 4.74  | 0.08 | 0.03 | -1    | 0.32917  | 0.217754 | 0.611504 | 0.491309 |
| MmugDNA.17047.1.S1_at   | MmugDNA.17047.1 | 4.25  | 4.49  | 0.36 | 0.21 | -1.18 | 0.873763 | 0.964368 | 0.945733 | 0.980183 |
| MmugDNA.1705.1.S1_at    | MmugDNA.1705.1  | 3.39  | 2.89  | 0.3  | 0.1  | 1.41  | 0.050695 | 0.052768 | 0.282967 | 0.275325 |
| MmugDNA.17050.1.S1_at   | MmugDNA.17050.1 | 6.94  | 6.91  | 0.34 | 0.27 | 1.02  | 0.928395 | 0.523248 | 0.969772 | 0.713624 |
| MmugDNA.17054.1.S1_at   | MmugDNA.17054.1 | 4.3   | 4.13  | 0.15 | 0.06 | 1.12  | 0.261205 | 0.336326 | 0.555294 | 0.583813 |
| MmugDNA.17055.1.S1_at   | MmugDNA.17055.1 | 6.43  | 6.57  | 0.2  | 0.21 | -1.1  | 0.677194 | 0.3764   | 0.846031 | 0.614243 |
| MmugDNA.17057.1.S1_at   | MmugDNA.17057.1 | 9.76  | 9.93  | 0.55 | 0.07 | -1.12 | 0.428728 | 0.529769 | 0.685503 | 0.717498 |
| MmugDNA.17057.1.S1_s_at | MmugDNA.17057.1 | 10.71 | 10.84 | 0.29 | 0.04 | -1.1  | 0.165145 | 0.663601 | 0.458108 | 0.803032 |
| MmugDNA.17058.1.S1_at   | MmugDNA.17058.1 | 4.76  | 4.78  | 0.45 | 0.05 | -1.01 | 0.359473 | 0.448734 | 0.635082 | 0.664584 |
| MmugDNA.1706.1.S1_at    | MmugDNA.1706.1  | 6.41  | 6.07  | 0.27 | 0.36 | 1.26  | 0.354602 | 0.284345 | 0.631745 | 0.54659  |
| MmugDNA.17060.1.S1_s_at | MmugDNA.17060.1 | 8.62  | 8.39  | 0.36 | 0.05 | 1.18  | 0.390316 | 0.577954 | 0.657974 | 0.748185 |
| MmugDNA.17061.1.S1_at   | MmugDNA.17061.1 | 4.43  | 4.45  | 0.69 | 0.19 | -1.01 | 0.526573 | 0.722431 | 0.752684 | 0.839239 |
| MmugDNA.17062.1.S1_at   | MmugDNA.17062.1 | 6.61  | 6.59  | 0.15 | 0.07 | 1.01  | 0.781779 | 0.939503 | 0.900329 | 0.965642 |
| MmugDNA.17063.1.S1_at   | MmugDNA.17063.1 | 3.1   | 3.4   | 0.16 | 0.13 | -1.23 | 0.070801 | 0.134628 | 0.324317 | 0.406629 |
| MmugDNA.17064.1.S1_at   | MmugDNA.17064.1 | 5.19  | 4.92  | 0.14 | 0.22 | 1.21  | 0.44734  | 0.682433 | 0.699354 | 0.814526 |
| MmugDNA.17066.1.S1_at   | MmugDNA.17066.1 | 7     | 7.26  | 0.19 | 0.12 | -1.2  | 0.229309 | 0.175606 | 0.528095 | 0.45218  |
| MmugDNA.17067.1.S1_at   | MmugDNA.17067.1 | 5.42  | 4.94  | 0.21 | 0.29 | 1.39  | 0.028358 | 0.040493 | 0.220919 | 0.246264 |
| MmugDNA.1707.1.S1_at    | MmugDNA.1707.1  | 13.05 | 12.81 | 0.06 | 0.09 | 1.18  | 0.051083 | 0.028566 | 0.283595 | 0.210791 |
| MmugDNA.17070.1.S1_at   | MmugDNA.17070.1 | 3.93  | 3.91  | 0.14 | 0.31 | 1.01  | 0.911087 | 0.635258 | 0.962223 | 0.78529  |
| MmugDNA.17071.1.S1_at   | MmugDNA.17071.1 | 4.48  | 4.46  | 0.04 | 0.1  | 1.01  | 0.692456 | 0.729945 | 0.853064 | 0.843733 |
| MmugDNA.17074.1.S1_at   | MmugDNA.17074.1 | 4.66  | 4.35  | 0.18 | 0.11 | 1.24  | 0.244639 | 0.438035 | 0.540961 | 0.657058 |
| MmugDNA.17077.1.S1_at   | MmugDNA.17077.1 | 3.61  | 3.43  | 0.19 | 0.49 | 1.13  | 0.781815 | 0.723103 | 0.900329 | 0.839592 |
| MmugDNA.17078.1.S1_at   | MmugDNA.17078.1 | 3.08  | 3.22  | 0.33 | 0.11 | -1.11 | 0.725214 | 0.124731 | 0.871051 | 0.39513  |
| MmugDNA.17079.1.S1_at   | MmugDNA.17079.1 | 3.38  | 3.41  | 0.06 | 0.11 | -1.02 | 0.177436 | 0.304848 | 0.472172 | 0.561994 |
| MmugDNA.1708.1.S1_at    | MmugDNA.1708.1  | 6.98  | 6.96  | 0.08 | 0.03 | 1.01  | 0.505906 | 0.541767 | 0.738743 | 0.725057 |
| MmugDNA.17080.1.S1_at   | MmugDNA.17080.1 | 4.58  | 4.5   | 0.08 | 0.23 | 1.06  | 0.692361 | 0.09791  | 0.852986 | 0.355715 |
| MmugDNA.17081.1.S1_at   | MmugDNA.17081.1 | 5.89  | 5.87  | 0.55 | 0.21 | 1.02  | 0.279517 | 0.375011 | 0.570786 | 0.613186 |
| MmugDNA.17082.1.S1_at   | MmugDNA.17082.1 | 6.48  | 5.51  | 0.36 | 0.22 | 1.96  | 0.024849 | 0.031898 | 0.210692 | 0.220981 |
| MmugDNA.17085.1.S1_at   | MmugDNA.17085.1 | 6.34  | 6.43  | 0.35 | 0.05 | -1.06 | 0.696958 | 0.784383 | 0.855721 | 0.87518  |
| MmugDNA.17086.1.S1_at   | MmugDNA.17086.1 | 8.87  | 9.24  | 0.12 | 0.06 | -1.29 | 0.017267 | 0.000229 | 0.184559 | 0.032385 |
| MmugDNA.17087.1.S1_at   | MmugDNA.17087.1 | 4.48  | 4.62  | 0.04 | 0.07 | -1.1  | 0.031586 | 0.036231 | 0.231141 | 0.234925 |
| MmugDNA.17089.1.S1_at   | MmugDNA.17089.1 | 5.32  | 5.44  | 0    | 0.26 | -1.09 | 0.439386 | 0.30546  | 0.693654 | 0.562418 |
| MmugDNA.1709.1.S1_at    | MmugDNA.1709.1  | 4.1   | 3.86  | 0.22 | 0.23 | 1.18  | 0.247886 | 0.324537 | 0.543263 | 0.57507  |
| MmugDNA.17090.1.S1_at   | MmugDNA.17090.1 | 5.06  | 6.07  | 1.12 | 0.3  | -2.01 | 0.590859 | 0.136726 | 0.792097 | 0.409287 |
| MmugDNA.17091.1.S1_at   | MmugDNA.17091.1 | 3.27  | 3.24  | 0.05 | 0.05 | 1.02  | 0.383175 | 0.1688   | 0.652502 | 0.445458 |
| MmugDNA.17092.1.S1_at   | MmugDNA.17092.1 | 8.08  | 7.82  | 0.38 | 0.23 | 1.2   | 0.859024 | 0.78744  | 0.938911 | 0.877025 |
| MmugDNA.17094.1.S1_at   | MmugDNA.17094.1 | 8.21  | 8.42  | 0.21 | 0.04 | -1.16 | 0.507908 | 0.411382 | 0.740153 | 0.638119 |
| MmugDNA.17095.1.S1_at   | MmugDNA.17095.1 | 4.18  | 4.24  | 1.01 | 0.1  | -1.04 | 0.444809 | 0.549077 | 0.697566 | 0.729559 |

|                         |                 |      |       |      |      |       |          |          |          |          |
|-------------------------|-----------------|------|-------|------|------|-------|----------|----------|----------|----------|
| MmugDNA.17096.1.S1_at   | MmugDNA.17096.1 | 3.85 | 3.74  | 0.18 | 0.36 | 1.08  | 0.948779 | 0.960457 | 0.978619 | 0.977507 |
| MmugDNA.17098.1.S1_at   | MmugDNA.17098.1 | 5.88 | 5.5   | 0.16 | 0.24 | 1.3   | 0.252591 | 0.311954 | 0.547204 | 0.566833 |
| MmugDNA.171.1.S1_at     | MmugDNA.171.1   | 4.13 | 3.96  | 0.32 | 0.04 | 1.13  | 0.268702 | 0.370755 | 0.561271 | 0.609736 |
| MmugDNA.1710.1.S1_at    | MmugDNA.1710.1  | 6.45 | 5.55  | 0.55 | 0.16 | 1.88  | 0.15671  | 0.37819  | 0.447252 | 0.615438 |
| MmugDNA.17101.1.S1_at   | MmugDNA.17101.1 | 5.25 | 5.19  | 0.22 | 0.22 | 1.04  | 0.356434 | 0.380905 | 0.632731 | 0.617426 |
| MmugDNA.17102.1.S1_s_at | MmugDNA.17102.1 | 7.89 | 8.77  | 0.39 | 0.23 | -1.85 | 0.106834 | 0.061206 | 0.381118 | 0.294035 |
| MmugDNA.17104.1.S1_at   | MmugDNA.17104.1 | 6.6  | 6.6   | 0.44 | 0.13 | -1    | 0.292649 | 0.198559 | 0.581743 | 0.473391 |
| MmugDNA.17106.1.S1_s_at | MmugDNA.17106.1 | 9.96 | 10.98 | 0.34 | 0.2  | -2.03 | 0.018159 | 0.161545 | 0.187719 | 0.43767  |
| MmugDNA.17107.1.S1_at   | MmugDNA.17107.1 | 7.99 | 8.02  | 0.07 | 0.15 | -1.02 | 0.876258 | 0.056361 | 0.94701  | 0.283382 |
| MmugDNA.17108.1.S1_at   | MmugDNA.17108.1 | 4.9  | 4.91  | 0    | 0.06 | -1    | 0.887018 | 0.965351 | 0.951875 | 0.980657 |
| MmugDNA.17110.1.S1_at   | MmugDNA.17110.1 | 3.69 | 3.7   | 0.12 | 0.14 | -1    | 0.958588 | 0.996861 | 0.983135 | 0.998202 |
| MmugDNA.17112.1.S1_at   | MmugDNA.17112.1 | 3.32 | 3.64  | 0.81 | 0.21 | -1.25 | 0.970907 | 0.87752  | 0.988445 | 0.930162 |
| MmugDNA.17114.1.S1_at   | MmugDNA.17114.1 | 4.29 | 4.2   | 0.13 | 0.06 | 1.06  | 0.27755  | 0.611406 | 0.569083 | 0.769296 |
| MmugDNA.17115.1.S1_at   | MmugDNA.17115.1 | 7.97 | 7.57  | 0.27 | 0.1  | 1.32  | 0.196552 | 0.659267 | 0.493604 | 0.80063  |
| MmugDNA.17116.1.S1_at   | MmugDNA.17116.1 | 8.78 | 7.71  | 0.55 | 0.2  | 2.09  | 0.090423 | 0.230168 | 0.357185 | 0.502015 |
| MmugDNA.17117.1.S1_at   | MmugDNA.17117.1 | 2.73 | 2.85  | 0.13 | 0.13 | -1.09 | 0.139377 | 0.208418 | 0.424947 | 0.482316 |
| MmugDNA.17119.1.S1_at   | MmugDNA.17119.1 | 3.26 | 3.18  | 0.1  | 0.06 | 1.05  | 0.392811 | 0.555319 | 0.659698 | 0.733767 |
| MmugDNA.1712.1.S1_at    | MmugDNA.1712.1  | 4.04 | 4.09  | 0.75 | 0.26 | -1.03 | 0.687389 | 0.326141 | 0.850804 | 0.576328 |
| MmugDNA.17120.1.S1_at   | MmugDNA.17120.1 | 6.32 | 6.84  | 0.36 | 0.15 | -1.44 | 0.106072 | 0.322032 | 0.380136 | 0.57365  |
| MmugDNA.17121.1.S1_at   | MmugDNA.17121.1 | 13   | 13.07 | 0.13 | 0.06 | -1.05 | 0.234685 | 0.426087 | 0.532792 | 0.648279 |
| MmugDNA.17123.1.S1_at   | MmugDNA.17123.1 | 4.2  | 4.08  | 0.57 | 0.21 | 1.08  | 0.458481 | 0.63783  | 0.707068 | 0.787216 |
| MmugDNA.17124.1.S1_at   | MmugDNA.17124.1 | 6.64 | 6.24  | 0.21 | 0.31 | 1.32  | 0.077946 | 0.072673 | 0.337174 | 0.31561  |
| MmugDNA.17126.1.S1_at   | MmugDNA.17126.1 | 5.62 | 5.93  | 0.61 | 0.65 | -1.24 | 0.270083 | 0.053822 | 0.562292 | 0.277535 |
| MmugDNA.17127.1.S1_at   | MmugDNA.17127.1 | 6.59 | 6.83  | 0.15 | 0.52 | -1.18 | 0.257485 | 0.56083  | 0.551704 | 0.736987 |
| MmugDNA.17127.1.S1_s_at | MmugDNA.17127.1 | 6.43 | 6.98  | 0.15 | 0.11 | -1.47 | 0.008604 | 0.086372 | 0.142363 | 0.338805 |
| MmugDNA.17128.1.S1_at   | MmugDNA.17128.1 | 3.81 | 3.66  | 0.7  | 0.01 | 1.11  | 0.265391 | 0.183253 | 0.558032 | 0.459553 |
| MmugDNA.17129.1.S1_at   | MmugDNA.17129.1 | 5.37 | 7.34  | 1.15 | 0.23 | -3.91 | 0.072703 | 0.270198 | 0.327657 | 0.535543 |
| MmugDNA.1713.1.S1_at    | MmugDNA.1713.1  | 4.15 | 4.45  | 0.7  | 0.5  | -1.23 | 0.916662 | 0.559467 | 0.964555 | 0.736301 |
| MmugDNA.17130.1.S1_at   | MmugDNA.17130.1 | 5.83 | 5.78  | 0.16 | 0.21 | 1.03  | 0.771948 | 0.131738 | 0.895533 | 0.40387  |
| MmugDNA.17131.1.S1_at   | MmugDNA.17131.1 | 5.59 | 6.03  | 0.45 | 0.18 | -1.35 | 0.268075 | 0.070614 | 0.560779 | 0.311913 |
| MmugDNA.17132.1.S1_at   | MmugDNA.17132.1 | 5.09 | 5.47  | 0.12 | 0.25 | -1.3  | 0.080449 | 0.068789 | 0.341026 | 0.308711 |
| MmugDNA.17133.1.S1_at   | MmugDNA.17133.1 | 4.55 | 4.57  | 0.38 | 0.21 | -1.02 | 0.277853 | 0.322412 | 0.569311 | 0.573972 |
| MmugDNA.17134.1.S1_at   | MmugDNA.17134.1 | 6.47 | 6.36  | 0.16 | 0.17 | 1.08  | 0.465645 | 0.789732 | 0.711634 | 0.878519 |
| MmugDNA.17136.1.S1_at   | MmugDNA.17136.1 | 7.31 | 6.12  | 1.39 | 0.44 | 2.29  | 0.234315 | 0.321719 | 0.532434 | 0.573355 |
| MmugDNA.17137.1.S1_at   | MmugDNA.17137.1 | 8.61 | 8.57  | 0.17 | 0.12 | 1.03  | 0.268497 | 0.009367 | 0.561073 | 0.127634 |
| MmugDNA.17138.1.S1_at   | MmugDNA.17138.1 | 3.55 | 3.43  | 0.16 | 0.21 | 1.08  | 0.982091 | 0.750088 | 0.993403 | 0.854691 |
| MmugDNA.17141.1.S1_at   | MmugDNA.17141.1 | 2.91 | 2.94  | 0.04 | 0.08 | -1.02 | 0.323168 | 0.760856 | 0.607056 | 0.86105  |
| MmugDNA.17144.1.S1_at   | MmugDNA.17144.1 | 3.04 | 3.07  | 0.2  | 0.11 | -1.02 | 0.876981 | 0.697328 | 0.94745  | 0.824132 |
| MmugDNA.17146.1.S1_at   | MmugDNA.17146.1 | 5.4  | 5.5   | 0.22 | 0.37 | -1.07 | 0.968431 | 0.997299 | 0.987529 | 0.998549 |
| MmugDNA.17147.1.S1_at   | MmugDNA.17147.1 | 6.79 | 6.73  | 0.09 | 0.22 | 1.04  | 0.677567 | 0.862066 | 0.846252 | 0.921619 |
| MmugDNA.17148.1.S1_at   | MmugDNA.17148.1 | 5.25 | 5.66  | 0.15 | 0.05 | -1.33 | 0.016664 | 0.353352 | 0.182466 | 0.596477 |
| MmugDNA.17149.1.S1_at   | MmugDNA.17149.1 | 4.35 | 3.59  | 0.7  | 0.12 | 1.69  | 0.168485 | 0.213933 | 0.461789 | 0.487596 |
| MmugDNA.17150.1.S1_at   | MmugDNA.17150.1 | 6.71 | 6.47  | 0.22 | 0.06 | 1.18  | 0.1487   | 0.072695 | 0.437305 | 0.31561  |

|                         |                 |       |       |      |      |       |          |          |          |          |
|-------------------------|-----------------|-------|-------|------|------|-------|----------|----------|----------|----------|
| MmugDNA.17151.1.S1_at   | MmugDNA.17151.1 | 4.48  | 4.61  | 0.06 | 0.15 | -1.09 | 0.369532 | 0.479165 | 0.642934 | 0.684975 |
| MmugDNA.17152.1.S1_at   | MmugDNA.17152.1 | 3.56  | 3.72  | 0.15 | 0.19 | -1.12 | 0.18789  | 0.019017 | 0.484149 | 0.173605 |
| MmugDNA.17153.1.S1_at   | MmugDNA.17153.1 | 5.1   | 5.01  | 0.15 | 0.08 | 1.07  | 0.412606 | 0.410363 | 0.674202 | 0.637229 |
| MmugDNA.17154.1.S1_at   | MmugDNA.17154.1 | 6.13  | 6.03  | 0.17 | 0.07 | 1.07  | 0.402991 | 0.498844 | 0.667108 | 0.697821 |
| MmugDNA.17155.1.S1_at   | MmugDNA.17155.1 | 2.96  | 2.96  | 0.04 | 0.09 | 1     | 0.249932 | 0.344762 | 0.544845 | 0.590101 |
| MmugDNA.17156.1.S1_at   | MmugDNA.17156.1 | 4.71  | 4.48  | 0.12 | 0.07 | 1.17  | 0.050866 | 0.110268 | 0.283144 | 0.374403 |
| MmugDNA.17157.1.S1_at   | MmugDNA.17157.1 | 7.56  | 7.5   | 0.1  | 0.11 | 1.04  | 0.368999 | 0.386108 | 0.642549 | 0.621345 |
| MmugDNA.17157.1.S1_x_at | MmugDNA.17157.1 | 7.69  | 7.67  | 0.04 | 0.1  | 1.01  | 0.709206 | 0.777908 | 0.86235  | 0.870964 |
| MmugDNA.1716.1.S1_at    | MmugDNA.1716.1  | 7.23  | 7.32  | 0.43 | 0.17 | -1.06 | 0.30455  | 0.43618  | 0.591677 | 0.655879 |
| MmugDNA.17160.1.S1_at   | MmugDNA.17160.1 | 8.68  | 9.02  | 0.17 | 0.22 | -1.26 | 0.53282  | 0.355851 | 0.756693 | 0.597864 |
| MmugDNA.17161.1.S1_at   | MmugDNA.17161.1 | 3.21  | 3.2   | 0.12 | 0.09 | 1     | 0.351186 | 0.52779  | 0.628851 | 0.716271 |
| MmugDNA.17162.1.S1_at   | MmugDNA.17162.1 | 5.76  | 7.91  | 0.49 | 0.03 | -4.42 | 0.002743 | 0.0095   | 0.09702  | 0.128375 |
| MmugDNA.17163.1.S1_at   | MmugDNA.17163.1 | 6.68  | 7.21  | 0.46 | 0.12 | -1.44 | 0.127654 | 0.064719 | 0.409569 | 0.300314 |
| MmugDNA.17165.1.S1_at   | MmugDNA.17165.1 | 5.21  | 5.02  | 0.38 | 0.09 | 1.15  | 0.205551 | 0.101478 | 0.503307 | 0.361278 |
| MmugDNA.17167.1.S1_at   | MmugDNA.17167.1 | 6.04  | 6.03  | 0.4  | 0.06 | 1.01  | 0.312117 | 0.336918 | 0.598216 | 0.584156 |
| MmugDNA.17168.1.S1_at   | MmugDNA.17168.1 | 3.52  | 3.47  | 0.07 | 0.04 | 1.03  | 0.367642 | 0.801709 | 0.641471 | 0.885902 |
| MmugDNA.17169.1.S1_at   | MmugDNA.17169.1 | 7.81  | 7.51  | 0.1  | 0.13 | 1.23  | 0.037431 | 0.081583 | 0.248934 | 0.329808 |
| MmugDNA.1717.1.S1_at    | MmugDNA.1717.1  | 11.49 | 11.02 | 0.17 | 0.06 | 1.38  | 0.007691 | 0.541888 | 0.136386 | 0.725146 |
| MmugDNA.17170.1.S1_at   | MmugDNA.17170.1 | 6     | 5.98  | 0.25 | 0.05 | 1.02  | 0.41679  | 0.516798 | 0.677133 | 0.70925  |
| MmugDNA.17171.1.S1_at   | MmugDNA.17171.1 | 8.17  | 8.1   | 0.58 | 0.2  | 1.05  | 0.320889 | 0.483505 | 0.605315 | 0.687943 |
| MmugDNA.17172.1.S1_at   | MmugDNA.17172.1 | 8.79  | 9.15  | 0.09 | 0.25 | -1.29 | 0.101081 | 0.001929 | 0.372328 | 0.065719 |
| MmugDNA.17173.1.S1_at   | MmugDNA.17173.1 | 3.41  | 3.3   | 0.22 | 0.11 | 1.08  | 0.387423 | 0.527233 | 0.655563 | 0.715896 |
| MmugDNA.17175.1.S1_at   | MmugDNA.17175.1 | 8.13  | 8.4   | 0.63 | 0.49 | -1.21 | 0.55044  | 0.50854  | 0.767803 | 0.703695 |
| MmugDNA.17176.1.S1_at   | MmugDNA.17176.1 | 3.66  | 3.58  | 0.1  | 0.05 | 1.06  | 0.252973 | 0.273286 | 0.547557 | 0.537788 |
| MmugDNA.17177.1.S1_at   | MmugDNA.17177.1 | 5.59  | 5.24  | 0.33 | 0.55 | 1.28  | 0.888947 | 0.985517 | 0.952689 | 0.991808 |
| MmugDNA.17178.1.S1_at   | MmugDNA.17178.1 | 8.55  | 8.6   | 0.12 | 0.12 | -1.03 | 0.984115 | 0.027761 | 0.9941   | 0.208034 |
| MmugDNA.17179.1.S1_at   | MmugDNA.17179.1 | 4.84  | 4.68  | 0.16 | 0.1  | 1.12  | 0.109305 | 0.525771 | 0.384379 | 0.715217 |
| MmugDNA.1718.1.S1_at    | MmugDNA.1718.1  | 10.4  | 10.35 | 0.21 | 0.11 | 1.04  | 0.339832 | 0.064555 | 0.620026 | 0.300255 |
| MmugDNA.17180.1.S1_at   | MmugDNA.17180.1 | 10.65 | 10.85 | 0.03 | 0.04 | -1.15 | 0.00345  | 0.062183 | 0.103385 | 0.296296 |
| MmugDNA.17181.1.S1_at   | MmugDNA.17181.1 | 3.71  | 3.56  | 0.17 | 0.12 | 1.11  | 0.496124 | 0.311485 | 0.732084 | 0.566468 |
| MmugDNA.17183.1.S1_at   | MmugDNA.17183.1 | 12.2  | 12.12 | 0.05 | 0.06 | 1.06  | 0.149333 | 0.036023 | 0.438217 | 0.234255 |
| MmugDNA.17184.1.S1_at   | MmugDNA.17184.1 | 5.24  | 5.27  | 0.17 | 0.1  | -1.02 | 0.808406 | 0.217205 | 0.914244 | 0.490853 |
| MmugDNA.17185.1.S1_at   | MmugDNA.17185.1 | 10.18 | 9.9   | 0.15 | 0.09 | 1.21  | 0.063647 | 0.325095 | 0.308797 | 0.575545 |
| MmugDNA.17186.1.S1_at   | MmugDNA.17186.1 | 8.55  | 10.04 | 1.05 | 0.19 | -2.82 | 0.223334 | 0.310235 | 0.521145 | 0.56542  |
| MmugDNA.17187.1.S1_at   | MmugDNA.17187.1 | 8.82  | 8.89  | 0.29 | 0.07 | -1.05 | 0.592392 | 0.644866 | 0.793395 | 0.791927 |
| MmugDNA.1719.1.S1_at    | MmugDNA.1719.1  | 5.03  | 4.63  | 0.34 | 0.08 | 1.31  | 0.116567 | 0.132047 | 0.393692 | 0.404043 |
| MmugDNA.17190.1.S1_at   | MmugDNA.17190.1 | 4.66  | 6.03  | 0.6  | 0.37 | -2.6  | 0.063286 | 0.356806 | 0.308234 | 0.598603 |
| MmugDNA.17191.1.S1_at   | MmugDNA.17191.1 | 5.46  | 6.96  | 0.27 | 0.37 | -2.83 | 0.008328 | 0.06326  | 0.140169 | 0.298244 |
| MmugDNA.17192.1.S1_at   | MmugDNA.17192.1 | 8.39  | 9.16  | 0.23 | 0.12 | -1.7  | 0.014593 | 0.000257 | 0.172727 | 0.033501 |
| MmugDNA.17192.1.S1_s_at | MmugDNA.17192.1 | 7.36  | 7.73  | 0.06 | 0.21 | -1.29 | 0.040136 | 0.000592 | 0.256842 | 0.041912 |
| MmugDNA.17194.1.S1_at   | MmugDNA.17194.1 | 6.41  | 6.97  | 0.22 | 0.24 | -1.47 | 0.083355 | 0.131232 | 0.345719 | 0.403252 |
| MmugDNA.17195.1.S1_at   | MmugDNA.17195.1 | 7.56  | 7.71  | 0.09 | 0.16 | -1.1  | 0.168779 | 0.038523 | 0.462083 | 0.241267 |
| MmugDNA.17197.1.S1_at   | MmugDNA.17197.1 | 10.81 | 10.85 | 0.37 | 0.15 | -1.03 | 0.808112 | 0.167844 | 0.914141 | 0.444426 |

|                         |                 |       |       |      |      |       |          |          |          |          |
|-------------------------|-----------------|-------|-------|------|------|-------|----------|----------|----------|----------|
| MmugDNA.17199.1.S1_at   | MmugDNA.17199.1 | 5.67  | 5.3   | 0.79 | 0.21 | 1.29  | 0.475459 | 0.24588  | 0.718106 | 0.51552  |
| MmugDNA.172.1.S1_s_at   | MmugDNA.172.1   | 9.04  | 8.98  | 0.1  | 0.13 | 1.05  | 0.684511 | 0.777006 | 0.84962  | 0.870467 |
| MmugDNA.1720.1.S1_at    | MmugDNA.1720.1  | 4.46  | 4.06  | 0.34 | 0.21 | 1.32  | 0.109556 | 0.368709 | 0.384575 | 0.608226 |
| MmugDNA.17200.1.S1_at   | MmugDNA.17200.1 | 6.13  | 6.72  | 0.2  | 0.09 | -1.5  | 0.019927 | 0.654676 | 0.19445  | 0.798114 |
| MmugDNA.17202.1.S1_at   | MmugDNA.17202.1 | 6.75  | 6.72  | 0.07 | 0.04 | 1.02  | 0.812723 | 0.448465 | 0.916216 | 0.664297 |
| MmugDNA.17204.1.S1_at   | MmugDNA.17204.1 | 2.98  | 3.02  | 0.32 | 0.35 | -1.03 | 0.881432 | 0.948894 | 0.949601 | 0.97078  |
| MmugDNA.17206.1.S1_at   | MmugDNA.17206.1 | 3.77  | 3.5   | 0.34 | 0.07 | 1.21  | 0.159292 | 0.312028 | 0.450559 | 0.56685  |
| MmugDNA.17207.1.S1_at   | MmugDNA.17207.1 | 5.54  | 5.13  | 0.29 | 0.05 | 1.33  | 0.105113 | 0.10897  | 0.378837 | 0.37269  |
| MmugDNA.17210.1.S1_at   | MmugDNA.17210.1 | 6.88  | 6.1   | 0.45 | 0.18 | 1.72  | 0.072422 | 0.172196 | 0.327004 | 0.448608 |
| MmugDNA.17211.1.S1_at   | MmugDNA.17211.1 | 3.95  | 4.24  | 0.24 | 0.22 | -1.22 | 0.073475 | 0.389188 | 0.328846 | 0.623403 |
| MmugDNA.17214.1.S1_at   | MmugDNA.17214.1 | 3.41  | 3.59  | 0.41 | 0.35 | -1.13 | 0.907967 | 0.989523 | 0.961052 | 0.994037 |
| MmugDNA.17215.1.S1_at   | MmugDNA.17215.1 | 6.3   | 6.28  | 0.04 | 0.13 | 1.01  | 0.939428 | 0.351594 | 0.974436 | 0.595109 |
| MmugDNA.17217.1.S1_at   | MmugDNA.17217.1 | 8.17  | 7.78  | 0.43 | 0.06 | 1.31  | 0.536592 | 0.720712 | 0.759061 | 0.838368 |
| MmugDNA.1722.1.S1_at    | MmugDNA.1722.1  | 4.7   | 4.67  | 0.06 | 0.03 | 1.02  | 0.294316 | 0.365357 | 0.583302 | 0.605473 |
| MmugDNA.17222.1.S1_at   | MmugDNA.17222.1 | 5.08  | 5.09  | 0.26 | 0.11 | -1.01 | 0.292647 | 0.35938  | 0.581743 | 0.600671 |
| MmugDNA.17223.1.S1_at   | MmugDNA.17223.1 | 8.78  | 8.55  | 0.14 | 0.08 | 1.17  | 0.308574 | 0.007544 | 0.595139 | 0.116437 |
| MmugDNA.17226.1.S1_at   | MmugDNA.17226.1 | 4.49  | 4.23  | 0.05 | 0.19 | 1.2   | 0.119932 | 0.0293   | 0.398178 | 0.21321  |
| MmugDNA.17228.1.S1_at   | MmugDNA.17228.1 | 6.03  | 6.01  | 0.15 | 0.1  | 1.02  | 0.693168 | 0.30502  | 0.853369 | 0.562176 |
| MmugDNA.1723.1.S1_at    | MmugDNA.1723.1  | 9.66  | 8.22  | 0.67 | 0.16 | 2.71  | 0.056759 | 0.116486 | 0.295741 | 0.383671 |
| MmugDNA.17230.1.S1_at   | MmugDNA.17230.1 | 4.32  | 4.73  | 0.83 | 0.21 | -1.33 | 0.92577  | 0.733872 | 0.968569 | 0.845895 |
| MmugDNA.17231.1.S1_at   | MmugDNA.17231.1 | 4.83  | 4.84  | 0.12 | 0.06 | -1.01 | 0.837488 | 0.061778 | 0.928775 | 0.295327 |
| MmugDNA.17232.1.S1_at   | MmugDNA.17232.1 | 9.51  | 9.14  | 0.36 | 0.2  | 1.29  | 0.211284 | 0.242797 | 0.509072 | 0.513151 |
| MmugDNA.17233.1.S1_at   | MmugDNA.17233.1 | 7.13  | 7.08  | 0.23 | 0.23 | 1.03  | 0.849355 | 0.590864 | 0.93439  | 0.75649  |
| MmugDNA.17234.1.S1_at   | MmugDNA.17234.1 | 4.24  | 4.12  | 0.23 | 0.19 | 1.08  | 0.65209  | 0.391658 | 0.831092 | 0.625282 |
| MmugDNA.17235.1.S1_at   | MmugDNA.17235.1 | 3.89  | 3.82  | 1.19 | 0.22 | 1.04  | 0.35084  | 0.490936 | 0.628649 | 0.692666 |
| MmugDNA.17236.1.S1_at   | MmugDNA.17236.1 | 7.53  | 7.52  | 0    | 0.07 | 1     | 0.457993 | 0.840531 | 0.706729 | 0.909112 |
| MmugDNA.17237.1.S1_at   | MmugDNA.17237.1 | 5.89  | 6.31  | 0.34 | 0.19 | -1.34 | 0.136861 | 0.286779 | 0.421672 | 0.548145 |
| MmugDNA.17239.1.S1_at   | MmugDNA.17239.1 | 5.49  | 5.58  | 0.2  | 0.02 | -1.07 | 0.908521 | 0.346618 | 0.961215 | 0.591439 |
| MmugDNA.1724.1.S1_at    | MmugDNA.1724.1  | 5.65  | 5.5   | 0.11 | 0.06 | 1.11  | 0.069963 | 0.133598 | 0.322968 | 0.40555  |
| MmugDNA.17240.1.S1_at   | MmugDNA.17240.1 | 10.83 | 11.08 | 0.13 | 0.18 | -1.19 | 0.029259 | 0.005988 | 0.223819 | 0.1058   |
| MmugDNA.17243.1.S1_at   | MmugDNA.17243.1 | 5.84  | 6.16  | 0.19 | 0.13 | -1.25 | 0.119512 | 0.124546 | 0.397408 | 0.394987 |
| MmugDNA.17244.1.S1_at   | MmugDNA.17244.1 | 5.24  | 5.39  | 0.13 | 0.14 | -1.11 | 0.713396 | 0.539924 | 0.864604 | 0.723995 |
| MmugDNA.17245.1.S1_at   | MmugDNA.17245.1 | 3.67  | 3.34  | 0.26 | 0.13 | 1.25  | 0.253953 | 0.339058 | 0.54824  | 0.585891 |
| MmugDNA.23475.1.S1_s_at | MmugDNA.23475.1 | 11.95 | 12.46 | 0.23 | 0.02 | -1.43 | 0.015858 | 0.021367 | 0.178315 | 0.183015 |
| MmugDNA.17247.1.S1_at   | MmugDNA.17247.1 | 5.56  | 5.04  | 0.42 | 0.05 | 1.44  | 0.113356 | 0.075745 | 0.390165 | 0.32034  |
| MmugDNA.17248.1.S1_at   | MmugDNA.17248.1 | 5.26  | 5.38  | 0.12 | 0.27 | -1.09 | 0.214169 | 0.493146 | 0.511924 | 0.694001 |
| MmugDNA.17249.1.S1_at   | MmugDNA.17249.1 | 8.22  | 7.63  | 0.28 | 0.3  | 1.51  | 0.169078 | 0.192595 | 0.462288 | 0.468095 |
| MmugDNA.1725.1.S1_at    | MmugDNA.1725.1  | 3.74  | 3.46  | 1.21 | 0.15 | 1.21  | 0.272414 | 0.355447 | 0.564464 | 0.597738 |
| MmugDNA.17251.1.S1_at   | MmugDNA.17251.1 | 12.01 | 12.23 | 0.07 | 0.11 | -1.16 | 0.186108 | 0.007943 | 0.482236 | 0.118702 |
| MmugDNA.17252.1.S1_at   | MmugDNA.17252.1 | 3.1   | 3.22  | 0.35 | 0.03 | -1.08 | 0.947575 | 0.989479 | 0.977941 | 0.994037 |
| MmugDNA.17255.1.S1_at   | MmugDNA.17255.1 | 9.74  | 9.95  | 0.11 | 0.07 | -1.16 | 0.058259 | 0.327255 | 0.298523 | 0.577173 |
| MmugDNA.17257.1.S1_at   | MmugDNA.17257.1 | 5.52  | 5.51  | 0.05 | 0.03 | 1     | 0.268439 | 0.970621 | 0.561069 | 0.984019 |
| MmugDNA.17258.1.S1_at   | MmugDNA.17258.1 | 6.88  | 6.78  | 0.17 | 0.19 | 1.07  | 0.897312 | 0.560663 | 0.956456 | 0.736915 |

|                         |                 |       |       |      |      |       |          |          |          |          |
|-------------------------|-----------------|-------|-------|------|------|-------|----------|----------|----------|----------|
| MmugDNA.1726.1.S1_at    | MmugDNA.1726.1  | 5.76  | 5.78  | 0.2  | 0.03 | -1.02 | 0.887106 | 0.520875 | 0.951902 | 0.711968 |
| MmugDNA.17260.1.S1_at   | MmugDNA.17260.1 | 5.44  | 5.42  | 0.2  | 0.03 | 1.02  | 0.958866 | 0.997617 | 0.98325  | 0.998769 |
| MmugDNA.17261.1.S1_at   | MmugDNA.17261.1 | 7.31  | 7.52  | 0.11 | 0.16 | -1.15 | 0.357653 | 0.204637 | 0.633636 | 0.478995 |
| MmugDNA.17262.1.S1_at   | MmugDNA.17262.1 | 11.33 | 11.2  | 0.26 | 0.15 | 1.09  | 0.705057 | 0.976517 | 0.86009  | 0.987202 |
| MmugDNA.17263.1.S1_at   | MmugDNA.17263.1 | 6.09  | 6.01  | 0.1  | 0.13 | 1.06  | 0.139724 | 0.041052 | 0.42522  | 0.247372 |
| MmugDNA.17264.1.S1_at   | MmugDNA.17264.1 | 5.55  | 5.28  | 0.36 | 0.13 | 1.21  | 0.237769 | 0.154656 | 0.535177 | 0.429564 |
| MmugDNA.17265.1.S1_at   | MmugDNA.17265.1 | 3.71  | 3.69  | 0.07 | 0.19 | 1.01  | 0.365937 | 0.248835 | 0.640412 | 0.517951 |
| MmugDNA.17266.1.S1_at   | MmugDNA.17266.1 | 3.96  | 4.46  | 0.15 | 0.93 | -1.41 | 0.317236 | 0.301306 | 0.601944 | 0.559356 |
| MmugDNA.17267.1.S1_at   | MmugDNA.17267.1 | 6.97  | 6.93  | 0.33 | 0.22 | 1.02  | 0.206128 | 0.137964 | 0.503843 | 0.410912 |
| MmugDNA.17267.1.S1_s_at | MmugDNA.17267.1 | 7.36  | 7.06  | 0.37 | 0.02 | 1.23  | 0.073185 | 0.013231 | 0.328293 | 0.147534 |
| MmugDNA.17268.1.S1_at   | MmugDNA.17268.1 | 4.95  | 4.59  | 0.17 | 0.06 | 1.28  | 0.070011 | 0.152749 | 0.323079 | 0.427571 |
| MmugDNA.1727.1.S1_at    | MmugDNA.1727.1  | 7.48  | 7.13  | 0.2  | 0.09 | 1.27  | 0.038571 | 0.457517 | 0.252331 | 0.670864 |
| MmugDNA.17270.1.S1_at   | MmugDNA.17270.1 | 6.78  | 6.4   | 0.77 | 0.39 | 1.3   | 0.235099 | 0.131394 | 0.533056 | 0.403563 |
| MmugDNA.17271.1.S1_at   | MmugDNA.17271.1 | 5.72  | 5.88  | 0.05 | 0.11 | -1.12 | 0.15212  | 0.132218 | 0.44164  | 0.404274 |
| MmugDNA.17272.1.S1_at   | MmugDNA.17272.1 | 5.98  | 6.16  | 0.18 | 0    | -1.13 | 0.159985 | 0.347276 | 0.451279 | 0.591911 |
| MmugDNA.17273.1.S1_at   | MmugDNA.17273.1 | 6.8   | 6.7   | 0.15 | 0.09 | 1.07  | 0.909642 | 0.118167 | 0.961647 | 0.386086 |
| MmugDNA.17274.1.S1_at   | MmugDNA.17274.1 | 6.07  | 5.9   | 0.51 | 0.41 | 1.12  | 0.93973  | 0.001622 | 0.974537 | 0.060897 |
| MmugDNA.17275.1.S1_s_at | MmugDNA.17275.1 | 7.51  | 7.44  | 0.11 | 0.1  | 1.04  | 0.612353 | 0.126904 | 0.80682  | 0.397605 |
| MmugDNA.17276.1.S1_at   | MmugDNA.17276.1 | 6.67  | 6.88  | 1.03 | 0.17 | -1.16 | 0.662412 | 0.78044  | 0.837065 | 0.872614 |
| MmugDNA.17278.1.S1_at   | MmugDNA.17278.1 | 4.01  | 4.05  | 0.16 | 0.02 | -1.03 | 0.588343 | 0.513241 | 0.790985 | 0.706851 |
| MmugDNA.17279.1.S1_at   | MmugDNA.17279.1 | 9.08  | 10.21 | 0.07 | 0.35 | -2.18 | 0.01145  | 0.227392 | 0.157145 | 0.499659 |
| MmugDNA.1728.1.S1_at    | MmugDNA.1728.1  | 5.82  | 5.6   | 0.05 | 0.1  | 1.17  | 0.021915 | 0.061771 | 0.201211 | 0.295327 |
| MmugDNA.17280.1.S1_at   | MmugDNA.17280.1 | 4.9   | 4.99  | 0.07 | 0.03 | -1.07 | 0.263494 | 0.549782 | 0.556984 | 0.730055 |
| MmugDNA.17281.1.S1_at   | MmugDNA.17281.1 | 3.84  | 3.83  | 0.03 | 0.1  | 1.01  | 0.873013 | 0.385247 | 0.945555 | 0.620709 |
| MmugDNA.17282.1.S1_at   | MmugDNA.17282.1 | 9.14  | 9.18  | 0.67 | 0.19 | -1.02 | 0.948637 | 0.773631 | 0.978511 | 0.868415 |
| MmugDNA.17283.1.S1_at   | MmugDNA.17283.1 | 3.91  | 4.01  | 0.31 | 0.09 | -1.07 | 0.651209 | 0.787898 | 0.830636 | 0.877314 |
| MmugDNA.17284.1.S1_at   | MmugDNA.17284.1 | 9.33  | 9.07  | 0.3  | 0.17 | 1.2   | 0.465505 | 0.505222 | 0.711552 | 0.702062 |
| MmugDNA.17285.1.S1_at   | MmugDNA.17285.1 | 3.29  | 3.3   | 0.12 | 0.21 | -1.01 | 0.464031 | 0.254585 | 0.710446 | 0.522869 |
| MmugDNA.17287.1.S1_at   | MmugDNA.17287.1 | 6.51  | 6.62  | 0.24 | 0.1  | -1.08 | 0.885091 | 0.331231 | 0.951023 | 0.579978 |
| MmugDNA.17288.1.S1_at   | MmugDNA.17288.1 | 3.7   | 3.71  | 0.06 | 0.02 | -1    | 0.889883 | 0.171316 | 0.953112 | 0.447809 |
| MmugDNA.17289.1.S1_at   | MmugDNA.17289.1 | 4.49  | 4.42  | 0.3  | 0    | 1.05  | 0.56841  | 0.79065  | 0.77836  | 0.878957 |
| MmugDNA.17290.1.S1_at   | MmugDNA.17290.1 | 5.31  | 6.02  | 0.05 | 0.31 | -1.64 | 0.042483 | 0.197403 | 0.263254 | 0.472311 |
| MmugDNA.17291.1.S1_at   | MmugDNA.17291.1 | 5.38  | 4.99  | 0.36 | 0.3  | 1.31  | 0.532908 | 0.467271 | 0.756706 | 0.677016 |
| MmugDNA.17293.1.S1_s_at | MmugDNA.17293.1 | 8.19  | 9.2   | 0.49 | 0.2  | -2.01 | 0.039703 | 0.138655 | 0.255929 | 0.411705 |
| MmugDNA.17296.1.S1_at   | MmugDNA.17296.1 | 4.51  | 4.4   | 0.3  | 0.1  | 1.08  | 0.773109 | 0.642331 | 0.89602  | 0.790154 |
| MmugDNA.17297.1.S1_at   | MmugDNA.17297.1 | 4.22  | 3.96  | 0.15 | 0.09 | 1.2   | 0.060518 | 0.082037 | 0.303075 | 0.330756 |
| MmugDNA.17298.1.S1_at   | MmugDNA.17298.1 | 4.8   | 4.88  | 0.4  | 0.24 | -1.06 | 0.587663 | 0.798145 | 0.790564 | 0.883809 |
| MmugDNA.1730.1.S1_at    | MmugDNA.1730.1  | 6.65  | 6.86  | 0.33 | 0.19 | -1.15 | 0.710361 | 0.064235 | 0.863055 | 0.299668 |
| MmugDNA.17301.1.S1_at   | MmugDNA.17301.1 | 7.18  | 7.18  | 0.11 | 0.06 | -1    | 0.270177 | 0.295086 | 0.562364 | 0.554551 |
| MmugDNA.37783.1.S1_x_at | MmugDNA.37783.1 | 3.05  | 3.08  | 0.11 | 0.09 | -1.02 | 0.36191  | 0.800387 | 0.637126 | 0.885129 |
| MmugDNA.17303.1.S1_at   | MmugDNA.17303.1 | 4.43  | 4.27  | 0.18 | 0.06 | 1.11  | 0.101287 | 0.309492 | 0.372655 | 0.564987 |
| MmugDNA.17304.1.S1_at   | MmugDNA.17304.1 | 9.5   | 9.61  | 0.39 | 0.38 | -1.07 | 0.536154 | 0.354148 | 0.758845 | 0.597059 |
| MmugDNA.17305.1.S1_at   | MmugDNA.17305.1 | 5.98  | 6.23  | 0.14 | 0.04 | -1.19 | 0.109677 | 0.018719 | 0.384769 | 0.171803 |



|                         |                 |       |       |      |      |       |          |          |          |          |
|-------------------------|-----------------|-------|-------|------|------|-------|----------|----------|----------|----------|
| MmugDNA.17306.1.S1_at   | MmugDNA.17306.1 | 5.85  | 5.49  | 1.29 | 0.13 | 1.28  | 0.215907 | 0.273702 | 0.513611 | 0.53817  |
| MmugDNA.17307.1.S1_at   | MmugDNA.17307.1 | 4.15  | 4.15  | 0.03 | 0.07 | 1     | 0.980198 | 0.764138 | 0.992552 | 0.862852 |
| MmugDNA.17308.1.S1_at   | MmugDNA.17308.1 | 8.21  | 7.76  | 0.6  | 0.2  | 1.37  | 0.198615 | 0.159309 | 0.49581  | 0.43531  |
| MmugDNA.17309.1.S1_at   | MmugDNA.17309.1 | 4.47  | 4.37  | 0.07 | 0.14 | 1.07  | 0.103719 | 0.277185 | 0.377025 | 0.541154 |
| MmugDNA.1731.1.S1_at    | MmugDNA.1731.1  | 8.36  | 8.1   | 0.85 | 0.05 | 1.19  | 0.205907 | 0.154869 | 0.503741 | 0.429849 |
| MmugDNA.17310.1.S1_at   | MmugDNA.17310.1 | 9.63  | 9.21  | 0.13 | 0.03 | 1.34  | 0.004868 | 0.002273 | 0.115123 | 0.070312 |
| MmugDNA.17311.1.S1_at   | MmugDNA.17311.1 | 5.83  | 5.69  | 0.1  | 0.13 | 1.1   | 0.259882 | 0.398402 | 0.554139 | 0.629374 |
| MmugDNA.17312.1.S1_at   | MmugDNA.17312.1 | 7.2   | 6.93  | 0.14 | 0.27 | 1.2   | 0.205323 | 0.238323 | 0.503171 | 0.508904 |
| MmugDNA.17313.1.S1_at   | MmugDNA.17313.1 | 4.29  | 4.31  | 0.21 | 0.14 | -1.01 | 0.524151 | 0.515145 | 0.75099  | 0.708126 |
| MmugDNA.17314.1.S1_at   | MmugDNA.17314.1 | 6.55  | 6.56  | 0.81 | 0.38 | -1.01 | 0.669756 | 0.472189 | 0.841513 | 0.679876 |
| MmugDNA.17315.1.S1_at   | MmugDNA.17315.1 | 6.21  | 7.03  | 0.16 | 0.18 | -1.76 | 0.0108   | 0.00068  | 0.153792 | 0.04413  |
| MmugDNA.17316.1.S1_at   | MmugDNA.17316.1 | 11.24 | 11.22 | 0.23 | 0.06 | 1.02  | 0.86461  | 0.982852 | 0.941377 | 0.990596 |
| MmugDNA.17317.1.S1_at   | MmugDNA.17317.1 | 4.19  | 3.82  | 0.14 | 0.21 | 1.29  | 0.301022 | 0.455593 | 0.589063 | 0.669584 |
| MmugDNA.17318.1.S1_at   | MmugDNA.17318.1 | 9.46  | 9.52  | 0.45 | 0.15 | -1.04 | 0.832619 | 0.155079 | 0.9263   | 0.430197 |
| MmugDNA.1732.1.S1_at    | MmugDNA.1732.1  | 6.19  | 6.15  | 0.07 | 0.05 | 1.03  | 0.242912 | 0.796816 | 0.539651 | 0.882803 |
| MmugDNA.17320.1.S1_at   | MmugDNA.17320.1 | 4.39  | 4.46  | 0.29 | 0.35 | -1.05 | 0.813612 | 0.707025 | 0.916664 | 0.830116 |
| MmugDNA.17321.1.S1_at   | MmugDNA.17321.1 | 3.56  | 3.31  | 0.16 | 0.02 | 1.2   | 0.151772 | 0.188941 | 0.441235 | 0.464854 |
| MmugDNA.17323.1.S1_at   | MmugDNA.17323.1 | 3.01  | 2.97  | 0.04 | 0.19 | 1.03  | 0.682919 | 0.736772 | 0.848772 | 0.847693 |
| MmugDNA.17324.1.S1_at   | MmugDNA.17324.1 | 5.68  | 5.62  | 0.04 | 0.07 | 1.04  | 0.271143 | 0.193126 | 0.563072 | 0.468554 |
| MmugDNA.17325.1.S1_at   | MmugDNA.17325.1 | 8.31  | 8.05  | 0.33 | 0.12 | 1.2   | 0.145789 | 0.224638 | 0.433374 | 0.497613 |
| MmugDNA.17326.1.S1_at   | MmugDNA.17326.1 | 5.03  | 5.05  | 0.08 | 0.05 | -1.01 | 0.222025 | 0.465969 | 0.520135 | 0.676055 |
| MmugDNA.17327.1.S1_at   | MmugDNA.17327.1 | 7.53  | 8.04  | 1.21 | 0.14 | -1.42 | 0.539932 | 0.74629  | 0.761159 | 0.85272  |
| MmugDNA.17328.1.S1_at   | MmugDNA.17328.1 | 5.81  | 5.93  | 0.1  | 0.13 | -1.08 | 0.284313 | 0.410203 | 0.574388 | 0.637131 |
| MmugDNA.1733.1.S1_at    | MmugDNA.1733.1  | 4.64  | 5.2   | 0.15 | 0.58 | -1.48 | 0.28128  | 0.029317 | 0.572137 | 0.21321  |
| MmugDNA.1733.1.S1_s_at  | MmugDNA.1733.1  | 8.8   | 9.28  | 0.31 | 0.29 | -1.39 | 0.069642 | 0.187662 | 0.322289 | 0.463673 |
| MmugDNA.17330.1.S1_at   | MmugDNA.17330.1 | 4.36  | 4.37  | 0.18 | 0.03 | -1    | 0.29085  | 0.150788 | 0.580217 | 0.425322 |
| MmugDNA.17331.1.S1_s_at | MmugDNA.17331.1 | 7.82  | 9.44  | 0.91 | 0.37 | -3.08 | 0.068427 | 0.025723 | 0.319391 | 0.201029 |
| MmugDNA.17332.1.S1_at   | MmugDNA.17332.1 | 5.41  | 5     | 0.26 | 0.1  | 1.33  | 0.060462 | 0.054777 | 0.30301  | 0.279545 |
| MmugDNA.17333.1.S1_x_at | MmugDNA.17333.1 | 4.35  | 4.36  | 0.39 | 0.45 | -1.01 | 0.338941 | 0.353747 | 0.619313 | 0.596815 |
| MmugDNA.17334.1.S1_at   | MmugDNA.17334.1 | 3.42  | 3.45  | 0.03 | 0.1  | -1.02 | 0.707571 | 0.480869 | 0.861502 | 0.686    |
| MmugDNA.17335.1.S1_at   | MmugDNA.17335.1 | 7.6   | 7.6   | 0.06 | 0.12 | -1    | 0.901407 | 0.916607 | 0.95827  | 0.953322 |
| MmugDNA.17336.1.S1_s_at | MmugDNA.17336.1 | 12.33 | 12.41 | 0.13 | 0.12 | -1.06 | 0.133394 | 0.148937 | 0.416975 | 0.423294 |
| MmugDNA.17337.1.S1_at   | MmugDNA.17337.1 | 11.2  | 11.24 | 0.1  | 0.07 | -1.03 | 0.218538 | 0.072714 | 0.516173 | 0.31565  |
| MmugDNA.17338.1.S1_at   | MmugDNA.17338.1 | 2.86  | 2.88  | 0.07 | 0.1  | -1.01 | 0.86674  | 0.593103 | 0.942468 | 0.758067 |
| MmugDNA.17339.1.S1_at   | MmugDNA.17339.1 | 5.15  | 5.44  | 0.53 | 0.35 | -1.22 | 0.199293 | 0.219456 | 0.496613 | 0.493156 |
| MmugDNA.17339.1.S1_s_at | MmugDNA.17339.1 | 5.7   | 5.65  | 0.9  | 0.37 | 1.04  | 0.982788 | 0.997663 | 0.993652 | 0.998797 |
| MmugDNA.17340.1.S1_at   | MmugDNA.17340.1 | 3.2   | 3.21  | 0.03 | 0.01 | -1.01 | 0.931456 | 0.994213 | 0.971135 | 0.99645  |
| MmugDNA.17341.1.S1_at   | MmugDNA.17341.1 | 4.49  | 4.26  | 0.72 | 0.15 | 1.17  | 0.420913 | 0.787821 | 0.67979  | 0.877302 |
| MmugDNA.17342.1.S1_s_at | MmugDNA.17342.1 | 10.76 | 10.96 | 0.14 | 0.04 | -1.15 | 0.284443 | 0.0032   | 0.574416 | 0.082002 |
| MmugDNA.17343.1.S1_at   | MmugDNA.17343.1 | 3.09  | 3.05  | 0.1  | 0.07 | 1.03  | 0.563756 | 0.702103 | 0.775658 | 0.827304 |
| MmugDNA.17345.1.S1_s_at | MmugDNA.17345.1 | 9.74  | 9.65  | 0.37 | 0.28 | 1.06  | 0.303986 | 0.80785  | 0.591317 | 0.8894   |
| MmugDNA.17346.1.S1_at   | MmugDNA.17346.1 | 3.73  | 3.48  | 0.13 | 0.35 | 1.19  | 0.602855 | 0.64652  | 0.800511 | 0.792953 |
| MmugDNA.17347.1.S1_at   | MmugDNA.17347.1 | 11.54 | 11.92 | 0.42 | 0.08 | -1.3  | 0.525626 | 0.524049 | 0.752022 | 0.714164 |

|                         |                 |       |       |      |      |       |          |          |          |          |
|-------------------------|-----------------|-------|-------|------|------|-------|----------|----------|----------|----------|
| MmugDNA.17349.1.S1_at   | MmugDNA.17349.1 | 6.91  | 6.75  | 1    | 0.33 | 1.12  | 0.937646 | 0.749446 | 0.973776 | 0.85442  |
| MmugDNA.1735.1.S1_at    | MmugDNA.1735.1  | 3.32  | 3.21  | 0.18 | 0.2  | 1.08  | 0.420175 | 0.0407   | 0.679329 | 0.246689 |
| MmugDNA.17351.1.S1_at   | MmugDNA.17351.1 | 5.17  | 4.99  | 0.51 | 0.2  | 1.14  | 0.571397 | 0.59302  | 0.779915 | 0.758    |
| MmugDNA.17352.1.S1_at   | MmugDNA.17352.1 | 4.41  | 4.42  | 0.05 | 0.05 | -1.01 | 0.648529 | 0.129273 | 0.829237 | 0.400682 |
| MmugDNA.17353.1.S1_at   | MmugDNA.17353.1 | 3.66  | 3.57  | 0.06 | 0    | 1.07  | 0.164995 | 0.117146 | 0.457897 | 0.384582 |
| MmugDNA.17354.1.S1_at   | MmugDNA.17354.1 | 6.65  | 6.7   | 0.11 | 0.03 | -1.03 | 0.643347 | 0.168812 | 0.826158 | 0.445458 |
| MmugDNA.17355.1.S1_at   | MmugDNA.17355.1 | 7.17  | 5.98  | 0.17 | 0.24 | 2.28  | 0.002065 | 0.28407  | 0.090098 | 0.546307 |
| MmugDNA.17356.1.S1_x_at | MmugDNA.17356.1 | 8.94  | 8.66  | 0.29 | 0.06 | 1.22  | 0.19041  | 0.064435 | 0.486753 | 0.300008 |
| MmugDNA.17357.1.S1_at   | MmugDNA.17357.1 | 8.86  | 8.89  | 0.18 | 0.12 | -1.02 | 0.917499 | 0.209383 | 0.964842 | 0.483069 |
| MmugDNA.17358.1.S1_at   | MmugDNA.17358.1 | 5.34  | 5.42  | 0.06 | 0.14 | -1.05 | 0.737466 | 0.17667  | 0.878145 | 0.453138 |
| MmugDNA.17359.1.S1_at   | MmugDNA.17359.1 | 7.81  | 7.8   | 0.5  | 0.37 | 1.01  | 0.821209 | 0.965134 | 0.920283 | 0.980605 |
| MmugDNA.1736.1.S1_at    | MmugDNA.1736.1  | 7.11  | 8.18  | 0.14 | 0.32 | -2.1  | 0.017198 | 0.209806 | 0.184359 | 0.483538 |
| MmugDNA.17361.1.S1_at   | MmugDNA.17361.1 | 3.04  | 3.05  | 0.04 | 0.05 | -1.01 | 0.441268 | 0.882857 | 0.694813 | 0.933206 |
| MmugDNA.17363.1.S1_at   | MmugDNA.17363.1 | 6.58  | 8.86  | 0.81 | 0.12 | -4.86 | 0.020624 | 0.198349 | 0.197109 | 0.473267 |
| MmugDNA.17364.1.S1_at   | MmugDNA.17364.1 | 5.04  | 5.13  | 0.07 | 0.19 | -1.07 | 0.528073 | 0.26308  | 0.753463 | 0.529402 |
| MmugDNA.17367.1.S1_at   | MmugDNA.17367.1 | 6.97  | 6.87  | 0.35 | 0.29 | 1.07  | 0.335528 | 0.367701 | 0.616435 | 0.607374 |
| MmugDNA.17368.1.S1_at   | MmugDNA.17368.1 | 4.86  | 5.52  | 1.12 | 0.35 | -1.58 | 0.935301 | 0.91914  | 0.972947 | 0.954586 |
| MmugDNA.1737.1.S1_at    | MmugDNA.1737.1  | 3.85  | 4.53  | 0.11 | 0.25 | -1.61 | 0.029942 | 0.001898 | 0.226315 | 0.065035 |
| MmugDNA.17370.1.S1_at   | MmugDNA.17370.1 | 10.1  | 11.85 | 0.65 | 0.18 | -3.38 | 0.025885 | 0.066705 | 0.213649 | 0.304114 |
| MmugDNA.17370.1.S1_s_at | MmugDNA.17370.1 | 11.27 | 12.83 | 0.7  | 0.13 | -2.95 | 0.049374 | 0.059298 | 0.279595 | 0.290528 |
| MmugDNA.17371.1.S1_at   | MmugDNA.17371.1 | 6.54  | 5.18  | 0.49 | 0.15 | 2.57  | 0.011946 | 0.007851 | 0.159316 | 0.118059 |
| MmugDNA.17372.1.S1_at   | MmugDNA.17372.1 | 5.18  | 5.92  | 0.54 | 0.33 | -1.67 | 0.541978 | 0.417664 | 0.762538 | 0.642365 |
| MmugDNA.17374.1.S1_at   | MmugDNA.17374.1 | 5.46  | 5.49  | 0.24 | 0.17 | -1.02 | 0.849871 | 0.860085 | 0.934722 | 0.920245 |
| MmugDNA.17375.1.S1_at   | MmugDNA.17375.1 | 6.63  | 6.69  | 0.08 | 0.11 | -1.04 | 0.215433 | 0.788424 | 0.513082 | 0.877622 |
| MmugDNA.17376.1.S1_at   | MmugDNA.17376.1 | 6.01  | 8.78  | 1.73 | 0.21 | -6.84 | 0.059036 | 0.358902 | 0.30011  | 0.600291 |
| MmugDNA.17377.1.S1_s_at | MmugDNA.17377.1 | 11.39 | 11.8  | 0.29 | 0.14 | -1.34 | 0.113743 | 0.193469 | 0.390429 | 0.468739 |
| MmugDNA.17378.1.S1_at   | MmugDNA.17378.1 | 10.63 | 10.65 | 0.34 | 0.2  | -1.01 | 0.85105  | 0.979695 | 0.935277 | 0.989107 |
| MmugDNA.17379.1.S1_at   | MmugDNA.17379.1 | 6.73  | 7.05  | 0.25 | 0.17 | -1.24 | 0.050437 | 0.034467 | 0.282391 | 0.229717 |
| MmugDNA.1738.1.S1_at    | MmugDNA.1738.1  | 5.98  | 6     | 0.68 | 0.07 | -1.02 | 0.357475 | 0.446418 | 0.633546 | 0.662842 |
| MmugDNA.17380.1.S1_at   | MmugDNA.17380.1 | 7.73  | 6.82  | 0.85 | 0.37 | 1.87  | 0.209263 | 0.286292 | 0.506766 | 0.547784 |
| MmugDNA.17381.1.S1_at   | MmugDNA.17381.1 | 7.22  | 7.54  | 0.2  | 0.21 | -1.25 | 0.12002  | 0.08282  | 0.398322 | 0.332331 |
| MmugDNA.17382.1.S1_at   | MmugDNA.17382.1 | 3.52  | 3.61  | 0.12 | 0.15 | -1.07 | 0.28962  | 0.472592 | 0.579119 | 0.68007  |
| MmugDNA.17383.1.S1_at   | MmugDNA.17383.1 | 5.75  | 6.07  | 0.2  | 0.04 | -1.24 | 0.168833 | 0.134491 | 0.462083 | 0.406626 |
| MmugDNA.17385.1.S1_at   | MmugDNA.17385.1 | 6.14  | 6.41  | 0.21 | 0.27 | -1.21 | 0.161566 | 0.234915 | 0.453186 | 0.506125 |
| MmugDNA.17386.1.S1_at   | MmugDNA.17386.1 | 4.96  | 5.02  | 0.2  | 0.12 | -1.04 | 0.161445 | 0.180176 | 0.453006 | 0.456751 |
| MmugDNA.17387.1.S1_at   | MmugDNA.17387.1 | 6.08  | 5.8   | 0.33 | 0.09 | 1.22  | 0.177465 | 0.056432 | 0.472186 | 0.283516 |
| MmugDNA.17388.1.S1_at   | MmugDNA.17388.1 | 9.52  | 9.36  | 0.31 | 0.11 | 1.12  | 0.757038 | 0.913876 | 0.888443 | 0.951561 |
| MmugDNA.17389.1.S1_at   | MmugDNA.17389.1 | 4.08  | 3.77  | 0.3  | 0.17 | 1.25  | 0.247878 | 0.124185 | 0.543263 | 0.394496 |
| MmugDNA.1739.1.S1_at    | MmugDNA.1739.1  | 4.12  | 3.82  | 0.21 | 0.15 | 1.23  | 0.280837 | 0.207853 | 0.571843 | 0.482049 |
| MmugDNA.17391.1.S1_at   | MmugDNA.17391.1 | 12.23 | 12.34 | 0.09 | 0.22 | -1.08 | 0.935475 | 0.50441  | 0.972982 | 0.701557 |
| MmugDNA.17392.1.S1_at   | MmugDNA.17392.1 | 3.99  | 4.12  | 0.06 | 0.01 | -1.09 | 0.014199 | 0.264044 | 0.170837 | 0.530185 |
| MmugDNA.17394.1.S1_at   | MmugDNA.17394.1 | 4     | 4     | 0.14 | 0.12 | 1     | 0.954046 | 0.258613 | 0.981138 | 0.52584  |
| MmugDNA.17396.1.S1_at   | MmugDNA.17396.1 | 3.71  | 3.66  | 0.23 | 0.05 | 1.03  | 0.900541 | 0.976895 | 0.957773 | 0.987434 |

|                         |                 |      |      |      |      |       |          |          |          |          |
|-------------------------|-----------------|------|------|------|------|-------|----------|----------|----------|----------|
| MmugDNA.17398.1.S1_at   | MmugDNA.17398.1 | 3.15 | 3.09 | 0.05 | 0.1  | 1.04  | 0.162873 | 0.59633  | 0.45497  | 0.759474 |
| MmugDNA.17399.1.S1_at   | MmugDNA.17399.1 | 3.57 | 3.87 | 0.14 | 0.37 | -1.23 | 0.272563 | 0.398651 | 0.564664 | 0.629458 |
| MmugDNA.174.1.S1_at     | MmugDNA.174.1   | 8.31 | 8.2  | 0.03 | 0.2  | 1.08  | 0.970485 | 0.090035 | 0.988339 | 0.344402 |
| MmugDNA.1740.1.S1_at    | MmugDNA.1740.1  | 4.28 | 4.92 | 0.16 | 0.27 | -1.56 | 0.025412 | 0.480946 | 0.212394 | 0.686018 |
| MmugDNA.17401.1.S1_at   | MmugDNA.17401.1 | 4.35 | 4.09 | 0.26 | 0.07 | 1.2   | 0.060936 | 0.045021 | 0.303761 | 0.256691 |
| MmugDNA.17402.1.S1_at   | MmugDNA.17402.1 | 6.12 | 6.06 | 0.35 | 0.09 | 1.04  | 0.716178 | 0.574177 | 0.866043 | 0.745679 |
| MmugDNA.17403.1.S1_at   | MmugDNA.17403.1 | 4.26 | 4.41 | 0.07 | 0.04 | -1.1  | 0.034193 | 0.3814   | 0.239608 | 0.617681 |
| MmugDNA.17404.1.S1_s_at | MmugDNA.17404.1 | 9.88 | 7.9  | 0.69 | 0.24 | 3.94  | 0.012473 | 0.013974 | 0.161936 | 0.151567 |
| MmugDNA.17405.1.S1_at   | MmugDNA.17405.1 | 7.99 | 7.49 | 0.21 | 0.34 | 1.42  | 0.104181 | 0.080028 | 0.377511 | 0.327429 |
| MmugDNA.17408.1.S1_at   | MmugDNA.17408.1 | 6.44 | 6.4  | 0.17 | 0.07 | 1.03  | 0.395636 | 0.515426 | 0.661945 | 0.708291 |
| MmugDNA.1741.1.S1_at    | MmugDNA.1741.1  | 7.85 | 7.82 | 0.18 | 0.01 | 1.03  | 0.682659 | 0.286366 | 0.848688 | 0.547791 |
| MmugDNA.17410.1.S1_at   | MmugDNA.17410.1 | 6.16 | 6.16 | 0.05 | 0.1  | 1     | 0.241221 | 0.272131 | 0.538538 | 0.536939 |
| MmugDNA.17411.1.S1_at   | MmugDNA.17411.1 | 7.28 | 7.31 | 0.59 | 0.09 | -1.02 | 0.900487 | 0.547494 | 0.957767 | 0.728479 |
| MmugDNA.17412.1.S1_at   | MmugDNA.17412.1 | 5.19 | 4.34 | 0.66 | 0.62 | 1.8   | 0.404877 | 0.162463 | 0.668504 | 0.438575 |
| MmugDNA.17414.1.S1_at   | MmugDNA.17414.1 | 7.95 | 8.01 | 0.18 | 0.03 | -1.05 | 0.972929 | 0.272682 | 0.989189 | 0.537433 |
| MmugDNA.17414.1.S1_s_at | MmugDNA.17414.1 | 6.45 | 6.52 | 0.4  | 0.07 | -1.05 | 0.666938 | 0.856715 | 0.840088 | 0.918126 |
| MmugDNA.17415.1.S1_at   | MmugDNA.17415.1 | 3.36 | 2.98 | 0.24 | 0.19 | 1.3   | 0.076554 | 0.129157 | 0.334818 | 0.400611 |
| MmugDNA.17416.1.S1_at   | MmugDNA.17416.1 | 6.23 | 6.14 | 0.04 | 0.04 | 1.06  | 0.061242 | 0.017994 | 0.304296 | 0.169171 |
| MmugDNA.17417.1.S1_at   | MmugDNA.17417.1 | 6.4  | 6.2  | 0.32 | 0.3  | 1.15  | 0.216745 | 0.273447 | 0.514582 | 0.537868 |
| MmugDNA.17418.1.S1_at   | MmugDNA.17418.1 | 3.68 | 3.81 | 0.21 | 0.12 | -1.09 | 0.983564 | 0.981763 | 0.993847 | 0.989984 |
| MmugDNA.17420.1.S1_at   | MmugDNA.17420.1 | 3.99 | 3.69 | 0.47 | 0.27 | 1.23  | 0.590693 | 0.374298 | 0.792009 | 0.612779 |
| MmugDNA.17421.1.S1_at   | MmugDNA.17421.1 | 6.88 | 6.47 | 0.12 | 0.13 | 1.33  | 0.009387 | 0.091905 | 0.146803 | 0.347243 |
| MmugDNA.17423.1.S1_at   | MmugDNA.17423.1 | 3.28 | 3.27 | 0.14 | 0.09 | 1.01  | 0.580627 | 0.18255  | 0.786011 | 0.459065 |
| MmugDNA.17424.1.S1_at   | MmugDNA.17424.1 | 4.38 | 4.47 | 0.05 | 0.01 | -1.07 | 0.075405 | 0.085348 | 0.332772 | 0.337226 |
| MmugDNA.17425.1.S1_at   | MmugDNA.17425.1 | 9.24 | 8.48 | 0.68 | 0.11 | 1.7   | 0.117448 | 0.203436 | 0.394772 | 0.477634 |
| MmugDNA.17427.1.S1_at   | MmugDNA.17427.1 | 7.06 | 7.73 | 0.44 | 0.08 | -1.59 | 0.066491 | 0.051865 | 0.315343 | 0.273151 |
| MmugDNA.17428.1.S1_at   | MmugDNA.17428.1 | 7.2  | 6.71 | 0.58 | 0.35 | 1.41  | 0.261021 | 0.421744 | 0.555198 | 0.645254 |
| MmugDNA.17429.1.S1_at   | MmugDNA.17429.1 | 3.23 | 3.21 | 0.06 | 0.05 | 1.02  | 0.672733 | 0.810864 | 0.843369 | 0.890858 |
| MmugDNA.1743.1.S1_at    | MmugDNA.1743.1  | 6.14 | 6.31 | 0.12 | 0.06 | -1.13 | 0.087165 | 0.103323 | 0.352835 | 0.364168 |
| MmugDNA.17431.1.S1_at   | MmugDNA.17431.1 | 4.73 | 4.25 | 0.31 | 0.59 | 1.39  | 0.96914  | 0.927954 | 0.98776  | 0.959116 |
| MmugDNA.17432.1.S1_at   | MmugDNA.17432.1 | 3.45 | 3.49 | 0.07 | 0.15 | -1.04 | 0.961069 | 0.370488 | 0.984082 | 0.609544 |
| MmugDNA.17434.1.S1_at   | MmugDNA.17434.1 | 2.96 | 3.13 | 0.11 | 0.11 | -1.12 | 0.304139 | 0.525846 | 0.591333 | 0.715222 |
| MmugDNA.17435.1.S1_at   | MmugDNA.17435.1 | 3.2  | 3.14 | 0.05 | 0.04 | 1.04  | 0.087917 | 0.141241 | 0.35408  | 0.414749 |
| MmugDNA.17436.1.S1_at   | MmugDNA.17436.1 | 4.12 | 4.27 | 0.2  | 0.27 | -1.11 | 0.533931 | 0.686927 | 0.757384 | 0.817365 |
| MmugDNA.17437.1.S1_at   | MmugDNA.17437.1 | 6.82 | 6.78 | 0.28 | 0.03 | 1.03  | 0.44551  | 0.566508 | 0.697986 | 0.74062  |
| MmugDNA.17438.1.S1_at   | MmugDNA.17438.1 | 4.24 | 4.03 | 0.32 | 0.33 | 1.15  | 0.528897 | 0.660585 | 0.753909 | 0.801437 |
| MmugDNA.17439.1.S1_at   | MmugDNA.17439.1 | 3.4  | 4.21 | 0.29 | 0.14 | -1.76 | 0.012855 | 0.002699 | 0.163918 | 0.076461 |
| MmugDNA.1744.1.S1_at    | MmugDNA.1744.1  | 3.38 | 3.18 | 0.35 | 0.21 | 1.15  | 0.438452 | 0.644884 | 0.693033 | 0.791927 |
| MmugDNA.17440.1.S1_at   | MmugDNA.17440.1 | 4.71 | 4.57 | 0.06 | 0.04 | 1.1   | 0.028272 | 0.680341 | 0.220719 | 0.813384 |
| MmugDNA.17441.1.S1_at   | MmugDNA.17441.1 | 3.59 | 3.14 | 0.35 | 0.12 | 1.37  | 0.096408 | 0.080502 | 0.366176 | 0.328159 |
| MmugDNA.17442.1.S1_at   | MmugDNA.17442.1 | 9.46 | 8.96 | 0.06 | 0.03 | 1.41  | 0.000325 | 0.006842 | 0.05945  | 0.111782 |
| MmugDNA.17443.1.S1_at   | MmugDNA.17443.1 | 3.72 | 3.67 | 0.13 | 0.13 | 1.04  | 0.850054 | 0.985942 | 0.934827 | 0.99201  |
| MmugDNA.17445.1.S1_at   | MmugDNA.17445.1 | 2.95 | 2.82 | 0.37 | 0.14 | 1.1   | 0.353275 | 0.492359 | 0.630389 | 0.693485 |

|                         |                 |       |       |      |      |       |          |          |          |          |
|-------------------------|-----------------|-------|-------|------|------|-------|----------|----------|----------|----------|
| MmugDNA.17446.1.S1_at   | MmugDNA.17446.1 | 3.72  | 3.66  | 0.05 | 0.07 | 1.04  | 0.258767 | 0.125661 | 0.552939 | 0.396249 |
| MmugDNA.17447.1.S1_at   | MmugDNA.17447.1 | 8.22  | 8.19  | 0.28 | 0.12 | 1.02  | 0.739152 | 0.046918 | 0.879163 | 0.261301 |
| MmugDNA.17449.1.S1_at   | MmugDNA.17449.1 | 4.82  | 9.18  | 2.13 | 0.19 | -20.6 | 0.064137 | 0.273262 | 0.309726 | 0.537788 |
| MmugDNA.1745.1.S1_at    | MmugDNA.1745.1  | 9.18  | 9.27  | 0.48 | 0.1  | -1.07 | 0.669725 | 0.206581 | 0.841513 | 0.480619 |
| MmugDNA.17455.1.S1_at   | MmugDNA.17455.1 | 4.97  | 4.95  | 0.33 | 0.13 | 1.01  | 0.570675 | 0.803039 | 0.779373 | 0.886557 |
| MmugDNA.17456.1.S1_at   | MmugDNA.17456.1 | 3.2   | 3.26  | 0.07 | 0.09 | -1.05 | 0.319172 | 0.507897 | 0.603812 | 0.703358 |
| MmugDNA.17457.1.S1_at   | MmugDNA.17457.1 | 6.52  | 6.52  | 0.35 | 0.25 | 1     | 0.976947 | 0.941966 | 0.990948 | 0.96711  |
| MmugDNA.17458.1.S1_at   | MmugDNA.17458.1 | 5.67  | 5.82  | 0.07 | 0.09 | -1.11 | 0.172347 | 0.718941 | 0.466593 | 0.83732  |
| MmugDNA.17458.1.S1_s_at | MmugDNA.17458.1 | 6.46  | 6.42  | 0.11 | 0.09 | 1.03  | 0.307325 | 0.653963 | 0.594052 | 0.797743 |
| MmugDNA.17459.1.S1_at   | MmugDNA.17459.1 | 4.48  | 4.87  | 0.27 | 0.27 | -1.3  | 0.229762 | 0.094332 | 0.528728 | 0.350889 |
| MmugDNA.1746.1.S1_at    | MmugDNA.1746.1  | 4.04  | 4.66  | 0.4  | 0.19 | -1.54 | 0.193912 | 0.275677 | 0.490511 | 0.539923 |
| MmugDNA.17460.1.S1_at   | MmugDNA.17460.1 | 6.25  | 6.23  | 0.68 | 0.27 | 1.01  | 0.297725 | 0.485288 | 0.586213 | 0.689049 |
| MmugDNA.17461.1.S1_at   | MmugDNA.17461.1 | 6.19  | 5.49  | 0.9  | 0.33 | 1.63  | 0.158536 | 0.150931 | 0.449641 | 0.425523 |
| MmugDNA.17462.1.S1_at   | MmugDNA.17462.1 | 11.27 | 11.17 | 0.17 | 0.13 | 1.07  | 0.421314 | 0.106552 | 0.679878 | 0.369099 |
| MmugDNA.17464.1.S1_at   | MmugDNA.17464.1 | 6.83  | 6.26  | 0.27 | 0.04 | 1.48  | 0.029073 | 0.14939  | 0.223234 | 0.423821 |
| MmugDNA.17465.1.S1_s_at | MmugDNA.17465.1 | 13.43 | 13.32 | 0.05 | 0.08 | 1.07  | 0.08574  | 0.064121 | 0.350079 | 0.299475 |
| MmugDNA.17466.1.S1_at   | MmugDNA.17466.1 | 4.43  | 4.46  | 0.18 | 0.02 | -1.02 | 0.858993 | 0.825547 | 0.938896 | 0.899762 |
| MmugDNA.1747.1.S1_at    | MmugDNA.1747.1  | 3.62  | 3.58  | 0.15 | 0.19 | 1.03  | 0.705515 | 0.853253 | 0.860429 | 0.916534 |
| MmugDNA.17471.1.S1_at   | MmugDNA.17471.1 | 9.39  | 9.94  | 0.23 | 0.13 | -1.46 | 0.015747 | 0.173289 | 0.177875 | 0.449791 |
| MmugDNA.17472.1.S1_at   | MmugDNA.17472.1 | 6.14  | 6.16  | 0.12 | 0.22 | -1.01 | 0.452726 | 0.484958 | 0.703157 | 0.688893 |
| MmugDNA.17473.1.S1_x_at | MmugDNA.17473.1 | 3.33  | 3.1   | 0.67 | 0.27 | 1.17  | 0.338756 | 0.352072 | 0.619173 | 0.595431 |
| MmugDNA.17474.1.S1_at   | MmugDNA.17474.1 | 7.71  | 7.63  | 0.09 | 0.28 | 1.06  | 0.34501  | 0.780426 | 0.624093 | 0.872614 |
| MmugDNA.17475.1.S1_s_at | MmugDNA.17475.1 | 6.98  | 7.01  | 0.77 | 0.19 | -1.02 | 0.271588 | 0.518409 | 0.563425 | 0.71038  |
| MmugDNA.17476.1.S1_at   | MmugDNA.17476.1 | 10.7  | 10.42 | 0.26 | 0.24 | 1.21  | 0.172178 | 0.40798  | 0.466269 | 0.635339 |
| MmugDNA.17477.1.S1_at   | MmugDNA.17477.1 | 4.82  | 4.96  | 0.26 | 0.05 | -1.1  | 0.914549 | 0.992125 | 0.963657 | 0.995515 |
| MmugDNA.17478.1.S1_at   | MmugDNA.17478.1 | 7.57  | 7.6   | 0.09 | 0.12 | -1.02 | 0.984922 | 0.350492 | 0.994497 | 0.594195 |
| MmugDNA.17479.1.S1_at   | MmugDNA.17479.1 | 11.01 | 11.03 | 0.13 | 0.07 | -1.01 | 0.441479 | 0.865299 | 0.695041 | 0.923554 |
| MmugDNA.17480.1.S1_at   | MmugDNA.17480.1 | 5.69  | 8.91  | 1.32 | 0.4  | -9.3  | 0.031671 | 0.194178 | 0.231419 | 0.469267 |
| MmugDNA.17481.1.S1_at   | MmugDNA.17481.1 | 5.95  | 5.96  | 0.07 | 0.01 | -1    | 0.562074 | 0.541557 | 0.774823 | 0.725015 |
| MmugDNA.33838.1.S1_at   | MmugDNA.33838.1 | 5.98  | 5.72  | 0.12 | 0.14 | 1.2   | 0.076932 | 0.070903 | 0.335395 | 0.312437 |
| MmugDNA.33838.1.S1_s_at | MmugDNA.33838.1 | 4.65  | 4.71  | 0.15 | 0.08 | -1.04 | 0.468198 | 0.087716 | 0.713381 | 0.340964 |
| MmugDNA.17483.1.S1_at   | MmugDNA.17483.1 | 5.92  | 5.98  | 0.14 | 0.11 | -1.04 | 0.653254 | 0.769343 | 0.832031 | 0.866048 |
| MmugDNA.1473.1.S1_s_at  | MmugDNA.1473.1  | 3.47  | 3.4   | 0.05 | 0.2  | 1.05  | 0.618581 | 0.152749 | 0.810696 | 0.427571 |
| MmugDNA.17486.1.S1_at   | MmugDNA.17486.1 | 5.65  | 5.56  | 0.07 | 0.06 | 1.06  | 0.082154 | 0.178289 | 0.343626 | 0.454627 |
| MmugDNA.17487.1.S1_at   | MmugDNA.17487.1 | 4.11  | 4.01  | 0.08 | 0.25 | 1.07  | 0.243055 | 0.28003  | 0.539753 | 0.543369 |
| MmugDNA.17488.1.S1_at   | MmugDNA.17488.1 | 6.46  | 6.68  | 0.48 | 0.21 | -1.16 | 0.344377 | 0.545005 | 0.623699 | 0.727256 |
| MmugDNA.356.1.S1_s_at   | MmugDNA.356.1   | 13.29 | 13.36 | 0.13 | 0.03 | -1.05 | 0.898757 | 0.869554 | 0.956973 | 0.925994 |
| MmugDNA.1749.1.S1_at    | MmugDNA.1749.1  | 3.44  | 3.51  | 0.02 | 0.29 | -1.05 | 0.219759 | 0.340596 | 0.51751  | 0.586789 |
| MmugDNA.17490.1.S1_at   | MmugDNA.17490.1 | 2.62  | 2.63  | 0.1  | 0.11 | -1.01 | 0.685008 | 0.864761 | 0.84989  | 0.923286 |
| MmugDNA.17491.1.S1_at   | MmugDNA.17491.1 | 4.09  | 4.09  | 0.11 | 0.12 | 1     | 0.809839 | 0.771457 | 0.914789 | 0.86719  |
| MmugDNA.17493.1.S1_at   | MmugDNA.17493.1 | 5.29  | 5.14  | 0.75 | 0.07 | 1.11  | 0.387298 | 0.353475 | 0.655535 | 0.596547 |
| MmugDNA.17494.1.S1_at   | MmugDNA.17494.1 | 11.98 | 12.28 | 0.2  | 0.17 | -1.23 | 0.379554 | 0.006979 | 0.649328 | 0.112771 |
| MmugDNA.17495.1.S1_at   | MmugDNA.17495.1 | 4.59  | 4.64  | 0.02 | 0.08 | -1.03 | 0.892891 | 0.604794 | 0.954372 | 0.764799 |

|                         |                 |       |       |      |      |       |          |          |          |          |
|-------------------------|-----------------|-------|-------|------|------|-------|----------|----------|----------|----------|
| MmugDNA.17496.1.S1_at   | MmugDNA.17496.1 | 9.51  | 9.75  | 0.06 | 0.14 | -1.17 | 0.053097 | 0.001507 | 0.287689 | 0.0591   |
| MmugDNA.17498.1.S1_at   | MmugDNA.17498.1 | 6.16  | 5.36  | 0.32 | 0.44 | 1.75  | 0.039381 | 0.008558 | 0.25488  | 0.122746 |
| MmugDNA.175.1.S1_at     | MmugDNA.175.1   | 5.63  | 6.31  | 1.22 | 0.13 | -1.6  | 0.929579 | 0.927566 | 0.970192 | 0.958853 |
| MmugDNA.1750.1.S1_at    | MmugDNA.1750.1  | 5.18  | 4.57  | 1.57 | 0.55 | 1.52  | 0.419371 | 0.7475   | 0.67873  | 0.853149 |
| MmugDNA.17501.1.S1_at   | MmugDNA.17501.1 | 5.99  | 6.01  | 0.06 | 0.03 | -1.01 | 0.32667  | 0.237954 | 0.609643 | 0.508495 |
| MmugDNA.17502.1.S1_at   | MmugDNA.17502.1 | 9.44  | 9.25  | 0.08 | 0.06 | 1.14  | 0.021891 | 0.037956 | 0.201211 | 0.239302 |
| MmugDNA.17504.1.S1_at   | MmugDNA.17504.1 | 7.46  | 7.22  | 0.18 | 0.11 | 1.18  | 0.163744 | 0.018073 | 0.456321 | 0.169379 |
| MmugDNA.17507.1.S1_at   | MmugDNA.17507.1 | 6.09  | 7.03  | 1.18 | 0.44 | -1.92 | 0.350215 | 0.66572  | 0.628033 | 0.804156 |
| MmugDNA.17508.1.S1_at   | MmugDNA.17508.1 | 7.42  | 7.35  | 0.05 | 0.26 | 1.05  | 0.271728 | 0.332582 | 0.563594 | 0.580972 |
| MmugDNA.17509.1.S1_at   | MmugDNA.17509.1 | 3.71  | 4.15  | 0.08 | 0.14 | -1.36 | 0.017604 | 0.14013  | 0.186392 | 0.413394 |
| MmugDNA.1751.1.S1_at    | MmugDNA.1751.1  | 6.56  | 6.73  | 0.13 | 0.26 | -1.13 | 0.850764 | 0.753761 | 0.935218 | 0.856661 |
| MmugDNA.17510.1.S1_at   | MmugDNA.17510.1 | 4.4   | 4.42  | 0.06 | 0.17 | -1.01 | 0.539197 | 0.065585 | 0.760647 | 0.301476 |
| MmugDNA.17512.1.S1_at   | MmugDNA.17512.1 | 4.66  | 4.49  | 0.45 | 0.71 | 1.13  | 0.685871 | 0.706872 | 0.850381 | 0.829968 |
| MmugDNA.17514.1.S1_at   | MmugDNA.17514.1 | 4.4   | 4.39  | 0.17 | 0.19 | 1.01  | 0.795351 | 0.509666 | 0.907532 | 0.704276 |
| MmugDNA.17515.1.S1_at   | MmugDNA.17515.1 | 7.65  | 7.14  | 0.2  | 0.32 | 1.43  | 0.079909 | 0.108261 | 0.340107 | 0.371557 |
| MmugDNA.17516.1.S1_at   | MmugDNA.17516.1 | 2.89  | 3.17  | 0.17 | 0.16 | -1.21 | 0.255438 | 0.3796   | 0.549894 | 0.616523 |
| MmugDNA.17517.1.S1_at   | MmugDNA.17517.1 | 8.76  | 8.1   | 0.3  | 0.32 | 1.58  | 0.144604 | 0.222115 | 0.431598 | 0.495113 |
| MmugDNA.17520.1.S1_at   | MmugDNA.17520.1 | 4.59  | 4.03  | 0.21 | 0.15 | 1.47  | 0.046634 | 0.035758 | 0.273564 | 0.233437 |
| MmugDNA.17521.1.S1_at   | MmugDNA.17521.1 | 4.63  | 4.64  | 0.05 | 0.07 | -1.01 | 0.313908 | 0.61097  | 0.599716 | 0.768967 |
| MmugDNA.17522.1.S1_at   | MmugDNA.17522.1 | 3.67  | 3.67  | 0.09 | 0.09 | 1     | 0.328167 | 0.501971 | 0.61059  | 0.699986 |
| MmugDNA.17524.1.S1_at   | MmugDNA.17524.1 | 4.08  | 4     | 0.26 | 0.3  | 1.06  | 0.933382 | 0.964084 | 0.972051 | 0.980052 |
| MmugDNA.17525.1.S1_s_at | MmugDNA.17525.1 | 11.15 | 10.89 | 0.14 | 0.12 | 1.2   | 0.050897 | 0.346029 | 0.283242 | 0.59115  |
| MmugDNA.17528.1.S1_at   | MmugDNA.17528.1 | 3.72  | 3.84  | 0.18 | 0.03 | -1.09 | 0.836588 | 0.825678 | 0.928302 | 0.899784 |
| MmugDNA.17529.1.S1_at   | MmugDNA.17529.1 | 3.35  | 3.25  | 0.07 | 0.05 | 1.07  | 0.094909 | 0.459744 | 0.363866 | 0.671948 |
| MmugDNA.1753.1.S1_at    | MmugDNA.1753.1  | 5.34  | 5.02  | 0.08 | 0.14 | 1.25  | 0.059974 | 0.053693 | 0.302259 | 0.277304 |
| MmugDNA.17532.1.S1_at   | MmugDNA.17532.1 | 5.19  | 5.58  | 0.91 | 0.45 | -1.31 | 0.814504 | 0.925494 | 0.917133 | 0.957833 |
| MmugDNA.17534.1.S1_at   | MmugDNA.17534.1 | 10.12 | 10.21 | 0.12 | 0.02 | -1.06 | 0.772531 | 0.987611 | 0.895806 | 0.993078 |
| MmugDNA.17534.1.S1_s_at | MmugDNA.17534.1 | 11.06 | 11.12 | 0.13 | 0.03 | -1.04 | 0.743604 | 0.950238 | 0.881384 | 0.971666 |
| MmugDNA.17535.1.S1_at   | MmugDNA.17535.1 | 13.11 | 13.08 | 0.09 | 0    | 1.02  | 0.189681 | 0.001999 | 0.486064 | 0.066331 |
| MmugDNA.17536.1.S1_at   | MmugDNA.17536.1 | 3.29  | 3.21  | 0.14 | 0.07 | 1.06  | 0.171697 | 0.151767 | 0.465666 | 0.426413 |
| MmugDNA.1754.1.S1_at    | MmugDNA.1754.1  | 6.36  | 6.43  | 0.02 | 0.08 | -1.05 | 0.667108 | 0.076242 | 0.8402   | 0.321157 |
| MmugDNA.17540.1.S1_at   | MmugDNA.17540.1 | 12.3  | 12.2  | 0.09 | 0.02 | 1.07  | 0.147476 | 0.267167 | 0.435407 | 0.532773 |
| MmugDNA.17541.1.S1_at   | MmugDNA.17541.1 | 4.9   | 4.92  | 1.25 | 0.57 | -1.01 | 0.55719  | 0.501701 | 0.772057 | 0.6998   |
| MmugDNA.17543.1.S1_at   | MmugDNA.17543.1 | 6.74  | 7.37  | 0.2  | 0.14 | -1.55 | 0.017773 | 0.013672 | 0.186977 | 0.14967  |
| MmugDNA.17544.1.S1_at   | MmugDNA.17544.1 | 6.61  | 6.45  | 0.16 | 0.02 | 1.11  | 0.508185 | 0.182001 | 0.740293 | 0.458537 |
| MmugDNA.17545.1.S1_at   | MmugDNA.17545.1 | 6.24  | 6.39  | 0.15 | 0.02 | -1.1  | 0.158914 | 0.344316 | 0.450204 | 0.589762 |
| MmugDNA.17546.1.S1_at   | MmugDNA.17546.1 | 9.55  | 9.08  | 0.06 | 0.07 | 1.39  | 0.000805 | 0.000006 | 0.073056 | 0.016421 |
| MmugDNA.11755.1.S1_s_at | MmugDNA.11755.1 | 9.24  | 8.77  | 0.12 | 0.01 | 1.39  | 0.002235 | 0.000059 | 0.091055 | 0.025666 |
| MmugDNA.17548.1.S1_at   | MmugDNA.17548.1 | 8.41  | 8.64  | 0.67 | 0.21 | -1.17 | 0.231319 | 0.042154 | 0.530046 | 0.249773 |
| MmugDNA.17549.1.S1_s_at | MmugDNA.17549.1 | 10.46 | 10.57 | 0.23 | 0.05 | -1.08 | 0.730071 | 0.854046 | 0.873891 | 0.91692  |
| MmugDNA.1755.1.S1_at    | MmugDNA.1755.1  | 5.21  | 5.05  | 0.04 | 0.1  | 1.12  | 0.099622 | 0.016115 | 0.370515 | 0.160891 |
| MmugDNA.17550.1.S1_at   | MmugDNA.17550.1 | 5.68  | 5.52  | 0.34 | 0.13 | 1.12  | 0.845754 | 0.320419 | 0.932611 | 0.572648 |
| MmugDNA.17551.1.S1_at   | MmugDNA.17551.1 | 6.46  | 7.46  | 0.98 | 0.31 | -2    | 0.165471 | 0.559793 | 0.458422 | 0.736394 |

|                         |                 |       |       |      |      |        |          |          |          |          |
|-------------------------|-----------------|-------|-------|------|------|--------|----------|----------|----------|----------|
| MmugDNA.17552.1.S1_at   | MmugDNA.17552.1 | 5.91  | 5.9   | 0.1  | 0.08 | 1      | 0.919655 | 0.722821 | 0.965621 | 0.839457 |
| MmugDNA.17553.1.S1_at   | MmugDNA.17553.1 | 7.24  | 10.93 | 2.2  | 0.32 | -12.84 | 0.156646 | 0.314725 | 0.44712  | 0.568449 |
| MmugDNA.17556.1.S1_at   | MmugDNA.17556.1 | 12.15 | 12.24 | 0.25 | 0.11 | -1.07  | 0.534727 | 0.596138 | 0.757913 | 0.759357 |
| MmugDNA.17557.1.S1_at   | MmugDNA.17557.1 | 7.31  | 7.35  | 0.13 | 0.05 | -1.02  | 0.375053 | 0.051854 | 0.6459   | 0.273151 |
| MmugDNA.17558.1.S1_at   | MmugDNA.17558.1 | 10.86 | 10.76 | 0.1  | 0.08 | 1.07   | 0.054603 | 0.264766 | 0.290604 | 0.530791 |
| MmugDNA.17559.1.S1_at   | MmugDNA.17559.1 | 4.08  | 4.07  | 0.08 | 0.14 | 1      | 0.804771 | 0.343115 | 0.912379 | 0.588883 |
| MmugDNA.1756.1.S1_at    | MmugDNA.1756.1  | 4.65  | 4.88  | 0.14 | 0.09 | -1.18  | 0.14081  | 0.236864 | 0.426579 | 0.507587 |
| MmugDNA.17560.1.S1_at   | MmugDNA.17560.1 | 6.32  | 6.34  | 0.11 | 0.02 | -1.01  | 0.744383 | 0.040098 | 0.881461 | 0.245388 |
| MmugDNA.17561.1.S1_at   | MmugDNA.17561.1 | 4.32  | 4.12  | 0.12 | 0.38 | 1.15   | 0.970686 | 0.720843 | 0.988376 | 0.838368 |
| MmugDNA.17563.1.S1_at   | MmugDNA.17563.1 | 6.52  | 6.51  | 0.04 | 0.11 | 1.01   | 0.859763 | 0.742083 | 0.939213 | 0.850611 |
| MmugDNA.17564.1.S1_at   | MmugDNA.17564.1 | 10.69 | 9.82  | 0.87 | 0.06 | 1.83   | 0.23886  | 0.179105 | 0.536078 | 0.455436 |
| MmugDNA.17565.1.S1_at   | MmugDNA.17565.1 | 9.62  | 9.63  | 0.15 | 0.14 | -1.01  | 0.262771 | 0.617386 | 0.556683 | 0.773397 |
| MmugDNA.17566.1.S1_at   | MmugDNA.17566.1 | 10.86 | 10.85 | 0.16 | 0.06 | 1.01   | 0.216863 | 0.435064 | 0.514655 | 0.655    |
| MmugDNA.17569.1.S1_at   | MmugDNA.17569.1 | 6.55  | 5.97  | 0.5  | 0.07 | 1.49   | 0.305971 | 0.176812 | 0.592927 | 0.453219 |
| MmugDNA.1757.1.S1_at    | MmugDNA.1757.1  | 6.3   | 6.34  | 0.64 | 0.48 | -1.03  | 0.789808 | 0.508653 | 0.904456 | 0.703759 |
| MmugDNA.17570.1.S1_at   | MmugDNA.17570.1 | 5.86  | 6.64  | 0.46 | 0.21 | -1.71  | 0.12331  | 0.060827 | 0.402568 | 0.293348 |
| MmugDNA.17572.1.S1_s_at | MmugDNA.17572.1 | 8.93  | 9.75  | 0.89 | 0.12 | -1.77  | 0.08161  | 0.1706   | 0.342734 | 0.447204 |
| MmugDNA.17576.1.S1_at   | MmugDNA.17576.1 | 9.07  | 8.67  | 0.1  | 0.12 | 1.32   | 0.017585 | 0.226441 | 0.186295 | 0.498888 |
| MmugDNA.17577.1.S1_at   | MmugDNA.17577.1 | 5.16  | 4.92  | 1    | 0.05 | 1.18   | 0.244789 | 0.374784 | 0.541082 | 0.613081 |
| MmugDNA.17578.1.S1_at   | MmugDNA.17578.1 | 4.98  | 5.03  | 0.26 | 0.24 | -1.03  | 0.423611 | 0.555148 | 0.681565 | 0.733715 |
| MmugDNA.1758.1.S1_at    | MmugDNA.1758.1  | 4.78  | 4.68  | 0.23 | 0.04 | 1.07   | 0.496938 | 0.828671 | 0.732751 | 0.901558 |
| MmugDNA.17580.1.S1_at   | MmugDNA.17580.1 | 4.21  | 4.59  | 0.08 | 0.47 | -1.3   | 0.595227 | 0.755931 | 0.795115 | 0.8579   |
| MmugDNA.17581.1.S1_at   | MmugDNA.17581.1 | 11.42 | 11.13 | 0.17 | 0.03 | 1.22   | 0.107932 | 0.522627 | 0.382531 | 0.713274 |
| MmugDNA.17582.1.S1_at   | MmugDNA.17582.1 | 4.35  | 4.3   | 0.15 | 0.2  | 1.04   | 0.842581 | 0.62455  | 0.930973 | 0.778718 |
| MmugDNA.17584.1.S1_s_at | MmugDNA.17584.1 | 7.7   | 8.09  | 0.15 | 0.15 | -1.32  | 0.030588 | 0.073981 | 0.227782 | 0.317505 |
| MmugDNA.17586.1.S1_s_at | MmugDNA.17586.1 | 10.77 | 10.32 | 0.1  | 0.25 | 1.37   | 0.173479 | 0.474957 | 0.467812 | 0.681837 |
| MmugDNA.17588.1.S1_at   | MmugDNA.17588.1 | 6.41  | 6.41  | 0.14 | 0.05 | -1     | 0.555194 | 0.047999 | 0.771139 | 0.264109 |
| MmugDNA.17589.1.S1_at   | MmugDNA.17589.1 | 5.17  | 5.18  | 0.16 | 0.01 | -1.01  | 0.474361 | 0.637333 | 0.717451 | 0.786824 |
| MmugDNA.1759.1.S1_at    | MmugDNA.1759.1  | 4.06  | 4.32  | 0.09 | 0.04 | -1.2   | 0.019509 | 0.01536  | 0.192411 | 0.157392 |
| MmugDNA.1759.1.S1_s_at  | MmugDNA.1759.1  | 6.83  | 6.87  | 0.13 | 0.1  | -1.03  | 0.790746 | 0.696534 | 0.904945 | 0.823764 |
| MmugDNA.17590.1.S1_at   | MmugDNA.17590.1 | 8.18  | 7.45  | 0.14 | 0.1  | 1.65   | 0.001887 | 0.001443 | 0.087741 | 0.057912 |
| MmugDNA.17591.1.S1_at   | MmugDNA.17591.1 | 4.97  | 4.91  | 1.15 | 0.2  | 1.04   | 0.281237 | 0.335305 | 0.572137 | 0.58305  |
| MmugDNA.17592.1.S1_at   | MmugDNA.17592.1 | 6.38  | 6.4   | 0.13 | 0.02 | -1.01  | 0.46239  | 0.725989 | 0.709639 | 0.84134  |
| MmugDNA.17593.1.S1_at   | MmugDNA.17593.1 | 9.71  | 9.92  | 0.12 | 0.03 | -1.15  | 0.029926 | 0.001397 | 0.226288 | 0.057005 |
| MmugDNA.17593.1.S1_s_at | MmugDNA.17593.1 | 10.22 | 10.44 | 0.17 | 0.03 | -1.16  | 0.028779 | 0.010538 | 0.222366 | 0.134072 |
| MmugDNA.17594.1.S1_at   | MmugDNA.17594.1 | 4.82  | 4.58  | 0.36 | 0.32 | 1.18   | 0.761708 | 0.546812 | 0.890644 | 0.728203 |
| MmugDNA.17595.1.S1_at   | MmugDNA.17595.1 | 5.41  | 5.36  | 0.13 | 0.05 | 1.03   | 0.514415 | 0.031862 | 0.744362 | 0.220909 |
| MmugDNA.17596.1.S1_at   | MmugDNA.17596.1 | 4.41  | 4.22  | 0.13 | 0.42 | 1.14   | 0.80244  | 0.509556 | 0.91128  | 0.704254 |
| MmugDNA.17597.1.S1_at   | MmugDNA.17597.1 | 8.03  | 7.44  | 0.23 | 0.26 | 1.5    | 0.049329 | 0.060652 | 0.279484 | 0.292871 |
| MmugDNA.17598.1.S1_at   | MmugDNA.17598.1 | 5.95  | 5.84  | 0.26 | 0.26 | 1.08   | 0.858471 | 0.91152  | 0.938636 | 0.950138 |
| MmugDNA.17600.1.S1_at   | MmugDNA.17600.1 | 5.29  | 5.34  | 0.25 | 0.07 | -1.03  | 0.711648 | 0.661603 | 0.863964 | 0.801881 |
| MmugDNA.17602.1.S1_at   | MmugDNA.17602.1 | 6.42  | 6.04  | 0.31 | 0.04 | 1.3    | 0.108433 | 0.048867 | 0.383021 | 0.265858 |
| MmugDNA.17605.1.S1_at   | MmugDNA.17605.1 | 6.3   | 6.12  | 0.32 | 0.11 | 1.13   | 0.546256 | 0.109381 | 0.765159 | 0.373156 |

|                         |                 |       |       |      |      |       |          |          |          |          |
|-------------------------|-----------------|-------|-------|------|------|-------|----------|----------|----------|----------|
| MmugDNA.17607.1.S1_at   | MmugDNA.17607.1 | 10.88 | 10.47 | 0.11 | 0.17 | 1.33  | 0.056567 | 0.471421 | 0.295381 | 0.679435 |
| MmugDNA.17608.1.S1_at   | MmugDNA.17608.1 | 7.1   | 7.06  | 0.27 | 0.11 | 1.03  | 0.292584 | 0.489328 | 0.581743 | 0.691792 |
| MmugDNA.17609.1.S1_at   | MmugDNA.17609.1 | 4.34  | 3.71  | 0.34 | 0.1  | 1.55  | 0.097455 | 0.098842 | 0.367624 | 0.357002 |
| MmugDNA.17610.1.S1_at   | MmugDNA.17610.1 | 4.72  | 4.6   | 0.25 | 0.07 | 1.08  | 0.212221 | 0.348304 | 0.51017  | 0.592478 |
| MmugDNA.17611.1.S1_at   | MmugDNA.17611.1 | 4.87  | 4.87  | 0    | 0.02 | 1     | 0.373901 | 0.791968 | 0.645118 | 0.879808 |
| MmugDNA.17613.1.S1_at   | MmugDNA.17613.1 | 3.52  | 3.39  | 0.32 | 0.09 | 1.1   | 0.803412 | 0.29733  | 0.911816 | 0.556071 |
| MmugDNA.17615.1.S1_at   | MmugDNA.17615.1 | 5.68  | 5.62  | 0.26 | 0.04 | 1.04  | 0.26109  | 0.266817 | 0.555232 | 0.53241  |
| MmugDNA.17616.1.S1_at   | MmugDNA.17616.1 | 4.63  | 4.55  | 0.17 | 0    | 1.06  | 0.459264 | 0.565276 | 0.70745  | 0.739795 |
| MmugDNA.17618.1.S1_at   | MmugDNA.17618.1 | 4.14  | 3.91  | 0.17 | 0.12 | 1.17  | 0.179674 | 0.486623 | 0.474837 | 0.689946 |
| MmugDNA.17619.1.S1_at   | MmugDNA.17619.1 | 6.46  | 6.61  | 0.16 | 0.09 | -1.11 | 0.121122 | 0.069766 | 0.39967  | 0.310269 |
| MmugDNA.1762.1.S1_at    | MmugDNA.1762.1  | 3.09  | 3.01  | 0    | 0.19 | 1.06  | 0.516852 | 0.65475  | 0.746092 | 0.798154 |
| MmugDNA.17620.1.S1_at   | MmugDNA.17620.1 | 6.92  | 6.68  | 0.09 | 0.25 | 1.18  | 0.066107 | 0.175449 | 0.314444 | 0.452157 |
| MmugDNA.17621.1.S1_at   | MmugDNA.17621.1 | 6.21  | 6.46  | 0.06 | 0.02 | -1.19 | 0.003241 | 0.001774 | 0.101778 | 0.0634   |
| MmugDNA.17622.1.S1_at   | MmugDNA.17622.1 | 7.16  | 7.22  | 0.83 | 0.22 | -1.04 | 0.945453 | 0.996018 | 0.977066 | 0.997565 |
| MmugDNA.17623.1.S1_at   | MmugDNA.17623.1 | 3.47  | 3.46  | 0.16 | 0    | 1     | 0.340478 | 0.565418 | 0.620818 | 0.739886 |
| MmugDNA.17626.1.S1_at   | MmugDNA.17626.1 | 4.3   | 3.88  | 0.25 | 0.31 | 1.34  | 0.701615 | 0.883356 | 0.858329 | 0.933542 |
| MmugDNA.17627.1.S1_at   | MmugDNA.17627.1 | 3.53  | 3.54  | 0.35 | 0.22 | -1.01 | 0.26403  | 0.394749 | 0.557422 | 0.627208 |
| MmugDNA.17628.1.S1_at   | MmugDNA.17628.1 | 3.24  | 3.29  | 0.13 | 0.08 | -1.04 | 0.798679 | 0.46522  | 0.909274 | 0.675638 |
| MmugDNA.17629.1.S1_at   | MmugDNA.17629.1 | 8.98  | 9.14  | 0.14 | 0.04 | -1.12 | 0.217742 | 0.875138 | 0.515562 | 0.929167 |
| MmugDNA.17630.1.S1_at   | MmugDNA.17630.1 | 8.87  | 9.12  | 0.25 | 0.28 | -1.19 | 0.805725 | 0.948567 | 0.9129   | 0.970655 |
| MmugDNA.17631.1.S1_at   | MmugDNA.17631.1 | 3.04  | 3     | 1.57 | 0.08 | 1.03  | 0.356028 | 0.423084 | 0.632435 | 0.646145 |
| MmugDNA.17633.1.S1_at   | MmugDNA.17633.1 | 4.54  | 3.83  | 0.34 | 0.74 | 1.64  | 0.302998 | 0.67667  | 0.590459 | 0.811032 |
| MmugDNA.17634.1.S1_at   | MmugDNA.17634.1 | 11.68 | 11.56 | 0.08 | 0.17 | 1.08  | 0.230936 | 0.109353 | 0.529768 | 0.373154 |
| MmugDNA.17635.1.S1_at   | MmugDNA.17635.1 | 5.52  | 5.5   | 0.12 | 0.08 | 1.01  | 0.249546 | 0.374467 | 0.544627 | 0.6129   |
| MmugDNA.17637.1.S1_at   | MmugDNA.17637.1 | 7.85  | 7.81  | 0.1  | 0.04 | 1.03  | 0.233437 | 0.266003 | 0.53162  | 0.531815 |
| MmugDNA.17637.1.S1_s_at | MmugDNA.17637.1 | 11.8  | 11.1  | 0.45 | 0.71 | 1.63  | 0.736787 | 0.821958 | 0.87768  | 0.897581 |
| MmugDNA.17638.1.S1_at   | MmugDNA.17638.1 | 11.18 | 11.21 | 0.16 | 0.04 | -1.03 | 0.262557 | 0.027364 | 0.556605 | 0.206695 |
| MmugDNA.17639.1.S1_at   | MmugDNA.17639.1 | 3.44  | 3.41  | 0.02 | 0.12 | 1.02  | 0.411177 | 0.523541 | 0.673155 | 0.713784 |
| MmugDNA.1764.1.S1_at    | MmugDNA.1764.1  | 6.89  | 7.4   | 0.44 | 0.26 | -1.42 | 0.237769 | 0.512689 | 0.535177 | 0.706478 |
| MmugDNA.17641.1.S1_at   | MmugDNA.17641.1 | 7.12  | 7.09  | 0.21 | 0.04 | 1.02  | 0.685561 | 0.31241  | 0.850157 | 0.567174 |
| MmugDNA.17645.1.S1_at   | MmugDNA.17645.1 | 5.29  | 5.18  | 0.05 | 0.06 | 1.07  | 0.111595 | 0.019177 | 0.387683 | 0.1742   |
| MmugDNA.17646.1.S1_at   | MmugDNA.17646.1 | 5.19  | 3.91  | 1.33 | 0.19 | 2.43  | 0.214728 | 0.312133 | 0.512314 | 0.566904 |
| MmugDNA.17647.1.S1_at   | MmugDNA.17647.1 | 5.52  | 5.5   | 0.1  | 0.15 | 1.01  | 0.785258 | 0.496552 | 0.902017 | 0.696119 |
| MmugDNA.17648.1.S1_at   | MmugDNA.17648.1 | 5.77  | 5.46  | 0.36 | 0.07 | 1.24  | 0.248961 | 0.340522 | 0.544234 | 0.586776 |
| MmugDNA.17649.1.S1_at   | MmugDNA.17649.1 | 7.92  | 7.33  | 0.21 | 0.19 | 1.5   | 0.044418 | 0.061515 | 0.267911 | 0.294835 |
| MmugDNA.1765.1.S1_at    | MmugDNA.1765.1  | 7.28  | 7.1   | 0.44 | 0.23 | 1.13  | 0.20953  | 0.552181 | 0.507041 | 0.73155  |
| MmugDNA.17650.1.S1_at   | MmugDNA.17650.1 | 5.17  | 5.27  | 0.15 | 0.15 | -1.07 | 0.230058 | 0.29516  | 0.528979 | 0.55456  |
| MmugDNA.17651.1.S1_at   | MmugDNA.17651.1 | 4.97  | 4.98  | 0.19 | 0.12 | -1.01 | 0.558544 | 0.036329 | 0.772919 | 0.235105 |
| MmugDNA.17652.1.S1_at   | MmugDNA.17652.1 | 2.97  | 2.94  | 0.27 | 0.14 | 1.02  | 0.579039 | 0.721219 | 0.784854 | 0.838628 |
| MmugDNA.17652.1.S1_x_at | MmugDNA.17652.1 | 3.06  | 3.02  | 0.09 | 0.22 | 1.02  | 0.873421 | 0.806506 | 0.945619 | 0.888656 |
| MmugDNA.17653.1.S1_at   | MmugDNA.17653.1 | 7.03  | 6.49  | 0.71 | 0.33 | 1.46  | 0.338243 | 0.38325  | 0.618679 | 0.619246 |
| MmugDNA.17654.1.S1_at   | MmugDNA.17654.1 | 9.89  | 9.69  | 0.25 | 0.04 | 1.15  | 0.159283 | 0.263191 | 0.450558 | 0.529498 |
| MmugDNA.17656.1.S1_at   | MmugDNA.17656.1 | 8.03  | 9.28  | 0.52 | 0.14 | -2.38 | 0.040503 | 0.044982 | 0.257665 | 0.256531 |

|                         |                 |       |       |      |      |       |          |          |          |          |
|-------------------------|-----------------|-------|-------|------|------|-------|----------|----------|----------|----------|
| MmugDNA.1766.1.S1_at    | MmugDNA.1766.1  | 6.44  | 6.64  | 0.15 | 0.08 | -1.15 | 0.130564 | 0.308429 | 0.412987 | 0.564482 |
| MmugDNA.17660.1.S1_at   | MmugDNA.17660.1 | 6.92  | 7.13  | 0.12 | 0.04 | -1.16 | 0.04628  | 0.381474 | 0.272946 | 0.617691 |
| MmugDNA.17660.1.S1_s_at | MmugDNA.17660.1 | 7.36  | 7.85  | 0.05 | 0.21 | -1.41 | 0.046546 | 0.364646 | 0.273563 | 0.604978 |
| MmugDNA.17661.1.S1_at   | MmugDNA.17661.1 | 7.07  | 6.98  | 0.28 | 0.02 | 1.06  | 0.661163 | 0.129935 | 0.836453 | 0.401515 |
| MmugDNA.17665.1.S1_s_at | MmugDNA.17665.1 | 6.62  | 6.59  | 0.11 | 0.11 | 1.02  | 0.667498 | 0.620867 | 0.840413 | 0.775643 |
| MmugDNA.17666.1.S1_at   | MmugDNA.17666.1 | 3.38  | 3.39  | 0.07 | 0.17 | -1    | 0.243631 | 0.220026 | 0.540272 | 0.49344  |
| MmugDNA.17667.1.S1_at   | MmugDNA.17667.1 | 3.34  | 3.16  | 0.26 | 0.12 | 1.13  | 0.435215 | 0.41672  | 0.69034  | 0.641672 |
| MmugDNA.17668.1.S1_at   | MmugDNA.17668.1 | 4.57  | 4.26  | 0.2  | 0.2  | 1.25  | 0.123011 | 0.114726 | 0.402175 | 0.381279 |
| MmugDNA.17669.1.S1_s_at | MmugDNA.17669.1 | 3.1   | 3.02  | 0.01 | 0.11 | 1.05  | 0.246353 | 0.263555 | 0.542125 | 0.529826 |
| MmugDNA.1767.1.S1_at    | MmugDNA.1767.1  | 4.06  | 4.09  | 0.22 | 0.02 | -1.02 | 0.529422 | 0.702982 | 0.754256 | 0.827866 |
| MmugDNA.17670.1.S1_at   | MmugDNA.17670.1 | 3.3   | 3.27  | 0.32 | 0.19 | 1.02  | 0.795373 | 0.644731 | 0.907532 | 0.791816 |
| MmugDNA.17672.1.S1_at   | MmugDNA.17672.1 | 8.18  | 8.07  | 0.22 | 0.21 | 1.08  | 0.185958 | 0.45068  | 0.482132 | 0.665844 |
| MmugDNA.17673.1.S1_at   | MmugDNA.17673.1 | 10.1  | 10.21 | 0.09 | 0.2  | -1.08 | 0.931978 | 0.075285 | 0.971431 | 0.319441 |
| MmugDNA.17674.1.S1_at   | MmugDNA.17674.1 | 3.37  | 3.45  | 0.08 | 0.04 | -1.05 | 0.346243 | 0.012154 | 0.624879 | 0.142648 |
| MmugDNA.17675.1.S1_at   | MmugDNA.17675.1 | 3.05  | 3.04  | 0.22 | 0.04 | 1.01  | 0.990777 | 0.994663 | 0.996659 | 0.996682 |
| MmugDNA.17677.1.S1_at   | MmugDNA.17677.1 | 5.25  | 5.25  | 0.13 | 0.02 | 1     | 0.325449 | 0.373246 | 0.608731 | 0.612061 |
| MmugDNA.17679.1.S1_at   | MmugDNA.17679.1 | 4.76  | 4.64  | 0.06 | 0.11 | 1.09  | 0.855521 | 0.44529  | 0.937039 | 0.662338 |
| MmugDNA.1768.1.S1_at    | MmugDNA.1768.1  | 5.13  | 4.87  | 0.2  | 0.15 | 1.2   | 0.084908 | 0.092783 | 0.348849 | 0.348989 |
| MmugDNA.17680.1.S1_at   | MmugDNA.17680.1 | 9.83  | 8.39  | 0.34 | 0.43 | 2.73  | 0.011207 | 0.013934 | 0.155478 | 0.151384 |
| MmugDNA.17683.1.S1_at   | MmugDNA.17683.1 | 6.02  | 6.04  | 0.04 | 0.04 | -1.01 | 0.48092  | 0.001636 | 0.721673 | 0.061167 |
| MmugDNA.17685.1.S1_at   | MmugDNA.17685.1 | 4.13  | 3.92  | 0.05 | 0.29 | 1.15  | 0.957989 | 0.97094  | 0.982752 | 0.984138 |
| MmugDNA.17687.1.S1_at   | MmugDNA.17687.1 | 4.65  | 4.9   | 0.13 | 0.67 | -1.19 | 0.565595 | 0.594124 | 0.776758 | 0.758517 |
| MmugDNA.17688.1.S1_at   | MmugDNA.17688.1 | 4.78  | 4.77  | 0.15 | 0.19 | 1.01  | 0.635018 | 0.575872 | 0.82111  | 0.746841 |
| MmugDNA.1769.1.S1_at    | MmugDNA.1769.1  | 6.25  | 5.64  | 0.69 | 0.23 | 1.53  | 0.166679 | 0.09577  | 0.459928 | 0.352753 |
| MmugDNA.17691.1.S1_at   | MmugDNA.17691.1 | 4.6   | 3.69  | 0.63 | 0.85 | 1.88  | 0.262194 | 0.508981 | 0.556354 | 0.703967 |
| MmugDNA.17692.1.S1_at   | MmugDNA.17692.1 | 11.68 | 11.81 | 0.28 | 0.06 | -1.1  | 0.614714 | 0.765836 | 0.808379 | 0.863939 |
| MmugDNA.17692.1.S1_s_at | MmugDNA.17692.1 | 11.31 | 11.54 | 0.35 | 0.09 | -1.17 | 0.308246 | 0.359044 | 0.59492  | 0.600414 |
| MmugDNA.17694.1.S1_at   | MmugDNA.17694.1 | 9.77  | 10.44 | 0.18 | 0.15 | -1.58 | 0.014127 | 0.061802 | 0.17039  | 0.295352 |
| MmugDNA.17695.1.S1_at   | MmugDNA.17695.1 | 4.15  | 3.17  | 1.31 | 0.23 | 1.97  | 0.245173 | 0.24511  | 0.541279 | 0.514861 |
| MmugDNA.17697.1.S1_at   | MmugDNA.17697.1 | 10.21 | 10.08 | 0.16 | 0.17 | 1.1   | 0.38835  | 0.627384 | 0.656369 | 0.780374 |
| MmugDNA.17698.1.S1_at   | MmugDNA.17698.1 | 3.94  | 4.01  | 0.14 | 0.06 | -1.05 | 0.675876 | 0.917351 | 0.845265 | 0.953807 |
| MmugDNA.177.1.S1_at     | MmugDNA.177.1   | 4.73  | 4.64  | 0.14 | 0.04 | 1.06  | 0.843167 | 0.919688 | 0.931314 | 0.954878 |
| MmugDNA.1770.1.S1_at    | MmugDNA.1770.1  | 3.01  | 3.15  | 0.08 | 0.07 | -1.1  | 0.078965 | 0.417995 | 0.338745 | 0.642531 |
| MmugDNA.17700.1.S1_at   | MmugDNA.17700.1 | 5.28  | 5.25  | 0.02 | 0.06 | 1.02  | 0.602003 | 0.687544 | 0.799962 | 0.817614 |
| MmugDNA.17701.1.S1_at   | MmugDNA.17701.1 | 3.98  | 4.12  | 0.19 | 0.26 | -1.1  | 0.197851 | 0.222465 | 0.49515  | 0.495518 |
| MmugDNA.17702.1.S1_at   | MmugDNA.17702.1 | 6.99  | 6.89  | 0.12 | 0.06 | 1.07  | 0.100319 | 0.408313 | 0.371099 | 0.635596 |
| MmugDNA.17703.1.S1_at   | MmugDNA.17703.1 | 9.2   | 9.49  | 0.1  | 0.07 | -1.23 | 0.011781 | 0.780268 | 0.158421 | 0.872567 |
| MmugDNA.17703.1.S1_x_at | MmugDNA.17703.1 | 9.43  | 9.7   | 0.08 | 0.08 | -1.21 | 0.010198 | 0.789892 | 0.150739 | 0.878631 |
| MmugDNA.17706.1.S1_at   | MmugDNA.17706.1 | 6.23  | 6.2   | 0.24 | 0.3  | 1.02  | 0.274019 | 0.54971  | 0.566013 | 0.730002 |
| MmugDNA.17707.1.S1_at   | MmugDNA.17707.1 | 6.58  | 6.48  | 0.48 | 0.36 | 1.07  | 0.814305 | 0.864052 | 0.91702  | 0.922865 |
| MmugDNA.17708.1.S1_at   | MmugDNA.17708.1 | 10.17 | 9.69  | 0.19 | 0.09 | 1.4   | 0.016047 | 0.039536 | 0.179208 | 0.243767 |
| MmugDNA.1771.1.S1_at    | MmugDNA.1771.1  | 5.78  | 5.16  | 0.07 | 0.37 | 1.54  | 0.031594 | 0.029363 | 0.231141 | 0.213234 |
| MmugDNA.17710.1.S1_at   | MmugDNA.17710.1 | 5.47  | 5.52  | 0.18 | 0.09 | -1.04 | 0.432471 | 0.320481 | 0.688321 | 0.572648 |



|                         |                 |       |       |      |      |       |          |          |          |          |
|-------------------------|-----------------|-------|-------|------|------|-------|----------|----------|----------|----------|
| MmugDNA.17711.1.S1_at   | MmugDNA.17711.1 | 3.34  | 3.31  | 0.1  | 0.28 | 1.02  | 0.49854  | 0.678212 | 0.733723 | 0.812051 |
| MmugDNA.17712.1.S1_at   | MmugDNA.17712.1 | 9.88  | 9.64  | 0.18 | 0.09 | 1.18  | 0.06526  | 0.037707 | 0.312385 | 0.23859  |
| MmugDNA.17713.1.S1_at   | MmugDNA.17713.1 | 7.56  | 6.58  | 0.41 | 0.18 | 1.97  | 0.024076 | 0.000806 | 0.208287 | 0.04607  |
| MmugDNA.17714.1.S1_at   | MmugDNA.17714.1 | 7.19  | 7.39  | 0.28 | 0.22 | -1.14 | 0.587301 | 0.688092 | 0.790419 | 0.817914 |
| MmugDNA.17716.1.S1_at   | MmugDNA.17716.1 | 5.6   | 6.77  | 0.38 | 0.12 | -2.27 | 0.016053 | 0.134797 | 0.179208 | 0.406854 |
| MmugDNA.17716.1.S1_s_at | MmugDNA.17716.1 | 5.71  | 7.49  | 1.35 | 0.22 | -3.44 | 0.078901 | 0.443075 | 0.338745 | 0.660962 |
| MmugDNA.17717.1.S1_at   | MmugDNA.17717.1 | 7.58  | 7.16  | 0.63 | 0.09 | 1.34  | 0.235938 | 0.31271  | 0.533552 | 0.567299 |
| MmugDNA.17718.1.S1_at   | MmugDNA.17718.1 | 4.19  | 4.23  | 0.03 | 0.09 | -1.03 | 0.4806   | 0.667997 | 0.721439 | 0.8057   |
| MmugDNA.17719.1.S1_x_at | MmugDNA.17719.1 | 12.88 | 12.84 | 0.39 | 0.18 | 1.03  | 0.345528 | 0.200375 | 0.624476 | 0.47478  |
| MmugDNA.1772.1.S1_at    | MmugDNA.1772.1  | 4.51  | 4.6   | 0.03 | 0.02 | -1.06 | 0.012468 | 0.742264 | 0.161927 | 0.850709 |
| MmugDNA.33829.1.S1_s_at | MmugDNA.33829.1 | 14.41 | 14.4  | 0.02 | 0.02 | 1.01  | 0.449089 | 0.833883 | 0.700431 | 0.904791 |
| MmugDNA.17721.1.S1_at   | MmugDNA.17721.1 | 6.18  | 5.93  | 0.44 | 0.14 | 1.19  | 0.191306 | 0.387135 | 0.487557 | 0.621935 |
| MmugDNA.17722.1.S1_at   | MmugDNA.17722.1 | 2.79  | 2.71  | 0.28 | 0.04 | 1.06  | 0.213002 | 0.213035 | 0.510974 | 0.487005 |
| MmugDNA.17723.1.S1_at   | MmugDNA.17723.1 | 4.35  | 3.99  | 0.09 | 0.18 | 1.28  | 0.097414 | 0.076024 | 0.367577 | 0.320716 |
| MmugDNA.17724.1.S1_at   | MmugDNA.17724.1 | 6.39  | 6.04  | 0.3  | 0.08 | 1.27  | 0.144445 | 0.306087 | 0.431343 | 0.562804 |
| MmugDNA.17725.1.S1_at   | MmugDNA.17725.1 | 6.19  | 6.46  | 0.18 | 0.23 | -1.2  | 0.164292 | 0.295934 | 0.457239 | 0.555241 |
| MmugDNA.17726.1.S1_at   | MmugDNA.17726.1 | 5.49  | 5.49  | 0.04 | 0.03 | 1     | 0.232369 | 0.679467 | 0.530886 | 0.812835 |
| MmugDNA.17726.1.S1_x_at | MmugDNA.17726.1 | 6.99  | 6.77  | 0.2  | 0.25 | 1.17  | 0.614433 | 0.810035 | 0.808151 | 0.890518 |
| MmugDNA.17729.1.S1_at   | MmugDNA.17729.1 | 4.33  | 4.12  | 0.19 | 0.11 | 1.15  | 0.39469  | 0.469645 | 0.661142 | 0.678318 |
| MmugDNA.1773.1.S1_at    | MmugDNA.1773.1  | 9.93  | 9.57  | 0.11 | 0.12 | 1.29  | 0.010678 | 0.000051 | 0.153062 | 0.025273 |
| MmugDNA.17731.1.S1_at   | MmugDNA.17731.1 | 5.53  | 5.55  | 0.13 | 0.1  | -1.01 | 0.992895 | 0.875422 | 0.997263 | 0.929245 |
| MmugDNA.17732.1.S1_at   | MmugDNA.17732.1 | 2.93  | 2.95  | 0.26 | 0.05 | -1.02 | 0.816648 | 0.898924 | 0.918066 | 0.942467 |
| MmugDNA.17733.1.S1_at   | MmugDNA.17733.1 | 9.86  | 8.77  | 0.52 | 0.21 | 2.12  | 0.023102 | 0.003119 | 0.205038 | 0.081345 |
| MmugDNA.17739.1.S1_at   | MmugDNA.17739.1 | 4.87  | 4.94  | 0.26 | 0    | -1.06 | 0.75555  | 0.926846 | 0.887352 | 0.958409 |
| MmugDNA.1774.1.S1_at    | MmugDNA.1774.1  | 4.45  | 3.53  | 1.11 | 0.05 | 1.89  | 0.242506 | 0.286275 | 0.539382 | 0.547784 |
| MmugDNA.17740.1.S1_at   | MmugDNA.17740.1 | 3.69  | 3.94  | 0.04 | 0.3  | -1.18 | 0.209181 | 0.400664 | 0.50665  | 0.630467 |
| MmugDNA.17741.1.S1_at   | MmugDNA.17741.1 | 6.17  | 5.62  | 0.58 | 0.07 | 1.46  | 0.155153 | 0.225775 | 0.445309 | 0.498159 |
| MmugDNA.17742.1.S1_at   | MmugDNA.17742.1 | 3.93  | 3.51  | 0.31 | 0.05 | 1.33  | 0.319757 | 0.441958 | 0.604318 | 0.660058 |
| MmugDNA.17743.1.S1_at   | MmugDNA.17743.1 | 7.09  | 8.65  | 0.97 | 0.56 | -2.96 | 0.339492 | 0.183141 | 0.619769 | 0.459531 |
| MmugDNA.17745.1.S1_at   | MmugDNA.17745.1 | 6.42  | 5.93  | 0.48 | 0.34 | 1.41  | 0.316183 | 0.094607 | 0.600997 | 0.351371 |
| MmugDNA.17746.1.S1_at   | MmugDNA.17746.1 | 5.78  | 7.32  | 0.59 | 0.12 | -2.89 | 0.019168 | 0.345699 | 0.191957 | 0.590854 |
| MmugDNA.17747.1.S1_at   | MmugDNA.17747.1 | 7.54  | 8.05  | 0.5  | 0.23 | -1.42 | 0.524714 | 0.026668 | 0.751511 | 0.20423  |
| MmugDNA.17748.1.S1_at   | MmugDNA.17748.1 | 4.31  | 4.5   | 0.14 | 0.43 | -1.15 | 0.408065 | 0.511803 | 0.670981 | 0.705797 |
| MmugDNA.17749.1.S1_at   | MmugDNA.17749.1 | 4.58  | 4.66  | 0.11 | 0.13 | -1.06 | 0.936456 | 0.043723 | 0.973488 | 0.253809 |
| MmugDNA.1775.1.S1_at    | MmugDNA.1775.1  | 5.02  | 5.03  | 0.05 | 0.13 | -1.01 | 0.542751 | 0.767286 | 0.762957 | 0.864856 |
| MmugDNA.17751.1.S1_at   | MmugDNA.17751.1 | 3.39  | 3.12  | 0.12 | 0.02 | 1.2   | 0.02842  | 0.027857 | 0.221039 | 0.208453 |
| MmugDNA.17753.1.S1_at   | MmugDNA.17753.1 | 2.93  | 2.93  | 0.08 | 0.07 | 1     | 0.230554 | 0.392417 | 0.529462 | 0.625813 |
| MmugDNA.17754.1.S1_at   | MmugDNA.17754.1 | 5.5   | 7.3   | 0.45 | 0.16 | -3.47 | 0.003937 | 0.00758  | 0.108453 | 0.116553 |
| MmugDNA.17755.1.S1_at   | MmugDNA.17755.1 | 4.28  | 4.49  | 0.17 | 0.21 | -1.16 | 0.251995 | 0.381609 | 0.546689 | 0.617822 |
| MmugDNA.17756.1.S1_at   | MmugDNA.17756.1 | 4.89  | 4.78  | 0.02 | 0.22 | 1.08  | 0.158738 | 0.187639 | 0.449964 | 0.463663 |
| MmugDNA.17757.1.S1_at   | MmugDNA.17757.1 | 6.15  | 6.06  | 0.18 | 0.21 | 1.06  | 0.34569  | 0.620284 | 0.624565 | 0.775303 |
| MmugDNA.17759.1.S1_at   | MmugDNA.17759.1 | 6.46  | 6.98  | 0.16 | 0.27 | -1.44 | 0.019202 | 0.007842 | 0.19202  | 0.118014 |
| MmugDNA.17761.1.S1_at   | MmugDNA.17761.1 | 4.03  | 3.81  | 0.15 | 0.86 | 1.16  | 0.624508 | 0.783641 | 0.814877 | 0.874711 |

|                         |                 |       |       |      |      |       |          |          |          |          |
|-------------------------|-----------------|-------|-------|------|------|-------|----------|----------|----------|----------|
| MmugDNA.17763.1.S1_at   | MmugDNA.17763.1 | 6.43  | 6.82  | 2    | 0.29 | -1.31 | 0.557171 | 0.143781 | 0.772057 | 0.41759  |
| MmugDNA.17765.1.S1_at   | MmugDNA.17765.1 | 8.47  | 8.26  | 0.09 | 0.2  | 1.16  | 0.517754 | 0.001611 | 0.746932 | 0.060665 |
| MmugDNA.17766.1.S1_at   | MmugDNA.17766.1 | 4.97  | 4.77  | 0.14 | 0.04 | 1.15  | 0.098401 | 0.066392 | 0.369063 | 0.303314 |
| MmugDNA.17767.1.S1_s_at | MmugDNA.17767.1 | 10.33 | 9.77  | 0.21 | 0.1  | 1.47  | 0.016632 | 0.005327 | 0.182335 | 0.100928 |
| MmugDNA.17768.1.S1_at   | MmugDNA.17768.1 | 5.95  | 6.95  | 0.43 | 0.05 | -2    | 0.037512 | 0.001838 | 0.249065 | 0.064374 |
| MmugDNA.1777.1.S1_at    | MmugDNA.1777.1  | 3.89  | 4.02  | 0.07 | 0.18 | -1.09 | 0.571475 | 0.626914 | 0.779965 | 0.780046 |
| MmugDNA.17770.1.S1_at   | MmugDNA.17770.1 | 4.1   | 3.82  | 0.13 | 0.15 | 1.21  | 0.140179 | 0.141204 | 0.425843 | 0.414709 |
| MmugDNA.17771.1.S1_at   | MmugDNA.17771.1 | 10.24 | 10.29 | 0.27 | 0.11 | -1.04 | 0.671772 | 0.634255 | 0.842664 | 0.784729 |
| MmugDNA.42843.1.S1_s_at | MmugDNA.42843.1 | 12.22 | 12.08 | 0.15 | 0.03 | 1.1   | 0.211504 | 0.712922 | 0.509275 | 0.833561 |
| MmugDNA.17774.1.S1_at   | MmugDNA.17774.1 | 6.95  | 7     | 0.24 | 0.23 | -1.04 | 0.80767  | 0.935579 | 0.913902 | 0.963632 |
| MmugDNA.17775.1.S1_s_at | MmugDNA.17775.1 | 9.41  | 8.93  | 0.06 | 0.3  | 1.39  | 0.046976 | 0.118583 | 0.27447  | 0.38654  |
| MmugDNA.17776.1.S1_at   | MmugDNA.17776.1 | 6.27  | 6.3   | 0.08 | 0.14 | -1.02 | 0.799579 | 0.097774 | 0.909612 | 0.355638 |
| MmugDNA.17777.1.S1_at   | MmugDNA.17777.1 | 6.66  | 5.74  | 0.51 | 0.36 | 1.9   | 0.113964 | 0.105038 | 0.390682 | 0.366736 |
| MmugDNA.17778.1.S1_at   | MmugDNA.17778.1 | 5.41  | 6.38  | 1.73 | 0.47 | -1.96 | 0.718179 | 0.848608 | 0.866974 | 0.914061 |
| MmugDNA.1778.1.S1_at    | MmugDNA.1778.1  | 8.91  | 8.65  | 0.23 | 0.25 | 1.2   | 0.052105 | 0.083311 | 0.28583  | 0.333375 |
| MmugDNA.17780.1.S1_at   | MmugDNA.17780.1 | 4.03  | 4.09  | 0.06 | 0.11 | -1.04 | 0.846632 | 0.959739 | 0.933103 | 0.977189 |
| MmugDNA.17783.1.S1_at   | MmugDNA.17783.1 | 3.13  | 3.06  | 0.29 | 0.07 | 1.04  | 0.688425 | 0.577842 | 0.851235 | 0.748148 |
| MmugDNA.17784.1.S1_at   | MmugDNA.17784.1 | 5.87  | 6.51  | 1.02 | 0.15 | -1.56 | 0.915928 | 0.741441 | 0.964264 | 0.850285 |
| MmugDNA.17785.1.S1_at   | MmugDNA.17785.1 | 5.51  | 5.92  | 0.55 | 0.22 | -1.33 | 0.169879 | 0.59417  | 0.463325 | 0.758517 |
| MmugDNA.17786.1.S1_at   | MmugDNA.17786.1 | 4.02  | 3.54  | 0.3  | 0.22 | 1.39  | 0.145529 | 0.131022 | 0.432894 | 0.403053 |
| MmugDNA.17787.1.S1_at   | MmugDNA.17787.1 | 8.98  | 8.53  | 0.33 | 0.05 | 1.37  | 0.07222  | 0.583937 | 0.326716 | 0.75206  |
| MmugDNA.17788.1.S1_at   | MmugDNA.17788.1 | 6.91  | 6.8   | 0.17 | 0.03 | 1.08  | 0.290035 | 0.57359  | 0.579597 | 0.745228 |
| MmugDNA.17789.1.S1_at   | MmugDNA.17789.1 | 7.54  | 7.92  | 0.23 | 0.03 | -1.31 | 0.144273 | 0.852595 | 0.431073 | 0.916218 |
| MmugDNA.17790.1.S1_at   | MmugDNA.17790.1 | 9.76  | 8.88  | 0.49 | 0.27 | 1.83  | 0.057385 | 0.084417 | 0.29695  | 0.335713 |
| MmugDNA.17792.1.S1_at   | MmugDNA.17792.1 | 7.27  | 7.25  | 0.15 | 0.11 | 1.01  | 0.313334 | 0.626238 | 0.599122 | 0.779684 |
| MmugDNA.17794.1.S1_at   | MmugDNA.17794.1 | 6.13  | 3.76  | 0.36 | 0.27 | 5.19  | 0.001094 | 0.00221  | 0.077278 | 0.069408 |
| MmugDNA.17795.1.S1_at   | MmugDNA.17795.1 | 7.78  | 8.06  | 0.29 | 0.22 | -1.21 | 0.50232  | 0.029373 | 0.735998 | 0.213239 |
| MmugDNA.17796.1.S1_at   | MmugDNA.17796.1 | 7.31  | 7.27  | 0.45 | 0.2  | 1.03  | 0.558236 | 0.025887 | 0.772705 | 0.2017   |
| MmugDNA.17797.1.S1_at   | MmugDNA.17797.1 | 10.66 | 10.61 | 0.05 | 0.04 | 1.04  | 0.193033 | 0.788973 | 0.489582 | 0.878011 |
| MmugDNA.17799.1.S1_at   | MmugDNA.17799.1 | 5.2   | 5.29  | 0.42 | 0.03 | -1.06 | 0.792628 | 0.32069  | 0.906054 | 0.572784 |
| MmugDNA.178.1.S1_at     | MmugDNA.178.1   | 6.86  | 6.9   | 0.18 | 0.22 | -1.02 | 0.748795 | 0.330974 | 0.883748 | 0.579657 |
| MmugDNA.1780.1.S1_at    | MmugDNA.1780.1  | 10.21 | 9.64  | 0.18 | 0.12 | 1.48  | 0.009632 | 0.007043 | 0.14832  | 0.113131 |
| MmugDNA.17800.1.S1_at   | MmugDNA.17800.1 | 7.37  | 7.09  | 0.17 | 0.42 | 1.22  | 0.601894 | 0.379218 | 0.799878 | 0.616197 |
| MmugDNA.17801.1.S1_at   | MmugDNA.17801.1 | 11.4  | 11.52 | 0.13 | 0.1  | -1.08 | 0.245161 | 0.204804 | 0.541279 | 0.479209 |
| MmugDNA.17802.1.S1_at   | MmugDNA.17802.1 | 11.6  | 11.61 | 0.06 | 0.07 | -1    | 0.89717  | 0.012412 | 0.956401 | 0.144066 |
| MmugDNA.17802.1.S1_s_at | MmugDNA.17802.1 | 12.35 | 12.27 | 0.08 | 0.08 | 1.05  | 0.786773 | 0.008502 | 0.902743 | 0.1223   |
| MmugDNA.17803.1.S1_at   | MmugDNA.17803.1 | 9.39  | 9.34  | 0.06 | 0.07 | 1.04  | 0.124518 | 0.096467 | 0.404711 | 0.35409  |
| MmugDNA.17804.1.S1_at   | MmugDNA.17804.1 | 5.07  | 5.03  | 0.64 | 0.11 | 1.03  | 0.80269  | 0.824776 | 0.911408 | 0.89939  |
| MmugDNA.17806.1.S1_at   | MmugDNA.17806.1 | 5.72  | 5.66  | 0.06 | 0.15 | 1.04  | 0.370593 | 0.757525 | 0.643477 | 0.858852 |
| MmugDNA.17807.1.S1_at   | MmugDNA.17807.1 | 6.64  | 6.56  | 0.14 | 0.07 | 1.06  | 0.146616 | 0.139519 | 0.434564 | 0.412743 |
| MmugDNA.17808.1.S1_at   | MmugDNA.17808.1 | 7.56  | 7.47  | 0.22 | 0.03 | 1.07  | 0.171707 | 0.232751 | 0.46567  | 0.504385 |
| MmugDNA.17809.1.S1_at   | MmugDNA.17809.1 | 9.86  | 9.79  | 0.07 | 0.07 | 1.05  | 0.302715 | 0.842608 | 0.590379 | 0.910315 |
| MmugDNA.1781.1.S1_at    | MmugDNA.1781.1  | 2.78  | 2.61  | 0.18 | 0.09 | 1.13  | 0.190569 | 0.095929 | 0.486767 | 0.353204 |

|                         |                 |       |       |      |      |       |          |          |          |          |
|-------------------------|-----------------|-------|-------|------|------|-------|----------|----------|----------|----------|
| MmugDNA.17810.1.S1_at   | MmugDNA.17810.1 | 4.98  | 4.76  | 0.3  | 0.06 | 1.16  | 0.311353 | 0.419789 | 0.59749  | 0.643717 |
| MmugDNA.17811.1.S1_at   | MmugDNA.17811.1 | 7.79  | 9.22  | 0.81 | 0.18 | -2.69 | 0.069227 | 0.007926 | 0.321249 | 0.11857  |
| MmugDNA.17812.1.S1_at   | MmugDNA.17812.1 | 6.87  | 8.74  | 0.91 | 0.26 | -3.67 | 0.035258 | 0.193814 | 0.242509 | 0.468847 |
| MmugDNA.17813.1.S1_at   | MmugDNA.17813.1 | 5.01  | 5.26  | 0.32 | 0.08 | -1.18 | 0.197841 | 0.323683 | 0.49515  | 0.574558 |
| MmugDNA.17814.1.S1_at   | MmugDNA.17814.1 | 4.51  | 4.84  | 0.14 | 0.24 | -1.26 | 0.170752 | 0.193816 | 0.464486 | 0.468847 |
| MmugDNA.17815.1.S1_at   | MmugDNA.17815.1 | 8.98  | 8.55  | 0.31 | 0.37 | 1.35  | 0.244606 | 0.109359 | 0.540942 | 0.373154 |
| MmugDNA.17816.1.S1_at   | MmugDNA.17816.1 | 3.05  | 3.03  | 0.14 | 0.11 | 1.01  | 0.997743 | 0.641061 | 0.999199 | 0.789381 |
| MmugDNA.17817.1.S1_at   | MmugDNA.17817.1 | 8.15  | 8.12  | 0.41 | 0.34 | 1.02  | 0.849211 | 0.858159 | 0.934328 | 0.919096 |
| MmugDNA.17818.1.S1_at   | MmugDNA.17818.1 | 6.31  | 6.31  | 0.01 | 0.31 | 1     | 0.811828 | 0.920312 | 0.915744 | 0.95511  |
| MmugDNA.1782.1.S1_at    | MmugDNA.1782.1  | 3.72  | 3.95  | 0.34 | 0.15 | -1.18 | 0.279309 | 0.011503 | 0.570678 | 0.138705 |
| MmugDNA.17820.1.S1_at   | MmugDNA.17820.1 | 7.93  | 7.42  | 0.16 | 0.46 | 1.43  | 0.149557 | 0.045935 | 0.438535 | 0.258774 |
| MmugDNA.17821.1.S1_at   | MmugDNA.17821.1 | 9.33  | 9.77  | 0.22 | 0.18 | -1.35 | 0.178921 | 0.635135 | 0.473857 | 0.785229 |
| MmugDNA.17822.1.S1_at   | MmugDNA.17822.1 | 3.92  | 3.82  | 0.19 | 0.12 | 1.07  | 0.444096 | 0.342251 | 0.697002 | 0.588375 |
| MmugDNA.17823.1.S1_at   | MmugDNA.17823.1 | 5.53  | 5.53  | 0.19 | 0.22 | 1     | 0.478082 | 0.37276  | 0.719805 | 0.611661 |
| MmugDNA.17824.1.S1_at   | MmugDNA.17824.1 | 5.93  | 6.42  | 0.29 | 0.16 | -1.41 | 0.069633 | 0.192708 | 0.322287 | 0.468219 |
| MmugDNA.17825.1.S1_at   | MmugDNA.17825.1 | 4.28  | 4.13  | 0.09 | 0.16 | 1.11  | 0.369559 | 0.47759  | 0.642934 | 0.68363  |
| MmugDNA.17827.1.S1_at   | MmugDNA.17827.1 | 9.8   | 9.18  | 0.13 | 0.04 | 1.54  | 0.001304 | 0.001057 | 0.078631 | 0.05169  |
| MmugDNA.1783.1.S1_s_at  | MmugDNA.1783.1  | 8.21  | 7.73  | 0.44 | 0.1  | 1.39  | 0.118039 | 0.109827 | 0.395593 | 0.373762 |
| MmugDNA.17830.1.S1_at   | MmugDNA.17830.1 | 5.88  | 5.72  | 0.2  | 0.34 | 1.12  | 0.720279 | 0.554947 | 0.868039 | 0.733559 |
| MmugDNA.17831.1.S1_at   | MmugDNA.17831.1 | 4.91  | 5.28  | 0.33 | 0.42 | -1.29 | 0.177528 | 0.431619 | 0.472191 | 0.652439 |
| MmugDNA.17833.1.S1_at   | MmugDNA.17833.1 | 3.33  | 3.32  | 0.02 | 0.16 | 1.01  | 0.934219 | 0.815559 | 0.972408 | 0.893609 |
| MmugDNA.17836.1.S1_at   | MmugDNA.17836.1 | 6.95  | 6.69  | 0.42 | 0.22 | 1.19  | 0.27474  | 0.506165 | 0.566556 | 0.702359 |
| MmugDNA.17839.1.S1_at   | MmugDNA.17839.1 | 5.03  | 4.99  | 0.23 | 0.07 | 1.03  | 0.873086 | 0.984962 | 0.945581 | 0.991478 |
| MmugDNA.1784.1.S1_at    | MmugDNA.1784.1  | 8.49  | 6.34  | 1.81 | 1.01 | 4.42  | 0.154312 | 0.19577  | 0.444624 | 0.470637 |
| MmugDNA.17841.1.S1_at   | MmugDNA.17841.1 | 5.73  | 5.55  | 1.39 | 0.04 | 1.14  | 0.614607 | 0.825496 | 0.808258 | 0.899753 |
| MmugDNA.17844.1.S1_at   | MmugDNA.17844.1 | 5.79  | 5.8   | 0.38 | 0.15 | -1.01 | 0.652653 | 0.486826 | 0.831546 | 0.690091 |
| MmugDNA.17845.1.S1_at   | MmugDNA.17845.1 | 4.21  | 4.12  | 1.01 | 0.33 | 1.06  | 0.473895 | 0.80679  | 0.717137 | 0.888839 |
| MmugDNA.17846.1.S1_at   | MmugDNA.17846.1 | 6.73  | 6.37  | 0.71 | 0.17 | 1.28  | 0.344365 | 0.308333 | 0.623699 | 0.564425 |
| MmugDNA.17847.1.S1_at   | MmugDNA.17847.1 | 7.58  | 7.36  | 0.07 | 0.16 | 1.17  | 0.187556 | 0.001377 | 0.48383  | 0.056928 |
| MmugDNA.17849.1.S1_at   | MmugDNA.17849.1 | 8.16  | 8.19  | 0.1  | 0.12 | -1.02 | 0.340566 | 0.302935 | 0.620825 | 0.560383 |
| MmugDNA.1785.1.S1_at    | MmugDNA.1785.1  | 3.65  | 3.65  | 0.08 | 0.09 | 1     | 0.91494  | 0.994665 | 0.963876 | 0.996682 |
| MmugDNA.17850.1.S1_at   | MmugDNA.17850.1 | 4.67  | 4.63  | 1.05 | 0.32 | 1.03  | 0.264442 | 0.26167  | 0.5577   | 0.528129 |
| MmugDNA.17852.1.S1_at   | MmugDNA.17852.1 | 6.37  | 6.19  | 0.11 | 0.19 | 1.14  | 0.515319 | 0.388244 | 0.745202 | 0.622692 |
| MmugDNA.17853.1.S1_at   | MmugDNA.17853.1 | 5.89  | 5.73  | 0.26 | 0.06 | 1.12  | 0.32266  | 0.28909  | 0.606572 | 0.550254 |
| MmugDNA.17854.1.S1_at   | MmugDNA.17854.1 | 6.19  | 6.08  | 0.01 | 0.08 | 1.08  | 0.105673 | 0.142857 | 0.379794 | 0.416786 |
| MmugDNA.17856.1.S1_at   | MmugDNA.17856.1 | 11.68 | 11.38 | 0.23 | 0.17 | 1.23  | 0.047193 | 0.071464 | 0.274594 | 0.313678 |
| MmugDNA.17857.1.S1_at   | MmugDNA.17857.1 | 6.92  | 6.58  | 0.15 | 0.25 | 1.26  | 0.200073 | 0.433787 | 0.49762  | 0.653992 |
| MmugDNA.1786.1.S1_at    | MmugDNA.1786.1  | 9.36  | 9.58  | 0.35 | 0.23 | -1.16 | 0.309632 | 0.25713  | 0.595927 | 0.524854 |
| MmugDNA.17861.1.S1_at   | MmugDNA.17861.1 | 5.52  | 5.52  | 0.61 | 0.1  | -1    | 0.378683 | 0.162991 | 0.64877  | 0.439145 |
| MmugDNA.17863.1.S1_at   | MmugDNA.17863.1 | 4.56  | 4.59  | 0.29 | 0.07 | -1.02 | 0.897692 | 0.768926 | 0.956564 | 0.865762 |
| MmugDNA.18234.1.S1_at   | MmugDNA.18234.1 | 6.72  | 6.7   | 0.19 | 0.06 | 1.01  | 0.759647 | 0.897906 | 0.889819 | 0.941859 |
| MmugDNA.18234.1.S1_s_at | MmugDNA.18234.1 | 5.1   | 4.84  | 0.09 | 0.11 | 1.2   | 0.164177 | 0.332686 | 0.45709  | 0.581058 |
| MmugDNA.17864.1.S1_at   | MmugDNA.17864.1 | 6.51  | 4.57  | 0.66 | 0.3  | 3.83  | 0.030078 | 0.024806 | 0.22657  | 0.197344 |

|                         |                 |       |       |      |      |       |          |          |          |          |
|-------------------------|-----------------|-------|-------|------|------|-------|----------|----------|----------|----------|
| MmugDNA.17866.1.S1_at   | MmugDNA.17866.1 | 9.34  | 9.26  | 0.32 | 0.61 | 1.06  | 0.830678 | 0.687073 | 0.925496 | 0.817434 |
| MmugDNA.17868.1.S1_at   | MmugDNA.17868.1 | 10.81 | 9.56  | 0.06 | 0.22 | 2.37  | 0.000693 | 0.004626 | 0.071248 | 0.094988 |
| MmugDNA.17869.1.S1_at   | MmugDNA.17869.1 | 3.55  | 3.25  | 0.19 | 0.09 | 1.23  | 0.07102  | 0.106183 | 0.324424 | 0.36856  |
| MmugDNA.1787.1.S1_at    | MmugDNA.1787.1  | 7.19  | 6.49  | 0.27 | 0.03 | 1.62  | 0.014244 | 0.005601 | 0.171056 | 0.10339  |
| MmugDNA.17870.1.S1_at   | MmugDNA.17870.1 | 4.37  | 4.21  | 0.02 | 0.08 | 1.11  | 0.027695 | 0.163612 | 0.218912 | 0.439768 |
| MmugDNA.17871.1.S1_at   | MmugDNA.17871.1 | 3.79  | 3.6   | 0.03 | 0.05 | 1.13  | 0.017971 | 0.01555  | 0.187151 | 0.158118 |
| MmugDNA.17872.1.S1_at   | MmugDNA.17872.1 | 5.66  | 5.62  | 0.12 | 0.1  | 1.03  | 0.345893 | 0.537702 | 0.624702 | 0.722661 |
| MmugDNA.17873.1.S1_at   | MmugDNA.17873.1 | 7.45  | 7.23  | 0.39 | 0.09 | 1.17  | 0.989103 | 0.378416 | 0.996231 | 0.615443 |
| MmugDNA.17874.1.S1_at   | MmugDNA.17874.1 | 5.98  | 5.76  | 0.19 | 0.05 | 1.16  | 0.36753  | 0.251936 | 0.641471 | 0.520632 |
| MmugDNA.17875.1.S1_at   | MmugDNA.17875.1 | 10.23 | 10.27 | 0.23 | 0.13 | -1.03 | 0.703908 | 0.010005 | 0.859443 | 0.131262 |
| MmugDNA.17876.1.S1_at   | MmugDNA.17876.1 | 3.44  | 3.65  | 0.11 | 0.2  | -1.16 | 0.767723 | 0.689875 | 0.893373 | 0.819167 |
| MmugDNA.17877.1.S1_at   | MmugDNA.17877.1 | 8.13  | 8.22  | 0.2  | 0.16 | -1.06 | 0.749366 | 0.015155 | 0.883959 | 0.156391 |
| MmugDNA.17877.1.S1_s_at | MmugDNA.17877.1 | 9.28  | 9.39  | 0.11 | 0.05 | -1.08 | 0.191446 | 0.01339  | 0.48775  | 0.14827  |
| MmugDNA.17878.1.S1_at   | MmugDNA.17878.1 | 10.79 | 11.01 | 0.3  | 0.21 | -1.16 | 0.175007 | 0.202882 | 0.469297 | 0.477312 |
| MmugDNA.1788.1.S1_at    | MmugDNA.1788.1  | 9.97  | 9.82  | 0.09 | 0.24 | 1.11  | 0.110183 | 0.031321 | 0.385521 | 0.218936 |
| MmugDNA.17882.1.S1_at   | MmugDNA.17882.1 | 3.95  | 3.94  | 0.06 | 0.07 | 1     | 0.793468 | 0.206924 | 0.906582 | 0.481052 |
| MmugDNA.17883.1.S1_at   | MmugDNA.17883.1 | 4.9   | 5.03  | 0.05 | 0.06 | -1.09 | 0.068049 | 0.212584 | 0.318551 | 0.486525 |
| MmugDNA.17886.1.S1_at   | MmugDNA.17886.1 | 4.98  | 4.97  | 0.53 | 0.24 | 1.01  | 0.245997 | 0.195387 | 0.541747 | 0.470253 |
| MmugDNA.17888.1.S1_at   | MmugDNA.17888.1 | 5.51  | 5.28  | 0.12 | 0.18 | 1.17  | 0.302269 | 0.363134 | 0.590132 | 0.60356  |
| MmugDNA.17889.1.S1_at   | MmugDNA.17889.1 | 9.95  | 8.34  | 0.13 | 0.06 | 3.05  | 0.000045 | 0.078725 | 0.045594 | 0.325673 |
| MmugDNA.1789.1.S1_at    | MmugDNA.1789.1  | 3.77  | 3.84  | 0.12 | 0.03 | -1.05 | 0.183798 | 0.246557 | 0.479745 | 0.515917 |
| MmugDNA.17890.1.S1_at   | MmugDNA.17890.1 | 7.08  | 7.62  | 0.37 | 0.12 | -1.45 | 0.183349 | 0.34848  | 0.479273 | 0.592593 |
| MmugDNA.17891.1.S1_at   | MmugDNA.17891.1 | 11.08 | 11.17 | 0.15 | 0.1  | -1.07 | 0.587946 | 0.165025 | 0.790724 | 0.44123  |
| MmugDNA.17892.1.S1_at   | MmugDNA.17892.1 | 7.79  | 7.5   | 0.34 | 0.19 | 1.22  | 0.261641 | 0.075111 | 0.555806 | 0.319301 |
| MmugDNA.17894.1.S1_at   | MmugDNA.17894.1 | 6.2   | 6.14  | 0.15 | 0.09 | 1.04  | 0.827987 | 0.001546 | 0.923804 | 0.05949  |
| MmugDNA.17895.1.S1_at   | MmugDNA.17895.1 | 3.16  | 3.2   | 0.19 | 0    | -1.03 | 0.562417 | 0.646195 | 0.774894 | 0.792676 |
| MmugDNA.17896.1.S1_s_at | MmugDNA.17896.1 | 6.66  | 6.64  | 0.2  | 0.09 | 1.01  | 0.750745 | 0.266033 | 0.884876 | 0.531815 |
| MmugDNA.17897.1.S1_at   | MmugDNA.17897.1 | 4.21  | 4.23  | 0    | 0.18 | -1.01 | 0.820905 | 0.398201 | 0.920074 | 0.629257 |
| MmugDNA.17898.1.S1_at   | MmugDNA.17898.1 | 7.02  | 6.74  | 0.49 | 0.25 | 1.21  | 0.435756 | 0.476426 | 0.690763 | 0.682725 |
| MmugDNA.17899.1.S1_at   | MmugDNA.17899.1 | 7.81  | 6.94  | 0.12 | 0.06 | 1.83  | 0.000245 | 0.00928  | 0.054642 | 0.127101 |
| MmugDNA.17900.1.S1_at   | MmugDNA.17900.1 | 7.17  | 6.96  | 0.18 | 0.1  | 1.15  | 0.168381 | 0.42732  | 0.461622 | 0.649175 |
| MmugDNA.17901.1.S1_at   | MmugDNA.17901.1 | 3.68  | 3.89  | 0.13 | 0.15 | -1.16 | 0.154725 | 0.244485 | 0.444943 | 0.514295 |
| MmugDNA.17902.1.S1_at   | MmugDNA.17902.1 | 7.03  | 6.94  | 0.09 | 0.14 | 1.07  | 0.737409 | 0.947342 | 0.878117 | 0.970134 |
| MmugDNA.17903.1.S1_at   | MmugDNA.17903.1 | 4.9   | 4.77  | 0.11 | 0.12 | 1.09  | 0.33402  | 0.075273 | 0.615174 | 0.319441 |
| MmugDNA.17904.1.S1_at   | MmugDNA.17904.1 | 6.08  | 6.31  | 0.56 | 0.25 | -1.18 | 0.866928 | 0.40707  | 0.942483 | 0.634722 |
| MmugDNA.17905.1.S1_at   | MmugDNA.17905.1 | 3.96  | 3.96  | 0.19 | 0.15 | -1    | 0.899853 | 0.440176 | 0.957435 | 0.658775 |
| MmugDNA.17908.1.S1_at   | MmugDNA.17908.1 | 10.42 | 10.19 | 0.13 | 0.11 | 1.18  | 0.032693 | 0.006922 | 0.234993 | 0.112445 |
| MmugDNA.1791.1.S1_at    | MmugDNA.1791.1  | 3.7   | 3.88  | 0.17 | 0.11 | -1.13 | 0.493107 | 0.428363 | 0.730197 | 0.649908 |
| MmugDNA.17911.1.S1_at   | MmugDNA.17911.1 | 13.5  | 13.31 | 0.11 | 0.02 | 1.14  | 0.018361 | 0.024074 | 0.188509 | 0.194476 |
| MmugDNA.3786.1.S1_s_at  | MmugDNA.3786.1  | 14.02 | 13.79 | 0.09 | 0.03 | 1.17  | 0.014887 | 0.006682 | 0.174119 | 0.110612 |
| MmugDNA.17912.1.S1_at   | MmugDNA.17912.1 | 3.29  | 3.38  | 0.04 | 0.15 | -1.07 | 0.41809  | 0.598199 | 0.678075 | 0.760681 |
| MmugDNA.17913.1.S1_at   | MmugDNA.17913.1 | 6.17  | 5.26  | 0.95 | 0.33 | 1.87  | 0.31575  | 0.413545 | 0.600522 | 0.639648 |
| MmugDNA.17914.1.S1_at   | MmugDNA.17914.1 | 3.14  | 3.01  | 0.08 | 0.02 | 1.1   | 0.051824 | 0.103513 | 0.285026 | 0.364346 |

|                         |                 |       |       |      |      |       |          |          |          |          |
|-------------------------|-----------------|-------|-------|------|------|-------|----------|----------|----------|----------|
| MmugDNA.17915.1.S1_at   | MmugDNA.17915.1 | 6.57  | 6.47  | 0.18 | 0.11 | 1.07  | 0.1428   | 0.333627 | 0.428908 | 0.581808 |
| MmugDNA.31853.1.S1_s_at | MmugDNA.31853.1 | 3.48  | 3.59  | 0.23 | 0.18 | -1.08 | 0.745491 | 0.953088 | 0.881939 | 0.973379 |
| MmugDNA.17916.1.S1_at   | MmugDNA.17916.1 | 9.45  | 9.54  | 0.28 | 0.2  | -1.06 | 0.289607 | 0.213154 | 0.579116 | 0.487068 |
| MmugDNA.19343.1.S1_s_at | MmugDNA.19343.1 | 4.99  | 4.93  | 0.08 | 0.11 | 1.04  | 0.537688 | 0.119948 | 0.759884 | 0.388671 |
| MmugDNA.17918.1.S1_at   | MmugDNA.17918.1 | 4.18  | 4.32  | 0.19 | 0.13 | -1.1  | 0.336766 | 0.048669 | 0.617306 | 0.265629 |
| MmugDNA.1792.1.S1_at    | MmugDNA.1792.1  | 11.04 | 11.16 | 0.07 | 0.1  | -1.08 | 0.590337 | 0.457987 | 0.791804 | 0.670999 |
| MmugDNA.17920.1.S1_at   | MmugDNA.17920.1 | 11.21 | 10.86 | 0.21 | 0.04 | 1.28  | 0.068843 | 0.202552 | 0.320453 | 0.476882 |
| MmugDNA.17921.1.S1_at   | MmugDNA.17921.1 | 4.41  | 4.55  | 0.14 | 0.27 | -1.11 | 0.761556 | 0.878256 | 0.890633 | 0.930529 |
| MmugDNA.17922.1.S1_at   | MmugDNA.17922.1 | 7.42  | 7.49  | 0.28 | 0.06 | -1.05 | 0.716408 | 0.634124 | 0.866195 | 0.784644 |
| MmugDNA.17923.1.S1_at   | MmugDNA.17923.1 | 4.95  | 4.96  | 0.08 | 0.12 | -1.01 | 0.912449 | 0.987868 | 0.963024 | 0.993223 |
| MmugDNA.17924.1.S1_at   | MmugDNA.17924.1 | 3.38  | 3.58  | 0.39 | 0.06 | -1.15 | 0.881799 | 0.972634 | 0.949726 | 0.98528  |
| MmugDNA.17926.1.S1_at   | MmugDNA.17926.1 | 5.54  | 5.45  | 0.17 | 0.07 | 1.06  | 0.202636 | 0.268335 | 0.500389 | 0.534041 |
| MmugDNA.17927.1.S1_at   | MmugDNA.17927.1 | 3.33  | 3.23  | 0.04 | 0.06 | 1.07  | 0.092079 | 0.123037 | 0.360151 | 0.392988 |
| MmugDNA.17928.1.S1_at   | MmugDNA.17928.1 | 8.4   | 7.49  | 0.21 | 0.37 | 1.88  | 0.079691 | 0.261836 | 0.339886 | 0.528265 |
| MmugDNA.17929.1.S1_at   | MmugDNA.17929.1 | 3.55  | 3.29  | 0.26 | 0.13 | 1.19  | 0.30446  | 0.191069 | 0.59162  | 0.466358 |
| MmugDNA.1793.1.S1_at    | MmugDNA.1793.1  | 9.06  | 9.11  | 0.31 | 0.1  | -1.03 | 0.787    | 0.264385 | 0.902861 | 0.530385 |
| MmugDNA.17930.1.S1_at   | MmugDNA.17930.1 | 3.99  | 3.96  | 0.06 | 0.07 | 1.02  | 0.850766 | 0.968321 | 0.935218 | 0.982558 |
| MmugDNA.17932.1.S1_at   | MmugDNA.17932.1 | 4.83  | 5.67  | 0.25 | 0.51 | -1.78 | 0.056726 | 0.012954 | 0.295681 | 0.146485 |
| MmugDNA.17933.1.S1_at   | MmugDNA.17933.1 | 5.08  | 4.95  | 0.15 | 0.14 | 1.09  | 0.129402 | 0.278942 | 0.411701 | 0.542661 |
| MmugDNA.17934.1.S1_at   | MmugDNA.17934.1 | 5.68  | 6.45  | 0.42 | 0.2  | -1.71 | 0.035191 | 0.006112 | 0.242214 | 0.10649  |
| MmugDNA.17935.1.S1_at   | MmugDNA.17935.1 | 11.76 | 11.49 | 0.23 | 0.04 | 1.2   | 0.11691  | 0.025402 | 0.394011 | 0.199747 |
| MmugDNA.17936.1.S1_at   | MmugDNA.17936.1 | 3.15  | 3.09  | 0.15 | 0.13 | 1.05  | 0.400711 | 0.329576 | 0.665557 | 0.578781 |
| MmugDNA.17937.1.S1_at   | MmugDNA.17937.1 | 5.16  | 4.9   | 0.14 | 0.04 | 1.2   | 0.041666 | 0.028877 | 0.260612 | 0.211763 |
| MmugDNA.1794.1.S1_at    | MmugDNA.1794.1  | 4.97  | 5.02  | 0.32 | 0.15 | -1.04 | 0.565656 | 0.773818 | 0.776758 | 0.868485 |
| MmugDNA.17942.1.S1_at   | MmugDNA.17942.1 | 4.23  | 4.71  | 0.06 | 0.12 | -1.4  | 0.003689 | 0.024509 | 0.106124 | 0.195985 |
| MmugDNA.17944.1.S1_at   | MmugDNA.17944.1 | 5.71  | 5.95  | 0.19 | 0.17 | -1.18 | 0.804828 | 0.364928 | 0.91238  | 0.60517  |
| MmugDNA.17945.1.S1_at   | MmugDNA.17945.1 | 9.95  | 10.65 | 0.51 | 0.06 | -1.63 | 0.119061 | 0.053734 | 0.396713 | 0.277384 |
| MmugDNA.17948.1.S1_at   | MmugDNA.17948.1 | 4.49  | 4.55  | 0.07 | 0.13 | -1.05 | 0.70554  | 0.146116 | 0.860441 | 0.420099 |
| MmugDNA.17949.1.S1_at   | MmugDNA.17949.1 | 4.75  | 4.68  | 0.48 | 0.18 | 1.05  | 0.207131 | 0.344758 | 0.504847 | 0.590101 |
| MmugDNA.1795.1.S1_at    | MmugDNA.1795.1  | 4.42  | 4.44  | 0    | 0.22 | -1.01 | 0.621689 | 0.823392 | 0.812872 | 0.898498 |
| MmugDNA.17953.1.S1_at   | MmugDNA.17953.1 | 5.7   | 6.34  | 0.9  | 0.19 | -1.56 | 0.243449 | 0.132526 | 0.540139 | 0.404544 |
| MmugDNA.17954.1.S1_at   | MmugDNA.17954.1 | 3.87  | 3.71  | 0.17 | 0.11 | 1.12  | 0.174385 | 0.257887 | 0.46858  | 0.525467 |
| MmugDNA.17955.1.S1_at   | MmugDNA.17955.1 | 3.87  | 3.99  | 0.13 | 0.21 | -1.08 | 0.785253 | 0.41656  | 0.902017 | 0.641647 |
| MmugDNA.42536.1.S1_s_at | MmugDNA.42536.1 | 14.05 | 14.21 | 0.14 | 0.05 | -1.12 | 0.208764 | 0.402083 | 0.506255 | 0.631176 |
| MmugDNA.17957.1.S1_at   | MmugDNA.17957.1 | 3.92  | 4.11  | 0.03 | 0.13 | -1.14 | 0.083202 | 0.463074 | 0.345461 | 0.674206 |
| MmugDNA.17958.1.S1_at   | MmugDNA.17958.1 | 5.91  | 5.52  | 0.19 | 0.18 | 1.31  | 0.227744 | 0.353898 | 0.525852 | 0.596886 |
| MmugDNA.17959.1.S1_at   | MmugDNA.17959.1 | 8.2   | 8.11  | 0.05 | 0.08 | 1.07  | 0.306376 | 0.220653 | 0.593269 | 0.494069 |
| MmugDNA.1796.1.S1_at    | MmugDNA.1796.1  | 3.54  | 3.52  | 0.18 | 0.02 | 1.02  | 0.568858 | 0.692129 | 0.778631 | 0.82091  |
| MmugDNA.24774.1.S1_s_at | MmugDNA.24774.1 | 10.6  | 10.87 | 0.46 | 0.08 | -1.2  | 0.307496 | 0.514274 | 0.594253 | 0.707592 |
| MmugDNA.17961.1.S1_at   | MmugDNA.17961.1 | 12.8  | 12.68 | 0.18 | 0.05 | 1.08  | 0.315052 | 0.845852 | 0.600231 | 0.912246 |
| MmugDNA.17962.1.S1_at   | MmugDNA.17962.1 | 8.48  | 7.82  | 0.41 | 0.37 | 1.59  | 0.331078 | 0.0992   | 0.613046 | 0.357381 |
| MmugDNA.17964.1.S1_at   | MmugDNA.17964.1 | 5.76  | 6.35  | 0.41 | 0.19 | -1.51 | 0.08647  | 0.04562  | 0.351333 | 0.257766 |
| MmugDNA.17964.1.S1_s_at | MmugDNA.17964.1 | 5.26  | 5.25  | 0.09 | 0.05 | 1     | 0.575614 | 0.583886 | 0.782893 | 0.752043 |

|                         |                 |       |       |      |      |       |          |          |          |          |
|-------------------------|-----------------|-------|-------|------|------|-------|----------|----------|----------|----------|
| MmugDNA.17966.1.S1_x_at | MmugDNA.17966.1 | 10.8  | 11.41 | 0.36 | 0.08 | -1.53 | 0.021523 | 0.071164 | 0.200494 | 0.313063 |
| MmugDNA.1797.1.S1_at    | MmugDNA.1797.1  | 9.23  | 9.5   | 0.02 | 0.26 | -1.21 | 0.152828 | 0.193375 | 0.442529 | 0.468698 |
| MmugDNA.17970.1.S1_at   | MmugDNA.17970.1 | 9.03  | 8.64  | 0.36 | 0.08 | 1.31  | 0.039672 | 0.042057 | 0.255826 | 0.249589 |
| MmugDNA.17971.1.S1_at   | MmugDNA.17971.1 | 3.76  | 3.69  | 0.06 | 0.15 | 1.05  | 0.130125 | 0.158692 | 0.412377 | 0.434745 |
| MmugDNA.17972.1.S1_at   | MmugDNA.17972.1 | 5.86  | 6.31  | 0.54 | 0.17 | -1.37 | 0.357238 | 0.400364 | 0.633398 | 0.630177 |
| MmugDNA.17974.1.S1_at   | MmugDNA.17974.1 | 6.16  | 6.16  | 0.14 | 0.04 | 1     | 0.42388  | 0.128114 | 0.681773 | 0.399126 |
| MmugDNA.17975.1.S1_s_at | MmugDNA.17975.1 | 11.62 | 11.38 | 0.62 | 0.22 | 1.19  | 0.400827 | 0.745481 | 0.665577 | 0.852409 |
| MmugDNA.17976.1.S1_at   | MmugDNA.17976.1 | 5.15  | 5.04  | 0.15 | 0.25 | 1.08  | 0.505903 | 0.0814   | 0.738743 | 0.329571 |
| MmugDNA.17978.1.S1_at   | MmugDNA.17978.1 | 5.18  | 4.97  | 0.79 | 0.21 | 1.16  | 0.253858 | 0.406072 | 0.548144 | 0.634197 |
| MmugDNA.17979.1.S1_at   | MmugDNA.17979.1 | 7.22  | 7.41  | 0.51 | 0.12 | -1.14 | 0.572097 | 0.042258 | 0.78032  | 0.250023 |
| MmugDNA.17980.1.S1_at   | MmugDNA.17980.1 | 6.33  | 6.75  | 0.68 | 0.23 | -1.33 | 0.511395 | 0.138477 | 0.742401 | 0.411453 |
| MmugDNA.17981.1.S1_at   | MmugDNA.17981.1 | 7.05  | 7.04  | 0.62 | 0.03 | 1.01  | 0.40877  | 0.592648 | 0.671414 | 0.757854 |
| MmugDNA.17982.1.S1_at   | MmugDNA.17982.1 | 6.18  | 6.12  | 0.1  | 0.04 | 1.04  | 0.816246 | 0.05054  | 0.91799  | 0.270205 |
| MmugDNA.17983.1.S1_at   | MmugDNA.17983.1 | 4.41  | 4.17  | 0.29 | 0.69 | 1.17  | 0.662103 | 0.412173 | 0.83691  | 0.638576 |
| MmugDNA.17984.1.S1_at   | MmugDNA.17984.1 | 4.5   | 4.49  | 0.11 | 0.06 | 1.01  | 0.434183 | 0.47315  | 0.689468 | 0.68048  |
| MmugDNA.17985.1.S1_at   | MmugDNA.17985.1 | 12.69 | 12.69 | 0.02 | 0.01 | -1    | 0.202704 | 0.539499 | 0.500419 | 0.723763 |
| MmugDNA.17987.1.S1_at   | MmugDNA.17987.1 | 5.47  | 4.6   | 1.06 | 0.22 | 1.83  | 0.196943 | 0.262825 | 0.494083 | 0.529164 |
| MmugDNA.17988.1.S1_at   | MmugDNA.17988.1 | 6     | 5.8   | 0.47 | 0.22 | 1.15  | 0.426338 | 0.377138 | 0.683705 | 0.614819 |
| MmugDNA.1799.1.S1_at    | MmugDNA.1799.1  | 4.7   | 4.59  | 0.09 | 0.16 | 1.07  | 0.11692  | 0.134137 | 0.394021 | 0.406393 |
| MmugDNA.17990.1.S1_at   | MmugDNA.17990.1 | 6.28  | 6.16  | 0.24 | 0.05 | 1.09  | 0.598875 | 0.816814 | 0.79767  | 0.894329 |
| MmugDNA.17993.1.S1_at   | MmugDNA.17993.1 | 5.28  | 5.16  | 0.29 | 0.19 | 1.08  | 0.261032 | 0.039378 | 0.555199 | 0.243406 |
| MmugDNA.17999.1.S1_at   | MmugDNA.17999.1 | 5.83  | 5.79  | 0.11 | 0.02 | 1.03  | 0.373931 | 0.777091 | 0.645123 | 0.870506 |
| MmugDNA.18.1.S1_at      | MmugDNA.18.1    | 4.63  | 4.13  | 0.32 | 0.32 | 1.41  | 0.263493 | 0.089808 | 0.556984 | 0.34404  |
| MmugDNA.18000.1.S1_at   | MmugDNA.18000.1 | 4.95  | 5.19  | 0.1  | 0.36 | -1.18 | 0.242428 | 0.488581 | 0.539382 | 0.691222 |
| MmugDNA.18002.1.S1_at   | MmugDNA.18002.1 | 3.26  | 3.26  | 0.33 | 0.1  | -1    | 0.927423 | 0.953064 | 0.969284 | 0.973379 |
| MmugDNA.18003.1.S1_at   | MmugDNA.18003.1 | 5.94  | 5.94  | 0.15 | 0.03 | 1     | 0.440883 | 0.827664 | 0.694673 | 0.901081 |
| MmugDNA.18004.1.S1_at   | MmugDNA.18004.1 | 8.95  | 9.88  | 0.86 | 0.12 | -1.91 | 0.249537 | 0.337918 | 0.544627 | 0.585111 |
| MmugDNA.18007.1.S1_at   | MmugDNA.18007.1 | 7.02  | 7.74  | 0.49 | 0.26 | -1.65 | 0.023296 | 0.040976 | 0.205593 | 0.247202 |
| MmugDNA.18007.1.S1_s_at | MmugDNA.18007.1 | 8.14  | 9.03  | 0.32 | 0.34 | -1.86 | 0.027193 | 0.062207 | 0.217796 | 0.296296 |
| MmugDNA.18008.1.S1_at   | MmugDNA.18008.1 | 5.76  | 5.77  | 0.18 | 0.06 | -1.01 | 0.416817 | 0.264406 | 0.677147 | 0.530385 |
| MmugDNA.18009.1.S1_at   | MmugDNA.18009.1 | 4.89  | 4.52  | 0.78 | 0.18 | 1.3   | 0.319091 | 0.201817 | 0.603736 | 0.476367 |
| MmugDNA.1801.1.S1_at    | MmugDNA.1801.1  | 3.65  | 3.23  | 0.19 | 0.08 | 1.33  | 0.050484 | 0.110101 | 0.282507 | 0.374235 |
| MmugDNA.18012.1.S1_at   | MmugDNA.18012.1 | 6.76  | 6.91  | 0.09 | 0.06 | -1.11 | 0.212484 | 0.284762 | 0.51051  | 0.546966 |
| MmugDNA.18014.1.S1_at   | MmugDNA.18014.1 | 4.31  | 3.89  | 0.88 | 0.24 | 1.34  | 0.209787 | 0.15585  | 0.507187 | 0.431223 |
| MmugDNA.18016.1.S1_at   | MmugDNA.18016.1 | 6.06  | 5.89  | 0.12 | 0.19 | 1.12  | 0.372848 | 0.428045 | 0.645098 | 0.649619 |
| MmugDNA.18017.1.S1_at   | MmugDNA.18017.1 | 9.92  | 9.66  | 0.15 | 0.13 | 1.2   | 0.039738 | 0.048608 | 0.256033 | 0.265596 |
| MmugDNA.18018.1.S1_at   | MmugDNA.18018.1 | 4.96  | 5.07  | 0.12 | 0.16 | -1.08 | 0.492564 | 0.126808 | 0.729806 | 0.397446 |
| MmugDNA.18019.1.S1_at   | MmugDNA.18019.1 | 3.92  | 4.29  | 0.15 | 0.12 | -1.29 | 0.08259  | 0.074627 | 0.344414 | 0.318313 |
| MmugDNA.18020.1.S1_at   | MmugDNA.18020.1 | 3.95  | 3.73  | 0.24 | 0.06 | 1.16  | 0.168016 | 0.643489 | 0.461204 | 0.790956 |
| MmugDNA.18021.1.S1_at   | MmugDNA.18021.1 | 4.54  | 4     | 0.58 | 0.32 | 1.45  | 0.561292 | 0.219171 | 0.77438  | 0.492915 |
| MmugDNA.18022.1.S1_at   | MmugDNA.18022.1 | 3.76  | 3.46  | 0.12 | 0.17 | 1.23  | 0.071032 | 0.5286   | 0.324424 | 0.71669  |
| MmugDNA.18023.1.S1_at   | MmugDNA.18023.1 | 6.3   | 6.3   | 0.18 | 0.05 | 1     | 0.987639 | 0.398855 | 0.995514 | 0.629585 |
| MmugDNA.18024.1.S1_at   | MmugDNA.18024.1 | 6.75  | 6.73  | 0.4  | 0.27 | 1.01  | 0.467045 | 0.781145 | 0.712594 | 0.873038 |

|                         |                 |       |       |      |      |       |          |          |          |          |
|-------------------------|-----------------|-------|-------|------|------|-------|----------|----------|----------|----------|
| MmugDNA.18025.1.S1_at   | MmugDNA.18025.1 | 3.19  | 3.29  | 0.09 | 0.09 | -1.07 | 0.268411 | 0.325651 | 0.561069 | 0.575963 |
| MmugDNA.18027.1.S1_at   | MmugDNA.18027.1 | 5.8   | 5.37  | 0.02 | 0.22 | 1.35  | 0.074653 | 0.366349 | 0.331339 | 0.606087 |
| MmugDNA.18029.1.S1_at   | MmugDNA.18029.1 | 6.33  | 6.29  | 0.21 | 0.11 | 1.03  | 0.876126 | 0.123169 | 0.946972 | 0.39322  |
| MmugDNA.1803.1.S1_at    | MmugDNA.1803.1  | 3.69  | 3.75  | 0.06 | 0.14 | -1.05 | 0.812244 | 0.668362 | 0.916018 | 0.805934 |
| MmugDNA.18030.1.S1_at   | MmugDNA.18030.1 | 5.38  | 5.33  | 0.2  | 0.1  | 1.04  | 0.697583 | 0.863296 | 0.856021 | 0.922356 |
| MmugDNA.18033.1.S1_at   | MmugDNA.18033.1 | 5.11  | 5.11  | 0.07 | 0.07 | 1     | 0.263127 | 0.368596 | 0.556921 | 0.608098 |
| MmugDNA.18034.1.S1_at   | MmugDNA.18034.1 | 8.26  | 8.05  | 0.12 | 0.05 | 1.16  | 0.050545 | 0.007884 | 0.282549 | 0.118304 |
| MmugDNA.18035.1.S1_at   | MmugDNA.18035.1 | 3.46  | 3.44  | 0.08 | 0.19 | 1.02  | 0.521537 | 0.516896 | 0.749377 | 0.709316 |
| MmugDNA.18036.1.S1_at   | MmugDNA.18036.1 | 2.98  | 3.01  | 0.3  | 0.02 | -1.02 | 0.724437 | 0.856886 | 0.870565 | 0.918235 |
| MmugDNA.18037.1.S1_at   | MmugDNA.18037.1 | 7.5   | 9.01  | 2.56 | 0.37 | -2.85 | 0.355254 | 0.244581 | 0.632085 | 0.514387 |
| MmugDNA.18038.1.S1_at   | MmugDNA.18038.1 | 6.67  | 6.25  | 0.23 | 0.14 | 1.34  | 0.050275 | 0.001066 | 0.282055 | 0.051835 |
| MmugDNA.1804.1.S1_at    | MmugDNA.1804.1  | 4.68  | 4.21  | 0.35 | 0.38 | 1.39  | 0.23275  | 0.271636 | 0.531068 | 0.536577 |
| MmugDNA.18040.1.S1_at   | MmugDNA.18040.1 | 4.78  | 4.25  | 0.83 | 0.43 | 1.45  | 0.592228 | 0.768031 | 0.793314 | 0.865326 |
| MmugDNA.18040.1.S1_s_at | MmugDNA.18040.1 | 3.88  | 3.87  | 0.06 | 0.09 | 1.01  | 0.401954 | 0.49976  | 0.666435 | 0.698494 |
| MmugDNA.18041.1.S1_at   | MmugDNA.18041.1 | 8.1   | 8.05  | 0.27 | 0.08 | 1.04  | 0.606354 | 0.029457 | 0.803106 | 0.213368 |
| MmugDNA.18042.1.S1_at   | MmugDNA.18042.1 | 4.82  | 4.76  | 0.22 | 0.05 | 1.04  | 0.652474 | 0.833449 | 0.831378 | 0.904502 |
| MmugDNA.18043.1.S1_at   | MmugDNA.18043.1 | 7.64  | 7.27  | 0.49 | 0.22 | 1.3   | 0.438332 | 0.119822 | 0.692934 | 0.388577 |
| MmugDNA.18044.1.S1_at   | MmugDNA.18044.1 | 5.39  | 5.23  | 0.17 | 0.12 | 1.12  | 0.977577 | 0.829256 | 0.991189 | 0.901825 |
| MmugDNA.18045.1.S1_at   | MmugDNA.18045.1 | 11.26 | 10.96 | 0.26 | 0.06 | 1.23  | 0.138265 | 0.613528 | 0.423511 | 0.770578 |
| MmugDNA.18047.1.S1_at   | MmugDNA.18047.1 | 4.33  | 4.35  | 0.06 | 0.18 | -1.01 | 0.925133 | 0.979034 | 0.96819  | 0.988665 |
| MmugDNA.18048.1.S1_at   | MmugDNA.18048.1 | 3.74  | 4.01  | 0.12 | 0.13 | -1.21 | 0.078302 | 0.308917 | 0.337998 | 0.564656 |
| MmugDNA.18049.1.S1_s_at | MmugDNA.18049.1 | 3.04  | 3.36  | 0.16 | 0.41 | -1.25 | 0.276833 | 0.517327 | 0.568332 | 0.709435 |
| MmugDNA.1805.1.S1_at    | MmugDNA.1805.1  | 7.51  | 7.77  | 0.23 | 0.2  | -1.2  | 0.07864  | 0.053978 | 0.338496 | 0.27777  |
| MmugDNA.18050.1.S1_at   | MmugDNA.18050.1 | 3.14  | 3.1   | 0.05 | 0.06 | 1.03  | 0.140735 | 0.504713 | 0.426473 | 0.70178  |
| MmugDNA.18051.1.S1_at   | MmugDNA.18051.1 | 9.03  | 9.23  | 0.31 | 0.07 | -1.15 | 0.08773  | 0.128717 | 0.353844 | 0.400135 |
| MmugDNA.18052.1.S1_at   | MmugDNA.18052.1 | 4.91  | 4.71  | 0.1  | 0.06 | 1.14  | 0.069563 | 0.065447 | 0.322162 | 0.301415 |
| MmugDNA.18053.1.S1_at   | MmugDNA.18053.1 | 7.19  | 7.02  | 1.26 | 0.29 | 1.12  | 0.854187 | 0.976513 | 0.936616 | 0.987202 |
| MmugDNA.18054.1.S1_at   | MmugDNA.18054.1 | 3.45  | 3.4   | 0.1  | 0.08 | 1.04  | 0.156452 | 0.184694 | 0.446993 | 0.460645 |
| MmugDNA.18056.1.S1_at   | MmugDNA.18056.1 | 4.83  | 4.5   | 0.38 | 0.12 | 1.26  | 0.175929 | 0.16467  | 0.470268 | 0.440974 |
| MmugDNA.18057.1.S1_at   | MmugDNA.18057.1 | 5.77  | 5.78  | 0.22 | 0.05 | -1.01 | 0.545936 | 0.712567 | 0.765075 | 0.833385 |
| MmugDNA.18058.1.S1_at   | MmugDNA.18058.1 | 5.99  | 5.95  | 0.1  | 0.03 | 1.03  | 0.587527 | 0.683738 | 0.790485 | 0.815491 |
| MmugDNA.18059.1.S1_at   | MmugDNA.18059.1 | 5.03  | 5.04  | 0.14 | 0.15 | -1.01 | 0.875236 | 0.977828 | 0.946453 | 0.9879   |
| MmugDNA.1806.1.S1_at    | MmugDNA.1806.1  | 11.1  | 11    | 0.09 | 0.21 | 1.07  | 0.2532   | 0.180452 | 0.547579 | 0.457115 |
| MmugDNA.18061.1.S1_a_at | MmugDNA.18061.1 | 7.01  | 7     | 0.33 | 0.08 | 1.01  | 0.278752 | 0.422506 | 0.570066 | 0.645729 |
| MmugDNA.18061.1.S1_at   | MmugDNA.18061.1 | 4.98  | 4.94  | 0.17 | 0.1  | 1.03  | 0.649954 | 0.321254 | 0.830067 | 0.573153 |
| MmugDNA.18062.1.S1_at   | MmugDNA.18062.1 | 4.64  | 4.82  | 1.1  | 0.06 | -1.13 | 0.595836 | 0.501764 | 0.795488 | 0.699813 |
| MmugDNA.18063.1.S1_at   | MmugDNA.18063.1 | 4.48  | 4.37  | 0.01 | 0.27 | 1.08  | 0.81213  | 0.739452 | 0.915948 | 0.848995 |
| MmugDNA.18064.1.S1_at   | MmugDNA.18064.1 | 5.33  | 5.34  | 0.07 | 0.01 | -1.01 | 0.801898 | 0.521849 | 0.911061 | 0.712654 |
| MmugDNA.18066.1.S1_at   | MmugDNA.18066.1 | 11.66 | 12.2  | 0.6  | 0.14 | -1.46 | 0.227074 | 0.347325 | 0.525075 | 0.591939 |
| MmugDNA.18067.1.S1_at   | MmugDNA.18067.1 | 5.83  | 6     | 0.11 | 0.37 | -1.12 | 0.203759 | 0.287484 | 0.501439 | 0.548718 |
| MmugDNA.18068.1.S1_at   | MmugDNA.18068.1 | 3.36  | 3.39  | 0.11 | 0.19 | -1.02 | 0.418854 | 0.630203 | 0.678622 | 0.782181 |
| MmugDNA.1807.1.S1_at    | MmugDNA.1807.1  | 6.37  | 5.56  | 1.09 | 0.57 | 1.75  | 0.554237 | 0.291715 | 0.770579 | 0.552054 |
| MmugDNA.18071.1.S1_at   | MmugDNA.18071.1 | 3.95  | 4.12  | 0.13 | 0.15 | -1.12 | 0.232772 | 0.52139  | 0.531068 | 0.712376 |

|                         |                 |       |       |      |      |       |          |          |          |          |
|-------------------------|-----------------|-------|-------|------|------|-------|----------|----------|----------|----------|
| MmugDNA.18072.1.S1_s_at | MmugDNA.18072.1 | 7.15  | 6.96  | 0.35 | 0.06 | 1.14  | 0.29675  | 0.385176 | 0.58546  | 0.62067  |
| MmugDNA.18073.1.S1_at   | MmugDNA.18073.1 | 5.4   | 6.15  | 1.22 | 0.06 | -1.68 | 0.38304  | 0.298728 | 0.652427 | 0.557321 |
| MmugDNA.18074.1.S1_at   | MmugDNA.18074.1 | 6.83  | 6.92  | 0.09 | 0.01 | -1.07 | 0.131171 | 0.043341 | 0.413871 | 0.252853 |
| MmugDNA.18075.1.S1_at   | MmugDNA.18075.1 | 3.46  | 3.46  | 0.1  | 0    | 1.01  | 0.835461 | 0.804492 | 0.927676 | 0.887566 |
| MmugDNA.18076.1.S1_at   | MmugDNA.18076.1 | 3.75  | 3.81  | 0.14 | 0.01 | -1.04 | 0.585399 | 0.568419 | 0.789198 | 0.741962 |
| MmugDNA.18077.1.S1_at   | MmugDNA.18077.1 | 4.31  | 4.34  | 0.21 | 0.08 | -1.02 | 0.88003  | 0.733623 | 0.948926 | 0.845775 |
| MmugDNA.18078.1.S1_at   | MmugDNA.18078.1 | 5.54  | 5.42  | 0.25 | 0.2  | 1.09  | 0.218646 | 0.45251  | 0.516338 | 0.667112 |
| MmugDNA.18079.1.S1_at   | MmugDNA.18079.1 | 3.92  | 3.9   | 0.12 | 0.12 | 1.01  | 0.247448 | 0.379622 | 0.542973 | 0.616523 |
| MmugDNA.1808.1.S1_at    | MmugDNA.1808.1  | 5.62  | 5.6   | 0.07 | 0.23 | 1.01  | 0.83128  | 0.755381 | 0.925813 | 0.857562 |
| MmugDNA.18080.1.S1_at   | MmugDNA.18080.1 | 7.97  | 7.46  | 0.36 | 0.09 | 1.42  | 0.280722 | 0.08341  | 0.571782 | 0.333699 |
| MmugDNA.18081.1.S1_at   | MmugDNA.18081.1 | 9.29  | 8.78  | 0.38 | 0.22 | 1.42  | 0.525286 | 0.072028 | 0.751903 | 0.314459 |
| MmugDNA.18082.1.S1_at   | MmugDNA.18082.1 | 6.46  | 6.4   | 0.21 | 0.14 | 1.04  | 0.77797  | 0.240991 | 0.898504 | 0.511657 |
| MmugDNA.18084.1.S1_at   | MmugDNA.18084.1 | 7.12  | 7.02  | 0.07 | 0.19 | 1.07  | 0.43397  | 0.046375 | 0.689295 | 0.259844 |
| MmugDNA.18085.1.S1_at   | MmugDNA.18085.1 | 6.07  | 5.98  | 0.03 | 0.42 | 1.07  | 0.612085 | 0.826229 | 0.80668  | 0.900203 |
| MmugDNA.18086.1.S1_at   | MmugDNA.18086.1 | 6.58  | 6.2   | 0.28 | 0.05 | 1.3   | 0.290469 | 0.397675 | 0.579917 | 0.629038 |
| MmugDNA.18088.1.S1_at   | MmugDNA.18088.1 | 4.39  | 3.91  | 0.13 | 0.38 | 1.4   | 0.434469 | 0.569697 | 0.689698 | 0.742585 |
| MmugDNA.18089.1.S1_at   | MmugDNA.18089.1 | 10.16 | 10.65 | 0.18 | 0.07 | -1.4  | 0.010865 | 0.041587 | 0.153933 | 0.248831 |
| MmugDNA.1809.1.S1_at    | MmugDNA.1809.1  | 4.01  | 3.88  | 0.78 | 0.2  | 1.1   | 0.616308 | 0.688637 | 0.809429 | 0.818251 |
| MmugDNA.18090.1.S1_at   | MmugDNA.18090.1 | 3.75  | 3.8   | 0.04 | 0.11 | -1.03 | 0.991551 | 0.995207 | 0.996906 | 0.996999 |
| MmugDNA.18091.1.S1_at   | MmugDNA.18091.1 | 5.55  | 5.6   | 0.29 | 0.49 | -1.03 | 0.871304 | 0.974867 | 0.944612 | 0.986264 |
| MmugDNA.18092.1.S1_at   | MmugDNA.18092.1 | 9.17  | 8.68  | 0.13 | 0.07 | 1.41  | 0.005157 | 0.085477 | 0.116998 | 0.337473 |
| MmugDNA.18093.1.S1_at   | MmugDNA.18093.1 | 9.8   | 10.62 | 0.42 | 0.17 | -1.77 | 0.043461 | 0.005041 | 0.265644 | 0.098963 |
| MmugDNA.18094.1.S1_at   | MmugDNA.18094.1 | 3.72  | 3.7   | 0.56 | 0.03 | 1.01  | 0.350402 | 0.242946 | 0.628235 | 0.513319 |
| MmugDNA.18097.1.S1_at   | MmugDNA.18097.1 | 5.06  | 5.06  | 0.02 | 0.17 | 1     | 0.417    | 0.148435 | 0.677282 | 0.423007 |
| MmugDNA.18098.1.S1_s_at | MmugDNA.18098.1 | 5.57  | 5.63  | 0.27 | 0.1  | -1.04 | 0.638314 | 0.664039 | 0.822964 | 0.803247 |
| MmugDNA.181.1.S1_at     | MmugDNA.181.1   | 12.11 | 12.16 | 0.02 | 0.03 | -1.03 | 0.04696  | 0.000001 | 0.27447  | 0.007307 |
| MmugDNA.1810.1.S1_at    | MmugDNA.1810.1  | 4.76  | 4.84  | 0.02 | 0.16 | -1.06 | 0.965741 | 0.093818 | 0.986129 | 0.350281 |
| MmugDNA.18101.1.S1_at   | MmugDNA.18101.1 | 3.8   | 6.83  | 0.39 | 0.61 | -8.15 | 0.00202  | 0.049994 | 0.089873 | 0.268839 |
| MmugDNA.18102.1.S1_at   | MmugDNA.18102.1 | 4.14  | 3.97  | 0.07 | 0.09 | 1.12  | 0.314385 | 0.003284 | 0.599959 | 0.082541 |
| MmugDNA.18103.1.S1_at   | MmugDNA.18103.1 | 5.41  | 5.26  | 0.26 | 0.1  | 1.11  | 0.204107 | 0.279623 | 0.501698 | 0.543186 |
| MmugDNA.18103.1.S1_x_at | MmugDNA.18103.1 | 5.34  | 4.93  | 0.3  | 0.12 | 1.33  | 0.061533 | 0.060457 | 0.304646 | 0.292547 |
| MmugDNA.18104.1.S1_at   | MmugDNA.18104.1 | 3.87  | 3.73  | 0.23 | 0.21 | 1.1   | 0.183329 | 0.32009  | 0.479273 | 0.572459 |
| MmugDNA.18106.1.S1_at   | MmugDNA.18106.1 | 6.14  | 5.61  | 0.29 | 0.21 | 1.45  | 0.059347 | 0.061967 | 0.300772 | 0.295763 |
| MmugDNA.18107.1.S1_at   | MmugDNA.18107.1 | 6.76  | 6.8   | 0.2  | 0.15 | -1.03 | 0.91807  | 0.901667 | 0.965083 | 0.944043 |
| MmugDNA.18108.1.S1_at   | MmugDNA.18108.1 | 9.94  | 9.51  | 0.1  | 0.18 | 1.35  | 0.021315 | 0.05227  | 0.199623 | 0.274146 |
| MmugDNA.18109.1.S1_at   | MmugDNA.18109.1 | 3.74  | 3.87  | 0.15 | 0.12 | -1.1  | 0.601345 | 0.693887 | 0.799529 | 0.821989 |
| MmugDNA.1811.1.S1_at    | MmugDNA.1811.1  | 9     | 9.82  | 0.2  | 0.1  | -1.76 | 0.003387 | 0.191227 | 0.102989 | 0.466553 |
| MmugDNA.18110.1.S1_at   | MmugDNA.18110.1 | 6.52  | 6.6   | 0.12 | 0.08 | -1.05 | 0.391222 | 0.47671  | 0.658623 | 0.682871 |
| MmugDNA.18115.1.S1_at   | MmugDNA.18115.1 | 5.79  | 5.57  | 0.15 | 0.06 | 1.16  | 0.109235 | 0.412153 | 0.384375 | 0.638565 |
| MmugDNA.18116.1.S1_s_at | MmugDNA.18116.1 | 3.62  | 3.62  | 0.11 | 0.13 | -1    | 0.968383 | 0.686435 | 0.987529 | 0.817012 |
| MmugDNA.18117.1.S1_at   | MmugDNA.18117.1 | 4.45  | 4.47  | 0.22 | 0.04 | -1.01 | 0.463534 | 0.643493 | 0.710097 | 0.790956 |
| MmugDNA.18118.1.S1_at   | MmugDNA.18118.1 | 2.86  | 2.99  | 0.12 | 0.14 | -1.1  | 0.286279 | 0.336144 | 0.576122 | 0.583675 |
| MmugDNA.18119.1.S1_at   | MmugDNA.18119.1 | 3.9   | 3.88  | 0.11 | 0.18 | 1.01  | 0.91091  | 0.027627 | 0.962223 | 0.207522 |



|                         |                 |       |       |      |      |       |          |          |          |          |
|-------------------------|-----------------|-------|-------|------|------|-------|----------|----------|----------|----------|
| MmugDNA.18120.1.S1_at   | MmugDNA.18120.1 | 5.29  | 5.18  | 0.13 | 0.09 | 1.08  | 0.140119 | 0.146764 | 0.425829 | 0.420799 |
| MmugDNA.18121.1.S1_at   | MmugDNA.18121.1 | 6.59  | 8.55  | 0.42 | 0.5  | -3.87 | 0.006226 | 0.001214 | 0.125175 | 0.054455 |
| MmugDNA.18125.1.S1_at   | MmugDNA.18125.1 | 3.45  | 3.48  | 0.21 | 0.19 | -1.03 | 0.272046 | 0.194144 | 0.563966 | 0.469266 |
| MmugDNA.18126.1.S1_at   | MmugDNA.18126.1 | 9.75  | 9.15  | 0.36 | 0.05 | 1.52  | 0.142567 | 0.015865 | 0.428642 | 0.159789 |
| MmugDNA.18129.1.S1_at   | MmugDNA.18129.1 | 8.19  | 7.41  | 0.56 | 0.07 | 1.72  | 0.273637 | 0.015062 | 0.565755 | 0.155853 |
| MmugDNA.1813.1.S1_at    | MmugDNA.1813.1  | 3.65  | 3.66  | 0.06 | 0.08 | -1.01 | 0.572402 | 0.516573 | 0.780609 | 0.709034 |
| MmugDNA.18131.1.S1_at   | MmugDNA.18131.1 | 5.73  | 5.75  | 0.35 | 0.02 | -1.02 | 0.788187 | 0.940935 | 0.903684 | 0.966553 |
| MmugDNA.18132.1.S1_at   | MmugDNA.18132.1 | 4.47  | 4.76  | 0.28 | 0.08 | -1.22 | 0.198216 | 0.11241  | 0.495463 | 0.377784 |
| MmugDNA.31631.1.S1_s_at | MmugDNA.31631.1 | 6.81  | 6.83  | 0.02 | 0.08 | -1.01 | 0.566243 | 0.098781 | 0.777215 | 0.356894 |
| MmugDNA.18135.1.S1_at   | MmugDNA.18135.1 | 7.78  | 7.83  | 0.66 | 0.15 | -1.04 | 0.561689 | 0.762527 | 0.774555 | 0.86188  |
| MmugDNA.18137.1.S1_at   | MmugDNA.18137.1 | 8.15  | 7.82  | 0.07 | 0.35 | 1.26  | 0.12466  | 0.164644 | 0.404951 | 0.44095  |
| MmugDNA.18139.1.S1_at   | MmugDNA.18139.1 | 6.3   | 6.37  | 0.1  | 0.1  | -1.05 | 0.190941 | 0.404994 | 0.487168 | 0.633428 |
| MmugDNA.1814.1.S1_at    | MmugDNA.1814.1  | 6.63  | 6.47  | 0.31 | 0.1  | 1.11  | 0.82862  | 0.109073 | 0.924251 | 0.372869 |
| MmugDNA.18140.1.S1_at   | MmugDNA.18140.1 | 11.92 | 11.79 | 0.03 | 0.06 | 1.09  | 0.108272 | 0.007171 | 0.382964 | 0.113839 |
| MmugDNA.18142.1.S1_at   | MmugDNA.18142.1 | 5.41  | 5.38  | 1.77 | 0.25 | 1.02  | 0.440939 | 0.588915 | 0.694673 | 0.75527  |
| MmugDNA.18143.1.S1_at   | MmugDNA.18143.1 | 5.53  | 5.52  | 0.8  | 0.29 | 1.01  | 0.521033 | 0.590755 | 0.749121 | 0.756437 |
| MmugDNA.18144.1.S1_at   | MmugDNA.18144.1 | 5.58  | 5.51  | 0.21 | 0.03 | 1.05  | 0.201487 | 0.570937 | 0.49907  | 0.743422 |
| MmugDNA.18145.1.S1_at   | MmugDNA.18145.1 | 5.01  | 4.9   | 0.21 | 0.09 | 1.08  | 0.415049 | 0.393154 | 0.675916 | 0.626102 |
| MmugDNA.18146.1.S1_at   | MmugDNA.18146.1 | 3.12  | 3.13  | 0.06 | 0.01 | -1.01 | 0.528701 | 0.319807 | 0.753764 | 0.572154 |
| MmugDNA.18147.1.S1_at   | MmugDNA.18147.1 | 5.89  | 5.54  | 0.38 | 0.23 | 1.27  | 0.127426 | 0.373711 | 0.409324 | 0.612403 |
| MmugDNA.18148.1.S1_at   | MmugDNA.18148.1 | 7.11  | 9.12  | 0.88 | 0.43 | -4.04 | 0.050193 | 0.404564 | 0.281792 | 0.63306  |
| MmugDNA.18149.1.S1_at   | MmugDNA.18149.1 | 6.63  | 7.01  | 0.74 | 0.29 | -1.3  | 0.788699 | 0.427945 | 0.903986 | 0.649602 |
| MmugDNA.1815.1.S1_at    | MmugDNA.1815.1  | 5.48  | 5.36  | 0.05 | 0.17 | 1.09  | 0.102937 | 0.208322 | 0.375529 | 0.482199 |
| MmugDNA.18151.1.S1_at   | MmugDNA.18151.1 | 5.3   | 5.29  | 0.19 | 0.09 | 1     | 0.266064 | 0.666795 | 0.558596 | 0.804789 |
| MmugDNA.18152.1.S1_at   | MmugDNA.18152.1 | 7.2   | 7.04  | 0.15 | 0.08 | 1.12  | 0.316203 | 0.440845 | 0.600997 | 0.659138 |
| MmugDNA.18153.1.S1_at   | MmugDNA.18153.1 | 5.28  | 3.92  | 0.21 | 0.08 | 2.56  | 0.000482 | 0.000328 | 0.067773 | 0.035797 |
| MmugDNA.18154.1.S1_at   | MmugDNA.18154.1 | 6.72  | 6.62  | 0.36 | 0.08 | 1.08  | 0.630572 | 0.348459 | 0.818647 | 0.592593 |
| MmugDNA.18155.1.S1_at   | MmugDNA.18155.1 | 9.2   | 9.31  | 0.65 | 0.18 | -1.08 | 0.998836 | 0.999993 | 0.999631 | 0.999968 |
| MmugDNA.18156.1.S1_at   | MmugDNA.18156.1 | 9.98  | 9.94  | 0.3  | 0.19 | 1.03  | 0.808711 | 0.387122 | 0.914357 | 0.621935 |
| MmugDNA.18157.1.S1_at   | MmugDNA.18157.1 | 5.95  | 5.92  | 0.12 | 0.14 | 1.02  | 0.739877 | 0.604743 | 0.879468 | 0.764797 |
| MmugDNA.18159.1.S1_at   | MmugDNA.18159.1 | 11.63 | 11.96 | 0.13 | 0.16 | -1.26 | 0.240314 | 0.011264 | 0.537838 | 0.138076 |
| MmugDNA.1816.1.S1_at    | MmugDNA.1816.1  | 7.55  | 7.96  | 0.4  | 0.13 | -1.33 | 0.378385 | 0.134636 | 0.648638 | 0.406629 |
| MmugDNA.18160.1.S1_at   | MmugDNA.18160.1 | 9.97  | 9.5   | 0.32 | 0.03 | 1.38  | 0.22593  | 0.084189 | 0.523661 | 0.335266 |
| MmugDNA.18161.1.S1_at   | MmugDNA.18161.1 | 7.43  | 9.11  | 0.81 | 0.41 | -3.22 | 0.021681 | 0.009293 | 0.20067  | 0.127142 |
| MmugDNA.18162.1.S1_at   | MmugDNA.18162.1 | 4.65  | 4.7   | 0.34 | 0.39 | -1.03 | 0.75223  | 0.816732 | 0.885542 | 0.894294 |
| MmugDNA.18164.1.S1_at   | MmugDNA.18164.1 | 6.83  | 7.24  | 0.05 | 0.32 | -1.33 | 0.148415 | 0.002584 | 0.436978 | 0.075213 |
| MmugDNA.18165.1.S1_at   | MmugDNA.18165.1 | 5.9   | 6.34  | 0.43 | 0.19 | -1.35 | 0.3574   | 0.33035  | 0.633494 | 0.579112 |
| MmugDNA.18166.1.S1_at   | MmugDNA.18166.1 | 10.01 | 10.5  | 0.12 | 0.26 | -1.41 | 0.028883 | 0.013505 | 0.222781 | 0.148824 |
| MmugDNA.18167.1.S1_at   | MmugDNA.18167.1 | 4.7   | 4.44  | 0.35 | 0.26 | 1.21  | 0.424782 | 0.466407 | 0.682288 | 0.676284 |
| MmugDNA.18168.1.S1_at   | MmugDNA.18168.1 | 8.82  | 9.31  | 0.26 | 0.14 | -1.4  | 0.086648 | 0.187178 | 0.351711 | 0.463149 |
| MmugDNA.1817.1.S1_at    | MmugDNA.1817.1  | 5.85  | 5.72  | 0.14 | 0.17 | 1.1   | 0.328849 | 0.170735 | 0.611123 | 0.447316 |
| MmugDNA.18170.1.S1_at   | MmugDNA.18170.1 | 3.78  | 3.74  | 0.13 | 0.17 | 1.03  | 0.863713 | 0.216897 | 0.940843 | 0.490515 |
| MmugDNA.18171.1.S1_at   | MmugDNA.18171.1 | 5.42  | 4.91  | 0.3  | 0.1  | 1.43  | 0.045005 | 0.137804 | 0.269447 | 0.410769 |

|                         |                 |       |       |      |      |       |          |          |          |          |
|-------------------------|-----------------|-------|-------|------|------|-------|----------|----------|----------|----------|
| MmugDNA.18172.1.S1_at   | MmugDNA.18172.1 | 4.93  | 4.59  | 0.12 | 0.1  | 1.27  | 0.020813 | 0.022268 | 0.197825 | 0.1867   |
| MmugDNA.18173.1.S1_at   | MmugDNA.18173.1 | 7.34  | 7.83  | 0.16 | 0.08 | -1.4  | 0.009703 | 0.445969 | 0.148419 | 0.662623 |
| MmugDNA.18174.1.S1_at   | MmugDNA.18174.1 | 8.81  | 8.5   | 0.25 | 0.17 | 1.23  | 0.216739 | 0.064264 | 0.514582 | 0.299692 |
| MmugDNA.18175.1.S1_at   | MmugDNA.18175.1 | 10.83 | 11.4  | 0.36 | 0.03 | -1.48 | 0.035074 | 0.096633 | 0.241969 | 0.354145 |
| MmugDNA.18176.1.S1_at   | MmugDNA.18176.1 | 8.41  | 8.97  | 0.29 | 0.15 | -1.47 | 0.044422 | 0.054504 | 0.267911 | 0.278959 |
| MmugDNA.18177.1.S1_at   | MmugDNA.18177.1 | 8.62  | 8.21  | 0.08 | 0.14 | 1.33  | 0.011496 | 0.011379 | 0.15722  | 0.138214 |
| MmugDNA.18178.1.S1_at   | MmugDNA.18178.1 | 7.12  | 8.41  | 0.48 | 0.13 | -2.45 | 0.03071  | 0.054974 | 0.228035 | 0.279898 |
| MmugDNA.18178.1.S1_x_at | MmugDNA.18178.1 | 7.23  | 8.62  | 0.51 | 0.1  | -2.62 | 0.019866 | 0.039483 | 0.194233 | 0.243642 |
| MmugDNA.1818.1.S1_at    | MmugDNA.1818.1  | 7.66  | 7.72  | 0.27 | 0.05 | -1.05 | 0.613215 | 0.579801 | 0.807289 | 0.749289 |
| MmugDNA.18180.1.S1_at   | MmugDNA.18180.1 | 6.3   | 6.19  | 0.24 | 0.09 | 1.08  | 0.474919 | 0.53206  | 0.7177   | 0.718995 |
| MmugDNA.18182.1.S1_at   | MmugDNA.18182.1 | 5.4   | 4.98  | 0.89 | 0.17 | 1.34  | 0.372305 | 0.615597 | 0.64489  | 0.772101 |
| MmugDNA.18183.1.S1_at   | MmugDNA.18183.1 | 8.99  | 7.82  | 0.48 | 0.11 | 2.25  | 0.014937 | 0.012459 | 0.174306 | 0.14417  |
| MmugDNA.18184.1.S1_at   | MmugDNA.18184.1 | 6.44  | 6.66  | 0.12 | 0.37 | -1.16 | 0.233342 | 0.135303 | 0.531615 | 0.407381 |
| MmugDNA.18188.1.S1_at   | MmugDNA.18188.1 | 3.21  | 3.3   | 0.04 | 0.05 | -1.06 | 0.072414 | 0.062442 | 0.327004 | 0.296717 |
| MmugDNA.1819.1.S1_at    | MmugDNA.1819.1  | 3.67  | 4.51  | 0.13 | 0.22 | -1.8  | 0.004533 | 0.010328 | 0.113436 | 0.13301  |
| MmugDNA.18190.1.S1_at   | MmugDNA.18190.1 | 12.32 | 12.26 | 0.03 | 0.02 | 1.04  | 0.132444 | 0.630269 | 0.415822 | 0.782195 |
| MmugDNA.18194.1.S1_at   | MmugDNA.18194.1 | 8.83  | 7.72  | 0.09 | 0.11 | 2.15  | 0.000206 | 0.012013 | 0.053494 | 0.141846 |
| MmugDNA.18196.1.S1_at   | MmugDNA.18196.1 | 3.24  | 3.51  | 0.09 | 0.07 | -1.21 | 0.024905 | 0.032183 | 0.211036 | 0.222111 |
| MmugDNA.18197.1.S1_at   | MmugDNA.18197.1 | 4.02  | 3.74  | 0.34 | 0.16 | 1.22  | 0.144777 | 0.235238 | 0.431713 | 0.50629  |
| MmugDNA.18198.1.S1_at   | MmugDNA.18198.1 | 3.69  | 3.67  | 0.16 | 0.09 | 1.01  | 0.784325 | 0.44928  | 0.901636 | 0.664983 |
| MmugDNA.18200.1.S1_at   | MmugDNA.18200.1 | 8.89  | 8.72  | 0.11 | 0.07 | 1.13  | 0.087462 | 0.005176 | 0.353257 | 0.099727 |
| MmugDNA.18201.1.S1_at   | MmugDNA.18201.1 | 6.17  | 6.08  | 0.26 | 0.21 | 1.06  | 0.803644 | 0.880013 | 0.911852 | 0.93148  |
| MmugDNA.18202.1.S1_at   | MmugDNA.18202.1 | 3.3   | 3.17  | 0.12 | 0.07 | 1.1   | 0.10463  | 0.225055 | 0.377962 | 0.49773  |
| MmugDNA.18203.1.S1_at   | MmugDNA.18203.1 | 9.61  | 10.3  | 0.14 | 0.25 | -1.62 | 0.039539 | 0.027244 | 0.255411 | 0.206279 |
| MmugDNA.18204.1.S1_s_at | MmugDNA.18204.1 | 5.77  | 5.85  | 0.31 | 0.09 | -1.06 | 0.989172 | 0.734149 | 0.996231 | 0.845901 |
| MmugDNA.18205.1.S1_at   | MmugDNA.18205.1 | 7.48  | 7.43  | 0.72 | 0.04 | 1.03  | 0.965671 | 0.79188  | 0.986096 | 0.87976  |
| MmugDNA.18206.1.S1_at   | MmugDNA.18206.1 | 3.72  | 3.76  | 0.11 | 0.02 | -1.02 | 0.629651 | 0.80685  | 0.818051 | 0.888868 |
| MmugDNA.18207.1.S1_at   | MmugDNA.18207.1 | 3.44  | 3.64  | 0.1  | 0.14 | -1.14 | 0.312291 | 0.550755 | 0.598269 | 0.730611 |
| MmugDNA.18208.1.S1_at   | MmugDNA.18208.1 | 3.63  | 3.53  | 0.13 | 0.16 | 1.07  | 0.215221 | 0.288471 | 0.512891 | 0.54977  |
| MmugDNA.18209.1.S1_at   | MmugDNA.18209.1 | 9.27  | 9.34  | 0.29 | 0.2  | -1.05 | 0.408423 | 0.433605 | 0.671204 | 0.653865 |
| MmugDNA.1821.1.S1_at    | MmugDNA.1821.1  | 13.08 | 13.3  | 0.18 | 0.08 | -1.17 | 0.157477 | 0.235934 | 0.44816  | 0.507056 |
| MmugDNA.1821.1.S1_s_at  | MmugDNA.1821.1  | 13.25 | 13.54 | 0.2  | 0.09 | -1.22 | 0.184455 | 0.2725   | 0.480429 | 0.537245 |
| MmugDNA.18210.1.S1_at   | MmugDNA.18210.1 | 6.41  | 6.5   | 0.42 | 0.49 | -1.07 | 0.302573 | 0.480292 | 0.59035  | 0.68574  |
| MmugDNA.18211.1.S1_at   | MmugDNA.18211.1 | 3.15  | 2.94  | 0.04 | 0.19 | 1.16  | 0.525706 | 0.567161 | 0.752031 | 0.74107  |
| MmugDNA.18212.1.S1_at   | MmugDNA.18212.1 | 9.14  | 9.26  | 0.11 | 0.03 | -1.09 | 0.199272 | 0.037188 | 0.496613 | 0.237285 |
| MmugDNA.18213.1.S1_at   | MmugDNA.18213.1 | 3.36  | 3.31  | 0.05 | 0.16 | 1.03  | 0.854667 | 0.979286 | 0.936785 | 0.988845 |
| MmugDNA.18214.1.S1_at   | MmugDNA.18214.1 | 4.55  | 4.5   | 0.04 | 0.31 | 1.04  | 0.890057 | 0.541245 | 0.953181 | 0.724781 |
| MmugDNA.18217.1.S1_at   | MmugDNA.18217.1 | 5.29  | 4.95  | 0.25 | 0.42 | 1.27  | 0.218206 | 0.267887 | 0.515982 | 0.533607 |
| MmugDNA.18218.1.S1_at   | MmugDNA.18218.1 | 8.87  | 8.92  | 0.28 | 0.1  | -1.04 | 0.368769 | 0.661584 | 0.642367 | 0.801876 |
| MmugDNA.18219.1.S1_at   | MmugDNA.18219.1 | 10.74 | 10.72 | 0.09 | 0.06 | 1.01  | 0.179636 | 0.794117 | 0.474837 | 0.881296 |
| MmugDNA.1822.1.S1_at    | MmugDNA.1822.1  | 6.02  | 6.93  | 0.53 | 0.18 | -1.89 | 0.122498 | 0.372203 | 0.401231 | 0.61109  |
| MmugDNA.18220.1.S1_at   | MmugDNA.18220.1 | 5.03  | 4.71  | 0.2  | 0.16 | 1.25  | 0.245695 | 0.430187 | 0.54172  | 0.651255 |
| MmugDNA.18221.1.S1_at   | MmugDNA.18221.1 | 5.68  | 5.53  | 0.94 | 0.47 | 1.11  | 0.366837 | 0.5226   | 0.641023 | 0.713255 |

|                         |                 |       |       |      |      |       |          |          |          |          |
|-------------------------|-----------------|-------|-------|------|------|-------|----------|----------|----------|----------|
| MmugDNA.18222.1.S1_at   | MmugDNA.18222.1 | 4.93  | 4.84  | 0.14 | 0.21 | 1.06  | 0.65687  | 0.490791 | 0.834022 | 0.692666 |
| MmugDNA.18223.1.S1_at   | MmugDNA.18223.1 | 5.85  | 5.92  | 0.08 | 0.03 | -1.05 | 0.512478 | 0.806357 | 0.742975 | 0.888642 |
| MmugDNA.18225.1.S1_at   | MmugDNA.18225.1 | 4.77  | 4.81  | 0.3  | 0.13 | -1.03 | 0.498026 | 0.594824 | 0.733394 | 0.758675 |
| MmugDNA.18226.1.S1_at   | MmugDNA.18226.1 | 3.02  | 3.02  | 0.04 | 0.12 | 1     | 0.401022 | 0.747557 | 0.665748 | 0.853168 |
| MmugDNA.18229.1.S1_at   | MmugDNA.18229.1 | 4.44  | 4.2   | 0.12 | 0.19 | 1.18  | 0.058382 | 0.047032 | 0.298756 | 0.261469 |
| MmugDNA.5447.1.S1_s_at  | MmugDNA.5447.1  | 3.86  | 3.87  | 0.08 | 0.16 | -1    | 0.41761  | 0.198864 | 0.677707 | 0.473475 |
| MmugDNA.18230.1.S1_at   | MmugDNA.18230.1 | 2.93  | 3.06  | 0.12 | 0.13 | -1.1  | 0.119893 | 0.103762 | 0.398101 | 0.364519 |
| MmugDNA.18231.1.S1_at   | MmugDNA.18231.1 | 3.61  | 3.61  | 0.18 | 0.05 | 1     | 0.832825 | 0.936831 | 0.926352 | 0.964385 |
| MmugDNA.18232.1.S1_at   | MmugDNA.18232.1 | 12.69 | 12.7  | 0.04 | 0.02 | -1.01 | 0.972411 | 0.932441 | 0.988877 | 0.961712 |
| MmugDNA.18237.1.S1_at   | MmugDNA.18237.1 | 9.33  | 9.31  | 0.1  | 0.13 | 1.02  | 0.486203 | 0.603143 | 0.725583 | 0.763963 |
| MmugDNA.18238.1.S1_at   | MmugDNA.18238.1 | 5.05  | 5.1   | 0.78 | 0.37 | -1.04 | 0.4816   | 0.489775 | 0.722079 | 0.691918 |
| MmugDNA.18239.1.S1_at   | MmugDNA.18239.1 | 5.84  | 6.21  | 0.3  | 0.13 | -1.29 | 0.121177 | 0.027092 | 0.399828 | 0.205797 |
| MmugDNA.18240.1.S1_at   | MmugDNA.18240.1 | 5.28  | 4.74  | 0.44 | 0.27 | 1.45  | 0.279244 | 0.485864 | 0.570643 | 0.689443 |
| MmugDNA.18242.1.S1_at   | MmugDNA.18242.1 | 6.05  | 5.09  | 1.35 | 0.15 | 1.95  | 0.181518 | 0.226969 | 0.47696  | 0.49928  |
| MmugDNA.18243.1.S1_at   | MmugDNA.18243.1 | 3.9   | 3.9   | 0.04 | 0.02 | 1     | 0.249699 | 0.720432 | 0.544771 | 0.838261 |
| MmugDNA.18244.1.S1_at   | MmugDNA.18244.1 | 4.17  | 4.16  | 0.46 | 0.09 | 1.01  | 0.34907  | 0.479082 | 0.62702  | 0.684931 |
| MmugDNA.18245.1.S1_at   | MmugDNA.18245.1 | 8.56  | 8.85  | 0.09 | 0.16 | -1.23 | 0.064281 | 0.007753 | 0.309888 | 0.117622 |
| MmugDNA.18245.1.S1_s_at | MmugDNA.18245.1 | 8.51  | 8.74  | 0.08 | 0.28 | -1.17 | 0.433339 | 0.006397 | 0.68886  | 0.108738 |
| MmugDNA.18246.1.S1_at   | MmugDNA.18246.1 | 3.62  | 3.65  | 0.1  | 0.12 | -1.02 | 0.630344 | 0.356531 | 0.818589 | 0.598459 |
| MmugDNA.18247.1.S1_at   | MmugDNA.18247.1 | 9.34  | 9.62  | 0.13 | 0.05 | -1.21 | 0.019752 | 0.119984 | 0.1935   | 0.388672 |
| MmugDNA.18248.1.S1_s_at | MmugDNA.18248.1 | 7.23  | 7.43  | 0.07 | 0    | -1.15 | 0.014329 | 0.005842 | 0.171529 | 0.10467  |
| MmugDNA.18249.1.S1_at   | MmugDNA.18249.1 | 5.78  | 5.78  | 0.04 | 0.01 | 1     | 0.498141 | 0.296529 | 0.733503 | 0.555531 |
| MmugDNA.1825.1.S1_at    | MmugDNA.1825.1  | 2.87  | 2.7   | 0.38 | 0    | 1.12  | 0.250003 | 0.197439 | 0.544879 | 0.472375 |
| MmugDNA.18250.1.S1_at   | MmugDNA.18250.1 | 5.49  | 5.08  | 0.33 | 0.17 | 1.33  | 0.339482 | 0.501721 | 0.619769 | 0.69981  |
| MmugDNA.18251.1.S1_at   | MmugDNA.18251.1 | 10.22 | 11.13 | 0.3  | 0.18 | -1.87 | 0.029726 | 0.010581 | 0.225633 | 0.134213 |
| MmugDNA.18251.1.S1_s_at | MmugDNA.18251.1 | 9.98  | 11.01 | 0.33 | 0.19 | -2.03 | 0.022605 | 0.014254 | 0.203475 | 0.152411 |
| MmugDNA.18252.1.S1_at   | MmugDNA.18252.1 | 4.49  | 3.86  | 0.26 | 0.21 | 1.54  | 0.071238 | 0.065627 | 0.324822 | 0.301554 |
| MmugDNA.18253.1.S1_at   | MmugDNA.18253.1 | 5.52  | 5.82  | 0.34 | 0    | -1.23 | 0.568877 | 0.499141 | 0.778631 | 0.698006 |
| MmugDNA.18255.1.S1_at   | MmugDNA.18255.1 | 4.68  | 4.31  | 0.51 | 0.2  | 1.3   | 0.437444 | 0.234855 | 0.692318 | 0.506125 |
| MmugDNA.37499.1.S1_s_at | MmugDNA.37499.1 | 7.72  | 7.66  | 0.08 | 0.09 | 1.04  | 0.152889 | 0.450204 | 0.442609 | 0.665549 |
| MmugDNA.18257.1.S1_at   | MmugDNA.18257.1 | 3.21  | 3.05  | 0.25 | 0.41 | 1.12  | 0.95186  | 0.993637 | 0.980049 | 0.996218 |
| MmugDNA.18258.1.S1_at   | MmugDNA.18258.1 | 5.8   | 5.37  | 0.6  | 0.29 | 1.34  | 0.291121 | 0.146269 | 0.58049  | 0.420267 |
| MmugDNA.1826.1.S1_at    | MmugDNA.1826.1  | 3.05  | 2.97  | 0.1  | 0.08 | 1.06  | 0.343681 | 0.284109 | 0.623047 | 0.546319 |
| MmugDNA.18260.1.S1_at   | MmugDNA.18260.1 | 6.71  | 5.66  | 0.52 | 0.79 | 2.08  | 0.047565 | 0.036351 | 0.275414 | 0.235105 |
| MmugDNA.18261.1.S1_at   | MmugDNA.18261.1 | 11.36 | 11.72 | 0.11 | 0.03 | -1.28 | 0.006521 | 0.000014 | 0.127373 | 0.017682 |
| MmugDNA.18262.1.S1_at   | MmugDNA.18262.1 | 6.09  | 6.02  | 0.38 | 0.02 | 1.05  | 0.261005 | 0.122681 | 0.555198 | 0.392657 |
| MmugDNA.18264.1.S1_at   | MmugDNA.18264.1 | 11.28 | 11.15 | 0.03 | 0.08 | 1.09  | 0.023255 | 0.151372 | 0.205562 | 0.426104 |
| MmugDNA.18265.1.S1_at   | MmugDNA.18265.1 | 5.09  | 5.31  | 0.34 | 0.21 | -1.16 | 0.168588 | 0.598027 | 0.461886 | 0.760536 |
| MmugDNA.18266.1.S1_at   | MmugDNA.18266.1 | 8.7   | 8.31  | 0.34 | 0.26 | 1.31  | 0.273176 | 0.236871 | 0.565268 | 0.507587 |
| MmugDNA.18267.1.S1_at   | MmugDNA.18267.1 | 11.09 | 11.06 | 0.18 | 0.05 | 1.02  | 0.290536 | 0.440889 | 0.579962 | 0.659138 |
| MmugDNA.18268.1.S1_at   | MmugDNA.18268.1 | 5     | 4.78  | 0.64 | 0.21 | 1.16  | 0.173367 | 0.213664 | 0.467652 | 0.487441 |
| MmugDNA.18269.1.S1_at   | MmugDNA.18269.1 | 4.15  | 3.6   | 0.24 | 0.11 | 1.47  | 0.08051  | 0.355937 | 0.341026 | 0.597902 |
| MmugDNA.1827.1.S1_at    | MmugDNA.1827.1  | 5.58  | 6.31  | 0.09 | 0.51 | -1.65 | 0.199951 | 0.167871 | 0.497525 | 0.444458 |

|                         |                 |       |       |      |      |       |          |          |          |          |
|-------------------------|-----------------|-------|-------|------|------|-------|----------|----------|----------|----------|
| MmugDNA.18271.1.S1_at   | MmugDNA.18271.1 | 7.06  | 9.26  | 0.5  | 0.36 | -4.59 | 0.0045   | 0.002098 | 0.113436 | 0.067756 |
| MmugDNA.18272.1.S1_at   | MmugDNA.18272.1 | 6.14  | 6.13  | 0.29 | 0.25 | 1     | 0.413197 | 0.819709 | 0.674562 | 0.896133 |
| MmugDNA.18273.1.S1_at   | MmugDNA.18273.1 | 3.86  | 3.93  | 0.42 | 0.3  | -1.05 | 0.618852 | 0.703027 | 0.810837 | 0.827866 |
| MmugDNA.18274.1.S1_at   | MmugDNA.18274.1 | 4.47  | 5.22  | 0.17 | 0.01 | -1.68 | 0.001531 | 0.004036 | 0.081678 | 0.090281 |
| MmugDNA.18275.1.S1_at   | MmugDNA.18275.1 | 3.54  | 3.51  | 0.17 | 0.09 | 1.02  | 0.602682 | 0.73867  | 0.800362 | 0.848486 |
| MmugDNA.18276.1.S1_at   | MmugDNA.18276.1 | 3.63  | 3.66  | 0.22 | 0.09 | -1.02 | 0.557252 | 0.880597 | 0.772057 | 0.9318   |
| MmugDNA.18277.1.S1_at   | MmugDNA.18277.1 | 3.51  | 3.53  | 0.04 | 0.09 | -1.01 | 0.962668 | 0.889405 | 0.984837 | 0.936977 |
| MmugDNA.18282.1.S1_at   | MmugDNA.18282.1 | 6.51  | 6.52  | 0.15 | 0.47 | -1.01 | 0.761341 | 0.120251 | 0.890581 | 0.389181 |
| MmugDNA.18283.1.S1_at   | MmugDNA.18283.1 | 3.56  | 4.54  | 0.32 | 0.89 | -1.98 | 0.325465 | 0.40356  | 0.608731 | 0.632215 |
| MmugDNA.18284.1.S1_at   | MmugDNA.18284.1 | 4.17  | 4.37  | 0.12 | 0.07 | -1.15 | 0.159259 | 0.067593 | 0.450516 | 0.306076 |
| MmugDNA.18285.1.S1_at   | MmugDNA.18285.1 | 7.75  | 6.62  | 0.53 | 0.17 | 2.19  | 0.040984 | 0.099171 | 0.258903 | 0.357379 |
| MmugDNA.18286.1.S1_at   | MmugDNA.18286.1 | 10.82 | 10.43 | 0.23 | 0.14 | 1.31  | 0.114425 | 0.004167 | 0.391374 | 0.091036 |
| MmugDNA.18287.1.S1_at   | MmugDNA.18287.1 | 9.63  | 9.28  | 0.27 | 0.07 | 1.28  | 0.088199 | 0.000141 | 0.354244 | 0.029307 |
| MmugDNA.18288.1.S1_at   | MmugDNA.18288.1 | 5.29  | 5.29  | 0.06 | 0.02 | -1    | 0.590509 | 0.520403 | 0.791914 | 0.711727 |
| MmugDNA.18289.1.S1_at   | MmugDNA.18289.1 | 5.59  | 5.57  | 0.14 | 0.06 | 1.01  | 0.471779 | 0.339125 | 0.715809 | 0.585891 |
| MmugDNA.1829.1.S1_at    | MmugDNA.1829.1  | 5.54  | 6.28  | 0.1  | 0.25 | -1.67 | 0.00897  | 0.03704  | 0.144493 | 0.236886 |
| MmugDNA.18291.1.S1_at   | MmugDNA.18291.1 | 9.82  | 9.47  | 0.23 | 0.13 | 1.28  | 0.080122 | 0.405651 | 0.340486 | 0.633894 |
| MmugDNA.18292.1.S1_at   | MmugDNA.18292.1 | 2.8   | 2.89  | 0.02 | 0.11 | -1.06 | 0.09413  | 0.074503 | 0.363134 | 0.318173 |
| MmugDNA.18293.1.S1_at   | MmugDNA.18293.1 | 6.25  | 6.09  | 0.2  | 0.11 | 1.12  | 0.791679 | 0.935654 | 0.905386 | 0.963691 |
| MmugDNA.18295.1.S1_at   | MmugDNA.18295.1 | 6.35  | 7.72  | 0.76 | 0.19 | -2.59 | 0.037994 | 0.332902 | 0.250694 | 0.581281 |
| MmugDNA.18296.1.S1_at   | MmugDNA.18296.1 | 10.39 | 10.16 | 0.15 | 0.17 | 1.17  | 0.148546 | 0.019161 | 0.437096 | 0.1742   |
| MmugDNA.18298.1.S1_at   | MmugDNA.18298.1 | 5.88  | 5.34  | 0.2  | 0.2  | 1.45  | 0.060125 | 0.053256 | 0.302405 | 0.276449 |
| MmugDNA.18299.1.S1_at   | MmugDNA.18299.1 | 4.13  | 3.88  | 0.23 | 0.13 | 1.18  | 0.158523 | 0.125436 | 0.44964  | 0.396079 |
| MmugDNA.183.1.S1_at     | MmugDNA.183.1   | 3.77  | 3.74  | 0    | 0.08 | 1.02  | 0.506469 | 0.480349 | 0.739179 | 0.68574  |
| MmugDNA.18300.1.S1_at   | MmugDNA.18300.1 | 5.19  | 5.03  | 0.07 | 0.22 | 1.12  | 0.258465 | 0.212527 | 0.552539 | 0.486502 |
| MmugDNA.18302.1.S1_at   | MmugDNA.18302.1 | 11.07 | 10.91 | 0.11 | 0.09 | 1.12  | 0.133833 | 0.664494 | 0.417214 | 0.803396 |
| MmugDNA.18303.1.S1_at   | MmugDNA.18303.1 | 4.32  | 4.34  | 0.08 | 0.09 | -1.01 | 0.964419 | 0.71867  | 0.985636 | 0.837178 |
| MmugDNA.18304.1.S1_at   | MmugDNA.18304.1 | 5.52  | 5.73  | 0.72 | 0.19 | -1.15 | 0.522595 | 0.206935 | 0.749837 | 0.481052 |
| MmugDNA.18305.1.S1_at   | MmugDNA.18305.1 | 5.68  | 7.68  | 0.57 | 0.03 | -3.99 | 0.006629 | 0.001231 | 0.127935 | 0.05478  |
| MmugDNA.18306.1.S1_at   | MmugDNA.18306.1 | 6.55  | 6.53  | 0.12 | 0.12 | 1.01  | 0.355194 | 0.712523 | 0.63202  | 0.833383 |
| MmugDNA.18308.1.S1_at   | MmugDNA.18308.1 | 8.72  | 8.92  | 0.28 | 0.13 | -1.15 | 0.845161 | 0.545798 | 0.932337 | 0.727653 |
| MmugDNA.1831.1.S1_at    | MmugDNA.1831.1  | 7.95  | 7.42  | 0.52 | 0.6  | 1.44  | 0.302876 | 0.209267 | 0.590429 | 0.48303  |
| MmugDNA.18311.1.S1_at   | MmugDNA.18311.1 | 9.84  | 9.98  | 0.07 | 0.08 | -1.1  | 0.042795 | 0.336361 | 0.264078 | 0.58383  |
| MmugDNA.18312.1.S1_at   | MmugDNA.18312.1 | 4.87  | 4.64  | 0.62 | 0.03 | 1.17  | 0.394964 | 0.293574 | 0.661484 | 0.553567 |
| MmugDNA.18313.1.S1_at   | MmugDNA.18313.1 | 6.95  | 8.51  | 0.78 | 0.11 | -2.96 | 0.068695 | 0.093973 | 0.319988 | 0.350467 |
| MmugDNA.18314.1.S1_at   | MmugDNA.18314.1 | 8.31  | 8.28  | 0.02 | 0.09 | 1.02  | 0.89173  | 0.99752  | 0.953838 | 0.99871  |
| MmugDNA.18315.1.S1_at   | MmugDNA.18315.1 | 10.14 | 9.76  | 0.1  | 0.21 | 1.3   | 0.046945 | 0.074353 | 0.27447  | 0.318046 |
| MmugDNA.18316.1.S1_at   | MmugDNA.18316.1 | 10.85 | 11.43 | 0.22 | 0.19 | -1.49 | 0.050093 | 0.229499 | 0.28151  | 0.501527 |
| MmugDNA.18317.1.S1_at   | MmugDNA.18317.1 | 3.55  | 3.44  | 0.09 | 0.18 | 1.08  | 0.986653 | 0.350832 | 0.995228 | 0.594561 |
| MmugDNA.18318.1.S1_at   | MmugDNA.18318.1 | 3.19  | 3.21  | 0.09 | 0.06 | -1.02 | 0.935415 | 0.755211 | 0.97298  | 0.857498 |
| MmugDNA.41120.1.S1_x_at | MmugDNA.41120.1 | 12.88 | 12.76 | 0.41 | 0.15 | 1.09  | 0.372608 | 0.216719 | 0.645023 | 0.490311 |
| MmugDNA.18320.1.S1_at   | MmugDNA.18320.1 | 7.39  | 7.57  | 0.2  | 0.04 | -1.13 | 0.251028 | 0.402144 | 0.54571  | 0.631235 |
| MmugDNA.18321.1.S1_at   | MmugDNA.18321.1 | 7.95  | 8.34  | 0.63 | 0.22 | -1.31 | 0.132944 | 0.499734 | 0.416355 | 0.698494 |

|                         |                 |       |       |      |      |       |          |          |          |          |
|-------------------------|-----------------|-------|-------|------|------|-------|----------|----------|----------|----------|
| MmugDNA.18322.1.S1_at   | MmugDNA.18322.1 | 5.18  | 5.14  | 0.13 | 0.34 | 1.03  | 0.434518 | 0.761115 | 0.68971  | 0.861205 |
| MmugDNA.18324.1.S1_at   | MmugDNA.18324.1 | 12.16 | 12.38 | 0.2  | 0.16 | -1.17 | 0.39583  | 0.331798 | 0.662054 | 0.580389 |
| MmugDNA.18325.1.S1_at   | MmugDNA.18325.1 | 5.98  | 5.84  | 0.14 | 0.16 | 1.1   | 0.140345 | 0.128861 | 0.426075 | 0.400277 |
| MmugDNA.18327.1.S1_at   | MmugDNA.18327.1 | 11.6  | 11.09 | 0.12 | 0.13 | 1.42  | 0.009147 | 0.001156 | 0.145612 | 0.053615 |
| MmugDNA.18328.1.S1_at   | MmugDNA.18328.1 | 4.23  | 4.18  | 0.17 | 0.04 | 1.04  | 0.709466 | 0.444794 | 0.862548 | 0.662072 |
| MmugDNA.18329.1.S1_at   | MmugDNA.18329.1 | 2.91  | 2.91  | 0.01 | 0    | 1     | 0.719426 | 0.70039  | 0.867677 | 0.826107 |
| MmugDNA.18330.1.S1_at   | MmugDNA.18330.1 | 8.79  | 8.73  | 0.03 | 0.02 | 1.04  | 0.148151 | 0.331402 | 0.436615 | 0.580076 |
| MmugDNA.18330.1.S1_x_at | MmugDNA.18330.1 | 8.75  | 8.73  | 0.05 | 0.03 | 1.02  | 0.580591 | 0.42242  | 0.785991 | 0.645722 |
| MmugDNA.18331.1.S1_at   | MmugDNA.18331.1 | 4.37  | 4.36  | 0.28 | 0.03 | 1     | 0.328421 | 0.237188 | 0.610777 | 0.507918 |
| MmugDNA.18334.1.S1_at   | MmugDNA.18334.1 | 8.77  | 8.88  | 0.24 | 0.15 | -1.08 | 0.568969 | 0.117947 | 0.778672 | 0.385845 |
| MmugDNA.18336.1.S1_at   | MmugDNA.18336.1 | 4.05  | 4.29  | 0.08 | 0.26 | -1.18 | 0.224744 | 0.212774 | 0.522728 | 0.486769 |
| MmugDNA.18338.1.S1_at   | MmugDNA.18338.1 | 6.68  | 6.07  | 0.43 | 0.08 | 1.52  | 0.072135 | 0.065279 | 0.326542 | 0.301239 |
| MmugDNA.18339.1.S1_at   | MmugDNA.18339.1 | 4.62  | 7.31  | 0.2  | 0.67 | -6.45 | 0.003936 | 0.259989 | 0.108453 | 0.52675  |
| MmugDNA.1834.1.S1_at    | MmugDNA.1834.1  | 10.8  | 10.32 | 0.46 | 0.28 | 1.39  | 0.292144 | 0.391128 | 0.581449 | 0.624833 |
| MmugDNA.18340.1.S1_at   | MmugDNA.18340.1 | 11.69 | 12.45 | 0.27 | 0.09 | -1.7  | 0.027374 | 0.035388 | 0.218317 | 0.232427 |
| MmugDNA.18341.1.S1_at   | MmugDNA.18341.1 | 6.64  | 6.52  | 0.22 | 0.08 | 1.09  | 0.272081 | 0.398656 | 0.564017 | 0.629458 |
| MmugDNA.18342.1.S1_at   | MmugDNA.18342.1 | 3.78  | 3.78  | 0.16 | 0.03 | 1     | 0.315523 | 0.255405 | 0.600423 | 0.523445 |
| MmugDNA.18343.1.S1_at   | MmugDNA.18343.1 | 2.96  | 2.72  | 0.18 | 0.1  | 1.18  | 0.190578 | 0.263785 | 0.486767 | 0.530066 |
| MmugDNA.18343.1.S1_x_at | MmugDNA.18343.1 | 3.04  | 2.91  | 0.09 | 0.12 | 1.09  | 0.19493  | 0.454396 | 0.491444 | 0.668576 |
| MmugDNA.18344.1.S1_at   | MmugDNA.18344.1 | 6.72  | 6.24  | 0.18 | 0.18 | 1.39  | 0.054065 | 0.011076 | 0.289645 | 0.137002 |
| MmugDNA.18345.1.S1_at   | MmugDNA.18345.1 | 6.29  | 6.24  | 0.16 | 0.13 | 1.04  | 0.705305 | 0.203073 | 0.860243 | 0.477343 |
| MmugDNA.1835.1.S1_at    | MmugDNA.1835.1  | 8.53  | 8.5   | 0.26 | 0.07 | 1.02  | 0.671101 | 0.014605 | 0.842222 | 0.15408  |
| MmugDNA.18352.1.S1_s_at | MmugDNA.18352.1 | 9.09  | 8.84  | 0.13 | 0.1  | 1.19  | 0.050027 | 0.206145 | 0.28132  | 0.480348 |
| MmugDNA.18356.1.S1_at   | MmugDNA.18356.1 | 5.97  | 6.62  | 0.51 | 0.16 | -1.57 | 0.28673  | 0.199925 | 0.576547 | 0.474603 |
| MmugDNA.1836.1.S1_at    | MmugDNA.1836.1  | 9.44  | 9.2   | 0.34 | 0.31 | 1.19  | 0.391687 | 0.025537 | 0.658751 | 0.200461 |
| MmugDNA.18360.1.S1_at   | MmugDNA.18360.1 | 3.47  | 3.33  | 1.05 | 0.24 | 1.1   | 0.302958 | 0.313615 | 0.590448 | 0.567977 |
| MmugDNA.18362.1.S1_at   | MmugDNA.18362.1 | 8.8   | 8.71  | 0.14 | 0.16 | 1.06  | 0.984708 | 0.25945  | 0.994376 | 0.526418 |
| MmugDNA.18364.1.S1_at   | MmugDNA.18364.1 | 5.52  | 5.53  | 0.02 | 0.05 | -1    | 0.469555 | 0.599905 | 0.71427  | 0.761677 |
| MmugDNA.18365.1.S1_at   | MmugDNA.18365.1 | 4.21  | 4.23  | 0.77 | 0.26 | -1.01 | 0.391631 | 0.499788 | 0.658751 | 0.698515 |
| MmugDNA.18367.1.S1_at   | MmugDNA.18367.1 | 3.11  | 3.15  | 0.12 | 0    | -1.03 | 0.795834 | 0.707544 | 0.907717 | 0.830395 |
| MmugDNA.18368.1.S1_at   | MmugDNA.18368.1 | 6.49  | 5.88  | 0.16 | 0.21 | 1.52  | 0.01601  | 0.009474 | 0.179129 | 0.128164 |
| MmugDNA.18369.1.S1_at   | MmugDNA.18369.1 | 3.77  | 3.79  | 0.02 | 0.08 | -1.01 | 0.58113  | 0.09352  | 0.786393 | 0.349846 |
| MmugDNA.18370.1.S1_at   | MmugDNA.18370.1 | 7.51  | 8.69  | 1.62 | 0.11 | -2.27 | 0.366499 | 0.733187 | 0.640793 | 0.845567 |
| MmugDNA.18371.1.S1_at   | MmugDNA.18371.1 | 12.07 | 12.1  | 0.06 | 0.03 | -1.02 | 0.458785 | 0.964452 | 0.707207 | 0.980225 |
| MmugDNA.18372.1.S1_at   | MmugDNA.18372.1 | 3.93  | 3.96  | 0.16 | 0.14 | -1.03 | 0.489263 | 0.313355 | 0.727626 | 0.567811 |
| MmugDNA.18375.1.S1_at   | MmugDNA.18375.1 | 6.61  | 6.71  | 1    | 0.39 | -1.08 | 0.343565 | 0.245164 | 0.622989 | 0.514922 |
| MmugDNA.18377.1.S1_at   | MmugDNA.18377.1 | 3.48  | 3.51  | 0.6  | 0.5  | -1.02 | 0.945051 | 0.754787 | 0.976877 | 0.857323 |
| MmugDNA.18379.1.S1_at   | MmugDNA.18379.1 | 6.57  | 6.44  | 0.39 | 0.28 | 1.1   | 0.647675 | 0.351932 | 0.828875 | 0.595335 |
| MmugDNA.1838.1.S1_at    | MmugDNA.1838.1  | 2.84  | 2.52  | 0.05 | 0.14 | 1.24  | 0.066074 | 0.104694 | 0.314442 | 0.366073 |
| MmugDNA.18380.1.S1_at   | MmugDNA.18380.1 | 5.73  | 5.51  | 0.15 | 0.22 | 1.16  | 0.105759 | 0.179456 | 0.379853 | 0.455929 |
| MmugDNA.18381.1.S1_at   | MmugDNA.18381.1 | 4.66  | 4.59  | 0.63 | 0.55 | 1.05  | 0.19455  | 0.197068 | 0.491206 | 0.472213 |
| MmugDNA.18383.1.S1_at   | MmugDNA.18383.1 | 5.74  | 5.79  | 0.18 | 0.06 | -1.04 | 0.877121 | 0.546186 | 0.947466 | 0.727803 |
| MmugDNA.18384.1.S1_at   | MmugDNA.18384.1 | 5.67  | 5.92  | 0.46 | 0.12 | -1.19 | 0.361172 | 0.597098 | 0.63668  | 0.760085 |

|                         |                 |       |       |      |      |       |          |          |          |          |
|-------------------------|-----------------|-------|-------|------|------|-------|----------|----------|----------|----------|
| MmugDNA.18386.1.S1_at   | MmugDNA.18386.1 | 3.25  | 3.12  | 0.11 | 0.26 | 1.09  | 0.687645 | 0.879657 | 0.850807 | 0.931253 |
| MmugDNA.18387.1.S1_at   | MmugDNA.18387.1 | 5.75  | 5.68  | 0.2  | 0.06 | 1.05  | 0.275715 | 0.629505 | 0.567274 | 0.781907 |
| MmugDNA.18388.1.S1_at   | MmugDNA.18388.1 | 3.28  | 3.17  | 0.01 | 0.06 | 1.08  | 0.101481 | 0.175479 | 0.372929 | 0.452157 |
| MmugDNA.18389.1.S1_at   | MmugDNA.18389.1 | 3.09  | 3.18  | 0.1  | 0.15 | -1.06 | 0.318167 | 0.388896 | 0.602917 | 0.623208 |
| MmugDNA.1839.1.S1_at    | MmugDNA.1839.1  | 10.53 | 10.53 | 0.24 | 0.09 | -1    | 0.991409 | 0.999859 | 0.99684  | 0.999954 |
| MmugDNA.18390.1.S1_at   | MmugDNA.18390.1 | 9.55  | 9.33  | 0.07 | 0.17 | 1.17  | 0.05649  | 0.038494 | 0.295149 | 0.241138 |
| MmugDNA.18392.1.S1_at   | MmugDNA.18392.1 | 4.26  | 4.31  | 0.08 | 0.04 | -1.04 | 0.238784 | 0.20136  | 0.53601  | 0.47589  |
| MmugDNA.18393.1.S1_at   | MmugDNA.18393.1 | 9.88  | 9.26  | 0.3  | 0.15 | 1.54  | 0.036098 | 0.153457 | 0.244978 | 0.42827  |
| MmugDNA.18394.1.S1_at   | MmugDNA.18394.1 | 5.85  | 5.48  | 0.39 | 0.03 | 1.29  | 0.504157 | 0.826525 | 0.737428 | 0.900356 |
| MmugDNA.18395.1.S1_at   | MmugDNA.18395.1 | 5.35  | 5.46  | 0.1  | 0.01 | -1.08 | 0.164792 | 0.059508 | 0.457897 | 0.290548 |
| MmugDNA.18396.1.S1_at   | MmugDNA.18396.1 | 6.1   | 6.07  | 0.24 | 0.11 | 1.02  | 0.901229 | 0.555518 | 0.958236 | 0.733893 |
| MmugDNA.18397.1.S1_at   | MmugDNA.18397.1 | 7.79  | 7.85  | 1.09 | 0.23 | -1.04 | 0.414015 | 0.708718 | 0.675335 | 0.831054 |
| MmugDNA.184.1.S1_at     | MmugDNA.184.1   | 3.97  | 4.05  | 0.19 | 0.14 | -1.06 | 0.906781 | 0.715437 | 0.960562 | 0.835033 |
| MmugDNA.1840.1.S1_at    | MmugDNA.1840.1  | 10.84 | 10.68 | 0.13 | 0.04 | 1.11  | 0.173639 | 0.001337 | 0.468029 | 0.056366 |
| MmugDNA.18400.1.S1_at   | MmugDNA.18400.1 | 7.78  | 7.53  | 1.06 | 0.46 | 1.19  | 0.605683 | 0.064228 | 0.802615 | 0.299668 |
| MmugDNA.18402.1.S1_at   | MmugDNA.18402.1 | 4.52  | 4.68  | 0.31 | 0.15 | -1.12 | 0.314441 | 0.507578 | 0.599959 | 0.703118 |
| MmugDNA.18403.1.S1_at   | MmugDNA.18403.1 | 4.36  | 4.02  | 0.27 | 0.04 | 1.27  | 0.082779 | 0.132993 | 0.344735 | 0.404666 |
| MmugDNA.18404.1.S1_at   | MmugDNA.18404.1 | 9.87  | 9.89  | 0.04 | 0.25 | -1.02 | 0.491908 | 0.043356 | 0.729428 | 0.252896 |
| MmugDNA.18405.1.S1_s_at | MmugDNA.18405.1 | 8.19  | 8.37  | 0.31 | 0.1  | -1.13 | 0.116589 | 0.028801 | 0.393692 | 0.211552 |
| MmugDNA.18406.1.S1_at   | MmugDNA.18406.1 | 3.4   | 3.26  | 0.14 | 0.06 | 1.11  | 0.150417 | 0.273651 | 0.439474 | 0.538093 |
| MmugDNA.18408.1.S1_at   | MmugDNA.18408.1 | 8.43  | 8.59  | 0.09 | 0.11 | -1.11 | 0.045398 | 0.116523 | 0.270665 | 0.383679 |
| MmugDNA.18409.1.S1_at   | MmugDNA.18409.1 | 4.76  | 4.87  | 0.46 | 0.28 | -1.08 | 0.887775 | 0.861146 | 0.952052 | 0.920989 |
| MmugDNA.18411.1.S1_at   | MmugDNA.18411.1 | 10.33 | 10.43 | 0.17 | 0.21 | -1.08 | 0.633674 | 0.1627   | 0.82045  | 0.43882  |
| MmugDNA.18416.1.S1_at   | MmugDNA.18416.1 | 4.97  | 4.95  | 0.1  | 0.16 | 1.02  | 0.309827 | 0.50222  | 0.596102 | 0.70006  |
| MmugDNA.18417.1.S1_at   | MmugDNA.18417.1 | 3.15  | 3.4   | 0.25 | 0.12 | -1.19 | 0.116077 | 0.107639 | 0.393069 | 0.370586 |
| MmugDNA.18418.1.S1_at   | MmugDNA.18418.1 | 4.71  | 4.64  | 0.1  | 0.16 | 1.05  | 0.823497 | 0.270904 | 0.921555 | 0.536026 |
| MmugDNA.18419.1.S1_at   | MmugDNA.18419.1 | 2.81  | 2.83  | 0.07 | 0.24 | -1.02 | 0.230578 | 0.370857 | 0.529468 | 0.609828 |
| MmugDNA.1842.1.S1_at    | MmugDNA.1842.1  | 5.68  | 5.5   | 0.91 | 0.54 | 1.13  | 0.318243 | 0.241348 | 0.602921 | 0.511952 |
| MmugDNA.1842.1.S1_s_at  | MmugDNA.1842.1  | 12.55 | 12.14 | 0.22 | 0.26 | 1.33  | 0.064813 | 0.045795 | 0.311316 | 0.258337 |
| MmugDNA.36421.1.S1_s_at | MmugDNA.36421.1 | 6.48  | 6.3   | 0.13 | 0.03 | 1.13  | 0.114036 | 0.187986 | 0.390801 | 0.464083 |
| MmugDNA.18421.1.S1_at   | MmugDNA.18421.1 | 9.26  | 8.89  | 0.09 | 0.01 | 1.29  | 0.002492 | 0.235181 | 0.094326 | 0.50629  |
| MmugDNA.18422.1.S1_at   | MmugDNA.18422.1 | 5.12  | 5.22  | 0.07 | 0.12 | -1.07 | 0.110859 | 0.153556 | 0.386352 | 0.428309 |
| MmugDNA.18424.1.S1_at   | MmugDNA.18424.1 | 3.67  | 3.66  | 0.19 | 0.04 | 1     | 0.8115   | 0.850241 | 0.91557  | 0.914842 |
| MmugDNA.18427.1.S1_at   | MmugDNA.18427.1 | 5.58  | 5.88  | 0.23 | 0.23 | -1.22 | 0.116579 | 0.440791 | 0.393692 | 0.659136 |
| MmugDNA.18428.1.S1_at   | MmugDNA.18428.1 | 4.93  | 4.91  | 0.23 | 0.13 | 1.01  | 0.749284 | 0.144931 | 0.883904 | 0.418859 |
| MmugDNA.18429.1.S1_at   | MmugDNA.18429.1 | 8.02  | 8.4   | 0.08 | 0.12 | -1.3  | 0.016193 | 0.068179 | 0.179908 | 0.307314 |
| MmugDNA.1843.1.S1_at    | MmugDNA.1843.1  | 7.53  | 6.96  | 0.47 | 0.6  | 1.49  | 0.183204 | 0.315015 | 0.479198 | 0.568759 |
| MmugDNA.18430.1.S1_at   | MmugDNA.18430.1 | 4.76  | 4.49  | 0.39 | 0.13 | 1.2   | 0.349448 | 0.457744 | 0.62731  | 0.670897 |
| MmugDNA.18433.1.S1_at   | MmugDNA.18433.1 | 6.24  | 5.9   | 0.29 | 0.09 | 1.26  | 0.407945 | 0.544193 | 0.670893 | 0.726643 |
| MmugDNA.18436.1.S1_at   | MmugDNA.18436.1 | 4.46  | 4.3   | 0.1  | 0.1  | 1.12  | 0.131062 | 0.459306 | 0.413841 | 0.671698 |
| MmugDNA.18437.1.S1_at   | MmugDNA.18437.1 | 7.07  | 7.45  | 0.37 | 0.23 | -1.3  | 0.124774 | 0.251442 | 0.405071 | 0.520175 |
| MmugDNA.18438.1.S1_at   | MmugDNA.18438.1 | 7.6   | 7.62  | 0.12 | 0.32 | -1.02 | 0.770246 | 0.046498 | 0.894561 | 0.260176 |
| MmugDNA.18439.1.S1_at   | MmugDNA.18439.1 | 12.08 | 12.13 | 0.1  | 0.03 | -1.03 | 0.381749 | 0.170715 | 0.651337 | 0.447316 |

|                         |                 |       |       |      |      |       |          |          |          |          |
|-------------------------|-----------------|-------|-------|------|------|-------|----------|----------|----------|----------|
| MmugDNA.1844.1.S1_at    | MmugDNA.1844.1  | 6.6   | 5.91  | 0.17 | 0.37 | 1.62  | 0.116298 | 0.205181 | 0.393384 | 0.47957  |
| MmugDNA.18440.1.S1_at   | MmugDNA.18440.1 | 9.86  | 10.17 | 0.08 | 0.03 | -1.24 | 0.002167 | 0.00583  | 0.090471 | 0.104661 |
| MmugDNA.18442.1.S1_at   | MmugDNA.18442.1 | 4.07  | 4.15  | 0.25 | 0.25 | -1.06 | 0.773223 | 0.274524 | 0.89602  | 0.538987 |
| MmugDNA.18443.1.S1_at   | MmugDNA.18443.1 | 5.6   | 5.86  | 0.17 | 0.3  | -1.2  | 0.139012 | 0.018124 | 0.424645 | 0.169609 |
| MmugDNA.18444.1.S1_at   | MmugDNA.18444.1 | 7.58  | 7.38  | 0.05 | 0.06 | 1.15  | 0.019494 | 0.000133 | 0.192357 | 0.029087 |
| MmugDNA.18447.1.S1_at   | MmugDNA.18447.1 | 5.02  | 4.72  | 0.56 | 0.08 | 1.23  | 0.253011 | 0.194596 | 0.547557 | 0.469707 |
| MmugDNA.18448.1.S1_at   | MmugDNA.18448.1 | 6.29  | 6.47  | 0.41 | 0.03 | -1.13 | 0.807135 | 0.907934 | 0.913649 | 0.947889 |
| MmugDNA.43373.1.S1_s_at | MmugDNA.43373.1 | 5.93  | 5.95  | 0.04 | 0.1  | -1.02 | 0.408328 | 0.7368   | 0.67117  | 0.847693 |
| MmugDNA.18449.1.S1_s_at | MmugDNA.18449.1 | 7.71  | 9.34  | 0.67 | 0.13 | -3.08 | 0.007452 | 0.008893 | 0.134678 | 0.124737 |
| MmugDNA.1845.1.S1_at    | MmugDNA.1845.1  | 7.05  | 7.21  | 0.08 | 0.05 | -1.12 | 0.087753 | 0.406948 | 0.353879 | 0.634629 |
| MmugDNA.18450.1.S1_s_at | MmugDNA.18450.1 | 8.65  | 8.6   | 0.15 | 0.12 | 1.03  | 0.749522 | 0.626564 | 0.884066 | 0.779867 |
| MmugDNA.18452.1.S1_at   | MmugDNA.18452.1 | 2.98  | 2.91  | 0.09 | 0.13 | 1.05  | 0.594746 | 0.815275 | 0.794991 | 0.89344  |
| MmugDNA.18454.1.S1_at   | MmugDNA.18454.1 | 4.76  | 5.67  | 0.48 | 0.44 | -1.88 | 0.094781 | 0.111895 | 0.36369  | 0.377006 |
| MmugDNA.18456.1.S1_at   | MmugDNA.18456.1 | 7.44  | 7.87  | 0.46 | 0.24 | -1.35 | 0.252878 | 0.154942 | 0.547459 | 0.42993  |
| MmugDNA.18459.1.S1_at   | MmugDNA.18459.1 | 8.35  | 8.28  | 0.18 | 0.09 | 1.05  | 0.165778 | 0.487712 | 0.458756 | 0.690656 |
| MmugDNA.1846.1.S1_at    | MmugDNA.1846.1  | 3.32  | 2.97  | 0.15 | 0.17 | 1.27  | 0.285205 | 0.4167   | 0.575143 | 0.64167  |
| MmugDNA.18460.1.S1_at   | MmugDNA.18460.1 | 7.85  | 7.88  | 0.17 | 0.12 | -1.02 | 0.989535 | 0.22554  | 0.996363 | 0.498155 |
| MmugDNA.18462.1.S1_at   | MmugDNA.18462.1 | 4.19  | 4.04  | 0.14 | 0.1  | 1.11  | 0.110467 | 0.102639 | 0.385799 | 0.362991 |
| MmugDNA.18464.1.S1_at   | MmugDNA.18464.1 | 3.03  | 2.98  | 0.04 | 0.1  | 1.04  | 0.892773 | 0.553219 | 0.954336 | 0.73239  |
| MmugDNA.18466.1.S1_at   | MmugDNA.18466.1 | 4.28  | 4.27  | 0.07 | 0.1  | 1.01  | 0.774325 | 0.059542 | 0.896766 | 0.290548 |
| MmugDNA.18467.1.S1_at   | MmugDNA.18467.1 | 9.78  | 9.55  | 0.29 | 0.06 | 1.17  | 0.078311 | 0.420296 | 0.337998 | 0.644084 |
| MmugDNA.18468.1.S1_at   | MmugDNA.18468.1 | 4.92  | 4.93  | 0.1  | 0.03 | -1.01 | 0.701028 | 0.932548 | 0.857907 | 0.961739 |
| MmugDNA.18469.1.S1_at   | MmugDNA.18469.1 | 7.19  | 7.22  | 0.42 | 0.19 | -1.02 | 0.990598 | 0.809056 | 0.996611 | 0.889981 |
| MmugDNA.18470.1.S1_at   | MmugDNA.18470.1 | 10.31 | 9.95  | 0.23 | 0.06 | 1.29  | 0.033566 | 0.297682 | 0.237136 | 0.556351 |
| MmugDNA.18471.1.S1_at   | MmugDNA.18471.1 | 8.57  | 8.69  | 0.15 | 0.08 | -1.09 | 0.575421 | 0.111575 | 0.782823 | 0.376407 |
| MmugDNA.18472.1.S1_at   | MmugDNA.18472.1 | 6.64  | 6.69  | 0.15 | 0.18 | -1.04 | 0.541301 | 0.479149 | 0.762074 | 0.68497  |
| MmugDNA.18475.1.S1_at   | MmugDNA.18475.1 | 6.21  | 6.63  | 0.39 | 0.05 | -1.33 | 0.473726 | 0.018415 | 0.717024 | 0.170755 |
| MmugDNA.18476.1.S1_at   | MmugDNA.18476.1 | 5.95  | 6.03  | 0.21 | 0.1  | -1.05 | 0.643279 | 0.268133 | 0.826158 | 0.533873 |
| MmugDNA.18478.1.S1_at   | MmugDNA.18478.1 | 6.03  | 6.06  | 0.15 | 0.13 | -1.02 | 0.353968 | 0.486001 | 0.631134 | 0.689551 |
| MmugDNA.18479.1.S1_at   | MmugDNA.18479.1 | 2.97  | 2.97  | 0.19 | 0.17 | -1    | 0.651095 | 0.440475 | 0.830545 | 0.658967 |
| MmugDNA.1848.1.S1_at    | MmugDNA.1848.1  | 4.94  | 5.06  | 0.05 | 0.04 | -1.08 | 0.055282 | 0.651405 | 0.292072 | 0.796212 |
| MmugDNA.18480.1.S1_at   | MmugDNA.18480.1 | 6.57  | 6.66  | 0.06 | 0.16 | -1.06 | 0.783385 | 0.765248 | 0.901128 | 0.863535 |
| MmugDNA.18482.1.S1_at   | MmugDNA.18482.1 | 5.92  | 6.01  | 0.04 | 0.13 | -1.07 | 0.528939 | 0.274313 | 0.753919 | 0.538751 |
| MmugDNA.18484.1.S1_at   | MmugDNA.18484.1 | 6.36  | 6.25  | 0.22 | 0.09 | 1.07  | 0.499804 | 0.31249  | 0.734372 | 0.567211 |
| MmugDNA.18485.1.S1_at   | MmugDNA.18485.1 | 4.9   | 4.83  | 0.26 | 0.51 | 1.05  | 0.591686 | 0.243806 | 0.792788 | 0.513949 |
| MmugDNA.18487.1.S1_at   | MmugDNA.18487.1 | 5.68  | 5.7   | 0.76 | 0.22 | -1.02 | 0.763721 | 0.825909 | 0.891841 | 0.899981 |
| MmugDNA.18489.1.S1_at   | MmugDNA.18489.1 | 4.05  | 3.48  | 0.13 | 0.44 | 1.49  | 0.254005 | 0.305258 | 0.548326 | 0.562255 |
| MmugDNA.1849.1.S1_at    | MmugDNA.1849.1  | 4.37  | 4.42  | 0.06 | 0.06 | -1.04 | 0.723415 | 0.15753  | 0.870006 | 0.433108 |
| MmugDNA.18491.1.S1_at   | MmugDNA.18491.1 | 5.48  | 5.51  | 0.19 | 0.03 | -1.02 | 0.91186  | 0.474293 | 0.962655 | 0.68135  |
| MmugDNA.18491.1.S1_s_at | MmugDNA.18491.1 | 5.64  | 5.24  | 0.03 | 0.09 | 1.32  | 0.002618 | 0.029743 | 0.095181 | 0.214138 |
| MmugDNA.18492.1.S1_at   | MmugDNA.18492.1 | 3.77  | 3.34  | 0.32 | 0.19 | 1.34  | 0.12753  | 0.012331 | 0.409503 | 0.143659 |
| MmugDNA.18493.1.S1_at   | MmugDNA.18493.1 | 5.79  | 5.53  | 0.14 | 0.01 | 1.2   | 0.031537 | 0.024127 | 0.23101  | 0.1945   |
| MmugDNA.18494.1.S1_at   | MmugDNA.18494.1 | 4.15  | 4.17  | 0.2  | 0.01 | -1.01 | 0.98518  | 0.696871 | 0.994671 | 0.823978 |

|                         |                 |       |       |      |      |       |          |          |          |          |
|-------------------------|-----------------|-------|-------|------|------|-------|----------|----------|----------|----------|
| MmugDNA.18497.1.S1_at   | MmugDNA.18497.1 | 5.28  | 5.24  | 0.56 | 0.2  | 1.03  | 0.653809 | 0.702254 | 0.832423 | 0.827401 |
| MmugDNA.18497.1.S1_s_at | MmugDNA.18497.1 | 6.56  | 6.19  | 0.57 | 0.33 | 1.29  | 0.143128 | 0.075878 | 0.429375 | 0.320523 |
| MmugDNA.185.1.S1_at     | MmugDNA.185.1   | 9.34  | 9.52  | 0.03 | 0.06 | -1.13 | 0.006068 | 0.135111 | 0.124422 | 0.407128 |
| MmugDNA.1850.1.S1_s_at  | MmugDNA.1850.1  | 5.72  | 5.32  | 0.57 | 0.18 | 1.31  | 0.097516 | 0.119318 | 0.367753 | 0.387834 |
| MmugDNA.18501.1.S1_at   | MmugDNA.18501.1 | 8.34  | 7.76  | 1.2  | 0.52 | 1.5   | 0.407824 | 0.506151 | 0.670804 | 0.702359 |
| MmugDNA.18503.1.S1_at   | MmugDNA.18503.1 | 5.28  | 4     | 0.94 | 0.65 | 2.43  | 0.255985 | 0.546425 | 0.550543 | 0.728034 |
| MmugDNA.18504.1.S1_at   | MmugDNA.18504.1 | 6.14  | 5.94  | 0.04 | 0.11 | 1.15  | 0.126524 | 0.005486 | 0.407922 | 0.102081 |
| MmugDNA.18505.1.S1_at   | MmugDNA.18505.1 | 3.53  | 3.58  | 0.04 | 0.07 | -1.04 | 0.333085 | 0.300515 | 0.614609 | 0.558841 |
| MmugDNA.18506.1.S1_at   | MmugDNA.18506.1 | 11.47 | 11.56 | 0.02 | 0.07 | -1.07 | 0.089295 | 0.511176 | 0.356188 | 0.705422 |
| MmugDNA.18507.1.S1_at   | MmugDNA.18507.1 | 3.21  | 3.48  | 0.78 | 0    | -1.21 | 0.727395 | 0.87659  | 0.872303 | 0.929709 |
| MmugDNA.18509.1.S1_at   | MmugDNA.18509.1 | 7     | 7.21  | 1.18 | 0.62 | -1.16 | 0.889949 | 0.876573 | 0.953143 | 0.929709 |
| MmugDNA.1851.1.S1_at    | MmugDNA.1851.1  | 5.95  | 5.91  | 0.29 | 0.17 | 1.03  | 0.450107 | 0.684781 | 0.701214 | 0.816146 |
| MmugDNA.18512.1.S1_at   | MmugDNA.18512.1 | 4.25  | 4.03  | 0.04 | 0.11 | 1.17  | 0.073877 | 0.057492 | 0.329828 | 0.285856 |
| MmugDNA.18514.1.S1_at   | MmugDNA.18514.1 | 7.47  | 6.85  | 0.24 | 0.19 | 1.53  | 0.028457 | 0.027545 | 0.22113  | 0.207227 |
| MmugDNA.18517.1.S1_at   | MmugDNA.18517.1 | 2.87  | 2.83  | 0.06 | 0.1  | 1.03  | 0.55108  | 0.109253 | 0.768269 | 0.37308  |
| MmugDNA.18518.1.S1_at   | MmugDNA.18518.1 | 6.22  | 6.22  | 0.27 | 0.03 | 1     | 0.316834 | 0.393812 | 0.601545 | 0.626565 |
| MmugDNA.1852.1.S1_at    | MmugDNA.1852.1  | 4.91  | 4.63  | 0.32 | 0.14 | 1.22  | 0.168256 | 0.084672 | 0.461471 | 0.33618  |
| MmugDNA.18521.1.S1_at   | MmugDNA.18521.1 | 5.5   | 5.17  | 0.29 | 0.51 | 1.26  | 0.1931   | 0.778208 | 0.489667 | 0.871222 |
| MmugDNA.18523.1.S1_at   | MmugDNA.18523.1 | 8.29  | 6.94  | 0.01 | 0.28 | 2.54  | 0.001175 | 0.02628  | 0.077718 | 0.203051 |
| MmugDNA.18524.1.S1_at   | MmugDNA.18524.1 | 11.64 | 10.92 | 0.03 | 0.29 | 1.64  | 0.006109 | 0.093901 | 0.124422 | 0.350423 |
| MmugDNA.18525.1.S1_at   | MmugDNA.18525.1 | 4.72  | 4.69  | 0.22 | 0.27 | 1.02  | 0.479009 | 0.59818  | 0.720418 | 0.760675 |
| MmugDNA.18526.1.S1_at   | MmugDNA.18526.1 | 6.39  | 6.34  | 0.13 | 0.12 | 1.03  | 0.663631 | 0.90399  | 0.837919 | 0.945483 |
| MmugDNA.18527.1.S1_at   | MmugDNA.18527.1 | 8.31  | 8.33  | 0.18 | 0.03 | -1.01 | 0.682207 | 0.882267 | 0.848446 | 0.932845 |
| MmugDNA.18529.1.S1_at   | MmugDNA.18529.1 | 7.45  | 7.26  | 0.07 | 0.09 | 1.14  | 0.072288 | 0.468155 | 0.326797 | 0.677624 |
| MmugDNA.1853.1.S1_at    | MmugDNA.1853.1  | 3.56  | 3.11  | 0.49 | 0.23 | 1.37  | 0.340852 | 0.31403  | 0.620908 | 0.568178 |
| MmugDNA.18530.1.S1_at   | MmugDNA.18530.1 | 6.47  | 6.53  | 0.62 | 0.39 | -1.04 | 0.686326 | 0.729908 | 0.850512 | 0.843733 |
| MmugDNA.18531.1.S1_at   | MmugDNA.18531.1 | 3.85  | 3.85  | 0.08 | 0    | 1     | 0.349096 | 0.631178 | 0.62702  | 0.782716 |
| MmugDNA.18532.1.S1_at   | MmugDNA.18532.1 | 7.8   | 7.81  | 0.08 | 0.07 | -1.01 | 0.878395 | 0.151597 | 0.948107 | 0.426333 |
| MmugDNA.18533.1.S1_at   | MmugDNA.18533.1 | 6.93  | 5.04  | 0.62 | 0.44 | 3.69  | 0.024125 | 0.025668 | 0.208473 | 0.200834 |
| MmugDNA.18534.1.S1_at   | MmugDNA.18534.1 | 8.76  | 8.18  | 0.25 | 0.16 | 1.5   | 0.030096 | 0.157061 | 0.22664  | 0.432547 |
| MmugDNA.18535.1.S1_at   | MmugDNA.18535.1 | 8.27  | 8.01  | 0.32 | 0.3  | 1.2   | 0.172482 | 0.107891 | 0.466621 | 0.370945 |
| MmugDNA.18536.1.S1_at   | MmugDNA.18536.1 | 5.47  | 4.76  | 0.97 | 0.39 | 1.63  | 0.347105 | 0.418797 | 0.625268 | 0.643118 |
| MmugDNA.18537.1.S1_at   | MmugDNA.18537.1 | 5.74  | 5.41  | 0.45 | 0.28 | 1.26  | 0.223771 | 0.286389 | 0.521797 | 0.547815 |
| MmugDNA.1854.1.S1_at    | MmugDNA.1854.1  | 6.4   | 5.55  | 0.72 | 0.16 | 1.8   | 0.470275 | 0.161398 | 0.71485  | 0.437598 |
| MmugDNA.18540.1.S1_at   | MmugDNA.18540.1 | 9.41  | 9     | 0.07 | 0.2  | 1.33  | 0.06887  | 0.434829 | 0.320468 | 0.654843 |
| MmugDNA.18542.1.S1_at   | MmugDNA.18542.1 | 5.85  | 5.73  | 0.09 | 0.06 | 1.09  | 0.048617 | 0.033064 | 0.277975 | 0.225068 |
| MmugDNA.18543.1.S1_at   | MmugDNA.18543.1 | 3.15  | 3.15  | 0.71 | 0.27 | -1    | 0.609905 | 0.525535 | 0.805522 | 0.715101 |
| MmugDNA.18545.1.S1_at   | MmugDNA.18545.1 | 3.61  | 3.58  | 0.22 | 0.12 | 1.02  | 0.939527 | 0.862851 | 0.974476 | 0.922029 |
| MmugDNA.18546.1.S1_at   | MmugDNA.18546.1 | 8.01  | 7.85  | 0.24 | 0.11 | 1.12  | 0.269294 | 0.034176 | 0.561615 | 0.228728 |
| MmugDNA.18547.1.S1_at   | MmugDNA.18547.1 | 6.04  | 6.19  | 0.23 | 0.22 | -1.1  | 0.481518 | 0.261722 | 0.721996 | 0.528157 |
| MmugDNA.18549.1.S1_at   | MmugDNA.18549.1 | 4.9   | 4.46  | 0.22 | 0.11 | 1.36  | 0.028408 | 0.051791 | 0.221039 | 0.273131 |
| MmugDNA.1855.1.S1_at    | MmugDNA.1855.1  | 10.94 | 10.67 | 0.14 | 0.06 | 1.21  | 0.088892 | 0.094296 | 0.355498 | 0.350889 |
| MmugDNA.18550.1.S1_at   | MmugDNA.18550.1 | 6.54  | 6.48  | 0.46 | 0    | 1.04  | 0.557046 | 0.762734 | 0.771999 | 0.862004 |



|                         |                 |       |       |      |      |        |          |          |          |          |
|-------------------------|-----------------|-------|-------|------|------|--------|----------|----------|----------|----------|
| MmugDNA.18553.1.S1_at   | MmugDNA.18553.1 | 12.84 | 12.73 | 0.11 | 0.07 | 1.07   | 0.344546 | 0.168562 | 0.623889 | 0.445172 |
| MmugDNA.18553.1.S1_s_at | MmugDNA.18553.1 | 12.21 | 11.92 | 0.14 | 0.05 | 1.22   | 0.072803 | 0.258172 | 0.327658 | 0.525574 |
| MmugDNA.18554.1.S1_at   | MmugDNA.18554.1 | 9.31  | 8.84  | 0.09 | 0.07 | 1.38   | 0.001566 | 0.011307 | 0.082337 | 0.138076 |
| MmugDNA.16984.1.S1_at   | MmugDNA.16984.1 | 7.47  | 7.22  | 0.11 | 0.1  | 1.19   | 0.021566 | 0.005766 | 0.200582 | 0.104378 |
| MmugDNA.16984.1.S1_s_at | MmugDNA.16984.1 | 4.05  | 4.26  | 0.17 | 0.22 | -1.15  | 0.221263 | 0.013392 | 0.519269 | 0.14827  |
| MmugDNA.1856.1.S1_at    | MmugDNA.1856.1  | 5.49  | 5.2   | 0.28 | 0.14 | 1.22   | 0.065559 | 0.205872 | 0.313444 | 0.480109 |
| MmugDNA.18560.1.S1_at   | MmugDNA.18560.1 | 5.06  | 5.09  | 0.18 | 0.03 | -1.02  | 0.432503 | 0.588288 | 0.688351 | 0.754859 |
| MmugDNA.18561.1.S1_at   | MmugDNA.18561.1 | 5.94  | 5.83  | 0.12 | 0.07 | 1.08   | 0.250454 | 0.172973 | 0.54512  | 0.449611 |
| MmugDNA.18562.1.S1_at   | MmugDNA.18562.1 | 5.28  | 5.14  | 0.26 | 0.22 | 1.1    | 0.397338 | 0.123993 | 0.662987 | 0.394262 |
| MmugDNA.18564.1.S1_at   | MmugDNA.18564.1 | 7.37  | 7.18  | 0.09 | 0.07 | 1.14   | 0.021701 | 0.015258 | 0.20067  | 0.15693  |
| MmugDNA.18565.1.S1_at   | MmugDNA.18565.1 | 3.32  | 3.75  | 0.08 | 0.42 | -1.35  | 0.055813 | 0.182569 | 0.293385 | 0.459065 |
| MmugDNA.18567.1.S1_at   | MmugDNA.18567.1 | 6.75  | 6.86  | 0.16 | 0.08 | -1.08  | 0.822293 | 0.696158 | 0.920888 | 0.823455 |
| MmugDNA.18568.1.S1_at   | MmugDNA.18568.1 | 7.34  | 6.73  | 0.24 | 0.25 | 1.53   | 0.019079 | 0.055774 | 0.191637 | 0.282044 |
| MmugDNA.18568.1.S1_s_at | MmugDNA.18568.1 | 5.84  | 5.47  | 0.13 | 0.16 | 1.3    | 0.038494 | 0.052514 | 0.2521   | 0.274757 |
| MmugDNA.18570.1.S1_at   | MmugDNA.18570.1 | 7.76  | 7.99  | 0.59 | 0.1  | -1.17  | 0.873385 | 0.839541 | 0.945619 | 0.90858  |
| MmugDNA.18571.1.S1_at   | MmugDNA.18571.1 | 4.81  | 4.81  | 0.06 | 0.04 | 1      | 0.738745 | 0.226821 | 0.878916 | 0.499232 |
| MmugDNA.18572.1.S1_at   | MmugDNA.18572.1 | 5.5   | 5.46  | 0.24 | 0.04 | 1.03   | 0.56944  | 0.670533 | 0.778858 | 0.807399 |
| MmugDNA.18575.1.S1_at   | MmugDNA.18575.1 | 3.51  | 3.41  | 0.07 | 0.09 | 1.07   | 0.179018 | 0.003543 | 0.474004 | 0.085371 |
| MmugDNA.18576.1.S1_at   | MmugDNA.18576.1 | 5.08  | 4.77  | 0.37 | 0.03 | 1.24   | 0.309585 | 0.421324 | 0.595886 | 0.644968 |
| MmugDNA.18577.1.S1_at   | MmugDNA.18577.1 | 3.88  | 3.77  | 0.01 | 0.05 | 1.08   | 0.035919 | 0.024427 | 0.244561 | 0.195598 |
| MmugDNA.18579.1.S1_at   | MmugDNA.18579.1 | 5.41  | 5.56  | 0.12 | 0.14 | -1.11  | 0.481212 | 0.575466 | 0.72184  | 0.746538 |
| MmugDNA.1858.1.S1_at    | MmugDNA.1858.1  | 3.27  | 3.33  | 0.09 | 0.07 | -1.04  | 0.543319 | 0.103259 | 0.763378 | 0.364143 |
| MmugDNA.18580.1.S1_at   | MmugDNA.18580.1 | 9.65  | 10.35 | 0.44 | 0.09 | -1.62  | 0.063632 | 0.55932  | 0.308797 | 0.736241 |
| MmugDNA.18581.1.S1_at   | MmugDNA.18581.1 | 4.93  | 4.77  | 0.23 | 0.25 | 1.12   | 0.758298 | 0.806586 | 0.88913  | 0.888726 |
| MmugDNA.18582.1.S1_at   | MmugDNA.18582.1 | 7.55  | 7.31  | 0.31 | 0.17 | 1.19   | 0.177494 | 0.124585 | 0.472186 | 0.394995 |
| MmugDNA.18583.1.S1_at   | MmugDNA.18583.1 | 7.63  | 7.24  | 0.2  | 0.18 | 1.31   | 0.066926 | 0.197672 | 0.316392 | 0.472633 |
| MmugDNA.18587.1.S1_at   | MmugDNA.18587.1 | 5.05  | 5.2   | 0.1  | 0.07 | -1.11  | 0.252541 | 0.126273 | 0.547201 | 0.39678  |
| MmugDNA.18589.1.S1_at   | MmugDNA.18589.1 | 11.19 | 10.16 | 0.25 | 0.05 | 2.04   | 0.002546 | 0.033472 | 0.094452 | 0.226577 |
| MmugDNA.1859.1.S1_at    | MmugDNA.1859.1  | 3.46  | 3.45  | 0.06 | 0.02 | 1      | 0.520874 | 0.817399 | 0.749015 | 0.894691 |
| MmugDNA.18591.1.S1_at   | MmugDNA.18591.1 | 6.81  | 6.88  | 0.27 | 0.17 | -1.06  | 0.905838 | 0.210688 | 0.960085 | 0.484747 |
| MmugDNA.18594.1.S1_at   | MmugDNA.18594.1 | 11.27 | 11.38 | 0.1  | 0.05 | -1.08  | 0.104025 | 0.147074 | 0.377324 | 0.421208 |
| MmugDNA.18596.1.S1_at   | MmugDNA.18596.1 | 6.96  | 6.97  | 0.07 | 0.04 | -1.01  | 0.658155 | 0.971209 | 0.834894 | 0.984355 |
| MmugDNA.18598.1.S1_at   | MmugDNA.18598.1 | 4.28  | 3.99  | 0.05 | 0.14 | 1.23   | 0.065654 | 0.118038 | 0.313663 | 0.385881 |
| MmugDNA.18599.1.S1_at   | MmugDNA.18599.1 | 5.2   | 4.98  | 0.38 | 0.07 | 1.17   | 0.259693 | 0.519483 | 0.554019 | 0.711062 |
| MmugDNA.186.1.S1_at     | MmugDNA.186.1   | 7.91  | 7.62  | 0.29 | 0.09 | 1.22   | 0.567449 | 0.651512 | 0.77778  | 0.796241 |
| MmugDNA.18601.1.S1_at   | MmugDNA.18601.1 | 9.42  | 12.82 | 1.55 | 0.15 | -10.51 | 0.053401 | 0.117524 | 0.288383 | 0.385295 |
| MmugDNA.18602.1.S1_s_at | MmugDNA.18602.1 | 6.69  | 7.05  | 0.23 | 0.67 | -1.28  | 0.491338 | 0.024702 | 0.729201 | 0.196795 |
| MmugDNA.18603.1.S1_at   | MmugDNA.18603.1 | 3.12  | 9.4   | 1.14 | 0.29 | -77.47 | 0.00129  | 0.008887 | 0.078631 | 0.124698 |
| MmugDNA.18604.1.S1_at   | MmugDNA.18604.1 | 7.93  | 8.14  | 0.89 | 0.08 | -1.15  | 0.936997 | 0.234124 | 0.97363  | 0.505319 |
| MmugDNA.18605.1.S1_at   | MmugDNA.18605.1 | 5.29  | 5.3   | 0.27 | 0.07 | -1.01  | 0.479152 | 0.524134 | 0.720456 | 0.714207 |
| MmugDNA.18608.1.S1_at   | MmugDNA.18608.1 | 4.78  | 4.76  | 0.14 | 0.16 | 1.02   | 0.796486 | 0.188444 | 0.908112 | 0.464433 |
| MmugDNA.18609.1.S1_at   | MmugDNA.18609.1 | 5.12  | 5.13  | 0.43 | 0.04 | -1.01  | 0.963876 | 0.571324 | 0.985358 | 0.743642 |
| MmugDNA.1861.1.S1_at    | MmugDNA.1861.1  | 11.64 | 11.57 | 0.13 | 0.04 | 1.05   | 0.528949 | 0.541001 | 0.753919 | 0.724694 |

|                         |                 |       |       |      |      |       |          |          |          |          |
|-------------------------|-----------------|-------|-------|------|------|-------|----------|----------|----------|----------|
| MmugDNA.18610.1.S1_at   | MmugDNA.18610.1 | 6.7   | 6.34  | 0.32 | 0.05 | 1.29  | 0.387857 | 0.471111 | 0.655933 | 0.679173 |
| MmugDNA.18613.1.S1_at   | MmugDNA.18613.1 | 9.82  | 9.3   | 0.13 | 0.03 | 1.44  | 0.002362 | 0.000173 | 0.092906 | 0.030511 |
| MmugDNA.18616.1.S1_at   | MmugDNA.18616.1 | 8.87  | 7.85  | 0.58 | 0.06 | 2.02  | 0.110257 | 0.378419 | 0.385603 | 0.615443 |
| MmugDNA.18617.1.S1_at   | MmugDNA.18617.1 | 11.15 | 10.91 | 0.28 | 0.22 | 1.18  | 0.634694 | 0.238263 | 0.820892 | 0.508825 |
| MmugDNA.18618.1.S1_at   | MmugDNA.18618.1 | 9.22  | 8.08  | 0.24 | 0.03 | 2.21  | 0.001093 | 0.000132 | 0.077278 | 0.029087 |
| MmugDNA.1862.1.S1_at    | MmugDNA.1862.1  | 8.47  | 8.96  | 0.24 | 0.2  | -1.41 | 0.048647 | 0.020207 | 0.278052 | 0.178561 |
| MmugDNA.18620.1.S1_at   | MmugDNA.18620.1 | 4.52  | 4.23  | 0.31 | 0.18 | 1.23  | 0.384358 | 0.470306 | 0.65341  | 0.678599 |
| MmugDNA.18622.1.S1_at   | MmugDNA.18622.1 | 10.87 | 10.88 | 0.21 | 0.18 | -1.01 | 0.566911 | 0.094669 | 0.777544 | 0.351481 |
| MmugDNA.18622.1.S1_s_at | MmugDNA.18622.1 | 10.81 | 10.68 | 0.24 | 0.13 | 1.1   | 0.583644 | 0.027529 | 0.788267 | 0.207161 |
| MmugDNA.18623.1.S1_at   | MmugDNA.18623.1 | 2.81  | 2.81  | 0.01 | 0.03 | 1     | 0.611346 | 0.497123 | 0.806237 | 0.696465 |
| MmugDNA.18624.1.S1_at   | MmugDNA.18624.1 | 8.18  | 7.86  | 0.19 | 0.33 | 1.24  | 0.256037 | 0.411559 | 0.550543 | 0.638261 |
| MmugDNA.18625.1.S1_s_at | MmugDNA.18625.1 | 3.11  | 2.97  | 0.18 | 0.13 | 1.1   | 0.282748 | 0.282173 | 0.573338 | 0.544937 |
| MmugDNA.18626.1.S1_at   | MmugDNA.18626.1 | 6.75  | 7.38  | 0.17 | 0.23 | -1.55 | 0.068005 | 0.213654 | 0.318434 | 0.487441 |
| MmugDNA.18627.1.S1_at   | MmugDNA.18627.1 | 5.97  | 5.81  | 0.11 | 0.05 | 1.12  | 0.034392 | 0.033586 | 0.24006  | 0.226848 |
| MmugDNA.18628.1.S1_at   | MmugDNA.18628.1 | 5.55  | 5.53  | 0.2  | 0.14 | 1.02  | 0.566015 | 0.785499 | 0.77703  | 0.875823 |
| MmugDNA.18629.1.S1_at   | MmugDNA.18629.1 | 3.91  | 3.78  | 0.07 | 0.02 | 1.09  | 0.019293 | 0.371328 | 0.192035 | 0.610172 |
| MmugDNA.1863.1.S1_at    | MmugDNA.1863.1  | 3.47  | 3.55  | 0.05 | 0.14 | -1.06 | 0.670607 | 0.879935 | 0.841922 | 0.931461 |
| MmugDNA.18632.1.S1_at   | MmugDNA.18632.1 | 5.44  | 5.21  | 0.19 | 0.09 | 1.17  | 0.185517 | 0.247784 | 0.481739 | 0.517199 |
| MmugDNA.18634.1.S1_at   | MmugDNA.18634.1 | 6.57  | 8.13  | 0.87 | 0.22 | -2.96 | 0.141935 | 0.378667 | 0.427917 | 0.615681 |
| MmugDNA.18634.1.S1_s_at | MmugDNA.18634.1 | 6.31  | 8.3   | 1.15 | 0.24 | -3.98 | 0.154236 | 0.3142   | 0.444562 | 0.568185 |
| MmugDNA.18636.1.S1_s_at | MmugDNA.18636.1 | 10.76 | 10.86 | 0.02 | 0.13 | -1.07 | 0.687376 | 0.793842 | 0.850804 | 0.881112 |
| MmugDNA.18637.1.S1_at   | MmugDNA.18637.1 | 3.93  | 3.84  | 0.01 | 0.05 | 1.06  | 0.091521 | 0.087412 | 0.359218 | 0.340589 |
| MmugDNA.18639.1.S1_at   | MmugDNA.18639.1 | 4.26  | 3.99  | 0.33 | 0.06 | 1.21  | 0.117731 | 0.131462 | 0.395125 | 0.403584 |
| MmugDNA.1864.1.S1_at    | MmugDNA.1864.1  | 4.76  | 4.76  | 0.82 | 0.07 | 1     | 0.409102 | 0.66164  | 0.671651 | 0.801903 |
| MmugDNA.18640.1.S1_at   | MmugDNA.18640.1 | 3.99  | 3.34  | 0.74 | 0.12 | 1.56  | 0.199526 | 0.276646 | 0.496887 | 0.540596 |
| MmugDNA.27602.1.S1_at   | MmugDNA.27602.1 | 12.41 | 12.28 | 0.05 | 0.1  | 1.09  | 0.129001 | 0.011418 | 0.411269 | 0.138384 |
| MmugDNA.27602.1.S1_s_at | MmugDNA.27602.1 | 11.37 | 11.13 | 0.06 | 0.17 | 1.18  | 0.082808 | 0.003328 | 0.344741 | 0.083001 |
| MmugDNA.18641.1.S1_at   | MmugDNA.18641.1 | 3.68  | 3.57  | 0.54 | 0.28 | 1.08  | 0.715089 | 0.875282 | 0.865457 | 0.929211 |
| MmugDNA.18642.1.S1_at   | MmugDNA.18642.1 | 3.19  | 3.14  | 0.15 | 0.07 | 1.04  | 0.229841 | 0.528703 | 0.528728 | 0.716773 |
| MmugDNA.18644.1.S1_at   | MmugDNA.18644.1 | 8.62  | 8.29  | 0.03 | 0.08 | 1.26  | 0.002782 | 0.126777 | 0.097767 | 0.397446 |
| MmugDNA.18646.1.S1_at   | MmugDNA.18646.1 | 4.36  | 4.37  | 0.13 | 0.05 | -1    | 0.273219 | 0.574673 | 0.56529  | 0.746072 |
| MmugDNA.18646.1.S1_s_at | MmugDNA.18646.1 | 3.47  | 3.5   | 0.25 | 0.26 | -1.02 | 0.409152 | 0.380893 | 0.671657 | 0.617426 |
| MmugDNA.18649.1.S1_at   | MmugDNA.18649.1 | 4.31  | 3.84  | 0.22 | 0.22 | 1.38  | 0.303057 | 0.407632 | 0.590511 | 0.635077 |
| MmugDNA.18651.1.S1_at   | MmugDNA.18651.1 | 7.6   | 6.32  | 0.24 | 0.31 | 2.44  | 0.002516 | 0.003739 | 0.094326 | 0.08718  |
| MmugDNA.18654.1.S1_at   | MmugDNA.18654.1 | 6.5   | 6.33  | 0.17 | 0.07 | 1.13  | 0.061764 | 0.07746  | 0.304962 | 0.323279 |
| MmugDNA.18656.1.S1_at   | MmugDNA.18656.1 | 7.02  | 6.98  | 0.19 | 0.01 | 1.03  | 0.536539 | 0.559659 | 0.759061 | 0.736365 |
| MmugDNA.18658.1.S1_at   | MmugDNA.18658.1 | 11.06 | 11.73 | 0.24 | 0.07 | -1.59 | 0.025841 | 0.224237 | 0.213519 | 0.497164 |
| MmugDNA.18660.1.S1_at   | MmugDNA.18660.1 | 7.48  | 6.7   | 0.24 | 0.18 | 1.72  | 0.010437 | 0.143643 | 0.152221 | 0.417555 |
| MmugDNA.18661.1.S1_at   | MmugDNA.18661.1 | 6.81  | 6.94  | 0.07 | 0.09 | -1.09 | 0.046026 | 0.076982 | 0.272172 | 0.322421 |
| MmugDNA.18663.1.S1_at   | MmugDNA.18663.1 | 7.52  | 9.08  | 0.87 | 0.25 | -2.96 | 0.033256 | 0.020457 | 0.236446 | 0.179597 |
| MmugDNA.18666.1.S1_at   | MmugDNA.18666.1 | 4.17  | 3.91  | 0.14 | 0.12 | 1.2   | 0.10461  | 0.205929 | 0.377932 | 0.48015  |
| MmugDNA.18669.1.S1_at   | MmugDNA.18669.1 | 4.56  | 4.73  | 0.75 | 0.25 | -1.13 | 0.623844 | 0.808515 | 0.81449  | 0.889757 |
| MmugDNA.1867.1.S1_at    | MmugDNA.1867.1  | 6.57  | 6.82  | 0.2  | 0.05 | -1.19 | 0.031318 | 0.069397 | 0.230161 | 0.30962  |

|                         |                 |       |       |      |      |       |          |          |          |          |
|-------------------------|-----------------|-------|-------|------|------|-------|----------|----------|----------|----------|
| MmugDNA.18671.1.S1_at   | MmugDNA.18671.1 | 9.96  | 10.19 | 0.08 | 0.11 | -1.17 | 0.100266 | 0.000644 | 0.371081 | 0.042928 |
| MmugDNA.18672.1.S1_at   | MmugDNA.18672.1 | 6.49  | 6.44  | 0.08 | 0.15 | 1.04  | 0.347711 | 0.263315 | 0.625846 | 0.529582 |
| MmugDNA.18675.1.S1_at   | MmugDNA.18675.1 | 2.91  | 2.91  | 0.05 | 0.05 | 1     | 0.249165 | 0.322816 | 0.544437 | 0.574157 |
| MmugDNA.18676.1.S1_at   | MmugDNA.18676.1 | 3.56  | 3.66  | 0.12 | 0.27 | -1.07 | 0.874389 | 0.301236 | 0.946178 | 0.559356 |
| MmugDNA.18677.1.S1_at   | MmugDNA.18677.1 | 4.37  | 4.47  | 0.04 | 0.17 | -1.07 | 0.983381 | 0.126078 | 0.99383  | 0.39672  |
| MmugDNA.18678.1.S1_at   | MmugDNA.18678.1 | 6.69  | 6.48  | 0.27 | 0.13 | 1.15  | 0.294737 | 0.382533 | 0.583721 | 0.618735 |
| MmugDNA.18679.1.S1_at   | MmugDNA.18679.1 | 3.27  | 3.19  | 0.07 | 0.06 | 1.06  | 0.194164 | 0.204699 | 0.490738 | 0.479056 |
| MmugDNA.1868.1.S1_at    | MmugDNA.1868.1  | 6.7   | 6.08  | 0.07 | 0.32 | 1.54  | 0.033572 | 0.053112 | 0.237136 | 0.276193 |
| MmugDNA.18680.1.S1_at   | MmugDNA.18680.1 | 2.61  | 2.76  | 0.12 | 0.05 | -1.1  | 0.261711 | 0.283375 | 0.555849 | 0.545922 |
| MmugDNA.18683.1.S1_at   | MmugDNA.18683.1 | 9.72  | 9.83  | 0.43 | 0.11 | -1.08 | 0.655114 | 0.234614 | 0.833095 | 0.505828 |
| MmugDNA.18686.1.S1_at   | MmugDNA.18686.1 | 6.49  | 6.46  | 0.06 | 0.06 | 1.02  | 0.927731 | 0.24944  | 0.969412 | 0.518532 |
| MmugDNA.18689.1.S1_at   | MmugDNA.18689.1 | 5.33  | 5.26  | 0.15 | 0.13 | 1.04  | 0.735556 | 0.269806 | 0.876915 | 0.535088 |
| MmugDNA.1869.1.S1_at    | MmugDNA.1869.1  | 10.96 | 10.8  | 0.18 | 0.08 | 1.12  | 0.386698 | 0.887051 | 0.655058 | 0.935666 |
| MmugDNA.18691.1.S1_at   | MmugDNA.18691.1 | 8.44  | 8.29  | 0.45 | 0.16 | 1.11  | 0.696356 | 0.861314 | 0.855377 | 0.921113 |
| MmugDNA.18691.1.S1_x_at | MmugDNA.18691.1 | 8.49  | 8.4   | 0.47 | 0.09 | 1.06  | 0.542561 | 0.811046 | 0.762884 | 0.890966 |
| MmugDNA.18692.1.S1_at   | MmugDNA.18692.1 | 2.89  | 2.84  | 0.37 | 0.12 | 1.04  | 0.208924 | 0.31201  | 0.506372 | 0.566838 |
| MmugDNA.18692.1.S1_x_at | MmugDNA.18692.1 | 2.77  | 2.81  | 0.32 | 0.06 | -1.03 | 0.443283 | 0.427046 | 0.696549 | 0.649087 |
| MmugDNA.18693.1.S1_at   | MmugDNA.18693.1 | 4.84  | 4.81  | 0.25 | 0.06 | 1.02  | 0.959981 | 0.398721 | 0.983565 | 0.629464 |
| MmugDNA.18694.1.S1_at   | MmugDNA.18694.1 | 3.93  | 4.04  | 0.1  | 0    | -1.08 | 0.403834 | 0.124008 | 0.667853 | 0.394273 |
| MmugDNA.18695.1.S1_at   | MmugDNA.18695.1 | 10.16 | 9.97  | 0.09 | 0.06 | 1.14  | 0.053256 | 0.361001 | 0.287986 | 0.60201  |
| MmugDNA.18696.1.S1_at   | MmugDNA.18696.1 | 13.55 | 13.34 | 0.07 | 0.03 | 1.16  | 0.011985 | 0.017624 | 0.159499 | 0.167839 |
| MmugDNA.18697.1.S1_at   | MmugDNA.18697.1 | 6.16  | 6.45  | 0.39 | 0.21 | -1.23 | 0.250132 | 0.213533 | 0.544879 | 0.48741  |
| MmugDNA.187.1.S1_at     | MmugDNA.187.1   | 6.86  | 6.85  | 0.3  | 0.16 | 1     | 0.543529 | 0.775147 | 0.763463 | 0.869083 |
| MmugDNA.21327.1.S1_s_at | MmugDNA.21327.1 | 5.8   | 4.89  | 0.22 | 0.72 | 1.87  | 0.325283 | 0.541409 | 0.608663 | 0.724909 |
| MmugDNA.18700.1.S1_at   | MmugDNA.18700.1 | 4.04  | 4.26  | 0.15 | 0.13 | -1.17 | 0.189869 | 0.226295 | 0.486238 | 0.498753 |
| MmugDNA.18702.1.S1_at   | MmugDNA.18702.1 | 5.76  | 6.68  | 0.17 | 0.25 | -1.9  | 0.006674 | 0.042797 | 0.128167 | 0.251394 |
| MmugDNA.18703.1.S1_at   | MmugDNA.18703.1 | 5.77  | 5.99  | 1.29 | 0.06 | -1.17 | 0.531174 | 0.71246  | 0.755624 | 0.833371 |
| MmugDNA.18705.1.S1_at   | MmugDNA.18705.1 | 5.21  | 6.28  | 0.14 | 0.31 | -2.1  | 0.010711 | 0.135618 | 0.153282 | 0.407744 |
| MmugDNA.18706.1.S1_at   | MmugDNA.18706.1 | 8.63  | 7.8   | 0.46 | 0.24 | 1.78  | 0.139342 | 0.450913 | 0.424947 | 0.66589  |
| MmugDNA.18706.1.S1_s_at | MmugDNA.18706.1 | 7.75  | 6.95  | 0.91 | 0.17 | 1.74  | 0.367127 | 0.656462 | 0.641275 | 0.799097 |
| MmugDNA.18708.1.S1_at   | MmugDNA.18708.1 | 4.04  | 4.03  | 0.39 | 0.06 | 1.01  | 0.372397 | 0.664995 | 0.644917 | 0.803726 |
| MmugDNA.18709.1.S1_at   | MmugDNA.18709.1 | 10.6  | 10.44 | 0.17 | 0    | 1.12  | 0.162126 | 0.59964  | 0.454008 | 0.761524 |
| MmugDNA.1871.1.S1_at    | MmugDNA.1871.1  | 3.33  | 3.39  | 0.05 | 0.08 | -1.04 | 0.122527 | 0.279059 | 0.401258 | 0.542782 |
| MmugDNA.16218.1.S1_s_at | MmugDNA.16218.1 | 5.92  | 5.86  | 0.23 | 0.05 | 1.04  | 0.785337 | 0.908689 | 0.90204  | 0.948291 |
| MmugDNA.18711.1.S1_at   | MmugDNA.18711.1 | 4.12  | 4.12  | 0.17 | 0.17 | -1    | 0.466926 | 0.637522 | 0.712527 | 0.787003 |
| MmugDNA.18712.1.S1_at   | MmugDNA.18712.1 | 9.14  | 9.05  | 0.42 | 0.23 | 1.06  | 0.272528 | 0.743259 | 0.564646 | 0.851277 |
| MmugDNA.18713.1.S1_at   | MmugDNA.18713.1 | 4.19  | 4.23  | 0.27 | 0.16 | -1.03 | 0.60332  | 0.577873 | 0.800927 | 0.748169 |
| MmugDNA.18714.1.S1_at   | MmugDNA.18714.1 | 7.31  | 6.36  | 0.24 | 0.17 | 1.94  | 0.003817 | 0.006654 | 0.107015 | 0.110505 |
| MmugDNA.18716.1.S1_at   | MmugDNA.18716.1 | 11.65 | 11.46 | 0.21 | 0.04 | 1.14  | 0.169479 | 0.550584 | 0.462689 | 0.730588 |
| MmugDNA.18718.1.S1_at   | MmugDNA.18718.1 | 3.97  | 4.15  | 0.12 | 0.32 | -1.14 | 0.58619  | 0.70444  | 0.789689 | 0.828481 |
| MmugDNA.18719.1.S1_at   | MmugDNA.18719.1 | 4.6   | 4.6   | 0    | 0.04 | 1     | 0.967415 | 0.77682  | 0.986962 | 0.870313 |
| MmugDNA.1872.1.S1_at    | MmugDNA.1872.1  | 3.64  | 3.35  | 0.25 | 0.13 | 1.22  | 0.161742 | 0.27119  | 0.453512 | 0.536264 |
| MmugDNA.18721.1.S1_at   | MmugDNA.18721.1 | 8.05  | 7.69  | 0.21 | 0.13 | 1.28  | 0.061089 | 0.59959  | 0.304005 | 0.761524 |

|                         |                 |       |       |      |      |        |          |          |          |          |
|-------------------------|-----------------|-------|-------|------|------|--------|----------|----------|----------|----------|
| MmugDNA.18723.1.S1_at   | MmugDNA.18723.1 | 5     | 4.82  | 0.12 | 0.04 | 1.13   | 0.041958 | 0.025569 | 0.261847 | 0.200613 |
| MmugDNA.18725.1.S1_at   | MmugDNA.18725.1 | 7.21  | 7.36  | 0.11 | 0.37 | -1.11  | 0.786776 | 0.062795 | 0.902743 | 0.297193 |
| MmugDNA.18726.1.S1_at   | MmugDNA.18726.1 | 3.96  | 3.82  | 0.52 | 0.16 | 1.1    | 0.236328 | 0.262691 | 0.533956 | 0.529054 |
| MmugDNA.18727.1.S1_at   | MmugDNA.18727.1 | 5.73  | 4.79  | 0.83 | 0.27 | 1.92   | 0.078449 | 0.06504  | 0.338154 | 0.301009 |
| MmugDNA.18728.1.S1_at   | MmugDNA.18728.1 | 10.5  | 10.78 | 0.26 | 0.05 | -1.21  | 0.140817 | 0.121644 | 0.426579 | 0.39083  |
| MmugDNA.18729.1.S1_at   | MmugDNA.18729.1 | 7.95  | 5.81  | 0.63 | 0.4  | 4.39   | 0.014679 | 0.013669 | 0.173096 | 0.14967  |
| MmugDNA.18731.1.S1_at   | MmugDNA.18731.1 | 6.96  | 8.22  | 1.17 | 0.23 | -2.38  | 0.173502 | 0.43907  | 0.467826 | 0.657845 |
| MmugDNA.18732.1.S1_at   | MmugDNA.18732.1 | 7.14  | 6.99  | 0.05 | 0.1  | 1.1    | 0.079774 | 0.295787 | 0.339935 | 0.555196 |
| MmugDNA.18733.1.S1_at   | MmugDNA.18733.1 | 11.38 | 11.4  | 0.05 | 0.06 | -1.01  | 0.707717 | 0.526855 | 0.861542 | 0.715627 |
| MmugDNA.7472.1.S1_s_at  | MmugDNA.7472.1  | 2.93  | 2.65  | 0.33 | 0.06 | 1.22   | 0.253673 | 0.401692 | 0.547927 | 0.631068 |
| MmugDNA.18737.1.S1_at   | MmugDNA.18737.1 | 4.25  | 3.97  | 0.54 | 0.12 | 1.21   | 0.941029 | 0.407202 | 0.975231 | 0.634801 |
| MmugDNA.18738.1.S1_at   | MmugDNA.18738.1 | 3.98  | 3.45  | 0.14 | 0.12 | 1.44   | 0.014307 | 0.147427 | 0.171429 | 0.421669 |
| MmugDNA.18739.1.S1_at   | MmugDNA.18739.1 | 7.89  | 8.68  | 0.14 | 0.26 | -1.73  | 0.019282 | 0.005882 | 0.192035 | 0.104899 |
| MmugDNA.1874.1.S1_at    | MmugDNA.1874.1  | 10.52 | 10.19 | 0.07 | 0.2  | 1.26   | 0.049173 | 0.030447 | 0.279211 | 0.216485 |
| MmugDNA.1874.1.S1_s_at  | MmugDNA.1874.1  | 8.97  | 8.68  | 0.02 | 0.16 | 1.23   | 0.035874 | 0.065672 | 0.244488 | 0.301631 |
| MmugDNA.18740.1.S1_at   | MmugDNA.18740.1 | 10.65 | 11.57 | 0.29 | 0.18 | -1.89  | 0.010527 | 0.00063  | 0.15243  | 0.042867 |
| MmugDNA.18740.1.S1_s_at | MmugDNA.18740.1 | 9.43  | 10.45 | 0.36 | 0.19 | -2.02  | 0.012227 | 0.00085  | 0.160868 | 0.047089 |
| MmugDNA.18742.1.S1_at   | MmugDNA.18742.1 | 3.34  | 3.44  | 0.08 | 0.09 | -1.07  | 0.108327 | 0.258162 | 0.382975 | 0.525574 |
| MmugDNA.19469.1.S1_at   | MmugDNA.19469.1 | 2.95  | 3.07  | 0.18 | 0.1  | -1.09  | 0.536454 | 0.735577 | 0.759061 | 0.846993 |
| MmugDNA.19469.1.S1_s_at | MmugDNA.19469.1 | 7.3   | 7.86  | 0.75 | 0.32 | -1.47  | 0.205999 | 0.172492 | 0.50382  | 0.448864 |
| MmugDNA.18745.1.S1_at   | MmugDNA.18745.1 | 4.98  | 4.98  | 0.13 | 0.12 | 1      | 0.695681 | 0.098582 | 0.854985 | 0.356709 |
| MmugDNA.18746.1.S1_at   | MmugDNA.18746.1 | 3.54  | 3.81  | 0.04 | 0.13 | -1.21  | 0.035096 | 0.034937 | 0.241992 | 0.231062 |
| MmugDNA.18747.1.S1_at   | MmugDNA.18747.1 | 7.92  | 12.03 | 2.39 | 0.25 | -17.31 | 0.097819 | 0.307219 | 0.368268 | 0.563499 |
| MmugDNA.18749.1.S1_at   | MmugDNA.18749.1 | 7.1   | 6.86  | 1.06 | 0.2  | 1.18   | 0.352596 | 0.647473 | 0.630029 | 0.793487 |
| MmugDNA.18750.1.S1_at   | MmugDNA.18750.1 | 4.38  | 3.9   | 0.18 | 0.02 | 1.4    | 0.007933 | 0.002685 | 0.138279 | 0.076408 |
| MmugDNA.18753.1.S1_s_at | MmugDNA.18753.1 | 10.91 | 11    | 0.12 | 0.05 | -1.07  | 0.568443 | 0.793613 | 0.77836  | 0.88095  |
| MmugDNA.18754.1.S1_at   | MmugDNA.18754.1 | 9.19  | 8.72  | 0.12 | 0.2  | 1.38   | 0.066981 | 0.668258 | 0.316461 | 0.805864 |
| MmugDNA.18758.1.S1_at   | MmugDNA.18758.1 | 2.48  | 2.6   | 0.19 | 0.01 | -1.09  | 0.802508 | 0.662314 | 0.911318 | 0.802245 |
| MmugDNA.18761.1.S1_at   | MmugDNA.18761.1 | 11.02 | 11    | 0.03 | 0.16 | 1.01   | 0.676119 | 0.899468 | 0.845327 | 0.942861 |
| MmugDNA.18762.1.S1_at   | MmugDNA.18762.1 | 7.07  | 7.17  | 0.15 | 0.27 | -1.08  | 0.886769 | 0.990047 | 0.951782 | 0.994314 |
| MmugDNA.18763.1.S1_at   | MmugDNA.18763.1 | 3.48  | 3.26  | 0.19 | 0.12 | 1.16   | 0.085855 | 0.085351 | 0.350239 | 0.337226 |
| MmugDNA.18764.1.S1_at   | MmugDNA.18764.1 | 6.55  | 6.54  | 0.05 | 0.08 | 1.01   | 0.499347 | 0.51601  | 0.734154 | 0.70867  |
| MmugDNA.18765.1.S1_at   | MmugDNA.18765.1 | 3.3   | 3.41  | 1.15 | 0.26 | -1.08  | 0.363661 | 0.513328 | 0.638278 | 0.706881 |
| MmugDNA.18766.1.S1_at   | MmugDNA.18766.1 | 6.89  | 6.94  | 0.2  | 0.15 | -1.03  | 0.324836 | 0.337201 | 0.608366 | 0.584418 |
| MmugDNA.18767.1.S1_at   | MmugDNA.18767.1 | 3.48  | 3.16  | 0.09 | 0.12 | 1.26   | 0.02512  | 0.394347 | 0.211462 | 0.626944 |
| MmugDNA.18768.1.S1_at   | MmugDNA.18768.1 | 7.05  | 6.98  | 0.08 | 0.31 | 1.06   | 0.287622 | 0.190831 | 0.577473 | 0.466228 |
| MmugDNA.18769.1.S1_at   | MmugDNA.18769.1 | 11.29 | 11.97 | 0.45 | 0.04 | -1.59  | 0.187654 | 0.198866 | 0.483874 | 0.473475 |
| MmugDNA.1877.1.S1_at    | MmugDNA.1877.1  | 8.36  | 8.1   | 0.13 | 0.05 | 1.2    | 0.072107 | 0.041357 | 0.326474 | 0.247995 |
| MmugDNA.18771.1.S1_at   | MmugDNA.18771.1 | 5.69  | 4.45  | 0.19 | 0.21 | 2.37   | 0.001522 | 0.001877 | 0.081668 | 0.064979 |
| MmugDNA.18772.1.S1_at   | MmugDNA.18772.1 | 6.44  | 6.23  | 0.23 | 0.07 | 1.16   | 0.386554 | 0.524259 | 0.654936 | 0.714248 |
| MmugDNA.18773.1.S1_at   | MmugDNA.18773.1 | 7.14  | 7.15  | 0.17 | 0.07 | -1     | 0.391252 | 0.078555 | 0.658623 | 0.325285 |
| MmugDNA.18775.1.S1_at   | MmugDNA.18775.1 | 8.53  | 8.21  | 0.38 | 0.12 | 1.25   | 0.714538 | 0.704286 | 0.865088 | 0.828392 |
| MmugDNA.18779.1.S1_at   | MmugDNA.18779.1 | 6.25  | 6.23  | 0.06 | 0.02 | 1.01   | 0.366297 | 0.006265 | 0.640628 | 0.107376 |

|                         |                 |       |       |      |      |       |          |          |          |          |
|-------------------------|-----------------|-------|-------|------|------|-------|----------|----------|----------|----------|
| MmugDNA.1878.1.S1_at    | MmugDNA.1878.1  | 11.3  | 11.47 | 0.17 | 0.02 | -1.13 | 0.051988 | 0.103811 | 0.285543 | 0.364519 |
| MmugDNA.18780.1.S1_at   | MmugDNA.18780.1 | 4.3   | 4.36  | 0.41 | 0.16 | -1.04 | 0.350828 | 0.468359 | 0.628649 | 0.677714 |
| MmugDNA.18781.1.S1_at   | MmugDNA.18781.1 | 6.44  | 6.48  | 1.23 | 0.24 | -1.03 | 0.795891 | 0.924401 | 0.907762 | 0.95736  |
| MmugDNA.18782.1.S1_at   | MmugDNA.18782.1 | 6.69  | 6.42  | 0.17 | 0.1  | 1.2   | 0.161481 | 0.217423 | 0.453043 | 0.491035 |
| MmugDNA.18784.1.S1_at   | MmugDNA.18784.1 | 4.99  | 3.88  | 1.02 | 0.22 | 2.16  | 0.142768 | 0.066719 | 0.42888  | 0.304114 |
| MmugDNA.18785.1.S1_at   | MmugDNA.18785.1 | 10.02 | 9.58  | 0.28 | 0.07 | 1.36  | 0.046573 | 0.126311 | 0.273564 | 0.396786 |
| MmugDNA.18786.1.S1_at   | MmugDNA.18786.1 | 9.61  | 8.7   | 0.1  | 0.27 | 1.88  | 0.006992 | 0.005508 | 0.130898 | 0.102269 |
| MmugDNA.18787.1.S1_at   | MmugDNA.18787.1 | 4.05  | 4.06  | 0.26 | 0.15 | -1    | 0.667783 | 0.849312 | 0.840528 | 0.914475 |
| MmugDNA.18788.1.S1_at   | MmugDNA.18788.1 | 6.2   | 5.9   | 0.64 | 0.27 | 1.24  | 0.495074 | 0.479774 | 0.731554 | 0.68541  |
| MmugDNA.18789.1.S1_at   | MmugDNA.18789.1 | 3.85  | 3.76  | 0.18 | 0.22 | 1.06  | 0.959568 | 0.882475 | 0.98355  | 0.933022 |
| MmugDNA.18790.1.S1_at   | MmugDNA.18790.1 | 5.58  | 5.61  | 0.22 | 0.03 | -1.02 | 0.493411 | 0.471251 | 0.730391 | 0.679282 |
| MmugDNA.18791.1.S1_at   | MmugDNA.18791.1 | 9.22  | 8.07  | 0.74 | 0.69 | 2.23  | 0.229749 | 0.392071 | 0.528728 | 0.625583 |
| MmugDNA.18792.1.S1_at   | MmugDNA.18792.1 | 4.66  | 4.42  | 0.17 | 0.03 | 1.18  | 0.110089 | 0.123367 | 0.385346 | 0.393391 |
| MmugDNA.18797.1.S1_at   | MmugDNA.18797.1 | 3.92  | 3.3   | 0.64 | 0.23 | 1.53  | 0.157346 | 0.10649  | 0.448021 | 0.369078 |
| MmugDNA.18798.1.S1_at   | MmugDNA.18798.1 | 5.72  | 5.33  | 0.16 | 0.16 | 1.31  | 0.114652 | 0.144612 | 0.391643 | 0.418466 |
| MmugDNA.188.1.S1_at     | MmugDNA.188.1   | 7.18  | 6.66  | 0.3  | 0.13 | 1.44  | 0.081814 | 0.099543 | 0.343105 | 0.357959 |
| MmugDNA.18800.1.S1_at   | MmugDNA.18800.1 | 3.16  | 3.05  | 0.13 | 0.14 | 1.08  | 0.382422 | 0.020572 | 0.65188  | 0.179964 |
| MmugDNA.18801.1.S1_at   | MmugDNA.18801.1 | 7.2   | 6.77  | 0.4  | 0.17 | 1.35  | 0.080471 | 0.039244 | 0.341026 | 0.243274 |
| MmugDNA.18803.1.S1_at   | MmugDNA.18803.1 | 4.44  | 4.3   | 0.12 | 0    | 1.11  | 0.248864 | 0.085552 | 0.544234 | 0.337567 |
| MmugDNA.18805.1.S1_at   | MmugDNA.18805.1 | 4.5   | 4.39  | 0.03 | 0.02 | 1.08  | 0.008535 | 0.001734 | 0.141745 | 0.062895 |
| MmugDNA.18806.1.S1_at   | MmugDNA.18806.1 | 5.62  | 5.78  | 0.2  | 0.1  | -1.12 | 0.988975 | 0.190124 | 0.99618  | 0.465774 |
| MmugDNA.18808.1.S1_at   | MmugDNA.18808.1 | 5.31  | 5.29  | 0.04 | 0.22 | 1.01  | 0.96524  | 0.527603 | 0.985924 | 0.716154 |
| MmugDNA.18809.1.S1_at   | MmugDNA.18809.1 | 3.9   | 3.87  | 0    | 0.19 | 1.02  | 0.492642 | 0.705167 | 0.729878 | 0.829041 |
| MmugDNA.1881.1.S1_at    | MmugDNA.1881.1  | 5.61  | 4.64  | 0.36 | 0.58 | 1.95  | 0.179112 | 0.288266 | 0.474053 | 0.549535 |
| MmugDNA.18810.1.S1_at   | MmugDNA.18810.1 | 4.29  | 4.14  | 0.21 | 0.01 | 1.11  | 0.086802 | 0.057824 | 0.351991 | 0.286866 |
| MmugDNA.18811.1.S1_at   | MmugDNA.18811.1 | 11.46 | 11.31 | 0.05 | 0.04 | 1.11  | 0.021586 | 0.056238 | 0.200598 | 0.283092 |
| MmugDNA.18812.1.S1_at   | MmugDNA.18812.1 | 11.51 | 11.46 | 0.14 | 0.09 | 1.04  | 0.713389 | 0.041753 | 0.864604 | 0.248933 |
| MmugDNA.18813.1.S1_at   | MmugDNA.18813.1 | 8.63  | 8.36  | 1.59 | 1.2  | 1.21  | 0.560451 | 0.058648 | 0.773879 | 0.288897 |
| MmugDNA.18815.1.S1_at   | MmugDNA.18815.1 | 7.52  | 7.67  | 0.13 | 0.25 | -1.1  | 0.468037 | 0.490816 | 0.713377 | 0.692666 |
| MmugDNA.18816.1.S1_at   | MmugDNA.18816.1 | 4.55  | 4.55  | 0.17 | 0.32 | 1     | 0.962459 | 0.399741 | 0.98468  | 0.629951 |
| MmugDNA.18818.1.S1_at   | MmugDNA.18818.1 | 4.57  | 4.41  | 0.18 | 0.09 | 1.12  | 0.425945 | 0.133052 | 0.683232 | 0.404726 |
| MmugDNA.18819.1.S1_at   | MmugDNA.18819.1 | 8.71  | 8.2   | 0.46 | 0.27 | 1.42  | 0.077509 | 0.104231 | 0.336248 | 0.365373 |
| MmugDNA.18820.1.S1_at   | MmugDNA.18820.1 | 7.3   | 7.41  | 0.15 | 0.04 | -1.08 | 0.759105 | 0.17433  | 0.889606 | 0.450745 |
| MmugDNA.18821.1.S1_at   | MmugDNA.18821.1 | 4.29  | 4.28  | 0.03 | 0.08 | 1.01  | 0.348226 | 0.28697  | 0.626326 | 0.548246 |
| MmugDNA.18822.1.S1_at   | MmugDNA.18822.1 | 4.83  | 4.41  | 0.16 | 0.16 | 1.33  | 0.04641  | 0.051866 | 0.273215 | 0.273151 |
| MmugDNA.29296.1.S1_s_at | MmugDNA.29296.1 | 12.08 | 12.11 | 0.04 | 0.11 | -1.03 | 0.687426 | 0.028313 | 0.850804 | 0.21008  |
| MmugDNA.18825.1.S1_at   | MmugDNA.18825.1 | 3.34  | 3.3   | 0.17 | 0.05 | 1.03  | 0.437192 | 0.589445 | 0.692022 | 0.755656 |
| MmugDNA.18829.1.S1_at   | MmugDNA.18829.1 | 3.08  | 3.09  | 0.07 | 0    | -1.01 | 0.756169 | 0.545335 | 0.887677 | 0.727505 |
| MmugDNA.18829.1.S1_s_at | MmugDNA.18829.1 | 5.05  | 5.18  | 0.19 | 0.24 | -1.09 | 0.707675 | 0.903496 | 0.861541 | 0.945191 |
| MmugDNA.1883.1.S1_at    | MmugDNA.1883.1  | 12.65 | 12.5  | 0.05 | 0.06 | 1.11  | 0.029133 | 0.684001 | 0.223495 | 0.81565  |
| MmugDNA.18831.1.S1_at   | MmugDNA.18831.1 | 10.34 | 10.37 | 0.37 | 0.05 | -1.02 | 0.775473 | 0.939589 | 0.897425 | 0.965668 |
| MmugDNA.18832.1.S1_at   | MmugDNA.18832.1 | 10.38 | 10.6  | 0.08 | 0.1  | -1.17 | 0.085479 | 0.433332 | 0.349891 | 0.653652 |
| MmugDNA.18833.1.S1_at   | MmugDNA.18833.1 | 8.12  | 8.49  | 0.07 | 0.47 | -1.29 | 0.731937 | 0.93843  | 0.874717 | 0.965059 |

|                         |                 |       |       |      |      |       |          |          |          |          |
|-------------------------|-----------------|-------|-------|------|------|-------|----------|----------|----------|----------|
| MmugDNA.18835.1.S1_at   | MmugDNA.18835.1 | 9.11  | 8.26  | 0.34 | 0.14 | 1.8   | 0.039489 | 0.003722 | 0.255214 | 0.086946 |
| MmugDNA.18836.1.S1_at   | MmugDNA.18836.1 | 10.38 | 10.14 | 0.22 | 0.22 | 1.19  | 0.115683 | 0.001298 | 0.39278  | 0.055585 |
| MmugDNA.18837.1.S1_at   | MmugDNA.18837.1 | 4.6   | 4.29  | 0.88 | 0.44 | 1.24  | 0.359814 | 0.355789 | 0.635387 | 0.597864 |
| MmugDNA.18838.1.S1_at   | MmugDNA.18838.1 | 7.25  | 7.16  | 1.31 | 0.28 | 1.06  | 0.869386 | 0.980939 | 0.94371  | 0.989478 |
| MmugDNA.18839.1.S1_at   | MmugDNA.18839.1 | 3.51  | 3.55  | 0.3  | 0.23 | -1.03 | 0.471391 | 0.4634   | 0.715544 | 0.674383 |
| MmugDNA.1884.1.S1_at    | MmugDNA.1884.1  | 6.82  | 5.79  | 0.67 | 0.5  | 2.03  | 0.202858 | 0.235909 | 0.500587 | 0.507056 |
| MmugDNA.18841.1.S1_at   | MmugDNA.18841.1 | 3.29  | 3.59  | 0.16 | 0.36 | -1.23 | 0.732133 | 0.802874 | 0.87477  | 0.886465 |
| MmugDNA.18842.1.S1_at   | MmugDNA.18842.1 | 2.67  | 2.68  | 0.02 | 0.08 | -1.01 | 0.554315 | 0.581416 | 0.77064  | 0.750451 |
| MmugDNA.18847.1.S1_at   | MmugDNA.18847.1 | 5.91  | 5.7   | 0.16 | 0.19 | 1.16  | 0.383151 | 0.544091 | 0.652491 | 0.726614 |
| MmugDNA.18848.1.S1_at   | MmugDNA.18848.1 | 3.9   | 3.69  | 0.19 | 0.33 | 1.15  | 0.360111 | 0.615959 | 0.635698 | 0.772359 |
| MmugDNA.18849.1.S1_at   | MmugDNA.18849.1 | 5.55  | 5.7   | 0.82 | 0.45 | -1.11 | 0.952519 | 0.475274 | 0.980442 | 0.682031 |
| MmugDNA.34587.1.S1_s_at | MmugDNA.34587.1 | 12.74 | 12.39 | 0.02 | 0.02 | 1.28  | 0.000034 | 0.027377 | 0.045594 | 0.206695 |
| MmugDNA.18850.1.S1_at   | MmugDNA.18850.1 | 9.56  | 9.83  | 0.53 | 0.21 | -1.2  | 0.733898 | 0.446517 | 0.875982 | 0.662842 |
| MmugDNA.18851.1.S1_at   | MmugDNA.18851.1 | 10.86 | 9.74  | 0.22 | 0.18 | 2.17  | 0.002607 | 0.051315 | 0.095164 | 0.271959 |
| MmugDNA.18852.1.S1_at   | MmugDNA.18852.1 | 3.17  | 3.05  | 0.09 | 0.09 | 1.08  | 0.093385 | 0.153864 | 0.361937 | 0.428509 |
| MmugDNA.18853.1.S1_at   | MmugDNA.18853.1 | 10.69 | 11.06 | 0.2  | 0.07 | -1.3  | 0.040744 | 0.13851  | 0.258449 | 0.411492 |
| MmugDNA.18854.1.S1_at   | MmugDNA.18854.1 | 7.23  | 6.2   | 0.39 | 0.27 | 2.05  | 0.018478 | 0.229896 | 0.189088 | 0.501802 |
| MmugDNA.18855.1.S1_at   | MmugDNA.18855.1 | 5.18  | 4.91  | 0.13 | 0.02 | 1.21  | 0.03044  | 0.116923 | 0.227311 | 0.384297 |
| MmugDNA.18856.1.S1_at   | MmugDNA.18856.1 | 9.44  | 9.07  | 0.12 | 0.01 | 1.29  | 0.009052 | 0.000134 | 0.144851 | 0.029087 |
| MmugDNA.18858.1.S1_at   | MmugDNA.18858.1 | 5.36  | 6.72  | 0.75 | 0.14 | -2.56 | 0.033337 | 0.228976 | 0.236556 | 0.501254 |
| MmugDNA.18859.1.S1_at   | MmugDNA.18859.1 | 9.66  | 10.12 | 0.5  | 0.21 | -1.37 | 0.463548 | 0.625646 | 0.710097 | 0.779265 |
| MmugDNA.1886.1.S1_at    | MmugDNA.1886.1  | 8.77  | 8.22  | 0.24 | 0.16 | 1.47  | 0.020914 | 0.287945 | 0.198215 | 0.549227 |
| MmugDNA.18861.1.S1_at   | MmugDNA.18861.1 | 7.83  | 7.06  | 0.75 | 0.41 | 1.71  | 0.121909 | 0.221211 | 0.400622 | 0.494537 |
| MmugDNA.18862.1.S1_at   | MmugDNA.18862.1 | 3.43  | 3.43  | 0.06 | 0.07 | 1     | 0.398211 | 0.580854 | 0.663706 | 0.749953 |
| MmugDNA.18865.1.S1_at   | MmugDNA.18865.1 | 5.72  | 5.74  | 0.12 | 0.02 | -1.01 | 0.325922 | 0.572732 | 0.609131 | 0.744687 |
| MmugDNA.18868.1.S1_at   | MmugDNA.18868.1 | 7.5   | 7.74  | 0.14 | 0.04 | -1.18 | 0.039228 | 0.346754 | 0.254518 | 0.591536 |
| MmugDNA.18870.1.S1_at   | MmugDNA.18870.1 | 3.92  | 3.93  | 0.47 | 0.69 | -1.01 | 0.893517 | 0.925348 | 0.954549 | 0.957778 |
| MmugDNA.18871.1.S1_at   | MmugDNA.18871.1 | 6.65  | 6.62  | 0.14 | 0.27 | 1.02  | 0.84356  | 0.98249  | 0.931516 | 0.99036  |
| MmugDNA.18874.1.S1_at   | MmugDNA.18874.1 | 9     | 9.28  | 0.34 | 0.24 | -1.21 | 0.662621 | 0.084416 | 0.837251 | 0.335713 |
| MmugDNA.18875.1.S1_at   | MmugDNA.18875.1 | 5.74  | 5.71  | 0.17 | 0.1  | 1.02  | 0.933557 | 0.844622 | 0.972111 | 0.91156  |
| MmugDNA.18876.1.S1_at   | MmugDNA.18876.1 | 5.4   | 5.44  | 0.18 | 0.07 | -1.03 | 0.689816 | 0.736127 | 0.851884 | 0.84733  |
| MmugDNA.18877.1.S1_at   | MmugDNA.18877.1 | 3.92  | 3.99  | 0.33 | 0.37 | -1.05 | 0.683038 | 0.843493 | 0.848853 | 0.910881 |
| MmugDNA.18879.1.S1_at   | MmugDNA.18879.1 | 7.9   | 7.99  | 0.21 | 0.12 | -1.06 | 0.815282 | 0.614943 | 0.917536 | 0.771635 |
| MmugDNA.1888.1.S1_at    | MmugDNA.1888.1  | 4.76  | 4.63  | 0.18 | 0.06 | 1.1   | 0.261435 | 0.246257 | 0.555631 | 0.515889 |
| MmugDNA.18881.1.S1_at   | MmugDNA.18881.1 | 6.31  | 6.43  | 0.55 | 0.05 | -1.09 | 0.441199 | 0.595577 | 0.694766 | 0.759091 |
| MmugDNA.18882.1.S1_at   | MmugDNA.18882.1 | 5.52  | 5.49  | 0.08 | 0.09 | 1.02  | 0.389183 | 0.719023 | 0.657132 | 0.83736  |
| MmugDNA.18883.1.S1_at   | MmugDNA.18883.1 | 6.22  | 6.17  | 0.19 | 0.07 | 1.03  | 0.60566  | 0.075978 | 0.802615 | 0.320676 |
| MmugDNA.18884.1.S1_at   | MmugDNA.18884.1 | 6.92  | 6.88  | 0.08 | 0.16 | 1.03  | 0.945364 | 0.48306  | 0.977063 | 0.687687 |
| MmugDNA.18885.1.S1_at   | MmugDNA.18885.1 | 8.97  | 8.37  | 0.16 | 0.34 | 1.52  | 0.079629 | 0.21991  | 0.33985  | 0.493423 |
| MmugDNA.18886.1.S1_at   | MmugDNA.18886.1 | 3.15  | 3.15  | 0.05 | 0.05 | 1     | 0.969221 | 0.840694 | 0.98776  | 0.909196 |
| MmugDNA.18887.1.S1_at   | MmugDNA.18887.1 | 4.48  | 4.35  | 0.54 | 0.38 | 1.09  | 0.277843 | 0.346035 | 0.569311 | 0.59115  |
| MmugDNA.18888.1.S1_at   | MmugDNA.18888.1 | 3.96  | 3.98  | 0.07 | 0.24 | -1.01 | 0.240272 | 0.410961 | 0.537838 | 0.63782  |
| MmugDNA.18889.1.S1_s_at | MmugDNA.18889.1 | 9.23  | 9.12  | 0.33 | 0.17 | 1.08  | 0.637217 | 0.406149 | 0.822365 | 0.634211 |

|                         |                 |       |       |      |      |       |          |          |          |          |
|-------------------------|-----------------|-------|-------|------|------|-------|----------|----------|----------|----------|
| MmugDNA.1889.1.S1_at    | MmugDNA.1889.1  | 9.18  | 8.23  | 0.47 | 0.12 | 1.93  | 0.077107 | 0.005744 | 0.335689 | 0.104342 |
| MmugDNA.18891.1.S1_s_at | MmugDNA.18891.1 | 8.76  | 7.28  | 1.06 | 0.15 | 2.79  | 0.264935 | 0.599015 | 0.557962 | 0.761257 |
| MmugDNA.18893.1.S1_at   | MmugDNA.18893.1 | 5.32  | 5.07  | 0.28 | 0.15 | 1.19  | 0.208973 | 0.266489 | 0.506432 | 0.532235 |
| MmugDNA.18894.1.S1_at   | MmugDNA.18894.1 | 7.56  | 7.96  | 0.2  | 0.14 | -1.32 | 0.075142 | 0.057716 | 0.332294 | 0.2866   |
| MmugDNA.18895.1.S1_at   | MmugDNA.18895.1 | 4.68  | 4.76  | 0.03 | 0.23 | -1.06 | 0.631102 | 0.46113  | 0.818772 | 0.672857 |
| MmugDNA.18896.1.S1_at   | MmugDNA.18896.1 | 10.22 | 10.12 | 0.26 | 0.12 | 1.07  | 0.831853 | 0.006054 | 0.925994 | 0.106152 |
| MmugDNA.18898.1.S1_at   | MmugDNA.18898.1 | 4.55  | 4.5   | 0.23 | 0.08 | 1.04  | 0.713231 | 0.790147 | 0.864601 | 0.878708 |
| MmugDNA.18899.1.S1_at   | MmugDNA.18899.1 | 3.95  | 4.21  | 0.17 | 0.22 | -1.19 | 0.470058 | 0.644447 | 0.714665 | 0.791578 |
| MmugDNA.189.1.S1_at     | MmugDNA.189.1   | 9.89  | 11.57 | 0.33 | 0.11 | -3.21 | 0.001667 | 0.009727 | 0.084462 | 0.129723 |
| MmugDNA.1890.1.S1_at    | MmugDNA.1890.1  | 5.68  | 5.71  | 0.3  | 0.35 | -1.02 | 0.975362 | 0.99787  | 0.99019  | 0.998947 |
| MmugDNA.18900.1.S1_at   | MmugDNA.18900.1 | 10.86 | 11.19 | 0.32 | 0.09 | -1.25 | 0.212893 | 0.001136 | 0.510861 | 0.053082 |
| MmugDNA.18901.1.S1_at   | MmugDNA.18901.1 | 7.01  | 7.06  | 0.3  | 0.31 | -1.03 | 0.450553 | 0.165597 | 0.70154  | 0.44189  |
| MmugDNA.18902.1.S1_at   | MmugDNA.18902.1 | 4.44  | 4.39  | 0.12 | 0.31 | 1.03  | 0.670317 | 0.884343 | 0.841785 | 0.9341   |
| MmugDNA.18904.1.S1_s_at | MmugDNA.18904.1 | 3.66  | 3.45  | 0.54 | 0.03 | 1.16  | 0.49573  | 0.618308 | 0.73183  | 0.774002 |
| MmugDNA.18906.1.S1_at   | MmugDNA.18906.1 | 5.46  | 6     | 0.39 | 0.25 | -1.45 | 0.227135 | 0.041294 | 0.525124 | 0.247995 |
| MmugDNA.18908.1.S1_at   | MmugDNA.18908.1 | 5.05  | 5.08  | 0.08 | 0.14 | -1.02 | 0.530024 | 0.102838 | 0.754645 | 0.363428 |
| MmugDNA.1891.1.S1_at    | MmugDNA.1891.1  | 6.09  | 6.12  | 0.12 | 0.03 | -1.02 | 0.739891 | 0.927195 | 0.879468 | 0.958627 |
| MmugDNA.18910.1.S1_at   | MmugDNA.18910.1 | 7.69  | 6.99  | 0.23 | 0.04 | 1.62  | 0.007009 | 0.009754 | 0.131064 | 0.129954 |
| MmugDNA.18911.1.S1_at   | MmugDNA.18911.1 | 2.58  | 2.57  | 0    | 0.05 | 1     | 0.865831 | 0.85784  | 0.941892 | 0.918921 |
| MmugDNA.18912.1.S1_at   | MmugDNA.18912.1 | 7.8   | 9.18  | 1.07 | 0.22 | -2.61 | 0.292368 | 0.435997 | 0.581688 | 0.655713 |
| MmugDNA.18914.1.S1_at   | MmugDNA.18914.1 | 6.85  | 6.6   | 0.08 | 0.12 | 1.19  | 0.03509  | 0.04089  | 0.241992 | 0.247132 |
| MmugDNA.18915.1.S1_at   | MmugDNA.18915.1 | 8.01  | 7.99  | 0.2  | 0.13 | 1.02  | 0.630633 | 0.482936 | 0.818647 | 0.687681 |
| MmugDNA.18916.1.S1_at   | MmugDNA.18916.1 | 13.38 | 13.2  | 0.08 | 0.1  | 1.13  | 0.077839 | 0.12823  | 0.336934 | 0.399322 |
| MmugDNA.18916.1.S1_s_at | MmugDNA.18916.1 | 13.01 | 12.82 | 0.12 | 0.05 | 1.14  | 0.070556 | 0.129995 | 0.324039 | 0.401576 |
| MmugDNA.18918.1.S1_at   | MmugDNA.18918.1 | 4.26  | 4.3   | 0.39 | 0.07 | -1.03 | 0.471445 | 0.59543  | 0.715544 | 0.759091 |
| MmugDNA.18919.1.S1_at   | MmugDNA.18919.1 | 6.04  | 5.84  | 0.97 | 0.05 | 1.15  | 0.584171 | 0.50696  | 0.788484 | 0.702692 |
| MmugDNA.1892.1.S1_at    | MmugDNA.1892.1  | 6.4   | 6.46  | 0.09 | 0.37 | -1.04 | 0.292564 | 0.46317  | 0.581743 | 0.674261 |
| MmugDNA.18920.1.S1_at   | MmugDNA.18920.1 | 6.41  | 6.35  | 0.15 | 0.12 | 1.04  | 0.24332  | 0.302573 | 0.539969 | 0.560201 |
| MmugDNA.19032.1.S1_s_at | MmugDNA.19032.1 | 6.19  | 6     | 0.27 | 0.2  | 1.14  | 0.704412 | 0.673937 | 0.859708 | 0.809483 |
| MmugDNA.18922.1.S1_at   | MmugDNA.18922.1 | 5.77  | 4.71  | 0.64 | 0.61 | 2.09  | 0.080568 | 0.084939 | 0.341175 | 0.336554 |
| MmugDNA.18924.1.S1_at   | MmugDNA.18924.1 | 9.97  | 10.15 | 0.07 | 0.03 | -1.13 | 0.026988 | 0.095454 | 0.217138 | 0.352482 |
| MmugDNA.18926.1.S1_at   | MmugDNA.18926.1 | 8.54  | 8.47  | 0.15 | 0.18 | 1.05  | 0.679862 | 0.659272 | 0.847268 | 0.80063  |
| MmugDNA.18927.1.S1_at   | MmugDNA.18927.1 | 8.2   | 8.46  | 0.29 | 0.27 | -1.2  | 0.318435 | 0.337833 | 0.603134 | 0.585027 |
| MmugDNA.18929.1.S1_at   | MmugDNA.18929.1 | 7.15  | 7.45  | 0.19 | 0.16 | -1.23 | 0.105721 | 0.14925  | 0.379811 | 0.42373  |
| MmugDNA.1893.1.S1_at    | MmugDNA.1893.1  | 8.22  | 7.98  | 0.21 | 0.25 | 1.18  | 0.212764 | 0.135276 | 0.510725 | 0.40737  |
| MmugDNA.18930.1.S1_at   | MmugDNA.18930.1 | 5.46  | 5.47  | 0.01 | 0.09 | -1.01 | 0.315424 | 0.342341 | 0.600357 | 0.588413 |
| MmugDNA.18931.1.S1_at   | MmugDNA.18931.1 | 5.11  | 6.54  | 0.63 | 0.53 | -2.7  | 0.092089 | 0.21335  | 0.360151 | 0.487225 |
| MmugDNA.18933.1.S1_at   | MmugDNA.18933.1 | 6.15  | 5.96  | 0.14 | 0.03 | 1.14  | 0.0721   | 0.01885  | 0.326471 | 0.172706 |
| MmugDNA.18934.1.S1_at   | MmugDNA.18934.1 | 7.17  | 7.14  | 0.16 | 0.02 | 1.02  | 0.452368 | 0.67284  | 0.702807 | 0.808824 |
| MmugDNA.18935.1.S1_at   | MmugDNA.18935.1 | 3.82  | 4.49  | 0.09 | 0.34 | -1.58 | 0.037933 | 0.074866 | 0.250574 | 0.31874  |
| MmugDNA.18936.1.S1_at   | MmugDNA.18936.1 | 5.62  | 5.72  | 1.25 | 0.19 | -1.07 | 0.506839 | 0.672528 | 0.739358 | 0.808615 |
| MmugDNA.18939.1.S1_at   | MmugDNA.18939.1 | 3.81  | 3.77  | 0.1  | 0.09 | 1.03  | 0.573154 | 0.766204 | 0.781077 | 0.864166 |
| MmugDNA.1894.1.S1_s_at  | MmugDNA.1894.1  | 7.57  | 9.26  | 0.65 | 0.48 | -3.22 | 0.060712 | 0.052625 | 0.303414 | 0.274903 |

|                         |                 |       |       |      |      |       |          |          |          |          |
|-------------------------|-----------------|-------|-------|------|------|-------|----------|----------|----------|----------|
| MmugDNA.18941.1.S1_at   | MmugDNA.18941.1 | 6.22  | 6.68  | 0.53 | 0.3  | -1.38 | 0.361997 | 0.34848  | 0.637175 | 0.592593 |
| MmugDNA.18943.1.S1_at   | MmugDNA.18943.1 | 3.88  | 3.78  | 0.19 | 0.09 | 1.07  | 0.996654 | 0.032925 | 0.998883 | 0.22466  |
| MmugDNA.18944.1.S1_at   | MmugDNA.18944.1 | 5.73  | 5.62  | 0.23 | 0.12 | 1.08  | 0.804401 | 0.975883 | 0.912096 | 0.986856 |
| MmugDNA.18945.1.S1_at   | MmugDNA.18945.1 | 8.02  | 7.76  | 0.2  | 0.07 | 1.2   | 0.098854 | 0.223146 | 0.369716 | 0.495907 |
| MmugDNA.18946.1.S1_at   | MmugDNA.18946.1 | 7.11  | 7.04  | 0.14 | 0.1  | 1.05  | 0.434311 | 0.486018 | 0.689624 | 0.689551 |
| MmugDNA.18947.1.S1_at   | MmugDNA.18947.1 | 5.69  | 5.46  | 0.51 | 0.15 | 1.17  | 0.180022 | 0.33261  | 0.475116 | 0.580982 |
| MmugDNA.18949.1.S1_at   | MmugDNA.18949.1 | 6.85  | 6.5   | 0.3  | 0.13 | 1.28  | 0.587571 | 0.00326  | 0.790498 | 0.082278 |
| MmugDNA.1895.1.S1_at    | MmugDNA.1895.1  | 6.39  | 6.41  | 0.3  | 0.4  | -1.01 | 0.716581 | 0.057135 | 0.866324 | 0.284945 |
| MmugDNA.18950.1.S1_at   | MmugDNA.18950.1 | 10.03 | 10.47 | 0.23 | 0.07 | -1.36 | 0.015678 | 0.022936 | 0.17771  | 0.189455 |
| MmugDNA.18950.1.S1_s_at | MmugDNA.18950.1 | 8.63  | 9.08  | 0.35 | 0.16 | -1.37 | 0.105971 | 0.158181 | 0.379981 | 0.433986 |
| MmugDNA.18951.1.S1_at   | MmugDNA.18951.1 | 6.66  | 6.36  | 0.43 | 0.21 | 1.23  | 0.106577 | 0.15634  | 0.380716 | 0.43161  |
| MmugDNA.18952.1.S1_at   | MmugDNA.18952.1 | 3.58  | 3.77  | 0.18 | 0.26 | -1.14 | 0.172702 | 0.3114   | 0.46677  | 0.566451 |
| MmugDNA.18954.1.S1_at   | MmugDNA.18954.1 | 6     | 6.15  | 0.25 | 0.1  | -1.11 | 0.842757 | 0.486198 | 0.931103 | 0.689643 |
| MmugDNA.18954.1.S1_x_at | MmugDNA.18954.1 | 6.21  | 6.12  | 0.47 | 0.17 | 1.06  | 0.867117 | 0.879284 | 0.942534 | 0.931101 |
| MmugDNA.18957.1.S1_at   | MmugDNA.18957.1 | 8.41  | 7.97  | 0.23 | 0.22 | 1.36  | 0.048476 | 0.304413 | 0.277562 | 0.561712 |
| MmugDNA.18959.1.S1_at   | MmugDNA.18959.1 | 2.53  | 2.7   | 0.38 | 0.13 | -1.12 | 0.815754 | 0.821652 | 0.917765 | 0.897303 |
| MmugDNA.1896.1.S1_at    | MmugDNA.1896.1  | 6.13  | 5.2   | 0.85 | 0.11 | 1.91  | 0.130507 | 0.107964 | 0.412931 | 0.37105  |
| MmugDNA.18960.1.S1_at   | MmugDNA.18960.1 | 6.85  | 6.59  | 0.32 | 0.12 | 1.2   | 0.245926 | 0.283461 | 0.541732 | 0.545959 |
| MmugDNA.18961.1.S1_at   | MmugDNA.18961.1 | 5.31  | 5.29  | 0.19 | 0.03 | 1.01  | 0.887233 | 0.932507 | 0.951902 | 0.961723 |
| MmugDNA.18962.1.S1_at   | MmugDNA.18962.1 | 7.28  | 7.29  | 0.08 | 0.06 | -1.01 | 0.755623 | 0.265413 | 0.887352 | 0.531363 |
| MmugDNA.18963.1.S1_at   | MmugDNA.18963.1 | 9.01  | 9.13  | 0.4  | 0.08 | -1.09 | 0.509196 | 0.813986 | 0.740889 | 0.892693 |
| MmugDNA.18964.1.S1_at   | MmugDNA.18964.1 | 10.02 | 9.25  | 0.28 | 0.2  | 1.71  | 0.017738 | 0.024001 | 0.18688  | 0.194183 |
| MmugDNA.18965.1.S1_at   | MmugDNA.18965.1 | 3.59  | 3.68  | 0.06 | 0.09 | -1.07 | 0.560844 | 0.124592 | 0.774056 | 0.394995 |
| MmugDNA.18966.1.S1_at   | MmugDNA.18966.1 | 5.63  | 5.62  | 0.21 | 0.07 | 1.01  | 0.628363 | 0.02002  | 0.817431 | 0.177698 |
| MmugDNA.18967.1.S1_at   | MmugDNA.18967.1 | 5.32  | 5.28  | 0.06 | 0.27 | 1.03  | 0.808774 | 0.88847  | 0.914357 | 0.936383 |
| MmugDNA.18968.1.S1_at   | MmugDNA.18968.1 | 8.01  | 8.11  | 0.25 | 0.26 | -1.07 | 0.789716 | 0.005288 | 0.904456 | 0.100736 |
| MmugDNA.1897.1.S1_at    | MmugDNA.1897.1  | 5.7   | 5.68  | 0.13 | 0.18 | 1.02  | 0.997503 | 0.614512 | 0.999096 | 0.771283 |
| MmugDNA.18972.1.S1_at   | MmugDNA.18972.1 | 4.16  | 4.19  | 0.18 | 0.26 | -1.02 | 0.693501 | 0.856998 | 0.853516 | 0.918317 |
| MmugDNA.18974.1.S1_at   | MmugDNA.18974.1 | 6.22  | 6.6   | 0.09 | 0.19 | -1.3  | 0.046819 | 0.074341 | 0.274065 | 0.318046 |
| MmugDNA.18975.1.S1_at   | MmugDNA.18975.1 | 10.09 | 10.27 | 0.04 | 0.12 | -1.14 | 0.161021 | 0.001239 | 0.452489 | 0.054781 |
| MmugDNA.18977.1.S1_at   | MmugDNA.18977.1 | 4.01  | 3.96  | 0.09 | 0.15 | 1.04  | 0.999549 | 0.470106 | 0.999849 | 0.678572 |
| MmugDNA.18978.1.S1_at   | MmugDNA.18978.1 | 9.14  | 9.32  | 0.3  | 0.05 | -1.13 | 0.365088 | 0.034821 | 0.639741 | 0.230811 |
| MmugDNA.18979.1.S1_at   | MmugDNA.18979.1 | 8.16  | 8.06  | 0.13 | 0.1  | 1.08  | 0.144719 | 0.426684 | 0.431674 | 0.648796 |
| MmugDNA.1898.1.S1_at    | MmugDNA.1898.1  | 7.74  | 7.74  | 0.08 | 0.04 | -1    | 0.240748 | 0.294326 | 0.538168 | 0.55407  |
| MmugDNA.18981.1.S1_at   | MmugDNA.18981.1 | 6.14  | 6.37  | 0.19 | 0.1  | -1.17 | 0.244536 | 0.556319 | 0.540909 | 0.734492 |
| MmugDNA.18982.1.S1_s_at | MmugDNA.18982.1 | 12.15 | 12.53 | 0.24 | 0.23 | -1.31 | 0.114999 | 0.224026 | 0.392018 | 0.497046 |
| MmugDNA.18983.1.S1_at   | MmugDNA.18983.1 | 5.49  | 5.51  | 0.18 | 0.03 | -1.02 | 0.414763 | 0.599018 | 0.675681 | 0.761257 |
| MmugDNA.18984.1.S1_s_at | MmugDNA.18984.1 | 6.71  | 6.76  | 0.09 | 0.05 | -1.03 | 0.164872 | 0.278602 | 0.457897 | 0.542329 |
| MmugDNA.18985.1.S1_at   | MmugDNA.18985.1 | 4.09  | 4     | 0.1  | 0    | 1.07  | 0.161253 | 0.114541 | 0.452791 | 0.381098 |
| MmugDNA.18986.1.S1_at   | MmugDNA.18986.1 | 4.87  | 5.29  | 0.24 | 0.43 | -1.35 | 0.883401 | 0.966683 | 0.950424 | 0.98148  |
| MmugDNA.18987.1.S1_at   | MmugDNA.18987.1 | 3.95  | 3.82  | 0.33 | 0.33 | 1.09  | 0.652802 | 0.592378 | 0.831632 | 0.757744 |
| MmugDNA.18988.1.S1_at   | MmugDNA.18988.1 | 4.78  | 4.37  | 0.2  | 0.12 | 1.32  | 0.140327 | 0.263212 | 0.426075 | 0.52952  |
| MmugDNA.18989.1.S1_at   | MmugDNA.18989.1 | 6.46  | 6.61  | 0.25 | 0.14 | -1.11 | 0.274324 | 0.669984 | 0.566281 | 0.806988 |



|                         |                 |       |       |      |      |       |          |          |          |          |
|-------------------------|-----------------|-------|-------|------|------|-------|----------|----------|----------|----------|
| MmugDNA.1899.1.S1_at    | MmugDNA.1899.1  | 3.67  | 3.75  | 0.03 | 0.16 | -1.06 | 0.530707 | 0.211065 | 0.755224 | 0.485086 |
| MmugDNA.18994.1.S1_at   | MmugDNA.18994.1 | 5.48  | 5.39  | 0.1  | 0.09 | 1.07  | 0.125213 | 0.540624 | 0.405649 | 0.724463 |
| MmugDNA.18995.1.S1_at   | MmugDNA.18995.1 | 4.86  | 4.7   | 0.15 | 0.15 | 1.12  | 0.527226 | 0.233079 | 0.753006 | 0.50445  |
| MmugDNA.18997.1.S1_at   | MmugDNA.18997.1 | 5.68  | 5.21  | 0.12 | 0.18 | 1.38  | 0.011084 | 0.040806 | 0.154972 | 0.246935 |
| MmugDNA.19.1.S1_at      | MmugDNA.19.1    | 6.44  | 7.14  | 0.98 | 0.36 | -1.63 | 0.455289 | 0.528865 | 0.705066 | 0.71692  |
| MmugDNA.190.1.S1_at     | MmugDNA.190.1   | 11.36 | 11.56 | 0.04 | 0.04 | -1.15 | 0.003291 | 0.307522 | 0.102103 | 0.563781 |
| MmugDNA.19001.1.S1_at   | MmugDNA.19001.1 | 4.92  | 4.73  | 0.36 | 0.12 | 1.15  | 0.135905 | 0.197192 | 0.42003  | 0.472213 |
| MmugDNA.19002.1.S1_at   | MmugDNA.19002.1 | 3.71  | 3.64  | 0.24 | 0.09 | 1.05  | 0.473249 | 0.684211 | 0.716569 | 0.815834 |
| MmugDNA.19003.1.S1_at   | MmugDNA.19003.1 | 4.11  | 4.2   | 0.31 | 0.05 | -1.07 | 0.655773 | 0.551301 | 0.833545 | 0.730915 |
| MmugDNA.19004.1.S1_at   | MmugDNA.19004.1 | 3.16  | 3.11  | 0.15 | 0.03 | 1.04  | 0.623541 | 0.501749 | 0.814256 | 0.699813 |
| MmugDNA.19006.1.S1_at   | MmugDNA.19006.1 | 5.16  | 4.81  | 0.13 | 0.09 | 1.28  | 0.031541 | 0.24541  | 0.23101  | 0.515213 |
| MmugDNA.19007.1.S1_at   | MmugDNA.19007.1 | 10.18 | 10.66 | 0.27 | 0.21 | -1.4  | 0.114058 | 0.210537 | 0.390825 | 0.484477 |
| MmugDNA.19009.1.S1_at   | MmugDNA.19009.1 | 7.63  | 7.79  | 0.27 | 0.29 | -1.11 | 0.942519 | 0.156651 | 0.975704 | 0.432153 |
| MmugDNA.1901.1.S1_at    | MmugDNA.1901.1  | 10.73 | 10.63 | 0.25 | 0.05 | 1.07  | 0.468945 | 0.191515 | 0.713885 | 0.466833 |
| MmugDNA.19010.1.S1_at   | MmugDNA.19010.1 | 6.27  | 6.27  | 0.27 | 0.03 | 1     | 0.889877 | 0.703361 | 0.953112 | 0.828004 |
| MmugDNA.19011.1.S1_at   | MmugDNA.19011.1 | 3.58  | 3.67  | 0.13 | 0.11 | -1.06 | 0.649639 | 0.110572 | 0.829826 | 0.374848 |
| MmugDNA.19012.1.S1_a_at | MmugDNA.19012.1 | 3.3   | 3.27  | 0.05 | 0.13 | 1.02  | 0.271288 | 0.144087 | 0.56319  | 0.417974 |
| MmugDNA.19012.1.S1_at   | MmugDNA.19012.1 | 6.36  | 6.24  | 0.3  | 0.07 | 1.09  | 0.421998 | 0.655898 | 0.680233 | 0.798739 |
| MmugDNA.19014.1.S1_at   | MmugDNA.19014.1 | 8.59  | 8.23  | 0.29 | 0.13 | 1.28  | 0.168095 | 0.085694 | 0.461363 | 0.337761 |
| MmugDNA.19015.1.S1_at   | MmugDNA.19015.1 | 6.27  | 6.17  | 0.2  | 0.08 | 1.07  | 0.172183 | 0.223433 | 0.466269 | 0.49623  |
| MmugDNA.29089.1.S1_at   | MmugDNA.29089.1 | 2.84  | 3.01  | 0.08 | 0.12 | -1.12 | 0.199616 | 0.3567   | 0.497019 | 0.598516 |
| MmugDNA.29089.1.S1_s_at | MmugDNA.29089.1 | 4.13  | 3.96  | 0.13 | 0.05 | 1.13  | 0.142337 | 0.241016 | 0.428351 | 0.511657 |
| MmugDNA.19018.1.S1_at   | MmugDNA.19018.1 | 9.76  | 9.25  | 0.23 | 0.11 | 1.43  | 0.017657 | 0.008426 | 0.186448 | 0.121867 |
| MmugDNA.19020.1.S1_at   | MmugDNA.19020.1 | 4.16  | 4.27  | 0.08 | 0.21 | -1.08 | 0.42101  | 0.838157 | 0.679818 | 0.907587 |
| MmugDNA.19021.1.S1_at   | MmugDNA.19021.1 | 11.37 | 11.31 | 0.01 | 0.02 | 1.04  | 0.010569 | 0.00081  | 0.152667 | 0.046161 |
| MmugDNA.19023.1.S1_at   | MmugDNA.19023.1 | 4.71  | 4.73  | 0.17 | 0.11 | -1.02 | 0.476895 | 0.653558 | 0.719161 | 0.797506 |
| MmugDNA.19024.1.S1_at   | MmugDNA.19024.1 | 10.08 | 9.93  | 0.39 | 0.1  | 1.11  | 0.953753 | 0.793723 | 0.981032 | 0.881035 |
| MmugDNA.19025.1.S1_at   | MmugDNA.19025.1 | 4.76  | 4.66  | 0.15 | 0.11 | 1.07  | 0.480698 | 0.419945 | 0.721501 | 0.643765 |
| MmugDNA.19027.1.S1_at   | MmugDNA.19027.1 | 3.6   | 3.53  | 0.2  | 0.16 | 1.05  | 0.86638  | 0.424116 | 0.942295 | 0.646737 |
| MmugDNA.19028.1.S1_at   | MmugDNA.19028.1 | 12.14 | 11.94 | 0.14 | 0.1  | 1.15  | 0.519479 | 0.6434   | 0.748059 | 0.790897 |
| MmugDNA.19029.1.S1_at   | MmugDNA.19029.1 | 3.67  | 3.43  | 0.18 | 0.16 | 1.18  | 0.105971 | 0.113033 | 0.379981 | 0.378888 |
| MmugDNA.1903.1.S1_at    | MmugDNA.1903.1  | 10.16 | 9.64  | 0.17 | 0.22 | 1.43  | 0.049409 | 0.096202 | 0.279687 | 0.353519 |
| MmugDNA.1903.1.S1_s_at  | MmugDNA.1903.1  | 9.13  | 8.48  | 0.18 | 0.11 | 1.57  | 0.008724 | 0.049417 | 0.14314  | 0.267237 |
| MmugDNA.19030.1.S1_at   | MmugDNA.19030.1 | 5.86  | 5.82  | 0.1  | 0.04 | 1.03  | 0.727379 | 0.140723 | 0.872303 | 0.414079 |
| MmugDNA.19031.1.S1_at   | MmugDNA.19031.1 | 5.92  | 5.88  | 0.2  | 0.12 | 1.02  | 0.236049 | 0.324426 | 0.533689 | 0.575042 |
| MmugDNA.19034.1.S1_at   | MmugDNA.19034.1 | 3.8   | 3.77  | 0.84 | 0.07 | 1.02  | 0.393745 | 0.349646 | 0.660469 | 0.593541 |
| MmugDNA.19035.1.S1_at   | MmugDNA.19035.1 | 5.39  | 5.38  | 0.05 | 0.02 | 1     | 0.630163 | 0.06678  | 0.818435 | 0.304293 |
| MmugDNA.19037.1.S1_at   | MmugDNA.19037.1 | 7.52  | 7.38  | 0.33 | 0.08 | 1.1   | 0.15945  | 0.116565 | 0.450742 | 0.383705 |
| MmugDNA.16452.1.S1_s_at | MmugDNA.16452.1 | 9.84  | 11.14 | 0.39 | 0.23 | -2.47 | 0.013338 | 0.007516 | 0.166232 | 0.116291 |
| MmugDNA.1904.1.S1_at    | MmugDNA.1904.1  | 3.12  | 3.1   | 0.19 | 0.06 | 1.01  | 0.813876 | 0.954721 | 0.916771 | 0.974331 |
| MmugDNA.19041.1.S1_at   | MmugDNA.19041.1 | 7.47  | 7.33  | 0.12 | 0.11 | 1.1   | 0.098875 | 0.043889 | 0.369716 | 0.254098 |
| MmugDNA.19042.1.S1_at   | MmugDNA.19042.1 | 7.78  | 7.26  | 0.24 | 0.18 | 1.44  | 0.041216 | 0.108528 | 0.259543 | 0.37207  |
| MmugDNA.19044.1.S1_at   | MmugDNA.19044.1 | 10.95 | 10.76 | 0.29 | 0.11 | 1.14  | 0.491011 | 0.025269 | 0.728974 | 0.199443 |

|                         |                 |       |       |      |      |       |          |          |          |          |
|-------------------------|-----------------|-------|-------|------|------|-------|----------|----------|----------|----------|
| MmugDNA.19044.1.S1_s_at | MmugDNA.19044.1 | 10.32 | 9.92  | 0.26 | 0.13 | 1.33  | 0.202214 | 0.031438 | 0.499812 | 0.219107 |
| MmugDNA.19045.1.S1_at   | MmugDNA.19045.1 | 11.55 | 11.32 | 0.26 | 0.08 | 1.17  | 0.2413   | 0.336884 | 0.538538 | 0.584144 |
| MmugDNA.19046.1.S1_at   | MmugDNA.19046.1 | 10.35 | 10.35 | 0.1  | 0.09 | 1     | 0.594793 | 0.355693 | 0.794991 | 0.597864 |
| MmugDNA.19048.1.S1_at   | MmugDNA.19048.1 | 9.97  | 10.29 | 0.3  | 0.02 | -1.24 | 0.452998 | 0.332015 | 0.703352 | 0.580557 |
| MmugDNA.1905.1.S1_at    | MmugDNA.1905.1  | 10.67 | 10.57 | 0.13 | 0.16 | 1.07  | 0.402114 | 0.793515 | 0.666552 | 0.880859 |
| MmugDNA.19052.1.S1_at   | MmugDNA.19052.1 | 5.43  | 5.54  | 0.09 | 0.12 | -1.08 | 0.206913 | 0.287246 | 0.504611 | 0.548526 |
| MmugDNA.19053.1.S1_at   | MmugDNA.19053.1 | 3.88  | 4.14  | 0.26 | 0.04 | -1.19 | 0.516866 | 0.744583 | 0.746092 | 0.852091 |
| MmugDNA.19054.1.S1_at   | MmugDNA.19054.1 | 4.59  | 4.81  | 0.53 | 0.69 | -1.17 | 0.837017 | 0.722922 | 0.928546 | 0.839489 |
| MmugDNA.19055.1.S1_at   | MmugDNA.19055.1 | 6.76  | 7.06  | 0.15 | 0.02 | -1.23 | 0.079416 | 0.004679 | 0.33945  | 0.095361 |
| MmugDNA.19057.1.S1_at   | MmugDNA.19057.1 | 7.11  | 7.04  | 0.11 | 0.05 | 1.05  | 0.60138  | 0.192471 | 0.79955  | 0.467952 |
| MmugDNA.19058.1.S1_at   | MmugDNA.19058.1 | 3.97  | 3.94  | 0.05 | 0.04 | 1.03  | 0.343984 | 0.216222 | 0.623277 | 0.489784 |
| MmugDNA.19059.1.S1_at   | MmugDNA.19059.1 | 3.38  | 3.38  | 0.14 | 0.04 | 1     | 0.337691 | 0.70598  | 0.61806  | 0.829628 |
| MmugDNA.1906.1.S1_at    | MmugDNA.1906.1  | 11.22 | 11.01 | 0.21 | 0.07 | 1.15  | 0.246944 | 0.005773 | 0.542575 | 0.104378 |
| MmugDNA.19060.1.S1_at   | MmugDNA.19060.1 | 6.63  | 6.51  | 0.27 | 0.1  | 1.08  | 0.514939 | 0.473777 | 0.744801 | 0.68101  |
| MmugDNA.19061.1.S1_at   | MmugDNA.19061.1 | 4.63  | 4.57  | 0.04 | 0.08 | 1.04  | 0.149977 | 0.591417 | 0.438986 | 0.756977 |
| MmugDNA.19062.1.S1_at   | MmugDNA.19062.1 | 8.51  | 8.06  | 0.31 | 0.15 | 1.37  | 0.037051 | 0.018344 | 0.247751 | 0.170313 |
| MmugDNA.19063.1.S1_at   | MmugDNA.19063.1 | 3.97  | 3.72  | 0.61 | 0.1  | 1.19  | 0.548681 | 0.69504  | 0.766623 | 0.822716 |
| MmugDNA.19064.1.S1_at   | MmugDNA.19064.1 | 4.09  | 4.02  | 0.09 | 0.14 | 1.05  | 0.999318 | 0.370781 | 0.99979  | 0.60976  |
| MmugDNA.19065.1.S1_at   | MmugDNA.19065.1 | 4.65  | 4.81  | 0.15 | 0.07 | -1.12 | 0.183599 | 0.063134 | 0.479495 | 0.29795  |
| MmugDNA.19067.1.S1_at   | MmugDNA.19067.1 | 3.17  | 3.33  | 0.05 | 0.11 | -1.12 | 0.04384  | 0.045262 | 0.266411 | 0.257084 |
| MmugDNA.33637.1.S1_s_at | MmugDNA.33637.1 | 10.33 | 10.17 | 0.15 | 0.07 | 1.12  | 0.103451 | 0.332168 | 0.376571 | 0.580593 |
| MmugDNA.19071.1.S1_at   | MmugDNA.19071.1 | 6.21  | 8.22  | 0.83 | 0.16 | -4.01 | 0.018047 | 0.045077 | 0.187335 | 0.256789 |
| MmugDNA.19072.1.S1_at   | MmugDNA.19072.1 | 3.87  | 4.97  | 0.39 | 0.16 | -2.14 | 0.021729 | 0.011383 | 0.200743 | 0.138214 |
| MmugDNA.19073.1.S1_at   | MmugDNA.19073.1 | 7.79  | 7.79  | 0.08 | 0.04 | -1    | 0.884029 | 0.899296 | 0.950645 | 0.942757 |
| MmugDNA.19076.1.S1_at   | MmugDNA.19076.1 | 11.33 | 11.5  | 0.08 | 0.15 | -1.13 | 0.238741 | 0.000385 | 0.536007 | 0.037273 |
| MmugDNA.19076.1.S1_s_at | MmugDNA.19076.1 | 11.71 | 11.86 | 0.05 | 0.13 | -1.11 | 0.105668 | 0.000052 | 0.379794 | 0.025333 |
| MmugDNA.19077.1.S1_at   | MmugDNA.19077.1 | 6.88  | 6.88  | 0.12 | 0.11 | 1     | 0.935329 | 0.980374 | 0.972947 | 0.989333 |
| MmugDNA.19078.1.S1_at   | MmugDNA.19078.1 | 4.95  | 4.78  | 0.76 | 0.18 | 1.12  | 0.231471 | 0.328884 | 0.530229 | 0.578452 |
| MmugDNA.19079.1.S1_at   | MmugDNA.19079.1 | 10.28 | 10.89 | 0.71 | 0.07 | -1.53 | 0.213905 | 0.115796 | 0.511702 | 0.382835 |
| MmugDNA.19079.1.S1_s_at | MmugDNA.19079.1 | 9.63  | 10.23 | 0.87 | 0.06 | -1.51 | 0.287838 | 0.173984 | 0.577522 | 0.450247 |
| MmugDNA.1908.1.S1_at    | MmugDNA.1908.1  | 7.17  | 7.34  | 0.23 | 0.02 | -1.12 | 0.467335 | 0.168018 | 0.712862 | 0.444641 |
| MmugDNA.1908.1.S1_s_at  | MmugDNA.1908.1  | 5.77  | 5.82  | 0.1  | 0.05 | -1.04 | 0.954165 | 0.900183 | 0.98117  | 0.943311 |
| MmugDNA.19080.1.S1_at   | MmugDNA.19080.1 | 5.07  | 5.12  | 0.43 | 0.18 | -1.03 | 0.525122 | 0.517648 | 0.751728 | 0.70974  |
| MmugDNA.19081.1.S1_at   | MmugDNA.19081.1 | 5.34  | 5.28  | 0.22 | 0.06 | 1.04  | 0.228804 | 0.457908 | 0.527323 | 0.670999 |
| MmugDNA.19082.1.S1_at   | MmugDNA.19082.1 | 5.23  | 5.35  | 0.31 | 0.14 | -1.08 | 0.904214 | 0.560937 | 0.959379 | 0.737054 |
| MmugDNA.19083.1.S1_at   | MmugDNA.19083.1 | 3.66  | 3.88  | 0.44 | 0.18 | -1.16 | 0.570877 | 0.274686 | 0.779514 | 0.539162 |
| MmugDNA.19084.1.S1_at   | MmugDNA.19084.1 | 5.02  | 5.01  | 0.08 | 0.07 | 1.01  | 0.375232 | 0.579035 | 0.646093 | 0.74883  |
| MmugDNA.19085.1.S1_at   | MmugDNA.19085.1 | 8.98  | 8.96  | 0.2  | 0.1  | 1.01  | 0.954268 | 0.049964 | 0.981196 | 0.268752 |
| MmugDNA.19087.1.S1_at   | MmugDNA.19087.1 | 5.51  | 4.73  | 0.29 | 0.29 | 1.71  | 0.015341 | 0.089869 | 0.176072 | 0.344073 |
| MmugDNA.19088.1.S1_at   | MmugDNA.19088.1 | 5.53  | 4.78  | 0.55 | 0.31 | 1.67  | 0.078749 | 0.13482  | 0.338573 | 0.406878 |
| MmugDNA.19089.1.S1_s_at | MmugDNA.19089.1 | 11.56 | 12.28 | 0.27 | 0.08 | -1.65 | 0.009025 | 0.0636   | 0.144777 | 0.29873  |
| MmugDNA.1909.1.S1_at    | MmugDNA.1909.1  | 5.7   | 5.65  | 0.03 | 0.28 | 1.04  | 0.862741 | 0.607634 | 0.940274 | 0.766457 |
| MmugDNA.19090.1.S1_at   | MmugDNA.19090.1 | 6.46  | 6.12  | 0.16 | 0.05 | 1.26  | 0.016531 | 0.004634 | 0.181539 | 0.094988 |

|                         |                 |       |       |      |      |       |          |          |          |          |
|-------------------------|-----------------|-------|-------|------|------|-------|----------|----------|----------|----------|
| MmugDNA.19091.1.S1_at   | MmugDNA.19091.1 | 11.52 | 11.33 | 0.11 | 0.05 | 1.14  | 0.098298 | 0.010772 | 0.368888 | 0.135471 |
| MmugDNA.19093.1.S1_at   | MmugDNA.19093.1 | 2.8   | 2.91  | 0.04 | 0.09 | -1.08 | 0.090279 | 0.094954 | 0.356872 | 0.352054 |
| MmugDNA.19094.1.S1_at   | MmugDNA.19094.1 | 4     | 4.07  | 0.07 | 0.07 | -1.05 | 0.404752 | 0.291148 | 0.668391 | 0.551652 |
| MmugDNA.19095.1.S1_at   | MmugDNA.19095.1 | 4.68  | 4.56  | 0.09 | 0.05 | 1.08  | 0.115495 | 0.038915 | 0.392682 | 0.242288 |
| MmugDNA.19098.1.S1_at   | MmugDNA.19098.1 | 3.15  | 3.05  | 0.16 | 0.07 | 1.08  | 0.206582 | 0.411182 | 0.504256 | 0.637937 |
| MmugDNA.19099.1.S1_at   | MmugDNA.19099.1 | 5.15  | 5.16  | 0.14 | 0.09 | -1    | 0.499131 | 0.058373 | 0.734029 | 0.288369 |
| MmugDNA.191.1.S1_at     | MmugDNA.191.1   | 6.04  | 5.95  | 0.37 | 0.04 | 1.06  | 0.242249 | 0.384104 | 0.539285 | 0.619926 |
| MmugDNA.19100.1.S1_at   | MmugDNA.19100.1 | 8.41  | 8.49  | 0.15 | 0.06 | -1.06 | 0.131503 | 0.313475 | 0.41434  | 0.567926 |
| MmugDNA.19101.1.S1_at   | MmugDNA.19101.1 | 6.69  | 6.98  | 0.68 | 0.35 | -1.22 | 0.677095 | 0.192262 | 0.845957 | 0.467715 |
| MmugDNA.19102.1.S1_at   | MmugDNA.19102.1 | 10.71 | 10.76 | 0.08 | 0.07 | -1.03 | 0.557301 | 0.917944 | 0.772057 | 0.954037 |
| MmugDNA.19103.1.S1_at   | MmugDNA.19103.1 | 2.98  | 2.97  | 0.17 | 0.06 | 1     | 0.398793 | 0.344703 | 0.664317 | 0.59007  |
| MmugDNA.19104.1.S1_at   | MmugDNA.19104.1 | 10.63 | 10.8  | 0.12 | 0.1  | -1.13 | 0.057324 | 0.143971 | 0.296809 | 0.41789  |
| MmugDNA.19105.1.S1_at   | MmugDNA.19105.1 | 12.78 | 12.83 | 0.05 | 0.2  | -1.03 | 0.600764 | 0.024596 | 0.799133 | 0.196239 |
| MmugDNA.19106.1.S1_at   | MmugDNA.19106.1 | 8.29  | 7.8   | 0.38 | 0.2  | 1.4   | 0.349051 | 0.092926 | 0.62702  | 0.349024 |
| MmugDNA.19106.1.S1_x_at | MmugDNA.19106.1 | 7.8   | 7.62  | 0.36 | 0.19 | 1.13  | 0.348167 | 0.100716 | 0.626326 | 0.360108 |
| MmugDNA.19108.1.S1_at   | MmugDNA.19108.1 | 4.52  | 4.58  | 0.07 | 0.09 | -1.04 | 0.25475  | 0.452419 | 0.549282 | 0.667088 |
| MmugDNA.19110.1.S1_at   | MmugDNA.19110.1 | 9.96  | 9.74  | 0.13 | 0.07 | 1.16  | 0.047152 | 0.009128 | 0.274594 | 0.125994 |
| MmugDNA.19114.1.S1_at   | MmugDNA.19114.1 | 5.66  | 5.65  | 0.22 | 0.1  | 1     | 0.988313 | 0.470114 | 0.99581  | 0.678572 |
| MmugDNA.19115.1.S1_at   | MmugDNA.19115.1 | 6.01  | 6.16  | 0.1  | 0.08 | -1.11 | 0.571487 | 0.237771 | 0.779965 | 0.50826  |
| MmugDNA.19116.1.S1_at   | MmugDNA.19116.1 | 6.58  | 6.42  | 0.09 | 0.14 | 1.12  | 0.170909 | 0.518359 | 0.464646 | 0.71038  |
| MmugDNA.19117.1.S1_at   | MmugDNA.19117.1 | 4.84  | 4.98  | 0.62 | 0.09 | -1.1  | 0.503821 | 0.8388   | 0.73721  | 0.908076 |
| MmugDNA.19118.1.S1_at   | MmugDNA.19118.1 | 9.78  | 10.02 | 0.36 | 0.25 | -1.18 | 0.521414 | 0.137064 | 0.749331 | 0.409836 |
| MmugDNA.19119.1.S1_at   | MmugDNA.19119.1 | 12.12 | 12.42 | 0.08 | 0.04 | -1.23 | 0.002297 | 0.005455 | 0.092325 | 0.101952 |
| MmugDNA.19119.1.S1_s_at | MmugDNA.19119.1 | 11.31 | 11.8  | 0.07 | 0.08 | -1.41 | 0.001386 | 0.001952 | 0.079595 | 0.065813 |
| MmugDNA.1912.1.S1_at    | MmugDNA.1912.1  | 6.86  | 6.95  | 0.26 | 0.16 | -1.07 | 0.792559 | 0.969443 | 0.905995 | 0.983275 |
| MmugDNA.19121.1.S1_at   | MmugDNA.19121.1 | 5.95  | 5.71  | 0.23 | 0.09 | 1.18  | 0.122442 | 0.110313 | 0.401149 | 0.374403 |
| MmugDNA.19122.1.S1_at   | MmugDNA.19122.1 | 6.97  | 6.75  | 0.05 | 0.15 | 1.17  | 0.062825 | 0.012606 | 0.307336 | 0.144807 |
| MmugDNA.19124.1.S1_at   | MmugDNA.19124.1 | 5.04  | 5.05  | 0.12 | 0.09 | -1.01 | 0.849532 | 0.979016 | 0.934492 | 0.988665 |
| MmugDNA.19128.1.S1_at   | MmugDNA.19128.1 | 4.03  | 4.04  | 0.26 | 0.07 | -1.01 | 0.963199 | 0.771398 | 0.985129 | 0.867177 |
| MmugDNA.19129.1.S1_at   | MmugDNA.19129.1 | 8.91  | 8.1   | 0.1  | 0.15 | 1.75  | 0.001383 | 0.000225 | 0.079595 | 0.032385 |
| MmugDNA.1913.1.S1_at    | MmugDNA.1913.1  | 11.02 | 10.84 | 0.08 | 0.05 | 1.14  | 0.040053 | 0.031195 | 0.256781 | 0.218399 |
| MmugDNA.19130.1.S1_at   | MmugDNA.19130.1 | 4.3   | 4.09  | 0.37 | 0.23 | 1.16  | 0.757741 | 0.600174 | 0.888869 | 0.761928 |
| MmugDNA.19131.1.S1_at   | MmugDNA.19131.1 | 6.6   | 6.93  | 0.88 | 0.09 | -1.26 | 0.428211 | 0.630481 | 0.685192 | 0.782239 |
| MmugDNA.19133.1.S1_at   | MmugDNA.19133.1 | 3.51  | 3.42  | 0.22 | 0.06 | 1.07  | 0.558726 | 0.670277 | 0.773051 | 0.807201 |
| MmugDNA.19134.1.S1_at   | MmugDNA.19134.1 | 12.15 | 12.11 | 0.11 | 0.12 | 1.03  | 0.357142 | 0.469196 | 0.633338 | 0.678155 |
| MmugDNA.19135.1.S1_at   | MmugDNA.19135.1 | 13.09 | 13.01 | 0.11 | 0.06 | 1.06  | 0.402991 | 0.472423 | 0.667108 | 0.67999  |
| MmugDNA.19136.1.S1_at   | MmugDNA.19136.1 | 10.76 | 10.95 | 0.03 | 0.08 | -1.14 | 0.029053 | 0.006474 | 0.223234 | 0.109314 |
| MmugDNA.19137.1.S1_at   | MmugDNA.19137.1 | 4.25  | 4.15  | 0.22 | 0.08 | 1.07  | 0.910069 | 0.974398 | 0.961883 | 0.986069 |
| MmugDNA.19139.1.S1_at   | MmugDNA.19139.1 | 4.37  | 4.33  | 0.09 | 0.26 | 1.02  | 0.758872 | 0.871389 | 0.889547 | 0.926844 |
| MmugDNA.1914.1.S1_at    | MmugDNA.1914.1  | 3.76  | 3.7   | 0.49 | 0.05 | 1.05  | 0.301887 | 0.401288 | 0.589851 | 0.630903 |
| MmugDNA.19140.1.S1_at   | MmugDNA.19140.1 | 6.15  | 6.07  | 0.1  | 0.04 | 1.05  | 0.459189 | 0.004044 | 0.707418 | 0.090281 |
| MmugDNA.19141.1.S1_at   | MmugDNA.19141.1 | 6.94  | 6.85  | 0.11 | 0.2  | 1.07  | 0.990881 | 0.677449 | 0.996666 | 0.81167  |
| MmugDNA.19142.1.S1_at   | MmugDNA.19142.1 | 3.53  | 3.54  | 0.14 | 0.09 | -1.01 | 0.259502 | 0.230424 | 0.553801 | 0.502199 |

|                         |                 |       |       |      |      |       |          |          |          |          |
|-------------------------|-----------------|-------|-------|------|------|-------|----------|----------|----------|----------|
| MmugDNA.19143.1.S1_at   | MmugDNA.19143.1 | 7.33  | 7.21  | 0.35 | 0.12 | 1.09  | 0.209165 | 0.029492 | 0.50665  | 0.213423 |
| MmugDNA.19144.1.S1_at   | MmugDNA.19144.1 | 3.78  | 4.18  | 0    | 0.3  | -1.32 | 0.253526 | 0.275128 | 0.547829 | 0.539542 |
| MmugDNA.19146.1.S1_at   | MmugDNA.19146.1 | 3.74  | 4.73  | 0.11 | 0.26 | -2    | 0.002796 | 0.00226  | 0.097799 | 0.070029 |
| MmugDNA.19147.1.S1_at   | MmugDNA.19147.1 | 3.44  | 3.77  | 0.08 | 0.02 | -1.25 | 0.004439 | 0.007121 | 0.112976 | 0.113654 |
| MmugDNA.19148.1.S1_at   | MmugDNA.19148.1 | 6.64  | 6.13  | 0.3  | 0.2  | 1.43  | 0.074852 | 0.116124 | 0.331799 | 0.383464 |
| MmugDNA.19149.1.S1_at   | MmugDNA.19149.1 | 5.98  | 5.91  | 0.71 | 0.12 | 1.05  | 0.703098 | 0.883625 | 0.859108 | 0.93366  |
| MmugDNA.1915.1.S1_at    | MmugDNA.1915.1  | 9.34  | 9.25  | 0.56 | 0.11 | 1.06  | 0.611609 | 0.801373 | 0.806382 | 0.885714 |
| MmugDNA.19150.1.S1_at   | MmugDNA.19150.1 | 6.12  | 5.52  | 0.15 | 0.19 | 1.52  | 0.017897 | 0.046573 | 0.187151 | 0.260267 |
| MmugDNA.19151.1.S1_at   | MmugDNA.19151.1 | 7.19  | 7.15  | 0.12 | 0.02 | 1.03  | 0.63641  | 0.905875 | 0.822111 | 0.946743 |
| MmugDNA.19152.1.S1_at   | MmugDNA.19152.1 | 6.37  | 6.52  | 0.44 | 0.27 | -1.11 | 0.688274 | 0.017025 | 0.851105 | 0.165384 |
| MmugDNA.19154.1.S1_at   | MmugDNA.19154.1 | 4.1   | 4.12  | 0.17 | 0.1  | -1.01 | 0.323291 | 0.275251 | 0.607132 | 0.53963  |
| MmugDNA.19155.1.S1_at   | MmugDNA.19155.1 | 6.53  | 7.13  | 0.19 | 0.07 | -1.51 | 0.005367 | 0.140751 | 0.118417 | 0.414115 |
| MmugDNA.19156.1.S1_s_at | MmugDNA.19156.1 | 10.64 | 10.42 | 0.42 | 0.12 | 1.16  | 0.579159 | 0.342321 | 0.78492  | 0.588413 |
| MmugDNA.19157.1.S1_at   | MmugDNA.19157.1 | 4.74  | 4.85  | 0.1  | 0.08 | -1.08 | 0.345072 | 0.009519 | 0.624133 | 0.1285   |
| MmugDNA.19158.1.S1_at   | MmugDNA.19158.1 | 12.1  | 11.77 | 0.23 | 0.1  | 1.25  | 0.154015 | 0.627645 | 0.444262 | 0.780625 |
| MmugDNA.19159.1.S1_at   | MmugDNA.19159.1 | 3.63  | 3.94  | 0.05 | 0.2  | -1.24 | 0.077062 | 0.273286 | 0.335617 | 0.537788 |
| MmugDNA.19160.1.S1_at   | MmugDNA.19160.1 | 4.07  | 3.42  | 0.99 | 0.33 | 1.57  | 0.267713 | 0.303295 | 0.560463 | 0.560748 |
| MmugDNA.19163.1.S1_at   | MmugDNA.19163.1 | 7.47  | 8.76  | 0.37 | 0.16 | -2.44 | 0.00517  | 0.005113 | 0.116998 | 0.099199 |
| MmugDNA.19164.1.S1_at   | MmugDNA.19164.1 | 9.31  | 9.34  | 0.01 | 0.06 | -1.02 | 0.428517 | 0.064555 | 0.685384 | 0.300255 |
| MmugDNA.19165.1.S1_at   | MmugDNA.19165.1 | 5.32  | 5.15  | 0.24 | 0.06 | 1.12  | 0.406841 | 0.147153 | 0.670124 | 0.421376 |
| MmugDNA.19169.1.S1_at   | MmugDNA.19169.1 | 7.98  | 8.07  | 0.13 | 0    | -1.07 | 0.796972 | 0.173652 | 0.908267 | 0.450003 |
| MmugDNA.19171.1.S1_at   | MmugDNA.19171.1 | 5.43  | 5.51  | 0.11 | 0.01 | -1.05 | 0.395894 | 0.355291 | 0.662088 | 0.597653 |
| MmugDNA.19172.1.S1_at   | MmugDNA.19172.1 | 6.62  | 6.4   | 0.9  | 0.19 | 1.16  | 0.628891 | 0.607582 | 0.817525 | 0.766437 |
| MmugDNA.19173.1.S1_at   | MmugDNA.19173.1 | 7.8   | 7.67  | 0.15 | 0.07 | 1.1   | 0.085876 | 0.183771 | 0.350251 | 0.459871 |
| MmugDNA.19174.1.S1_at   | MmugDNA.19174.1 | 2.91  | 2.91  | 0.06 | 0.04 | 1.01  | 0.290193 | 0.655797 | 0.57966  | 0.798709 |
| MmugDNA.19175.1.S1_at   | MmugDNA.19175.1 | 3.89  | 3.96  | 0.13 | 0.12 | -1.05 | 0.857083 | 0.883645 | 0.937933 | 0.933662 |
| MmugDNA.19176.1.S1_at   | MmugDNA.19176.1 | 5.81  | 5.38  | 0.37 | 0.01 | 1.35  | 0.24894  | 0.244144 | 0.544234 | 0.514148 |
| MmugDNA.19177.1.S1_at   | MmugDNA.19177.1 | 5.25  | 5.38  | 0.22 | 0.08 | -1.1  | 0.781286 | 0.611895 | 0.900076 | 0.769622 |
| MmugDNA.19178.1.S1_at   | MmugDNA.19178.1 | 9.59  | 9.59  | 0.32 | 0.08 | 1     | 0.405209 | 0.145117 | 0.668717 | 0.419075 |
| MmugDNA.19179.1.S1_at   | MmugDNA.19179.1 | 4.89  | 4.3   | 0.72 | 0.19 | 1.5   | 0.139713 | 0.252849 | 0.42522  | 0.521174 |
| MmugDNA.1918.1.S1_at    | MmugDNA.1918.1  | 4.14  | 4.04  | 0.06 | 0.07 | 1.07  | 0.666759 | 0.941887 | 0.840024 | 0.967077 |
| MmugDNA.19180.1.S1_at   | MmugDNA.19180.1 | 4.7   | 5.49  | 0.86 | 0.16 | -1.73 | 0.174651 | 0.126859 | 0.46889  | 0.397534 |
| MmugDNA.2125.1.S1_s_at  | MmugDNA.2125.1  | 13.31 | 13.09 | 0.04 | 0.03 | 1.16  | 0.002567 | 0.011318 | 0.094893 | 0.138076 |
| MmugDNA.19182.1.S1_at   | MmugDNA.19182.1 | 5.78  | 5.48  | 0.26 | 0.25 | 1.23  | 0.477504 | 0.398339 | 0.719447 | 0.629355 |
| MmugDNA.19184.1.S1_at   | MmugDNA.19184.1 | 3.41  | 3.56  | 0.54 | 0.12 | -1.11 | 0.581156 | 0.505001 | 0.786393 | 0.70197  |
| MmugDNA.19185.1.S1_at   | MmugDNA.19185.1 | 5.92  | 5.54  | 0.46 | 0.23 | 1.3   | 0.394592 | 0.047907 | 0.661066 | 0.263765 |
| MmugDNA.19186.1.S1_at   | MmugDNA.19186.1 | 5.79  | 3.47  | 0.69 | 1.11 | 4.99  | 0.162581 | 0.273215 | 0.454561 | 0.537788 |
| MmugDNA.19187.1.S1_at   | MmugDNA.19187.1 | 5.7   | 6.39  | 0.26 | 0.36 | -1.62 | 0.159407 | 0.12124  | 0.450703 | 0.390351 |
| MmugDNA.19188.1.S1_at   | MmugDNA.19188.1 | 5.57  | 6.06  | 0.35 | 0.22 | -1.41 | 0.027321 | 0.157597 | 0.218069 | 0.433131 |
| MmugDNA.19189.1.S1_at   | MmugDNA.19189.1 | 6.17  | 6.15  | 0.6  | 0.13 | 1.01  | 0.878707 | 0.582817 | 0.948288 | 0.751399 |
| MmugDNA.1919.1.S1_at    | MmugDNA.1919.1  | 7.24  | 7.18  | 0.13 | 0.01 | 1.04  | 0.501331 | 0.601786 | 0.735287 | 0.763113 |
| MmugDNA.19190.1.S1_at   | MmugDNA.19190.1 | 4.38  | 4.29  | 0.33 | 0.14 | 1.06  | 0.183076 | 0.248749 | 0.478959 | 0.517931 |
| MmugDNA.19191.1.S1_at   | MmugDNA.19191.1 | 6.05  | 6.04  | 0.02 | 0.12 | 1.01  | 0.827626 | 0.020172 | 0.923688 | 0.178414 |

|                         |                 |       |       |      |      |        |          |          |          |          |
|-------------------------|-----------------|-------|-------|------|------|--------|----------|----------|----------|----------|
| MmugDNA.19192.1.S1_at   | MmugDNA.19192.1 | 10.25 | 9.69  | 0.35 | 0.68 | 1.47   | 0.341041 | 0.882558 | 0.620979 | 0.933072 |
| MmugDNA.19193.1.S1_at   | MmugDNA.19193.1 | 5.31  | 5.18  | 0.08 | 0.02 | 1.09   | 0.031605 | 0.085438 | 0.23116  | 0.337416 |
| MmugDNA.19194.1.S1_at   | MmugDNA.19194.1 | 7.12  | 7.17  | 0.2  | 0.04 | -1.04  | 0.527342 | 0.714053 | 0.753064 | 0.834108 |
| MmugDNA.19195.1.S1_at   | MmugDNA.19195.1 | 9.22  | 8.54  | 0.07 | 0.14 | 1.6    | 0.002019 | 0.002319 | 0.089873 | 0.071105 |
| MmugDNA.19196.1.S1_at   | MmugDNA.19196.1 | 4.1   | 3.67  | 0.8  | 0.14 | 1.35   | 0.132054 | 0.114874 | 0.415191 | 0.381554 |
| MmugDNA.19197.1.S1_at   | MmugDNA.19197.1 | 3.11  | 3.1   | 0.14 | 0.05 | 1.01   | 0.474819 | 0.704851 | 0.717692 | 0.828846 |
| MmugDNA.19198.1.S1_at   | MmugDNA.19198.1 | 9.74  | 9.78  | 0.32 | 0.05 | -1.03  | 0.778616 | 0.663136 | 0.898859 | 0.80284  |
| MmugDNA.19199.1.S1_at   | MmugDNA.19199.1 | 5.64  | 4.91  | 0.57 | 0.29 | 1.66   | 0.145315 | 0.139183 | 0.432623 | 0.412324 |
| MmugDNA.192.1.S1_at     | MmugDNA.192.1   | 6.55  | 5.64  | 0.49 | 0.13 | 1.88   | 0.075382 | 0.048908 | 0.332755 | 0.265919 |
| MmugDNA.19200.1.S1_at   | MmugDNA.19200.1 | 5.04  | 4.96  | 0.08 | 0.17 | 1.05   | 0.585655 | 0.497207 | 0.789285 | 0.696514 |
| MmugDNA.19201.1.S1_at   | MmugDNA.19201.1 | 8.47  | 8.45  | 0.37 | 0.26 | 1.01   | 0.917785 | 0.502612 | 0.964887 | 0.700236 |
| MmugDNA.19202.1.S1_at   | MmugDNA.19202.1 | 5.49  | 5.69  | 0.81 | 0.37 | -1.15  | 0.697069 | 0.182923 | 0.855776 | 0.45941  |
| MmugDNA.19205.1.S1_at   | MmugDNA.19205.1 | 2.76  | 2.8   | 0.09 | 0.19 | -1.03  | 0.236707 | 0.425529 | 0.534328 | 0.647884 |
| MmugDNA.19206.1.S1_at   | MmugDNA.19206.1 | 3.2   | 3.06  | 0.52 | 0.06 | 1.1    | 0.294791 | 0.369462 | 0.583732 | 0.60886  |
| MmugDNA.1921.1.S1_at    | MmugDNA.1921.1  | 6.81  | 8.64  | 0.65 | 0.34 | -3.54  | 0.021273 | 0.009016 | 0.199615 | 0.125499 |
| MmugDNA.19210.1.S1_at   | MmugDNA.19210.1 | 10.37 | 10.06 | 0.13 | 0.09 | 1.24   | 0.026486 | 0.000009 | 0.215841 | 0.016421 |
| MmugDNA.19211.1.S1_at   | MmugDNA.19211.1 | 5.49  | 5.28  | 0.28 | 0.16 | 1.15   | 0.247137 | 0.264304 | 0.542766 | 0.530366 |
| MmugDNA.33352.1.S1_s_at | MmugDNA.33352.1 | 10.34 | 10.64 | 0.08 | 0.04 | -1.24  | 0.004572 | 0.001049 | 0.113728 | 0.051466 |
| MmugDNA.19213.1.S1_at   | MmugDNA.19213.1 | 7.51  | 7.39  | 0.07 | 0.06 | 1.08   | 0.084275 | 0.157385 | 0.347682 | 0.432859 |
| MmugDNA.19215.1.S1_at   | MmugDNA.19215.1 | 6.35  | 7.01  | 1.03 | 0.3  | -1.58  | 0.615094 | 0.608865 | 0.808718 | 0.76736  |
| MmugDNA.19216.1.S1_at   | MmugDNA.19216.1 | 3.72  | 6.68  | 1.57 | 0.17 | -7.75  | 0.081167 | 0.048219 | 0.342203 | 0.264675 |
| MmugDNA.19218.1.S1_at   | MmugDNA.19218.1 | 2.87  | 2.84  | 0.21 | 0.01 | 1.02   | 0.788668 | 0.961822 | 0.903971 | 0.978471 |
| MmugDNA.1922.1.S1_at    | MmugDNA.1922.1  | 9.58  | 9.69  | 0.08 | 0.06 | -1.07  | 0.297496 | 0.483336 | 0.585915 | 0.687887 |
| MmugDNA.19223.1.S1_at   | MmugDNA.19223.1 | 3.62  | 3.94  | 0.19 | 0.1  | -1.25  | 0.100973 | 0.458288 | 0.372265 | 0.671096 |
| MmugDNA.19226.1.S1_at   | MmugDNA.19226.1 | 5.41  | 5.42  | 0.15 | 0.07 | -1.01  | 0.651246 | 0.827795 | 0.830636 | 0.901152 |
| MmugDNA.19227.1.S1_at   | MmugDNA.19227.1 | 9.88  | 9.77  | 0.17 | 0.04 | 1.08   | 0.115711 | 0.02567  | 0.392825 | 0.200834 |
| MmugDNA.19228.1.S1_at   | MmugDNA.19228.1 | 5.73  | 5.57  | 0.16 | 0.21 | 1.11   | 0.537726 | 0.678643 | 0.759894 | 0.81231  |
| MmugDNA.26886.1.S1_at   | MmugDNA.26886.1 | 9.31  | 9.25  | 0.33 | 0.12 | 1.04   | 0.55928  | 0.763927 | 0.773275 | 0.862744 |
| MmugDNA.26886.1.S1_s_at | MmugDNA.26886.1 | 11.28 | 11.37 | 0.27 | 0.06 | -1.07  | 0.724609 | 0.849925 | 0.87072  | 0.914673 |
| MmugDNA.19232.1.S1_at   | MmugDNA.19232.1 | 4.94  | 4.79  | 0.51 | 0.15 | 1.11   | 0.232404 | 0.192787 | 0.530886 | 0.468274 |
| MmugDNA.19234.1.S1_at   | MmugDNA.19234.1 | 5.17  | 5.36  | 0.04 | 0.12 | -1.14  | 0.179696 | 0.018299 | 0.474837 | 0.17013  |
| MmugDNA.19235.1.S1_at   | MmugDNA.19235.1 | 5.54  | 5.28  | 0.08 | 0.09 | 1.2    | 0.022863 | 0.17768  | 0.204235 | 0.454073 |
| MmugDNA.19237.1.S1_at   | MmugDNA.19237.1 | 3.97  | 4.09  | 0.2  | 0.28 | -1.09  | 0.747629 | 0.273755 | 0.883101 | 0.538254 |
| MmugDNA.19239.1.S1_at   | MmugDNA.19239.1 | 5.46  | 5.11  | 0.1  | 0.21 | 1.28   | 0.047294 | 0.004728 | 0.274777 | 0.095802 |
| MmugDNA.1924.1.S1_at    | MmugDNA.1924.1  | 5.93  | 6.89  | 0.16 | 0.42 | -1.94  | 0.041534 | 0.084381 | 0.260186 | 0.335713 |
| MmugDNA.19240.1.S1_at   | MmugDNA.19240.1 | 5.17  | 5.24  | 0.24 | 0.22 | -1.05  | 0.700066 | 0.840429 | 0.857518 | 0.90902  |
| MmugDNA.19241.1.S1_at   | MmugDNA.19241.1 | 5.57  | 6.23  | 0.39 | 0.4  | -1.58  | 0.107193 | 0.115996 | 0.381659 | 0.383164 |
| MmugDNA.19243.1.S1_at   | MmugDNA.19243.1 | 7.33  | 7.34  | 0.21 | 0.09 | -1.01  | 0.62521  | 0.329921 | 0.815247 | 0.578874 |
| MmugDNA.19244.1.S1_at   | MmugDNA.19244.1 | 6.41  | 6.23  | 0.1  | 0.33 | 1.13   | 0.51482  | 0.011    | 0.744724 | 0.136623 |
| MmugDNA.19245.1.S1_at   | MmugDNA.19245.1 | 6.21  | 9.76  | 1.19 | 0.48 | -11.76 | 0.019613 | 0.202092 | 0.192972 | 0.476545 |
| MmugDNA.19247.1.S1_at   | MmugDNA.19247.1 | 4.7   | 4.58  | 0.11 | 0.05 | 1.08   | 0.408904 | 0.763928 | 0.671457 | 0.862744 |
| MmugDNA.19248.1.S1_at   | MmugDNA.19248.1 | 6.57  | 6.52  | 0.23 | 0.09 | 1.03   | 0.580208 | 0.618721 | 0.785706 | 0.774185 |
| MmugDNA.19249.1.S1_at   | MmugDNA.19249.1 | 4.87  | 4.66  | 0.02 | 0.09 | 1.16   | 0.016911 | 0.009962 | 0.183348 | 0.131094 |

|                         |                 |       |       |      |      |        |          |          |          |          |
|-------------------------|-----------------|-------|-------|------|------|--------|----------|----------|----------|----------|
| MmugDNA.1925.1.S1_at    | MmugDNA.1925.1  | 11.92 | 10.23 | 0.13 | 0.39 | 3.24   | 0.004122 | 0.148413 | 0.10967  | 0.423003 |
| MmugDNA.19251.1.S1_at   | MmugDNA.19251.1 | 5.11  | 4.53  | 0.2  | 0.22 | 1.5    | 0.055215 | 0.241125 | 0.291993 | 0.511749 |
| MmugDNA.19253.1.S1_at   | MmugDNA.19253.1 | 3.96  | 3.72  | 0.11 | 0.1  | 1.18   | 0.128517 | 0.104246 | 0.410529 | 0.365376 |
| MmugDNA.19256.1.S1_s_at | MmugDNA.19256.1 | 7.85  | 11.59 | 1.47 | 0.19 | -13.41 | 0.014398 | 0.110608 | 0.171686 | 0.374854 |
| MmugDNA.19257.1.S1_at   | MmugDNA.19257.1 | 11.69 | 11.29 | 0.11 | 0.08 | 1.32   | 0.010755 | 0.428055 | 0.153458 | 0.649619 |
| MmugDNA.19259.1.S1_at   | MmugDNA.19259.1 | 5.68  | 5.63  | 0.23 | 0.07 | 1.04   | 0.773404 | 0.437833 | 0.896112 | 0.656977 |
| MmugDNA.1926.1.S1_at    | MmugDNA.1926.1  | 3.56  | 3.52  | 0.13 | 0.23 | 1.03   | 0.567277 | 0.462842 | 0.77771  | 0.674149 |
| MmugDNA.19260.1.S1_at   | MmugDNA.19260.1 | 10.82 | 10.89 | 0.28 | 0.08 | -1.04  | 0.843848 | 0.674524 | 0.931568 | 0.809854 |
| MmugDNA.19261.1.S1_at   | MmugDNA.19261.1 | 6.24  | 6.19  | 0.22 | 0.18 | 1.03   | 0.242551 | 0.387865 | 0.539382 | 0.622486 |
| MmugDNA.19263.1.S1_at   | MmugDNA.19263.1 | 9.96  | 9.43  | 0.34 | 0.17 | 1.44   | 0.092379 | 0.060168 | 0.360442 | 0.291882 |
| MmugDNA.19267.1.S1_at   | MmugDNA.19267.1 | 4.15  | 3.82  | 0.14 | 0.08 | 1.26   | 0.061146 | 0.368468 | 0.304091 | 0.60798  |
| MmugDNA.19268.1.S1_at   | MmugDNA.19268.1 | 10.08 | 9.7   | 0.01 | 0.12 | 1.3    | 0.011777 | 0.179878 | 0.158421 | 0.456429 |
| MmugDNA.19270.1.S1_at   | MmugDNA.19270.1 | 5.07  | 5.08  | 0.17 | 0.3  | -1     | 0.761149 | 0.048072 | 0.890559 | 0.26428  |
| MmugDNA.19271.1.S1_s_at | MmugDNA.19271.1 | 13.14 | 12.81 | 0.09 | 0.16 | 1.26   | 0.040771 | 0.547085 | 0.258464 | 0.728283 |
| MmugDNA.19273.1.S1_at   | MmugDNA.19273.1 | 11.44 | 11.35 | 0.08 | 0.08 | 1.06   | 0.10107  | 0.120658 | 0.372328 | 0.389476 |
| MmugDNA.19274.1.S1_at   | MmugDNA.19274.1 | 4.7   | 5.01  | 0.38 | 0.21 | -1.24  | 0.950716 | 0.654481 | 0.979586 | 0.79808  |
| MmugDNA.19275.1.S1_at   | MmugDNA.19275.1 | 5.22  | 5.12  | 0.17 | 0.27 | 1.07   | 0.174283 | 0.206907 | 0.468449 | 0.481052 |
| MmugDNA.19277.1.S1_at   | MmugDNA.19277.1 | 9.52  | 9.3   | 0.1  | 0.08 | 1.17   | 0.011385 | 0.317208 | 0.156988 | 0.570458 |
| MmugDNA.19278.1.S1_at   | MmugDNA.19278.1 | 12.09 | 11.98 | 0.11 | 0.15 | 1.08   | 0.136041 | 0.288914 | 0.420353 | 0.550032 |
| MmugDNA.19279.1.S1_at   | MmugDNA.19279.1 | 11.66 | 11.52 | 0.33 | 0.01 | 1.1    | 0.678485 | 0.780866 | 0.846605 | 0.872849 |
| MmugDNA.1928.1.S1_at    | MmugDNA.1928.1  | 5.55  | 5.67  | 0.09 | 0.14 | -1.09  | 0.913816 | 0.039242 | 0.96343  | 0.243274 |
| MmugDNA.19280.1.S1_at   | MmugDNA.19280.1 | 7.67  | 7.61  | 0.13 | 0.13 | 1.04   | 0.941612 | 0.346292 | 0.975589 | 0.59124  |
| MmugDNA.19281.1.S1_at   | MmugDNA.19281.1 | 5.8   | 5.76  | 0.22 | 0.22 | 1.02   | 0.935669 | 0.339622 | 0.973034 | 0.586217 |
| MmugDNA.19283.1.S1_at   | MmugDNA.19283.1 | 6.97  | 7.04  | 0.09 | 0.07 | -1.05  | 0.138167 | 0.189313 | 0.423406 | 0.465078 |
| MmugDNA.19285.1.S1_s_at | MmugDNA.19285.1 | 11.54 | 11.4  | 0.41 | 0.04 | 1.1    | 0.653726 | 0.430876 | 0.832375 | 0.651894 |
| MmugDNA.19288.1.S1_at   | MmugDNA.19288.1 | 3.39  | 3.49  | 0.15 | 0.38 | -1.07  | 0.556406 | 0.870405 | 0.771647 | 0.926446 |
| MmugDNA.19289.1.S1_at   | MmugDNA.19289.1 | 12.64 | 12.57 | 0.21 | 0.09 | 1.05   | 0.662574 | 0.490908 | 0.837225 | 0.692666 |
| MmugDNA.19290.1.S1_at   | MmugDNA.19290.1 | 4.7   | 4.64  | 0.1  | 0.04 | 1.04   | 0.130072 | 0.104457 | 0.412244 | 0.365719 |
| MmugDNA.19291.1.S1_x_at | MmugDNA.19291.1 | 11.38 | 11.33 | 0.32 | 0.12 | 1.04   | 0.32076  | 0.1835   | 0.605271 | 0.459641 |
| MmugDNA.19292.1.S1_at   | MmugDNA.19292.1 | 3.21  | 3.2   | 0.26 | 0.1  | 1.01   | 0.66141  | 0.522925 | 0.836571 | 0.713429 |
| MmugDNA.19293.1.S1_at   | MmugDNA.19293.1 | 5.27  | 5.31  | 0.52 | 0.24 | -1.03  | 0.999344 | 0.506256 | 0.999798 | 0.702368 |
| MmugDNA.19294.1.S1_at   | MmugDNA.19294.1 | 3.16  | 3.15  | 0.09 | 0.1  | 1.01   | 0.188258 | 0.174478 | 0.484576 | 0.450952 |
| MmugDNA.19296.1.S1_at   | MmugDNA.19296.1 | 5.01  | 5.29  | 0.1  | 0.24 | -1.21  | 0.214117 | 0.204453 | 0.511862 | 0.478821 |
| MmugDNA.19297.1.S1_at   | MmugDNA.19297.1 | 8.59  | 8.08  | 0.42 | 0.11 | 1.43   | 0.154043 | 0.236787 | 0.44432  | 0.50753  |
| MmugDNA.19299.1.S1_s_at | MmugDNA.19299.1 | 11.26 | 11.23 | 0.1  | 0.01 | 1.02   | 0.27925  | 0.567189 | 0.570643 | 0.741088 |
| MmugDNA.193.1.S1_at     | MmugDNA.193.1   | 5.14  | 5.17  | 0.21 | 0.09 | -1.02  | 0.471187 | 0.070542 | 0.715413 | 0.311777 |
| MmugDNA.1930.1.S1_at    | MmugDNA.1930.1  | 5.07  | 5.26  | 0.53 | 0.19 | -1.14  | 0.641906 | 0.406393 | 0.825292 | 0.634305 |
| MmugDNA.19303.1.S1_at   | MmugDNA.19303.1 | 6.93  | 6.87  | 0.44 | 0.01 | 1.05   | 0.674139 | 0.793303 | 0.844381 | 0.880679 |
| MmugDNA.19304.1.S1_at   | MmugDNA.19304.1 | 9.9   | 10    | 0.03 | 0.34 | -1.07  | 0.202205 | 0.231594 | 0.499812 | 0.503379 |
| MmugDNA.19305.1.S1_at   | MmugDNA.19305.1 | 6.49  | 6.42  | 0.22 | 0.48 | 1.05   | 0.313776 | 0.022679 | 0.599642 | 0.188657 |
| MmugDNA.16930.1.S1_x_at | MmugDNA.16930.1 | 4.38  | 4.49  | 0.06 | 0.1  | -1.08  | 0.051392 | 0.136152 | 0.284155 | 0.408473 |
| MmugDNA.19307.1.S1_at   | MmugDNA.19307.1 | 10.68 | 10.6  | 0.04 | 0.19 | 1.05   | 0.76971  | 0.04802  | 0.894341 | 0.264118 |
| MmugDNA.19308.1.S1_at   | MmugDNA.19308.1 | 11.4  | 11.33 | 0.13 | 0.04 | 1.05   | 0.245952 | 0.128894 | 0.541732 | 0.400327 |

|                         |                 |       |       |      |      |       |          |          |          |          |
|-------------------------|-----------------|-------|-------|------|------|-------|----------|----------|----------|----------|
| MmugDNA.19309.1.S1_at   | MmugDNA.19309.1 | 4.82  | 4.87  | 0.1  | 0.04 | -1.04 | 0.58439  | 0.194965 | 0.788586 | 0.470117 |
| MmugDNA.1931.1.S1_at    | MmugDNA.1931.1  | 6.54  | 6.71  | 0.14 | 0.29 | -1.13 | 0.333055 | 0.367256 | 0.614585 | 0.606869 |
| MmugDNA.19310.1.S1_at   | MmugDNA.19310.1 | 8.15  | 8.2   | 0.41 | 0.06 | -1.04 | 0.581739 | 0.844561 | 0.7868   | 0.911531 |
| MmugDNA.19312.1.S1_at   | MmugDNA.19312.1 | 7.8   | 7.68  | 0.73 | 0.12 | 1.09  | 0.776707 | 0.948988 | 0.897931 | 0.970785 |
| MmugDNA.19313.1.S1_at   | MmugDNA.19313.1 | 13.12 | 13.13 | 0.15 | 0.01 | -1    | 0.345461 | 0.402251 | 0.624454 | 0.631271 |
| MmugDNA.19314.1.S1_at   | MmugDNA.19314.1 | 5.35  | 6.51  | 0.52 | 0.18 | -2.24 | 0.029521 | 0.004064 | 0.224838 | 0.090288 |
| MmugDNA.19317.1.S1_at   | MmugDNA.19317.1 | 8.3   | 8.29  | 0.03 | 0.07 | 1.01  | 0.509768 | 0.376244 | 0.741244 | 0.614089 |
| MmugDNA.19319.1.S1_at   | MmugDNA.19319.1 | 6.68  | 6.57  | 0.2  | 0.26 | 1.08  | 0.990095 | 0.023112 | 0.996449 | 0.190371 |
| MmugDNA.1932.1.S1_at    | MmugDNA.1932.1  | 7.3   | 6.65  | 0.03 | 0.07 | 1.57  | 0.000105 | 0.039583 | 0.051196 | 0.244002 |
| MmugDNA.19321.1.S1_at   | MmugDNA.19321.1 | 9.49  | 9.65  | 0.2  | 0.27 | -1.11 | 0.604155 | 0.006178 | 0.801436 | 0.106774 |
| MmugDNA.19322.1.S1_at   | MmugDNA.19322.1 | 6.33  | 5.44  | 0.21 | 0.23 | 1.85  | 0.012022 | 0.023131 | 0.159649 | 0.190443 |
| MmugDNA.19323.1.S1_at   | MmugDNA.19323.1 | 4.5   | 4.41  | 0.18 | 0.06 | 1.07  | 0.257085 | 0.400942 | 0.551586 | 0.630658 |
| MmugDNA.19325.1.S1_at   | MmugDNA.19325.1 | 4.47  | 4.46  | 0.07 | 0.09 | 1.01  | 0.563378 | 0.264082 | 0.775443 | 0.530214 |
| MmugDNA.19326.1.S1_at   | MmugDNA.19326.1 | 11.63 | 11.34 | 0.02 | 0.09 | 1.22  | 0.005639 | 0.013314 | 0.120879 | 0.148042 |
| MmugDNA.19327.1.S1_at   | MmugDNA.19327.1 | 4.33  | 4.21  | 0    | 0.04 | 1.08  | 0.012556 | 0.005092 | 0.162479 | 0.099108 |
| MmugDNA.19328.1.S1_at   | MmugDNA.19328.1 | 8.73  | 9.24  | 0.58 | 0.41 | -1.42 | 0.209004 | 0.039043 | 0.506441 | 0.242798 |
| MmugDNA.19329.1.S1_at   | MmugDNA.19329.1 | 9.63  | 10.37 | 0.4  | 0.2  | -1.68 | 0.029448 | 0.009822 | 0.224611 | 0.130205 |
| MmugDNA.1933.1.S1_at    | MmugDNA.1933.1  | 10.04 | 9.62  | 0.11 | 0.2  | 1.34  | 0.037478 | 0.001237 | 0.249007 | 0.05478  |
| MmugDNA.19330.1.S1_at   | MmugDNA.19330.1 | 5.77  | 6.45  | 0.37 | 0.33 | -1.6  | 0.101111 | 0.288016 | 0.372328 | 0.549277 |
| MmugDNA.19333.1.S1_at   | MmugDNA.19333.1 | 4.54  | 4.53  | 0.16 | 0.01 | 1.01  | 0.88163  | 0.883546 | 0.94964  | 0.933618 |
| MmugDNA.19334.1.S1_at   | MmugDNA.19334.1 | 8.27  | 8.16  | 0.27 | 0.11 | 1.08  | 0.920155 | 0.107407 | 0.965869 | 0.370219 |
| MmugDNA.19335.1.S1_at   | MmugDNA.19335.1 | 4.55  | 4.35  | 0.14 | 0.09 | 1.15  | 0.194163 | 0.271751 | 0.490738 | 0.536577 |
| MmugDNA.19336.1.S1_at   | MmugDNA.19336.1 | 4.52  | 4.5   | 0.43 | 0.09 | 1.01  | 0.346404 | 0.324885 | 0.624993 | 0.575416 |
| MmugDNA.19337.1.S1_at   | MmugDNA.19337.1 | 4.47  | 4.69  | 0.13 | 0.08 | -1.17 | 0.154555 | 0.079686 | 0.444802 | 0.326981 |
| MmugDNA.32562.1.S1_s_at | MmugDNA.32562.1 | 8.14  | 7.91  | 0.14 | 0.14 | 1.17  | 0.114322 | 0.124108 | 0.391223 | 0.394389 |
| MmugDNA.19339.1.S1_at   | MmugDNA.19339.1 | 9.36  | 8.9   | 0.71 | 0.19 | 1.37  | 0.861531 | 0.137593 | 0.939844 | 0.410558 |
| MmugDNA.19340.1.S1_at   | MmugDNA.19340.1 | 3.2   | 3.21  | 0.06 | 0.09 | -1.01 | 0.383507 | 0.888854 | 0.652845 | 0.936694 |
| MmugDNA.19344.1.S1_at   | MmugDNA.19344.1 | 4.8   | 4.79  | 0.33 | 0.13 | 1.01  | 0.714358 | 0.890322 | 0.86508  | 0.937508 |
| MmugDNA.27164.1.S1_s_at | MmugDNA.27164.1 | 9.67  | 10.15 | 0.22 | 0.11 | -1.39 | 0.018942 | 0.359633 | 0.19119  | 0.600904 |
| MmugDNA.19346.1.S1_at   | MmugDNA.19346.1 | 10.26 | 10.28 | 0.01 | 0.04 | -1.01 | 0.194346 | 0.888158 | 0.490973 | 0.936222 |
| MmugDNA.1935.1.S1_at    | MmugDNA.1935.1  | 6.39  | 6.47  | 0.1  | 0.15 | -1.06 | 0.249911 | 0.145765 | 0.544845 | 0.419756 |
| MmugDNA.19350.1.S1_at   | MmugDNA.19350.1 | 5.89  | 6.18  | 0.24 | 0.17 | -1.22 | 0.189195 | 0.245032 | 0.485786 | 0.514813 |
| MmugDNA.19351.1.S1_at   | MmugDNA.19351.1 | 10.5  | 10.48 | 0.39 | 0.08 | 1.01  | 0.469418 | 0.812909 | 0.714166 | 0.891875 |
| MmugDNA.19354.1.S1_at   | MmugDNA.19354.1 | 5.23  | 5.22  | 0.1  | 0.03 | 1.01  | 0.551677 | 0.387181 | 0.768597 | 0.621949 |
| MmugDNA.19355.1.S1_at   | MmugDNA.19355.1 | 6.81  | 6.79  | 0.23 | 0.4  | 1.01  | 0.622409 | 0.495602 | 0.813259 | 0.695576 |
| MmugDNA.19356.1.S1_at   | MmugDNA.19356.1 | 11.22 | 9.9   | 0.28 | 0.34 | 2.49  | 0.009784 | 0.007155 | 0.148542 | 0.113788 |
| MmugDNA.19357.1.S1_at   | MmugDNA.19357.1 | 11.82 | 10.49 | 0.19 | 0.34 | 2.52  | 0.007575 | 0.007685 | 0.135306 | 0.117153 |
| MmugDNA.19359.1.S1_at   | MmugDNA.19359.1 | 6     | 6.65  | 0.58 | 0.14 | -1.56 | 0.429978 | 0.082225 | 0.686317 | 0.331091 |
| MmugDNA.1936.1.S1_at    | MmugDNA.1936.1  | 8.03  | 8     | 0.09 | 0.08 | 1.02  | 0.538543 | 0.911062 | 0.760315 | 0.949838 |
| MmugDNA.19360.1.S1_at   | MmugDNA.19360.1 | 5.68  | 5.72  | 0.46 | 0.24 | -1.03 | 0.446733 | 0.581321 | 0.698851 | 0.75041  |
| MmugDNA.19363.1.S1_at   | MmugDNA.19363.1 | 7.01  | 7.43  | 0.37 | 0.17 | -1.34 | 0.480403 | 0.145914 | 0.721309 | 0.419892 |
| MmugDNA.19364.1.S1_at   | MmugDNA.19364.1 | 6     | 4.8   | 0.56 | 0.43 | 2.29  | 0.039724 | 0.027973 | 0.256007 | 0.208777 |
| MmugDNA.19365.1.S1_at   | MmugDNA.19365.1 | 5.5   | 5.23  | 0.37 | 0.3  | 1.21  | 0.348304 | 0.41619  | 0.626353 | 0.641398 |

|                         |                 |       |       |      |      |       |          |          |          |          |
|-------------------------|-----------------|-------|-------|------|------|-------|----------|----------|----------|----------|
| MmugDNA.19366.1.S1_at   | MmugDNA.19366.1 | 8.57  | 8.75  | 0.33 | 0.21 | -1.14 | 0.343053 | 0.135239 | 0.622701 | 0.407303 |
| MmugDNA.19367.1.S1_at   | MmugDNA.19367.1 | 4.35  | 4.3   | 0.32 | 0.06 | 1.03  | 0.708508 | 0.887666 | 0.861951 | 0.93601  |
| MmugDNA.19368.1.S1_at   | MmugDNA.19368.1 | 7.01  | 7     | 0.21 | 0.03 | 1.01  | 0.958026 | 0.427502 | 0.982769 | 0.649302 |
| MmugDNA.19369.1.S1_at   | MmugDNA.19369.1 | 6.97  | 6.78  | 0.23 | 0.19 | 1.14  | 0.43566  | 0.14441  | 0.690714 | 0.418323 |
| MmugDNA.19369.1.S1_s_at | MmugDNA.19369.1 | 6.23  | 5.91  | 0.24 | 0.08 | 1.26  | 0.208504 | 0.070395 | 0.506156 | 0.311676 |
| MmugDNA.1937.1.S1_at    | MmugDNA.1937.1  | 3.33  | 3.29  | 0.01 | 0.06 | 1.03  | 0.148798 | 0.211612 | 0.437337 | 0.485681 |
| MmugDNA.19371.1.S1_at   | MmugDNA.19371.1 | 6.26  | 4.41  | 1.57 | 0.48 | 3.61  | 0.114868 | 0.069143 | 0.391851 | 0.30917  |
| MmugDNA.19372.1.S1_at   | MmugDNA.19372.1 | 5.75  | 5.9   | 0.1  | 0.1  | -1.11 | 0.479935 | 0.321967 | 0.720994 | 0.573575 |
| MmugDNA.19373.1.S1_at   | MmugDNA.19373.1 | 3.33  | 3.34  | 0    | 0.15 | -1.01 | 0.88043  | 0.42721  | 0.949159 | 0.649175 |
| MmugDNA.19374.1.S1_at   | MmugDNA.19374.1 | 3.34  | 3.43  | 0.49 | 0.02 | -1.07 | 0.555625 | 0.75117  | 0.77141  | 0.855371 |
| MmugDNA.19375.1.S1_at   | MmugDNA.19375.1 | 5.82  | 5.8   | 0.16 | 0.02 | 1.01  | 0.551611 | 0.602982 | 0.768597 | 0.763857 |
| MmugDNA.19376.1.S1_at   | MmugDNA.19376.1 | 6.09  | 5.73  | 0.59 | 0.19 | 1.28  | 0.174599 | 0.211039 | 0.468862 | 0.485047 |
| MmugDNA.19378.1.S1_at   | MmugDNA.19378.1 | 8.61  | 7.84  | 0.2  | 0.16 | 1.7   | 0.006007 | 0.044336 | 0.124151 | 0.255042 |
| MmugDNA.19379.1.S1_at   | MmugDNA.19379.1 | 4.49  | 4.34  | 0.42 | 0.21 | 1.12  | 0.246082 | 0.336849 | 0.541875 | 0.584113 |
| MmugDNA.1938.1.S1_at    | MmugDNA.1938.1  | 5.58  | 6.9   | 0.94 | 0.21 | -2.49 | 0.128153 | 0.472613 | 0.410223 | 0.68007  |
| MmugDNA.19381.1.S1_at   | MmugDNA.19381.1 | 6.17  | 7.36  | 0.73 | 0.09 | -2.28 | 0.060132 | 0.235241 | 0.302405 | 0.50629  |
| MmugDNA.19384.1.S1_at   | MmugDNA.19384.1 | 4.89  | 5.12  | 0.09 | 0.11 | -1.17 | 0.024367 | 0.028979 | 0.209221 | 0.212129 |
| MmugDNA.19386.1.S1_at   | MmugDNA.19386.1 | 4.95  | 4.96  | 0.1  | 0.28 | -1    | 0.913686 | 0.981979 | 0.963382 | 0.990145 |
| MmugDNA.19387.1.S1_at   | MmugDNA.19387.1 | 8.59  | 8.62  | 0.19 | 0.01 | -1.02 | 0.807206 | 0.567064 | 0.913669 | 0.740985 |
| MmugDNA.19389.1.S1_at   | MmugDNA.19389.1 | 8.84  | 8.79  | 1.2  | 0.37 | 1.04  | 0.971954 | 0.710676 | 0.98874  | 0.83219  |
| MmugDNA.19391.1.S1_at   | MmugDNA.19391.1 | 5.13  | 6.06  | 0.35 | 0.1  | -1.91 | 0.019179 | 0.09829  | 0.191978 | 0.356337 |
| MmugDNA.19392.1.S1_at   | MmugDNA.19392.1 | 12.51 | 12.37 | 0.02 | 0.09 | 1.11  | 0.020099 | 0.00216  | 0.195301 | 0.068763 |
| MmugDNA.19393.1.S1_at   | MmugDNA.19393.1 | 3.77  | 3.77  | 0.2  | 0.17 | -1.01 | 0.93973  | 0.958898 | 0.974537 | 0.976709 |
| MmugDNA.19395.1.S1_at   | MmugDNA.19395.1 | 4.92  | 4.93  | 0.02 | 0.1  | -1.01 | 0.378288 | 0.806833 | 0.648513 | 0.888868 |
| MmugDNA.19396.1.S1_at   | MmugDNA.19396.1 | 3.84  | 3.72  | 0.28 | 0.11 | 1.09  | 0.167119 | 0.209784 | 0.460327 | 0.483538 |
| MmugDNA.19397.1.S1_at   | MmugDNA.19397.1 | 5.56  | 5.58  | 0.33 | 0.14 | -1.01 | 0.775442 | 0.709339 | 0.897425 | 0.831579 |
| MmugDNA.19398.1.S1_at   | MmugDNA.19398.1 | 3.94  | 4.06  | 0.22 | 0.19 | -1.09 | 0.873374 | 0.94237  | 0.945619 | 0.967292 |
| MmugDNA.19399.1.S1_at   | MmugDNA.19399.1 | 10.7  | 8.99  | 0.44 | 0.15 | 3.29  | 0.003022 | 0.039799 | 0.100006 | 0.244507 |
| MmugDNA.194.1.S1_at     | MmugDNA.194.1   | 3.02  | 3.07  | 0.18 | 0.15 | -1.03 | 0.596298 | 0.695248 | 0.795749 | 0.822869 |
| MmugDNA.1940.1.S1_at    | MmugDNA.1940.1  | 8.29  | 8.01  | 0.3  | 0.29 | 1.22  | 0.173469 | 0.034049 | 0.467808 | 0.22837  |
| MmugDNA.19400.1.S1_at   | MmugDNA.19400.1 | 4.5   | 4.58  | 0.41 | 0.06 | -1.05 | 0.756115 | 0.883767 | 0.887655 | 0.933691 |
| MmugDNA.19401.1.S1_at   | MmugDNA.19401.1 | 4     | 3.9   | 0.13 | 0.04 | 1.07  | 0.584134 | 0.688106 | 0.788484 | 0.817914 |
| MmugDNA.19403.1.S1_at   | MmugDNA.19403.1 | 4.15  | 4.26  | 0.09 | 0.15 | -1.08 | 0.571607 | 0.751938 | 0.780017 | 0.855729 |
| MmugDNA.19404.1.S1_at   | MmugDNA.19404.1 | 3.72  | 3.52  | 0.06 | 0.12 | 1.14  | 0.241098 | 0.088545 | 0.538472 | 0.341972 |
| MmugDNA.19405.1.S1_at   | MmugDNA.19405.1 | 5.46  | 5.29  | 0.08 | 0.13 | 1.13  | 0.096584 | 0.296953 | 0.366453 | 0.555895 |
| MmugDNA.19406.1.S1_at   | MmugDNA.19406.1 | 3.65  | 3.65  | 0.03 | 0.15 | 1     | 0.302909 | 0.6106   | 0.590429 | 0.76874  |
| MmugDNA.19407.1.S1_at   | MmugDNA.19407.1 | 6.28  | 6.35  | 0.07 | 0.13 | -1.05 | 0.671439 | 0.124203 | 0.842413 | 0.394496 |
| MmugDNA.19409.1.S1_at   | MmugDNA.19409.1 | 5.29  | 5.06  | 0.33 | 0.11 | 1.17  | 0.911    | 0.671965 | 0.962223 | 0.808177 |
| MmugDNA.19410.1.S1_at   | MmugDNA.19410.1 | 8.13  | 8.22  | 0.28 | 0.23 | -1.06 | 0.82241  | 0.697092 | 0.920984 | 0.824045 |
| MmugDNA.19412.1.S1_at   | MmugDNA.19412.1 | 7.68  | 7.66  | 0.3  | 0.08 | 1.01  | 0.709707 | 0.545771 | 0.86264  | 0.727653 |
| MmugDNA.19413.1.S1_at   | MmugDNA.19413.1 | 6.76  | 6.62  | 0.46 | 0.39 | 1.1   | 0.977587 | 0.691349 | 0.991189 | 0.820406 |
| MmugDNA.19414.1.S1_at   | MmugDNA.19414.1 | 5.07  | 4.96  | 0.12 | 0.24 | 1.07  | 0.369076 | 0.500799 | 0.642641 | 0.699278 |
| MmugDNA.19415.1.S1_at   | MmugDNA.19415.1 | 5.57  | 5.61  | 0.33 | 0.04 | -1.03 | 0.829354 | 0.935507 | 0.924798 | 0.96359  |



|                         |                 |       |       |      |      |       |          |          |          |          |
|-------------------------|-----------------|-------|-------|------|------|-------|----------|----------|----------|----------|
| MmugDNA.19415.1.S1_x_at | MmugDNA.19415.1 | 5.75  | 5.72  | 0.23 | 0.04 | 1.02  | 0.649073 | 0.827118 | 0.829524 | 0.900723 |
| MmugDNA.19416.1.S1_at   | MmugDNA.19416.1 | 4.32  | 4.34  | 0.15 | 0.08 | -1.01 | 0.609695 | 0.744869 | 0.805459 | 0.852198 |
| MmugDNA.19419.1.S1_at   | MmugDNA.19419.1 | 4.38  | 4.52  | 0.09 | 0.19 | -1.1  | 0.193226 | 0.497765 | 0.489751 | 0.697059 |
| MmugDNA.19421.1.S1_at   | MmugDNA.19421.1 | 6.92  | 6.36  | 0.46 | 0.12 | 1.48  | 0.117481 | 0.068356 | 0.394772 | 0.307912 |
| MmugDNA.19422.1.S1_s_at | MmugDNA.19422.1 | 7.27  | 7.31  | 0.07 | 0.09 | -1.03 | 0.313871 | 0.127411 | 0.599699 | 0.398249 |
| MmugDNA.19423.1.S1_at   | MmugDNA.19423.1 | 4.27  | 4.17  | 0.77 | 0.15 | 1.08  | 0.292632 | 0.403378 | 0.581743 | 0.632083 |
| MmugDNA.19424.1.S1_at   | MmugDNA.19424.1 | 4.15  | 4.37  | 0.03 | 0.05 | -1.16 | 0.009678 | 0.03885  | 0.14832  | 0.242022 |
| MmugDNA.19425.1.S1_at   | MmugDNA.19425.1 | 11.29 | 11.56 | 0.13 | 0.1  | -1.21 | 0.052713 | 0.036048 | 0.286588 | 0.234272 |
| MmugDNA.19426.1.S1_at   | MmugDNA.19426.1 | 6.51  | 6.48  | 0.16 | 0.1  | 1.02  | 0.256653 | 0.657448 | 0.551177 | 0.799704 |
| MmugDNA.19427.1.S1_at   | MmugDNA.19427.1 | 9.58  | 9.28  | 0.34 | 0.13 | 1.23  | 0.232627 | 0.023635 | 0.531064 | 0.192555 |
| MmugDNA.19429.1.S1_at   | MmugDNA.19429.1 | 4.19  | 4.31  | 0.33 | 0.24 | -1.09 | 0.706144 | 0.460154 | 0.860839 | 0.672064 |
| MmugDNA.1943.1.S1_at    | MmugDNA.1943.1  | 4.03  | 4.06  | 0.09 | 0.06 | -1.02 | 0.433475 | 0.629708 | 0.688966 | 0.781989 |
| MmugDNA.19431.1.S1_at   | MmugDNA.19431.1 | 8.52  | 8.27  | 0.32 | 0.15 | 1.19  | 0.551708 | 0.01001  | 0.768619 | 0.131262 |
| MmugDNA.19432.1.S1_at   | MmugDNA.19432.1 | 5.22  | 4.66  | 0.28 | 0.17 | 1.47  | 0.0451   | 0.074535 | 0.269707 | 0.318173 |
| MmugDNA.19433.1.S1_at   | MmugDNA.19433.1 | 4.83  | 4.59  | 0.38 | 0.04 | 1.18  | 0.395969 | 0.394213 | 0.662119 | 0.626807 |
| MmugDNA.19434.1.S1_at   | MmugDNA.19434.1 | 5.28  | 5.24  | 0.22 | 0.05 | 1.03  | 0.817409 | 0.855339 | 0.918429 | 0.917526 |
| MmugDNA.31007.1.S1_s_at | MmugDNA.31007.1 | 12.2  | 13.12 | 0.65 | 0.08 | -1.9  | 0.235239 | 0.568296 | 0.533113 | 0.741876 |
| MmugDNA.19437.1.S1_at   | MmugDNA.19437.1 | 5.52  | 6.35  | 0.61 | 0.11 | -1.77 | 0.250304 | 0.318284 | 0.545033 | 0.571151 |
| MmugDNA.19439.1.S1_at   | MmugDNA.19439.1 | 5.39  | 5.39  | 0.1  | 0.01 | 1     | 0.779071 | 0.322192 | 0.89919  | 0.573769 |
| MmugDNA.1944.1.S1_at    | MmugDNA.1944.1  | 4.19  | 4.38  | 1.13 | 0.19 | -1.14 | 0.882773 | 0.880115 | 0.950154 | 0.931533 |
| MmugDNA.19440.1.S1_at   | MmugDNA.19440.1 | 9.17  | 8.96  | 0.27 | 0.23 | 1.15  | 0.40499  | 0.597266 | 0.668575 | 0.76013  |
| MmugDNA.19440.1.S1_x_at | MmugDNA.19440.1 | 8.53  | 8.35  | 0.42 | 0.19 | 1.13  | 0.205321 | 0.243274 | 0.503171 | 0.513356 |
| MmugDNA.19441.1.S1_at   | MmugDNA.19441.1 | 5.65  | 5.65  | 0.09 | 0    | 1     | 0.865034 | 0.886665 | 0.941423 | 0.935519 |
| MmugDNA.19442.1.S1_at   | MmugDNA.19442.1 | 4.41  | 4.18  | 0.12 | 0.29 | 1.18  | 0.260099 | 0.591025 | 0.554284 | 0.756581 |
| MmugDNA.19444.1.S1_at   | MmugDNA.19444.1 | 10.97 | 10.8  | 0.04 | 0.14 | 1.12  | 0.327963 | 0.004666 | 0.610549 | 0.095314 |
| MmugDNA.19445.1.S1_at   | MmugDNA.19445.1 | 5.74  | 5.38  | 0.35 | 0.15 | 1.28  | 0.152568 | 0.094358 | 0.442239 | 0.350889 |
| MmugDNA.19446.1.S1_s_at | MmugDNA.19446.1 | 5.29  | 5.2   | 0.55 | 0.13 | 1.06  | 0.584815 | 0.383862 | 0.7888   | 0.61978  |
| MmugDNA.19447.1.S1_at   | MmugDNA.19447.1 | 7.46  | 7.06  | 0.4  | 0.21 | 1.32  | 0.124286 | 0.422284 | 0.404356 | 0.645637 |
| MmugDNA.19448.1.S1_at   | MmugDNA.19448.1 | 3.64  | 3.51  | 0.23 | 0.03 | 1.09  | 0.329704 | 0.224267 | 0.611807 | 0.497164 |
| MmugDNA.1945.1.S1_at    | MmugDNA.1945.1  | 4.68  | 4.5   | 0.08 | 0.07 | 1.13  | 0.041238 | 0.44609  | 0.259558 | 0.662692 |
| MmugDNA.19450.1.S1_at   | MmugDNA.19450.1 | 6.19  | 6.72  | 1.05 | 0.09 | -1.44 | 0.365602 | 0.395219 | 0.640052 | 0.62738  |
| MmugDNA.19451.1.S1_at   | MmugDNA.19451.1 | 3.56  | 3.55  | 0.26 | 0.43 | 1.01  | 0.998194 | 0.487933 | 0.999328 | 0.690787 |
| MmugDNA.19452.1.S1_at   | MmugDNA.19452.1 | 5.52  | 5.5   | 0.07 | 0.14 | 1.01  | 0.621258 | 0.237696 | 0.81255  | 0.50826  |
| MmugDNA.19453.1.S1_at   | MmugDNA.19453.1 | 10.46 | 10.17 | 0.11 | 0.06 | 1.22  | 0.036483 | 0.069351 | 0.246098 | 0.309558 |
| MmugDNA.19454.1.S1_at   | MmugDNA.19454.1 | 6.97  | 6.91  | 0.19 | 0.13 | 1.04  | 0.924853 | 0.145916 | 0.968031 | 0.419892 |
| MmugDNA.19458.1.S1_at   | MmugDNA.19458.1 | 5.83  | 6.11  | 0.27 | 0.21 | -1.22 | 0.261122 | 0.430726 | 0.555257 | 0.651717 |
| MmugDNA.19459.1.S1_at   | MmugDNA.19459.1 | 4.67  | 4.7   | 0.5  | 0.13 | -1.02 | 0.569701 | 0.450511 | 0.779023 | 0.665705 |
| MmugDNA.1946.1.S1_at    | MmugDNA.1946.1  | 5.22  | 5.28  | 0.72 | 0.54 | -1.05 | 0.84146  | 0.161245 | 0.930364 | 0.437386 |
| MmugDNA.19460.1.S1_at   | MmugDNA.19460.1 | 6.52  | 6.31  | 0.04 | 0.32 | 1.16  | 0.186989 | 0.017871 | 0.483077 | 0.168774 |
| MmugDNA.19461.1.S1_at   | MmugDNA.19461.1 | 4.85  | 5.05  | 0.74 | 0.09 | -1.15 | 0.561288 | 0.74211  | 0.77438  | 0.850618 |
| MmugDNA.19462.1.S1_at   | MmugDNA.19462.1 | 5.63  | 5.31  | 0.39 | 0.13 | 1.25  | 0.287763 | 0.422099 | 0.577473 | 0.645462 |
| MmugDNA.19465.1.S1_at   | MmugDNA.19465.1 | 5.69  | 5.05  | 0.33 | 0.3  | 1.55  | 0.223644 | 0.029222 | 0.521615 | 0.212898 |
| MmugDNA.19466.1.S1_at   | MmugDNA.19466.1 | 6.21  | 5.55  | 0.26 | 0.18 | 1.58  | 0.04033  | 0.160166 | 0.257247 | 0.436296 |

|                         |                 |       |       |      |      |       |          |          |          |          |
|-------------------------|-----------------|-------|-------|------|------|-------|----------|----------|----------|----------|
| MmugDNA.19467.1.S1_at   | MmugDNA.19467.1 | 5.14  | 5.23  | 0.36 | 0.15 | -1.07 | 0.472589 | 0.711554 | 0.716214 | 0.832754 |
| MmugDNA.19468.1.S1_at   | MmugDNA.19468.1 | 13.86 | 13.84 | 0.12 | 0.06 | 1.01  | 0.872523 | 0.887364 | 0.945359 | 0.935852 |
| MmugDNA.19468.1.S1_s_at | MmugDNA.19468.1 | 14.63 | 14.6  | 0.05 | 0.01 | 1.02  | 0.845668 | 0.956933 | 0.932611 | 0.975609 |
| MmugDNA.1947.1.S1_at    | MmugDNA.1947.1  | 3     | 3.03  | 0.17 | 0.06 | -1.03 | 0.594637 | 0.336855 | 0.794949 | 0.584113 |
| MmugDNA.19470.1.S1_at   | MmugDNA.19470.1 | 3.76  | 4.48  | 0.2  | 0.12 | -1.64 | 0.010295 | 0.035714 | 0.151269 | 0.233368 |
| MmugDNA.19471.1.S1_at   | MmugDNA.19471.1 | 6.26  | 6.25  | 0.34 | 0.14 | 1.01  | 0.420293 | 0.581837 | 0.679364 | 0.750784 |
| MmugDNA.19472.1.S1_at   | MmugDNA.19472.1 | 8.02  | 8.02  | 0.51 | 0.1  | 1     | 0.302571 | 0.130254 | 0.59035  | 0.402007 |
| MmugDNA.19473.1.S1_at   | MmugDNA.19473.1 | 9.23  | 9.72  | 0.2  | 0.18 | -1.41 | 0.043586 | 0.005306 | 0.265765 | 0.10082  |
| MmugDNA.19474.1.S1_at   | MmugDNA.19474.1 | 12.03 | 11.9  | 0.08 | 0.1  | 1.1   | 0.684966 | 0.670066 | 0.849869 | 0.807031 |
| MmugDNA.19474.1.S1_s_at | MmugDNA.19474.1 | 10.82 | 10.76 | 0.07 | 0.1  | 1.04  | 0.279177 | 0.388107 | 0.570605 | 0.622607 |
| MmugDNA.38013.1.S1_at   | MmugDNA.38013.1 | 3     | 3.01  | 0.18 | 0.12 | -1.01 | 0.33874  | 0.492052 | 0.619173 | 0.693403 |
| MmugDNA.38013.1.S1_s_at | MmugDNA.38013.1 | 8.91  | 8.94  | 0.47 | 0.61 | -1.02 | 0.990664 | 0.015646 | 0.996621 | 0.158546 |
| MmugDNA.19477.1.S1_at   | MmugDNA.19477.1 | 3.95  | 3.96  | 0.11 | 0.1  | -1.01 | 0.433608 | 0.128106 | 0.688989 | 0.399122 |
| MmugDNA.19478.1.S1_at   | MmugDNA.19478.1 | 6.35  | 6.16  | 0.04 | 0.16 | 1.15  | 0.161925 | 0.330466 | 0.453731 | 0.579193 |
| MmugDNA.19479.1.S1_at   | MmugDNA.19479.1 | 4.85  | 4.72  | 0.19 | 0.15 | 1.1   | 0.65539  | 0.889129 | 0.833306 | 0.936796 |
| MmugDNA.1948.1.S1_at    | MmugDNA.1948.1  | 8.08  | 8.11  | 0.19 | 0.07 | -1.02 | 0.845137 | 0.084672 | 0.932337 | 0.33618  |
| MmugDNA.19480.1.S1_at   | MmugDNA.19480.1 | 6.92  | 6.09  | 0.45 | 0.1  | 1.79  | 0.111771 | 0.152596 | 0.387879 | 0.427435 |
| MmugDNA.19482.1.S1_at   | MmugDNA.19482.1 | 10.16 | 9.67  | 0.2  | 0.17 | 1.4   | 0.071923 | 0.231844 | 0.326129 | 0.503592 |
| MmugDNA.19483.1.S1_at   | MmugDNA.19483.1 | 12.49 | 12.52 | 0.17 | 0.04 | -1.02 | 0.880342 | 0.487658 | 0.949116 | 0.690634 |
| MmugDNA.19485.1.S1_s_at | MmugDNA.19485.1 | 7.95  | 11.25 | 1.61 | 0.25 | -9.87 | 0.072593 | 0.068402 | 0.327359 | 0.307955 |
| MmugDNA.19487.1.S1_at   | MmugDNA.19487.1 | 6.62  | 6.77  | 0.16 | 0.02 | -1.11 | 0.644922 | 0.22989  | 0.827097 | 0.501802 |
| MmugDNA.19489.1.S1_at   | MmugDNA.19489.1 | 4.01  | 3.72  | 0.74 | 0.21 | 1.22  | 0.236689 | 0.330921 | 0.534328 | 0.579609 |
| MmugDNA.1949.1.S1_at    | MmugDNA.1949.1  | 3.2   | 3.13  | 0.24 | 0.03 | 1.05  | 0.539487 | 0.722511 | 0.760837 | 0.839261 |
| MmugDNA.19490.1.S1_at   | MmugDNA.19490.1 | 11.45 | 11.55 | 0.18 | 0.05 | -1.07 | 0.866463 | 0.927617 | 0.942366 | 0.958869 |
| MmugDNA.19491.1.S1_at   | MmugDNA.19491.1 | 5.79  | 5.73  | 0.12 | 0.22 | 1.04  | 0.192365 | 0.339453 | 0.488949 | 0.586093 |
| MmugDNA.19493.1.S1_at   | MmugDNA.19493.1 | 7.65  | 6.96  | 0.47 | 0.05 | 1.61  | 0.178009 | 0.202959 | 0.472794 | 0.477343 |
| MmugDNA.19494.1.S1_s_at | MmugDNA.19494.1 | 8.01  | 7.92  | 0.14 | 0.1  | 1.06  | 0.916616 | 0.047125 | 0.96453  | 0.261659 |
| MmugDNA.19495.1.S1_at   | MmugDNA.19495.1 | 3.68  | 3.11  | 0.39 | 0.06 | 1.47  | 0.094725 | 0.091739 | 0.36369  | 0.346977 |
| MmugDNA.19496.1.S1_at   | MmugDNA.19496.1 | 3.14  | 3.03  | 0.27 | 0.15 | 1.08  | 0.353863 | 0.248831 | 0.631075 | 0.517951 |
| MmugDNA.19497.1.S1_at   | MmugDNA.19497.1 | 4.44  | 4.68  | 0.23 | 0.25 | -1.18 | 0.122397 | 0.393574 | 0.401122 | 0.626497 |
| MmugDNA.19498.1.S1_at   | MmugDNA.19498.1 | 11.57 | 11.3  | 0.23 | 0.08 | 1.2   | 0.086421 | 0.031258 | 0.351273 | 0.218668 |
| MmugDNA.19499.1.S1_at   | MmugDNA.19499.1 | 11.05 | 10.68 | 0.28 | 0.04 | 1.3   | 0.036776 | 0.009318 | 0.246859 | 0.127446 |
| MmugDNA.1950.1.S1_at    | MmugDNA.1950.1  | 5.97  | 6.29  | 0.24 | 0.09 | -1.25 | 0.026838 | 0.275963 | 0.216925 | 0.540057 |
| MmugDNA.19500.1.S1_at   | MmugDNA.19500.1 | 8.71  | 7.98  | 0.28 | 0.29 | 1.66  | 0.072879 | 0.353069 | 0.327658 | 0.596363 |
| MmugDNA.19501.1.S1_at   | MmugDNA.19501.1 | 5.5   | 5.53  | 1.13 | 0.12 | -1.02 | 0.396083 | 0.401788 | 0.662207 | 0.631068 |
| MmugDNA.19502.1.S1_at   | MmugDNA.19502.1 | 8.37  | 8.59  | 0.16 | 0.2  | -1.16 | 0.106284 | 0.003108 | 0.380284 | 0.081305 |
| MmugDNA.19503.1.S1_at   | MmugDNA.19503.1 | 5.18  | 5.01  | 0.23 | 0.08 | 1.13  | 0.293139 | 0.280835 | 0.58211  | 0.544021 |
| MmugDNA.19504.1.S1_at   | MmugDNA.19504.1 | 8.15  | 9.08  | 0.45 | 0.1  | -1.9  | 0.012421 | 0.030859 | 0.161773 | 0.217427 |
| MmugDNA.19505.1.S1_at   | MmugDNA.19505.1 | 5.99  | 6.08  | 0.15 | 0.03 | -1.07 | 0.525425 | 0.232064 | 0.75194  | 0.503781 |
| MmugDNA.19507.1.S1_at   | MmugDNA.19507.1 | 5.01  | 4.9   | 0.14 | 0.08 | 1.08  | 0.24444  | 0.041291 | 0.540909 | 0.247995 |
| MmugDNA.19508.1.S1_at   | MmugDNA.19508.1 | 6.06  | 6.16  | 1.18 | 0.26 | -1.07 | 0.633497 | 0.374292 | 0.820437 | 0.612779 |
| MmugDNA.19509.1.S1_at   | MmugDNA.19509.1 | 3.78  | 2.93  | 0.44 | 0.12 | 1.8   | 0.037593 | 0.027809 | 0.24932  | 0.208293 |
| MmugDNA.1951.1.S1_at    | MmugDNA.1951.1  | 5.32  | 5.33  | 0.62 | 0.26 | -1.01 | 0.402959 | 0.755843 | 0.667108 | 0.857865 |

|                         |                 |       |       |      |      |       |          |          |          |          |
|-------------------------|-----------------|-------|-------|------|------|-------|----------|----------|----------|----------|
| MmugDNA.19510.1.S1_at   | MmugDNA.19510.1 | 7.75  | 6.13  | 0.31 | 0.43 | 3.08  | 0.011481 | 0.002511 | 0.15722  | 0.074158 |
| MmugDNA.19511.1.S1_at   | MmugDNA.19511.1 | 6.07  | 6.08  | 0.54 | 0.04 | -1    | 0.546813 | 0.724262 | 0.765573 | 0.840433 |
| MmugDNA.19514.1.S1_at   | MmugDNA.19514.1 | 7.54  | 7.8   | 0.26 | 0.23 | -1.2  | 0.281709 | 0.091241 | 0.572546 | 0.346216 |
| MmugDNA.19516.1.S1_at   | MmugDNA.19516.1 | 4.58  | 4.51  | 0.04 | 0.13 | 1.05  | 0.43984  | 0.675668 | 0.693926 | 0.810429 |
| MmugDNA.19517.1.S1_at   | MmugDNA.19517.1 | 3.7   | 3.84  | 0.2  | 0.03 | -1.1  | 0.447908 | 0.592594 | 0.699731 | 0.757847 |
| MmugDNA.25286.1.S1_s_at | MmugDNA.25286.1 | 7.37  | 7.43  | 0.17 | 0.02 | -1.04 | 0.721741 | 0.577049 | 0.86896  | 0.747634 |
| MmugDNA.19519.1.S1_at   | MmugDNA.19519.1 | 5.09  | 4.57  | 0.42 | 0.16 | 1.44  | 0.089829 | 0.094607 | 0.356705 | 0.351371 |
| MmugDNA.1952.1.S1_at    | MmugDNA.1952.1  | 6.68  | 6.61  | 0.15 | 0.22 | 1.05  | 0.811489 | 0.924004 | 0.91557  | 0.957162 |
| MmugDNA.19521.1.S1_at   | MmugDNA.19521.1 | 3.65  | 3.58  | 0.98 | 0.19 | 1.05  | 0.361919 | 0.367348 | 0.637126 | 0.607004 |
| MmugDNA.19522.1.S1_at   | MmugDNA.19522.1 | 9.86  | 10    | 0.29 | 0.19 | -1.11 | 0.95253  | 0.009282 | 0.980442 | 0.127101 |
| MmugDNA.19523.1.S1_at   | MmugDNA.19523.1 | 9.87  | 10.72 | 0.27 | 0.3  | -1.8  | 0.044055 | 0.063498 | 0.266932 | 0.298444 |
| MmugDNA.19523.1.S1_s_at | MmugDNA.19523.1 | 9.09  | 9.86  | 0.18 | 0.26 | -1.7  | 0.02569  | 0.037968 | 0.212966 | 0.239302 |
| MmugDNA.19524.1.S1_at   | MmugDNA.19524.1 | 8.94  | 9.26  | 0.08 | 0.19 | -1.25 | 0.065613 | 0.05005  | 0.313575 | 0.268916 |
| MmugDNA.19525.1.S1_at   | MmugDNA.19525.1 | 5.32  | 5.38  | 0.19 | 0.16 | -1.05 | 0.547829 | 0.754132 | 0.766242 | 0.856862 |
| MmugDNA.19526.1.S1_at   | MmugDNA.19526.1 | 12.27 | 12.39 | 0.02 | 0.06 | -1.08 | 0.018968 | 0.005725 | 0.19121  | 0.104271 |
| MmugDNA.19527.1.S1_at   | MmugDNA.19527.1 | 5.39  | 4.91  | 0.26 | 0.61 | 1.4   | 0.963912 | 0.379869 | 0.985358 | 0.616629 |
| MmugDNA.19527.1.S1_s_at | MmugDNA.19527.1 | 3.78  | 4.87  | 0.58 | 0.44 | -2.13 | 0.217616 | 0.307884 | 0.515458 | 0.563992 |
| MmugDNA.19529.1.S1_at   | MmugDNA.19529.1 | 4.2   | 4.36  | 0.4  | 0.06 | -1.12 | 0.777437 | 0.939881 | 0.898343 | 0.96581  |
| MmugDNA.1953.1.S1_at    | MmugDNA.1953.1  | 7.53  | 7.21  | 0.14 | 0.09 | 1.25  | 0.024494 | 0.071729 | 0.209655 | 0.313981 |
| MmugDNA.19531.1.S1_at   | MmugDNA.19531.1 | 4.7   | 4.74  | 0.11 | 0.09 | -1.03 | 0.844901 | 0.371    | 0.932176 | 0.609964 |
| MmugDNA.19532.1.S1_at   | MmugDNA.19532.1 | 6.87  | 6.1   | 0.2  | 0.11 | 1.71  | 0.00397  | 0.552958 | 0.108634 | 0.732213 |
| MmugDNA.19535.1.S1_at   | MmugDNA.19535.1 | 5.34  | 6.71  | 1.34 | 0.28 | -2.6  | 0.449686 | 0.637236 | 0.70101  | 0.786759 |
| MmugDNA.19536.1.S1_at   | MmugDNA.19536.1 | 5.68  | 5     | 0.19 | 0.13 | 1.6   | 0.007788 | 0.000498 | 0.137073 | 0.038955 |
| MmugDNA.19537.1.S1_at   | MmugDNA.19537.1 | 4.42  | 4.7   | 0.3  | 0.12 | -1.21 | 0.84292  | 0.970176 | 0.931186 | 0.983723 |
| MmugDNA.19539.1.S1_at   | MmugDNA.19539.1 | 5.35  | 5.58  | 0.2  | 0.2  | -1.17 | 0.691477 | 0.051443 | 0.852473 | 0.272231 |
| MmugDNA.1954.1.S1_at    | MmugDNA.1954.1  | 8.59  | 8.59  | 0.13 | 0.16 | -1    | 0.820185 | 0.760084 | 0.919814 | 0.86059  |
| MmugDNA.19541.1.S1_at   | MmugDNA.19541.1 | 6.89  | 6.08  | 0.44 | 0.62 | 1.74  | 0.686574 | 0.751992 | 0.850635 | 0.855739 |
| MmugDNA.19542.1.S1_at   | MmugDNA.19542.1 | 6.63  | 6.5   | 0.02 | 0.04 | 1.1   | 0.022412 | 0.033746 | 0.202983 | 0.227391 |
| MmugDNA.19544.1.S1_at   | MmugDNA.19544.1 | 6.77  | 7.76  | 0.13 | 0.73 | -1.98 | 0.293824 | 0.26826  | 0.582851 | 0.533981 |
| MmugDNA.19547.1.S1_at   | MmugDNA.19547.1 | 4.95  | 4.96  | 0.12 | 0.14 | -1.01 | 0.66272  | 0.610929 | 0.837251 | 0.768948 |
| MmugDNA.19548.1.S1_at   | MmugDNA.19548.1 | 5.15  | 5.1   | 0.17 | 0.14 | 1.04  | 0.815019 | 0.17564  | 0.917406 | 0.452208 |
| MmugDNA.19549.1.S1_at   | MmugDNA.19549.1 | 9.62  | 9.73  | 0.6  | 0.15 | -1.07 | 0.807313 | 0.145699 | 0.913693 | 0.419653 |
| MmugDNA.1955.1.S1_at    | MmugDNA.1955.1  | 4.75  | 4.6   | 0.09 | 0.14 | 1.11  | 0.103886 | 0.09961  | 0.377205 | 0.358095 |
| MmugDNA.19550.1.S1_at   | MmugDNA.19550.1 | 7.13  | 7.71  | 0.39 | 0.25 | -1.5  | 0.244413 | 0.012669 | 0.540909 | 0.145097 |
| MmugDNA.19554.1.S1_at   | MmugDNA.19554.1 | 5.92  | 5.86  | 0.3  | 0.11 | 1.05  | 0.176391 | 0.189845 | 0.470765 | 0.465403 |
| MmugDNA.19555.1.S1_at   | MmugDNA.19555.1 | 6.75  | 6.75  | 0.04 | 0.02 | -1.01 | 0.214371 | 0.389234 | 0.512006 | 0.623403 |
| MmugDNA.19557.1.S1_at   | MmugDNA.19557.1 | 11.39 | 11.4  | 0.14 | 0.03 | -1.01 | 0.796322 | 0.072262 | 0.908058 | 0.314904 |
| MmugDNA.19558.1.S1_at   | MmugDNA.19558.1 | 5.78  | 5.69  | 0.19 | 0.05 | 1.07  | 0.111298 | 0.315896 | 0.38732  | 0.569327 |
| MmugDNA.19559.1.S1_at   | MmugDNA.19559.1 | 6.06  | 6.2   | 0.17 | 0.03 | -1.11 | 0.056931 | 0.298061 | 0.295858 | 0.556707 |
| MmugDNA.1956.1.S1_at    | MmugDNA.1956.1  | 5.26  | 5.76  | 0.66 | 0.12 | -1.42 | 0.76559  | 0.89461  | 0.892487 | 0.939853 |
| MmugDNA.19560.1.S1_at   | MmugDNA.19560.1 | 5.92  | 5.75  | 0.47 | 0.1  | 1.13  | 0.360225 | 0.495258 | 0.635815 | 0.695411 |
| MmugDNA.19563.1.S1_at   | MmugDNA.19563.1 | 3.22  | 3.12  | 0.1  | 0.02 | 1.07  | 0.133155 | 0.090261 | 0.416662 | 0.344673 |
| MmugDNA.19564.1.S1_s_at | MmugDNA.19564.1 | 10.82 | 11.5  | 0.06 | 0.16 | -1.6  | 0.005694 | 0.003297 | 0.121164 | 0.082571 |

|                         |                 |       |       |      |      |       |          |          |          |          |
|-------------------------|-----------------|-------|-------|------|------|-------|----------|----------|----------|----------|
| MmugDNA.19565.1.S1_at   | MmugDNA.19565.1 | 6.09  | 6.43  | 1.32 | 0.19 | -1.27 | 0.816569 | 0.94484  | 0.918047 | 0.968794 |
| MmugDNA.19569.1.S1_at   | MmugDNA.19569.1 | 5.09  | 5.2   | 0.43 | 0.15 | -1.08 | 0.716629 | 0.832926 | 0.866324 | 0.904143 |
| MmugDNA.1957.1.S1_at    | MmugDNA.1957.1  | 5.2   | 4.61  | 1.28 | 0.03 | 1.5   | 0.439098 | 0.737293 | 0.693448 | 0.847869 |
| MmugDNA.19570.1.S1_at   | MmugDNA.19570.1 | 3.39  | 3.39  | 0    | 0.08 | 1     | 0.373901 | 0.285166 | 0.645118 | 0.547098 |
| MmugDNA.19571.1.S1_at   | MmugDNA.19571.1 | 6.31  | 6.39  | 0.19 | 0.02 | -1.06 | 0.677303 | 0.815131 | 0.846109 | 0.893355 |
| MmugDNA.19572.1.S1_at   | MmugDNA.19572.1 | 6.81  | 6.77  | 0.17 | 0.08 | 1.02  | 0.928466 | 0.37796  | 0.969772 | 0.615264 |
| MmugDNA.19573.1.S1_at   | MmugDNA.19573.1 | 8.35  | 9.3   | 0.48 | 0.07 | -1.94 | 0.028033 | 0.121755 | 0.219909 | 0.391043 |
| MmugDNA.1958.1.S1_at    | MmugDNA.1958.1  | 4.58  | 4.67  | 0.67 | 0.28 | -1.07 | 0.529898 | 0.724447 | 0.754539 | 0.840485 |
| MmugDNA.19582.1.S1_at   | MmugDNA.19582.1 | 7.28  | 7.16  | 0.29 | 0.13 | 1.09  | 0.455419 | 0.481783 | 0.705136 | 0.686748 |
| MmugDNA.19582.1.S1_x_at | MmugDNA.19582.1 | 7.22  | 7.03  | 0.28 | 0.02 | 1.14  | 0.854307 | 0.962306 | 0.936621 | 0.978822 |
| MmugDNA.19583.1.S1_at   | MmugDNA.19583.1 | 8.44  | 8.5   | 0.12 | 0.12 | -1.04 | 0.488467 | 0.017562 | 0.726931 | 0.167672 |
| MmugDNA.19584.1.S1_at   | MmugDNA.19584.1 | 4.27  | 4.25  | 0    | 0.15 | 1.01  | 0.905915 | 0.985545 | 0.960118 | 0.991808 |
| MmugDNA.19585.1.S1_at   | MmugDNA.19585.1 | 4.09  | 4.1   | 0.11 | 0.05 | -1.01 | 0.357743 | 0.344048 | 0.633636 | 0.58962  |
| MmugDNA.19587.1.S1_at   | MmugDNA.19587.1 | 11.5  | 12.46 | 0.57 | 0.12 | -1.94 | 0.058754 | 0.095313 | 0.29949  | 0.35236  |
| MmugDNA.5697.1.S1_s_at  | MmugDNA.5697.1  | 12.24 | 13.05 | 0.54 | 0.1  | -1.74 | 0.081322 | 0.132695 | 0.342222 | 0.404544 |
| MmugDNA.19589.1.S1_at   | MmugDNA.19589.1 | 9.46  | 9.53  | 0.4  | 0.09 | -1.04 | 0.763585 | 0.68397  | 0.891841 | 0.81565  |
| MmugDNA.1959.1.S1_at    | MmugDNA.1959.1  | 3.46  | 3.46  | 0.04 | 0.02 | -1.01 | 0.291602 | 0.32466  | 0.580994 | 0.575208 |
| MmugDNA.19590.1.S1_at   | MmugDNA.19590.1 | 5.67  | 5.64  | 0.16 | 0.07 | 1.02  | 0.864976 | 0.194375 | 0.941423 | 0.469464 |
| MmugDNA.19591.1.S1_at   | MmugDNA.19591.1 | 5.4   | 6.97  | 1.23 | 0.19 | -2.98 | 0.260874 | 0.500811 | 0.555006 | 0.699278 |
| MmugDNA.19592.1.S1_at   | MmugDNA.19592.1 | 7.76  | 7.69  | 0.06 | 0.06 | 1.05  | 0.172738 | 0.091777 | 0.46677  | 0.346977 |
| MmugDNA.19593.1.S1_at   | MmugDNA.19593.1 | 3.99  | 3.9   | 0.17 | 0.08 | 1.07  | 0.518268 | 0.571243 | 0.747407 | 0.743629 |
| MmugDNA.19595.1.S1_at   | MmugDNA.19595.1 | 7.15  | 7.22  | 0.11 | 0.09 | -1.05 | 0.488563 | 0.050913 | 0.726931 | 0.270955 |
| MmugDNA.19596.1.S1_at   | MmugDNA.19596.1 | 3.79  | 3.32  | 0.49 | 0.06 | 1.39  | 0.144082 | 0.158521 | 0.430916 | 0.434442 |
| MmugDNA.19597.1.S1_at   | MmugDNA.19597.1 | 3.6   | 3.31  | 0.41 | 0.25 | 1.23  | 0.574619 | 0.698886 | 0.782052 | 0.825026 |
| MmugDNA.196.1.S1_at     | MmugDNA.196.1   | 5.06  | 5     | 0.28 | 0.45 | 1.04  | 0.872365 | 0.02482  | 0.945259 | 0.197372 |
| MmugDNA.1960.1.S1_at    | MmugDNA.1960.1  | 5.76  | 5.87  | 0.04 | 0.01 | -1.08 | 0.006105 | 0.25542  | 0.124422 | 0.523445 |
| MmugDNA.19600.1.S1_at   | MmugDNA.19600.1 | 4.65  | 4.23  | 1.3  | 0.17 | 1.34  | 0.229002 | 0.269928 | 0.527641 | 0.535208 |
| MmugDNA.19602.1.S1_at   | MmugDNA.19602.1 | 4.66  | 4.96  | 0.04 | 0.5  | -1.23 | 0.340921 | 0.394691 | 0.620931 | 0.627208 |
| MmugDNA.19603.1.S1_at   | MmugDNA.19603.1 | 3.36  | 3.45  | 0.19 | 0.23 | -1.07 | 0.314484 | 0.506735 | 0.599987 | 0.702575 |
| MmugDNA.19606.1.S1_at   | MmugDNA.19606.1 | 8.8   | 8.01  | 0.16 | 0.21 | 1.72  | 0.010078 | 0.021204 | 0.149988 | 0.182326 |
| MmugDNA.19607.1.S1_at   | MmugDNA.19607.1 | 4.85  | 4.94  | 0.42 | 0.04 | -1.06 | 0.558232 | 0.628758 | 0.772705 | 0.781403 |
| MmugDNA.19608.1.S1_at   | MmugDNA.19608.1 | 3.24  | 3.45  | 0.09 | 0.06 | -1.16 | 0.059207 | 0.209999 | 0.300409 | 0.48375  |
| MmugDNA.19609.1.S1_at   | MmugDNA.19609.1 | 4.73  | 5.1   | 0.79 | 0.15 | -1.29 | 0.892738 | 0.851147 | 0.954333 | 0.91535  |
| MmugDNA.19610.1.S1_at   | MmugDNA.19610.1 | 3.76  | 3.61  | 0.22 | 0.2  | 1.11  | 0.363098 | 0.12867  | 0.637776 | 0.400083 |
| MmugDNA.19611.1.S1_at   | MmugDNA.19611.1 | 3.4   | 3.42  | 0.16 | 0.38 | -1.02 | 0.739878 | 0.750771 | 0.879468 | 0.855064 |
| MmugDNA.19612.1.S1_at   | MmugDNA.19612.1 | 6.32  | 7.23  | 0.6  | 0.13 | -1.87 | 0.123633 | 0.086579 | 0.403224 | 0.33911  |
| MmugDNA.19616.1.S1_at   | MmugDNA.19616.1 | 4.79  | 4.59  | 0.04 | 0.05 | 1.15  | 0.009701 | 0.027501 | 0.148419 | 0.207161 |
| MmugDNA.19617.1.S1_at   | MmugDNA.19617.1 | 4.21  | 4.05  | 0.07 | 0.09 | 1.12  | 0.028639 | 0.171483 | 0.221765 | 0.447895 |
| MmugDNA.19618.1.S1_at   | MmugDNA.19618.1 | 4.09  | 4.07  | 0.04 | 0.08 | 1.02  | 0.990036 | 0.71327  | 0.996449 | 0.833666 |
| MmugDNA.19619.1.S1_at   | MmugDNA.19619.1 | 12.33 | 12.29 | 0.11 | 0.07 | 1.03  | 0.546007 | 0.051608 | 0.7651   | 0.272636 |
| MmugDNA.1962.1.S1_at    | MmugDNA.1962.1  | 3.87  | 4.22  | 0.09 | 0.23 | -1.28 | 0.184936 | 0.371266 | 0.481073 | 0.610135 |
| MmugDNA.19620.1.S1_at   | MmugDNA.19620.1 | 3.27  | 3.53  | 0.21 | 1.1  | -1.2  | 0.27968  | 0.310019 | 0.57097  | 0.565253 |
| MmugDNA.19621.1.S1_at   | MmugDNA.19621.1 | 9.85  | 9.79  | 0.06 | 0.26 | 1.04  | 0.676186 | 0.229355 | 0.845333 | 0.501527 |

|                         |                 |       |       |      |      |       |          |          |          |          |
|-------------------------|-----------------|-------|-------|------|------|-------|----------|----------|----------|----------|
| MmugDNA.19623.1.S1_at   | MmugDNA.19623.1 | 5.91  | 6.63  | 0.33 | 0.18 | -1.64 | 0.046006 | 0.000736 | 0.272142 | 0.044846 |
| MmugDNA.19623.1.S1_s_at | MmugDNA.19623.1 | 8.77  | 9.22  | 0.29 | 0.21 | -1.36 | 0.078835 | 0.000356 | 0.338706 | 0.037229 |
| MmugDNA.19624.1.S1_at   | MmugDNA.19624.1 | 6.81  | 5.97  | 0.11 | 0.21 | 1.79  | 0.009198 | 0.007084 | 0.145865 | 0.113353 |
| MmugDNA.19625.1.S1_at   | MmugDNA.19625.1 | 5.78  | 8.46  | 1.22 | 0.18 | -6.37 | 0.053208 | 0.058067 | 0.287986 | 0.28759  |
| MmugDNA.19626.1.S1_at   | MmugDNA.19626.1 | 7.32  | 6.61  | 0.12 | 0.2  | 1.63  | 0.0061   | 0.059354 | 0.124422 | 0.29054  |
| MmugDNA.19627.1.S1_at   | MmugDNA.19627.1 | 12.16 | 12.28 | 0.12 | 0.03 | -1.09 | 0.461359 | 0.047025 | 0.708826 | 0.261469 |
| MmugDNA.19628.1.S1_at   | MmugDNA.19628.1 | 4.63  | 4.89  | 0.13 | 0.53 | -1.2  | 0.805869 | 0.271459 | 0.912997 | 0.536512 |
| MmugDNA.19629.1.S1_at   | MmugDNA.19629.1 | 5.99  | 5.99  | 0.2  | 0.02 | -1    | 0.437671 | 0.634784 | 0.69248  | 0.785035 |
| MmugDNA.1963.1.S1_at    | MmugDNA.1963.1  | 4.95  | 4.94  | 0.2  | 0.21 | 1     | 0.667489 | 0.153506 | 0.840413 | 0.42827  |
| MmugDNA.19630.1.S1_at   | MmugDNA.19630.1 | 7.07  | 6.93  | 0.12 | 0.04 | 1.1   | 0.382087 | 0.109438 | 0.651635 | 0.373277 |
| MmugDNA.19631.1.S1_at   | MmugDNA.19631.1 | 6.45  | 6.56  | 0.15 | 0.04 | -1.08 | 0.396789 | 0.132336 | 0.662694 | 0.404294 |
| MmugDNA.6510.1.S1_s_at  | MmugDNA.6510.1  | 9.2   | 10.04 | 0.24 | 0.21 | -1.78 | 0.027664 | 0.004163 | 0.218836 | 0.091036 |
| MmugDNA.19633.1.S1_at   | MmugDNA.19633.1 | 9.21  | 6.65  | 0.41 | 0.68 | 5.91  | 0.009668 | 0.00249  | 0.14832  | 0.073794 |
| MmugDNA.19634.1.S1_at   | MmugDNA.19634.1 | 5.07  | 4.83  | 0.15 | 0.18 | 1.18  | 0.767433 | 0.641714 | 0.893274 | 0.789688 |
| MmugDNA.19635.1.S1_at   | MmugDNA.19635.1 | 7.04  | 7.12  | 0.07 | 0.02 | -1.05 | 0.145188 | 0.04694  | 0.432532 | 0.261301 |
| MmugDNA.19636.1.S1_at   | MmugDNA.19636.1 | 5.83  | 5.83  | 0.1  | 0.1  | -1    | 0.543492 | 0.265075 | 0.763461 | 0.531    |
| MmugDNA.19637.1.S1_at   | MmugDNA.19637.1 | 6.88  | 6.5   | 0.25 | 0.25 | 1.3   | 0.292443 | 0.351446 | 0.581729 | 0.595067 |
| MmugDNA.19638.1.S1_at   | MmugDNA.19638.1 | 4.26  | 3.93  | 0.5  | 0.18 | 1.26  | 0.494738 | 0.191793 | 0.731345 | 0.467133 |
| MmugDNA.19639.1.S1_at   | MmugDNA.19639.1 | 3.52  | 3.71  | 0.16 | 0.08 | -1.14 | 0.669822 | 0.895686 | 0.841529 | 0.940369 |
| MmugDNA.1964.1.S1_at    | MmugDNA.1964.1  | 8.19  | 7.8   | 0.43 | 0.08 | 1.31  | 0.444907 | 0.615078 | 0.697593 | 0.771731 |
| MmugDNA.1964.1.S1_s_at  | MmugDNA.1964.1  | 8.23  | 7.9   | 0.53 | 0.15 | 1.26  | 0.945555 | 0.853941 | 0.977125 | 0.916872 |
| MmugDNA.19640.1.S1_at   | MmugDNA.19640.1 | 8.42  | 8.74  | 0.55 | 0.08 | -1.25 | 0.143124 | 0.026445 | 0.429375 | 0.203765 |
| MmugDNA.19641.1.S1_at   | MmugDNA.19641.1 | 7.18  | 6.15  | 0.21 | 0.42 | 2.05  | 0.027516 | 0.030026 | 0.218484 | 0.215056 |
| MmugDNA.19642.1.S1_s_at | MmugDNA.19642.1 | 7.09  | 7.69  | 0.14 | 0.22 | -1.52 | 0.009118 | 0.001922 | 0.145356 | 0.06556  |
| MmugDNA.19646.1.S1_at   | MmugDNA.19646.1 | 5.05  | 5.12  | 0.18 | 0.18 | -1.06 | 0.839621 | 0.226936 | 0.92965  | 0.499276 |
| MmugDNA.19647.1.S1_at   | MmugDNA.19647.1 | 4.72  | 4.64  | 0.17 | 0.12 | 1.06  | 0.110463 | 0.246912 | 0.385799 | 0.516238 |
| MmugDNA.19648.1.S1_at   | MmugDNA.19648.1 | 7.74  | 8.63  | 0.56 | 0.11 | -1.85 | 0.055636 | 0.037926 | 0.293005 | 0.239302 |
| MmugDNA.19649.1.S1_at   | MmugDNA.19649.1 | 6.57  | 6.98  | 1.65 | 0.59 | -1.33 | 0.813337 | 0.870514 | 0.916527 | 0.926446 |
| MmugDNA.1965.1.S1_at    | MmugDNA.1965.1  | 5.49  | 5.78  | 0.95 | 0.25 | -1.22 | 0.605389 | 0.738672 | 0.802424 | 0.848486 |
| MmugDNA.19650.1.S1_at   | MmugDNA.19650.1 | 8.47  | 8.39  | 0.22 | 0.12 | 1.06  | 0.712961 | 0.459706 | 0.864525 | 0.671948 |
| MmugDNA.19652.1.S1_at   | MmugDNA.19652.1 | 4.99  | 5.03  | 0.16 | 0    | -1.03 | 0.828623 | 0.59717  | 0.924251 | 0.760104 |
| MmugDNA.19654.1.S1_at   | MmugDNA.19654.1 | 7.21  | 7.54  | 0.65 | 0.03 | -1.26 | 0.141058 | 0.17045  | 0.426897 | 0.447103 |
| MmugDNA.19656.1.S1_at   | MmugDNA.19656.1 | 11.33 | 11.7  | 0.07 | 0.11 | -1.3  | 0.014701 | 0.000059 | 0.173188 | 0.025666 |
| MmugDNA.19657.1.S1_at   | MmugDNA.19657.1 | 4.92  | 4.93  | 0.65 | 0.23 | -1.01 | 0.600036 | 0.05207  | 0.798553 | 0.273761 |
| MmugDNA.19658.1.S1_at   | MmugDNA.19658.1 | 12.69 | 12.53 | 0.03 | 0.03 | 1.12  | 0.001613 | 0.468271 | 0.084022 | 0.6777   |
| MmugDNA.19659.1.S1_at   | MmugDNA.19659.1 | 9.58  | 10.05 | 0.31 | 0.02 | -1.38 | 0.066578 | 0.008114 | 0.315578 | 0.119642 |
| MmugDNA.1966.1.S1_at    | MmugDNA.1966.1  | 4.18  | 3.54  | 0.6  | 0.29 | 1.56  | 0.306013 | 0.278314 | 0.592958 | 0.542037 |
| MmugDNA.19661.1.S1_at   | MmugDNA.19661.1 | 5.63  | 5.58  | 0.05 | 0    | 1.04  | 0.034608 | 0.051406 | 0.240603 | 0.272192 |
| MmugDNA.19662.1.S1_at   | MmugDNA.19662.1 | 3.9   | 3.94  | 0.07 | 0.05 | -1.03 | 0.646992 | 0.192811 | 0.828492 | 0.468296 |
| MmugDNA.19664.1.S1_at   | MmugDNA.19664.1 | 11.84 | 11.85 | 0.13 | 0.01 | -1.01 | 0.453812 | 0.105438 | 0.703872 | 0.367279 |
| MmugDNA.19665.1.S1_at   | MmugDNA.19665.1 | 8.64  | 8.6   | 0.17 | 0.13 | 1.03  | 0.95129  | 0.047014 | 0.97989  | 0.261469 |
| MmugDNA.19667.1.S1_at   | MmugDNA.19667.1 | 4.13  | 4.14  | 0.08 | 0.11 | -1    | 0.217056 | 0.696852 | 0.514906 | 0.823975 |
| MmugDNA.19668.1.S1_at   | MmugDNA.19668.1 | 7.25  | 6.75  | 0.82 | 0.22 | 1.42  | 0.323036 | 0.36311  | 0.606912 | 0.60356  |

|                         |                 |       |       |      |      |       |          |          |          |          |
|-------------------------|-----------------|-------|-------|------|------|-------|----------|----------|----------|----------|
| MmugDNA.19669.1.S1_at   | MmugDNA.19669.1 | 3.89  | 3.92  | 0.19 | 0.07 | -1.02 | 0.49659  | 0.433186 | 0.732443 | 0.653513 |
| MmugDNA.19670.1.S1_at   | MmugDNA.19670.1 | 8.96  | 9.17  | 0.52 | 0.15 | -1.16 | 0.178102 | 0.240628 | 0.472824 | 0.511328 |
| MmugDNA.19672.1.S1_at   | MmugDNA.19672.1 | 3.24  | 3.09  | 0.15 | 0.07 | 1.11  | 0.513464 | 0.178786 | 0.743659 | 0.455095 |
| MmugDNA.19673.1.S1_at   | MmugDNA.19673.1 | 5.15  | 5.17  | 0.26 | 0.11 | -1.02 | 0.856367 | 0.834712 | 0.93748  | 0.905374 |
| MmugDNA.19675.1.S1_at   | MmugDNA.19675.1 | 4.24  | 3.96  | 0.45 | 0.04 | 1.21  | 0.41267  | 0.245803 | 0.674202 | 0.515519 |
| MmugDNA.19676.1.S1_at   | MmugDNA.19676.1 | 4.33  | 4.11  | 0.46 | 0.09 | 1.16  | 0.130384 | 0.069349 | 0.41274  | 0.309558 |
| MmugDNA.19678.1.S1_at   | MmugDNA.19678.1 | 3.09  | 2.79  | 0.12 | 0.05 | 1.23  | 0.018759 | 0.058353 | 0.190313 | 0.288356 |
| MmugDNA.1968.1.S1_at    | MmugDNA.1968.1  | 7.35  | 6.44  | 0.2  | 0.14 | 1.88  | 0.004208 | 0.004231 | 0.110618 | 0.091435 |
| MmugDNA.1968.1.S1_s_at  | MmugDNA.1968.1  | 7.59  | 6.86  | 0.19 | 0.33 | 1.66  | 0.009683 | 0.021298 | 0.148334 | 0.182706 |
| MmugDNA.19680.1.S1_at   | MmugDNA.19680.1 | 5.82  | 5.8   | 0.19 | 0.03 | 1.01  | 0.930768 | 0.98014  | 0.970878 | 0.989236 |
| MmugDNA.19681.1.S1_at   | MmugDNA.19681.1 | 3.9   | 3.72  | 0.21 | 0.12 | 1.13  | 0.278453 | 0.092214 | 0.5698   | 0.347969 |
| MmugDNA.19683.1.S1_at   | MmugDNA.19683.1 | 5.65  | 5.7   | 0.37 | 0.02 | -1.04 | 0.544376 | 0.543415 | 0.764016 | 0.726105 |
| MmugDNA.19684.1.S1_at   | MmugDNA.19684.1 | 8.28  | 8.82  | 0.27 | 0.12 | -1.45 | 0.034891 | 0.011247 | 0.241271 | 0.138014 |
| MmugDNA.19687.1.S1_at   | MmugDNA.19687.1 | 3.57  | 3.62  | 0.09 | 0    | -1.04 | 0.349624 | 0.399768 | 0.627381 | 0.629973 |
| MmugDNA.19688.1.S1_at   | MmugDNA.19688.1 | 9.42  | 9     | 0.11 | 0.24 | 1.34  | 0.023642 | 0.003659 | 0.207074 | 0.086526 |
| MmugDNA.1969.1.S1_at    | MmugDNA.1969.1  | 10.95 | 9.8   | 0.13 | 0.14 | 2.23  | 0.000451 | 0.000729 | 0.065806 | 0.044699 |
| MmugDNA.19690.1.S1_at   | MmugDNA.19690.1 | 4.75  | 5.11  | 0.24 | 0.44 | -1.28 | 0.923934 | 0.005054 | 0.967672 | 0.099022 |
| MmugDNA.19692.1.S1_at   | MmugDNA.19692.1 | 5.49  | 5.61  | 0.4  | 0.19 | -1.09 | 0.800668 | 0.868008 | 0.910305 | 0.925053 |
| MmugDNA.19693.1.S1_at   | MmugDNA.19693.1 | 6.33  | 7.54  | 0.47 | 0.48 | -2.32 | 0.069031 | 0.099378 | 0.320837 | 0.357673 |
| MmugDNA.19694.1.S1_at   | MmugDNA.19694.1 | 6.12  | 6.12  | 0.11 | 0.19 | 1     | 0.38465  | 0.225311 | 0.653612 | 0.497892 |
| MmugDNA.19696.1.S1_at   | MmugDNA.19696.1 | 3.39  | 3.46  | 0.11 | 0.04 | -1.05 | 0.862322 | 0.684782 | 0.940186 | 0.816146 |
| MmugDNA.19697.1.S1_x_at | MmugDNA.19697.1 | 10.63 | 10.59 | 0.54 | 0.22 | 1.03  | 0.704272 | 0.280311 | 0.859667 | 0.543544 |
| MmugDNA.19698.1.S1_at   | MmugDNA.19698.1 | 11.05 | 10.51 | 0.04 | 0.07 | 1.45  | 0.00029  | 0.008093 | 0.057043 | 0.119551 |
| MmugDNA.38719.1.S1_s_at | MmugDNA.38719.1 | 9.72  | 9.08  | 0.06 | 0.06 | 1.56  | 0.000239 | 0.001534 | 0.054642 | 0.059437 |
| MmugDNA.19699.1.S1_at   | MmugDNA.19699.1 | 8.91  | 8.68  | 0.14 | 0.07 | 1.17  | 0.078014 | 0.069272 | 0.337305 | 0.309468 |
| MmugDNA.1970.1.S1_at    | MmugDNA.1970.1  | 3.63  | 3.71  | 0.46 | 0.06 | -1.05 | 0.453708 | 0.622391 | 0.703831 | 0.776887 |
| MmugDNA.19700.1.S1_at   | MmugDNA.19700.1 | 3.86  | 3.99  | 0.14 | 0.05 | -1.1  | 0.553504 | 0.880934 | 0.770019 | 0.932026 |
| MmugDNA.19702.1.S1_at   | MmugDNA.19702.1 | 9.72  | 9.94  | 0.07 | 0.07 | -1.16 | 0.01166  | 0.02973  | 0.157772 | 0.214096 |
| MmugDNA.19703.1.S1_at   | MmugDNA.19703.1 | 5.24  | 5.19  | 0.17 | 0.2  | 1.04  | 0.423335 | 0.367368 | 0.681371 | 0.607012 |
| MmugDNA.19705.1.S1_at   | MmugDNA.19705.1 | 4.9   | 4.97  | 0.24 | 0.1  | -1.04 | 0.717014 | 0.920283 | 0.866435 | 0.95511  |
| MmugDNA.19707.1.S1_at   | MmugDNA.19707.1 | 7.06  | 6.74  | 0.25 | 0.07 | 1.25  | 0.162266 | 0.333607 | 0.454227 | 0.581808 |
| MmugDNA.19708.1.S1_at   | MmugDNA.19708.1 | 6.32  | 6.68  | 0.43 | 0.41 | -1.28 | 0.287133 | 0.610622 | 0.57683  | 0.76874  |
| MmugDNA.19708.1.S1_s_at | MmugDNA.19708.1 | 5.89  | 6.75  | 0.24 | 0.34 | -1.81 | 0.023721 | 0.377957 | 0.207099 | 0.615264 |
| MmugDNA.19709.1.S1_x_at | MmugDNA.19709.1 | 4.69  | 4.9   | 0.14 | 0.13 | -1.16 | 0.063291 | 0.219736 | 0.308234 | 0.493388 |
| MmugDNA.1971.1.S1_at    | MmugDNA.1971.1  | 6.45  | 6.66  | 0.33 | 0.25 | -1.16 | 0.637238 | 0.828567 | 0.822365 | 0.901537 |
| MmugDNA.19710.1.S1_at   | MmugDNA.19710.1 | 8.14  | 7.72  | 0.36 | 0.16 | 1.34  | 0.247363 | 0.050766 | 0.542869 | 0.270457 |
| MmugDNA.19711.1.S1_at   | MmugDNA.19711.1 | 6.42  | 6.39  | 0.04 | 0.19 | 1.02  | 0.479286 | 0.835812 | 0.720531 | 0.906066 |
| MmugDNA.19713.1.S1_at   | MmugDNA.19713.1 | 4.9   | 4.75  | 0.09 | 0.14 | 1.11  | 0.190161 | 0.105562 | 0.486539 | 0.367526 |
| MmugDNA.19715.1.S1_at   | MmugDNA.19715.1 | 2.75  | 2.76  | 0.05 | 0.04 | -1    | 0.403603 | 0.636089 | 0.667695 | 0.785876 |
| MmugDNA.19716.1.S1_at   | MmugDNA.19716.1 | 7.28  | 6.58  | 0.53 | 0.89 | 1.63  | 0.45819  | 0.162144 | 0.706883 | 0.438282 |
| MmugDNA.19717.1.S1_at   | MmugDNA.19717.1 | 4.62  | 4.4   | 0.4  | 0.24 | 1.16  | 0.997552 | 0.918994 | 0.999115 | 0.95449  |
| MmugDNA.19719.1.S1_at   | MmugDNA.19719.1 | 7.25  | 7.62  | 0.75 | 0.37 | -1.29 | 0.410011 | 0.00352  | 0.672223 | 0.085137 |
| MmugDNA.1972.1.S1_at    | MmugDNA.1972.1  | 7.27  | 7.26  | 0.12 | 0.02 | 1     | 0.827151 | 0.952172 | 0.923472 | 0.972894 |

|                         |                 |       |       |      |      |       |          |          |          |          |
|-------------------------|-----------------|-------|-------|------|------|-------|----------|----------|----------|----------|
| MmugDNA.19720.1.S1_at   | MmugDNA.19720.1 | 9.82  | 10.17 | 0.22 | 0.11 | -1.28 | 0.019485 | 0.040997 | 0.192357 | 0.247202 |
| MmugDNA.19721.1.S1_at   | MmugDNA.19721.1 | 3.72  | 3.9   | 0.11 | 0.15 | -1.13 | 0.304227 | 0.23644  | 0.591438 | 0.507314 |
| MmugDNA.19722.1.S1_at   | MmugDNA.19722.1 | 12.35 | 12.36 | 0.18 | 0.03 | -1.01 | 0.988132 | 0.02073  | 0.995736 | 0.180654 |
| MmugDNA.19723.1.S1_at   | MmugDNA.19723.1 | 5.8   | 5.66  | 0.17 | 0.11 | 1.1   | 0.24211  | 0.282394 | 0.539137 | 0.545076 |
| MmugDNA.19724.1.S1_at   | MmugDNA.19724.1 | 13.03 | 13.15 | 0.09 | 0.03 | -1.09 | 0.202203 | 0.053746 | 0.499812 | 0.277384 |
| MmugDNA.19726.1.S1_at   | MmugDNA.19726.1 | 3.47  | 3.33  | 0.05 | 0.08 | 1.1   | 0.081257 | 0.236533 | 0.342222 | 0.507364 |
| MmugDNA.19728.1.S1_at   | MmugDNA.19728.1 | 7.15  | 7.19  | 0.68 | 0.2  | -1.03 | 0.726312 | 0.886803 | 0.871526 | 0.935553 |
| MmugDNA.19728.1.S1_x_at | MmugDNA.19728.1 | 7.11  | 7.25  | 0.55 | 0.17 | -1.1  | 0.342638 | 0.481622 | 0.622342 | 0.686557 |
| MmugDNA.1973.1.S1_at    | MmugDNA.1973.1  | 3.43  | 3.25  | 0.59 | 0.16 | 1.13  | 0.807494 | 0.947567 | 0.91382  | 0.970252 |
| MmugDNA.19730.1.S1_at   | MmugDNA.19730.1 | 8.8   | 9.19  | 0.93 | 0.21 | -1.3  | 0.537956 | 0.602175 | 0.759999 | 0.763204 |
| MmugDNA.19731.1.S1_at   | MmugDNA.19731.1 | 9.91  | 10.25 | 0.25 | 0.19 | -1.27 | 0.524916 | 0.383459 | 0.751591 | 0.619433 |
| MmugDNA.19732.1.S1_at   | MmugDNA.19732.1 | 3.99  | 3.64  | 0.14 | 0.04 | 1.28  | 0.029264 | 0.108296 | 0.223819 | 0.371557 |
| MmugDNA.19732.1.S1_s_at | MmugDNA.19732.1 | 6.81  | 6.82  | 0.94 | 0.07 | -1.01 | 0.877588 | 0.397322 | 0.947695 | 0.628781 |
| MmugDNA.19733.1.S1_at   | MmugDNA.19733.1 | 3.32  | 3.3   | 0.11 | 0.19 | 1.01  | 0.544779 | 0.252629 | 0.764258 | 0.521174 |
| MmugDNA.19734.1.S1_at   | MmugDNA.19734.1 | 4.64  | 4.62  | 0.04 | 0.09 | 1.01  | 0.765071 | 0.275885 | 0.892236 | 0.540035 |
| MmugDNA.19735.1.S1_at   | MmugDNA.19735.1 | 5.04  | 5.07  | 0.02 | 0.14 | -1.02 | 0.23273  | 0.219891 | 0.531068 | 0.493401 |
| MmugDNA.19737.1.S1_at   | MmugDNA.19737.1 | 4.36  | 4     | 0.33 | 0.11 | 1.29  | 0.056274 | 0.037152 | 0.294454 | 0.237229 |
| MmugDNA.19739.1.S1_at   | MmugDNA.19739.1 | 6.06  | 6.15  | 0.3  | 0.17 | -1.06 | 0.79538  | 0.557866 | 0.907532 | 0.735286 |
| MmugDNA.1974.1.S1_at    | MmugDNA.1974.1  | 6.68  | 6.8   | 0.21 | 0.04 | -1.09 | 0.098982 | 0.0705   | 0.369854 | 0.311777 |
| MmugDNA.19740.1.S1_at   | MmugDNA.19740.1 | 4.64  | 4.64  | 0.07 | 0.08 | 1     | 0.521811 | 0.666474 | 0.749403 | 0.804596 |
| MmugDNA.19741.1.S1_at   | MmugDNA.19741.1 | 3.02  | 3.1   | 0.12 | 0.03 | -1.06 | 0.806764 | 0.924467 | 0.913444 | 0.957385 |
| MmugDNA.19742.1.S1_at   | MmugDNA.19742.1 | 2.92  | 2.75  | 0.1  | 0.06 | 1.12  | 0.157968 | 0.179094 | 0.448708 | 0.455436 |
| MmugDNA.19743.1.S1_at   | MmugDNA.19743.1 | 6.15  | 6.28  | 0.58 | 0.2  | -1.09 | 0.41393  | 0.577469 | 0.675232 | 0.747923 |
| MmugDNA.19744.1.S1_at   | MmugDNA.19744.1 | 8.11  | 7.74  | 0.21 | 0.19 | 1.3   | 0.156302 | 0.318795 | 0.446893 | 0.571379 |
| MmugDNA.19745.1.S1_at   | MmugDNA.19745.1 | 5.86  | 5.04  | 0.81 | 0.11 | 1.77  | 0.567441 | 0.467972 | 0.77778  | 0.677457 |
| MmugDNA.19746.1.S1_at   | MmugDNA.19746.1 | 7.57  | 8.19  | 0.89 | 0.33 | -1.53 | 0.3321   | 0.519562 | 0.613928 | 0.711134 |
| MmugDNA.19747.1.S1_at   | MmugDNA.19747.1 | 10.61 | 11.52 | 0.91 | 0.27 | -1.87 | 0.246173 | 0.530725 | 0.541931 | 0.718104 |
| MmugDNA.19749.1.S1_at   | MmugDNA.19749.1 | 10.61 | 10.26 | 0.23 | 0.29 | 1.27  | 0.224405 | 0.029652 | 0.522615 | 0.213852 |
| MmugDNA.19750.1.S1_x_at | MmugDNA.19750.1 | 7.72  | 8.86  | 0.23 | 0.02 | -2.2  | 0.001048 | 0.085049 | 0.076524 | 0.336812 |
| MmugDNA.19753.1.S1_at   | MmugDNA.19753.1 | 4.76  | 4.59  | 0.19 | 0.09 | 1.13  | 0.190314 | 0.103301 | 0.486666 | 0.364143 |
| MmugDNA.19757.1.S1_at   | MmugDNA.19757.1 | 4.85  | 5.15  | 0.56 | 0.08 | -1.23 | 0.924915 | 0.992554 | 0.968078 | 0.995715 |
| MmugDNA.19758.1.S1_at   | MmugDNA.19758.1 | 4.98  | 4.61  | 0.05 | 0.05 | 1.3   | 0.000568 | 0.023638 | 0.070727 | 0.192555 |
| MmugDNA.1976.1.S1_s_at  | MmugDNA.1976.1  | 10.77 | 10.98 | 0.11 | 0.03 | -1.15 | 0.030957 | 0.177395 | 0.229015 | 0.453745 |
| MmugDNA.19761.1.S1_at   | MmugDNA.19761.1 | 4.44  | 4.07  | 0.19 | 0.11 | 1.3   | 0.067793 | 0.089763 | 0.318199 | 0.34404  |
| MmugDNA.19762.1.S1_at   | MmugDNA.19762.1 | 10.56 | 10.58 | 0.11 | 0.06 | -1.02 | 0.172981 | 0.000334 | 0.467062 | 0.036179 |
| MmugDNA.19763.1.S1_at   | MmugDNA.19763.1 | 4.51  | 4.58  | 0.01 | 0.07 | -1.05 | 0.072037 | 0.294763 | 0.3263   | 0.554345 |
| MmugDNA.19764.1.S1_at   | MmugDNA.19764.1 | 8.43  | 8.15  | 0.07 | 0.07 | 1.21  | 0.010401 | 0.002122 | 0.151942 | 0.068137 |
| MmugDNA.19766.1.S1_at   | MmugDNA.19766.1 | 7.41  | 7.04  | 0.13 | 0.13 | 1.29  | 0.032967 | 0.038543 | 0.23593  | 0.241322 |
| MmugDNA.19767.1.S1_s_at | MmugDNA.19767.1 | 6.65  | 6.52  | 0.12 | 0.15 | 1.09  | 0.119619 | 0.353042 | 0.397588 | 0.596356 |
| MmugDNA.1977.1.S1_at    | MmugDNA.1977.1  | 5.1   | 4.93  | 0.45 | 0.15 | 1.12  | 0.472529 | 0.639055 | 0.716189 | 0.788038 |
| MmugDNA.19771.1.S1_at   | MmugDNA.19771.1 | 7.33  | 8.17  | 0.15 | 0.09 | -1.79 | 0.001448 | 0.169054 | 0.079991 | 0.445593 |
| MmugDNA.19772.1.S1_at   | MmugDNA.19772.1 | 3.65  | 3.64  | 0.03 | 0.11 | 1.01  | 0.773974 | 0.927048 | 0.896497 | 0.958505 |
| MmugDNA.19773.1.S1_at   | MmugDNA.19773.1 | 12.59 | 12    | 0.34 | 0.15 | 1.5   | 0.138436 | 0.315311 | 0.423789 | 0.568939 |

|                         |                 |       |       |      |      |       |          |          |          |          |
|-------------------------|-----------------|-------|-------|------|------|-------|----------|----------|----------|----------|
| MmugDNA.19775.1.S1_at   | MmugDNA.19775.1 | 9.96  | 9.95  | 0.12 | 0.04 | 1.01  | 0.790751 | 0.253965 | 0.904945 | 0.522345 |
| MmugDNA.19776.1.S1_at   | MmugDNA.19776.1 | 3.64  | 3.63  | 0.21 | 0.22 | 1.01  | 0.814226 | 0.937658 | 0.917001 | 0.964687 |
| MmugDNA.19778.1.S1_at   | MmugDNA.19778.1 | 6.83  | 6.72  | 0.62 | 0.22 | 1.08  | 0.203482 | 0.238232 | 0.501192 | 0.508825 |
| MmugDNA.19779.1.S1_at   | MmugDNA.19779.1 | 7.01  | 6.53  | 0.51 | 0.42 | 1.4   | 0.174256 | 0.187023 | 0.4684   | 0.462938 |
| MmugDNA.19779.1.S1_s_at | MmugDNA.19779.1 | 9.63  | 8.95  | 0.16 | 0.2  | 1.61  | 0.009511 | 0.009063 | 0.147625 | 0.125855 |
| MmugDNA.1978.1.S1_at    | MmugDNA.1978.1  | 6.56  | 6.6   | 0.11 | 0.42 | -1.03 | 0.903241 | 0.964013 | 0.959024 | 0.980031 |
| MmugDNA.19780.1.S1_at   | MmugDNA.19780.1 | 3.24  | 3.3   | 0.05 | 0.12 | -1.04 | 0.488107 | 0.314116 | 0.726687 | 0.568185 |
| MmugDNA.19781.1.S1_at   | MmugDNA.19781.1 | 12.1  | 11.74 | 0.06 | 0.06 | 1.28  | 0.002869 | 0.103194 | 0.098485 | 0.364123 |
| MmugDNA.19782.1.S1_at   | MmugDNA.19782.1 | 5.32  | 5.41  | 0.4  | 0.06 | -1.07 | 0.916542 | 0.785725 | 0.964497 | 0.875928 |
| MmugDNA.19783.1.S1_at   | MmugDNA.19783.1 | 6.54  | 6.53  | 0.2  | 0.05 | 1     | 0.528571 | 0.350148 | 0.753758 | 0.593918 |
| MmugDNA.19785.1.S1_at   | MmugDNA.19785.1 | 3.91  | 3.78  | 0.04 | 0.15 | 1.1   | 0.211064 | 0.200638 | 0.508865 | 0.475191 |
| MmugDNA.19787.1.S1_at   | MmugDNA.19787.1 | 7.13  | 7.24  | 0.6  | 0.28 | -1.08 | 0.953973 | 0.587643 | 0.981106 | 0.754408 |
| MmugDNA.19788.1.S1_at   | MmugDNA.19788.1 | 10.48 | 10.49 | 0.4  | 0.14 | -1.01 | 0.997004 | 0.660899 | 0.999045 | 0.801634 |
| MmugDNA.19788.1.S1_s_at | MmugDNA.19788.1 | 9.81  | 9.38  | 0.13 | 0.16 | 1.35  | 0.025709 | 0.189388 | 0.212966 | 0.465117 |
| MmugDNA.19789.1.S1_at   | MmugDNA.19789.1 | 4.5   | 4.66  | 0.09 | 0.06 | -1.12 | 0.07006  | 0.118389 | 0.323085 | 0.3864   |
| MmugDNA.1979.1.S1_at    | MmugDNA.1979.1  | 6.25  | 6.35  | 1.43 | 0.24 | -1.07 | 0.989851 | 0.791997 | 0.996439 | 0.879813 |
| MmugDNA.19790.1.S1_at   | MmugDNA.19790.1 | 5.46  | 5.53  | 0.53 | 0.2  | -1.05 | 0.874892 | 0.920954 | 0.94633  | 0.955491 |
| MmugDNA.19792.1.S1_at   | MmugDNA.19792.1 | 6.99  | 6.96  | 0.5  | 0    | 1.02  | 0.61314  | 0.810593 | 0.807283 | 0.890812 |
| MmugDNA.19793.1.S1_at   | MmugDNA.19793.1 | 3.91  | 3.05  | 1.05 | 0.16 | 1.81  | 0.148527 | 0.184008 | 0.437096 | 0.460195 |
| MmugDNA.19794.1.S1_at   | MmugDNA.19794.1 | 3.54  | 3.44  | 0.05 | 0.13 | 1.07  | 0.241409 | 0.134748 | 0.538575 | 0.40678  |
| MmugDNA.19795.1.S1_at   | MmugDNA.19795.1 | 6.91  | 6.92  | 0.07 | 0.1  | -1.01 | 0.202205 | 0.028636 | 0.499812 | 0.210901 |
| MmugDNA.19796.1.S1_s_at | MmugDNA.19796.1 | 5.79  | 5.88  | 0.07 | 0.1  | -1.06 | 0.253293 | 0.329765 | 0.547663 | 0.578874 |
| MmugDNA.19797.1.S1_at   | MmugDNA.19797.1 | 8.96  | 8.68  | 0.37 | 0.18 | 1.22  | 0.234786 | 0.222095 | 0.532874 | 0.495113 |
| MmugDNA.19798.1.S1_at   | MmugDNA.19798.1 | 6.69  | 8.18  | 0.53 | 0.29 | -2.81 | 0.009255 | 0.012077 | 0.145977 | 0.14216  |
| MmugDNA.1980.1.S1_at    | MmugDNA.1980.1  | 6.62  | 6.31  | 0.13 | 0.06 | 1.24  | 0.047101 | 0.396269 | 0.274594 | 0.628074 |
| MmugDNA.19800.1.S1_at   | MmugDNA.19800.1 | 9.16  | 9.19  | 0.39 | 0.16 | -1.02 | 0.476012 | 0.434947 | 0.718592 | 0.654901 |
| MmugDNA.19804.1.S1_s_at | MmugDNA.19804.1 | 4.92  | 4.46  | 0.26 | 0.09 | 1.37  | 0.172546 | 0.378332 | 0.466621 | 0.615443 |
| MmugDNA.19805.1.S1_at   | MmugDNA.19805.1 | 5.29  | 5.04  | 0.42 | 0.13 | 1.19  | 0.9489   | 0.995932 | 0.978649 | 0.997533 |
| MmugDNA.19806.1.S1_s_at | MmugDNA.19806.1 | 8.1   | 8.39  | 0.22 | 0.15 | -1.22 | 0.157369 | 0.339815 | 0.448021 | 0.586394 |
| MmugDNA.19807.1.S1_at   | MmugDNA.19807.1 | 5.54  | 5.51  | 0.01 | 0.03 | 1.02  | 0.19056  | 0.339875 | 0.486767 | 0.586417 |
| MmugDNA.19808.1.S1_at   | MmugDNA.19808.1 | 5.46  | 5.47  | 0.42 | 0.11 | -1.01 | 0.576523 | 0.732357 | 0.783247 | 0.844986 |
| MmugDNA.1981.1.S1_at    | MmugDNA.1981.1  | 2.94  | 3.22  | 0.16 | 0.2  | -1.21 | 0.195824 | 0.252239 | 0.49272  | 0.520924 |
| MmugDNA.19812.1.S1_at   | MmugDNA.19812.1 | 6.66  | 6.33  | 0.14 | 0.14 | 1.26  | 0.022458 | 0.605845 | 0.203164 | 0.765513 |
| MmugDNA.19813.1.S1_at   | MmugDNA.19813.1 | 9.67  | 10.16 | 0.25 | 0.16 | -1.41 | 0.083684 | 0.198395 | 0.346423 | 0.473292 |
| MmugDNA.19814.1.S1_at   | MmugDNA.19814.1 | 4.31  | 4.1   | 0.03 | 0.14 | 1.15  | 0.099862 | 0.103149 | 0.370801 | 0.364041 |
| MmugDNA.19815.1.S1_at   | MmugDNA.19815.1 | 4.37  | 4.38  | 0.03 | 0.01 | -1.01 | 0.83176  | 0.110263 | 0.925994 | 0.374403 |
| MmugDNA.19816.1.S1_at   | MmugDNA.19816.1 | 9.02  | 9.56  | 1.33 | 0.07 | -1.46 | 0.17641  | 0.204828 | 0.470768 | 0.479209 |
| MmugDNA.19817.1.S1_at   | MmugDNA.19817.1 | 4.51  | 4.22  | 0.29 | 0.3  | 1.22  | 0.886765 | 0.385599 | 0.951782 | 0.621049 |
| MmugDNA.19818.1.S1_at   | MmugDNA.19818.1 | 4.22  | 4.13  | 1.47 | 0.12 | 1.06  | 0.308394 | 0.383916 | 0.595031 | 0.61978  |
| MmugDNA.19819.1.S1_at   | MmugDNA.19819.1 | 9.63  | 9.27  | 0.14 | 0.03 | 1.29  | 0.01407  | 0.257567 | 0.170011 | 0.525302 |
| MmugDNA.1982.1.S1_at    | MmugDNA.1982.1  | 3.84  | 3.91  | 0.05 | 0.08 | -1.05 | 0.281723 | 0.315273 | 0.572546 | 0.568939 |
| MmugDNA.19821.1.S1_at   | MmugDNA.19821.1 | 5.8   | 5.89  | 0.06 | 0.14 | -1.06 | 0.489622 | 0.23907  | 0.727859 | 0.509827 |
| MmugDNA.19822.1.S1_at   | MmugDNA.19822.1 | 3.18  | 3.09  | 0.12 | 0.13 | 1.07  | 0.461361 | 0.294737 | 0.708826 | 0.554345 |



|                         |                 |       |       |      |      |       |          |          |          |          |
|-------------------------|-----------------|-------|-------|------|------|-------|----------|----------|----------|----------|
| MmugDNA.19828.1.S1_at   | MmugDNA.19828.1 | 9.83  | 9.85  | 0.27 | 0.2  | -1.01 | 0.513148 | 0.021487 | 0.743501 | 0.183659 |
| MmugDNA.19829.1.S1_at   | MmugDNA.19829.1 | 5.53  | 5.54  | 0.27 | 0.16 | -1.01 | 0.839237 | 0.878286 | 0.929506 | 0.930529 |
| MmugDNA.1983.1.S1_at    | MmugDNA.1983.1  | 9.11  | 9.05  | 0.49 | 0.24 | 1.04  | 0.572686 | 0.15911  | 0.780748 | 0.435217 |
| MmugDNA.19831.1.S1_at   | MmugDNA.19831.1 | 10.32 | 9.86  | 0.04 | 0.11 | 1.37  | 0.002591 | 0.051361 | 0.094992 | 0.272082 |
| MmugDNA.19832.1.S1_at   | MmugDNA.19832.1 | 4.83  | 4.76  | 0.08 | 0.04 | 1.05  | 0.109294 | 0.422965 | 0.384379 | 0.646141 |
| MmugDNA.19833.1.S1_at   | MmugDNA.19833.1 | 3.72  | 3.72  | 0.06 | 0.26 | 1     | 0.296616 | 0.447318 | 0.585315 | 0.663434 |
| MmugDNA.19834.1.S1_at   | MmugDNA.19834.1 | 4.36  | 4.51  | 0.17 | 0.28 | -1.11 | 0.714268 | 0.825672 | 0.865055 | 0.899784 |
| MmugDNA.1984.1.S1_at    | MmugDNA.1984.1  | 4.28  | 4.42  | 0.47 | 0.13 | -1.11 | 0.531323 | 0.582877 | 0.75568  | 0.751428 |
| MmugDNA.19843.1.S1_at   | MmugDNA.19843.1 | 11.42 | 11.67 | 0.11 | 0.05 | -1.19 | 0.022871 | 0.024855 | 0.204235 | 0.197532 |
| MmugDNA.19844.1.S1_at   | MmugDNA.19844.1 | 3.34  | 3.15  | 0.12 | 0.06 | 1.15  | 0.133241 | 0.167018 | 0.416749 | 0.443466 |
| MmugDNA.19845.1.S1_at   | MmugDNA.19845.1 | 5.46  | 5.48  | 0    | 0.13 | -1.02 | 0.556053 | 0.640341 | 0.771459 | 0.788874 |
| MmugDNA.19846.1.S1_at   | MmugDNA.19846.1 | 3.72  | 4.28  | 0.02 | 0.54 | -1.47 | 0.135383 | 0.285082 | 0.419311 | 0.547096 |
| MmugDNA.19847.1.S1_at   | MmugDNA.19847.1 | 8.76  | 8.82  | 0.08 | 0.04 | -1.04 | 0.191974 | 0.329524 | 0.488531 | 0.578781 |
| MmugDNA.19848.1.S1_at   | MmugDNA.19848.1 | 9.95  | 10.05 | 0.2  | 0.06 | -1.07 | 0.594074 | 0.011378 | 0.794478 | 0.138214 |
| MmugDNA.19849.1.S1_at   | MmugDNA.19849.1 | 6.62  | 6.11  | 0.36 | 0.31 | 1.42  | 0.240196 | 0.223338 | 0.537832 | 0.49612  |
| MmugDNA.1985.1.S1_at    | MmugDNA.1985.1  | 2.98  | 3.04  | 0.14 | 0.08 | -1.04 | 0.160146 | 0.192785 | 0.451479 | 0.468274 |
| MmugDNA.19850.1.S1_at   | MmugDNA.19850.1 | 9.06  | 9.04  | 0.1  | 0.26 | 1.02  | 0.809463 | 0.866589 | 0.914657 | 0.924174 |
| MmugDNA.19851.1.S1_at   | MmugDNA.19851.1 | 10.2  | 10.13 | 0.26 | 0.23 | 1.05  | 0.767875 | 0.290109 | 0.893418 | 0.551128 |
| MmugDNA.19852.1.S1_at   | MmugDNA.19852.1 | 7.9   | 8.38  | 0.3  | 0.27 | -1.4  | 0.269039 | 0.131887 | 0.561476 | 0.403906 |
| MmugDNA.19853.1.S1_at   | MmugDNA.19853.1 | 6.61  | 6.49  | 0.08 | 0.07 | 1.09  | 0.586151 | 0.358827 | 0.789675 | 0.600291 |
| MmugDNA.19854.1.S1_at   | MmugDNA.19854.1 | 5.39  | 5.26  | 0.33 | 0.18 | 1.1   | 0.186462 | 0.230818 | 0.482628 | 0.502498 |
| MmugDNA.19855.1.S1_at   | MmugDNA.19855.1 | 6.16  | 6.46  | 0.58 | 0.08 | -1.23 | 0.92725  | 0.986645 | 0.969216 | 0.992465 |
| MmugDNA.19856.1.S1_at   | MmugDNA.19856.1 | 5.52  | 5.6   | 0.07 | 0.19 | -1.06 | 0.55935  | 0.59725  | 0.773275 | 0.76013  |
| MmugDNA.19859.1.S1_at   | MmugDNA.19859.1 | 9.45  | 10.47 | 0.45 | 0.18 | -2.02 | 0.029494 | 0.014431 | 0.224759 | 0.153335 |
| MmugDNA.1986.1.S1_at    | MmugDNA.1986.1  | 9.21  | 9.62  | 0.4  | 0.13 | -1.33 | 0.149264 | 0.060314 | 0.438114 | 0.292254 |
| MmugDNA.19860.1.S1_s_at | MmugDNA.19860.1 | 9.26  | 10.44 | 0.5  | 0.22 | -2.28 | 0.04653  | 0.430266 | 0.273563 | 0.651316 |
| MmugDNA.19861.1.S1_at   | MmugDNA.19861.1 | 5.35  | 5.23  | 0.11 | 0.03 | 1.09  | 0.163754 | 0.412522 | 0.456321 | 0.63893  |
| MmugDNA.19862.1.S1_at   | MmugDNA.19862.1 | 8.27  | 8.26  | 0.39 | 0.1  | 1     | 0.958597 | 0.210319 | 0.983135 | 0.484192 |
| MmugDNA.19863.1.S1_at   | MmugDNA.19863.1 | 3.68  | 3.88  | 0.18 | 0    | -1.15 | 0.127798 | 0.064969 | 0.409656 | 0.300855 |
| MmugDNA.19866.1.S1_at   | MmugDNA.19866.1 | 4.97  | 4.8   | 0.24 | 0.13 | 1.12  | 0.648762 | 0.81297  | 0.829361 | 0.891895 |
| MmugDNA.19868.1.S1_at   | MmugDNA.19868.1 | 9.02  | 8.71  | 0.24 | 0.34 | 1.24  | 0.350935 | 0.159795 | 0.628649 | 0.435871 |
| MmugDNA.19869.1.S1_at   | MmugDNA.19869.1 | 7.42  | 7.37  | 0.22 | 0.16 | 1.04  | 0.295499 | 0.347115 | 0.584279 | 0.591815 |
| MmugDNA.19870.1.S1_at   | MmugDNA.19870.1 | 11.66 | 11.66 | 0.14 | 0    | -1    | 0.367747 | 0.334399 | 0.641588 | 0.582387 |
| MmugDNA.19870.1.S1_s_at | MmugDNA.19870.1 | 12.03 | 12.02 | 0.14 | 0.02 | 1.01  | 0.523564 | 0.393956 | 0.750433 | 0.6267   |
| MmugDNA.506.1.S1_s_at   | MmugDNA.506.1   | 10.85 | 10.59 | 0.11 | 0.11 | 1.2   | 0.072289 | 0.286661 | 0.326797 | 0.548077 |
| MmugDNA.19873.1.S1_at   | MmugDNA.19873.1 | 4.47  | 4.48  | 0.01 | 0.04 | -1    | 0.970699 | 0.461567 | 0.988376 | 0.673162 |
| MmugDNA.19874.1.S1_at   | MmugDNA.19874.1 | 7.1   | 7.15  | 0.12 | 0.06 | -1.04 | 0.862349 | 0.813096 | 0.940193 | 0.891939 |
| MmugDNA.19876.1.S1_at   | MmugDNA.19876.1 | 4.52  | 4.52  | 0.11 | 0.18 | -1    | 0.423482 | 0.505572 | 0.681441 | 0.702218 |
| MmugDNA.19877.1.S1_at   | MmugDNA.19877.1 | 6.06  | 6.21  | 0.26 | 0.24 | -1.11 | 0.764362 | 0.436785 | 0.89193  | 0.65629  |
| MmugDNA.19878.1.S1_at   | MmugDNA.19878.1 | 3.18  | 3.4   | 0.16 | 0.06 | -1.16 | 0.110278 | 0.179531 | 0.385603 | 0.456008 |
| MmugDNA.19879.1.S1_at   | MmugDNA.19879.1 | 6.26  | 6.26  | 0.2  | 0.14 | -1    | 0.971035 | 0.966673 | 0.988518 | 0.98148  |
| MmugDNA.1988.1.S1_at    | MmugDNA.1988.1  | 10.69 | 10.8  | 0.23 | 0.27 | -1.08 | 0.836598 | 0.6835   | 0.928302 | 0.815372 |
| MmugDNA.19880.1.S1_at   | MmugDNA.19880.1 | 5.29  | 5.27  | 0.19 | 0.2  | 1.01  | 0.61634  | 0.629699 | 0.809431 | 0.781989 |

|                         |                 |       |       |      |      |       |          |          |          |          |
|-------------------------|-----------------|-------|-------|------|------|-------|----------|----------|----------|----------|
| MmugDNA.19882.1.S1_at   | MmugDNA.19882.1 | 8.17  | 8.12  | 0.31 | 0.3  | 1.03  | 0.575685 | 0.902255 | 0.782938 | 0.944435 |
| MmugDNA.19885.1.S1_at   | MmugDNA.19885.1 | 6.5   | 5.98  | 0.36 | 0.35 | 1.43  | 0.328418 | 0.452307 | 0.610777 | 0.667046 |
| MmugDNA.19886.1.S1_at   | MmugDNA.19886.1 | 9.8   | 9.46  | 0.08 | 0.05 | 1.27  | 0.004126 | 0.112749 | 0.10967  | 0.378404 |
| MmugDNA.19887.1.S1_at   | MmugDNA.19887.1 | 4.21  | 3.72  | 0.34 | 0.36 | 1.4   | 0.266438 | 0.252584 | 0.558813 | 0.521145 |
| MmugDNA.19889.1.S1_at   | MmugDNA.19889.1 | 7.95  | 7.98  | 0.92 | 0.02 | -1.02 | 0.438369 | 0.407183 | 0.692967 | 0.634794 |
| MmugDNA.1989.1.S1_at    | MmugDNA.1989.1  | 5.5   | 5.53  | 0.09 | 0.04 | -1.02 | 0.374373 | 0.113219 | 0.64551  | 0.379229 |
| MmugDNA.19890.1.S1_at   | MmugDNA.19890.1 | 11.54 | 11.99 | 0.42 | 0.04 | -1.37 | 0.118876 | 0.169196 | 0.396589 | 0.445812 |
| MmugDNA.19891.1.S1_at   | MmugDNA.19891.1 | 4.01  | 3.97  | 0.17 | 0.27 | 1.03  | 0.490204 | 0.689164 | 0.728348 | 0.818618 |
| MmugDNA.19892.1.S1_s_at | MmugDNA.19892.1 | 7.48  | 6.63  | 0.41 | 0.45 | 1.8   | 0.07256  | 0.144767 | 0.327336 | 0.418614 |
| MmugDNA.19893.1.S1_at   | MmugDNA.19893.1 | 4.04  | 4.01  | 0.41 | 0.07 | 1.02  | 0.890569 | 0.849651 | 0.953318 | 0.914616 |
| MmugDNA.19894.1.S1_at   | MmugDNA.19894.1 | 4.33  | 4.31  | 0.03 | 0.2  | 1.01  | 0.757205 | 0.874367 | 0.88856  | 0.928629 |
| MmugDNA.19895.1.S1_at   | MmugDNA.19895.1 | 9.52  | 9.08  | 0.17 | 0.13 | 1.35  | 0.008639 | 0.013045 | 0.142384 | 0.14696  |
| MmugDNA.19896.1.S1_at   | MmugDNA.19896.1 | 3.24  | 3.39  | 0.55 | 0.28 | -1.1  | 0.64576  | 0.695601 | 0.82755  | 0.823073 |
| MmugDNA.19897.1.S1_at   | MmugDNA.19897.1 | 5.85  | 5.9   | 1.21 | 0.21 | -1.04 | 0.811388 | 0.46934  | 0.915561 | 0.678197 |
| MmugDNA.19898.1.S1_at   | MmugDNA.19898.1 | 5.52  | 5.78  | 0.14 | 0.23 | -1.2  | 0.639629 | 0.165701 | 0.823651 | 0.441982 |
| MmugDNA.199.1.S1_at     | MmugDNA.199.1   | 7.28  | 7.19  | 0.32 | 0.08 | 1.07  | 0.280876 | 0.205028 | 0.571843 | 0.479318 |
| MmugDNA.1990.1.S1_s_at  | MmugDNA.1990.1  | 7.07  | 9.68  | 1.18 | 0.28 | -6.14 | 0.04048  | 0.022589 | 0.257596 | 0.188092 |
| MmugDNA.19900.1.S1_at   | MmugDNA.19900.1 | 7.62  | 6.97  | 0.38 | 0.69 | 1.57  | 0.171744 | 0.236518 | 0.465674 | 0.507364 |
| MmugDNA.19901.1.S1_at   | MmugDNA.19901.1 | 5.21  | 5.21  | 0.33 | 0.09 | -1    | 0.756759 | 0.592522 | 0.888175 | 0.757844 |
| MmugDNA.19903.1.S1_at   | MmugDNA.19903.1 | 4.58  | 4.6   | 0.29 | 0.09 | -1.01 | 0.334939 | 0.436344 | 0.615988 | 0.655923 |
| MmugDNA.19904.1.S1_at   | MmugDNA.19904.1 | 4.76  | 4.32  | 0.32 | 0.12 | 1.36  | 0.099065 | 0.107195 | 0.369902 | 0.36989  |
| MmugDNA.19905.1.S1_at   | MmugDNA.19905.1 | 11.21 | 11.48 | 0.05 | 0.06 | -1.2  | 0.006689 | 0.005346 | 0.128403 | 0.101089 |
| MmugDNA.19906.1.S1_at   | MmugDNA.19906.1 | 7.78  | 7.28  | 0.44 | 0.44 | 1.42  | 0.277664 | 0.184023 | 0.569172 | 0.460209 |
| MmugDNA.19907.1.S1_at   | MmugDNA.19907.1 | 4.83  | 4.72  | 0.33 | 0.06 | 1.07  | 0.41941  | 0.416914 | 0.678752 | 0.641838 |
| MmugDNA.1991.1.S1_at    | MmugDNA.1991.1  | 5.63  | 5.67  | 0.58 | 0.25 | -1.03 | 0.37681  | 0.442852 | 0.647386 | 0.660759 |
| MmugDNA.19911.1.S1_at   | MmugDNA.19911.1 | 7.67  | 7.74  | 0.2  | 0.06 | -1.05 | 0.49636  | 0.099643 | 0.732272 | 0.358128 |
| MmugDNA.19912.1.S1_at   | MmugDNA.19912.1 | 3.71  | 3.58  | 0.27 | 0.01 | 1.09  | 0.347092 | 0.416589 | 0.625268 | 0.641647 |
| MmugDNA.19913.1.S1_at   | MmugDNA.19913.1 | 7.16  | 7.2   | 0.74 | 0.23 | -1.03 | 0.914937 | 0.895478 | 0.963876 | 0.940264 |
| MmugDNA.19914.1.S1_at   | MmugDNA.19914.1 | 4.29  | 4.14  | 0.47 | 0.23 | 1.11  | 0.399532 | 0.231163 | 0.664824 | 0.5029   |
| MmugDNA.19916.1.S1_at   | MmugDNA.19916.1 | 11.14 | 10.69 | 0.16 | 0.03 | 1.37  | 0.007762 | 0.051732 | 0.136748 | 0.272993 |
| MmugDNA.19917.1.S1_at   | MmugDNA.19917.1 | 5.32  | 5.56  | 0.16 | 0.15 | -1.18 | 0.434412 | 0.39778  | 0.689698 | 0.629114 |
| MmugDNA.19918.1.S1_at   | MmugDNA.19918.1 | 4.55  | 4.71  | 0.16 | 0.15 | -1.12 | 0.394158 | 0.362013 | 0.660857 | 0.602727 |
| MmugDNA.19919.1.S1_at   | MmugDNA.19919.1 | 3.42  | 3.31  | 0.2  | 0.22 | 1.08  | 0.474062 | 0.74108  | 0.717256 | 0.850126 |
| MmugDNA.1992.1.S1_at    | MmugDNA.1992.1  | 6.73  | 6.73  | 0.24 | 0.03 | 1     | 0.990141 | 0.76909  | 0.996449 | 0.865855 |
| MmugDNA.19920.1.S1_at   | MmugDNA.19920.1 | 6.67  | 6.68  | 0.18 | 0.04 | -1    | 0.950778 | 0.978101 | 0.979595 | 0.988066 |
| MmugDNA.19925.1.S1_at   | MmugDNA.19925.1 | 4.45  | 4.36  | 0.05 | 0.1  | 1.06  | 0.065624 | 0.31663  | 0.313587 | 0.569963 |
| MmugDNA.19926.1.S1_at   | MmugDNA.19926.1 | 9.66  | 9.54  | 0.22 | 0.14 | 1.09  | 0.377866 | 0.668725 | 0.648273 | 0.806133 |
| MmugDNA.19927.1.S1_at   | MmugDNA.19927.1 | 6.86  | 6.64  | 0.2  | 0.19 | 1.16  | 0.114811 | 0.13103  | 0.391813 | 0.403053 |
| MmugDNA.19928.1.S1_at   | MmugDNA.19928.1 | 3.82  | 3.65  | 0.09 | 0.16 | 1.12  | 0.25102  | 0.752539 | 0.54571  | 0.855916 |
| MmugDNA.19929.1.S1_at   | MmugDNA.19929.1 | 3.67  | 3.79  | 0.05 | 0    | -1.09 | 0.017642 | 0.505129 | 0.186416 | 0.70197  |
| MmugDNA.19930.1.S1_at   | MmugDNA.19930.1 | 3.68  | 3.11  | 0.15 | 0.17 | 1.49  | 0.007092 | 0.001938 | 0.131731 | 0.065795 |
| MmugDNA.19931.1.S1_at   | MmugDNA.19931.1 | 6.45  | 6.7   | 0.27 | 0.09 | -1.19 | 0.784498 | 0.446697 | 0.901752 | 0.662885 |
| MmugDNA.19932.1.S1_at   | MmugDNA.19932.1 | 3.95  | 3.73  | 0.16 | 0.16 | 1.17  | 0.077592 | 0.116318 | 0.336434 | 0.383671 |

|                         |                 |       |       |      |      |       |          |          |          |          |
|-------------------------|-----------------|-------|-------|------|------|-------|----------|----------|----------|----------|
| MmugDNA.19933.1.S1_at   | MmugDNA.19933.1 | 4.76  | 4.81  | 0.15 | 0.06 | -1.03 | 0.450696 | 0.623682 | 0.701646 | 0.778057 |
| MmugDNA.19934.1.S1_at   | MmugDNA.19934.1 | 4.21  | 4.2   | 0.15 | 0.01 | 1.01  | 0.573695 | 0.663221 | 0.781268 | 0.802867 |
| MmugDNA.19935.1.S1_at   | MmugDNA.19935.1 | 7.94  | 7.62  | 0.08 | 0.29 | 1.25  | 0.245232 | 0.173201 | 0.541279 | 0.449779 |
| MmugDNA.19936.1.S1_at   | MmugDNA.19936.1 | 4.6   | 4.58  | 0.06 | 0.26 | 1.02  | 0.775421 | 0.710069 | 0.897425 | 0.831904 |
| MmugDNA.19939.1.S1_at   | MmugDNA.19939.1 | 8.02  | 7.89  | 0.17 | 0.08 | 1.09  | 0.257829 | 0.831188 | 0.55205  | 0.903172 |
| MmugDNA.19939.1.S1_s_at | MmugDNA.19939.1 | 7.9   | 7.84  | 0.17 | 0.06 | 1.04  | 0.589924 | 0.910369 | 0.791769 | 0.949414 |
| MmugDNA.19942.1.S1_at   | MmugDNA.19942.1 | 3.51  | 3.58  | 0.05 | 0.05 | -1.05 | 0.520526 | 0.599815 | 0.748819 | 0.7616   |
| MmugDNA.19943.1.S1_s_at | MmugDNA.19943.1 | 11.62 | 11.63 | 0.23 | 0.13 | -1.01 | 0.862569 | 0.974982 | 0.940257 | 0.986326 |
| MmugDNA.19944.1.S1_at   | MmugDNA.19944.1 | 5.28  | 5.39  | 0.08 | 0.02 | -1.08 | 0.198255 | 0.261681 | 0.495463 | 0.528129 |
| MmugDNA.19945.1.S1_at   | MmugDNA.19945.1 | 6.14  | 6.09  | 0.27 | 0.26 | 1.04  | 0.173184 | 0.409502 | 0.467373 | 0.636528 |
| MmugDNA.19946.1.S1_at   | MmugDNA.19946.1 | 3.93  | 3.9   | 0.41 | 0    | 1.02  | 0.619631 | 0.799287 | 0.811329 | 0.884463 |
| MmugDNA.19949.1.S1_at   | MmugDNA.19949.1 | 6.05  | 5.91  | 0.05 | 0.12 | 1.1   | 0.073983 | 0.449584 | 0.330014 | 0.665135 |
| MmugDNA.1995.1.S1_at    | MmugDNA.1995.1  | 7.2   | 8.13  | 1.34 | 0.15 | -1.91 | 0.807285 | 0.780236 | 0.913693 | 0.87255  |
| MmugDNA.19951.1.S1_s_at | MmugDNA.19951.1 | 6.78  | 6.36  | 0.64 | 0.25 | 1.34  | 0.173696 | 0.272497 | 0.468149 | 0.537245 |
| MmugDNA.19952.1.S1_at   | MmugDNA.19952.1 | 3.79  | 3.78  | 0.13 | 0.02 | 1.01  | 0.456975 | 0.591722 | 0.706061 | 0.757198 |
| MmugDNA.19957.1.S1_at   | MmugDNA.19957.1 | 9.56  | 8.89  | 0.2  | 0.18 | 1.59  | 0.018449 | 0.107382 | 0.188936 | 0.370219 |
| MmugDNA.19958.1.S1_at   | MmugDNA.19958.1 | 9.72  | 9.68  | 0.03 | 0.1  | 1.03  | 0.337157 | 0.150776 | 0.617702 | 0.425322 |
| MmugDNA.19959.1.S1_at   | MmugDNA.19959.1 | 9.44  | 8.89  | 0.18 | 0.12 | 1.46  | 0.015043 | 0.061429 | 0.174736 | 0.294704 |
| MmugDNA.1996.1.S1_at    | MmugDNA.1996.1  | 9.57  | 9.29  | 0.03 | 0.06 | 1.22  | 0.004193 | 0.013335 | 0.11036  | 0.148042 |
| MmugDNA.19960.1.S1_at   | MmugDNA.19960.1 | 12.23 | 12.57 | 0.15 | 0.04 | -1.26 | 0.021697 | 0.506786 | 0.20067  | 0.702575 |
| MmugDNA.19962.1.S1_at   | MmugDNA.19962.1 | 7.26  | 7.29  | 0.12 | 0.04 | -1.02 | 0.476322 | 0.845986 | 0.718743 | 0.912303 |
| MmugDNA.19962.1.S1_s_at | MmugDNA.19962.1 | 7.52  | 7.37  | 0.04 | 0.02 | 1.11  | 0.005627 | 0.075371 | 0.120803 | 0.319655 |
| MmugDNA.19963.1.S1_at   | MmugDNA.19963.1 | 4.83  | 4.87  | 0    | 0.27 | -1.03 | 0.28785  | 0.252016 | 0.577524 | 0.520646 |
| MmugDNA.19964.1.S1_at   | MmugDNA.19964.1 | 6.05  | 6.04  | 0.11 | 0.12 | 1.01  | 0.832171 | 0.285061 | 0.926055 | 0.547095 |
| MmugDNA.19967.1.S1_at   | MmugDNA.19967.1 | 3.9   | 4.17  | 0.09 | 0.16 | -1.2  | 0.039732 | 0.02444  | 0.256023 | 0.19564  |
| MmugDNA.19968.1.S1_at   | MmugDNA.19968.1 | 6.1   | 6.18  | 0.26 | 0.03 | -1.06 | 0.64976  | 0.776585 | 0.829921 | 0.870105 |
| MmugDNA.19969.1.S1_at   | MmugDNA.19969.1 | 7.09  | 6.86  | 0.77 | 0.09 | 1.17  | 0.636902 | 0.649016 | 0.822282 | 0.794525 |
| MmugDNA.19970.1.S1_at   | MmugDNA.19970.1 | 8.21  | 8.47  | 0.27 | 0.12 | -1.19 | 0.177864 | 0.635566 | 0.472595 | 0.785437 |
| MmugDNA.19971.1.S1_at   | MmugDNA.19971.1 | 4.68  | 4.68  | 0.1  | 0.14 | -1    | 0.987234 | 0.961711 | 0.995376 | 0.978408 |
| MmugDNA.19973.1.S1_at   | MmugDNA.19973.1 | 9.46  | 10.18 | 0.25 | 0.12 | -1.65 | 0.02229  | 0.045309 | 0.202621 | 0.257167 |
| MmugDNA.571.1.S1_s_at   | MmugDNA.571.1   | 7.42  | 7.48  | 0.44 | 0.07 | -1.04 | 0.53997  | 0.439337 | 0.761174 | 0.658078 |
| MmugDNA.19976.1.S1_at   | MmugDNA.19976.1 | 3.19  | 3.32  | 0.32 | 0.21 | -1.09 | 0.554789 | 0.73924  | 0.7708   | 0.848883 |
| MmugDNA.19977.1.S1_at   | MmugDNA.19977.1 | 6.82  | 7.39  | 0.37 | 0.13 | -1.48 | 0.080557 | 0.121325 | 0.341154 | 0.390351 |
| MmugDNA.19978.1.S1_at   | MmugDNA.19978.1 | 9.29  | 9.37  | 0.1  | 0.05 | -1.05 | 0.782884 | 0.592869 | 0.900922 | 0.757932 |
| MmugDNA.1998.1.S1_at    | MmugDNA.1998.1  | 10.11 | 9.66  | 0.43 | 0.03 | 1.37  | 0.085474 | 0.000892 | 0.349891 | 0.047789 |
| MmugDNA.1998.1.S1_s_at  | MmugDNA.1998.1  | 10.9  | 10.7  | 0.38 | 0.04 | 1.15  | 0.233546 | 0.123215 | 0.531645 | 0.393273 |
| MmugDNA.19980.1.S1_at   | MmugDNA.19980.1 | 4.5   | 4.84  | 0.48 | 0.42 | -1.26 | 0.415198 | 0.034982 | 0.676055 | 0.231166 |
| MmugDNA.19981.1.S1_at   | MmugDNA.19981.1 | 5.78  | 5.98  | 0.11 | 0.19 | -1.15 | 0.349809 | 0.479969 | 0.627551 | 0.685569 |
| MmugDNA.19982.1.S1_at   | MmugDNA.19982.1 | 8.66  | 8.66  | 0.11 | 0.08 | -1    | 0.809599 | 0.376812 | 0.914733 | 0.614593 |
| MmugDNA.19983.1.S1_at   | MmugDNA.19983.1 | 12.8  | 13.33 | 0.15 | 0.03 | -1.45 | 0.001903 | 0.001238 | 0.087869 | 0.05478  |
| MmugDNA.19983.1.S1_s_at | MmugDNA.19983.1 | 10.61 | 11.67 | 0.37 | 0.07 | -2.09 | 0.007524 | 0.003155 | 0.134968 | 0.081739 |
| MmugDNA.19984.1.S1_at   | MmugDNA.19984.1 | 3.79  | 3.83  | 0.26 | 0.12 | -1.03 | 0.921191 | 0.992928 | 0.966268 | 0.995829 |
| MmugDNA.19985.1.S1_at   | MmugDNA.19985.1 | 6.16  | 6.04  | 0.15 | 0.12 | 1.09  | 0.252176 | 0.187973 | 0.546813 | 0.464078 |

|                         |                 |       |       |      |      |       |          |          |          |          |
|-------------------------|-----------------|-------|-------|------|------|-------|----------|----------|----------|----------|
| MmugDNA.19986.1.S1_at   | MmugDNA.19986.1 | 3.5   | 3.35  | 0.08 | 0.1  | 1.11  | 0.236793 | 0.456938 | 0.534396 | 0.670591 |
| MmugDNA.19987.1.S1_at   | MmugDNA.19987.1 | 9.3   | 9.55  | 0.49 | 0.22 | -1.19 | 0.472342 | 0.006926 | 0.716181 | 0.112445 |
| MmugDNA.19987.1.S1_s_at | MmugDNA.19987.1 | 10.37 | 10.97 | 0.24 | 0.26 | -1.52 | 0.092949 | 0.002036 | 0.361523 | 0.066885 |
| MmugDNA.19989.1.S1_at   | MmugDNA.19989.1 | 10.86 | 9.12  | 0.24 | 0.35 | 3.35  | 0.003247 | 0.002049 | 0.101782 | 0.066887 |
| MmugDNA.1999.1.S1_at    | MmugDNA.1999.1  | 11.33 | 12.04 | 0.28 | 0.17 | -1.64 | 0.014703 | 0.199445 | 0.173188 | 0.474035 |
| MmugDNA.19990.1.S1_s_at | MmugDNA.19990.1 | 13.7  | 13.03 | 0.19 | 0.03 | 1.59  | 0.002709 | 0.064799 | 0.096803 | 0.300493 |
| MmugDNA.19991.1.S1_at   | MmugDNA.19991.1 | 5.97  | 6.18  | 0.31 | 0.11 | -1.16 | 0.285812 | 0.363855 | 0.575629 | 0.604215 |
| MmugDNA.19993.1.S1_at   | MmugDNA.19993.1 | 8.84  | 8.08  | 0.51 | 0.33 | 1.69  | 0.18193  | 0.120641 | 0.477448 | 0.389476 |
| MmugDNA.19994.1.S1_at   | MmugDNA.19994.1 | 8.96  | 8.7   | 0.25 | 0.07 | 1.2   | 0.112028 | 0.223346 | 0.388221 | 0.49612  |
| MmugDNA.19995.1.S1_at   | MmugDNA.19995.1 | 3.92  | 3.76  | 0.63 | 0.18 | 1.12  | 0.256022 | 0.320003 | 0.550543 | 0.57237  |
| MmugDNA.19996.1.S1_at   | MmugDNA.19996.1 | 6.79  | 5.57  | 1.63 | 0.53 | 2.33  | 0.986842 | 0.990712 | 0.995228 | 0.994757 |
| MmugDNA.2.1.S1_at       | MmugDNA.2.1     | 4.34  | 4.12  | 0.09 | 0.18 | 1.16  | 0.092093 | 0.102634 | 0.360151 | 0.362991 |
| MmugDNA.20.1.S1_at      | MmugDNA.20.1    | 6.07  | 6.08  | 0.05 | 0.01 | -1    | 0.409665 | 0.272793 | 0.671978 | 0.537505 |
| MmugDNA.200.1.S1_at     | MmugDNA.200.1   | 4.99  | 4.76  | 0.29 | 0.08 | 1.17  | 0.795183 | 0.461142 | 0.907466 | 0.672857 |
| MmugDNA.2000.1.S1_at    | MmugDNA.2000.1  | 5.71  | 5.69  | 0.24 | 0.11 | 1.01  | 0.23475  | 0.227209 | 0.532848 | 0.49956  |
| MmugDNA.20001.1.S1_at   | MmugDNA.20001.1 | 6.57  | 6.62  | 0.19 | 0.09 | -1.04 | 0.984171 | 0.445535 | 0.994119 | 0.662445 |
| MmugDNA.20002.1.S1_at   | MmugDNA.20002.1 | 10.62 | 10.33 | 0.22 | 0.09 | 1.23  | 0.223933 | 0.018103 | 0.521943 | 0.169534 |
| MmugDNA.20006.1.S1_at   | MmugDNA.20006.1 | 8.87  | 9.53  | 0.16 | 0.15 | -1.58 | 0.013089 | 0.009013 | 0.165061 | 0.125499 |
| MmugDNA.20007.1.S1_at   | MmugDNA.20007.1 | 4.39  | 4.42  | 0.09 | 0.05 | -1.02 | 0.982243 | 0.236629 | 0.993444 | 0.50743  |
| MmugDNA.20008.1.S1_at   | MmugDNA.20008.1 | 7.34  | 7.38  | 0.32 | 0.37 | -1.03 | 0.858605 | 0.972644 | 0.938746 | 0.98528  |
| MmugDNA.20009.1.S1_at   | MmugDNA.20009.1 | 9.05  | 9.11  | 0.16 | 0.07 | -1.04 | 0.995879 | 0.031598 | 0.998465 | 0.219905 |
| MmugDNA.2001.1.S1_at    | MmugDNA.2001.1  | 6.29  | 5.25  | 0.29 | 0.38 | 2.06  | 0.039153 | 0.028637 | 0.254306 | 0.210901 |
| MmugDNA.20010.1.S1_at   | MmugDNA.20010.1 | 6.38  | 6.57  | 0.5  | 0.36 | -1.15 | 0.123051 | 0.287149 | 0.402192 | 0.548447 |
| MmugDNA.20011.1.S1_at   | MmugDNA.20011.1 | 3.98  | 3.89  | 0.25 | 0.16 | 1.06  | 0.185768 | 0.29492  | 0.481947 | 0.554462 |
| MmugDNA.20013.1.S1_at   | MmugDNA.20013.1 | 4.1   | 4.52  | 0.6  | 0.13 | -1.34 | 0.840837 | 0.685453 | 0.930071 | 0.816523 |
| MmugDNA.20014.1.S1_at   | MmugDNA.20014.1 | 2.96  | 2.95  | 0.08 | 0.02 | 1     | 0.765431 | 0.190531 | 0.892409 | 0.465906 |
| MmugDNA.20015.1.S1_at   | MmugDNA.20015.1 | 11.08 | 11.26 | 0.44 | 0.14 | -1.14 | 0.87764  | 0.984158 | 0.947698 | 0.991189 |
| MmugDNA.20016.1.S1_at   | MmugDNA.20016.1 | 3.72  | 3.58  | 0.17 | 0.13 | 1.1   | 0.340955 | 0.263978 | 0.620937 | 0.530153 |
| MmugDNA.20017.1.S1_at   | MmugDNA.20017.1 | 11.16 | 10.91 | 0.01 | 0.07 | 1.19  | 0.002978 | 0.000193 | 0.099641 | 0.030888 |
| MmugDNA.20018.1.S1_at   | MmugDNA.20018.1 | 5.79  | 5.62  | 0.11 | 0.19 | 1.13  | 0.090825 | 0.071068 | 0.357863 | 0.312745 |
| MmugDNA.20019.1.S1_at   | MmugDNA.20019.1 | 4.34  | 4.01  | 0.33 | 0.05 | 1.27  | 0.508409 | 0.636844 | 0.740391 | 0.786404 |
| MmugDNA.2002.1.S1_at    | MmugDNA.2002.1  | 5.51  | 5.7   | 0.62 | 0.13 | -1.14 | 0.809762 | 0.006311 | 0.914781 | 0.107847 |
| MmugDNA.20023.1.S1_at   | MmugDNA.20023.1 | 3.76  | 3.63  | 0.18 | 0.12 | 1.09  | 0.150815 | 0.119786 | 0.440003 | 0.388567 |
| MmugDNA.20024.1.S1_at   | MmugDNA.20024.1 | 5.71  | 5.73  | 0.08 | 0.13 | -1.01 | 0.86497  | 0.988388 | 0.941423 | 0.993461 |
| MmugDNA.20025.1.S1_at   | MmugDNA.20025.1 | 4.4   | 4.12  | 0.02 | 0.23 | 1.21  | 0.325722 | 0.252959 | 0.608885 | 0.521261 |
| MmugDNA.20026.1.S1_at   | MmugDNA.20026.1 | 10.22 | 10.52 | 0.26 | 0.06 | -1.23 | 0.127044 | 0.211737 | 0.408591 | 0.485757 |
| MmugDNA.20027.1.S1_s_at | MmugDNA.20027.1 | 11.72 | 12.09 | 0.15 | 0.08 | -1.29 | 0.008447 | 0.013451 | 0.141088 | 0.148623 |
| MmugDNA.20028.1.S1_at   | MmugDNA.20028.1 | 11.5  | 11.47 | 0.03 | 0.02 | 1.03  | 0.135078 | 0.289873 | 0.419042 | 0.550831 |
| MmugDNA.20029.1.S1_at   | MmugDNA.20029.1 | 6.17  | 6.16  | 0.13 | 0    | 1.01  | 0.639537 | 0.707331 | 0.823589 | 0.830238 |
| MmugDNA.2003.1.S1_at    | MmugDNA.2003.1  | 8.59  | 9.18  | 0.33 | 0.15 | -1.51 | 0.076785 | 0.159895 | 0.335141 | 0.435987 |
| MmugDNA.20030.1.S1_at   | MmugDNA.20030.1 | 7.69  | 7.83  | 0.28 | 0.18 | -1.1  | 0.521574 | 0.62593  | 0.749389 | 0.7794   |
| MmugDNA.20032.1.S1_at   | MmugDNA.20032.1 | 5.06  | 4.82  | 0.09 | 0.18 | 1.18  | 0.190949 | 0.221184 | 0.487168 | 0.494511 |
| MmugDNA.20033.1.S1_at   | MmugDNA.20033.1 | 6.81  | 7.91  | 0.91 | 0.02 | -2.15 | 0.330088 | 0.45986  | 0.612143 | 0.671989 |

|                         |                 |       |       |      |      |       |          |          |          |          |
|-------------------------|-----------------|-------|-------|------|------|-------|----------|----------|----------|----------|
| MmugDNA.20033.1.S1_x_at | MmugDNA.20033.1 | 7.45  | 8.18  | 1.16 | 0.05 | -1.66 | 0.386947 | 0.544322 | 0.655283 | 0.726748 |
| MmugDNA.20034.1.S1_at   | MmugDNA.20034.1 | 11.63 | 12.13 | 0.14 | 0.21 | -1.41 | 0.032075 | 0.052992 | 0.232919 | 0.275841 |
| MmugDNA.20035.1.S1_at   | MmugDNA.20035.1 | 7.39  | 8.79  | 0.15 | 0.07 | -2.63 | 0.000198 | 0.019294 | 0.053494 | 0.174723 |
| MmugDNA.20036.1.S1_at   | MmugDNA.20036.1 | 8.84  | 8.72  | 0.03 | 0.11 | 1.08  | 0.254944 | 0.226096 | 0.549478 | 0.498585 |
| MmugDNA.20038.1.S1_at   | MmugDNA.20038.1 | 6.14  | 5.99  | 0.06 | 0.09 | 1.11  | 0.172607 | 0.001954 | 0.466715 | 0.065813 |
| MmugDNA.20039.1.S1_at   | MmugDNA.20039.1 | 5.98  | 5.87  | 0.25 | 0.1  | 1.08  | 0.218457 | 0.27189  | 0.516097 | 0.536644 |
| MmugDNA.2004.1.S1_at    | MmugDNA.2004.1  | 6.22  | 6.2   | 0.24 | 0.04 | 1.02  | 0.726651 | 0.680215 | 0.871827 | 0.813309 |
| MmugDNA.20040.1.S1_at   | MmugDNA.20040.1 | 3.01  | 3.03  | 0.32 | 0.13 | -1.01 | 0.728788 | 0.830741 | 0.873272 | 0.902874 |
| MmugDNA.20041.1.S1_at   | MmugDNA.20041.1 | 5.23  | 5.12  | 0.16 | 0.09 | 1.08  | 0.298184 | 0.461649 | 0.586571 | 0.673228 |
| MmugDNA.35850.1.S1_s_at | MmugDNA.35850.1 | 5.57  | 5.72  | 0.13 | 0.1  | -1.11 | 0.200968 | 0.458885 | 0.498371 | 0.671498 |
| MmugDNA.20043.1.S1_at   | MmugDNA.20043.1 | 6.16  | 6.31  | 0.04 | 0.14 | -1.11 | 0.036058 | 0.041327 | 0.244886 | 0.247995 |
| MmugDNA.20044.1.S1_at   | MmugDNA.20044.1 | 7.62  | 7.45  | 0.2  | 0.11 | 1.12  | 0.205991 | 0.135299 | 0.50382  | 0.407381 |
| MmugDNA.20044.1.S1_s_at | MmugDNA.20044.1 | 7.88  | 7.3   | 0.19 | 0.35 | 1.49  | 0.05538  | 0.045467 | 0.292296 | 0.2575   |
| MmugDNA.20045.1.S1_at   | MmugDNA.20045.1 | 9.42  | 9.35  | 0.34 | 0.07 | 1.05  | 0.389523 | 0.206853 | 0.657329 | 0.481011 |
| MmugDNA.20048.1.S1_at   | MmugDNA.20048.1 | 5.29  | 5.28  | 0.03 | 0.02 | 1.01  | 0.17159  | 0.625686 | 0.465575 | 0.779265 |
| MmugDNA.20049.1.S1_at   | MmugDNA.20049.1 | 5.21  | 5.58  | 0.75 | 0.34 | -1.29 | 0.812624 | 0.941448 | 0.916193 | 0.966805 |
| MmugDNA.2005.1.S1_at    | MmugDNA.2005.1  | 3.54  | 3.2   | 0.12 | 0.1  | 1.27  | 0.072413 | 0.159289 | 0.327004 | 0.43531  |
| MmugDNA.20052.1.S1_at   | MmugDNA.20052.1 | 8.28  | 9.52  | 0.32 | 0.2  | -2.37 | 0.007565 | 0.141963 | 0.135286 | 0.415505 |
| MmugDNA.20056.1.S1_at   | MmugDNA.20056.1 | 9.29  | 9.25  | 0.19 | 0.09 | 1.03  | 0.717044 | 0.371201 | 0.866435 | 0.610135 |
| MmugDNA.20057.1.S1_s_at | MmugDNA.20057.1 | 5.72  | 5.99  | 0.21 | 0.36 | -1.21 | 0.81047  | 0.164326 | 0.915091 | 0.440566 |
| MmugDNA.20058.1.S1_at   | MmugDNA.20058.1 | 4.97  | 5.01  | 0.24 | 0.23 | -1.03 | 0.504982 | 0.41473  | 0.738088 | 0.640456 |
| MmugDNA.20059.1.S1_at   | MmugDNA.20059.1 | 3.59  | 3.55  | 0.03 | 0.02 | 1.03  | 0.068701 | 0.329384 | 0.319991 | 0.578733 |
| MmugDNA.2006.1.S1_at    | MmugDNA.2006.1  | 6.49  | 7.07  | 0.22 | 0.18 | -1.49 | 0.099331 | 0.01176  | 0.370274 | 0.140492 |
| MmugDNA.20060.1.S1_at   | MmugDNA.20060.1 | 11.52 | 11.59 | 0.02 | 0.03 | -1.05 | 0.068447 | 0.555017 | 0.3194   | 0.733598 |
| MmugDNA.20061.1.S1_at   | MmugDNA.20061.1 | 3.61  | 3.64  | 0.04 | 0.21 | -1.02 | 0.880635 | 0.801205 | 0.949265 | 0.885679 |
| MmugDNA.20062.1.S1_at   | MmugDNA.20062.1 | 5.45  | 5.42  | 0.11 | 0.01 | 1.02  | 0.562165 | 0.060075 | 0.774838 | 0.291767 |
| MmugDNA.20063.1.S1_at   | MmugDNA.20063.1 | 10.34 | 10.69 | 0.1  | 0.04 | -1.27 | 0.002501 | 0.003    | 0.094326 | 0.079958 |
| MmugDNA.20064.1.S1_at   | MmugDNA.20064.1 | 8.99  | 9.4   | 0.09 | 0.09 | -1.33 | 0.003907 | 0.000032 | 0.108265 | 0.022097 |
| MmugDNA.20065.1.S1_at   | MmugDNA.20065.1 | 5.84  | 5.66  | 0.11 | 0.19 | 1.14  | 0.484655 | 0.052235 | 0.724421 | 0.274065 |
| MmugDNA.20068.1.S1_at   | MmugDNA.20068.1 | 6.85  | 7.32  | 0.11 | 0.12 | -1.38 | 0.007685 | 0.226151 | 0.136377 | 0.498644 |
| MmugDNA.20069.1.S1_at   | MmugDNA.20069.1 | 9.54  | 10.91 | 0.11 | 0.27 | -2.58 | 0.001802 | 0.009895 | 0.086149 | 0.13068  |
| MmugDNA.2007.1.S1_at    | MmugDNA.2007.1  | 5.84  | 5.76  | 0.09 | 0.08 | 1.06  | 0.133842 | 0.133627 | 0.417214 | 0.40557  |
| MmugDNA.20070.1.S1_at   | MmugDNA.20070.1 | 4.69  | 4.73  | 0.06 | 0.09 | -1.02 | 0.13325  | 0.211767 | 0.416749 | 0.485757 |
| MmugDNA.20071.1.S1_at   | MmugDNA.20071.1 | 5.32  | 4.84  | 0.48 | 0.1  | 1.39  | 0.593563 | 0.894307 | 0.794036 | 0.939697 |
| MmugDNA.20072.1.S1_at   | MmugDNA.20072.1 | 4.57  | 4.95  | 0.85 | 0.02 | -1.3  | 0.825824 | 0.658517 | 0.922614 | 0.800401 |
| MmugDNA.20072.1.S1_s_at | MmugDNA.20072.1 | 8.45  | 7.73  | 0.31 | 0.07 | 1.65  | 0.037354 | 0.001092 | 0.248641 | 0.052283 |
| MmugDNA.20074.1.S1_at   | MmugDNA.20074.1 | 9.89  | 9.78  | 0.27 | 0.08 | 1.07  | 0.252798 | 0.004631 | 0.547383 | 0.094988 |
| MmugDNA.20075.1.S1_at   | MmugDNA.20075.1 | 7.97  | 7.5   | 0.16 | 0.23 | 1.39  | 0.043412 | 0.469198 | 0.265644 | 0.678155 |
| MmugDNA.20076.1.S1_at   | MmugDNA.20076.1 | 5.67  | 5.72  | 0.72 | 0.31 | -1.04 | 0.717772 | 0.868789 | 0.866693 | 0.925437 |
| MmugDNA.20077.1.S1_at   | MmugDNA.20077.1 | 7.14  | 7.33  | 0.8  | 0.2  | -1.14 | 0.262841 | 0.299569 | 0.556683 | 0.557945 |
| MmugDNA.20078.1.S1_at   | MmugDNA.20078.1 | 5.87  | 5.64  | 0.07 | 0.11 | 1.17  | 0.089125 | 0.200904 | 0.355884 | 0.475395 |
| MmugDNA.2008.1.S1_at    | MmugDNA.2008.1  | 9.4   | 8.71  | 0.4  | 0.07 | 1.61  | 0.043532 | 0.014354 | 0.265724 | 0.152926 |
| MmugDNA.20080.1.S1_at   | MmugDNA.20080.1 | 6.43  | 6.37  | 0.05 | 0.06 | 1.04  | 0.224082 | 0.004124 | 0.522199 | 0.090887 |

|                         |                 |       |       |      |      |       |          |          |          |          |
|-------------------------|-----------------|-------|-------|------|------|-------|----------|----------|----------|----------|
| MmugDNA.20081.1.S1_at   | MmugDNA.20081.1 | 4.87  | 4.87  | 0.3  | 0.13 | 1     | 0.430229 | 0.54206  | 0.68655  | 0.725196 |
| MmugDNA.20082.1.S1_at   | MmugDNA.20082.1 | 5.25  | 5.53  | 0.35 | 0.32 | -1.21 | 0.156931 | 0.43509  | 0.447666 | 0.655005 |
| MmugDNA.20083.1.S1_at   | MmugDNA.20083.1 | 3.65  | 3.66  | 0.07 | 0.06 | -1    | 0.805307 | 0.146956 | 0.912692 | 0.421011 |
| MmugDNA.20084.1.S1_at   | MmugDNA.20084.1 | 6.78  | 6.71  | 0.37 | 0.2  | 1.05  | 0.579662 | 0.058623 | 0.785276 | 0.288825 |
| MmugDNA.20086.1.S1_at   | MmugDNA.20086.1 | 3.57  | 3.84  | 0.39 | 0.16 | -1.21 | 0.581522 | 0.819456 | 0.786647 | 0.895996 |
| MmugDNA.20087.1.S1_at   | MmugDNA.20087.1 | 8.5   | 8.36  | 0.19 | 0.18 | 1.1   | 0.405678 | 0.005918 | 0.669103 | 0.105276 |
| MmugDNA.20088.1.S1_at   | MmugDNA.20088.1 | 9.2   | 8.88  | 0.2  | 0.29 | 1.25  | 0.144148 | 0.15693  | 0.430943 | 0.432372 |
| MmugDNA.20089.1.S1_at   | MmugDNA.20089.1 | 8.22  | 11.06 | 1.25 | 0.32 | -7.18 | 0.048827 | 0.1027   | 0.278538 | 0.363111 |
| MmugDNA.2009.1.S1_at    | MmugDNA.2009.1  | 6.71  | 5.96  | 0.38 | 0.54 | 1.69  | 0.071958 | 0.046139 | 0.326151 | 0.259209 |
| MmugDNA.20091.1.S1_at   | MmugDNA.20091.1 | 4.55  | 4.33  | 0.08 | 0.15 | 1.16  | 0.066799 | 0.05494  | 0.3162   | 0.279837 |
| MmugDNA.20092.1.S1_at   | MmugDNA.20092.1 | 2.76  | 2.78  | 0.1  | 0.03 | -1.02 | 0.573361 | 0.246268 | 0.781098 | 0.515889 |
| MmugDNA.20093.1.S1_at   | MmugDNA.20093.1 | 6.17  | 6.96  | 0.86 | 0.3  | -1.73 | 0.192094 | 0.457221 | 0.488697 | 0.670746 |
| MmugDNA.20094.1.S1_at   | MmugDNA.20094.1 | 5.47  | 4.51  | 0.49 | 0.34 | 1.95  | 0.037874 | 0.044652 | 0.250372 | 0.255716 |
| MmugDNA.20096.1.S1_at   | MmugDNA.20096.1 | 10.01 | 10.01 | 0.51 | 0.22 | 1     | 0.90422  | 0.907553 | 0.959379 | 0.947728 |
| MmugDNA.20097.1.S1_at   | MmugDNA.20097.1 | 8.53  | 8.53  | 0.14 | 0.15 | 1     | 0.497125 | 0.618525 | 0.73289  | 0.774147 |
| MmugDNA.20098.1.S1_at   | MmugDNA.20098.1 | 3.77  | 3.82  | 0.3  | 0.14 | -1.04 | 0.512863 | 0.272882 | 0.743298 | 0.537598 |
| MmugDNA.20099.1.S1_at   | MmugDNA.20099.1 | 3.1   | 3.26  | 0.13 | 0.15 | -1.12 | 0.346202 | 0.311933 | 0.624868 | 0.566833 |
| MmugDNA.20101.1.S1_at   | MmugDNA.20101.1 | 6.89  | 6.97  | 0.52 | 0.37 | -1.06 | 0.568098 | 0.141101 | 0.778144 | 0.414602 |
| MmugDNA.20102.1.S1_at   | MmugDNA.20102.1 | 4.08  | 4.77  | 0.64 | 0.59 | -1.62 | 0.331099 | 0.598259 | 0.613047 | 0.760715 |
| MmugDNA.20103.1.S1_at   | MmugDNA.20103.1 | 3.66  | 3.66  | 0    | 0.03 | 1     | 0.321555 | 0.861817 | 0.605866 | 0.92146  |
| MmugDNA.20104.1.S1_at   | MmugDNA.20104.1 | 4.62  | 4.63  | 0.24 | 0.09 | -1    | 0.601722 | 0.855621 | 0.799789 | 0.917679 |
| MmugDNA.20105.1.S1_at   | MmugDNA.20105.1 | 4.4   | 4.45  | 0.15 | 0.27 | -1.04 | 0.566957 | 0.744419 | 0.777544 | 0.852014 |
| MmugDNA.20107.1.S1_at   | MmugDNA.20107.1 | 5.28  | 5.11  | 0.11 | 0.13 | 1.13  | 0.370879 | 0.185893 | 0.643707 | 0.461752 |
| MmugDNA.20108.1.S1_at   | MmugDNA.20108.1 | 6.88  | 6.37  | 0.62 | 0.78 | 1.43  | 0.380569 | 0.578723 | 0.65023  | 0.748611 |
| MmugDNA.20109.1.S1_at   | MmugDNA.20109.1 | 5.57  | 5.78  | 0.19 | 0.14 | -1.16 | 0.857429 | 0.102118 | 0.938077 | 0.362168 |
| MmugDNA.2011.1.S1_at    | MmugDNA.2011.1  | 8.9   | 8.97  | 0.15 | 0.28 | -1.05 | 0.556865 | 0.174569 | 0.771968 | 0.451078 |
| MmugDNA.2011.1.S1_s_at  | MmugDNA.2011.1  | 10.22 | 10.23 | 0.12 | 0.13 | -1.01 | 0.737252 | 0.100465 | 0.878069 | 0.359612 |
| MmugDNA.20112.1.S1_at   | MmugDNA.20112.1 | 3.51  | 3.7   | 0.22 | 0.16 | -1.14 | 0.671954 | 0.60315  | 0.84282  | 0.763963 |
| MmugDNA.20113.1.S1_at   | MmugDNA.20113.1 | 4.15  | 3.96  | 0.41 | 0.05 | 1.14  | 0.329564 | 0.335103 | 0.611806 | 0.582853 |
| MmugDNA.20114.1.S1_at   | MmugDNA.20114.1 | 10.6  | 11.02 | 0.31 | 0.19 | -1.35 | 0.54163  | 0.113975 | 0.762335 | 0.380304 |
| MmugDNA.20114.1.S1_s_at | MmugDNA.20114.1 | 11.23 | 11.63 | 0.22 | 0.09 | -1.32 | 0.139661 | 0.064231 | 0.42522  | 0.299668 |
| MmugDNA.20115.1.S1_at   | MmugDNA.20115.1 | 6.07  | 6.3   | 0.23 | 0.05 | -1.17 | 0.536673 | 0.701492 | 0.759076 | 0.826875 |
| MmugDNA.20116.1.S1_at   | MmugDNA.20116.1 | 8.42  | 7.68  | 0.25 | 0.07 | 1.67  | 0.019622 | 0.05349  | 0.193026 | 0.276963 |
| MmugDNA.41342.1.S1_at   | MmugDNA.41342.1 | 9.13  | 8.62  | 0.08 | 0.46 | 1.42  | 0.41932  | 0.19623  | 0.67873  | 0.471236 |
| MmugDNA.41342.1.S1_s_at | MmugDNA.41342.1 | 8.35  | 7.86  | 0.23 | 0.23 | 1.4   | 0.147728 | 0.195665 | 0.435758 | 0.470495 |
| MmugDNA.20118.1.S1_at   | MmugDNA.20118.1 | 9.43  | 9.55  | 0.08 | 0.12 | -1.09 | 0.447671 | 0.026493 | 0.699602 | 0.203897 |
| MmugDNA.20119.1.S1_at   | MmugDNA.20119.1 | 3.67  | 3.65  | 0.42 | 0.01 | 1.02  | 0.924009 | 0.937731 | 0.967685 | 0.964687 |
| MmugDNA.2012.1.S1_at    | MmugDNA.2012.1  | 3.8   | 3.78  | 0.36 | 0.09 | 1.02  | 0.255373 | 0.235383 | 0.549821 | 0.506431 |
| MmugDNA.20120.1.S1_at   | MmugDNA.20120.1 | 11.52 | 10.71 | 0.1  | 0.03 | 1.76  | 0.000274 | 0.025901 | 0.056654 | 0.201714 |
| MmugDNA.20121.1.S1_at   | MmugDNA.20121.1 | 8.42  | 8.19  | 0.08 | 0.17 | 1.17  | 0.076184 | 0.195624 | 0.334238 | 0.470481 |
| MmugDNA.20122.1.S1_at   | MmugDNA.20122.1 | 5.88  | 5.45  | 0.51 | 0.32 | 1.35  | 0.106556 | 0.153135 | 0.380675 | 0.428011 |
| MmugDNA.20123.1.S1_at   | MmugDNA.20123.1 | 3.03  | 3.04  | 0.2  | 0.05 | -1.01 | 0.95981  | 0.997404 | 0.983565 | 0.998632 |
| MmugDNA.20124.1.S1_at   | MmugDNA.20124.1 | 6.03  | 6.2   | 0.22 | 0.1  | -1.12 | 0.184143 | 0.335679 | 0.480065 | 0.583441 |

|                         |                 |       |       |      |      |       |          |          |          |          |
|-------------------------|-----------------|-------|-------|------|------|-------|----------|----------|----------|----------|
| MmugDNA.20125.1.S1_at   | MmugDNA.20125.1 | 4.05  | 3.97  | 0    | 0.17 | 1.06  | 0.564774 | 0.390082 | 0.776348 | 0.624002 |
| MmugDNA.20130.1.S1_at   | MmugDNA.20130.1 | 9.73  | 9.51  | 0.18 | 0.22 | 1.17  | 0.214073 | 0.008099 | 0.511862 | 0.119551 |
| MmugDNA.20132.1.S1_at   | MmugDNA.20132.1 | 9.3   | 9.14  | 0.23 | 0.11 | 1.12  | 0.207706 | 0.322655 | 0.505542 | 0.574024 |
| MmugDNA.20133.1.S1_at   | MmugDNA.20133.1 | 10.05 | 9.67  | 0.17 | 0.05 | 1.3   | 0.041683 | 0.159772 | 0.260653 | 0.435871 |
| MmugDNA.20135.1.S1_at   | MmugDNA.20135.1 | 10.11 | 10.36 | 0.09 | 0.22 | -1.19 | 0.420436 | 0.010512 | 0.679414 | 0.133936 |
| MmugDNA.20136.1.S1_at   | MmugDNA.20136.1 | 6.94  | 7.09  | 0.45 | 0.2  | -1.11 | 0.140101 | 0.075172 | 0.425829 | 0.319373 |
| MmugDNA.20137.1.S1_at   | MmugDNA.20137.1 | 8.09  | 7.77  | 0.94 | 0.61 | 1.24  | 0.919075 | 0.425859 | 0.965387 | 0.6481   |
| MmugDNA.20138.1.S1_at   | MmugDNA.20138.1 | 8.54  | 9.34  | 0.31 | 0.09 | -1.75 | 0.018568 | 0.00063  | 0.189513 | 0.042867 |
| MmugDNA.20139.1.S1_s_at | MmugDNA.20139.1 | 4.16  | 4.41  | 0.25 | 0.11 | -1.19 | 0.771285 | 0.126607 | 0.895207 | 0.397214 |
| MmugDNA.20140.1.S1_at   | MmugDNA.20140.1 | 7.73  | 8.15  | 0.19 | 0.14 | -1.34 | 0.055239 | 0.433721 | 0.291993 | 0.653946 |
| MmugDNA.20141.1.S1_at   | MmugDNA.20141.1 | 4.39  | 4.5   | 0.46 | 0.14 | -1.08 | 0.586148 | 0.637081 | 0.789675 | 0.786624 |
| MmugDNA.20142.1.S1_at   | MmugDNA.20142.1 | 6.83  | 6.81  | 0.26 | 0.15 | 1.01  | 0.516062 | 0.840407 | 0.745613 | 0.909015 |
| MmugDNA.20143.1.S1_at   | MmugDNA.20143.1 | 7.3   | 7.03  | 0.39 | 0.25 | 1.2   | 0.164314 | 0.137737 | 0.457253 | 0.410738 |
| MmugDNA.20147.1.S1_at   | MmugDNA.20147.1 | 7     | 6.37  | 1.48 | 0.28 | 1.55  | 0.855577 | 0.331986 | 0.937081 | 0.580544 |
| MmugDNA.20148.1.S1_at   | MmugDNA.20148.1 | 6.6   | 6.92  | 0.59 | 0.24 | -1.25 | 0.156449 | 0.121415 | 0.446993 | 0.390499 |
| MmugDNA.20149.1.S1_at   | MmugDNA.20149.1 | 6.73  | 6.33  | 0.68 | 0.32 | 1.32  | 0.625366 | 0.383222 | 0.815353 | 0.61922  |
| MmugDNA.2015.1.S1_at    | MmugDNA.2015.1  | 9.04  | 9.34  | 0.28 | 0.14 | -1.23 | 0.123282 | 0.107864 | 0.402508 | 0.370945 |
| MmugDNA.20151.1.S1_at   | MmugDNA.20151.1 | 9.49  | 9.35  | 0.17 | 0.09 | 1.1   | 0.273457 | 0.249258 | 0.565583 | 0.518332 |
| MmugDNA.20151.1.S1_x_at | MmugDNA.20151.1 | 9.64  | 9.49  | 0.12 | 0.03 | 1.11  | 0.247175 | 0.34051  | 0.542786 | 0.586776 |
| MmugDNA.20152.1.S1_at   | MmugDNA.20152.1 | 5.88  | 5.89  | 0.02 | 0.15 | -1.01 | 0.477768 | 0.299089 | 0.719594 | 0.557663 |
| MmugDNA.20153.1.S1_at   | MmugDNA.20153.1 | 3.95  | 3.98  | 0.07 | 0.37 | -1.01 | 0.339396 | 0.225204 | 0.619721 | 0.497865 |
| MmugDNA.20154.1.S1_at   | MmugDNA.20154.1 | 6.68  | 7.03  | 0.43 | 0.18 | -1.27 | 0.706943 | 0.722711 | 0.861311 | 0.839378 |
| MmugDNA.20155.1.S1_at   | MmugDNA.20155.1 | 7.66  | 7.42  | 0.03 | 0.16 | 1.18  | 0.063977 | 0.014111 | 0.309382 | 0.15195  |
| MmugDNA.31444.1.S1_s_at | MmugDNA.31444.1 | 7.39  | 7.51  | 0.19 | 0.03 | -1.09 | 0.449462 | 0.518803 | 0.700806 | 0.710724 |
| MmugDNA.31444.1.S1_x_at | MmugDNA.31444.1 | 6.37  | 6.39  | 0.23 | 0.06 | -1.02 | 0.912998 | 0.577906 | 0.963229 | 0.748185 |
| MmugDNA.2016.1.S1_at    | MmugDNA.2016.1  | 5.44  | 5.24  | 0.17 | 0.13 | 1.15  | 0.088008 | 0.142907 | 0.354244 | 0.416854 |
| MmugDNA.20160.1.S1_at   | MmugDNA.20160.1 | 5.78  | 7.12  | 0.29 | 0.26 | -2.53 | 0.003525 | 0.118736 | 0.104286 | 0.386775 |
| MmugDNA.20161.1.S1_at   | MmugDNA.20161.1 | 5.77  | 5.93  | 0.24 | 0.31 | -1.11 | 0.814673 | 0.764781 | 0.917175 | 0.863209 |
| MmugDNA.20162.1.S1_at   | MmugDNA.20162.1 | 6.02  | 5.68  | 0.58 | 0.59 | 1.26  | 0.123912 | 0.151714 | 0.403734 | 0.426383 |
| MmugDNA.20163.1.S1_at   | MmugDNA.20163.1 | 3.71  | 3.82  | 0.32 | 0.02 | -1.08 | 0.77726  | 0.934557 | 0.898237 | 0.962917 |
| MmugDNA.20166.1.S1_at   | MmugDNA.20166.1 | 5.23  | 5.14  | 0.06 | 0.13 | 1.06  | 0.975988 | 0.072134 | 0.990409 | 0.314635 |
| MmugDNA.20167.1.S1_at   | MmugDNA.20167.1 | 11.82 | 11.84 | 0.05 | 0.11 | -1.01 | 0.394574 | 0.140198 | 0.661066 | 0.413405 |
| MmugDNA.20168.1.S1_at   | MmugDNA.20168.1 | 3.07  | 2.8   | 0.15 | 0.1  | 1.21  | 0.083509 | 0.064727 | 0.345905 | 0.300314 |
| MmugDNA.20169.1.S1_at   | MmugDNA.20169.1 | 5.64  | 5.57  | 0.35 | 0.07 | 1.05  | 0.736028 | 0.89847  | 0.877149 | 0.942214 |
| MmugDNA.2017.1.S1_at    | MmugDNA.2017.1  | 3.51  | 3.63  | 0.04 | 0.12 | -1.08 | 0.125104 | 0.255721 | 0.405516 | 0.523675 |
| MmugDNA.20171.1.S1_at   | MmugDNA.20171.1 | 5.44  | 5.34  | 0.79 | 0.24 | 1.07  | 0.339026 | 0.42199  | 0.619372 | 0.645406 |
| MmugDNA.20172.1.S1_at   | MmugDNA.20172.1 | 6.1   | 6.71  | 0.32 | 0.33 | -1.53 | 0.135535 | 0.225009 | 0.419377 | 0.49773  |
| MmugDNA.20173.1.S1_at   | MmugDNA.20173.1 | 7     | 6.86  | 0.33 | 0.12 | 1.11  | 0.682845 | 0.942032 | 0.84876  | 0.967113 |
| MmugDNA.20176.1.S1_at   | MmugDNA.20176.1 | 5.89  | 6.16  | 0.29 | 0.12 | -1.21 | 0.466227 | 0.403392 | 0.712097 | 0.632085 |
| MmugDNA.20178.1.S1_at   | MmugDNA.20178.1 | 4.37  | 3.96  | 0.45 | 0.58 | 1.33  | 0.514222 | 0.74633  | 0.744206 | 0.85272  |
| MmugDNA.20180.1.S1_at   | MmugDNA.20180.1 | 9.79  | 9.33  | 0.12 | 0.04 | 1.38  | 0.003612 | 0.001195 | 0.105451 | 0.05421  |
| MmugDNA.20181.1.S1_at   | MmugDNA.20181.1 | 4.64  | 4.64  | 0.39 | 0.18 | 1     | 0.698473 | 0.89587  | 0.856592 | 0.940488 |
| MmugDNA.20183.1.S1_at   | MmugDNA.20183.1 | 3.34  | 3.39  | 0.03 | 0.16 | -1.04 | 0.662416 | 0.489861 | 0.837065 | 0.691972 |

|                         |                 |       |       |      |      |       |          |          |          |          |
|-------------------------|-----------------|-------|-------|------|------|-------|----------|----------|----------|----------|
| MmugDNA.20185.1.S1_at   | MmugDNA.20185.1 | 3.67  | 3.77  | 0.11 | 0.07 | -1.07 | 0.115218 | 0.160902 | 0.392258 | 0.437116 |
| MmugDNA.20186.1.S1_at   | MmugDNA.20186.1 | 4.94  | 4.94  | 0.04 | 0.12 | -1    | 0.799388 | 0.967251 | 0.909533 | 0.981908 |
| MmugDNA.20187.1.S1_at   | MmugDNA.20187.1 | 7.18  | 7.29  | 0.35 | 0.04 | -1.08 | 0.754066 | 0.88795  | 0.886688 | 0.936115 |
| MmugDNA.20188.1.S1_at   | MmugDNA.20188.1 | 6.75  | 4.6   | 0.14 | 0.33 | 4.44  | 0.000577 | 0.000466 | 0.070727 | 0.038572 |
| MmugDNA.20189.1.S1_at   | MmugDNA.20189.1 | 5.97  | 6.21  | 0.04 | 0.18 | -1.18 | 0.202535 | 0.028188 | 0.500226 | 0.2095   |
| MmugDNA.2019.1.S1_at    | MmugDNA.2019.1  | 12.29 | 11.97 | 0.31 | 0.04 | 1.25  | 0.102848 | 0.490939 | 0.375378 | 0.692666 |
| MmugDNA.20190.1.S1_at   | MmugDNA.20190.1 | 8.01  | 7.4   | 0.04 | 0.04 | 1.53  | 0.000042 | 5.42E-07 | 0.045594 | 0.005999 |
| MmugDNA.20191.1.S1_at   | MmugDNA.20191.1 | 6.71  | 6.71  | 0.02 | 0.01 | 1     | 0.747062 | 0.320867 | 0.882851 | 0.572849 |
| MmugDNA.20194.1.S1_at   | MmugDNA.20194.1 | 5.06  | 5.87  | 0.24 | 0.46 | -1.76 | 0.040987 | 0.190468 | 0.258903 | 0.465906 |
| MmugDNA.20196.1.S1_at   | MmugDNA.20196.1 | 9.3   | 9.45  | 0.22 | 0.07 | -1.11 | 0.109028 | 0.409294 | 0.384048 | 0.63643  |
| MmugDNA.20199.1.S1_at   | MmugDNA.20199.1 | 7.81  | 7.4   | 0.55 | 0.44 | 1.33  | 0.792931 | 0.212989 | 0.906342 | 0.486926 |
| MmugDNA.2020.1.S1_at    | MmugDNA.2020.1  | 3.51  | 3.53  | 0.4  | 0.14 | -1.02 | 0.319739 | 0.3896   | 0.604318 | 0.623668 |
| MmugDNA.20200.1.S1_at   | MmugDNA.20200.1 | 4.46  | 4.35  | 0.1  | 0.1  | 1.08  | 0.246153 | 0.536842 | 0.541923 | 0.722119 |
| MmugDNA.20202.1.S1_at   | MmugDNA.20202.1 | 9.38  | 8.99  | 0.32 | 0.03 | 1.31  | 0.159202 | 0.15915  | 0.450505 | 0.435217 |
| MmugDNA.20204.1.S1_at   | MmugDNA.20204.1 | 5.31  | 5.22  | 0.22 | 0.07 | 1.07  | 0.358962 | 0.335556 | 0.634581 | 0.583326 |
| MmugDNA.20205.1.S1_at   | MmugDNA.20205.1 | 6.73  | 6.83  | 0.17 | 0.08 | -1.07 | 0.586084 | 0.229353 | 0.789675 | 0.501527 |
| MmugDNA.20207.1.S1_at   | MmugDNA.20207.1 | 9.11  | 9.12  | 0.13 | 0.18 | -1.01 | 0.542812 | 0.739783 | 0.763003 | 0.849224 |
| MmugDNA.20208.1.S1_at   | MmugDNA.20208.1 | 6.52  | 6.28  | 1.08 | 0.29 | 1.19  | 0.998966 | 0.395967 | 0.999637 | 0.627802 |
| MmugDNA.20209.1.S1_at   | MmugDNA.20209.1 | 4.93  | 4.95  | 0.28 | 0.09 | -1.01 | 0.314655 | 0.427952 | 0.600041 | 0.649602 |
| MmugDNA.20210.1.S1_at   | MmugDNA.20210.1 | 9.4   | 9.09  | 0.16 | 0.11 | 1.24  | 0.022234 | 0.024405 | 0.202307 | 0.19551  |
| MmugDNA.20211.1.S1_at   | MmugDNA.20211.1 | 3.15  | 3.05  | 0.29 | 0.05 | 1.07  | 0.229722 | 0.349434 | 0.528724 | 0.593409 |
| MmugDNA.20212.1.S1_at   | MmugDNA.20212.1 | 2.69  | 2.66  | 0.05 | 0.02 | 1.02  | 0.27257  | 0.344403 | 0.564664 | 0.58981  |
| MmugDNA.20213.1.S1_at   | MmugDNA.20213.1 | 7.25  | 7.6   | 0.4  | 0.08 | -1.27 | 0.228833 | 0.559926 | 0.52733  | 0.736439 |
| MmugDNA.20214.1.S1_at   | MmugDNA.20214.1 | 3.82  | 3.72  | 0.18 | 0.05 | 1.07  | 0.132451 | 0.197299 | 0.415822 | 0.472213 |
| MmugDNA.20215.1.S1_at   | MmugDNA.20215.1 | 5.51  | 5.49  | 0.24 | 0.06 | 1.01  | 0.581394 | 0.851307 | 0.786514 | 0.915393 |
| MmugDNA.20216.1.S1_at   | MmugDNA.20216.1 | 4.65  | 4.26  | 1.59 | 0.55 | 1.31  | 0.299456 | 0.20323  | 0.587716 | 0.477415 |
| MmugDNA.20217.1.S1_at   | MmugDNA.20217.1 | 6.63  | 6.66  | 0.21 | 0.1  | -1.02 | 0.707002 | 0.718202 | 0.861311 | 0.836902 |
| MmugDNA.20218.1.S1_at   | MmugDNA.20218.1 | 5.5   | 7     | 0.18 | 0.1  | -2.84 | 0.000236 | 0.191691 | 0.054642 | 0.46695  |
| MmugDNA.2022.1.S1_at    | MmugDNA.2022.1  | 6.27  | 5.82  | 0.25 | 0.22 | 1.36  | 0.077731 | 0.113409 | 0.336684 | 0.379509 |
| MmugDNA.20222.1.S1_at   | MmugDNA.20222.1 | 10.57 | 10.29 | 0.48 | 0.32 | 1.22  | 0.657182 | 0.034246 | 0.834252 | 0.228903 |
| MmugDNA.20222.1.S1_s_at | MmugDNA.20222.1 | 12.81 | 12.8  | 0.24 | 0.23 | 1.01  | 0.992991 | 0.052316 | 0.997273 | 0.274201 |
| MmugDNA.20223.1.S1_at   | MmugDNA.20223.1 | 5.29  | 4.51  | 1.02 | 0.35 | 1.72  | 0.208259 | 0.207808 | 0.50598  | 0.482031 |
| MmugDNA.20224.1.S1_at   | MmugDNA.20224.1 | 9.54  | 10.02 | 0.07 | 0.12 | -1.4  | 0.002009 | 0.000194 | 0.089852 | 0.030888 |
| MmugDNA.20225.1.S1_at   | MmugDNA.20225.1 | 3.44  | 3.3   | 0.98 | 0.24 | 1.11  | 0.225417 | 0.29469  | 0.523271 | 0.554326 |
| MmugDNA.20226.1.S1_at   | MmugDNA.20226.1 | 4.11  | 4.01  | 0.13 | 0.2  | 1.07  | 0.540708 | 0.928759 | 0.761662 | 0.959449 |
| MmugDNA.20228.1.S1_at   | MmugDNA.20228.1 | 4.8   | 4.65  | 0.08 | 0.06 | 1.11  | 0.043536 | 0.05398  | 0.265724 | 0.27777  |
| MmugDNA.20229.1.S1_at   | MmugDNA.20229.1 | 7.07  | 7.16  | 0.21 | 0.07 | -1.06 | 0.745588 | 0.878616 | 0.881965 | 0.930729 |
| MmugDNA.2023.1.S1_at    | MmugDNA.2023.1  | 3.9   | 3.9   | 0.03 | 0    | 1     | 0.373901 | 0.822106 | 0.645118 | 0.897658 |
| MmugDNA.20230.1.S1_at   | MmugDNA.20230.1 | 8.07  | 7.7   | 0.18 | 0.13 | 1.3   | 0.09468  | 0.656708 | 0.363624 | 0.79927  |
| MmugDNA.20231.1.S1_at   | MmugDNA.20231.1 | 10.97 | 10.75 | 0.14 | 0.03 | 1.17  | 0.019311 | 0.539819 | 0.192077 | 0.723976 |
| MmugDNA.20232.1.S1_at   | MmugDNA.20232.1 | 3.74  | 3.75  | 0.16 | 0.56 | -1.01 | 0.592678 | 0.651361 | 0.793595 | 0.796212 |
| MmugDNA.20233.1.S1_at   | MmugDNA.20233.1 | 4.18  | 4.26  | 0.17 | 0.25 | -1.06 | 0.781248 | 0.872355 | 0.900071 | 0.927442 |
| MmugDNA.20235.1.S1_at   | MmugDNA.20235.1 | 3.3   | 3.48  | 0.12 | 0.08 | -1.13 | 0.10888  | 0.104527 | 0.383806 | 0.365803 |



|                         |                 |       |       |      |      |       |          |          |          |          |
|-------------------------|-----------------|-------|-------|------|------|-------|----------|----------|----------|----------|
| MmugDNA.20236.1.S1_at   | MmugDNA.20236.1 | 9.88  | 10.01 | 0.08 | 0.05 | -1.09 | 0.11701  | 0.666661 | 0.394147 | 0.804716 |
| MmugDNA.20237.1.S1_at   | MmugDNA.20237.1 | 6.05  | 5.96  | 0.06 | 0.08 | 1.06  | 0.463925 | 0.048907 | 0.710366 | 0.265919 |
| MmugDNA.20238.1.S1_at   | MmugDNA.20238.1 | 10.45 | 10.46 | 0.17 | 0.15 | -1    | 0.827747 | 0.130383 | 0.923717 | 0.402234 |
| MmugDNA.20239.1.S1_at   | MmugDNA.20239.1 | 5.32  | 5.33  | 0.14 | 0.01 | -1.01 | 0.670501 | 0.970325 | 0.841859 | 0.983836 |
| MmugDNA.2024.1.S1_at    | MmugDNA.2024.1  | 10.2  | 11.06 | 1.11 | 0.1  | -1.81 | 0.744519 | 0.641083 | 0.881518 | 0.78939  |
| MmugDNA.20240.1.S1_s_at | MmugDNA.20240.1 | 5.46  | 5.53  | 0.08 | 0.13 | -1.05 | 0.428442 | 0.481118 | 0.685384 | 0.686152 |
| MmugDNA.20242.1.S1_at   | MmugDNA.20242.1 | 5.82  | 5.81  | 0.2  | 0.09 | 1.01  | 0.428559 | 0.495631 | 0.685396 | 0.695576 |
| MmugDNA.20243.1.S1_at   | MmugDNA.20243.1 | 5.27  | 4.69  | 1.24 | 0.46 | 1.49  | 0.192287 | 0.306465 | 0.488854 | 0.563029 |
| MmugDNA.20244.1.S1_at   | MmugDNA.20244.1 | 9.4   | 9.12  | 0.2  | 0.13 | 1.22  | 0.054205 | 0.003332 | 0.289903 | 0.083001 |
| MmugDNA.20245.1.S1_at   | MmugDNA.20245.1 | 5.86  | 6.23  | 0.38 | 0.31 | -1.29 | 0.31921  | 0.020359 | 0.603834 | 0.17912  |
| MmugDNA.20246.1.S1_at   | MmugDNA.20246.1 | 5.6   | 4.85  | 0.13 | 0.21 | 1.67  | 0.009547 | 0.005443 | 0.147873 | 0.101853 |
| MmugDNA.20247.1.S1_at   | MmugDNA.20247.1 | 11.72 | 10.45 | 0.75 | 0.2  | 2.42  | 0.058086 | 0.019642 | 0.298157 | 0.176149 |
| MmugDNA.20248.1.S1_at   | MmugDNA.20248.1 | 5.73  | 5.42  | 0.02 | 0.16 | 1.24  | 0.011929 | 0.029168 | 0.159288 | 0.212798 |
| MmugDNA.20249.1.S1_at   | MmugDNA.20249.1 | 10.15 | 9.84  | 0.14 | 0.08 | 1.24  | 0.043712 | 0.027744 | 0.266107 | 0.208003 |
| MmugDNA.2025.1.S1_at    | MmugDNA.2025.1  | 3.61  | 3.73  | 0.1  | 0.04 | -1.08 | 0.096876 | 0.102618 | 0.366938 | 0.362991 |
| MmugDNA.20250.1.S1_at   | MmugDNA.20250.1 | 2.94  | 2.78  | 0.09 | 0.07 | 1.12  | 0.132771 | 0.15609  | 0.416209 | 0.431551 |
| MmugDNA.20251.1.S1_at   | MmugDNA.20251.1 | 5.82  | 5.64  | 0.24 | 0.13 | 1.13  | 0.154237 | 0.001225 | 0.444562 | 0.054593 |
| MmugDNA.20252.1.S1_at   | MmugDNA.20252.1 | 10.42 | 10.3  | 0.24 | 0.39 | 1.08  | 0.336851 | 0.518889 | 0.617378 | 0.710789 |
| MmugDNA.20252.1.S1_x_at | MmugDNA.20252.1 | 10.47 | 10.28 | 0.26 | 0.42 | 1.15  | 0.270047 | 0.411274 | 0.562292 | 0.637991 |
| MmugDNA.20253.1.S1_at   | MmugDNA.20253.1 | 4.26  | 4.16  | 0.13 | 0.08 | 1.07  | 0.843036 | 0.159092 | 0.931219 | 0.435217 |
| MmugDNA.20254.1.S1_at   | MmugDNA.20254.1 | 4.78  | 4.58  | 0.03 | 0.09 | 1.15  | 0.069757 | 0.041582 | 0.322494 | 0.248831 |
| MmugDNA.20255.1.S1_at   | MmugDNA.20255.1 | 4.68  | 4.65  | 0.28 | 0.31 | 1.02  | 0.957754 | 0.93265  | 0.982604 | 0.961739 |
| MmugDNA.20256.1.S1_at   | MmugDNA.20256.1 | 9.57  | 10.92 | 0.53 | 0.25 | -2.55 | 0.023029 | 0.074097 | 0.204746 | 0.317745 |
| MmugDNA.20257.1.S1_at   | MmugDNA.20257.1 | 9.69  | 9.41  | 0.63 | 0.26 | 1.21  | 0.626614 | 0.051795 | 0.816168 | 0.273131 |
| MmugDNA.20258.1.S1_at   | MmugDNA.20258.1 | 2.95  | 2.9   | 0.31 | 0.07 | 1.04  | 0.261716 | 0.51157  | 0.555849 | 0.705677 |
| MmugDNA.20259.1.S1_at   | MmugDNA.20259.1 | 4.01  | 3.97  | 0.14 | 0.19 | 1.03  | 0.918175 | 0.458058 | 0.965131 | 0.671038 |
| MmugDNA.20260.1.S1_at   | MmugDNA.20260.1 | 5.88  | 6.05  | 0.26 | 0.05 | -1.13 | 0.512998 | 0.388381 | 0.743423 | 0.622797 |
| MmugDNA.20261.1.S1_at   | MmugDNA.20261.1 | 4.24  | 4.84  | 0.96 | 0.33 | -1.52 | 0.930667 | 0.771579 | 0.970849 | 0.86729  |
| MmugDNA.20262.1.S1_at   | MmugDNA.20262.1 | 3.16  | 3.03  | 0.07 | 0.03 | 1.1   | 0.022811 | 0.012777 | 0.204235 | 0.145663 |
| MmugDNA.20263.1.S1_at   | MmugDNA.20263.1 | 4.35  | 4.14  | 0.46 | 0.2  | 1.15  | 0.227608 | 0.284445 | 0.525712 | 0.546637 |
| MmugDNA.20264.1.S1_at   | MmugDNA.20264.1 | 3.6   | 3.47  | 0.26 | 0.14 | 1.09  | 0.787874 | 0.656272 | 0.903491 | 0.798992 |
| MmugDNA.20265.1.S1_at   | MmugDNA.20265.1 | 5.08  | 5.17  | 0.34 | 0.26 | -1.06 | 0.349135 | 0.292072 | 0.627023 | 0.552232 |
| MmugDNA.20266.1.S1_at   | MmugDNA.20266.1 | 3.65  | 3.7   | 0.22 | 0.05 | -1.03 | 0.775146 | 0.833097 | 0.897254 | 0.90427  |
| MmugDNA.20267.1.S1_at   | MmugDNA.20267.1 | 10.89 | 10.1  | 0.26 | 0.03 | 1.73  | 0.00514  | 0.005255 | 0.116966 | 0.100401 |
| MmugDNA.20267.1.S1_s_at | MmugDNA.20267.1 | 11.92 | 11.3  | 0.16 | 0.06 | 1.54  | 0.002043 | 0.001597 | 0.090054 | 0.060468 |
| MmugDNA.20268.1.S1_at   | MmugDNA.20268.1 | 5.97  | 5.93  | 0.17 | 0.1  | 1.03  | 0.676533 | 0.376946 | 0.84554  | 0.614678 |
| MmugDNA.20269.1.S1_at   | MmugDNA.20269.1 | 4.88  | 4.67  | 0.34 | 0.11 | 1.16  | 0.168514 | 0.260271 | 0.461844 | 0.526809 |
| MmugDNA.20270.1.S1_at   | MmugDNA.20270.1 | 4.85  | 4.92  | 0.99 | 0.11 | -1.05 | 0.851996 | 0.521309 | 0.93566  | 0.712346 |
| MmugDNA.20273.1.S1_at   | MmugDNA.20273.1 | 3.67  | 3.67  | 0.26 | 0.03 | -1    | 0.881364 | 0.982537 | 0.949601 | 0.99036  |
| MmugDNA.20274.1.S1_at   | MmugDNA.20274.1 | 3.58  | 3.58  | 0.15 | 0.05 | -1    | 0.295752 | 0.589968 | 0.584549 | 0.756034 |
| MmugDNA.20276.1.S1_at   | MmugDNA.20276.1 | 4.86  | 4.88  | 0.1  | 0.09 | -1.01 | 0.384251 | 0.627001 | 0.653292 | 0.780117 |
| MmugDNA.20279.1.S1_at   | MmugDNA.20279.1 | 3.85  | 3.67  | 0.7  | 0.8  | 1.13  | 0.55611  | 0.742226 | 0.771459 | 0.850683 |
| MmugDNA.2028.1.S1_at    | MmugDNA.2028.1  | 5.83  | 5.97  | 0.72 | 0.24 | -1.1  | 0.903409 | 0.109498 | 0.959069 | 0.373339 |

|                         |                 |       |       |      |      |       |          |          |          |          |
|-------------------------|-----------------|-------|-------|------|------|-------|----------|----------|----------|----------|
| MmugDNA.20280.1.S1_at   | MmugDNA.20280.1 | 11.95 | 12.11 | 0.2  | 0.15 | -1.12 | 0.810346 | 0.929438 | 0.915068 | 0.959707 |
| MmugDNA.20281.1.S1_at   | MmugDNA.20281.1 | 11.51 | 11.57 | 0.24 | 0.03 | -1.04 | 0.948361 | 0.84516  | 0.978363 | 0.911899 |
| MmugDNA.20282.1.S1_at   | MmugDNA.20282.1 | 4.94  | 5.09  | 0.08 | 0.1  | -1.1  | 0.109149 | 0.131601 | 0.384284 | 0.403716 |
| MmugDNA.20283.1.S1_at   | MmugDNA.20283.1 | 3.4   | 3.15  | 0.24 | 0.17 | 1.19  | 0.209811 | 0.197582 | 0.507187 | 0.472564 |
| MmugDNA.20284.1.S1_at   | MmugDNA.20284.1 | 8.6   | 8.08  | 0.14 | 0.16 | 1.44  | 0.020353 | 0.0655   | 0.196287 | 0.301415 |
| MmugDNA.39169.1.S1_at   | MmugDNA.39169.1 | 4.02  | 4.07  | 0.94 | 0.19 | -1.04 | 0.348454 | 0.446697 | 0.626378 | 0.662885 |
| MmugDNA.39169.1.S1_s_at | MmugDNA.39169.1 | 11.66 | 11.82 | 0.65 | 0.17 | -1.12 | 0.416041 | 0.428852 | 0.676531 | 0.650408 |
| MmugDNA.20286.1.S1_at   | MmugDNA.20286.1 | 4.31  | 4.14  | 0.09 | 0.14 | 1.12  | 0.060378 | 0.061406 | 0.302922 | 0.294656 |
| MmugDNA.20288.1.S1_at   | MmugDNA.20288.1 | 3.5   | 3.32  | 0.11 | 0.18 | 1.13  | 0.32688  | 0.403744 | 0.609778 | 0.632356 |
| MmugDNA.20289.1.S1_at   | MmugDNA.20289.1 | 7.06  | 7.11  | 0.07 | 0.07 | -1.03 | 0.224095 | 0.769879 | 0.522206 | 0.866376 |
| MmugDNA.20290.1.S1_at   | MmugDNA.20290.1 | 3.61  | 3.04  | 0.17 | 0.08 | 1.48  | 0.008275 | 0.005962 | 0.139959 | 0.105589 |
| MmugDNA.20293.1.S1_at   | MmugDNA.20293.1 | 6.68  | 6.87  | 0.11 | 0.02 | -1.14 | 0.060688 | 0.013497 | 0.303381 | 0.148777 |
| MmugDNA.20294.1.S1_at   | MmugDNA.20294.1 | 8.56  | 7.92  | 0.05 | 0.41 | 1.55  | 0.040395 | 0.084709 | 0.257321 | 0.336196 |
| MmugDNA.20296.1.S1_at   | MmugDNA.20296.1 | 11.15 | 11.05 | 0.03 | 0.07 | 1.07  | 0.08485  | 0.000581 | 0.34881  | 0.041459 |
| MmugDNA.20297.1.S1_at   | MmugDNA.20297.1 | 5.34  | 5.22  | 0.33 | 0.37 | 1.09  | 0.798066 | 0.654786 | 0.908855 | 0.798154 |
| MmugDNA.20298.1.S1_at   | MmugDNA.20298.1 | 5.5   | 4.66  | 0.56 | 0.34 | 1.78  | 0.074324 | 0.091339 | 0.330856 | 0.346281 |
| MmugDNA.203.1.S1_at     | MmugDNA.203.1   | 3.25  | 3.31  | 0.11 | 0.09 | -1.04 | 0.973872 | 0.558808 | 0.989501 | 0.735887 |
| MmugDNA.2030.1.S1_at    | MmugDNA.2030.1  | 6.56  | 6.5   | 0.07 | 0.15 | 1.04  | 0.507613 | 0.189781 | 0.739847 | 0.465403 |
| MmugDNA.20300.1.S1_at   | MmugDNA.20300.1 | 12.74 | 12.96 | 0.08 | 0.1  | -1.16 | 0.032519 | 0.565965 | 0.234691 | 0.740174 |
| MmugDNA.20301.1.S1_at   | MmugDNA.20301.1 | 4.14  | 4.29  | 0.48 | 0.16 | -1.11 | 0.670308 | 0.398684 | 0.841785 | 0.629458 |
| MmugDNA.20305.1.S1_at   | MmugDNA.20305.1 | 4.48  | 4.46  | 0.07 | 0.08 | 1.02  | 0.422579 | 0.303857 | 0.680692 | 0.561225 |
| MmugDNA.20307.1.S1_at   | MmugDNA.20307.1 | 3.27  | 3.26  | 0.07 | 0.06 | 1     | 0.964365 | 0.089846 | 0.985636 | 0.344058 |
| MmugDNA.20309.1.S1_at   | MmugDNA.20309.1 | 4.27  | 4.23  | 0.25 | 0.04 | 1.03  | 0.449635 | 0.452652 | 0.700971 | 0.667247 |
| MmugDNA.2031.1.S1_s_at  | MmugDNA.2031.1  | 11.19 | 11.13 | 0.1  | 0.23 | 1.04  | 0.1746   | 0.063815 | 0.468862 | 0.29906  |
| MmugDNA.20310.1.S1_at   | MmugDNA.20310.1 | 9.04  | 8.97  | 0.09 | 0.07 | 1.05  | 0.678972 | 0.015214 | 0.846873 | 0.156741 |
| MmugDNA.20312.1.S1_at   | MmugDNA.20312.1 | 8.04  | 8.12  | 0.29 | 0.15 | -1.05 | 0.423026 | 0.121079 | 0.681122 | 0.390082 |
| MmugDNA.20314.1.S1_at   | MmugDNA.20314.1 | 4.05  | 3.89  | 0.49 | 0.22 | 1.11  | 0.214567 | 0.300973 | 0.512196 | 0.559198 |
| MmugDNA.20315.1.S1_at   | MmugDNA.20315.1 | 5.09  | 5.04  | 0.32 | 0.03 | 1.03  | 0.827221 | 0.953744 | 0.923507 | 0.973663 |
| MmugDNA.20316.1.S1_at   | MmugDNA.20316.1 | 10.33 | 10.41 | 0.14 | 0.31 | -1.06 | 0.326681 | 0.318984 | 0.609643 | 0.571552 |
| MmugDNA.20317.1.S1_at   | MmugDNA.20317.1 | 10.69 | 10.43 | 0.1  | 0.14 | 1.2   | 0.039991 | 0.200384 | 0.256645 | 0.47478  |
| MmugDNA.20318.1.S1_at   | MmugDNA.20318.1 | 5.04  | 5.09  | 0.13 | 0.11 | -1.03 | 0.921506 | 0.63627  | 0.966402 | 0.786026 |
| MmugDNA.2032.1.S1_at    | MmugDNA.2032.1  | 8.11  | 8.4   | 0.77 | 0.19 | -1.23 | 0.902003 | 0.161418 | 0.958512 | 0.437604 |
| MmugDNA.20320.1.S1_at   | MmugDNA.20320.1 | 11.85 | 12.12 | 0.18 | 0.04 | -1.2  | 0.042104 | 0.059642 | 0.262198 | 0.290838 |
| MmugDNA.20322.1.S1_at   | MmugDNA.20322.1 | 5.55  | 5.44  | 0.2  | 0.2  | 1.07  | 0.553966 | 0.279086 | 0.770349 | 0.542782 |
| MmugDNA.20323.1.S1_at   | MmugDNA.20323.1 | 8.9   | 7.72  | 0.28 | 0.11 | 2.26  | 0.002557 | 0.000087 | 0.094709 | 0.027016 |
| MmugDNA.20324.1.S1_at   | MmugDNA.20324.1 | 7.65  | 8.47  | 0.31 | 0.52 | -1.77 | 0.114109 | 0.240205 | 0.390874 | 0.51084  |
| MmugDNA.20326.1.S1_at   | MmugDNA.20326.1 | 10.67 | 11.4  | 0.13 | 0.05 | -1.66 | 0.00122  | 0.000393 | 0.078414 | 0.037471 |
| MmugDNA.20329.1.S1_at   | MmugDNA.20329.1 | 5.72  | 5.72  | 0.04 | 0.11 | 1     | 0.505987 | 0.219431 | 0.738796 | 0.493156 |
| MmugDNA.2033.1.S1_at    | MmugDNA.2033.1  | 6.25  | 6.61  | 0.15 | 0.13 | -1.29 | 0.036557 | 0.136485 | 0.246142 | 0.408936 |
| MmugDNA.20330.1.S1_at   | MmugDNA.20330.1 | 5.04  | 4.98  | 0.15 | 0.06 | 1.04  | 0.50422  | 0.472963 | 0.737442 | 0.680272 |
| MmugDNA.20331.1.S1_at   | MmugDNA.20331.1 | 2.89  | 2.94  | 0.08 | 0.11 | -1.04 | 0.20455  | 0.265968 | 0.502251 | 0.531796 |
| MmugDNA.20332.1.S1_at   | MmugDNA.20332.1 | 3.51  | 3.51  | 0.23 | 0.09 | 1     | 0.582891 | 0.481906 | 0.787632 | 0.68685  |
| MmugDNA.20334.1.S1_at   | MmugDNA.20334.1 | 12.77 | 13.31 | 0.12 | 0.09 | -1.46 | 0.00338  | 0.021958 | 0.102989 | 0.185407 |

|                         |                 |       |       |      |      |       |          |          |          |          |
|-------------------------|-----------------|-------|-------|------|------|-------|----------|----------|----------|----------|
| MmugDNA.20335.1.S1_at   | MmugDNA.20335.1 | 5.15  | 5.14  | 0.11 | 0.03 | 1.01  | 0.810758 | 0.759983 | 0.91525  | 0.860514 |
| MmugDNA.20336.1.S1_at   | MmugDNA.20336.1 | 3.64  | 3.38  | 0.15 | 0.09 | 1.2   | 0.063827 | 0.106939 | 0.309173 | 0.369499 |
| MmugDNA.20337.1.S1_at   | MmugDNA.20337.1 | 6.51  | 7.25  | 1.09 | 0.25 | -1.67 | 0.997768 | 0.692296 | 0.999204 | 0.820975 |
| MmugDNA.20338.1.S1_at   | MmugDNA.20338.1 | 10.23 | 8.46  | 0.68 | 0.24 | 3.4   | 0.024671 | 0.136187 | 0.210126 | 0.408517 |
| MmugDNA.20339.1.S1_at   | MmugDNA.20339.1 | 8.32  | 8.15  | 0.17 | 0.3  | 1.12  | 0.476318 | 0.705892 | 0.718743 | 0.829555 |
| MmugDNA.2034.1.S1_at    | MmugDNA.2034.1  | 7.17  | 7.17  | 0.24 | 0.1  | 1     | 0.263063 | 0.557387 | 0.556852 | 0.735031 |
| MmugDNA.20340.1.S1_at   | MmugDNA.20340.1 | 3.04  | 2.92  | 0.19 | 0.12 | 1.08  | 0.247731 | 0.310608 | 0.543078 | 0.565787 |
| MmugDNA.20341.1.S1_at   | MmugDNA.20341.1 | 4.81  | 4.35  | 0.26 | 0.05 | 1.37  | 0.042271 | 0.211158 | 0.262598 | 0.485194 |
| MmugDNA.20343.1.S1_at   | MmugDNA.20343.1 | 4.99  | 4.89  | 0.2  | 0.2  | 1.07  | 0.55582  | 0.237234 | 0.771458 | 0.507954 |
| MmugDNA.20344.1.S1_at   | MmugDNA.20344.1 | 8.26  | 8.24  | 0.3  | 0.02 | 1.02  | 0.955164 | 0.868689 | 0.981605 | 0.925405 |
| MmugDNA.20345.1.S1_at   | MmugDNA.20345.1 | 4.75  | 4.75  | 0.32 | 0.25 | 1     | 0.923988 | 0.494089 | 0.967682 | 0.694663 |
| MmugDNA.20346.1.S1_at   | MmugDNA.20346.1 | 3.23  | 3.13  | 0.16 | 0.09 | 1.08  | 0.185908 | 0.239455 | 0.482074 | 0.510147 |
| MmugDNA.20347.1.S1_at   | MmugDNA.20347.1 | 3.56  | 3.39  | 0.03 | 0.16 | 1.12  | 0.203996 | 0.028438 | 0.501522 | 0.210443 |
| MmugDNA.2035.1.S1_at    | MmugDNA.2035.1  | 3.53  | 3.43  | 0.03 | 0.03 | 1.07  | 0.020798 | 0.472085 | 0.197815 | 0.679861 |
| MmugDNA.20351.1.S1_at   | MmugDNA.20351.1 | 5.8   | 5.93  | 0.12 | 0.14 | -1.09 | 0.637765 | 0.035747 | 0.822594 | 0.233437 |
| MmugDNA.20352.1.S1_at   | MmugDNA.20352.1 | 6.15  | 5.49  | 0.62 | 0.36 | 1.58  | 0.145135 | 0.209132 | 0.432453 | 0.482939 |
| MmugDNA.20353.1.S1_at   | MmugDNA.20353.1 | 7.6   | 7.95  | 0.02 | 0.07 | -1.27 | 0.000977 | 0.005136 | 0.076222 | 0.099462 |
| MmugDNA.20355.1.S1_at   | MmugDNA.20355.1 | 5.37  | 5.35  | 0.28 | 0.2  | 1.01  | 0.386083 | 0.180155 | 0.654597 | 0.456751 |
| MmugDNA.20356.1.S1_at   | MmugDNA.20356.1 | 7.78  | 7.16  | 0.17 | 0.17 | 1.54  | 0.006139 | 0.007251 | 0.12462  | 0.114309 |
| MmugDNA.2036.1.S1_at    | MmugDNA.2036.1  | 7.28  | 6.86  | 0.11 | 0.11 | 1.33  | 0.012021 | 0.394431 | 0.159649 | 0.626982 |
| MmugDNA.20360.1.S1_at   | MmugDNA.20360.1 | 4.93  | 4.81  | 0.11 | 0.03 | 1.09  | 0.092533 | 0.141379 | 0.360747 | 0.414874 |
| MmugDNA.20361.1.S1_at   | MmugDNA.20361.1 | 3.08  | 3.1   | 0.41 | 0.16 | -1.01 | 0.612538 | 0.81144  | 0.806905 | 0.891158 |
| MmugDNA.20363.1.S1_at   | MmugDNA.20363.1 | 5.7   | 5.84  | 0.23 | 0.11 | -1.1  | 0.405276 | 0.038445 | 0.668751 | 0.240974 |
| MmugDNA.25887.1.S1_s_at | MmugDNA.25887.1 | 12.07 | 12.28 | 0.07 | 0.01 | -1.15 | 0.007957 | 0.029567 | 0.138304 | 0.213618 |
| MmugDNA.20366.1.S1_at   | MmugDNA.20366.1 | 3.5   | 3.31  | 0.32 | 0.12 | 1.14  | 0.120235 | 0.134974 | 0.398635 | 0.406951 |
| MmugDNA.20367.1.S1_at   | MmugDNA.20367.1 | 3.81  | 3.78  | 0.03 | 0.07 | 1.02  | 0.86088  | 0.142194 | 0.939561 | 0.415754 |
| MmugDNA.20368.1.S1_at   | MmugDNA.20368.1 | 13.14 | 13.1  | 0.11 | 0.07 | 1.02  | 0.973494 | 0.560234 | 0.989336 | 0.736553 |
| MmugDNA.20369.1.S1_at   | MmugDNA.20369.1 | 3.89  | 3.78  | 0.13 | 0.06 | 1.08  | 0.314408 | 0.360537 | 0.599959 | 0.601613 |
| MmugDNA.2037.1.S1_at    | MmugDNA.2037.1  | 9.57  | 9.7   | 0.06 | 0.13 | -1.09 | 0.420854 | 0.080346 | 0.67979  | 0.327965 |
| MmugDNA.20370.1.S1_at   | MmugDNA.20370.1 | 3.84  | 3.82  | 0.06 | 0.2  | 1.01  | 0.627573 | 0.865105 | 0.816897 | 0.923484 |
| MmugDNA.20371.1.S1_at   | MmugDNA.20371.1 | 7.1   | 6.6   | 0.43 | 0.16 | 1.42  | 0.234122 | 0.369646 | 0.532201 | 0.608957 |
| MmugDNA.20372.1.S1_s_at | MmugDNA.20372.1 | 6.43  | 6.41  | 0.1  | 0.07 | 1.01  | 0.267687 | 0.070687 | 0.560446 | 0.312056 |
| MmugDNA.20374.1.S1_at   | MmugDNA.20374.1 | 6.45  | 5.12  | 0.63 | 0.35 | 2.52  | 0.01671  | 0.022172 | 0.182634 | 0.186409 |
| MmugDNA.20375.1.S1_at   | MmugDNA.20375.1 | 8.3   | 7.81  | 0.34 | 0.08 | 1.4   | 0.067687 | 0.256133 | 0.318012 | 0.524069 |
| MmugDNA.20376.1.S1_at   | MmugDNA.20376.1 | 5.46  | 5.36  | 0.12 | 0.11 | 1.07  | 0.950097 | 0.153726 | 0.979278 | 0.428413 |
| MmugDNA.20382.1.S1_at   | MmugDNA.20382.1 | 6.62  | 5.99  | 1.01 | 0.45 | 1.55  | 0.255218 | 0.289481 | 0.549665 | 0.550495 |
| MmugDNA.20383.1.S1_at   | MmugDNA.20383.1 | 8.53  | 8.02  | 0.49 | 0.15 | 1.42  | 0.076815 | 0.034663 | 0.335246 | 0.230352 |
| MmugDNA.20384.1.S1_at   | MmugDNA.20384.1 | 6.99  | 7.04  | 0.05 | 0.05 | -1.03 | 0.672679 | 0.85735  | 0.843341 | 0.918545 |
| MmugDNA.20385.1.S1_at   | MmugDNA.20385.1 | 5.12  | 5.5   | 0.26 | 0.21 | -1.3  | 0.109445 | 0.037467 | 0.384517 | 0.237837 |
| MmugDNA.20387.1.S1_at   | MmugDNA.20387.1 | 10.78 | 11.05 | 0.46 | 0.23 | -1.21 | 0.164591 | 0.483771 | 0.457706 | 0.688117 |
| MmugDNA.20388.1.S1_at   | MmugDNA.20388.1 | 3.5   | 3.48  | 0.21 | 0.12 | 1.02  | 0.615766 | 0.269278 | 0.809127 | 0.534534 |
| MmugDNA.20389.1.S1_at   | MmugDNA.20389.1 | 9.54  | 8.64  | 0.3  | 0.06 | 1.86  | 0.01534  | 0.013464 | 0.176072 | 0.148626 |
| MmugDNA.2039.1.S1_s_at  | MmugDNA.2039.1  | 5.88  | 6.43  | 0.17 | 0.26 | -1.46 | 0.050355 | 0.050328 | 0.282317 | 0.269595 |

|                         |                 |       |       |      |      |       |          |          |          |          |
|-------------------------|-----------------|-------|-------|------|------|-------|----------|----------|----------|----------|
| MmugDNA.20390.1.S1_at   | MmugDNA.20390.1 | 4.15  | 4.57  | 0.15 | 0.28 | -1.34 | 0.050434 | 0.10574  | 0.282391 | 0.367881 |
| MmugDNA.20391.1.S1_at   | MmugDNA.20391.1 | 4.23  | 4.26  | 0.06 | 0.01 | -1.02 | 0.759403 | 0.083563 | 0.889659 | 0.334152 |
| MmugDNA.20392.1.S1_at   | MmugDNA.20392.1 | 4.73  | 4.5   | 0.61 | 0.23 | 1.17  | 0.462688 | 0.570238 | 0.70975  | 0.743016 |
| MmugDNA.20393.1.S1_at   | MmugDNA.20393.1 | 5.49  | 5.18  | 0.39 | 0.09 | 1.24  | 0.432049 | 0.433948 | 0.687889 | 0.65412  |
| MmugDNA.20394.1.S1_at   | MmugDNA.20394.1 | 8.66  | 8.92  | 0.39 | 0.14 | -1.2  | 0.263316 | 0.117989 | 0.556921 | 0.385881 |
| MmugDNA.20395.1.S1_at   | MmugDNA.20395.1 | 6.02  | 5.77  | 0.1  | 0.03 | 1.19  | 0.041848 | 0.17101  | 0.261386 | 0.447561 |
| MmugDNA.20396.1.S1_at   | MmugDNA.20396.1 | 6.07  | 5.94  | 0.33 | 0.13 | 1.1   | 0.298113 | 0.471104 | 0.586518 | 0.679173 |
| MmugDNA.20398.1.S1_s_at | MmugDNA.20398.1 | 10.85 | 10.85 | 0.2  | 0.07 | -1    | 0.767403 | 0.981256 | 0.893274 | 0.989643 |
| MmugDNA.2040.1.S1_at    | MmugDNA.2040.1  | 6.13  | 5.91  | 0.34 | 0.17 | 1.17  | 0.358326 | 0.478895 | 0.634157 | 0.684774 |
| MmugDNA.2040.1.S1_s_at  | MmugDNA.2040.1  | 5.92  | 6.4   | 0.59 | 0.1  | -1.39 | 0.753775 | 0.225007 | 0.886502 | 0.49773  |
| MmugDNA.20400.1.S1_at   | MmugDNA.20400.1 | 6.58  | 6.55  | 0.04 | 0.27 | 1.02  | 0.901255 | 0.131564 | 0.958244 | 0.403665 |
| MmugDNA.20401.1.S1_at   | MmugDNA.20401.1 | 8.03  | 7.77  | 0.1  | 0.01 | 1.2   | 0.005924 | 0.151846 | 0.123442 | 0.42651  |
| MmugDNA.20402.1.S1_at   | MmugDNA.20402.1 | 3.73  | 3.61  | 0.1  | 0.22 | 1.09  | 0.292402 | 0.145959 | 0.581701 | 0.41997  |
| MmugDNA.20403.1.S1_at   | MmugDNA.20403.1 | 10.8  | 10.52 | 0.34 | 0.09 | 1.22  | 0.185882 | 0.139932 | 0.482073 | 0.413293 |
| MmugDNA.20404.1.S1_at   | MmugDNA.20404.1 | 10.71 | 9.78  | 0.17 | 0.17 | 1.9   | 0.003854 | 0.002866 | 0.107584 | 0.078799 |
| MmugDNA.20406.1.S1_at   | MmugDNA.20406.1 | 5.94  | 6.81  | 0.57 | 0.23 | -1.82 | 0.104472 | 0.121984 | 0.377773 | 0.391416 |
| MmugDNA.20407.1.S1_at   | MmugDNA.20407.1 | 11.86 | 11.08 | 0.36 | 0.21 | 1.72  | 0.047124 | 0.095152 | 0.274594 | 0.35218  |
| MmugDNA.20408.1.S1_at   | MmugDNA.20408.1 | 3.09  | 3.09  | 0.04 | 0.11 | 1     | 0.739    | 0.76761  | 0.879058 | 0.865109 |
| MmugDNA.20409.1.S1_at   | MmugDNA.20409.1 | 3.94  | 3.77  | 0.1  | 0.18 | 1.12  | 0.945843 | 0.377699 | 0.977159 | 0.615086 |
| MmugDNA.2041.1.S1_at    | MmugDNA.2041.1  | 5.41  | 4.9   | 0.77 | 0.22 | 1.43  | 0.296688 | 0.320601 | 0.585414 | 0.572702 |
| MmugDNA.2041.1.S1_s_at  | MmugDNA.2041.1  | 3.11  | 2.91  | 0.19 | 0.15 | 1.15  | 0.246872 | 0.223446 | 0.542566 | 0.496239 |
| MmugDNA.20410.1.S1_at   | MmugDNA.20410.1 | 5.48  | 5.17  | 0.18 | 0.08 | 1.24  | 0.095083 | 0.112405 | 0.364251 | 0.377784 |
| MmugDNA.20411.1.S1_at   | MmugDNA.20411.1 | 5.17  | 5.4   | 0.86 | 0.55 | -1.17 | 0.911108 | 0.859057 | 0.962223 | 0.919754 |
| MmugDNA.20412.1.S1_at   | MmugDNA.20412.1 | 4.17  | 4.18  | 0.3  | 0.1  | -1.01 | 0.296159 | 0.248086 | 0.584902 | 0.517567 |
| MmugDNA.20413.1.S1_s_at | MmugDNA.20413.1 | 11.7  | 11.25 | 0.08 | 0.06 | 1.37  | 0.001042 | 0.004937 | 0.076321 | 0.097906 |
| MmugDNA.20414.1.S1_at   | MmugDNA.20414.1 | 5.81  | 5.91  | 0.2  | 0.09 | -1.07 | 0.201197 | 0.341774 | 0.498709 | 0.587862 |
| MmugDNA.20417.1.S1_s_at | MmugDNA.20417.1 | 11.89 | 11.43 | 0.14 | 0.2  | 1.37  | 0.025153 | 0.004363 | 0.211649 | 0.092486 |
| MmugDNA.20419.1.S1_at   | MmugDNA.20419.1 | 12.07 | 11.72 | 0.12 | 0.04 | 1.27  | 0.019059 | 0.05603  | 0.191521 | 0.2826   |
| MmugDNA.2042.1.S1_at    | MmugDNA.2042.1  | 5.77  | 5.76  | 0.51 | 0.32 | 1.01  | 0.474762 | 0.666284 | 0.717662 | 0.804419 |
| MmugDNA.20422.1.S1_at   | MmugDNA.20422.1 | 7.92  | 7.85  | 0.19 | 0.07 | 1.05  | 0.138205 | 0.002168 | 0.423422 | 0.068824 |
| MmugDNA.20424.1.S1_at   | MmugDNA.20424.1 | 8.56  | 8.92  | 0.33 | 0.15 | -1.28 | 0.495571 | 0.11203  | 0.73183  | 0.377203 |
| MmugDNA.20426.1.S1_at   | MmugDNA.20426.1 | 5.71  | 5.8   | 1.27 | 0.16 | -1.06 | 0.918877 | 0.7816   | 0.965374 | 0.87341  |
| MmugDNA.20428.1.S1_at   | MmugDNA.20428.1 | 6.77  | 6.71  | 0.29 | 0.07 | 1.04  | 0.516056 | 0.432201 | 0.745613 | 0.652775 |
| MmugDNA.20429.1.S1_at   | MmugDNA.20429.1 | 3.45  | 3.32  | 0.1  | 0.06 | 1.09  | 0.114339 | 0.235923 | 0.391258 | 0.507056 |
| MmugDNA.2043.1.S1_at    | MmugDNA.2043.1  | 3.09  | 3.06  | 0.26 | 0.08 | 1.02  | 0.282711 | 0.428145 | 0.573338 | 0.649689 |
| MmugDNA.20431.1.S1_at   | MmugDNA.20431.1 | 7.1   | 7.08  | 0.27 | 0.03 | 1.02  | 0.738519 | 0.862017 | 0.878825 | 0.921585 |
| MmugDNA.20432.1.S1_at   | MmugDNA.20432.1 | 11.13 | 11.45 | 0.23 | 0.12 | -1.26 | 0.063558 | 0.000597 | 0.308742 | 0.041941 |
| MmugDNA.20433.1.S1_at   | MmugDNA.20433.1 | 7.43  | 6.42  | 0.05 | 0.34 | 2.02  | 0.006581 | 0.117398 | 0.127727 | 0.38505  |
| MmugDNA.20434.1.S1_at   | MmugDNA.20434.1 | 4.79  | 4.35  | 0.03 | 0.12 | 1.35  | 0.003783 | 0.030545 | 0.106813 | 0.216711 |
| MmugDNA.20435.1.S1_at   | MmugDNA.20435.1 | 6.07  | 6.23  | 1.02 | 0.05 | -1.12 | 0.529573 | 0.507365 | 0.75438  | 0.702917 |
| MmugDNA.20436.1.S1_at   | MmugDNA.20436.1 | 11.04 | 11.22 | 0.11 | 0.07 | -1.14 | 0.177024 | 0.211945 | 0.47162  | 0.48595  |
| MmugDNA.20437.1.S1_at   | MmugDNA.20437.1 | 5.12  | 5.13  | 0.22 | 0.18 | -1.01 | 0.388438 | 0.442065 | 0.65644  | 0.660148 |
| MmugDNA.20438.1.S1_at   | MmugDNA.20438.1 | 8.94  | 8.77  | 0.37 | 0.03 | 1.13  | 0.301439 | 0.360383 | 0.589355 | 0.601434 |

|                         |                 |       |       |      |      |       |          |          |          |          |
|-------------------------|-----------------|-------|-------|------|------|-------|----------|----------|----------|----------|
| MmugDNA.20439.1.S1_at   | MmugDNA.20439.1 | 3.93  | 3.92  | 0.58 | 0.29 | 1.01  | 0.501939 | 0.38414  | 0.735633 | 0.619927 |
| MmugDNA.20441.1.S1_at   | MmugDNA.20441.1 | 7.25  | 7.16  | 0.04 | 0.1  | 1.07  | 0.210326 | 0.020285 | 0.507935 | 0.178761 |
| MmugDNA.20443.1.S1_at   | MmugDNA.20443.1 | 3.1   | 3.05  | 0    | 0.07 | 1.03  | 0.191407 | 0.079066 | 0.487743 | 0.32614  |
| MmugDNA.20444.1.S1_at   | MmugDNA.20444.1 | 5.5   | 5.59  | 0.22 | 0.25 | -1.06 | 0.267571 | 0.675076 | 0.56038  | 0.810146 |
| MmugDNA.20445.1.S1_at   | MmugDNA.20445.1 | 9.8   | 10.6  | 0.95 | 0.08 | -1.75 | 0.07022  | 0.050148 | 0.323363 | 0.269087 |
| MmugDNA.20446.1.S1_at   | MmugDNA.20446.1 | 3.52  | 3.47  | 0.15 | 0.05 | 1.04  | 0.128952 | 0.184431 | 0.41116  | 0.460468 |
| MmugDNA.20448.1.S1_at   | MmugDNA.20448.1 | 9.47  | 9.11  | 0.2  | 0.21 | 1.29  | 0.096678 | 0.148888 | 0.366681 | 0.42326  |
| MmugDNA.2045.1.S1_at    | MmugDNA.2045.1  | 5.1   | 4.66  | 0.74 | 0.15 | 1.35  | 0.226536 | 0.208925 | 0.524344 | 0.482749 |
| MmugDNA.20450.1.S1_at   | MmugDNA.20450.1 | 7.93  | 7.78  | 0.22 | 0.06 | 1.11  | 0.160557 | 0.487799 | 0.452057 | 0.690669 |
| MmugDNA.20452.1.S1_at   | MmugDNA.20452.1 | 4     | 4     | 0.03 | 0.17 | 1     | 0.296789 | 0.293883 | 0.585504 | 0.553872 |
| MmugDNA.20456.1.S1_at   | MmugDNA.20456.1 | 13.1  | 13.13 | 0.26 | 0.15 | -1.02 | 0.56272  | 0.761514 | 0.775077 | 0.861416 |
| MmugDNA.20458.1.S1_at   | MmugDNA.20458.1 | 5.13  | 5.01  | 0.08 | 0.08 | 1.08  | 0.151509 | 0.104753 | 0.440961 | 0.366183 |
| MmugDNA.2046.1.S1_s_at  | MmugDNA.2046.1  | 12.04 | 12.51 | 0.09 | 0.03 | -1.39 | 0.000782 | 0.009196 | 0.072818 | 0.126573 |
| MmugDNA.20460.1.S1_at   | MmugDNA.20460.1 | 3.99  | 4     | 0.19 | 0.01 | -1    | 0.572096 | 0.910263 | 0.78032  | 0.949391 |
| MmugDNA.20461.1.S1_at   | MmugDNA.20461.1 | 5.38  | 4.88  | 0.39 | 0.09 | 1.42  | 0.14095  | 0.168733 | 0.426802 | 0.445379 |
| MmugDNA.20462.1.S1_at   | MmugDNA.20462.1 | 7.47  | 7.81  | 0.56 | 0.33 | -1.27 | 0.498718 | 0.668334 | 0.7339   | 0.805919 |
| MmugDNA.20463.1.S1_at   | MmugDNA.20463.1 | 7.5   | 7.63  | 0.27 | 0.04 | -1.1  | 0.596303 | 0.072106 | 0.795749 | 0.314595 |
| MmugDNA.20464.1.S1_at   | MmugDNA.20464.1 | 5.99  | 5.57  | 0.31 | 0.18 | 1.34  | 0.322167 | 0.290301 | 0.606295 | 0.551169 |
| MmugDNA.20466.1.S1_at   | MmugDNA.20466.1 | 4.49  | 4.62  | 0.24 | 0.15 | -1.1  | 0.866258 | 0.892752 | 0.942202 | 0.938818 |
| MmugDNA.20468.1.S1_at   | MmugDNA.20468.1 | 4.15  | 4.06  | 0.09 | 0.07 | 1.07  | 0.120551 | 0.199072 | 0.398904 | 0.473647 |
| MmugDNA.20469.1.S1_at   | MmugDNA.20469.1 | 8     | 7.96  | 0.28 | 0.03 | 1.03  | 0.283619 | 0.076401 | 0.573936 | 0.321372 |
| MmugDNA.2047.1.S1_at    | MmugDNA.2047.1  | 8.13  | 7.66  | 0.84 | 0.71 | 1.39  | 0.2272   | 0.317994 | 0.525206 | 0.571046 |
| MmugDNA.20471.1.S1_at   | MmugDNA.20471.1 | 12    | 11.98 | 0.21 | 0.09 | 1.01  | 0.911459 | 0.905898 | 0.962453 | 0.946748 |
| MmugDNA.20472.1.S1_at   | MmugDNA.20472.1 | 3.5   | 3.46  | 0.07 | 0    | 1.03  | 0.234125 | 0.161984 | 0.532201 | 0.438108 |
| MmugDNA.20472.1.S1_x_at | MmugDNA.20472.1 | 5.05  | 4.91  | 0.2  | 0.12 | 1.1   | 0.144903 | 0.064961 | 0.431932 | 0.300855 |
| MmugDNA.20474.1.S1_at   | MmugDNA.20474.1 | 3.77  | 3.73  | 0.15 | 0.11 | 1.03  | 0.158437 | 0.149018 | 0.449548 | 0.423337 |
| MmugDNA.20475.1.S1_at   | MmugDNA.20475.1 | 7.4   | 7.26  | 0.22 | 0.14 | 1.1   | 0.28346  | 0.529934 | 0.573857 | 0.71758  |
| MmugDNA.20476.1.S1_at   | MmugDNA.20476.1 | 4.45  | 5.01  | 0.12 | 0.16 | -1.47 | 0.009166 | 0.470095 | 0.145768 | 0.678572 |
| MmugDNA.20477.1.S1_at   | MmugDNA.20477.1 | 4.71  | 4.64  | 0.08 | 0.07 | 1.05  | 0.605096 | 0.374708 | 0.802237 | 0.613037 |
| MmugDNA.20478.1.S1_at   | MmugDNA.20478.1 | 11.41 | 11.21 | 0.17 | 0.06 | 1.15  | 0.11395  | 0.266743 | 0.390682 | 0.53241  |
| MmugDNA.20478.1.S1_s_at | MmugDNA.20478.1 | 12.59 | 12.47 | 0.13 | 0.04 | 1.08  | 0.058441 | 0.170371 | 0.298877 | 0.447103 |
| MmugDNA.20479.1.S1_at   | MmugDNA.20479.1 | 9.8   | 9.51  | 0.3  | 0.06 | 1.23  | 0.238829 | 0.291995 | 0.536032 | 0.552163 |
| MmugDNA.2048.1.S1_at    | MmugDNA.2048.1  | 6.06  | 6.3   | 1.22 | 0.17 | -1.18 | 0.711798 | 0.917861 | 0.864026 | 0.954026 |
| MmugDNA.20480.1.S1_at   | MmugDNA.20480.1 | 8.1   | 8.09  | 0.19 | 0.08 | 1     | 0.511884 | 0.428167 | 0.742815 | 0.649705 |
| MmugDNA.20481.1.S1_at   | MmugDNA.20481.1 | 7.64  | 7.47  | 0.83 | 0.29 | 1.12  | 0.316624 | 0.349126 | 0.601384 | 0.593178 |
| MmugDNA.20483.1.S1_at   | MmugDNA.20483.1 | 7.92  | 7.95  | 0.01 | 0.06 | -1.02 | 0.470529 | 0.737646 | 0.71497  | 0.848008 |
| MmugDNA.20484.1.S1_at   | MmugDNA.20484.1 | 5.97  | 6.17  | 0.17 | 0.12 | -1.15 | 0.712884 | 0.67887  | 0.864466 | 0.812474 |
| MmugDNA.20485.1.S1_at   | MmugDNA.20485.1 | 4.78  | 4.79  | 0.17 | 0.09 | -1    | 0.365257 | 0.301855 | 0.639887 | 0.559788 |
| MmugDNA.20486.1.S1_at   | MmugDNA.20486.1 | 4.8   | 4.98  | 0.14 | 0.16 | -1.14 | 0.185776 | 0.272734 | 0.481947 | 0.537479 |
| MmugDNA.20488.1.S1_at   | MmugDNA.20488.1 | 3.53  | 3.44  | 0.26 | 0.39 | 1.06  | 0.877853 | 0.867457 | 0.947831 | 0.924699 |
| MmugDNA.2049.1.S1_at    | MmugDNA.2049.1  | 5.84  | 5.82  | 0.04 | 0.13 | 1.02  | 0.860846 | 0.949178 | 0.939561 | 0.970886 |
| MmugDNA.20490.1.S1_at   | MmugDNA.20490.1 | 7.56  | 7.45  | 0.15 | 0.12 | 1.08  | 0.213691 | 0.212649 | 0.51163  | 0.48659  |
| MmugDNA.20491.1.S1_s_at | MmugDNA.20491.1 | 3.13  | 3.13  | 0.05 | 0.07 | -1.01 | 0.880564 | 0.820741 | 0.949245 | 0.896776 |

|                         |                 |       |       |      |      |       |          |          |          |          |
|-------------------------|-----------------|-------|-------|------|------|-------|----------|----------|----------|----------|
| MmugDNA.20495.1.S1_at   | MmugDNA.20495.1 | 7.42  | 4.69  | 0.66 | 0.72 | 6.66  | 0.016442 | 0.062284 | 0.181069 | 0.296416 |
| MmugDNA.20497.1.S1_at   | MmugDNA.20497.1 | 10.99 | 11.81 | 0.12 | 0.11 | -1.76 | 0.001246 | 0.007661 | 0.078631 | 0.117089 |
| MmugDNA.20498.1.S1_at   | MmugDNA.20498.1 | 3.59  | 3.26  | 0.43 | 0.45 | 1.26  | 0.776546 | 0.928765 | 0.897785 | 0.959449 |
| MmugDNA.20499.1.S1_at   | MmugDNA.20499.1 | 5.39  | 5.33  | 0.19 | 0.11 | 1.05  | 0.320947 | 0.37066  | 0.605315 | 0.609675 |
| MmugDNA.205.1.S1_at     | MmugDNA.205.1   | 5.48  | 5.62  | 0.32 | 0.12 | -1.1  | 0.708527 | 0.677898 | 0.861951 | 0.811841 |
| MmugDNA.20500.1.S1_at   | MmugDNA.20500.1 | 3.54  | 3.53  | 0.16 | 0.02 | 1.01  | 0.313972 | 0.365286 | 0.599734 | 0.605413 |
| MmugDNA.20501.1.S1_at   | MmugDNA.20501.1 | 10.54 | 10.93 | 0.11 | 0.12 | -1.31 | 0.015078 | 0.129447 | 0.174736 | 0.400867 |
| MmugDNA.20502.1.S1_at   | MmugDNA.20502.1 | 5.17  | 5.09  | 0.07 | 0.09 | 1.06  | 0.539336 | 0.041699 | 0.760725 | 0.24887  |
| MmugDNA.20503.1.S1_at   | MmugDNA.20503.1 | 5.32  | 5.33  | 0.12 | 0.1  | -1.01 | 0.717073 | 0.71694  | 0.866435 | 0.836151 |
| MmugDNA.20504.1.S1_at   | MmugDNA.20504.1 | 9.27  | 9.36  | 1.12 | 0.17 | -1.06 | 0.550775 | 0.375017 | 0.76811  | 0.613186 |
| MmugDNA.20506.1.S1_at   | MmugDNA.20506.1 | 10.29 | 10.2  | 0.15 | 0.16 | 1.06  | 0.530494 | 0.683007 | 0.755063 | 0.815061 |
| MmugDNA.20507.1.S1_at   | MmugDNA.20507.1 | 7.39  | 8.28  | 0.77 | 0.75 | -1.85 | 0.189311 | 0.000361 | 0.485819 | 0.037273 |
| MmugDNA.20508.1.S1_at   | MmugDNA.20508.1 | 2.96  | 3.01  | 0.11 | 0.01 | -1.03 | 0.577179 | 0.386709 | 0.783459 | 0.62187  |
| MmugDNA.20509.1.S1_at   | MmugDNA.20509.1 | 3.73  | 3.74  | 0.13 | 0.16 | -1.01 | 0.524652 | 0.819103 | 0.751482 | 0.895759 |
| MmugDNA.2051.1.S1_at    | MmugDNA.2051.1  | 5.89  | 5.89  | 0.04 | 0.1  | 1     | 0.320386 | 0.744862 | 0.60498  | 0.852198 |
| MmugDNA.20510.1.S1_at   | MmugDNA.20510.1 | 5.4   | 5.13  | 0.69 | 0.25 | 1.2   | 0.409604 | 0.427956 | 0.671953 | 0.649602 |
| MmugDNA.20511.1.S1_at   | MmugDNA.20511.1 | 3.33  | 3.32  | 0    | 0.01 | 1     | 0.200016 | 0.407971 | 0.497566 | 0.635339 |
| MmugDNA.20513.1.S1_at   | MmugDNA.20513.1 | 5.73  | 6.72  | 1.79 | 0.08 | -1.98 | 0.977176 | 0.339823 | 0.991068 | 0.586394 |
| MmugDNA.20514.1.S1_at   | MmugDNA.20514.1 | 5.94  | 5.96  | 0.37 | 0.07 | -1.02 | 0.435086 | 0.524506 | 0.690268 | 0.714395 |
| MmugDNA.20515.1.S1_at   | MmugDNA.20515.1 | 4.67  | 4.87  | 0.07 | 0.1  | -1.14 | 0.102961 | 0.119999 | 0.375587 | 0.388672 |
| MmugDNA.20517.1.S1_at   | MmugDNA.20517.1 | 6.48  | 6.39  | 0.08 | 0.06 | 1.07  | 0.320961 | 0.040347 | 0.605315 | 0.245984 |
| MmugDNA.20519.1.S1_at   | MmugDNA.20519.1 | 7.25  | 7.34  | 0.37 | 0.34 | -1.06 | 0.160776 | 0.041665 | 0.452392 | 0.24887  |
| MmugDNA.2052.1.S1_at    | MmugDNA.2052.1  | 4.62  | 4.75  | 0.35 | 0.06 | -1.09 | 0.570506 | 0.29353  | 0.779323 | 0.553502 |
| MmugDNA.20522.1.S1_at   | MmugDNA.20522.1 | 5.72  | 5.79  | 0.16 | 0.03 | -1.05 | 0.680914 | 0.791294 | 0.847795 | 0.879433 |
| MmugDNA.20523.1.S1_at   | MmugDNA.20523.1 | 6.5   | 6.4   | 0.41 | 0.12 | 1.07  | 0.56751  | 0.424049 | 0.77779  | 0.646666 |
| MmugDNA.20523.1.S1_s_at | MmugDNA.20523.1 | 7.41  | 7.78  | 0.18 | 0.29 | -1.29 | 0.139305 | 0.050729 | 0.424942 | 0.270368 |
| MmugDNA.20524.1.S1_at   | MmugDNA.20524.1 | 3.32  | 3.18  | 0.09 | 0.03 | 1.1   | 0.079779 | 0.327241 | 0.339935 | 0.577173 |
| MmugDNA.20525.1.S1_at   | MmugDNA.20525.1 | 11.8  | 11.33 | 0.15 | 0.14 | 1.38  | 0.031001 | 0.071987 | 0.229092 | 0.314305 |
| MmugDNA.20526.1.S1_at   | MmugDNA.20526.1 | 5.88  | 5.38  | 0.26 | 0.21 | 1.42  | 0.063752 | 0.117359 | 0.308957 | 0.384998 |
| MmugDNA.20527.1.S1_at   | MmugDNA.20527.1 | 4.16  | 4.18  | 0.29 | 0.05 | -1.02 | 0.522515 | 0.752468 | 0.749811 | 0.855897 |
| MmugDNA.20528.1.S1_at   | MmugDNA.20528.1 | 4.92  | 5.27  | 0.34 | 0.09 | -1.27 | 0.212695 | 0.03782  | 0.510678 | 0.238869 |
| MmugDNA.20529.1.S1_at   | MmugDNA.20529.1 | 5.87  | 6.27  | 0.64 | 0.37 | -1.32 | 0.481979 | 0.285287 | 0.722245 | 0.547192 |
| MmugDNA.2053.1.S1_at    | MmugDNA.2053.1  | 4.21  | 4.18  | 0.14 | 0.04 | 1.02  | 0.971721 | 0.641682 | 0.988595 | 0.789672 |
| MmugDNA.20530.1.S1_at   | MmugDNA.20530.1 | 2.86  | 2.81  | 0.03 | 0.06 | 1.03  | 0.878938 | 0.079887 | 0.948422 | 0.327207 |
| MmugDNA.20531.1.S1_at   | MmugDNA.20531.1 | 5.38  | 5.18  | 0.33 | 0.14 | 1.15  | 0.354217 | 0.449547 | 0.631413 | 0.665113 |
| MmugDNA.20532.1.S1_at   | MmugDNA.20532.1 | 9.74  | 9.45  | 0.19 | 0.15 | 1.22  | 0.081391 | 0.240503 | 0.342343 | 0.511123 |
| MmugDNA.20533.1.S1_at   | MmugDNA.20533.1 | 4.96  | 5.28  | 1.63 | 0.61 | -1.25 | 0.919428 | 0.970023 | 0.965499 | 0.983605 |
| MmugDNA.20534.1.S1_at   | MmugDNA.20534.1 | 11.55 | 11.21 | 0.11 | 0.06 | 1.26  | 0.009706 | 0.000209 | 0.148419 | 0.032262 |
| MmugDNA.20536.1.S1_at   | MmugDNA.20536.1 | 9.56  | 9.43  | 0.23 | 0.17 | 1.1   | 0.386395 | 0.06242  | 0.654871 | 0.296669 |
| MmugDNA.20537.1.S1_at   | MmugDNA.20537.1 | 11.02 | 10.33 | 0.24 | 0.15 | 1.61  | 0.015202 | 0.058719 | 0.175349 | 0.289005 |
| MmugDNA.20538.1.S1_at   | MmugDNA.20538.1 | 5.56  | 4.83  | 0.52 | 0.15 | 1.66  | 0.101309 | 0.16445  | 0.372655 | 0.440678 |
| MmugDNA.20539.1.S1_at   | MmugDNA.20539.1 | 4.5   | 4.31  | 0.22 | 0.04 | 1.14  | 0.07147  | 0.104808 | 0.325377 | 0.366313 |
| MmugDNA.20541.1.S1_at   | MmugDNA.20541.1 | 4.18  | 3.83  | 0.25 | 0.05 | 1.28  | 0.228235 | 0.546429 | 0.526425 | 0.728034 |

|                         |                 |       |       |      |      |       |          |          |          |          |
|-------------------------|-----------------|-------|-------|------|------|-------|----------|----------|----------|----------|
| MmugDNA.20543.1.S1_at   | MmugDNA.20543.1 | 3.31  | 3.12  | 0.33 | 0.18 | 1.14  | 0.296267 | 0.316945 | 0.584998 | 0.570275 |
| MmugDNA.20544.1.S1_at   | MmugDNA.20544.1 | 6.3   | 6.21  | 0.37 | 0.09 | 1.06  | 0.324095 | 0.391115 | 0.607806 | 0.624833 |
| MmugDNA.20545.1.S1_s_at | MmugDNA.20545.1 | 5.62  | 5.57  | 0.1  | 0.07 | 1.03  | 0.642004 | 0.320855 | 0.825362 | 0.572849 |
| MmugDNA.20546.1.S1_at   | MmugDNA.20546.1 | 4.5   | 4.46  | 0.74 | 0.06 | 1.03  | 0.365508 | 0.432235 | 0.639969 | 0.652776 |
| MmugDNA.20547.1.S1_at   | MmugDNA.20547.1 | 7.35  | 8.03  | 0.36 | 0.24 | -1.6  | 0.033533 | 0.348908 | 0.237037 | 0.592939 |
| MmugDNA.20548.1.S1_at   | MmugDNA.20548.1 | 4.67  | 5.27  | 0.21 | 0.35 | -1.51 | 0.061265 | 0.025987 | 0.304306 | 0.202122 |
| MmugDNA.20550.1.S1_at   | MmugDNA.20550.1 | 4.67  | 4.49  | 0.2  | 0.09 | 1.13  | 0.285623 | 0.190812 | 0.575349 | 0.466228 |
| MmugDNA.20551.1.S1_at   | MmugDNA.20551.1 | 9.7   | 9.99  | 0.17 | 0.13 | -1.22 | 0.088102 | 0.768754 | 0.354244 | 0.865653 |
| MmugDNA.20552.1.S1_at   | MmugDNA.20552.1 | 6.08  | 5.99  | 0.19 | 0.06 | 1.06  | 0.373627 | 0.318217 | 0.645118 | 0.571088 |
| MmugDNA.20553.1.S1_at   | MmugDNA.20553.1 | 10.64 | 10.85 | 0.15 | 0.18 | -1.16 | 0.376406 | 0.442389 | 0.647133 | 0.660386 |
| MmugDNA.20554.1.S1_at   | MmugDNA.20554.1 | 6.44  | 7.96  | 1.06 | 0.19 | -2.87 | 0.088299 | 0.364915 | 0.354408 | 0.60517  |
| MmugDNA.20555.1.S1_at   | MmugDNA.20555.1 | 5.05  | 5.06  | 0.22 | 0.12 | -1.01 | 0.652093 | 0.825589 | 0.831092 | 0.89978  |
| MmugDNA.20556.1.S1_at   | MmugDNA.20556.1 | 7.42  | 7.46  | 0.09 | 0.48 | -1.03 | 0.87002  | 0.628759 | 0.944117 | 0.781403 |
| MmugDNA.20557.1.S1_at   | MmugDNA.20557.1 | 9.85  | 9.72  | 0.45 | 0.1  | 1.09  | 0.536625 | 0.324507 | 0.759061 | 0.57507  |
| MmugDNA.20558.1.S1_at   | MmugDNA.20558.1 | 5.98  | 6.8   | 0.07 | 0.37 | -1.76 | 0.050612 | 0.532331 | 0.282692 | 0.719017 |
| MmugDNA.20559.1.S1_at   | MmugDNA.20559.1 | 11.54 | 11.25 | 0.11 | 0.03 | 1.22  | 0.004927 | 0.001689 | 0.115175 | 0.062186 |
| MmugDNA.2056.1.S1_at    | MmugDNA.2056.1  | 3.79  | 3.72  | 0.14 | 0.09 | 1.05  | 0.497777 | 0.814377 | 0.73333  | 0.892923 |
| MmugDNA.20562.1.S1_at   | MmugDNA.20562.1 | 3.9   | 3.44  | 0.72 | 0.22 | 1.38  | 0.264821 | 0.401202 | 0.557962 | 0.630823 |
| MmugDNA.20563.1.S1_at   | MmugDNA.20563.1 | 8.87  | 8.95  | 0.38 | 0.06 | -1.06 | 0.478947 | 0.618967 | 0.720389 | 0.774229 |
| MmugDNA.20564.1.S1_s_at | MmugDNA.20564.1 | 10.9  | 10.94 | 0.06 | 0.07 | -1.03 | 0.086363 | 0.163672 | 0.351199 | 0.439841 |
| MmugDNA.20565.1.S1_at   | MmugDNA.20565.1 | 8.1   | 7.75  | 0.27 | 0.13 | 1.27  | 0.042108 | 0.004393 | 0.262198 | 0.092744 |
| MmugDNA.20566.1.S1_at   | MmugDNA.20566.1 | 4.15  | 4.22  | 0.39 | 0.12 | -1.05 | 0.849241 | 0.747553 | 0.934333 | 0.853168 |
| MmugDNA.20567.1.S1_at   | MmugDNA.20567.1 | 9.11  | 8.92  | 0.13 | 0.06 | 1.14  | 0.12761  | 0.470722 | 0.409544 | 0.67902  |
| MmugDNA.20568.1.S1_s_at | MmugDNA.20568.1 | 3.44  | 3.26  | 0.28 | 0.22 | 1.13  | 0.188822 | 0.500863 | 0.485415 | 0.699296 |
| MmugDNA.20569.1.S1_at   | MmugDNA.20569.1 | 5.09  | 6.55  | 0.44 | 0.26 | -2.75 | 0.008316 | 0.012586 | 0.140121 | 0.144644 |
| MmugDNA.2057.1.S1_at    | MmugDNA.2057.1  | 4.91  | 4.9   | 0.06 | 0.11 | 1.01  | 0.627084 | 0.071047 | 0.816643 | 0.312704 |
| MmugDNA.20571.1.S1_at   | MmugDNA.20571.1 | 6.62  | 6.11  | 0.52 | 0.24 | 1.42  | 0.343625 | 0.477736 | 0.622989 | 0.683745 |
| MmugDNA.20572.1.S1_at   | MmugDNA.20572.1 | 9.51  | 8.82  | 0.36 | 0.41 | 1.62  | 0.061372 | 0.09241  | 0.304438 | 0.348296 |
| MmugDNA.20575.1.S1_at   | MmugDNA.20575.1 | 4.52  | 5.15  | 0.52 | 0.12 | -1.55 | 0.406361 | 0.561515 | 0.669705 | 0.737449 |
| MmugDNA.20576.1.S1_at   | MmugDNA.20576.1 | 4.9   | 5     | 0.17 | 0.14 | -1.07 | 0.560342 | 0.855925 | 0.773816 | 0.917744 |
| MmugDNA.20578.1.S1_at   | MmugDNA.20578.1 | 4.64  | 4.62  | 0.32 | 0.21 | 1.01  | 0.41907  | 0.484314 | 0.678626 | 0.688463 |
| MmugDNA.20579.1.S1_at   | MmugDNA.20579.1 | 9.19  | 9.46  | 0.27 | 0.02 | -1.21 | 0.248365 | 0.398036 | 0.54379  | 0.629138 |
| MmugDNA.2058.1.S1_at    | MmugDNA.2058.1  | 13.16 | 13.05 | 0.08 | 0.08 | 1.08  | 0.398945 | 0.576784 | 0.664488 | 0.747419 |
| MmugDNA.2058.1.S1_s_at  | MmugDNA.2058.1  | 13.27 | 13.24 | 0.04 | 0.05 | 1.02  | 0.238356 | 0.473751 | 0.53577  | 0.68101  |
| MmugDNA.20580.1.S1_at   | MmugDNA.20580.1 | 8.3   | 6.87  | 0.19 | 0.15 | 2.69  | 0.000669 | 0.081238 | 0.071248 | 0.329351 |
| MmugDNA.20582.1.S1_at   | MmugDNA.20582.1 | 6.13  | 6.44  | 0.36 | 1.39 | -1.24 | 0.340747 | 0.004613 | 0.620859 | 0.094882 |
| MmugDNA.20583.1.S1_at   | MmugDNA.20583.1 | 4.92  | 4.61  | 0.36 | 0.2  | 1.24  | 0.266507 | 0.286844 | 0.558859 | 0.548162 |
| MmugDNA.20584.1.S1_at   | MmugDNA.20584.1 | 6.36  | 6.36  | 0.11 | 0.03 | -1    | 0.51694  | 0.675318 | 0.746178 | 0.81026  |
| MmugDNA.20585.1.S1_s_at | MmugDNA.20585.1 | 7.89  | 8.18  | 0.19 | 0.1  | -1.22 | 0.379515 | 0.007329 | 0.649328 | 0.115015 |
| MmugDNA.20587.1.S1_at   | MmugDNA.20587.1 | 5.11  | 4.87  | 0.21 | 0.13 | 1.19  | 0.732544 | 0.623866 | 0.875097 | 0.778232 |
| MmugDNA.20589.1.S1_at   | MmugDNA.20589.1 | 7.89  | 7.8   | 0.13 | 0.03 | 1.06  | 0.27356  | 0.308945 | 0.565699 | 0.564656 |
| MmugDNA.2059.1.S1_at    | MmugDNA.2059.1  | 4.32  | 4.31  | 0.08 | 0.14 | 1     | 0.491426 | 0.199711 | 0.729201 | 0.474335 |
| MmugDNA.20590.1.S1_at   | MmugDNA.20590.1 | 7.28  | 7.17  | 0.14 | 0.16 | 1.08  | 0.484178 | 0.048032 | 0.724135 | 0.264118 |

|                         |                 |       |       |      |      |       |          |          |          |          |
|-------------------------|-----------------|-------|-------|------|------|-------|----------|----------|----------|----------|
| MmugDNA.20591.1.S1_at   | MmugDNA.20591.1 | 4.3   | 4.74  | 0.69 | 0.16 | -1.36 | 0.757874 | 0.520551 | 0.888951 | 0.711831 |
| MmugDNA.20592.1.S1_at   | MmugDNA.20592.1 | 6.85  | 6.72  | 0.5  | 0.05 | 1.1   | 0.930819 | 0.353537 | 0.97089  | 0.596602 |
| MmugDNA.20593.1.S1_at   | MmugDNA.20593.1 | 5.89  | 5.69  | 0.14 | 0.11 | 1.15  | 0.120401 | 0.153302 | 0.398818 | 0.428139 |
| MmugDNA.20594.1.S1_at   | MmugDNA.20594.1 | 7.35  | 7.15  | 0.07 | 0.05 | 1.15  | 0.01309  | 0.027163 | 0.165061 | 0.205893 |
| MmugDNA.20595.1.S1_at   | MmugDNA.20595.1 | 3.63  | 3.38  | 0.01 | 0.11 | 1.18  | 0.054442 | 0.039329 | 0.290603 | 0.243406 |
| MmugDNA.20596.1.S1_s_at | MmugDNA.20596.1 | 3.73  | 4.11  | 0.13 | 0.22 | -1.29 | 0.070898 | 0.063481 | 0.324334 | 0.298441 |
| MmugDNA.20597.1.S1_at   | MmugDNA.20597.1 | 8.01  | 7.8   | 0.27 | 0.1  | 1.16  | 0.489595 | 0.291996 | 0.727852 | 0.552163 |
| MmugDNA.20599.1.S1_at   | MmugDNA.20599.1 | 10.81 | 10.94 | 0.09 | 0.12 | -1.09 | 0.303255 | 0.002923 | 0.590656 | 0.079414 |
| MmugDNA.206.1.S1_at     | MmugDNA.206.1   | 2.64  | 2.64  | 0.01 | 0.02 | 1     | 0.253056 | 0.448922 | 0.547557 | 0.664695 |
| MmugDNA.2060.1.S1_at    | MmugDNA.2060.1  | 5.15  | 5.24  | 0.24 | 0.13 | -1.06 | 0.61073  | 0.043742 | 0.805939 | 0.253863 |
| MmugDNA.20600.1.S1_at   | MmugDNA.20600.1 | 8.6   | 8.72  | 0.22 | 0.15 | -1.09 | 0.427508 | 0.264305 | 0.684792 | 0.530366 |
| MmugDNA.20603.1.S1_at   | MmugDNA.20603.1 | 5.35  | 5.44  | 0.16 | 0.07 | -1.06 | 0.443415 | 0.759692 | 0.696554 | 0.860313 |
| MmugDNA.20605.1.S1_at   | MmugDNA.20605.1 | 5.26  | 5.25  | 0.18 | 0.31 | 1.01  | 0.989914 | 0.817318 | 0.996442 | 0.89464  |
| MmugDNA.20606.1.S1_at   | MmugDNA.20606.1 | 6.81  | 6.64  | 0.05 | 0.12 | 1.12  | 0.095272 | 0.054127 | 0.364719 | 0.277968 |
| MmugDNA.20607.1.S1_at   | MmugDNA.20607.1 | 4.61  | 4.5   | 0.43 | 0.02 | 1.08  | 0.592458 | 0.396868 | 0.793461 | 0.62846  |
| MmugDNA.20608.1.S1_at   | MmugDNA.20608.1 | 8.99  | 8.83  | 0.28 | 0.14 | 1.12  | 0.713576 | 0.09472  | 0.864722 | 0.351535 |
| MmugDNA.20609.1.S1_at   | MmugDNA.20609.1 | 7.5   | 6.94  | 0.38 | 0.13 | 1.47  | 0.072819 | 0.22139  | 0.327658 | 0.494644 |
| MmugDNA.2061.1.S1_at    | MmugDNA.2061.1  | 6.63  | 6.77  | 0.17 | 0.19 | -1.1  | 0.915254 | 0.966746 | 0.963939 | 0.981494 |
| MmugDNA.20613.1.S1_at   | MmugDNA.20613.1 | 10.81 | 10.88 | 0.12 | 0.15 | -1.05 | 0.571829 | 0.001594 | 0.780082 | 0.06044  |
| MmugDNA.20614.1.S1_at   | MmugDNA.20614.1 | 4.37  | 4.66  | 0.3  | 0.31 | -1.22 | 0.129789 | 0.162056 | 0.412052 | 0.43817  |
| MmugDNA.20615.1.S1_at   | MmugDNA.20615.1 | 9.38  | 9.67  | 0.68 | 0.08 | -1.22 | 0.788885 | 0.84297  | 0.904019 | 0.910558 |
| MmugDNA.20617.1.S1_at   | MmugDNA.20617.1 | 3.73  | 3.78  | 1.06 | 0.56 | -1.03 | 0.743807 | 0.630622 | 0.881384 | 0.782345 |
| MmugDNA.20618.1.S1_s_at | MmugDNA.20618.1 | 10.15 | 10.04 | 0.03 | 0.07 | 1.08  | 0.024633 | 0.631672 | 0.210005 | 0.782925 |
| MmugDNA.20619.1.S1_at   | MmugDNA.20619.1 | 7.57  | 7.67  | 0.13 | 0.04 | -1.07 | 0.757247 | 0.258704 | 0.88859  | 0.525949 |
| MmugDNA.20619.1.S1_x_at | MmugDNA.20619.1 | 7.1   | 7.39  | 0.16 | 0.13 | -1.22 | 0.164803 | 0.171077 | 0.457897 | 0.447611 |
| MmugDNA.2062.1.S1_at    | MmugDNA.2062.1  | 3.37  | 3.33  | 0.2  | 0.05 | 1.03  | 0.763029 | 0.91774  | 0.891457 | 0.954011 |
| MmugDNA.20620.1.S1_at   | MmugDNA.20620.1 | 8.52  | 7.88  | 0.06 | 0.12 | 1.56  | 0.002045 | 0.134401 | 0.090054 | 0.406603 |
| MmugDNA.20621.1.S1_at   | MmugDNA.20621.1 | 4.49  | 4.48  | 0.06 | 0.09 | 1     | 0.341803 | 0.850312 | 0.621589 | 0.914874 |
| MmugDNA.20622.1.S1_at   | MmugDNA.20622.1 | 5.88  | 5.68  | 0.15 | 0.04 | 1.15  | 0.111087 | 0.256143 | 0.386863 | 0.524069 |
| MmugDNA.20623.1.S1_at   | MmugDNA.20623.1 | 2.7   | 2.66  | 0.04 | 0.02 | 1.03  | 0.128366 | 0.789792 | 0.410302 | 0.878553 |
| MmugDNA.20624.1.S1_at   | MmugDNA.20624.1 | 5.13  | 5.05  | 0.17 | 0.77 | 1.06  | 0.687812 | 0.19693  | 0.850912 | 0.472072 |
| MmugDNA.20625.1.S1_at   | MmugDNA.20625.1 | 3.02  | 2.95  | 0.07 | 0.06 | 1.05  | 0.488984 | 0.675929 | 0.727476 | 0.810621 |
| MmugDNA.20626.1.S1_at   | MmugDNA.20626.1 | 6.11  | 6.22  | 0.48 | 0.06 | -1.08 | 0.993239 | 0.344043 | 0.997379 | 0.58962  |
| MmugDNA.20627.1.S1_at   | MmugDNA.20627.1 | 6.99  | 6.84  | 0.25 | 0.1  | 1.11  | 0.465709 | 0.724867 | 0.711655 | 0.840716 |
| MmugDNA.20628.1.S1_at   | MmugDNA.20628.1 | 11    | 11.06 | 0.23 | 0.01 | -1.05 | 0.664913 | 0.80741  | 0.838857 | 0.889121 |
| MmugDNA.20629.1.S1_at   | MmugDNA.20629.1 | 4.7   | 4.69  | 0.03 | 0.13 | 1.01  | 0.856164 | 0.131725 | 0.937374 | 0.403854 |
| MmugDNA.20630.1.S1_at   | MmugDNA.20630.1 | 10.69 | 10.96 | 0.16 | 0.19 | -1.2  | 0.123207 | 0.22473  | 0.402406 | 0.497614 |
| MmugDNA.20631.1.S1_at   | MmugDNA.20631.1 | 6.91  | 6.95  | 0.16 | 0.25 | -1.03 | 0.369286 | 0.519473 | 0.642815 | 0.711062 |
| MmugDNA.20632.1.S1_at   | MmugDNA.20632.1 | 3.55  | 3.84  | 0.1  | 0.36 | -1.22 | 0.287543 | 0.425845 | 0.577456 | 0.6481   |
| MmugDNA.20633.1.S1_at   | MmugDNA.20633.1 | 9.35  | 8.45  | 0.4  | 0.27 | 1.87  | 0.0793   | 0.098308 | 0.339255 | 0.356377 |
| MmugDNA.20634.1.S1_at   | MmugDNA.20634.1 | 7.08  | 7.2   | 0.06 | 0.06 | -1.08 | 0.070834 | 0.20987  | 0.324317 | 0.483643 |
| MmugDNA.20635.1.S1_at   | MmugDNA.20635.1 | 5.23  | 4.95  | 0.15 | 0.32 | 1.21  | 0.088005 | 0.107911 | 0.354244 | 0.370945 |
| MmugDNA.20637.1.S1_at   | MmugDNA.20637.1 | 5.26  | 5.2   | 0.02 | 0.07 | 1.05  | 0.137995 | 0.223324 | 0.423144 | 0.49612  |



|                         |                 |       |       |      |      |       |          |          |          |          |
|-------------------------|-----------------|-------|-------|------|------|-------|----------|----------|----------|----------|
| MmugDNA.20638.1.S1_at   | MmugDNA.20638.1 | 3.73  | 3.54  | 0.22 | 0.08 | 1.14  | 0.105289 | 0.272102 | 0.379187 | 0.536923 |
| MmugDNA.20639.1.S1_at   | MmugDNA.20639.1 | 6.64  | 6.71  | 0.08 | 0.04 | -1.05 | 0.47629  | 0.729393 | 0.718743 | 0.843541 |
| MmugDNA.2064.1.S1_at    | MmugDNA.2064.1  | 8.21  | 9.39  | 0.66 | 0.18 | -2.27 | 0.107012 | 0.588179 | 0.381391 | 0.754803 |
| MmugDNA.20640.1.S1_at   | MmugDNA.20640.1 | 9.24  | 8.91  | 0.18 | 0.05 | 1.25  | 0.07235  | 0.076265 | 0.326908 | 0.321227 |
| MmugDNA.20641.1.S1_at   | MmugDNA.20641.1 | 5.73  | 5.81  | 0.1  | 0.23 | -1.06 | 0.857963 | 0.50581  | 0.938213 | 0.702218 |
| MmugDNA.20643.1.S1_at   | MmugDNA.20643.1 | 10.04 | 9.54  | 0.17 | 0.04 | 1.41  | 0.003549 | 0.004306 | 0.104689 | 0.092019 |
| MmugDNA.20644.1.S1_at   | MmugDNA.20644.1 | 2.67  | 2.81  | 0.01 | 0.02 | -1.1  | 0.001469 | 0.004346 | 0.080473 | 0.092371 |
| MmugDNA.20645.1.S1_s_at | MmugDNA.20645.1 | 11.83 | 12.2  | 0.08 | 0.06 | -1.29 | 0.002542 | 0.038154 | 0.094413 | 0.239949 |
| MmugDNA.20646.1.S1_at   | MmugDNA.20646.1 | 9.47  | 9.44  | 0.36 | 0.06 | 1.02  | 0.333268 | 0.206853 | 0.614682 | 0.481011 |
| MmugDNA.20647.1.S1_at   | MmugDNA.20647.1 | 4.74  | 4.41  | 0.82 | 0.17 | 1.25  | 0.206325 | 0.384993 | 0.503982 | 0.620583 |
| MmugDNA.20648.1.S1_at   | MmugDNA.20648.1 | 8.33  | 7.98  | 0.37 | 0.17 | 1.28  | 0.165289 | 0.197542 | 0.458322 | 0.472537 |
| MmugDNA.20649.1.S1_at   | MmugDNA.20649.1 | 4.5   | 4.38  | 0.47 | 0.18 | 1.09  | 0.178755 | 0.243763 | 0.47356  | 0.513899 |
| MmugDNA.2065.1.S1_at    | MmugDNA.2065.1  | 2.86  | 2.91  | 0.02 | 0.14 | -1.03 | 0.716165 | 0.769875 | 0.866043 | 0.866376 |
| MmugDNA.20651.1.S1_at   | MmugDNA.20651.1 | 5.2   | 4.96  | 0.17 | 0.19 | 1.18  | 0.198304 | 0.238267 | 0.495518 | 0.508825 |
| MmugDNA.20652.1.S1_at   | MmugDNA.20652.1 | 4.58  | 4.61  | 0.05 | 0.2  | -1.02 | 0.63547  | 0.848695 | 0.821448 | 0.914071 |
| MmugDNA.20653.1.S1_at   | MmugDNA.20653.1 | 4.65  | 4.64  | 0.07 | 0.23 | 1.01  | 0.31638  | 0.681093 | 0.601116 | 0.813786 |
| MmugDNA.20654.1.S1_x_at | MmugDNA.20654.1 | 12.83 | 12.7  | 0.18 | 0.15 | 1.1   | 0.84057  | 0.862179 | 0.930008 | 0.921663 |
| MmugDNA.20655.1.S1_at   | MmugDNA.20655.1 | 6.2   | 6.2   | 0.04 | 0.18 | -1    | 0.889083 | 0.967172 | 0.952737 | 0.981863 |
| MmugDNA.20656.1.S1_at   | MmugDNA.20656.1 | 4.96  | 4.75  | 0.2  | 0.08 | 1.15  | 0.202736 | 0.09425  | 0.500426 | 0.350889 |
| MmugDNA.20657.1.S1_at   | MmugDNA.20657.1 | 3.58  | 3.55  | 0.12 | 0.1  | 1.03  | 0.221501 | 0.129815 | 0.519477 | 0.40147  |
| MmugDNA.20658.1.S1_at   | MmugDNA.20658.1 | 6.12  | 6.55  | 0.1  | 0.26 | -1.34 | 0.153683 | 0.183164 | 0.443756 | 0.459531 |
| MmugDNA.20659.1.S1_at   | MmugDNA.20659.1 | 4.98  | 4.55  | 0.42 | 0.07 | 1.35  | 0.052601 | 0.051348 | 0.286352 | 0.272052 |
| MmugDNA.20661.1.S1_at   | MmugDNA.20661.1 | 10.59 | 9.93  | 0.21 | 0.03 | 1.58  | 0.006817 | 0.008853 | 0.129236 | 0.12451  |
| MmugDNA.20662.1.S1_at   | MmugDNA.20662.1 | 11.15 | 11.24 | 0.1  | 0.1  | -1.06 | 0.341314 | 0.782318 | 0.621248 | 0.873935 |
| MmugDNA.20663.1.S1_at   | MmugDNA.20663.1 | 6.73  | 6.74  | 0.32 | 0.24 | -1.01 | 0.220251 | 0.243072 | 0.517792 | 0.513356 |
| MmugDNA.20664.1.S1_at   | MmugDNA.20664.1 | 7     | 7.2   | 0.14 | 0.18 | -1.15 | 0.366341 | 0.227988 | 0.640663 | 0.500211 |
| MmugDNA.20665.1.S1_at   | MmugDNA.20665.1 | 5.15  | 5.03  | 0.4  | 0.07 | 1.08  | 0.260338 | 0.344615 | 0.554485 | 0.589982 |
| MmugDNA.20667.1.S1_at   | MmugDNA.20667.1 | 5.91  | 5.32  | 0.57 | 0.55 | 1.51  | 0.685868 | 0.144999 | 0.850381 | 0.418938 |
| MmugDNA.20668.1.S1_at   | MmugDNA.20668.1 | 12.05 | 12.12 | 0.1  | 0.05 | -1.05 | 0.910133 | 0.434877 | 0.961887 | 0.654867 |
| MmugDNA.2067.1.S1_at    | MmugDNA.2067.1  | 6.75  | 6.63  | 0.15 | 0.14 | 1.09  | 0.121938 | 0.193441 | 0.400622 | 0.468711 |
| MmugDNA.20673.1.S1_at   | MmugDNA.20673.1 | 5.72  | 4.73  | 0.88 | 0.08 | 1.99  | 0.224523 | 0.490102 | 0.522652 | 0.692168 |
| MmugDNA.20674.1.S1_at   | MmugDNA.20674.1 | 3.06  | 3.06  | 0.03 | 0.03 | -1    | 0.236765 | 0.354605 | 0.534391 | 0.597297 |
| MmugDNA.20676.1.S1_at   | MmugDNA.20676.1 | 12    | 12.53 | 0.17 | 0.1  | -1.45 | 0.012434 | 0.027014 | 0.161829 | 0.205513 |
| MmugDNA.20677.1.S1_at   | MmugDNA.20677.1 | 3.68  | 3.61  | 0.47 | 0.17 | 1.05  | 0.649484 | 0.589005 | 0.829674 | 0.755312 |
| MmugDNA.20678.1.S1_at   | MmugDNA.20678.1 | 5.44  | 5.5   | 0.07 | 0.04 | -1.04 | 0.942904 | 0.33491  | 0.97595  | 0.58275  |
| MmugDNA.20679.1.S1_at   | MmugDNA.20679.1 | 3     | 2.84  | 0.07 | 0.11 | 1.12  | 0.055668 | 0.13823  | 0.293068 | 0.411198 |
| MmugDNA.2068.1.S1_at    | MmugDNA.2068.1  | 6.62  | 5.9   | 0.33 | 0.23 | 1.64  | 0.070866 | 0.224733 | 0.324317 | 0.497614 |
| MmugDNA.20680.1.S1_at   | MmugDNA.20680.1 | 7.79  | 7.68  | 0.21 | 0.08 | 1.08  | 0.114579 | 0.193103 | 0.391622 | 0.468554 |
| MmugDNA.20680.1.S1_s_at | MmugDNA.20680.1 | 9.84  | 9.46  | 0.27 | 0.11 | 1.3   | 0.024367 | 0.168829 | 0.209221 | 0.445458 |
| MmugDNA.20681.1.S1_at   | MmugDNA.20681.1 | 6.3   | 6.14  | 0.35 | 0.08 | 1.11  | 0.533472 | 0.409813 | 0.757039 | 0.636825 |
| MmugDNA.20682.1.S1_s_at | MmugDNA.20682.1 | 7.63  | 7.59  | 0.16 | 0.04 | 1.03  | 0.363198 | 0.488877 | 0.637867 | 0.691436 |
| MmugDNA.20684.1.S1_at   | MmugDNA.20684.1 | 4.3   | 4.26  | 0.03 | 0.26 | 1.03  | 0.343146 | 0.249229 | 0.622847 | 0.518313 |
| MmugDNA.20688.1.S1_at   | MmugDNA.20688.1 | 2.95  | 2.95  | 0.21 | 0.05 | -1    | 0.951773 | 0.767114 | 0.980036 | 0.864712 |

|                         |                 |       |       |      |      |       |          |          |          |          |
|-------------------------|-----------------|-------|-------|------|------|-------|----------|----------|----------|----------|
| MmugDNA.20689.1.S1_at   | MmugDNA.20689.1 | 8.23  | 7.79  | 0.29 | 0.24 | 1.35  | 0.113301 | 0.030005 | 0.390065 | 0.214994 |
| MmugDNA.2069.1.S1_at    | MmugDNA.2069.1  | 8.05  | 7.99  | 1.54 | 1.03 | 1.05  | 0.666624 | 0.791601 | 0.839898 | 0.879621 |
| MmugDNA.20690.1.S1_at   | MmugDNA.20690.1 | 3.3   | 3.29  | 0.17 | 0.15 | 1.01  | 0.61044  | 0.75681  | 0.805846 | 0.858443 |
| MmugDNA.20691.1.S1_at   | MmugDNA.20691.1 | 7.71  | 7.55  | 0.25 | 0.08 | 1.12  | 0.470197 | 0.15354  | 0.714793 | 0.428309 |
| MmugDNA.20692.1.S1_at   | MmugDNA.20692.1 | 5.76  | 5.85  | 0.25 | 0.04 | -1.06 | 0.8356   | 0.794243 | 0.927771 | 0.881316 |
| MmugDNA.20695.1.S1_at   | MmugDNA.20695.1 | 8.81  | 8.24  | 0.07 | 0.75 | 1.48  | 0.704377 | 0.161704 | 0.859708 | 0.437771 |
| MmugDNA.29371.1.S1_at   | MmugDNA.29371.1 | 8.01  | 8.03  | 0.18 | 0.23 | -1.01 | 0.804541 | 0.956304 | 0.91222  | 0.975137 |
| MmugDNA.29371.1.S1_s_at | MmugDNA.29371.1 | 8.65  | 7.95  | 0.05 | 0.74 | 1.62  | 0.554687 | 0.146678 | 0.770788 | 0.420711 |
| MmugDNA.20696.1.S1_at   | MmugDNA.20696.1 | 5.62  | 5.79  | 0.3  | 0.04 | -1.13 | 0.857985 | 0.677439 | 0.938213 | 0.81167  |
| MmugDNA.20697.1.S1_at   | MmugDNA.20697.1 | 4.87  | 4.96  | 0.07 | 0.03 | -1.06 | 0.297972 | 0.046529 | 0.586445 | 0.260221 |
| MmugDNA.20699.1.S1_at   | MmugDNA.20699.1 | 5.66  | 7.69  | 1.52 | 0.3  | -4.07 | 0.100311 | 0.039296 | 0.371099 | 0.243338 |
| MmugDNA.207.1.S1_at     | MmugDNA.207.1   | 6.02  | 8.51  | 1.15 | 0.23 | -5.61 | 0.033436 | 0.214264 | 0.236786 | 0.487891 |
| MmugDNA.2070.1.S1_at    | MmugDNA.2070.1  | 5.73  | 5.61  | 0.12 | 0.34 | 1.09  | 0.642464 | 0.770803 | 0.825608 | 0.866807 |
| MmugDNA.20700.1.S1_at   | MmugDNA.20700.1 | 5.22  | 5.11  | 0.08 | 0.08 | 1.08  | 0.786684 | 0.210312 | 0.902743 | 0.484192 |
| MmugDNA.20701.1.S1_at   | MmugDNA.20701.1 | 7.11  | 6.98  | 0.24 | 0.12 | 1.09  | 0.445595 | 0.629344 | 0.698029 | 0.781818 |
| MmugDNA.20703.1.S1_at   | MmugDNA.20703.1 | 6.21  | 6.02  | 0.31 | 0.16 | 1.14  | 0.214567 | 0.221081 | 0.512196 | 0.494477 |
| MmugDNA.20704.1.S1_at   | MmugDNA.20704.1 | 5.7   | 6.06  | 0.14 | 0.16 | -1.28 | 0.198386 | 0.007555 | 0.495518 | 0.116437 |
| MmugDNA.20705.1.S1_at   | MmugDNA.20705.1 | 11.57 | 10.73 | 0.09 | 0.25 | 1.78  | 0.010525 | 0.009821 | 0.15243  | 0.130205 |
| MmugDNA.20707.1.S1_at   | MmugDNA.20707.1 | 12.6  | 12.41 | 0.14 | 0.03 | 1.14  | 0.129366 | 0.000015 | 0.411701 | 0.018351 |
| MmugDNA.20708.1.S1_at   | MmugDNA.20708.1 | 6.13  | 6.03  | 0.39 | 0.08 | 1.07  | 0.242377 | 0.341184 | 0.539382 | 0.587303 |
| MmugDNA.20709.1.S1_at   | MmugDNA.20709.1 | 3.58  | 3.58  | 0.14 | 0.08 | -1    | 0.982092 | 0.158945 | 0.993403 | 0.435111 |
| MmugDNA.20710.1.S1_at   | MmugDNA.20710.1 | 6.96  | 6.81  | 0.14 | 0.16 | 1.11  | 0.235675 | 0.313737 | 0.533475 | 0.568083 |
| MmugDNA.25418.1.S1_s_at | MmugDNA.25418.1 | 10.6  | 10.36 | 0.12 | 0.16 | 1.18  | 0.12571  | 0.024984 | 0.406488 | 0.19808  |
| MmugDNA.20713.1.S1_at   | MmugDNA.20713.1 | 5.23  | 5.23  | 0.07 | 0.1  | 1     | 0.930071 | 0.603733 | 0.970533 | 0.764262 |
| MmugDNA.20715.1.S1_at   | MmugDNA.20715.1 | 4.64  | 4.58  | 0.1  | 0.07 | 1.05  | 0.870447 | 0.200931 | 0.944238 | 0.475426 |
| MmugDNA.20716.1.S1_at   | MmugDNA.20716.1 | 11.16 | 11.26 | 0.02 | 0.02 | -1.07 | 0.008566 | 0.119355 | 0.141954 | 0.387887 |
| MmugDNA.20717.1.S1_s_at | MmugDNA.20717.1 | 13.12 | 12.79 | 0.08 | 0.12 | 1.26  | 0.016488 | 0.005753 | 0.181374 | 0.104378 |
| MmugDNA.20718.1.S1_at   | MmugDNA.20718.1 | 12.05 | 11.7  | 0.12 | 0.02 | 1.28  | 0.016202 | 0.018612 | 0.179944 | 0.171539 |
| MmugDNA.20720.1.S1_at   | MmugDNA.20720.1 | 11.22 | 10.65 | 0.17 | 0.08 | 1.48  | 0.007157 | 0.272739 | 0.132147 | 0.537479 |
| MmugDNA.20721.1.S1_at   | MmugDNA.20721.1 | 12.42 | 12.13 | 0.1  | 0.02 | 1.23  | 0.009558 | 0.393401 | 0.147916 | 0.626287 |
| MmugDNA.20722.1.S1_at   | MmugDNA.20722.1 | 2.96  | 2.96  | 0.01 | 0.07 | 1     | 0.343804 | 0.169268 | 0.6231   | 0.44588  |
| MmugDNA.20723.1.S1_s_at | MmugDNA.20723.1 | 2.89  | 2.87  | 0.12 | 0.12 | 1.02  | 0.741865 | 0.908657 | 0.880409 | 0.948282 |
| MmugDNA.20724.1.S1_at   | MmugDNA.20724.1 | 3.16  | 3.15  | 0.02 | 0.08 | 1     | 0.421192 | 0.815816 | 0.679846 | 0.893773 |
| MmugDNA.33850.1.S1_s_at | MmugDNA.33850.1 | 3.48  | 3.45  | 0.08 | 0.15 | 1.02  | 0.608676 | 0.770808 | 0.804644 | 0.866807 |
| MmugDNA.20729.1.S1_at   | MmugDNA.20729.1 | 2.88  | 2.85  | 0.03 | 0.09 | 1.02  | 0.602386 | 0.079618 | 0.800189 | 0.326981 |
| MmugDNA.2073.1.S1_at    | MmugDNA.2073.1  | 5.63  | 5.64  | 0.01 | 0.02 | -1.01 | 0.941595 | 0.31279  | 0.975589 | 0.567319 |
| MmugDNA.20733.1.S1_at   | MmugDNA.20733.1 | 10.5  | 10.44 | 0.17 | 0.08 | 1.04  | 0.592677 | 0.539579 | 0.793595 | 0.723833 |
| MmugDNA.20735.1.S1_at   | MmugDNA.20735.1 | 11.71 | 11.75 | 0.19 | 0.03 | -1.03 | 0.242545 | 0.271626 | 0.539382 | 0.536577 |
| MmugDNA.20736.1.S1_at   | MmugDNA.20736.1 | 10.2  | 10.14 | 0.31 | 0.07 | 1.04  | 0.772434 | 0.689264 | 0.895784 | 0.818665 |
| MmugDNA.12659.1.S1_s_at | MmugDNA.12659.1 | 6.2   | 5.82  | 0.37 | 0.43 | 1.3   | 0.53461  | 0.739578 | 0.75784  | 0.849084 |
| MmugDNA.20739.1.S1_at   | MmugDNA.20739.1 | 4.88  | 4.88  | 0.12 | 0.18 | -1    | 0.253065 | 0.343496 | 0.547557 | 0.58925  |
| MmugDNA.2074.1.S1_at    | MmugDNA.2074.1  | 4.39  | 4.38  | 0.06 | 0.08 | 1.01  | 0.437116 | 0.698566 | 0.691964 | 0.824875 |
| MmugDNA.20740.1.S1_at   | MmugDNA.20740.1 | 3.51  | 3.69  | 0.08 | 0.11 | -1.13 | 0.07848  | 0.075721 | 0.338186 | 0.320317 |

|                         |                 |       |       |      |      |        |          |          |          |          |
|-------------------------|-----------------|-------|-------|------|------|--------|----------|----------|----------|----------|
| MmugDNA.20741.1.S1_at   | MmugDNA.20741.1 | 8.43  | 8.42  | 0.06 | 0.14 | 1      | 0.373209 | 0.065519 | 0.645118 | 0.301415 |
| MmugDNA.20742.1.S1_at   | MmugDNA.20742.1 | 4.3   | 3.99  | 0.75 | 0.03 | 1.25   | 0.161164 | 0.257071 | 0.45273  | 0.524783 |
| MmugDNA.20743.1.S1_at   | MmugDNA.20743.1 | 8.18  | 8.02  | 0.75 | 0.05 | 1.11   | 0.252208 | 0.164739 | 0.546816 | 0.441047 |
| MmugDNA.20744.1.S1_at   | MmugDNA.20744.1 | 6.72  | 6.7   | 0.42 | 0.39 | 1.01   | 0.320897 | 0.354702 | 0.605315 | 0.597404 |
| MmugDNA.20745.1.S1_s_at | MmugDNA.20745.1 | 11.75 | 11.46 | 0.07 | 0.16 | 1.23   | 0.070073 | 0.727848 | 0.323085 | 0.842701 |
| MmugDNA.20746.1.S1_at   | MmugDNA.20746.1 | 5     | 5.22  | 0.28 | 0.29 | -1.17  | 0.332043 | 0.517746 | 0.613842 | 0.709857 |
| MmugDNA.20747.1.S1_at   | MmugDNA.20747.1 | 8.68  | 9.02  | 0.11 | 0.12 | -1.26  | 0.027723 | 0.000095 | 0.21894  | 0.027665 |
| MmugDNA.20747.1.S1_x_at | MmugDNA.20747.1 | 8.56  | 8.95  | 0.09 | 0.06 | -1.31  | 0.004231 | 0.000023 | 0.110901 | 0.019635 |
| MmugDNA.20748.1.S1_at   | MmugDNA.20748.1 | 4.79  | 4.75  | 0.23 | 0.01 | 1.02   | 0.97472  | 0.818715 | 0.989906 | 0.895529 |
| MmugDNA.20749.1.S1_at   | MmugDNA.20749.1 | 3.71  | 3.73  | 0.16 | 0.07 | -1.01  | 0.337951 | 0.580466 | 0.618376 | 0.749728 |
| MmugDNA.2075.1.S1_at    | MmugDNA.2075.1  | 8.8   | 8.34  | 0.18 | 0.08 | 1.38   | 0.010527 | 0.002859 | 0.15243  | 0.078756 |
| MmugDNA.20750.1.S1_at   | MmugDNA.20750.1 | 5.75  | 6.4   | 0.49 | 0.31 | -1.57  | 0.560729 | 0.367805 | 0.773987 | 0.607466 |
| MmugDNA.20751.1.S1_at   | MmugDNA.20751.1 | 10.74 | 10.92 | 0.09 | 0.1  | -1.13  | 0.087397 | 0.008633 | 0.353204 | 0.123154 |
| MmugDNA.20752.1.S1_at   | MmugDNA.20752.1 | 12.25 | 11.89 | 0.04 | 0.17 | 1.28   | 0.05769  | 0.102782 | 0.297451 | 0.363305 |
| MmugDNA.20753.1.S1_at   | MmugDNA.20753.1 | 5.49  | 5.53  | 0.29 | 0.11 | -1.03  | 0.626503 | 0.783767 | 0.816067 | 0.874778 |
| MmugDNA.20754.1.S1_at   | MmugDNA.20754.1 | 2.99  | 3.01  | 0.23 | 0.16 | -1.01  | 0.584644 | 0.675491 | 0.78871  | 0.810353 |
| MmugDNA.20755.1.S1_at   | MmugDNA.20755.1 | 5.01  | 5.01  | 0.27 | 0.27 | -1     | 0.991139 | 0.75069  | 0.996757 | 0.855009 |
| MmugDNA.20756.1.S1_at   | MmugDNA.20756.1 | 6.6   | 6.39  | 0.94 | 0.21 | 1.16   | 0.755293 | 0.620356 | 0.887223 | 0.775353 |
| MmugDNA.20757.1.S1_at   | MmugDNA.20757.1 | 5.96  | 6.71  | 0.4  | 0.3  | -1.68  | 0.112104 | 0.3384   | 0.388227 | 0.585432 |
| MmugDNA.20758.1.S1_at   | MmugDNA.20758.1 | 6.54  | 6.92  | 2.18 | 0.09 | -1.31  | 0.865443 | 0.531089 | 0.941663 | 0.718415 |
| MmugDNA.20759.1.S1_at   | MmugDNA.20759.1 | 4.93  | 5.39  | 0.29 | 0.34 | -1.37  | 0.198992 | 0.192776 | 0.496212 | 0.468274 |
| MmugDNA.2076.1.S1_at    | MmugDNA.2076.1  | 4.96  | 4.99  | 0.04 | 0.03 | -1.02  | 0.441148 | 0.290979 | 0.694766 | 0.551525 |
| MmugDNA.20760.1.S1_at   | MmugDNA.20760.1 | 5.83  | 9.69  | 2.04 | 0.24 | -14.58 | 0.070936 | 0.140147 | 0.324377 | 0.413394 |
| MmugDNA.20761.1.S1_at   | MmugDNA.20761.1 | 6.28  | 6.08  | 0.26 | 0.09 | 1.15   | 0.26279  | 0.365056 | 0.556683 | 0.605259 |
| MmugDNA.20761.1.S1_x_at | MmugDNA.20761.1 | 6.67  | 6.34  | 0.4  | 0.15 | 1.26   | 0.14411  | 0.158791 | 0.430929 | 0.434881 |
| MmugDNA.20762.1.S1_at   | MmugDNA.20762.1 | 11.94 | 12.06 | 0.06 | 0.08 | -1.09  | 0.08962  | 0.491034 | 0.356524 | 0.692751 |
| MmugDNA.20763.1.S1_at   | MmugDNA.20763.1 | 3.72  | 3.74  | 0.47 | 0.27 | -1.01  | 0.454055 | 0.560004 | 0.704064 | 0.736439 |
| MmugDNA.20765.1.S1_at   | MmugDNA.20765.1 | 7.27  | 6.72  | 0.43 | 0.08 | 1.47   | 0.070095 | 0.197721 | 0.323085 | 0.472633 |
| MmugDNA.20766.1.S1_at   | MmugDNA.20766.1 | 6.07  | 7.51  | 0.21 | 0.09 | -2.72  | 0.000554 | 0.000112 | 0.070113 | 0.028233 |
| MmugDNA.20767.1.S1_at   | MmugDNA.20767.1 | 4.58  | 4.82  | 0.17 | 0.01 | -1.18  | 0.231685 | 0.250682 | 0.530333 | 0.51941  |
| MmugDNA.1306.1.S1_s_at  | MmugDNA.1306.1  | 6.24  | 6.19  | 0.1  | 0.22 | 1.03   | 0.633589 | 0.624883 | 0.820437 | 0.778939 |
| MmugDNA.20769.1.S1_at   | MmugDNA.20769.1 | 13.45 | 13.61 | 0.05 | 0.04 | -1.12  | 0.024384 | 0.308774 | 0.209245 | 0.56463  |
| MmugDNA.2077.1.S1_at    | MmugDNA.2077.1  | 10.93 | 10.64 | 0.22 | 0.03 | 1.22   | 0.077183 | 0.0199   | 0.335786 | 0.177357 |
| MmugDNA.20771.1.S1_at   | MmugDNA.20771.1 | 3.52  | 3.5   | 0.08 | 0.19 | 1.01   | 0.839549 | 0.32243  | 0.929638 | 0.573972 |
| MmugDNA.20772.1.S1_s_at | MmugDNA.20772.1 | 10.74 | 10.7  | 0.13 | 0.21 | 1.03   | 0.349661 | 0.53166  | 0.627392 | 0.718819 |
| MmugDNA.20773.1.S1_at   | MmugDNA.20773.1 | 3.38  | 3.39  | 0.16 | 0.07 | -1.01  | 0.287006 | 0.346736 | 0.576707 | 0.591536 |
| MmugDNA.20774.1.S1_at   | MmugDNA.20774.1 | 7.32  | 10.98 | 2.37 | 0.29 | -12.7  | 0.047155 | 0.102158 | 0.274594 | 0.362212 |
| MmugDNA.20775.1.S1_at   | MmugDNA.20775.1 | 11.24 | 11.36 | 0.07 | 0.09 | -1.09  | 0.096575 | 0.078547 | 0.366453 | 0.325285 |
| MmugDNA.20777.1.S1_at   | MmugDNA.20777.1 | 5.05  | 4.98  | 0.42 | 0.17 | 1.05   | 0.976043 | 0.821598 | 0.990427 | 0.897299 |
| MmugDNA.20778.1.S1_at   | MmugDNA.20778.1 | 8.47  | 8.4   | 0.02 | 0.09 | 1.04   | 0.150337 | 0.521978 | 0.43942  | 0.712775 |
| MmugDNA.20779.1.S1_at   | MmugDNA.20779.1 | 3.36  | 3.31  | 0.23 | 0.19 | 1.03   | 0.834823 | 0.94115  | 0.927337 | 0.966652 |
| MmugDNA.2078.1.S1_at    | MmugDNA.2078.1  | 9.86  | 9.83  | 0.09 | 0.04 | 1.02   | 0.293143 | 0.100989 | 0.58211  | 0.360558 |
| MmugDNA.20781.1.S1_at   | MmugDNA.20781.1 | 10.08 | 9.72  | 0.22 | 0.28 | 1.29   | 0.07169  | 0.004301 | 0.325611 | 0.092019 |

|                         |                 |       |       |      |      |       |          |          |          |          |
|-------------------------|-----------------|-------|-------|------|------|-------|----------|----------|----------|----------|
| MmugDNA.20782.1.S1_at   | MmugDNA.20782.1 | 5.21  | 3.98  | 0.91 | 0.81 | 2.36  | 0.324381 | 0.233292 | 0.608078 | 0.50468  |
| MmugDNA.20783.1.S1_at   | MmugDNA.20783.1 | 4.26  | 4.48  | 0.17 | 0.04 | -1.16 | 0.078674 | 0.032662 | 0.338535 | 0.223791 |
| MmugDNA.20786.1.S1_at   | MmugDNA.20786.1 | 6.7   | 6.64  | 0.48 | 0.05 | 1.04  | 0.717765 | 0.897535 | 0.866693 | 0.941525 |
| MmugDNA.20787.1.S1_at   | MmugDNA.20787.1 | 3.42  | 3.3   | 0.16 | 0.04 | 1.09  | 0.249764 | 0.104716 | 0.544804 | 0.3661   |
| MmugDNA.20788.1.S1_at   | MmugDNA.20788.1 | 6.96  | 6.77  | 0.43 | 0.35 | 1.14  | 0.466181 | 0.037106 | 0.712068 | 0.237165 |
| MmugDNA.20789.1.S1_at   | MmugDNA.20789.1 | 6.08  | 6.08  | 0    | 0.02 | 1     | 0.373901 | 0.285911 | 0.645118 | 0.547484 |
| MmugDNA.20791.1.S1_at   | MmugDNA.20791.1 | 4.49  | 5.08  | 0.64 | 0.11 | -1.5  | 0.242407 | 0.10812  | 0.539382 | 0.371347 |
| MmugDNA.20791.1.S1_at   | MmugDNA.20791.1 | 5.57  | 5.81  | 0.82 | 0.1  | -1.19 | 0.540721 | 0.55462  | 0.761662 | 0.73333  |
| MmugDNA.20792.1.S1_at   | MmugDNA.20792.1 | 8.96  | 8.66  | 0.71 | 0.22 | 1.23  | 0.245967 | 0.070831 | 0.541732 | 0.31231  |
| MmugDNA.20793.1.S1_at   | MmugDNA.20793.1 | 5.01  | 5.67  | 0.58 | 0.25 | -1.58 | 0.43595  | 0.306243 | 0.690935 | 0.562907 |
| MmugDNA.20795.1.S1_at   | MmugDNA.20795.1 | 5.51  | 5.87  | 0.32 | 0.25 | -1.29 | 0.515724 | 0.632839 | 0.745426 | 0.783788 |
| MmugDNA.20796.1.S1_at   | MmugDNA.20796.1 | 3.96  | 3.93  | 0.54 | 0.23 | 1.02  | 0.525002 | 0.666033 | 0.751646 | 0.804374 |
| MmugDNA.20797.1.S1_at   | MmugDNA.20797.1 | 3.6   | 3.71  | 0.4  | 0.27 | -1.08 | 0.642554 | 0.770171 | 0.82562  | 0.866555 |
| MmugDNA.20798.1.S1_at   | MmugDNA.20798.1 | 8.95  | 9.05  | 0.16 | 0.07 | -1.07 | 0.266722 | 0.149192 | 0.559179 | 0.423692 |
| MmugDNA.20799.1.S1_at   | MmugDNA.20799.1 | 5.78  | 5.74  | 0    | 0.1  | 1.03  | 0.833169 | 0.833651 | 0.926532 | 0.904613 |
| MmugDNA.2080.1.S1_at    | MmugDNA.2080.1  | 4.84  | 4.85  | 0.32 | 0.09 | -1.01 | 0.304792 | 0.414802 | 0.591803 | 0.640456 |
| MmugDNA.20801.1.S1_at   | MmugDNA.20801.1 | 8.43  | 7.99  | 0.25 | 0.17 | 1.36  | 0.042149 | 0.309027 | 0.262198 | 0.564721 |
| MmugDNA.20803.1.S1_s_at | MmugDNA.20803.1 | 5.72  | 5.61  | 0.11 | 0.04 | 1.08  | 0.115029 | 0.383477 | 0.39207  | 0.619444 |
| MmugDNA.20804.1.S1_at   | MmugDNA.20804.1 | 4.19  | 4.04  | 0.12 | 0.17 | 1.11  | 0.264855 | 0.165209 | 0.557962 | 0.441389 |
| MmugDNA.20805.1.S1_at   | MmugDNA.20805.1 | 3.51  | 3.51  | 0.03 | 0.13 | 1     | 0.494038 | 0.336405 | 0.730933 | 0.583831 |
| MmugDNA.20806.1.S1_at   | MmugDNA.20806.1 | 10.21 | 10.39 | 0.25 | 0.08 | -1.14 | 0.299738 | 0.656963 | 0.588074 | 0.799401 |
| MmugDNA.20807.1.S1_at   | MmugDNA.20807.1 | 8.97  | 9.04  | 0.43 | 0.17 | -1.05 | 0.711612 | 0.904773 | 0.863959 | 0.946059 |
| MmugDNA.20808.1.S1_at   | MmugDNA.20808.1 | 3.46  | 3.45  | 0.09 | 0.2  | 1.01  | 0.558578 | 0.048052 | 0.772936 | 0.264201 |
| MmugDNA.2081.1.S1_at    | MmugDNA.2081.1  | 3.09  | 3.2   | 0.1  | 0.11 | -1.08 | 0.734316 | 0.645597 | 0.87617  | 0.792428 |
| MmugDNA.20811.1.S1_at   | MmugDNA.20811.1 | 7.34  | 7.36  | 0.09 | 0.05 | -1.01 | 0.677653 | 0.065544 | 0.846284 | 0.301415 |
| MmugDNA.20812.1.S1_at   | MmugDNA.20812.1 | 10.2  | 10.02 | 0.01 | 0.14 | 1.13  | 0.033354 | 0.0541   | 0.236556 | 0.277914 |
| MmugDNA.20813.1.S1_at   | MmugDNA.20813.1 | 3.8   | 3.86  | 0.2  | 0.13 | -1.04 | 0.566091 | 0.437016 | 0.777107 | 0.656424 |
| MmugDNA.20814.1.S1_at   | MmugDNA.20814.1 | 4.45  | 4.37  | 0.59 | 0.21 | 1.06  | 0.211608 | 0.453892 | 0.509436 | 0.668329 |
| MmugDNA.20815.1.S1_at   | MmugDNA.20815.1 | 2.93  | 2.98  | 0.02 | 0.08 | -1.03 | 0.32099  | 0.455822 | 0.605348 | 0.669659 |
| MmugDNA.20816.1.S1_at   | MmugDNA.20816.1 | 3.85  | 3.55  | 0.31 | 0.16 | 1.24  | 0.207066 | 0.177805 | 0.504797 | 0.454111 |
| MmugDNA.20817.1.S1_at   | MmugDNA.20817.1 | 5.35  | 5.23  | 0.16 | 0.08 | 1.08  | 0.574192 | 0.556716 | 0.781733 | 0.734725 |
| MmugDNA.2082.1.S1_at    | MmugDNA.2082.1  | 5.82  | 6.36  | 0.49 | 0.11 | -1.46 | 0.328764 | 0.494351 | 0.611086 | 0.694829 |
| MmugDNA.20820.1.S1_at   | MmugDNA.20820.1 | 4.72  | 4.33  | 0.33 | 0.39 | 1.31  | 0.213874 | 0.296954 | 0.511674 | 0.555895 |
| MmugDNA.20821.1.S1_at   | MmugDNA.20821.1 | 3.51  | 3.51  | 0.21 | 0.17 | -1    | 0.801355 | 0.569429 | 0.910753 | 0.742382 |
| MmugDNA.20822.1.S1_at   | MmugDNA.20822.1 | 6.24  | 6.24  | 0.03 | 0.05 | -1    | 0.556914 | 0.132483 | 0.771968 | 0.404534 |
| MmugDNA.20823.1.S1_at   | MmugDNA.20823.1 | 8.99  | 9.83  | 0.22 | 0.08 | -1.79 | 0.002745 | 0.028532 | 0.09702  | 0.210754 |
| MmugDNA.20824.1.S1_at   | MmugDNA.20824.1 | 4.69  | 4.34  | 0.5  | 0.09 | 1.28  | 0.40493  | 0.448771 | 0.668531 | 0.664601 |
| MmugDNA.20826.1.S1_at   | MmugDNA.20826.1 | 3.6   | 3.39  | 0.23 | 0.07 | 1.16  | 0.432534 | 0.344936 | 0.688358 | 0.590239 |
| MmugDNA.20827.1.S1_at   | MmugDNA.20827.1 | 4.65  | 4.54  | 0.29 | 0.07 | 1.08  | 0.578963 | 0.636649 | 0.784772 | 0.786329 |
| MmugDNA.20828.1.S1_at   | MmugDNA.20828.1 | 7.55  | 8.16  | 0.42 | 0.21 | -1.53 | 0.337335 | 0.026357 | 0.617824 | 0.203321 |
| MmugDNA.20829.1.S1_at   | MmugDNA.20829.1 | 3.58  | 3.58  | 0.26 | 0.6  | 1     | 0.395243 | 0.344355 | 0.661763 | 0.589762 |
| MmugDNA.20830.1.S1_at   | MmugDNA.20830.1 | 10.74 | 10.34 | 0.02 | 0.07 | 1.32  | 0.00149  | 0.087764 | 0.081104 | 0.341027 |
| MmugDNA.20831.1.S1_at   | MmugDNA.20831.1 | 6.73  | 6.52  | 0.12 | 0.1  | 1.16  | 0.167198 | 0.196273 | 0.460409 | 0.471236 |

|                         |                 |       |       |      |      |       |          |          |          |          |
|-------------------------|-----------------|-------|-------|------|------|-------|----------|----------|----------|----------|
| MmugDNA.20831.1.S1_s_at | MmugDNA.20831.1 | 9.99  | 9.56  | 0.09 | 0.24 | 1.35  | 0.044823 | 0.000456 | 0.269024 | 0.038572 |
| MmugDNA.20832.1.S1_at   | MmugDNA.20832.1 | 8.29  | 7.21  | 0.76 | 0.05 | 2.12  | 0.215685 | 0.235609 | 0.513483 | 0.506671 |
| MmugDNA.20833.1.S1_at   | MmugDNA.20833.1 | 3.96  | 3.89  | 0.15 | 0.06 | 1.05  | 0.963437 | 0.322889 | 0.985186 | 0.574228 |
| MmugDNA.20836.1.S1_at   | MmugDNA.20836.1 | 5.09  | 4.84  | 0.33 | 0.17 | 1.18  | 0.477774 | 0.330453 | 0.719594 | 0.579193 |
| MmugDNA.20837.1.S1_at   | MmugDNA.20837.1 | 3.35  | 3.36  | 0.1  | 0.09 | -1.01 | 0.836566 | 0.967352 | 0.928302 | 0.98199  |
| MmugDNA.20838.1.S1_at   | MmugDNA.20838.1 | 5.03  | 5.11  | 0.09 | 0.24 | -1.06 | 0.803574 | 0.962377 | 0.911852 | 0.978876 |
| MmugDNA.2084.1.S1_at    | MmugDNA.2084.1  | 3.33  | 3.15  | 0.27 | 0.05 | 1.13  | 0.269746 | 0.223597 | 0.562025 | 0.496451 |
| MmugDNA.20841.1.S1_at   | MmugDNA.20841.1 | 4.93  | 4.92  | 0.07 | 0.06 | 1     | 0.491004 | 0.173756 | 0.728974 | 0.450128 |
| MmugDNA.20844.1.S1_at   | MmugDNA.20844.1 | 3.47  | 3.46  | 0.17 | 0.03 | 1.01  | 0.933687 | 0.815478 | 0.972136 | 0.893588 |
| MmugDNA.20845.1.S1_at   | MmugDNA.20845.1 | 8.79  | 8.54  | 0.06 | 0.44 | 1.19  | 0.338173 | 0.268705 | 0.61862  | 0.534138 |
| MmugDNA.20847.1.S1_at   | MmugDNA.20847.1 | 5.65  | 5.29  | 0.35 | 0.03 | 1.28  | 0.053658 | 0.097956 | 0.288851 | 0.355858 |
| MmugDNA.20849.1.S1_at   | MmugDNA.20849.1 | 8.76  | 7.76  | 0.4  | 0.47 | 2     | 0.086959 | 0.011654 | 0.352429 | 0.139826 |
| MmugDNA.2085.1.S1_at    | MmugDNA.2085.1  | 7.17  | 7.12  | 0.12 | 0.11 | 1.03  | 0.569705 | 0.937421 | 0.779023 | 0.964687 |
| MmugDNA.20850.1.S1_s_at | MmugDNA.20850.1 | 10.58 | 10.61 | 0.21 | 0.1  | -1.02 | 0.812865 | 0.88564  | 0.916222 | 0.934982 |
| MmugDNA.20851.1.S1_at   | MmugDNA.20851.1 | 4.13  | 4.13  | 0.06 | 0.08 | 1.01  | 0.443002 | 0.800777 | 0.696402 | 0.885425 |
| MmugDNA.20852.1.S1_at   | MmugDNA.20852.1 | 4.78  | 4.89  | 1.21 | 0.77 | -1.08 | 0.778904 | 0.944557 | 0.899056 | 0.968614 |
| MmugDNA.20853.1.S1_at   | MmugDNA.20853.1 | 4.74  | 4.68  | 0.11 | 0.08 | 1.04  | 0.202848 | 0.250882 | 0.500586 | 0.51958  |
| MmugDNA.20854.1.S1_at   | MmugDNA.20854.1 | 4.79  | 4.64  | 0.31 | 0.06 | 1.11  | 0.964111 | 0.70331  | 0.985473 | 0.827962 |
| MmugDNA.20856.1.S1_at   | MmugDNA.20856.1 | 3.55  | 3.71  | 0.08 | 0.24 | -1.11 | 0.491905 | 0.465746 | 0.729428 | 0.6759   |
| MmugDNA.20857.1.S1_at   | MmugDNA.20857.1 | 3.52  | 3.63  | 0.65 | 0.22 | -1.08 | 0.430151 | 0.571559 | 0.686507 | 0.743837 |
| MmugDNA.20858.1.S1_at   | MmugDNA.20858.1 | 4.1   | 3.84  | 0.21 | 0.19 | 1.19  | 0.101027 | 0.109088 | 0.372328 | 0.372869 |
| MmugDNA.20859.1.S1_at   | MmugDNA.20859.1 | 3.88  | 3.26  | 0.88 | 0.14 | 1.54  | 0.323073 | 0.37991  | 0.606932 | 0.616659 |
| MmugDNA.20860.1.S1_at   | MmugDNA.20860.1 | 7.15  | 6.91  | 0.32 | 0.03 | 1.17  | 0.240745 | 0.673805 | 0.538168 | 0.80947  |
| MmugDNA.20862.1.S1_at   | MmugDNA.20862.1 | 6.84  | 7.02  | 0.21 | 0.02 | -1.13 | 0.269285 | 0.070599 | 0.561615 | 0.311901 |
| MmugDNA.20862.1.S1_s_at | MmugDNA.20862.1 | 8.75  | 8.65  | 0.28 | 0.05 | 1.07  | 0.44518  | 0.315311 | 0.697732 | 0.568939 |
| MmugDNA.9246.1.S1_s_at  | MmugDNA.9246.1  | 11.25 | 11.28 | 0.02 | 0.04 | -1.02 | 0.771425 | 0.943255 | 0.895235 | 0.967814 |
| MmugDNA.20864.1.S1_at   | MmugDNA.20864.1 | 7.82  | 7.86  | 0.16 | 0.06 | -1.02 | 0.291795 | 0.309221 | 0.581226 | 0.564807 |
| MmugDNA.20866.1.S1_at   | MmugDNA.20866.1 | 11.65 | 11.51 | 0.21 | 0.03 | 1.1   | 0.799735 | 0.318809 | 0.909655 | 0.571379 |
| MmugDNA.20867.1.S1_at   | MmugDNA.20867.1 | 4.19  | 4.21  | 0    | 0.13 | -1.01 | 0.779704 | 0.56846  | 0.899387 | 0.741979 |
| MmugDNA.20868.1.S1_at   | MmugDNA.20868.1 | 6.52  | 6.26  | 0.21 | 0.19 | 1.2   | 0.078224 | 0.116782 | 0.337769 | 0.38408  |
| MmugDNA.20869.1.S1_at   | MmugDNA.20869.1 | 3.93  | 4.21  | 1.01 | 0.29 | -1.22 | 0.648764 | 0.280569 | 0.829361 | 0.543746 |
| MmugDNA.2087.1.S1_at    | MmugDNA.2087.1  | 8.12  | 7.95  | 0.14 | 0.02 | 1.12  | 0.118146 | 0.1973   | 0.39564  | 0.472213 |
| MmugDNA.20870.1.S1_at   | MmugDNA.20870.1 | 8.48  | 8.5   | 0.13 | 0.07 | -1.01 | 0.572437 | 0.033432 | 0.780609 | 0.226501 |
| MmugDNA.20872.1.S1_at   | MmugDNA.20872.1 | 8.07  | 8.17  | 0.18 | 0.18 | -1.07 | 0.261464 | 0.50873  | 0.555648 | 0.703792 |
| MmugDNA.20873.1.S1_at   | MmugDNA.20873.1 | 4.14  | 4.1   | 0.15 | 0.15 | 1.03  | 0.37557  | 0.407721 | 0.646358 | 0.635141 |
| MmugDNA.20874.1.S1_at   | MmugDNA.20874.1 | 3.41  | 3.43  | 0.16 | 0.16 | -1.01 | 0.916461 | 0.89368  | 0.96446  | 0.939323 |
| MmugDNA.20875.1.S1_at   | MmugDNA.20875.1 | 3.42  | 3.35  | 0.75 | 0.22 | 1.04  | 0.345424 | 0.485851 | 0.624408 | 0.689442 |
| MmugDNA.20876.1.S1_at   | MmugDNA.20876.1 | 5.18  | 5.24  | 0.46 | 0.25 | -1.04 | 0.290786 | 0.394419 | 0.580217 | 0.626982 |
| MmugDNA.20877.1.S1_at   | MmugDNA.20877.1 | 6.46  | 6.21  | 0.21 | 0.17 | 1.19  | 0.107683 | 0.259476 | 0.382296 | 0.526418 |
| MmugDNA.20878.1.S1_at   | MmugDNA.20878.1 | 4.37  | 4.39  | 0.03 | 0.21 | -1.02 | 0.551672 | 0.739889 | 0.768597 | 0.849294 |
| MmugDNA.20879.1.S1_at   | MmugDNA.20879.1 | 6.99  | 6.83  | 0.1  | 0.02 | 1.12  | 0.08473  | 0.33348  | 0.348607 | 0.581694 |
| MmugDNA.2088.1.S1_at    | MmugDNA.2088.1  | 9.03  | 9.69  | 0.18 | 0.11 | -1.58 | 0.004734 | 0.030218 | 0.115008 | 0.21576  |
| MmugDNA.20881.1.S1_at   | MmugDNA.20881.1 | 3.06  | 3.05  | 0.11 | 0.02 | 1.01  | 0.859844 | 0.367034 | 0.939228 | 0.606673 |

|                         |                 |       |       |      |      |        |          |          |          |          |
|-------------------------|-----------------|-------|-------|------|------|--------|----------|----------|----------|----------|
| MmugDNA.20882.1.S1_at   | MmugDNA.20882.1 | 11.2  | 10.7  | 0.14 | 0.21 | 1.41   | 0.084815 | 0.093399 | 0.348795 | 0.349611 |
| MmugDNA.20883.1.S1_at   | MmugDNA.20883.1 | 8.64  | 8.37  | 0.45 | 0.22 | 1.2    | 0.601247 | 0.204292 | 0.79946  | 0.478541 |
| MmugDNA.20884.1.S1_at   | MmugDNA.20884.1 | 2.95  | 2.96  | 0.12 | 0.06 | -1.01  | 0.32571  | 0.436384 | 0.608885 | 0.655959 |
| MmugDNA.20886.1.S1_at   | MmugDNA.20886.1 | 3.34  | 3.15  | 0.04 | 0.11 | 1.14   | 0.081621 | 0.077393 | 0.342752 | 0.323204 |
| MmugDNA.20887.1.S1_at   | MmugDNA.20887.1 | 4.97  | 5.21  | 0.17 | 0.18 | -1.18  | 0.779334 | 0.424725 | 0.899222 | 0.647239 |
| MmugDNA.20888.1.S1_at   | MmugDNA.20888.1 | 5.21  | 4.96  | 0.2  | 0.41 | 1.19   | 0.62184  | 0.659609 | 0.812905 | 0.800804 |
| MmugDNA.20889.1.S1_at   | MmugDNA.20889.1 | 10.92 | 10.42 | 0.27 | 0.27 | 1.42   | 0.08327  | 0.081103 | 0.345533 | 0.329276 |
| MmugDNA.2089.1.S1_at    | MmugDNA.2089.1  | 3.75  | 3.73  | 0.08 | 0.12 | 1.01   | 0.19287  | 0.265288 | 0.48942  | 0.53127  |
| MmugDNA.20890.1.S1_at   | MmugDNA.20890.1 | 4     | 3.83  | 0.26 | 0.09 | 1.13   | 0.162096 | 0.188238 | 0.453951 | 0.464251 |
| MmugDNA.20891.1.S1_at   | MmugDNA.20891.1 | 6.91  | 7.16  | 0.31 | 0.16 | -1.19  | 0.213869 | 0.026559 | 0.511674 | 0.203915 |
| MmugDNA.20892.1.S1_at   | MmugDNA.20892.1 | 9.71  | 9.13  | 0.08 | 0.11 | 1.5    | 0.001365 | 0.046581 | 0.079595 | 0.260267 |
| MmugDNA.20892.1.S1_s_at | MmugDNA.20892.1 | 10.46 | 9.81  | 0.03 | 0.11 | 1.57   | 0.000647 | 0.013798 | 0.0711   | 0.150555 |
| MmugDNA.20893.1.S1_at   | MmugDNA.20893.1 | 5.4   | 4.92  | 0.32 | 0.26 | 1.39   | 0.14227  | 0.220219 | 0.428332 | 0.493655 |
| MmugDNA.20894.1.S1_at   | MmugDNA.20894.1 | 5.13  | 4.74  | 0.69 | 0.55 | 1.31   | 0.462089 | 0.835219 | 0.709348 | 0.905645 |
| MmugDNA.20895.1.S1_at   | MmugDNA.20895.1 | 6.25  | 6.08  | 0.23 | 0.14 | 1.13   | 0.825776 | 0.932635 | 0.92258  | 0.961739 |
| MmugDNA.20896.1.S1_at   | MmugDNA.20896.1 | 6.01  | 6.02  | 0.13 | 0.03 | -1.01  | 0.262228 | 0.12566  | 0.556354 | 0.396249 |
| MmugDNA.20897.1.S1_at   | MmugDNA.20897.1 | 6.59  | 6.44  | 0.43 | 0.26 | 1.11   | 0.340517 | 0.121146 | 0.620818 | 0.390217 |
| MmugDNA.20898.1.S1_at   | MmugDNA.20898.1 | 8.39  | 12.12 | 1.72 | 0.21 | -13.29 | 0.038349 | 0.264215 | 0.251853 | 0.530286 |
| MmugDNA.2090.1.S1_at    | MmugDNA.2090.1  | 4.46  | 4.47  | 0.16 | 0.06 | -1.01  | 0.873685 | 0.624919 | 0.945725 | 0.778939 |
| MmugDNA.20900.1.S1_at   | MmugDNA.20900.1 | 2.62  | 2.52  | 0.13 | 0.06 | 1.07   | 0.442656 | 0.653814 | 0.696105 | 0.79769  |
| MmugDNA.20901.1.S1_at   | MmugDNA.20901.1 | 7.89  | 8.38  | 0.21 | 0.19 | -1.41  | 0.03695  | 0.177355 | 0.24745  | 0.453742 |
| MmugDNA.20902.1.S1_at   | MmugDNA.20902.1 | 9.37  | 9.93  | 0.37 | 0.19 | -1.48  | 0.080474 | 0.241792 | 0.341026 | 0.51238  |
| MmugDNA.20903.1.S1_at   | MmugDNA.20903.1 | 3.03  | 3.12  | 0.04 | 0.08 | -1.07  | 0.171105 | 0.145806 | 0.464967 | 0.419833 |
| MmugDNA.20904.1.S1_at   | MmugDNA.20904.1 | 8.15  | 8.79  | 0.46 | 0.12 | -1.56  | 0.073749 | 0.24716  | 0.329399 | 0.516341 |
| MmugDNA.20905.1.S1_at   | MmugDNA.20905.1 | 9.52  | 8.95  | 0.2  | 0.3  | 1.49   | 0.128234 | 0.131942 | 0.410227 | 0.404002 |
| MmugDNA.20908.1.S1_at   | MmugDNA.20908.1 | 11.96 | 12.01 | 0.26 | 0.09 | -1.04  | 0.435053 | 0.443151 | 0.690248 | 0.661011 |
| MmugDNA.20909.1.S1_at   | MmugDNA.20909.1 | 7.5   | 7.63  | 0.18 | 0.23 | -1.09  | 0.22007  | 0.805909 | 0.517678 | 0.888395 |
| MmugDNA.2091.1.S1_at    | MmugDNA.2091.1  | 3.05  | 2.98  | 0.23 | 0.07 | 1.05   | 0.775505 | 0.58876  | 0.897425 | 0.755137 |
| MmugDNA.20910.1.S1_at   | MmugDNA.20910.1 | 7.54  | 6.58  | 0.42 | 0.07 | 1.94   | 0.01914  | 0.009266 | 0.191778 | 0.127089 |
| MmugDNA.20911.1.S1_at   | MmugDNA.20911.1 | 3.08  | 3.09  | 0.18 | 0.26 | -1.01  | 0.415784 | 0.456985 | 0.676389 | 0.670592 |
| MmugDNA.20912.1.S1_at   | MmugDNA.20912.1 | 12.41 | 12.52 | 0.03 | 0.05 | -1.08  | 0.083474 | 0.149543 | 0.345905 | 0.424095 |
| MmugDNA.20913.1.S1_at   | MmugDNA.20913.1 | 4.93  | 4.86  | 0.06 | 0.38 | 1.05   | 0.568911 | 0.47284  | 0.778633 | 0.680163 |
| MmugDNA.20914.1.S1_at   | MmugDNA.20914.1 | 3.44  | 3.38  | 0.6  | 0.22 | 1.04   | 0.328805 | 0.483387 | 0.611105 | 0.687904 |
| MmugDNA.20915.1.S1_at   | MmugDNA.20915.1 | 4.86  | 4.55  | 1.06 | 0.66 | 1.24   | 0.505582 | 0.441433 | 0.738603 | 0.659611 |
| MmugDNA.20917.1.S1_at   | MmugDNA.20917.1 | 7.79  | 7.38  | 0.31 | 0.35 | 1.32   | 0.085128 | 0.162265 | 0.349307 | 0.438447 |
| MmugDNA.20918.1.S1_at   | MmugDNA.20918.1 | 3.19  | 3.26  | 0.09 | 0.07 | -1.05  | 0.314809 | 0.193135 | 0.600158 | 0.468554 |
| MmugDNA.20919.1.S1_at   | MmugDNA.20919.1 | 4.71  | 4.72  | 0.59 | 0.08 | -1     | 0.392239 | 0.534639 | 0.65926  | 0.720477 |
| MmugDNA.2092.1.S1_at    | MmugDNA.2092.1  | 5.28  | 5.3   | 0.29 | 0.06 | -1.01  | 0.81261  | 0.876386 | 0.916193 | 0.929683 |
| MmugDNA.20922.1.S1_at   | MmugDNA.20922.1 | 4.09  | 3.99  | 0.37 | 0.1  | 1.07   | 0.316437 | 0.306961 | 0.60114  | 0.563427 |
| MmugDNA.20923.1.S1_at   | MmugDNA.20923.1 | 3.91  | 3.93  | 0.14 | 0.18 | -1.02  | 0.893469 | 0.410106 | 0.954549 | 0.637065 |
| MmugDNA.20924.1.S1_at   | MmugDNA.20924.1 | 3.94  | 4.63  | 0.37 | 0.36 | -1.62  | 0.073432 | 0.028886 | 0.328846 | 0.211763 |
| MmugDNA.20925.1.S1_at   | MmugDNA.20925.1 | 5.98  | 6.11  | 0.1  | 0.1  | -1.09  | 0.28312  | 0.2619   | 0.573595 | 0.528287 |
| MmugDNA.20926.1.S1_at   | MmugDNA.20926.1 | 6.55  | 4.89  | 1.7  | 0.79 | 3.16   | 0.189496 | 0.214064 | 0.485955 | 0.487645 |

|                         |                 |       |       |      |      |       |          |          |          |          |
|-------------------------|-----------------|-------|-------|------|------|-------|----------|----------|----------|----------|
| MmugDNA.20927.1.S1_at   | MmugDNA.20927.1 | 8.32  | 8.59  | 0.34 | 0.06 | -1.21 | 0.178238 | 0.093973 | 0.472973 | 0.350467 |
| MmugDNA.20929.1.S1_at   | MmugDNA.20929.1 | 4.31  | 4.37  | 0.21 | 0.04 | -1.04 | 0.550354 | 0.397898 | 0.767803 | 0.629138 |
| MmugDNA.32454.1.S1_s_at | MmugDNA.32454.1 | 3.92  | 3.94  | 0.07 | 0.04 | -1.01 | 0.657788 | 0.07264  | 0.834785 | 0.315579 |
| MmugDNA.20931.1.S1_at   | MmugDNA.20931.1 | 4.52  | 4.58  | 0.03 | 0.26 | -1.05 | 0.668738 | 0.660021 | 0.841085 | 0.801028 |
| MmugDNA.20933.1.S1_at   | MmugDNA.20933.1 | 4.95  | 5.27  | 0.11 | 0.4  | -1.25 | 0.322805 | 0.349608 | 0.606637 | 0.593539 |
| MmugDNA.20934.1.S1_at   | MmugDNA.20934.1 | 9.91  | 9.88  | 0.05 | 0.22 | 1.02  | 0.312729 | 0.333384 | 0.598778 | 0.581668 |
| MmugDNA.20935.1.S1_at   | MmugDNA.20935.1 | 3.73  | 3.68  | 0.31 | 0.06 | 1.03  | 0.707584 | 0.729967 | 0.861502 | 0.843733 |
| MmugDNA.20938.1.S1_at   | MmugDNA.20938.1 | 6.27  | 6.33  | 0.41 | 0.08 | -1.05 | 0.541339 | 0.092301 | 0.762087 | 0.348137 |
| MmugDNA.20939.1.S1_at   | MmugDNA.20939.1 | 7.35  | 7.3   | 0.48 | 0.3  | 1.03  | 0.400447 | 0.285135 | 0.665444 | 0.547098 |
| MmugDNA.2094.1.S1_s_at  | MmugDNA.2094.1  | 8.43  | 8.37  | 0.06 | 0.18 | 1.04  | 0.750282 | 0.227368 | 0.8846   | 0.499659 |
| MmugDNA.20940.1.S1_at   | MmugDNA.20940.1 | 4.79  | 4.15  | 0.91 | 0.26 | 1.55  | 0.169031 | 0.159798 | 0.462206 | 0.435871 |
| MmugDNA.20941.1.S1_s_at | MmugDNA.20941.1 | 5.57  | 5.58  | 0.18 | 0.02 | -1.01 | 0.379441 | 0.679721 | 0.649328 | 0.812998 |
| MmugDNA.20942.1.S1_at   | MmugDNA.20942.1 | 3.59  | 3.69  | 0.19 | 0.23 | -1.07 | 0.452015 | 0.493847 | 0.702692 | 0.694433 |
| MmugDNA.20943.1.S1_at   | MmugDNA.20943.1 | 5.9   | 5.85  | 0.17 | 0.33 | 1.03  | 0.908183 | 0.849806 | 0.961131 | 0.914673 |
| MmugDNA.20944.1.S1_at   | MmugDNA.20944.1 | 2.85  | 2.89  | 0.16 | 0.04 | -1.03 | 0.78115  | 0.800307 | 0.900025 | 0.885129 |
| MmugDNA.20945.1.S1_at   | MmugDNA.20945.1 | 6.59  | 6.52  | 0.22 | 0.07 | 1.05  | 0.819732 | 0.471412 | 0.919644 | 0.679435 |
| MmugDNA.20946.1.S1_at   | MmugDNA.20946.1 | 7.29  | 6.98  | 0.31 | 0.21 | 1.25  | 0.096514 | 0.021687 | 0.366407 | 0.184333 |
| MmugDNA.20947.1.S1_at   | MmugDNA.20947.1 | 3.65  | 3.42  | 1.03 | 0.5  | 1.17  | 0.465194 | 0.405082 | 0.711362 | 0.633481 |
| MmugDNA.20948.1.S1_at   | MmugDNA.20948.1 | 5.81  | 5.61  | 0.06 | 0.15 | 1.14  | 0.132406 | 0.333101 | 0.415753 | 0.581387 |
| MmugDNA.20949.1.S1_at   | MmugDNA.20949.1 | 4.4   | 4.23  | 0.47 | 0.29 | 1.12  | 0.723365 | 0.562419 | 0.869996 | 0.738025 |
| MmugDNA.2095.1.S1_at    | MmugDNA.2095.1  | 4.64  | 5.77  | 1.17 | 0.26 | -2.19 | 0.162684 | 0.266107 | 0.454729 | 0.531943 |
| MmugDNA.20950.1.S1_at   | MmugDNA.20950.1 | 11.71 | 11.63 | 0.13 | 0.14 | 1.05  | 0.297334 | 0.840712 | 0.585786 | 0.909196 |
| MmugDNA.20951.1.S1_at   | MmugDNA.20951.1 | 5.54  | 5.64  | 0.5  | 0.04 | -1.08 | 0.56338  | 0.745309 | 0.775443 | 0.852351 |
| MmugDNA.20952.1.S1_at   | MmugDNA.20952.1 | 6.92  | 6.94  | 0.24 | 0    | -1.01 | 0.694607 | 0.66947  | 0.854266 | 0.806626 |
| MmugDNA.20953.1.S1_at   | MmugDNA.20953.1 | 4.91  | 5.01  | 0.03 | 0.07 | -1.06 | 0.073976 | 0.002802 | 0.330014 | 0.078041 |
| MmugDNA.20954.1.S1_at   | MmugDNA.20954.1 | 4.49  | 4.03  | 0.25 | 0.24 | 1.38  | 0.043904 | 0.046068 | 0.266505 | 0.258977 |
| MmugDNA.20955.1.S1_at   | MmugDNA.20955.1 | 5.56  | 5.37  | 0.17 | 0.19 | 1.14  | 0.528879 | 0.469456 | 0.753909 | 0.678248 |
| MmugDNA.20956.1.S1_at   | MmugDNA.20956.1 | 8.35  | 8.36  | 0.16 | 0.1  | -1    | 0.560943 | 0.010807 | 0.774101 | 0.135636 |
| MmugDNA.20959.1.S1_at   | MmugDNA.20959.1 | 3.25  | 3.15  | 0.03 | 0.08 | 1.07  | 0.5372   | 0.224188 | 0.759433 | 0.497164 |
| MmugDNA.2096.1.S1_at    | MmugDNA.2096.1  | 8.38  | 8.8   | 0.26 | 0.07 | -1.34 | 0.056117 | 0.002692 | 0.294018 | 0.076455 |
| MmugDNA.20960.1.S1_at   | MmugDNA.20960.1 | 3.92  | 5.12  | 0.12 | 0.19 | -2.3  | 0.000779 | 0.028991 | 0.072818 | 0.212154 |
| MmugDNA.20961.1.S1_at   | MmugDNA.20961.1 | 5.31  | 4.87  | 0.39 | 0.28 | 1.36  | 0.185812 | 0.401256 | 0.481966 | 0.63089  |
| MmugDNA.20962.1.S1_at   | MmugDNA.20962.1 | 3.46  | 3.38  | 0.09 | 0.09 | 1.05  | 0.149328 | 0.169634 | 0.438217 | 0.446221 |
| MmugDNA.20965.1.S1_at   | MmugDNA.20965.1 | 4.87  | 4.74  | 0.25 | 0.15 | 1.09  | 0.536698 | 0.858883 | 0.759085 | 0.919647 |
| MmugDNA.20966.1.S1_at   | MmugDNA.20966.1 | 13.3  | 13.2  | 0.03 | 0.04 | 1.07  | 0.047728 | 0.190476 | 0.275898 | 0.465906 |
| MmugDNA.20966.1.S1_s_at | MmugDNA.20966.1 | 13.47 | 13.39 | 0.04 | 0.04 | 1.05  | 0.084257 | 0.369585 | 0.347662 | 0.608948 |
| MmugDNA.20967.1.S1_at   | MmugDNA.20967.1 | 7.84  | 7.56  | 0.33 | 0.23 | 1.21  | 0.745189 | 0.950512 | 0.881818 | 0.971855 |
| MmugDNA.20968.1.S1_at   | MmugDNA.20968.1 | 3.32  | 3.33  | 0.08 | 0.01 | -1.01 | 0.795606 | 0.781778 | 0.907596 | 0.873516 |
| MmugDNA.20969.1.S1_at   | MmugDNA.20969.1 | 5.51  | 5.57  | 0.37 | 0.14 | -1.04 | 0.719733 | 0.007972 | 0.867741 | 0.118702 |
| MmugDNA.2097.1.S1_at    | MmugDNA.2097.1  | 4.44  | 4.13  | 0.3  | 0.09 | 1.24  | 0.154941 | 0.259164 | 0.445143 | 0.526264 |
| MmugDNA.33235.1.S1_s_at | MmugDNA.33235.1 | 6.37  | 6.81  | 0.35 | 0.34 | -1.35 | 0.159739 | 0.010664 | 0.4511   | 0.13482  |
| MmugDNA.20971.1.S1_at   | MmugDNA.20971.1 | 4.91  | 4.23  | 0.41 | 0.21 | 1.61  | 0.278028 | 0.342697 | 0.569395 | 0.588666 |
| MmugDNA.20972.1.S1_at   | MmugDNA.20972.1 | 4.95  | 4.95  | 0.14 | 0.17 | -1    | 0.921578 | 0.984005 | 0.966402 | 0.991111 |

|                         |                 |       |       |      |      |       |          |          |          |          |
|-------------------------|-----------------|-------|-------|------|------|-------|----------|----------|----------|----------|
| MmugDNA.20973.1.S1_at   | MmugDNA.20973.1 | 3.37  | 3.07  | 0.32 | 0.26 | 1.23  | 0.333527 | 0.317187 | 0.614935 | 0.570458 |
| MmugDNA.20974.1.S1_at   | MmugDNA.20974.1 | 6.8   | 6.75  | 0.08 | 0.07 | 1.03  | 0.466659 | 0.592695 | 0.712325 | 0.757854 |
| MmugDNA.20975.1.S1_at   | MmugDNA.20975.1 | 8.23  | 8.84  | 0.39 | 0.2  | -1.52 | 0.154429 | 0.076143 | 0.444671 | 0.320969 |
| MmugDNA.20976.1.S1_at   | MmugDNA.20976.1 | 4.1   | 4.08  | 0.26 | 0.13 | 1.01  | 0.939201 | 0.984448 | 0.974332 | 0.991287 |
| MmugDNA.20977.1.S1_at   | MmugDNA.20977.1 | 8.47  | 8.24  | 0.27 | 0.11 | 1.17  | 0.083921 | 0.07025  | 0.346952 | 0.311287 |
| MmugDNA.20978.1.S1_at   | MmugDNA.20978.1 | 5.83  | 5.83  | 0.14 | 0.06 | 1     | 0.415512 | 0.485637 | 0.67619  | 0.68924  |
| MmugDNA.2098.1.S1_at    | MmugDNA.2098.1  | 4.42  | 3.98  | 0.33 | 0.07 | 1.36  | 0.104217 | 0.138873 | 0.377566 | 0.412037 |
| MmugDNA.20980.1.S1_at   | MmugDNA.20980.1 | 8.73  | 8.71  | 0.52 | 0.23 | 1.01  | 0.569447 | 0.604486 | 0.778858 | 0.764647 |
| MmugDNA.20980.1.S1_s_at | MmugDNA.20980.1 | 6.5   | 6.81  | 0.24 | 0.14 | -1.24 | 0.045061 | 0.009807 | 0.269602 | 0.130166 |
| MmugDNA.20981.1.S1_at   | MmugDNA.20981.1 | 6.41  | 6.58  | 0.24 | 0.11 | -1.13 | 0.876818 | 0.811586 | 0.947352 | 0.891244 |
| MmugDNA.20982.1.S1_at   | MmugDNA.20982.1 | 3.14  | 3.28  | 0.08 | 0.02 | -1.1  | 0.076446 | 0.48407  | 0.334713 | 0.688318 |
| MmugDNA.20984.1.S1_at   | MmugDNA.20984.1 | 8.29  | 8.66  | 0.32 | 0.02 | -1.29 | 0.107586 | 0.168706 | 0.382272 | 0.445379 |
| MmugDNA.20985.1.S1_at   | MmugDNA.20985.1 | 9.5   | 9.58  | 0.51 | 0.07 | -1.06 | 0.596489 | 0.709411 | 0.795855 | 0.831622 |
| MmugDNA.20987.1.S1_at   | MmugDNA.20987.1 | 12.37 | 11.11 | 0.51 | 0.12 | 2.38  | 0.029874 | 0.004094 | 0.226143 | 0.090584 |
| MmugDNA.20988.1.S1_at   | MmugDNA.20988.1 | 9.37  | 9.04  | 0.12 | 0.16 | 1.25  | 0.119948 | 0.255122 | 0.398202 | 0.52317  |
| MmugDNA.20989.1.S1_at   | MmugDNA.20989.1 | 5.79  | 6.93  | 0.56 | 0.19 | -2.2  | 0.108776 | 0.072988 | 0.383665 | 0.315986 |
| MmugDNA.2099.1.S1_at    | MmugDNA.2099.1  | 12.53 | 12.46 | 0.49 | 0.07 | 1.05  | 0.595828 | 0.812759 | 0.795488 | 0.891794 |
| MmugDNA.20990.1.S1_at   | MmugDNA.20990.1 | 4.69  | 4.55  | 0.02 | 0.17 | 1.1   | 0.222246 | 0.209144 | 0.520237 | 0.482939 |
| MmugDNA.20991.1.S1_at   | MmugDNA.20991.1 | 5.97  | 5.97  | 0.03 | 0.02 | -1    | 0.717614 | 0.33741  | 0.866658 | 0.58462  |
| MmugDNA.20992.1.S1_at   | MmugDNA.20992.1 | 4.6   | 3.7   | 0.88 | 0.18 | 1.86  | 0.208645 | 0.268666 | 0.506196 | 0.534138 |
| MmugDNA.20993.1.S1_at   | MmugDNA.20993.1 | 12.2  | 12.05 | 0.32 | 0.19 | 1.1   | 0.764237 | 0.210397 | 0.891902 | 0.484267 |
| MmugDNA.20994.1.S1_at   | MmugDNA.20994.1 | 4.19  | 4.16  | 0.3  | 0.09 | 1.02  | 0.717518 | 0.812372 | 0.866592 | 0.891607 |
| MmugDNA.20996.1.S1_at   | MmugDNA.20996.1 | 4.24  | 4.23  | 0.1  | 0.2  | 1.01  | 0.296342 | 0.406057 | 0.585059 | 0.634197 |
| MmugDNA.20997.1.S1_at   | MmugDNA.20997.1 | 3.24  | 2.92  | 0.09 | 0.17 | 1.25  | 0.068621 | 0.065941 | 0.319786 | 0.302161 |
| MmugDNA.20998.1.S1_at   | MmugDNA.20998.1 | 8.2   | 8.09  | 0.47 | 0.16 | 1.08  | 0.42928  | 0.629649 | 0.685718 | 0.781989 |
| MmugDNA.20999.1.S1_at   | MmugDNA.20999.1 | 6.73  | 6.83  | 0.27 | 0.29 | -1.07 | 0.816087 | 0.451273 | 0.917941 | 0.666113 |
| MmugDNA.2100.1.S1_at    | MmugDNA.2100.1  | 10.27 | 10.75 | 0.13 | 0.11 | -1.39 | 0.007884 | 0.173541 | 0.137831 | 0.449938 |
| MmugDNA.21000.1.S1_at   | MmugDNA.21000.1 | 5.72  | 5.5   | 0.11 | 0.14 | 1.17  | 0.05955  | 0.043325 | 0.30116  | 0.252847 |
| MmugDNA.21001.1.S1_at   | MmugDNA.21001.1 | 7.73  | 7.06  | 0.25 | 0.12 | 1.58  | 0.018918 | 0.05466  | 0.191115 | 0.279311 |
| MmugDNA.21003.1.S1_at   | MmugDNA.21003.1 | 7.03  | 7.32  | 0.13 | 0.12 | -1.23 | 0.117322 | 0.80574  | 0.394595 | 0.888331 |
| MmugDNA.21006.1.S1_at   | MmugDNA.21006.1 | 4.46  | 4.27  | 0.28 | 0.21 | 1.14  | 0.762691 | 0.335203 | 0.891323 | 0.582968 |
| MmugDNA.21008.1.S1_at   | MmugDNA.21008.1 | 11.4  | 11.32 | 0.17 | 0.02 | 1.06  | 0.4487   | 0.751382 | 0.700155 | 0.855447 |
| MmugDNA.21010.1.S1_at   | MmugDNA.21010.1 | 8.22  | 8.55  | 0.47 | 0.18 | -1.26 | 0.289837 | 0.421003 | 0.579378 | 0.644662 |
| MmugDNA.21010.1.S1_s_at | MmugDNA.21010.1 | 7.46  | 7.93  | 0.42 | 0.32 | -1.39 | 0.362712 | 0.571997 | 0.63739  | 0.744171 |
| MmugDNA.21011.1.S1_at   | MmugDNA.21011.1 | 7.63  | 7.62  | 0.05 | 0.2  | 1     | 0.555212 | 0.171349 | 0.771144 | 0.447813 |
| MmugDNA.21012.1.S1_at   | MmugDNA.21012.1 | 5.2   | 5.27  | 0.23 | 0.12 | -1.04 | 0.838617 | 0.888089 | 0.929155 | 0.936183 |
| MmugDNA.21014.1.S1_at   | MmugDNA.21014.1 | 5.11  | 5.11  | 0.15 | 0.04 | -1    | 0.811251 | 0.799837 | 0.915484 | 0.884906 |
| MmugDNA.21015.1.S1_at   | MmugDNA.21015.1 | 6.54  | 6.28  | 0.36 | 0.29 | 1.19  | 0.677225 | 0.727266 | 0.846031 | 0.84224  |
| MmugDNA.21016.1.S1_at   | MmugDNA.21016.1 | 5.49  | 4.36  | 1.07 | 0.45 | 2.19  | 0.213453 | 0.176245 | 0.511324 | 0.452718 |
| MmugDNA.21017.1.S1_at   | MmugDNA.21017.1 | 8.2   | 8.54  | 1.15 | 0.26 | -1.27 | 0.969357 | 0.997303 | 0.987838 | 0.998549 |
| MmugDNA.21018.1.S1_at   | MmugDNA.21018.1 | 3.09  | 3.02  | 0.17 | 0.07 | 1.05  | 0.167605 | 0.198003 | 0.46081  | 0.472955 |
| MmugDNA.21019.1.S1_at   | MmugDNA.21019.1 | 7.26  | 7.37  | 0.55 | 0.13 | -1.08 | 0.908883 | 0.179277 | 0.961366 | 0.455692 |
| MmugDNA.2102.1.S1_at    | MmugDNA.2102.1  | 6.02  | 5.92  | 0.01 | 0.09 | 1.07  | 0.120118 | 0.599324 | 0.398476 | 0.761415 |



|                         |                 |       |       |      |      |       |          |          |          |          |
|-------------------------|-----------------|-------|-------|------|------|-------|----------|----------|----------|----------|
| MmugDNA.21020.1.S1_at   | MmugDNA.21020.1 | 6.05  | 5.97  | 0.15 | 0.04 | 1.05  | 0.389325 | 0.751995 | 0.657321 | 0.855739 |
| MmugDNA.21021.1.S1_at   | MmugDNA.21021.1 | 4.34  | 4.43  | 0.14 | 0.24 | -1.06 | 0.821044 | 0.46305  | 0.920132 | 0.674193 |
| MmugDNA.21022.1.S1_at   | MmugDNA.21022.1 | 3.55  | 3.9   | 0.34 | 0.38 | -1.27 | 0.363513 | 0.525134 | 0.638251 | 0.714766 |
| MmugDNA.21024.1.S1_at   | MmugDNA.21024.1 | 5.86  | 5.87  | 0.09 | 0.05 | -1.01 | 0.925536 | 0.33711  | 0.968463 | 0.584337 |
| MmugDNA.21025.1.S1_at   | MmugDNA.21025.1 | 8.22  | 7.9   | 0.4  | 0.13 | 1.25  | 0.232011 | 0.035683 | 0.530597 | 0.233314 |
| MmugDNA.21027.1.S1_at   | MmugDNA.21027.1 | 5.09  | 4.9   | 0.1  | 0.13 | 1.15  | 0.093357 | 0.654539 | 0.361907 | 0.798087 |
| MmugDNA.21028.1.S1_at   | MmugDNA.21028.1 | 3.72  | 3.57  | 0.22 | 0.01 | 1.11  | 0.231274 | 0.103662 | 0.530006 | 0.364465 |
| MmugDNA.21029.1.S1_at   | MmugDNA.21029.1 | 7.06  | 6.84  | 0.13 | 0.23 | 1.16  | 0.436459 | 0.157141 | 0.691433 | 0.432616 |
| MmugDNA.2103.1.S1_at    | MmugDNA.2103.1  | 4.16  | 4.34  | 1.43 | 0.4  | -1.14 | 0.663507 | 0.723201 | 0.837822 | 0.839645 |
| MmugDNA.21030.1.S1_at   | MmugDNA.21030.1 | 5.47  | 6.29  | 0.16 | 0.21 | -1.77 | 0.011432 | 0.016786 | 0.157067 | 0.164091 |
| MmugDNA.21031.1.S1_at   | MmugDNA.21031.1 | 7.62  | 6.83  | 0.46 | 0.11 | 1.73  | 0.094829 | 0.07043  | 0.363741 | 0.311729 |
| MmugDNA.21033.1.S1_at   | MmugDNA.21033.1 | 3.69  | 3.56  | 0.65 | 0.58 | 1.1   | 0.639025 | 0.813283 | 0.823331 | 0.892071 |
| MmugDNA.21034.1.S1_at   | MmugDNA.21034.1 | 6.75  | 6.64  | 0.28 | 0.09 | 1.08  | 0.700564 | 0.496873 | 0.857793 | 0.696265 |
| MmugDNA.21035.1.S1_s_at | MmugDNA.21035.1 | 9.36  | 9.38  | 0.08 | 0.14 | -1.01 | 0.811763 | 0.939148 | 0.915719 | 0.965446 |
| MmugDNA.21036.1.S1_at   | MmugDNA.21036.1 | 5.1   | 5.09  | 0.16 | 0.03 | 1     | 0.423843 | 0.161711 | 0.681752 | 0.437771 |
| MmugDNA.21037.1.S1_at   | MmugDNA.21037.1 | 6.57  | 6.78  | 0.5  | 0.12 | -1.16 | 0.17213  | 0.102268 | 0.466213 | 0.36236  |
| MmugDNA.21039.1.S1_at   | MmugDNA.21039.1 | 5.64  | 5.61  | 0.21 | 0.09 | 1.02  | 0.660083 | 0.826704 | 0.836024 | 0.900485 |
| MmugDNA.2104.1.S1_at    | MmugDNA.2104.1  | 5.35  | 5.08  | 0.23 | 0.27 | 1.21  | 0.112533 | 0.03775  | 0.388857 | 0.238716 |
| MmugDNA.21040.1.S1_at   | MmugDNA.21040.1 | 6.26  | 6.12  | 0.74 | 0.19 | 1.1   | 0.258208 | 0.337535 | 0.552443 | 0.584716 |
| MmugDNA.21043.1.S1_at   | MmugDNA.21043.1 | 7.18  | 7.17  | 1.64 | 0.26 | 1.01  | 0.82841  | 0.956129 | 0.924117 | 0.975053 |
| MmugDNA.21044.1.S1_at   | MmugDNA.21044.1 | 7.43  | 7.41  | 0.12 | 0.23 | 1.02  | 0.962319 | 0.331258 | 0.984644 | 0.579981 |
| MmugDNA.21045.1.S1_at   | MmugDNA.21045.1 | 5.11  | 4.76  | 0.99 | 0.42 | 1.27  | 0.337453 | 0.558815 | 0.617875 | 0.735887 |
| MmugDNA.21046.1.S1_at   | MmugDNA.21046.1 | 12.4  | 12.57 | 0.24 | 0.03 | -1.12 | 0.74975  | 0.474984 | 0.88413  | 0.681837 |
| MmugDNA.21049.1.S1_at   | MmugDNA.21049.1 | 4.88  | 4.57  | 0.2  | 0.16 | 1.24  | 0.091356 | 0.033445 | 0.358885 | 0.226517 |
| MmugDNA.2105.1.S1_at    | MmugDNA.2105.1  | 5.02  | 5.03  | 0.23 | 0.06 | -1.01 | 0.492491 | 0.514547 | 0.729756 | 0.707765 |
| MmugDNA.21050.1.S1_at   | MmugDNA.21050.1 | 6.57  | 6.18  | 0.34 | 0.26 | 1.31  | 0.132694 | 0.006054 | 0.416039 | 0.106152 |
| MmugDNA.21052.1.S1_at   | MmugDNA.21052.1 | 6.89  | 9.56  | 0.86 | 0.17 | -6.34 | 0.014754 | 0.043784 | 0.173373 | 0.25387  |
| MmugDNA.21053.1.S1_at   | MmugDNA.21053.1 | 3.27  | 3.31  | 0.63 | 0.05 | -1.03 | 0.465251 | 0.279657 | 0.711393 | 0.543212 |
| MmugDNA.21054.1.S1_at   | MmugDNA.21054.1 | 4.09  | 3.97  | 0    | 0.11 | 1.09  | 0.155508 | 0.391788 | 0.445869 | 0.625301 |
| MmugDNA.21055.1.S1_at   | MmugDNA.21055.1 | 7.33  | 6.34  | 0.48 | 0.57 | 1.99  | 0.060592 | 0.0503   | 0.303194 | 0.269573 |
| MmugDNA.21056.1.S1_at   | MmugDNA.21056.1 | 6.64  | 6.42  | 0.24 | 0.05 | 1.16  | 0.186873 | 0.255754 | 0.482992 | 0.523692 |
| MmugDNA.21057.1.S1_at   | MmugDNA.21057.1 | 4.9   | 4.44  | 0.21 | 0.4  | 1.37  | 0.703426 | 0.655066 | 0.859271 | 0.798277 |
| MmugDNA.2106.1.S1_at    | MmugDNA.2106.1  | 6.65  | 6.66  | 0.07 | 0.09 | -1    | 0.899178 | 0.055632 | 0.957065 | 0.281649 |
| MmugDNA.21060.1.S1_at   | MmugDNA.21060.1 | 7.65  | 7.88  | 0.15 | 0.05 | -1.18 | 0.118219 | 0.250843 | 0.395722 | 0.51956  |
| MmugDNA.21061.1.S1_s_at | MmugDNA.21061.1 | 9.59  | 10.08 | 0.16 | 0.07 | -1.41 | 0.006991 | 0.104282 | 0.130898 | 0.365479 |
| MmugDNA.21062.1.S1_at   | MmugDNA.21062.1 | 8.68  | 8.39  | 0.23 | 0.04 | 1.23  | 0.099662 | 0.054638 | 0.370613 | 0.279266 |
| MmugDNA.21063.1.S1_at   | MmugDNA.21063.1 | 12.24 | 11.56 | 0.15 | 0.05 | 1.61  | 0.00249  | 0.059971 | 0.094326 | 0.291581 |
| MmugDNA.21064.1.S1_at   | MmugDNA.21064.1 | 8.83  | 7.74  | 0.46 | 0.16 | 2.13  | 0.013512 | 0.00887  | 0.167092 | 0.12465  |
| MmugDNA.21066.1.S1_at   | MmugDNA.21066.1 | 11.42 | 11.41 | 0.02 | 0.03 | 1.01  | 0.759305 | 0.278703 | 0.889659 | 0.542416 |
| MmugDNA.21068.1.S1_at   | MmugDNA.21068.1 | 4.32  | 4.48  | 0.15 | 0.28 | -1.12 | 0.660972 | 0.839663 | 0.83642  | 0.908582 |
| MmugDNA.21068.1.S1_s_at | MmugDNA.21068.1 | 2.96  | 3.03  | 0.04 | 0.08 | -1.05 | 0.270694 | 0.187359 | 0.562838 | 0.463379 |
| MmugDNA.21069.1.S1_at   | MmugDNA.21069.1 | 8.29  | 8.88  | 0.25 | 0.23 | -1.51 | 0.03892  | 0.186654 | 0.253692 | 0.462457 |
| MmugDNA.2107.1.S1_at    | MmugDNA.2107.1  | 4.12  | 4.41  | 0.87 | 0.36 | -1.23 | 0.744126 | 0.167135 | 0.881397 | 0.443621 |

|                         |                 |       |       |      |      |       |          |          |          |          |
|-------------------------|-----------------|-------|-------|------|------|-------|----------|----------|----------|----------|
| MmugDNA.21070.1.S1_at   | MmugDNA.21070.1 | 7.83  | 10.07 | 0.37 | 0.23 | -4.71 | 0.001004 | 0.004641 | 0.076321 | 0.095    |
| MmugDNA.21072.1.S1_at   | MmugDNA.21072.1 | 6.2   | 6.11  | 0.06 | 0.14 | 1.06  | 0.977839 | 0.807113 | 0.991321 | 0.888946 |
| MmugDNA.21073.1.S1_at   | MmugDNA.21073.1 | 4.43  | 4.29  | 0.14 | 0.08 | 1.1   | 0.141953 | 0.16179  | 0.427917 | 0.437876 |
| MmugDNA.21075.1.S1_at   | MmugDNA.21075.1 | 8.6   | 8.87  | 0.37 | 0.02 | -1.21 | 0.579098 | 0.402875 | 0.784894 | 0.631631 |
| MmugDNA.21076.1.S1_at   | MmugDNA.21076.1 | 9.3   | 10.38 | 0.3  | 0.1  | -2.12 | 0.006033 | 0.223967 | 0.124151 | 0.497019 |
| MmugDNA.21078.1.S1_at   | MmugDNA.21078.1 | 2.71  | 2.66  | 0    | 0.04 | 1.03  | 0.157234 | 0.221381 | 0.447994 | 0.494644 |
| MmugDNA.21079.1.S1_at   | MmugDNA.21079.1 | 4.84  | 4.81  | 0.12 | 0.03 | 1.02  | 0.32968  | 0.553717 | 0.611807 | 0.732777 |
| MmugDNA.21081.1.S1_at   | MmugDNA.21081.1 | 4.16  | 4.11  | 0.11 | 0.18 | 1.03  | 0.70828  | 0.594842 | 0.861834 | 0.758675 |
| MmugDNA.21087.1.S1_at   | MmugDNA.21087.1 | 9.99  | 10.82 | 0.62 | 0.18 | -1.78 | 0.103964 | 0.050417 | 0.377277 | 0.269746 |
| MmugDNA.21089.1.S1_at   | MmugDNA.21089.1 | 9.94  | 9.68  | 0.09 | 0.05 | 1.2   | 0.015933 | 0.001674 | 0.17868  | 0.061979 |
| MmugDNA.13762.1.S1_at   | MmugDNA.13762.1 | 10.67 | 10.35 | 0.59 | 0.15 | 1.25  | 0.347297 | 0.694897 | 0.625463 | 0.822638 |
| MmugDNA.13762.1.S1_s_at | MmugDNA.13762.1 | 11.08 | 10.76 | 0.69 | 0.02 | 1.24  | 0.506913 | 0.858008 | 0.739358 | 0.919035 |
| MmugDNA.21092.1.S1_at   | MmugDNA.21092.1 | 4.42  | 4.57  | 1.11 | 0.16 | -1.11 | 0.508467 | 0.560008 | 0.740418 | 0.736439 |
| MmugDNA.21093.1.S1_at   | MmugDNA.21093.1 | 4.28  | 3.94  | 0.3  | 0.04 | 1.26  | 0.23807  | 0.062962 | 0.535495 | 0.297586 |
| MmugDNA.21094.1.S1_at   | MmugDNA.21094.1 | 3.15  | 3.19  | 0.1  | 0.11 | -1.03 | 0.14217  | 0.200995 | 0.428166 | 0.475442 |
| MmugDNA.21096.1.S1_at   | MmugDNA.21096.1 | 12.94 | 12.7  | 0.1  | 0.06 | 1.18  | 0.036208 | 0.309348 | 0.245341 | 0.564912 |
| MmugDNA.21097.1.S1_at   | MmugDNA.21097.1 | 6.08  | 6.07  | 0.13 | 0.04 | 1     | 0.642567 | 0.561825 | 0.82562  | 0.737654 |
| MmugDNA.21099.1.S1_at   | MmugDNA.21099.1 | 3.77  | 3.81  | 0.11 | 0.13 | -1.03 | 0.369184 | 0.51841  | 0.642787 | 0.71038  |
| MmugDNA.2110.1.S1_at    | MmugDNA.2110.1  | 3.83  | 3.84  | 0.22 | 0.03 | -1.01 | 0.484113 | 0.217473 | 0.724078 | 0.491035 |
| MmugDNA.21101.1.S1_s_at | MmugDNA.21101.1 | 6.2   | 6.63  | 0.42 | 0.24 | -1.34 | 0.115973 | 0.047722 | 0.393014 | 0.263325 |
| MmugDNA.21102.1.S1_at   | MmugDNA.21102.1 | 6.53  | 6.81  | 0.63 | 0.56 | -1.22 | 0.314692 | 0.3391   | 0.600086 | 0.585891 |
| MmugDNA.21103.1.S1_at   | MmugDNA.21103.1 | 6.01  | 7.08  | 0.35 | 0.21 | -2.1  | 0.016507 | 0.021914 | 0.181462 | 0.185265 |
| MmugDNA.21106.1.S1_at   | MmugDNA.21106.1 | 6.87  | 6.76  | 0.19 | 0.22 | 1.08  | 0.543265 | 0.023311 | 0.763355 | 0.191355 |
| MmugDNA.21107.1.S1_at   | MmugDNA.21107.1 | 5.9   | 5.87  | 0.12 | 0.08 | 1.02  | 0.160096 | 0.168553 | 0.451433 | 0.445172 |
| MmugDNA.2111.1.S1_at    | MmugDNA.2111.1  | 3.7   | 3.68  | 0.16 | 0.05 | 1.02  | 0.712032 | 0.807029 | 0.864171 | 0.888946 |
| MmugDNA.21110.1.S1_at   | MmugDNA.21110.1 | 9.84  | 9.86  | 0.22 | 0.06 | -1.01 | 0.567487 | 0.816548 | 0.77779  | 0.894202 |
| MmugDNA.21111.1.S1_at   | MmugDNA.21111.1 | 4.87  | 4.9   | 0.14 | 0.25 | -1.02 | 0.877602 | 0.820112 | 0.947695 | 0.896336 |
| MmugDNA.21112.1.S1_at   | MmugDNA.21112.1 | 8.77  | 8.25  | 0.15 | 0.3  | 1.43  | 0.131855 | 0.002734 | 0.414912 | 0.07708  |
| MmugDNA.21113.1.S1_at   | MmugDNA.21113.1 | 4.33  | 4.57  | 0.14 | 0.15 | -1.18 | 0.286815 | 0.112261 | 0.576587 | 0.37755  |
| MmugDNA.21114.1.S1_at   | MmugDNA.21114.1 | 5.86  | 5.83  | 0.29 | 0.13 | 1.02  | 0.947049 | 0.664218 | 0.977707 | 0.803247 |
| MmugDNA.21115.1.S1_at   | MmugDNA.21115.1 | 8.82  | 8.66  | 0.12 | 0.05 | 1.12  | 0.025362 | 0.0208   | 0.21227  | 0.180908 |
| MmugDNA.21116.1.S1_at   | MmugDNA.21116.1 | 8.23  | 7.62  | 0.19 | 0.14 | 1.53  | 0.008671 | 0.003845 | 0.142597 | 0.088232 |
| MmugDNA.21117.1.S1_at   | MmugDNA.21117.1 | 11.98 | 11.92 | 0.08 | 0.02 | 1.04  | 0.192744 | 0.687267 | 0.489336 | 0.817523 |
| MmugDNA.21117.1.S1_s_at | MmugDNA.21117.1 | 12.45 | 12.34 | 0.06 | 0.01 | 1.07  | 0.055239 | 0.620105 | 0.291993 | 0.775227 |
| MmugDNA.21119.1.S1_at   | MmugDNA.21119.1 | 11.53 | 11.26 | 0.1  | 0.05 | 1.2   | 0.009582 | 0.069968 | 0.148076 | 0.31072  |
| MmugDNA.21121.1.S1_at   | MmugDNA.21121.1 | 10.47 | 9.95  | 0.23 | 0.08 | 1.43  | 0.027917 | 0.434836 | 0.219684 | 0.654843 |
| MmugDNA.21123.1.S1_at   | MmugDNA.21123.1 | 10.98 | 11.02 | 0.19 | 0.04 | -1.03 | 0.913993 | 0.943828 | 0.963475 | 0.96811  |
| MmugDNA.21124.1.S1_at   | MmugDNA.21124.1 | 3.8   | 3.12  | 0.46 | 0.9  | 1.61  | 0.762942 | 0.277168 | 0.891457 | 0.541154 |
| MmugDNA.21129.1.S1_at   | MmugDNA.21129.1 | 8.52  | 7.96  | 0.12 | 0.07 | 1.47  | 0.0032   | 0.000731 | 0.101477 | 0.044701 |
| MmugDNA.2113.1.S1_at    | MmugDNA.2113.1  | 9.61  | 9.95  | 0.26 | 0.2  | -1.27 | 0.223178 | 0.050704 | 0.520981 | 0.270338 |
| MmugDNA.21130.1.S1_at   | MmugDNA.21130.1 | 6.9   | 6.73  | 0.14 | 0.23 | 1.13  | 0.815183 | 0.71637  | 0.917477 | 0.835633 |
| MmugDNA.21131.1.S1_at   | MmugDNA.21131.1 | 2.78  | 2.91  | 0.22 | 0.03 | -1.1  | 0.973002 | 0.713627 | 0.9892   | 0.833863 |
| MmugDNA.21132.1.S1_at   | MmugDNA.21132.1 | 7.44  | 7.15  | 0.55 | 0.17 | 1.22  | 0.483385 | 0.086419 | 0.723504 | 0.338882 |

|                         |                 |       |       |      |      |       |          |          |          |          |
|-------------------------|-----------------|-------|-------|------|------|-------|----------|----------|----------|----------|
| MmugDNA.21133.1.S1_at   | MmugDNA.21133.1 | 6.22  | 6.22  | 0.11 | 0.14 | 1     | 0.956294 | 0.772222 | 0.982055 | 0.867607 |
| MmugDNA.21134.1.S1_at   | MmugDNA.21134.1 | 3.81  | 3.66  | 0.52 | 0.06 | 1.11  | 0.214702 | 0.250285 | 0.512314 | 0.519282 |
| MmugDNA.21135.1.S1_at   | MmugDNA.21135.1 | 3.6   | 3.38  | 0.32 | 0.05 | 1.16  | 0.188744 | 0.218277 | 0.485343 | 0.491804 |
| MmugDNA.21137.1.S1_at   | MmugDNA.21137.1 | 5.36  | 5.22  | 0.16 | 0.12 | 1.1   | 0.907484 | 0.025816 | 0.960895 | 0.201408 |
| MmugDNA.21139.1.S1_at   | MmugDNA.21139.1 | 4.36  | 4.08  | 0.82 | 0.62 | 1.22  | 0.359835 | 0.774883 | 0.635403 | 0.868962 |
| MmugDNA.2114.1.S1_at    | MmugDNA.2114.1  | 3.74  | 3.82  | 0.4  | 0.56 | -1.06 | 0.396024 | 0.589427 | 0.66219  | 0.755652 |
| MmugDNA.21140.1.S1_at   | MmugDNA.21140.1 | 9.28  | 8.39  | 0.29 | 0.15 | 1.85  | 0.006629 | 0.318036 | 0.127935 | 0.571046 |
| MmugDNA.21141.1.S1_at   | MmugDNA.21141.1 | 6.54  | 6.18  | 0.23 | 0.22 | 1.28  | 0.257942 | 0.078505 | 0.552137 | 0.325285 |
| MmugDNA.21142.1.S1_at   | MmugDNA.21142.1 | 7.57  | 8.78  | 0.38 | 0.15 | -2.3  | 0.00842  | 0.058454 | 0.140949 | 0.288529 |
| MmugDNA.21143.1.S1_at   | MmugDNA.21143.1 | 10.06 | 10.66 | 0.66 | 0.13 | -1.51 | 0.190009 | 0.078303 | 0.486315 | 0.324949 |
| MmugDNA.21147.1.S1_at   | MmugDNA.21147.1 | 4.05  | 3.54  | 0.68 | 0.34 | 1.42  | 0.188201 | 0.298345 | 0.484526 | 0.55702  |
| MmugDNA.21149.1.S1_at   | MmugDNA.21149.1 | 11.7  | 11.24 | 0.15 | 0.03 | 1.38  | 0.01055  | 0.020048 | 0.152509 | 0.177855 |
| MmugDNA.21151.1.S1_at   | MmugDNA.21151.1 | 3.49  | 3.52  | 0.2  | 0.3  | -1.02 | 0.476569 | 0.540176 | 0.71892  | 0.724194 |
| MmugDNA.21152.1.S1_at   | MmugDNA.21152.1 | 5.07  | 6.02  | 0.72 | 0.37 | -1.94 | 0.100036 | 0.096754 | 0.37088  | 0.354171 |
| MmugDNA.21153.1.S1_at   | MmugDNA.21153.1 | 3.06  | 3.04  | 0.24 | 0.2  | 1.01  | 0.780273 | 0.683099 | 0.899732 | 0.815134 |
| MmugDNA.21154.1.S1_at   | MmugDNA.21154.1 | 3.77  | 3.85  | 0.04 | 0.07 | -1.05 | 0.217959 | 0.590695 | 0.515795 | 0.756416 |
| MmugDNA.24977.1.S1_s_at | MmugDNA.24977.1 | 8.3   | 8.78  | 0.45 | 0.15 | -1.39 | 0.645884 | 0.816179 | 0.827662 | 0.893967 |
| MmugDNA.21156.1.S1_at   | MmugDNA.21156.1 | 9.15  | 9.34  | 0.03 | 0.14 | -1.14 | 0.131437 | 0.911828 | 0.414336 | 0.950281 |
| MmugDNA.21157.1.S1_at   | MmugDNA.21157.1 | 5.23  | 4.78  | 0.15 | 0.19 | 1.37  | 0.063855 | 0.153305 | 0.309214 | 0.428139 |
| MmugDNA.21159.1.S1_at   | MmugDNA.21159.1 | 4.46  | 4.05  | 0.34 | 0.47 | 1.33  | 0.853123 | 0.972845 | 0.936099 | 0.985352 |
| MmugDNA.2116.1.S1_at    | MmugDNA.2116.1  | 11.37 | 11.03 | 0.33 | 0.07 | 1.27  | 0.186007 | 0.177235 | 0.48218  | 0.453664 |
| MmugDNA.21161.1.S1_at   | MmugDNA.21161.1 | 5.26  | 5.29  | 0.75 | 0.49 | -1.02 | 0.491454 | 0.666178 | 0.729222 | 0.804415 |
| MmugDNA.21163.1.S1_at   | MmugDNA.21163.1 | 7.29  | 7.17  | 0.34 | 0.1  | 1.09  | 0.191979 | 0.340456 | 0.488531 | 0.586776 |
| MmugDNA.21165.1.S1_at   | MmugDNA.21165.1 | 6.08  | 5.98  | 0.19 | 0.14 | 1.07  | 0.30812  | 0.417899 | 0.594805 | 0.642478 |
| MmugDNA.21167.1.S1_at   | MmugDNA.21167.1 | 6.45  | 6.37  | 0.16 | 0.17 | 1.06  | 0.355825 | 0.851299 | 0.632435 | 0.915393 |
| MmugDNA.21168.1.S1_at   | MmugDNA.21168.1 | 6.24  | 6.3   | 0.07 | 0.16 | -1.04 | 0.717266 | 0.156144 | 0.866489 | 0.43161  |
| MmugDNA.21169.1.S1_at   | MmugDNA.21169.1 | 9.53  | 9.08  | 0.29 | 0.15 | 1.37  | 0.067721 | 0.004679 | 0.318077 | 0.095361 |
| MmugDNA.34148.1.S1_s_at | MmugDNA.34148.1 | 9.88  | 10.02 | 0.15 | 0.09 | -1.1  | 0.369628 | 0.223598 | 0.642966 | 0.496451 |
| MmugDNA.2117.1.S1_at    | MmugDNA.2117.1  | 5.19  | 5.26  | 0.17 | 0.05 | -1.05 | 0.131964 | 0.120978 | 0.415087 | 0.38997  |
| MmugDNA.21170.1.S1_at   | MmugDNA.21170.1 | 4.56  | 4.63  | 0.08 | 0.16 | -1.05 | 0.912024 | 0.316316 | 0.962758 | 0.569809 |
| MmugDNA.21172.1.S1_at   | MmugDNA.21172.1 | 12.84 | 12.84 | 0.05 | 0.05 | 1     | 0.887167 | 0.759504 | 0.951902 | 0.860136 |
| MmugDNA.21173.1.S1_at   | MmugDNA.21173.1 | 6.86  | 6.52  | 0.95 | 0.05 | 1.26  | 0.574505 | 0.023539 | 0.781968 | 0.192231 |
| MmugDNA.21174.1.S1_at   | MmugDNA.21174.1 | 5.14  | 5.12  | 0.25 | 0.09 | 1.01  | 0.668762 | 0.276419 | 0.841085 | 0.540378 |
| MmugDNA.21175.1.S1_at   | MmugDNA.21175.1 | 5.8   | 5.83  | 0.11 | 0.1  | -1.02 | 0.796575 | 0.175924 | 0.908127 | 0.452486 |
| MmugDNA.21176.1.S1_at   | MmugDNA.21176.1 | 9.32  | 9.16  | 0.19 | 0.14 | 1.11  | 0.131092 | 0.447098 | 0.413841 | 0.663294 |
| MmugDNA.21177.1.S1_at   | MmugDNA.21177.1 | 5.46  | 4.97  | 0.82 | 0.25 | 1.41  | 0.123237 | 0.16909  | 0.402454 | 0.44561  |
| MmugDNA.21178.1.S1_at   | MmugDNA.21178.1 | 4.4   | 3.85  | 0.27 | 0.08 | 1.47  | 0.049003 | 0.059872 | 0.278945 | 0.291315 |
| MmugDNA.21179.1.S1_at   | MmugDNA.21179.1 | 9.29  | 9.04  | 0.23 | 0.06 | 1.19  | 0.115226 | 0.043945 | 0.392261 | 0.254098 |
| MmugDNA.2118.1.S1_at    | MmugDNA.2118.1  | 5.12  | 6.95  | 1.89 | 0.23 | -3.55 | 0.529775 | 0.719782 | 0.7545   | 0.837888 |
| MmugDNA.21180.1.S1_at   | MmugDNA.21180.1 | 10.23 | 10.03 | 0.31 | 0.11 | 1.15  | 0.314972 | 0.095124 | 0.600177 | 0.352151 |
| MmugDNA.21181.1.S1_at   | MmugDNA.21181.1 | 5.66  | 5.06  | 0.54 | 0.31 | 1.52  | 0.259283 | 0.362126 | 0.55365  | 0.602821 |
| MmugDNA.21182.1.S1_at   | MmugDNA.21182.1 | 5.31  | 5.25  | 0.21 | 0.05 | 1.04  | 0.667676 | 0.833112 | 0.840503 | 0.90427  |
| MmugDNA.21183.1.S1_at   | MmugDNA.21183.1 | 6.33  | 6.49  | 0.2  | 0.04 | -1.12 | 0.549474 | 0.618988 | 0.767185 | 0.774229 |

|                         |                 |       |       |      |      |       |          |          |          |          |
|-------------------------|-----------------|-------|-------|------|------|-------|----------|----------|----------|----------|
| MmugDNA.21184.1.S1_at   | MmugDNA.21184.1 | 6.67  | 6.73  | 0.58 | 0.12 | -1.04 | 0.747988 | 0.348206 | 0.883193 | 0.592413 |
| MmugDNA.21185.1.S1_at   | MmugDNA.21185.1 | 8.29  | 8.18  | 0.12 | 0.18 | 1.08  | 0.329003 | 0.51186  | 0.611301 | 0.705797 |
| MmugDNA.21186.1.S1_at   | MmugDNA.21186.1 | 3.86  | 4.02  | 0.1  | 0.25 | -1.11 | 0.295083 | 0.297697 | 0.584039 | 0.556361 |
| MmugDNA.21187.1.S1_at   | MmugDNA.21187.1 | 5.16  | 5.16  | 0.49 | 0.25 | -1    | 0.677982 | 0.682115 | 0.846363 | 0.814349 |
| MmugDNA.2119.1.S1_at    | MmugDNA.2119.1  | 5.6   | 5.76  | 0.15 | 0.02 | -1.11 | 0.149885 | 0.358259 | 0.438796 | 0.599765 |
| MmugDNA.21190.1.S1_at   | MmugDNA.21190.1 | 10.59 | 10.58 | 0.28 | 0.2  | 1     | 0.479669 | 0.501127 | 0.720829 | 0.699443 |
| MmugDNA.21192.1.S1_at   | MmugDNA.21192.1 | 6.71  | 6.69  | 0.15 | 0.05 | 1.01  | 0.900462 | 0.960787 | 0.957767 | 0.97771  |
| MmugDNA.21193.1.S1_at   | MmugDNA.21193.1 | 12.61 | 12.73 | 0.24 | 0.07 | -1.09 | 0.261855 | 0.017706 | 0.555987 | 0.168321 |
| MmugDNA.21194.1.S1_at   | MmugDNA.21194.1 | 4.44  | 5.1   | 0.27 | 0.22 | -1.58 | 0.115092 | 0.210623 | 0.392115 | 0.484617 |
| MmugDNA.21196.1.S1_at   | MmugDNA.21196.1 | 4.45  | 4.62  | 0.25 | 0.11 | -1.12 | 0.808158 | 0.806887 | 0.914141 | 0.888872 |
| MmugDNA.21197.1.S1_at   | MmugDNA.21197.1 | 4.12  | 4.08  | 0.12 | 0.22 | 1.03  | 0.336338 | 0.301294 | 0.616985 | 0.559356 |
| MmugDNA.21198.1.S1_at   | MmugDNA.21198.1 | 4.92  | 4.55  | 1.52 | 0.81 | 1.29  | 0.28092  | 0.395627 | 0.571847 | 0.627583 |
| MmugDNA.212.1.S1_s_at   | MmugDNA.212.1   | 4.08  | 3.96  | 0.16 | 0.23 | 1.09  | 0.643306 | 0.853609 | 0.826158 | 0.91673  |
| MmugDNA.2120.1.S1_at    | MmugDNA.2120.1  | 7.51  | 7.65  | 0.13 | 0.2  | -1.11 | 0.205467 | 0.731654 | 0.503212 | 0.844499 |
| MmugDNA.21200.1.S1_at   | MmugDNA.21200.1 | 2.97  | 2.96  | 0.24 | 0.09 | 1     | 0.473089 | 0.719326 | 0.716471 | 0.837566 |
| MmugDNA.21201.1.S1_at   | MmugDNA.21201.1 | 4.75  | 4.65  | 0.34 | 0.11 | 1.07  | 0.412062 | 0.554429 | 0.673833 | 0.733205 |
| MmugDNA.21202.1.S1_at   | MmugDNA.21202.1 | 3.48  | 3.22  | 0.1  | 0.15 | 1.2   | 0.125657 | 0.121558 | 0.406339 | 0.390683 |
| MmugDNA.21203.1.S1_x_at | MmugDNA.21203.1 | 6.41  | 6.21  | 0.28 | 0.06 | 1.15  | 0.677379 | 0.928808 | 0.846164 | 0.959449 |
| MmugDNA.21204.1.S1_at   | MmugDNA.21204.1 | 2.89  | 2.91  | 0.7  | 0.13 | -1.02 | 0.408282 | 0.423657 | 0.671139 | 0.646464 |
| MmugDNA.21205.1.S1_at   | MmugDNA.21205.1 | 5.12  | 5.12  | 0    | 0    | 1     | 1        | 0.997832 | 1        | 0.998927 |
| MmugDNA.21206.1.S1_at   | MmugDNA.21206.1 | 7.62  | 7.47  | 0.4  | 0.19 | 1.11  | 0.221332 | 0.283292 | 0.519357 | 0.545836 |
| MmugDNA.21207.1.S1_at   | MmugDNA.21207.1 | 7.08  | 7.31  | 0.92 | 0.06 | -1.17 | 0.67648  | 0.773674 | 0.84554  | 0.868427 |
| MmugDNA.21208.1.S1_at   | MmugDNA.21208.1 | 5.5   | 5.53  | 0.58 | 0.31 | -1.02 | 0.443243 | 0.465097 | 0.696549 | 0.67557  |
| MmugDNA.21209.1.S1_at   | MmugDNA.21209.1 | 8.77  | 9.05  | 0.37 | 0.08 | -1.21 | 0.177724 | 0.10331  | 0.472391 | 0.364146 |
| MmugDNA.2121.1.S1_at    | MmugDNA.2121.1  | 10.53 | 10.38 | 0.35 | 0.16 | 1.11  | 0.375854 | 0.008418 | 0.646605 | 0.121839 |
| MmugDNA.21210.1.S1_at   | MmugDNA.21210.1 | 4.1   | 4.07  | 0.18 | 0.26 | 1.02  | 0.697334 | 0.163217 | 0.855921 | 0.439324 |
| MmugDNA.21212.1.S1_at   | MmugDNA.21212.1 | 3.84  | 3.82  | 0.08 | 0.09 | 1.01  | 0.37076  | 0.702761 | 0.643582 | 0.827685 |
| MmugDNA.21213.1.S1_at   | MmugDNA.21213.1 | 5.1   | 4.97  | 0.55 | 0.33 | 1.09  | 0.166699 | 0.288087 | 0.459945 | 0.549319 |
| MmugDNA.21215.1.S1_at   | MmugDNA.21215.1 | 5.65  | 5.86  | 0.12 | 0.16 | -1.15 | 0.315188 | 0.295831 | 0.600287 | 0.555208 |
| MmugDNA.21217.1.S1_at   | MmugDNA.21217.1 | 3.56  | 3.51  | 0.05 | 0.03 | 1.03  | 0.120416 | 0.144314 | 0.398818 | 0.418196 |
| MmugDNA.21218.1.S1_at   | MmugDNA.21218.1 | 6.29  | 6.37  | 0.15 | 0.14 | -1.06 | 0.784729 | 0.094294 | 0.901788 | 0.350889 |
| MmugDNA.21219.1.S1_at   | MmugDNA.21219.1 | 4.12  | 4.2   | 0.96 | 0.28 | -1.05 | 0.461481 | 0.605904 | 0.708883 | 0.765543 |
| MmugDNA.2122.1.S1_at    | MmugDNA.2122.1  | 12.89 | 12.79 | 0.57 | 0.07 | 1.07  | 0.597196 | 0.492225 | 0.796437 | 0.693477 |
| MmugDNA.21220.1.S1_at   | MmugDNA.21220.1 | 3.64  | 3.69  | 0.04 | 0.04 | -1.03 | 0.320777 | 0.445003 | 0.605271 | 0.662212 |
| MmugDNA.21221.1.S1_at   | MmugDNA.21221.1 | 4.36  | 4.17  | 0.17 | 0.05 | 1.14  | 0.204731 | 0.394622 | 0.502496 | 0.627137 |
| MmugDNA.21222.1.S1_at   | MmugDNA.21222.1 | 3.92  | 3.65  | 0.31 | 0.04 | 1.21  | 0.621721 | 0.796713 | 0.812872 | 0.882782 |
| MmugDNA.21223.1.S1_at   | MmugDNA.21223.1 | 7.2   | 7.15  | 0.28 | 0.31 | 1.04  | 0.379011 | 0.611478 | 0.649062 | 0.769353 |
| MmugDNA.21224.1.S1_at   | MmugDNA.21224.1 | 7.75  | 7.61  | 0.25 | 0.08 | 1.1   | 0.185765 | 0.509615 | 0.481947 | 0.704267 |
| MmugDNA.21225.1.S1_at   | MmugDNA.21225.1 | 5.1   | 5.22  | 0.07 | 0.2  | -1.08 | 0.222617 | 0.338318 | 0.520511 | 0.585417 |
| MmugDNA.21226.1.S1_at   | MmugDNA.21226.1 | 5.75  | 5.76  | 0.07 | 0.05 | -1    | 0.756532 | 0.093134 | 0.887988 | 0.349303 |
| MmugDNA.21228.1.S1_at   | MmugDNA.21228.1 | 4.7   | 4.59  | 0.12 | 0.09 | 1.08  | 0.121499 | 0.117802 | 0.400293 | 0.385702 |
| MmugDNA.8392.1.S1_s_at  | MmugDNA.8392.1  | 11.05 | 11.16 | 0.11 | 0.09 | -1.08 | 0.954279 | 0.033416 | 0.981196 | 0.22646  |
| MmugDNA.21231.1.S1_at   | MmugDNA.21231.1 | 5.65  | 5.59  | 0.16 | 0.07 | 1.04  | 0.336057 | 0.588127 | 0.616699 | 0.754761 |

|                         |                 |       |       |      |      |       |          |          |          |          |
|-------------------------|-----------------|-------|-------|------|------|-------|----------|----------|----------|----------|
| MmugDNA.21232.1.S1_at   | MmugDNA.21232.1 | 6.26  | 6.78  | 0.06 | 0.15 | -1.43 | 0.004506 | 0.258356 | 0.113436 | 0.525631 |
| MmugDNA.21232.1.S1_s_at | MmugDNA.21232.1 | 5.66  | 8.31  | 1.18 | 0.35 | -6.28 | 0.039031 | 0.270755 | 0.253922 | 0.536024 |
| MmugDNA.21233.1.S1_at   | MmugDNA.21233.1 | 6.24  | 6.43  | 0.2  | 0.05 | -1.14 | 0.371053 | 0.41686  | 0.6438   | 0.641776 |
| MmugDNA.21235.1.S1_s_at | MmugDNA.21235.1 | 11.86 | 11.63 | 0.15 | 0.03 | 1.17  | 0.088535 | 0.528976 | 0.354709 | 0.71703  |
| MmugDNA.21237.1.S1_at   | MmugDNA.21237.1 | 4.99  | 4.67  | 0.33 | 0.12 | 1.25  | 0.378148 | 0.41496  | 0.648422 | 0.640553 |
| MmugDNA.21238.1.S1_at   | MmugDNA.21238.1 | 3.48  | 3.51  | 0.07 | 0    | -1.02 | 0.439058 | 0.430393 | 0.693444 | 0.651399 |
| MmugDNA.21239.1.S1_at   | MmugDNA.21239.1 | 4.41  | 4.16  | 0.12 | 0.31 | 1.18  | 0.310094 | 0.283986 | 0.596353 | 0.546237 |
| MmugDNA.21241.1.S1_at   | MmugDNA.21241.1 | 5.39  | 5.37  | 0.07 | 0.05 | 1.01  | 0.37009  | 0.127104 | 0.643241 | 0.397922 |
| MmugDNA.21243.1.S1_at   | MmugDNA.21243.1 | 6.08  | 6.04  | 0.05 | 0.03 | 1.03  | 0.125895 | 0.554056 | 0.406859 | 0.73295  |
| MmugDNA.21244.1.S1_at   | MmugDNA.21244.1 | 5.2   | 4.35  | 0.09 | 0.07 | 1.8   | 0.000195 | 0.007088 | 0.053494 | 0.113367 |
| MmugDNA.21245.1.S1_at   | MmugDNA.21245.1 | 4.48  | 4.7   | 0.14 | 0.18 | -1.16 | 0.320328 | 0.560876 | 0.604943 | 0.736993 |
| MmugDNA.21247.1.S1_s_at | MmugDNA.21247.1 | 6.5   | 6.73  | 0.23 | 0.23 | -1.17 | 0.460887 | 0.642248 | 0.708484 | 0.790088 |
| MmugDNA.21248.1.S1_at   | MmugDNA.21248.1 | 4.91  | 4.7   | 0.07 | 0.09 | 1.16  | 0.055227 | 0.048697 | 0.291993 | 0.265699 |
| MmugDNA.21251.1.S1_at   | MmugDNA.21251.1 | 4.06  | 3.97  | 0.34 | 0.09 | 1.06  | 0.707418 | 0.900793 | 0.861472 | 0.943558 |
| MmugDNA.21253.1.S1_at   | MmugDNA.21253.1 | 3.94  | 3.97  | 0.28 | 0.12 | -1.02 | 0.780213 | 0.749599 | 0.89973  | 0.854505 |
| MmugDNA.21254.1.S1_at   | MmugDNA.21254.1 | 6.66  | 6.12  | 0.74 | 0.3  | 1.45  | 0.937642 | 0.279319 | 0.973776 | 0.542962 |
| MmugDNA.21255.1.S1_at   | MmugDNA.21255.1 | 6.84  | 8.3   | 0.31 | 0.22 | -2.75 | 0.005594 | 0.240979 | 0.120456 | 0.511657 |
| MmugDNA.6929.1.S1_at    | MmugDNA.6929.1  | 7.54  | 7.87  | 0.15 | 0.14 | -1.26 | 0.055944 | 0.181131 | 0.29346  | 0.457582 |
| MmugDNA.6929.1.S1_s_at  | MmugDNA.6929.1  | 6.71  | 7.82  | 0.23 | 0.24 | -2.17 | 0.006959 | 0.239895 | 0.13059  | 0.510627 |
| MmugDNA.21256.1.S1_at   | MmugDNA.21256.1 | 6.51  | 6.34  | 0.12 | 0.1  | 1.12  | 0.65337  | 0.088054 | 0.832139 | 0.341547 |
| MmugDNA.21257.1.S1_at   | MmugDNA.21257.1 | 6.54  | 6.51  | 0.15 | 0.07 | 1.02  | 0.716184 | 0.80892  | 0.866043 | 0.889962 |
| MmugDNA.21258.1.S1_at   | MmugDNA.21258.1 | 7.06  | 6.89  | 0.77 | 0.29 | 1.12  | 0.850497 | 0.737594 | 0.935082 | 0.847993 |
| MmugDNA.21259.1.S1_at   | MmugDNA.21259.1 | 6.26  | 6.19  | 0.51 | 0.07 | 1.05  | 0.285068 | 0.418648 | 0.575086 | 0.643031 |
| MmugDNA.2126.1.S1_at    | MmugDNA.2126.1  | 4.81  | 5.01  | 0.9  | 0.35 | -1.15 | 0.81042  | 0.882879 | 0.915074 | 0.933206 |
| MmugDNA.21260.1.S1_at   | MmugDNA.21260.1 | 4.67  | 4.15  | 0.66 | 0.07 | 1.43  | 0.164605 | 0.145143 | 0.457706 | 0.419105 |
| MmugDNA.21261.1.S1_at   | MmugDNA.21261.1 | 9.82  | 9.8   | 0.21 | 0.03 | 1.01  | 0.284653 | 0.279998 | 0.574573 | 0.543369 |
| MmugDNA.21262.1.S1_at   | MmugDNA.21262.1 | 3.36  | 3.21  | 0.15 | 0.28 | 1.11  | 0.993447 | 0.780484 | 0.997388 | 0.872614 |
| MmugDNA.21263.1.S1_at   | MmugDNA.21263.1 | 6.62  | 6.73  | 0.31 | 0.05 | -1.08 | 0.906728 | 0.413216 | 0.960562 | 0.639484 |
| MmugDNA.21264.1.S1_at   | MmugDNA.21264.1 | 5.31  | 4.79  | 0.53 | 0.06 | 1.44  | 0.121737 | 0.197905 | 0.400504 | 0.472828 |
| MmugDNA.21265.1.S1_at   | MmugDNA.21265.1 | 5.54  | 5.39  | 0.54 | 0.04 | 1.12  | 0.456465 | 0.750703 | 0.705772 | 0.855009 |
| MmugDNA.21267.1.S1_at   | MmugDNA.21267.1 | 5.26  | 4.87  | 0.37 | 0.07 | 1.32  | 0.079913 | 0.076372 | 0.340107 | 0.321368 |
| MmugDNA.21268.1.S1_at   | MmugDNA.21268.1 | 6.91  | 7.16  | 0.15 | 0.52 | -1.19 | 0.866526 | 0.193056 | 0.942395 | 0.468554 |
| MmugDNA.2127.1.S1_at    | MmugDNA.2127.1  | 12.46 | 12.52 | 0.17 | 0.14 | -1.04 | 0.879229 | 0.970829 | 0.948589 | 0.984101 |
| MmugDNA.21271.1.S1_at   | MmugDNA.21271.1 | 3.92  | 3.89  | 0.23 | 0.18 | 1.03  | 0.338724 | 0.285913 | 0.619173 | 0.547484 |
| MmugDNA.21272.1.S1_at   | MmugDNA.21272.1 | 9.57  | 9.36  | 0.1  | 0.12 | 1.16  | 0.045937 | 0.122221 | 0.271942 | 0.391921 |
| MmugDNA.21277.1.S1_at   | MmugDNA.21277.1 | 6.13  | 6.15  | 0.18 | 0.13 | -1.01 | 0.807913 | 0.764678 | 0.914039 | 0.863167 |
| MmugDNA.21278.1.S1_at   | MmugDNA.21278.1 | 3.84  | 3.76  | 0.03 | 0.1  | 1.06  | 0.119399 | 0.135624 | 0.397257 | 0.407744 |
| MmugDNA.21278.1.S1_s_at | MmugDNA.21278.1 | 3.26  | 3.26  | 0.1  | 0.11 | 1     | 0.758373 | 0.951341 | 0.889161 | 0.972417 |
| MmugDNA.21279.1.S1_at   | MmugDNA.21279.1 | 3.39  | 4.78  | 0.76 | 0.23 | -2.61 | 0.056483 | 0.195654 | 0.295149 | 0.470491 |
| MmugDNA.2128.1.S1_at    | MmugDNA.2128.1  | 7.74  | 8.85  | 0.36 | 0.04 | -2.16 | 0.005224 | 0.058704 | 0.117353 | 0.288956 |
| MmugDNA.21280.1.S1_at   | MmugDNA.21280.1 | 9.55  | 9.75  | 0.05 | 0.16 | -1.15 | 0.45789  | 0.352623 | 0.706652 | 0.595866 |
| MmugDNA.21281.1.S1_at   | MmugDNA.21281.1 | 11.79 | 11.74 | 0.09 | 0.11 | 1.03  | 0.128289 | 0.004289 | 0.410227 | 0.091951 |
| MmugDNA.21282.1.S1_at   | MmugDNA.21282.1 | 5.84  | 5.85  | 0.19 | 0.05 | -1    | 0.773729 | 0.853879 | 0.896356 | 0.916852 |

|                         |                 |       |       |      |      |       |          |          |          |          |
|-------------------------|-----------------|-------|-------|------|------|-------|----------|----------|----------|----------|
| MmugDNA.21284.1.S1_at   | MmugDNA.21284.1 | 2.94  | 3     | 0.02 | 0.02 | -1.04 | 0.012404 | 0.586417 | 0.161664 | 0.753459 |
| MmugDNA.21285.1.S1_at   | MmugDNA.21285.1 | 2.67  | 2.77  | 0.05 | 0.03 | -1.08 | 0.047463 | 0.17063  | 0.275184 | 0.447219 |
| MmugDNA.21286.1.S1_at   | MmugDNA.21286.1 | 7.21  | 7.2   | 0.32 | 0.13 | 1.01  | 0.776287 | 0.75566  | 0.897687 | 0.85776  |
| MmugDNA.21288.1.S1_at   | MmugDNA.21288.1 | 3.29  | 2.95  | 0.41 | 0.56 | 1.26  | 0.680524 | 0.552044 | 0.847608 | 0.731461 |
| MmugDNA.2129.1.S1_at    | MmugDNA.2129.1  | 9.91  | 9.88  | 0.04 | 0.1  | 1.02  | 0.204176 | 0.198543 | 0.50178  | 0.473391 |
| MmugDNA.21290.1.S1_at   | MmugDNA.21290.1 | 6.29  | 6.45  | 0.1  | 0.22 | -1.12 | 0.103258 | 0.379784 | 0.376178 | 0.616576 |
| MmugDNA.21291.1.S1_at   | MmugDNA.21291.1 | 5.5   | 5.14  | 0.15 | 0.07 | 1.29  | 0.036613 | 0.186547 | 0.246347 | 0.462364 |
| MmugDNA.21292.1.S1_at   | MmugDNA.21292.1 | 6.73  | 6.77  | 0.19 | 0.11 | -1.03 | 0.928927 | 0.991153 | 0.969935 | 0.99503  |
| MmugDNA.21293.1.S1_at   | MmugDNA.21293.1 | 5.85  | 5.97  | 1.36 | 0.44 | -1.09 | 0.64594  | 0.336114 | 0.8277   | 0.583652 |
| MmugDNA.21294.1.S1_at   | MmugDNA.21294.1 | 3.78  | 3.79  | 0.01 | 0.05 | -1    | 0.800454 | 0.272768 | 0.910198 | 0.537505 |
| MmugDNA.21295.1.S1_at   | MmugDNA.21295.1 | 11.92 | 11.93 | 0.19 | 0.04 | -1.01 | 0.432911 | 0.023536 | 0.68855  | 0.192231 |
| MmugDNA.21296.1.S1_at   | MmugDNA.21296.1 | 7.4   | 8.72  | 1.94 | 0.14 | -2.5  | 0.238038 | 0.210187 | 0.535485 | 0.484033 |
| MmugDNA.21297.1.S1_at   | MmugDNA.21297.1 | 5.46  | 5.35  | 0.25 | 0.01 | 1.08  | 0.862779 | 0.983645 | 0.940274 | 0.990902 |
| MmugDNA.21298.1.S1_at   | MmugDNA.21298.1 | 9.98  | 10.08 | 0.16 | 0.1  | -1.07 | 0.245465 | 0.678487 | 0.541518 | 0.81221  |
| MmugDNA.21299.1.S1_at   | MmugDNA.21299.1 | 8.67  | 8.92  | 0.14 | 0.18 | -1.19 | 0.173859 | 0.034554 | 0.468263 | 0.229979 |
| MmugDNA.21301.1.S1_at   | MmugDNA.21301.1 | 6.08  | 5.96  | 0.26 | 0.08 | 1.09  | 0.184768 | 0.230787 | 0.480792 | 0.502452 |
| MmugDNA.21302.1.S1_at   | MmugDNA.21302.1 | 7.53  | 7.62  | 0.24 | 0.3  | -1.06 | 0.908302 | 0.006765 | 0.961181 | 0.111315 |
| MmugDNA.21303.1.S1_at   | MmugDNA.21303.1 | 4.31  | 4.21  | 0.13 | 0.33 | 1.07  | 0.911682 | 0.68048  | 0.962593 | 0.813477 |
| MmugDNA.21304.1.S1_s_at | MmugDNA.21304.1 | 8.35  | 8.47  | 0.13 | 0.07 | -1.08 | 0.176182 | 0.821116 | 0.470586 | 0.897052 |
| MmugDNA.21305.1.S1_at   | MmugDNA.21305.1 | 4.09  | 4.37  | 0.38 | 0.02 | -1.21 | 0.776941 | 0.86421  | 0.898112 | 0.922972 |
| MmugDNA.21306.1.S1_at   | MmugDNA.21306.1 | 4.01  | 3.74  | 0.24 | 0.17 | 1.21  | 0.120558 | 0.241588 | 0.398904 | 0.512194 |
| MmugDNA.21307.1.S1_at   | MmugDNA.21307.1 | 13.41 | 13.56 | 0.04 | 0.05 | -1.11 | 0.011503 | 0.117992 | 0.15722  | 0.385881 |
| MmugDNA.21308.1.S1_at   | MmugDNA.21308.1 | 5.45  | 5.31  | 0.79 | 0.38 | 1.1   | 0.304543 | 0.224607 | 0.591677 | 0.497613 |
| MmugDNA.21309.1.S1_at   | MmugDNA.21309.1 | 4.61  | 4.54  | 0.1  | 0.06 | 1.04  | 0.447722 | 0.248031 | 0.699609 | 0.517532 |
| MmugDNA.2131.1.S1_at    | MmugDNA.2131.1  | 3.46  | 3.44  | 0.05 | 0.02 | 1.01  | 0.972358 | 0.470881 | 0.988877 | 0.679128 |
| MmugDNA.21310.1.S1_at   | MmugDNA.21310.1 | 4.43  | 4.32  | 0.14 | 0.12 | 1.08  | 0.409151 | 0.212087 | 0.671657 | 0.486036 |
| MmugDNA.21311.1.S1_at   | MmugDNA.21311.1 | 4.64  | 4.66  | 0.22 | 0.52 | -1.01 | 0.932017 | 0.008072 | 0.971437 | 0.119402 |
| MmugDNA.21312.1.S1_at   | MmugDNA.21312.1 | 5.81  | 5.81  | 0.19 | 0.02 | 1     | 0.418094 | 0.483046 | 0.678075 | 0.687687 |
| MmugDNA.21313.1.S1_at   | MmugDNA.21313.1 | 9.47  | 9.16  | 0.27 | 0.2  | 1.24  | 0.270604 | 0.143492 | 0.562765 | 0.417442 |
| MmugDNA.21314.1.S1_at   | MmugDNA.21314.1 | 9.41  | 9.88  | 0.33 | 0.19 | -1.38 | 0.066249 | 0.088343 | 0.314867 | 0.341767 |
| MmugDNA.21316.1.S1_at   | MmugDNA.21316.1 | 10.97 | 10.86 | 0.14 | 0.03 | 1.08  | 0.078394 | 0.61633  | 0.338082 | 0.772571 |
| MmugDNA.21318.1.S1_at   | MmugDNA.21318.1 | 3.87  | 3.77  | 0.31 | 0.08 | 1.07  | 0.290378 | 0.397128 | 0.579851 | 0.628653 |
| MmugDNA.21319.1.S1_at   | MmugDNA.21319.1 | 4.68  | 4.34  | 0.51 | 0.45 | 1.26  | 0.208165 | 0.095631 | 0.505958 | 0.35267  |
| MmugDNA.2132.1.S1_at    | MmugDNA.2132.1  | 8.09  | 8.39  | 0.56 | 0.06 | -1.23 | 0.986092 | 0.832435 | 0.995115 | 0.903893 |
| MmugDNA.21320.1.S1_at   | MmugDNA.21320.1 | 5.57  | 5.6   | 0.04 | 0.01 | -1.02 | 0.294192 | 0.076897 | 0.583201 | 0.322402 |
| MmugDNA.21321.1.S1_at   | MmugDNA.21321.1 | 7.07  | 7.52  | 0.26 | 0.19 | -1.37 | 0.049445 | 0.127099 | 0.279817 | 0.397922 |
| MmugDNA.21322.1.S1_at   | MmugDNA.21322.1 | 5.78  | 7.28  | 0.83 | 0.41 | -2.83 | 0.140377 | 0.307087 | 0.426075 | 0.563432 |
| MmugDNA.21323.1.S1_at   | MmugDNA.21323.1 | 5.28  | 4.68  | 0.41 | 0.24 | 1.52  | 0.203384 | 0.338981 | 0.501192 | 0.585891 |
| MmugDNA.21324.1.S1_at   | MmugDNA.21324.1 | 3.42  | 3.51  | 0.1  | 0.06 | -1.07 | 0.128492 | 0.032543 | 0.41051  | 0.223428 |
| MmugDNA.21325.1.S1_at   | MmugDNA.21325.1 | 6.38  | 6.36  | 0.35 | 0.41 | 1.01  | 0.616024 | 0.679538 | 0.809258 | 0.812884 |
| MmugDNA.21326.1.S1_at   | MmugDNA.21326.1 | 5.67  | 5.68  | 0.07 | 0.03 | -1    | 0.439273 | 0.642959 | 0.693571 | 0.79055  |
| MmugDNA.21328.1.S1_at   | MmugDNA.21328.1 | 3.9   | 3.72  | 0.06 | 0.33 | 1.13  | 0.340666 | 0.520136 | 0.620859 | 0.711472 |
| MmugDNA.21329.1.S1_at   | MmugDNA.21329.1 | 7.4   | 7.24  | 0.19 | 0.09 | 1.12  | 0.145578 | 0.230257 | 0.432967 | 0.502102 |

|                         |                 |       |       |      |      |       |          |          |          |          |
|-------------------------|-----------------|-------|-------|------|------|-------|----------|----------|----------|----------|
| MmugDNA.2133.1.S1_at    | MmugDNA.2133.1  | 6.1   | 5.34  | 1.12 | 0.35 | 1.7   | 0.218291 | 0.335869 | 0.515982 | 0.583533 |
| MmugDNA.21330.1.S1_at   | MmugDNA.21330.1 | 7.63  | 7.67  | 0.12 | 0.11 | -1.03 | 0.313081 | 0.649309 | 0.598916 | 0.794742 |
| MmugDNA.21331.1.S1_at   | MmugDNA.21331.1 | 6.03  | 6.18  | 0.1  | 0.03 | -1.11 | 0.063925 | 0.109766 | 0.309333 | 0.373701 |
| MmugDNA.21332.1.S1_at   | MmugDNA.21332.1 | 5.97  | 5.94  | 0.3  | 0.07 | 1.02  | 0.608279 | 0.530215 | 0.804344 | 0.717793 |
| MmugDNA.21333.1.S1_s_at | MmugDNA.21333.1 | 10.72 | 10.56 | 0.14 | 0    | 1.12  | 0.038989 | 0.005249 | 0.253751 | 0.100352 |
| MmugDNA.21334.1.S1_at   | MmugDNA.21334.1 | 6.35  | 6.46  | 0.27 | 0.26 | -1.08 | 0.745257 | 0.847039 | 0.881818 | 0.913065 |
| MmugDNA.21335.1.S1_at   | MmugDNA.21335.1 | 4.12  | 4.41  | 0.3  | 0.75 | -1.23 | 0.182549 | 0.360018 | 0.478336 | 0.601198 |
| MmugDNA.21336.1.S1_at   | MmugDNA.21336.1 | 7.64  | 8.35  | 0.59 | 0.42 | -1.63 | 0.320776 | 0.013605 | 0.605271 | 0.149283 |
| MmugDNA.21337.1.S1_at   | MmugDNA.21337.1 | 4.63  | 4.62  | 0.07 | 0.14 | 1.01  | 0.287099 | 0.379473 | 0.576783 | 0.616406 |
| MmugDNA.21340.1.S1_at   | MmugDNA.21340.1 | 5.96  | 5.81  | 0.26 | 0.03 | 1.11  | 0.894016 | 0.520723 | 0.954786 | 0.711925 |
| MmugDNA.21341.1.S1_at   | MmugDNA.21341.1 | 8.89  | 7.92  | 0.39 | 0.29 | 1.96  | 0.108574 | 0.315119 | 0.383317 | 0.568849 |
| MmugDNA.21342.1.S1_at   | MmugDNA.21342.1 | 3.86  | 3.92  | 0.17 | 0.01 | -1.04 | 0.559339 | 0.50567  | 0.773275 | 0.702218 |
| MmugDNA.21343.1.S1_at   | MmugDNA.21343.1 | 11.26 | 12.06 | 0.18 | 0.15 | -1.74 | 0.005961 | 0.044284 | 0.123893 | 0.254966 |
| MmugDNA.21344.1.S1_at   | MmugDNA.21344.1 | 11.62 | 11.56 | 0.02 | 0.08 | 1.04  | 0.088174 | 0.698679 | 0.354244 | 0.824936 |
| MmugDNA.21348.1.S1_at   | MmugDNA.21348.1 | 5.11  | 4.8   | 0.33 | 0.22 | 1.24  | 0.221653 | 0.272687 | 0.519652 | 0.537433 |
| MmugDNA.2135.1.S1_at    | MmugDNA.2135.1  | 4.09  | 4.03  | 0.18 | 0.13 | 1.05  | 0.812595 | 0.251368 | 0.916193 | 0.5201   |
| MmugDNA.21350.1.S1_at   | MmugDNA.21350.1 | 4.98  | 4.67  | 0.18 | 0.19 | 1.24  | 0.231031 | 0.098905 | 0.529821 | 0.357049 |
| MmugDNA.21351.1.S1_at   | MmugDNA.21351.1 | 7.6   | 7.24  | 0.54 | 0.2  | 1.29  | 0.113706 | 0.084038 | 0.390392 | 0.334991 |
| MmugDNA.21352.1.S1_at   | MmugDNA.21352.1 | 6.54  | 6.5   | 0.04 | 0.17 | 1.03  | 0.477288 | 0.611131 | 0.719345 | 0.769079 |
| MmugDNA.21354.1.S1_at   | MmugDNA.21354.1 | 3.14  | 3.09  | 0.05 | 0.09 | 1.03  | 0.928997 | 0.414627 | 0.969935 | 0.640456 |
| MmugDNA.21355.1.S1_at   | MmugDNA.21355.1 | 7.13  | 6.97  | 0.08 | 0.03 | 1.12  | 0.031698 | 0.269088 | 0.231452 | 0.534445 |
| MmugDNA.21356.1.S1_at   | MmugDNA.21356.1 | 3.61  | 3.73  | 0.2  | 0.02 | -1.08 | 0.368547 | 0.414221 | 0.642226 | 0.640137 |
| MmugDNA.21357.1.S1_at   | MmugDNA.21357.1 | 11.61 | 12.28 | 0.27 | 0.14 | -1.59 | 0.032058 | 0.061722 | 0.232892 | 0.29518  |
| MmugDNA.21357.1.S1_s_at | MmugDNA.21357.1 | 10.08 | 11.17 | 0.36 | 0.25 | -2.12 | 0.04117  | 0.111307 | 0.259407 | 0.375989 |
| MmugDNA.21358.1.S1_at   | MmugDNA.21358.1 | 7.99  | 7.58  | 0.37 | 0.4  | 1.33  | 0.577225 | 0.102069 | 0.783495 | 0.362122 |
| MmugDNA.21360.1.S1_at   | MmugDNA.21360.1 | 5.3   | 5.3   | 0.08 | 0.05 | 1     | 0.304999 | 0.681612 | 0.592002 | 0.814092 |
| MmugDNA.21361.1.S1_at   | MmugDNA.21361.1 | 11.62 | 12.22 | 0.26 | 0.18 | -1.52 | 0.051754 | 0.060519 | 0.284844 | 0.292656 |
| MmugDNA.21362.1.S1_at   | MmugDNA.21362.1 | 3.87  | 3.73  | 0.18 | 0.02 | 1.1   | 0.636876 | 0.876219 | 0.822282 | 0.929606 |
| MmugDNA.21363.1.S1_at   | MmugDNA.21363.1 | 6.5   | 6.26  | 0.29 | 0.3  | 1.19  | 0.455225 | 0.101118 | 0.705039 | 0.360749 |
| MmugDNA.21364.1.S1_at   | MmugDNA.21364.1 | 5.98  | 5.61  | 0.11 | 0.26 | 1.29  | 0.133564 | 0.120442 | 0.41701  | 0.38925  |
| MmugDNA.21365.1.S1_at   | MmugDNA.21365.1 | 9.91  | 9.85  | 0.09 | 0.09 | 1.04  | 0.850776 | 0.068617 | 0.935218 | 0.308486 |
| MmugDNA.21366.1.S1_at   | MmugDNA.21366.1 | 6.39  | 5.58  | 0.42 | 0.25 | 1.74  | 0.080912 | 0.12123  | 0.341702 | 0.390351 |
| MmugDNA.21367.1.S1_at   | MmugDNA.21367.1 | 6.17  | 6.16  | 0.16 | 0.04 | 1.01  | 0.937247 | 0.196236 | 0.973671 | 0.471236 |
| MmugDNA.21368.1.S1_at   | MmugDNA.21368.1 | 4.58  | 4.57  | 0.01 | 0.1  | 1.01  | 0.797763 | 0.932626 | 0.908721 | 0.961739 |
| MmugDNA.21369.1.S1_at   | MmugDNA.21369.1 | 5.52  | 5.49  | 0.29 | 0.05 | 1.02  | 0.7732   | 0.534471 | 0.89602  | 0.720382 |
| MmugDNA.2137.1.S1_at    | MmugDNA.2137.1  | 6.87  | 8.22  | 1.29 | 0.32 | -2.55 | 0.56521  | 0.449987 | 0.776544 | 0.665414 |
| MmugDNA.21370.1.S1_at   | MmugDNA.21370.1 | 3.84  | 3.85  | 0.49 | 0.07 | -1.01 | 0.738065 | 0.89563  | 0.878569 | 0.940329 |
| MmugDNA.21372.1.S1_at   | MmugDNA.21372.1 | 10.1  | 10.22 | 0.08 | 0.02 | -1.09 | 0.165129 | 0.277804 | 0.458108 | 0.541664 |
| MmugDNA.21373.1.S1_at   | MmugDNA.21373.1 | 4.17  | 3.98  | 0.12 | 0.05 | 1.14  | 0.097792 | 0.114459 | 0.368245 | 0.381021 |
| MmugDNA.21374.1.S1_at   | MmugDNA.21374.1 | 3.33  | 3.3   | 0.06 | 0.13 | 1.03  | 0.14393  | 0.160948 | 0.430682 | 0.437116 |
| MmugDNA.21375.1.S1_at   | MmugDNA.21375.1 | 11.5  | 11.47 | 0.15 | 0.05 | 1.02  | 0.403187 | 0.823072 | 0.667341 | 0.898353 |
| MmugDNA.21378.1.S1_at   | MmugDNA.21378.1 | 5.17  | 5.23  | 0.25 | 0.24 | -1.04 | 0.468372 | 0.265603 | 0.713506 | 0.531449 |
| MmugDNA.21379.1.S1_at   | MmugDNA.21379.1 | 8.87  | 8.29  | 0.24 | 0.27 | 1.49  | 0.111458 | 0.0444   | 0.387443 | 0.255192 |

|                         |                 |       |       |      |      |       |          |          |          |          |
|-------------------------|-----------------|-------|-------|------|------|-------|----------|----------|----------|----------|
| MmugDNA.2138.1.S1_at    | MmugDNA.2138.1  | 6.61  | 7.01  | 0.05 | 0.18 | -1.32 | 0.023385 | 0.076989 | 0.205907 | 0.322421 |
| MmugDNA.2138.1.S1_s_at  | MmugDNA.2138.1  | 7.15  | 7.34  | 0.15 | 0.03 | -1.14 | 0.097107 | 0.09054  | 0.367275 | 0.345015 |
| MmugDNA.21381.1.S1_at   | MmugDNA.21381.1 | 10.37 | 10.11 | 0.27 | 0.05 | 1.2   | 0.62377  | 0.084161 | 0.814454 | 0.335181 |
| MmugDNA.21383.1.S1_at   | MmugDNA.21383.1 | 5.54  | 5.21  | 0.34 | 0.1  | 1.26  | 0.287409 | 0.111448 | 0.577253 | 0.376126 |
| MmugDNA.21384.1.S1_at   | MmugDNA.21384.1 | 6.42  | 6.72  | 0.52 | 0.28 | -1.23 | 0.158413 | 0.384983 | 0.449548 | 0.620583 |
| MmugDNA.21385.1.S1_at   | MmugDNA.21385.1 | 5.31  | 4.82  | 0.35 | 0.35 | 1.4   | 0.250518 | 0.231215 | 0.545185 | 0.5029   |
| MmugDNA.21388.1.S1_at   | MmugDNA.21388.1 | 3.9   | 3.8   | 0.09 | 0.12 | 1.07  | 0.14154  | 0.385922 | 0.427522 | 0.621161 |
| MmugDNA.21388.1.S1_s_at | MmugDNA.21388.1 | 5.6   | 5.59  | 0.07 | 0.08 | 1     | 0.436151 | 0.634127 | 0.691113 | 0.784644 |
| MmugDNA.21389.1.S1_at   | MmugDNA.21389.1 | 8.1   | 7.89  | 0.23 | 0.22 | 1.16  | 0.329763 | 0.700826 | 0.611875 | 0.826511 |
| MmugDNA.2139.1.S1_at    | MmugDNA.2139.1  | 10.18 | 10.18 | 0.26 | 0.08 | -1    | 0.898017 | 0.384312 | 0.956686 | 0.619996 |
| MmugDNA.21390.1.S1_at   | MmugDNA.21390.1 | 3.71  | 3.72  | 0.07 | 0.04 | -1    | 0.713873 | 0.495825 | 0.864758 | 0.695746 |
| MmugDNA.21392.1.S1_at   | MmugDNA.21392.1 | 4.85  | 5.3   | 0.21 | 0.25 | -1.36 | 0.092276 | 0.096058 | 0.36034  | 0.353319 |
| MmugDNA.21393.1.S1_at   | MmugDNA.21393.1 | 4.88  | 4.93  | 0.73 | 0.12 | -1.04 | 0.617187 | 0.718418 | 0.8099   | 0.837032 |
| MmugDNA.21394.1.S1_at   | MmugDNA.21394.1 | 5.53  | 5.3   | 0.18 | 0.1  | 1.18  | 0.071951 | 0.081342 | 0.326151 | 0.329437 |
| MmugDNA.21395.1.S1_at   | MmugDNA.21395.1 | 2.95  | 2.94  | 0.36 | 0.07 | 1.01  | 0.449526 | 0.611817 | 0.700883 | 0.769593 |
| MmugDNA.21396.1.S1_at   | MmugDNA.21396.1 | 3.27  | 3.25  | 0.04 | 0.03 | 1.01  | 0.586746 | 0.834173 | 0.79005  | 0.904977 |
| MmugDNA.21397.1.S1_at   | MmugDNA.21397.1 | 5.23  | 5.22  | 0.22 | 0.25 | 1.01  | 0.883202 | 0.909584 | 0.950338 | 0.94895  |
| MmugDNA.21398.1.S1_at   | MmugDNA.21398.1 | 2.92  | 2.81  | 0.11 | 0.05 | 1.07  | 0.116856 | 0.030171 | 0.393878 | 0.215629 |
| MmugDNA.21399.1.S1_at   | MmugDNA.21399.1 | 3.18  | 3.39  | 0.28 | 0.07 | -1.16 | 0.584184 | 0.782958 | 0.788484 | 0.87441  |
| MmugDNA.214.1.S1_at     | MmugDNA.214.1   | 10.6  | 10.75 | 0.03 | 0.13 | -1.11 | 0.329411 | 0.80878  | 0.61165  | 0.889895 |
| MmugDNA.21400.1.S1_at   | MmugDNA.21400.1 | 3.51  | 3.53  | 0.05 | 0.13 | -1.01 | 0.712693 | 0.319706 | 0.864378 | 0.572051 |
| MmugDNA.21401.1.S1_at   | MmugDNA.21401.1 | 5.86  | 5.08  | 0.42 | 0.16 | 1.71  | 0.113603 | 0.095962 | 0.390328 | 0.353252 |
| MmugDNA.21402.1.S1_at   | MmugDNA.21402.1 | 9.23  | 9.14  | 0.13 | 0.2  | 1.06  | 0.634997 | 0.849953 | 0.821102 | 0.914673 |
| MmugDNA.21405.1.S1_at   | MmugDNA.21405.1 | 7.28  | 8.07  | 0.14 | 0.12 | -1.73 | 0.00312  | 0.376267 | 0.100877 | 0.614101 |
| MmugDNA.21406.1.S1_at   | MmugDNA.21406.1 | 8.38  | 7.85  | 0.16 | 0.39 | 1.44  | 0.148448 | 0.217101 | 0.436978 | 0.490681 |
| MmugDNA.21408.1.S1_at   | MmugDNA.21408.1 | 6.15  | 5.72  | 0.94 | 0.42 | 1.35  | 0.452899 | 0.465424 | 0.703282 | 0.675748 |
| MmugDNA.21409.1.S1_at   | MmugDNA.21409.1 | 7.78  | 8.46  | 0.08 | 0.07 | -1.61 | 0.000331 | 0.231643 | 0.059838 | 0.503446 |
| MmugDNA.2141.1.S1_at    | MmugDNA.2141.1  | 4.94  | 5.46  | 0.4  | 0.26 | -1.43 | 0.642994 | 0.416781 | 0.825908 | 0.64171  |
| MmugDNA.21411.1.S1_at   | MmugDNA.21411.1 | 6.11  | 6.07  | 0.05 | 0.03 | 1.03  | 0.359034 | 0.250935 | 0.634653 | 0.519612 |
| MmugDNA.21412.1.S1_at   | MmugDNA.21412.1 | 5.56  | 4.41  | 0.34 | 0.47 | 2.22  | 0.047935 | 0.138129 | 0.276361 | 0.411042 |
| MmugDNA.21413.1.S1_at   | MmugDNA.21413.1 | 6.42  | 6.22  | 0.59 | 0.13 | 1.15  | 0.25319  | 0.15918  | 0.547579 | 0.435217 |
| MmugDNA.21415.1.S1_at   | MmugDNA.21415.1 | 11.29 | 11.69 | 0.31 | 0.17 | -1.31 | 0.207307 | 0.013426 | 0.505036 | 0.148459 |
| MmugDNA.21416.1.S1_at   | MmugDNA.21416.1 | 5.61  | 5.25  | 0.15 | 0.2  | 1.28  | 0.056616 | 0.106796 | 0.295477 | 0.369391 |
| MmugDNA.21417.1.S1_at   | MmugDNA.21417.1 | 4.8   | 4.86  | 0.16 | 0    | -1.04 | 0.34821  | 0.308666 | 0.626326 | 0.56461  |
| MmugDNA.21418.1.S1_at   | MmugDNA.21418.1 | 6.82  | 6.82  | 0.03 | 0.09 | -1    | 0.442721 | 0.478831 | 0.696133 | 0.684739 |
| MmugDNA.21419.1.S1_at   | MmugDNA.21419.1 | 7.96  | 7.69  | 0.31 | 0.2  | 1.2   | 0.258478 | 0.48891  | 0.552539 | 0.691464 |
| MmugDNA.21420.1.S1_at   | MmugDNA.21420.1 | 3.68  | 3.59  | 0.17 | 0.26 | 1.07  | 0.247791 | 0.080863 | 0.543141 | 0.328831 |
| MmugDNA.21421.1.S1_at   | MmugDNA.21421.1 | 9.86  | 9.52  | 0.51 | 0.25 | 1.26  | 0.291319 | 0.388318 | 0.580629 | 0.62274  |
| MmugDNA.21422.1.S1_at   | MmugDNA.21422.1 | 7.45  | 7.75  | 0.14 | 0.08 | -1.23 | 0.057111 | 0.067412 | 0.296303 | 0.305664 |
| MmugDNA.21422.1.S1_s_at | MmugDNA.21422.1 | 7.16  | 7.44  | 0.25 | 0.03 | -1.21 | 0.216222 | 0.240047 | 0.513988 | 0.510742 |
| MmugDNA.21424.1.S1_at   | MmugDNA.21424.1 | 5.01  | 4.81  | 0.26 | 0.18 | 1.15  | 0.211976 | 0.250378 | 0.509831 | 0.519391 |
| MmugDNA.21425.1.S1_at   | MmugDNA.21425.1 | 8.87  | 8.56  | 0.08 | 0.11 | 1.23  | 0.012382 | 0.000955 | 0.161664 | 0.049326 |
| MmugDNA.21426.1.S1_at   | MmugDNA.21426.1 | 5.13  | 4.97  | 0.06 | 0.01 | 1.12  | 0.030561 | 0.028365 | 0.227713 | 0.21025  |



|                         |                 |       |       |      |      |       |          |          |          |          |
|-------------------------|-----------------|-------|-------|------|------|-------|----------|----------|----------|----------|
| MmugDNA.21427.1.S1_at   | MmugDNA.21427.1 | 11.11 | 11.37 | 0.11 | 0.11 | -1.2  | 0.049653 | 0.006807 | 0.280318 | 0.111444 |
| MmugDNA.21428.1.S1_at   | MmugDNA.21428.1 | 5.47  | 4.23  | 1.06 | 0.31 | 2.37  | 0.120895 | 0.150012 | 0.399442 | 0.424621 |
| MmugDNA.21429.1.S1_at   | MmugDNA.21429.1 | 3.07  | 3.33  | 0.49 | 0.17 | -1.2  | 0.949581 | 0.991883 | 0.978971 | 0.995442 |
| MmugDNA.21429.1.S1_s_at | MmugDNA.21429.1 | 6.68  | 6.61  | 0.65 | 0.25 | 1.05  | 0.907594 | 0.989163 | 0.960932 | 0.993825 |
| MmugDNA.2143.1.S1_at    | MmugDNA.2143.1  | 10.23 | 10.34 | 0.11 | 0.04 | -1.08 | 0.576588 | 0.98893  | 0.783279 | 0.993666 |
| MmugDNA.21430.1.S1_at   | MmugDNA.21430.1 | 2.79  | 2.58  | 0.13 | 0.1  | 1.15  | 0.468897 | 0.60114  | 0.713885 | 0.762532 |
| MmugDNA.21432.1.S1_at   | MmugDNA.21432.1 | 7.07  | 6.89  | 0.73 | 0.15 | 1.14  | 0.757578 | 0.340211 | 0.888802 | 0.586637 |
| MmugDNA.21433.1.S1_at   | MmugDNA.21433.1 | 4.99  | 5.05  | 0.01 | 0.01 | -1.04 | 0.000355 | 0.01054  | 0.062105 | 0.134072 |
| MmugDNA.21434.1.S1_at   | MmugDNA.21434.1 | 6.96  | 6.94  | 0.07 | 0    | 1.01  | 0.630743 | 0.661278 | 0.818647 | 0.801687 |
| MmugDNA.21437.1.S1_at   | MmugDNA.21437.1 | 5.88  | 5.88  | 0.12 | 0.06 | 1     | 0.960273 | 0.936161 | 0.983703 | 0.963987 |
| MmugDNA.21438.1.S1_at   | MmugDNA.21438.1 | 3.81  | 3.84  | 0.28 | 0.12 | -1.02 | 0.93449  | 0.584908 | 0.972505 | 0.75256  |
| MmugDNA.21440.1.S1_at   | MmugDNA.21440.1 | 11.98 | 11.98 | 0.07 | 0.07 | 1     | 0.966148 | 0.259115 | 0.986317 | 0.526263 |
| MmugDNA.21442.1.S1_at   | MmugDNA.21442.1 | 4.97  | 5.7   | 0.37 | 0.55 | -1.66 | 0.205846 | 0.151723 | 0.503636 | 0.426383 |
| MmugDNA.21443.1.S1_at   | MmugDNA.21443.1 | 5.02  | 4.71  | 0.34 | 0.19 | 1.24  | 0.408418 | 0.008352 | 0.671204 | 0.121226 |
| MmugDNA.21444.1.S1_at   | MmugDNA.21444.1 | 7.49  | 7.44  | 0.14 | 0.04 | 1.04  | 0.231505 | 0.485992 | 0.530229 | 0.689551 |
| MmugDNA.21445.1.S1_at   | MmugDNA.21445.1 | 10.85 | 10.96 | 0.22 | 0.03 | -1.08 | 0.896645 | 0.319066 | 0.956034 | 0.571622 |
| MmugDNA.21447.1.S1_at   | MmugDNA.21447.1 | 9.02  | 8.82  | 0.17 | 0.15 | 1.15  | 0.125251 | 0.05553  | 0.405722 | 0.281454 |
| MmugDNA.21448.1.S1_at   | MmugDNA.21448.1 | 7.24  | 7.39  | 0.54 | 0.35 | -1.11 | 0.735365 | 0.807999 | 0.876836 | 0.889467 |
| MmugDNA.21449.1.S1_at   | MmugDNA.21449.1 | 3.52  | 3.54  | 0.06 | 0.2  | -1.01 | 0.241869 | 0.263517 | 0.538882 | 0.529826 |
| MmugDNA.21449.1.S1_s_at | MmugDNA.21449.1 | 9.46  | 9.16  | 0.12 | 0.01 | 1.23  | 0.015261 | 0.320589 | 0.175847 | 0.572701 |
| MmugDNA.21450.1.S1_at   | MmugDNA.21450.1 | 7.55  | 7.53  | 1.2  | 0.06 | 1.02  | 0.8879   | 0.810112 | 0.952087 | 0.890539 |
| MmugDNA.21451.1.S1_at   | MmugDNA.21451.1 | 8.11  | 8.78  | 0.25 | 0.16 | -1.59 | 0.020267 | 0.106651 | 0.196077 | 0.369205 |
| MmugDNA.21452.1.S1_s_at | MmugDNA.21452.1 | 11.95 | 11.81 | 0.28 | 0.11 | 1.1   | 0.150566 | 0.263628 | 0.439616 | 0.529913 |
| MmugDNA.21453.1.S1_at   | MmugDNA.21453.1 | 6.31  | 6.63  | 0.54 | 0.08 | -1.25 | 0.961519 | 0.739786 | 0.984328 | 0.849224 |
| MmugDNA.21454.1.S1_at   | MmugDNA.21454.1 | 4.64  | 4.57  | 1.17 | 0.26 | 1.05  | 0.702975 | 0.790567 | 0.859037 | 0.878916 |
| MmugDNA.21455.1.S1_at   | MmugDNA.21455.1 | 3.41  | 3.7   | 0.43 | 0.09 | -1.23 | 0.993501 | 0.868419 | 0.997388 | 0.925323 |
| MmugDNA.21456.1.S1_at   | MmugDNA.21456.1 | 10.16 | 10.14 | 0.06 | 0.12 | 1.01  | 0.908317 | 0.249423 | 0.961181 | 0.518532 |
| MmugDNA.21457.1.S1_at   | MmugDNA.21457.1 | 5.33  | 5.7   | 0.29 | 0.13 | -1.29 | 0.300585 | 0.394082 | 0.588799 | 0.626734 |
| MmugDNA.21458.1.S1_at   | MmugDNA.21458.1 | 3.52  | 3.38  | 0.2  | 0.11 | 1.1   | 0.221555 | 0.361227 | 0.519541 | 0.602104 |
| MmugDNA.21459.1.S1_at   | MmugDNA.21459.1 | 4.94  | 5.46  | 0.43 | 0.4  | -1.43 | 0.488551 | 0.795106 | 0.726931 | 0.881926 |
| MmugDNA.2146.1.S1_at    | MmugDNA.2146.1  | 4.58  | 4.64  | 0.1  | 0.02 | -1.05 | 0.750864 | 0.805224 | 0.88497  | 0.888036 |
| MmugDNA.21460.1.S1_at   | MmugDNA.21460.1 | 4.39  | 4.3   | 0.07 | 0.12 | 1.07  | 0.196605 | 0.648142 | 0.493637 | 0.794002 |
| MmugDNA.21461.1.S1_at   | MmugDNA.21461.1 | 9.34  | 9.6   | 0.1  | 0.03 | -1.2  | 0.014567 | 0.055503 | 0.172573 | 0.281404 |
| MmugDNA.21463.1.S1_at   | MmugDNA.21463.1 | 9.49  | 9.54  | 0.27 | 0.09 | -1.04 | 0.18642  | 0.828037 | 0.482612 | 0.901214 |
| MmugDNA.21464.1.S1_at   | MmugDNA.21464.1 | 9.57  | 9.41  | 0.12 | 0.07 | 1.12  | 0.113472 | 0.694181 | 0.390238 | 0.822159 |
| MmugDNA.21464.1.S1_s_at | MmugDNA.21464.1 | 10.65 | 10.37 | 0.13 | 0.04 | 1.21  | 0.043593 | 0.311419 | 0.265765 | 0.566456 |
| MmugDNA.21465.1.S1_at   | MmugDNA.21465.1 | 5.22  | 4.98  | 0.62 | 0.19 | 1.18  | 0.135387 | 0.094946 | 0.419311 | 0.352054 |
| MmugDNA.21466.1.S1_at   | MmugDNA.21466.1 | 3.95  | 3.66  | 0.34 | 0.26 | 1.22  | 0.608648 | 0.786818 | 0.804644 | 0.876684 |
| MmugDNA.21468.1.S1_at   | MmugDNA.21468.1 | 4.14  | 4.42  | 0.13 | 0.12 | -1.21 | 0.082459 | 0.222413 | 0.344209 | 0.495479 |
| MmugDNA.21469.1.S1_at   | MmugDNA.21469.1 | 13.09 | 13.15 | 0.32 | 0.01 | -1.05 | 0.617323 | 0.474414 | 0.810009 | 0.681427 |
| MmugDNA.2147.1.S1_at    | MmugDNA.2147.1  | 3.95  | 3.99  | 0.3  | 0.06 | -1.03 | 0.487923 | 0.501188 | 0.726552 | 0.699449 |
| MmugDNA.21470.1.S1_at   | MmugDNA.21470.1 | 4.58  | 4.58  | 0.05 | 0.21 | 1     | 0.425771 | 0.326112 | 0.683025 | 0.576315 |
| MmugDNA.21471.1.S1_at   | MmugDNA.21471.1 | 6.76  | 7.42  | 0.42 | 0.11 | -1.58 | 0.05398  | 0.590422 | 0.289412 | 0.756223 |

|                         |                 |       |       |      |      |       |          |          |          |          |
|-------------------------|-----------------|-------|-------|------|------|-------|----------|----------|----------|----------|
| MmugDNA.21473.1.S1_at   | MmugDNA.21473.1 | 4.72  | 4.9   | 0.2  | 0    | -1.13 | 0.573204 | 0.877729 | 0.781077 | 0.930219 |
| MmugDNA.21474.1.S1_at   | MmugDNA.21474.1 | 4.6   | 4.29  | 0.25 | 0.17 | 1.24  | 0.114359 | 0.13624  | 0.391276 | 0.408621 |
| MmugDNA.21475.1.S1_at   | MmugDNA.21475.1 | 3.58  | 3.71  | 0.98 | 0.26 | -1.1  | 0.407923 | 0.614068 | 0.670893 | 0.771067 |
| MmugDNA.21477.1.S1_at   | MmugDNA.21477.1 | 3.51  | 3.51  | 0.01 | 0.13 | -1    | 0.521624 | 0.700094 | 0.749394 | 0.825946 |
| MmugDNA.21478.1.S1_at   | MmugDNA.21478.1 | 12.22 | 12.35 | 0.12 | 0.04 | -1.09 | 0.700272 | 0.267861 | 0.857676 | 0.533607 |
| MmugDNA.21479.1.S1_at   | MmugDNA.21479.1 | 7.83  | 8.1   | 0.2  | 0.08 | -1.21 | 0.149648 | 0.033812 | 0.438613 | 0.227489 |
| MmugDNA.2148.1.S1_at    | MmugDNA.2148.1  | 3.51  | 3.52  | 0.04 | 0.13 | -1    | 0.825345 | 0.792889 | 0.92243  | 0.880387 |
| MmugDNA.21480.1.S1_at   | MmugDNA.21480.1 | 5.38  | 5.73  | 0.11 | 0.25 | -1.27 | 0.094036 | 0.436201 | 0.363011 | 0.655879 |
| MmugDNA.21481.1.S1_at   | MmugDNA.21481.1 | 5.97  | 5.96  | 0.24 | 0.11 | 1     | 0.261215 | 0.396946 | 0.555294 | 0.628506 |
| MmugDNA.21482.1.S1_at   | MmugDNA.21482.1 | 10.96 | 10.96 | 0.14 | 0.16 | 1     | 0.590852 | 0.144546 | 0.792097 | 0.418409 |
| MmugDNA.21484.1.S1_at   | MmugDNA.21484.1 | 3.05  | 3.11  | 0.03 | 0.07 | -1.04 | 0.090947 | 0.057114 | 0.358159 | 0.284945 |
| MmugDNA.21485.1.S1_at   | MmugDNA.21485.1 | 4.64  | 4.81  | 0.79 | 0.32 | -1.12 | 0.838193 | 0.977248 | 0.929053 | 0.987636 |
| MmugDNA.21486.1.S1_at   | MmugDNA.21486.1 | 8.27  | 7.69  | 0.31 | 0.39 | 1.5   | 0.041455 | 0.002484 | 0.259966 | 0.073652 |
| MmugDNA.21488.1.S1_at   | MmugDNA.21488.1 | 4.82  | 4.66  | 0.26 | 0.14 | 1.12  | 0.110246 | 0.414263 | 0.385603 | 0.640164 |
| MmugDNA.2149.1.S1_at    | MmugDNA.2149.1  | 9.81  | 9.19  | 0.43 | 0.07 | 1.53  | 0.1063   | 0.101176 | 0.380284 | 0.360831 |
| MmugDNA.21490.1.S1_at   | MmugDNA.21490.1 | 3.78  | 3.81  | 0.19 | 0.05 | -1.02 | 0.973831 | 0.257983 | 0.989501 | 0.525559 |
| MmugDNA.21491.1.S1_at   | MmugDNA.21491.1 | 8.81  | 6.92  | 0.52 | 0.49 | 3.7   | 0.021913 | 0.014557 | 0.201211 | 0.153907 |
| MmugDNA.21493.1.S1_at   | MmugDNA.21493.1 | 4.92  | 4.47  | 0.38 | 0.05 | 1.36  | 0.189127 | 0.160936 | 0.485774 | 0.437116 |
| MmugDNA.21494.1.S1_at   | MmugDNA.21494.1 | 2.88  | 3     | 0.08 | 0.03 | -1.09 | 0.050513 | 0.05099  | 0.282549 | 0.271078 |
| MmugDNA.21495.1.S1_at   | MmugDNA.21495.1 | 3.23  | 3.1   | 0.38 | 0.09 | 1.1   | 0.576059 | 0.504215 | 0.783034 | 0.701456 |
| MmugDNA.21496.1.S1_at   | MmugDNA.21496.1 | 4.85  | 4.87  | 0.03 | 0.14 | -1.02 | 0.603938 | 0.462228 | 0.801426 | 0.673604 |
| MmugDNA.21497.1.S1_at   | MmugDNA.21497.1 | 9.97  | 10.59 | 0    | 0.18 | -1.54 | 0.007461 | 0.090675 | 0.134751 | 0.345151 |
| MmugDNA.21498.1.S1_at   | MmugDNA.21498.1 | 4.16  | 3.93  | 0.15 | 0.54 | 1.17  | 0.845819 | 0.956171 | 0.932616 | 0.975058 |
| MmugDNA.21499.1.S1_at   | MmugDNA.21499.1 | 11.01 | 11.07 | 0.14 | 0.14 | -1.05 | 0.457841 | 0.509959 | 0.706617 | 0.704535 |
| MmugDNA.215.1.S1_at     | MmugDNA.215.1   | 11.11 | 11.01 | 0.19 | 0.03 | 1.07  | 0.394215 | 0.24793  | 0.660901 | 0.517401 |
| MmugDNA.21500.1.S1_at   | MmugDNA.21500.1 | 5.51  | 5.41  | 0.13 | 0.12 | 1.07  | 0.702159 | 0.43726  | 0.858655 | 0.656613 |
| MmugDNA.21501.1.S1_at   | MmugDNA.21501.1 | 13.01 | 12.73 | 0.25 | 0.01 | 1.22  | 0.116237 | 0.448873 | 0.393335 | 0.664672 |
| MmugDNA.21503.1.S1_at   | MmugDNA.21503.1 | 4.53  | 4.5   | 0.04 | 0.03 | 1.02  | 0.765793 | 0.208041 | 0.892599 | 0.482049 |
| MmugDNA.21504.1.S1_at   | MmugDNA.21504.1 | 4.02  | 3.87  | 0.12 | 0.03 | 1.11  | 0.031943 | 0.401749 | 0.232535 | 0.631068 |
| MmugDNA.21505.1.S1_at   | MmugDNA.21505.1 | 5.27  | 5.27  | 0.22 | 0.1  | 1     | 0.983079 | 0.972216 | 0.993737 | 0.985011 |
| MmugDNA.21506.1.S1_at   | MmugDNA.21506.1 | 6.5   | 5.75  | 0.45 | 0.13 | 1.69  | 0.083168 | 0.053396 | 0.345425 | 0.27666  |
| MmugDNA.21507.1.S1_at   | MmugDNA.21507.1 | 7.3   | 7.15  | 0.11 | 0.12 | 1.11  | 0.106258 | 0.330203 | 0.380284 | 0.579016 |
| MmugDNA.21508.1.S1_at   | MmugDNA.21508.1 | 5.81  | 5.17  | 0.65 | 0.04 | 1.55  | 0.25778  | 0.077547 | 0.551991 | 0.323421 |
| MmugDNA.21509.1.S1_at   | MmugDNA.21509.1 | 7.54  | 7.68  | 0.41 | 0.09 | -1.1  | 0.636224 | 0.014512 | 0.822077 | 0.153682 |
| MmugDNA.2151.1.S1_at    | MmugDNA.2151.1  | 6.31  | 6.28  | 0.68 | 0.06 | 1.02  | 0.614021 | 0.651144 | 0.807838 | 0.796048 |
| MmugDNA.24188.1.S1_s_at | MmugDNA.24188.1 | 11.35 | 10.83 | 0.08 | 0.04 | 1.43  | 0.000804 | 0.018528 | 0.073056 | 0.171243 |
| MmugDNA.21512.1.S1_at   | MmugDNA.21512.1 | 6.42  | 6.58  | 0.05 | 0.19 | -1.12 | 0.659673 | 0.900565 | 0.835757 | 0.943469 |
| MmugDNA.21513.1.S1_at   | MmugDNA.21513.1 | 4.59  | 4.59  | 0.11 | 0.14 | 1     | 0.233293 | 0.257181 | 0.531554 | 0.524938 |
| MmugDNA.21514.1.S1_at   | MmugDNA.21514.1 | 8.62  | 7.97  | 0.25 | 0.18 | 1.56  | 0.051171 | 0.000693 | 0.283595 | 0.044166 |
| MmugDNA.21517.1.S1_at   | MmugDNA.21517.1 | 6.31  | 6.07  | 0.32 | 0.28 | 1.18  | 0.466056 | 0.648688 | 0.711999 | 0.794407 |
| MmugDNA.21519.1.S1_at   | MmugDNA.21519.1 | 12.44 | 12.59 | 0.07 | 0.06 | -1.12 | 0.048043 | 0.29002  | 0.27653  | 0.551016 |
| MmugDNA.2152.1.S1_at    | MmugDNA.2152.1  | 2.9   | 2.93  | 0.04 | 0.04 | -1.02 | 0.699336 | 0.327082 | 0.857245 | 0.577104 |
| MmugDNA.21520.1.S1_at   | MmugDNA.21520.1 | 4.3   | 4.34  | 0.37 | 0.76 | -1.03 | 0.237129 | 0.307536 | 0.534591 | 0.563781 |

|                         |                 |       |       |      |      |       |          |          |          |          |
|-------------------------|-----------------|-------|-------|------|------|-------|----------|----------|----------|----------|
| MmugDNA.21521.1.S1_at   | MmugDNA.21521.1 | 5.83  | 5.83  | 0.06 | 0.03 | -1    | 0.574336 | 0.473438 | 0.781868 | 0.680697 |
| MmugDNA.21522.1.S1_at   | MmugDNA.21522.1 | 3.76  | 3.83  | 0.1  | 0.13 | -1.05 | 0.560468 | 0.75911  | 0.773879 | 0.859979 |
| MmugDNA.21527.1.S1_at   | MmugDNA.21527.1 | 4.04  | 3.28  | 0.34 | 0.1  | 1.7   | 0.067774 | 0.053227 | 0.318137 | 0.276445 |
| MmugDNA.2153.1.S1_at    | MmugDNA.2153.1  | 3.67  | 3.6   | 0.53 | 0.14 | 1.05  | 0.258192 | 0.310335 | 0.552443 | 0.565544 |
| MmugDNA.21531.1.S1_at   | MmugDNA.21531.1 | 3.03  | 3.65  | 0.13 | 0.48 | -1.54 | 0.161209 | 0.203552 | 0.452749 | 0.477767 |
| MmugDNA.21532.1.S1_at   | MmugDNA.21532.1 | 3.3   | 3.26  | 0.12 | 0.1  | 1.03  | 0.946124 | 0.144989 | 0.977211 | 0.418937 |
| MmugDNA.21533.1.S1_at   | MmugDNA.21533.1 | 7.43  | 7.73  | 0.26 | 0.15 | -1.23 | 0.731108 | 0.040922 | 0.874375 | 0.247161 |
| MmugDNA.21535.1.S1_at   | MmugDNA.21535.1 | 6.56  | 6.64  | 0.09 | 0.17 | -1.05 | 0.555767 | 0.875258 | 0.771458 | 0.929211 |
| MmugDNA.21536.1.S1_at   | MmugDNA.21536.1 | 9.72  | 9.84  | 0.22 | 0.03 | -1.09 | 0.520603 | 0.841968 | 0.748889 | 0.909959 |
| MmugDNA.21537.1.S1_at   | MmugDNA.21537.1 | 9.07  | 8.96  | 0.32 | 0.1  | 1.08  | 0.586139 | 0.59831  | 0.789675 | 0.76073  |
| MmugDNA.21538.1.S1_at   | MmugDNA.21538.1 | 4.24  | 4.18  | 0.12 | 0.06 | 1.04  | 0.940301 | 0.878547 | 0.974839 | 0.930686 |
| MmugDNA.2154.1.S1_at    | MmugDNA.2154.1  | 6.86  | 7.04  | 0.15 | 0.18 | -1.13 | 0.656165 | 0.162285 | 0.833605 | 0.438447 |
| MmugDNA.21541.1.S1_at   | MmugDNA.21541.1 | 3.26  | 3.22  | 0.24 | 0.08 | 1.03  | 0.68346  | 0.819148 | 0.849083 | 0.89579  |
| MmugDNA.21542.1.S1_at   | MmugDNA.21542.1 | 12.39 | 12.31 | 0.54 | 0.06 | 1.06  | 0.914543 | 0.595624 | 0.963657 | 0.759123 |
| MmugDNA.21544.1.S1_at   | MmugDNA.21544.1 | 4.83  | 4.68  | 0.73 | 0.25 | 1.11  | 0.188736 | 0.223389 | 0.485343 | 0.496174 |
| MmugDNA.21545.1.S1_at   | MmugDNA.21545.1 | 6.59  | 6.03  | 0.11 | 0.05 | 1.47  | 0.002127 | 0.000822 | 0.090208 | 0.046584 |
| MmugDNA.21547.1.S1_at   | MmugDNA.21547.1 | 6.25  | 6.44  | 1.2  | 0.24 | -1.14 | 0.640843 | 0.657693 | 0.824509 | 0.799912 |
| MmugDNA.21548.1.S1_s_at | MmugDNA.21548.1 | 7.94  | 9.05  | 0.47 | 0.03 | -2.15 | 0.016663 | 0.01478  | 0.182466 | 0.154626 |
| MmugDNA.21549.1.S1_at   | MmugDNA.21549.1 | 9.5   | 8.49  | 0.3  | 0.31 | 2.02  | 0.013688 | 0.008069 | 0.167927 | 0.119402 |
| MmugDNA.2155.1.S1_at    | MmugDNA.2155.1  | 4.37  | 3.9   | 0.1  | 0.29 | 1.39  | 0.1288   | 0.136607 | 0.410998 | 0.409115 |
| MmugDNA.21550.1.S1_at   | MmugDNA.21550.1 | 3.31  | 3.27  | 0.05 | 0.18 | 1.03  | 0.24804  | 0.303996 | 0.543371 | 0.561344 |
| MmugDNA.21553.1.S1_at   | MmugDNA.21553.1 | 6.97  | 7.15  | 0.12 | 0.19 | -1.14 | 0.937563 | 0.389977 | 0.973767 | 0.624002 |
| MmugDNA.21554.1.S1_at   | MmugDNA.21554.1 | 5.1   | 6.49  | 0.68 | 0.27 | -2.63 | 0.067666 | 0.05724  | 0.31797  | 0.285059 |
| MmugDNA.21557.1.S1_at   | MmugDNA.21557.1 | 10.49 | 10.58 | 0.18 | 0.02 | -1.07 | 0.992313 | 0.065921 | 0.997161 | 0.302141 |
| MmugDNA.21558.1.S1_at   | MmugDNA.21558.1 | 5.98  | 5.95  | 0.11 | 0.04 | 1.02  | 0.238561 | 0.033561 | 0.535912 | 0.226764 |
| MmugDNA.21559.1.S1_at   | MmugDNA.21559.1 | 10.3  | 10.79 | 0.16 | 0.12 | -1.41 | 0.016268 | 0.175562 | 0.180344 | 0.45218  |
| MmugDNA.2156.1.S1_at    | MmugDNA.2156.1  | 3.88  | 3.85  | 0.35 | 0.14 | 1.02  | 0.233803 | 0.307032 | 0.532017 | 0.563427 |
| MmugDNA.21560.1.S1_at   | MmugDNA.21560.1 | 6.54  | 5.97  | 0.32 | 0.13 | 1.48  | 0.194869 | 0.589259 | 0.49141  | 0.755509 |
| MmugDNA.21560.1.S1_s_at | MmugDNA.21560.1 | 9.71  | 11.44 | 0.61 | 0.16 | -3.31 | 0.023099 | 0.179422 | 0.205038 | 0.455908 |
| MmugDNA.21563.1.S1_at   | MmugDNA.21563.1 | 6.17  | 6.15  | 0.15 | 0.12 | 1.01  | 0.910805 | 0.457978 | 0.962223 | 0.670999 |
| MmugDNA.21564.1.S1_at   | MmugDNA.21564.1 | 5.1   | 5.03  | 0.08 | 0.16 | 1.04  | 0.60408  | 0.890693 | 0.801436 | 0.937697 |
| MmugDNA.21565.1.S1_at   | MmugDNA.21565.1 | 5.92  | 6.17  | 0.04 | 0.19 | -1.19 | 0.375761 | 0.664095 | 0.646508 | 0.803247 |
| MmugDNA.21568.1.S1_at   | MmugDNA.21568.1 | 6.22  | 6.34  | 1.04 | 0.35 | -1.08 | 0.487198 | 0.324314 | 0.726032 | 0.574924 |
| MmugDNA.21569.1.S1_at   | MmugDNA.21569.1 | 9.64  | 9.23  | 0.36 | 0.06 | 1.34  | 0.296993 | 0.140267 | 0.585548 | 0.413448 |
| MmugDNA.21570.1.S1_at   | MmugDNA.21570.1 | 3.19  | 3.25  | 0.11 | 0.15 | -1.04 | 0.606146 | 0.202847 | 0.802904 | 0.477312 |
| MmugDNA.21571.1.S1_at   | MmugDNA.21571.1 | 6.2   | 6.35  | 0.09 | 0.01 | -1.11 | 0.10624  | 0.020175 | 0.380284 | 0.178414 |
| MmugDNA.21572.1.S1_at   | MmugDNA.21572.1 | 5.04  | 5.12  | 0.2  | 0.12 | -1.06 | 0.709919 | 0.714428 | 0.862704 | 0.834313 |
| MmugDNA.21573.1.S1_at   | MmugDNA.21573.1 | 7.52  | 7.27  | 0.23 | 0.09 | 1.19  | 0.239239 | 0.123995 | 0.53651  | 0.394262 |
| MmugDNA.21574.1.S1_at   | MmugDNA.21574.1 | 3.6   | 3.67  | 0.54 | 0.11 | -1.05 | 0.466562 | 0.6042   | 0.712278 | 0.764542 |
| MmugDNA.21576.1.S1_at   | MmugDNA.21576.1 | 4.81  | 4.7   | 0.27 | 0.07 | 1.08  | 0.345938 | 0.484404 | 0.624741 | 0.688478 |
| MmugDNA.21577.1.S1_at   | MmugDNA.21577.1 | 4.71  | 4.72  | 0.25 | 0.35 | -1.01 | 0.813507 | 0.484602 | 0.916615 | 0.688576 |
| MmugDNA.21578.1.S1_at   | MmugDNA.21578.1 | 6.83  | 6.51  | 0.32 | 0.38 | 1.25  | 0.264707 | 0.119391 | 0.55795  | 0.387887 |
| MmugDNA.21579.1.S1_at   | MmugDNA.21579.1 | 7.69  | 7.57  | 0.12 | 0.4  | 1.08  | 0.885013 | 0.026602 | 0.951005 | 0.204008 |

|                         |                 |       |       |      |      |       |          |          |          |          |
|-------------------------|-----------------|-------|-------|------|------|-------|----------|----------|----------|----------|
| MmugDNA.2158.1.S1_at    | MmugDNA.2158.1  | 4.05  | 3.62  | 0.42 | 0.48 | 1.35  | 0.840565 | 0.966753 | 0.930008 | 0.981494 |
| MmugDNA.21580.1.S1_at   | MmugDNA.21580.1 | 4.98  | 4.89  | 1.05 | 0.46 | 1.06  | 0.545332 | 0.229861 | 0.764553 | 0.501802 |
| MmugDNA.21581.1.S1_at   | MmugDNA.21581.1 | 5.09  | 5.13  | 0.06 | 0.16 | -1.03 | 0.843719 | 0.188849 | 0.931554 | 0.464789 |
| MmugDNA.21582.1.S1_at   | MmugDNA.21582.1 | 7.02  | 7.05  | 0.14 | 0.34 | -1.02 | 0.421711 | 0.576336 | 0.680117 | 0.747186 |
| MmugDNA.21583.1.S1_at   | MmugDNA.21583.1 | 12.92 | 12.94 | 0.07 | 0.04 | -1.01 | 0.752987 | 0.543339 | 0.885904 | 0.726059 |
| MmugDNA.21584.1.S1_at   | MmugDNA.21584.1 | 7.7   | 7.52  | 0.15 | 0.03 | 1.14  | 0.311204 | 0.041187 | 0.597379 | 0.247733 |
| MmugDNA.21584.1.S1_s_at | MmugDNA.21584.1 | 7.09  | 6.96  | 0.21 | 0.16 | 1.09  | 0.571657 | 0.646196 | 0.780018 | 0.792676 |
| MmugDNA.21585.1.S1_at   | MmugDNA.21585.1 | 4.25  | 4.33  | 0.81 | 0.36 | -1.05 | 0.46492  | 0.437761 | 0.711025 | 0.656927 |
| MmugDNA.21587.1.S1_at   | MmugDNA.21587.1 | 10.66 | 10.75 | 0.15 | 0.06 | -1.07 | 0.95648  | 0.04066  | 0.982106 | 0.246578 |
| MmugDNA.21588.1.S1_at   | MmugDNA.21588.1 | 6.04  | 9.36  | 1.21 | 0.29 | -10   | 0.017985 | 0.339557 | 0.187151 | 0.586165 |
| MmugDNA.21591.1.S1_at   | MmugDNA.21591.1 | 3.29  | 3.44  | 0.09 | 0.33 | -1.11 | 0.472129 | 0.677659 | 0.71594  | 0.811756 |
| MmugDNA.21592.1.S1_at   | MmugDNA.21592.1 | 3.69  | 3.87  | 0.28 | 0.1  | -1.14 | 0.356262 | 0.081248 | 0.632563 | 0.329351 |
| MmugDNA.21594.1.S1_at   | MmugDNA.21594.1 | 4.03  | 4     | 0.05 | 0.12 | 1.02  | 0.212673 | 0.385562 | 0.510654 | 0.621027 |
| MmugDNA.21595.1.S1_at   | MmugDNA.21595.1 | 3.55  | 3.65  | 0.09 | 0.11 | -1.07 | 0.115647 | 0.19049  | 0.392733 | 0.465906 |
| MmugDNA.21596.1.S1_at   | MmugDNA.21596.1 | 5.76  | 5.63  | 0.18 | 0.13 | 1.09  | 0.17522  | 0.223339 | 0.469551 | 0.49612  |
| MmugDNA.21597.1.S1_at   | MmugDNA.21597.1 | 9.91  | 9.98  | 0.14 | 0.11 | -1.05 | 0.922241 | 0.898459 | 0.966724 | 0.942214 |
| MmugDNA.21597.1.S1_s_at | MmugDNA.21597.1 | 11.09 | 11.23 | 0.21 | 0.1  | -1.1  | 0.789776 | 0.957517 | 0.904456 | 0.975944 |
| MmugDNA.21598.1.S1_at   | MmugDNA.21598.1 | 5.21  | 5.25  | 0.07 | 0.03 | -1.02 | 0.509741 | 0.309848 | 0.741244 | 0.565046 |
| MmugDNA.216.1.S1_at     | MmugDNA.216.1   | 9.9   | 10.02 | 0.16 | 0.08 | -1.09 | 0.522493 | 0.558222 | 0.749811 | 0.735467 |
| MmugDNA.2160.1.S1_at    | MmugDNA.2160.1  | 4.81  | 4.27  | 0.44 | 0.3  | 1.46  | 0.116512 | 0.159448 | 0.393658 | 0.435568 |
| MmugDNA.21600.1.S1_at   | MmugDNA.21600.1 | 5.65  | 5.82  | 0.32 | 0.16 | -1.13 | 0.709033 | 0.66151  | 0.862234 | 0.801842 |
| MmugDNA.21601.1.S1_at   | MmugDNA.21601.1 | 3.41  | 3.53  | 0.07 | 0    | -1.08 | 0.117764 | 0.051585 | 0.395125 | 0.272597 |
| MmugDNA.21604.1.S1_at   | MmugDNA.21604.1 | 3.96  | 3.95  | 0.12 | 0.05 | 1.01  | 0.236725 | 0.187686 | 0.534328 | 0.46368  |
| MmugDNA.21605.1.S1_at   | MmugDNA.21605.1 | 4.64  | 4.55  | 0.36 | 0.35 | 1.06  | 0.76301  | 0.25779  | 0.891457 | 0.52542  |
| MmugDNA.21606.1.S1_at   | MmugDNA.21606.1 | 5.25  | 5.25  | 0.36 | 0.05 | 1     | 0.886211 | 0.903455 | 0.951473 | 0.945185 |
| MmugDNA.21609.1.S1_at   | MmugDNA.21609.1 | 4.46  | 4.21  | 0.23 | 0.5  | 1.19  | 0.767661 | 0.857516 | 0.893363 | 0.918676 |
| MmugDNA.21610.1.S1_at   | MmugDNA.21610.1 | 6.56  | 6.68  | 0.24 | 0.06 | -1.09 | 0.372592 | 0.240125 | 0.645023 | 0.510813 |
| MmugDNA.21611.1.S1_at   | MmugDNA.21611.1 | 6.96  | 6.65  | 0.05 | 0.34 | 1.24  | 0.153805 | 0.162308 | 0.443947 | 0.438447 |
| MmugDNA.21613.1.S1_at   | MmugDNA.21613.1 | 11.14 | 11.09 | 0.15 | 0.09 | 1.04  | 0.167391 | 0.738049 | 0.460585 | 0.848158 |
| MmugDNA.21614.1.S1_at   | MmugDNA.21614.1 | 7.3   | 7.78  | 1.48 | 0.37 | -1.39 | 0.782793 | 0.624165 | 0.90089  | 0.778457 |
| MmugDNA.21615.1.S1_at   | MmugDNA.21615.1 | 7.31  | 7.57  | 0.61 | 0.41 | -1.2  | 0.929401 | 0.13208  | 0.970065 | 0.404051 |
| MmugDNA.21616.1.S1_at   | MmugDNA.21616.1 | 4.73  | 4.64  | 0.17 | 0.14 | 1.07  | 0.474279 | 0.071192 | 0.71743  | 0.31311  |
| MmugDNA.21617.1.S1_at   | MmugDNA.21617.1 | 10.18 | 9.52  | 0.23 | 0.12 | 1.58  | 0.02132  | 0.004684 | 0.199623 | 0.095363 |
| MmugDNA.21618.1.S1_at   | MmugDNA.21618.1 | 9.23  | 9.09  | 0.43 | 0.17 | 1.11  | 0.966641 | 0.992537 | 0.986533 | 0.995715 |
| MmugDNA.21619.1.S1_at   | MmugDNA.21619.1 | 4.8   | 5.09  | 0.14 | 0.07 | -1.22 | 0.066828 | 0.39887  | 0.316219 | 0.629591 |
| MmugDNA.21623.1.S1_at   | MmugDNA.21623.1 | 4.68  | 4.77  | 0.06 | 0.07 | -1.07 | 0.506743 | 0.715886 | 0.739271 | 0.83531  |
| MmugDNA.21624.1.S1_at   | MmugDNA.21624.1 | 4.12  | 3.99  | 0.1  | 0.39 | 1.1   | 0.687863 | 0.632836 | 0.85092  | 0.783788 |
| MmugDNA.21625.1.S1_at   | MmugDNA.21625.1 | 4.12  | 4.15  | 0.44 | 0.01 | -1.02 | 0.439113 | 0.509169 | 0.693448 | 0.704028 |
| MmugDNA.21626.1.S1_at   | MmugDNA.21626.1 | 3.28  | 3.27  | 0.06 | 0    | 1     | 0.824241 | 0.541757 | 0.921872 | 0.725057 |
| MmugDNA.21627.1.S1_at   | MmugDNA.21627.1 | 5.07  | 4.93  | 0.45 | 0.09 | 1.11  | 0.198163 | 0.253337 | 0.495406 | 0.521662 |
| MmugDNA.21628.1.S1_at   | MmugDNA.21628.1 | 4.53  | 4.3   | 0.01 | 0.16 | 1.17  | 0.095821 | 0.238248 | 0.365401 | 0.508825 |
| MmugDNA.2163.1.S1_s_at  | MmugDNA.2163.1  | 3.15  | 3.12  | 0.08 | 0.06 | 1.02  | 0.251803 | 0.156201 | 0.546475 | 0.43161  |
| MmugDNA.21631.1.S1_at   | MmugDNA.21631.1 | 5.59  | 5.43  | 0.26 | 0.32 | 1.12  | 0.898548 | 0.518802 | 0.956887 | 0.710724 |

|                         |                 |       |       |      |      |       |          |          |          |          |
|-------------------------|-----------------|-------|-------|------|------|-------|----------|----------|----------|----------|
| MmugDNA.21632.1.S1_at   | MmugDNA.21632.1 | 12.04 | 12.36 | 0.1  | 0.05 | -1.25 | 0.019429 | 0.037437 | 0.192344 | 0.237777 |
| MmugDNA.21635.1.S1_at   | MmugDNA.21635.1 | 3.67  | 3.43  | 0.07 | 0.07 | 1.18  | 0.024501 | 0.204178 | 0.209655 | 0.478507 |
| MmugDNA.21637.1.S1_at   | MmugDNA.21637.1 | 4.12  | 4.03  | 0.27 | 0.09 | 1.07  | 0.13785  | 0.118253 | 0.422926 | 0.386244 |
| MmugDNA.21638.1.S1_at   | MmugDNA.21638.1 | 9.58  | 8.98  | 0.07 | 0.17 | 1.51  | 0.003003 | 0.008924 | 0.099851 | 0.124951 |
| MmugDNA.21639.1.S1_at   | MmugDNA.21639.1 | 6.88  | 6.82  | 0.05 | 0.03 | 1.05  | 0.047474 | 0.096689 | 0.275186 | 0.35417  |
| MmugDNA.2164.1.S1_at    | MmugDNA.2164.1  | 3.08  | 3.19  | 0.17 | 0.08 | -1.08 | 0.958773 | 0.796716 | 0.983221 | 0.882782 |
| MmugDNA.21640.1.S1_at   | MmugDNA.21640.1 | 9.53  | 9.56  | 0.18 | 0.15 | -1.02 | 0.92903  | 0.611252 | 0.969935 | 0.769195 |
| MmugDNA.21641.1.S1_at   | MmugDNA.21641.1 | 10.41 | 10.35 | 0.22 | 0.08 | 1.05  | 0.73193  | 0.017546 | 0.874717 | 0.167632 |
| MmugDNA.21642.1.S1_at   | MmugDNA.21642.1 | 3.14  | 3.25  | 0.04 | 0.13 | -1.08 | 0.217435 | 0.186166 | 0.515324 | 0.462007 |
| MmugDNA.21643.1.S1_at   | MmugDNA.21643.1 | 11.04 | 10.69 | 0.18 | 0.04 | 1.28  | 0.013071 | 0.044908 | 0.165033 | 0.256424 |
| MmugDNA.21644.1.S1_at   | MmugDNA.21644.1 | 7.94  | 7.82  | 0.04 | 0.16 | 1.09  | 0.383593 | 0.573931 | 0.652919 | 0.745476 |
| MmugDNA.21645.1.S1_at   | MmugDNA.21645.1 | 4.04  | 3.81  | 0.11 | 0.06 | 1.17  | 0.027822 | 0.019965 | 0.219261 | 0.17752  |
| MmugDNA.21647.1.S1_at   | MmugDNA.21647.1 | 8.88  | 8.6   | 0.27 | 0.18 | 1.21  | 0.653077 | 0.013964 | 0.831886 | 0.151509 |
| MmugDNA.21648.1.S1_at   | MmugDNA.21648.1 | 5.74  | 5.57  | 0.13 | 0.02 | 1.12  | 0.031742 | 0.095198 | 0.231584 | 0.35218  |
| MmugDNA.21649.1.S1_at   | MmugDNA.21649.1 | 4.81  | 4.9   | 0.05 | 0.27 | -1.07 | 0.205312 | 0.528721 | 0.503171 | 0.71678  |
| MmugDNA.2165.1.S1_at    | MmugDNA.2165.1  | 8.17  | 8.03  | 0.45 | 0.16 | 1.1   | 0.561457 | 0.916545 | 0.774424 | 0.953277 |
| MmugDNA.21650.1.S1_at   | MmugDNA.21650.1 | 7.98  | 7.94  | 1.56 | 0.56 | 1.02  | 0.425381 | 0.328308 | 0.682786 | 0.578012 |
| MmugDNA.21652.1.S1_at   | MmugDNA.21652.1 | 9.79  | 9.52  | 0.18 | 0.16 | 1.21  | 0.043509 | 0.012381 | 0.265724 | 0.143958 |
| MmugDNA.21653.1.S1_at   | MmugDNA.21653.1 | 10.17 | 9.06  | 0.41 | 0.06 | 2.15  | 0.026304 | 0.002631 | 0.215228 | 0.075845 |
| MmugDNA.21654.1.S1_at   | MmugDNA.21654.1 | 6.75  | 6.96  | 0.18 | 0.21 | -1.16 | 0.188058 | 0.002688 | 0.484319 | 0.076436 |
| MmugDNA.21656.1.S1_at   | MmugDNA.21656.1 | 7.43  | 8.72  | 0.52 | 0.2  | -2.45 | 0.024219 | 0.004277 | 0.208762 | 0.091847 |
| MmugDNA.21657.1.S1_at   | MmugDNA.21657.1 | 8.47  | 8.5   | 0.46 | 0.12 | -1.02 | 0.262814 | 0.008405 | 0.556683 | 0.121726 |
| MmugDNA.21658.1.S1_at   | MmugDNA.21658.1 | 6.07  | 6.05  | 0.06 | 0.11 | 1.02  | 0.590106 | 0.745988 | 0.791771 | 0.852688 |
| MmugDNA.21659.1.S1_at   | MmugDNA.21659.1 | 6.49  | 6.98  | 1    | 0.37 | -1.41 | 0.707757 | 0.641274 | 0.861544 | 0.789506 |
| MmugDNA.2166.1.S1_at    | MmugDNA.2166.1  | 3.38  | 3.14  | 0.31 | 0.12 | 1.18  | 0.246516 | 0.429489 | 0.542414 | 0.650934 |
| MmugDNA.21660.1.S1_at   | MmugDNA.21660.1 | 3.43  | 2.87  | 0.26 | 0.06 | 1.47  | 0.07754  | 0.078539 | 0.336282 | 0.325285 |
| MmugDNA.21662.1.S1_at   | MmugDNA.21662.1 | 4.41  | 4.14  | 0.6  | 0.1  | 1.2   | 0.324098 | 0.514402 | 0.607806 | 0.707675 |
| MmugDNA.21663.1.S1_at   | MmugDNA.21663.1 | 4.3   | 4.35  | 0.1  | 0.09 | -1.04 | 0.604032 | 0.074354 | 0.801436 | 0.318046 |
| MmugDNA.21664.1.S1_at   | MmugDNA.21664.1 | 5.69  | 3.25  | 0.94 | 0.46 | 5.46  | 0.01079  | 0.03505  | 0.153792 | 0.231385 |
| MmugDNA.21666.1.S1_at   | MmugDNA.21666.1 | 6.42  | 6.88  | 0.54 | 0.25 | -1.37 | 0.370182 | 0.431264 | 0.643242 | 0.652249 |
| MmugDNA.21667.1.S1_s_at | MmugDNA.21667.1 | 6.41  | 7.5   | 0.41 | 0.23 | -2.12 | 0.034148 | 0.012854 | 0.239518 | 0.145997 |
| MmugDNA.21668.1.S1_at   | MmugDNA.21668.1 | 2.82  | 3.06  | 0.13 | 0.11 | -1.19 | 0.104056 | 0.12465  | 0.377336 | 0.395085 |
| MmugDNA.21669.1.S1_at   | MmugDNA.21669.1 | 5.4   | 5.79  | 0.29 | 0.24 | -1.31 | 0.312816 | 0.413324 | 0.598778 | 0.639596 |
| MmugDNA.21670.1.S1_at   | MmugDNA.21670.1 | 3.74  | 3.67  | 0.28 | 0.03 | 1.05  | 0.681821 | 0.53827  | 0.848244 | 0.723014 |
| MmugDNA.21672.1.S1_at   | MmugDNA.21672.1 | 5.87  | 5.95  | 0.69 | 0.3  | -1.06 | 0.535397 | 0.705898 | 0.758305 | 0.829555 |
| MmugDNA.21673.1.S1_at   | MmugDNA.21673.1 | 5.03  | 4.93  | 0.66 | 0.14 | 1.08  | 0.218136 | 0.2506   | 0.51594  | 0.51941  |
| MmugDNA.21674.1.S1_at   | MmugDNA.21674.1 | 3.66  | 3.56  | 0.03 | 0.12 | 1.07  | 0.156478 | 0.217277 | 0.446993 | 0.490911 |
| MmugDNA.21675.1.S1_at   | MmugDNA.21675.1 | 5.51  | 6.26  | 0.72 | 0.34 | -1.69 | 0.133803 | 0.249883 | 0.417214 | 0.518876 |
| MmugDNA.21676.1.S1_at   | MmugDNA.21676.1 | 5.78  | 5.5   | 0.63 | 0.81 | 1.21  | 0.763704 | 0.85004  | 0.891841 | 0.914681 |
| MmugDNA.21677.1.S1_at   | MmugDNA.21677.1 | 3.36  | 3.38  | 0.18 | 0.03 | -1.02 | 0.903291 | 0.327787 | 0.959027 | 0.577604 |
| MmugDNA.21678.1.S1_at   | MmugDNA.21678.1 | 4.71  | 4.33  | 0.17 | 0.18 | 1.3   | 0.116598 | 0.051529 | 0.393692 | 0.27241  |
| MmugDNA.21679.1.S1_at   | MmugDNA.21679.1 | 3.52  | 3.48  | 0.07 | 0.06 | 1.03  | 0.538197 | 0.349239 | 0.760153 | 0.593267 |
| MmugDNA.21680.1.S1_at   | MmugDNA.21680.1 | 6.29  | 6.22  | 0.84 | 0.5  | 1.05  | 0.975312 | 0.904997 | 0.99019  | 0.946165 |

|                        |                 |       |       |      |      |       |          |          |          |          |
|------------------------|-----------------|-------|-------|------|------|-------|----------|----------|----------|----------|
| MmugDNA.21681.1.S1_at  | MmugDNA.21681.1 | 11.13 | 11.11 | 0.16 | 0.16 | 1.01  | 0.283451 | 0.001554 | 0.573857 | 0.059629 |
| MmugDNA.21683.1.S1_at  | MmugDNA.21683.1 | 4.75  | 4.88  | 0.38 | 0.25 | -1.09 | 0.747015 | 0.178195 | 0.882818 | 0.454531 |
| MmugDNA.21685.1.S1_at  | MmugDNA.21685.1 | 3.59  | 3.66  | 0.04 | 0.07 | -1.05 | 0.138072 | 0.298093 | 0.423226 | 0.556726 |
| MmugDNA.21686.1.S1_at  | MmugDNA.21686.1 | 8.09  | 7.66  | 0.09 | 0.14 | 1.34  | 0.007669 | 0.002893 | 0.13621  | 0.079107 |
| MmugDNA.21687.1.S1_at  | MmugDNA.21687.1 | 6.24  | 6.28  | 0.06 | 0.05 | -1.02 | 0.40813  | 0.800224 | 0.671014 | 0.885129 |
| MmugDNA.21688.1.S1_at  | MmugDNA.21688.1 | 5.47  | 5.46  | 0.05 | 0.11 | 1.01  | 0.692574 | 0.208653 | 0.853103 | 0.482544 |
| MmugDNA.21689.1.S1_at  | MmugDNA.21689.1 | 7.46  | 8.38  | 1.34 | 0.26 | -1.9  | 0.122211 | 0.202171 | 0.400904 | 0.476559 |
| MmugDNA.2169.1.S1_at   | MmugDNA.2169.1  | 7.14  | 7.13  | 0.04 | 0.11 | 1     | 0.292521 | 0.809729 | 0.581743 | 0.890333 |
| MmugDNA.21690.1.S1_at  | MmugDNA.21690.1 | 7.35  | 7.85  | 0.25 | 0.2  | -1.41 | 0.14171  | 0.506822 | 0.427634 | 0.702605 |
| MmugDNA.21693.1.S1_at  | MmugDNA.21693.1 | 4.79  | 4.77  | 0.2  | 0.01 | 1.01  | 0.477682 | 0.704901 | 0.719543 | 0.828857 |
| MmugDNA.21694.1.S1_at  | MmugDNA.21694.1 | 3.39  | 3.45  | 0.15 | 0.44 | -1.04 | 0.408678 | 0.645055 | 0.671414 | 0.791993 |
| MmugDNA.21696.1.S1_at  | MmugDNA.21696.1 | 10.37 | 9.92  | 0.17 | 0.39 | 1.37  | 0.087959 | 0.703986 | 0.354175 | 0.828326 |
| MmugDNA.21698.1.S1_at  | MmugDNA.21698.1 | 6.31  | 6.74  | 0.18 | 0.13 | -1.34 | 0.073195 | 0.001934 | 0.32831  | 0.065795 |
| MmugDNA.217.1.S1_at    | MmugDNA.217.1   | 3.81  | 3.95  | 0.21 | 0.32 | -1.1  | 0.631242 | 0.232913 | 0.8189   | 0.50445  |
| MmugDNA.21700.1.S1_at  | MmugDNA.21700.1 | 3.65  | 3.66  | 0.15 | 0.09 | -1.01 | 0.744237 | 0.665175 | 0.881397 | 0.803767 |
| MmugDNA.21703.1.S1_at  | MmugDNA.21703.1 | 4.75  | 3.46  | 0.69 | 0.43 | 2.45  | 0.111507 | 0.057407 | 0.387496 | 0.285608 |
| MmugDNA.21704.1.S1_at  | MmugDNA.21704.1 | 6.85  | 6.76  | 0.45 | 0.16 | 1.06  | 0.422159 | 0.188063 | 0.680451 | 0.464164 |
| MmugDNA.21707.1.S1_at  | MmugDNA.21707.1 | 4.29  | 4.26  | 0.3  | 0.05 | 1.02  | 0.323733 | 0.362643 | 0.607479 | 0.603188 |
| MmugDNA.21709.1.S1_at  | MmugDNA.21709.1 | 3.2   | 3.22  | 0.76 | 0.14 | -1.01 | 0.326663 | 0.27171  | 0.609643 | 0.536577 |
| MmugDNA.2171.1.S1_at   | MmugDNA.2171.1  | 5.92  | 5.79  | 0.56 | 0.38 | 1.1   | 0.513942 | 0.528156 | 0.744054 | 0.716456 |
| MmugDNA.21710.1.S1_at  | MmugDNA.21710.1 | 9.73  | 10.04 | 0.32 | 0.23 | -1.24 | 0.251271 | 0.069384 | 0.546081 | 0.309615 |
| MmugDNA.21711.1.S1_at  | MmugDNA.21711.1 | 4.1   | 4.37  | 0.27 | 0.18 | -1.2  | 0.227932 | 0.125652 | 0.526025 | 0.396249 |
| MmugDNA.21712.1.S1_at  | MmugDNA.21712.1 | 9.06  | 8.71  | 0.26 | 0.07 | 1.27  | 0.087534 | 0.313079 | 0.353406 | 0.567649 |
| MmugDNA.21713.1.S1_at  | MmugDNA.21713.1 | 4.14  | 4.07  | 0.94 | 0.14 | 1.05  | 0.48019  | 0.461498 | 0.721192 | 0.673152 |
| MmugDNA.21715.1.S1_at  | MmugDNA.21715.1 | 9.15  | 8.54  | 0.11 | 0.32 | 1.52  | 0.024414 | 0.016841 | 0.209245 | 0.164506 |
| MmugDNA.21716.1.S1_at  | MmugDNA.21716.1 | 11.11 | 11.4  | 0.02 | 0.08 | -1.22 | 0.006131 | 0.053657 | 0.124614 | 0.277225 |
| MmugDNA.21717.1.S1_at  | MmugDNA.21717.1 | 4.44  | 4.09  | 0.2  | 0.27 | 1.27  | 0.303889 | 0.226919 | 0.591258 | 0.499276 |
| MmugDNA.21718.1.S1_at  | MmugDNA.21718.1 | 4.08  | 4.19  | 0.14 | 0.19 | -1.08 | 0.870623 | 0.243354 | 0.944325 | 0.513384 |
| MmugDNA.21720.1.S1_at  | MmugDNA.21720.1 | 5.25  | 5.2   | 0.09 | 0.17 | 1.03  | 0.932853 | 0.145304 | 0.971855 | 0.41934  |
| MmugDNA.21721.1.S1_at  | MmugDNA.21721.1 | 10.08 | 10.01 | 0.09 | 0.13 | 1.05  | 0.509679 | 0.215147 | 0.741244 | 0.488943 |
| MmugDNA.21724.1.S1_at  | MmugDNA.21724.1 | 5.12  | 5.12  | 0.12 | 0.57 | -1    | 0.308469 | 0.317303 | 0.595066 | 0.570532 |
| MmugDNA.21727.1.S1_at  | MmugDNA.21727.1 | 5.03  | 5.32  | 0.43 | 0.23 | -1.22 | 0.947438 | 0.253513 | 0.977941 | 0.521823 |
| MmugDNA.21728.1.S1_at  | MmugDNA.21728.1 | 6.12  | 5.79  | 0.29 | 0.24 | 1.26  | 0.901374 | 0.964164 | 0.95827  | 0.980052 |
| MmugDNA.21729.1.S1_at  | MmugDNA.21729.1 | 6.31  | 6.11  | 0.09 | 0.08 | 1.14  | 0.031299 | 0.022763 | 0.230121 | 0.188931 |
| MmugDNA.21730.1.S1_at  | MmugDNA.21730.1 | 7.31  | 7.29  | 0.09 | 0.05 | 1.01  | 0.893907 | 0.143675 | 0.954747 | 0.417555 |
| MmugDNA.21731.1.S1_at  | MmugDNA.21731.1 | 4.01  | 4.1   | 0.08 | 0.15 | -1.06 | 0.533668 | 0.043168 | 0.757177 | 0.252528 |
| MmugDNA.21732.1.S1_at  | MmugDNA.21732.1 | 8.77  | 8.63  | 0.46 | 0.16 | 1.1   | 0.808026 | 0.025682 | 0.914114 | 0.200834 |
| MmugDNA.21733.1.S1_at  | MmugDNA.21733.1 | 5.91  | 4.94  | 1.06 | 0.2  | 1.96  | 0.705223 | 0.432119 | 0.860193 | 0.652775 |
| MmugDNA.9679.1.S1_s_at | MmugDNA.9679.1  | 10.83 | 10.26 | 0.17 | 0.02 | 1.49  | 0.005927 | 0.06859  | 0.12345  | 0.308466 |
| MmugDNA.21736.1.S1_at  | MmugDNA.21736.1 | 3.01  | 2.78  | 0.35 | 0.62 | 1.17  | 0.890975 | 0.546911 | 0.95346  | 0.728281 |
| MmugDNA.21739.1.S1_at  | MmugDNA.21739.1 | 4.82  | 4.82  | 0.14 | 0.01 | 1     | 0.400757 | 0.703738 | 0.665557 | 0.828214 |
| MmugDNA.2174.1.S1_at   | MmugDNA.2174.1  | 6.18  | 5.59  | 0.36 | 0.27 | 1.51  | 0.116551 | 0.59549  | 0.393692 | 0.759091 |
| MmugDNA.21741.1.S1_at  | MmugDNA.21741.1 | 9.02  | 8.92  | 0.07 | 0.07 | 1.07  | 0.0518   | 0.335378 | 0.284953 | 0.583158 |

|                         |                 |       |       |      |      |       |          |          |          |          |
|-------------------------|-----------------|-------|-------|------|------|-------|----------|----------|----------|----------|
| MmugDNA.21742.1.S1_at   | MmugDNA.21742.1 | 4.94  | 4.85  | 0.1  | 0.07 | 1.07  | 0.925628 | 0.951265 | 0.968497 | 0.972381 |
| MmugDNA.21743.1.S1_at   | MmugDNA.21743.1 | 3.52  | 3.55  | 0.43 | 0.06 | -1.02 | 0.437721 | 0.503049 | 0.692489 | 0.700559 |
| MmugDNA.21744.1.S1_at   | MmugDNA.21744.1 | 5.37  | 5.33  | 0.12 | 0.16 | 1.03  | 0.312808 | 0.702804 | 0.598778 | 0.827716 |
| MmugDNA.21746.1.S1_at   | MmugDNA.21746.1 | 9.06  | 9.81  | 0.42 | 0.07 | -1.68 | 0.038248 | 0.110186 | 0.251651 | 0.374331 |
| MmugDNA.21747.1.S1_at   | MmugDNA.21747.1 | 5     | 5.07  | 0.11 | 0.13 | -1.05 | 0.648353 | 0.730695 | 0.829161 | 0.844055 |
| MmugDNA.21750.1.S1_at   | MmugDNA.21750.1 | 5.47  | 5.42  | 0.07 | 0.16 | 1.03  | 0.674912 | 0.859573 | 0.844854 | 0.919999 |
| MmugDNA.21751.1.S1_at   | MmugDNA.21751.1 | 7.12  | 6.72  | 0.28 | 0.29 | 1.32  | 0.139187 | 0.219182 | 0.424933 | 0.492919 |
| MmugDNA.21752.1.S1_at   | MmugDNA.21752.1 | 3.24  | 3.47  | 0.28 | 0.07 | -1.18 | 0.537835 | 0.462208 | 0.759948 | 0.673537 |
| MmugDNA.21753.1.S1_at   | MmugDNA.21753.1 | 8.67  | 9.01  | 0.41 | 0.17 | -1.26 | 0.172444 | 0.625054 | 0.466621 | 0.778973 |
| MmugDNA.21754.1.S1_s_at | MmugDNA.21754.1 | 6.8   | 6.82  | 0.38 | 0.18 | -1.01 | 0.928069 | 0.852664 | 0.969612 | 0.916254 |
| MmugDNA.21755.1.S1_at   | MmugDNA.21755.1 | 5.34  | 5.41  | 0.07 | 0.05 | -1.05 | 0.136422 | 0.089558 | 0.420965 | 0.343811 |
| MmugDNA.21757.1.S1_at   | MmugDNA.21757.1 | 4.1   | 4.15  | 0.03 | 0    | -1.04 | 0.116742 | 0.14156  | 0.39382  | 0.415063 |
| MmugDNA.21758.1.S1_at   | MmugDNA.21758.1 | 7.49  | 6.92  | 0.31 | 0.2  | 1.49  | 0.081835 | 0.142406 | 0.343105 | 0.415965 |
| MmugDNA.21759.1.S1_at   | MmugDNA.21759.1 | 7.07  | 7.05  | 0.04 | 0.07 | 1.01  | 0.654521 | 0.523871 | 0.832788 | 0.714052 |
| MmugDNA.21760.1.S1_at   | MmugDNA.21760.1 | 4.33  | 4.28  | 0.07 | 0.1  | 1.04  | 0.475253 | 0.925959 | 0.71802  | 0.958059 |
| MmugDNA.21761.1.S1_at   | MmugDNA.21761.1 | 5.51  | 5.62  | 1.09 | 0.14 | -1.08 | 0.47979  | 0.631561 | 0.7209   | 0.782845 |
| MmugDNA.21763.1.S1_at   | MmugDNA.21763.1 | 3.56  | 3.6   | 0.23 | 0.02 | -1.02 | 0.773145 | 0.649942 | 0.89602  | 0.795295 |
| MmugDNA.21764.1.S1_at   | MmugDNA.21764.1 | 4.76  | 4.79  | 0.36 | 0.04 | -1.02 | 0.444988 | 0.494663 | 0.697647 | 0.69497  |
| MmugDNA.21765.1.S1_at   | MmugDNA.21765.1 | 3.07  | 3.13  | 0.16 | 0.05 | -1.04 | 0.745198 | 0.732374 | 0.881818 | 0.844986 |
| MmugDNA.21766.1.S1_at   | MmugDNA.21766.1 | 5.46  | 5.41  | 0.45 | 0.15 | 1.04  | 0.717256 | 0.321699 | 0.866489 | 0.573346 |
| MmugDNA.21767.1.S1_at   | MmugDNA.21767.1 | 4.61  | 4.94  | 0.66 | 0.33 | -1.25 | 0.600775 | 0.371385 | 0.799133 | 0.610177 |
| MmugDNA.21769.1.S1_at   | MmugDNA.21769.1 | 9.53  | 8.99  | 0.68 | 0.69 | 1.46  | 0.689859 | 0.433556 | 0.851884 | 0.653828 |
| MmugDNA.2177.1.S1_at    | MmugDNA.2177.1  | 5.84  | 5.87  | 0.18 | 0.08 | -1.02 | 0.224783 | 0.233306 | 0.522763 | 0.50468  |
| MmugDNA.21770.1.S1_at   | MmugDNA.21770.1 | 10.25 | 10.05 | 0.33 | 0.34 | 1.15  | 0.469446 | 0.772599 | 0.714166 | 0.867785 |
| MmugDNA.21771.1.S1_at   | MmugDNA.21771.1 | 7.61  | 7.48  | 0.29 | 0.16 | 1.09  | 0.137574 | 0.068725 | 0.422683 | 0.308711 |
| MmugDNA.21772.1.S1_at   | MmugDNA.21772.1 | 4.14  | 3.97  | 0.21 | 0.14 | 1.13  | 0.45778  | 0.297879 | 0.706543 | 0.556563 |
| MmugDNA.21773.1.S1_at   | MmugDNA.21773.1 | 6.91  | 6.9   | 0.28 | 0.21 | 1.01  | 0.23077  | 0.361657 | 0.529522 | 0.602408 |
| MmugDNA.21774.1.S1_at   | MmugDNA.21774.1 | 4.33  | 4.23  | 0.99 | 0.34 | 1.07  | 0.365621 | 0.497991 | 0.640052 | 0.697181 |
| MmugDNA.21775.1.S1_at   | MmugDNA.21775.1 | 4.89  | 4.41  | 0.2  | 0.11 | 1.39  | 0.089305 | 0.06958  | 0.356201 | 0.309848 |
| MmugDNA.21776.1.S1_at   | MmugDNA.21776.1 | 8.92  | 7.6   | 0.72 | 0.26 | 2.49  | 0.117331 | 0.093798 | 0.394599 | 0.350281 |
| MmugDNA.21777.1.S1_at   | MmugDNA.21777.1 | 3.27  | 3.29  | 0.18 | 0.17 | -1.01 | 0.563928 | 0.222599 | 0.77575  | 0.495617 |
| MmugDNA.21778.1.S1_at   | MmugDNA.21778.1 | 9.04  | 9.38  | 0.2  | 0.1  | -1.27 | 0.018101 | 0.253197 | 0.18753  | 0.521578 |
| MmugDNA.21779.1.S1_at   | MmugDNA.21779.1 | 5.41  | 4.89  | 0.32 | 0.17 | 1.43  | 0.105892 | 0.121317 | 0.379885 | 0.390351 |
| MmugDNA.2178.1.S1_s_at  | MmugDNA.2178.1  | 10.68 | 10.49 | 1.26 | 0.18 | 1.14  | 0.854845 | 0.317257 | 0.93686  | 0.570489 |
| MmugDNA.21780.1.S1_at   | MmugDNA.21780.1 | 9.23  | 8.97  | 0.21 | 0.05 | 1.2   | 0.121619 | 0.047114 | 0.400461 | 0.261624 |
| MmugDNA.21781.1.S1_at   | MmugDNA.21781.1 | 10.17 | 10.1  | 0.15 | 0.18 | 1.05  | 0.74718  | 0.030812 | 0.88295  | 0.217376 |
| MmugDNA.21782.1.S1_at   | MmugDNA.21782.1 | 10.45 | 10.28 | 0.53 | 0.1  | 1.13  | 0.940276 | 0.596673 | 0.974839 | 0.75976  |
| MmugDNA.21783.1.S1_at   | MmugDNA.21783.1 | 10.24 | 9.5   | 0.15 | 0.08 | 1.67  | 0.001339 | 0.073211 | 0.079218 | 0.316124 |
| MmugDNA.21784.1.S1_at   | MmugDNA.21784.1 | 4.58  | 3.52  | 0.56 | 0.14 | 2.09  | 0.024405 | 0.008028 | 0.209245 | 0.119047 |
| MmugDNA.21785.1.S1_at   | MmugDNA.21785.1 | 4.44  | 4.3   | 0.26 | 0.06 | 1.1   | 0.17816  | 0.347303 | 0.472847 | 0.59192  |
| MmugDNA.21786.1.S1_at   | MmugDNA.21786.1 | 4.07  | 4.04  | 0.1  | 0.11 | 1.02  | 0.366407 | 0.502854 | 0.640737 | 0.700392 |
| MmugDNA.21788.1.S1_at   | MmugDNA.21788.1 | 5.56  | 5.29  | 0.16 | 0.01 | 1.2   | 0.119633 | 0.189283 | 0.397592 | 0.465059 |
| MmugDNA.21789.1.S1_at   | MmugDNA.21789.1 | 5.09  | 5.08  | 0.08 | 0.04 | 1.01  | 0.921575 | 0.153599 | 0.966402 | 0.428341 |

|                         |                 |       |       |      |      |        |          |          |          |          |
|-------------------------|-----------------|-------|-------|------|------|--------|----------|----------|----------|----------|
| MmugDNA.2179.1.S1_at    | MmugDNA.2179.1  | 4.57  | 4.32  | 0.18 | 0.1  | 1.19   | 0.083775 | 0.152958 | 0.346539 | 0.42777  |
| MmugDNA.21790.1.S1_at   | MmugDNA.21790.1 | 5.81  | 6.43  | 0.27 | 0.43 | -1.53  | 0.107812 | 0.191396 | 0.382472 | 0.466769 |
| MmugDNA.21791.1.S1_at   | MmugDNA.21791.1 | 5.02  | 5.32  | 0.33 | 0.05 | -1.23  | 0.624435 | 0.809886 | 0.814839 | 0.89045  |
| MmugDNA.21792.1.S1_at   | MmugDNA.21792.1 | 4.22  | 4.18  | 0.07 | 0.1  | 1.03   | 0.62763  | 0.612423 | 0.816925 | 0.770044 |
| MmugDNA.21793.1.S1_at   | MmugDNA.21793.1 | 4.02  | 4.03  | 0.18 | 0.08 | -1.01  | 0.318794 | 0.074229 | 0.603489 | 0.318046 |
| MmugDNA.21794.1.S1_at   | MmugDNA.21794.1 | 8.12  | 8.11  | 0.18 | 0.08 | 1.01   | 0.878537 | 0.163422 | 0.948162 | 0.439629 |
| MmugDNA.21796.1.S1_at   | MmugDNA.21796.1 | 5.98  | 6.13  | 0.28 | 0.44 | -1.11  | 0.586653 | 0.308656 | 0.789969 | 0.56461  |
| MmugDNA.21797.1.S1_at   | MmugDNA.21797.1 | 5.55  | 5.41  | 0.24 | 0.49 | 1.1    | 0.643892 | 0.517246 | 0.826478 | 0.709435 |
| MmugDNA.21798.1.S1_at   | MmugDNA.21798.1 | 4.28  | 4.14  | 0.46 | 0.22 | 1.11   | 0.627722 | 0.130819 | 0.816953 | 0.403015 |
| MmugDNA.21799.1.S1_at   | MmugDNA.21799.1 | 4.35  | 4.54  | 0.14 | 0.08 | -1.14  | 0.32522  | 0.360867 | 0.608658 | 0.601938 |
| MmugDNA.218.1.S1_at     | MmugDNA.218.1   | 4.88  | 5.4   | 0.52 | 0.34 | -1.44  | 0.124811 | 0.169065 | 0.40514  | 0.445593 |
| MmugDNA.2180.1.S1_at    | MmugDNA.2180.1  | 5.18  | 3.97  | 0.54 | 0.17 | 2.31   | 0.026392 | 0.265962 | 0.215511 | 0.531796 |
| MmugDNA.21800.1.S1_at   | MmugDNA.21800.1 | 4.94  | 6.29  | 0.84 | 0.14 | -2.55  | 0.066493 | 0.054858 | 0.315343 | 0.279693 |
| MmugDNA.21801.1.S1_at   | MmugDNA.21801.1 | 3.95  | 4.17  | 0.1  | 0.41 | -1.17  | 0.311975 | 0.376662 | 0.598156 | 0.614483 |
| MmugDNA.21802.1.S1_at   | MmugDNA.21802.1 | 5.15  | 4.75  | 0.2  | 0    | 1.32   | 0.026432 | 0.002977 | 0.21565  | 0.079958 |
| MmugDNA.21804.1.S1_at   | MmugDNA.21804.1 | 4.21  | 4.11  | 0.22 | 0.04 | 1.07   | 0.546952 | 0.73326  | 0.765646 | 0.845573 |
| MmugDNA.21805.1.S1_at   | MmugDNA.21805.1 | 5.34  | 4.92  | 0.23 | 0.23 | 1.33   | 0.154849 | 0.258365 | 0.44505  | 0.525631 |
| MmugDNA.2181.1.S1_at    | MmugDNA.2181.1  | 4.28  | 4.41  | 0.04 | 0.07 | -1.09  | 0.026226 | 0.203008 | 0.214951 | 0.477343 |
| MmugDNA.21810.1.S1_at   | MmugDNA.21810.1 | 5.04  | 4.75  | 0.23 | 0.11 | 1.22   | 0.048568 | 0.044962 | 0.277767 | 0.256489 |
| MmugDNA.21812.1.S1_at   | MmugDNA.21812.1 | 6.56  | 6.59  | 0.45 | 0.51 | -1.02  | 0.570715 | 0.350178 | 0.779387 | 0.593948 |
| MmugDNA.21813.1.S1_at   | MmugDNA.21813.1 | 3.87  | 3.96  | 0.21 | 0.07 | -1.07  | 0.920609 | 0.98869  | 0.966056 | 0.993595 |
| MmugDNA.21815.1.S1_x_at | MmugDNA.21815.1 | 7.27  | 7.24  | 0.54 | 0.12 | 1.02   | 0.872315 | 0.772704 | 0.945259 | 0.867816 |
| MmugDNA.21816.1.S1_at   | MmugDNA.21816.1 | 4.62  | 4.54  | 0.24 | 0.06 | 1.06   | 0.421836 | 0.493673 | 0.680158 | 0.694288 |
| MmugDNA.21819.1.S1_at   | MmugDNA.21819.1 | 4.98  | 5.12  | 0.12 | 0.14 | -1.1   | 0.099564 | 0.08374  | 0.370507 | 0.334485 |
| MmugDNA.2182.1.S1_at    | MmugDNA.2182.1  | 4.6   | 4.19  | 0.47 | 0.24 | 1.33   | 0.367084 | 0.427072 | 0.641242 | 0.649087 |
| MmugDNA.21820.1.S1_at   | MmugDNA.21820.1 | 5.97  | 10.09 | 1.93 | 0.29 | -17.36 | 0.063426 | 0.349409 | 0.308549 | 0.593406 |
| MmugDNA.21821.1.S1_at   | MmugDNA.21821.1 | 5.44  | 5.32  | 0.22 | 0.01 | 1.09   | 0.120421 | 0.109739 | 0.398818 | 0.373701 |
| MmugDNA.21822.1.S1_at   | MmugDNA.21822.1 | 5.88  | 5.69  | 0.1  | 0.09 | 1.14   | 0.16684  | 0.195895 | 0.460015 | 0.470812 |
| MmugDNA.21823.1.S1_at   | MmugDNA.21823.1 | 13.24 | 13.15 | 0.08 | 0    | 1.06   | 0.174032 | 0.136064 | 0.468351 | 0.408363 |
| MmugDNA.21824.1.S1_at   | MmugDNA.21824.1 | 3.67  | 3.43  | 0.21 | 0.31 | 1.18   | 0.589644 | 0.222741 | 0.791637 | 0.49569  |
| MmugDNA.21825.1.S1_at   | MmugDNA.21825.1 | 11.59 | 10.51 | 0.26 | 0.18 | 2.13   | 0.004609 | 0.01022  | 0.114111 | 0.132544 |
| MmugDNA.21827.1.S1_at   | MmugDNA.21827.1 | 10.25 | 10.77 | 0.21 | 0.1  | -1.43  | 0.062497 | 0.028851 | 0.306597 | 0.211661 |
| MmugDNA.21828.1.S1_at   | MmugDNA.21828.1 | 9.25  | 9.77  | 0.48 | 0.06 | -1.44  | 0.114784 | 0.145074 | 0.391813 | 0.419047 |
| MmugDNA.2183.1.S1_at    | MmugDNA.2183.1  | 7.17  | 7.43  | 0.45 | 0.03 | -1.2   | 0.994017 | 0.341751 | 0.997578 | 0.587862 |
| MmugDNA.21830.1.S1_at   | MmugDNA.21830.1 | 9.57  | 9.97  | 0.78 | 0.28 | -1.31  | 0.228567 | 0.430905 | 0.526913 | 0.651894 |
| MmugDNA.21831.1.S1_at   | MmugDNA.21831.1 | 4.45  | 4.47  | 0.22 | 0.03 | -1.01  | 0.773676 | 0.920269 | 0.896329 | 0.95511  |
| MmugDNA.21832.1.S1_at   | MmugDNA.21832.1 | 5.52  | 5.8   | 0.57 | 0.07 | -1.21  | 0.27114  | 0.310451 | 0.563072 | 0.565661 |
| MmugDNA.21833.1.S1_at   | MmugDNA.21833.1 | 8.47  | 8.47  | 0.39 | 0.03 | -1     | 0.934158 | 0.841254 | 0.972399 | 0.909576 |
| MmugDNA.21834.1.S1_at   | MmugDNA.21834.1 | 4.02  | 3.91  | 0.22 | 0.1  | 1.08   | 0.527074 | 0.613863 | 0.752912 | 0.770884 |
| MmugDNA.21836.1.S1_at   | MmugDNA.21836.1 | 7.63  | 6.81  | 0.65 | 0.47 | 1.76   | 0.367635 | 0.165057 | 0.641471 | 0.441242 |
| MmugDNA.21837.1.S1_at   | MmugDNA.21837.1 | 10.16 | 9.81  | 0.08 | 0.06 | 1.28   | 0.002882 | 0.125462 | 0.098644 | 0.396116 |
| MmugDNA.21837.1.S1_s_at | MmugDNA.21837.1 | 9.8   | 9.48  | 0.09 | 0.07 | 1.25   | 0.009822 | 0.100673 | 0.148542 | 0.360037 |
| MmugDNA.21838.1.S1_s_at | MmugDNA.21838.1 | 7.35  | 6.98  | 0.2  | 0.43 | 1.29   | 0.259505 | 0.655715 | 0.553801 | 0.7987   |



|                         |                 |       |       |      |      |       |          |          |          |          |
|-------------------------|-----------------|-------|-------|------|------|-------|----------|----------|----------|----------|
| MmugDNA.21841.1.S1_s_at | MmugDNA.21841.1 | 7.15  | 6.94  | 0.11 | 0.06 | 1.16  | 0.059148 | 0.081562 | 0.30037  | 0.329764 |
| MmugDNA.33727.1.S1_s_at | MmugDNA.33727.1 | 7.86  | 7.56  | 0.23 | 0.21 | 1.23  | 0.055831 | 0.311867 | 0.293385 | 0.56683  |
| MmugDNA.21843.1.S1_at   | MmugDNA.21843.1 | 8.49  | 8.02  | 0.37 | 0.18 | 1.38  | 0.077479 | 0.199494 | 0.336173 | 0.474096 |
| MmugDNA.21845.1.S1_at   | MmugDNA.21845.1 | 6.45  | 6.73  | 0.65 | 0.23 | -1.21 | 0.717785 | 0.90502  | 0.866693 | 0.946165 |
| MmugDNA.21846.1.S1_at   | MmugDNA.21846.1 | 5.6   | 5.84  | 0.24 | 0.24 | -1.19 | 0.372705 | 0.631919 | 0.645067 | 0.78303  |
| MmugDNA.21848.1.S1_at   | MmugDNA.21848.1 | 8.96  | 8.63  | 0.48 | 0.08 | 1.26  | 0.21763  | 0.060899 | 0.515458 | 0.293504 |
| MmugDNA.21849.1.S1_at   | MmugDNA.21849.1 | 3.87  | 3.28  | 0.77 | 0.2  | 1.51  | 0.268832 | 0.221528 | 0.561311 | 0.494849 |
| MmugDNA.21850.1.S1_at   | MmugDNA.21850.1 | 3.92  | 3.75  | 0.15 | 0.16 | 1.12  | 0.514459 | 0.684327 | 0.744385 | 0.815899 |
| MmugDNA.21851.1.S1_at   | MmugDNA.21851.1 | 6.18  | 6.13  | 0.11 | 0.08 | 1.04  | 0.566582 | 0.866106 | 0.777458 | 0.923808 |
| MmugDNA.21853.1.S1_at   | MmugDNA.21853.1 | 3.05  | 3.08  | 0.1  | 0.03 | -1.02 | 0.80949  | 0.921488 | 0.914669 | 0.955761 |
| MmugDNA.21854.1.S1_at   | MmugDNA.21854.1 | 3.93  | 3.74  | 0.12 | 0.11 | 1.14  | 0.045754 | 0.045467 | 0.271409 | 0.2575   |
| MmugDNA.21855.1.S1_s_at | MmugDNA.21855.1 | 6.02  | 5.8   | 0    | 0.12 | 1.16  | 0.11667  | 0.039762 | 0.393781 | 0.244402 |
| MmugDNA.21857.1.S1_at   | MmugDNA.21857.1 | 4.09  | 4.19  | 0.09 | 0.05 | -1.07 | 0.16085  | 0.133579 | 0.452392 | 0.405542 |
| MmugDNA.21858.1.S1_at   | MmugDNA.21858.1 | 10.74 | 10.58 | 0.1  | 0.32 | 1.12  | 0.665999 | 0.796111 | 0.839495 | 0.882495 |
| MmugDNA.21858.1.S1_s_at | MmugDNA.21858.1 | 10.33 | 10.07 | 0.12 | 0.05 | 1.19  | 0.033294 | 0.060693 | 0.236556 | 0.292935 |
| MmugDNA.21859.1.S1_at   | MmugDNA.21859.1 | 4.24  | 4.2   | 0.08 | 0.1  | 1.03  | 0.588929 | 0.324663 | 0.791341 | 0.575208 |
| MmugDNA.21860.1.S1_at   | MmugDNA.21860.1 | 5.25  | 5.17  | 0.05 | 0.05 | 1.06  | 0.024789 | 0.095686 | 0.210464 | 0.3527   |
| MmugDNA.21861.1.S1_at   | MmugDNA.21861.1 | 5.74  | 5.34  | 1.19 | 0.2  | 1.32  | 0.363078 | 0.46372  | 0.637776 | 0.674626 |
| MmugDNA.21862.1.S1_at   | MmugDNA.21862.1 | 6.42  | 6.41  | 0.25 | 0.03 | 1.01  | 0.495349 | 0.557103 | 0.731814 | 0.73494  |
| MmugDNA.21863.1.S1_at   | MmugDNA.21863.1 | 3.37  | 3.38  | 0.18 | 0.21 | -1    | 0.939568 | 0.919918 | 0.974477 | 0.954962 |
| MmugDNA.21864.1.S1_at   | MmugDNA.21864.1 | 6.02  | 6.08  | 0.32 | 0.07 | -1.05 | 0.988805 | 0.854714 | 0.996059 | 0.91719  |
| MmugDNA.21869.1.S1_at   | MmugDNA.21869.1 | 8.3   | 7.35  | 0.2  | 0.07 | 1.93  | 0.000983 | 0.000938 | 0.076321 | 0.049026 |
| MmugDNA.21871.1.S1_at   | MmugDNA.21871.1 | 4.05  | 4.23  | 0.25 | 0.14 | -1.14 | 0.836262 | 0.950361 | 0.928236 | 0.971738 |
| MmugDNA.21872.1.S1_at   | MmugDNA.21872.1 | 7.5   | 7.66  | 0.19 | 0.25 | -1.12 | 0.835522 | 0.07702  | 0.927709 | 0.32248  |
| MmugDNA.21874.1.S1_at   | MmugDNA.21874.1 | 5.46  | 5.57  | 0.12 | 0.19 | -1.08 | 0.709563 | 0.908011 | 0.862601 | 0.947889 |
| MmugDNA.21877.1.S1_at   | MmugDNA.21877.1 | 6.08  | 5.81  | 0.19 | 0.02 | 1.21  | 0.068253 | 0.018603 | 0.319026 | 0.171539 |
| MmugDNA.21879.1.S1_at   | MmugDNA.21879.1 | 7.92  | 7.27  | 0.6  | 0.35 | 1.57  | 0.116729 | 0.147477 | 0.39382  | 0.421765 |
| MmugDNA.2188.1.S1_at    | MmugDNA.2188.1  | 10.79 | 10.64 | 0.19 | 0.07 | 1.11  | 0.960936 | 0.094449 | 0.984074 | 0.351129 |
| MmugDNA.21880.1.S1_at   | MmugDNA.21880.1 | 4.94  | 4.88  | 0.62 | 0.04 | 1.04  | 0.326523 | 0.568812 | 0.609577 | 0.74211  |
| MmugDNA.21881.1.S1_at   | MmugDNA.21881.1 | 3.12  | 3.14  | 0.01 | 0.09 | -1.01 | 0.353034 | 0.559672 | 0.630277 | 0.736365 |
| MmugDNA.21882.1.S1_at   | MmugDNA.21882.1 | 5.8   | 5.79  | 0.12 | 0.07 | 1.01  | 0.877458 | 0.184344 | 0.947617 | 0.460458 |
| MmugDNA.21883.1.S1_at   | MmugDNA.21883.1 | 2.8   | 2.77  | 0.05 | 0.08 | 1.02  | 0.640806 | 0.791849 | 0.824509 | 0.87976  |
| MmugDNA.21884.1.S1_at   | MmugDNA.21884.1 | 3.56  | 3.57  | 0.23 | 0.03 | -1.01 | 0.315634 | 0.260075 | 0.600453 | 0.52675  |
| MmugDNA.21885.1.S1_s_at | MmugDNA.21885.1 | 11.27 | 11.32 | 0.11 | 0.03 | -1.04 | 0.745435 | 0.123211 | 0.881894 | 0.393273 |
| MmugDNA.21886.1.S1_at   | MmugDNA.21886.1 | 3.09  | 2.88  | 0.15 | 0.08 | 1.16  | 0.169311 | 0.132829 | 0.462589 | 0.404544 |
| MmugDNA.21888.1.S1_at   | MmugDNA.21888.1 | 3.35  | 3.21  | 0.79 | 0.05 | 1.1   | 0.265967 | 0.259165 | 0.558529 | 0.526264 |
| MmugDNA.2189.1.S1_at    | MmugDNA.2189.1  | 6.81  | 6.69  | 0.08 | 0.03 | 1.09  | 0.083961 | 0.259434 | 0.347068 | 0.526418 |
| MmugDNA.21890.1.S1_s_at | MmugDNA.21890.1 | 9.64  | 9.07  | 0.24 | 0.12 | 1.48  | 0.040069 | 0.010133 | 0.256783 | 0.131974 |
| MmugDNA.21891.1.S1_at   | MmugDNA.21891.1 | 5.97  | 5.96  | 0.15 | 0.1  | 1.01  | 0.789446 | 0.770009 | 0.904411 | 0.866428 |
| MmugDNA.21892.1.S1_at   | MmugDNA.21892.1 | 5.63  | 5.53  | 0.23 | 0.09 | 1.08  | 0.798059 | 0.924607 | 0.908855 | 0.957386 |
| MmugDNA.21893.1.S1_at   | MmugDNA.21893.1 | 5.5   | 5.58  | 0.13 | 0.18 | -1.06 | 0.526801 | 0.179556 | 0.752776 | 0.456011 |
| MmugDNA.21896.1.S1_at   | MmugDNA.21896.1 | 5     | 4.99  | 0.08 | 0.05 | 1     | 0.283586 | 0.525221 | 0.573936 | 0.714809 |
| MmugDNA.21897.1.S1_at   | MmugDNA.21897.1 | 3.98  | 4.05  | 0.06 | 0.13 | -1.05 | 0.978131 | 0.436104 | 0.991503 | 0.655802 |

|                         |                 |       |       |      |      |       |          |          |          |          |
|-------------------------|-----------------|-------|-------|------|------|-------|----------|----------|----------|----------|
| MmugDNA.21898.1.S1_at   | MmugDNA.21898.1 | 10.36 | 10.49 | 0.25 | 0.04 | -1.09 | 0.155818 | 0.55579  | 0.446194 | 0.734106 |
| MmugDNA.2190.1.S1_at    | MmugDNA.2190.1  | 6.45  | 6.28  | 0.2  | 0.1  | 1.12  | 0.21416  | 0.238418 | 0.511924 | 0.50907  |
| MmugDNA.21900.1.S1_at   | MmugDNA.21900.1 | 5.4   | 5.41  | 0.02 | 0.12 | -1.01 | 0.959805 | 0.955211 | 0.983565 | 0.97461  |
| MmugDNA.21901.1.S1_at   | MmugDNA.21901.1 | 9.97  | 9.47  | 0.27 | 0.15 | 1.41  | 0.053256 | 0.236755 | 0.287986 | 0.507512 |
| MmugDNA.21902.1.S1_at   | MmugDNA.21902.1 | 5.68  | 4.96  | 0.18 | 0.23 | 1.64  | 0.012208 | 0.015079 | 0.160818 | 0.155923 |
| MmugDNA.21903.1.S1_at   | MmugDNA.21903.1 | 6.59  | 6.46  | 0.76 | 0.34 | 1.1   | 0.995389 | 0.556053 | 0.99814  | 0.734325 |
| MmugDNA.21905.1.S1_at   | MmugDNA.21905.1 | 8.61  | 9.78  | 0.29 | 0.18 | -2.25 | 0.005421 | 0.007438 | 0.118857 | 0.115858 |
| MmugDNA.21906.1.S1_at   | MmugDNA.21906.1 | 12.81 | 12.68 | 0.07 | 0.1  | 1.09  | 0.711921 | 0.628806 | 0.864096 | 0.781444 |
| MmugDNA.21907.1.S1_at   | MmugDNA.21907.1 | 3.53  | 3.87  | 0.27 | 0.29 | -1.26 | 0.290445 | 0.454102 | 0.57991  | 0.668398 |
| MmugDNA.21908.1.S1_at   | MmugDNA.21908.1 | 4.57  | 4.54  | 0.16 | 0.07 | 1.02  | 0.45137  | 0.582025 | 0.702207 | 0.750784 |
| MmugDNA.21909.1.S1_at   | MmugDNA.21909.1 | 5.07  | 5.19  | 0.27 | 0.11 | -1.08 | 0.94748  | 0.995057 | 0.977941 | 0.996929 |
| MmugDNA.2191.1.S1_at    | MmugDNA.2191.1  | 3.57  | 3.46  | 0.37 | 0.12 | 1.08  | 0.226388 | 0.286688 | 0.524218 | 0.548077 |
| MmugDNA.21910.1.S1_at   | MmugDNA.21910.1 | 4.43  | 4.53  | 0.11 | 0.14 | -1.07 | 0.690056 | 0.199155 | 0.851894 | 0.473759 |
| MmugDNA.21911.1.S1_at   | MmugDNA.21911.1 | 6.43  | 6.55  | 0.12 | 0.08 | -1.08 | 0.130631 | 0.018269 | 0.413084 | 0.169975 |
| MmugDNA.21913.1.S1_at   | MmugDNA.21913.1 | 9.23  | 9.58  | 0.16 | 0.06 | -1.27 | 0.027915 | 0.040505 | 0.219684 | 0.246264 |
| MmugDNA.21914.1.S1_at   | MmugDNA.21914.1 | 7.15  | 7.79  | 0.38 | 0.28 | -1.56 | 0.043723 | 0.28023  | 0.266107 | 0.543487 |
| MmugDNA.21915.1.S1_at   | MmugDNA.21915.1 | 5.16  | 5.93  | 0.64 | 0.11 | -1.7  | 0.27747  | 0.012518 | 0.569007 | 0.144362 |
| MmugDNA.21916.1.S1_at   | MmugDNA.21916.1 | 3.3   | 3.05  | 0.07 | 0.06 | 1.19  | 0.015296 | 0.007369 | 0.175986 | 0.115284 |
| MmugDNA.21917.1.S1_at   | MmugDNA.21917.1 | 5.94  | 5.83  | 0.07 | 0.08 | 1.08  | 0.133497 | 0.125675 | 0.416989 | 0.396249 |
| MmugDNA.21918.1.S1_at   | MmugDNA.21918.1 | 5.62  | 5.57  | 0.05 | 0.19 | 1.04  | 0.978282 | 0.496804 | 0.991561 | 0.696208 |
| MmugDNA.21919.1.S1_s_at | MmugDNA.21919.1 | 8.53  | 9.46  | 0.94 | 0.39 | -1.91 | 0.17579  | 0.382232 | 0.470151 | 0.618433 |
| MmugDNA.2192.1.S1_at    | MmugDNA.2192.1  | 4.14  | 3.96  | 0.29 | 0.08 | 1.13  | 0.237013 | 0.347287 | 0.534591 | 0.591911 |
| MmugDNA.21921.1.S1_at   | MmugDNA.21921.1 | 3.85  | 3.74  | 0.09 | 0.02 | 1.08  | 0.125906 | 0.093418 | 0.406859 | 0.349657 |
| MmugDNA.21922.1.S1_at   | MmugDNA.21922.1 | 3.59  | 3.58  | 0.16 | 0.06 | 1.01  | 0.59645  | 0.569725 | 0.795824 | 0.742604 |
| MmugDNA.21923.1.S1_at   | MmugDNA.21923.1 | 5.23  | 5.21  | 0.43 | 0.03 | 1.02  | 0.321367 | 0.505926 | 0.60565  | 0.702265 |
| MmugDNA.21923.1.S1_s_at | MmugDNA.21923.1 | 2.82  | 2.78  | 0.72 | 0.09 | 1.03  | 0.34378  | 0.476154 | 0.623078 | 0.682535 |
| MmugDNA.21925.1.S1_at   | MmugDNA.21925.1 | 6.78  | 6.87  | 0.05 | 0.07 | -1.07 | 0.362014 | 0.987849 | 0.637175 | 0.993223 |
| MmugDNA.21926.1.S1_at   | MmugDNA.21926.1 | 4.39  | 4.25  | 0.03 | 0.15 | 1.1   | 0.227122 | 0.280548 | 0.525116 | 0.543725 |
| MmugDNA.21927.1.S1_at   | MmugDNA.21927.1 | 5.87  | 6.25  | 0.21 | 0.18 | -1.31 | 0.075055 | 0.096581 | 0.332117 | 0.354126 |
| MmugDNA.21929.1.S1_at   | MmugDNA.21929.1 | 4.97  | 4.99  | 0.11 | 0.04 | -1.01 | 0.542005 | 0.663737 | 0.762538 | 0.803123 |
| MmugDNA.2193.1.S1_at    | MmugDNA.2193.1  | 4.99  | 5.12  | 0.1  | 0.07 | -1.09 | 0.18868  | 0.183256 | 0.485343 | 0.459553 |
| MmugDNA.21930.1.S1_at   | MmugDNA.21930.1 | 6.16  | 6.49  | 0.19 | 0.03 | -1.25 | 0.100147 | 0.020496 | 0.37088  | 0.179723 |
| MmugDNA.21931.1.S1_at   | MmugDNA.21931.1 | 11.95 | 12.1  | 0.17 | 0.1  | -1.11 | 0.129542 | 0.101916 | 0.411923 | 0.361927 |
| MmugDNA.21932.1.S1_at   | MmugDNA.21932.1 | 10.27 | 10.64 | 0.13 | 0.07 | -1.3  | 0.015716 | 0.031944 | 0.177791 | 0.221125 |
| MmugDNA.21933.1.S1_at   | MmugDNA.21933.1 | 6.37  | 6.63  | 0.12 | 0.24 | -1.2  | 0.273808 | 0.253102 | 0.565911 | 0.521426 |
| MmugDNA.21935.1.S1_at   | MmugDNA.21935.1 | 5.02  | 5.5   | 0.62 | 0.34 | -1.39 | 0.567798 | 0.654413 | 0.777975 | 0.798021 |
| MmugDNA.21936.1.S1_at   | MmugDNA.21936.1 | 3.66  | 3.56  | 0.13 | 0.06 | 1.07  | 0.099787 | 0.266804 | 0.370801 | 0.53241  |
| MmugDNA.21937.1.S1_at   | MmugDNA.21937.1 | 5.46  | 5.29  | 0.29 | 0.04 | 1.13  | 0.979001 | 0.985674 | 0.992043 | 0.991846 |
| MmugDNA.21939.1.S1_at   | MmugDNA.21939.1 | 6.76  | 6.6   | 0.14 | 0.22 | 1.12  | 0.323622 | 0.422877 | 0.607387 | 0.646054 |
| MmugDNA.2194.1.S1_at    | MmugDNA.2194.1  | 3.06  | 2.95  | 0.05 | 0.17 | 1.08  | 0.443717 | 0.576882 | 0.69678  | 0.747519 |
| MmugDNA.21940.1.S1_at   | MmugDNA.21940.1 | 3.21  | 3.22  | 0.02 | 0.03 | -1.01 | 0.246788 | 0.931248 | 0.542539 | 0.96095  |
| MmugDNA.21941.1.S1_at   | MmugDNA.21941.1 | 10.38 | 10.32 | 0.08 | 0.06 | 1.04  | 0.372298 | 0.025326 | 0.64489  | 0.199522 |
| MmugDNA.21942.1.S1_at   | MmugDNA.21942.1 | 5.42  | 4.8   | 0.3  | 0.22 | 1.54  | 0.039452 | 0.028635 | 0.25509  | 0.210901 |

|                         |                 |       |       |      |      |       |          |          |          |          |
|-------------------------|-----------------|-------|-------|------|------|-------|----------|----------|----------|----------|
| MmugDNA.21943.1.S1_at   | MmugDNA.21943.1 | 6.76  | 7.07  | 0.37 | 0.32 | -1.24 | 0.357672 | 0.515534 | 0.633636 | 0.708385 |
| MmugDNA.21944.1.S1_at   | MmugDNA.21944.1 | 11.81 | 11.74 | 0.24 | 0.06 | 1.05  | 0.769581 | 0.460017 | 0.894281 | 0.671989 |
| MmugDNA.21944.1.S1_s_at | MmugDNA.21944.1 | 10.28 | 9.76  | 0.16 | 0.08 | 1.42  | 0.00621  | 0.003504 | 0.125037 | 0.08503  |
| MmugDNA.21946.1.S1_at   | MmugDNA.21946.1 | 7.01  | 7.26  | 0.37 | 0.13 | -1.19 | 0.871403 | 0.734492 | 0.944625 | 0.846185 |
| MmugDNA.21949.1.S1_at   | MmugDNA.21949.1 | 6.67  | 6.59  | 0.19 | 0.02 | 1.06  | 0.381701 | 0.554914 | 0.651322 | 0.733553 |
| MmugDNA.2195.1.S1_at    | MmugDNA.2195.1  | 4.95  | 4.11  | 0.97 | 0.02 | 1.79  | 0.218955 | 0.28353  | 0.516629 | 0.54596  |
| MmugDNA.21950.1.S1_at   | MmugDNA.21950.1 | 11.74 | 11.72 | 0.21 | 0.09 | 1.02  | 0.797492 | 0.002513 | 0.908527 | 0.074158 |
| MmugDNA.21951.1.S1_at   | MmugDNA.21951.1 | 10.55 | 10.08 | 0.16 | 0.16 | 1.39  | 0.034444 | 0.097169 | 0.240156 | 0.354801 |
| MmugDNA.21952.1.S1_at   | MmugDNA.21952.1 | 6.61  | 6.03  | 0.1  | 0.19 | 1.5   | 0.008467 | 0.027007 | 0.141252 | 0.205501 |
| MmugDNA.21956.1.S1_at   | MmugDNA.21956.1 | 11.99 | 12.43 | 0.08 | 0.09 | -1.35 | 0.008379 | 0.035446 | 0.140667 | 0.232564 |
| MmugDNA.21957.1.S1_at   | MmugDNA.21957.1 | 6.91  | 6.72  | 0.13 | 0.1  | 1.14  | 0.30776  | 0.022183 | 0.594601 | 0.186422 |
| MmugDNA.21958.1.S1_at   | MmugDNA.21958.1 | 6.84  | 7.01  | 0.11 | 0.11 | -1.13 | 0.138778 | 0.550271 | 0.42437  | 0.730374 |
| MmugDNA.21959.1.S1_at   | MmugDNA.21959.1 | 5.75  | 5.8   | 0.19 | 0.03 | -1.04 | 0.226553 | 0.131515 | 0.524351 | 0.403658 |
| MmugDNA.2196.1.S1_at    | MmugDNA.2196.1  | 6.92  | 7.69  | 0.5  | 0.31 | -1.7  | 0.087281 | 0.011946 | 0.353005 | 0.141411 |
| MmugDNA.21960.1.S1_at   | MmugDNA.21960.1 | 3.14  | 3.5   | 0.11 | 0.2  | -1.28 | 0.168132 | 0.145165 | 0.461419 | 0.419147 |
| MmugDNA.21961.1.S1_at   | MmugDNA.21961.1 | 2.94  | 2.96  | 0.12 | 0.09 | -1.01 | 0.544186 | 0.640361 | 0.763878 | 0.788874 |
| MmugDNA.21962.1.S1_at   | MmugDNA.21962.1 | 12.08 | 12.49 | 0.07 | 0.18 | -1.33 | 0.075165 | 0.03321  | 0.332294 | 0.225663 |
| MmugDNA.21963.1.S1_at   | MmugDNA.21963.1 | 6.35  | 6.49  | 1.35 | 0.21 | -1.1  | 0.451351 | 0.586078 | 0.702207 | 0.75324  |
| MmugDNA.21964.1.S1_at   | MmugDNA.21964.1 | 4.35  | 4.29  | 0.02 | 0.17 | 1.04  | 0.62979  | 0.849572 | 0.81817  | 0.914595 |
| MmugDNA.21965.1.S1_at   | MmugDNA.21965.1 | 4.07  | 3.81  | 0.22 | 0.06 | 1.2   | 0.166797 | 0.128811 | 0.460006 | 0.400277 |
| MmugDNA.21966.1.S1_at   | MmugDNA.21966.1 | 6.05  | 6.46  | 0.24 | 0.16 | -1.34 | 0.322546 | 0.277393 | 0.606547 | 0.541326 |
| MmugDNA.21967.1.S1_at   | MmugDNA.21967.1 | 6.14  | 5.93  | 0.11 | 0.09 | 1.16  | 0.20403  | 0.109861 | 0.501584 | 0.373829 |
| MmugDNA.21968.1.S1_at   | MmugDNA.21968.1 | 8.84  | 8.73  | 0.22 | 0.27 | 1.08  | 0.588396 | 0.425702 | 0.791007 | 0.648009 |
| MmugDNA.21969.1.S1_at   | MmugDNA.21969.1 | 4.5   | 4.47  | 0.27 | 0.15 | 1.02  | 0.621263 | 0.758198 | 0.81255  | 0.859308 |
| MmugDNA.2197.1.S1_at    | MmugDNA.2197.1  | 6.75  | 6.84  | 0.2  | 0.03 | -1.07 | 0.590612 | 0.045977 | 0.791991 | 0.258818 |
| MmugDNA.21970.1.S1_at   | MmugDNA.21970.1 | 5.75  | 5.65  | 0.16 | 0.17 | 1.07  | 0.230233 | 0.169139 | 0.529091 | 0.445716 |
| MmugDNA.21971.1.S1_at   | MmugDNA.21971.1 | 12.81 | 13.27 | 0.21 | 0.1  | -1.38 | 0.033338 | 0.198622 | 0.236556 | 0.473391 |
| MmugDNA.13035.1.S1_s_at | MmugDNA.13035.1 | 12.63 | 13.04 | 0.14 | 0.07 | -1.33 | 0.009868 | 0.195406 | 0.148832 | 0.470253 |
| MmugDNA.21972.1.S1_at   | MmugDNA.21972.1 | 9.42  | 8.73  | 0.49 | 0.04 | 1.62  | 0.168591 | 0.046028 | 0.461886 | 0.258971 |
| MmugDNA.21973.1.S1_at   | MmugDNA.21973.1 | 9.52  | 9.36  | 0.21 | 0.13 | 1.11  | 0.52925  | 0.361185 | 0.754165 | 0.60207  |
| MmugDNA.21975.1.S1_at   | MmugDNA.21975.1 | 7.52  | 8.15  | 1.28 | 0.62 | -1.55 | 0.706409 | 0.600005 | 0.861004 | 0.761762 |
| MmugDNA.21976.1.S1_at   | MmugDNA.21976.1 | 3.68  | 3.71  | 0.21 | 0.06 | -1.02 | 0.677681 | 0.599691 | 0.846284 | 0.761534 |
| MmugDNA.21977.1.S1_at   | MmugDNA.21977.1 | 4.04  | 4.05  | 0.1  | 0.08 | -1    | 0.431664 | 0.376973 | 0.687592 | 0.614684 |
| MmugDNA.21978.1.S1_at   | MmugDNA.21978.1 | 11.46 | 11.92 | 0.09 | 0.13 | -1.38 | 0.018491 | 0.000192 | 0.189141 | 0.030888 |
| MmugDNA.21979.1.S1_at   | MmugDNA.21979.1 | 4.02  | 4.49  | 0.06 | 0.46 | -1.38 | 0.049961 | 0.102453 | 0.281126 | 0.362675 |
| MmugDNA.2198.1.S1_at    | MmugDNA.2198.1  | 8.12  | 5.87  | 0.48 | 0.3  | 4.76  | 0.002493 | 0.041966 | 0.094326 | 0.24943  |
| MmugDNA.21980.1.S1_at   | MmugDNA.21980.1 | 6.28  | 6.18  | 0.75 | 0.47 | 1.07  | 0.329649 | 0.379607 | 0.611807 | 0.616523 |
| MmugDNA.21981.1.S1_at   | MmugDNA.21981.1 | 6.11  | 6.36  | 0.14 | 0.05 | -1.19 | 0.09023  | 0.064795 | 0.356864 | 0.300493 |
| MmugDNA.21982.1.S1_at   | MmugDNA.21982.1 | 9.88  | 10.22 | 0.21 | 0.24 | -1.26 | 0.296427 | 0.048628 | 0.585161 | 0.265602 |
| MmugDNA.21983.1.S1_x_at | MmugDNA.21983.1 | 7.21  | 7.06  | 0.45 | 0.11 | 1.11  | 0.200087 | 0.296513 | 0.497628 | 0.555528 |
| MmugDNA.21984.1.S1_at   | MmugDNA.21984.1 | 6.35  | 5.95  | 0.66 | 0.27 | 1.31  | 0.143124 | 0.213551 | 0.429375 | 0.48741  |
| MmugDNA.21985.1.S1_at   | MmugDNA.21985.1 | 8.4   | 8.63  | 0.11 | 0.09 | -1.18 | 0.069755 | 0.177707 | 0.322494 | 0.454073 |
| MmugDNA.21986.1.S1_at   | MmugDNA.21986.1 | 9.05  | 8.72  | 0.29 | 0.23 | 1.26  | 0.456563 | 0.004784 | 0.70584  | 0.096484 |

|                         |                 |       |       |      |      |       |          |          |          |          |
|-------------------------|-----------------|-------|-------|------|------|-------|----------|----------|----------|----------|
| MmugDNA.21988.1.S1_at   | MmugDNA.21988.1 | 3.61  | 3.62  | 0.26 | 0.06 | -1    | 0.384605 | 0.519085 | 0.653612 | 0.710813 |
| MmugDNA.2199.1.S1_at    | MmugDNA.2199.1  | 9.17  | 9.81  | 0.21 | 0.29 | -1.55 | 0.104348 | 0.358119 | 0.377773 | 0.59966  |
| MmugDNA.569.1.S1_s_at   | MmugDNA.569.1   | 9.62  | 10.14 | 0.25 | 0.24 | -1.43 | 0.094946 | 0.356219 | 0.363924 | 0.598166 |
| MmugDNA.21990.1.S1_at   | MmugDNA.21990.1 | 3.85  | 4.35  | 0.07 | 0.35 | -1.42 | 0.223849 | 0.423905 | 0.521882 | 0.646571 |
| MmugDNA.21991.1.S1_at   | MmugDNA.21991.1 | 8.76  | 7.63  | 0.39 | 0.34 | 2.19  | 0.074694 | 0.294705 | 0.331379 | 0.554335 |
| MmugDNA.21992.1.S1_at   | MmugDNA.21992.1 | 7.19  | 6.84  | 0.44 | 0.36 | 1.27  | 0.747354 | 0.002843 | 0.883018 | 0.078566 |
| MmugDNA.21993.1.S1_at   | MmugDNA.21993.1 | 7.75  | 7.67  | 0.26 | 0.06 | 1.06  | 0.699015 | 0.335629 | 0.85699  | 0.583403 |
| MmugDNA.21996.1.S1_at   | MmugDNA.21996.1 | 5.34  | 5.26  | 0.02 | 0.08 | 1.06  | 0.166863 | 0.007341 | 0.460015 | 0.11509  |
| MmugDNA.21997.1.S1_at   | MmugDNA.21997.1 | 3.66  | 4.38  | 0.19 | 0.1  | -1.64 | 0.008138 | 0.112432 | 0.138956 | 0.377784 |
| MmugDNA.21999.1.S1_at   | MmugDNA.21999.1 | 7.34  | 7.35  | 0.23 | 0.04 | -1.01 | 0.49343  | 0.637726 | 0.730391 | 0.787114 |
| MmugDNA.22.1.S1_at      | MmugDNA.22.1    | 5.17  | 5.12  | 0.2  | 0.31 | 1.03  | 0.6259   | 0.126652 | 0.815603 | 0.39731  |
| MmugDNA.220.1.S1_at     | MmugDNA.220.1   | 3.3   | 3.61  | 0.09 | 0.46 | -1.24 | 0.327159 | 0.360303 | 0.609783 | 0.601339 |
| MmugDNA.22000.1.S1_at   | MmugDNA.22000.1 | 6.31  | 6.34  | 0.17 | 0.19 | -1.02 | 0.283608 | 0.390646 | 0.573936 | 0.624421 |
| MmugDNA.22002.1.S1_at   | MmugDNA.22002.1 | 5.17  | 5.18  | 0.25 | 0.15 | -1.01 | 0.306081 | 0.410251 | 0.593014 | 0.637167 |
| MmugDNA.22003.1.S1_at   | MmugDNA.22003.1 | 5.48  | 5.4   | 0.06 | 0.17 | 1.05  | 0.262196 | 0.532977 | 0.556354 | 0.71934  |
| MmugDNA.22004.1.S1_at   | MmugDNA.22004.1 | 8.87  | 9.31  | 0.65 | 0.12 | -1.35 | 0.100031 | 0.075115 | 0.37088  | 0.319301 |
| MmugDNA.22005.1.S1_s_at | MmugDNA.22005.1 | 4.49  | 4.51  | 0.53 | 0.08 | -1.02 | 0.42148  | 0.579698 | 0.679956 | 0.749267 |
| MmugDNA.22006.1.S1_at   | MmugDNA.22006.1 | 5.07  | 6.27  | 0.23 | 0.46 | -2.29 | 0.015138 | 0.004079 | 0.175122 | 0.090423 |
| MmugDNA.22007.1.S1_at   | MmugDNA.22007.1 | 8.15  | 9.36  | 0.27 | 0.26 | -2.33 | 0.005224 | 0.165369 | 0.117353 | 0.441544 |
| MmugDNA.22008.1.S1_at   | MmugDNA.22008.1 | 5.49  | 5.42  | 0.21 | 0.01 | 1.05  | 0.622962 | 0.862547 | 0.81372  | 0.921853 |
| MmugDNA.22009.1.S1_at   | MmugDNA.22009.1 | 3.29  | 3.04  | 0.3  | 0.03 | 1.19  | 0.439655 | 0.475463 | 0.693883 | 0.682155 |
| MmugDNA.22010.1.S1_at   | MmugDNA.22010.1 | 6.6   | 6.06  | 0.36 | 0.05 | 1.45  | 0.059911 | 0.047857 | 0.302129 | 0.263679 |
| MmugDNA.22011.1.S1_at   | MmugDNA.22011.1 | 3.46  | 3.28  | 0.12 | 0.18 | 1.13  | 0.354843 | 0.062432 | 0.631821 | 0.296699 |
| MmugDNA.22012.1.S1_at   | MmugDNA.22012.1 | 6.46  | 6.22  | 0.14 | 0.01 | 1.18  | 0.125954 | 0.063902 | 0.406905 | 0.29906  |
| MmugDNA.22013.1.S1_at   | MmugDNA.22013.1 | 6.07  | 6.1   | 0.24 | 0.05 | -1.02 | 0.785494 | 0.523261 | 0.902048 | 0.713624 |
| MmugDNA.22014.1.S1_at   | MmugDNA.22014.1 | 10.61 | 10.78 | 0.06 | 0.06 | -1.13 | 0.014739 | 0.315944 | 0.173341 | 0.569367 |
| MmugDNA.22015.1.S1_at   | MmugDNA.22015.1 | 4.74  | 4.71  | 0.23 | 0.07 | 1.02  | 0.586427 | 0.763095 | 0.789807 | 0.862257 |
| MmugDNA.22015.1.S1_x_at | MmugDNA.22015.1 | 5.03  | 4.7   | 0.22 | 0.2  | 1.25  | 0.12727  | 0.115963 | 0.408955 | 0.383164 |
| MmugDNA.22016.1.S1_at   | MmugDNA.22016.1 | 3.75  | 3.9   | 0.12 | 0.12 | -1.11 | 0.487657 | 0.548466 | 0.726421 | 0.729187 |
| MmugDNA.22017.1.S1_at   | MmugDNA.22017.1 | 4.75  | 4.84  | 0.04 | 0.24 | -1.06 | 0.872378 | 0.9769   | 0.945259 | 0.987434 |
| MmugDNA.22019.1.S1_at   | MmugDNA.22019.1 | 3.76  | 3.76  | 0.1  | 0.2  | 1     | 0.660107 | 0.708899 | 0.836026 | 0.831167 |
| MmugDNA.2202.1.S1_at    | MmugDNA.2202.1  | 3.69  | 3.62  | 0.08 | 0.06 | 1.05  | 0.813304 | 0.399634 | 0.91651  | 0.629912 |
| MmugDNA.22022.1.S1_at   | MmugDNA.22022.1 | 5.42  | 5.14  | 0.13 | 0.14 | 1.21  | 0.134172 | 0.276608 | 0.417703 | 0.540596 |
| MmugDNA.22023.1.S1_at   | MmugDNA.22023.1 | 5.69  | 5.05  | 0.33 | 0.53 | 1.55  | 0.145904 | 0.020883 | 0.433608 | 0.181338 |
| MmugDNA.22024.1.S1_at   | MmugDNA.22024.1 | 3.4   | 3.88  | 0.27 | 0.11 | -1.39 | 0.039745 | 0.004392 | 0.256046 | 0.092744 |
| MmugDNA.22025.1.S1_at   | MmugDNA.22025.1 | 5.32  | 5.44  | 0.21 | 0.19 | -1.09 | 0.983162 | 0.813039 | 0.993783 | 0.891895 |
| MmugDNA.22027.1.S1_at   | MmugDNA.22027.1 | 8.32  | 7.79  | 0.12 | 0.25 | 1.45  | 0.031153 | 0.175459 | 0.229536 | 0.452157 |
| MmugDNA.22028.1.S1_at   | MmugDNA.22028.1 | 2.58  | 2.71  | 0.08 | 0.03 | -1.09 | 0.147222 | 0.33337  | 0.43531  | 0.581668 |
| MmugDNA.22029.1.S1_at   | MmugDNA.22029.1 | 3.88  | 4.36  | 0.15 | 0.29 | -1.4  | 0.042881 | 0.040565 | 0.26421  | 0.246274 |
| MmugDNA.6145.1.S1_s_at  | MmugDNA.6145.1  | 12.94 | 12.4  | 0.06 | 0.22 | 1.45  | 0.048405 | 0.052982 | 0.277466 | 0.275815 |
| MmugDNA.22030.1.S1_at   | MmugDNA.22030.1 | 2.92  | 2.87  | 0.19 | 0.11 | 1.03  | 0.391081 | 0.561888 | 0.658569 | 0.737659 |
| MmugDNA.22031.1.S1_at   | MmugDNA.22031.1 | 5.52  | 5.05  | 0.66 | 0.15 | 1.39  | 0.270819 | 0.331629 | 0.56285  | 0.580208 |
| MmugDNA.22032.1.S1_at   | MmugDNA.22032.1 | 4.04  | 4.07  | 0.37 | 0.56 | -1.02 | 0.547459 | 0.808713 | 0.765963 | 0.889895 |

|                         |                 |       |       |      |      |       |          |          |          |          |
|-------------------------|-----------------|-------|-------|------|------|-------|----------|----------|----------|----------|
| MmugDNA.22033.1.S1_at   | MmugDNA.22033.1 | 3.3   | 3.19  | 0.22 | 0.07 | 1.08  | 0.34019  | 0.154974 | 0.6204   | 0.429973 |
| MmugDNA.22034.1.S1_at   | MmugDNA.22034.1 | 4.67  | 5.33  | 0.44 | 0.4  | -1.58 | 0.127169 | 0.088531 | 0.408754 | 0.341947 |
| MmugDNA.22035.1.S1_at   | MmugDNA.22035.1 | 6.73  | 8.31  | 0.35 | 0.19 | -2.98 | 0.003389 | 0.000788 | 0.102989 | 0.045969 |
| MmugDNA.22036.1.S1_at   | MmugDNA.22036.1 | 3.5   | 3.45  | 0.1  | 0.07 | 1.04  | 0.421985 | 0.763365 | 0.680233 | 0.862471 |
| MmugDNA.22037.1.S1_at   | MmugDNA.22037.1 | 12.55 | 11.69 | 0.15 | 0.1  | 1.8   | 0.00091  | 0.001429 | 0.075607 | 0.057607 |
| MmugDNA.22038.1.S1_at   | MmugDNA.22038.1 | 3.99  | 4.15  | 0.07 | 0.07 | -1.11 | 0.057976 | 0.237495 | 0.297882 | 0.508163 |
| MmugDNA.22039.1.S1_at   | MmugDNA.22039.1 | 3.72  | 3.72  | 0.08 | 0.02 | 1     | 0.546679 | 0.937148 | 0.765425 | 0.964571 |
| MmugDNA.2204.1.S1_at    | MmugDNA.2204.1  | 13.13 | 13.14 | 0.05 | 0.02 | -1.01 | 0.885657 | 0.936435 | 0.951213 | 0.964171 |
| MmugDNA.22041.1.S1_at   | MmugDNA.22041.1 | 5.17  | 5.14  | 0.22 | 0.41 | 1.02  | 0.997372 | 0.5869   | 0.999086 | 0.753893 |
| MmugDNA.22042.1.S1_at   | MmugDNA.22042.1 | 10.84 | 10.93 | 0.1  | 0.05 | -1.06 | 0.143114 | 0.514767 | 0.429375 | 0.707865 |
| MmugDNA.22043.1.S1_at   | MmugDNA.22043.1 | 10.22 | 10.55 | 0.17 | 0.04 | -1.25 | 0.076096 | 0.033499 | 0.334149 | 0.226577 |
| MmugDNA.22044.1.S1_at   | MmugDNA.22044.1 | 9.1   | 9.94  | 0.73 | 0.07 | -1.78 | 0.1277   | 0.121066 | 0.409591 | 0.390064 |
| MmugDNA.22045.1.S1_at   | MmugDNA.22045.1 | 10.57 | 10.51 | 0.18 | 0.18 | 1.04  | 0.893848 | 0.70796  | 0.954747 | 0.830569 |
| MmugDNA.22046.1.S1_at   | MmugDNA.22046.1 | 11.1  | 10.83 | 0.21 | 0.12 | 1.2   | 0.185438 | 0.028251 | 0.48166  | 0.209847 |
| MmugDNA.22047.1.S1_s_at | MmugDNA.22047.1 | 11.62 | 11.61 | 0.1  | 0.07 | 1     | 0.457553 | 0.475198 | 0.706421 | 0.682031 |
| MmugDNA.22048.1.S1_at   | MmugDNA.22048.1 | 4.48  | 4.42  | 0.17 | 0    | 1.04  | 0.552813 | 0.467651 | 0.769449 | 0.677207 |
| MmugDNA.22049.1.S1_at   | MmugDNA.22049.1 | 8.31  | 7.3   | 0.46 | 0.1  | 2.02  | 0.047977 | 0.00678  | 0.276383 | 0.111388 |
| MmugDNA.2205.1.S1_at    | MmugDNA.2205.1  | 4     | 3.97  | 0    | 0.06 | 1.02  | 0.246973 | 0.519353 | 0.5426   | 0.710998 |
| MmugDNA.22050.1.S1_at   | MmugDNA.22050.1 | 7.78  | 7.98  | 0.41 | 0.1  | -1.14 | 0.896237 | 0.011423 | 0.955792 | 0.138412 |
| MmugDNA.22051.1.S1_x_at | MmugDNA.22051.1 | 11.6  | 11.22 | 0.42 | 0.24 | 1.31  | 0.242737 | 0.189856 | 0.539526 | 0.465403 |
| MmugDNA.22053.1.S1_at   | MmugDNA.22053.1 | 9.17  | 9.15  | 0.12 | 0.11 | 1.01  | 0.384014 | 0.834979 | 0.653161 | 0.905534 |
| MmugDNA.22054.1.S1_at   | MmugDNA.22054.1 | 4.76  | 4.78  | 0.29 | 0.09 | -1.01 | 0.381751 | 0.395285 | 0.651337 | 0.62738  |
| MmugDNA.22056.1.S1_at   | MmugDNA.22056.1 | 4.53  | 4.37  | 0.13 | 0.15 | 1.12  | 0.669423 | 0.533219 | 0.841414 | 0.719483 |
| MmugDNA.22058.1.S1_at   | MmugDNA.22058.1 | 9.94  | 10.43 | 0.19 | 0.16 | -1.4  | 0.048325 | 0.201226 | 0.277205 | 0.475667 |
| MmugDNA.2206.1.S1_at    | MmugDNA.2206.1  | 5.61  | 4.4   | 0.57 | 0.8  | 2.31  | 0.431392 | 0.627977 | 0.687507 | 0.780909 |
| MmugDNA.22061.1.S1_at   | MmugDNA.22061.1 | 11.92 | 12.42 | 0.02 | 0.04 | -1.42 | 0.000025 | 0.001689 | 0.045594 | 0.062186 |
| MmugDNA.22062.1.S1_at   | MmugDNA.22062.1 | 13.17 | 13.39 | 0.02 | 0.03 | -1.17 | 0.000178 | 0.198616 | 0.053494 | 0.473391 |
| MmugDNA.22064.1.S1_at   | MmugDNA.22064.1 | 5.04  | 5.04  | 0.26 | 0.16 | 1     | 0.935497 | 0.731525 | 0.972982 | 0.844387 |
| MmugDNA.22065.1.S1_at   | MmugDNA.22065.1 | 3.74  | 3.68  | 0.59 | 0.54 | 1.04  | 0.856211 | 0.596178 | 0.937387 | 0.759371 |
| MmugDNA.22070.1.S1_at   | MmugDNA.22070.1 | 7.36  | 7.03  | 0.07 | 0.04 | 1.26  | 0.002669 | 0.000042 | 0.095935 | 0.025273 |
| MmugDNA.22071.1.S1_at   | MmugDNA.22071.1 | 6.61  | 6.55  | 0.11 | 0.06 | 1.04  | 0.808134 | 0.161673 | 0.914141 | 0.437771 |
| MmugDNA.22076.1.S1_at   | MmugDNA.22076.1 | 5.06  | 5.11  | 0.16 | 0.24 | -1.03 | 0.620269 | 0.668301 | 0.811767 | 0.805897 |
| MmugDNA.12895.1.S1_s_at | MmugDNA.12895.1 | 6.07  | 6.21  | 0.15 | 0.17 | -1.1  | 0.337781 | 0.313144 | 0.618161 | 0.567709 |
| MmugDNA.22078.1.S1_at   | MmugDNA.22078.1 | 4.97  | 5.01  | 0.17 | 0.08 | -1.03 | 0.274388 | 0.189819 | 0.566281 | 0.465403 |
| MmugDNA.2208.1.S1_at    | MmugDNA.2208.1  | 4.06  | 3.95  | 0.06 | 0.08 | 1.08  | 0.300197 | 0.828036 | 0.588392 | 0.901214 |
| MmugDNA.22080.1.S1_at   | MmugDNA.22080.1 | 5.37  | 5.17  | 0.06 | 0.16 | 1.15  | 0.181311 | 0.147899 | 0.476653 | 0.422265 |
| MmugDNA.22081.1.S1_at   | MmugDNA.22081.1 | 6.3   | 5.94  | 1.2  | 0.12 | 1.28  | 0.621087 | 0.659519 | 0.812455 | 0.800801 |
| MmugDNA.22082.1.S1_at   | MmugDNA.22082.1 | 3.55  | 3.74  | 0.26 | 0.16 | -1.14 | 0.674417 | 0.205988 | 0.844514 | 0.480224 |
| MmugDNA.22085.1.S1_at   | MmugDNA.22085.1 | 3.04  | 2.99  | 0.23 | 0.27 | 1.04  | 0.481237 | 0.632003 | 0.72184  | 0.783079 |
| MmugDNA.22086.1.S1_at   | MmugDNA.22086.1 | 5.9   | 6     | 0.06 | 0.03 | -1.08 | 0.078802 | 0.731425 | 0.338687 | 0.84431  |
| MmugDNA.22087.1.S1_at   | MmugDNA.22087.1 | 3.39  | 3.23  | 0.1  | 0.15 | 1.12  | 0.167284 | 0.230548 | 0.460507 | 0.50226  |
| MmugDNA.22088.1.S1_at   | MmugDNA.22088.1 | 3.36  | 3.31  | 0.5  | 0.07 | 1.04  | 0.297906 | 0.37416  | 0.586373 | 0.612678 |
| MmugDNA.22089.1.S1_at   | MmugDNA.22089.1 | 11.43 | 11.22 | 0.21 | 0.05 | 1.16  | 0.314765 | 0.078272 | 0.600124 | 0.32487  |

|                         |                 |       |       |      |      |       |          |          |          |          |
|-------------------------|-----------------|-------|-------|------|------|-------|----------|----------|----------|----------|
| MmugDNA.2209.1.S1_at    | MmugDNA.2209.1  | 5.84  | 5.54  | 0.17 | 0.19 | 1.24  | 0.174014 | 0.193416 | 0.468351 | 0.468711 |
| MmugDNA.22090.1.S1_at   | MmugDNA.22090.1 | 5.91  | 5.04  | 0.48 | 0.39 | 1.83  | 0.320676 | 0.151692 | 0.605178 | 0.426383 |
| MmugDNA.22092.1.S1_at   | MmugDNA.22092.1 | 5.76  | 5.48  | 0.2  | 0.15 | 1.21  | 0.226413 | 0.14461  | 0.524218 | 0.418466 |
| MmugDNA.22093.1.S1_at   | MmugDNA.22093.1 | 4.26  | 4.1   | 0.2  | 0.08 | 1.12  | 0.347028 | 0.67401  | 0.625212 | 0.809495 |
| MmugDNA.22100.1.S1_at   | MmugDNA.22100.1 | 8.94  | 7.86  | 0.3  | 0.44 | 2.12  | 0.032648 | 0.041969 | 0.234993 | 0.24943  |
| MmugDNA.22101.1.S1_at   | MmugDNA.22101.1 | 3.65  | 3.84  | 0.73 | 0.1  | -1.14 | 0.54505  | 0.639737 | 0.764388 | 0.78843  |
| MmugDNA.22102.1.S1_at   | MmugDNA.22102.1 | 8.98  | 8.82  | 0.17 | 0.1  | 1.11  | 0.253176 | 0.472698 | 0.547579 | 0.68007  |
| MmugDNA.22103.1.S1_at   | MmugDNA.22103.1 | 6.46  | 6.49  | 0.08 | 0.1  | -1.02 | 0.670271 | 0.1796   | 0.841785 | 0.45603  |
| MmugDNA.22104.1.S1_at   | MmugDNA.22104.1 | 6.47  | 6.49  | 0.16 | 0.02 | -1.02 | 0.946276 | 0.201868 | 0.977297 | 0.476373 |
| MmugDNA.22105.1.S1_at   | MmugDNA.22105.1 | 7.05  | 7.15  | 0.96 | 0.41 | -1.07 | 0.740733 | 0.15348  | 0.879816 | 0.42827  |
| MmugDNA.22106.1.S1_at   | MmugDNA.22106.1 | 5.95  | 7.2   | 0.26 | 0.21 | -2.37 | 0.005918 | 0.000481 | 0.123406 | 0.038665 |
| MmugDNA.22107.1.S1_at   | MmugDNA.22107.1 | 9.38  | 9.58  | 0.07 | 0.13 | -1.15 | 0.145233 | 0.359782 | 0.432542 | 0.601077 |
| MmugDNA.22108.1.S1_at   | MmugDNA.22108.1 | 5.6   | 5.3   | 0.21 | 0.11 | 1.22  | 0.089528 | 0.061633 | 0.356406 | 0.295095 |
| MmugDNA.22109.1.S1_at   | MmugDNA.22109.1 | 3.8   | 3.68  | 0.05 | 0.17 | 1.09  | 0.095432 | 0.203755 | 0.364958 | 0.478011 |
| MmugDNA.2211.1.S1_at    | MmugDNA.2211.1  | 4.71  | 4.51  | 0.22 | 0.1  | 1.15  | 0.188872 | 0.250348 | 0.485448 | 0.519362 |
| MmugDNA.22113.1.S1_at   | MmugDNA.22113.1 | 5.35  | 5.16  | 0.18 | 0.06 | 1.14  | 0.213275 | 0.266176 | 0.511049 | 0.532    |
| MmugDNA.22114.1.S1_at   | MmugDNA.22114.1 | 8.52  | 8.03  | 0.15 | 0.31 | 1.4   | 0.096205 | 0.007452 | 0.365761 | 0.115872 |
| MmugDNA.22117.1.S1_at   | MmugDNA.22117.1 | 6.11  | 5.81  | 0.55 | 0.17 | 1.23  | 0.189695 | 0.432358 | 0.486076 | 0.652794 |
| MmugDNA.2212.1.S1_at    | MmugDNA.2212.1  | 5.54  | 5.52  | 0.41 | 0.04 | 1.01  | 0.611003 | 0.56243  | 0.806046 | 0.738025 |
| MmugDNA.22120.1.S1_at   | MmugDNA.22120.1 | 5.16  | 5.19  | 0.14 | 0.17 | -1.03 | 0.621379 | 0.846558 | 0.812616 | 0.912681 |
| MmugDNA.22122.1.S1_at   | MmugDNA.22122.1 | 10.11 | 10.72 | 0.39 | 0.07 | -1.52 | 0.036358 | 0.105423 | 0.245737 | 0.367279 |
| MmugDNA.22123.1.S1_at   | MmugDNA.22123.1 | 5.84  | 5.75  | 0.39 | 0.08 | 1.06  | 0.326449 | 0.303959 | 0.609577 | 0.561344 |
| MmugDNA.22124.1.S1_at   | MmugDNA.22124.1 | 8.26  | 8.09  | 0.31 | 0.19 | 1.13  | 0.194487 | 0.605112 | 0.491143 | 0.764917 |
| MmugDNA.22126.1.S1_at   | MmugDNA.22126.1 | 9.35  | 9.26  | 0.12 | 0.02 | 1.06  | 0.089788 | 0.44063  | 0.356705 | 0.659029 |
| MmugDNA.22127.1.S1_x_at | MmugDNA.22127.1 | 11.16 | 11.11 | 0.54 | 0.21 | 1.04  | 0.321812 | 0.167526 | 0.606128 | 0.443968 |
| MmugDNA.22128.1.S1_at   | MmugDNA.22128.1 | 6.03  | 6     | 0.18 | 0.16 | 1.02  | 0.305762 | 0.519768 | 0.592808 | 0.711338 |
| MmugDNA.22129.1.S1_at   | MmugDNA.22129.1 | 4.1   | 4.03  | 0.19 | 0.11 | 1.05  | 0.685456 | 0.928843 | 0.850067 | 0.959449 |
| MmugDNA.2213.1.S1_at    | MmugDNA.2213.1  | 3.08  | 3.02  | 0.33 | 0.09 | 1.04  | 0.243938 | 0.270046 | 0.540712 | 0.535338 |
| MmugDNA.22130.1.S1_at   | MmugDNA.22130.1 | 10.87 | 10.75 | 0.06 | 0    | 1.08  | 0.09135  | 0.399072 | 0.358885 | 0.62969  |
| MmugDNA.22133.1.S1_at   | MmugDNA.22133.1 | 9.4   | 8.76  | 0.17 | 0.23 | 1.56  | 0.021279 | 0.056884 | 0.199623 | 0.284636 |
| MmugDNA.22135.1.S1_at   | MmugDNA.22135.1 | 3.82  | 3.84  | 0.16 | 0.09 | -1.01 | 0.341187 | 0.437597 | 0.621119 | 0.656798 |
| MmugDNA.22136.1.S1_at   | MmugDNA.22136.1 | 13.07 | 12.98 | 0.07 | 0.06 | 1.06  | 0.858667 | 0.685575 | 0.938766 | 0.816542 |
| MmugDNA.22137.1.S1_at   | MmugDNA.22137.1 | 5.31  | 5.41  | 0.05 | 0.07 | -1.07 | 0.056936 | 0.361454 | 0.295858 | 0.602215 |
| MmugDNA.22138.1.S1_s_at | MmugDNA.22138.1 | 9.07  | 9.36  | 0.41 | 0.16 | -1.22 | 0.601705 | 0.078772 | 0.799788 | 0.325725 |
| MmugDNA.22139.1.S1_at   | MmugDNA.22139.1 | 7.18  | 7.54  | 0.44 | 0.26 | -1.28 | 0.161384 | 0.187249 | 0.452988 | 0.463238 |
| MmugDNA.22141.1.S1_at   | MmugDNA.22141.1 | 5.91  | 5.69  | 0.74 | 0.72 | 1.16  | 0.780801 | 0.780686 | 0.899949 | 0.872739 |
| MmugDNA.22142.1.S1_at   | MmugDNA.22142.1 | 7.24  | 7.12  | 0.06 | 0.28 | 1.09  | 0.286844 | 0.761481 | 0.5766   | 0.861416 |
| MmugDNA.22144.1.S1_at   | MmugDNA.22144.1 | 3.48  | 3.52  | 0.07 | 0.11 | -1.03 | 0.747824 | 0.910659 | 0.883182 | 0.949583 |
| MmugDNA.22145.1.S1_at   | MmugDNA.22145.1 | 3.89  | 3.91  | 0.21 | 0.15 | -1.01 | 0.965257 | 0.967789 | 0.985924 | 0.982192 |
| MmugDNA.22146.1.S1_at   | MmugDNA.22146.1 | 5.1   | 5.18  | 0.03 | 0.16 | -1.06 | 0.293878 | 0.277363 | 0.582887 | 0.541302 |
| MmugDNA.22147.1.S1_at   | MmugDNA.22147.1 | 5.75  | 5.52  | 0.93 | 0.21 | 1.17  | 0.254986 | 0.336035 | 0.549525 | 0.583647 |
| MmugDNA.22149.1.S1_at   | MmugDNA.22149.1 | 10.98 | 9.04  | 0.63 | 0.03 | 3.82  | 0.006643 | 0.291839 | 0.127957 | 0.552086 |
| MmugDNA.22151.1.S1_at   | MmugDNA.22151.1 | 7.88  | 8.01  | 0.13 | 0.04 | -1.09 | 0.174344 | 0.018162 | 0.468517 | 0.169673 |

|                         |                 |       |       |      |      |        |          |          |          |          |
|-------------------------|-----------------|-------|-------|------|------|--------|----------|----------|----------|----------|
| MmugDNA.22152.1.S1_at   | MmugDNA.22152.1 | 5.8   | 5.63  | 0.18 | 0.02 | 1.12   | 0.139102 | 0.242877 | 0.424844 | 0.513274 |
| MmugDNA.22153.1.S1_at   | MmugDNA.22153.1 | 6.92  | 7.6   | 0.25 | 0.09 | -1.6   | 0.006058 | 0.086367 | 0.12428  | 0.338805 |
| MmugDNA.22155.1.S1_at   | MmugDNA.22155.1 | 10.07 | 10.62 | 0.12 | 0.12 | -1.47  | 0.006918 | 0.009404 | 0.130303 | 0.127832 |
| MmugDNA.22157.1.S1_at   | MmugDNA.22157.1 | 8.23  | 8.05  | 0.31 | 0.12 | 1.14   | 0.351717 | 0.000498 | 0.62935  | 0.038955 |
| MmugDNA.22158.1.S1_at   | MmugDNA.22158.1 | 11.17 | 12.22 | 0.2  | 0.19 | -2.06  | 0.003781 | 0.008792 | 0.106813 | 0.124117 |
| MmugDNA.22159.1.S1_at   | MmugDNA.22159.1 | 5.92  | 5.29  | 0.43 | 0.18 | 1.55   | 0.167917 | 0.692365 | 0.461188 | 0.820984 |
| MmugDNA.2216.1.S1_at    | MmugDNA.2216.1  | 3.56  | 3.52  | 0.08 | 0.1  | 1.02   | 0.868147 | 0.91206  | 0.943202 | 0.950407 |
| MmugDNA.22161.1.S1_at   | MmugDNA.22161.1 | 5.57  | 5.29  | 0.12 | 0.18 | 1.21   | 0.06521  | 0.068493 | 0.312231 | 0.308214 |
| MmugDNA.22163.1.S1_at   | MmugDNA.22163.1 | 4.19  | 4.27  | 0.1  | 0.24 | -1.05  | 0.955807 | 0.668676 | 0.981846 | 0.806111 |
| MmugDNA.22164.1.S1_at   | MmugDNA.22164.1 | 5.9   | 5.91  | 0.04 | 0.13 | -1     | 0.77578  | 0.526123 | 0.897461 | 0.715385 |
| MmugDNA.22166.1.S1_s_at | MmugDNA.22166.1 | 7.65  | 7.36  | 0.05 | 0.12 | 1.23   | 0.006631 | 0.012669 | 0.127935 | 0.145097 |
| MmugDNA.22166.1.S1_x_at | MmugDNA.22166.1 | 8.1   | 7.64  | 0.28 | 0.2  | 1.38   | 0.155709 | 0.070106 | 0.446095 | 0.310998 |
| MmugDNA.22168.1.S1_at   | MmugDNA.22168.1 | 5.8   | 5.73  | 0.41 | 0.38 | 1.05   | 0.8997   | 0.984537 | 0.957418 | 0.991307 |
| MmugDNA.22169.1.S1_at   | MmugDNA.22169.1 | 8.02  | 7.66  | 0.22 | 0.26 | 1.29   | 0.237136 | 0.268205 | 0.534591 | 0.533916 |
| MmugDNA.2217.1.S1_at    | MmugDNA.2217.1  | 3.45  | 3.45  | 0.06 | 0.13 | 1      | 0.988146 | 0.71398  | 0.995736 | 0.83406  |
| MmugDNA.22171.1.S1_at   | MmugDNA.22171.1 | 4.31  | 4.28  | 0.16 | 0.11 | 1.02   | 0.518328 | 0.609481 | 0.747433 | 0.767788 |
| MmugDNA.22173.1.S1_at   | MmugDNA.22173.1 | 4.01  | 3.79  | 0.83 | 0.25 | 1.17   | 0.226011 | 0.249371 | 0.523718 | 0.518496 |
| MmugDNA.22177.1.S1_at   | MmugDNA.22177.1 | 3.16  | 3.15  | 0.14 | 0.06 | 1.01   | 0.286395 | 0.227695 | 0.576201 | 0.499962 |
| MmugDNA.22179.1.S1_at   | MmugDNA.22179.1 | 7.61  | 8.27  | 0.24 | 0.09 | -1.57  | 0.012547 | 0.122333 | 0.162479 | 0.392032 |
| MmugDNA.22180.1.S1_at   | MmugDNA.22180.1 | 3.48  | 3.31  | 0.08 | 0.12 | 1.12   | 0.052464 | 0.189535 | 0.286213 | 0.465277 |
| MmugDNA.22181.1.S1_at   | MmugDNA.22181.1 | 3.29  | 3.29  | 0.33 | 0.1  | -1     | 0.385286 | 0.55546  | 0.654083 | 0.733834 |
| MmugDNA.22182.1.S1_at   | MmugDNA.22182.1 | 5.1   | 4.53  | 0.98 | 0.02 | 1.49   | 0.343219 | 0.398388 | 0.622887 | 0.629374 |
| MmugDNA.22183.1.S1_at   | MmugDNA.22183.1 | 8.58  | 8.45  | 0.14 | 0.18 | 1.1    | 0.758478 | 0.96938  | 0.889227 | 0.983237 |
| MmugDNA.22184.1.S1_at   | MmugDNA.22184.1 | 12.2  | 11.81 | 0.06 | 0.08 | 1.31   | 0.002502 | 0.01086  | 0.094326 | 0.13586  |
| MmugDNA.22185.1.S1_at   | MmugDNA.22185.1 | 5.96  | 5.88  | 0.22 | 0.07 | 1.06   | 0.512918 | 0.650111 | 0.743337 | 0.795406 |
| MmugDNA.22187.1.S1_at   | MmugDNA.22187.1 | 2.92  | 3.05  | 0.05 | 0.1  | -1.1   | 0.177556 | 0.665714 | 0.472205 | 0.804156 |
| MmugDNA.22188.1.S1_at   | MmugDNA.22188.1 | 5.53  | 5.95  | 1.13 | 0.49 | -1.33  | 0.888383 | 0.831701 | 0.952412 | 0.903453 |
| MmugDNA.22189.1.S1_at   | MmugDNA.22189.1 | 5.29  | 5.17  | 0.11 | 0.07 | 1.09   | 0.354468 | 0.28682  | 0.631669 | 0.548162 |
| MmugDNA.2219.1.S1_at    | MmugDNA.2219.1  | 4.92  | 4.76  | 0.11 | 0.17 | 1.11   | 0.610571 | 0.842549 | 0.805938 | 0.910315 |
| MmugDNA.22193.1.S1_at   | MmugDNA.22193.1 | 8.3   | 9.23  | 0.67 | 0.12 | -1.92  | 0.086087 | 0.336114 | 0.350603 | 0.583652 |
| MmugDNA.10744.1.S1_at   | MmugDNA.10744.1 | 6.79  | 11.78 | 2.79 | 0.11 | -31.82 | 0.103973 | 0.354106 | 0.377277 | 0.597048 |
| MmugDNA.10744.1.S1_s_at | MmugDNA.10744.1 | 6.09  | 10.15 | 2.26 | 0.14 | -16.66 | 0.103802 | 0.296781 | 0.377069 | 0.555779 |
| MmugDNA.22194.1.S1_at   | MmugDNA.22194.1 | 9.73  | 9.71  | 0.24 | 0.11 | 1.01   | 0.48021  | 0.427134 | 0.721201 | 0.649124 |
| MmugDNA.22196.1.S1_at   | MmugDNA.22196.1 | 7.16  | 7.58  | 0.62 | 0.25 | -1.33  | 0.385879 | 0.780492 | 0.654498 | 0.872614 |
| MmugDNA.22198.1.S1_at   | MmugDNA.22198.1 | 6.74  | 6.56  | 0.34 | 0.26 | 1.13   | 0.955356 | 0.653425 | 0.981711 | 0.797435 |
| MmugDNA.22198.1.S1_s_at | MmugDNA.22198.1 | 9.24  | 9.4   | 0.27 | 0.34 | -1.12  | 0.59412  | 0.822284 | 0.794519 | 0.89777  |
| MmugDNA.222.1.S1_at     | MmugDNA.222.1   | 7.41  | 8.59  | 0.8  | 0.3  | -2.28  | 0.1244   | 0.019686 | 0.404554 | 0.176286 |
| MmugDNA.22201.1.S1_at   | MmugDNA.22201.1 | 9.26  | 8.56  | 0.07 | 0.34 | 1.62   | 0.020503 | 0.03053  | 0.196642 | 0.216711 |
| MmugDNA.22202.1.S1_at   | MmugDNA.22202.1 | 5.69  | 4.91  | 0.09 | 0.25 | 1.71   | 0.008213 | 0.144144 | 0.139736 | 0.418024 |
| MmugDNA.22203.1.S1_at   | MmugDNA.22203.1 | 11.57 | 11.8  | 0.28 | 0.06 | -1.17  | 0.310219 | 0.577485 | 0.596486 | 0.747923 |
| MmugDNA.22204.1.S1_at   | MmugDNA.22204.1 | 5.13  | 5.2   | 0.1  | 0.18 | -1.04  | 0.877148 | 0.668104 | 0.947466 | 0.80577  |
| MmugDNA.22205.1.S1_at   | MmugDNA.22205.1 | 8.13  | 8.4   | 0.09 | 0.2  | -1.21  | 0.037592 | 0.109437 | 0.24932  | 0.373277 |
| MmugDNA.22206.1.S1_at   | MmugDNA.22206.1 | 8.29  | 8.3   | 0.75 | 0.18 | -1.01  | 0.379412 | 0.398296 | 0.649328 | 0.629324 |

|                         |                 |       |       |      |      |       |          |          |          |          |
|-------------------------|-----------------|-------|-------|------|------|-------|----------|----------|----------|----------|
| MmugDNA.22207.1.S1_at   | MmugDNA.22207.1 | 7.38  | 7.48  | 0.06 | 0.17 | -1.07 | 0.94927  | 0.190528 | 0.97884  | 0.465906 |
| MmugDNA.22208.1.S1_at   | MmugDNA.22208.1 | 3.71  | 3.84  | 0.11 | 0.16 | -1.09 | 0.655372 | 0.817058 | 0.833303 | 0.894492 |
| MmugDNA.22209.1.S1_at   | MmugDNA.22209.1 | 5.18  | 5.15  | 0.06 | 0.06 | 1.02  | 0.966257 | 0.081566 | 0.986351 | 0.329764 |
| MmugDNA.2221.1.S1_at    | MmugDNA.2221.1  | 3.13  | 3.88  | 0.63 | 0.25 | -1.68 | 0.365477 | 0.161272 | 0.639967 | 0.437434 |
| MmugDNA.22210.1.S1_at   | MmugDNA.22210.1 | 4.81  | 4.87  | 0.03 | 0.42 | -1.04 | 0.269111 | 0.37018  | 0.561493 | 0.609371 |
| MmugDNA.22211.1.S1_at   | MmugDNA.22211.1 | 6.74  | 6.87  | 0.23 | 0.19 | -1.09 | 0.529732 | 0.472694 | 0.754486 | 0.68007  |
| MmugDNA.22212.1.S1_at   | MmugDNA.22212.1 | 4.51  | 4.54  | 0.37 | 0.02 | -1.02 | 0.748811 | 0.84496  | 0.883748 | 0.911795 |
| MmugDNA.22213.1.S1_at   | MmugDNA.22213.1 | 2.99  | 2.77  | 0.07 | 0.23 | 1.17  | 0.475829 | 0.078701 | 0.718418 | 0.325673 |
| MmugDNA.22214.1.S1_at   | MmugDNA.22214.1 | 3.73  | 3.59  | 0.27 | 0.04 | 1.1   | 0.436982 | 0.624527 | 0.691834 | 0.778707 |
| MmugDNA.22215.1.S1_at   | MmugDNA.22215.1 | 5.22  | 5     | 0.89 | 0.14 | 1.16  | 0.51373  | 0.47474  | 0.74388  | 0.681695 |
| MmugDNA.22216.1.S1_at   | MmugDNA.22216.1 | 4.54  | 4.73  | 0.24 | 0.12 | -1.14 | 0.41943  | 0.228674 | 0.678764 | 0.500897 |
| MmugDNA.22217.1.S1_at   | MmugDNA.22217.1 | 6.42  | 6.41  | 0.09 | 0.04 | 1.01  | 0.909519 | 0.837102 | 0.96159  | 0.906887 |
| MmugDNA.6319.1.S1_s_at  | MmugDNA.6319.1  | 12.36 | 12.49 | 0.3  | 0.22 | -1.09 | 0.532366 | 0.197381 | 0.756445 | 0.472311 |
| MmugDNA.2222.1.S1_at    | MmugDNA.2222.1  | 7.38  | 7.39  | 0.69 | 0.27 | -1.01 | 0.989813 | 0.069481 | 0.996439 | 0.309802 |
| MmugDNA.22220.1.S1_at   | MmugDNA.22220.1 | 7.3   | 7.43  | 0.13 | 0.03 | -1.09 | 0.137633 | 0.144621 | 0.422708 | 0.418466 |
| MmugDNA.22222.1.S1_at   | MmugDNA.22222.1 | 9.4   | 9.3   | 0.09 | 0.09 | 1.07  | 0.555244 | 0.508259 | 0.771148 | 0.703491 |
| MmugDNA.22222.1.S1_s_at | MmugDNA.22222.1 | 9.7   | 9.48  | 0.12 | 0.02 | 1.16  | 0.033988 | 0.293036 | 0.238985 | 0.552978 |
| MmugDNA.22223.1.S1_at   | MmugDNA.22223.1 | 5.79  | 5.79  | 0.13 | 0.08 | -1.01 | 0.539423 | 0.000491 | 0.760807 | 0.038921 |
| MmugDNA.22225.1.S1_at   | MmugDNA.22225.1 | 6.53  | 6.26  | 0.15 | 0.12 | 1.2   | 0.228357 | 0.276716 | 0.52666  | 0.540618 |
| MmugDNA.22226.1.S1_at   | MmugDNA.22226.1 | 4.69  | 4.4   | 0.11 | 0.03 | 1.22  | 0.012015 | 0.018645 | 0.159626 | 0.171648 |
| MmugDNA.22227.1.S1_at   | MmugDNA.22227.1 | 5.27  | 5.22  | 0.45 | 0.3  | 1.04  | 0.681836 | 0.85692  | 0.848244 | 0.918253 |
| MmugDNA.22228.1.S1_at   | MmugDNA.22228.1 | 9.41  | 9.72  | 0.51 | 0.18 | -1.24 | 0.221007 | 0.302696 | 0.519009 | 0.560276 |
| MmugDNA.22230.1.S1_s_at | MmugDNA.22230.1 | 6.17  | 6.17  | 0.11 | 0.03 | 1     | 0.278412 | 0.471627 | 0.569746 | 0.679537 |
| MmugDNA.22232.1.S1_at   | MmugDNA.22232.1 | 4.06  | 4.75  | 0.14 | 0.41 | -1.62 | 0.100092 | 0.072553 | 0.37088  | 0.315511 |
| MmugDNA.22236.1.S1_at   | MmugDNA.22236.1 | 11.9  | 11.64 | 0.18 | 0.08 | 1.2   | 0.063663 | 0.068764 | 0.308797 | 0.308711 |
| MmugDNA.22237.1.S1_at   | MmugDNA.22237.1 | 3.56  | 3.66  | 0.12 | 0.1  | -1.08 | 0.132545 | 0.104386 | 0.415892 | 0.365672 |
| MmugDNA.22238.1.S1_at   | MmugDNA.22238.1 | 6.05  | 5.97  | 0.31 | 0.04 | 1.06  | 0.627273 | 0.780836 | 0.816769 | 0.872833 |
| MmugDNA.22239.1.S1_at   | MmugDNA.22239.1 | 4.24  | 4.27  | 0.27 | 0.29 | -1.02 | 0.630621 | 0.724003 | 0.818647 | 0.840254 |
| MmugDNA.2224.1.S1_at    | MmugDNA.2224.1  | 5.62  | 5.74  | 0    | 0.2  | -1.09 | 0.340888 | 0.70392  | 0.620908 | 0.828312 |
| MmugDNA.22242.1.S1_at   | MmugDNA.22242.1 | 3.76  | 3.74  | 0.29 | 0.06 | 1.01  | 0.802124 | 0.965214 | 0.911176 | 0.98061  |
| MmugDNA.22243.1.S1_at   | MmugDNA.22243.1 | 5.78  | 5.64  | 0.02 | 0.06 | 1.1   | 0.018743 | 0.014818 | 0.190291 | 0.154879 |
| MmugDNA.22245.1.S1_at   | MmugDNA.22245.1 | 3.39  | 3.4   | 0.09 | 0.05 | -1    | 0.635218 | 0.491303 | 0.821235 | 0.692931 |
| MmugDNA.22247.1.S1_at   | MmugDNA.22247.1 | 3.05  | 3.11  | 0    | 0.06 | -1.04 | 0.160844 | 0.92204  | 0.452392 | 0.956039 |
| MmugDNA.22249.1.S1_at   | MmugDNA.22249.1 | 11.37 | 11.5  | 0.26 | 0.05 | -1.1  | 0.427578 | 0.091421 | 0.684843 | 0.34639  |
| MmugDNA.22250.1.S1_at   | MmugDNA.22250.1 | 4.59  | 4.71  | 0.16 | 0.11 | -1.09 | 0.785133 | 0.48968  | 0.901972 | 0.691862 |
| MmugDNA.22254.1.S1_at   | MmugDNA.22254.1 | 10.94 | 11.39 | 0.14 | 0.08 | -1.36 | 0.009595 | 0.089528 | 0.14818  | 0.343811 |
| MmugDNA.22255.1.S1_at   | MmugDNA.22255.1 | 4.06  | 4.03  | 0.51 | 0.04 | 1.02  | 0.364239 | 0.403616 | 0.638845 | 0.63225  |
| MmugDNA.22256.1.S1_at   | MmugDNA.22256.1 | 3.49  | 3.57  | 0.6  | 0.09 | -1.06 | 0.421113 | 0.524633 | 0.679846 | 0.714463 |
| MmugDNA.22257.1.S1_at   | MmugDNA.22257.1 | 5.57  | 4.31  | 1.23 | 0.13 | 2.4   | 0.123478 | 0.110278 | 0.402842 | 0.374403 |
| MmugDNA.22258.1.S1_at   | MmugDNA.22258.1 | 3.95  | 3.7   | 0.41 | 0.15 | 1.18  | 0.380526 | 0.59388  | 0.65023  | 0.758418 |
| MmugDNA.22259.1.S1_at   | MmugDNA.22259.1 | 4.33  | 4.09  | 0.3  | 0.11 | 1.18  | 0.335677 | 0.328037 | 0.616542 | 0.577844 |
| MmugDNA.2226.1.S1_at    | MmugDNA.2226.1  | 6.61  | 6.65  | 0.19 | 0.03 | -1.03 | 0.495437 | 0.498511 | 0.731814 | 0.697582 |
| MmugDNA.22261.1.S1_at   | MmugDNA.22261.1 | 6.71  | 8.11  | 0.45 | 0.3  | -2.63 | 0.019269 | 0.065138 | 0.192035 | 0.301205 |



|                         |                 |       |       |      |      |        |          |          |          |          |
|-------------------------|-----------------|-------|-------|------|------|--------|----------|----------|----------|----------|
| MmugDNA.22265.1.S1_at   | MmugDNA.22265.1 | 5.57  | 5.74  | 1.3  | 0.43 | -1.12  | 0.50142  | 0.65893  | 0.735287 | 0.800473 |
| MmugDNA.22267.1.S1_at   | MmugDNA.22267.1 | 6.35  | 6.09  | 0.06 | 0.05 | 1.2    | 0.006408 | 0.006811 | 0.126645 | 0.111444 |
| MmugDNA.22268.1.S1_at   | MmugDNA.22268.1 | 5.58  | 5.64  | 0.9  | 0.16 | -1.04  | 0.358026 | 0.444791 | 0.633833 | 0.662072 |
| MmugDNA.24074.1.S1_at   | MmugDNA.24074.1 | 3.26  | 3.47  | 0.56 | 0.5  | -1.16  | 0.555552 | 0.224064 | 0.771368 | 0.497048 |
| MmugDNA.24074.1.S1_s_at | MmugDNA.24074.1 | 5.01  | 5.17  | 0.1  | 0.2  | -1.11  | 0.18103  | 0.20776  | 0.476244 | 0.482016 |
| MmugDNA.2227.1.S1_at    | MmugDNA.2227.1  | 8.3   | 8.34  | 0.12 | 0.08 | -1.03  | 0.928779 | 0.019452 | 0.969855 | 0.175136 |
| MmugDNA.22270.1.S1_at   | MmugDNA.22270.1 | 4.05  | 3.72  | 0.26 | 0.16 | 1.26   | 0.159399 | 0.228034 | 0.450703 | 0.500228 |
| MmugDNA.22271.1.S1_at   | MmugDNA.22271.1 | 7.1   | 6.57  | 1.16 | 0.1  | 1.44   | 0.51454  | 0.254179 | 0.744483 | 0.522481 |
| MmugDNA.22272.1.S1_at   | MmugDNA.22272.1 | 6.15  | 5.99  | 0.51 | 0.16 | 1.11   | 0.472121 | 0.533342 | 0.71594  | 0.719567 |
| MmugDNA.22273.1.S1_at   | MmugDNA.22273.1 | 3.72  | 3.68  | 0.27 | 0.1  | 1.03   | 0.350969 | 0.419881 | 0.628649 | 0.643733 |
| MmugDNA.22274.1.S1_at   | MmugDNA.22274.1 | 10.43 | 9.67  | 0.15 | 0.19 | 1.69   | 0.003981 | 0.023924 | 0.108676 | 0.19376  |
| MmugDNA.22275.1.S1_at   | MmugDNA.22275.1 | 8.14  | 8.26  | 0.64 | 0.31 | -1.09  | 0.482837 | 0.632204 | 0.723113 | 0.783289 |
| MmugDNA.22276.1.S1_at   | MmugDNA.22276.1 | 8.28  | 8.17  | 0.16 | 0.11 | 1.08   | 0.151366 | 0.242748 | 0.440961 | 0.5131   |
| MmugDNA.22277.1.S1_at   | MmugDNA.22277.1 | 3.25  | 3.11  | 0.2  | 0.12 | 1.11   | 0.139899 | 0.254807 | 0.425483 | 0.523051 |
| MmugDNA.22278.1.S1_at   | MmugDNA.22278.1 | 11.07 | 11.19 | 0.2  | 0.1  | -1.08  | 0.509179 | 0.557019 | 0.740889 | 0.734903 |
| MmugDNA.2228.1.S1_at    | MmugDNA.2228.1  | 3.28  | 3.29  | 0.17 | 0.13 | -1     | 0.577341 | 0.690548 | 0.783538 | 0.819619 |
| MmugDNA.22280.1.S1_at   | MmugDNA.22280.1 | 6.05  | 6.11  | 0.09 | 0.14 | -1.04  | 0.494683 | 0.257598 | 0.731304 | 0.525302 |
| MmugDNA.22281.1.S1_at   | MmugDNA.22281.1 | 5.87  | 5.86  | 0.13 | 0.07 | 1.01   | 0.834585 | 0.374553 | 0.927293 | 0.6129   |
| MmugDNA.22286.1.S1_at   | MmugDNA.22286.1 | 8.07  | 7.78  | 0.27 | 0.2  | 1.22   | 0.165229 | 0.583505 | 0.458247 | 0.751817 |
| MmugDNA.22286.1.S1_s_at | MmugDNA.22286.1 | 10.9  | 10.73 | 0.17 | 0.17 | 1.13   | 0.164943 | 0.733271 | 0.457897 | 0.845573 |
| MmugDNA.22288.1.S1_at   | MmugDNA.22288.1 | 7.34  | 7.13  | 0.23 | 0.11 | 1.16   | 0.158627 | 0.239787 | 0.449785 | 0.510505 |
| MmugDNA.22289.1.S1_at   | MmugDNA.22289.1 | 4.49  | 4.42  | 0.17 | 0.03 | 1.05   | 0.676011 | 0.904941 | 0.845314 | 0.946143 |
| MmugDNA.2229.1.S1_at    | MmugDNA.2229.1  | 7.65  | 7.55  | 0.39 | 0.06 | 1.08   | 0.781177 | 0.454401 | 0.900029 | 0.668576 |
| MmugDNA.22290.1.S1_at   | MmugDNA.22290.1 | 9.11  | 9.15  | 0.34 | 0.24 | -1.03  | 0.551297 | 0.641373 | 0.768336 | 0.789506 |
| MmugDNA.22291.1.S1_at   | MmugDNA.22291.1 | 5.11  | 4.98  | 0.14 | 0.14 | 1.09   | 0.796466 | 0.766961 | 0.908112 | 0.864663 |
| MmugDNA.22292.1.S1_at   | MmugDNA.22292.1 | 3.7   | 3.7   | 0.16 | 0.04 | 1      | 0.822976 | 0.810821 | 0.921321 | 0.890845 |
| MmugDNA.22293.1.S1_at   | MmugDNA.22293.1 | 5.37  | 5.07  | 0.04 | 0.21 | 1.23   | 0.073279 | 0.034529 | 0.328434 | 0.229979 |
| MmugDNA.22294.1.S1_at   | MmugDNA.22294.1 | 7.48  | 7.76  | 0.16 | 0.25 | -1.21  | 0.450126 | 0.131871 | 0.701214 | 0.403891 |
| MmugDNA.22296.1.S1_at   | MmugDNA.22296.1 | 3.55  | 3.51  | 0.09 | 0.06 | 1.03   | 0.535264 | 0.011927 | 0.758219 | 0.141312 |
| MmugDNA.22297.1.S1_at   | MmugDNA.22297.1 | 10.02 | 13.7  | 1.6  | 0.15 | -12.74 | 0.04445  | 0.21947  | 0.267911 | 0.493156 |
| MmugDNA.22299.1.S1_at   | MmugDNA.22299.1 | 7.23  | 7.72  | 1.28 | 0.09 | -1.4   | 0.606599 | 0.762169 | 0.803242 | 0.861664 |
| MmugDNA.22300.1.S1_at   | MmugDNA.22300.1 | 6.32  | 6.63  | 0.18 | 0.05 | -1.24  | 0.047218 | 0.127513 | 0.274594 | 0.398403 |
| MmugDNA.22302.1.S1_at   | MmugDNA.22302.1 | 3.1   | 3.16  | 0.08 | 0.38 | -1.04  | 0.36093  | 0.512765 | 0.63639  | 0.7065   |
| MmugDNA.22303.1.S1_at   | MmugDNA.22303.1 | 7.56  | 8.59  | 0.43 | 0.2  | -2.04  | 0.041292 | 0.000856 | 0.259651 | 0.047266 |
| MmugDNA.22304.1.S1_at   | MmugDNA.22304.1 | 8.03  | 7.86  | 0.41 | 0.17 | 1.12   | 0.537443 | 0.550761 | 0.759637 | 0.730611 |
| MmugDNA.22305.1.S1_at   | MmugDNA.22305.1 | 5.79  | 4.95  | 0.97 | 0.28 | 1.8    | 0.484835 | 0.44319  | 0.724497 | 0.661021 |
| MmugDNA.22306.1.S1_at   | MmugDNA.22306.1 | 5.4   | 5.38  | 0.27 | 0.48 | 1.01   | 0.76671  | 0.034927 | 0.892936 | 0.231062 |
| MmugDNA.22307.1.S1_at   | MmugDNA.22307.1 | 3.5   | 3.46  | 0.11 | 0.04 | 1.03   | 0.188894 | 0.586243 | 0.485458 | 0.7534   |
| MmugDNA.22308.1.S1_at   | MmugDNA.22308.1 | 4.78  | 4.93  | 0.05 | 0.06 | -1.11  | 0.037474 | 0.011066 | 0.249007 | 0.136934 |
| MmugDNA.2231.1.S1_at    | MmugDNA.2231.1  | 3.28  | 3.28  | 0.05 | 0    | 1      | 0.373901 | 0.237132 | 0.645118 | 0.507879 |
| MmugDNA.22310.1.S1_at   | MmugDNA.22310.1 | 12.64 | 12.68 | 0.04 | 0.08 | -1.02  | 0.749053 | 0.726736 | 0.883781 | 0.841963 |
| MmugDNA.22311.1.S1_at   | MmugDNA.22311.1 | 7.76  | 5.22  | 0.67 | 0.17 | 5.82   | 0.003118 | 0.017104 | 0.100877 | 0.165728 |
| MmugDNA.22313.1.S1_at   | MmugDNA.22313.1 | 8.29  | 8.03  | 0.37 | 0.23 | 1.2    | 0.359757 | 0.086967 | 0.635363 | 0.33984  |

|                         |                 |       |       |      |      |       |          |          |          |          |
|-------------------------|-----------------|-------|-------|------|------|-------|----------|----------|----------|----------|
| MmugDNA.22315.1.S1_at   | MmugDNA.22315.1 | 4.45  | 4.45  | 0.02 | 0.02 | 1     | 0.382873 | 0.397586 | 0.652248 | 0.628973 |
| MmugDNA.22316.1.S1_at   | MmugDNA.22316.1 | 4.97  | 4.96  | 0.14 | 0.23 | 1.01  | 0.764936 | 0.472163 | 0.892127 | 0.679874 |
| MmugDNA.22317.1.S1_at   | MmugDNA.22317.1 | 6.36  | 6.56  | 0.29 | 0.08 | -1.15 | 0.582032 | 0.737908 | 0.786914 | 0.848144 |
| MmugDNA.22318.1.S1_at   | MmugDNA.22318.1 | 6.37  | 5.79  | 0.62 | 0.18 | 1.5   | 0.185756 | 0.02693  | 0.481947 | 0.205254 |
| MmugDNA.2232.1.S1_s_at  | MmugDNA.2232.1  | 8.25  | 7.32  | 0.36 | 0.14 | 1.9   | 0.014212 | 0.008604 | 0.170947 | 0.123072 |
| MmugDNA.22321.1.S1_at   | MmugDNA.22321.1 | 6.01  | 5.03  | 0.69 | 0.32 | 1.98  | 0.081862 | 0.062113 | 0.343137 | 0.296141 |
| MmugDNA.22322.1.S1_at   | MmugDNA.22322.1 | 10.76 | 10.77 | 0.3  | 0.12 | -1.01 | 0.824883 | 0.935058 | 0.922259 | 0.963246 |
| MmugDNA.22323.1.S1_x_at | MmugDNA.22323.1 | 5.01  | 4.62  | 0.16 | 0.05 | 1.31  | 0.007939 | 0.064693 | 0.138287 | 0.300314 |
| MmugDNA.22324.1.S1_at   | MmugDNA.22324.1 | 4.42  | 4.37  | 0.21 | 0.03 | 1.04  | 0.262537 | 0.538513 | 0.556605 | 0.723211 |
| MmugDNA.22325.1.S1_at   | MmugDNA.22325.1 | 8.37  | 8.91  | 0.3  | 0.14 | -1.46 | 0.057143 | 0.320585 | 0.296384 | 0.572701 |
| MmugDNA.22326.1.S1_at   | MmugDNA.22326.1 | 7.64  | 6.53  | 0.92 | 0.58 | 2.16  | 0.279548 | 0.185264 | 0.570786 | 0.461194 |
| MmugDNA.22329.1.S1_at   | MmugDNA.22329.1 | 4.45  | 4.75  | 0.09 | 0.2  | -1.23 | 0.084725 | 0.021535 | 0.348607 | 0.183818 |
| MmugDNA.2233.1.S1_at    | MmugDNA.2233.1  | 11.67 | 11.42 | 0.02 | 0.09 | 1.19  | 0.004703 | 0.538824 | 0.115008 | 0.723368 |
| MmugDNA.22331.1.S1_s_at | MmugDNA.22331.1 | 6.21  | 8.37  | 1.28 | 0.24 | -4.46 | 0.141954 | 0.31539  | 0.427917 | 0.568939 |
| MmugDNA.22333.1.S1_at   | MmugDNA.22333.1 | 7.01  | 7.14  | 0.4  | 0.3  | -1.09 | 0.731422 | 0.866668 | 0.874476 | 0.924203 |
| MmugDNA.22334.1.S1_at   | MmugDNA.22334.1 | 9.46  | 9.05  | 0.08 | 0.18 | 1.33  | 0.022062 | 0.447741 | 0.201819 | 0.663819 |
| MmugDNA.22335.1.S1_at   | MmugDNA.22335.1 | 12.72 | 12.72 | 0.04 | 0.06 | -1    | 0.584482 | 0.609472 | 0.788586 | 0.767788 |
| MmugDNA.22336.1.S1_at   | MmugDNA.22336.1 | 4.43  | 4.29  | 0.09 | 0.07 | 1.1   | 0.199031 | 0.272379 | 0.496263 | 0.537122 |
| MmugDNA.22337.1.S1_at   | MmugDNA.22337.1 | 6.81  | 8.21  | 0.76 | 0.21 | -2.66 | 0.05143  | 0.336241 | 0.284251 | 0.583736 |
| MmugDNA.22338.1.S1_at   | MmugDNA.22338.1 | 5.76  | 5.77  | 0.2  | 0.13 | -1.01 | 0.963217 | 0.955513 | 0.985129 | 0.974745 |
| MmugDNA.22339.1.S1_at   | MmugDNA.22339.1 | 4     | 3.74  | 0.16 | 0.29 | 1.19  | 0.274728 | 0.51693  | 0.566556 | 0.709326 |
| MmugDNA.2234.1.S1_at    | MmugDNA.2234.1  | 4.38  | 4.33  | 0.22 | 0.08 | 1.04  | 0.46277  | 0.569609 | 0.70977  | 0.742525 |
| MmugDNA.22340.1.S1_at   | MmugDNA.22340.1 | 7.55  | 7.43  | 0.05 | 0.06 | 1.09  | 0.127023 | 0.00359  | 0.408591 | 0.085714 |
| MmugDNA.22341.1.S1_at   | MmugDNA.22341.1 | 10.29 | 10.2  | 0.18 | 0.01 | 1.06  | 0.944715 | 0.603336 | 0.976696 | 0.764052 |
| MmugDNA.22342.1.S1_at   | MmugDNA.22342.1 | 13.09 | 13.06 | 0.07 | 0.03 | 1.02  | 0.868933 | 0.346762 | 0.943616 | 0.591536 |
| MmugDNA.22348.1.S1_at   | MmugDNA.22348.1 | 6.82  | 6.86  | 0.04 | 0.13 | -1.03 | 0.947399 | 0.007676 | 0.97794  | 0.117153 |
| MmugDNA.22349.1.S1_at   | MmugDNA.22349.1 | 5.78  | 5.52  | 0.2  | 0.22 | 1.2   | 0.173489 | 0.238501 | 0.467813 | 0.5091   |
| MmugDNA.2235.1.S1_at    | MmugDNA.2235.1  | 5.89  | 5.88  | 0.3  | 0.12 | 1.01  | 0.980098 | 0.158291 | 0.992489 | 0.43403  |
| MmugDNA.22350.1.S1_at   | MmugDNA.22350.1 | 8.7   | 8.54  | 0.18 | 0.08 | 1.12  | 0.079647 | 0.387056 | 0.33985  | 0.621935 |
| MmugDNA.22351.1.S1_at   | MmugDNA.22351.1 | 13.3  | 13.51 | 0.12 | 0.06 | -1.16 | 0.075863 | 0.108328 | 0.333763 | 0.371601 |
| MmugDNA.22352.1.S1_at   | MmugDNA.22352.1 | 6.1   | 5.92  | 0.07 | 0.06 | 1.13  | 0.108217 | 0.017001 | 0.382964 | 0.165304 |
| MmugDNA.22353.1.S1_at   | MmugDNA.22353.1 | 5.22  | 5.22  | 0.31 | 0.21 | 1     | 0.55126  | 0.005458 | 0.768319 | 0.101952 |
| MmugDNA.22355.1.S1_at   | MmugDNA.22355.1 | 6.18  | 6.01  | 0.18 | 0.18 | 1.12  | 0.654988 | 0.076185 | 0.833035 | 0.321047 |
| MmugDNA.22356.1.S1_at   | MmugDNA.22356.1 | 3.52  | 3.66  | 0.18 | 0.1  | -1.1  | 0.101862 | 0.069831 | 0.373468 | 0.310353 |
| MmugDNA.22357.1.S1_at   | MmugDNA.22357.1 | 4.93  | 5.12  | 0.24 | 0.11 | -1.14 | 0.574401 | 0.802199 | 0.781916 | 0.886112 |
| MmugDNA.22358.1.S1_at   | MmugDNA.22358.1 | 3.94  | 3.96  | 0.25 | 0.06 | -1.02 | 0.807375 | 0.713415 | 0.913724 | 0.833698 |
| MmugDNA.2236.1.S1_at    | MmugDNA.2236.1  | 3.52  | 3.34  | 0.03 | 0.23 | 1.13  | 0.697605 | 0.787839 | 0.856021 | 0.877304 |
| MmugDNA.22361.1.S1_at   | MmugDNA.22361.1 | 8.37  | 7.92  | 0.34 | 0.15 | 1.37  | 0.078178 | 0.280415 | 0.337737 | 0.543648 |
| MmugDNA.22363.1.S1_at   | MmugDNA.22363.1 | 4.86  | 4.86  | 0.08 | 0.11 | 1     | 0.224887 | 0.400949 | 0.522818 | 0.630658 |
| MmugDNA.22365.1.S1_at   | MmugDNA.22365.1 | 4.38  | 4.23  | 0.28 | 0.09 | 1.11  | 0.715159 | 0.256873 | 0.865467 | 0.524698 |
| MmugDNA.22367.1.S1_at   | MmugDNA.22367.1 | 4.23  | 3.94  | 0.47 | 0.35 | 1.22  | 0.364748 | 0.43334  | 0.6394   | 0.653652 |
| MmugDNA.22368.1.S1_at   | MmugDNA.22368.1 | 3.2   | 3.15  | 0.28 | 0.04 | 1.04  | 0.265949 | 0.37947  | 0.558529 | 0.616406 |
| MmugDNA.22369.1.S1_at   | MmugDNA.22369.1 | 9.79  | 8.2   | 0.48 | 0.26 | 3.02  | 0.008322 | 0.049187 | 0.140121 | 0.266611 |

|                       |                 |       |       |      |      |       |          |          |          |          |
|-----------------------|-----------------|-------|-------|------|------|-------|----------|----------|----------|----------|
| MmugDNA.2237.1.S1_at  | MmugDNA.2237.1  | 3.58  | 3.56  | 0.27 | 0.04 | 1.01  | 0.842314 | 0.967812 | 0.930778 | 0.982192 |
| MmugDNA.22370.1.S1_at | MmugDNA.22370.1 | 5.77  | 5.76  | 0.22 | 0.12 | 1.01  | 0.758424 | 0.726877 | 0.889201 | 0.842011 |
| MmugDNA.22372.1.S1_at | MmugDNA.22372.1 | 3.45  | 3.51  | 0.05 | 0.05 | -1.05 | 0.081876 | 0.268422 | 0.343159 | 0.534106 |
| MmugDNA.22374.1.S1_at | MmugDNA.22374.1 | 8.79  | 9.37  | 0.34 | 0.21 | -1.49 | 0.048989 | 0.044859 | 0.278936 | 0.256375 |
| MmugDNA.22375.1.S1_at | MmugDNA.22375.1 | 4.14  | 3.98  | 0.65 | 0.05 | 1.12  | 0.24053  | 0.369497 | 0.53802  | 0.608861 |
| MmugDNA.22377.1.S1_at | MmugDNA.22377.1 | 5.02  | 4.99  | 0.28 | 0.12 | 1.02  | 0.920243 | 0.40273  | 0.965922 | 0.631543 |
| MmugDNA.22378.1.S1_at | MmugDNA.22378.1 | 8.72  | 9.2   | 0.75 | 0.09 | -1.4  | 0.400455 | 0.592846 | 0.665444 | 0.757932 |
| MmugDNA.22379.1.S1_at | MmugDNA.22379.1 | 6.03  | 6.19  | 0.13 | 0    | -1.12 | 0.095866 | 0.081133 | 0.365496 | 0.32931  |
| MmugDNA.2238.1.S1_at  | MmugDNA.2238.1  | 5.86  | 5.81  | 0.07 | 0.15 | 1.04  | 0.995351 | 0.999809 | 0.99814  | 0.999948 |
| MmugDNA.22381.1.S1_at | MmugDNA.22381.1 | 6.19  | 6.13  | 0.09 | 0.17 | 1.05  | 0.623512 | 0.725115 | 0.814237 | 0.84088  |
| MmugDNA.22382.1.S1_at | MmugDNA.22382.1 | 7.68  | 8.38  | 0.72 | 0    | -1.62 | 0.13941  | 0.045867 | 0.424974 | 0.258448 |
| MmugDNA.22384.1.S1_at | MmugDNA.22384.1 | 7.04  | 7.07  | 0.09 | 0.06 | -1.02 | 0.390801 | 0.240922 | 0.658393 | 0.511624 |
| MmugDNA.22385.1.S1_at | MmugDNA.22385.1 | 3.94  | 3.83  | 0.16 | 0.14 | 1.08  | 0.138529 | 0.115748 | 0.423999 | 0.382814 |
| MmugDNA.22386.1.S1_at | MmugDNA.22386.1 | 4.68  | 3.97  | 0.62 | 0.49 | 1.63  | 0.510881 | 0.390318 | 0.742178 | 0.624142 |
| MmugDNA.2239.1.S1_at  | MmugDNA.2239.1  | 4.19  | 4     | 0.06 | 0.19 | 1.14  | 0.247677 | 0.294635 | 0.543078 | 0.554306 |
| MmugDNA.22390.1.S1_at | MmugDNA.22390.1 | 5.83  | 6.4   | 0.95 | 1.2  | -1.48 | 0.310651 | 0.009881 | 0.596946 | 0.130618 |
| MmugDNA.22391.1.S1_at | MmugDNA.22391.1 | 5.95  | 5.99  | 0.87 | 0.12 | -1.02 | 0.478396 | 0.549984 | 0.71999  | 0.730214 |
| MmugDNA.22393.1.S1_at | MmugDNA.22393.1 | 5.55  | 5.82  | 0.87 | 0.44 | -1.2  | 0.433478 | 0.372872 | 0.688966 | 0.611735 |
| MmugDNA.22394.1.S1_at | MmugDNA.22394.1 | 8.43  | 7.66  | 0.27 | 0.04 | 1.7   | 0.009836 | 0.071519 | 0.148608 | 0.313706 |
| MmugDNA.22395.1.S1_at | MmugDNA.22395.1 | 3.54  | 3.75  | 0.17 | 0.2  | -1.16 | 0.18078  | 0.165062 | 0.47597  | 0.441242 |
| MmugDNA.22396.1.S1_at | MmugDNA.22396.1 | 5.32  | 5.16  | 0.1  | 0.2  | 1.12  | 0.123686 | 0.056335 | 0.403307 | 0.283348 |
| MmugDNA.22397.1.S1_at | MmugDNA.22397.1 | 6.06  | 5.23  | 0.6  | 0.04 | 1.77  | 0.088398 | 0.019038 | 0.35451  | 0.173644 |
| MmugDNA.22398.1.S1_at | MmugDNA.22398.1 | 3.5   | 3.33  | 0.12 | 0.07 | 1.12  | 0.206904 | 0.257222 | 0.504611 | 0.525002 |
| MmugDNA.22399.1.S1_at | MmugDNA.22399.1 | 10.69 | 10.3  | 0.64 | 0.16 | 1.3   | 0.854255 | 0.681128 | 0.936616 | 0.813791 |
| MmugDNA.224.1.S1_at   | MmugDNA.224.1   | 3.48  | 3.62  | 0.13 | 0    | -1.11 | 0.137186 | 0.035705 | 0.422016 | 0.233368 |
| MmugDNA.22400.1.S1_at | MmugDNA.22400.1 | 10.49 | 10.43 | 0.13 | 0.09 | 1.04  | 0.4314   | 0.667893 | 0.687507 | 0.805681 |
| MmugDNA.22402.1.S1_at | MmugDNA.22402.1 | 10.58 | 10.84 | 0.04 | 0.02 | -1.2  | 0.000384 | 0.008795 | 0.062479 | 0.124117 |
| MmugDNA.22403.1.S1_at | MmugDNA.22403.1 | 11.09 | 11.49 | 0.22 | 0.08 | -1.32 | 0.041579 | 0.423534 | 0.260296 | 0.646441 |
| MmugDNA.22404.1.S1_at | MmugDNA.22404.1 | 3.94  | 3.64  | 0.15 | 0.08 | 1.23  | 0.156576 | 0.279077 | 0.44712  | 0.542782 |
| MmugDNA.22405.1.S1_at | MmugDNA.22405.1 | 11.17 | 10.91 | 0.13 | 0.05 | 1.2   | 0.086159 | 0.099797 | 0.350673 | 0.358407 |
| MmugDNA.22406.1.S1_at | MmugDNA.22406.1 | 6.93  | 6.93  | 0.18 | 0.1  | 1     | 0.701623 | 0.179717 | 0.858329 | 0.456204 |
| MmugDNA.22408.1.S1_at | MmugDNA.22408.1 | 11.26 | 10.68 | 0.22 | 0.03 | 1.5   | 0.017986 | 0.04323  | 0.187151 | 0.252677 |
| MmugDNA.22409.1.S1_at | MmugDNA.22409.1 | 7.92  | 7.94  | 0.51 | 0.36 | -1.01 | 0.643591 | 0.53374  | 0.826261 | 0.719857 |
| MmugDNA.2241.1.S1_at  | MmugDNA.2241.1  | 5.93  | 5.81  | 0.14 | 0.16 | 1.08  | 0.155824 | 0.285092 | 0.446194 | 0.547096 |
| MmugDNA.22410.1.S1_at | MmugDNA.22410.1 | 6.6   | 6.36  | 0.27 | 0.3  | 1.19  | 0.551986 | 0.003821 | 0.768805 | 0.08794  |
| MmugDNA.22411.1.S1_at | MmugDNA.22411.1 | 4.67  | 4.54  | 0.19 | 0.12 | 1.09  | 0.87432  | 0.121406 | 0.946122 | 0.390493 |
| MmugDNA.22412.1.S1_at | MmugDNA.22412.1 | 9.95  | 10.26 | 1.13 | 0.35 | -1.24 | 0.84871  | 0.563586 | 0.934049 | 0.738718 |
| MmugDNA.22413.1.S1_at | MmugDNA.22413.1 | 5.72  | 5.36  | 0.67 | 0.14 | 1.28  | 0.17132  | 0.180346 | 0.465234 | 0.456981 |
| MmugDNA.22414.1.S1_at | MmugDNA.22414.1 | 4.81  | 4.23  | 0.29 | 0.2  | 1.49  | 0.025625 | 0.046267 | 0.212966 | 0.259486 |
| MmugDNA.22415.1.S1_at | MmugDNA.22415.1 | 6.31  | 6.17  | 0.13 | 0.13 | 1.1   | 0.276571 | 0.274287 | 0.568108 | 0.538751 |
| MmugDNA.22416.1.S1_at | MmugDNA.22416.1 | 3.41  | 3.38  | 0.25 | 0.3  | 1.02  | 0.732572 | 0.76967  | 0.875097 | 0.86625  |
| MmugDNA.22417.1.S1_at | MmugDNA.22417.1 | 8.43  | 8.04  | 0.06 | 0.03 | 1.31  | 0.000773 | 0.138266 | 0.072818 | 0.411198 |
| MmugDNA.22419.1.S1_at | MmugDNA.22419.1 | 4.59  | 6.87  | 1.38 | 0.25 | -4.86 | 0.174216 | 0.185117 | 0.468371 | 0.460962 |

|                         |                 |       |       |      |      |       |          |          |          |          |
|-------------------------|-----------------|-------|-------|------|------|-------|----------|----------|----------|----------|
| MmugDNA.22420.1.S1_at   | MmugDNA.22420.1 | 10.24 | 10.05 | 0.19 | 0.09 | 1.14  | 0.072721 | 0.005738 | 0.327657 | 0.104271 |
| MmugDNA.22423.1.S1_at   | MmugDNA.22423.1 | 11.08 | 11.16 | 0.37 | 0.06 | -1.06 | 0.293279 | 0.595874 | 0.582187 | 0.759258 |
| MmugDNA.22424.1.S1_at   | MmugDNA.22424.1 | 4.87  | 4.83  | 0.2  | 0.26 | 1.03  | 0.677519 | 0.352628 | 0.846252 | 0.595866 |
| MmugDNA.22425.1.S1_at   | MmugDNA.22425.1 | 3.57  | 3.67  | 0.09 | 0.1  | -1.07 | 0.270826 | 0.204919 | 0.56285  | 0.479254 |
| MmugDNA.22427.1.S1_at   | MmugDNA.22427.1 | 5.82  | 5.73  | 0.12 | 0.05 | 1.06  | 0.466619 | 0.161476 | 0.712305 | 0.437616 |
| MmugDNA.22428.1.S1_at   | MmugDNA.22428.1 | 10.68 | 11.65 | 0.71 | 0.16 | -1.96 | 0.086839 | 0.131539 | 0.352079 | 0.403658 |
| MmugDNA.2243.1.S1_at    | MmugDNA.2243.1  | 4.84  | 4.34  | 0.29 | 0.19 | 1.41  | 0.070556 | 0.214293 | 0.324039 | 0.487902 |
| MmugDNA.22430.1.S1_at   | MmugDNA.22430.1 | 8.34  | 8.41  | 0.32 | 0.17 | -1.05 | 0.474671 | 0.02359  | 0.717592 | 0.192389 |
| MmugDNA.28289.1.S1_s_at | MmugDNA.28289.1 | 12.53 | 12.47 | 0.02 | 0.04 | 1.05  | 0.040152 | 0.01099  | 0.256842 | 0.136575 |
| MmugDNA.22433.1.S1_at   | MmugDNA.22433.1 | 8.25  | 7.6   | 0.83 | 0.22 | 1.57  | 0.402441 | 0.465174 | 0.666761 | 0.675626 |
| MmugDNA.22434.1.S1_at   | MmugDNA.22434.1 | 5.77  | 6.12  | 0.34 | 0.18 | -1.27 | 0.150209 | 0.194663 | 0.439349 | 0.469765 |
| MmugDNA.22435.1.S1_at   | MmugDNA.22435.1 | 6.44  | 6.13  | 0.22 | 0.13 | 1.24  | 0.117106 | 0.169581 | 0.394269 | 0.446192 |
| MmugDNA.1042.1.S1_s_at  | MmugDNA.1042.1  | 6.12  | 6.88  | 0.05 | 0.05 | -1.69 | 0.000054 | 0.010726 | 0.045594 | 0.135271 |
| MmugDNA.22437.1.S1_at   | MmugDNA.22437.1 | 2.92  | 3.06  | 0.09 | 0.08 | -1.1  | 0.263915 | 0.51622  | 0.557422 | 0.708757 |
| MmugDNA.22438.1.S1_at   | MmugDNA.22438.1 | 6     | 5.96  | 0.18 | 0.15 | 1.03  | 0.167634 | 0.200018 | 0.460816 | 0.474603 |
| MmugDNA.22439.1.S1_at   | MmugDNA.22439.1 | 5.48  | 5.71  | 0.24 | 0.14 | -1.17 | 0.471966 | 0.04555  | 0.715918 | 0.257596 |
| MmugDNA.2244.1.S1_at    | MmugDNA.2244.1  | 5.95  | 6.05  | 0.19 | 0.05 | -1.07 | 0.594174 | 0.397058 | 0.794572 | 0.628607 |
| MmugDNA.22440.1.S1_at   | MmugDNA.22440.1 | 6.35  | 6.41  | 0.08 | 0.01 | -1.04 | 0.337248 | 0.123348 | 0.617762 | 0.393391 |
| MmugDNA.22441.1.S1_s_at | MmugDNA.22441.1 | 4.56  | 4.47  | 0.11 | 0.05 | 1.06  | 0.166973 | 0.48262  | 0.460211 | 0.687368 |
| MmugDNA.22442.1.S1_at   | MmugDNA.22442.1 | 6.72  | 6.67  | 0.4  | 0.23 | 1.03  | 0.994677 | 0.082509 | 0.997848 | 0.331625 |
| MmugDNA.22443.1.S1_at   | MmugDNA.22443.1 | 8.58  | 9.44  | 0.2  | 0.11 | -1.82 | 0.002135 | 0.003423 | 0.090208 | 0.084135 |
| MmugDNA.22444.1.S1_at   | MmugDNA.22444.1 | 10.36 | 11.39 | 0.35 | 0.04 | -2.04 | 0.006938 | 0.019508 | 0.130411 | 0.175439 |
| MmugDNA.22445.1.S1_at   | MmugDNA.22445.1 | 9.1   | 9.81  | 0.19 | 0.41 | -1.64 | 0.023901 | 0.131825 | 0.207647 | 0.403891 |
| MmugDNA.22447.1.S1_at   | MmugDNA.22447.1 | 3.81  | 3.54  | 0.13 | 0.14 | 1.21  | 0.034622 | 0.297063 | 0.240605 | 0.555996 |
| MmugDNA.22448.1.S1_at   | MmugDNA.22448.1 | 13.36 | 13.36 | 0.06 | 0.08 | -1    | 0.778452 | 0.33398  | 0.898788 | 0.582063 |
| MmugDNA.22449.1.S1_at   | MmugDNA.22449.1 | 8.69  | 7.3   | 0.25 | 0.19 | 2.63  | 0.001367 | 0.001761 | 0.079595 | 0.063161 |
| MmugDNA.22450.1.S1_at   | MmugDNA.22450.1 | 5.45  | 5.49  | 0.13 | 0.24 | -1.03 | 0.471496 | 0.197189 | 0.715544 | 0.472213 |
| MmugDNA.22451.1.S1_at   | MmugDNA.22451.1 | 4.09  | 3.51  | 0.27 | 0.14 | 1.5   | 0.041446 | 0.012914 | 0.259966 | 0.146309 |
| MmugDNA.22452.1.S1_at   | MmugDNA.22452.1 | 11.55 | 10.25 | 0.07 | 0.43 | 2.47  | 0.007428 | 0.084001 | 0.134411 | 0.3349   |
| MmugDNA.22454.1.S1_at   | MmugDNA.22454.1 | 5.91  | 4.83  | 0.86 | 0.14 | 2.12  | 0.115682 | 0.33587  | 0.39278  | 0.583533 |
| MmugDNA.22457.1.S1_at   | MmugDNA.22457.1 | 10.34 | 10.01 | 0.32 | 0.12 | 1.26  | 0.114805 | 0.563752 | 0.391813 | 0.738808 |
| MmugDNA.22458.1.S1_at   | MmugDNA.22458.1 | 4.66  | 4.74  | 1    | 0.2  | -1.06 | 0.516641 | 0.71021  | 0.74599  | 0.831904 |
| MmugDNA.22459.1.S1_at   | MmugDNA.22459.1 | 11.06 | 11.19 | 0.16 | 0.04 | -1.09 | 0.163735 | 0.212442 | 0.456321 | 0.486432 |
| MmugDNA.2246.1.S1_at    | MmugDNA.2246.1  | 4.05  | 3.95  | 0.1  | 0.12 | 1.07  | 0.122458 | 0.317421 | 0.401149 | 0.570627 |
| MmugDNA.22460.1.S1_at   | MmugDNA.22460.1 | 5.02  | 5.08  | 0.6  | 0.42 | -1.04 | 0.924774 | 0.877223 | 0.968005 | 0.930041 |
| MmugDNA.22461.1.S1_at   | MmugDNA.22461.1 | 3.19  | 3.1   | 0.28 | 0.05 | 1.06  | 0.556089 | 0.79465  | 0.771459 | 0.881638 |
| MmugDNA.22462.1.S1_at   | MmugDNA.22462.1 | 6.06  | 5.93  | 0.12 | 0.06 | 1.1   | 0.19768  | 0.269288 | 0.494972 | 0.534534 |
| MmugDNA.31457.1.S1_s_at | MmugDNA.31457.1 | 6.89  | 6.88  | 0.28 | 0.04 | 1.01  | 0.924163 | 0.633923 | 0.967791 | 0.784538 |
| MmugDNA.22465.1.S1_at   | MmugDNA.22465.1 | 6.55  | 6.55  | 0.04 | 0.17 | -1    | 0.994869 | 0.766653 | 0.997957 | 0.864438 |
| MmugDNA.22466.1.S1_at   | MmugDNA.22466.1 | 5.43  | 5.46  | 0.05 | 0.08 | -1.02 | 0.313889 | 0.43964  | 0.599701 | 0.658383 |
| MmugDNA.22468.1.S1_at   | MmugDNA.22468.1 | 3.94  | 3.55  | 0.1  | 0.22 | 1.31  | 0.131517 | 0.04821  | 0.41434  | 0.264671 |
| MmugDNA.22469.1.S1_at   | MmugDNA.22469.1 | 4.5   | 4.36  | 0.34 | 0.06 | 1.1   | 0.343032 | 0.465785 | 0.622701 | 0.675937 |
| MmugDNA.22470.1.S1_at   | MmugDNA.22470.1 | 3.04  | 3.09  | 0.05 | 0.1  | -1.03 | 0.907317 | 0.143798 | 0.960844 | 0.417593 |

|                         |                 |       |       |      |      |       |          |          |          |          |
|-------------------------|-----------------|-------|-------|------|------|-------|----------|----------|----------|----------|
| MmugDNA.22471.1.S1_at   | MmugDNA.22471.1 | 5.62  | 5.24  | 0.72 | 0.32 | 1.3   | 0.717324 | 0.564073 | 0.866489 | 0.738956 |
| MmugDNA.22472.1.S1_at   | MmugDNA.22472.1 | 9.79  | 9.4   | 0.08 | 0.2  | 1.31  | 0.030558 | 0.079879 | 0.227713 | 0.327207 |
| MmugDNA.22473.1.S1_at   | MmugDNA.22473.1 | 8.17  | 9.75  | 0.78 | 0.13 | -2.99 | 0.024208 | 0.118427 | 0.208762 | 0.386431 |
| MmugDNA.22475.1.S1_at   | MmugDNA.22475.1 | 6.64  | 9.02  | 0.86 | 0.1  | -5.19 | 0.019898 | 0.019061 | 0.194328 | 0.173688 |
| MmugDNA.22477.1.S1_at   | MmugDNA.22477.1 | 12.21 | 12.54 | 0.03 | 0.07 | -1.25 | 0.001055 | 0.000161 | 0.076562 | 0.030478 |
| MmugDNA.22477.1.S1_s_at | MmugDNA.22477.1 | 11.96 | 12.48 | 0.04 | 0.09 | -1.43 | 0.000986 | 0.000048 | 0.076321 | 0.025273 |
| MmugDNA.22478.1.S1_at   | MmugDNA.22478.1 | 4.23  | 4.22  | 0.05 | 0.03 | 1     | 0.385923 | 0.582736 | 0.654498 | 0.751337 |
| MmugDNA.2248.1.S1_at    | MmugDNA.2248.1  | 7.71  | 7.55  | 0.66 | 0.16 | 1.12  | 0.234358 | 0.253978 | 0.532475 | 0.522353 |
| MmugDNA.22480.1.S1_at   | MmugDNA.22480.1 | 4.25  | 3.79  | 0.34 | 0.24 | 1.38  | 0.062402 | 0.357803 | 0.306557 | 0.599418 |
| MmugDNA.22483.1.S1_at   | MmugDNA.22483.1 | 10.31 | 9.65  | 0.39 | 0.11 | 1.58  | 0.032792 | 0.006724 | 0.235182 | 0.110963 |
| MmugDNA.22484.1.S1_at   | MmugDNA.22484.1 | 6.14  | 5.93  | 0.09 | 0.08 | 1.16  | 0.068718 | 0.450728 | 0.320038 | 0.665844 |
| MmugDNA.22486.1.S1_at   | MmugDNA.22486.1 | 3.66  | 3.62  | 0.28 | 0.04 | 1.03  | 0.284374 | 0.394574 | 0.574388 | 0.627098 |
| MmugDNA.22488.1.S1_at   | MmugDNA.22488.1 | 8.14  | 8.17  | 0.39 | 0.34 | -1.02 | 0.889741 | 0.363245 | 0.953075 | 0.603657 |
| MmugDNA.22489.1.S1_at   | MmugDNA.22489.1 | 11.24 | 11.08 | 0.21 | 0.03 | 1.12  | 0.240639 | 0.267059 | 0.538141 | 0.532638 |
| MmugDNA.2249.1.S1_at    | MmugDNA.2249.1  | 5.74  | 6.13  | 0.42 | 0.22 | -1.31 | 0.142044 | 0.172421 | 0.428066 | 0.448837 |
| MmugDNA.22490.1.S1_at   | MmugDNA.22490.1 | 4.04  | 4.17  | 0.13 | 0.06 | -1.09 | 0.252039 | 0.392626 | 0.546696 | 0.625813 |
| MmugDNA.22491.1.S1_at   | MmugDNA.22491.1 | 4.04  | 3.9   | 0.3  | 0.07 | 1.1   | 0.328075 | 0.620184 | 0.61059  | 0.77525  |
| MmugDNA.22492.1.S1_at   | MmugDNA.22492.1 | 5.68  | 5.74  | 0.29 | 0.08 | -1.05 | 0.520498 | 0.691351 | 0.748804 | 0.820406 |
| MmugDNA.22493.1.S1_at   | MmugDNA.22493.1 | 3.57  | 3.57  | 0.01 | 0.03 | -1    | 0.998519 | 0.432809 | 0.999471 | 0.653151 |
| MmugDNA.22494.1.S1_at   | MmugDNA.22494.1 | 6.7   | 6.77  | 0.19 | 0.03 | -1.05 | 0.895739 | 0.979989 | 0.955531 | 0.989229 |
| MmugDNA.22496.1.S1_at   | MmugDNA.22496.1 | 7.13  | 6.82  | 0.04 | 0.17 | 1.24  | 0.045548 | 0.067898 | 0.270946 | 0.306745 |
| MmugDNA.22497.1.S1_at   | MmugDNA.22497.1 | 6.39  | 6.39  | 0.05 | 0.07 | -1    | 0.355179 | 0.141301 | 0.63202  | 0.414874 |
| MmugDNA.22498.1.S1_at   | MmugDNA.22498.1 | 5.63  | 6.38  | 0.78 | 0.49 | -1.69 | 0.129746 | 0.547752 | 0.412052 | 0.72866  |
| MmugDNA.22499.1.S1_at   | MmugDNA.22499.1 | 3.18  | 3.17  | 0.11 | 0.08 | 1.01  | 0.81584  | 0.739186 | 0.917842 | 0.848856 |
| MmugDNA.225.1.S1_at     | MmugDNA.225.1   | 7.73  | 6.5   | 0.46 | 0.44 | 2.35  | 0.120679 | 0.131445 | 0.399064 | 0.403584 |
| MmugDNA.2250.1.S1_at    | MmugDNA.2250.1  | 8.52  | 8.53  | 0.21 | 0.11 | -1.01 | 0.287774 | 0.938571 | 0.577473 | 0.965059 |
| MmugDNA.22501.1.S1_at   | MmugDNA.22501.1 | 3.9   | 4.33  | 0.13 | 0.35 | -1.34 | 0.172502 | 0.154808 | 0.466621 | 0.429828 |
| MmugDNA.22503.1.S1_at   | MmugDNA.22503.1 | 9.63  | 9.91  | 0.13 | 0.28 | -1.21 | 0.103855 | 0.089661 | 0.377157 | 0.343848 |
| MmugDNA.15819.1.S1_s_at | MmugDNA.15819.1 | 10.54 | 10.87 | 0.07 | 0.16 | -1.26 | 0.04707  | 0.063978 | 0.274594 | 0.299066 |
| MmugDNA.22504.1.S1_at   | MmugDNA.22504.1 | 8.48  | 8.04  | 0.34 | 0.03 | 1.36  | 0.262955 | 0.205465 | 0.556723 | 0.479764 |
| MmugDNA.22506.1.S1_at   | MmugDNA.22506.1 | 7.78  | 9.55  | 1.73 | 0.48 | -3.4  | 0.211936 | 0.573655 | 0.509822 | 0.745229 |
| MmugDNA.22506.1.S1_s_at | MmugDNA.22506.1 | 8.47  | 10.06 | 1.4  | 0.32 | -3    | 0.165382 | 0.501752 | 0.458328 | 0.699813 |
| MmugDNA.22507.1.S1_at   | MmugDNA.22507.1 | 7.49  | 7.41  | 0.18 | 0.09 | 1.05  | 0.640942 | 0.063823 | 0.824514 | 0.29906  |
| MmugDNA.22508.1.S1_at   | MmugDNA.22508.1 | 11.38 | 11.14 | 0.15 | 0.07 | 1.18  | 0.108259 | 0.233368 | 0.382964 | 0.504725 |
| MmugDNA.2251.1.S1_at    | MmugDNA.2251.1  | 6.33  | 6.33  | 0    | 0.05 | 1     | 0.373901 | 0.336092 | 0.645118 | 0.583652 |
| MmugDNA.22510.1.S1_at   | MmugDNA.22510.1 | 8.99  | 8.73  | 0.3  | 0.09 | 1.2   | 0.2404   | 0.565598 | 0.537959 | 0.739997 |
| MmugDNA.22511.1.S1_at   | MmugDNA.22511.1 | 5.63  | 5.55  | 0.03 | 0.15 | 1.06  | 0.118256 | 0.265438 | 0.395722 | 0.531363 |
| MmugDNA.22513.1.S1_at   | MmugDNA.22513.1 | 5.45  | 4.69  | 1.14 | 0.79 | 1.69  | 0.418615 | 0.535955 | 0.678524 | 0.721454 |
| MmugDNA.22514.1.S1_at   | MmugDNA.22514.1 | 3.86  | 3.63  | 0.2  | 0.06 | 1.17  | 0.167598 | 0.206247 | 0.46081  | 0.480404 |
| MmugDNA.22515.1.S1_at   | MmugDNA.22515.1 | 8.28  | 8.3   | 0.14 | 0.21 | -1.01 | 0.754197 | 0.291086 | 0.886723 | 0.551574 |
| MmugDNA.22516.1.S1_at   | MmugDNA.22516.1 | 4.66  | 4.38  | 0.09 | 0.18 | 1.22  | 0.074926 | 0.130226 | 0.331987 | 0.401961 |
| MmugDNA.22517.1.S1_at   | MmugDNA.22517.1 | 6.08  | 6.14  | 0.18 | 0    | -1.04 | 0.600455 | 0.754848 | 0.798905 | 0.857323 |
| MmugDNA.22519.1.S1_at   | MmugDNA.22519.1 | 10.64 | 10.7  | 0.11 | 0.05 | -1.04 | 0.321234 | 0.631454 | 0.605501 | 0.782839 |

|                         |                 |       |       |      |      |       |          |          |          |          |
|-------------------------|-----------------|-------|-------|------|------|-------|----------|----------|----------|----------|
| MmugDNA.22521.1.S1_at   | MmugDNA.22521.1 | 4.43  | 4.37  | 0.03 | 0.13 | 1.04  | 0.524674 | 0.361185 | 0.751494 | 0.60207  |
| MmugDNA.22522.1.S1_at   | MmugDNA.22522.1 | 4.95  | 4.96  | 0.09 | 0.11 | -1.01 | 0.975374 | 0.150064 | 0.99019  | 0.424698 |
| MmugDNA.22523.1.S1_at   | MmugDNA.22523.1 | 6     | 6.06  | 0.14 | 0.11 | -1.04 | 0.162856 | 0.193306 | 0.45497  | 0.468656 |
| MmugDNA.22524.1.S1_at   | MmugDNA.22524.1 | 3.59  | 3.58  | 0.21 | 0.09 | 1     | 0.252442 | 0.407537 | 0.54703  | 0.63505  |
| MmugDNA.22525.1.S1_at   | MmugDNA.22525.1 | 7.23  | 6.88  | 0.37 | 0.01 | 1.28  | 0.23014  | 0.106032 | 0.529056 | 0.368427 |
| MmugDNA.22527.1.S1_at   | MmugDNA.22527.1 | 5.08  | 4.35  | 0.03 | 0.22 | 1.66  | 0.008927 | 0.029904 | 0.144271 | 0.214615 |
| MmugDNA.22528.1.S1_at   | MmugDNA.22528.1 | 6.45  | 6.43  | 0.04 | 0.05 | 1.01  | 0.763662 | 0.166189 | 0.891841 | 0.442753 |
| MmugDNA.22529.1.S1_at   | MmugDNA.22529.1 | 11.12 | 10.86 | 0.17 | 0.05 | 1.19  | 0.115969 | 0.399374 | 0.393014 | 0.629776 |
| MmugDNA.2253.1.S1_at    | MmugDNA.2253.1  | 3.38  | 3.32  | 0.32 | 0.1  | 1.05  | 0.746932 | 0.770865 | 0.882818 | 0.866807 |
| MmugDNA.22530.1.S1_at   | MmugDNA.22530.1 | 4.93  | 4.94  | 0.18 | 0.01 | -1.01 | 0.888142 | 0.93298  | 0.952269 | 0.961911 |
| MmugDNA.22531.1.S1_s_at | MmugDNA.22531.1 | 8.79  | 9.02  | 0.2  | 0.34 | -1.17 | 0.599741 | 0.005995 | 0.798347 | 0.105892 |
| MmugDNA.22533.1.S1_at   | MmugDNA.22533.1 | 4.59  | 4.51  | 0.81 | 0.05 | 1.06  | 0.326353 | 0.344974 | 0.609498 | 0.590239 |
| MmugDNA.22534.1.S1_s_at | MmugDNA.22534.1 | 9.75  | 9.86  | 0.97 | 0.35 | -1.09 | 0.788508 | 0.587338 | 0.903881 | 0.754144 |
| MmugDNA.22535.1.S1_at   | MmugDNA.22535.1 | 8.64  | 8.68  | 0.1  | 0.18 | -1.03 | 0.648693 | 0.931428 | 0.829342 | 0.961034 |
| MmugDNA.22536.1.S1_at   | MmugDNA.22536.1 | 9.89  | 9.5   | 0.41 | 0.28 | 1.31  | 0.384515 | 0.211553 | 0.653565 | 0.485658 |
| MmugDNA.22538.1.S1_at   | MmugDNA.22538.1 | 4.56  | 4.63  | 0.25 | 0.1  | -1.05 | 0.710578 | 0.565197 | 0.86316  | 0.739754 |
| MmugDNA.22539.1.S1_at   | MmugDNA.22539.1 | 6.31  | 5.49  | 0.24 | 0.15 | 1.77  | 0.006855 | 0.002596 | 0.129605 | 0.075412 |
| MmugDNA.2254.1.S1_at    | MmugDNA.2254.1  | 4.7   | 4.43  | 0.11 | 0.13 | 1.2   | 0.049404 | 0.057593 | 0.279687 | 0.286152 |
| MmugDNA.22540.1.S1_at   | MmugDNA.22540.1 | 6.02  | 6.03  | 0.08 | 0.12 | -1.01 | 0.93338  | 0.50618  | 0.972051 | 0.70236  |
| MmugDNA.22541.1.S1_at   | MmugDNA.22541.1 | 8.35  | 8.42  | 0.12 | 0.03 | -1.05 | 0.851153 | 0.323388 | 0.935277 | 0.574453 |
| MmugDNA.22542.1.S1_at   | MmugDNA.22542.1 | 4.27  | 4.17  | 0.25 | 0.06 | 1.07  | 0.967098 | 0.674648 | 0.986753 | 0.80993  |
| MmugDNA.22544.1.S1_at   | MmugDNA.22544.1 | 9.19  | 9.86  | 0.28 | 0.16 | -1.59 | 0.026089 | 0.105555 | 0.214634 | 0.367526 |
| MmugDNA.22547.1.S1_at   | MmugDNA.22547.1 | 6.74  | 6.58  | 0.23 | 0.08 | 1.12  | 0.415469 | 0.035511 | 0.676162 | 0.232714 |
| MmugDNA.22548.1.S1_at   | MmugDNA.22548.1 | 5.75  | 5.28  | 0.2  | 0.21 | 1.39  | 0.051615 | 0.067656 | 0.284589 | 0.306199 |
| MmugDNA.22550.1.S1_at   | MmugDNA.22550.1 | 2.93  | 2.95  | 0.03 | 0.15 | -1.01 | 0.445583 | 0.278089 | 0.698029 | 0.541754 |
| MmugDNA.22551.1.S1_at   | MmugDNA.22551.1 | 9.56  | 9.32  | 0.37 | 0.08 | 1.18  | 0.238563 | 0.314635 | 0.535912 | 0.568415 |
| MmugDNA.22552.1.S1_at   | MmugDNA.22552.1 | 4.4   | 4.36  | 0.19 | 0.18 | 1.03  | 0.593308 | 0.754812 | 0.79394  | 0.857323 |
| MmugDNA.22553.1.S1_at   | MmugDNA.22553.1 | 3.14  | 3.06  | 0.14 | 0.13 | 1.05  | 0.298554 | 0.37232  | 0.586839 | 0.611225 |
| MmugDNA.22555.1.S1_at   | MmugDNA.22555.1 | 6.34  | 6.29  | 0.07 | 0    | 1.04  | 0.751907 | 0.973651 | 0.885488 | 0.985648 |
| MmugDNA.22556.1.S1_at   | MmugDNA.22556.1 | 3.25  | 3.11  | 0.14 | 0.04 | 1.1   | 0.230756 | 0.240793 | 0.529522 | 0.511521 |
| MmugDNA.22557.1.S1_at   | MmugDNA.22557.1 | 6.11  | 6.34  | 0.12 | 0.14 | -1.18 | 0.098041 | 0.098731 | 0.368604 | 0.356811 |
| MmugDNA.22558.1.S1_at   | MmugDNA.22558.1 | 9.02  | 9.06  | 0.05 | 0.17 | -1.03 | 0.60179  | 0.580035 | 0.799852 | 0.749408 |
| MmugDNA.22559.1.S1_at   | MmugDNA.22559.1 | 6.27  | 5.92  | 0.31 | 0.26 | 1.27  | 0.115153 | 0.272944 | 0.392172 | 0.53761  |
| MmugDNA.2256.1.S1_at    | MmugDNA.2256.1  | 3.35  | 3.33  | 0.02 | 0.03 | 1.01  | 0.157333 | 0.263072 | 0.448021 | 0.529402 |
| MmugDNA.22561.1.S1_at   | MmugDNA.22561.1 | 3.8   | 3.93  | 0.61 | 0.12 | -1.09 | 0.959977 | 0.490859 | 0.983565 | 0.692666 |
| MmugDNA.22562.1.S1_at   | MmugDNA.22562.1 | 4.53  | 4.29  | 0.24 | 0.08 | 1.18  | 0.152351 | 0.19364  | 0.441916 | 0.468785 |
| MmugDNA.22563.1.S1_at   | MmugDNA.22563.1 | 4.63  | 4.52  | 0.01 | 0.07 | 1.08  | 0.106683 | 0.386184 | 0.380862 | 0.621435 |
| MmugDNA.22564.1.S1_at   | MmugDNA.22564.1 | 5.8   | 5.84  | 0.05 | 0.13 | -1.03 | 0.532301 | 0.163852 | 0.756373 | 0.440054 |
| MmugDNA.22565.1.S1_at   | MmugDNA.22565.1 | 3.24  | 4.12  | 0.48 | 0.52 | -1.84 | 0.190226 | 0.263547 | 0.486633 | 0.529826 |
| MmugDNA.22566.1.S1_at   | MmugDNA.22566.1 | 3.35  | 3.4   | 0.07 | 0.16 | -1.04 | 0.890021 | 0.607581 | 0.95318  | 0.766437 |
| MmugDNA.22567.1.S1_at   | MmugDNA.22567.1 | 6.76  | 6.75  | 0.04 | 0.1  | 1.01  | 0.225716 | 0.534145 | 0.523438 | 0.720143 |
| MmugDNA.2257.1.S1_at    | MmugDNA.2257.1  | 7.01  | 7.62  | 0.15 | 0.06 | -1.53 | 0.005664 | 0.010612 | 0.120889 | 0.134345 |
| MmugDNA.22570.1.S1_at   | MmugDNA.22570.1 | 6.14  | 5.96  | 0.06 | 0.04 | 1.13  | 0.0067   | 0.002922 | 0.12845  | 0.079414 |

|                         |                 |       |       |      |      |       |          |          |          |          |
|-------------------------|-----------------|-------|-------|------|------|-------|----------|----------|----------|----------|
| MmugDNA.22571.1.S1_at   | MmugDNA.22571.1 | 10.64 | 11.09 | 0.23 | 0.13 | -1.37 | 0.08093  | 0.362198 | 0.341723 | 0.602845 |
| MmugDNA.22572.1.S1_at   | MmugDNA.22572.1 | 5.99  | 5.98  | 0.36 | 0.18 | 1     | 0.947363 | 0.901413 | 0.97794  | 0.943931 |
| MmugDNA.22574.1.S1_at   | MmugDNA.22574.1 | 7.15  | 7.14  | 0.09 | 0.03 | 1.01  | 0.890436 | 0.811942 | 0.953316 | 0.891493 |
| MmugDNA.22575.1.S1_at   | MmugDNA.22575.1 | 6.28  | 6.2   | 0.28 | 0.37 | 1.06  | 0.594843 | 0.081395 | 0.794991 | 0.329571 |
| MmugDNA.22576.1.S1_at   | MmugDNA.22576.1 | 4.09  | 4.1   | 0.07 | 0.26 | -1.01 | 0.428531 | 0.608507 | 0.685384 | 0.767091 |
| MmugDNA.22577.1.S1_at   | MmugDNA.22577.1 | 8.7   | 8.31  | 0.34 | 0.16 | 1.3   | 0.23123  | 0.051152 | 0.530003 | 0.271638 |
| MmugDNA.22578.1.S1_at   | MmugDNA.22578.1 | 6.9   | 6.7   | 0.3  | 0.22 | 1.15  | 0.170032 | 0.060657 | 0.463561 | 0.292871 |
| MmugDNA.22580.1.S1_at   | MmugDNA.22580.1 | 8.78  | 8.76  | 0.99 | 0.19 | 1.01  | 0.523222 | 0.542313 | 0.750262 | 0.725385 |
| MmugDNA.22581.1.S1_at   | MmugDNA.22581.1 | 4.14  | 4.82  | 0.46 | 0.78 | -1.6  | 0.429031 | 0.312777 | 0.685579 | 0.567314 |
| MmugDNA.22583.1.S1_at   | MmugDNA.22583.1 | 3.05  | 2.98  | 0.17 | 0.15 | 1.05  | 0.546238 | 0.751475 | 0.765159 | 0.855508 |
| MmugDNA.22584.1.S1_at   | MmugDNA.22584.1 | 4.72  | 4.41  | 0.18 | 0.09 | 1.24  | 0.135233 | 0.143065 | 0.419109 | 0.416953 |
| MmugDNA.1433.1.S1_at    | MmugDNA.1433.1  | 9.25  | 9.44  | 0.27 | 0.05 | -1.14 | 0.73816  | 0.67397  | 0.878576 | 0.809483 |
| MmugDNA.1433.1.S1_s_at  | MmugDNA.1433.1  | 10.57 | 10.6  | 0.3  | 0.05 | -1.02 | 0.898193 | 0.456255 | 0.956732 | 0.670036 |
| MmugDNA.22586.1.S1_at   | MmugDNA.22586.1 | 4.52  | 4.3   | 0.66 | 0.1  | 1.17  | 0.520395 | 0.589833 | 0.748753 | 0.755973 |
| MmugDNA.22587.1.S1_at   | MmugDNA.22587.1 | 3.87  | 3.94  | 0.32 | 0.04 | -1.05 | 0.879176 | 0.141589 | 0.948562 | 0.415102 |
| MmugDNA.22588.1.S1_at   | MmugDNA.22588.1 | 8.57  | 8.47  | 0.03 | 0.21 | 1.07  | 0.225352 | 0.066661 | 0.523235 | 0.303999 |
| MmugDNA.22589.1.S1_at   | MmugDNA.22589.1 | 3.62  | 3.75  | 0.21 | 0.23 | -1.09 | 0.258649 | 0.43397  | 0.552799 | 0.654135 |
| MmugDNA.22590.1.S1_at   | MmugDNA.22590.1 | 4.9   | 4.49  | 0.16 | 0.4  | 1.34  | 0.532614 | 0.711079 | 0.75668  | 0.8324   |
| MmugDNA.22591.1.S1_at   | MmugDNA.22591.1 | 11.53 | 11.31 | 0.1  | 0.01 | 1.16  | 0.033125 | 0.57547  | 0.236253 | 0.746538 |
| MmugDNA.22592.1.S1_at   | MmugDNA.22592.1 | 7.44  | 6.44  | 0.18 | 0.08 | 2.01  | 0.00141  | 0.080389 | 0.07964  | 0.328028 |
| MmugDNA.22593.1.S1_at   | MmugDNA.22593.1 | 4.71  | 4.72  | 0.14 | 0.11 | -1.01 | 0.761759 | 0.260092 | 0.890644 | 0.52675  |
| MmugDNA.22598.1.S1_at   | MmugDNA.22598.1 | 9.62  | 9.21  | 0.27 | 0.2  | 1.33  | 0.116937 | 0.195026 | 0.394034 | 0.470176 |
| MmugDNA.22599.1.S1_at   | MmugDNA.22599.1 | 5.91  | 5.21  | 0.24 | 0.34 | 1.62  | 0.01304  | 0.041625 | 0.164954 | 0.24887  |
| MmugDNA.2260.1.S1_s_at  | MmugDNA.2260.1  | 10.56 | 10.53 | 0.16 | 0.27 | 1.02  | 0.205375 | 0.626788 | 0.503171 | 0.779995 |
| MmugDNA.22600.1.S1_at   | MmugDNA.22600.1 | 3.82  | 3.59  | 0.32 | 0.17 | 1.17  | 0.115526 | 0.143652 | 0.392712 | 0.417555 |
| MmugDNA.22601.1.S1_at   | MmugDNA.22601.1 | 9.49  | 8.87  | 0.29 | 0.28 | 1.53  | 0.0545   | 0.003264 | 0.290603 | 0.082278 |
| MmugDNA.22602.1.S1_at   | MmugDNA.22602.1 | 12.12 | 12.26 | 0.1  | 0.1  | -1.1  | 0.190782 | 0.384243 | 0.486956 | 0.619994 |
| MmugDNA.22603.1.S1_at   | MmugDNA.22603.1 | 5.78  | 8.04  | 0.9  | 0.38 | -4.77 | 0.040765 | 0.197617 | 0.258464 | 0.472566 |
| MmugDNA.22604.1.S1_at   | MmugDNA.22604.1 | 7.74  | 7.41  | 0.19 | 0.21 | 1.26  | 0.271257 | 0.383682 | 0.563159 | 0.61968  |
| MmugDNA.22605.1.S1_at   | MmugDNA.22605.1 | 3.16  | 3.14  | 0.13 | 0.11 | 1.01  | 0.687663 | 0.107523 | 0.850807 | 0.370389 |
| MmugDNA.22606.1.S1_at   | MmugDNA.22606.1 | 5.24  | 5.39  | 0.3  | 0.19 | -1.11 | 0.503465 | 0.889576 | 0.736984 | 0.937097 |
| MmugDNA.22608.1.S1_at   | MmugDNA.22608.1 | 3.79  | 3.23  | 0.26 | 0.09 | 1.48  | 0.056213 | 0.045831 | 0.294294 | 0.258354 |
| MmugDNA.2261.1.S1_at    | MmugDNA.2261.1  | 7.94  | 7.14  | 0.23 | 0.26 | 1.74  | 0.014315 | 0.134975 | 0.171479 | 0.406951 |
| MmugDNA.22611.1.S1_at   | MmugDNA.22611.1 | 12.69 | 12.63 | 0.41 | 0.15 | 1.04  | 0.924578 | 0.237369 | 0.967916 | 0.508098 |
| MmugDNA.22612.1.S1_at   | MmugDNA.22612.1 | 5.08  | 4.93  | 0.13 | 0.13 | 1.11  | 0.101469 | 0.131987 | 0.372929 | 0.404024 |
| MmugDNA.22613.1.S1_at   | MmugDNA.22613.1 | 2.85  | 2.81  | 0.04 | 0.15 | 1.03  | 0.423314 | 0.051718 | 0.681371 | 0.272972 |
| MmugDNA.22614.1.S1_at   | MmugDNA.22614.1 | 5.38  | 5.5   | 0.21 | 0.11 | -1.09 | 0.675628 | 0.10236  | 0.845101 | 0.362527 |
| MmugDNA.22615.1.S1_at   | MmugDNA.22615.1 | 11.03 | 12.09 | 0.77 | 0.27 | -2.08 | 0.138296 | 0.171935 | 0.423581 | 0.448352 |
| MmugDNA.22615.1.S1_s_at | MmugDNA.22615.1 | 11.86 | 12.14 | 0.24 | 0.11 | -1.22 | 0.207943 | 0.511249 | 0.505791 | 0.705465 |
| MmugDNA.22616.1.S1_at   | MmugDNA.22616.1 | 7.22  | 7.17  | 0.08 | 0.05 | 1.04  | 0.28609  | 0.202118 | 0.575961 | 0.476557 |
| MmugDNA.22618.1.S1_at   | MmugDNA.22618.1 | 3.31  | 3.15  | 0.19 | 0.27 | 1.11  | 0.472932 | 0.633025 | 0.716389 | 0.783894 |
| MmugDNA.2262.1.S1_at    | MmugDNA.2262.1  | 12.84 | 12.59 | 0.09 | 0.18 | 1.19  | 0.059376 | 0.257816 | 0.300862 | 0.525442 |
| MmugDNA.22621.1.S1_at   | MmugDNA.22621.1 | 5.41  | 5.43  | 1.11 | 0.32 | -1.02 | 0.947917 | 0.990187 | 0.978054 | 0.9944   |

|                         |                 |       |       |      |      |       |          |          |          |          |
|-------------------------|-----------------|-------|-------|------|------|-------|----------|----------|----------|----------|
| MmugDNA.22623.1.S1_at   | MmugDNA.22623.1 | 8.19  | 7.42  | 0.2  | 0.47 | 1.71  | 0.095577 | 0.31464  | 0.365105 | 0.568415 |
| MmugDNA.22624.1.S1_at   | MmugDNA.22624.1 | 10.45 | 9.5   | 0.24 | 0.03 | 1.92  | 0.003755 | 0.17397  | 0.106678 | 0.450247 |
| MmugDNA.22625.1.S1_at   | MmugDNA.22625.1 | 7.45  | 7.43  | 0.12 | 0.03 | 1.01  | 0.277419 | 0.505167 | 0.568941 | 0.702005 |
| MmugDNA.22626.1.S1_at   | MmugDNA.22626.1 | 11.47 | 11.7  | 0.11 | 0.29 | -1.17 | 0.461723 | 0.073681 | 0.709048 | 0.317014 |
| MmugDNA.22628.1.S1_at   | MmugDNA.22628.1 | 8     | 7.93  | 0.22 | 0.32 | 1.06  | 0.716217 | 0.027575 | 0.866049 | 0.207355 |
| MmugDNA.2263.1.S1_at    | MmugDNA.2263.1  | 5.13  | 5.16  | 0.44 | 0.05 | -1.02 | 0.371755 | 0.527848 | 0.644376 | 0.71629  |
| MmugDNA.22630.1.S1_at   | MmugDNA.22630.1 | 3.46  | 3.39  | 0.03 | 0.09 | 1.05  | 0.460695 | 0.191514 | 0.708355 | 0.466833 |
| MmugDNA.22633.1.S1_at   | MmugDNA.22633.1 | 13.8  | 13.77 | 0.05 | 0.04 | 1.02  | 0.501438 | 0.396016 | 0.735287 | 0.627823 |
| MmugDNA.22635.1.S1_at   | MmugDNA.22635.1 | 3.49  | 3.55  | 0.19 | 0.05 | -1.05 | 0.706143 | 0.549618 | 0.860839 | 0.729956 |
| MmugDNA.22637.1.S1_at   | MmugDNA.22637.1 | 6.84  | 6.87  | 0.1  | 0.07 | -1.03 | 0.537808 | 0.508467 | 0.759948 | 0.70363  |
| MmugDNA.22638.1.S1_at   | MmugDNA.22638.1 | 8.86  | 8.68  | 0.1  | 0.36 | 1.14  | 0.522117 | 0.260769 | 0.749556 | 0.52721  |
| MmugDNA.22639.1.S1_at   | MmugDNA.22639.1 | 3.48  | 3.45  | 0.06 | 0.08 | 1.02  | 0.841064 | 0.14323  | 0.930114 | 0.417179 |
| MmugDNA.2264.1.S1_at    | MmugDNA.2264.1  | 6.18  | 6.59  | 1.42 | 0.33 | -1.33 | 0.639257 | 0.796314 | 0.82339  | 0.882625 |
| MmugDNA.22641.1.S1_at   | MmugDNA.22641.1 | 3.33  | 3.22  | 0.34 | 0.04 | 1.08  | 0.236716 | 0.325356 | 0.534328 | 0.575769 |
| MmugDNA.22643.1.S1_at   | MmugDNA.22643.1 | 11.19 | 11.51 | 0.2  | 0.19 | -1.25 | 0.190512 | 0.233292 | 0.486767 | 0.50468  |
| MmugDNA.22644.1.S1_at   | MmugDNA.22644.1 | 3.17  | 2.83  | 0.28 | 0.1  | 1.26  | 0.155474 | 0.2482   | 0.445869 | 0.517574 |
| MmugDNA.22644.1.S1_x_at | MmugDNA.22644.1 | 3.65  | 3.26  | 0.29 | 0.1  | 1.3   | 0.094753 | 0.112111 | 0.36369  | 0.377398 |
| MmugDNA.22645.1.S1_at   | MmugDNA.22645.1 | 4.4   | 4.09  | 0.48 | 0.38 | 1.24  | 0.42041  | 0.554879 | 0.679414 | 0.733544 |
| MmugDNA.22646.1.S1_at   | MmugDNA.22646.1 | 3.34  | 3.45  | 0.06 | 0.02 | -1.08 | 0.089653 | 0.048031 | 0.356593 | 0.264118 |
| MmugDNA.22647.1.S1_at   | MmugDNA.22647.1 | 4.9   | 5.26  | 0.26 | 0.31 | -1.28 | 0.56888  | 0.799504 | 0.778631 | 0.884661 |
| MmugDNA.22648.1.S1_at   | MmugDNA.22648.1 | 5.77  | 5.57  | 0.49 | 0.29 | 1.15  | 0.957526 | 0.860759 | 0.982581 | 0.920687 |
| MmugDNA.22649.1.S1_at   | MmugDNA.22649.1 | 7.57  | 5.86  | 0.88 | 0.3  | 3.27  | 0.015967 | 0.017944 | 0.178871 | 0.168998 |
| MmugDNA.22650.1.S1_at   | MmugDNA.22650.1 | 3.03  | 2.9   | 0.21 | 0.15 | 1.1   | 0.219384 | 0.406164 | 0.517155 | 0.634211 |
| MmugDNA.22651.1.S1_at   | MmugDNA.22651.1 | 5.25  | 5.29  | 0.33 | 0.12 | -1.03 | 0.909927 | 0.589872 | 0.961815 | 0.755987 |
| MmugDNA.22653.1.S1_at   | MmugDNA.22653.1 | 6.69  | 6.69  | 0.14 | 0.12 | -1    | 0.937572 | 0.92029  | 0.973767 | 0.95511  |
| MmugDNA.22654.1.S1_at   | MmugDNA.22654.1 | 6.68  | 6.41  | 0.37 | 0.17 | 1.21  | 0.343669 | 0.466341 | 0.623047 | 0.67624  |
| MmugDNA.22656.1.S1_at   | MmugDNA.22656.1 | 6.39  | 6.39  | 0.16 | 0.1  | 1     | 0.241891 | 0.365419 | 0.538882 | 0.605537 |
| MmugDNA.22657.1.S1_at   | MmugDNA.22657.1 | 9.43  | 9.7   | 0.49 | 0.17 | -1.21 | 0.961826 | 0.952379 | 0.984432 | 0.973038 |
| MmugDNA.22658.1.S1_at   | MmugDNA.22658.1 | 6.37  | 6.37  | 0.28 | 0.04 | -1    | 0.795185 | 0.900406 | 0.907466 | 0.94344  |
| MmugDNA.22661.1.S1_at   | MmugDNA.22661.1 | 7.57  | 7.63  | 0.03 | 0.1  | -1.05 | 0.214235 | 0.031654 | 0.51193  | 0.22018  |
| MmugDNA.22662.1.S1_at   | MmugDNA.22662.1 | 8.98  | 8.84  | 0.47 | 0.31 | 1.1   | 0.278107 | 0.532619 | 0.569462 | 0.719151 |
| MmugDNA.22664.1.S1_at   | MmugDNA.22664.1 | 4.15  | 4.07  | 0.17 | 0.08 | 1.06  | 0.175156 | 0.27591  | 0.469506 | 0.540035 |
| MmugDNA.22666.1.S1_at   | MmugDNA.22666.1 | 10.05 | 10    | 0.01 | 0.07 | 1.03  | 0.112071 | 0.051769 | 0.388221 | 0.273102 |
| MmugDNA.22667.1.S1_at   | MmugDNA.22667.1 | 3.9   | 3.9   | 0.29 | 0.03 | 1     | 0.933139 | 0.951603 | 0.971968 | 0.972522 |
| MmugDNA.22668.1.S1_at   | MmugDNA.22668.1 | 5.89  | 5.83  | 0.11 | 0.12 | 1.04  | 0.287618 | 0.443866 | 0.577473 | 0.661533 |
| MmugDNA.22669.1.S1_at   | MmugDNA.22669.1 | 5.34  | 5.36  | 0.23 | 0.1  | -1.02 | 0.451613 | 0.623455 | 0.702439 | 0.777793 |
| MmugDNA.2267.1.S1_at    | MmugDNA.2267.1  | 5.68  | 5.73  | 0.27 | 0.2  | -1.03 | 0.357029 | 0.120472 | 0.633247 | 0.38925  |
| MmugDNA.22670.1.S1_at   | MmugDNA.22670.1 | 7.29  | 7.14  | 0.4  | 0.15 | 1.11  | 0.247482 | 0.173085 | 0.542973 | 0.449765 |
| MmugDNA.22671.1.S1_at   | MmugDNA.22671.1 | 11.37 | 11.32 | 0.06 | 0.07 | 1.03  | 0.154253 | 0.067153 | 0.444585 | 0.305165 |
| MmugDNA.22671.1.S1_s_at | MmugDNA.22671.1 | 12.29 | 11.89 | 0.13 | 0.04 | 1.32  | 0.010855 | 0.00135  | 0.153933 | 0.056546 |
| MmugDNA.22672.1.S1_at   | MmugDNA.22672.1 | 5.43  | 5.56  | 0.19 | 0.07 | -1.1  | 0.403909 | 0.456778 | 0.667865 | 0.67045  |
| MmugDNA.22673.1.S1_at   | MmugDNA.22673.1 | 10.53 | 10.3  | 0.33 | 0.07 | 1.17  | 0.611428 | 0.598831 | 0.806265 | 0.761155 |
| MmugDNA.22674.1.S1_at   | MmugDNA.22674.1 | 12.1  | 12.06 | 0.14 | 0.04 | 1.02  | 0.876905 | 0.02615  | 0.947388 | 0.202721 |



|                         |                 |       |       |      |      |       |          |          |          |          |
|-------------------------|-----------------|-------|-------|------|------|-------|----------|----------|----------|----------|
| MmugDNA.22675.1.S1_at   | MmugDNA.22675.1 | 4.59  | 4.38  | 0.21 | 0.06 | 1.16  | 0.474397 | 0.615306 | 0.717451 | 0.771918 |
| MmugDNA.22676.1.S1_at   | MmugDNA.22676.1 | 6.18  | 6.06  | 0.17 | 0.09 | 1.09  | 0.370494 | 0.067293 | 0.643448 | 0.30541  |
| MmugDNA.22677.1.S1_at   | MmugDNA.22677.1 | 5.8   | 5.66  | 0.07 | 0.2  | 1.1   | 0.103923 | 0.329536 | 0.377213 | 0.578781 |
| MmugDNA.22678.1.S1_at   | MmugDNA.22678.1 | 10.49 | 11.06 | 0.29 | 0.04 | -1.49 | 0.088666 | 0.095172 | 0.355022 | 0.35218  |
| MmugDNA.2268.1.S1_at    | MmugDNA.2268.1  | 6.43  | 6.32  | 0.04 | 0.1  | 1.08  | 0.055897 | 0.027009 | 0.293434 | 0.205501 |
| MmugDNA.2268.1.S1_x_at  | MmugDNA.2268.1  | 6.39  | 6.22  | 0.02 | 0.11 | 1.13  | 0.197539 | 0.020008 | 0.494763 | 0.17768  |
| MmugDNA.22680.1.S1_at   | MmugDNA.22680.1 | 4.72  | 4.82  | 0.98 | 0.24 | -1.07 | 0.613228 | 0.573533 | 0.807289 | 0.745197 |
| MmugDNA.22681.1.S1_at   | MmugDNA.22681.1 | 4.09  | 3.76  | 0.37 | 0.04 | 1.26  | 0.611035 | 0.734062 | 0.806059 | 0.845896 |
| MmugDNA.22682.1.S1_at   | MmugDNA.22682.1 | 4.87  | 5.11  | 0.12 | 0.02 | -1.18 | 0.061053 | 0.000092 | 0.303985 | 0.027225 |
| MmugDNA.22683.1.S1_at   | MmugDNA.22683.1 | 5.28  | 5.62  | 0.16 | 0.15 | -1.27 | 0.058831 | 0.113787 | 0.299626 | 0.380021 |
| MmugDNA.22684.1.S1_at   | MmugDNA.22684.1 | 3.44  | 3.51  | 0.2  | 0.05 | -1.05 | 0.93107  | 0.236803 | 0.971037 | 0.507545 |
| MmugDNA.22685.1.S1_at   | MmugDNA.22685.1 | 3.6   | 3.64  | 0.06 | 0.17 | -1.03 | 0.17863  | 0.303266 | 0.473394 | 0.560748 |
| MmugDNA.22686.1.S1_at   | MmugDNA.22686.1 | 2.91  | 3.17  | 0.04 | 0.22 | -1.2  | 0.040825 | 0.095998 | 0.258464 | 0.353302 |
| MmugDNA.22687.1.S1_at   | MmugDNA.22687.1 | 6.31  | 6.81  | 0.18 | 0.12 | -1.42 | 0.022252 | 0.004899 | 0.202369 | 0.097632 |
| MmugDNA.22689.1.S1_at   | MmugDNA.22689.1 | 3.71  | 3.11  | 0.5  | 0.12 | 1.52  | 0.10929  | 0.250426 | 0.384379 | 0.519391 |
| MmugDNA.22690.1.S1_at   | MmugDNA.22690.1 | 5.21  | 5.42  | 0.37 | 0.26 | -1.15 | 0.595438 | 0.568895 | 0.795236 | 0.742129 |
| MmugDNA.22691.1.S1_at   | MmugDNA.22691.1 | 5.47  | 6.05  | 0.54 | 0.35 | -1.49 | 0.076944 | 0.226669 | 0.335411 | 0.499139 |
| MmugDNA.22694.1.S1_at   | MmugDNA.22694.1 | 6.02  | 5.28  | 0.51 | 0.15 | 1.68  | 0.068271 | 0.049564 | 0.319084 | 0.267592 |
| MmugDNA.22695.1.S1_at   | MmugDNA.22695.1 | 7.49  | 8.35  | 0.29 | 0.09 | -1.81 | 0.004664 | 0.015007 | 0.114906 | 0.155713 |
| MmugDNA.22696.1.S1_at   | MmugDNA.22696.1 | 4.63  | 4.47  | 0.27 | 0.2  | 1.12  | 0.354747 | 0.419228 | 0.631771 | 0.643398 |
| MmugDNA.22697.1.S1_at   | MmugDNA.22697.1 | 4.63  | 4.69  | 0.1  | 0    | -1.04 | 0.957755 | 0.8097   | 0.982604 | 0.890319 |
| MmugDNA.22698.1.S1_at   | MmugDNA.22698.1 | 6.34  | 6.5   | 0.08 | 0.14 | -1.11 | 0.314503 | 0.209978 | 0.599987 | 0.483744 |
| MmugDNA.22699.1.S1_at   | MmugDNA.22699.1 | 2.81  | 2.81  | 0.12 | 0.06 | -1    | 0.669638 | 0.867658 | 0.841513 | 0.924791 |
| MmugDNA.227.1.S1_at     | MmugDNA.227.1   | 5.11  | 5.12  | 0.43 | 0.11 | -1.01 | 0.371195 | 0.413724 | 0.643902 | 0.639742 |
| MmugDNA.2270.1.S1_at    | MmugDNA.2270.1  | 6.24  | 6.04  | 1.03 | 0.3  | 1.15  | 0.509057 | 0.285553 | 0.740869 | 0.547395 |
| MmugDNA.22700.1.S1_at   | MmugDNA.22700.1 | 12.36 | 12.61 | 0.07 | 0.12 | -1.19 | 0.017234 | 0.248348 | 0.184429 | 0.5176   |
| MmugDNA.22701.1.S1_at   | MmugDNA.22701.1 | 10.62 | 10.39 | 0.17 | 0.08 | 1.17  | 0.038806 | 0.217172 | 0.253271 | 0.490822 |
| MmugDNA.22702.1.S1_at   | MmugDNA.22702.1 | 5.32  | 5.26  | 0.17 | 0.23 | 1.04  | 0.347366 | 0.484832 | 0.625483 | 0.688773 |
| MmugDNA.22703.1.S1_at   | MmugDNA.22703.1 | 11.71 | 11.81 | 0.02 | 0.1  | -1.07 | 0.558127 | 0.883084 | 0.772615 | 0.933312 |
| MmugDNA.22704.1.S1_at   | MmugDNA.22704.1 | 5.08  | 4.91  | 0.06 | 0.11 | 1.12  | 0.079525 | 0.360576 | 0.339662 | 0.601624 |
| MmugDNA.22705.1.S1_at   | MmugDNA.22705.1 | 7.09  | 6.55  | 0.55 | 0.32 | 1.45  | 0.100514 | 0.071932 | 0.371552 | 0.314293 |
| MmugDNA.22706.1.S1_at   | MmugDNA.22706.1 | 5.56  | 5.55  | 0.15 | 0.4  | 1.01  | 0.808743 | 0.592082 | 0.914357 | 0.757476 |
| MmugDNA.22707.1.S1_at   | MmugDNA.22707.1 | 6.94  | 6.84  | 0.11 | 0.11 | 1.07  | 0.168855 | 0.323123 | 0.462083 | 0.574351 |
| MmugDNA.22708.1.S1_at   | MmugDNA.22708.1 | 12.35 | 12.05 | 0.11 | 0.02 | 1.23  | 0.00519  | 0.005153 | 0.116998 | 0.09964  |
| MmugDNA.22709.1.S1_at   | MmugDNA.22709.1 | 3.18  | 3.18  | 0.08 | 0.16 | -1    | 0.565084 | 0.662216 | 0.776513 | 0.802201 |
| MmugDNA.2271.1.S1_s_at  | MmugDNA.2271.1  | 3.88  | 4.76  | 0.12 | 1.07 | -1.85 | 0.08105  | 0.085813 | 0.341998 | 0.337901 |
| MmugDNA.22713.1.S1_s_at | MmugDNA.22713.1 | 5.46  | 5.45  | 0.14 | 0.04 | 1     | 0.83929  | 0.906025 | 0.929506 | 0.946832 |
| MmugDNA.22714.1.S1_at   | MmugDNA.22714.1 | 5.25  | 5.77  | 0.13 | 0.23 | -1.43 | 0.027489 | 0.036642 | 0.218484 | 0.235943 |
| MmugDNA.22715.1.S1_s_at | MmugDNA.22715.1 | 10.77 | 10.74 | 0.19 | 0.09 | 1.02  | 0.191531 | 0.752339 | 0.487896 | 0.855799 |
| MmugDNA.22716.1.S1_at   | MmugDNA.22716.1 | 10.76 | 10.26 | 0.43 | 0.04 | 1.41  | 0.358808 | 0.715293 | 0.634504 | 0.834966 |
| MmugDNA.22717.1.S1_at   | MmugDNA.22717.1 | 10.34 | 9.79  | 0.25 | 0.06 | 1.46  | 0.026831 | 0.153744 | 0.216925 | 0.428426 |
| MmugDNA.22718.1.S1_at   | MmugDNA.22718.1 | 10.78 | 10.64 | 0.19 | 0.12 | 1.11  | 0.142942 | 0.223685 | 0.429135 | 0.496603 |
| MmugDNA.22719.1.S1_at   | MmugDNA.22719.1 | 4.15  | 4.29  | 0.23 | 0.14 | -1.1  | 0.353745 | 0.322484 | 0.630929 | 0.573991 |

|                         |                 |       |       |      |      |       |          |          |          |          |
|-------------------------|-----------------|-------|-------|------|------|-------|----------|----------|----------|----------|
| MmugDNA.22719.1.S1_s_at | MmugDNA.22719.1 | 5.75  | 5.76  | 0.1  | 0.06 | -1    | 0.959079 | 0.730758 | 0.983307 | 0.844055 |
| MmugDNA.2272.1.S1_at    | MmugDNA.2272.1  | 5.93  | 5.68  | 0.32 | 0.29 | 1.19  | 0.304778 | 0.453656 | 0.591803 | 0.668074 |
| MmugDNA.22720.1.S1_at   | MmugDNA.22720.1 | 3.78  | 3.79  | 0.07 | 0.08 | -1.01 | 0.815173 | 0.718989 | 0.917477 | 0.83734  |
| MmugDNA.22721.1.S1_at   | MmugDNA.22721.1 | 5.88  | 5.85  | 0.09 | 0.15 | 1.02  | 0.539059 | 0.351027 | 0.760526 | 0.594737 |
| MmugDNA.22723.1.S1_at   | MmugDNA.22723.1 | 4.83  | 4.78  | 0.17 | 0.01 | 1.04  | 0.683678 | 0.150235 | 0.849222 | 0.42486  |
| MmugDNA.22724.1.S1_at   | MmugDNA.22724.1 | 5.95  | 6.07  | 0.1  | 0.08 | -1.09 | 0.138513 | 0.177211 | 0.423985 | 0.453647 |
| MmugDNA.22725.1.S1_at   | MmugDNA.22725.1 | 5.67  | 5.65  | 0.21 | 0.02 | 1.01  | 0.506065 | 0.394875 | 0.738797 | 0.627216 |
| MmugDNA.22727.1.S1_at   | MmugDNA.22727.1 | 3.48  | 3.39  | 0.22 | 0.04 | 1.07  | 0.342965 | 0.429885 | 0.622647 | 0.651109 |
| MmugDNA.22728.1.S1_at   | MmugDNA.22728.1 | 9.22  | 9.24  | 0.24 | 0.02 | -1.01 | 0.595872 | 0.005466 | 0.795488 | 0.102078 |
| MmugDNA.22729.1.S1_at   | MmugDNA.22729.1 | 4.04  | 4.05  | 0.09 | 0.05 | -1    | 0.525494 | 0.668    | 0.751956 | 0.8057   |
| MmugDNA.2273.1.S1_at    | MmugDNA.2273.1  | 12.51 | 12.53 | 0.14 | 0.05 | -1.01 | 0.650357 | 0.143778 | 0.830261 | 0.41759  |
| MmugDNA.22730.1.S1_at   | MmugDNA.22730.1 | 9.37  | 9.31  | 0.25 | 0.21 | 1.04  | 0.913    | 0.299698 | 0.963229 | 0.558037 |
| MmugDNA.22732.1.S1_at   | MmugDNA.22732.1 | 7.56  | 7.61  | 0.25 | 0.1  | -1.03 | 0.989759 | 0.980199 | 0.996439 | 0.989257 |
| MmugDNA.22733.1.S1_at   | MmugDNA.22733.1 | 6.18  | 6.12  | 0.25 | 0.04 | 1.04  | 0.62724  | 0.803093 | 0.816769 | 0.886577 |
| MmugDNA.22734.1.S1_at   | MmugDNA.22734.1 | 9.19  | 9.46  | 0.23 | 0.19 | -1.21 | 0.159225 | 0.072119 | 0.450505 | 0.314611 |
| MmugDNA.4390.1.S1_at    | MmugDNA.4390.1  | 9.95  | 10.44 | 0.09 | 0.07 | -1.4  | 0.002015 | 0.421104 | 0.089873 | 0.644743 |
| MmugDNA.4390.1.S1_s_at  | MmugDNA.4390.1  | 10.84 | 11.27 | 0.19 | 0.09 | -1.35 | 0.018286 | 0.640396 | 0.1882   | 0.788874 |
| MmugDNA.22739.1.S1_at   | MmugDNA.22739.1 | 9.11  | 8.54  | 0.09 | 0.2  | 1.49  | 0.013193 | 0.004931 | 0.16538  | 0.097846 |
| MmugDNA.2274.1.S1_at    | MmugDNA.2274.1  | 6.52  | 6.59  | 0.12 | 0.05 | -1.05 | 0.421192 | 0.052491 | 0.679846 | 0.274693 |
| MmugDNA.22740.1.S1_at   | MmugDNA.22740.1 | 6.03  | 5.44  | 0.25 | 0.26 | 1.49  | 0.042816 | 0.000116 | 0.264078 | 0.028664 |
| MmugDNA.22741.1.S1_at   | MmugDNA.22741.1 | 5.84  | 5.44  | 0.42 | 0.55 | 1.32  | 0.165717 | 0.172409 | 0.458753 | 0.448837 |
| MmugDNA.22742.1.S1_at   | MmugDNA.22742.1 | 6.2   | 6.32  | 0.08 | 0.22 | -1.09 | 0.112998 | 0.10919  | 0.389499 | 0.37308  |
| MmugDNA.22743.1.S1_at   | MmugDNA.22743.1 | 3     | 2.95  | 0.05 | 0.03 | 1.03  | 0.717575 | 0.107435 | 0.866641 | 0.370267 |
| MmugDNA.22744.1.S1_at   | MmugDNA.22744.1 | 3.37  | 3.71  | 0.22 | 0.01 | -1.26 | 0.058152 | 0.058017 | 0.298244 | 0.287396 |
| MmugDNA.22744.1.S1_s_at | MmugDNA.22744.1 | 5.9   | 6.48  | 0.34 | 0.18 | -1.5  | 0.139673 | 0.053918 | 0.42522  | 0.277732 |
| MmugDNA.22744.1.S1_x_at | MmugDNA.22744.1 | 5.81  | 6.05  | 0.07 | 0.05 | -1.18 | 0.005425 | 0.008504 | 0.118857 | 0.1223   |
| MmugDNA.22745.1.S1_at   | MmugDNA.22745.1 | 8.76  | 8.22  | 0.31 | 0.06 | 1.46  | 0.090092 | 0.188834 | 0.356863 | 0.464789 |
| MmugDNA.22746.1.S1_at   | MmugDNA.22746.1 | 6.67  | 6.76  | 0.03 | 0.09 | -1.06 | 0.207289 | 0.348638 | 0.505017 | 0.592648 |
| MmugDNA.22747.1.S1_at   | MmugDNA.22747.1 | 8.97  | 8.35  | 0.19 | 0.07 | 1.54  | 0.009053 | 0.279312 | 0.144851 | 0.542962 |
| MmugDNA.22749.1.S1_at   | MmugDNA.22749.1 | 8.54  | 7.67  | 0.27 | 0.17 | 1.82  | 0.008974 | 0.020598 | 0.144511 | 0.180074 |
| MmugDNA.2275.1.S1_at    | MmugDNA.2275.1  | 8.06  | 7.73  | 0.35 | 0.04 | 1.26  | 0.559437 | 0.687721 | 0.773306 | 0.817664 |
| MmugDNA.22750.1.S1_at   | MmugDNA.22750.1 | 7.38  | 6.47  | 1.44 | 0.24 | 1.87  | 0.367287 | 0.242153 | 0.641349 | 0.512652 |
| MmugDNA.22751.1.S1_at   | MmugDNA.22751.1 | 3.86  | 3.39  | 0.16 | 0.23 | 1.38  | 0.124526 | 0.208543 | 0.404714 | 0.482453 |
| MmugDNA.22752.1.S1_at   | MmugDNA.22752.1 | 4.91  | 4.81  | 0.06 | 0.15 | 1.08  | 0.33237  | 0.13263  | 0.614085 | 0.404544 |
| MmugDNA.22753.1.S1_at   | MmugDNA.22753.1 | 4.81  | 4.5   | 0.09 | 0.08 | 1.24  | 0.010211 | 0.014247 | 0.150739 | 0.152403 |
| MmugDNA.22754.1.S1_at   | MmugDNA.22754.1 | 8.5   | 8.44  | 0.36 | 0.17 | 1.04  | 0.848323 | 0.805917 | 0.933974 | 0.888395 |
| MmugDNA.22755.1.S1_at   | MmugDNA.22755.1 | 3.58  | 3.36  | 0.49 | 0.34 | 1.17  | 0.415712 | 0.31932  | 0.676389 | 0.571724 |
| MmugDNA.22758.1.S1_at   | MmugDNA.22758.1 | 4.3   | 4.31  | 0.09 | 0.16 | -1.01 | 0.855445 | 0.896494 | 0.937004 | 0.940901 |
| MmugDNA.22759.1.S1_at   | MmugDNA.22759.1 | 6.76  | 5.89  | 0.84 | 0.25 | 1.83  | 0.159365 | 0.136862 | 0.450703 | 0.409568 |
| MmugDNA.2276.1.S1_at    | MmugDNA.2276.1  | 6.4   | 5.66  | 0.95 | 0.35 | 1.67  | 0.137738 | 0.210196 | 0.422804 | 0.484033 |
| MmugDNA.22760.1.S1_at   | MmugDNA.22760.1 | 9.35  | 8.89  | 0.19 | 0.12 | 1.37  | 0.019056 | 0.144309 | 0.191521 | 0.418196 |
| MmugDNA.22761.1.S1_at   | MmugDNA.22761.1 | 5.62  | 5.36  | 0.09 | 0.09 | 1.2   | 0.028495 | 0.031119 | 0.22113  | 0.218175 |
| MmugDNA.22763.1.S1_at   | MmugDNA.22763.1 | 3.86  | 3.9   | 0.06 | 0.08 | -1.03 | 0.961874 | 0.308728 | 0.984463 | 0.564619 |

|                         |                 |       |       |      |      |       |          |          |          |          |
|-------------------------|-----------------|-------|-------|------|------|-------|----------|----------|----------|----------|
| MmugDNA.22764.1.S1_at   | MmugDNA.22764.1 | 5.66  | 5.58  | 0.45 | 0.01 | 1.06  | 0.852475 | 0.815376 | 0.935873 | 0.893521 |
| MmugDNA.22765.1.S1_at   | MmugDNA.22765.1 | 3.84  | 3.82  | 0.2  | 0.34 | 1.01  | 0.983986 | 0.284444 | 0.994033 | 0.546637 |
| MmugDNA.22767.1.S1_at   | MmugDNA.22767.1 | 3.52  | 3.38  | 0.1  | 0.23 | 1.11  | 0.501439 | 0.447901 | 0.735287 | 0.663881 |
| MmugDNA.22768.1.S1_at   | MmugDNA.22768.1 | 5.39  | 5.34  | 0.36 | 0.55 | 1.03  | 0.247094 | 0.395745 | 0.542716 | 0.627639 |
| MmugDNA.2277.1.S1_at    | MmugDNA.2277.1  | 4.65  | 4.59  | 0.13 | 0.07 | 1.04  | 0.299326 | 0.247698 | 0.587663 | 0.517122 |
| MmugDNA.22770.1.S1_at   | MmugDNA.22770.1 | 3.57  | 2.92  | 0.72 | 0.25 | 1.57  | 0.210297 | 0.357666 | 0.507898 | 0.599285 |
| MmugDNA.22771.1.S1_s_at | MmugDNA.22771.1 | 7.65  | 7.99  | 0.14 | 0.14 | -1.27 | 0.053097 | 0.281474 | 0.287689 | 0.54458  |
| MmugDNA.22772.1.S1_at   | MmugDNA.22772.1 | 4.03  | 3.93  | 0.06 | 0.04 | 1.07  | 0.076163 | 0.002517 | 0.334238 | 0.074158 |
| MmugDNA.22774.1.S1_at   | MmugDNA.22774.1 | 6.73  | 7.56  | 0.44 | 0.03 | -1.77 | 0.033086 | 0.020733 | 0.236137 | 0.180654 |
| MmugDNA.22775.1.S1_at   | MmugDNA.22775.1 | 13.02 | 12.63 | 0.14 | 0.03 | 1.31  | 0.009178 | 0.111277 | 0.145783 | 0.375963 |
| MmugDNA.22776.1.S1_at   | MmugDNA.22776.1 | 3.48  | 3.38  | 0.88 | 0.06 | 1.07  | 0.275638 | 0.27718  | 0.567274 | 0.541154 |
| MmugDNA.22777.1.S1_at   | MmugDNA.22777.1 | 8.97  | 8.76  | 0.18 | 0.34 | 1.15  | 0.628099 | 0.00113  | 0.81726  | 0.053028 |
| MmugDNA.22778.1.S1_at   | MmugDNA.22778.1 | 4.47  | 4.46  | 0.07 | 0.03 | 1.01  | 0.504611 | 0.692112 | 0.737769 | 0.82091  |
| MmugDNA.22779.1.S1_at   | MmugDNA.22779.1 | 10.61 | 10.45 | 0.16 | 0.09 | 1.12  | 0.222798 | 0.491202 | 0.520677 | 0.692848 |
| MmugDNA.2278.1.S1_at    | MmugDNA.2278.1  | 9.22  | 7.62  | 0.68 | 0.3  | 3.03  | 0.026893 | 0.20109  | 0.217016 | 0.475515 |
| MmugDNA.22781.1.S1_at   | MmugDNA.22781.1 | 4.87  | 4.45  | 0.34 | 0.21 | 1.33  | 0.455429 | 0.198256 | 0.705136 | 0.473234 |
| MmugDNA.22784.1.S1_at   | MmugDNA.22784.1 | 8.66  | 8.01  | 0.25 | 0.24 | 1.58  | 0.135178 | 0.096184 | 0.419109 | 0.353501 |
| MmugDNA.22785.1.S1_at   | MmugDNA.22785.1 | 8.13  | 7.96  | 0.93 | 0.15 | 1.13  | 0.413548 | 0.552615 | 0.674865 | 0.731885 |
| MmugDNA.22789.1.S1_at   | MmugDNA.22789.1 | 10.89 | 10.81 | 0.11 | 0.12 | 1.06  | 0.374596 | 0.018434 | 0.645606 | 0.170756 |
| MmugDNA.22790.1.S1_at   | MmugDNA.22790.1 | 4.08  | 4.04  | 0.31 | 0    | 1.02  | 0.764839 | 0.805045 | 0.892078 | 0.887934 |
| MmugDNA.22791.1.S1_at   | MmugDNA.22791.1 | 5.93  | 5.96  | 0.03 | 0.1  | -1.02 | 0.684629 | 0.170435 | 0.849679 | 0.447103 |
| MmugDNA.22793.1.S1_at   | MmugDNA.22793.1 | 10.28 | 10.09 | 0.27 | 0.14 | 1.14  | 0.109944 | 0.684681 | 0.385169 | 0.8161   |
| MmugDNA.22793.1.S1_s_at | MmugDNA.22793.1 | 10.32 | 10.18 | 0.34 | 0.21 | 1.1   | 0.24977  | 0.801491 | 0.544804 | 0.885789 |
| MmugDNA.22794.1.S1_at   | MmugDNA.22794.1 | 3.38  | 3.3   | 0.33 | 0.12 | 1.05  | 0.385254 | 0.465941 | 0.65405  | 0.676055 |
| MmugDNA.22795.1.S1_at   | MmugDNA.22795.1 | 6.76  | 7.06  | 0.37 | 0.21 | -1.23 | 0.167724 | 0.340399 | 0.460968 | 0.586725 |
| MmugDNA.22796.1.S1_at   | MmugDNA.22796.1 | 7.22  | 7.07  | 0.13 | 0.05 | 1.11  | 0.045478 | 0.041351 | 0.270804 | 0.247995 |
| MmugDNA.22797.1.S1_at   | MmugDNA.22797.1 | 3.44  | 3.43  | 0.13 | 0.19 | 1.01  | 0.747174 | 0.133795 | 0.88295  | 0.405793 |
| MmugDNA.22799.1.S1_at   | MmugDNA.22799.1 | 6.67  | 6.71  | 0.23 | 0.16 | -1.03 | 0.328276 | 0.006946 | 0.610662 | 0.112568 |
| MmugDNA.22800.1.S1_at   | MmugDNA.22800.1 | 5.34  | 4.99  | 0.21 | 0.18 | 1.28  | 0.068557 | 0.112752 | 0.319684 | 0.378404 |
| MmugDNA.22801.1.S1_at   | MmugDNA.22801.1 | 4.35  | 4.46  | 0.35 | 0.09 | -1.09 | 0.596345 | 0.86846  | 0.795784 | 0.925329 |
| MmugDNA.22802.1.S1_at   | MmugDNA.22802.1 | 6.6   | 6.08  | 0.7  | 0.64 | 1.43  | 0.264157 | 0.405677 | 0.557422 | 0.633894 |
| MmugDNA.22803.1.S1_at   | MmugDNA.22803.1 | 8.28  | 8.95  | 0.3  | 0.12 | -1.59 | 0.01587  | 0.013485 | 0.178371 | 0.148703 |
| MmugDNA.22806.1.S1_at   | MmugDNA.22806.1 | 10.66 | 10.59 | 0.32 | 0.06 | 1.05  | 0.827557 | 0.022846 | 0.923667 | 0.189246 |
| MmugDNA.22808.1.S1_at   | MmugDNA.22808.1 | 4.49  | 4.5   | 0.08 | 0.03 | -1.01 | 0.428996 | 0.650466 | 0.685579 | 0.795661 |
| MmugDNA.22809.1.S1_at   | MmugDNA.22809.1 | 5.91  | 5.49  | 0.12 | 0.29 | 1.34  | 0.363268 | 0.03263  | 0.637958 | 0.223676 |
| MmugDNA.22812.1.S1_at   | MmugDNA.22812.1 | 4.18  | 4.12  | 0.13 | 0.07 | 1.05  | 0.911625 | 0.346032 | 0.962572 | 0.59115  |
| MmugDNA.22813.1.S1_at   | MmugDNA.22813.1 | 7.52  | 8.03  | 0.06 | 0.11 | -1.42 | 0.002422 | 0.006192 | 0.093606 | 0.106774 |
| MmugDNA.22814.1.S1_at   | MmugDNA.22814.1 | 7.71  | 8.5   | 1.07 | 0.2  | -1.73 | 0.673544 | 0.397134 | 0.843865 | 0.628653 |
| MmugDNA.22815.1.S1_at   | MmugDNA.22815.1 | 5.6   | 5.7   | 0.19 | 0.24 | -1.07 | 0.536651 | 0.776067 | 0.759064 | 0.869726 |
| MmugDNA.22816.1.S1_at   | MmugDNA.22816.1 | 7.61  | 7.68  | 0.21 | 0.17 | -1.05 | 0.569349 | 0.956038 | 0.77881  | 0.975043 |
| MmugDNA.22817.1.S1_at   | MmugDNA.22817.1 | 5.84  | 5.75  | 0.36 | 0.2  | 1.06  | 0.287975 | 0.570129 | 0.577687 | 0.74291  |
| MmugDNA.22818.1.S1_at   | MmugDNA.22818.1 | 7.93  | 7.63  | 0.16 | 0.21 | 1.23  | 0.125303 | 0.060996 | 0.405737 | 0.293811 |
| MmugDNA.22819.1.S1_at   | MmugDNA.22819.1 | 10.3  | 11.72 | 0.54 | 0.01 | -2.66 | 0.022689 | 0.164876 | 0.203642 | 0.441191 |

|                         |                 |       |       |      |      |       |          |          |          |          |
|-------------------------|-----------------|-------|-------|------|------|-------|----------|----------|----------|----------|
| MmugDNA.22820.1.S1_at   | MmugDNA.22820.1 | 9.9   | 10.63 | 0.18 | 0.14 | -1.66 | 0.006518 | 0.215415 | 0.127373 | 0.489109 |
| MmugDNA.22820.1.S1_s_at | MmugDNA.22820.1 | 11.65 | 12.13 | 0.17 | 0.05 | -1.4  | 0.004873 | 0.118599 | 0.115123 | 0.386567 |
| MmugDNA.22823.1.S1_at   | MmugDNA.22823.1 | 6.42  | 6.21  | 0.15 | 0.12 | 1.15  | 0.10425  | 0.31647  | 0.37758  | 0.569888 |
| MmugDNA.22824.1.S1_at   | MmugDNA.22824.1 | 3.01  | 3.1   | 0.09 | 0.04 | -1.06 | 0.585408 | 0.208362 | 0.789198 | 0.482269 |
| MmugDNA.22826.1.S1_at   | MmugDNA.22826.1 | 4.01  | 3.77  | 0.13 | 0.53 | 1.19  | 0.628946 | 0.815577 | 0.817557 | 0.893609 |
| MmugDNA.22827.1.S1_at   | MmugDNA.22827.1 | 6.03  | 6.02  | 0.2  | 0.03 | 1.01  | 0.864473 | 0.83171  | 0.941344 | 0.903453 |
| MmugDNA.22828.1.S1_at   | MmugDNA.22828.1 | 6.25  | 6.36  | 0.13 | 0.03 | -1.08 | 0.497549 | 0.796804 | 0.733194 | 0.882803 |
| MmugDNA.22829.1.S1_at   | MmugDNA.22829.1 | 11.44 | 10.52 | 0.9  | 0.05 | 1.89  | 0.142891 | 0.062577 | 0.429054 | 0.297022 |
| MmugDNA.15639.1.S1_s_at | MmugDNA.15639.1 | 11.22 | 11.17 | 0.05 | 0.04 | 1.03  | 0.385564 | 0.411828 | 0.65436  | 0.638434 |
| MmugDNA.22830.1.S1_s_at | MmugDNA.22830.1 | 11.06 | 10.66 | 0.32 | 0.07 | 1.31  | 0.098291 | 0.238826 | 0.368888 | 0.509485 |
| MmugDNA.22831.1.S1_at   | MmugDNA.22831.1 | 5.21  | 5.22  | 0.08 | 0.01 | -1.01 | 0.328113 | 0.707733 | 0.61059  | 0.830472 |
| MmugDNA.22832.1.S1_at   | MmugDNA.22832.1 | 10.95 | 10.59 | 0.2  | 0.06 | 1.28  | 0.036819 | 0.332928 | 0.247012 | 0.581307 |
| MmugDNA.22833.1.S1_at   | MmugDNA.22833.1 | 3.38  | 3.36  | 0.12 | 0.06 | 1.02  | 0.362757 | 0.222853 | 0.63739  | 0.495769 |
| MmugDNA.22834.1.S1_at   | MmugDNA.22834.1 | 11.11 | 10.62 | 0.16 | 0.02 | 1.4   | 0.013696 | 0.011003 | 0.167946 | 0.136623 |
| MmugDNA.22835.1.S1_at   | MmugDNA.22835.1 | 10.8  | 10.53 | 0.05 | 0.13 | 1.21  | 0.044863 | 0.207808 | 0.269173 | 0.482031 |
| MmugDNA.22837.1.S1_at   | MmugDNA.22837.1 | 9.64  | 9.79  | 0.09 | 0.1  | -1.11 | 0.118617 | 0.002931 | 0.396265 | 0.079548 |
| MmugDNA.22838.1.S1_at   | MmugDNA.22838.1 | 5.96  | 5.74  | 0.15 | 0.23 | 1.16  | 0.092086 | 0.059776 | 0.360151 | 0.291114 |
| MmugDNA.22839.1.S1_at   | MmugDNA.22839.1 | 4.88  | 4.81  | 0.1  | 0.13 | 1.05  | 0.172047 | 0.013991 | 0.466112 | 0.151593 |
| MmugDNA.2284.1.S1_at    | MmugDNA.2284.1  | 12.5  | 12.17 | 0.11 | 0.14 | 1.26  | 0.052492 | 0.113217 | 0.286257 | 0.379229 |
| MmugDNA.22840.1.S1_at   | MmugDNA.22840.1 | 3.62  | 3.75  | 0.04 | 0.01 | -1.1  | 0.003174 | 0.032335 | 0.101357 | 0.222605 |
| MmugDNA.22841.1.S1_at   | MmugDNA.22841.1 | 11.09 | 10.87 | 0.07 | 0.27 | 1.16  | 0.581729 | 0.906365 | 0.7868   | 0.947011 |
| MmugDNA.22842.1.S1_at   | MmugDNA.22842.1 | 5.57  | 5.4   | 0.2  | 0.04 | 1.13  | 0.158067 | 0.401402 | 0.448896 | 0.631018 |
| MmugDNA.22843.1.S1_at   | MmugDNA.22843.1 | 5.22  | 5.16  | 0.03 | 0.1  | 1.04  | 0.10425  | 0.059548 | 0.37758  | 0.290548 |
| MmugDNA.22844.1.S1_at   | MmugDNA.22844.1 | 3.66  | 3.65  | 0.12 | 0.08 | 1.01  | 0.355906 | 0.491212 | 0.632435 | 0.692848 |
| MmugDNA.22845.1.S1_at   | MmugDNA.22845.1 | 6.87  | 6.66  | 0.29 | 0.1  | 1.16  | 0.322241 | 0.338931 | 0.606311 | 0.585891 |
| MmugDNA.22846.1.S1_at   | MmugDNA.22846.1 | 8.04  | 8.09  | 0.23 | 0.04 | -1.04 | 0.868974 | 0.975098 | 0.943641 | 0.986405 |
| MmugDNA.22847.1.S1_at   | MmugDNA.22847.1 | 4.77  | 4.99  | 0.19 | 0.13 | -1.17 | 0.183274 | 0.164205 | 0.479242 | 0.440466 |
| MmugDNA.22848.1.S1_at   | MmugDNA.22848.1 | 3.55  | 3.65  | 0.35 | 0.09 | -1.08 | 0.790879 | 0.937551 | 0.90499  | 0.964687 |
| MmugDNA.22849.1.S1_at   | MmugDNA.22849.1 | 12.28 | 12.21 | 0.11 | 0.03 | 1.05  | 0.996886 | 0.340629 | 0.998983 | 0.586801 |
| MmugDNA.22849.1.S1_s_at | MmugDNA.22849.1 | 11.7  | 11.56 | 0.14 | 0.09 | 1.1   | 0.918993 | 0.201671 | 0.965376 | 0.476208 |
| MmugDNA.2285.1.S1_at    | MmugDNA.2285.1  | 5.37  | 6.1   | 0.24 | 0.54 | -1.67 | 0.099081 | 0.183068 | 0.369936 | 0.459493 |
| MmugDNA.22852.1.S1_at   | MmugDNA.22852.1 | 3.75  | 3.74  | 0.08 | 0    | 1.01  | 0.716549 | 0.681813 | 0.866312 | 0.81415  |
| MmugDNA.22854.1.S1_at   | MmugDNA.22854.1 | 10.32 | 10.59 | 0.29 | 0.11 | -1.21 | 0.30948  | 0.47357  | 0.595823 | 0.680843 |
| MmugDNA.22855.1.S1_at   | MmugDNA.22855.1 | 5.56  | 5.67  | 0.13 | 0.19 | -1.08 | 0.544979 | 0.730114 | 0.764374 | 0.843808 |
| MmugDNA.22857.1.S1_at   | MmugDNA.22857.1 | 6.47  | 6.38  | 0.38 | 0.16 | 1.07  | 0.755983 | 0.160236 | 0.88758  | 0.436398 |
| MmugDNA.22858.1.S1_at   | MmugDNA.22858.1 | 4.47  | 4.65  | 0.32 | 0.16 | -1.13 | 0.851394 | 0.788828 | 0.935336 | 0.877997 |
| MmugDNA.22859.1.S1_at   | MmugDNA.22859.1 | 5.66  | 5.53  | 0.37 | 0.05 | 1.1   | 0.888752 | 0.993622 | 0.952576 | 0.996218 |
| MmugDNA.22861.1.S1_at   | MmugDNA.22861.1 | 3.22  | 3.02  | 0.07 | 0.07 | 1.15  | 0.025491 | 0.014199 | 0.212784 | 0.152173 |
| MmugDNA.22862.1.S1_at   | MmugDNA.22862.1 | 7.59  | 7.69  | 0.25 | 0.09 | -1.07 | 0.275925 | 0.228064 | 0.567557 | 0.500249 |
| MmugDNA.22864.1.S1_at   | MmugDNA.22864.1 | 10.06 | 10.71 | 0.36 | 0.14 | -1.57 | 0.043834 | 0.085205 | 0.266411 | 0.337096 |
| MmugDNA.22865.1.S1_at   | MmugDNA.22865.1 | 6.33  | 6.45  | 0.11 | 0.06 | -1.09 | 0.133135 | 0.093122 | 0.416662 | 0.349303 |
| MmugDNA.22868.1.S1_at   | MmugDNA.22868.1 | 3.85  | 3.53  | 0.78 | 0.17 | 1.25  | 0.485763 | 0.65459  | 0.725194 | 0.798087 |
| MmugDNA.22869.1.S1_at   | MmugDNA.22869.1 | 8.2   | 7.97  | 0.13 | 0.12 | 1.17  | 0.042706 | 0.006151 | 0.263867 | 0.106774 |

|                         |                 |       |       |      |      |       |          |          |          |          |
|-------------------------|-----------------|-------|-------|------|------|-------|----------|----------|----------|----------|
| MmugDNA.2287.1.S1_at    | MmugDNA.2287.1  | 5.42  | 5.29  | 0.11 | 0.13 | 1.09  | 0.122638 | 0.18559  | 0.401465 | 0.461566 |
| MmugDNA.22870.1.S1_at   | MmugDNA.22870.1 | 10.09 | 10.15 | 0.08 | 0.14 | -1.04 | 0.715491 | 0.000518 | 0.865726 | 0.039625 |
| MmugDNA.22872.1.S1_at   | MmugDNA.22872.1 | 3.36  | 3.16  | 0.3  | 0.25 | 1.15  | 0.818486 | 0.629065 | 0.91896  | 0.781597 |
| MmugDNA.22873.1.S1_at   | MmugDNA.22873.1 | 3.52  | 3.84  | 0.12 | 0.14 | -1.24 | 0.038314 | 0.138139 | 0.251853 | 0.411051 |
| MmugDNA.22874.1.S1_at   | MmugDNA.22874.1 | 6.34  | 6.71  | 0.55 | 0.19 | -1.3  | 0.370159 | 0.413551 | 0.643242 | 0.639648 |
| MmugDNA.22877.1.S1_at   | MmugDNA.22877.1 | 5.57  | 5.34  | 0.44 | 0.14 | 1.18  | 0.20369  | 0.180674 | 0.501439 | 0.457245 |
| MmugDNA.22879.1.S1_at   | MmugDNA.22879.1 | 3.78  | 3.69  | 0.07 | 0.48 | 1.07  | 0.908078 | 0.823345 | 0.961081 | 0.898479 |
| MmugDNA.22880.1.S1_at   | MmugDNA.22880.1 | 5.56  | 5.97  | 0.16 | 0.2  | -1.33 | 0.076881 | 0.26575  | 0.335339 | 0.531611 |
| MmugDNA.22881.1.S1_at   | MmugDNA.22881.1 | 4.49  | 4.78  | 0.08 | 0.1  | -1.22 | 0.009537 | 0.004115 | 0.147873 | 0.090887 |
| MmugDNA.22882.1.S1_at   | MmugDNA.22882.1 | 5.34  | 5.33  | 0.11 | 0.16 | 1.01  | 0.890209 | 0.978194 | 0.953248 | 0.98807  |
| MmugDNA.22883.1.S1_at   | MmugDNA.22883.1 | 3.13  | 3.15  | 0.12 | 0    | -1.02 | 0.718201 | 0.94637  | 0.866981 | 0.969598 |
| MmugDNA.22884.1.S1_at   | MmugDNA.22884.1 | 5.81  | 5.9   | 0.01 | 0.08 | -1.06 | 0.400157 | 0.806943 | 0.665292 | 0.888903 |
| MmugDNA.22885.1.S1_at   | MmugDNA.22885.1 | 3.46  | 3.46  | 0.06 | 0.11 | -1    | 0.242427 | 0.841666 | 0.539382 | 0.909744 |
| MmugDNA.22886.1.S1_at   | MmugDNA.22886.1 | 5.27  | 5.62  | 0.09 | 0.83 | -1.27 | 0.194062 | 0.459429 | 0.490678 | 0.671741 |
| MmugDNA.22887.1.S1_s_at | MmugDNA.22887.1 | 10.46 | 11.06 | 0.2  | 0.02 | -1.52 | 0.008395 | 0.02129  | 0.140891 | 0.182681 |
| MmugDNA.22889.1.S1_at   | MmugDNA.22889.1 | 3.74  | 3.59  | 0.38 | 0.17 | 1.11  | 0.341798 | 0.465538 | 0.621589 | 0.675802 |
| MmugDNA.22890.1.S1_at   | MmugDNA.22890.1 | 4.46  | 3.89  | 0.65 | 0.7  | 1.48  | 0.832295 | 0.503239 | 0.926066 | 0.700743 |
| MmugDNA.22891.1.S1_at   | MmugDNA.22891.1 | 7.64  | 7.64  | 0.15 | 0.15 | 1     | 0.995047 | 0.224658 | 0.997973 | 0.497613 |
| MmugDNA.22892.1.S1_at   | MmugDNA.22892.1 | 3.99  | 3.98  | 0.5  | 0.18 | 1.01  | 0.302785 | 0.387499 | 0.590415 | 0.622163 |
| MmugDNA.22893.1.S1_at   | MmugDNA.22893.1 | 7.67  | 7.4   | 0.16 | 0.93 | 1.21  | 0.650288 | 0.91744  | 0.830259 | 0.953833 |
| MmugDNA.22894.1.S1_at   | MmugDNA.22894.1 | 11.65 | 11.62 | 0.11 | 0.03 | 1.02  | 0.953956 | 0.07892  | 0.981106 | 0.325912 |
| MmugDNA.22895.1.S1_at   | MmugDNA.22895.1 | 5.58  | 5.88  | 0.14 | 0.14 | -1.23 | 0.107104 | 0.041635 | 0.381616 | 0.24887  |
| MmugDNA.22896.1.S1_at   | MmugDNA.22896.1 | 12.53 | 12.41 | 0.13 | 0.06 | 1.09  | 0.500011 | 0.001273 | 0.734497 | 0.055241 |
| MmugDNA.22898.1.S1_at   | MmugDNA.22898.1 | 5.2   | 5.21  | 0.56 | 0.17 | -1.01 | 0.952878 | 0.971365 | 0.980564 | 0.984419 |
| MmugDNA.22899.1.S1_at   | MmugDNA.22899.1 | 5.53  | 5.43  | 0.08 | 0.06 | 1.07  | 0.193676 | 0.198856 | 0.490322 | 0.473475 |
| MmugDNA.229.1.S1_at     | MmugDNA.229.1   | 8.17  | 7.7   | 0.17 | 0.03 | 1.38  | 0.011602 | 0.037435 | 0.157634 | 0.237777 |
| MmugDNA.22900.1.S1_at   | MmugDNA.22900.1 | 4.51  | 4.48  | 0.29 | 0.07 | 1.02  | 0.794427 | 0.731833 | 0.90713  | 0.844668 |
| MmugDNA.22902.1.S1_at   | MmugDNA.22902.1 | 6.07  | 6.06  | 0.19 | 0.06 | 1     | 0.591123 | 0.879423 | 0.792276 | 0.931144 |
| MmugDNA.22903.1.S1_at   | MmugDNA.22903.1 | 5.87  | 5.9   | 0.54 | 0.16 | -1.02 | 0.654067 | 0.834006 | 0.832505 | 0.904868 |
| MmugDNA.22904.1.S1_s_at | MmugDNA.22904.1 | 10    | 10    | 0.02 | 0.09 | 1     | 0.336345 | 0.604198 | 0.616985 | 0.764542 |
| MmugDNA.22905.1.S1_s_at | MmugDNA.22905.1 | 11.08 | 10.95 | 0.24 | 0.27 | 1.09  | 0.429078 | 0.117559 | 0.685604 | 0.38531  |
| MmugDNA.22906.1.S1_at   | MmugDNA.22906.1 | 6.17  | 6.11  | 0.08 | 0.2  | 1.04  | 0.24186  | 0.25497  | 0.538882 | 0.52317  |
| MmugDNA.22907.1.S1_at   | MmugDNA.22907.1 | 3.18  | 3.2   | 0.03 | 0.1  | -1.01 | 0.4779   | 0.83144  | 0.719648 | 0.903345 |
| MmugDNA.22908.1.S1_at   | MmugDNA.22908.1 | 11.1  | 11.02 | 0.05 | 0.03 | 1.06  | 0.078002 | 0.015278 | 0.337305 | 0.156987 |
| MmugDNA.22909.1.S1_at   | MmugDNA.22909.1 | 6.92  | 6.98  | 0.17 | 0.15 | -1.04 | 0.393146 | 0.784164 | 0.660002 | 0.875049 |
| MmugDNA.22910.1.S1_at   | MmugDNA.22910.1 | 4.42  | 4.48  | 0.21 | 0.19 | -1.04 | 0.802741 | 0.464937 | 0.911425 | 0.675523 |
| MmugDNA.26086.1.S1_s_at | MmugDNA.26086.1 | 9.33  | 9.23  | 0.52 | 0.28 | 1.07  | 0.461849 | 0.064236 | 0.70916  | 0.299668 |
| MmugDNA.22912.1.S1_s_at | MmugDNA.22912.1 | 8.53  | 9.22  | 0.59 | 0.14 | -1.61 | 0.053543 | 0.029136 | 0.288636 | 0.212747 |
| MmugDNA.22913.1.S1_at   | MmugDNA.22913.1 | 9.29  | 9.19  | 0.14 | 0.17 | 1.07  | 0.463076 | 0.020172 | 0.709925 | 0.178414 |
| MmugDNA.22914.1.S1_at   | MmugDNA.22914.1 | 7     | 6.69  | 0.2  | 0.17 | 1.24  | 0.065201 | 0.066868 | 0.312217 | 0.304529 |
| MmugDNA.22915.1.S1_at   | MmugDNA.22915.1 | 5.59  | 5.43  | 0.79 | 0.08 | 1.12  | 0.250463 | 0.210876 | 0.54512  | 0.484934 |
| MmugDNA.22916.1.S1_at   | MmugDNA.22916.1 | 9.06  | 8.92  | 0.14 | 0.13 | 1.1   | 0.285981 | 0.778373 | 0.575829 | 0.871278 |
| MmugDNA.22917.1.S1_at   | MmugDNA.22917.1 | 8.32  | 9.52  | 0.4  | 0.16 | -2.3  | 0.016655 | 0.044739 | 0.182466 | 0.256009 |

|                         |                 |       |       |      |      |       |          |          |          |          |
|-------------------------|-----------------|-------|-------|------|------|-------|----------|----------|----------|----------|
| MmugDNA.22918.1.S1_at   | MmugDNA.22918.1 | 5.02  | 5.02  | 0.01 | 0.12 | -1    | 0.988232 | 0.811179 | 0.995767 | 0.89102  |
| MmugDNA.22919.1.S1_at   | MmugDNA.22919.1 | 10.09 | 9.86  | 0.27 | 0.03 | 1.17  | 0.224722 | 0.491746 | 0.522708 | 0.693249 |
| MmugDNA.22920.1.S1_at   | MmugDNA.22920.1 | 3.8   | 3.85  | 0.1  | 0.21 | -1.04 | 0.194434 | 0.074532 | 0.491056 | 0.318173 |
| MmugDNA.22921.1.S1_at   | MmugDNA.22921.1 | 4.87  | 5.06  | 0.42 | 0.46 | -1.14 | 0.65394  | 0.849085 | 0.832444 | 0.914324 |
| MmugDNA.22922.1.S1_at   | MmugDNA.22922.1 | 2.91  | 2.93  | 0.07 | 0.4  | -1.01 | 0.413308 | 0.608267 | 0.674659 | 0.766971 |
| MmugDNA.22924.1.S1_at   | MmugDNA.22924.1 | 2.95  | 2.95  | 0.09 | 0.09 | 1     | 1        | 0.804444 | 1        | 0.887549 |
| MmugDNA.22924.1.S1_s_at | MmugDNA.22924.1 | 2.72  | 2.73  | 0.27 | 0.1  | -1.01 | 0.397656 | 0.270721 | 0.663192 | 0.53602  |
| MmugDNA.22925.1.S1_at   | MmugDNA.22925.1 | 7.72  | 7.82  | 0.29 | 0.06 | -1.07 | 0.155609 | 0.10012  | 0.445915 | 0.359055 |
| MmugDNA.22927.1.S1_at   | MmugDNA.22927.1 | 5.79  | 5.75  | 0.12 | 0.05 | 1.02  | 0.677593 | 0.056337 | 0.846252 | 0.283348 |
| MmugDNA.22928.1.S1_at   | MmugDNA.22928.1 | 6.71  | 7.47  | 0.36 | 0.5  | -1.69 | 0.496032 | 0.582977 | 0.732047 | 0.751492 |
| MmugDNA.2293.1.S1_at    | MmugDNA.2293.1  | 4.95  | 4.94  | 0.19 | 0.05 | 1     | 0.356213 | 0.296074 | 0.632513 | 0.555339 |
| MmugDNA.22930.1.S1_at   | MmugDNA.22930.1 | 4.17  | 4.17  | 0.11 | 0.1  | 1     | 0.230979 | 0.294792 | 0.529768 | 0.55437  |
| MmugDNA.22931.1.S1_at   | MmugDNA.22931.1 | 5.02  | 4.64  | 0.31 | 0.39 | 1.3   | 0.480787 | 0.212033 | 0.721535 | 0.486013 |
| MmugDNA.22933.1.S1_at   | MmugDNA.22933.1 | 9.65  | 9.64  | 0.16 | 0.08 | 1     | 0.377129 | 0.47144  | 0.64767  | 0.679444 |
| MmugDNA.22935.1.S1_at   | MmugDNA.22935.1 | 2.93  | 2.95  | 0.08 | 0.18 | -1.02 | 0.208478 | 0.31065  | 0.506143 | 0.565787 |
| MmugDNA.22937.1.S1_at   | MmugDNA.22937.1 | 4.87  | 4.89  | 0.01 | 0.24 | -1.01 | 0.712078 | 0.937669 | 0.864188 | 0.964687 |
| MmugDNA.22938.1.S1_at   | MmugDNA.22938.1 | 3.56  | 3.74  | 0.07 | 0.2  | -1.13 | 0.147486 | 0.16334  | 0.435407 | 0.43947  |
| MmugDNA.22939.1.S1_at   | MmugDNA.22939.1 | 4.35  | 4.37  | 0.24 | 0.19 | -1.01 | 0.451862 | 0.271459 | 0.702538 | 0.536512 |
| MmugDNA.22940.1.S1_at   | MmugDNA.22940.1 | 6.9   | 7.09  | 0.31 | 0.29 | -1.14 | 0.225358 | 0.044402 | 0.523235 | 0.255192 |
| MmugDNA.22943.1.S1_at   | MmugDNA.22943.1 | 8     | 7.83  | 0.31 | 0.17 | 1.13  | 0.647082 | 0.391921 | 0.828492 | 0.625419 |
| MmugDNA.22944.1.S1_at   | MmugDNA.22944.1 | 9.13  | 8.83  | 0.03 | 0.21 | 1.23  | 0.029795 | 0.062054 | 0.225856 | 0.29597  |
| MmugDNA.22945.1.S1_at   | MmugDNA.22945.1 | 7.61  | 7.79  | 0.25 | 0.12 | -1.13 | 0.83182  | 0.164934 | 0.925994 | 0.44123  |
| MmugDNA.22946.1.S1_at   | MmugDNA.22946.1 | 5.64  | 5.51  | 0.21 | 0.18 | 1.1   | 0.315947 | 0.450146 | 0.600734 | 0.665505 |
| MmugDNA.22948.1.S1_at   | MmugDNA.22948.1 | 7.73  | 7.37  | 0.29 | 0.15 | 1.29  | 0.216462 | 0.075892 | 0.514258 | 0.320523 |
| MmugDNA.22949.1.S1_at   | MmugDNA.22949.1 | 7.23  | 7.45  | 0.19 | 0.21 | -1.17 | 0.945402 | 0.185493 | 0.977063 | 0.461566 |
| MmugDNA.2295.1.S1_at    | MmugDNA.2295.1  | 6.44  | 6.47  | 0.2  | 0.12 | -1.03 | 0.623485 | 0.362984 | 0.814223 | 0.603471 |
| MmugDNA.22951.1.S1_at   | MmugDNA.22951.1 | 5.39  | 5.4   | 0.16 | 0.09 | -1.01 | 0.359807 | 0.399442 | 0.635387 | 0.629798 |
| MmugDNA.22952.1.S1_at   | MmugDNA.22952.1 | 6.15  | 6.89  | 0.25 | 0.15 | -1.66 | 0.022321 | 0.060046 | 0.202646 | 0.291714 |
| MmugDNA.22953.1.S1_at   | MmugDNA.22953.1 | 9.01  | 9.09  | 0.5  | 0.25 | -1.06 | 0.609838 | 0.023755 | 0.805512 | 0.192931 |
| MmugDNA.22954.1.S1_at   | MmugDNA.22954.1 | 3.51  | 3.45  | 0.05 | 0.02 | 1.04  | 0.41969  | 0.779696 | 0.678996 | 0.872303 |
| MmugDNA.22956.1.S1_x_at | MmugDNA.22956.1 | 13.17 | 13.18 | 0.41 | 0.1  | -1    | 0.501378 | 0.306779 | 0.735287 | 0.563337 |
| MmugDNA.22957.1.S1_at   | MmugDNA.22957.1 | 2.99  | 3.01  | 0.17 | 0.01 | -1.01 | 0.804377 | 0.571202 | 0.912089 | 0.743594 |
| MmugDNA.22959.1.S1_at   | MmugDNA.22959.1 | 5.78  | 5.81  | 0.52 | 0.29 | -1.02 | 0.921428 | 0.948562 | 0.966381 | 0.970655 |
| MmugDNA.2296.1.S1_at    | MmugDNA.2296.1  | 5.85  | 5.7   | 0.38 | 0.36 | 1.1   | 0.901641 | 0.733641 | 0.958288 | 0.845776 |
| MmugDNA.22960.1.S1_at   | MmugDNA.22960.1 | 6.26  | 8.95  | 0.98 | 0.33 | -6.42 | 0.02536  | 0.222795 | 0.21227  | 0.49573  |
| MmugDNA.22961.1.S1_at   | MmugDNA.22961.1 | 10.39 | 10.62 | 0.05 | 0.22 | -1.17 | 0.204986 | 0.787393 | 0.502835 | 0.876991 |
| MmugDNA.22962.1.S1_at   | MmugDNA.22962.1 | 6.45  | 6.55  | 0.38 | 0.16 | -1.08 | 0.664693 | 0.724676 | 0.838694 | 0.840629 |
| MmugDNA.23219.1.S1_at   | MmugDNA.23219.1 | 8.24  | 9.46  | 0.47 | 0.1  | -2.34 | 0.009791 | 0.053461 | 0.148542 | 0.276864 |
| MmugDNA.23219.1.S1_s_at | MmugDNA.23219.1 | 8.54  | 9.78  | 0.47 | 0.11 | -2.38 | 0.010857 | 0.07588  | 0.153933 | 0.320523 |
| MmugDNA.22964.1.S1_at   | MmugDNA.22964.1 | 4.13  | 4.15  | 0.34 | 0    | -1.02 | 0.428048 | 0.347519 | 0.68508  | 0.592019 |
| MmugDNA.22966.1.S1_at   | MmugDNA.22966.1 | 3.09  | 3.16  | 0.04 | 0.06 | -1.05 | 0.30908  | 0.120855 | 0.59555  | 0.38974  |
| MmugDNA.22968.1.S1_at   | MmugDNA.22968.1 | 6.71  | 6.82  | 0.3  | 0.18 | -1.07 | 0.911724 | 0.989739 | 0.962619 | 0.994108 |
| MmugDNA.22969.1.S1_at   | MmugDNA.22969.1 | 3.44  | 3.26  | 0.06 | 0.13 | 1.13  | 0.188066 | 0.457492 | 0.484319 | 0.670863 |

|                         |                 |       |       |      |      |       |          |          |          |          |
|-------------------------|-----------------|-------|-------|------|------|-------|----------|----------|----------|----------|
| MmugDNA.2297.1.S1_at    | MmugDNA.2297.1  | 6.8   | 7.03  | 0.11 | 0.31 | -1.17 | 0.226177 | 0.373377 | 0.523944 | 0.61221  |
| MmugDNA.22970.1.S1_at   | MmugDNA.22970.1 | 5.95  | 5.93  | 0.15 | 0.04 | 1.01  | 0.987016 | 0.236373 | 0.995278 | 0.507308 |
| MmugDNA.22971.1.S1_at   | MmugDNA.22971.1 | 8     | 8.07  | 0.2  | 0.01 | -1.05 | 0.688532 | 0.125358 | 0.851246 | 0.396001 |
| MmugDNA.22973.1.S1_at   | MmugDNA.22973.1 | 3.61  | 3.44  | 0.05 | 0.14 | 1.13  | 0.314129 | 0.433328 | 0.599848 | 0.653652 |
| MmugDNA.22974.1.S1_at   | MmugDNA.22974.1 | 3.5   | 3.54  | 0.04 | 0.18 | -1.03 | 0.507229 | 0.65636  | 0.739593 | 0.799062 |
| MmugDNA.22976.1.S1_s_at | MmugDNA.22976.1 | 10.81 | 11.08 | 0.18 | 0.16 | -1.21 | 0.342046 | 0.469481 | 0.621859 | 0.678248 |
| MmugDNA.22977.1.S1_at   | MmugDNA.22977.1 | 4.07  | 3.88  | 0.02 | 0.25 | 1.15  | 0.732892 | 0.688622 | 0.875334 | 0.818251 |
| MmugDNA.22978.1.S1_at   | MmugDNA.22978.1 | 4.31  | 4.25  | 0.52 | 0.06 | 1.04  | 0.889933 | 0.427675 | 0.953143 | 0.649406 |
| MmugDNA.22979.1.S1_at   | MmugDNA.22979.1 | 7.12  | 7.3   | 0.29 | 0.36 | -1.14 | 0.990121 | 0.221652 | 0.996449 | 0.494901 |
| MmugDNA.2298.1.S1_at    | MmugDNA.2298.1  | 3.04  | 3.09  | 0.05 | 0.15 | -1.04 | 0.724802 | 0.184318 | 0.870869 | 0.460458 |
| MmugDNA.22980.1.S1_at   | MmugDNA.22980.1 | 3.51  | 3.53  | 0.22 | 0.18 | -1.02 | 0.672438 | 0.685657 | 0.843221 | 0.816563 |
| MmugDNA.22981.1.S1_at   | MmugDNA.22981.1 | 5.9   | 5.91  | 0.13 | 0.04 | -1.01 | 0.432132 | 0.420263 | 0.687947 | 0.64407  |
| MmugDNA.22982.1.S1_at   | MmugDNA.22982.1 | 6.73  | 7.69  | 0.69 | 0.04 | -1.94 | 0.23508  | 0.261952 | 0.533056 | 0.528351 |
| MmugDNA.22983.1.S1_at   | MmugDNA.22983.1 | 4.23  | 4.12  | 0.03 | 0.1  | 1.08  | 0.219978 | 0.005758 | 0.517641 | 0.104378 |
| MmugDNA.22984.1.S1_at   | MmugDNA.22984.1 | 4.96  | 4.67  | 0.17 | 0.16 | 1.22  | 0.084865 | 0.085694 | 0.34881  | 0.337761 |
| MmugDNA.22987.1.S1_at   | MmugDNA.22987.1 | 3.8   | 3.96  | 0.02 | 0.22 | -1.12 | 0.136966 | 0.197107 | 0.421782 | 0.472213 |
| MmugDNA.22988.1.S1_at   | MmugDNA.22988.1 | 7.42  | 7.78  | 0.45 | 0.09 | -1.28 | 0.277839 | 0.330925 | 0.569311 | 0.579609 |
| MmugDNA.22988.1.S1_s_at | MmugDNA.22988.1 | 10.31 | 10.48 | 0.5  | 0.18 | -1.12 | 0.77379  | 0.717796 | 0.896356 | 0.836614 |
| MmugDNA.22989.1.S1_at   | MmugDNA.22989.1 | 4.25  | 4.02  | 0.44 | 0.26 | 1.17  | 0.379819 | 0.31379  | 0.649579 | 0.568083 |
| MmugDNA.22990.1.S1_at   | MmugDNA.22990.1 | 8.22  | 8.25  | 0.08 | 0.2  | -1.02 | 0.646698 | 0.4085   | 0.828301 | 0.635694 |
| MmugDNA.22992.1.S1_at   | MmugDNA.22992.1 | 5.6   | 5.81  | 0.44 | 0.09 | -1.15 | 0.532889 | 0.814258 | 0.7567   | 0.892898 |
| MmugDNA.22993.1.S1_at   | MmugDNA.22993.1 | 5.75  | 5.82  | 0.16 | 0    | -1.05 | 0.593538 | 0.258995 | 0.794024 | 0.526202 |
| MmugDNA.22994.1.S1_at   | MmugDNA.22994.1 | 4.32  | 4.02  | 1.28 | 0.15 | 1.24  | 0.282373 | 0.271655 | 0.573148 | 0.536577 |
| MmugDNA.22995.1.S1_at   | MmugDNA.22995.1 | 11.84 | 11.98 | 0.08 | 0.04 | -1.11 | 0.038741 | 0.013922 | 0.25316  | 0.151344 |
| MmugDNA.22996.1.S1_at   | MmugDNA.22996.1 | 10.63 | 10.74 | 0.23 | 0.07 | -1.08 | 0.670318 | 0.8632   | 0.841785 | 0.92229  |
| MmugDNA.22997.1.S1_at   | MmugDNA.22997.1 | 6.02  | 5.98  | 0.11 | 0.34 | 1.03  | 0.557518 | 0.876125 | 0.772197 | 0.92958  |
| MmugDNA.22998.1.S1_at   | MmugDNA.22998.1 | 4.35  | 4.34  | 0.45 | 0.17 | 1.01  | 0.486189 | 0.293029 | 0.725583 | 0.552978 |
| MmugDNA.22999.1.S1_at   | MmugDNA.22999.1 | 3.27  | 3.41  | 0.17 | 0.17 | -1.11 | 0.335457 | 0.537521 | 0.616404 | 0.722606 |
| MmugDNA.23.1.S1_at      | MmugDNA.23.1    | 5.01  | 5.08  | 0.06 | 0.1  | -1.05 | 0.877934 | 0.034761 | 0.947885 | 0.230665 |
| MmugDNA.230.1.S1_at     | MmugDNA.230.1   | 4.32  | 4.04  | 0.39 | 0.22 | 1.21  | 0.284312 | 0.238799 | 0.574388 | 0.509485 |
| MmugDNA.23000.1.S1_at   | MmugDNA.23000.1 | 10.8  | 11.04 | 0.54 | 0.06 | -1.18 | 0.422516 | 0.736709 | 0.680653 | 0.847693 |
| MmugDNA.23001.1.S1_at   | MmugDNA.23001.1 | 5.44  | 5.43  | 0.13 | 0.21 | 1     | 0.855455 | 0.711159 | 0.937004 | 0.832439 |
| MmugDNA.23002.1.S1_at   | MmugDNA.23002.1 | 3.43  | 3.91  | 0.07 | 0.24 | -1.39 | 0.063093 | 0.067648 | 0.307923 | 0.306199 |
| MmugDNA.23004.1.S1_at   | MmugDNA.23004.1 | 5.58  | 5.63  | 0.13 | 0.09 | -1.03 | 0.520555 | 0.85211  | 0.74884  | 0.915883 |
| MmugDNA.23005.1.S1_at   | MmugDNA.23005.1 | 6.55  | 6.99  | 0.39 | 0.47 | -1.36 | 0.455176 | 0.29558  | 0.705015 | 0.555053 |
| MmugDNA.23006.1.S1_at   | MmugDNA.23006.1 | 5.02  | 5.03  | 0.18 | 0.03 | -1.01 | 0.984668 | 0.945738 | 0.994355 | 0.969149 |
| MmugDNA.23008.1.S1_at   | MmugDNA.23008.1 | 5.68  | 5.52  | 0.11 | 0.18 | 1.11  | 0.307684 | 0.473253 | 0.594485 | 0.680582 |
| MmugDNA.23009.1.S1_at   | MmugDNA.23009.1 | 4.36  | 4.59  | 0.26 | 0.14 | -1.17 | 0.177368 | 0.217219 | 0.472133 | 0.490864 |
| MmugDNA.2301.1.S1_at    | MmugDNA.2301.1  | 8.53  | 7.93  | 0.39 | 0.13 | 1.51  | 0.042699 | 0.291483 | 0.263867 | 0.551848 |
| MmugDNA.23010.1.S1_x_at | MmugDNA.23010.1 | 9.89  | 9.82  | 0.55 | 0.2  | 1.05  | 0.315251 | 0.225401 | 0.600287 | 0.498035 |
| MmugDNA.23011.1.S1_at   | MmugDNA.23011.1 | 8.34  | 7.91  | 0.27 | 0.12 | 1.34  | 0.047847 | 0.182697 | 0.276149 | 0.459186 |
| MmugDNA.23012.1.S1_at   | MmugDNA.23012.1 | 7.52  | 7.48  | 0.68 | 0.2  | 1.03  | 0.791449 | 0.932975 | 0.905298 | 0.961911 |
| MmugDNA.23013.1.S1_at   | MmugDNA.23013.1 | 7.95  | 8.02  | 0.18 | 0.04 | -1.05 | 0.358794 | 0.527513 | 0.634504 | 0.716154 |

|                         |                 |       |       |      |      |       |          |          |          |          |
|-------------------------|-----------------|-------|-------|------|------|-------|----------|----------|----------|----------|
| MmugDNA.23014.1.S1_at   | MmugDNA.23014.1 | 3.51  | 3.48  | 0.19 | 0.22 | 1.02  | 0.733475 | 0.8943   | 0.875708 | 0.939697 |
| MmugDNA.23016.1.S1_at   | MmugDNA.23016.1 | 4.04  | 4.21  | 0.39 | 0.07 | -1.12 | 0.82537  | 0.759913 | 0.922432 | 0.860508 |
| MmugDNA.23017.1.S1_at   | MmugDNA.23017.1 | 5.49  | 4.91  | 0.85 | 0.5  | 1.5   | 0.848651 | 0.937135 | 0.934034 | 0.964571 |
| MmugDNA.23018.1.S1_at   | MmugDNA.23018.1 | 9.78  | 9.29  | 0.26 | 0.2  | 1.41  | 0.067097 | 0.015556 | 0.316787 | 0.158118 |
| MmugDNA.23019.1.S1_at   | MmugDNA.23019.1 | 8.82  | 9.25  | 0.35 | 0.13 | -1.35 | 0.155966 | 0.034825 | 0.446335 | 0.230811 |
| MmugDNA.2302.1.S1_at    | MmugDNA.2302.1  | 6.33  | 6.33  | 0.09 | 0    | -1    | 0.400385 | 0.848119 | 0.665436 | 0.913786 |
| MmugDNA.23020.1.S1_at   | MmugDNA.23020.1 | 12.28 | 12.22 | 0.16 | 0.04 | 1.04  | 0.464478 | 0.891617 | 0.710664 | 0.938242 |
| MmugDNA.23022.1.S1_s_at | MmugDNA.23022.1 | 11.28 | 11.56 | 0.1  | 0.1  | -1.22 | 0.013176 | 0.020215 | 0.165334 | 0.178591 |
| MmugDNA.23024.1.S1_at   | MmugDNA.23024.1 | 5.16  | 5.51  | 0.24 | 0.06 | -1.28 | 0.089928 | 0.190598 | 0.356863 | 0.465984 |
| MmugDNA.23026.1.S1_at   | MmugDNA.23026.1 | 3.82  | 3.14  | 0.65 | 0.12 | 1.6   | 0.121981 | 0.139033 | 0.400631 | 0.412159 |
| MmugDNA.23029.1.S1_at   | MmugDNA.23029.1 | 5.53  | 5.76  | 0.05 | 0.32 | -1.18 | 0.327557 | 0.562696 | 0.610266 | 0.7381   |
| MmugDNA.2303.1.S1_at    | MmugDNA.2303.1  | 7.59  | 7.72  | 1.02 | 0.34 | -1.09 | 0.642041 | 0.171566 | 0.825386 | 0.447981 |
| MmugDNA.23030.1.S1_at   | MmugDNA.23030.1 | 7.32  | 7.61  | 0.3  | 0.14 | -1.22 | 0.346193 | 0.005294 | 0.624868 | 0.100738 |
| MmugDNA.23031.1.S1_at   | MmugDNA.23031.1 | 3.46  | 3.31  | 0.01 | 0.22 | 1.11  | 0.524872 | 0.719561 | 0.751591 | 0.837728 |
| MmugDNA.23032.1.S1_at   | MmugDNA.23032.1 | 4.88  | 4.8   | 0.1  | 0.17 | 1.06  | 0.279515 | 0.356182 | 0.570786 | 0.598158 |
| MmugDNA.23033.1.S1_at   | MmugDNA.23033.1 | 4.13  | 4.01  | 0.21 | 0.11 | 1.08  | 0.862743 | 0.960534 | 0.940274 | 0.977546 |
| MmugDNA.23034.1.S1_at   | MmugDNA.23034.1 | 9.64  | 10.06 | 0.03 | 0.28 | -1.34 | 0.064762 | 0.003427 | 0.311238 | 0.084173 |
| MmugDNA.23035.1.S1_at   | MmugDNA.23035.1 | 3.99  | 4.14  | 0.41 | 0.01 | -1.11 | 0.525391 | 0.445453 | 0.751933 | 0.662388 |
| MmugDNA.23036.1.S1_s_at | MmugDNA.23036.1 | 12.31 | 12.46 | 0.14 | 0.15 | -1.12 | 0.937217 | 0.037359 | 0.973667 | 0.237723 |
| MmugDNA.23037.1.S1_at   | MmugDNA.23037.1 | 5.22  | 5.17  | 0.05 | 0.13 | 1.03  | 0.236084 | 0.332348 | 0.5337   | 0.580773 |
| MmugDNA.23038.1.S1_at   | MmugDNA.23038.1 | 7.03  | 7.89  | 0.28 | 0.14 | -1.81 | 0.026697 | 0.01942  | 0.216593 | 0.175117 |
| MmugDNA.23039.1.S1_at   | MmugDNA.23039.1 | 5.81  | 5.61  | 0.44 | 0.07 | 1.15  | 0.284719 | 0.400395 | 0.574629 | 0.630187 |
| MmugDNA.3986.1.S1_at    | MmugDNA.3986.1  | 10.22 | 10.01 | 0.26 | 0.06 | 1.16  | 0.704419 | 0.652018 | 0.859708 | 0.796529 |
| MmugDNA.3986.1.S1_s_at  | MmugDNA.3986.1  | 10.66 | 10.53 | 0.21 | 0.06 | 1.09  | 0.770742 | 0.51306  | 0.894865 | 0.706712 |
| MmugDNA.23044.1.S1_at   | MmugDNA.23044.1 | 6.9   | 6.56  | 0.19 | 0.05 | 1.26  | 0.035797 | 0.059265 | 0.244149 | 0.29047  |
| MmugDNA.23048.1.S1_at   | MmugDNA.23048.1 | 3.61  | 3.58  | 0.06 | 0.11 | 1.02  | 0.793164 | 0.232258 | 0.906516 | 0.503975 |
| MmugDNA.2305.1.S1_at    | MmugDNA.2305.1  | 5.18  | 5.08  | 0.03 | 0.08 | 1.07  | 0.495139 | 0.578272 | 0.73163  | 0.748372 |
| MmugDNA.23050.1.S1_at   | MmugDNA.23050.1 | 3.37  | 3.48  | 0.35 | 0.22 | -1.08 | 0.650497 | 0.583553 | 0.830274 | 0.751822 |
| MmugDNA.23051.1.S1_at   | MmugDNA.23051.1 | 11.42 | 10.9  | 0.29 | 0.03 | 1.43  | 0.104068 | 0.172962 | 0.377336 | 0.449606 |
| MmugDNA.23052.1.S1_at   | MmugDNA.23052.1 | 3.31  | 3.37  | 0.14 | 0.04 | -1.04 | 0.447727 | 0.610086 | 0.699609 | 0.768367 |
| MmugDNA.23054.1.S1_at   | MmugDNA.23054.1 | 5.2   | 6.69  | 0.53 | 0.07 | -2.82 | 0.018126 | 0.043364 | 0.187629 | 0.252916 |
| MmugDNA.23056.1.S1_at   | MmugDNA.23056.1 | 9.92  | 9.66  | 0.08 | 0.23 | 1.2   | 0.040705 | 0.128082 | 0.258359 | 0.399072 |
| MmugDNA.23057.1.S1_at   | MmugDNA.23057.1 | 8.44  | 7.48  | 0.16 | 0.23 | 1.94  | 0.004814 | 0.002622 | 0.115098 | 0.075772 |
| MmugDNA.23059.1.S1_at   | MmugDNA.23059.1 | 5.99  | 6.27  | 0.17 | 0.18 | -1.21 | 0.12758  | 0.154489 | 0.409503 | 0.429395 |
| MmugDNA.23061.1.S1_at   | MmugDNA.23061.1 | 10.76 | 10.69 | 0.12 | 0.04 | 1.05  | 0.24878  | 0.387504 | 0.544151 | 0.622163 |
| MmugDNA.23061.1.S1_s_at | MmugDNA.23061.1 | 9.79  | 9.69  | 0.18 | 0.04 | 1.07  | 0.317986 | 0.520635 | 0.60278  | 0.711831 |
| MmugDNA.23062.1.S1_at   | MmugDNA.23062.1 | 3.68  | 3.57  | 0.1  | 0.1  | 1.08  | 0.246832 | 0.614164 | 0.542546 | 0.771143 |
| MmugDNA.23063.1.S1_at   | MmugDNA.23063.1 | 6.26  | 6.23  | 0.08 | 0.23 | 1.02  | 0.648188 | 0.941515 | 0.829161 | 0.966846 |
| MmugDNA.23065.1.S1_at   | MmugDNA.23065.1 | 5.24  | 4.94  | 0.75 | 0.2  | 1.23  | 0.589021 | 0.816352 | 0.791378 | 0.894082 |
| MmugDNA.42207.1.S1_s_at | MmugDNA.42207.1 | 13.6  | 13.56 | 0.08 | 0.03 | 1.03  | 0.504927 | 0.382794 | 0.738034 | 0.618907 |
| MmugDNA.23067.1.S1_at   | MmugDNA.23067.1 | 6.38  | 6.43  | 0.38 | 0.18 | -1.04 | 0.743236 | 0.323928 | 0.881285 | 0.57466  |
| MmugDNA.23069.1.S1_at   | MmugDNA.23069.1 | 9.76  | 11.11 | 0.69 | 0.32 | -2.56 | 0.052398 | 0.161143 | 0.286189 | 0.437288 |
| MmugDNA.23071.1.S1_at   | MmugDNA.23071.1 | 4.44  | 4.65  | 0.59 | 0.16 | -1.16 | 0.932175 | 0.295232 | 0.971481 | 0.554615 |



|                         |                 |       |       |      |      |       |          |          |          |          |
|-------------------------|-----------------|-------|-------|------|------|-------|----------|----------|----------|----------|
| MmugDNA.23072.1.S1_at   | MmugDNA.23072.1 | 6.12  | 6.01  | 0.21 | 0.29 | 1.08  | 0.60732  | 0.319021 | 0.803674 | 0.571591 |
| MmugDNA.23073.1.S1_at   | MmugDNA.23073.1 | 6.45  | 5.85  | 0.44 | 0.06 | 1.52  | 0.251643 | 0.319109 | 0.546364 | 0.57166  |
| MmugDNA.23074.1.S1_at   | MmugDNA.23074.1 | 8.64  | 7.69  | 0.39 | 0.25 | 1.93  | 0.023007 | 0.086628 | 0.204623 | 0.339176 |
| MmugDNA.23076.1.S1_at   | MmugDNA.23076.1 | 8.1   | 8.32  | 0.29 | 0.25 | -1.17 | 0.310232 | 0.02081  | 0.596486 | 0.180917 |
| MmugDNA.23077.1.S1_at   | MmugDNA.23077.1 | 6.27  | 6     | 0.36 | 0.17 | 1.21  | 0.414553 | 0.732096 | 0.675681 | 0.844824 |
| MmugDNA.23077.1.S1_x_at | MmugDNA.23077.1 | 6.22  | 6.25  | 0.26 | 0.18 | -1.02 | 0.794375 | 0.959563 | 0.90713  | 0.977061 |
| MmugDNA.23078.1.S1_at   | MmugDNA.23078.1 | 5.41  | 5.25  | 0.35 | 0.2  | 1.12  | 0.830079 | 0.293306 | 0.92519  | 0.553239 |
| MmugDNA.23079.1.S1_at   | MmugDNA.23079.1 | 3.78  | 3.91  | 0.03 | 0.07 | -1.1  | 0.038798 | 0.030747 | 0.253262 | 0.217245 |
| MmugDNA.2308.1.S1_at    | MmugDNA.2308.1  | 4.52  | 4.64  | 1.04 | 0.69 | -1.09 | 0.552226 | 0.194404 | 0.769038 | 0.469481 |
| MmugDNA.23081.1.S1_at   | MmugDNA.23081.1 | 11.8  | 11.98 | 0.08 | 0.16 | -1.13 | 0.438392 | 0.097893 | 0.692967 | 0.355679 |
| MmugDNA.23083.1.S1_at   | MmugDNA.23083.1 | 9.59  | 9.39  | 0.2  | 0.06 | 1.15  | 0.044217 | 0.041135 | 0.267305 | 0.247659 |
| MmugDNA.23085.1.S1_at   | MmugDNA.23085.1 | 6.02  | 5.93  | 0.07 | 0.03 | 1.07  | 0.113919 | 0.465688 | 0.390674 | 0.675863 |
| MmugDNA.23086.1.S1_at   | MmugDNA.23086.1 | 5.04  | 5.29  | 0.1  | 0.33 | -1.19 | 0.744052 | 0.309778 | 0.881384 | 0.565044 |
| MmugDNA.23087.1.S1_at   | MmugDNA.23087.1 | 6.65  | 6.69  | 0.18 | 0.01 | -1.03 | 0.589502 | 0.781041 | 0.791613 | 0.87297  |
| MmugDNA.23089.1.S1_at   | MmugDNA.23089.1 | 5.2   | 5.08  | 0.07 | 0.03 | 1.09  | 0.029574 | 0.213162 | 0.22511  | 0.487068 |
| MmugDNA.23090.1.S1_at   | MmugDNA.23090.1 | 7.56  | 7.76  | 1.23 | 0.17 | -1.14 | 0.277202 | 0.459916 | 0.568724 | 0.671989 |
| MmugDNA.23091.1.S1_at   | MmugDNA.23091.1 | 4.93  | 5.27  | 1.36 | 0.47 | -1.26 | 0.84559  | 0.972814 | 0.932611 | 0.985352 |
| MmugDNA.23092.1.S1_at   | MmugDNA.23092.1 | 6.51  | 6.58  | 0.48 | 0.38 | -1.05 | 0.85322  | 0.679857 | 0.936187 | 0.8131   |
| MmugDNA.23093.1.S1_at   | MmugDNA.23093.1 | 5.98  | 5.9   | 0.15 | 0.01 | 1.06  | 0.413601 | 0.545845 | 0.674909 | 0.72769  |
| MmugDNA.23094.1.S1_at   | MmugDNA.23094.1 | 4.29  | 4.42  | 0.19 | 0.09 | -1.09 | 0.963585 | 0.448067 | 0.985244 | 0.663986 |
| MmugDNA.23096.1.S1_at   | MmugDNA.23096.1 | 6.43  | 6.33  | 0.08 | 0.06 | 1.07  | 0.244024 | 0.387663 | 0.540781 | 0.622281 |
| MmugDNA.23097.1.S1_at   | MmugDNA.23097.1 | 5.92  | 5.65  | 0.22 | 0.15 | 1.2   | 0.192727 | 0.297111 | 0.489336 | 0.555996 |
| MmugDNA.23099.1.S1_at   | MmugDNA.23099.1 | 8.07  | 10.13 | 0.75 | 0.19 | -4.18 | 0.021567 | 0.243908 | 0.200582 | 0.514069 |
| MmugDNA.231.1.S1_x_at   | MmugDNA.231.1   | 5.03  | 5.07  | 0.08 | 0.05 | -1.03 | 0.548589 | 0.104034 | 0.766578 | 0.36495  |
| MmugDNA.2310.1.S1_at    | MmugDNA.2310.1  | 6.99  | 6.45  | 0.31 | 0.03 | 1.45  | 0.017838 | 0.031606 | 0.187044 | 0.219905 |
| MmugDNA.23100.1.S1_at   | MmugDNA.23100.1 | 3.71  | 3.68  | 0.16 | 0.18 | 1.02  | 0.70306  | 0.882917 | 0.85908  | 0.933228 |
| MmugDNA.23101.1.S1_s_at | MmugDNA.23101.1 | 6.85  | 6.85  | 0.13 | 0.14 | -1    | 0.955617 | 0.674547 | 0.981771 | 0.809864 |
| MmugDNA.23102.1.S1_at   | MmugDNA.23102.1 | 3.85  | 3.8   | 0.12 | 0.08 | 1.04  | 0.377173 | 0.378931 | 0.647673 | 0.615882 |
| MmugDNA.23103.1.S1_at   | MmugDNA.23103.1 | 9.21  | 8.76  | 0.2  | 0.14 | 1.36  | 0.07526  | 0.007471 | 0.332504 | 0.115888 |
| MmugDNA.23103.1.S1_x_at | MmugDNA.23103.1 | 9.74  | 9.41  | 0.18 | 0.12 | 1.26  | 0.240987 | 0.013993 | 0.538362 | 0.151593 |
| MmugDNA.23104.1.S1_at   | MmugDNA.23104.1 | 5.26  | 5.16  | 0.04 | 0.21 | 1.08  | 0.525561 | 0.756839 | 0.75199  | 0.858443 |
| MmugDNA.23105.1.S1_at   | MmugDNA.23105.1 | 3.26  | 3.72  | 0.15 | 0.47 | -1.37 | 0.180635 | 0.233157 | 0.475777 | 0.504458 |
| MmugDNA.23105.1.S1_s_at | MmugDNA.23105.1 | 6.76  | 6.94  | 0.31 | 0.15 | -1.13 | 0.111086 | 0.050945 | 0.386863 | 0.270968 |
| MmugDNA.23106.1.S1_at   | MmugDNA.23106.1 | 2.75  | 3.03  | 0.63 | 0.08 | -1.22 | 0.847317 | 0.879959 | 0.93341  | 0.931461 |
| MmugDNA.23107.1.S1_at   | MmugDNA.23107.1 | 3.7   | 3.69  | 0.15 | 0.14 | 1.01  | 0.548819 | 0.408794 | 0.766737 | 0.6359   |
| MmugDNA.23109.1.S1_at   | MmugDNA.23109.1 | 5.4   | 5.53  | 0.19 | 0.03 | -1.1  | 0.264497 | 0.239019 | 0.557767 | 0.509794 |
| MmugDNA.2311.1.S1_at    | MmugDNA.2311.1  | 10.63 | 10.5  | 0.18 | 0.04 | 1.1   | 0.784939 | 0.077562 | 0.901907 | 0.323421 |
| MmugDNA.23110.1.S1_at   | MmugDNA.23110.1 | 5.11  | 4.89  | 0.08 | 0.19 | 1.16  | 0.167961 | 0.229956 | 0.461204 | 0.501802 |
| MmugDNA.23111.1.S1_at   | MmugDNA.23111.1 | 4.4   | 4.13  | 0.38 | 0.09 | 1.2   | 0.681231 | 0.04433  | 0.847983 | 0.255035 |
| MmugDNA.23112.1.S1_at   | MmugDNA.23112.1 | 6.15  | 6.04  | 0.15 | 0.04 | 1.08  | 0.992892 | 0.493061 | 0.997263 | 0.693984 |
| MmugDNA.23113.1.S1_at   | MmugDNA.23113.1 | 4.02  | 3.89  | 0.32 | 0.06 | 1.09  | 0.6658   | 0.731143 | 0.839433 | 0.844204 |
| MmugDNA.23114.1.S1_at   | MmugDNA.23114.1 | 11.86 | 12.09 | 0.33 | 0.05 | -1.17 | 0.380501 | 0.561974 | 0.65023  | 0.737666 |
| MmugDNA.23116.1.S1_at   | MmugDNA.23116.1 | 4.97  | 4.97  | 0.18 | 0.23 | 1     | 0.370175 | 0.535609 | 0.643242 | 0.721162 |

|                         |                 |       |       |      |      |       |          |          |          |          |
|-------------------------|-----------------|-------|-------|------|------|-------|----------|----------|----------|----------|
| MmugDNA.23117.1.S1_at   | MmugDNA.23117.1 | 8.69  | 9.65  | 0.19 | 0.11 | -1.94 | 0.002903 | 0.07277  | 0.099145 | 0.315651 |
| MmugDNA.23118.1.S1_at   | MmugDNA.23118.1 | 5.86  | 5.91  | 0.09 | 0.16 | -1.04 | 0.45354  | 0.504307 | 0.703709 | 0.701474 |
| MmugDNA.23119.1.S1_at   | MmugDNA.23119.1 | 5.21  | 5.32  | 0.33 | 0.08 | -1.08 | 0.778794 | 0.938145 | 0.898959 | 0.964949 |
| MmugDNA.2312.1.S1_at    | MmugDNA.2312.1  | 4.31  | 4.3   | 0.04 | 0.07 | 1.01  | 0.935774 | 0.327673 | 0.973047 | 0.577472 |
| MmugDNA.23122.1.S1_at   | MmugDNA.23122.1 | 7.97  | 7.05  | 0.09 | 0.13 | 1.9   | 0.000733 | 0.007258 | 0.07246  | 0.114309 |
| MmugDNA.23123.1.S1_at   | MmugDNA.23123.1 | 10.21 | 9.78  | 0.53 | 0.15 | 1.35  | 0.633331 | 0.852829 | 0.820372 | 0.91634  |
| MmugDNA.23124.1.S1_at   | MmugDNA.23124.1 | 9.66  | 10.16 | 0.23 | 0.1  | -1.41 | 0.039997 | 0.156664 | 0.256645 | 0.432167 |
| MmugDNA.23125.1.S1_at   | MmugDNA.23125.1 | 6.71  | 6.72  | 0.03 | 0.11 | -1.01 | 0.244706 | 0.511227 | 0.541023 | 0.705455 |
| MmugDNA.23126.1.S1_at   | MmugDNA.23126.1 | 3.81  | 3.63  | 0.2  | 0.07 | 1.13  | 0.333139 | 0.1705   | 0.61466  | 0.447141 |
| MmugDNA.23127.1.S1_at   | MmugDNA.23127.1 | 3.94  | 3.77  | 0.06 | 0.19 | 1.12  | 0.214515 | 0.153616 | 0.512167 | 0.428341 |
| MmugDNA.2313.1.S1_at    | MmugDNA.2313.1  | 5.66  | 5.52  | 0.02 | 0.14 | 1.1   | 0.42691  | 0.856849 | 0.684257 | 0.918214 |
| MmugDNA.23130.1.S1_at   | MmugDNA.23130.1 | 3.25  | 3.26  | 0.01 | 0.06 | -1.01 | 0.550364 | 0.769487 | 0.767803 | 0.866136 |
| MmugDNA.23131.1.S1_at   | MmugDNA.23131.1 | 6.49  | 6.29  | 0.32 | 0.26 | 1.15  | 0.184687 | 0.093578 | 0.480751 | 0.349952 |
| MmugDNA.23132.1.S1_at   | MmugDNA.23132.1 | 7.69  | 8.22  | 0.22 | 0.19 | -1.44 | 0.010643 | 0.18005  | 0.152845 | 0.456601 |
| MmugDNA.23132.1.S1_s_at | MmugDNA.23132.1 | 9.94  | 10.53 | 0.15 | 0.23 | -1.5  | 0.010283 | 0.278761 | 0.151176 | 0.542468 |
| MmugDNA.23134.1.S1_at   | MmugDNA.23134.1 | 9.28  | 9.46  | 0.57 | 0.13 | -1.13 | 0.821485 | 0.966862 | 0.920411 | 0.981586 |
| MmugDNA.23138.1.S1_at   | MmugDNA.23138.1 | 12.36 | 12.81 | 0.22 | 0.13 | -1.36 | 0.065738 | 0.062418 | 0.31383  | 0.296669 |
| MmugDNA.23139.1.S1_at   | MmugDNA.23139.1 | 5.78  | 5.46  | 0.01 | 0.18 | 1.25  | 0.108841 | 0.168372 | 0.383769 | 0.445027 |
| MmugDNA.23140.1.S1_at   | MmugDNA.23140.1 | 3.24  | 3.34  | 0.25 | 0.07 | -1.07 | 0.897441 | 0.831503 | 0.956478 | 0.903392 |
| MmugDNA.23142.1.S1_at   | MmugDNA.23142.1 | 6.82  | 6.56  | 0.06 | 0.17 | 1.2   | 0.174252 | 0.44524  | 0.4684   | 0.662338 |
| MmugDNA.23145.1.S1_at   | MmugDNA.23145.1 | 7.44  | 6.51  | 1.21 | 0.52 | 1.91  | 0.146419 | 0.060444 | 0.434245 | 0.292512 |
| MmugDNA.23146.1.S1_at   | MmugDNA.23146.1 | 3.49  | 3.85  | 0.18 | 0.99 | -1.29 | 0.180065 | 0.383701 | 0.475161 | 0.61969  |
| MmugDNA.23147.1.S1_at   | MmugDNA.23147.1 | 3.06  | 3.06  | 0.08 | 0.1  | 1     | 0.226633 | 0.38842  | 0.524469 | 0.622841 |
| MmugDNA.23148.1.S1_at   | MmugDNA.23148.1 | 3.81  | 3.8   | 0.08 | 0.01 | 1     | 0.454468 | 0.840698 | 0.704378 | 0.909196 |
| MmugDNA.23150.1.S1_at   | MmugDNA.23150.1 | 7.43  | 6.4   | 0.75 | 0.66 | 2.03  | 0.114741 | 0.160774 | 0.391794 | 0.436897 |
| MmugDNA.23151.1.S1_at   | MmugDNA.23151.1 | 7.73  | 8.43  | 0.11 | 0.15 | -1.63 | 0.004731 | 0.295868 | 0.115008 | 0.555241 |
| MmugDNA.23152.1.S1_at   | MmugDNA.23152.1 | 12.71 | 12.42 | 0.11 | 0.03 | 1.21  | 0.009865 | 0.043853 | 0.148832 | 0.25403  |
| MmugDNA.23153.1.S1_at   | MmugDNA.23153.1 | 4.37  | 4.37  | 0.17 | 0.05 | 1     | 0.277358 | 0.332291 | 0.568888 | 0.580733 |
| MmugDNA.23154.1.S1_at   | MmugDNA.23154.1 | 4.14  | 4.35  | 0.42 | 0.19 | -1.16 | 0.63297  | 0.50059  | 0.820085 | 0.699154 |
| MmugDNA.23155.1.S1_at   | MmugDNA.23155.1 | 4.37  | 4.13  | 0.17 | 0.08 | 1.18  | 0.054844 | 0.056301 | 0.291031 | 0.283274 |
| MmugDNA.23156.1.S1_s_at | MmugDNA.23156.1 | 9.27  | 9.09  | 0.35 | 0.14 | 1.13  | 0.247615 | 0.112821 | 0.543025 | 0.37844  |
| MmugDNA.23157.1.S1_at   | MmugDNA.23157.1 | 3.31  | 3.43  | 0.27 | 0.16 | -1.09 | 0.795453 | 0.85441  | 0.907556 | 0.91705  |
| MmugDNA.23159.1.S1_at   | MmugDNA.23159.1 | 5.55  | 5.65  | 0.04 | 0.2  | -1.07 | 0.334331 | 0.460051 | 0.615487 | 0.671989 |
| MmugDNA.23161.1.S1_at   | MmugDNA.23161.1 | 4.55  | 4.37  | 0.29 | 0.09 | 1.13  | 0.283974 | 0.321511 | 0.574303 | 0.573226 |
| MmugDNA.23163.1.S1_at   | MmugDNA.23163.1 | 3.52  | 3.17  | 1.11 | 0.13 | 1.27  | 0.257276 | 0.253311 | 0.551586 | 0.521662 |
| MmugDNA.23164.1.S1_at   | MmugDNA.23164.1 | 5.8   | 6.5   | 0.43 | 0.4  | -1.62 | 0.05518  | 0.419377 | 0.291915 | 0.643466 |
| MmugDNA.23165.1.S1_at   | MmugDNA.23165.1 | 9.03  | 9.41  | 0.34 | 0.15 | -1.3  | 0.543837 | 0.160411 | 0.763667 | 0.436528 |
| MmugDNA.23166.1.S1_at   | MmugDNA.23166.1 | 4.04  | 5.88  | 0.77 | 0.29 | -3.59 | 0.045486 | 0.097616 | 0.270813 | 0.355473 |
| MmugDNA.23167.1.S1_x_at | MmugDNA.23167.1 | 9.28  | 9.21  | 0.48 | 0.16 | 1.05  | 0.437801 | 0.522885 | 0.69255  | 0.713429 |
| MmugDNA.23168.1.S1_at   | MmugDNA.23168.1 | 5.47  | 5.41  | 0.08 | 0.04 | 1.04  | 0.159575 | 0.410091 | 0.450901 | 0.637065 |
| MmugDNA.23169.1.S1_at   | MmugDNA.23169.1 | 7.43  | 7.32  | 0.42 | 0.07 | 1.08  | 0.448856 | 0.531248 | 0.700211 | 0.718529 |
| MmugDNA.23170.1.S1_at   | MmugDNA.23170.1 | 4.89  | 4.81  | 0.4  | 0.37 | 1.06  | 0.3168   | 0.387009 | 0.60152  | 0.621935 |
| MmugDNA.23171.1.S1_at   | MmugDNA.23171.1 | 6.05  | 6.03  | 0.68 | 0.32 | 1.01  | 0.999271 | 0.354201 | 0.999783 | 0.597105 |

|                         |                 |       |       |      |      |       |          |          |          |          |
|-------------------------|-----------------|-------|-------|------|------|-------|----------|----------|----------|----------|
| MmugDNA.23172.1.S1_at   | MmugDNA.23172.1 | 3.52  | 3.53  | 0.39 | 0.08 | -1.01 | 0.378433 | 0.515232 | 0.648677 | 0.70821  |
| MmugDNA.23175.1.S1_at   | MmugDNA.23175.1 | 5.81  | 5.45  | 0.54 | 0.05 | 1.27  | 0.16709  | 0.177283 | 0.460327 | 0.45372  |
| MmugDNA.23176.1.S1_at   | MmugDNA.23176.1 | 10.32 | 10.89 | 0.06 | 0.05 | -1.49 | 0.000164 | 0.000008 | 0.053494 | 0.016421 |
| MmugDNA.23178.1.S1_at   | MmugDNA.23178.1 | 9.47  | 8.81  | 0.14 | 0.17 | 1.59  | 0.010249 | 0.001068 | 0.150937 | 0.051862 |
| MmugDNA.2318.1.S1_at    | MmugDNA.2318.1  | 5.23  | 5.36  | 0.11 | 0.19 | -1.09 | 0.614593 | 0.570458 | 0.808258 | 0.743121 |
| MmugDNA.23180.1.S1_at   | MmugDNA.23180.1 | 6.24  | 6.15  | 0.41 | 0.21 | 1.07  | 0.928325 | 0.186301 | 0.969727 | 0.462168 |
| MmugDNA.23184.1.S1_at   | MmugDNA.23184.1 | 3.82  | 3.9   | 0.17 | 0.07 | -1.06 | 0.554027 | 0.430935 | 0.770389 | 0.651921 |
| MmugDNA.23185.1.S1_at   | MmugDNA.23185.1 | 7.46  | 7.29  | 0.14 | 0.24 | 1.12  | 0.377156 | 0.625659 | 0.64767  | 0.779265 |
| MmugDNA.23186.1.S1_at   | MmugDNA.23186.1 | 5.55  | 5.55  | 0.28 | 0.03 | -1    | 0.604119 | 0.569329 | 0.801436 | 0.742375 |
| MmugDNA.23188.1.S1_at   | MmugDNA.23188.1 | 7.28  | 5.77  | 0.75 | 1.23 | 2.84  | 0.242516 | 0.318404 | 0.539382 | 0.571239 |
| MmugDNA.23189.1.S1_at   | MmugDNA.23189.1 | 4.63  | 4.61  | 0    | 0.19 | 1.02  | 0.711141 | 0.540525 | 0.863578 | 0.724446 |
| MmugDNA.2319.1.S1_at    | MmugDNA.2319.1  | 7.47  | 6.88  | 0.41 | 0.26 | 1.5   | 0.101646 | 0.007059 | 0.373027 | 0.113278 |
| MmugDNA.23190.1.S1_at   | MmugDNA.23190.1 | 6.61  | 6.78  | 0.3  | 0.1  | -1.12 | 0.620143 | 0.459998 | 0.811682 | 0.671989 |
| MmugDNA.23191.1.S1_at   | MmugDNA.23191.1 | 3.01  | 2.9   | 0.17 | 0.17 | 1.08  | 0.276991 | 0.333106 | 0.568475 | 0.581387 |
| MmugDNA.23192.1.S1_at   | MmugDNA.23192.1 | 5.24  | 3.66  | 1.18 | 0.48 | 3     | 0.205405 | 0.269734 | 0.503171 | 0.53502  |
| MmugDNA.23193.1.S1_at   | MmugDNA.23193.1 | 3.92  | 3.93  | 0.09 | 0.03 | -1.01 | 0.853928 | 0.465402 | 0.936498 | 0.675748 |
| MmugDNA.23194.1.S1_at   | MmugDNA.23194.1 | 7.57  | 8.97  | 0.39 | 0.22 | -2.65 | 0.005501 | 0.061546 | 0.119627 | 0.294865 |
| MmugDNA.23196.1.S1_at   | MmugDNA.23196.1 | 5.35  | 5.85  | 0.91 | 0.36 | -1.41 | 0.581801 | 0.110678 | 0.786843 | 0.374854 |
| MmugDNA.23198.1.S1_at   | MmugDNA.23198.1 | 5.27  | 5.87  | 0.71 | 0.08 | -1.52 | 0.237092 | 0.404614 | 0.534591 | 0.6331   |
| MmugDNA.23199.1.S1_at   | MmugDNA.23199.1 | 3.85  | 3.49  | 0.14 | 0.1  | 1.29  | 0.022142 | 0.022846 | 0.20197  | 0.189246 |
| MmugDNA.23201.1.S1_at   | MmugDNA.23201.1 | 10.11 | 10.14 | 0.45 | 0.23 | -1.02 | 0.637672 | 0.037799 | 0.82257  | 0.238765 |
| MmugDNA.23203.1.S1_at   | MmugDNA.23203.1 | 7.81  | 8.21  | 0.14 | 0.2  | -1.32 | 0.049322 | 0.062202 | 0.279484 | 0.296296 |
| MmugDNA.23204.1.S1_at   | MmugDNA.23204.1 | 10.08 | 10    | 0.36 | 0.21 | 1.06  | 0.568458 | 0.875997 | 0.77836  | 0.929526 |
| MmugDNA.23205.1.S1_at   | MmugDNA.23205.1 | 9.11  | 9.15  | 0.09 | 0.16 | -1.03 | 0.937302 | 0.031717 | 0.973697 | 0.220503 |
| MmugDNA.23206.1.S1_at   | MmugDNA.23206.1 | 6.76  | 6.99  | 0.1  | 0.14 | -1.18 | 0.207974 | 0.744061 | 0.505821 | 0.851697 |
| MmugDNA.23208.1.S1_at   | MmugDNA.23208.1 | 4.63  | 4.75  | 1.06 | 0.46 | -1.09 | 0.459588 | 0.671693 | 0.707702 | 0.808089 |
| MmugDNA.23209.1.S1_at   | MmugDNA.23209.1 | 5.53  | 6.48  | 0.39 | 0.29 | -1.93 | 0.028111 | 0.221557 | 0.22011  | 0.494892 |
| MmugDNA.23210.1.S1_x_at | MmugDNA.23210.1 | 11.37 | 10.62 | 0.39 | 0.04 | 1.68  | 0.06995  | 0.503488 | 0.322963 | 0.700892 |
| MmugDNA.23212.1.S1_at   | MmugDNA.23212.1 | 4.32  | 4.36  | 0.08 | 0.1  | -1.03 | 0.601062 | 0.323265 | 0.799314 | 0.574408 |
| MmugDNA.23213.1.S1_at   | MmugDNA.23213.1 | 5.96  | 6.24  | 1.59 | 0.08 | -1.22 | 0.602484 | 0.796762 | 0.80028  | 0.882803 |
| MmugDNA.23214.1.S1_at   | MmugDNA.23214.1 | 3.99  | 3.92  | 0.13 | 0.11 | 1.05  | 0.415972 | 0.430097 | 0.676502 | 0.651143 |
| MmugDNA.23215.1.S1_at   | MmugDNA.23215.1 | 10.38 | 10.4  | 0.04 | 0.08 | -1.01 | 0.708539 | 0.34393  | 0.861951 | 0.589617 |
| MmugDNA.23218.1.S1_at   | MmugDNA.23218.1 | 4.81  | 4.55  | 0.86 | 0.22 | 1.2   | 0.216351 | 0.191262 | 0.514109 | 0.466553 |
| MmugDNA.2322.1.S1_at    | MmugDNA.2322.1  | 3.73  | 3.74  | 0.06 | 0    | -1.01 | 0.767292 | 0.28668  | 0.893239 | 0.548077 |
| MmugDNA.23220.1.S1_at   | MmugDNA.23220.1 | 6.35  | 6.35  | 0.21 | 0.14 | 1     | 0.493692 | 0.123381 | 0.730599 | 0.393391 |
| MmugDNA.23221.1.S1_at   | MmugDNA.23221.1 | 3.67  | 3.59  | 0.14 | 0.07 | 1.06  | 0.858678 | 0.03141  | 0.938766 | 0.219107 |
| MmugDNA.23223.1.S1_at   | MmugDNA.23223.1 | 11.66 | 11.56 | 0.14 | 0.04 | 1.07  | 0.133544 | 0.152434 | 0.41701  | 0.427274 |
| MmugDNA.23224.1.S1_at   | MmugDNA.23224.1 | 4.39  | 4.31  | 0.12 | 0.07 | 1.06  | 0.112844 | 0.152662 | 0.389338 | 0.427485 |
| MmugDNA.23225.1.S1_at   | MmugDNA.23225.1 | 6.6   | 6.68  | 0.32 | 0.34 | -1.06 | 0.312144 | 0.022184 | 0.598226 | 0.186422 |
| MmugDNA.23226.1.S1_at   | MmugDNA.23226.1 | 6.34  | 6.22  | 0.24 | 0.06 | 1.09  | 0.460497 | 0.512714 | 0.708236 | 0.706493 |
| MmugDNA.23227.1.S1_at   | MmugDNA.23227.1 | 4.39  | 4.61  | 0.2  | 0.56 | -1.17 | 0.547349 | 0.176888 | 0.765933 | 0.453303 |
| MmugDNA.23228.1.S1_at   | MmugDNA.23228.1 | 3.85  | 3.84  | 0.15 | 0.03 | 1     | 0.952799 | 0.191633 | 0.980564 | 0.466918 |
| MmugDNA.23229.1.S1_at   | MmugDNA.23229.1 | 3.86  | 3.82  | 0.1  | 0    | 1.03  | 0.532669 | 0.790751 | 0.756693 | 0.878973 |

|                       |                 |       |       |      |      |       |          |          |          |          |
|-----------------------|-----------------|-------|-------|------|------|-------|----------|----------|----------|----------|
| MmugDNA.2323.1.S1_at  | MmugDNA.2323.1  | 3.06  | 2.97  | 0.41 | 0.22 | 1.07  | 0.943268 | 0.747824 | 0.976135 | 0.853252 |
| MmugDNA.23230.1.S1_at | MmugDNA.23230.1 | 9.29  | 9.13  | 0.14 | 0.04 | 1.12  | 0.172717 | 0.743066 | 0.46677  | 0.851135 |
| MmugDNA.23231.1.S1_at | MmugDNA.23231.1 | 3.83  | 4.05  | 0.41 | 0.29 | -1.16 | 0.665548 | 0.858855 | 0.839297 | 0.919637 |
| MmugDNA.23232.1.S1_at | MmugDNA.23232.1 | 5.46  | 5.53  | 0.05 | 0.08 | -1.05 | 0.1642   | 0.022068 | 0.457122 | 0.185927 |
| MmugDNA.23233.1.S1_at | MmugDNA.23233.1 | 5.35  | 5.34  | 0.23 | 0.05 | 1     | 0.794169 | 0.493019 | 0.907055 | 0.69397  |
| MmugDNA.23235.1.S1_at | MmugDNA.23235.1 | 11.59 | 11.47 | 0.15 | 0.08 | 1.09  | 0.075169 | 0.188165 | 0.332294 | 0.464251 |
| MmugDNA.23237.1.S1_at | MmugDNA.23237.1 | 4.26  | 4.01  | 0.03 | 0.08 | 1.19  | 0.004032 | 0.033898 | 0.108999 | 0.227771 |
| MmugDNA.23238.1.S1_at | MmugDNA.23238.1 | 13.05 | 12.76 | 0.08 | 0.06 | 1.22  | 0.003134 | 0.00603  | 0.101143 | 0.106089 |
| MmugDNA.23239.1.S1_at | MmugDNA.23239.1 | 10.38 | 10.33 | 0.07 | 0.11 | 1.04  | 0.239667 | 0.043468 | 0.537159 | 0.253142 |
| MmugDNA.23240.1.S1_at | MmugDNA.23240.1 | 9.61  | 9.03  | 0.39 | 0.05 | 1.49  | 0.038203 | 0.016081 | 0.251526 | 0.160703 |
| MmugDNA.23241.1.S1_at | MmugDNA.23241.1 | 3.26  | 4.41  | 0.48 | 0.78 | -2.22 | 0.173837 | 0.00133  | 0.468263 | 0.056205 |
| MmugDNA.23242.1.S1_at | MmugDNA.23242.1 | 4.9   | 4.83  | 0.19 | 0.13 | 1.06  | 0.987666 | 0.159624 | 0.995514 | 0.435785 |
| MmugDNA.23244.1.S1_at | MmugDNA.23244.1 | 3.62  | 3.64  | 0.21 | 0.07 | -1.01 | 0.492564 | 0.463795 | 0.729806 | 0.674656 |
| MmugDNA.23246.1.S1_at | MmugDNA.23246.1 | 6.28  | 6.06  | 0.11 | 0.15 | 1.17  | 0.084292 | 0.134177 | 0.347695 | 0.406421 |
| MmugDNA.23248.1.S1_at | MmugDNA.23248.1 | 6.22  | 5.64  | 0.56 | 0.14 | 1.5   | 0.337998 | 0.581111 | 0.618387 | 0.750212 |
| MmugDNA.23249.1.S1_at | MmugDNA.23249.1 | 8.06  | 7.62  | 0.12 | 0.21 | 1.36  | 0.053602 | 0.135745 | 0.288683 | 0.407925 |
| MmugDNA.2325.1.S1_at  | MmugDNA.2325.1  | 3.88  | 3.88  | 0.19 | 0.09 | 1     | 0.414481 | 0.346975 | 0.675678 | 0.591769 |
| MmugDNA.23252.1.S1_at | MmugDNA.23252.1 | 4.8   | 4.53  | 1.33 | 0.21 | 1.21  | 0.479094 | 0.667932 | 0.720448 | 0.805689 |
| MmugDNA.23253.1.S1_at | MmugDNA.23253.1 | 4.91  | 4.91  | 0.12 | 0.16 | -1    | 0.239025 | 0.467676 | 0.536335 | 0.677207 |
| MmugDNA.23255.1.S1_at | MmugDNA.23255.1 | 3.73  | 3.17  | 0.45 | 0.41 | 1.47  | 0.229399 | 0.167004 | 0.528164 | 0.443466 |
| MmugDNA.23257.1.S1_at | MmugDNA.23257.1 | 3.41  | 3.41  | 0.05 | 0.12 | -1    | 0.374685 | 0.434078 | 0.645606 | 0.654223 |
| MmugDNA.23258.1.S1_at | MmugDNA.23258.1 | 7.27  | 7.11  | 0.11 | 0.24 | 1.12  | 0.222569 | 0.336912 | 0.520511 | 0.584156 |
| MmugDNA.23259.1.S1_at | MmugDNA.23259.1 | 4.75  | 4.8   | 0.08 | 0.05 | -1.04 | 0.182901 | 0.133196 | 0.47869  | 0.404934 |
| MmugDNA.2326.1.S1_at  | MmugDNA.2326.1  | 5.61  | 5.63  | 0.13 | 0.05 | -1.01 | 0.939099 | 0.643338 | 0.97432  | 0.79084  |
| MmugDNA.23260.1.S1_at | MmugDNA.23260.1 | 5.47  | 5.72  | 0.43 | 0.35 | -1.19 | 0.692537 | 0.172224 | 0.853103 | 0.448609 |
| MmugDNA.23261.1.S1_at | MmugDNA.23261.1 | 4.46  | 4.58  | 0.22 | 0.05 | -1.09 | 0.96793  | 0.276848 | 0.987302 | 0.540757 |
| MmugDNA.23263.1.S1_at | MmugDNA.23263.1 | 5.02  | 4.95  | 0.14 | 0.13 | 1.05  | 0.573894 | 0.362145 | 0.781467 | 0.602827 |
| MmugDNA.23264.1.S1_at | MmugDNA.23264.1 | 6.99  | 6.87  | 0.43 | 0.11 | 1.09  | 0.669748 | 0.088393 | 0.841513 | 0.341877 |
| MmugDNA.23265.1.S1_at | MmugDNA.23265.1 | 5.85  | 6.03  | 0.32 | 0.16 | -1.13 | 0.949565 | 0.828764 | 0.978971 | 0.901565 |
| MmugDNA.23266.1.S1_at | MmugDNA.23266.1 | 9.28  | 9.54  | 0.12 | 0.13 | -1.19 | 0.058487 | 0.018387 | 0.298965 | 0.170558 |
| MmugDNA.23268.1.S1_at | MmugDNA.23268.1 | 7.33  | 6.3   | 0.41 | 0.19 | 2.04  | 0.016258 | 0.000297 | 0.180322 | 0.034892 |
| MmugDNA.23269.1.S1_at | MmugDNA.23269.1 | 2.86  | 2.87  | 0.04 | 0.01 | -1.01 | 0.554847 | 0.496262 | 0.770859 | 0.695931 |
| MmugDNA.2327.1.S1_at  | MmugDNA.2327.1  | 5.06  | 5.11  | 0.01 | 0.11 | -1.04 | 0.854236 | 0.970722 | 0.936616 | 0.98405  |
| MmugDNA.23270.1.S1_at | MmugDNA.23270.1 | 9     | 8.73  | 0.24 | 0.25 | 1.21  | 0.116953 | 0.0504   | 0.394034 | 0.269732 |
| MmugDNA.23272.1.S1_at | MmugDNA.23272.1 | 3.76  | 3.7   | 0.07 | 0.03 | 1.04  | 0.248319 | 0.593527 | 0.543712 | 0.758329 |
| MmugDNA.23273.1.S1_at | MmugDNA.23273.1 | 5.5   | 5.68  | 0.1  | 0.16 | -1.13 | 0.590907 | 0.141576 | 0.792099 | 0.415087 |
| MmugDNA.23274.1.S1_at | MmugDNA.23274.1 | 6.9   | 6.39  | 0.46 | 0.4  | 1.42  | 0.304645 | 0.400914 | 0.591791 | 0.630658 |
| MmugDNA.23275.1.S1_at | MmugDNA.23275.1 | 5.18  | 5.09  | 0.03 | 0.07 | 1.06  | 0.030132 | 0.319873 | 0.226716 | 0.572234 |
| MmugDNA.23276.1.S1_at | MmugDNA.23276.1 | 6.31  | 6.04  | 0.15 | 0.18 | 1.2   | 0.111946 | 0.143089 | 0.388118 | 0.416995 |
| MmugDNA.23277.1.S1_at | MmugDNA.23277.1 | 4.81  | 4.4   | 0.35 | 0.12 | 1.33  | 0.197211 | 0.028924 | 0.494323 | 0.211953 |
| MmugDNA.23278.1.S1_at | MmugDNA.23278.1 | 3.55  | 3.52  | 0.18 | 0.06 | 1.03  | 0.29694  | 0.110471 | 0.585548 | 0.374684 |
| MmugDNA.23279.1.S1_at | MmugDNA.23279.1 | 3.9   | 5.18  | 0    | 0.22 | -2.43 | 0.000772 | 0.000025 | 0.072818 | 0.020254 |
| MmugDNA.2328.1.S1_at  | MmugDNA.2328.1  | 6.24  | 6.18  | 0.32 | 0.46 | 1.04  | 0.842323 | 0.982548 | 0.930778 | 0.99036  |

|                         |                 |       |       |      |      |       |          |          |          |          |
|-------------------------|-----------------|-------|-------|------|------|-------|----------|----------|----------|----------|
| MmugDNA.23280.1.S1_at   | MmugDNA.23280.1 | 7.58  | 7.2   | 0.28 | 0.12 | 1.3   | 0.037142 | 0.007069 | 0.247978 | 0.113284 |
| MmugDNA.23281.1.S1_at   | MmugDNA.23281.1 | 10.23 | 10.85 | 0.29 | 0.16 | -1.54 | 0.015643 | 0.334292 | 0.177553 | 0.582323 |
| MmugDNA.23282.1.S1_s_at | MmugDNA.23282.1 | 11.42 | 11.39 | 0.28 | 0.27 | 1.02  | 0.915335 | 0.793892 | 0.964005 | 0.881131 |
| MmugDNA.23283.1.S1_at   | MmugDNA.23283.1 | 5.34  | 4.81  | 0.42 | 0.07 | 1.44  | 0.110097 | 0.07247  | 0.385347 | 0.315294 |
| MmugDNA.23284.1.S1_at   | MmugDNA.23284.1 | 5.94  | 6.2   | 0.14 | 0.22 | -1.2  | 0.377914 | 0.308005 | 0.648293 | 0.564176 |
| MmugDNA.23285.1.S1_at   | MmugDNA.23285.1 | 5.46  | 5.36  | 0.04 | 0.03 | 1.07  | 0.062881 | 0.010792 | 0.30751  | 0.135577 |
| MmugDNA.23286.1.S1_at   | MmugDNA.23286.1 | 3.25  | 3.25  | 0.14 | 0.02 | 1     | 0.7867   | 0.582826 | 0.902743 | 0.751399 |
| MmugDNA.23287.1.S1_at   | MmugDNA.23287.1 | 5.62  | 5.6   | 0.09 | 0.11 | 1.01  | 0.390849 | 0.568744 | 0.658414 | 0.742094 |
| MmugDNA.23288.1.S1_at   | MmugDNA.23288.1 | 4.43  | 4.45  | 0.07 | 0.22 | -1.02 | 0.73681  | 0.931701 | 0.87768  | 0.961211 |
| MmugDNA.2329.1.S1_at    | MmugDNA.2329.1  | 5.08  | 5.12  | 0.03 | 0.08 | -1.03 | 0.767932 | 0.270856 | 0.893427 | 0.536026 |
| MmugDNA.23291.1.S1_at   | MmugDNA.23291.1 | 3.09  | 3.12  | 0.05 | 0.07 | -1.02 | 0.722135 | 0.773445 | 0.869249 | 0.868298 |
| MmugDNA.23293.1.S1_at   | MmugDNA.23293.1 | 8.64  | 8.97  | 0.22 | 0.24 | -1.25 | 0.082239 | 0.080072 | 0.343845 | 0.327455 |
| MmugDNA.23294.1.S1_at   | MmugDNA.23294.1 | 2.82  | 2.81  | 0.05 | 0.06 | 1     | 0.891565 | 0.926823 | 0.953744 | 0.958404 |
| MmugDNA.23295.1.S1_at   | MmugDNA.23295.1 | 4.01  | 3.04  | 1.17 | 0.15 | 1.95  | 0.235026 | 0.259766 | 0.533056 | 0.526648 |
| MmugDNA.23296.1.S1_s_at | MmugDNA.23296.1 | 11.14 | 11.1  | 0.2  | 0.12 | 1.02  | 0.328058 | 0.778285 | 0.61059  | 0.871272 |
| MmugDNA.23297.1.S1_at   | MmugDNA.23297.1 | 6.28  | 6.47  | 0.17 | 0.03 | -1.15 | 0.315749 | 0.490851 | 0.600522 | 0.692666 |
| MmugDNA.23298.1.S1_at   | MmugDNA.23298.1 | 4.02  | 4.02  | 0.26 | 0.15 | 1     | 0.245586 | 0.351917 | 0.541637 | 0.595331 |
| MmugDNA.233.1.S1_at     | MmugDNA.233.1   | 5.91  | 5.75  | 0.32 | 0.17 | 1.12  | 0.701694 | 0.260402 | 0.858344 | 0.526975 |
| MmugDNA.23300.1.S1_at   | MmugDNA.23300.1 | 6.53  | 6.5   | 0.02 | 0.37 | 1.02  | 0.775941 | 0.570934 | 0.897498 | 0.743422 |
| MmugDNA.23301.1.S1_at   | MmugDNA.23301.1 | 7.16  | 7.16  | 0.12 | 0.11 | 1     | 0.571977 | 0.800489 | 0.780243 | 0.885198 |
| MmugDNA.23305.1.S1_at   | MmugDNA.23305.1 | 7.46  | 7.29  | 0.1  | 0.07 | 1.13  | 0.16451  | 0.005184 | 0.457655 | 0.099739 |
| MmugDNA.23306.1.S1_at   | MmugDNA.23306.1 | 9.16  | 8.84  | 0.05 | 0.12 | 1.24  | 0.012194 | 0.153511 | 0.160755 | 0.42827  |
| MmugDNA.23308.1.S1_at   | MmugDNA.23308.1 | 2.76  | 2.91  | 0.03 | 0.1  | -1.11 | 0.096814 | 0.346071 | 0.36686  | 0.591154 |
| MmugDNA.23309.1.S1_at   | MmugDNA.23309.1 | 13.01 | 12.95 | 0.13 | 0.05 | 1.04  | 0.265    | 0.014509 | 0.557962 | 0.153682 |
| MmugDNA.23310.1.S1_at   | MmugDNA.23310.1 | 12.08 | 12.12 | 0.25 | 0.03 | -1.03 | 0.282325 | 0.528437 | 0.573117 | 0.716634 |
| MmugDNA.23311.1.S1_at   | MmugDNA.23311.1 | 12.13 | 12.15 | 0.25 | 0.07 | -1.01 | 0.777575 | 0.374557 | 0.898391 | 0.6129   |
| MmugDNA.23312.1.S1_at   | MmugDNA.23312.1 | 4.75  | 5.99  | 0.41 | 0.38 | -2.36 | 0.017079 | 0.142216 | 0.184179 | 0.415754 |
| MmugDNA.23313.1.S1_at   | MmugDNA.23313.1 | 8.45  | 8.44  | 0.06 | 0.27 | 1.01  | 0.654564 | 0.727438 | 0.832797 | 0.842336 |
| MmugDNA.23314.1.S1_at   | MmugDNA.23314.1 | 5.04  | 4.71  | 0.07 | 0.05 | 1.26  | 0.003041 | 0.003158 | 0.100201 | 0.081739 |
| MmugDNA.23315.1.S1_at   | MmugDNA.23315.1 | 9.51  | 9.33  | 0.1  | 0.28 | 1.13  | 0.464137 | 0.346598 | 0.710515 | 0.591427 |
| MmugDNA.16921.1.S1_s_at | MmugDNA.16921.1 | 10.03 | 9.87  | 0.16 | 0.11 | 1.12  | 0.324935 | 0.21416  | 0.608426 | 0.487789 |
| MmugDNA.23317.1.S1_at   | MmugDNA.23317.1 | 11.01 | 11.79 | 0.36 | 0.14 | -1.71 | 0.035678 | 0.040824 | 0.243824 | 0.246981 |
| MmugDNA.23318.1.S1_at   | MmugDNA.23318.1 | 3.16  | 3.13  | 0.03 | 0.1  | 1.02  | 0.595134 | 0.806337 | 0.795091 | 0.888642 |
| MmugDNA.23319.1.S1_at   | MmugDNA.23319.1 | 6.97  | 6.98  | 0.11 | 0.07 | -1.01 | 0.630579 | 0.281522 | 0.818647 | 0.54464  |
| MmugDNA.2332.1.S1_at    | MmugDNA.2332.1  | 5.82  | 5.85  | 0.5  | 0.28 | -1.02 | 0.353168 | 0.478713 | 0.630353 | 0.684691 |
| MmugDNA.23320.1.S1_at   | MmugDNA.23320.1 | 12.64 | 12.59 | 0.05 | 0.03 | 1.03  | 0.185975 | 0.811722 | 0.482153 | 0.891337 |
| MmugDNA.23321.1.S1_at   | MmugDNA.23321.1 | 7.59  | 7     | 0.45 | 0.06 | 1.5   | 0.117467 | 0.010866 | 0.394772 | 0.135879 |
| MmugDNA.23323.1.S1_at   | MmugDNA.23323.1 | 10.41 | 9.74  | 0.19 | 0.04 | 1.6   | 0.002013 | 0.000385 | 0.089873 | 0.037273 |
| MmugDNA.23324.1.S1_at   | MmugDNA.23324.1 | 4.59  | 5.93  | 1.37 | 0.36 | -2.54 | 0.535887 | 0.678968 | 0.758682 | 0.812533 |
| MmugDNA.23325.1.S1_at   | MmugDNA.23325.1 | 11.49 | 11.57 | 0.06 | 0.05 | -1.05 | 0.814883 | 0.030104 | 0.917341 | 0.215348 |
| MmugDNA.23327.1.S1_at   | MmugDNA.23327.1 | 8.07  | 7.81  | 0.15 | 0.33 | 1.2   | 0.704623 | 0.779162 | 0.859786 | 0.871904 |
| MmugDNA.23329.1.S1_at   | MmugDNA.23329.1 | 9.02  | 9.14  | 0.42 | 0.12 | -1.08 | 0.471187 | 0.000174 | 0.715413 | 0.030511 |
| MmugDNA.23330.1.S1_at   | MmugDNA.23330.1 | 3.82  | 3.75  | 0.15 | 0.05 | 1.05  | 0.736517 | 0.48809  | 0.877553 | 0.690896 |

|                         |                 |       |       |      |      |       |          |          |          |          |
|-------------------------|-----------------|-------|-------|------|------|-------|----------|----------|----------|----------|
| MmugDNA.23331.1.S1_at   | MmugDNA.23331.1 | 3.33  | 3.4   | 0.67 | 0.17 | -1.05 | 0.485327 | 0.628224 | 0.724871 | 0.781087 |
| MmugDNA.23332.1.S1_at   | MmugDNA.23332.1 | 8.64  | 8.21  | 0.27 | 0.34 | 1.35  | 0.351908 | 0.012499 | 0.62954  | 0.144302 |
| MmugDNA.23333.1.S1_at   | MmugDNA.23333.1 | 6.08  | 5.35  | 0.28 | 0.06 | 1.66  | 0.027094 | 0.04151  | 0.217323 | 0.24862  |
| MmugDNA.23335.1.S1_at   | MmugDNA.23335.1 | 2.94  | 2.88  | 0.2  | 0.17 | 1.05  | 0.860839 | 0.510295 | 0.939561 | 0.704814 |
| MmugDNA.23336.1.S1_s_at | MmugDNA.23336.1 | 8.94  | 9.85  | 0.26 | 0.13 | -1.88 | 0.008135 | 0.037085 | 0.138956 | 0.237117 |
| MmugDNA.23338.1.S1_at   | MmugDNA.23338.1 | 5.61  | 5.71  | 0.34 | 0.08 | -1.07 | 0.603987 | 0.556883 | 0.801436 | 0.734847 |
| MmugDNA.23339.1.S1_at   | MmugDNA.23339.1 | 10.75 | 10.2  | 0.5  | 0.1  | 1.46  | 0.152566 | 0.134493 | 0.442239 | 0.406626 |
| MmugDNA.23340.1.S1_at   | MmugDNA.23340.1 | 3.4   | 3.3   | 0.14 | 0.13 | 1.07  | 0.809579 | 0.319348 | 0.91473  | 0.571724 |
| MmugDNA.23341.1.S1_at   | MmugDNA.23341.1 | 6.85  | 7.19  | 0.32 | 0.02 | -1.27 | 0.182381 | 0.089196 | 0.478109 | 0.343259 |
| MmugDNA.23342.1.S1_at   | MmugDNA.23342.1 | 9.64  | 9.62  | 0.23 | 0.05 | 1.01  | 0.303254 | 0.274899 | 0.590656 | 0.53934  |
| MmugDNA.23343.1.S1_at   | MmugDNA.23343.1 | 4.81  | 4.37  | 0.38 | 0.36 | 1.36  | 0.098164 | 0.090662 | 0.36881  | 0.345151 |
| MmugDNA.23344.1.S1_at   | MmugDNA.23344.1 | 11.62 | 11.72 | 0.19 | 0.04 | -1.07 | 0.520655 | 0.163116 | 0.748924 | 0.43928  |
| MmugDNA.23345.1.S1_at   | MmugDNA.23345.1 | 2.88  | 3.04  | 0.1  | 0.11 | -1.12 | 0.366326 | 0.178589 | 0.640659 | 0.454817 |
| MmugDNA.23345.1.S1_s_at | MmugDNA.23345.1 | 5.96  | 5.69  | 0.1  | 0.14 | 1.21  | 0.091699 | 0.202165 | 0.359438 | 0.476559 |
| MmugDNA.23347.1.S1_at   | MmugDNA.23347.1 | 5.08  | 6.51  | 0.41 | 0.38 | -2.7  | 0.013407 | 0.015041 | 0.166531 | 0.155766 |
| MmugDNA.23348.1.S1_at   | MmugDNA.23348.1 | 2.88  | 2.81  | 0.14 | 0.04 | 1.05  | 0.58119  | 0.429769 | 0.786399 | 0.651032 |
| MmugDNA.23349.1.S1_at   | MmugDNA.23349.1 | 3.26  | 3.12  | 0.13 | 0.15 | 1.1   | 0.1181   | 0.128052 | 0.395593 | 0.399035 |
| MmugDNA.2335.1.S1_at    | MmugDNA.2335.1  | 4.54  | 4.48  | 0.23 | 0.07 | 1.05  | 0.485428 | 0.471045 | 0.724942 | 0.679172 |
| MmugDNA.23350.1.S1_at   | MmugDNA.23350.1 | 4     | 3.97  | 0.45 | 0.04 | 1.02  | 0.747456 | 0.942677 | 0.883065 | 0.967498 |
| MmugDNA.23351.1.S1_at   | MmugDNA.23351.1 | 4.78  | 4.83  | 0.53 | 0.25 | -1.04 | 0.417026 | 0.548677 | 0.677282 | 0.729318 |
| MmugDNA.23353.1.S1_at   | MmugDNA.23353.1 | 6.09  | 6.03  | 0.17 | 0.13 | 1.04  | 0.956032 | 0.960337 | 0.981979 | 0.977459 |
| MmugDNA.23354.1.S1_at   | MmugDNA.23354.1 | 11.46 | 11.4  | 0.07 | 0.07 | 1.04  | 0.126689 | 0.055328 | 0.408107 | 0.281024 |
| MmugDNA.23354.1.S1_s_at | MmugDNA.23354.1 | 12.14 | 12.02 | 0.02 | 0.07 | 1.09  | 0.016224 | 0.082238 | 0.180107 | 0.331091 |
| MmugDNA.23355.1.S1_at   | MmugDNA.23355.1 | 7.48  | 7.27  | 0.18 | 0.1  | 1.15  | 0.505606 | 0.488303 | 0.738603 | 0.691049 |
| MmugDNA.23357.1.S1_at   | MmugDNA.23357.1 | 4.58  | 4.51  | 0.09 | 0.04 | 1.05  | 0.373513 | 0.942892 | 0.645118 | 0.967564 |
| MmugDNA.23359.1.S1_x_at | MmugDNA.23359.1 | 9.64  | 9.42  | 0.31 | 0.08 | 1.17  | 0.302755 | 0.532899 | 0.5904   | 0.71929  |
| MmugDNA.2336.1.S1_at    | MmugDNA.2336.1  | 8.51  | 8.08  | 0.08 | 0.18 | 1.35  | 0.010835 | 0.004287 | 0.153877 | 0.091951 |
| MmugDNA.23360.1.S1_at   | MmugDNA.23360.1 | 3.68  | 3.55  | 0.28 | 0.17 | 1.1   | 0.481222 | 0.570403 | 0.72184  | 0.743103 |
| MmugDNA.23361.1.S1_at   | MmugDNA.23361.1 | 5.89  | 5.85  | 0.23 | 0.03 | 1.03  | 0.262556 | 0.35577  | 0.556605 | 0.597864 |
| MmugDNA.23362.1.S1_at   | MmugDNA.23362.1 | 2.78  | 2.77  | 0.14 | 0.06 | 1.01  | 0.508584 | 0.704053 | 0.740507 | 0.828326 |
| MmugDNA.23363.1.S1_at   | MmugDNA.23363.1 | 6.3   | 6.45  | 0.58 | 0.8  | -1.11 | 0.547822 | 0.721366 | 0.766242 | 0.838685 |
| MmugDNA.23364.1.S1_at   | MmugDNA.23364.1 | 3.14  | 3.23  | 0.06 | 0.01 | -1.06 | 0.184479 | 0.523736 | 0.480429 | 0.713976 |
| MmugDNA.23365.1.S1_at   | MmugDNA.23365.1 | 7.29  | 7.25  | 0.54 | 0.2  | 1.03  | 0.69307  | 0.265543 | 0.853323 | 0.531418 |
| MmugDNA.23366.1.S1_s_at | MmugDNA.23366.1 | 6.3   | 5.93  | 0.22 | 0.15 | 1.3   | 0.34252  | 0.219857 | 0.622224 | 0.493388 |
| MmugDNA.23367.1.S1_at   | MmugDNA.23367.1 | 7.57  | 6.66  | 0.9  | 0.2  | 1.88  | 0.10096  | 0.14179  | 0.372244 | 0.415331 |
| MmugDNA.23367.1.S1_s_at | MmugDNA.23367.1 | 7.41  | 6.96  | 0.83 | 0.16 | 1.37  | 0.315878 | 0.41852  | 0.600637 | 0.642927 |
| MmugDNA.23368.1.S1_at   | MmugDNA.23368.1 | 4.67  | 4.41  | 0.17 | 0.04 | 1.19  | 0.088558 | 0.080779 | 0.354742 | 0.328657 |
| MmugDNA.23369.1.S1_at   | MmugDNA.23369.1 | 3.33  | 3.21  | 0.04 | 0.08 | 1.09  | 0.089998 | 0.079741 | 0.356863 | 0.327009 |
| MmugDNA.23370.1.S1_at   | MmugDNA.23370.1 | 4.9   | 4.97  | 0.22 | 0.09 | -1.05 | 0.209112 | 0.495292 | 0.506631 | 0.695411 |
| MmugDNA.23371.1.S1_at   | MmugDNA.23371.1 | 10.04 | 10.21 | 0.16 | 0.12 | -1.13 | 0.282566 | 0.001238 | 0.573229 | 0.05478  |
| MmugDNA.23372.1.S1_at   | MmugDNA.23372.1 | 8.03  | 8.09  | 0.36 | 0.11 | -1.05 | 0.730963 | 0.174088 | 0.874299 | 0.450385 |
| MmugDNA.23374.1.S1_at   | MmugDNA.23374.1 | 8.1   | 7.79  | 0.27 | 0.08 | 1.24  | 0.331923 | 0.114219 | 0.613772 | 0.380761 |
| MmugDNA.23375.1.S1_at   | MmugDNA.23375.1 | 6.89  | 8.75  | 0.37 | 0.17 | -3.64 | 0.002138 | 0.003148 | 0.090208 | 0.081732 |

|                         |                 |       |       |      |      |       |          |          |          |          |
|-------------------------|-----------------|-------|-------|------|------|-------|----------|----------|----------|----------|
| MmugDNA.23376.1.S1_at   | MmugDNA.23376.1 | 3.84  | 3.61  | 0.42 | 0.16 | 1.18  | 0.205185 | 0.310088 | 0.503054 | 0.565307 |
| MmugDNA.23377.1.S1_at   | MmugDNA.23377.1 | 3.79  | 3.5   | 0.58 | 0.21 | 1.22  | 0.468669 | 0.440699 | 0.713693 | 0.659076 |
| MmugDNA.23380.1.S1_at   | MmugDNA.23380.1 | 10.86 | 10.57 | 0.07 | 0.09 | 1.22  | 0.011622 | 0.033644 | 0.157638 | 0.227006 |
| MmugDNA.23381.1.S1_at   | MmugDNA.23381.1 | 13.59 | 13.55 | 0.07 | 0.02 | 1.02  | 0.11951  | 0.084205 | 0.397408 | 0.33528  |
| MmugDNA.23382.1.S1_at   | MmugDNA.23382.1 | 5.54  | 5.89  | 0.78 | 0.08 | -1.28 | 0.542612 | 0.767876 | 0.762884 | 0.865256 |
| MmugDNA.23383.1.S1_at   | MmugDNA.23383.1 | 8.42  | 8.22  | 0.53 | 0.12 | 1.15  | 0.480141 | 0.514464 | 0.721151 | 0.707693 |
| MmugDNA.23384.1.S1_at   | MmugDNA.23384.1 | 3.96  | 3.39  | 0.49 | 0.09 | 1.48  | 0.219209 | 0.191628 | 0.516927 | 0.466918 |
| MmugDNA.23385.1.S1_at   | MmugDNA.23385.1 | 7.37  | 8.45  | 0.48 | 0.39 | -2.11 | 0.070105 | 0.041697 | 0.323085 | 0.24887  |
| MmugDNA.23386.1.S1_at   | MmugDNA.23386.1 | 3.33  | 3.34  | 0.03 | 0.05 | -1    | 0.850182 | 0.23645  | 0.93489  | 0.507314 |
| MmugDNA.23389.1.S1_at   | MmugDNA.23389.1 | 7.31  | 7.97  | 1.01 | 0.33 | -1.58 | 0.891606 | 0.922408 | 0.953744 | 0.956308 |
| MmugDNA.2339.1.S1_at    | MmugDNA.2339.1  | 3.96  | 4.02  | 0.17 | 0.3  | -1.05 | 0.618631 | 0.810065 | 0.810696 | 0.890518 |
| MmugDNA.23390.1.S1_at   | MmugDNA.23390.1 | 4.53  | 4.19  | 0.36 | 0.11 | 1.27  | 0.093782 | 0.040266 | 0.362519 | 0.245902 |
| MmugDNA.23391.1.S1_at   | MmugDNA.23391.1 | 5.07  | 5.14  | 0.1  | 0.02 | -1.05 | 0.079784 | 0.082237 | 0.339935 | 0.331091 |
| MmugDNA.23393.1.S1_at   | MmugDNA.23393.1 | 4.81  | 4.54  | 0.13 | 0.81 | 1.2   | 0.236696 | 0.044493 | 0.534328 | 0.255279 |
| MmugDNA.23394.1.S1_at   | MmugDNA.23394.1 | 10.26 | 9.77  | 0.16 | 0.1  | 1.4   | 0.024519 | 0.432215 | 0.209655 | 0.652775 |
| MmugDNA.23395.1.S1_at   | MmugDNA.23395.1 | 5.75  | 5.75  | 0.02 | 0.04 | 1     | 0.628794 | 0.801686 | 0.817507 | 0.885902 |
| MmugDNA.23396.1.S1_at   | MmugDNA.23396.1 | 13.46 | 13.6  | 0.03 | 0.05 | -1.1  | 0.01205  | 0.015091 | 0.159696 | 0.155995 |
| MmugDNA.23397.1.S1_at   | MmugDNA.23397.1 | 4.23  | 4.22  | 0.08 | 0.08 | 1     | 0.317675 | 0.299479 | 0.602424 | 0.557916 |
| MmugDNA.23398.1.S1_at   | MmugDNA.23398.1 | 7.37  | 8.49  | 0.28 | 0.3  | -2.18 | 0.010967 | 0.182274 | 0.154565 | 0.458766 |
| MmugDNA.28352.1.S1_at   | MmugDNA.28352.1 | 12.45 | 11.95 | 0.26 | 0.04 | 1.42  | 0.03256  | 0.024175 | 0.234816 | 0.194641 |
| MmugDNA.28352.1.S1_s_at | MmugDNA.28352.1 | 12.37 | 12.19 | 0.15 | 0.01 | 1.13  | 0.040674 | 0.07499  | 0.258252 | 0.319038 |
| MmugDNA.234.1.S1_at     | MmugDNA.234.1   | 4.13  | 3.73  | 0.12 | 0.11 | 1.32  | 0.049281 | 0.03964  | 0.279456 | 0.244183 |
| MmugDNA.2340.1.S1_at    | MmugDNA.2340.1  | 6.32  | 6.21  | 0.24 | 0.07 | 1.08  | 0.269537 | 0.24067  | 0.561872 | 0.511396 |
| MmugDNA.23400.1.S1_at   | MmugDNA.23400.1 | 4.57  | 4.61  | 0.21 | 0.09 | -1.03 | 0.969821 | 0.96857  | 0.988006 | 0.982645 |
| MmugDNA.23401.1.S1_at   | MmugDNA.23401.1 | 7.32  | 6.9   | 0.71 | 0.3  | 1.34  | 0.402302 | 0.470605 | 0.666675 | 0.678925 |
| MmugDNA.23402.1.S1_at   | MmugDNA.23402.1 | 4.3   | 4.31  | 0.79 | 0.04 | -1    | 0.370016 | 0.399483 | 0.643241 | 0.629825 |
| MmugDNA.23404.1.S1_at   | MmugDNA.23404.1 | 5.46  | 5.44  | 0.3  | 0.02 | 1.02  | 0.325096 | 0.480089 | 0.608531 | 0.685659 |
| MmugDNA.23406.1.S1_at   | MmugDNA.23406.1 | 4.42  | 4.47  | 0.06 | 0.36 | -1.04 | 0.330643 | 0.57661  | 0.612604 | 0.747284 |
| MmugDNA.23408.1.S1_at   | MmugDNA.23408.1 | 4.35  | 4.35  | 0.08 | 0.14 | 1     | 0.425656 | 0.370485 | 0.682976 | 0.609544 |
| MmugDNA.23409.1.S1_at   | MmugDNA.23409.1 | 5.28  | 5.24  | 0.17 | 0.18 | 1.03  | 0.915681 | 0.844331 | 0.964127 | 0.911376 |
| MmugDNA.2341.1.S1_at    | MmugDNA.2341.1  | 5.68  | 5.52  | 0.04 | 0.07 | 1.12  | 0.043502 | 0.002239 | 0.265724 | 0.069669 |
| MmugDNA.23410.1.S1_at   | MmugDNA.23410.1 | 11.55 | 11.49 | 0.13 | 0.14 | 1.04  | 0.310122 | 0.136049 | 0.596363 | 0.408363 |
| MmugDNA.23411.1.S1_at   | MmugDNA.23411.1 | 3.24  | 3.23  | 0.08 | 0.02 | 1.01  | 0.699963 | 0.430339 | 0.857508 | 0.651374 |
| MmugDNA.23412.1.S1_at   | MmugDNA.23412.1 | 6.2   | 6.36  | 0.2  | 0.05 | -1.12 | 0.509298 | 0.678499 | 0.740974 | 0.81221  |
| MmugDNA.23412.1.S1_x_at | MmugDNA.23412.1 | 8.17  | 8.14  | 0.15 | 0.07 | 1.02  | 0.659224 | 0.427098 | 0.835548 | 0.649106 |
| MmugDNA.23413.1.S1_at   | MmugDNA.23413.1 | 10.61 | 10.54 | 0.14 | 0.03 | 1.05  | 0.477353 | 0.576598 | 0.719381 | 0.747284 |
| MmugDNA.23415.1.S1_at   | MmugDNA.23415.1 | 9.2   | 8.87  | 0.33 | 0.11 | 1.26  | 0.192918 | 0.360834 | 0.48947  | 0.601938 |
| MmugDNA.23416.1.S1_at   | MmugDNA.23416.1 | 9.04  | 9.04  | 0.49 | 0.06 | -1    | 0.819788 | 0.710292 | 0.919644 | 0.831912 |
| MmugDNA.23417.1.S1_at   | MmugDNA.23417.1 | 5.74  | 5.7   | 0.06 | 0.02 | 1.03  | 0.082013 | 0.156739 | 0.343272 | 0.432216 |
| MmugDNA.23418.1.S1_at   | MmugDNA.23418.1 | 7.14  | 7.16  | 0.51 | 0.21 | -1.01 | 0.95904  | 0.796932 | 0.983307 | 0.882822 |
| MmugDNA.23419.1.S1_at   | MmugDNA.23419.1 | 3.8   | 4.08  | 0.41 | 0.03 | -1.21 | 0.830497 | 0.517204 | 0.925496 | 0.709435 |
| MmugDNA.2342.1.S1_at    | MmugDNA.2342.1  | 2.82  | 2.81  | 0.14 | 0    | 1.01  | 0.893243 | 0.951514 | 0.954486 | 0.972522 |
| MmugDNA.23420.1.S1_at   | MmugDNA.23420.1 | 4.29  | 4.31  | 0.08 | 0.11 | -1.01 | 0.430431 | 0.320802 | 0.686666 | 0.572849 |

|                       |                 |       |       |      |      |       |          |          |          |          |
|-----------------------|-----------------|-------|-------|------|------|-------|----------|----------|----------|----------|
| MmugDNA.23421.1.S1_at | MmugDNA.23421.1 | 3.95  | 3.72  | 0.05 | 0.12 | 1.17  | 0.143481 | 0.376429 | 0.429972 | 0.614271 |
| MmugDNA.23422.1.S1_at | MmugDNA.23422.1 | 10.53 | 10.4  | 0.15 | 0.08 | 1.09  | 0.438218 | 0.2082   | 0.692858 | 0.482086 |
| MmugDNA.23426.1.S1_at | MmugDNA.23426.1 | 3.23  | 3.22  | 0.1  | 0.03 | 1.01  | 0.788643 | 0.588366 | 0.903969 | 0.754874 |
| MmugDNA.23427.1.S1_at | MmugDNA.23427.1 | 6.77  | 7.35  | 0.28 | 0.04 | -1.5  | 0.027993 | 0.00491  | 0.219887 | 0.097662 |
| MmugDNA.23429.1.S1_at | MmugDNA.23429.1 | 5.92  | 5.76  | 0.26 | 0.21 | 1.12  | 0.204632 | 0.061705 | 0.502362 | 0.295166 |
| MmugDNA.2343.1.S1_at  | MmugDNA.2343.1  | 3.45  | 3.4   | 0.08 | 0.08 | 1.03  | 0.507429 | 0.077861 | 0.739639 | 0.324099 |
| MmugDNA.23430.1.S1_at | MmugDNA.23430.1 | 3.23  | 3.09  | 0.13 | 0.07 | 1.11  | 0.142334 | 0.457658 | 0.428351 | 0.670889 |
| MmugDNA.23432.1.S1_at | MmugDNA.23432.1 | 5.23  | 5.33  | 0.1  | 0.02 | -1.08 | 0.100591 | 0.018516 | 0.371612 | 0.171214 |
| MmugDNA.23433.1.S1_at | MmugDNA.23433.1 | 4.93  | 4.34  | 0.52 | 0.59 | 1.51  | 0.11844  | 0.06851  | 0.396104 | 0.308262 |
| MmugDNA.23435.1.S1_at | MmugDNA.23435.1 | 11.78 | 11.89 | 0.22 | 0.06 | -1.08 | 0.129225 | 0.674317 | 0.411585 | 0.809716 |
| MmugDNA.23437.1.S1_at | MmugDNA.23437.1 | 6.34  | 6.27  | 0.21 | 0.03 | 1.05  | 0.646704 | 0.28048  | 0.828301 | 0.543671 |
| MmugDNA.23438.1.S1_at | MmugDNA.23438.1 | 5.09  | 5.07  | 1.23 | 0.69 | 1.02  | 0.713572 | 0.892846 | 0.864722 | 0.93888  |
| MmugDNA.23439.1.S1_at | MmugDNA.23439.1 | 5.09  | 5.18  | 0.78 | 0.35 | -1.06 | 0.759597 | 0.57916  | 0.889813 | 0.748918 |
| MmugDNA.2344.1.S1_at  | MmugDNA.2344.1  | 5.08  | 5.46  | 0.32 | 0.39 | -1.3  | 0.485645 | 0.580644 | 0.725109 | 0.749827 |
| MmugDNA.23440.1.S1_at | MmugDNA.23440.1 | 4.14  | 4.09  | 0.04 | 0.07 | 1.03  | 0.156617 | 0.421192 | 0.44712  | 0.644807 |
| MmugDNA.23441.1.S1_at | MmugDNA.23441.1 | 5.63  | 5.77  | 0.17 | 0.1  | -1.1  | 0.235482 | 0.727904 | 0.533339 | 0.842707 |
| MmugDNA.23443.1.S1_at | MmugDNA.23443.1 | 5.63  | 5.36  | 0.27 | 0.13 | 1.2   | 0.132919 | 0.074749 | 0.416351 | 0.318471 |
| MmugDNA.23444.1.S1_at | MmugDNA.23444.1 | 6.75  | 6.53  | 0.83 | 0.16 | 1.17  | 0.223241 | 0.353877 | 0.52109  | 0.596873 |
| MmugDNA.23446.1.S1_at | MmugDNA.23446.1 | 7.34  | 6.9   | 1.06 | 0.15 | 1.36  | 0.909908 | 0.705828 | 0.961815 | 0.829542 |
| MmugDNA.23447.1.S1_at | MmugDNA.23447.1 | 3.15  | 3.2   | 0.02 | 0.06 | -1.03 | 0.097763 | 0.091735 | 0.36816  | 0.346977 |
| MmugDNA.23449.1.S1_at | MmugDNA.23449.1 | 4.15  | 4.18  | 0.15 | 0.21 | -1.02 | 0.638129 | 0.581434 | 0.822758 | 0.750451 |
| MmugDNA.2345.1.S1_at  | MmugDNA.2345.1  | 4.46  | 4.4   | 0.21 | 0.06 | 1.04  | 0.495415 | 0.747354 | 0.731814 | 0.853149 |
| MmugDNA.23450.1.S1_at | MmugDNA.23450.1 | 4.34  | 3.04  | 1.02 | 0.35 | 2.46  | 0.097027 | 0.077371 | 0.36722  | 0.323177 |
| MmugDNA.23452.1.S1_at | MmugDNA.23452.1 | 8.94  | 9.54  | 0.14 | 0.05 | -1.51 | 0.002135 | 0.000602 | 0.090208 | 0.041985 |
| MmugDNA.23453.1.S1_at | MmugDNA.23453.1 | 4.89  | 4.93  | 0.11 | 0.24 | -1.03 | 0.565375 | 0.687975 | 0.776688 | 0.817831 |
| MmugDNA.23454.1.S1_at | MmugDNA.23454.1 | 9.9   | 8.17  | 0.59 | 0.35 | 3.31  | 0.013332 | 0.030427 | 0.166232 | 0.216377 |
| MmugDNA.23455.1.S1_at | MmugDNA.23455.1 | 3.47  | 3.47  | 0.1  | 0.09 | 1     | 0.951793 | 0.839533 | 0.980036 | 0.90858  |
| MmugDNA.23456.1.S1_at | MmugDNA.23456.1 | 6.87  | 5.84  | 0.82 | 0.15 | 2.04  | 0.090302 | 0.115355 | 0.356895 | 0.382394 |
| MmugDNA.23457.1.S1_at | MmugDNA.23457.1 | 4.93  | 4.66  | 0.22 | 0.13 | 1.21  | 0.073544 | 0.083309 | 0.328967 | 0.333375 |
| MmugDNA.23458.1.S1_at | MmugDNA.23458.1 | 5.95  | 5.71  | 0.22 | 0.23 | 1.18  | 0.120331 | 0.265089 | 0.398774 | 0.531    |
| MmugDNA.23459.1.S1_at | MmugDNA.23459.1 | 5     | 4.89  | 0.43 | 0.26 | 1.08  | 0.511167 | 0.704042 | 0.742366 | 0.828326 |
| MmugDNA.2346.1.S1_at  | MmugDNA.2346.1  | 4.81  | 4.92  | 0.06 | 0.08 | -1.08 | 0.232853 | 0.211379 | 0.531142 | 0.48553  |
| MmugDNA.23461.1.S1_at | MmugDNA.23461.1 | 9.73  | 9.5   | 0.15 | 0.09 | 1.18  | 0.098978 | 0.540985 | 0.369854 | 0.72469  |
| MmugDNA.23462.1.S1_at | MmugDNA.23462.1 | 4.81  | 4.81  | 0.15 | 0.03 | 1     | 0.300564 | 0.618649 | 0.588798 | 0.774185 |
| MmugDNA.23463.1.S1_at | MmugDNA.23463.1 | 3.77  | 3.85  | 0.11 | 0.16 | -1.06 | 0.481761 | 0.126807 | 0.722197 | 0.397446 |
| MmugDNA.23464.1.S1_at | MmugDNA.23464.1 | 6.95  | 6.6   | 0.06 | 0.21 | 1.28  | 0.111942 | 0.456725 | 0.388118 | 0.670428 |
| MmugDNA.23465.1.S1_at | MmugDNA.23465.1 | 9.95  | 9.9   | 0.2  | 0.15 | 1.04  | 0.945176 | 0.006524 | 0.976981 | 0.10961  |
| MmugDNA.23466.1.S1_at | MmugDNA.23466.1 | 5.83  | 5.36  | 0.17 | 0.6  | 1.39  | 0.261078 | 0.466588 | 0.555232 | 0.676398 |
| MmugDNA.23467.1.S1_at | MmugDNA.23467.1 | 5.78  | 6.38  | 0.41 | 0.32 | -1.51 | 0.114172 | 0.252887 | 0.390933 | 0.521223 |
| MmugDNA.23468.1.S1_at | MmugDNA.23468.1 | 8.89  | 9.71  | 0.39 | 0.05 | -1.76 | 0.052471 | 0.010765 | 0.286213 | 0.135471 |
| MmugDNA.23469.1.S1_at | MmugDNA.23469.1 | 5.49  | 5.85  | 0.32 | 0.54 | -1.28 | 0.651914 | 0.282078 | 0.830985 | 0.544937 |
| MmugDNA.23470.1.S1_at | MmugDNA.23470.1 | 7.6   | 7.7   | 0.15 | 0.12 | -1.07 | 0.801527 | 0.175489 | 0.91087  | 0.452157 |
| MmugDNA.23471.1.S1_at | MmugDNA.23471.1 | 7.05  | 7.04  | 0.39 | 0.52 | 1.01  | 0.79508  | 0.978489 | 0.907466 | 0.988285 |



|                         |                 |       |       |      |      |       |          |          |          |          |
|-------------------------|-----------------|-------|-------|------|------|-------|----------|----------|----------|----------|
| MmugDNA.23472.1.S1_at   | MmugDNA.23472.1 | 8.02  | 8.91  | 0.51 | 0.15 | -1.85 | 0.05622  | 0.010258 | 0.294294 | 0.132655 |
| MmugDNA.23476.1.S1_at   | MmugDNA.23476.1 | 3.62  | 3.69  | 0.07 | 0.23 | -1.05 | 0.660349 | 0.792355 | 0.83613  | 0.880015 |
| MmugDNA.23477.1.S1_at   | MmugDNA.23477.1 | 6.1   | 6.19  | 0.15 | 0.18 | -1.06 | 0.937005 | 0.960592 | 0.97363  | 0.977548 |
| MmugDNA.23478.1.S1_at   | MmugDNA.23478.1 | 3.9   | 3.44  | 0.14 | 0.07 | 1.38  | 0.01142  | 0.130782 | 0.157067 | 0.402959 |
| MmugDNA.23479.1.S1_at   | MmugDNA.23479.1 | 6.43  | 6.43  | 0.33 | 0.01 | 1     | 0.966171 | 0.824541 | 0.986321 | 0.89925  |
| MmugDNA.2348.1.S1_at    | MmugDNA.2348.1  | 4.17  | 4.03  | 0.17 | 0.17 | 1.1   | 0.716541 | 0.684127 | 0.866312 | 0.81577  |
| MmugDNA.23480.1.S1_at   | MmugDNA.23480.1 | 6.28  | 6.17  | 0.05 | 0.11 | 1.08  | 0.161459 | 0.188683 | 0.453006 | 0.46461  |
| MmugDNA.23481.1.S1_at   | MmugDNA.23481.1 | 7.93  | 7.65  | 0.14 | 0.25 | 1.21  | 0.138693 | 0.159011 | 0.42426  | 0.435213 |
| MmugDNA.23482.1.S1_at   | MmugDNA.23482.1 | 5.12  | 4.98  | 0.06 | 0.12 | 1.1   | 0.173835 | 0.096033 | 0.468263 | 0.353302 |
| MmugDNA.23482.1.S1_s_at | MmugDNA.23482.1 | 8.1   | 8.14  | 0.18 | 0.1  | -1.03 | 0.394474 | 0.054668 | 0.661066 | 0.279311 |
| MmugDNA.23483.1.S1_at   | MmugDNA.23483.1 | 7.83  | 7.94  | 0.92 | 0.21 | -1.08 | 0.891891 | 0.399851 | 0.953851 | 0.630048 |
| MmugDNA.23484.1.S1_at   | MmugDNA.23484.1 | 5.3   | 5.19  | 0.39 | 0.15 | 1.08  | 0.70652  | 0.175934 | 0.861067 | 0.452486 |
| MmugDNA.23485.1.S1_at   | MmugDNA.23485.1 | 9.92  | 8.2   | 0.2  | 0.34 | 3.31  | 0.00223  | 0.000714 | 0.091055 | 0.044419 |
| MmugDNA.23512.1.S1_s_at | MmugDNA.23512.1 | 4.47  | 4.35  | 0.19 | 0.07 | 1.09  | 0.441866 | 0.338418 | 0.69534  | 0.585432 |
| MmugDNA.23488.1.S1_at   | MmugDNA.23488.1 | 3.31  | 3.49  | 0.28 | 0.76 | -1.14 | 0.258508 | 0.281873 | 0.552565 | 0.544844 |
| MmugDNA.2349.1.S1_at    | MmugDNA.2349.1  | 3.22  | 3.15  | 0.16 | 0.06 | 1.05  | 0.557055 | 0.3948   | 0.771999 | 0.627216 |
| MmugDNA.23490.1.S1_at   | MmugDNA.23490.1 | 5.08  | 4.92  | 0.46 | 0.12 | 1.12  | 0.391666 | 0.528541 | 0.658751 | 0.716664 |
| MmugDNA.23491.1.S1_at   | MmugDNA.23491.1 | 8.12  | 8.29  | 0.28 | 0.21 | -1.13 | 0.163114 | 0.437649 | 0.455306 | 0.656833 |
| MmugDNA.23493.1.S1_at   | MmugDNA.23493.1 | 4.51  | 4.55  | 0.03 | 0.04 | -1.03 | 0.642782 | 0.821302 | 0.825715 | 0.897125 |
| MmugDNA.23494.1.S1_at   | MmugDNA.23494.1 | 5.72  | 4.98  | 0.38 | 0.37 | 1.67  | 0.146962 | 0.338829 | 0.434942 | 0.585883 |
| MmugDNA.23495.1.S1_at   | MmugDNA.23495.1 | 5.55  | 6.02  | 0.28 | 0.05 | -1.38 | 0.054565 | 0.087513 | 0.290604 | 0.340677 |
| MmugDNA.23496.1.S1_at   | MmugDNA.23496.1 | 8.84  | 7.56  | 0.23 | 0.26 | 2.43  | 0.002387 | 0.002819 | 0.093345 | 0.078275 |
| MmugDNA.23497.1.S1_at   | MmugDNA.23497.1 | 8.43  | 8.72  | 0.1  | 0.19 | -1.22 | 0.055281 | 0.100698 | 0.292072 | 0.360078 |
| MmugDNA.23499.1.S1_at   | MmugDNA.23499.1 | 4.46  | 4.49  | 0.7  | 0.34 | -1.02 | 0.773103 | 0.559987 | 0.89602  | 0.736439 |
| MmugDNA.2350.1.S1_at    | MmugDNA.2350.1  | 6.3   | 6.24  | 0.13 | 0.03 | 1.04  | 0.316412 | 0.307392 | 0.601133 | 0.563638 |
| MmugDNA.23502.1.S1_at   | MmugDNA.23502.1 | 4.33  | 4.54  | 0.82 | 0.19 | -1.16 | 0.765542 | 0.689967 | 0.892487 | 0.819224 |
| MmugDNA.23503.1.S1_at   | MmugDNA.23503.1 | 3.42  | 3.36  | 0.21 | 0.06 | 1.04  | 0.423821 | 0.242399 | 0.681747 | 0.51282  |
| MmugDNA.23504.1.S1_s_at | MmugDNA.23504.1 | 7.6   | 9.77  | 0.77 | 0.32 | -4.51 | 0.015667 | 0.154068 | 0.177615 | 0.428867 |
| MmugDNA.23505.1.S1_at   | MmugDNA.23505.1 | 3.04  | 3.02  | 0.09 | 0.12 | 1.01  | 0.776284 | 0.870199 | 0.897687 | 0.926372 |
| MmugDNA.23506.1.S1_s_at | MmugDNA.23506.1 | 14.42 | 14.43 | 0.06 | 0.01 | -1.01 | 0.628614 | 0.694422 | 0.817487 | 0.822288 |
| MmugDNA.23507.1.S1_at   | MmugDNA.23507.1 | 4.22  | 4.38  | 0.15 | 0.11 | -1.11 | 0.175776 | 0.130845 | 0.470151 | 0.403037 |
| MmugDNA.23508.1.S1_at   | MmugDNA.23508.1 | 5.23  | 5.12  | 0.35 | 0.16 | 1.08  | 0.21975  | 0.221294 | 0.51751  | 0.494618 |
| MmugDNA.23509.1.S1_at   | MmugDNA.23509.1 | 11.81 | 11.75 | 0.05 | 0.07 | 1.04  | 0.25651  | 0.000758 | 0.551012 | 0.045403 |
| MmugDNA.2351.1.S1_at    | MmugDNA.2351.1  | 5.82  | 5.58  | 0.43 | 0.21 | 1.18  | 0.158748 | 0.268524 | 0.449964 | 0.534123 |
| MmugDNA.23516.1.S1_at   | MmugDNA.23516.1 | 12.97 | 12.82 | 0.09 | 0.04 | 1.11  | 0.056279 | 0.260959 | 0.294454 | 0.527351 |
| MmugDNA.23517.1.S1_at   | MmugDNA.23517.1 | 7.04  | 7.51  | 0.69 | 0.06 | -1.38 | 0.104548 | 0.244297 | 0.377911 | 0.514184 |
| MmugDNA.23518.1.S1_at   | MmugDNA.23518.1 | 7.13  | 6.83  | 1.23 | 0.62 | 1.23  | 0.826804 | 0.866531 | 0.923258 | 0.92415  |
| MmugDNA.23519.1.S1_at   | MmugDNA.23519.1 | 3.24  | 3.1   | 0.11 | 0.03 | 1.1   | 0.148541 | 0.413407 | 0.437096 | 0.639648 |
| MmugDNA.2352.1.S1_at    | MmugDNA.2352.1  | 7.71  | 7.7   | 0.39 | 0.24 | 1.01  | 0.736421 | 0.107393 | 0.877494 | 0.370219 |
| MmugDNA.23520.1.S1_at   | MmugDNA.23520.1 | 6.86  | 7.34  | 0.39 | 0.11 | -1.39 | 0.089738 | 0.177867 | 0.356703 | 0.454181 |
| MmugDNA.23521.1.S1_at   | MmugDNA.23521.1 | 8.43  | 8.22  | 0.27 | 0.1  | 1.16  | 0.36987  | 0.831962 | 0.643133 | 0.90356  |
| MmugDNA.23522.1.S1_at   | MmugDNA.23522.1 | 6.11  | 6.23  | 0.47 | 0.1  | -1.09 | 0.621283 | 0.201894 | 0.81255  | 0.476373 |
| MmugDNA.23524.1.S1_at   | MmugDNA.23524.1 | 5.71  | 5.73  | 0.38 | 0.03 | -1.02 | 0.637063 | 0.725556 | 0.822346 | 0.841059 |

|                         |                 |       |       |      |      |        |          |          |          |          |
|-------------------------|-----------------|-------|-------|------|------|--------|----------|----------|----------|----------|
| MmugDNA.23525.1.S1_at   | MmugDNA.23525.1 | 3.99  | 3.85  | 0.33 | 0.07 | 1.1    | 0.178841 | 0.277919 | 0.473693 | 0.541664 |
| MmugDNA.23526.1.S1_at   | MmugDNA.23526.1 | 3.54  | 3.46  | 0.07 | 0.14 | 1.06   | 0.956334 | 0.24996  | 0.982055 | 0.518974 |
| MmugDNA.23527.1.S1_at   | MmugDNA.23527.1 | 4.9   | 4.56  | 0.58 | 0.07 | 1.27   | 0.119617 | 0.083977 | 0.397588 | 0.3349   |
| MmugDNA.23528.1.S1_at   | MmugDNA.23528.1 | 12.37 | 12.24 | 0.21 | 0.05 | 1.09   | 0.821213 | 0.831262 | 0.920283 | 0.903226 |
| MmugDNA.23529.1.S1_at   | MmugDNA.23529.1 | 6.56  | 6.54  | 0.27 | 0.18 | 1.02   | 0.379252 | 0.52801  | 0.649238 | 0.716422 |
| MmugDNA.2353.1.S1_at    | MmugDNA.2353.1  | 5.75  | 5.64  | 0.23 | 0.06 | 1.08   | 0.16703  | 0.152844 | 0.460288 | 0.427654 |
| MmugDNA.23530.1.S1_at   | MmugDNA.23530.1 | 2.97  | 2.89  | 0.1  | 0.04 | 1.06   | 0.232743 | 0.359475 | 0.531068 | 0.600754 |
| MmugDNA.23531.1.S1_at   | MmugDNA.23531.1 | 3.98  | 4.5   | 0.12 | 0.17 | -1.43  | 0.024787 | 0.11888  | 0.210464 | 0.387068 |
| MmugDNA.23533.1.S1_at   | MmugDNA.23533.1 | 5.3   | 6.4   | 0.84 | 0.2  | -2.15  | 0.367252 | 0.41606  | 0.641323 | 0.641342 |
| MmugDNA.23534.1.S1_at   | MmugDNA.23534.1 | 9.85  | 9.38  | 0.22 | 0.16 | 1.38   | 0.047206 | 0.133411 | 0.274594 | 0.405246 |
| MmugDNA.23536.1.S1_at   | MmugDNA.23536.1 | 3.61  | 3.48  | 0.07 | 0.08 | 1.09   | 0.143887 | 0.366233 | 0.430578 | 0.606013 |
| MmugDNA.23537.1.S1_at   | MmugDNA.23537.1 | 3.2   | 3.05  | 0.26 | 0.08 | 1.11   | 0.300063 | 0.356699 | 0.588361 | 0.598516 |
| MmugDNA.23539.1.S1_at   | MmugDNA.23539.1 | 8.75  | 9.07  | 0.49 | 0.06 | -1.26  | 0.374031 | 0.463637 | 0.645254 | 0.67456  |
| MmugDNA.2354.1.S1_at    | MmugDNA.2354.1  | 4.5   | 4.53  | 0.17 | 0.02 | -1.02  | 0.282431 | 0.516985 | 0.573155 | 0.709346 |
| MmugDNA.23540.1.S1_at   | MmugDNA.23540.1 | 6.28  | 6.28  | 0.19 | 0.1  | 1      | 0.962114 | 0.961615 | 0.984578 | 0.978382 |
| MmugDNA.23541.1.S1_at   | MmugDNA.23541.1 | 10.82 | 11.2  | 0.23 | 0.1  | -1.3   | 0.083826 | 0.752311 | 0.34664  | 0.855787 |
| MmugDNA.23543.1.S1_s_at | MmugDNA.23543.1 | 10.51 | 10.94 | 0.21 | 0.25 | -1.35  | 0.075841 | 0.137497 | 0.333731 | 0.410458 |
| MmugDNA.23545.1.S1_at   | MmugDNA.23545.1 | 10.81 | 10.85 | 0.11 | 0.09 | -1.03  | 0.769173 | 0.268299 | 0.894031 | 0.534021 |
| MmugDNA.23546.1.S1_at   | MmugDNA.23546.1 | 2.98  | 3.02  | 0.09 | 0.08 | -1.03  | 0.721745 | 0.360721 | 0.86896  | 0.60179  |
| MmugDNA.23547.1.S1_at   | MmugDNA.23547.1 | 7.67  | 9.28  | 1.55 | 0.15 | -3.05  | 0.144876 | 0.465135 | 0.431907 | 0.675606 |
| MmugDNA.23549.1.S1_at   | MmugDNA.23549.1 | 4.4   | 4.36  | 0.32 | 0.07 | 1.03   | 0.733676 | 0.908028 | 0.875847 | 0.947889 |
| MmugDNA.2355.1.S1_at    | MmugDNA.2355.1  | 3.36  | 3.25  | 0.09 | 0    | 1.07   | 0.340536 | 0.284803 | 0.620818 | 0.546966 |
| MmugDNA.23550.1.S1_at   | MmugDNA.23550.1 | 4.75  | 4.77  | 0.21 | 0.02 | -1.01  | 0.402745 | 0.622564 | 0.667006 | 0.777066 |
| MmugDNA.23551.1.S1_at   | MmugDNA.23551.1 | 6.56  | 6.71  | 0.12 | 0.02 | -1.11  | 0.330706 | 0.037837 | 0.612657 | 0.238912 |
| MmugDNA.23552.1.S1_at   | MmugDNA.23552.1 | 4.23  | 4.19  | 0.26 | 0.13 | 1.03   | 0.644761 | 0.766047 | 0.82702  | 0.864085 |
| MmugDNA.23553.1.S1_at   | MmugDNA.23553.1 | 8     | 7.18  | 0.22 | 0.14 | 1.77   | 0.003945 | 0.006406 | 0.108453 | 0.108767 |
| MmugDNA.23554.1.S1_at   | MmugDNA.23554.1 | 6.89  | 6.74  | 0.3  | 0.18 | 1.11   | 0.33218  | 0.458188 | 0.613975 | 0.671077 |
| MmugDNA.23555.1.S1_at   | MmugDNA.23555.1 | 6.05  | 5.84  | 0.21 | 0.2  | 1.16   | 0.233615 | 0.01751  | 0.531728 | 0.167516 |
| MmugDNA.23557.1.S1_at   | MmugDNA.23557.1 | 5.39  | 5.15  | 0.08 | 0.04 | 1.18   | 0.008912 | 0.003355 | 0.144128 | 0.083359 |
| MmugDNA.23558.1.S1_at   | MmugDNA.23558.1 | 7.55  | 7.4   | 0.19 | 0.02 | 1.11   | 0.815556 | 0.546831 | 0.917658 | 0.728203 |
| MmugDNA.2356.1.S1_at    | MmugDNA.2356.1  | 4.03  | 3.86  | 0.08 | 0.28 | 1.12   | 0.821445 | 0.743617 | 0.920411 | 0.851428 |
| MmugDNA.23562.1.S1_at   | MmugDNA.23562.1 | 5.72  | 9.18  | 1.62 | 0.33 | -11.02 | 0.060943 | 0.284172 | 0.303765 | 0.546381 |
| MmugDNA.23563.1.S1_at   | MmugDNA.23563.1 | 5.65  | 5.88  | 0.04 | 0.12 | -1.17  | 0.079045 | 0.340952 | 0.338745 | 0.587051 |
| MmugDNA.23565.1.S1_at   | MmugDNA.23565.1 | 3.62  | 4     | 0.09 | 0.09 | -1.3   | 0.014732 | 0.027678 | 0.173341 | 0.207762 |
| MmugDNA.23566.1.S1_at   | MmugDNA.23566.1 | 7     | 7     | 0.12 | 0.1  | -1     | 0.667681 | 0.196451 | 0.840503 | 0.471483 |
| MmugDNA.23544.1.S1_s_at | MmugDNA.23544.1 | 6.82  | 10.53 | 2.41 | 0.24 | -13.15 | 0.083243 | 0.339132 | 0.345528 | 0.585891 |
| MmugDNA.23568.1.S1_at   | MmugDNA.23568.1 | 4.4   | 4.22  | 0.19 | 0.15 | 1.13   | 0.713108 | 0.407751 | 0.864548 | 0.635158 |
| MmugDNA.23569.1.S1_at   | MmugDNA.23569.1 | 5.45  | 5.18  | 0.33 | 0.2  | 1.21   | 0.150634 | 0.210071 | 0.439728 | 0.483853 |
| MmugDNA.2357.1.S1_at    | MmugDNA.2357.1  | 3.6   | 4.14  | 0.06 | 0.3  | -1.45  | 0.049448 | 0.104938 | 0.279817 | 0.366498 |
| MmugDNA.23570.1.S1_at   | MmugDNA.23570.1 | 5.47  | 5.47  | 0.04 | 0.23 | -1     | 0.947622 | 0.466013 | 0.977941 | 0.676083 |
| MmugDNA.23571.1.S1_at   | MmugDNA.23571.1 | 4.38  | 4     | 0.06 | 0.18 | 1.3    | 0.0119   | 0.005712 | 0.159222 | 0.104201 |
| MmugDNA.23573.1.S1_at   | MmugDNA.23573.1 | 11.46 | 11.57 | 0.07 | 0.07 | -1.08  | 0.565273 | 0.206514 | 0.776569 | 0.480571 |
| MmugDNA.23574.1.S1_at   | MmugDNA.23574.1 | 9.69  | 8.68  | 0.28 | 0.09 | 2.02   | 0.007111 | 0.018529 | 0.131735 | 0.171243 |

|                         |                 |       |       |      |      |        |          |          |          |          |
|-------------------------|-----------------|-------|-------|------|------|--------|----------|----------|----------|----------|
| MmugDNA.23576.1.S1_at   | MmugDNA.23576.1 | 11.18 | 10.37 | 0.21 | 0.06 | 1.75   | 0.002838 | 0.000495 | 0.098188 | 0.038955 |
| MmugDNA.23578.1.S1_at   | MmugDNA.23578.1 | 4.98  | 4.3   | 1.12 | 0.22 | 1.61   | 0.218987 | 0.256096 | 0.516662 | 0.524057 |
| MmugDNA.23579.1.S1_at   | MmugDNA.23579.1 | 7.63  | 7.8   | 0.08 | 0.1  | -1.13  | 0.083258 | 0.313809 | 0.345528 | 0.568083 |
| MmugDNA.2358.1.S1_at    | MmugDNA.2358.1  | 4.56  | 4.59  | 0.88 | 0.04 | -1.02  | 0.546881 | 0.717296 | 0.765598 | 0.836345 |
| MmugDNA.23580.1.S1_at   | MmugDNA.23580.1 | 11.61 | 12.03 | 0.2  | 0.28 | -1.34  | 0.194333 | 0.716205 | 0.490964 | 0.835515 |
| MmugDNA.23585.1.S1_at   | MmugDNA.23585.1 | 2.89  | 3.18  | 0.08 | 0.19 | -1.22  | 0.09345  | 0.173314 | 0.36203  | 0.449791 |
| MmugDNA.23587.1.S1_at   | MmugDNA.23587.1 | 4.67  | 4.7   | 0.39 | 0.02 | -1.02  | 0.859135 | 0.589933 | 0.938955 | 0.756007 |
| MmugDNA.23589.1.S1_at   | MmugDNA.23589.1 | 8.97  | 9.11  | 0.21 | 0    | -1.1   | 0.565675 | 0.905758 | 0.776758 | 0.946695 |
| MmugDNA.23590.1.S1_at   | MmugDNA.23590.1 | 5.46  | 5.8   | 0.06 | 0.08 | -1.27  | 0.004366 | 0.00299  | 0.112174 | 0.079958 |
| MmugDNA.23591.1.S1_at   | MmugDNA.23591.1 | 5.37  | 5.71  | 0.23 | 0.37 | -1.27  | 0.246272 | 0.180427 | 0.542014 | 0.457077 |
| MmugDNA.23594.1.S1_at   | MmugDNA.23594.1 | 5.23  | 5.21  | 0.4  | 0.32 | 1.01   | 0.916164 | 0.938675 | 0.964383 | 0.96511  |
| MmugDNA.23595.1.S1_at   | MmugDNA.23595.1 | 8.67  | 8.46  | 1.01 | 0.42 | 1.16   | 0.412838 | 0.135496 | 0.674373 | 0.407591 |
| MmugDNA.23597.1.S1_at   | MmugDNA.23597.1 | 3.36  | 3.43  | 0.06 | 0.03 | -1.05  | 0.110268 | 0.605298 | 0.385603 | 0.765071 |
| MmugDNA.23598.1.S1_at   | MmugDNA.23598.1 | 5.95  | 5.65  | 0.31 | 0.07 | 1.23   | 0.220585 | 0.07815  | 0.518299 | 0.324634 |
| MmugDNA.23599.1.S1_at   | MmugDNA.23599.1 | 9.39  | 9.35  | 0.3  | 0.15 | 1.03   | 0.535364 | 0.511428 | 0.75828  | 0.705549 |
| MmugDNA.236.1.S1_at     | MmugDNA.236.1   | 3.5   | 3.2   | 0.22 | 0.15 | 1.24   | 0.154984 | 0.310167 | 0.445174 | 0.565379 |
| MmugDNA.2360.1.S1_at    | MmugDNA.2360.1  | 8.22  | 7.58  | 0.45 | 0.2  | 1.56   | 0.130981 | 0.593553 | 0.413687 | 0.758329 |
| MmugDNA.23600.1.S1_at   | MmugDNA.23600.1 | 8.22  | 8.42  | 0.35 | 0.16 | -1.15  | 0.292212 | 0.000874 | 0.581488 | 0.047471 |
| MmugDNA.23601.1.S1_at   | MmugDNA.23601.1 | 6.63  | 7.28  | 0.33 | 0.32 | -1.57  | 0.059043 | 0.383997 | 0.30011  | 0.619866 |
| MmugDNA.23602.1.S1_at   | MmugDNA.23602.1 | 10.69 | 10.65 | 0.07 | 0.15 | 1.02   | 0.67399  | 0.396806 | 0.844284 | 0.628452 |
| MmugDNA.23604.1.S1_at   | MmugDNA.23604.1 | 6.68  | 6.52  | 0.13 | 0.12 | 1.12   | 0.293067 | 0.103549 | 0.582105 | 0.364346 |
| MmugDNA.13635.1.S1_at   | MmugDNA.13635.1 | 8.87  | 8.52  | 0.44 | 0.05 | 1.27   | 0.700864 | 0.850439 | 0.857901 | 0.914942 |
| MmugDNA.13635.1.S1_s_at | MmugDNA.13635.1 | 5.21  | 5.17  | 0.05 | 0.16 | 1.03   | 0.754851 | 0.56487  | 0.886949 | 0.739484 |
| MmugDNA.23606.1.S1_at   | MmugDNA.23606.1 | 3.63  | 3.92  | 0.24 | 0.03 | -1.22  | 0.360359 | 0.087934 | 0.635954 | 0.341336 |
| MmugDNA.23608.1.S1_at   | MmugDNA.23608.1 | 5.92  | 6.12  | 0.13 | 0.05 | -1.15  | 0.191095 | 0.346562 | 0.487278 | 0.591427 |
| MmugDNA.2361.1.S1_at    | MmugDNA.2361.1  | 7.12  | 7.25  | 0.55 | 0.4  | -1.09  | 0.64142  | 0.139443 | 0.824827 | 0.412743 |
| MmugDNA.23610.1.S1_at   | MmugDNA.23610.1 | 11.3  | 11.02 | 0.1  | 0.08 | 1.21   | 0.069199 | 0.004522 | 0.321158 | 0.093974 |
| MmugDNA.23611.1.S1_at   | MmugDNA.23611.1 | 4.25  | 8.06  | 0.83 | 0.62 | -14.04 | 0.007689 | 0.059919 | 0.136386 | 0.291408 |
| MmugDNA.23612.1.S1_at   | MmugDNA.23612.1 | 10    | 10.04 | 0.26 | 0.13 | -1.02  | 0.789254 | 0.001611 | 0.904231 | 0.060665 |
| MmugDNA.23613.1.S1_at   | MmugDNA.23613.1 | 5.78  | 7.1   | 0.53 | 0.21 | -2.49  | 0.052293 | 0.155132 | 0.285979 | 0.430275 |
| MmugDNA.23614.1.S1_at   | MmugDNA.23614.1 | 8.92  | 9.43  | 0.34 | 0.1  | -1.42  | 0.067276 | 0.010078 | 0.317039 | 0.13168  |
| MmugDNA.23616.1.S1_at   | MmugDNA.23616.1 | 10.73 | 10.82 | 0.14 | 0.04 | -1.06  | 0.211416 | 0.334353 | 0.50918  | 0.582352 |
| MmugDNA.23617.1.S1_at   | MmugDNA.23617.1 | 4.43  | 4.41  | 0.2  | 0.14 | 1.01   | 0.901532 | 0.692068 | 0.958284 | 0.82091  |
| MmugDNA.23618.1.S1_s_at | MmugDNA.23618.1 | 5.46  | 5.54  | 0.37 | 0.14 | -1.06  | 0.835013 | 0.584483 | 0.927446 | 0.752435 |
| MmugDNA.2362.1.S1_at    | MmugDNA.2362.1  | 3.49  | 3.54  | 0.2  | 0.09 | -1.04  | 0.980415 | 0.344254 | 0.992718 | 0.589762 |
| MmugDNA.23620.1.S1_at   | MmugDNA.23620.1 | 3.4   | 3.41  | 0.14 | 0.12 | -1.01  | 0.473999 | 0.179918 | 0.717191 | 0.456453 |
| MmugDNA.23621.1.S1_at   | MmugDNA.23621.1 | 7.17  | 8.08  | 0.44 | 0.46 | -1.87  | 0.346581 | 0.21824  | 0.624998 | 0.491764 |
| MmugDNA.23622.1.S1_at   | MmugDNA.23622.1 | 7.39  | 7.08  | 0.42 | 0.21 | 1.23   | 0.80367  | 0.006206 | 0.911852 | 0.106829 |
| MmugDNA.23623.1.S1_at   | MmugDNA.23623.1 | 4.05  | 4.08  | 0.04 | 0.13 | -1.02  | 0.528067 | 0.679281 | 0.753463 | 0.81275  |
| MmugDNA.23624.1.S1_at   | MmugDNA.23624.1 | 9.79  | 8.94  | 0.59 | 0.29 | 1.8    | 0.075588 | 0.332988 | 0.333192 | 0.581326 |
| MmugDNA.23625.1.S1_at   | MmugDNA.23625.1 | 3.74  | 3.46  | 0.92 | 0.14 | 1.22   | 0.265734 | 0.242094 | 0.558335 | 0.512652 |
| MmugDNA.23626.1.S1_at   | MmugDNA.23626.1 | 4.27  | 4.12  | 0.14 | 0.19 | 1.11   | 0.897777 | 0.716266 | 0.956586 | 0.835531 |
| MmugDNA.23627.1.S1_at   | MmugDNA.23627.1 | 11.38 | 10.96 | 0.1  | 0.1  | 1.34   | 0.011845 | 0.005382 | 0.15889  | 0.101199 |

|                         |                 |       |       |      |      |       |          |          |          |          |
|-------------------------|-----------------|-------|-------|------|------|-------|----------|----------|----------|----------|
| MmugDNA.23629.1.S1_at   | MmugDNA.23629.1 | 4.1   | 4.18  | 0.11 | 0.03 | -1.06 | 0.140638 | 0.463153 | 0.426393 | 0.674261 |
| MmugDNA.2363.1.S1_at    | MmugDNA.2363.1  | 9.61  | 8.77  | 0.02 | 0.09 | 1.79  | 0.000105 | 0.066984 | 0.051196 | 0.304846 |
| MmugDNA.23631.1.S1_at   | MmugDNA.23631.1 | 3.87  | 3.96  | 0.1  | 0.03 | -1.06 | 0.153998 | 0.177942 | 0.444262 | 0.454286 |
| MmugDNA.23632.1.S1_at   | MmugDNA.23632.1 | 4.81  | 4.81  | 0.05 | 0.06 | 1     | 0.535643 | 0.403375 | 0.758492 | 0.632083 |
| MmugDNA.23633.1.S1_at   | MmugDNA.23633.1 | 8.1   | 7.6   | 0.24 | 0.3  | 1.42  | 0.070118 | 0.070292 | 0.32309  | 0.31135  |
| MmugDNA.23635.1.S1_at   | MmugDNA.23635.1 | 3.08  | 3.05  | 0.12 | 0.07 | 1.03  | 0.729548 | 0.641374 | 0.87368  | 0.789506 |
| MmugDNA.23636.1.S1_at   | MmugDNA.23636.1 | 4.99  | 4.87  | 0.17 | 0.04 | 1.09  | 0.098344 | 0.125583 | 0.368957 | 0.396226 |
| MmugDNA.23637.1.S1_at   | MmugDNA.23637.1 | 9.11  | 9     | 0.33 | 0.1  | 1.08  | 0.797942 | 0.026024 | 0.908808 | 0.202199 |
| MmugDNA.23638.1.S1_at   | MmugDNA.23638.1 | 4.04  | 4.04  | 0.35 | 0.38 | -1    | 0.868177 | 0.955953 | 0.943202 | 0.975016 |
| MmugDNA.23640.1.S1_at   | MmugDNA.23640.1 | 6.85  | 7.7   | 0.57 | 0.04 | -1.81 | 0.203525 | 0.19296  | 0.501202 | 0.468455 |
| MmugDNA.23643.1.S1_at   | MmugDNA.23643.1 | 5.14  | 5     | 0.26 | 0.37 | 1.1   | 0.968138 | 0.99557  | 0.987372 | 0.997264 |
| MmugDNA.23644.1.S1_at   | MmugDNA.23644.1 | 11.91 | 11.96 | 0.18 | 0.09 | -1.04 | 0.682541 | 0.487521 | 0.848621 | 0.690559 |
| MmugDNA.12021.1.S1_s_at | MmugDNA.12021.1 | 3.22  | 3.3   | 0.16 | 0.06 | -1.05 | 0.592726 | 0.624232 | 0.793615 | 0.778505 |
| MmugDNA.23648.1.S1_at   | MmugDNA.23648.1 | 6.92  | 6.85  | 0.03 | 0.18 | 1.05  | 0.781973 | 0.422312 | 0.900409 | 0.645653 |
| MmugDNA.23649.1.S1_at   | MmugDNA.23649.1 | 6.03  | 6.25  | 0.35 | 0.25 | -1.16 | 0.747007 | 0.53241  | 0.882818 | 0.719052 |
| MmugDNA.2365.1.S1_at    | MmugDNA.2365.1  | 5.12  | 4.77  | 0.1  | 0.07 | 1.28  | 0.008628 | 0.004822 | 0.142375 | 0.096904 |
| MmugDNA.23650.1.S1_at   | MmugDNA.23650.1 | 7.66  | 7.57  | 0.19 | 0.02 | 1.07  | 0.929723 | 0.933171 | 0.970278 | 0.962032 |
| MmugDNA.23651.1.S1_at   | MmugDNA.23651.1 | 4.16  | 4.15  | 0.19 | 0.12 | 1.01  | 0.7125   | 0.887739 | 0.864309 | 0.936023 |
| MmugDNA.23652.1.S1_at   | MmugDNA.23652.1 | 12.34 | 12.22 | 0.2  | 0.1  | 1.09  | 0.242285 | 0.293638 | 0.539323 | 0.553638 |
| MmugDNA.23653.1.S1_at   | MmugDNA.23653.1 | 5.85  | 5.87  | 0.15 | 0.07 | -1.01 | 0.790183 | 0.707242 | 0.904554 | 0.830225 |
| MmugDNA.23654.1.S1_at   | MmugDNA.23654.1 | 6.14  | 4.97  | 0.81 | 0.79 | 2.26  | 0.206338 | 0.018237 | 0.503982 | 0.169844 |
| MmugDNA.23655.1.S1_at   | MmugDNA.23655.1 | 6.07  | 6.1   | 0.23 | 0.01 | -1.02 | 0.898209 | 0.518432 | 0.956732 | 0.710391 |
| MmugDNA.23656.1.S1_at   | MmugDNA.23656.1 | 2.61  | 2.65  | 0.03 | 0.02 | -1.03 | 0.11016  | 0.18796  | 0.385466 | 0.464078 |
| MmugDNA.23657.1.S1_at   | MmugDNA.23657.1 | 2.76  | 2.81  | 0.06 | 0.12 | -1.04 | 0.171832 | 0.282695 | 0.465779 | 0.545446 |
| MmugDNA.23658.1.S1_at   | MmugDNA.23658.1 | 3.46  | 3.39  | 0.08 | 0.01 | 1.05  | 0.218952 | 0.526676 | 0.516629 | 0.715627 |
| MmugDNA.23659.1.S1_at   | MmugDNA.23659.1 | 7.42  | 7.25  | 0.21 | 0.06 | 1.13  | 0.274294 | 0.318942 | 0.566281 | 0.571532 |
| MmugDNA.2366.1.S1_at    | MmugDNA.2366.1  | 4.7   | 4.92  | 0.22 | 0.17 | -1.16 | 0.492752 | 0.124359 | 0.72996  | 0.394826 |
| MmugDNA.23661.1.S1_at   | MmugDNA.23661.1 | 4.15  | 4.1   | 0    | 0    | 1.03  | 0.000177 | 0.212255 | 0.053494 | 0.486151 |
| MmugDNA.23663.1.S1_at   | MmugDNA.23663.1 | 4.29  | 4.25  | 0.29 | 0.03 | 1.02  | 0.947549 | 0.936462 | 0.977941 | 0.964171 |
| MmugDNA.23664.1.S1_at   | MmugDNA.23664.1 | 9.21  | 9.68  | 0.57 | 0.23 | -1.39 | 0.476964 | 0.121957 | 0.719208 | 0.391384 |
| MmugDNA.23666.1.S1_at   | MmugDNA.23666.1 | 5.18  | 5.15  | 0.29 | 0.05 | 1.02  | 0.289993 | 0.548675 | 0.579537 | 0.729318 |
| MmugDNA.23667.1.S1_at   | MmugDNA.23667.1 | 5.11  | 5.12  | 0.22 | 0.1  | -1.01 | 0.983733 | 0.704044 | 0.993924 | 0.828326 |
| MmugDNA.23669.1.S1_at   | MmugDNA.23669.1 | 3.15  | 3.15  | 0.12 | 0.08 | 1     | 0.806984 | 0.296837 | 0.913559 | 0.5558   |
| MmugDNA.2367.1.S1_at    | MmugDNA.2367.1  | 6.52  | 6.34  | 0.16 | 0.14 | 1.13  | 0.599448 | 0.825307 | 0.798152 | 0.899641 |
| MmugDNA.23671.1.S1_at   | MmugDNA.23671.1 | 4.27  | 3.48  | 0.41 | 0.03 | 1.74  | 0.079551 | 0.094305 | 0.339699 | 0.350889 |
| MmugDNA.23672.1.S1_at   | MmugDNA.23672.1 | 6.1   | 5.9   | 0.27 | 0.35 | 1.15  | 0.237937 | 0.70068  | 0.535375 | 0.826376 |
| MmugDNA.23673.1.S1_at   | MmugDNA.23673.1 | 4.68  | 4.66  | 0.14 | 0.12 | 1.01  | 0.834608 | 0.747459 | 0.927293 | 0.853149 |
| MmugDNA.23674.1.S1_at   | MmugDNA.23674.1 | 4.73  | 4.43  | 2.32 | 0.26 | 1.23  | 0.445791 | 0.643691 | 0.698211 | 0.791108 |
| MmugDNA.23675.1.S1_at   | MmugDNA.23675.1 | 5.98  | 6.21  | 1.06 | 0.41 | -1.18 | 0.803302 | 0.887798 | 0.911769 | 0.936048 |
| MmugDNA.23677.1.S1_at   | MmugDNA.23677.1 | 3.79  | 3.67  | 0.07 | 0.06 | 1.09  | 0.051811 | 0.032982 | 0.284987 | 0.224867 |
| MmugDNA.23679.1.S1_at   | MmugDNA.23679.1 | 3.65  | 3.5   | 0.5  | 0.18 | 1.11  | 0.269467 | 0.337517 | 0.561805 | 0.584716 |
| MmugDNA.2368.1.S1_at    | MmugDNA.2368.1  | 5.28  | 4.84  | 0.55 | 0.26 | 1.36  | 0.278175 | 0.268448 | 0.569525 | 0.534123 |
| MmugDNA.23680.1.S1_at   | MmugDNA.23680.1 | 3.95  | 4.2   | 0.2  | 0.15 | -1.19 | 0.150375 | 0.098769 | 0.439446 | 0.356875 |

|                         |                 |       |       |      |      |       |          |          |          |          |
|-------------------------|-----------------|-------|-------|------|------|-------|----------|----------|----------|----------|
| MmugDNA.23681.1.S1_at   | MmugDNA.23681.1 | 6.35  | 6     | 0.57 | 0.12 | 1.27  | 0.33243  | 0.161213 | 0.614085 | 0.437386 |
| MmugDNA.23682.1.S1_at   | MmugDNA.23682.1 | 6.4   | 6.74  | 0.08 | 0.07 | -1.26 | 0.004732 | 0.219468 | 0.115008 | 0.493156 |
| MmugDNA.23683.1.S1_at   | MmugDNA.23683.1 | 10.96 | 11.27 | 0.83 | 0.17 | -1.24 | 0.336779 | 0.058127 | 0.61731  | 0.287755 |
| MmugDNA.23684.1.S1_at   | MmugDNA.23684.1 | 9.17  | 9.01  | 1.16 | 0.16 | 1.12  | 0.709155 | 0.555323 | 0.862342 | 0.733767 |
| MmugDNA.23684.1.S1_x_at | MmugDNA.23684.1 | 8.89  | 8.82  | 1.11 | 0.15 | 1.05  | 0.695576 | 0.588377 | 0.854915 | 0.754874 |
| MmugDNA.23685.1.S1_at   | MmugDNA.23685.1 | 3.95  | 3.51  | 0.16 | 0.13 | 1.35  | 0.041068 | 0.127245 | 0.259171 | 0.397935 |
| MmugDNA.23686.1.S1_at   | MmugDNA.23686.1 | 8.18  | 8.29  | 0.04 | 0.1  | -1.08 | 0.47411  | 0.291803 | 0.717299 | 0.552063 |
| MmugDNA.23688.1.S1_at   | MmugDNA.23688.1 | 4.96  | 4.85  | 0.19 | 0.09 | 1.08  | 0.144025 | 0.226603 | 0.430892 | 0.499067 |
| MmugDNA.2369.1.S1_at    | MmugDNA.2369.1  | 4.32  | 4.16  | 0.26 | 0.09 | 1.12  | 0.356415 | 0.181925 | 0.632723 | 0.458456 |
| MmugDNA.23690.1.S1_at   | MmugDNA.23690.1 | 9.78  | 9.86  | 0.21 | 0.08 | -1.05 | 0.30598  | 0.452931 | 0.592927 | 0.667359 |
| MmugDNA.23691.1.S1_at   | MmugDNA.23691.1 | 4.8   | 4.82  | 0.14 | 0.15 | -1.02 | 0.913248 | 0.983794 | 0.963343 | 0.990974 |
| MmugDNA.23692.1.S1_at   | MmugDNA.23692.1 | 5.18  | 5.13  | 0.03 | 0.11 | 1.04  | 0.868455 | 0.847093 | 0.943445 | 0.91309  |
| MmugDNA.23696.1.S1_at   | MmugDNA.23696.1 | 4     | 4.01  | 0.01 | 0.13 | -1.01 | 0.790768 | 0.606279 | 0.904945 | 0.765727 |
| MmugDNA.23697.1.S1_at   | MmugDNA.23697.1 | 4.91  | 4.7   | 0.12 | 0.05 | 1.15  | 0.020845 | 0.013105 | 0.197986 | 0.147251 |
| MmugDNA.23698.1.S1_a_at | MmugDNA.23698.1 | 5.35  | 5.29  | 0.15 | 0.15 | 1.04  | 0.333451 | 0.366215 | 0.614877 | 0.606003 |
| MmugDNA.23698.1.S1_at   | MmugDNA.23698.1 | 3.39  | 3.4   | 0.01 | 0    | -1    | 0.272475 | 0.300059 | 0.564567 | 0.558262 |
| MmugDNA.23699.1.S1_at   | MmugDNA.23699.1 | 5.23  | 5.1   | 0.02 | 0.08 | 1.1   | 0.040332 | 0.057496 | 0.257247 | 0.285856 |
| MmugDNA.2370.1.S1_at    | MmugDNA.2370.1  | 4.34  | 3.35  | 0.32 | 0.27 | 1.98  | 0.052951 | 0.036749 | 0.287165 | 0.236287 |
| MmugDNA.23700.1.S1_at   | MmugDNA.23700.1 | 4     | 3.76  | 0.22 | 0.15 | 1.18  | 0.256873 | 0.267867 | 0.55141  | 0.533607 |
| MmugDNA.23701.1.S1_at   | MmugDNA.23701.1 | 10.29 | 10.86 | 0.36 | 0.06 | -1.48 | 0.052765 | 0.494236 | 0.286707 | 0.694758 |
| MmugDNA.23703.1.S1_at   | MmugDNA.23703.1 | 4.24  | 4.34  | 0.6  | 0.53 | -1.07 | 0.670847 | 0.445966 | 0.842083 | 0.662623 |
| MmugDNA.23705.1.S1_at   | MmugDNA.23705.1 | 3.04  | 2.96  | 0.12 | 0.03 | 1.05  | 0.829509 | 0.171428 | 0.924914 | 0.447886 |
| MmugDNA.23706.1.S1_at   | MmugDNA.23706.1 | 8.47  | 8.79  | 0.11 | 0.08 | -1.25 | 0.017001 | 0.005291 | 0.183829 | 0.100738 |
| MmugDNA.23706.1.S1_s_at | MmugDNA.23706.1 | 9.49  | 9.65  | 0.25 | 0.13 | -1.12 | 0.218941 | 0.031345 | 0.516629 | 0.219013 |
| MmugDNA.23707.1.S1_at   | MmugDNA.23707.1 | 9.63  | 7.51  | 0.06 | 0.35 | 4.35  | 0.000529 | 0.029155 | 0.069726 | 0.212767 |
| MmugDNA.23708.1.S1_at   | MmugDNA.23708.1 | 5.86  | 5.82  | 0.1  | 0.17 | 1.03  | 0.656477 | 0.948964 | 0.833833 | 0.97078  |
| MmugDNA.2371.1.S1_at    | MmugDNA.2371.1  | 8.58  | 7.94  | 0.58 | 0.2  | 1.56  | 0.142702 | 0.192492 | 0.42873  | 0.467952 |
| MmugDNA.23710.1.S1_at   | MmugDNA.23710.1 | 8.12  | 7.54  | 0.25 | 0.08 | 1.49  | 0.013863 | 0.042371 | 0.16879  | 0.250522 |
| MmugDNA.23711.1.S1_at   | MmugDNA.23711.1 | 3.96  | 3.56  | 0.25 | 0.07 | 1.31  | 0.058227 | 0.043556 | 0.298386 | 0.253261 |
| MmugDNA.23712.1.S1_at   | MmugDNA.23712.1 | 4.98  | 4.94  | 0.36 | 0.34 | 1.03  | 0.431833 | 0.602523 | 0.687712 | 0.763461 |
| MmugDNA.23713.1.S1_at   | MmugDNA.23713.1 | 7.31  | 7.48  | 0.15 | 0.05 | -1.12 | 0.24137  | 0.144282 | 0.538538 | 0.418196 |
| MmugDNA.23714.1.S1_at   | MmugDNA.23714.1 | 7.9   | 7.68  | 0.2  | 0.15 | 1.17  | 0.416893 | 0.127353 | 0.677228 | 0.398184 |
| MmugDNA.23715.1.S1_at   | MmugDNA.23715.1 | 7.27  | 7.3   | 0.03 | 0.07 | -1.02 | 0.404305 | 0.230467 | 0.668112 | 0.502232 |
| MmugDNA.23716.1.S1_at   | MmugDNA.23716.1 | 4.67  | 3.86  | 0.07 | 0.07 | 1.76  | 0.000198 | 0.000289 | 0.053494 | 0.034892 |
| MmugDNA.23717.1.S1_at   | MmugDNA.23717.1 | 5.55  | 5.23  | 0.82 | 0.35 | 1.25  | 0.690949 | 0.656167 | 0.852272 | 0.798919 |
| MmugDNA.2372.1.S1_at    | MmugDNA.2372.1  | 4.28  | 4.16  | 0.23 | 0.09 | 1.09  | 0.09865  | 0.218214 | 0.369447 | 0.491764 |
| MmugDNA.23720.1.S1_at   | MmugDNA.23720.1 | 4.92  | 7.69  | 1.3  | 0.38 | -6.85 | 0.057641 | 0.32586  | 0.297348 | 0.57614  |
| MmugDNA.23721.1.S1_at   | MmugDNA.23721.1 | 5.11  | 4.78  | 0.29 | 0.17 | 1.26  | 0.085621 | 0.119604 | 0.350073 | 0.388247 |
| MmugDNA.23723.1.S1_at   | MmugDNA.23723.1 | 3.8   | 3.58  | 0.04 | 0.17 | 1.17  | 0.264181 | 0.10195  | 0.557422 | 0.361984 |
| MmugDNA.23724.1.S1_at   | MmugDNA.23724.1 | 8.8   | 8.7   | 0.04 | 0.12 | 1.07  | 0.238243 | 0.008131 | 0.535757 | 0.11972  |
| MmugDNA.23726.1.S1_at   | MmugDNA.23726.1 | 5.8   | 5.6   | 0.18 | 0.05 | 1.14  | 0.105277 | 0.080266 | 0.379171 | 0.327882 |
| MmugDNA.23727.1.S1_at   | MmugDNA.23727.1 | 6.51  | 6.26  | 0.31 | 0.21 | 1.19  | 0.145183 | 0.109647 | 0.432532 | 0.373629 |
| MmugDNA.23728.1.S1_at   | MmugDNA.23728.1 | 9.67  | 10.56 | 0.63 | 0.08 | -1.85 | 0.046178 | 0.035752 | 0.272667 | 0.233437 |

|                         |                 |       |       |      |      |       |          |          |          |          |
|-------------------------|-----------------|-------|-------|------|------|-------|----------|----------|----------|----------|
| MmugDNA.23729.1.S1_at   | MmugDNA.23729.1 | 6.12  | 5.95  | 0.22 | 0.26 | 1.13  | 0.811454 | 0.267728 | 0.915561 | 0.533525 |
| MmugDNA.2373.1.S1_at    | MmugDNA.2373.1  | 7.53  | 7.71  | 0.44 | 0.14 | -1.13 | 0.218912 | 0.761702 | 0.516629 | 0.861459 |
| MmugDNA.23730.1.S1_at   | MmugDNA.23730.1 | 5.53  | 5.3   | 0.3  | 0.41 | 1.17  | 0.191262 | 0.21163  | 0.48749  | 0.485681 |
| MmugDNA.23731.1.S1_at   | MmugDNA.23731.1 | 8.91  | 9.16  | 0.22 | 0.18 | -1.18 | 0.584075 | 0.947789 | 0.788484 | 0.970347 |
| MmugDNA.23732.1.S1_at   | MmugDNA.23732.1 | 5.25  | 4.68  | 0.37 | 0.41 | 1.49  | 0.710178 | 0.020857 | 0.862892 | 0.181218 |
| MmugDNA.23733.1.S1_at   | MmugDNA.23733.1 | 7.88  | 7.55  | 0.52 | 0.22 | 1.25  | 0.549446 | 0.184779 | 0.767177 | 0.460661 |
| MmugDNA.23735.1.S1_at   | MmugDNA.23735.1 | 3.66  | 3.53  | 0.06 | 0.03 | 1.09  | 0.027804 | 0.696148 | 0.219187 | 0.823455 |
| MmugDNA.23736.1.S1_at   | MmugDNA.23736.1 | 4.18  | 4.27  | 0.11 | 0.06 | -1.07 | 0.650869 | 0.403184 | 0.830453 | 0.631984 |
| MmugDNA.23737.1.S1_at   | MmugDNA.23737.1 | 4.92  | 4.83  | 0.48 | 0.29 | 1.07  | 0.360712 | 0.512397 | 0.636187 | 0.706278 |
| MmugDNA.23738.1.S1_at   | MmugDNA.23738.1 | 4.93  | 5.3   | 0.12 | 0.06 | -1.29 | 0.023353 | 0.135725 | 0.20583  | 0.407917 |
| MmugDNA.23739.1.S1_at   | MmugDNA.23739.1 | 4.13  | 7.31  | 1.41 | 0.34 | -9.09 | 0.047561 | 0.132351 | 0.275414 | 0.404294 |
| MmugDNA.2374.1.S1_at    | MmugDNA.2374.1  | 3.49  | 3.61  | 0.11 | 0.08 | -1.08 | 0.221152 | 0.343675 | 0.519102 | 0.589384 |
| MmugDNA.23742.1.S1_at   | MmugDNA.23742.1 | 5.98  | 6.02  | 0.16 | 0.12 | -1.03 | 0.633958 | 0.070921 | 0.820621 | 0.312444 |
| MmugDNA.23743.1.S1_at   | MmugDNA.23743.1 | 11.54 | 11.41 | 0.31 | 0.07 | 1.09  | 0.421513 | 0.248191 | 0.679956 | 0.517574 |
| MmugDNA.23744.1.S1_at   | MmugDNA.23744.1 | 3.76  | 3.61  | 0.18 | 0.11 | 1.11  | 0.27432  | 0.37825  | 0.566281 | 0.615438 |
| MmugDNA.23745.1.S1_at   | MmugDNA.23745.1 | 11.41 | 11.53 | 0.18 | 0.04 | -1.09 | 0.999001 | 0.578284 | 0.999637 | 0.748372 |
| MmugDNA.23746.1.S1_at   | MmugDNA.23746.1 | 4.22  | 4.19  | 0.22 | 0.07 | 1.02  | 0.882791 | 0.293853 | 0.950154 | 0.553861 |
| MmugDNA.23747.1.S1_at   | MmugDNA.23747.1 | 5.18  | 6.13  | 0.16 | 0.85 | -1.93 | 0.411996 | 0.618196 | 0.673787 | 0.77393  |
| MmugDNA.23748.1.S1_at   | MmugDNA.23748.1 | 4.8   | 4.48  | 0.6  | 0.32 | 1.25  | 0.286778 | 0.342275 | 0.576587 | 0.588397 |
| MmugDNA.23749.1.S1_at   | MmugDNA.23749.1 | 5.35  | 5.44  | 0.09 | 0.03 | -1.07 | 0.235823 | 0.002805 | 0.533475 | 0.078098 |
| MmugDNA.23750.1.S1_at   | MmugDNA.23750.1 | 12.77 | 12.21 | 0.3  | 0.1  | 1.48  | 0.094189 | 0.225599 | 0.363216 | 0.498155 |
| MmugDNA.23751.1.S1_at   | MmugDNA.23751.1 | 5.12  | 5.89  | 0.48 | 0.05 | -1.71 | 0.081997 | 0.035122 | 0.343272 | 0.231645 |
| MmugDNA.23752.1.S1_at   | MmugDNA.23752.1 | 10.49 | 9.79  | 0.09 | 0.11 | 1.63  | 0.00097  | 0.0029   | 0.076222 | 0.079107 |
| MmugDNA.23753.1.S1_at   | MmugDNA.23753.1 | 5.07  | 4.82  | 0.1  | 0.07 | 1.19  | 0.052117 | 0.155929 | 0.28583  | 0.431331 |
| MmugDNA.23754.1.S1_at   | MmugDNA.23754.1 | 4.38  | 4.58  | 0.67 | 0.03 | -1.14 | 0.668822 | 0.231276 | 0.841119 | 0.502954 |
| MmugDNA.23755.1.S1_at   | MmugDNA.23755.1 | 8.13  | 7.33  | 0.28 | 0.76 | 1.75  | 0.362323 | 0.053849 | 0.637219 | 0.277598 |
| MmugDNA.23756.1.S1_at   | MmugDNA.23756.1 | 11.21 | 10.77 | 0.06 | 0.08 | 1.35  | 0.002049 | 0.150445 | 0.090054 | 0.424978 |
| MmugDNA.23759.1.S1_at   | MmugDNA.23759.1 | 6.31  | 6.14  | 0.2  | 0.09 | 1.12  | 0.150591 | 0.222783 | 0.43964  | 0.495724 |
| MmugDNA.23760.1.S1_at   | MmugDNA.23760.1 | 13.07 | 13.09 | 0.08 | 0.05 | -1.02 | 0.747269 | 0.204991 | 0.882955 | 0.479296 |
| MmugDNA.23761.1.S1_at   | MmugDNA.23761.1 | 10.25 | 8.96  | 0.15 | 0.26 | 2.44  | 0.00167  | 0.000129 | 0.084462 | 0.029087 |
| MmugDNA.23762.1.S1_at   | MmugDNA.23762.1 | 5.67  | 6.14  | 0.67 | 0.65 | -1.38 | 0.210812 | 0.012669 | 0.50843  | 0.145097 |
| MmugDNA.23763.1.S1_at   | MmugDNA.23763.1 | 4.92  | 4.5   | 0.93 | 0.33 | 1.34  | 0.159625 | 0.371764 | 0.450943 | 0.610541 |
| MmugDNA.23764.1.S1_at   | MmugDNA.23764.1 | 12.31 | 11.61 | 0.15 | 0.13 | 1.63  | 0.003798 | 0.000942 | 0.106813 | 0.049026 |
| MmugDNA.23766.1.S1_at   | MmugDNA.23766.1 | 9.84  | 9.3   | 0.2  | 0.28 | 1.46  | 0.073449 | 0.10612  | 0.328846 | 0.368498 |
| MmugDNA.23767.1.S1_at   | MmugDNA.23767.1 | 4.96  | 4.76  | 0.16 | 0.26 | 1.14  | 0.831824 | 0.235984 | 0.925994 | 0.507056 |
| MmugDNA.37120.1.S1_s_at | MmugDNA.37120.1 | 6.96  | 6.99  | 0.45 | 0.11 | -1.02 | 0.622326 | 0.416188 | 0.813211 | 0.641398 |
| MmugDNA.23769.1.S1_at   | MmugDNA.23769.1 | 6.72  | 6.4   | 0.49 | 0.22 | 1.25  | 0.332712 | 0.263765 | 0.614336 | 0.530066 |
| MmugDNA.2377.1.S1_at    | MmugDNA.2377.1  | 6.71  | 6.66  | 0.13 | 0    | 1.04  | 0.231172 | 0.296495 | 0.529962 | 0.555528 |
| MmugDNA.23770.1.S1_at   | MmugDNA.23770.1 | 3.78  | 4.02  | 0.32 | 0.14 | -1.18 | 0.724428 | 0.749799 | 0.870565 | 0.854601 |
| MmugDNA.23773.1.S1_at   | MmugDNA.23773.1 | 8.9   | 8.81  | 0.13 | 0.13 | 1.06  | 0.883981 | 0.552566 | 0.950642 | 0.73184  |
| MmugDNA.23774.1.S1_at   | MmugDNA.23774.1 | 3.99  | 3.89  | 0.19 | 0.09 | 1.08  | 0.276899 | 0.219317 | 0.568365 | 0.493094 |
| MmugDNA.23775.1.S1_at   | MmugDNA.23775.1 | 3.64  | 2.67  | 1.05 | 0.06 | 1.95  | 0.16387  | 0.162589 | 0.456595 | 0.43872  |
| MmugDNA.23776.1.S1_at   | MmugDNA.23776.1 | 5.56  | 5.42  | 0.16 | 0.04 | 1.1   | 0.147878 | 0.529805 | 0.436081 | 0.717498 |

|                         |                 |       |       |      |      |       |          |          |          |          |
|-------------------------|-----------------|-------|-------|------|------|-------|----------|----------|----------|----------|
| MmugDNA.23777.1.S1_at   | MmugDNA.23777.1 | 6.93  | 7.79  | 0.41 | 0.15 | -1.81 | 0.102857 | 0.439264 | 0.375378 | 0.658025 |
| MmugDNA.23778.1.S1_at   | MmugDNA.23778.1 | 3.29  | 3.28  | 0.06 | 0.02 | 1.01  | 0.846187 | 0.992745 | 0.932845 | 0.995715 |
| MmugDNA.23779.1.S1_at   | MmugDNA.23779.1 | 5.75  | 5.49  | 0.21 | 0.24 | 1.2   | 0.119539 | 0.020762 | 0.397422 | 0.180781 |
| MmugDNA.2378.1.S1_at    | MmugDNA.2378.1  | 8.6   | 8.39  | 0.18 | 0.03 | 1.16  | 0.417213 | 0.048024 | 0.677435 | 0.264118 |
| MmugDNA.23780.1.S1_at   | MmugDNA.23780.1 | 5.79  | 5.2   | 0.13 | 0.38 | 1.5   | 0.01868  | 0.26382  | 0.189833 | 0.530086 |
| MmugDNA.23782.1.S1_at   | MmugDNA.23782.1 | 5.31  | 5.4   | 0.11 | 0.2  | -1.07 | 0.350963 | 0.204971 | 0.628649 | 0.479296 |
| MmugDNA.23783.1.S1_at   | MmugDNA.23783.1 | 3.84  | 3.89  | 0.05 | 0.08 | -1.04 | 0.484262 | 0.012057 | 0.724151 | 0.142044 |
| MmugDNA.23784.1.S1_at   | MmugDNA.23784.1 | 4.97  | 4.9   | 0.06 | 0.2  | 1.05  | 0.210224 | 0.349644 | 0.507813 | 0.593541 |
| MmugDNA.23785.1.S1_at   | MmugDNA.23785.1 | 2.82  | 2.81  | 0.22 | 0.12 | 1     | 0.380621 | 0.429629 | 0.650294 | 0.650973 |
| MmugDNA.23786.1.S1_at   | MmugDNA.23786.1 | 3.98  | 3.84  | 0.28 | 0    | 1.1   | 0.428525 | 0.526409 | 0.685384 | 0.715557 |
| MmugDNA.23787.1.S1_at   | MmugDNA.23787.1 | 4.81  | 4.71  | 0.12 | 0.09 | 1.07  | 0.630505 | 0.084716 | 0.818647 | 0.336196 |
| MmugDNA.23789.1.S1_at   | MmugDNA.23789.1 | 3.78  | 3.56  | 0.21 | 0.07 | 1.16  | 0.084018 | 0.042505 | 0.347198 | 0.250786 |
| MmugDNA.2379.1.S1_at    | MmugDNA.2379.1  | 10.9  | 10.83 | 0.17 | 0.02 | 1.05  | 0.313687 | 0.00783  | 0.599554 | 0.117929 |
| MmugDNA.23791.1.S1_s_at | MmugDNA.23791.1 | 10.98 | 10.6  | 0.31 | 0.02 | 1.3   | 0.093532 | 0.423659 | 0.362134 | 0.646464 |
| MmugDNA.23794.1.S1_at   | MmugDNA.23794.1 | 2.76  | 2.71  | 0.12 | 0.03 | 1.04  | 0.694143 | 0.538617 | 0.853968 | 0.723301 |
| MmugDNA.23795.1.S1_at   | MmugDNA.23795.1 | 6.22  | 6.23  | 0.23 | 0.08 | -1.01 | 0.856599 | 0.886717 | 0.937676 | 0.935519 |
| MmugDNA.23796.1.S1_at   | MmugDNA.23796.1 | 6.11  | 6.25  | 0.52 | 0.14 | -1.1  | 0.637835 | 0.091422 | 0.822597 | 0.34639  |
| MmugDNA.23797.1.S1_at   | MmugDNA.23797.1 | 8.8   | 8.53  | 0.13 | 0.13 | 1.21  | 0.061508 | 0.095068 | 0.30458  | 0.352124 |
| MmugDNA.23798.1.S1_at   | MmugDNA.23798.1 | 5.85  | 6.04  | 0.15 | 0.01 | -1.14 | 0.179941 | 0.06185  | 0.475023 | 0.295524 |
| MmugDNA.23799.1.S1_at   | MmugDNA.23799.1 | 4.53  | 4.29  | 0.29 | 0.05 | 1.18  | 0.51274  | 0.46953  | 0.743192 | 0.678282 |
| MmugDNA.2380.1.S1_at    | MmugDNA.2380.1  | 3.66  | 3.67  | 0.73 | 0.1  | -1    | 0.881411 | 0.98311  | 0.949601 | 0.990726 |
| MmugDNA.23800.1.S1_at   | MmugDNA.23800.1 | 3.07  | 2.74  | 0.21 | 0.27 | 1.26  | 0.68441  | 0.689953 | 0.849603 | 0.819224 |
| MmugDNA.23801.1.S1_at   | MmugDNA.23801.1 | 3.96  | 3.92  | 0.03 | 0.14 | 1.03  | 0.693976 | 0.084507 | 0.853822 | 0.335901 |
| MmugDNA.23802.1.S1_at   | MmugDNA.23802.1 | 3.82  | 3.79  | 0.23 | 0.11 | 1.02  | 0.20243  | 0.209973 | 0.500091 | 0.483744 |
| MmugDNA.23803.1.S1_at   | MmugDNA.23803.1 | 12.91 | 12.89 | 0.09 | 0.03 | 1.01  | 0.332358 | 0.031427 | 0.614085 | 0.219107 |
| MmugDNA.23804.1.S1_at   | MmugDNA.23804.1 | 2.98  | 3.06  | 0.06 | 0.07 | -1.06 | 0.678916 | 0.451803 | 0.846843 | 0.66662  |
| MmugDNA.23805.1.S1_at   | MmugDNA.23805.1 | 12.22 | 12.05 | 0.1  | 0.12 | 1.13  | 0.066336 | 0.112208 | 0.315051 | 0.377537 |
| MmugDNA.23805.1.S1_x_at | MmugDNA.23805.1 | 12.21 | 12.04 | 0.11 | 0.11 | 1.13  | 0.057786 | 0.098222 | 0.297541 | 0.356262 |
| MmugDNA.23806.1.S1_at   | MmugDNA.23806.1 | 5.28  | 5.52  | 0.04 | 0.27 | -1.18 | 0.225238 | 0.152678 | 0.52312  | 0.427505 |
| MmugDNA.23807.1.S1_at   | MmugDNA.23807.1 | 4.32  | 4.32  | 0.23 | 0.05 | 1     | 0.544534 | 0.342479 | 0.764143 | 0.588536 |
| MmugDNA.23808.1.S1_at   | MmugDNA.23808.1 | 3.38  | 3.32  | 0.1  | 0.11 | 1.04  | 0.2419   | 0.365283 | 0.538882 | 0.605413 |
| MmugDNA.23809.1.S1_at   | MmugDNA.23809.1 | 2.82  | 2.71  | 0.19 | 0.12 | 1.08  | 0.388032 | 0.592522 | 0.656101 | 0.757844 |
| MmugDNA.2381.1.S1_at    | MmugDNA.2381.1  | 10.02 | 9.58  | 0.17 | 0.08 | 1.35  | 0.01036  | 0.01239  | 0.151697 | 0.144023 |
| MmugDNA.23810.1.S1_at   | MmugDNA.23810.1 | 3.06  | 3.15  | 0.19 | 0.13 | -1.07 | 0.320544 | 0.309317 | 0.605112 | 0.564912 |
| MmugDNA.23811.1.S1_at   | MmugDNA.23811.1 | 9.4   | 9.31  | 0.27 | 0.16 | 1.06  | 0.549901 | 0.438366 | 0.767477 | 0.65735  |
| MmugDNA.23813.1.S1_at   | MmugDNA.23813.1 | 5     | 4.88  | 0.49 | 0.07 | 1.09  | 0.629983 | 0.66944  | 0.818285 | 0.806626 |
| MmugDNA.23814.1.S1_at   | MmugDNA.23814.1 | 7.71  | 7.7   | 0.43 | 0.03 | 1.01  | 0.977596 | 0.906032 | 0.991189 | 0.946832 |
| MmugDNA.23815.1.S1_at   | MmugDNA.23815.1 | 9.99  | 8.95  | 1.76 | 1.4  | 2.06  | 0.391643 | 0.273416 | 0.658751 | 0.537863 |
| MmugDNA.23816.1.S1_at   | MmugDNA.23816.1 | 8.52  | 7.81  | 0.54 | 0.16 | 1.64  | 0.138716 | 0.015302 | 0.42426  | 0.157071 |
| MmugDNA.23818.1.S1_at   | MmugDNA.23818.1 | 2.97  | 3.18  | 0.4  | 0.3  | -1.16 | 0.968816 | 0.767756 | 0.987676 | 0.865182 |
| MmugDNA.23819.1.S1_at   | MmugDNA.23819.1 | 11.27 | 10.64 | 0.35 | 0.23 | 1.54  | 0.098856 | 0.217727 | 0.369716 | 0.491309 |
| MmugDNA.2382.1.S1_at    | MmugDNA.2382.1  | 4.72  | 4.45  | 0.1  | 0.11 | 1.2   | 0.033275 | 0.021104 | 0.236493 | 0.181869 |
| MmugDNA.23820.1.S1_at   | MmugDNA.23820.1 | 6.84  | 7.05  | 0.33 | 0.11 | -1.16 | 0.515537 | 0.268684 | 0.745383 | 0.534138 |

|                         |                 |       |       |      |      |       |          |          |          |          |
|-------------------------|-----------------|-------|-------|------|------|-------|----------|----------|----------|----------|
| MmugDNA.23821.1.S1_at   | MmugDNA.23821.1 | 4.77  | 4.71  | 0.19 | 0.12 | 1.04  | 0.222268 | 0.102083 | 0.520257 | 0.362122 |
| MmugDNA.23822.1.S1_s_at | MmugDNA.23822.1 | 7.83  | 7.78  | 0    | 0.1  | 1.04  | 0.706398 | 0.329627 | 0.861004 | 0.578813 |
| MmugDNA.23823.1.S1_at   | MmugDNA.23823.1 | 5.78  | 5.88  | 0.04 | 0.09 | -1.08 | 0.113277 | 0.818102 | 0.390051 | 0.89509  |
| MmugDNA.23825.1.S1_at   | MmugDNA.23825.1 | 13.57 | 13.7  | 0.02 | 0.03 | -1.09 | 0.004828 | 0.068476 | 0.115098 | 0.308214 |
| MmugDNA.23826.1.S1_at   | MmugDNA.23826.1 | 3.5   | 3.55  | 0.04 | 0.09 | -1.04 | 0.94382  | 0.08554  | 0.976378 | 0.337567 |
| MmugDNA.23827.1.S1_at   | MmugDNA.23827.1 | 13.55 | 13.65 | 0.07 | 0.07 | -1.08 | 0.2544   | 0.12274  | 0.54882  | 0.392729 |
| MmugDNA.23828.1.S1_at   | MmugDNA.23828.1 | 4.73  | 4.34  | 0.45 | 0.06 | 1.31  | 0.194317 | 0.294215 | 0.490945 | 0.554004 |
| MmugDNA.23829.1.S1_at   | MmugDNA.23829.1 | 6.59  | 6.26  | 0.1  | 0.4  | 1.25  | 0.358403 | 0.576555 | 0.634198 | 0.747267 |
| MmugDNA.2383.1.S1_x_at  | MmugDNA.2383.1  | 7.9   | 7.85  | 0.84 | 0.09 | 1.04  | 0.377815 | 0.496875 | 0.648249 | 0.696265 |
| MmugDNA.23830.1.S1_at   | MmugDNA.23830.1 | 8.16  | 8.38  | 0.36 | 0.18 | -1.17 | 0.939451 | 0.157342 | 0.974436 | 0.432821 |
| MmugDNA.23831.1.S1_at   | MmugDNA.23831.1 | 6.05  | 5.66  | 0.14 | 0.16 | 1.31  | 0.036507 | 0.058494 | 0.246106 | 0.288569 |
| MmugDNA.23832.1.S1_at   | MmugDNA.23832.1 | 3.68  | 3.65  | 0.84 | 0.18 | 1.02  | 0.31828  | 0.369108 | 0.60297  | 0.608618 |
| MmugDNA.23834.1.S1_at   | MmugDNA.23834.1 | 4.26  | 4.04  | 0.24 | 0.04 | 1.16  | 0.213484 | 0.077142 | 0.511324 | 0.322685 |
| MmugDNA.23835.1.S1_at   | MmugDNA.23835.1 | 7.05  | 7.37  | 0.95 | 0.19 | -1.25 | 0.950242 | 0.330794 | 0.979345 | 0.579563 |
| MmugDNA.23836.1.S1_at   | MmugDNA.23836.1 | 4.9   | 4.69  | 0.17 | 0.09 | 1.16  | 0.165428 | 0.238188 | 0.458352 | 0.508821 |
| MmugDNA.23837.1.S1_at   | MmugDNA.23837.1 | 3.23  | 3.18  | 0.07 | 0.02 | 1.03  | 0.099749 | 0.11796  | 0.370728 | 0.385858 |
| MmugDNA.23838.1.S1_at   | MmugDNA.23838.1 | 5.46  | 5.34  | 0.14 | 0.07 | 1.08  | 0.958624 | 0.978156 | 0.983135 | 0.988066 |
| MmugDNA.23839.1.S1_at   | MmugDNA.23839.1 | 9.5   | 9.63  | 0.09 | 0.09 | -1.09 | 0.302896 | 0.080262 | 0.590429 | 0.327882 |
| MmugDNA.2384.1.S1_at    | MmugDNA.2384.1  | 9.65  | 9.55  | 0.11 | 0.2  | 1.07  | 0.504144 | 0.330875 | 0.737428 | 0.57958  |
| MmugDNA.23840.1.S1_at   | MmugDNA.23840.1 | 5.52  | 5.51  | 0.04 | 0.05 | 1     | 0.628178 | 0.734999 | 0.817322 | 0.846622 |
| MmugDNA.23841.1.S1_at   | MmugDNA.23841.1 | 3.54  | 3.54  | 0.23 | 0.08 | -1    | 0.816201 | 0.620185 | 0.917981 | 0.77525  |
| MmugDNA.23842.1.S1_at   | MmugDNA.23842.1 | 5.03  | 5.08  | 0.77 | 0.36 | -1.04 | 0.294477 | 0.394872 | 0.583448 | 0.627216 |
| MmugDNA.23843.1.S1_at   | MmugDNA.23843.1 | 11.44 | 11.46 | 0.22 | 0.17 | -1.01 | 0.626167 | 0.332988 | 0.815828 | 0.581326 |
| MmugDNA.23844.1.S1_at   | MmugDNA.23844.1 | 3.62  | 3.67  | 0.26 | 0.17 | -1.03 | 0.612777 | 0.833602 | 0.807089 | 0.904597 |
| MmugDNA.23845.1.S1_at   | MmugDNA.23845.1 | 4.67  | 4.41  | 0.35 | 0.1  | 1.2   | 0.411821 | 0.6781   | 0.673681 | 0.811973 |
| MmugDNA.23846.1.S1_at   | MmugDNA.23846.1 | 12.68 | 12.77 | 0.12 | 0.03 | -1.07 | 0.065056 | 0.080571 | 0.31189  | 0.328327 |
| MmugDNA.23847.1.S1_at   | MmugDNA.23847.1 | 11.01 | 11.46 | 0.1  | 0.13 | -1.36 | 0.010195 | 0.001179 | 0.150739 | 0.05381  |
| MmugDNA.23848.1.S1_at   | MmugDNA.23848.1 | 3.54  | 3.51  | 0.07 | 0.09 | 1.02  | 0.953651 | 0.089019 | 0.981026 | 0.342876 |
| MmugDNA.23849.1.S1_at   | MmugDNA.23849.1 | 8.9   | 8.7   | 0.1  | 0.19 | 1.15  | 0.230108 | 0.637663 | 0.529013 | 0.787067 |
| MmugDNA.2385.1.S1_at    | MmugDNA.2385.1  | 4.59  | 4.51  | 0.05 | 0.5  | 1.05  | 0.506573 | 0.212142 | 0.739179 | 0.486036 |
| MmugDNA.23850.1.S1_at   | MmugDNA.23850.1 | 8.96  | 9.67  | 0.36 | 0.18 | -1.64 | 0.071254 | 0.046623 | 0.324861 | 0.260458 |
| MmugDNA.23851.1.S1_at   | MmugDNA.23851.1 | 5.34  | 5.11  | 0.19 | 0.08 | 1.17  | 0.109617 | 0.414815 | 0.38471  | 0.640456 |
| MmugDNA.23852.1.S1_at   | MmugDNA.23852.1 | 6.99  | 6.46  | 0.72 | 0.3  | 1.44  | 0.070111 | 0.079355 | 0.323085 | 0.326697 |
| MmugDNA.23853.1.S1_at   | MmugDNA.23853.1 | 6.54  | 6.59  | 0.17 | 0.23 | -1.03 | 0.470687 | 0.597154 | 0.715067 | 0.760102 |
| MmugDNA.23855.1.S1_at   | MmugDNA.23855.1 | 2.87  | 2.81  | 0.15 | 0.07 | 1.04  | 0.177495 | 0.30323  | 0.472186 | 0.560731 |
| MmugDNA.23856.1.S1_at   | MmugDNA.23856.1 | 9.45  | 9.5   | 0.37 | 0.15 | -1.04 | 0.51611  | 0.001077 | 0.745613 | 0.051912 |
| MmugDNA.23857.1.S1_at   | MmugDNA.23857.1 | 12.59 | 12.89 | 0.11 | 0.05 | -1.23 | 0.017685 | 0.218371 | 0.186535 | 0.491929 |
| MmugDNA.23858.1.S1_at   | MmugDNA.23858.1 | 9.67  | 9.76  | 0.25 | 0.22 | -1.06 | 0.768794 | 0.083672 | 0.893807 | 0.334346 |
| MmugDNA.23859.1.S1_at   | MmugDNA.23859.1 | 10.73 | 10.92 | 0.11 | 0.17 | -1.14 | 0.812834 | 0.000781 | 0.916222 | 0.045664 |
| MmugDNA.2386.1.S1_at    | MmugDNA.2386.1  | 5.06  | 4.85  | 0.18 | 0.21 | 1.15  | 0.548716 | 0.874093 | 0.766633 | 0.928468 |
| MmugDNA.23860.1.S1_at   | MmugDNA.23860.1 | 8.29  | 8.22  | 0.26 | 0.17 | 1.05  | 0.811338 | 0.502896 | 0.915543 | 0.700417 |
| MmugDNA.23861.1.S1_at   | MmugDNA.23861.1 | 4.07  | 4.65  | 0.22 | 0.15 | -1.49 | 0.023141 | 0.001299 | 0.205264 | 0.055585 |
| MmugDNA.23861.1.S1_s_at | MmugDNA.23861.1 | 6.22  | 6.27  | 0.56 | 0.07 | -1.04 | 0.300212 | 0.002908 | 0.588392 | 0.079157 |



|                         |                 |       |       |      |      |       |          |          |          |          |
|-------------------------|-----------------|-------|-------|------|------|-------|----------|----------|----------|----------|
| MmugDNA.23863.1.S1_at   | MmugDNA.23863.1 | 5.5   | 6.29  | 1.34 | 0.35 | -1.73 | 0.971746 | 0.423318 | 0.988595 | 0.646277 |
| MmugDNA.23864.1.S1_at   | MmugDNA.23864.1 | 6.33  | 5.92  | 0.62 | 0.43 | 1.33  | 0.588997 | 0.408757 | 0.791372 | 0.6359   |
| MmugDNA.23865.1.S1_at   | MmugDNA.23865.1 | 5.79  | 5.65  | 0.2  | 0.61 | 1.1   | 0.430332 | 0.526065 | 0.686627 | 0.715374 |
| MmugDNA.23866.1.S1_at   | MmugDNA.23866.1 | 4.55  | 4.28  | 0.27 | 0.13 | 1.21  | 0.100751 | 0.199687 | 0.371863 | 0.474335 |
| MmugDNA.23867.1.S1_at   | MmugDNA.23867.1 | 5.93  | 6.31  | 0.63 | 0.19 | -1.3  | 0.940661 | 0.605274 | 0.975078 | 0.765059 |
| MmugDNA.23868.1.S1_at   | MmugDNA.23868.1 | 7.59  | 7.5   | 0.27 | 0.05 | 1.06  | 0.623974 | 0.823207 | 0.814557 | 0.89837  |
| MmugDNA.23869.1.S1_at   | MmugDNA.23869.1 | 4.88  | 4.89  | 0.15 | 0.09 | -1    | 0.478139 | 0.540939 | 0.719818 | 0.724649 |
| MmugDNA.2387.1.S1_at    | MmugDNA.2387.1  | 2.8   | 2.69  | 0.11 | 0.24 | 1.08  | 0.947055 | 0.881172 | 0.977707 | 0.932188 |
| MmugDNA.23870.1.S1_at   | MmugDNA.23870.1 | 6.02  | 5.87  | 0.17 | 0.1  | 1.11  | 0.346879 | 0.021212 | 0.625079 | 0.182364 |
| MmugDNA.23871.1.S1_at   | MmugDNA.23871.1 | 3.9   | 3.91  | 0.04 | 0.12 | -1.01 | 0.830567 | 0.706093 | 0.925496 | 0.829633 |
| MmugDNA.23872.1.S1_at   | MmugDNA.23872.1 | 4.04  | 3.15  | 0.42 | 0.26 | 1.86  | 0.055938 | 0.039263 | 0.293459 | 0.243333 |
| MmugDNA.23873.1.S1_at   | MmugDNA.23873.1 | 10.15 | 9.78  | 0.09 | 0.15 | 1.29  | 0.013875 | 0.091348 | 0.168813 | 0.346281 |
| MmugDNA.23874.1.S1_at   | MmugDNA.23874.1 | 4.74  | 4.47  | 0.28 | 0.37 | 1.2   | 0.150973 | 0.14446  | 0.440318 | 0.418323 |
| MmugDNA.23875.1.S1_at   | MmugDNA.23875.1 | 3.65  | 3.98  | 0.08 | 0.19 | -1.25 | 0.090174 | 0.137885 | 0.356864 | 0.410846 |
| MmugDNA.39181.1.S1_at   | MmugDNA.39181.1 | 3.85  | 3.84  | 0.18 | 0.05 | 1.01  | 0.893919 | 0.986804 | 0.954747 | 0.992556 |
| MmugDNA.39181.1.S1_s_at | MmugDNA.39181.1 | 4.23  | 4.45  | 0.15 | 0.05 | -1.17 | 0.113564 | 0.090314 | 0.390238 | 0.3447   |
| MmugDNA.23877.1.S1_at   | MmugDNA.23877.1 | 5.46  | 5.52  | 0.04 | 0.07 | -1.04 | 0.626836 | 0.955355 | 0.8164   | 0.974645 |
| MmugDNA.23878.1.S1_at   | MmugDNA.23878.1 | 6.06  | 6.05  | 0.23 | 0.23 | 1.01  | 0.810764 | 0.002443 | 0.91525  | 0.073201 |
| MmugDNA.2388.1.S1_at    | MmugDNA.2388.1  | 3.83  | 3.95  | 0.16 | 0.03 | -1.09 | 0.167888 | 0.196663 | 0.461188 | 0.471715 |
| MmugDNA.23880.1.S1_at   | MmugDNA.23880.1 | 3.88  | 3.92  | 0.07 | 0.12 | -1.03 | 0.468711 | 0.686602 | 0.713705 | 0.81711  |
| MmugDNA.23881.1.S1_at   | MmugDNA.23881.1 | 6     | 5.84  | 0.31 | 0.1  | 1.12  | 0.196763 | 0.291408 | 0.493882 | 0.551823 |
| MmugDNA.23882.1.S1_at   | MmugDNA.23882.1 | 4.6   | 4.58  | 0.07 | 0.08 | 1.01  | 0.687041 | 0.891967 | 0.850763 | 0.938422 |
| MmugDNA.23883.1.S1_at   | MmugDNA.23883.1 | 5.42  | 5.32  | 0.27 | 0.03 | 1.07  | 0.831548 | 0.225294 | 0.925937 | 0.497892 |
| MmugDNA.23884.1.S1_at   | MmugDNA.23884.1 | 3.13  | 3.1   | 0.16 | 0.12 | 1.02  | 0.862374 | 0.972831 | 0.940196 | 0.985352 |
| MmugDNA.23885.1.S1_at   | MmugDNA.23885.1 | 7.67  | 7.93  | 0.38 | 0.07 | -1.2  | 0.57256  | 0.894549 | 0.780677 | 0.939811 |
| MmugDNA.23886.1.S1_at   | MmugDNA.23886.1 | 9.51  | 9.47  | 0.27 | 0.23 | 1.03  | 0.414446 | 0.639828 | 0.675678 | 0.788487 |
| MmugDNA.23888.1.S1_at   | MmugDNA.23888.1 | 3.96  | 3.4   | 0.29 | 0.18 | 1.48  | 0.037896 | 0.301734 | 0.250485 | 0.559671 |
| MmugDNA.2389.1.S1_at    | MmugDNA.2389.1  | 9.97  | 9.84  | 0.06 | 0.08 | 1.09  | 0.066839 | 0.478744 | 0.316219 | 0.684706 |
| MmugDNA.23890.1.S1_at   | MmugDNA.23890.1 | 5.02  | 4.93  | 0.59 | 0.07 | 1.07  | 0.791482 | 0.34432  | 0.905298 | 0.589762 |
| MmugDNA.23891.1.S1_at   | MmugDNA.23891.1 | 8.74  | 8.15  | 0.26 | 0.07 | 1.51  | 0.015887 | 0.212831 | 0.17843  | 0.486774 |
| MmugDNA.23892.1.S1_at   | MmugDNA.23892.1 | 11.91 | 11.82 | 0.05 | 0.17 | 1.07  | 0.926762 | 0.42604  | 0.969032 | 0.648241 |
| MmugDNA.23892.1.S1_s_at | MmugDNA.23892.1 | 10.99 | 10.87 | 0.08 | 0.13 | 1.09  | 0.203733 | 0.596888 | 0.501439 | 0.759909 |
| MmugDNA.23893.1.S1_at   | MmugDNA.23893.1 | 3.94  | 4.12  | 0.13 | 0.19 | -1.13 | 0.239342 | 0.147042 | 0.536594 | 0.421162 |
| MmugDNA.23895.1.S1_at   | MmugDNA.23895.1 | 4.39  | 5.28  | 0.67 | 0.15 | -1.86 | 0.222441 | 0.180954 | 0.52037  | 0.457426 |
| MmugDNA.23897.1.S1_at   | MmugDNA.23897.1 | 3.67  | 3.67  | 0.73 | 0.15 | 1     | 0.476988 | 0.362734 | 0.719215 | 0.603245 |
| MmugDNA.23898.1.S1_at   | MmugDNA.23898.1 | 9.57  | 10.17 | 0.19 | 0.08 | -1.51 | 0.00457  | 0.015529 | 0.113728 | 0.158053 |
| MmugDNA.23899.1.S1_at   | MmugDNA.23899.1 | 6.39  | 6.09  | 0.29 | 0.18 | 1.22  | 0.205325 | 0.097251 | 0.503171 | 0.354908 |
| MmugDNA.239.1.S1_at     | MmugDNA.239.1   | 12.08 | 11.86 | 0.25 | 0.11 | 1.17  | 0.428375 | 0.123722 | 0.685363 | 0.393867 |
| MmugDNA.2390.1.S1_at    | MmugDNA.2390.1  | 6.05  | 6.06  | 0.17 | 0.16 | -1    | 0.990145 | 0.98847  | 0.996449 | 0.993525 |
| MmugDNA.23900.1.S1_at   | MmugDNA.23900.1 | 4.59  | 4.54  | 0.59 | 0.66 | 1.04  | 0.74092  | 0.893081 | 0.879899 | 0.939015 |
| MmugDNA.23901.1.S1_at   | MmugDNA.23901.1 | 6.66  | 6.58  | 0.05 | 0.07 | 1.06  | 0.390033 | 0.832122 | 0.657707 | 0.903678 |
| MmugDNA.23902.1.S1_at   | MmugDNA.23902.1 | 6.55  | 6.64  | 0.18 | 0.09 | -1.06 | 0.868854 | 0.332111 | 0.943567 | 0.580584 |
| MmugDNA.23903.1.S1_at   | MmugDNA.23903.1 | 8.35  | 7.95  | 0.39 | 0.21 | 1.32  | 0.511053 | 0.945011 | 0.742322 | 0.968834 |

|                         |                 |       |       |      |      |       |          |          |          |          |
|-------------------------|-----------------|-------|-------|------|------|-------|----------|----------|----------|----------|
| MmugDNA.23904.1.S1_at   | MmugDNA.23904.1 | 7.71  | 7.31  | 0.04 | 0.15 | 1.32  | 0.01918  | 0.005015 | 0.191978 | 0.098672 |
| MmugDNA.23906.1.S1_at   | MmugDNA.23906.1 | 4.3   | 4.25  | 0.14 | 0.05 | 1.03  | 0.690329 | 0.180742 | 0.851986 | 0.457294 |
| MmugDNA.23907.1.S1_at   | MmugDNA.23907.1 | 6.29  | 6.45  | 0.18 | 0.1  | -1.12 | 0.218927 | 0.259426 | 0.516629 | 0.526418 |
| MmugDNA.23908.1.S1_at   | MmugDNA.23908.1 | 3.94  | 3.77  | 0.09 | 0.16 | 1.13  | 0.158749 | 0.147627 | 0.449964 | 0.421901 |
| MmugDNA.2391.1.S1_at    | MmugDNA.2391.1  | 5.49  | 5.42  | 0.27 | 0.05 | 1.05  | 0.1867   | 0.209687 | 0.482823 | 0.48341  |
| MmugDNA.23910.1.S1_at   | MmugDNA.23910.1 | 6.27  | 6.27  | 0.02 | 0.07 | -1    | 0.415893 | 0.349512 | 0.676498 | 0.593484 |
| MmugDNA.23911.1.S1_at   | MmugDNA.23911.1 | 8.34  | 8.23  | 0.29 | 0.28 | 1.08  | 0.461517 | 0.564248 | 0.708897 | 0.739128 |
| MmugDNA.23912.1.S1_at   | MmugDNA.23912.1 | 5.42  | 5.39  | 0.13 | 0.07 | 1.02  | 0.661232 | 0.434833 | 0.836453 | 0.654843 |
| MmugDNA.23913.1.S1_at   | MmugDNA.23913.1 | 6.55  | 6.51  | 0.07 | 0    | 1.03  | 0.998046 | 0.848319 | 0.999236 | 0.91389  |
| MmugDNA.23914.1.S1_at   | MmugDNA.23914.1 | 7.49  | 7.02  | 0.35 | 0.29 | 1.38  | 0.195035 | 0.072449 | 0.491564 | 0.315294 |
| MmugDNA.23915.1.S1_at   | MmugDNA.23915.1 | 6.55  | 6.29  | 0.09 | 0.19 | 1.19  | 0.264664 | 0.78789  | 0.55795  | 0.877314 |
| MmugDNA.23916.1.S1_at   | MmugDNA.23916.1 | 4.08  | 3.84  | 0.1  | 0.07 | 1.18  | 0.027561 | 0.075948 | 0.218525 | 0.320634 |
| MmugDNA.23917.1.S1_at   | MmugDNA.23917.1 | 6.95  | 6.89  | 0.2  | 0.08 | 1.04  | 0.210826 | 0.175034 | 0.50843  | 0.451682 |
| MmugDNA.23918.1.S1_at   | MmugDNA.23918.1 | 5.72  | 5.25  | 1.4  | 0.13 | 1.39  | 0.44419  | 0.679928 | 0.697088 | 0.8131   |
| MmugDNA.23919.1.S1_at   | MmugDNA.23919.1 | 7.49  | 6.36  | 1.62 | 0.06 | 2.2   | 0.813368 | 0.964165 | 0.916543 | 0.980052 |
| MmugDNA.2392.1.S1_at    | MmugDNA.2392.1  | 3.7   | 3.64  | 0.24 | 0.2  | 1.04  | 0.765824 | 0.545266 | 0.892599 | 0.727457 |
| MmugDNA.23920.1.S1_at   | MmugDNA.23920.1 | 3.34  | 3.38  | 0.13 | 0.15 | -1.03 | 0.698191 | 0.735228 | 0.856385 | 0.846794 |
| MmugDNA.23921.1.S1_at   | MmugDNA.23921.1 | 3.82  | 3.87  | 0.31 | 0.15 | -1.03 | 0.696092 | 0.815908 | 0.855244 | 0.893781 |
| MmugDNA.23922.1.S1_at   | MmugDNA.23922.1 | 5.13  | 5.27  | 0.16 | 0.14 | -1.11 | 0.620764 | 0.893247 | 0.812174 | 0.939152 |
| MmugDNA.23923.1.S1_at   | MmugDNA.23923.1 | 10.92 | 11.05 | 0.21 | 0.14 | -1.09 | 0.219961 | 0.048447 | 0.517641 | 0.26532  |
| MmugDNA.23924.1.S1_at   | MmugDNA.23924.1 | 6.56  | 6.52  | 0.47 | 0.18 | 1.03  | 0.519749 | 0.304733 | 0.748244 | 0.561921 |
| MmugDNA.23926.1.S1_s_at | MmugDNA.23926.1 | 9.68  | 9.1   | 0.09 | 0.17 | 1.5   | 0.003517 | 0.009996 | 0.104235 | 0.131262 |
| MmugDNA.23927.1.S1_at   | MmugDNA.23927.1 | 6.46  | 6.37  | 0.06 | 0.06 | 1.06  | 0.335856 | 0.125703 | 0.616625 | 0.396249 |
| MmugDNA.23930.1.S1_at   | MmugDNA.23930.1 | 6.19  | 5.95  | 0.07 | 0.16 | 1.18  | 0.197598 | 0.475865 | 0.494854 | 0.682387 |
| MmugDNA.23931.1.S1_at   | MmugDNA.23931.1 | 8.08  | 8.42  | 0.39 | 0.11 | -1.27 | 0.645178 | 0.55323  | 0.82722  | 0.73239  |
| MmugDNA.23934.1.S1_at   | MmugDNA.23934.1 | 5.62  | 5.23  | 0.21 | 0.1  | 1.31  | 0.07445  | 0.084082 | 0.331099 | 0.335065 |
| MmugDNA.23935.1.S1_at   | MmugDNA.23935.1 | 6.91  | 6.93  | 0.18 | 0.03 | -1.02 | 0.441176 | 0.724796 | 0.694766 | 0.840693 |
| MmugDNA.23936.1.S1_at   | MmugDNA.23936.1 | 8.93  | 8.22  | 0.23 | 0.14 | 1.63  | 0.022298 | 0.078947 | 0.202621 | 0.325957 |
| MmugDNA.23937.1.S1_at   | MmugDNA.23937.1 | 10.05 | 9.77  | 0.22 | 0.18 | 1.21  | 0.139208 | 0.070251 | 0.424942 | 0.311287 |
| MmugDNA.23939.1.S1_at   | MmugDNA.23939.1 | 8.73  | 8.62  | 0.3  | 0.09 | 1.08  | 0.416678 | 0.567994 | 0.67708  | 0.74176  |
| MmugDNA.23939.1.S1_s_at | MmugDNA.23939.1 | 9.29  | 8.97  | 0.36 | 0.07 | 1.25  | 0.246528 | 0.301029 | 0.542419 | 0.559198 |
| MmugDNA.23940.1.S1_at   | MmugDNA.23940.1 | 5.33  | 4.93  | 1.75 | 0.81 | 1.32  | 0.698091 | 0.800369 | 0.856374 | 0.885129 |
| MmugDNA.23941.1.S1_at   | MmugDNA.23941.1 | 4.2   | 4.22  | 0.55 | 0.46 | -1.02 | 0.311413 | 0.366256 | 0.597508 | 0.606019 |
| MmugDNA.23943.1.S1_at   | MmugDNA.23943.1 | 6.93  | 6.68  | 0.16 | 0.21 | 1.19  | 0.324769 | 0.26842  | 0.608363 | 0.534106 |
| MmugDNA.23944.1.S1_at   | MmugDNA.23944.1 | 5.16  | 5.18  | 0.16 | 0.13 | -1.02 | 0.759393 | 0.419619 | 0.889659 | 0.643568 |
| MmugDNA.23946.1.S1_at   | MmugDNA.23946.1 | 6.64  | 6.98  | 0.08 | 0.35 | -1.27 | 0.232722 | 0.306095 | 0.531068 | 0.562804 |
| MmugDNA.23947.1.S1_at   | MmugDNA.23947.1 | 6.52  | 6.34  | 0.4  | 0.03 | 1.13  | 0.163445 | 0.193187 | 0.455676 | 0.468578 |
| MmugDNA.23948.1.S1_at   | MmugDNA.23948.1 | 3.56  | 3.57  | 0.04 | 0.04 | -1.01 | 0.860635 | 0.020621 | 0.939526 | 0.180141 |
| MmugDNA.23949.1.S1_at   | MmugDNA.23949.1 | 4.48  | 4.49  | 0.5  | 0.09 | -1.01 | 0.367039 | 0.523965 | 0.641205 | 0.714099 |
| MmugDNA.23950.1.S1_at   | MmugDNA.23950.1 | 6.93  | 6.85  | 0.06 | 0.09 | 1.05  | 0.144175 | 0.286644 | 0.430944 | 0.548077 |
| MmugDNA.23951.1.S1_at   | MmugDNA.23951.1 | 5.97  | 5.58  | 0.36 | 0.31 | 1.31  | 0.652244 | 0.196959 | 0.831164 | 0.472072 |
| MmugDNA.23953.1.S1_at   | MmugDNA.23953.1 | 5.52  | 5.57  | 0.09 | 0.08 | -1.03 | 0.760362 | 0.144648 | 0.890152 | 0.418477 |
| MmugDNA.23955.1.S1_at   | MmugDNA.23955.1 | 8.3   | 8.32  | 0.52 | 0.12 | -1.02 | 0.448478 | 0.214227 | 0.700064 | 0.487856 |

|                         |                 |       |       |      |      |       |          |          |          |          |
|-------------------------|-----------------|-------|-------|------|------|-------|----------|----------|----------|----------|
| MmugDNA.23956.1.S1_at   | MmugDNA.23956.1 | 7.55  | 7.47  | 0.66 | 0.07 | 1.06  | 0.699604 | 0.685718 | 0.857338 | 0.816612 |
| MmugDNA.23957.1.S1_at   | MmugDNA.23957.1 | 4.37  | 4.99  | 0.93 | 0.15 | -1.53 | 0.266668 | 0.143484 | 0.559087 | 0.417442 |
| MmugDNA.23958.1.S1_at   | MmugDNA.23958.1 | 3.77  | 4.02  | 0.16 | 0.31 | -1.19 | 0.264118 | 0.22965  | 0.557422 | 0.50163  |
| MmugDNA.23959.1.S1_at   | MmugDNA.23959.1 | 6.03  | 5.82  | 0.02 | 0.34 | 1.15  | 0.417693 | 0.836307 | 0.677723 | 0.90636  |
| MmugDNA.2396.1.S1_at    | MmugDNA.2396.1  | 3.34  | 3.32  | 0.14 | 0.17 | 1.01  | 0.929465 | 0.821687 | 0.970112 | 0.897323 |
| MmugDNA.23960.1.S1_at   | MmugDNA.23960.1 | 6.42  | 6.26  | 0.21 | 0.09 | 1.12  | 0.276477 | 0.412965 | 0.568029 | 0.63928  |
| MmugDNA.23961.1.S1_at   | MmugDNA.23961.1 | 6.79  | 7.01  | 0.13 | 0.15 | -1.17 | 0.062961 | 0.489369 | 0.307682 | 0.691792 |
| MmugDNA.23962.1.S1_at   | MmugDNA.23962.1 | 8.32  | 8.59  | 0.09 | 0.15 | -1.2  | 0.033187 | 0.000375 | 0.236343 | 0.037273 |
| MmugDNA.23963.1.S1_at   | MmugDNA.23963.1 | 5.09  | 5.22  | 0.06 | 0.04 | -1.09 | 0.021214 | 0.02225  | 0.199338 | 0.186618 |
| MmugDNA.23964.1.S1_at   | MmugDNA.23964.1 | 6.9   | 7.43  | 0.42 | 0.22 | -1.45 | 0.270282 | 0.545984 | 0.562443 | 0.727708 |
| MmugDNA.23965.1.S1_at   | MmugDNA.23965.1 | 4.55  | 4.4   | 0.1  | 0.03 | 1.11  | 0.089426 | 0.259448 | 0.356406 | 0.526418 |
| MmugDNA.23966.1.S1_at   | MmugDNA.23966.1 | 5.64  | 5.61  | 0.31 | 0.13 | 1.02  | 0.274449 | 0.311101 | 0.566305 | 0.566159 |
| MmugDNA.23967.1.S1_at   | MmugDNA.23967.1 | 5.39  | 5.06  | 0.2  | 0.19 | 1.26  | 0.218575 | 0.203674 | 0.516192 | 0.477907 |
| MmugDNA.23968.1.S1_at   | MmugDNA.23968.1 | 5.34  | 4.94  | 0.9  | 0.22 | 1.32  | 0.763661 | 0.924698 | 0.891841 | 0.957442 |
| MmugDNA.23968.1.S1_s_at | MmugDNA.23968.1 | 7.14  | 6.95  | 0.63 | 0.18 | 1.14  | 0.218323 | 0.338876 | 0.516034 | 0.585891 |
| MmugDNA.23969.1.S1_at   | MmugDNA.23969.1 | 5.4   | 3.81  | 0.89 | 0.7  | 3.01  | 0.138713 | 0.265102 | 0.42426  | 0.531    |
| MmugDNA.23970.1.S1_at   | MmugDNA.23970.1 | 5.02  | 5.33  | 0.21 | 0.05 | -1.23 | 0.078783 | 0.047038 | 0.338647 | 0.261469 |
| MmugDNA.23971.1.S1_at   | MmugDNA.23971.1 | 10.38 | 10.62 | 0.08 | 0.13 | -1.18 | 0.046648 | 0.530685 | 0.273564 | 0.718104 |
| MmugDNA.23972.1.S1_at   | MmugDNA.23972.1 | 4.08  | 5.68  | 0.45 | 0.54 | -3.03 | 0.018359 | 0.185985 | 0.188509 | 0.461839 |
| MmugDNA.23972.1.S1_s_at | MmugDNA.23972.1 | 4.83  | 6.1   | 0.22 | 0.37 | -2.42 | 0.006753 | 0.078359 | 0.128994 | 0.325024 |
| MmugDNA.23973.1.S1_at   | MmugDNA.23973.1 | 6.21  | 6     | 0.16 | 0.13 | 1.16  | 0.057741 | 0.083682 | 0.297465 | 0.334355 |
| MmugDNA.23974.1.S1_at   | MmugDNA.23974.1 | 3.07  | 2.91  | 0.15 | 0.03 | 1.11  | 0.121609 | 0.159215 | 0.400461 | 0.435217 |
| MmugDNA.23975.1.S1_at   | MmugDNA.23975.1 | 4.88  | 5.26  | 0.25 | 0.02 | -1.31 | 0.169988 | 0.522683 | 0.463481 | 0.713295 |
| MmugDNA.23976.1.S1_at   | MmugDNA.23976.1 | 8.04  | 7.94  | 0.19 | 0.05 | 1.07  | 0.47983  | 0.491846 | 0.720918 | 0.693275 |
| MmugDNA.23977.1.S1_at   | MmugDNA.23977.1 | 6.48  | 6.51  | 0.03 | 0.07 | -1.02 | 0.587431 | 0.652181 | 0.790473 | 0.796592 |
| MmugDNA.23978.1.S1_at   | MmugDNA.23978.1 | 3.4   | 3.46  | 0.68 | 0.42 | -1.04 | 0.823978 | 0.912113 | 0.92174  | 0.950444 |
| MmugDNA.2398.1.S1_at    | MmugDNA.2398.1  | 4.31  | 4.3   | 0.2  | 0.15 | 1.01  | 0.822916 | 0.93158  | 0.921293 | 0.961152 |
| MmugDNA.23980.1.S1_at   | MmugDNA.23980.1 | 3.64  | 3.67  | 0.26 | 0.05 | -1.02 | 0.584119 | 0.560985 | 0.788484 | 0.737076 |
| MmugDNA.23981.1.S1_at   | MmugDNA.23981.1 | 8.35  | 7.78  | 0.5  | 0.19 | 1.49  | 0.16341  | 0.139069 | 0.455676 | 0.412165 |
| MmugDNA.23984.1.S1_at   | MmugDNA.23984.1 | 5.67  | 5.68  | 0.07 | 0.04 | -1    | 0.343926 | 0.520805 | 0.623214 | 0.711942 |
| MmugDNA.23985.1.S1_at   | MmugDNA.23985.1 | 8.74  | 9.27  | 0.38 | 0.13 | -1.45 | 0.117781 | 0.009495 | 0.395156 | 0.128349 |
| MmugDNA.23987.1.S1_at   | MmugDNA.23987.1 | 3.83  | 3.84  | 0.11 | 0.08 | -1.01 | 0.77409  | 0.532491 | 0.896553 | 0.719065 |
| MmugDNA.23988.1.S1_at   | MmugDNA.23988.1 | 5.49  | 3.93  | 1.73 | 0.59 | 2.95  | 0.304094 | 0.304698 | 0.59132  | 0.561914 |
| MmugDNA.23989.1.S1_s_at | MmugDNA.23989.1 | 4.07  | 3.58  | 0.32 | 0.07 | 1.41  | 0.073517 | 0.076302 | 0.328947 | 0.321334 |
| MmugDNA.23990.1.S1_at   | MmugDNA.23990.1 | 5.77  | 6.03  | 0.29 | 0.11 | -1.2  | 0.080099 | 0.079997 | 0.340456 | 0.327352 |
| MmugDNA.23991.1.S1_at   | MmugDNA.23991.1 | 3.84  | 3.83  | 0.04 | 0.14 | 1.01  | 0.709586 | 0.911775 | 0.862609 | 0.950259 |
| MmugDNA.23992.1.S1_at   | MmugDNA.23992.1 | 5.04  | 5.08  | 0.15 | 0.36 | -1.02 | 0.362943 | 0.324239 | 0.637611 | 0.57488  |
| MmugDNA.23993.1.S1_at   | MmugDNA.23993.1 | 6.61  | 6.17  | 0.24 | 0.35 | 1.36  | 0.293192 | 0.269532 | 0.582128 | 0.534806 |
| MmugDNA.23994.1.S1_at   | MmugDNA.23994.1 | 5.31  | 5.1   | 0.25 | 0.24 | 1.15  | 0.469319 | 0.020255 | 0.714096 | 0.178702 |
| MmugDNA.23996.1.S1_at   | MmugDNA.23996.1 | 12.93 | 12.92 | 0.27 | 0.01 | 1.01  | 0.844231 | 0.827307 | 0.931782 | 0.900836 |
| MmugDNA.23997.1.S1_at   | MmugDNA.23997.1 | 4.42  | 4.09  | 0.42 | 0.28 | 1.26  | 0.316692 | 0.429674 | 0.601415 | 0.650982 |
| MmugDNA.23999.1.S1_at   | MmugDNA.23999.1 | 4.1   | 4.14  | 0.34 | 0.07 | -1.03 | 0.923023 | 0.989677 | 0.96715  | 0.994108 |
| MmugDNA.24.1.S1_at      | MmugDNA.24.1    | 6.05  | 4.58  | 0.33 | 0.3  | 2.77  | 0.007372 | 0.006669 | 0.134072 | 0.110588 |

|                         |                 |       |       |      |      |       |          |          |          |          |
|-------------------------|-----------------|-------|-------|------|------|-------|----------|----------|----------|----------|
| MmugDNA.240.1.S1_at     | MmugDNA.240.1   | 4.48  | 4.36  | 0.41 | 0.16 | 1.08  | 0.598654 | 0.509798 | 0.797532 | 0.704385 |
| MmugDNA.2400.1.S1_at    | MmugDNA.2400.1  | 5.63  | 5.6   | 0.18 | 0.07 | 1.02  | 0.805538 | 0.943459 | 0.912779 | 0.967902 |
| MmugDNA.24000.1.S1_at   | MmugDNA.24000.1 | 5.55  | 5.55  | 0.04 | 0.26 | -1    | 0.877628 | 0.977222 | 0.947698 | 0.987628 |
| MmugDNA.24002.1.S1_at   | MmugDNA.24002.1 | 6.77  | 6.76  | 0.25 | 0.07 | 1.01  | 0.944645 | 0.945002 | 0.976662 | 0.968834 |
| MmugDNA.24008.1.S1_at   | MmugDNA.24008.1 | 3.99  | 3.85  | 0.03 | 0.1  | 1.1   | 0.156423 | 0.167613 | 0.446993 | 0.444043 |
| MmugDNA.24009.1.S1_at   | MmugDNA.24009.1 | 3.81  | 3.95  | 0.03 | 0.06 | -1.1  | 0.016909 | 0.021578 | 0.183348 | 0.18405  |
| MmugDNA.31059.1.S1_at   | MmugDNA.31059.1 | 13.63 | 12.7  | 0.13 | 0.2  | 1.91  | 0.005057 | 0.002862 | 0.116282 | 0.078756 |
| MmugDNA.31059.1.S1_s_at | MmugDNA.31059.1 | 12.19 | 11.3  | 0.12 | 0.08 | 1.86  | 0.000479 | 0.000806 | 0.067728 | 0.04607  |
| MmugDNA.24011.1.S1_at   | MmugDNA.24011.1 | 4.31  | 4.32  | 0.07 | 0.17 | -1.01 | 0.851009 | 0.899164 | 0.935277 | 0.942655 |
| MmugDNA.24012.1.S1_at   | MmugDNA.24012.1 | 3.93  | 3.89  | 0.03 | 0.02 | 1.03  | 0.030171 | 0.207172 | 0.226849 | 0.481307 |
| MmugDNA.24013.1.S1_at   | MmugDNA.24013.1 | 11.26 | 10.92 | 0.25 | 0.15 | 1.26  | 0.101607 | 0.065537 | 0.37296  | 0.301415 |
| MmugDNA.24014.1.S1_at   | MmugDNA.24014.1 | 12.31 | 12.12 | 0.13 | 0.03 | 1.13  | 0.07686  | 0.164803 | 0.335302 | 0.441106 |
| MmugDNA.24015.1.S1_at   | MmugDNA.24015.1 | 5.3   | 5.41  | 0.13 | 0.15 | -1.08 | 0.720151 | 0.08029  | 0.867967 | 0.327939 |
| MmugDNA.24016.1.S1_at   | MmugDNA.24016.1 | 3.64  | 3.7   | 0.06 | 0.05 | -1.04 | 0.278225 | 0.550095 | 0.56957  | 0.730241 |
| MmugDNA.24018.1.S1_at   | MmugDNA.24018.1 | 5.61  | 6.82  | 0.3  | 0.53 | -2.31 | 0.026723 | 0.034357 | 0.216637 | 0.229283 |
| MmugDNA.24019.1.S1_at   | MmugDNA.24019.1 | 3.27  | 3.27  | 0.01 | 0    | 1     | 0.373901 | 0.880628 | 0.645118 | 0.931813 |
| MmugDNA.2402.1.S1_at    | MmugDNA.2402.1  | 4.17  | 4.34  | 0.06 | 0.09 | -1.12 | 0.274851 | 0.852865 | 0.566556 | 0.916359 |
| MmugDNA.24020.1.S1_at   | MmugDNA.24020.1 | 3.98  | 3.91  | 0.16 | 0.33 | 1.05  | 0.383402 | 0.057161 | 0.652771 | 0.284972 |
| MmugDNA.24021.1.S1_at   | MmugDNA.24021.1 | 11.58 | 10.51 | 0.17 | 0.05 | 2.09  | 0.000521 | 0.012099 | 0.0694   | 0.142307 |
| MmugDNA.24022.1.S1_at   | MmugDNA.24022.1 | 5.67  | 5.39  | 0.17 | 0.05 | 1.22  | 0.062502 | 0.054472 | 0.306597 | 0.278959 |
| MmugDNA.24025.1.S1_at   | MmugDNA.24025.1 | 6.3   | 6.68  | 0.25 | 0.31 | -1.3  | 0.257846 | 0.087782 | 0.552065 | 0.341044 |
| MmugDNA.24029.1.S1_at   | MmugDNA.24029.1 | 5.59  | 5.79  | 0.14 | 0.1  | -1.15 | 0.175813 | 0.264033 | 0.470151 | 0.530183 |
| MmugDNA.24030.1.S1_at   | MmugDNA.24030.1 | 11.73 | 12.12 | 0.47 | 0.13 | -1.31 | 0.248781 | 0.056454 | 0.544151 | 0.283516 |
| MmugDNA.24031.1.S1_at   | MmugDNA.24031.1 | 5.79  | 5.76  | 0.23 | 0.18 | 1.02  | 0.859869 | 0.810817 | 0.939228 | 0.890845 |
| MmugDNA.24032.1.S1_at   | MmugDNA.24032.1 | 3.81  | 3.81  | 0.13 | 0.04 | -1    | 0.435334 | 0.789043 | 0.690435 | 0.878071 |
| MmugDNA.24033.1.S1_at   | MmugDNA.24033.1 | 5.23  | 5.82  | 1.4  | 0.37 | -1.51 | 0.988426 | 0.992644 | 0.995872 | 0.995715 |
| MmugDNA.24034.1.S1_at   | MmugDNA.24034.1 | 4.13  | 3.7   | 0.45 | 0.22 | 1.34  | 0.115741 | 0.10931  | 0.39285  | 0.373084 |
| MmugDNA.24035.1.S1_at   | MmugDNA.24035.1 | 8.39  | 8.11  | 0.26 | 0.16 | 1.21  | 0.524651 | 0.099109 | 0.751482 | 0.357246 |
| MmugDNA.24037.1.S1_at   | MmugDNA.24037.1 | 3.44  | 3.44  | 0.14 | 0.06 | 1     | 0.241738 | 0.213574 | 0.538882 | 0.48741  |
| MmugDNA.24038.1.S1_at   | MmugDNA.24038.1 | 3.9   | 4.24  | 0.23 | 0.48 | -1.27 | 0.416007 | 0.602045 | 0.676502 | 0.763167 |
| MmugDNA.2404.1.S1_at    | MmugDNA.2404.1  | 7.51  | 7.52  | 0.31 | 0.1  | -1.01 | 0.60882  | 0.188251 | 0.804712 | 0.464261 |
| MmugDNA.24040.1.S1_at   | MmugDNA.24040.1 | 3.88  | 3.87  | 0.33 | 0.53 | 1.01  | 0.398348 | 0.662243 | 0.663851 | 0.802209 |
| MmugDNA.24041.1.S1_at   | MmugDNA.24041.1 | 5.82  | 5.76  | 0.19 | 0.13 | 1.04  | 0.460781 | 0.463111 | 0.708419 | 0.67424  |
| MmugDNA.24042.1.S1_at   | MmugDNA.24042.1 | 11.74 | 11.27 | 0.14 | 0.09 | 1.39  | 0.00605  | 0.136548 | 0.124182 | 0.409055 |
| MmugDNA.24043.1.S1_at   | MmugDNA.24043.1 | 7.06  | 6.97  | 0.21 | 0.05 | 1.07  | 0.424117 | 0.61307  | 0.681872 | 0.770391 |
| MmugDNA.24045.1.S1_s_at | MmugDNA.24045.1 | 7.99  | 8.18  | 0.12 | 0.24 | -1.14 | 0.931309 | 0.029778 | 0.971084 | 0.214208 |
| MmugDNA.24046.1.S1_at   | MmugDNA.24046.1 | 6.55  | 6.25  | 1.03 | 0.26 | 1.23  | 0.196578 | 0.225654 | 0.493604 | 0.498155 |
| MmugDNA.24049.1.S1_at   | MmugDNA.24049.1 | 5.16  | 5.27  | 0.65 | 0.18 | -1.08 | 0.846305 | 0.536148 | 0.932897 | 0.721538 |
| MmugDNA.2405.1.S1_at    | MmugDNA.2405.1  | 5.28  | 5.48  | 0.18 | 0.16 | -1.15 | 0.562152 | 0.073855 | 0.774838 | 0.31722  |
| MmugDNA.24050.1.S1_at   | MmugDNA.24050.1 | 3.94  | 3.64  | 0.3  | 0.08 | 1.23  | 0.225656 | 0.446288 | 0.523395 | 0.662743 |
| MmugDNA.24051.1.S1_at   | MmugDNA.24051.1 | 7.03  | 8.45  | 0.93 | 0.23 | -2.67 | 0.097382 | 0.47251  | 0.367528 | 0.680025 |
| MmugDNA.24052.1.S1_at   | MmugDNA.24052.1 | 5.39  | 5.35  | 0.17 | 0.3  | 1.02  | 0.897766 | 0.961464 | 0.956586 | 0.978247 |
| MmugDNA.24053.1.S1_at   | MmugDNA.24053.1 | 4.16  | 3.84  | 0.32 | 0.16 | 1.24  | 0.087361 | 0.123394 | 0.353109 | 0.393391 |

|                         |                 |       |       |      |      |       |          |          |          |          |
|-------------------------|-----------------|-------|-------|------|------|-------|----------|----------|----------|----------|
| MmugDNA.24054.1.S1_at   | MmugDNA.24054.1 | 4.64  | 4.54  | 0.21 | 0.09 | 1.07  | 0.468951 | 0.673315 | 0.713885 | 0.809102 |
| MmugDNA.24055.1.S1_at   | MmugDNA.24055.1 | 6.94  | 6.81  | 0.13 | 0.05 | 1.09  | 0.125078 | 0.417109 | 0.405516 | 0.642022 |
| MmugDNA.24056.1.S1_at   | MmugDNA.24056.1 | 7.66  | 7.56  | 0.19 | 0.06 | 1.07  | 0.433983 | 0.711816 | 0.689295 | 0.832894 |
| MmugDNA.24057.1.S1_at   | MmugDNA.24057.1 | 5.53  | 5.52  | 0.11 | 0.02 | 1     | 0.346512 | 0.516518 | 0.624998 | 0.709034 |
| MmugDNA.24058.1.S1_at   | MmugDNA.24058.1 | 5.94  | 6.2   | 0.14 | 0.35 | -1.2  | 0.214107 | 0.399141 | 0.511862 | 0.62969  |
| MmugDNA.24059.1.S1_at   | MmugDNA.24059.1 | 7.34  | 7.76  | 0.3  | 0.09 | -1.34 | 0.086453 | 0.560736 | 0.351333 | 0.736921 |
| MmugDNA.2406.1.S1_at    | MmugDNA.2406.1  | 7.62  | 7.56  | 0.01 | 0.1  | 1.04  | 0.281704 | 0.215384 | 0.572546 | 0.489067 |
| MmugDNA.24060.1.S1_at   | MmugDNA.24060.1 | 7.04  | 6.6   | 0.54 | 0.25 | 1.35  | 0.684923 | 0.026864 | 0.849864 | 0.205049 |
| MmugDNA.24061.1.S1_at   | MmugDNA.24061.1 | 5.55  | 5.23  | 0.3  | 0.1  | 1.25  | 0.125011 | 0.117627 | 0.405516 | 0.385348 |
| MmugDNA.24062.1.S1_at   | MmugDNA.24062.1 | 6.32  | 6.77  | 0.41 | 0.17 | -1.37 | 0.181716 | 0.429287 | 0.477223 | 0.650754 |
| MmugDNA.24063.1.S1_at   | MmugDNA.24063.1 | 5.77  | 5.67  | 0.1  | 0.21 | 1.07  | 0.686199 | 0.783399 | 0.850502 | 0.874571 |
| MmugDNA.24064.1.S1_at   | MmugDNA.24064.1 | 7.75  | 8.02  | 0.11 | 0.07 | -1.21 | 0.020435 | 0.45793  | 0.196491 | 0.670999 |
| MmugDNA.24064.1.S1_x_at | MmugDNA.24064.1 | 7.93  | 8.14  | 0.11 | 0.05 | -1.15 | 0.040105 | 0.686734 | 0.256783 | 0.817214 |
| MmugDNA.24065.1.S1_at   | MmugDNA.24065.1 | 9.2   | 9.07  | 0.16 | 0.14 | 1.1   | 0.75579  | 0.895065 | 0.887438 | 0.940055 |
| MmugDNA.24066.1.S1_at   | MmugDNA.24066.1 | 6.18  | 6.19  | 0.22 | 0.4  | -1    | 0.645894 | 0.458607 | 0.827662 | 0.671246 |
| MmugDNA.24067.1.S1_at   | MmugDNA.24067.1 | 6.08  | 5.48  | 0.47 | 0.35 | 1.52  | 0.105443 | 0.005939 | 0.37938  | 0.105426 |
| MmugDNA.24068.1.S1_at   | MmugDNA.24068.1 | 6.34  | 6     | 0.54 | 0.2  | 1.27  | 0.21424  | 0.280213 | 0.51193  | 0.543487 |
| MmugDNA.2407.1.S1_at    | MmugDNA.2407.1  | 10.31 | 10.43 | 0.17 | 0.03 | -1.09 | 0.306495 | 0.883708 | 0.593297 | 0.933691 |
| MmugDNA.24070.1.S1_at   | MmugDNA.24070.1 | 6.61  | 5.97  | 0.59 | 0.16 | 1.57  | 0.044926 | 0.030424 | 0.269298 | 0.216377 |
| MmugDNA.24072.1.S1_at   | MmugDNA.24072.1 | 7     | 6.97  | 0.1  | 0.09 | 1.02  | 0.845437 | 0.17499  | 0.932485 | 0.451647 |
| MmugDNA.24073.1.S1_at   | MmugDNA.24073.1 | 4.47  | 4.34  | 0.15 | 0.3  | 1.1   | 0.919318 | 0.259581 | 0.965499 | 0.526502 |
| MmugDNA.24075.1.S1_at   | MmugDNA.24075.1 | 6.28  | 6.01  | 0.24 | 0.16 | 1.2   | 0.076054 | 0.069904 | 0.33408  | 0.310552 |
| MmugDNA.24077.1.S1_at   | MmugDNA.24077.1 | 7.61  | 7.21  | 0.34 | 0.08 | 1.32  | 0.102997 | 0.027679 | 0.375642 | 0.207762 |
| MmugDNA.24079.1.S1_s_at | MmugDNA.24079.1 | 11.13 | 10.72 | 0.19 | 0.17 | 1.33  | 0.03988  | 0.129391 | 0.256386 | 0.4008   |
| MmugDNA.2408.1.S1_at    | MmugDNA.2408.1  | 9.38  | 9.55  | 0.28 | 0.09 | -1.13 | 0.570899 | 0.213488 | 0.779514 | 0.487391 |
| MmugDNA.24080.1.S1_at   | MmugDNA.24080.1 | 5     | 4.99  | 0.14 | 0.02 | 1.01  | 0.402418 | 0.56744  | 0.666744 | 0.741344 |
| MmugDNA.24082.1.S1_at   | MmugDNA.24082.1 | 5.42  | 6.03  | 0.36 | 0.39 | -1.52 | 0.142313 | 0.235692 | 0.428351 | 0.506807 |
| MmugDNA.24083.1.S1_at   | MmugDNA.24083.1 | 6.75  | 6.49  | 1.05 | 0.24 | 1.2   | 0.408    | 0.209887 | 0.670905 | 0.48366  |
| MmugDNA.24084.1.S1_at   | MmugDNA.24084.1 | 7.39  | 7.35  | 0.03 | 0.44 | 1.03  | 0.739331 | 0.03386  | 0.879245 | 0.227647 |
| MmugDNA.24085.1.S1_at   | MmugDNA.24085.1 | 8.19  | 8.64  | 0.87 | 0.09 | -1.37 | 0.951342 | 0.362384 | 0.979913 | 0.602965 |
| MmugDNA.24086.1.S1_at   | MmugDNA.24086.1 | 5.85  | 6     | 0.06 | 0.05 | -1.11 | 0.058107 | 0.606442 | 0.298185 | 0.765747 |
| MmugDNA.24087.1.S1_at   | MmugDNA.24087.1 | 4.3   | 5.71  | 0.62 | 0.18 | -2.65 | 0.028007 | 0.0787   | 0.219887 | 0.325673 |
| MmugDNA.24088.1.S1_at   | MmugDNA.24088.1 | 6.33  | 6.47  | 0.12 | 0.18 | -1.1  | 0.278658 | 0.290861 | 0.569962 | 0.551436 |
| MmugDNA.24089.1.S1_at   | MmugDNA.24089.1 | 8.39  | 8.54  | 0.32 | 0.12 | -1.12 | 0.108279 | 0.235042 | 0.382964 | 0.506255 |
| MmugDNA.24089.1.S1_s_at | MmugDNA.24089.1 | 6.32  | 6.24  | 0.34 | 0.04 | 1.06  | 0.230328 | 0.184067 | 0.529161 | 0.460277 |
| MmugDNA.2409.1.S1_at    | MmugDNA.2409.1  | 4.7   | 4.49  | 0.22 | 0.1  | 1.16  | 0.287757 | 0.25341  | 0.577473 | 0.521713 |
| MmugDNA.24090.1.S1_at   | MmugDNA.24090.1 | 5.76  | 5.99  | 0.04 | 0.12 | -1.17 | 0.035548 | 0.05251  | 0.243391 | 0.274757 |
| MmugDNA.24092.1.S1_at   | MmugDNA.24092.1 | 5.2   | 5.13  | 0.59 | 0.29 | 1.05  | 0.547054 | 0.684965 | 0.765708 | 0.816272 |
| MmugDNA.24093.1.S1_at   | MmugDNA.24093.1 | 6.58  | 4.42  | 1.03 | 0.64 | 4.48  | 0.0996   | 0.158051 | 0.370515 | 0.433821 |
| MmugDNA.24094.1.S1_at   | MmugDNA.24094.1 | 6.49  | 6.4   | 0.18 | 0.03 | 1.07  | 0.115436 | 0.255758 | 0.392595 | 0.523692 |
| MmugDNA.24095.1.S1_at   | MmugDNA.24095.1 | 12.49 | 12.54 | 0.08 | 0.08 | -1.03 | 0.214173 | 0.45577  | 0.511924 | 0.669659 |
| MmugDNA.24096.1.S1_at   | MmugDNA.24096.1 | 4.3   | 4.34  | 0.1  | 0.32 | -1.03 | 0.785732 | 0.726813 | 0.902158 | 0.841963 |
| MmugDNA.24097.1.S1_at   | MmugDNA.24097.1 | 3.55  | 3.55  | 0.06 | 0.03 | 1     | 0.933079 | 0.438031 | 0.971965 | 0.657058 |

|                         |                 |       |       |      |      |       |          |          |          |          |
|-------------------------|-----------------|-------|-------|------|------|-------|----------|----------|----------|----------|
| MmugDNA.24098.1.S1_at   | MmugDNA.24098.1 | 4.58  | 4.53  | 0.18 | 0.1  | 1.04  | 0.693171 | 0.505366 | 0.853369 | 0.702079 |
| MmugDNA.24099.1.S1_at   | MmugDNA.24099.1 | 8.61  | 8.49  | 0.67 | 0.12 | 1.09  | 0.332351 | 0.638923 | 0.614085 | 0.787922 |
| MmugDNA.24099.1.S1_s_at | MmugDNA.24099.1 | 9.28  | 9.19  | 0.56 | 0.09 | 1.06  | 0.277516 | 0.548661 | 0.569079 | 0.729318 |
| MmugDNA.2410.1.S1_at    | MmugDNA.2410.1  | 5.57  | 5.5   | 0.25 | 0.08 | 1.05  | 0.350839 | 0.273457 | 0.628649 | 0.537868 |
| MmugDNA.24101.1.S1_at   | MmugDNA.24101.1 | 3.79  | 3.77  | 0.21 | 0.11 | 1.01  | 0.669122 | 0.790705 | 0.841296 | 0.878973 |
| MmugDNA.24102.1.S1_at   | MmugDNA.24102.1 | 7.76  | 8.1   | 0.18 | 0.19 | -1.26 | 0.099501 | 0.62435  | 0.370394 | 0.778577 |
| MmugDNA.24103.1.S1_at   | MmugDNA.24103.1 | 8.03  | 7.95  | 0.19 | 0.21 | 1.06  | 0.795438 | 0.360217 | 0.907556 | 0.601275 |
| MmugDNA.24104.1.S1_at   | MmugDNA.24104.1 | 4.46  | 3.36  | 0.87 | 0.83 | 2.15  | 0.289605 | 0.400645 | 0.579116 | 0.630467 |
| MmugDNA.24105.1.S1_at   | MmugDNA.24105.1 | 2.94  | 3.12  | 0.27 | 0.05 | -1.14 | 0.704704 | 0.253782 | 0.859798 | 0.52217  |
| MmugDNA.24106.1.S1_at   | MmugDNA.24106.1 | 3.63  | 4.18  | 0.04 | 0.04 | -1.46 | 0.000089 | 0.001744 | 0.051196 | 0.062895 |
| MmugDNA.24107.1.S1_at   | MmugDNA.24107.1 | 6.75  | 6.77  | 0.19 | 0.05 | -1.01 | 0.918368 | 0.237708 | 0.965256 | 0.50826  |
| MmugDNA.24108.1.S1_at   | MmugDNA.24108.1 | 3.74  | 3.91  | 0.14 | 0.16 | -1.13 | 0.604804 | 0.728254 | 0.802011 | 0.842893 |
| MmugDNA.2411.1.S1_at    | MmugDNA.2411.1  | 6.22  | 6.69  | 0.25 | 0.2  | -1.39 | 0.100272 | 0.320402 | 0.371081 | 0.572648 |
| MmugDNA.24110.1.S1_at   | MmugDNA.24110.1 | 6.22  | 6.42  | 0.08 | 0.03 | -1.15 | 0.008078 | 0.002823 | 0.138956 | 0.078299 |
| MmugDNA.24111.1.S1_at   | MmugDNA.24111.1 | 3.68  | 3.73  | 0.18 | 0.09 | -1.03 | 0.622696 | 0.335074 | 0.813453 | 0.582853 |
| MmugDNA.24113.1.S1_at   | MmugDNA.24113.1 | 4.78  | 4.37  | 0.53 | 0.16 | 1.32  | 0.14376  | 0.156198 | 0.430369 | 0.43161  |
| MmugDNA.24114.1.S1_at   | MmugDNA.24114.1 | 13.12 | 12.73 | 0.05 | 0.15 | 1.31  | 0.010036 | 0.071558 | 0.149669 | 0.313714 |
| MmugDNA.24116.1.S1_at   | MmugDNA.24116.1 | 6.74  | 6.06  | 0.52 | 0.06 | 1.6   | 0.083714 | 0.016958 | 0.346423 | 0.165103 |
| MmugDNA.24117.1.S1_at   | MmugDNA.24117.1 | 4.36  | 4.18  | 0.48 | 0.16 | 1.14  | 0.355907 | 0.556845 | 0.632435 | 0.734831 |
| MmugDNA.24118.1.S1_at   | MmugDNA.24118.1 | 3.9   | 3.9   | 0    | 0.07 | 1     | 0.373901 | 0.198346 | 0.645118 | 0.473267 |
| MmugDNA.2412.1.S1_at    | MmugDNA.2412.1  | 5.13  | 4.91  | 0.17 | 0.2  | 1.17  | 0.285478 | 0.45381  | 0.575232 | 0.668264 |
| MmugDNA.24120.1.S1_at   | MmugDNA.24120.1 | 4.3   | 4.11  | 0.07 | 0.1  | 1.14  | 0.103428 | 0.005636 | 0.376565 | 0.10371  |
| MmugDNA.24121.1.S1_at   | MmugDNA.24121.1 | 5.92  | 5.66  | 0.23 | 0.09 | 1.19  | 0.342907 | 0.352078 | 0.622627 | 0.595431 |
| MmugDNA.24122.1.S1_at   | MmugDNA.24122.1 | 4.87  | 4.17  | 0.87 | 0.23 | 1.63  | 0.121734 | 0.104158 | 0.400504 | 0.365261 |
| MmugDNA.24123.1.S1_at   | MmugDNA.24123.1 | 12.45 | 12.58 | 0.16 | 0.14 | -1.09 | 0.39727  | 0.291874 | 0.662987 | 0.552094 |
| MmugDNA.24124.1.S1_at   | MmugDNA.24124.1 | 8.09  | 8.25  | 0.23 | 0.26 | -1.12 | 0.635864 | 0.116421 | 0.821741 | 0.383671 |
| MmugDNA.24125.1.S1_s_at | MmugDNA.24125.1 | 9.13  | 8.14  | 0.23 | 0.46 | 1.99  | 0.012764 | 0.021089 | 0.163162 | 0.181869 |
| MmugDNA.24126.1.S1_at   | MmugDNA.24126.1 | 5.07  | 5.07  | 0.35 | 0.03 | 1     | 0.337558 | 0.522265 | 0.617966 | 0.713019 |
| MmugDNA.24128.1.S1_at   | MmugDNA.24128.1 | 3.75  | 3.79  | 0.06 | 0.12 | -1.03 | 0.492186 | 0.011719 | 0.72956  | 0.140206 |
| MmugDNA.24129.1.S1_at   | MmugDNA.24129.1 | 6.68  | 7.19  | 0.11 | 0.09 | -1.42 | 0.003473 | 0.086415 | 0.103444 | 0.338882 |
| MmugDNA.24130.1.S1_at   | MmugDNA.24130.1 | 11.17 | 11.15 | 0.08 | 0.1  | 1.01  | 0.361303 | 0.959022 | 0.636743 | 0.976779 |
| MmugDNA.24131.1.S1_at   | MmugDNA.24131.1 | 10.07 | 10.15 | 0.07 | 0.1  | -1.06 | 0.678256 | 0.016298 | 0.846549 | 0.161803 |
| MmugDNA.24132.1.S1_at   | MmugDNA.24132.1 | 10.03 | 10.14 | 0.18 | 0.06 | -1.08 | 0.66581  | 0.001783 | 0.839433 | 0.063434 |
| MmugDNA.24133.1.S1_at   | MmugDNA.24133.1 | 3.84  | 3.63  | 0.87 | 0.15 | 1.16  | 0.235726 | 0.268052 | 0.533475 | 0.533832 |
| MmugDNA.24134.1.S1_at   | MmugDNA.24134.1 | 7.01  | 7.26  | 0.8  | 0.05 | -1.19 | 0.512421 | 0.638855 | 0.742962 | 0.787894 |
| MmugDNA.24136.1.S1_at   | MmugDNA.24136.1 | 5.69  | 5.46  | 1.53 | 0.09 | 1.18  | 0.430386 | 0.612712 | 0.686649 | 0.770151 |
| MmugDNA.24137.1.S1_at   | MmugDNA.24137.1 | 4.28  | 4.28  | 0.02 | 0.08 | 1     | 0.27887  | 0.469207 | 0.57022  | 0.678155 |
| MmugDNA.24138.1.S1_at   | MmugDNA.24138.1 | 4.91  | 4.96  | 0.79 | 0.45 | -1.03 | 0.89419  | 0.706795 | 0.954822 | 0.829922 |
| MmugDNA.24139.1.S1_at   | MmugDNA.24139.1 | 8.15  | 8.21  | 0.23 | 0.19 | -1.05 | 0.677924 | 0.130161 | 0.846342 | 0.401855 |
| MmugDNA.24140.1.S1_at   | MmugDNA.24140.1 | 6.29  | 7.25  | 0.67 | 0.48 | -1.95 | 0.237315 | 0.343602 | 0.534725 | 0.589322 |
| MmugDNA.24141.1.S1_at   | MmugDNA.24141.1 | 7.41  | 7.53  | 0.25 | 0.08 | -1.09 | 0.341892 | 0.120323 | 0.621647 | 0.38925  |
| MmugDNA.24142.1.S1_at   | MmugDNA.24142.1 | 4.53  | 4.54  | 0.16 | 0    | -1    | 0.940787 | 0.708467 | 0.975133 | 0.830919 |
| MmugDNA.24143.1.S1_at   | MmugDNA.24143.1 | 4.59  | 4.68  | 0.17 | 0.05 | -1.06 | 0.689446 | 0.870458 | 0.851703 | 0.926446 |

|                         |                 |       |       |      |      |       |          |          |          |          |
|-------------------------|-----------------|-------|-------|------|------|-------|----------|----------|----------|----------|
| MmugDNA.24143.1.S1_s_at | MmugDNA.24143.1 | 3.99  | 4.02  | 0.06 | 0.06 | -1.02 | 0.55318  | 0.13721  | 0.769696 | 0.410063 |
| MmugDNA.24145.1.S1_at   | MmugDNA.24145.1 | 3.31  | 3.47  | 0.12 | 0.1  | -1.12 | 0.290786 | 0.06884  | 0.580217 | 0.308714 |
| MmugDNA.24149.1.S1_at   | MmugDNA.24149.1 | 4.37  | 4.23  | 0.01 | 0.17 | 1.1   | 0.180444 | 0.192255 | 0.475556 | 0.467715 |
| MmugDNA.2415.1.S1_at    | MmugDNA.2415.1  | 8.06  | 8.15  | 0.07 | 0.13 | -1.07 | 0.140339 | 0.037514 | 0.426075 | 0.23801  |
| MmugDNA.24150.1.S1_at   | MmugDNA.24150.1 | 11.9  | 12.05 | 0.65 | 0.23 | -1.11 | 0.176262 | 0.071272 | 0.470611 | 0.313318 |
| MmugDNA.24152.1.S1_at   | MmugDNA.24152.1 | 9.36  | 9.6   | 0.17 | 0.12 | -1.18 | 0.123068 | 0.001966 | 0.402192 | 0.065838 |
| MmugDNA.24153.1.S1_at   | MmugDNA.24153.1 | 7.35  | 7.03  | 0.25 | 0.14 | 1.25  | 0.137578 | 0.097399 | 0.422683 | 0.355097 |
| MmugDNA.24154.1.S1_at   | MmugDNA.24154.1 | 6.59  | 6.05  | 1.27 | 0.9  | 1.46  | 0.997988 | 0.717688 | 0.999236 | 0.836543 |
| MmugDNA.24155.1.S1_at   | MmugDNA.24155.1 | 7.2   | 8.36  | 0.3  | 0.34 | -2.24 | 0.024269 | 0.150266 | 0.208861 | 0.424877 |
| MmugDNA.24156.1.S1_at   | MmugDNA.24156.1 | 3.91  | 3.57  | 0.49 | 0.11 | 1.26  | 0.393472 | 0.303027 | 0.660304 | 0.560475 |
| MmugDNA.24159.1.S1_at   | MmugDNA.24159.1 | 3.86  | 4.09  | 0.1  | 0.13 | -1.17 | 0.090135 | 0.16436  | 0.356864 | 0.440612 |
| MmugDNA.24162.1.S1_at   | MmugDNA.24162.1 | 3.8   | 3.55  | 0.33 | 0.15 | 1.2   | 0.063478 | 0.090465 | 0.308631 | 0.344952 |
| MmugDNA.24163.1.S1_at   | MmugDNA.24163.1 | 4.88  | 4.65  | 0.13 | 0.12 | 1.18  | 0.072859 | 0.134624 | 0.327658 | 0.406629 |
| MmugDNA.24164.1.S1_at   | MmugDNA.24164.1 | 6.71  | 7.15  | 0.77 | 0.29 | -1.36 | 0.838197 | 0.958096 | 0.929053 | 0.976277 |
| MmugDNA.24165.1.S1_at   | MmugDNA.24165.1 | 6.79  | 6.05  | 0.21 | 0.28 | 1.67  | 0.023273 | 0.011852 | 0.205562 | 0.140973 |
| MmugDNA.24166.1.S1_at   | MmugDNA.24166.1 | 11.11 | 11.52 | 0.19 | 0.05 | -1.33 | 0.026883 | 0.008755 | 0.217016 | 0.124009 |
| MmugDNA.23302.1.S1_s_at | MmugDNA.23302.1 | 14.32 | 14.27 | 0.04 | 0.02 | 1.04  | 0.223325 | 0.590554 | 0.521145 | 0.756311 |
| MmugDNA.24168.1.S1_at   | MmugDNA.24168.1 | 5.09  | 5.08  | 0.1  | 0.08 | 1.01  | 0.203531 | 0.357595 | 0.501202 | 0.599221 |
| MmugDNA.2417.1.S1_at    | MmugDNA.2417.1  | 9.65  | 9.24  | 0.14 | 0.01 | 1.33  | 0.005338 | 0.060554 | 0.11815  | 0.292748 |
| MmugDNA.24170.1.S1_at   | MmugDNA.24170.1 | 3.81  | 3.85  | 0.17 | 0.22 | -1.03 | 0.946229 | 0.956686 | 0.977267 | 0.975395 |
| MmugDNA.24171.1.S1_at   | MmugDNA.24171.1 | 3.12  | 3.14  | 0.2  | 0.06 | -1.01 | 0.810136 | 0.562241 | 0.914977 | 0.737898 |
| MmugDNA.24173.1.S1_at   | MmugDNA.24173.1 | 7.21  | 8.08  | 0.94 | 0.22 | -1.84 | 0.45311  | 0.422236 | 0.703443 | 0.645596 |
| MmugDNA.24175.1.S1_at   | MmugDNA.24175.1 | 4.31  | 4.2   | 0.18 | 0.26 | 1.08  | 0.96848  | 0.801247 | 0.987529 | 0.88568  |
| MmugDNA.24176.1.S1_at   | MmugDNA.24176.1 | 5.88  | 5.97  | 0.15 | 0.09 | -1.06 | 0.214872 | 0.337686 | 0.512462 | 0.584863 |
| MmugDNA.24177.1.S1_at   | MmugDNA.24177.1 | 5.42  | 5.02  | 0.35 | 0.28 | 1.32  | 0.194928 | 0.065874 | 0.491444 | 0.302111 |
| MmugDNA.24178.1.S1_at   | MmugDNA.24178.1 | 8.2   | 8.32  | 1.35 | 0.22 | -1.08 | 0.845193 | 0.922371 | 0.932344 | 0.956288 |
| MmugDNA.24179.1.S1_at   | MmugDNA.24179.1 | 10.62 | 10.17 | 0.12 | 0.22 | 1.37  | 0.032557 | 0.174732 | 0.234816 | 0.451299 |
| MmugDNA.2418.1.S1_at    | MmugDNA.2418.1  | 6.08  | 6.16  | 0.19 | 0.15 | -1.06 | 0.772089 | 0.14888  | 0.89559  | 0.42326  |
| MmugDNA.24182.1.S1_at   | MmugDNA.24182.1 | 5.43  | 5.46  | 0.31 | 0.06 | -1.02 | 0.942153 | 0.761478 | 0.975589 | 0.861416 |
| MmugDNA.24183.1.S1_at   | MmugDNA.24183.1 | 6.39  | 6.45  | 0.07 | 0.09 | -1.04 | 0.859483 | 0.04581  | 0.93919  | 0.258337 |
| MmugDNA.24184.1.S1_at   | MmugDNA.24184.1 | 6.67  | 5.45  | 0.21 | 0.14 | 2.33  | 0.000945 | 0.001376 | 0.076054 | 0.05691  |
| MmugDNA.24186.1.S1_at   | MmugDNA.24186.1 | 3.38  | 3.37  | 0.1  | 0.15 | 1.01  | 0.537947 | 0.719768 | 0.759999 | 0.837888 |
| MmugDNA.24189.1.S1_at   | MmugDNA.24189.1 | 6.02  | 6     | 0.09 | 0.17 | 1.02  | 0.87091  | 0.791554 | 0.944458 | 0.879606 |
| MmugDNA.24193.1.S1_at   | MmugDNA.24193.1 | 6.75  | 6.2   | 0.37 | 0.41 | 1.47  | 0.157345 | 0.314026 | 0.448021 | 0.568178 |
| MmugDNA.24194.1.S1_at   | MmugDNA.24194.1 | 5.41  | 5.18  | 0.19 | 0.12 | 1.17  | 0.258549 | 0.368338 | 0.55263  | 0.607917 |
| MmugDNA.24195.1.S1_at   | MmugDNA.24195.1 | 6.04  | 6.08  | 0.07 | 0.01 | -1.03 | 0.989497 | 0.087477 | 0.996357 | 0.340617 |
| MmugDNA.24196.1.S1_at   | MmugDNA.24196.1 | 8.86  | 8.8   | 0.11 | 0.03 | 1.04  | 0.972328 | 0.369726 | 0.988877 | 0.609048 |
| MmugDNA.24197.1.S1_at   | MmugDNA.24197.1 | 4.41  | 4.7   | 0.34 | 0.11 | -1.22 | 0.141859 | 0.131704 | 0.427804 | 0.403854 |
| MmugDNA.24199.1.S1_at   | MmugDNA.24199.1 | 8.1   | 10.4  | 0.87 | 0.32 | -4.93 | 0.038433 | 0.064076 | 0.252019 | 0.299311 |
| MmugDNA.242.1.S1_at     | MmugDNA.242.1   | 10.2  | 10.92 | 0.21 | 0.17 | -1.64 | 0.01133  | 0.298279 | 0.156654 | 0.556936 |
| MmugDNA.2420.1.S1_at    | MmugDNA.2420.1  | 7.68  | 7.42  | 0.51 | 0.29 | 1.2   | 0.579537 | 0.176535 | 0.785166 | 0.452925 |
| MmugDNA.24200.1.S1_at   | MmugDNA.24200.1 | 6.54  | 6.68  | 0.26 | 0.02 | -1.1  | 0.396714 | 0.218754 | 0.662694 | 0.492438 |
| MmugDNA.24201.1.S1_at   | MmugDNA.24201.1 | 5.33  | 5.24  | 0.2  | 0.07 | 1.06  | 0.522635 | 0.687216 | 0.749853 | 0.817518 |

|                         |                 |       |       |      |      |       |          |          |          |          |
|-------------------------|-----------------|-------|-------|------|------|-------|----------|----------|----------|----------|
| MmugDNA.24202.1.S1_at   | MmugDNA.24202.1 | 6.2   | 6.32  | 0.18 | 0.11 | -1.09 | 0.905134 | 0.972718 | 0.959898 | 0.985334 |
| MmugDNA.24204.1.S1_at   | MmugDNA.24204.1 | 7.51  | 7.37  | 0.35 | 0.15 | 1.1   | 0.658336 | 0.972002 | 0.834943 | 0.984884 |
| MmugDNA.24207.1.S1_at   | MmugDNA.24207.1 | 6.63  | 6.47  | 0.17 | 0.05 | 1.12  | 0.208562 | 0.13952  | 0.506194 | 0.412743 |
| MmugDNA.24209.1.S1_at   | MmugDNA.24209.1 | 5.15  | 4.93  | 0.66 | 0.43 | 1.17  | 0.979924 | 0.382487 | 0.992376 | 0.618714 |
| MmugDNA.2421.1.S1_at    | MmugDNA.2421.1  | 5.31  | 5.21  | 0.22 | 0.14 | 1.07  | 0.442397 | 0.260243 | 0.695806 | 0.526807 |
| MmugDNA.24211.1.S1_at   | MmugDNA.24211.1 | 2.94  | 2.83  | 0.15 | 0.1  | 1.08  | 0.198325 | 0.258439 | 0.495518 | 0.525699 |
| MmugDNA.24213.1.S1_at   | MmugDNA.24213.1 | 8.51  | 8.26  | 0.19 | 0.16 | 1.19  | 0.036881 | 0.083219 | 0.247118 | 0.333211 |
| MmugDNA.24214.1.S1_at   | MmugDNA.24214.1 | 8.26  | 7.06  | 0.5  | 0.13 | 2.31  | 0.043612 | 0.220364 | 0.265829 | 0.493783 |
| MmugDNA.24216.1.S1_at   | MmugDNA.24216.1 | 3.55  | 3.51  | 0.29 | 0.12 | 1.03  | 0.682685 | 0.903862 | 0.848688 | 0.945424 |
| MmugDNA.24217.1.S1_at   | MmugDNA.24217.1 | 7.1   | 8.15  | 0.37 | 0.2  | -2.07 | 0.008831 | 0.006472 | 0.143825 | 0.109304 |
| MmugDNA.24218.1.S1_at   | MmugDNA.24218.1 | 6.41  | 5.64  | 0.56 | 0.13 | 1.71  | 0.070328 | 0.158928 | 0.323556 | 0.435097 |
| MmugDNA.24219.1.S1_at   | MmugDNA.24219.1 | 5.22  | 6.35  | 0.56 | 0.35 | -2.19 | 0.040301 | 0.017936 | 0.257247 | 0.168998 |
| MmugDNA.2422.1.S1_at    | MmugDNA.2422.1  | 3.25  | 3.25  | 0.24 | 0.15 | -1    | 0.811899 | 0.89652  | 0.915788 | 0.940905 |
| MmugDNA.24220.1.S1_at   | MmugDNA.24220.1 | 3.87  | 3.9   | 0.03 | 0.03 | -1.02 | 0.614992 | 0.18423  | 0.808624 | 0.460382 |
| MmugDNA.24221.1.S1_at   | MmugDNA.24221.1 | 3.51  | 3.44  | 0.12 | 0.1  | 1.05  | 0.194745 | 0.332457 | 0.491324 | 0.58087  |
| MmugDNA.24222.1.S1_at   | MmugDNA.24222.1 | 11.23 | 11.13 | 0.04 | 0.03 | 1.07  | 0.008738 | 0.545517 | 0.14316  | 0.727564 |
| MmugDNA.24223.1.S1_at   | MmugDNA.24223.1 | 6.88  | 6.98  | 1.2  | 0.16 | -1.07 | 0.552525 | 0.754811 | 0.76919  | 0.857323 |
| MmugDNA.24225.1.S1_at   | MmugDNA.24225.1 | 12.29 | 12.12 | 0.05 | 0.05 | 1.12  | 0.036262 | 0.323768 | 0.245534 | 0.574609 |
| MmugDNA.24226.1.S1_at   | MmugDNA.24226.1 | 13.4  | 13.2  | 0.07 | 0.02 | 1.15  | 0.015947 | 0.28347  | 0.178761 | 0.545959 |
| MmugDNA.24227.1.S1_at   | MmugDNA.24227.1 | 10.16 | 10.18 | 0.23 | 0.1  | -1.02 | 0.797755 | 0.120491 | 0.908721 | 0.38925  |
| MmugDNA.24229.1.S1_at   | MmugDNA.24229.1 | 4.16  | 4.17  | 0.13 | 0.24 | -1.01 | 0.700449 | 0.209381 | 0.857753 | 0.483069 |
| MmugDNA.2423.1.S1_at    | MmugDNA.2423.1  | 3.27  | 3.47  | 0.22 | 0.11 | -1.14 | 0.969474 | 0.691027 | 0.987881 | 0.820095 |
| MmugDNA.24232.1.S1_s_at | MmugDNA.24232.1 | 8.72  | 8.71  | 0.14 | 0.06 | 1     | 0.986637 | 0.511539 | 0.995228 | 0.705677 |
| MmugDNA.24233.1.S1_at   | MmugDNA.24233.1 | 4.28  | 4.24  | 0.02 | 0.08 | 1.03  | 0.371525 | 0.135754 | 0.64419  | 0.407925 |
| MmugDNA.24234.1.S1_at   | MmugDNA.24234.1 | 7.06  | 6.78  | 0.28 | 0.16 | 1.21  | 0.230974 | 0.046194 | 0.529768 | 0.25935  |
| MmugDNA.24235.1.S1_at   | MmugDNA.24235.1 | 7.95  | 7.38  | 0.25 | 0.14 | 1.48  | 0.023268 | 0.132586 | 0.205562 | 0.404544 |
| MmugDNA.24236.1.S1_at   | MmugDNA.24236.1 | 7.15  | 7.6   | 0.36 | 0.08 | -1.37 | 0.046844 | 0.008419 | 0.274151 | 0.121839 |
| MmugDNA.24237.1.S1_at   | MmugDNA.24237.1 | 5.76  | 7.09  | 0.56 | 0.23 | -2.51 | 0.048437 | 0.218092 | 0.277485 | 0.491683 |
| MmugDNA.24239.1.S1_at   | MmugDNA.24239.1 | 3.28  | 3.27  | 0.12 | 0.13 | 1     | 0.931763 | 0.6653   | 0.971341 | 0.803874 |
| MmugDNA.2424.1.S1_at    | MmugDNA.2424.1  | 5.1   | 4.51  | 0.85 | 0.1  | 1.5   | 0.095726 | 0.058737 | 0.365277 | 0.28904  |
| MmugDNA.24240.1.S1_x_at | MmugDNA.24240.1 | 12.74 | 12.68 | 0.41 | 0.11 | 1.04  | 0.309483 | 0.180752 | 0.595823 | 0.457294 |
| MmugDNA.24241.1.S1_at   | MmugDNA.24241.1 | 3.9   | 3.41  | 0.4  | 0.03 | 1.41  | 0.100746 | 0.12974  | 0.371863 | 0.401362 |
| MmugDNA.24242.1.S1_at   | MmugDNA.24242.1 | 3.48  | 3.51  | 0.06 | 0.02 | -1.03 | 0.891536 | 0.723889 | 0.953744 | 0.840177 |
| MmugDNA.24244.1.S1_at   | MmugDNA.24244.1 | 5.61  | 5.73  | 0.23 | 0.15 | -1.08 | 0.687706 | 0.182575 | 0.850841 | 0.459065 |
| MmugDNA.24245.1.S1_at   | MmugDNA.24245.1 | 2.95  | 2.86  | 0.1  | 0.12 | 1.06  | 0.357159 | 0.185776 | 0.633338 | 0.461631 |
| MmugDNA.24247.1.S1_at   | MmugDNA.24247.1 | 8.16  | 7.76  | 0.49 | 0.17 | 1.32  | 0.209169 | 0.043477 | 0.50665  | 0.253152 |
| MmugDNA.24248.1.S1_at   | MmugDNA.24248.1 | 4.28  | 4.18  | 0.41 | 0.14 | 1.07  | 0.275664 | 0.466365 | 0.567274 | 0.67624  |
| MmugDNA.24249.1.S1_at   | MmugDNA.24249.1 | 6.5   | 6.55  | 0.2  | 0.19 | -1.03 | 0.739417 | 0.291546 | 0.879245 | 0.551927 |
| MmugDNA.24250.1.S1_at   | MmugDNA.24250.1 | 3.49  | 3.56  | 0.18 | 0.1  | -1.04 | 0.231881 | 0.232627 | 0.530482 | 0.504359 |
| MmugDNA.10242.1.S1_s_at | MmugDNA.10242.1 | 6.29  | 6.25  | 0.16 | 0.02 | 1.03  | 0.786055 | 0.542907 | 0.902346 | 0.725841 |
| MmugDNA.24253.1.S1_at   | MmugDNA.24253.1 | 10.98 | 10.81 | 0.1  | 0.09 | 1.12  | 0.130137 | 0.078797 | 0.412377 | 0.325757 |
| MmugDNA.24254.1.S1_at   | MmugDNA.24254.1 | 4.75  | 5.67  | 0.75 | 0.24 | -1.9  | 0.4805   | 0.642447 | 0.721351 | 0.790222 |
| MmugDNA.24255.1.S1_at   | MmugDNA.24255.1 | 8.38  | 6.51  | 0.3  | 0.36 | 3.65  | 0.002462 | 0.000776 | 0.093973 | 0.045626 |



|                         |                 |       |       |      |      |       |          |          |          |          |
|-------------------------|-----------------|-------|-------|------|------|-------|----------|----------|----------|----------|
| MmugDNA.24256.1.S1_at   | MmugDNA.24256.1 | 10.82 | 10.77 | 0.25 | 0.15 | 1.04  | 0.360138 | 0.738451 | 0.635725 | 0.848307 |
| MmugDNA.24257.1.S1_at   | MmugDNA.24257.1 | 8.75  | 8.68  | 0.27 | 0.14 | 1.05  | 0.919826 | 0.527813 | 0.96576  | 0.716283 |
| MmugDNA.24258.1.S1_at   | MmugDNA.24258.1 | 5.61  | 5.46  | 0.37 | 0.35 | 1.11  | 0.3007   | 0.145457 | 0.588854 | 0.419421 |
| MmugDNA.24259.1.S1_at   | MmugDNA.24259.1 | 8.27  | 8.15  | 0.43 | 0.06 | 1.09  | 0.205773 | 0.049904 | 0.503573 | 0.268519 |
| MmugDNA.2426.1.S1_at    | MmugDNA.2426.1  | 6.46  | 6.6   | 0.13 | 0.18 | -1.1  | 0.391675 | 0.326041 | 0.658751 | 0.576285 |
| MmugDNA.24260.1.S1_at   | MmugDNA.24260.1 | 12.29 | 12.21 | 0.07 | 0.01 | 1.05  | 0.04778  | 0.472749 | 0.275924 | 0.680089 |
| MmugDNA.24261.1.S1_at   | MmugDNA.24261.1 | 5.15  | 5.15  | 0.1  | 0.14 | -1    | 0.891581 | 0.137305 | 0.953744 | 0.410231 |
| MmugDNA.24262.1.S1_at   | MmugDNA.24262.1 | 5.65  | 4.84  | 0.4  | 0.03 | 1.75  | 0.065541 | 0.243364 | 0.313418 | 0.513385 |
| MmugDNA.24264.1.S1_at   | MmugDNA.24264.1 | 3.35  | 3.29  | 0.82 | 0.13 | 1.04  | 0.342254 | 0.338049 | 0.622081 | 0.585223 |
| MmugDNA.24265.1.S1_at   | MmugDNA.24265.1 | 2.98  | 3     | 0.07 | 0.04 | -1.02 | 0.761064 | 0.76197  | 0.890519 | 0.861597 |
| MmugDNA.24268.1.S1_at   | MmugDNA.24268.1 | 5.63  | 5.81  | 0.18 | 0.24 | -1.13 | 0.374375 | 0.267852 | 0.64551  | 0.533607 |
| MmugDNA.24269.1.S1_at   | MmugDNA.24269.1 | 11.16 | 11.23 | 0.14 | 0.03 | -1.05 | 0.595371 | 0.461829 | 0.795207 | 0.673361 |
| MmugDNA.24270.1.S1_at   | MmugDNA.24270.1 | 9.2   | 9.28  | 0.26 | 0.01 | -1.05 | 0.678822 | 0.359336 | 0.846794 | 0.600635 |
| MmugDNA.24271.1.S1_at   | MmugDNA.24271.1 | 3.61  | 3.53  | 0.13 | 0.18 | 1.06  | 0.915648 | 0.385912 | 0.964127 | 0.621161 |
| MmugDNA.24272.1.S1_at   | MmugDNA.24272.1 | 3.73  | 3.65  | 0.1  | 0.07 | 1.05  | 0.781111 | 0.795398 | 0.900025 | 0.882153 |
| MmugDNA.24273.1.S1_at   | MmugDNA.24273.1 | 5.42  | 5.29  | 0.61 | 0.18 | 1.1   | 0.37061  | 0.190968 | 0.643477 | 0.46629  |
| MmugDNA.24276.1.S1_at   | MmugDNA.24276.1 | 4.06  | 4.03  | 0.23 | 0.36 | 1.03  | 0.702564 | 0.673523 | 0.858848 | 0.809257 |
| MmugDNA.24277.1.S1_at   | MmugDNA.24277.1 | 7.98  | 8.17  | 0.21 | 0.03 | -1.13 | 0.214264 | 0.056883 | 0.51193  | 0.284636 |
| MmugDNA.24279.1.S1_at   | MmugDNA.24279.1 | 4.06  | 4.22  | 0.3  | 0.12 | -1.12 | 0.961074 | 0.920349 | 0.984082 | 0.95511  |
| MmugDNA.2428.1.S1_at    | MmugDNA.2428.1  | 5.66  | 5.56  | 0.19 | 0.02 | 1.07  | 0.916763 | 0.72871  | 0.964555 | 0.843181 |
| MmugDNA.24280.1.S1_at   | MmugDNA.24280.1 | 7.08  | 6.97  | 0.11 | 0.28 | 1.08  | 0.176754 | 0.23065  | 0.471211 | 0.502361 |
| MmugDNA.24281.1.S1_at   | MmugDNA.24281.1 | 5.23  | 5.13  | 0.26 | 0.09 | 1.07  | 0.508319 | 0.319275 | 0.740303 | 0.571722 |
| MmugDNA.24282.1.S1_at   | MmugDNA.24282.1 | 6.87  | 6.7   | 0.45 | 0.19 | 1.13  | 0.445094 | 0.651166 | 0.697715 | 0.796057 |
| MmugDNA.24283.1.S1_at   | MmugDNA.24283.1 | 9.26  | 9.39  | 0.08 | 0.16 | -1.09 | 0.741346 | 0.900479 | 0.880128 | 0.943447 |
| MmugDNA.24284.1.S1_at   | MmugDNA.24284.1 | 5.09  | 5.72  | 0.08 | 0.15 | -1.54 | 0.004976 | 0.002573 | 0.115722 | 0.075105 |
| MmugDNA.24285.1.S1_at   | MmugDNA.24285.1 | 5.68  | 5.5   | 0.19 | 0.07 | 1.13  | 0.137606 | 0.294102 | 0.422708 | 0.553936 |
| MmugDNA.24288.1.S1_s_at | MmugDNA.24288.1 | 7.07  | 7.21  | 0.1  | 0.04 | -1.1  | 0.135777 | 0.294061 | 0.419782 | 0.553912 |
| MmugDNA.24289.1.S1_at   | MmugDNA.24289.1 | 3.35  | 3.62  | 0.15 | 0.15 | -1.2  | 0.083584 | 0.096459 | 0.34613  | 0.35409  |
| MmugDNA.2429.1.S1_at    | MmugDNA.2429.1  | 5.74  | 6.13  | 0.29 | 0.03 | -1.31 | 0.087033 | 0.431325 | 0.352593 | 0.652268 |
| MmugDNA.24290.1.S1_at   | MmugDNA.24290.1 | 6.93  | 7.07  | 0.24 | 0.11 | -1.1  | 0.980666 | 0.061437 | 0.992779 | 0.294704 |
| MmugDNA.24292.1.S1_at   | MmugDNA.24292.1 | 4.74  | 4.71  | 0.19 | 0.01 | 1.03  | 0.712987 | 0.856708 | 0.864536 | 0.918126 |
| MmugDNA.24293.1.S1_at   | MmugDNA.24293.1 | 8.41  | 7.93  | 0.26 | 0.09 | 1.4   | 0.042167 | 0.029916 | 0.262221 | 0.214643 |
| MmugDNA.24294.1.S1_at   | MmugDNA.24294.1 | 6.55  | 6.38  | 0.1  | 0.04 | 1.12  | 0.17707  | 0.042239 | 0.471716 | 0.249997 |
| MmugDNA.24295.1.S1_at   | MmugDNA.24295.1 | 5.23  | 5.15  | 0.13 | 0.48 | 1.05  | 0.501854 | 0.505027 | 0.735564 | 0.70197  |
| MmugDNA.24296.1.S1_at   | MmugDNA.24296.1 | 8.72  | 8.6   | 0.46 | 0.19 | 1.09  | 0.425599 | 0.707154 | 0.682976 | 0.830195 |
| MmugDNA.24296.1.S1_s_at | MmugDNA.24296.1 | 8.68  | 8.31  | 0.66 | 0.24 | 1.29  | 0.344616 | 0.523449 | 0.62393  | 0.713714 |
| MmugDNA.24297.1.S1_at   | MmugDNA.24297.1 | 7.25  | 7.41  | 0.18 | 0.03 | -1.12 | 0.588845 | 0.259476 | 0.791302 | 0.526418 |
| MmugDNA.24297.1.S1_s_at | MmugDNA.24297.1 | 7.42  | 7.36  | 0.18 | 0.08 | 1.04  | 0.433068 | 0.495785 | 0.688696 | 0.695734 |
| MmugDNA.24298.1.S1_at   | MmugDNA.24298.1 | 4.17  | 3.96  | 0.22 | 0.14 | 1.16  | 0.203801 | 0.159774 | 0.501441 | 0.435871 |
| MmugDNA.24299.1.S1_at   | MmugDNA.24299.1 | 7.93  | 7.69  | 0.42 | 0.05 | 1.19  | 0.207145 | 0.170585 | 0.504851 | 0.447204 |
| MmugDNA.24299.1.S1_x_at | MmugDNA.24299.1 | 8.19  | 8.02  | 0.67 | 0.1  | 1.13  | 0.233374 | 0.179754 | 0.53162  | 0.456267 |
| MmugDNA.243.1.S1_at     | MmugDNA.243.1   | 3.59  | 3.7   | 0.09 | 0.03 | -1.08 | 0.081841 | 0.049565 | 0.343105 | 0.267592 |
| MmugDNA.2430.1.S1_at    | MmugDNA.2430.1  | 3.42  | 3.46  | 0.4  | 0.09 | -1.03 | 0.364876 | 0.454018 | 0.63954  | 0.668366 |

|                         |                 |       |       |      |      |       |          |          |          |          |
|-------------------------|-----------------|-------|-------|------|------|-------|----------|----------|----------|----------|
| MmugDNA.24300.1.S1_at   | MmugDNA.24300.1 | 11.43 | 11.48 | 0.34 | 0.04 | -1.04 | 0.465326 | 0.139575 | 0.711399 | 0.412837 |
| MmugDNA.24301.1.S1_at   | MmugDNA.24301.1 | 3.23  | 3.22  | 0.09 | 0.04 | 1     | 0.606131 | 0.096851 | 0.802904 | 0.354254 |
| MmugDNA.24302.1.S1_at   | MmugDNA.24302.1 | 10.45 | 9.38  | 0.32 | 0.21 | 2.1   | 0.010283 | 0.014836 | 0.151176 | 0.154918 |
| MmugDNA.24303.1.S1_at   | MmugDNA.24303.1 | 7.06  | 6.85  | 0.39 | 0.56 | 1.16  | 0.34035  | 0.025132 | 0.620628 | 0.198651 |
| MmugDNA.24304.1.S1_at   | MmugDNA.24304.1 | 5.79  | 5.79  | 0.5  | 0.27 | -1    | 0.426648 | 0.520295 | 0.684016 | 0.711612 |
| MmugDNA.24307.1.S1_s_at | MmugDNA.24307.1 | 9.74  | 10.4  | 0.04 | 0.15 | -1.58 | 0.000999 | 0.010889 | 0.076321 | 0.135939 |
| MmugDNA.24309.1.S1_at   | MmugDNA.24309.1 | 4.92  | 7.24  | 0.32 | 0.4  | -4.98 | 0.00119  | 0.035911 | 0.077857 | 0.234002 |
| MmugDNA.24310.1.S1_at   | MmugDNA.24310.1 | 5.48  | 5.43  | 0.25 | 0.18 | 1.03  | 0.971583 | 0.54808  | 0.98857  | 0.728874 |
| MmugDNA.24311.1.S1_at   | MmugDNA.24311.1 | 6.52  | 6.27  | 0.01 | 0.12 | 1.19  | 0.017504 | 0.008913 | 0.185974 | 0.12491  |
| MmugDNA.24312.1.S1_s_at | MmugDNA.24312.1 | 9.27  | 8.78  | 0.51 | 0.12 | 1.4   | 0.245446 | 0.401908 | 0.541518 | 0.63109  |
| MmugDNA.24313.1.S1_at   | MmugDNA.24313.1 | 4.56  | 4.35  | 0.23 | 0.03 | 1.16  | 0.209862 | 0.156936 | 0.507287 | 0.432372 |
| MmugDNA.24314.1.S1_at   | MmugDNA.24314.1 | 5.93  | 5.74  | 0.05 | 0.11 | 1.15  | 0.090082 | 0.057457 | 0.356863 | 0.285751 |
| MmugDNA.24315.1.S1_s_at | MmugDNA.24315.1 | 7.5   | 7.72  | 0.04 | 0.17 | -1.17 | 0.091344 | 0.339084 | 0.358885 | 0.585891 |
| MmugDNA.24316.1.S1_at   | MmugDNA.24316.1 | 5.24  | 4.5   | 0.74 | 0.24 | 1.66  | 0.083173 | 0.084077 | 0.345425 | 0.335065 |
| MmugDNA.24317.1.S1_at   | MmugDNA.24317.1 | 3.22  | 3.15  | 0.14 | 0.09 | 1.05  | 0.892028 | 0.97952  | 0.953921 | 0.988986 |
| MmugDNA.24318.1.S1_at   | MmugDNA.24318.1 | 11.65 | 11.22 | 0.29 | 0.02 | 1.35  | 0.062777 | 0.139142 | 0.307182 | 0.412266 |
| MmugDNA.24319.1.S1_at   | MmugDNA.24319.1 | 7.53  | 7.53  | 0.09 | 0.13 | -1    | 0.735122 | 0.137154 | 0.876697 | 0.410034 |
| MmugDNA.2432.1.S1_at    | MmugDNA.2432.1  | 5.71  | 5.59  | 0.09 | 0.07 | 1.09  | 0.050739 | 0.078562 | 0.283078 | 0.325285 |
| MmugDNA.24320.1.S1_at   | MmugDNA.24320.1 | 2.82  | 2.84  | 0.12 | 0.25 | -1.01 | 0.824111 | 0.693523 | 0.921772 | 0.82172  |
| MmugDNA.24321.1.S1_at   | MmugDNA.24321.1 | 3.7   | 3.54  | 0.24 | 0.13 | 1.12  | 0.135368 | 0.155305 | 0.419311 | 0.430664 |
| MmugDNA.24322.1.S1_at   | MmugDNA.24322.1 | 3.31  | 3.08  | 0.58 | 0.12 | 1.17  | 0.177779 | 0.28526  | 0.47249  | 0.54718  |
| MmugDNA.24323.1.S1_at   | MmugDNA.24323.1 | 4.29  | 3.71  | 0.23 | 0.27 | 1.49  | 0.101481 | 0.104243 | 0.372929 | 0.365376 |
| MmugDNA.24324.1.S1_at   | MmugDNA.24324.1 | 4.76  | 4.92  | 0.39 | 0.49 | -1.12 | 0.791415 | 0.655713 | 0.905298 | 0.7987   |
| MmugDNA.24326.1.S1_at   | MmugDNA.24326.1 | 3.33  | 3.75  | 0.09 | 0.26 | -1.34 | 0.175212 | 0.427752 | 0.469551 | 0.649503 |
| MmugDNA.24327.1.S1_at   | MmugDNA.24327.1 | 5.87  | 5.38  | 0.3  | 0.12 | 1.4   | 0.067483 | 0.097347 | 0.31742  | 0.355066 |
| MmugDNA.24329.1.S1_at   | MmugDNA.24329.1 | 8.19  | 7.92  | 0.3  | 0.03 | 1.2   | 0.095077 | 0.069782 | 0.364251 | 0.310316 |
| MmugDNA.2433.1.S1_at    | MmugDNA.2433.1  | 3.69  | 3.6   | 0.36 | 0.22 | 1.06  | 0.914391 | 0.736609 | 0.963616 | 0.847627 |
| MmugDNA.24331.1.S1_at   | MmugDNA.24331.1 | 10.37 | 10.21 | 0.17 | 0.06 | 1.12  | 0.136261 | 0.01721  | 0.420638 | 0.166206 |
| MmugDNA.24332.1.S1_at   | MmugDNA.24332.1 | 4.4   | 4.31  | 0.12 | 0.1  | 1.06  | 0.184148 | 0.279164 | 0.480065 | 0.542814 |
| MmugDNA.24334.1.S1_at   | MmugDNA.24334.1 | 4.97  | 4.88  | 0.24 | 0.04 | 1.07  | 0.76605  | 0.844126 | 0.89269  | 0.911248 |
| MmugDNA.24335.1.S1_at   | MmugDNA.24335.1 | 9.57  | 9.68  | 0.11 | 0.11 | -1.08 | 0.235381 | 0.052761 | 0.533273 | 0.275315 |
| MmugDNA.24336.1.S1_at   | MmugDNA.24336.1 | 3.58  | 3.56  | 0.17 | 0.14 | 1.01  | 0.809011 | 0.70704  | 0.914402 | 0.830116 |
| MmugDNA.24337.1.S1_at   | MmugDNA.24337.1 | 4.36  | 4.23  | 0.12 | 0.12 | 1.09  | 0.596592 | 0.207635 | 0.795916 | 0.481906 |
| MmugDNA.24338.1.S1_at   | MmugDNA.24338.1 | 10.69 | 11.15 | 0.07 | 0.23 | -1.37 | 0.033202 | 0.002719 | 0.236396 | 0.076776 |
| MmugDNA.24339.1.S1_at   | MmugDNA.24339.1 | 11.65 | 11.13 | 0.26 | 0.05 | 1.43  | 0.066707 | 0.000797 | 0.315937 | 0.046064 |
| MmugDNA.2434.1.S1_at    | MmugDNA.2434.1  | 2.87  | 2.85  | 0.25 | 0    | 1.01  | 0.838061 | 0.875964 | 0.929038 | 0.929526 |
| MmugDNA.24340.1.S1_at   | MmugDNA.24340.1 | 11.07 | 11.67 | 0.06 | 0.17 | -1.52 | 0.007107 | 0.000238 | 0.131735 | 0.032465 |
| MmugDNA.24344.1.S1_at   | MmugDNA.24344.1 | 4.85  | 4.84  | 0.47 | 0.44 | 1.01  | 0.562698 | 0.773052 | 0.775065 | 0.868023 |
| MmugDNA.24345.1.S1_at   | MmugDNA.24345.1 | 6.61  | 6.05  | 0.65 | 0.5  | 1.47  | 0.138987 | 0.307063 | 0.424645 | 0.563427 |
| MmugDNA.24346.1.S1_at   | MmugDNA.24346.1 | 7.5   | 7.44  | 0.06 | 0.06 | 1.04  | 0.130878 | 0.602546 | 0.413436 | 0.763472 |
| MmugDNA.24347.1.S1_s_at | MmugDNA.24347.1 | 6.08  | 7.62  | 0.06 | 0.28 | -2.91 | 0.001033 | 0.053412 | 0.076321 | 0.276707 |
| MmugDNA.24348.1.S1_at   | MmugDNA.24348.1 | 3.69  | 3.5   | 0.29 | 0.11 | 1.15  | 0.670318 | 0.894824 | 0.841785 | 0.939987 |
| MmugDNA.24349.1.S1_at   | MmugDNA.24349.1 | 5.67  | 5.58  | 0.23 | 0.06 | 1.07  | 0.807561 | 0.499351 | 0.913856 | 0.698217 |

|                         |                 |       |       |      |      |       |          |          |          |          |
|-------------------------|-----------------|-------|-------|------|------|-------|----------|----------|----------|----------|
| MmugDNA.2435.1.S1_at    | MmugDNA.2435.1  | 6.65  | 6.93  | 0.72 | 0.15 | -1.22 | 0.929094 | 0.681781 | 0.969943 | 0.81413  |
| MmugDNA.24351.1.S1_at   | MmugDNA.24351.1 | 9.89  | 9.65  | 0.06 | 0.03 | 1.18  | 0.003668 | 0.120401 | 0.105789 | 0.38925  |
| MmugDNA.24352.1.S1_at   | MmugDNA.24352.1 | 3.66  | 3.72  | 0.03 | 0.01 | -1.04 | 0.092276 | 0.068614 | 0.36034  | 0.308486 |
| MmugDNA.24353.1.S1_at   | MmugDNA.24353.1 | 6.29  | 9.36  | 0.85 | 0.2  | -8.41 | 0.006983 | 0.151065 | 0.130898 | 0.425719 |
| MmugDNA.24354.1.S1_at   | MmugDNA.24354.1 | 3.28  | 3.39  | 0.14 | 0.12 | -1.08 | 0.451724 | 0.637888 | 0.702488 | 0.787216 |
| MmugDNA.24355.1.S1_at   | MmugDNA.24355.1 | 5.3   | 4.44  | 0.7  | 1.24 | 1.81  | 0.599828 | 0.385933 | 0.798417 | 0.621161 |
| MmugDNA.24356.1.S1_at   | MmugDNA.24356.1 | 3.23  | 3.41  | 0.17 | 0.15 | -1.13 | 0.816207 | 0.967942 | 0.917981 | 0.982248 |
| MmugDNA.24357.1.S1_at   | MmugDNA.24357.1 | 13.3  | 13.34 | 0.19 | 0.06 | -1.02 | 0.396324 | 0.607031 | 0.66242  | 0.766185 |
| MmugDNA.24358.1.S1_at   | MmugDNA.24358.1 | 5.91  | 5.78  | 0.07 | 0.1  | 1.09  | 0.102778 | 0.137899 | 0.375206 | 0.410846 |
| MmugDNA.24359.1.S1_at   | MmugDNA.24359.1 | 3.02  | 2.89  | 0.08 | 0.08 | 1.09  | 0.308181 | 0.10387  | 0.594856 | 0.364519 |
| MmugDNA.24360.1.S1_at   | MmugDNA.24360.1 | 4.68  | 4.69  | 0.32 | 0.07 | -1    | 0.316082 | 0.448362 | 0.600905 | 0.664212 |
| MmugDNA.24361.1.S1_at   | MmugDNA.24361.1 | 4.89  | 4.94  | 0.06 | 0.24 | -1.04 | 0.870951 | 0.30629  | 0.944458 | 0.562919 |
| MmugDNA.24362.1.S1_at   | MmugDNA.24362.1 | 9.16  | 9.14  | 0.04 | 0.12 | 1.01  | 0.549793 | 0.003599 | 0.767442 | 0.085874 |
| MmugDNA.24365.1.S1_at   | MmugDNA.24365.1 | 3.83  | 4.02  | 0.45 | 0.45 | -1.14 | 0.533735 | 0.75331  | 0.757217 | 0.85647  |
| MmugDNA.24366.1.S1_at   | MmugDNA.24366.1 | 4.74  | 5.85  | 0.37 | 0.13 | -2.17 | 0.007531 | 0.019952 | 0.135041 | 0.177476 |
| MmugDNA.24367.1.S1_at   | MmugDNA.24367.1 | 7.69  | 8.2   | 0.22 | 0.19 | -1.42 | 0.033778 | 0.009384 | 0.237957 | 0.127665 |
| MmugDNA.24368.1.S1_at   | MmugDNA.24368.1 | 4.91  | 4.79  | 0.1  | 0.1  | 1.09  | 0.18036  | 0.462956 | 0.475506 | 0.674149 |
| MmugDNA.24369.1.S1_at   | MmugDNA.24369.1 | 8.41  | 8.06  | 0.38 | 0.06 | 1.28  | 0.071262 | 0.419874 | 0.324861 | 0.643733 |
| MmugDNA.2437.1.S1_at    | MmugDNA.2437.1  | 5.09  | 5.16  | 0.06 | 0.17 | -1.05 | 0.5694   | 0.607698 | 0.778858 | 0.766491 |
| MmugDNA.24370.1.S1_at   | MmugDNA.24370.1 | 6.92  | 8.21  | 0.27 | 0.38 | -2.45 | 0.007809 | 0.389285 | 0.137244 | 0.623403 |
| MmugDNA.24371.1.S1_at   | MmugDNA.24371.1 | 8.77  | 8.67  | 0.11 | 0.13 | 1.07  | 0.701148 | 0.760485 | 0.858031 | 0.860842 |
| MmugDNA.24372.1.S1_at   | MmugDNA.24372.1 | 9.09  | 8.01  | 0.35 | 0.06 | 2.12  | 0.005814 | 0.004606 | 0.122176 | 0.094858 |
| MmugDNA.24373.1.S1_at   | MmugDNA.24373.1 | 4.27  | 4.03  | 0.48 | 0.06 | 1.18  | 0.753048 | 0.746574 | 0.885907 | 0.852873 |
| MmugDNA.24374.1.S1_s_at | MmugDNA.24374.1 | 7.77  | 7.69  | 0.12 | 0.03 | 1.06  | 0.294397 | 0.002642 | 0.583398 | 0.076012 |
| MmugDNA.24375.1.S1_at   | MmugDNA.24375.1 | 3.5   | 3.61  | 0.24 | 0.16 | -1.08 | 0.818542 | 0.929341 | 0.918984 | 0.959675 |
| MmugDNA.24376.1.S1_at   | MmugDNA.24376.1 | 4.32  | 3.99  | 0.13 | 0.28 | 1.26  | 0.096719 | 0.224296 | 0.366735 | 0.497208 |
| MmugDNA.24377.1.S1_at   | MmugDNA.24377.1 | 3.4   | 3.31  | 0.08 | 0.13 | 1.06  | 0.255172 | 0.417757 | 0.549651 | 0.642391 |
| MmugDNA.24378.1.S1_at   | MmugDNA.24378.1 | 4.54  | 4.16  | 0.17 | 0.12 | 1.3   | 0.035376 | 0.106625 | 0.242908 | 0.36916  |
| MmugDNA.24381.1.S1_at   | MmugDNA.24381.1 | 4.33  | 4.35  | 0.56 | 0.09 | -1.02 | 0.487185 | 0.629092 | 0.726032 | 0.781597 |
| MmugDNA.24382.1.S1_at   | MmugDNA.24382.1 | 9.92  | 9.67  | 0.05 | 0.08 | 1.19  | 0.013016 | 0.037851 | 0.164853 | 0.238921 |
| MmugDNA.24383.1.S1_at   | MmugDNA.24383.1 | 4.45  | 4.29  | 0.22 | 0.12 | 1.12  | 0.960135 | 0.221059 | 0.983635 | 0.494471 |
| MmugDNA.24384.1.S1_at   | MmugDNA.24384.1 | 8.26  | 7.76  | 0.25 | 0.18 | 1.42  | 0.113241 | 0.007357 | 0.389972 | 0.115199 |
| MmugDNA.24385.1.S1_at   | MmugDNA.24385.1 | 5.44  | 5.45  | 0.41 | 0.07 | -1.01 | 0.885947 | 0.772657 | 0.951324 | 0.867785 |
| MmugDNA.24386.1.S1_at   | MmugDNA.24386.1 | 8.38  | 8.55  | 0.12 | 0.05 | -1.12 | 0.173388 | 0.583367 | 0.467685 | 0.751729 |
| MmugDNA.24387.1.S1_at   | MmugDNA.24387.1 | 5.3   | 6.95  | 0.65 | 0.27 | -3.16 | 0.020608 | 0.287984 | 0.197032 | 0.549255 |
| MmugDNA.24388.1.S1_at   | MmugDNA.24388.1 | 5.29  | 5.3   | 0.23 | 0.07 | -1.01 | 0.801961 | 0.918438 | 0.911061 | 0.95425  |
| MmugDNA.24389.1.S1_at   | MmugDNA.24389.1 | 4.66  | 4.52  | 0.07 | 0    | 1.1   | 0.02413  | 0.007924 | 0.208473 | 0.11857  |
| MmugDNA.24391.1.S1_at   | MmugDNA.24391.1 | 3.51  | 3.25  | 0.01 | 0.15 | 1.2   | 0.015846 | 0.201643 | 0.178312 | 0.476208 |
| MmugDNA.24392.1.S1_at   | MmugDNA.24392.1 | 4.16  | 3.91  | 0.32 | 0.18 | 1.19  | 0.180215 | 0.171317 | 0.475353 | 0.447809 |
| MmugDNA.24393.1.S1_at   | MmugDNA.24393.1 | 8.47  | 8.8   | 0.46 | 0.2  | -1.25 | 0.399333 | 0.056695 | 0.664758 | 0.284213 |
| MmugDNA.24394.1.S1_at   | MmugDNA.24394.1 | 4.43  | 4.76  | 0.28 | 0.09 | -1.25 | 0.276629 | 0.348875 | 0.568177 | 0.592917 |
| MmugDNA.24396.1.S1_at   | MmugDNA.24396.1 | 10.61 | 10.3  | 0.18 | 0.08 | 1.24  | 0.2284   | 0.60328  | 0.526707 | 0.764037 |
| MmugDNA.24398.1.S1_at   | MmugDNA.24398.1 | 4.58  | 4.33  | 0.35 | 0.19 | 1.19  | 0.41416  | 0.608024 | 0.675439 | 0.766737 |

|                         |                 |       |       |      |      |       |          |          |          |          |
|-------------------------|-----------------|-------|-------|------|------|-------|----------|----------|----------|----------|
| MmugDNA.24399.1.S1_at   | MmugDNA.24399.1 | 3.28  | 3.39  | 0.05 | 0.02 | -1.08 | 0.046849 | 0.010157 | 0.274151 | 0.132095 |
| MmugDNA.244.1.S1_at     | MmugDNA.244.1   | 4.71  | 4.48  | 0.58 | 0.06 | 1.17  | 0.414909 | 0.61671  | 0.675831 | 0.77288  |
| MmugDNA.2440.1.S1_at    | MmugDNA.2440.1  | 7.04  | 6.7   | 0.52 | 0.17 | 1.27  | 0.185637 | 0.178762 | 0.481867 | 0.455062 |
| MmugDNA.24400.1.S1_at   | MmugDNA.24400.1 | 6.37  | 6.09  | 0    | 0.21 | 1.21  | 0.243064 | 0.301581 | 0.539753 | 0.55955  |
| MmugDNA.24401.1.S1_at   | MmugDNA.24401.1 | 5.36  | 5.37  | 0.13 | 0.2  | -1.01 | 0.568818 | 0.761684 | 0.778625 | 0.861459 |
| MmugDNA.24402.1.S1_at   | MmugDNA.24402.1 | 7.23  | 7.21  | 0.44 | 0.07 | 1.02  | 0.759919 | 0.396882 | 0.890046 | 0.62846  |
| MmugDNA.24404.1.S1_at   | MmugDNA.24404.1 | 8.47  | 8.42  | 0.18 | 0.12 | 1.04  | 0.335231 | 0.001326 | 0.616202 | 0.056164 |
| MmugDNA.24404.1.S1_s_at | MmugDNA.24404.1 | 9.57  | 9.34  | 0.07 | 0.08 | 1.17  | 0.046278 | 0.000019 | 0.272946 | 0.019635 |
| MmugDNA.24405.1.S1_at   | MmugDNA.24405.1 | 3.38  | 3.42  | 0.13 | 0.23 | -1.02 | 0.570215 | 0.680445 | 0.779298 | 0.813453 |
| MmugDNA.24406.1.S1_at   | MmugDNA.24406.1 | 9     | 8.73  | 0.18 | 0.13 | 1.21  | 0.054515 | 0.146616 | 0.290603 | 0.420646 |
| MmugDNA.24407.1.S1_at   | MmugDNA.24407.1 | 4.11  | 4.05  | 0.08 | 0.01 | 1.04  | 0.37415  | 0.959965 | 0.645374 | 0.977362 |
| MmugDNA.24408.1.S1_at   | MmugDNA.24408.1 | 11.06 | 11.09 | 0.21 | 0.11 | -1.02 | 0.443361 | 0.300554 | 0.696549 | 0.558854 |
| MmugDNA.24409.1.S1_at   | MmugDNA.24409.1 | 3.78  | 3.68  | 1.05 | 0.47 | 1.08  | 0.540239 | 0.455189 | 0.761308 | 0.669157 |
| MmugDNA.2441.1.S1_at    | MmugDNA.2441.1  | 10.14 | 8.95  | 0.18 | 0.05 | 2.27  | 0.000362 | 0.000259 | 0.06234  | 0.033501 |
| MmugDNA.24410.1.S1_at   | MmugDNA.24410.1 | 8.8   | 8.73  | 0.83 | 0.28 | 1.05  | 0.762964 | 0.498641 | 0.891457 | 0.697648 |
| MmugDNA.24411.1.S1_at   | MmugDNA.24411.1 | 13.7  | 13.54 | 0.08 | 0.02 | 1.12  | 0.015003 | 0.018217 | 0.174543 | 0.169777 |
| MmugDNA.24412.1.S1_at   | MmugDNA.24412.1 | 3.53  | 3.27  | 0.3  | 0.2  | 1.2   | 0.295102 | 0.290619 | 0.584039 | 0.551363 |
| MmugDNA.24414.1.S1_at   | MmugDNA.24414.1 | 3.21  | 3.17  | 0.03 | 0.05 | 1.03  | 0.40218  | 0.259412 | 0.666556 | 0.526418 |
| MmugDNA.24415.1.S1_at   | MmugDNA.24415.1 | 4.95  | 4.87  | 0.71 | 0.2  | 1.05  | 0.441688 | 0.728937 | 0.695145 | 0.843315 |
| MmugDNA.24416.1.S1_at   | MmugDNA.24416.1 | 4.77  | 4.28  | 0.95 | 0.43 | 1.4   | 0.38525  | 0.583909 | 0.65405  | 0.752043 |
| MmugDNA.24417.1.S1_at   | MmugDNA.24417.1 | 5.6   | 5.79  | 0.43 | 0.09 | -1.14 | 0.755777 | 0.364475 | 0.887438 | 0.604845 |
| MmugDNA.24418.1.S1_at   | MmugDNA.24418.1 | 8.07  | 8.44  | 0.16 | 0.04 | -1.3  | 0.040132 | 0.017169 | 0.256842 | 0.16599  |
| MmugDNA.24419.1.S1_at   | MmugDNA.24419.1 | 6.68  | 6.07  | 0.11 | 0.34 | 1.53  | 0.079398 | 0.046233 | 0.339427 | 0.259397 |
| MmugDNA.2442.1.S1_at    | MmugDNA.2442.1  | 8.75  | 8.64  | 0.13 | 0.23 | 1.07  | 0.526825 | 0.226554 | 0.752776 | 0.499001 |
| MmugDNA.24420.1.S1_at   | MmugDNA.24420.1 | 4.98  | 4.19  | 0.54 | 0.15 | 1.73  | 0.076013 | 0.112306 | 0.334035 | 0.377592 |
| MmugDNA.24420.1.S1_s_at | MmugDNA.24420.1 | 9.99  | 10.22 | 0.29 | 0.07 | -1.17 | 0.24383  | 0.358568 | 0.540592 | 0.600072 |
| MmugDNA.24423.1.S1_at   | MmugDNA.24423.1 | 5.84  | 5.84  | 0.09 | 0.04 | 1.01  | 0.979051 | 0.387395 | 0.992043 | 0.622065 |
| MmugDNA.24424.1.S1_at   | MmugDNA.24424.1 | 5.67  | 5.88  | 0.2  | 0.04 | -1.15 | 0.490161 | 0.060009 | 0.728327 | 0.291649 |
| MmugDNA.24425.1.S1_at   | MmugDNA.24425.1 | 4.48  | 4.91  | 0.4  | 0.19 | -1.35 | 0.122143 | 0.447172 | 0.400937 | 0.663366 |
| MmugDNA.24427.1.S1_at   | MmugDNA.24427.1 | 10.66 | 10.6  | 0.19 | 0.05 | 1.04  | 0.728814 | 0.39107  | 0.873272 | 0.624817 |
| MmugDNA.24428.1.S1_at   | MmugDNA.24428.1 | 12.44 | 12.73 | 0.08 | 0.01 | -1.22 | 0.003797 | 0.005631 | 0.106813 | 0.103694 |
| MmugDNA.24429.1.S1_at   | MmugDNA.24429.1 | 3.9   | 3.9   | 0.13 | 0.06 | 1     | 0.490807 | 0.695361 | 0.728854 | 0.82295  |
| MmugDNA.2443.1.S1_at    | MmugDNA.2443.1  | 5.96  | 5.78  | 0.08 | 0.31 | 1.13  | 0.974072 | 0.649587 | 0.989627 | 0.795009 |
| MmugDNA.24430.1.S1_at   | MmugDNA.24430.1 | 9.87  | 8.73  | 0.05 | 0.12 | 2.2   | 0.0001   | 0.002573 | 0.051196 | 0.075105 |
| MmugDNA.24433.1.S1_at   | MmugDNA.24433.1 | 7.83  | 8.44  | 0.42 | 0.2  | -1.52 | 0.136034 | 0.312666 | 0.420353 | 0.567299 |
| MmugDNA.24434.1.S1_at   | MmugDNA.24434.1 | 7.66  | 7.6   | 0.3  | 0.19 | 1.04  | 0.642292 | 0.225276 | 0.825507 | 0.497892 |
| MmugDNA.24435.1.S1_at   | MmugDNA.24435.1 | 7.89  | 7.52  | 0.21 | 0.24 | 1.29  | 0.098872 | 0.377716 | 0.369716 | 0.615086 |
| MmugDNA.24436.1.S1_at   | MmugDNA.24436.1 | 4.72  | 4.19  | 0.49 | 0.24 | 1.45  | 0.140772 | 0.292839 | 0.42652  | 0.552832 |
| MmugDNA.24438.1.S1_at   | MmugDNA.24438.1 | 4.99  | 4.98  | 0.11 | 0.08 | 1.01  | 0.570226 | 0.215378 | 0.779298 | 0.489067 |
| MmugDNA.24439.1.S1_at   | MmugDNA.24439.1 | 3.91  | 3.78  | 0.26 | 0.12 | 1.1   | 0.164913 | 0.291607 | 0.457897 | 0.551985 |
| MmugDNA.2444.1.S1_at    | MmugDNA.2444.1  | 7.22  | 7.23  | 0.09 | 0.04 | -1.01 | 0.999979 | 0.10818  | 1        | 0.371527 |
| MmugDNA.24440.1.S1_at   | MmugDNA.24440.1 | 6.74  | 6.72  | 0.09 | 0.12 | 1.01  | 0.840405 | 0.021059 | 0.929923 | 0.181869 |
| MmugDNA.24443.1.S1_at   | MmugDNA.24443.1 | 3.02  | 3.05  | 0.13 | 0.27 | -1.02 | 0.659116 | 0.879415 | 0.835451 | 0.931144 |

|                         |                 |       |       |      |      |       |          |          |          |          |
|-------------------------|-----------------|-------|-------|------|------|-------|----------|----------|----------|----------|
| MmugDNA.24444.1.S1_at   | MmugDNA.24444.1 | 6.44  | 6.47  | 0.1  | 0.01 | -1.02 | 0.22118  | 0.404186 | 0.519144 | 0.632691 |
| MmugDNA.24446.1.S1_at   | MmugDNA.24446.1 | 7.23  | 6.93  | 0.37 | 0.28 | 1.23  | 0.167969 | 0.360188 | 0.461204 | 0.601275 |
| MmugDNA.24447.1.S1_at   | MmugDNA.24447.1 | 7.82  | 8.59  | 0.38 | 0.06 | -1.7  | 0.010896 | 0.082662 | 0.154141 | 0.331987 |
| MmugDNA.24449.1.S1_at   | MmugDNA.24449.1 | 8.75  | 8.6   | 0.25 | 0.06 | 1.11  | 0.941827 | 0.676303 | 0.975589 | 0.810904 |
| MmugDNA.2445.1.S1_at    | MmugDNA.2445.1  | 5.46  | 6.26  | 0.96 | 0.33 | -1.74 | 0.90455  | 0.206539 | 0.95949  | 0.480577 |
| MmugDNA.24452.1.S1_at   | MmugDNA.24452.1 | 6.9   | 6.9   | 0.21 | 0.05 | -1    | 0.391274 | 0.440545 | 0.658623 | 0.65901  |
| MmugDNA.24453.1.S1_s_at | MmugDNA.24453.1 | 8.68  | 8.85  | 0.14 | 0.06 | -1.12 | 0.404028 | 0.043242 | 0.667926 | 0.252677 |
| MmugDNA.24455.1.S1_x_at | MmugDNA.24455.1 | 9.96  | 9.74  | 0.53 | 0.24 | 1.16  | 0.379842 | 0.466674 | 0.649597 | 0.676425 |
| MmugDNA.24457.1.S1_at   | MmugDNA.24457.1 | 9.41  | 10.14 | 0.56 | 0.08 | -1.66 | 0.05255  | 0.157602 | 0.286297 | 0.433131 |
| MmugDNA.24458.1.S1_at   | MmugDNA.24458.1 | 5.21  | 5.21  | 0.07 | 0.13 | -1    | 0.636646 | 0.779926 | 0.822222 | 0.872422 |
| MmugDNA.24459.1.S1_at   | MmugDNA.24459.1 | 4.75  | 4.7   | 0.14 | 0.04 | 1.03  | 0.881382 | 0.596121 | 0.949601 | 0.759357 |
| MmugDNA.24460.1.S1_at   | MmugDNA.24460.1 | 5.52  | 5.9   | 0.21 | 0.31 | -1.3  | 0.155113 | 0.148489 | 0.445286 | 0.423016 |
| MmugDNA.24461.1.S1_at   | MmugDNA.24461.1 | 4.77  | 4.57  | 0.09 | 0.09 | 1.14  | 0.053593 | 0.099058 | 0.288683 | 0.357208 |
| MmugDNA.24464.1.S1_at   | MmugDNA.24464.1 | 6.62  | 6.21  | 0.21 | 0.1  | 1.34  | 0.066617 | 0.250454 | 0.315622 | 0.519391 |
| MmugDNA.24465.1.S1_at   | MmugDNA.24465.1 | 3.9   | 3.9   | 0.02 | 0.24 | -1    | 0.332728 | 0.148803 | 0.614336 | 0.423201 |
| MmugDNA.24466.1.S1_at   | MmugDNA.24466.1 | 2.95  | 2.9   | 0.01 | 0.1  | 1.03  | 0.25364  | 0.146564 | 0.547927 | 0.420583 |
| MmugDNA.24467.1.S1_at   | MmugDNA.24467.1 | 12.34 | 12.05 | 0.1  | 0.05 | 1.22  | 0.020739 | 0.007221 | 0.1976   | 0.114121 |
| MmugDNA.24468.1.S1_at   | MmugDNA.24468.1 | 4.84  | 5     | 0.4  | 0.23 | -1.11 | 0.589052 | 0.832794 | 0.791382 | 0.904055 |
| MmugDNA.24469.1.S1_at   | MmugDNA.24469.1 | 4.26  | 4.35  | 0.18 | 0.23 | -1.06 | 0.428668 | 0.597624 | 0.685446 | 0.760279 |
| MmugDNA.2447.1.S1_at    | MmugDNA.2447.1  | 11.9  | 11.94 | 0.2  | 0.12 | -1.03 | 0.175301 | 0.130919 | 0.469705 | 0.403037 |
| MmugDNA.24470.1.S1_at   | MmugDNA.24470.1 | 5.97  | 5.64  | 0.65 | 0.39 | 1.26  | 0.453591 | 0.302247 | 0.703757 | 0.560092 |
| MmugDNA.24472.1.S1_at   | MmugDNA.24472.1 | 4.56  | 4.59  | 0.17 | 0.08 | -1.02 | 0.223832 | 0.30718  | 0.521871 | 0.563487 |
| MmugDNA.24473.1.S1_at   | MmugDNA.24473.1 | 4.82  | 5.06  | 0.07 | 0.09 | -1.18 | 0.016037 | 0.095729 | 0.179208 | 0.352735 |
| MmugDNA.24475.1.S1_at   | MmugDNA.24475.1 | 12.14 | 12.14 | 0.09 | 0.11 | 1     | 0.528106 | 0.566108 | 0.75349  | 0.740262 |
| MmugDNA.24479.1.S1_at   | MmugDNA.24479.1 | 6.92  | 8.32  | 0.49 | 0.46 | -2.65 | 0.023742 | 0.217002 | 0.207099 | 0.490626 |
| MmugDNA.2448.1.S1_at    | MmugDNA.2448.1  | 4.43  | 4.82  | 1.12 | 0.07 | -1.31 | 0.690214 | 0.623924 | 0.851949 | 0.77828  |
| MmugDNA.24480.1.S1_at   | MmugDNA.24480.1 | 12.06 | 11.52 | 0.08 | 0.07 | 1.46  | 0.001044 | 0.168772 | 0.076332 | 0.445439 |
| MmugDNA.24481.1.S1_at   | MmugDNA.24481.1 | 8.9   | 8.37  | 0.5  | 0.28 | 1.44  | 0.245064 | 0.809355 | 0.541271 | 0.890107 |
| MmugDNA.24482.1.S1_at   | MmugDNA.24482.1 | 8.63  | 7.32  | 0.17 | 0.15 | 2.48  | 0.000599 | 0.000619 | 0.070727 | 0.042444 |
| MmugDNA.24483.1.S1_at   | MmugDNA.24483.1 | 4.98  | 4.73  | 0.08 | 0.12 | 1.19  | 0.085155 | 0.304476 | 0.349307 | 0.561741 |
| MmugDNA.10687.1.S1_s_at | MmugDNA.10687.1 | 10.41 | 10.14 | 0.22 | 0.02 | 1.2   | 0.329095 | 0.573858 | 0.611429 | 0.745436 |
| MmugDNA.24485.1.S1_at   | MmugDNA.24485.1 | 4.7   | 4.59  | 0.01 | 0.1  | 1.08  | 0.120957 | 0.042385 | 0.399467 | 0.250533 |
| MmugDNA.24486.1.S1_at   | MmugDNA.24486.1 | 4.44  | 4.55  | 0.21 | 0.06 | -1.08 | 0.409396 | 0.596699 | 0.671738 | 0.75976  |
| MmugDNA.24487.1.S1_at   | MmugDNA.24487.1 | 4.09  | 4.3   | 0.08 | 0.08 | -1.16 | 0.044203 | 0.082717 | 0.267305 | 0.332171 |
| MmugDNA.24488.1.S1_at   | MmugDNA.24488.1 | 5.28  | 5.44  | 0.24 | 0.04 | -1.12 | 0.973853 | 0.550782 | 0.989501 | 0.730611 |
| MmugDNA.24489.1.S1_at   | MmugDNA.24489.1 | 4.42  | 4.48  | 0.04 | 0.03 | -1.04 | 0.109252 | 0.413995 | 0.384375 | 0.639979 |
| MmugDNA.24490.1.S1_at   | MmugDNA.24490.1 | 4.73  | 4.83  | 0.2  | 0.01 | -1.07 | 0.481868 | 0.048877 | 0.722245 | 0.265858 |
| MmugDNA.24491.1.S1_at   | MmugDNA.24491.1 | 3.61  | 3.45  | 0.15 | 0.21 | 1.12  | 0.155685 | 0.2408   | 0.446061 | 0.511521 |
| MmugDNA.24492.1.S1_at   | MmugDNA.24492.1 | 5.38  | 5.19  | 0.29 | 0.13 | 1.14  | 0.134632 | 0.17662  | 0.418463 | 0.453098 |
| MmugDNA.24493.1.S1_at   | MmugDNA.24493.1 | 4.76  | 4.48  | 0.5  | 0.1  | 1.21  | 0.122142 | 0.131847 | 0.400937 | 0.403891 |
| MmugDNA.24494.1.S1_at   | MmugDNA.24494.1 | 3.82  | 3.84  | 0.15 | 0.07 | -1.01 | 0.490299 | 0.841039 | 0.728387 | 0.909421 |
| MmugDNA.24495.1.S1_at   | MmugDNA.24495.1 | 5.45  | 5.68  | 0.45 | 0.17 | -1.17 | 0.90379  | 0.987917 | 0.959255 | 0.993253 |
| MmugDNA.24496.1.S1_at   | MmugDNA.24496.1 | 5.4   | 5.75  | 0.14 | 0.27 | -1.27 | 0.029128 | 0.063554 | 0.223491 | 0.298646 |

|                         |                 |       |       |      |      |        |          |          |          |          |
|-------------------------|-----------------|-------|-------|------|------|--------|----------|----------|----------|----------|
| MmugDNA.24497.1.S1_at   | MmugDNA.24497.1 | 6.3   | 6.3   | 0.06 | 0.37 | -1     | 0.913831 | 0.784162 | 0.96343  | 0.875049 |
| MmugDNA.24499.1.S1_at   | MmugDNA.24499.1 | 4.1   | 4.09  | 0.18 | 0.02 | 1      | 0.858943 | 0.688227 | 0.938861 | 0.818003 |
| MmugDNA.245.1.S1_at     | MmugDNA.245.1   | 10.04 | 8.86  | 0.06 | 0.08 | 2.27   | 0.000029 | 0.000054 | 0.045594 | 0.025666 |
| MmugDNA.24501.1.S1_at   | MmugDNA.24501.1 | 3.9   | 3.82  | 0.11 | 0.22 | 1.06   | 0.416478 | 0.553836 | 0.676962 | 0.732843 |
| MmugDNA.24502.1.S1_at   | MmugDNA.24502.1 | 5.92  | 5.89  | 0.04 | 0.13 | 1.02   | 0.745184 | 0.156738 | 0.881818 | 0.432216 |
| MmugDNA.24503.1.S1_at   | MmugDNA.24503.1 | 4.18  | 3.98  | 0.21 | 0.05 | 1.15   | 0.235235 | 0.237459 | 0.533113 | 0.508127 |
| MmugDNA.24504.1.S1_at   | MmugDNA.24504.1 | 10.71 | 10.65 | 0.11 | 0.14 | 1.04   | 0.48926  | 0.0005   | 0.727626 | 0.038996 |
| MmugDNA.24505.1.S1_at   | MmugDNA.24505.1 | 11.92 | 11.31 | 0.23 | 0    | 1.53   | 0.012583 | 0.568644 | 0.162521 | 0.742052 |
| MmugDNA.24506.1.S1_at   | MmugDNA.24506.1 | 5.57  | 6.25  | 0.05 | 0.12 | -1.6   | 0.000516 | 0.089017 | 0.069024 | 0.342876 |
| MmugDNA.24507.1.S1_at   | MmugDNA.24507.1 | 7.46  | 7.85  | 0.46 | 0.07 | -1.31  | 0.156863 | 0.17423  | 0.447546 | 0.450573 |
| MmugDNA.24508.1.S1_at   | MmugDNA.24508.1 | 6.08  | 5.9   | 0.25 | 0.21 | 1.13   | 0.843571 | 0.875308 | 0.931516 | 0.929211 |
| MmugDNA.2451.1.S1_at    | MmugDNA.2451.1  | 3.7   | 3.69  | 0.04 | 0    | 1      | 0.676544 | 0.268661 | 0.84554  | 0.534138 |
| MmugDNA.24511.1.S1_at   | MmugDNA.24511.1 | 5.58  | 5.73  | 0.17 | 0.19 | -1.11  | 0.298865 | 0.196274 | 0.587058 | 0.471236 |
| MmugDNA.24513.1.S1_at   | MmugDNA.24513.1 | 7.05  | 10.28 | 1.23 | 0.19 | -9.39  | 0.025669 | 0.170379 | 0.212966 | 0.447103 |
| MmugDNA.24513.1.S1_s_at | MmugDNA.24513.1 | 6.59  | 10.07 | 1.38 | 0.21 | -11.17 | 0.03058  | 0.168911 | 0.227754 | 0.445458 |
| MmugDNA.24514.1.S1_s_at | MmugDNA.24514.1 | 7.96  | 10.99 | 1.2  | 0.25 | -8.13  | 0.025149 | 0.184357 | 0.211649 | 0.460458 |
| MmugDNA.24516.1.S1_s_at | MmugDNA.24516.1 | 10.28 | 9.58  | 0.27 | 0.11 | 1.62   | 0.02093  | 0.009351 | 0.198295 | 0.127602 |
| MmugDNA.24517.1.S1_at   | MmugDNA.24517.1 | 12.9  | 12.79 | 0.18 | 0.05 | 1.07   | 0.123024 | 0.018603 | 0.40218  | 0.171539 |
| MmugDNA.24518.1.S1_at   | MmugDNA.24518.1 | 6.1   | 6.08  | 0.19 | 0.06 | 1.01   | 0.566263 | 0.550774 | 0.777222 | 0.730611 |
| MmugDNA.24519.1.S1_at   | MmugDNA.24519.1 | 7.35  | 7.23  | 1.03 | 0.31 | 1.09   | 0.691688 | 0.679391 | 0.852609 | 0.812799 |
| MmugDNA.2452.1.S1_at    | MmugDNA.2452.1  | 8.4   | 7.89  | 0.28 | 0.14 | 1.43   | 0.078296 | 0.194205 | 0.337998 | 0.469312 |
| MmugDNA.24520.1.S1_at   | MmugDNA.24520.1 | 4.93  | 5.25  | 0.17 | 0.35 | -1.25  | 0.154397 | 0.185998 | 0.444671 | 0.461851 |
| MmugDNA.24521.1.S1_at   | MmugDNA.24521.1 | 4.46  | 4.17  | 0.36 | 0.3  | 1.22   | 0.289774 | 0.396012 | 0.579317 | 0.627823 |
| MmugDNA.24522.1.S1_at   | MmugDNA.24522.1 | 6.86  | 6.88  | 0.12 | 0.02 | -1.01  | 0.257496 | 0.690045 | 0.551704 | 0.819235 |
| MmugDNA.24524.1.S1_at   | MmugDNA.24524.1 | 8.05  | 7.95  | 0.44 | 0.01 | 1.08   | 0.653535 | 0.887709 | 0.832228 | 0.93601  |
| MmugDNA.24525.1.S1_at   | MmugDNA.24525.1 | 4.7   | 4.79  | 0.09 | 0.17 | -1.06  | 0.833679 | 0.607136 | 0.926824 | 0.766223 |
| MmugDNA.24526.1.S1_at   | MmugDNA.24526.1 | 5.12  | 5.07  | 0.24 | 0.12 | 1.03   | 0.926162 | 0.017052 | 0.968794 | 0.165465 |
| MmugDNA.24527.1.S1_at   | MmugDNA.24527.1 | 10.01 | 10.01 | 0.6  | 0.06 | -1     | 0.75448  | 0.064322 | 0.886799 | 0.299804 |
| MmugDNA.24528.1.S1_at   | MmugDNA.24528.1 | 14.31 | 14.28 | 0.05 | 0.03 | 1.02   | 0.734928 | 0.86583  | 0.876604 | 0.923757 |
| MmugDNA.24529.1.S1_at   | MmugDNA.24529.1 | 6.95  | 6.86  | 0.35 | 0.16 | 1.07   | 0.737202 | 0.362169 | 0.878028 | 0.602827 |
| MmugDNA.2453.1.S1_at    | MmugDNA.2453.1  | 7.51  | 7.91  | 0.47 | 0.08 | -1.33  | 0.751799 | 0.11144  | 0.885488 | 0.376126 |
| MmugDNA.24530.1.S1_at   | MmugDNA.24530.1 | 4.26  | 4.19  | 0.1  | 0.04 | 1.05   | 0.281954 | 0.455252 | 0.572752 | 0.669198 |
| MmugDNA.24531.1.S1_at   | MmugDNA.24531.1 | 4.34  | 4.39  | 0.04 | 0    | -1.03  | 0.069399 | 0.095989 | 0.32176  | 0.353302 |
| MmugDNA.24532.1.S1_at   | MmugDNA.24532.1 | 4.2   | 4.24  | 0.21 | 0.15 | -1.02  | 0.329925 | 0.562735 | 0.612004 | 0.738115 |
| MmugDNA.24534.1.S1_at   | MmugDNA.24534.1 | 6.58  | 6.57  | 0.08 | 0.23 | 1.01   | 0.810988 | 0.370411 | 0.915344 | 0.609492 |
| MmugDNA.24535.1.S1_at   | MmugDNA.24535.1 | 5.45  | 5.43  | 0.06 | 0.22 | 1.01   | 0.894312 | 0.244323 | 0.954914 | 0.514184 |
| MmugDNA.24536.1.S1_at   | MmugDNA.24536.1 | 7.15  | 7.57  | 1.35 | 0.18 | -1.33  | 0.468027 | 0.306484 | 0.713377 | 0.563029 |
| MmugDNA.24537.1.S1_at   | MmugDNA.24537.1 | 4.85  | 4.83  | 0.43 | 0.08 | 1.01   | 0.350704 | 0.491097 | 0.628558 | 0.692777 |
| MmugDNA.24539.1.S1_at   | MmugDNA.24539.1 | 5.69  | 5.72  | 0.15 | 0.13 | -1.02  | 0.328627 | 0.697036 | 0.610955 | 0.824045 |
| MmugDNA.2454.1.S1_at    | MmugDNA.2454.1  | 3.33  | 3.37  | 0.14 | 0.31 | -1.03  | 0.204112 | 0.254547 | 0.501698 | 0.522863 |
| MmugDNA.24540.1.S1_at   | MmugDNA.24540.1 | 6.7   | 6.32  | 0.18 | 0.19 | 1.3    | 0.32354  | 0.49458  | 0.60732  | 0.694909 |
| MmugDNA.24541.1.S1_at   | MmugDNA.24541.1 | 3.55  | 3.55  | 0.07 | 0.15 | -1     | 0.744997 | 0.924771 | 0.881771 | 0.957465 |
| MmugDNA.24542.1.S1_at   | MmugDNA.24542.1 | 5.23  | 5.39  | 0.15 | 0.19 | -1.12  | 0.420616 | 0.54655  | 0.679563 | 0.728079 |

|                       |                 |       |       |      |      |       |          |          |          |          |
|-----------------------|-----------------|-------|-------|------|------|-------|----------|----------|----------|----------|
| MmugDNA.24543.1.S1_at | MmugDNA.24543.1 | 2.96  | 2.82  | 0.02 | 0.09 | 1.1   | 0.065368 | 0.231218 | 0.312815 | 0.5029   |
| MmugDNA.24544.1.S1_at | MmugDNA.24544.1 | 7.66  | 8.28  | 0.56 | 0.08 | -1.54 | 0.235819 | 0.152822 | 0.533475 | 0.427616 |
| MmugDNA.24545.1.S1_at | MmugDNA.24545.1 | 6.47  | 6.52  | 0.84 | 0.23 | -1.04 | 0.987128 | 0.518983 | 0.995318 | 0.710813 |
| MmugDNA.24546.1.S1_at | MmugDNA.24546.1 | 7.03  | 6.95  | 0.07 | 0.13 | 1.06  | 0.161911 | 0.502649 | 0.453721 | 0.700236 |
| MmugDNA.24547.1.S1_at | MmugDNA.24547.1 | 7.54  | 7.22  | 0.23 | 0.12 | 1.25  | 0.158297 | 0.190396 | 0.449259 | 0.465906 |
| MmugDNA.24548.1.S1_at | MmugDNA.24548.1 | 4.81  | 4.78  | 0.17 | 0.37 | 1.02  | 0.84003  | 0.747621 | 0.929875 | 0.853205 |
| MmugDNA.24549.1.S1_at | MmugDNA.24549.1 | 3.7   | 3.66  | 0.12 | 0.12 | 1.03  | 0.703709 | 0.255633 | 0.859331 | 0.523617 |
| MmugDNA.2455.1.S1_at  | MmugDNA.2455.1  | 3.97  | 4.87  | 1.33 | 0.07 | -1.86 | 0.647517 | 0.772457 | 0.82876  | 0.867741 |
| MmugDNA.24550.1.S1_at | MmugDNA.24550.1 | 5.02  | 4.9   | 0.04 | 0.09 | 1.09  | 0.450153 | 0.548413 | 0.701214 | 0.729154 |
| MmugDNA.24552.1.S1_at | MmugDNA.24552.1 | 4.41  | 4.41  | 0.11 | 0.18 | 1     | 0.646989 | 0.374843 | 0.828492 | 0.613091 |
| MmugDNA.24553.1.S1_at | MmugDNA.24553.1 | 5.64  | 5.64  | 0.18 | 0.04 | -1    | 0.95333  | 0.993909 | 0.980807 | 0.996321 |
| MmugDNA.24554.1.S1_at | MmugDNA.24554.1 | 6.83  | 7.67  | 0.38 | 0.18 | -1.79 | 0.031063 | 0.221371 | 0.22922  | 0.494644 |
| MmugDNA.24556.1.S1_at | MmugDNA.24556.1 | 8.58  | 8.5   | 0.54 | 0.06 | 1.06  | 0.744514 | 0.96125  | 0.881518 | 0.978105 |
| MmugDNA.24557.1.S1_at | MmugDNA.24557.1 | 12.4  | 12.57 | 0.41 | 0.06 | -1.13 | 0.729769 | 0.269439 | 0.873782 | 0.534742 |
| MmugDNA.24558.1.S1_at | MmugDNA.24558.1 | 3.62  | 3.45  | 0.08 | 0.25 | 1.12  | 0.346323 | 0.470943 | 0.624923 | 0.679153 |
| MmugDNA.24559.1.S1_at | MmugDNA.24559.1 | 4.33  | 4.41  | 0.23 | 0.22 | -1.06 | 0.945807 | 0.982458 | 0.977159 | 0.99036  |
| MmugDNA.2456.1.S1_at  | MmugDNA.2456.1  | 6.34  | 5.95  | 0.13 | 0.09 | 1.31  | 0.006421 | 0.010861 | 0.126742 | 0.13586  |
| MmugDNA.24560.1.S1_at | MmugDNA.24560.1 | 3.9   | 3.89  | 0.01 | 0.24 | 1.01  | 0.871587 | 0.931367 | 0.944731 | 0.961034 |
| MmugDNA.24561.1.S1_at | MmugDNA.24561.1 | 5.66  | 6.15  | 0.71 | 0.68 | -1.4  | 0.333161 | 0.318281 | 0.61466  | 0.571151 |
| MmugDNA.24562.1.S1_at | MmugDNA.24562.1 | 6.85  | 7.39  | 0.27 | 0.19 | -1.45 | 0.018367 | 0.052978 | 0.18854  | 0.275815 |
| MmugDNA.24564.1.S1_at | MmugDNA.24564.1 | 6.21  | 5.96  | 0.18 | 0.02 | 1.19  | 0.070871 | 0.17303  | 0.324317 | 0.449673 |
| MmugDNA.24565.1.S1_at | MmugDNA.24565.1 | 3.11  | 3.15  | 0.21 | 0.03 | -1.03 | 0.94207  | 0.812745 | 0.975589 | 0.891794 |
| MmugDNA.24568.1.S1_at | MmugDNA.24568.1 | 9.12  | 8.96  | 0.17 | 0.19 | 1.11  | 0.299605 | 0.013102 | 0.587907 | 0.147241 |
| MmugDNA.24569.1.S1_at | MmugDNA.24569.1 | 5.67  | 5.18  | 0.25 | 0.29 | 1.41  | 0.072907 | 0.056398 | 0.327698 | 0.283382 |
| MmugDNA.2457.1.S1_at  | MmugDNA.2457.1  | 4.44  | 4.03  | 0.84 | 0.67 | 1.33  | 0.444471 | 0.234233 | 0.697363 | 0.505485 |
| MmugDNA.24571.1.S1_at | MmugDNA.24571.1 | 12.65 | 12.51 | 0.18 | 0.02 | 1.1   | 0.236843 | 0.075055 | 0.534416 | 0.31921  |
| MmugDNA.24572.1.S1_at | MmugDNA.24572.1 | 9.03  | 7.87  | 0.08 | 0.26 | 2.23  | 0.001908 | 0.003734 | 0.087869 | 0.087162 |
| MmugDNA.24573.1.S1_at | MmugDNA.24573.1 | 3.28  | 3.24  | 0.12 | 0.1  | 1.03  | 0.516204 | 0.384287 | 0.745621 | 0.619994 |
| MmugDNA.24574.1.S1_at | MmugDNA.24574.1 | 4.8   | 4.77  | 0.22 | 0.07 | 1.02  | 0.231789 | 0.449154 | 0.530455 | 0.664892 |
| MmugDNA.24576.1.S1_at | MmugDNA.24576.1 | 6.93  | 7.17  | 1.05 | 0.12 | -1.18 | 0.68354  | 0.646175 | 0.849124 | 0.792676 |
| MmugDNA.24577.1.S1_at | MmugDNA.24577.1 | 3.67  | 3.74  | 0.12 | 0.4  | -1.05 | 0.769016 | 0.851994 | 0.893947 | 0.915852 |
| MmugDNA.24578.1.S1_at | MmugDNA.24578.1 | 8.19  | 8.49  | 0.2  | 0.18 | -1.23 | 0.18476  | 0.116301 | 0.480792 | 0.383671 |
| MmugDNA.24579.1.S1_at | MmugDNA.24579.1 | 10.81 | 12.23 | 0.6  | 0.08 | -2.68 | 0.012647 | 0.005384 | 0.162529 | 0.101199 |
| MmugDNA.2458.1.S1_at  | MmugDNA.2458.1  | 4.12  | 4.08  | 0.51 | 0.64 | 1.03  | 0.934056 | 0.989073 | 0.972331 | 0.993772 |
| MmugDNA.24580.1.S1_at | MmugDNA.24580.1 | 4.13  | 4.27  | 0.18 | 0.18 | -1.1  | 0.415632 | 0.241541 | 0.676303 | 0.512152 |
| MmugDNA.24581.1.S1_at | MmugDNA.24581.1 | 5.16  | 5.02  | 0.31 | 0.06 | 1.1   | 0.200893 | 0.198056 | 0.498263 | 0.473041 |
| MmugDNA.24583.1.S1_at | MmugDNA.24583.1 | 4.26  | 3.99  | 0.24 | 0.17 | 1.2   | 0.87465  | 0.847473 | 0.946214 | 0.913316 |
| MmugDNA.24584.1.S1_at | MmugDNA.24584.1 | 4.68  | 4.66  | 0.28 | 0.16 | 1.01  | 0.691116 | 0.119827 | 0.85229  | 0.388577 |
| MmugDNA.24587.1.S1_at | MmugDNA.24587.1 | 10.02 | 9.94  | 0.62 | 0.15 | 1.06  | 0.853026 | 0.704215 | 0.936051 | 0.828375 |
| MmugDNA.24588.1.S1_at | MmugDNA.24588.1 | 3.03  | 3.02  | 0.15 | 0.03 | 1.01  | 0.404938 | 0.651973 | 0.668531 | 0.796529 |
| MmugDNA.24589.1.S1_at | MmugDNA.24589.1 | 2.9   | 3.27  | 0.36 | 0.02 | -1.28 | 0.537961 | 0.419857 | 0.759999 | 0.643733 |
| MmugDNA.2459.1.S1_at  | MmugDNA.2459.1  | 8.93  | 8.87  | 0.36 | 0.16 | 1.04  | 0.763906 | 0.873742 | 0.891841 | 0.928207 |
| MmugDNA.24590.1.S1_at | MmugDNA.24590.1 | 3.2   | 3.32  | 0.1  | 0.12 | -1.09 | 0.242903 | 0.32599  | 0.539651 | 0.576235 |

|                         |                 |       |       |      |      |       |          |          |          |          |
|-------------------------|-----------------|-------|-------|------|------|-------|----------|----------|----------|----------|
| MmugDNA.24591.1.S1_at   | MmugDNA.24591.1 | 4.07  | 3.93  | 0.21 | 0.1  | 1.1   | 0.819651 | 0.151133 | 0.919644 | 0.425795 |
| MmugDNA.24592.1.S1_at   | MmugDNA.24592.1 | 7.77  | 7.86  | 0.23 | 0.29 | -1.06 | 0.646943 | 0.008747 | 0.828492 | 0.123975 |
| MmugDNA.24593.1.S1_at   | MmugDNA.24593.1 | 5.29  | 5.15  | 0.08 | 0.16 | 1.1   | 0.178258 | 0.246736 | 0.473001 | 0.51609  |
| MmugDNA.24594.1.S1_at   | MmugDNA.24594.1 | 9.95  | 9     | 0.12 | 0.23 | 1.93  | 0.004067 | 0.01456  | 0.108999 | 0.153907 |
| MmugDNA.24596.1.S1_s_at | MmugDNA.24596.1 | 11.41 | 11.04 | 0.02 | 0.13 | 1.29  | 0.005964 | 0.01659  | 0.123893 | 0.163051 |
| MmugDNA.24597.1.S1_at   | MmugDNA.24597.1 | 8.37  | 8.51  | 0.28 | 0.22 | -1.1  | 0.956232 | 0.070174 | 0.982016 | 0.311142 |
| MmugDNA.24599.1.S1_at   | MmugDNA.24599.1 | 5.32  | 5.28  | 0.2  | 0.08 | 1.02  | 0.799093 | 0.144299 | 0.909433 | 0.418196 |
| MmugDNA.246.1.S1_at     | MmugDNA.246.1   | 4.85  | 4.86  | 0.48 | 0.35 | -1.01 | 0.616272 | 0.424567 | 0.809428 | 0.647146 |
| MmugDNA.2460.1.S1_at    | MmugDNA.2460.1  | 6.2   | 5.4   | 0.64 | 0.16 | 1.74  | 0.161459 | 0.181806 | 0.453006 | 0.458382 |
| MmugDNA.24601.1.S1_at   | MmugDNA.24601.1 | 9.59  | 9.55  | 0.53 | 0.16 | 1.03  | 0.949179 | 0.641479 | 0.978825 | 0.789564 |
| MmugDNA.24603.1.S1_at   | MmugDNA.24603.1 | 6.29  | 6.34  | 0.12 | 0.14 | -1.04 | 0.924445 | 0.088324 | 0.967863 | 0.341743 |
| MmugDNA.22320.1.S1_at   | MmugDNA.22320.1 | 3.02  | 3.18  | 0.1  | 0.02 | -1.12 | 0.118036 | 0.10201  | 0.395593 | 0.362076 |
| MmugDNA.22320.1.S1_s_at | MmugDNA.22320.1 | 3.28  | 3.33  | 0.2  | 0.06 | -1.04 | 0.988693 | 0.983452 | 0.996022 | 0.99078  |
| MmugDNA.24626.1.S1_s_at | MmugDNA.24626.1 | 10.85 | 10.59 | 0.23 | 0.06 | 1.19  | 0.23278  | 0.332668 | 0.531068 | 0.581046 |
| MmugDNA.24606.1.S1_at   | MmugDNA.24606.1 | 3.57  | 3.58  | 0.21 | 0.04 | -1    | 0.329212 | 0.438288 | 0.611528 | 0.657289 |
| MmugDNA.24607.1.S1_at   | MmugDNA.24607.1 | 3.47  | 3.21  | 0.39 | 0.13 | 1.2   | 0.444798 | 0.476972 | 0.697566 | 0.683096 |
| MmugDNA.24608.1.S1_at   | MmugDNA.24608.1 | 5.97  | 6.25  | 0.26 | 0.22 | -1.22 | 0.963611 | 0.045187 | 0.985248 | 0.256979 |
| MmugDNA.24609.1.S1_at   | MmugDNA.24609.1 | 6.63  | 6.78  | 0.62 | 0.12 | -1.11 | 0.196583 | 0.198699 | 0.493604 | 0.473391 |
| MmugDNA.2461.1.S1_s_at  | MmugDNA.2461.1  | 8.08  | 7.93  | 0.04 | 0.07 | 1.1   | 0.011515 | 0.013216 | 0.15722  | 0.147492 |
| MmugDNA.18215.1.S1_s_at | MmugDNA.18215.1 | 6.51  | 6.7   | 0.08 | 0.11 | -1.14 | 0.088771 | 0.03932  | 0.355162 | 0.243401 |
| MmugDNA.24611.1.S1_at   | MmugDNA.24611.1 | 5.35  | 5.35  | 0.11 | 0.12 | -1    | 0.994968 | 0.998147 | 0.997969 | 0.999039 |
| MmugDNA.24612.1.S1_at   | MmugDNA.24612.1 | 11    | 10.82 | 0.21 | 0.06 | 1.13  | 0.269765 | 0.034979 | 0.562034 | 0.231166 |
| MmugDNA.24613.1.S1_at   | MmugDNA.24613.1 | 3.75  | 3.48  | 0.43 | 0.08 | 1.21  | 0.368751 | 0.557704 | 0.642367 | 0.735173 |
| MmugDNA.24615.1.S1_at   | MmugDNA.24615.1 | 5.83  | 5.13  | 0.67 | 0.3  | 1.62  | 0.219737 | 0.152951 | 0.517502 | 0.42777  |
| MmugDNA.24617.1.S1_at   | MmugDNA.24617.1 | 12.78 | 12.19 | 0.04 | 0.03 | 1.5   | 0.000031 | 0.014873 | 0.045594 | 0.155055 |
| MmugDNA.24618.1.S1_at   | MmugDNA.24618.1 | 5.36  | 5.4   | 0.23 | 0.13 | -1.03 | 0.98291  | 0.111653 | 0.993693 | 0.376592 |
| MmugDNA.24619.1.S1_at   | MmugDNA.24619.1 | 9.8   | 9.65  | 0.24 | 0.24 | 1.1   | 0.335738 | 0.112352 | 0.616577 | 0.377686 |
| MmugDNA.24620.1.S1_at   | MmugDNA.24620.1 | 4.38  | 6.13  | 0.49 | 0.23 | -3.36 | 0.004338 | 0.036096 | 0.111896 | 0.234417 |
| MmugDNA.24621.1.S1_at   | MmugDNA.24621.1 | 4.07  | 3.52  | 0.3  | 0.04 | 1.46  | 0.098101 | 0.103857 | 0.368627 | 0.364519 |
| MmugDNA.24622.1.S1_at   | MmugDNA.24622.1 | 6.68  | 6.67  | 0.11 | 0.08 | 1.01  | 0.965785 | 0.351664 | 0.986156 | 0.595164 |
| MmugDNA.24623.1.S1_at   | MmugDNA.24623.1 | 3.52  | 3.38  | 0.28 | 0.17 | 1.1   | 0.286394 | 0.408231 | 0.576201 | 0.635527 |
| MmugDNA.24627.1.S1_at   | MmugDNA.24627.1 | 4.59  | 4.94  | 0.28 | 0.55 | -1.28 | 0.197215 | 0.396994 | 0.494323 | 0.628563 |
| MmugDNA.24628.1.S1_at   | MmugDNA.24628.1 | 11.26 | 11.22 | 0.12 | 0.1  | 1.03  | 0.62519  | 0.018678 | 0.815247 | 0.171717 |
| MmugDNA.24629.1.S1_at   | MmugDNA.24629.1 | 6.31  | 6.13  | 0.57 | 0.44 | 1.14  | 0.945531 | 0.246405 | 0.977119 | 0.515899 |
| MmugDNA.2463.1.S1_at    | MmugDNA.2463.1  | 3.02  | 3.88  | 0.76 | 0.22 | -1.81 | 0.405406 | 0.435824 | 0.668845 | 0.65554  |
| MmugDNA.24632.1.S1_at   | MmugDNA.24632.1 | 3.26  | 3.25  | 0.12 | 0.06 | 1     | 0.991243 | 0.826232 | 0.996767 | 0.900203 |
| MmugDNA.24634.1.S1_at   | MmugDNA.24634.1 | 6.38  | 6.37  | 0.18 | 0    | 1.01  | 0.410165 | 0.309192 | 0.6723   | 0.564807 |
| MmugDNA.24637.1.S1_at   | MmugDNA.24637.1 | 10.44 | 10.52 | 0.05 | 0.1  | -1.06 | 0.242195 | 0.001624 | 0.539191 | 0.060918 |
| MmugDNA.24639.1.S1_at   | MmugDNA.24639.1 | 4.37  | 4.04  | 0.24 | 0.18 | 1.26  | 0.159159 | 0.119133 | 0.450505 | 0.387496 |
| MmugDNA.2464.1.S1_at    | MmugDNA.2464.1  | 6.51  | 6.48  | 0.17 | 0.05 | 1.02  | 0.901463 | 0.566002 | 0.95827  | 0.740179 |
| MmugDNA.24640.1.S1_at   | MmugDNA.24640.1 | 12.1  | 11.94 | 0.05 | 0.13 | 1.12  | 0.124385 | 0.067413 | 0.404534 | 0.305664 |
| MmugDNA.24641.1.S1_at   | MmugDNA.24641.1 | 3.83  | 3.91  | 0.08 | 0.01 | -1.06 | 0.195998 | 0.723425 | 0.492933 | 0.83986  |
| MmugDNA.24642.1.S1_at   | MmugDNA.24642.1 | 3.78  | 3.39  | 0.8  | 0.25 | 1.31  | 0.2132   | 0.259474 | 0.511046 | 0.526418 |



|                         |                 |       |       |      |      |       |          |          |          |          |
|-------------------------|-----------------|-------|-------|------|------|-------|----------|----------|----------|----------|
| MmugDNA.24643.1.S1_at   | MmugDNA.24643.1 | 5.26  | 5.26  | 0.17 | 0.06 | 1     | 0.771283 | 0.771786 | 0.895207 | 0.867347 |
| MmugDNA.24644.1.S1_at   | MmugDNA.24644.1 | 5.41  | 5.36  | 0.18 | 0.08 | 1.03  | 0.440384 | 0.626532 | 0.694455 | 0.779856 |
| MmugDNA.24647.1.S1_at   | MmugDNA.24647.1 | 7.25  | 7.17  | 0.13 | 0.13 | 1.05  | 0.946856 | 0.78753  | 0.977666 | 0.877072 |
| MmugDNA.24648.1.S1_at   | MmugDNA.24648.1 | 5.81  | 6.12  | 0.35 | 0.43 | -1.24 | 0.837243 | 0.658361 | 0.92862  | 0.8003   |
| MmugDNA.24649.1.S1_at   | MmugDNA.24649.1 | 5.03  | 4.84  | 0.78 | 0.78 | 1.14  | 0.363829 | 0.550862 | 0.638446 | 0.730625 |
| MmugDNA.2465.1.S1_at    | MmugDNA.2465.1  | 4.12  | 4.73  | 0.77 | 0.66 | -1.53 | 0.559083 | 0.582275 | 0.773148 | 0.750926 |
| MmugDNA.24650.1.S1_at   | MmugDNA.24650.1 | 5.26  | 5.24  | 0.22 | 0.08 | 1.01  | 0.784188 | 0.764116 | 0.901553 | 0.862852 |
| MmugDNA.24654.1.S1_at   | MmugDNA.24654.1 | 6.84  | 7.11  | 0.39 | 0.12 | -1.2  | 0.308731 | 0.511428 | 0.595248 | 0.705549 |
| MmugDNA.24655.1.S1_at   | MmugDNA.24655.1 | 10.37 | 10.29 | 0.08 | 0.11 | 1.06  | 0.43639  | 0.711647 | 0.691373 | 0.832789 |
| MmugDNA.24655.1.S1_s_at | MmugDNA.24655.1 | 10.45 | 10.2  | 0.13 | 0.15 | 1.19  | 0.275106 | 0.591093 | 0.566774 | 0.756649 |
| MmugDNA.24656.1.S1_at   | MmugDNA.24656.1 | 11.67 | 11.82 | 0.06 | 0.11 | -1.11 | 0.180655 | 0.119529 | 0.475803 | 0.388186 |
| MmugDNA.24657.1.S1_at   | MmugDNA.24657.1 | 4.06  | 3.79  | 0.81 | 0.18 | 1.21  | 0.373262 | 0.66378  | 0.645118 | 0.80314  |
| MmugDNA.24658.1.S1_at   | MmugDNA.24658.1 | 5.05  | 5     | 0.52 | 0.31 | 1.03  | 0.782863 | 0.928092 | 0.900922 | 0.959154 |
| MmugDNA.2466.1.S1_at    | MmugDNA.2466.1  | 4.83  | 4.92  | 0.03 | 0.11 | -1.06 | 0.327089 | 0.199326 | 0.609782 | 0.474002 |
| MmugDNA.24660.1.S1_at   | MmugDNA.24660.1 | 7.15  | 6.57  | 0.39 | 0.29 | 1.49  | 0.08578  | 0.063911 | 0.350079 | 0.29906  |
| MmugDNA.24661.1.S1_at   | MmugDNA.24661.1 | 6.27  | 5.11  | 0.78 | 0.7  | 2.23  | 0.199728 | 0.265822 | 0.497195 | 0.531695 |
| MmugDNA.24662.1.S1_at   | MmugDNA.24662.1 | 10.16 | 10.82 | 0.4  | 0.26 | -1.59 | 0.099058 | 0.044154 | 0.3699   | 0.254547 |
| MmugDNA.24663.1.S1_at   | MmugDNA.24663.1 | 3.2   | 3.2   | 0.06 | 0.24 | -1    | 0.771364 | 0.43313  | 0.895234 | 0.653502 |
| MmugDNA.24664.1.S1_at   | MmugDNA.24664.1 | 10.34 | 11.45 | 0.51 | 0.28 | -2.16 | 0.048402 | 0.008116 | 0.277466 | 0.119642 |
| MmugDNA.24665.1.S1_at   | MmugDNA.24665.1 | 4.82  | 5.09  | 0.28 | 0.13 | -1.21 | 0.792757 | 0.631494 | 0.906163 | 0.782845 |
| MmugDNA.24666.1.S1_at   | MmugDNA.24666.1 | 7.98  | 7.85  | 0.19 | 0.37 | 1.1   | 0.189781 | 0.828603 | 0.486228 | 0.901542 |
| MmugDNA.24669.1.S1_at   | MmugDNA.24669.1 | 12.36 | 12.38 | 0.07 | 0.07 | -1.02 | 0.632123 | 0.65027  | 0.819596 | 0.79555  |
| MmugDNA.24670.1.S1_at   | MmugDNA.24670.1 | 9.19  | 9.48  | 0.18 | 0.18 | -1.22 | 0.499458 | 0.338438 | 0.734175 | 0.585436 |
| MmugDNA.24670.1.S1_s_at | MmugDNA.24670.1 | 9.42  | 9.74  | 0.19 | 0.19 | -1.25 | 0.240483 | 0.149304 | 0.53802  | 0.423805 |
| MmugDNA.24672.1.S1_at   | MmugDNA.24672.1 | 5.34  | 5.4   | 0.16 | 0.03 | -1.04 | 0.721917 | 0.195584 | 0.869054 | 0.470441 |
| MmugDNA.24673.1.S1_at   | MmugDNA.24673.1 | 5.33  | 5.38  | 0.35 | 0.14 | -1.04 | 0.964777 | 0.585186 | 0.985755 | 0.752781 |
| MmugDNA.24675.1.S1_at   | MmugDNA.24675.1 | 4.82  | 5.21  | 0.18 | 0.12 | -1.31 | 0.093922 | 0.229486 | 0.362806 | 0.501527 |
| MmugDNA.24676.1.S1_at   | MmugDNA.24676.1 | 4.38  | 4.17  | 0.26 | 0.14 | 1.16  | 0.610002 | 0.686963 | 0.805589 | 0.817365 |
| MmugDNA.24677.1.S1_at   | MmugDNA.24677.1 | 3.66  | 3.76  | 0.06 | 0.07 | -1.07 | 0.121829 | 0.217082 | 0.400523 | 0.490668 |
| MmugDNA.24678.1.S1_at   | MmugDNA.24678.1 | 5.53  | 5.39  | 0.25 | 0.14 | 1.1   | 0.539763 | 0.721393 | 0.761049 | 0.838685 |
| MmugDNA.2468.1.S1_at    | MmugDNA.2468.1  | 7.06  | 7.08  | 0.15 | 0.14 | -1.02 | 0.98967  | 0.034785 | 0.99638  | 0.230686 |
| MmugDNA.24680.1.S1_at   | MmugDNA.24680.1 | 3.73  | 3.6   | 0.12 | 0.11 | 1.1   | 0.112074 | 0.114065 | 0.388221 | 0.380421 |
| MmugDNA.24683.1.S1_at   | MmugDNA.24683.1 | 9.09  | 9.91  | 0.26 | 0.08 | -1.76 | 0.003342 | 0.010481 | 0.102526 | 0.133867 |
| MmugDNA.24684.1.S1_at   | MmugDNA.24684.1 | 7.28  | 8.17  | 0.88 | 0.11 | -1.86 | 0.188298 | 0.090081 | 0.484627 | 0.344402 |
| MmugDNA.24686.1.S1_at   | MmugDNA.24686.1 | 6     | 5.97  | 0.02 | 0.17 | 1.01  | 0.605929 | 0.530175 | 0.802798 | 0.717775 |
| MmugDNA.24687.1.S1_at   | MmugDNA.24687.1 | 6.54  | 6.21  | 0.42 | 0.32 | 1.26  | 0.134095 | 0.189189 | 0.417577 | 0.464997 |
| MmugDNA.24688.1.S1_at   | MmugDNA.24688.1 | 9.9   | 9.97  | 1.01 | 0.56 | -1.05 | 0.718839 | 0.007013 | 0.867276 | 0.113029 |
| MmugDNA.24689.1.S1_at   | MmugDNA.24689.1 | 5.47  | 5.6   | 0.07 | 0.1  | -1.09 | 0.435892 | 0.052002 | 0.690916 | 0.273539 |
| MmugDNA.2469.1.S1_at    | MmugDNA.2469.1  | 5.45  | 5.77  | 0.6  | 0.37 | -1.24 | 0.601413 | 0.21172  | 0.79956  | 0.485746 |
| MmugDNA.24693.1.S1_at   | MmugDNA.24693.1 | 5.06  | 4.89  | 0.5  | 0.09 | 1.12  | 0.494278 | 0.624763 | 0.731105 | 0.77888  |
| MmugDNA.24694.1.S1_at   | MmugDNA.24694.1 | 7.86  | 7.42  | 0.33 | 0.1  | 1.35  | 0.071109 | 0.336951 | 0.324551 | 0.584184 |
| MmugDNA.24695.1.S1_at   | MmugDNA.24695.1 | 4.54  | 4.38  | 0.14 | 0.2  | 1.11  | 0.49278  | 0.243125 | 0.72996  | 0.513356 |
| MmugDNA.24696.1.S1_at   | MmugDNA.24696.1 | 4.65  | 4.15  | 0.55 | 0.11 | 1.42  | 0.15907  | 0.408597 | 0.450439 | 0.635757 |

|                         |                 |       |       |      |      |       |          |          |          |          |
|-------------------------|-----------------|-------|-------|------|------|-------|----------|----------|----------|----------|
| MmugDNA.24697.1.S1_at   | MmugDNA.24697.1 | 11.66 | 11.55 | 0.07 | 0.08 | 1.08  | 0.605566 | 0.023892 | 0.802615 | 0.193629 |
| MmugDNA.24698.1.S1_at   | MmugDNA.24698.1 | 4.2   | 4.15  | 0.45 | 0.28 | 1.04  | 0.366384 | 0.53515  | 0.640717 | 0.720819 |
| MmugDNA.24699.1.S1_at   | MmugDNA.24699.1 | 9.23  | 9.67  | 0.1  | 0.13 | -1.36 | 0.012638 | 0.526489 | 0.162521 | 0.715574 |
| MmugDNA.24700.1.S1_at   | MmugDNA.24700.1 | 9.74  | 9.39  | 0.18 | 0.03 | 1.27  | 0.08322  | 0.22751  | 0.345461 | 0.499805 |
| MmugDNA.24701.1.S1_at   | MmugDNA.24701.1 | 8.22  | 7.49  | 0.19 | 0.24 | 1.66  | 0.028884 | 0.045203 | 0.222781 | 0.256979 |
| MmugDNA.24702.1.S1_at   | MmugDNA.24702.1 | 12.56 | 12.64 | 0.14 | 0.04 | -1.05 | 0.974506 | 0.018075 | 0.98978  | 0.169379 |
| MmugDNA.24704.1.S1_at   | MmugDNA.24704.1 | 8.01  | 7.53  | 0.32 | 0.15 | 1.39  | 0.046134 | 0.178327 | 0.272531 | 0.454672 |
| MmugDNA.24706.1.S1_at   | MmugDNA.24706.1 | 3.48  | 3.18  | 0.3  | 0.08 | 1.23  | 0.095708 | 0.13599  | 0.365237 | 0.408287 |
| MmugDNA.24709.1.S1_at   | MmugDNA.24709.1 | 5.84  | 5.87  | 0.06 | 0.1  | -1.02 | 0.935003 | 0.417448 | 0.9728   | 0.64224  |
| MmugDNA.2471.1.S1_at    | MmugDNA.2471.1  | 5.27  | 5.3   | 0.14 | 0.09 | -1.03 | 0.82058  | 0.005702 | 0.919941 | 0.104102 |
| MmugDNA.24710.1.S1_s_at | MmugDNA.24710.1 | 12.37 | 12.17 | 0.19 | 0.05 | 1.15  | 0.157537 | 0.083637 | 0.448235 | 0.334255 |
| MmugDNA.24714.1.S1_at   | MmugDNA.24714.1 | 9.99  | 9.61  | 0.25 | 0.04 | 1.3   | 0.192867 | 0.838758 | 0.48942  | 0.908049 |
| MmugDNA.24716.1.S1_at   | MmugDNA.24716.1 | 5.71  | 5.69  | 0.15 | 0.14 | 1.01  | 0.965341 | 0.14504  | 0.985931 | 0.418994 |
| MmugDNA.24717.1.S1_at   | MmugDNA.24717.1 | 5.71  | 5.25  | 0.39 | 0.15 | 1.37  | 0.255974 | 0.383365 | 0.550543 | 0.619375 |
| MmugDNA.24719.1.S1_at   | MmugDNA.24719.1 | 4.95  | 4.94  | 0.42 | 0.26 | 1.01  | 0.989007 | 0.690054 | 0.996187 | 0.819235 |
| MmugDNA.2472.1.S1_at    | MmugDNA.2472.1  | 4.72  | 4.21  | 1.09 | 0.72 | 1.43  | 0.931055 | 0.329859 | 0.971037 | 0.578874 |
| MmugDNA.24720.1.S1_at   | MmugDNA.24720.1 | 4.06  | 3.62  | 0.37 | 0.18 | 1.36  | 0.391653 | 0.362381 | 0.658751 | 0.602965 |
| MmugDNA.24723.1.S1_at   | MmugDNA.24723.1 | 12.67 | 12.46 | 0.24 | 0.05 | 1.16  | 0.258387 | 0.085721 | 0.552539 | 0.337761 |
| MmugDNA.24725.1.S1_at   | MmugDNA.24725.1 | 3.87  | 3.84  | 0.3  | 0.04 | 1.02  | 0.76753  | 0.730225 | 0.89332  | 0.843882 |
| MmugDNA.24726.1.S1_at   | MmugDNA.24726.1 | 9.92  | 9.53  | 0.29 | 0.03 | 1.32  | 0.105956 | 0.029584 | 0.379981 | 0.213628 |
| MmugDNA.24729.1.S1_at   | MmugDNA.24729.1 | 9.32  | 8.56  | 0.64 | 0.12 | 1.69  | 0.109951 | 0.054918 | 0.385169 | 0.279778 |
| MmugDNA.24732.1.S1_at   | MmugDNA.24732.1 | 6.94  | 6.68  | 0.16 | 0.11 | 1.2   | 0.045813 | 0.001308 | 0.271515 | 0.055684 |
| MmugDNA.24732.1.S1_s_at | MmugDNA.24732.1 | 6.48  | 6.43  | 0.04 | 0.08 | 1.03  | 0.251558 | 0.00216  | 0.546344 | 0.068763 |
| MmugDNA.24733.1.S1_at   | MmugDNA.24733.1 | 4.3   | 4.31  | 0.07 | 0.22 | -1    | 0.293207 | 0.262127 | 0.582128 | 0.528402 |
| MmugDNA.24734.1.S1_at   | MmugDNA.24734.1 | 3.56  | 3.45  | 0.18 | 0.22 | 1.08  | 0.80302  | 0.559663 | 0.911626 | 0.736365 |
| MmugDNA.24735.1.S1_s_at | MmugDNA.24735.1 | 9.25  | 8.72  | 0.26 | 0.33 | 1.44  | 0.051721 | 0.075259 | 0.284699 | 0.319434 |
| MmugDNA.24738.1.S1_at   | MmugDNA.24738.1 | 6.22  | 6.08  | 0.13 | 0.17 | 1.1   | 0.714258 | 0.879265 | 0.865055 | 0.9311   |
| MmugDNA.2474.1.S1_at    | MmugDNA.2474.1  | 5.33  | 5.11  | 0.17 | 0.14 | 1.17  | 0.283872 | 0.158621 | 0.574141 | 0.434612 |
| MmugDNA.24741.1.S1_at   | MmugDNA.24741.1 | 3.28  | 3.19  | 0.04 | 0.02 | 1.06  | 0.073158 | 0.004225 | 0.328251 | 0.091435 |
| MmugDNA.24745.1.S1_at   | MmugDNA.24745.1 | 3.49  | 3.56  | 0.43 | 0.17 | -1.05 | 0.54632  | 0.101033 | 0.765166 | 0.360691 |
| MmugDNA.24748.1.S1_at   | MmugDNA.24748.1 | 8.56  | 7.99  | 0.34 | 0.23 | 1.48  | 0.098735 | 0.007493 | 0.369635 | 0.116204 |
| MmugDNA.2475.1.S1_at    | MmugDNA.2475.1  | 8.22  | 8.43  | 0.09 | 0.25 | -1.16 | 0.586049 | 0.015007 | 0.789659 | 0.155713 |
| MmugDNA.24750.1.S1_at   | MmugDNA.24750.1 | 5.85  | 5.59  | 0.03 | 0.1  | 1.19  | 0.006018 | 0.012959 | 0.124151 | 0.146501 |
| MmugDNA.24751.1.S1_at   | MmugDNA.24751.1 | 4.9   | 4.81  | 0.18 | 0    | 1.06  | 0.903709 | 0.649939 | 0.959219 | 0.795295 |
| MmugDNA.24752.1.S1_at   | MmugDNA.24752.1 | 5.51  | 5.41  | 0.29 | 0.07 | 1.07  | 0.669172 | 0.875172 | 0.841308 | 0.929179 |
| MmugDNA.24754.1.S1_at   | MmugDNA.24754.1 | 4.77  | 4.87  | 0.04 | 0.08 | -1.07 | 0.207482 | 0.8019   | 0.505183 | 0.885989 |
| MmugDNA.24755.1.S1_at   | MmugDNA.24755.1 | 5.51  | 5.76  | 1.2  | 0.09 | -1.19 | 0.610876 | 0.697979 | 0.805959 | 0.824551 |
| MmugDNA.24756.1.S1_at   | MmugDNA.24756.1 | 9.77  | 9.82  | 0.14 | 0.18 | -1.04 | 0.376148 | 0.929187 | 0.646817 | 0.959644 |
| MmugDNA.24757.1.S1_at   | MmugDNA.24757.1 | 5.01  | 6.25  | 0.18 | 0.06 | -2.37 | 0.000251 | 0.000084 | 0.054642 | 0.027016 |
| MmugDNA.24758.1.S1_at   | MmugDNA.24758.1 | 5.27  | 5.67  | 0.13 | 0.17 | -1.32 | 0.082808 | 0.063816 | 0.344741 | 0.29906  |
| MmugDNA.24759.1.S1_at   | MmugDNA.24759.1 | 6.82  | 6.55  | 0.12 | 0.1  | 1.21  | 0.055448 | 0.212878 | 0.292419 | 0.486798 |
| MmugDNA.24760.1.S1_at   | MmugDNA.24760.1 | 8.57  | 9.53  | 0.55 | 0.38 | -1.94 | 0.112563 | 0.438792 | 0.388887 | 0.657691 |
| MmugDNA.24762.1.S1_at   | MmugDNA.24762.1 | 11.91 | 11.77 | 0.12 | 0.08 | 1.1   | 0.08704  | 0.009699 | 0.352594 | 0.129542 |

|                         |                 |       |       |      |      |       |          |          |          |          |
|-------------------------|-----------------|-------|-------|------|------|-------|----------|----------|----------|----------|
| MmugDNA.24763.1.S1_at   | MmugDNA.24763.1 | 6.94  | 6.7   | 0.29 | 0.15 | 1.19  | 0.221697 | 0.152892 | 0.519652 | 0.427765 |
| MmugDNA.24764.1.S1_at   | MmugDNA.24764.1 | 8.48  | 8.44  | 0.14 | 0.2  | 1.03  | 0.825276 | 0.059364 | 0.922422 | 0.29054  |
| MmugDNA.24765.1.S1_at   | MmugDNA.24765.1 | 11.03 | 11.06 | 0.12 | 0.06 | -1.02 | 0.914251 | 0.090307 | 0.963616 | 0.3447   |
| MmugDNA.24766.1.S1_at   | MmugDNA.24766.1 | 12.07 | 12.05 | 0.36 | 0.02 | 1.02  | 0.331436 | 0.462791 | 0.613386 | 0.674127 |
| MmugDNA.24766.1.S1_s_at | MmugDNA.24766.1 | 12.54 | 12.54 | 0.42 | 0.03 | -1    | 0.355516 | 0.491374 | 0.632237 | 0.692976 |
| MmugDNA.24767.1.S1_at   | MmugDNA.24767.1 | 9.11  | 9.25  | 0.1  | 0.05 | -1.1  | 0.086666 | 0.034391 | 0.351711 | 0.229384 |
| MmugDNA.24768.1.S1_at   | MmugDNA.24768.1 | 7.53  | 8.46  | 0.52 | 0.24 | -1.9  | 0.068223 | 0.130079 | 0.319001 | 0.401724 |
| MmugDNA.24769.1.S1_at   | MmugDNA.24769.1 | 5.73  | 5.89  | 0.2  | 0.05 | -1.12 | 0.199388 | 0.402048 | 0.496686 | 0.631153 |
| MmugDNA.2477.1.S1_at    | MmugDNA.2477.1  | 4.83  | 5.58  | 0.07 | 0.38 | -1.68 | 0.027106 | 0.098911 | 0.217323 | 0.357049 |
| MmugDNA.2477.1.S1_x_at  | MmugDNA.2477.1  | 5.36  | 5.52  | 0.23 | 0.02 | -1.12 | 0.082496 | 0.034308 | 0.344209 | 0.229145 |
| MmugDNA.24770.1.S1_at   | MmugDNA.24770.1 | 7.27  | 7.49  | 0.35 | 0.18 | -1.17 | 0.129917 | 0.078167 | 0.412108 | 0.324661 |
| MmugDNA.24772.1.S1_at   | MmugDNA.24772.1 | 5.49  | 5.05  | 0.38 | 0.2  | 1.36  | 0.066872 | 0.059152 | 0.316281 | 0.290162 |
| MmugDNA.24775.1.S1_at   | MmugDNA.24775.1 | 2.91  | 2.98  | 0.1  | 0.11 | -1.05 | 0.28363  | 0.187277 | 0.573936 | 0.463284 |
| MmugDNA.24776.1.S1_at   | MmugDNA.24776.1 | 9.59  | 9.55  | 0.09 | 0.11 | 1.03  | 0.173723 | 0.658707 | 0.468158 | 0.800473 |
| MmugDNA.24777.1.S1_at   | MmugDNA.24777.1 | 5.31  | 4.88  | 0.31 | 0.13 | 1.34  | 0.166119 | 0.189658 | 0.459209 | 0.465297 |
| MmugDNA.24779.1.S1_at   | MmugDNA.24779.1 | 3.45  | 3.42  | 0.07 | 0.06 | 1.02  | 0.760199 | 0.601946 | 0.890109 | 0.763127 |
| MmugDNA.24781.1.S1_at   | MmugDNA.24781.1 | 4.29  | 4.31  | 0.81 | 0.33 | -1.02 | 0.682315 | 0.55004  | 0.84853  | 0.730241 |
| MmugDNA.24782.1.S1_at   | MmugDNA.24782.1 | 5.41  | 5.36  | 0.16 | 0.02 | 1.03  | 0.73042  | 0.676357 | 0.873958 | 0.810914 |
| MmugDNA.24785.1.S1_s_at | MmugDNA.24785.1 | 12.85 | 12.62 | 0.07 | 0.05 | 1.17  | 0.009764 | 0.004839 | 0.148542 | 0.097041 |
| MmugDNA.24786.1.S1_at   | MmugDNA.24786.1 | 3.88  | 4.12  | 0.42 | 0.15 | -1.18 | 0.971602 | 0.712345 | 0.98857  | 0.833347 |
| MmugDNA.24786.1.S1_s_at | MmugDNA.24786.1 | 4.91  | 4.9   | 0.01 | 0.03 | 1.01  | 0.567891 | 0.006381 | 0.778023 | 0.108551 |
| MmugDNA.24787.1.S1_at   | MmugDNA.24787.1 | 4.74  | 4.77  | 0.04 | 0.02 | -1.02 | 0.580293 | 0.157567 | 0.785727 | 0.433131 |
| MmugDNA.24788.1.S1_at   | MmugDNA.24788.1 | 4.53  | 4.54  | 0.17 | 0.06 | -1    | 0.832105 | 0.937979 | 0.926055 | 0.964856 |
| MmugDNA.2479.1.S1_at    | MmugDNA.2479.1  | 6.26  | 6.24  | 0.36 | 0.21 | 1.02  | 0.557117 | 0.936309 | 0.772025 | 0.964102 |
| MmugDNA.24790.1.S1_at   | MmugDNA.24790.1 | 6.35  | 6.2   | 0.78 | 0.2  | 1.11  | 0.352728 | 0.422876 | 0.630029 | 0.646054 |
| MmugDNA.24790.1.S1_x_at | MmugDNA.24790.1 | 7.07  | 6.89  | 0.81 | 0.16 | 1.13  | 0.27354  | 0.256262 | 0.565699 | 0.524079 |
| MmugDNA.24792.1.S1_at   | MmugDNA.24792.1 | 5.66  | 5.41  | 0.37 | 0.16 | 1.19  | 0.118579 | 0.120739 | 0.396252 | 0.389579 |
| MmugDNA.24795.1.S1_at   | MmugDNA.24795.1 | 6.23  | 6.3   | 0.32 | 0.22 | -1.05 | 0.88888  | 0.845569 | 0.952674 | 0.912145 |
| MmugDNA.24796.1.S1_at   | MmugDNA.24796.1 | 4.33  | 4.08  | 0.34 | 0.18 | 1.18  | 0.33186  | 0.49796  | 0.613772 | 0.697158 |
| MmugDNA.24799.1.S1_at   | MmugDNA.24799.1 | 4.49  | 4.39  | 0.21 | 0.21 | 1.08  | 0.188112 | 0.278469 | 0.48439  | 0.54224  |
| MmugDNA.248.1.S1_at     | MmugDNA.248.1   | 5.1   | 4.98  | 0.28 | 0.1  | 1.09  | 0.727562 | 0.882868 | 0.872385 | 0.933206 |
| MmugDNA.2480.1.S1_at    | MmugDNA.2480.1  | 5.79  | 5.82  | 0.43 | 0.49 | -1.02 | 0.933539 | 0.960578 | 0.972111 | 0.977548 |
| MmugDNA.24800.1.S1_at   | MmugDNA.24800.1 | 2.83  | 2.81  | 0.03 | 0.03 | 1.01  | 0.998522 | 0.746139 | 0.999471 | 0.852688 |
| MmugDNA.24801.1.S1_at   | MmugDNA.24801.1 | 6.66  | 5.9   | 0.59 | 0.26 | 1.69  | 0.171542 | 0.007796 | 0.465521 | 0.117765 |
| MmugDNA.24802.1.S1_at   | MmugDNA.24802.1 | 3.57  | 3.48  | 0.07 | 0.21 | 1.06  | 0.841374 | 0.394647 | 0.930334 | 0.627158 |
| MmugDNA.24805.1.S1_at   | MmugDNA.24805.1 | 8.45  | 8.64  | 0.34 | 0.11 | -1.14 | 0.445181 | 0.120255 | 0.697732 | 0.389181 |
| MmugDNA.24806.1.S1_at   | MmugDNA.24806.1 | 4.55  | 4.48  | 0.28 | 0.15 | 1.05  | 0.769237 | 0.814075 | 0.894086 | 0.892736 |
| MmugDNA.24807.1.S1_at   | MmugDNA.24807.1 | 6.36  | 6.28  | 0.59 | 0.04 | 1.06  | 0.767098 | 0.448416 | 0.893102 | 0.664262 |
| MmugDNA.24808.1.S1_at   | MmugDNA.24808.1 | 3.2   | 3.17  | 0.17 | 0.02 | 1.02  | 0.276259 | 0.495321 | 0.5679   | 0.695427 |
| MmugDNA.24808.1.S1_x_at | MmugDNA.24808.1 | 5.47  | 5.45  | 0.28 | 0.11 | 1.02  | 0.231213 | 0.293139 | 0.530003 | 0.553061 |
| MmugDNA.24811.1.S1_at   | MmugDNA.24811.1 | 12.84 | 12.75 | 0.07 | 0.03 | 1.06  | 0.148077 | 0.632962 | 0.436446 | 0.783881 |
| MmugDNA.24812.1.S1_at   | MmugDNA.24812.1 | 3.7   | 3.84  | 0.09 | 0.07 | -1.1  | 0.030188 | 0.014145 | 0.226892 | 0.15208  |
| MmugDNA.24813.1.S1_at   | MmugDNA.24813.1 | 6.33  | 7.08  | 0.85 | 0.21 | -1.68 | 0.289152 | 0.328051 | 0.578755 | 0.577849 |

|                         |                 |       |       |      |      |       |          |          |          |          |
|-------------------------|-----------------|-------|-------|------|------|-------|----------|----------|----------|----------|
| MmugDNA.24814.1.S1_at   | MmugDNA.24814.1 | 5.5   | 5.75  | 0.56 | 0.43 | -1.18 | 0.96126  | 0.877871 | 0.984145 | 0.93029  |
| MmugDNA.24815.1.S1_at   | MmugDNA.24815.1 | 3.6   | 3.65  | 0.13 | 0.33 | -1.04 | 0.920937 | 0.783014 | 0.966268 | 0.874447 |
| MmugDNA.24817.1.S1_at   | MmugDNA.24817.1 | 7.62  | 8.24  | 0.38 | 0.17 | -1.54 | 0.055411 | 0.098986 | 0.292343 | 0.357049 |
| MmugDNA.24818.1.S1_at   | MmugDNA.24818.1 | 9.18  | 9.57  | 0.33 | 0.14 | -1.32 | 0.080637 | 0.155439 | 0.341285 | 0.430802 |
| MmugDNA.2482.1.S1_at    | MmugDNA.2482.1  | 6.62  | 7.13  | 0.83 | 0.25 | -1.42 | 0.918947 | 0.266634 | 0.965374 | 0.532396 |
| MmugDNA.24821.1.S1_s_at | MmugDNA.24821.1 | 3.92  | 4.97  | 0.32 | 0.18 | -2.07 | 0.010242 | 0.351609 | 0.150918 | 0.595114 |
| MmugDNA.24822.1.S1_at   | MmugDNA.24822.1 | 5.04  | 5.01  | 0.13 | 0.24 | 1.03  | 0.686254 | 0.74214  | 0.850512 | 0.850621 |
| MmugDNA.24824.1.S1_at   | MmugDNA.24824.1 | 5.94  | 5.86  | 0.66 | 0.24 | 1.06  | 0.715767 | 0.579534 | 0.86589  | 0.749182 |
| MmugDNA.24825.1.S1_at   | MmugDNA.24825.1 | 9.22  | 10.06 | 0.04 | 0.09 | -1.78 | 0.00014  | 0.004414 | 0.051196 | 0.092896 |
| MmugDNA.24826.1.S1_at   | MmugDNA.24826.1 | 5.59  | 4.28  | 0.29 | 0.3  | 2.48  | 0.006072 | 0.001948 | 0.124422 | 0.065813 |
| MmugDNA.24827.1.S1_at   | MmugDNA.24827.1 | 5.54  | 5.35  | 0.13 | 0.39 | 1.14  | 0.276214 | 0.500375 | 0.567864 | 0.699024 |
| MmugDNA.24829.1.S1_at   | MmugDNA.24829.1 | 4.92  | 4.96  | 0.04 | 0.09 | -1.03 | 0.327857 | 0.348104 | 0.610524 | 0.592293 |
| MmugDNA.2483.1.S1_at    | MmugDNA.2483.1  | 5.8   | 5.86  | 0.39 | 0.26 | -1.04 | 0.708855 | 0.647138 | 0.862097 | 0.793279 |
| MmugDNA.24830.1.S1_at   | MmugDNA.24830.1 | 7.81  | 8.21  | 0.28 | 0.11 | -1.32 | 0.156452 | 0.005278 | 0.446993 | 0.100662 |
| MmugDNA.24831.1.S1_at   | MmugDNA.24831.1 | 6.1   | 6.5   | 0.41 | 0.21 | -1.32 | 0.129155 | 0.29617  | 0.411529 | 0.555371 |
| MmugDNA.24832.1.S1_at   | MmugDNA.24832.1 | 9.8   | 9.86  | 0.05 | 0.06 | -1.04 | 0.569712 | 0.870798 | 0.779023 | 0.926571 |
| MmugDNA.24834.1.S1_at   | MmugDNA.24834.1 | 4.79  | 4.62  | 1.07 | 0.27 | 1.13  | 0.27897  | 0.234546 | 0.570293 | 0.505741 |
| MmugDNA.24835.1.S1_at   | MmugDNA.24835.1 | 13.25 | 12.71 | 0.09 | 0.06 | 1.46  | 0.001534 | 0.005772 | 0.081678 | 0.104378 |
| MmugDNA.24836.1.S1_at   | MmugDNA.24836.1 | 11.94 | 11.59 | 0.15 | 0.11 | 1.28  | 0.030227 | 0.014877 | 0.226971 | 0.155055 |
| MmugDNA.24837.1.S1_s_at | MmugDNA.24837.1 | 12.1  | 12.08 | 0.05 | 0.05 | 1.01  | 0.590213 | 0.938161 | 0.791777 | 0.964949 |
| MmugDNA.2484.1.S1_at    | MmugDNA.2484.1  | 4.28  | 4.14  | 0.84 | 0.2  | 1.1   | 0.289899 | 0.161701 | 0.579459 | 0.437771 |
| MmugDNA.24840.1.S1_at   | MmugDNA.24840.1 | 8.22  | 8.35  | 0.06 | 0.05 | -1.1  | 0.042003 | 0.581999 | 0.261908 | 0.750784 |
| MmugDNA.24842.1.S1_at   | MmugDNA.24842.1 | 11.55 | 11.98 | 0.14 | 0.13 | -1.35 | 0.014847 | 0.076329 | 0.17402  | 0.321368 |
| MmugDNA.24843.1.S1_at   | MmugDNA.24843.1 | 7.9   | 7.58  | 0.19 | 0.03 | 1.25  | 0.112111 | 0.651753 | 0.388227 | 0.796356 |
| MmugDNA.24843.1.S1_s_at | MmugDNA.24843.1 | 9.73  | 9.6   | 0.14 | 0.02 | 1.09  | 0.713725 | 0.131451 | 0.864758 | 0.403584 |
| MmugDNA.24843.1.S1_x_at | MmugDNA.24843.1 | 9.72  | 9.41  | 0.1  | 0.07 | 1.25  | 0.015116 | 0.389727 | 0.174973 | 0.623783 |
| MmugDNA.24844.1.S1_at   | MmugDNA.24844.1 | 9.72  | 10.18 | 0.13 | 0.13 | -1.37 | 0.013878 | 0.306041 | 0.168813 | 0.562782 |
| MmugDNA.24845.1.S1_at   | MmugDNA.24845.1 | 6.76  | 7     | 0.06 | 0.21 | -1.18 | 0.165777 | 0.107455 | 0.458756 | 0.370311 |
| MmugDNA.24846.1.S1_at   | MmugDNA.24846.1 | 10.05 | 9.77  | 0.17 | 0.02 | 1.21  | 0.08716  | 0.010351 | 0.352835 | 0.133191 |
| MmugDNA.24847.1.S1_at   | MmugDNA.24847.1 | 5.2   | 5.1   | 0.68 | 0.13 | 1.07  | 0.335269 | 0.274978 | 0.616209 | 0.539402 |
| MmugDNA.24848.1.S1_at   | MmugDNA.24848.1 | 5.74  | 5.85  | 0.32 | 0.26 | -1.08 | 0.272647 | 0.260964 | 0.564702 | 0.527351 |
| MmugDNA.24849.1.S1_at   | MmugDNA.24849.1 | 7.17  | 7.59  | 0.98 | 0.55 | -1.34 | 0.358037 | 0.271045 | 0.633833 | 0.536178 |
| MmugDNA.2485.1.S1_at    | MmugDNA.2485.1  | 6.35  | 6.41  | 0.31 | 0.12 | -1.04 | 0.972803 | 0.328938 | 0.989113 | 0.578482 |
| MmugDNA.24850.1.S1_at   | MmugDNA.24850.1 | 3.2   | 3.2   | 0.12 | 0.03 | -1    | 0.852014 | 0.8939   | 0.93566  | 0.939452 |
| MmugDNA.24851.1.S1_at   | MmugDNA.24851.1 | 4.64  | 4.57  | 0.04 | 0.1  | 1.04  | 0.401822 | 0.125803 | 0.666322 | 0.396313 |
| MmugDNA.24852.1.S1_at   | MmugDNA.24852.1 | 4.88  | 5.14  | 0.25 | 0.09 | -1.2  | 0.166779 | 0.09029  | 0.460006 | 0.3447   |
| MmugDNA.24853.1.S1_at   | MmugDNA.24853.1 | 3.32  | 3.24  | 0.33 | 0.14 | 1.06  | 0.647298 | 0.814583 | 0.828637 | 0.892959 |
| MmugDNA.24854.1.S1_at   | MmugDNA.24854.1 | 3.69  | 3.75  | 0.07 | 0.11 | -1.04 | 0.893864 | 0.973582 | 0.954747 | 0.985645 |
| MmugDNA.24855.1.S1_at   | MmugDNA.24855.1 | 3.91  | 4.11  | 0.06 | 0.05 | -1.15 | 0.008046 | 0.001094 | 0.138783 | 0.052283 |
| MmugDNA.24856.1.S1_at   | MmugDNA.24856.1 | 9.77  | 9.54  | 0.68 | 0.23 | 1.17  | 0.698845 | 0.816146 | 0.856841 | 0.893955 |
| MmugDNA.24857.1.S1_at   | MmugDNA.24857.1 | 6.9   | 6.75  | 0.06 | 0.17 | 1.11  | 0.309388 | 0.244058 | 0.595819 | 0.514111 |
| MmugDNA.24858.1.S1_at   | MmugDNA.24858.1 | 7.53  | 7.77  | 0.54 | 0.04 | -1.18 | 0.270136 | 0.029574 | 0.562321 | 0.213628 |
| MmugDNA.24859.1.S1_at   | MmugDNA.24859.1 | 4.13  | 4.26  | 0.08 | 0.25 | -1.1  | 0.816759 | 0.965669 | 0.918114 | 0.980751 |

|                         |                 |       |       |      |      |        |          |          |          |          |
|-------------------------|-----------------|-------|-------|------|------|--------|----------|----------|----------|----------|
| MmugDNA.2486.1.S1_at    | MmugDNA.2486.1  | 3.65  | 3.68  | 0.65 | 0.19 | -1.02  | 0.966634 | 0.773402 | 0.986533 | 0.868269 |
| MmugDNA.24860.1.S1_at   | MmugDNA.24860.1 | 5.58  | 5.67  | 0.21 | 0.12 | -1.06  | 0.642778 | 0.574839 | 0.825715 | 0.746142 |
| MmugDNA.24863.1.S1_at   | MmugDNA.24863.1 | 8.96  | 12.63 | 1.48 | 0.19 | -12.77 | 0.03438  | 0.151824 | 0.240032 | 0.426505 |
| MmugDNA.24864.1.S1_at   | MmugDNA.24864.1 | 3.94  | 3.81  | 0.01 | 0.12 | 1.09   | 0.459673 | 0.223085 | 0.707772 | 0.49588  |
| MmugDNA.24866.1.S1_at   | MmugDNA.24866.1 | 7.14  | 8.86  | 0.77 | 0.51 | -3.3   | 0.077663 | 0.017239 | 0.336558 | 0.166344 |
| MmugDNA.24867.1.S1_at   | MmugDNA.24867.1 | 4.47  | 4.44  | 1.38 | 0.35 | 1.02   | 0.418023 | 0.5133   | 0.678023 | 0.706881 |
| MmugDNA.24868.1.S1_at   | MmugDNA.24868.1 | 6.44  | 6.16  | 0.03 | 0.15 | 1.21   | 0.016236 | 0.005532 | 0.180208 | 0.102614 |
| MmugDNA.24869.1.S1_at   | MmugDNA.24869.1 | 4.13  | 4.35  | 0.09 | 0.07 | -1.16  | 0.008425 | 0.034035 | 0.140949 | 0.228307 |
| MmugDNA.2487.1.S1_at    | MmugDNA.2487.1  | 7.31  | 7.19  | 0.14 | 0.02 | 1.09   | 0.164267 | 0.240813 | 0.457197 | 0.511521 |
| MmugDNA.24870.1.S1_at   | MmugDNA.24870.1 | 5.76  | 5.93  | 0.23 | 0.26 | -1.13  | 0.669064 | 0.290506 | 0.841263 | 0.55123  |
| MmugDNA.24871.1.S1_at   | MmugDNA.24871.1 | 5     | 5.41  | 0.55 | 0.14 | -1.33  | 0.589425 | 0.64835  | 0.791592 | 0.794176 |
| MmugDNA.24872.1.S1_at   | MmugDNA.24872.1 | 8.09  | 8.37  | 0.2  | 0.24 | -1.21  | 0.197073 | 0.130961 | 0.494224 | 0.403037 |
| MmugDNA.24873.1.S1_at   | MmugDNA.24873.1 | 5.7   | 6.33  | 1.48 | 0.16 | -1.54  | 0.819429 | 0.939272 | 0.919554 | 0.965536 |
| MmugDNA.24874.1.S1_at   | MmugDNA.24874.1 | 3.84  | 3.91  | 0.42 | 0.01 | -1.04  | 0.489221 | 0.708909 | 0.727603 | 0.831167 |
| MmugDNA.24875.1.S1_at   | MmugDNA.24875.1 | 3.99  | 3.54  | 0.16 | 0.14 | 1.36   | 0.047644 | 0.041522 | 0.275692 | 0.24862  |
| MmugDNA.24876.1.S1_at   | MmugDNA.24876.1 | 4.5   | 4.33  | 0.34 | 0.49 | 1.12   | 0.720408 | 0.37277  | 0.868039 | 0.611661 |
| MmugDNA.24877.1.S1_at   | MmugDNA.24877.1 | 8.89  | 8.75  | 0.47 | 0.13 | 1.11   | 0.703584 | 0.841267 | 0.859276 | 0.909576 |
| MmugDNA.2488.1.S1_at    | MmugDNA.2488.1  | 4.19  | 4.16  | 0.15 | 0.1  | 1.03   | 0.191701 | 0.468557 | 0.488163 | 0.677755 |
| MmugDNA.24881.1.S1_at   | MmugDNA.24881.1 | 7.15  | 7.19  | 0.13 | 0.06 | -1.03  | 0.917046 | 0.953351 | 0.964712 | 0.97351  |
| MmugDNA.24882.1.S1_at   | MmugDNA.24882.1 | 8.9   | 8.99  | 0.15 | 0.15 | -1.06  | 0.712617 | 0.839191 | 0.864345 | 0.908339 |
| MmugDNA.24883.1.S1_at   | MmugDNA.24883.1 | 6.36  | 6.04  | 0.26 | 0.26 | 1.25   | 0.277055 | 0.546658 | 0.568531 | 0.728135 |
| MmugDNA.24884.1.S1_at   | MmugDNA.24884.1 | 4.1   | 3.9   | 0.19 | 0.03 | 1.16   | 0.475971 | 0.688297 | 0.71855  | 0.818012 |
| MmugDNA.24885.1.S1_at   | MmugDNA.24885.1 | 2.75  | 2.67  | 0.09 | 0.03 | 1.05   | 0.166556 | 0.327816 | 0.459742 | 0.577604 |
| MmugDNA.24886.1.S1_x_at | MmugDNA.24886.1 | 8.73  | 8.77  | 0.69 | 0.21 | -1.03  | 0.539361 | 0.379937 | 0.760741 | 0.616659 |
| MmugDNA.24889.1.S1_at   | MmugDNA.24889.1 | 4.32  | 4.3   | 0.47 | 0.64 | 1.01   | 0.864859 | 0.94279  | 0.94142  | 0.967515 |
| MmugDNA.2489.1.S1_at    | MmugDNA.2489.1  | 6.87  | 7.06  | 0.91 | 0.24 | -1.14  | 0.494286 | 0.447444 | 0.731105 | 0.663509 |
| MmugDNA.24890.1.S1_at   | MmugDNA.24890.1 | 6.1   | 6.71  | 0.63 | 0.33 | -1.52  | 0.133304 | 0.33203  | 0.416866 | 0.580563 |
| MmugDNA.24891.1.S1_at   | MmugDNA.24891.1 | 9.76  | 9.27  | 0.26 | 0.13 | 1.41   | 0.167605 | 0.104369 | 0.46081  | 0.365636 |
| MmugDNA.24892.1.S1_at   | MmugDNA.24892.1 | 9.85  | 9.96  | 0.09 | 0.02 | -1.08  | 0.105427 | 0.045302 | 0.379376 | 0.257157 |
| MmugDNA.24893.1.S1_at   | MmugDNA.24893.1 | 4.25  | 4.21  | 0.17 | 0.12 | 1.03   | 0.669304 | 0.642212 | 0.841385 | 0.79008  |
| MmugDNA.24894.1.S1_at   | MmugDNA.24894.1 | 5.68  | 6.28  | 0.23 | 0.32 | -1.51  | 0.129161 | 0.096807 | 0.411529 | 0.354207 |
| MmugDNA.24895.1.S1_at   | MmugDNA.24895.1 | 2.92  | 2.94  | 0.06 | 0.02 | -1.02  | 0.675523 | 0.722307 | 0.845076 | 0.83917  |
| MmugDNA.24896.1.S1_at   | MmugDNA.24896.1 | 13.39 | 13.36 | 0.07 | 0.03 | 1.02   | 0.44437  | 0.178939 | 0.697267 | 0.455243 |
| MmugDNA.24897.1.S1_at   | MmugDNA.24897.1 | 3.07  | 3.03  | 0.1  | 0.05 | 1.03   | 0.563849 | 0.484547 | 0.775724 | 0.688536 |
| MmugDNA.24898.1.S1_at   | MmugDNA.24898.1 | 4.85  | 4.76  | 0.12 | 0.25 | 1.07   | 0.217477 | 0.373628 | 0.515372 | 0.612389 |
| MmugDNA.24899.1.S1_at   | MmugDNA.24899.1 | 3.8   | 3.62  | 0.27 | 0.16 | 1.13   | 0.112995 | 0.259778 | 0.389499 | 0.526648 |
| MmugDNA.249.1.S1_at     | MmugDNA.249.1   | 8.09  | 7.34  | 0.36 | 0.34 | 1.68   | 0.192272 | 0.135556 | 0.48884  | 0.407655 |
| MmugDNA.24900.1.S1_at   | MmugDNA.24900.1 | 7.95  | 7.25  | 0.38 | 0.11 | 1.63   | 0.028667 | 0.093814 | 0.221856 | 0.350281 |
| MmugDNA.24901.1.S1_at   | MmugDNA.24901.1 | 7.79  | 7.45  | 0.18 | 0.13 | 1.26   | 0.065201 | 0.066215 | 0.312217 | 0.302858 |
| MmugDNA.24902.1.S1_at   | MmugDNA.24902.1 | 5.5   | 5.46  | 0.33 | 0.13 | 1.03   | 0.739381 | 0.924676 | 0.879245 | 0.957439 |
| MmugDNA.24903.1.S1_at   | MmugDNA.24903.1 | 3.79  | 3.15  | 0.32 | 0.13 | 1.56   | 0.052127 | 0.243222 | 0.28583  | 0.513356 |
| MmugDNA.24904.1.S1_at   | MmugDNA.24904.1 | 4.14  | 4.29  | 0.07 | 0.2  | -1.11  | 0.735455 | 0.460895 | 0.87686  | 0.672763 |
| MmugDNA.24905.1.S1_s_at | MmugDNA.24905.1 | 10.41 | 11.65 | 0.32 | 0.18 | -2.37  | 0.00548  | 0.197162 | 0.119547 | 0.472213 |

|                         |                 |       |       |      |      |       |          |          |          |          |
|-------------------------|-----------------|-------|-------|------|------|-------|----------|----------|----------|----------|
| MmugDNA.24906.1.S1_at   | MmugDNA.24906.1 | 3.01  | 2.8   | 0.23 | 0.18 | 1.16  | 0.184397 | 0.19097  | 0.480429 | 0.46629  |
| MmugDNA.24908.1.S1_at   | MmugDNA.24908.1 | 4.89  | 4.94  | 0.05 | 0.07 | -1.03 | 0.851099 | 0.275851 | 0.935277 | 0.540035 |
| MmugDNA.24909.1.S1_at   | MmugDNA.24909.1 | 12.98 | 13.42 | 0.14 | 0.07 | -1.36 | 0.008266 | 0.01082  | 0.139927 | 0.135641 |
| MmugDNA.24909.1.S1_s_at | MmugDNA.24909.1 | 12.17 | 12.7  | 0.14 | 0.1  | -1.45 | 0.005978 | 0.011378 | 0.124032 | 0.138214 |
| MmugDNA.2491.1.S1_at    | MmugDNA.2491.1  | 3.46  | 3.47  | 0.15 | 0.13 | -1.01 | 0.265885 | 0.340195 | 0.558465 | 0.586637 |
| MmugDNA.24910.1.S1_at   | MmugDNA.24910.1 | 4.55  | 4.31  | 0.25 | 0.08 | 1.18  | 0.086552 | 0.089348 | 0.35156  | 0.343595 |
| MmugDNA.24912.1.S1_at   | MmugDNA.24912.1 | 3.4   | 3.4   | 0.11 | 0.13 | 1     | 0.931681 | 0.694224 | 0.971294 | 0.822191 |
| MmugDNA.24913.1.S1_at   | MmugDNA.24913.1 | 5.89  | 5.1   | 0.27 | 0.26 | 1.73  | 0.01263  | 0.039852 | 0.162521 | 0.244748 |
| MmugDNA.24914.1.S1_at   | MmugDNA.24914.1 | 3.67  | 3.46  | 0.14 | 0.04 | 1.15  | 0.076675 | 0.210213 | 0.334992 | 0.484033 |
| MmugDNA.24915.1.S1_at   | MmugDNA.24915.1 | 6.2   | 5.09  | 0.98 | 0.51 | 2.16  | 0.144321 | 0.207053 | 0.431168 | 0.481115 |
| MmugDNA.24916.1.S1_at   | MmugDNA.24916.1 | 7.24  | 7.1   | 0.75 | 0.28 | 1.1   | 0.973446 | 0.711593 | 0.989335 | 0.832761 |
| MmugDNA.24917.1.S1_at   | MmugDNA.24917.1 | 6.04  | 5.39  | 0.65 | 0.04 | 1.56  | 0.136385 | 0.160604 | 0.420898 | 0.436745 |
| MmugDNA.24919.1.S1_at   | MmugDNA.24919.1 | 4.68  | 4.36  | 0.38 | 0.18 | 1.25  | 0.307819 | 0.42796  | 0.594658 | 0.649602 |
| MmugDNA.2492.1.S1_at    | MmugDNA.2492.1  | 3.94  | 3.95  | 0.29 | 0.09 | -1.01 | 0.333761 | 0.187495 | 0.615104 | 0.463586 |
| MmugDNA.24920.1.S1_at   | MmugDNA.24920.1 | 5.23  | 5.48  | 0.29 | 0.17 | -1.19 | 0.346982 | 0.451126 | 0.625173 | 0.666073 |
| MmugDNA.24921.1.S1_at   | MmugDNA.24921.1 | 3.57  | 3.55  | 0.35 | 0.15 | 1.01  | 0.796546 | 0.926954 | 0.908118 | 0.958446 |
| MmugDNA.24922.1.S1_at   | MmugDNA.24922.1 | 7.94  | 7.8   | 0.06 | 0.08 | 1.1   | 0.0365   | 0.473603 | 0.246105 | 0.680872 |
| MmugDNA.24923.1.S1_at   | MmugDNA.24923.1 | 3.97  | 4.03  | 0.69 | 0.19 | -1.04 | 0.339624 | 0.446679 | 0.619844 | 0.662885 |
| MmugDNA.24924.1.S1_at   | MmugDNA.24924.1 | 5.41  | 4.98  | 0.23 | 0.24 | 1.34  | 0.041531 | 0.070862 | 0.260186 | 0.312357 |
| MmugDNA.24925.1.S1_at   | MmugDNA.24925.1 | 3.48  | 3.91  | 0.33 | 0.12 | -1.35 | 0.094487 | 0.217232 | 0.36341  | 0.490872 |
| MmugDNA.24926.1.S1_at   | MmugDNA.24926.1 | 4.35  | 5.12  | 0.73 | 0.19 | -1.7  | 0.476595 | 0.598971 | 0.718938 | 0.761244 |
| MmugDNA.24929.1.S1_at   | MmugDNA.24929.1 | 5.73  | 5.92  | 0.13 | 0.09 | -1.14 | 0.091524 | 0.08023  | 0.359218 | 0.32783  |
| MmugDNA.2493.1.S1_at    | MmugDNA.2493.1  | 6.74  | 6.74  | 0.07 | 0.16 | -1    | 0.952359 | 0.616918 | 0.980367 | 0.77303  |
| MmugDNA.24930.1.S1_at   | MmugDNA.24930.1 | 8.49  | 6.59  | 0.84 | 0.72 | 3.72  | 0.088893 | 0.008939 | 0.355498 | 0.125013 |
| MmugDNA.24931.1.S1_s_at | MmugDNA.24931.1 | 3.12  | 3.21  | 0.08 | 0.08 | -1.06 | 0.923367 | 0.354376 | 0.967345 | 0.597166 |
| MmugDNA.24932.1.S1_at   | MmugDNA.24932.1 | 11.26 | 10.89 | 0.31 | 0.12 | 1.29  | 0.250506 | 0.326574 | 0.545182 | 0.576612 |
| MmugDNA.24932.1.S1_s_at | MmugDNA.24932.1 | 10.5  | 9.88  | 0.37 | 0.18 | 1.55  | 0.122209 | 0.094309 | 0.40103  | 0.350889 |
| MmugDNA.24933.1.S1_at   | MmugDNA.24933.1 | 9.34  | 9.71  | 0.07 | 0.21 | -1.29 | 0.040155 | 0.087513 | 0.256842 | 0.340677 |
| MmugDNA.24934.1.S1_at   | MmugDNA.24934.1 | 9.24  | 9.16  | 0.57 | 0.22 | 1.06  | 0.725076 | 0.529542 | 0.871012 | 0.717341 |
| MmugDNA.24935.1.S1_at   | MmugDNA.24935.1 | 10.09 | 8.64  | 0.68 | 0.25 | 2.73  | 0.032578 | 0.02815  | 0.234862 | 0.209306 |
| MmugDNA.24937.1.S1_at   | MmugDNA.24937.1 | 8.78  | 8.98  | 0.28 | 0.09 | -1.15 | 0.349353 | 0.355231 | 0.627286 | 0.597576 |
| MmugDNA.24938.1.S1_at   | MmugDNA.24938.1 | 11.18 | 11.37 | 0.14 | 0.08 | -1.15 | 0.132219 | 0.00769  | 0.415465 | 0.117153 |
| MmugDNA.24939.1.S1_at   | MmugDNA.24939.1 | 6.41  | 6.79  | 0.12 | 0.13 | -1.3  | 0.040854 | 0.024895 | 0.25855  | 0.197685 |
| MmugDNA.2494.1.S1_at    | MmugDNA.2494.1  | 4.94  | 4.61  | 0.15 | 0.13 | 1.26  | 0.026545 | 0.094621 | 0.216097 | 0.351374 |
| MmugDNA.24940.1.S1_at   | MmugDNA.24940.1 | 9.6   | 9.35  | 0.32 | 0.17 | 1.19  | 0.580271 | 0.34016  | 0.785727 | 0.58661  |
| MmugDNA.24941.1.S1_at   | MmugDNA.24941.1 | 3.83  | 3.84  | 0.14 | 0.05 | -1.01 | 0.901002 | 0.710911 | 0.958105 | 0.832314 |
| MmugDNA.24942.1.S1_at   | MmugDNA.24942.1 | 5.51  | 5.34  | 0.11 | 0.15 | 1.12  | 0.342555 | 0.32311  | 0.622244 | 0.574351 |
| MmugDNA.24943.1.S1_at   | MmugDNA.24943.1 | 4.84  | 4.66  | 0.3  | 0.39 | 1.13  | 0.679138 | 0.329796 | 0.846979 | 0.578874 |
| MmugDNA.24944.1.S1_at   | MmugDNA.24944.1 | 7.68  | 8.07  | 1.21 | 0.2  | -1.31 | 0.650207 | 0.781813 | 0.830259 | 0.873524 |
| MmugDNA.24947.1.S1_at   | MmugDNA.24947.1 | 7.69  | 6.89  | 0.33 | 0.09 | 1.75  | 0.035909 | 0.020663 | 0.244561 | 0.180392 |
| MmugDNA.24948.1.S1_at   | MmugDNA.24948.1 | 4.85  | 5.92  | 0.37 | 0.47 | -2.1  | 0.10215  | 0.089722 | 0.374049 | 0.34398  |
| MmugDNA.24949.1.S1_at   | MmugDNA.24949.1 | 4.29  | 4.38  | 0.08 | 0.11 | -1.06 | 0.141211 | 0.166615 | 0.427091 | 0.443115 |
| MmugDNA.2495.1.S1_at    | MmugDNA.2495.1  | 4.16  | 4.11  | 0.15 | 0.02 | 1.04  | 0.7034   | 0.029478 | 0.859271 | 0.213368 |

|                         |                 |       |       |      |      |       |          |          |          |          |
|-------------------------|-----------------|-------|-------|------|------|-------|----------|----------|----------|----------|
| MmugDNA.24952.1.S1_at   | MmugDNA.24952.1 | 7.98  | 8.1   | 0.25 | 0.19 | -1.09 | 0.245622 | 0.291697 | 0.541668 | 0.552054 |
| MmugDNA.24953.1.S1_at   | MmugDNA.24953.1 | 6.53  | 6.83  | 0.17 | 0.1  | -1.23 | 0.136723 | 0.146296 | 0.421401 | 0.420301 |
| MmugDNA.24954.1.S1_at   | MmugDNA.24954.1 | 7.52  | 7.66  | 0.02 | 0.05 | -1.1  | 0.012615 | 0.023151 | 0.162521 | 0.190549 |
| MmugDNA.24955.1.S1_at   | MmugDNA.24955.1 | 4.88  | 3.41  | 0.57 | 0.25 | 2.78  | 0.033515 | 0.019531 | 0.237028 | 0.175505 |
| MmugDNA.24956.1.S1_at   | MmugDNA.24956.1 | 5.72  | 7.22  | 0.53 | 0.39 | -2.82 | 0.025788 | 0.013563 | 0.213243 | 0.149001 |
| MmugDNA.24958.1.S1_at   | MmugDNA.24958.1 | 3.65  | 3.79  | 0.07 | 0.14 | -1.11 | 0.181664 | 0.290279 | 0.477223 | 0.551169 |
| MmugDNA.2496.1.S1_at    | MmugDNA.2496.1  | 9.35  | 9.29  | 0.15 | 0.09 | 1.04  | 0.543237 | 0.0051   | 0.763336 | 0.099108 |
| MmugDNA.24961.1.S1_at   | MmugDNA.24961.1 | 3.62  | 3.62  | 0.12 | 0.08 | -1    | 0.247201 | 0.340133 | 0.542786 | 0.586602 |
| MmugDNA.24962.1.S1_at   | MmugDNA.24962.1 | 10.64 | 11.28 | 0.11 | 0.08 | -1.56 | 0.002509 | 0.004675 | 0.094326 | 0.095353 |
| MmugDNA.24963.1.S1_at   | MmugDNA.24963.1 | 12.21 | 12.21 | 0.04 | 0.1  | 1     | 0.49191  | 0.828905 | 0.729428 | 0.901662 |
| MmugDNA.24965.1.S1_at   | MmugDNA.24965.1 | 4.02  | 4.81  | 0.46 | 0.02 | -1.73 | 0.043038 | 0.02842  | 0.264642 | 0.210385 |
| MmugDNA.24966.1.S1_at   | MmugDNA.24966.1 | 5.28  | 5.24  | 0.12 | 0.16 | 1.03  | 0.894928 | 0.953888 | 0.955224 | 0.973725 |
| MmugDNA.24967.1.S1_at   | MmugDNA.24967.1 | 4.15  | 4.5   | 0.12 | 0.18 | -1.28 | 0.071039 | 0.066106 | 0.324424 | 0.302572 |
| MmugDNA.24969.1.S1_at   | MmugDNA.24969.1 | 5.22  | 5.54  | 0.19 | 0.1  | -1.25 | 0.071675 | 0.252559 | 0.325611 | 0.521128 |
| MmugDNA.24969.1.S1_x_at | MmugDNA.24969.1 | 4.82  | 5.03  | 0.14 | 0.19 | -1.16 | 0.212971 | 0.221374 | 0.510923 | 0.494644 |
| MmugDNA.24971.1.S1_at   | MmugDNA.24971.1 | 7.82  | 7.59  | 0.21 | 0.12 | 1.18  | 0.302461 | 0.491863 | 0.590305 | 0.693275 |
| MmugDNA.24973.1.S1_at   | MmugDNA.24973.1 | 3.42  | 3.42  | 0.05 | 0.04 | 1     | 0.231634 | 0.574763 | 0.530307 | 0.746142 |
| MmugDNA.24974.1.S1_at   | MmugDNA.24974.1 | 4.53  | 4.57  | 0.22 | 0.34 | -1.03 | 0.853882 | 0.695248 | 0.936466 | 0.822869 |
| MmugDNA.24975.1.S1_at   | MmugDNA.24975.1 | 3.13  | 3.15  | 0.21 | 0.16 | -1.02 | 0.982832 | 0.339007 | 0.993678 | 0.585891 |
| MmugDNA.2498.1.S1_at    | MmugDNA.2498.1  | 4.19  | 4.2   | 0.26 | 0.06 | -1.01 | 0.943681 | 0.942939 | 0.976335 | 0.967574 |
| MmugDNA.24980.1.S1_at   | MmugDNA.24980.1 | 3.29  | 3.05  | 0.26 | 0.09 | 1.18  | 0.180127 | 0.231593 | 0.475236 | 0.503379 |
| MmugDNA.24981.1.S1_at   | MmugDNA.24981.1 | 5.79  | 5.73  | 0.08 | 0.1  | 1.04  | 0.237229 | 0.00094  | 0.534656 | 0.049026 |
| MmugDNA.24982.1.S1_at   | MmugDNA.24982.1 | 5.03  | 5.06  | 0.2  | 0.08 | -1.02 | 0.70074  | 0.901448 | 0.857861 | 0.943931 |
| MmugDNA.24983.1.S1_at   | MmugDNA.24983.1 | 3.45  | 3.67  | 0.14 | 0.03 | -1.17 | 0.090995 | 0.084866 | 0.358212 | 0.336416 |
| MmugDNA.24985.1.S1_at   | MmugDNA.24985.1 | 4.05  | 4.06  | 0.09 | 0.02 | -1    | 0.443134 | 0.701645 | 0.69649  | 0.826974 |
| MmugDNA.24986.1.S1_at   | MmugDNA.24986.1 | 3.01  | 2.98  | 0.12 | 0.19 | 1.03  | 0.680079 | 0.404734 | 0.84734  | 0.633231 |
| MmugDNA.24987.1.S1_at   | MmugDNA.24987.1 | 7.88  | 7.7   | 0.69 | 0.36 | 1.13  | 0.790351 | 0.489368 | 0.904709 | 0.691792 |
| MmugDNA.24988.1.S1_at   | MmugDNA.24988.1 | 5.9   | 5.87  | 0.15 | 0.2  | 1.03  | 0.838663 | 0.824713 | 0.929155 | 0.899382 |
| MmugDNA.24989.1.S1_at   | MmugDNA.24989.1 | 4.27  | 3.95  | 0.37 | 0.52 | 1.24  | 0.199523 | 0.258103 | 0.496887 | 0.525574 |
| MmugDNA.2499.1.S1_at    | MmugDNA.2499.1  | 9.93  | 10.55 | 0.23 | 0.16 | -1.54 | 0.037352 | 0.379475 | 0.248641 | 0.616406 |
| MmugDNA.24990.1.S1_at   | MmugDNA.24990.1 | 6.55  | 6.71  | 0.19 | 0.14 | -1.12 | 0.68995  | 0.837515 | 0.851884 | 0.907127 |
| MmugDNA.24991.1.S1_at   | MmugDNA.24991.1 | 4.97  | 4.6   | 0.36 | 0.62 | 1.29  | 0.986165 | 0.938567 | 0.995144 | 0.965059 |
| MmugDNA.24992.1.S1_at   | MmugDNA.24992.1 | 3.91  | 4.11  | 0.3  | 0.07 | -1.15 | 0.093202 | 0.085533 | 0.361736 | 0.337566 |
| MmugDNA.24993.1.S1_at   | MmugDNA.24993.1 | 3.26  | 2.97  | 0.09 | 0.1  | 1.22  | 0.041038 | 0.027054 | 0.259074 | 0.205689 |
| MmugDNA.24994.1.S1_at   | MmugDNA.24994.1 | 8.2   | 9.39  | 0.17 | 0.24 | -2.29 | 0.002548 | 0.002063 | 0.094458 | 0.06723  |
| MmugDNA.24995.1.S1_at   | MmugDNA.24995.1 | 10.95 | 10.55 | 0.04 | 0.05 | 1.32  | 0.000303 | 0.019978 | 0.058024 | 0.177532 |
| MmugDNA.24996.1.S1_at   | MmugDNA.24996.1 | 7.69  | 7.27  | 0.1  | 0.04 | 1.34  | 0.00456  | 0.363987 | 0.113722 | 0.60434  |
| MmugDNA.24997.1.S1_at   | MmugDNA.24997.1 | 7.01  | 6.83  | 0.29 | 0.15 | 1.14  | 0.851134 | 0.870655 | 0.935277 | 0.926473 |
| MmugDNA.24999.1.S1_at   | MmugDNA.24999.1 | 5.86  | 8.49  | 0.95 | 0.38 | -6.21 | 0.015432 | 0.125804 | 0.176321 | 0.396313 |
| MmugDNA.250.1.S1_at     | MmugDNA.250.1   | 6.42  | 5.95  | 1.26 | 0.47 | 1.39  | 0.297088 | 0.383148 | 0.585548 | 0.619153 |
| MmugDNA.2500.1.S1_x_at  | MmugDNA.2500.1  | 5.21  | 5.19  | 1.11 | 0.23 | 1.02  | 0.376713 | 0.377816 | 0.647366 | 0.615206 |
| MmugDNA.25000.1.S1_at   | MmugDNA.25000.1 | 9.73  | 9.53  | 0.28 | 0.07 | 1.15  | 0.10103  | 0.161765 | 0.372328 | 0.437853 |
| MmugDNA.25001.1.S1_at   | MmugDNA.25001.1 | 6.57  | 6.5   | 0.15 | 0    | 1.05  | 0.900161 | 0.590255 | 0.957601 | 0.756124 |

|                         |                 |       |       |      |      |       |          |          |          |          |
|-------------------------|-----------------|-------|-------|------|------|-------|----------|----------|----------|----------|
| MmugDNA.25004.1.S1_at   | MmugDNA.25004.1 | 3.62  | 3.86  | 0.08 | 0.14 | -1.18 | 0.057642 | 0.00488  | 0.297348 | 0.097538 |
| MmugDNA.25005.1.S1_at   | MmugDNA.25005.1 | 10.12 | 10.01 | 0.04 | 0.03 | 1.08  | 0.014927 | 0.001546 | 0.174272 | 0.05949  |
| MmugDNA.25006.1.S1_x_at | MmugDNA.25006.1 | 5.64  | 5.33  | 0.64 | 0.22 | 1.24  | 0.158876 | 0.21154  | 0.450154 | 0.485658 |
| MmugDNA.25008.1.S1_at   | MmugDNA.25008.1 | 4.03  | 4.42  | 0.15 | 0.37 | -1.31 | 0.37952  | 0.260068 | 0.649328 | 0.52675  |
| MmugDNA.25009.1.S1_at   | MmugDNA.25009.1 | 4.32  | 4.08  | 0.85 | 0.11 | 1.18  | 0.21265  | 0.298446 | 0.510654 | 0.557143 |
| MmugDNA.2501.1.S1_at    | MmugDNA.2501.1  | 8.38  | 8.34  | 0.86 | 0.23 | 1.03  | 0.762729 | 0.145533 | 0.891323 | 0.419442 |
| MmugDNA.25010.1.S1_at   | MmugDNA.25010.1 | 3.56  | 3.54  | 0.12 | 0.03 | 1.01  | 0.846995 | 0.629897 | 0.933231 | 0.782009 |
| MmugDNA.25011.1.S1_at   | MmugDNA.25011.1 | 3.33  | 3.39  | 0.06 | 0.08 | -1.05 | 0.823377 | 0.232202 | 0.921502 | 0.503915 |
| MmugDNA.25014.1.S1_at   | MmugDNA.25014.1 | 8.73  | 8.49  | 0.07 | 0.23 | 1.19  | 0.15778  | 0.051599 | 0.448587 | 0.272617 |
| MmugDNA.25015.1.S1_at   | MmugDNA.25015.1 | 5.1   | 5.26  | 0.22 | 0.19 | -1.12 | 0.785053 | 0.011882 | 0.901955 | 0.141097 |
| MmugDNA.25016.1.S1_at   | MmugDNA.25016.1 | 6.03  | 5.59  | 0.25 | 0.27 | 1.36  | 0.061433 | 0.059543 | 0.304446 | 0.290548 |
| MmugDNA.25017.1.S1_at   | MmugDNA.25017.1 | 7.57  | 6.97  | 0.26 | 0.4  | 1.51  | 0.136391 | 0.227186 | 0.420898 | 0.499529 |
| MmugDNA.25019.1.S1_at   | MmugDNA.25019.1 | 6.75  | 7.94  | 0.22 | 0.15 | -2.27 | 0.002344 | 0.120473 | 0.092897 | 0.38925  |
| MmugDNA.2502.1.S1_at    | MmugDNA.2502.1  | 7.08  | 7.25  | 0.27 | 0.2  | -1.13 | 0.153902 | 0.807039 | 0.444107 | 0.888946 |
| MmugDNA.25021.1.S1_at   | MmugDNA.25021.1 | 5.41  | 5.39  | 0.17 | 0.1  | 1.01  | 0.890874 | 0.850527 | 0.953458 | 0.914981 |
| MmugDNA.25022.1.S1_at   | MmugDNA.25022.1 | 4.21  | 3.71  | 0.29 | 0.12 | 1.42  | 0.08993  | 0.102789 | 0.356863 | 0.363305 |
| MmugDNA.25023.1.S1_at   | MmugDNA.25023.1 | 4.48  | 4.42  | 0.32 | 0.15 | 1.04  | 0.997868 | 0.304905 | 0.999236 | 0.562044 |
| MmugDNA.25025.1.S1_at   | MmugDNA.25025.1 | 3.4   | 3.46  | 0.09 | 0.05 | -1.04 | 0.825774 | 0.784174 | 0.92258  | 0.875049 |
| MmugDNA.25026.1.S1_at   | MmugDNA.25026.1 | 7.08  | 7.08  | 0.14 | 0.11 | -1    | 0.979155 | 0.684671 | 0.992066 | 0.8161   |
| MmugDNA.25029.1.S1_at   | MmugDNA.25029.1 | 3.63  | 3.56  | 0.71 | 0.18 | 1.05  | 0.847222 | 0.91742  | 0.933366 | 0.95383  |
| MmugDNA.25030.1.S1_at   | MmugDNA.25030.1 | 8.38  | 8.64  | 0.06 | 0.13 | -1.2  | 0.029727 | 0.096017 | 0.225633 | 0.353302 |
| MmugDNA.25031.1.S1_at   | MmugDNA.25031.1 | 10.3  | 10.33 | 0.24 | 0.04 | -1.03 | 0.70754  | 0.657031 | 0.861502 | 0.799401 |
| MmugDNA.25032.1.S1_at   | MmugDNA.25032.1 | 4.55  | 5.15  | 0.19 | 0.07 | -1.52 | 0.003794 | 0.004539 | 0.106813 | 0.094138 |
| MmugDNA.25037.1.S1_at   | MmugDNA.25037.1 | 10.15 | 10.07 | 0.35 | 0.34 | 1.06  | 0.328079 | 0.7368   | 0.61059  | 0.847693 |
| MmugDNA.25039.1.S1_at   | MmugDNA.25039.1 | 5.33  | 4.57  | 0.26 | 0.4  | 1.69  | 0.06649  | 0.091939 | 0.315343 | 0.347267 |
| MmugDNA.18410.1.S1_s_at | MmugDNA.18410.1 | 5.65  | 6.26  | 0.23 | 0.21 | -1.52 | 0.041924 | 0.248813 | 0.261664 | 0.517951 |
| MmugDNA.25040.1.S1_at   | MmugDNA.25040.1 | 12.63 | 12.63 | 0.55 | 0.03 | 1     | 0.681966 | 0.270528 | 0.848286 | 0.535835 |
| MmugDNA.25041.1.S1_at   | MmugDNA.25041.1 | 4.73  | 4.74  | 0.1  | 0.05 | -1.01 | 0.558858 | 0.307245 | 0.773051 | 0.563506 |
| MmugDNA.25042.1.S1_at   | MmugDNA.25042.1 | 7.37  | 6.36  | 0.55 | 0.06 | 2.01  | 0.042728 | 0.04443  | 0.263882 | 0.25521  |
| MmugDNA.25043.1.S1_at   | MmugDNA.25043.1 | 4.39  | 4.1   | 0.16 | 0.1  | 1.22  | 0.025049 | 0.019808 | 0.211212 | 0.177036 |
| MmugDNA.25046.1.S1_at   | MmugDNA.25046.1 | 6.07  | 6.01  | 0.1  | 0.1  | 1.04  | 0.224723 | 0.318062 | 0.522708 | 0.571046 |
| MmugDNA.25047.1.S1_at   | MmugDNA.25047.1 | 9.01  | 9.25  | 0.21 | 0.16 | -1.18 | 0.690261 | 0.160584 | 0.851973 | 0.436745 |
| MmugDNA.25048.1.S1_at   | MmugDNA.25048.1 | 3.41  | 3.39  | 0.9  | 0.08 | 1.02  | 0.354892 | 0.471223 | 0.631833 | 0.679261 |
| MmugDNA.25049.1.S1_at   | MmugDNA.25049.1 | 8.29  | 8.15  | 0.2  | 0.05 | 1.1   | 0.093549 | 0.170719 | 0.362157 | 0.447316 |
| MmugDNA.25050.1.S1_at   | MmugDNA.25050.1 | 9.58  | 9.84  | 0.1  | 0.22 | -1.2  | 0.12767  | 0.037475 | 0.409569 | 0.237853 |
| MmugDNA.25051.1.S1_at   | MmugDNA.25051.1 | 12.14 | 12.27 | 0.02 | 0.06 | -1.09 | 0.018025 | 0.026782 | 0.187281 | 0.20472  |
| MmugDNA.25052.1.S1_at   | MmugDNA.25052.1 | 5.65  | 5.64  | 0.05 | 0.08 | 1     | 0.64886  | 0.994486 | 0.829432 | 0.996631 |
| MmugDNA.25054.1.S1_at   | MmugDNA.25054.1 | 3.5   | 3.09  | 0.46 | 0.22 | 1.32  | 0.374916 | 0.389236 | 0.645792 | 0.623403 |
| MmugDNA.25055.1.S1_at   | MmugDNA.25055.1 | 3.87  | 3.76  | 0.12 | 0.11 | 1.07  | 0.279395 | 0.486166 | 0.570767 | 0.689643 |
| MmugDNA.25056.1.S1_at   | MmugDNA.25056.1 | 8.45  | 8.35  | 0.06 | 0.04 | 1.07  | 0.065517 | 0.70161  | 0.31336  | 0.826955 |
| MmugDNA.25057.1.S1_s_at | MmugDNA.25057.1 | 7.81  | 7.76  | 0.16 | 0.1  | 1.04  | 0.452968 | 0.779315 | 0.703333 | 0.872047 |
| MmugDNA.25059.1.S1_at   | MmugDNA.25059.1 | 3.77  | 3.6   | 0.12 | 0.11 | 1.12  | 0.731496 | 0.172426 | 0.874514 | 0.448837 |
| MmugDNA.2506.1.S1_at    | MmugDNA.2506.1  | 4.66  | 5     | 0.02 | 0.59 | -1.26 | 0.378682 | 0.229346 | 0.64877  | 0.501527 |



|                         |                 |       |       |      |      |       |          |          |          |          |
|-------------------------|-----------------|-------|-------|------|------|-------|----------|----------|----------|----------|
| MmugDNA.25062.1.S1_at   | MmugDNA.25062.1 | 10.27 | 8.85  | 0.39 | 0.12 | 2.66  | 0.002762 | 0.003188 | 0.097385 | 0.08199  |
| MmugDNA.25063.1.S1_at   | MmugDNA.25063.1 | 10.71 | 10.61 | 0.13 | 0.06 | 1.07  | 0.569473 | 0.015318 | 0.778858 | 0.157152 |
| MmugDNA.25064.1.S1_at   | MmugDNA.25064.1 | 3.46  | 3.42  | 0.06 | 0.03 | 1.02  | 0.476634 | 0.785183 | 0.718951 | 0.875656 |
| MmugDNA.25065.1.S1_at   | MmugDNA.25065.1 | 5.32  | 4.67  | 0.33 | 0.38 | 1.57  | 0.105055 | 0.493662 | 0.378776 | 0.694288 |
| MmugDNA.25066.1.S1_at   | MmugDNA.25066.1 | 5.51  | 5.56  | 0.03 | 0.05 | -1.04 | 0.360437 | 0.266412 | 0.635998 | 0.532211 |
| MmugDNA.25067.1.S1_at   | MmugDNA.25067.1 | 12.49 | 11.93 | 0.09 | 0.16 | 1.48  | 0.016884 | 0.010526 | 0.18332  | 0.134019 |
| MmugDNA.25067.1.S1_x_at | MmugDNA.25067.1 | 12.43 | 11.89 | 0.1  | 0.16 | 1.45  | 0.014646 | 0.012319 | 0.172899 | 0.143659 |
| MmugDNA.25069.1.S1_at   | MmugDNA.25069.1 | 5.48  | 6.36  | 0.49 | 0.23 | -1.84 | 0.075211 | 0.394963 | 0.332388 | 0.627216 |
| MmugDNA.2507.1.S1_at    | MmugDNA.2507.1  | 6.95  | 6.47  | 0.21 | 0.32 | 1.4   | 0.078394 | 0.580302 | 0.338082 | 0.749618 |
| MmugDNA.25070.1.S1_at   | MmugDNA.25070.1 | 3.48  | 3.48  | 0.52 | 0    | -1    | 0.375893 | 0.527149 | 0.646631 | 0.715861 |
| MmugDNA.25073.1.S1_at   | MmugDNA.25073.1 | 5.05  | 5.22  | 0.08 | 0.03 | -1.13 | 0.074678 | 0.123645 | 0.331379 | 0.393692 |
| MmugDNA.25074.1.S1_at   | MmugDNA.25074.1 | 10.35 | 9.6   | 0.03 | 0.2  | 1.68  | 0.003394 | 0.287977 | 0.102989 | 0.549255 |
| MmugDNA.25075.1.S1_at   | MmugDNA.25075.1 | 8.48  | 8.27  | 0.16 | 0.14 | 1.16  | 0.125456 | 0.330257 | 0.405938 | 0.579044 |
| MmugDNA.25077.1.S1_at   | MmugDNA.25077.1 | 8.59  | 8.51  | 0.09 | 0.04 | 1.06  | 0.22654  | 0.000968 | 0.524344 | 0.049591 |
| MmugDNA.25078.1.S1_at   | MmugDNA.25078.1 | 3.91  | 3.88  | 0.43 | 0.02 | 1.03  | 0.332001 | 0.447124 | 0.613809 | 0.663315 |
| MmugDNA.2508.1.S1_at    | MmugDNA.2508.1  | 2.95  | 2.97  | 0.16 | 0.1  | -1.01 | 0.420077 | 0.483725 | 0.679303 | 0.688112 |
| MmugDNA.25080.1.S1_at   | MmugDNA.25080.1 | 3.96  | 4.47  | 1.14 | 0.11 | -1.42 | 0.82808  | 0.960659 | 0.923866 | 0.977598 |
| MmugDNA.25082.1.S1_at   | MmugDNA.25082.1 | 5.45  | 5.54  | 0.04 | 0.14 | -1.07 | 0.428798 | 0.405996 | 0.685509 | 0.634136 |
| MmugDNA.5329.1.S1_s_at  | MmugDNA.5329.1  | 10.05 | 9.94  | 0.08 | 0.06 | 1.08  | 0.048776 | 0.006147 | 0.278402 | 0.106774 |
| MmugDNA.25084.1.S1_at   | MmugDNA.25084.1 | 9.64  | 9.5   | 0.23 | 0.03 | 1.11  | 0.337899 | 0.101544 | 0.618334 | 0.361393 |
| MmugDNA.25085.1.S1_at   | MmugDNA.25085.1 | 4.93  | 4.53  | 0.15 | 0.22 | 1.33  | 0.213577 | 0.036114 | 0.511449 | 0.234485 |
| MmugDNA.25086.1.S1_at   | MmugDNA.25086.1 | 8.94  | 8.42  | 0.5  | 0.04 | 1.43  | 0.47304  | 0.194287 | 0.716437 | 0.469384 |
| MmugDNA.25087.1.S1_at   | MmugDNA.25087.1 | 3.47  | 3.55  | 0.04 | 0.08 | -1.06 | 0.31902  | 0.055631 | 0.603736 | 0.281649 |
| MmugDNA.25089.1.S1_at   | MmugDNA.25089.1 | 10.32 | 9.9   | 0.08 | 0.19 | 1.33  | 0.058442 | 0.111922 | 0.298877 | 0.377007 |
| MmugDNA.2509.1.S1_at    | MmugDNA.2509.1  | 8.68  | 8.42  | 0.12 | 0.08 | 1.2   | 0.022013 | 0.105708 | 0.201587 | 0.3678   |
| MmugDNA.25091.1.S1_at   | MmugDNA.25091.1 | 5.18  | 5.15  | 0.31 | 0.03 | 1.02  | 0.676504 | 0.313666 | 0.84554  | 0.568012 |
| MmugDNA.25092.1.S1_at   | MmugDNA.25092.1 | 6.28  | 6.35  | 0.04 | 0.06 | -1.05 | 0.120381 | 0.13736  | 0.398818 | 0.41029  |
| MmugDNA.25093.1.S1_at   | MmugDNA.25093.1 | 5.71  | 5.29  | 0.1  | 0.18 | 1.34  | 0.049101 | 0.051453 | 0.279154 | 0.272242 |
| MmugDNA.25095.1.S1_at   | MmugDNA.25095.1 | 4.34  | 4.69  | 0.21 | 0.56 | -1.27 | 0.806665 | 0.597217 | 0.913434 | 0.760127 |
| MmugDNA.25096.1.S1_at   | MmugDNA.25096.1 | 8.93  | 8.8   | 0.15 | 0.03 | 1.1   | 0.151409 | 0.456431 | 0.440961 | 0.670188 |
| MmugDNA.25097.1.S1_at   | MmugDNA.25097.1 | 3.25  | 3.21  | 0.15 | 0.04 | 1.03  | 0.543105 | 0.7346   | 0.763252 | 0.846255 |
| MmugDNA.25098.1.S1_at   | MmugDNA.25098.1 | 4.25  | 4.15  | 0.05 | 0.07 | 1.07  | 0.107195 | 0.355196 | 0.381659 | 0.59757  |
| MmugDNA.25099.1.S1_at   | MmugDNA.25099.1 | 9.46  | 9.29  | 0.53 | 0.13 | 1.13  | 0.741772 | 0.95423  | 0.880351 | 0.973995 |
| MmugDNA.251.1.S1_at     | MmugDNA.251.1   | 4.9   | 4.93  | 0.12 | 0.09 | -1.02 | 0.709424 | 0.677931 | 0.86254  | 0.811843 |
| MmugDNA.2510.1.S1_at    | MmugDNA.2510.1  | 8.54  | 8.13  | 0.11 | 0.08 | 1.32  | 0.013276 | 0.081339 | 0.165875 | 0.329437 |
| MmugDNA.25100.1.S1_at   | MmugDNA.25100.1 | 11.76 | 11.85 | 0.1  | 0.05 | -1.07 | 0.548339 | 0.006855 | 0.766511 | 0.11185  |
| MmugDNA.25101.1.S1_at   | MmugDNA.25101.1 | 8.94  | 7.71  | 0.48 | 0.32 | 2.34  | 0.03429  | 0.088166 | 0.239767 | 0.341721 |
| MmugDNA.25102.1.S1_at   | MmugDNA.25102.1 | 10.32 | 11.04 | 0.79 | 0.09 | -1.65 | 0.362076 | 0.59369  | 0.637175 | 0.758395 |
| MmugDNA.25104.1.S1_at   | MmugDNA.25104.1 | 5.15  | 4.96  | 0.56 | 0.25 | 1.14  | 0.218484 | 0.341597 | 0.516127 | 0.587795 |
| MmugDNA.25105.1.S1_at   | MmugDNA.25105.1 | 12.34 | 12.36 | 0.07 | 0.04 | -1.01 | 0.16707  | 0.410149 | 0.460327 | 0.637086 |
| MmugDNA.25106.1.S1_at   | MmugDNA.25106.1 | 11.79 | 11.85 | 0.03 | 0.07 | -1.04 | 0.403526 | 0.092116 | 0.66766  | 0.34776  |
| MmugDNA.25107.1.S1_at   | MmugDNA.25107.1 | 6.35  | 4.78  | 0.2  | 0.15 | 2.97  | 0.000534 | 0.000032 | 0.069726 | 0.022097 |
| MmugDNA.25108.1.S1_at   | MmugDNA.25108.1 | 12.03 | 10.9  | 0.23 | 0.28 | 2.19  | 0.008497 | 0.01103  | 0.141348 | 0.136793 |

|                         |                 |       |       |      |      |       |          |          |          |          |
|-------------------------|-----------------|-------|-------|------|------|-------|----------|----------|----------|----------|
| MmugDNA.25109.1.S1_at   | MmugDNA.25109.1 | 5.75  | 5.77  | 0.19 | 0.12 | -1.02 | 0.785975 | 0.512131 | 0.902329 | 0.706076 |
| MmugDNA.25109.1.S1_s_at | MmugDNA.25109.1 | 5.77  | 5.77  | 0.08 | 0.15 | -1    | 0.253806 | 0.428993 | 0.548075 | 0.650509 |
| MmugDNA.2511.1.S1_at    | MmugDNA.2511.1  | 7.02  | 7.06  | 0.1  | 0.05 | -1.03 | 0.331118 | 0.436507 | 0.613047 | 0.656032 |
| MmugDNA.25110.1.S1_at   | MmugDNA.25110.1 | 4.62  | 4.61  | 0.04 | 0.09 | 1     | 0.957224 | 0.552079 | 0.982499 | 0.73147  |
| MmugDNA.25112.1.S1_at   | MmugDNA.25112.1 | 8.29  | 8.18  | 0.19 | 0.23 | 1.08  | 0.270484 | 0.027953 | 0.562706 | 0.208689 |
| MmugDNA.25113.1.S1_at   | MmugDNA.25113.1 | 7.2   | 5.69  | 1.28 | 0.22 | 2.84  | 0.376616 | 0.472365 | 0.647284 | 0.67998  |
| MmugDNA.25116.1.S1_at   | MmugDNA.25116.1 | 7.82  | 8.91  | 0.22 | 0.22 | -2.13 | 0.005175 | 0.022254 | 0.116998 | 0.186618 |
| MmugDNA.25117.1.S1_at   | MmugDNA.25117.1 | 3.97  | 4.16  | 0.15 | 0.19 | -1.14 | 0.072603 | 0.007846 | 0.327376 | 0.118032 |
| MmugDNA.25118.1.S1_at   | MmugDNA.25118.1 | 9.75  | 8.72  | 0.05 | 0.11 | 2.04  | 0.000152 | 0.318787 | 0.051907 | 0.571379 |
| MmugDNA.25119.1.S1_at   | MmugDNA.25119.1 | 4.64  | 4.62  | 0.26 | 0.15 | 1.02  | 0.603275 | 0.698966 | 0.800908 | 0.825058 |
| MmugDNA.25120.1.S1_at   | MmugDNA.25120.1 | 4.45  | 4.23  | 0.09 | 0.26 | 1.16  | 0.172804 | 0.182885 | 0.466842 | 0.459362 |
| MmugDNA.25122.1.S1_at   | MmugDNA.25122.1 | 6.52  | 6.32  | 0.02 | 0.4  | 1.15  | 0.224508 | 0.130398 | 0.52264  | 0.402257 |
| MmugDNA.25124.1.S1_at   | MmugDNA.25124.1 | 5     | 5.03  | 0.25 | 0.17 | -1.02 | 0.280549 | 0.383452 | 0.571619 | 0.619433 |
| MmugDNA.25125.1.S1_at   | MmugDNA.25125.1 | 6.15  | 6.17  | 0.73 | 0.41 | -1.02 | 0.685243 | 0.855836 | 0.849991 | 0.917723 |
| MmugDNA.25126.1.S1_at   | MmugDNA.25126.1 | 3.37  | 3.5   | 0.11 | 0.04 | -1.09 | 0.046868 | 0.053683 | 0.274229 | 0.277304 |
| MmugDNA.25127.1.S1_at   | MmugDNA.25127.1 | 6.04  | 5.98  | 0.11 | 0.04 | 1.04  | 0.181298 | 0.347642 | 0.476642 | 0.592039 |
| MmugDNA.25128.1.S1_at   | MmugDNA.25128.1 | 7.2   | 7.39  | 0.24 | 0.16 | -1.15 | 0.441227 | 0.726099 | 0.694769 | 0.841422 |
| MmugDNA.25129.1.S1_at   | MmugDNA.25129.1 | 4.29  | 4.38  | 0.23 | 0.4  | -1.07 | 0.997178 | 0.999954 | 0.999081 | 0.999973 |
| MmugDNA.2513.1.S1_at    | MmugDNA.2513.1  | 9.53  | 9.32  | 0.23 | 0.27 | 1.15  | 0.765412 | 0.309818 | 0.892409 | 0.565044 |
| MmugDNA.25130.1.S1_at   | MmugDNA.25130.1 | 4.26  | 4.16  | 0.37 | 0.06 | 1.07  | 0.681913 | 0.79075  | 0.84828  | 0.878973 |
| MmugDNA.25131.1.S1_at   | MmugDNA.25131.1 | 5.84  | 6.31  | 0.82 | 0.24 | -1.38 | 0.27987  | 0.076655 | 0.571182 | 0.32195  |
| MmugDNA.25132.1.S1_at   | MmugDNA.25132.1 | 3.54  | 3.43  | 0.35 | 0.24 | 1.08  | 0.380719 | 0.312143 | 0.650319 | 0.566904 |
| MmugDNA.25133.1.S1_at   | MmugDNA.25133.1 | 5.06  | 4.46  | 0.49 | 0.09 | 1.51  | 0.281533 | 0.326732 | 0.572454 | 0.576725 |
| MmugDNA.25134.1.S1_at   | MmugDNA.25134.1 | 3.74  | 3.64  | 0.15 | 0.21 | 1.07  | 0.895895 | 0.978634 | 0.955609 | 0.988411 |
| MmugDNA.25135.1.S1_at   | MmugDNA.25135.1 | 5.68  | 5.45  | 0.01 | 0.08 | 1.17  | 0.015839 | 0.136874 | 0.178312 | 0.409568 |
| MmugDNA.25136.1.S1_at   | MmugDNA.25136.1 | 4.22  | 4.27  | 0.37 | 0.26 | -1.04 | 0.473925 | 0.476133 | 0.717141 | 0.682524 |
| MmugDNA.25138.1.S1_at   | MmugDNA.25138.1 | 6.69  | 6.6   | 0.1  | 0.06 | 1.07  | 0.262067 | 0.157903 | 0.556302 | 0.433583 |
| MmugDNA.25139.1.S1_at   | MmugDNA.25139.1 | 10.53 | 10.12 | 0.28 | 0.08 | 1.32  | 0.168344 | 0.423291 | 0.461584 | 0.646277 |
| MmugDNA.2514.1.S1_at    | MmugDNA.2514.1  | 5.47  | 5.85  | 0.1  | 0.2  | -1.31 | 0.093663 | 0.109346 | 0.362321 | 0.373154 |
| MmugDNA.25141.1.S1_at   | MmugDNA.25141.1 | 11.22 | 10.96 | 0.02 | 0.11 | 1.2   | 0.02057  | 0.080525 | 0.196858 | 0.328189 |
| MmugDNA.25142.1.S1_at   | MmugDNA.25142.1 | 7.96  | 8.44  | 0.59 | 0.07 | -1.39 | 0.081978 | 0.129644 | 0.343272 | 0.401242 |
| MmugDNA.25143.1.S1_at   | MmugDNA.25143.1 | 12.13 | 10.19 | 1.17 | 0.11 | 3.83  | 0.132144 | 0.245254 | 0.415359 | 0.515049 |
| MmugDNA.25144.1.S1_at   | MmugDNA.25144.1 | 5.7   | 5.51  | 0.22 | 0.1  | 1.14  | 0.136899 | 0.532791 | 0.421672 | 0.719235 |
| MmugDNA.25145.1.S1_at   | MmugDNA.25145.1 | 3.41  | 3.88  | 0.25 | 0.42 | -1.39 | 0.304892 | 0.288911 | 0.591903 | 0.550032 |
| MmugDNA.25148.1.S1_at   | MmugDNA.25148.1 | 10.33 | 10.79 | 0.24 | 0.24 | -1.38 | 0.085453 | 0.093217 | 0.349865 | 0.34931  |
| MmugDNA.25149.1.S1_at   | MmugDNA.25149.1 | 8.65  | 8.26  | 0.23 | 0.47 | 1.31  | 0.610369 | 0.009095 | 0.805838 | 0.125944 |
| MmugDNA.2515.1.S1_at    | MmugDNA.2515.1  | 12.17 | 12.55 | 0.2  | 0.19 | -1.3  | 0.096244 | 0.219384 | 0.365829 | 0.493156 |
| MmugDNA.25150.1.S1_at   | MmugDNA.25150.1 | 9.31  | 10    | 0.17 | 0.06 | -1.62 | 0.004182 | 0.002592 | 0.11023  | 0.075326 |
| MmugDNA.25151.1.S1_at   | MmugDNA.25151.1 | 5.67  | 5.67  | 0.09 | 0.14 | 1     | 0.558841 | 0.636835 | 0.773051 | 0.786404 |
| MmugDNA.25152.1.S1_at   | MmugDNA.25152.1 | 9.06  | 9.13  | 0.23 | 0.11 | -1.05 | 0.385254 | 0.87647  | 0.65405  | 0.929683 |
| MmugDNA.25154.1.S1_at   | MmugDNA.25154.1 | 10.53 | 10.4  | 0.11 | 0.04 | 1.09  | 0.092858 | 0.062186 | 0.361387 | 0.296296 |
| MmugDNA.25155.1.S1_at   | MmugDNA.25155.1 | 13.07 | 12.52 | 0.14 | 0.09 | 1.47  | 0.004937 | 0.017259 | 0.11523  | 0.166393 |
| MmugDNA.25156.1.S1_at   | MmugDNA.25156.1 | 13.74 | 13.44 | 0.07 | 0.02 | 1.23  | 0.001552 | 0.020615 | 0.081983 | 0.180141 |

|                         |                 |       |       |      |      |       |          |          |          |          |
|-------------------------|-----------------|-------|-------|------|------|-------|----------|----------|----------|----------|
| MmugDNA.25157.1.S1_at   | MmugDNA.25157.1 | 11.2  | 11.31 | 0.09 | 0.23 | -1.08 | 0.66615  | 0.770659 | 0.839554 | 0.866801 |
| MmugDNA.25157.1.S1_s_at | MmugDNA.25157.1 | 10.73 | 11.02 | 0.23 | 0.25 | -1.22 | 0.965091 | 0.739368 | 0.985924 | 0.848935 |
| MmugDNA.25158.1.S1_at   | MmugDNA.25158.1 | 3.7   | 3.69  | 0.45 | 0.08 | 1     | 0.354062 | 0.46946  | 0.631226 | 0.678248 |
| MmugDNA.2516.1.S1_at    | MmugDNA.2516.1  | 6.96  | 6.98  | 0.05 | 0.01 | -1.01 | 0.294851 | 0.125275 | 0.583794 | 0.395832 |
| MmugDNA.25160.1.S1_at   | MmugDNA.25160.1 | 4.62  | 4.21  | 0.15 | 0.17 | 1.33  | 0.067135 | 0.139525 | 0.31683  | 0.412743 |
| MmugDNA.25161.1.S1_at   | MmugDNA.25161.1 | 3.9   | 3.83  | 0.21 | 0.04 | 1.05  | 0.734739 | 0.315076 | 0.876463 | 0.56883  |
| MmugDNA.25162.1.S1_at   | MmugDNA.25162.1 | 9.5   | 9.4   | 0.03 | 0.06 | 1.07  | 0.052571 | 0.063345 | 0.286306 | 0.29838  |
| MmugDNA.25163.1.S1_at   | MmugDNA.25163.1 | 6.48  | 6.52  | 0.24 | 0.14 | -1.03 | 0.553796 | 0.046025 | 0.77027  | 0.258971 |
| MmugDNA.25166.1.S1_at   | MmugDNA.25166.1 | 9.31  | 9.24  | 0.11 | 0.08 | 1.04  | 0.362745 | 0.399308 | 0.63739  | 0.629737 |
| MmugDNA.25167.1.S1_at   | MmugDNA.25167.1 | 4.74  | 4.7   | 0.83 | 0.14 | 1.03  | 0.420276 | 0.594748 | 0.679364 | 0.758628 |
| MmugDNA.25168.1.S1_at   | MmugDNA.25168.1 | 3.01  | 3.02  | 0.05 | 0.09 | -1.01 | 0.598832 | 0.928496 | 0.797662 | 0.95936  |
| MmugDNA.2517.1.S1_at    | MmugDNA.2517.1  | 8.46  | 8.22  | 0.42 | 0.34 | 1.18  | 0.829871 | 0.066654 | 0.925141 | 0.303999 |
| MmugDNA.25170.1.S1_at   | MmugDNA.25170.1 | 3.38  | 3.37  | 0.13 | 0.18 | 1.01  | 0.221583 | 0.221147 | 0.51957  | 0.494498 |
| MmugDNA.25171.1.S1_at   | MmugDNA.25171.1 | 3.77  | 3.76  | 0.14 | 0.19 | 1.01  | 0.410555 | 0.620378 | 0.672532 | 0.775363 |
| MmugDNA.25172.1.S1_at   | MmugDNA.25172.1 | 3.67  | 3.67  | 0.01 | 0.06 | -1    | 0.43432  | 0.355437 | 0.689624 | 0.597738 |
| MmugDNA.25174.1.S1_at   | MmugDNA.25174.1 | 7.28  | 6.97  | 0.31 | 0.09 | 1.24  | 0.058283 | 0.002235 | 0.298559 | 0.069621 |
| MmugDNA.25175.1.S1_at   | MmugDNA.25175.1 | 2.81  | 2.66  | 0.11 | 0.04 | 1.11  | 0.087182 | 0.387121 | 0.352835 | 0.621935 |
| MmugDNA.25177.1.S1_at   | MmugDNA.25177.1 | 4.46  | 4.89  | 0.63 | 0.37 | -1.34 | 0.741416 | 0.839643 | 0.880173 | 0.908582 |
| MmugDNA.25178.1.S1_at   | MmugDNA.25178.1 | 3.9   | 3.75  | 0.04 | 0.22 | 1.11  | 0.236842 | 0.04566  | 0.534416 | 0.25794  |
| MmugDNA.25179.1.S1_s_at | MmugDNA.25179.1 | 13.78 | 13.45 | 0.05 | 0.07 | 1.26  | 0.002607 | 0.005095 | 0.095164 | 0.099108 |
| MmugDNA.2518.1.S1_at    | MmugDNA.2518.1  | 3.92  | 3.58  | 0.27 | 0.33 | 1.26  | 0.250146 | 0.364087 | 0.544879 | 0.604449 |
| MmugDNA.25180.1.S1_at   | MmugDNA.25180.1 | 3.52  | 3.58  | 0.06 | 0.24 | -1.04 | 0.236524 | 0.284776 | 0.534169 | 0.546966 |
| MmugDNA.25183.1.S1_at   | MmugDNA.25183.1 | 9.14  | 6.75  | 1.84 | 0.49 | 5.23  | 0.093979 | 0.05389  | 0.362933 | 0.277685 |
| MmugDNA.25185.1.S1_at   | MmugDNA.25185.1 | 11.01 | 10.52 | 0.1  | 0.04 | 1.41  | 0.003231 | 0.096471 | 0.101775 | 0.35409  |
| MmugDNA.25186.1.S1_at   | MmugDNA.25186.1 | 3.82  | 6.69  | 0.98 | 0.39 | -7.3  | 0.019476 | 0.256291 | 0.192357 | 0.524079 |
| MmugDNA.25187.1.S1_at   | MmugDNA.25187.1 | 11.17 | 9.91  | 0.14 | 0.15 | 2.39  | 0.000303 | 0.000295 | 0.058024 | 0.034892 |
| MmugDNA.25188.1.S1_at   | MmugDNA.25188.1 | 5.3   | 4.62  | 0.27 | 0.31 | 1.61  | 0.050255 | 0.038973 | 0.282002 | 0.24253  |
| MmugDNA.25189.1.S1_at   | MmugDNA.25189.1 | 5.65  | 5.32  | 0.23 | 0.14 | 1.26  | 0.18676  | 0.461172 | 0.482843 | 0.67288  |
| MmugDNA.25190.1.S1_at   | MmugDNA.25190.1 | 6.13  | 6.08  | 0.08 | 0.05 | 1.04  | 0.147458 | 0.723792 | 0.435407 | 0.840126 |
| MmugDNA.25191.1.S1_at   | MmugDNA.25191.1 | 6.87  | 6.75  | 0.26 | 0.16 | 1.08  | 0.633281 | 0.795081 | 0.820348 | 0.881926 |
| MmugDNA.25191.1.S1_s_at | MmugDNA.25191.1 | 9.67  | 9.81  | 0.24 | 0.12 | -1.1  | 0.249925 | 0.340525 | 0.544845 | 0.586776 |
| MmugDNA.25192.1.S1_at   | MmugDNA.25192.1 | 10.82 | 10.73 | 0.11 | 0.04 | 1.07  | 0.211609 | 0.724097 | 0.509436 | 0.840308 |
| MmugDNA.25193.1.S1_at   | MmugDNA.25193.1 | 9.53  | 9.57  | 0.17 | 0.07 | -1.03 | 0.853664 | 0.785377 | 0.936342 | 0.875742 |
| MmugDNA.25194.1.S1_at   | MmugDNA.25194.1 | 3.18  | 3.46  | 0.23 | 0.25 | -1.21 | 0.631896 | 0.783057 | 0.819395 | 0.874447 |
| MmugDNA.25195.1.S1_at   | MmugDNA.25195.1 | 7.09  | 7.26  | 0.95 | 0.28 | -1.13 | 0.590686 | 0.612206 | 0.792009 | 0.769863 |
| MmugDNA.25196.1.S1_at   | MmugDNA.25196.1 | 8.45  | 7.84  | 0.21 | 0.25 | 1.52  | 0.140279 | 0.348121 | 0.426028 | 0.592302 |
| MmugDNA.25196.1.S1_x_at | MmugDNA.25196.1 | 8.26  | 7.72  | 0.17 | 0.38 | 1.45  | 0.253091 | 0.498923 | 0.547579 | 0.697877 |
| MmugDNA.25197.1.S1_at   | MmugDNA.25197.1 | 9.86  | 8.18  | 0.41 | 0.34 | 3.21  | 0.004986 | 0.002811 | 0.115785 | 0.078181 |
| MmugDNA.25199.1.S1_at   | MmugDNA.25199.1 | 12.02 | 12.08 | 0.12 | 0.11 | -1.04 | 0.448009 | 0.254236 | 0.699768 | 0.522538 |
| MmugDNA.2520.1.S1_at    | MmugDNA.2520.1  | 4.03  | 4.02  | 0.15 | 0.04 | 1.01  | 0.835148 | 0.277313 | 0.927484 | 0.541265 |
| MmugDNA.25200.1.S1_at   | MmugDNA.25200.1 | 8.9   | 8.33  | 0.28 | 0.13 | 1.49  | 0.036495 | 0.126203 | 0.246105 | 0.396748 |
| MmugDNA.25201.1.S1_at   | MmugDNA.25201.1 | 4.24  | 4.18  | 0.15 | 0.05 | 1.04  | 0.1962   | 0.349554 | 0.493276 | 0.593537 |
| MmugDNA.25202.1.S1_at   | MmugDNA.25202.1 | 7.35  | 7.43  | 0.46 | 0.26 | -1.06 | 0.633645 | 0.57761  | 0.820437 | 0.748013 |

|                         |                 |       |       |      |      |       |          |          |          |          |
|-------------------------|-----------------|-------|-------|------|------|-------|----------|----------|----------|----------|
| MmugDNA.25206.1.S1_at   | MmugDNA.25206.1 | 9.16  | 8.32  | 0.12 | 0.01 | 1.79  | 0.000283 | 0.005073 | 0.056985 | 0.09907  |
| MmugDNA.25207.1.S1_at   | MmugDNA.25207.1 | 5.19  | 4.96  | 0.27 | 0.41 | 1.17  | 0.639657 | 0.386466 | 0.823651 | 0.621593 |
| MmugDNA.25209.1.S1_at   | MmugDNA.25209.1 | 10.23 | 10.27 | 0.09 | 0.08 | -1.03 | 0.407556 | 0.066881 | 0.670551 | 0.304535 |
| MmugDNA.25210.1.S1_at   | MmugDNA.25210.1 | 5.76  | 5.86  | 0.11 | 0.06 | -1.08 | 0.169739 | 0.51098  | 0.463121 | 0.705318 |
| MmugDNA.25212.1.S1_at   | MmugDNA.25212.1 | 7.5   | 8.13  | 1.08 | 0.35 | -1.55 | 0.526937 | 0.541097 | 0.752839 | 0.72475  |
| MmugDNA.25214.1.S1_at   | MmugDNA.25214.1 | 4.74  | 3.89  | 1.14 | 0.21 | 1.8   | 0.174152 | 0.18025  | 0.468365 | 0.456804 |
| MmugDNA.25215.1.S1_at   | MmugDNA.25215.1 | 3.51  | 3.45  | 0    | 0.05 | 1.04  | 0.135882 | 0.296213 | 0.419983 | 0.555413 |
| MmugDNA.25216.1.S1_at   | MmugDNA.25216.1 | 7.98  | 7.87  | 0.06 | 0.19 | 1.08  | 0.099284 | 0.692863 | 0.370274 | 0.821279 |
| MmugDNA.25217.1.S1_at   | MmugDNA.25217.1 | 3.9   | 3.52  | 0    | 0.22 | 1.3   | 0.117699 | 0.248137 | 0.395125 | 0.517567 |
| MmugDNA.25219.1.S1_at   | MmugDNA.25219.1 | 7.19  | 6.58  | 0.6  | 0.17 | 1.53  | 0.198515 | 0.216041 | 0.4957   | 0.48965  |
| MmugDNA.25222.1.S1_at   | MmugDNA.25222.1 | 4.29  | 4.26  | 0.27 | 0.04 | 1.02  | 0.36429  | 0.512942 | 0.638873 | 0.706623 |
| MmugDNA.25224.1.S1_at   | MmugDNA.25224.1 | 12.05 | 11.83 | 0.13 | 0.06 | 1.17  | 0.040188 | 0.006506 | 0.25696  | 0.109521 |
| MmugDNA.7346.1.S1_s_at  | MmugDNA.7346.1  | 13.51 | 13.55 | 0.32 | 0.06 | -1.03 | 0.748042 | 0.826751 | 0.883219 | 0.900506 |
| MmugDNA.25227.1.S1_at   | MmugDNA.25227.1 | 5.19  | 5.16  | 0.08 | 0.14 | 1.02  | 0.523063 | 0.766027 | 0.750171 | 0.864085 |
| MmugDNA.25228.1.S1_at   | MmugDNA.25228.1 | 5.16  | 5.24  | 0.39 | 0.02 | -1.05 | 0.542184 | 0.794184 | 0.762647 | 0.881296 |
| MmugDNA.2523.1.S1_at    | MmugDNA.2523.1  | 3.21  | 3.15  | 0.14 | 0.04 | 1.04  | 0.796082 | 0.407533 | 0.907901 | 0.63505  |
| MmugDNA.25230.1.S1_at   | MmugDNA.25230.1 | 5.52  | 5.28  | 0.11 | 0.08 | 1.19  | 0.060142 | 0.088928 | 0.302422 | 0.34275  |
| MmugDNA.25231.1.S1_at   | MmugDNA.25231.1 | 11.6  | 11.81 | 0.17 | 0.13 | -1.16 | 0.428447 | 0.6148   | 0.685384 | 0.771546 |
| MmugDNA.25232.1.S1_at   | MmugDNA.25232.1 | 5.43  | 5.42  | 0.14 | 0.04 | 1.01  | 0.713228 | 0.908702 | 0.864601 | 0.948291 |
| MmugDNA.25233.1.S1_at   | MmugDNA.25233.1 | 3.66  | 3.89  | 0.67 | 0.29 | -1.18 | 0.493716 | 0.639583 | 0.730609 | 0.788351 |
| MmugDNA.25234.1.S1_at   | MmugDNA.25234.1 | 4.23  | 4.21  | 0.01 | 0.24 | 1.01  | 0.915094 | 0.655705 | 0.963917 | 0.7987   |
| MmugDNA.25236.1.S1_at   | MmugDNA.25236.1 | 6.27  | 6.25  | 0.14 | 0.04 | 1.01  | 0.217029 | 0.65018  | 0.514863 | 0.795459 |
| MmugDNA.25238.1.S1_at   | MmugDNA.25238.1 | 6.47  | 6.16  | 0.05 | 0.07 | 1.24  | 0.004574 | 0.000954 | 0.113728 | 0.049326 |
| MmugDNA.25239.1.S1_at   | MmugDNA.25239.1 | 5.78  | 5.67  | 0.1  | 0.16 | 1.08  | 0.696316 | 0.064678 | 0.855348 | 0.300314 |
| MmugDNA.2524.1.S1_at    | MmugDNA.2524.1  | 3.63  | 3.72  | 0.07 | 0.06 | -1.07 | 0.064417 | 0.279777 | 0.310347 | 0.543246 |
| MmugDNA.25240.1.S1_at   | MmugDNA.25240.1 | 9.93  | 10.11 | 0.1  | 0.04 | -1.13 | 0.068418 | 0.046478 | 0.319391 | 0.260115 |
| MmugDNA.25241.1.S1_at   | MmugDNA.25241.1 | 6.33  | 6.56  | 0.15 | 0.22 | -1.17 | 0.563231 | 0.823793 | 0.775375 | 0.898803 |
| MmugDNA.25242.1.S1_at   | MmugDNA.25242.1 | 7.95  | 8.25  | 0.36 | 0.08 | -1.23 | 0.068839 | 0.10042  | 0.320453 | 0.359541 |
| MmugDNA.25244.1.S1_at   | MmugDNA.25244.1 | 3.15  | 3.26  | 0.13 | 0.06 | -1.08 | 0.707197 | 0.064483 | 0.861311 | 0.300133 |
| MmugDNA.25245.1.S1_at   | MmugDNA.25245.1 | 6.54  | 6.49  | 0.06 | 0.03 | 1.03  | 0.941974 | 0.001736 | 0.975589 | 0.062895 |
| MmugDNA.25246.1.S1_at   | MmugDNA.25246.1 | 8.53  | 8.33  | 0.18 | 0.12 | 1.15  | 0.038569 | 0.000355 | 0.252331 | 0.037229 |
| MmugDNA.25247.1.S1_at   | MmugDNA.25247.1 | 3.33  | 3.34  | 0    | 0.09 | -1.01 | 0.735055 | 0.902097 | 0.876681 | 0.944306 |
| MmugDNA.25248.1.S1_at   | MmugDNA.25248.1 | 3.4   | 3.33  | 0.17 | 0.28 | 1.05  | 0.93806  | 0.493068 | 0.973844 | 0.693984 |
| MmugDNA.25249.1.S1_s_at | MmugDNA.25249.1 | 5.35  | 5.29  | 0.07 | 0.05 | 1.04  | 0.217399 | 0.353003 | 0.515303 | 0.596329 |
| MmugDNA.25251.1.S1_at   | MmugDNA.25251.1 | 4.66  | 4.65  | 0.19 | 0.18 | 1.01  | 0.453865 | 0.444904 | 0.703883 | 0.662121 |
| MmugDNA.25252.1.S1_at   | MmugDNA.25252.1 | 4.65  | 4.7   | 0.14 | 0.05 | -1.04 | 0.857445 | 0.387261 | 0.938077 | 0.62202  |
| MmugDNA.25253.1.S1_at   | MmugDNA.25253.1 | 4.59  | 4.6   | 0.23 | 0.1  | -1    | 0.636785 | 0.16031  | 0.822268 | 0.43644  |
| MmugDNA.25254.1.S1_at   | MmugDNA.25254.1 | 2.8   | 2.82  | 0.05 | 0.07 | -1.01 | 0.676165 | 0.365557 | 0.845327 | 0.605602 |
| MmugDNA.25254.1.S1_s_at | MmugDNA.25254.1 | 4.77  | 4.71  | 0.45 | 0.07 | 1.04  | 0.352077 | 0.476711 | 0.629611 | 0.682871 |
| MmugDNA.25256.1.S1_s_at | MmugDNA.25256.1 | 5.61  | 4.74  | 0.48 | 0.27 | 1.82  | 0.046151 | 0.091554 | 0.272569 | 0.346652 |
| MmugDNA.25259.1.S1_at   | MmugDNA.25259.1 | 11.52 | 11.3  | 0.06 | 0.09 | 1.16  | 0.020304 | 0.144235 | 0.196136 | 0.418146 |
| MmugDNA.25259.1.S1_s_at | MmugDNA.25259.1 | 9.49  | 9.12  | 0.05 | 0.01 | 1.29  | 0.000204 | 0.090133 | 0.053494 | 0.344432 |
| MmugDNA.2526.1.S1_at    | MmugDNA.2526.1  | 4.89  | 4.01  | 0.45 | 0.16 | 1.84  | 0.073629 | 0.047389 | 0.329086 | 0.262438 |

|                         |                 |       |       |      |      |       |          |          |          |          |
|-------------------------|-----------------|-------|-------|------|------|-------|----------|----------|----------|----------|
| MmugDNA.25260.1.S1_at   | MmugDNA.25260.1 | 4.28  | 4.53  | 0.31 | 0.07 | -1.19 | 0.197409 | 0.15021  | 0.494552 | 0.42486  |
| MmugDNA.25261.1.S1_at   | MmugDNA.25261.1 | 6.09  | 6.03  | 0.17 | 0.04 | 1.05  | 0.419117 | 0.617417 | 0.678626 | 0.773417 |
| MmugDNA.25262.1.S1_at   | MmugDNA.25262.1 | 5.28  | 6.38  | 0.83 | 0.14 | -2.14 | 0.263183 | 0.405003 | 0.556921 | 0.633428 |
| MmugDNA.25264.1.S1_at   | MmugDNA.25264.1 | 4.64  | 4.51  | 0.43 | 0.25 | 1.1   | 0.491335 | 0.530332 | 0.729201 | 0.717877 |
| MmugDNA.25265.1.S1_at   | MmugDNA.25265.1 | 11.34 | 12.18 | 0.36 | 0.06 | -1.78 | 0.017375 | 0.005776 | 0.185259 | 0.104378 |
| MmugDNA.25266.1.S1_at   | MmugDNA.25266.1 | 4.18  | 4.07  | 0.19 | 0.1  | 1.08  | 0.089528 | 0.095214 | 0.356406 | 0.35218  |
| MmugDNA.25268.1.S1_at   | MmugDNA.25268.1 | 5.59  | 6.16  | 0.31 | 0.19 | -1.48 | 0.079976 | 0.079444 | 0.340223 | 0.326766 |
| MmugDNA.25269.1.S1_at   | MmugDNA.25269.1 | 11.11 | 10.51 | 0.38 | 0.13 | 1.51  | 0.091342 | 0.052049 | 0.358885 | 0.273735 |
| MmugDNA.25270.1.S1_at   | MmugDNA.25270.1 | 7.77  | 7.85  | 0.21 | 0.12 | -1.05 | 0.610811 | 0.572568 | 0.805939 | 0.744566 |
| MmugDNA.25270.1.S1_s_at | MmugDNA.25270.1 | 5.98  | 6.06  | 0.16 | 0.13 | -1.05 | 0.630413 | 0.885869 | 0.818639 | 0.935095 |
| MmugDNA.25271.1.S1_at   | MmugDNA.25271.1 | 4.46  | 4.24  | 0.37 | 0.55 | 1.17  | 0.867018 | 0.968692 | 0.942519 | 0.982746 |
| MmugDNA.25273.1.S1_at   | MmugDNA.25273.1 | 6.72  | 7.05  | 0.37 | 0.17 | -1.25 | 0.238424 | 0.330313 | 0.535783 | 0.579074 |
| MmugDNA.25274.1.S1_at   | MmugDNA.25274.1 | 4.83  | 4.79  | 0.11 | 0.29 | 1.03  | 0.874252 | 0.615394 | 0.946068 | 0.771962 |
| MmugDNA.25275.1.S1_at   | MmugDNA.25275.1 | 4.69  | 4.63  | 0.11 | 0.12 | 1.04  | 0.242038 | 0.310735 | 0.539093 | 0.565809 |
| MmugDNA.25276.1.S1_at   | MmugDNA.25276.1 | 8.44  | 8.47  | 0.19 | 0.07 | -1.02 | 0.416621 | 0.447402 | 0.677057 | 0.66348  |
| MmugDNA.25278.1.S1_at   | MmugDNA.25278.1 | 4.04  | 3.73  | 0.86 | 0.11 | 1.24  | 0.209541 | 0.268912 | 0.507044 | 0.534356 |
| MmugDNA.25279.1.S1_at   | MmugDNA.25279.1 | 5.12  | 4.66  | 0.72 | 0.08 | 1.38  | 0.106496 | 0.109543 | 0.380675 | 0.373395 |
| MmugDNA.2528.1.S1_at    | MmugDNA.2528.1  | 6.42  | 5.2   | 0.43 | 0.38 | 2.34  | 0.062204 | 0.045624 | 0.306073 | 0.257766 |
| MmugDNA.25280.1.S1_at   | MmugDNA.25280.1 | 7.34  | 8.39  | 0.22 | 0.28 | -2.07 | 0.007151 | 0.014407 | 0.132084 | 0.153215 |
| MmugDNA.25282.1.S1_at   | MmugDNA.25282.1 | 5.31  | 5.16  | 0.22 | 0.04 | 1.1   | 0.225243 | 0.378537 | 0.52312  | 0.615564 |
| MmugDNA.25283.1.S1_at   | MmugDNA.25283.1 | 10.91 | 11.29 | 0.27 | 0.11 | -1.3  | 0.104304 | 0.52823  | 0.377751 | 0.716462 |
| MmugDNA.25284.1.S1_at   | MmugDNA.25284.1 | 4.58  | 4.1   | 0.53 | 0.33 | 1.4   | 0.169119 | 0.125707 | 0.462327 | 0.396249 |
| MmugDNA.25287.1.S1_at   | MmugDNA.25287.1 | 4.12  | 4.14  | 0.2  | 0.07 | -1.02 | 0.700975 | 0.5426   | 0.857901 | 0.725615 |
| MmugDNA.25288.1.S1_at   | MmugDNA.25288.1 | 3.37  | 3.57  | 0.23 | 0    | -1.15 | 0.641271 | 0.724316 | 0.82473  | 0.840433 |
| MmugDNA.25289.1.S1_at   | MmugDNA.25289.1 | 4.24  | 4     | 0.94 | 0.27 | 1.18  | 0.333847 | 0.442606 | 0.615174 | 0.660578 |
| MmugDNA.2529.1.S1_at    | MmugDNA.2529.1  | 3.4   | 3.2   | 0.17 | 0.07 | 1.15  | 0.112141 | 0.146842 | 0.388251 | 0.42088  |
| MmugDNA.25290.1.S1_at   | MmugDNA.25290.1 | 2.9   | 2.89  | 0.11 | 0.05 | 1.01  | 0.627882 | 0.173129 | 0.817059 | 0.449765 |
| MmugDNA.25291.1.S1_at   | MmugDNA.25291.1 | 8.4   | 8.36  | 0.22 | 0.09 | 1.03  | 0.607389 | 0.880644 | 0.803725 | 0.931813 |
| MmugDNA.25293.1.S1_at   | MmugDNA.25293.1 | 3.85  | 3.86  | 0.12 | 0.15 | -1.01 | 0.924684 | 0.980411 | 0.967957 | 0.989333 |
| MmugDNA.25294.1.S1_at   | MmugDNA.25294.1 | 4.77  | 4.81  | 0.03 | 0.1  | -1.03 | 0.697305 | 0.395463 | 0.855921 | 0.627492 |
| MmugDNA.25296.1.S1_at   | MmugDNA.25296.1 | 5.53  | 7.23  | 0.55 | 0.26 | -3.25 | 0.023767 | 0.07675  | 0.207137 | 0.322168 |
| MmugDNA.25297.1.S1_at   | MmugDNA.25297.1 | 5.07  | 5.17  | 0.16 | 0.06 | -1.07 | 0.949312 | 0.712331 | 0.978845 | 0.833347 |
| MmugDNA.25298.1.S1_at   | MmugDNA.25298.1 | 5.99  | 5.64  | 0.33 | 0.33 | 1.28  | 0.18383  | 0.212952 | 0.479745 | 0.4869   |
| MmugDNA.253.1.S1_at     | MmugDNA.253.1   | 6.5   | 6.38  | 0.22 | 0.21 | 1.09  | 0.537075 | 0.753518 | 0.759385 | 0.856527 |
| MmugDNA.2530.1.S1_x_at  | MmugDNA.2530.1  | 5.97  | 5.75  | 0.41 | 0.19 | 1.17  | 0.154421 | 0.193191 | 0.444671 | 0.468578 |
| MmugDNA.25300.1.S1_at   | MmugDNA.25300.1 | 3.61  | 3.48  | 0    | 0.11 | 1.09  | 0.353953 | 0.550186 | 0.63113  | 0.730298 |
| MmugDNA.25301.1.S1_at   | MmugDNA.25301.1 | 9.19  | 9.17  | 0.03 | 0.07 | 1.01  | 0.790923 | 0.213781 | 0.90499  | 0.487564 |
| MmugDNA.25303.1.S1_at   | MmugDNA.25303.1 | 8.28  | 8.66  | 0.45 | 0.27 | -1.3  | 0.406539 | 0.12214  | 0.669808 | 0.39178  |
| MmugDNA.25304.1.S1_at   | MmugDNA.25304.1 | 4.08  | 4.08  | 0.14 | 0.15 | 1     | 0.890947 | 0.985072 | 0.95346  | 0.991524 |
| MmugDNA.25306.1.S1_at   | MmugDNA.25306.1 | 8.85  | 7.91  | 0.26 | 0.08 | 1.92  | 0.005943 | 0.012533 | 0.123663 | 0.144417 |
| MmugDNA.25308.1.S1_at   | MmugDNA.25308.1 | 8.32  | 7.85  | 0.3  | 0.3  | 1.38  | 0.057163 | 0.098802 | 0.296384 | 0.356945 |
| MmugDNA.25309.1.S1_at   | MmugDNA.25309.1 | 6.66  | 6.53  | 0.23 | 0.49 | 1.09  | 0.608298 | 0.530313 | 0.804344 | 0.71787  |
| MmugDNA.2531.1.S1_at    | MmugDNA.2531.1  | 5.18  | 5.09  | 0.08 | 0.07 | 1.06  | 0.430743 | 0.039404 | 0.686984 | 0.243495 |

|                         |                 |       |       |      |      |       |          |          |          |          |
|-------------------------|-----------------|-------|-------|------|------|-------|----------|----------|----------|----------|
| MmugDNA.25310.1.S1_at   | MmugDNA.25310.1 | 6.06  | 5.91  | 0.33 | 0.16 | 1.11  | 0.384935 | 0.507802 | 0.653852 | 0.703336 |
| MmugDNA.25311.1.S1_at   | MmugDNA.25311.1 | 4.57  | 4.69  | 0.27 | 0.09 | -1.09 | 0.262832 | 0.468427 | 0.556683 | 0.677714 |
| MmugDNA.25312.1.S1_at   | MmugDNA.25312.1 | 9.43  | 9.12  | 0.23 | 0.22 | 1.24  | 0.168939 | 0.010007 | 0.46212  | 0.131262 |
| MmugDNA.25313.1.S1_at   | MmugDNA.25313.1 | 10.1  | 9.99  | 0.18 | 0.03 | 1.08  | 0.538123 | 0.767874 | 0.760127 | 0.865256 |
| MmugDNA.25314.1.S1_at   | MmugDNA.25314.1 | 6.15  | 6.16  | 0    | 0.05 | -1    | 0.858013 | 0.70728  | 0.938213 | 0.83023  |
| MmugDNA.25316.1.S1_at   | MmugDNA.25316.1 | 2.76  | 2.84  | 0.02 | 0.12 | -1.06 | 0.904493 | 0.798592 | 0.959486 | 0.884032 |
| MmugDNA.25317.1.S1_at   | MmugDNA.25317.1 | 6.39  | 6.45  | 0.3  | 0.26 | -1.04 | 0.663723 | 0.264358 | 0.837982 | 0.530385 |
| MmugDNA.25319.1.S1_at   | MmugDNA.25319.1 | 6.06  | 6.25  | 0.17 | 0.37 | -1.14 | 0.381982 | 0.246567 | 0.651508 | 0.515917 |
| MmugDNA.2532.1.S1_at    | MmugDNA.2532.1  | 3.99  | 3.85  | 0.16 | 0.23 | 1.1   | 0.538386 | 0.647161 | 0.760296 | 0.793288 |
| MmugDNA.25320.1.S1_at   | MmugDNA.25320.1 | 4.34  | 4.09  | 0.29 | 0.6  | 1.19  | 0.522101 | 0.683298 | 0.749555 | 0.815238 |
| MmugDNA.25323.1.S1_x_at | MmugDNA.25323.1 | 8.04  | 7.84  | 0.16 | 0.04 | 1.15  | 0.108394 | 0.296895 | 0.383016 | 0.555864 |
| MmugDNA.25324.1.S1_at   | MmugDNA.25324.1 | 7.19  | 7.4   | 0.49 | 0.45 | -1.16 | 0.808772 | 0.003494 | 0.914357 | 0.084997 |
| MmugDNA.25325.1.S1_at   | MmugDNA.25325.1 | 8.35  | 7.6   | 0.26 | 0.12 | 1.68  | 0.020936 | 0.110009 | 0.198298 | 0.374138 |
| MmugDNA.25326.1.S1_at   | MmugDNA.25326.1 | 4     | 4.01  | 0.07 | 0.04 | -1    | 0.42221  | 0.816693 | 0.680473 | 0.89427  |
| MmugDNA.25328.1.S1_at   | MmugDNA.25328.1 | 3.42  | 3.34  | 0.07 | 0.16 | 1.05  | 0.990169 | 0.919496 | 0.996449 | 0.954822 |
| MmugDNA.25329.1.S1_at   | MmugDNA.25329.1 | 5.09  | 4.87  | 0.12 | 0.21 | 1.16  | 0.111433 | 0.198174 | 0.387382 | 0.473148 |
| MmugDNA.25330.1.S1_at   | MmugDNA.25330.1 | 3.27  | 3.16  | 0.28 | 0.09 | 1.08  | 0.507338 | 0.682633 | 0.739612 | 0.814669 |
| MmugDNA.25331.1.S1_at   | MmugDNA.25331.1 | 10.98 | 11.37 | 0.19 | 0.04 | -1.32 | 0.02377  | 0.079895 | 0.207137 | 0.327207 |
| MmugDNA.25332.1.S1_at   | MmugDNA.25332.1 | 3.4   | 3.47  | 0.16 | 0.15 | -1.05 | 0.38444  | 0.543782 | 0.653507 | 0.726357 |
| MmugDNA.25333.1.S1_at   | MmugDNA.25333.1 | 3.5   | 3.33  | 0.3  | 0.09 | 1.13  | 0.309379 | 0.432213 | 0.595819 | 0.652775 |
| MmugDNA.25334.1.S1_at   | MmugDNA.25334.1 | 5.06  | 6.26  | 0.53 | 0.31 | -2.31 | 0.044772 | 0.243284 | 0.268915 | 0.513356 |
| MmugDNA.25335.1.S1_at   | MmugDNA.25335.1 | 5.85  | 5.64  | 0.18 | 0.05 | 1.16  | 0.38013  | 0.699124 | 0.649885 | 0.825184 |
| MmugDNA.25336.1.S1_at   | MmugDNA.25336.1 | 7.49  | 7.35  | 0.58 | 0.47 | 1.1   | 0.859268 | 0.011453 | 0.939061 | 0.13846  |
| MmugDNA.25339.1.S1_at   | MmugDNA.25339.1 | 6.42  | 6.66  | 0.62 | 0.27 | -1.18 | 0.496241 | 0.172375 | 0.732208 | 0.448831 |
| MmugDNA.2534.1.S1_at    | MmugDNA.2534.1  | 4.91  | 5.09  | 0.51 | 0.79 | -1.14 | 0.963755 | 0.907354 | 0.985326 | 0.947602 |
| MmugDNA.25340.1.S1_at   | MmugDNA.25340.1 | 9.01  | 8.59  | 0.08 | 0.18 | 1.33  | 0.018347 | 0.006786 | 0.188509 | 0.111388 |
| MmugDNA.25344.1.S1_at   | MmugDNA.25344.1 | 8.22  | 8.86  | 0.17 | 0.05 | -1.56 | 0.001745 | 0.000637 | 0.085035 | 0.042882 |
| MmugDNA.25345.1.S1_at   | MmugDNA.25345.1 | 4.88  | 4.76  | 0.13 | 0.11 | 1.09  | 0.377344 | 0.281962 | 0.647882 | 0.544868 |
| MmugDNA.25346.1.S1_at   | MmugDNA.25346.1 | 5.92  | 5.81  | 0.47 | 0.42 | 1.08  | 0.878349 | 0.433745 | 0.948095 | 0.653964 |
| MmugDNA.25349.1.S1_at   | MmugDNA.25349.1 | 4.66  | 4.72  | 0.14 | 0.04 | -1.05 | 0.739004 | 0.126702 | 0.879058 | 0.397372 |
| MmugDNA.2535.1.S1_at    | MmugDNA.2535.1  | 4.28  | 4.2   | 0.25 | 0.16 | 1.06  | 0.303956 | 0.687254 | 0.591303 | 0.817523 |
| MmugDNA.25350.1.S1_at   | MmugDNA.25350.1 | 3.83  | 3.84  | 0.11 | 0.04 | -1.01 | 0.429016 | 0.666712 | 0.685579 | 0.804734 |
| MmugDNA.25351.1.S1_at   | MmugDNA.25351.1 | 4.39  | 4.37  | 0.28 | 0.17 | 1.01  | 0.217921 | 0.375827 | 0.51576  | 0.613706 |
| MmugDNA.25352.1.S1_at   | MmugDNA.25352.1 | 3.65  | 3.43  | 0.11 | 0.1  | 1.17  | 0.026645 | 0.01724  | 0.216412 | 0.166344 |
| MmugDNA.25355.1.S1_at   | MmugDNA.25355.1 | 4.03  | 3.97  | 0.07 | 0.03 | 1.04  | 0.455248 | 0.883264 | 0.705045 | 0.933464 |
| MmugDNA.25356.1.S1_at   | MmugDNA.25356.1 | 4.46  | 4.53  | 0.07 | 0.09 | -1.05 | 0.145881 | 0.065587 | 0.433576 | 0.301476 |
| MmugDNA.25357.1.S1_at   | MmugDNA.25357.1 | 10.63 | 10.49 | 0.2  | 0.05 | 1.1   | 0.476552 | 0.061686 | 0.718915 | 0.295135 |
| MmugDNA.25358.1.S1_at   | MmugDNA.25358.1 | 8.28  | 8.17  | 1.19 | 0.13 | 1.08  | 0.940596 | 0.134894 | 0.975031 | 0.406878 |
| MmugDNA.2536.1.S1_at    | MmugDNA.2536.1  | 5.94  | 5.85  | 0.22 | 0.15 | 1.07  | 0.636294 | 0.24017  | 0.822077 | 0.51084  |
| MmugDNA.25360.1.S1_at   | MmugDNA.25360.1 | 4.24  | 4.26  | 0.18 | 0.1  | -1.02 | 0.918245 | 0.915012 | 0.965166 | 0.952293 |
| MmugDNA.25361.1.S1_at   | MmugDNA.25361.1 | 11.27 | 11.45 | 0.13 | 0.02 | -1.13 | 0.234834 | 0.000728 | 0.532896 | 0.044699 |
| MmugDNA.25363.1.S1_at   | MmugDNA.25363.1 | 6.87  | 7.06  | 0.44 | 0.52 | -1.14 | 0.150227 | 0.246874 | 0.439377 | 0.516237 |
| MmugDNA.25364.1.S1_at   | MmugDNA.25364.1 | 6.48  | 7.14  | 0.62 | 0.3  | -1.58 | 0.091659 | 0.109507 | 0.359407 | 0.373339 |

|                         |                 |       |       |      |      |        |          |          |          |          |
|-------------------------|-----------------|-------|-------|------|------|--------|----------|----------|----------|----------|
| MmugDNA.31429.1.S1_at   | MmugDNA.31429.1 | 12.75 | 12.78 | 0.06 | 0.05 | -1.02  | 0.139461 | 0.63387  | 0.425004 | 0.784509 |
| MmugDNA.31429.1.S1_s_at | MmugDNA.31429.1 | 12.61 | 12.69 | 0.03 | 0.04 | -1.06  | 0.026531 | 0.395751 | 0.216097 | 0.627639 |
| MmugDNA.25366.1.S1_at   | MmugDNA.25366.1 | 4.32  | 4.26  | 0.09 | 0.16 | 1.04   | 0.689896 | 0.066561 | 0.851884 | 0.303733 |
| MmugDNA.25368.1.S1_at   | MmugDNA.25368.1 | 5.68  | 5.47  | 0.07 | 0.06 | 1.16   | 0.01858  | 0.22958  | 0.189536 | 0.501574 |
| MmugDNA.2537.1.S1_at    | MmugDNA.2537.1  | 11.69 | 11.88 | 0.14 | 0.01 | -1.14  | 0.18921  | 0.003155 | 0.485786 | 0.081739 |
| MmugDNA.25371.1.S1_at   | MmugDNA.25371.1 | 5.03  | 5.15  | 0.13 | 0.09 | -1.09  | 0.099027 | 0.221954 | 0.36989  | 0.495044 |
| MmugDNA.25372.1.S1_at   | MmugDNA.25372.1 | 6.1   | 6.17  | 0.32 | 0.1  | -1.05  | 0.725626 | 0.815563 | 0.871228 | 0.893609 |
| MmugDNA.25373.1.S1_at   | MmugDNA.25373.1 | 11.05 | 11.06 | 0.16 | 0.14 | -1     | 0.728965 | 0.025583 | 0.873373 | 0.200662 |
| MmugDNA.25374.1.S1_at   | MmugDNA.25374.1 | 5.84  | 5.72  | 0.18 | 0.08 | 1.09   | 0.306362 | 0.39519  | 0.593269 | 0.627379 |
| MmugDNA.25375.1.S1_at   | MmugDNA.25375.1 | 6.15  | 7.44  | 0.38 | 0.28 | -2.45  | 0.020297 | 0.018775 | 0.196136 | 0.172226 |
| MmugDNA.25377.1.S1_at   | MmugDNA.25377.1 | 9.35  | 9.23  | 0.25 | 0.15 | 1.08   | 0.643958 | 0.096101 | 0.826523 | 0.353322 |
| MmugDNA.25378.1.S1_at   | MmugDNA.25378.1 | 4.92  | 4.91  | 0.2  | 0.01 | 1.01   | 0.305398 | 0.299076 | 0.59245  | 0.557663 |
| MmugDNA.25379.1.S1_at   | MmugDNA.25379.1 | 12.83 | 12.58 | 0.12 | 0.09 | 1.19   | 0.048995 | 0.140751 | 0.278936 | 0.414115 |
| MmugDNA.2538.1.S1_at    | MmugDNA.2538.1  | 10.18 | 9.92  | 0.42 | 0.17 | 1.2    | 0.135438 | 0.002664 | 0.419372 | 0.076299 |
| MmugDNA.34811.1.S1_at   | MmugDNA.34811.1 | 10.54 | 10.48 | 0.04 | 0.07 | 1.04   | 0.211812 | 0.011986 | 0.509683 | 0.141658 |
| MmugDNA.34811.1.S1_s_at | MmugDNA.34811.1 | 11.73 | 11.68 | 0.08 | 0.05 | 1.04   | 0.424877 | 0.013741 | 0.682288 | 0.150134 |
| MmugDNA.25382.1.S1_at   | MmugDNA.25382.1 | 7.77  | 8.38  | 0.54 | 0.07 | -1.52  | 0.384877 | 0.121562 | 0.653808 | 0.390683 |
| MmugDNA.25383.1.S1_at   | MmugDNA.25383.1 | 5.1   | 4.94  | 0.81 | 0.49 | 1.12   | 0.960976 | 0.789526 | 0.98408  | 0.878424 |
| MmugDNA.25385.1.S1_s_at | MmugDNA.25385.1 | 9.93  | 9.8   | 0.09 | 0.2  | 1.09   | 0.128399 | 0.064609 | 0.410319 | 0.300314 |
| MmugDNA.25387.1.S1_at   | MmugDNA.25387.1 | 4.04  | 4.2   | 0.14 | 0.03 | -1.12  | 0.102362 | 0.079267 | 0.374399 | 0.326444 |
| MmugDNA.25388.1.S1_at   | MmugDNA.25388.1 | 6.42  | 6.79  | 0.19 | 0.38 | -1.29  | 0.633636 | 0.541126 | 0.820437 | 0.72475  |
| MmugDNA.2539.1.S1_at    | MmugDNA.2539.1  | 3.31  | 3.33  | 0.26 | 0    | -1.01  | 0.887861 | 0.911065 | 0.952087 | 0.949838 |
| MmugDNA.25390.1.S1_at   | MmugDNA.25390.1 | 4.16  | 3.55  | 0.35 | 0.15 | 1.52   | 0.081542 | 0.132599 | 0.342555 | 0.404544 |
| MmugDNA.25391.1.S1_at   | MmugDNA.25391.1 | 6.59  | 6.75  | 0.23 | 0.03 | -1.11  | 0.853636 | 0.421734 | 0.936335 | 0.645254 |
| MmugDNA.25391.1.S1_x_at | MmugDNA.25391.1 | 6.57  | 6.79  | 0.2  | 0.06 | -1.17  | 0.385756 | 0.353327 | 0.654416 | 0.596477 |
| MmugDNA.25393.1.S1_at   | MmugDNA.25393.1 | 4.36  | 4.31  | 0.19 | 0.19 | 1.04   | 0.77638  | 0.78157  | 0.89774  | 0.873395 |
| MmugDNA.25394.1.S1_at   | MmugDNA.25394.1 | 3.88  | 3.84  | 0.36 | 0.03 | 1.03   | 0.808194 | 0.813034 | 0.914162 | 0.891895 |
| MmugDNA.25395.1.S1_at   | MmugDNA.25395.1 | 5.35  | 5.29  | 0.64 | 0.13 | 1.04   | 0.369375 | 0.470968 | 0.642818 | 0.679162 |
| MmugDNA.25397.1.S1_at   | MmugDNA.25397.1 | 7.7   | 8.41  | 0.37 | 0.05 | -1.64  | 0.024199 | 0.046028 | 0.208762 | 0.258971 |
| MmugDNA.25398.1.S1_at   | MmugDNA.25398.1 | 10.09 | 10.17 | 0.23 | 0.12 | -1.05  | 0.716691 | 0.427405 | 0.866324 | 0.649237 |
| MmugDNA.25398.1.S1_s_at | MmugDNA.25398.1 | 9.8   | 9.87  | 0.13 | 0.08 | -1.05  | 0.952779 | 0.210894 | 0.980564 | 0.484934 |
| MmugDNA.2540.1.S1_at    | MmugDNA.2540.1  | 5.44  | 5.14  | 0.22 | 0.26 | 1.23   | 0.454083 | 0.566671 | 0.704064 | 0.740723 |
| MmugDNA.2540.1.S1_s_at  | MmugDNA.2540.1  | 7.55  | 6.27  | 0.21 | 0.37 | 2.44   | 0.017281 | 0.010074 | 0.184654 | 0.13168  |
| MmugDNA.25401.1.S1_at   | MmugDNA.25401.1 | 9.95  | 10.06 | 0.24 | 0.01 | -1.08  | 0.140974 | 0.74599  | 0.426837 | 0.852688 |
| MmugDNA.25402.1.S1_at   | MmugDNA.25402.1 | 4.88  | 4.91  | 0.18 | 0.11 | -1.02  | 0.643054 | 0.184728 | 0.825965 | 0.460645 |
| MmugDNA.25403.1.S1_at   | MmugDNA.25403.1 | 3.12  | 3.28  | 0.51 | 0.28 | -1.12  | 0.523768 | 0.586135 | 0.750643 | 0.753294 |
| MmugDNA.25405.1.S1_at   | MmugDNA.25405.1 | 5.54  | 6.03  | 0.09 | 0.28 | -1.41  | 0.056933 | 0.048873 | 0.295858 | 0.265858 |
| MmugDNA.25406.1.S1_at   | MmugDNA.25406.1 | 5.45  | 5.4   | 0.02 | 0.11 | 1.04   | 0.595839 | 0.546135 | 0.795488 | 0.727787 |
| MmugDNA.25407.1.S1_at   | MmugDNA.25407.1 | 10.08 | 10.52 | 0.53 | 0.28 | -1.37  | 0.666088 | 0.860731 | 0.839504 | 0.920675 |
| MmugDNA.25408.1.S1_at   | MmugDNA.25408.1 | 6.68  | 7.57  | 0.47 | 0.41 | -1.85  | 0.152338 | 0.160527 | 0.441909 | 0.436692 |
| MmugDNA.2541.1.S1_at    | MmugDNA.2541.1  | 13.04 | 12.53 | 0.09 | 0.04 | 1.42   | 0.000862 | 0.000128 | 0.073779 | 0.029087 |
| MmugDNA.25410.1.S1_at   | MmugDNA.25410.1 | 3.71  | 3.47  | 0.16 | 0.04 | 1.19   | 0.133888 | 0.568477 | 0.417214 | 0.741983 |
| MmugDNA.25411.1.S1_at   | MmugDNA.25411.1 | 5.37  | 9.14  | 1.86 | 0.28 | -13.64 | 0.05907  | 0.100074 | 0.300144 | 0.358965 |

|                         |                 |       |       |      |      |       |          |          |          |          |
|-------------------------|-----------------|-------|-------|------|------|-------|----------|----------|----------|----------|
| MmugDNA.25412.1.S1_at   | MmugDNA.25412.1 | 5.15  | 5.11  | 0.62 | 0.04 | 1.03  | 0.337965 | 0.452828 | 0.618376 | 0.667356 |
| MmugDNA.25413.1.S1_at   | MmugDNA.25413.1 | 9.53  | 9.32  | 0.18 | 0.12 | 1.16  | 0.11599  | 0.740599 | 0.393014 | 0.849805 |
| MmugDNA.25414.1.S1_at   | MmugDNA.25414.1 | 5.65  | 5.83  | 0.19 | 0.16 | -1.13 | 0.255762 | 0.116628 | 0.550344 | 0.383829 |
| MmugDNA.25415.1.S1_at   | MmugDNA.25415.1 | 3.55  | 3.51  | 0.12 | 0.03 | 1.03  | 0.213822 | 0.419675 | 0.511664 | 0.643599 |
| MmugDNA.25417.1.S1_at   | MmugDNA.25417.1 | 3.87  | 3.92  | 0.15 | 0.2  | -1.03 | 0.33056  | 0.462432 | 0.612579 | 0.673754 |
| MmugDNA.25419.1.S1_at   | MmugDNA.25419.1 | 3.52  | 3.59  | 0.11 | 0.02 | -1.05 | 0.334755 | 0.242553 | 0.615803 | 0.512882 |
| MmugDNA.25420.1.S1_at   | MmugDNA.25420.1 | 4.09  | 3.28  | 0.99 | 0.08 | 1.75  | 0.232701 | 0.302622 | 0.531068 | 0.560201 |
| MmugDNA.25421.1.S1_at   | MmugDNA.25421.1 | 5.95  | 5.96  | 0.07 | 0.07 | -1.01 | 0.486123 | 0.859735 | 0.725548 | 0.920075 |
| MmugDNA.25422.1.S1_at   | MmugDNA.25422.1 | 8.68  | 7.43  | 1.18 | 0.07 | 2.39  | 0.181441 | 0.380885 | 0.476903 | 0.617426 |
| MmugDNA.25423.1.S1_at   | MmugDNA.25423.1 | 4.63  | 4.49  | 0.21 | 0.06 | 1.1   | 0.145507 | 0.180183 | 0.432852 | 0.456751 |
| MmugDNA.25424.1.S1_at   | MmugDNA.25424.1 | 3.75  | 3.84  | 0.62 | 0.04 | -1.06 | 0.492975 | 0.651605 | 0.73014  | 0.796299 |
| MmugDNA.25425.1.S1_at   | MmugDNA.25425.1 | 5.89  | 5.78  | 0.16 | 0.08 | 1.08  | 0.777586 | 0.947074 | 0.898391 | 0.969997 |
| MmugDNA.25426.1.S1_at   | MmugDNA.25426.1 | 4.34  | 4.91  | 0.25 | 0.06 | -1.49 | 0.017936 | 0.123485 | 0.187151 | 0.393518 |
| MmugDNA.25427.1.S1_at   | MmugDNA.25427.1 | 5.26  | 4.86  | 0.28 | 0.1  | 1.32  | 0.138152 | 0.137436 | 0.423385 | 0.410368 |
| MmugDNA.25429.1.S1_at   | MmugDNA.25429.1 | 5.93  | 5.98  | 0.12 | 0.1  | -1.03 | 0.907861 | 0.108757 | 0.961007 | 0.372285 |
| MmugDNA.25430.1.S1_at   | MmugDNA.25430.1 | 5.07  | 5.1   | 0.02 | 0.08 | -1.02 | 0.782173 | 0.012464 | 0.900549 | 0.14417  |
| MmugDNA.25432.1.S1_at   | MmugDNA.25432.1 | 6.17  | 5.26  | 0.7  | 0.35 | 1.88  | 0.152317 | 0.356146 | 0.441909 | 0.59815  |
| MmugDNA.25434.1.S1_at   | MmugDNA.25434.1 | 9.04  | 8.8   | 0.13 | 0.12 | 1.19  | 0.090704 | 0.114486 | 0.357682 | 0.381041 |
| MmugDNA.25435.1.S1_at   | MmugDNA.25435.1 | 4.62  | 4.47  | 0.53 | 0.14 | 1.11  | 0.384164 | 0.48369  | 0.653269 | 0.688112 |
| MmugDNA.25437.1.S1_at   | MmugDNA.25437.1 | 11.41 | 10.43 | 0.25 | 0.24 | 1.98  | 0.017248 | 0.023265 | 0.184536 | 0.191218 |
| MmugDNA.25437.1.S1_s_at | MmugDNA.25437.1 | 10.68 | 10.87 | 0.25 | 0.34 | -1.14 | 0.095502 | 0.018213 | 0.364961 | 0.169777 |
| MmugDNA.25438.1.S1_at   | MmugDNA.25438.1 | 4.5   | 4.7   | 0.16 | 0.07 | -1.15 | 0.14823  | 0.116468 | 0.436776 | 0.383671 |
| MmugDNA.2544.1.S1_at    | MmugDNA.2544.1  | 3.31  | 3.02  | 0.18 | 0.08 | 1.23  | 0.094276 | 0.084422 | 0.363294 | 0.335713 |
| MmugDNA.25441.1.S1_at   | MmugDNA.25441.1 | 6.7   | 6.74  | 0.15 | 0.14 | -1.02 | 0.730978 | 0.414637 | 0.874299 | 0.640456 |
| MmugDNA.25442.1.S1_at   | MmugDNA.25442.1 | 9.83  | 9.33  | 0.22 | 0.06 | 1.42  | 0.017637 | 0.185897 | 0.186416 | 0.461752 |
| MmugDNA.25443.1.S1_at   | MmugDNA.25443.1 | 10.75 | 10.98 | 0.2  | 0.07 | -1.17 | 0.305969 | 0.625308 | 0.592927 | 0.779111 |
| MmugDNA.25445.1.S1_at   | MmugDNA.25445.1 | 4.55  | 4.37  | 0.05 | 0.12 | 1.13  | 0.054656 | 0.209696 | 0.290604 | 0.48341  |
| MmugDNA.25446.1.S1_at   | MmugDNA.25446.1 | 9.65  | 8.79  | 0.22 | 0.11 | 1.82  | 0.004124 | 0.001178 | 0.10967  | 0.05381  |
| MmugDNA.25447.1.S1_at   | MmugDNA.25447.1 | 3.69  | 3.51  | 0.08 | 0.06 | 1.14  | 0.034423 | 0.25066  | 0.240132 | 0.51941  |
| MmugDNA.25448.1.S1_at   | MmugDNA.25448.1 | 10.83 | 10.34 | 0.13 | 0.05 | 1.4   | 0.005793 | 0.000715 | 0.122007 | 0.044419 |
| MmugDNA.25449.1.S1_s_at | MmugDNA.25449.1 | 5.86  | 6.04  | 0.09 | 0.02 | -1.13 | 0.022559 | 0.127169 | 0.203331 | 0.397922 |
| MmugDNA.2545.1.S1_at    | MmugDNA.2545.1  | 6.7   | 6.52  | 0.31 | 0.14 | 1.13  | 0.98261  | 0.734007 | 0.993625 | 0.845896 |
| MmugDNA.25451.1.S1_at   | MmugDNA.25451.1 | 3.28  | 3.1   | 0.26 | 0.05 | 1.13  | 0.777098 | 0.919977 | 0.898158 | 0.954967 |
| MmugDNA.25453.1.S1_at   | MmugDNA.25453.1 | 8.85  | 9.07  | 0.06 | 0.12 | -1.16 | 0.05762  | 0.001827 | 0.297348 | 0.064165 |
| MmugDNA.25455.1.S1_at   | MmugDNA.25455.1 | 8.77  | 9.68  | 0.35 | 0.21 | -1.87 | 0.051662 | 0.096894 | 0.284589 | 0.354311 |
| MmugDNA.25456.1.S1_at   | MmugDNA.25456.1 | 8.7   | 8.24  | 0.42 | 0.13 | 1.37  | 0.054987 | 0.113833 | 0.291487 | 0.380062 |
| MmugDNA.25457.1.S1_at   | MmugDNA.25457.1 | 4.52  | 4.63  | 0.66 | 0.42 | -1.08 | 0.587093 | 0.666924 | 0.790341 | 0.804898 |
| MmugDNA.25458.1.S1_at   | MmugDNA.25458.1 | 3.55  | 3.62  | 0    | 0.11 | -1.05 | 0.943941 | 0.578447 | 0.976384 | 0.748527 |
| MmugDNA.25460.1.S1_x_at | MmugDNA.25460.1 | 6.15  | 5.33  | 1.25 | 0.15 | 1.77  | 0.365042 | 0.546499 | 0.639725 | 0.728079 |
| MmugDNA.25462.1.S1_at   | MmugDNA.25462.1 | 2.89  | 2.9   | 0.04 | 0.05 | -1.01 | 0.8646   | 0.706776 | 0.941377 | 0.829917 |
| MmugDNA.25464.1.S1_at   | MmugDNA.25464.1 | 7.63  | 7.37  | 0.35 | 0.16 | 1.2   | 0.796984 | 0.301312 | 0.908267 | 0.559356 |
| MmugDNA.25465.1.S1_at   | MmugDNA.25465.1 | 5.18  | 5.19  | 0    | 0.11 | -1.01 | 0.855075 | 0.864427 | 0.93691  | 0.923115 |
| MmugDNA.25466.1.S1_at   | MmugDNA.25466.1 | 8.86  | 9.13  | 0.12 | 0.17 | -1.2  | 0.24189  | 0.386323 | 0.538882 | 0.621534 |



|                         |                 |      |       |      |      |       |          |          |          |          |
|-------------------------|-----------------|------|-------|------|------|-------|----------|----------|----------|----------|
| MmugDNA.25467.1.S1_at   | MmugDNA.25467.1 | 4.84 | 4.75  | 0.05 | 0.1  | 1.06  | 0.426974 | 0.272301 | 0.684319 | 0.537053 |
| MmugDNA.2547.1.S1_at    | MmugDNA.2547.1  | 5.44 | 5.25  | 0.34 | 0.09 | 1.14  | 0.367005 | 0.454004 | 0.641189 | 0.668362 |
| MmugDNA.25470.1.S1_at   | MmugDNA.25470.1 | 5.96 | 5.94  | 0.63 | 0.17 | 1.02  | 0.339352 | 0.394276 | 0.619661 | 0.626868 |
| MmugDNA.25473.1.S1_at   | MmugDNA.25473.1 | 3.69 | 3.67  | 0.06 | 0.1  | 1.02  | 0.616067 | 0.318164 | 0.809292 | 0.571046 |
| MmugDNA.25474.1.S1_at   | MmugDNA.25474.1 | 4.87 | 4.93  | 0.09 | 0.1  | -1.04 | 0.564854 | 0.331255 | 0.776417 | 0.579981 |
| MmugDNA.25475.1.S1_at   | MmugDNA.25475.1 | 6.22 | 6.46  | 0.07 | 0.12 | -1.18 | 0.115986 | 0.084318 | 0.393014 | 0.335576 |
| MmugDNA.25476.1.S1_at   | MmugDNA.25476.1 | 3.8  | 3.69  | 0.22 | 0.12 | 1.08  | 0.620581 | 0.036585 | 0.812011 | 0.235834 |
| MmugDNA.25479.1.S1_at   | MmugDNA.25479.1 | 7.84 | 7.15  | 0.18 | 0.08 | 1.6   | 0.004862 | 0.01052  | 0.115123 | 0.13398  |
| MmugDNA.2548.1.S1_at    | MmugDNA.2548.1  | 6.69 | 6.67  | 0.28 | 0.1  | 1.01  | 0.669746 | 0.767148 | 0.841513 | 0.864719 |
| MmugDNA.25480.1.S1_at   | MmugDNA.25480.1 | 5.82 | 5.81  | 0.08 | 0.1  | 1.01  | 0.642007 | 0.278853 | 0.825362 | 0.542599 |
| MmugDNA.25482.1.S1_at   | MmugDNA.25482.1 | 3.66 | 3.39  | 0.32 | 0.29 | 1.21  | 0.752972 | 0.809283 | 0.885904 | 0.890102 |
| MmugDNA.25483.1.S1_at   | MmugDNA.25483.1 | 4.41 | 4.21  | 0.31 | 0.3  | 1.15  | 0.787612 | 0.779862 | 0.903289 | 0.872389 |
| MmugDNA.25484.1.S1_at   | MmugDNA.25484.1 | 6.13 | 6.66  | 0.19 | 0    | -1.44 | 0.010835 | 0.007454 | 0.153877 | 0.115872 |
| MmugDNA.25485.1.S1_at   | MmugDNA.25485.1 | 9.88 | 9.94  | 0.13 | 0.15 | -1.04 | 0.798152 | 0.555363 | 0.908871 | 0.733767 |
| MmugDNA.25486.1.S1_at   | MmugDNA.25486.1 | 4.9  | 4.98  | 0.41 | 0.27 | -1.06 | 0.353541 | 0.494832 | 0.630714 | 0.695116 |
| MmugDNA.25488.1.S1_at   | MmugDNA.25488.1 | 5.95 | 5.55  | 0.3  | 0.2  | 1.32  | 0.18919  | 0.406794 | 0.485786 | 0.634501 |
| MmugDNA.25489.1.S1_at   | MmugDNA.25489.1 | 4.26 | 4.18  | 0.09 | 0.06 | 1.06  | 0.73057  | 0.881301 | 0.87404  | 0.932281 |
| MmugDNA.25490.1.S1_s_at | MmugDNA.25490.1 | 5.45 | 5.75  | 0.5  | 0.05 | -1.23 | 0.933338 | 0.449888 | 0.972051 | 0.665343 |
| MmugDNA.25491.1.S1_s_at | MmugDNA.25491.1 | 7.75 | 7.26  | 0.38 | 0.21 | 1.4   | 0.117429 | 0.295431 | 0.394754 | 0.554885 |
| MmugDNA.25493.1.S1_at   | MmugDNA.25493.1 | 8.39 | 8.87  | 0.25 | 0.15 | -1.39 | 0.053141 | 0.245448 | 0.28778  | 0.515213 |
| MmugDNA.25495.1.S1_at   | MmugDNA.25495.1 | 3.93 | 3.95  | 0.02 | 0.08 | -1.02 | 0.294304 | 0.336427 | 0.583302 | 0.583831 |
| MmugDNA.25497.1.S1_at   | MmugDNA.25497.1 | 6.1  | 6.34  | 0.18 | 0.1  | -1.17 | 0.087228 | 0.052201 | 0.35291  | 0.274044 |
| MmugDNA.25498.1.S1_at   | MmugDNA.25498.1 | 4.58 | 4.58  | 0.08 | 0.01 | 1     | 0.894612 | 0.706424 | 0.955061 | 0.829634 |
| MmugDNA.25499.1.S1_at   | MmugDNA.25499.1 | 4.36 | 4.37  | 0.05 | 0    | -1    | 0.751234 | 0.510226 | 0.885228 | 0.704755 |
| MmugDNA.255.1.S1_at     | MmugDNA.255.1   | 7.16 | 6.31  | 0.55 | 0.22 | 1.81  | 0.048319 | 0.079826 | 0.277205 | 0.327156 |
| MmugDNA.25500.1.S1_at   | MmugDNA.25500.1 | 6.4  | 6.37  | 0.18 | 0    | 1.02  | 0.510228 | 0.295756 | 0.741634 | 0.555186 |
| MmugDNA.25501.1.S1_at   | MmugDNA.25501.1 | 7.17 | 7.36  | 0.21 | 0.17 | -1.14 | 0.291759 | 0.892268 | 0.581177 | 0.938598 |
| MmugDNA.25502.1.S1_at   | MmugDNA.25502.1 | 6.26 | 5.41  | 0.38 | 0.12 | 1.8   | 0.052518 | 0.136329 | 0.286291 | 0.408746 |
| MmugDNA.25503.1.S1_at   | MmugDNA.25503.1 | 9.84 | 10.21 | 0.38 | 0.04 | -1.29 | 0.14919  | 0.788718 | 0.437947 | 0.877894 |
| MmugDNA.25505.1.S1_at   | MmugDNA.25505.1 | 6.81 | 6.8   | 0.11 | 0.05 | 1.01  | 0.874519 | 0.151227 | 0.94618  | 0.425924 |
| MmugDNA.25506.1.S1_at   | MmugDNA.25506.1 | 7    | 7.07  | 0.1  | 0.21 | -1.05 | 0.672472 | 0.129486 | 0.843221 | 0.400938 |
| MmugDNA.2551.1.S1_at    | MmugDNA.2551.1  | 4.23 | 3.89  | 0.31 | 0.09 | 1.26  | 0.124378 | 0.162705 | 0.404534 | 0.43882  |
| MmugDNA.25510.1.S1_s_at | MmugDNA.25510.1 | 4.31 | 4.7   | 0.69 | 0.3  | -1.32 | 0.300596 | 0.401963 | 0.588799 | 0.631137 |
| MmugDNA.25512.1.S1_at   | MmugDNA.25512.1 | 9.58 | 9.2   | 0.15 | 0.09 | 1.3   | 0.047692 | 0.437914 | 0.275876 | 0.657026 |
| MmugDNA.25514.1.S1_at   | MmugDNA.25514.1 | 4.43 | 4.48  | 0.05 | 0.06 | -1.03 | 0.809757 | 0.24418  | 0.914781 | 0.514164 |
| MmugDNA.25516.1.S1_at   | MmugDNA.25516.1 | 5.05 | 4.8   | 0.15 | 0.12 | 1.19  | 0.351956 | 0.010885 | 0.629564 | 0.135939 |
| MmugDNA.25517.1.S1_at   | MmugDNA.25517.1 | 3.72 | 3.78  | 0.05 | 0.09 | -1.04 | 0.454336 | 0.052869 | 0.704251 | 0.275522 |
| MmugDNA.25517.1.S1_s_at | MmugDNA.25517.1 | 4.99 | 4.9   | 0.09 | 0.17 | 1.07  | 0.707465 | 0.315129 | 0.861496 | 0.568849 |
| MmugDNA.25518.1.S1_at   | MmugDNA.25518.1 | 5.76 | 5.58  | 0.39 | 0.13 | 1.14  | 0.166555 | 0.200603 | 0.459742 | 0.47515  |
| MmugDNA.25519.1.S1_at   | MmugDNA.25519.1 | 3.66 | 3.56  | 0.25 | 0.11 | 1.08  | 0.510793 | 0.381478 | 0.742113 | 0.617691 |
| MmugDNA.2552.1.S1_at    | MmugDNA.2552.1  | 6.46 | 6.48  | 0.23 | 0.09 | -1.02 | 0.492155 | 0.422287 | 0.72956  | 0.645637 |
| MmugDNA.25520.1.S1_at   | MmugDNA.25520.1 | 3.87 | 3.93  | 0.06 | 0.1  | -1.04 | 0.95071  | 0.634013 | 0.979586 | 0.784594 |
| MmugDNA.25521.1.S1_at   | MmugDNA.25521.1 | 3.69 | 3.73  | 0.28 | 0.31 | -1.03 | 0.961311 | 0.61732  | 0.984154 | 0.773333 |

|                         |                 |       |       |      |      |       |          |          |          |          |
|-------------------------|-----------------|-------|-------|------|------|-------|----------|----------|----------|----------|
| MmugDNA.25522.1.S1_at   | MmugDNA.25522.1 | 3.53  | 3.66  | 0.07 | 0.04 | -1.09 | 0.063022 | 0.103577 | 0.307802 | 0.364346 |
| MmugDNA.25523.1.S1_at   | MmugDNA.25523.1 | 6.09  | 6.08  | 0.43 | 0.19 | 1.01  | 0.421906 | 0.55244  | 0.68023  | 0.731747 |
| MmugDNA.25524.1.S1_at   | MmugDNA.25524.1 | 5.1   | 5     | 0.01 | 0.12 | 1.07  | 0.114977 | 0.049819 | 0.392008 | 0.268305 |
| MmugDNA.25526.1.S1_at   | MmugDNA.25526.1 | 10.94 | 10.28 | 0.17 | 0.47 | 1.57  | 0.270911 | 0.00522  | 0.562872 | 0.100105 |
| MmugDNA.25528.1.S1_at   | MmugDNA.25528.1 | 4.95  | 5.11  | 0.51 | 0.27 | -1.12 | 0.699379 | 0.808755 | 0.857265 | 0.889895 |
| MmugDNA.2553.1.S1_at    | MmugDNA.2553.1  | 5.74  | 5.46  | 0.35 | 0.07 | 1.21  | 0.214894 | 0.31323  | 0.512491 | 0.567753 |
| MmugDNA.25531.1.S1_at   | MmugDNA.25531.1 | 10.26 | 10.54 | 0.34 | 0.03 | -1.21 | 0.637536 | 0.132966 | 0.822534 | 0.404626 |
| MmugDNA.25532.1.S1_s_at | MmugDNA.25532.1 | 9     | 9.17  | 0.09 | 0.06 | -1.12 | 0.310261 | 0.066027 | 0.596522 | 0.302361 |
| MmugDNA.25533.1.S1_at   | MmugDNA.25533.1 | 3.71  | 3.67  | 0.14 | 0.24 | 1.03  | 0.416173 | 0.486143 | 0.676628 | 0.689635 |
| MmugDNA.25534.1.S1_at   | MmugDNA.25534.1 | 10.06 | 10.1  | 0.2  | 0.07 | -1.03 | 0.97269  | 0.084503 | 0.98906  | 0.335901 |
| MmugDNA.25536.1.S1_at   | MmugDNA.25536.1 | 7.46  | 7.53  | 0.06 | 0.04 | -1.05 | 0.338347 | 0.063363 | 0.61869  | 0.298403 |
| MmugDNA.25537.1.S1_at   | MmugDNA.25537.1 | 5.13  | 4.87  | 0.28 | 0.3  | 1.19  | 0.147454 | 0.197068 | 0.435407 | 0.472213 |
| MmugDNA.25539.1.S1_at   | MmugDNA.25539.1 | 13.05 | 13.14 | 0.11 | 0.01 | -1.07 | 0.685157 | 0.358957 | 0.849975 | 0.600344 |
| MmugDNA.2554.1.S1_at    | MmugDNA.2554.1  | 6.1   | 6.16  | 0.12 | 0.05 | -1.04 | 0.483358 | 0.057985 | 0.723504 | 0.287289 |
| MmugDNA.25542.1.S1_at   | MmugDNA.25542.1 | 7.97  | 7.24  | 0.47 | 0.07 | 1.66  | 0.079409 | 0.166309 | 0.339448 | 0.442861 |
| MmugDNA.25543.1.S1_at   | MmugDNA.25543.1 | 3.06  | 3.04  | 0.14 | 0.09 | 1.01  | 0.739243 | 0.916287 | 0.879231 | 0.953121 |
| MmugDNA.25544.1.S1_at   | MmugDNA.25544.1 | 7.53  | 8.42  | 0.5  | 0.34 | -1.85 | 0.306697 | 0.113039 | 0.593535 | 0.378888 |
| MmugDNA.25545.1.S1_at   | MmugDNA.25545.1 | 11.63 | 11.94 | 0.14 | 0.14 | -1.24 | 0.020492 | 0.065056 | 0.196641 | 0.301009 |
| MmugDNA.25546.1.S1_at   | MmugDNA.25546.1 | 4.49  | 4.19  | 1.24 | 0.25 | 1.24  | 0.226134 | 0.245801 | 0.523932 | 0.515519 |
| MmugDNA.25547.1.S1_at   | MmugDNA.25547.1 | 6.3   | 6.26  | 0.12 | 0.06 | 1.03  | 0.976108 | 0.42617  | 0.990441 | 0.648368 |
| MmugDNA.25548.1.S1_at   | MmugDNA.25548.1 | 6.21  | 6.03  | 0.15 | 0.08 | 1.13  | 0.07582  | 0.134453 | 0.333731 | 0.406605 |
| MmugDNA.25549.1.S1_at   | MmugDNA.25549.1 | 6.84  | 7.06  | 0.31 | 0.15 | -1.17 | 0.524928 | 0.783246 | 0.751591 | 0.874547 |
| MmugDNA.2555.1.S1_at    | MmugDNA.2555.1  | 6.03  | 5.26  | 0.19 | 0.63 | 1.7   | 0.163517 | 0.216724 | 0.455853 | 0.490311 |
| MmugDNA.25550.1.S1_at   | MmugDNA.25550.1 | 7.28  | 7.27  | 0.02 | 0.09 | 1     | 0.956158 | 0.033769 | 0.981989 | 0.227414 |
| MmugDNA.25551.1.S1_at   | MmugDNA.25551.1 | 3.24  | 3.16  | 0.15 | 0.03 | 1.06  | 0.349503 | 0.111707 | 0.627316 | 0.376691 |
| MmugDNA.25554.1.S1_at   | MmugDNA.25554.1 | 9.72  | 10.07 | 0.45 | 0.1  | -1.28 | 0.283404 | 0.293712 | 0.573857 | 0.553707 |
| MmugDNA.25555.1.S1_at   | MmugDNA.25555.1 | 6.47  | 7.34  | 0.32 | 0.17 | -1.83 | 0.010075 | 0.035482 | 0.149988 | 0.232579 |
| MmugDNA.25556.1.S1_at   | MmugDNA.25556.1 | 3.66  | 3.66  | 0.03 | 0    | 1     | 0.373901 | 0.421875 | 0.645118 | 0.645369 |
| MmugDNA.25557.1.S1_at   | MmugDNA.25557.1 | 8.88  | 9.36  | 0.43 | 0.05 | -1.4  | 0.09961  | 0.008228 | 0.370515 | 0.120459 |
| MmugDNA.25558.1.S1_at   | MmugDNA.25558.1 | 4.09  | 4.08  | 0    | 0.1  | 1.01  | 0.464256 | 0.339853 | 0.710586 | 0.586417 |
| MmugDNA.25559.1.S1_at   | MmugDNA.25559.1 | 5.6   | 6.26  | 0.45 | 0.19 | -1.57 | 0.228969 | 0.31519  | 0.527594 | 0.568899 |
| MmugDNA.2556.1.S1_at    | MmugDNA.2556.1  | 9.08  | 8.84  | 0.07 | 0.09 | 1.18  | 0.010386 | 0.035124 | 0.151842 | 0.231645 |
| MmugDNA.25560.1.S1_at   | MmugDNA.25560.1 | 2.76  | 2.81  | 0.11 | 0.06 | -1.04 | 0.542123 | 0.670119 | 0.762635 | 0.807077 |
| MmugDNA.25562.1.S1_at   | MmugDNA.25562.1 | 4.3   | 4.38  | 0.38 | 0.05 | -1.06 | 0.612549 | 0.411867 | 0.806905 | 0.638434 |
| MmugDNA.25563.1.S1_at   | MmugDNA.25563.1 | 4.8   | 4.83  | 0.84 | 0.17 | -1.02 | 0.516079 | 0.445404 | 0.745613 | 0.662343 |
| MmugDNA.25564.1.S1_at   | MmugDNA.25564.1 | 9.61  | 9.07  | 0.17 | 0.3  | 1.45  | 0.127953 | 0.101611 | 0.409866 | 0.361509 |
| MmugDNA.25565.1.S1_at   | MmugDNA.25565.1 | 4.29  | 4.53  | 0.1  | 0.22 | -1.18 | 0.27931  | 0.405842 | 0.570678 | 0.634037 |
| MmugDNA.25566.1.S1_at   | MmugDNA.25566.1 | 4.56  | 4.32  | 0.24 | 0.12 | 1.18  | 0.419834 | 0.54174  | 0.679064 | 0.725057 |
| MmugDNA.25567.1.S1_at   | MmugDNA.25567.1 | 3.78  | 3.56  | 0.09 | 0.2  | 1.16  | 0.109879 | 0.134952 | 0.385105 | 0.406951 |
| MmugDNA.25568.1.S1_at   | MmugDNA.25568.1 | 7.95  | 7.27  | 0.06 | 0.08 | 1.6   | 0.000303 | 0.000302 | 0.058024 | 0.034907 |
| MmugDNA.25569.1.S1_at   | MmugDNA.25569.1 | 5.41  | 5.13  | 0.19 | 0.05 | 1.21  | 0.128821 | 0.087164 | 0.41104  | 0.340133 |
| MmugDNA.2557.1.S1_x_at  | MmugDNA.2557.1  | 11.71 | 11.56 | 0.66 | 0.21 | 1.11  | 0.26047  | 0.192355 | 0.554576 | 0.467834 |
| MmugDNA.25571.1.S1_at   | MmugDNA.25571.1 | 7.53  | 5.4   | 0.82 | 0.26 | 4.37  | 0.019129 | 0.042196 | 0.191749 | 0.24989  |

|                         |                 |       |       |      |      |       |          |          |          |          |
|-------------------------|-----------------|-------|-------|------|------|-------|----------|----------|----------|----------|
| MmugDNA.25574.1.S1_at   | MmugDNA.25574.1 | 8.11  | 8     | 0.5  | 0.16 | 1.08  | 0.72432  | 0.149749 | 0.870551 | 0.424364 |
| MmugDNA.25575.1.S1_at   | MmugDNA.25575.1 | 4.95  | 4.99  | 0.33 | 0.1  | -1.03 | 0.909239 | 0.572156 | 0.961553 | 0.744268 |
| MmugDNA.25576.1.S1_at   | MmugDNA.25576.1 | 10.4  | 10.32 | 0.33 | 0.24 | 1.06  | 0.688167 | 0.536058 | 0.851067 | 0.721454 |
| MmugDNA.25577.1.S1_at   | MmugDNA.25577.1 | 6.46  | 6.25  | 0.32 | 0.34 | 1.16  | 0.564337 | 0.093087 | 0.776031 | 0.349292 |
| MmugDNA.25578.1.S1_at   | MmugDNA.25578.1 | 6.7   | 6.67  | 0.56 | 0.1  | 1.02  | 0.340641 | 0.517325 | 0.620859 | 0.709435 |
| MmugDNA.25579.1.S1_at   | MmugDNA.25579.1 | 5.16  | 5.38  | 0.11 | 0.23 | -1.17 | 0.16536  | 0.194998 | 0.458328 | 0.470146 |
| MmugDNA.2558.1.S1_at    | MmugDNA.2558.1  | 2.71  | 2.63  | 0.1  | 0.06 | 1.05  | 0.143338 | 0.463536 | 0.429654 | 0.674489 |
| MmugDNA.25580.1.S1_at   | MmugDNA.25580.1 | 11.9  | 11.34 | 0.17 | 0.04 | 1.47  | 0.005178 | 0.058482 | 0.116998 | 0.288549 |
| MmugDNA.25581.1.S1_at   | MmugDNA.25581.1 | 4.72  | 4.66  | 0.05 | 0.15 | 1.04  | 0.326617 | 0.183094 | 0.609643 | 0.459493 |
| MmugDNA.25582.1.S1_at   | MmugDNA.25582.1 | 4.52  | 4.45  | 0.06 | 0.06 | 1.05  | 0.211932 | 0.069298 | 0.509822 | 0.309515 |
| MmugDNA.25584.1.S1_at   | MmugDNA.25584.1 | 10.92 | 11.23 | 0.69 | 0.02 | -1.24 | 0.153856 | 0.086486 | 0.444014 | 0.33905  |
| MmugDNA.25585.1.S1_at   | MmugDNA.25585.1 | 3.66  | 3.48  | 0.56 | 0.13 | 1.13  | 0.241361 | 0.244397 | 0.538538 | 0.514233 |
| MmugDNA.25586.1.S1_at   | MmugDNA.25586.1 | 6.28  | 6.44  | 0.32 | 0.15 | -1.12 | 0.151979 | 0.438842 | 0.441546 | 0.657715 |
| MmugDNA.25588.1.S1_at   | MmugDNA.25588.1 | 3.82  | 3.35  | 0.85 | 0.78 | 1.38  | 0.849649 | 0.577956 | 0.934538 | 0.748185 |
| MmugDNA.25589.1.S1_at   | MmugDNA.25589.1 | 7.59  | 7.51  | 0.1  | 0.12 | 1.06  | 0.086252 | 0.050032 | 0.350935 | 0.268904 |
| MmugDNA.2559.1.S1_at    | MmugDNA.2559.1  | 9.8   | 9.84  | 0.21 | 0.13 | -1.02 | 0.76851  | 0.073708 | 0.893634 | 0.317051 |
| MmugDNA.25591.1.S1_at   | MmugDNA.25591.1 | 5.67  | 5.68  | 0.19 | 0    | -1    | 0.391545 | 0.637331 | 0.658723 | 0.786824 |
| MmugDNA.25592.1.S1_at   | MmugDNA.25592.1 | 3.6   | 3.32  | 0.28 | 0.22 | 1.21  | 0.473998 | 0.597578 | 0.717191 | 0.760257 |
| MmugDNA.25593.1.S1_at   | MmugDNA.25593.1 | 6.12  | 5.51  | 0.28 | 0.22 | 1.52  | 0.027695 | 0.168359 | 0.218912 | 0.445015 |
| MmugDNA.25595.1.S1_at   | MmugDNA.25595.1 | 6.01  | 5.81  | 0.62 | 0.1  | 1.15  | 0.357868 | 0.40958  | 0.633697 | 0.636594 |
| MmugDNA.25596.1.S1_at   | MmugDNA.25596.1 | 8.52  | 9.15  | 0.44 | 0.28 | -1.55 | 0.082261 | 0.0652   | 0.343869 | 0.301239 |
| MmugDNA.25597.1.S1_at   | MmugDNA.25597.1 | 6.57  | 6.52  | 0.07 | 0.14 | 1.04  | 0.420986 | 0.459341 | 0.679818 | 0.671726 |
| MmugDNA.25598.1.S1_at   | MmugDNA.25598.1 | 6.54  | 7.32  | 0.42 | 0.25 | -1.71 | 0.245473 | 0.354998 | 0.541518 | 0.597466 |
| MmugDNA.25599.1.S1_at   | MmugDNA.25599.1 | 5.76  | 5.73  | 0.14 | 0.04 | 1.02  | 0.657657 | 0.39577  | 0.834622 | 0.627639 |
| MmugDNA.256.1.S1_at     | MmugDNA.256.1   | 2.5   | 2.54  | 0.66 | 0.03 | -1.03 | 0.413928 | 0.524574 | 0.675232 | 0.714424 |
| MmugDNA.2560.1.S1_s_at  | MmugDNA.2560.1  | 8.48  | 8.3   | 0.17 | 0.08 | 1.13  | 0.288233 | 0.445353 | 0.577949 | 0.662341 |
| MmugDNA.25600.1.S1_at   | MmugDNA.25600.1 | 5.87  | 5.89  | 0.12 | 0.02 | -1.01 | 0.593732 | 0.91862  | 0.794185 | 0.954356 |
| MmugDNA.25602.1.S1_at   | MmugDNA.25602.1 | 6.45  | 6.41  | 0.04 | 0.13 | 1.03  | 0.322966 | 0.395871 | 0.606849 | 0.627744 |
| MmugDNA.25603.1.S1_at   | MmugDNA.25603.1 | 11.68 | 10.82 | 0.29 | 0.31 | 1.81  | 0.055096 | 0.319473 | 0.291755 | 0.571823 |
| MmugDNA.25604.1.S1_at   | MmugDNA.25604.1 | 6.37  | 6.68  | 0.41 | 0.27 | -1.24 | 0.619084 | 0.47478  | 0.810999 | 0.681695 |
| MmugDNA.25605.1.S1_at   | MmugDNA.25605.1 | 5.87  | 5.86  | 0.22 | 0.44 | 1.01  | 0.709709 | 0.60907  | 0.86264  | 0.767545 |
| MmugDNA.25606.1.S1_at   | MmugDNA.25606.1 | 11.96 | 11.25 | 0.2  | 0.14 | 1.64  | 0.007027 | 0.010264 | 0.131283 | 0.132661 |
| MmugDNA.25606.1.S1_s_at | MmugDNA.25606.1 | 11.14 | 10.34 | 0.25 | 0.17 | 1.75  | 0.006204 | 0.008577 | 0.125037 | 0.122911 |
| MmugDNA.25607.1.S1_at   | MmugDNA.25607.1 | 3.8   | 3.57  | 0.12 | 0.14 | 1.17  | 0.238077 | 0.151394 | 0.535495 | 0.426104 |
| MmugDNA.25608.1.S1_at   | MmugDNA.25608.1 | 5.05  | 5.54  | 0.3  | 0.18 | -1.4  | 0.36965  | 0.414527 | 0.642969 | 0.640403 |
| MmugDNA.25609.1.S1_at   | MmugDNA.25609.1 | 4.46  | 4.84  | 0.56 | 0.23 | -1.3  | 0.54831  | 0.767909 | 0.766492 | 0.865256 |
| MmugDNA.2561.1.S1_at    | MmugDNA.2561.1  | 9.72  | 9.43  | 0.22 | 0.27 | 1.22  | 0.187087 | 0.010192 | 0.483199 | 0.132348 |
| MmugDNA.25610.1.S1_at   | MmugDNA.25610.1 | 2.96  | 3.17  | 0.34 | 0.44 | -1.16 | 0.452302 | 0.560224 | 0.702807 | 0.736553 |
| MmugDNA.25611.1.S1_at   | MmugDNA.25611.1 | 8.97  | 9.1   | 0.18 | 0.09 | -1.1  | 0.617617 | 0.474977 | 0.810081 | 0.681837 |
| MmugDNA.25612.1.S1_at   | MmugDNA.25612.1 | 4.1   | 3.94  | 0.22 | 0.18 | 1.12  | 0.30826  | 0.394442 | 0.594925 | 0.626982 |
| MmugDNA.25613.1.S1_at   | MmugDNA.25613.1 | 8.93  | 8.18  | 0.75 | 0.7  | 1.68  | 0.296872 | 0.452574 | 0.585528 | 0.667169 |
| MmugDNA.25614.1.S1_at   | MmugDNA.25614.1 | 6.57  | 6.76  | 0.36 | 0.3  | -1.14 | 0.945057 | 0.382085 | 0.976877 | 0.618309 |
| MmugDNA.25615.1.S1_at   | MmugDNA.25615.1 | 6.31  | 6.02  | 0.25 | 0.1  | 1.22  | 0.141939 | 0.211362 | 0.427917 | 0.48553  |

|                         |                 |       |       |      |      |        |          |          |          |          |
|-------------------------|-----------------|-------|-------|------|------|--------|----------|----------|----------|----------|
| MmugDNA.25618.1.S1_at   | MmugDNA.25618.1 | 9.15  | 9.22  | 0.3  | 0.06 | -1.04  | 0.20938  | 0.469252 | 0.506886 | 0.678175 |
| MmugDNA.2562.1.S1_at    | MmugDNA.2562.1  | 6.95  | 7.11  | 0.1  | 0.16 | -1.12  | 0.192455 | 0.829694 | 0.488977 | 0.902187 |
| MmugDNA.25620.1.S1_s_at | MmugDNA.25620.1 | 6.88  | 6.76  | 0.06 | 0.07 | 1.08   | 0.275164 | 0.024316 | 0.566807 | 0.195185 |
| MmugDNA.25623.1.S1_at   | MmugDNA.25623.1 | 5.14  | 4.99  | 0.7  | 0.33 | 1.11   | 0.484717 | 0.718111 | 0.724452 | 0.836865 |
| MmugDNA.25624.1.S1_at   | MmugDNA.25624.1 | 7.35  | 7.65  | 0.8  | 0.05 | -1.23  | 0.53294  | 0.480554 | 0.756711 | 0.685885 |
| MmugDNA.25625.1.S1_at   | MmugDNA.25625.1 | 5.6   | 9.09  | 1.26 | 0.26 | -11.23 | 0.017316 | 0.180425 | 0.184859 | 0.457077 |
| MmugDNA.25627.1.S1_at   | MmugDNA.25627.1 | 8.66  | 9.73  | 0.85 | 0.14 | -2.09  | 0.11137  | 0.453207 | 0.387378 | 0.66762  |
| MmugDNA.25628.1.S1_at   | MmugDNA.25628.1 | 7.95  | 7.53  | 0.15 | 0.33 | 1.33   | 0.067862 | 0.036032 | 0.318295 | 0.234255 |
| MmugDNA.25629.1.S1_at   | MmugDNA.25629.1 | 5.81  | 5.63  | 0.27 | 0.05 | 1.13   | 0.27431  | 0.359867 | 0.566281 | 0.601105 |
| MmugDNA.25630.1.S1_at   | MmugDNA.25630.1 | 8.15  | 7.85  | 0.29 | 0.04 | 1.23   | 0.457471 | 0.732897 | 0.706397 | 0.845436 |
| MmugDNA.25631.1.S1_at   | MmugDNA.25631.1 | 4.54  | 4.21  | 0.36 | 0.1  | 1.26   | 0.162941 | 0.194289 | 0.45504  | 0.469384 |
| MmugDNA.25632.1.S1_at   | MmugDNA.25632.1 | 9.89  | 9.47  | 0.24 | 0.06 | 1.34   | 0.02658  | 0.088208 | 0.216244 | 0.341721 |
| MmugDNA.25633.1.S1_at   | MmugDNA.25633.1 | 2.85  | 2.82  | 0.09 | 0.21 | 1.02   | 0.521992 | 0.654285 | 0.749514 | 0.797979 |
| MmugDNA.25635.1.S1_at   | MmugDNA.25635.1 | 3.39  | 3.39  | 0.06 | 0    | -1     | 0.859563 | 0.34999  | 0.93919  | 0.593743 |
| MmugDNA.25636.1.S1_at   | MmugDNA.25636.1 | 3.65  | 3.62  | 0.15 | 0.02 | 1.02   | 0.242809 | 0.394018 | 0.539559 | 0.626734 |
| MmugDNA.25637.1.S1_at   | MmugDNA.25637.1 | 12.34 | 12.61 | 0.18 | 0.1  | -1.21  | 0.112086 | 0.66927  | 0.388221 | 0.806514 |
| MmugDNA.25638.1.S1_at   | MmugDNA.25638.1 | 6.89  | 6.85  | 0.19 | 0.05 | 1.02   | 0.645373 | 0.378288 | 0.827328 | 0.615438 |
| MmugDNA.25639.1.S1_at   | MmugDNA.25639.1 | 4.66  | 4.55  | 0.27 | 0.2  | 1.08   | 0.683139 | 0.579743 | 0.848902 | 0.74927  |
| MmugDNA.25640.1.S1_at   | MmugDNA.25640.1 | 5.5   | 6.48  | 1.26 | 0.32 | -1.98  | 0.921084 | 0.540607 | 0.966268 | 0.724459 |
| MmugDNA.25641.1.S1_at   | MmugDNA.25641.1 | 5.53  | 5.7   | 0.11 | 0.07 | -1.13  | 0.075979 | 0.036138 | 0.333968 | 0.234582 |
| MmugDNA.25643.1.S1_at   | MmugDNA.25643.1 | 4.14  | 4.17  | 0.53 | 0.02 | -1.02  | 0.41246  | 0.578242 | 0.674115 | 0.748372 |
| MmugDNA.25644.1.S1_at   | MmugDNA.25644.1 | 11.2  | 11.25 | 0.2  | 0.08 | -1.03  | 0.944184 | 0.037567 | 0.976499 | 0.238211 |
| MmugDNA.25648.1.S1_at   | MmugDNA.25648.1 | 5.6   | 5.38  | 0.27 | 0.19 | 1.16   | 0.535557 | 0.80084  | 0.75841  | 0.885464 |
| MmugDNA.25650.1.S1_at   | MmugDNA.25650.1 | 4.13  | 3.81  | 0.17 | 0.19 | 1.25   | 0.100737 | 0.133087 | 0.371863 | 0.404734 |
| MmugDNA.25651.1.S1_at   | MmugDNA.25651.1 | 4.42  | 4.39  | 0.13 | 0.08 | 1.02   | 0.193933 | 0.271158 | 0.490515 | 0.536259 |
| MmugDNA.25654.1.S1_at   | MmugDNA.25654.1 | 7.2   | 7.28  | 0.5  | 0.19 | -1.06  | 0.797446 | 0.321941 | 0.908517 | 0.573573 |
| MmugDNA.25655.1.S1_at   | MmugDNA.25655.1 | 4.49  | 4.52  | 0.06 | 0.12 | -1.02  | 0.764781 | 0.445661 | 0.892078 | 0.662478 |
| MmugDNA.25657.1.S1_at   | MmugDNA.25657.1 | 4.83  | 10.66 | 3.04 | 0.29 | -56.68 | 0.084122 | 0.34676  | 0.34741  | 0.591536 |
| MmugDNA.25657.1.S1_s_at | MmugDNA.25657.1 | 5.25  | 10.58 | 2.69 | 0.32 | -40.5  | 0.079032 | 0.335782 | 0.338745 | 0.583515 |
| MmugDNA.25658.1.S1_at   | MmugDNA.25658.1 | 6.13  | 6.68  | 0.44 | 0.23 | -1.46  | 0.126553 | 0.208497 | 0.407968 | 0.482435 |
| MmugDNA.25659.1.S1_at   | MmugDNA.25659.1 | 6.3   | 6.02  | 0.21 | 0.03 | 1.21   | 0.104372 | 0.11881  | 0.377773 | 0.386946 |
| MmugDNA.25660.1.S1_at   | MmugDNA.25660.1 | 7.56  | 6.74  | 0.34 | 0.52 | 1.76   | 0.122539 | 0.36745  | 0.401258 | 0.607095 |
| MmugDNA.25661.1.S1_at   | MmugDNA.25661.1 | 7.11  | 6.82  | 1.63 | 0.81 | 1.22   | 0.499075 | 0.321919 | 0.734029 | 0.573567 |
| MmugDNA.25662.1.S1_at   | MmugDNA.25662.1 | 9.24  | 9.24  | 0.17 | 0.1  | 1      | 0.38534  | 0.274122 | 0.654133 | 0.538575 |
| MmugDNA.25663.1.S1_at   | MmugDNA.25663.1 | 6.22  | 6.34  | 0.12 | 0.1  | -1.09  | 0.491256 | 0.880024 | 0.729196 | 0.93148  |
| MmugDNA.25664.1.S1_at   | MmugDNA.25664.1 | 9.03  | 9.79  | 0.32 | 0.09 | -1.69  | 0.022473 | 0.047915 | 0.203193 | 0.26377  |
| MmugDNA.25665.1.S1_at   | MmugDNA.25665.1 | 3.81  | 3.89  | 0.18 | 0.13 | -1.05  | 0.543404 | 0.760613 | 0.763461 | 0.860949 |
| MmugDNA.25668.1.S1_at   | MmugDNA.25668.1 | 8.4   | 8.31  | 0.44 | 0.29 | 1.07   | 0.583811 | 0.484439 | 0.788356 | 0.688478 |
| MmugDNA.25668.1.S1_s_at | MmugDNA.25668.1 | 11.65 | 11.62 | 0.1  | 0.03 | 1.03   | 0.570194 | 0.000996 | 0.779298 | 0.050485 |
| MmugDNA.25669.1.S1_at   | MmugDNA.25669.1 | 4.93  | 4.98  | 0.24 | 0.03 | -1.03  | 0.712153 | 0.349986 | 0.864239 | 0.593743 |
| MmugDNA.2567.1.S1_at    | MmugDNA.2567.1  | 5.73  | 5.66  | 0    | 0.08 | 1.05   | 0.17398  | 0.534071 | 0.468349 | 0.720079 |
| MmugDNA.25670.1.S1_at   | MmugDNA.25670.1 | 6.23  | 6.22  | 0.07 | 0.14 | 1.01   | 0.938398 | 0.422988 | 0.973993 | 0.646145 |
| MmugDNA.24730.1.S1_at   | MmugDNA.24730.1 | 4.02  | 3.98  | 0.15 | 0.1  | 1.02   | 0.91551  | 0.953747 | 0.964085 | 0.973663 |

|                         |                 |       |       |      |      |       |          |          |          |          |
|-------------------------|-----------------|-------|-------|------|------|-------|----------|----------|----------|----------|
| MmugDNA.24730.1.S1_s_at | MmugDNA.24730.1 | 5.92  | 6.03  | 0.23 | 0.08 | -1.09 | 0.52769  | 0.403517 | 0.753222 | 0.632188 |
| MmugDNA.25672.1.S1_at   | MmugDNA.25672.1 | 4.64  | 4.64  | 0.16 | 0.03 | -1    | 0.729977 | 0.597485 | 0.873871 | 0.760211 |
| MmugDNA.25673.1.S1_at   | MmugDNA.25673.1 | 6.4   | 6.25  | 1.21 | 0.55 | 1.11  | 0.697529 | 0.630214 | 0.856021 | 0.782181 |
| MmugDNA.25675.1.S1_at   | MmugDNA.25675.1 | 7.08  | 6.65  | 0.52 | 0.76 | 1.35  | 0.24415  | 0.369204 | 0.540834 | 0.608669 |
| MmugDNA.25676.1.S1_at   | MmugDNA.25676.1 | 7.22  | 6.98  | 0.35 | 0.18 | 1.18  | 0.121851 | 0.025035 | 0.400551 | 0.198273 |
| MmugDNA.25676.1.S1_x_at | MmugDNA.25676.1 | 7.72  | 7.37  | 0.22 | 0.11 | 1.27  | 0.025194 | 0.007726 | 0.211801 | 0.117463 |
| MmugDNA.25677.1.S1_s_at | MmugDNA.25677.1 | 6.91  | 6.18  | 0.46 | 0.08 | 1.66  | 0.053301 | 0.096795 | 0.287986 | 0.354207 |
| MmugDNA.25680.1.S1_at   | MmugDNA.25680.1 | 11.87 | 12.71 | 0.98 | 0.05 | -1.78 | 0.207654 | 0.334054 | 0.505439 | 0.582104 |
| MmugDNA.25680.1.S1_at   | MmugDNA.25680.1 | 9.99  | 10.07 | 0.19 | 0.02 | -1.06 | 0.46056  | 0.777483 | 0.708278 | 0.870723 |
| MmugDNA.25682.1.S1_at   | MmugDNA.25682.1 | 7.98  | 8.05  | 0.18 | 0.05 | -1.05 | 0.756703 | 0.557429 | 0.888129 | 0.735031 |
| MmugDNA.25683.1.S1_at   | MmugDNA.25683.1 | 6.69  | 7.11  | 0.5  | 0.08 | -1.34 | 0.209975 | 0.111973 | 0.507412 | 0.37707  |
| MmugDNA.25684.1.S1_at   | MmugDNA.25684.1 | 9.85  | 9.77  | 0.25 | 0.07 | 1.06  | 0.382146 | 0.292739 | 0.651641 | 0.552783 |
| MmugDNA.25685.1.S1_at   | MmugDNA.25685.1 | 4.74  | 4.16  | 0.06 | 0.19 | 1.5   | 0.003656 | 0.036814 | 0.105789 | 0.236386 |
| MmugDNA.25686.1.S1_at   | MmugDNA.25686.1 | 3.59  | 3.51  | 0.16 | 0.28 | 1.06  | 0.471979 | 0.685073 | 0.715918 | 0.816309 |
| MmugDNA.25687.1.S1_at   | MmugDNA.25687.1 | 3.9   | 3.9   | 0.24 | 0    | 1     | 0.37429  | 0.25024  | 0.645448 | 0.519271 |
| MmugDNA.25688.1.S1_at   | MmugDNA.25688.1 | 2.75  | 2.9   | 0.08 | 0.15 | -1.11 | 0.122458 | 0.129644 | 0.401149 | 0.401242 |
| MmugDNA.25689.1.S1_at   | MmugDNA.25689.1 | 6.64  | 6.79  | 0.03 | 0.04 | -1.11 | 0.006324 | 0.438421 | 0.125881 | 0.657396 |
| MmugDNA.2569.1.S1_s_at  | MmugDNA.2569.1  | 10.88 | 11.36 | 0.07 | 0.15 | -1.39 | 0.008852 | 0.000509 | 0.143993 | 0.039357 |
| MmugDNA.25690.1.S1_at   | MmugDNA.25690.1 | 5.74  | 5.29  | 0.33 | 0.24 | 1.36  | 0.366206 | 0.19186  | 0.640626 | 0.467233 |
| MmugDNA.25691.1.S1_at   | MmugDNA.25691.1 | 9.31  | 10.4  | 0.94 | 0.27 | -2.13 | 0.384609 | 0.391464 | 0.653612 | 0.625086 |
| MmugDNA.25692.1.S1_at   | MmugDNA.25692.1 | 7.31  | 7.45  | 0.46 | 0.3  | -1.1  | 0.714008 | 0.025136 | 0.864882 | 0.198657 |
| MmugDNA.25694.1.S1_at   | MmugDNA.25694.1 | 6.78  | 6.45  | 0.17 | 0.12 | 1.26  | 0.117764 | 0.00863  | 0.395125 | 0.123154 |
| MmugDNA.25695.1.S1_at   | MmugDNA.25695.1 | 2.99  | 2.99  | 0.05 | 0.08 | -1    | 0.410022 | 0.22688  | 0.672223 | 0.499276 |
| MmugDNA.25696.1.S1_at   | MmugDNA.25696.1 | 7.26  | 6.34  | 0.21 | 0.26 | 1.89  | 0.008624 | 0.002549 | 0.142375 | 0.074581 |
| MmugDNA.25697.1.S1_at   | MmugDNA.25697.1 | 8.71  | 9.46  | 0.32 | 0.11 | -1.69 | 0.020204 | 0.024263 | 0.195767 | 0.194952 |
| MmugDNA.25699.1.S1_at   | MmugDNA.25699.1 | 5.02  | 5.03  | 0.33 | 0.13 | -1.01 | 0.996021 | 0.945757 | 0.998476 | 0.969149 |
| MmugDNA.257.1.S1_at     | MmugDNA.257.1   | 6.14  | 6.15  | 0.04 | 0.07 | -1.01 | 0.789767 | 0.081292 | 0.904456 | 0.329351 |
| MmugDNA.2570.1.S1_at    | MmugDNA.2570.1  | 3.88  | 3.84  | 0.14 | 0.07 | 1.03  | 0.768649 | 0.819188 | 0.893737 | 0.895796 |
| MmugDNA.25700.1.S1_at   | MmugDNA.25700.1 | 4.03  | 3.67  | 0.1  | 0.08 | 1.28  | 0.020777 | 0.58375  | 0.197797 | 0.751983 |
| MmugDNA.25701.1.S1_at   | MmugDNA.25701.1 | 3.64  | 3.73  | 0.26 | 0.62 | -1.07 | 0.49458  | 0.710908 | 0.731275 | 0.832314 |
| MmugDNA.25702.1.S1_at   | MmugDNA.25702.1 | 5.78  | 5.76  | 0.14 | 0.08 | 1.01  | 0.475653 | 0.315565 | 0.718263 | 0.569053 |
| MmugDNA.25705.1.S1_at   | MmugDNA.25705.1 | 4.32  | 4.31  | 0.31 | 0.16 | 1     | 0.870831 | 0.897151 | 0.944458 | 0.941309 |
| MmugDNA.25706.1.S1_at   | MmugDNA.25706.1 | 5.54  | 5.37  | 0.29 | 0.06 | 1.12  | 0.403464 | 0.556922 | 0.667618 | 0.734847 |
| MmugDNA.25707.1.S1_at   | MmugDNA.25707.1 | 12.31 | 12.11 | 0.14 | 0.13 | 1.15  | 0.12063  | 0.005826 | 0.399017 | 0.104661 |
| MmugDNA.25708.1.S1_at   | MmugDNA.25708.1 | 5.42  | 4.51  | 0.63 | 0.16 | 1.89  | 0.15616  | 0.149269 | 0.446697 | 0.42373  |
| MmugDNA.25709.1.S1_at   | MmugDNA.25709.1 | 7.03  | 7.09  | 0.34 | 0.32 | -1.05 | 0.17852  | 0.176635 | 0.47328  | 0.453117 |
| MmugDNA.25710.1.S1_at   | MmugDNA.25710.1 | 2.85  | 2.84  | 0.11 | 0.14 | 1     | 0.313509 | 0.238041 | 0.59936  | 0.50861  |
| MmugDNA.25711.1.S1_at   | MmugDNA.25711.1 | 5.26  | 5.27  | 0.18 | 0.18 | -1    | 0.959845 | 0.885785 | 0.983565 | 0.935063 |
| MmugDNA.25712.1.S1_at   | MmugDNA.25712.1 | 7.62  | 8.22  | 0.16 | 0.35 | -1.52 | 0.045269 | 0.252757 | 0.270246 | 0.521174 |
| MmugDNA.25713.1.S1_at   | MmugDNA.25713.1 | 8.83  | 8.88  | 0.19 | 0.16 | -1.04 | 0.37666  | 0.030737 | 0.647297 | 0.217205 |
| MmugDNA.25714.1.S1_at   | MmugDNA.25714.1 | 9.86  | 9.75  | 0.1  | 0.07 | 1.08  | 0.269745 | 0.36978  | 0.562025 | 0.609079 |
| MmugDNA.25715.1.S1_at   | MmugDNA.25715.1 | 5.02  | 4.12  | 0.35 | 0.23 | 1.86  | 0.0264   | 0.020268 | 0.215535 | 0.17872  |
| MmugDNA.25717.1.S1_s_at | MmugDNA.25717.1 | 9.53  | 9.49  | 0.13 | 0.01 | 1.03  | 0.80109  | 0.756386 | 0.910582 | 0.858223 |

|                         |                 |       |       |      |      |       |          |          |          |          |
|-------------------------|-----------------|-------|-------|------|------|-------|----------|----------|----------|----------|
| MmugDNA.25718.1.S1_at   | MmugDNA.25718.1 | 10.49 | 10.26 | 0.65 | 0.18 | 1.18  | 0.766868 | 0.810545 | 0.893021 | 0.890812 |
| MmugDNA.2572.1.S1_at    | MmugDNA.2572.1  | 8.12  | 8.06  | 0.51 | 0.21 | 1.04  | 0.619445 | 0.107602 | 0.811271 | 0.370497 |
| MmugDNA.25720.1.S1_at   | MmugDNA.25720.1 | 6.65  | 6.7   | 0.3  | 0.14 | -1.03 | 0.740663 | 0.012532 | 0.879789 | 0.144417 |
| MmugDNA.25721.1.S1_at   | MmugDNA.25721.1 | 5.05  | 5     | 0.37 | 0.21 | 1.04  | 0.222341 | 0.574838 | 0.520299 | 0.746142 |
| MmugDNA.25722.1.S1_at   | MmugDNA.25722.1 | 6.71  | 6.88  | 0.34 | 0.17 | -1.12 | 0.499082 | 0.856428 | 0.734029 | 0.917996 |
| MmugDNA.25723.1.S1_at   | MmugDNA.25723.1 | 5.82  | 5.71  | 1.14 | 0.27 | 1.08  | 0.722857 | 0.914572 | 0.869766 | 0.951966 |
| MmugDNA.25724.1.S1_at   | MmugDNA.25724.1 | 12.32 | 12.15 | 0.21 | 0.02 | 1.12  | 0.21709  | 0.023556 | 0.51492  | 0.192238 |
| MmugDNA.25726.1.S1_at   | MmugDNA.25726.1 | 5.64  | 5.72  | 0.04 | 0.08 | -1.05 | 0.670286 | 0.001599 | 0.841785 | 0.060468 |
| MmugDNA.25727.1.S1_at   | MmugDNA.25727.1 | 11.72 | 11.52 | 0.1  | 0.17 | 1.15  | 0.353217 | 0.227642 | 0.630388 | 0.499898 |
| MmugDNA.25728.1.S1_at   | MmugDNA.25728.1 | 6.98  | 6.25  | 0.02 | 0.14 | 1.66  | 0.000673 | 0.001806 | 0.071248 | 0.063714 |
| MmugDNA.25731.1.S1_at   | MmugDNA.25731.1 | 8.75  | 9.19  | 0.32 | 0.24 | -1.35 | 0.238357 | 0.303344 | 0.53577  | 0.560808 |
| MmugDNA.25732.1.S1_at   | MmugDNA.25732.1 | 3.73  | 3.82  | 0.12 | 0.22 | -1.07 | 0.667278 | 0.196254 | 0.840276 | 0.471236 |
| MmugDNA.25733.1.S1_at   | MmugDNA.25733.1 | 5.53  | 5.53  | 0.25 | 0.08 | -1    | 0.823526 | 0.968899 | 0.921555 | 0.982889 |
| MmugDNA.25734.1.S1_at   | MmugDNA.25734.1 | 3.52  | 3.52  | 0.13 | 0.03 | -1    | 0.50934  | 0.234443 | 0.740994 | 0.505674 |
| MmugDNA.25735.1.S1_at   | MmugDNA.25735.1 | 5.21  | 5.22  | 0.17 | 0.14 | -1    | 0.533141 | 0.761284 | 0.756823 | 0.861304 |
| MmugDNA.25737.1.S1_at   | MmugDNA.25737.1 | 4.28  | 4.36  | 0.43 | 0.7  | -1.06 | 0.784265 | 0.910282 | 0.901621 | 0.949391 |
| MmugDNA.25738.1.S1_at   | MmugDNA.25738.1 | 6.73  | 6.31  | 0.42 | 0.24 | 1.33  | 0.127836 | 0.118622 | 0.409677 | 0.38662  |
| MmugDNA.25739.1.S1_at   | MmugDNA.25739.1 | 5.19  | 5.19  | 0.09 | 0.04 | 1     | 0.635482 | 0.589983 | 0.821448 | 0.756034 |
| MmugDNA.2574.1.S1_at    | MmugDNA.2574.1  | 7.24  | 7.55  | 0.19 | 0.17 | -1.25 | 0.213092 | 0.003178 | 0.511046 | 0.081873 |
| MmugDNA.25740.1.S1_at   | MmugDNA.25740.1 | 10.36 | 9.92  | 0.11 | 0.06 | 1.35  | 0.004117 | 0.014743 | 0.10967  | 0.15446  |
| MmugDNA.25741.1.S1_at   | MmugDNA.25741.1 | 4.69  | 4.8   | 0.16 | 0.19 | -1.08 | 0.572779 | 0.100093 | 0.780814 | 0.358984 |
| MmugDNA.25742.1.S1_at   | MmugDNA.25742.1 | 7.96  | 6.68  | 0.27 | 0.08 | 2.43  | 0.001301 | 0.00016  | 0.078631 | 0.030478 |
| MmugDNA.25744.1.S1_at   | MmugDNA.25744.1 | 3.76  | 3.78  | 0.21 | 0    | -1.02 | 0.495537 | 0.765031 | 0.731829 | 0.863388 |
| MmugDNA.25745.1.S1_at   | MmugDNA.25745.1 | 4.24  | 4.25  | 0.33 | 0.12 | -1.01 | 0.932608 | 0.855803 | 0.971784 | 0.917707 |
| MmugDNA.25747.1.S1_at   | MmugDNA.25747.1 | 4.04  | 3.96  | 0.26 | 0.11 | 1.06  | 0.315844 | 0.487743 | 0.600607 | 0.690658 |
| MmugDNA.25748.1.S1_at   | MmugDNA.25748.1 | 10.49 | 10.39 | 0.08 | 0.01 | 1.08  | 0.074235 | 0.115367 | 0.330639 | 0.382394 |
| MmugDNA.25749.1.S1_at   | MmugDNA.25749.1 | 6.12  | 6.12  | 0.15 | 0.02 | 1     | 0.954997 | 0.992034 | 0.98151  | 0.995515 |
| MmugDNA.2575.1.S1_at    | MmugDNA.2575.1  | 9.88  | 10.04 | 0.17 | 0.07 | -1.12 | 0.24927  | 0.01513  | 0.544486 | 0.156224 |
| MmugDNA.2575.1.S1_s_at  | MmugDNA.2575.1  | 9.2   | 9.61  | 0.21 | 0.11 | -1.33 | 0.040032 | 0.003345 | 0.256732 | 0.083256 |
| MmugDNA.25750.1.S1_at   | MmugDNA.25750.1 | 4.1   | 4.15  | 0.29 | 0.18 | -1.04 | 0.760028 | 0.912557 | 0.890079 | 0.950757 |
| MmugDNA.25751.1.S1_at   | MmugDNA.25751.1 | 4.5   | 4.86  | 1.21 | 0.29 | -1.28 | 0.700445 | 0.588674 | 0.857753 | 0.755137 |
| MmugDNA.25752.1.S1_at   | MmugDNA.25752.1 | 8.88  | 9.23  | 0.4  | 0.13 | -1.28 | 0.074598 | 0.313483 | 0.331249 | 0.567926 |
| MmugDNA.25752.1.S1_s_at | MmugDNA.25752.1 | 10.02 | 10.3  | 0.57 | 0.11 | -1.22 | 0.248052 | 0.507975 | 0.543375 | 0.703358 |
| MmugDNA.25754.1.S1_at   | MmugDNA.25754.1 | 4.3   | 3.83  | 0.55 | 0.1  | 1.39  | 0.208236 | 0.255197 | 0.505958 | 0.523252 |
| MmugDNA.25756.1.S1_at   | MmugDNA.25756.1 | 7.58  | 7.86  | 0.36 | 0.36 | -1.21 | 0.871299 | 0.000259 | 0.944612 | 0.033501 |
| MmugDNA.25757.1.S1_at   | MmugDNA.25757.1 | 4.99  | 4.97  | 0.42 | 0.46 | 1.01  | 0.217674 | 0.311573 | 0.515507 | 0.566537 |
| MmugDNA.25758.1.S1_at   | MmugDNA.25758.1 | 3.56  | 3.66  | 0.85 | 0.36 | -1.08 | 0.553349 | 0.515043 | 0.769891 | 0.708042 |
| MmugDNA.2576.1.S1_at    | MmugDNA.2576.1  | 6.24  | 6.07  | 0.21 | 0.09 | 1.12  | 0.729953 | 0.645306 | 0.873865 | 0.792172 |
| MmugDNA.25760.1.S1_at   | MmugDNA.25760.1 | 6.91  | 6.28  | 0.38 | 0.15 | 1.54  | 0.025486 | 0.030707 | 0.212784 | 0.217148 |
| MmugDNA.25761.1.S1_at   | MmugDNA.25761.1 | 2.94  | 2.85  | 0.09 | 0.08 | 1.07  | 0.108278 | 0.204298 | 0.382964 | 0.478541 |
| MmugDNA.25762.1.S1_at   | MmugDNA.25762.1 | 3.21  | 3.18  | 0.12 | 0.09 | 1.02  | 0.499208 | 0.720851 | 0.734073 | 0.838368 |
| MmugDNA.25763.1.S1_at   | MmugDNA.25763.1 | 5.23  | 4.87  | 0.47 | 0.15 | 1.28  | 0.605266 | 0.296761 | 0.802341 | 0.555779 |
| MmugDNA.25767.1.S1_at   | MmugDNA.25767.1 | 12.7  | 12.35 | 0.05 | 0.05 | 1.27  | 0.000629 | 0.044253 | 0.070727 | 0.25493  |

|                         |                 |       |       |      |      |       |          |          |          |          |
|-------------------------|-----------------|-------|-------|------|------|-------|----------|----------|----------|----------|
| MmugDNA.25769.1.S1_s_at | MmugDNA.25769.1 | 7.29  | 7.06  | 0.12 | 0.11 | 1.17  | 0.093248 | 0.644897 | 0.361736 | 0.791927 |
| MmugDNA.2577.1.S1_at    | MmugDNA.2577.1  | 2.94  | 2.87  | 0.08 | 0.13 | 1.04  | 0.748319 | 0.92008  | 0.883435 | 0.955037 |
| MmugDNA.25772.1.S1_at   | MmugDNA.25772.1 | 2.94  | 2.94  | 0.13 | 0.08 | 1     | 0.54977  | 0.692063 | 0.767442 | 0.82091  |
| MmugDNA.25773.1.S1_at   | MmugDNA.25773.1 | 5.09  | 4.82  | 0.18 | 0.13 | 1.2   | 0.095129 | 0.111371 | 0.364314 | 0.376087 |
| MmugDNA.25774.1.S1_at   | MmugDNA.25774.1 | 4.77  | 4.76  | 0.06 | 0.08 | 1.01  | 0.395146 | 0.629394 | 0.661643 | 0.781843 |
| MmugDNA.25775.1.S1_at   | MmugDNA.25775.1 | 7.45  | 7.46  | 0.13 | 0.33 | -1.01 | 0.870877 | 0.738032 | 0.944458 | 0.848158 |
| MmugDNA.25776.1.S1_at   | MmugDNA.25776.1 | 4.44  | 3.82  | 0.78 | 0.29 | 1.53  | 0.137433 | 0.160917 | 0.422407 | 0.437116 |
| MmugDNA.25778.1.S1_at   | MmugDNA.25778.1 | 5.36  | 5.29  | 0.28 | 0.24 | 1.05  | 0.324625 | 0.376551 | 0.608255 | 0.614375 |
| MmugDNA.2578.1.S1_at    | MmugDNA.2578.1  | 6.78  | 7.04  | 1.06 | 0.16 | -1.2  | 0.712489 | 0.679184 | 0.864309 | 0.812736 |
| MmugDNA.25780.1.S1_at   | MmugDNA.25780.1 | 4.09  | 3.98  | 0.03 | 0.17 | 1.08  | 0.52031  | 0.217284 | 0.74869  | 0.490911 |
| MmugDNA.25781.1.S1_at   | MmugDNA.25781.1 | 6.07  | 5.85  | 0.03 | 0.34 | 1.17  | 0.3572   | 0.058796 | 0.633351 | 0.289228 |
| MmugDNA.25782.1.S1_s_at | MmugDNA.25782.1 | 10.58 | 11.4  | 0.09 | 0.12 | -1.77 | 0.000619 | 0.049348 | 0.070727 | 0.267081 |
| MmugDNA.25783.1.S1_at   | MmugDNA.25783.1 | 2.97  | 3.05  | 0.06 | 0.09 | -1.05 | 0.269988 | 0.522471 | 0.562262 | 0.713153 |
| MmugDNA.25784.1.S1_at   | MmugDNA.25784.1 | 7.99  | 8     | 0.15 | 0.02 | -1    | 0.912085 | 0.810487 | 0.962768 | 0.890812 |
| MmugDNA.25785.1.S1_at   | MmugDNA.25785.1 | 8.88  | 9.16  | 0.79 | 0.45 | -1.22 | 0.880004 | 0.088975 | 0.948926 | 0.342831 |
| MmugDNA.25786.1.S1_at   | MmugDNA.25786.1 | 5.72  | 5.16  | 0.29 | 0.67 | 1.48  | 0.86932  | 0.122783 | 0.943687 | 0.392771 |
| MmugDNA.25787.1.S1_at   | MmugDNA.25787.1 | 4.71  | 4.57  | 0.06 | 0.07 | 1.11  | 0.058628 | 0.491153 | 0.299229 | 0.692801 |
| MmugDNA.25788.1.S1_at   | MmugDNA.25788.1 | 4.99  | 4.91  | 0.11 | 0.07 | 1.06  | 0.146094 | 0.171    | 0.433854 | 0.447561 |
| MmugDNA.2579.1.S1_at    | MmugDNA.2579.1  | 5.11  | 5     | 0.19 | 0.19 | 1.08  | 0.481035 | 0.853848 | 0.72178  | 0.916838 |
| MmugDNA.25791.1.S1_s_at | MmugDNA.25791.1 | 14.42 | 14.46 | 0.05 | 0.01 | -1.03 | 0.214088 | 0.156943 | 0.511862 | 0.432372 |
| MmugDNA.25792.1.S1_at   | MmugDNA.25792.1 | 6.26  | 6.21  | 0.48 | 0.2  | 1.03  | 0.796224 | 0.221139 | 0.907966 | 0.494498 |
| MmugDNA.25797.1.S1_at   | MmugDNA.25797.1 | 3.6   | 3.6   | 0.05 | 0.1  | 1     | 0.892499 | 0.328154 | 0.954212 | 0.577915 |
| MmugDNA.25798.1.S1_at   | MmugDNA.25798.1 | 6.01  | 6.69  | 0.1  | 0.18 | -1.6  | 0.006697 | 0.0001   | 0.12845  | 0.027996 |
| MmugDNA.25799.1.S1_at   | MmugDNA.25799.1 | 3.38  | 3.42  | 0.13 | 0.09 | -1.03 | 0.936123 | 0.361303 | 0.973295 | 0.602104 |
| MmugDNA.2580.1.S1_at    | MmugDNA.2580.1  | 8.61  | 8.78  | 0.12 | 0.24 | -1.13 | 0.337043 | 0.292574 | 0.617664 | 0.552628 |
| MmugDNA.25800.1.S1_at   | MmugDNA.25800.1 | 4.11  | 5.44  | 0.97 | 0.31 | -2.51 | 0.252618 | 0.067418 | 0.547232 | 0.305664 |
| MmugDNA.25801.1.S1_at   | MmugDNA.25801.1 | 3.72  | 4.15  | 0.12 | 0.18 | -1.35 | 0.0384   | 0.076177 | 0.251895 | 0.321047 |
| MmugDNA.25802.1.S1_at   | MmugDNA.25802.1 | 5.45  | 5.05  | 0.02 | 0.2  | 1.32  | 0.019652 | 0.011721 | 0.193139 | 0.140206 |
| MmugDNA.25803.1.S1_at   | MmugDNA.25803.1 | 9.1   | 8.94  | 0.04 | 0.05 | 1.12  | 0.012963 | 0.008759 | 0.164576 | 0.124009 |
| MmugDNA.25804.1.S1_at   | MmugDNA.25804.1 | 8.98  | 9     | 0.12 | 0.01 | -1.01 | 0.49682  | 0.00027  | 0.73264  | 0.033828 |
| MmugDNA.25806.1.S1_at   | MmugDNA.25806.1 | 4.99  | 4.96  | 0.03 | 0.03 | 1.02  | 0.129457 | 0.531303 | 0.411753 | 0.718555 |
| MmugDNA.25807.1.S1_at   | MmugDNA.25807.1 | 3.9   | 3.9   | 0.04 | 0.12 | -1    | 0.493261 | 0.505865 | 0.730304 | 0.702226 |
| MmugDNA.25808.1.S1_at   | MmugDNA.25808.1 | 3.68  | 3.5   | 0.35 | 0.42 | 1.14  | 0.959172 | 0.746882 | 0.983335 | 0.853023 |
| MmugDNA.25809.1.S1_at   | MmugDNA.25809.1 | 3.56  | 3.55  | 0.18 | 0.12 | 1     | 0.624701 | 0.400271 | 0.814965 | 0.630158 |
| MmugDNA.2581.1.S1_at    | MmugDNA.2581.1  | 5.14  | 5.16  | 0.32 | 0.06 | -1.01 | 0.409261 | 0.508126 | 0.671686 | 0.70337  |
| MmugDNA.25811.1.S1_at   | MmugDNA.25811.1 | 7.63  | 8.49  | 0.24 | 0.24 | -1.81 | 0.014349 | 0.035999 | 0.171567 | 0.234197 |
| MmugDNA.25812.1.S1_s_at | MmugDNA.25812.1 | 14.27 | 14.27 | 0.05 | 0.01 | -1    | 0.806157 | 0.93943  | 0.913167 | 0.965611 |
| MmugDNA.25815.1.S1_at   | MmugDNA.25815.1 | 8.62  | 8.78  | 0.12 | 0.03 | -1.11 | 0.051683 | 0.192457 | 0.284638 | 0.467952 |
| MmugDNA.25816.1.S1_s_at | MmugDNA.25816.1 | 9.12  | 9.19  | 0.14 | 0.11 | -1.05 | 0.783867 | 0.242954 | 0.901419 | 0.513319 |
| MmugDNA.25817.1.S1_at   | MmugDNA.25817.1 | 3.64  | 3.75  | 0.16 | 0.24 | -1.08 | 0.207594 | 0.181815 | 0.50535  | 0.458382 |
| MmugDNA.25818.1.S1_at   | MmugDNA.25818.1 | 4.07  | 4.02  | 0.52 | 0.14 | 1.04  | 0.52254  | 0.699299 | 0.749811 | 0.825318 |
| MmugDNA.15311.1.S1_x_at | MmugDNA.15311.1 | 3.88  | 4.07  | 0.18 | 0.12 | -1.15 | 0.505816 | 0.195726 | 0.738714 | 0.470621 |
| MmugDNA.2582.1.S1_at    | MmugDNA.2582.1  | 4.11  | 4.29  | 0.2  | 0    | -1.13 | 0.32604  | 0.045001 | 0.609265 | 0.256602 |

|                         |                 |       |       |      |      |       |          |          |          |          |
|-------------------------|-----------------|-------|-------|------|------|-------|----------|----------|----------|----------|
| MmugDNA.25820.1.S1_at   | MmugDNA.25820.1 | 7.14  | 7.27  | 0.23 | 0.01 | -1.09 | 0.857518 | 0.293321 | 0.938079 | 0.553239 |
| MmugDNA.25821.1.S1_at   | MmugDNA.25821.1 | 3.39  | 3.19  | 0.85 | 0.12 | 1.15  | 0.30241  | 0.412865 | 0.590249 | 0.639181 |
| MmugDNA.25822.1.S1_at   | MmugDNA.25822.1 | 3.08  | 2.99  | 0.1  | 0.13 | 1.07  | 0.33988  | 0.399629 | 0.620086 | 0.629912 |
| MmugDNA.25823.1.S1_at   | MmugDNA.25823.1 | 5.48  | 5.18  | 0.35 | 0.29 | 1.24  | 0.063002 | 0.052226 | 0.307763 | 0.274065 |
| MmugDNA.25825.1.S1_at   | MmugDNA.25825.1 | 7.38  | 6.76  | 0.17 | 0.35 | 1.54  | 0.077677 | 0.483646 | 0.336576 | 0.688088 |
| MmugDNA.25826.1.S1_at   | MmugDNA.25826.1 | 3.56  | 3.51  | 0.44 | 0.09 | 1.04  | 0.302671 | 0.409005 | 0.590379 | 0.636073 |
| MmugDNA.25827.1.S1_s_at | MmugDNA.25827.1 | 7.28  | 7.84  | 0.17 | 0.1  | -1.47 | 0.020908 | 0.000557 | 0.198215 | 0.041049 |
| MmugDNA.25828.1.S1_at   | MmugDNA.25828.1 | 12.39 | 12.42 | 0.17 | 0.02 | -1.02 | 0.813237 | 0.812645 | 0.916498 | 0.891778 |
| MmugDNA.25829.1.S1_at   | MmugDNA.25829.1 | 3.38  | 3.42  | 0.1  | 0.17 | -1.03 | 0.761625 | 0.899677 | 0.890644 | 0.942903 |
| MmugDNA.25832.1.S1_at   | MmugDNA.25832.1 | 3.22  | 3.34  | 0.06 | 0.18 | -1.08 | 0.170458 | 0.440491 | 0.464091 | 0.658967 |
| MmugDNA.25834.1.S1_at   | MmugDNA.25834.1 | 3.2   | 3.21  | 0.47 | 0.02 | -1.01 | 0.372792 | 0.546105 | 0.645067 | 0.727769 |
| MmugDNA.25835.1.S1_at   | MmugDNA.25835.1 | 8.06  | 6.97  | 0.22 | 0.29 | 2.13  | 0.016044 | 0.007144 | 0.179208 | 0.113735 |
| MmugDNA.25836.1.S1_at   | MmugDNA.25836.1 | 9.76  | 9.36  | 0.21 | 0.16 | 1.32  | 0.282313 | 0.113348 | 0.573117 | 0.379441 |
| MmugDNA.25838.1.S1_at   | MmugDNA.25838.1 | 5.41  | 5.54  | 0.14 | 0.07 | -1.1  | 0.267069 | 0.234126 | 0.559752 | 0.505319 |
| MmugDNA.25839.1.S1_at   | MmugDNA.25839.1 | 10.24 | 9.89  | 0.27 | 0.16 | 1.27  | 0.167091 | 0.137456 | 0.460327 | 0.41037  |
| MmugDNA.2584.1.S1_at    | MmugDNA.2584.1  | 8.69  | 8.62  | 0.41 | 0.16 | 1.05  | 0.874407 | 0.001336 | 0.946178 | 0.056352 |
| MmugDNA.25840.1.S1_at   | MmugDNA.25840.1 | 9.8   | 10.01 | 0.36 | 0.15 | -1.15 | 0.938268 | 0.027117 | 0.973878 | 0.205797 |
| MmugDNA.25841.1.S1_at   | MmugDNA.25841.1 | 6.88  | 6.85  | 0.24 | 0.04 | 1.02  | 0.5313   | 0.750315 | 0.75568  | 0.854766 |
| MmugDNA.25842.1.S1_at   | MmugDNA.25842.1 | 8.27  | 7.62  | 0.33 | 0.16 | 1.56  | 0.105559 | 0.4313   | 0.379567 | 0.652249 |
| MmugDNA.25844.1.S1_at   | MmugDNA.25844.1 | 3.75  | 3.39  | 0.57 | 0.04 | 1.28  | 0.358184 | 0.607229 | 0.633969 | 0.766302 |
| MmugDNA.25847.1.S1_at   | MmugDNA.25847.1 | 6.89  | 6.17  | 0.25 | 0.23 | 1.65  | 0.021295 | 0.041705 | 0.199623 | 0.24887  |
| MmugDNA.25848.1.S1_at   | MmugDNA.25848.1 | 5.52  | 5.51  | 0.97 | 0.46 | 1.01  | 0.786887 | 0.37772  | 0.902791 | 0.615086 |
| MmugDNA.25849.1.S1_at   | MmugDNA.25849.1 | 10.8  | 10.77 | 0.14 | 0.12 | 1.03  | 0.17074  | 0.208853 | 0.464486 | 0.482717 |
| MmugDNA.2585.1.S1_at    | MmugDNA.2585.1  | 10.98 | 11.1  | 0.02 | 0.08 | -1.09 | 0.039073 | 0.2194   | 0.25407  | 0.493156 |
| MmugDNA.25850.1.S1_at   | MmugDNA.25850.1 | 12.33 | 12.28 | 0.11 | 0.07 | 1.03  | 0.476349 | 0.536438 | 0.718752 | 0.721763 |
| MmugDNA.25851.1.S1_at   | MmugDNA.25851.1 | 4.8   | 4.92  | 0.3  | 0.07 | -1.09 | 0.520811 | 0.628271 | 0.748988 | 0.781109 |
| MmugDNA.25852.1.S1_at   | MmugDNA.25852.1 | 5.47  | 5.94  | 0.36 | 0.15 | -1.39 | 0.059119 | 0.083182 | 0.300315 | 0.333113 |
| MmugDNA.25853.1.S1_at   | MmugDNA.25853.1 | 6.33  | 6.06  | 0.51 | 0.24 | 1.21  | 0.277287 | 0.164485 | 0.568831 | 0.440679 |
| MmugDNA.25854.1.S1_at   | MmugDNA.25854.1 | 5.22  | 5.75  | 0.46 | 0.32 | -1.44 | 0.585649 | 0.237729 | 0.789285 | 0.50826  |
| MmugDNA.25855.1.S1_at   | MmugDNA.25855.1 | 4.27  | 5.17  | 0.31 | 0.36 | -1.86 | 0.062749 | 0.138513 | 0.307182 | 0.411492 |
| MmugDNA.25856.1.S1_at   | MmugDNA.25856.1 | 2.78  | 2.8   | 0.07 | 0.08 | -1.02 | 0.799663 | 0.742746 | 0.909612 | 0.851023 |
| MmugDNA.25857.1.S1_at   | MmugDNA.25857.1 | 5.58  | 5.36  | 0.63 | 0.45 | 1.16  | 0.506712 | 0.254891 | 0.739271 | 0.523091 |
| MmugDNA.25858.1.S1_at   | MmugDNA.25858.1 | 5.14  | 5.24  | 0.18 | 0.14 | -1.07 | 0.911131 | 0.416749 | 0.962223 | 0.641698 |
| MmugDNA.25859.1.S1_at   | MmugDNA.25859.1 | 4.97  | 4.87  | 0.67 | 0.16 | 1.07  | 0.292838 | 0.616141 | 0.58186  | 0.772496 |
| MmugDNA.25860.1.S1_at   | MmugDNA.25860.1 | 3.66  | 3.78  | 0.02 | 0.23 | -1.09 | 0.96992  | 0.949463 | 0.98803  | 0.971102 |
| MmugDNA.25862.1.S1_at   | MmugDNA.25862.1 | 7.08  | 6.91  | 0.14 | 0.39 | 1.13  | 0.704218 | 0.782705 | 0.859667 | 0.874202 |
| MmugDNA.25863.1.S1_at   | MmugDNA.25863.1 | 8     | 6.92  | 0.17 | 0.52 | 2.12  | 0.062346 | 0.017839 | 0.306441 | 0.168707 |
| MmugDNA.25865.1.S1_at   | MmugDNA.25865.1 | 10.84 | 10.88 | 0.14 | 0.22 | -1.02 | 0.46458  | 0.179339 | 0.710751 | 0.455805 |
| MmugDNA.25866.1.S1_at   | MmugDNA.25866.1 | 5.74  | 5.66  | 0    | 0.18 | 1.05  | 0.433327 | 0.405756 | 0.68886  | 0.633949 |
| MmugDNA.25868.1.S1_at   | MmugDNA.25868.1 | 14.57 | 14.54 | 0.02 | 0.01 | 1.01  | 0.762254 | 0.371018 | 0.890988 | 0.609964 |
| MmugDNA.2587.1.S1_at    | MmugDNA.2587.1  | 6.64  | 6.8   | 0.06 | 0.14 | -1.12 | 0.418683 | 0.01585  | 0.678527 | 0.15969  |
| MmugDNA.25871.1.S1_at   | MmugDNA.25871.1 | 4.91  | 4.91  | 0.02 | 0.07 | -1    | 0.57133  | 0.067045 | 0.779864 | 0.304872 |
| MmugDNA.25872.1.S1_at   | MmugDNA.25872.1 | 7.86  | 7.77  | 0.14 | 0.14 | 1.07  | 0.357398 | 0.673872 | 0.633494 | 0.809483 |



|                         |                 |       |       |      |      |       |          |          |          |          |
|-------------------------|-----------------|-------|-------|------|------|-------|----------|----------|----------|----------|
| MmugDNA.25873.1.S1_x_at | MmugDNA.25873.1 | 3.63  | 3.76  | 0.08 | 0.09 | -1.09 | 0.157822 | 0.365542 | 0.448605 | 0.605602 |
| MmugDNA.25874.1.S1_at   | MmugDNA.25874.1 | 4.14  | 4.28  | 0.3  | 0.81 | -1.1  | 0.655594 | 0.809409 | 0.833465 | 0.890131 |
| MmugDNA.25875.1.S1_at   | MmugDNA.25875.1 | 8.18  | 8.13  | 0.65 | 0.06 | 1.04  | 0.400976 | 0.432175 | 0.665711 | 0.652775 |
| MmugDNA.25876.1.S1_at   | MmugDNA.25876.1 | 6.23  | 6.14  | 0.15 | 0.09 | 1.06  | 0.160865 | 0.181999 | 0.452392 | 0.458537 |
| MmugDNA.25877.1.S1_at   | MmugDNA.25877.1 | 6.76  | 5.89  | 0.39 | 0.15 | 1.82  | 0.058847 | 0.036263 | 0.299676 | 0.235    |
| MmugDNA.25878.1.S1_at   | MmugDNA.25878.1 | 5.09  | 5.09  | 0.1  | 0.07 | 1     | 0.234219 | 0.283518 | 0.532289 | 0.545959 |
| MmugDNA.25880.1.S1_at   | MmugDNA.25880.1 | 3.24  | 3.25  | 0.07 | 0.13 | -1.01 | 0.578722 | 0.596564 | 0.784534 | 0.759662 |
| MmugDNA.25882.1.S1_at   | MmugDNA.25882.1 | 8.34  | 9.73  | 0.43 | 0.28 | -2.64 | 0.023601 | 0.225028 | 0.206972 | 0.49773  |
| MmugDNA.25883.1.S1_at   | MmugDNA.25883.1 | 9.11  | 9.29  | 0.09 | 0.19 | -1.13 | 0.121426 | 0.451825 | 0.400247 | 0.66662  |
| MmugDNA.25885.1.S1_at   | MmugDNA.25885.1 | 4.49  | 5.23  | 0.44 | 0.37 | -1.68 | 0.223902 | 0.375587 | 0.521914 | 0.613533 |
| MmugDNA.25886.1.S1_at   | MmugDNA.25886.1 | 6.66  | 7.02  | 0.67 | 0.38 | -1.28 | 0.710084 | 0.945408 | 0.862837 | 0.968942 |
| MmugDNA.25889.1.S1_at   | MmugDNA.25889.1 | 2.93  | 2.93  | 0.18 | 0.03 | 1     | 0.76911  | 0.437192 | 0.893978 | 0.656591 |
| MmugDNA.25890.1.S1_at   | MmugDNA.25890.1 | 8.84  | 9.37  | 0.13 | 0.57 | -1.45 | 0.176236 | 0.00231  | 0.470611 | 0.070884 |
| MmugDNA.25891.1.S1_at   | MmugDNA.25891.1 | 5.14  | 5     | 0.07 | 0.08 | 1.1   | 0.152042 | 0.063803 | 0.441589 | 0.29906  |
| MmugDNA.25892.1.S1_at   | MmugDNA.25892.1 | 3.4   | 3.45  | 0.05 | 0.15 | -1.04 | 0.431581 | 0.281333 | 0.687567 | 0.544391 |
| MmugDNA.25893.1.S1_at   | MmugDNA.25893.1 | 4.6   | 4.54  | 0.09 | 0.01 | 1.05  | 0.187122 | 0.096906 | 0.483249 | 0.354311 |
| MmugDNA.25894.1.S1_at   | MmugDNA.25894.1 | 3.91  | 4.01  | 0.29 | 0.05 | -1.08 | 0.72789  | 0.522396 | 0.872679 | 0.713139 |
| MmugDNA.25895.1.S1_at   | MmugDNA.25895.1 | 4.09  | 4.09  | 0.1  | 0.02 | 1     | 0.934222 | 0.404459 | 0.972408 | 0.632988 |
| MmugDNA.25898.1.S1_at   | MmugDNA.25898.1 | 4.05  | 3.81  | 0.13 | 0.24 | 1.18  | 0.33451  | 0.500481 | 0.61561  | 0.69907  |
| MmugDNA.25899.1.S1_at   | MmugDNA.25899.1 | 7     | 6.72  | 0.2  | 0.04 | 1.21  | 0.078461 | 0.05309  | 0.338154 | 0.276139 |
| MmugDNA.259.1.S1_at     | MmugDNA.259.1   | 3.62  | 2.92  | 0.37 | 0.07 | 1.62  | 0.091673 | 0.058703 | 0.359427 | 0.288956 |
| MmugDNA.2590.1.S1_at    | MmugDNA.2590.1  | 8.79  | 8.53  | 0.09 | 0.06 | 1.2   | 0.00715  | 0.085566 | 0.132084 | 0.337567 |
| MmugDNA.25901.1.S1_s_at | MmugDNA.25901.1 | 8.44  | 8.85  | 0.9  | 0.05 | -1.32 | 0.403754 | 0.128024 | 0.667808 | 0.398986 |
| MmugDNA.25902.1.S1_at   | MmugDNA.25902.1 | 10.08 | 9.86  | 0.23 | 0.04 | 1.17  | 0.491245 | 0.003165 | 0.729196 | 0.081793 |
| MmugDNA.25904.1.S1_at   | MmugDNA.25904.1 | 6.58  | 6.86  | 0.43 | 0.68 | -1.21 | 0.308999 | 0.421195 | 0.595457 | 0.644807 |
| MmugDNA.25905.1.S1_at   | MmugDNA.25905.1 | 9.7   | 9.77  | 0.45 | 0.19 | -1.05 | 0.866824 | 0.231699 | 0.942479 | 0.503526 |
| MmugDNA.12980.1.S1_s_at | MmugDNA.12980.1 | 14.51 | 14.48 | 0.04 | 0.01 | 1.02  | 0.315517 | 0.2045   | 0.600423 | 0.478845 |
| MmugDNA.12980.1.S1_x_at | MmugDNA.12980.1 | 13.62 | 13.58 | 0.25 | 0.03 | 1.03  | 0.745595 | 0.93028  | 0.881965 | 0.960382 |
| MmugDNA.25907.1.S1_at   | MmugDNA.25907.1 | 7.66  | 7.11  | 0.22 | 0.18 | 1.46  | 0.028594 | 0.017157 | 0.221646 | 0.16594  |
| MmugDNA.25908.1.S1_at   | MmugDNA.25908.1 | 14.13 | 14.08 | 0.11 | 0.08 | 1.04  | 0.939989 | 0.988579 | 0.974707 | 0.993572 |
| MmugDNA.25909.1.S1_at   | MmugDNA.25909.1 | 6.35  | 6.39  | 0.09 | 0.08 | -1.03 | 0.256785 | 0.049157 | 0.551333 | 0.266534 |
| MmugDNA.25910.1.S1_at   | MmugDNA.25910.1 | 2.87  | 2.95  | 0.49 | 0.26 | -1.05 | 0.626145 | 0.548555 | 0.815822 | 0.729268 |
| MmugDNA.25911.1.S1_at   | MmugDNA.25911.1 | 8.79  | 8.23  | 0.39 | 0.24 | 1.48  | 0.090052 | 0.181017 | 0.356863 | 0.457529 |
| MmugDNA.25912.1.S1_at   | MmugDNA.25912.1 | 6.61  | 6.79  | 0.31 | 0.2  | -1.13 | 0.754723 | 0.447238 | 0.88688  | 0.663409 |
| MmugDNA.25913.1.S1_at   | MmugDNA.25913.1 | 4.65  | 4.73  | 0.06 | 0.04 | -1.06 | 0.177399 | 0.314344 | 0.472172 | 0.568273 |
| MmugDNA.25914.1.S1_at   | MmugDNA.25914.1 | 10.45 | 10.27 | 0.43 | 0.23 | 1.13  | 0.27299  | 0.319036 | 0.565169 | 0.571591 |
| MmugDNA.25915.1.S1_at   | MmugDNA.25915.1 | 3.61  | 3.44  | 0.3  | 0.09 | 1.13  | 0.131488 | 0.122957 | 0.41434  | 0.392923 |
| MmugDNA.25916.1.S1_at   | MmugDNA.25916.1 | 6.97  | 8.33  | 0.72 | 0.34 | -2.55 | 0.055878 | 0.00153  | 0.293434 | 0.059426 |
| MmugDNA.25917.1.S1_at   | MmugDNA.25917.1 | 6.89  | 6.94  | 0.08 | 0.05 | -1.03 | 0.231858 | 0.474518 | 0.530482 | 0.681511 |
| MmugDNA.25918.1.S1_at   | MmugDNA.25918.1 | 3.54  | 3.54  | 0.23 | 0.03 | 1     | 0.324521 | 0.368096 | 0.60819  | 0.607669 |
| MmugDNA.25919.1.S1_at   | MmugDNA.25919.1 | 3.3   | 3.28  | 0.37 | 0.1  | 1.01  | 0.460173 | 0.654395 | 0.708089 | 0.798021 |
| MmugDNA.25920.1.S1_at   | MmugDNA.25920.1 | 3.33  | 3.25  | 0.13 | 0.09 | 1.06  | 0.159039 | 0.222462 | 0.450398 | 0.495518 |
| MmugDNA.25922.1.S1_at   | MmugDNA.25922.1 | 3.78  | 3.9   | 0.07 | 0.07 | -1.09 | 0.05904  | 0.312747 | 0.30011  | 0.567299 |

|                         |                 |       |       |      |      |       |          |          |          |          |
|-------------------------|-----------------|-------|-------|------|------|-------|----------|----------|----------|----------|
| MmugDNA.25926.1.S1_at   | MmugDNA.25926.1 | 5.95  | 5.81  | 0.23 | 0.07 | 1.1   | 0.947865 | 0.858699 | 0.978044 | 0.919548 |
| MmugDNA.25928.1.S1_at   | MmugDNA.25928.1 | 3.38  | 3.26  | 0.05 | 0.04 | 1.08  | 0.061067 | 0.197279 | 0.303985 | 0.472213 |
| MmugDNA.2593.1.S1_at    | MmugDNA.2593.1  | 5.74  | 6.03  | 0.4  | 0.18 | -1.22 | 0.16825  | 0.163681 | 0.461471 | 0.439841 |
| MmugDNA.25930.1.S1_at   | MmugDNA.25930.1 | 5.23  | 4.9   | 0.36 | 0.16 | 1.25  | 0.141475 | 0.211859 | 0.427458 | 0.485854 |
| MmugDNA.25930.1.S1_s_at | MmugDNA.25930.1 | 5.04  | 4.69  | 1    | 0.51 | 1.28  | 0.482707 | 0.522447 | 0.72298  | 0.713139 |
| MmugDNA.25932.1.S1_at   | MmugDNA.25932.1 | 5.7   | 5.65  | 0.07 | 0.21 | 1.04  | 0.456419 | 0.550307 | 0.705768 | 0.730382 |
| MmugDNA.25933.1.S1_at   | MmugDNA.25933.1 | 4.48  | 4.39  | 0.19 | 0.23 | 1.06  | 0.775571 | 0.905624 | 0.89744  | 0.946574 |
| MmugDNA.25934.1.S1_at   | MmugDNA.25934.1 | 5.79  | 5.86  | 0.2  | 0.06 | -1.05 | 0.668201 | 0.211549 | 0.840658 | 0.485658 |
| MmugDNA.25935.1.S1_at   | MmugDNA.25935.1 | 6.47  | 6.71  | 0.23 | 0.19 | -1.18 | 0.098324 | 0.003524 | 0.368957 | 0.085139 |
| MmugDNA.25937.1.S1_at   | MmugDNA.25937.1 | 6.3   | 6.61  | 0.16 | 0.28 | -1.25 | 0.104792 | 0.418313 | 0.378347 | 0.642707 |
| MmugDNA.25938.1.S1_at   | MmugDNA.25938.1 | 3.16  | 3.71  | 0.46 | 0.58 | -1.46 | 0.402781 | 0.464988 | 0.667011 | 0.675534 |
| MmugDNA.25939.1.S1_s_at | MmugDNA.25939.1 | 11.69 | 11.3  | 0.24 | 0.16 | 1.31  | 0.18751  | 0.280348 | 0.483784 | 0.543556 |
| MmugDNA.2594.1.S1_at    | MmugDNA.2594.1  | 6.17  | 6.17  | 0.33 | 0.13 | 1     | 0.402313 | 0.51841  | 0.666675 | 0.71038  |
| MmugDNA.25940.1.S1_at   | MmugDNA.25940.1 | 3.48  | 3.46  | 0.17 | 0.19 | 1.02  | 0.226339 | 0.30213  | 0.524154 | 0.560071 |
| MmugDNA.25942.1.S1_at   | MmugDNA.25942.1 | 6.38  | 6.39  | 0.3  | 0.18 | -1.01 | 0.619513 | 0.626074 | 0.81128  | 0.779551 |
| MmugDNA.25944.1.S1_at   | MmugDNA.25944.1 | 3.45  | 3.31  | 0.06 | 0.31 | 1.11  | 0.86578  | 0.894778 | 0.941888 | 0.939961 |
| MmugDNA.25945.1.S1_at   | MmugDNA.25945.1 | 6.72  | 6.61  | 0.06 | 0.09 | 1.08  | 0.093931 | 0.133618 | 0.362806 | 0.405565 |
| MmugDNA.25947.1.S1_at   | MmugDNA.25947.1 | 5.9   | 5.87  | 0.07 | 0    | 1.02  | 0.79875  | 0.860544 | 0.909336 | 0.920569 |
| MmugDNA.25948.1.S1_at   | MmugDNA.25948.1 | 4.7   | 4.65  | 0.07 | 0    | 1.03  | 0.298348 | 0.310279 | 0.586678 | 0.565461 |
| MmugDNA.25949.1.S1_at   | MmugDNA.25949.1 | 3.66  | 3.52  | 0.19 | 0.16 | 1.11  | 0.146812 | 0.122759 | 0.434827 | 0.39274  |
| MmugDNA.2595.1.S1_at    | MmugDNA.2595.1  | 7.53  | 7.19  | 0.27 | 0.03 | 1.27  | 0.064187 | 0.086083 | 0.309799 | 0.33835  |
| MmugDNA.25952.1.S1_at   | MmugDNA.25952.1 | 4.66  | 4.58  | 0.05 | 0.09 | 1.06  | 0.133259 | 0.188526 | 0.416749 | 0.464458 |
| MmugDNA.25953.1.S1_at   | MmugDNA.25953.1 | 7.26  | 6.4   | 0.58 | 0.23 | 1.81  | 0.081753 | 0.062777 | 0.342963 | 0.297193 |
| MmugDNA.25956.1.S1_at   | MmugDNA.25956.1 | 3.9   | 4.06  | 0.07 | 0.17 | -1.12 | 0.669573 | 0.109069 | 0.841502 | 0.372869 |
| MmugDNA.25957.1.S1_at   | MmugDNA.25957.1 | 6.57  | 5.8   | 0.09 | 0.11 | 1.71  | 0.000956 | 0.094093 | 0.076054 | 0.350744 |
| MmugDNA.25959.1.S1_at   | MmugDNA.25959.1 | 3.51  | 3.48  | 0.12 | 0.23 | 1.02  | 0.744257 | 0.305791 | 0.881397 | 0.562731 |
| MmugDNA.2596.1.S1_at    | MmugDNA.2596.1  | 4.15  | 4.18  | 0.09 | 0.02 | -1.02 | 0.19695  | 0.132349 | 0.494083 | 0.404294 |
| MmugDNA.25960.1.S1_at   | MmugDNA.25960.1 | 11.76 | 11.6  | 0.07 | 0.04 | 1.11  | 0.008428 | 0.162415 | 0.140949 | 0.438575 |
| MmugDNA.25961.1.S1_at   | MmugDNA.25961.1 | 6.97  | 6.59  | 0.3  | 0.37 | 1.3   | 0.147584 | 0.171588 | 0.43548  | 0.448017 |
| MmugDNA.25962.1.S1_at   | MmugDNA.25962.1 | 3.36  | 3.34  | 0.03 | 0.12 | 1.02  | 0.917142 | 0.491877 | 0.964746 | 0.693275 |
| MmugDNA.25965.1.S1_at   | MmugDNA.25965.1 | 11.25 | 11.23 | 0.09 | 0.17 | 1.02  | 0.639093 | 0.653988 | 0.823331 | 0.797755 |
| MmugDNA.25966.1.S1_at   | MmugDNA.25966.1 | 11.4  | 11.44 | 0.13 | 0.08 | -1.02 | 0.712411 | 0.770502 | 0.864309 | 0.866725 |
| MmugDNA.3279.1.S1_at    | MmugDNA.3279.1  | 10.93 | 10.77 | 0.08 | 0.04 | 1.12  | 0.075024 | 0.547098 | 0.332088 | 0.728283 |
| MmugDNA.3279.1.S1_s_at  | MmugDNA.3279.1  | 9.74  | 9.63  | 0.01 | 0.13 | 1.08  | 0.100144 | 0.479741 | 0.37088  | 0.685409 |
| MmugDNA.25967.1.S1_at   | MmugDNA.25967.1 | 3.47  | 4.24  | 0.28 | 0.21 | -1.7  | 0.040888 | 0.04111  | 0.258622 | 0.247611 |
| MmugDNA.25968.1.S1_at   | MmugDNA.25968.1 | 6     | 5.8   | 0.73 | 0.29 | 1.14  | 0.598704 | 0.808908 | 0.797542 | 0.889962 |
| MmugDNA.2597.1.S1_at    | MmugDNA.2597.1  | 3.25  | 3.25  | 0.02 | 0.03 | -1    | 0.195878 | 0.801806 | 0.492745 | 0.885933 |
| MmugDNA.25971.1.S1_at   | MmugDNA.25971.1 | 14.21 | 14.31 | 0.04 | 0.01 | -1.08 | 0.020845 | 0.022004 | 0.197986 | 0.18564  |
| MmugDNA.24445.1.S1_s_at | MmugDNA.24445.1 | 14.47 | 14.45 | 0.04 | 0.01 | 1.01  | 0.934803 | 0.400196 | 0.972726 | 0.630158 |
| MmugDNA.25972.1.S1_at   | MmugDNA.25972.1 | 7.34  | 7.96  | 0.11 | 0.11 | -1.54 | 0.001385 | 0.00073  | 0.079595 | 0.044701 |
| MmugDNA.25974.1.S1_at   | MmugDNA.25974.1 | 4.34  | 4.42  | 0.14 | 0.09 | -1.06 | 0.629422 | 0.413864 | 0.817951 | 0.639865 |
| MmugDNA.25975.1.S1_at   | MmugDNA.25975.1 | 8.06  | 7.98  | 0.11 | 0.02 | 1.06  | 0.670841 | 0.961268 | 0.842083 | 0.978105 |
| MmugDNA.25976.1.S1_at   | MmugDNA.25976.1 | 3.86  | 3.87  | 0.17 | 0    | -1.01 | 0.963649 | 0.920347 | 0.985268 | 0.95511  |

|                         |                 |       |       |      |      |       |          |          |          |          |
|-------------------------|-----------------|-------|-------|------|------|-------|----------|----------|----------|----------|
| MmugDNA.28095.1.S1_s_at | MmugDNA.28095.1 | 13.9  | 13.96 | 0.06 | 0.05 | -1.04 | 0.462249 | 0.368404 | 0.709505 | 0.607932 |
| MmugDNA.25979.1.S1_at   | MmugDNA.25979.1 | 3.56  | 3.53  | 0.08 | 0.12 | 1.02  | 0.800246 | 0.829846 | 0.91     | 0.902225 |
| MmugDNA.2598.1.S1_at    | MmugDNA.2598.1  | 5.8   | 5.55  | 0.07 | 0.26 | 1.19  | 0.155019 | 0.072166 | 0.445174 | 0.314694 |
| MmugDNA.25980.1.S1_at   | MmugDNA.25980.1 | 6.86  | 7.01  | 0.35 | 0.01 | -1.11 | 0.511261 | 0.295651 | 0.742401 | 0.555108 |
| MmugDNA.25981.1.S1_at   | MmugDNA.25981.1 | 12.75 | 12.7  | 0.06 | 0.03 | 1.03  | 0.238799 | 0.006962 | 0.53601  | 0.112719 |
| MmugDNA.25982.1.S1_at   | MmugDNA.25982.1 | 6.86  | 6.67  | 0.12 | 0.04 | 1.14  | 0.087611 | 0.262151 | 0.353608 | 0.528414 |
| MmugDNA.25983.1.S1_at   | MmugDNA.25983.1 | 3.51  | 3.52  | 0.09 | 0.17 | -1.01 | 0.925545 | 0.051232 | 0.968463 | 0.271799 |
| MmugDNA.25984.1.S1_at   | MmugDNA.25984.1 | 3.55  | 3.49  | 0.19 | 0.2  | 1.04  | 0.336061 | 0.182301 | 0.616699 | 0.458768 |
| MmugDNA.25987.1.S1_at   | MmugDNA.25987.1 | 8.47  | 9.03  | 0.17 | 0.35 | -1.48 | 0.170525 | 0.124196 | 0.464183 | 0.394496 |
| MmugDNA.25988.1.S1_at   | MmugDNA.25988.1 | 6.3   | 7.28  | 0.3  | 0.17 | -1.97 | 0.01701  | 0.232882 | 0.183848 | 0.50445  |
| MmugDNA.25989.1.S1_at   | MmugDNA.25989.1 | 9.1   | 8.56  | 0.29 | 0.11 | 1.45  | 0.076211 | 0.243996 | 0.334238 | 0.514069 |
| MmugDNA.2599.1.S1_at    | MmugDNA.2599.1  | 6.7   | 6.68  | 0.2  | 0.08 | 1.01  | 0.4958   | 0.185228 | 0.73187  | 0.461174 |
| MmugDNA.25990.1.S1_at   | MmugDNA.25990.1 | 9.46  | 9.02  | 0.2  | 0.09 | 1.36  | 0.072378 | 0.070833 | 0.327    | 0.31231  |
| MmugDNA.25991.1.S1_at   | MmugDNA.25991.1 | 6.88  | 6.27  | 0.39 | 0.06 | 1.53  | 0.078611 | 0.115503 | 0.338468 | 0.38267  |
| MmugDNA.25992.1.S1_at   | MmugDNA.25992.1 | 6.22  | 6.3   | 0.27 | 0.18 | -1.06 | 0.281254 | 0.446649 | 0.572137 | 0.66287  |
| MmugDNA.25994.1.S1_at   | MmugDNA.25994.1 | 11.52 | 11.42 | 0.24 | 0.11 | 1.07  | 0.953791 | 0.228245 | 0.981052 | 0.500443 |
| MmugDNA.25995.1.S1_at   | MmugDNA.25995.1 | 5.21  | 4.41  | 0.67 | 0.6  | 1.74  | 0.55143  | 0.485185 | 0.768449 | 0.688969 |
| MmugDNA.25996.1.S1_at   | MmugDNA.25996.1 | 6.34  | 6.09  | 0.1  | 0.1  | 1.19  | 0.079749 | 0.085233 | 0.339935 | 0.337096 |
| MmugDNA.25997.1.S1_at   | MmugDNA.25997.1 | 5.18  | 5.09  | 0.55 | 0.08 | 1.06  | 0.25993  | 0.400858 | 0.554139 | 0.630658 |
| MmugDNA.25998.1.S1_at   | MmugDNA.25998.1 | 4.96  | 5.14  | 0.22 | 0.1  | -1.13 | 0.176893 | 0.048457 | 0.471415 | 0.265349 |
| MmugDNA.25999.1.S1_at   | MmugDNA.25999.1 | 12.88 | 12.62 | 0.12 | 0.11 | 1.19  | 0.13703  | 0.001821 | 0.421892 | 0.063997 |
| MmugDNA.26.1.S1_at      | MmugDNA.26.1    | 4.08  | 4.17  | 1.05 | 0.17 | -1.06 | 0.388717 | 0.560384 | 0.656681 | 0.736645 |
| MmugDNA.260.1.S1_at     | MmugDNA.260.1   | 5.43  | 5.84  | 0.34 | 0.54 | -1.33 | 0.643439 | 0.907024 | 0.826158 | 0.947344 |
| MmugDNA.26000.1.S1_at   | MmugDNA.26000.1 | 6.43  | 6.2   | 0.15 | 0.13 | 1.18  | 0.156852 | 0.055222 | 0.447538 | 0.280676 |
| MmugDNA.26001.1.S1_at   | MmugDNA.26001.1 | 4.21  | 4.19  | 0.02 | 0.12 | 1.02  | 0.250333 | 0.546697 | 0.545075 | 0.728135 |
| MmugDNA.26002.1.S1_at   | MmugDNA.26002.1 | 5.78  | 5.72  | 0.15 | 0.05 | 1.04  | 0.482898 | 0.932825 | 0.723175 | 0.961845 |
| MmugDNA.26003.1.S1_at   | MmugDNA.26003.1 | 4.11  | 4.09  | 0.17 | 0.06 | 1.01  | 0.658386 | 0.85712  | 0.834958 | 0.918374 |
| MmugDNA.26004.1.S1_at   | MmugDNA.26004.1 | 4.46  | 3.99  | 0.62 | 0.29 | 1.38  | 0.217754 | 0.312242 | 0.515566 | 0.566963 |
| MmugDNA.26006.1.S1_at   | MmugDNA.26006.1 | 7.52  | 6.58  | 0.19 | 0.1  | 1.92  | 0.001377 | 0.006811 | 0.079595 | 0.111444 |
| MmugDNA.26007.1.S1_at   | MmugDNA.26007.1 | 9.35  | 9.09  | 0.59 | 0.31 | 1.2   | 0.112925 | 0.291805 | 0.389499 | 0.552063 |
| MmugDNA.26008.1.S1_at   | MmugDNA.26008.1 | 12.15 | 12.01 | 0.3  | 0.07 | 1.1   | 0.118325 | 0.548311 | 0.39584  | 0.729053 |
| MmugDNA.26009.1.S1_at   | MmugDNA.26009.1 | 8.88  | 8.56  | 0.41 | 0.11 | 1.24  | 0.089792 | 0.348868 | 0.356705 | 0.592917 |
| MmugDNA.2601.1.S1_at    | MmugDNA.2601.1  | 8.68  | 8.69  | 0.17 | 0.07 | -1.01 | 0.650474 | 0.872664 | 0.830274 | 0.927592 |
| MmugDNA.26010.1.S1_at   | MmugDNA.26010.1 | 7.26  | 6.23  | 0.04 | 0.02 | 2.03  | 0.000002 | 0.041176 | 0.037385 | 0.247733 |
| MmugDNA.26011.1.S1_at   | MmugDNA.26011.1 | 5.78  | 5.6   | 0.27 | 0.03 | 1.14  | 0.358746 | 0.565016 | 0.634504 | 0.739639 |
| MmugDNA.26012.1.S1_at   | MmugDNA.26012.1 | 5.72  | 5.38  | 0.39 | 0.19 | 1.26  | 0.269286 | 0.355505 | 0.561615 | 0.597777 |
| MmugDNA.26013.1.S1_at   | MmugDNA.26013.1 | 3.99  | 3.94  | 0    | 0.05 | 1.04  | 0.180506 | 0.598768 | 0.475655 | 0.761123 |
| MmugDNA.26014.1.S1_at   | MmugDNA.26014.1 | 6.89  | 6.9   | 0.13 | 0.03 | -1.01 | 0.4144   | 0.657337 | 0.675645 | 0.799643 |
| MmugDNA.26016.1.S1_at   | MmugDNA.26016.1 | 5.07  | 5.2   | 0.19 | 0.07 | -1.09 | 0.342427 | 0.286603 | 0.622192 | 0.548065 |
| MmugDNA.26017.1.S1_at   | MmugDNA.26017.1 | 10.42 | 10.61 | 0.38 | 0.19 | -1.14 | 0.798779 | 0.537088 | 0.909337 | 0.722271 |
| MmugDNA.26018.1.S1_at   | MmugDNA.26018.1 | 5.67  | 5.84  | 0.07 | 0.08 | -1.13 | 0.056919 | 0.035658 | 0.295858 | 0.233228 |
| MmugDNA.26019.1.S1_at   | MmugDNA.26019.1 | 6.37  | 5.93  | 0.09 | 0.21 | 1.35  | 0.026378 | 0.080963 | 0.215478 | 0.32901  |
| MmugDNA.2602.1.S1_at    | MmugDNA.2602.1  | 5.72  | 5.68  | 0.23 | 0.36 | 1.03  | 0.56565  | 0.17744  | 0.776758 | 0.453773 |

|                         |                 |       |       |      |      |       |          |          |          |          |
|-------------------------|-----------------|-------|-------|------|------|-------|----------|----------|----------|----------|
| MmugDNA.26020.1.S1_at   | MmugDNA.26020.1 | 7.59  | 6.89  | 0.36 | 0.05 | 1.63  | 0.028616 | 0.00422  | 0.221685 | 0.091392 |
| MmugDNA.26021.1.S1_at   | MmugDNA.26021.1 | 4.14  | 4.15  | 0.13 | 0.04 | -1.01 | 0.730963 | 0.660666 | 0.874299 | 0.801499 |
| MmugDNA.26023.1.S1_at   | MmugDNA.26023.1 | 5.37  | 6.92  | 0.74 | 0.41 | -2.93 | 0.058453 | 0.246585 | 0.298877 | 0.515917 |
| MmugDNA.26024.1.S1_at   | MmugDNA.26024.1 | 5.29  | 5.44  | 0.12 | 0.31 | -1.11 | 0.572245 | 0.216097 | 0.780448 | 0.489686 |
| MmugDNA.26025.1.S1_at   | MmugDNA.26025.1 | 7.12  | 7.15  | 0.1  | 0.25 | -1.02 | 0.887288 | 0.948387 | 0.951911 | 0.970565 |
| MmugDNA.26026.1.S1_at   | MmugDNA.26026.1 | 4.4   | 4.22  | 0.28 | 0.11 | 1.13  | 0.125303 | 0.139319 | 0.405737 | 0.412518 |
| MmugDNA.26027.1.S1_at   | MmugDNA.26027.1 | 11    | 10.67 | 0.14 | 0.05 | 1.26  | 0.022091 | 0.561676 | 0.201888 | 0.73751  |
| MmugDNA.26029.1.S1_at   | MmugDNA.26029.1 | 4.51  | 4.78  | 0.13 | 0.09 | -1.21 | 0.115919 | 0.000702 | 0.392991 | 0.04424  |
| MmugDNA.2603.1.S1_at    | MmugDNA.2603.1  | 3.3   | 3.34  | 0.11 | 0.05 | -1.03 | 0.242088 | 0.111852 | 0.539116 | 0.376915 |
| MmugDNA.26030.1.S1_at   | MmugDNA.26030.1 | 11.74 | 11.6  | 0.23 | 0.12 | 1.1   | 0.351361 | 0.089794 | 0.628948 | 0.34404  |
| MmugDNA.26031.1.S1_at   | MmugDNA.26031.1 | 4.68  | 4.72  | 0.2  | 0.17 | -1.03 | 0.867085 | 0.984765 | 0.942519 | 0.991423 |
| MmugDNA.26032.1.S1_at   | MmugDNA.26032.1 | 5.19  | 5.16  | 0.22 | 0.06 | 1.02  | 0.827772 | 0.508837 | 0.923717 | 0.703867 |
| MmugDNA.26033.1.S1_at   | MmugDNA.26033.1 | 10.94 | 9.83  | 0.18 | 0.29 | 2.16  | 0.003865 | 0.004586 | 0.107698 | 0.094513 |
| MmugDNA.26034.1.S1_at   | MmugDNA.26034.1 | 6.53  | 6.52  | 0.12 | 0.04 | 1     | 0.519374 | 0.07622  | 0.747997 | 0.321127 |
| MmugDNA.26035.1.S1_at   | MmugDNA.26035.1 | 4.43  | 4.28  | 0.87 | 0.62 | 1.11  | 0.367802 | 0.470661 | 0.641596 | 0.67895  |
| MmugDNA.26036.1.S1_at   | MmugDNA.26036.1 | 6.05  | 5.51  | 0.25 | 0.15 | 1.45  | 0.030736 | 0.02935  | 0.228054 | 0.213228 |
| MmugDNA.26037.1.S1_at   | MmugDNA.26037.1 | 5.21  | 4.99  | 0.39 | 0.22 | 1.17  | 0.344891 | 0.472261 | 0.624064 | 0.679922 |
| MmugDNA.26038.1.S1_at   | MmugDNA.26038.1 | 3.65  | 3.8   | 0.12 | 0.38 | -1.11 | 0.684266 | 0.721548 | 0.849568 | 0.838748 |
| MmugDNA.26039.1.S1_at   | MmugDNA.26039.1 | 5.85  | 5.76  | 0.06 | 0.16 | 1.06  | 0.21445  | 0.173576 | 0.512121 | 0.449956 |
| MmugDNA.2604.1.S1_at    | MmugDNA.2604.1  | 5.36  | 4.72  | 0.54 | 0.34 | 1.56  | 0.116622 | 0.075777 | 0.393693 | 0.320348 |
| MmugDNA.26040.1.S1_at   | MmugDNA.26040.1 | 6.97  | 7.02  | 0.28 | 0.02 | -1.03 | 0.494064 | 0.55803  | 0.730933 | 0.735346 |
| MmugDNA.26041.1.S1_at   | MmugDNA.26041.1 | 6     | 5.32  | 0.46 | 0.2  | 1.6   | 0.305629 | 0.536297 | 0.592703 | 0.721629 |
| MmugDNA.26042.1.S1_at   | MmugDNA.26042.1 | 6.71  | 6.71  | 0.14 | 0.1  | -1.01 | 0.864887 | 0.947137 | 0.941423 | 0.97002  |
| MmugDNA.26043.1.S1_at   | MmugDNA.26043.1 | 5.02  | 5.02  | 0.37 | 0.36 | 1     | 0.670425 | 0.770894 | 0.841859 | 0.866807 |
| MmugDNA.26046.1.S1_at   | MmugDNA.26046.1 | 4.63  | 4.28  | 0.31 | 0.1  | 1.27  | 0.096333 | 0.12459  | 0.366014 | 0.394995 |
| MmugDNA.26047.1.S1_at   | MmugDNA.26047.1 | 5.8   | 5.75  | 0.15 | 0.04 | 1.04  | 0.421171 | 0.634113 | 0.679846 | 0.784644 |
| MmugDNA.26048.1.S1_at   | MmugDNA.26048.1 | 3.05  | 2.98  | 0.01 | 0.25 | 1.05  | 0.615788 | 0.7255   | 0.809127 | 0.841043 |
| MmugDNA.26049.1.S1_at   | MmugDNA.26049.1 | 10.04 | 9.83  | 0.31 | 0.13 | 1.16  | 0.494646 | 0.204527 | 0.73129  | 0.478866 |
| MmugDNA.26050.1.S1_at   | MmugDNA.26050.1 | 5.29  | 5.56  | 0.17 | 0.06 | -1.2  | 0.161785 | 0.570568 | 0.45355  | 0.743175 |
| MmugDNA.26050.1.S1_s_at | MmugDNA.26050.1 | 5.63  | 5.76  | 0.12 | 0.11 | -1.09 | 0.285321 | 0.459695 | 0.575167 | 0.671948 |
| MmugDNA.26051.1.S1_at   | MmugDNA.26051.1 | 3.07  | 3.15  | 0.17 | 0.07 | -1.06 | 0.78769  | 0.227982 | 0.90334  | 0.500211 |
| MmugDNA.26052.1.S1_at   | MmugDNA.26052.1 | 6.22  | 6.23  | 0.06 | 0.05 | -1    | 0.433594 | 0.170639 | 0.688989 | 0.447219 |
| MmugDNA.26053.1.S1_at   | MmugDNA.26053.1 | 6.31  | 6.21  | 0.21 | 0    | 1.08  | 0.793194 | 0.878891 | 0.906516 | 0.930872 |
| MmugDNA.26054.1.S1_at   | MmugDNA.26054.1 | 6.16  | 6.21  | 0.05 | 0.05 | -1.04 | 0.24185  | 0.003907 | 0.538882 | 0.088806 |
| MmugDNA.26055.1.S1_at   | MmugDNA.26055.1 | 6.06  | 5.74  | 0.16 | 0.47 | 1.24  | 0.178071 | 0.346379 | 0.472824 | 0.59124  |
| MmugDNA.26056.1.S1_at   | MmugDNA.26056.1 | 5.34  | 5.45  | 0.07 | 0.06 | -1.08 | 0.152225 | 0.083276 | 0.441751 | 0.333372 |
| MmugDNA.26057.1.S1_at   | MmugDNA.26057.1 | 5.57  | 5.42  | 0.18 | 0.06 | 1.11  | 0.13484  | 0.680657 | 0.418721 | 0.813542 |
| MmugDNA.26058.1.S1_at   | MmugDNA.26058.1 | 3.82  | 3.84  | 0.27 | 0.44 | -1.01 | 0.431117 | 0.687503 | 0.687263 | 0.817606 |
| MmugDNA.26059.1.S1_at   | MmugDNA.26059.1 | 7.63  | 9.08  | 0.39 | 0.38 | -2.73 | 0.029258 | 0.002214 | 0.223819 | 0.069424 |
| MmugDNA.2606.1.S1_x_at  | MmugDNA.2606.1  | 3.02  | 2.98  | 0.15 | 0.07 | 1.03  | 0.990512 | 0.948841 | 0.996572 | 0.97077  |
| MmugDNA.26060.1.S1_at   | MmugDNA.26060.1 | 5.23  | 5.11  | 0.23 | 0.05 | 1.08  | 0.299991 | 0.34641  | 0.588264 | 0.591247 |
| MmugDNA.26061.1.S1_at   | MmugDNA.26061.1 | 5.69  | 7.44  | 0.34 | 0.39 | -3.35 | 0.010795 | 0.116038 | 0.153792 | 0.383257 |
| MmugDNA.26062.1.S1_at   | MmugDNA.26062.1 | 4.91  | 4.94  | 0.01 | 0.06 | -1.02 | 0.252156 | 0.230779 | 0.546792 | 0.502452 |

|                         |                 |       |       |      |      |       |          |          |          |          |
|-------------------------|-----------------|-------|-------|------|------|-------|----------|----------|----------|----------|
| MmugDNA.26063.1.S1_at   | MmugDNA.26063.1 | 3.79  | 3.89  | 0.05 | 0.1  | -1.07 | 0.344123 | 0.094038 | 0.623409 | 0.350662 |
| MmugDNA.26064.1.S1_at   | MmugDNA.26064.1 | 3.21  | 3.25  | 0.54 | 0.2  | -1.03 | 0.457575 | 0.421016 | 0.706421 | 0.644663 |
| MmugDNA.41422.1.S1_s_at | MmugDNA.41422.1 | 6.1   | 6.65  | 0.37 | 0.31 | -1.47 | 0.129173 | 0.365633 | 0.411529 | 0.605647 |
| MmugDNA.26066.1.S1_at   | MmugDNA.26066.1 | 6.86  | 4.01  | 1.47 | 0.48 | 7.22  | 0.014439 | 0.015909 | 0.171859 | 0.160062 |
| MmugDNA.26067.1.S1_at   | MmugDNA.26067.1 | 5.42  | 5.09  | 0.12 | 0.13 | 1.26  | 0.06311  | 0.319284 | 0.30795  | 0.571722 |
| MmugDNA.26068.1.S1_at   | MmugDNA.26068.1 | 3.22  | 3.36  | 0.24 | 0.18 | -1.1  | 0.569274 | 0.722571 | 0.778786 | 0.839293 |
| MmugDNA.26070.1.S1_at   | MmugDNA.26070.1 | 7.82  | 8.05  | 0.26 | 0.26 | -1.17 | 0.165862 | 0.538934 | 0.458849 | 0.72339  |
| MmugDNA.26071.1.S1_s_at | MmugDNA.26071.1 | 8.06  | 8.4   | 0.31 | 0.24 | -1.26 | 0.28344  | 0.166916 | 0.573857 | 0.443394 |
| MmugDNA.26073.1.S1_at   | MmugDNA.26073.1 | 6.89  | 6.79  | 0.33 | 0.29 | 1.07  | 0.579093 | 0.003031 | 0.784894 | 0.080386 |
| MmugDNA.26074.1.S1_at   | MmugDNA.26074.1 | 4.84  | 5.64  | 0.93 | 0.11 | -1.74 | 0.425968 | 0.398339 | 0.683236 | 0.629355 |
| MmugDNA.26075.1.S1_at   | MmugDNA.26075.1 | 4.05  | 4     | 0.23 | 0.05 | 1.04  | 0.830009 | 0.953398 | 0.92519  | 0.97351  |
| MmugDNA.26078.1.S1_at   | MmugDNA.26078.1 | 7.29  | 7.28  | 0.41 | 0.26 | 1     | 0.457917 | 0.926109 | 0.70667  | 0.95813  |
| MmugDNA.26079.1.S1_at   | MmugDNA.26079.1 | 7.56  | 7.68  | 0.05 | 0.02 | -1.08 | 0.037353 | 0.41351  | 0.248641 | 0.639648 |
| MmugDNA.2608.1.S1_at    | MmugDNA.2608.1  | 5.56  | 5.67  | 0.09 | 0.02 | -1.08 | 0.145552 | 0.068589 | 0.432938 | 0.308466 |
| MmugDNA.26080.1.S1_at   | MmugDNA.26080.1 | 6.81  | 6.77  | 0.41 | 0.04 | 1.03  | 0.691398 | 0.830143 | 0.852436 | 0.902493 |
| MmugDNA.26081.1.S1_at   | MmugDNA.26081.1 | 5.44  | 5.44  | 0.22 | 0.08 | -1    | 0.27642  | 0.403251 | 0.567973 | 0.631996 |
| MmugDNA.26082.1.S1_at   | MmugDNA.26082.1 | 9.76  | 10.27 | 0.76 | 0.15 | -1.43 | 0.10337  | 0.37472  | 0.376455 | 0.613037 |
| MmugDNA.26083.1.S1_at   | MmugDNA.26083.1 | 2.8   | 2.81  | 0.12 | 0.04 | -1    | 0.3087   | 0.379452 | 0.595229 | 0.616406 |
| MmugDNA.26085.1.S1_at   | MmugDNA.26085.1 | 3.78  | 3.66  | 0.33 | 0.21 | 1.09  | 0.553895 | 0.681549 | 0.770323 | 0.814092 |
| MmugDNA.26087.1.S1_at   | MmugDNA.26087.1 | 5.4   | 5.43  | 0.11 | 0.1  | -1.03 | 0.686847 | 0.179922 | 0.850752 | 0.456453 |
| MmugDNA.26088.1.S1_at   | MmugDNA.26088.1 | 3.76  | 3.8   | 0.14 | 0.05 | -1.03 | 0.824641 | 0.62737  | 0.922091 | 0.780374 |
| MmugDNA.26089.1.S1_at   | MmugDNA.26089.1 | 3.45  | 3.46  | 0.05 | 0.11 | -1.01 | 0.221716 | 0.426325 | 0.519663 | 0.648491 |
| MmugDNA.2609.1.S1_at    | MmugDNA.2609.1  | 7.39  | 7.69  | 0.1  | 0.1  | -1.23 | 0.013922 | 0.007461 | 0.169154 | 0.115888 |
| MmugDNA.26090.1.S1_at   | MmugDNA.26090.1 | 4.28  | 4.09  | 0.15 | 0.08 | 1.14  | 0.169288 | 0.255611 | 0.462574 | 0.523608 |
| MmugDNA.26091.1.S1_at   | MmugDNA.26091.1 | 11.68 | 11.41 | 0.18 | 0.07 | 1.21  | 0.090751 | 0.149828 | 0.357761 | 0.424427 |
| MmugDNA.26092.1.S1_at   | MmugDNA.26092.1 | 4.25  | 4.17  | 0.21 | 0.23 | 1.05  | 0.40146  | 0.568452 | 0.666035 | 0.741979 |
| MmugDNA.26093.1.S1_at   | MmugDNA.26093.1 | 4.04  | 4.08  | 0.56 | 0.19 | -1.03 | 0.656131 | 0.546956 | 0.833605 | 0.728283 |
| MmugDNA.26096.1.S1_at   | MmugDNA.26096.1 | 4.73  | 4.42  | 0.17 | 0.16 | 1.24  | 0.158962 | 0.394442 | 0.450252 | 0.626982 |
| MmugDNA.26097.1.S1_at   | MmugDNA.26097.1 | 2.62  | 2.64  | 0.15 | 0.04 | -1.01 | 0.46379  | 0.674441 | 0.710222 | 0.809792 |
| MmugDNA.26098.1.S1_at   | MmugDNA.26098.1 | 5.29  | 4.75  | 0.17 | 0.21 | 1.46  | 0.05237  | 0.299606 | 0.286127 | 0.557956 |
| MmugDNA.26099.1.S1_at   | MmugDNA.26099.1 | 5.13  | 5.13  | 0.03 | 0.09 | 1     | 0.716961 | 0.897514 | 0.866434 | 0.941525 |
| MmugDNA.261.1.S1_at     | MmugDNA.261.1   | 4.25  | 4.36  | 0.07 | 0.02 | -1.08 | 0.048743 | 0.730224 | 0.278272 | 0.843882 |
| MmugDNA.2610.1.S1_at    | MmugDNA.2610.1  | 8.88  | 9.74  | 0.31 | 0.29 | -1.81 | 0.102291 | 0.040684 | 0.374312 | 0.246648 |
| MmugDNA.2610.1.S1_s_at  | MmugDNA.2610.1  | 7.18  | 7.71  | 0.28 | 0.21 | -1.45 | 0.069965 | 0.043877 | 0.322968 | 0.254088 |
| MmugDNA.26100.1.S1_at   | MmugDNA.26100.1 | 6.29  | 6.08  | 0.52 | 0.14 | 1.16  | 0.307882 | 0.241219 | 0.594672 | 0.511821 |
| MmugDNA.26101.1.S1_at   | MmugDNA.26101.1 | 10.17 | 8.7   | 0.52 | 0.58 | 2.77  | 0.064692 | 0.065942 | 0.31107  | 0.302161 |
| MmugDNA.26102.1.S1_at   | MmugDNA.26102.1 | 5.47  | 5.25  | 0.19 | 0.11 | 1.16  | 0.297652 | 0.046813 | 0.586122 | 0.261106 |
| MmugDNA.26103.1.S1_at   | MmugDNA.26103.1 | 6.21  | 6.36  | 0.15 | 0.07 | -1.11 | 0.087464 | 0.088403 | 0.353257 | 0.341877 |
| MmugDNA.26105.1.S1_at   | MmugDNA.26105.1 | 3.28  | 3.24  | 0.6  | 0.11 | 1.03  | 0.33306  | 0.499079 | 0.614585 | 0.697988 |
| MmugDNA.26106.1.S1_at   | MmugDNA.26106.1 | 6.84  | 6.37  | 0.56 | 0.07 | 1.38  | 0.227107 | 0.131868 | 0.525116 | 0.403891 |
| MmugDNA.26107.1.S1_s_at | MmugDNA.26107.1 | 14.64 | 14.66 | 0    | 0.01 | -1.01 | 0.035541 | 0.012499 | 0.243391 | 0.144302 |
| MmugDNA.26109.1.S1_at   | MmugDNA.26109.1 | 9.1   | 9.01  | 0.23 | 0.06 | 1.06  | 0.712839 | 0.853378 | 0.864436 | 0.916579 |
| MmugDNA.2611.1.S1_at    | MmugDNA.2611.1  | 7.27  | 7.21  | 0.13 | 0.04 | 1.04  | 0.206903 | 0.323729 | 0.504611 | 0.574587 |

|                         |                 |       |       |      |      |       |          |          |          |          |
|-------------------------|-----------------|-------|-------|------|------|-------|----------|----------|----------|----------|
| MmugDNA.26110.1.S1_at   | MmugDNA.26110.1 | 3.59  | 3.48  | 0.42 | 0.13 | 1.07  | 0.963209 | 0.90844  | 0.985129 | 0.948167 |
| MmugDNA.26111.1.S1_at   | MmugDNA.26111.1 | 6.75  | 7.26  | 0.09 | 0.15 | -1.42 | 0.006877 | 0.187042 | 0.129792 | 0.462965 |
| MmugDNA.26112.1.S1_at   | MmugDNA.26112.1 | 4.39  | 4.24  | 0.23 | 0.2  | 1.11  | 0.088515 | 0.08104  | 0.354709 | 0.329189 |
| MmugDNA.26113.1.S1_at   | MmugDNA.26113.1 | 6.5   | 5.51  | 0.57 | 0.08 | 1.99  | 0.112806 | 0.084664 | 0.389296 | 0.33618  |
| MmugDNA.26115.1.S1_at   | MmugDNA.26115.1 | 4.86  | 4.93  | 0.16 | 0.2  | -1.05 | 0.575037 | 0.322938 | 0.782459 | 0.574261 |
| MmugDNA.33058.1.S1_s_at | MmugDNA.33058.1 | 8.25  | 8.1   | 0.11 | 0.14 | 1.11  | 0.548012 | 0.378961 | 0.766338 | 0.615912 |
| MmugDNA.26117.1.S1_at   | MmugDNA.26117.1 | 5.32  | 5.42  | 0.15 | 0.24 | -1.07 | 0.711081 | 0.735151 | 0.863578 | 0.846742 |
| MmugDNA.26118.1.S1_at   | MmugDNA.26118.1 | 6.7   | 6.61  | 0.1  | 0.05 | 1.07  | 0.135599 | 0.262327 | 0.419501 | 0.528633 |
| MmugDNA.26119.1.S1_at   | MmugDNA.26119.1 | 6.76  | 7.15  | 0.31 | 0.11 | -1.31 | 0.095624 | 0.055864 | 0.365116 | 0.282172 |
| MmugDNA.26120.1.S1_at   | MmugDNA.26120.1 | 6.34  | 6.92  | 0.77 | 0.07 | -1.5  | 0.702293 | 0.804429 | 0.858719 | 0.887549 |
| MmugDNA.26121.1.S1_at   | MmugDNA.26121.1 | 4.52  | 4.02  | 0.76 | 0.13 | 1.41  | 0.221509 | 0.211629 | 0.519477 | 0.485681 |
| MmugDNA.26122.1.S1_at   | MmugDNA.26122.1 | 6.82  | 6.78  | 0.21 | 0.14 | 1.02  | 0.630863 | 0.218749 | 0.818647 | 0.492438 |
| MmugDNA.26123.1.S1_at   | MmugDNA.26123.1 | 7.61  | 5.66  | 0.53 | 1.14 | 3.87  | 0.118861 | 0.12444  | 0.396589 | 0.394865 |
| MmugDNA.26124.1.S1_at   | MmugDNA.26124.1 | 4.69  | 4.76  | 0.07 | 0.13 | -1.04 | 0.826313 | 0.866057 | 0.922907 | 0.923791 |
| MmugDNA.26125.1.S1_at   | MmugDNA.26125.1 | 6.34  | 6.7   | 0.35 | 0.16 | -1.28 | 0.11354  | 0.033309 | 0.390238 | 0.226131 |
| MmugDNA.26126.1.S1_at   | MmugDNA.26126.1 | 4.7   | 4.67  | 0.03 | 0.16 | 1.02  | 0.573261 | 0.761156 | 0.781077 | 0.86123  |
| MmugDNA.26127.1.S1_at   | MmugDNA.26127.1 | 5.95  | 5.75  | 0.29 | 0.05 | 1.15  | 0.430617 | 0.479323 | 0.686898 | 0.685088 |
| MmugDNA.26128.1.S1_at   | MmugDNA.26128.1 | 7.91  | 7.8   | 0.14 | 0.09 | 1.08  | 0.063938 | 0.092223 | 0.309333 | 0.347969 |
| MmugDNA.26129.1.S1_at   | MmugDNA.26129.1 | 5.6   | 5.76  | 0.16 | 0.03 | -1.12 | 0.130765 | 0.233144 | 0.413324 | 0.504458 |
| MmugDNA.2613.1.S1_at    | MmugDNA.2613.1  | 4.51  | 3.93  | 0.73 | 0.49 | 1.49  | 0.230242 | 0.265536 | 0.529091 | 0.531418 |
| MmugDNA.26130.1.S1_s_at | MmugDNA.26130.1 | 6.93  | 6.97  | 0.08 | 0.04 | -1.03 | 0.838207 | 0.041765 | 0.929053 | 0.248947 |
| MmugDNA.26131.1.S1_at   | MmugDNA.26131.1 | 8.58  | 8.42  | 0.57 | 0.23 | 1.12  | 0.251497 | 0.372895 | 0.546309 | 0.611752 |
| MmugDNA.26133.1.S1_at   | MmugDNA.26133.1 | 5.63  | 5.46  | 0.71 | 0.33 | 1.13  | 0.920284 | 0.351684 | 0.965927 | 0.595164 |
| MmugDNA.26134.1.S1_at   | MmugDNA.26134.1 | 4.79  | 4.92  | 0.06 | 0.08 | -1.09 | 0.285123 | 0.01066  | 0.57512  | 0.134819 |
| MmugDNA.26135.1.S1_at   | MmugDNA.26135.1 | 3.15  | 3.04  | 0.93 | 0.09 | 1.08  | 0.298967 | 0.344008 | 0.587215 | 0.58962  |
| MmugDNA.26136.1.S1_s_at | MmugDNA.26136.1 | 8.03  | 8.02  | 0.42 | 0.22 | 1.01  | 0.917382 | 0.191566 | 0.964764 | 0.466896 |
| MmugDNA.26137.1.S1_at   | MmugDNA.26137.1 | 3.17  | 3.29  | 0.08 | 0.1  | -1.09 | 0.126509 | 0.180684 | 0.407915 | 0.457245 |
| MmugDNA.26138.1.S1_at   | MmugDNA.26138.1 | 3.15  | 3.2   | 0.52 | 0.06 | -1.03 | 0.855952 | 0.684984 | 0.937316 | 0.816278 |
| MmugDNA.26139.1.S1_at   | MmugDNA.26139.1 | 7.02  | 6.7   | 0.52 | 0.57 | 1.24  | 0.56313  | 0.811401 | 0.775309 | 0.891158 |
| MmugDNA.26141.1.S1_at   | MmugDNA.26141.1 | 3.62  | 3.32  | 0.23 | 0.15 | 1.23  | 0.094849 | 0.168677 | 0.363741 | 0.445352 |
| MmugDNA.26142.1.S1_at   | MmugDNA.26142.1 | 9.16  | 9.15  | 0.06 | 0.19 | 1.01  | 0.598386 | 0.058579 | 0.797381 | 0.288743 |
| MmugDNA.26143.1.S1_at   | MmugDNA.26143.1 | 5.88  | 5.33  | 0.3  | 0.3  | 1.46  | 0.043118 | 0.155857 | 0.264804 | 0.431223 |
| MmugDNA.26144.1.S1_at   | MmugDNA.26144.1 | 2.91  | 3.04  | 0.09 | 0.15 | -1.09 | 0.095228 | 0.065212 | 0.364615 | 0.301239 |
| MmugDNA.26145.1.S1_at   | MmugDNA.26145.1 | 7.47  | 7.67  | 0.48 | 0.34 | -1.15 | 0.809997 | 0.979683 | 0.91487  | 0.989107 |
| MmugDNA.26146.1.S1_at   | MmugDNA.26146.1 | 8.17  | 8.22  | 0.3  | 0.03 | -1.04 | 0.859481 | 0.378854 | 0.93919  | 0.615818 |
| MmugDNA.26147.1.S1_at   | MmugDNA.26147.1 | 4.28  | 4.52  | 0.12 | 0.02 | -1.18 | 0.077051 | 0.269963 | 0.335611 | 0.535239 |
| MmugDNA.2615.1.S1_at    | MmugDNA.2615.1  | 10.06 | 10.12 | 0.24 | 0    | -1.04 | 0.225926 | 0.135215 | 0.523661 | 0.407277 |
| MmugDNA.26152.1.S1_at   | MmugDNA.26152.1 | 4.55  | 4.63  | 0.06 | 0.28 | -1.06 | 0.780509 | 0.191112 | 0.899867 | 0.466378 |
| MmugDNA.26153.1.S1_at   | MmugDNA.26153.1 | 5.98  | 5.96  | 0.65 | 0.19 | 1.01  | 0.760635 | 0.957202 | 0.890273 | 0.975789 |
| MmugDNA.26154.1.S1_at   | MmugDNA.26154.1 | 7.51  | 7.38  | 0.28 | 0.12 | 1.1   | 0.442328 | 0.38889  | 0.695777 | 0.623208 |
| MmugDNA.26156.1.S1_at   | MmugDNA.26156.1 | 10.04 | 10.21 | 0.27 | 0.23 | -1.13 | 0.793091 | 0.967729 | 0.906465 | 0.982165 |
| MmugDNA.26157.1.S1_at   | MmugDNA.26157.1 | 5.72  | 5.46  | 0.03 | 0.14 | 1.2   | 0.011701 | 0.039148 | 0.158    | 0.243072 |
| MmugDNA.26159.1.S1_at   | MmugDNA.26159.1 | 7.92  | 7.35  | 0.36 | 0.58 | 1.48  | 0.234107 | 0.320538 | 0.532201 | 0.572648 |

|                         |                 |       |       |      |      |       |          |          |          |          |
|-------------------------|-----------------|-------|-------|------|------|-------|----------|----------|----------|----------|
| MmugDNA.2616.1.S1_at    | MmugDNA.2616.1  | 2.84  | 2.72  | 0.06 | 0.1  | 1.09  | 0.15307  | 0.236675 | 0.442744 | 0.507459 |
| MmugDNA.26160.1.S1_at   | MmugDNA.26160.1 | 11.31 | 11.43 | 0.05 | 0.07 | -1.09 | 0.066976 | 0.33194  | 0.316461 | 0.580503 |
| MmugDNA.26161.1.S1_at   | MmugDNA.26161.1 | 5.95  | 5.8   | 0.15 | 0.39 | 1.1   | 0.199831 | 0.252937 | 0.497351 | 0.521261 |
| MmugDNA.26162.1.S1_at   | MmugDNA.26162.1 | 7     | 7.16  | 0.25 | 0.09 | -1.12 | 0.991019 | 0.98497  | 0.996713 | 0.991478 |
| MmugDNA.26164.1.S1_at   | MmugDNA.26164.1 | 11.47 | 11.83 | 0.05 | 0.16 | -1.28 | 0.026403 | 0.008783 | 0.215535 | 0.124066 |
| MmugDNA.26166.1.S1_at   | MmugDNA.26166.1 | 7.3   | 8     | 0.34 | 0.19 | -1.62 | 0.022726 | 0.130516 | 0.203836 | 0.402373 |
| MmugDNA.26167.1.S1_at   | MmugDNA.26167.1 | 5.17  | 4.03  | 0.27 | 0.49 | 2.2   | 0.094592 | 0.094677 | 0.363543 | 0.351481 |
| MmugDNA.26168.1.S1_at   | MmugDNA.26168.1 | 5.29  | 5.17  | 0.1  | 0.09 | 1.09  | 0.183536 | 0.406779 | 0.479427 | 0.634497 |
| MmugDNA.2617.1.S1_at    | MmugDNA.2617.1  | 6     | 5.96  | 0.12 | 0.02 | 1.02  | 0.753123 | 0.415472 | 0.885933 | 0.64091  |
| MmugDNA.26172.1.S1_at   | MmugDNA.26172.1 | 10.31 | 10.36 | 0.13 | 0.08 | -1.03 | 0.690208 | 0.835035 | 0.851949 | 0.905549 |
| MmugDNA.26173.1.S1_at   | MmugDNA.26173.1 | 5.25  | 5.13  | 0.04 | 0.2  | 1.09  | 0.234891 | 0.423833 | 0.532919 | 0.646547 |
| MmugDNA.26175.1.S1_s_at | MmugDNA.26175.1 | 12.87 | 13.42 | 0.23 | 0.02 | -1.46 | 0.01679  | 0.236109 | 0.182845 | 0.507179 |
| MmugDNA.26176.1.S1_at   | MmugDNA.26176.1 | 8.79  | 8.71  | 0.19 | 0.12 | 1.06  | 0.432715 | 0.516206 | 0.688399 | 0.708757 |
| MmugDNA.26178.1.S1_at   | MmugDNA.26178.1 | 5.69  | 5.67  | 0.08 | 0.14 | 1.02  | 0.862301 | 0.489122 | 0.940186 | 0.691616 |
| MmugDNA.2618.1.S1_at    | MmugDNA.2618.1  | 5.73  | 5.52  | 0.33 | 0.23 | 1.16  | 0.314595 | 0.472133 | 0.599987 | 0.679868 |
| MmugDNA.26180.1.S1_at   | MmugDNA.26180.1 | 8.28  | 8.52  | 0.28 | 0.16 | -1.18 | 0.431511 | 0.010665 | 0.687538 | 0.13482  |
| MmugDNA.26181.1.S1_at   | MmugDNA.26181.1 | 5.4   | 5.23  | 0.6  | 0.41 | 1.13  | 0.541953 | 0.639824 | 0.762538 | 0.788487 |
| MmugDNA.26182.1.S1_at   | MmugDNA.26182.1 | 8.25  | 7.82  | 1.5  | 0.19 | 1.35  | 0.704198 | 0.887467 | 0.859667 | 0.935867 |
| MmugDNA.26183.1.S1_at   | MmugDNA.26183.1 | 6.4   | 6.61  | 0.07 | 0.18 | -1.15 | 0.050521 | 0.193057 | 0.282549 | 0.468554 |
| MmugDNA.26184.1.S1_at   | MmugDNA.26184.1 | 4.71  | 4.65  | 0.08 | 0.06 | 1.04  | 0.410838 | 0.283684 | 0.672789 | 0.546118 |
| MmugDNA.26185.1.S1_at   | MmugDNA.26185.1 | 6.44  | 6.67  | 0.11 | 0.04 | -1.17 | 0.034096 | 0.035563 | 0.239433 | 0.232813 |
| MmugDNA.26186.1.S1_at   | MmugDNA.26186.1 | 9.18  | 7.64  | 0.06 | 0.16 | 2.91  | 0.000145 | 0.034854 | 0.051196 | 0.230897 |
| MmugDNA.26189.1.S1_at   | MmugDNA.26189.1 | 11.65 | 12.02 | 0.18 | 0.26 | -1.29 | 0.04841  | 0.128432 | 0.277466 | 0.399714 |
| MmugDNA.2619.1.S1_at    | MmugDNA.2619.1  | 6.85  | 7.02  | 0.22 | 0.26 | -1.13 | 0.617597 | 0.284152 | 0.810076 | 0.546362 |
| MmugDNA.26190.1.S1_at   | MmugDNA.26190.1 | 3.66  | 3.44  | 0.16 | 0.18 | 1.16  | 0.113822 | 0.090904 | 0.390524 | 0.345537 |
| MmugDNA.26191.1.S1_at   | MmugDNA.26191.1 | 7.33  | 7.94  | 0.42 | 0.01 | -1.53 | 0.125297 | 0.0153   | 0.405737 | 0.157071 |
| MmugDNA.26192.1.S1_at   | MmugDNA.26192.1 | 4.6   | 4.47  | 0.08 | 0.07 | 1.09  | 0.095696 | 0.119355 | 0.365214 | 0.387887 |
| MmugDNA.26194.1.S1_at   | MmugDNA.26194.1 | 5     | 4.86  | 0.37 | 0.68 | 1.1   | 0.743567 | 0.641444 | 0.881381 | 0.78954  |
| MmugDNA.26196.1.S1_at   | MmugDNA.26196.1 | 5.23  | 5.25  | 0.12 | 0.14 | -1.02 | 0.963289 | 0.639625 | 0.985134 | 0.788365 |
| MmugDNA.26197.1.S1_at   | MmugDNA.26197.1 | 3.33  | 3.34  | 0.26 | 0.11 | -1    | 0.466572 | 0.410296 | 0.712278 | 0.637216 |
| MmugDNA.26198.1.S1_at   | MmugDNA.26198.1 | 4.88  | 4.84  | 0.1  | 0.01 | 1.03  | 0.479496 | 0.700968 | 0.720709 | 0.826604 |
| MmugDNA.26199.1.S1_at   | MmugDNA.26199.1 | 6.11  | 5.99  | 0.1  | 0.08 | 1.08  | 0.392614 | 0.713395 | 0.659492 | 0.833698 |
| MmugDNA.26200.1.S1_at   | MmugDNA.26200.1 | 4.67  | 4.56  | 0.38 | 0.15 | 1.09  | 0.602511 | 0.598792 | 0.800294 | 0.761124 |
| MmugDNA.26201.1.S1_at   | MmugDNA.26201.1 | 4.86  | 4.9   | 0.05 | 0    | -1.03 | 0.191115 | 0.191479 | 0.487306 | 0.466821 |
| MmugDNA.26202.1.S1_at   | MmugDNA.26202.1 | 3.86  | 3.71  | 0.11 | 0.24 | 1.11  | 0.435516 | 0.590892 | 0.69059  | 0.756503 |
| MmugDNA.26203.1.S1_at   | MmugDNA.26203.1 | 3.39  | 3.37  | 0.19 | 0.13 | 1.01  | 0.213118 | 0.417668 | 0.511046 | 0.642365 |
| MmugDNA.26205.1.S1_at   | MmugDNA.26205.1 | 4.61  | 4.84  | 0.24 | 0.21 | -1.17 | 0.573741 | 0.548211 | 0.781279 | 0.728958 |
| MmugDNA.26206.1.S1_at   | MmugDNA.26206.1 | 5.59  | 6.42  | 0.05 | 0.18 | -1.77 | 0.001277 | 0.001178 | 0.078631 | 0.05381  |
| MmugDNA.26207.1.S1_at   | MmugDNA.26207.1 | 5.23  | 5.24  | 0.03 | 0.07 | -1    | 0.636462 | 0.891273 | 0.822111 | 0.938047 |
| MmugDNA.26208.1.S1_at   | MmugDNA.26208.1 | 9.32  | 9.24  | 0.22 | 0.05 | 1.06  | 0.900488 | 0.576403 | 0.957767 | 0.747202 |
| MmugDNA.26210.1.S1_at   | MmugDNA.26210.1 | 6.12  | 6.19  | 0.08 | 0.03 | -1.05 | 0.249323 | 0.070304 | 0.544528 | 0.311377 |
| MmugDNA.26211.1.S1_at   | MmugDNA.26211.1 | 3.89  | 3.61  | 0.25 | 0.14 | 1.21  | 0.156239 | 0.232584 | 0.446825 | 0.504359 |
| MmugDNA.26213.1.S1_s_at | MmugDNA.26213.1 | 5.26  | 5.94  | 0.13 | 0.23 | -1.6  | 0.010936 | 0.01631  | 0.154379 | 0.161818 |

|                         |                 |       |       |      |      |        |          |          |          |          |
|-------------------------|-----------------|-------|-------|------|------|--------|----------|----------|----------|----------|
| MmugDNA.26214.1.S1_at   | MmugDNA.26214.1 | 12.88 | 13.28 | 0.29 | 0.14 | -1.32  | 0.070376 | 0.126397 | 0.323654 | 0.396917 |
| MmugDNA.26215.1.S1_at   | MmugDNA.26215.1 | 5.21  | 5.07  | 0.2  | 0.16 | 1.1    | 0.78652  | 0.780641 | 0.902673 | 0.872726 |
| MmugDNA.26216.1.S1_at   | MmugDNA.26216.1 | 5.32  | 5.22  | 0.31 | 0.1  | 1.07   | 0.49219  | 0.639155 | 0.72956  | 0.788117 |
| MmugDNA.26217.1.S1_at   | MmugDNA.26217.1 | 3.99  | 3.88  | 0.07 | 0.12 | 1.08   | 0.162555 | 0.098447 | 0.454561 | 0.356564 |
| MmugDNA.26218.1.S1_at   | MmugDNA.26218.1 | 6.21  | 6.22  | 0.44 | 0.3  | -1.01  | 0.573723 | 0.471175 | 0.781274 | 0.679213 |
| MmugDNA.26220.1.S1_at   | MmugDNA.26220.1 | 11.36 | 11.9  | 0.18 | 0.11 | -1.46  | 0.010815 | 0.001391 | 0.153877 | 0.057005 |
| MmugDNA.26221.1.S1_at   | MmugDNA.26221.1 | 5.82  | 5.85  | 0.22 | 0.17 | -1.02  | 0.803064 | 0.398685 | 0.911652 | 0.629458 |
| MmugDNA.26222.1.S1_at   | MmugDNA.26222.1 | 7.62  | 7.25  | 0.08 | 0.14 | 1.29   | 0.0255   | 0.158771 | 0.212829 | 0.434869 |
| MmugDNA.26223.1.S1_at   | MmugDNA.26223.1 | 3.24  | 3.35  | 0.19 | 0.19 | -1.07  | 0.525557 | 0.743165 | 0.75199  | 0.851188 |
| MmugDNA.26224.1.S1_at   | MmugDNA.26224.1 | 3.11  | 3.1   | 0.14 | 0.12 | 1      | 0.797999 | 0.439581 | 0.908853 | 0.658313 |
| MmugDNA.26224.1.S1_s_at | MmugDNA.26224.1 | 3.56  | 3.6   | 0    | 0.2  | -1.02  | 0.274572 | 0.18505  | 0.566493 | 0.460891 |
| MmugDNA.26225.1.S1_at   | MmugDNA.26225.1 | 4.31  | 8.03  | 1.71 | 0.2  | -13.16 | 0.053985 | 0.308669 | 0.289412 | 0.56461  |
| MmugDNA.26227.1.S1_at   | MmugDNA.26227.1 | 6.43  | 6.5   | 0.48 | 0.34 | -1.05  | 0.805402 | 0.450732 | 0.9127   | 0.665844 |
| MmugDNA.26228.1.S1_at   | MmugDNA.26228.1 | 3.05  | 3.06  | 0.14 | 0    | -1.01  | 0.601889 | 0.570876 | 0.799878 | 0.743422 |
| MmugDNA.26229.1.S1_at   | MmugDNA.26229.1 | 12.16 | 12.11 | 0    | 0.05 | 1.04   | 0.176654 | 0.004498 | 0.471175 | 0.093593 |
| MmugDNA.26230.1.S1_at   | MmugDNA.26230.1 | 6.59  | 6.51  | 0.41 | 0.21 | 1.06   | 0.310413 | 0.074016 | 0.596705 | 0.317579 |
| MmugDNA.26231.1.S1_at   | MmugDNA.26231.1 | 6.61  | 6.48  | 0.49 | 0.13 | 1.09   | 0.812642 | 0.146512 | 0.916193 | 0.420576 |
| MmugDNA.26232.1.S1_at   | MmugDNA.26232.1 | 3.56  | 3.74  | 0.07 | 0.12 | -1.14  | 0.203286 | 0.403269 | 0.501192 | 0.631998 |
| MmugDNA.26233.1.S1_at   | MmugDNA.26233.1 | 7.53  | 7.83  | 0.43 | 0.09 | -1.23  | 0.809029 | 0.17871  | 0.914402 | 0.454995 |
| MmugDNA.26234.1.S1_at   | MmugDNA.26234.1 | 3.66  | 3.53  | 0.03 | 0.18 | 1.1    | 0.348087 | 0.680822 | 0.626271 | 0.813597 |
| MmugDNA.26235.1.S1_at   | MmugDNA.26235.1 | 3.91  | 3.9   | 0.07 | 0.09 | 1.01   | 0.392434 | 0.10938  | 0.6594   | 0.373156 |
| MmugDNA.26236.1.S1_at   | MmugDNA.26236.1 | 4.66  | 4.5   | 0.14 | 0.18 | 1.11   | 0.578479 | 0.114965 | 0.784318 | 0.381719 |
| MmugDNA.26237.1.S1_at   | MmugDNA.26237.1 | 5.09  | 5.05  | 0.16 | 0.28 | 1.03   | 0.481915 | 0.705618 | 0.722245 | 0.829349 |
| MmugDNA.26238.1.S1_at   | MmugDNA.26238.1 | 5.19  | 5.31  | 0.06 | 0.02 | -1.09  | 0.024298 | 0.005066 | 0.208931 | 0.09907  |
| MmugDNA.26239.1.S1_at   | MmugDNA.26239.1 | 4.19  | 4.2   | 0.12 | 0.01 | -1     | 0.588706 | 0.625697 | 0.791222 | 0.779265 |
| MmugDNA.26240.1.S1_at   | MmugDNA.26240.1 | 4.36  | 5.19  | 0.76 | 0.27 | -1.78  | 0.162079 | 0.176056 | 0.453951 | 0.452526 |
| MmugDNA.26241.1.S1_at   | MmugDNA.26241.1 | 9.77  | 9.46  | 0.15 | 0.02 | 1.24   | 0.01704  | 0.021614 | 0.183882 | 0.184324 |
| MmugDNA.26241.1.S1_s_at | MmugDNA.26241.1 | 8.54  | 8.33  | 0.13 | 0.06 | 1.15   | 0.032008 | 0.204202 | 0.232689 | 0.478507 |
| MmugDNA.26242.1.S1_at   | MmugDNA.26242.1 | 4.65  | 4.68  | 0.12 | 0.22 | -1.02  | 0.32549  | 0.541356 | 0.608731 | 0.724874 |
| MmugDNA.26244.1.S1_at   | MmugDNA.26244.1 | 10.04 | 10.69 | 0.16 | 0.16 | -1.56  | 0.014302 | 0.211035 | 0.171429 | 0.485047 |
| MmugDNA.26245.1.S1_at   | MmugDNA.26245.1 | 7.8   | 9.59  | 0.65 | 0.27 | -3.44  | 0.033366 | 0.106301 | 0.236556 | 0.368766 |
| MmugDNA.26246.1.S1_at   | MmugDNA.26246.1 | 6.89  | 7.53  | 0.21 | 0.09 | -1.56  | 0.011158 | 0.203441 | 0.155389 | 0.477634 |
| MmugDNA.521.1.S1_s_at   | MmugDNA.521.1   | 8.85  | 10.34 | 0.47 | 0.21 | -2.82  | 0.02113  | 0.009578 | 0.198834 | 0.129001 |
| MmugDNA.26248.1.S1_at   | MmugDNA.26248.1 | 3.21  | 3.2   | 0.06 | 0.17 | 1.01   | 0.565906 | 0.732    | 0.776954 | 0.844751 |
| MmugDNA.26249.1.S1_at   | MmugDNA.26249.1 | 5.89  | 5.52  | 0.41 | 0.38 | 1.29   | 0.240307 | 0.099729 | 0.537838 | 0.358285 |
| MmugDNA.2625.1.S1_at    | MmugDNA.2625.1  | 3.9   | 3.71  | 0.29 | 0.3  | 1.14   | 0.210573 | 0.075138 | 0.5081   | 0.319331 |
| MmugDNA.26250.1.S1_at   | MmugDNA.26250.1 | 8.04  | 8.15  | 0.05 | 0.13 | -1.08  | 0.117271 | 0.09119  | 0.39452  | 0.346097 |
| MmugDNA.26252.1.S1_at   | MmugDNA.26252.1 | 8.29  | 8.17  | 0.11 | 0.07 | 1.08   | 0.112417 | 0.106425 | 0.388628 | 0.368978 |
| MmugDNA.26252.1.S1_s_at | MmugDNA.26252.1 | 8.06  | 8.08  | 0.02 | 0.04 | -1.01  | 0.807093 | 0.366381 | 0.91362  | 0.606087 |
| MmugDNA.26253.1.S1_at   | MmugDNA.26253.1 | 8.69  | 7.51  | 0.28 | 0.24 | 2.26   | 0.006934 | 0.009995 | 0.130411 | 0.131262 |
| MmugDNA.26254.1.S1_at   | MmugDNA.26254.1 | 6.47  | 8.69  | 1.04 | 0.27 | -4.67  | 0.057127 | 0.03108  | 0.296343 | 0.218117 |
| MmugDNA.26255.1.S1_at   | MmugDNA.26255.1 | 12.58 | 12.52 | 0.14 | 0.02 | 1.04   | 0.487748 | 0.377666 | 0.726421 | 0.615086 |
| MmugDNA.26257.1.S1_at   | MmugDNA.26257.1 | 9.13  | 8.31  | 0.29 | 0.24 | 1.76   | 0.01538  | 0.02426  | 0.176257 | 0.194952 |



|                         |                 |       |       |      |      |       |          |          |          |          |
|-------------------------|-----------------|-------|-------|------|------|-------|----------|----------|----------|----------|
| MmugDNA.26258.1.S1_at   | MmugDNA.26258.1 | 6.18  | 6.02  | 0.16 | 0.11 | 1.11  | 0.209903 | 0.310955 | 0.50734  | 0.565951 |
| MmugDNA.26259.1.S1_at   | MmugDNA.26259.1 | 3.75  | 3.6   | 0.31 | 0.17 | 1.11  | 0.183931 | 0.165136 | 0.479818 | 0.441373 |
| MmugDNA.2626.1.S1_at    | MmugDNA.2626.1  | 7.81  | 7.64  | 0.08 | 0.07 | 1.13  | 0.07016  | 0.144095 | 0.323175 | 0.417974 |
| MmugDNA.26260.1.S1_at   | MmugDNA.26260.1 | 4.45  | 4.02  | 0.26 | 0.07 | 1.35  | 0.042349 | 0.066665 | 0.262827 | 0.303999 |
| MmugDNA.26262.1.S1_at   | MmugDNA.26262.1 | 8.66  | 8.36  | 0.1  | 0.03 | 1.23  | 0.005228 | 0.009983 | 0.117353 | 0.131219 |
| MmugDNA.26263.1.S1_at   | MmugDNA.26263.1 | 5.72  | 5.24  | 0.99 | 1.16 | 1.39  | 0.999028 | 0.964744 | 0.999637 | 0.980422 |
| MmugDNA.26265.1.S1_at   | MmugDNA.26265.1 | 5.94  | 7.03  | 0.23 | 0.53 | -2.12 | 0.079016 | 0.128957 | 0.338745 | 0.400429 |
| MmugDNA.26266.1.S1_at   | MmugDNA.26266.1 | 10.97 | 11.39 | 0.36 | 0.06 | -1.34 | 0.074971 | 0.207542 | 0.331989 | 0.48185  |
| MmugDNA.26266.1.S1_s_at | MmugDNA.26266.1 | 9.56  | 9.96  | 0.33 | 0.1  | -1.33 | 0.099191 | 0.270573 | 0.370154 | 0.535837 |
| MmugDNA.26267.1.S1_at   | MmugDNA.26267.1 | 3.43  | 3.13  | 1.3  | 0.25 | 1.23  | 0.262525 | 0.350866 | 0.556605 | 0.594581 |
| MmugDNA.26268.1.S1_at   | MmugDNA.26268.1 | 6.04  | 5.86  | 0.19 | 0.22 | 1.13  | 0.740613 | 0.358782 | 0.879776 | 0.600242 |
| MmugDNA.26269.1.S1_at   | MmugDNA.26269.1 | 7.76  | 7.57  | 0.12 | 0.13 | 1.14  | 0.029929 | 0.011977 | 0.226288 | 0.14165  |
| MmugDNA.2627.1.S1_at    | MmugDNA.2627.1  | 5.49  | 5.46  | 0.82 | 0.25 | 1.02  | 0.368855 | 0.532367 | 0.642403 | 0.719017 |
| MmugDNA.26270.1.S1_at   | MmugDNA.26270.1 | 3.52  | 3.56  | 0.08 | 0.13 | -1.03 | 0.450921 | 0.64217  | 0.701868 | 0.790047 |
| MmugDNA.26271.1.S1_at   | MmugDNA.26271.1 | 4.53  | 4.41  | 0.48 | 0.1  | 1.08  | 0.247312 | 0.174001 | 0.542869 | 0.450247 |
| MmugDNA.26273.1.S1_at   | MmugDNA.26273.1 | 9.81  | 9.81  | 0.56 | 0.04 | 1.01  | 0.791684 | 0.63114  | 0.905386 | 0.782688 |
| MmugDNA.26274.1.S1_at   | MmugDNA.26274.1 | 5.1   | 5.13  | 0.22 | 0.02 | -1.03 | 0.704264 | 0.960253 | 0.859667 | 0.977459 |
| MmugDNA.26275.1.S1_at   | MmugDNA.26275.1 | 6.61  | 6.15  | 0.15 | 0.21 | 1.38  | 0.037184 | 0.4654   | 0.248107 | 0.675748 |
| MmugDNA.26276.1.S1_at   | MmugDNA.26276.1 | 5.92  | 5.9   | 0.14 | 0.06 | 1.01  | 0.593735 | 0.796145 | 0.794185 | 0.882501 |
| MmugDNA.26277.1.S1_at   | MmugDNA.26277.1 | 6.79  | 6.12  | 0.59 | 0.05 | 1.59  | 0.12381  | 0.101754 | 0.403554 | 0.361627 |
| MmugDNA.26278.1.S1_at   | MmugDNA.26278.1 | 7.17  | 7.16  | 0.05 | 0.1  | 1.01  | 0.354301 | 0.470259 | 0.631473 | 0.678575 |
| MmugDNA.26279.1.S1_at   | MmugDNA.26279.1 | 4.85  | 4.72  | 0.19 | 0.11 | 1.09  | 0.208344 | 0.355594 | 0.506068 | 0.597844 |
| MmugDNA.2628.1.S1_at    | MmugDNA.2628.1  | 6.22  | 6.04  | 0.23 | 0.26 | 1.13  | 0.987453 | 0.823595 | 0.995456 | 0.898664 |
| MmugDNA.26280.1.S1_at   | MmugDNA.26280.1 | 3.23  | 3.42  | 0.01 | 0.09 | -1.14 | 0.010378 | 0.012466 | 0.15181  | 0.14417  |
| MmugDNA.26282.1.S1_at   | MmugDNA.26282.1 | 4.65  | 4.08  | 0.57 | 0.11 | 1.48  | 0.20666  | 0.345472 | 0.504305 | 0.590746 |
| MmugDNA.26283.1.S1_at   | MmugDNA.26283.1 | 4.98  | 4.95  | 0.05 | 0.08 | 1.02  | 0.872869 | 0.973062 | 0.945492 | 0.985401 |
| MmugDNA.26284.1.S1_at   | MmugDNA.26284.1 | 5.38  | 5.4   | 0.24 | 0.16 | -1.01 | 0.27394  | 0.370336 | 0.565983 | 0.609407 |
| MmugDNA.26285.1.S1_at   | MmugDNA.26285.1 | 7.79  | 8.9   | 0.5  | 0.29 | -2.16 | 0.0492   | 0.012846 | 0.279271 | 0.14598  |
| MmugDNA.26287.1.S1_at   | MmugDNA.26287.1 | 5     | 5.15  | 0.13 | 0.19 | -1.11 | 0.281263 | 0.386781 | 0.572137 | 0.621895 |
| MmugDNA.2629.1.S1_at    | MmugDNA.2629.1  | 4.81  | 4.73  | 0.08 | 0.08 | 1.06  | 0.212415 | 0.323027 | 0.510471 | 0.57432  |
| MmugDNA.26290.1.S1_at   | MmugDNA.26290.1 | 5.4   | 5.4   | 0.45 | 0.15 | 1     | 0.970708 | 0.939455 | 0.988376 | 0.965611 |
| MmugDNA.26291.1.S1_at   | MmugDNA.26291.1 | 4.88  | 5.66  | 0.58 | 0.25 | -1.72 | 0.061928 | 0.039428 | 0.305393 | 0.243529 |
| MmugDNA.26292.1.S1_at   | MmugDNA.26292.1 | 6.42  | 6.89  | 0.37 | 0.26 | -1.38 | 0.494205 | 0.040856 | 0.731052 | 0.247004 |
| MmugDNA.26293.1.S1_at   | MmugDNA.26293.1 | 3.76  | 3.77  | 0.1  | 0.02 | -1.01 | 0.686562 | 0.862741 | 0.850635 | 0.921968 |
| MmugDNA.26294.1.S1_at   | MmugDNA.26294.1 | 4.66  | 4.48  | 0.09 | 0.16 | 1.14  | 0.348008 | 0.315053 | 0.626168 | 0.568808 |
| MmugDNA.26295.1.S1_at   | MmugDNA.26295.1 | 3.55  | 3.66  | 0.29 | 0.07 | -1.08 | 0.954637 | 0.984643 | 0.981374 | 0.991346 |
| MmugDNA.26296.1.S1_at   | MmugDNA.26296.1 | 8.9   | 9.1   | 0.4  | 0.04 | -1.14 | 0.892439 | 0.823703 | 0.954212 | 0.898726 |
| MmugDNA.26297.1.S1_at   | MmugDNA.26297.1 | 6.69  | 6.44  | 0.76 | 0.26 | 1.19  | 0.683343 | 0.323427 | 0.849    | 0.574466 |
| MmugDNA.26299.1.S1_at   | MmugDNA.26299.1 | 6.56  | 6.5   | 0.16 | 0.04 | 1.04  | 0.588333 | 0.89157  | 0.790985 | 0.938242 |
| MmugDNA.263.1.S1_at     | MmugDNA.263.1   | 5.27  | 5.25  | 0.27 | 0.11 | 1.01  | 0.794894 | 0.814422 | 0.907378 | 0.892923 |
| MmugDNA.2630.1.S1_at    | MmugDNA.2630.1  | 5.31  | 5.15  | 0.32 | 0.27 | 1.12  | 0.482255 | 0.658085 | 0.722552 | 0.800181 |
| MmugDNA.26300.1.S1_at   | MmugDNA.26300.1 | 5.46  | 5.63  | 0.04 | 0.17 | -1.13 | 0.289387 | 0.511861 | 0.578963 | 0.705797 |
| MmugDNA.26301.1.S1_s_at | MmugDNA.26301.1 | 8.19  | 9.16  | 0.54 | 0.07 | -1.95 | 0.080513 | 0.165582 | 0.341026 | 0.44189  |

|                         |                 |       |       |      |      |        |          |          |          |          |
|-------------------------|-----------------|-------|-------|------|------|--------|----------|----------|----------|----------|
| MmugDNA.26302.1.S1_at   | MmugDNA.26302.1 | 11.86 | 11.66 | 0.06 | 0.1  | 1.15   | 0.01799  | 0.038795 | 0.187151 | 0.241916 |
| MmugDNA.26303.1.S1_at   | MmugDNA.26303.1 | 6.18  | 6.57  | 0.94 | 0.36 | -1.31  | 0.690361 | 0.276036 | 0.851986 | 0.540071 |
| MmugDNA.26304.1.S1_at   | MmugDNA.26304.1 | 7.09  | 7.34  | 0.23 | 0.18 | -1.19  | 0.116772 | 0.120017 | 0.39382  | 0.388672 |
| MmugDNA.26306.1.S1_at   | MmugDNA.26306.1 | 8.27  | 8.26  | 0.12 | 0.18 | 1.01   | 0.630668 | 0.133739 | 0.818647 | 0.40572  |
| MmugDNA.26308.1.S1_at   | MmugDNA.26308.1 | 4.27  | 4.08  | 0.23 | 0.3  | 1.14   | 0.917797 | 0.96501  | 0.964887 | 0.980553 |
| MmugDNA.26308.1.S1_s_at | MmugDNA.26308.1 | 3.77  | 3.58  | 0.3  | 0.07 | 1.14   | 0.251218 | 0.398378 | 0.546013 | 0.629374 |
| MmugDNA.26309.1.S1_at   | MmugDNA.26309.1 | 3.06  | 3.07  | 0.06 | 0.18 | -1     | 0.257735 | 0.153697 | 0.551962 | 0.428413 |
| MmugDNA.2631.1.S1_at    | MmugDNA.2631.1  | 13.41 | 12.83 | 0.13 | 0.07 | 1.49   | 0.001649 | 0.352447 | 0.084462 | 0.595723 |
| MmugDNA.26311.1.S1_s_at | MmugDNA.26311.1 | 10.07 | 10.65 | 0.36 | 0.16 | -1.49  | 0.186668 | 0.014462 | 0.48279  | 0.153457 |
| MmugDNA.26312.1.S1_at   | MmugDNA.26312.1 | 12.11 | 11.73 | 0.32 | 0.05 | 1.3    | 0.098039 | 0.305799 | 0.368604 | 0.562731 |
| MmugDNA.26313.1.S1_at   | MmugDNA.26313.1 | 6.95  | 7.28  | 0.17 | 0.22 | -1.26  | 0.096921 | 0.241233 | 0.367057 | 0.511831 |
| MmugDNA.26315.1.S1_at   | MmugDNA.26315.1 | 4.18  | 3.94  | 0.5  | 0.21 | 1.17   | 0.272575 | 0.367164 | 0.564664 | 0.606832 |
| MmugDNA.26319.1.S1_at   | MmugDNA.26319.1 | 4.91  | 4.46  | 0.37 | 0.07 | 1.36   | 0.322528 | 0.441851 | 0.60654  | 0.659939 |
| MmugDNA.2632.1.S1_at    | MmugDNA.2632.1  | 6.5   | 6.39  | 0.75 | 0.24 | 1.08   | 0.874655 | 0.899487 | 0.946214 | 0.942862 |
| MmugDNA.26320.1.S1_at   | MmugDNA.26320.1 | 5.03  | 4.43  | 1.16 | 0.35 | 1.51   | 0.427346 | 0.121712 | 0.684657 | 0.390956 |
| MmugDNA.26322.1.S1_s_at | MmugDNA.26322.1 | 10.37 | 10.55 | 0.34 | 0.24 | -1.13  | 0.633566 | 0.452096 | 0.820437 | 0.666799 |
| MmugDNA.26324.1.S1_at   | MmugDNA.26324.1 | 13.54 | 13.02 | 0.21 | 0.17 | 1.44   | 0.033767 | 0.052372 | 0.237957 | 0.274345 |
| MmugDNA.26325.1.S1_at   | MmugDNA.26325.1 | 4.52  | 4.67  | 0.14 | 0.17 | -1.11  | 0.2699   | 0.357938 | 0.562186 | 0.599532 |
| MmugDNA.26326.1.S1_at   | MmugDNA.26326.1 | 4.25  | 4.1   | 0.22 | 0.08 | 1.11   | 0.441895 | 0.177431 | 0.695358 | 0.453773 |
| MmugDNA.26327.1.S1_at   | MmugDNA.26327.1 | 3.5   | 3.51  | 0.14 | 0.01 | -1.01  | 0.905209 | 0.914806 | 0.959957 | 0.952124 |
| MmugDNA.26329.1.S1_at   | MmugDNA.26329.1 | 5.48  | 6.85  | 0.66 | 0.13 | -2.6   | 0.074456 | 0.071493 | 0.331099 | 0.313706 |
| MmugDNA.26330.1.S1_at   | MmugDNA.26330.1 | 7.72  | 7.32  | 0.21 | 0.3  | 1.33   | 0.115024 | 0.017594 | 0.39207  | 0.167721 |
| MmugDNA.26331.1.S1_at   | MmugDNA.26331.1 | 10.37 | 10.26 | 0.18 | 0.13 | 1.08   | 0.825692 | 0.010416 | 0.922525 | 0.133522 |
| MmugDNA.26332.1.S1_at   | MmugDNA.26332.1 | 5.22  | 5.32  | 0.33 | 0    | -1.07  | 0.865086 | 0.962449 | 0.941423 | 0.97891  |
| MmugDNA.26333.1.S1_at   | MmugDNA.26333.1 | 4.03  | 4.07  | 0.07 | 0.02 | -1.03  | 0.331405 | 0.055537 | 0.613386 | 0.281454 |
| MmugDNA.26334.1.S1_at   | MmugDNA.26334.1 | 4.02  | 3.62  | 0.21 | 0.28 | 1.32   | 0.5763   | 0.461515 | 0.783164 | 0.673152 |
| MmugDNA.26335.1.S1_at   | MmugDNA.26335.1 | 4.59  | 4.57  | 0.15 | 0.29 | 1.01   | 0.506514 | 0.603225 | 0.739179 | 0.764033 |
| MmugDNA.27336.1.S1_s_at | MmugDNA.27336.1 | 10.79 | 10.71 | 0.1  | 0.13 | 1.06   | 0.914578 | 0.035568 | 0.963669 | 0.232813 |
| MmugDNA.26337.1.S1_at   | MmugDNA.26337.1 | 6.08  | 6.1   | 0.18 | 0.07 | -1.01  | 0.861626 | 0.554693 | 0.939908 | 0.733408 |
| MmugDNA.26338.1.S1_at   | MmugDNA.26338.1 | 12.86 | 12.81 | 0.21 | 0.05 | 1.04   | 0.688775 | 0.108222 | 0.851406 | 0.371557 |
| MmugDNA.26339.1.S1_at   | MmugDNA.26339.1 | 4.38  | 4.5   | 0.11 | 0.04 | -1.09  | 0.255236 | 0.065402 | 0.549682 | 0.301415 |
| MmugDNA.2634.1.S1_at    | MmugDNA.2634.1  | 10.21 | 11.1  | 0.52 | 0.11 | -1.85  | 0.099346 | 0.012134 | 0.370274 | 0.142546 |
| MmugDNA.26340.1.S1_at   | MmugDNA.26340.1 | 4.7   | 8.72  | 1.73 | 0.42 | -16.13 | 0.046144 | 0.232662 | 0.272561 | 0.504359 |
| MmugDNA.26341.1.S1_at   | MmugDNA.26341.1 | 4.84  | 4.96  | 0.07 | 0.3  | -1.08  | 0.193782 | 0.3537   | 0.490333 | 0.596782 |
| MmugDNA.26342.1.S1_at   | MmugDNA.26342.1 | 4.34  | 4.26  | 0.19 | 0.08 | 1.06   | 0.273454 | 0.476071 | 0.565583 | 0.682475 |
| MmugDNA.26343.1.S1_at   | MmugDNA.26343.1 | 4.53  | 4.6   | 0.05 | 0.03 | -1.05  | 0.091793 | 0.030982 | 0.359594 | 0.21786  |
| MmugDNA.26344.1.S1_at   | MmugDNA.26344.1 | 6.72  | 6.33  | 0.21 | 0.04 | 1.31   | 0.027952 | 0.003883 | 0.219792 | 0.0887   |
| MmugDNA.26345.1.S1_at   | MmugDNA.26345.1 | 5.91  | 6.37  | 0.16 | 0.05 | -1.37  | 0.020893 | 0.099559 | 0.198207 | 0.35796  |
| MmugDNA.26346.1.S1_at   | MmugDNA.26346.1 | 6.08  | 6.67  | 0.28 | 0.22 | -1.51  | 0.105831 | 0.060586 | 0.379857 | 0.292769 |
| MmugDNA.26348.1.S1_at   | MmugDNA.26348.1 | 3.76  | 3.79  | 0.31 | 0.29 | -1.02  | 0.609079 | 0.565239 | 0.804954 | 0.739765 |
| MmugDNA.26349.1.S1_at   | MmugDNA.26349.1 | 11.74 | 11.54 | 0.48 | 0.07 | 1.15   | 0.820719 | 0.116594 | 0.920042 | 0.383771 |
| MmugDNA.26350.1.S1_at   | MmugDNA.26350.1 | 6.88  | 7.47  | 0.49 | 0.58 | -1.51  | 0.444995 | 0.20661  | 0.697647 | 0.480635 |
| MmugDNA.26351.1.S1_at   | MmugDNA.26351.1 | 3.25  | 3.24  | 0.1  | 0.09 | 1.01   | 0.898618 | 0.627212 | 0.956903 | 0.780325 |

|                         |                 |       |       |      |      |       |          |          |          |          |
|-------------------------|-----------------|-------|-------|------|------|-------|----------|----------|----------|----------|
| MmugDNA.26352.1.S1_at   | MmugDNA.26352.1 | 4.16  | 3.92  | 0.85 | 0.12 | 1.18  | 0.215907 | 0.312133 | 0.513611 | 0.566904 |
| MmugDNA.26354.1.S1_at   | MmugDNA.26354.1 | 9.41  | 10.92 | 0.39 | 0.37 | -2.83 | 0.016765 | 0.079853 | 0.182686 | 0.327179 |
| MmugDNA.26356.1.S1_at   | MmugDNA.26356.1 | 5.28  | 5.21  | 0.09 | 0.1  | 1.05  | 0.173851 | 0.264543 | 0.468263 | 0.53051  |
| MmugDNA.26359.1.S1_at   | MmugDNA.26359.1 | 5.9   | 6.54  | 0.41 | 0.41 | -1.56 | 0.193019 | 0.25768  | 0.489582 | 0.525332 |
| MmugDNA.2636.1.S1_at    | MmugDNA.2636.1  | 6.07  | 5.96  | 0.11 | 0.05 | 1.07  | 0.345013 | 0.163007 | 0.624093 | 0.439145 |
| MmugDNA.26360.1.S1_at   | MmugDNA.26360.1 | 9.99  | 9.88  | 0.15 | 0.19 | 1.07  | 0.998899 | 0.005721 | 0.999637 | 0.104271 |
| MmugDNA.26361.1.S1_at   | MmugDNA.26361.1 | 3.26  | 3.33  | 0.18 | 0.04 | -1.05 | 0.965244 | 0.985024 | 0.985924 | 0.991497 |
| MmugDNA.26362.1.S1_at   | MmugDNA.26362.1 | 5.61  | 6.03  | 0.12 | 0.08 | -1.34 | 0.009251 | 0.007832 | 0.145977 | 0.117929 |
| MmugDNA.26363.1.S1_s_at | MmugDNA.26363.1 | 10.74 | 11.59 | 0.3  | 0.13 | -1.8  | 0.018677 | 0.009656 | 0.189833 | 0.129267 |
| MmugDNA.26364.1.S1_at   | MmugDNA.26364.1 | 5.25  | 5.21  | 0.08 | 0.12 | 1.02  | 0.572648 | 0.093625 | 0.780725 | 0.349995 |
| MmugDNA.26365.1.S1_at   | MmugDNA.26365.1 | 12.76 | 12.82 | 0.02 | 0.01 | -1.04 | 0.018184 | 0.002291 | 0.187817 | 0.07045  |
| MmugDNA.26366.1.S1_at   | MmugDNA.26366.1 | 11.02 | 10.65 | 0.1  | 0.03 | 1.3   | 0.002844 | 0.001024 | 0.098277 | 0.051079 |
| MmugDNA.26368.1.S1_at   | MmugDNA.26368.1 | 6.32  | 6.23  | 0.51 | 0.36 | 1.06  | 0.456801 | 0.602495 | 0.705979 | 0.763444 |
| MmugDNA.26369.1.S1_at   | MmugDNA.26369.1 | 5.77  | 5.93  | 0.14 | 0.19 | -1.12 | 0.417405 | 0.071524 | 0.677553 | 0.313706 |
| MmugDNA.26369.1.S1_s_at | MmugDNA.26369.1 | 6.71  | 6.73  | 0.03 | 0.21 | -1.01 | 0.445236 | 0.331467 | 0.697742 | 0.580121 |
| MmugDNA.26370.1.S1_at   | MmugDNA.26370.1 | 6.79  | 6.73  | 0.51 | 0.35 | 1.04  | 0.397794 | 0.651485 | 0.663304 | 0.796226 |
| MmugDNA.26371.1.S1_at   | MmugDNA.26371.1 | 4.26  | 3.91  | 0.25 | 0.24 | 1.28  | 0.130659 | 0.21146  | 0.413115 | 0.485578 |
| MmugDNA.26372.1.S1_at   | MmugDNA.26372.1 | 11.08 | 11.47 | 0.13 | 0.02 | -1.31 | 0.007125 | 0.000942 | 0.131745 | 0.049026 |
| MmugDNA.26373.1.S1_at   | MmugDNA.26373.1 | 3.65  | 4.45  | 0.91 | 1.17 | -1.75 | 0.447731 | 0.274427 | 0.699609 | 0.538914 |
| MmugDNA.26374.1.S1_at   | MmugDNA.26374.1 | 3.39  | 3.38  | 0.05 | 0.11 | 1.01  | 0.640908 | 0.815383 | 0.824509 | 0.893521 |
| MmugDNA.26375.1.S1_s_at | MmugDNA.26375.1 | 3.33  | 3.15  | 0.08 | 0.05 | 1.13  | 0.046964 | 0.049829 | 0.27447  | 0.268305 |
| MmugDNA.26377.1.S1_at   | MmugDNA.26377.1 | 3.93  | 4.03  | 0.35 | 0.19 | -1.07 | 0.701002 | 0.684723 | 0.857901 | 0.816113 |
| MmugDNA.26378.1.S1_at   | MmugDNA.26378.1 | 6     | 6.18  | 0.17 | 0.07 | -1.13 | 0.163098 | 0.417474 | 0.455285 | 0.64224  |
| MmugDNA.26379.1.S1_at   | MmugDNA.26379.1 | 10.11 | 10.22 | 0.27 | 0.13 | -1.08 | 0.372332 | 0.16711  | 0.64489  | 0.4436   |
| MmugDNA.26379.1.S1_s_at | MmugDNA.26379.1 | 9.61  | 9.89  | 0.24 | 0.13 | -1.22 | 0.107019 | 0.055877 | 0.381391 | 0.282172 |
| MmugDNA.2638.1.S1_at    | MmugDNA.2638.1  | 5.09  | 5.05  | 0.02 | 0.1  | 1.02  | 0.724197 | 0.764346 | 0.870462 | 0.86305  |
| MmugDNA.26380.1.S1_at   | MmugDNA.26380.1 | 5.54  | 5.37  | 0.28 | 0.08 | 1.12  | 0.394605 | 0.53568  | 0.661066 | 0.72122  |
| MmugDNA.26381.1.S1_at   | MmugDNA.26381.1 | 5.1   | 4.98  | 0.11 | 0.11 | 1.09  | 0.677919 | 0.100865 | 0.846342 | 0.360398 |
| MmugDNA.26383.1.S1_at   | MmugDNA.26383.1 | 5.6   | 5.6   | 0.38 | 0.02 | -1    | 0.754766 | 0.932015 | 0.88688  | 0.961384 |
| MmugDNA.26384.1.S1_at   | MmugDNA.26384.1 | 6.53  | 6.53  | 0.23 | 0.13 | 1     | 0.874613 | 0.852674 | 0.946214 | 0.916254 |
| MmugDNA.26385.1.S1_x_at | MmugDNA.26385.1 | 8.61  | 7.97  | 0.54 | 0.49 | 1.56  | 0.205725 | 0.301522 | 0.503526 | 0.55955  |
| MmugDNA.26386.1.S1_at   | MmugDNA.26386.1 | 6.23  | 6.42  | 0.25 | 0.06 | -1.14 | 0.730445 | 0.857524 | 0.873958 | 0.918676 |
| MmugDNA.26387.1.S1_at   | MmugDNA.26387.1 | 4.37  | 3.67  | 0.56 | 0.1  | 1.62  | 0.10952  | 0.122913 | 0.384571 | 0.392923 |
| MmugDNA.26388.1.S1_at   | MmugDNA.26388.1 | 5.13  | 5.83  | 0.92 | 0.49 | -1.62 | 0.885848 | 0.974352 | 0.951295 | 0.986047 |
| MmugDNA.26389.1.S1_at   | MmugDNA.26389.1 | 7.03  | 7.36  | 1.29 | 0.23 | -1.26 | 0.664342 | 0.822621 | 0.838381 | 0.89799  |
| MmugDNA.26390.1.S1_x_at | MmugDNA.26390.1 | 8.45  | 8.37  | 0.93 | 0.31 | 1.06  | 0.351177 | 0.282443 | 0.628851 | 0.545139 |
| MmugDNA.26392.1.S1_at   | MmugDNA.26392.1 | 6.84  | 6.02  | 0.45 | 0.09 | 1.76  | 0.038919 | 0.030072 | 0.253692 | 0.215243 |
| MmugDNA.26393.1.S1_at   | MmugDNA.26393.1 | 11.18 | 11.49 | 0.09 | 0.05 | -1.24 | 0.020379 | 0.000306 | 0.196305 | 0.034907 |
| MmugDNA.26395.1.S1_at   | MmugDNA.26395.1 | 7.61  | 7.6   | 0.59 | 0.04 | 1.01  | 0.419506 | 0.416494 | 0.678845 | 0.641647 |
| MmugDNA.26398.1.S1_at   | MmugDNA.26398.1 | 10.21 | 10.04 | 0.22 | 0.08 | 1.12  | 0.208722 | 0.261921 | 0.506255 | 0.528309 |
| MmugDNA.264.1.S1_at     | MmugDNA.264.1   | 4.13  | 4.29  | 0.99 | 0.19 | -1.12 | 0.658709 | 0.84479  | 0.835196 | 0.911667 |
| MmugDNA.26400.1.S1_at   | MmugDNA.26400.1 | 5.38  | 5.46  | 0.19 | 0.26 | -1.06 | 0.80237  | 0.946795 | 0.911259 | 0.96978  |
| MmugDNA.26401.1.S1_at   | MmugDNA.26401.1 | 5.21  | 5.1   | 0.18 | 0.02 | 1.08  | 0.107462 | 0.123911 | 0.382148 | 0.394201 |

|                         |                 |       |       |      |      |       |          |          |          |          |
|-------------------------|-----------------|-------|-------|------|------|-------|----------|----------|----------|----------|
| MmugDNA.26402.1.S1_at   | MmugDNA.26402.1 | 4.21  | 4.08  | 0.1  | 0.06 | 1.1   | 0.098087 | 0.102244 | 0.368627 | 0.36236  |
| MmugDNA.26403.1.S1_at   | MmugDNA.26403.1 | 10.04 | 10.43 | 0.13 | 0.08 | -1.31 | 0.009367 | 0.223269 | 0.146681 | 0.496078 |
| MmugDNA.26404.1.S1_at   | MmugDNA.26404.1 | 3.99  | 3.82  | 0.49 | 0.08 | 1.13  | 0.230587 | 0.24886  | 0.529468 | 0.517951 |
| MmugDNA.26405.1.S1_at   | MmugDNA.26405.1 | 12.72 | 12.84 | 0.25 | 0.11 | -1.09 | 0.638022 | 0.386944 | 0.822679 | 0.621935 |
| MmugDNA.26405.1.S1_s_at | MmugDNA.26405.1 | 12.91 | 13.08 | 0.28 | 0.11 | -1.13 | 0.554357 | 0.475895 | 0.77064  | 0.682387 |
| MmugDNA.26406.1.S1_at   | MmugDNA.26406.1 | 10.55 | 10.99 | 0.14 | 0.06 | -1.36 | 0.010443 | 0.240684 | 0.152221 | 0.511405 |
| MmugDNA.26407.1.S1_at   | MmugDNA.26407.1 | 3.46  | 3.36  | 0.29 | 0.09 | 1.07  | 0.409792 | 0.120807 | 0.672061 | 0.389657 |
| MmugDNA.26409.1.S1_at   | MmugDNA.26409.1 | 7.2   | 7.53  | 0.92 | 0.2  | -1.25 | 0.931494 | 0.029401 | 0.971156 | 0.213352 |
| MmugDNA.27697.1.S1_s_at | MmugDNA.27697.1 | 3.25  | 3.31  | 0.05 | 0.17 | -1.04 | 0.475444 | 0.521237 | 0.718106 | 0.712315 |
| MmugDNA.26411.1.S1_at   | MmugDNA.26411.1 | 3.15  | 3.04  | 0.02 | 0.19 | 1.08  | 0.554368 | 0.708979 | 0.77064  | 0.831212 |
| MmugDNA.26412.1.S1_at   | MmugDNA.26412.1 | 11.12 | 11.25 | 0.18 | 0.15 | -1.09 | 0.961037 | 0.313291 | 0.984082 | 0.567753 |
| MmugDNA.26414.1.S1_at   | MmugDNA.26414.1 | 4.39  | 4.12  | 0.13 | 0.13 | 1.21  | 0.065123 | 0.120038 | 0.311982 | 0.388718 |
| MmugDNA.26415.1.S1_at   | MmugDNA.26415.1 | 4.23  | 4.23  | 0    | 0.09 | 1     | 0.373901 | 0.281893 | 0.645118 | 0.544852 |
| MmugDNA.26416.1.S1_at   | MmugDNA.26416.1 | 6.92  | 6.93  | 0.19 | 0.04 | -1.01 | 0.87589  | 0.979611 | 0.946814 | 0.989059 |
| MmugDNA.26417.1.S1_at   | MmugDNA.26417.1 | 3.94  | 3.94  | 0.33 | 0.13 | 1     | 0.262281 | 0.338081 | 0.556406 | 0.585259 |
| MmugDNA.26418.1.S1_at   | MmugDNA.26418.1 | 3.91  | 3.82  | 0.25 | 0.2  | 1.07  | 0.940716 | 0.659764 | 0.975102 | 0.800854 |
| MmugDNA.26419.1.S1_at   | MmugDNA.26419.1 | 6.67  | 6.6   | 0.11 | 0.15 | 1.05  | 0.873162 | 0.955377 | 0.945586 | 0.974645 |
| MmugDNA.2642.1.S1_at    | MmugDNA.2642.1  | 6.52  | 6.35  | 0.37 | 0.1  | 1.12  | 0.702643 | 0.016933 | 0.858882 | 0.165006 |
| MmugDNA.26420.1.S1_at   | MmugDNA.26420.1 | 4.78  | 4.64  | 0.14 | 0.16 | 1.1   | 0.259994 | 0.367214 | 0.554191 | 0.606858 |
| MmugDNA.26421.1.S1_at   | MmugDNA.26421.1 | 4.15  | 4     | 0.43 | 0.61 | 1.11  | 0.945818 | 0.970961 | 0.977159 | 0.984141 |
| MmugDNA.26422.1.S1_at   | MmugDNA.26422.1 | 5.07  | 5.17  | 0.2  | 0.1  | -1.07 | 0.518638 | 0.16991  | 0.747601 | 0.446569 |
| MmugDNA.26423.1.S1_at   | MmugDNA.26423.1 | 4.37  | 4.34  | 0.13 | 0.06 | 1.02  | 0.567247 | 0.673649 | 0.77771  | 0.809337 |
| MmugDNA.26424.1.S1_at   | MmugDNA.26424.1 | 4.65  | 4.65  | 0.05 | 0.04 | 1     | 0.720336 | 0.844502 | 0.868039 | 0.911523 |
| MmugDNA.26425.1.S1_at   | MmugDNA.26425.1 | 5.47  | 5.59  | 0.32 | 0.17 | -1.09 | 0.741614 | 0.188533 | 0.880267 | 0.464458 |
| MmugDNA.26427.1.S1_at   | MmugDNA.26427.1 | 5.99  | 5.81  | 0.2  | 0.13 | 1.13  | 0.274146 | 0.035959 | 0.566119 | 0.234139 |
| MmugDNA.26428.1.S1_at   | MmugDNA.26428.1 | 12.05 | 11.4  | 0.29 | 0.12 | 1.57  | 0.022205 | 0.002433 | 0.202213 | 0.073093 |
| MmugDNA.26429.1.S1_at   | MmugDNA.26429.1 | 4.1   | 4.3   | 0.67 | 0.62 | -1.15 | 0.360683 | 0.419406 | 0.636187 | 0.643466 |
| MmugDNA.2643.1.S1_at    | MmugDNA.2643.1  | 11.57 | 11.7  | 0.19 | 0.07 | -1.1  | 0.159191 | 0.663617 | 0.450505 | 0.803033 |
| MmugDNA.26431.1.S1_at   | MmugDNA.26431.1 | 7.17  | 7.16  | 0.81 | 0.1  | 1     | 0.641459 | 0.620083 | 0.824838 | 0.775227 |
| MmugDNA.26433.1.S1_at   | MmugDNA.26433.1 | 3.45  | 3.38  | 0.19 | 0.05 | 1.05  | 0.138699 | 0.09383  | 0.42426  | 0.350281 |
| MmugDNA.26434.1.S1_at   | MmugDNA.26434.1 | 4.38  | 4.41  | 0.02 | 0.05 | -1.02 | 0.341039 | 0.193307 | 0.620979 | 0.468656 |
| MmugDNA.26437.1.S1_at   | MmugDNA.26437.1 | 4.51  | 4.64  | 0.21 | 0.5  | -1.09 | 0.986746 | 0.639669 | 0.995228 | 0.788389 |
| MmugDNA.26438.1.S1_at   | MmugDNA.26438.1 | 5.19  | 5.11  | 0.78 | 0.17 | 1.06  | 0.709866 | 0.647423 | 0.862704 | 0.793471 |
| MmugDNA.26439.1.S1_at   | MmugDNA.26439.1 | 5.3   | 5.55  | 0.06 | 0.22 | -1.19 | 0.10457  | 0.079691 | 0.377911 | 0.326981 |
| MmugDNA.2644.1.S1_at    | MmugDNA.2644.1  | 8.63  | 7.64  | 0.34 | 0.24 | 1.99  | 0.015619 | 0.014567 | 0.177553 | 0.153907 |
| MmugDNA.26440.1.S1_at   | MmugDNA.26440.1 | 3.6   | 3.89  | 0.08 | 0.08 | -1.23 | 0.016042 | 0.157663 | 0.179208 | 0.433137 |
| MmugDNA.26441.1.S1_at   | MmugDNA.26441.1 | 8.41  | 8.41  | 0.31 | 0.08 | 1     | 0.297531 | 0.791215 | 0.58594  | 0.879378 |
| MmugDNA.26442.1.S1_at   | MmugDNA.26442.1 | 9     | 8.55  | 0.06 | 0.09 | 1.37  | 0.003141 | 0.084429 | 0.10126  | 0.335717 |
| MmugDNA.26443.1.S1_at   | MmugDNA.26443.1 | 3.33  | 3.24  | 0.01 | 0.19 | 1.06  | 0.846768 | 0.859576 | 0.933119 | 0.919999 |
| MmugDNA.26444.1.S1_at   | MmugDNA.26444.1 | 6.98  | 5.88  | 0.67 | 0.21 | 2.13  | 0.085728 | 0.321506 | 0.350079 | 0.573226 |
| MmugDNA.26445.1.S1_at   | MmugDNA.26445.1 | 13.17 | 13.09 | 0.28 | 0.01 | 1.06  | 0.629951 | 0.724369 | 0.818285 | 0.840457 |
| MmugDNA.26448.1.S1_at   | MmugDNA.26448.1 | 10.28 | 10.29 | 0.21 | 0.04 | -1    | 0.291086 | 0.501577 | 0.58049  | 0.699719 |
| MmugDNA.26449.1.S1_at   | MmugDNA.26449.1 | 9.55  | 9.21  | 0.22 | 0.11 | 1.27  | 0.050759 | 0.282807 | 0.283078 | 0.545524 |

|                         |                 |       |       |      |      |       |          |          |          |          |
|-------------------------|-----------------|-------|-------|------|------|-------|----------|----------|----------|----------|
| MmugDNA.2645.1.S1_at    | MmugDNA.2645.1  | 8.01  | 7.66  | 0.4  | 0.11 | 1.28  | 0.070687 | 0.175287 | 0.324185 | 0.452061 |
| MmugDNA.26450.1.S1_at   | MmugDNA.26450.1 | 5.19  | 5.2   | 0.17 | 0.12 | -1.01 | 0.691238 | 0.756507 | 0.852358 | 0.858223 |
| MmugDNA.26451.1.S1_at   | MmugDNA.26451.1 | 9.23  | 8.49  | 0.18 | 0.09 | 1.67  | 0.005374 | 0.031753 | 0.118439 | 0.22064  |
| MmugDNA.26452.1.S1_at   | MmugDNA.26452.1 | 7.9   | 7.89  | 0.28 | 0.14 | 1.01  | 0.438776 | 0.245695 | 0.69332  | 0.515484 |
| MmugDNA.26452.1.S1_s_at | MmugDNA.26452.1 | 7.31  | 7.3   | 0.15 | 0.01 | 1     | 0.364014 | 0.376726 | 0.638642 | 0.614539 |
| MmugDNA.26453.1.S1_at   | MmugDNA.26453.1 | 3.21  | 3.21  | 0.05 | 0    | 1     | 0.378019 | 0.855795 | 0.648368 | 0.917707 |
| MmugDNA.26454.1.S1_at   | MmugDNA.26454.1 | 3.55  | 3.57  | 0.29 | 0    | -1.01 | 0.548983 | 0.500227 | 0.766905 | 0.698951 |
| MmugDNA.26455.1.S1_at   | MmugDNA.26455.1 | 12.37 | 12.6  | 0.14 | 0.09 | -1.17 | 0.131757 | 0.002585 | 0.414728 | 0.075213 |
| MmugDNA.26456.1.S1_at   | MmugDNA.26456.1 | 5.28  | 5.21  | 0.07 | 0.15 | 1.05  | 0.168323 | 0.351276 | 0.461582 | 0.594937 |
| MmugDNA.26457.1.S1_at   | MmugDNA.26457.1 | 4.63  | 4.23  | 0.24 | 0.18 | 1.32  | 0.142071 | 0.163989 | 0.428118 | 0.440128 |
| MmugDNA.26458.1.S1_at   | MmugDNA.26458.1 | 10.35 | 10.73 | 0.13 | 0.06 | -1.3  | 0.006819 | 0.017055 | 0.129236 | 0.165465 |
| MmugDNA.26459.1.S1_at   | MmugDNA.26459.1 | 10.08 | 10.33 | 0.13 | 0.23 | -1.19 | 0.782257 | 0.276177 | 0.900606 | 0.540179 |
| MmugDNA.26460.1.S1_at   | MmugDNA.26460.1 | 7.12  | 6.92  | 0.03 | 0.34 | 1.15  | 0.204191 | 0.194542 | 0.501793 | 0.469632 |
| MmugDNA.26462.1.S1_at   | MmugDNA.26462.1 | 6.96  | 6.98  | 0.26 | 0.03 | -1.01 | 0.976876 | 0.560118 | 0.990931 | 0.73651  |
| MmugDNA.26463.1.S1_at   | MmugDNA.26463.1 | 6.8   | 6.75  | 0.12 | 0.08 | 1.03  | 0.215845 | 0.67851  | 0.513611 | 0.81221  |
| MmugDNA.26464.1.S1_at   | MmugDNA.26464.1 | 4.17  | 4.17  | 0.16 | 0.09 | 1     | 0.24444  | 0.574127 | 0.540909 | 0.745639 |
| MmugDNA.26465.1.S1_at   | MmugDNA.26465.1 | 4.55  | 4.45  | 0.24 | 0.27 | 1.07  | 0.202728 | 0.458569 | 0.500426 | 0.671232 |
| MmugDNA.26468.1.S1_at   | MmugDNA.26468.1 | 9.44  | 10.06 | 0.22 | 0.16 | -1.54 | 0.022439 | 0.00151  | 0.203119 | 0.059146 |
| MmugDNA.26469.1.S1_at   | MmugDNA.26469.1 | 6.92  | 6.39  | 0.41 | 0.14 | 1.44  | 0.20704  | 0.009165 | 0.504797 | 0.126331 |
| MmugDNA.26470.1.S1_at   | MmugDNA.26470.1 | 5.85  | 5.44  | 0.26 | 0.23 | 1.33  | 0.085055 | 0.299693 | 0.349155 | 0.558037 |
| MmugDNA.26471.1.S1_at   | MmugDNA.26471.1 | 8.38  | 8.54  | 0.03 | 0.13 | -1.12 | 0.072881 | 0.358021 | 0.327658 | 0.599604 |
| MmugDNA.26472.1.S1_at   | MmugDNA.26472.1 | 13.22 | 13.31 | 0.07 | 0.04 | -1.06 | 0.236774 | 0.236184 | 0.534391 | 0.507225 |
| MmugDNA.26473.1.S1_at   | MmugDNA.26473.1 | 3.83  | 4.02  | 0.13 | 0.31 | -1.14 | 0.433542 | 0.732022 | 0.688989 | 0.844757 |
| MmugDNA.26474.1.S1_at   | MmugDNA.26474.1 | 12.87 | 13.29 | 0.15 | 0.08 | -1.34 | 0.019198 | 0.062782 | 0.19202  | 0.297193 |
| MmugDNA.26475.1.S1_at   | MmugDNA.26475.1 | 4.84  | 4.72  | 0.27 | 0.09 | 1.08  | 0.322208 | 0.453941 | 0.606311 | 0.668338 |
| MmugDNA.26477.1.S1_at   | MmugDNA.26477.1 | 12.06 | 10.9  | 0.76 | 0.09 | 2.23  | 0.047748 | 0.014839 | 0.275898 | 0.154918 |
| MmugDNA.26478.1.S1_at   | MmugDNA.26478.1 | 9.94  | 9.8   | 0.22 | 0.13 | 1.1   | 0.376917 | 0.011764 | 0.647491 | 0.140492 |
| MmugDNA.26479.1.S1_at   | MmugDNA.26479.1 | 9.96  | 10.13 | 0.13 | 0.15 | -1.13 | 0.183708 | 0.214573 | 0.47971  | 0.488385 |
| MmugDNA.2648.1.S1_at    | MmugDNA.2648.1  | 3.62  | 3.51  | 0.18 | 0.02 | 1.08  | 0.970652 | 0.832474 | 0.988376 | 0.903893 |
| MmugDNA.26480.1.S1_at   | MmugDNA.26480.1 | 5.93  | 5.8   | 0.14 | 0.48 | 1.1   | 0.835322 | 0.310028 | 0.927563 | 0.565253 |
| MmugDNA.26481.1.S1_at   | MmugDNA.26481.1 | 13.85 | 13.91 | 0.1  | 0.01 | -1.04 | 0.480571 | 0.707775 | 0.721416 | 0.830472 |
| MmugDNA.26482.1.S1_at   | MmugDNA.26482.1 | 12.78 | 12.89 | 0.06 | 0.06 | -1.08 | 0.050622 | 0.095512 | 0.282692 | 0.352588 |
| MmugDNA.26483.1.S1_at   | MmugDNA.26483.1 | 3.39  | 3.39  | 0.03 | 0.44 | 1     | 0.346579 | 0.408029 | 0.624998 | 0.635378 |
| MmugDNA.26484.1.S1_x_at | MmugDNA.26484.1 | 7.72  | 7.95  | 0.66 | 0.23 | -1.18 | 0.725941 | 0.459026 | 0.871415 | 0.671535 |
| MmugDNA.26486.1.S1_at   | MmugDNA.26486.1 | 10.31 | 9.58  | 0.31 | 0.19 | 1.66  | 0.055598 | 0.376757 | 0.292866 | 0.614541 |
| MmugDNA.26487.1.S1_at   | MmugDNA.26487.1 | 4.02  | 3.91  | 0.25 | 0.07 | 1.08  | 0.373837 | 0.198881 | 0.645118 | 0.473482 |
| MmugDNA.26487.1.S1_x_at | MmugDNA.26487.1 | 4.61  | 4.21  | 0.1  | 0.13 | 1.32  | 0.015793 | 0.036423 | 0.178092 | 0.235375 |
| MmugDNA.26488.1.S1_at   | MmugDNA.26488.1 | 8.11  | 8.27  | 0.12 | 0.15 | -1.12 | 0.503865 | 0.229541 | 0.73721  | 0.501534 |
| MmugDNA.2649.1.S1_at    | MmugDNA.2649.1  | 2.76  | 2.77  | 0.01 | 0.09 | -1.01 | 0.622761 | 0.090684 | 0.813498 | 0.345151 |
| MmugDNA.26490.1.S1_at   | MmugDNA.26490.1 | 3.43  | 3.05  | 0.43 | 0.12 | 1.3   | 0.063336 | 0.078114 | 0.308295 | 0.324578 |
| MmugDNA.26492.1.S1_at   | MmugDNA.26492.1 | 7.24  | 6.92  | 0.2  | 0.16 | 1.24  | 0.028066 | 0.058237 | 0.219909 | 0.287992 |
| MmugDNA.26493.1.S1_at   | MmugDNA.26493.1 | 5.66  | 5.36  | 0.27 | 0.11 | 1.23  | 0.264557 | 0.198887 | 0.557815 | 0.473482 |
| MmugDNA.26494.1.S1_at   | MmugDNA.26494.1 | 8.67  | 7.37  | 0.55 | 0.13 | 2.46  | 0.037959 | 0.01037  | 0.250617 | 0.133236 |

|                         |                 |       |       |      |      |       |          |          |          |          |
|-------------------------|-----------------|-------|-------|------|------|-------|----------|----------|----------|----------|
| MmugDNA.26495.1.S1_at   | MmugDNA.26495.1 | 3.7   | 3.79  | 0.12 | 0.06 | -1.06 | 0.778322 | 0.323376 | 0.898737 | 0.574453 |
| MmugDNA.26496.1.S1_at   | MmugDNA.26496.1 | 9.39  | 9.16  | 0.49 | 0.08 | 1.17  | 0.891507 | 0.827617 | 0.953744 | 0.901081 |
| MmugDNA.26497.1.S1_at   | MmugDNA.26497.1 | 8.31  | 7.79  | 0.97 | 0.2  | 1.43  | 0.31833  | 0.308114 | 0.603003 | 0.564219 |
| MmugDNA.26497.1.S1_x_at | MmugDNA.26497.1 | 8.35  | 8.08  | 0.92 | 0.22 | 1.21  | 0.283693 | 0.236691 | 0.574001 | 0.507459 |
| MmugDNA.26498.1.S1_at   | MmugDNA.26498.1 | 4.15  | 4.15  | 0.14 | 0.03 | -1    | 0.418903 | 0.782189 | 0.678622 | 0.873828 |
| MmugDNA.26499.1.S1_at   | MmugDNA.26499.1 | 5.91  | 5.86  | 0.55 | 0.02 | 1.03  | 0.797873 | 0.93799  | 0.90876  | 0.964856 |
| MmugDNA.265.1.S1_at     | MmugDNA.265.1   | 9.13  | 9.73  | 0.05 | 0.48 | -1.51 | 0.341078 | 0.572234 | 0.620991 | 0.744313 |
| MmugDNA.2650.1.S1_at    | MmugDNA.2650.1  | 3.82  | 3.81  | 0.09 | 0.09 | 1.01  | 0.198772 | 0.418817 | 0.495887 | 0.643118 |
| MmugDNA.26501.1.S1_at   | MmugDNA.26501.1 | 10.53 | 10.67 | 0.18 | 0.24 | -1.11 | 0.364974 | 0.152034 | 0.639649 | 0.42681  |
| MmugDNA.26502.1.S1_at   | MmugDNA.26502.1 | 4     | 3.9   | 0.3  | 0.04 | 1.07  | 0.57193  | 0.598281 | 0.780199 | 0.760715 |
| MmugDNA.26503.1.S1_at   | MmugDNA.26503.1 | 6.36  | 6.08  | 0.16 | 0.11 | 1.22  | 0.108536 | 0.08806  | 0.383257 | 0.341547 |
| MmugDNA.26504.1.S1_at   | MmugDNA.26504.1 | 5.3   | 5.4   | 0.44 | 0.14 | -1.07 | 0.688475 | 0.392095 | 0.851235 | 0.625588 |
| MmugDNA.26507.1.S1_at   | MmugDNA.26507.1 | 5.83  | 6.05  | 0.21 | 0.14 | -1.16 | 0.075986 | 0.071955 | 0.333971 | 0.314293 |
| MmugDNA.26508.1.S1_at   | MmugDNA.26508.1 | 13.15 | 13.35 | 0.12 | 0.05 | -1.15 | 0.143535 | 0.41594  | 0.429995 | 0.641275 |
| MmugDNA.2651.1.S1_at    | MmugDNA.2651.1  | 7.48  | 7.33  | 0.63 | 0.17 | 1.11  | 0.727469 | 0.832322 | 0.872348 | 0.903821 |
| MmugDNA.2651.1.S1_s_at  | MmugDNA.2651.1  | 3.22  | 3.48  | 0.01 | 0.23 | -1.2  | 0.365483 | 0.340658 | 0.639967 | 0.586818 |
| MmugDNA.2651.1.S1_x_at  | MmugDNA.2651.1  | 5.63  | 5.8   | 0.64 | 0.13 | -1.12 | 0.849565 | 0.800504 | 0.934504 | 0.885198 |
| MmugDNA.26512.1.S1_at   | MmugDNA.26512.1 | 5.26  | 6.36  | 0.45 | 0.24 | -2.15 | 0.0106   | 0.012495 | 0.152762 | 0.144302 |
| MmugDNA.26513.1.S1_at   | MmugDNA.26513.1 | 3.05  | 3.12  | 0.11 | 0.1  | -1.04 | 0.415211 | 0.566216 | 0.676055 | 0.74033  |
| MmugDNA.26515.1.S1_at   | MmugDNA.26515.1 | 6     | 5.78  | 0.31 | 0.46 | 1.17  | 0.697636 | 0.571177 | 0.856021 | 0.743594 |
| MmugDNA.26516.1.S1_at   | MmugDNA.26516.1 | 4.95  | 5.75  | 1.24 | 0.05 | -1.74 | 0.897565 | 0.91504  | 0.956523 | 0.952293 |
| MmugDNA.26517.1.S1_at   | MmugDNA.26517.1 | 6.56  | 6.46  | 0    | 0.32 | 1.08  | 0.525738 | 0.139771 | 0.75204  | 0.413114 |
| MmugDNA.26518.1.S1_s_at | MmugDNA.26518.1 | 6.26  | 6.62  | 0.22 | 0.27 | -1.29 | 0.076087 | 0.184921 | 0.334138 | 0.460776 |
| MmugDNA.26519.1.S1_at   | MmugDNA.26519.1 | 3.04  | 3.26  | 0.46 | 0.02 | -1.17 | 0.9343   | 0.452355 | 0.972471 | 0.667046 |
| MmugDNA.2652.1.S1_at    | MmugDNA.2652.1  | 5.35  | 4.99  | 0.08 | 0.16 | 1.29  | 0.085752 | 0.060808 | 0.350079 | 0.293306 |
| MmugDNA.26521.1.S1_at   | MmugDNA.26521.1 | 4.49  | 4.37  | 0.97 | 0.18 | 1.08  | 0.295116 | 0.386093 | 0.584039 | 0.621345 |
| MmugDNA.26521.1.S1_x_at | MmugDNA.26521.1 | 4.94  | 4.99  | 0.79 | 0.18 | -1.03 | 0.431429 | 0.483021 | 0.687507 | 0.687687 |
| MmugDNA.26522.1.S1_at   | MmugDNA.26522.1 | 10.09 | 10.82 | 0.16 | 0.1  | -1.66 | 0.004194 | 0.00076  | 0.11036  | 0.04544  |
| MmugDNA.26523.1.S1_s_at | MmugDNA.26523.1 | 9.14  | 9.14  | 0.32 | 0.17 | 1     | 0.896896 | 0.98143  | 0.956205 | 0.989775 |
| MmugDNA.26524.1.S1_at   | MmugDNA.26524.1 | 3.87  | 4.16  | 0.31 | 0.02 | -1.22 | 0.603239 | 0.252987 | 0.80088  | 0.521279 |
| MmugDNA.26526.1.S1_at   | MmugDNA.26526.1 | 4.35  | 4.5   | 0.37 | 0.1  | -1.11 | 0.770293 | 0.878884 | 0.894566 | 0.930872 |
| MmugDNA.26527.1.S1_at   | MmugDNA.26527.1 | 11.8  | 11.79 | 0.1  | 0.09 | 1.01  | 0.545671 | 0.219003 | 0.764885 | 0.492768 |
| MmugDNA.26528.1.S1_at   | MmugDNA.26528.1 | 5.93  | 5.46  | 0.38 | 0.14 | 1.38  | 0.490858 | 0.259976 | 0.728864 | 0.52675  |
| MmugDNA.2653.1.S1_at    | MmugDNA.2653.1  | 4.99  | 4.88  | 0.53 | 0.1  | 1.08  | 0.683808 | 0.568648 | 0.84925  | 0.742052 |
| MmugDNA.26530.1.S1_at   | MmugDNA.26530.1 | 6.63  | 6.66  | 0.39 | 0.51 | -1.03 | 0.343718 | 0.244202 | 0.623057 | 0.514167 |
| MmugDNA.32549.1.S1_s_at | MmugDNA.32549.1 | 14.78 | 14.77 | 0    | 0    | 1.01  | 0.059577 | 0.012961 | 0.301206 | 0.146501 |
| MmugDNA.32549.1.S1_x_at | MmugDNA.32549.1 | 14.45 | 14.44 | 0.02 | 0.01 | 1     | 0.822753 | 0.078229 | 0.921129 | 0.324765 |
| MmugDNA.26534.1.S1_at   | MmugDNA.26534.1 | 10.89 | 10.72 | 0.11 | 0.08 | 1.13  | 0.041337 | 0.036675 | 0.259688 | 0.235973 |
| MmugDNA.26535.1.S1_at   | MmugDNA.26535.1 | 14.39 | 14.4  | 0.07 | 0.03 | -1    | 0.50816  | 0.415412 | 0.740293 | 0.640873 |
| MmugDNA.26536.1.S1_at   | MmugDNA.26536.1 | 5.08  | 4.63  | 0.26 | 0.02 | 1.36  | 0.034887 | 0.055403 | 0.241271 | 0.28129  |
| MmugDNA.26538.1.S1_at   | MmugDNA.26538.1 | 5.7   | 7.08  | 1.16 | 0.26 | -2.6  | 0.396766 | 0.661221 | 0.662694 | 0.801687 |
| MmugDNA.26539.1.S1_at   | MmugDNA.26539.1 | 6.68  | 6.59  | 0.2  | 0.15 | 1.06  | 0.926859 | 0.261625 | 0.969076 | 0.528095 |
| MmugDNA.2654.1.S1_at    | MmugDNA.2654.1  | 5.21  | 5.27  | 0.03 | 0.23 | -1.04 | 0.582311 | 0.734012 | 0.78718  | 0.845896 |

|                         |                 |       |       |      |      |       |          |          |          |          |
|-------------------------|-----------------|-------|-------|------|------|-------|----------|----------|----------|----------|
| MmugDNA.26540.1.S1_at   | MmugDNA.26540.1 | 4.99  | 4.57  | 0.25 | 0.28 | 1.34  | 0.149062 | 0.265037 | 0.437811 | 0.531    |
| MmugDNA.26542.1.S1_at   | MmugDNA.26542.1 | 3.62  | 3.52  | 0.1  | 0.12 | 1.07  | 0.839771 | 0.179994 | 0.929709 | 0.456552 |
| MmugDNA.26543.1.S1_at   | MmugDNA.26543.1 | 9.99  | 10.01 | 0.11 | 0.11 | -1.01 | 0.990072 | 0.002828 | 0.996449 | 0.078363 |
| MmugDNA.26544.1.S1_at   | MmugDNA.26544.1 | 2.81  | 2.88  | 0.27 | 0.09 | -1.05 | 0.619065 | 0.744964 | 0.810995 | 0.852232 |
| MmugDNA.26546.1.S1_at   | MmugDNA.26546.1 | 8.43  | 8.33  | 0.08 | 0.04 | 1.08  | 0.153116 | 0.643733 | 0.442808 | 0.791112 |
| MmugDNA.26548.1.S1_at   | MmugDNA.26548.1 | 8.35  | 8.05  | 0.54 | 0.03 | 1.23  | 0.528518 | 0.243751 | 0.753712 | 0.513899 |
| MmugDNA.26549.1.S1_at   | MmugDNA.26549.1 | 5.76  | 5.59  | 0.21 | 0.26 | 1.13  | 0.671749 | 0.687362 | 0.842654 | 0.817576 |
| MmugDNA.2655.1.S1_at    | MmugDNA.2655.1  | 6.78  | 6.74  | 0.76 | 0.3  | 1.03  | 0.954697 | 0.989284 | 0.981394 | 0.993909 |
| MmugDNA.36289.1.S1_s_at | MmugDNA.36289.1 | 10.53 | 9.8   | 0.59 | 0.49 | 1.66  | 0.242018 | 0.224016 | 0.539092 | 0.497045 |
| MmugDNA.26551.1.S1_at   | MmugDNA.26551.1 | 8.58  | 8.92  | 0.17 | 0.09 | -1.26 | 0.037372 | 0.212791 | 0.248698 | 0.486769 |
| MmugDNA.26554.1.S1_at   | MmugDNA.26554.1 | 4.05  | 3.96  | 0.07 | 0.07 | 1.06  | 0.106287 | 0.36097  | 0.380284 | 0.60201  |
| MmugDNA.26555.1.S1_at   | MmugDNA.26555.1 | 13.3  | 13.07 | 0.16 | 0.05 | 1.17  | 0.22563  | 0.04976  | 0.523395 | 0.268151 |
| MmugDNA.26558.1.S1_at   | MmugDNA.26558.1 | 9.92  | 9.72  | 0.27 | 0.05 | 1.15  | 0.091057 | 0.04851  | 0.358316 | 0.265472 |
| MmugDNA.26559.1.S1_at   | MmugDNA.26559.1 | 4.34  | 3.67  | 0.66 | 0.11 | 1.59  | 0.126819 | 0.132326 | 0.408301 | 0.404294 |
| MmugDNA.26560.1.S1_at   | MmugDNA.26560.1 | 5.54  | 6.37  | 0.23 | 0.06 | -1.77 | 0.004109 | 0.06892  | 0.109608 | 0.308874 |
| MmugDNA.26562.1.S1_at   | MmugDNA.26562.1 | 9.51  | 9.38  | 0.74 | 0.07 | 1.09  | 0.798498 | 0.82014  | 0.909127 | 0.896336 |
| MmugDNA.26562.1.S1_s_at | MmugDNA.26562.1 | 11.15 | 11.11 | 0.82 | 0.18 | 1.03  | 0.878878 | 0.928466 | 0.948396 | 0.959353 |
| MmugDNA.26563.1.S1_at   | MmugDNA.26563.1 | 5.33  | 5.56  | 0.17 | 0.29 | -1.17 | 0.284095 | 0.383391 | 0.574388 | 0.619384 |
| MmugDNA.26565.1.S1_at   | MmugDNA.26565.1 | 7.97  | 7.63  | 0.22 | 0.14 | 1.27  | 0.074782 | 0.066556 | 0.331577 | 0.303733 |
| MmugDNA.26566.1.S1_at   | MmugDNA.26566.1 | 3.15  | 3.14  | 0.13 | 0.26 | 1.01  | 0.630834 | 0.841509 | 0.818647 | 0.909663 |
| MmugDNA.26567.1.S1_at   | MmugDNA.26567.1 | 10.23 | 10.4  | 0.09 | 0.14 | -1.13 | 0.497163 | 0.682517 | 0.732899 | 0.814568 |
| MmugDNA.26567.1.S1_s_at | MmugDNA.26567.1 | 11.18 | 11.41 | 0.13 | 0.12 | -1.17 | 0.369541 | 0.526256 | 0.642934 | 0.715488 |
| MmugDNA.26569.1.S1_at   | MmugDNA.26569.1 | 3.19  | 3.18  | 0.2  | 0.14 | 1.01  | 0.660383 | 0.580311 | 0.83613  | 0.749618 |
| MmugDNA.2657.1.S1_at    | MmugDNA.2657.1  | 5.35  | 5.33  | 0.17 | 0.07 | 1.02  | 0.941137 | 0.703214 | 0.975266 | 0.827928 |
| MmugDNA.26570.1.S1_at   | MmugDNA.26570.1 | 2.91  | 2.98  | 1.41 | 0.28 | -1.06 | 0.531304 | 0.573278 | 0.75568  | 0.744994 |
| MmugDNA.26570.1.S1_x_at | MmugDNA.26570.1 | 2.81  | 2.68  | 1.43 | 0.38 | 1.1   | 0.436683 | 0.462276 | 0.691585 | 0.673638 |
| MmugDNA.26571.1.S1_at   | MmugDNA.26571.1 | 3.16  | 3.28  | 0.27 | 0.09 | -1.08 | 0.536872 | 0.706094 | 0.759199 | 0.829633 |
| MmugDNA.26572.1.S1_at   | MmugDNA.26572.1 | 6.19  | 6.22  | 0.12 | 0.08 | -1.03 | 0.999373 | 0.235177 | 0.999808 | 0.50629  |
| MmugDNA.26573.1.S1_at   | MmugDNA.26573.1 | 4.03  | 4.02  | 0.34 | 0.03 | 1     | 0.491869 | 0.608914 | 0.729428 | 0.767385 |
| MmugDNA.26574.1.S1_at   | MmugDNA.26574.1 | 9.52  | 9.16  | 0.24 | 0.1  | 1.28  | 0.053915 | 0.065931 | 0.28932  | 0.30216  |
| MmugDNA.26576.1.S1_at   | MmugDNA.26576.1 | 3.34  | 3.2   | 0.43 | 0.11 | 1.1   | 0.356193 | 0.237658 | 0.632513 | 0.50826  |
| MmugDNA.2658.1.S1_at    | MmugDNA.2658.1  | 7.08  | 7.63  | 0.16 | 0.11 | -1.46 | 0.008368 | 0.03021  | 0.140536 | 0.21576  |
| MmugDNA.26580.1.S1_at   | MmugDNA.26580.1 | 10.02 | 10.36 | 0.25 | 0.13 | -1.26 | 0.330798 | 0.500246 | 0.612778 | 0.698951 |
| MmugDNA.26581.1.S1_at   | MmugDNA.26581.1 | 4.33  | 4.37  | 0.12 | 0.14 | -1.03 | 0.245442 | 0.445789 | 0.541518 | 0.662505 |
| MmugDNA.26582.1.S1_at   | MmugDNA.26582.1 | 8.65  | 8.94  | 0.86 | 0.33 | -1.23 | 0.579508 | 0.53294  | 0.785166 | 0.719308 |
| MmugDNA.26583.1.S1_at   | MmugDNA.26583.1 | 6.1   | 6.37  | 0.3  | 0.3  | -1.2  | 0.974393 | 0.789652 | 0.989745 | 0.87847  |
| MmugDNA.31842.1.S1_s_at | MmugDNA.31842.1 | 3.21  | 3.81  | 0.11 | 0.61 | -1.52 | 0.052432 | 0.042459 | 0.286213 | 0.250702 |
| MmugDNA.26586.1.S1_at   | MmugDNA.26586.1 | 8.64  | 8.79  | 0.06 | 0.36 | -1.11 | 0.869999 | 0.67529  | 0.944114 | 0.81026  |
| MmugDNA.26587.1.S1_at   | MmugDNA.26587.1 | 7.6   | 7.59  | 0.12 | 0.12 | 1.01  | 0.286855 | 0.389834 | 0.5766   | 0.623878 |
| MmugDNA.26589.1.S1_x_at | MmugDNA.26589.1 | 7.36  | 7.46  | 0.45 | 0.07 | -1.07 | 0.582169 | 0.603512 | 0.787062 | 0.764189 |
| MmugDNA.2659.1.S1_at    | MmugDNA.2659.1  | 9.67  | 9.55  | 0.56 | 0.05 | 1.09  | 0.8089   | 0.926102 | 0.914357 | 0.95813  |
| MmugDNA.26590.1.S1_at   | MmugDNA.26590.1 | 9.89  | 9.55  | 0.17 | 0.04 | 1.27  | 0.014555 | 0.619506 | 0.172573 | 0.774712 |
| MmugDNA.26591.1.S1_at   | MmugDNA.26591.1 | 5.97  | 7.5   | 0.99 | 0.28 | -2.9  | 0.092499 | 0.029445 | 0.360707 | 0.213368 |

|                       |                 |       |       |      |      |       |          |          |          |          |
|-----------------------|-----------------|-------|-------|------|------|-------|----------|----------|----------|----------|
| MmugDNA.26592.1.S1_at | MmugDNA.26592.1 | 7.63  | 7.59  | 0.07 | 0.1  | 1.03  | 0.626136 | 0.716485 | 0.815822 | 0.835749 |
| MmugDNA.26594.1.S1_at | MmugDNA.26594.1 | 4.02  | 4.17  | 0.09 | 0.11 | -1.12 | 0.527675 | 0.200785 | 0.753222 | 0.475282 |
| MmugDNA.26595.1.S1_at | MmugDNA.26595.1 | 10.13 | 9.74  | 0.03 | 0.12 | 1.31  | 0.015151 | 0.011937 | 0.175172 | 0.141357 |
| MmugDNA.26596.1.S1_at | MmugDNA.26596.1 | 9.55  | 8.64  | 0.2  | 0.12 | 1.88  | 0.00281  | 0.002429 | 0.097939 | 0.073093 |
| MmugDNA.26598.1.S1_at | MmugDNA.26598.1 | 10.09 | 10.47 | 0.52 | 0.11 | -1.3  | 0.339894 | 0.210388 | 0.620086 | 0.484266 |
| MmugDNA.26599.1.S1_at | MmugDNA.26599.1 | 5.53  | 5.68  | 0.13 | 0.07 | -1.11 | 0.311747 | 0.104455 | 0.597884 | 0.365719 |
| MmugDNA.266.1.S1_s_at | MmugDNA.266.1   | 3.2   | 3.16  | 0.02 | 0.05 | 1.03  | 0.093778 | 0.291296 | 0.362519 | 0.551803 |
| MmugDNA.26600.1.S1_at | MmugDNA.26600.1 | 5.03  | 4.98  | 0.26 | 0.16 | 1.03  | 0.471967 | 0.395672 | 0.715918 | 0.627623 |
| MmugDNA.26601.1.S1_at | MmugDNA.26601.1 | 4.68  | 4.99  | 0.5  | 0.05 | -1.24 | 0.518431 | 0.584897 | 0.747521 | 0.75256  |
| MmugDNA.26603.1.S1_at | MmugDNA.26603.1 | 4.73  | 4.87  | 0.09 | 0.05 | -1.1  | 0.086161 | 0.176008 | 0.350673 | 0.452526 |
| MmugDNA.26605.1.S1_at | MmugDNA.26605.1 | 9.58  | 10.27 | 0.36 | 0.17 | -1.61 | 0.057954 | 0.027767 | 0.297855 | 0.208035 |
| MmugDNA.26606.1.S1_at | MmugDNA.26606.1 | 7.89  | 7.85  | 0.28 | 0.15 | 1.03  | 0.559836 | 0.087073 | 0.773535 | 0.340038 |
| MmugDNA.26607.1.S1_at | MmugDNA.26607.1 | 4.37  | 3.96  | 0.21 | 0.09 | 1.33  | 0.050863 | 0.073364 | 0.283144 | 0.316469 |
| MmugDNA.26608.1.S1_at | MmugDNA.26608.1 | 10.95 | 11    | 0.06 | 0.02 | -1.04 | 0.253068 | 0.056343 | 0.547557 | 0.283351 |
| MmugDNA.26609.1.S1_at | MmugDNA.26609.1 | 10.18 | 9.01  | 0.59 | 0.13 | 2.25  | 0.077194 | 0.06474  | 0.33579  | 0.30035  |
| MmugDNA.26611.1.S1_at | MmugDNA.26611.1 | 6.56  | 6.67  | 0.07 | 0.18 | -1.08 | 0.150961 | 0.564318 | 0.440305 | 0.739165 |
| MmugDNA.26612.1.S1_at | MmugDNA.26612.1 | 8.83  | 8.61  | 0.54 | 0.18 | 1.17  | 0.192745 | 0.012812 | 0.489336 | 0.14584  |
| MmugDNA.26614.1.S1_at | MmugDNA.26614.1 | 11.71 | 11.53 | 0.14 | 0.07 | 1.14  | 0.0661   | 0.000798 | 0.314442 | 0.046064 |
| MmugDNA.26615.1.S1_at | MmugDNA.26615.1 | 6.46  | 6.33  | 0.23 | 0.29 | 1.1   | 0.452644 | 0.08514  | 0.70305  | 0.336972 |
| MmugDNA.26616.1.S1_at | MmugDNA.26616.1 | 5.66  | 5.7   | 0.33 | 0.07 | -1.03 | 0.393712 | 0.546532 | 0.660434 | 0.728079 |
| MmugDNA.26617.1.S1_at | MmugDNA.26617.1 | 3.56  | 4.01  | 0.24 | 0.26 | -1.36 | 0.367808 | 0.601989 | 0.641596 | 0.763151 |
| MmugDNA.26618.1.S1_at | MmugDNA.26618.1 | 5.27  | 5.22  | 0.25 | 0.19 | 1.03  | 0.676032 | 0.602033 | 0.84532  | 0.763167 |
| MmugDNA.26619.1.S1_at | MmugDNA.26619.1 | 4.18  | 4.09  | 0.47 | 0.12 | 1.07  | 0.213505 | 0.316159 | 0.511324 | 0.56963  |
| MmugDNA.26620.1.S1_at | MmugDNA.26620.1 | 7.05  | 7.89  | 0.24 | 0.13 | -1.78 | 0.007247 | 0.085576 | 0.132695 | 0.337567 |
| MmugDNA.26621.1.S1_at | MmugDNA.26621.1 | 3.71  | 3.76  | 0.11 | 0.19 | -1.04 | 0.393329 | 0.485008 | 0.660177 | 0.688893 |
| MmugDNA.26622.1.S1_at | MmugDNA.26622.1 | 3.66  | 3.68  | 0.04 | 0.04 | -1.01 | 0.174084 | 0.798642 | 0.468351 | 0.884045 |
| MmugDNA.26624.1.S1_at | MmugDNA.26624.1 | 6.49  | 6.29  | 0.39 | 0.12 | 1.15  | 0.325959 | 0.463997 | 0.609178 | 0.674769 |
| MmugDNA.26625.1.S1_at | MmugDNA.26625.1 | 3.23  | 3.09  | 0.19 | 0.05 | 1.1   | 0.312225 | 0.553223 | 0.598235 | 0.73239  |
| MmugDNA.26628.1.S1_at | MmugDNA.26628.1 | 5.82  | 5.18  | 0.48 | 0.25 | 1.56  | 0.333619 | 0.095692 | 0.614974 | 0.3527   |
| MmugDNA.2663.1.S1_at  | MmugDNA.2663.1  | 3.58  | 3.58  | 0    | 0.07 | -1    | 0.327892 | 0.315429 | 0.610547 | 0.568949 |
| MmugDNA.26630.1.S1_at | MmugDNA.26630.1 | 5.6   | 7.17  | 1.11 | 0.09 | -2.98 | 0.068601 | 0.178444 | 0.319749 | 0.454778 |
| MmugDNA.26631.1.S1_at | MmugDNA.26631.1 | 3.76  | 3.86  | 0.08 | 0.33 | -1.07 | 0.602888 | 0.809501 | 0.800534 | 0.890191 |
| MmugDNA.26632.1.S1_at | MmugDNA.26632.1 | 5.02  | 5.33  | 0.05 | 0.14 | -1.24 | 0.022787 | 0.008603 | 0.204142 | 0.123072 |
| MmugDNA.26633.1.S1_at | MmugDNA.26633.1 | 6.14  | 6.13  | 0.16 | 0.06 | 1.01  | 0.673462 | 0.631619 | 0.843822 | 0.782878 |
| MmugDNA.26634.1.S1_at | MmugDNA.26634.1 | 4.34  | 4.37  | 0.3  | 0.32 | -1.01 | 0.492321 | 0.635462 | 0.729648 | 0.785405 |
| MmugDNA.26635.1.S1_at | MmugDNA.26635.1 | 4.71  | 4.61  | 0.47 | 0.42 | 1.08  | 0.612434 | 0.746163 | 0.806855 | 0.852688 |
| MmugDNA.26636.1.S1_at | MmugDNA.26636.1 | 4.76  | 4.58  | 0.2  | 0.05 | 1.13  | 0.351994 | 0.337086 | 0.629589 | 0.584337 |
| MmugDNA.26638.1.S1_at | MmugDNA.26638.1 | 3.45  | 3.56  | 0.37 | 0    | -1.08 | 0.65403  | 0.887905 | 0.832505 | 0.936115 |
| MmugDNA.26639.1.S1_at | MmugDNA.26639.1 | 6.4   | 6.56  | 0.09 | 0.04 | -1.12 | 0.074565 | 0.451938 | 0.331249 | 0.666713 |
| MmugDNA.26640.1.S1_at | MmugDNA.26640.1 | 3.6   | 3.88  | 0.62 | 0.37 | -1.22 | 0.554344 | 0.528527 | 0.77064  | 0.716664 |
| MmugDNA.26641.1.S1_at | MmugDNA.26641.1 | 8.26  | 7.73  | 0.26 | 0.24 | 1.44  | 0.051089 | 0.098021 | 0.283595 | 0.355964 |
| MmugDNA.26644.1.S1_at | MmugDNA.26644.1 | 6.42  | 6.53  | 0.11 | 0.44 | -1.08 | 0.508759 | 0.672777 | 0.740566 | 0.808768 |
| MmugDNA.26647.1.S1_at | MmugDNA.26647.1 | 6.67  | 6.72  | 0.19 | 0.07 | -1.04 | 0.896015 | 0.023089 | 0.955633 | 0.190213 |



|                         |                 |       |       |      |      |       |          |          |          |          |
|-------------------------|-----------------|-------|-------|------|------|-------|----------|----------|----------|----------|
| MmugDNA.26649.1.S1_at   | MmugDNA.26649.1 | 5.31  | 5.5   | 0.07 | 0.11 | -1.14 | 0.227003 | 0.255416 | 0.524952 | 0.523445 |
| MmugDNA.2665.1.S1_at    | MmugDNA.2665.1  | 7.89  | 8.06  | 0.2  | 0.04 | -1.12 | 0.232101 | 0.00619  | 0.530631 | 0.106774 |
| MmugDNA.26650.1.S1_at   | MmugDNA.26650.1 | 6.7   | 6.27  | 0.19 | 0.47 | 1.35  | 0.29384  | 0.146104 | 0.582862 | 0.420092 |
| MmugDNA.26651.1.S1_at   | MmugDNA.26651.1 | 5.62  | 5.38  | 1.13 | 0.06 | 1.18  | 0.97057  | 0.901457 | 0.98835  | 0.943931 |
| MmugDNA.26652.1.S1_at   | MmugDNA.26652.1 | 4.21  | 4.31  | 0.17 | 0.11 | -1.07 | 0.738133 | 0.1715   | 0.878569 | 0.447895 |
| MmugDNA.26653.1.S1_at   | MmugDNA.26653.1 | 3.82  | 3.67  | 0.59 | 0.23 | 1.11  | 0.434158 | 0.415499 | 0.68945  | 0.64091  |
| MmugDNA.26654.1.S1_at   | MmugDNA.26654.1 | 7.9   | 8.11  | 0.3  | 0.14 | -1.16 | 0.091244 | 0.432846 | 0.358687 | 0.653185 |
| MmugDNA.26655.1.S1_at   | MmugDNA.26655.1 | 3.52  | 3.58  | 0.17 | 0.05 | -1.04 | 0.736636 | 0.057645 | 0.877612 | 0.286357 |
| MmugDNA.26656.1.S1_at   | MmugDNA.26656.1 | 11.95 | 11.65 | 0.27 | 0.03 | 1.23  | 0.051062 | 0.05947  | 0.283595 | 0.290548 |
| MmugDNA.26657.1.S1_at   | MmugDNA.26657.1 | 5.54  | 5.5   | 0.28 | 0.22 | 1.03  | 0.916424 | 0.67773  | 0.964441 | 0.811787 |
| MmugDNA.26658.1.S1_at   | MmugDNA.26658.1 | 4.66  | 4.05  | 0.91 | 0.07 | 1.52  | 0.266502 | 0.229274 | 0.558859 | 0.501527 |
| MmugDNA.26659.1.S1_at   | MmugDNA.26659.1 | 6.93  | 7.15  | 0.15 | 0.05 | -1.16 | 0.098274 | 0.260354 | 0.368888 | 0.526915 |
| MmugDNA.2666.1.S1_at    | MmugDNA.2666.1  | 9.56  | 8.92  | 0.25 | 0.11 | 1.57  | 0.02283  | 0.171233 | 0.204235 | 0.447792 |
| MmugDNA.26660.1.S1_at   | MmugDNA.26660.1 | 7.8   | 7.77  | 0.28 | 0.11 | 1.02  | 0.929896 | 0.842035 | 0.970389 | 0.910013 |
| MmugDNA.26662.1.S1_at   | MmugDNA.26662.1 | 3.11  | 3.15  | 0    | 0.11 | -1.02 | 0.672551 | 0.101863 | 0.843261 | 0.361836 |
| MmugDNA.26663.1.S1_at   | MmugDNA.26663.1 | 6.35  | 3.98  | 1.5  | 0.53 | 5.17  | 0.163176 | 0.211947 | 0.455382 | 0.48595  |
| MmugDNA.26663.1.S1_x_at | MmugDNA.26663.1 | 6.98  | 5.15  | 1.2  | 0.3  | 3.55  | 0.141124 | 0.171972 | 0.426954 | 0.448364 |
| MmugDNA.26665.1.S1_at   | MmugDNA.26665.1 | 5.24  | 5.84  | 1.37 | 0.05 | -1.52 | 0.796152 | 0.917828 | 0.907954 | 0.954011 |
| MmugDNA.26666.1.S1_at   | MmugDNA.26666.1 | 4.46  | 4.48  | 0.2  | 0.14 | -1.02 | 0.480125 | 0.614517 | 0.721151 | 0.771283 |
| MmugDNA.26667.1.S1_at   | MmugDNA.26667.1 | 7.9   | 7.68  | 1.12 | 0.19 | 1.16  | 0.747873 | 0.759026 | 0.883182 | 0.859964 |
| MmugDNA.2667.1.S1_at    | MmugDNA.2667.1  | 5.78  | 5.66  | 0.24 | 0.25 | 1.09  | 0.516381 | 0.413513 | 0.745778 | 0.639648 |
| MmugDNA.26671.1.S1_at   | MmugDNA.26671.1 | 9.62  | 9.64  | 0.24 | 0.21 | -1.01 | 0.92395  | 0.486808 | 0.967672 | 0.690091 |
| MmugDNA.26675.1.S1_at   | MmugDNA.26675.1 | 8.44  | 8.55  | 1.34 | 0.04 | -1.08 | 0.96982  | 0.990735 | 0.988006 | 0.994762 |
| MmugDNA.26676.1.S1_at   | MmugDNA.26676.1 | 5.77  | 5.75  | 0.72 | 0.03 | 1.02  | 0.909441 | 0.665353 | 0.961571 | 0.803901 |
| MmugDNA.26677.1.S1_s_at | MmugDNA.26677.1 | 5.74  | 5.8   | 0.17 | 0.16 | -1.04 | 0.971135 | 0.929228 | 0.988523 | 0.959644 |
| MmugDNA.26678.1.S1_at   | MmugDNA.26678.1 | 3.92  | 3.65  | 0.28 | 0.03 | 1.2   | 0.50575  | 0.783731 | 0.738658 | 0.874756 |
| MmugDNA.26680.1.S1_at   | MmugDNA.26680.1 | 5.09  | 5.35  | 0.17 | 0.11 | -1.2  | 0.061338 | 0.014634 | 0.304438 | 0.154176 |
| MmugDNA.26682.1.S1_at   | MmugDNA.26682.1 | 5.36  | 5.26  | 0.51 | 0.12 | 1.07  | 0.786557 | 0.710094 | 0.902686 | 0.831904 |
| MmugDNA.26683.1.S1_at   | MmugDNA.26683.1 | 5.35  | 5.34  | 0.15 | 0    | 1.01  | 0.314038 | 0.176131 | 0.59977  | 0.452581 |
| MmugDNA.26684.1.S1_at   | MmugDNA.26684.1 | 6.06  | 5.92  | 0.09 | 0.05 | 1.1   | 0.093132 | 0.083285 | 0.361736 | 0.333372 |
| MmugDNA.26685.1.S1_at   | MmugDNA.26685.1 | 11.06 | 10.88 | 0.07 | 0.07 | 1.13  | 0.052997 | 0.863374 | 0.287322 | 0.922402 |
| MmugDNA.26688.1.S1_at   | MmugDNA.26688.1 | 7.77  | 7.68  | 0.23 | 0.14 | 1.07  | 0.526629 | 0.937301 | 0.75269  | 0.964687 |
| MmugDNA.26690.1.S1_at   | MmugDNA.26690.1 | 4.4   | 4.32  | 0.14 | 0.03 | 1.06  | 0.153058 | 0.441258 | 0.442744 | 0.659477 |
| MmugDNA.26691.1.S1_at   | MmugDNA.26691.1 | 7.81  | 8.96  | 0.31 | 0.13 | -2.21 | 0.008552 | 0.089927 | 0.141834 | 0.344119 |
| MmugDNA.26692.1.S1_at   | MmugDNA.26692.1 | 8.2   | 9.63  | 0.66 | 0.36 | -2.69 | 0.049575 | 0.158185 | 0.280028 | 0.433986 |
| MmugDNA.26694.1.S1_at   | MmugDNA.26694.1 | 4.35  | 4.11  | 0.19 | 0.18 | 1.18  | 0.38637  | 0.342246 | 0.65485  | 0.588375 |
| MmugDNA.26697.1.S1_at   | MmugDNA.26697.1 | 8.1   | 7.98  | 0.62 | 0.18 | 1.09  | 0.657629 | 0.515319 | 0.834607 | 0.708237 |
| MmugDNA.26698.1.S1_at   | MmugDNA.26698.1 | 7.55  | 6.97  | 0.36 | 0.15 | 1.49  | 0.15473  | 0.187798 | 0.444943 | 0.463856 |
| MmugDNA.26699.1.S1_at   | MmugDNA.26699.1 | 3.02  | 3.09  | 0.05 | 0.05 | -1.06 | 0.458263 | 0.533116 | 0.706897 | 0.719436 |
| MmugDNA.39929.1.S1_s_at | MmugDNA.39929.1 | 7.94  | 8.13  | 0.22 | 0.03 | -1.14 | 0.512504 | 0.194374 | 0.742975 | 0.469464 |
| MmugDNA.2670.1.S1_at    | MmugDNA.2670.1  | 3.24  | 3.29  | 0.15 | 0.02 | -1.04 | 0.284249 | 0.28653  | 0.574388 | 0.547946 |
| MmugDNA.26700.1.S1_at   | MmugDNA.26700.1 | 4.59  | 4.37  | 0.38 | 0.06 | 1.17  | 0.126898 | 0.182549 | 0.408456 | 0.459065 |
| MmugDNA.26701.1.S1_at   | MmugDNA.26701.1 | 6.2   | 5.98  | 0.39 | 0.4  | 1.16  | 0.860959 | 0.755118 | 0.939567 | 0.857465 |

|                         |                 |       |       |      |      |       |          |          |          |          |
|-------------------------|-----------------|-------|-------|------|------|-------|----------|----------|----------|----------|
| MmugDNA.26703.1.S1_at   | MmugDNA.26703.1 | 8.87  | 7.21  | 0.28 | 0.73 | 3.15  | 0.032428 | 0.096994 | 0.234344 | 0.354502 |
| MmugDNA.26704.1.S1_at   | MmugDNA.26704.1 | 5.39  | 5.5   | 0.13 | 0.04 | -1.08 | 0.653237 | 0.823906 | 0.83203  | 0.898817 |
| MmugDNA.26705.1.S1_at   | MmugDNA.26705.1 | 3.56  | 4.41  | 0.21 | 0.29 | -1.81 | 0.016113 | 0.033417 | 0.179484 | 0.22646  |
| MmugDNA.26706.1.S1_at   | MmugDNA.26706.1 | 5.13  | 4.9   | 1.31 | 0.16 | 1.17  | 0.248441 | 0.320514 | 0.543845 | 0.572648 |
| MmugDNA.26708.1.S1_at   | MmugDNA.26708.1 | 5.41  | 5.51  | 1.24 | 0.22 | -1.07 | 0.838244 | 0.763019 | 0.929053 | 0.862233 |
| MmugDNA.26709.1.S1_at   | MmugDNA.26709.1 | 5.41  | 4.51  | 1.09 | 0.12 | 1.87  | 0.110795 | 0.062098 | 0.386305 | 0.296094 |
| MmugDNA.2671.1.S1_at    | MmugDNA.2671.1  | 5.76  | 4.99  | 0.49 | 0.09 | 1.7   | 0.16597  | 0.13132  | 0.459032 | 0.403407 |
| MmugDNA.26710.1.S1_at   | MmugDNA.26710.1 | 5.59  | 5.57  | 0.29 | 0.11 | 1.01  | 0.892475 | 0.986138 | 0.954212 | 0.992143 |
| MmugDNA.26711.1.S1_at   | MmugDNA.26711.1 | 4.98  | 4.85  | 0.24 | 0.26 | 1.1   | 0.916278 | 0.884275 | 0.964383 | 0.934066 |
| MmugDNA.26712.1.S1_at   | MmugDNA.26712.1 | 10.11 | 9.28  | 0.65 | 0.35 | 1.78  | 0.573236 | 0.286894 | 0.781077 | 0.548205 |
| MmugDNA.26713.1.S1_at   | MmugDNA.26713.1 | 3.81  | 3.98  | 0.19 | 0.14 | -1.12 | 0.312249 | 0.307689 | 0.598255 | 0.563871 |
| MmugDNA.26714.1.S1_at   | MmugDNA.26714.1 | 5.84  | 5.42  | 0.13 | 0.35 | 1.35  | 0.051624 | 0.090307 | 0.284589 | 0.3447   |
| MmugDNA.26716.1.S1_s_at | MmugDNA.26716.1 | 4.41  | 3.71  | 0.56 | 0.23 | 1.62  | 0.079843 | 0.062329 | 0.340064 | 0.296502 |
| MmugDNA.26717.1.S1_at   | MmugDNA.26717.1 | 3.9   | 3.94  | 0.38 | 0.07 | -1.03 | 0.894855 | 0.966264 | 0.955185 | 0.981168 |
| MmugDNA.26718.1.S1_at   | MmugDNA.26718.1 | 4.79  | 5.02  | 0.65 | 0.2  | -1.17 | 0.949377 | 0.86859  | 0.978873 | 0.925383 |
| MmugDNA.26719.1.S1_at   | MmugDNA.26719.1 | 5.34  | 5.08  | 0.41 | 0.5  | 1.19  | 0.109801 | 0.084002 | 0.384999 | 0.3349   |
| MmugDNA.2672.1.S1_at    | MmugDNA.2672.1  | 7     | 7.47  | 0.32 | 0.19 | -1.39 | 0.143946 | 0.2883   | 0.430706 | 0.549561 |
| MmugDNA.26720.1.S1_at   | MmugDNA.26720.1 | 4.98  | 4.9   | 0.13 | 0.05 | 1.06  | 0.26173  | 0.493273 | 0.555855 | 0.694018 |
| MmugDNA.26721.1.S1_at   | MmugDNA.26721.1 | 3.59  | 3.8   | 0.04 | 0.21 | -1.16 | 0.496588 | 0.227141 | 0.732443 | 0.499494 |
| MmugDNA.26722.1.S1_at   | MmugDNA.26722.1 | 9.28  | 10.01 | 0.23 | 0.07 | -1.65 | 0.013115 | 0.001412 | 0.165173 | 0.057381 |
| MmugDNA.26723.1.S1_at   | MmugDNA.26723.1 | 2.8   | 3.21  | 0.26 | 0.43 | -1.33 | 0.129442 | 0.139233 | 0.41173  | 0.412402 |
| MmugDNA.26724.1.S1_at   | MmugDNA.26724.1 | 7.05  | 6.81  | 0.13 | 0.05 | 1.18  | 0.065775 | 0.275521 | 0.313967 | 0.53974  |
| MmugDNA.26725.1.S1_at   | MmugDNA.26725.1 | 6.93  | 5.26  | 0.71 | 0.08 | 3.19  | 0.013694 | 0.014576 | 0.167946 | 0.15396  |
| MmugDNA.26726.1.S1_at   | MmugDNA.26726.1 | 11.4  | 11.33 | 0.24 | 0.11 | 1.05  | 0.310877 | 0.323142 | 0.597141 | 0.574351 |
| MmugDNA.26727.1.S1_at   | MmugDNA.26727.1 | 3.16  | 2.81  | 0.05 | 0.1  | 1.28  | 0.012638 | 0.180529 | 0.162521 | 0.457138 |
| MmugDNA.26728.1.S1_at   | MmugDNA.26728.1 | 6.53  | 6.39  | 0.81 | 0.14 | 1.11  | 0.803899 | 0.188002 | 0.911913 | 0.4641   |
| MmugDNA.26730.1.S1_at   | MmugDNA.26730.1 | 5.88  | 5.88  | 0.9  | 0.69 | 1     | 0.796067 | 0.853949 | 0.907901 | 0.916872 |
| MmugDNA.26731.1.S1_at   | MmugDNA.26731.1 | 5.01  | 5.09  | 0.11 | 0.04 | -1.05 | 0.473882 | 0.268748 | 0.717137 | 0.534151 |
| MmugDNA.26733.1.S1_at   | MmugDNA.26733.1 | 6.28  | 5.63  | 0.42 | 0.52 | 1.57  | 0.277959 | 0.500975 | 0.569392 | 0.699362 |
| MmugDNA.26736.1.S1_at   | MmugDNA.26736.1 | 7.04  | 7.16  | 0.18 | 0.04 | -1.09 | 0.082713 | 0.067886 | 0.344584 | 0.306745 |
| MmugDNA.34775.1.S1_at   | MmugDNA.34775.1 | 3.19  | 3.35  | 0.15 | 0.04 | -1.12 | 0.303562 | 0.337208 | 0.591015 | 0.584418 |
| MmugDNA.34775.1.S1_s_at | MmugDNA.34775.1 | 6.21  | 6.15  | 0.23 | 0.05 | 1.05  | 0.540497 | 0.74079  | 0.76151  | 0.84994  |
| MmugDNA.26738.1.S1_at   | MmugDNA.26738.1 | 5.03  | 4.63  | 0.52 | 0.5  | 1.32  | 0.38654  | 0.602858 | 0.654936 | 0.763758 |
| MmugDNA.26739.1.S1_at   | MmugDNA.26739.1 | 5.58  | 5.38  | 0.15 | 0.16 | 1.14  | 0.087671 | 0.105661 | 0.353716 | 0.367776 |
| MmugDNA.2674.1.S1_at    | MmugDNA.2674.1  | 6.89  | 7.03  | 0.08 | 0.22 | -1.1  | 0.694827 | 0.884111 | 0.854418 | 0.933911 |
| MmugDNA.26740.1.S1_at   | MmugDNA.26740.1 | 4.97  | 4.99  | 0.24 | 0.06 | -1.02 | 0.357717 | 0.500333 | 0.633636 | 0.699009 |
| MmugDNA.26741.1.S1_at   | MmugDNA.26741.1 | 6.6   | 6.87  | 0.56 | 0.28 | -1.21 | 0.160908 | 0.457926 | 0.452408 | 0.670999 |
| MmugDNA.26742.1.S1_s_at | MmugDNA.26742.1 | 8.23  | 7.95  | 0.12 | 0.08 | 1.21  | 0.009313 | 0.010985 | 0.146315 | 0.136546 |
| MmugDNA.26743.1.S1_at   | MmugDNA.26743.1 | 8.43  | 8.77  | 0.1  | 0.02 | -1.26 | 0.007636 | 0.107358 | 0.135925 | 0.370219 |
| MmugDNA.26744.1.S1_s_at | MmugDNA.26744.1 | 4.88  | 4.55  | 0.42 | 0.1  | 1.25  | 0.365896 | 0.320218 | 0.640394 | 0.572561 |
| MmugDNA.26745.1.S1_s_at | MmugDNA.26745.1 | 10.93 | 10.56 | 0.13 | 0.11 | 1.29  | 0.020854 | 0.061786 | 0.197998 | 0.295327 |
| MmugDNA.26747.1.S1_at   | MmugDNA.26747.1 | 7.01  | 7.63  | 1.1  | 0.39 | -1.54 | 0.444807 | 0.545368 | 0.697566 | 0.727517 |
| MmugDNA.26748.1.S1_at   | MmugDNA.26748.1 | 9.66  | 9.48  | 0.07 | 0.03 | 1.14  | 0.010992 | 0.013633 | 0.154588 | 0.149433 |

|                         |                 |       |       |      |      |       |          |          |          |          |
|-------------------------|-----------------|-------|-------|------|------|-------|----------|----------|----------|----------|
| MmugDNA.26748.1.S1_s_at | MmugDNA.26748.1 | 11.98 | 11.68 | 0.1  | 0.07 | 1.23  | 0.013048 | 0.0067   | 0.16498  | 0.110751 |
| MmugDNA.2675.1.S1_at    | MmugDNA.2675.1  | 8.27  | 8.86  | 0.01 | 0.15 | -1.5  | 0.003874 | 0.0792   | 0.107741 | 0.32639  |
| MmugDNA.26750.1.S1_at   | MmugDNA.26750.1 | 6.7   | 6.63  | 0.14 | 0.07 | 1.05  | 0.205473 | 0.259108 | 0.503212 | 0.526263 |
| MmugDNA.26753.1.S1_at   | MmugDNA.26753.1 | 6.26  | 5.98  | 0.25 | 0.12 | 1.22  | 0.408471 | 0.256223 | 0.671241 | 0.524075 |
| MmugDNA.26754.1.S1_at   | MmugDNA.26754.1 | 5.23  | 5.05  | 0.16 | 0.41 | 1.14  | 0.878471 | 0.378928 | 0.94815  | 0.615882 |
| MmugDNA.26755.1.S1_at   | MmugDNA.26755.1 | 4.62  | 4.63  | 0.1  | 0.06 | -1.01 | 0.94929  | 0.671529 | 0.978842 | 0.807948 |
| MmugDNA.26756.1.S1_s_at | MmugDNA.26756.1 | 11.01 | 10.93 | 0.17 | 0.02 | 1.06  | 0.145195 | 0.009377 | 0.432532 | 0.127634 |
| MmugDNA.26757.1.S1_at   | MmugDNA.26757.1 | 9.01  | 7.58  | 0.16 | 0.04 | 2.68  | 0.000131 | 0.000719 | 0.051196 | 0.044427 |
| MmugDNA.26758.1.S1_s_at | MmugDNA.26758.1 | 11.23 | 10.84 | 0.09 | 0.08 | 1.3   | 0.005105 | 0.039422 | 0.116736 | 0.243529 |
| MmugDNA.2676.1.S1_at    | MmugDNA.2676.1  | 5.04  | 5.03  | 0.12 | 0.03 | 1.01  | 0.595581 | 0.777911 | 0.795327 | 0.870964 |
| MmugDNA.26760.1.S1_at   | MmugDNA.26760.1 | 8.4   | 8.49  | 0.38 | 0.08 | -1.06 | 0.640371 | 0.850633 | 0.824281 | 0.915021 |
| MmugDNA.26761.1.S1_at   | MmugDNA.26761.1 | 3.69  | 3.72  | 0.51 | 0.07 | -1.02 | 0.361731 | 0.416509 | 0.63707  | 0.641647 |
| MmugDNA.26762.1.S1_at   | MmugDNA.26762.1 | 6.95  | 7.11  | 0.09 | 0.05 | -1.11 | 0.120416 | 0.065222 | 0.398818 | 0.301239 |
| MmugDNA.26764.1.S1_at   | MmugDNA.26764.1 | 8.97  | 9.42  | 1.39 | 0.05 | -1.37 | 0.852843 | 0.777422 | 0.935956 | 0.870674 |
| MmugDNA.26765.1.S1_at   | MmugDNA.26765.1 | 5.87  | 6.06  | 1.01 | 0.26 | -1.15 | 0.553076 | 0.547664 | 0.769694 | 0.728596 |
| MmugDNA.26766.1.S1_at   | MmugDNA.26766.1 | 4.54  | 4.54  | 0.12 | 0    | -1    | 0.341684 | 0.463492 | 0.621474 | 0.674461 |
| MmugDNA.26768.1.S1_s_at | MmugDNA.26768.1 | 2.77  | 2.9   | 0.06 | 0.05 | -1.09 | 0.022778 | 0.026298 | 0.204093 | 0.203132 |
| MmugDNA.26769.1.S1_at   | MmugDNA.26769.1 | 6.9   | 7.02  | 0.22 | 0.04 | -1.09 | 0.857821 | 0.432569 | 0.938197 | 0.652991 |
| MmugDNA.2677.1.S1_at    | MmugDNA.2677.1  | 9.86  | 9.65  | 0.23 | 0.16 | 1.16  | 0.213217 | 0.031507 | 0.511046 | 0.219534 |
| MmugDNA.26771.1.S1_at   | MmugDNA.26771.1 | 7.8   | 8.55  | 0.38 | 0.05 | -1.68 | 0.048665 | 0.292796 | 0.278061 | 0.552823 |
| MmugDNA.26772.1.S1_at   | MmugDNA.26772.1 | 6.55  | 6.58  | 0.32 | 0.06 | -1.02 | 0.255141 | 0.324154 | 0.549651 | 0.574853 |
| MmugDNA.26773.1.S1_at   | MmugDNA.26773.1 | 4.3   | 4.37  | 0.17 | 0.18 | -1.05 | 0.418639 | 0.438645 | 0.678527 | 0.657605 |
| MmugDNA.26775.1.S1_at   | MmugDNA.26775.1 | 11.65 | 10.85 | 0.43 | 0.1  | 1.74  | 0.096873 | 0.172472 | 0.366938 | 0.448864 |
| MmugDNA.26776.1.S1_at   | MmugDNA.26776.1 | 5.72  | 5.22  | 0.25 | 0.08 | 1.42  | 0.039601 | 0.063886 | 0.255615 | 0.29906  |
| MmugDNA.26777.1.S1_at   | MmugDNA.26777.1 | 10.3  | 10.17 | 0.1  | 0.1  | 1.09  | 0.395935 | 0.075468 | 0.662105 | 0.319857 |
| MmugDNA.26778.1.S1_at   | MmugDNA.26778.1 | 4.76  | 4.24  | 0.42 | 0.09 | 1.43  | 0.104159 | 0.051813 | 0.377457 | 0.273151 |
| MmugDNA.26779.1.S1_at   | MmugDNA.26779.1 | 4.16  | 4.11  | 0.1  | 0.23 | 1.04  | 0.869233 | 0.186341 | 0.943687 | 0.46218  |
| MmugDNA.2678.1.S1_at    | MmugDNA.2678.1  | 5.11  | 4.89  | 0.09 | 0.17 | 1.17  | 0.300302 | 0.397362 | 0.588503 | 0.628812 |
| MmugDNA.26780.1.S1_at   | MmugDNA.26780.1 | 6     | 6.28  | 0.25 | 0.2  | -1.21 | 0.096743 | 0.299599 | 0.366756 | 0.557956 |
| MmugDNA.26781.1.S1_at   | MmugDNA.26781.1 | 3.43  | 3.54  | 0.12 | 0.04 | -1.08 | 0.230496 | 0.067234 | 0.529445 | 0.305302 |
| MmugDNA.26782.1.S1_at   | MmugDNA.26782.1 | 4.6   | 4.3   | 0.4  | 0.11 | 1.24  | 0.196489 | 0.186064 | 0.493578 | 0.461931 |
| MmugDNA.26783.1.S1_at   | MmugDNA.26783.1 | 3.76  | 3.9   | 0.15 | 0.2  | -1.1  | 0.884581 | 0.963692 | 0.950923 | 0.979798 |
| MmugDNA.26784.1.S1_at   | MmugDNA.26784.1 | 4.86  | 4.73  | 0.79 | 0.09 | 1.09  | 0.452893 | 0.607777 | 0.703282 | 0.766554 |
| MmugDNA.26785.1.S1_at   | MmugDNA.26785.1 | 4.13  | 4.09  | 0.26 | 0.07 | 1.03  | 0.576617 | 0.762723 | 0.783299 | 0.862004 |
| MmugDNA.26786.1.S1_at   | MmugDNA.26786.1 | 4.21  | 4.04  | 0.13 | 0.12 | 1.13  | 0.168571 | 0.285022 | 0.46188  | 0.547095 |
| MmugDNA.26788.1.S1_at   | MmugDNA.26788.1 | 3.7   | 3.6   | 0.19 | 0.04 | 1.07  | 0.491285 | 0.632993 | 0.729196 | 0.783894 |
| MmugDNA.26789.1.S1_at   | MmugDNA.26789.1 | 10.82 | 10.9  | 0.11 | 0.12 | -1.06 | 0.919101 | 0.009737 | 0.965387 | 0.129787 |
| MmugDNA.26790.1.S1_at   | MmugDNA.26790.1 | 5.13  | 4.16  | 0.3  | 0.73 | 1.97  | 0.293066 | 0.066608 | 0.582105 | 0.303842 |
| MmugDNA.26791.1.S1_at   | MmugDNA.26791.1 | 6.67  | 6.49  | 0.23 | 0.05 | 1.14  | 0.788004 | 0.397797 | 0.903601 | 0.629114 |
| MmugDNA.26792.1.S1_at   | MmugDNA.26792.1 | 6     | 5.18  | 0.23 | 0.2  | 1.76  | 0.017658 | 0.00932  | 0.186448 | 0.127446 |
| MmugDNA.26793.1.S1_at   | MmugDNA.26793.1 | 8.79  | 8.87  | 0.26 | 0.11 | -1.06 | 0.559419 | 0.423365 | 0.773306 | 0.646277 |
| MmugDNA.26794.1.S1_s_at | MmugDNA.26794.1 | 12.01 | 11.91 | 0.05 | 0.02 | 1.07  | 0.049695 | 0.000865 | 0.280406 | 0.047425 |
| MmugDNA.26795.1.S1_at   | MmugDNA.26795.1 | 3.6   | 3.05  | 0.49 | 0.1  | 1.46  | 0.173957 | 0.214033 | 0.468349 | 0.487633 |

|                         |                 |       |       |      |      |       |          |          |          |          |
|-------------------------|-----------------|-------|-------|------|------|-------|----------|----------|----------|----------|
| MmugDNA.26798.1.S1_at   | MmugDNA.26798.1 | 6     | 5.95  | 0.24 | 0.05 | 1.03  | 0.847266 | 0.502731 | 0.933382 | 0.700289 |
| MmugDNA.268.1.S1_at     | MmugDNA.268.1   | 6.15  | 6.27  | 0.14 | 0.05 | -1.09 | 0.641628 | 0.837687 | 0.824975 | 0.907261 |
| MmugDNA.2680.1.S1_at    | MmugDNA.2680.1  | 7.67  | 7.51  | 0.29 | 0.13 | 1.11  | 0.607071 | 0.353126 | 0.803546 | 0.596383 |
| MmugDNA.26800.1.S1_s_at | MmugDNA.26800.1 | 10.82 | 10.81 | 0.09 | 0.23 | 1     | 0.2572   | 0.018484 | 0.551586 | 0.171015 |
| MmugDNA.26801.1.S1_at   | MmugDNA.26801.1 | 7.24  | 7.93  | 0.4  | 0.12 | -1.61 | 0.085598 | 0.206266 | 0.350053 | 0.480426 |
| MmugDNA.26802.1.S1_at   | MmugDNA.26802.1 | 4.52  | 4.45  | 0.47 | 0.06 | 1.05  | 0.282687 | 0.357984 | 0.573338 | 0.59957  |
| MmugDNA.26803.1.S1_at   | MmugDNA.26803.1 | 3.66  | 3.36  | 1.13 | 0.26 | 1.23  | 0.27304  | 0.456118 | 0.565206 | 0.669909 |
| MmugDNA.26804.1.S1_at   | MmugDNA.26804.1 | 10.1  | 10.15 | 0.14 | 0.19 | -1.04 | 0.711501 | 0.006763 | 0.863886 | 0.111308 |
| MmugDNA.26805.1.S1_at   | MmugDNA.26805.1 | 4.47  | 4.49  | 0.23 | 0.11 | -1.02 | 0.836024 | 0.791321 | 0.928068 | 0.879439 |
| MmugDNA.26807.1.S1_at   | MmugDNA.26807.1 | 2.74  | 2.79  | 0.05 | 0.07 | -1.04 | 0.567339 | 0.227741 | 0.77771  | 0.499979 |
| MmugDNA.26810.1.S1_at   | MmugDNA.26810.1 | 3.36  | 3.31  | 0.46 | 0.34 | 1.03  | 0.741167 | 0.844251 | 0.880016 | 0.911327 |
| MmugDNA.26811.1.S1_at   | MmugDNA.26811.1 | 2.9   | 2.71  | 0.31 | 0.04 | 1.14  | 0.134832 | 0.193777 | 0.418721 | 0.468847 |
| MmugDNA.26811.1.S1_x_at | MmugDNA.26811.1 | 2.67  | 2.8   | 0.54 | 0.03 | -1.09 | 0.545611 | 0.697503 | 0.764822 | 0.824228 |
| MmugDNA.26812.1.S1_at   | MmugDNA.26812.1 | 3     | 3.47  | 0.17 | 0.29 | -1.38 | 0.04665  | 0.391141 | 0.273564 | 0.624834 |
| MmugDNA.26813.1.S1_at   | MmugDNA.26813.1 | 9.44  | 10.39 | 0.63 | 0.08 | -1.93 | 0.053728 | 0.095663 | 0.288972 | 0.35269  |
| MmugDNA.26815.1.S1_at   | MmugDNA.26815.1 | 9.14  | 9.05  | 0.1  | 0.28 | 1.07  | 0.653907 | 0.022036 | 0.832423 | 0.185855 |
| MmugDNA.26816.1.S1_at   | MmugDNA.26816.1 | 4.65  | 4.54  | 0.14 | 0.77 | 1.08  | 0.425307 | 0.401545 | 0.682757 | 0.631068 |
| MmugDNA.26817.1.S1_at   | MmugDNA.26817.1 | 8.55  | 7.91  | 0.22 | 0.23 | 1.56  | 0.050544 | 0.057112 | 0.282549 | 0.284945 |
| MmugDNA.26819.1.S1_at   | MmugDNA.26819.1 | 6.39  | 6.78  | 0.18 | 0.29 | -1.31 | 0.050458 | 0.045412 | 0.282448 | 0.257437 |
| MmugDNA.26820.1.S1_at   | MmugDNA.26820.1 | 3     | 2.8   | 0.33 | 0.13 | 1.15  | 0.323175 | 0.305459 | 0.607056 | 0.562418 |
| MmugDNA.26821.1.S1_at   | MmugDNA.26821.1 | 7.44  | 9     | 0.87 | 0.23 | -2.94 | 0.033801 | 0.01265  | 0.238058 | 0.145088 |
| MmugDNA.26823.1.S1_at   | MmugDNA.26823.1 | 4.21  | 3.66  | 0.42 | 0.33 | 1.47  | 0.395497 | 0.612986 | 0.661903 | 0.770331 |
| MmugDNA.26824.1.S1_at   | MmugDNA.26824.1 | 5.32  | 5.37  | 0.14 | 0.14 | -1.03 | 0.870372 | 0.986349 | 0.944208 | 0.992243 |
| MmugDNA.26825.1.S1_at   | MmugDNA.26825.1 | 6.42  | 6.79  | 0.14 | 0.3  | -1.29 | 0.076617 | 0.031165 | 0.334909 | 0.218378 |
| MmugDNA.26827.1.S1_at   | MmugDNA.26827.1 | 4.89  | 4.9   | 0.08 | 0.09 | -1.01 | 0.197929 | 0.379652 | 0.49515  | 0.616523 |
| MmugDNA.26829.1.S1_at   | MmugDNA.26829.1 | 5.86  | 5.7   | 0.12 | 0.11 | 1.11  | 0.099342 | 0.025848 | 0.370274 | 0.201605 |
| MmugDNA.2683.1.S1_at    | MmugDNA.2683.1  | 4.76  | 4.61  | 0.61 | 0.13 | 1.11  | 0.346874 | 0.416422 | 0.625079 | 0.641587 |
| MmugDNA.26830.1.S1_at   | MmugDNA.26830.1 | 8.04  | 7.8   | 0.11 | 0.24 | 1.18  | 0.059535 | 0.457478 | 0.301148 | 0.670862 |
| MmugDNA.26831.1.S1_at   | MmugDNA.26831.1 | 4.24  | 4.32  | 0.89 | 0.06 | -1.06 | 0.421182 | 0.434672 | 0.679846 | 0.654756 |
| MmugDNA.26832.1.S1_at   | MmugDNA.26832.1 | 2.9   | 2.81  | 0.03 | 0.05 | 1.07  | 0.206753 | 0.597372 | 0.504407 | 0.760178 |
| MmugDNA.26833.1.S1_at   | MmugDNA.26833.1 | 3.75  | 3.58  | 0.16 | 0.3  | 1.12  | 0.465625 | 0.113691 | 0.71163  | 0.379818 |
| MmugDNA.26834.1.S1_at   | MmugDNA.26834.1 | 8.71  | 8.5   | 0.25 | 0.07 | 1.15  | 0.2222   | 0.435761 | 0.520231 | 0.655508 |
| MmugDNA.26835.1.S1_at   | MmugDNA.26835.1 | 8.14  | 8.15  | 0.05 | 0.45 | -1.01 | 0.965414 | 0.95728  | 0.985967 | 0.975831 |
| MmugDNA.26836.1.S1_at   | MmugDNA.26836.1 | 10.78 | 10.44 | 0.05 | 0.09 | 1.27  | 0.003991 | 0.107395 | 0.108676 | 0.370219 |
| MmugDNA.26839.1.S1_at   | MmugDNA.26839.1 | 9.23  | 9.32  | 0.43 | 0.2  | -1.06 | 0.884992 | 0.059455 | 0.951005 | 0.290548 |
| MmugDNA.2684.1.S1_at    | MmugDNA.2684.1  | 6.13  | 6.85  | 0.15 | 0.16 | -1.65 | 0.00469  | 0.004328 | 0.115008 | 0.092251 |
| MmugDNA.26840.1.S1_at   | MmugDNA.26840.1 | 6.45  | 5.86  | 1.54 | 0.82 | 1.51  | 0.728924 | 0.560367 | 0.873344 | 0.736645 |
| MmugDNA.26842.1.S1_at   | MmugDNA.26842.1 | 5.42  | 5.05  | 0.51 | 0.19 | 1.3   | 0.441402 | 0.605107 | 0.69494  | 0.764917 |
| MmugDNA.26843.1.S1_at   | MmugDNA.26843.1 | 4.29  | 4.21  | 0.16 | 0.26 | 1.05  | 0.432701 | 0.600746 | 0.688399 | 0.76224  |
| MmugDNA.26844.1.S1_at   | MmugDNA.26844.1 | 6.87  | 7.29  | 0.36 | 0.32 | -1.34 | 0.213833 | 0.015203 | 0.511667 | 0.156703 |
| MmugDNA.26845.1.S1_at   | MmugDNA.26845.1 | 9.58  | 9.49  | 0.06 | 0.17 | 1.07  | 0.216128 | 0.272339 | 0.513879 | 0.537108 |
| MmugDNA.26846.1.S1_at   | MmugDNA.26846.1 | 7.39  | 7.5   | 0.68 | 0.11 | -1.07 | 0.944435 | 0.415611 | 0.976597 | 0.641007 |
| MmugDNA.26847.1.S1_at   | MmugDNA.26847.1 | 5.36  | 5.6   | 0.11 | 0.44 | -1.18 | 0.128282 | 0.319785 | 0.410227 | 0.572135 |

|                         |                 |       |       |      |      |       |          |          |          |          |
|-------------------------|-----------------|-------|-------|------|------|-------|----------|----------|----------|----------|
| MmugDNA.26848.1.S1_s_at | MmugDNA.26848.1 | 4.95  | 5     | 0.17 | 0.04 | -1.03 | 0.827902 | 0.486067 | 0.923804 | 0.689573 |
| MmugDNA.26849.1.S1_at   | MmugDNA.26849.1 | 4.36  | 4.25  | 0.06 | 0.06 | 1.08  | 0.104404 | 0.310803 | 0.377773 | 0.565832 |
| MmugDNA.2685.1.S1_at    | MmugDNA.2685.1  | 4.62  | 4.31  | 0.42 | 0.06 | 1.24  | 0.281945 | 0.553651 | 0.572752 | 0.732764 |
| MmugDNA.26850.1.S1_at   | MmugDNA.26850.1 | 5.13  | 5.14  | 0.14 | 0.08 | -1.01 | 0.474306 | 0.732208 | 0.71745  | 0.844899 |
| MmugDNA.26851.1.S1_at   | MmugDNA.26851.1 | 9.21  | 8.75  | 0.23 | 0.19 | 1.38  | 0.091729 | 0.006187 | 0.359472 | 0.106774 |
| MmugDNA.26852.1.S1_at   | MmugDNA.26852.1 | 5.68  | 5.78  | 0.11 | 0.11 | -1.07 | 0.144181 | 0.499021 | 0.430944 | 0.697958 |
| MmugDNA.26853.1.S1_at   | MmugDNA.26853.1 | 2.98  | 3.01  | 0.38 | 0    | -1.02 | 0.545713 | 0.631218 | 0.764894 | 0.782734 |
| MmugDNA.26856.1.S1_at   | MmugDNA.26856.1 | 10.35 | 11.17 | 0.47 | 0.33 | -1.77 | 0.06819  | 0.039759 | 0.318984 | 0.244402 |
| MmugDNA.26857.1.S1_at   | MmugDNA.26857.1 | 10.99 | 10.29 | 0.53 | 0.09 | 1.62  | 0.268755 | 0.578108 | 0.561283 | 0.7483   |
| MmugDNA.26858.1.S1_at   | MmugDNA.26858.1 | 9     | 7.3   | 0.35 | 0.34 | 3.25  | 0.002746 | 0.000804 | 0.09702  | 0.04607  |
| MmugDNA.26859.1.S1_at   | MmugDNA.26859.1 | 3.4   | 3.65  | 0.13 | 0.34 | -1.19 | 0.660068 | 0.850011 | 0.836024 | 0.914673 |
| MmugDNA.2686.1.S1_at    | MmugDNA.2686.1  | 12.28 | 12.35 | 0.14 | 0.09 | -1.05 | 0.678725 | 0.073481 | 0.846793 | 0.316769 |
| MmugDNA.26860.1.S1_at   | MmugDNA.26860.1 | 4.5   | 4.45  | 0.11 | 0.09 | 1.04  | 0.884056 | 0.290431 | 0.950645 | 0.551169 |
| MmugDNA.26862.1.S1_at   | MmugDNA.26862.1 | 6.92  | 6.96  | 0.16 | 0.01 | -1.03 | 0.884317 | 0.252901 | 0.95081  | 0.521232 |
| MmugDNA.26864.1.S1_at   | MmugDNA.26864.1 | 7.77  | 7.84  | 0.02 | 0.09 | -1.04 | 0.32334  | 0.121915 | 0.607153 | 0.391296 |
| MmugDNA.26864.1.S1_s_at | MmugDNA.26864.1 | 9.89  | 9.62  | 0.13 | 0.03 | 1.21  | 0.017526 | 0.030552 | 0.185974 | 0.216711 |
| MmugDNA.26865.1.S1_at   | MmugDNA.26865.1 | 6.75  | 6.78  | 0.19 | 0.06 | -1.02 | 0.667989 | 0.522727 | 0.840528 | 0.713338 |
| MmugDNA.26866.1.S1_at   | MmugDNA.26866.1 | 6.27  | 5.74  | 0.32 | 0.22 | 1.44  | 0.197605 | 0.214595 | 0.494854 | 0.4884   |
| MmugDNA.26867.1.S1_at   | MmugDNA.26867.1 | 3.4   | 3.39  | 0.01 | 0.08 | 1     | 0.286928 | 0.504308 | 0.576674 | 0.701474 |
| MmugDNA.26868.1.S1_at   | MmugDNA.26868.1 | 3.26  | 3.16  | 0.11 | 0.21 | 1.07  | 0.378599 | 0.659537 | 0.648732 | 0.800801 |
| MmugDNA.26869.1.S1_at   | MmugDNA.26869.1 | 5.07  | 5     | 0.19 | 0.07 | 1.05  | 0.341439 | 0.687376 | 0.621327 | 0.817576 |
| MmugDNA.2687.1.S1_at    | MmugDNA.2687.1  | 5.51  | 5.81  | 0.17 | 0.23 | -1.24 | 0.075623 | 0.005105 | 0.333234 | 0.099108 |
| MmugDNA.26870.1.S1_at   | MmugDNA.26870.1 | 11.47 | 10.94 | 0.23 | 0.11 | 1.45  | 0.090986 | 0.012636 | 0.358205 | 0.145032 |
| MmugDNA.26871.1.S1_at   | MmugDNA.26871.1 | 3.59  | 3.63  | 0.11 | 0.19 | -1.03 | 0.318092 | 0.538685 | 0.602872 | 0.723313 |
| MmugDNA.26874.1.S1_at   | MmugDNA.26874.1 | 8.12  | 8.03  | 0.17 | 0.09 | 1.07  | 0.31544  | 0.103281 | 0.600364 | 0.364143 |
| MmugDNA.26875.1.S1_at   | MmugDNA.26875.1 | 10.09 | 10.19 | 0.04 | 0.04 | -1.08 | 0.031277 | 0.212498 | 0.230061 | 0.486502 |
| MmugDNA.26876.1.S1_at   | MmugDNA.26876.1 | 8.28  | 8.53  | 0.93 | 0.08 | -1.19 | 0.709958 | 0.926978 | 0.862704 | 0.958453 |
| MmugDNA.26877.1.S1_at   | MmugDNA.26877.1 | 8.47  | 8.61  | 0.07 | 0.08 | -1.1  | 0.174803 | 0.789232 | 0.469037 | 0.878225 |
| MmugDNA.26878.1.S1_at   | MmugDNA.26878.1 | 5.5   | 6.65  | 0.33 | 0.18 | -2.21 | 0.006255 | 0.198382 | 0.125354 | 0.473292 |
| MmugDNA.26879.1.S1_at   | MmugDNA.26879.1 | 4.25  | 4.25  | 0.26 | 0.2  | -1    | 0.68633  | 0.115516 | 0.850512 | 0.38267  |
| MmugDNA.2688.1.S1_at    | MmugDNA.2688.1  | 3.97  | 4.08  | 0.23 | 0.25 | -1.08 | 0.560564 | 0.802806 | 0.773961 | 0.886441 |
| MmugDNA.26880.1.S1_at   | MmugDNA.26880.1 | 4.24  | 4.25  | 0.17 | 0.05 | -1.01 | 0.321003 | 0.410446 | 0.605351 | 0.637311 |
| MmugDNA.26882.1.S1_at   | MmugDNA.26882.1 | 6.45  | 6.49  | 0.16 | 0.01 | -1.03 | 0.298074 | 0.033854 | 0.5865   | 0.227639 |
| MmugDNA.26883.1.S1_at   | MmugDNA.26883.1 | 5.4   | 4.36  | 0.66 | 0.06 | 2.06  | 0.049202 | 0.065217 | 0.279271 | 0.301239 |
| MmugDNA.26887.1.S1_at   | MmugDNA.26887.1 | 3.79  | 3.83  | 0.22 | 0.22 | -1.02 | 0.902968 | 0.590576 | 0.95885  | 0.756311 |
| MmugDNA.26888.1.S1_at   | MmugDNA.26888.1 | 4.42  | 4.68  | 0.28 | 0.26 | -1.19 | 0.210843 | 0.422065 | 0.508448 | 0.645447 |
| MmugDNA.26889.1.S1_at   | MmugDNA.26889.1 | 4.35  | 4.24  | 0.15 | 0.14 | 1.08  | 0.41767  | 0.320853 | 0.67772  | 0.572849 |
| MmugDNA.2689.1.S1_at    | MmugDNA.2689.1  | 8.96  | 8.92  | 0.23 | 0.08 | 1.03  | 0.372552 | 0.847981 | 0.645002 | 0.913675 |
| MmugDNA.26890.1.S1_at   | MmugDNA.26890.1 | 3.81  | 3.3   | 0.45 | 0.33 | 1.42  | 0.268293 | 0.347146 | 0.561027 | 0.591815 |
| MmugDNA.26891.1.S1_at   | MmugDNA.26891.1 | 5.17  | 4.4   | 0.32 | 0.15 | 1.71  | 0.009021 | 0.018607 | 0.144777 | 0.171539 |
| MmugDNA.26892.1.S1_at   | MmugDNA.26892.1 | 3.63  | 3.57  | 0.11 | 0.05 | 1.04  | 0.795153 | 0.359232 | 0.907466 | 0.600537 |
| MmugDNA.26893.1.S1_at   | MmugDNA.26893.1 | 6.8   | 6.74  | 0.51 | 0.22 | 1.04  | 0.965239 | 0.984843 | 0.985924 | 0.991445 |
| MmugDNA.26894.1.S1_at   | MmugDNA.26894.1 | 8.03  | 8.23  | 0.15 | 0.22 | -1.15 | 0.154477 | 0.074409 | 0.444769 | 0.318058 |

|                         |                 |       |       |      |      |       |          |          |          |          |
|-------------------------|-----------------|-------|-------|------|------|-------|----------|----------|----------|----------|
| MmugDNA.26895.1.S1_at   | MmugDNA.26895.1 | 3.53  | 3.79  | 0.16 | 0.28 | -1.19 | 0.315534 | 0.284353 | 0.600423 | 0.54659  |
| MmugDNA.26896.1.S1_at   | MmugDNA.26896.1 | 4.51  | 4.71  | 0.19 | 0.33 | -1.15 | 0.471096 | 0.535109 | 0.715413 | 0.720807 |
| MmugDNA.26897.1.S1_at   | MmugDNA.26897.1 | 5.13  | 4.9   | 0.34 | 0.29 | 1.17  | 0.875134 | 0.093103 | 0.946414 | 0.349292 |
| MmugDNA.26898.1.S1_at   | MmugDNA.26898.1 | 3.84  | 3.95  | 0.09 | 0.02 | -1.08 | 0.142203 | 0.096587 | 0.428204 | 0.354126 |
| MmugDNA.269.1.S1_at     | MmugDNA.269.1   | 9.52  | 11.22 | 0.93 | 0.24 | -3.25 | 0.103996 | 0.234495 | 0.377283 | 0.505674 |
| MmugDNA.2690.1.S1_at    | MmugDNA.2690.1  | 8.42  | 8.32  | 0.1  | 0.05 | 1.07  | 0.110325 | 0.75395  | 0.385634 | 0.856765 |
| MmugDNA.26900.1.S1_at   | MmugDNA.26900.1 | 6.98  | 6.73  | 0.24 | 0.4  | 1.19  | 0.392391 | 0.419884 | 0.6594   | 0.643733 |
| MmugDNA.26901.1.S1_at   | MmugDNA.26901.1 | 6.5   | 6.71  | 0.36 | 0.42 | -1.16 | 0.883372 | 0.269084 | 0.950421 | 0.534445 |
| MmugDNA.26906.1.S1_at   | MmugDNA.26906.1 | 11.4  | 11.29 | 0.17 | 0.02 | 1.08  | 0.547433 | 0.823018 | 0.765963 | 0.898312 |
| MmugDNA.26907.1.S1_at   | MmugDNA.26907.1 | 6.38  | 5.71  | 0.62 | 0.22 | 1.59  | 0.18269  | 0.317887 | 0.478492 | 0.571044 |
| MmugDNA.26908.1.S1_at   | MmugDNA.26908.1 | 6.7   | 6.79  | 0.89 | 0.31 | -1.06 | 0.586286 | 0.255532 | 0.789745 | 0.523538 |
| MmugDNA.26909.1.S1_at   | MmugDNA.26909.1 | 6.39  | 5.62  | 0.64 | 0.29 | 1.7   | 0.11892  | 0.141019 | 0.396589 | 0.414507 |
| MmugDNA.2691.1.S1_at    | MmugDNA.2691.1  | 10.11 | 10.24 | 0.21 | 0.03 | -1.09 | 0.262294 | 0.047713 | 0.556406 | 0.263325 |
| MmugDNA.26910.1.S1_at   | MmugDNA.26910.1 | 10.88 | 10.88 | 0.13 | 0.11 | 1     | 0.906261 | 0.173268 | 0.960302 | 0.449791 |
| MmugDNA.26912.1.S1_at   | MmugDNA.26912.1 | 12.38 | 10.61 | 0.18 | 0.28 | 3.42  | 0.001259 | 0.063287 | 0.078631 | 0.298244 |
| MmugDNA.26913.1.S1_at   | MmugDNA.26913.1 | 6.36  | 6.43  | 0.45 | 0.34 | -1.05 | 0.66618  | 0.187712 | 0.839554 | 0.463689 |
| MmugDNA.26914.1.S1_at   | MmugDNA.26914.1 | 3.73  | 3.61  | 0.03 | 0.09 | 1.08  | 0.118613 | 0.351069 | 0.396265 | 0.594752 |
| MmugDNA.26916.1.S1_at   | MmugDNA.26916.1 | 4.11  | 4.41  | 0.38 | 0.51 | -1.24 | 0.631766 | 0.764661 | 0.819248 | 0.863166 |
| MmugDNA.26917.1.S1_at   | MmugDNA.26917.1 | 3.36  | 3.35  | 0.11 | 0.14 | 1.01  | 0.212876 | 0.30164  | 0.510857 | 0.559555 |
| MmugDNA.26918.1.S1_at   | MmugDNA.26918.1 | 2.85  | 2.85  | 0.11 | 0    | -1    | 0.385059 | 0.705812 | 0.65395  | 0.829541 |
| MmugDNA.26919.1.S1_at   | MmugDNA.26919.1 | 4.7   | 4.62  | 0.22 | 0.08 | 1.06  | 0.194676 | 0.274708 | 0.491303 | 0.53918  |
| MmugDNA.2692.1.S1_at    | MmugDNA.2692.1  | 5.61  | 5.57  | 0.12 | 0.17 | 1.03  | 0.595686 | 0.270904 | 0.795406 | 0.536026 |
| MmugDNA.26920.1.S1_at   | MmugDNA.26920.1 | 5.59  | 4.28  | 0.89 | 0.36 | 2.48  | 0.081214 | 0.06461  | 0.342222 | 0.300314 |
| MmugDNA.26921.1.S1_at   | MmugDNA.26921.1 | 10.99 | 10.49 | 0.05 | 0.13 | 1.41  | 0.002966 | 0.074069 | 0.099551 | 0.317699 |
| MmugDNA.26922.1.S1_at   | MmugDNA.26922.1 | 3.04  | 2.88  | 0.04 | 0.06 | 1.12  | 0.019391 | 0.161294 | 0.192331 | 0.437434 |
| MmugDNA.26924.1.S1_at   | MmugDNA.26924.1 | 7.01  | 7.41  | 0.25 | 0.13 | -1.32 | 0.181184 | 0.500852 | 0.476509 | 0.699296 |
| MmugDNA.26927.1.S1_at   | MmugDNA.26927.1 | 3.29  | 3.28  | 0.15 | 0.09 | 1.01  | 0.775154 | 0.937016 | 0.897254 | 0.964492 |
| MmugDNA.2018.1.S1_at    | MmugDNA.2018.1  | 10.61 | 10.43 | 0.1  | 0.01 | 1.14  | 0.08563  | 0.140963 | 0.350073 | 0.414474 |
| MmugDNA.2018.1.S1_s_at  | MmugDNA.2018.1  | 11.21 | 11.12 | 0.05 | 0.05 | 1.06  | 0.268927 | 0.067967 | 0.561347 | 0.306909 |
| MmugDNA.26930.1.S1_at   | MmugDNA.26930.1 | 4.06  | 3.61  | 0.28 | 0.3  | 1.36  | 0.155531 | 0.220471 | 0.445885 | 0.493818 |
| MmugDNA.26931.1.S1_at   | MmugDNA.26931.1 | 6.44  | 6.31  | 0.07 | 0.12 | 1.1   | 0.159504 | 0.095265 | 0.450798 | 0.352254 |
| MmugDNA.26934.1.S1_at   | MmugDNA.26934.1 | 8.85  | 8.57  | 0.34 | 0.23 | 1.21  | 0.331416 | 0.685414 | 0.613386 | 0.816513 |
| MmugDNA.26935.1.S1_at   | MmugDNA.26935.1 | 11.48 | 11.72 | 0.14 | 0.03 | -1.18 | 0.047826 | 0.056932 | 0.276107 | 0.284714 |
| MmugDNA.26936.1.S1_at   | MmugDNA.26936.1 | 6.66  | 6.33  | 0.21 | 0.28 | 1.26  | 0.229079 | 0.21776  | 0.527772 | 0.491309 |
| MmugDNA.26937.1.S1_at   | MmugDNA.26937.1 | 5.51  | 5.32  | 0.29 | 0.08 | 1.14  | 0.694927 | 0.881823 | 0.854495 | 0.932594 |
| MmugDNA.26938.1.S1_at   | MmugDNA.26938.1 | 3.77  | 3.78  | 0.1  | 0.03 | -1.01 | 0.920437 | 0.174959 | 0.965991 | 0.451599 |
| MmugDNA.26939.1.S1_at   | MmugDNA.26939.1 | 3.7   | 3.63  | 0.07 | 0.04 | 1.05  | 0.859509 | 0.694895 | 0.93919  | 0.822638 |
| MmugDNA.26940.1.S1_at   | MmugDNA.26940.1 | 4.76  | 4.73  | 0.29 | 0.12 | 1.02  | 0.561327 | 0.821085 | 0.774384 | 0.897041 |
| MmugDNA.26941.1.S1_at   | MmugDNA.26941.1 | 5.18  | 5.12  | 0.03 | 0.02 | 1.04  | 0.093267 | 0.775825 | 0.361736 | 0.869553 |
| MmugDNA.26942.1.S1_at   | MmugDNA.26942.1 | 5.55  | 5.64  | 0.12 | 0.11 | -1.07 | 0.759754 | 0.457288 | 0.889892 | 0.670746 |
| MmugDNA.26943.1.S1_s_at | MmugDNA.26943.1 | 10.91 | 10.51 | 0.34 | 0.06 | 1.32  | 0.122557 | 0.109531 | 0.401265 | 0.373377 |
| MmugDNA.26944.1.S1_at   | MmugDNA.26944.1 | 4.24  | 3.7   | 0.43 | 0.37 | 1.45  | 0.19024  | 0.216497 | 0.486645 | 0.490113 |
| MmugDNA.26945.1.S1_at   | MmugDNA.26945.1 | 4.65  | 4.85  | 0.23 | 0.09 | -1.15 | 0.885179 | 0.680793 | 0.951028 | 0.813594 |

|                         |                 |       |       |      |      |       |          |          |          |          |
|-------------------------|-----------------|-------|-------|------|------|-------|----------|----------|----------|----------|
| MmugDNA.26946.1.S1_at   | MmugDNA.26946.1 | 12.83 | 12.8  | 0.03 | 0.07 | 1.01  | 0.720409 | 0.00146  | 0.868039 | 0.058204 |
| MmugDNA.26946.1.S1_s_at | MmugDNA.26946.1 | 12.18 | 12.19 | 0.09 | 0.09 | -1.01 | 0.922686 | 0.020578 | 0.96695  | 0.179964 |
| MmugDNA.26948.1.S1_s_at | MmugDNA.26948.1 | 10.46 | 10.13 | 0.11 | 0.1  | 1.25  | 0.01941  | 0.040269 | 0.192344 | 0.245902 |
| MmugDNA.26950.1.S1_at   | MmugDNA.26950.1 | 8.27  | 6.71  | 0.8  | 0.44 | 2.94  | 0.052868 | 0.088215 | 0.286978 | 0.341721 |
| MmugDNA.26952.1.S1_at   | MmugDNA.26952.1 | 4.69  | 4.62  | 0.04 | 0.08 | 1.05  | 0.116348 | 0.314201 | 0.393495 | 0.568185 |
| MmugDNA.26953.1.S1_at   | MmugDNA.26953.1 | 9.85  | 9.3   | 0.39 | 0.17 | 1.47  | 0.032269 | 0.105852 | 0.233644 | 0.368111 |
| MmugDNA.26954.1.S1_at   | MmugDNA.26954.1 | 4.05  | 4.06  | 0.06 | 0.25 | -1.01 | 0.743878 | 0.754825 | 0.881384 | 0.857323 |
| MmugDNA.26955.1.S1_at   | MmugDNA.26955.1 | 5.73  | 5.64  | 0.06 | 0.04 | 1.06  | 0.090474 | 0.282973 | 0.35723  | 0.545692 |
| MmugDNA.26956.1.S1_at   | MmugDNA.26956.1 | 9.33  | 10    | 0.18 | 0.21 | -1.59 | 0.029551 | 0.074067 | 0.225003 | 0.317699 |
| MmugDNA.26958.1.S1_at   | MmugDNA.26958.1 | 4.06  | 4.8   | 0.35 | 0.7  | -1.66 | 0.300464 | 0.462322 | 0.588647 | 0.673686 |
| MmugDNA.2696.1.S1_at    | MmugDNA.2696.1  | 8.51  | 8.92  | 0.42 | 0.11 | -1.33 | 0.268017 | 0.22801  | 0.560761 | 0.500218 |
| MmugDNA.26960.1.S1_at   | MmugDNA.26960.1 | 11.66 | 11.52 | 0.05 | 0.11 | 1.1   | 0.533741 | 0.001162 | 0.757217 | 0.053615 |
| MmugDNA.26961.1.S1_at   | MmugDNA.26961.1 | 3.55  | 3.52  | 0.1  | 0.06 | 1.02  | 0.48519  | 0.405701 | 0.724739 | 0.633894 |
| MmugDNA.26963.1.S1_at   | MmugDNA.26963.1 | 6.47  | 6.64  | 0.13 | 0.08 | -1.13 | 0.099448 | 0.049645 | 0.370342 | 0.267876 |
| MmugDNA.26965.1.S1_at   | MmugDNA.26965.1 | 8.54  | 8.78  | 0.6  | 0.19 | -1.19 | 0.176321 | 0.183785 | 0.470709 | 0.459871 |
| MmugDNA.26966.1.S1_at   | MmugDNA.26966.1 | 3.54  | 3.54  | 0.24 | 0.09 | -1    | 0.920332 | 0.407377 | 0.965958 | 0.634981 |
| MmugDNA.26967.1.S1_at   | MmugDNA.26967.1 | 10.37 | 10.61 | 0.36 | 0.17 | -1.18 | 0.16248  | 0.032503 | 0.454544 | 0.223265 |
| MmugDNA.26969.1.S1_at   | MmugDNA.26969.1 | 6.04  | 6.24  | 0.14 | 0.04 | -1.15 | 0.316395 | 0.434948 | 0.601122 | 0.654901 |
| MmugDNA.2697.1.S1_at    | MmugDNA.2697.1  | 6.37  | 6.46  | 0.14 | 0.02 | -1.07 | 0.966059 | 0.948215 | 0.986286 | 0.970472 |
| MmugDNA.26970.1.S1_at   | MmugDNA.26970.1 | 3.68  | 3.79  | 0.14 | 0.07 | -1.08 | 0.11285  | 0.167167 | 0.389338 | 0.443636 |
| MmugDNA.26970.1.S1_x_at | MmugDNA.26970.1 | 5.37  | 5.68  | 0.16 | 0.11 | -1.24 | 0.119136 | 0.151318 | 0.396724 | 0.426073 |
| MmugDNA.26973.1.S1_at   | MmugDNA.26973.1 | 7.07  | 7.03  | 0.21 | 0.13 | 1.03  | 0.440857 | 0.599193 | 0.694673 | 0.761359 |
| MmugDNA.26974.1.S1_at   | MmugDNA.26974.1 | 3.96  | 4.34  | 0.15 | 0.32 | -1.3  | 0.463017 | 0.399711 | 0.709909 | 0.629951 |
| MmugDNA.26977.1.S1_at   | MmugDNA.26977.1 | 5.22  | 5.22  | 0.01 | 0.01 | 1     | 0.648415 | 0.158853 | 0.829183 | 0.43496  |
| MmugDNA.26979.1.S1_at   | MmugDNA.26979.1 | 7.28  | 7.77  | 0.32 | 0.33 | -1.4  | 0.409196 | 0.762303 | 0.67166  | 0.861726 |
| MmugDNA.26980.1.S1_at   | MmugDNA.26980.1 | 4.46  | 4.7   | 0.11 | 0.17 | -1.18 | 0.096054 | 0.105206 | 0.365529 | 0.366982 |
| MmugDNA.26981.1.S1_at   | MmugDNA.26981.1 | 3.27  | 3.22  | 0.01 | 0.15 | 1.04  | 0.623408 | 0.471912 | 0.814191 | 0.679793 |
| MmugDNA.26984.1.S1_at   | MmugDNA.26984.1 | 8.96  | 9.55  | 0.23 | 0.13 | -1.51 | 0.020709 | 0.01301  | 0.197473 | 0.146803 |
| MmugDNA.26985.1.S1_at   | MmugDNA.26985.1 | 5.7   | 5.71  | 0.02 | 0.08 | -1.01 | 0.397185 | 0.444    | 0.662936 | 0.661632 |
| MmugDNA.26986.1.S1_at   | MmugDNA.26986.1 | 5.84  | 5.87  | 0.33 | 0.13 | -1.02 | 0.491652 | 0.685813 | 0.729331 | 0.816612 |
| MmugDNA.26987.1.S1_at   | MmugDNA.26987.1 | 3.09  | 3.16  | 0.06 | 0.07 | -1.05 | 0.676605 | 0.878225 | 0.845573 | 0.93052  |
| MmugDNA.26988.1.S1_at   | MmugDNA.26988.1 | 5.62  | 5.56  | 0.24 | 0.13 | 1.04  | 0.382638 | 0.512289 | 0.652037 | 0.706182 |
| MmugDNA.26989.1.S1_at   | MmugDNA.26989.1 | 10.72 | 10.71 | 0.11 | 0.06 | 1     | 0.456239 | 0.196397 | 0.705691 | 0.471418 |
| MmugDNA.2699.1.S1_at    | MmugDNA.2699.1  | 3.89  | 3.65  | 0.3  | 0.29 | 1.18  | 0.788035 | 0.937428 | 0.903618 | 0.964687 |
| MmugDNA.26991.1.S1_s_at | MmugDNA.26991.1 | 11.2  | 11.15 | 0.22 | 0.08 | 1.04  | 0.389935 | 0.48694  | 0.657584 | 0.690118 |
| MmugDNA.26991.1.S1_x_at | MmugDNA.26991.1 | 4.97  | 4.72  | 0.3  | 0.58 | 1.19  | 0.843522 | 0.575903 | 0.931516 | 0.746847 |
| MmugDNA.26992.1.S1_at   | MmugDNA.26992.1 | 5.35  | 5.22  | 0.2  | 0.2  | 1.1   | 0.27478  | 0.290196 | 0.566556 | 0.551169 |
| MmugDNA.26995.1.S1_at   | MmugDNA.26995.1 | 5.9   | 6.01  | 0.1  | 0.04 | -1.08 | 0.114647 | 0.667319 | 0.391643 | 0.805297 |
| MmugDNA.26996.1.S1_at   | MmugDNA.26996.1 | 3.31  | 3.21  | 1.28 | 0.12 | 1.07  | 0.319599 | 0.34698  | 0.604201 | 0.591769 |
| MmugDNA.26998.1.S1_at   | MmugDNA.26998.1 | 2.99  | 2.89  | 0.1  | 0.14 | 1.07  | 0.198029 | 0.222681 | 0.495303 | 0.495617 |
| MmugDNA.26999.1.S1_at   | MmugDNA.26999.1 | 4     | 3.96  | 0.37 | 0.21 | 1.03  | 0.641399 | 0.282501 | 0.824827 | 0.545215 |
| MmugDNA.27.1.S1_at      | MmugDNA.27.1    | 7.26  | 7.28  | 0.1  | 0.05 | -1.01 | 0.570914 | 0.265466 | 0.779514 | 0.531363 |
| MmugDNA.270.1.S1_at     | MmugDNA.270.1   | 5.72  | 5.69  | 0.11 | 0.1  | 1.02  | 0.209367 | 0.561939 | 0.506877 | 0.737659 |

|                         |                 |       |       |      |      |        |          |          |          |          |
|-------------------------|-----------------|-------|-------|------|------|--------|----------|----------|----------|----------|
| MmugDNA.2700.1.S1_at    | MmugDNA.2700.1  | 4.39  | 3.65  | 0.33 | 0.27 | 1.67   | 0.0513   | 0.065053 | 0.283884 | 0.301009 |
| MmugDNA.27003.1.S1_at   | MmugDNA.27003.1 | 6.1   | 6.35  | 0.18 | 0.28 | -1.19  | 0.668609 | 0.095606 | 0.840971 | 0.352645 |
| MmugDNA.27005.1.S1_at   | MmugDNA.27005.1 | 7.62  | 7.58  | 0.15 | 0.11 | 1.03   | 0.59389  | 0.010366 | 0.794312 | 0.133236 |
| MmugDNA.27007.1.S1_at   | MmugDNA.27007.1 | 6.27  | 5.78  | 0.15 | 0.14 | 1.4    | 0.01491  | 0.00765  | 0.174233 | 0.117015 |
| MmugDNA.27008.1.S1_at   | MmugDNA.27008.1 | 4.82  | 5.62  | 1.07 | 0.14 | -1.74  | 0.630807 | 0.823275 | 0.818647 | 0.898426 |
| MmugDNA.27010.1.S1_at   | MmugDNA.27010.1 | 4.9   | 6.74  | 0.42 | 0.15 | -3.59  | 0.002201 | 0.001573 | 0.090729 | 0.060185 |
| MmugDNA.27013.1.S1_at   | MmugDNA.27013.1 | 7.54  | 7.42  | 0.29 | 0.05 | 1.09   | 0.411546 | 0.146941 | 0.673488 | 0.421008 |
| MmugDNA.27014.1.S1_at   | MmugDNA.27014.1 | 6.49  | 6.97  | 0.33 | 0.15 | -1.4   | 0.103573 | 0.180795 | 0.376749 | 0.457306 |
| MmugDNA.27015.1.S1_at   | MmugDNA.27015.1 | 8.66  | 8.85  | 0.55 | 0.19 | -1.14  | 0.599869 | 0.039207 | 0.798444 | 0.243157 |
| MmugDNA.27016.1.S1_at   | MmugDNA.27016.1 | 6.68  | 6.7   | 0.12 | 0.07 | -1.02  | 0.708222 | 0.484976 | 0.861785 | 0.688893 |
| MmugDNA.27021.1.S1_at   | MmugDNA.27021.1 | 4.16  | 4.17  | 0.09 | 0.05 | -1.01  | 0.210371 | 0.502093 | 0.507935 | 0.700051 |
| MmugDNA.27024.1.S1_at   | MmugDNA.27024.1 | 6.69  | 6.75  | 0.14 | 0.01 | -1.04  | 0.525304 | 0.35243  | 0.751908 | 0.595722 |
| MmugDNA.27025.1.S1_at   | MmugDNA.27025.1 | 4.87  | 4.71  | 0.24 | 0.12 | 1.12   | 0.127461 | 0.192122 | 0.409393 | 0.467591 |
| MmugDNA.27026.1.S1_at   | MmugDNA.27026.1 | 5.3   | 6.18  | 0.18 | 0.31 | -1.85  | 0.023307 | 0.01258  | 0.205593 | 0.14463  |
| MmugDNA.27028.1.S1_at   | MmugDNA.27028.1 | 9.27  | 9.02  | 0.4  | 0.08 | 1.19   | 0.953236 | 0.977783 | 0.980786 | 0.987873 |
| MmugDNA.2703.1.S1_at    | MmugDNA.2703.1  | 4.4   | 4.07  | 0.42 | 0.19 | 1.25   | 0.704379 | 0.51089  | 0.859708 | 0.70525  |
| MmugDNA.27031.1.S1_at   | MmugDNA.27031.1 | 6.54  | 6.55  | 0.19 | 0.01 | -1.01  | 0.32694  | 0.266269 | 0.609778 | 0.532086 |
| MmugDNA.27032.1.S1_at   | MmugDNA.27032.1 | 3.67  | 3.55  | 0.2  | 0.07 | 1.09   | 0.323253 | 0.459776 | 0.607083 | 0.671958 |
| MmugDNA.27033.1.S1_at   | MmugDNA.27033.1 | 3.75  | 3.61  | 0.24 | 0.02 | 1.1    | 0.292851 | 0.202637 | 0.58186  | 0.47704  |
| MmugDNA.27034.1.S1_at   | MmugDNA.27034.1 | 3.77  | 3.94  | 0.1  | 0.13 | -1.13  | 0.167662 | 0.53932  | 0.460871 | 0.723689 |
| MmugDNA.27034.1.S1_s_at | MmugDNA.27034.1 | 3.95  | 3.89  | 0.11 | 0.16 | 1.04   | 0.648491 | 0.598027 | 0.829221 | 0.760536 |
| MmugDNA.27035.1.S1_at   | MmugDNA.27035.1 | 7.51  | 7.26  | 0.09 | 0.22 | 1.19   | 0.054848 | 0.46886  | 0.291031 | 0.677906 |
| MmugDNA.27036.1.S1_at   | MmugDNA.27036.1 | 6.35  | 5.91  | 0.57 | 0.19 | 1.36   | 0.240107 | 0.205963 | 0.537736 | 0.480207 |
| MmugDNA.27037.1.S1_at   | MmugDNA.27037.1 | 5.9   | 11.92 | 2.37 | 0.19 | -64.78 | 0.027703 | 0.185358 | 0.21894  | 0.461323 |
| MmugDNA.27039.1.S1_at   | MmugDNA.27039.1 | 5.26  | 5.75  | 0.18 | 0.25 | -1.41  | 0.080734 | 0.249906 | 0.341441 | 0.518889 |
| MmugDNA.27040.1.S1_at   | MmugDNA.27040.1 | 6.57  | 6.49  | 0.3  | 0.1  | 1.05   | 0.259731 | 0.364153 | 0.554037 | 0.604488 |
| MmugDNA.27041.1.S1_at   | MmugDNA.27041.1 | 5.41  | 5.37  | 0.39 | 0.17 | 1.03   | 0.421276 | 0.30854  | 0.679877 | 0.564575 |
| MmugDNA.27043.1.S1_at   | MmugDNA.27043.1 | 4.74  | 5.65  | 0.77 | 0.31 | -1.88  | 0.105028 | 0.200102 | 0.378728 | 0.474603 |
| MmugDNA.27047.1.S1_at   | MmugDNA.27047.1 | 7.59  | 7.16  | 0.09 | 0.21 | 1.35   | 0.022612 | 0.238471 | 0.203479 | 0.509084 |
| MmugDNA.27048.1.S1_at   | MmugDNA.27048.1 | 2.89  | 2.91  | 0.13 | 0.06 | -1.01  | 0.556004 | 0.787499 | 0.771459 | 0.877072 |
| MmugDNA.27049.1.S1_at   | MmugDNA.27049.1 | 3.35  | 3.26  | 0.17 | 0.53 | 1.07   | 0.976664 | 0.74204  | 0.990824 | 0.850608 |
| MmugDNA.2705.1.S1_at    | MmugDNA.2705.1  | 7.19  | 6.89  | 0.08 | 0.08 | 1.23   | 0.010708 | 0.004496 | 0.153282 | 0.093593 |
| MmugDNA.27051.1.S1_at   | MmugDNA.27051.1 | 5.91  | 5.67  | 0.52 | 0.32 | 1.18   | 0.278284 | 0.401886 | 0.569595 | 0.63109  |
| MmugDNA.27054.1.S1_at   | MmugDNA.27054.1 | 3.9   | 3.67  | 0.05 | 0    | 1.17   | 0.00114  | 0.001792 | 0.077306 | 0.063581 |
| MmugDNA.27055.1.S1_at   | MmugDNA.27055.1 | 5.5   | 5.6   | 0.17 | 0.05 | -1.08  | 0.466292 | 0.468143 | 0.712157 | 0.677624 |
| MmugDNA.27057.1.S1_at   | MmugDNA.27057.1 | 3.2   | 3.25  | 0.06 | 0.12 | -1.03  | 0.195028 | 0.292312 | 0.491564 | 0.552389 |
| MmugDNA.27058.1.S1_at   | MmugDNA.27058.1 | 11.83 | 11    | 0.26 | 0.11 | 1.77   | 0.014524 | 0.459041 | 0.172426 | 0.671535 |
| MmugDNA.2706.1.S1_at    | MmugDNA.2706.1  | 5.47  | 5.46  | 0.11 | 0.1  | 1.01   | 0.210695 | 0.043718 | 0.5083   | 0.253804 |
| MmugDNA.27060.1.S1_at   | MmugDNA.27060.1 | 3.2   | 3.27  | 0.02 | 0.27 | -1.05  | 0.223172 | 0.266447 | 0.520981 | 0.532234 |
| MmugDNA.27061.1.S1_at   | MmugDNA.27061.1 | 6.84  | 6.97  | 0.12 | 0.23 | -1.09  | 0.461751 | 0.305827 | 0.709051 | 0.562731 |
| MmugDNA.27062.1.S1_at   | MmugDNA.27062.1 | 3.87  | 3.72  | 0.21 | 0.3  | 1.11   | 0.807056 | 0.767095 | 0.913608 | 0.864712 |
| MmugDNA.27063.1.S1_at   | MmugDNA.27063.1 | 5.76  | 5.74  | 0.36 | 0.25 | 1.01   | 0.891163 | 0.059976 | 0.953555 | 0.291581 |
| MmugDNA.27064.1.S1_at   | MmugDNA.27064.1 | 3.27  | 3.09  | 0.42 | 0.03 | 1.14   | 0.151804 | 0.190549 | 0.441279 | 0.465929 |



|                         |                 |       |       |      |      |       |          |          |          |          |
|-------------------------|-----------------|-------|-------|------|------|-------|----------|----------|----------|----------|
| MmugDNA.27065.1.S1_at   | MmugDNA.27065.1 | 6.45  | 6.42  | 0.04 | 0.06 | 1.02  | 0.945704 | 0.400235 | 0.977159 | 0.630158 |
| MmugDNA.27066.1.S1_at   | MmugDNA.27066.1 | 4.29  | 4.47  | 0.31 | 0.26 | -1.13 | 0.549267 | 0.558303 | 0.767038 | 0.735514 |
| MmugDNA.27067.1.S1_at   | MmugDNA.27067.1 | 3.96  | 4.11  | 0.15 | 0.16 | -1.11 | 0.155247 | 0.20168  | 0.445435 | 0.476208 |
| MmugDNA.27068.1.S1_x_at | MmugDNA.27068.1 | 6.15  | 5.37  | 0.29 | 0.48 | 1.71  | 0.162215 | 0.208535 | 0.454114 | 0.482453 |
| MmugDNA.27069.1.S1_at   | MmugDNA.27069.1 | 3.37  | 3.33  | 0.2  | 0.07 | 1.03  | 0.181561 | 0.149269 | 0.477048 | 0.42373  |
| MmugDNA.36044.1.S1_at   | MmugDNA.36044.1 | 5.89  | 5.81  | 0.25 | 0.14 | 1.06  | 0.486471 | 0.870576 | 0.725664 | 0.926446 |
| MmugDNA.36044.1.S1_s_at | MmugDNA.36044.1 | 9.92  | 9.48  | 0.08 | 0.14 | 1.36  | 0.011937 | 0.036732 | 0.159288 | 0.236262 |
| MmugDNA.27072.1.S1_at   | MmugDNA.27072.1 | 3.37  | 3.57  | 0.06 | 0.26 | -1.15 | 0.075313 | 0.106475 | 0.332587 | 0.369055 |
| MmugDNA.27073.1.S1_at   | MmugDNA.27073.1 | 5.24  | 5.2   | 0.26 | 0.28 | 1.02  | 0.410458 | 0.529313 | 0.672479 | 0.717233 |
| MmugDNA.27073.1.S1_s_at | MmugDNA.27073.1 | 9.43  | 9.4   | 0.04 | 0.1  | 1.02  | 0.652006 | 0.41855  | 0.831042 | 0.642955 |
| MmugDNA.27073.1.S1_x_at | MmugDNA.27073.1 | 5.92  | 6.01  | 0.09 | 0.14 | -1.06 | 0.213124 | 0.74009  | 0.511046 | 0.849396 |
| MmugDNA.27074.1.S1_at   | MmugDNA.27074.1 | 6.26  | 6.16  | 0.37 | 0.28 | 1.07  | 0.186013 | 0.264116 | 0.48218  | 0.530214 |
| MmugDNA.27075.1.S1_at   | MmugDNA.27075.1 | 7.91  | 5.89  | 1.01 | 0.64 | 4.06  | 0.065889 | 0.10325  | 0.3142   | 0.364143 |
| MmugDNA.27076.1.S1_s_at | MmugDNA.27076.1 | 7.53  | 7.31  | 0.15 | 0.04 | 1.16  | 0.052853 | 0.037618 | 0.286956 | 0.238384 |
| MmugDNA.27077.1.S1_at   | MmugDNA.27077.1 | 6.04  | 6.06  | 0.12 | 0.17 | -1.01 | 0.634686 | 0.79582  | 0.820892 | 0.88238  |
| MmugDNA.27078.1.S1_at   | MmugDNA.27078.1 | 6.11  | 5.76  | 0.05 | 0.17 | 1.27  | 0.075757 | 0.0802   | 0.333547 | 0.327801 |
| MmugDNA.27079.1.S1_at   | MmugDNA.27079.1 | 8.9   | 9.41  | 0.72 | 0.14 | -1.42 | 0.362463 | 0.359969 | 0.637339 | 0.601195 |
| MmugDNA.2708.1.S1_at    | MmugDNA.2708.1  | 3.66  | 3.63  | 0.2  | 0.2  | 1.02  | 0.870439 | 0.916495 | 0.944238 | 0.953262 |
| MmugDNA.27081.1.S1_at   | MmugDNA.27081.1 | 3.61  | 3.61  | 0.04 | 0.02 | 1     | 0.249131 | 0.86826  | 0.544437 | 0.925234 |
| MmugDNA.27083.1.S1_at   | MmugDNA.27083.1 | 6.24  | 6.18  | 0.21 | 0.11 | 1.04  | 0.567781 | 0.730636 | 0.777973 | 0.844055 |
| MmugDNA.27085.1.S1_at   | MmugDNA.27085.1 | 5.67  | 4.95  | 0.89 | 0.27 | 1.65  | 0.27029  | 0.096672 | 0.562443 | 0.35417  |
| MmugDNA.27086.1.S1_at   | MmugDNA.27086.1 | 3.73  | 3.35  | 0.39 | 0.16 | 1.3   | 0.288624 | 0.530779 | 0.578353 | 0.718133 |
| MmugDNA.27087.1.S1_at   | MmugDNA.27087.1 | 3.33  | 3.28  | 0.07 | 0.25 | 1.03  | 0.736573 | 0.912289 | 0.877556 | 0.950571 |
| MmugDNA.27088.1.S1_at   | MmugDNA.27088.1 | 3.75  | 3.8   | 0.04 | 0.03 | -1.03 | 0.423367 | 0.122591 | 0.681371 | 0.39249  |
| MmugDNA.27089.1.S1_at   | MmugDNA.27089.1 | 10.19 | 10.24 | 0.15 | 0.06 | -1.04 | 0.69017  | 0.70634  | 0.851936 | 0.829634 |
| MmugDNA.2709.1.S1_at    | MmugDNA.2709.1  | 3.31  | 3.03  | 0.15 | 0.09 | 1.21  | 0.240549 | 0.776103 | 0.53802  | 0.869726 |
| MmugDNA.27091.1.S1_at   | MmugDNA.27091.1 | 8.1   | 8.9   | 1.06 | 0.1  | -1.73 | 0.534014 | 0.557399 | 0.757384 | 0.735031 |
| MmugDNA.27092.1.S1_at   | MmugDNA.27092.1 | 6.5   | 6.69  | 0.11 | 0.07 | -1.15 | 0.326075 | 0.000411 | 0.609284 | 0.037913 |
| MmugDNA.27094.1.S1_at   | MmugDNA.27094.1 | 9.24  | 9.19  | 0.11 | 0.04 | 1.04  | 0.909086 | 0.951756 | 0.961465 | 0.9726   |
| MmugDNA.27095.1.S1_at   | MmugDNA.27095.1 | 2.79  | 2.98  | 0.05 | 0.16 | -1.14 | 0.077851 | 0.020723 | 0.336958 | 0.180645 |
| MmugDNA.27096.1.S1_at   | MmugDNA.27096.1 | 7.54  | 7.56  | 0.19 | 0.11 | -1.01 | 0.382456 | 0.737506 | 0.651916 | 0.847993 |
| MmugDNA.7891.1.S1_s_at  | MmugDNA.7891.1  | 8.68  | 8.56  | 0.07 | 0.04 | 1.09  | 0.051227 | 0.07169  | 0.283682 | 0.313904 |
| MmugDNA.27098.1.S1_at   | MmugDNA.27098.1 | 8.01  | 8.19  | 0.05 | 0.16 | -1.13 | 0.033652 | 0.075396 | 0.237488 | 0.319693 |
| MmugDNA.27099.1.S1_at   | MmugDNA.27099.1 | 11.42 | 11.6  | 0.07 | 0.02 | -1.14 | 0.00929  | 0.166089 | 0.146233 | 0.442666 |
| MmugDNA.271.1.S1_at     | MmugDNA.271.1   | 5.15  | 4.49  | 0.1  | 0.58 | 1.58  | 0.128457 | 0.413604 | 0.410425 | 0.639669 |
| MmugDNA.2710.1.S1_at    | MmugDNA.2710.1  | 5.75  | 5.15  | 0.6  | 0.14 | 1.51  | 0.071305 | 0.048021 | 0.324878 | 0.264118 |
| MmugDNA.27100.1.S1_at   | MmugDNA.27100.1 | 2.76  | 2.76  | 0.04 | 0    | 1     | 0.420739 | 0.346409 | 0.679676 | 0.591247 |
| MmugDNA.27101.1.S1_at   | MmugDNA.27101.1 | 3.94  | 3.65  | 0.33 | 0.05 | 1.22  | 0.166411 | 0.283493 | 0.45963  | 0.545959 |
| MmugDNA.27102.1.S1_at   | MmugDNA.27102.1 | 5.21  | 5.33  | 0.56 | 0.07 | -1.09 | 0.578772 | 0.703123 | 0.784553 | 0.827872 |
| MmugDNA.27103.1.S1_at   | MmugDNA.27103.1 | 9.53  | 8.56  | 0.78 | 0.87 | 1.96  | 0.257249 | 0.179146 | 0.551586 | 0.45549  |
| MmugDNA.27104.1.S1_at   | MmugDNA.27104.1 | 5.34  | 5.38  | 1.16 | 0.34 | -1.03 | 0.431531 | 0.314048 | 0.687549 | 0.568178 |
| MmugDNA.27105.1.S1_at   | MmugDNA.27105.1 | 3.75  | 3.51  | 0.4  | 0.09 | 1.18  | 0.459304 | 0.723828 | 0.707471 | 0.840144 |
| MmugDNA.27106.1.S1_at   | MmugDNA.27106.1 | 5.83  | 5.21  | 0.34 | 0.49 | 1.54  | 0.400443 | 0.389794 | 0.665444 | 0.623851 |

|                         |                 |       |       |      |      |       |          |          |          |          |
|-------------------------|-----------------|-------|-------|------|------|-------|----------|----------|----------|----------|
| MmugDNA.27109.1.S1_at   | MmugDNA.27109.1 | 3.47  | 3.46  | 0.3  | 0.13 | 1     | 0.416652 | 0.611655 | 0.67708  | 0.769481 |
| MmugDNA.2711.1.S1_at    | MmugDNA.2711.1  | 6.02  | 7.21  | 0.41 | 0.23 | -2.29 | 0.006331 | 0.009203 | 0.125881 | 0.126579 |
| MmugDNA.27110.1.S1_at   | MmugDNA.27110.1 | 5.41  | 6.02  | 0.28 | 0.19 | -1.53 | 0.084009 | 0.217068 | 0.347198 | 0.490668 |
| MmugDNA.27112.1.S1_at   | MmugDNA.27112.1 | 3.29  | 3.31  | 0.15 | 0.05 | -1.01 | 0.506735 | 0.153927 | 0.739271 | 0.42862  |
| MmugDNA.27113.1.S1_at   | MmugDNA.27113.1 | 3.64  | 3.45  | 0.57 | 0.19 | 1.13  | 0.317986 | 0.643798 | 0.60278  | 0.791129 |
| MmugDNA.27114.1.S1_at   | MmugDNA.27114.1 | 4.11  | 3.33  | 0.16 | 0.08 | 1.72  | 0.003216 | 0.063064 | 0.101676 | 0.297788 |
| MmugDNA.27115.1.S1_at   | MmugDNA.27115.1 | 4.42  | 5.09  | 0.25 | 0.21 | -1.59 | 0.020859 | 0.14405  | 0.198011 | 0.417912 |
| MmugDNA.27118.1.S1_at   | MmugDNA.27118.1 | 5.25  | 5.03  | 0.96 | 0.07 | 1.17  | 0.241212 | 0.266967 | 0.538538 | 0.532513 |
| MmugDNA.2712.1.S1_at    | MmugDNA.2712.1  | 6.94  | 6.7   | 0.44 | 0.21 | 1.18  | 0.300037 | 0.172593 | 0.588332 | 0.449    |
| MmugDNA.27120.1.S1_at   | MmugDNA.27120.1 | 4.84  | 4.54  | 0.31 | 0.2  | 1.23  | 0.088252 | 0.081533 | 0.354301 | 0.329764 |
| MmugDNA.27121.1.S1_at   | MmugDNA.27121.1 | 4.15  | 4.35  | 0.05 | 0.49 | -1.15 | 0.389462 | 0.668834 | 0.657329 | 0.806227 |
| MmugDNA.27122.1.S1_at   | MmugDNA.27122.1 | 7.97  | 7.68  | 0.29 | 0.08 | 1.22  | 0.298216 | 0.18483  | 0.586575 | 0.460768 |
| MmugDNA.27122.1.S1_s_at | MmugDNA.27122.1 | 8.75  | 8.44  | 0.3  | 0.11 | 1.24  | 0.167372 | 0.198659 | 0.460585 | 0.473391 |
| MmugDNA.27123.1.S1_at   | MmugDNA.27123.1 | 6.21  | 6.18  | 0.21 | 0.14 | 1.02  | 0.484427 | 0.709999 | 0.724263 | 0.831887 |
| MmugDNA.27124.1.S1_at   | MmugDNA.27124.1 | 5.33  | 5.28  | 0.22 | 0.34 | 1.04  | 0.509238 | 0.836941 | 0.740907 | 0.906826 |
| MmugDNA.27125.1.S1_at   | MmugDNA.27125.1 | 3.89  | 3.53  | 0.13 | 0.08 | 1.28  | 0.010597 | 0.023966 | 0.152762 | 0.194025 |
| MmugDNA.2713.1.S1_at    | MmugDNA.2713.1  | 8.81  | 8.91  | 0.65 | 0.13 | -1.07 | 0.673386 | 0.821448 | 0.843815 | 0.897172 |
| MmugDNA.27130.1.S1_at   | MmugDNA.27130.1 | 4.99  | 4.68  | 0.23 | 0.21 | 1.23  | 0.134747 | 0.182848 | 0.418618 | 0.459357 |
| MmugDNA.27131.1.S1_at   | MmugDNA.27131.1 | 5.48  | 5.68  | 0.05 | 0.34 | -1.15 | 0.448555 | 0.476804 | 0.700097 | 0.682948 |
| MmugDNA.27132.1.S1_at   | MmugDNA.27132.1 | 7.5   | 7.46  | 0.32 | 0.09 | 1.03  | 0.921899 | 0.84745  | 0.966549 | 0.913316 |
| MmugDNA.27134.1.S1_at   | MmugDNA.27134.1 | 5.81  | 5.69  | 0.24 | 0.12 | 1.09  | 0.359954 | 0.234485 | 0.63552  | 0.505674 |
| MmugDNA.27135.1.S1_at   | MmugDNA.27135.1 | 6.84  | 6.01  | 0.25 | 0.09 | 1.78  | 0.003631 | 0.000555 | 0.10567  | 0.040995 |
| MmugDNA.27136.1.S1_at   | MmugDNA.27136.1 | 8.4   | 7.22  | 0.32 | 0.48 | 2.26  | 0.043328 | 0.030935 | 0.265479 | 0.217705 |
| MmugDNA.27137.1.S1_at   | MmugDNA.27137.1 | 7.01  | 6.98  | 0.41 | 0.06 | 1.02  | 0.353159 | 0.382306 | 0.630353 | 0.618482 |
| MmugDNA.27138.1.S1_at   | MmugDNA.27138.1 | 5.6   | 4.22  | 0.4  | 0.12 | 2.59  | 0.005642 | 0.004703 | 0.120879 | 0.09546  |
| MmugDNA.27140.1.S1_at   | MmugDNA.27140.1 | 7.65  | 7.62  | 0.1  | 0.13 | 1.02  | 0.660517 | 0.788969 | 0.83613  | 0.878011 |
| MmugDNA.27141.1.S1_at   | MmugDNA.27141.1 | 3.93  | 4     | 0.29 | 0.06 | -1.05 | 0.953941 | 0.800391 | 0.981106 | 0.885129 |
| MmugDNA.27142.1.S1_at   | MmugDNA.27142.1 | 3.53  | 3.58  | 0.49 | 0.23 | -1.04 | 0.314914 | 0.443332 | 0.600177 | 0.661168 |
| MmugDNA.27143.1.S1_at   | MmugDNA.27143.1 | 4.13  | 4.15  | 0.12 | 0.21 | -1.01 | 0.530828 | 0.702468 | 0.755314 | 0.827542 |
| MmugDNA.27144.1.S1_at   | MmugDNA.27144.1 | 8.56  | 8.57  | 0.06 | 0.19 | -1.01 | 0.251608 | 0.573117 | 0.546344 | 0.744941 |
| MmugDNA.27145.1.S1_at   | MmugDNA.27145.1 | 6.13  | 6.2   | 0.11 | 0.18 | -1.05 | 0.910546 | 0.667485 | 0.962142 | 0.805333 |
| MmugDNA.27146.1.S1_at   | MmugDNA.27146.1 | 4.82  | 4.81  | 0.16 | 0.02 | 1.01  | 0.370722 | 0.386435 | 0.643577 | 0.621593 |
| MmugDNA.27147.1.S1_at   | MmugDNA.27147.1 | 3.66  | 3.68  | 0.1  | 0.18 | -1.01 | 0.553117 | 0.277911 | 0.769696 | 0.541664 |
| MmugDNA.27148.1.S1_at   | MmugDNA.27148.1 | 10.67 | 10.86 | 0.08 | 0.07 | -1.14 | 0.021557 | 0.0896   | 0.200582 | 0.343811 |
| MmugDNA.27149.1.S1_at   | MmugDNA.27149.1 | 7.36  | 6.77  | 0.71 | 0.22 | 1.51  | 0.332602 | 0.026922 | 0.614259 | 0.205227 |
| MmugDNA.2715.1.S1_at    | MmugDNA.2715.1  | 6.42  | 6.28  | 0.14 | 0.15 | 1.1   | 0.125401 | 0.126867 | 0.405837 | 0.397534 |
| MmugDNA.27150.1.S1_at   | MmugDNA.27150.1 | 9.25  | 8.86  | 0.05 | 0.06 | 1.31  | 0.000805 | 0.125423 | 0.073056 | 0.396079 |
| MmugDNA.27151.1.S1_at   | MmugDNA.27151.1 | 10.76 | 10.71 | 0.14 | 0.19 | 1.04  | 0.523527 | 0.702758 | 0.750433 | 0.827685 |
| MmugDNA.27152.1.S1_at   | MmugDNA.27152.1 | 7.39  | 7.94  | 0.52 | 0.29 | -1.46 | 0.162564 | 0.334326 | 0.454561 | 0.582352 |
| MmugDNA.27153.1.S1_x_at | MmugDNA.27153.1 | 9.87  | 9.79  | 0.65 | 0.31 | 1.06  | 0.474069 | 0.503072 | 0.717256 | 0.700566 |
| MmugDNA.27154.1.S1_at   | MmugDNA.27154.1 | 3.92  | 3.98  | 0.06 | 0.03 | -1.04 | 0.314581 | 0.034239 | 0.599987 | 0.228886 |
| MmugDNA.27156.1.S1_at   | MmugDNA.27156.1 | 7.91  | 8.73  | 0.21 | 0.25 | -1.76 | 0.013161 | 0.045706 | 0.165301 | 0.258049 |
| MmugDNA.27158.1.S1_at   | MmugDNA.27158.1 | 4.51  | 4.41  | 0.16 | 0.08 | 1.07  | 0.224713 | 0.309436 | 0.522708 | 0.564979 |

|                         |                 |       |       |      |      |        |          |          |          |          |
|-------------------------|-----------------|-------|-------|------|------|--------|----------|----------|----------|----------|
| MmugDNA.27159.1.S1_at   | MmugDNA.27159.1 | 3.37  | 3.32  | 0.13 | 0.07 | 1.03   | 0.484356 | 0.27613  | 0.724218 | 0.540169 |
| MmugDNA.2716.1.S1_at    | MmugDNA.2716.1  | 4.11  | 3.7   | 0.48 | 0.28 | 1.33   | 0.309567 | 0.678243 | 0.595886 | 0.812064 |
| MmugDNA.27161.1.S1_at   | MmugDNA.27161.1 | 5.45  | 5.88  | 0.44 | 0.47 | -1.35  | 0.407029 | 0.053229 | 0.670205 | 0.276445 |
| MmugDNA.27162.1.S1_at   | MmugDNA.27162.1 | 5.81  | 5.74  | 0.05 | 0.11 | 1.05   | 0.388537 | 0.289742 | 0.656523 | 0.550776 |
| MmugDNA.27165.1.S1_at   | MmugDNA.27165.1 | 9.42  | 9.35  | 0.27 | 0.07 | 1.05   | 0.569314 | 0.1439   | 0.778786 | 0.41782  |
| MmugDNA.27165.1.S1_s_at | MmugDNA.27165.1 | 9.68  | 9.64  | 0.29 | 0.08 | 1.03   | 0.926386 | 0.190314 | 0.968882 | 0.465906 |
| MmugDNA.27166.1.S1_at   | MmugDNA.27166.1 | 5.5   | 5.54  | 0.03 | 0.09 | -1.03  | 0.952318 | 0.618683 | 0.980357 | 0.774185 |
| MmugDNA.27167.1.S1_at   | MmugDNA.27167.1 | 4.07  | 3.84  | 0.14 | 0.24 | 1.18   | 0.279397 | 0.670734 | 0.570767 | 0.807469 |
| MmugDNA.27168.1.S1_at   | MmugDNA.27168.1 | 3.8   | 4.02  | 0.15 | 0.06 | -1.16  | 0.089533 | 0.080424 | 0.356406 | 0.328057 |
| MmugDNA.27169.1.S1_at   | MmugDNA.27169.1 | 9.97  | 10.04 | 0.17 | 0.12 | -1.05  | 0.280755 | 0.152001 | 0.571782 | 0.426741 |
| MmugDNA.2717.1.S1_at    | MmugDNA.2717.1  | 7.89  | 7.42  | 0.88 | 0.22 | 1.39   | 0.470439 | 0.547252 | 0.714956 | 0.728342 |
| MmugDNA.27170.1.S1_at   | MmugDNA.27170.1 | 10.14 | 10.15 | 0.17 | 0.11 | -1     | 0.61238  | 0.865308 | 0.806836 | 0.923554 |
| MmugDNA.27172.1.S1_at   | MmugDNA.27172.1 | 6.4   | 6.3   | 1.32 | 0.46 | 1.07   | 0.665467 | 0.891716 | 0.839236 | 0.938272 |
| MmugDNA.27175.1.S1_at   | MmugDNA.27175.1 | 8.12  | 7.77  | 0.23 | 0.14 | 1.28   | 0.046421 | 0.006169 | 0.273249 | 0.106774 |
| MmugDNA.27176.1.S1_at   | MmugDNA.27176.1 | 4.47  | 4.58  | 0.1  | 0.12 | -1.08  | 0.307221 | 0.396098 | 0.593961 | 0.627915 |
| MmugDNA.27178.1.S1_at   | MmugDNA.27178.1 | 9.73  | 9.67  | 0.14 | 0.15 | 1.04   | 0.677905 | 0.12338  | 0.846342 | 0.393391 |
| MmugDNA.27179.1.S1_at   | MmugDNA.27179.1 | 10.3  | 10.06 | 0.11 | 0.02 | 1.18   | 0.022234 | 0.056652 | 0.202307 | 0.284094 |
| MmugDNA.2718.1.S1_at    | MmugDNA.2718.1  | 4.16  | 4.21  | 0.24 | 0.04 | -1.04  | 0.563899 | 0.746177 | 0.775749 | 0.852688 |
| MmugDNA.27180.1.S1_at   | MmugDNA.27180.1 | 9.23  | 8.91  | 0.14 | 0.2  | 1.25   | 0.0989   | 0.20951  | 0.369756 | 0.48315  |
| MmugDNA.27182.1.S1_at   | MmugDNA.27182.1 | 10.97 | 11.1  | 0.09 | 0.13 | -1.09  | 0.504813 | 0.143682 | 0.737942 | 0.417555 |
| MmugDNA.27183.1.S1_at   | MmugDNA.27183.1 | 7.75  | 7.82  | 0.28 | 0.31 | -1.05  | 0.694611 | 0.177426 | 0.854266 | 0.453773 |
| MmugDNA.27186.1.S1_at   | MmugDNA.27186.1 | 9.12  | 9.79  | 0.14 | 0.04 | -1.59  | 0.001177 | 0.005479 | 0.077718 | 0.102081 |
| MmugDNA.27187.1.S1_at   | MmugDNA.27187.1 | 6.21  | 6.35  | 1.07 | 0.16 | -1.1   | 0.707188 | 0.743355 | 0.861311 | 0.85129  |
| MmugDNA.27188.1.S1_at   | MmugDNA.27188.1 | 3.59  | 3.66  | 0.13 | 0.05 | -1.05  | 0.272703 | 0.040567 | 0.564775 | 0.246274 |
| MmugDNA.27190.1.S1_at   | MmugDNA.27190.1 | 5.51  | 5.51  | 0.09 | 0.13 | 1      | 0.520853 | 0.470214 | 0.749004 | 0.678572 |
| MmugDNA.27191.1.S1_at   | MmugDNA.27191.1 | 7.29  | 6.66  | 0.34 | 0.13 | 1.54   | 0.080988 | 0.15689  | 0.341848 | 0.432372 |
| MmugDNA.27192.1.S1_at   | MmugDNA.27192.1 | 10.31 | 10.05 | 0.08 | 0.09 | 1.19   | 0.068427 | 0.687726 | 0.319391 | 0.817664 |
| MmugDNA.27193.1.S1_at   | MmugDNA.27193.1 | 6.92  | 7.18  | 0.66 | 0.1  | -1.2   | 0.49411  | 0.408073 | 0.730947 | 0.635428 |
| MmugDNA.27194.1.S1_at   | MmugDNA.27194.1 | 7.72  | 8.06  | 0.93 | 0.11 | -1.26  | 0.894798 | 0.9214   | 0.955181 | 0.955761 |
| MmugDNA.27196.1.S1_at   | MmugDNA.27196.1 | 4.7   | 4.48  | 0.27 | 0.1  | 1.16   | 0.509336 | 0.453417 | 0.740994 | 0.667816 |
| MmugDNA.27198.1.S1_at   | MmugDNA.27198.1 | 5.06  | 5.11  | 0.41 | 0.17 | -1.03  | 0.71191  | 0.785277 | 0.864096 | 0.875687 |
| MmugDNA.272.1.S1_at     | MmugDNA.272.1   | 3.94  | 8.92  | 2.68 | 0.43 | -31.62 | 0.095842 | 0.167707 | 0.365458 | 0.444225 |
| MmugDNA.2720.1.S1_at    | MmugDNA.2720.1  | 9.94  | 10.24 | 0.39 | 0.11 | -1.23  | 0.159619 | 0.768277 | 0.450943 | 0.865456 |
| MmugDNA.27200.1.S1_at   | MmugDNA.27200.1 | 11.92 | 11.72 | 0.12 | 0.06 | 1.15   | 0.101704 | 0.116174 | 0.373168 | 0.383524 |
| MmugDNA.27202.1.S1_at   | MmugDNA.27202.1 | 7.88  | 8.06  | 0.1  | 0.06 | -1.13  | 0.173407 | 0.416706 | 0.467689 | 0.64167  |
| MmugDNA.27203.1.S1_at   | MmugDNA.27203.1 | 9.86  | 9.76  | 0.03 | 0.1  | 1.07   | 0.141597 | 0.025797 | 0.42755  | 0.201349 |
| MmugDNA.27205.1.S1_at   | MmugDNA.27205.1 | 8.22  | 8.49  | 0.54 | 0.1  | -1.2   | 0.315117 | 0.080947 | 0.600287 | 0.328993 |
| MmugDNA.27206.1.S1_at   | MmugDNA.27206.1 | 9.4   | 9.5   | 0.16 | 0.06 | -1.07  | 0.405173 | 0.375679 | 0.668706 | 0.613577 |
| MmugDNA.27207.1.S1_at   | MmugDNA.27207.1 | 9.39  | 9.43  | 0.17 | 0.04 | -1.03  | 0.408728 | 0.406529 | 0.671414 | 0.634382 |
| MmugDNA.27209.1.S1_at   | MmugDNA.27209.1 | 6.57  | 6.76  | 0.23 | 0.33 | -1.15  | 0.460622 | 0.659639 | 0.708304 | 0.800823 |
| MmugDNA.2721.1.S1_s_at  | MmugDNA.2721.1  | 8.55  | 9.12  | 0.16 | 0.12 | -1.49  | 0.009168 | 0.011835 | 0.145768 | 0.14094  |
| MmugDNA.27210.1.S1_at   | MmugDNA.27210.1 | 5.87  | 5.89  | 0.18 | 0.04 | -1.02  | 0.557476 | 0.541171 | 0.772158 | 0.724774 |
| MmugDNA.27211.1.S1_at   | MmugDNA.27211.1 | 10.28 | 10.8  | 0.33 | 0.11 | -1.44  | 0.054475 | 0.040291 | 0.290603 | 0.245902 |

|                         |                 |       |       |      |      |       |          |          |          |          |
|-------------------------|-----------------|-------|-------|------|------|-------|----------|----------|----------|----------|
| MmugDNA.27211.1.S1_s_at | MmugDNA.27211.1 | 8.33  | 8.58  | 0.35 | 0.03 | -1.19 | 0.095788 | 0.094374 | 0.365399 | 0.350924 |
| MmugDNA.27212.1.S1_at   | MmugDNA.27212.1 | 5.45  | 5.55  | 0.12 | 0.07 | -1.07 | 0.367237 | 0.277848 | 0.641323 | 0.541664 |
| MmugDNA.27215.1.S1_at   | MmugDNA.27215.1 | 4.09  | 4.01  | 0.04 | 0.21 | 1.05  | 0.469792 | 0.694346 | 0.714445 | 0.822254 |
| MmugDNA.27216.1.S1_at   | MmugDNA.27216.1 | 5.25  | 5.03  | 0.17 | 0.08 | 1.17  | 0.15968  | 0.198855 | 0.450981 | 0.473475 |
| MmugDNA.27217.1.S1_s_at | MmugDNA.27217.1 | 10.75 | 11.59 | 0.28 | 0.05 | -1.79 | 0.014735 | 0.002263 | 0.173341 | 0.070074 |
| MmugDNA.3139.1.S1_s_at  | MmugDNA.3139.1  | 7.13  | 7.3   | 0.23 | 0.03 | -1.13 | 0.505314 | 0.616472 | 0.738313 | 0.772691 |
| MmugDNA.27220.1.S1_at   | MmugDNA.27220.1 | 3.62  | 3.54  | 0.23 | 0.09 | 1.06  | 0.18519  | 0.298142 | 0.481345 | 0.556797 |
| MmugDNA.27221.1.S1_at   | MmugDNA.27221.1 | 3.11  | 3.02  | 0.17 | 0.1  | 1.06  | 0.878235 | 0.07317  | 0.948031 | 0.316064 |
| MmugDNA.27222.1.S1_at   | MmugDNA.27222.1 | 6.52  | 6.62  | 0.15 | 0.16 | -1.07 | 0.502488 | 0.314642 | 0.736132 | 0.568415 |
| MmugDNA.27224.1.S1_at   | MmugDNA.27224.1 | 5.68  | 5.41  | 0.46 | 0.4  | 1.2   | 0.895461 | 0.890765 | 0.955388 | 0.937717 |
| MmugDNA.27225.1.S1_at   | MmugDNA.27225.1 | 7.09  | 7.03  | 0.26 | 0.05 | 1.05  | 0.496403 | 0.44568  | 0.732272 | 0.662478 |
| MmugDNA.27227.1.S1_at   | MmugDNA.27227.1 | 7.07  | 6.4   | 0.33 | 0.28 | 1.59  | 0.064139 | 0.113499 | 0.309726 | 0.37961  |
| MmugDNA.27228.1.S1_at   | MmugDNA.27228.1 | 4.12  | 4.09  | 0.12 | 0.01 | 1.02  | 0.737085 | 0.257049 | 0.877909 | 0.524781 |
| MmugDNA.2723.1.S1_at    | MmugDNA.2723.1  | 9.64  | 9.69  | 0.2  | 0.11 | -1.03 | 0.861586 | 0.068738 | 0.939884 | 0.308711 |
| MmugDNA.27231.1.S1_at   | MmugDNA.27231.1 | 6.39  | 6.4   | 0.18 | 0.09 | -1    | 0.489479 | 0.745674 | 0.727823 | 0.85256  |
| MmugDNA.27233.1.S1_at   | MmugDNA.27233.1 | 3.32  | 3.48  | 0.11 | 0.1  | -1.12 | 0.114685 | 0.098985 | 0.391699 | 0.357049 |
| MmugDNA.39057.1.S1_at   | MmugDNA.39057.1 | 6.86  | 6.89  | 0.12 | 0.14 | -1.02 | 0.737388 | 0.502087 | 0.878112 | 0.700051 |
| MmugDNA.39057.1.S1_s_at | MmugDNA.39057.1 | 8.01  | 8.18  | 0.16 | 0.05 | -1.12 | 0.456011 | 0.312728 | 0.705605 | 0.567299 |
| MmugDNA.27236.1.S1_at   | MmugDNA.27236.1 | 10.28 | 10.5  | 0.28 | 0.2  | -1.17 | 0.55144  | 0.676333 | 0.768449 | 0.810904 |
| MmugDNA.2724.1.S1_at    | MmugDNA.2724.1  | 9.82  | 10.22 | 0.34 | 0.17 | -1.32 | 0.055502 | 0.283566 | 0.292535 | 0.54601  |
| MmugDNA.27243.1.S1_at   | MmugDNA.27243.1 | 11.31 | 11.02 | 0.05 | 0.08 | 1.22  | 0.010182 | 0.652115 | 0.150739 | 0.796591 |
| MmugDNA.27244.1.S1_at   | MmugDNA.27244.1 | 3.25  | 3.26  | 0.08 | 0.04 | -1.01 | 0.330681 | 0.418839 | 0.612631 | 0.643118 |
| MmugDNA.27245.1.S1_at   | MmugDNA.27245.1 | 6.86  | 6.88  | 0.03 | 0.05 | -1.02 | 0.17326  | 0.036886 | 0.467457 | 0.236506 |
| MmugDNA.27247.1.S1_at   | MmugDNA.27247.1 | 3.12  | 3.09  | 0.08 | 0.06 | 1.03  | 0.68788  | 0.241209 | 0.85092  | 0.511821 |
| MmugDNA.27248.1.S1_at   | MmugDNA.27248.1 | 3.13  | 3.17  | 0.04 | 0.05 | -1.02 | 0.80803  | 0.011575 | 0.914114 | 0.139225 |
| MmugDNA.27249.1.S1_at   | MmugDNA.27249.1 | 9.41  | 9.46  | 0.2  | 0.16 | -1.03 | 0.767958 | 0.991936 | 0.893427 | 0.995469 |
| MmugDNA.2725.1.S1_at    | MmugDNA.2725.1  | 5.48  | 5.14  | 0.68 | 0.66 | 1.27  | 0.896015 | 0.872959 | 0.955633 | 0.927791 |
| MmugDNA.27251.1.S1_at   | MmugDNA.27251.1 | 4.75  | 4.81  | 0.05 | 0.02 | -1.05 | 0.062531 | 0.000196 | 0.306652 | 0.030951 |
| MmugDNA.27252.1.S1_at   | MmugDNA.27252.1 | 7.65  | 7.94  | 0.59 | 0.35 | -1.22 | 0.893955 | 0.98492  | 0.954747 | 0.991478 |
| MmugDNA.27253.1.S1_at   | MmugDNA.27253.1 | 3.86  | 3.86  | 0.1  | 0.07 | -1    | 0.416712 | 0.294669 | 0.67708  | 0.554326 |
| MmugDNA.27254.1.S1_s_at | MmugDNA.27254.1 | 6.09  | 5.84  | 0.72 | 0.67 | 1.19  | 0.464504 | 0.111399 | 0.710664 | 0.376126 |
| MmugDNA.27255.1.S1_at   | MmugDNA.27255.1 | 5.36  | 5.31  | 1.44 | 0.08 | 1.03  | 0.894882 | 0.722862 | 0.955195 | 0.839464 |
| MmugDNA.27256.1.S1_at   | MmugDNA.27256.1 | 10.05 | 10.33 | 0.2  | 0.1  | -1.22 | 0.147582 | 0.490871 | 0.43548  | 0.692666 |
| MmugDNA.2242.1.S1_s_at  | MmugDNA.2242.1  | 9.78  | 10.05 | 0.1  | 0.08 | -1.2  | 0.0372   | 0.199868 | 0.248182 | 0.474559 |
| MmugDNA.27257.1.S1_at   | MmugDNA.27257.1 | 4.16  | 4.04  | 0.53 | 0.05 | 1.08  | 0.238915 | 0.220656 | 0.536156 | 0.494069 |
| MmugDNA.27259.1.S1_at   | MmugDNA.27259.1 | 4.28  | 4.16  | 0.07 | 0.12 | 1.09  | 0.248653 | 0.291316 | 0.544039 | 0.551803 |
| MmugDNA.2726.1.S1_at    | MmugDNA.2726.1  | 10.11 | 10.91 | 0.13 | 0.02 | -1.74 | 0.000504 | 0.016962 | 0.06872  | 0.165103 |
| MmugDNA.27260.1.S1_at   | MmugDNA.27260.1 | 6.49  | 6.46  | 0.02 | 0.05 | 1.02  | 0.367634 | 0.011861 | 0.641471 | 0.140973 |
| MmugDNA.27261.1.S1_at   | MmugDNA.27261.1 | 7.49  | 6.5   | 0.21 | 0.26 | 1.98  | 0.020025 | 0.015021 | 0.194982 | 0.155736 |
| MmugDNA.27264.1.S1_at   | MmugDNA.27264.1 | 3.59  | 3.58  | 0.07 | 0.06 | 1     | 0.265258 | 0.359823 | 0.557962 | 0.601086 |
| MmugDNA.27266.1.S1_at   | MmugDNA.27266.1 | 7.6   | 8.18  | 0.23 | 0.08 | -1.49 | 0.011797 | 0.009623 | 0.158436 | 0.12918  |
| MmugDNA.27268.1.S1_at   | MmugDNA.27268.1 | 5.59  | 5.51  | 0.38 | 0.09 | 1.05  | 0.746183 | 0.890629 | 0.882363 | 0.937649 |
| MmugDNA.27269.1.S1_at   | MmugDNA.27269.1 | 9.25  | 8.59  | 0.27 | 0.11 | 1.58  | 0.061012 | 0.276636 | 0.303936 | 0.540596 |

|                         |                 |       |       |      |      |       |          |          |          |          |
|-------------------------|-----------------|-------|-------|------|------|-------|----------|----------|----------|----------|
| MmugDNA.27270.1.S1_at   | MmugDNA.27270.1 | 7.48  | 7.4   | 0.02 | 0.09 | 1.06  | 0.134346 | 0.109237 | 0.417974 | 0.37308  |
| MmugDNA.27271.1.S1_at   | MmugDNA.27271.1 | 3.38  | 3.25  | 0.38 | 0.15 | 1.09  | 0.448355 | 0.407702 | 0.699971 | 0.635135 |
| MmugDNA.27273.1.S1_at   | MmugDNA.27273.1 | 5.56  | 7.14  | 0.73 | 0.3  | -2.97 | 0.060203 | 0.380219 | 0.302505 | 0.616914 |
| MmugDNA.27275.1.S1_at   | MmugDNA.27275.1 | 5.14  | 5.02  | 0.31 | 0.27 | 1.09  | 0.189366 | 0.1862   | 0.485844 | 0.46207  |
| MmugDNA.27277.1.S1_at   | MmugDNA.27277.1 | 5.39  | 5.68  | 0.23 | 0.07 | -1.22 | 0.234264 | 0.038326 | 0.53234  | 0.240641 |
| MmugDNA.2728.1.S1_at    | MmugDNA.2728.1  | 5.26  | 5.25  | 0.05 | 0.04 | 1     | 0.56512  | 0.581099 | 0.776513 | 0.750212 |
| MmugDNA.27281.1.S1_at   | MmugDNA.27281.1 | 7.68  | 7.75  | 0.15 | 0.11 | -1.05 | 0.508295 | 0.526683 | 0.740303 | 0.715627 |
| MmugDNA.27282.1.S1_at   | MmugDNA.27282.1 | 10.2  | 11    | 0.2  | 0.16 | -1.74 | 0.006115 | 0.255918 | 0.124422 | 0.523862 |
| MmugDNA.27283.1.S1_at   | MmugDNA.27283.1 | 8.64  | 8.86  | 0.35 | 0.08 | -1.17 | 0.321894 | 0.67648  | 0.60613  | 0.81095  |
| MmugDNA.27285.1.S1_at   | MmugDNA.27285.1 | 3.68  | 3.86  | 0.51 | 0.09 | -1.14 | 0.631071 | 0.781568 | 0.818772 | 0.873395 |
| MmugDNA.27286.1.S1_at   | MmugDNA.27286.1 | 9.23  | 9.3   | 0.34 | 0.15 | -1.05 | 0.593041 | 0.591959 | 0.793805 | 0.757386 |
| MmugDNA.27287.1.S1_at   | MmugDNA.27287.1 | 4.39  | 4.76  | 0.15 | 0.14 | -1.29 | 0.121509 | 0.083732 | 0.400293 | 0.33448  |
| MmugDNA.27288.1.S1_at   | MmugDNA.27288.1 | 5.68  | 5.79  | 0.1  | 0.17 | -1.08 | 0.469715 | 0.130979 | 0.71441  | 0.403037 |
| MmugDNA.39152.1.S1_s_at | MmugDNA.39152.1 | 7.44  | 5.74  | 0.78 | 0.04 | 3.25  | 0.009152 | 0.001071 | 0.145646 | 0.051873 |
| MmugDNA.27290.1.S1_s_at | MmugDNA.27290.1 | 12.53 | 12.57 | 0.06 | 0.02 | -1.03 | 0.288117 | 0.5242   | 0.577838 | 0.714207 |
| MmugDNA.27291.1.S1_at   | MmugDNA.27291.1 | 3.13  | 3.14  | 0.26 | 0.04 | -1.01 | 0.403973 | 0.611275 | 0.667897 | 0.769205 |
| MmugDNA.27293.1.S1_at   | MmugDNA.27293.1 | 7.79  | 7.58  | 0.11 | 0.18 | 1.16  | 0.035423 | 0.003969 | 0.243013 | 0.089594 |
| MmugDNA.27294.1.S1_at   | MmugDNA.27294.1 | 10.29 | 10.47 | 0.09 | 0.09 | -1.14 | 0.024443 | 0.078754 | 0.209409 | 0.325716 |
| MmugDNA.27295.1.S1_at   | MmugDNA.27295.1 | 7.89  | 7.98  | 0.25 | 0.18 | -1.06 | 0.867795 | 0.622129 | 0.943038 | 0.77667  |
| MmugDNA.27296.1.S1_at   | MmugDNA.27296.1 | 3.51  | 3.33  | 0.35 | 0.09 | 1.13  | 0.345306 | 0.187159 | 0.624363 | 0.46313  |
| MmugDNA.27297.1.S1_at   | MmugDNA.27297.1 | 3.26  | 3.76  | 0.16 | 0.73 | -1.41 | 0.20416  | 0.322383 | 0.501762 | 0.573972 |
| MmugDNA.27299.1.S1_at   | MmugDNA.27299.1 | 8.87  | 8.42  | 0.2  | 0.12 | 1.37  | 0.02056  | 0.010819 | 0.196858 | 0.135641 |
| MmugDNA.273.1.S1_at     | MmugDNA.273.1   | 12.58 | 12.56 | 0.21 | 0.03 | 1.01  | 0.833739 | 0.93591  | 0.926824 | 0.96389  |
| MmugDNA.2730.1.S1_at    | MmugDNA.2730.1  | 6.61  | 6.62  | 0.12 | 0.28 | -1    | 0.278586 | 0.517811 | 0.569948 | 0.709928 |
| MmugDNA.27301.1.S1_at   | MmugDNA.27301.1 | 7.26  | 7.25  | 0.23 | 0.04 | 1.01  | 0.869245 | 0.532178 | 0.943687 | 0.718995 |
| MmugDNA.27302.1.S1_at   | MmugDNA.27302.1 | 3.81  | 3.45  | 0.95 | 0.43 | 1.29  | 0.498348 | 0.697672 | 0.733594 | 0.824317 |
| MmugDNA.27303.1.S1_at   | MmugDNA.27303.1 | 8.07  | 5.79  | 0.57 | 0.76 | 4.85  | 0.026553 | 0.123884 | 0.216119 | 0.394194 |
| MmugDNA.27304.1.S1_at   | MmugDNA.27304.1 | 9.49  | 9.28  | 1.36 | 0.24 | 1.15  | 0.914768 | 0.920675 | 0.963792 | 0.955279 |
| MmugDNA.27305.1.S1_at   | MmugDNA.27305.1 | 4.46  | 4.57  | 0.19 | 0.3  | -1.08 | 0.128931 | 0.199758 | 0.41116  | 0.474382 |
| MmugDNA.27306.1.S1_at   | MmugDNA.27306.1 | 3.6   | 3.45  | 0.13 | 0.11 | 1.11  | 0.088955 | 0.128159 | 0.355552 | 0.399148 |
| MmugDNA.27307.1.S1_at   | MmugDNA.27307.1 | 2.84  | 2.82  | 0.03 | 0.1  | 1.02  | 0.704761 | 0.151872 | 0.859827 | 0.426512 |
| MmugDNA.27308.1.S1_at   | MmugDNA.27308.1 | 7.28  | 7.11  | 0.07 | 0.23 | 1.12  | 0.069523 | 0.059535 | 0.322002 | 0.290548 |
| MmugDNA.27309.1.S1_at   | MmugDNA.27309.1 | 5.38  | 5.33  | 0.29 | 0.02 | 1.04  | 0.679293 | 0.887352 | 0.84701  | 0.935852 |
| MmugDNA.2731.1.S1_at    | MmugDNA.2731.1  | 5.88  | 6.7   | 0.56 | 0.13 | -1.77 | 0.064271 | 0.07153  | 0.309888 | 0.313706 |
| MmugDNA.27310.1.S1_at   | MmugDNA.27310.1 | 8.41  | 8.8   | 0.13 | 0.13 | -1.31 | 0.066615 | 0.79433  | 0.315622 | 0.881371 |
| MmugDNA.27311.1.S1_at   | MmugDNA.27311.1 | 3.2   | 3.15  | 0.02 | 0.05 | 1.04  | 0.105436 | 0.052932 | 0.37938  | 0.275692 |
| MmugDNA.27312.1.S1_at   | MmugDNA.27312.1 | 4.64  | 4.51  | 0.07 | 0.26 | 1.1   | 0.131105 | 0.281735 | 0.413841 | 0.544807 |
| MmugDNA.27314.1.S1_at   | MmugDNA.27314.1 | 8.32  | 9.44  | 0.95 | 0.26 | -2.18 | 0.140139 | 0.106885 | 0.425829 | 0.369499 |
| MmugDNA.27315.1.S1_at   | MmugDNA.27315.1 | 7.5   | 6.74  | 1.43 | 0.24 | 1.68  | 0.454754 | 0.617131 | 0.704548 | 0.773224 |
| MmugDNA.27316.1.S1_at   | MmugDNA.27316.1 | 3.87  | 3.38  | 0.22 | 0.1  | 1.4   | 0.066436 | 0.083511 | 0.315274 | 0.334048 |
| MmugDNA.27316.1.S1_x_at | MmugDNA.27316.1 | 4     | 4     | 0.26 | 0.04 | 1     | 0.316345 | 0.461221 | 0.601116 | 0.672916 |
| MmugDNA.27317.1.S1_at   | MmugDNA.27317.1 | 3.85  | 3.45  | 0.39 | 0.15 | 1.32  | 0.054253 | 0.086036 | 0.289967 | 0.338256 |
| MmugDNA.27319.1.S1_at   | MmugDNA.27319.1 | 8.89  | 8.87  | 0.16 | 0.08 | 1.01  | 0.606676 | 0.372635 | 0.803284 | 0.61161  |

|                         |                 |       |       |      |      |       |          |          |          |          |
|-------------------------|-----------------|-------|-------|------|------|-------|----------|----------|----------|----------|
| MmugDNA.2732.1.S1_at    | MmugDNA.2732.1  | 6.99  | 7.34  | 0.33 | 0.25 | -1.28 | 0.270249 | 0.501903 | 0.562402 | 0.699953 |
| MmugDNA.27321.1.S1_at   | MmugDNA.27321.1 | 7.89  | 7.84  | 0.05 | 0.12 | 1.03  | 0.780946 | 0.125772 | 0.900006 | 0.396313 |
| MmugDNA.27322.1.S1_at   | MmugDNA.27322.1 | 5.7   | 4.95  | 0.24 | 0.53 | 1.69  | 0.036778 | 0.028776 | 0.246859 | 0.211515 |
| MmugDNA.27323.1.S1_at   | MmugDNA.27323.1 | 6.33  | 6.29  | 0.38 | 0.25 | 1.03  | 0.200986 | 0.266978 | 0.498387 | 0.532515 |
| MmugDNA.27324.1.S1_at   | MmugDNA.27324.1 | 8.31  | 8.4   | 0.63 | 0.18 | -1.06 | 0.685813 | 0.91276  | 0.850363 | 0.950874 |
| MmugDNA.27325.1.S1_at   | MmugDNA.27325.1 | 7.74  | 7.34  | 0.26 | 0.24 | 1.32  | 0.229105 | 0.243208 | 0.52781  | 0.513356 |
| MmugDNA.27326.1.S1_at   | MmugDNA.27326.1 | 5.92  | 5.9   | 0.22 | 0.17 | 1.01  | 0.634155 | 0.039426 | 0.820636 | 0.243529 |
| MmugDNA.27328.1.S1_at   | MmugDNA.27328.1 | 7.8   | 7.76  | 0.11 | 0.12 | 1.03  | 0.137705 | 0.450637 | 0.422774 | 0.665844 |
| MmugDNA.27329.1.S1_at   | MmugDNA.27329.1 | 8.04  | 8.25  | 0.53 | 0.12 | -1.15 | 0.434059 | 0.235548 | 0.689374 | 0.506633 |
| MmugDNA.27331.1.S1_at   | MmugDNA.27331.1 | 5.85  | 5.87  | 0.31 | 0    | -1.02 | 0.889216 | 0.969631 | 0.95279  | 0.983359 |
| MmugDNA.27333.1.S1_at   | MmugDNA.27333.1 | 3.38  | 3.33  | 0.13 | 0.03 | 1.03  | 0.423072 | 0.49925  | 0.681133 | 0.698117 |
| MmugDNA.27334.1.S1_at   | MmugDNA.27334.1 | 5.04  | 4.81  | 0.12 | 0.09 | 1.17  | 0.060539 | 0.058104 | 0.303127 | 0.287718 |
| MmugDNA.27335.1.S1_at   | MmugDNA.27335.1 | 3.33  | 3.57  | 0.24 | 0.89 | -1.19 | 0.392442 | 0.532544 | 0.6594   | 0.719092 |
| MmugDNA.27338.1.S1_at   | MmugDNA.27338.1 | 6.68  | 7.53  | 0.32 | 0.12 | -1.8  | 0.007014 | 0.044912 | 0.131113 | 0.256424 |
| MmugDNA.2734.1.S1_at    | MmugDNA.2734.1  | 8.57  | 8.52  | 0.12 | 0.12 | 1.04  | 0.531085 | 0.764056 | 0.755559 | 0.862833 |
| MmugDNA.27340.1.S1_at   | MmugDNA.27340.1 | 5.97  | 4.98  | 0.58 | 0.87 | 2     | 0.215407 | 0.359486 | 0.513072 | 0.600754 |
| MmugDNA.27343.1.S1_s_at | MmugDNA.27343.1 | 9.46  | 10.31 | 0.34 | 0.36 | -1.8  | 0.18426  | 0.179784 | 0.480296 | 0.456321 |
| MmugDNA.27346.1.S1_at   | MmugDNA.27346.1 | 3.35  | 3.34  | 0.15 | 0.21 | 1.01  | 0.374211 | 0.493114 | 0.645421 | 0.694001 |
| MmugDNA.27347.1.S1_at   | MmugDNA.27347.1 | 3     | 3     | 0.29 | 0.54 | -1    | 0.441519 | 0.52055  | 0.695043 | 0.711831 |
| MmugDNA.27348.1.S1_at   | MmugDNA.27348.1 | 5.88  | 7.14  | 0.35 | 0.17 | -2.39 | 0.006605 | 0.029819 | 0.127762 | 0.214326 |
| MmugDNA.27349.1.S1_at   | MmugDNA.27349.1 | 5.43  | 5.43  | 0.24 | 0.2  | 1     | 0.662703 | 0.244019 | 0.837251 | 0.514069 |
| MmugDNA.27350.1.S1_at   | MmugDNA.27350.1 | 4.51  | 4.76  | 0.14 | 0.4  | -1.19 | 0.121769 | 0.136111 | 0.400504 | 0.408419 |
| MmugDNA.27354.1.S1_at   | MmugDNA.27354.1 | 5.42  | 5.25  | 0.07 | 0.17 | 1.13  | 0.37238  | 0.399159 | 0.644917 | 0.62969  |
| MmugDNA.27355.1.S1_at   | MmugDNA.27355.1 | 8.95  | 8.29  | 0.07 | 0.1  | 1.58  | 0.000955 | 0.050338 | 0.076054 | 0.269619 |
| MmugDNA.27357.1.S1_at   | MmugDNA.27357.1 | 3.83  | 3.62  | 0.3  | 0.05 | 1.16  | 0.317013 | 0.396669 | 0.601691 | 0.628434 |
| MmugDNA.27359.1.S1_at   | MmugDNA.27359.1 | 7.84  | 8.16  | 0.13 | 0.2  | -1.25 | 0.081987 | 0.051521 | 0.343272 | 0.27241  |
| MmugDNA.2736.1.S1_at    | MmugDNA.2736.1  | 8.05  | 8.29  | 0.41 | 0.17 | -1.18 | 0.397743 | 0.810832 | 0.663261 | 0.890845 |
| MmugDNA.27360.1.S1_at   | MmugDNA.27360.1 | 8.48  | 8.34  | 0.69 | 0.51 | 1.1   | 0.587299 | 0.51341  | 0.790419 | 0.706881 |
| MmugDNA.27365.1.S1_at   | MmugDNA.27365.1 | 10.3  | 10.3  | 0.18 | 0.14 | 1     | 0.348507 | 0.634694 | 0.626405 | 0.784978 |
| MmugDNA.27366.1.S1_at   | MmugDNA.27366.1 | 4.29  | 3.7   | 0.95 | 0.24 | 1.5   | 0.263932 | 0.322571 | 0.557422 | 0.573991 |
| MmugDNA.27367.1.S1_at   | MmugDNA.27367.1 | 10.5  | 10.59 | 0.19 | 0.27 | -1.06 | 0.835058 | 0.125552 | 0.927448 | 0.396226 |
| MmugDNA.27367.1.S1_x_at | MmugDNA.27367.1 | 10.87 | 10.99 | 0.22 | 0.21 | -1.08 | 0.538424 | 0.113286 | 0.760312 | 0.379339 |
| MmugDNA.27368.1.S1_at   | MmugDNA.27368.1 | 4.62  | 4.95  | 0.35 | 0.23 | -1.26 | 0.341861 | 0.395148 | 0.621646 | 0.627379 |
| MmugDNA.27369.1.S1_at   | MmugDNA.27369.1 | 7.46  | 7.74  | 0.15 | 0.04 | -1.22 | 0.033246 | 0.113477 | 0.236446 | 0.379588 |
| MmugDNA.27370.1.S1_at   | MmugDNA.27370.1 | 4.99  | 5.01  | 0.79 | 0.21 | -1.02 | 0.772549 | 0.515288 | 0.895806 | 0.70823  |
| MmugDNA.27370.1.S1_s_at | MmugDNA.27370.1 | 5.15  | 5.3   | 0.26 | 0.34 | -1.11 | 0.542736 | 0.258885 | 0.762957 | 0.52608  |
| MmugDNA.27371.1.S1_at   | MmugDNA.27371.1 | 9.06  | 8.65  | 0.21 | 0.27 | 1.33  | 0.21394  | 0.022076 | 0.51174  | 0.185927 |
| MmugDNA.27372.1.S1_at   | MmugDNA.27372.1 | 4.96  | 4.66  | 0.02 | 0.33 | 1.24  | 0.536782 | 0.014566 | 0.759108 | 0.153907 |
| MmugDNA.27373.1.S1_at   | MmugDNA.27373.1 | 9.16  | 8.94  | 0.12 | 0.21 | 1.16  | 0.096092 | 0.000538 | 0.36555  | 0.040466 |
| MmugDNA.27374.1.S1_at   | MmugDNA.27374.1 | 2.74  | 2.88  | 0.05 | 0.08 | -1.1  | 0.064109 | 0.05461  | 0.309726 | 0.279211 |
| MmugDNA.27375.1.S1_at   | MmugDNA.27375.1 | 10.62 | 10.62 | 0.29 | 0.16 | -1.01 | 0.836706 | 0.160752 | 0.928356 | 0.436897 |
| MmugDNA.41358.1.S1_at   | MmugDNA.41358.1 | 4.23  | 4.1   | 0.11 | 0.07 | 1.09  | 0.189662 | 0.13502  | 0.486064 | 0.406995 |
| MmugDNA.41358.1.S1_s_at | MmugDNA.41358.1 | 5.93  | 5.68  | 0.14 | 0.12 | 1.19  | 0.078029 | 0.04447  | 0.33734  | 0.255242 |

|                         |                 |       |       |      |      |       |          |          |          |          |
|-------------------------|-----------------|-------|-------|------|------|-------|----------|----------|----------|----------|
| MmugDNA.27377.1.S1_at   | MmugDNA.27377.1 | 9.22  | 9.77  | 0.32 | 0.17 | -1.46 | 0.059938 | 0.055437 | 0.302176 | 0.281336 |
| MmugDNA.27378.1.S1_at   | MmugDNA.27378.1 | 6.43  | 5.86  | 0.07 | 0.15 | 1.49  | 0.006606 | 0.006902 | 0.127762 | 0.11226  |
| MmugDNA.27379.1.S1_at   | MmugDNA.27379.1 | 4.85  | 4.27  | 0.27 | 0.22 | 1.49  | 0.138613 | 0.240743 | 0.42416  | 0.511469 |
| MmugDNA.27380.1.S1_s_at | MmugDNA.27380.1 | 7.67  | 7.87  | 0.07 | 0.06 | -1.14 | 0.014821 | 0.093624 | 0.173867 | 0.349995 |
| MmugDNA.27386.1.S1_at   | MmugDNA.27386.1 | 4.26  | 4.12  | 0.07 | 0.1  | 1.1   | 0.124121 | 0.119205 | 0.40411  | 0.387659 |
| MmugDNA.27388.1.S1_at   | MmugDNA.27388.1 | 7.15  | 7.33  | 0.34 | 0.26 | -1.14 | 0.74214  | 0.641816 | 0.880577 | 0.789771 |
| MmugDNA.27389.1.S1_at   | MmugDNA.27389.1 | 5.33  | 5.29  | 0.18 | 0.05 | 1.03  | 0.568131 | 0.675677 | 0.77817  | 0.810429 |
| MmugDNA.27390.1.S1_at   | MmugDNA.27390.1 | 3.88  | 3.84  | 0.25 | 0.01 | 1.03  | 0.269695 | 0.241807 | 0.562001 | 0.51238  |
| MmugDNA.27391.1.S1_at   | MmugDNA.27391.1 | 9.92  | 8.93  | 0.38 | 0.54 | 1.99  | 0.131192 | 0.346584 | 0.413871 | 0.591427 |
| MmugDNA.27392.1.S1_at   | MmugDNA.27392.1 | 6.94  | 6.59  | 0.64 | 0.08 | 1.27  | 0.146223 | 0.184394 | 0.434072 | 0.460458 |
| MmugDNA.27393.1.S1_at   | MmugDNA.27393.1 | 3.27  | 3.2   | 0.04 | 0.14 | 1.04  | 0.632329 | 0.256376 | 0.819774 | 0.524114 |
| MmugDNA.27394.1.S1_at   | MmugDNA.27394.1 | 3.85  | 3.95  | 0.19 | 0.13 | -1.07 | 0.308806 | 0.323079 | 0.595283 | 0.574351 |
| MmugDNA.27395.1.S1_at   | MmugDNA.27395.1 | 10.76 | 11    | 0.11 | 0.1  | -1.18 | 0.052156 | 0.188088 | 0.285921 | 0.464169 |
| MmugDNA.27396.1.S1_at   | MmugDNA.27396.1 | 5.9   | 5.75  | 0.09 | 0.05 | 1.11  | 0.06335  | 0.220019 | 0.308295 | 0.49344  |
| MmugDNA.27397.1.S1_at   | MmugDNA.27397.1 | 10.61 | 10.54 | 0.27 | 0.05 | 1.06  | 0.213041 | 0.16888  | 0.51103  | 0.445458 |
| MmugDNA.27398.1.S1_at   | MmugDNA.27398.1 | 3.61  | 4.09  | 0.31 | 0.75 | -1.4  | 0.590224 | 0.769939 | 0.791777 | 0.866376 |
| MmugDNA.27399.1.S1_at   | MmugDNA.27399.1 | 5.49  | 5.44  | 0.17 | 0.1  | 1.04  | 0.801874 | 0.865568 | 0.911061 | 0.923598 |
| MmugDNA.274.1.S1_at     | MmugDNA.274.1   | 9.52  | 8.67  | 0.17 | 0.34 | 1.8   | 0.021205 | 0.052709 | 0.199286 | 0.275206 |
| MmugDNA.2740.1.S1_at    | MmugDNA.2740.1  | 7.75  | 7.78  | 0.57 | 0.22 | -1.02 | 0.807958 | 0.720902 | 0.91407  | 0.838368 |
| MmugDNA.27400.1.S1_at   | MmugDNA.27400.1 | 7.35  | 8.34  | 0.82 | 0.27 | -1.98 | 0.112056 | 0.11794  | 0.388221 | 0.385845 |
| MmugDNA.27401.1.S1_at   | MmugDNA.27401.1 | 4.49  | 4.5   | 0.15 | 0.12 | -1.01 | 0.263265 | 0.343591 | 0.556921 | 0.589322 |
| MmugDNA.27402.1.S1_at   | MmugDNA.27402.1 | 5.79  | 5.91  | 0.05 | 0.05 | -1.08 | 0.107681 | 0.598951 | 0.382296 | 0.761244 |
| MmugDNA.27404.1.S1_at   | MmugDNA.27404.1 | 7.09  | 6.95  | 0.25 | 0.11 | 1.1   | 0.897218 | 0.138914 | 0.956433 | 0.412037 |
| MmugDNA.27405.1.S1_at   | MmugDNA.27405.1 | 5.68  | 5.29  | 0.84 | 0.6  | 1.31  | 0.211263 | 0.324536 | 0.509057 | 0.57507  |
| MmugDNA.27406.1.S1_at   | MmugDNA.27406.1 | 8.24  | 8.28  | 0.15 | 0.23 | -1.03 | 0.90559  | 0.016123 | 0.960065 | 0.160936 |
| MmugDNA.27407.1.S1_at   | MmugDNA.27407.1 | 5.6   | 5.46  | 0.23 | 0.34 | 1.1   | 0.655995 | 0.843596 | 0.83356  | 0.910913 |
| MmugDNA.27408.1.S1_at   | MmugDNA.27408.1 | 5.01  | 5.05  | 0.12 | 0.07 | -1.02 | 0.725401 | 0.501673 | 0.871157 | 0.6998   |
| MmugDNA.27409.1.S1_at   | MmugDNA.27409.1 | 4.64  | 4.43  | 0.07 | 0.12 | 1.16  | 0.274847 | 0.014248 | 0.566556 | 0.152403 |
| MmugDNA.2741.1.S1_at    | MmugDNA.2741.1  | 7.44  | 7.11  | 0.34 | 0.16 | 1.26  | 0.55946  | 0.589889 | 0.773306 | 0.755987 |
| MmugDNA.27410.1.S1_at   | MmugDNA.27410.1 | 3.09  | 3.26  | 0.03 | 0.07 | -1.13 | 0.067282 | 0.379068 | 0.317039 | 0.616029 |
| MmugDNA.27411.1.S1_at   | MmugDNA.27411.1 | 8.24  | 8.26  | 0.03 | 0.17 | -1.01 | 0.569473 | 0.785627 | 0.778858 | 0.875891 |
| MmugDNA.27413.1.S1_at   | MmugDNA.27413.1 | 6.18  | 6.02  | 0.18 | 0.07 | 1.12  | 0.180143 | 0.269268 | 0.475236 | 0.534534 |
| MmugDNA.27414.1.S1_at   | MmugDNA.27414.1 | 5.9   | 5.65  | 0.1  | 0.21 | 1.19  | 0.137843 | 0.184719 | 0.422926 | 0.460645 |
| MmugDNA.27415.1.S1_at   | MmugDNA.27415.1 | 7.09  | 7.26  | 0.17 | 0.06 | -1.12 | 0.286197 | 0.17475  | 0.576072 | 0.451302 |
| MmugDNA.27416.1.S1_at   | MmugDNA.27416.1 | 2.7   | 2.68  | 0.1  | 0.09 | 1.01  | 0.924046 | 0.994578 | 0.967704 | 0.99666  |
| MmugDNA.27417.1.S1_at   | MmugDNA.27417.1 | 4.77  | 4.81  | 0.04 | 0.09 | -1.03 | 0.174916 | 0.225224 | 0.469243 | 0.497865 |
| MmugDNA.27418.1.S1_at   | MmugDNA.27418.1 | 8.71  | 7.69  | 0.15 | 0.17 | 2.03  | 0.001445 | 0.00043  | 0.079991 | 0.038359 |
| MmugDNA.27419.1.S1_at   | MmugDNA.27419.1 | 8.22  | 8.27  | 0.23 | 0.08 | -1.04 | 0.955299 | 0.265184 | 0.981687 | 0.531121 |
| MmugDNA.2742.1.S1_at    | MmugDNA.2742.1  | 6.31  | 6.13  | 0.86 | 0.16 | 1.13  | 0.315302 | 0.455813 | 0.600287 | 0.669659 |
| MmugDNA.27420.1.S1_at   | MmugDNA.27420.1 | 6.25  | 6.65  | 0.23 | 0.24 | -1.33 | 0.288123 | 0.31431  | 0.577838 | 0.568263 |
| MmugDNA.27421.1.S1_at   | MmugDNA.27421.1 | 3.59  | 3.62  | 0.18 | 0.25 | -1.02 | 0.354897 | 0.618207 | 0.631833 | 0.77393  |
| MmugDNA.27422.1.S1_at   | MmugDNA.27422.1 | 11.98 | 11.63 | 0.09 | 0.16 | 1.28  | 0.045191 | 0.134888 | 0.270005 | 0.406878 |
| MmugDNA.27423.1.S1_at   | MmugDNA.27423.1 | 3.66  | 3.66  | 0.05 | 0.05 | 1     | 0.230766 | 0.698006 | 0.529522 | 0.82456  |

|                         |                 |       |       |      |      |       |          |          |          |          |
|-------------------------|-----------------|-------|-------|------|------|-------|----------|----------|----------|----------|
| MmugDNA.27424.1.S1_at   | MmugDNA.27424.1 | 7.63  | 7.25  | 0.11 | 0.18 | 1.29  | 0.023748 | 0.039487 | 0.207102 | 0.243642 |
| MmugDNA.27426.1.S1_at   | MmugDNA.27426.1 | 4.33  | 4.42  | 0.05 | 0.08 | -1.06 | 0.146272 | 0.109233 | 0.434151 | 0.37308  |
| MmugDNA.27430.1.S1_at   | MmugDNA.27430.1 | 4.42  | 4.35  | 0    | 0.05 | 1.05  | 0.072914 | 0.132733 | 0.327698 | 0.404544 |
| MmugDNA.27431.1.S1_at   | MmugDNA.27431.1 | 13.33 | 13.34 | 0.1  | 0.02 | -1.01 | 0.469649 | 0.562962 | 0.714331 | 0.738285 |
| MmugDNA.27433.1.S1_at   | MmugDNA.27433.1 | 5.8   | 5.98  | 0.25 | 0.14 | -1.13 | 0.804556 | 0.298309 | 0.91222  | 0.556972 |
| MmugDNA.27434.1.S1_at   | MmugDNA.27434.1 | 6.1   | 6.18  | 0.4  | 0.49 | -1.05 | 0.92286  | 0.538648 | 0.967056 | 0.723301 |
| MmugDNA.27436.1.S1_at   | MmugDNA.27436.1 | 5.03  | 4.59  | 0.35 | 0.42 | 1.36  | 0.295172 | 0.46452  | 0.584058 | 0.675158 |
| MmugDNA.27437.1.S1_at   | MmugDNA.27437.1 | 6.18  | 4.99  | 0.69 | 0.17 | 2.29  | 0.049727 | 0.035209 | 0.280409 | 0.231826 |
| MmugDNA.27439.1.S1_at   | MmugDNA.27439.1 | 5.32  | 4.35  | 0.37 | 0.42 | 1.95  | 0.020405 | 0.029163 | 0.1964   | 0.212798 |
| MmugDNA.27440.1.S1_at   | MmugDNA.27440.1 | 4.53  | 4.42  | 0.33 | 0    | 1.08  | 0.603498 | 0.694577 | 0.801013 | 0.822424 |
| MmugDNA.27441.1.S1_at   | MmugDNA.27441.1 | 7.77  | 7.12  | 0.06 | 0.54 | 1.57  | 0.078048 | 0.221932 | 0.337394 | 0.495019 |
| MmugDNA.27442.1.S1_at   | MmugDNA.27442.1 | 5.64  | 5.42  | 0.33 | 0.37 | 1.17  | 0.503689 | 0.345976 | 0.737208 | 0.59115  |
| MmugDNA.27443.1.S1_at   | MmugDNA.27443.1 | 6.8   | 7.62  | 0.45 | 0.04 | -1.76 | 0.02959  | 0.148004 | 0.22511  | 0.422406 |
| MmugDNA.27444.1.S1_at   | MmugDNA.27444.1 | 2.73  | 2.65  | 0.07 | 0.11 | 1.06  | 0.08313  | 0.263268 | 0.345384 | 0.529531 |
| MmugDNA.27445.1.S1_at   | MmugDNA.27445.1 | 7.24  | 7.2   | 0.32 | 0.05 | 1.03  | 0.780095 | 0.887034 | 0.899664 | 0.935666 |
| MmugDNA.27446.1.S1_at   | MmugDNA.27446.1 | 6.38  | 6.19  | 0.1  | 0.21 | 1.14  | 0.081659 | 0.095057 | 0.342855 | 0.352124 |
| MmugDNA.27447.1.S1_at   | MmugDNA.27447.1 | 2.65  | 2.6   | 0.35 | 0.15 | 1.04  | 0.199968 | 0.295056 | 0.497544 | 0.554551 |
| MmugDNA.27448.1.S1_at   | MmugDNA.27448.1 | 5     | 4.96  | 0.04 | 0.07 | 1.03  | 0.176077 | 0.168194 | 0.470426 | 0.444824 |
| MmugDNA.27449.1.S1_at   | MmugDNA.27449.1 | 5.73  | 5.71  | 0.18 | 0.11 | 1.01  | 0.747642 | 0.271755 | 0.883101 | 0.536577 |
| MmugDNA.2745.1.S1_at    | MmugDNA.2745.1  | 3.8   | 3.75  | 0.14 | 0.11 | 1.03  | 0.782863 | 0.66398  | 0.900922 | 0.803247 |
| MmugDNA.27450.1.S1_at   | MmugDNA.27450.1 | 4.44  | 4.3   | 0.08 | 0.09 | 1.1   | 0.090016 | 0.253847 | 0.356863 | 0.522185 |
| MmugDNA.27451.1.S1_at   | MmugDNA.27451.1 | 5.47  | 5.47  | 0.07 | 0    | 1     | 0.362393 | 0.635234 | 0.637275 | 0.785279 |
| MmugDNA.27453.1.S1_at   | MmugDNA.27453.1 | 8.39  | 7.81  | 0.26 | 0.3  | 1.49  | 0.079871 | 0.08027  | 0.340107 | 0.327882 |
| MmugDNA.27453.1.S1_s_at | MmugDNA.27453.1 | 5.6   | 5.28  | 0.44 | 0.83 | 1.25  | 0.281498 | 0.418239 | 0.572427 | 0.642683 |
| MmugDNA.27454.1.S1_at   | MmugDNA.27454.1 | 3.12  | 3.16  | 0.22 | 0.1  | -1.03 | 0.847544 | 0.454802 | 0.933572 | 0.668859 |
| MmugDNA.27455.1.S1_at   | MmugDNA.27455.1 | 4.81  | 5.09  | 0.31 | 0.42 | -1.21 | 0.391271 | 0.441452 | 0.658623 | 0.65962  |
| MmugDNA.27456.1.S1_at   | MmugDNA.27456.1 | 11.86 | 11.66 | 0.3  | 0.12 | 1.15  | 0.905607 | 0.724271 | 0.960065 | 0.840433 |
| MmugDNA.27457.1.S1_at   | MmugDNA.27457.1 | 11.6  | 11.58 | 0.06 | 0.03 | 1.01  | 0.870927 | 0.007343 | 0.944458 | 0.11509  |
| MmugDNA.27458.1.S1_at   | MmugDNA.27458.1 | 4.98  | 4.66  | 0.2  | 0.2  | 1.25  | 0.594797 | 0.847322 | 0.794991 | 0.913262 |
| MmugDNA.27459.1.S1_at   | MmugDNA.27459.1 | 4.99  | 6.34  | 1.5  | 0.16 | -2.55 | 0.612079 | 0.419986 | 0.80668  | 0.643787 |
| MmugDNA.2746.1.S1_at    | MmugDNA.2746.1  | 4.55  | 4.76  | 0.24 | 0.18 | -1.15 | 0.287642 | 0.43437  | 0.577473 | 0.654536 |
| MmugDNA.27460.1.S1_at   | MmugDNA.27460.1 | 3.24  | 3.11  | 0.27 | 0.04 | 1.09  | 0.456509 | 0.528055 | 0.705816 | 0.716428 |
| MmugDNA.27461.1.S1_at   | MmugDNA.27461.1 | 8.15  | 8     | 0.22 | 0.21 | 1.11  | 0.433572 | 0.825477 | 0.688989 | 0.899751 |
| MmugDNA.27462.1.S1_at   | MmugDNA.27462.1 | 3.18  | 3.37  | 0.65 | 0.23 | -1.14 | 0.741329 | 0.785247 | 0.880128 | 0.875672 |
| MmugDNA.27465.1.S1_at   | MmugDNA.27465.1 | 5.19  | 5.28  | 0.2  | 0.13 | -1.06 | 0.661248 | 0.22101  | 0.836453 | 0.494401 |
| MmugDNA.27466.1.S1_at   | MmugDNA.27466.1 | 3.99  | 3.57  | 0.44 | 0.16 | 1.34  | 0.088938 | 0.115277 | 0.355552 | 0.382292 |
| MmugDNA.27468.1.S1_at   | MmugDNA.27468.1 | 7.6   | 7.64  | 0.11 | 0.06 | -1.03 | 0.255183 | 0.035088 | 0.549651 | 0.231521 |
| MmugDNA.27469.1.S1_at   | MmugDNA.27469.1 | 10.83 | 11.09 | 0.22 | 0.1  | -1.2  | 0.609094 | 0.069485 | 0.804954 | 0.309802 |
| MmugDNA.2747.1.S1_at    | MmugDNA.2747.1  | 3.67  | 3.69  | 0.06 | 0.02 | -1.02 | 0.558859 | 0.086449 | 0.773051 | 0.338938 |
| MmugDNA.27470.1.S1_at   | MmugDNA.27470.1 | 8.15  | 8.33  | 0.46 | 0.21 | -1.14 | 0.440577 | 0.843398 | 0.694572 | 0.910815 |
| MmugDNA.27472.1.S1_at   | MmugDNA.27472.1 | 3.35  | 3.45  | 0.1  | 0.16 | -1.07 | 0.954283 | 0.215431 | 0.981196 | 0.489123 |
| MmugDNA.27473.1.S1_at   | MmugDNA.27473.1 | 9.99  | 10.57 | 0.11 | 0.25 | -1.49 | 0.076822 | 0.001044 | 0.335246 | 0.051426 |
| MmugDNA.27473.1.S1_s_at | MmugDNA.27473.1 | 8.71  | 8.44  | 0.07 | 0.34 | 1.21  | 0.096472 | 0.000424 | 0.366326 | 0.038316 |



|                         |                 |       |       |      |      |       |          |          |          |          |
|-------------------------|-----------------|-------|-------|------|------|-------|----------|----------|----------|----------|
| MmugDNA.27474.1.S1_at   | MmugDNA.27474.1 | 6.25  | 5.87  | 1.49 | 0.18 | 1.3   | 0.780595 | 0.921335 | 0.899901 | 0.955739 |
| MmugDNA.27475.1.S1_at   | MmugDNA.27475.1 | 2.91  | 2.9   | 0.01 | 0.09 | 1.01  | 0.64833  | 0.835627 | 0.829161 | 0.905921 |
| MmugDNA.27478.1.S1_at   | MmugDNA.27478.1 | 5.64  | 5.6   | 0.17 | 0.11 | 1.03  | 0.668281 | 0.364874 | 0.840738 | 0.605148 |
| MmugDNA.27479.1.S1_at   | MmugDNA.27479.1 | 10.97 | 10.47 | 0.06 | 0.03 | 1.42  | 0.000204 | 0.001876 | 0.053494 | 0.064979 |
| MmugDNA.2748.1.S1_at    | MmugDNA.2748.1  | 12.19 | 12.45 | 0.05 | 0.02 | -1.2  | 0.001092 | 0.001271 | 0.077278 | 0.055241 |
| MmugDNA.27480.1.S1_at   | MmugDNA.27480.1 | 11.26 | 11.4  | 0.13 | 0.22 | -1.1  | 0.634947 | 0.731273 | 0.821078 | 0.84425  |
| MmugDNA.27480.1.S1_s_at | MmugDNA.27480.1 | 11.29 | 11.38 | 0.14 | 0.09 | -1.07 | 0.576176 | 0.608669 | 0.783141 | 0.767185 |
| MmugDNA.27481.1.S1_at   | MmugDNA.27481.1 | 6.09  | 5.66  | 0.28 | 0.22 | 1.35  | 0.244479 | 0.026527 | 0.540909 | 0.203899 |
| MmugDNA.27482.1.S1_at   | MmugDNA.27482.1 | 4.22  | 4.15  | 0.12 | 0.08 | 1.05  | 0.166404 | 0.203825 | 0.45963  | 0.478081 |
| MmugDNA.27483.1.S1_at   | MmugDNA.27483.1 | 4.24  | 4.24  | 0.31 | 0.11 | 1     | 0.27133  | 0.392766 | 0.563234 | 0.625846 |
| MmugDNA.27485.1.S1_at   | MmugDNA.27485.1 | 4.42  | 4.4   | 0.15 | 0.2  | 1.01  | 0.523934 | 0.550016 | 0.75074  | 0.730238 |
| MmugDNA.27486.1.S1_at   | MmugDNA.27486.1 | 5.77  | 5.75  | 0.01 | 0.19 | 1.01  | 0.861287 | 0.383005 | 0.939733 | 0.61904  |
| MmugDNA.27487.1.S1_at   | MmugDNA.27487.1 | 10.25 | 9.93  | 0.19 | 0.05 | 1.25  | 0.036678 | 0.003084 | 0.24663  | 0.081159 |
| MmugDNA.27488.1.S1_at   | MmugDNA.27488.1 | 6.12  | 6.2   | 0.21 | 0.02 | -1.06 | 0.204843 | 0.075879 | 0.502623 | 0.320523 |
| MmugDNA.38170.1.S1_at   | MmugDNA.38170.1 | 7.3   | 7.66  | 0.12 | 0.08 | -1.28 | 0.012043 | 0.054825 | 0.159683 | 0.279675 |
| MmugDNA.38170.1.S1_s_at | MmugDNA.38170.1 | 6.6   | 7.73  | 0.19 | 0.22 | -2.19 | 0.003388 | 0.014042 | 0.102989 | 0.15177  |
| MmugDNA.2749.1.S1_at    | MmugDNA.2749.1  | 4.3   | 4.18  | 0.12 | 0.23 | 1.09  | 0.152903 | 0.290094 | 0.442626 | 0.551128 |
| MmugDNA.27490.1.S1_at   | MmugDNA.27490.1 | 5.83  | 5.15  | 0.26 | 0.07 | 1.61  | 0.024403 | 0.024046 | 0.209245 | 0.194371 |
| MmugDNA.27491.1.S1_at   | MmugDNA.27491.1 | 3.06  | 6.34  | 1.18 | 0.36 | -9.71 | 0.023277 | 0.161449 | 0.205562 | 0.437604 |
| MmugDNA.27492.1.S1_at   | MmugDNA.27492.1 | 2.76  | 2.85  | 0.03 | 0.05 | -1.07 | 0.10256  | 0.142488 | 0.374826 | 0.416082 |
| MmugDNA.27493.1.S1_at   | MmugDNA.27493.1 | 8.47  | 8.12  | 0.22 | 0.12 | 1.27  | 0.106258 | 0.186899 | 0.380284 | 0.46276  |
| MmugDNA.27494.1.S1_at   | MmugDNA.27494.1 | 6.16  | 6.45  | 0.32 | 0.26 | -1.22 | 0.21967  | 0.179683 | 0.51742  | 0.456153 |
| MmugDNA.27496.1.S1_at   | MmugDNA.27496.1 | 3.19  | 2.94  | 0.18 | 0.15 | 1.19  | 0.296574 | 0.301179 | 0.585308 | 0.559356 |
| MmugDNA.27498.1.S1_at   | MmugDNA.27498.1 | 6.83  | 6.91  | 0.52 | 0.12 | -1.06 | 0.552471 | 0.227389 | 0.769177 | 0.499659 |
| MmugDNA.275.1.S1_at     | MmugDNA.275.1   | 7.74  | 7.78  | 0.2  | 0.13 | -1.02 | 0.790749 | 0.581616 | 0.904945 | 0.750589 |
| MmugDNA.2750.1.S1_at    | MmugDNA.2750.1  | 7.31  | 9.4   | 1.56 | 0.42 | -4.26 | 0.21588  | 0.345686 | 0.513611 | 0.590854 |
| MmugDNA.27500.1.S1_at   | MmugDNA.27500.1 | 5.76  | 5.61  | 0.47 | 0.16 | 1.11  | 0.253563 | 0.318091 | 0.547866 | 0.571046 |
| MmugDNA.27501.1.S1_at   | MmugDNA.27501.1 | 3.88  | 3.97  | 0.42 | 0.25 | -1.07 | 0.742899 | 0.487792 | 0.881088 | 0.690669 |
| MmugDNA.27502.1.S1_at   | MmugDNA.27502.1 | 3.2   | 3.26  | 0.03 | 0.1  | -1.04 | 0.860631 | 0.07182  | 0.939526 | 0.314082 |
| MmugDNA.27503.1.S1_at   | MmugDNA.27503.1 | 13.08 | 13.08 | 0.13 | 0    | -1.01 | 0.441603 | 0.24934  | 0.695103 | 0.518461 |
| MmugDNA.27504.1.S1_at   | MmugDNA.27504.1 | 5.18  | 3.77  | 0.11 | 0.14 | 2.65  | 0.000158 | 0.018427 | 0.052915 | 0.170755 |
| MmugDNA.27505.1.S1_at   | MmugDNA.27505.1 | 3.95  | 3.97  | 0.18 | 0.29 | -1.01 | 0.846086 | 0.958831 | 0.932773 | 0.976695 |
| MmugDNA.27506.1.S1_at   | MmugDNA.27506.1 | 5.37  | 5.65  | 0.44 | 0.09 | -1.21 | 0.9086   | 0.839761 | 0.961257 | 0.908633 |
| MmugDNA.27507.1.S1_at   | MmugDNA.27507.1 | 7.75  | 7.9   | 0.17 | 0.19 | -1.11 | 0.439199 | 0.214841 | 0.69348  | 0.488729 |
| MmugDNA.27508.1.S1_at   | MmugDNA.27508.1 | 3.54  | 3.36  | 0.18 | 0.06 | 1.13  | 0.049776 | 0.061365 | 0.280592 | 0.294488 |
| MmugDNA.27509.1.S1_at   | MmugDNA.27509.1 | 11.18 | 11.24 | 0.23 | 0.11 | -1.04 | 0.731244 | 0.236128 | 0.874456 | 0.507179 |
| MmugDNA.2751.1.S1_at    | MmugDNA.2751.1  | 5.01  | 5.1   | 0.13 | 0.03 | -1.06 | 0.467805 | 0.073154 | 0.713187 | 0.316064 |
| MmugDNA.27510.1.S1_at   | MmugDNA.27510.1 | 3.6   | 3.58  | 0.18 | 0    | 1.01  | 0.864864 | 0.936769 | 0.94142  | 0.964351 |
| MmugDNA.27511.1.S1_at   | MmugDNA.27511.1 | 3.74  | 3.77  | 0.35 | 0.18 | -1.02 | 0.832069 | 0.894979 | 0.926049 | 0.940055 |
| MmugDNA.27512.1.S1_at   | MmugDNA.27512.1 | 7.68  | 8.21  | 0.09 | 0.2  | -1.44 | 0.03023  | 0.000158 | 0.226971 | 0.030199 |
| MmugDNA.27512.1.S1_x_at | MmugDNA.27512.1 | 8.01  | 8.42  | 0.07 | 0.03 | -1.32 | 0.000628 | 0.000115 | 0.070727 | 0.028568 |
| MmugDNA.27513.1.S1_at   | MmugDNA.27513.1 | 6.17  | 6.11  | 0.57 | 0.24 | 1.04  | 0.432411 | 0.801583 | 0.688267 | 0.885853 |
| MmugDNA.27514.1.S1_at   | MmugDNA.27514.1 | 6.88  | 7.21  | 0.21 | 0.18 | -1.25 | 0.337476 | 0.747271 | 0.61788  | 0.853149 |

|                         |                 |       |       |      |      |       |          |          |          |          |
|-------------------------|-----------------|-------|-------|------|------|-------|----------|----------|----------|----------|
| MmugDNA.27516.1.S1_at   | MmugDNA.27516.1 | 4.82  | 4.99  | 0.28 | 0.08 | -1.12 | 0.414169 | 0.608264 | 0.675439 | 0.766971 |
| MmugDNA.27517.1.S1_at   | MmugDNA.27517.1 | 2.98  | 3.04  | 0.01 | 0.16 | -1.04 | 0.73679  | 0.792057 | 0.87768  | 0.879814 |
| MmugDNA.27518.1.S1_at   | MmugDNA.27518.1 | 11.86 | 11.86 | 0.11 | 0.14 | 1     | 0.929515 | 0.592601 | 0.970145 | 0.757847 |
| MmugDNA.27519.1.S1_at   | MmugDNA.27519.1 | 5.51  | 5.49  | 0.25 | 0.03 | 1.02  | 0.357006 | 0.309538 | 0.633245 | 0.564987 |
| MmugDNA.39509.1.S1_s_at | MmugDNA.39509.1 | 7.11  | 7.08  | 0.13 | 0.03 | 1.02  | 0.776292 | 0.726951 | 0.897687 | 0.84203  |
| MmugDNA.27522.1.S1_at   | MmugDNA.27522.1 | 11.09 | 11.1  | 0.17 | 0.08 | -1.01 | 0.408187 | 0.756489 | 0.671025 | 0.858223 |
| MmugDNA.27523.1.S1_at   | MmugDNA.27523.1 | 4.98  | 4.87  | 0.2  | 0.3  | 1.08  | 0.716123 | 0.881599 | 0.866043 | 0.932407 |
| MmugDNA.27524.1.S1_at   | MmugDNA.27524.1 | 4.26  | 4.31  | 0.19 | 0.26 | -1.04 | 0.336732 | 0.436343 | 0.617287 | 0.655923 |
| MmugDNA.27525.1.S1_at   | MmugDNA.27525.1 | 7.86  | 8.04  | 0.18 | 0.14 | -1.13 | 0.198351 | 0.400366 | 0.495518 | 0.630177 |
| MmugDNA.27526.1.S1_at   | MmugDNA.27526.1 | 11.18 | 11.22 | 0.24 | 0.09 | -1.03 | 0.950827 | 0.008104 | 0.979623 | 0.119551 |
| MmugDNA.27527.1.S1_at   | MmugDNA.27527.1 | 4.18  | 4.23  | 0.03 | 0.02 | -1.03 | 0.154342 | 0.348236 | 0.444624 | 0.592441 |
| MmugDNA.27528.1.S1_at   | MmugDNA.27528.1 | 6.02  | 6.25  | 0.09 | 0.26 | -1.17 | 0.171839 | 0.072909 | 0.465779 | 0.315942 |
| MmugDNA.27529.1.S1_at   | MmugDNA.27529.1 | 5.14  | 5.28  | 0.26 | 0.27 | -1.1  | 0.817843 | 0.146686 | 0.918669 | 0.420713 |
| MmugDNA.2753.1.S1_at    | MmugDNA.2753.1  | 3.47  | 3.4   | 0.25 | 0.07 | 1.05  | 0.212675 | 0.402011 | 0.510654 | 0.631153 |
| MmugDNA.27530.1.S1_at   | MmugDNA.27530.1 | 3.68  | 3.52  | 0.34 | 0.19 | 1.12  | 0.39309  | 0.315143 | 0.659938 | 0.568855 |
| MmugDNA.27531.1.S1_at   | MmugDNA.27531.1 | 4.47  | 4.35  | 0.07 | 0.09 | 1.09  | 0.129386 | 0.127698 | 0.411701 | 0.398581 |
| MmugDNA.27532.1.S1_at   | MmugDNA.27532.1 | 4.74  | 4.58  | 0.37 | 0.21 | 1.12  | 0.489588 | 0.668921 | 0.727852 | 0.806313 |
| MmugDNA.27533.1.S1_at   | MmugDNA.27533.1 | 7.95  | 7.85  | 0.4  | 0.1  | 1.07  | 0.189856 | 0.094222 | 0.486238 | 0.350889 |
| MmugDNA.27534.1.S1_at   | MmugDNA.27534.1 | 3.66  | 3.5   | 0.35 | 0.09 | 1.12  | 0.159819 | 0.186572 | 0.451208 | 0.462364 |
| MmugDNA.27535.1.S1_at   | MmugDNA.27535.1 | 5.51  | 5.59  | 0.25 | 0.16 | -1.06 | 0.875549 | 0.706386 | 0.946674 | 0.829634 |
| MmugDNA.27536.1.S1_at   | MmugDNA.27536.1 | 3.26  | 3.2   | 0.17 | 0.07 | 1.05  | 0.194179 | 0.451352 | 0.490738 | 0.666168 |
| MmugDNA.27537.1.S1_at   | MmugDNA.27537.1 | 10.11 | 10.03 | 0.05 | 0.06 | 1.06  | 0.186061 | 0.480455 | 0.482202 | 0.685781 |
| MmugDNA.27538.1.S1_at   | MmugDNA.27538.1 | 3.82  | 3.66  | 0.15 | 0.08 | 1.12  | 0.119675 | 0.118574 | 0.397626 | 0.38654  |
| MmugDNA.2754.1.S1_at    | MmugDNA.2754.1  | 6.04  | 5.91  | 0.03 | 0.11 | 1.09  | 0.106935 | 0.116427 | 0.381299 | 0.383671 |
| MmugDNA.27540.1.S1_at   | MmugDNA.27540.1 | 5.4   | 5.43  | 0.25 | 0.25 | -1.02 | 0.796822 | 0.841011 | 0.908267 | 0.909421 |
| MmugDNA.27541.1.S1_at   | MmugDNA.27541.1 | 9.14  | 8.63  | 0.34 | 0.05 | 1.43  | 0.2205   | 0.596685 | 0.518216 | 0.75976  |
| MmugDNA.27542.1.S1_at   | MmugDNA.27542.1 | 6.71  | 6.33  | 0.87 | 0.17 | 1.3   | 0.972816 | 0.473998 | 0.989113 | 0.681163 |
| MmugDNA.27543.1.S1_at   | MmugDNA.27543.1 | 5.87  | 5.82  | 0.03 | 0.07 | 1.04  | 0.352613 | 0.057191 | 0.630029 | 0.285009 |
| MmugDNA.27544.1.S1_at   | MmugDNA.27544.1 | 4.4   | 4.27  | 0.34 | 0.49 | 1.1   | 0.685347 | 0.877883 | 0.849991 | 0.93029  |
| MmugDNA.27545.1.S1_at   | MmugDNA.27545.1 | 3.63  | 3.37  | 0.21 | 0.24 | 1.19  | 0.219969 | 0.414748 | 0.517641 | 0.640456 |
| MmugDNA.27546.1.S1_s_at | MmugDNA.27546.1 | 3.85  | 3.89  | 0.26 | 0.12 | -1.03 | 0.352989 | 0.469909 | 0.630239 | 0.678572 |
| MmugDNA.27547.1.S1_at   | MmugDNA.27547.1 | 6.39  | 6.03  | 0.14 | 0.16 | 1.29  | 0.099857 | 0.120822 | 0.370801 | 0.389657 |
| MmugDNA.27548.1.S1_s_at | MmugDNA.27548.1 | 8.08  | 8.11  | 0.05 | 0.08 | -1.02 | 0.755373 | 0.075256 | 0.887277 | 0.319434 |
| MmugDNA.27549.1.S1_at   | MmugDNA.27549.1 | 3.88  | 3.79  | 0.19 | 0.06 | 1.07  | 0.148394 | 0.556595 | 0.436978 | 0.734636 |
| MmugDNA.27550.1.S1_at   | MmugDNA.27550.1 | 5.62  | 5.26  | 0.82 | 0.13 | 1.29  | 0.731869 | 0.406697 | 0.874712 | 0.634487 |
| MmugDNA.27551.1.S1_at   | MmugDNA.27551.1 | 10.4  | 10.13 | 0.39 | 0.08 | 1.21  | 0.265103 | 0.171046 | 0.557962 | 0.447597 |
| MmugDNA.27553.1.S1_at   | MmugDNA.27553.1 | 3.93  | 4.54  | 0.94 | 0.24 | -1.52 | 0.932069 | 0.805574 | 0.971437 | 0.888295 |
| MmugDNA.27554.1.S1_at   | MmugDNA.27554.1 | 6.24  | 8.78  | 0.94 | 0.25 | -5.81 | 0.027273 | 0.142776 | 0.218055 | 0.416687 |
| MmugDNA.27555.1.S1_at   | MmugDNA.27555.1 | 9.36  | 8.81  | 0.31 | 0.14 | 1.46  | 0.07901  | 0.083857 | 0.338745 | 0.334752 |
| MmugDNA.27556.1.S1_at   | MmugDNA.27556.1 | 10.26 | 10.4  | 0.14 | 0.12 | -1.11 | 0.284878 | 0.157604 | 0.574835 | 0.433131 |
| MmugDNA.27558.1.S1_at   | MmugDNA.27558.1 | 9.02  | 8.15  | 0.31 | 0.36 | 1.82  | 0.07303  | 0.037433 | 0.327903 | 0.237777 |
| MmugDNA.27559.1.S1_at   | MmugDNA.27559.1 | 3.71  | 3.4   | 0.25 | 0.09 | 1.24  | 0.07821  | 0.084479 | 0.337766 | 0.335864 |
| MmugDNA.2756.1.S1_at    | MmugDNA.2756.1  | 7.02  | 6.86  | 0.1  | 0.08 | 1.12  | 0.267716 | 0.264411 | 0.560463 | 0.530385 |

|                         |                 |       |       |      |      |        |          |          |          |          |
|-------------------------|-----------------|-------|-------|------|------|--------|----------|----------|----------|----------|
| MmugDNA.27560.1.S1_at   | MmugDNA.27560.1 | 11.9  | 12.15 | 0.15 | 0.05 | -1.19  | 0.11615  | 0.00022  | 0.393212 | 0.032385 |
| MmugDNA.27561.1.S1_at   | MmugDNA.27561.1 | 8.49  | 9.12  | 0.4  | 0.08 | -1.55  | 0.060773 | 0.444505 | 0.303492 | 0.662072 |
| MmugDNA.27562.1.S1_at   | MmugDNA.27562.1 | 6.23  | 6.25  | 0.02 | 0.09 | -1.01  | 0.864851 | 0.518355 | 0.94142  | 0.71038  |
| MmugDNA.27563.1.S1_at   | MmugDNA.27563.1 | 6.67  | 6.67  | 0.21 | 0.05 | 1      | 0.910626 | 0.380553 | 0.96217  | 0.61719  |
| MmugDNA.27565.1.S1_at   | MmugDNA.27565.1 | 4.4   | 4.39  | 0.03 | 0.04 | 1      | 0.679361 | 0.995099 | 0.847057 | 0.996947 |
| MmugDNA.27566.1.S1_at   | MmugDNA.27566.1 | 6.79  | 6.62  | 0.15 | 0.16 | 1.12   | 0.116567 | 0.099615 | 0.393692 | 0.358095 |
| MmugDNA.27567.1.S1_at   | MmugDNA.27567.1 | 7.56  | 7.38  | 1.37 | 0.15 | 1.13   | 0.556403 | 0.31374  | 0.771647 | 0.568083 |
| MmugDNA.27568.1.S1_at   | MmugDNA.27568.1 | 3.73  | 3.68  | 0.04 | 0.12 | 1.03   | 0.177641 | 0.487387 | 0.472289 | 0.690473 |
| MmugDNA.27569.1.S1_at   | MmugDNA.27569.1 | 3.3   | 3.39  | 0.07 | 0.1  | -1.06  | 0.873296 | 0.168914 | 0.945619 | 0.445458 |
| MmugDNA.2757.1.S1_at    | MmugDNA.2757.1  | 3.44  | 3.44  | 0.12 | 0.04 | -1     | 0.639404 | 0.45928  | 0.823517 | 0.671678 |
| MmugDNA.27570.1.S1_at   | MmugDNA.27570.1 | 6.71  | 6.71  | 0.01 | 0.09 | 1      | 0.33156  | 0.192364 | 0.613465 | 0.467834 |
| MmugDNA.27571.1.S1_at   | MmugDNA.27571.1 | 10.77 | 11.08 | 0.29 | 0.14 | -1.24  | 0.487073 | 0.766433 | 0.726032 | 0.86428  |
| MmugDNA.27572.1.S1_at   | MmugDNA.27572.1 | 2.77  | 2.75  | 0.17 | 0.09 | 1.01   | 0.358859 | 0.560006 | 0.634521 | 0.736439 |
| MmugDNA.27573.1.S1_at   | MmugDNA.27573.1 | 4.1   | 4.09  | 0.11 | 0.18 | 1      | 0.247323 | 0.441237 | 0.542869 | 0.659477 |
| MmugDNA.27574.1.S1_at   | MmugDNA.27574.1 | 7.48  | 12.05 | 1.69 | 0.25 | -23.73 | 0.017771 | 0.20968  | 0.186977 | 0.48341  |
| MmugDNA.27575.1.S1_at   | MmugDNA.27575.1 | 5.12  | 4.98  | 0.01 | 0.01 | 1.1    | 0.000101 | 0.034659 | 0.051196 | 0.230352 |
| MmugDNA.27576.1.S1_at   | MmugDNA.27576.1 | 7.81  | 6.95  | 0.26 | 0.07 | 1.82   | 0.008118 | 0.02018  | 0.138956 | 0.178424 |
| MmugDNA.27578.1.S1_at   | MmugDNA.27578.1 | 9.5   | 9.58  | 0.2  | 0.13 | -1.05  | 0.501699 | 0.219417 | 0.735505 | 0.493156 |
| MmugDNA.2758.1.S1_at    | MmugDNA.2758.1  | 4.11  | 3.3   | 0.72 | 0.32 | 1.75   | 0.238148 | 0.336071 | 0.535595 | 0.583652 |
| MmugDNA.27581.1.S1_at   | MmugDNA.27581.1 | 4.87  | 4.91  | 0.04 | 0.08 | -1.03  | 0.508984 | 0.281771 | 0.740783 | 0.544844 |
| MmugDNA.27582.1.S1_at   | MmugDNA.27582.1 | 2.98  | 2.82  | 0.02 | 0.11 | 1.11   | 0.072953 | 0.302929 | 0.32778  | 0.560383 |
| MmugDNA.27583.1.S1_at   | MmugDNA.27583.1 | 6.61  | 6.55  | 0.72 | 0.36 | 1.05   | 0.972844 | 0.184171 | 0.989122 | 0.460382 |
| MmugDNA.27585.1.S1_at   | MmugDNA.27585.1 | 8.93  | 8.92  | 0.12 | 0.07 | 1      | 0.58742  | 0.5659   | 0.790473 | 0.740154 |
| MmugDNA.27586.1.S1_at   | MmugDNA.27586.1 | 10.07 | 9.62  | 0.28 | 0.11 | 1.37   | 0.048449 | 0.26013  | 0.277499 | 0.526776 |
| MmugDNA.27587.1.S1_at   | MmugDNA.27587.1 | 5.27  | 4.03  | 0.62 | 0.2  | 2.35   | 0.109861 | 0.05906  | 0.385105 | 0.289927 |
| MmugDNA.27588.1.S1_at   | MmugDNA.27588.1 | 4.44  | 3.7   | 0.82 | 0.71 | 1.66   | 0.458907 | 0.712417 | 0.707292 | 0.833371 |
| MmugDNA.27589.1.S1_at   | MmugDNA.27589.1 | 4.25  | 4.21  | 0.48 | 0.24 | 1.03   | 0.304211 | 0.384165 | 0.591428 | 0.61993  |
| MmugDNA.2759.1.S1_at    | MmugDNA.2759.1  | 7.74  | 7.94  | 0.98 | 0.17 | -1.15  | 0.956835 | 0.797286 | 0.982318 | 0.883122 |
| MmugDNA.27590.1.S1_at   | MmugDNA.27590.1 | 7.29  | 7.79  | 0.54 | 0.07 | -1.41  | 0.060289 | 0.035852 | 0.302661 | 0.233788 |
| MmugDNA.27591.1.S1_at   | MmugDNA.27591.1 | 4.46  | 3.78  | 0.28 | 0.28 | 1.61   | 0.070763 | 0.204615 | 0.324313 | 0.478993 |
| MmugDNA.27592.1.S1_at   | MmugDNA.27592.1 | 3.65  | 3.6   | 0.11 | 0.05 | 1.03   | 0.915736 | 0.257328 | 0.964159 | 0.525115 |
| MmugDNA.36405.1.S1_at   | MmugDNA.36405.1 | 11.47 | 11.97 | 0.19 | 0.24 | -1.41  | 0.220573 | 0.228364 | 0.518295 | 0.50054  |
| MmugDNA.36405.1.S1_s_at | MmugDNA.36405.1 | 14.52 | 14.52 | 0.02 | 0.01 | 1.01   | 0.235814 | 0.248602 | 0.533475 | 0.517903 |
| MmugDNA.27595.1.S1_at   | MmugDNA.27595.1 | 2.95  | 2.98  | 0.09 | 0.07 | -1.02  | 0.258414 | 0.166574 | 0.552539 | 0.443065 |
| MmugDNA.27596.1.S1_at   | MmugDNA.27596.1 | 4.76  | 4.83  | 0.73 | 0.32 | -1.04  | 0.308303 | 0.37164  | 0.594964 | 0.610431 |
| MmugDNA.27597.1.S1_at   | MmugDNA.27597.1 | 3.04  | 3.13  | 0.18 | 0.05 | -1.06  | 0.917717 | 0.865584 | 0.96488  | 0.923598 |
| MmugDNA.27598.1.S1_at   | MmugDNA.27598.1 | 5.35  | 5.35  | 0.48 | 0.21 | -1.01  | 0.420033 | 0.572621 | 0.679269 | 0.744597 |
| MmugDNA.27599.1.S1_at   | MmugDNA.27599.1 | 9.27  | 7.95  | 0.06 | 0.33 | 2.49   | 0.003659 | 0.009722 | 0.105789 | 0.129718 |
| MmugDNA.276.1.S1_at     | MmugDNA.276.1   | 11.63 | 11.45 | 0.15 | 0.15 | 1.13   | 0.185944 | 0.026186 | 0.48212  | 0.202799 |
| MmugDNA.2760.1.S1_at    | MmugDNA.2760.1  | 12.8  | 13.33 | 0.12 | 0.03 | -1.44  | 0.001815 | 0.40013  | 0.08633  | 0.630158 |
| MmugDNA.27600.1.S1_at   | MmugDNA.27600.1 | 5.48  | 5.54  | 0.21 | 0.25 | -1.04  | 0.561354 | 0.683533 | 0.774384 | 0.815375 |
| MmugDNA.27601.1.S1_at   | MmugDNA.27601.1 | 5.7   | 5.45  | 0.25 | 0.59 | 1.19   | 0.48669  | 0.535473 | 0.725795 | 0.721033 |
| MmugDNA.27603.1.S1_at   | MmugDNA.27603.1 | 5.68  | 5.2   | 0.3  | 0.29 | 1.4    | 0.121746 | 0.142506 | 0.400504 | 0.416106 |

|                       |                 |       |       |      |      |       |          |          |          |          |
|-----------------------|-----------------|-------|-------|------|------|-------|----------|----------|----------|----------|
| MmugDNA.27604.1.S1_at | MmugDNA.27604.1 | 10.55 | 10.74 | 0.11 | 0.07 | -1.13 | 0.046325 | 0.130785 | 0.272999 | 0.402959 |
| MmugDNA.27605.1.S1_at | MmugDNA.27605.1 | 8.23  | 8.83  | 0.31 | 0.17 | -1.51 | 0.127735 | 0.005927 | 0.409611 | 0.105331 |
| MmugDNA.27607.1.S1_at | MmugDNA.27607.1 | 4.1   | 3.84  | 0.28 | 0.19 | 1.19  | 0.367598 | 0.559978 | 0.641471 | 0.736439 |
| MmugDNA.27608.1.S1_at | MmugDNA.27608.1 | 6.03  | 6.01  | 0.09 | 0.18 | 1.01  | 0.902501 | 0.54404  | 0.958703 | 0.726592 |
| MmugDNA.27609.1.S1_at | MmugDNA.27609.1 | 5.31  | 5.18  | 0.43 | 0.08 | 1.1   | 0.518598 | 0.301813 | 0.747601 | 0.559758 |
| MmugDNA.2761.1.S1_at  | MmugDNA.2761.1  | 10.3  | 10.45 | 0.31 | 0.09 | -1.1  | 0.134346 | 0.121966 | 0.417974 | 0.391389 |
| MmugDNA.27610.1.S1_at | MmugDNA.27610.1 | 5.61  | 5.44  | 0.22 | 0.16 | 1.12  | 0.190361 | 0.081995 | 0.486685 | 0.330664 |
| MmugDNA.27611.1.S1_at | MmugDNA.27611.1 | 2.66  | 2.67  | 0.09 | 0.17 | -1.01 | 0.324062 | 0.430408 | 0.607782 | 0.651404 |
| MmugDNA.27613.1.S1_at | MmugDNA.27613.1 | 3.66  | 3.6   | 0.03 | 0.25 | 1.05  | 0.589551 | 0.752739 | 0.791613 | 0.855968 |
| MmugDNA.27614.1.S1_at | MmugDNA.27614.1 | 3.82  | 3.86  | 0.16 | 0.05 | -1.03 | 0.721519 | 0.677513 | 0.868843 | 0.811672 |
| MmugDNA.27615.1.S1_at | MmugDNA.27615.1 | 6.28  | 6.36  | 0.12 | 0.05 | -1.05 | 0.997347 | 0.555624 | 0.999086 | 0.733978 |
| MmugDNA.27616.1.S1_at | MmugDNA.27616.1 | 8.19  | 7.52  | 0.11 | 0.35 | 1.59  | 0.048162 | 0.119516 | 0.276908 | 0.388167 |
| MmugDNA.27618.1.S1_at | MmugDNA.27618.1 | 4.44  | 4.43  | 0.12 | 0.04 | 1.01  | 0.352617 | 0.557095 | 0.630029 | 0.73494  |
| MmugDNA.27619.1.S1_at | MmugDNA.27619.1 | 3.81  | 3.72  | 0.15 | 0.04 | 1.06  | 0.178273 | 0.188314 | 0.473017 | 0.46433  |
| MmugDNA.2762.1.S1_at  | MmugDNA.2762.1  | 5.5   | 5.52  | 0.12 | 0.2  | -1.02 | 0.990956 | 0.076556 | 0.996677 | 0.32166  |
| MmugDNA.27620.1.S1_at | MmugDNA.27620.1 | 7.12  | 7.26  | 0.07 | 0.16 | -1.1  | 0.09434  | 0.341662 | 0.363345 | 0.587796 |
| MmugDNA.27622.1.S1_at | MmugDNA.27622.1 | 3.44  | 3.43  | 0.07 | 0.09 | 1.01  | 0.220555 | 0.173533 | 0.518282 | 0.449938 |
| MmugDNA.27623.1.S1_at | MmugDNA.27623.1 | 6.54  | 6.68  | 0.28 | 0.14 | -1.1  | 0.725325 | 0.57899  | 0.871137 | 0.748791 |
| MmugDNA.27624.1.S1_at | MmugDNA.27624.1 | 8.25  | 7.9   | 0.21 | 0.06 | 1.27  | 0.031642 | 0.085744 | 0.231334 | 0.337761 |
| MmugDNA.27625.1.S1_at | MmugDNA.27625.1 | 3.9   | 4     | 0.37 | 0.22 | -1.07 | 0.64378  | 0.762311 | 0.826406 | 0.861726 |
| MmugDNA.27627.1.S1_at | MmugDNA.27627.1 | 3.8   | 3.73  | 0.18 | 0.08 | 1.05  | 0.399497 | 0.316324 | 0.664823 | 0.569809 |
| MmugDNA.27629.1.S1_at | MmugDNA.27629.1 | 6.55  | 6.03  | 0.26 | 0.45 | 1.43  | 0.10338  | 0.103403 | 0.376468 | 0.3643   |
| MmugDNA.2763.1.S1_at  | MmugDNA.2763.1  | 4.95  | 4.91  | 0.09 | 0.01 | 1.03  | 0.158181 | 0.184664 | 0.449156 | 0.460645 |
| MmugDNA.27630.1.S1_at | MmugDNA.27630.1 | 4.46  | 4.69  | 1.01 | 0.03 | -1.18 | 0.581683 | 0.77502  | 0.786785 | 0.869033 |
| MmugDNA.27632.1.S1_at | MmugDNA.27632.1 | 6.48  | 6.44  | 0.55 | 0.12 | 1.03  | 0.350791 | 0.593792 | 0.628649 | 0.758418 |
| MmugDNA.27633.1.S1_at | MmugDNA.27633.1 | 4.98  | 5.7   | 0.48 | 0.53 | -1.64 | 0.141809 | 0.352825 | 0.427793 | 0.596151 |
| MmugDNA.27634.1.S1_at | MmugDNA.27634.1 | 9.65  | 9.54  | 0.35 | 0.03 | 1.08  | 0.893644 | 0.965191 | 0.954606 | 0.98061  |
| MmugDNA.27635.1.S1_at | MmugDNA.27635.1 | 6.82  | 6.91  | 0.03 | 0.08 | -1.06 | 0.12368  | 0.0491   | 0.403307 | 0.266518 |
| MmugDNA.27636.1.S1_at | MmugDNA.27636.1 | 8.9   | 11.87 | 1.44 | 0.22 | -7.84 | 0.070018 | 0.252437 | 0.323079 | 0.521061 |
| MmugDNA.27637.1.S1_at | MmugDNA.27637.1 | 7.19  | 7.02  | 0.23 | 0.01 | 1.13  | 0.085716 | 0.090139 | 0.350079 | 0.344432 |
| MmugDNA.27638.1.S1_at | MmugDNA.27638.1 | 9.72  | 9.49  | 0.14 | 0.27 | 1.17  | 0.923862 | 0.381369 | 0.967657 | 0.617681 |
| MmugDNA.27639.1.S1_at | MmugDNA.27639.1 | 9.01  | 8.95  | 0.17 | 0.18 | 1.04  | 0.707061 | 0.584846 | 0.861311 | 0.75256  |
| MmugDNA.27640.1.S1_at | MmugDNA.27640.1 | 11.92 | 11.75 | 0.11 | 0.07 | 1.12  | 0.119531 | 0.03421  | 0.397421 | 0.228779 |
| MmugDNA.27641.1.S1_at | MmugDNA.27641.1 | 7.2   | 6.84  | 0.11 | 0.29 | 1.29  | 0.276842 | 0.746868 | 0.568332 | 0.853023 |
| MmugDNA.27642.1.S1_at | MmugDNA.27642.1 | 6.3   | 5.96  | 0.83 | 0.45 | 1.27  | 0.322755 | 0.324915 | 0.606593 | 0.575451 |
| MmugDNA.27643.1.S1_at | MmugDNA.27643.1 | 4.55  | 4.56  | 0.17 | 0.18 | -1.01 | 0.981882 | 0.288483 | 0.993299 | 0.54977  |
| MmugDNA.27644.1.S1_at | MmugDNA.27644.1 | 8.4   | 8.39  | 0.54 | 0.11 | 1.01  | 0.840993 | 0.042263 | 0.930107 | 0.250026 |
| MmugDNA.27645.1.S1_at | MmugDNA.27645.1 | 10.67 | 10.39 | 0.12 | 0.16 | 1.21  | 0.126298 | 0.327416 | 0.407515 | 0.577284 |
| MmugDNA.27646.1.S1_at | MmugDNA.27646.1 | 6.65  | 7.29  | 0.08 | 0.21 | -1.56 | 0.007752 | 0.417724 | 0.136735 | 0.642382 |
| MmugDNA.27647.1.S1_at | MmugDNA.27647.1 | 10.19 | 9.59  | 0.22 | 0.19 | 1.51  | 0.041004 | 0.608447 | 0.258927 | 0.767074 |
| MmugDNA.27648.1.S1_at | MmugDNA.27648.1 | 5.47  | 5.62  | 1.41 | 0.43 | -1.11 | 0.801234 | 0.757627 | 0.910693 | 0.858927 |
| MmugDNA.2765.1.S1_at  | MmugDNA.2765.1  | 8.25  | 8.12  | 0.24 | 0.06 | 1.09  | 0.94895  | 0.143256 | 0.978682 | 0.417211 |
| MmugDNA.27650.1.S1_at | MmugDNA.27650.1 | 6.71  | 6.83  | 0.19 | 0.37 | -1.08 | 0.649457 | 0.830796 | 0.829674 | 0.902905 |

|                       |                 |       |       |      |      |       |          |          |          |          |
|-----------------------|-----------------|-------|-------|------|------|-------|----------|----------|----------|----------|
| MmugDNA.27651.1.S1_at | MmugDNA.27651.1 | 3.95  | 3.18  | 0.5  | 0.1  | 1.71  | 0.071875 | 0.05724  | 0.325982 | 0.285059 |
| MmugDNA.27653.1.S1_at | MmugDNA.27653.1 | 4.39  | 4.31  | 0.23 | 0.05 | 1.06  | 0.717412 | 0.652018 | 0.866517 | 0.796529 |
| MmugDNA.27654.1.S1_at | MmugDNA.27654.1 | 3.34  | 3.28  | 0.07 | 0.2  | 1.04  | 0.745805 | 0.596038 | 0.882129 | 0.759325 |
| MmugDNA.27656.1.S1_at | MmugDNA.27656.1 | 5.38  | 5.27  | 0.05 | 0.02 | 1.08  | 0.02695  | 0.132866 | 0.217062 | 0.404544 |
| MmugDNA.27657.1.S1_at | MmugDNA.27657.1 | 4.23  | 4.05  | 0.17 | 0.1  | 1.13  | 0.283202 | 0.471013 | 0.573616 | 0.679162 |
| MmugDNA.27658.1.S1_at | MmugDNA.27658.1 | 5.43  | 5.48  | 0.03 | 0.07 | -1.03 | 0.152166 | 0.196995 | 0.441678 | 0.472105 |
| MmugDNA.2766.1.S1_at  | MmugDNA.2766.1  | 6.08  | 5.7   | 0.29 | 0.11 | 1.3   | 0.073246 | 0.108502 | 0.328341 | 0.372066 |
| MmugDNA.27661.1.S1_at | MmugDNA.27661.1 | 3.23  | 3.33  | 0.29 | 0.09 | -1.07 | 0.674879 | 0.843806 | 0.844854 | 0.911025 |
| MmugDNA.27662.1.S1_at | MmugDNA.27662.1 | 3.16  | 3.19  | 0.5  | 0.11 | -1.02 | 0.557197 | 0.613532 | 0.772057 | 0.770578 |
| MmugDNA.27665.1.S1_at | MmugDNA.27665.1 | 6.12  | 5.99  | 0.17 | 0.06 | 1.09  | 0.558346 | 0.295049 | 0.772827 | 0.554551 |
| MmugDNA.27667.1.S1_at | MmugDNA.27667.1 | 5.93  | 5.68  | 0.91 | 0.34 | 1.18  | 0.251601 | 0.225025 | 0.546344 | 0.49773  |
| MmugDNA.27669.1.S1_at | MmugDNA.27669.1 | 6.87  | 7.49  | 0.65 | 0.19 | -1.53 | 0.070674 | 0.086676 | 0.324153 | 0.339267 |
| MmugDNA.27670.1.S1_at | MmugDNA.27670.1 | 3.45  | 3.39  | 0.03 | 0.15 | 1.04  | 0.879128 | 0.56946  | 0.948529 | 0.742405 |
| MmugDNA.27672.1.S1_at | MmugDNA.27672.1 | 7.64  | 8.03  | 0.51 | 0.16 | -1.31 | 0.577564 | 0.868973 | 0.783679 | 0.925578 |
| MmugDNA.27673.1.S1_at | MmugDNA.27673.1 | 3.73  | 3.85  | 0.1  | 0.11 | -1.09 | 0.109929 | 0.040755 | 0.385165 | 0.246735 |
| MmugDNA.27674.1.S1_at | MmugDNA.27674.1 | 3.26  | 3.09  | 0.52 | 0.44 | 1.13  | 0.997191 | 0.968574 | 0.999081 | 0.982645 |
| MmugDNA.27677.1.S1_at | MmugDNA.27677.1 | 6.08  | 5.97  | 0.01 | 0.11 | 1.08  | 0.128229 | 0.585383 | 0.410227 | 0.752844 |
| MmugDNA.27678.1.S1_at | MmugDNA.27678.1 | 10.74 | 10.53 | 0.13 | 0.06 | 1.16  | 0.025852 | 0.024998 | 0.213543 | 0.198121 |
| MmugDNA.27679.1.S1_at | MmugDNA.27679.1 | 5.09  | 5.16  | 0.01 | 0.22 | -1.05 | 0.505564 | 0.38093  | 0.738603 | 0.617426 |
| MmugDNA.27680.1.S1_at | MmugDNA.27680.1 | 11.65 | 11.54 | 0.13 | 0.08 | 1.08  | 0.182403 | 0.065521 | 0.478114 | 0.301415 |
| MmugDNA.27686.1.S1_at | MmugDNA.27686.1 | 11.92 | 11.82 | 0.09 | 0.05 | 1.07  | 0.162498 | 0.510748 | 0.454561 | 0.705145 |
| MmugDNA.2769.1.S1_at  | MmugDNA.2769.1  | 6.02  | 6.21  | 1.07 | 0.36 | -1.14 | 0.55051  | 0.426307 | 0.76784  | 0.648483 |
| MmugDNA.27692.1.S1_at | MmugDNA.27692.1 | 3.17  | 3.19  | 0.1  | 0.09 | -1.02 | 0.581284 | 0.099298 | 0.786445 | 0.357562 |
| MmugDNA.27694.1.S1_at | MmugDNA.27694.1 | 6.35  | 6.29  | 0.15 | 0.06 | 1.04  | 0.570653 | 0.346534 | 0.779362 | 0.591411 |
| MmugDNA.2770.1.S1_at  | MmugDNA.2770.1  | 6.22  | 6.27  | 0.08 | 0.08 | -1.04 | 0.374985 | 0.82109  | 0.645803 | 0.897041 |
| MmugDNA.27700.1.S1_at | MmugDNA.27700.1 | 9.31  | 9.72  | 0.1  | 0.05 | -1.33 | 0.005096 | 0.044346 | 0.116664 | 0.255072 |
| MmugDNA.27702.1.S1_at | MmugDNA.27702.1 | 4.6   | 3.95  | 0.56 | 0.16 | 1.57  | 0.123462 | 0.109505 | 0.402832 | 0.373339 |
| MmugDNA.27704.1.S1_at | MmugDNA.27704.1 | 3.85  | 3.66  | 0.08 | 0.06 | 1.14  | 0.062597 | 0.615517 | 0.306862 | 0.772025 |
| MmugDNA.27705.1.S1_at | MmugDNA.27705.1 | 9.15  | 9.57  | 0.25 | 0.1  | -1.34 | 0.100778 | 0.122298 | 0.371886 | 0.391979 |
| MmugDNA.27707.1.S1_at | MmugDNA.27707.1 | 7.34  | 7.13  | 0.08 | 0.05 | 1.15  | 0.027595 | 0.008781 | 0.21866  | 0.124066 |
| MmugDNA.27708.1.S1_at | MmugDNA.27708.1 | 7.55  | 7.47  | 0.8  | 0.35 | 1.05  | 0.758966 | 0.73685  | 0.889555 | 0.847693 |
| MmugDNA.27709.1.S1_at | MmugDNA.27709.1 | 5.1   | 6.05  | 0.97 | 0.61 | -1.93 | 0.41441  | 0.170951 | 0.675645 | 0.447561 |
| MmugDNA.2771.1.S1_at  | MmugDNA.2771.1  | 7.88  | 7.8   | 0.25 | 0.2  | 1.06  | 0.772462 | 0.95335  | 0.895784 | 0.97351  |
| MmugDNA.27711.1.S1_at | MmugDNA.27711.1 | 7.39  | 7.8   | 1.1  | 0.39 | -1.33 | 0.981411 | 0.584895 | 0.993043 | 0.75256  |
| MmugDNA.27712.1.S1_at | MmugDNA.27712.1 | 8.23  | 8.19  | 0.1  | 0.19 | 1.03  | 0.239274 | 0.231855 | 0.536529 | 0.503594 |
| MmugDNA.27713.1.S1_at | MmugDNA.27713.1 | 7     | 6.56  | 0.98 | 0.68 | 1.36  | 0.220194 | 0.507366 | 0.517758 | 0.702917 |
| MmugDNA.27714.1.S1_at | MmugDNA.27714.1 | 3.97  | 3.62  | 0.13 | 0.13 | 1.28  | 0.057208 | 0.054684 | 0.296556 | 0.27934  |
| MmugDNA.27716.1.S1_at | MmugDNA.27716.1 | 7.3   | 6.78  | 0.43 | 0.36 | 1.43  | 0.129777 | 0.137405 | 0.412052 | 0.410338 |
| MmugDNA.27717.1.S1_at | MmugDNA.27717.1 | 3.48  | 3.51  | 0.31 | 0.14 | -1.02 | 0.30377  | 0.234858 | 0.591195 | 0.506125 |
| MmugDNA.27718.1.S1_at | MmugDNA.27718.1 | 3.45  | 3.4   | 0.06 | 0.12 | 1.04  | 0.891346 | 0.677625 | 0.953686 | 0.811734 |
| MmugDNA.27719.1.S1_at | MmugDNA.27719.1 | 8.06  | 8.11  | 0.52 | 0.11 | -1.04 | 0.420025 | 0.710008 | 0.679269 | 0.831887 |
| MmugDNA.2772.1.S1_at  | MmugDNA.2772.1  | 4.93  | 4.82  | 0.15 | 0.18 | 1.08  | 0.564534 | 0.774554 | 0.776201 | 0.868769 |
| MmugDNA.27721.1.S1_at | MmugDNA.27721.1 | 2.53  | 2.5   | 0.03 | 0.1  | 1.02  | 0.744173 | 0.920372 | 0.881397 | 0.955115 |

|                         |                 |       |       |      |      |       |          |          |          |          |
|-------------------------|-----------------|-------|-------|------|------|-------|----------|----------|----------|----------|
| MmugDNA.27721.1.S1_x_at | MmugDNA.27721.1 | 2.42  | 2.61  | 0.04 | 0.04 | -1.14 | 0.005232 | 0.030074 | 0.117387 | 0.215243 |
| MmugDNA.27722.1.S1_at   | MmugDNA.27722.1 | 9.72  | 9.74  | 0.33 | 0.05 | -1.01 | 0.337132 | 0.296045 | 0.617686 | 0.555314 |
| MmugDNA.27723.1.S1_at   | MmugDNA.27723.1 | 5.36  | 5.36  | 0.15 | 0.12 | 1     | 0.965102 | 0.939523 | 0.985924 | 0.965642 |
| MmugDNA.27724.1.S1_at   | MmugDNA.27724.1 | 5.73  | 6.57  | 0.53 | 0.11 | -1.79 | 0.122228 | 0.127094 | 0.401065 | 0.397922 |
| MmugDNA.27725.1.S1_at   | MmugDNA.27725.1 | 9.97  | 9.98  | 0.14 | 0.08 | -1.01 | 0.466477 | 0.782802 | 0.712252 | 0.874272 |
| MmugDNA.27726.1.S1_at   | MmugDNA.27726.1 | 4.59  | 4.41  | 0.37 | 0.27 | 1.13  | 0.217578 | 0.259534 | 0.515458 | 0.526448 |
| MmugDNA.27727.1.S1_at   | MmugDNA.27727.1 | 9.68  | 9.44  | 0.07 | 0.26 | 1.18  | 0.183877 | 0.125737 | 0.479745 | 0.396313 |
| MmugDNA.27728.1.S1_at   | MmugDNA.27728.1 | 3.32  | 3.08  | 0.11 | 0.05 | 1.18  | 0.017943 | 0.064917 | 0.187151 | 0.300818 |
| MmugDNA.2773.1.S1_at    | MmugDNA.2773.1  | 7.81  | 6.91  | 0.22 | 0.13 | 1.87  | 0.004861 | 0.013406 | 0.115123 | 0.148363 |
| MmugDNA.27731.1.S1_at   | MmugDNA.27731.1 | 7.31  | 7.47  | 0.7  | 0.12 | -1.11 | 0.454474 | 0.625916 | 0.704378 | 0.7794   |
| MmugDNA.27732.1.S1_at   | MmugDNA.27732.1 | 11.04 | 11.12 | 0.03 | 0.09 | -1.06 | 0.137051 | 0.306991 | 0.421892 | 0.563427 |
| MmugDNA.27733.1.S1_at   | MmugDNA.27733.1 | 3.36  | 3.35  | 0.1  | 0.1  | 1.01  | 0.724676 | 0.279505 | 0.87078  | 0.543055 |
| MmugDNA.27735.1.S1_at   | MmugDNA.27735.1 | 11.92 | 11.78 | 0.14 | 0.06 | 1.11  | 0.253501 | 0.000424 | 0.547829 | 0.038316 |
| MmugDNA.27737.1.S1_at   | MmugDNA.27737.1 | 5.26  | 5.16  | 0.44 | 0.05 | 1.07  | 0.282556 | 0.304612 | 0.573229 | 0.561838 |
| MmugDNA.27738.1.S1_at   | MmugDNA.27738.1 | 3.02  | 3.34  | 0.13 | 0.25 | -1.25 | 0.195604 | 0.433594 | 0.492376 | 0.653865 |
| MmugDNA.27739.1.S1_at   | MmugDNA.27739.1 | 4.69  | 4.24  | 0.09 | 0.2  | 1.37  | 0.021949 | 0.013622 | 0.201313 | 0.1494   |
| MmugDNA.27740.1.S1_at   | MmugDNA.27740.1 | 7.01  | 7.64  | 1.57 | 0.32 | -1.55 | 0.939332 | 0.979898 | 0.974419 | 0.989228 |
| MmugDNA.27742.1.S1_s_at | MmugDNA.27742.1 | 11.13 | 11    | 0.1  | 0.05 | 1.1   | 0.115587 | 0.002429 | 0.392723 | 0.073093 |
| MmugDNA.27743.1.S1_at   | MmugDNA.27743.1 | 4.11  | 4.13  | 0.48 | 0.22 | -1.01 | 0.377149 | 0.561207 | 0.64767  | 0.737235 |
| MmugDNA.27745.1.S1_at   | MmugDNA.27745.1 | 4.43  | 4.19  | 0.28 | 0.37 | 1.19  | 0.486297 | 0.4154   | 0.725583 | 0.640873 |
| MmugDNA.27748.1.S1_at   | MmugDNA.27748.1 | 5.55  | 5.56  | 0.31 | 0.06 | -1.01 | 0.434737 | 0.158292 | 0.689913 | 0.43403  |
| MmugDNA.27749.1.S1_at   | MmugDNA.27749.1 | 9.45  | 9.41  | 0.22 | 0.12 | 1.03  | 0.951388 | 0.037865 | 0.979913 | 0.238987 |
| MmugDNA.31397.1.S1_s_at | MmugDNA.31397.1 | 10.19 | 10.03 | 0.23 | 0.11 | 1.12  | 0.842096 | 0.075605 | 0.930723 | 0.32003  |
| MmugDNA.2775.1.S1_at    | MmugDNA.2775.1  | 7.77  | 7.9   | 0.17 | 0.12 | -1.09 | 0.762984 | 0.068397 | 0.891457 | 0.307955 |
| MmugDNA.27750.1.S1_at   | MmugDNA.27750.1 | 3.47  | 3.47  | 0.11 | 0.09 | 1     | 0.477643 | 0.637133 | 0.719533 | 0.786653 |
| MmugDNA.27751.1.S1_at   | MmugDNA.27751.1 | 5.07  | 5.09  | 0.4  | 0.38 | -1.01 | 0.975769 | 0.429054 | 0.990389 | 0.650583 |
| MmugDNA.27754.1.S1_at   | MmugDNA.27754.1 | 5.47  | 5.59  | 0.25 | 0.12 | -1.09 | 0.927094 | 0.153616 | 0.969143 | 0.428341 |
| MmugDNA.27755.1.S1_at   | MmugDNA.27755.1 | 4.4   | 4.35  | 0.63 | 0.49 | 1.03  | 0.731582 | 0.318508 | 0.874587 | 0.571239 |
| MmugDNA.27756.1.S1_at   | MmugDNA.27756.1 | 6.99  | 4.73  | 0.34 | 0.76 | 4.77  | 0.014044 | 0.006446 | 0.169894 | 0.109087 |
| MmugDNA.2776.1.S1_at    | MmugDNA.2776.1  | 7.91  | 8.49  | 0.61 | 0.16 | -1.49 | 0.172681 | 0.464141 | 0.46677  | 0.674916 |
| MmugDNA.27761.1.S1_at   | MmugDNA.27761.1 | 4.69  | 4.67  | 0.07 | 0.04 | 1.01  | 0.965693 | 0.043923 | 0.9861   | 0.254098 |
| MmugDNA.27764.1.S1_at   | MmugDNA.27764.1 | 4.19  | 4.94  | 0.21 | 0.42 | -1.68 | 0.14539  | 0.053325 | 0.432674 | 0.276481 |
| MmugDNA.27765.1.S1_at   | MmugDNA.27765.1 | 3.27  | 3.27  | 0.08 | 0.15 | 1     | 0.719344 | 0.31658  | 0.867628 | 0.569949 |
| MmugDNA.27767.1.S1_at   | MmugDNA.27767.1 | 5.51  | 4.92  | 0.49 | 0.2  | 1.5   | 0.384304 | 0.334651 | 0.653339 | 0.582581 |
| MmugDNA.27770.1.S1_at   | MmugDNA.27770.1 | 5.07  | 4.95  | 0.11 | 0.07 | 1.09  | 0.201922 | 0.323806 | 0.499426 | 0.574609 |
| MmugDNA.27771.1.S1_at   | MmugDNA.27771.1 | 7.03  | 7.12  | 0.42 | 0.25 | -1.07 | 0.80786  | 0.931817 | 0.91403  | 0.961265 |
| MmugDNA.27774.1.S1_at   | MmugDNA.27774.1 | 7.11  | 7.07  | 0.12 | 0.05 | 1.03  | 0.222165 | 0.160646 | 0.520231 | 0.436745 |
| MmugDNA.27775.1.S1_at   | MmugDNA.27775.1 | 5.43  | 5.48  | 0.27 | 0.06 | -1.03 | 0.934474 | 0.764497 | 0.972505 | 0.863128 |
| MmugDNA.27777.1.S1_at   | MmugDNA.27777.1 | 5.77  | 5.76  | 0.02 | 0.05 | 1.01  | 0.827371 | 0.434984 | 0.923582 | 0.654901 |
| MmugDNA.27778.1.S1_at   | MmugDNA.27778.1 | 11.49 | 11.84 | 0.15 | 0.06 | -1.28 | 0.033434 | 0.042618 | 0.236786 | 0.251037 |
| MmugDNA.27778.1.S1_s_at | MmugDNA.27778.1 | 11.27 | 11.67 | 0.16 | 0.03 | -1.31 | 0.02658  | 0.009204 | 0.216244 | 0.126579 |
| MmugDNA.27780.1.S1_at   | MmugDNA.27780.1 | 4.71  | 4.71  | 0.03 | 0.04 | -1    | 0.895052 | 0.004258 | 0.955278 | 0.091808 |
| MmugDNA.27782.1.S1_at   | MmugDNA.27782.1 | 7.73  | 7.76  | 0.16 | 0    | -1.02 | 0.751027 | 0.995143 | 0.885057 | 0.996973 |

|                         |                 |       |       |      |      |       |          |          |          |          |
|-------------------------|-----------------|-------|-------|------|------|-------|----------|----------|----------|----------|
| MmugDNA.27783.1.S1_at   | MmugDNA.27783.1 | 8.57  | 8.44  | 0.09 | 0.06 | 1.09  | 0.026056 | 0.318671 | 0.214457 | 0.571315 |
| MmugDNA.27784.1.S1_at   | MmugDNA.27784.1 | 7.3   | 7.29  | 0.1  | 0.01 | 1.01  | 0.6607   | 0.481074 | 0.836228 | 0.686127 |
| MmugDNA.27786.1.S1_at   | MmugDNA.27786.1 | 3.65  | 3.66  | 0.01 | 0.11 | -1.01 | 0.426994 | 0.421395 | 0.684319 | 0.644994 |
| MmugDNA.27789.1.S1_at   | MmugDNA.27789.1 | 7.61  | 7.46  | 0.05 | 0.17 | 1.11  | 0.281041 | 0.050294 | 0.571931 | 0.269573 |
| MmugDNA.2779.1.S1_at    | MmugDNA.2779.1  | 3.58  | 3.49  | 0.03 | 0.05 | 1.06  | 0.087009 | 0.017126 | 0.352559 | 0.165775 |
| MmugDNA.27791.1.S1_at   | MmugDNA.27791.1 | 4.18  | 4.29  | 0.15 | 0.08 | -1.08 | 0.908456 | 0.59384  | 0.961215 | 0.758418 |
| MmugDNA.27792.1.S1_at   | MmugDNA.27792.1 | 3.45  | 3.45  | 0.12 | 0.08 | -1    | 0.795601 | 0.267899 | 0.907596 | 0.533607 |
| MmugDNA.27794.1.S1_at   | MmugDNA.27794.1 | 6.46  | 6.86  | 0.33 | 0.33 | -1.32 | 0.257765 | 0.171006 | 0.55199  | 0.447561 |
| MmugDNA.27795.1.S1_at   | MmugDNA.27795.1 | 4.99  | 4.86  | 0.25 | 0.18 | 1.09  | 0.890119 | 0.902825 | 0.953208 | 0.944844 |
| MmugDNA.27796.1.S1_at   | MmugDNA.27796.1 | 5.62  | 5.98  | 0.48 | 0.09 | -1.28 | 0.097116 | 0.285653 | 0.367275 | 0.547395 |
| MmugDNA.27797.1.S1_at   | MmugDNA.27797.1 | 3.67  | 3.78  | 0.1  | 0    | -1.08 | 0.468365 | 0.559603 | 0.713506 | 0.736365 |
| MmugDNA.27798.1.S1_at   | MmugDNA.27798.1 | 5.42  | 5.89  | 0.37 | 0.12 | -1.38 | 0.070131 | 0.114936 | 0.323118 | 0.381665 |
| MmugDNA.27799.1.S1_at   | MmugDNA.27799.1 | 4.65  | 4.96  | 0.38 | 0.29 | -1.24 | 0.620796 | 0.263963 | 0.812178 | 0.530153 |
| MmugDNA.27800.1.S1_at   | MmugDNA.27800.1 | 5.68  | 4.46  | 1.14 | 0.28 | 2.32  | 0.130266 | 0.169704 | 0.412564 | 0.446287 |
| MmugDNA.27802.1.S1_at   | MmugDNA.27802.1 | 5.67  | 5.6   | 0.33 | 0.21 | 1.05  | 0.677217 | 0.717579 | 0.846031 | 0.836471 |
| MmugDNA.27803.1.S1_at   | MmugDNA.27803.1 | 3.17  | 3.01  | 0.11 | 0.05 | 1.12  | 0.319799 | 0.112602 | 0.604352 | 0.378094 |
| MmugDNA.27806.1.S1_at   | MmugDNA.27806.1 | 3.34  | 4.07  | 0.14 | 0.48 | -1.65 | 0.203233 | 0.170995 | 0.501162 | 0.447561 |
| MmugDNA.27807.1.S1_at   | MmugDNA.27807.1 | 5.88  | 5.88  | 0.12 | 0.17 | 1     | 0.445972 | 0.452927 | 0.698308 | 0.667359 |
| MmugDNA.27809.1.S1_at   | MmugDNA.27809.1 | 5.25  | 5.73  | 0.19 | 0.12 | -1.4  | 0.009221 | 0.007467 | 0.145865 | 0.115888 |
| MmugDNA.27810.1.S1_at   | MmugDNA.27810.1 | 5.85  | 5.28  | 0.58 | 0.24 | 1.49  | 0.351111 | 0.550096 | 0.628776 | 0.730241 |
| MmugDNA.27811.1.S1_at   | MmugDNA.27811.1 | 4.51  | 4.59  | 0.2  | 0.17 | -1.05 | 0.936962 | 0.059162 | 0.97363  | 0.290182 |
| MmugDNA.27812.1.S1_at   | MmugDNA.27812.1 | 6.01  | 5.97  | 0.17 | 0.1  | 1.03  | 0.370534 | 0.462022 | 0.643448 | 0.673527 |
| MmugDNA.27813.1.S1_at   | MmugDNA.27813.1 | 9.02  | 8.94  | 0.08 | 0.13 | 1.06  | 0.262777 | 0.137713 | 0.556683 | 0.410711 |
| MmugDNA.27814.1.S1_at   | MmugDNA.27814.1 | 8.22  | 8.94  | 0.46 | 0.06 | -1.65 | 0.139874 | 0.350335 | 0.425463 | 0.594081 |
| MmugDNA.27815.1.S1_at   | MmugDNA.27815.1 | 7.58  | 6.65  | 1.06 | 0.3  | 1.9   | 0.637862 | 0.896023 | 0.822597 | 0.940574 |
| MmugDNA.27817.1.S1_at   | MmugDNA.27817.1 | 8.22  | 7.68  | 0.03 | 0.31 | 1.46  | 0.016535 | 0.267294 | 0.181539 | 0.532924 |
| MmugDNA.27818.1.S1_at   | MmugDNA.27818.1 | 5.21  | 5.2   | 0.18 | 0.02 | 1     | 0.687884 | 0.726588 | 0.85092  | 0.841849 |
| MmugDNA.27819.1.S1_at   | MmugDNA.27819.1 | 6.27  | 6.97  | 0.75 | 0.29 | -1.63 | 0.162756 | 0.215283 | 0.454811 | 0.489018 |
| MmugDNA.27820.1.S1_at   | MmugDNA.27820.1 | 5.59  | 5.77  | 0.17 | 0.19 | -1.14 | 0.133366 | 0.100613 | 0.41693  | 0.359897 |
| MmugDNA.27821.1.S1_at   | MmugDNA.27821.1 | 3.27  | 3.31  | 0.14 | 0.02 | -1.03 | 0.219244 | 0.229925 | 0.516987 | 0.501802 |
| MmugDNA.27822.1.S1_at   | MmugDNA.27822.1 | 3.84  | 4.81  | 0.38 | 0.14 | -1.97 | 0.022137 | 0.01775  | 0.20197  | 0.168367 |
| MmugDNA.25318.1.S1_s_at | MmugDNA.25318.1 | 5.52  | 5.64  | 0.08 | 0.19 | -1.09 | 0.346709 | 0.568172 | 0.625    | 0.741859 |
| MmugDNA.27823.1.S1_at   | MmugDNA.27823.1 | 9.73  | 9.65  | 0.17 | 0.04 | 1.06  | 0.150487 | 0.233071 | 0.439529 | 0.50445  |
| MmugDNA.27824.1.S1_at   | MmugDNA.27824.1 | 4.05  | 3.83  | 0.42 | 0.1  | 1.17  | 0.952865 | 0.363783 | 0.980564 | 0.604189 |
| MmugDNA.27825.1.S1_at   | MmugDNA.27825.1 | 11.08 | 11.45 | 0.09 | 0.07 | -1.29 | 0.005408 | 0.457212 | 0.118701 | 0.670746 |
| MmugDNA.27826.1.S1_at   | MmugDNA.27826.1 | 5.28  | 5.12  | 0.18 | 0.06 | 1.12  | 0.455544 | 0.553223 | 0.705182 | 0.73239  |
| MmugDNA.27828.1.S1_at   | MmugDNA.27828.1 | 10.96 | 10.73 | 0.13 | 0.12 | 1.17  | 0.06048  | 0.512172 | 0.30301  | 0.706087 |
| MmugDNA.2783.1.S1_at    | MmugDNA.2783.1  | 4.05  | 4.05  | 0.05 | 0.03 | 1     | 0.248254 | 0.339461 | 0.543637 | 0.586093 |
| MmugDNA.27830.1.S1_at   | MmugDNA.27830.1 | 9.33  | 9.25  | 0.31 | 0.38 | 1.06  | 0.889039 | 0.96984  | 0.952724 | 0.983503 |
| MmugDNA.27831.1.S1_at   | MmugDNA.27831.1 | 5.35  | 5.23  | 0.07 | 0.29 | 1.08  | 0.602844 | 0.0054   | 0.800511 | 0.101438 |
| MmugDNA.27832.1.S1_at   | MmugDNA.27832.1 | 5.91  | 5.92  | 0.31 | 0.15 | -1.01 | 0.875199 | 0.043183 | 0.946453 | 0.252557 |
| MmugDNA.27834.1.S1_at   | MmugDNA.27834.1 | 6.93  | 6.93  | 0.11 | 0.13 | -1    | 0.92509  | 0.936078 | 0.96818  | 0.963958 |
| MmugDNA.27837.1.S1_at   | MmugDNA.27837.1 | 10.2  | 10.22 | 0.2  | 0.09 | -1.02 | 0.775635 | 0.85612  | 0.89744  | 0.917842 |

|                         |                 |       |       |      |      |       |          |          |          |          |
|-------------------------|-----------------|-------|-------|------|------|-------|----------|----------|----------|----------|
| MmugDNA.27838.1.S1_at   | MmugDNA.27838.1 | 4.87  | 5.22  | 0.34 | 0.36 | -1.28 | 0.527425 | 0.551344 | 0.753064 | 0.730922 |
| MmugDNA.2784.1.S1_at    | MmugDNA.2784.1  | 4.47  | 4.65  | 0.14 | 0.17 | -1.13 | 0.971863 | 0.220907 | 0.988676 | 0.494317 |
| MmugDNA.27840.1.S1_at   | MmugDNA.27840.1 | 11.06 | 10.51 | 0.33 | 0.09 | 1.46  | 0.049277 | 0.069321 | 0.279456 | 0.309558 |
| MmugDNA.27841.1.S1_at   | MmugDNA.27841.1 | 12.44 | 12.29 | 0.09 | 0.02 | 1.11  | 0.04739  | 0.008622 | 0.275072 | 0.123117 |
| MmugDNA.27842.1.S1_at   | MmugDNA.27842.1 | 6.24  | 6.24  | 0.08 | 0.18 | -1    | 0.264674 | 0.304858 | 0.55795  | 0.561994 |
| MmugDNA.27843.1.S1_at   | MmugDNA.27843.1 | 5.1   | 5.1   | 0.21 | 0.03 | -1    | 0.343521 | 0.817181 | 0.622989 | 0.894545 |
| MmugDNA.27846.1.S1_at   | MmugDNA.27846.1 | 7.48  | 7.29  | 0.09 | 0.3  | 1.14  | 0.337134 | 0.793092 | 0.617686 | 0.88052  |
| MmugDNA.27847.1.S1_at   | MmugDNA.27847.1 | 4.9   | 4.4   | 0.26 | 0.24 | 1.41  | 0.152761 | 0.195224 | 0.442472 | 0.470253 |
| MmugDNA.27849.1.S1_at   | MmugDNA.27849.1 | 3.07  | 3.08  | 0.02 | 0.09 | -1    | 0.8      | 0.7048   | 0.909858 | 0.828831 |
| MmugDNA.27851.1.S1_at   | MmugDNA.27851.1 | 7.86  | 8.34  | 0.48 | 0.14 | -1.39 | 0.566322 | 0.458412 | 0.777263 | 0.671165 |
| MmugDNA.27852.1.S1_at   | MmugDNA.27852.1 | 12.35 | 11.99 | 0.09 | 0.03 | 1.29  | 0.00242  | 0.620491 | 0.093606 | 0.775449 |
| MmugDNA.27853.1.S1_at   | MmugDNA.27853.1 | 11.23 | 10.63 | 0.26 | 0.07 | 1.51  | 0.020355 | 0.316961 | 0.196287 | 0.570275 |
| MmugDNA.27854.1.S1_at   | MmugDNA.27854.1 | 9.62  | 9.08  | 0.22 | 0.1  | 1.45  | 0.019838 | 0.202878 | 0.193999 | 0.477312 |
| MmugDNA.27855.1.S1_at   | MmugDNA.27855.1 | 5.28  | 5.15  | 0.48 | 0.27 | 1.09  | 0.410394 | 0.230489 | 0.672457 | 0.502251 |
| MmugDNA.27856.1.S1_s_at | MmugDNA.27856.1 | 6.05  | 6.27  | 0.57 | 0.05 | -1.17 | 0.206055 | 0.205772 | 0.50382  | 0.48007  |
| MmugDNA.27858.1.S1_at   | MmugDNA.27858.1 | 7     | 6.78  | 0.34 | 0.03 | 1.16  | 0.206709 | 0.148936 | 0.504346 | 0.423294 |
| MmugDNA.27860.1.S1_at   | MmugDNA.27860.1 | 4.04  | 4.74  | 0.25 | 0.73 | -1.62 | 0.446095 | 0.591012 | 0.698352 | 0.756581 |
| MmugDNA.27861.1.S1_at   | MmugDNA.27861.1 | 3.89  | 3.91  | 0.76 | 0.25 | -1.01 | 0.991306 | 0.947294 | 0.996793 | 0.970103 |
| MmugDNA.27862.1.S1_at   | MmugDNA.27862.1 | 3.32  | 3.38  | 0.08 | 0.19 | -1.04 | 0.808863 | 0.889676 | 0.914357 | 0.937154 |
| MmugDNA.27863.1.S1_at   | MmugDNA.27863.1 | 5.33  | 4.73  | 0.4  | 0.74 | 1.52  | 0.790857 | 0.432123 | 0.90499  | 0.652775 |
| MmugDNA.27864.1.S1_at   | MmugDNA.27864.1 | 7.5   | 7.98  | 0.93 | 0.2  | -1.39 | 0.130808 | 0.225092 | 0.413365 | 0.497741 |
| MmugDNA.27865.1.S1_at   | MmugDNA.27865.1 | 10.49 | 10.59 | 0.11 | 0.1  | -1.07 | 0.25012  | 0.08313  | 0.544879 | 0.332999 |
| MmugDNA.27866.1.S1_at   | MmugDNA.27866.1 | 4.52  | 4.93  | 0.83 | 0.05 | -1.33 | 0.974831 | 0.992595 | 0.989924 | 0.995715 |
| MmugDNA.27867.1.S1_at   | MmugDNA.27867.1 | 6.66  | 6.45  | 0.18 | 0.34 | 1.16  | 0.323192 | 0.353788 | 0.607056 | 0.596815 |
| MmugDNA.27868.1.S1_at   | MmugDNA.27868.1 | 5.72  | 5.54  | 0.49 | 0.07 | 1.13  | 0.180196 | 0.098978 | 0.475329 | 0.357049 |
| MmugDNA.2787.1.S1_at    | MmugDNA.2787.1  | 3.7   | 3.8   | 0.2  | 0.15 | -1.07 | 0.971094 | 0.675232 | 0.988523 | 0.81026  |
| MmugDNA.27871.1.S1_at   | MmugDNA.27871.1 | 4.13  | 4.05  | 0.33 | 0.24 | 1.06  | 0.684343 | 0.764407 | 0.849602 | 0.863093 |
| MmugDNA.27872.1.S1_at   | MmugDNA.27872.1 | 7.15  | 6.88  | 0.1  | 0.18 | 1.21  | 0.051712 | 0.043394 | 0.284675 | 0.252955 |
| MmugDNA.27874.1.S1_at   | MmugDNA.27874.1 | 6.21  | 6.27  | 0.07 | 0.05 | -1.05 | 0.247049 | 0.031851 | 0.542659 | 0.220909 |
| MmugDNA.27875.1.S1_at   | MmugDNA.27875.1 | 12.27 | 12.17 | 0.24 | 0.15 | 1.08  | 0.724018 | 0.528657 | 0.870379 | 0.716749 |
| MmugDNA.27877.1.S1_at   | MmugDNA.27877.1 | 4.63  | 5.32  | 1.59 | 0.63 | -1.62 | 0.971612 | 0.964135 | 0.98857  | 0.980052 |
| MmugDNA.27878.1.S1_at   | MmugDNA.27878.1 | 3.68  | 3.15  | 0.44 | 0.57 | 1.45  | 0.47327  | 0.781932 | 0.716569 | 0.873615 |
| MmugDNA.27879.1.S1_at   | MmugDNA.27879.1 | 8.58  | 9.59  | 0.53 | 0.16 | -2    | 0.037913 | 0.248263 | 0.250532 | 0.517596 |
| MmugDNA.27880.1.S1_at   | MmugDNA.27880.1 | 5.82  | 5.82  | 0.36 | 0.04 | -1    | 0.374609 | 0.559472 | 0.645606 | 0.736301 |
| MmugDNA.27881.1.S1_at   | MmugDNA.27881.1 | 7.75  | 7.73  | 0.31 | 0.32 | 1.02  | 0.640914 | 0.557535 | 0.824509 | 0.73509  |
| MmugDNA.27882.1.S1_at   | MmugDNA.27882.1 | 6.82  | 6.51  | 0.37 | 0.15 | 1.24  | 0.282245 | 0.14228  | 0.573042 | 0.41579  |
| MmugDNA.27883.1.S1_at   | MmugDNA.27883.1 | 4.6   | 4.58  | 0.52 | 0.12 | 1.01  | 0.277992 | 0.302752 | 0.569395 | 0.560307 |
| MmugDNA.27884.1.S1_at   | MmugDNA.27884.1 | 4.28  | 4.25  | 0.09 | 0.16 | 1.02  | 0.751358 | 0.122555 | 0.885256 | 0.392468 |
| MmugDNA.27887.1.S1_at   | MmugDNA.27887.1 | 9.04  | 8.63  | 0.44 | 0.13 | 1.32  | 0.068316 | 0.395556 | 0.319152 | 0.627565 |
| MmugDNA.27889.1.S1_at   | MmugDNA.27889.1 | 9.32  | 9.77  | 0.46 | 0.19 | -1.37 | 0.261765 | 0.796933 | 0.555908 | 0.882822 |
| MmugDNA.2789.1.S1_at    | MmugDNA.2789.1  | 10.31 | 8.31  | 0.49 | 0.11 | 4.03  | 0.002206 | 0.002155 | 0.090814 | 0.068763 |
| MmugDNA.27890.1.S1_s_at | MmugDNA.27890.1 | 9.98  | 9.39  | 0.28 | 0.08 | 1.51  | 0.076948 | 0.173808 | 0.335411 | 0.450128 |
| MmugDNA.27891.1.S1_at   | MmugDNA.27891.1 | 6.43  | 6.39  | 0.02 | 0.03 | 1.03  | 0.389601 | 0.25066  | 0.657397 | 0.51941  |



|                         |                 |       |       |      |      |       |          |          |          |          |
|-------------------------|-----------------|-------|-------|------|------|-------|----------|----------|----------|----------|
| MmugDNA.27892.1.S1_at   | MmugDNA.27892.1 | 5.91  | 5.76  | 0.27 | 0.09 | 1.11  | 0.481035 | 0.568553 | 0.72178  | 0.742027 |
| MmugDNA.27893.1.S1_at   | MmugDNA.27893.1 | 6.2   | 6.14  | 0.23 | 0.03 | 1.04  | 0.677874 | 0.466817 | 0.846342 | 0.676543 |
| MmugDNA.27894.1.S1_at   | MmugDNA.27894.1 | 3.62  | 3.54  | 0.21 | 0.28 | 1.06  | 0.846347 | 0.489404 | 0.932925 | 0.691792 |
| MmugDNA.27896.1.S1_at   | MmugDNA.27896.1 | 6.98  | 6.85  | 0.39 | 0.19 | 1.1   | 0.290078 | 0.168542 | 0.579597 | 0.445172 |
| MmugDNA.27897.1.S1_at   | MmugDNA.27897.1 | 4.85  | 4.9   | 0.19 | 0.06 | -1.03 | 0.481672 | 0.329328 | 0.722105 | 0.57871  |
| MmugDNA.27898.1.S1_at   | MmugDNA.27898.1 | 3.58  | 3.86  | 0.55 | 0.21 | -1.21 | 0.733622 | 0.501695 | 0.875837 | 0.6998   |
| MmugDNA.27899.1.S1_at   | MmugDNA.27899.1 | 4.97  | 4.85  | 0.19 | 0.14 | 1.08  | 0.381802 | 0.752934 | 0.651337 | 0.856089 |
| MmugDNA.279.1.S1_at     | MmugDNA.279.1   | 5.69  | 5.68  | 0.11 | 0.14 | 1.01  | 0.335179 | 0.840124 | 0.616193 | 0.908905 |
| MmugDNA.2790.1.S1_at    | MmugDNA.2790.1  | 9.42  | 9.29  | 0.25 | 0.09 | 1.1   | 0.155368 | 0.189207 | 0.445709 | 0.464997 |
| MmugDNA.27901.1.S1_at   | MmugDNA.27901.1 | 5.94  | 6.28  | 0.61 | 0.29 | -1.27 | 0.683279 | 0.688678 | 0.848962 | 0.818281 |
| MmugDNA.27902.1.S1_at   | MmugDNA.27902.1 | 3.37  | 3.38  | 0.06 | 0.02 | -1.01 | 0.746174 | 0.224657 | 0.882363 | 0.497613 |
| MmugDNA.27906.1.S1_at   | MmugDNA.27906.1 | 5.71  | 5.34  | 0.66 | 0.07 | 1.29  | 0.290057 | 0.416616 | 0.579597 | 0.641647 |
| MmugDNA.27908.1.S1_at   | MmugDNA.27908.1 | 5.86  | 6.56  | 0.55 | 0.02 | -1.62 | 0.288504 | 0.322149 | 0.578244 | 0.573743 |
| MmugDNA.27909.1.S1_at   | MmugDNA.27909.1 | 9.02  | 8.95  | 0.04 | 0.11 | 1.05  | 0.481427 | 0.000797 | 0.721944 | 0.046064 |
| MmugDNA.2791.1.S1_at    | MmugDNA.2791.1  | 10.75 | 9.08  | 0.6  | 0.07 | 3.18  | 0.00918  | 0.025265 | 0.145783 | 0.199437 |
| MmugDNA.27911.1.S1_at   | MmugDNA.27911.1 | 11.08 | 10.96 | 0.13 | 0.1  | 1.08  | 0.281807 | 0.188192 | 0.572644 | 0.464251 |
| MmugDNA.27916.1.S1_at   | MmugDNA.27916.1 | 3.62  | 3.3   | 0.45 | 0.1  | 1.25  | 0.288916 | 0.414475 | 0.578652 | 0.640342 |
| MmugDNA.27917.1.S1_at   | MmugDNA.27917.1 | 4.45  | 4.21  | 0.19 | 0.04 | 1.18  | 0.081587 | 0.041856 | 0.34269  | 0.249172 |
| MmugDNA.27918.1.S1_at   | MmugDNA.27918.1 | 4.41  | 4.38  | 0.02 | 0.12 | 1.02  | 0.690976 | 0.01794  | 0.852272 | 0.168998 |
| MmugDNA.27919.1.S1_at   | MmugDNA.27919.1 | 7.19  | 7.02  | 0.75 | 0.09 | 1.13  | 0.368984 | 0.087478 | 0.642544 | 0.340617 |
| MmugDNA.27920.1.S1_at   | MmugDNA.27920.1 | 5.03  | 4.85  | 0.51 | 0.17 | 1.13  | 0.884562 | 0.558608 | 0.950923 | 0.735766 |
| MmugDNA.27921.1.S1_at   | MmugDNA.27921.1 | 8.75  | 8.52  | 0.08 | 0.12 | 1.17  | 0.14418  | 0.000312 | 0.430944 | 0.035198 |
| MmugDNA.27923.1.S1_at   | MmugDNA.27923.1 | 4.63  | 4.6   | 0.14 | 0.09 | 1.02  | 0.634361 | 0.629849 | 0.820718 | 0.782009 |
| MmugDNA.27924.1.S1_at   | MmugDNA.27924.1 | 3.28  | 3.28  | 0.04 | 0.08 | 1     | 0.68284  | 0.058095 | 0.84876  | 0.2877   |
| MmugDNA.27925.1.S1_at   | MmugDNA.27925.1 | 4.3   | 4.47  | 0.18 | 0.16 | -1.12 | 0.157236 | 0.126725 | 0.447994 | 0.397398 |
| MmugDNA.27926.1.S1_at   | MmugDNA.27926.1 | 5.3   | 5.27  | 0.46 | 0.37 | 1.02  | 0.946317 | 0.994217 | 0.97732  | 0.99645  |
| MmugDNA.27927.1.S1_at   | MmugDNA.27927.1 | 11.45 | 9.72  | 0.72 | 0.28 | 3.33  | 0.012085 | 0.004631 | 0.15992  | 0.094988 |
| MmugDNA.27927.1.S1_s_at | MmugDNA.27927.1 | 10.88 | 9.33  | 0.76 | 0.3  | 2.92  | 0.018962 | 0.006719 | 0.191198 | 0.110963 |
| MmugDNA.27928.1.S1_at   | MmugDNA.27928.1 | 4.89  | 4.81  | 0.06 | 0.14 | 1.05  | 0.376215 | 0.585319 | 0.646909 | 0.752844 |
| MmugDNA.2793.1.S1_at    | MmugDNA.2793.1  | 7.52  | 7.62  | 0.25 | 0.03 | -1.07 | 0.773083 | 0.864222 | 0.89602  | 0.922972 |
| MmugDNA.2774.1.S1_at    | MmugDNA.2774.1  | 6.53  | 6.39  | 0.12 | 0.15 | 1.11  | 0.419128 | 0.082817 | 0.678626 | 0.332331 |
| MmugDNA.2774.1.S1_s_at  | MmugDNA.2774.1  | 5.75  | 5.92  | 0.18 | 0.14 | -1.13 | 0.257716 | 0.147149 | 0.551942 | 0.421376 |
| MmugDNA.27930.1.S1_at   | MmugDNA.27930.1 | 8.85  | 7.75  | 0.97 | 0.57 | 2.15  | 0.157209 | 0.067265 | 0.447994 | 0.305363 |
| MmugDNA.27931.1.S1_at   | MmugDNA.27931.1 | 6.36  | 4.68  | 0.71 | 0.36 | 3.21  | 0.025329 | 0.095179 | 0.212168 | 0.35218  |
| MmugDNA.27932.1.S1_at   | MmugDNA.27932.1 | 11.57 | 11.44 | 0.11 | 0.19 | 1.1   | 0.24891  | 0.638648 | 0.544234 | 0.787767 |
| MmugDNA.27933.1.S1_s_at | MmugDNA.27933.1 | 12.43 | 12.43 | 0.18 | 0.14 | 1     | 0.997994 | 0.242922 | 0.999236 | 0.513293 |
| MmugDNA.27935.1.S1_at   | MmugDNA.27935.1 | 6.04  | 6.13  | 0.19 | 0.09 | -1.06 | 0.386084 | 0.471295 | 0.654597 | 0.679323 |
| MmugDNA.27935.1.S1_s_at | MmugDNA.27935.1 | 5.86  | 6.25  | 0.25 | 0.34 | -1.31 | 0.254759 | 0.14901  | 0.549282 | 0.423337 |
| MmugDNA.27936.1.S1_s_at | MmugDNA.27936.1 | 7.36  | 7.52  | 0.21 | 0.18 | -1.11 | 0.446283 | 0.058962 | 0.698527 | 0.289669 |
| MmugDNA.27937.1.S1_at   | MmugDNA.27937.1 | 4.83  | 7.84  | 1.02 | 0.38 | -8.02 | 0.0128   | 0.07831  | 0.163405 | 0.324949 |
| MmugDNA.27938.1.S1_at   | MmugDNA.27938.1 | 3     | 2.8   | 0.49 | 0.13 | 1.15  | 0.22224  | 0.266475 | 0.520237 | 0.532234 |
| MmugDNA.27939.1.S1_at   | MmugDNA.27939.1 | 4.31  | 4.09  | 0.28 | 0.15 | 1.17  | 0.927413 | 0.886702 | 0.969284 | 0.935519 |
| MmugDNA.2794.1.S1_at    | MmugDNA.2794.1  | 4.96  | 5.08  | 0.11 | 0.16 | -1.09 | 0.395383 | 0.470561 | 0.661853 | 0.678898 |

|                         |                 |       |       |      |      |       |          |          |          |          |
|-------------------------|-----------------|-------|-------|------|------|-------|----------|----------|----------|----------|
| MmugDNA.27941.1.S1_at   | MmugDNA.27941.1 | 3.36  | 3.25  | 0.13 | 0.07 | 1.08  | 0.129513 | 0.203177 | 0.411857 | 0.477415 |
| MmugDNA.27942.1.S1_at   | MmugDNA.27942.1 | 10.1  | 9.81  | 0.17 | 0.1  | 1.22  | 0.068498 | 0.064648 | 0.319531 | 0.300314 |
| MmugDNA.27942.1.S1_s_at | MmugDNA.27942.1 | 10.67 | 10.76 | 0.16 | 0.19 | -1.07 | 0.880919 | 0.85482  | 0.949377 | 0.917266 |
| MmugDNA.27943.1.S1_at   | MmugDNA.27943.1 | 6.72  | 6.78  | 0.23 | 0.04 | -1.05 | 0.538687 | 0.942985 | 0.760318 | 0.967603 |
| MmugDNA.27944.1.S1_at   | MmugDNA.27944.1 | 11.35 | 11.69 | 0.71 | 0.23 | -1.26 | 0.696103 | 0.663375 | 0.855244 | 0.802979 |
| MmugDNA.27945.1.S1_at   | MmugDNA.27945.1 | 2.84  | 2.87  | 0.12 | 0.11 | -1.02 | 0.678003 | 0.786356 | 0.846363 | 0.876293 |
| MmugDNA.27946.1.S1_at   | MmugDNA.27946.1 | 4.62  | 4.6   | 0.2  | 0.09 | 1.02  | 0.954433 | 0.769304 | 0.981307 | 0.866034 |
| MmugDNA.27947.1.S1_at   | MmugDNA.27947.1 | 5.5   | 5.11  | 0.31 | 0.27 | 1.31  | 0.171903 | 0.343067 | 0.46589  | 0.588878 |
| MmugDNA.27948.1.S1_at   | MmugDNA.27948.1 | 2.6   | 2.6   | 0.05 | 0.07 | -1    | 0.439667 | 0.213838 | 0.693883 | 0.48758  |
| MmugDNA.27948.1.S1_s_at | MmugDNA.27948.1 | 5.8   | 5.87  | 0.06 | 0.14 | -1.06 | 0.742403 | 0.099407 | 0.880791 | 0.357689 |
| MmugDNA.27949.1.S1_at   | MmugDNA.27949.1 | 12.05 | 12.13 | 0.1  | 0.02 | -1.05 | 0.356477 | 0.152144 | 0.632749 | 0.426919 |
| MmugDNA.27950.1.S1_at   | MmugDNA.27950.1 | 4.07  | 4.09  | 0.19 | 0.17 | -1.02 | 0.405258 | 0.671633 | 0.668746 | 0.808036 |
| MmugDNA.27951.1.S1_at   | MmugDNA.27951.1 | 5.68  | 5.45  | 0.2  | 0.75 | 1.17  | 0.525678 | 0.692698 | 0.75203  | 0.821139 |
| MmugDNA.27952.1.S1_at   | MmugDNA.27952.1 | 3.67  | 3.82  | 0.07 | 0.06 | -1.11 | 0.060292 | 0.251271 | 0.302661 | 0.519984 |
| MmugDNA.27953.1.S1_at   | MmugDNA.27953.1 | 9.72  | 9.41  | 0.24 | 0.02 | 1.24  | 0.032479 | 0.291874 | 0.234482 | 0.552094 |
| MmugDNA.27956.1.S1_at   | MmugDNA.27956.1 | 3.67  | 3.62  | 0.3  | 0.17 | 1.03  | 0.472537 | 0.64496  | 0.716189 | 0.791968 |
| MmugDNA.27958.1.S1_at   | MmugDNA.27958.1 | 11.33 | 11.47 | 0.29 | 0.11 | -1.1  | 0.852835 | 0.20639  | 0.935956 | 0.480546 |
| MmugDNA.27959.1.S1_at   | MmugDNA.27959.1 | 5.94  | 7.94  | 0.68 | 0.25 | -3.98 | 0.013366 | 0.214512 | 0.16632  | 0.488274 |
| MmugDNA.2796.1.S1_at    | MmugDNA.2796.1  | 6.73  | 6.61  | 0.41 | 0.05 | 1.09  | 0.448753 | 0.255085 | 0.700162 | 0.52317  |
| MmugDNA.27960.1.S1_at   | MmugDNA.27960.1 | 10.75 | 11.03 | 0.27 | 0.24 | -1.22 | 0.861066 | 0.228415 | 0.939627 | 0.500587 |
| MmugDNA.27962.1.S1_at   | MmugDNA.27962.1 | 11.94 | 12.19 | 0.06 | 0.12 | -1.18 | 0.079523 | 0.089628 | 0.339662 | 0.343821 |
| MmugDNA.27964.1.S1_at   | MmugDNA.27964.1 | 6.42  | 6.63  | 0.1  | 0.11 | -1.15 | 0.185628 | 0.060036 | 0.481867 | 0.291714 |
| MmugDNA.27965.1.S1_at   | MmugDNA.27965.1 | 3.63  | 3.75  | 0.1  | 0.2  | -1.09 | 0.746826 | 0.237431 | 0.882809 | 0.508117 |
| MmugDNA.27966.1.S1_at   | MmugDNA.27966.1 | 9.44  | 9.69  | 0.18 | 0.31 | -1.19 | 0.935268 | 0.497211 | 0.972947 | 0.696514 |
| MmugDNA.27967.1.S1_at   | MmugDNA.27967.1 | 7.14  | 6.35  | 0.24 | 0.19 | 1.73  | 0.010873 | 0.008481 | 0.153933 | 0.122133 |
| MmugDNA.27968.1.S1_at   | MmugDNA.27968.1 | 2.94  | 3.03  | 0.19 | 0.11 | -1.07 | 0.516739 | 0.634957 | 0.74601  | 0.785108 |
| MmugDNA.27969.1.S1_at   | MmugDNA.27969.1 | 3.47  | 3.57  | 0.14 | 0.34 | -1.07 | 0.726082 | 0.058247 | 0.87144  | 0.287992 |
| MmugDNA.27970.1.S1_at   | MmugDNA.27970.1 | 6.18  | 4.71  | 0.19 | 0.71 | 2.77  | 0.085799 | 0.191281 | 0.35009  | 0.466553 |
| MmugDNA.27972.1.S1_at   | MmugDNA.27972.1 | 10.39 | 10.3  | 0.01 | 0.03 | 1.06  | 0.031767 | 0.810622 | 0.231669 | 0.890812 |
| MmugDNA.27974.1.S1_at   | MmugDNA.27974.1 | 10.25 | 10.27 | 0.24 | 0.11 | -1.02 | 0.567036 | 0.162523 | 0.777597 | 0.438649 |
| MmugDNA.27974.1.S1_s_at | MmugDNA.27974.1 | 12.7  | 12.76 | 0.14 | 0.03 | -1.05 | 0.919908 | 0.992423 | 0.96576  | 0.995715 |
| MmugDNA.27975.1.S1_s_at | MmugDNA.27975.1 | 12.83 | 12.48 | 0.09 | 0.03 | 1.28  | 0.00495  | 0.000374 | 0.115338 | 0.037273 |
| MmugDNA.27976.1.S1_at   | MmugDNA.27976.1 | 9.35  | 9.07  | 0.23 | 0.1  | 1.22  | 0.132643 | 0.146024 | 0.415954 | 0.420022 |
| MmugDNA.27979.1.S1_at   | MmugDNA.27979.1 | 3.64  | 3.4   | 0.28 | 0.05 | 1.18  | 0.174945 | 0.27543  | 0.469252 | 0.539682 |
| MmugDNA.2798.1.S1_at    | MmugDNA.2798.1  | 8.39  | 8.33  | 0.18 | 0.07 | 1.04  | 0.706727 | 0.246011 | 0.861133 | 0.515719 |
| MmugDNA.27981.1.S1_at   | MmugDNA.27981.1 | 10.29 | 10.16 | 0.15 | 0.12 | 1.1   | 0.328308 | 0.803744 | 0.610675 | 0.887111 |
| MmugDNA.27982.1.S1_at   | MmugDNA.27982.1 | 4.41  | 5.17  | 0.62 | 0.38 | -1.69 | 0.282176 | 0.246538 | 0.572947 | 0.515917 |
| MmugDNA.27984.1.S1_at   | MmugDNA.27984.1 | 8.77  | 9.04  | 0.1  | 0.06 | -1.21 | 0.032926 | 0.270737 | 0.235732 | 0.53602  |
| MmugDNA.27985.1.S1_at   | MmugDNA.27985.1 | 4.41  | 4.23  | 0.23 | 0.09 | 1.13  | 0.13071  | 0.277481 | 0.413226 | 0.541411 |
| MmugDNA.27986.1.S1_at   | MmugDNA.27986.1 | 8.25  | 7.79  | 0.11 | 0.12 | 1.38  | 0.014915 | 0.001044 | 0.174254 | 0.051426 |
| MmugDNA.27988.1.S1_at   | MmugDNA.27988.1 | 6.18  | 6.63  | 0.5  | 0.61 | -1.37 | 0.810042 | 0.086225 | 0.914901 | 0.33863  |
| MmugDNA.27989.1.S1_at   | MmugDNA.27989.1 | 10.62 | 9.38  | 0.93 | 0.89 | 2.37  | 0.502355 | 0.110222 | 0.736018 | 0.374349 |
| MmugDNA.27991.1.S1_at   | MmugDNA.27991.1 | 4.75  | 4.64  | 0.28 | 0.22 | 1.08  | 0.322894 | 0.219257 | 0.606774 | 0.493026 |

|                         |                 |       |       |      |      |       |          |          |          |          |
|-------------------------|-----------------|-------|-------|------|------|-------|----------|----------|----------|----------|
| MmugDNA.27993.1.S1_at   | MmugDNA.27993.1 | 3.27  | 3.27  | 0.05 | 0.1  | -1    | 0.472478 | 0.662966 | 0.716189 | 0.802687 |
| MmugDNA.27994.1.S1_at   | MmugDNA.27994.1 | 3.59  | 3.58  | 0.2  | 0.02 | 1.01  | 0.998526 | 0.535124 | 0.999471 | 0.720807 |
| MmugDNA.27995.1.S1_at   | MmugDNA.27995.1 | 4.83  | 4.99  | 0.7  | 0.36 | -1.11 | 0.390888 | 0.376516 | 0.658414 | 0.614337 |
| MmugDNA.27996.1.S1_at   | MmugDNA.27996.1 | 7.92  | 7.78  | 0.06 | 0.1  | 1.1   | 0.316217 | 0.165795 | 0.600997 | 0.442107 |
| MmugDNA.27998.1.S1_at   | MmugDNA.27998.1 | 9.19  | 7.46  | 0.33 | 0.49 | 3.32  | 0.012081 | 0.232354 | 0.15991  | 0.504088 |
| MmugDNA.27999.1.S1_at   | MmugDNA.27999.1 | 5.79  | 5.72  | 0.08 | 0.04 | 1.05  | 0.468999 | 0.783824 | 0.713915 | 0.874823 |
| MmugDNA.28.1.S1_at      | MmugDNA.28.1    | 4.06  | 3.96  | 0.58 | 0.41 | 1.07  | 0.365127 | 0.388449 | 0.639789 | 0.622858 |
| MmugDNA.280.1.S1_at     | MmugDNA.280.1   | 4.51  | 4.05  | 0.26 | 0.48 | 1.38  | 0.586191 | 0.484681 | 0.789689 | 0.688615 |
| MmugDNA.2800.1.S1_at    | MmugDNA.2800.1  | 4.83  | 5.07  | 0.24 | 0.39 | -1.18 | 0.685307 | 0.466145 | 0.849991 | 0.676144 |
| MmugDNA.28000.1.S1_at   | MmugDNA.28000.1 | 4.42  | 4.42  | 0.02 | 0.09 | 1     | 0.40748  | 0.136417 | 0.670508 | 0.408839 |
| MmugDNA.28003.1.S1_at   | MmugDNA.28003.1 | 5.02  | 5.6   | 0.29 | 0.62 | -1.49 | 0.282697 | 0.503891 | 0.573338 | 0.701193 |
| MmugDNA.28004.1.S1_at   | MmugDNA.28004.1 | 4     | 3.96  | 0.18 | 0.09 | 1.03  | 0.277803 | 0.211235 | 0.569311 | 0.48533  |
| MmugDNA.28006.1.S1_at   | MmugDNA.28006.1 | 9.52  | 9.33  | 0.08 | 0.03 | 1.14  | 0.020429 | 0.015282 | 0.196463 | 0.156987 |
| MmugDNA.28007.1.S1_at   | MmugDNA.28007.1 | 6.28  | 6.28  | 0.87 | 0.38 | -1    | 0.338252 | 0.613027 | 0.618679 | 0.770364 |
| MmugDNA.28008.1.S1_at   | MmugDNA.28008.1 | 8.7   | 8.58  | 0.47 | 0.29 | 1.09  | 0.828008 | 0.019628 | 0.923804 | 0.176052 |
| MmugDNA.28009.1.S1_s_at | MmugDNA.28009.1 | 6.55  | 7.08  | 0.11 | 0.11 | -1.45 | 0.003972 | 0.184353 | 0.108643 | 0.460458 |
| MmugDNA.28010.1.S1_at   | MmugDNA.28010.1 | 6.18  | 7.32  | 0.04 | 0.43 | -2.2  | 0.011156 | 0.001129 | 0.155389 | 0.053019 |
| MmugDNA.28011.1.S1_at   | MmugDNA.28011.1 | 5.24  | 5.08  | 0.6  | 0.15 | 1.12  | 0.261261 | 0.192076 | 0.555306 | 0.467522 |
| MmugDNA.28012.1.S1_at   | MmugDNA.28012.1 | 6.74  | 5.21  | 1.73 | 0.64 | 2.88  | 0.257365 | 0.418603 | 0.551692 | 0.642999 |
| MmugDNA.28013.1.S1_s_at | MmugDNA.28013.1 | 11.41 | 11.02 | 0.18 | 0.06 | 1.32  | 0.053493 | 0.156359 | 0.28856  | 0.431641 |
| MmugDNA.28014.1.S1_at   | MmugDNA.28014.1 | 10.81 | 11.26 | 0.34 | 0.12 | -1.37 | 0.070861 | 0.321491 | 0.324317 | 0.573226 |
| MmugDNA.28016.1.S1_at   | MmugDNA.28016.1 | 3.98  | 3.79  | 0.22 | 0.1  | 1.14  | 0.40789  | 0.079708 | 0.67087  | 0.326981 |
| MmugDNA.28017.1.S1_at   | MmugDNA.28017.1 | 3.03  | 3.02  | 0.2  | 0.07 | 1     | 0.360501 | 0.447213 | 0.636043 | 0.663391 |
| MmugDNA.28018.1.S1_at   | MmugDNA.28018.1 | 5.63  | 4.69  | 0.36 | 0.79 | 1.93  | 0.394586 | 0.401069 | 0.661066 | 0.630671 |
| MmugDNA.28019.1.S1_at   | MmugDNA.28019.1 | 4.46  | 4.43  | 0.24 | 0.05 | 1.02  | 0.7235   | 0.716752 | 0.870006 | 0.835987 |
| MmugDNA.2802.1.S1_at    | MmugDNA.2802.1  | 7.42  | 7.4   | 0.2  | 0.06 | 1.01  | 0.751493 | 0.91509  | 0.885332 | 0.952307 |
| MmugDNA.28021.1.S1_at   | MmugDNA.28021.1 | 5.45  | 5.74  | 0.2  | 0.19 | -1.22 | 0.155495 | 0.096197 | 0.445869 | 0.353519 |
| MmugDNA.28022.1.S1_at   | MmugDNA.28022.1 | 3.46  | 3.53  | 0    | 0.15 | -1.05 | 0.894466 | 0.792694 | 0.954963 | 0.880287 |
| MmugDNA.28024.1.S1_at   | MmugDNA.28024.1 | 8.12  | 7.84  | 0.34 | 0.21 | 1.21  | 0.18148  | 0.116485 | 0.476952 | 0.383671 |
| MmugDNA.28025.1.S1_at   | MmugDNA.28025.1 | 6.33  | 5.88  | 0.09 | 0.1  | 1.36  | 0.001903 | 0.012895 | 0.087869 | 0.14622  |
| MmugDNA.28026.1.S1_at   | MmugDNA.28026.1 | 7.48  | 7.51  | 0.45 | 0.22 | -1.01 | 0.933374 | 0.913268 | 0.972051 | 0.951159 |
| MmugDNA.28028.1.S1_at   | MmugDNA.28028.1 | 7.86  | 7.85  | 0.26 | 0.24 | 1.01  | 0.512748 | 0.423796 | 0.743192 | 0.646542 |
| MmugDNA.22897.1.S1_s_at | MmugDNA.22897.1 | 13.73 | 13.73 | 0.12 | 0.1  | -1    | 0.971558 | 0.003673 | 0.98857  | 0.086568 |
| MmugDNA.2803.1.S1_at    | MmugDNA.2803.1  | 3.01  | 3.04  | 0.09 | 0.07 | -1.02 | 0.820739 | 0.807771 | 0.920044 | 0.889345 |
| MmugDNA.28030.1.S1_at   | MmugDNA.28030.1 | 7.27  | 6.88  | 0.11 | 0.11 | 1.31  | 0.022965 | 0.103535 | 0.204423 | 0.364346 |
| MmugDNA.28031.1.S1_at   | MmugDNA.28031.1 | 9.82  | 9.89  | 0.25 | 0.09 | -1.05 | 0.501102 | 0.673005 | 0.73526  | 0.808913 |
| MmugDNA.28032.1.S1_at   | MmugDNA.28032.1 | 4.09  | 3.79  | 0.12 | 0.08 | 1.24  | 0.007306 | 0.045217 | 0.13327  | 0.257005 |
| MmugDNA.28035.1.S1_at   | MmugDNA.28035.1 | 4.29  | 4.24  | 0.15 | 0.21 | 1.03  | 0.888222 | 0.976396 | 0.952297 | 0.98717  |
| MmugDNA.28039.1.S1_at   | MmugDNA.28039.1 | 6.57  | 6.26  | 1.03 | 0.56 | 1.25  | 0.950882 | 0.871412 | 0.979624 | 0.926844 |
| MmugDNA.28040.1.S1_at   | MmugDNA.28040.1 | 7.3   | 7.11  | 0.52 | 0.12 | 1.14  | 0.186428 | 0.22853  | 0.482612 | 0.500752 |
| MmugDNA.28041.1.S1_at   | MmugDNA.28041.1 | 3.36  | 3.43  | 0.27 | 0.35 | -1.05 | 0.86137  | 0.886438 | 0.939804 | 0.935397 |
| MmugDNA.28043.1.S1_at   | MmugDNA.28043.1 | 5.87  | 5.63  | 0.43 | 0.15 | 1.18  | 0.441227 | 0.60667  | 0.694769 | 0.765925 |
| MmugDNA.28044.1.S1_at   | MmugDNA.28044.1 | 6.38  | 6.06  | 0.11 | 0.22 | 1.25  | 0.14865  | 0.167582 | 0.437221 | 0.443998 |

|                         |                 |       |       |      |      |       |          |          |          |          |
|-------------------------|-----------------|-------|-------|------|------|-------|----------|----------|----------|----------|
| MmugDNA.28045.1.S1_s_at | MmugDNA.28045.1 | 11.92 | 11.59 | 0.11 | 0.09 | 1.26  | 0.022903 | 0.057108 | 0.204235 | 0.284945 |
| MmugDNA.28046.1.S1_at   | MmugDNA.28046.1 | 5.14  | 5.02  | 0.07 | 0.08 | 1.09  | 0.550365 | 0.065537 | 0.767803 | 0.301415 |
| MmugDNA.28047.1.S1_at   | MmugDNA.28047.1 | 5.42  | 5.15  | 0.38 | 0.13 | 1.2   | 0.278341 | 0.369659 | 0.569688 | 0.608957 |
| MmugDNA.28048.1.S1_at   | MmugDNA.28048.1 | 6.65  | 7.01  | 0.85 | 0.12 | -1.29 | 0.404444 | 0.073706 | 0.668175 | 0.317051 |
| MmugDNA.2805.1.S1_at    | MmugDNA.2805.1  | 5.38  | 5.4   | 0.36 | 0.16 | -1.01 | 0.553344 | 0.656584 | 0.769891 | 0.799169 |
| MmugDNA.28050.1.S1_at   | MmugDNA.28050.1 | 6.62  | 6.53  | 0.92 | 0.13 | 1.06  | 0.970905 | 0.856286 | 0.988445 | 0.917926 |
| MmugDNA.28051.1.S1_at   | MmugDNA.28051.1 | 5.95  | 5.79  | 0.63 | 0.18 | 1.12  | 0.334571 | 0.09181  | 0.615659 | 0.346977 |
| MmugDNA.28052.1.S1_at   | MmugDNA.28052.1 | 4.46  | 5.2   | 1.46 | 0.37 | -1.68 | 0.927385 | 0.830714 | 0.969284 | 0.902872 |
| MmugDNA.28054.1.S1_at   | MmugDNA.28054.1 | 4.75  | 4.93  | 0.54 | 0.3  | -1.13 | 0.906851 | 0.349807 | 0.960577 | 0.593595 |
| MmugDNA.28055.1.S1_at   | MmugDNA.28055.1 | 3.5   | 3.62  | 0.12 | 0.15 | -1.08 | 0.437588 | 0.586387 | 0.692421 | 0.753454 |
| MmugDNA.28056.1.S1_at   | MmugDNA.28056.1 | 7.28  | 6.98  | 0.27 | 0.07 | 1.23  | 0.406416 | 0.811696 | 0.669756 | 0.891328 |
| MmugDNA.28058.1.S1_at   | MmugDNA.28058.1 | 4.48  | 4.36  | 0.2  | 0.11 | 1.09  | 0.996202 | 0.438146 | 0.998547 | 0.657187 |
| MmugDNA.28059.1.S1_at   | MmugDNA.28059.1 | 6.98  | 7.11  | 0.18 | 0.09 | -1.09 | 0.415286 | 0.576919 | 0.676055 | 0.747521 |
| MmugDNA.28061.1.S1_at   | MmugDNA.28061.1 | 6.37  | 6.24  | 0.18 | 0    | 1.09  | 0.818015 | 0.962561 | 0.918705 | 0.978987 |
| MmugDNA.28062.1.S1_s_at | MmugDNA.28062.1 | 5.91  | 5.89  | 0.05 | 0.11 | 1.02  | 0.291448 | 0.03034  | 0.580753 | 0.216116 |
| MmugDNA.28063.1.S1_at   | MmugDNA.28063.1 | 7.12  | 6.96  | 0.05 | 0.09 | 1.12  | 0.02907  | 0.056523 | 0.223234 | 0.283744 |
| MmugDNA.28064.1.S1_at   | MmugDNA.28064.1 | 7.03  | 8.17  | 0.72 | 0.48 | -2.2  | 0.41903  | 0.029118 | 0.678626 | 0.212733 |
| MmugDNA.28065.1.S1_at   | MmugDNA.28065.1 | 5.12  | 5.5   | 1.14 | 0.27 | -1.3  | 0.863161 | 0.828138 | 0.940496 | 0.901214 |
| MmugDNA.28066.1.S1_at   | MmugDNA.28066.1 | 7.41  | 7.45  | 0.77 | 0.12 | -1.03 | 0.398118 | 0.22676  | 0.663626 | 0.499176 |
| MmugDNA.28068.1.S1_at   | MmugDNA.28068.1 | 3.79  | 3.86  | 0.78 | 0.15 | -1.05 | 0.376885 | 0.536325 | 0.64749  | 0.721648 |
| MmugDNA.28069.1.S1_at   | MmugDNA.28069.1 | 6.48  | 6.19  | 0.26 | 0.03 | 1.23  | 0.452475 | 0.284714 | 0.702926 | 0.546925 |
| MmugDNA.28070.1.S1_at   | MmugDNA.28070.1 | 8.39  | 8.38  | 0.15 | 0.06 | 1     | 0.360502 | 0.69866  | 0.636043 | 0.824932 |
| MmugDNA.28071.1.S1_at   | MmugDNA.28071.1 | 10.15 | 10.59 | 0.22 | 0.24 | -1.36 | 0.04185  | 0.072921 | 0.261386 | 0.315955 |
| MmugDNA.28072.1.S1_at   | MmugDNA.28072.1 | 9.96  | 12.83 | 0.89 | 0.2  | -7.3  | 0.006875 | 0.055692 | 0.129792 | 0.281818 |
| MmugDNA.28074.1.S1_at   | MmugDNA.28074.1 | 9.58  | 10    | 0.71 | 0.33 | -1.35 | 0.139319 | 0.279209 | 0.424942 | 0.54288  |
| MmugDNA.28075.1.S1_at   | MmugDNA.28075.1 | 6.3   | 6.38  | 0.14 | 0.13 | -1.05 | 0.611335 | 0.138347 | 0.806237 | 0.411244 |
| MmugDNA.28077.1.S1_at   | MmugDNA.28077.1 | 11.54 | 11.27 | 0.18 | 0.07 | 1.2   | 0.089946 | 0.001843 | 0.356863 | 0.064452 |
| MmugDNA.28078.1.S1_at   | MmugDNA.28078.1 | 4.69  | 4.7   | 0.14 | 0.06 | -1.01 | 0.833741 | 0.487554 | 0.926824 | 0.690562 |
| MmugDNA.2808.1.S1_at    | MmugDNA.2808.1  | 4.25  | 4.06  | 0.07 | 0.08 | 1.14  | 0.036701 | 0.102145 | 0.246698 | 0.362212 |
| MmugDNA.28080.1.S1_at   | MmugDNA.28080.1 | 6.21  | 6.23  | 0.05 | 0.04 | -1.02 | 0.951907 | 0.918905 | 0.980049 | 0.954473 |
| MmugDNA.28081.1.S1_at   | MmugDNA.28081.1 | 4.49  | 4.3   | 0.06 | 0.12 | 1.13  | 0.074671 | 0.170255 | 0.331379 | 0.446987 |
| MmugDNA.28082.1.S1_at   | MmugDNA.28082.1 | 5.94  | 5.57  | 0.24 | 0.23 | 1.29  | 0.592759 | 0.479676 | 0.793615 | 0.685353 |
| MmugDNA.28083.1.S1_at   | MmugDNA.28083.1 | 3.17  | 3.03  | 0.45 | 0.15 | 1.1   | 0.214556 | 0.309008 | 0.512196 | 0.564721 |
| MmugDNA.28084.1.S1_at   | MmugDNA.28084.1 | 10.41 | 10.05 | 0.3  | 0.07 | 1.28  | 0.470408 | 0.418868 | 0.714956 | 0.643141 |
| MmugDNA.28085.1.S1_at   | MmugDNA.28085.1 | 5.45  | 5.15  | 0.24 | 0.09 | 1.23  | 0.108746 | 0.174872 | 0.383665 | 0.45155  |
| MmugDNA.28087.1.S1_at   | MmugDNA.28087.1 | 4.35  | 4.45  | 0.33 | 0.3  | -1.07 | 0.648132 | 0.663848 | 0.829161 | 0.803202 |
| MmugDNA.28088.1.S1_at   | MmugDNA.28088.1 | 8.99  | 8.77  | 0.09 | 0.27 | 1.16  | 0.236122 | 0.461115 | 0.533741 | 0.672855 |
| MmugDNA.28089.1.S1_s_at | MmugDNA.28089.1 | 8.95  | 8.82  | 0.23 | 0.23 | 1.1   | 0.453076 | 0.535316 | 0.703412 | 0.720887 |
| MmugDNA.2809.1.S1_at    | MmugDNA.2809.1  | 5.72  | 5.7   | 0.27 | 0.06 | 1.01  | 0.540435 | 0.450149 | 0.761465 | 0.665505 |
| MmugDNA.28090.1.S1_at   | MmugDNA.28090.1 | 5.3   | 5.32  | 0.15 | 0.06 | -1.01 | 0.844913 | 0.967891 | 0.932176 | 0.982235 |
| MmugDNA.28091.1.S1_at   | MmugDNA.28091.1 | 4.73  | 4.63  | 0.12 | 0.18 | 1.07  | 0.845729 | 0.95189  | 0.932611 | 0.972702 |
| MmugDNA.28092.1.S1_at   | MmugDNA.28092.1 | 5.52  | 4.93  | 0.2  | 0.19 | 1.5   | 0.021682 | 0.046724 | 0.20067  | 0.260831 |
| MmugDNA.28093.1.S1_at   | MmugDNA.28093.1 | 4.42  | 4.5   | 0.28 | 0.19 | -1.05 | 0.420352 | 0.511711 | 0.679382 | 0.705797 |

|                         |                 |       |       |      |      |       |          |          |          |          |
|-------------------------|-----------------|-------|-------|------|------|-------|----------|----------|----------|----------|
| MmugDNA.28094.1.S1_at   | MmugDNA.28094.1 | 5.15  | 4.51  | 0.55 | 0.25 | 1.56  | 0.181845 | 0.188656 | 0.47739  | 0.464569 |
| MmugDNA.28098.1.S1_at   | MmugDNA.28098.1 | 6.53  | 7.34  | 0.45 | 0.08 | -1.76 | 0.088043 | 0.044063 | 0.354244 | 0.254195 |
| MmugDNA.28099.1.S1_at   | MmugDNA.28099.1 | 4.21  | 4.64  | 0.1  | 0.23 | -1.35 | 0.018383 | 0.009653 | 0.188632 | 0.129267 |
| MmugDNA.281.1.S1_at     | MmugDNA.281.1   | 2.98  | 2.99  | 0.09 | 0.02 | -1    | 0.923887 | 0.328207 | 0.967657 | 0.577947 |
| MmugDNA.2810.1.S1_at    | MmugDNA.2810.1  | 3.55  | 3.95  | 0.31 | 0.31 | -1.32 | 0.346729 | 0.318247 | 0.625011 | 0.571122 |
| MmugDNA.28100.1.S1_at   | MmugDNA.28100.1 | 3.63  | 3.68  | 0.15 | 0.1  | -1.03 | 0.806613 | 0.25248  | 0.913409 | 0.521077 |
| MmugDNA.28102.1.S1_at   | MmugDNA.28102.1 | 10.34 | 11.91 | 0.45 | 0.17 | -2.98 | 0.005052 | 0.019988 | 0.116282 | 0.177571 |
| MmugDNA.28103.1.S1_at   | MmugDNA.28103.1 | 6.96  | 6.36  | 0.08 | 0.17 | 1.51  | 0.009815 | 0.075611 | 0.148542 | 0.320031 |
| MmugDNA.28104.1.S1_at   | MmugDNA.28104.1 | 3.85  | 3.76  | 0.04 | 0.23 | 1.06  | 0.451534 | 0.331375 | 0.702379 | 0.580076 |
| MmugDNA.28105.1.S1_at   | MmugDNA.28105.1 | 5.86  | 6.54  | 0.35 | 0.16 | -1.6  | 0.077175 | 0.171906 | 0.335786 | 0.448352 |
| MmugDNA.28106.1.S1_at   | MmugDNA.28106.1 | 6.02  | 6.13  | 0.33 | 0.22 | -1.08 | 0.140171 | 0.668609 | 0.425843 | 0.806109 |
| MmugDNA.28107.1.S1_s_at | MmugDNA.28107.1 | 6.21  | 6.21  | 0.08 | 0.01 | 1     | 0.666996 | 0.761323 | 0.840142 | 0.86133  |
| MmugDNA.28108.1.S1_at   | MmugDNA.28108.1 | 6.75  | 6.67  | 0.73 | 0.13 | 1.06  | 0.284957 | 0.384161 | 0.57495  | 0.61993  |
| MmugDNA.2811.1.S1_at    | MmugDNA.2811.1  | 3.95  | 3.87  | 0.11 | 0.2  | 1.05  | 0.739066 | 0.722947 | 0.879096 | 0.839489 |
| MmugDNA.28110.1.S1_at   | MmugDNA.28110.1 | 7.05  | 6.95  | 0.41 | 0.21 | 1.07  | 0.946156 | 0.939612 | 0.977211 | 0.965668 |
| MmugDNA.28111.1.S1_at   | MmugDNA.28111.1 | 5.57  | 7.8   | 1.13 | 0.26 | -4.7  | 0.03035  | 0.156061 | 0.227199 | 0.431494 |
| MmugDNA.28111.1.S1_x_at | MmugDNA.28111.1 | 5.62  | 7.19  | 0.73 | 0.25 | -2.96 | 0.025513 | 0.244832 | 0.212834 | 0.514655 |
| MmugDNA.28112.1.S1_at   | MmugDNA.28112.1 | 4.52  | 4.61  | 0.18 | 0.09 | -1.06 | 0.69881  | 0.681053 | 0.856818 | 0.813776 |
| MmugDNA.28114.1.S1_at   | MmugDNA.28114.1 | 2.99  | 3.01  | 0.04 | 0.23 | -1.02 | 0.992901 | 0.591927 | 0.997263 | 0.757386 |
| MmugDNA.28115.1.S1_at   | MmugDNA.28115.1 | 4.93  | 4.92  | 0.07 | 0.11 | 1.01  | 0.366556 | 0.924801 | 0.640793 | 0.957467 |
| MmugDNA.28116.1.S1_x_at | MmugDNA.28116.1 | 10.48 | 10.43 | 0.4  | 0.12 | 1.04  | 0.312266 | 0.313576 | 0.59826  | 0.567977 |
| MmugDNA.28119.1.S1_at   | MmugDNA.28119.1 | 11.23 | 12.07 | 0.23 | 0.13 | -1.79 | 0.004376 | 0.318503 | 0.112249 | 0.571239 |
| MmugDNA.2812.1.S1_at    | MmugDNA.2812.1  | 3.39  | 3.39  | 0.12 | 0.1  | 1     | 0.47549  | 0.472113 | 0.718112 | 0.679861 |
| MmugDNA.28120.1.S1_at   | MmugDNA.28120.1 | 6.89  | 6.13  | 0.56 | 0.22 | 1.69  | 0.204527 | 0.071008 | 0.502251 | 0.312637 |
| MmugDNA.28122.1.S1_at   | MmugDNA.28122.1 | 5.08  | 5.06  | 0.23 | 0    | 1.02  | 0.514943 | 0.765765 | 0.744801 | 0.863914 |
| MmugDNA.28123.1.S1_at   | MmugDNA.28123.1 | 5.46  | 5.52  | 0.8  | 0.16 | -1.04 | 0.852457 | 0.880163 | 0.935873 | 0.931547 |
| MmugDNA.28124.1.S1_at   | MmugDNA.28124.1 | 10.43 | 10.29 | 0.08 | 0.15 | 1.1   | 0.05227  | 0.179166 | 0.285979 | 0.455496 |
| MmugDNA.28125.1.S1_at   | MmugDNA.28125.1 | 4.57  | 4.72  | 0.3  | 0.17 | -1.11 | 0.859533 | 0.883803 | 0.93919  | 0.933691 |
| MmugDNA.28126.1.S1_at   | MmugDNA.28126.1 | 7.99  | 8.2   | 0.28 | 0.15 | -1.15 | 0.366548 | 0.015508 | 0.640793 | 0.158052 |
| MmugDNA.28127.1.S1_at   | MmugDNA.28127.1 | 4.9   | 4.89  | 0.13 | 0.11 | 1.01  | 0.323474 | 0.326658 | 0.60726  | 0.576683 |
| MmugDNA.28129.1.S1_at   | MmugDNA.28129.1 | 5.77  | 5.75  | 0.36 | 0.29 | 1.01  | 0.878392 | 0.710125 | 0.948107 | 0.831904 |
| MmugDNA.2813.1.S1_at    | MmugDNA.2813.1  | 8.01  | 7.68  | 0.11 | 0.05 | 1.26  | 0.008675 | 0.007072 | 0.142597 | 0.113284 |
| MmugDNA.28130.1.S1_s_at | MmugDNA.28130.1 | 10.29 | 10.36 | 0.08 | 0.03 | -1.05 | 0.2196   | 0.092899 | 0.517388 | 0.349024 |
| MmugDNA.28131.1.S1_at   | MmugDNA.28131.1 | 7.8   | 7.99  | 0.15 | 0.05 | -1.14 | 0.085696 | 0.096939 | 0.350079 | 0.354379 |
| MmugDNA.28132.1.S1_x_at | MmugDNA.28132.1 | 7.06  | 6.67  | 0.61 | 0.35 | 1.31  | 0.150122 | 0.178226 | 0.439118 | 0.454572 |
| MmugDNA.28133.1.S1_at   | MmugDNA.28133.1 | 11.12 | 10.78 | 0.08 | 0.09 | 1.27  | 0.008236 | 0.006031 | 0.139904 | 0.106089 |
| MmugDNA.28134.1.S1_at   | MmugDNA.28134.1 | 5.63  | 5.67  | 0.36 | 0.06 | -1.03 | 0.973212 | 0.810561 | 0.989282 | 0.890812 |
| MmugDNA.28135.1.S1_at   | MmugDNA.28135.1 | 5.98  | 6.01  | 0.12 | 0.15 | -1.02 | 0.616938 | 0.507945 | 0.809733 | 0.703358 |
| MmugDNA.28136.1.S1_at   | MmugDNA.28136.1 | 6.21  | 6.36  | 0.07 | 0.07 | -1.11 | 0.048654 | 0.085966 | 0.278061 | 0.338116 |
| MmugDNA.28138.1.S1_at   | MmugDNA.28138.1 | 4.45  | 4.43  | 0.24 | 0.08 | 1.02  | 0.615333 | 0.541214 | 0.808831 | 0.724781 |
| MmugDNA.28139.1.S1_at   | MmugDNA.28139.1 | 4.13  | 4.15  | 0.23 | 0.03 | -1.02 | 0.268802 | 0.361618 | 0.561284 | 0.602374 |
| MmugDNA.2814.1.S1_at    | MmugDNA.2814.1  | 6.5   | 4.43  | 0.93 | 0.44 | 4.17  | 0.097424 | 0.12497  | 0.367577 | 0.395386 |
| MmugDNA.28140.1.S1_at   | MmugDNA.28140.1 | 5.71  | 6.01  | 1.33 | 0.23 | -1.23 | 0.688858 | 0.801937 | 0.851433 | 0.885989 |

|                         |                 |       |       |      |      |       |          |          |          |          |
|-------------------------|-----------------|-------|-------|------|------|-------|----------|----------|----------|----------|
| MmugDNA.28141.1.S1_at   | MmugDNA.28141.1 | 7.74  | 7.46  | 0.44 | 0.34 | 1.21  | 0.733418 | 0.015494 | 0.875708 | 0.158044 |
| MmugDNA.28142.1.S1_at   | MmugDNA.28142.1 | 4.23  | 4.59  | 0.15 | 0.1  | -1.28 | 0.057032 | 0.208751 | 0.296156 | 0.482608 |
| MmugDNA.28143.1.S1_at   | MmugDNA.28143.1 | 4.65  | 4.57  | 0.08 | 0.1  | 1.06  | 0.298228 | 0.455255 | 0.586575 | 0.669198 |
| MmugDNA.28144.1.S1_at   | MmugDNA.28144.1 | 6.07  | 5.96  | 0.13 | 0.14 | 1.08  | 0.360688 | 0.381471 | 0.636187 | 0.617691 |
| MmugDNA.28145.1.S1_s_at | MmugDNA.28145.1 | 8.82  | 9.36  | 0.35 | 0.38 | -1.45 | 0.255259 | 0.070122 | 0.54971  | 0.311029 |
| MmugDNA.28146.1.S1_at   | MmugDNA.28146.1 | 7.03  | 7.01  | 0.15 | 0.15 | 1.01  | 0.779378 | 0.303384 | 0.899222 | 0.560842 |
| MmugDNA.28148.1.S1_at   | MmugDNA.28148.1 | 4.3   | 4.04  | 0.62 | 0.2  | 1.19  | 0.49927  | 0.190121 | 0.734113 | 0.465774 |
| MmugDNA.28149.1.S1_at   | MmugDNA.28149.1 | 9.86  | 10.28 | 0.24 | 0.16 | -1.34 | 0.054071 | 0.027381 | 0.289645 | 0.206695 |
| MmugDNA.2815.1.S1_at    | MmugDNA.2815.1  | 5.06  | 5.04  | 0.07 | 0.03 | 1.01  | 0.594232 | 0.877387 | 0.794623 | 0.930136 |
| MmugDNA.28150.1.S1_at   | MmugDNA.28150.1 | 3.47  | 3.53  | 0.45 | 0.08 | -1.04 | 0.593334 | 0.392545 | 0.79394  | 0.625813 |
| MmugDNA.28151.1.S1_at   | MmugDNA.28151.1 | 4.07  | 3.91  | 0.26 | 0.08 | 1.12  | 0.366705 | 0.47201  | 0.640955 | 0.679835 |
| MmugDNA.28152.1.S1_at   | MmugDNA.28152.1 | 6.05  | 6.21  | 0.17 | 0.07 | -1.11 | 0.420146 | 0.569965 | 0.679329 | 0.742751 |
| MmugDNA.28153.1.S1_at   | MmugDNA.28153.1 | 9.18  | 9.65  | 0.1  | 0.1  | -1.38 | 0.002803 | 0.000137 | 0.097936 | 0.02919  |
| MmugDNA.28154.1.S1_at   | MmugDNA.28154.1 | 10.69 | 10.55 | 0.14 | 0.01 | 1.11  | 0.154339 | 0.160417 | 0.444624 | 0.436528 |
| MmugDNA.28156.1.S1_at   | MmugDNA.28156.1 | 10.36 | 10.31 | 0.12 | 0.17 | 1.04  | 0.900038 | 0.528691 | 0.957528 | 0.716773 |
| MmugDNA.28157.1.S1_at   | MmugDNA.28157.1 | 5.41  | 5.07  | 0.16 | 0.1  | 1.27  | 0.033707 | 0.031249 | 0.23778  | 0.218668 |
| MmugDNA.28160.1.S1_at   | MmugDNA.28160.1 | 4.43  | 5.27  | 0.18 | 0.43 | -1.8  | 0.089487 | 0.158187 | 0.356406 | 0.433986 |
| MmugDNA.28161.1.S1_at   | MmugDNA.28161.1 | 9.57  | 9.02  | 0.29 | 0.12 | 1.46  | 0.159968 | 0.002891 | 0.451279 | 0.079107 |
| MmugDNA.28162.1.S1_at   | MmugDNA.28162.1 | 4.01  | 3.89  | 0.15 | 0.04 | 1.09  | 0.061549 | 0.092712 | 0.304689 | 0.348867 |
| MmugDNA.28163.1.S1_at   | MmugDNA.28163.1 | 5.22  | 4.97  | 0.19 | 0.28 | 1.19  | 0.672046 | 0.372334 | 0.842838 | 0.611229 |
| MmugDNA.28166.1.S1_at   | MmugDNA.28166.1 | 5.09  | 4.96  | 0.28 | 0.02 | 1.09  | 0.391443 | 0.366056 | 0.658679 | 0.605891 |
| MmugDNA.28168.1.S1_at   | MmugDNA.28168.1 | 2.75  | 2.74  | 0.19 | 0.06 | 1     | 0.975676 | 0.77555  | 0.990389 | 0.869402 |
| MmugDNA.2817.1.S1_at    | MmugDNA.2817.1  | 10.61 | 10.5  | 0.1  | 0.24 | 1.08  | 0.434072 | 0.676546 | 0.689375 | 0.810956 |
| MmugDNA.28170.1.S1_at   | MmugDNA.28170.1 | 9.19  | 9.24  | 0.17 | 0.12 | -1.04 | 0.64159  | 0.01374  | 0.824945 | 0.150134 |
| MmugDNA.28171.1.S1_at   | MmugDNA.28171.1 | 6.3   | 6.8   | 0.49 | 0.06 | -1.42 | 0.136617 | 0.104466 | 0.421269 | 0.365719 |
| MmugDNA.28172.1.S1_at   | MmugDNA.28172.1 | 3.56  | 3.42  | 0.24 | 0.25 | 1.1   | 0.251412 | 0.352052 | 0.546254 | 0.595426 |
| MmugDNA.28173.1.S1_at   | MmugDNA.28173.1 | 5.78  | 5.49  | 1.47 | 0.48 | 1.23  | 0.386996 | 0.46939  | 0.655324 | 0.678209 |
| MmugDNA.28174.1.S1_at   | MmugDNA.28174.1 | 4.41  | 4.33  | 0.12 | 0.1  | 1.06  | 0.88953  | 0.145537 | 0.952984 | 0.419442 |
| MmugDNA.28175.1.S1_at   | MmugDNA.28175.1 | 4.12  | 3.67  | 0.16 | 0.13 | 1.37  | 0.034403 | 0.102473 | 0.240092 | 0.362722 |
| MmugDNA.28176.1.S1_at   | MmugDNA.28176.1 | 4.16  | 4.02  | 0.13 | 0.03 | 1.1   | 0.309337 | 0.605958 | 0.595817 | 0.765547 |
| MmugDNA.28177.1.S1_s_at | MmugDNA.28177.1 | 10.74 | 10.67 | 0.17 | 0.05 | 1.05  | 0.999782 | 0.158414 | 0.999962 | 0.434313 |
| MmugDNA.28178.1.S1_at   | MmugDNA.28178.1 | 4.32  | 4.04  | 0.04 | 0.08 | 1.21  | 0.003589 | 0.109735 | 0.10529  | 0.373701 |
| MmugDNA.2818.1.S1_at    | MmugDNA.2818.1  | 6.99  | 6.93  | 0.18 | 0.04 | 1.04  | 0.571693 | 0.496627 | 0.78003  | 0.696119 |
| MmugDNA.28180.1.S1_at   | MmugDNA.28180.1 | 8.19  | 8.19  | 0.09 | 0.22 | -1    | 0.467282 | 0.215142 | 0.712842 | 0.488943 |
| MmugDNA.28181.1.S1_at   | MmugDNA.28181.1 | 10.47 | 10.66 | 0.24 | 0.01 | -1.14 | 0.332878 | 0.000065 | 0.614402 | 0.025805 |
| MmugDNA.28182.1.S1_at   | MmugDNA.28182.1 | 10.9  | 11.66 | 0.49 | 0.19 | -1.69 | 0.08384  | 0.687757 | 0.346645 | 0.817665 |
| MmugDNA.28183.1.S1_at   | MmugDNA.28183.1 | 3.42  | 3.46  | 0.06 | 0.01 | -1.02 | 0.186278 | 0.445942 | 0.482508 | 0.662623 |
| MmugDNA.28184.1.S1_at   | MmugDNA.28184.1 | 4.16  | 6.07  | 1.19 | 0.56 | -3.75 | 0.173592 | 0.169875 | 0.467948 | 0.446566 |
| MmugDNA.28185.1.S1_at   | MmugDNA.28185.1 | 8.46  | 8.94  | 0.11 | 0.06 | -1.4  | 0.003163 | 0.491507 | 0.101335 | 0.693004 |
| MmugDNA.28187.1.S1_at   | MmugDNA.28187.1 | 5.04  | 5.15  | 0.02 | 0.18 | -1.08 | 0.523075 | 0.69443  | 0.750171 | 0.822288 |
| MmugDNA.28188.1.S1_at   | MmugDNA.28188.1 | 7.62  | 7.81  | 0.47 | 0.13 | -1.14 | 0.620404 | 0.711326 | 0.811904 | 0.832597 |
| MmugDNA.28189.1.S1_at   | MmugDNA.28189.1 | 5.19  | 5.37  | 0.12 | 0.07 | -1.14 | 0.08736  | 0.14337  | 0.353109 | 0.417384 |
| MmugDNA.13537.1.S1_s_at | MmugDNA.13537.1 | 4.66  | 4.66  | 0.33 | 0.11 | -1    | 0.536336 | 0.535488 | 0.758945 | 0.721035 |

|                         |                 |       |       |      |      |        |          |          |          |          |
|-------------------------|-----------------|-------|-------|------|------|--------|----------|----------|----------|----------|
| MmugDNA.28193.1.S1_at   | MmugDNA.28193.1 | 5.14  | 5.18  | 0.06 | 0.15 | -1.02  | 0.786882 | 0.968511 | 0.902791 | 0.982645 |
| MmugDNA.28194.1.S1_at   | MmugDNA.28194.1 | 3.32  | 3.57  | 0.11 | 0.15 | -1.19  | 0.066232 | 0.088417 | 0.314842 | 0.341877 |
| MmugDNA.28195.1.S1_at   | MmugDNA.28195.1 | 9.81  | 10.02 | 0.05 | 0.02 | -1.16  | 0.001402 | 0.107906 | 0.07964  | 0.370945 |
| MmugDNA.28196.1.S1_at   | MmugDNA.28196.1 | 4.92  | 4.63  | 0.21 | 0.19 | 1.22   | 0.200494 | 0.212807 | 0.497869 | 0.486769 |
| MmugDNA.28197.1.S1_at   | MmugDNA.28197.1 | 5.8   | 9.58  | 1.58 | 0.34 | -13.73 | 0.045396 | 0.173697 | 0.270665 | 0.450043 |
| MmugDNA.28199.1.S1_at   | MmugDNA.28199.1 | 10.12 | 9.98  | 0.11 | 0.02 | 1.1    | 0.064738 | 0.000073 | 0.311181 | 0.026477 |
| MmugDNA.282.1.S1_at     | MmugDNA.282.1   | 4.06  | 3.72  | 0.77 | 0.03 | 1.26   | 0.344883 | 0.429522 | 0.624064 | 0.650957 |
| MmugDNA.28200.1.S1_at   | MmugDNA.28200.1 | 5.17  | 5.06  | 0.75 | 0.05 | 1.08   | 0.854009 | 0.83538  | 0.936533 | 0.905783 |
| MmugDNA.28201.1.S1_at   | MmugDNA.28201.1 | 11.81 | 11.42 | 0.09 | 0.08 | 1.32   | 0.006534 | 0.059179 | 0.127373 | 0.290208 |
| MmugDNA.28202.1.S1_at   | MmugDNA.28202.1 | 4.69  | 4.96  | 0.87 | 0.13 | -1.2   | 0.677003 | 0.440156 | 0.845923 | 0.658763 |
| MmugDNA.28203.1.S1_at   | MmugDNA.28203.1 | 5.62  | 5.34  | 0.31 | 0.36 | 1.21   | 0.933942 | 0.914059 | 0.972289 | 0.951684 |
| MmugDNA.28204.1.S1_at   | MmugDNA.28204.1 | 8.12  | 8.1   | 0.18 | 0.14 | 1.01   | 0.767032 | 0.740933 | 0.893102 | 0.850031 |
| MmugDNA.28205.1.S1_at   | MmugDNA.28205.1 | 10.81 | 10.96 | 0.19 | 0.13 | -1.11  | 0.257066 | 0.629532 | 0.551586 | 0.781923 |
| MmugDNA.28207.1.S1_at   | MmugDNA.28207.1 | 5.71  | 6.07  | 0.06 | 0.04 | -1.28  | 0.000628 | 0.399096 | 0.070727 | 0.62969  |
| MmugDNA.28208.1.S1_at   | MmugDNA.28208.1 | 3.27  | 3.21  | 0.07 | 0.12 | 1.04   | 0.227929 | 0.263413 | 0.526025 | 0.529715 |
| MmugDNA.28209.1.S1_at   | MmugDNA.28209.1 | 5.25  | 4.89  | 0.27 | 0.03 | 1.28   | 0.096611 | 0.078506 | 0.366504 | 0.325285 |
| MmugDNA.2821.1.S1_at    | MmugDNA.2821.1  | 3.74  | 3.53  | 0.03 | 0.12 | 1.15   | 0.089825 | 0.115126 | 0.356705 | 0.382007 |
| MmugDNA.28212.1.S1_at   | MmugDNA.28212.1 | 12.49 | 11.97 | 0.28 | 0.05 | 1.44   | 0.073323 | 0.506358 | 0.328603 | 0.702371 |
| MmugDNA.28213.1.S1_at   | MmugDNA.28213.1 | 9.94  | 9.66  | 0.09 | 0.26 | 1.21   | 0.233834 | 0.091091 | 0.532026 | 0.345932 |
| MmugDNA.28213.1.S1_s_at | MmugDNA.28213.1 | 7.96  | 7.73  | 0.08 | 0.18 | 1.17   | 0.101786 | 0.146459 | 0.373285 | 0.420523 |
| MmugDNA.28214.1.S1_at   | MmugDNA.28214.1 | 8.22  | 6.34  | 0.18 | 0.6  | 3.69   | 0.011181 | 0.016719 | 0.155424 | 0.163766 |
| MmugDNA.28215.1.S1_at   | MmugDNA.28215.1 | 4.8   | 4.77  | 0.25 | 0.07 | 1.02   | 0.586604 | 0.782665 | 0.789944 | 0.874202 |
| MmugDNA.28216.1.S1_at   | MmugDNA.28216.1 | 8.79  | 8.97  | 0.5  | 0.19 | -1.14  | 0.793756 | 0.77425  | 0.906781 | 0.868735 |
| MmugDNA.28217.1.S1_s_at | MmugDNA.28217.1 | 5.96  | 5.84  | 0.05 | 0.15 | 1.09   | 0.102186 | 0.047866 | 0.374157 | 0.263695 |
| MmugDNA.28218.1.S1_at   | MmugDNA.28218.1 | 5.95  | 5.94  | 0.84 | 0.08 | 1.01   | 0.954146 | 0.937588 | 0.98117  | 0.964687 |
| MmugDNA.28219.1.S1_at   | MmugDNA.28219.1 | 3.97  | 3.94  | 0.14 | 0.03 | 1.02   | 0.384774 | 0.648901 | 0.653701 | 0.794501 |
| MmugDNA.2822.1.S1_at    | MmugDNA.2822.1  | 8.31  | 7.91  | 0.37 | 0.15 | 1.31   | 0.479977 | 0.908566 | 0.721015 | 0.948227 |
| MmugDNA.28220.1.S1_at   | MmugDNA.28220.1 | 4.35  | 4.43  | 0.11 | 0.07 | -1.05  | 0.66775  | 0.197399 | 0.840528 | 0.472311 |
| MmugDNA.28221.1.S1_at   | MmugDNA.28221.1 | 9.69  | 9.57  | 0.16 | 0.04 | 1.09   | 0.22504  | 0.833963 | 0.522982 | 0.904859 |
| MmugDNA.28222.1.S1_at   | MmugDNA.28222.1 | 10.36 | 10.42 | 0.24 | 0.1  | -1.04  | 0.363889 | 0.044847 | 0.638487 | 0.256375 |
| MmugDNA.28223.1.S1_at   | MmugDNA.28223.1 | 2.83  | 2.71  | 0.14 | 0.11 | 1.09   | 0.705035 | 0.839877 | 0.860083 | 0.908703 |
| MmugDNA.28224.1.S1_at   | MmugDNA.28224.1 | 4.86  | 5.64  | 0.39 | 0.12 | -1.71  | 0.108324 | 0.040197 | 0.382975 | 0.245726 |
| MmugDNA.28225.1.S1_at   | MmugDNA.28225.1 | 10.75 | 10.94 | 0.12 | 0.23 | -1.14  | 0.456404 | 0.579674 | 0.705768 | 0.749254 |
| MmugDNA.28226.1.S1_at   | MmugDNA.28226.1 | 10.59 | 10.42 | 0.07 | 0.09 | 1.12   | 0.058737 | 0.00032  | 0.299483 | 0.035444 |
| MmugDNA.28227.1.S1_at   | MmugDNA.28227.1 | 6.67  | 6.45  | 0.15 | 0.13 | 1.16   | 0.090968 | 0.617228 | 0.358186 | 0.77329  |
| MmugDNA.28228.1.S1_at   | MmugDNA.28228.1 | 3.14  | 3.04  | 0.13 | 0.12 | 1.07   | 0.703985 | 0.84963  | 0.859516 | 0.914612 |
| MmugDNA.28229.1.S1_at   | MmugDNA.28229.1 | 3.05  | 2.93  | 0.18 | 0.04 | 1.09   | 0.419087 | 0.53757  | 0.678626 | 0.722606 |
| MmugDNA.2823.1.S1_at    | MmugDNA.2823.1  | 5.94  | 6.29  | 1.19 | 0.52 | -1.28  | 0.828635 | 0.160156 | 0.924251 | 0.436296 |
| MmugDNA.28231.1.S1_at   | MmugDNA.28231.1 | 3.5   | 3.68  | 0.08 | 0.12 | -1.13  | 0.105715 | 0.111168 | 0.379811 | 0.375798 |
| MmugDNA.28232.1.S1_at   | MmugDNA.28232.1 | 9.73  | 10.07 | 0.16 | 0.02 | -1.26  | 0.062488 | 0.002394 | 0.306597 | 0.072408 |
| MmugDNA.28233.1.S1_at   | MmugDNA.28233.1 | 2.59  | 2.58  | 0.02 | 0.02 | 1.01   | 0.095792 | 0.024171 | 0.365399 | 0.19464  |
| MmugDNA.28235.1.S1_s_at | MmugDNA.28235.1 | 12.25 | 12.49 | 0.14 | 0.05 | -1.18  | 0.034721 | 0.043523 | 0.241011 | 0.253227 |
| MmugDNA.28236.1.S1_at   | MmugDNA.28236.1 | 3.77  | 3.65  | 0.14 | 0.01 | 1.08   | 0.273613 | 0.717399 | 0.565728 | 0.836425 |

|                         |                 |       |       |      |      |       |          |          |          |          |
|-------------------------|-----------------|-------|-------|------|------|-------|----------|----------|----------|----------|
| MmugDNA.28237.1.S1_at   | MmugDNA.28237.1 | 9.28  | 9.15  | 0.1  | 0.12 | 1.09  | 0.233154 | 0.151714 | 0.531371 | 0.426383 |
| MmugDNA.28238.1.S1_at   | MmugDNA.28238.1 | 4.59  | 4.47  | 0.18 | 0.08 | 1.08  | 0.760303 | 0.835497 | 0.890148 | 0.905854 |
| MmugDNA.28239.1.S1_at   | MmugDNA.28239.1 | 4.96  | 4.76  | 0.06 | 0.15 | 1.16  | 0.088953 | 0.105101 | 0.355552 | 0.366755 |
| MmugDNA.2824.1.S1_at    | MmugDNA.2824.1  | 8.2   | 8.29  | 0.13 | 0.06 | -1.06 | 0.349692 | 0.024109 | 0.627405 | 0.1945   |
| MmugDNA.28240.1.S1_at   | MmugDNA.28240.1 | 5.25  | 5.14  | 0.08 | 0.15 | 1.08  | 0.148718 | 0.079725 | 0.437305 | 0.326982 |
| MmugDNA.28241.1.S1_at   | MmugDNA.28241.1 | 9.95  | 10.36 | 0.31 | 0.17 | -1.33 | 0.091707 | 0.004704 | 0.359438 | 0.09546  |
| MmugDNA.28242.1.S1_at   | MmugDNA.28242.1 | 3.66  | 3.62  | 0.06 | 0.05 | 1.03  | 0.152752 | 0.461831 | 0.442472 | 0.673361 |
| MmugDNA.28243.1.S1_at   | MmugDNA.28243.1 | 4.55  | 4.44  | 0.15 | 0.08 | 1.08  | 0.320584 | 0.024883 | 0.605112 | 0.197662 |
| MmugDNA.28245.1.S1_at   | MmugDNA.28245.1 | 6.84  | 6.49  | 0.19 | 0.06 | 1.28  | 0.104843 | 0.116997 | 0.378397 | 0.384404 |
| MmugDNA.28247.1.S1_at   | MmugDNA.28247.1 | 6.27  | 6.2   | 0.07 | 0.04 | 1.05  | 0.384639 | 0.073836 | 0.653612 | 0.317166 |
| MmugDNA.28248.1.S1_at   | MmugDNA.28248.1 | 11.72 | 11.83 | 0.19 | 0.02 | -1.08 | 0.458541 | 0.328881 | 0.707108 | 0.578452 |
| MmugDNA.28249.1.S1_at   | MmugDNA.28249.1 | 3.58  | 3.6   | 0.4  | 0.32 | -1.01 | 0.906692 | 0.616796 | 0.960553 | 0.772969 |
| MmugDNA.2825.1.S1_at    | MmugDNA.2825.1  | 3.76  | 3.69  | 0.14 | 0.06 | 1.05  | 0.109354 | 0.006944 | 0.384426 | 0.112568 |
| MmugDNA.28251.1.S1_at   | MmugDNA.28251.1 | 10.2  | 9.56  | 0.12 | 0.05 | 1.56  | 0.001041 | 0.210944 | 0.076321 | 0.484934 |
| MmugDNA.28253.1.S1_at   | MmugDNA.28253.1 | 4.22  | 3.79  | 0.18 | 0.31 | 1.34  | 0.133229 | 0.604279 | 0.416749 | 0.764558 |
| MmugDNA.28254.1.S1_x_at | MmugDNA.28254.1 | 6.59  | 6.33  | 0.58 | 0.17 | 1.2   | 0.403862 | 0.601918 | 0.667861 | 0.763122 |
| MmugDNA.28255.1.S1_at   | MmugDNA.28255.1 | 9.25  | 8.84  | 0.31 | 0.12 | 1.32  | 0.157225 | 0.081605 | 0.447994 | 0.329818 |
| MmugDNA.28256.1.S1_at   | MmugDNA.28256.1 | 4.43  | 4.26  | 0.56 | 0.11 | 1.13  | 0.20765  | 0.42675  | 0.505439 | 0.648857 |
| MmugDNA.28257.1.S1_at   | MmugDNA.28257.1 | 3.12  | 3.21  | 0.09 | 0.03 | -1.07 | 0.121759 | 0.112801 | 0.400504 | 0.37844  |
| MmugDNA.28258.1.S1_at   | MmugDNA.28258.1 | 6.24  | 6.31  | 0.02 | 0.05 | -1.05 | 0.061404 | 0.400168 | 0.304438 | 0.630158 |
| MmugDNA.28259.1.S1_at   | MmugDNA.28259.1 | 8     | 8.62  | 1.79 | 0.12 | -1.54 | 0.713715 | 0.901471 | 0.864758 | 0.943931 |
| MmugDNA.2826.1.S1_at    | MmugDNA.2826.1  | 8.43  | 8.49  | 0.36 | 0.15 | -1.04 | 0.776877 | 0.208168 | 0.898089 | 0.482086 |
| MmugDNA.28261.1.S1_at   | MmugDNA.28261.1 | 4.58  | 4.57  | 0.05 | 0.08 | 1.01  | 0.495197 | 0.321596 | 0.731674 | 0.573303 |
| MmugDNA.28262.1.S1_at   | MmugDNA.28262.1 | 4.15  | 4.18  | 0.1  | 0.17 | -1.02 | 0.931202 | 0.969591 | 0.971043 | 0.983356 |
| MmugDNA.28263.1.S1_at   | MmugDNA.28263.1 | 5.73  | 5.81  | 0.42 | 0.16 | -1.06 | 0.819345 | 0.797695 | 0.919515 | 0.883459 |
| MmugDNA.28264.1.S1_at   | MmugDNA.28264.1 | 3.9   | 3.84  | 0.32 | 0.13 | 1.04  | 0.192235 | 0.264149 | 0.488787 | 0.530214 |
| MmugDNA.28265.1.S1_s_at | MmugDNA.28265.1 | 7.1   | 6.1   | 0.19 | 0.35 | 2     | 0.006523 | 0.004557 | 0.127373 | 0.094355 |
| MmugDNA.28266.1.S1_at   | MmugDNA.28266.1 | 5.89  | 5.96  | 0.08 | 0.02 | -1.06 | 0.121953 | 0.522926 | 0.400622 | 0.713429 |
| MmugDNA.28267.1.S1_at   | MmugDNA.28267.1 | 6.57  | 6.55  | 0.44 | 0.16 | 1.02  | 0.987289 | 0.035199 | 0.995376 | 0.231787 |
| MmugDNA.28268.1.S1_at   | MmugDNA.28268.1 | 4.91  | 4.9   | 0.15 | 0.17 | 1.01  | 0.841541 | 0.061003 | 0.930364 | 0.293811 |
| MmugDNA.28269.1.S1_at   | MmugDNA.28269.1 | 4.34  | 4.13  | 0.21 | 0.16 | 1.15  | 0.355026 | 0.643534 | 0.631887 | 0.790981 |
| MmugDNA.2827.1.S1_at    | MmugDNA.2827.1  | 9.18  | 10.39 | 0.15 | 0.12 | -2.31 | 0.000382 | 0.347505 | 0.062479 | 0.592019 |
| MmugDNA.28270.1.S1_at   | MmugDNA.28270.1 | 3.24  | 3.29  | 0.31 | 0.17 | -1.03 | 0.584327 | 0.771965 | 0.788579 | 0.867436 |
| MmugDNA.28271.1.S1_at   | MmugDNA.28271.1 | 5.56  | 5.25  | 0.25 | 0.1  | 1.24  | 0.039261 | 0.231221 | 0.254605 | 0.5029   |
| MmugDNA.28272.1.S1_at   | MmugDNA.28272.1 | 7.06  | 6.77  | 0.02 | 0.09 | 1.22  | 0.003664 | 0.119983 | 0.105789 | 0.388672 |
| MmugDNA.28273.1.S1_at   | MmugDNA.28273.1 | 5.49  | 5.41  | 0.14 | 0.28 | 1.05  | 0.635416 | 0.790247 | 0.821423 | 0.878754 |
| MmugDNA.28274.1.S1_at   | MmugDNA.28274.1 | 5.57  | 5.24  | 0.16 | 0.11 | 1.26  | 0.02385  | 0.023634 | 0.207529 | 0.192555 |
| MmugDNA.28275.1.S1_at   | MmugDNA.28275.1 | 6.5   | 6.46  | 0.23 | 0.09 | 1.03  | 0.742489 | 0.423185 | 0.880829 | 0.646188 |
| MmugDNA.28276.1.S1_at   | MmugDNA.28276.1 | 4.15  | 4.1   | 0.22 | 0.11 | 1.03  | 0.222955 | 0.511794 | 0.520904 | 0.705797 |
| MmugDNA.28277.1.S1_at   | MmugDNA.28277.1 | 5.43  | 5.26  | 0.24 | 0.12 | 1.12  | 0.766444 | 0.903481 | 0.892881 | 0.945191 |
| MmugDNA.28280.1.S1_at   | MmugDNA.28280.1 | 5.19  | 5.32  | 0.25 | 0.06 | -1.1  | 0.855232 | 0.776129 | 0.93691  | 0.869726 |
| MmugDNA.28281.1.S1_at   | MmugDNA.28281.1 | 6.75  | 5.48  | 0.56 | 0.29 | 2.41  | 0.058399 | 0.148792 | 0.298756 | 0.423201 |
| MmugDNA.28283.1.S1_at   | MmugDNA.28283.1 | 4.69  | 4.47  | 0.16 | 0.15 | 1.16  | 0.286062 | 0.488423 | 0.575948 | 0.691144 |



|                         |                 |       |       |      |      |       |          |          |          |          |
|-------------------------|-----------------|-------|-------|------|------|-------|----------|----------|----------|----------|
| MmugDNA.28285.1.S1_at   | MmugDNA.28285.1 | 3.37  | 3.38  | 0.81 | 0.2  | -1.01 | 0.386794 | 0.377008 | 0.655097 | 0.614703 |
| MmugDNA.28286.1.S1_at   | MmugDNA.28286.1 | 5.04  | 4.81  | 0.78 | 0.15 | 1.17  | 0.247278 | 0.330056 | 0.542869 | 0.578938 |
| MmugDNA.28286.1.S1_s_at | MmugDNA.28286.1 | 5.93  | 5.6   | 0.16 | 0.16 | 1.25  | 0.080859 | 0.062461 | 0.341635 | 0.296717 |
| MmugDNA.28287.1.S1_at   | MmugDNA.28287.1 | 4.65  | 4.22  | 0.1  | 0.11 | 1.35  | 0.007358 | 0.016334 | 0.133949 | 0.161853 |
| MmugDNA.2829.1.S1_at    | MmugDNA.2829.1  | 4     | 4.01  | 0.26 | 0.11 | -1.01 | 0.749691 | 0.890821 | 0.884104 | 0.937722 |
| MmugDNA.28290.1.S1_at   | MmugDNA.28290.1 | 11.62 | 11.31 | 0.16 | 0.1  | 1.24  | 0.031548 | 0.014882 | 0.231026 | 0.155055 |
| MmugDNA.28292.1.S1_at   | MmugDNA.28292.1 | 5.19  | 5.18  | 0.01 | 0.06 | 1.01  | 0.267208 | 0.130941 | 0.559954 | 0.403037 |
| MmugDNA.28293.1.S1_at   | MmugDNA.28293.1 | 8.94  | 8.94  | 0.25 | 0.12 | -1    | 0.429396 | 0.09556  | 0.685822 | 0.352631 |
| MmugDNA.28293.1.S1_s_at | MmugDNA.28293.1 | 9.67  | 9.69  | 0.4  | 0.12 | -1.01 | 0.375936 | 0.141483 | 0.64664  | 0.415019 |
| MmugDNA.28296.1.S1_at   | MmugDNA.28296.1 | 6.57  | 6.26  | 0.15 | 0.13 | 1.24  | 0.02427  | 0.135101 | 0.208861 | 0.407128 |
| MmugDNA.28297.1.S1_at   | MmugDNA.28297.1 | 6.06  | 6.03  | 0.33 | 0.22 | 1.02  | 0.898286 | 0.903406 | 0.956742 | 0.945171 |
| MmugDNA.28298.1.S1_at   | MmugDNA.28298.1 | 12.24 | 12.63 | 0.2  | 0.04 | -1.3  | 0.013198 | 0.026265 | 0.16538  | 0.203033 |
| MmugDNA.28299.1.S1_at   | MmugDNA.28299.1 | 6.51  | 6.56  | 0.2  | 0.07 | -1.04 | 0.81729  | 0.516569 | 0.918379 | 0.709034 |
| MmugDNA.30962.1.S1_at   | MmugDNA.30962.1 | 7.83  | 8.03  | 0.76 | 0.07 | -1.15 | 0.851567 | 0.645721 | 0.935402 | 0.792516 |
| MmugDNA.30962.1.S1_s_at | MmugDNA.30962.1 | 7.26  | 7.23  | 0.32 | 0    | 1.02  | 0.794847 | 0.712204 | 0.907378 | 0.833243 |
| MmugDNA.283.1.S1_at     | MmugDNA.283.1   | 5.71  | 5.56  | 0.2  | 0.2  | 1.1   | 0.509574 | 0.64152  | 0.741152 | 0.789578 |
| MmugDNA.28300.1.S1_at   | MmugDNA.28300.1 | 6.64  | 6.55  | 0.03 | 0.1  | 1.07  | 0.650257 | 0.374859 | 0.830259 | 0.613091 |
| MmugDNA.28302.1.S1_at   | MmugDNA.28302.1 | 5.57  | 5.73  | 0.14 | 0.16 | -1.12 | 0.468297 | 0.709889 | 0.713445 | 0.831863 |
| MmugDNA.28303.1.S1_at   | MmugDNA.28303.1 | 6.15  | 6.61  | 0.78 | 0.3  | -1.38 | 0.763808 | 0.925528 | 0.891841 | 0.957833 |
| MmugDNA.28304.1.S1_at   | MmugDNA.28304.1 | 4.39  | 4.56  | 0.37 | 0.08 | -1.13 | 0.118695 | 0.00903  | 0.396437 | 0.125559 |
| MmugDNA.28306.1.S1_at   | MmugDNA.28306.1 | 6.82  | 6.78  | 0.09 | 0.04 | 1.03  | 0.907083 | 0.081227 | 0.960691 | 0.329351 |
| MmugDNA.28308.1.S1_at   | MmugDNA.28308.1 | 4.17  | 3.99  | 0.38 | 0.22 | 1.14  | 0.179435 | 0.268164 | 0.474552 | 0.533876 |
| MmugDNA.2831.1.S1_at    | MmugDNA.2831.1  | 9.55  | 9.35  | 0.27 | 0.24 | 1.15  | 0.498303 | 0.309543 | 0.733585 | 0.564987 |
| MmugDNA.32394.1.S1_at   | MmugDNA.32394.1 | 9.91  | 9.98  | 0.26 | 0.23 | -1.05 | 0.645238 | 0.164072 | 0.827242 | 0.440265 |
| MmugDNA.32394.1.S1_s_at | MmugDNA.32394.1 | 10.16 | 10    | 0.3  | 0.22 | 1.11  | 0.472126 | 0.230505 | 0.71594  | 0.502251 |
| MmugDNA.28310.1.S1_at   | MmugDNA.28310.1 | 3.39  | 3.63  | 0.4  | 0.07 | -1.18 | 0.949443 | 0.929258 | 0.978903 | 0.959645 |
| MmugDNA.8184.1.S1_s_at  | MmugDNA.8184.1  | 13.51 | 13.82 | 0.12 | 0.02 | -1.24 | 0.012298 | 0.655813 | 0.161126 | 0.798709 |
| MmugDNA.28312.1.S1_at   | MmugDNA.28312.1 | 11.17 | 10.84 | 0.15 | 0.03 | 1.26  | 0.064848 | 0.00327  | 0.311366 | 0.082312 |
| MmugDNA.4576.1.S1_at    | MmugDNA.4576.1  | 13.2  | 13.19 | 0.01 | 0.01 | 1.01  | 0.451671 | 0.964315 | 0.702488 | 0.980149 |
| MmugDNA.4576.1.S1_s_at  | MmugDNA.4576.1  | 13.03 | 13.05 | 0.03 | 0.02 | -1.02 | 0.878145 | 0.987758 | 0.947963 | 0.993169 |
| MmugDNA.28315.1.S1_at   | MmugDNA.28315.1 | 4.91  | 4.77  | 0.13 | 0.09 | 1.1   | 0.195609 | 0.362525 | 0.492376 | 0.603067 |
| MmugDNA.28317.1.S1_at   | MmugDNA.28317.1 | 8.41  | 8.47  | 0.25 | 0.04 | -1.04 | 0.612857 | 0.442159 | 0.807098 | 0.66021  |
| MmugDNA.28318.1.S1_at   | MmugDNA.28318.1 | 5.12  | 5.09  | 0.14 | 0.07 | 1.02  | 0.721203 | 0.512935 | 0.86861  | 0.706623 |
| MmugDNA.2832.1.S1_at    | MmugDNA.2832.1  | 9.66  | 9.71  | 0.08 | 0.07 | -1.03 | 0.555013 | 0.206175 | 0.770988 | 0.480364 |
| MmugDNA.28320.1.S1_at   | MmugDNA.28320.1 | 6.44  | 6.2   | 0.48 | 0.54 | 1.19  | 0.333266 | 0.143921 | 0.614682 | 0.417858 |
| MmugDNA.28321.1.S1_at   | MmugDNA.28321.1 | 3.45  | 3.46  | 0.05 | 0.28 | -1    | 0.360623 | 0.086656 | 0.63616  | 0.339212 |
| MmugDNA.28324.1.S1_at   | MmugDNA.28324.1 | 5.24  | 4.67  | 0.64 | 0.07 | 1.48  | 0.179053 | 0.242753 | 0.474016 | 0.5131   |
| MmugDNA.28325.1.S1_at   | MmugDNA.28325.1 | 5.37  | 5.43  | 0.28 | 0.09 | -1.04 | 0.252296 | 0.168415 | 0.546837 | 0.445092 |
| MmugDNA.28326.1.S1_at   | MmugDNA.28326.1 | 7.03  | 5.98  | 0.51 | 0.14 | 2.07  | 0.023572 | 0.087068 | 0.206829 | 0.340038 |
| MmugDNA.28327.1.S1_at   | MmugDNA.28327.1 | 4.81  | 4.95  | 0.23 | 0    | -1.1  | 0.971341 | 0.854045 | 0.98857  | 0.91692  |
| MmugDNA.28329.1.S1_at   | MmugDNA.28329.1 | 7.75  | 7.28  | 0.24 | 0.2  | 1.39  | 0.170435 | 0.561366 | 0.464074 | 0.737362 |
| MmugDNA.28330.1.S1_at   | MmugDNA.28330.1 | 12.73 | 12.61 | 0.15 | 0.02 | 1.08  | 0.677797 | 0.042141 | 0.846315 | 0.249753 |
| MmugDNA.28332.1.S1_at   | MmugDNA.28332.1 | 4.98  | 5.03  | 0.21 | 0.28 | -1.04 | 0.691915 | 0.303506 | 0.852783 | 0.561    |

|                         |                 |       |       |      |      |       |          |          |          |          |
|-------------------------|-----------------|-------|-------|------|------|-------|----------|----------|----------|----------|
| MmugDNA.28334.1.S1_at   | MmugDNA.28334.1 | 7.44  | 7.36  | 0.76 | 0.12 | 1.06  | 0.378903 | 0.194142 | 0.648999 | 0.469266 |
| MmugDNA.28335.1.S1_at   | MmugDNA.28335.1 | 12.3  | 12.71 | 0.17 | 0.06 | -1.33 | 0.009876 | 0.026556 | 0.148832 | 0.203915 |
| MmugDNA.28336.1.S1_at   | MmugDNA.28336.1 | 4.49  | 3.71  | 1.87 | 0.07 | 1.71  | 0.16179  | 0.191738 | 0.45355  | 0.467043 |
| MmugDNA.28337.1.S1_at   | MmugDNA.28337.1 | 5.8   | 5.59  | 0.39 | 0.06 | 1.16  | 0.297438 | 0.492821 | 0.585846 | 0.693802 |
| MmugDNA.28338.1.S1_at   | MmugDNA.28338.1 | 5.79  | 5.97  | 0.23 | 0.17 | -1.13 | 0.856347 | 0.341681 | 0.937477 | 0.587796 |
| MmugDNA.28339.1.S1_at   | MmugDNA.28339.1 | 8.47  | 8.77  | 0.3  | 0.38 | -1.23 | 0.407473 | 0.006112 | 0.670508 | 0.10649  |
| MmugDNA.2834.1.S1_at    | MmugDNA.2834.1  | 10.19 | 10.35 | 0.17 | 0.05 | -1.12 | 0.148411 | 0.142826 | 0.436978 | 0.416786 |
| MmugDNA.28340.1.S1_at   | MmugDNA.28340.1 | 4.78  | 4.92  | 0.28 | 0.15 | -1.1  | 0.110589 | 0.140987 | 0.385979 | 0.414507 |
| MmugDNA.28341.1.S1_at   | MmugDNA.28341.1 | 5.67  | 5.63  | 0.51 | 0.17 | 1.03  | 0.758674 | 0.640386 | 0.889396 | 0.788874 |
| MmugDNA.28342.1.S1_at   | MmugDNA.28342.1 | 5.45  | 5.54  | 0.3  | 0.04 | -1.07 | 0.570217 | 0.762568 | 0.779298 | 0.861882 |
| MmugDNA.28343.1.S1_at   | MmugDNA.28343.1 | 5.42  | 5.28  | 0.18 | 0.17 | 1.1   | 0.901634 | 0.573501 | 0.958288 | 0.745173 |
| MmugDNA.28344.1.S1_s_at | MmugDNA.28344.1 | 8.17  | 7.99  | 0.96 | 0.15 | 1.14  | 0.601331 | 0.687368 | 0.799529 | 0.817576 |
| MmugDNA.28345.1.S1_at   | MmugDNA.28345.1 | 10.41 | 10.08 | 0.21 | 0.19 | 1.25  | 0.07045  | 0.329093 | 0.323801 | 0.578482 |
| MmugDNA.28346.1.S1_at   | MmugDNA.28346.1 | 3.24  | 3.38  | 0.09 | 0.06 | -1.1  | 0.094448 | 0.229895 | 0.363371 | 0.501802 |
| MmugDNA.28348.1.S1_s_at | MmugDNA.28348.1 | 12.55 | 12.6  | 0.04 | 0.05 | -1.04 | 0.40181  | 0.888356 | 0.666322 | 0.936338 |
| MmugDNA.2835.1.S1_at    | MmugDNA.2835.1  | 7.37  | 7.44  | 0.9  | 0.24 | -1.05 | 0.853542 | 0.985236 | 0.936335 | 0.991633 |
| MmugDNA.28350.1.S1_at   | MmugDNA.28350.1 | 4.92  | 5.44  | 0.51 | 0.22 | -1.43 | 0.222906 | 0.571867 | 0.520883 | 0.744056 |
| MmugDNA.28353.1.S1_at   | MmugDNA.28353.1 | 7.37  | 7.49  | 0.18 | 0.04 | -1.09 | 0.92935  | 0.57109  | 0.97005  | 0.743541 |
| MmugDNA.28354.1.S1_at   | MmugDNA.28354.1 | 3.2   | 3.42  | 0.23 | 0.25 | -1.17 | 0.68524  | 0.837584 | 0.849991 | 0.907168 |
| MmugDNA.28355.1.S1_at   | MmugDNA.28355.1 | 4.17  | 4.29  | 0.18 | 0.16 | -1.08 | 0.944543 | 0.677959 | 0.976613 | 0.811858 |
| MmugDNA.28356.1.S1_at   | MmugDNA.28356.1 | 4.59  | 4.73  | 0.39 | 0.37 | -1.11 | 0.689414 | 0.727882 | 0.851703 | 0.842703 |
| MmugDNA.28357.1.S1_s_at | MmugDNA.28357.1 | 11.43 | 11.44 | 0.16 | 0.06 | -1.01 | 0.907968 | 0.0447   | 0.961052 | 0.255871 |
| MmugDNA.28358.1.S1_at   | MmugDNA.28358.1 | 2.89  | 2.9   | 0.08 | 0.12 | -1.01 | 0.488549 | 0.67     | 0.726931 | 0.806989 |
| MmugDNA.28359.1.S1_at   | MmugDNA.28359.1 | 6.94  | 6.14  | 0.56 | 0.2  | 1.74  | 0.263202 | 0.73778  | 0.556921 | 0.848088 |
| MmugDNA.28360.1.S1_at   | MmugDNA.28360.1 | 4.67  | 4.57  | 0.12 | 0.47 | 1.07  | 0.840937 | 0.893961 | 0.930103 | 0.939462 |
| MmugDNA.28362.1.S1_at   | MmugDNA.28362.1 | 6.95  | 6.77  | 0.31 | 0.52 | 1.14  | 0.803383 | 0.965871 | 0.911802 | 0.980863 |
| MmugDNA.28363.1.S1_at   | MmugDNA.28363.1 | 5.25  | 5.28  | 0.36 | 0.12 | -1.02 | 0.627784 | 0.543289 | 0.817007 | 0.726012 |
| MmugDNA.28364.1.S1_at   | MmugDNA.28364.1 | 3.16  | 3.2   | 0.14 | 0.05 | -1.03 | 0.664245 | 0.438674 | 0.838354 | 0.65762  |
| MmugDNA.28365.1.S1_at   | MmugDNA.28365.1 | 5.83  | 6.37  | 0.42 | 0.16 | -1.45 | 0.167175 | 0.261438 | 0.460393 | 0.527919 |
| MmugDNA.28366.1.S1_at   | MmugDNA.28366.1 | 6.9   | 7.06  | 0.26 | 0.19 | -1.12 | 0.636509 | 0.848899 | 0.822111 | 0.914216 |
| MmugDNA.28368.1.S1_at   | MmugDNA.28368.1 | 5.82  | 5.54  | 0.14 | 0.09 | 1.21  | 0.086671 | 0.157233 | 0.351711 | 0.432721 |
| MmugDNA.2837.1.S1_at    | MmugDNA.2837.1  | 6.33  | 6.18  | 0.29 | 0.09 | 1.11  | 0.415617 | 0.472025 | 0.676298 | 0.679835 |
| MmugDNA.28370.1.S1_at   | MmugDNA.28370.1 | 11.23 | 11.37 | 0.1  | 0.26 | -1.11 | 0.865581 | 0.00286  | 0.941782 | 0.078756 |
| MmugDNA.28371.1.S1_at   | MmugDNA.28371.1 | 4     | 3.96  | 0.69 | 0.63 | 1.03  | 0.559823 | 0.606281 | 0.773535 | 0.765727 |
| MmugDNA.28372.1.S1_at   | MmugDNA.28372.1 | 3.18  | 3.19  | 0.15 | 0.1  | -1.01 | 0.307426 | 0.413497 | 0.594183 | 0.639648 |
| MmugDNA.28373.1.S1_at   | MmugDNA.28373.1 | 6.87  | 6.97  | 0.07 | 0.06 | -1.07 | 0.296109 | 0.012399 | 0.58484  | 0.144058 |
| MmugDNA.28374.1.S1_at   | MmugDNA.28374.1 | 4.37  | 3.72  | 0.11 | 0.43 | 1.56  | 0.067683 | 0.293969 | 0.318012 | 0.553909 |
| MmugDNA.28375.1.S1_at   | MmugDNA.28375.1 | 4.6   | 4.54  | 0.16 | 0.04 | 1.04  | 0.658459 | 0.118704 | 0.834958 | 0.38672  |
| MmugDNA.28377.1.S1_at   | MmugDNA.28377.1 | 5.94  | 5.83  | 0.34 | 0.04 | 1.08  | 0.233476 | 0.341653 | 0.53162  | 0.587796 |
| MmugDNA.28378.1.S1_at   | MmugDNA.28378.1 | 8.22  | 8     | 0.05 | 0.24 | 1.16  | 0.147245 | 0.016326 | 0.435327 | 0.16183  |
| MmugDNA.28379.1.S1_at   | MmugDNA.28379.1 | 5.32  | 5.29  | 0.19 | 0.09 | 1.02  | 0.995904 | 0.50254  | 0.998465 | 0.700192 |
| MmugDNA.2838.1.S1_at    | MmugDNA.2838.1  | 5.24  | 5.45  | 0.1  | 0.04 | -1.16 | 0.018241 | 0.011063 | 0.188082 | 0.136934 |
| MmugDNA.28381.1.S1_at   | MmugDNA.28381.1 | 4.62  | 4.98  | 0.32 | 0.46 | -1.29 | 0.167406 | 0.142336 | 0.46059  | 0.415907 |

|                         |                 |       |       |      |      |       |          |          |          |          |
|-------------------------|-----------------|-------|-------|------|------|-------|----------|----------|----------|----------|
| MmugDNA.28383.1.S1_at   | MmugDNA.28383.1 | 7.01  | 7.07  | 0.07 | 0.02 | -1.04 | 0.105031 | 0.080181 | 0.378728 | 0.327772 |
| MmugDNA.28384.1.S1_at   | MmugDNA.28384.1 | 7.21  | 6.64  | 0.48 | 0.14 | 1.48  | 0.338368 | 0.023576 | 0.61869  | 0.192311 |
| MmugDNA.28385.1.S1_at   | MmugDNA.28385.1 | 4.01  | 4.2   | 0.72 | 0.46 | -1.15 | 0.390539 | 0.567999 | 0.65814  | 0.74176  |
| MmugDNA.28386.1.S1_at   | MmugDNA.28386.1 | 7.01  | 6.55  | 0.23 | 0.38 | 1.38  | 0.058121 | 0.19939  | 0.298185 | 0.474002 |
| MmugDNA.28387.1.S1_at   | MmugDNA.28387.1 | 7.58  | 7.41  | 0.61 | 0.28 | 1.13  | 0.919112 | 0.961714 | 0.965387 | 0.978408 |
| MmugDNA.28388.1.S1_at   | MmugDNA.28388.1 | 3.46  | 3.48  | 0.06 | 0.58 | -1.02 | 0.389547 | 0.271776 | 0.657347 | 0.536577 |
| MmugDNA.28389.1.S1_at   | MmugDNA.28389.1 | 4.98  | 4.99  | 0.51 | 0.1  | -1    | 0.478448 | 0.425672 | 0.71999  | 0.648002 |
| MmugDNA.2839.1.S1_at    | MmugDNA.2839.1  | 6.97  | 7.06  | 0.23 | 0.14 | -1.07 | 0.472862 | 0.172041 | 0.716353 | 0.448447 |
| MmugDNA.28391.1.S1_at   | MmugDNA.28391.1 | 6.64  | 6.52  | 0.34 | 0    | 1.08  | 0.648    | 0.871638 | 0.829095 | 0.92696  |
| MmugDNA.28392.1.S1_at   | MmugDNA.28392.1 | 5.4   | 6.47  | 1.23 | 0.44 | -2.1  | 0.8957   | 0.967486 | 0.955509 | 0.982071 |
| MmugDNA.28394.1.S1_at   | MmugDNA.28394.1 | 3.57  | 3.84  | 0.27 | 0.03 | -1.21 | 0.532155 | 0.472512 | 0.756226 | 0.680025 |
| MmugDNA.28395.1.S1_at   | MmugDNA.28395.1 | 5.5   | 5.55  | 0.41 | 0.05 | -1.04 | 0.749146 | 0.770617 | 0.883851 | 0.866798 |
| MmugDNA.28396.1.S1_at   | MmugDNA.28396.1 | 6.94  | 6.97  | 0.17 | 0.09 | -1.02 | 0.633622 | 0.448894 | 0.820437 | 0.664672 |
| MmugDNA.28397.1.S1_at   | MmugDNA.28397.1 | 4.1   | 4.16  | 0.16 | 0.09 | -1.04 | 0.282453 | 0.342893 | 0.573179 | 0.588712 |
| MmugDNA.28398.1.S1_at   | MmugDNA.28398.1 | 3.5   | 3.56  | 0.06 | 0.1  | -1.04 | 0.150341 | 0.529312 | 0.43942  | 0.717233 |
| MmugDNA.28399.1.S1_x_at | MmugDNA.28399.1 | 6.06  | 6.08  | 0.39 | 0.06 | -1.02 | 0.360865 | 0.783242 | 0.636345 | 0.874547 |
| MmugDNA.284.1.S1_at     | MmugDNA.284.1   | 6.65  | 6.71  | 0.2  | 0.16 | -1.04 | 0.837582 | 0.401993 | 0.928841 | 0.631153 |
| MmugDNA.28400.1.S1_at   | MmugDNA.28400.1 | 12.06 | 12.15 | 0.1  | 0.1  | -1.07 | 0.162832 | 0.269165 | 0.454927 | 0.534497 |
| MmugDNA.28403.1.S1_at   | MmugDNA.28403.1 | 4.74  | 4.75  | 0.08 | 0.06 | -1.01 | 0.418158 | 0.733273 | 0.678114 | 0.845573 |
| MmugDNA.28404.1.S1_at   | MmugDNA.28404.1 | 5.6   | 5.49  | 0.06 | 0.03 | 1.08  | 0.121935 | 0.431971 | 0.400622 | 0.652723 |
| MmugDNA.28405.1.S1_at   | MmugDNA.28405.1 | 7.39  | 7.82  | 0.75 | 0.24 | -1.35 | 0.613703 | 0.225044 | 0.807582 | 0.49773  |
| MmugDNA.28406.1.S1_at   | MmugDNA.28406.1 | 6.25  | 6.29  | 0.44 | 0.25 | -1.02 | 0.658305 | 0.095236 | 0.834939 | 0.352197 |
| MmugDNA.28407.1.S1_at   | MmugDNA.28407.1 | 3.05  | 3.11  | 0.09 | 0.15 | -1.05 | 0.403668 | 0.546182 | 0.667761 | 0.727803 |
| MmugDNA.28408.1.S1_at   | MmugDNA.28408.1 | 6.75  | 7.82  | 0.07 | 0.32 | -2.09 | 0.009784 | 0.089674 | 0.148542 | 0.343848 |
| MmugDNA.28409.1.S1_at   | MmugDNA.28409.1 | 8.76  | 10.41 | 0.16 | 0.26 | -3.13 | 0.001425 | 0.045393 | 0.07964  | 0.257395 |
| MmugDNA.2841.1.S1_at    | MmugDNA.2841.1  | 3.81  | 3.81  | 0.24 | 0.24 | -1    | 0.945461 | 0.970282 | 0.977066 | 0.983812 |
| MmugDNA.28410.1.S1_at   | MmugDNA.28410.1 | 4.04  | 4.15  | 0.11 | 0.03 | -1.08 | 0.386887 | 0.452961 | 0.655201 | 0.667385 |
| MmugDNA.28411.1.S1_at   | MmugDNA.28411.1 | 4.67  | 4.42  | 0.21 | 0.26 | 1.19  | 0.393914 | 0.480513 | 0.660605 | 0.685845 |
| MmugDNA.28412.1.S1_at   | MmugDNA.28412.1 | 9.29  | 9.52  | 0.28 | 0.2  | -1.17 | 0.115796 | 0.305191 | 0.392935 | 0.562255 |
| MmugDNA.28416.1.S1_at   | MmugDNA.28416.1 | 3.23  | 3.19  | 0.06 | 0.09 | 1.03  | 0.178306 | 0.35094  | 0.473054 | 0.594649 |
| MmugDNA.28417.1.S1_at   | MmugDNA.28417.1 | 5.1   | 4.96  | 0.33 | 0.26 | 1.1   | 0.539767 | 0.644378 | 0.761049 | 0.791566 |
| MmugDNA.2842.1.S1_at    | MmugDNA.2842.1  | 3.17  | 2.96  | 0.53 | 0.1  | 1.16  | 0.197665 | 0.19831  | 0.494972 | 0.473267 |
| MmugDNA.28421.1.S1_at   | MmugDNA.28421.1 | 6.22  | 8.16  | 0.36 | 0.24 | -3.86 | 0.001102 | 0.000338 | 0.077306 | 0.036485 |
| MmugDNA.28424.1.S1_at   | MmugDNA.28424.1 | 2.81  | 2.77  | 0.09 | 0.03 | 1.03  | 0.193251 | 0.535841 | 0.489751 | 0.721345 |
| MmugDNA.28425.1.S1_at   | MmugDNA.28425.1 | 9.27  | 9.48  | 0.61 | 0.11 | -1.16 | 0.231857 | 0.055874 | 0.530482 | 0.282172 |
| MmugDNA.28426.1.S1_at   | MmugDNA.28426.1 | 5.4   | 5.33  | 0.35 | 0.08 | 1.05  | 0.275609 | 0.457748 | 0.567274 | 0.670897 |
| MmugDNA.28427.1.S1_at   | MmugDNA.28427.1 | 7.47  | 8.03  | 0.74 | 0.21 | -1.47 | 0.144732 | 0.332139 | 0.431682 | 0.580584 |
| MmugDNA.28428.1.S1_at   | MmugDNA.28428.1 | 6.3   | 6.31  | 0.23 | 0.08 | -1.01 | 0.884368 | 0.377322 | 0.950845 | 0.614891 |
| MmugDNA.28429.1.S1_at   | MmugDNA.28429.1 | 11.57 | 11.42 | 0.19 | 0.03 | 1.11  | 0.221635 | 0.060986 | 0.519634 | 0.293811 |
| MmugDNA.2843.1.S1_at    | MmugDNA.2843.1  | 4.88  | 5.42  | 0.3  | 0.26 | -1.45 | 0.10566  | 0.095617 | 0.379794 | 0.352645 |
| MmugDNA.28431.1.S1_x_at | MmugDNA.28431.1 | 7.77  | 7.75  | 0.11 | 0.06 | 1.01  | 0.42282  | 0.526266 | 0.680915 | 0.715488 |
| MmugDNA.28432.1.S1_at   | MmugDNA.28432.1 | 10.25 | 10.39 | 0.27 | 0.15 | -1.1  | 0.185149 | 0.602009 | 0.481333 | 0.763157 |
| MmugDNA.28433.1.S1_at   | MmugDNA.28433.1 | 8.31  | 8.2   | 0.46 | 0.58 | 1.08  | 0.875504 | 0.207224 | 0.94665  | 0.481364 |

|                         |                 |       |       |      |      |       |          |          |          |          |
|-------------------------|-----------------|-------|-------|------|------|-------|----------|----------|----------|----------|
| MmugDNA.28434.1.S1_at   | MmugDNA.28434.1 | 10.58 | 11.1  | 0.07 | 0.07 | -1.43 | 0.001707 | 0.034185 | 0.085033 | 0.228728 |
| MmugDNA.28435.1.S1_at   | MmugDNA.28435.1 | 9.05  | 8.97  | 0.1  | 0.11 | 1.05  | 0.464714 | 0.807951 | 0.710874 | 0.889436 |
| MmugDNA.28436.1.S1_at   | MmugDNA.28436.1 | 4.26  | 4.37  | 0.02 | 0.01 | -1.08 | 0.002441 | 0.014826 | 0.093763 | 0.154895 |
| MmugDNA.28438.1.S1_at   | MmugDNA.28438.1 | 13.55 | 13.52 | 0.01 | 0.05 | 1.02  | 0.264066 | 0.455433 | 0.557422 | 0.669404 |
| MmugDNA.2844.1.S1_s_at  | MmugDNA.2844.1  | 5.29  | 5.12  | 0.13 | 0.18 | 1.12  | 0.18781  | 0.378255 | 0.484107 | 0.615438 |
| MmugDNA.28442.1.S1_s_at | MmugDNA.28442.1 | 4.75  | 5.75  | 1.39 | 0.32 | -2    | 0.820549 | 0.922964 | 0.919941 | 0.956659 |
| MmugDNA.28445.1.S1_at   | MmugDNA.28445.1 | 3.76  | 3.8   | 0.05 | 0.12 | -1.03 | 0.510786 | 0.505581 | 0.742113 | 0.702218 |
| MmugDNA.28447.1.S1_at   | MmugDNA.28447.1 | 5.75  | 5.83  | 0.16 | 0.03 | -1.05 | 0.644942 | 0.459624 | 0.827097 | 0.671921 |
| MmugDNA.28449.1.S1_at   | MmugDNA.28449.1 | 5.41  | 5.53  | 0.28 | 0.25 | -1.09 | 0.982739 | 0.80646  | 0.993625 | 0.888651 |
| MmugDNA.2845.1.S1_at    | MmugDNA.2845.1  | 5.89  | 5.83  | 0.1  | 0.08 | 1.04  | 0.948768 | 0.165494 | 0.978619 | 0.44175  |
| MmugDNA.28450.1.S1_at   | MmugDNA.28450.1 | 8.18  | 8.38  | 0.47 | 0.18 | -1.15 | 0.518939 | 0.306498 | 0.747833 | 0.563035 |
| MmugDNA.28452.1.S1_at   | MmugDNA.28452.1 | 4.74  | 5.08  | 1.16 | 0.49 | -1.27 | 0.79493  | 0.460033 | 0.907391 | 0.671989 |
| MmugDNA.28454.1.S1_at   | MmugDNA.28454.1 | 5.17  | 4.89  | 0.13 | 0.28 | 1.21  | 0.123132 | 0.07351  | 0.40226  | 0.316778 |
| MmugDNA.28456.1.S1_at   | MmugDNA.28456.1 | 4.03  | 3.85  | 0.62 | 0.06 | 1.14  | 0.185754 | 0.214609 | 0.481947 | 0.488411 |
| MmugDNA.28457.1.S1_at   | MmugDNA.28457.1 | 6.56  | 6.12  | 0.4  | 0.03 | 1.35  | 0.12681  | 0.176869 | 0.408298 | 0.453303 |
| MmugDNA.28458.1.S1_at   | MmugDNA.28458.1 | 9.06  | 9.57  | 0.19 | 0.13 | -1.43 | 0.010314 | 0.008479 | 0.151339 | 0.122133 |
| MmugDNA.28459.1.S1_at   | MmugDNA.28459.1 | 8.99  | 9.36  | 0.22 | 0.05 | -1.29 | 0.14297  | 0.197986 | 0.429137 | 0.472936 |
| MmugDNA.28460.1.S1_at   | MmugDNA.28460.1 | 7.75  | 7.56  | 0.09 | 0.18 | 1.15  | 0.213816 | 0.636575 | 0.511664 | 0.786262 |
| MmugDNA.28463.1.S1_at   | MmugDNA.28463.1 | 5.51  | 5.32  | 0.23 | 0.1  | 1.14  | 0.983016 | 0.892477 | 0.993693 | 0.938696 |
| MmugDNA.28464.1.S1_at   | MmugDNA.28464.1 | 7.38  | 7.58  | 0.15 | 0.08 | -1.15 | 0.067849 | 0.060671 | 0.318295 | 0.292876 |
| MmugDNA.28466.1.S1_at   | MmugDNA.28466.1 | 6.45  | 7.56  | 0.59 | 0.19 | -2.17 | 0.091914 | 0.307577 | 0.359901 | 0.563785 |
| MmugDNA.28468.1.S1_at   | MmugDNA.28468.1 | 7.77  | 8.38  | 1.02 | 0.12 | -1.52 | 0.970969 | 0.78803  | 0.98847  | 0.877426 |
| MmugDNA.28470.1.S1_at   | MmugDNA.28470.1 | 3.15  | 3.61  | 0.99 | 0.15 | -1.38 | 0.810952 | 0.918799 | 0.915323 | 0.954387 |
| MmugDNA.28475.1.S1_at   | MmugDNA.28475.1 | 13.08 | 12.92 | 0.02 | 0.1  | 1.12  | 0.035772 | 0.00386  | 0.244077 | 0.088378 |
| MmugDNA.28476.1.S1_at   | MmugDNA.28476.1 | 11.03 | 11.03 | 0.07 | 0.04 | 1     | 0.67196  | 0.931155 | 0.84282  | 0.960891 |
| MmugDNA.28477.1.S1_at   | MmugDNA.28477.1 | 4.17  | 4.6   | 0.17 | 0.08 | -1.35 | 0.014666 | 0.005737 | 0.172984 | 0.104271 |
| MmugDNA.2848.1.S1_at    | MmugDNA.2848.1  | 3.94  | 4     | 0.14 | 0    | -1.04 | 0.322555 | 0.352549 | 0.606547 | 0.595789 |
| MmugDNA.28480.1.S1_at   | MmugDNA.28480.1 | 5.42  | 5.32  | 0.23 | 0.11 | 1.07  | 0.926253 | 0.942151 | 0.968841 | 0.967154 |
| MmugDNA.28481.1.S1_at   | MmugDNA.28481.1 | 3.32  | 3.08  | 0.15 | 0.15 | 1.18  | 0.41467  | 0.619137 | 0.675681 | 0.774379 |
| MmugDNA.28482.1.S1_at   | MmugDNA.28482.1 | 6.27  | 6.28  | 0.1  | 0.08 | -1    | 0.540838 | 0.090765 | 0.761766 | 0.345227 |
| MmugDNA.28483.1.S1_at   | MmugDNA.28483.1 | 3.44  | 3.63  | 0.12 | 0.05 | -1.14 | 0.132492 | 0.016878 | 0.415892 | 0.164713 |
| MmugDNA.28484.1.S1_at   | MmugDNA.28484.1 | 5.73  | 5.57  | 0.12 | 0.05 | 1.12  | 0.104711 | 0.121153 | 0.37819  | 0.390217 |
| MmugDNA.28486.1.S1_at   | MmugDNA.28486.1 | 4.15  | 4.15  | 0.02 | 0.1  | 1     | 0.315477 | 0.917811 | 0.600413 | 0.954011 |
| MmugDNA.28487.1.S1_at   | MmugDNA.28487.1 | 9.59  | 9.48  | 0.05 | 0.18 | 1.08  | 0.38797  | 0.057147 | 0.656068 | 0.284972 |
| MmugDNA.28488.1.S1_at   | MmugDNA.28488.1 | 8.6   | 9.59  | 0.35 | 0.02 | -1.98 | 0.008998 | 0.142077 | 0.144777 | 0.415655 |
| MmugDNA.28491.1.S1_at   | MmugDNA.28491.1 | 6.06  | 7.09  | 0.82 | 0.6  | -2.04 | 0.244581 | 0.108731 | 0.540942 | 0.372257 |
| MmugDNA.28492.1.S1_at   | MmugDNA.28492.1 | 3.91  | 3.99  | 0.09 | 0.01 | -1.06 | 0.182419 | 0.418321 | 0.478114 | 0.642707 |
| MmugDNA.28494.1.S1_at   | MmugDNA.28494.1 | 4.43  | 5.2   | 0.54 | 0.4  | -1.72 | 0.18692  | 0.483157 | 0.482992 | 0.687762 |
| MmugDNA.28496.1.S1_at   | MmugDNA.28496.1 | 6.57  | 5.71  | 0.7  | 0.21 | 1.82  | 0.040408 | 0.038303 | 0.257326 | 0.240571 |
| MmugDNA.28498.1.S1_at   | MmugDNA.28498.1 | 2.96  | 3.17  | 0.77 | 0.33 | -1.16 | 0.937761 | 0.763816 | 0.973791 | 0.862673 |
| MmugDNA.28499.1.S1_at   | MmugDNA.28499.1 | 3.99  | 3.66  | 0.46 | 0.12 | 1.26  | 0.282827 | 0.388119 | 0.573387 | 0.622607 |
| MmugDNA.285.1.S1_at     | MmugDNA.285.1   | 6.63  | 7.33  | 0.25 | 0.45 | -1.62 | 0.056939 | 0.053354 | 0.295858 | 0.27654  |
| MmugDNA.2850.1.S1_at    | MmugDNA.2850.1  | 10.46 | 7.76  | 1.31 | 0.45 | 6.51  | 0.07118  | 0.06436  | 0.324758 | 0.299875 |

|                         |                 |       |       |      |      |       |          |          |          |          |
|-------------------------|-----------------|-------|-------|------|------|-------|----------|----------|----------|----------|
| MmugDNA.28500.1.S1_at   | MmugDNA.28500.1 | 6.58  | 6.63  | 0.24 | 0.05 | -1.03 | 0.586322 | 0.668613 | 0.789745 | 0.806109 |
| MmugDNA.28502.1.S1_at   | MmugDNA.28502.1 | 3.8   | 3.68  | 0.74 | 0.19 | 1.09  | 0.602634 | 0.761017 | 0.800338 | 0.861185 |
| MmugDNA.28503.1.S1_at   | MmugDNA.28503.1 | 8.85  | 8.14  | 0.08 | 0.09 | 1.63  | 0.00069  | 0.000699 | 0.071248 | 0.04424  |
| MmugDNA.28505.1.S1_at   | MmugDNA.28505.1 | 5.1   | 5.32  | 0.14 | 0.02 | -1.16 | 0.022507 | 0.046784 | 0.203286 | 0.261029 |
| MmugDNA.28506.1.S1_at   | MmugDNA.28506.1 | 3.53  | 3.4   | 0.37 | 0.1  | 1.09  | 0.213261 | 0.200683 | 0.511046 | 0.47524  |
| MmugDNA.28507.1.S1_at   | MmugDNA.28507.1 | 10.27 | 10.48 | 0.08 | 0.03 | -1.16 | 0.011111 | 0.292893 | 0.155073 | 0.552857 |
| MmugDNA.28508.1.S1_at   | MmugDNA.28508.1 | 6.13  | 5.8   | 0.39 | 0.05 | 1.26  | 0.273157 | 0.452331 | 0.565251 | 0.667046 |
| MmugDNA.28509.1.S1_at   | MmugDNA.28509.1 | 4.61  | 4.68  | 0.15 | 0.16 | -1.05 | 0.290152 | 0.622207 | 0.579635 | 0.776749 |
| MmugDNA.2851.1.S1_at    | MmugDNA.2851.1  | 11.71 | 11.46 | 0.25 | 0.03 | 1.19  | 0.075368 | 0.148404 | 0.332723 | 0.423003 |
| MmugDNA.28510.1.S1_at   | MmugDNA.28510.1 | 5.79  | 5.71  | 0.29 | 0.04 | 1.06  | 0.185167 | 0.228846 | 0.481333 | 0.501117 |
| MmugDNA.28511.1.S1_s_at | MmugDNA.28511.1 | 9.49  | 10.14 | 0.35 | 0.05 | -1.57 | 0.021625 | 0.028417 | 0.20067  | 0.210385 |
| MmugDNA.28512.1.S1_at   | MmugDNA.28512.1 | 4.1   | 4.07  | 0.17 | 0.06 | 1.02  | 0.970214 | 0.628955 | 0.988215 | 0.781556 |
| MmugDNA.28513.1.S1_at   | MmugDNA.28513.1 | 12.33 | 12.14 | 0.07 | 0.18 | 1.14  | 0.26541  | 0.732431 | 0.558032 | 0.845008 |
| MmugDNA.28515.1.S1_at   | MmugDNA.28515.1 | 7.47  | 8.03  | 0.07 | 0.18 | -1.47 | 0.015971 | 0.025304 | 0.178882 | 0.199522 |
| MmugDNA.28516.1.S1_s_at | MmugDNA.28516.1 | 10.14 | 9.63  | 0.22 | 0.12 | 1.42  | 0.024474 | 0.014311 | 0.209623 | 0.152747 |
| MmugDNA.28517.1.S1_at   | MmugDNA.28517.1 | 3.19  | 3.27  | 0.08 | 0.08 | -1.06 | 0.125168 | 0.331531 | 0.405579 | 0.580171 |
| MmugDNA.28518.1.S1_at   | MmugDNA.28518.1 | 5.02  | 4.89  | 0.21 | 0.17 | 1.1   | 0.973215 | 0.010015 | 0.989282 | 0.131262 |
| MmugDNA.28519.1.S1_at   | MmugDNA.28519.1 | 7.41  | 7.25  | 0.37 | 0.04 | 1.11  | 0.190656 | 0.20228  | 0.486844 | 0.476687 |
| MmugDNA.2852.1.S1_at    | MmugDNA.2852.1  | 3.85  | 3.91  | 0.04 | 0.15 | -1.04 | 0.248801 | 0.023354 | 0.544159 | 0.191568 |
| MmugDNA.28520.1.S1_at   | MmugDNA.28520.1 | 5.7   | 5.7   | 0.8  | 0.41 | -1    | 0.44832  | 0.364679 | 0.699971 | 0.605001 |
| MmugDNA.28521.1.S1_at   | MmugDNA.28521.1 | 6.52  | 6.58  | 0.02 | 0.1  | -1.04 | 0.306036 | 0.390313 | 0.59297  | 0.624142 |
| MmugDNA.28522.1.S1_at   | MmugDNA.28522.1 | 8.96  | 8.94  | 0.19 | 0.22 | 1.01  | 0.910769 | 0.455118 | 0.962206 | 0.669109 |
| MmugDNA.28523.1.S1_at   | MmugDNA.28523.1 | 11.51 | 11.23 | 0.21 | 0.16 | 1.21  | 0.112036 | 0.085896 | 0.388221 | 0.338068 |
| MmugDNA.28524.1.S1_at   | MmugDNA.28524.1 | 4.87  | 4.83  | 0.25 | 0.56 | 1.02  | 0.916924 | 0.564699 | 0.964649 | 0.739425 |
| MmugDNA.28525.1.S1_at   | MmugDNA.28525.1 | 7.17  | 6.84  | 0.1  | 0.29 | 1.26  | 0.240214 | 0.012329 | 0.537838 | 0.143659 |
| MmugDNA.28526.1.S1_at   | MmugDNA.28526.1 | 3.26  | 3.37  | 0.06 | 0.11 | -1.08 | 0.259468 | 0.161662 | 0.553789 | 0.437771 |
| MmugDNA.28528.1.S1_at   | MmugDNA.28528.1 | 8.09  | 8.46  | 0.2  | 0.07 | -1.29 | 0.024873 | 0.0991   | 0.210862 | 0.357241 |
| MmugDNA.28529.1.S1_at   | MmugDNA.28529.1 | 7.26  | 6.45  | 0.17 | 0.25 | 1.75  | 0.015775 | 0.31683  | 0.177999 | 0.570212 |
| MmugDNA.28532.1.S1_at   | MmugDNA.28532.1 | 3.05  | 2.94  | 0.11 | 0.31 | 1.08  | 0.997303 | 0.855336 | 0.999086 | 0.917526 |
| MmugDNA.28533.1.S1_at   | MmugDNA.28533.1 | 6.19  | 6.14  | 0.09 | 0.04 | 1.04  | 0.292396 | 0.050708 | 0.581701 | 0.270338 |
| MmugDNA.28536.1.S1_at   | MmugDNA.28536.1 | 3.63  | 3.73  | 0.44 | 0.09 | -1.07 | 0.916235 | 0.549592 | 0.964383 | 0.729956 |
| MmugDNA.28537.1.S1_at   | MmugDNA.28537.1 | 6.6   | 6.68  | 0.16 | 0.02 | -1.05 | 0.835744 | 0.72544  | 0.927795 | 0.841043 |
| MmugDNA.28539.1.S1_at   | MmugDNA.28539.1 | 11.51 | 11.74 | 0.31 | 0.13 | -1.18 | 0.760021 | 0.257949 | 0.890079 | 0.525531 |
| MmugDNA.2854.1.S1_at    | MmugDNA.2854.1  | 6.81  | 6.86  | 0.19 | 0.08 | -1.04 | 0.55587  | 0.713769 | 0.771458 | 0.833937 |
| MmugDNA.28540.1.S1_at   | MmugDNA.28540.1 | 3.25  | 3.11  | 0.23 | 0.06 | 1.1   | 0.343314 | 0.383783 | 0.622959 | 0.619734 |
| MmugDNA.28541.1.S1_at   | MmugDNA.28541.1 | 4.82  | 5.17  | 0.12 | 0.15 | -1.27 | 0.161577 | 0.338914 | 0.453193 | 0.585891 |
| MmugDNA.28542.1.S1_at   | MmugDNA.28542.1 | 3.13  | 3.06  | 0.03 | 0.09 | 1.05  | 0.115931 | 0.204284 | 0.392991 | 0.478541 |
| MmugDNA.28542.1.S1_x_at | MmugDNA.28542.1 | 3.45  | 3.44  | 0.24 | 0.32 | 1     | 0.466335 | 0.298557 | 0.712179 | 0.557183 |
| MmugDNA.28543.1.S1_at   | MmugDNA.28543.1 | 10.7  | 10.96 | 0.24 | 0.15 | -1.2  | 0.82094  | 0.858083 | 0.920094 | 0.919063 |
| MmugDNA.28545.1.S1_at   | MmugDNA.28545.1 | 5.76  | 5.68  | 0.18 | 0.02 | 1.06  | 0.539033 | 0.848009 | 0.760521 | 0.913686 |
| MmugDNA.28547.1.S1_at   | MmugDNA.28547.1 | 5.2   | 4.95  | 0.12 | 0.27 | 1.19  | 0.079072 | 0.040326 | 0.338803 | 0.245973 |
| MmugDNA.28548.1.S1_at   | MmugDNA.28548.1 | 5.88  | 5.35  | 0.1  | 0.18 | 1.44  | 0.006131 | 0.034908 | 0.124614 | 0.231062 |
| MmugDNA.28549.1.S1_s_at | MmugDNA.28549.1 | 11.45 | 11.27 | 0.03 | 0.04 | 1.13  | 0.006111 | 0.341646 | 0.124422 | 0.587796 |

|                         |                 |       |       |      |      |       |          |          |          |          |
|-------------------------|-----------------|-------|-------|------|------|-------|----------|----------|----------|----------|
| MmugDNA.28550.1.S1_at   | MmugDNA.28550.1 | 8.97  | 8.44  | 0.38 | 0.23 | 1.44  | 0.130633 | 0.039682 | 0.413084 | 0.244271 |
| MmugDNA.28551.1.S1_at   | MmugDNA.28551.1 | 7.33  | 7.34  | 0.51 | 0.15 | -1.01 | 0.87968  | 0.856301 | 0.948777 | 0.917926 |
| MmugDNA.28552.1.S1_at   | MmugDNA.28552.1 | 8.11  | 8.06  | 0.04 | 0.05 | 1.03  | 0.109926 | 0.57652  | 0.385165 | 0.747267 |
| MmugDNA.28553.1.S1_at   | MmugDNA.28553.1 | 5.01  | 5.07  | 0.43 | 0.47 | -1.04 | 0.691623 | 0.864758 | 0.852609 | 0.923286 |
| MmugDNA.28555.1.S1_at   | MmugDNA.28555.1 | 5.15  | 4.9   | 0.2  | 0.09 | 1.2   | 0.08228  | 0.060999 | 0.343885 | 0.293811 |
| MmugDNA.28556.1.S1_at   | MmugDNA.28556.1 | 5.24  | 5.02  | 0.37 | 0.01 | 1.17  | 0.110631 | 0.201078 | 0.385989 | 0.475509 |
| MmugDNA.28557.1.S1_s_at | MmugDNA.28557.1 | 2.93  | 2.91  | 0.09 | 0.15 | 1.01  | 0.906147 | 0.638979 | 0.960257 | 0.787973 |
| MmugDNA.28558.1.S1_at   | MmugDNA.28558.1 | 4.99  | 4.97  | 0.18 | 0.24 | 1.01  | 0.476316 | 0.70637  | 0.718743 | 0.829634 |
| MmugDNA.28559.1.S1_at   | MmugDNA.28559.1 | 4.55  | 4.54  | 0.03 | 0.11 | 1.01  | 0.645365 | 0.465268 | 0.827328 | 0.67567  |
| MmugDNA.2856.1.S1_at    | MmugDNA.2856.1  | 3.48  | 3.51  | 0.21 | 0.07 | -1.02 | 0.766075 | 0.332882 | 0.89269  | 0.581266 |
| MmugDNA.28560.1.S1_at   | MmugDNA.28560.1 | 9.87  | 8.71  | 0.05 | 0.06 | 2.24  | 0.000015 | 0.00003  | 0.045594 | 0.022097 |
| MmugDNA.28562.1.S1_at   | MmugDNA.28562.1 | 6.29  | 6.44  | 0.18 | 0.12 | -1.1  | 0.32927  | 0.485057 | 0.611539 | 0.688908 |
| MmugDNA.28563.1.S1_at   | MmugDNA.28563.1 | 6.66  | 7.02  | 0.09 | 0.2  | -1.29 | 0.039062 | 0.001343 | 0.254032 | 0.056396 |
| MmugDNA.28564.1.S1_at   | MmugDNA.28564.1 | 5.19  | 4.91  | 0.31 | 1    | 1.22  | 0.7093   | 0.617442 | 0.862439 | 0.77343  |
| MmugDNA.28565.1.S1_at   | MmugDNA.28565.1 | 3.86  | 3.85  | 0.16 | 0.1  | 1     | 0.75866  | 0.962411 | 0.889396 | 0.978891 |
| MmugDNA.28567.1.S1_at   | MmugDNA.28567.1 | 6.18  | 5.69  | 0.09 | 0.22 | 1.4   | 0.039313 | 0.058977 | 0.254782 | 0.289669 |
| MmugDNA.28568.1.S1_at   | MmugDNA.28568.1 | 5.47  | 5.61  | 0.35 | 0.09 | -1.1  | 0.759069 | 0.185799 | 0.889603 | 0.461631 |
| MmugDNA.28573.1.S1_at   | MmugDNA.28573.1 | 4.73  | 4.51  | 0.68 | 0.28 | 1.16  | 0.605674 | 0.742945 | 0.802615 | 0.851083 |
| MmugDNA.28575.1.S1_at   | MmugDNA.28575.1 | 7.24  | 6.23  | 0.31 | 0.31 | 2.02  | 0.013267 | 0.02026  | 0.165811 | 0.178715 |
| MmugDNA.28576.1.S1_at   | MmugDNA.28576.1 | 5.1   | 5.26  | 0.29 | 0.08 | -1.12 | 0.28343  | 0.625119 | 0.573857 | 0.779004 |
| MmugDNA.28577.1.S1_at   | MmugDNA.28577.1 | 5.96  | 5.96  | 0.3  | 0.03 | -1.01 | 0.76883  | 0.665665 | 0.893815 | 0.804131 |
| MmugDNA.28578.1.S1_at   | MmugDNA.28578.1 | 5.19  | 5.18  | 0.24 | 0.2  | 1.01  | 0.913622 | 0.374554 | 0.963382 | 0.6129   |
| MmugDNA.28579.1.S1_at   | MmugDNA.28579.1 | 7.19  | 6.94  | 0.27 | 0.11 | 1.19  | 0.184998 | 0.042697 | 0.4811   | 0.251049 |
| MmugDNA.2858.1.S1_at    | MmugDNA.2858.1  | 4.23  | 4.28  | 0.24 | 0.07 | -1.03 | 0.256833 | 0.442819 | 0.551407 | 0.660759 |
| MmugDNA.28580.1.S1_at   | MmugDNA.28580.1 | 11.21 | 11.97 | 0.46 | 0.17 | -1.7  | 0.065113 | 0.216981 | 0.311972 | 0.4906   |
| MmugDNA.28581.1.S1_at   | MmugDNA.28581.1 | 7.29  | 7.42  | 0.34 | 0.16 | -1.09 | 0.563866 | 0.038842 | 0.775725 | 0.242022 |
| MmugDNA.28582.1.S1_at   | MmugDNA.28582.1 | 4.1   | 3.92  | 0.21 | 0.08 | 1.13  | 0.185233 | 0.326287 | 0.481385 | 0.576452 |
| MmugDNA.28583.1.S1_at   | MmugDNA.28583.1 | 4.69  | 4.46  | 0.34 | 0.26 | 1.17  | 0.459059 | 0.130415 | 0.707358 | 0.402257 |
| MmugDNA.28584.1.S1_at   | MmugDNA.28584.1 | 3.39  | 3.49  | 0.06 | 0.06 | -1.07 | 0.118113 | 0.33811  | 0.395593 | 0.585286 |
| MmugDNA.28585.1.S1_at   | MmugDNA.28585.1 | 4.07  | 4.26  | 0.22 | 0.1  | -1.14 | 0.115488 | 0.198583 | 0.392682 | 0.473391 |
| MmugDNA.28586.1.S1_at   | MmugDNA.28586.1 | 4.77  | 4.77  | 0.09 | 0.04 | 1     | 0.727419 | 0.227068 | 0.872313 | 0.499415 |
| MmugDNA.28587.1.S1_at   | MmugDNA.28587.1 | 8.66  | 8.86  | 0.53 | 0.21 | -1.15 | 0.212643 | 0.402816 | 0.510654 | 0.631615 |
| MmugDNA.28588.1.S1_at   | MmugDNA.28588.1 | 4.96  | 5.3   | 0.21 | 0.12 | -1.26 | 0.283581 | 0.183582 | 0.573936 | 0.459681 |
| MmugDNA.28589.1.S1_at   | MmugDNA.28589.1 | 4.71  | 4.32  | 0.38 | 0.04 | 1.31  | 0.146032 | 0.148803 | 0.433778 | 0.423201 |
| MmugDNA.2859.1.S1_at    | MmugDNA.2859.1  | 3.25  | 3.26  | 0.05 | 0.15 | -1.01 | 0.679959 | 0.365739 | 0.847291 | 0.605685 |
| MmugDNA.28590.1.S1_at   | MmugDNA.28590.1 | 6.57  | 6.73  | 1.02 | 0.35 | -1.12 | 0.951568 | 0.768359 | 0.979984 | 0.865493 |
| MmugDNA.28592.1.S1_at   | MmugDNA.28592.1 | 3.2   | 3.23  | 0.14 | 0.08 | -1.02 | 0.633087 | 0.271024 | 0.820177 | 0.536155 |
| MmugDNA.28593.1.S1_at   | MmugDNA.28593.1 | 7.65  | 7.64  | 0.14 | 0.21 | 1.01  | 0.535907 | 0.318064 | 0.758682 | 0.571046 |
| MmugDNA.28594.1.S1_at   | MmugDNA.28594.1 | 6.45  | 6.13  | 1.01 | 0.1  | 1.25  | 0.246234 | 0.131116 | 0.541997 | 0.403084 |
| MmugDNA.28595.1.S1_at   | MmugDNA.28595.1 | 4.98  | 5.06  | 0.07 | 0.17 | -1.06 | 0.528172 | 0.638706 | 0.753524 | 0.787808 |
| MmugDNA.28596.1.S1_at   | MmugDNA.28596.1 | 4.51  | 4.59  | 0.14 | 0.1  | -1.06 | 0.093829 | 0.374249 | 0.362619 | 0.612738 |
| MmugDNA.28597.1.S1_at   | MmugDNA.28597.1 | 4.19  | 3.98  | 0.17 | 0.14 | 1.16  | 0.247153 | 0.215524 | 0.542778 | 0.489269 |
| MmugDNA.28598.1.S1_at   | MmugDNA.28598.1 | 7.82  | 7.74  | 0.29 | 0.09 | 1.06  | 0.658442 | 0.736447 | 0.834958 | 0.84751  |

|                         |                 |       |       |      |      |       |          |          |          |          |
|-------------------------|-----------------|-------|-------|------|------|-------|----------|----------|----------|----------|
| MmugDNA.2860.1.S1_at    | MmugDNA.2860.1  | 4.2   | 4.2   | 0.06 | 0.13 | 1     | 0.380531 | 0.53969  | 0.65023  | 0.72391  |
| MmugDNA.28600.1.S1_at   | MmugDNA.28600.1 | 5.82  | 5.71  | 0.16 | 0.02 | 1.07  | 0.108644 | 0.208135 | 0.383512 | 0.482082 |
| MmugDNA.28601.1.S1_at   | MmugDNA.28601.1 | 7.44  | 7.08  | 0.16 | 0.33 | 1.29  | 0.120529 | 0.490331 | 0.398904 | 0.692363 |
| MmugDNA.28602.1.S1_at   | MmugDNA.28602.1 | 5.9   | 5.88  | 0.02 | 0.08 | 1.02  | 0.956413 | 0.998911 | 0.982106 | 0.99944  |
| MmugDNA.28604.1.S1_at   | MmugDNA.28604.1 | 9.56  | 9.71  | 0.32 | 0.08 | -1.11 | 0.362727 | 0.401633 | 0.63739  | 0.631068 |
| MmugDNA.28605.1.S1_at   | MmugDNA.28605.1 | 6.4   | 7.02  | 0.22 | 0.31 | -1.54 | 0.061729 | 0.195277 | 0.304962 | 0.470253 |
| MmugDNA.28606.1.S1_s_at | MmugDNA.28606.1 | 10.65 | 10.81 | 0.16 | 0.07 | -1.11 | 0.387165 | 0.465198 | 0.655438 | 0.675638 |
| MmugDNA.28607.1.S1_at   | MmugDNA.28607.1 | 6.09  | 5.99  | 0.15 | 0.15 | 1.07  | 0.974553 | 0.707494 | 0.98978  | 0.830363 |
| MmugDNA.28608.1.S1_at   | MmugDNA.28608.1 | 6.98  | 6.59  | 0.72 | 0.23 | 1.31  | 0.534041 | 0.313496 | 0.757384 | 0.567926 |
| MmugDNA.28609.1.S1_at   | MmugDNA.28609.1 | 3.69  | 3.69  | 0.42 | 0.15 | 1     | 0.428946 | 0.332292 | 0.685557 | 0.580733 |
| MmugDNA.2861.1.S1_at    | MmugDNA.2861.1  | 4.31  | 4.26  | 0.09 | 0.03 | 1.04  | 0.110463 | 0.336512 | 0.385799 | 0.583862 |
| MmugDNA.28610.1.S1_at   | MmugDNA.28610.1 | 10.07 | 9.8   | 0.57 | 0.19 | 1.21  | 0.869008 | 0.712766 | 0.943648 | 0.8335   |
| MmugDNA.28611.1.S1_at   | MmugDNA.28611.1 | 3.82  | 3.77  | 0.18 | 0.11 | 1.03  | 0.84097  | 0.074787 | 0.930107 | 0.31853  |
| MmugDNA.28612.1.S1_at   | MmugDNA.28612.1 | 9.11  | 8.73  | 0.31 | 0.18 | 1.31  | 0.485225 | 0.006059 | 0.724739 | 0.106152 |
| MmugDNA.28613.1.S1_at   | MmugDNA.28613.1 | 3.16  | 3.08  | 0.11 | 0.13 | 1.06  | 0.141564 | 0.157213 | 0.427545 | 0.432687 |
| MmugDNA.28614.1.S1_at   | MmugDNA.28614.1 | 4.95  | 4.97  | 0.07 | 0.31 | -1.01 | 0.350655 | 0.214713 | 0.628492 | 0.488578 |
| MmugDNA.28615.1.S1_at   | MmugDNA.28615.1 | 3.34  | 3.38  | 0.19 | 0.14 | -1.02 | 0.876525 | 0.836547 | 0.947123 | 0.906546 |
| MmugDNA.28616.1.S1_at   | MmugDNA.28616.1 | 3.59  | 3.23  | 0.25 | 0.12 | 1.29  | 0.384962 | 0.338748 | 0.653852 | 0.585819 |
| MmugDNA.28617.1.S1_at   | MmugDNA.28617.1 | 5.41  | 5.44  | 0.21 | 0.05 | -1.02 | 0.469609 | 0.080336 | 0.714298 | 0.327965 |
| MmugDNA.28618.1.S1_at   | MmugDNA.28618.1 | 7.96  | 7.8   | 0.52 | 0.12 | 1.12  | 0.587282 | 0.877055 | 0.790419 | 0.92994  |
| MmugDNA.28619.1.S1_at   | MmugDNA.28619.1 | 3.77  | 3.62  | 0.41 | 0.14 | 1.11  | 0.783272 | 0.556109 | 0.901127 | 0.73438  |
| MmugDNA.2862.1.S1_at    | MmugDNA.2862.1  | 4.66  | 4.62  | 0.23 | 0.09 | 1.03  | 0.923173 | 0.990064 | 0.967269 | 0.994314 |
| MmugDNA.28620.1.S1_at   | MmugDNA.28620.1 | 3.36  | 3.31  | 0.3  | 0.03 | 1.03  | 0.569156 | 0.758556 | 0.778726 | 0.859634 |
| MmugDNA.28622.1.S1_at   | MmugDNA.28622.1 | 8.59  | 7.79  | 0.34 | 0.06 | 1.74  | 0.01377  | 0.000635 | 0.168161 | 0.042882 |
| MmugDNA.28622.1.S1_s_at | MmugDNA.28622.1 | 9.55  | 8.83  | 0.42 | 0.2  | 1.65  | 0.052295 | 0.004524 | 0.285979 | 0.093974 |
| MmugDNA.28623.1.S1_at   | MmugDNA.28623.1 | 10.9  | 10.95 | 0.06 | 0.03 | -1.04 | 0.908188 | 0.00137  | 0.961131 | 0.05691  |
| MmugDNA.28624.1.S1_at   | MmugDNA.28624.1 | 5.09  | 5.09  | 0.25 | 0.08 | -1    | 0.375378 | 0.236133 | 0.646249 | 0.507179 |
| MmugDNA.28628.1.S1_at   | MmugDNA.28628.1 | 6.35  | 6.19  | 0.11 | 0.09 | 1.12  | 0.111851 | 0.145632 | 0.387954 | 0.419554 |
| MmugDNA.28629.1.S1_s_at | MmugDNA.28629.1 | 8.03  | 7.87  | 0.2  | 0.06 | 1.12  | 0.360104 | 0.033764 | 0.635698 | 0.22741  |
| MmugDNA.28630.1.S1_at   | MmugDNA.28630.1 | 6.5   | 6.43  | 0.92 | 0.42 | 1.05  | 0.36229  | 0.383099 | 0.637219 | 0.619136 |
| MmugDNA.40354.1.S1_s_at | MmugDNA.40354.1 | 11.79 | 11.72 | 0.08 | 0.08 | 1.05  | 0.779972 | 0.045573 | 0.899582 | 0.257646 |
| MmugDNA.28633.1.S1_at   | MmugDNA.28633.1 | 7.67  | 7.67  | 0.07 | 0.05 | 1     | 0.240315 | 0.500341 | 0.537838 | 0.699009 |
| MmugDNA.28636.1.S1_at   | MmugDNA.28636.1 | 4.61  | 4.73  | 0.26 | 0.03 | -1.09 | 0.76053  | 0.799222 | 0.890254 | 0.884446 |
| MmugDNA.28638.1.S1_at   | MmugDNA.28638.1 | 8.02  | 7.31  | 0.2  | 0.28 | 1.64  | 0.041435 | 0.407241 | 0.259966 | 0.634843 |
| MmugDNA.28639.1.S1_at   | MmugDNA.28639.1 | 8.34  | 8.38  | 0.54 | 0.39 | -1.03 | 0.903947 | 0.348014 | 0.959332 | 0.592215 |
| MmugDNA.23581.1.S1_at   | MmugDNA.23581.1 | 10.84 | 11    | 0.1  | 0.04 | -1.12 | 0.183506 | 0.00783  | 0.479416 | 0.117929 |
| MmugDNA.23581.1.S1_s_at | MmugDNA.23581.1 | 9.34  | 9.35  | 0.08 | 0.03 | -1.01 | 0.509778 | 0.141998 | 0.741244 | 0.415564 |
| MmugDNA.28640.1.S1_at   | MmugDNA.28640.1 | 4.7   | 4.42  | 0.36 | 0.02 | 1.22  | 0.244443 | 0.305592 | 0.540909 | 0.562504 |
| MmugDNA.28642.1.S1_at   | MmugDNA.28642.1 | 4.4   | 4.37  | 0.3  | 0.11 | 1.03  | 0.209981 | 0.170207 | 0.507412 | 0.446906 |
| MmugDNA.28644.1.S1_at   | MmugDNA.28644.1 | 11.38 | 11.26 | 0.16 | 0.09 | 1.09  | 0.068438 | 0.225626 | 0.3194   | 0.498155 |
| MmugDNA.28645.1.S1_at   | MmugDNA.28645.1 | 5.99  | 6.01  | 0.06 | 0.13 | -1.01 | 0.780788 | 0.08923  | 0.899949 | 0.34333  |
| MmugDNA.28646.1.S1_at   | MmugDNA.28646.1 | 7.73  | 7.94  | 0.14 | 0.17 | -1.15 | 0.216141 | 0.684422 | 0.513888 | 0.815943 |
| MmugDNA.28647.1.S1_at   | MmugDNA.28647.1 | 7.33  | 7.29  | 0.22 | 0.07 | 1.02  | 0.722255 | 0.656926 | 0.869355 | 0.799401 |

|                         |                 |       |       |      |      |       |          |          |          |          |
|-------------------------|-----------------|-------|-------|------|------|-------|----------|----------|----------|----------|
| MmugDNA.28648.1.S1_at   | MmugDNA.28648.1 | 4.97  | 4.98  | 0.12 | 0.06 | -1.01 | 0.936416 | 0.163824 | 0.973466 | 0.440054 |
| MmugDNA.28649.1.S1_at   | MmugDNA.28649.1 | 4.13  | 4.08  | 0.13 | 0.06 | 1.03  | 0.670133 | 0.119904 | 0.841766 | 0.388593 |
| MmugDNA.2865.1.S1_at    | MmugDNA.2865.1  | 9.93  | 9.63  | 0.25 | 0.05 | 1.23  | 0.332812 | 0.413938 | 0.614385 | 0.639942 |
| MmugDNA.28650.1.S1_at   | MmugDNA.28650.1 | 5.34  | 5.32  | 0.19 | 0.12 | 1.01  | 0.44161  | 0.622106 | 0.695103 | 0.77667  |
| MmugDNA.28651.1.S1_at   | MmugDNA.28651.1 | 3.51  | 3.39  | 0.06 | 0.06 | 1.09  | 0.067091 | 0.380009 | 0.316787 | 0.616686 |
| MmugDNA.130.1.S1_s_at   | MmugDNA.130.1   | 7.1   | 6.84  | 0.27 | 0.25 | 1.2   | 0.282967 | 0.015279 | 0.573516 | 0.156987 |
| MmugDNA.28653.1.S1_at   | MmugDNA.28653.1 | 9.93  | 9.84  | 0.22 | 0.03 | 1.06  | 0.492444 | 0.006419 | 0.729741 | 0.108813 |
| MmugDNA.28654.1.S1_at   | MmugDNA.28654.1 | 8.33  | 8.21  | 0.14 | 0.1  | 1.09  | 0.115099 | 0.32044  | 0.392115 | 0.572648 |
| MmugDNA.28655.1.S1_at   | MmugDNA.28655.1 | 3.29  | 3.03  | 0.47 | 0.18 | 1.19  | 0.287511 | 0.260212 | 0.577436 | 0.526807 |
| MmugDNA.28655.1.S1_s_at | MmugDNA.28655.1 | 5.47  | 5.08  | 0.46 | 0.16 | 1.31  | 0.355481 | 0.417196 | 0.632237 | 0.642069 |
| MmugDNA.28656.1.S1_at   | MmugDNA.28656.1 | 6.16  | 5.99  | 0.07 | 0.13 | 1.13  | 0.091075 | 0.114701 | 0.358343 | 0.381252 |
| MmugDNA.28657.1.S1_at   | MmugDNA.28657.1 | 4.07  | 4.41  | 0.23 | 0.22 | -1.27 | 0.528014 | 0.824327 | 0.753456 | 0.899073 |
| MmugDNA.28658.1.S1_at   | MmugDNA.28658.1 | 9.72  | 9.45  | 0.05 | 0.12 | 1.2   | 0.024957 | 0.743529 | 0.211179 | 0.851395 |
| MmugDNA.28659.1.S1_at   | MmugDNA.28659.1 | 8.39  | 8.38  | 0.54 | 0.2  | 1.01  | 0.985189 | 0.596398 | 0.994671 | 0.759542 |
| MmugDNA.2866.1.S1_at    | MmugDNA.2866.1  | 10.14 | 10.1  | 0.07 | 0.04 | 1.03  | 0.540174 | 0.143755 | 0.761298 | 0.417583 |
| MmugDNA.28660.1.S1_at   | MmugDNA.28660.1 | 7.85  | 7.94  | 0.3  | 0.08 | -1.06 | 0.16106  | 0.141015 | 0.452522 | 0.414507 |
| MmugDNA.28661.1.S1_at   | MmugDNA.28661.1 | 6.92  | 6.71  | 0.05 | 0.07 | 1.15  | 0.009939 | 0.009886 | 0.149006 | 0.130618 |
| MmugDNA.28662.1.S1_at   | MmugDNA.28662.1 | 3.48  | 3.41  | 0.17 | 0.59 | 1.04  | 0.434927 | 0.545482 | 0.69009  | 0.727564 |
| MmugDNA.28663.1.S1_at   | MmugDNA.28663.1 | 9.08  | 8.88  | 0.18 | 0.21 | 1.15  | 0.439797 | 0.849275 | 0.693902 | 0.914453 |
| MmugDNA.28664.1.S1_at   | MmugDNA.28664.1 | 6.78  | 7.58  | 0.66 | 0.37 | -1.74 | 0.151497 | 0.269625 | 0.440961 | 0.534868 |
| MmugDNA.28665.1.S1_at   | MmugDNA.28665.1 | 5.6   | 5.54  | 0.19 | 0.04 | 1.04  | 0.213505 | 0.263251 | 0.511324 | 0.529531 |
| MmugDNA.28667.1.S1_at   | MmugDNA.28667.1 | 10.05 | 10.16 | 0.18 | 0.01 | -1.08 | 0.953109 | 0.770348 | 0.980695 | 0.866591 |
| MmugDNA.28668.1.S1_at   | MmugDNA.28668.1 | 11.22 | 10.77 | 0.04 | 0.15 | 1.36  | 0.009753 | 0.202939 | 0.148542 | 0.477343 |
| MmugDNA.28669.1.S1_at   | MmugDNA.28669.1 | 4.54  | 3.71  | 0.08 | 0.29 | 1.78  | 0.019493 | 0.002786 | 0.192357 | 0.077966 |
| MmugDNA.2867.1.S1_at    | MmugDNA.2867.1  | 7.49  | 7.88  | 0.07 | 0.47 | -1.31 | 0.182318 | 0.263706 | 0.478063 | 0.529988 |
| MmugDNA.28670.1.S1_at   | MmugDNA.28670.1 | 10.86 | 10.68 | 0.25 | 0.21 | 1.13  | 0.21931  | 0.325888 | 0.517071 | 0.576171 |
| MmugDNA.28671.1.S1_at   | MmugDNA.28671.1 | 4.14  | 4.03  | 0.23 | 0.1  | 1.08  | 0.926299 | 0.553715 | 0.968841 | 0.732777 |
| MmugDNA.28673.1.S1_at   | MmugDNA.28673.1 | 3.92  | 3.93  | 0.07 | 0.27 | -1    | 0.404285 | 0.445639 | 0.668101 | 0.662468 |
| MmugDNA.28674.1.S1_at   | MmugDNA.28674.1 | 7.45  | 6.65  | 0.21 | 0.35 | 1.75  | 0.031626 | 0.02573  | 0.231243 | 0.201029 |
| MmugDNA.28675.1.S1_at   | MmugDNA.28675.1 | 5.43  | 5.24  | 0.02 | 0.04 | 1.14  | 0.001425 | 0.003711 | 0.07964  | 0.086814 |
| MmugDNA.28676.1.S1_at   | MmugDNA.28676.1 | 4.16  | 4.14  | 0.62 | 0.07 | 1.01  | 0.354707 | 0.476342 | 0.631771 | 0.682695 |
| MmugDNA.28677.1.S1_at   | MmugDNA.28677.1 | 4.08  | 4.04  | 0.24 | 0.18 | 1.03  | 0.649419 | 0.659475 | 0.829674 | 0.800789 |
| MmugDNA.28679.1.S1_at   | MmugDNA.28679.1 | 4.86  | 4.82  | 0.01 | 0.06 | 1.03  | 0.207899 | 0.286796 | 0.505752 | 0.548149 |
| MmugDNA.2868.1.S1_at    | MmugDNA.2868.1  | 5.11  | 4.96  | 0.12 | 0.07 | 1.11  | 0.569007 | 0.591714 | 0.778679 | 0.757198 |
| MmugDNA.28680.1.S1_at   | MmugDNA.28680.1 | 10.11 | 10.26 | 0.03 | 0.11 | -1.11 | 0.254593 | 0.630456 | 0.549102 | 0.782237 |
| MmugDNA.28681.1.S1_at   | MmugDNA.28681.1 | 6     | 6.02  | 0.26 | 0.11 | -1.01 | 0.372555 | 0.505336 | 0.645002 | 0.702073 |
| MmugDNA.28684.1.S1_at   | MmugDNA.28684.1 | 3.49  | 3.38  | 0.03 | 0.09 | 1.08  | 0.081477 | 0.505838 | 0.342512 | 0.702218 |
| MmugDNA.28685.1.S1_at   | MmugDNA.28685.1 | 4.72  | 4.21  | 0.81 | 0.33 | 1.43  | 0.520747 | 0.770928 | 0.748953 | 0.866807 |
| MmugDNA.28687.1.S1_at   | MmugDNA.28687.1 | 4.45  | 4.51  | 0.66 | 0.78 | -1.04 | 0.682696 | 0.61154  | 0.848688 | 0.76941  |
| MmugDNA.28688.1.S1_at   | MmugDNA.28688.1 | 6.23  | 6.33  | 0.05 | 0.07 | -1.07 | 0.122761 | 0.090412 | 0.401667 | 0.344899 |
| MmugDNA.2869.1.S1_at    | MmugDNA.2869.1  | 4.24  | 3.85  | 0.58 | 0.14 | 1.31  | 0.111926 | 0.123095 | 0.3881   | 0.393102 |
| MmugDNA.28690.1.S1_at   | MmugDNA.28690.1 | 4.92  | 4.9   | 0.13 | 0    | 1.01  | 0.651598 | 0.934852 | 0.830755 | 0.963108 |
| MmugDNA.28691.1.S1_at   | MmugDNA.28691.1 | 8.03  | 8.2   | 0.33 | 0.13 | -1.13 | 0.662572 | 0.843542 | 0.837225 | 0.910896 |



|                         |                 |       |       |      |      |       |          |          |          |          |
|-------------------------|-----------------|-------|-------|------|------|-------|----------|----------|----------|----------|
| MmugDNA.28692.1.S1_at   | MmugDNA.28692.1 | 7.52  | 8.67  | 0.7  | 0.13 | -2.21 | 0.14203  | 0.222658 | 0.42805  | 0.495617 |
| MmugDNA.28693.1.S1_s_at | MmugDNA.28693.1 | 8.29  | 8.4   | 0.05 | 0.05 | -1.08 | 0.10672  | 0.000007 | 0.380915 | 0.016421 |
| MmugDNA.28695.1.S1_s_at | MmugDNA.28695.1 | 11.8  | 11.71 | 0.06 | 0.05 | 1.06  | 0.125051 | 0.535258 | 0.405516 | 0.720836 |
| MmugDNA.28696.1.S1_at   | MmugDNA.28696.1 | 7.91  | 8.59  | 0.62 | 0.19 | -1.61 | 0.447075 | 0.306555 | 0.699104 | 0.563101 |
| MmugDNA.28697.1.S1_at   | MmugDNA.28697.1 | 4.15  | 4.15  | 0.1  | 0.01 | 1     | 0.333991 | 0.299464 | 0.615174 | 0.557907 |
| MmugDNA.28699.1.S1_at   | MmugDNA.28699.1 | 5.34  | 6.05  | 1.04 | 0.36 | -1.64 | 0.916618 | 0.137371 | 0.96453  | 0.41029  |
| MmugDNA.287.1.S1_at     | MmugDNA.287.1   | 11.51 | 12.1  | 0.25 | 0.04 | -1.5  | 0.014722 | 0.065014 | 0.173341 | 0.300961 |
| MmugDNA.28701.1.S1_at   | MmugDNA.28701.1 | 4.34  | 4.25  | 0.22 | 0.16 | 1.07  | 0.645589 | 0.869922 | 0.827498 | 0.926178 |
| MmugDNA.28702.1.S1_at   | MmugDNA.28702.1 | 10.48 | 11.06 | 0.18 | 0.11 | -1.5  | 0.01704  | 0.145422 | 0.183882 | 0.419421 |
| MmugDNA.28703.1.S1_at   | MmugDNA.28703.1 | 10.33 | 9.91  | 0.13 | 0.07 | 1.34  | 0.005668 | 0.001986 | 0.120889 | 0.066165 |
| MmugDNA.28705.1.S1_at   | MmugDNA.28705.1 | 9.24  | 9.53  | 0.13 | 0.06 | -1.22 | 0.048149 | 0.002521 | 0.276908 | 0.074158 |
| MmugDNA.28707.1.S1_at   | MmugDNA.28707.1 | 9.11  | 9.12  | 0.26 | 0.12 | -1    | 0.454222 | 0.320769 | 0.704125 | 0.572849 |
| MmugDNA.28708.1.S1_at   | MmugDNA.28708.1 | 5.43  | 5.42  | 0.11 | 0    | 1.01  | 0.707248 | 0.096505 | 0.861311 | 0.35409  |
| MmugDNA.28709.1.S1_at   | MmugDNA.28709.1 | 5.21  | 5.15  | 0.26 | 0.16 | 1.05  | 0.317555 | 0.357134 | 0.602329 | 0.59881  |
| MmugDNA.2871.1.S1_s_at  | MmugDNA.2871.1  | 8.64  | 8.43  | 0.12 | 0.39 | 1.16  | 0.359984 | 0.010035 | 0.63552  | 0.131317 |
| MmugDNA.28710.1.S1_at   | MmugDNA.28710.1 | 6.87  | 7.4   | 0.07 | 0.11 | -1.45 | 0.002609 | 0.335799 | 0.095164 | 0.583525 |
| MmugDNA.28711.1.S1_at   | MmugDNA.28711.1 | 4.22  | 6.77  | 1.09 | 0.48 | -5.85 | 0.022481 | 0.212612 | 0.203193 | 0.486547 |
| MmugDNA.28712.1.S1_at   | MmugDNA.28712.1 | 3.09  | 3.15  | 0.12 | 0    | -1.04 | 0.441122 | 0.262782 | 0.694766 | 0.529136 |
| MmugDNA.28714.1.S1_at   | MmugDNA.28714.1 | 6.28  | 6.42  | 0.03 | 0.04 | -1.1  | 0.004943 | 0.090583 | 0.115244 | 0.345079 |
| MmugDNA.28715.1.S1_at   | MmugDNA.28715.1 | 6.46  | 8.17  | 0.33 | 0.18 | -3.29 | 0.001354 | 0.000582 | 0.079562 | 0.04147  |
| MmugDNA.28716.1.S1_at   | MmugDNA.28716.1 | 8.71  | 8.51  | 0.1  | 0.33 | 1.14  | 0.800889 | 0.12186  | 0.910458 | 0.391189 |
| MmugDNA.28717.1.S1_at   | MmugDNA.28717.1 | 9.61  | 9.87  | 0.26 | 0.15 | -1.2  | 0.045548 | 0.490736 | 0.270946 | 0.692666 |
| MmugDNA.28718.1.S1_at   | MmugDNA.28718.1 | 8.54  | 8.8   | 0.08 | 0.15 | -1.2  | 0.016351 | 0.015716 | 0.180774 | 0.158858 |
| MmugDNA.28719.1.S1_at   | MmugDNA.28719.1 | 8.81  | 9.49  | 0.22 | 0.2  | -1.6  | 0.014288 | 0.34752  | 0.171355 | 0.592019 |
| MmugDNA.2872.1.S1_at    | MmugDNA.2872.1  | 4.13  | 4.32  | 0.25 | 0.08 | -1.14 | 0.36976  | 0.052853 | 0.643069 | 0.275521 |
| MmugDNA.28720.1.S1_at   | MmugDNA.28720.1 | 11.39 | 11.46 | 0.18 | 0.15 | -1.05 | 0.471036 | 0.722938 | 0.71541  | 0.839489 |
| MmugDNA.28722.1.S1_at   | MmugDNA.28722.1 | 12.66 | 13.07 | 0.11 | 0.06 | -1.32 | 0.003979 | 0.198165 | 0.108676 | 0.473148 |
| MmugDNA.28723.1.S1_at   | MmugDNA.28723.1 | 10.58 | 11.04 | 0.07 | 0.18 | -1.38 | 0.014353 | 0.263018 | 0.171567 | 0.529397 |
| MmugDNA.28725.1.S1_at   | MmugDNA.28725.1 | 12.06 | 12.22 | 0.39 | 0.22 | -1.12 | 0.596093 | 0.102248 | 0.795628 | 0.36236  |
| MmugDNA.28725.1.S1_s_at | MmugDNA.28725.1 | 12.19 | 12.33 | 0.33 | 0.06 | -1.1  | 0.724936 | 0.209436 | 0.870935 | 0.483069 |
| MmugDNA.28726.1.S1_at   | MmugDNA.28726.1 | 6.46  | 6.36  | 0.39 | 0.09 | 1.07  | 0.357033 | 0.521872 | 0.633247 | 0.712667 |
| MmugDNA.28727.1.S1_at   | MmugDNA.28727.1 | 4.79  | 4.7   | 0.6  | 0.33 | 1.07  | 0.878306 | 0.865283 | 0.948088 | 0.923554 |
| MmugDNA.28728.1.S1_at   | MmugDNA.28728.1 | 4.61  | 5.33  | 1.37 | 0.62 | -1.64 | 0.967084 | 0.998346 | 0.986753 | 0.999091 |
| MmugDNA.28729.1.S1_at   | MmugDNA.28729.1 | 3.55  | 3.63  | 0.08 | 0.02 | -1.06 | 0.18723  | 0.181911 | 0.483367 | 0.458442 |
| MmugDNA.28730.1.S1_at   | MmugDNA.28730.1 | 2.84  | 3.03  | 0.42 | 0.21 | -1.14 | 0.967741 | 0.92209  | 0.98718  | 0.956072 |
| MmugDNA.28731.1.S1_at   | MmugDNA.28731.1 | 6     | 5.97  | 0.24 | 0.16 | 1.02  | 0.814132 | 0.875707 | 0.916927 | 0.929398 |
| MmugDNA.28732.1.S1_at   | MmugDNA.28732.1 | 5.68  | 5.63  | 0.27 | 0.08 | 1.03  | 0.71642  | 0.688456 | 0.866195 | 0.818166 |
| MmugDNA.28733.1.S1_at   | MmugDNA.28733.1 | 4.96  | 4.94  | 0.48 | 0.52 | 1.01  | 0.931186 | 0.454842 | 0.971043 | 0.668889 |
| MmugDNA.28734.1.S1_at   | MmugDNA.28734.1 | 3.98  | 3.88  | 0.06 | 0.48 | 1.07  | 0.984229 | 0.96987  | 0.994129 | 0.983507 |
| MmugDNA.28735.1.S1_at   | MmugDNA.28735.1 | 5.29  | 5.27  | 0.12 | 0.18 | 1.02  | 0.190272 | 0.229824 | 0.486658 | 0.501802 |
| MmugDNA.28736.1.S1_at   | MmugDNA.28736.1 | 8.03  | 8.03  | 0.34 | 0.17 | 1     | 0.785506 | 0.952648 | 0.902048 | 0.973147 |
| MmugDNA.28737.1.S1_at   | MmugDNA.28737.1 | 7.42  | 7.44  | 0.43 | 0.18 | -1.01 | 0.914276 | 0.229825 | 0.963616 | 0.501802 |
| MmugDNA.28739.1.S1_at   | MmugDNA.28739.1 | 5.53  | 6.2   | 0.08 | 0.09 | -1.59 | 0.000993 | 0.005371 | 0.076321 | 0.101194 |

|                         |                 |       |       |      |      |       |          |          |          |          |
|-------------------------|-----------------|-------|-------|------|------|-------|----------|----------|----------|----------|
| MmugDNA.28740.1.S1_at   | MmugDNA.28740.1 | 12.37 | 10.31 | 0.8  | 0.11 | 4.16  | 0.02671  | 0.034942 | 0.216593 | 0.231062 |
| MmugDNA.28741.1.S1_at   | MmugDNA.28741.1 | 11.11 | 11.37 | 0.06 | 0.17 | -1.2  | 0.067874 | 0.000618 | 0.318295 | 0.042444 |
| MmugDNA.28743.1.S1_at   | MmugDNA.28743.1 | 9.89  | 9.17  | 0.3  | 0.03 | 1.65  | 0.019223 | 0.075814 | 0.192035 | 0.320402 |
| MmugDNA.28744.1.S1_at   | MmugDNA.28744.1 | 5.19  | 4.95  | 0.48 | 0.05 | 1.18  | 0.179528 | 0.196545 | 0.474704 | 0.471582 |
| MmugDNA.28745.1.S1_at   | MmugDNA.28745.1 | 9.09  | 10.17 | 0.57 | 0.13 | -2.13 | 0.040804 | 0.164134 | 0.258464 | 0.440346 |
| MmugDNA.28746.1.S1_at   | MmugDNA.28746.1 | 5.99  | 5.76  | 0.24 | 0.13 | 1.17  | 0.052888 | 0.035139 | 0.287028 | 0.231645 |
| MmugDNA.28747.1.S1_at   | MmugDNA.28747.1 | 7.74  | 7.58  | 0.09 | 0.16 | 1.12  | 0.182027 | 0.64624  | 0.477584 | 0.792712 |
| MmugDNA.28750.1.S1_at   | MmugDNA.28750.1 | 6.68  | 6.61  | 0.38 | 0.21 | 1.05  | 0.936252 | 0.273969 | 0.973334 | 0.538503 |
| MmugDNA.28751.1.S1_at   | MmugDNA.28751.1 | 10.23 | 9.46  | 0.52 | 0.3  | 1.7   | 0.077344 | 0.241671 | 0.336    | 0.512225 |
| MmugDNA.28753.1.S1_at   | MmugDNA.28753.1 | 3.11  | 3.2   | 0.02 | 0.05 | -1.06 | 0.016686 | 0.049772 | 0.182519 | 0.26818  |
| MmugDNA.28754.1.S1_at   | MmugDNA.28754.1 | 6.66  | 6.72  | 0.08 | 0.05 | -1.04 | 0.628776 | 0.061993 | 0.817507 | 0.295862 |
| MmugDNA.28755.1.S1_at   | MmugDNA.28755.1 | 4.42  | 5.87  | 0.99 | 0.57 | -2.72 | 0.410437 | 0.454565 | 0.672479 | 0.668668 |
| MmugDNA.28756.1.S1_at   | MmugDNA.28756.1 | 4.33  | 4.28  | 0.06 | 0.16 | 1.03  | 0.375105 | 0.047395 | 0.645969 | 0.262443 |
| MmugDNA.28759.1.S1_at   | MmugDNA.28759.1 | 7.14  | 6.83  | 0.36 | 0.38 | 1.24  | 0.699319 | 0.258537 | 0.857245 | 0.525796 |
| MmugDNA.2876.1.S1_at    | MmugDNA.2876.1  | 3.84  | 3.8   | 0.01 | 0.08 | 1.03  | 0.3912   | 0.079275 | 0.658623 | 0.326444 |
| MmugDNA.28760.1.S1_at   | MmugDNA.28760.1 | 4.5   | 4.79  | 0.16 | 0.26 | -1.23 | 0.185885 | 0.106507 | 0.482073 | 0.369078 |
| MmugDNA.28761.1.S1_at   | MmugDNA.28761.1 | 7.39  | 7.47  | 0.14 | 0.03 | -1.05 | 0.976002 | 0.374132 | 0.990409 | 0.612678 |
| MmugDNA.28762.1.S1_at   | MmugDNA.28762.1 | 8.16  | 8.99  | 0.65 | 0.17 | -1.79 | 0.147423 | 0.353925 | 0.435407 | 0.596894 |
| MmugDNA.28763.1.S1_at   | MmugDNA.28763.1 | 4.6   | 4.79  | 0.13 | 0.14 | -1.14 | 0.171242 | 0.484186 | 0.465154 | 0.688399 |
| MmugDNA.36143.1.S1_s_at | MmugDNA.36143.1 | 6.13  | 6.65  | 0.5  | 0.18 | -1.43 | 0.452214 | 0.524194 | 0.702807 | 0.714207 |
| MmugDNA.28765.1.S1_at   | MmugDNA.28765.1 | 10.98 | 10.89 | 0.17 | 0.03 | 1.06  | 0.146767 | 0.164301 | 0.434815 | 0.440539 |
| MmugDNA.28766.1.S1_at   | MmugDNA.28766.1 | 5.61  | 5.15  | 0.2  | 0.09 | 1.37  | 0.023043 | 0.024311 | 0.204777 | 0.195175 |
| MmugDNA.28767.1.S1_at   | MmugDNA.28767.1 | 2.72  | 2.97  | 0.08 | 0.58 | -1.19 | 0.15782  | 0.292215 | 0.448605 | 0.552363 |
| MmugDNA.28768.1.S1_at   | MmugDNA.28768.1 | 6.42  | 6.4   | 0.47 | 0.1  | 1.01  | 0.327955 | 0.345545 | 0.610549 | 0.59079  |
| MmugDNA.28769.1.S1_at   | MmugDNA.28769.1 | 3.56  | 3.84  | 0.11 | 0.1  | -1.22 | 0.056935 | 0.051979 | 0.295858 | 0.273453 |
| MmugDNA.2877.1.S1_at    | MmugDNA.2877.1  | 3.54  | 3.58  | 0.07 | 0.02 | -1.03 | 0.345272 | 0.255321 | 0.624363 | 0.523394 |
| MmugDNA.28770.1.S1_at   | MmugDNA.28770.1 | 7.99  | 8.14  | 0.28 | 0.05 | -1.11 | 0.364826 | 0.022092 | 0.639495 | 0.185972 |
| MmugDNA.28771.1.S1_at   | MmugDNA.28771.1 | 8.47  | 7.37  | 0.22 | 0.18 | 2.15  | 0.002401 | 0.014558 | 0.093451 | 0.153907 |
| MmugDNA.28772.1.S1_at   | MmugDNA.28772.1 | 4.29  | 3.86  | 0.28 | 0.08 | 1.35  | 0.107804 | 0.177364 | 0.382472 | 0.453742 |
| MmugDNA.28774.1.S1_at   | MmugDNA.28774.1 | 3.01  | 2.85  | 0.07 | 0.01 | 1.11  | 0.017597 | 0.286042 | 0.186388 | 0.547527 |
| MmugDNA.28775.1.S1_at   | MmugDNA.28775.1 | 7.56  | 8.21  | 0.2  | 0.27 | -1.57 | 0.013191 | 0.292814 | 0.16538  | 0.552823 |
| MmugDNA.28777.1.S1_at   | MmugDNA.28777.1 | 7.46  | 6.63  | 0.62 | 0.1  | 1.77  | 0.264577 | 0.133441 | 0.557815 | 0.405282 |
| MmugDNA.28778.1.S1_at   | MmugDNA.28778.1 | 11.05 | 9.93  | 0.32 | 0.09 | 2.18  | 0.003999 | 0.000983 | 0.108676 | 0.050067 |
| MmugDNA.28780.1.S1_at   | MmugDNA.28780.1 | 4.9   | 4.77  | 0.32 | 0.14 | 1.1   | 0.310571 | 0.165033 | 0.596884 | 0.44123  |
| MmugDNA.28781.1.S1_s_at | MmugDNA.28781.1 | 8.7   | 7.81  | 0.14 | 0.11 | 1.85  | 0.001425 | 0.031121 | 0.07964  | 0.218175 |
| MmugDNA.28782.1.S1_at   | MmugDNA.28782.1 | 10    | 9.3   | 0.53 | 0.34 | 1.62  | 0.057951 | 0.079054 | 0.297855 | 0.326117 |
| MmugDNA.28782.1.S1_s_at | MmugDNA.28782.1 | 9.67  | 8.74  | 0.61 | 0.35 | 1.9   | 0.087412 | 0.122923 | 0.353207 | 0.392923 |
| MmugDNA.28783.1.S1_at   | MmugDNA.28783.1 | 3.47  | 3.91  | 0.22 | 0.14 | -1.36 | 0.055396 | 0.082867 | 0.292327 | 0.332423 |
| MmugDNA.28784.1.S1_at   | MmugDNA.28784.1 | 4.25  | 4.41  | 0.25 | 0.12 | -1.12 | 0.403515 | 0.090869 | 0.66766  | 0.345474 |
| MmugDNA.28785.1.S1_at   | MmugDNA.28785.1 | 8.82  | 8.9   | 0.21 | 0.39 | -1.05 | 0.601621 | 0.003049 | 0.799756 | 0.08051  |
| MmugDNA.28786.1.S1_at   | MmugDNA.28786.1 | 3.75  | 3.33  | 0.33 | 0.26 | 1.34  | 0.33593  | 0.47613  | 0.616626 | 0.682524 |
| MmugDNA.28788.1.S1_at   | MmugDNA.28788.1 | 11.88 | 12.05 | 0.19 | 0.14 | -1.12 | 0.699556 | 0.212553 | 0.857319 | 0.486502 |
| MmugDNA.28789.1.S1_s_at | MmugDNA.28789.1 | 11.08 | 10.85 | 0.24 | 0.07 | 1.18  | 0.225348 | 0.008446 | 0.523235 | 0.121922 |

|                         |                 |       |       |      |      |       |          |          |          |          |
|-------------------------|-----------------|-------|-------|------|------|-------|----------|----------|----------|----------|
| MmugDNA.2879.1.S1_at    | MmugDNA.2879.1  | 2.9   | 2.8   | 0.05 | 0.06 | 1.07  | 0.098843 | 0.227995 | 0.369716 | 0.500211 |
| MmugDNA.28790.1.S1_at   | MmugDNA.28790.1 | 4.42  | 4.35  | 0.03 | 0.12 | 1.05  | 0.580769 | 0.319594 | 0.78605  | 0.571885 |
| MmugDNA.28791.1.S1_at   | MmugDNA.28791.1 | 6.82  | 5.79  | 0.46 | 0.74 | 2.04  | 0.286617 | 0.387309 | 0.576462 | 0.622027 |
| MmugDNA.28793.1.S1_at   | MmugDNA.28793.1 | 3.96  | 3.93  | 0.06 | 0.18 | 1.02  | 0.948843 | 0.970741 | 0.978648 | 0.984051 |
| MmugDNA.28794.1.S1_at   | MmugDNA.28794.1 | 5.66  | 5.63  | 0.17 | 0.46 | 1.02  | 0.793809 | 0.488019 | 0.906796 | 0.690855 |
| MmugDNA.28795.1.S1_at   | MmugDNA.28795.1 | 7.2   | 7.87  | 0.47 | 0.35 | -1.59 | 0.149488 | 0.17087  | 0.438403 | 0.447512 |
| MmugDNA.28796.1.S1_at   | MmugDNA.28796.1 | 3.75  | 3.85  | 0.03 | 0.07 | -1.07 | 0.061861 | 0.0975   | 0.305226 | 0.355299 |
| MmugDNA.28797.1.S1_at   | MmugDNA.28797.1 | 7.44  | 7.21  | 0.12 | 0.11 | 1.17  | 0.079667 | 0.482114 | 0.33985  | 0.687016 |
| MmugDNA.28798.1.S1_at   | MmugDNA.28798.1 | 6.6   | 6.61  | 0.1  | 0.08 | -1    | 0.875634 | 0.107421 | 0.946675 | 0.370243 |
| MmugDNA.28799.1.S1_at   | MmugDNA.28799.1 | 3.47  | 3.57  | 0.4  | 0.1  | -1.07 | 0.676437 | 0.890091 | 0.845526 | 0.937419 |
| MmugDNA.288.1.S1_at     | MmugDNA.288.1   | 10.21 | 11    | 0.37 | 0.1  | -1.74 | 0.028443 | 0.015743 | 0.221125 | 0.158972 |
| MmugDNA.28800.1.S1_at   | MmugDNA.28800.1 | 4.84  | 3.13  | 0.56 | 0.46 | 3.26  | 0.054443 | 0.054557 | 0.290603 | 0.279114 |
| MmugDNA.28801.1.S1_at   | MmugDNA.28801.1 | 6.08  | 6.07  | 0.07 | 0.03 | 1     | 0.579759 | 0.571195 | 0.785348 | 0.743594 |
| MmugDNA.28802.1.S1_at   | MmugDNA.28802.1 | 6.08  | 5.63  | 0.27 | 0.07 | 1.37  | 0.037489 | 0.071945 | 0.249007 | 0.314293 |
| MmugDNA.28803.1.S1_at   | MmugDNA.28803.1 | 10.09 | 9.96  | 0.17 | 0.04 | 1.1   | 0.078584 | 0.029202 | 0.338457 | 0.212898 |
| MmugDNA.28804.1.S1_at   | MmugDNA.28804.1 | 5.32  | 5.32  | 0.09 | 0.11 | 1     | 0.939203 | 0.516583 | 0.974332 | 0.709034 |
| MmugDNA.28805.1.S1_at   | MmugDNA.28805.1 | 2.63  | 2.81  | 0.08 | 0.1  | -1.13 | 0.100118 | 0.185717 | 0.37088  | 0.46163  |
| MmugDNA.28806.1.S1_at   | MmugDNA.28806.1 | 7.07  | 6.97  | 0.46 | 0.49 | 1.07  | 0.289507 | 0.391255 | 0.579047 | 0.624942 |
| MmugDNA.28807.1.S1_at   | MmugDNA.28807.1 | 9.55  | 9.2   | 0.42 | 0.11 | 1.28  | 0.262066 | 0.285036 | 0.556302 | 0.547095 |
| MmugDNA.28808.1.S1_at   | MmugDNA.28808.1 | 7.5   | 10.95 | 1.88 | 0.22 | -10.9 | 0.05217  | 0.251577 | 0.285936 | 0.520309 |
| MmugDNA.28809.1.S1_at   | MmugDNA.28809.1 | 6.97  | 7.29  | 0.2  | 0.17 | -1.25 | 0.073965 | 0.510927 | 0.330014 | 0.705282 |
| MmugDNA.28810.1.S1_at   | MmugDNA.28810.1 | 7.07  | 8.56  | 0.59 | 0.26 | -2.81 | 0.054072 | 0.038196 | 0.289645 | 0.240129 |
| MmugDNA.28811.1.S1_at   | MmugDNA.28811.1 | 7.85  | 7.55  | 0.3  | 0.1  | 1.23  | 0.161671 | 0.221722 | 0.453408 | 0.494901 |
| MmugDNA.28812.1.S1_at   | MmugDNA.28812.1 | 3.97  | 3.97  | 0.1  | 0.28 | 1     | 0.689986 | 0.797441 | 0.851891 | 0.883215 |
| MmugDNA.28813.1.S1_at   | MmugDNA.28813.1 | 10.1  | 10.67 | 0.86 | 0.31 | -1.48 | 0.307841 | 0.03129  | 0.594659 | 0.218776 |
| MmugDNA.28814.1.S1_at   | MmugDNA.28814.1 | 12.28 | 12.45 | 0.11 | 0.05 | -1.12 | 0.030497 | 0.017656 | 0.227524 | 0.168002 |
| MmugDNA.28815.1.S1_at   | MmugDNA.28815.1 | 4.83  | 4.77  | 0.07 | 0.17 | 1.05  | 0.196099 | 0.20803  | 0.493082 | 0.482049 |
| MmugDNA.28816.1.S1_at   | MmugDNA.28816.1 | 7.04  | 7.28  | 0.5  | 0.07 | -1.18 | 0.264107 | 0.370644 | 0.557422 | 0.609667 |
| MmugDNA.28817.1.S1_at   | MmugDNA.28817.1 | 4.73  | 4.17  | 0.57 | 0.37 | 1.47  | 0.450277 | 0.598432 | 0.701332 | 0.760839 |
| MmugDNA.28818.1.S1_at   | MmugDNA.28818.1 | 3.25  | 3.28  | 0.12 | 0.29 | -1.02 | 0.846693 | 0.274215 | 0.933119 | 0.538698 |
| MmugDNA.28819.1.S1_at   | MmugDNA.28819.1 | 3.84  | 3.92  | 0.2  | 0.22 | -1.06 | 0.276774 | 0.282751 | 0.568296 | 0.545473 |
| MmugDNA.28823.1.S1_at   | MmugDNA.28823.1 | 5.11  | 5.24  | 0.28 | 0.15 | -1.09 | 0.783901 | 0.805281 | 0.901439 | 0.888065 |
| MmugDNA.28824.1.S1_s_at | MmugDNA.28824.1 | 11.86 | 12.1  | 0.01 | 0.05 | -1.18 | 0.000833 | 0.001862 | 0.07338  | 0.064697 |
| MmugDNA.28825.1.S1_at   | MmugDNA.28825.1 | 8.49  | 7.61  | 0.58 | 0.19 | 1.84  | 0.058055 | 0.001375 | 0.298056 | 0.05691  |
| MmugDNA.28826.1.S1_at   | MmugDNA.28826.1 | 3.62  | 3.54  | 0.16 | 0.14 | 1.06  | 0.535907 | 0.63658  | 0.758682 | 0.786262 |
| MmugDNA.28827.1.S1_at   | MmugDNA.28827.1 | 5.93  | 5.89  | 0.13 | 0.05 | 1.03  | 0.845718 | 0.757433 | 0.932611 | 0.858821 |
| MmugDNA.28829.1.S1_at   | MmugDNA.28829.1 | 3.51  | 3.49  | 0.1  | 0.12 | 1.01  | 0.618459 | 0.578647 | 0.810674 | 0.748603 |
| MmugDNA.2883.1.S1_at    | MmugDNA.2883.1  | 3.75  | 3.66  | 0.11 | 0.17 | 1.06  | 0.536591 | 0.712645 | 0.759061 | 0.83344  |
| MmugDNA.28830.1.S1_at   | MmugDNA.28830.1 | 4.96  | 4.98  | 0.47 | 0.08 | -1.02 | 0.929181 | 0.99413  | 0.969943 | 0.996429 |
| MmugDNA.28832.1.S1_at   | MmugDNA.28832.1 | 3.03  | 3.1   | 0.53 | 0.12 | -1.05 | 0.400752 | 0.515454 | 0.665557 | 0.708312 |
| MmugDNA.28833.1.S1_at   | MmugDNA.28833.1 | 9.74  | 9.26  | 0.35 | 0.11 | 1.39  | 0.118616 | 0.215913 | 0.396265 | 0.489546 |
| MmugDNA.28834.1.S1_at   | MmugDNA.28834.1 | 11.35 | 11.49 | 0.02 | 0.01 | -1.1  | 0.000396 | 0.000881 | 0.062519 | 0.047602 |
| MmugDNA.28834.1.S1_s_at | MmugDNA.28834.1 | 11.82 | 11.94 | 0.01 | 0.06 | -1.09 | 0.012328 | 0.006657 | 0.16135  | 0.110505 |

|                         |                 |       |       |      |      |       |          |          |          |          |
|-------------------------|-----------------|-------|-------|------|------|-------|----------|----------|----------|----------|
| MmugDNA.28835.1.S1_at   | MmugDNA.28835.1 | 8.15  | 7.92  | 0.02 | 0.25 | 1.18  | 0.152195 | 0.114909 | 0.441712 | 0.381621 |
| MmugDNA.28836.1.S1_at   | MmugDNA.28836.1 | 5.69  | 5.54  | 0.97 | 0.06 | 1.11  | 0.307049 | 0.239942 | 0.593773 | 0.510627 |
| MmugDNA.28838.1.S1_at   | MmugDNA.28838.1 | 3.08  | 3.14  | 0.11 | 0.03 | -1.04 | 0.270585 | 0.030684 | 0.562765 | 0.217148 |
| MmugDNA.28839.1.S1_at   | MmugDNA.28839.1 | 6.94  | 6.28  | 0.05 | 0.28 | 1.58  | 0.011756 | 0.0037   | 0.158257 | 0.086769 |
| MmugDNA.28841.1.S1_at   | MmugDNA.28841.1 | 5.43  | 5.41  | 0.09 | 0.06 | 1.01  | 0.76401  | 0.488868 | 0.891893 | 0.691436 |
| MmugDNA.28844.1.S1_at   | MmugDNA.28844.1 | 4.58  | 4.48  | 0.21 | 0.05 | 1.07  | 0.297229 | 0.285665 | 0.585693 | 0.547395 |
| MmugDNA.28845.1.S1_at   | MmugDNA.28845.1 | 4.17  | 3.98  | 0.11 | 0.16 | 1.14  | 0.127161 | 0.333392 | 0.408754 | 0.581668 |
| MmugDNA.28846.1.S1_at   | MmugDNA.28846.1 | 5.8   | 5.81  | 0.12 | 0    | -1.01 | 0.32247  | 0.409367 | 0.606475 | 0.636452 |
| MmugDNA.28847.1.S1_at   | MmugDNA.28847.1 | 4.15  | 3.71  | 0.53 | 0.1  | 1.36  | 0.260161 | 0.391918 | 0.554308 | 0.625419 |
| MmugDNA.28849.1.S1_at   | MmugDNA.28849.1 | 5.76  | 5.41  | 0.39 | 0.24 | 1.27  | 0.238822 | 0.06607  | 0.536032 | 0.302434 |
| MmugDNA.2885.1.S1_at    | MmugDNA.2885.1  | 4.02  | 4.01  | 0.11 | 0.05 | 1.01  | 0.833223 | 0.477355 | 0.926558 | 0.683422 |
| MmugDNA.28850.1.S1_at   | MmugDNA.28850.1 | 6.4   | 6.49  | 0.11 | 0.14 | -1.07 | 0.468221 | 0.816553 | 0.713381 | 0.894202 |
| MmugDNA.28851.1.S1_at   | MmugDNA.28851.1 | 3.58  | 3.16  | 0.27 | 0.19 | 1.34  | 0.112782 | 0.140099 | 0.389296 | 0.413394 |
| MmugDNA.28852.1.S1_at   | MmugDNA.28852.1 | 3.06  | 2.95  | 0.25 | 0.15 | 1.08  | 0.211873 | 0.24874  | 0.50977  | 0.517931 |
| MmugDNA.28852.1.S1_s_at | MmugDNA.28852.1 | 8.86  | 8.04  | 0.2  | 0.36 | 1.77  | 0.03408  | 0.073969 | 0.239358 | 0.317476 |
| MmugDNA.28853.1.S1_at   | MmugDNA.28853.1 | 6.12  | 6.13  | 0.04 | 0.11 | -1.01 | 0.598529 | 0.316023 | 0.797496 | 0.569488 |
| MmugDNA.28854.1.S1_at   | MmugDNA.28854.1 | 3.09  | 3     | 0.15 | 0.11 | 1.07  | 0.837408 | 0.894437 | 0.928726 | 0.939731 |
| MmugDNA.28856.1.S1_at   | MmugDNA.28856.1 | 3.03  | 3.06  | 0.18 | 0.38 | -1.02 | 0.926168 | 0.984031 | 0.968794 | 0.991118 |
| MmugDNA.28857.1.S1_at   | MmugDNA.28857.1 | 4.75  | 4.63  | 0.24 | 0.26 | 1.09  | 0.525817 | 0.527137 | 0.752112 | 0.715861 |
| MmugDNA.28858.1.S1_at   | MmugDNA.28858.1 | 7.49  | 7.2   | 0.27 | 0.23 | 1.23  | 0.11825  | 0.160595 | 0.395722 | 0.436745 |
| MmugDNA.28859.1.S1_at   | MmugDNA.28859.1 | 4.97  | 4.53  | 0.72 | 0.23 | 1.36  | 0.324836 | 0.422416 | 0.608366 | 0.645722 |
| MmugDNA.2886.1.S1_at    | MmugDNA.2886.1  | 5.1   | 4.03  | 0.62 | 0.44 | 2.1   | 0.090936 | 0.078055 | 0.358159 | 0.324529 |
| MmugDNA.28860.1.S1_at   | MmugDNA.28860.1 | 5.37  | 5.39  | 0.14 | 0.04 | -1.01 | 0.951479 | 0.99648  | 0.979952 | 0.997934 |
| MmugDNA.28861.1.S1_at   | MmugDNA.28861.1 | 5.23  | 4.94  | 0.14 | 0.1  | 1.22  | 0.042493 | 0.188164 | 0.263254 | 0.464251 |
| MmugDNA.28862.1.S1_at   | MmugDNA.28862.1 | 4.29  | 4.29  | 0.26 | 0.15 | -1    | 0.666809 | 0.573069 | 0.840039 | 0.744941 |
| MmugDNA.28863.1.S1_at   | MmugDNA.28863.1 | 10.59 | 10.68 | 0.28 | 0.1  | -1.06 | 0.461211 | 0.101088 | 0.708726 | 0.360724 |
| MmugDNA.28864.1.S1_at   | MmugDNA.28864.1 | 13.44 | 13.36 | 0.03 | 0.11 | 1.06  | 0.207502 | 0.023731 | 0.505209 | 0.192891 |
| MmugDNA.28865.1.S1_at   | MmugDNA.28865.1 | 11.41 | 11.45 | 0.19 | 0.17 | -1.03 | 0.909042 | 0.068799 | 0.961457 | 0.308711 |
| MmugDNA.28866.1.S1_at   | MmugDNA.28866.1 | 4.41  | 4.23  | 0.15 | 0.26 | 1.13  | 0.110027 | 0.130111 | 0.385253 | 0.401746 |
| MmugDNA.28867.1.S1_at   | MmugDNA.28867.1 | 3.84  | 3.84  | 0    | 0.06 | 1     | 0.351333 | 0.303834 | 0.628948 | 0.561225 |
| MmugDNA.28868.1.S1_at   | MmugDNA.28868.1 | 11.61 | 11.36 | 0.2  | 0.25 | 1.19  | 0.736547 | 0.020826 | 0.877553 | 0.180995 |
| MmugDNA.28869.1.S1_s_at | MmugDNA.28869.1 | 9.09  | 9.38  | 0.17 | 0.23 | -1.23 | 0.182648 | 0.484449 | 0.478431 | 0.688478 |
| MmugDNA.2887.1.S1_at    | MmugDNA.2887.1  | 7.53  | 7.42  | 0.22 | 0.09 | 1.08  | 0.468526 | 0.324841 | 0.713629 | 0.575375 |
| MmugDNA.28871.1.S1_at   | MmugDNA.28871.1 | 8.09  | 8.1   | 0.21 | 0.12 | -1.01 | 0.385793 | 0.821464 | 0.65444  | 0.897172 |
| MmugDNA.28872.1.S1_at   | MmugDNA.28872.1 | 4.24  | 4.32  | 0.39 | 0.29 | -1.05 | 0.796385 | 0.360944 | 0.908111 | 0.601991 |
| MmugDNA.28873.1.S1_at   | MmugDNA.28873.1 | 9.43  | 9.13  | 0.16 | 0.06 | 1.24  | 0.075556 | 0.012826 | 0.333134 | 0.145883 |
| MmugDNA.28874.1.S1_at   | MmugDNA.28874.1 | 9.5   | 9.53  | 0.21 | 0.12 | -1.02 | 0.316697 | 0.796418 | 0.601415 | 0.882655 |
| MmugDNA.28876.1.S1_at   | MmugDNA.28876.1 | 5.3   | 5.34  | 0.14 | 0.09 | -1.03 | 0.529805 | 0.516524 | 0.7545   | 0.709034 |
| MmugDNA.28877.1.S1_at   | MmugDNA.28877.1 | 11.08 | 11.03 | 0.1  | 0.03 | 1.03  | 0.33296  | 0.907546 | 0.614488 | 0.947728 |
| MmugDNA.28878.1.S1_at   | MmugDNA.28878.1 | 5.11  | 5.15  | 0.02 | 0.19 | -1.03 | 0.653272 | 0.724666 | 0.832034 | 0.840629 |
| MmugDNA.2888.1.S1_at    | MmugDNA.2888.1  | 10.06 | 9.58  | 0.27 | 0.42 | 1.4   | 0.214809 | 0.107464 | 0.512402 | 0.370311 |
| MmugDNA.28881.1.S1_at   | MmugDNA.28881.1 | 8.19  | 8.24  | 0.27 | 0.08 | -1.03 | 0.926713 | 0.812168 | 0.969008 | 0.89155  |
| MmugDNA.28882.1.S1_at   | MmugDNA.28882.1 | 3.64  | 3.77  | 0.15 | 0.07 | -1.1  | 0.239761 | 0.304381 | 0.53725  | 0.561684 |

|                         |                 |       |       |      |      |       |          |          |          |          |
|-------------------------|-----------------|-------|-------|------|------|-------|----------|----------|----------|----------|
| MmugDNA.28884.1.S1_at   | MmugDNA.28884.1 | 8.73  | 8.74  | 0.23 | 0.08 | -1.01 | 0.466846 | 0.178047 | 0.712465 | 0.454422 |
| MmugDNA.28885.1.S1_at   | MmugDNA.28885.1 | 9.97  | 9.35  | 0.09 | 0.16 | 1.54  | 0.00294  | 0.024922 | 0.099331 | 0.197766 |
| MmugDNA.28886.1.S1_at   | MmugDNA.28886.1 | 4.53  | 5.15  | 0.31 | 0.59 | -1.54 | 0.100904 | 0.094151 | 0.372141 | 0.350859 |
| MmugDNA.28887.1.S1_at   | MmugDNA.28887.1 | 4.15  | 4.29  | 0.15 | 0.21 | -1.1  | 0.184281 | 0.284886 | 0.480329 | 0.54701  |
| MmugDNA.28888.1.S1_at   | MmugDNA.28888.1 | 5.28  | 5.07  | 0.38 | 0.3  | 1.16  | 0.404135 | 0.638757 | 0.66804  | 0.787827 |
| MmugDNA.2889.1.S1_at    | MmugDNA.2889.1  | 2.96  | 2.87  | 0.02 | 0.1  | 1.06  | 0.330615 | 0.531112 | 0.612597 | 0.718416 |
| MmugDNA.28891.1.S1_at   | MmugDNA.28891.1 | 5.43  | 5.13  | 0.17 | 0.01 | 1.23  | 0.037714 | 0.008618 | 0.249842 | 0.123117 |
| MmugDNA.28892.1.S1_at   | MmugDNA.28892.1 | 5.76  | 5.03  | 1.02 | 0.42 | 1.66  | 0.233187 | 0.301193 | 0.531423 | 0.559356 |
| MmugDNA.28893.1.S1_at   | MmugDNA.28893.1 | 6.49  | 6.69  | 0.07 | 0.06 | -1.15 | 0.014874 | 0.007018 | 0.174075 | 0.113044 |
| MmugDNA.28894.1.S1_at   | MmugDNA.28894.1 | 6.34  | 6.39  | 0.22 | 0.24 | -1.04 | 0.998396 | 0.311292 | 0.999429 | 0.566351 |
| MmugDNA.28895.1.S1_at   | MmugDNA.28895.1 | 5.5   | 5.46  | 0.27 | 0.02 | 1.03  | 0.572183 | 0.617285 | 0.780404 | 0.773326 |
| MmugDNA.28896.1.S1_at   | MmugDNA.28896.1 | 3.71  | 3.69  | 0.16 | 0.13 | 1.02  | 0.562195 | 0.329466 | 0.774838 | 0.578781 |
| MmugDNA.28897.1.S1_at   | MmugDNA.28897.1 | 6.5   | 6.69  | 0.18 | 0.08 | -1.14 | 0.159867 | 0.075988 | 0.451222 | 0.320676 |
| MmugDNA.28898.1.S1_at   | MmugDNA.28898.1 | 3.09  | 2.97  | 0.29 | 0.26 | 1.08  | 0.646695 | 0.897217 | 0.828301 | 0.941342 |
| MmugDNA.28899.1.S1_at   | MmugDNA.28899.1 | 3.95  | 4.12  | 0.2  | 0.31 | -1.13 | 0.243317 | 0.299285 | 0.539969 | 0.557769 |
| MmugDNA.2890.1.S1_at    | MmugDNA.2890.1  | 5.34  | 5.51  | 0.92 | 0.65 | -1.12 | 0.782544 | 0.934771 | 0.900788 | 0.963044 |
| MmugDNA.28900.1.S1_at   | MmugDNA.28900.1 | 6.32  | 6.34  | 0.15 | 0.02 | -1.01 | 0.760834 | 0.827223 | 0.890353 | 0.9008   |
| MmugDNA.28901.1.S1_at   | MmugDNA.28901.1 | 5.44  | 5.84  | 0.23 | 0.23 | -1.32 | 0.102484 | 0.12105  | 0.374663 | 0.39006  |
| MmugDNA.28902.1.S1_at   | MmugDNA.28902.1 | 11.35 | 11.44 | 0.09 | 0.07 | -1.07 | 0.372776 | 0.00781  | 0.645067 | 0.117858 |
| MmugDNA.28904.1.S1_at   | MmugDNA.28904.1 | 3.46  | 3.28  | 0.03 | 0.1  | 1.13  | 0.092348 | 0.064983 | 0.360374 | 0.300855 |
| MmugDNA.28905.1.S1_at   | MmugDNA.28905.1 | 6.7   | 6.7   | 0.34 | 0.05 | -1    | 0.96224  | 0.542591 | 0.984644 | 0.725615 |
| MmugDNA.28906.1.S1_at   | MmugDNA.28906.1 | 7.04  | 7.01  | 0.11 | 0.04 | 1.02  | 0.664188 | 0.099988 | 0.838332 | 0.3588   |
| MmugDNA.28908.1.S1_at   | MmugDNA.28908.1 | 6.91  | 6.92  | 0.11 | 0.16 | -1.01 | 0.909531 | 0.994061 | 0.96159  | 0.996398 |
| MmugDNA.28908.1.S1_s_at | MmugDNA.28908.1 | 8.39  | 8.25  | 0.19 | 0    | 1.1   | 0.801412 | 0.824836 | 0.910797 | 0.899424 |
| MmugDNA.28909.1.S1_at   | MmugDNA.28909.1 | 3.98  | 4.09  | 0.1  | 0.15 | -1.08 | 0.81661  | 0.588256 | 0.918047 | 0.754847 |
| MmugDNA.2891.1.S1_at    | MmugDNA.2891.1  | 5.52  | 5.33  | 0.08 | 0.17 | 1.14  | 0.147171 | 0.034391 | 0.435239 | 0.229384 |
| MmugDNA.28910.1.S1_at   | MmugDNA.28910.1 | 5.06  | 4.95  | 0.24 | 0.12 | 1.08  | 0.322396 | 0.416122 | 0.606379 | 0.64135  |
| MmugDNA.28912.1.S1_at   | MmugDNA.28912.1 | 3.46  | 3.27  | 0.43 | 0.5  | 1.14  | 0.717335 | 0.887289 | 0.866489 | 0.93582  |
| MmugDNA.28913.1.S1_at   | MmugDNA.28913.1 | 5.6   | 5.36  | 0.7  | 0.31 | 1.19  | 0.186355 | 0.213245 | 0.482562 | 0.487131 |
| MmugDNA.28914.1.S1_at   | MmugDNA.28914.1 | 12.3  | 11.98 | 0.13 | 0.07 | 1.25  | 0.012382 | 0.022694 | 0.161664 | 0.188693 |
| MmugDNA.28915.1.S1_at   | MmugDNA.28915.1 | 3.2   | 3.1   | 0.19 | 0.15 | 1.07  | 0.936175 | 0.858136 | 0.973311 | 0.91909  |
| MmugDNA.28917.1.S1_at   | MmugDNA.28917.1 | 3.92  | 4.18  | 0.17 | 0.3  | -1.2  | 0.294561 | 0.159207 | 0.583547 | 0.435217 |
| MmugDNA.28920.1.S1_at   | MmugDNA.28920.1 | 3.91  | 4.13  | 0.06 | 0.12 | -1.16 | 0.054753 | 0.010653 | 0.290791 | 0.134769 |
| MmugDNA.28921.1.S1_at   | MmugDNA.28921.1 | 4.89  | 4.77  | 0.53 | 0.22 | 1.09  | 0.28413  | 0.399434 | 0.574388 | 0.629798 |
| MmugDNA.28923.1.S1_at   | MmugDNA.28923.1 | 4.82  | 4.86  | 0.2  | 0    | -1.03 | 0.555825 | 0.802755 | 0.771458 | 0.886441 |
| MmugDNA.28924.1.S1_at   | MmugDNA.28924.1 | 6.73  | 6.61  | 0.15 | 0.03 | 1.08  | 0.178409 | 0.184714 | 0.473151 | 0.460645 |
| MmugDNA.28925.1.S1_at   | MmugDNA.28925.1 | 4.68  | 4.69  | 0.13 | 0.02 | -1    | 0.816849 | 0.761498 | 0.918133 | 0.861416 |
| MmugDNA.28926.1.S1_at   | MmugDNA.28926.1 | 6.47  | 6.64  | 0.32 | 0.1  | -1.13 | 0.971591 | 0.088966 | 0.98857  | 0.342822 |
| MmugDNA.28928.1.S1_at   | MmugDNA.28928.1 | 10.44 | 9.95  | 0.23 | 0.13 | 1.41  | 0.038344 | 0.141977 | 0.251853 | 0.415525 |
| MmugDNA.28929.1.S1_at   | MmugDNA.28929.1 | 4.67  | 4.26  | 0.14 | 0.16 | 1.33  | 0.022745 | 0.006083 | 0.203934 | 0.106306 |
| MmugDNA.2893.1.S1_at    | MmugDNA.2893.1  | 6.48  | 6.43  | 0.28 | 0.08 | 1.03  | 0.940289 | 0.76136  | 0.974839 | 0.861352 |
| MmugDNA.28930.1.S1_at   | MmugDNA.28930.1 | 8.52  | 7.97  | 0.29 | 0.17 | 1.47  | 0.092966 | 0.526801 | 0.361523 | 0.715627 |
| MmugDNA.28931.1.S1_at   | MmugDNA.28931.1 | 7.99  | 8.29  | 0.27 | 0.12 | -1.23 | 0.097743 | 0.140353 | 0.368111 | 0.413542 |

|                         |                 |       |       |      |      |       |          |          |          |          |
|-------------------------|-----------------|-------|-------|------|------|-------|----------|----------|----------|----------|
| MmugDNA.28932.1.S1_at   | MmugDNA.28932.1 | 5.72  | 5.5   | 0.41 | 0.14 | 1.17  | 0.362738 | 0.369256 | 0.63739  | 0.608691 |
| MmugDNA.28934.1.S1_at   | MmugDNA.28934.1 | 4.43  | 5.86  | 0.26 | 0.88 | -2.69 | 0.076785 | 0.074959 | 0.335141 | 0.318932 |
| MmugDNA.28935.1.S1_at   | MmugDNA.28935.1 | 4.88  | 4.58  | 0.25 | 0.04 | 1.23  | 0.119183 | 0.172511 | 0.396738 | 0.448864 |
| MmugDNA.28937.1.S1_at   | MmugDNA.28937.1 | 5.12  | 4.15  | 0.86 | 0.23 | 1.95  | 0.340871 | 0.671786 | 0.620908 | 0.808157 |
| MmugDNA.28939.1.S1_at   | MmugDNA.28939.1 | 4.02  | 4.03  | 0.01 | 0.04 | -1    | 0.62456  | 0.688154 | 0.81488  | 0.817952 |
| MmugDNA.2894.1.S1_at    | MmugDNA.2894.1  | 5.52  | 5.51  | 0.57 | 0.13 | 1.01  | 0.932605 | 0.567068 | 0.971784 | 0.740985 |
| MmugDNA.28940.1.S1_at   | MmugDNA.28940.1 | 10.32 | 10.4  | 0.15 | 0.09 | -1.05 | 0.559911 | 0.187555 | 0.773577 | 0.463628 |
| MmugDNA.28941.1.S1_at   | MmugDNA.28941.1 | 3.05  | 3.16  | 0.26 | 0.37 | -1.08 | 0.620139 | 0.721597 | 0.811682 | 0.838759 |
| MmugDNA.28942.1.S1_at   | MmugDNA.28942.1 | 8.52  | 8.34  | 0.2  | 0.15 | 1.13  | 0.234851 | 0.752313 | 0.532896 | 0.855787 |
| MmugDNA.28943.1.S1_at   | MmugDNA.28943.1 | 4.3   | 4.3   | 0.19 | 0.1  | -1    | 0.439953 | 0.61606  | 0.694023 | 0.77245  |
| MmugDNA.28944.1.S1_at   | MmugDNA.28944.1 | 4.9   | 4.55  | 0.52 | 0.2  | 1.28  | 0.875079 | 0.022088 | 0.946398 | 0.185972 |
| MmugDNA.28945.1.S1_at   | MmugDNA.28945.1 | 5.85  | 5.76  | 0.31 | 0.22 | 1.07  | 0.813518 | 0.901563 | 0.916615 | 0.943991 |
| MmugDNA.28946.1.S1_at   | MmugDNA.28946.1 | 4.53  | 4.23  | 1.38 | 0.22 | 1.23  | 0.300499 | 0.25341  | 0.588694 | 0.521713 |
| MmugDNA.28947.1.S1_at   | MmugDNA.28947.1 | 8.97  | 9.86  | 0.47 | 0.2  | -1.84 | 0.113568 | 0.665756 | 0.390238 | 0.804165 |
| MmugDNA.28948.1.S1_at   | MmugDNA.28948.1 | 9.74  | 9.73  | 0.4  | 0.14 | 1     | 0.768356 | 0.377105 | 0.893594 | 0.614795 |
| MmugDNA.28948.1.S1_s_at | MmugDNA.28948.1 | 10.82 | 10.69 | 0.4  | 0.16 | 1.09  | 0.802596 | 0.374859 | 0.911359 | 0.613091 |
| MmugDNA.28949.1.S1_at   | MmugDNA.28949.1 | 5.06  | 5.12  | 0.26 | 0.26 | -1.04 | 0.90706  | 0.86397  | 0.960687 | 0.922815 |
| MmugDNA.28950.1.S1_at   | MmugDNA.28950.1 | 5.34  | 5.1   | 0.04 | 0.14 | 1.18  | 0.19031  | 0.157253 | 0.486666 | 0.432729 |
| MmugDNA.28951.1.S1_at   | MmugDNA.28951.1 | 5.94  | 5.84  | 0.56 | 0.14 | 1.08  | 0.265289 | 0.32625  | 0.557962 | 0.576452 |
| MmugDNA.28952.1.S1_at   | MmugDNA.28952.1 | 4.67  | 4.66  | 0.18 | 0.13 | 1.01  | 0.503914 | 0.603008 | 0.73721  | 0.763857 |
| MmugDNA.28953.1.S1_at   | MmugDNA.28953.1 | 2.72  | 2.7   | 0.11 | 0.06 | 1.01  | 0.378196 | 0.825154 | 0.64844  | 0.899551 |
| MmugDNA.28954.1.S1_at   | MmugDNA.28954.1 | 11.44 | 11.35 | 0.22 | 0.07 | 1.06  | 0.380659 | 0.540017 | 0.650314 | 0.724035 |
| MmugDNA.28955.1.S1_at   | MmugDNA.28955.1 | 12.05 | 12.15 | 0.22 | 0.23 | -1.07 | 0.499074 | 0.246182 | 0.734029 | 0.515883 |
| MmugDNA.28956.1.S1_s_at | MmugDNA.28956.1 | 9.15  | 8.5   | 0.21 | 0.15 | 1.56  | 0.019348 | 0.010933 | 0.192255 | 0.136187 |
| MmugDNA.28957.1.S1_at   | MmugDNA.28957.1 | 10.08 | 10.12 | 0.32 | 0.09 | -1.03 | 0.704406 | 0.093251 | 0.859708 | 0.349378 |
| MmugDNA.2896.1.S1_at    | MmugDNA.2896.1  | 11.19 | 11.56 | 0.29 | 0.03 | -1.29 | 0.125118 | 0.328216 | 0.405516 | 0.577947 |
| MmugDNA.28960.1.S1_x_at | MmugDNA.28960.1 | 8.86  | 8.33  | 0.18 | 0.12 | 1.45  | 0.009568 | 0.004844 | 0.147978 | 0.097102 |
| MmugDNA.28961.1.S1_a_at | MmugDNA.28961.1 | 4.01  | 4.19  | 0.1  | 0.08 | -1.13 | 0.055063 | 0.138618 | 0.291673 | 0.41168  |
| MmugDNA.28962.1.S1_s_at | MmugDNA.28962.1 | 9.44  | 8.83  | 0.12 | 0.03 | 1.52  | 0.00072  | 0.000541 | 0.072175 | 0.040593 |
| MmugDNA.28964.1.S1_at   | MmugDNA.28964.1 | 5.27  | 4.74  | 0.55 | 0.32 | 1.44  | 0.69257  | 0.306217 | 0.853103 | 0.562907 |
| MmugDNA.28966.1.S1_at   | MmugDNA.28966.1 | 4.02  | 3.45  | 0.48 | 0.13 | 1.48  | 0.126663 | 0.246413 | 0.408085 | 0.515899 |
| MmugDNA.28967.1.S1_at   | MmugDNA.28967.1 | 3.38  | 3.38  | 0.08 | 0.06 | 1     | 0.236796 | 0.316838 | 0.534396 | 0.570212 |
| MmugDNA.28968.1.S1_at   | MmugDNA.28968.1 | 6.9   | 7.09  | 0.19 | 0.16 | -1.14 | 0.514777 | 0.000375 | 0.744683 | 0.037273 |
| MmugDNA.28969.1.S1_at   | MmugDNA.28969.1 | 6.81  | 6.76  | 0.2  | 0.06 | 1.04  | 0.342584 | 0.019795 | 0.622275 | 0.176951 |
| MmugDNA.28970.1.S1_at   | MmugDNA.28970.1 | 6.86  | 7.29  | 0.61 | 0.14 | -1.35 | 0.356983 | 0.628007 | 0.633243 | 0.780911 |
| MmugDNA.28971.1.S1_at   | MmugDNA.28971.1 | 6.57  | 6.3   | 0.42 | 0.22 | 1.2   | 0.403329 | 0.463283 | 0.667479 | 0.674323 |
| MmugDNA.28971.1.S1_x_at | MmugDNA.28971.1 | 6.27  | 6.07  | 0.64 | 0.11 | 1.15  | 0.459988 | 0.569913 | 0.707988 | 0.742739 |
| MmugDNA.28972.1.S1_at   | MmugDNA.28972.1 | 6     | 5.7   | 0.37 | 0.1  | 1.23  | 0.203771 | 0.387569 | 0.501439 | 0.622193 |
| MmugDNA.28973.1.S1_at   | MmugDNA.28973.1 | 6     | 7.28  | 0.55 | 0.17 | -2.42 | 0.015166 | 0.007795 | 0.175242 | 0.117765 |
| MmugDNA.28974.1.S1_at   | MmugDNA.28974.1 | 9.17  | 8.67  | 0.24 | 0.22 | 1.41  | 0.077416 | 0.305217 | 0.336144 | 0.562255 |
| MmugDNA.28975.1.S1_at   | MmugDNA.28975.1 | 5.43  | 5.98  | 0.14 | 0.09 | -1.46 | 0.003255 | 0.047292 | 0.101887 | 0.262176 |
| MmugDNA.28976.1.S1_at   | MmugDNA.28976.1 | 6.2   | 5.59  | 0.61 | 0.22 | 1.52  | 0.121037 | 0.250857 | 0.399514 | 0.51956  |
| MmugDNA.28977.1.S1_at   | MmugDNA.28977.1 | 9.96  | 9.7   | 0.14 | 0.1  | 1.2   | 0.053646 | 0.079995 | 0.288836 | 0.327352 |

|                         |                 |       |       |      |      |       |          |          |          |          |
|-------------------------|-----------------|-------|-------|------|------|-------|----------|----------|----------|----------|
| MmugDNA.28978.1.S1_at   | MmugDNA.28978.1 | 4.81  | 5.17  | 0.29 | 0.12 | -1.29 | 0.222224 | 0.160516 | 0.520231 | 0.436686 |
| MmugDNA.2898.1.S1_at    | MmugDNA.2898.1  | 5.75  | 5.69  | 0.09 | 0.05 | 1.04  | 0.435972 | 0.035003 | 0.690939 | 0.231203 |
| MmugDNA.28980.1.S1_at   | MmugDNA.28980.1 | 3.72  | 3.73  | 0.1  | 0.12 | -1    | 0.930477 | 0.847751 | 0.970779 | 0.913501 |
| MmugDNA.28981.1.S1_at   | MmugDNA.28981.1 | 10.7  | 11.3  | 0.21 | 0.13 | -1.52 | 0.028347 | 0.100547 | 0.220898 | 0.359831 |
| MmugDNA.28983.1.S1_at   | MmugDNA.28983.1 | 4.49  | 4.61  | 0.16 | 0.06 | -1.09 | 0.956852 | 0.278629 | 0.982318 | 0.54233  |
| MmugDNA.28985.1.S1_at   | MmugDNA.28985.1 | 4.67  | 4.77  | 0.14 | 0.16 | -1.07 | 0.925719 | 0.825373 | 0.968535 | 0.899693 |
| MmugDNA.28988.1.S1_s_at | MmugDNA.28988.1 | 9.91  | 9.68  | 0.25 | 0.34 | 1.17  | 0.198404 | 0.321319 | 0.495518 | 0.57319  |
| MmugDNA.28989.1.S1_at   | MmugDNA.28989.1 | 6.8   | 6.87  | 0.23 | 0.08 | -1.05 | 0.883068 | 0.283087 | 0.950279 | 0.545692 |
| MmugDNA.28990.1.S1_at   | MmugDNA.28990.1 | 6.45  | 6.36  | 0.15 | 0.12 | 1.06  | 0.170661 | 0.318525 | 0.464374 | 0.571239 |
| MmugDNA.28991.1.S1_at   | MmugDNA.28991.1 | 4.35  | 4.34  | 0.1  | 0.03 | 1.01  | 0.855273 | 0.536872 | 0.93691  | 0.722119 |
| MmugDNA.28992.1.S1_at   | MmugDNA.28992.1 | 4.52  | 4.66  | 0.1  | 0.17 | -1.1  | 0.905944 | 0.570324 | 0.96012  | 0.743056 |
| MmugDNA.28994.1.S1_at   | MmugDNA.28994.1 | 3.04  | 3.11  | 0.04 | 0.1  | -1.05 | 0.285513 | 0.749732 | 0.575257 | 0.854564 |
| MmugDNA.28995.1.S1_at   | MmugDNA.28995.1 | 3     | 2.83  | 0.1  | 0.16 | 1.13  | 0.523885 | 0.75765  | 0.75073  | 0.858927 |
| MmugDNA.28996.1.S1_at   | MmugDNA.28996.1 | 4.68  | 4.71  | 0.01 | 0.1  | -1.02 | 0.95166  | 0.998656 | 0.980004 | 0.99928  |
| MmugDNA.28999.1.S1_at   | MmugDNA.28999.1 | 6.88  | 6.93  | 0.1  | 0.06 | -1.04 | 0.534807 | 0.705032 | 0.757917 | 0.828945 |
| MmugDNA.290.1.S1_at     | MmugDNA.290.1   | 10.68 | 10.83 | 0.31 | 0.13 | -1.11 | 0.394984 | 0.431215 | 0.661498 | 0.652219 |
| MmugDNA.2900.1.S1_at    | MmugDNA.2900.1  | 6.5   | 6.42  | 0.13 | 0.04 | 1.05  | 0.779383 | 0.710945 | 0.899222 | 0.832335 |
| MmugDNA.29000.1.S1_at   | MmugDNA.29000.1 | 2.9   | 3.82  | 0.78 | 1    | -1.9  | 0.484834 | 0.568271 | 0.724497 | 0.741876 |
| MmugDNA.29002.1.S1_at   | MmugDNA.29002.1 | 3.8   | 3.77  | 0.09 | 0.28 | 1.02  | 0.824665 | 0.957237 | 0.922099 | 0.975806 |
| MmugDNA.29003.1.S1_at   | MmugDNA.29003.1 | 5.62  | 5.51  | 0.07 | 0.14 | 1.08  | 0.350493 | 0.487596 | 0.628308 | 0.690565 |
| MmugDNA.29004.1.S1_at   | MmugDNA.29004.1 | 6.6   | 6.51  | 0.09 | 0.06 | 1.07  | 0.400274 | 0.14051  | 0.665383 | 0.413727 |
| MmugDNA.29005.1.S1_at   | MmugDNA.29005.1 | 4.78  | 4.85  | 0.15 | 0.18 | -1.05 | 0.712648 | 0.952502 | 0.864347 | 0.973066 |
| MmugDNA.29008.1.S1_at   | MmugDNA.29008.1 | 6.92  | 6.49  | 0.17 | 0.15 | 1.34  | 0.063715 | 0.051388 | 0.308957 | 0.272154 |
| MmugDNA.29009.1.S1_at   | MmugDNA.29009.1 | 10.49 | 10.44 | 0.36 | 0.02 | 1.04  | 0.297175 | 0.716248 | 0.585609 | 0.835531 |
| MmugDNA.29010.1.S1_at   | MmugDNA.29010.1 | 7.7   | 7.41  | 0.32 | 0.28 | 1.23  | 0.279586 | 0.467482 | 0.570824 | 0.677091 |
| MmugDNA.29011.1.S1_at   | MmugDNA.29011.1 | 3.36  | 3.38  | 0.12 | 0.17 | -1.02 | 0.947843 | 0.36124  | 0.978044 | 0.602104 |
| MmugDNA.29012.1.S1_at   | MmugDNA.29012.1 | 3.56  | 3.54  | 0.13 | 0.07 | 1.01  | 0.820686 | 0.713699 | 0.920024 | 0.833916 |
| MmugDNA.29013.1.S1_at   | MmugDNA.29013.1 | 8.21  | 8.01  | 0.18 | 0.08 | 1.14  | 0.113097 | 0.057553 | 0.389701 | 0.286008 |
| MmugDNA.29015.1.S1_at   | MmugDNA.29015.1 | 8.65  | 8.27  | 0.45 | 0.23 | 1.3   | 0.380704 | 0.784209 | 0.650314 | 0.875049 |
| MmugDNA.29016.1.S1_at   | MmugDNA.29016.1 | 12.1  | 12.13 | 0.1  | 0.09 | -1.02 | 0.374669 | 0.025295 | 0.645606 | 0.199522 |
| MmugDNA.29017.1.S1_at   | MmugDNA.29017.1 | 3.3   | 3.18  | 0.16 | 0.63 | 1.09  | 0.597574 | 0.506008 | 0.796781 | 0.702337 |
| MmugDNA.29019.1.S1_at   | MmugDNA.29019.1 | 9.62  | 9.35  | 0.24 | 0.16 | 1.21  | 0.107574 | 0.175439 | 0.382272 | 0.452157 |
| MmugDNA.29020.1.S1_at   | MmugDNA.29020.1 | 5.29  | 5.11  | 0.22 | 0.08 | 1.14  | 0.177664 | 0.442618 | 0.472303 | 0.660578 |
| MmugDNA.29021.1.S1_at   | MmugDNA.29021.1 | 5.38  | 5.36  | 0.02 | 0.02 | 1.02  | 0.63783  | 0.2517   | 0.822597 | 0.520444 |
| MmugDNA.29024.1.S1_at   | MmugDNA.29024.1 | 5.22  | 5.4   | 0.1  | 0.06 | -1.14 | 0.061064 | 0.109282 | 0.303985 | 0.37308  |
| MmugDNA.29026.1.S1_at   | MmugDNA.29026.1 | 10.38 | 9.95  | 0.08 | 0.08 | 1.35  | 0.00178  | 0.002119 | 0.085481 | 0.068092 |
| MmugDNA.29027.1.S1_at   | MmugDNA.29027.1 | 5.41  | 5.14  | 0.13 | 0.12 | 1.2   | 0.124865 | 0.068054 | 0.405291 | 0.307142 |
| MmugDNA.29028.1.S1_at   | MmugDNA.29028.1 | 3.9   | 3.79  | 0.04 | 0.09 | 1.08  | 0.219314 | 0.047165 | 0.517071 | 0.261755 |
| MmugDNA.2903.1.S1_at    | MmugDNA.2903.1  | 9.04  | 8.62  | 0.2  | 0.13 | 1.34  | 0.075047 | 0.361499 | 0.332117 | 0.602232 |
| MmugDNA.29031.1.S1_at   | MmugDNA.29031.1 | 6.59  | 6.66  | 0.4  | 0.11 | -1.05 | 0.338882 | 0.018324 | 0.619253 | 0.170215 |
| MmugDNA.29032.1.S1_at   | MmugDNA.29032.1 | 6.76  | 6.6   | 0.2  | 0.04 | 1.12  | 0.297789 | 0.498519 | 0.586265 | 0.697582 |
| MmugDNA.29033.1.S1_at   | MmugDNA.29033.1 | 10.57 | 10.51 | 0.23 | 0.02 | 1.04  | 0.211336 | 0.07607  | 0.509127 | 0.320843 |
| MmugDNA.29034.1.S1_at   | MmugDNA.29034.1 | 9.37  | 9.23  | 0.36 | 0.35 | 1.1   | 0.98765  | 0.863662 | 0.995514 | 0.922638 |

|                         |                 |       |       |      |      |       |          |          |          |          |
|-------------------------|-----------------|-------|-------|------|------|-------|----------|----------|----------|----------|
| MmugDNA.29035.1.S1_at   | MmugDNA.29035.1 | 3.61  | 3.67  | 0.35 | 0.04 | -1.04 | 0.456332 | 0.510721 | 0.705738 | 0.705126 |
| MmugDNA.29037.1.S1_at   | MmugDNA.29037.1 | 5.13  | 4.56  | 0.45 | 0.13 | 1.49  | 0.40203  | 0.257873 | 0.666532 | 0.525467 |
| MmugDNA.29039.1.S1_at   | MmugDNA.29039.1 | 10.41 | 10.61 | 0.28 | 0.41 | -1.15 | 0.546076 | 0.298836 | 0.765129 | 0.557444 |
| MmugDNA.2904.1.S1_at    | MmugDNA.2904.1  | 5.81  | 5.61  | 0.34 | 0.04 | 1.15  | 0.431371 | 0.276221 | 0.687507 | 0.540183 |
| MmugDNA.29041.1.S1_at   | MmugDNA.29041.1 | 4.8   | 5.12  | 0.51 | 0.61 | -1.25 | 0.686179 | 0.453526 | 0.850502 | 0.667957 |
| MmugDNA.29043.1.S1_at   | MmugDNA.29043.1 | 8.81  | 8.47  | 0.29 | 0.23 | 1.26  | 0.540324 | 0.116544 | 0.761387 | 0.383705 |
| MmugDNA.29044.1.S1_at   | MmugDNA.29044.1 | 5.96  | 6.04  | 0.04 | 0.09 | -1.06 | 0.229782 | 0.755057 | 0.528728 | 0.857434 |
| MmugDNA.29045.1.S1_at   | MmugDNA.29045.1 | 4.24  | 3.81  | 0.28 | 0.03 | 1.35  | 0.055748 | 0.045783 | 0.293273 | 0.258303 |
| MmugDNA.29050.1.S1_at   | MmugDNA.29050.1 | 8.59  | 8.46  | 0.31 | 0.08 | 1.1   | 0.466147 | 0.785355 | 0.712041 | 0.875741 |
| MmugDNA.29051.1.S1_at   | MmugDNA.29051.1 | 8.94  | 8.62  | 0.29 | 0.11 | 1.24  | 0.092622 | 0.392932 | 0.360982 | 0.625917 |
| MmugDNA.29052.1.S1_at   | MmugDNA.29052.1 | 6.18  | 5.74  | 1.04 | 0.48 | 1.36  | 0.389421 | 0.527549 | 0.657321 | 0.716154 |
| MmugDNA.29054.1.S1_at   | MmugDNA.29054.1 | 4.39  | 4.24  | 0.07 | 0.21 | 1.11  | 0.274427 | 0.20186  | 0.566281 | 0.476373 |
| MmugDNA.29056.1.S1_at   | MmugDNA.29056.1 | 7.25  | 7.24  | 0.1  | 0.16 | 1.01  | 0.659498 | 0.849423 | 0.83568  | 0.914533 |
| MmugDNA.29057.1.S1_at   | MmugDNA.29057.1 | 3.57  | 3.36  | 0.03 | 0.18 | 1.15  | 0.182206 | 0.183581 | 0.477958 | 0.459681 |
| MmugDNA.29058.1.S1_at   | MmugDNA.29058.1 | 10.89 | 10.89 | 0.03 | 0.15 | -1    | 0.614414 | 0.179039 | 0.808151 | 0.455404 |
| MmugDNA.29059.1.S1_at   | MmugDNA.29059.1 | 3.83  | 3.84  | 0.22 | 0.14 | -1.01 | 0.963926 | 0.251901 | 0.985358 | 0.520632 |
| MmugDNA.29060.1.S1_at   | MmugDNA.29060.1 | 5.27  | 4.95  | 0.23 | 0.19 | 1.25  | 0.075536 | 0.134757 | 0.333134 | 0.40678  |
| MmugDNA.29061.1.S1_at   | MmugDNA.29061.1 | 4.75  | 4.9   | 0.16 | 0.01 | -1.11 | 0.146343 | 0.031793 | 0.434192 | 0.220741 |
| MmugDNA.43339.1.S1_s_at | MmugDNA.43339.1 | 6.73  | 6.22  | 0.5  | 0.12 | 1.42  | 0.047211 | 0.031371 | 0.274594 | 0.219065 |
| MmugDNA.29063.1.S1_at   | MmugDNA.29063.1 | 4.47  | 4.47  | 0.02 | 0.12 | 1     | 0.96927  | 0.889363 | 0.987768 | 0.93695  |
| MmugDNA.29064.1.S1_at   | MmugDNA.29064.1 | 3.78  | 3.8   | 0.02 | 0.15 | -1.01 | 0.707895 | 0.708424 | 0.861603 | 0.830919 |
| MmugDNA.29065.1.S1_at   | MmugDNA.29065.1 | 6.99  | 6.9   | 0.72 | 0.16 | 1.07  | 0.711126 | 0.814578 | 0.863578 | 0.892959 |
| MmugDNA.29067.1.S1_at   | MmugDNA.29067.1 | 5.47  | 5.3   | 0.19 | 0.02 | 1.13  | 0.140574 | 0.261085 | 0.426348 | 0.527481 |
| MmugDNA.29069.1.S1_at   | MmugDNA.29069.1 | 8.35  | 8.62  | 0.2  | 0.11 | -1.21 | 0.280095 | 0.403969 | 0.571289 | 0.63254  |
| MmugDNA.2907.1.S1_at    | MmugDNA.2907.1  | 3.69  | 3.38  | 0.56 | 0.22 | 1.24  | 0.174771 | 0.233887 | 0.469009 | 0.505169 |
| MmugDNA.29070.1.S1_at   | MmugDNA.29070.1 | 6.1   | 6.02  | 0.38 | 0.18 | 1.06  | 0.935351 | 0.977782 | 0.972951 | 0.987873 |
| MmugDNA.29071.1.S1_at   | MmugDNA.29071.1 | 5.22  | 5.21  | 0.14 | 0.09 | 1.01  | 0.813452 | 0.94359  | 0.91658  | 0.967955 |
| MmugDNA.29072.1.S1_at   | MmugDNA.29072.1 | 7.04  | 7.18  | 0.47 | 0.12 | -1.11 | 0.570381 | 0.752662 | 0.779298 | 0.855968 |
| MmugDNA.29074.1.S1_at   | MmugDNA.29074.1 | 7.91  | 7.53  | 0.65 | 0.25 | 1.3   | 0.427079 | 0.81129  | 0.684395 | 0.891123 |
| MmugDNA.29076.1.S1_at   | MmugDNA.29076.1 | 7.07  | 8.27  | 0.93 | 0.3  | -2.31 | 0.182398 | 0.10594  | 0.478114 | 0.36826  |
| MmugDNA.29077.1.S1_at   | MmugDNA.29077.1 | 8.83  | 8.26  | 0.26 | 0.15 | 1.49  | 0.082617 | 0.06277  | 0.344435 | 0.297193 |
| MmugDNA.29078.1.S1_at   | MmugDNA.29078.1 | 5.55  | 5.53  | 0.16 | 0.17 | 1.02  | 0.795665 | 0.597325 | 0.907602 | 0.760137 |
| MmugDNA.29079.1.S1_at   | MmugDNA.29079.1 | 6.23  | 7.11  | 0.4  | 0.48 | -1.85 | 0.344944 | 0.127674 | 0.624093 | 0.398581 |
| MmugDNA.2908.1.S1_at    | MmugDNA.2908.1  | 3.93  | 3.66  | 0.33 | 0.18 | 1.21  | 0.176541 | 0.195846 | 0.470975 | 0.470737 |
| MmugDNA.29080.1.S1_at   | MmugDNA.29080.1 | 7.93  | 7.75  | 0.19 | 0.09 | 1.14  | 0.589445 | 0.082413 | 0.791592 | 0.331381 |
| MmugDNA.29081.1.S1_at   | MmugDNA.29081.1 | 10.85 | 11.19 | 0.31 | 0.05 | -1.27 | 0.199379 | 0.245596 | 0.496686 | 0.515348 |
| MmugDNA.29082.1.S1_at   | MmugDNA.29082.1 | 3.46  | 3.45  | 0.07 | 0.08 | 1.01  | 0.657291 | 0.6284   | 0.834359 | 0.781141 |
| MmugDNA.29083.1.S1_at   | MmugDNA.29083.1 | 5.29  | 5.16  | 0.12 | 0.3  | 1.09  | 0.228466 | 0.263481 | 0.526818 | 0.529799 |
| MmugDNA.29084.1.S1_at   | MmugDNA.29084.1 | 10.37 | 10.94 | 0.05 | 0.17 | -1.48 | 0.010404 | 0.229615 | 0.151942 | 0.501574 |
| MmugDNA.29085.1.S1_at   | MmugDNA.29085.1 | 5.68  | 5.56  | 0.08 | 0.19 | 1.09  | 0.922993 | 0.98803  | 0.967137 | 0.993307 |
| MmugDNA.29086.1.S1_at   | MmugDNA.29086.1 | 11.59 | 11.43 | 0.16 | 0.02 | 1.11  | 0.194023 | 0.013439 | 0.490602 | 0.148537 |
| MmugDNA.29087.1.S1_at   | MmugDNA.29087.1 | 6.87  | 6.89  | 0.2  | 0.38 | -1.01 | 0.647982 | 0.004621 | 0.829095 | 0.094974 |
| MmugDNA.2909.1.S1_at    | MmugDNA.2909.1  | 5.24  | 5.2   | 0.08 | 0.04 | 1.03  | 0.637261 | 0.893775 | 0.822365 | 0.939386 |



|                         |                 |       |       |      |      |       |          |          |          |          |
|-------------------------|-----------------|-------|-------|------|------|-------|----------|----------|----------|----------|
| MmugDNA.29091.1.S1_at   | MmugDNA.29091.1 | 7.01  | 6.74  | 0.15 | 0.15 | 1.21  | 0.190667 | 0.200246 | 0.486844 | 0.474689 |
| MmugDNA.29092.1.S1_at   | MmugDNA.29092.1 | 4.1   | 3.81  | 0.09 | 0.09 | 1.23  | 0.022837 | 0.081262 | 0.204235 | 0.329351 |
| MmugDNA.29095.1.S1_at   | MmugDNA.29095.1 | 4.83  | 4.94  | 0.34 | 0.24 | -1.08 | 0.822733 | 0.23654  | 0.921129 | 0.507364 |
| MmugDNA.29096.1.S1_s_at | MmugDNA.29096.1 | 8.01  | 7.96  | 0.15 | 0.03 | 1.04  | 0.424235 | 0.00351  | 0.681968 | 0.08503  |
| MmugDNA.29097.1.S1_at   | MmugDNA.29097.1 | 3.8   | 3.8   | 0.01 | 0.03 | 1     | 0.259817 | 0.205287 | 0.554139 | 0.479606 |
| MmugDNA.29098.1.S1_at   | MmugDNA.29098.1 | 11.27 | 11.72 | 0.18 | 0.06 | -1.37 | 0.030544 | 0.158974 | 0.227713 | 0.435156 |
| MmugDNA.29099.1.S1_at   | MmugDNA.29099.1 | 13.63 | 13.47 | 0.06 | 0    | 1.11  | 0.015182 | 0.002517 | 0.175242 | 0.074158 |
| MmugDNA.291.1.S1_at     | MmugDNA.291.1   | 5.66  | 5.14  | 0.34 | 0.11 | 1.43  | 0.046601 | 0.078863 | 0.273564 | 0.325838 |
| MmugDNA.2910.1.S1_at    | MmugDNA.2910.1  | 9.72  | 9.61  | 0.35 | 0    | 1.08  | 0.190978 | 0.22354  | 0.48719  | 0.496385 |
| MmugDNA.29102.1.S1_at   | MmugDNA.29102.1 | 5.71  | 5.73  | 0.47 | 0.02 | -1.01 | 0.959635 | 0.997989 | 0.983565 | 0.999008 |
| MmugDNA.29103.1.S1_at   | MmugDNA.29103.1 | 5.96  | 6.24  | 1.76 | 0.37 | -1.22 | 0.876875 | 0.975738 | 0.947378 | 0.98677  |
| MmugDNA.29105.1.S1_at   | MmugDNA.29105.1 | 3.09  | 3.09  | 0.01 | 0.02 | -1    | 0.290481 | 0.885651 | 0.579919 | 0.934982 |
| MmugDNA.29106.1.S1_at   | MmugDNA.29106.1 | 4.97  | 5.18  | 0.86 | 0.19 | -1.16 | 0.492415 | 0.605064 | 0.729741 | 0.764917 |
| MmugDNA.29107.1.S1_at   | MmugDNA.29107.1 | 3.5   | 3.3   | 0.19 | 0.03 | 1.14  | 0.418489 | 0.712409 | 0.678425 | 0.833371 |
| MmugDNA.29108.1.S1_at   | MmugDNA.29108.1 | 11.21 | 11.07 | 0.05 | 0.1  | 1.11  | 0.163089 | 0.628502 | 0.455284 | 0.781231 |
| MmugDNA.29109.1.S1_at   | MmugDNA.29109.1 | 3.17  | 3.08  | 0.58 | 0.15 | 1.07  | 0.633561 | 0.755406 | 0.820437 | 0.857572 |
| MmugDNA.2911.1.S1_at    | MmugDNA.2911.1  | 5.38  | 5.4   | 0.1  | 0.26 | -1.02 | 0.6843   | 0.444958 | 0.849589 | 0.662174 |
| MmugDNA.29111.1.S1_at   | MmugDNA.29111.1 | 7.55  | 7.74  | 0.09 | 0.03 | -1.14 | 0.038391 | 0.04451  | 0.251895 | 0.255346 |
| MmugDNA.29112.1.S1_at   | MmugDNA.29112.1 | 4.26  | 3.59  | 0.51 | 0.1  | 1.59  | 0.106558 | 0.208015 | 0.380675 | 0.482049 |
| MmugDNA.29113.1.S1_at   | MmugDNA.29113.1 | 9.5   | 9.58  | 0.31 | 0.12 | -1.06 | 0.661436 | 0.630396 | 0.836571 | 0.782237 |
| MmugDNA.29114.1.S1_at   | MmugDNA.29114.1 | 5.83  | 6     | 0.22 | 0.03 | -1.13 | 0.351666 | 0.543236 | 0.629302 | 0.726012 |
| MmugDNA.29115.1.S1_at   | MmugDNA.29115.1 | 5.36  | 5.89  | 0.45 | 0.13 | -1.45 | 0.231503 | 0.534651 | 0.530229 | 0.720477 |
| MmugDNA.29116.1.S1_at   | MmugDNA.29116.1 | 7.36  | 7.49  | 0.13 | 0.04 | -1.09 | 0.207831 | 0.324747 | 0.505752 | 0.575287 |
| MmugDNA.29117.1.S1_at   | MmugDNA.29117.1 | 8.66  | 8.73  | 0.19 | 0.18 | -1.05 | 0.790927 | 0.804259 | 0.90499  | 0.887401 |
| MmugDNA.29117.1.S1_s_at | MmugDNA.29117.1 | 8.23  | 8.3   | 0.2  | 0.26 | -1.05 | 0.676711 | 0.711426 | 0.845649 | 0.832667 |
| MmugDNA.29120.1.S1_at   | MmugDNA.29120.1 | 7.67  | 7.55  | 0.21 | 0.16 | 1.09  | 0.099874 | 0.276513 | 0.370801 | 0.540522 |
| MmugDNA.29121.1.S1_at   | MmugDNA.29121.1 | 5.63  | 5.65  | 0.02 | 0    | -1.01 | 0.324756 | 0.104941 | 0.608363 | 0.366498 |
| MmugDNA.29122.1.S1_s_at | MmugDNA.29122.1 | 7     | 6.96  | 0.06 | 0.11 | 1.03  | 0.447742 | 0.162814 | 0.699609 | 0.438932 |
| MmugDNA.29123.1.S1_at   | MmugDNA.29123.1 | 5.88  | 4.9   | 0.44 | 0.28 | 1.97  | 0.029712 | 0.011316 | 0.225611 | 0.138076 |
| MmugDNA.29124.1.S1_at   | MmugDNA.29124.1 | 4.18  | 4.21  | 0.05 | 0.02 | -1.02 | 0.374575 | 0.012699 | 0.645606 | 0.145316 |
| MmugDNA.29125.1.S1_at   | MmugDNA.29125.1 | 5.31  | 5.32  | 0.37 | 0.32 | -1.01 | 0.740207 | 0.36421  | 0.879526 | 0.604513 |
| MmugDNA.29126.1.S1_at   | MmugDNA.29126.1 | 6.14  | 6.04  | 0.22 | 0.02 | 1.07  | 0.175636 | 0.246239 | 0.470125 | 0.515889 |
| MmugDNA.29128.1.S1_at   | MmugDNA.29128.1 | 4.98  | 4.89  | 0.06 | 0.01 | 1.06  | 0.070888 | 0.033907 | 0.324317 | 0.227771 |
| MmugDNA.29129.1.S1_at   | MmugDNA.29129.1 | 4.71  | 4.67  | 0.03 | 0.1  | 1.03  | 0.412662 | 0.061949 | 0.674202 | 0.295734 |
| MmugDNA.2913.1.S1_at    | MmugDNA.2913.1  | 6.47  | 6.52  | 0.31 | 0.15 | -1.03 | 0.339799 | 0.475282 | 0.620001 | 0.682031 |
| MmugDNA.29131.1.S1_at   | MmugDNA.29131.1 | 10.26 | 10    | 0.26 | 0.08 | 1.2   | 0.158797 | 0.000871 | 0.450026 | 0.047471 |
| MmugDNA.29132.1.S1_s_at | MmugDNA.29132.1 | 10.81 | 10.67 | 0.22 | 0.05 | 1.11  | 0.198315 | 0.036886 | 0.495518 | 0.236506 |
| MmugDNA.29133.1.S1_at   | MmugDNA.29133.1 | 4.64  | 5.11  | 0.2  | 0.47 | -1.38 | 0.119696 | 0.093211 | 0.397651 | 0.34931  |
| MmugDNA.29135.1.S1_at   | MmugDNA.29135.1 | 9.92  | 9.66  | 0.3  | 0.13 | 1.2   | 0.672762 | 0.072803 | 0.843386 | 0.315651 |
| MmugDNA.29137.1.S1_at   | MmugDNA.29137.1 | 4.85  | 4.91  | 0.04 | 0.14 | -1.05 | 0.128299 | 0.195159 | 0.410227 | 0.470241 |
| MmugDNA.2914.1.S1_at    | MmugDNA.2914.1  | 4.8   | 4.53  | 0    | 0.12 | 1.2   | 0.047392 | 0.096749 | 0.275072 | 0.354171 |
| MmugDNA.29140.1.S1_s_at | MmugDNA.29140.1 | 8.4   | 8.54  | 0.2  | 0.18 | -1.1  | 0.419881 | 0.764997 | 0.679119 | 0.863388 |
| MmugDNA.29141.1.S1_at   | MmugDNA.29141.1 | 8.38  | 8.11  | 0.63 | 0.22 | 1.21  | 0.99005  | 0.359289 | 0.996449 | 0.600575 |

|                         |                 |       |       |      |      |       |          |          |          |          |
|-------------------------|-----------------|-------|-------|------|------|-------|----------|----------|----------|----------|
| MmugDNA.29142.1.S1_s_at | MmugDNA.29142.1 | 12.98 | 12.52 | 0.14 | 0.12 | 1.38  | 0.021145 | 0.037591 | 0.198926 | 0.238336 |
| MmugDNA.29143.1.S1_at   | MmugDNA.29143.1 | 12.11 | 11.45 | 0.2  | 0.15 | 1.58  | 0.011984 | 0.019345 | 0.159499 | 0.174785 |
| MmugDNA.29145.1.S1_at   | MmugDNA.29145.1 | 5.09  | 5.09  | 0.06 | 0.04 | 1     | 0.841187 | 0.222062 | 0.930165 | 0.495112 |
| MmugDNA.29148.1.S1_at   | MmugDNA.29148.1 | 6.96  | 6.91  | 0.26 | 0.18 | 1.04  | 0.865013 | 0.90308  | 0.941423 | 0.944962 |
| MmugDNA.29149.1.S1_at   | MmugDNA.29149.1 | 3.35  | 3.13  | 0.19 | 0.26 | 1.16  | 0.302159 | 0.187093 | 0.590132 | 0.463003 |
| MmugDNA.29150.1.S1_at   | MmugDNA.29150.1 | 3.4   | 3.52  | 0.07 | 0.04 | -1.08 | 0.140135 | 0.114496 | 0.425829 | 0.381041 |
| MmugDNA.29152.1.S1_at   | MmugDNA.29152.1 | 11.6  | 11.58 | 0.13 | 0.03 | 1.01  | 0.729158 | 0.866617 | 0.873447 | 0.924185 |
| MmugDNA.29153.1.S1_at   | MmugDNA.29153.1 | 5.27  | 5.27  | 0.39 | 0.04 | -1    | 0.917919 | 0.98233  | 0.964965 | 0.990348 |
| MmugDNA.29155.1.S1_at   | MmugDNA.29155.1 | 5.79  | 5.38  | 0.45 | 0.05 | 1.33  | 0.063761 | 0.054394 | 0.308957 | 0.278799 |
| MmugDNA.29156.1.S1_at   | MmugDNA.29156.1 | 6.63  | 6.82  | 0.21 | 0.32 | -1.14 | 0.427972 | 0.42473  | 0.685045 | 0.647239 |
| MmugDNA.29158.1.S1_at   | MmugDNA.29158.1 | 4.2   | 4.35  | 0.09 | 0.12 | -1.11 | 0.202564 | 0.691299 | 0.500236 | 0.820381 |
| MmugDNA.29159.1.S1_at   | MmugDNA.29159.1 | 7.39  | 7.26  | 0.17 | 0.27 | 1.1   | 0.867261 | 0.863753 | 0.942613 | 0.922638 |
| MmugDNA.2916.1.S1_at    | MmugDNA.2916.1  | 8     | 7.75  | 0.09 | 0.15 | 1.19  | 0.024285 | 0.01779  | 0.208905 | 0.168549 |
| MmugDNA.29160.1.S1_at   | MmugDNA.29160.1 | 4.16  | 4.07  | 0.17 | 0.03 | 1.06  | 0.735758 | 0.645837 | 0.877005 | 0.792616 |
| MmugDNA.29161.1.S1_at   | MmugDNA.29161.1 | 5.15  | 4.82  | 0.38 | 0.32 | 1.26  | 0.907472 | 0.998025 | 0.960895 | 0.999008 |
| MmugDNA.29162.1.S1_at   | MmugDNA.29162.1 | 6.21  | 6.18  | 0.17 | 0.13 | 1.02  | 0.961654 | 0.23408  | 0.984372 | 0.505319 |
| MmugDNA.29163.1.S1_at   | MmugDNA.29163.1 | 3.63  | 3.4   | 0.3  | 0.06 | 1.17  | 0.262777 | 0.320746 | 0.556683 | 0.572846 |
| MmugDNA.29166.1.S1_at   | MmugDNA.29166.1 | 8.99  | 8.78  | 0.24 | 0.24 | 1.16  | 0.344791 | 0.078859 | 0.624027 | 0.325838 |
| MmugDNA.29167.1.S1_at   | MmugDNA.29167.1 | 3.2   | 3.23  | 0.04 | 0.03 | -1.02 | 0.314183 | 0.888609 | 0.599901 | 0.936492 |
| MmugDNA.29168.1.S1_at   | MmugDNA.29168.1 | 8.34  | 9.08  | 0.14 | 0.16 | -1.68 | 0.004889 | 0.003205 | 0.115123 | 0.082023 |
| MmugDNA.29169.1.S1_at   | MmugDNA.29169.1 | 9.28  | 8.66  | 0.34 | 0.14 | 1.54  | 0.023703 | 0.279119 | 0.207081 | 0.542807 |
| MmugDNA.2917.1.S1_at    | MmugDNA.2917.1  | 9.98  | 10.28 | 0.4  | 0.05 | -1.24 | 0.725506 | 0.037621 | 0.871194 | 0.238384 |
| MmugDNA.29170.1.S1_at   | MmugDNA.29170.1 | 8.82  | 9.23  | 0.11 | 0.08 | -1.33 | 0.00722  | 0.053272 | 0.132536 | 0.276463 |
| MmugDNA.29170.1.S1_s_at | MmugDNA.29170.1 | 7.8   | 7.99  | 0.56 | 0.41 | -1.15 | 0.709648 | 0.904251 | 0.86264  | 0.945683 |
| MmugDNA.29171.1.S1_at   | MmugDNA.29171.1 | 8.78  | 9.39  | 0.3  | 0.19 | -1.52 | 0.038353 | 0.137265 | 0.251853 | 0.410165 |
| MmugDNA.29173.1.S1_at   | MmugDNA.29173.1 | 3.63  | 3.62  | 0.08 | 0.23 | 1     | 0.939259 | 0.155099 | 0.974371 | 0.43023  |
| MmugDNA.29175.1.S1_s_at | MmugDNA.29175.1 | 6.17  | 6.18  | 0.18 | 0.11 | -1.01 | 0.371573 | 0.119092 | 0.644245 | 0.387386 |
| MmugDNA.29177.1.S1_at   | MmugDNA.29177.1 | 4.06  | 4.1   | 0.28 | 0.07 | -1.03 | 0.417134 | 0.294418 | 0.677381 | 0.554169 |
| MmugDNA.29178.1.S1_at   | MmugDNA.29178.1 | 7.87  | 8.67  | 0.05 | 0.03 | -1.74 | 0.000016 | 0.000564 | 0.045594 | 0.041049 |
| MmugDNA.29179.1.S1_at   | MmugDNA.29179.1 | 2.97  | 2.95  | 0.05 | 0.07 | 1.01  | 0.372983 | 0.239675 | 0.645118 | 0.510389 |
| MmugDNA.2918.1.S1_at    | MmugDNA.2918.1  | 8.11  | 7.98  | 0.08 | 0.1  | 1.09  | 0.084932 | 0.143834 | 0.348868 | 0.417676 |
| MmugDNA.29180.1.S1_at   | MmugDNA.29180.1 | 5.45  | 5.38  | 0.36 | 0.21 | 1.05  | 0.18125  | 0.061547 | 0.476588 | 0.294865 |
| MmugDNA.29181.1.S1_at   | MmugDNA.29181.1 | 7.34  | 7.05  | 0.17 | 0.13 | 1.23  | 0.026414 | 0.129945 | 0.215579 | 0.401515 |
| MmugDNA.29182.1.S1_at   | MmugDNA.29182.1 | 9.62  | 9.04  | 0.45 | 0.26 | 1.5   | 0.072796 | 0.056392 | 0.327658 | 0.283382 |
| MmugDNA.29184.1.S1_at   | MmugDNA.29184.1 | 5.61  | 5.56  | 0.06 | 0.08 | 1.04  | 0.352171 | 0.099464 | 0.629736 | 0.357827 |
| MmugDNA.29185.1.S1_at   | MmugDNA.29185.1 | 5.73  | 4.3   | 0.87 | 0.28 | 2.69  | 0.085897 | 0.06449  | 0.350251 | 0.300137 |
| MmugDNA.29187.1.S1_at   | MmugDNA.29187.1 | 3.64  | 3.73  | 0.21 | 0.1  | -1.07 | 0.823747 | 0.159206 | 0.921686 | 0.435217 |
| MmugDNA.29187.1.S1_x_at | MmugDNA.29187.1 | 7.1   | 7.08  | 0.24 | 0.14 | 1.02  | 0.655882 | 0.041207 | 0.83356  | 0.247826 |
| MmugDNA.29189.1.S1_at   | MmugDNA.29189.1 | 9.76  | 9.77  | 0.16 | 0.05 | -1.01 | 0.558819 | 0.006181 | 0.773051 | 0.106774 |
| MmugDNA.2919.1.S1_at    | MmugDNA.2919.1  | 4.28  | 4.42  | 0.09 | 0.34 | -1.1  | 0.521647 | 0.754596 | 0.749394 | 0.857244 |
| MmugDNA.29190.1.S1_at   | MmugDNA.29190.1 | 5.5   | 5.48  | 0.24 | 0.07 | 1.02  | 0.727198 | 0.532326 | 0.872172 | 0.719017 |
| MmugDNA.29192.1.S1_at   | MmugDNA.29192.1 | 3.67  | 3.21  | 0.62 | 0.32 | 1.38  | 0.358476 | 0.543122 | 0.634231 | 0.725952 |
| MmugDNA.29193.1.S1_at   | MmugDNA.29193.1 | 6.72  | 6.87  | 0.09 | 0.04 | -1.11 | 0.225938 | 0.141708 | 0.523661 | 0.415265 |

|                         |                 |      |       |      |      |       |          |          |          |          |
|-------------------------|-----------------|------|-------|------|------|-------|----------|----------|----------|----------|
| MmugDNA.29194.1.S1_at   | MmugDNA.29194.1 | 5.89 | 6.21  | 0.16 | 0.17 | -1.25 | 0.127996 | 0.227725 | 0.409893 | 0.499979 |
| MmugDNA.29195.1.S1_at   | MmugDNA.29195.1 | 6.92 | 6.65  | 0.17 | 0.02 | 1.21  | 0.02256  | 0.015356 | 0.203331 | 0.157392 |
| MmugDNA.29198.1.S1_x_at | MmugDNA.29198.1 | 8.86 | 8.72  | 0.52 | 0.17 | 1.1   | 0.241444 | 0.243345 | 0.538602 | 0.513384 |
| MmugDNA.29199.1.S1_at   | MmugDNA.29199.1 | 4.05 | 3.47  | 0.36 | 0.4  | 1.5   | 0.30201  | 0.225675 | 0.589947 | 0.498155 |
| MmugDNA.292.1.S1_at     | MmugDNA.292.1   | 5.58 | 6.35  | 0.24 | 0.31 | -1.71 | 0.053777 | 0.099782 | 0.289059 | 0.358379 |
| MmugDNA.2920.1.S1_at    | MmugDNA.2920.1  | 3.46 | 3.4   | 0.14 | 0.05 | 1.04  | 0.816556 | 0.5895   | 0.918047 | 0.755691 |
| MmugDNA.29200.1.S1_at   | MmugDNA.29200.1 | 4.23 | 6.81  | 0.6  | 0.48 | -6.01 | 0.008259 | 0.010588 | 0.139927 | 0.134213 |
| MmugDNA.15109.1.S1_s_at | MmugDNA.15109.1 | 6.06 | 4.94  | 0.14 | 0.85 | 2.17  | 0.265621 | 0.262396 | 0.558222 | 0.528655 |
| MmugDNA.29202.1.S1_at   | MmugDNA.29202.1 | 5.09 | 5.12  | 0.06 | 0.23 | -1.02 | 0.40585  | 0.49317  | 0.669242 | 0.694004 |
| MmugDNA.29203.1.S1_at   | MmugDNA.29203.1 | 5.28 | 5.3   | 0.04 | 0.06 | -1.01 | 0.187612 | 0.269123 | 0.483874 | 0.534447 |
| MmugDNA.29205.1.S1_at   | MmugDNA.29205.1 | 4.15 | 4.14  | 0.14 | 0.29 | 1     | 0.391504 | 0.05934  | 0.658699 | 0.29054  |
| MmugDNA.29206.1.S1_at   | MmugDNA.29206.1 | 4.03 | 3.7   | 0.38 | 0.4  | 1.26  | 0.739606 | 0.540463 | 0.879307 | 0.724395 |
| MmugDNA.29207.1.S1_at   | MmugDNA.29207.1 | 4.05 | 4.25  | 0.17 | 0.11 | -1.15 | 0.431661 | 0.612297 | 0.687592 | 0.769941 |
| MmugDNA.29208.1.S1_at   | MmugDNA.29208.1 | 7.07 | 7.64  | 0.36 | 0.2  | -1.48 | 0.052116 | 0.263324 | 0.28583  | 0.529582 |
| MmugDNA.29209.1.S1_at   | MmugDNA.29209.1 | 5.2  | 5.25  | 0.05 | 0.18 | -1.03 | 0.642635 | 0.39505  | 0.825647 | 0.62727  |
| MmugDNA.2921.1.S1_at    | MmugDNA.2921.1  | 6.28 | 6.24  | 0.03 | 0.04 | 1.03  | 0.476223 | 0.296083 | 0.718743 | 0.555339 |
| MmugDNA.29210.1.S1_at   | MmugDNA.29210.1 | 4.4  | 4.04  | 0.38 | 0.07 | 1.28  | 0.313276 | 0.382084 | 0.599071 | 0.618309 |
| MmugDNA.29212.1.S1_at   | MmugDNA.29212.1 | 6.71 | 6.51  | 0.68 | 0.4  | 1.15  | 0.145964 | 0.143947 | 0.433699 | 0.417867 |
| MmugDNA.29214.1.S1_at   | MmugDNA.29214.1 | 5    | 4.78  | 0.27 | 0.01 | 1.16  | 0.346876 | 0.299098 | 0.625079 | 0.557663 |
| MmugDNA.29215.1.S1_at   | MmugDNA.29215.1 | 3.51 | 3.45  | 0.34 | 0.04 | 1.04  | 0.304288 | 0.5929   | 0.59149  | 0.757939 |
| MmugDNA.29216.1.S1_at   | MmugDNA.29216.1 | 3.97 | 3.98  | 0.2  | 0.18 | -1    | 0.793424 | 0.868455 | 0.906582 | 0.925329 |
| MmugDNA.29219.1.S1_at   | MmugDNA.29219.1 | 7.88 | 7.47  | 0.21 | 0.27 | 1.33  | 0.099125 | 0.011238 | 0.370049 | 0.138014 |
| MmugDNA.2922.1.S1_at    | MmugDNA.2922.1  | 7.82 | 7.67  | 0.03 | 0.2  | 1.11  | 0.650247 | 0.023131 | 0.830259 | 0.190443 |
| MmugDNA.29221.1.S1_at   | MmugDNA.29221.1 | 10.9 | 10.53 | 0.3  | 0.16 | 1.29  | 0.094373 | 0.395262 | 0.363345 | 0.62738  |
| MmugDNA.29222.1.S1_at   | MmugDNA.29222.1 | 3.39 | 3.22  | 0.33 | 0.17 | 1.13  | 0.389615 | 0.498117 | 0.657399 | 0.697266 |
| MmugDNA.29224.1.S1_at   | MmugDNA.29224.1 | 5.98 | 5.77  | 0.19 | 0.19 | 1.16  | 0.280381 | 0.321344 | 0.571521 | 0.57319  |
| MmugDNA.29225.1.S1_at   | MmugDNA.29225.1 | 5.5  | 5.64  | 0.09 | 0.12 | -1.1  | 0.125093 | 0.097684 | 0.405516 | 0.355554 |
| MmugDNA.29226.1.S1_at   | MmugDNA.29226.1 | 4.16 | 4.57  | 0.53 | 0.48 | -1.33 | 0.486352 | 0.087314 | 0.725603 | 0.340377 |
| MmugDNA.29227.1.S1_at   | MmugDNA.29227.1 | 5.89 | 5.79  | 0.05 | 0.09 | 1.07  | 0.105574 | 0.123902 | 0.379594 | 0.394201 |
| MmugDNA.29228.1.S1_at   | MmugDNA.29228.1 | 6.03 | 5.07  | 0.27 | 0.33 | 1.95  | 0.015399 | 0.043343 | 0.176257 | 0.252853 |
| MmugDNA.29229.1.S1_at   | MmugDNA.29229.1 | 4.84 | 4.39  | 1.2  | 0.46 | 1.36  | 0.875506 | 0.752051 | 0.94665  | 0.855744 |
| MmugDNA.29231.1.S1_at   | MmugDNA.29231.1 | 4.02 | 3.87  | 0.21 | 0.15 | 1.11  | 0.295247 | 0.210332 | 0.584116 | 0.484202 |
| MmugDNA.29232.1.S1_at   | MmugDNA.29232.1 | 6.57 | 6.22  | 0.21 | 0.07 | 1.28  | 0.047636 | 0.040835 | 0.275691 | 0.246981 |
| MmugDNA.29235.1.S1_at   | MmugDNA.29235.1 | 3.33 | 2.95  | 0.87 | 0.17 | 1.29  | 0.206562 | 0.25007  | 0.504244 | 0.519122 |
| MmugDNA.29236.1.S1_at   | MmugDNA.29236.1 | 8.2  | 7.56  | 0.98 | 0.09 | 1.55  | 0.325315 | 0.073427 | 0.608663 | 0.316616 |
| MmugDNA.29237.1.S1_at   | MmugDNA.29237.1 | 3.79 | 3.58  | 0.25 | 0.06 | 1.16  | 0.317178 | 0.423936 | 0.601917 | 0.646587 |
| MmugDNA.29238.1.S1_at   | MmugDNA.29238.1 | 11.2 | 9.97  | 0.43 | 0.02 | 2.33  | 0.009907 | 0.181676 | 0.148933 | 0.458271 |
| MmugDNA.29239.1.S1_at   | MmugDNA.29239.1 | 4.87 | 4.74  | 0.13 | 0.11 | 1.09  | 0.503109 | 0.218969 | 0.736714 | 0.492722 |
| MmugDNA.2924.1.S1_at    | MmugDNA.2924.1  | 7.43 | 6.86  | 1.09 | 0.11 | 1.48  | 0.419067 | 0.592545 | 0.678626 | 0.757844 |
| MmugDNA.29240.1.S1_at   | MmugDNA.29240.1 | 5.87 | 6.2   | 0.35 | 0.25 | -1.26 | 0.266031 | 0.045183 | 0.558595 | 0.256979 |
| MmugDNA.29241.1.S1_at   | MmugDNA.29241.1 | 5.38 | 5.58  | 0.11 | 0.02 | -1.15 | 0.094739 | 0.054978 | 0.36369  | 0.279898 |
| MmugDNA.29243.1.S1_at   | MmugDNA.29243.1 | 4.8  | 4.83  | 0.56 | 0.34 | -1.02 | 0.752688 | 0.407899 | 0.885782 | 0.635288 |
| MmugDNA.29245.1.S1_at   | MmugDNA.29245.1 | 5.28 | 5.24  | 0.36 | 0.18 | 1.02  | 0.725335 | 0.869848 | 0.871137 | 0.926148 |

|                         |                 |       |       |      |      |       |          |          |          |          |
|-------------------------|-----------------|-------|-------|------|------|-------|----------|----------|----------|----------|
| MmugDNA.29247.1.S1_at   | MmugDNA.29247.1 | 5.74  | 5.68  | 0.02 | 0.08 | 1.04  | 0.357647 | 0.176734 | 0.633636 | 0.453171 |
| MmugDNA.29248.1.S1_at   | MmugDNA.29248.1 | 5.73  | 5.54  | 0.21 | 0.05 | 1.14  | 0.218282 | 0.279949 | 0.515982 | 0.543359 |
| MmugDNA.29248.1.S1_s_at | MmugDNA.29248.1 | 8.58  | 8.41  | 0.3  | 0.04 | 1.13  | 0.344393 | 0.490481 | 0.623699 | 0.692472 |
| MmugDNA.29249.1.S1_at   | MmugDNA.29249.1 | 5.58  | 5.56  | 0.26 | 0.16 | 1.02  | 0.533285 | 0.694533 | 0.756897 | 0.822391 |
| MmugDNA.29250.1.S1_at   | MmugDNA.29250.1 | 12.63 | 12.83 | 0.03 | 0.02 | -1.15 | 0.000491 | 0.215108 | 0.068271 | 0.488937 |
| MmugDNA.29252.1.S1_at   | MmugDNA.29252.1 | 3.79  | 3.72  | 0.46 | 0.15 | 1.04  | 0.32466  | 0.28726  | 0.608278 | 0.548526 |
| MmugDNA.29253.1.S1_at   | MmugDNA.29253.1 | 6.76  | 6.77  | 0.01 | 0.21 | -1.01 | 0.397138 | 0.354158 | 0.662922 | 0.597059 |
| MmugDNA.29255.1.S1_at   | MmugDNA.29255.1 | 5.5   | 5.44  | 0.62 | 0.23 | 1.04  | 0.420117 | 0.715796 | 0.679313 | 0.835259 |
| MmugDNA.29256.1.S1_at   | MmugDNA.29256.1 | 6.08  | 5.66  | 0.63 | 0.44 | 1.34  | 0.347317 | 0.353356 | 0.625472 | 0.596477 |
| MmugDNA.29257.1.S1_at   | MmugDNA.29257.1 | 6.34  | 6.09  | 0.31 | 0.39 | 1.19  | 0.995027 | 0.999975 | 0.997972 | 0.999975 |
| MmugDNA.29258.1.S1_at   | MmugDNA.29258.1 | 3.4   | 3.38  | 0.14 | 0.13 | 1.01  | 0.340688 | 0.447668 | 0.620859 | 0.663731 |
| MmugDNA.29259.1.S1_at   | MmugDNA.29259.1 | 7.91  | 8.54  | 0.27 | 0.36 | -1.55 | 0.152967 | 0.461078 | 0.442701 | 0.672838 |
| MmugDNA.2926.1.S1_at    | MmugDNA.2926.1  | 6.21  | 6.08  | 0.12 | 0.06 | 1.1   | 0.099604 | 0.101893 | 0.370515 | 0.36188  |
| MmugDNA.29260.1.S1_at   | MmugDNA.29260.1 | 5.74  | 5.98  | 0.41 | 0.17 | -1.18 | 0.751664 | 0.757199 | 0.885419 | 0.858648 |
| MmugDNA.29261.1.S1_at   | MmugDNA.29261.1 | 4.76  | 4.9   | 0.26 | 0.2  | -1.1  | 0.582981 | 0.534496 | 0.787708 | 0.720396 |
| MmugDNA.29262.1.S1_at   | MmugDNA.29262.1 | 4.1   | 3.45  | 0.24 | 0.19 | 1.56  | 0.028206 | 0.025684 | 0.220446 | 0.200834 |
| MmugDNA.29264.1.S1_at   | MmugDNA.29264.1 | 12.28 | 12.46 | 0.12 | 0.12 | -1.13 | 0.080402 | 0.423355 | 0.341026 | 0.646277 |
| MmugDNA.29266.1.S1_at   | MmugDNA.29266.1 | 9.64  | 9.68  | 0.95 | 0.07 | -1.03 | 0.352882 | 0.64816  | 0.630154 | 0.794002 |
| MmugDNA.29267.1.S1_at   | MmugDNA.29267.1 | 5.08  | 4.15  | 0.41 | 0.31 | 1.9   | 0.066407 | 0.057083 | 0.31527  | 0.284945 |
| MmugDNA.29268.1.S1_at   | MmugDNA.29268.1 | 6.31  | 5.47  | 0.59 | 0.43 | 1.8   | 0.198116 | 0.287751 | 0.495359 | 0.549029 |
| MmugDNA.2927.1.S1_at    | MmugDNA.2927.1  | 4.99  | 4.73  | 0.27 | 0.27 | 1.2   | 0.284056 | 0.738872 | 0.574388 | 0.848647 |
| MmugDNA.29270.1.S1_at   | MmugDNA.29270.1 | 4.6   | 4.58  | 0.13 | 0.28 | 1.01  | 0.373211 | 0.38714  | 0.645118 | 0.621935 |
| MmugDNA.29271.1.S1_at   | MmugDNA.29271.1 | 9.17  | 9.42  | 0.33 | 0.04 | -1.19 | 0.43311  | 0.571128 | 0.688736 | 0.743552 |
| MmugDNA.29273.1.S1_at   | MmugDNA.29273.1 | 6.24  | 6.54  | 0.04 | 0.35 | -1.23 | 0.200489 | 0.069906 | 0.497869 | 0.310552 |
| MmugDNA.29276.1.S1_at   | MmugDNA.29276.1 | 11.27 | 11.17 | 0.1  | 0.1  | 1.08  | 0.713619 | 0.113289 | 0.86473  | 0.379339 |
| MmugDNA.29279.1.S1_x_at | MmugDNA.29279.1 | 6.91  | 6.79  | 0.82 | 0.23 | 1.09  | 0.320394 | 0.330909 | 0.60498  | 0.579609 |
| MmugDNA.29280.1.S1_at   | MmugDNA.29280.1 | 5.64  | 5.71  | 0.1  | 0    | -1.05 | 0.385091 | 0.662924 | 0.653973 | 0.802665 |
| MmugDNA.29282.1.S1_s_at | MmugDNA.29282.1 | 11.28 | 10.58 | 0.32 | 0.05 | 1.62  | 0.020543 | 0.023647 | 0.196858 | 0.192564 |
| MmugDNA.29283.1.S1_at   | MmugDNA.29283.1 | 3.84  | 3.84  | 0.03 | 0    | 1     | 0.463789 | 0.530127 | 0.710222 | 0.717729 |
| MmugDNA.29284.1.S1_at   | MmugDNA.29284.1 | 10.91 | 11.4  | 0.42 | 0.13 | -1.41 | 0.129483 | 0.206585 | 0.411793 | 0.480619 |
| MmugDNA.29286.1.S1_at   | MmugDNA.29286.1 | 6.63  | 7.18  | 0.6  | 0.32 | -1.47 | 0.605286 | 0.038395 | 0.802347 | 0.240833 |
| MmugDNA.29287.1.S1_at   | MmugDNA.29287.1 | 7.17  | 6.82  | 0.08 | 0.15 | 1.28  | 0.020405 | 0.03314  | 0.1964   | 0.225324 |
| MmugDNA.29289.1.S1_at   | MmugDNA.29289.1 | 6.8   | 7.4   | 0.56 | 0.29 | -1.52 | 0.527331 | 0.529199 | 0.753064 | 0.717207 |
| MmugDNA.2929.1.S1_at    | MmugDNA.2929.1  | 10.05 | 10.23 | 0.33 | 0.17 | -1.13 | 0.775771 | 0.034568 | 0.897461 | 0.23001  |
| MmugDNA.29290.1.S1_at   | MmugDNA.29290.1 | 13.03 | 13.11 | 0.15 | 0.03 | -1.05 | 0.390913 | 0.118832 | 0.658414 | 0.386991 |
| MmugDNA.29291.1.S1_at   | MmugDNA.29291.1 | 4.75  | 4.75  | 0.09 | 0.05 | 1     | 0.719756 | 0.033561 | 0.867748 | 0.226764 |
| MmugDNA.29292.1.S1_at   | MmugDNA.29292.1 | 4.78  | 7.53  | 1.39 | 0.07 | -6.73 | 0.051658 | 0.037054 | 0.284589 | 0.236952 |
| MmugDNA.29293.1.S1_s_at | MmugDNA.29293.1 | 3.68  | 3.56  | 0.14 | 0.15 | 1.09  | 0.658753 | 0.017745 | 0.83523  | 0.168367 |
| MmugDNA.29294.1.S1_at   | MmugDNA.29294.1 | 4.06  | 4.18  | 0.02 | 0.06 | -1.08 | 0.092979 | 0.585061 | 0.361523 | 0.752684 |
| MmugDNA.29295.1.S1_at   | MmugDNA.29295.1 | 9.72  | 9.44  | 0.04 | 0.09 | 1.22  | 0.01376  | 0.227889 | 0.168072 | 0.500201 |
| MmugDNA.29297.1.S1_at   | MmugDNA.29297.1 | 10.91 | 11.2  | 0.11 | 0.14 | -1.22 | 0.017196 | 0.000109 | 0.184359 | 0.028099 |
| MmugDNA.29298.1.S1_at   | MmugDNA.29298.1 | 6.01  | 6     | 0    | 0.1  | 1     | 0.913537 | 0.990655 | 0.963382 | 0.994725 |
| MmugDNA.293.1.S1_at     | MmugDNA.293.1   | 9.29  | 9.33  | 0.95 | 0.25 | -1.02 | 0.836744 | 0.321147 | 0.928379 | 0.573111 |

|                         |                 |       |       |      |      |       |          |          |          |          |
|-------------------------|-----------------|-------|-------|------|------|-------|----------|----------|----------|----------|
| MmugDNA.2930.1.S1_at    | MmugDNA.2930.1  | 10.57 | 10.7  | 0.11 | 0.04 | -1.1  | 0.144387 | 0.741393 | 0.43127  | 0.850285 |
| MmugDNA.29300.1.S1_at   | MmugDNA.29300.1 | 9.58  | 9.32  | 0.04 | 0.05 | 1.2   | 0.002536 | 0.000455 | 0.094413 | 0.038572 |
| MmugDNA.29301.1.S1_at   | MmugDNA.29301.1 | 4.21  | 4.3   | 0.24 | 0.19 | -1.06 | 0.420684 | 0.342888 | 0.679621 | 0.588712 |
| MmugDNA.29302.1.S1_at   | MmugDNA.29302.1 | 5.19  | 5.2   | 0.12 | 0.06 | -1.01 | 0.591111 | 0.87013  | 0.792276 | 0.926362 |
| MmugDNA.29303.1.S1_at   | MmugDNA.29303.1 | 10.33 | 10.88 | 0.13 | 0.05 | -1.45 | 0.002963 | 0.113724 | 0.099517 | 0.379889 |
| MmugDNA.29305.1.S1_s_at | MmugDNA.29305.1 | 4.86  | 4.54  | 0.27 | 0.17 | 1.25  | 0.085725 | 0.060486 | 0.350079 | 0.292569 |
| MmugDNA.29306.1.S1_at   | MmugDNA.29306.1 | 4.46  | 4.55  | 0.1  | 0.07 | -1.06 | 0.218363 | 0.496229 | 0.516054 | 0.695914 |
| MmugDNA.29307.1.S1_at   | MmugDNA.29307.1 | 6.55  | 7.07  | 0.24 | 0.25 | -1.44 | 0.109708 | 0.076288 | 0.384826 | 0.321299 |
| MmugDNA.29309.1.S1_at   | MmugDNA.29309.1 | 5.08  | 5.04  | 0.27 | 0.09 | 1.03  | 0.611742 | 0.694042 | 0.806497 | 0.822068 |
| MmugDNA.2931.1.S1_at    | MmugDNA.2931.1  | 4.06  | 3.97  | 0.13 | 0.08 | 1.06  | 0.301894 | 0.265419 | 0.589851 | 0.531363 |
| MmugDNA.29310.1.S1_at   | MmugDNA.29310.1 | 8.48  | 7.55  | 1.11 | 0.16 | 1.91  | 0.761272 | 0.737388 | 0.890581 | 0.847889 |
| MmugDNA.29311.1.S1_at   | MmugDNA.29311.1 | 7.82  | 7.17  | 0.29 | 0.09 | 1.57  | 0.036712 | 0.148768 | 0.246698 | 0.423201 |
| MmugDNA.29312.1.S1_at   | MmugDNA.29312.1 | 4.67  | 4.71  | 0.13 | 0.03 | -1.02 | 0.829135 | 0.633845 | 0.924609 | 0.784497 |
| MmugDNA.29313.1.S1_at   | MmugDNA.29313.1 | 3     | 2.95  | 0.1  | 0.11 | 1.03  | 0.174477 | 0.302852 | 0.468676 | 0.560356 |
| MmugDNA.29315.1.S1_at   | MmugDNA.29315.1 | 10.07 | 8.2   | 0.33 | 0.44 | 3.67  | 0.005331 | 0.00494  | 0.118146 | 0.097917 |
| MmugDNA.29317.1.S1_at   | MmugDNA.29317.1 | 10.64 | 10.57 | 0.36 | 0.28 | 1.05  | 0.835216 | 0.109091 | 0.927521 | 0.372869 |
| MmugDNA.29318.1.S1_at   | MmugDNA.29318.1 | 10.31 | 10.13 | 0.1  | 0.16 | 1.14  | 0.238303 | 0.240003 | 0.53577  | 0.510717 |
| MmugDNA.2932.1.S1_at    | MmugDNA.2932.1  | 3.58  | 3.51  | 0.06 | 0.08 | 1.05  | 0.127955 | 0.225404 | 0.409866 | 0.498035 |
| MmugDNA.29323.1.S1_at   | MmugDNA.29323.1 | 5.55  | 5.7   | 0.15 | 0.19 | -1.11 | 0.849935 | 0.225267 | 0.934756 | 0.497892 |
| MmugDNA.29324.1.S1_at   | MmugDNA.29324.1 | 3.7   | 3.84  | 0.75 | 0.01 | -1.1  | 0.542256 | 0.693478 | 0.762647 | 0.821713 |
| MmugDNA.29325.1.S1_at   | MmugDNA.29325.1 | 4.24  | 3.96  | 0.3  | 0.21 | 1.22  | 0.492169 | 0.47267  | 0.72956  | 0.68007  |
| MmugDNA.29326.1.S1_at   | MmugDNA.29326.1 | 3.79  | 4.07  | 0.24 | 0.15 | -1.22 | 0.734579 | 0.817257 | 0.876326 | 0.894592 |
| MmugDNA.29329.1.S1_at   | MmugDNA.29329.1 | 7.33  | 7.91  | 0.07 | 0.29 | -1.49 | 0.035161 | 0.017926 | 0.242214 | 0.168998 |
| MmugDNA.29331.1.S1_at   | MmugDNA.29331.1 | 11.66 | 11.99 | 0.07 | 0.11 | -1.26 | 0.012652 | 0.033964 | 0.162529 | 0.227969 |
| MmugDNA.29334.1.S1_at   | MmugDNA.29334.1 | 4.33  | 3.92  | 0.32 | 0.37 | 1.33  | 0.453265 | 0.570743 | 0.703496 | 0.743326 |
| MmugDNA.29335.1.S1_at   | MmugDNA.29335.1 | 3.94  | 4.08  | 0.09 | 0.08 | -1.1  | 0.648306 | 0.15546  | 0.829161 | 0.430824 |
| MmugDNA.7297.1.S1_s_at  | MmugDNA.7297.1  | 7.49  | 8.25  | 0.12 | 0.1  | -1.69 | 0.001609 | 0.051646 | 0.083874 | 0.272698 |
| MmugDNA.29339.1.S1_at   | MmugDNA.29339.1 | 3.92  | 3.97  | 0.45 | 0.11 | -1.03 | 0.412441 | 0.041588 | 0.674115 | 0.248831 |
| MmugDNA.29340.1.S1_at   | MmugDNA.29340.1 | 10.19 | 9.97  | 0.09 | 0.13 | 1.17  | 0.10109  | 0.000596 | 0.372328 | 0.041941 |
| MmugDNA.29341.1.S1_at   | MmugDNA.29341.1 | 4.3   | 4.11  | 0.12 | 0.1  | 1.14  | 0.247328 | 0.456967 | 0.542869 | 0.670592 |
| MmugDNA.29342.1.S1_at   | MmugDNA.29342.1 | 4.41  | 4.83  | 0.89 | 0.11 | -1.34 | 0.887598 | 0.968817 | 0.951994 | 0.982835 |
| MmugDNA.29343.1.S1_at   | MmugDNA.29343.1 | 11.74 | 11.89 | 0.08 | 0.04 | -1.11 | 0.036882 | 0.194744 | 0.247118 | 0.469774 |
| MmugDNA.29344.1.S1_at   | MmugDNA.29344.1 | 3.19  | 3.28  | 0.15 | 0.03 | -1.06 | 0.388907 | 0.316792 | 0.656881 | 0.570195 |
| MmugDNA.29345.1.S1_at   | MmugDNA.29345.1 | 4.48  | 5.56  | 0.92 | 0.2  | -2.11 | 0.410421 | 0.640356 | 0.672479 | 0.788874 |
| MmugDNA.29346.1.S1_at   | MmugDNA.29346.1 | 7.82  | 7.89  | 0.15 | 0.1  | -1.05 | 0.403549 | 0.227078 | 0.667677 | 0.499417 |
| MmugDNA.29346.1.S1_s_at | MmugDNA.29346.1 | 11.36 | 11.51 | 0.23 | 0.05 | -1.11 | 0.734625 | 0.652974 | 0.876362 | 0.797125 |
| MmugDNA.29347.1.S1_at   | MmugDNA.29347.1 | 3.75  | 3.43  | 0.24 | 0.17 | 1.25  | 0.068546 | 0.048529 | 0.31966  | 0.265534 |
| MmugDNA.29348.1.S1_at   | MmugDNA.29348.1 | 6.14  | 5.91  | 0.71 | 0.16 | 1.17  | 0.945578 | 0.199283 | 0.977128 | 0.473999 |
| MmugDNA.29349.1.S1_at   | MmugDNA.29349.1 | 7.59  | 7.81  | 0.07 | 0.16 | -1.17 | 0.109267 | 0.294744 | 0.384379 | 0.554345 |
| MmugDNA.29350.1.S1_at   | MmugDNA.29350.1 | 2.76  | 2.82  | 0.03 | 0.11 | -1.04 | 0.295698 | 0.402867 | 0.584463 | 0.631631 |
| MmugDNA.29351.1.S1_at   | MmugDNA.29351.1 | 5.94  | 6.67  | 0.59 | 0.36 | -1.65 | 0.218353 | 0.435676 | 0.516054 | 0.655454 |
| MmugDNA.29352.1.S1_at   | MmugDNA.29352.1 | 4.75  | 4.7   | 0.03 | 0.03 | 1.04  | 0.119757 | 0.585612 | 0.397747 | 0.752934 |
| MmugDNA.29354.1.S1_at   | MmugDNA.29354.1 | 11.12 | 11    | 0.06 | 0.12 | 1.09  | 0.073719 | 0.479387 | 0.329321 | 0.685126 |

|                         |                 |       |       |      |      |       |          |          |          |          |
|-------------------------|-----------------|-------|-------|------|------|-------|----------|----------|----------|----------|
| MmugDNA.29355.1.S1_at   | MmugDNA.29355.1 | 5.14  | 5.08  | 0.03 | 0.25 | 1.04  | 0.713742 | 0.654976 | 0.864758 | 0.7982   |
| MmugDNA.29356.1.S1_at   | MmugDNA.29356.1 | 9.81  | 9.77  | 0.31 | 0.11 | 1.03  | 0.905882 | 0.001951 | 0.960113 | 0.065813 |
| MmugDNA.29357.1.S1_at   | MmugDNA.29357.1 | 6.02  | 5.81  | 0.23 | 0.04 | 1.16  | 0.70794  | 0.030897 | 0.861638 | 0.217584 |
| MmugDNA.29358.1.S1_at   | MmugDNA.29358.1 | 7.36  | 6.96  | 0.26 | 0.11 | 1.32  | 0.149676 | 0.176936 | 0.438615 | 0.453337 |
| MmugDNA.29359.1.S1_at   | MmugDNA.29359.1 | 6.67  | 6.68  | 0.04 | 0.21 | -1.01 | 0.612998 | 0.725019 | 0.807188 | 0.840843 |
| MmugDNA.29360.1.S1_at   | MmugDNA.29360.1 | 5.22  | 5.15  | 0.23 | 0.09 | 1.05  | 0.240868 | 0.285799 | 0.538254 | 0.547484 |
| MmugDNA.29361.1.S1_at   | MmugDNA.29361.1 | 7.32  | 7.55  | 0.22 | 0.2  | -1.17 | 0.531753 | 0.563972 | 0.755933 | 0.738913 |
| MmugDNA.29362.1.S1_at   | MmugDNA.29362.1 | 11.03 | 9.95  | 0.23 | 0.23 | 2.11  | 0.006278 | 0.144532 | 0.125521 | 0.418408 |
| MmugDNA.29363.1.S1_at   | MmugDNA.29363.1 | 5.11  | 5.09  | 0.13 | 0.12 | 1.01  | 0.876293 | 0.746665 | 0.947017 | 0.852899 |
| MmugDNA.29364.1.S1_at   | MmugDNA.29364.1 | 10.78 | 11.08 | 0.16 | 0.06 | -1.24 | 0.066588 | 0.014303 | 0.315597 | 0.152693 |
| MmugDNA.29365.1.S1_at   | MmugDNA.29365.1 | 5.33  | 4.89  | 0.13 | 0.2  | 1.35  | 0.021095 | 0.002643 | 0.198834 | 0.076012 |
| MmugDNA.29366.1.S1_at   | MmugDNA.29366.1 | 6.69  | 6.64  | 0.23 | 0.13 | 1.03  | 0.518798 | 0.069325 | 0.747723 | 0.309558 |
| MmugDNA.29367.1.S1_at   | MmugDNA.29367.1 | 7.33  | 7.26  | 0.18 | 0.09 | 1.06  | 0.489188 | 0.153651 | 0.727602 | 0.428413 |
| MmugDNA.29368.1.S1_at   | MmugDNA.29368.1 | 4.47  | 4.52  | 0.04 | 0.07 | -1.03 | 0.843774 | 0.908079 | 0.931554 | 0.947903 |
| MmugDNA.29369.1.S1_at   | MmugDNA.29369.1 | 6.33  | 7.09  | 0.52 | 0.27 | -1.69 | 0.297439 | 0.159675 | 0.585846 | 0.435785 |
| MmugDNA.2937.1.S1_at    | MmugDNA.2937.1  | 7.53  | 7.9   | 0.18 | 0.24 | -1.29 | 0.226701 | 0.219642 | 0.524513 | 0.49324  |
| MmugDNA.29372.1.S1_at   | MmugDNA.29372.1 | 3.21  | 3.1   | 0.13 | 0.13 | 1.07  | 0.332486 | 0.210739 | 0.614123 | 0.48478  |
| MmugDNA.29373.1.S1_at   | MmugDNA.29373.1 | 4.37  | 5.1   | 0.08 | 0.43 | -1.65 | 0.044657 | 0.124696 | 0.268588 | 0.39513  |
| MmugDNA.29376.1.S1_at   | MmugDNA.29376.1 | 7.67  | 7.75  | 0.27 | 0.12 | -1.06 | 0.51371  | 0.68166  | 0.743872 | 0.814095 |
| MmugDNA.29377.1.S1_at   | MmugDNA.29377.1 | 4.64  | 4.64  | 0.19 | 0.08 | 1     | 0.621728 | 0.195053 | 0.812872 | 0.470179 |
| MmugDNA.29378.1.S1_at   | MmugDNA.29378.1 | 3.63  | 3.89  | 0.32 | 0.34 | -1.2  | 0.370288 | 0.348314 | 0.643268 | 0.592478 |
| MmugDNA.29379.1.S1_at   | MmugDNA.29379.1 | 6.84  | 7.17  | 0.83 | 0.68 | -1.25 | 0.639107 | 0.077553 | 0.823331 | 0.323421 |
| MmugDNA.2938.1.S1_at    | MmugDNA.2938.1  | 5.86  | 6.25  | 0.11 | 0.01 | -1.32 | 0.001691 | 0.03335  | 0.084735 | 0.226324 |
| MmugDNA.29380.1.S1_at   | MmugDNA.29380.1 | 7.38  | 7.39  | 0.09 | 0.04 | -1.01 | 0.204324 | 0.145325 | 0.502025 | 0.419365 |
| MmugDNA.29381.1.S1_at   | MmugDNA.29381.1 | 3.19  | 3.24  | 0.08 | 0    | -1.03 | 0.439471 | 0.117406 | 0.693698 | 0.385054 |
| MmugDNA.29382.1.S1_at   | MmugDNA.29382.1 | 7.25  | 7.08  | 1.54 | 0.61 | 1.12  | 0.832383 | 0.840363 | 0.926125 | 0.909015 |
| MmugDNA.29383.1.S1_at   | MmugDNA.29383.1 | 8.33  | 8.01  | 0.13 | 0.03 | 1.25  | 0.013202 | 0.294562 | 0.16538  | 0.554282 |
| MmugDNA.29384.1.S1_at   | MmugDNA.29384.1 | 3.96  | 3.95  | 0.08 | 0.07 | 1.01  | 0.593254 | 0.043919 | 0.793939 | 0.254098 |
| MmugDNA.29385.1.S1_at   | MmugDNA.29385.1 | 12.46 | 12.62 | 0.19 | 0.07 | -1.12 | 0.242039 | 0.44205  | 0.539093 | 0.660148 |
| MmugDNA.29386.1.S1_at   | MmugDNA.29386.1 | 3.25  | 3.21  | 0.04 | 0.07 | 1.03  | 0.230083 | 0.739909 | 0.528979 | 0.849298 |
| MmugDNA.29387.1.S1_at   | MmugDNA.29387.1 | 3.51  | 3.51  | 0.13 | 0    | 1     | 0.390132 | 0.614704 | 0.657832 | 0.771445 |
| MmugDNA.29388.1.S1_at   | MmugDNA.29388.1 | 10.51 | 10.23 | 0.27 | 0.07 | 1.22  | 0.20343  | 0.292757 | 0.501192 | 0.552783 |
| MmugDNA.29388.1.S1_s_at | MmugDNA.29388.1 | 10.85 | 10.65 | 0.25 | 0.01 | 1.15  | 0.230221 | 0.289864 | 0.529091 | 0.550831 |
| MmugDNA.29389.1.S1_at   | MmugDNA.29389.1 | 7.14  | 6.98  | 0.07 | 0.07 | 1.11  | 0.049036 | 0.269766 | 0.279073 | 0.53503  |
| MmugDNA.2939.1.S1_at    | MmugDNA.2939.1  | 3.56  | 3.2   | 0.23 | 0.11 | 1.28  | 0.113569 | 0.163499 | 0.390238 | 0.439731 |
| MmugDNA.29390.1.S1_at   | MmugDNA.29390.1 | 4.36  | 4.54  | 0.11 | 0.58 | -1.14 | 0.793662 | 0.406221 | 0.906727 | 0.634225 |
| MmugDNA.29392.1.S1_at   | MmugDNA.29392.1 | 8.7   | 8.62  | 0.25 | 0.38 | 1.06  | 0.772974 | 0.002875 | 0.896007 | 0.078929 |
| MmugDNA.29393.1.S1_at   | MmugDNA.29393.1 | 7.94  | 8.66  | 0.74 | 0.02 | -1.64 | 0.53478  | 0.276381 | 0.757917 | 0.540334 |
| MmugDNA.29394.1.S1_at   | MmugDNA.29394.1 | 4.47  | 4.32  | 0.56 | 0.34 | 1.11  | 0.500481 | 0.273334 | 0.734739 | 0.537788 |
| MmugDNA.29396.1.S1_at   | MmugDNA.29396.1 | 6.18  | 6     | 0.13 | 0.01 | 1.14  | 0.079022 | 0.85733  | 0.338745 | 0.918543 |
| MmugDNA.29397.1.S1_at   | MmugDNA.29397.1 | 3.43  | 3.43  | 0.07 | 0.02 | -1    | 0.322286 | 0.204276 | 0.606311 | 0.478541 |
| MmugDNA.29398.1.S1_at   | MmugDNA.29398.1 | 4.86  | 4.68  | 0.06 | 0.12 | 1.13  | 0.143152 | 0.172532 | 0.429392 | 0.448864 |
| MmugDNA.29399.1.S1_at   | MmugDNA.29399.1 | 11.34 | 11.34 | 0.18 | 0.08 | -1    | 0.426725 | 0.023637 | 0.684098 | 0.192555 |

|                         |                 |       |       |      |      |       |          |          |          |          |
|-------------------------|-----------------|-------|-------|------|------|-------|----------|----------|----------|----------|
| MmugDNA.294.1.S1_at     | MmugDNA.294.1   | 4.1   | 4.08  | 0.07 | 0.13 | 1.02  | 0.222003 | 0.501868 | 0.520105 | 0.699941 |
| MmugDNA.29400.1.S1_at   | MmugDNA.29400.1 | 10.58 | 10.42 | 0.23 | 0.02 | 1.12  | 0.248787 | 0.036029 | 0.544151 | 0.234255 |
| MmugDNA.29401.1.S1_at   | MmugDNA.29401.1 | 8.09  | 7.56  | 0.65 | 0.22 | 1.44  | 0.738702 | 0.856174 | 0.878914 | 0.917861 |
| MmugDNA.29402.1.S1_at   | MmugDNA.29402.1 | 10.79 | 10.78 | 0.17 | 0.08 | 1.01  | 0.988111 | 0.651974 | 0.995736 | 0.796529 |
| MmugDNA.29403.1.S1_at   | MmugDNA.29403.1 | 4.69  | 4.54  | 0.19 | 0.18 | 1.11  | 0.379549 | 0.349421 | 0.649328 | 0.593406 |
| MmugDNA.29404.1.S1_at   | MmugDNA.29404.1 | 8.95  | 7.63  | 0.96 | 0.15 | 2.49  | 0.201668 | 0.394085 | 0.499203 | 0.626734 |
| MmugDNA.29405.1.S1_at   | MmugDNA.29405.1 | 5.15  | 5.01  | 0.18 | 0.15 | 1.1   | 0.361768 | 0.245989 | 0.637071 | 0.515713 |
| MmugDNA.29406.1.S1_at   | MmugDNA.29406.1 | 7.91  | 7.28  | 0.14 | 0.21 | 1.55  | 0.006624 | 0.002658 | 0.127935 | 0.076211 |
| MmugDNA.29407.1.S1_s_at | MmugDNA.29407.1 | 9.3   | 8.08  | 0.18 | 0.18 | 2.32  | 0.001535 | 0.028135 | 0.081678 | 0.209306 |
| MmugDNA.29409.1.S1_at   | MmugDNA.29409.1 | 3.12  | 3.15  | 0.15 | 0.07 | -1.02 | 0.788812 | 0.731981 | 0.904019 | 0.844751 |
| MmugDNA.2941.1.S1_at    | MmugDNA.2941.1  | 3.72  | 3.46  | 0.84 | 0.13 | 1.2   | 0.324371 | 0.345171 | 0.608078 | 0.590438 |
| MmugDNA.29412.1.S1_at   | MmugDNA.29412.1 | 5.19  | 5.24  | 0.14 | 0.17 | -1.04 | 0.752311 | 0.798783 | 0.885549 | 0.884072 |
| MmugDNA.29413.1.S1_at   | MmugDNA.29413.1 | 3.46  | 3.46  | 0.05 | 0.04 | 1     | 0.276298 | 0.784476 | 0.567926 | 0.875181 |
| MmugDNA.29414.1.S1_at   | MmugDNA.29414.1 | 11.88 | 11.59 | 0.11 | 0.08 | 1.22  | 0.025635 | 0.005582 | 0.212966 | 0.103258 |
| MmugDNA.29415.1.S1_at   | MmugDNA.29415.1 | 8.19  | 8     | 0.1  | 0    | 1.14  | 0.011626 | 0.000861 | 0.157638 | 0.047371 |
| MmugDNA.29416.1.S1_at   | MmugDNA.29416.1 | 3.07  | 3.13  | 0.13 | 0.08 | -1.04 | 0.594284 | 0.250538 | 0.794628 | 0.519391 |
| MmugDNA.29419.1.S1_at   | MmugDNA.29419.1 | 3.67  | 3.63  | 0.03 | 0.12 | 1.03  | 0.208831 | 0.141227 | 0.506325 | 0.414749 |
| MmugDNA.29420.1.S1_at   | MmugDNA.29420.1 | 7.11  | 7.09  | 0.12 | 0.08 | 1.01  | 0.717821 | 0.898842 | 0.8667   | 0.942448 |
| MmugDNA.29421.1.S1_at   | MmugDNA.29421.1 | 5.59  | 5.58  | 0.11 | 0.01 | 1.01  | 0.821939 | 0.516101 | 0.920706 | 0.708704 |
| MmugDNA.29422.1.S1_at   | MmugDNA.29422.1 | 4.99  | 4.86  | 0.04 | 0.08 | 1.1   | 0.287725 | 0.07434  | 0.577473 | 0.318046 |
| MmugDNA.29423.1.S1_at   | MmugDNA.29423.1 | 5.3   | 5.45  | 0.24 | 0.14 | -1.12 | 0.544413 | 0.516081 | 0.764034 | 0.708704 |
| MmugDNA.29424.1.S1_at   | MmugDNA.29424.1 | 5.42  | 5.55  | 0.23 | 0.11 | -1.1  | 0.383859 | 0.150812 | 0.65303  | 0.425335 |
| MmugDNA.29425.1.S1_at   | MmugDNA.29425.1 | 7.51  | 7.86  | 0.07 | 0.09 | -1.28 | 0.006101 | 0.040929 | 0.124422 | 0.247161 |
| MmugDNA.29426.1.S1_at   | MmugDNA.29426.1 | 7.49  | 7.32  | 1.08 | 0.4  | 1.13  | 0.972166 | 0.879643 | 0.988864 | 0.931253 |
| MmugDNA.29427.1.S1_at   | MmugDNA.29427.1 | 3.6   | 3.67  | 0.18 | 0.14 | -1.05 | 0.749012 | 0.71063  | 0.883781 | 0.832169 |
| MmugDNA.29428.1.S1_at   | MmugDNA.29428.1 | 3.91  | 3.81  | 0.12 | 0.2  | 1.08  | 0.698207 | 0.87796  | 0.856385 | 0.930333 |
| MmugDNA.29429.1.S1_at   | MmugDNA.29429.1 | 9.49  | 9.29  | 0.17 | 0.12 | 1.14  | 0.252594 | 0.168421 | 0.547204 | 0.445092 |
| MmugDNA.2943.1.S1_at    | MmugDNA.2943.1  | 6.71  | 6.21  | 0.15 | 0.38 | 1.42  | 0.129813 | 0.579921 | 0.412066 | 0.749335 |
| MmugDNA.29430.1.S1_at   | MmugDNA.29430.1 | 9.54  | 9.56  | 0.14 | 0.19 | -1.02 | 0.99376  | 0.004008 | 0.997458 | 0.089969 |
| MmugDNA.27011.1.S1_s_at | MmugDNA.27011.1 | 6.12  | 6.07  | 0.02 | 0.08 | 1.04  | 0.957478 | 0.974887 | 0.982581 | 0.986264 |
| MmugDNA.29432.1.S1_at   | MmugDNA.29432.1 | 6.54  | 6.99  | 0.41 | 0.19 | -1.36 | 0.178029 | 0.040752 | 0.472807 | 0.246735 |
| MmugDNA.29434.1.S1_at   | MmugDNA.29434.1 | 6.17  | 6.07  | 0.38 | 0.14 | 1.07  | 0.750984 | 0.856518 | 0.885057 | 0.918027 |
| MmugDNA.29435.1.S1_at   | MmugDNA.29435.1 | 6.62  | 6.69  | 0.06 | 0.2  | -1.05 | 0.46417  | 0.426823 | 0.710524 | 0.648894 |
| MmugDNA.29437.1.S1_at   | MmugDNA.29437.1 | 6.19  | 6.17  | 0.2  | 0.01 | 1.02  | 0.749695 | 0.741747 | 0.884104 | 0.850485 |
| MmugDNA.29438.1.S1_at   | MmugDNA.29438.1 | 8.82  | 8.03  | 0.33 | 0.1  | 1.73  | 0.020343 | 0.070084 | 0.196249 | 0.31098  |
| MmugDNA.29439.1.S1_at   | MmugDNA.29439.1 | 4.28  | 3.91  | 0.34 | 0.44 | 1.29  | 0.854704 | 0.971248 | 0.936785 | 0.984375 |
| MmugDNA.29441.1.S1_at   | MmugDNA.29441.1 | 8.55  | 8.77  | 0.41 | 0.06 | -1.16 | 0.128948 | 0.055681 | 0.41116  | 0.28179  |
| MmugDNA.29442.1.S1_at   | MmugDNA.29442.1 | 7.43  | 6.94  | 0.04 | 0.41 | 1.4   | 0.127032 | 0.001784 | 0.408591 | 0.063434 |
| MmugDNA.29443.1.S1_at   | MmugDNA.29443.1 | 5.05  | 4.95  | 0.5  | 0.19 | 1.07  | 0.514726 | 0.257575 | 0.744649 | 0.525302 |
| MmugDNA.29445.1.S1_at   | MmugDNA.29445.1 | 3.13  | 3.15  | 0.16 | 0.05 | -1.01 | 0.337195 | 0.476481 | 0.617723 | 0.682725 |
| MmugDNA.29446.1.S1_at   | MmugDNA.29446.1 | 4.51  | 4.3   | 0.12 | 0.07 | 1.16  | 0.146229 | 0.571607 | 0.434072 | 0.743847 |
| MmugDNA.29447.1.S1_at   | MmugDNA.29447.1 | 4.72  | 3.84  | 0.47 | 0.47 | 1.85  | 0.176585 | 0.183002 | 0.471046 | 0.459481 |
| MmugDNA.35458.1.S1_at   | MmugDNA.35458.1 | 12.25 | 12.27 | 0.18 | 0.08 | -1.01 | 0.592857 | 0.847053 | 0.793684 | 0.913065 |

|                         |                 |       |       |      |      |       |          |          |          |          |
|-------------------------|-----------------|-------|-------|------|------|-------|----------|----------|----------|----------|
| MmugDNA.35458.1.S1_s_at | MmugDNA.35458.1 | 13.72 | 13.74 | 0.06 | 0.04 | -1.01 | 0.43209  | 0.810412 | 0.687921 | 0.890812 |
| MmugDNA.29450.1.S1_at   | MmugDNA.29450.1 | 11.58 | 11.53 | 0.09 | 0.03 | 1.04  | 0.994031 | 0.000419 | 0.997578 | 0.038093 |
| MmugDNA.29451.1.S1_at   | MmugDNA.29451.1 | 5.06  | 5.01  | 0.03 | 0.11 | 1.04  | 0.603115 | 0.069245 | 0.800785 | 0.309436 |
| MmugDNA.29452.1.S1_at   | MmugDNA.29452.1 | 12.7  | 12.58 | 0.12 | 0.02 | 1.09  | 0.138794 | 0.005978 | 0.42437  | 0.105736 |
| MmugDNA.29453.1.S1_at   | MmugDNA.29453.1 | 5.05  | 4.95  | 0.04 | 0.15 | 1.07  | 0.981138 | 0.34737  | 0.992909 | 0.591967 |
| MmugDNA.29454.1.S1_at   | MmugDNA.29454.1 | 9.87  | 9.87  | 0.11 | 0.09 | -1    | 0.468136 | 0.391458 | 0.713381 | 0.625086 |
| MmugDNA.29455.1.S1_at   | MmugDNA.29455.1 | 10.44 | 11.17 | 0.24 | 0.08 | -1.66 | 0.009174 | 0.039376 | 0.145783 | 0.243406 |
| MmugDNA.29456.1.S1_at   | MmugDNA.29456.1 | 9.88  | 9.86  | 0.07 | 0.12 | 1.01  | 0.759603 | 0.083309 | 0.889813 | 0.333375 |
| MmugDNA.29457.1.S1_at   | MmugDNA.29457.1 | 3.19  | 3.31  | 0.15 | 0.22 | -1.09 | 0.967935 | 0.999371 | 0.987302 | 0.999769 |
| MmugDNA.29458.1.S1_at   | MmugDNA.29458.1 | 4.13  | 3.75  | 0.3  | 0.09 | 1.3   | 0.058448 | 0.095121 | 0.298877 | 0.352151 |
| MmugDNA.29459.1.S1_at   | MmugDNA.29459.1 | 6.23  | 6.14  | 0.19 | 0.01 | 1.06  | 0.484947 | 0.64703  | 0.724549 | 0.793279 |
| MmugDNA.2946.1.S1_at    | MmugDNA.2946.1  | 4.29  | 4.04  | 0.19 | 0.04 | 1.19  | 0.096616 | 0.138058 | 0.366504 | 0.410919 |
| MmugDNA.29460.1.S1_at   | MmugDNA.29460.1 | 3.75  | 3.7   | 0.08 | 0.31 | 1.03  | 0.984014 | 0.323561 | 0.994033 | 0.574497 |
| MmugDNA.29461.1.S1_at   | MmugDNA.29461.1 | 5.29  | 5.35  | 0.12 | 0.23 | -1.04 | 0.691262 | 0.866155 | 0.852368 | 0.923842 |
| MmugDNA.29462.1.S1_at   | MmugDNA.29462.1 | 3.46  | 3.45  | 0.11 | 0.06 | 1.01  | 0.506999 | 0.861114 | 0.7394   | 0.920974 |
| MmugDNA.29463.1.S1_at   | MmugDNA.29463.1 | 2.9   | 2.81  | 0.13 | 0.12 | 1.07  | 0.754582 | 0.896298 | 0.886871 | 0.940788 |
| MmugDNA.29464.1.S1_at   | MmugDNA.29464.1 | 9.37  | 9.31  | 0.05 | 0.14 | 1.04  | 0.589626 | 0.000067 | 0.791633 | 0.025805 |
| MmugDNA.29465.1.S1_at   | MmugDNA.29465.1 | 9.52  | 9.1   | 0.33 | 0.1  | 1.33  | 0.252155 | 0.032292 | 0.546792 | 0.222452 |
| MmugDNA.29466.1.S1_at   | MmugDNA.29466.1 | 9.6   | 9.29  | 0.08 | 0.06 | 1.24  | 0.008105 | 0.698171 | 0.138956 | 0.824649 |
| MmugDNA.29468.1.S1_x_at | MmugDNA.29468.1 | 8.28  | 8.24  | 0.17 | 0.11 | 1.03  | 0.346596 | 0.030421 | 0.624998 | 0.216377 |
| MmugDNA.29469.1.S1_at   | MmugDNA.29469.1 | 6.71  | 6.74  | 0.55 | 0.01 | -1.02 | 0.936646 | 0.900143 | 0.97357  | 0.943307 |
| MmugDNA.2947.1.S1_at    | MmugDNA.2947.1  | 10.66 | 10    | 0.4  | 0.05 | 1.57  | 0.055298 | 0.098508 | 0.292072 | 0.356636 |
| MmugDNA.29470.1.S1_at   | MmugDNA.29470.1 | 10.41 | 10.93 | 0.26 | 0.2  | -1.43 | 0.042405 | 0.03391  | 0.263112 | 0.227771 |
| MmugDNA.29471.1.S1_at   | MmugDNA.29471.1 | 3.71  | 3.63  | 0.04 | 0.06 | 1.06  | 0.095736 | 0.135436 | 0.365289 | 0.407526 |
| MmugDNA.29472.1.S1_at   | MmugDNA.29472.1 | 3.13  | 2.97  | 0.53 | 0.39 | 1.12  | 0.926478 | 0.992688 | 0.968882 | 0.995715 |
| MmugDNA.29474.1.S1_at   | MmugDNA.29474.1 | 10.05 | 10.15 | 0.12 | 0.09 | -1.07 | 0.358424 | 0.681486 | 0.634202 | 0.814091 |
| MmugDNA.29476.1.S1_at   | MmugDNA.29476.1 | 7.68  | 7.61  | 0.11 | 0.06 | 1.05  | 0.22011  | 0.323124 | 0.517736 | 0.574351 |
| MmugDNA.29478.1.S1_at   | MmugDNA.29478.1 | 8.45  | 8.15  | 0.36 | 0.07 | 1.23  | 0.077685 | 0.041759 | 0.336576 | 0.248939 |
| MmugDNA.29479.1.S1_at   | MmugDNA.29479.1 | 10.37 | 10.1  | 0.29 | 0.15 | 1.21  | 0.354635 | 0.804608 | 0.631745 | 0.88762  |
| MmugDNA.29480.1.S1_at   | MmugDNA.29480.1 | 4.92  | 4.93  | 0.01 | 0.22 | -1.01 | 0.575883 | 0.88691  | 0.78296  | 0.935578 |
| MmugDNA.29481.1.S1_at   | MmugDNA.29481.1 | 4.86  | 4.79  | 0.21 | 0.16 | 1.05  | 0.457016 | 0.609239 | 0.706061 | 0.767684 |
| MmugDNA.29482.1.S1_at   | MmugDNA.29482.1 | 6.43  | 6.4   | 0.29 | 0.24 | 1.03  | 0.605965 | 0.108052 | 0.802826 | 0.37128  |
| MmugDNA.29484.1.S1_at   | MmugDNA.29484.1 | 4.93  | 4.94  | 0.23 | 0.14 | -1.01 | 0.891524 | 0.952404 | 0.953744 | 0.973038 |
| MmugDNA.29485.1.S1_at   | MmugDNA.29485.1 | 4.28  | 4.21  | 0.29 | 0.04 | 1.05  | 0.424534 | 0.568642 | 0.682261 | 0.742052 |
| MmugDNA.29486.1.S1_at   | MmugDNA.29486.1 | 7.93  | 8.01  | 0.18 | 0.07 | -1.06 | 0.624517 | 0.49784  | 0.814877 | 0.697071 |
| MmugDNA.29487.1.S1_at   | MmugDNA.29487.1 | 8.85  | 9.17  | 0.34 | 0.14 | -1.25 | 0.297513 | 0.286228 | 0.585927 | 0.547725 |
| MmugDNA.29488.1.S1_at   | MmugDNA.29488.1 | 6.63  | 6.75  | 0.35 | 0.15 | -1.09 | 0.495614 | 0.557338 | 0.73183  | 0.735031 |
| MmugDNA.29489.1.S1_at   | MmugDNA.29489.1 | 6.61  | 6.44  | 0.22 | 0.01 | 1.13  | 0.07549  | 0.143988 | 0.333009 | 0.417912 |
| MmugDNA.2949.1.S1_at    | MmugDNA.2949.1  | 5.96  | 6.77  | 1.04 | 0.6  | -1.76 | 0.615366 | 0.600437 | 0.808855 | 0.762128 |
| MmugDNA.29490.1.S1_at   | MmugDNA.29490.1 | 2.78  | 2.72  | 0.15 | 0.1  | 1.04  | 0.461075 | 0.373588 | 0.708593 | 0.612375 |
| MmugDNA.29491.1.S1_at   | MmugDNA.29491.1 | 4.59  | 3.98  | 0.25 | 0.18 | 1.53  | 0.013058 | 0.029149 | 0.165004 | 0.212767 |
| MmugDNA.29492.1.S1_x_at | MmugDNA.29492.1 | 9.12  | 9.1   | 0.61 | 0.2  | 1.01  | 0.386489 | 0.299551 | 0.654936 | 0.557945 |
| MmugDNA.29493.1.S1_at   | MmugDNA.29493.1 | 5.44  | 5.34  | 0.25 | 0.07 | 1.07  | 0.249399 | 0.445099 | 0.544566 | 0.662281 |



|                         |                 |       |       |      |      |       |          |          |          |          |
|-------------------------|-----------------|-------|-------|------|------|-------|----------|----------|----------|----------|
| MmugDNA.29495.1.S1_at   | MmugDNA.29495.1 | 6.49  | 6.51  | 0.12 | 0.09 | -1.02 | 0.826408 | 0.94405  | 0.922984 | 0.968301 |
| MmugDNA.29496.1.S1_at   | MmugDNA.29496.1 | 4.06  | 4.23  | 0.25 | 0.09 | -1.12 | 0.441975 | 0.860219 | 0.695386 | 0.920296 |
| MmugDNA.10539.1.S1_s_at | MmugDNA.10539.1 | 9.82  | 9.96  | 0.14 | 0.05 | -1.1  | 0.328115 | 0.713054 | 0.61059  | 0.833638 |
| MmugDNA.29498.1.S1_at   | MmugDNA.29498.1 | 9.46  | 8.27  | 0.32 | 0.15 | 2.29  | 0.004291 | 0.006788 | 0.111625 | 0.111388 |
| MmugDNA.29499.1.S1_at   | MmugDNA.29499.1 | 8.29  | 7.55  | 0.45 | 0.29 | 1.67  | 0.087897 | 0.045144 | 0.354034 | 0.256979 |
| MmugDNA.295.1.S1_at     | MmugDNA.295.1   | 8.37  | 8.48  | 0.14 | 0.24 | -1.08 | 0.502629 | 0.460918 | 0.736287 | 0.672772 |
| MmugDNA.2950.1.S1_at    | MmugDNA.2950.1  | 2.89  | 2.76  | 0.35 | 1.03 | 1.09  | 0.695013 | 0.631897 | 0.854541 | 0.78302  |
| MmugDNA.29500.1.S1_at   | MmugDNA.29500.1 | 6.66  | 6.64  | 0.16 | 0.07 | 1.01  | 0.525949 | 0.558097 | 0.752178 | 0.735404 |
| MmugDNA.29501.1.S1_at   | MmugDNA.29501.1 | 3.37  | 3.57  | 0.24 | 0.11 | -1.15 | 0.963368 | 0.337841 | 0.985153 | 0.585027 |
| MmugDNA.29502.1.S1_at   | MmugDNA.29502.1 | 4.52  | 4.31  | 0.05 | 0.19 | 1.15  | 0.225488 | 0.340921 | 0.523339 | 0.587035 |
| MmugDNA.29504.1.S1_at   | MmugDNA.29504.1 | 5.52  | 5.39  | 0.04 | 0.15 | 1.09  | 0.842278 | 0.296119 | 0.930778 | 0.555339 |
| MmugDNA.29505.1.S1_at   | MmugDNA.29505.1 | 6.18  | 6.28  | 0.37 | 0.17 | -1.07 | 0.86213  | 0.177221 | 0.940168 | 0.45365  |
| MmugDNA.29506.1.S1_at   | MmugDNA.29506.1 | 7.96  | 7.47  | 0.39 | 0.13 | 1.4   | 0.472334 | 0.396296 | 0.716181 | 0.628079 |
| MmugDNA.29508.1.S1_at   | MmugDNA.29508.1 | 11.39 | 12.01 | 0.05 | 0.08 | -1.54 | 0.000468 | 0.001487 | 0.066672 | 0.058901 |
| MmugDNA.29509.1.S1_at   | MmugDNA.29509.1 | 4.55  | 3.83  | 0.97 | 0.25 | 1.65  | 0.08857  | 0.10375  | 0.354742 | 0.364519 |
| MmugDNA.29510.1.S1_at   | MmugDNA.29510.1 | 4.36  | 4.53  | 0.12 | 0.01 | -1.12 | 0.110749 | 0.329391 | 0.386221 | 0.578733 |
| MmugDNA.29511.1.S1_at   | MmugDNA.29511.1 | 6.29  | 5.05  | 0.14 | 0.13 | 2.36  | 0.000657 | 0.000313 | 0.071248 | 0.035198 |
| MmugDNA.29512.1.S1_at   | MmugDNA.29512.1 | 4.66  | 4.69  | 0.54 | 0.03 | -1.02 | 0.970266 | 0.941221 | 0.988239 | 0.966693 |
| MmugDNA.29513.1.S1_at   | MmugDNA.29513.1 | 9.05  | 8.87  | 0.31 | 0.01 | 1.13  | 0.975895 | 0.975661 | 0.990409 | 0.98673  |
| MmugDNA.29516.1.S1_at   | MmugDNA.29516.1 | 5.11  | 5.29  | 0.42 | 0.29 | -1.13 | 0.981295 | 0.947624 | 0.992959 | 0.970275 |
| MmugDNA.29518.1.S1_at   | MmugDNA.29518.1 | 6.91  | 6.67  | 0.18 | 0.03 | 1.18  | 0.278704 | 0.1886   | 0.570013 | 0.464557 |
| MmugDNA.29519.1.S1_at   | MmugDNA.29519.1 | 8.69  | 8.96  | 0.24 | 0.28 | -1.2  | 0.31102  | 0.64235  | 0.597264 | 0.790158 |
| MmugDNA.2952.1.S1_at    | MmugDNA.2952.1  | 3.2   | 3.46  | 0.05 | 0.2  | -1.2  | 0.108265 | 0.129151 | 0.382964 | 0.400611 |
| MmugDNA.29520.1.S1_at   | MmugDNA.29520.1 | 10.82 | 10.62 | 0.09 | 0.06 | 1.15  | 0.030702 | 0.015507 | 0.228035 | 0.158052 |
| MmugDNA.29521.1.S1_at   | MmugDNA.29521.1 | 4.18  | 4.21  | 0.04 | 0.15 | -1.02 | 0.777882 | 0.934713 | 0.898465 | 0.963039 |
| MmugDNA.29523.1.S1_at   | MmugDNA.29523.1 | 3.39  | 3.43  | 0.03 | 0.14 | -1.03 | 0.222164 | 0.650561 | 0.520231 | 0.795663 |
| MmugDNA.29523.1.S1_s_at | MmugDNA.29523.1 | 12.53 | 12.59 | 0.01 | 0.01 | -1.04 | 0.00143  | 0.00035  | 0.07964  | 0.037097 |
| MmugDNA.29524.1.S1_at   | MmugDNA.29524.1 | 6.17  | 6.55  | 1.07 | 0.46 | -1.3  | 0.810182 | 0.813029 | 0.914977 | 0.891895 |
| MmugDNA.29525.1.S1_at   | MmugDNA.29525.1 | 11.54 | 12.06 | 0.13 | 0.14 | -1.43 | 0.017061 | 0.000563 | 0.184068 | 0.041049 |
| MmugDNA.29526.1.S1_at   | MmugDNA.29526.1 | 3.76  | 3.76  | 0.22 | 0.06 | 1     | 0.784819 | 0.778829 | 0.901827 | 0.871622 |
| MmugDNA.29527.1.S1_at   | MmugDNA.29527.1 | 8.6   | 8.64  | 0.14 | 0.18 | -1.02 | 0.941634 | 0.103521 | 0.975589 | 0.364346 |
| MmugDNA.29528.1.S1_at   | MmugDNA.29528.1 | 4.76  | 4.74  | 0.14 | 0.23 | 1.01  | 0.742123 | 0.490337 | 0.880577 | 0.692363 |
| MmugDNA.29532.1.S1_at   | MmugDNA.29532.1 | 4.8   | 4.8   | 0.01 | 0.09 | -1    | 0.373191 | 0.286448 | 0.645118 | 0.547829 |
| MmugDNA.29535.1.S1_at   | MmugDNA.29535.1 | 3.44  | 3.55  | 0.15 | 0.03 | -1.08 | 0.348089 | 0.167683 | 0.626271 | 0.444205 |
| MmugDNA.29537.1.S1_at   | MmugDNA.29537.1 | 5.01  | 4.92  | 0.41 | 0.15 | 1.07  | 0.724238 | 0.514615 | 0.870492 | 0.707767 |
| MmugDNA.29538.1.S1_at   | MmugDNA.29538.1 | 8     | 8.15  | 0.07 | 0.1  | -1.12 | 0.064275 | 0.05914  | 0.309888 | 0.290131 |
| MmugDNA.29539.1.S1_at   | MmugDNA.29539.1 | 4.64  | 4.92  | 0.12 | 0.22 | -1.21 | 0.206605 | 0.295068 | 0.504256 | 0.554551 |
| MmugDNA.29541.1.S1_at   | MmugDNA.29541.1 | 3.79  | 6.47  | 1.23 | 0.62 | -6.38 | 0.073643 | 0.199052 | 0.329118 | 0.473621 |
| MmugDNA.29542.1.S1_at   | MmugDNA.29542.1 | 8.64  | 8.81  | 0.14 | 0.1  | -1.13 | 0.133461 | 0.632693 | 0.416989 | 0.783731 |
| MmugDNA.29543.1.S1_at   | MmugDNA.29543.1 | 4.93  | 4.99  | 0.13 | 0.05 | -1.04 | 0.123934 | 0.189634 | 0.403751 | 0.465297 |
| MmugDNA.29544.1.S1_at   | MmugDNA.29544.1 | 9.29  | 8.06  | 0.1  | 0.16 | 2.34  | 0.000347 | 0.000281 | 0.061557 | 0.03453  |
| MmugDNA.29545.1.S1_at   | MmugDNA.29545.1 | 4.04  | 4.13  | 0.24 | 0.26 | -1.06 | 0.711111 | 0.906566 | 0.863578 | 0.947166 |
| MmugDNA.29546.1.S1_at   | MmugDNA.29546.1 | 6.32  | 6.12  | 0.73 | 0.17 | 1.15  | 0.251473 | 0.329693 | 0.546309 | 0.578874 |

|                         |                 |       |       |      |      |       |          |          |          |          |
|-------------------------|-----------------|-------|-------|------|------|-------|----------|----------|----------|----------|
| MmugDNA.29547.1.S1_at   | MmugDNA.29547.1 | 3.44  | 3.45  | 0.18 | 0.1  | -1.01 | 0.877427 | 0.313265 | 0.947604 | 0.567753 |
| MmugDNA.29548.1.S1_at   | MmugDNA.29548.1 | 4.03  | 4.37  | 0.62 | 0.21 | -1.27 | 0.869016 | 0.839228 | 0.943648 | 0.908353 |
| MmugDNA.29549.1.S1_s_at | MmugDNA.29549.1 | 4.93  | 5.18  | 0.12 | 0.29 | -1.19 | 0.100151 | 0.008473 | 0.37088  | 0.12211  |
| MmugDNA.2955.1.S1_at    | MmugDNA.2955.1  | 4.08  | 3.97  | 0.26 | 0.2  | 1.08  | 0.257264 | 0.386832 | 0.551586 | 0.621935 |
| MmugDNA.29550.1.S1_at   | MmugDNA.29550.1 | 10.38 | 11.09 | 0.3  | 0.11 | -1.63 | 0.062756 | 0.293177 | 0.307182 | 0.553093 |
| MmugDNA.29551.1.S1_at   | MmugDNA.29551.1 | 3.84  | 3.82  | 0.11 | 0.21 | 1.02  | 0.238666 | 0.342514 | 0.53598  | 0.588539 |
| MmugDNA.29552.1.S1_at   | MmugDNA.29552.1 | 4.93  | 4.95  | 0.22 | 0.36 | -1.02 | 0.591005 | 0.67945  | 0.792177 | 0.812834 |
| MmugDNA.29553.1.S1_at   | MmugDNA.29553.1 | 6.7   | 6.43  | 0.17 | 0.05 | 1.21  | 0.027289 | 0.008334 | 0.218069 | 0.121147 |
| MmugDNA.29554.1.S1_at   | MmugDNA.29554.1 | 2.97  | 2.85  | 0.13 | 0.07 | 1.09  | 0.302654 | 0.235572 | 0.590379 | 0.506633 |
| MmugDNA.29555.1.S1_at   | MmugDNA.29555.1 | 4.95  | 5.45  | 0.07 | 0.34 | -1.41 | 0.161989 | 0.222822 | 0.453841 | 0.495748 |
| MmugDNA.29556.1.S1_at   | MmugDNA.29556.1 | 6.35  | 6.52  | 0.06 | 0.07 | -1.12 | 0.113165 | 0.050521 | 0.389815 | 0.270134 |
| MmugDNA.29557.1.S1_at   | MmugDNA.29557.1 | 7.08  | 6.59  | 0.6  | 0.2  | 1.41  | 0.246581 | 0.371963 | 0.542468 | 0.610792 |
| MmugDNA.29559.1.S1_at   | MmugDNA.29559.1 | 6.06  | 4.86  | 0.3  | 0.47 | 2.29  | 0.030021 | 0.019088 | 0.226527 | 0.173827 |
| MmugDNA.2956.1.S1_at    | MmugDNA.2956.1  | 6.76  | 6.7   | 0.39 | 0.06 | 1.05  | 0.327168 | 0.453649 | 0.609783 | 0.668074 |
| MmugDNA.29560.1.S1_at   | MmugDNA.29560.1 | 9.2   | 9.32  | 0.98 | 0.17 | -1.09 | 0.827587 | 0.402024 | 0.923667 | 0.631153 |
| MmugDNA.29563.1.S1_at   | MmugDNA.29563.1 | 6.78  | 6.21  | 1.55 | 0.62 | 1.49  | 0.312127 | 0.272211 | 0.598216 | 0.536976 |
| MmugDNA.29564.1.S1_at   | MmugDNA.29564.1 | 3.46  | 3.44  | 0.02 | 0.03 | 1.01  | 0.64565  | 0.784918 | 0.827528 | 0.875471 |
| MmugDNA.29567.1.S1_at   | MmugDNA.29567.1 | 4.07  | 4.14  | 0.09 | 0.14 | -1.05 | 0.943098 | 0.00709  | 0.976029 | 0.113367 |
| MmugDNA.29568.1.S1_at   | MmugDNA.29568.1 | 7.77  | 7.15  | 1.06 | 0.35 | 1.53  | 0.630785 | 0.033044 | 0.818647 | 0.225023 |
| MmugDNA.2957.1.S1_at    | MmugDNA.2957.1  | 4.67  | 4.67  | 0.14 | 0.13 | -1    | 0.563482 | 0.520149 | 0.775479 | 0.711472 |
| MmugDNA.29572.1.S1_at   | MmugDNA.29572.1 | 8.19  | 7.63  | 0.54 | 0.3  | 1.46  | 0.081066 | 0.072563 | 0.342022 | 0.315511 |
| MmugDNA.29573.1.S1_at   | MmugDNA.29573.1 | 5.42  | 5.27  | 0.31 | 0.18 | 1.11  | 0.666093 | 0.210961 | 0.839504 | 0.484938 |
| MmugDNA.29574.1.S1_at   | MmugDNA.29574.1 | 7.14  | 7.31  | 0.4  | 0.23 | -1.12 | 0.118683 | 0.269242 | 0.396421 | 0.534534 |
| MmugDNA.29575.1.S1_at   | MmugDNA.29575.1 | 7.34  | 9.04  | 0.6  | 0.11 | -3.24 | 0.012451 | 0.001206 | 0.161927 | 0.054389 |
| MmugDNA.29576.1.S1_at   | MmugDNA.29576.1 | 3.02  | 3.11  | 0.02 | 0.05 | -1.06 | 0.208107 | 0.009425 | 0.505909 | 0.127893 |
| MmugDNA.29579.1.S1_at   | MmugDNA.29579.1 | 7.22  | 6.99  | 0.03 | 0.18 | 1.18  | 0.065789 | 0.325611 | 0.314008 | 0.575912 |
| MmugDNA.2958.1.S1_at    | MmugDNA.2958.1  | 4.59  | 4.45  | 0.25 | 0.12 | 1.1   | 0.16467  | 0.320612 | 0.457715 | 0.572703 |
| MmugDNA.29580.1.S1_at   | MmugDNA.29580.1 | 7.14  | 6.52  | 0.21 | 0.25 | 1.54  | 0.038026 | 0.536578 | 0.250745 | 0.721903 |
| MmugDNA.29581.1.S1_at   | MmugDNA.29581.1 | 5.35  | 5.35  | 0.08 | 0.05 | -1    | 0.785445 | 0.04863  | 0.90204  | 0.265602 |
| MmugDNA.29583.1.S1_at   | MmugDNA.29583.1 | 8.49  | 8.43  | 0.78 | 0.14 | 1.04  | 0.678059 | 0.603691 | 0.846393 | 0.764245 |
| MmugDNA.29584.1.S1_at   | MmugDNA.29584.1 | 5.21  | 5.37  | 0.36 | 0.21 | -1.12 | 0.561061 | 0.395727 | 0.774182 | 0.627639 |
| MmugDNA.29586.1.S1_at   | MmugDNA.29586.1 | 4.16  | 4.21  | 0.08 | 0.11 | -1.03 | 0.24854  | 0.627268 | 0.543943 | 0.780361 |
| MmugDNA.29587.1.S1_at   | MmugDNA.29587.1 | 11.54 | 11.33 | 0.25 | 0.14 | 1.16  | 0.216371 | 0.531283 | 0.514135 | 0.718555 |
| MmugDNA.29589.1.S1_at   | MmugDNA.29589.1 | 4.7   | 5.55  | 1.15 | 0.42 | -1.81 | 0.605351 | 0.783941 | 0.802393 | 0.874935 |
| MmugDNA.2959.1.S1_at    | MmugDNA.2959.1  | 5.21  | 5.28  | 1.01 | 0.02 | -1.05 | 0.424206 | 0.548867 | 0.681942 | 0.729463 |
| MmugDNA.29590.1.S1_at   | MmugDNA.29590.1 | 6.26  | 6.18  | 0.15 | 0.03 | 1.06  | 0.408797 | 0.318168 | 0.671414 | 0.571046 |
| MmugDNA.29592.1.S1_at   | MmugDNA.29592.1 | 9.05  | 8.91  | 0.24 | 0.19 | 1.11  | 0.383684 | 0.806957 | 0.652919 | 0.888903 |
| MmugDNA.29595.1.S1_at   | MmugDNA.29595.1 | 2.93  | 2.91  | 0.17 | 0.12 | 1.01  | 0.693891 | 0.20522  | 0.853757 | 0.479596 |
| MmugDNA.29596.1.S1_at   | MmugDNA.29596.1 | 3.28  | 3.13  | 0.22 | 0.09 | 1.11  | 0.316336 | 0.400374 | 0.601116 | 0.630177 |
| MmugDNA.29597.1.S1_at   | MmugDNA.29597.1 | 4.42  | 4.4   | 0.14 | 0.16 | 1.02  | 0.773803 | 0.803713 | 0.896356 | 0.887094 |
| MmugDNA.29598.1.S1_at   | MmugDNA.29598.1 | 5.2   | 5.09  | 0.08 | 0.1  | 1.08  | 0.116484 | 0.124967 | 0.39363  | 0.395386 |
| MmugDNA.296.1.S1_at     | MmugDNA.296.1   | 4.79  | 4.47  | 0.06 | 0.22 | 1.25  | 0.102244 | 0.038195 | 0.374232 | 0.240129 |
| MmugDNA.29600.1.S1_at   | MmugDNA.29600.1 | 6.45  | 5.43  | 1.44 | 0.96 | 2.03  | 0.497949 | 0.647199 | 0.733379 | 0.793312 |

|                         |                 |       |       |      |      |       |          |          |          |          |
|-------------------------|-----------------|-------|-------|------|------|-------|----------|----------|----------|----------|
| MmugDNA.29601.1.S1_at   | MmugDNA.29601.1 | 5.39  | 5.46  | 0.16 | 0.06 | -1.05 | 0.37778  | 0.295793 | 0.648249 | 0.555196 |
| MmugDNA.29602.1.S1_at   | MmugDNA.29602.1 | 6.01  | 6.3   | 1.09 | 0.54 | -1.22 | 0.991959 | 0.807638 | 0.997006 | 0.889237 |
| MmugDNA.29603.1.S1_at   | MmugDNA.29603.1 | 6.15  | 6.35  | 1.43 | 0.21 | -1.15 | 0.888718 | 0.813018 | 0.952558 | 0.891895 |
| MmugDNA.29605.1.S1_at   | MmugDNA.29605.1 | 10.49 | 11.81 | 0.66 | 0.26 | -2.48 | 0.051928 | 0.248    | 0.285355 | 0.517487 |
| MmugDNA.29606.1.S1_at   | MmugDNA.29606.1 | 6.98  | 7.63  | 0.86 | 0.22 | -1.56 | 0.791449 | 0.75627  | 0.905298 | 0.858165 |
| MmugDNA.29607.1.S1_at   | MmugDNA.29607.1 | 9.95  | 9.75  | 0.13 | 0.21 | 1.15  | 0.235614 | 0.344525 | 0.533412 | 0.589905 |
| MmugDNA.29608.1.S1_at   | MmugDNA.29608.1 | 11.21 | 11.31 | 0.13 | 0.12 | -1.07 | 0.764177 | 0.639494 | 0.891902 | 0.788314 |
| MmugDNA.29609.1.S1_at   | MmugDNA.29609.1 | 5.68  | 5.99  | 0.22 | 0.39 | -1.24 | 0.434008 | 0.828778 | 0.689315 | 0.901565 |
| MmugDNA.2961.1.S1_at    | MmugDNA.2961.1  | 3.08  | 2.89  | 0.12 | 0.1  | 1.14  | 0.075398 | 0.145706 | 0.332772 | 0.419653 |
| MmugDNA.29610.1.S1_at   | MmugDNA.29610.1 | 3.19  | 3.29  | 0.31 | 0.06 | -1.07 | 0.568176 | 0.360902 | 0.778211 | 0.60194  |
| MmugDNA.29611.1.S1_at   | MmugDNA.29611.1 | 4.36  | 4.39  | 0.48 | 0.29 | -1.02 | 0.279922 | 0.2491   | 0.571191 | 0.51821  |
| MmugDNA.29612.1.S1_at   | MmugDNA.29612.1 | 7.43  | 6.09  | 0.54 | 0.31 | 2.54  | 0.027542 | 0.09678  | 0.218489 | 0.354207 |
| MmugDNA.29613.1.S1_at   | MmugDNA.29613.1 | 3.41  | 3.53  | 0.34 | 0.18 | -1.09 | 0.760927 | 0.81753  | 0.890398 | 0.894746 |
| MmugDNA.29614.1.S1_at   | MmugDNA.29614.1 | 8.91  | 9.27  | 0.13 | 0.15 | -1.29 | 0.030266 | 0.110824 | 0.227083 | 0.375124 |
| MmugDNA.5184.1.S1_s_at  | MmugDNA.5184.1  | 10.01 | 8.43  | 0.29 | 0.3  | 2.99  | 0.002962 | 0.000433 | 0.099517 | 0.038359 |
| MmugDNA.29618.1.S1_at   | MmugDNA.29618.1 | 8.03  | 8.49  | 0.22 | 0.03 | -1.38 | 0.021347 | 0.06155  | 0.199702 | 0.294865 |
| MmugDNA.29619.1.S1_at   | MmugDNA.29619.1 | 7.58  | 7.57  | 0.05 | 0.11 | 1     | 0.742519 | 0.151556 | 0.880829 | 0.426307 |
| MmugDNA.2962.1.S1_at    | MmugDNA.2962.1  | 4.71  | 4.87  | 0.24 | 0.2  | -1.12 | 0.683372 | 0.394471 | 0.849016 | 0.62701  |
| MmugDNA.29623.1.S1_at   | MmugDNA.29623.1 | 5.66  | 5.63  | 0.56 | 0.1  | 1.03  | 0.341841 | 0.433923 | 0.621631 | 0.654102 |
| MmugDNA.29624.1.S1_at   | MmugDNA.29624.1 | 3.75  | 3.71  | 0.42 | 0.22 | 1.03  | 0.361061 | 0.503895 | 0.636561 | 0.701193 |
| MmugDNA.29626.1.S1_at   | MmugDNA.29626.1 | 5.66  | 5.71  | 0.42 | 0.12 | -1.03 | 0.373808 | 0.52449  | 0.645118 | 0.714395 |
| MmugDNA.29628.1.S1_at   | MmugDNA.29628.1 | 5.59  | 5.25  | 0.22 | 0.22 | 1.27  | 0.131659 | 0.563969 | 0.414491 | 0.738913 |
| MmugDNA.29629.1.S1_at   | MmugDNA.29629.1 | 4.72  | 4.72  | 0.09 | 0.1  | 1.01  | 0.630538 | 0.106106 | 0.818647 | 0.368498 |
| MmugDNA.29630.1.S1_at   | MmugDNA.29630.1 | 8.91  | 8.71  | 0.2  | 0.25 | 1.14  | 0.515993 | 0.729618 | 0.745613 | 0.843613 |
| MmugDNA.29631.1.S1_at   | MmugDNA.29631.1 | 3.08  | 3.08  | 0.14 | 0.1  | -1    | 0.647918 | 0.87135  | 0.829089 | 0.926844 |
| MmugDNA.29632.1.S1_at   | MmugDNA.29632.1 | 3.05  | 3.1   | 0.08 | 0.12 | -1.04 | 0.808612 | 0.825771 | 0.914357 | 0.899849 |
| MmugDNA.29633.1.S1_at   | MmugDNA.29633.1 | 4.86  | 5.58  | 0.45 | 0.45 | -1.64 | 0.186661 | 0.17083  | 0.48279  | 0.447451 |
| MmugDNA.29634.1.S1_at   | MmugDNA.29634.1 | 9.96  | 9.67  | 0.22 | 0.13 | 1.23  | 0.283048 | 0.236312 | 0.573539 | 0.507308 |
| MmugDNA.29635.1.S1_at   | MmugDNA.29635.1 | 3.83  | 3.88  | 0.09 | 0.04 | -1.03 | 0.469495 | 0.243328 | 0.71422  | 0.513371 |
| MmugDNA.29636.1.S1_at   | MmugDNA.29636.1 | 5.61  | 5.49  | 0.13 | 0.48 | 1.08  | 0.945745 | 0.284827 | 0.977159 | 0.546966 |
| MmugDNA.29637.1.S1_at   | MmugDNA.29637.1 | 3.38  | 3.21  | 0.06 | 0.18 | 1.12  | 0.564884 | 0.763507 | 0.776435 | 0.862471 |
| MmugDNA.29638.1.S1_at   | MmugDNA.29638.1 | 4.72  | 4.39  | 0.36 | 0.07 | 1.26  | 0.135521 | 0.176321 | 0.419375 | 0.452752 |
| MmugDNA.29639.1.S1_at   | MmugDNA.29639.1 | 8.01  | 8.57  | 0.43 | 0.16 | -1.48 | 0.301171 | 0.12848  | 0.589201 | 0.399818 |
| MmugDNA.2964.1.S1_at    | MmugDNA.2964.1  | 6.75  | 6.69  | 0.15 | 0.02 | 1.04  | 0.468051 | 0.681343 | 0.713379 | 0.813957 |
| MmugDNA.29640.1.S1_s_at | MmugDNA.29640.1 | 9.41  | 8.74  | 0.22 | 0.12 | 1.59  | 0.011499 | 0.006234 | 0.15722  | 0.107112 |
| MmugDNA.29641.1.S1_at   | MmugDNA.29641.1 | 12    | 12.05 | 0.21 | 0.06 | -1.04 | 0.519182 | 0.708122 | 0.747956 | 0.830704 |
| MmugDNA.29642.1.S1_at   | MmugDNA.29642.1 | 7.46  | 7.39  | 0.51 | 0.99 | 1.04  | 0.842177 | 0.571893 | 0.930767 | 0.744056 |
| MmugDNA.29643.1.S1_at   | MmugDNA.29643.1 | 5.88  | 5.83  | 0.05 | 0.04 | 1.03  | 0.118091 | 0.485478 | 0.395593 | 0.68914  |
| MmugDNA.29644.1.S1_at   | MmugDNA.29644.1 | 6.47  | 6.47  | 0.38 | 0.15 | -1    | 0.477887 | 0.427243 | 0.719648 | 0.649175 |
| MmugDNA.29645.1.S1_at   | MmugDNA.29645.1 | 5.17  | 4.95  | 0.19 | 0.16 | 1.17  | 0.09475  | 0.137003 | 0.36369  | 0.409836 |
| MmugDNA.29646.1.S1_at   | MmugDNA.29646.1 | 4.57  | 5.2   | 0.45 | 0.22 | -1.54 | 0.451714 | 0.590343 | 0.702488 | 0.756166 |
| MmugDNA.29647.1.S1_at   | MmugDNA.29647.1 | 4.64  | 4.48  | 0.15 | 0.03 | 1.12  | 0.366289 | 0.281129 | 0.640628 | 0.544261 |
| MmugDNA.29649.1.S1_at   | MmugDNA.29649.1 | 7.01  | 7.04  | 0.23 | 0.1  | -1.02 | 0.867512 | 0.150467 | 0.942789 | 0.425007 |

|                         |                 |       |       |      |      |       |          |          |          |          |
|-------------------------|-----------------|-------|-------|------|------|-------|----------|----------|----------|----------|
| MmugDNA.2965.1.S1_at    | MmugDNA.2965.1  | 10.05 | 9.7   | 0.23 | 0.14 | 1.28  | 0.026434 | 0.057602 | 0.21565  | 0.286171 |
| MmugDNA.29650.1.S1_at   | MmugDNA.29650.1 | 7.83  | 8.21  | 0.12 | 0.11 | -1.3  | 0.032584 | 0.071566 | 0.234863 | 0.313714 |
| MmugDNA.29651.1.S1_at   | MmugDNA.29651.1 | 5.59  | 5.69  | 0.09 | 0.17 | -1.07 | 0.465243 | 0.226757 | 0.711393 | 0.499176 |
| MmugDNA.29652.1.S1_at   | MmugDNA.29652.1 | 7.96  | 8.1   | 0.08 | 0.16 | -1.1  | 0.125279 | 0.359288 | 0.405737 | 0.600575 |
| MmugDNA.29653.1.S1_at   | MmugDNA.29653.1 | 6.01  | 5.88  | 0.45 | 0.37 | 1.1   | 0.311379 | 0.312228 | 0.597498 | 0.566963 |
| MmugDNA.29654.1.S1_s_at | MmugDNA.29654.1 | 12.07 | 12.26 | 0.08 | 0.03 | -1.14 | 0.0425   | 0.011796 | 0.263254 | 0.140638 |
| MmugDNA.29655.1.S1_at   | MmugDNA.29655.1 | 3.33  | 3.51  | 0.32 | 0.1  | -1.13 | 0.473032 | 0.125692 | 0.716437 | 0.396249 |
| MmugDNA.29657.1.S1_at   | MmugDNA.29657.1 | 6.42  | 6.41  | 0.08 | 0.05 | 1     | 0.766139 | 0.382258 | 0.892703 | 0.618438 |
| MmugDNA.29658.1.S1_at   | MmugDNA.29658.1 | 2.96  | 3.16  | 0.12 | 0.14 | -1.15 | 0.138566 | 0.225863 | 0.424088 | 0.498248 |
| MmugDNA.29659.1.S1_at   | MmugDNA.29659.1 | 12.52 | 11.96 | 0.26 | 0.14 | 1.47  | 0.030611 | 0.080679 | 0.227891 | 0.328487 |
| MmugDNA.2966.1.S1_at    | MmugDNA.2966.1  | 7.91  | 8.17  | 0.1  | 0.05 | -1.2  | 0.012561 | 0.859962 | 0.162479 | 0.920188 |
| MmugDNA.29660.1.S1_at   | MmugDNA.29660.1 | 5.3   | 5.29  | 0.05 | 0.01 | 1     | 0.454175 | 0.803567 | 0.704125 | 0.886984 |
| MmugDNA.29661.1.S1_at   | MmugDNA.29661.1 | 5.9   | 5.54  | 0.35 | 0.33 | 1.28  | 0.368377 | 0.472449 | 0.6421   | 0.67999  |
| MmugDNA.29662.1.S1_at   | MmugDNA.29662.1 | 6.63  | 6.29  | 0.4  | 0.3  | 1.27  | 0.671063 | 0.873273 | 0.842222 | 0.927896 |
| MmugDNA.29663.1.S1_at   | MmugDNA.29663.1 | 8.63  | 8.49  | 0.2  | 0.11 | 1.1   | 0.913204 | 0.103523 | 0.963334 | 0.364346 |
| MmugDNA.29664.1.S1_at   | MmugDNA.29664.1 | 9.58  | 8.8   | 0.22 | 0.22 | 1.71  | 0.017925 | 0.176918 | 0.187151 | 0.453317 |
| MmugDNA.29665.1.S1_at   | MmugDNA.29665.1 | 10.85 | 10.58 | 0.15 | 0.17 | 1.2   | 0.112774 | 0.061592 | 0.389296 | 0.295042 |
| MmugDNA.29666.1.S1_at   | MmugDNA.29666.1 | 5.2   | 4.47  | 0.51 | 0.23 | 1.66  | 0.155602 | 0.176009 | 0.445915 | 0.452526 |
| MmugDNA.29667.1.S1_at   | MmugDNA.29667.1 | 3.88  | 4.57  | 0.22 | 0.44 | -1.61 | 0.03995  | 0.322701 | 0.25663  | 0.574043 |
| MmugDNA.29668.1.S1_at   | MmugDNA.29668.1 | 5.08  | 5.04  | 0.11 | 0.03 | 1.03  | 0.245589 | 0.085746 | 0.541637 | 0.337761 |
| MmugDNA.2967.1.S1_at    | MmugDNA.2967.1  | 12.75 | 12.57 | 0.06 | 0.06 | 1.14  | 0.011996 | 0.130497 | 0.159499 | 0.402373 |
| MmugDNA.29671.1.S1_at   | MmugDNA.29671.1 | 10.51 | 10.4  | 0.06 | 0.06 | 1.08  | 0.224844 | 0.057464 | 0.522793 | 0.285751 |
| MmugDNA.29672.1.S1_at   | MmugDNA.29672.1 | 5     | 4.94  | 0.13 | 0    | 1.04  | 0.610896 | 0.844538 | 0.805965 | 0.911525 |
| MmugDNA.29673.1.S1_at   | MmugDNA.29673.1 | 4.9   | 4.9   | 0.03 | 0.12 | 1     | 0.523536 | 0.618527 | 0.750433 | 0.774147 |
| MmugDNA.29674.1.S1_at   | MmugDNA.29674.1 | 9.34  | 8.99  | 0.2  | 0.18 | 1.28  | 0.075961 | 0.14849  | 0.333917 | 0.423016 |
| MmugDNA.29676.1.S1_at   | MmugDNA.29676.1 | 4.35  | 4.58  | 0.19 | 0.32 | -1.17 | 0.26763  | 0.476316 | 0.560407 | 0.682693 |
| MmugDNA.29677.1.S1_at   | MmugDNA.29677.1 | 11.14 | 11.36 | 0.23 | 0.13 | -1.16 | 0.121492 | 0.005156 | 0.400293 | 0.09966  |
| MmugDNA.29678.1.S1_at   | MmugDNA.29678.1 | 3.66  | 3.47  | 0.09 | 0.19 | 1.14  | 0.087871 | 0.031538 | 0.353994 | 0.219695 |
| MmugDNA.29679.1.S1_at   | MmugDNA.29679.1 | 7.69  | 7.93  | 0.19 | 0.31 | -1.18 | 0.836355 | 0.847839 | 0.928245 | 0.91354  |
| MmugDNA.2968.1.S1_at    | MmugDNA.2968.1  | 5.63  | 5.42  | 0.49 | 0.21 | 1.16  | 0.339128 | 0.477713 | 0.619424 | 0.683731 |
| MmugDNA.29680.1.S1_at   | MmugDNA.29680.1 | 4.97  | 5.57  | 0.36 | 0.27 | -1.52 | 0.168469 | 0.255134 | 0.461767 | 0.52317  |
| MmugDNA.29682.1.S1_at   | MmugDNA.29682.1 | 6.52  | 6.38  | 0.13 | 0.12 | 1.1   | 0.099156 | 0.348416 | 0.370086 | 0.592591 |
| MmugDNA.29683.1.S1_at   | MmugDNA.29683.1 | 4.57  | 4.3   | 0.1  | 0.03 | 1.21  | 0.021973 | 0.029218 | 0.201353 | 0.212898 |
| MmugDNA.29684.1.S1_at   | MmugDNA.29684.1 | 9.66  | 9.77  | 0.15 | 0.02 | -1.08 | 0.891841 | 0.660367 | 0.953838 | 0.801285 |
| MmugDNA.29685.1.S1_at   | MmugDNA.29685.1 | 6.37  | 6.33  | 0.25 | 0.31 | 1.02  | 0.6243   | 0.254785 | 0.814783 | 0.523051 |
| MmugDNA.29686.1.S1_at   | MmugDNA.29686.1 | 4.6   | 4.43  | 0.23 | 0.11 | 1.13  | 0.499137 | 0.391483 | 0.734029 | 0.625086 |
| MmugDNA.29687.1.S1_at   | MmugDNA.29687.1 | 7.2   | 7.28  | 0.1  | 0.04 | -1.06 | 0.517057 | 0.10464  | 0.746286 | 0.365941 |
| MmugDNA.29688.1.S1_at   | MmugDNA.29688.1 | 6.58  | 6.52  | 0.55 | 0.36 | 1.04  | 0.982718 | 0.504654 | 0.993625 | 0.701754 |
| MmugDNA.29690.1.S1_at   | MmugDNA.29690.1 | 11.02 | 11.32 | 0.58 | 0.2  | -1.23 | 0.564948 | 0.818521 | 0.776448 | 0.8954   |
| MmugDNA.29691.1.S1_at   | MmugDNA.29691.1 | 7.79  | 7.13  | 0.11 | 0.26 | 1.58  | 0.036503 | 0.006588 | 0.246105 | 0.110034 |
| MmugDNA.29692.1.S1_at   | MmugDNA.29692.1 | 6.4   | 5.57  | 0.22 | 0.26 | 1.78  | 0.011425 | 0.013519 | 0.157067 | 0.148864 |
| MmugDNA.29693.1.S1_at   | MmugDNA.29693.1 | 8.3   | 7.29  | 0.83 | 0.17 | 2.01  | 0.134956 | 0.048145 | 0.418904 | 0.264422 |
| MmugDNA.29694.1.S1_at   | MmugDNA.29694.1 | 8.09  | 8.03  | 0.22 | 0.02 | 1.04  | 0.244462 | 0.275399 | 0.540909 | 0.539663 |

|                         |                 |       |       |      |      |       |          |          |          |          |
|-------------------------|-----------------|-------|-------|------|------|-------|----------|----------|----------|----------|
| MmugDNA.29694.1.S1_s_at | MmugDNA.29694.1 | 8.08  | 8.12  | 0.32 | 0.02 | -1.03 | 0.536634 | 0.459567 | 0.759061 | 0.671856 |
| MmugDNA.29695.1.S1_at   | MmugDNA.29695.1 | 3.88  | 3.74  | 0.11 | 0    | 1.1   | 0.127794 | 0.231742 | 0.409656 | 0.503577 |
| MmugDNA.29696.1.S1_at   | MmugDNA.29696.1 | 4.59  | 4.59  | 0.05 | 0.05 | 1     | 0.482229 | 0.928854 | 0.722551 | 0.959449 |
| MmugDNA.29698.1.S1_at   | MmugDNA.29698.1 | 11.01 | 11.02 | 0.21 | 0.1  | -1.01 | 0.720067 | 0.850015 | 0.867925 | 0.914673 |
| MmugDNA.29699.1.S1_at   | MmugDNA.29699.1 | 9.46  | 7.86  | 0.08 | 0.38 | 3.03  | 0.002025 | 0.001249 | 0.089887 | 0.054879 |
| MmugDNA.297.1.S1_at     | MmugDNA.297.1   | 9.46  | 9.59  | 0.17 | 0.18 | -1.09 | 0.200582 | 0.434959 | 0.497869 | 0.654901 |
| MmugDNA.2970.1.S1_at    | MmugDNA.2970.1  | 8.36  | 7.93  | 0.27 | 0.21 | 1.35  | 0.113822 | 0.118699 | 0.390524 | 0.38672  |
| MmugDNA.29700.1.S1_at   | MmugDNA.29700.1 | 4.53  | 4.59  | 0.04 | 0.08 | -1.04 | 0.718784 | 0.126839 | 0.867276 | 0.397499 |
| MmugDNA.29701.1.S1_at   | MmugDNA.29701.1 | 4.15  | 3.98  | 0.51 | 0.57 | 1.12  | 0.252273 | 0.077328 | 0.546837 | 0.323135 |
| MmugDNA.29702.1.S1_at   | MmugDNA.29702.1 | 4.59  | 4.66  | 0.06 | 0.03 | -1.05 | 0.14633  | 0.209425 | 0.434192 | 0.483069 |
| MmugDNA.29703.1.S1_at   | MmugDNA.29703.1 | 6.22  | 6.12  | 0.06 | 0.08 | 1.07  | 0.164028 | 0.713883 | 0.456843 | 0.833976 |
| MmugDNA.29704.1.S1_at   | MmugDNA.29704.1 | 9.41  | 9.84  | 0.15 | 0.2  | -1.35 | 0.047745 | 0.082849 | 0.275898 | 0.332384 |
| MmugDNA.29705.1.S1_at   | MmugDNA.29705.1 | 5.04  | 4.91  | 0.42 | 0.27 | 1.1   | 0.176688 | 0.313028 | 0.471177 | 0.567594 |
| MmugDNA.29707.1.S1_at   | MmugDNA.29707.1 | 5.48  | 4.63  | 0.66 | 0.26 | 1.81  | 0.106331 | 0.186085 | 0.380319 | 0.461931 |
| MmugDNA.29708.1.S1_at   | MmugDNA.29708.1 | 4.26  | 4.53  | 0.65 | 0.41 | -1.21 | 0.493942 | 0.458204 | 0.730862 | 0.671077 |
| MmugDNA.29709.1.S1_at   | MmugDNA.29709.1 | 5.72  | 5.68  | 0.06 | 0.05 | 1.03  | 0.739926 | 0.057406 | 0.87947  | 0.285608 |
| MmugDNA.2971.1.S1_at    | MmugDNA.2971.1  | 6.36  | 6.08  | 0.95 | 0.18 | 1.22  | 0.584989 | 0.658091 | 0.788935 | 0.800181 |
| MmugDNA.29711.1.S1_at   | MmugDNA.29711.1 | 4.66  | 4.56  | 0.29 | 0.25 | 1.07  | 0.575823 | 0.112996 | 0.78296  | 0.378851 |
| MmugDNA.29713.1.S1_at   | MmugDNA.29713.1 | 5.08  | 4.63  | 0.17 | 0.1  | 1.37  | 0.019641 | 0.064903 | 0.193099 | 0.300815 |
| MmugDNA.29714.1.S1_s_at | MmugDNA.29714.1 | 6.6   | 6.78  | 0.16 | 0.27 | -1.13 | 0.915142 | 0.983964 | 0.963917 | 0.991088 |
| MmugDNA.29715.1.S1_at   | MmugDNA.29715.1 | 3.85  | 4.64  | 0.08 | 0.49 | -1.73 | 0.067407 | 0.161238 | 0.317287 | 0.437386 |
| MmugDNA.29716.1.S1_at   | MmugDNA.29716.1 | 6.27  | 6.2   | 0.1  | 0.09 | 1.05  | 0.180258 | 0.231828 | 0.475396 | 0.503592 |
| MmugDNA.29717.1.S1_at   | MmugDNA.29717.1 | 3.51  | 3.52  | 0.07 | 0.15 | -1.01 | 0.378189 | 0.526481 | 0.64844  | 0.715574 |
| MmugDNA.29718.1.S1_at   | MmugDNA.29718.1 | 5.44  | 5.5   | 0.04 | 0.08 | -1.04 | 0.07096  | 0.072737 | 0.324424 | 0.31565  |
| MmugDNA.29719.1.S1_at   | MmugDNA.29719.1 | 5.74  | 5.66  | 0.05 | 0.28 | 1.06  | 0.732363 | 0.524187 | 0.874977 | 0.714207 |
| MmugDNA.29721.1.S1_at   | MmugDNA.29721.1 | 12.05 | 12.39 | 0.12 | 0.12 | -1.27 | 0.050776 | 0.087959 | 0.283078 | 0.341368 |
| MmugDNA.29725.1.S1_at   | MmugDNA.29725.1 | 6.87  | 6.92  | 0.09 | 0    | -1.04 | 0.827212 | 0.947626 | 0.923507 | 0.970275 |
| MmugDNA.29728.1.S1_at   | MmugDNA.29728.1 | 8.98  | 8.13  | 1.98 | 1.37 | 1.81  | 0.439116 | 0.286316 | 0.693448 | 0.547784 |
| MmugDNA.29730.1.S1_at   | MmugDNA.29730.1 | 7.58  | 7.57  | 0.2  | 0.04 | 1.01  | 0.897049 | 0.16694  | 0.956311 | 0.443415 |
| MmugDNA.29731.1.S1_at   | MmugDNA.29731.1 | 4.19  | 4.31  | 0.1  | 0.2  | -1.08 | 0.697934 | 0.191629 | 0.856252 | 0.466918 |
| MmugDNA.29732.1.S1_at   | MmugDNA.29732.1 | 3.52  | 3.51  | 0.31 | 0.04 | 1     | 0.944628 | 0.972792 | 0.976662 | 0.985352 |
| MmugDNA.29733.1.S1_at   | MmugDNA.29733.1 | 5.06  | 5.01  | 0.07 | 0.15 | 1.03  | 0.225402 | 0.310191 | 0.523271 | 0.565379 |
| MmugDNA.29734.1.S1_at   | MmugDNA.29734.1 | 4.59  | 4.39  | 0.12 | 0.13 | 1.15  | 0.155243 | 0.036208 | 0.445435 | 0.234837 |
| MmugDNA.29737.1.S1_at   | MmugDNA.29737.1 | 4.14  | 4.05  | 0.11 | 0.09 | 1.06  | 0.769668 | 0.799855 | 0.894341 | 0.884906 |
| MmugDNA.29738.1.S1_at   | MmugDNA.29738.1 | 10.8  | 10.73 | 0.26 | 0.19 | 1.04  | 0.970884 | 0.877884 | 0.988445 | 0.93029  |
| MmugDNA.29739.1.S1_at   | MmugDNA.29739.1 | 4.37  | 4.31  | 0.04 | 0.07 | 1.04  | 0.468951 | 0.427846 | 0.713885 | 0.649582 |
| MmugDNA.29740.1.S1_at   | MmugDNA.29740.1 | 9.62  | 9.68  | 0.15 | 0.19 | -1.04 | 0.383928 | 0.667652 | 0.653078 | 0.805472 |
| MmugDNA.29741.1.S1_at   | MmugDNA.29741.1 | 9.93  | 9.65  | 0.12 | 0.17 | 1.21  | 0.020589 | 0.035563 | 0.196956 | 0.232813 |
| MmugDNA.29745.1.S1_at   | MmugDNA.29745.1 | 6.89  | 8.08  | 0.51 | 0.41 | -2.28 | 0.030471 | 0.414782 | 0.227409 | 0.640456 |
| MmugDNA.29746.1.S1_at   | MmugDNA.29746.1 | 4.36  | 4.61  | 0.61 | 0.31 | -1.19 | 0.216781 | 0.125445 | 0.514637 | 0.396086 |
| MmugDNA.29747.1.S1_s_at | MmugDNA.29747.1 | 3.77  | 3.82  | 0.18 | 0.01 | -1.04 | 0.665904 | 0.59596  | 0.839466 | 0.759313 |
| MmugDNA.29749.1.S1_at   | MmugDNA.29749.1 | 3.54  | 3.25  | 0.53 | 0.22 | 1.23  | 0.342734 | 0.384648 | 0.622462 | 0.620255 |
| MmugDNA.29749.1.S1_s_at | MmugDNA.29749.1 | 3.21  | 3.15  | 0.11 | 0.1  | 1.04  | 0.986791 | 0.183319 | 0.995228 | 0.459553 |

|                       |                 |       |       |      |      |       |          |          |          |          |
|-----------------------|-----------------|-------|-------|------|------|-------|----------|----------|----------|----------|
| MmugDNA.29750.1.S1_at | MmugDNA.29750.1 | 7.05  | 7.31  | 0.22 | 0.08 | -1.2  | 0.243291 | 0.188465 | 0.539969 | 0.464458 |
| MmugDNA.29751.1.S1_at | MmugDNA.29751.1 | 9.1   | 9.2   | 0.23 | 0.12 | -1.08 | 0.24449  | 0.037113 | 0.540909 | 0.237165 |
| MmugDNA.29752.1.S1_at | MmugDNA.29752.1 | 9.32  | 9.61  | 0.27 | 0.1  | -1.23 | 0.319769 | 0.044792 | 0.604318 | 0.256105 |
| MmugDNA.29753.1.S1_at | MmugDNA.29753.1 | 8.02  | 7.91  | 0.27 | 0.1  | 1.08  | 0.272845 | 0.341928 | 0.564959 | 0.588008 |
| MmugDNA.29755.1.S1_at | MmugDNA.29755.1 | 11.47 | 11.46 | 0.24 | 0.07 | 1.01  | 0.359097 | 0.626882 | 0.634671 | 0.780043 |
| MmugDNA.29756.1.S1_at | MmugDNA.29756.1 | 3.61  | 3.63  | 0.01 | 0.08 | -1.01 | 0.56588  | 0.752034 | 0.776954 | 0.855744 |
| MmugDNA.29757.1.S1_at | MmugDNA.29757.1 | 5.94  | 5.98  | 0.87 | 0.76 | -1.03 | 0.977417 | 0.733959 | 0.991176 | 0.845896 |
| MmugDNA.29758.1.S1_at | MmugDNA.29758.1 | 6.59  | 6.66  | 0.08 | 0.62 | -1.05 | 0.599022 | 0.582091 | 0.797786 | 0.750784 |
| MmugDNA.29759.1.S1_at | MmugDNA.29759.1 | 3.29  | 3.28  | 0.06 | 0.11 | 1.01  | 0.36925  | 0.616233 | 0.642795 | 0.772538 |
| MmugDNA.2976.1.S1_at  | MmugDNA.2976.1  | 9.75  | 9.01  | 0.28 | 0.15 | 1.67  | 0.008106 | 0.002839 | 0.138956 | 0.078566 |
| MmugDNA.29760.1.S1_at | MmugDNA.29760.1 | 10.24 | 10.36 | 0.1  | 0.05 | -1.09 | 0.249218 | 0.479921 | 0.544484 | 0.685555 |
| MmugDNA.29762.1.S1_at | MmugDNA.29762.1 | 7.57  | 7.64  | 0.28 | 0.07 | -1.05 | 0.713758 | 0.988926 | 0.864758 | 0.993666 |
| MmugDNA.29764.1.S1_at | MmugDNA.29764.1 | 4.24  | 3.95  | 0.28 | 0.09 | 1.22  | 0.114841 | 0.197513 | 0.391836 | 0.472488 |
| MmugDNA.29765.1.S1_at | MmugDNA.29765.1 | 4.86  | 5.42  | 0.26 | 0.29 | -1.48 | 0.049177 | 0.184005 | 0.279211 | 0.460195 |
| MmugDNA.29766.1.S1_at | MmugDNA.29766.1 | 9.6   | 9.4   | 0.22 | 0.3  | 1.15  | 0.519488 | 0.040219 | 0.748059 | 0.245801 |
| MmugDNA.29767.1.S1_at | MmugDNA.29767.1 | 3.42  | 3.18  | 0.13 | 0.22 | 1.18  | 0.342451 | 0.352127 | 0.622192 | 0.595496 |
| MmugDNA.29768.1.S1_at | MmugDNA.29768.1 | 6.1   | 5.58  | 0.27 | 0.14 | 1.43  | 0.040603 | 0.282113 | 0.25803  | 0.544937 |
| MmugDNA.29769.1.S1_at | MmugDNA.29769.1 | 9.25  | 9.94  | 0.03 | 0.14 | -1.61 | 0.001316 | 0.180105 | 0.078631 | 0.456699 |
| MmugDNA.2977.1.S1_at  | MmugDNA.2977.1  | 3.27  | 3.23  | 0.88 | 0.13 | 1.02  | 0.303635 | 0.368597 | 0.591084 | 0.608098 |
| MmugDNA.29770.1.S1_at | MmugDNA.29770.1 | 5.61  | 5.6   | 0.27 | 0.07 | 1     | 0.284182 | 0.436919 | 0.574388 | 0.656357 |
| MmugDNA.29771.1.S1_at | MmugDNA.29771.1 | 8.73  | 8.75  | 0.26 | 0.17 | -1.02 | 0.872657 | 0.277957 | 0.945426 | 0.541664 |
| MmugDNA.29773.1.S1_at | MmugDNA.29773.1 | 3.61  | 3.38  | 0.09 | 0.15 | 1.17  | 0.061625 | 0.076716 | 0.304837 | 0.322127 |
| MmugDNA.29774.1.S1_at | MmugDNA.29774.1 | 4.81  | 5.22  | 0.32 | 0.47 | -1.33 | 0.197062 | 0.226023 | 0.49422  | 0.498465 |
| MmugDNA.29775.1.S1_at | MmugDNA.29775.1 | 4.04  | 3.49  | 0.63 | 0.29 | 1.46  | 0.135458 | 0.157957 | 0.419375 | 0.433697 |
| MmugDNA.29776.1.S1_at | MmugDNA.29776.1 | 5.62  | 5.91  | 0.33 | 0.33 | -1.22 | 0.230067 | 0.386203 | 0.528979 | 0.621435 |
| MmugDNA.29777.1.S1_at | MmugDNA.29777.1 | 4.24  | 4.23  | 0.16 | 0.1  | 1.01  | 0.794422 | 0.224481 | 0.90713  | 0.497492 |
| MmugDNA.29778.1.S1_at | MmugDNA.29778.1 | 3.39  | 3.38  | 0.07 | 0.16 | 1.01  | 0.57848  | 0.618562 | 0.784318 | 0.774155 |
| MmugDNA.29780.1.S1_at | MmugDNA.29780.1 | 5.86  | 5.85  | 0.33 | 0.17 | 1.01  | 0.941694 | 0.618881 | 0.975589 | 0.774212 |
| MmugDNA.29781.1.S1_at | MmugDNA.29781.1 | 7.68  | 6.98  | 0.09 | 0.25 | 1.62  | 0.02113  | 0.025971 | 0.198834 | 0.202085 |
| MmugDNA.29782.1.S1_at | MmugDNA.29782.1 | 6.29  | 6.79  | 0.35 | 0.18 | -1.41 | 0.055154 | 0.00751  | 0.291849 | 0.116291 |
| MmugDNA.29783.1.S1_at | MmugDNA.29783.1 | 10.69 | 10.37 | 0.18 | 0.2  | 1.25  | 0.164866 | 0.010654 | 0.457897 | 0.134769 |
| MmugDNA.29784.1.S1_at | MmugDNA.29784.1 | 6.98  | 6.4   | 0.26 | 0.25 | 1.49  | 0.061391 | 0.018813 | 0.304438 | 0.172431 |
| MmugDNA.29785.1.S1_at | MmugDNA.29785.1 | 4.76  | 4.8   | 0.32 | 0.19 | -1.03 | 0.556609 | 0.606413 | 0.771767 | 0.765747 |
| MmugDNA.29786.1.S1_at | MmugDNA.29786.1 | 5.68  | 5.66  | 0.3  | 0.09 | 1.01  | 0.738615 | 0.601384 | 0.878861 | 0.762731 |
| MmugDNA.29787.1.S1_at | MmugDNA.29787.1 | 2.9   | 2.83  | 0.09 | 0.15 | 1.05  | 0.838768 | 0.619831 | 0.929209 | 0.775009 |
| MmugDNA.29789.1.S1_at | MmugDNA.29789.1 | 3.12  | 3.1   | 0.09 | 0.35 | 1.02  | 0.645226 | 0.362654 | 0.827242 | 0.603188 |
| MmugDNA.2979.1.S1_at  | MmugDNA.2979.1  | 6.6   | 6.74  | 0.4  | 0.26 | -1.11 | 0.257618 | 0.167174 | 0.551845 | 0.443636 |
| MmugDNA.29790.1.S1_at | MmugDNA.29790.1 | 3.22  | 3.28  | 0.16 | 0.08 | -1.04 | 0.552276 | 0.245739 | 0.769066 | 0.515519 |
| MmugDNA.29791.1.S1_at | MmugDNA.29791.1 | 7.33  | 7.43  | 0.17 | 0.04 | -1.07 | 0.95289  | 0.21823  | 0.980564 | 0.491764 |
| MmugDNA.29793.1.S1_at | MmugDNA.29793.1 | 7.7   | 7.6   | 0.16 | 0.04 | 1.07  | 0.788167 | 0.948673 | 0.903684 | 0.970685 |
| MmugDNA.29794.1.S1_at | MmugDNA.29794.1 | 3.62  | 3.68  | 0.1  | 0.13 | -1.05 | 0.538244 | 0.566506 | 0.760199 | 0.74062  |
| MmugDNA.29795.1.S1_at | MmugDNA.29795.1 | 3.86  | 3.6   | 0.44 | 0.41 | 1.19  | 0.476996 | 0.51865  | 0.719215 | 0.710598 |
| MmugDNA.29796.1.S1_at | MmugDNA.29796.1 | 5.06  | 4.98  | 0.09 | 0.05 | 1.06  | 0.142644 | 0.344692 | 0.428696 | 0.59007  |

|                         |                 |       |       |      |      |        |          |          |          |          |
|-------------------------|-----------------|-------|-------|------|------|--------|----------|----------|----------|----------|
| MmugDNA.29797.1.S1_at   | MmugDNA.29797.1 | 4.23  | 4.12  | 0.05 | 0.15 | 1.08   | 0.3367   | 0.219755 | 0.617272 | 0.493388 |
| MmugDNA.29798.1.S1_at   | MmugDNA.29798.1 | 5.54  | 5.34  | 0.05 | 0.07 | 1.15   | 0.007345 | 0.000226 | 0.133765 | 0.032385 |
| MmugDNA.298.1.S1_at     | MmugDNA.298.1   | 5.71  | 6.04  | 0.14 | 0.08 | -1.26  | 0.079326 | 0.384835 | 0.339285 | 0.620462 |
| MmugDNA.2980.1.S1_at    | MmugDNA.2980.1  | 7.1   | 6.72  | 0.08 | 0.05 | 1.3    | 0.002098 | 0.000961 | 0.090208 | 0.049342 |
| MmugDNA.5436.1.S1_at    | MmugDNA.5436.1  | 9.64  | 8.62  | 0.39 | 0.32 | 2.02   | 0.049282 | 0.017276 | 0.279456 | 0.166459 |
| MmugDNA.5436.1.S1_s_at  | MmugDNA.5436.1  | 8.33  | 7.44  | 0.22 | 0.21 | 1.85   | 0.012557 | 0.003521 | 0.162479 | 0.085137 |
| MmugDNA.29800.1.S1_at   | MmugDNA.29800.1 | 5.31  | 5.07  | 0.08 | 0.11 | 1.18   | 0.037058 | 0.020984 | 0.247767 | 0.181647 |
| MmugDNA.29803.1.S1_at   | MmugDNA.29803.1 | 9.64  | 9.76  | 0.17 | 0.1  | -1.09  | 0.921089 | 0.908569 | 0.966268 | 0.948227 |
| MmugDNA.29804.1.S1_at   | MmugDNA.29804.1 | 4.62  | 8.37  | 1.13 | 0.23 | -13.53 | 0.006737 | 0.082599 | 0.128853 | 0.331808 |
| MmugDNA.29805.1.S1_at   | MmugDNA.29805.1 | 4.78  | 4.74  | 0.56 | 0.25 | 1.03   | 0.57706  | 0.818006 | 0.783459 | 0.895039 |
| MmugDNA.29806.1.S1_at   | MmugDNA.29806.1 | 7.08  | 7.13  | 0.15 | 0.03 | -1.04  | 0.62221  | 0.596819 | 0.813099 | 0.75984  |
| MmugDNA.29808.1.S1_at   | MmugDNA.29808.1 | 7.01  | 6.72  | 0.33 | 0.29 | 1.23   | 0.432458 | 0.022706 | 0.688321 | 0.188723 |
| MmugDNA.29809.1.S1_at   | MmugDNA.29809.1 | 4.84  | 4.67  | 0.11 | 0.08 | 1.13   | 0.096693 | 0.099317 | 0.366692 | 0.357584 |
| MmugDNA.29810.1.S1_at   | MmugDNA.29810.1 | 7.69  | 7.67  | 0.11 | 0.11 | 1.01   | 0.714583 | 0.912987 | 0.865103 | 0.951043 |
| MmugDNA.29811.1.S1_at   | MmugDNA.29811.1 | 4.85  | 5.37  | 0.58 | 0.19 | -1.43  | 0.836264 | 0.252335 | 0.928236 | 0.520979 |
| MmugDNA.29816.1.S1_at   | MmugDNA.29816.1 | 6.1   | 6.02  | 0.1  | 0.1  | 1.06   | 0.152844 | 0.035327 | 0.44255  | 0.232227 |
| MmugDNA.29817.1.S1_at   | MmugDNA.29817.1 | 6.81  | 6.98  | 1.62 | 0.01 | -1.12  | 0.67397  | 0.824104 | 0.844284 | 0.898903 |
| MmugDNA.29818.1.S1_s_at | MmugDNA.29818.1 | 7.57  | 8.03  | 0.52 | 0.04 | -1.37  | 0.262517 | 0.159057 | 0.556605 | 0.435217 |
| MmugDNA.2982.1.S1_at    | MmugDNA.2982.1  | 7.77  | 7.6   | 0.25 | 0.05 | 1.12   | 0.636893 | 0.790637 | 0.822282 | 0.878957 |
| MmugDNA.29821.1.S1_at   | MmugDNA.29821.1 | 4.33  | 4.01  | 0.29 | 0.03 | 1.24   | 0.099845 | 0.047984 | 0.370801 | 0.264101 |
| MmugDNA.29823.1.S1_at   | MmugDNA.29823.1 | 5.65  | 5.65  | 0.11 | 0    | -1     | 0.585289 | 0.728017 | 0.789137 | 0.842711 |
| MmugDNA.29824.1.S1_at   | MmugDNA.29824.1 | 2.95  | 3.01  | 0.05 | 0    | -1.04  | 0.138246 | 0.251334 | 0.423499 | 0.520051 |
| MmugDNA.29825.1.S1_at   | MmugDNA.29825.1 | 9.61  | 8.88  | 0.18 | 0.24 | 1.66   | 0.019214 | 0.024139 | 0.192035 | 0.194527 |
| MmugDNA.29826.1.S1_at   | MmugDNA.29826.1 | 5.19  | 5.18  | 0.11 | 0.03 | 1      | 0.857606 | 0.947465 | 0.938079 | 0.970204 |
| MmugDNA.29827.1.S1_at   | MmugDNA.29827.1 | 10.74 | 10.57 | 0.23 | 0.27 | 1.13   | 0.22259  | 0.395327 | 0.520511 | 0.627404 |
| MmugDNA.29829.1.S1_at   | MmugDNA.29829.1 | 7.17  | 6.88  | 0.4  | 0.08 | 1.22   | 0.228407 | 0.206382 | 0.526707 | 0.480546 |
| MmugDNA.2983.1.S1_at    | MmugDNA.2983.1  | 3.54  | 3.52  | 0.09 | 0.01 | 1.01   | 0.968006 | 0.984149 | 0.987324 | 0.991189 |
| MmugDNA.29831.1.S1_at   | MmugDNA.29831.1 | 4.79  | 4.85  | 0.23 | 0.13 | -1.04  | 0.912454 | 0.653731 | 0.963024 | 0.797625 |
| MmugDNA.29832.1.S1_at   | MmugDNA.29832.1 | 6.49  | 6.38  | 0.08 | 0.32 | 1.08   | 0.722587 | 0.026339 | 0.869555 | 0.203321 |
| MmugDNA.29834.1.S1_at   | MmugDNA.29834.1 | 9.16  | 10.25 | 0.72 | 0.08 | -2.13  | 0.085149 | 0.332458 | 0.349307 | 0.58087  |
| MmugDNA.29835.1.S1_at   | MmugDNA.29835.1 | 4.48  | 4.59  | 0.22 | 0.15 | -1.08  | 0.497713 | 0.599654 | 0.73333  | 0.761524 |
| MmugDNA.29836.1.S1_at   | MmugDNA.29836.1 | 5.7   | 4.59  | 0.32 | 0.34 | 2.16   | 0.037092 | 0.05881  | 0.24788  | 0.289228 |
| MmugDNA.29837.1.S1_at   | MmugDNA.29837.1 | 7.74  | 7.93  | 0.79 | 0.44 | -1.14  | 0.777738 | 0.086566 | 0.898434 | 0.33911  |
| MmugDNA.29838.1.S1_at   | MmugDNA.29838.1 | 8.1   | 8.19  | 0.76 | 0.13 | -1.07  | 0.398393 | 0.697759 | 0.663859 | 0.824384 |
| MmugDNA.2984.1.S1_at    | MmugDNA.2984.1  | 5.64  | 5.65  | 0.05 | 0.11 | -1     | 0.450581 | 0.312875 | 0.701557 | 0.567453 |
| MmugDNA.29840.1.S1_at   | MmugDNA.29840.1 | 10.13 | 9.6   | 0.3  | 0.1  | 1.44   | 0.055893 | 0.420532 | 0.293434 | 0.644221 |
| MmugDNA.29840.1.S1_x_at | MmugDNA.29840.1 | 10.3  | 9.77  | 0.29 | 0.04 | 1.44   | 0.041301 | 0.375731 | 0.259651 | 0.613624 |
| MmugDNA.29841.1.S1_at   | MmugDNA.29841.1 | 7.66  | 7.56  | 0.46 | 0.33 | 1.07   | 0.901576 | 0.12899  | 0.958288 | 0.400461 |
| MmugDNA.29844.1.S1_at   | MmugDNA.29844.1 | 6.9   | 6.93  | 0.25 | 0.05 | -1.02  | 0.426272 | 0.613365 | 0.68362  | 0.770518 |
| MmugDNA.29845.1.S1_at   | MmugDNA.29845.1 | 7.11  | 6.97  | 0.05 | 0.08 | 1.1    | 0.060723 | 0.183412 | 0.303419 | 0.459553 |
| MmugDNA.29846.1.S1_at   | MmugDNA.29846.1 | 9.07  | 8.91  | 0.33 | 0.11 | 1.11   | 0.415249 | 0.322653 | 0.676055 | 0.574024 |
| MmugDNA.29847.1.S1_at   | MmugDNA.29847.1 | 5.17  | 5.24  | 0.2  | 0.05 | -1.05  | 0.534825 | 0.803465 | 0.757921 | 0.886895 |
| MmugDNA.29848.1.S1_at   | MmugDNA.29848.1 | 7.27  | 6.01  | 0.75 | 0.58 | 2.39   | 0.199771 | 0.187233 | 0.497264 | 0.463221 |

|                         |                 |       |       |      |      |       |          |          |          |          |
|-------------------------|-----------------|-------|-------|------|------|-------|----------|----------|----------|----------|
| MmugDNA.29849.1.S1_at   | MmugDNA.29849.1 | 3.13  | 3.2   | 0.4  | 0.03 | -1.05 | 0.575438 | 0.665421 | 0.782823 | 0.803964 |
| MmugDNA.29850.1.S1_at   | MmugDNA.29850.1 | 10.88 | 10.78 | 0.21 | 0.04 | 1.07  | 0.310674 | 0.203436 | 0.596946 | 0.477634 |
| MmugDNA.29852.1.S1_at   | MmugDNA.29852.1 | 4.33  | 4.15  | 0.02 | 0.64 | 1.13  | 0.743989 | 0.892371 | 0.881384 | 0.938624 |
| MmugDNA.29852.1.S1_x_at | MmugDNA.29852.1 | 9.14  | 8.98  | 0.31 | 0.2  | 1.12  | 0.49405  | 0.524829 | 0.730933 | 0.714619 |
| MmugDNA.29853.1.S1_at   | MmugDNA.29853.1 | 6.6   | 5.39  | 0.85 | 0.66 | 2.31  | 0.126415 | 0.184249 | 0.407793 | 0.460382 |
| MmugDNA.29854.1.S1_at   | MmugDNA.29854.1 | 5.38  | 5.53  | 0.3  | 0.16 | -1.11 | 0.933974 | 0.093149 | 0.972304 | 0.349303 |
| MmugDNA.29854.1.S1_x_at | MmugDNA.29854.1 | 6.59  | 6.37  | 0.5  | 0.19 | 1.16  | 0.391058 | 0.173989 | 0.658569 | 0.450247 |
| MmugDNA.29856.1.S1_at   | MmugDNA.29856.1 | 11.03 | 10.83 | 0.01 | 0.17 | 1.15  | 0.373758 | 0.03845  | 0.645118 | 0.24098  |
| MmugDNA.29857.1.S1_at   | MmugDNA.29857.1 | 4.17  | 4.17  | 0.13 | 0.2  | 1     | 0.773274 | 0.370925 | 0.896039 | 0.609902 |
| MmugDNA.29859.1.S1_at   | MmugDNA.29859.1 | 3.38  | 3.39  | 0.04 | 0.01 | -1.01 | 0.945254 | 0.50258  | 0.977023 | 0.700213 |
| MmugDNA.2986.1.S1_at    | MmugDNA.2986.1  | 6.26  | 5.74  | 0.97 | 0.68 | 1.44  | 0.319071 | 0.493273 | 0.603736 | 0.694018 |
| MmugDNA.29860.1.S1_at   | MmugDNA.29860.1 | 3.32  | 3.2   | 0.33 | 0.1  | 1.08  | 0.567823 | 0.675363 | 0.777977 | 0.81026  |
| MmugDNA.29862.1.S1_at   | MmugDNA.29862.1 | 9.79  | 10.06 | 0.57 | 0.19 | -1.21 | 0.943635 | 0.522064 | 0.976323 | 0.712853 |
| MmugDNA.29864.1.S1_at   | MmugDNA.29864.1 | 4.67  | 4.79  | 0.06 | 0.24 | -1.08 | 0.956711 | 0.105952 | 0.982259 | 0.36826  |
| MmugDNA.29865.1.S1_at   | MmugDNA.29865.1 | 2.86  | 2.84  | 0.08 | 0.07 | 1.01  | 0.713568 | 0.65424  | 0.864722 | 0.797979 |
| MmugDNA.29866.1.S1_at   | MmugDNA.29866.1 | 3.13  | 3.17  | 0.21 | 0.05 | -1.03 | 0.956929 | 0.994768 | 0.98233  | 0.996729 |
| MmugDNA.29868.1.S1_at   | MmugDNA.29868.1 | 5.88  | 5.89  | 0.22 | 0.09 | -1    | 0.458436 | 0.253392 | 0.707032 | 0.521713 |
| MmugDNA.29869.1.S1_at   | MmugDNA.29869.1 | 6.52  | 6.42  | 0.29 | 0.16 | 1.07  | 0.553813 | 0.091764 | 0.770273 | 0.346977 |
| MmugDNA.2987.1.S1_at    | MmugDNA.2987.1  | 4.55  | 4.6   | 0.26 | 0.04 | -1.03 | 0.722522 | 0.763805 | 0.869499 | 0.862673 |
| MmugDNA.29870.1.S1_at   | MmugDNA.29870.1 | 12.49 | 12.31 | 0.11 | 0.07 | 1.14  | 0.050366 | 0.11733  | 0.282317 | 0.384947 |
| MmugDNA.29874.1.S1_at   | MmugDNA.29874.1 | 9.47  | 9.83  | 0.5  | 0.09 | -1.28 | 0.298798 | 0.313795 | 0.587033 | 0.568083 |
| MmugDNA.29875.1.S1_at   | MmugDNA.29875.1 | 9.18  | 8.93  | 0.09 | 0.03 | 1.19  | 0.013556 | 0.517289 | 0.167258 | 0.709435 |
| MmugDNA.29877.1.S1_at   | MmugDNA.29877.1 | 4.88  | 4.45  | 0.32 | 0.38 | 1.35  | 0.188727 | 0.198634 | 0.485343 | 0.473391 |
| MmugDNA.29881.1.S1_at   | MmugDNA.29881.1 | 5.85  | 5.59  | 0.33 | 0.31 | 1.2   | 0.072261 | 0.209402 | 0.326794 | 0.483069 |
| MmugDNA.29882.1.S1_at   | MmugDNA.29882.1 | 4.04  | 3.87  | 0.2  | 0.23 | 1.13  | 0.737964 | 0.414589 | 0.878521 | 0.640431 |
| MmugDNA.29883.1.S1_at   | MmugDNA.29883.1 | 9.17  | 8.47  | 0.13 | 0.05 | 1.63  | 0.000758 | 0.000963 | 0.072567 | 0.049392 |
| MmugDNA.29885.1.S1_at   | MmugDNA.29885.1 | 6.26  | 6.11  | 0    | 0.07 | 1.11  | 0.016786 | 0.043098 | 0.182845 | 0.252256 |
| MmugDNA.29886.1.S1_at   | MmugDNA.29886.1 | 5.41  | 5.14  | 0.83 | 0.46 | 1.21  | 0.424663 | 0.620818 | 0.682288 | 0.775619 |
| MmugDNA.29887.1.S1_at   | MmugDNA.29887.1 | 9.69  | 9.99  | 0.14 | 0.1  | -1.23 | 0.016962 | 0.187021 | 0.183747 | 0.462938 |
| MmugDNA.29888.1.S1_at   | MmugDNA.29888.1 | 3.43  | 3.29  | 0.25 | 0.07 | 1.1   | 0.182646 | 0.211131 | 0.478431 | 0.485153 |
| MmugDNA.29889.1.S1_at   | MmugDNA.29889.1 | 5.58  | 5.56  | 0.15 | 0.06 | 1.01  | 0.329415 | 0.435761 | 0.61165  | 0.655508 |
| MmugDNA.29892.1.S1_at   | MmugDNA.29892.1 | 4.4   | 4.26  | 0.07 | 0.08 | 1.1   | 0.43205  | 0.127054 | 0.687889 | 0.397885 |
| MmugDNA.29893.1.S1_at   | MmugDNA.29893.1 | 7.85  | 7.95  | 0.27 | 0.11 | -1.08 | 0.587251 | 0.648613 | 0.790419 | 0.794369 |
| MmugDNA.29896.1.S1_at   | MmugDNA.29896.1 | 4.6   | 5.48  | 0.18 | 0.57 | -1.84 | 0.069129 | 0.180631 | 0.321019 | 0.457245 |
| MmugDNA.29898.1.S1_at   | MmugDNA.29898.1 | 6.13  | 6.32  | 0.17 | 0.03 | -1.14 | 0.135168 | 0.146489 | 0.419109 | 0.420533 |
| MmugDNA.29899.1.S1_at   | MmugDNA.29899.1 | 5.76  | 5.6   | 0.26 | 0.08 | 1.11  | 0.97906  | 0.924774 | 0.992043 | 0.957465 |
| MmugDNA.299.1.S1_at     | MmugDNA.299.1   | 4.42  | 4.43  | 0    | 0.13 | -1    | 0.342459 | 0.289637 | 0.622192 | 0.5507   |
| MmugDNA.2990.1.S1_at    | MmugDNA.2990.1  | 8.37  | 8.54  | 0.03 | 0.01 | -1.12 | 0.00092  | 0.003111 | 0.075607 | 0.081305 |
| MmugDNA.29900.1.S1_s_at | MmugDNA.29900.1 | 10.26 | 9     | 0.42 | 0.11 | 2.38  | 0.004871 | 0.001271 | 0.115123 | 0.055241 |
| MmugDNA.29901.1.S1_at   | MmugDNA.29901.1 | 6.48  | 6.61  | 0.12 | 0.12 | -1.09 | 0.254592 | 0.218093 | 0.549102 | 0.491683 |
| MmugDNA.29902.1.S1_at   | MmugDNA.29902.1 | 9.39  | 9.81  | 0.26 | 0.05 | -1.34 | 0.158466 | 0.073418 | 0.449548 | 0.316609 |
| MmugDNA.29903.1.S1_at   | MmugDNA.29903.1 | 8.63  | 8.61  | 0.27 | 0.13 | 1.01  | 0.669665 | 0.031578 | 0.841513 | 0.219857 |
| MmugDNA.29904.1.S1_at   | MmugDNA.29904.1 | 6.4   | 5.36  | 0.84 | 0.38 | 2.07  | 0.118917 | 0.127889 | 0.396589 | 0.398825 |



|                         |                 |       |       |      |      |       |          |          |          |          |
|-------------------------|-----------------|-------|-------|------|------|-------|----------|----------|----------|----------|
| MmugDNA.29905.1.S1_at   | MmugDNA.29905.1 | 4.89  | 5.04  | 0.14 | 0.04 | -1.12 | 0.207442 | 0.320463 | 0.505141 | 0.572648 |
| MmugDNA.29907.1.S1_at   | MmugDNA.29907.1 | 8.16  | 8.42  | 0.31 | 0.1  | -1.19 | 0.585049 | 0.782629 | 0.78898  | 0.874202 |
| MmugDNA.29908.1.S1_at   | MmugDNA.29908.1 | 5.6   | 5.57  | 0.18 | 0.06 | 1.02  | 0.994921 | 0.389614 | 0.997965 | 0.623668 |
| MmugDNA.29909.1.S1_at   | MmugDNA.29909.1 | 4.37  | 4.37  | 0.09 | 0.2  | -1.01 | 0.640286 | 0.331932 | 0.824212 | 0.580503 |
| MmugDNA.2991.1.S1_at    | MmugDNA.2991.1  | 5.98  | 5.96  | 0.17 | 0.02 | 1.01  | 0.892322 | 0.727308 | 0.954155 | 0.84224  |
| MmugDNA.29910.1.S1_at   | MmugDNA.29910.1 | 5.01  | 4.99  | 0.79 | 0.09 | 1.01  | 0.968422 | 0.579223 | 0.987529 | 0.748973 |
| MmugDNA.29911.1.S1_at   | MmugDNA.29911.1 | 8.79  | 8.68  | 0.1  | 0.08 | 1.08  | 0.247588 | 0.017007 | 0.543025 | 0.165333 |
| MmugDNA.29912.1.S1_at   | MmugDNA.29912.1 | 5.22  | 5.15  | 0.38 | 0.12 | 1.05  | 0.814686 | 0.910193 | 0.917175 | 0.949342 |
| MmugDNA.29913.1.S1_at   | MmugDNA.29913.1 | 3.99  | 3.9   | 0.06 | 0.04 | 1.07  | 0.091149 | 0.892276 | 0.358525 | 0.938598 |
| MmugDNA.29914.1.S1_at   | MmugDNA.29914.1 | 4.31  | 4.64  | 0.31 | 0.18 | -1.25 | 0.538324 | 0.582068 | 0.760247 | 0.750784 |
| MmugDNA.29915.1.S1_at   | MmugDNA.29915.1 | 8.63  | 9.09  | 0.21 | 0.09 | -1.37 | 0.023274 | 0.003898 | 0.205562 | 0.088806 |
| MmugDNA.29916.1.S1_at   | MmugDNA.29916.1 | 4.4   | 4.97  | 0.09 | 0.17 | -1.48 | 0.010571 | 0.004176 | 0.152667 | 0.091064 |
| MmugDNA.29917.1.S1_at   | MmugDNA.29917.1 | 5.19  | 3.98  | 1.04 | 0.59 | 2.31  | 0.139029 | 0.321725 | 0.424645 | 0.573355 |
| MmugDNA.29918.1.S1_at   | MmugDNA.29918.1 | 8.78  | 7.94  | 0.14 | 0.21 | 1.79  | 0.006761 | 0.072912 | 0.128994 | 0.315942 |
| MmugDNA.29919.1.S1_at   | MmugDNA.29919.1 | 4.99  | 4.41  | 0.58 | 0.18 | 1.49  | 0.160713 | 0.213832 | 0.452305 | 0.48758  |
| MmugDNA.2992.1.S1_at    | MmugDNA.2992.1  | 10.24 | 9.78  | 0.23 | 0.23 | 1.37  | 0.043544 | 0.010423 | 0.265724 | 0.133525 |
| MmugDNA.29920.1.S1_at   | MmugDNA.29920.1 | 5.38  | 5.45  | 0.16 | 0.13 | -1.05 | 0.809549 | 0.868307 | 0.914716 | 0.925241 |
| MmugDNA.29921.1.S1_at   | MmugDNA.29921.1 | 3.07  | 3.03  | 0.22 | 0.08 | 1.03  | 0.659839 | 0.68947  | 0.835807 | 0.818854 |
| MmugDNA.29923.1.S1_at   | MmugDNA.29923.1 | 7.33  | 6.82  | 0.71 | 0.31 | 1.43  | 0.558534 | 0.061937 | 0.772919 | 0.295734 |
| MmugDNA.29925.1.S1_at   | MmugDNA.29925.1 | 9.94  | 9.42  | 0.04 | 0.22 | 1.44  | 0.03935  | 0.137411 | 0.254835 | 0.410338 |
| MmugDNA.29926.1.S1_at   | MmugDNA.29926.1 | 5.62  | 5.81  | 0.09 | 0.18 | -1.14 | 0.094536 | 0.100941 | 0.363527 | 0.360509 |
| MmugDNA.29927.1.S1_at   | MmugDNA.29927.1 | 4.52  | 4.49  | 0.03 | 0.1  | 1.02  | 0.664315 | 0.18266  | 0.838381 | 0.459186 |
| MmugDNA.29928.1.S1_at   | MmugDNA.29928.1 | 5.72  | 5.79  | 0.18 | 0.09 | -1.05 | 0.501915 | 0.438846 | 0.735617 | 0.657715 |
| MmugDNA.29929.1.S1_at   | MmugDNA.29929.1 | 5.32  | 5.1   | 0.18 | 0.23 | 1.17  | 0.244821 | 0.256811 | 0.541082 | 0.524607 |
| MmugDNA.2993.1.S1_at    | MmugDNA.2993.1  | 6.02  | 5.79  | 0.22 | 0.36 | 1.18  | 0.146819 | 0.167539 | 0.434827 | 0.443979 |
| MmugDNA.29931.1.S1_at   | MmugDNA.29931.1 | 5.53  | 5.37  | 0.14 | 0.22 | 1.12  | 0.489033 | 0.709612 | 0.727508 | 0.831691 |
| MmugDNA.29932.1.S1_at   | MmugDNA.29932.1 | 3.39  | 3.22  | 0.18 | 0.09 | 1.12  | 0.133432 | 0.314532 | 0.416977 | 0.568372 |
| MmugDNA.29934.1.S1_at   | MmugDNA.29934.1 | 9.9   | 10.57 | 0.46 | 0.15 | -1.59 | 0.062625 | 0.027934 | 0.306893 | 0.208628 |
| MmugDNA.29935.1.S1_at   | MmugDNA.29935.1 | 8.31  | 8.37  | 0.45 | 0.23 | -1.04 | 0.781157 | 0.930497 | 0.900025 | 0.960513 |
| MmugDNA.29935.1.S1_s_at | MmugDNA.29935.1 | 9.57  | 9.81  | 0.36 | 0.13 | -1.18 | 0.929988 | 0.584556 | 0.970466 | 0.752462 |
| MmugDNA.29937.1.S1_at   | MmugDNA.29937.1 | 5.17  | 5.37  | 0.03 | 0.37 | -1.15 | 0.49841  | 0.507356 | 0.733621 | 0.702917 |
| MmugDNA.29937.1.S1_x_at | MmugDNA.29937.1 | 5.41  | 5.61  | 0.43 | 0.24 | -1.15 | 0.624202 | 0.64721  | 0.814736 | 0.793312 |
| MmugDNA.29938.1.S1_at   | MmugDNA.29938.1 | 9.82  | 8.09  | 0.15 | 0.17 | 3.32  | 0.000251 | 0.002383 | 0.054642 | 0.072165 |
| MmugDNA.2994.1.S1_at    | MmugDNA.2994.1  | 3.45  | 4.16  | 0.43 | 0.49 | -1.63 | 0.307992 | 0.239884 | 0.59471  | 0.510627 |
| MmugDNA.29940.1.S1_at   | MmugDNA.29940.1 | 3.15  | 3.25  | 0.06 | 0    | -1.07 | 0.116954 | 0.081773 | 0.394034 | 0.330121 |
| MmugDNA.29942.1.S1_at   | MmugDNA.29942.1 | 6.66  | 6.04  | 0.61 | 0.21 | 1.53  | 0.537093 | 0.719809 | 0.759385 | 0.837888 |
| MmugDNA.29943.1.S1_at   | MmugDNA.29943.1 | 8.07  | 8.26  | 0.59 | 0.19 | -1.14 | 0.435625 | 0.737999 | 0.690707 | 0.848158 |
| MmugDNA.29944.1.S1_at   | MmugDNA.29944.1 | 3.96  | 3.59  | 0.1  | 0.12 | 1.29  | 0.027059 | 0.029345 | 0.217262 | 0.213228 |
| MmugDNA.29945.1.S1_at   | MmugDNA.29945.1 | 12.19 | 11.95 | 0.08 | 0.02 | 1.18  | 0.01088  | 0.027905 | 0.154001 | 0.208529 |
| MmugDNA.29946.1.S1_at   | MmugDNA.29946.1 | 5.07  | 5.84  | 0.23 | 0.15 | -1.7  | 0.00881  | 0.01251  | 0.143663 | 0.144302 |
| MmugDNA.29947.1.S1_at   | MmugDNA.29947.1 | 5.55  | 5.46  | 0.09 | 0.16 | 1.07  | 0.27734  | 0.186672 | 0.568874 | 0.462459 |
| MmugDNA.29948.1.S1_at   | MmugDNA.29948.1 | 6.76  | 6.77  | 0.13 | 0.08 | -1.01 | 0.802972 | 0.060131 | 0.91161  | 0.291882 |
| MmugDNA.29949.1.S1_at   | MmugDNA.29949.1 | 3.77  | 3.64  | 0.08 | 0.11 | 1.1   | 0.127592 | 0.157611 | 0.409517 | 0.433131 |

|                         |                 |       |       |      |      |       |          |          |          |          |
|-------------------------|-----------------|-------|-------|------|------|-------|----------|----------|----------|----------|
| MmugDNA.2995.1.S1_at    | MmugDNA.2995.1  | 5.42  | 5.97  | 0.27 | 0.28 | -1.45 | 0.065947 | 0.37439  | 0.314251 | 0.612855 |
| MmugDNA.29951.1.S1_at   | MmugDNA.29951.1 | 8.05  | 7.99  | 0.16 | 0.12 | 1.05  | 0.310033 | 0.595541 | 0.596339 | 0.759091 |
| MmugDNA.29953.1.S1_at   | MmugDNA.29953.1 | 4.4   | 4.31  | 0.17 | 0.09 | 1.06  | 0.983304 | 0.126538 | 0.99383  | 0.39714  |
| MmugDNA.29955.1.S1_at   | MmugDNA.29955.1 | 11.02 | 11.04 | 0.17 | 0.06 | -1.01 | 0.3777   | 0.936756 | 0.64816  | 0.964351 |
| MmugDNA.29957.1.S1_at   | MmugDNA.29957.1 | 5.15  | 5.04  | 0.08 | 0.07 | 1.08  | 0.147387 | 0.415673 | 0.435407 | 0.641027 |
| MmugDNA.29959.1.S1_at   | MmugDNA.29959.1 | 9.46  | 9.96  | 0.31 | 0.2  | -1.42 | 0.10118  | 0.14654  | 0.37238  | 0.420583 |
| MmugDNA.2996.1.S1_at    | MmugDNA.2996.1  | 3.57  | 3.48  | 0.13 | 0.2  | 1.06  | 0.434317 | 0.234792 | 0.689624 | 0.506108 |
| MmugDNA.29960.1.S1_at   | MmugDNA.29960.1 | 4.93  | 4.75  | 0.47 | 0.27 | 1.13  | 0.745007 | 0.558702 | 0.881771 | 0.735856 |
| MmugDNA.29961.1.S1_at   | MmugDNA.29961.1 | 5.71  | 5.69  | 1.46 | 0.39 | 1.01  | 0.782926 | 0.702193 | 0.900922 | 0.827347 |
| MmugDNA.29963.1.S1_at   | MmugDNA.29963.1 | 4.19  | 4.3   | 0.14 | 0.06 | -1.07 | 0.394075 | 0.231831 | 0.660792 | 0.503592 |
| MmugDNA.29964.1.S1_at   | MmugDNA.29964.1 | 3.43  | 3.35  | 0.03 | 0.08 | 1.05  | 0.229369 | 0.112951 | 0.528143 | 0.378759 |
| MmugDNA.29966.1.S1_at   | MmugDNA.29966.1 | 12.37 | 12.6  | 0.07 | 0.14 | -1.17 | 0.170183 | 0.043487 | 0.463822 | 0.253159 |
| MmugDNA.29967.1.S1_at   | MmugDNA.29967.1 | 11.29 | 11.04 | 0.56 | 0.04 | 1.19  | 0.848984 | 0.401882 | 0.934214 | 0.63109  |
| MmugDNA.29968.1.S1_at   | MmugDNA.29968.1 | 5.3   | 4.92  | 0.37 | 0.31 | 1.3   | 0.203368 | 0.10866  | 0.501192 | 0.372171 |
| MmugDNA.29969.1.S1_at   | MmugDNA.29969.1 | 5.3   | 5.39  | 0.27 | 0.11 | -1.06 | 0.455499 | 0.313273 | 0.705182 | 0.567753 |
| MmugDNA.29973.1.S1_at   | MmugDNA.29973.1 | 3.72  | 3.89  | 0.09 | 0.11 | -1.12 | 0.059459 | 0.028935 | 0.300954 | 0.211979 |
| MmugDNA.29974.1.S1_at   | MmugDNA.29974.1 | 5.39  | 4.1   | 1.03 | 0.5  | 2.45  | 0.162175 | 0.31989  | 0.454027 | 0.572245 |
| MmugDNA.29976.1.S1_at   | MmugDNA.29976.1 | 3.8   | 3.77  | 0.12 | 0.08 | 1.03  | 0.714726 | 0.700097 | 0.865177 | 0.825946 |
| MmugDNA.29978.1.S1_at   | MmugDNA.29978.1 | 5.26  | 5.4   | 0.03 | 0.03 | -1.1  | 0.00888  | 0.047237 | 0.143995 | 0.261952 |
| MmugDNA.2998.1.S1_at    | MmugDNA.2998.1  | 8.32  | 8.1   | 0.17 | 0.09 | 1.17  | 0.092595 | 0.232561 | 0.360911 | 0.504341 |
| MmugDNA.29980.1.S1_at   | MmugDNA.29980.1 | 3.51  | 3.48  | 0.17 | 0.14 | 1.02  | 0.405286 | 0.454137 | 0.668751 | 0.668407 |
| MmugDNA.29981.1.S1_s_at | MmugDNA.29981.1 | 12.02 | 11.92 | 0.16 | 0.05 | 1.07  | 0.913685 | 0.2275   | 0.963382 | 0.499805 |
| MmugDNA.29982.1.S1_at   | MmugDNA.29982.1 | 9.52  | 9.44  | 0.11 | 0.1  | 1.06  | 0.377527 | 0.486399 | 0.648007 | 0.689764 |
| MmugDNA.33355.1.S1_at   | MmugDNA.33355.1 | 12.01 | 12.23 | 0.32 | 0.08 | -1.16 | 0.401116 | 0.735932 | 0.665882 | 0.847217 |
| MmugDNA.33355.1.S1_s_at | MmugDNA.33355.1 | 10.82 | 10.93 | 0.28 | 0.09 | -1.08 | 0.577411 | 0.8237   | 0.783593 | 0.898726 |
| MmugDNA.29984.1.S1_at   | MmugDNA.29984.1 | 6     | 5.89  | 0.12 | 0.05 | 1.08  | 0.335096 | 0.334074 | 0.616104 | 0.582104 |
| MmugDNA.29985.1.S1_at   | MmugDNA.29985.1 | 8.81  | 8.84  | 0.29 | 0.03 | -1.02 | 0.404394 | 0.615477 | 0.668151 | 0.772012 |
| MmugDNA.29986.1.S1_at   | MmugDNA.29986.1 | 5.94  | 5.91  | 0.04 | 0.09 | 1.02  | 0.520814 | 0.792399 | 0.748988 | 0.880041 |
| MmugDNA.29987.1.S1_at   | MmugDNA.29987.1 | 4.95  | 5.07  | 0.76 | 0.31 | -1.09 | 0.659742 | 0.834114 | 0.835796 | 0.904949 |
| MmugDNA.29988.1.S1_at   | MmugDNA.29988.1 | 8.59  | 8.97  | 0.2  | 0.3  | -1.3  | 0.444572 | 0.005196 | 0.69744  | 0.099895 |
| MmugDNA.29990.1.S1_s_at | MmugDNA.29990.1 | 4.26  | 4.15  | 0.07 | 0.11 | 1.08  | 0.124737 | 0.217396 | 0.405027 | 0.491012 |
| MmugDNA.29991.1.S1_at   | MmugDNA.29991.1 | 4.86  | 4.45  | 0.9  | 0.21 | 1.33  | 0.157548 | 0.206631 | 0.448241 | 0.480662 |
| MmugDNA.29992.1.S1_at   | MmugDNA.29992.1 | 11.01 | 10.58 | 0.12 | 0.04 | 1.35  | 0.005759 | 0.087449 | 0.121722 | 0.340617 |
| MmugDNA.29993.1.S1_s_at | MmugDNA.29993.1 | 7.94  | 11.69 | 2.6  | 0.21 | -13.5 | 0.094935 | 0.412637 | 0.363913 | 0.639015 |
| MmugDNA.29995.1.S1_at   | MmugDNA.29995.1 | 10.51 | 10.28 | 0.21 | 0.06 | 1.18  | 0.138183 | 0.155575 | 0.423422 | 0.43094  |
| MmugDNA.29997.1.S1_at   | MmugDNA.29997.1 | 9.19  | 8.81  | 0.44 | 0.11 | 1.3   | 0.097712 | 0.079848 | 0.368101 | 0.327179 |
| MmugDNA.29998.1.S1_at   | MmugDNA.29998.1 | 6.59  | 6.67  | 0.14 | 0.11 | -1.06 | 0.268967 | 0.337529 | 0.561347 | 0.584716 |
| MmugDNA.29999.1.S1_at   | MmugDNA.29999.1 | 8.5   | 8.57  | 0.12 | 0.11 | -1.05 | 0.218152 | 0.880392 | 0.515954 | 0.931677 |
| MmugDNA.3.1.S1_at       | MmugDNA.3.1     | 5.79  | 6.68  | 0.36 | 0.44 | -1.85 | 0.05531  | 0.173512 | 0.292075 | 0.449938 |
| MmugDNA.30.1.S1_at      | MmugDNA.30.1    | 4.08  | 4.08  | 0.14 | 0.07 | 1     | 0.251963 | 0.488227 | 0.546684 | 0.690997 |
| MmugDNA.300.1.S1_at     | MmugDNA.300.1   | 5.48  | 5.47  | 0.02 | 0.12 | 1.01  | 0.260688 | 0.20932  | 0.554798 | 0.483038 |
| MmugDNA.30000.1.S1_at   | MmugDNA.30000.1 | 3.26  | 3.27  | 0.12 | 0.06 | -1    | 0.778422 | 0.160588 | 0.898788 | 0.436745 |
| MmugDNA.30001.1.S1_at   | MmugDNA.30001.1 | 3.26  | 3.02  | 0.19 | 0.17 | 1.18  | 0.522372 | 0.275392 | 0.749806 | 0.539663 |

|                         |                 |       |       |      |      |       |          |          |          |          |
|-------------------------|-----------------|-------|-------|------|------|-------|----------|----------|----------|----------|
| MmugDNA.30002.1.S1_at   | MmugDNA.30002.1 | 5.94  | 5.6   | 0.68 | 0.07 | 1.26  | 0.439927 | 0.508464 | 0.694023 | 0.70363  |
| MmugDNA.31451.1.S1_s_at | MmugDNA.31451.1 | 6.47  | 6.48  | 0.08 | 0.09 | -1.01 | 0.939846 | 0.065199 | 0.9746   | 0.301239 |
| MmugDNA.30005.1.S1_at   | MmugDNA.30005.1 | 4.01  | 3.68  | 0.76 | 0.19 | 1.25  | 0.3765   | 0.524916 | 0.647232 | 0.714646 |
| MmugDNA.30006.1.S1_at   | MmugDNA.30006.1 | 7.24  | 6.54  | 0.28 | 0.28 | 1.63  | 0.080511 | 0.059401 | 0.341026 | 0.290548 |
| MmugDNA.30007.1.S1_at   | MmugDNA.30007.1 | 8.78  | 8.66  | 0.03 | 0.22 | 1.09  | 0.650476 | 0.098683 | 0.830274 | 0.356783 |
| MmugDNA.30008.1.S1_at   | MmugDNA.30008.1 | 9.08  | 9.64  | 0.17 | 0.06 | -1.47 | 0.005738 | 0.314213 | 0.121435 | 0.568185 |
| MmugDNA.30009.1.S1_s_at | MmugDNA.30009.1 | 11.75 | 11.61 | 0.19 | 0.03 | 1.1   | 0.675574 | 0.861761 | 0.845101 | 0.921441 |
| MmugDNA.30014.1.S1_at   | MmugDNA.30014.1 | 4.45  | 4.1   | 0.35 | 0.13 | 1.28  | 0.501325 | 0.642142 | 0.735287 | 0.79003  |
| MmugDNA.30015.1.S1_at   | MmugDNA.30015.1 | 11.06 | 10.93 | 0.06 | 0.07 | 1.1   | 0.147001 | 0.8333   | 0.434942 | 0.9044   |
| MmugDNA.30017.1.S1_at   | MmugDNA.30017.1 | 10.9  | 11.63 | 0.2  | 0.06 | -1.66 | 0.004093 | 0.003702 | 0.109381 | 0.086769 |
| MmugDNA.4234.1.S1_s_at  | MmugDNA.4234.1  | 10.29 | 11.24 | 0.25 | 0.09 | -1.93 | 0.004131 | 0.005358 | 0.109689 | 0.101092 |
| MmugDNA.30018.1.S1_at   | MmugDNA.30018.1 | 6.37  | 6.91  | 0.18 | 0.09 | -1.46 | 0.006557 | 0.008994 | 0.127421 | 0.125485 |
| MmugDNA.3002.1.S1_at    | MmugDNA.3002.1  | 8.86  | 8.95  | 0.3  | 0.02 | -1.06 | 0.352541 | 0.479116 | 0.630029 | 0.684942 |
| MmugDNA.30020.1.S1_at   | MmugDNA.30020.1 | 4.47  | 4.44  | 0.03 | 0.73 | 1.02  | 0.507861 | 0.625371 | 0.740126 | 0.779171 |
| MmugDNA.30021.1.S1_at   | MmugDNA.30021.1 | 13.65 | 13.66 | 0.03 | 0.04 | -1.01 | 0.673782 | 0.021003 | 0.844104 | 0.181715 |
| MmugDNA.30022.1.S1_at   | MmugDNA.30022.1 | 5.55  | 5.49  | 0.06 | 0.07 | 1.05  | 0.306497 | 0.046061 | 0.593297 | 0.258977 |
| MmugDNA.30023.1.S1_at   | MmugDNA.30023.1 | 6.75  | 7.3   | 0.9  | 0.37 | -1.47 | 0.532698 | 0.729579 | 0.756693 | 0.843613 |
| MmugDNA.30024.1.S1_at   | MmugDNA.30024.1 | 5.56  | 5.26  | 0.67 | 0.82 | 1.23  | 0.737777 | 0.569273 | 0.878397 | 0.742375 |
| MmugDNA.30025.1.S1_at   | MmugDNA.30025.1 | 6.09  | 6.39  | 0.59 | 0.45 | -1.23 | 0.94241  | 0.770923 | 0.975651 | 0.866807 |
| MmugDNA.30029.1.S1_at   | MmugDNA.30029.1 | 5.66  | 5.49  | 0.25 | 0.17 | 1.13  | 0.292956 | 0.560809 | 0.581994 | 0.736978 |
| MmugDNA.3003.1.S1_at    | MmugDNA.3003.1  | 5.05  | 5.05  | 0.22 | 0.22 | -1    | 0.335604 | 0.537891 | 0.616515 | 0.722779 |
| MmugDNA.30034.1.S1_at   | MmugDNA.30034.1 | 5.32  | 5.25  | 1.64 | 1.08 | 1.05  | 0.582361 | 0.792171 | 0.78718  | 0.879905 |
| MmugDNA.30035.1.S1_at   | MmugDNA.30035.1 | 4     | 4.41  | 0.16 | 0.39 | -1.33 | 0.168185 | 0.17592  | 0.461465 | 0.452486 |
| MmugDNA.30036.1.S1_at   | MmugDNA.30036.1 | 7.57  | 7.4   | 0.25 | 0.12 | 1.12  | 0.208644 | 0.299762 | 0.506196 | 0.558081 |
| MmugDNA.30037.1.S1_at   | MmugDNA.30037.1 | 7.03  | 7.45  | 0.07 | 0.11 | -1.34 | 0.006954 | 0.044526 | 0.130571 | 0.255364 |
| MmugDNA.30039.1.S1_at   | MmugDNA.30039.1 | 10.22 | 10.07 | 0.26 | 0.04 | 1.11  | 0.84078  | 0.084816 | 0.930069 | 0.336344 |
| MmugDNA.30040.1.S1_at   | MmugDNA.30040.1 | 5.31  | 5.14  | 0.19 | 0.06 | 1.12  | 0.195866 | 0.254842 | 0.492745 | 0.523051 |
| MmugDNA.30041.1.S1_at   | MmugDNA.30041.1 | 5.11  | 4.65  | 0.17 | 0.2  | 1.37  | 0.139439 | 0.319138 | 0.425004 | 0.57167  |
| MmugDNA.30043.1.S1_at   | MmugDNA.30043.1 | 9.86  | 9.51  | 0.36 | 0.13 | 1.28  | 0.299364 | 0.076877 | 0.587689 | 0.322368 |
| MmugDNA.30047.1.S1_at   | MmugDNA.30047.1 | 5.02  | 5.32  | 0.27 | 0.16 | -1.22 | 0.302722 | 0.135824 | 0.590379 | 0.408019 |
| MmugDNA.30048.1.S1_at   | MmugDNA.30048.1 | 8.74  | 8.73  | 0.06 | 0.1  | 1.01  | 0.825294 | 0.372657 | 0.922422 | 0.611617 |
| MmugDNA.30049.1.S1_at   | MmugDNA.30049.1 | 9.88  | 10.05 | 0.28 | 0.14 | -1.12 | 0.962394 | 0.080317 | 0.984652 | 0.327965 |
| MmugDNA.30050.1.S1_at   | MmugDNA.30050.1 | 7.37  | 7.26  | 0.62 | 0.59 | 1.08  | 0.320596 | 0.230346 | 0.605112 | 0.502112 |
| MmugDNA.30051.1.S1_at   | MmugDNA.30051.1 | 6.91  | 8     | 0.97 | 0.34 | -2.13 | 0.122562 | 0.003679 | 0.401265 | 0.086591 |
| MmugDNA.30052.1.S1_at   | MmugDNA.30052.1 | 4.22  | 3.74  | 0.2  | 0.16 | 1.4   | 0.112246 | 0.46024  | 0.388393 | 0.672134 |
| MmugDNA.30053.1.S1_at   | MmugDNA.30053.1 | 7.13  | 5.83  | 0.25 | 0.64 | 2.47  | 0.11846  | 0.002699 | 0.396104 | 0.076461 |
| MmugDNA.30053.1.S1_s_at | MmugDNA.30053.1 | 8.18  | 7.19  | 0.55 | 0.41 | 1.97  | 0.057842 | 0.004439 | 0.297685 | 0.092958 |
| MmugDNA.30054.1.S1_at   | MmugDNA.30054.1 | 11.2  | 11.27 | 0.11 | 0.06 | -1.05 | 0.873012 | 0.339003 | 0.945555 | 0.585891 |
| MmugDNA.30055.1.S1_at   | MmugDNA.30055.1 | 8.23  | 8.24  | 0.11 | 0.29 | -1    | 0.863775 | 0.542469 | 0.940861 | 0.725516 |
| MmugDNA.30056.1.S1_at   | MmugDNA.30056.1 | 12.02 | 10.96 | 0.16 | 0.06 | 2.09  | 0.000564 | 0.000087 | 0.070714 | 0.027016 |
| MmugDNA.30058.1.S1_at   | MmugDNA.30058.1 | 6.09  | 6.14  | 0.13 | 0.08 | -1.04 | 0.74422  | 0.937242 | 0.881397 | 0.96465  |
| MmugDNA.3006.1.S1_at    | MmugDNA.3006.1  | 4.59  | 4.45  | 0.34 | 0.18 | 1.11  | 0.406974 | 0.547167 | 0.670192 | 0.728314 |
| MmugDNA.30060.1.S1_at   | MmugDNA.30060.1 | 5.04  | 5.04  | 0.05 | 0.03 | -1    | 0.601836 | 0.94905  | 0.799861 | 0.970812 |

|                         |                 |       |       |      |      |       |          |          |          |          |
|-------------------------|-----------------|-------|-------|------|------|-------|----------|----------|----------|----------|
| MmugDNA.30061.1.S1_at   | MmugDNA.30061.1 | 5.74  | 5.88  | 0.21 | 0.12 | -1.1  | 0.67124  | 0.331119 | 0.842316 | 0.579835 |
| MmugDNA.30063.1.S1_at   | MmugDNA.30063.1 | 8.46  | 8.92  | 0.83 | 0.24 | -1.37 | 0.134811 | 0.0178   | 0.418682 | 0.168575 |
| MmugDNA.30065.1.S1_at   | MmugDNA.30065.1 | 3.87  | 3.66  | 0.26 | 0.11 | 1.15  | 0.37596  | 0.730813 | 0.646644 | 0.844063 |
| MmugDNA.30066.1.S1_at   | MmugDNA.30066.1 | 6.26  | 6.5   | 0.6  | 0.19 | -1.18 | 0.790004 | 0.139672 | 0.90449  | 0.413008 |
| MmugDNA.30068.1.S1_at   | MmugDNA.30068.1 | 5.36  | 6.86  | 0.95 | 0.12 | -2.83 | 0.143679 | 0.458795 | 0.430174 | 0.671427 |
| MmugDNA.3007.1.S1_at    | MmugDNA.3007.1  | 6.25  | 6.17  | 0.25 | 0.07 | 1.06  | 0.541739 | 0.733023 | 0.762386 | 0.845498 |
| MmugDNA.30070.1.S1_at   | MmugDNA.30070.1 | 5.21  | 5.34  | 0.47 | 0.02 | -1.09 | 0.682201 | 0.848415 | 0.848446 | 0.913956 |
| MmugDNA.30071.1.S1_at   | MmugDNA.30071.1 | 7.05  | 7.15  | 0.08 | 0.03 | -1.07 | 0.044955 | 0.131514 | 0.26933  | 0.403658 |
| MmugDNA.30072.1.S1_s_at | MmugDNA.30072.1 | 9.64  | 9.85  | 0.2  | 0.21 | -1.16 | 0.891611 | 0.004377 | 0.953744 | 0.092619 |
| MmugDNA.30073.1.S1_at   | MmugDNA.30073.1 | 7.26  | 7.28  | 0.27 | 0.07 | -1.01 | 0.848625 | 0.876571 | 0.934034 | 0.929709 |
| MmugDNA.30073.1.S1_s_at | MmugDNA.30073.1 | 4.33  | 4.42  | 0.97 | 0.19 | -1.07 | 0.373532 | 0.57689  | 0.645118 | 0.747519 |
| MmugDNA.30075.1.S1_at   | MmugDNA.30075.1 | 9.8   | 9.92  | 0.23 | 0.17 | -1.08 | 0.557289 | 0.094355 | 0.772057 | 0.350889 |
| MmugDNA.30077.1.S1_at   | MmugDNA.30077.1 | 5.28  | 4.96  | 0.3  | 0.18 | 1.25  | 0.203883 | 0.491277 | 0.501449 | 0.692921 |
| MmugDNA.30078.1.S1_at   | MmugDNA.30078.1 | 8.96  | 9.69  | 0.32 | 0.34 | -1.66 | 0.076459 | 0.284553 | 0.334738 | 0.546721 |
| MmugDNA.30078.1.S1_x_at | MmugDNA.30078.1 | 9.29  | 9.62  | 0.27 | 0.3  | -1.25 | 0.111277 | 0.423015 | 0.387297 | 0.646145 |
| MmugDNA.3008.1.S1_at    | MmugDNA.3008.1  | 8.73  | 9.53  | 0.04 | 0.17 | -1.74 | 0.001563 | 0.00217  | 0.082331 | 0.068844 |
| MmugDNA.30080.1.S1_at   | MmugDNA.30080.1 | 4.89  | 4.93  | 0.06 | 0.02 | -1.02 | 0.941629 | 0.318359 | 0.975589 | 0.571192 |
| MmugDNA.30081.1.S1_at   | MmugDNA.30081.1 | 4.28  | 4.84  | 0.15 | 0.32 | -1.48 | 0.121721 | 0.031896 | 0.400504 | 0.220981 |
| MmugDNA.30082.1.S1_at   | MmugDNA.30082.1 | 8.85  | 8.63  | 0.06 | 0.13 | 1.16  | 0.029399 | 0.044747 | 0.224424 | 0.256009 |
| MmugDNA.30083.1.S1_at   | MmugDNA.30083.1 | 4.49  | 4.59  | 0.14 | 0.18 | -1.07 | 0.401605 | 0.545892 | 0.666149 | 0.727697 |
| MmugDNA.30084.1.S1_at   | MmugDNA.30084.1 | 6.35  | 6.02  | 0.58 | 0.1  | 1.26  | 0.129138 | 0.07125  | 0.411506 | 0.313293 |
| MmugDNA.30086.1.S1_at   | MmugDNA.30086.1 | 9.52  | 9.54  | 0.45 | 0.09 | -1.01 | 0.412648 | 0.389313 | 0.674202 | 0.623403 |
| MmugDNA.30087.1.S1_at   | MmugDNA.30087.1 | 5.84  | 6.18  | 0.52 | 0.42 | -1.26 | 0.38908  | 0.717269 | 0.657021 | 0.836332 |
| MmugDNA.30088.1.S1_at   | MmugDNA.30088.1 | 6.75  | 6.79  | 0.91 | 0.46 | -1.03 | 0.496058 | 0.698466 | 0.732047 | 0.82482  |
| MmugDNA.3009.1.S1_at    | MmugDNA.3009.1  | 6.79  | 6.64  | 0.18 | 0.04 | 1.11  | 0.158429 | 0.286958 | 0.449548 | 0.548246 |
| MmugDNA.30090.1.S1_at   | MmugDNA.30090.1 | 5.55  | 5.51  | 0.5  | 0.12 | 1.03  | 0.455324 | 0.528595 | 0.705079 | 0.71669  |
| MmugDNA.30091.1.S1_at   | MmugDNA.30091.1 | 5.49  | 5.4   | 0.11 | 0.07 | 1.07  | 0.853997 | 0.153461 | 0.936533 | 0.42827  |
| MmugDNA.30092.1.S1_at   | MmugDNA.30092.1 | 7.23  | 7.09  | 0.05 | 0.04 | 1.1   | 0.005152 | 0.040086 | 0.116998 | 0.245388 |
| MmugDNA.30093.1.S1_at   | MmugDNA.30093.1 | 11.32 | 11.09 | 0.33 | 0.05 | 1.17  | 0.311374 | 0.14657  | 0.597498 | 0.420583 |
| MmugDNA.30094.1.S1_at   | MmugDNA.30094.1 | 9.55  | 8.72  | 0.54 | 0.09 | 1.78  | 0.023039 | 0.021655 | 0.204777 | 0.184333 |
| MmugDNA.30095.1.S1_at   | MmugDNA.30095.1 | 6.48  | 6.82  | 0.08 | 0.06 | -1.26 | 0.010092 | 0.017576 | 0.150153 | 0.167721 |
| MmugDNA.30096.1.S1_at   | MmugDNA.30096.1 | 5.49  | 5.34  | 0.18 | 0.17 | 1.11  | 0.334017 | 0.04769  | 0.615174 | 0.263323 |
| MmugDNA.30099.1.S1_at   | MmugDNA.30099.1 | 3.8   | 3.58  | 0.03 | 0.17 | 1.17  | 0.246626 | 0.598973 | 0.542477 | 0.761244 |
| MmugDNA.301.1.S1_at     | MmugDNA.301.1   | 5.55  | 5.53  | 0.21 | 0.16 | 1.01  | 0.218268 | 0.31377  | 0.515982 | 0.568083 |
| MmugDNA.3010.1.S1_at    | MmugDNA.3010.1  | 3.8   | 3.68  | 0.06 | 0.04 | 1.08  | 0.030726 | 0.020929 | 0.228035 | 0.181439 |
| MmugDNA.30100.1.S1_at   | MmugDNA.30100.1 | 4.11  | 3.98  | 0.35 | 0.11 | 1.1   | 0.189926 | 0.188617 | 0.486266 | 0.464569 |
| MmugDNA.30101.1.S1_at   | MmugDNA.30101.1 | 11.16 | 11.33 | 0.2  | 0.08 | -1.12 | 0.369418 | 0.561861 | 0.642818 | 0.737659 |
| MmugDNA.30104.1.S1_at   | MmugDNA.30104.1 | 5.95  | 5.77  | 0.33 | 0.06 | 1.13  | 0.463964 | 0.25218  | 0.710381 | 0.520863 |
| MmugDNA.30107.1.S1_at   | MmugDNA.30107.1 | 5.82  | 5.64  | 0.27 | 0.06 | 1.13  | 0.41394  | 0.710843 | 0.675232 | 0.832271 |
| MmugDNA.30109.1.S1_at   | MmugDNA.30109.1 | 5.66  | 5.66  | 0.31 | 0.1  | 1.01  | 0.367291 | 0.534083 | 0.641349 | 0.720079 |
| MmugDNA.30110.1.S1_at   | MmugDNA.30110.1 | 5.4   | 5.44  | 0.11 | 0.04 | -1.03 | 0.793699 | 0.268507 | 0.906749 | 0.534123 |
| MmugDNA.30111.1.S1_at   | MmugDNA.30111.1 | 8.3   | 8.21  | 0.27 | 0.04 | 1.06  | 0.217242 | 0.424672 | 0.515068 | 0.647214 |
| MmugDNA.30112.1.S1_at   | MmugDNA.30112.1 | 4.97  | 4.66  | 0.2  | 0.05 | 1.24  | 0.051999 | 0.43009  | 0.285572 | 0.651143 |

|                         |                 |       |       |      |      |        |          |          |          |          |
|-------------------------|-----------------|-------|-------|------|------|--------|----------|----------|----------|----------|
| MmugDNA.30113.1.S1_at   | MmugDNA.30113.1 | 10.68 | 8.97  | 0.45 | 0.12 | 3.27   | 0.003773 | 0.080321 | 0.106813 | 0.327965 |
| MmugDNA.30114.1.S1_at   | MmugDNA.30114.1 | 11.13 | 11.11 | 0.15 | 0.15 | 1.02   | 0.860609 | 0.081596 | 0.939526 | 0.329808 |
| MmugDNA.30115.1.S1_at   | MmugDNA.30115.1 | 5.69  | 5.66  | 0.33 | 0.06 | 1.02   | 0.313615 | 0.412292 | 0.599481 | 0.638705 |
| MmugDNA.30116.1.S1_at   | MmugDNA.30116.1 | 8.15  | 8     | 0.15 | 0.2  | 1.11   | 0.226698 | 0.283902 | 0.524513 | 0.546237 |
| MmugDNA.30117.1.S1_at   | MmugDNA.30117.1 | 5.09  | 5.03  | 0.08 | 0.11 | 1.04   | 0.433812 | 0.861103 | 0.689189 | 0.920974 |
| MmugDNA.30118.1.S1_at   | MmugDNA.30118.1 | 11.36 | 11.93 | 0.07 | 0.17 | -1.48  | 0.01216  | 0.001418 | 0.160553 | 0.057458 |
| MmugDNA.30119.1.S1_at   | MmugDNA.30119.1 | 5.32  | 5.52  | 0.89 | 0.25 | -1.15  | 0.513034 | 0.594727 | 0.743443 | 0.758628 |
| MmugDNA.3012.1.S1_s_at  | MmugDNA.3012.1  | 10.7  | 10.35 | 0.11 | 0.08 | 1.27   | 0.009506 | 0.010942 | 0.147625 | 0.13621  |
| MmugDNA.30120.1.S1_at   | MmugDNA.30120.1 | 8.14  | 7.68  | 0.11 | 0.21 | 1.38   | 0.022676 | 0.243974 | 0.203642 | 0.514069 |
| MmugDNA.30122.1.S1_at   | MmugDNA.30122.1 | 9.6   | 9.95  | 0.38 | 0.11 | -1.27  | 0.393881 | 0.500628 | 0.660571 | 0.69917  |
| MmugDNA.30123.1.S1_at   | MmugDNA.30123.1 | 3.42  | 3.35  | 0.03 | 0.15 | 1.05   | 0.196667 | 0.017125 | 0.493731 | 0.165775 |
| MmugDNA.30124.1.S1_at   | MmugDNA.30124.1 | 4.88  | 4.89  | 0.1  | 0.11 | -1.01  | 0.509763 | 0.370223 | 0.741244 | 0.609392 |
| MmugDNA.30125.1.S1_at   | MmugDNA.30125.1 | 5.37  | 5.38  | 0    | 0.03 | -1     | 0.808423 | 0.244486 | 0.914244 | 0.514295 |
| MmugDNA.30126.1.S1_at   | MmugDNA.30126.1 | 6.15  | 9.88  | 1.11 | 0.33 | -13.23 | 0.012233 | 0.311777 | 0.160912 | 0.56678  |
| MmugDNA.30127.1.S1_at   | MmugDNA.30127.1 | 4.37  | 4.37  | 0.14 | 0.04 | 1      | 0.28432  | 0.542062 | 0.574388 | 0.725196 |
| MmugDNA.30128.1.S1_s_at | MmugDNA.30128.1 | 12.32 | 12.27 | 0.03 | 0.05 | 1.03   | 0.381385 | 0.306654 | 0.650973 | 0.563224 |
| MmugDNA.30129.1.S1_at   | MmugDNA.30129.1 | 9.91  | 11.01 | 0.51 | 0.15 | -2.14  | 0.029618 | 0.22002  | 0.225201 | 0.49344  |
| MmugDNA.30130.1.S1_at   | MmugDNA.30130.1 | 9.97  | 9.68  | 0.08 | 0.14 | 1.23   | 0.090239 | 0.002452 | 0.356864 | 0.073276 |
| MmugDNA.30131.1.S1_at   | MmugDNA.30131.1 | 6.72  | 7.01  | 0.25 | 0.22 | -1.22  | 0.182861 | 0.262478 | 0.478646 | 0.528747 |
| MmugDNA.30132.1.S1_at   | MmugDNA.30132.1 | 11.09 | 10.8  | 0.15 | 0.16 | 1.22   | 0.302702 | 0.030369 | 0.590379 | 0.216116 |
| MmugDNA.30133.1.S1_at   | MmugDNA.30133.1 | 10.75 | 10.72 | 0.07 | 0.16 | 1.02   | 0.544183 | 0.975092 | 0.763878 | 0.986405 |
| MmugDNA.30134.1.S1_at   | MmugDNA.30134.1 | 4.71  | 4.52  | 0.22 | 0.07 | 1.14   | 0.189659 | 0.236104 | 0.486064 | 0.507179 |
| MmugDNA.30135.1.S1_at   | MmugDNA.30135.1 | 3.85  | 3.51  | 0.59 | 0.31 | 1.26   | 0.253511 | 0.302547 | 0.547829 | 0.560201 |
| MmugDNA.30137.1.S1_at   | MmugDNA.30137.1 | 9.12  | 8.82  | 0.42 | 0.2  | 1.23   | 0.192142 | 0.315395 | 0.488745 | 0.568939 |
| MmugDNA.30139.1.S1_at   | MmugDNA.30139.1 | 4.75  | 4.75  | 0.03 | 0.16 | -1     | 0.860062 | 0.967566 | 0.93923  | 0.982093 |
| MmugDNA.3014.1.S1_at    | MmugDNA.3014.1  | 11.48 | 11.99 | 0.19 | 0.09 | -1.42  | 0.020137 | 0.148645 | 0.195367 | 0.423201 |
| MmugDNA.30141.1.S1_at   | MmugDNA.30141.1 | 6.65  | 6.67  | 0.16 | 0.06 | -1.02  | 0.913645 | 0.166852 | 0.963382 | 0.443311 |
| MmugDNA.30142.1.S1_at   | MmugDNA.30142.1 | 6.6   | 6.61  | 0.18 | 0.01 | -1.01  | 0.393155 | 0.492247 | 0.660002 | 0.693477 |
| MmugDNA.30143.1.S1_at   | MmugDNA.30143.1 | 8.26  | 8.23  | 0.28 | 0.11 | 1.02   | 0.509553 | 0.571057 | 0.741152 | 0.743533 |
| MmugDNA.30146.1.S1_at   | MmugDNA.30146.1 | 4.47  | 4.59  | 0.21 | 0.32 | -1.09  | 0.538445 | 0.124679 | 0.760315 | 0.39513  |
| MmugDNA.30148.1.S1_at   | MmugDNA.30148.1 | 6.59  | 5.71  | 1.12 | 0.66 | 1.84   | 0.309331 | 0.383352 | 0.595817 | 0.619374 |
| MmugDNA.30149.1.S1_at   | MmugDNA.30149.1 | 5.01  | 4.93  | 0.2  | 0.06 | 1.06   | 0.232942 | 0.226252 | 0.531164 | 0.498699 |
| MmugDNA.30150.1.S1_at   | MmugDNA.30150.1 | 10.48 | 10.15 | 0.05 | 0.08 | 1.26   | 0.004732 | 0.000009 | 0.115008 | 0.016421 |
| MmugDNA.30151.1.S1_at   | MmugDNA.30151.1 | 6.94  | 7.09  | 0.78 | 0.17 | -1.12  | 0.868639 | 0.306165 | 0.943548 | 0.562889 |
| MmugDNA.30152.1.S1_at   | MmugDNA.30152.1 | 5.51  | 5.32  | 0.05 | 0.24 | 1.14   | 0.082108 | 0.017344 | 0.343485 | 0.166673 |
| MmugDNA.30153.1.S1_at   | MmugDNA.30153.1 | 9.75  | 9.23  | 0.17 | 0.04 | 1.44   | 0.012282 | 0.078971 | 0.161126 | 0.325986 |
| MmugDNA.30155.1.S1_at   | MmugDNA.30155.1 | 7.3   | 7.2   | 0.04 | 0.08 | 1.07   | 0.123697 | 0.013329 | 0.403307 | 0.148042 |
| MmugDNA.30157.1.S1_s_at | MmugDNA.30157.1 | 11.45 | 10.89 | 0.05 | 0.27 | 1.48   | 0.048203 | 0.007198 | 0.276915 | 0.114062 |
| MmugDNA.30158.1.S1_at   | MmugDNA.30158.1 | 4.1   | 3.68  | 0.09 | 0.21 | 1.34   | 0.059691 | 0.463608 | 0.301505 | 0.674537 |
| MmugDNA.30159.1.S1_at   | MmugDNA.30159.1 | 3.45  | 3.46  | 0.16 | 0.08 | -1     | 0.406436 | 0.524527 | 0.669756 | 0.714395 |
| MmugDNA.3016.1.S1_at    | MmugDNA.3016.1  | 3.79  | 4.43  | 0.46 | 0.24 | -1.57  | 0.14269  | 0.178453 | 0.428717 | 0.454778 |
| MmugDNA.30160.1.S1_at   | MmugDNA.30160.1 | 11.88 | 11.79 | 0.06 | 0.05 | 1.06   | 0.672007 | 0.126968 | 0.842838 | 0.397729 |
| MmugDNA.30161.1.S1_at   | MmugDNA.30161.1 | 5.24  | 5.39  | 0.95 | 0.65 | -1.11  | 0.391824 | 0.569118 | 0.658845 | 0.742251 |

|                         |                 |       |       |      |      |       |          |          |          |          |
|-------------------------|-----------------|-------|-------|------|------|-------|----------|----------|----------|----------|
| MmugDNA.30165.1.S1_at   | MmugDNA.30165.1 | 5.88  | 6.09  | 0.35 | 0.09 | -1.16 | 0.39675  | 0.023474 | 0.662694 | 0.19201  |
| MmugDNA.30166.1.S1_s_at | MmugDNA.30166.1 | 7.78  | 8.55  | 0.2  | 0.25 | -1.71 | 0.017868 | 0.034537 | 0.187044 | 0.229979 |
| MmugDNA.30167.1.S1_at   | MmugDNA.30167.1 | 13.18 | 12.89 | 0.08 | 0.14 | 1.22  | 0.03244  | 0.022363 | 0.234344 | 0.187176 |
| MmugDNA.3017.1.S1_at    | MmugDNA.3017.1  | 6.83  | 6.37  | 0.39 | 0.07 | 1.37  | 0.369848 | 0.500474 | 0.643133 | 0.69907  |
| MmugDNA.30170.1.S1_at   | MmugDNA.30170.1 | 6.29  | 7.2   | 0.98 | 0.1  | -1.88 | 0.574241 | 0.801636 | 0.781758 | 0.885894 |
| MmugDNA.30171.1.S1_at   | MmugDNA.30171.1 | 12.02 | 12.25 | 0.03 | 0.08 | -1.18 | 0.021262 | 0.186341 | 0.199615 | 0.46218  |
| MmugDNA.30172.1.S1_at   | MmugDNA.30172.1 | 3.37  | 3.25  | 0.01 | 0.06 | 1.09  | 0.012269 | 0.148759 | 0.161109 | 0.423201 |
| MmugDNA.30173.1.S1_at   | MmugDNA.30173.1 | 5.7   | 5.8   | 0.06 | 0.08 | -1.07 | 0.207897 | 0.497772 | 0.505752 | 0.697059 |
| MmugDNA.30174.1.S1_at   | MmugDNA.30174.1 | 8.05  | 9.01  | 0.37 | 0.16 | -1.95 | 0.046586 | 0.096483 | 0.273564 | 0.35409  |
| MmugDNA.30176.1.S1_at   | MmugDNA.30176.1 | 3.26  | 3.2   | 0.62 | 0.24 | 1.04  | 0.223408 | 0.229442 | 0.521225 | 0.501527 |
| MmugDNA.30178.1.S1_at   | MmugDNA.30178.1 | 10.03 | 10.87 | 0.56 | 0.26 | -1.78 | 0.094269 | 0.304282 | 0.363294 | 0.561599 |
| MmugDNA.30178.1.S1_s_at | MmugDNA.30178.1 | 10.47 | 11.73 | 0.79 | 0.27 | -2.41 | 0.078869 | 0.243763 | 0.338733 | 0.513899 |
| MmugDNA.30179.1.S1_at   | MmugDNA.30179.1 | 6.23  | 7.28  | 0.68 | 0.24 | -2.08 | 0.044606 | 0.215163 | 0.268363 | 0.488943 |
| MmugDNA.30180.1.S1_at   | MmugDNA.30180.1 | 5.99  | 6.16  | 0.14 | 0.14 | -1.12 | 0.249918 | 0.59317  | 0.544845 | 0.758097 |
| MmugDNA.30182.1.S1_at   | MmugDNA.30182.1 | 6.22  | 7.66  | 0.8  | 0.22 | -2.72 | 0.078328 | 0.139062 | 0.337998 | 0.412165 |
| MmugDNA.30184.1.S1_at   | MmugDNA.30184.1 | 6.75  | 6.84  | 0.22 | 0.14 | -1.07 | 0.934158 | 0.378606 | 0.972399 | 0.615639 |
| MmugDNA.30185.1.S1_at   | MmugDNA.30185.1 | 3.79  | 3.56  | 0.09 | 0.18 | 1.17  | 0.061692 | 0.054897 | 0.304942 | 0.279748 |
| MmugDNA.30188.1.S1_at   | MmugDNA.30188.1 | 11.3  | 11.83 | 0.13 | 0.09 | -1.44 | 0.010021 | 0.131537 | 0.149521 | 0.403658 |
| MmugDNA.30189.1.S1_at   | MmugDNA.30189.1 | 4.72  | 4.84  | 0.09 | 0.14 | -1.09 | 0.292165 | 0.875667 | 0.581449 | 0.929374 |
| MmugDNA.3019.1.S1_at    | MmugDNA.3019.1  | 4.66  | 4.33  | 0.08 | 0.3  | 1.26  | 0.119829 | 0.286331 | 0.397936 | 0.547784 |
| MmugDNA.30191.1.S1_at   | MmugDNA.30191.1 | 4.72  | 3.94  | 0.3  | 0.2  | 1.72  | 0.071668 | 0.109641 | 0.325611 | 0.373629 |
| MmugDNA.30192.1.S1_at   | MmugDNA.30192.1 | 6.85  | 6.9   | 0.14 | 0.2  | -1.04 | 0.681727 | 0.016258 | 0.848213 | 0.161615 |
| MmugDNA.30194.1.S1_at   | MmugDNA.30194.1 | 5.67  | 6.1   | 0.23 | 0.04 | -1.35 | 0.080851 | 0.113664 | 0.341635 | 0.379818 |
| MmugDNA.30195.1.S1_at   | MmugDNA.30195.1 | 10.61 | 10.54 | 0.13 | 0.07 | 1.05  | 0.291565 | 0.006479 | 0.580943 | 0.109342 |
| MmugDNA.30196.1.S1_at   | MmugDNA.30196.1 | 6.22  | 5.4   | 0.45 | 0.25 | 1.75  | 0.236412 | 0.44307  | 0.534031 | 0.660962 |
| MmugDNA.30197.1.S1_at   | MmugDNA.30197.1 | 7.71  | 7.34  | 0.15 | 0.06 | 1.29  | 0.013375 | 0.004122 | 0.16632  | 0.090887 |
| MmugDNA.30198.1.S1_at   | MmugDNA.30198.1 | 3.42  | 3.55  | 0.45 | 0.14 | -1.1  | 0.880271 | 0.873354 | 0.949085 | 0.927953 |
| MmugDNA.30199.1.S1_at   | MmugDNA.30199.1 | 11.56 | 11.55 | 0.09 | 0.19 | 1.01  | 0.477364 | 0.20615  | 0.719381 | 0.480348 |
| MmugDNA.302.1.S1_at     | MmugDNA.302.1   | 10.88 | 10.85 | 0.12 | 0.09 | 1.02  | 0.566711 | 0.933227 | 0.777534 | 0.962071 |
| MmugDNA.3020.1.S1_at    | MmugDNA.3020.1  | 9.11  | 8.34  | 0.31 | 0.23 | 1.71  | 0.017261 | 0.017149 | 0.184559 | 0.165888 |
| MmugDNA.30201.1.S1_at   | MmugDNA.30201.1 | 4.78  | 4.75  | 0.03 | 0.06 | 1.02  | 0.809985 | 0.728776 | 0.91487  | 0.843203 |
| MmugDNA.30202.1.S1_at   | MmugDNA.30202.1 | 2.9   | 2.86  | 0.12 | 0.07 | 1.03  | 0.638987 | 0.151525 | 0.823331 | 0.426242 |
| MmugDNA.30203.1.S1_at   | MmugDNA.30203.1 | 5.42  | 5.17  | 0.4  | 0.23 | 1.19  | 0.415671 | 0.377333 | 0.676345 | 0.614891 |
| MmugDNA.30204.1.S1_at   | MmugDNA.30204.1 | 4.07  | 3.89  | 0.23 | 0.15 | 1.13  | 0.598778 | 0.580657 | 0.797621 | 0.749827 |
| MmugDNA.30205.1.S1_at   | MmugDNA.30205.1 | 4.94  | 4.26  | 0.42 | 0.36 | 1.6   | 0.238403 | 0.271466 | 0.535783 | 0.536512 |
| MmugDNA.30206.1.S1_at   | MmugDNA.30206.1 | 4.14  | 4.24  | 0.05 | 0.13 | -1.07 | 0.388951 | 0.547453 | 0.656909 | 0.728464 |
| MmugDNA.30207.1.S1_at   | MmugDNA.30207.1 | 6.16  | 4.94  | 0.53 | 0.24 | 2.33  | 0.022379 | 0.002985 | 0.202823 | 0.079958 |
| MmugDNA.30208.1.S1_at   | MmugDNA.30208.1 | 6.28  | 6.35  | 0.54 | 0.05 | -1.05 | 0.283032 | 0.105703 | 0.573538 | 0.3678   |
| MmugDNA.30209.1.S1_at   | MmugDNA.30209.1 | 6.5   | 6.74  | 0.09 | 0.09 | -1.18 | 0.043693 | 0.204069 | 0.266104 | 0.478386 |
| MmugDNA.3021.1.S1_at    | MmugDNA.3021.1  | 7.93  | 7.9   | 0.04 | 0.19 | 1.02  | 0.83707  | 0.942368 | 0.928546 | 0.967292 |
| MmugDNA.30210.1.S1_at   | MmugDNA.30210.1 | 7.76  | 7.6   | 0.11 | 0.25 | 1.12  | 0.198104 | 0.018684 | 0.495359 | 0.171717 |
| MmugDNA.30211.1.S1_at   | MmugDNA.30211.1 | 7.09  | 7.63  | 0.95 | 0.42 | -1.45 | 0.986098 | 0.572184 | 0.995115 | 0.744268 |
| MmugDNA.30212.1.S1_at   | MmugDNA.30212.1 | 5.44  | 5.41  | 0.07 | 0.21 | 1.02  | 0.989939 | 0.889152 | 0.996442 | 0.936796 |

|                       |                 |       |       |      |      |       |          |          |          |          |
|-----------------------|-----------------|-------|-------|------|------|-------|----------|----------|----------|----------|
| MmugDNA.30213.1.S1_at | MmugDNA.30213.1 | 7.43  | 7.48  | 0.19 | 0.28 | -1.04 | 0.605208 | 0.546955 | 0.802305 | 0.728283 |
| MmugDNA.30214.1.S1_at | MmugDNA.30214.1 | 3.61  | 3.53  | 0.7  | 0.06 | 1.05  | 0.310232 | 0.38082  | 0.596486 | 0.617426 |
| MmugDNA.30216.1.S1_at | MmugDNA.30216.1 | 3.54  | 3.64  | 0.14 | 0.05 | -1.07 | 0.826168 | 0.063878 | 0.922823 | 0.29906  |
| MmugDNA.30217.1.S1_at | MmugDNA.30217.1 | 6.37  | 6.68  | 0.62 | 0.3  | -1.24 | 0.71866  | 0.903131 | 0.867276 | 0.94497  |
| MmugDNA.30218.1.S1_at | MmugDNA.30218.1 | 3.7   | 2.97  | 0.56 | 0.12 | 1.66  | 0.122302 | 0.141381 | 0.40112  | 0.414874 |
| MmugDNA.3022.1.S1_at  | MmugDNA.3022.1  | 6.01  | 5.94  | 0.18 | 0.09 | 1.05  | 0.862769 | 0.878005 | 0.940274 | 0.930359 |
| MmugDNA.30221.1.S1_at | MmugDNA.30221.1 | 7.63  | 7.72  | 0.13 | 0.17 | -1.06 | 0.132882 | 0.565983 | 0.416311 | 0.740174 |
| MmugDNA.30222.1.S1_at | MmugDNA.30222.1 | 7.49  | 7.46  | 0.25 | 0.16 | 1.02  | 0.573562 | 0.565944 | 0.781176 | 0.740174 |
| MmugDNA.30223.1.S1_at | MmugDNA.30223.1 | 9.54  | 8.49  | 0.78 | 0.48 | 2.08  | 0.381357 | 0.384734 | 0.650966 | 0.620363 |
| MmugDNA.30224.1.S1_at | MmugDNA.30224.1 | 12.46 | 12.19 | 0.15 | 0.15 | 1.2   | 0.083622 | 0.236259 | 0.346254 | 0.507263 |
| MmugDNA.30225.1.S1_at | MmugDNA.30225.1 | 13.17 | 13.15 | 0.07 | 0.01 | 1.02  | 0.197817 | 0.284071 | 0.49515  | 0.546307 |
| MmugDNA.30226.1.S1_at | MmugDNA.30226.1 | 6.18  | 6.16  | 0.1  | 0.14 | 1.01  | 0.194087 | 0.704355 | 0.490693 | 0.828437 |
| MmugDNA.30228.1.S1_at | MmugDNA.30228.1 | 4.68  | 4.76  | 0.17 | 0.04 | -1.06 | 0.155563 | 0.246413 | 0.445907 | 0.515899 |
| MmugDNA.3023.1.S1_at  | MmugDNA.3023.1  | 9.36  | 8.82  | 0.18 | 0.15 | 1.45  | 0.005599 | 0.002578 | 0.120502 | 0.075183 |
| MmugDNA.30230.1.S1_at | MmugDNA.30230.1 | 9.46  | 9.26  | 0.16 | 0.2  | 1.15  | 0.090717 | 0.430029 | 0.357705 | 0.65111  |
| MmugDNA.30231.1.S1_at | MmugDNA.30231.1 | 4.57  | 4.9   | 0.73 | 0.38 | -1.25 | 0.828584 | 0.952962 | 0.924251 | 0.973344 |
| MmugDNA.30232.1.S1_at | MmugDNA.30232.1 | 5.96  | 5.96  | 0.35 | 0.17 | 1     | 0.251888 | 0.318354 | 0.546576 | 0.571192 |
| MmugDNA.30233.1.S1_at | MmugDNA.30233.1 | 4.34  | 4.03  | 0.16 | 0.24 | 1.24  | 0.308084 | 0.500732 | 0.594785 | 0.699242 |
| MmugDNA.30234.1.S1_at | MmugDNA.30234.1 | 5.28  | 4.99  | 0.09 | 0.36 | 1.22  | 0.717153 | 0.279443 | 0.866451 | 0.543049 |
| MmugDNA.30235.1.S1_at | MmugDNA.30235.1 | 5.32  | 5.43  | 0.26 | 0.24 | -1.08 | 0.648898 | 0.798215 | 0.829441 | 0.88385  |
| MmugDNA.30236.1.S1_at | MmugDNA.30236.1 | 8.12  | 8.23  | 0.23 | 0.04 | -1.08 | 0.79536  | 0.917362 | 0.907532 | 0.953807 |
| MmugDNA.30237.1.S1_at | MmugDNA.30237.1 | 6.14  | 5.21  | 1.12 | 0.15 | 1.91  | 0.217122 | 0.34375  | 0.514925 | 0.589457 |
| MmugDNA.30238.1.S1_at | MmugDNA.30238.1 | 5.56  | 4.28  | 0.55 | 0.44 | 2.42  | 0.061865 | 0.100766 | 0.305226 | 0.360174 |
| MmugDNA.30239.1.S1_at | MmugDNA.30239.1 | 6.65  | 6.64  | 0.84 | 0.35 | 1     | 0.411355 | 0.468526 | 0.673306 | 0.677755 |
| MmugDNA.3024.1.S1_at  | MmugDNA.3024.1  | 5.31  | 5.11  | 0.22 | 0.05 | 1.14  | 0.244311 | 0.401428 | 0.540909 | 0.631018 |
| MmugDNA.30240.1.S1_at | MmugDNA.30240.1 | 3.01  | 3.05  | 0.05 | 0.09 | -1.03 | 0.192383 | 0.367886 | 0.488957 | 0.607469 |
| MmugDNA.30241.1.S1_at | MmugDNA.30241.1 | 6.88  | 6.52  | 0.11 | 0.07 | 1.28  | 0.013468 | 0.017244 | 0.166746 | 0.166347 |
| MmugDNA.30242.1.S1_at | MmugDNA.30242.1 | 6.79  | 6.86  | 0.17 | 0.07 | -1.05 | 0.743557 | 0.657537 | 0.881381 | 0.799759 |
| MmugDNA.30243.1.S1_at | MmugDNA.30243.1 | 9.83  | 9.7   | 0.44 | 0.28 | 1.1   | 0.76302  | 0.828334 | 0.891457 | 0.901341 |
| MmugDNA.30244.1.S1_at | MmugDNA.30244.1 | 3.64  | 3.56  | 0.08 | 0.07 | 1.06  | 0.675498 | 0.274927 | 0.845076 | 0.539375 |
| MmugDNA.30245.1.S1_at | MmugDNA.30245.1 | 8.16  | 7.18  | 0.73 | 0.27 | 1.97  | 0.277612 | 0.238311 | 0.569151 | 0.5089   |
| MmugDNA.30246.1.S1_at | MmugDNA.30246.1 | 6.08  | 6.08  | 0.1  | 0.01 | -1    | 0.342049 | 0.431787 | 0.621859 | 0.652556 |
| MmugDNA.30247.1.S1_at | MmugDNA.30247.1 | 11.21 | 11.28 | 0.14 | 0.14 | -1.05 | 0.625816 | 0.012413 | 0.815574 | 0.144066 |
| MmugDNA.30248.1.S1_at | MmugDNA.30248.1 | 3.09  | 3.09  | 0.05 | 0.1  | -1    | 0.23777  | 0.392599 | 0.535177 | 0.625813 |
| MmugDNA.3025.1.S1_at  | MmugDNA.3025.1  | 4.76  | 4.98  | 0.17 | 0.38 | -1.16 | 0.144461 | 0.189615 | 0.431368 | 0.465297 |
| MmugDNA.30251.1.S1_at | MmugDNA.30251.1 | 7.02  | 7.09  | 0.26 | 0.03 | -1.05 | 0.700584 | 0.718676 | 0.857793 | 0.837178 |
| MmugDNA.30252.1.S1_at | MmugDNA.30252.1 | 3.48  | 4.19  | 0.11 | 0.25 | -1.63 | 0.012115 | 0.011156 | 0.16019  | 0.137506 |
| MmugDNA.30254.1.S1_at | MmugDNA.30254.1 | 8.39  | 8.45  | 0.29 | 0.28 | -1.05 | 0.709842 | 0.323947 | 0.862704 | 0.57466  |
| MmugDNA.30256.1.S1_at | MmugDNA.30256.1 | 10.41 | 10.71 | 0.11 | 0.1  | -1.23 | 0.022564 | 0.213934 | 0.203331 | 0.487596 |
| MmugDNA.30258.1.S1_at | MmugDNA.30258.1 | 5.32  | 5.23  | 0.08 | 0.19 | 1.06  | 0.835006 | 0.068097 | 0.927446 | 0.307142 |
| MmugDNA.30259.1.S1_at | MmugDNA.30259.1 | 4.33  | 4.33  | 0.17 | 0.03 | -1.01 | 0.414526 | 0.208951 | 0.675681 | 0.482751 |
| MmugDNA.30260.1.S1_at | MmugDNA.30260.1 | 5.22  | 5.1   | 0.15 | 0.13 | 1.08  | 0.815957 | 0.65576  | 0.917896 | 0.798709 |
| MmugDNA.30261.1.S1_at | MmugDNA.30261.1 | 4.56  | 4.55  | 0.28 | 0.16 | 1     | 0.492985 | 0.700204 | 0.73014  | 0.825987 |

|                         |                 |       |       |      |      |       |          |          |          |          |
|-------------------------|-----------------|-------|-------|------|------|-------|----------|----------|----------|----------|
| MmugDNA.30262.1.S1_at   | MmugDNA.30262.1 | 6.78  | 6.54  | 0.2  | 0.13 | 1.18  | 0.140919 | 0.198304 | 0.42677  | 0.473267 |
| MmugDNA.30264.1.S1_at   | MmugDNA.30264.1 | 7.02  | 7.11  | 0.14 | 0.09 | -1.06 | 0.82859  | 0.184389 | 0.924251 | 0.460458 |
| MmugDNA.30265.1.S1_at   | MmugDNA.30265.1 | 5.29  | 5.26  | 0.25 | 0.21 | 1.02  | 0.95182  | 0.728241 | 0.980036 | 0.842893 |
| MmugDNA.30267.1.S1_at   | MmugDNA.30267.1 | 3.68  | 3.78  | 0.66 | 0.11 | -1.08 | 0.560028 | 0.594098 | 0.773651 | 0.758517 |
| MmugDNA.30270.1.S1_at   | MmugDNA.30270.1 | 5.78  | 5.03  | 0.58 | 0.22 | 1.68  | 0.109242 | 0.077707 | 0.384375 | 0.323851 |
| MmugDNA.30272.1.S1_at   | MmugDNA.30272.1 | 3.51  | 3.5   | 0.07 | 0.15 | 1.01  | 0.911287 | 0.243224 | 0.962311 | 0.513356 |
| MmugDNA.30273.1.S1_at   | MmugDNA.30273.1 | 6.08  | 6.69  | 0.66 | 0.09 | -1.53 | 0.449966 | 0.86012  | 0.701198 | 0.920245 |
| MmugDNA.30274.1.S1_at   | MmugDNA.30274.1 | 7.07  | 6.81  | 0.95 | 0.42 | 1.2   | 0.731505 | 0.455876 | 0.874514 | 0.669664 |
| MmugDNA.30275.1.S1_at   | MmugDNA.30275.1 | 7.25  | 9.69  | 1.38 | 0.21 | -5.42 | 0.066304 | 0.075234 | 0.314985 | 0.319432 |
| MmugDNA.30276.1.S1_s_at | MmugDNA.30276.1 | 5     | 4.66  | 0.34 | 0.06 | 1.27  | 0.414563 | 0.602196 | 0.675681 | 0.763212 |
| MmugDNA.30277.1.S1_at   | MmugDNA.30277.1 | 8.01  | 7.73  | 0.15 | 0.12 | 1.21  | 0.153126 | 0.000682 | 0.442808 | 0.044166 |
| MmugDNA.30278.1.S1_at   | MmugDNA.30278.1 | 3.73  | 3.71  | 0.09 | 0.14 | 1.01  | 0.768164 | 0.926134 | 0.893506 | 0.95813  |
| MmugDNA.30279.1.S1_at   | MmugDNA.30279.1 | 3.84  | 3.82  | 0.32 | 0.11 | 1.01  | 0.854267 | 0.922509 | 0.936616 | 0.956337 |
| MmugDNA.3028.1.S1_at    | MmugDNA.3028.1  | 7.1   | 7.3   | 0.37 | 0.48 | -1.15 | 0.873438 | 0.980922 | 0.945619 | 0.989478 |
| MmugDNA.30280.1.S1_at   | MmugDNA.30280.1 | 7.41  | 7.08  | 0.09 | 0.41 | 1.26  | 0.064779 | 0.04218  | 0.311264 | 0.249842 |
| MmugDNA.30281.1.S1_at   | MmugDNA.30281.1 | 5.6   | 6.84  | 0.4  | 0.3  | -2.36 | 0.021265 | 0.031384 | 0.199615 | 0.219065 |
| MmugDNA.30282.1.S1_at   | MmugDNA.30282.1 | 10.95 | 10.95 | 0.22 | 0.11 | 1     | 0.672461 | 0.118057 | 0.843221 | 0.385921 |
| MmugDNA.30283.1.S1_at   | MmugDNA.30283.1 | 5.43  | 5.27  | 0.33 | 0.06 | 1.12  | 0.472475 | 0.664865 | 0.716189 | 0.803709 |
| MmugDNA.30283.1.S1_s_at | MmugDNA.30283.1 | 10.78 | 10.95 | 0.1  | 0.04 | -1.12 | 0.061059 | 0.478797 | 0.303985 | 0.684733 |
| MmugDNA.30284.1.S1_at   | MmugDNA.30284.1 | 3.15  | 3.05  | 0.64 | 0.06 | 1.07  | 0.305202 | 0.446236 | 0.592201 | 0.662743 |
| MmugDNA.30285.1.S1_at   | MmugDNA.30285.1 | 10.97 | 10.85 | 0.39 | 0    | 1.08  | 0.855268 | 0.584776 | 0.93691  | 0.752534 |
| MmugDNA.30288.1.S1_at   | MmugDNA.30288.1 | 3.08  | 3.05  | 0.71 | 0.05 | 1.02  | 0.356719 | 0.457362 | 0.633012 | 0.670806 |
| MmugDNA.30289.1.S1_at   | MmugDNA.30289.1 | 3.06  | 3.2   | 0.12 | 0.08 | -1.1  | 0.241239 | 0.516809 | 0.538538 | 0.70925  |
| MmugDNA.3029.1.S1_at    | MmugDNA.3029.1  | 4.83  | 4.45  | 0.25 | 0.21 | 1.3   | 0.054772 | 0.120083 | 0.290805 | 0.388792 |
| MmugDNA.30290.1.S1_at   | MmugDNA.30290.1 | 9.22  | 8.05  | 0.4  | 0.14 | 2.24  | 0.018958 | 0.00734  | 0.191192 | 0.11509  |
| MmugDNA.30291.1.S1_at   | MmugDNA.30291.1 | 3.48  | 3.45  | 0.18 | 0.03 | 1.01  | 0.879537 | 0.407571 | 0.948758 | 0.63505  |
| MmugDNA.30292.1.S1_at   | MmugDNA.30292.1 | 7.34  | 8.08  | 0.67 | 0.04 | -1.67 | 0.043109 | 0.014128 | 0.264779 | 0.152052 |
| MmugDNA.30293.1.S1_at   | MmugDNA.30293.1 | 4.65  | 4.44  | 0.27 | 0.05 | 1.16  | 0.651661 | 0.402711 | 0.830755 | 0.631543 |
| MmugDNA.30295.1.S1_at   | MmugDNA.30295.1 | 10.96 | 11.09 | 0.49 | 0.2  | -1.09 | 0.491422 | 0.51691  | 0.729201 | 0.709317 |
| MmugDNA.303.1.S1_at     | MmugDNA.303.1   | 9.99  | 9.2   | 0.33 | 0.19 | 1.72  | 0.025031 | 0.021895 | 0.211194 | 0.185199 |
| MmugDNA.3030.1.S1_at    | MmugDNA.3030.1  | 2.75  | 2.84  | 0.17 | 0.06 | -1.06 | 0.740669 | 0.770279 | 0.879789 | 0.866566 |
| MmugDNA.30301.1.S1_s_at | MmugDNA.30301.1 | 10.83 | 10.71 | 0.26 | 0.07 | 1.09  | 0.967371 | 0.159779 | 0.986955 | 0.435871 |
| MmugDNA.30303.1.S1_at   | MmugDNA.30303.1 | 7.92  | 7.87  | 0.2  | 0.17 | 1.04  | 0.747967 | 0.515681 | 0.883193 | 0.708451 |
| MmugDNA.30304.1.S1_at   | MmugDNA.30304.1 | 5.87  | 5.84  | 0.16 | 0.18 | 1.03  | 0.555577 | 0.585649 | 0.771368 | 0.752957 |
| MmugDNA.30305.1.S1_at   | MmugDNA.30305.1 | 7.31  | 7.48  | 0.22 | 0.01 | -1.13 | 0.256386 | 0.122489 | 0.550901 | 0.392376 |
| MmugDNA.30306.1.S1_at   | MmugDNA.30306.1 | 12.17 | 11.86 | 0.08 | 0.08 | 1.24  | 0.009543 | 0.016032 | 0.147873 | 0.160532 |
| MmugDNA.30307.1.S1_at   | MmugDNA.30307.1 | 5.14  | 6.79  | 0.98 | 0.15 | -3.13 | 0.046583 | 0.005101 | 0.273564 | 0.099108 |
| MmugDNA.30308.1.S1_at   | MmugDNA.30308.1 | 5.21  | 5.09  | 0.15 | 0.03 | 1.08  | 0.101239 | 0.37826  | 0.372548 | 0.615438 |
| MmugDNA.30309.1.S1_s_at | MmugDNA.30309.1 | 4.66  | 4.63  | 0.26 | 0.09 | 1.02  | 0.599494 | 0.882225 | 0.798168 | 0.932845 |
| MmugDNA.3031.1.S1_at    | MmugDNA.3031.1  | 4.9   | 4.9   | 0.35 | 0    | -1    | 0.992441 | 0.937745 | 0.997182 | 0.964687 |
| MmugDNA.30310.1.S1_at   | MmugDNA.30310.1 | 3.98  | 3.7   | 0.09 | 0.2  | 1.21  | 0.252565 | 0.449335 | 0.547204 | 0.665021 |
| MmugDNA.30311.1.S1_at   | MmugDNA.30311.1 | 4.11  | 4.29  | 1.21 | 0.52 | -1.13 | 0.799145 | 0.87908  | 0.909452 | 0.931015 |
| MmugDNA.30312.1.S1_at   | MmugDNA.30312.1 | 3.37  | 3.21  | 0.06 | 0.07 | 1.12  | 0.062281 | 0.023852 | 0.306263 | 0.193455 |



|                         |                 |       |       |      |      |       |          |          |          |          |
|-------------------------|-----------------|-------|-------|------|------|-------|----------|----------|----------|----------|
| MmugDNA.30313.1.S1_at   | MmugDNA.30313.1 | 3.16  | 2.98  | 0.14 | 0.06 | 1.13  | 0.108306 | 0.28919  | 0.382975 | 0.550293 |
| MmugDNA.30314.1.S1_at   | MmugDNA.30314.1 | 10.04 | 9.42  | 0.1  | 0.12 | 1.54  | 0.003052 | 0.014703 | 0.100267 | 0.154371 |
| MmugDNA.30315.1.S1_at   | MmugDNA.30315.1 | 8.64  | 8.14  | 0.14 | 0.01 | 1.42  | 0.006712 | 0.03286  | 0.128604 | 0.224478 |
| MmugDNA.30316.1.S1_at   | MmugDNA.30316.1 | 6.84  | 5.72  | 0.72 | 0.35 | 2.17  | 0.051115 | 0.13685  | 0.283595 | 0.409566 |
| MmugDNA.30317.1.S1_at   | MmugDNA.30317.1 | 8.56  | 8.51  | 0.11 | 0.19 | 1.03  | 0.792135 | 0.053284 | 0.905706 | 0.276463 |
| MmugDNA.30317.1.S1_s_at | MmugDNA.30317.1 | 8.28  | 8.02  | 0.12 | 0.12 | 1.2   | 0.028467 | 0.052195 | 0.22113  | 0.274036 |
| MmugDNA.30318.1.S1_at   | MmugDNA.30318.1 | 8.9   | 9.55  | 0.03 | 0.15 | -1.57 | 0.003045 | 0.12557  | 0.100201 | 0.396226 |
| MmugDNA.3032.1.S1_at    | MmugDNA.3032.1  | 5.7   | 5.61  | 0.19 | 0.08 | 1.06  | 0.90863  | 0.296832 | 0.961257 | 0.5558   |
| MmugDNA.30320.1.S1_at   | MmugDNA.30320.1 | 3.25  | 3.37  | 0.19 | 0.11 | -1.08 | 0.975567 | 0.738173 | 0.990329 | 0.848203 |
| MmugDNA.30324.1.S1_at   | MmugDNA.30324.1 | 4.11  | 4.29  | 0.3  | 0.2  | -1.13 | 0.598666 | 0.764167 | 0.797532 | 0.862867 |
| MmugDNA.30325.1.S1_at   | MmugDNA.30325.1 | 10.44 | 10.13 | 0.05 | 0.18 | 1.23  | 0.042126 | 0.060804 | 0.262198 | 0.293306 |
| MmugDNA.30326.1.S1_at   | MmugDNA.30326.1 | 4.51  | 4.56  | 0.2  | 0.04 | -1.04 | 0.854749 | 0.319079 | 0.936795 | 0.571625 |
| MmugDNA.30327.1.S1_at   | MmugDNA.30327.1 | 3.78  | 3.78  | 0.07 | 0.13 | 1.01  | 0.919359 | 0.665269 | 0.965499 | 0.803854 |
| MmugDNA.3033.1.S1_at    | MmugDNA.3033.1  | 3.44  | 3.51  | 0.34 | 0.12 | -1.05 | 0.763312 | 0.80478  | 0.891591 | 0.887735 |
| MmugDNA.30330.1.S1_at   | MmugDNA.30330.1 | 6.75  | 6.29  | 0.26 | 0.15 | 1.37  | 0.020991 | 0.042167 | 0.198347 | 0.249821 |
| MmugDNA.30332.1.S1_at   | MmugDNA.30332.1 | 3.35  | 3.32  | 0    | 0.17 | 1.02  | 0.786689 | 0.212149 | 0.902743 | 0.486036 |
| MmugDNA.30335.1.S1_s_at | MmugDNA.30335.1 | 9.61  | 8.93  | 0.24 | 0.11 | 1.6   | 0.006232 | 0.000915 | 0.125213 | 0.048471 |
| MmugDNA.30336.1.S1_at   | MmugDNA.30336.1 | 6.56  | 6.56  | 0.08 | 0.06 | -1    | 0.807296 | 0.559159 | 0.913693 | 0.736091 |
| MmugDNA.30337.1.S1_at   | MmugDNA.30337.1 | 7.14  | 10.15 | 1.72 | 0.21 | -8.07 | 0.042874 | 0.318811 | 0.26421  | 0.571379 |
| MmugDNA.30338.1.S1_at   | MmugDNA.30338.1 | 5.68  | 5.6   | 0.13 | 0.08 | 1.05  | 0.162172 | 0.303729 | 0.454027 | 0.561146 |
| MmugDNA.30339.1.S1_at   | MmugDNA.30339.1 | 3.15  | 3.14  | 0.28 | 0.07 | 1     | 0.491368 | 0.776717 | 0.729201 | 0.870216 |
| MmugDNA.30340.1.S1_at   | MmugDNA.30340.1 | 5     | 5.06  | 0.25 | 0.1  | -1.04 | 0.170391 | 0.121375 | 0.46404  | 0.390439 |
| MmugDNA.30342.1.S1_at   | MmugDNA.30342.1 | 10.66 | 11.48 | 0.22 | 0.05 | -1.76 | 0.003311 | 0.019384 | 0.102374 | 0.175012 |
| MmugDNA.30343.1.S1_at   | MmugDNA.30343.1 | 5.27  | 5.27  | 0.34 | 0.25 | -1    | 0.48043  | 0.652037 | 0.721309 | 0.796529 |
| MmugDNA.30344.1.S1_at   | MmugDNA.30344.1 | 5.62  | 5.82  | 0.3  | 0.2  | -1.15 | 0.1395   | 0.356463 | 0.425004 | 0.598459 |
| MmugDNA.30344.1.S1_x_at | MmugDNA.30344.1 | 6.44  | 7.04  | 0.18 | 0.25 | -1.51 | 0.055416 | 0.184742 | 0.292343 | 0.460656 |
| MmugDNA.30345.1.S1_at   | MmugDNA.30345.1 | 3.25  | 3.01  | 0.01 | 0.15 | 1.18  | 0.05038  | 0.081242 | 0.282317 | 0.329351 |
| MmugDNA.30346.1.S1_at   | MmugDNA.30346.1 | 4.66  | 4.3   | 0.17 | 0.26 | 1.28  | 0.255156 | 0.409054 | 0.549651 | 0.636113 |
| MmugDNA.30347.1.S1_at   | MmugDNA.30347.1 | 5.33  | 5.43  | 0.26 | 0.25 | -1.07 | 0.864266 | 0.463905 | 0.941235 | 0.67471  |
| MmugDNA.30348.1.S1_at   | MmugDNA.30348.1 | 5.96  | 6.22  | 0.3  | 0.17 | -1.2  | 0.16191  | 0.053302 | 0.453721 | 0.276463 |
| MmugDNA.30349.1.S1_at   | MmugDNA.30349.1 | 9.01  | 9.34  | 0.25 | 0.11 | -1.26 | 0.076982 | 0.085429 | 0.33549  | 0.337409 |
| MmugDNA.3035.1.S1_at    | MmugDNA.3035.1  | 4.27  | 4.4   | 0.26 | 0.13 | -1.1  | 0.433175 | 0.648328 | 0.68877  | 0.794167 |
| MmugDNA.30353.1.S1_at   | MmugDNA.30353.1 | 4.63  | 4.61  | 0.05 | 0.19 | 1.01  | 0.986944 | 0.924558 | 0.995246 | 0.957386 |
| MmugDNA.30354.1.S1_at   | MmugDNA.30354.1 | 3.06  | 3.02  | 0.11 | 0.37 | 1.03  | 0.485551 | 0.63337  | 0.725062 | 0.784111 |
| MmugDNA.30356.1.S1_s_at | MmugDNA.30356.1 | 9.83  | 9.6   | 0.16 | 0.05 | 1.17  | 0.069781 | 0.038703 | 0.322574 | 0.24169  |
| MmugDNA.30357.1.S1_at   | MmugDNA.30357.1 | 6.31  | 5.95  | 0.23 | 0.13 | 1.28  | 0.221036 | 0.309297 | 0.519014 | 0.564899 |
| MmugDNA.30358.1.S1_at   | MmugDNA.30358.1 | 6.64  | 6.55  | 0.28 | 0.1  | 1.06  | 0.900471 | 0.976601 | 0.957767 | 0.987237 |
| MmugDNA.30358.1.S1_s_at | MmugDNA.30358.1 | 7.47  | 7.54  | 0.16 | 0.09 | -1.05 | 0.630275 | 0.954838 | 0.818539 | 0.974414 |
| MmugDNA.3036.1.S1_at    | MmugDNA.3036.1  | 10.18 | 10.19 | 0.04 | 0.05 | -1.01 | 0.636778 | 0.000398 | 0.822268 | 0.037471 |
| MmugDNA.30360.1.S1_at   | MmugDNA.30360.1 | 7.54  | 8.19  | 0.38 | 0.15 | -1.56 | 0.094951 | 0.001536 | 0.363924 | 0.059437 |
| MmugDNA.30362.1.S1_at   | MmugDNA.30362.1 | 5.6   | 6.95  | 0.82 | 0.27 | -2.55 | 0.214342 | 0.041781 | 0.511995 | 0.248981 |
| MmugDNA.30363.1.S1_at   | MmugDNA.30363.1 | 7     | 6.92  | 0.28 | 0.08 | 1.05  | 0.856757 | 0.914714 | 0.937791 | 0.952066 |
| MmugDNA.30364.1.S1_at   | MmugDNA.30364.1 | 3.86  | 3.73  | 0.16 | 0.08 | 1.09  | 0.141818 | 0.178521 | 0.427793 | 0.454778 |

|                         |                 |       |       |      |      |       |          |          |          |          |
|-------------------------|-----------------|-------|-------|------|------|-------|----------|----------|----------|----------|
| MmugDNA.30365.1.S1_at   | MmugDNA.30365.1 | 5.85  | 6.02  | 0.09 | 0.27 | -1.13 | 0.880128 | 0.031875 | 0.949008 | 0.220938 |
| MmugDNA.30368.1.S1_at   | MmugDNA.30368.1 | 8.05  | 7.94  | 0.24 | 0.22 | 1.08  | 0.160196 | 0.194348 | 0.451571 | 0.469464 |
| MmugDNA.30369.1.S1_at   | MmugDNA.30369.1 | 9.1   | 8.53  | 0.07 | 0.12 | 1.49  | 0.001868 | 0.006397 | 0.087447 | 0.108738 |
| MmugDNA.3037.1.S1_at    | MmugDNA.3037.1  | 6.26  | 6.31  | 0.38 | 0.17 | -1.04 | 0.536709 | 0.457068 | 0.759085 | 0.67067  |
| MmugDNA.30370.1.S1_at   | MmugDNA.30370.1 | 4.06  | 4.05  | 0.24 | 0.23 | 1.01  | 0.220025 | 0.437747 | 0.517666 | 0.656924 |
| MmugDNA.30372.1.S1_at   | MmugDNA.30372.1 | 3.74  | 3.65  | 0.27 | 0.14 | 1.06  | 0.658398 | 0.357218 | 0.834958 | 0.598864 |
| MmugDNA.30373.1.S1_at   | MmugDNA.30373.1 | 6.49  | 6.39  | 0.28 | 0.06 | 1.07  | 0.716673 | 0.409361 | 0.866324 | 0.636452 |
| MmugDNA.30373.1.S1_s_at | MmugDNA.30373.1 | 3.68  | 3.74  | 0.12 | 0.09 | -1.04 | 0.371033 | 0.538681 | 0.6438   | 0.723313 |
| MmugDNA.30374.1.S1_at   | MmugDNA.30374.1 | 5.55  | 5.69  | 0.11 | 0.06 | -1.1  | 0.147945 | 0.047465 | 0.436178 | 0.262486 |
| MmugDNA.30375.1.S1_at   | MmugDNA.30375.1 | 6.27  | 6.09  | 0.28 | 0.16 | 1.14  | 0.362743 | 0.312142 | 0.63739  | 0.566904 |
| MmuSTS.724.1.S1_at      | MmuSTS.724.1    | 9.03  | 8.73  | 0.24 | 0.09 | 1.23  | 0.115125 | 0.17203  | 0.392143 | 0.448441 |
| MmuSTS.724.1.S1_s_at    | MmuSTS.724.1    | 8.66  | 8.12  | 0.27 | 0.08 | 1.46  | 0.024251 | 0.030655 | 0.20883  | 0.217119 |
| MmugDNA.30377.1.S1_at   | MmugDNA.30377.1 | 9.61  | 10.24 | 0.28 | 0.1  | -1.54 | 0.019088 | 0.000316 | 0.191696 | 0.035358 |
| MmugDNA.30379.1.S1_at   | MmugDNA.30379.1 | 4.04  | 3.68  | 0.3  | 0.02 | 1.28  | 0.099449 | 0.091275 | 0.370342 | 0.346281 |
| MmugDNA.3038.1.S1_at    | MmugDNA.3038.1  | 5.54  | 5.54  | 0.03 | 0.04 | -1    | 0.251852 | 0.386982 | 0.546536 | 0.621935 |
| MmugDNA.30380.1.S1_at   | MmugDNA.30380.1 | 10.04 | 9.6   | 0.05 | 0.14 | 1.36  | 0.002851 | 0.002992 | 0.098362 | 0.079958 |
| MmugDNA.30381.1.S1_at   | MmugDNA.30381.1 | 6.94  | 7.05  | 0.15 | 0.12 | -1.07 | 0.655926 | 0.133956 | 0.83356  | 0.4061   |
| MmugDNA.30382.1.S1_at   | MmugDNA.30382.1 | 5.25  | 5.08  | 0.38 | 0.08 | 1.12  | 0.44236  | 0.733032 | 0.695806 | 0.845498 |
| MmugDNA.30383.1.S1_at   | MmugDNA.30383.1 | 6.98  | 6.81  | 0.42 | 0.21 | 1.12  | 0.53722  | 0.753541 | 0.759433 | 0.856527 |
| MmugDNA.30385.1.S1_at   | MmugDNA.30385.1 | 8.32  | 8.11  | 0.5  | 0.11 | 1.16  | 0.131828 | 0.110611 | 0.414857 | 0.374854 |
| MmugDNA.30386.1.S1_at   | MmugDNA.30386.1 | 6.87  | 6.96  | 0.32 | 0.07 | -1.07 | 0.532925 | 0.288296 | 0.75671  | 0.549561 |
| MmugDNA.30388.1.S1_at   | MmugDNA.30388.1 | 3.42  | 3.24  | 0.17 | 0.05 | 1.13  | 0.166438 | 0.252614 | 0.45963  | 0.521169 |
| MmugDNA.30389.1.S1_at   | MmugDNA.30389.1 | 5.71  | 8.2   | 1.79 | 0.76 | -5.62 | 0.107433 | 0.037031 | 0.382147 | 0.236886 |
| MmugDNA.3039.1.S1_at    | MmugDNA.3039.1  | 6.95  | 6.93  | 0.5  | 0.21 | 1.01  | 0.39287  | 0.345705 | 0.659767 | 0.590854 |
| MmugDNA.30390.1.S1_at   | MmugDNA.30390.1 | 3     | 2.85  | 0.08 | 0.05 | 1.1   | 0.023273 | 0.440888 | 0.205562 | 0.659138 |
| MmugDNA.30393.1.S1_at   | MmugDNA.30393.1 | 9.71  | 9.03  | 0.52 | 0    | 1.6   | 0.055156 | 0.021101 | 0.291849 | 0.181869 |
| MmugDNA.30394.1.S1_at   | MmugDNA.30394.1 | 6.05  | 7.51  | 1.62 | 0.28 | -2.76 | 0.605262 | 0.658861 | 0.802341 | 0.800473 |
| MmugDNA.30395.1.S1_at   | MmugDNA.30395.1 | 3.4   | 3.22  | 0.26 | 0.07 | 1.13  | 0.253203 | 0.39943  | 0.547579 | 0.629798 |
| MmugDNA.30396.1.S1_at   | MmugDNA.30396.1 | 5.33  | 5.28  | 0.13 | 0.12 | 1.03  | 0.136783 | 0.142244 | 0.42156  | 0.415754 |
| MmugDNA.30397.1.S1_at   | MmugDNA.30397.1 | 7.61  | 7.2   | 0.31 | 0.4  | 1.33  | 0.171674 | 0.004671 | 0.465636 | 0.095314 |
| MmugDNA.30398.1.S1_at   | MmugDNA.30398.1 | 5     | 5.08  | 0.05 | 0.05 | -1.06 | 0.34154  | 0.840286 | 0.621347 | 0.908996 |
| MmugDNA.30399.1.S1_at   | MmugDNA.30399.1 | 9.41  | 9.38  | 0.13 | 0.34 | 1.02  | 0.36351  | 0.809139 | 0.638251 | 0.889995 |
| MmugDNA.304.1.S1_at     | MmugDNA.304.1   | 5.57  | 5.31  | 0.21 | 0.33 | 1.2   | 0.211962 | 0.26178  | 0.509822 | 0.528227 |
| MmugDNA.30400.1.S1_at   | MmugDNA.30400.1 | 2.72  | 2.71  | 0.09 | 0.11 | 1     | 0.855233 | 0.222618 | 0.93691  | 0.495617 |
| MmugDNA.30401.1.S1_at   | MmugDNA.30401.1 | 4.35  | 4.3   | 0.28 | 0.02 | 1.04  | 0.484898 | 0.331271 | 0.724507 | 0.579984 |
| MmugDNA.30402.1.S1_at   | MmugDNA.30402.1 | 5.32  | 4.93  | 0.54 | 0.07 | 1.31  | 0.170912 | 0.033819 | 0.464646 | 0.227489 |
| MmugDNA.30403.1.S1_s_at | MmugDNA.30403.1 | 12.4  | 12.46 | 0.28 | 0.26 | -1.04 | 0.871937 | 0.073821 | 0.944956 | 0.317146 |
| MmugDNA.30404.1.S1_at   | MmugDNA.30404.1 | 3.33  | 3.35  | 0.05 | 0.1  | -1.01 | 0.644392 | 0.498527 | 0.826839 | 0.697582 |
| MmugDNA.30405.1.S1_at   | MmugDNA.30405.1 | 6.23  | 6.26  | 0.31 | 0.05 | -1.02 | 0.892224 | 0.589835 | 0.954092 | 0.755973 |
| MmugDNA.30408.1.S1_at   | MmugDNA.30408.1 | 4.9   | 5.3   | 0.09 | 0.05 | -1.32 | 0.003375 | 0.000779 | 0.102989 | 0.045626 |
| MmugDNA.30409.1.S1_at   | MmugDNA.30409.1 | 6.75  | 7.66  | 0.55 | 0.03 | -1.88 | 0.038959 | 0.021519 | 0.253706 | 0.183771 |
| MmugDNA.3041.1.S1_at    | MmugDNA.3041.1  | 10.54 | 11.51 | 0.34 | 0.07 | -1.95 | 0.006821 | 0.162864 | 0.129236 | 0.438966 |
| MmugDNA.30410.1.S1_s_at | MmugDNA.30410.1 | 9.11  | 7.92  | 0.05 | 0.63 | 2.28  | 0.067247 | 0.029626 | 0.316989 | 0.213783 |

|                         |                 |       |       |      |      |       |          |          |          |          |
|-------------------------|-----------------|-------|-------|------|------|-------|----------|----------|----------|----------|
| MmugDNA.30411.1.S1_at   | MmugDNA.30411.1 | 3.31  | 3.44  | 0.09 | 0.1  | -1.09 | 0.386204 | 0.036353 | 0.65465  | 0.235105 |
| MmugDNA.30413.1.S1_at   | MmugDNA.30413.1 | 7.88  | 8.31  | 0.33 | 0.05 | -1.35 | 0.083287 | 0.012059 | 0.345547 | 0.142044 |
| MmugDNA.30414.1.S1_at   | MmugDNA.30414.1 | 5.29  | 5.12  | 0.77 | 0.41 | 1.13  | 0.72275  | 0.486517 | 0.869672 | 0.689881 |
| MmugDNA.30414.1.S1_s_at | MmugDNA.30414.1 | 9.03  | 10.43 | 0.58 | 0.25 | -2.64 | 0.021966 | 0.063945 | 0.201327 | 0.29906  |
| MmugDNA.30415.1.S1_at   | MmugDNA.30415.1 | 6.57  | 6.93  | 0.22 | 0.08 | -1.28 | 0.211008 | 0.181859 | 0.508779 | 0.458395 |
| MmugDNA.30417.1.S1_at   | MmugDNA.30417.1 | 3.18  | 3.21  | 0.28 | 0.12 | -1.02 | 0.744413 | 0.870729 | 0.881461 | 0.926534 |
| MmugDNA.30418.1.S1_at   | MmugDNA.30418.1 | 4.8   | 4.68  | 0.08 | 0.17 | 1.08  | 0.184426 | 0.102602 | 0.480429 | 0.362984 |
| MmugDNA.3042.1.S1_at    | MmugDNA.3042.1  | 8.02  | 7.55  | 0.1  | 0.11 | 1.38  | 0.009787 | 0.009451 | 0.148542 | 0.128022 |
| MmugDNA.30420.1.S1_at   | MmugDNA.30420.1 | 5.25  | 5.2   | 0.47 | 0.3  | 1.03  | 0.716047 | 0.753473 | 0.866042 | 0.856527 |
| MmugDNA.30421.1.S1_at   | MmugDNA.30421.1 | 4.69  | 4.56  | 0.31 | 0.2  | 1.1   | 0.964122 | 0.983661 | 0.985473 | 0.990902 |
| MmugDNA.30422.1.S1_at   | MmugDNA.30422.1 | 6.72  | 6.8   | 0.06 | 0.05 | -1.05 | 0.176244 | 0.012268 | 0.470611 | 0.143266 |
| MmugDNA.30423.1.S1_at   | MmugDNA.30423.1 | 5.2   | 4.28  | 0.53 | 0.54 | 1.89  | 0.207264 | 0.351805 | 0.50501  | 0.595256 |
| MmugDNA.30424.1.S1_at   | MmugDNA.30424.1 | 4.94  | 4.97  | 0.16 | 0.15 | -1.03 | 0.460846 | 0.482141 | 0.708442 | 0.687037 |
| MmugDNA.30426.1.S1_at   | MmugDNA.30426.1 | 12.01 | 11.72 | 0.04 | 0.08 | 1.22  | 0.009195 | 0.069668 | 0.145865 | 0.310164 |
| MmugDNA.30426.1.S1_s_at | MmugDNA.30426.1 | 13.26 | 13.16 | 0.01 | 0.05 | 1.07  | 0.094422 | 0.068789 | 0.363345 | 0.308711 |
| MmugDNA.30428.1.S1_at   | MmugDNA.30428.1 | 2.88  | 3     | 0.05 | 0.1  | -1.09 | 0.146301 | 0.163578 | 0.434187 | 0.439765 |
| MmugDNA.3043.1.S1_at    | MmugDNA.3043.1  | 5.95  | 6.21  | 0.46 | 0.37 | -1.19 | 0.223068 | 0.215028 | 0.52097  | 0.488898 |
| MmugDNA.30430.1.S1_at   | MmugDNA.30430.1 | 3.53  | 3.27  | 0.13 | 0.09 | 1.2   | 0.042898 | 0.088557 | 0.264232 | 0.341995 |
| MmugDNA.30431.1.S1_at   | MmugDNA.30431.1 | 3.88  | 3.96  | 0.06 | 0.17 | -1.05 | 0.771692 | 0.877517 | 0.895391 | 0.930162 |
| MmugDNA.30432.1.S1_at   | MmugDNA.30432.1 | 4.64  | 4.25  | 0.14 | 0.22 | 1.3   | 0.170899 | 0.073894 | 0.464646 | 0.31727  |
| MmugDNA.30434.1.S1_at   | MmugDNA.30434.1 | 4.18  | 4.22  | 0.46 | 0.11 | -1.03 | 0.381699 | 0.525452 | 0.651322 | 0.715025 |
| MmugDNA.30436.1.S1_at   | MmugDNA.30436.1 | 4.68  | 4.62  | 0.05 | 0.21 | 1.04  | 0.636671 | 0.655202 | 0.822222 | 0.798333 |
| MmugDNA.30437.1.S1_at   | MmugDNA.30437.1 | 5.33  | 5.74  | 0.42 | 0.16 | -1.33 | 0.244148 | 0.378483 | 0.540834 | 0.615514 |
| MmugDNA.30438.1.S1_at   | MmugDNA.30438.1 | 12.65 | 12.72 | 0.09 | 0.06 | -1.05 | 0.17508  | 0.23938  | 0.469373 | 0.510039 |
| MmugDNA.3044.1.S1_at    | MmugDNA.3044.1  | 4.96  | 4.94  | 0.29 | 0.07 | 1.02  | 0.775745 | 0.742469 | 0.897461 | 0.850851 |
| MmugDNA.30440.1.S1_at   | MmugDNA.30440.1 | 5.29  | 5.36  | 0.28 | 0.06 | -1.05 | 0.916751 | 0.978243 | 0.964555 | 0.988093 |
| MmugDNA.30441.1.S1_at   | MmugDNA.30441.1 | 4.41  | 4.31  | 0.76 | 0.12 | 1.07  | 0.289012 | 0.449557 | 0.578714 | 0.665113 |
| MmugDNA.30443.1.S1_at   | MmugDNA.30443.1 | 4.66  | 4.53  | 0.98 | 0.1  | 1.09  | 0.321055 | 0.475889 | 0.60539  | 0.682387 |
| MmugDNA.30444.1.S1_at   | MmugDNA.30444.1 | 4.98  | 5.6   | 0.25 | 0.04 | -1.54 | 0.012641 | 0.010464 | 0.162521 | 0.133678 |
| MmugDNA.30448.1.S1_at   | MmugDNA.30448.1 | 10.4  | 10.91 | 0.11 | 0.23 | -1.43 | 0.030357 | 0.000402 | 0.227199 | 0.037471 |
| MmugDNA.30449.1.S1_at   | MmugDNA.30449.1 | 5.29  | 5.41  | 0.17 | 0.18 | -1.09 | 0.294786 | 0.537633 | 0.583732 | 0.722616 |
| MmugDNA.30450.1.S1_at   | MmugDNA.30450.1 | 5.11  | 5.26  | 0.42 | 0.27 | -1.11 | 0.457105 | 0.470017 | 0.70612  | 0.678572 |
| MmugDNA.30451.1.S1_at   | MmugDNA.30451.1 | 5.4   | 5.51  | 0.15 | 0.06 | -1.08 | 0.510698 | 0.761973 | 0.742051 | 0.861597 |
| MmugDNA.30452.1.S1_at   | MmugDNA.30452.1 | 5.47  | 5.48  | 0.09 | 0.15 | -1    | 0.566672 | 0.646582 | 0.777529 | 0.792965 |
| MmugDNA.30453.1.S1_at   | MmugDNA.30453.1 | 4.45  | 4.5   | 0.07 | 0.09 | -1.03 | 0.815293 | 0.522203 | 0.917536 | 0.712954 |
| MmugDNA.30454.1.S1_at   | MmugDNA.30454.1 | 8.19  | 8.8   | 0.31 | 0.19 | -1.53 | 0.072782 | 0.138015 | 0.327658 | 0.410919 |
| MmugDNA.30455.1.S1_at   | MmugDNA.30455.1 | 6.61  | 5.81  | 0.84 | 0.11 | 1.74  | 0.175554 | 0.15432  | 0.470049 | 0.429188 |
| MmugDNA.30457.1.S1_at   | MmugDNA.30457.1 | 5.34  | 4.87  | 0.26 | 0.29 | 1.38  | 0.076302 | 0.082383 | 0.33441  | 0.331354 |
| MmugDNA.30458.1.S1_at   | MmugDNA.30458.1 | 9.31  | 9.19  | 0.58 | 0.18 | 1.08  | 0.346544 | 0.17642  | 0.624998 | 0.45282  |
| MmugDNA.30458.1.S1_x_at | MmugDNA.30458.1 | 9.09  | 9     | 0.61 | 0.15 | 1.06  | 0.344725 | 0.151464 | 0.624009 | 0.426214 |
| MmugDNA.30459.1.S1_at   | MmugDNA.30459.1 | 4.41  | 4.06  | 0.17 | 0.46 | 1.28  | 0.746871 | 0.42403  | 0.882818 | 0.646666 |
| MmugDNA.30460.1.S1_at   | MmugDNA.30460.1 | 8.21  | 9.18  | 0.57 | 0.23 | -1.96 | 0.078966 | 0.16734  | 0.338745 | 0.443785 |
| MmugDNA.30461.1.S1_at   | MmugDNA.30461.1 | 2.97  | 2.98  | 0.21 | 0.15 | -1.01 | 0.251768 | 0.32363  | 0.546475 | 0.574525 |

|                         |                 |       |       |      |      |       |          |          |          |          |
|-------------------------|-----------------|-------|-------|------|------|-------|----------|----------|----------|----------|
| MmugDNA.30462.1.S1_at   | MmugDNA.30462.1 | 5.61  | 6.61  | 0.31 | 0.21 | -2    | 0.008491 | 0.129801 | 0.141338 | 0.40147  |
| MmugDNA.30465.1.S1_at   | MmugDNA.30465.1 | 5.9   | 5.92  | 0.08 | 0.1  | -1.02 | 0.827008 | 0.088743 | 0.92338  | 0.342415 |
| MmugDNA.30468.1.S1_at   | MmugDNA.30468.1 | 4.28  | 3.83  | 0.19 | 0.13 | 1.36  | 0.098041 | 0.1755   | 0.368604 | 0.452157 |
| MmugDNA.30469.1.S1_at   | MmugDNA.30469.1 | 6.11  | 6.14  | 0.03 | 0.29 | -1.02 | 0.889705 | 0.976347 | 0.953075 | 0.98714  |
| MmugDNA.3047.1.S1_at    | MmugDNA.3047.1  | 6.72  | 6.24  | 0.48 | 0.17 | 1.39  | 0.144547 | 0.218858 | 0.431527 | 0.492611 |
| MmugDNA.30470.1.S1_at   | MmugDNA.30470.1 | 11.66 | 11.68 | 0.18 | 0.18 | -1.01 | 0.540126 | 0.005    | 0.761291 | 0.098514 |
| MmugDNA.30471.1.S1_at   | MmugDNA.30471.1 | 12.85 | 12.94 | 0.07 | 0.05 | -1.07 | 0.229291 | 0.00038  | 0.528085 | 0.037273 |
| MmugDNA.30472.1.S1_at   | MmugDNA.30472.1 | 6.99  | 5.01  | 0.4  | 0.31 | 3.95  | 0.002321 | 0.002282 | 0.092632 | 0.07037  |
| MmugDNA.30473.1.S1_at   | MmugDNA.30473.1 | 4.62  | 4.8   | 0.1  | 0.23 | -1.13 | 0.371455 | 0.078568 | 0.64419  | 0.325285 |
| MmugDNA.30474.1.S1_at   | MmugDNA.30474.1 | 5.51  | 4.51  | 0.84 | 0.26 | 2.01  | 0.101922 | 0.053738 | 0.373552 | 0.277384 |
| MmugDNA.30475.1.S1_at   | MmugDNA.30475.1 | 6.92  | 6.76  | 0.32 | 0.14 | 1.12  | 0.403747 | 0.539757 | 0.667808 | 0.723926 |
| MmugDNA.30476.1.S1_at   | MmugDNA.30476.1 | 4.49  | 4.96  | 0.11 | 0.05 | -1.38 | 0.004062 | 0.01591  | 0.108999 | 0.160062 |
| MmugDNA.30477.1.S1_at   | MmugDNA.30477.1 | 5.16  | 5.23  | 0.32 | 0.12 | -1.05 | 0.783762 | 0.40614  | 0.901337 | 0.634211 |
| MmugDNA.30478.1.S1_at   | MmugDNA.30478.1 | 3.58  | 3.59  | 0.19 | 0.06 | -1    | 0.50341  | 0.421632 | 0.73695  | 0.645195 |
| MmugDNA.30479.1.S1_at   | MmugDNA.30479.1 | 3.24  | 3.31  | 0.07 | 0.11 | -1.05 | 0.181856 | 0.864136 | 0.477396 | 0.922925 |
| MmugDNA.30479.1.S1_x_at | MmugDNA.30479.1 | 4.36  | 4.33  | 0.15 | 0.28 | 1.02  | 0.883678 | 0.948124 | 0.950562 | 0.970446 |
| MmugDNA.3048.1.S1_at    | MmugDNA.3048.1  | 3.42  | 3.4   | 0.32 | 0.16 | 1.02  | 0.530615 | 0.714703 | 0.755142 | 0.8345   |
| MmugDNA.30480.1.S1_at   | MmugDNA.30480.1 | 7.37  | 6.94  | 0.27 | 0.04 | 1.34  | 0.056866 | 0.209324 | 0.295858 | 0.483038 |
| MmugDNA.30482.1.S1_at   | MmugDNA.30482.1 | 8.64  | 8.89  | 0.27 | 0.25 | -1.19 | 0.326729 | 0.007861 | 0.609643 | 0.118059 |
| MmugDNA.30483.1.S1_at   | MmugDNA.30483.1 | 11.3  | 10.93 | 0.3  | 0.02 | 1.3   | 0.29629  | 0.382935 | 0.585001 | 0.619021 |
| MmugDNA.30484.1.S1_at   | MmugDNA.30484.1 | 9.46  | 10.12 | 0.23 | 0.21 | -1.59 | 0.055803 | 0.56068  | 0.293385 | 0.736919 |
| MmugDNA.30485.1.S1_at   | MmugDNA.30485.1 | 5.46  | 5.52  | 0.06 | 0.17 | -1.04 | 0.589597 | 0.421605 | 0.791627 | 0.645173 |
| MmugDNA.30486.1.S1_at   | MmugDNA.30486.1 | 4.04  | 3.69  | 0.25 | 0.15 | 1.27  | 0.099178 | 0.295779 | 0.370141 | 0.555196 |
| MmugDNA.30488.1.S1_at   | MmugDNA.30488.1 | 7.32  | 7.48  | 0.3  | 0.15 | -1.12 | 0.6114   | 0.794469 | 0.806248 | 0.881455 |
| MmugDNA.30489.1.S1_at   | MmugDNA.30489.1 | 9.01  | 8.37  | 0.26 | 0.07 | 1.56  | 0.023197 | 0.031962 | 0.205385 | 0.221191 |
| MmugDNA.30491.1.S1_at   | MmugDNA.30491.1 | 8.12  | 8.47  | 0.15 | 0.08 | -1.28 | 0.03316  | 0.220872 | 0.236296 | 0.494262 |
| MmugDNA.30492.1.S1_at   | MmugDNA.30492.1 | 11.16 | 11.48 | 0.09 | 0.03 | -1.25 | 0.006025 | 0.05022  | 0.124151 | 0.269367 |
| MmugDNA.30493.1.S1_at   | MmugDNA.30493.1 | 6.33  | 7.13  | 0.26 | 0.48 | -1.74 | 0.208726 | 0.030519 | 0.506255 | 0.216711 |
| MmugDNA.30494.1.S1_at   | MmugDNA.30494.1 | 6.48  | 6.48  | 0.24 | 0.1  | 1     | 0.585503 | 0.761711 | 0.789262 | 0.861459 |
| MmugDNA.30495.1.S1_at   | MmugDNA.30495.1 | 5.98  | 5.53  | 0.92 | 0.4  | 1.37  | 0.276428 | 0.445999 | 0.567973 | 0.662635 |
| MmugDNA.30497.1.S1_at   | MmugDNA.30497.1 | 3.44  | 3.39  | 0.57 | 0.28 | 1.04  | 0.987947 | 0.961707 | 0.995669 | 0.978408 |
| MmugDNA.30498.1.S1_at   | MmugDNA.30498.1 | 7.42  | 8.9   | 0.74 | 0.03 | -2.79 | 0.068251 | 0.07364  | 0.319026 | 0.316967 |
| MmugDNA.30499.1.S1_at   | MmugDNA.30499.1 | 3.39  | 3.2   | 0.09 | 0.11 | 1.15  | 0.324567 | 0.466653 | 0.608233 | 0.676425 |
| MmugDNA.305.1.S1_at     | MmugDNA.305.1   | 9.25  | 9.15  | 0.21 | 0.06 | 1.07  | 0.650542 | 0.685527 | 0.830274 | 0.816542 |
| MmugDNA.3050.1.S1_at    | MmugDNA.3050.1  | 4.12  | 4.13  | 0.35 | 0.21 | -1    | 0.401751 | 0.326505 | 0.666287 | 0.576576 |
| MmugDNA.30500.1.S1_at   | MmugDNA.30500.1 | 6.61  | 6.6   | 0.07 | 0.01 | 1.01  | 0.912577 | 0.40031  | 0.963089 | 0.630169 |
| MmugDNA.30501.1.S1_at   | MmugDNA.30501.1 | 5.7   | 5.7   | 0.04 | 0.03 | 1     | 0.777794 | 0.579362 | 0.898434 | 0.749058 |
| MmugDNA.30502.1.S1_at   | MmugDNA.30502.1 | 5.74  | 6.91  | 0.25 | 0.51 | -2.24 | 0.060706 | 0.08371  | 0.303414 | 0.334417 |
| MmugDNA.30504.1.S1_at   | MmugDNA.30504.1 | 9.31  | 10.18 | 0.39 | 0.24 | -1.82 | 0.069622 | 0.087225 | 0.322287 | 0.340206 |
| MmugDNA.30506.1.S1_at   | MmugDNA.30506.1 | 3.72  | 3.89  | 0.09 | 0.23 | -1.13 | 0.602234 | 0.796651 | 0.800067 | 0.882765 |
| MmugDNA.30508.1.S1_at   | MmugDNA.30508.1 | 9.51  | 9.48  | 0.18 | 0.11 | 1.02  | 0.380061 | 0.199367 | 0.649803 | 0.474002 |
| MmugDNA.30509.1.S1_at   | MmugDNA.30509.1 | 4.61  | 4.64  | 0.19 | 0.08 | -1.02 | 0.833139 | 0.986336 | 0.926518 | 0.992243 |
| MmugDNA.3051.1.S1_at    | MmugDNA.3051.1  | 3.52  | 3.35  | 0.16 | 0.09 | 1.12  | 0.138972 | 0.624882 | 0.424645 | 0.778939 |

|                         |                 |       |       |      |      |       |          |          |          |          |
|-------------------------|-----------------|-------|-------|------|------|-------|----------|----------|----------|----------|
| MmugDNA.30511.1.S1_at   | MmugDNA.30511.1 | 2.75  | 2.55  | 0.05 | 0.5  | 1.15  | 0.730302 | 0.897194 | 0.873938 | 0.941337 |
| MmugDNA.30513.1.S1_at   | MmugDNA.30513.1 | 7.43  | 7.96  | 0.24 | 0.35 | -1.44 | 0.486918 | 0.200899 | 0.725874 | 0.475395 |
| MmugDNA.30514.1.S1_at   | MmugDNA.30514.1 | 3.83  | 3.36  | 0.42 | 0.07 | 1.38  | 0.099311 | 0.117099 | 0.370274 | 0.384548 |
| MmugDNA.30516.1.S1_at   | MmugDNA.30516.1 | 5.47  | 5.06  | 0.27 | 0.31 | 1.33  | 0.063601 | 0.216246 | 0.308797 | 0.489816 |
| MmugDNA.30518.1.S1_at   | MmugDNA.30518.1 | 5.08  | 4.95  | 0.31 | 0.08 | 1.1   | 0.218808 | 0.292755 | 0.516489 | 0.552783 |
| MmugDNA.30519.1.S1_at   | MmugDNA.30519.1 | 8.73  | 8.7   | 0.07 | 0.14 | 1.02  | 0.418297 | 0.085263 | 0.678208 | 0.337096 |
| MmugDNA.3052.1.S1_at    | MmugDNA.3052.1  | 2.88  | 2.87  | 0.29 | 0.12 | 1.01  | 0.400329 | 0.355787 | 0.665412 | 0.597864 |
| MmugDNA.30520.1.S1_at   | MmugDNA.30520.1 | 6.75  | 6.89  | 0.06 | 0.07 | -1.1  | 0.083459 | 0.060465 | 0.345905 | 0.292553 |
| MmugDNA.30521.1.S1_at   | MmugDNA.30521.1 | 3.26  | 3.27  | 0.02 | 0.05 | -1.01 | 0.847114 | 0.557609 | 0.933311 | 0.735113 |
| MmugDNA.30522.1.S1_at   | MmugDNA.30522.1 | 7.35  | 7.42  | 0.1  | 0.04 | -1.05 | 0.209765 | 0.246792 | 0.507187 | 0.516126 |
| MmugDNA.30523.1.S1_at   | MmugDNA.30523.1 | 4.62  | 4.43  | 0.13 | 0.08 | 1.14  | 0.043633 | 0.304765 | 0.265888 | 0.561921 |
| MmugDNA.30524.1.S1_at   | MmugDNA.30524.1 | 4.61  | 5.29  | 0.33 | 0.34 | -1.6  | 0.15286  | 0.172474 | 0.442573 | 0.448864 |
| MmugDNA.30525.1.S1_at   | MmugDNA.30525.1 | 5.8   | 5.64  | 0.34 | 0.53 | 1.11  | 0.202078 | 0.238226 | 0.499672 | 0.508825 |
| MmugDNA.30527.1.S1_at   | MmugDNA.30527.1 | 4.99  | 4.7   | 0.05 | 0.11 | 1.23  | 0.030396 | 0.072795 | 0.227249 | 0.315651 |
| MmugDNA.30529.1.S1_at   | MmugDNA.30529.1 | 6.34  | 7.5   | 0.42 | 0.29 | -2.24 | 0.020889 | 0.054613 | 0.198207 | 0.279211 |
| MmugDNA.30531.1.S1_at   | MmugDNA.30531.1 | 5.65  | 5.6   | 0.09 | 0.2  | 1.04  | 0.442669 | 0.300091 | 0.696105 | 0.558262 |
| MmugDNA.30532.1.S1_at   | MmugDNA.30532.1 | 3.69  | 3.56  | 0.25 | 0.27 | 1.09  | 0.762676 | 0.517332 | 0.891323 | 0.709435 |
| MmugDNA.30533.1.S1_at   | MmugDNA.30533.1 | 8.31  | 8.57  | 0.13 | 0.16 | -1.2  | 0.105849 | 0.48939  | 0.379859 | 0.691792 |
| MmugDNA.30535.1.S1_at   | MmugDNA.30535.1 | 5.94  | 6.02  | 0.72 | 0.23 | -1.06 | 0.28636  | 0.611788 | 0.576174 | 0.769583 |
| MmugDNA.30536.1.S1_at   | MmugDNA.30536.1 | 3.32  | 3.46  | 0.55 | 0.1  | -1.11 | 0.654735 | 0.766369 | 0.832889 | 0.864264 |
| MmugDNA.30536.1.S1_x_at | MmugDNA.30536.1 | 5.27  | 5.04  | 0.45 | 0.04 | 1.17  | 0.406225 | 0.230625 | 0.669589 | 0.502327 |
| MmugDNA.30538.1.S1_at   | MmugDNA.30538.1 | 3.1   | 3     | 0.06 | 0.09 | 1.07  | 0.265413 | 0.38349  | 0.558032 | 0.619446 |
| MmugDNA.30539.1.S1_at   | MmugDNA.30539.1 | 11.09 | 10.5  | 0.21 | 0.11 | 1.51  | 0.031188 | 0.13107  | 0.229693 | 0.403084 |
| MmugDNA.30539.1.S1_x_at | MmugDNA.30539.1 | 10.9  | 10.17 | 0.28 | 0.11 | 1.66  | 0.043516 | 0.118529 | 0.265724 | 0.38654  |
| MmugDNA.3054.1.S1_at    | MmugDNA.3054.1  | 3.11  | 3.11  | 0.06 | 0.04 | 1     | 0.958617 | 0.325099 | 0.983135 | 0.575545 |
| MmugDNA.30540.1.S1_at   | MmugDNA.30540.1 | 8.87  | 8.63  | 0.11 | 0.03 | 1.18  | 0.025061 | 0.064713 | 0.211247 | 0.300314 |
| MmugDNA.30542.1.S1_at   | MmugDNA.30542.1 | 11.63 | 11.5  | 0.13 | 0.05 | 1.1   | 0.081885 | 0.216028 | 0.343159 | 0.48965  |
| MmugDNA.30543.1.S1_at   | MmugDNA.30543.1 | 4.54  | 4.5   | 0.1  | 0.04 | 1.03  | 0.943332 | 0.048837 | 0.976183 | 0.265858 |
| MmuSTS.2792.1.S1_at     | MmuSTS.2792.1   | 4.23  | 4.36  | 0.12 | 0.07 | -1.09 | 0.323081 | 0.728068 | 0.606932 | 0.842733 |
| MmuSTS.2792.1.S1_s_at   | MmuSTS.2792.1   | 4.6   | 4.69  | 0.28 | 0.15 | -1.06 | 0.760596 | 0.91226  | 0.890267 | 0.950559 |
| MmugDNA.30544.1.S1_at   | MmugDNA.30544.1 | 6.13  | 6.5   | 0.13 | 0.17 | -1.29 | 0.074353 | 0.233399 | 0.330891 | 0.504751 |
| MmugDNA.30545.1.S1_at   | MmugDNA.30545.1 | 8.55  | 9.22  | 0.36 | 0.16 | -1.59 | 0.042859 | 0.11341  | 0.264168 | 0.379509 |
| MmugDNA.30546.1.S1_at   | MmugDNA.30546.1 | 3.63  | 3.67  | 0.82 | 0.05 | -1.03 | 0.393453 | 0.400596 | 0.660293 | 0.630415 |
| MmugDNA.30547.1.S1_at   | MmugDNA.30547.1 | 6.29  | 6.28  | 0.12 | 0.16 | 1     | 0.451773 | 0.271887 | 0.702502 | 0.536644 |
| MmugDNA.30548.1.S1_at   | MmugDNA.30548.1 | 6.62  | 7.21  | 0.28 | 0.1  | -1.51 | 0.011707 | 0.089017 | 0.158005 | 0.342876 |
| MmugDNA.30549.1.S1_at   | MmugDNA.30549.1 | 3.3   | 3.15  | 0.09 | 0.06 | 1.11  | 0.222921 | 0.236841 | 0.520894 | 0.507565 |
| MmugDNA.3055.1.S1_at    | MmugDNA.3055.1  | 3.35  | 3.56  | 0.17 | 0.14 | -1.16 | 0.064897 | 0.033761 | 0.311409 | 0.22741  |
| MmugDNA.30550.1.S1_at   | MmugDNA.30550.1 | 7.02  | 5.92  | 0.47 | 0.26 | 2.15  | 0.035768 | 0.043998 | 0.244077 | 0.254195 |
| MmugDNA.27278.1.S1_s_at | MmugDNA.27278.1 | 6.04  | 6.11  | 0.19 | 0.08 | -1.05 | 0.925526 | 0.974709 | 0.968463 | 0.986238 |
| MmugDNA.30553.1.S1_at   | MmugDNA.30553.1 | 6.35  | 6.15  | 0.04 | 0.12 | 1.15  | 0.071967 | 0.112367 | 0.326151 | 0.37769  |
| MmugDNA.30556.1.S1_at   | MmugDNA.30556.1 | 5.58  | 5.51  | 0.17 | 0.13 | 1.05  | 0.840818 | 0.828143 | 0.930069 | 0.901214 |
| MmugDNA.30557.1.S1_at   | MmugDNA.30557.1 | 6.3   | 5.41  | 0.85 | 0.09 | 1.86  | 0.139391 | 0.190058 | 0.424957 | 0.465697 |
| MmugDNA.30558.1.S1_at   | MmugDNA.30558.1 | 3.67  | 3.61  | 0.2  | 0.09 | 1.04  | 0.257221 | 0.323457 | 0.551586 | 0.574466 |

|                         |                 |       |       |      |      |       |          |          |          |          |
|-------------------------|-----------------|-------|-------|------|------|-------|----------|----------|----------|----------|
| MmugDNA.3056.1.S1_at    | MmugDNA.3056.1  | 8.56  | 8.64  | 0.25 | 0.04 | -1.05 | 0.643425 | 0.36212  | 0.826158 | 0.602821 |
| MmugDNA.30560.1.S1_at   | MmugDNA.30560.1 | 3.75  | 3.88  | 1.07 | 0.31 | -1.09 | 0.465962 | 0.460485 | 0.711898 | 0.672362 |
| MmugDNA.30561.1.S1_at   | MmugDNA.30561.1 | 7.39  | 7.71  | 0.21 | 0.01 | -1.25 | 0.18716  | 0.172149 | 0.483304 | 0.448529 |
| MmugDNA.30561.1.S1_s_at | MmugDNA.30561.1 | 6.31  | 6.38  | 0.28 | 0.25 | -1.05 | 0.533569 | 0.002162 | 0.757075 | 0.068763 |
| MmugDNA.30564.1.S1_at   | MmugDNA.30564.1 | 11.1  | 10.94 | 0.12 | 0.13 | 1.12  | 0.150529 | 0.753563 | 0.439612 | 0.856527 |
| MmugDNA.30567.1.S1_at   | MmugDNA.30567.1 | 7.03  | 7.06  | 0.31 | 0.15 | -1.02 | 0.361549 | 0.476888 | 0.636982 | 0.683011 |
| MmugDNA.30569.1.S1_at   | MmugDNA.30569.1 | 6.73  | 4.9   | 2.21 | 0.74 | 3.56  | 0.36018  | 0.673854 | 0.635778 | 0.809483 |
| MmugDNA.3057.1.S1_at    | MmugDNA.3057.1  | 5     | 4.96  | 0    | 0.07 | 1.03  | 0.354632 | 0.67394  | 0.631745 | 0.809483 |
| MmugDNA.30570.1.S1_at   | MmugDNA.30570.1 | 9.02  | 9.6   | 0.26 | 0.18 | -1.5  | 0.14293  | 0.009407 | 0.429122 | 0.127839 |
| MmugDNA.30571.1.S1_at   | MmugDNA.30571.1 | 4.22  | 4.28  | 0.11 | 0.14 | -1.04 | 0.178575 | 0.154852 | 0.473373 | 0.429849 |
| MmugDNA.30573.1.S1_at   | MmugDNA.30573.1 | 10.94 | 10.07 | 0.14 | 0.12 | 1.83  | 0.001749 | 0.035624 | 0.085116 | 0.233105 |
| MmugDNA.30574.1.S1_at   | MmugDNA.30574.1 | 4.35  | 4.15  | 0.09 | 0.06 | 1.15  | 0.053444 | 0.013154 | 0.288494 | 0.147338 |
| MmugDNA.30575.1.S1_at   | MmugDNA.30575.1 | 7.25  | 6.96  | 0.07 | 0.07 | 1.22  | 0.004984 | 0.005354 | 0.115785 | 0.101092 |
| MmugDNA.30576.1.S1_at   | MmugDNA.30576.1 | 4.79  | 4.92  | 0.16 | 0.06 | -1.09 | 0.368908 | 0.368373 | 0.642454 | 0.607917 |
| MmugDNA.30577.1.S1_at   | MmugDNA.30577.1 | 7.09  | 6.97  | 0.24 | 0.15 | 1.09  | 0.711101 | 0.268108 | 0.863578 | 0.533862 |
| MmugDNA.30579.1.S1_at   | MmugDNA.30579.1 | 12.12 | 12.35 | 0.07 | 0.03 | -1.17 | 0.007165 | 0.085512 | 0.132203 | 0.337508 |
| MmugDNA.3058.1.S1_at    | MmugDNA.3058.1  | 5.84  | 5.99  | 0.2  | 0.07 | -1.11 | 0.833404 | 0.918332 | 0.926598 | 0.954227 |
| MmugDNA.30583.1.S1_at   | MmugDNA.30583.1 | 7.2   | 7.65  | 0.1  | 0.33 | -1.36 | 0.241126 | 0.30891  | 0.53849  | 0.564656 |
| MmugDNA.30584.1.S1_at   | MmugDNA.30584.1 | 3.77  | 3.77  | 0.07 | 0.08 | -1    | 0.274514 | 0.327124 | 0.566396 | 0.577136 |
| MmugDNA.30585.1.S1_at   | MmugDNA.30585.1 | 3.46  | 3.35  | 0.41 | 0.17 | 1.08  | 0.263211 | 0.386778 | 0.556921 | 0.621895 |
| MmugDNA.30586.1.S1_at   | MmugDNA.30586.1 | 5.28  | 4.84  | 0.81 | 0.05 | 1.35  | 0.450793 | 0.280986 | 0.701742 | 0.544166 |
| MmugDNA.30587.1.S1_s_at | MmugDNA.30587.1 | 7.05  | 6.97  | 0.18 | 0.17 | 1.06  | 0.878055 | 0.012841 | 0.947953 | 0.145955 |
| MmugDNA.30588.1.S1_at   | MmugDNA.30588.1 | 5.14  | 5.16  | 0.37 | 0.09 | -1.01 | 0.320656 | 0.412755 | 0.605178 | 0.63909  |
| MmugDNA.30589.1.S1_at   | MmugDNA.30589.1 | 11.05 | 11.2  | 0.31 | 0.09 | -1.11 | 0.219471 | 0.115652 | 0.5172   | 0.382714 |
| MmugDNA.30590.1.S1_at   | MmugDNA.30590.1 | 3.47  | 3.73  | 0.11 | 0.08 | -1.19 | 0.060368 | 0.077914 | 0.302898 | 0.32425  |
| MmugDNA.30591.1.S1_at   | MmugDNA.30591.1 | 5.64  | 5.69  | 0.06 | 0.32 | -1.03 | 0.841815 | 0.960125 | 0.93049  | 0.977408 |
| MmugDNA.30596.1.S1_at   | MmugDNA.30596.1 | 10.61 | 10.32 | 0.2  | 0.06 | 1.22  | 0.067186 | 0.113408 | 0.316853 | 0.379509 |
| MmugDNA.30597.1.S1_at   | MmugDNA.30597.1 | 9.82  | 10.04 | 0.24 | 0.05 | -1.17 | 0.478172 | 0.545588 | 0.719818 | 0.727579 |
| MmugDNA.30599.1.S1_at   | MmugDNA.30599.1 | 4.57  | 4.55  | 0.18 | 0.1  | 1.01  | 0.744533 | 0.768874 | 0.881518 | 0.865722 |
| MmugDNA.306.1.S1_at     | MmugDNA.306.1   | 3.52  | 3.54  | 0.13 | 0.17 | -1.01 | 0.55541  | 0.749982 | 0.771257 | 0.854652 |
| MmugDNA.306.1.S1_s_at   | MmugDNA.306.1   | 5.35  | 5.42  | 0.06 | 0.02 | -1.05 | 0.541452 | 0.756558 | 0.762186 | 0.858235 |
| MmugDNA.30600.1.S1_at   | MmugDNA.30600.1 | 3.96  | 3.76  | 0.15 | 0.29 | 1.15  | 0.775435 | 0.64105  | 0.897425 | 0.789381 |
| MmugDNA.30602.1.S1_at   | MmugDNA.30602.1 | 4.58  | 4.82  | 0.33 | 0.19 | -1.18 | 0.462455 | 0.017284 | 0.709665 | 0.166461 |
| MmugDNA.30603.1.S1_at   | MmugDNA.30603.1 | 11.44 | 11.66 | 0.13 | 0.1  | -1.17 | 0.028845 | 0.17221  | 0.22259  | 0.448609 |
| MmugDNA.30603.1.S1_s_at | MmugDNA.30603.1 | 11.78 | 12.05 | 0.11 | 0.08 | -1.21 | 0.029755 | 0.123225 | 0.225738 | 0.39328  |
| MmugDNA.30605.1.S1_at   | MmugDNA.30605.1 | 4.63  | 5.06  | 0.14 | 0.18 | -1.35 | 0.054194 | 0.118371 | 0.289903 | 0.386398 |
| MmugDNA.30606.1.S1_at   | MmugDNA.30606.1 | 4.63  | 3.65  | 0.86 | 0.43 | 1.98  | 0.096842 | 0.073241 | 0.366886 | 0.316225 |
| MmugDNA.30607.1.S1_at   | MmugDNA.30607.1 | 3.51  | 3.62  | 0.15 | 0.08 | -1.08 | 0.282938 | 0.490743 | 0.573503 | 0.692666 |
| MmugDNA.30608.1.S1_at   | MmugDNA.30608.1 | 7.6   | 7.39  | 0.26 | 0.25 | 1.15  | 0.60558  | 0.141846 | 0.802615 | 0.41535  |
| MmugDNA.3061.1.S1_at    | MmugDNA.3061.1  | 5.57  | 5.52  | 0.19 | 0.05 | 1.04  | 0.669179 | 0.914205 | 0.841308 | 0.951773 |
| MmugDNA.30610.1.S1_at   | MmugDNA.30610.1 | 6.76  | 6.63  | 0.07 | 0.02 | 1.09  | 0.123884 | 0.243264 | 0.403694 | 0.513356 |
| MmugDNA.30612.1.S1_at   | MmugDNA.30612.1 | 10.83 | 11.73 | 0.26 | 0.14 | -1.87 | 0.011547 | 0.127369 | 0.157286 | 0.398205 |
| MmugDNA.30613.1.S1_at   | MmugDNA.30613.1 | 7.26  | 7.57  | 0.05 | 0.15 | -1.24 | 0.027539 | 0.049887 | 0.218489 | 0.268454 |

|                         |                 |       |       |      |      |       |          |          |          |          |
|-------------------------|-----------------|-------|-------|------|------|-------|----------|----------|----------|----------|
| MmugDNA.30614.1.S1_at   | MmugDNA.30614.1 | 8.15  | 8.43  | 0.22 | 0.14 | -1.21 | 0.131319 | 0.185439 | 0.414136 | 0.46148  |
| MmugDNA.30616.1.S1_at   | MmugDNA.30616.1 | 3.91  | 4     | 0.1  | 0.32 | -1.07 | 0.229032 | 0.356709 | 0.527687 | 0.598516 |
| MmugDNA.30617.1.S1_at   | MmugDNA.30617.1 | 6.43  | 5.96  | 0.1  | 0.11 | 1.39  | 0.009372 | 0.147366 | 0.146709 | 0.421554 |
| MmugDNA.30617.1.S1_s_at | MmugDNA.30617.1 | 6.91  | 6.69  | 0.22 | 0.22 | 1.16  | 0.134944 | 0.321534 | 0.418904 | 0.573226 |
| MmugDNA.30618.1.S1_at   | MmugDNA.30618.1 | 8.73  | 8.76  | 0.23 | 0.01 | -1.01 | 0.327913 | 0.734037 | 0.610549 | 0.845896 |
| MmugDNA.3062.1.S1_at    | MmugDNA.3062.1  | 3.78  | 4.05  | 0.24 | 0.03 | -1.21 | 0.13118  | 0.134304 | 0.413871 | 0.406573 |
| MmugDNA.30622.1.S1_at   | MmugDNA.30622.1 | 3.52  | 3.67  | 1.01 | 0.99 | -1.11 | 0.994088 | 0.709998 | 0.997585 | 0.831887 |
| MmugDNA.30624.1.S1_at   | MmugDNA.30624.1 | 3.92  | 4.27  | 0.69 | 0.06 | -1.28 | 0.862172 | 0.814418 | 0.940177 | 0.892923 |
| MmugDNA.30625.1.S1_at   | MmugDNA.30625.1 | 10.25 | 9.03  | 0.34 | 0.12 | 2.33  | 0.004533 | 0.003831 | 0.113436 | 0.088065 |
| MmugDNA.30626.1.S1_at   | MmugDNA.30626.1 | 6.3   | 6.37  | 0.28 | 0.18 | -1.05 | 0.569249 | 0.379967 | 0.778773 | 0.616659 |
| MmugDNA.30627.1.S1_at   | MmugDNA.30627.1 | 8.1   | 8.06  | 0.24 | 0.25 | 1.03  | 0.443919 | 0.901771 | 0.696899 | 0.944082 |
| MmugDNA.30627.1.S1_s_at | MmugDNA.30627.1 | 10.71 | 10.58 | 0.06 | 0.09 | 1.1   | 0.088125 | 0.746342 | 0.354244 | 0.85272  |
| MmugDNA.3063.1.S1_at    | MmugDNA.3063.1  | 5.53  | 5.42  | 0.06 | 0.12 | 1.08  | 0.224427 | 0.156491 | 0.522615 | 0.431866 |
| MmugDNA.30630.1.S1_at   | MmugDNA.30630.1 | 5.55  | 5.04  | 1.15 | 0.29 | 1.43  | 0.217701 | 0.198164 | 0.515507 | 0.473148 |
| MmugDNA.30631.1.S1_at   | MmugDNA.30631.1 | 3.1   | 3.11  | 0.47 | 0.18 | -1.01 | 0.469446 | 0.607823 | 0.714166 | 0.766594 |
| MmugDNA.30633.1.S1_at   | MmugDNA.30633.1 | 9.52  | 10.39 | 0.4  | 0.29 | -1.83 | 0.0785   | 0.087552 | 0.338242 | 0.340753 |
| MmugDNA.30637.1.S1_at   | MmugDNA.30637.1 | 4.62  | 4.59  | 0.03 | 0.04 | 1.02  | 0.240284 | 0.103273 | 0.537838 | 0.364143 |
| MmugDNA.30638.1.S1_at   | MmugDNA.30638.1 | 3.41  | 3.3   | 0.1  | 0.02 | 1.08  | 0.0537   | 0.200335 | 0.288946 | 0.474729 |
| MmugDNA.30640.1.S1_at   | MmugDNA.30640.1 | 3.02  | 3.04  | 0.15 | 0.1  | -1.01 | 0.517155 | 0.730089 | 0.746407 | 0.843808 |
| MmugDNA.30641.1.S1_at   | MmugDNA.30641.1 | 3.95  | 3.81  | 0.06 | 0.32 | 1.1   | 0.423265 | 0.62752  | 0.68136  | 0.780488 |
| MmugDNA.30642.1.S1_at   | MmugDNA.30642.1 | 7.07  | 6.73  | 0.04 | 0.43 | 1.27  | 0.716689 | 0.312001 | 0.866324 | 0.566838 |
| MmugDNA.30647.1.S1_at   | MmugDNA.30647.1 | 4.3   | 4.41  | 0.22 | 0.16 | -1.07 | 0.698166 | 0.582054 | 0.856385 | 0.750784 |
| MmugDNA.30650.1.S1_at   | MmugDNA.30650.1 | 3.31  | 3.34  | 0.06 | 0.14 | -1.03 | 0.99803  | 0.915072 | 0.999236 | 0.952307 |
| MmugDNA.30651.1.S1_at   | MmugDNA.30651.1 | 5.47  | 5.44  | 0.08 | 0.03 | 1.02  | 0.462731 | 0.58555  | 0.70975  | 0.752909 |
| MmugDNA.30652.1.S1_at   | MmugDNA.30652.1 | 4.93  | 7.25  | 0.81 | 0.43 | -4.99 | 0.038016 | 0.150299 | 0.250711 | 0.424877 |
| MmugDNA.30652.1.S1_s_at | MmugDNA.30652.1 | 4.64  | 7.21  | 1.08 | 0.43 | -5.92 | 0.065009 | 0.237706 | 0.311749 | 0.50826  |
| MmugDNA.30653.1.S1_at   | MmugDNA.30653.1 | 5.48  | 5.49  | 0.83 | 0.19 | -1.01 | 0.429516 | 0.468258 | 0.68593  | 0.6777   |
| MmugDNA.30656.1.S1_at   | MmugDNA.30656.1 | 12.51 | 12.64 | 0.05 | 0.02 | -1.09 | 0.036364 | 0.237108 | 0.245737 | 0.507849 |
| MmugDNA.30657.1.S1_at   | MmugDNA.30657.1 | 3.17  | 3.05  | 0.08 | 0.37 | 1.09  | 0.749629 | 0.7773   | 0.884066 | 0.87064  |
| MmugDNA.30658.1.S1_at   | MmugDNA.30658.1 | 6.84  | 6.77  | 0.91 | 0.13 | 1.05  | 0.375161 | 0.456178 | 0.646002 | 0.669959 |
| MmugDNA.3066.1.S1_at    | MmugDNA.3066.1  | 9.16  | 9.71  | 0.21 | 0.1  | -1.46 | 0.019994 | 0.079307 | 0.194766 | 0.326549 |
| MmugDNA.30660.1.S1_at   | MmugDNA.30660.1 | 3.77  | 3.7   | 0.12 | 0.1  | 1.05  | 0.350416 | 0.232972 | 0.628235 | 0.50445  |
| MmugDNA.30661.1.S1_s_at | MmugDNA.30661.1 | 9.66  | 10.3  | 0.3  | 0.07 | -1.55 | 0.061479 | 0.18494  | 0.304485 | 0.460776 |
| MmugDNA.30663.1.S1_at   | MmugDNA.30663.1 | 7.76  | 8.78  | 0.31 | 0.07 | -2.02 | 0.006454 | 0.015102 | 0.127119 | 0.156008 |
| MmugDNA.30664.1.S1_at   | MmugDNA.30664.1 | 7.23  | 7.4   | 0.15 | 0.15 | -1.12 | 0.836361 | 0.827196 | 0.928245 | 0.90079  |
| MmugDNA.30668.1.S1_at   | MmugDNA.30668.1 | 3.63  | 3.67  | 0.42 | 0.1  | -1.03 | 0.444061 | 0.631577 | 0.696968 | 0.782845 |
| MmugDNA.30669.1.S1_at   | MmugDNA.30669.1 | 3.96  | 3.84  | 0.09 | 0.07 | 1.09  | 0.109851 | 0.111811 | 0.385105 | 0.376856 |
| MmugDNA.3067.1.S1_at    | MmugDNA.3067.1  | 4.1   | 4.09  | 0.3  | 0.04 | 1.01  | 0.837604 | 0.771692 | 0.928846 | 0.867344 |
| MmugDNA.30672.1.S1_at   | MmugDNA.30672.1 | 13.01 | 12.92 | 0.22 | 0.03 | 1.06  | 0.451851 | 0.036495 | 0.702538 | 0.235526 |
| MmugDNA.30673.1.S1_at   | MmugDNA.30673.1 | 8.14  | 8.4   | 0.1  | 0.22 | -1.19 | 0.1299   | 0.192622 | 0.412108 | 0.468116 |
| MmugDNA.30673.1.S1_s_at | MmugDNA.30673.1 | 11.67 | 11.85 | 0.11 | 0.15 | -1.13 | 0.247762 | 0.472712 | 0.543123 | 0.680072 |
| MmugDNA.30674.1.S1_at   | MmugDNA.30674.1 | 10.88 | 11.32 | 0.5  | 0.13 | -1.36 | 0.198876 | 0.307035 | 0.496017 | 0.563427 |
| MmugDNA.30675.1.S1_at   | MmugDNA.30675.1 | 10.79 | 11.14 | 0.2  | 0.18 | -1.28 | 0.16976  | 0.121453 | 0.463121 | 0.390578 |

|                         |                 |       |       |      |      |       |          |          |          |          |
|-------------------------|-----------------|-------|-------|------|------|-------|----------|----------|----------|----------|
| MmugDNA.30676.1.S1_at   | MmugDNA.30676.1 | 10.52 | 10.69 | 0.18 | 0.03 | -1.13 | 0.057624 | 0.613398 | 0.297348 | 0.770528 |
| MmugDNA.3068.1.S1_at    | MmugDNA.3068.1  | 4.17  | 4.16  | 0.22 | 0.12 | 1.01  | 0.644683 | 0.197154 | 0.827017 | 0.472213 |
| MmugDNA.30680.1.S1_at   | MmugDNA.30680.1 | 7.39  | 9.04  | 0.91 | 0.18 | -3.14 | 0.047636 | 0.081526 | 0.275691 | 0.329764 |
| MmugDNA.30681.1.S1_at   | MmugDNA.30681.1 | 5.52  | 5.25  | 1.07 | 0.58 | 1.2   | 0.172561 | 0.361473 | 0.466621 | 0.602216 |
| MmugDNA.30682.1.S1_at   | MmugDNA.30682.1 | 5.93  | 5.62  | 0.41 | 0.16 | 1.25  | 0.86245  | 0.157371 | 0.940225 | 0.432859 |
| MmugDNA.30685.1.S1_at   | MmugDNA.30685.1 | 4.13  | 4.17  | 0.14 | 0.07 | -1.03 | 0.813943 | 0.827841 | 0.91682  | 0.90116  |
| MmugDNA.30687.1.S1_at   | MmugDNA.30687.1 | 7.27  | 7.24  | 0.23 | 0.09 | 1.02  | 0.364246 | 0.339505 | 0.638845 | 0.586095 |
| MmugDNA.3069.1.S1_at    | MmugDNA.3069.1  | 10.37 | 10.42 | 0.07 | 0.03 | -1.04 | 0.446436 | 0.040581 | 0.698684 | 0.246306 |
| MmugDNA.30690.1.S1_at   | MmugDNA.30690.1 | 6.83  | 6.77  | 0.08 | 0    | 1.04  | 0.275745 | 0.106929 | 0.567274 | 0.369499 |
| MmugDNA.30692.1.S1_at   | MmugDNA.30692.1 | 6.48  | 6.23  | 0.2  | 0.16 | 1.19  | 0.082491 | 0.08159  | 0.344209 | 0.329808 |
| MmugDNA.30693.1.S1_at   | MmugDNA.30693.1 | 4.63  | 4.57  | 0.09 | 0.11 | 1.04  | 0.548384 | 0.265857 | 0.766533 | 0.531705 |
| MmugDNA.30695.1.S1_at   | MmugDNA.30695.1 | 4.39  | 4.58  | 0.13 | 0.28 | -1.14 | 0.449826 | 0.230416 | 0.701103 | 0.502199 |
| MmugDNA.30696.1.S1_at   | MmugDNA.30696.1 | 3.13  | 3.32  | 0.02 | 0.12 | -1.14 | 0.043067 | 0.007049 | 0.264735 | 0.113192 |
| MmugDNA.30697.1.S1_at   | MmugDNA.30697.1 | 7.48  | 7.33  | 0.25 | 0.12 | 1.11  | 0.286352 | 0.256875 | 0.576174 | 0.524698 |
| MmugDNA.30698.1.S1_at   | MmugDNA.30698.1 | 3.97  | 3.93  | 0.25 | 0.18 | 1.03  | 0.532053 | 0.684359 | 0.756167 | 0.815919 |
| MmugDNA.30699.1.S1_at   | MmugDNA.30699.1 | 5.75  | 5.29  | 0.48 | 0.05 | 1.38  | 0.163423 | 0.123298 | 0.455676 | 0.393386 |
| MmugDNA.307.1.S1_at     | MmugDNA.307.1   | 8.05  | 7.88  | 0.41 | 0.27 | 1.12  | 0.53446  | 0.543001 | 0.757694 | 0.725879 |
| MmugDNA.3070.1.S1_at    | MmugDNA.3070.1  | 3.89  | 3.75  | 0.19 | 0.09 | 1.1   | 0.340651 | 0.178165 | 0.620859 | 0.454527 |
| MmugDNA.30700.1.S1_at   | MmugDNA.30700.1 | 6.17  | 5.94  | 0.14 | 0.03 | 1.17  | 0.164988 | 0.133952 | 0.457897 | 0.4061   |
| MmugDNA.30701.1.S1_at   | MmugDNA.30701.1 | 5.04  | 4.65  | 0.21 | 0.03 | 1.31  | 0.037734 | 0.027791 | 0.249882 | 0.20819  |
| MmugDNA.30702.1.S1_x_at | MmugDNA.30702.1 | 9.91  | 9.81  | 0.54 | 0.15 | 1.07  | 0.273192 | 0.335987 | 0.565268 | 0.583601 |
| MmugDNA.30703.1.S1_at   | MmugDNA.30703.1 | 3.71  | 3.66  | 0.93 | 0.04 | 1.04  | 0.57579  | 0.734129 | 0.78295  | 0.845896 |
| MmugDNA.30704.1.S1_at   | MmugDNA.30704.1 | 4.82  | 4.44  | 0.83 | 0.7  | 1.31  | 0.743202 | 0.630942 | 0.881283 | 0.782552 |
| MmugDNA.30705.1.S1_at   | MmugDNA.30705.1 | 5.12  | 5.03  | 0.12 | 0.05 | 1.06  | 0.125089 | 0.243977 | 0.405516 | 0.514069 |
| MmugDNA.30707.1.S1_at   | MmugDNA.30707.1 | 4.39  | 4.59  | 0.29 | 0.55 | -1.15 | 0.204398 | 0.237921 | 0.502114 | 0.508478 |
| MmugDNA.30708.1.S1_at   | MmugDNA.30708.1 | 12.16 | 12.22 | 0.06 | 0.07 | -1.04 | 0.973647 | 0.016215 | 0.989412 | 0.161389 |
| MmugDNA.30709.1.S1_at   | MmugDNA.30709.1 | 7.33  | 7.24  | 0.16 | 0.05 | 1.06  | 0.58185  | 0.312495 | 0.786843 | 0.567211 |
| MmugDNA.3071.1.S1_at    | MmugDNA.3071.1  | 9.22  | 9.05  | 0.56 | 0.1  | 1.12  | 0.719842 | 0.017665 | 0.867793 | 0.168048 |
| MmugDNA.30710.1.S1_at   | MmugDNA.30710.1 | 7.17  | 8.69  | 0.82 | 0.16 | -2.86 | 0.074654 | 0.316966 | 0.331339 | 0.570275 |
| MmugDNA.30714.1.S1_at   | MmugDNA.30714.1 | 5.07  | 5.03  | 0.16 | 0.09 | 1.03  | 0.164871 | 0.189765 | 0.457897 | 0.465403 |
| MmugDNA.30716.1.S1_at   | MmugDNA.30716.1 | 12.49 | 12.05 | 0.15 | 0.08 | 1.36  | 0.009401 | 0.001732 | 0.146817 | 0.062895 |
| MmugDNA.30716.1.S1_s_at | MmugDNA.30716.1 | 11.92 | 11.37 | 0.17 | 0.08 | 1.47  | 0.008669 | 0.000869 | 0.142597 | 0.047471 |
| MmugDNA.30717.1.S1_at   | MmugDNA.30717.1 | 6.23  | 6.24  | 0.11 | 0.1  | -1    | 0.241119 | 0.068967 | 0.53849  | 0.308954 |
| MmugDNA.30718.1.S1_at   | MmugDNA.30718.1 | 5.12  | 4.96  | 0.03 | 0.05 | 1.12  | 0.016334 | 0.362874 | 0.18068  | 0.603383 |
| MmugDNA.3072.1.S1_at    | MmugDNA.3072.1  | 4.17  | 4.68  | 0.34 | 0.32 | -1.42 | 0.236716 | 0.142459 | 0.534328 | 0.416035 |
| MmugDNA.30720.1.S1_at   | MmugDNA.30720.1 | 2.92  | 3.02  | 0.09 | 0.17 | -1.07 | 0.158576 | 0.190305 | 0.44969  | 0.465906 |
| MmugDNA.30721.1.S1_at   | MmugDNA.30721.1 | 11.39 | 11.26 | 0.43 | 0.19 | 1.09  | 0.567708 | 0.004438 | 0.777934 | 0.092958 |
| MmugDNA.30722.1.S1_at   | MmugDNA.30722.1 | 8.83  | 8.92  | 0.21 | 0.04 | -1.06 | 0.617089 | 0.706134 | 0.809826 | 0.829634 |
| MmugDNA.30723.1.S1_at   | MmugDNA.30723.1 | 6.84  | 6.89  | 0.12 | 0.11 | -1.04 | 0.34118  | 0.747942 | 0.621119 | 0.853333 |
| MmugDNA.30724.1.S1_at   | MmugDNA.30724.1 | 4.12  | 4.02  | 0.27 | 0.08 | 1.07  | 0.514119 | 0.697474 | 0.744131 | 0.824228 |
| MmugDNA.30726.1.S1_s_at | MmugDNA.30726.1 | 10.58 | 10.4  | 0.22 | 0.04 | 1.13  | 0.718692 | 0.000397 | 0.867276 | 0.037471 |
| MmugDNA.30727.1.S1_at   | MmugDNA.30727.1 | 3.76  | 3.61  | 0.09 | 0.05 | 1.11  | 0.087066 | 0.123742 | 0.352616 | 0.393883 |
| MmugDNA.30728.1.S1_at   | MmugDNA.30728.1 | 8.26  | 8.18  | 0.26 | 0.07 | 1.06  | 0.653889 | 0.445122 | 0.832423 | 0.662296 |



|                         |                 |       |       |      |      |       |          |          |          |          |
|-------------------------|-----------------|-------|-------|------|------|-------|----------|----------|----------|----------|
| MmugDNA.30729.1.S1_s_at | MmugDNA.30729.1 | 11.3  | 11.23 | 0.11 | 0.02 | 1.04  | 0.12426  | 0.154679 | 0.404297 | 0.429605 |
| MmugDNA.3073.1.S1_at    | MmugDNA.3073.1  | 3.1   | 3.07  | 0.28 | 0.01 | 1.02  | 0.652543 | 0.840399 | 0.831446 | 0.909015 |
| MmugDNA.30731.1.S1_at   | MmugDNA.30731.1 | 4.76  | 4.88  | 0.07 | 0.18 | -1.08 | 0.379926 | 0.172215 | 0.649662 | 0.448609 |
| MmugDNA.30732.1.S1_at   | MmugDNA.30732.1 | 6.43  | 6.26  | 0.44 | 0.33 | 1.13  | 0.68135  | 0.860951 | 0.848035 | 0.920854 |
| MmugDNA.30734.1.S1_at   | MmugDNA.30734.1 | 8.55  | 7.99  | 0.2  | 0.13 | 1.48  | 0.007103 | 0.000093 | 0.131735 | 0.027285 |
| MmugDNA.30735.1.S1_at   | MmugDNA.30735.1 | 6.29  | 6.39  | 0.04 | 0.07 | -1.07 | 0.086302 | 0.236213 | 0.351033 | 0.507252 |
| MmugDNA.30736.1.S1_at   | MmugDNA.30736.1 | 10.69 | 11.4  | 0.25 | 0.11 | -1.64 | 0.006559 | 0.014353 | 0.127421 | 0.152926 |
| MmugDNA.30737.1.S1_at   | MmugDNA.30737.1 | 6.98  | 6.19  | 0.24 | 0.3  | 1.74  | 0.029738 | 0.501958 | 0.225679 | 0.699986 |
| MmugDNA.30738.1.S1_at   | MmugDNA.30738.1 | 4.65  | 4.64  | 0.18 | 0.17 | 1.01  | 0.4868   | 0.465028 | 0.725872 | 0.675534 |
| MmugDNA.30739.1.S1_at   | MmugDNA.30739.1 | 5.23  | 5.18  | 0.07 | 0.13 | 1.03  | 0.266109 | 0.304431 | 0.558636 | 0.561712 |
| MmugDNA.3074.1.S1_at    | MmugDNA.3074.1  | 6.61  | 6.09  | 0.74 | 0.58 | 1.43  | 0.162437 | 0.12223  | 0.454494 | 0.391926 |
| MmugDNA.30740.1.S1_at   | MmugDNA.30740.1 | 5.81  | 5.99  | 0.23 | 0.35 | -1.14 | 0.98954  | 0.786022 | 0.996363 | 0.876037 |
| MmugDNA.30741.1.S1_at   | MmugDNA.30741.1 | 4.67  | 4.14  | 0.34 | 0.16 | 1.45  | 0.115722 | 0.126945 | 0.392831 | 0.397686 |
| MmugDNA.30743.1.S1_at   | MmugDNA.30743.1 | 4.28  | 4.27  | 0.13 | 0.14 | 1.01  | 0.944192 | 0.875338 | 0.976499 | 0.929211 |
| MmugDNA.30745.1.S1_at   | MmugDNA.30745.1 | 9.26  | 8.36  | 0.39 | 0.28 | 1.87  | 0.037652 | 0.027607 | 0.249552 | 0.207455 |
| MmugDNA.30748.1.S1_at   | MmugDNA.30748.1 | 7.16  | 7.2   | 0.26 | 0.04 | -1.03 | 0.519639 | 0.468611 | 0.748174 | 0.677755 |
| MmugDNA.30749.1.S1_at   | MmugDNA.30749.1 | 12.65 | 12.55 | 0.03 | 0.02 | 1.07  | 0.021377 | 0.725165 | 0.199771 | 0.84092  |
| MmugDNA.3075.1.S1_at    | MmugDNA.3075.1  | 6.95  | 6.58  | 0.49 | 0.51 | 1.29  | 0.288779 | 0.320819 | 0.578509 | 0.572849 |
| MmugDNA.30750.1.S1_at   | MmugDNA.30750.1 | 3.29  | 3.29  | 0.05 | 0.06 | 1.01  | 0.396524 | 0.897528 | 0.662576 | 0.941525 |
| MmugDNA.30751.1.S1_s_at | MmugDNA.30751.1 | 10.42 | 10.26 | 0.12 | 0.1  | 1.11  | 0.144122 | 0.152937 | 0.430938 | 0.42777  |
| MmugDNA.30752.1.S1_at   | MmugDNA.30752.1 | 6.53  | 6.86  | 0.18 | 0.15 | -1.25 | 0.190338 | 0.168452 | 0.486684 | 0.445092 |
| MmugDNA.30753.1.S1_at   | MmugDNA.30753.1 | 12.02 | 12.03 | 0.19 | 0.16 | -1    | 0.411678 | 0.298562 | 0.673582 | 0.557183 |
| MmugDNA.30754.1.S1_at   | MmugDNA.30754.1 | 6.01  | 5.92  | 0.16 | 0.08 | 1.06  | 0.766727 | 0.229452 | 0.892936 | 0.501527 |
| MmugDNA.30755.1.S1_at   | MmugDNA.30755.1 | 4.29  | 4.24  | 0.05 | 0.11 | 1.04  | 0.532873 | 0.385093 | 0.7567   | 0.620662 |
| MmugDNA.30756.1.S1_at   | MmugDNA.30756.1 | 10.69 | 10.18 | 0.32 | 0.24 | 1.43  | 0.041866 | 0.199884 | 0.261395 | 0.474559 |
| MmugDNA.30758.1.S1_at   | MmugDNA.30758.1 | 6.39  | 7.21  | 1.46 | 0.48 | -1.77 | 0.42459  | 0.476601 | 0.682288 | 0.682787 |
| MmugDNA.30759.1.S1_at   | MmugDNA.30759.1 | 4.08  | 3.9   | 0.31 | 0.13 | 1.13  | 0.260286 | 0.101967 | 0.554455 | 0.36202  |
| MmugDNA.30760.1.S1_at   | MmugDNA.30760.1 | 5.99  | 6.06  | 0.19 | 0.01 | -1.05 | 0.264904 | 0.308939 | 0.557962 | 0.564656 |
| MmugDNA.30761.1.S1_at   | MmugDNA.30761.1 | 4.54  | 5.32  | 0.12 | 0.44 | -1.71 | 0.031011 | 0.032941 | 0.229092 | 0.224663 |
| MmugDNA.30762.1.S1_at   | MmugDNA.30762.1 | 4.72  | 5.02  | 0.16 | 0.24 | -1.23 | 0.304051 | 0.330025 | 0.59132  | 0.578915 |
| MmugDNA.30763.1.S1_at   | MmugDNA.30763.1 | 9.89  | 10.03 | 0.19 | 0.17 | -1.1  | 0.189211 | 0.035496 | 0.485786 | 0.232645 |
| MmugDNA.30764.1.S1_at   | MmugDNA.30764.1 | 10.6  | 10.27 | 0.35 | 0.15 | 1.26  | 0.268202 | 0.665911 | 0.560925 | 0.804281 |
| MmugDNA.30766.1.S1_at   | MmugDNA.30766.1 | 4.75  | 4.75  | 0.27 | 0.1  | 1     | 0.265384 | 0.371238 | 0.558032 | 0.610135 |
| MmugDNA.30767.1.S1_at   | MmugDNA.30767.1 | 4.52  | 4.55  | 0.14 | 0.14 | -1.03 | 0.846748 | 0.025883 | 0.933119 | 0.201698 |
| MmugDNA.3077.1.S1_at    | MmugDNA.3077.1  | 5.96  | 5.94  | 0.16 | 0.09 | 1.01  | 0.450163 | 0.765033 | 0.701214 | 0.863388 |
| MmugDNA.30770.1.S1_at   | MmugDNA.30770.1 | 8.17  | 8.23  | 0.22 | 0.05 | -1.04 | 0.193843 | 0.110668 | 0.490404 | 0.374854 |
| MmugDNA.30773.1.S1_at   | MmugDNA.30773.1 | 13.36 | 13.21 | 0.06 | 0.02 | 1.11  | 0.026181 | 0.017804 | 0.21487  | 0.168584 |
| MmugDNA.30773.1.S1_s_at | MmugDNA.30773.1 | 13.32 | 13.17 | 0.06 | 0.02 | 1.11  | 0.041431 | 0.020811 | 0.259966 | 0.180917 |
| MmugDNA.30774.1.S1_at   | MmugDNA.30774.1 | 5.09  | 4.82  | 0.06 | 0.13 | 1.2   | 0.046613 | 0.119863 | 0.273564 | 0.388577 |
| MmugDNA.30777.1.S1_at   | MmugDNA.30777.1 | 7.14  | 7.17  | 0.26 | 0.11 | -1.02 | 0.830768 | 0.701054 | 0.925496 | 0.826613 |
| MmugDNA.30779.1.S1_at   | MmugDNA.30779.1 | 2.73  | 2.76  | 0.29 | 0.02 | -1.02 | 0.421532 | 0.54705  | 0.679956 | 0.728283 |
| MmugDNA.3078.1.S1_at    | MmugDNA.3078.1  | 7.73  | 8.31  | 0.32 | 0.29 | -1.49 | 0.044265 | 0.045159 | 0.267433 | 0.256979 |
| MmugDNA.30782.1.S1_at   | MmugDNA.30782.1 | 3.9   | 3.82  | 0.1  | 0.01 | 1.06  | 0.197084 | 0.08619  | 0.494229 | 0.338568 |

|                         |                 |       |       |      |      |       |          |          |          |          |
|-------------------------|-----------------|-------|-------|------|------|-------|----------|----------|----------|----------|
| MmugDNA.30783.1.S1_at   | MmugDNA.30783.1 | 4.53  | 4.45  | 0.15 | 0.12 | 1.06  | 0.668862 | 0.911603 | 0.841129 | 0.950175 |
| MmugDNA.30785.1.S1_at   | MmugDNA.30785.1 | 4.16  | 4.12  | 0.38 | 0.26 | 1.03  | 0.375608 | 0.225743 | 0.64637  | 0.498159 |
| MmugDNA.30786.1.S1_at   | MmugDNA.30786.1 | 3.84  | 3.86  | 0.42 | 0.51 | -1.01 | 0.890861 | 0.714736 | 0.953458 | 0.8345   |
| MmugDNA.30787.1.S1_at   | MmugDNA.30787.1 | 4.19  | 3.81  | 0.56 | 0.22 | 1.3   | 0.230166 | 0.183048 | 0.529077 | 0.459493 |
| MmugDNA.30788.1.S1_at   | MmugDNA.30788.1 | 4.22  | 4.52  | 0.3  | 0.16 | -1.23 | 0.225502 | 0.216265 | 0.523339 | 0.48984  |
| MmugDNA.30789.1.S1_at   | MmugDNA.30789.1 | 5.67  | 5.62  | 0.16 | 0.15 | 1.04  | 0.573197 | 0.78938  | 0.781077 | 0.878335 |
| MmugDNA.3079.1.S1_at    | MmugDNA.3079.1  | 6.23  | 6     | 1.29 | 0.26 | 1.17  | 0.79064  | 0.851875 | 0.904916 | 0.915799 |
| MmugDNA.30791.1.S1_at   | MmugDNA.30791.1 | 3.34  | 3.35  | 0.28 | 0.07 | -1    | 0.403595 | 0.321064 | 0.667695 | 0.573046 |
| MmugDNA.30792.1.S1_at   | MmugDNA.30792.1 | 5.39  | 5.25  | 0.15 | 0.1  | 1.1   | 0.123094 | 0.374168 | 0.402205 | 0.612678 |
| MmugDNA.30793.1.S1_at   | MmugDNA.30793.1 | 6.35  | 6.2   | 0.09 | 0.13 | 1.11  | 0.37445  | 0.069572 | 0.645576 | 0.309848 |
| MmugDNA.30794.1.S1_at   | MmugDNA.30794.1 | 3.33  | 3.24  | 0.83 | 0.1  | 1.06  | 0.306878 | 0.298026 | 0.593637 | 0.556695 |
| MmugDNA.30795.1.S1_at   | MmugDNA.30795.1 | 3.33  | 3.34  | 0.11 | 0.11 | -1.01 | 0.276753 | 0.652147 | 0.568287 | 0.796592 |
| MmugDNA.30796.1.S1_at   | MmugDNA.30796.1 | 3.71  | 3.42  | 0.46 | 0.12 | 1.22  | 0.106262 | 0.112827 | 0.380284 | 0.37844  |
| MmugDNA.308.1.S1_at     | MmugDNA.308.1   | 8.14  | 8     | 0.37 | 0.11 | 1.1   | 0.703226 | 0.706699 | 0.859182 | 0.829857 |
| MmugDNA.3080.1.S1_at    | MmugDNA.3080.1  | 3.42  | 3.04  | 0.15 | 0.06 | 1.31  | 0.009798 | 0.005804 | 0.148542 | 0.104597 |
| MmugDNA.30801.1.S1_at   | MmugDNA.30801.1 | 11.8  | 11.92 | 0.03 | 0.05 | -1.09 | 0.057252 | 0.670327 | 0.296612 | 0.807235 |
| MmugDNA.30805.1.S1_at   | MmugDNA.30805.1 | 5.05  | 5     | 0.27 | 0.06 | 1.04  | 0.45329  | 0.624961 | 0.703496 | 0.778972 |
| MmugDNA.30806.1.S1_at   | MmugDNA.30806.1 | 5.1   | 5.07  | 0.21 | 0.1  | 1.02  | 0.195979 | 0.259106 | 0.492909 | 0.526263 |
| MmugDNA.30807.1.S1_at   | MmugDNA.30807.1 | 4.76  | 4.77  | 0.18 | 0.39 | -1.01 | 0.657828 | 0.707851 | 0.834779 | 0.830504 |
| MmugDNA.35605.1.S1_s_at | MmugDNA.35605.1 | 12.49 | 12.33 | 0.11 | 0.09 | 1.12  | 0.056757 | 0.283953 | 0.295741 | 0.546237 |
| MmugDNA.30809.1.S1_at   | MmugDNA.30809.1 | 3.98  | 3.39  | 0.37 | 0.62 | 1.51  | 0.333644 | 0.367676 | 0.614974 | 0.607369 |
| MmugDNA.3081.1.S1_at    | MmugDNA.3081.1  | 6.13  | 5.94  | 0.31 | 0.21 | 1.15  | 0.437972 | 0.420371 | 0.692763 | 0.644099 |
| MmugDNA.30810.1.S1_at   | MmugDNA.30810.1 | 5.9   | 6.01  | 0.26 | 0.05 | -1.08 | 0.760793 | 0.492354 | 0.890353 | 0.693485 |
| MmugDNA.30811.1.S1_at   | MmugDNA.30811.1 | 3.43  | 3.62  | 0.14 | 0.09 | -1.14 | 0.104195 | 0.11826  | 0.377539 | 0.386244 |
| MmugDNA.30812.1.S1_at   | MmugDNA.30812.1 | 9.47  | 9.11  | 0.25 | 0.27 | 1.28  | 0.509681 | 0.707604 | 0.741244 | 0.830424 |
| MmugDNA.30813.1.S1_at   | MmugDNA.30813.1 | 10.43 | 10.8  | 0.21 | 0.07 | -1.29 | 0.017788 | 0.209608 | 0.187001 | 0.483271 |
| MmugDNA.30814.1.S1_at   | MmugDNA.30814.1 | 6.72  | 6.54  | 0.1  | 0.1  | 1.13  | 0.079878 | 0.580593 | 0.340107 | 0.749782 |
| MmugDNA.30815.1.S1_at   | MmugDNA.30815.1 | 9.51  | 9.81  | 0.19 | 0.13 | -1.23 | 0.097162 | 0.021713 | 0.367275 | 0.184333 |
| MmugDNA.30816.1.S1_at   | MmugDNA.30816.1 | 5.54  | 5.28  | 0.2  | 0.08 | 1.19  | 0.099476 | 0.106988 | 0.370364 | 0.369557 |
| MmugDNA.30817.1.S1_at   | MmugDNA.30817.1 | 7.85  | 8.61  | 0.51 | 0.22 | -1.7  | 0.09046  | 0.010077 | 0.35723  | 0.13168  |
| MmugDNA.30819.1.S1_at   | MmugDNA.30819.1 | 3.49  | 3.46  | 0.29 | 0.14 | 1.02  | 0.358061 | 0.114516 | 0.633837 | 0.381059 |
| MmugDNA.30820.1.S1_at   | MmugDNA.30820.1 | 3.79  | 3.36  | 0.2  | 0.23 | 1.34  | 0.2379   | 0.285301 | 0.535334 | 0.547196 |
| MmugDNA.30821.1.S1_at   | MmugDNA.30821.1 | 6.3   | 5.46  | 0.67 | 0.25 | 1.79  | 0.121024 | 0.135895 | 0.399514 | 0.408103 |
| MmugDNA.30822.1.S1_at   | MmugDNA.30822.1 | 5.33  | 5.17  | 0.44 | 0.2  | 1.12  | 0.595769 | 0.65231  | 0.795477 | 0.796682 |
| MmugDNA.30823.1.S1_at   | MmugDNA.30823.1 | 3.87  | 3.78  | 0.31 | 0.2  | 1.06  | 0.288264 | 0.408115 | 0.577961 | 0.635475 |
| MmugDNA.30825.1.S1_at   | MmugDNA.30825.1 | 6.58  | 6.38  | 0.11 | 0.11 | 1.15  | 0.057765 | 0.046241 | 0.297529 | 0.259397 |
| MmugDNA.30826.1.S1_at   | MmugDNA.30826.1 | 4.92  | 5.02  | 0.09 | 0.13 | -1.07 | 0.139723 | 0.205735 | 0.42522  | 0.48007  |
| MmugDNA.30827.1.S1_at   | MmugDNA.30827.1 | 8.28  | 7.72  | 0.1  | 0.16 | 1.48  | 0.007833 | 0.039378 | 0.137244 | 0.243406 |
| MmugDNA.3083.1.S1_at    | MmugDNA.3083.1  | 11.74 | 12.04 | 0.43 | 0.22 | -1.23 | 0.783924 | 0.435344 | 0.901444 | 0.65516  |
| MmugDNA.30833.1.S1_at   | MmugDNA.30833.1 | 9.48  | 10.13 | 0.18 | 0.07 | -1.57 | 0.003067 | 0.009907 | 0.100464 | 0.130731 |
| MmugDNA.30834.1.S1_at   | MmugDNA.30834.1 | 3.6   | 3.13  | 0.24 | 0.12 | 1.38  | 0.053358 | 0.049715 | 0.288214 | 0.267995 |
| MmugDNA.30835.1.S1_at   | MmugDNA.30835.1 | 6.37  | 7.02  | 1.46 | 0.26 | -1.56 | 0.536239 | 0.725288 | 0.758857 | 0.840954 |
| MmugDNA.30838.1.S1_at   | MmugDNA.30838.1 | 6.42  | 6.57  | 0.18 | 0.05 | -1.11 | 0.69638  | 0.136268 | 0.855387 | 0.408681 |

|                         |                 |       |       |      |      |       |          |          |          |          |
|-------------------------|-----------------|-------|-------|------|------|-------|----------|----------|----------|----------|
| MmugDNA.30839.1.S1_at   | MmugDNA.30839.1 | 4.3   | 5.43  | 0.52 | 0.36 | -2.19 | 0.083578 | 0.254044 | 0.34613  | 0.522387 |
| MmugDNA.3084.1.S1_at    | MmugDNA.3084.1  | 9.25  | 9.23  | 0.39 | 0.13 | 1.01  | 0.945859 | 0.485348 | 0.977159 | 0.689081 |
| MmugDNA.30840.1.S1_at   | MmugDNA.30840.1 | 3.79  | 4.17  | 0.31 | 0.11 | -1.31 | 0.128205 | 0.243515 | 0.410227 | 0.513585 |
| MmugDNA.30843.1.S1_at   | MmugDNA.30843.1 | 5.69  | 5.65  | 0.55 | 0.2  | 1.02  | 0.651526 | 0.836915 | 0.83075  | 0.906826 |
| MmugDNA.30844.1.S1_at   | MmugDNA.30844.1 | 6.08  | 5.98  | 0.48 | 0.14 | 1.07  | 0.462434 | 0.369895 | 0.709665 | 0.609138 |
| MmugDNA.30845.1.S1_at   | MmugDNA.30845.1 | 8.02  | 7.48  | 1.05 | 0.14 | 1.46  | 0.989183 | 0.999919 | 0.996231 | 0.999968 |
| MmugDNA.30846.1.S1_at   | MmugDNA.30846.1 | 8.87  | 8.1   | 0.18 | 0.23 | 1.7   | 0.006105 | 0.003    | 0.124422 | 0.079958 |
| MmugDNA.30849.1.S1_at   | MmugDNA.30849.1 | 5.86  | 5.95  | 0.17 | 0.12 | -1.06 | 0.750695 | 0.739258 | 0.884869 | 0.848883 |
| MmugDNA.3085.1.S1_at    | MmugDNA.3085.1  | 10.57 | 10.55 | 0.11 | 0.12 | 1.01  | 0.680011 | 0.276769 | 0.847309 | 0.540682 |
| MmugDNA.30850.1.S1_at   | MmugDNA.30850.1 | 3.09  | 3.25  | 0.16 | 0.12 | -1.12 | 0.051318 | 0.136968 | 0.283923 | 0.409769 |
| MmugDNA.30851.1.S1_s_at | MmugDNA.30851.1 | 5.42  | 5.52  | 0.14 | 0.02 | -1.07 | 0.715221 | 0.738636 | 0.865498 | 0.848483 |
| MmugDNA.30852.1.S1_at   | MmugDNA.30852.1 | 4.28  | 4.46  | 0.34 | 0.19 | -1.13 | 0.455518 | 0.30758  | 0.705182 | 0.563785 |
| MmugDNA.30853.1.S1_at   | MmugDNA.30853.1 | 3.18  | 3.29  | 0.09 | 0.09 | -1.07 | 0.500286 | 0.487919 | 0.734595 | 0.690787 |
| MmugDNA.30855.1.S1_at   | MmugDNA.30855.1 | 12.84 | 12.83 | 0.09 | 0.04 | 1.01  | 0.827016 | 0.335897 | 0.92338  | 0.58354  |
| MmugDNA.30855.1.S1_s_at | MmugDNA.30855.1 | 11.86 | 11.83 | 0.17 | 0.08 | 1.02  | 0.511197 | 0.425341 | 0.74238  | 0.647722 |
| MmugDNA.30856.1.S1_at   | MmugDNA.30856.1 | 9.31  | 9.12  | 0.06 | 0.05 | 1.14  | 0.007751 | 0.031533 | 0.136735 | 0.219688 |
| MmugDNA.30857.1.S1_at   | MmugDNA.30857.1 | 2.73  | 2.56  | 0.17 | 0.08 | 1.13  | 0.205432 | 0.296876 | 0.503171 | 0.555847 |
| MmugDNA.30858.1.S1_at   | MmugDNA.30858.1 | 4.47  | 4.32  | 0.4  | 0.22 | 1.11  | 0.796986 | 0.549056 | 0.908267 | 0.729549 |
| MmugDNA.30859.1.S1_at   | MmugDNA.30859.1 | 9.09  | 9.34  | 0.21 | 0.09 | -1.19 | 0.382411 | 0.015824 | 0.65188  | 0.159503 |
| MmugDNA.3086.1.S1_at    | MmugDNA.3086.1  | 9.85  | 9.94  | 0.12 | 0.02 | -1.07 | 0.240644 | 0.427316 | 0.538141 | 0.649175 |
| MmugDNA.30860.1.S1_s_at | MmugDNA.30860.1 | 10.82 | 10.62 | 0.08 | 0.06 | 1.15  | 0.020104 | 0.068392 | 0.195301 | 0.307955 |
| MmugDNA.30861.1.S1_at   | MmugDNA.30861.1 | 4.37  | 4.32  | 0.28 | 0.09 | 1.03  | 0.296742 | 0.398983 | 0.58546  | 0.629665 |
| MmugDNA.30863.1.S1_at   | MmugDNA.30863.1 | 12.86 | 12.6  | 0.07 | 0.03 | 1.2   | 0.007457 | 0.07609  | 0.134734 | 0.320848 |
| MmugDNA.30864.1.S1_a_at | MmugDNA.30864.1 | 6.01  | 6.14  | 0.08 | 0.09 | -1.09 | 0.111366 | 0.098136 | 0.387378 | 0.356241 |
| MmugDNA.30865.1.S1_at   | MmugDNA.30865.1 | 5.63  | 5.16  | 0.08 | 0.31 | 1.38  | 0.206068 | 0.053311 | 0.503828 | 0.276463 |
| MmugDNA.30866.1.S1_at   | MmugDNA.30866.1 | 5.38  | 5.27  | 0.14 | 0.02 | 1.08  | 0.273122 | 0.348049 | 0.565251 | 0.59222  |
| MmugDNA.30867.1.S1_at   | MmugDNA.30867.1 | 7.54  | 6.6   | 1.71 | 0.69 | 1.92  | 0.70723  | 0.896738 | 0.861311 | 0.941007 |
| MmugDNA.30868.1.S1_at   | MmugDNA.30868.1 | 9.66  | 9.85  | 0.1  | 0.14 | -1.14 | 0.365216 | 0.058423 | 0.639882 | 0.288459 |
| MmugDNA.30869.1.S1_s_at | MmugDNA.30869.1 | 6.58  | 7.14  | 0.38 | 0.16 | -1.47 | 0.117478 | 0.246315 | 0.394772 | 0.515889 |
| MmugDNA.3087.1.S1_at    | MmugDNA.3087.1  | 9.72  | 10.06 | 0.19 | 0.12 | -1.26 | 0.082005 | 0.068805 | 0.343272 | 0.308711 |
| MmugDNA.30870.1.S1_at   | MmugDNA.30870.1 | 6.57  | 7.94  | 0.29 | 0.29 | -2.59 | 0.006038 | 0.126711 | 0.124151 | 0.397376 |
| MmugDNA.30871.1.S1_at   | MmugDNA.30871.1 | 6.89  | 6.38  | 0.3  | 0.11 | 1.42  | 0.020643 | 0.007782 | 0.197195 | 0.117732 |
| MmugDNA.30872.1.S1_at   | MmugDNA.30872.1 | 10.55 | 10.44 | 0.02 | 0.02 | 1.08  | 0.002447 | 0.000088 | 0.093816 | 0.027016 |
| MmugDNA.30875.1.S1_at   | MmugDNA.30875.1 | 8.63  | 9.25  | 0.33 | 0.13 | -1.53 | 0.063241 | 0.537228 | 0.308134 | 0.72233  |
| MmugDNA.30876.1.S1_at   | MmugDNA.30876.1 | 4.46  | 4.47  | 0.24 | 0.04 | -1.01 | 0.991799 | 0.788065 | 0.997004 | 0.877426 |
| MmugDNA.30877.1.S1_at   | MmugDNA.30877.1 | 10    | 9.89  | 0.18 | 0.06 | 1.08  | 0.357542 | 0.015736 | 0.633615 | 0.158941 |
| MmugDNA.30878.1.S1_at   | MmugDNA.30878.1 | 5.32  | 5.33  | 0.22 | 0.16 | -1    | 0.615452 | 0.612131 | 0.808923 | 0.769787 |
| MmugDNA.30879.1.S1_at   | MmugDNA.30879.1 | 4.2   | 3.95  | 0.48 | 0.05 | 1.19  | 0.137951 | 0.19235  | 0.423113 | 0.467834 |
| MmugDNA.3088.1.S1_at    | MmugDNA.3088.1  | 12.53 | 11.22 | 0.23 | 0.14 | 2.48  | 0.000977 | 0.05394  | 0.076222 | 0.277766 |
| MmugDNA.30880.1.S1_at   | MmugDNA.30880.1 | 3.56  | 3.56  | 0.5  | 0.06 | -1    | 0.373226 | 0.65519  | 0.645118 | 0.798333 |
| MmugDNA.30881.1.S1_at   | MmugDNA.30881.1 | 3.67  | 3.62  | 0.04 | 0.38 | 1.04  | 0.562442 | 0.723861 | 0.774894 | 0.840163 |
| MmugDNA.30882.1.S1_at   | MmugDNA.30882.1 | 3.79  | 3.51  | 0.14 | 0.06 | 1.21  | 0.011428 | 0.007271 | 0.157067 | 0.114408 |
| MmugDNA.30883.1.S1_at   | MmugDNA.30883.1 | 6.5   | 5.83  | 0.72 | 0.24 | 1.59  | 0.067304 | 0.015945 | 0.317061 | 0.160254 |

|                         |                 |       |       |      |      |       |          |          |          |          |
|-------------------------|-----------------|-------|-------|------|------|-------|----------|----------|----------|----------|
| MmugDNA.30884.1.S1_at   | MmugDNA.30884.1 | 5.3   | 4.91  | 0.32 | 0.14 | 1.31  | 0.187501 | 0.230926 | 0.483783 | 0.502548 |
| MmugDNA.30886.1.S1_at   | MmugDNA.30886.1 | 4.91  | 5     | 0.75 | 0.65 | -1.07 | 0.28277  | 0.32499  | 0.573345 | 0.575512 |
| MmugDNA.30887.1.S1_at   | MmugDNA.30887.1 | 7.06  | 6.84  | 0.14 | 0.01 | 1.16  | 0.020118 | 0.036273 | 0.195301 | 0.235    |
| MmugDNA.30889.1.S1_at   | MmugDNA.30889.1 | 9.33  | 8.9   | 0.22 | 0.15 | 1.35  | 0.068951 | 0.319307 | 0.320591 | 0.571724 |
| MmugDNA.3089.1.S1_at    | MmugDNA.3089.1  | 3.53  | 4.19  | 0.56 | 0.56 | -1.58 | 0.097072 | 0.135896 | 0.367275 | 0.408103 |
| MmugDNA.30890.1.S1_at   | MmugDNA.30890.1 | 9.75  | 9.66  | 0.09 | 0.07 | 1.06  | 0.239197 | 0.010426 | 0.53651  | 0.133525 |
| MmugDNA.30892.1.S1_at   | MmugDNA.30892.1 | 3.59  | 3.69  | 0.19 | 0.03 | -1.08 | 0.894532 | 0.7639   | 0.955014 | 0.862744 |
| MmugDNA.30893.1.S1_at   | MmugDNA.30893.1 | 8.79  | 8.38  | 0.25 | 0.03 | 1.33  | 0.144302 | 0.001491 | 0.431137 | 0.058965 |
| MmugDNA.30895.1.S1_at   | MmugDNA.30895.1 | 13.36 | 13.35 | 0.17 | 0.04 | 1.01  | 0.926537 | 0.463935 | 0.968912 | 0.674716 |
| MmugDNA.30895.1.S1_s_at | MmugDNA.30895.1 | 13.94 | 14.01 | 0.08 | 0.04 | -1.05 | 0.431404 | 0.759094 | 0.687507 | 0.859979 |
| MmugDNA.30896.1.S1_at   | MmugDNA.30896.1 | 9.96  | 10.29 | 0.18 | 0.1  | -1.26 | 0.135056 | 0.651131 | 0.419042 | 0.796048 |
| MmugDNA.30898.1.S1_at   | MmugDNA.30898.1 | 4.29  | 4.29  | 0.04 | 0.11 | -1    | 0.973522 | 0.305535 | 0.989336 | 0.562486 |
| MmugDNA.30899.1.S1_at   | MmugDNA.30899.1 | 4.83  | 4.89  | 0.22 | 0.33 | -1.05 | 0.682723 | 0.339504 | 0.848688 | 0.586095 |
| MmugDNA.309.1.S1_at     | MmugDNA.309.1   | 9.26  | 9.18  | 0.17 | 0.1  | 1.06  | 0.26294  | 0.555382 | 0.556723 | 0.733767 |
| MmugDNA.3090.1.S1_at    | MmugDNA.3090.1  | 9.96  | 9.81  | 0.18 | 0.11 | 1.11  | 0.19077  | 0.019304 | 0.486956 | 0.174723 |
| MmugDNA.30900.1.S1_at   | MmugDNA.30900.1 | 2.76  | 2.85  | 0.1  | 0.08 | -1.06 | 0.250068 | 0.287025 | 0.544879 | 0.548317 |
| MmugDNA.30901.1.S1_at   | MmugDNA.30901.1 | 4.26  | 4.54  | 0.29 | 0.41 | -1.22 | 0.507313 | 0.49663  | 0.739612 | 0.696119 |
| MmugDNA.30903.1.S1_at   | MmugDNA.30903.1 | 4.79  | 4.31  | 0.81 | 0.51 | 1.4   | 0.646001 | 0.671025 | 0.827741 | 0.807635 |
| MmugDNA.30904.1.S1_at   | MmugDNA.30904.1 | 3.82  | 4.09  | 0.44 | 0.14 | -1.2  | 0.981152 | 0.837399 | 0.992909 | 0.907098 |
| MmugDNA.30905.1.S1_at   | MmugDNA.30905.1 | 12.61 | 12.38 | 0.02 | 0.04 | 1.17  | 0.003216 | 0.029119 | 0.101676 | 0.212733 |
| MmugDNA.30906.1.S1_at   | MmugDNA.30906.1 | 3.09  | 3.03  | 0.21 | 0.13 | 1.04  | 0.539664 | 0.875994 | 0.761006 | 0.929526 |
| MmugDNA.30907.1.S1_at   | MmugDNA.30907.1 | 10.13 | 10.23 | 0.31 | 0.02 | -1.07 | 0.6961   | 0.895999 | 0.855244 | 0.940569 |
| MmugDNA.30908.1.S1_at   | MmugDNA.30908.1 | 4.28  | 4.35  | 0.96 | 0.15 | -1.05 | 0.503488 | 0.431004 | 0.736984 | 0.651988 |
| MmugDNA.30909.1.S1_at   | MmugDNA.30909.1 | 11.96 | 11.62 | 0.17 | 0.11 | 1.26  | 0.085646 | 0.115501 | 0.350073 | 0.38267  |
| MmugDNA.30910.1.S1_at   | MmugDNA.30910.1 | 11.55 | 11.23 | 0.09 | 0.04 | 1.26  | 0.007292 | 0.07183  | 0.133153 | 0.314082 |
| MmugDNA.30911.1.S1_at   | MmugDNA.30911.1 | 4.24  | 3.87  | 0.06 | 0.1  | 1.3   | 0.006777 | 0.005103 | 0.129089 | 0.099108 |
| MmugDNA.30912.1.S1_at   | MmugDNA.30912.1 | 8.89  | 7.46  | 0.14 | 0.27 | 2.69  | 0.001173 | 0.040401 | 0.077718 | 0.246134 |
| MmugDNA.30913.1.S1_at   | MmugDNA.30913.1 | 10.24 | 9.85  | 0.21 | 0.05 | 1.31  | 0.030314 | 0.035709 | 0.227117 | 0.233368 |
| MmugDNA.30915.1.S1_s_at | MmugDNA.30915.1 | 7.8   | 7.78  | 0.16 | 0.1  | 1.01  | 0.760784 | 0.820832 | 0.890353 | 0.896833 |
| MmugDNA.30917.1.S1_at   | MmugDNA.30917.1 | 7.72  | 7.23  | 0.34 | 0.12 | 1.41  | 0.082479 | 0.127164 | 0.344209 | 0.397922 |
| MmugDNA.30918.1.S1_at   | MmugDNA.30918.1 | 8.77  | 8.62  | 0.26 | 0.03 | 1.11  | 0.662808 | 0.771635 | 0.83726  | 0.867316 |
| MmugDNA.30920.1.S1_at   | MmugDNA.30920.1 | 3.08  | 3.16  | 0.09 | 0.32 | -1.06 | 0.554748 | 0.585399 | 0.770788 | 0.752844 |
| MmugDNA.30923.1.S1_at   | MmugDNA.30923.1 | 6.28  | 6.68  | 0.87 | 0.05 | -1.32 | 0.916236 | 0.710604 | 0.964383 | 0.832158 |
| MmugDNA.30924.1.S1_at   | MmugDNA.30924.1 | 9.49  | 9.24  | 0.36 | 0.09 | 1.19  | 0.306464 | 0.229968 | 0.593297 | 0.501807 |
| MmugDNA.30925.1.S1_at   | MmugDNA.30925.1 | 7.01  | 7.31  | 0.57 | 0.43 | -1.23 | 0.792295 | 0.752216 | 0.905814 | 0.855787 |
| MmugDNA.30926.1.S1_at   | MmugDNA.30926.1 | 3.73  | 3.45  | 0.2  | 0.25 | 1.21  | 0.192105 | 0.161447 | 0.488697 | 0.437604 |
| MmugDNA.30927.1.S1_at   | MmugDNA.30927.1 | 10.32 | 9.11  | 0.44 | 0.2  | 2.31  | 0.019492 | 0.105887 | 0.192357 | 0.368175 |
| MmugDNA.30928.1.S1_at   | MmugDNA.30928.1 | 4.05  | 4.05  | 0.05 | 0.02 | 1     | 0.621329 | 0.814544 | 0.812589 | 0.892959 |
| MmugDNA.3093.1.S1_at    | MmugDNA.3093.1  | 3.51  | 3.66  | 0.07 | 0.1  | -1.11 | 0.224012 | 0.253077 | 0.522106 | 0.521415 |
| MmugDNA.30930.1.S1_at   | MmugDNA.30930.1 | 6.06  | 5.7   | 0.17 | 0.02 | 1.28  | 0.022379 | 0.044052 | 0.202823 | 0.254195 |
| MmugDNA.30931.1.S1_at   | MmugDNA.30931.1 | 9.28  | 9.4   | 0.19 | 0.18 | -1.08 | 0.512385 | 0.005825 | 0.742962 | 0.104661 |
| MmugDNA.30932.1.S1_at   | MmugDNA.30932.1 | 6.87  | 6.67  | 0.05 | 0.18 | 1.15  | 0.036082 | 0.028001 | 0.244978 | 0.208898 |
| MmugDNA.30935.1.S1_at   | MmugDNA.30935.1 | 3.23  | 3.21  | 0.19 | 0.06 | 1.02  | 0.302318 | 0.431603 | 0.590132 | 0.652439 |

|                         |                 |       |       |      |      |        |          |          |          |          |
|-------------------------|-----------------|-------|-------|------|------|--------|----------|----------|----------|----------|
| MmugDNA.30936.1.S1_at   | MmugDNA.30936.1 | 3.08  | 3.1   | 0.06 | 0.08 | -1.01  | 0.277837 | 0.290794 | 0.569311 | 0.551399 |
| MmugDNA.30938.1.S1_at   | MmugDNA.30938.1 | 10.9  | 10.74 | 0.04 | 0.17 | 1.12   | 0.200243 | 0.085116 | 0.497759 | 0.336936 |
| MmugDNA.30939.1.S1_at   | MmugDNA.30939.1 | 9.96  | 9.29  | 0.52 | 0.21 | 1.59   | 0.102292 | 0.148542 | 0.374312 | 0.423074 |
| MmugDNA.3094.1.S1_at    | MmugDNA.3094.1  | 8.76  | 8.42  | 0.45 | 0.25 | 1.27   | 0.268537 | 0.019514 | 0.561073 | 0.175439 |
| MmugDNA.30940.1.S1_at   | MmugDNA.30940.1 | 5.46  | 4.74  | 1.04 | 0.24 | 1.65   | 0.225357 | 0.248448 | 0.523235 | 0.517727 |
| MmugDNA.30941.1.S1_at   | MmugDNA.30941.1 | 11.91 | 11.75 | 0.09 | 0.15 | 1.12   | 0.189786 | 0.270356 | 0.486228 | 0.535681 |
| MmugDNA.30942.1.S1_at   | MmugDNA.30942.1 | 4.26  | 3.97  | 0.33 | 0.13 | 1.23   | 0.172533 | 0.297129 | 0.466621 | 0.555996 |
| MmugDNA.30944.1.S1_at   | MmugDNA.30944.1 | 6.64  | 8.4   | 0.87 | 0.36 | -3.39  | 0.081133 | 0.000762 | 0.342143 | 0.04544  |
| MmugDNA.30945.1.S1_at   | MmugDNA.30945.1 | 8.92  | 8.6   | 0.47 | 0.23 | 1.25   | 0.330963 | 0.082443 | 0.612918 | 0.331433 |
| MmugDNA.30946.1.S1_at   | MmugDNA.30946.1 | 7.92  | 7.96  | 0.19 | 0.03 | -1.03  | 0.726301 | 0.255304 | 0.871526 | 0.52339  |
| MmugDNA.30946.1.S1_x_at | MmugDNA.30946.1 | 6.79  | 6.85  | 0.2  | 0.05 | -1.04  | 0.630148 | 0.121325 | 0.818435 | 0.390351 |
| MmugDNA.30948.1.S1_at   | MmugDNA.30948.1 | 4.66  | 4.79  | 0.14 | 0.18 | -1.1   | 0.79196  | 0.492039 | 0.90557  | 0.693403 |
| MmugDNA.30949.1.S1_at   | MmugDNA.30949.1 | 3.64  | 3.64  | 0.08 | 0.17 | -1     | 0.566382 | 0.221916 | 0.777306 | 0.495019 |
| MmugDNA.3095.1.S1_at    | MmugDNA.3095.1  | 4.72  | 4.73  | 0.15 | 0.14 | -1.01  | 0.789029 | 0.198329 | 0.904071 | 0.473267 |
| MmugDNA.30950.1.S1_at   | MmugDNA.30950.1 | 5.27  | 5.26  | 0.2  | 0.06 | 1.01   | 0.455533 | 0.841582 | 0.705182 | 0.909677 |
| MmugDNA.30951.1.S1_at   | MmugDNA.30951.1 | 6.71  | 6.06  | 0.63 | 0.37 | 1.57   | 0.211688 | 0.215036 | 0.509556 | 0.488898 |
| MmugDNA.30952.1.S1_at   | MmugDNA.30952.1 | 5.26  | 5.39  | 0.06 | 0.07 | -1.1   | 0.128675 | 0.348011 | 0.410774 | 0.592215 |
| MmugDNA.30954.1.S1_at   | MmugDNA.30954.1 | 5.03  | 5.01  | 0.23 | 0.1  | 1.01   | 0.27368  | 0.463791 | 0.565779 | 0.674656 |
| MmugDNA.30955.1.S1_at   | MmugDNA.30955.1 | 3.44  | 3.46  | 0.28 | 0.2  | -1.02  | 0.808295 | 0.75155  | 0.914178 | 0.855508 |
| MmugDNA.30956.1.S1_at   | MmugDNA.30956.1 | 8.99  | 9.26  | 0.1  | 0.19 | -1.21  | 0.225589 | 0.076055 | 0.523395 | 0.320805 |
| MmugDNA.30957.1.S1_at   | MmugDNA.30957.1 | 11.64 | 11.95 | 0.08 | 0.06 | -1.24  | 0.006518 | 0.014454 | 0.127373 | 0.153403 |
| MmugDNA.30957.1.S1_x_at | MmugDNA.30957.1 | 11.65 | 12.03 | 0.1  | 0.03 | -1.3   | 0.005817 | 0.028544 | 0.122176 | 0.210754 |
| MmugDNA.30958.1.S1_at   | MmugDNA.30958.1 | 10.44 | 10.84 | 0.28 | 0.06 | -1.32  | 0.114544 | 0.458975 | 0.391605 | 0.671504 |
| MmugDNA.30959.1.S1_at   | MmugDNA.30959.1 | 7.12  | 7.32  | 1.42 | 0.19 | -1.15  | 0.829291 | 0.955869 | 0.924748 | 0.975006 |
| MmugDNA.3096.1.S1_at    | MmugDNA.3096.1  | 9.43  | 8.84  | 0.64 | 0.49 | 1.5    | 0.257239 | 0.192215 | 0.551586 | 0.467665 |
| MmugDNA.30960.1.S1_at   | MmugDNA.30960.1 | 6.21  | 6.57  | 0.39 | 0.08 | -1.28  | 0.217709 | 0.026017 | 0.515507 | 0.202179 |
| MmugDNA.30961.1.S1_at   | MmugDNA.30961.1 | 3.7   | 3.49  | 0.24 | 0.09 | 1.16   | 0.702028 | 0.671941 | 0.858653 | 0.808177 |
| MmugDNA.30963.1.S1_at   | MmugDNA.30963.1 | 4.4   | 4.83  | 0.71 | 0.22 | -1.34  | 0.963049 | 0.970498 | 0.985072 | 0.983936 |
| MmugDNA.30964.1.S1_at   | MmugDNA.30964.1 | 3.13  | 3.27  | 0.35 | 0.3  | -1.1   | 0.464249 | 0.620532 | 0.710586 | 0.77547  |
| MmugDNA.30965.1.S1_at   | MmugDNA.30965.1 | 4.58  | 4.53  | 0.14 | 0.17 | 1.03   | 0.721234 | 0.724959 | 0.868619 | 0.840792 |
| MmugDNA.30967.1.S1_at   | MmugDNA.30967.1 | 7.56  | 7.5   | 0.1  | 0.4  | 1.04   | 0.914514 | 0.503295 | 0.963657 | 0.700767 |
| MmugDNA.30968.1.S1_at   | MmugDNA.30968.1 | 2.97  | 2.97  | 0.15 | 0.05 | -1     | 0.417419 | 0.648808 | 0.677553 | 0.794478 |
| MmugDNA.30969.1.S1_at   | MmugDNA.30969.1 | 10.85 | 10.27 | 0.14 | 0.21 | 1.49   | 0.030542 | 0.338477 | 0.227713 | 0.585465 |
| MmugDNA.3097.1.S1_s_at  | MmugDNA.3097.1  | 5.11  | 4.95  | 0.07 | 0.1  | 1.11   | 0.129304 | 0.107606 | 0.411629 | 0.370497 |
| MmugDNA.30970.1.S1_at   | MmugDNA.30970.1 | 5.3   | 5.36  | 0.15 | 0.1  | -1.04  | 0.768115 | 0.31525  | 0.893506 | 0.568939 |
| MmugDNA.30971.1.S1_at   | MmugDNA.30971.1 | 5.71  | 11.08 | 1.82 | 0.22 | -41.47 | 0.01065  | 0.038701 | 0.152845 | 0.24169  |
| MmugDNA.1900.1.S1_at    | MmugDNA.1900.1  | 5.18  | 4.27  | 0.5  | 0.17 | 1.87   | 0.082634 | 0.516945 | 0.344435 | 0.709329 |
| MmugDNA.1900.1.S1_s_at  | MmugDNA.1900.1  | 4.61  | 10.36 | 1.97 | 0.22 | -53.87 | 0.015531 | 0.045564 | 0.176911 | 0.257646 |
| MmugDNA.30972.1.S1_at   | MmugDNA.30972.1 | 9.75  | 9.36  | 0.31 | 0.35 | 1.31   | 0.200653 | 0.009356 | 0.497934 | 0.127602 |
| MmugDNA.30974.1.S1_at   | MmugDNA.30974.1 | 8.44  | 7.86  | 0.07 | 0.15 | 1.49   | 0.003472 | 0.023516 | 0.103444 | 0.192225 |
| MmugDNA.30975.1.S1_s_at | MmugDNA.30975.1 | 9.38  | 9.38  | 0.04 | 0.07 | 1      | 0.616854 | 0.426264 | 0.809703 | 0.648455 |
| MmugDNA.30977.1.S1_at   | MmugDNA.30977.1 | 10.38 | 11.43 | 0.3  | 0.06 | -2.06  | 0.0076   | 0.349733 | 0.135697 | 0.593566 |
| MmugDNA.30979.1.S1_at   | MmugDNA.30979.1 | 8.3   | 8.61  | 0.28 | 0.24 | -1.24  | 0.245085 | 0.441828 | 0.541271 | 0.659939 |

|                         |                 |       |       |      |      |       |          |          |          |          |
|-------------------------|-----------------|-------|-------|------|------|-------|----------|----------|----------|----------|
| MmugDNA.3098.1.S1_at    | MmugDNA.3098.1  | 5.8   | 6.1   | 0.7  | 0.03 | -1.23 | 0.787191 | 0.470215 | 0.902963 | 0.678572 |
| MmugDNA.30981.1.S1_at   | MmugDNA.30981.1 | 3.38  | 3.32  | 0.33 | 0.08 | 1.04  | 0.499871 | 0.565356 | 0.734394 | 0.739877 |
| MmugDNA.30982.1.S1_at   | MmugDNA.30982.1 | 4.88  | 4.93  | 0.04 | 0.1  | -1.04 | 0.36692  | 0.231076 | 0.641083 | 0.502813 |
| MmugDNA.30983.1.S1_at   | MmugDNA.30983.1 | 7.15  | 7.37  | 0.44 | 0.12 | -1.17 | 0.806132 | 0.284038 | 0.913158 | 0.546283 |
| MmugDNA.30986.1.S1_at   | MmugDNA.30986.1 | 3.11  | 3.11  | 0.3  | 0.34 | 1     | 0.598191 | 0.539829 | 0.79722  | 0.723976 |
| MmugDNA.30987.1.S1_at   | MmugDNA.30987.1 | 4.43  | 4.25  | 0.28 | 0.02 | 1.13  | 0.098676 | 0.071492 | 0.369495 | 0.313706 |
| MmugDNA.30988.1.S1_at   | MmugDNA.30988.1 | 7.39  | 6.19  | 0.79 | 0.98 | 2.31  | 0.1463   | 0.10537  | 0.434187 | 0.367245 |
| MmugDNA.30989.1.S1_at   | MmugDNA.30989.1 | 3.56  | 3.18  | 0.54 | 0.1  | 1.3   | 0.263512 | 0.296701 | 0.557    | 0.555717 |
| MmugDNA.3099.1.S1_at    | MmugDNA.3099.1  | 5.75  | 5.75  | 0.03 | 0.07 | -1    | 0.776933 | 0.983667 | 0.898112 | 0.990902 |
| MmugDNA.30990.1.S1_at   | MmugDNA.30990.1 | 9.03  | 8.94  | 0.18 | 0.01 | 1.07  | 0.579836 | 0.059857 | 0.785371 | 0.291297 |
| MmugDNA.30991.1.S1_at   | MmugDNA.30991.1 | 5.88  | 5.62  | 0.31 | 0.23 | 1.2   | 0.594889 | 0.521549 | 0.795002 | 0.712483 |
| MmugDNA.30992.1.S1_at   | MmugDNA.30992.1 | 4.78  | 4.19  | 0.75 | 0.56 | 1.51  | 0.61018  | 0.701393 | 0.805703 | 0.826814 |
| MmugDNA.30993.1.S1_at   | MmugDNA.30993.1 | 4.37  | 4.21  | 0.13 | 0.39 | 1.11  | 0.995163 | 0.973142 | 0.998014 | 0.985426 |
| MmugDNA.30994.1.S1_at   | MmugDNA.30994.1 | 3.85  | 3.8   | 0.05 | 0.05 | 1.04  | 0.113112 | 0.665571 | 0.389708 | 0.804072 |
| MmugDNA.30995.1.S1_at   | MmugDNA.30995.1 | 9.71  | 9.61  | 0.24 | 0.08 | 1.07  | 0.421944 | 0.858973 | 0.680233 | 0.919706 |
| MmugDNA.30996.1.S1_at   | MmugDNA.30996.1 | 5.41  | 5.42  | 0.28 | 0.06 | -1    | 0.865133 | 0.867071 | 0.941423 | 0.924465 |
| MmugDNA.30997.1.S1_at   | MmugDNA.30997.1 | 4.21  | 4.21  | 0.12 | 0.08 | 1     | 0.235667 | 0.273926 | 0.533475 | 0.538452 |
| MmugDNA.30999.1.S1_at   | MmugDNA.30999.1 | 6.63  | 6.7   | 0.14 | 0.02 | -1.05 | 0.953469 | 0.521729 | 0.980931 | 0.712623 |
| MmugDNA.31.1.S1_at      | MmugDNA.31.1    | 6.52  | 6.46  | 0.1  | 0.08 | 1.05  | 0.767819 | 0.427659 | 0.893381 | 0.649406 |
| MmugDNA.310.1.S1_at     | MmugDNA.310.1   | 4.16  | 4.08  | 0.19 | 0.13 | 1.06  | 0.206241 | 0.254343 | 0.503856 | 0.522647 |
| MmugDNA.31000.1.S1_at   | MmugDNA.31000.1 | 5.32  | 5.67  | 1.5  | 0.21 | -1.28 | 0.959242 | 0.557194 | 0.983355 | 0.735006 |
| MmugDNA.31001.1.S1_at   | MmugDNA.31001.1 | 4.22  | 4.42  | 0.15 | 0.02 | -1.15 | 0.237031 | 0.273326 | 0.534591 | 0.537788 |
| MmugDNA.31003.1.S1_at   | MmugDNA.31003.1 | 5.21  | 5.78  | 0.18 | 0.33 | -1.48 | 0.139517 | 0.183275 | 0.425031 | 0.459553 |
| MmugDNA.31004.1.S1_at   | MmugDNA.31004.1 | 3.93  | 3.92  | 0.16 | 0.07 | 1     | 0.707052 | 0.910869 | 0.861311 | 0.949709 |
| MmugDNA.31005.1.S1_at   | MmugDNA.31005.1 | 10.68 | 10.36 | 0.66 | 0.07 | 1.25  | 0.445524 | 0.630721 | 0.697986 | 0.782389 |
| MmugDNA.31006.1.S1_at   | MmugDNA.31006.1 | 11.23 | 11.1  | 0.25 | 0.11 | 1.1   | 0.264842 | 0.094322 | 0.557962 | 0.350889 |
| MmugDNA.31006.1.S1_s_at | MmugDNA.31006.1 | 12.48 | 12.43 | 0.14 | 0.08 | 1.03  | 0.370126 | 0.062413 | 0.643242 | 0.296669 |
| MmugDNA.31008.1.S1_at   | MmugDNA.31008.1 | 5.13  | 5.47  | 0.51 | 0.96 | -1.26 | 0.231661 | 0.099903 | 0.530333 | 0.358619 |
| MmugDNA.31009.1.S1_at   | MmugDNA.31009.1 | 3.33  | 3.32  | 0.38 | 0.1  | 1.01  | 0.591988 | 0.835944 | 0.793093 | 0.906135 |
| MmugDNA.3101.1.S1_at    | MmugDNA.3101.1  | 6.08  | 5.62  | 0.65 | 0.37 | 1.38  | 0.1845   | 0.125744 | 0.48045  | 0.396313 |
| MmugDNA.31010.1.S1_at   | MmugDNA.31010.1 | 5.35  | 5.44  | 0.15 | 0.28 | -1.07 | 0.872376 | 0.859182 | 0.945259 | 0.919754 |
| MmugDNA.31014.1.S1_at   | MmugDNA.31014.1 | 4.83  | 4.66  | 0.42 | 0.18 | 1.13  | 0.121671 | 0.064726 | 0.400504 | 0.300314 |
| MmugDNA.31016.1.S1_at   | MmugDNA.31016.1 | 3.55  | 4.34  | 0.36 | 0.1  | -1.74 | 0.03945  | 0.174135 | 0.25509  | 0.45044  |
| MmugDNA.31017.1.S1_at   | MmugDNA.31017.1 | 8.74  | 8.29  | 0.21 | 0.07 | 1.36  | 0.017537 | 0.002433 | 0.186019 | 0.073093 |
| MmugDNA.31019.1.S1_at   | MmugDNA.31019.1 | 7.49  | 7.43  | 0.13 | 0.07 | 1.04  | 0.443378 | 0.70644  | 0.696549 | 0.829634 |
| MmugDNA.3102.1.S1_at    | MmugDNA.3102.1  | 2.74  | 2.95  | 0.08 | 0.13 | -1.16 | 0.07699  | 0.252026 | 0.33549  | 0.520647 |
| MmugDNA.3102.1.S1_x_at  | MmugDNA.3102.1  | 2.96  | 3.07  | 0.18 | 0.03 | -1.08 | 0.371689 | 0.557122 | 0.644326 | 0.734946 |
| MmugDNA.31020.1.S1_at   | MmugDNA.31020.1 | 6.51  | 5.93  | 0.08 | 0.14 | 1.49  | 0.004579 | 0.02928  | 0.113728 | 0.213122 |
| MmugDNA.31022.1.S1_at   | MmugDNA.31022.1 | 4.98  | 4.93  | 0.29 | 0.05 | 1.03  | 0.913395 | 0.945614 | 0.963369 | 0.969098 |
| MmugDNA.31023.1.S1_at   | MmugDNA.31023.1 | 4.62  | 4.36  | 0.31 | 0.08 | 1.2   | 0.242701 | 0.610597 | 0.539526 | 0.76874  |
| MmugDNA.31024.1.S1_at   | MmugDNA.31024.1 | 3.95  | 3.89  | 0.05 | 0.12 | 1.04  | 0.334938 | 0.164912 | 0.615988 | 0.441219 |
| MmugDNA.31025.1.S1_at   | MmugDNA.31025.1 | 7.5   | 8.07  | 0.02 | 0.07 | -1.48 | 0.000207 | 0.090946 | 0.053494 | 0.345594 |
| MmugDNA.31026.1.S1_at   | MmugDNA.31026.1 | 3.06  | 3.35  | 0.09 | 0.29 | -1.23 | 0.293498 | 0.248325 | 0.582468 | 0.5176   |

|                         |                 |       |       |      |      |       |          |          |          |          |
|-------------------------|-----------------|-------|-------|------|------|-------|----------|----------|----------|----------|
| MmugDNA.31027.1.S1_at   | MmugDNA.31027.1 | 4.91  | 4.89  | 0.06 | 0.14 | 1.01  | 0.51983  | 0.686935 | 0.748277 | 0.817365 |
| MmugDNA.31028.1.S1_at   | MmugDNA.31028.1 | 5.74  | 5.76  | 0.25 | 0.22 | -1.01 | 0.887635 | 0.013192 | 0.952015 | 0.147352 |
| MmugDNA.31029.1.S1_at   | MmugDNA.31029.1 | 6.42  | 5.73  | 0.3  | 0.66 | 1.62  | 0.454481 | 0.68598  | 0.704378 | 0.816691 |
| MmugDNA.31029.1.S1_s_at | MmugDNA.31029.1 | 5.36  | 5.2   | 0.48 | 0.43 | 1.12  | 0.93449  | 0.728053 | 0.972505 | 0.842733 |
| MmugDNA.3103.1.S1_at    | MmugDNA.3103.1  | 8.67  | 9.17  | 0.27 | 0.2  | -1.41 | 0.13458  | 0.439812 | 0.41843  | 0.658439 |
| MmugDNA.31031.1.S1_at   | MmugDNA.31031.1 | 5.26  | 5.31  | 0.6  | 0.03 | -1.03 | 0.471516 | 0.510629 | 0.715544 | 0.705036 |
| MmugDNA.31032.1.S1_at   | MmugDNA.31032.1 | 10.85 | 10.85 | 0.15 | 0.01 | 1     | 0.418768 | 0.126117 | 0.678606 | 0.39672  |
| MmugDNA.31033.1.S1_at   | MmugDNA.31033.1 | 10.6  | 10.76 | 0.32 | 0.02 | -1.12 | 0.4209   | 0.712897 | 0.67979  | 0.833557 |
| MmugDNA.9801.1.S1_s_at  | MmugDNA.9801.1  | 10.64 | 10.73 | 0.33 | 0.01 | -1.07 | 0.559451 | 0.786908 | 0.773306 | 0.876732 |
| MmugDNA.31036.1.S1_at   | MmugDNA.31036.1 | 6.4   | 6.68  | 0.16 | 0.08 | -1.22 | 0.098379 | 0.235438 | 0.369057 | 0.506489 |
| MmugDNA.31037.1.S1_at   | MmugDNA.31037.1 | 8.38  | 8.1   | 0.37 | 0.19 | 1.22  | 0.297124 | 0.00027  | 0.585596 | 0.033828 |
| MmugDNA.31038.1.S1_at   | MmugDNA.31038.1 | 6.46  | 6.49  | 0.37 | 0.21 | -1.03 | 0.745134 | 0.86171  | 0.881818 | 0.921406 |
| MmugDNA.31039.1.S1_at   | MmugDNA.31039.1 | 3.28  | 3.43  | 0.17 | 0.14 | -1.11 | 0.578316 | 0.82726  | 0.784162 | 0.900803 |
| MmugDNA.3104.1.S1_at    | MmugDNA.3104.1  | 10.67 | 11.12 | 0.12 | 0.19 | -1.36 | 0.028011 | 0.111747 | 0.219887 | 0.376787 |
| MmugDNA.31041.1.S1_at   | MmugDNA.31041.1 | 5.68  | 5.68  | 0    | 0.07 | 1     | 0.982929 | 0.992101 | 0.993693 | 0.995515 |
| MmugDNA.31042.1.S1_at   | MmugDNA.31042.1 | 4.85  | 4.93  | 0.06 | 0.24 | -1.06 | 0.394396 | 0.530127 | 0.661036 | 0.717729 |
| MmugDNA.31044.1.S1_at   | MmugDNA.31044.1 | 10.75 | 11.26 | 0.53 | 0.12 | -1.42 | 0.151761 | 0.264267 | 0.441235 | 0.530329 |
| MmugDNA.31045.1.S1_at   | MmugDNA.31045.1 | 7.44  | 6.83  | 0.45 | 0.16 | 1.53  | 0.106876 | 0.372404 | 0.38124  | 0.611306 |
| MmugDNA.31046.1.S1_at   | MmugDNA.31046.1 | 3.92  | 3.82  | 0.17 | 0.17 | 1.08  | 0.192417 | 0.075205 | 0.488958 | 0.319384 |
| MmugDNA.31047.1.S1_at   | MmugDNA.31047.1 | 4.84  | 4.06  | 0.48 | 0.3  | 1.71  | 0.062527 | 0.055956 | 0.306652 | 0.28236  |
| MmugDNA.31048.1.S1_at   | MmugDNA.31048.1 | 4.44  | 3.92  | 0.28 | 0.2  | 1.43  | 0.267999 | 0.180979 | 0.560744 | 0.457466 |
| MmugDNA.31050.1.S1_at   | MmugDNA.31050.1 | 8.63  | 8.67  | 0.1  | 0.12 | -1.03 | 0.719562 | 0.983952 | 0.867731 | 0.991088 |
| MmugDNA.31051.1.S1_at   | MmugDNA.31051.1 | 8.43  | 9.47  | 0.22 | 0.1  | -2.05 | 0.00198  | 0.026571 | 0.089447 | 0.203932 |
| MmugDNA.31052.1.S1_at   | MmugDNA.31052.1 | 5.81  | 5.58  | 1.05 | 0.53 | 1.17  | 0.593783 | 0.824788 | 0.79421  | 0.89939  |
| MmugDNA.31053.1.S1_at   | MmugDNA.31053.1 | 8.77  | 8.61  | 0.15 | 0.03 | 1.12  | 0.138699 | 0.143934 | 0.42426  | 0.417867 |
| MmugDNA.31055.1.S1_at   | MmugDNA.31055.1 | 9.26  | 9.65  | 0.21 | 0.2  | -1.31 | 0.158226 | 0.000222 | 0.44918  | 0.032385 |
| MmugDNA.31058.1.S1_at   | MmugDNA.31058.1 | 10.15 | 9.4   | 0.09 | 0.27 | 1.69  | 0.019133 | 0.042791 | 0.191749 | 0.251394 |
| MmugDNA.31061.1.S1_at   | MmugDNA.31061.1 | 3.56  | 3.54  | 0.35 | 0.1  | 1.01  | 0.35132  | 0.323263 | 0.628948 | 0.574408 |
| MmugDNA.31062.1.S1_at   | MmugDNA.31062.1 | 5.93  | 5.91  | 0.28 | 0.06 | 1.01  | 0.895378 | 0.958226 | 0.95534  | 0.976343 |
| MmugDNA.31063.1.S1_at   | MmugDNA.31063.1 | 3.26  | 3.29  | 0.07 | 0.07 | -1.02 | 0.871412 | 0.170359 | 0.944625 | 0.447103 |
| MmugDNA.31064.1.S1_at   | MmugDNA.31064.1 | 3.39  | 3.36  | 0.09 | 0.29 | 1.02  | 0.744281 | 0.763398 | 0.881397 | 0.862471 |
| MmugDNA.31065.1.S1_at   | MmugDNA.31065.1 | 7.02  | 6.93  | 0.18 | 0.02 | 1.06  | 0.374568 | 0.356579 | 0.645606 | 0.598459 |
| MmugDNA.31066.1.S1_at   | MmugDNA.31066.1 | 8.32  | 8.35  | 0.42 | 0.15 | -1.02 | 0.840889 | 0.146738 | 0.930077 | 0.42078  |
| MmugDNA.31068.1.S1_at   | MmugDNA.31068.1 | 7.45  | 7.08  | 0.28 | 0.03 | 1.29  | 0.234119 | 0.614494 | 0.532201 | 0.771283 |
| MmugDNA.31069.1.S1_at   | MmugDNA.31069.1 | 7.78  | 7.54  | 0.12 | 0.03 | 1.18  | 0.024719 | 0.171232 | 0.210329 | 0.447792 |
| MmugDNA.31069.1.S1_s_at | MmugDNA.31069.1 | 9.84  | 9.83  | 0.06 | 0.1  | 1.01  | 0.452083 | 0.130072 | 0.702736 | 0.401724 |
| MmugDNA.3107.1.S1_at    | MmugDNA.3107.1  | 8.19  | 8.1   | 0.32 | 0.24 | 1.07  | 0.972286 | 0.871493 | 0.988877 | 0.926844 |
| MmugDNA.31071.1.S1_at   | MmugDNA.31071.1 | 7.78  | 7.32  | 0.2  | 0.07 | 1.38  | 0.039361 | 0.165132 | 0.254878 | 0.441373 |
| MmugDNA.31072.1.S1_at   | MmugDNA.31072.1 | 7.23  | 7.23  | 0.56 | 0.29 | -1    | 0.259167 | 0.430696 | 0.553502 | 0.651691 |
| MmugDNA.31073.1.S1_at   | MmugDNA.31073.1 | 11.5  | 11.5  | 0.09 | 0.06 | 1     | 0.492059 | 0.000167 | 0.729508 | 0.030511 |
| MmugDNA.31074.1.S1_at   | MmugDNA.31074.1 | 4.87  | 4.79  | 0.23 | 0.2  | 1.06  | 0.420908 | 0.106396 | 0.67979  | 0.36895  |
| MmugDNA.31075.1.S1_at   | MmugDNA.31075.1 | 6.92  | 7.06  | 0.33 | 0.29 | -1.1  | 0.618202 | 0.639192 | 0.810607 | 0.788125 |
| MmugDNA.31076.1.S1_at   | MmugDNA.31076.1 | 5.47  | 5.44  | 0.12 | 0.17 | 1.02  | 0.600631 | 0.831694 | 0.799059 | 0.903453 |

|                         |                 |       |       |      |      |        |          |          |          |          |
|-------------------------|-----------------|-------|-------|------|------|--------|----------|----------|----------|----------|
| MmugDNA.31077.1.S1_at   | MmugDNA.31077.1 | 6.41  | 5.86  | 0.39 | 0.29 | 1.46   | 0.079918 | 0.126219 | 0.340107 | 0.396751 |
| MmugDNA.31078.1.S1_at   | MmugDNA.31078.1 | 4.49  | 4.47  | 0.03 | 0.1  | 1.01   | 0.541107 | 0.277937 | 0.761929 | 0.541664 |
| MmugDNA.31079.1.S1_at   | MmugDNA.31079.1 | 7.91  | 7.45  | 0.09 | 0.1  | 1.37   | 0.002781 | 0.38946  | 0.097767 | 0.623564 |
| MmugDNA.3108.1.S1_at    | MmugDNA.3108.1  | 9.21  | 9.09  | 0.41 | 0.13 | 1.08   | 0.501462 | 0.093005 | 0.735301 | 0.349174 |
| MmugDNA.31081.1.S1_at   | MmugDNA.31081.1 | 9.58  | 9.69  | 0.27 | 0.2  | -1.08  | 0.287599 | 0.03878  | 0.577473 | 0.241916 |
| MmugDNA.31082.1.S1_at   | MmugDNA.31082.1 | 5.05  | 4.86  | 0.18 | 0.13 | 1.14   | 0.231409 | 0.607494 | 0.53018  | 0.766417 |
| MmugDNA.31083.1.S1_at   | MmugDNA.31083.1 | 3.32  | 3.32  | 0.33 | 0.05 | 1      | 0.431511 | 0.339593 | 0.687538 | 0.586188 |
| MmugDNA.31084.1.S1_at   | MmugDNA.31084.1 | 10.17 | 10.73 | 0.35 | 0.12 | -1.48  | 0.239464 | 0.569274 | 0.536818 | 0.742375 |
| MmugDNA.31086.1.S1_at   | MmugDNA.31086.1 | 7.39  | 7.28  | 0.18 | 0.06 | 1.08   | 0.769438 | 0.801207 | 0.894241 | 0.885679 |
| MmugDNA.31087.1.S1_at   | MmugDNA.31087.1 | 9.07  | 8.61  | 0.97 | 0.46 | 1.38   | 0.2233   | 0.29234  | 0.521135 | 0.552408 |
| MmugDNA.31089.1.S1_s_at | MmugDNA.31089.1 | 10.98 | 10.5  | 0.08 | 0.06 | 1.4    | 0.001535 | 0.007258 | 0.081678 | 0.114309 |
| MmugDNA.3109.1.S1_at    | MmugDNA.3109.1  | 6.16  | 10.15 | 0.88 | 0.05 | -15.88 | 0.000893 | 0.038104 | 0.075114 | 0.239835 |
| MmugDNA.3109.1.S1_s_at  | MmugDNA.3109.1  | 6.12  | 9.3   | 0.59 | 0.26 | -9.07  | 0.000817 | 0.012641 | 0.07338  | 0.14505  |
| MmugDNA.31091.1.S1_at   | MmugDNA.31091.1 | 9.89  | 10.37 | 0.07 | 0.03 | -1.39  | 0.000457 | 0.104538 | 0.065937 | 0.365805 |
| MmugDNA.31093.1.S1_at   | MmugDNA.31093.1 | 10.76 | 10.4  | 0.25 | 0.28 | 1.29   | 0.363373 | 0.386733 | 0.63807  | 0.621891 |
| MmugDNA.31094.1.S1_at   | MmugDNA.31094.1 | 6.01  | 5.77  | 0.2  | 0.28 | 1.18   | 0.169426 | 0.355798 | 0.462642 | 0.597864 |
| MmugDNA.31095.1.S1_at   | MmugDNA.31095.1 | 11.64 | 11.3  | 0.32 | 0.06 | 1.27   | 0.162664 | 0.219955 | 0.454697 | 0.49344  |
| MmugDNA.31097.1.S1_at   | MmugDNA.31097.1 | 5.98  | 6.14  | 0.77 | 0.04 | -1.12  | 0.263769 | 0.216731 | 0.557319 | 0.490311 |
| MmugDNA.31099.1.S1_at   | MmugDNA.31099.1 | 7.17  | 7.72  | 0.28 | 0.08 | -1.46  | 0.054606 | 0.123143 | 0.290604 | 0.393174 |
| MmugDNA.31099.1.S1_s_at | MmugDNA.31099.1 | 8.65  | 9.19  | 0.43 | 0.09 | -1.46  | 0.07617  | 0.190674 | 0.334238 | 0.466127 |
| MmugDNA.311.1.S1_at     | MmugDNA.311.1   | 4.25  | 4.25  | 0.1  | 0.15 | -1     | 0.985542 | 0.829323 | 0.9948   | 0.901879 |
| MmugDNA.3110.1.S1_at    | MmugDNA.3110.1  | 2.85  | 2.85  | 0.03 | 0.01 | 1      | 0.276996 | 0.583192 | 0.568475 | 0.751632 |
| MmugDNA.31101.1.S1_at   | MmugDNA.31101.1 | 8.74  | 8.8   | 0.05 | 0.07 | -1.04  | 0.817427 | 0.607527 | 0.918429 | 0.766417 |
| MmugDNA.31102.1.S1_at   | MmugDNA.31102.1 | 6.09  | 6.39  | 0.47 | 0.36 | -1.23  | 0.775091 | 0.843387 | 0.897241 | 0.910815 |
| MmugDNA.31103.1.S1_at   | MmugDNA.31103.1 | 7.65  | 7.43  | 0.38 | 0.12 | 1.17   | 0.418234 | 0.457649 | 0.678177 | 0.670889 |
| MmugDNA.31104.1.S1_at   | MmugDNA.31104.1 | 5.26  | 5.04  | 0.2  | 0.05 | 1.17   | 0.30515  | 0.677409 | 0.592121 | 0.81167  |
| MmugDNA.31105.1.S1_at   | MmugDNA.31105.1 | 4.12  | 3.78  | 0.29 | 0.04 | 1.26   | 0.310053 | 0.393012 | 0.596339 | 0.625971 |
| MmugDNA.31108.1.S1_at   | MmugDNA.31108.1 | 4.17  | 3.77  | 0.34 | 0.12 | 1.33   | 0.152756 | 0.23396  | 0.442472 | 0.505221 |
| MmugDNA.3111.1.S1_at    | MmugDNA.3111.1  | 4.07  | 4.45  | 1.11 | 0.27 | -1.3   | 0.910061 | 0.909714 | 0.961883 | 0.949067 |
| MmugDNA.31110.1.S1_at   | MmugDNA.31110.1 | 3.6   | 3.51  | 0.33 | 0.07 | 1.06   | 0.422577 | 0.604056 | 0.680692 | 0.764452 |
| MmugDNA.31111.1.S1_at   | MmugDNA.31111.1 | 6.41  | 6.43  | 0.14 | 0.13 | -1.01  | 0.505765 | 0.706063 | 0.73866  | 0.829633 |
| MmugDNA.31113.1.S1_at   | MmugDNA.31113.1 | 5.18  | 5.74  | 0.69 | 0.1  | -1.47  | 0.763098 | 0.541642 | 0.891497 | 0.725033 |
| MmugDNA.31115.1.S1_at   | MmugDNA.31115.1 | 3.24  | 3.25  | 0.09 | 0.14 | -1.01  | 0.955747 | 0.282989 | 0.981823 | 0.545692 |
| MmugDNA.31116.1.S1_at   | MmugDNA.31116.1 | 6.53  | 6.41  | 0.27 | 0.21 | 1.09   | 0.683814 | 0.476592 | 0.84925  | 0.682787 |
| MmugDNA.31117.1.S1_at   | MmugDNA.31117.1 | 4.98  | 4.8   | 0.31 | 0.04 | 1.13   | 0.370079 | 0.524202 | 0.643241 | 0.714207 |
| MmugDNA.31118.1.S1_at   | MmugDNA.31118.1 | 7.15  | 7     | 0.03 | 0.12 | 1.11   | 0.108509 | 0.139839 | 0.383213 | 0.413131 |
| MmugDNA.31119.1.S1_at   | MmugDNA.31119.1 | 4.94  | 5.03  | 0.13 | 0.03 | -1.06  | 0.169358 | 0.018009 | 0.462597 | 0.169233 |
| MmugDNA.3112.1.S1_at    | MmugDNA.3112.1  | 3.11  | 2.96  | 0.17 | 0.1  | 1.11   | 0.601999 | 0.657766 | 0.799962 | 0.799981 |
| MmugDNA.31121.1.S1_at   | MmugDNA.31121.1 | 2.9   | 2.88  | 0.05 | 0.13 | 1.02   | 0.772297 | 0.948435 | 0.895752 | 0.970595 |
| MmugDNA.31123.1.S1_at   | MmugDNA.31123.1 | 5.01  | 4.95  | 0.33 | 0.09 | 1.04   | 0.964253 | 0.484631 | 0.985543 | 0.68858  |
| MmugDNA.31124.1.S1_at   | MmugDNA.31124.1 | 7.71  | 8.29  | 0.39 | 0.03 | -1.49  | 0.188736 | 0.42711  | 0.485343 | 0.649106 |
| MmugDNA.31126.1.S1_at   | MmugDNA.31126.1 | 5.07  | 4.87  | 0.18 | 0.07 | 1.15   | 0.132259 | 0.05621  | 0.415489 | 0.282978 |
| MmugDNA.31127.1.S1_at   | MmugDNA.31127.1 | 3.65  | 3.12  | 0.42 | 0.12 | 1.44   | 0.097114 | 0.113811 | 0.367275 | 0.380052 |



|                         |                 |       |       |      |      |       |          |          |          |          |
|-------------------------|-----------------|-------|-------|------|------|-------|----------|----------|----------|----------|
| MmugDNA.31128.1.S1_at   | MmugDNA.31128.1 | 7.49  | 7.53  | 0.17 | 0.02 | -1.03 | 0.609875 | 0.373797 | 0.805512 | 0.61244  |
| MmugDNA.31129.1.S1_at   | MmugDNA.31129.1 | 8.82  | 10.08 | 0.76 | 0.2  | -2.38 | 0.05946  | 0.030751 | 0.300954 | 0.217248 |
| MmugDNA.3113.1.S1_at    | MmugDNA.3113.1  | 7.3   | 6.93  | 0.53 | 0.28 | 1.29  | 0.313336 | 0.169327 | 0.599122 | 0.445925 |
| MmugDNA.31130.1.S1_at   | MmugDNA.31130.1 | 6.92  | 6.92  | 0.26 | 0.05 | 1     | 0.936995 | 0.294058 | 0.97363  | 0.553912 |
| MmugDNA.31130.1.S1_x_at | MmugDNA.31130.1 | 6.45  | 6.51  | 0.17 | 0.04 | -1.04 | 0.809812 | 0.129175 | 0.914789 | 0.400611 |
| MmugDNA.31133.1.S1_at   | MmugDNA.31133.1 | 5.04  | 5.03  | 0.04 | 0.15 | 1.01  | 0.432914 | 0.729318 | 0.68855  | 0.843541 |
| MmugDNA.31137.1.S1_at   | MmugDNA.31137.1 | 5.67  | 5.66  | 0.08 | 0.12 | 1     | 0.822609 | 0.753529 | 0.921047 | 0.856527 |
| MmugDNA.31138.1.S1_at   | MmugDNA.31138.1 | 5.32  | 5.11  | 0.1  | 0.11 | 1.16  | 0.139563 | 0.046266 | 0.42511  | 0.259486 |
| MmugDNA.31140.1.S1_at   | MmugDNA.31140.1 | 4.47  | 4.36  | 0.12 | 0.12 | 1.08  | 0.318565 | 0.429228 | 0.603251 | 0.650729 |
| MmugDNA.31142.1.S1_at   | MmugDNA.31142.1 | 9.69  | 9.46  | 0.31 | 0.08 | 1.17  | 0.51577  | 0.446492 | 0.745426 | 0.662842 |
| MmugDNA.31143.1.S1_at   | MmugDNA.31143.1 | 7.4   | 7.41  | 0.21 | 0.06 | -1.01 | 0.248016 | 0.002519 | 0.543371 | 0.074158 |
| MmugDNA.31144.1.S1_at   | MmugDNA.31144.1 | 4.27  | 4.1   | 0.11 | 0.16 | 1.13  | 0.151061 | 0.12045  | 0.440524 | 0.38925  |
| MmugDNA.31145.1.S1_at   | MmugDNA.31145.1 | 3.23  | 3.43  | 0.61 | 0.11 | -1.16 | 0.84081  | 0.948358 | 0.930069 | 0.970554 |
| MmugDNA.31146.1.S1_at   | MmugDNA.31146.1 | 4.75  | 4.72  | 0.2  | 0.05 | 1.02  | 0.697547 | 0.675331 | 0.856021 | 0.81026  |
| MmugDNA.31147.1.S1_at   | MmugDNA.31147.1 | 7.94  | 7.93  | 0.09 | 0.03 | 1.01  | 0.387351 | 0.745409 | 0.655546 | 0.852384 |
| MmugDNA.31147.1.S1_s_at | MmugDNA.31147.1 | 5.48  | 5.37  | 0.05 | 0.06 | 1.08  | 0.072063 | 0.048745 | 0.326375 | 0.265744 |
| MmugDNA.31149.1.S1_at   | MmugDNA.31149.1 | 3.33  | 3.29  | 0.35 | 0.07 | 1.03  | 0.275267 | 0.323639 | 0.566954 | 0.574525 |
| MmugDNA.3115.1.S1_at    | MmugDNA.3115.1  | 3.97  | 4.1   | 0.28 | 0.07 | -1.1  | 0.576008 | 0.147562 | 0.783034 | 0.421872 |
| MmugDNA.31151.1.S1_at   | MmugDNA.31151.1 | 4.1   | 4.09  | 0.07 | 0.03 | 1     | 0.619758 | 0.743903 | 0.81142  | 0.85159  |
| MmugDNA.31152.1.S1_at   | MmugDNA.31152.1 | 3.47  | 3.14  | 0.32 | 0.12 | 1.26  | 0.483363 | 0.089488 | 0.723504 | 0.343811 |
| MmugDNA.31153.1.S1_at   | MmugDNA.31153.1 | 6.93  | 6.31  | 0.26 | 0.17 | 1.54  | 0.027019 | 0.11773  | 0.217188 | 0.385519 |
| MmugDNA.31155.1.S1_at   | MmugDNA.31155.1 | 4.03  | 4     | 0.09 | 0.37 | 1.02  | 0.449576 | 0.322543 | 0.70092  | 0.573991 |
| MmugDNA.31156.1.S1_s_at | MmugDNA.31156.1 | 10.3  | 10.52 | 0.22 | 0.06 | -1.17 | 0.472571 | 0.597236 | 0.716214 | 0.76013  |
| MmugDNA.31158.1.S1_at   | MmugDNA.31158.1 | 5.1   | 5.04  | 0.2  | 0.03 | 1.04  | 0.472143 | 0.684716 | 0.715941 | 0.816113 |
| MmugDNA.3116.1.S1_at    | MmugDNA.3116.1  | 4.43  | 4.29  | 0.72 | 0.08 | 1.1   | 0.755655 | 0.811481 | 0.887352 | 0.891185 |
| MmugDNA.31160.1.S1_at   | MmugDNA.31160.1 | 5.18  | 7.01  | 0.09 | 0.47 | -3.55 | 0.004719 | 0.022963 | 0.115008 | 0.189548 |
| MmugDNA.31161.1.S1_at   | MmugDNA.31161.1 | 8.14  | 9.53  | 0.42 | 0.13 | -2.6  | 0.005295 | 0.016651 | 0.117714 | 0.163343 |
| MmugDNA.31163.1.S1_at   | MmugDNA.31163.1 | 3.21  | 3.1   | 0.03 | 0.04 | 1.09  | 0.047958 | 0.025897 | 0.276361 | 0.201714 |
| MmugDNA.31164.1.S1_at   | MmugDNA.31164.1 | 11.35 | 11.44 | 0.13 | 0.2  | -1.06 | 0.236615 | 0.011577 | 0.534305 | 0.139225 |
| MmugDNA.31165.1.S1_at   | MmugDNA.31165.1 | 3.39  | 3.35  | 0.26 | 0.09 | 1.03  | 0.80509  | 0.953439 | 0.912553 | 0.97351  |
| MmugDNA.31167.1.S1_s_at | MmugDNA.31167.1 | 3.17  | 3.39  | 0.15 | 0.09 | -1.17 | 0.481972 | 0.174524 | 0.722245 | 0.450998 |
| MmugDNA.31167.1.S1_x_at | MmugDNA.31167.1 | 3.11  | 3.27  | 0.13 | 0.4  | -1.12 | 0.212395 | 0.399303 | 0.510459 | 0.629737 |
| MmugDNA.31168.1.S1_at   | MmugDNA.31168.1 | 4.45  | 3.8   | 0.93 | 0.13 | 1.57  | 0.226697 | 0.221748 | 0.524513 | 0.494901 |
| MmugDNA.31169.1.S1_at   | MmugDNA.31169.1 | 7.44  | 7.26  | 0.14 | 0.25 | 1.13  | 0.249146 | 0.031605 | 0.544437 | 0.219905 |
| MmugDNA.3117.1.S1_at    | MmugDNA.3117.1  | 4.62  | 4.43  | 0.65 | 0.33 | 1.14  | 0.765556 | 0.671366 | 0.892487 | 0.807861 |
| MmugDNA.31170.1.S1_at   | MmugDNA.31170.1 | 5.53  | 5.03  | 0.68 | 0.35 | 1.42  | 0.332199 | 0.38343  | 0.613975 | 0.619424 |
| MmugDNA.31171.1.S1_at   | MmugDNA.31171.1 | 5.09  | 5.11  | 0.25 | 0.21 | -1.01 | 0.424067 | 0.35707  | 0.681872 | 0.59875  |
| MmugDNA.31173.1.S1_at   | MmugDNA.31173.1 | 5.81  | 5.81  | 0.18 | 0.13 | 1     | 0.76419  | 0.931088 | 0.891902 | 0.960841 |
| MmugDNA.31174.1.S1_at   | MmugDNA.31174.1 | 3.52  | 3.4   | 0.39 | 0.17 | 1.09  | 0.584695 | 0.800055 | 0.78874  | 0.885072 |
| MmugDNA.31176.1.S1_at   | MmugDNA.31176.1 | 3.97  | 4.04  | 0.12 | 0.04 | -1.06 | 0.57177  | 0.798473 | 0.780057 | 0.884012 |
| MmugDNA.31178.1.S1_at   | MmugDNA.31178.1 | 8.45  | 8.29  | 0.66 | 0.33 | 1.12  | 0.963066 | 0.474313 | 0.985072 | 0.68135  |
| MmugDNA.31179.1.S1_at   | MmugDNA.31179.1 | 11.6  | 10.98 | 0.06 | 0.1  | 1.54  | 0.000882 | 0.002152 | 0.074796 | 0.068732 |
| MmugDNA.3118.1.S1_at    | MmugDNA.3118.1  | 5.57  | 5.38  | 0.09 | 0.12 | 1.14  | 0.111035 | 0.102118 | 0.386768 | 0.362168 |

|                         |                 |       |       |      |      |       |          |          |          |          |
|-------------------------|-----------------|-------|-------|------|------|-------|----------|----------|----------|----------|
| MmugDNA.31180.1.S1_at   | MmugDNA.31180.1 | 10.16 | 10.46 | 0.31 | 0.23 | -1.23 | 0.494976 | 0.77994  | 0.731471 | 0.872422 |
| MmugDNA.31182.1.S1_at   | MmugDNA.31182.1 | 9.37  | 9.2   | 0.18 | 0.55 | 1.13  | 0.598533 | 0.831421 | 0.797496 | 0.903343 |
| MmugDNA.31183.1.S1_at   | MmugDNA.31183.1 | 5.22  | 5.22  | 0.02 | 0.12 | 1     | 0.912055 | 0.7361   | 0.962758 | 0.84733  |
| MmugDNA.31184.1.S1_at   | MmugDNA.31184.1 | 5.07  | 4.97  | 0.07 | 0.11 | 1.07  | 0.139187 | 0.254853 | 0.424933 | 0.523051 |
| MmugDNA.31186.1.S1_at   | MmugDNA.31186.1 | 7.52  | 7.12  | 0.12 | 0.44 | 1.32  | 0.594832 | 0.50121  | 0.794991 | 0.699449 |
| MmugDNA.31187.1.S1_at   | MmugDNA.31187.1 | 6.72  | 6.9   | 0.18 | 0.15 | -1.13 | 0.50697  | 0.527858 | 0.739378 | 0.71629  |
| MmugDNA.31188.1.S1_at   | MmugDNA.31188.1 | 8.88  | 9.71  | 0.18 | 0.15 | -1.78 | 0.005737 | 0.03776  | 0.121435 | 0.238746 |
| MmugDNA.31189.1.S1_at   | MmugDNA.31189.1 | 5.56  | 5.04  | 1.11 | 0.69 | 1.43  | 0.702545 | 0.573877 | 0.858848 | 0.745442 |
| MmugDNA.31190.1.S1_at   | MmugDNA.31190.1 | 5.02  | 5.05  | 0.26 | 0.01 | -1.02 | 0.875144 | 0.917567 | 0.946414 | 0.95389  |
| MmugDNA.31192.1.S1_at   | MmugDNA.31192.1 | 4.31  | 4.14  | 0.41 | 0.12 | 1.13  | 0.159485 | 0.242595 | 0.450798 | 0.51293  |
| MmugDNA.31193.1.S1_at   | MmugDNA.31193.1 | 9.24  | 8.77  | 0.11 | 0.1  | 1.38  | 0.008798 | 0.046189 | 0.143588 | 0.25935  |
| MmugDNA.31194.1.S1_at   | MmugDNA.31194.1 | 6.73  | 6.74  | 0.12 | 0.14 | -1.01 | 0.70754  | 0.361324 | 0.861502 | 0.602112 |
| MmugDNA.31195.1.S1_at   | MmugDNA.31195.1 | 6.33  | 6.44  | 0.13 | 0.05 | -1.08 | 0.319595 | 0.048731 | 0.604201 | 0.265744 |
| MmugDNA.31196.1.S1_at   | MmugDNA.31196.1 | 10.07 | 10.48 | 0.26 | 0.24 | -1.33 | 0.163989 | 0.21527  | 0.45681  | 0.489011 |
| MmugDNA.31197.1.S1_at   | MmugDNA.31197.1 | 3.97  | 3.85  | 0.15 | 0.04 | 1.09  | 0.739331 | 0.470048 | 0.879245 | 0.678572 |
| MmugDNA.31199.1.S1_at   | MmugDNA.31199.1 | 8.21  | 9.51  | 0.76 | 0.2  | -2.47 | 0.060424 | 0.079037 | 0.302968 | 0.326117 |
| MmugDNA.312.1.S1_at     | MmugDNA.312.1   | 3.6   | 3.6   | 0.13 | 0.13 | -1    | 0.545876 | 0.309598 | 0.765031 | 0.564987 |
| MmugDNA.3120.1.S1_at    | MmugDNA.3120.1  | 2.73  | 2.84  | 0.03 | 0.08 | -1.08 | 0.248315 | 0.05285  | 0.543712 | 0.275521 |
| MmugDNA.31200.1.S1_at   | MmugDNA.31200.1 | 3.55  | 3.72  | 0.16 | 0.13 | -1.12 | 0.410324 | 0.70717  | 0.672397 | 0.830195 |
| MmugDNA.31202.1.S1_at   | MmugDNA.31202.1 | 8.78  | 9.33  | 0.25 | 0.11 | -1.46 | 0.069069 | 0.421095 | 0.320914 | 0.644743 |
| MmugDNA.31203.1.S1_at   | MmugDNA.31203.1 | 7.69  | 7.71  | 0.09 | 0.23 | -1.01 | 0.513158 | 0.000419 | 0.743501 | 0.038093 |
| MmugDNA.31204.1.S1_at   | MmugDNA.31204.1 | 6.2   | 5.51  | 0.54 | 0.34 | 1.62  | 0.130748 | 0.099504 | 0.413299 | 0.35789  |
| MmugDNA.31205.1.S1_at   | MmugDNA.31205.1 | 3.38  | 3.2   | 0.01 | 0.13 | 1.13  | 0.194778 | 0.115763 | 0.491384 | 0.382814 |
| MmugDNA.31205.1.S1_s_at | MmugDNA.31205.1 | 6.04  | 5.93  | 0.03 | 0.22 | 1.08  | 0.974114 | 0.881596 | 0.989627 | 0.932407 |
| MmugDNA.31206.1.S1_at   | MmugDNA.31206.1 | 8.42  | 7.86  | 0.15 | 0.19 | 1.48  | 0.009779 | 0.046065 | 0.148542 | 0.258977 |
| MmugDNA.31207.1.S1_at   | MmugDNA.31207.1 | 7.56  | 7.57  | 0.15 | 0.03 | -1.01 | 0.852253 | 0.720228 | 0.935786 | 0.838202 |
| MmugDNA.31208.1.S1_at   | MmugDNA.31208.1 | 3.23  | 3.27  | 0.08 | 0.08 | -1.03 | 0.741379 | 0.904601 | 0.880148 | 0.945935 |
| MmugDNA.31209.1.S1_at   | MmugDNA.31209.1 | 5.73  | 6.05  | 0.71 | 0.25 | -1.24 | 0.616539 | 0.631272 | 0.809516 | 0.782742 |
| MmugDNA.3121.1.S1_at    | MmugDNA.3121.1  | 5.03  | 5.1   | 0.1  | 0.07 | -1.05 | 0.67906  | 0.48258  | 0.846949 | 0.687366 |
| MmugDNA.31210.1.S1_at   | MmugDNA.31210.1 | 5.54  | 5.51  | 0.2  | 0.09 | 1.02  | 0.53876  | 0.359595 | 0.760379 | 0.600859 |
| MmugDNA.31212.1.S1_at   | MmugDNA.31212.1 | 12.2  | 11.86 | 0.07 | 0.1  | 1.27  | 0.01906  | 0.012901 | 0.191521 | 0.146227 |
| MmugDNA.31213.1.S1_at   | MmugDNA.31213.1 | 4.94  | 4.95  | 0.24 | 0.06 | -1.01 | 0.465117 | 0.452344 | 0.711264 | 0.667046 |
| MmugDNA.31214.1.S1_at   | MmugDNA.31214.1 | 3.75  | 3.76  | 0.43 | 0.11 | -1.01 | 0.916418 | 0.990112 | 0.964441 | 0.994344 |
| MmugDNA.31215.1.S1_at   | MmugDNA.31215.1 | 7.06  | 7.03  | 0.01 | 0.03 | 1.02  | 0.099503 | 0.273916 | 0.370394 | 0.538452 |
| MmugDNA.31216.1.S1_at   | MmugDNA.31216.1 | 3.64  | 3.55  | 0.07 | 0.04 | 1.06  | 0.104474 | 0.319147 | 0.377773 | 0.57167  |
| MmugDNA.31217.1.S1_at   | MmugDNA.31217.1 | 2.83  | 2.83  | 0.06 | 0.03 | 1     | 0.473687 | 0.710374 | 0.716998 | 0.831943 |
| MmugDNA.31220.1.S1_at   | MmugDNA.31220.1 | 4.42  | 4.75  | 0.9  | 0.38 | -1.26 | 0.952443 | 0.996824 | 0.980429 | 0.998184 |
| MmugDNA.31222.1.S1_at   | MmugDNA.31222.1 | 6.7   | 6.39  | 1.27 | 0.54 | 1.24  | 0.933518 | 0.405635 | 0.972111 | 0.633891 |
| MmugDNA.31224.1.S1_at   | MmugDNA.31224.1 | 9.62  | 8.94  | 0.17 | 0.23 | 1.61  | 0.038441 | 0.008342 | 0.252039 | 0.121147 |
| MmugDNA.31226.1.S1_at   | MmugDNA.31226.1 | 6.45  | 6.32  | 0.08 | 0.04 | 1.09  | 0.111189 | 0.295931 | 0.387042 | 0.555241 |
| MmugDNA.31228.1.S1_at   | MmugDNA.31228.1 | 3.26  | 2.92  | 0.67 | 0.08 | 1.27  | 0.240999 | 0.305731 | 0.538366 | 0.562722 |
| MmugDNA.31229.1.S1_at   | MmugDNA.31229.1 | 5.67  | 5.95  | 0.37 | 0.17 | -1.21 | 0.217279 | 0.494648 | 0.515088 | 0.69497  |
| MmugDNA.3123.1.S1_at    | MmugDNA.3123.1  | 4.98  | 5.04  | 0.26 | 0.14 | -1.04 | 0.717798 | 0.277821 | 0.866693 | 0.541664 |

|                         |                 |       |       |      |      |        |          |          |          |          |
|-------------------------|-----------------|-------|-------|------|------|--------|----------|----------|----------|----------|
| MmugDNA.31230.1.S1_at   | MmugDNA.31230.1 | 7     | 6.81  | 0.13 | 0.24 | 1.14   | 0.224717 | 0.31385  | 0.522708 | 0.568091 |
| MmugDNA.31231.1.S1_at   | MmugDNA.31231.1 | 4.25  | 4.07  | 0.21 | 0.07 | 1.13   | 0.421505 | 0.255208 | 0.679956 | 0.523254 |
| MmugDNA.31233.1.S1_at   | MmugDNA.31233.1 | 3.8   | 3.6   | 0.71 | 0.09 | 1.15   | 0.214683 | 0.222897 | 0.512314 | 0.495791 |
| MmugDNA.31234.1.S1_at   | MmugDNA.31234.1 | 3.72  | 3.69  | 0.2  | 0.1  | 1.01   | 0.421329 | 0.581522 | 0.67988  | 0.750522 |
| MmugDNA.31235.1.S1_at   | MmugDNA.31235.1 | 3.72  | 3.57  | 0.35 | 0.09 | 1.11   | 0.280287 | 0.308627 | 0.57143  | 0.56461  |
| MmugDNA.31236.1.S1_at   | MmugDNA.31236.1 | 5.6   | 5.69  | 0.11 | 0.27 | -1.06  | 0.724815 | 0.383059 | 0.870869 | 0.619089 |
| MmugDNA.31237.1.S1_at   | MmugDNA.31237.1 | 5.6   | 5.57  | 0.37 | 0.18 | 1.02   | 0.504753 | 0.225665 | 0.737875 | 0.498155 |
| MmugDNA.31238.1.S1_at   | MmugDNA.31238.1 | 7.23  | 7     | 0.48 | 0.08 | 1.17   | 0.44996  | 0.514416 | 0.701198 | 0.707677 |
| MmugDNA.31239.1.S1_at   | MmugDNA.31239.1 | 6.39  | 6.01  | 0.96 | 0.29 | 1.3    | 0.97234  | 0.758156 | 0.988877 | 0.8593   |
| MmugDNA.3124.1.S1_at    | MmugDNA.3124.1  | 10.76 | 10.53 | 0.53 | 0.08 | 1.17   | 0.566609 | 0.590585 | 0.777476 | 0.756311 |
| MmugDNA.31240.1.S1_at   | MmugDNA.31240.1 | 3.67  | 3.67  | 0.04 | 0.05 | 1      | 0.232165 | 0.294479 | 0.530631 | 0.554225 |
| MmugDNA.31241.1.S1_at   | MmugDNA.31241.1 | 5.75  | 5.73  | 0.51 | 0.09 | 1.01   | 0.829653 | 0.778808 | 0.925018 | 0.871617 |
| MmugDNA.31242.1.S1_at   | MmugDNA.31242.1 | 11.47 | 12.08 | 0.41 | 0.06 | -1.52  | 0.094545 | 0.188795 | 0.363527 | 0.464778 |
| MmugDNA.31242.1.S1_s_at | MmugDNA.31242.1 | 11.05 | 11.4  | 0.41 | 0.07 | -1.27  | 0.292419 | 0.115977 | 0.581702 | 0.383164 |
| MmugDNA.31243.1.S1_at   | MmugDNA.31243.1 | 10.04 | 10.06 | 0.21 | 0.03 | -1.02  | 0.265258 | 0.317043 | 0.557962 | 0.570317 |
| MmugDNA.31245.1.S1_at   | MmugDNA.31245.1 | 8.51  | 8.85  | 0.16 | 0.05 | -1.27  | 0.024388 | 0.008877 | 0.209245 | 0.124662 |
| MmugDNA.31246.1.S1_at   | MmugDNA.31246.1 | 6.42  | 6.46  | 0.16 | 0.12 | -1.03  | 0.891039 | 0.355096 | 0.953461 | 0.597508 |
| MmugDNA.31247.1.S1_at   | MmugDNA.31247.1 | 11.55 | 11.5  | 0.19 | 0.02 | 1.04   | 0.681242 | 0.028018 | 0.847983 | 0.208909 |
| MmugDNA.31248.1.S1_at   | MmugDNA.31248.1 | 4.62  | 3.95  | 0.53 | 0.44 | 1.59   | 0.232895 | 0.286615 | 0.531154 | 0.548069 |
| MmugDNA.31249.1.S1_at   | MmugDNA.31249.1 | 11.18 | 11.55 | 0.06 | 0.07 | -1.29  | 0.002661 | 0.022457 | 0.095754 | 0.187518 |
| MmugDNA.3125.1.S1_at    | MmugDNA.3125.1  | 10.53 | 9.74  | 0.3  | 0.54 | 1.73   | 0.074938 | 0.047551 | 0.331988 | 0.262758 |
| MmugDNA.31250.1.S1_at   | MmugDNA.31250.1 | 6.3   | 6.26  | 0.1  | 0.05 | 1.03   | 0.954935 | 0.321046 | 0.98151  | 0.573046 |
| MmugDNA.31251.1.S1_at   | MmugDNA.31251.1 | 5.07  | 8.43  | 0.83 | 0.18 | -10.28 | 0.004215 | 0.083598 | 0.110696 | 0.334194 |
| MmugDNA.31251.1.S1_s_at | MmugDNA.31251.1 | 6.35  | 7.38  | 0.52 | 0.42 | -2.05  | 0.058926 | 0.199369 | 0.299904 | 0.474002 |
| MmugDNA.31252.1.S1_at   | MmugDNA.31252.1 | 8.52  | 8.47  | 0.12 | 0.09 | 1.04   | 0.89297  | 0.973719 | 0.954376 | 0.985652 |
| MmugDNA.31253.1.S1_at   | MmugDNA.31253.1 | 3.87  | 4.02  | 0.28 | 0.51 | -1.11  | 0.449743 | 0.3928   | 0.701057 | 0.625846 |
| MmugDNA.31254.1.S1_at   | MmugDNA.31254.1 | 3.15  | 3.36  | 0.05 | 0.24 | -1.15  | 0.221322 | 0.321598 | 0.519357 | 0.573303 |
| MmugDNA.31255.1.S1_at   | MmugDNA.31255.1 | 8.22  | 7.94  | 0.62 | 0.14 | 1.21   | 0.896513 | 0.817732 | 0.955936 | 0.894815 |
| MmugDNA.31257.1.S1_at   | MmugDNA.31257.1 | 10.19 | 10.03 | 0.22 | 0.07 | 1.12   | 0.194891 | 0.51563  | 0.49141  | 0.708449 |
| MmugDNA.31259.1.S1_at   | MmugDNA.31259.1 | 4.89  | 4.83  | 0.08 | 0    | 1.04   | 0.218917 | 0.269735 | 0.516629 | 0.53502  |
| MmugDNA.3126.1.S1_at    | MmugDNA.3126.1  | 3.41  | 3.38  | 0.29 | 0.04 | 1.02   | 0.539484 | 0.658783 | 0.760837 | 0.800473 |
| MmugDNA.31260.1.S1_at   | MmugDNA.31260.1 | 8.53  | 7.42  | 0.12 | 0.22 | 2.16   | 0.00166  | 0.008391 | 0.084462 | 0.12163  |
| MmugDNA.31262.1.S1_at   | MmugDNA.31262.1 | 6.18  | 6.28  | 0.27 | 0.12 | -1.07  | 0.505143 | 0.524797 | 0.738175 | 0.714595 |
| MmugDNA.31264.1.S1_at   | MmugDNA.31264.1 | 4.79  | 4.87  | 0.81 | 0.24 | -1.06  | 0.954523 | 0.711715 | 0.98132  | 0.832794 |
| MmugDNA.31266.1.S1_at   | MmugDNA.31266.1 | 4.58  | 4.61  | 0.26 | 0.19 | -1.02  | 0.99048  | 0.361158 | 0.996572 | 0.60207  |
| MmugDNA.31267.1.S1_at   | MmugDNA.31267.1 | 6.45  | 6.46  | 0.31 | 0.11 | -1.01  | 0.979941 | 0.184555 | 0.992376 | 0.460582 |
| MmugDNA.31268.1.S1_at   | MmugDNA.31268.1 | 4.13  | 4.38  | 0.5  | 0.46 | -1.2   | 0.3011   | 0.664465 | 0.589084 | 0.803396 |
| MmugDNA.31271.1.S1_at   | MmugDNA.31271.1 | 8.52  | 9.2   | 0.35 | 0.13 | -1.59  | 0.028902 | 0.174693 | 0.222888 | 0.451231 |
| MmugDNA.31273.1.S1_at   | MmugDNA.31273.1 | 10.86 | 10.2  | 0.31 | 0.05 | 1.58   | 0.02216  | 0.047323 | 0.201977 | 0.262262 |
| MmugDNA.31275.1.S1_at   | MmugDNA.31275.1 | 2.81  | 2.75  | 0.11 | 0.07 | 1.04   | 0.351008 | 0.2217   | 0.628699 | 0.494901 |
| MmugDNA.31278.1.S1_at   | MmugDNA.31278.1 | 5.66  | 5.72  | 0.25 | 0.04 | -1.04  | 0.884054 | 0.981901 | 0.950645 | 0.990085 |
| MmugDNA.31279.1.S1_at   | MmugDNA.31279.1 | 6.01  | 5.79  | 0.06 | 0.09 | 1.17   | 0.045333 | 0.012939 | 0.270399 | 0.14641  |
| MmugDNA.3128.1.S1_at    | MmugDNA.3128.1  | 5.57  | 5.42  | 0.18 | 0.11 | 1.11   | 0.833135 | 0.495144 | 0.926518 | 0.695319 |

|                         |                 |       |       |      |      |       |          |          |          |          |
|-------------------------|-----------------|-------|-------|------|------|-------|----------|----------|----------|----------|
| MmugDNA.31280.1.S1_at   | MmugDNA.31280.1 | 5.12  | 5.08  | 0.35 | 0.39 | 1.02  | 0.96633  | 0.98915  | 0.986388 | 0.993825 |
| MmugDNA.31281.1.S1_at   | MmugDNA.31281.1 | 10.43 | 10.34 | 0.1  | 0.04 | 1.06  | 0.353263 | 0.066909 | 0.630388 | 0.304608 |
| MmugDNA.31282.1.S1_at   | MmugDNA.31282.1 | 6.14  | 5.68  | 0.69 | 0.19 | 1.37  | 0.227635 | 0.051745 | 0.525741 | 0.273002 |
| MmugDNA.31283.1.S1_at   | MmugDNA.31283.1 | 9.43  | 8.14  | 0.44 | 0.25 | 2.45  | 0.011447 | 0.006567 | 0.157145 | 0.109895 |
| MmugDNA.31284.1.S1_at   | MmugDNA.31284.1 | 6.87  | 6.69  | 0.16 | 0.08 | 1.13  | 0.105486 | 0.302453 | 0.37939  | 0.56012  |
| MmugDNA.31285.1.S1_at   | MmugDNA.31285.1 | 6.66  | 6.43  | 0.31 | 0.24 | 1.17  | 0.263403 | 0.74828  | 0.556958 | 0.853508 |
| MmugDNA.31286.1.S1_x_at | MmugDNA.31286.1 | 11.44 | 11.55 | 0.62 | 0.19 | -1.08 | 0.543015 | 0.479467 | 0.763166 | 0.685202 |
| MmugDNA.31287.1.S1_at   | MmugDNA.31287.1 | 9.34  | 9.74  | 0.39 | 0.05 | -1.32 | 0.327624 | 0.510438 | 0.610314 | 0.704938 |
| MmugDNA.31290.1.S1_at   | MmugDNA.31290.1 | 4.85  | 4.76  | 0.09 | 0.03 | 1.07  | 0.085275 | 0.094548 | 0.34932  | 0.351301 |
| MmugDNA.31294.1.S1_at   | MmugDNA.31294.1 | 5.89  | 5.75  | 0.17 | 0.06 | 1.11  | 0.906223 | 0.228576 | 0.960282 | 0.500752 |
| MmugDNA.31295.1.S1_at   | MmugDNA.31295.1 | 6.57  | 6.53  | 0.06 | 0.08 | 1.02  | 0.546569 | 0.003105 | 0.765373 | 0.081305 |
| MmugDNA.31296.1.S1_at   | MmugDNA.31296.1 | 7.65  | 7.58  | 0.25 | 0.08 | 1.05  | 0.672038 | 0.04706  | 0.842838 | 0.261469 |
| MmugDNA.31297.1.S1_at   | MmugDNA.31297.1 | 4     | 3.84  | 0.45 | 0.04 | 1.12  | 0.527074 | 0.362814 | 0.752912 | 0.60332  |
| MmugDNA.31298.1.S1_at   | MmugDNA.31298.1 | 7.41  | 6.95  | 1.28 | 0.66 | 1.37  | 0.634644 | 0.753913 | 0.820892 | 0.85676  |
| MmugDNA.31299.1.S1_at   | MmugDNA.31299.1 | 4.55  | 4.55  | 0.15 | 0.03 | 1     | 0.689068 | 0.788282 | 0.851509 | 0.877534 |
| MmugDNA.313.1.S1_at     | MmugDNA.313.1   | 6.4   | 6.8   | 0.16 | 0.18 | -1.32 | 0.061461 | 0.036506 | 0.304484 | 0.235526 |
| MmugDNA.31300.1.S1_s_at | MmugDNA.31300.1 | 6.56  | 6.57  | 0.1  | 0.18 | -1.01 | 0.56007  | 0.321111 | 0.773651 | 0.57309  |
| MmugDNA.31301.1.S1_at   | MmugDNA.31301.1 | 4.05  | 4.15  | 0.06 | 0.23 | -1.07 | 0.674188 | 0.084224 | 0.844392 | 0.33533  |
| MmugDNA.31303.1.S1_at   | MmugDNA.31303.1 | 4.53  | 4.09  | 1.29 | 0.09 | 1.35  | 0.395057 | 0.349335 | 0.661557 | 0.593355 |
| MmugDNA.31304.1.S1_at   | MmugDNA.31304.1 | 3.58  | 3.49  | 0.23 | 0.25 | 1.07  | 0.807065 | 0.823502 | 0.913608 | 0.8986   |
| MmugDNA.31305.1.S1_at   | MmugDNA.31305.1 | 6.16  | 6.15  | 0.11 | 0.08 | 1.01  | 0.298444 | 0.43663  | 0.586735 | 0.656124 |
| MmugDNA.31307.1.S1_at   | MmugDNA.31307.1 | 4.75  | 4.51  | 0.25 | 0.22 | 1.18  | 0.691127 | 0.061918 | 0.85229  | 0.295717 |
| MmugDNA.31309.1.S1_at   | MmugDNA.31309.1 | 4.49  | 5.01  | 0.65 | 0.21 | -1.43 | 0.43512  | 0.526831 | 0.690271 | 0.715627 |
| MmugDNA.3131.1.S1_at    | MmugDNA.3131.1  | 3.98  | 4.28  | 0.31 | 0.35 | -1.23 | 0.670728 | 0.353373 | 0.842035 | 0.596477 |
| MmugDNA.31310.1.S1_at   | MmugDNA.31310.1 | 9.31  | 9.02  | 0.02 | 0.13 | 1.23  | 0.008099 | 0.006    | 0.138956 | 0.105939 |
| MmugDNA.31311.1.S1_at   | MmugDNA.31311.1 | 10.3  | 10.35 | 0.3  | 0.11 | -1.04 | 0.821832 | 0.266505 | 0.920645 | 0.532235 |
| MmugDNA.31311.1.S1_s_at | MmugDNA.31311.1 | 10.79 | 10.82 | 0.24 | 0.3  | -1.02 | 0.438581 | 0.22756  | 0.6931   | 0.499841 |
| MmugDNA.31314.1.S1_at   | MmugDNA.31314.1 | 8.61  | 8.73  | 0.06 | 0.15 | -1.08 | 0.817326 | 0.052283 | 0.9184   | 0.274146 |
| MmugDNA.31315.1.S1_at   | MmugDNA.31315.1 | 4.92  | 5.03  | 0.12 | 0.09 | -1.08 | 0.558974 | 0.217479 | 0.773139 | 0.491035 |
| MmugDNA.31316.1.S1_at   | MmugDNA.31316.1 | 6.63  | 6.05  | 1.48 | 0.64 | 1.5   | 0.313983 | 0.519956 | 0.599734 | 0.71141  |
| MmugDNA.31316.1.S1_s_at | MmugDNA.31316.1 | 12.01 | 11.55 | 0.13 | 0.07 | 1.38  | 0.010419 | 0.0749   | 0.152069 | 0.318838 |
| MmugDNA.31317.1.S1_at   | MmugDNA.31317.1 | 4.7   | 4.7   | 0.06 | 0.05 | 1     | 0.988878 | 0.395218 | 0.996114 | 0.62738  |
| MmugDNA.31318.1.S1_at   | MmugDNA.31318.1 | 3.27  | 3.25  | 0.02 | 0.23 | 1.02  | 0.803621 | 0.958333 | 0.911852 | 0.976396 |
| MmugDNA.31319.1.S1_at   | MmugDNA.31319.1 | 7.03  | 6.82  | 0.5  | 0.36 | 1.15  | 0.775973 | 0.729252 | 0.897515 | 0.843541 |
| MmugDNA.3132.1.S1_at    | MmugDNA.3132.1  | 5.37  | 4.7   | 1.07 | 0.35 | 1.59  | 0.277686 | 0.416065 | 0.569172 | 0.641342 |
| MmugDNA.31320.1.S1_at   | MmugDNA.31320.1 | 3.18  | 3.28  | 0.2  | 0.11 | -1.07 | 0.845145 | 0.662643 | 0.932337 | 0.802461 |
| MmugDNA.31321.1.S1_at   | MmugDNA.31321.1 | 2.92  | 2.94  | 0.06 | 0.11 | -1.01 | 0.997834 | 0.855738 | 0.999233 | 0.917693 |
| MmugDNA.31322.1.S1_at   | MmugDNA.31322.1 | 5.53  | 5.58  | 0.17 | 0.18 | -1.04 | 0.884435 | 0.106859 | 0.950846 | 0.369487 |
| MmugDNA.31323.1.S1_at   | MmugDNA.31323.1 | 3.71  | 3.43  | 0.23 | 0.11 | 1.21  | 0.224042 | 0.189605 | 0.522129 | 0.465297 |
| MmugDNA.31325.1.S1_at   | MmugDNA.31325.1 | 7.13  | 7.69  | 0.2  | 0.23 | -1.47 | 0.043266 | 0.362441 | 0.265331 | 0.603016 |
| MmugDNA.31326.1.S1_at   | MmugDNA.31326.1 | 7.44  | 6.82  | 0.28 | 0.21 | 1.54  | 0.020474 | 0.012024 | 0.196586 | 0.141889 |
| MmugDNA.31328.1.S1_at   | MmugDNA.31328.1 | 3.58  | 3.43  | 0.44 | 0.14 | 1.11  | 0.292966 | 0.35685  | 0.581994 | 0.598638 |
| MmugDNA.31329.1.S1_at   | MmugDNA.31329.1 | 4.41  | 4.41  | 0.16 | 0.09 | -1    | 0.437742 | 0.644806 | 0.692499 | 0.791889 |

|                         |                 |       |       |      |      |       |          |          |          |          |
|-------------------------|-----------------|-------|-------|------|------|-------|----------|----------|----------|----------|
| MmugDNA.31332.1.S1_at   | MmugDNA.31332.1 | 3.36  | 3.16  | 0.13 | 0.04 | 1.15  | 0.02289  | 0.013961 | 0.204235 | 0.151509 |
| MmugDNA.31334.1.S1_at   | MmugDNA.31334.1 | 12.9  | 12.97 | 0.01 | 0.01 | -1.05 | 0.001752 | 0.283067 | 0.085202 | 0.545692 |
| MmugDNA.31338.1.S1_at   | MmugDNA.31338.1 | 5.92  | 5.84  | 0.71 | 0.07 | 1.05  | 0.460426 | 0.645928 | 0.708167 | 0.792659 |
| MmugDNA.31339.1.S1_at   | MmugDNA.31339.1 | 5.62  | 5.69  | 0.73 | 0.14 | -1.05 | 0.370689 | 0.498182 | 0.643559 | 0.697339 |
| MmugDNA.3134.1.S1_at    | MmugDNA.3134.1  | 3.28  | 3.39  | 0.07 | 0.01 | -1.08 | 0.139316 | 0.00711  | 0.424942 | 0.113555 |
| MmugDNA.31340.1.S1_at   | MmugDNA.31340.1 | 6.05  | 6     | 0.12 | 0.17 | 1.04  | 0.671982 | 0.222109 | 0.842828 | 0.495113 |
| MmugDNA.31342.1.S1_at   | MmugDNA.31342.1 | 5.87  | 6.05  | 0.04 | 0.25 | -1.14 | 0.248548 | 0.434435 | 0.543943 | 0.654569 |
| MmugDNA.31344.1.S1_at   | MmugDNA.31344.1 | 4.13  | 4.23  | 0.06 | 0.07 | -1.08 | 0.061741 | 0.061675 | 0.304962 | 0.295135 |
| MmugDNA.31345.1.S1_at   | MmugDNA.31345.1 | 2.96  | 2.89  | 0.12 | 0.13 | 1.05  | 0.243613 | 0.135546 | 0.540255 | 0.407655 |
| MmugDNA.31346.1.S1_at   | MmugDNA.31346.1 | 5.39  | 5.38  | 0.11 | 0.16 | 1.01  | 0.772284 | 0.061713 | 0.895752 | 0.295166 |
| MmugDNA.31347.1.S1_at   | MmugDNA.31347.1 | 4.81  | 4.91  | 0.32 | 0.16 | -1.07 | 0.862538 | 0.703076 | 0.940257 | 0.827866 |
| MmugDNA.31348.1.S1_at   | MmugDNA.31348.1 | 11.45 | 11.16 | 0.12 | 0.11 | 1.23  | 0.056818 | 0.173259 | 0.295781 | 0.449791 |
| MmugDNA.31349.1.S1_at   | MmugDNA.31349.1 | 4.58  | 4.96  | 0.78 | 0.1  | -1.3  | 0.982076 | 0.717008 | 0.993403 | 0.836191 |
| MmugDNA.31350.1.S1_at   | MmugDNA.31350.1 | 5.88  | 5.95  | 0.12 | 0.06 | -1.05 | 0.143973 | 0.06568  | 0.430761 | 0.301631 |
| MmugDNA.31352.1.S1_at   | MmugDNA.31352.1 | 5.47  | 5.52  | 0.09 | 0.04 | -1.03 | 0.425021 | 0.146454 | 0.682442 | 0.420523 |
| MmugDNA.31353.1.S1_at   | MmugDNA.31353.1 | 9.64  | 9.17  | 0.24 | 0.22 | 1.38  | 0.05013  | 0.060892 | 0.281629 | 0.293504 |
| MmugDNA.31353.1.S1_s_at | MmugDNA.31353.1 | 8.74  | 8.46  | 0.27 | 0.34 | 1.21  | 0.142525 | 0.245271 | 0.428631 | 0.515052 |
| MmugDNA.31354.1.S1_at   | MmugDNA.31354.1 | 10.15 | 9.69  | 0.23 | 0.22 | 1.38  | 0.030456 | 0.4066   | 0.227342 | 0.634462 |
| MmugDNA.15302.1.S1_s_at | MmugDNA.15302.1 | 11.55 | 12.07 | 0.12 | 0.04 | -1.43 | 0.001943 | 0.069797 | 0.08845  | 0.310331 |
| MmugDNA.31358.1.S1_s_at | MmugDNA.31358.1 | 4.74  | 4.64  | 0.28 | 0.21 | 1.07  | 0.928734 | 0.189425 | 0.969846 | 0.465117 |
| MmugDNA.3136.1.S1_at    | MmugDNA.3136.1  | 3.32  | 3.8   | 0.04 | 0.22 | -1.39 | 0.051769 | 0.036634 | 0.284844 | 0.235943 |
| MmugDNA.31361.1.S1_at   | MmugDNA.31361.1 | 12.23 | 12.6  | 0.04 | 0.07 | -1.29 | 0.001393 | 0.000287 | 0.07964  | 0.034857 |
| MmugDNA.31363.1.S1_at   | MmugDNA.31363.1 | 5.92  | 5.8   | 0.15 | 0.04 | 1.09  | 0.266463 | 0.316933 | 0.558813 | 0.570275 |
| MmugDNA.31364.1.S1_at   | MmugDNA.31364.1 | 6.44  | 6.45  | 0.27 | 0.02 | -1.01 | 0.757952 | 0.34458  | 0.888983 | 0.589942 |
| MmugDNA.31365.1.S1_at   | MmugDNA.31365.1 | 11.51 | 11.55 | 0.07 | 0.14 | -1.03 | 0.677162 | 0.261508 | 0.846012 | 0.527999 |
| MmugDNA.31366.1.S1_at   | MmugDNA.31366.1 | 12.18 | 12.63 | 0.21 | 0.16 | -1.36 | 0.210039 | 0.489299 | 0.507529 | 0.691774 |
| MmugDNA.31367.1.S1_at   | MmugDNA.31367.1 | 4.12  | 4.28  | 0.51 | 0.15 | -1.11 | 0.667373 | 0.661386 | 0.840356 | 0.801746 |
| MmugDNA.31368.1.S1_at   | MmugDNA.31368.1 | 8.88  | 8.02  | 0.53 | 0.13 | 1.81  | 0.039846 | 0.017791 | 0.256294 | 0.168549 |
| MmugDNA.31369.1.S1_at   | MmugDNA.31369.1 | 12.24 | 11.75 | 0.22 | 0.11 | 1.4   | 0.012393 | 0.005527 | 0.161664 | 0.102563 |
| MmugDNA.31370.1.S1_at   | MmugDNA.31370.1 | 4.93  | 4.87  | 0.1  | 0.05 | 1.04  | 0.156341 | 0.399151 | 0.446949 | 0.62969  |
| MmugDNA.31372.1.S1_at   | MmugDNA.31372.1 | 3.35  | 3.45  | 0.18 | 0.13 | -1.07 | 0.410133 | 0.423077 | 0.6723   | 0.646145 |
| MmugDNA.23687.1.S1_at   | MmugDNA.23687.1 | 3.55  | 2.9   | 0.38 | 0.07 | 1.57  | 0.14159  | 0.258775 | 0.42755  | 0.525949 |
| MmugDNA.23687.1.S1_s_at | MmugDNA.23687.1 | 3.71  | 3.62  | 0.2  | 0.06 | 1.06  | 0.53896  | 0.783394 | 0.76048  | 0.874571 |
| MmugDNA.31374.1.S1_at   | MmugDNA.31374.1 | 9.06  | 9.36  | 0.3  | 0.44 | -1.23 | 0.960279 | 0.212842 | 0.983703 | 0.486774 |
| MmugDNA.31375.1.S1_s_at | MmugDNA.31375.1 | 7.29  | 10.56 | 1.28 | 0.42 | -9.66 | 0.037508 | 0.297735 | 0.249065 | 0.556393 |
| MmugDNA.31376.1.S1_at   | MmugDNA.31376.1 | 5.61  | 5.66  | 0.09 | 0.12 | -1.03 | 0.902573 | 0.973058 | 0.958703 | 0.985401 |
| MmugDNA.31377.1.S1_s_at | MmugDNA.31377.1 | 9.15  | 11.86 | 1.19 | 0.25 | -6.53 | 0.027324 | 0.285221 | 0.218069 | 0.547165 |
| MmugDNA.31379.1.S1_at   | MmugDNA.31379.1 | 7.8   | 7.78  | 0.21 | 0.1  | 1.01  | 0.293261 | 0.288916 | 0.582171 | 0.550032 |
| MmugDNA.31380.1.S1_at   | MmugDNA.31380.1 | 9.78  | 10.15 | 0.48 | 0.07 | -1.29 | 0.76583  | 0.866718 | 0.892599 | 0.924237 |
| MmugDNA.31381.1.S1_at   | MmugDNA.31381.1 | 4.57  | 5.3   | 0.85 | 0.13 | -1.66 | 0.612801 | 0.468832 | 0.807089 | 0.677906 |
| MmugDNA.31382.1.S1_at   | MmugDNA.31382.1 | 5.89  | 5.84  | 0.14 | 0.24 | 1.04  | 0.998944 | 0.185503 | 0.999637 | 0.461566 |
| MmugDNA.31383.1.S1_at   | MmugDNA.31383.1 | 9.2   | 10.16 | 0.08 | 0.27 | -1.94 | 0.008323 | 0.342566 | 0.140121 | 0.588572 |
| MmugDNA.31384.1.S1_at   | MmugDNA.31384.1 | 4.07  | 4     | 0.14 | 0.12 | 1.05  | 0.930119 | 0.283958 | 0.97055  | 0.546237 |

|                         |                 |       |       |      |      |       |          |          |          |          |
|-------------------------|-----------------|-------|-------|------|------|-------|----------|----------|----------|----------|
| MmugDNA.31386.1.S1_at   | MmugDNA.31386.1 | 4.08  | 4.04  | 0.02 | 0.16 | 1.03  | 0.794561 | 0.705269 | 0.907212 | 0.829122 |
| MmugDNA.31390.1.S1_at   | MmugDNA.31390.1 | 6.18  | 5.88  | 0.1  | 0.21 | 1.23  | 0.137064 | 0.141818 | 0.421892 | 0.415331 |
| MmugDNA.31392.1.S1_at   | MmugDNA.31392.1 | 3.19  | 3.18  | 0.11 | 0.01 | 1.01  | 0.936847 | 0.19359  | 0.973607 | 0.468785 |
| MmugDNA.31395.1.S1_at   | MmugDNA.31395.1 | 7.07  | 5.7   | 0.4  | 0.08 | 2.59  | 0.007982 | 0.057012 | 0.138394 | 0.284868 |
| MmugDNA.31399.1.S1_at   | MmugDNA.31399.1 | 10.9  | 10.97 | 0.09 | 0.06 | -1.06 | 0.797439 | 0.096794 | 0.908517 | 0.354207 |
| MmugDNA.314.1.S1_at     | MmugDNA.314.1   | 5.04  | 4.57  | 0.97 | 0.14 | 1.38  | 0.169986 | 0.184761 | 0.463481 | 0.460661 |
| MmugDNA.3140.1.S1_at    | MmugDNA.3140.1  | 2.81  | 2.8   | 0.04 | 0.05 | 1.01  | 0.172691 | 0.013883 | 0.46677  | 0.151137 |
| MmugDNA.31400.1.S1_at   | MmugDNA.31400.1 | 9.91  | 10.02 | 0.41 | 0.09 | -1.08 | 0.624526 | 0.183102 | 0.814877 | 0.459493 |
| MmugDNA.31401.1.S1_at   | MmugDNA.31401.1 | 3.59  | 3.53  | 0.07 | 0.08 | 1.04  | 0.149792 | 0.21749  | 0.438771 | 0.491037 |
| MmugDNA.31401.1.S1_s_at | MmugDNA.31401.1 | 2.73  | 2.76  | 0.02 | 0.03 | -1.02 | 0.123186 | 0.225083 | 0.402363 | 0.497741 |
| MmugDNA.31402.1.S1_at   | MmugDNA.31402.1 | 8.21  | 8.26  | 0.31 | 0.1  | -1.04 | 0.775688 | 0.270064 | 0.89744  | 0.535338 |
| MmugDNA.31403.1.S1_at   | MmugDNA.31403.1 | 4.26  | 4.24  | 0.22 | 0.06 | 1.01  | 0.598558 | 0.739941 | 0.7975   | 0.849317 |
| MmugDNA.31404.1.S1_at   | MmugDNA.31404.1 | 7.61  | 7.52  | 0.34 | 0.19 | 1.06  | 0.459935 | 0.763577 | 0.707972 | 0.862495 |
| MmugDNA.31407.1.S1_at   | MmugDNA.31407.1 | 4.79  | 4.7   | 0.24 | 0.06 | 1.07  | 0.77962  | 0.251281 | 0.899345 | 0.519984 |
| MmugDNA.31408.1.S1_at   | MmugDNA.31408.1 | 6.73  | 6.92  | 0.35 | 0.25 | -1.14 | 0.915521 | 0.806421 | 0.964085 | 0.888651 |
| MmugDNA.31409.1.S1_at   | MmugDNA.31409.1 | 6.58  | 6.35  | 0.09 | 0.16 | 1.17  | 0.113925 | 0.073154 | 0.390674 | 0.316064 |
| MmugDNA.3141.1.S1_at    | MmugDNA.3141.1  | 7.32  | 7.82  | 0.23 | 0.3  | -1.41 | 0.060164 | 0.285509 | 0.302467 | 0.547395 |
| MmugDNA.31410.1.S1_at   | MmugDNA.31410.1 | 11.09 | 11.26 | 0.46 | 0.14 | -1.12 | 0.890512 | 0.215675 | 0.953316 | 0.489477 |
| MmugDNA.31413.1.S1_x_at | MmugDNA.31413.1 | 7.53  | 7.52  | 0.71 | 0.26 | 1.01  | 0.405472 | 0.338813 | 0.668932 | 0.585875 |
| MmugDNA.31415.1.S1_at   | MmugDNA.31415.1 | 7.03  | 6.96  | 0.17 | 0.03 | 1.05  | 0.730951 | 0.550795 | 0.874299 | 0.730611 |
| MmugDNA.31416.1.S1_at   | MmugDNA.31416.1 | 3.53  | 3.37  | 0.14 | 0.06 | 1.11  | 0.096524 | 0.059865 | 0.366417 | 0.291305 |
| MmugDNA.31417.1.S1_at   | MmugDNA.31417.1 | 4.42  | 4.51  | 0.27 | 0.21 | -1.07 | 0.596065 | 0.821341 | 0.795628 | 0.897125 |
| MmugDNA.31418.1.S1_at   | MmugDNA.31418.1 | 5.16  | 4.37  | 0.36 | 0.23 | 1.73  | 0.054899 | 0.055527 | 0.291213 | 0.281454 |
| MmugDNA.3142.1.S1_at    | MmugDNA.3142.1  | 10.43 | 10.06 | 0.15 | 0.28 | 1.29  | 0.065862 | 0.116185 | 0.314134 | 0.383524 |
| MmugDNA.31420.1.S1_at   | MmugDNA.31420.1 | 5.45  | 5.29  | 0.73 | 0.27 | 1.12  | 0.683335 | 0.752564 | 0.849    | 0.855926 |
| MmugDNA.31421.1.S1_at   | MmugDNA.31421.1 | 7.56  | 7.06  | 0.55 | 0.16 | 1.41  | 0.185678 | 0.03071  | 0.481925 | 0.217148 |
| MmugDNA.31422.1.S1_at   | MmugDNA.31422.1 | 5.31  | 5.39  | 0.12 | 0.05 | -1.05 | 0.702227 | 0.222089 | 0.858658 | 0.495113 |
| MmugDNA.31423.1.S1_at   | MmugDNA.31423.1 | 6.32  | 6.65  | 0.07 | 0.04 | -1.26 | 0.002195 | 0.00561  | 0.090721 | 0.103487 |
| MmugDNA.31424.1.S1_at   | MmugDNA.31424.1 | 12.44 | 12.31 | 0.07 | 0.14 | 1.09  | 0.148575 | 0.011861 | 0.437111 | 0.140973 |
| MmugDNA.31426.1.S1_s_at | MmugDNA.31426.1 | 7.72  | 10.35 | 1.51 | 0.1  | -6.17 | 0.052249 | 0.151478 | 0.285979 | 0.426223 |
| MmugDNA.3143.1.S1_at    | MmugDNA.3143.1  | 6.26  | 6.18  | 0.17 | 0.09 | 1.06  | 0.817796 | 0.256928 | 0.918654 | 0.524765 |
| MmugDNA.31430.1.S1_at   | MmugDNA.31430.1 | 6.11  | 6.1   | 0.09 | 0.2  | 1     | 0.589867 | 0.497701 | 0.791747 | 0.697017 |
| MmugDNA.31431.1.S1_at   | MmugDNA.31431.1 | 8.97  | 8.92  | 0.56 | 0.12 | 1.03  | 0.977489 | 0.91997  | 0.991176 | 0.954967 |
| MmugDNA.31432.1.S1_at   | MmugDNA.31432.1 | 4.66  | 4.62  | 0.33 | 0.08 | 1.03  | 0.832967 | 0.452873 | 0.926463 | 0.667359 |
| MmugDNA.31433.1.S1_at   | MmugDNA.31433.1 | 11.12 | 10.87 | 0.13 | 0.07 | 1.2   | 0.094883 | 0.622727 | 0.363818 | 0.777232 |
| MmugDNA.31434.1.S1_at   | MmugDNA.31434.1 | 8.13  | 7.46  | 1.01 | 0.09 | 1.59  | 0.313139 | 0.140424 | 0.598961 | 0.413589 |
| MmugDNA.31435.1.S1_at   | MmugDNA.31435.1 | 6.03  | 5.79  | 0.03 | 0.28 | 1.18  | 0.200891 | 0.172129 | 0.498263 | 0.448529 |
| MmugDNA.31437.1.S1_at   | MmugDNA.31437.1 | 7.91  | 8.01  | 0.21 | 0.23 | -1.07 | 0.322485 | 0.806698 | 0.60648  | 0.888775 |
| MmugDNA.31438.1.S1_at   | MmugDNA.31438.1 | 5.95  | 7.25  | 0.56 | 0.46 | -2.46 | 0.018129 | 0.052141 | 0.187629 | 0.273955 |
| MmugDNA.31439.1.S1_at   | MmugDNA.31439.1 | 7.17  | 7.92  | 1.17 | 0.14 | -1.68 | 0.898258 | 0.954397 | 0.956732 | 0.974132 |
| MmugDNA.31440.1.S1_at   | MmugDNA.31440.1 | 3.11  | 3.11  | 0.04 | 0.05 | 1     | 0.233081 | 0.235291 | 0.531318 | 0.506336 |
| MmugDNA.31441.1.S1_at   | MmugDNA.31441.1 | 4.97  | 5.42  | 0.14 | 0.46 | -1.37 | 0.169276 | 0.557325 | 0.462574 | 0.735031 |
| MmugDNA.31442.1.S1_at   | MmugDNA.31442.1 | 5.22  | 5.02  | 0.07 | 0.07 | 1.15  | 0.022681 | 0.071951 | 0.203642 | 0.314293 |

|                         |                 |       |       |      |      |       |          |          |          |          |
|-------------------------|-----------------|-------|-------|------|------|-------|----------|----------|----------|----------|
| MmugDNA.31443.1.S1_at   | MmugDNA.31443.1 | 6.12  | 5.98  | 0.12 | 0.09 | 1.1   | 0.156169 | 0.099041 | 0.446698 | 0.357183 |
| MmugDNA.31445.1.S1_at   | MmugDNA.31445.1 | 3.81  | 3.79  | 0.12 | 0.16 | 1.01  | 0.73432  | 0.403755 | 0.87617  | 0.632356 |
| MmugDNA.3145.1.S1_at    | MmugDNA.3145.1  | 3.01  | 3.01  | 0.04 | 0.02 | 1     | 0.769877 | 0.533314 | 0.894412 | 0.719556 |
| MmugDNA.31453.1.S1_at   | MmugDNA.31453.1 | 4.06  | 4.13  | 0.06 | 0.1  | -1.05 | 0.730157 | 0.047816 | 0.873891 | 0.263649 |
| MmugDNA.31454.1.S1_at   | MmugDNA.31454.1 | 11.06 | 11.33 | 0.03 | 0.23 | -1.21 | 0.373584 | 0.111173 | 0.645118 | 0.375798 |
| MmugDNA.31454.1.S1_s_at | MmugDNA.31454.1 | 12.02 | 12.21 | 0.02 | 0.19 | -1.14 | 0.432056 | 0.134907 | 0.687889 | 0.406878 |
| MmugDNA.31455.1.S1_at   | MmugDNA.31455.1 | 11.83 | 11.58 | 0.04 | 0.13 | 1.19  | 0.028606 | 0.042427 | 0.221674 | 0.25063  |
| MmugDNA.31455.1.S1_s_at | MmugDNA.31455.1 | 11.82 | 11.54 | 0.07 | 0.08 | 1.22  | 0.010818 | 0.060257 | 0.153877 | 0.29214  |
| MmugDNA.31459.1.S1_at   | MmugDNA.31459.1 | 7.33  | 6.64  | 0.33 | 0.28 | 1.61  | 0.053742 | 0.049401 | 0.288988 | 0.267199 |
| MmugDNA.3146.1.S1_at    | MmugDNA.3146.1  | 4.14  | 4.31  | 0.16 | 0.51 | -1.13 | 0.214081 | 0.309501 | 0.511862 | 0.564987 |
| MmugDNA.31460.1.S1_at   | MmugDNA.31460.1 | 4.8   | 4.69  | 0.16 | 0.05 | 1.08  | 0.145674 | 0.052897 | 0.433154 | 0.27559  |
| MmugDNA.12460.1.S1_s_at | MmugDNA.12460.1 | 11.06 | 11.03 | 0.41 | 0.19 | 1.02  | 0.47365  | 0.766815 | 0.716991 | 0.864582 |
| MmugDNA.31463.1.S1_at   | MmugDNA.31463.1 | 6.87  | 6.82  | 0.38 | 0.04 | 1.03  | 0.730513 | 0.908946 | 0.874    | 0.948471 |
| MmugDNA.31464.1.S1_at   | MmugDNA.31464.1 | 6.46  | 6.92  | 0.55 | 0.16 | -1.37 | 0.253751 | 0.15132  | 0.548024 | 0.426073 |
| MmugDNA.31465.1.S1_at   | MmugDNA.31465.1 | 3.24  | 3.24  | 0.19 | 0.2  | -1    | 0.471941 | 0.633999 | 0.715918 | 0.784594 |
| MmugDNA.31466.1.S1_at   | MmugDNA.31466.1 | 8.87  | 8.89  | 0.2  | 0.11 | -1.01 | 0.961156 | 0.013388 | 0.984145 | 0.14827  |
| MmugDNA.31468.1.S1_at   | MmugDNA.31468.1 | 13.34 | 13.25 | 0.11 | 0.03 | 1.06  | 0.119642 | 0.063768 | 0.397592 | 0.29906  |
| MmugDNA.31469.1.S1_at   | MmugDNA.31469.1 | 7.63  | 7.36  | 0.27 | 0.06 | 1.2   | 0.205422 | 0.076344 | 0.503171 | 0.321368 |
| MmugDNA.3147.1.S1_at    | MmugDNA.3147.1  | 10.26 | 9.84  | 0.17 | 0.2  | 1.35  | 0.10116  | 0.207049 | 0.372334 | 0.481115 |
| MmugDNA.31470.1.S1_at   | MmugDNA.31470.1 | 6.63  | 7.12  | 0.11 | 0.46 | -1.41 | 0.437723 | 0.374105 | 0.692489 | 0.612678 |
| MmugDNA.31471.1.S1_at   | MmugDNA.31471.1 | 7.41  | 8.32  | 0.28 | 0.45 | -1.88 | 0.041572 | 0.06814  | 0.260296 | 0.307227 |
| MmugDNA.31472.1.S1_at   | MmugDNA.31472.1 | 6.66  | 6.47  | 0.03 | 0.21 | 1.14  | 0.200339 | 0.089394 | 0.497792 | 0.343637 |
| MmugDNA.31473.1.S1_at   | MmugDNA.31473.1 | 3.65  | 3.56  | 0.16 | 0.18 | 1.07  | 0.500301 | 0.189129 | 0.734596 | 0.464973 |
| MmugDNA.31474.1.S1_at   | MmugDNA.31474.1 | 11.01 | 10.68 | 0.11 | 0.11 | 1.25  | 0.018091 | 0.139478 | 0.18753  | 0.412743 |
| MmugDNA.31475.1.S1_at   | MmugDNA.31475.1 | 4.14  | 4.16  | 0.12 | 0.04 | -1.01 | 0.620158 | 0.53674  | 0.811682 | 0.722078 |
| MmugDNA.31477.1.S1_at   | MmugDNA.31477.1 | 8.15  | 8.47  | 0.34 | 0.1  | -1.25 | 0.237153 | 0.356522 | 0.534591 | 0.598459 |
| MmugDNA.31479.1.S1_at   | MmugDNA.31479.1 | 9.23  | 10.03 | 0.22 | 0.34 | -1.75 | 0.057711 | 0.07228  | 0.297463 | 0.314934 |
| MmugDNA.3148.1.S1_at    | MmugDNA.3148.1  | 5.02  | 4.56  | 0.14 | 0.3  | 1.37  | 0.124387 | 0.021672 | 0.404534 | 0.184333 |
| MmugDNA.31483.1.S1_s_at | MmugDNA.31483.1 | 8.07  | 9.38  | 0.86 | 0.2  | -2.48 | 0.024533 | 0.03532  | 0.209655 | 0.232207 |
| MmugDNA.31487.1.S1_at   | MmugDNA.31487.1 | 9.68  | 9.3   | 0.23 | 0.21 | 1.3   | 0.182172 | 0.073888 | 0.477898 | 0.31727  |
| MmugDNA.31488.1.S1_at   | MmugDNA.31488.1 | 3.7   | 3.78  | 0.07 | 0.17 | -1.06 | 0.471737 | 0.705765 | 0.715777 | 0.829505 |
| MmugDNA.31489.1.S1_at   | MmugDNA.31489.1 | 9.21  | 8.94  | 0.13 | 0.05 | 1.2   | 0.03407  | 0.190218 | 0.239354 | 0.465854 |
| MmugDNA.3149.1.S1_at    | MmugDNA.3149.1  | 6.45  | 5.82  | 0.54 | 0.33 | 1.55  | 0.146416 | 0.224624 | 0.434245 | 0.497613 |
| MmugDNA.30854.1.S1_s_at | MmugDNA.30854.1 | 11.24 | 11.34 | 0.08 | 0.1  | -1.07 | 0.642771 | 0.291339 | 0.825715 | 0.551803 |
| MmugDNA.31490.1.S1_at   | MmugDNA.31490.1 | 4.11  | 3.87  | 0.41 | 0.31 | 1.18  | 0.211545 | 0.655683 | 0.509328 | 0.7987   |
| MmugDNA.31491.1.S1_at   | MmugDNA.31491.1 | 7.56  | 7.27  | 0.2  | 0.06 | 1.22  | 0.065663 | 0.182324 | 0.313663 | 0.458787 |
| MmugDNA.31493.1.S1_s_at | MmugDNA.31493.1 | 8.11  | 7.91  | 0.19 | 0.04 | 1.15  | 0.11361  | 0.036376 | 0.390328 | 0.235146 |
| MmugDNA.31494.1.S1_at   | MmugDNA.31494.1 | 3.96  | 4.05  | 0.41 | 0.05 | -1.07 | 0.660458 | 0.722346 | 0.83613  | 0.839197 |
| MmugDNA.31495.1.S1_at   | MmugDNA.31495.1 | 3.9   | 3.88  | 0.05 | 0.15 | 1.01  | 0.904624 | 0.261548 | 0.959549 | 0.52802  |
| MmugDNA.31496.1.S1_at   | MmugDNA.31496.1 | 5.87  | 5.85  | 0.08 | 0.26 | 1.01  | 0.249399 | 0.504913 | 0.544566 | 0.701947 |
| MmugDNA.31497.1.S1_at   | MmugDNA.31497.1 | 4.88  | 5.33  | 0.39 | 0.26 | -1.37 | 0.295633 | 0.241549 | 0.584357 | 0.512152 |
| MmugDNA.31498.1.S1_at   | MmugDNA.31498.1 | 5.92  | 5.95  | 0.39 | 0.12 | -1.03 | 0.757164 | 0.595981 | 0.888531 | 0.759321 |
| MmugDNA.31499.1.S1_at   | MmugDNA.31499.1 | 5.28  | 5.52  | 0.42 | 0.16 | -1.18 | 0.730868 | 0.594121 | 0.874267 | 0.758517 |

|                         |                 |       |       |      |      |       |          |          |          |          |
|-------------------------|-----------------|-------|-------|------|------|-------|----------|----------|----------|----------|
| MmugDNA.315.1.S1_at     | MmugDNA.315.1   | 4.08  | 3.86  | 0.19 | 0.04 | 1.17  | 0.119705 | 0.139276 | 0.397651 | 0.412461 |
| MmugDNA.3150.1.S1_at    | MmugDNA.3150.1  | 9.68  | 10.39 | 0.31 | 0.08 | -1.64 | 0.017806 | 0.034949 | 0.187001 | 0.231062 |
| MmugDNA.3150.1.S1_s_at  | MmugDNA.3150.1  | 8.96  | 9.51  | 0.31 | 0.05 | -1.46 | 0.03938  | 0.092583 | 0.25488  | 0.348529 |
| MmugDNA.31500.1.S1_at   | MmugDNA.31500.1 | 3.46  | 3.35  | 0.37 | 0.18 | 1.08  | 0.334599 | 0.356187 | 0.615683 | 0.598158 |
| MmugDNA.31502.1.S1_at   | MmugDNA.31502.1 | 5.62  | 5.61  | 0.14 | 0.08 | 1.01  | 0.703578 | 0.633494 | 0.859276 | 0.784173 |
| MmugDNA.31503.1.S1_at   | MmugDNA.31503.1 | 3.74  | 3.86  | 0.16 | 0.13 | -1.09 | 0.19106  | 0.11089  | 0.487272 | 0.375256 |
| MmugDNA.39643.1.S1_at   | MmugDNA.39643.1 | 12.18 | 12.31 | 0.09 | 0.09 | -1.09 | 0.13524  | 0.000434 | 0.419109 | 0.038359 |
| MmugDNA.39643.1.S1_s_at | MmugDNA.39643.1 | 11.53 | 11.46 | 0.13 | 0.05 | 1.05  | 0.917138 | 0.007444 | 0.964746 | 0.115858 |
| MmugDNA.31507.1.S1_at   | MmugDNA.31507.1 | 4     | 3.9   | 0.07 | 0.02 | 1.07  | 0.022305 | 0.012255 | 0.202621 | 0.143179 |
| MmugDNA.3151.1.S1_at    | MmugDNA.3151.1  | 3.9   | 3.9   | 0.16 | 0.24 | -1    | 0.9476   | 0.795967 | 0.977941 | 0.882469 |
| MmugDNA.31510.1.S1_at   | MmugDNA.31510.1 | 2.94  | 2.97  | 0.16 | 0.06 | -1.02 | 0.586244 | 0.662301 | 0.789737 | 0.802245 |
| MmugDNA.31511.1.S1_at   | MmugDNA.31511.1 | 4.02  | 4.09  | 0.05 | 0.07 | -1.05 | 0.048997 | 0.055812 | 0.278936 | 0.2821   |
| MmugDNA.31512.1.S1_at   | MmugDNA.31512.1 | 8.12  | 7.85  | 0.17 | 0.14 | 1.21  | 0.211741 | 0.014765 | 0.509648 | 0.154596 |
| MmugDNA.31514.1.S1_at   | MmugDNA.31514.1 | 5.01  | 4.85  | 0.06 | 0.1  | 1.12  | 0.058636 | 0.03408  | 0.299236 | 0.228514 |
| MmugDNA.31515.1.S1_at   | MmugDNA.31515.1 | 4.54  | 4.59  | 0.71 | 0.4  | -1.03 | 0.274241 | 0.376826 | 0.566229 | 0.614596 |
| MmugDNA.31516.1.S1_at   | MmugDNA.31516.1 | 7.03  | 6.76  | 0.08 | 0.03 | 1.2   | 0.004174 | 0.05693  | 0.110227 | 0.284714 |
| MmugDNA.31517.1.S1_at   | MmugDNA.31517.1 | 5.14  | 5.09  | 0.88 | 0.02 | 1.04  | 0.53933  | 0.515703 | 0.760725 | 0.708451 |
| MmugDNA.31518.1.S1_at   | MmugDNA.31518.1 | 3.94  | 3.81  | 0.25 | 0.08 | 1.09  | 0.219499 | 0.211387 | 0.517242 | 0.48553  |
| MmugDNA.31519.1.S1_at   | MmugDNA.31519.1 | 5.32  | 6.32  | 0.64 | 0.1  | -1.99 | 0.051115 | 0.04539  | 0.283595 | 0.257395 |
| MmugDNA.3152.1.S1_at    | MmugDNA.3152.1  | 5.38  | 5.18  | 0.12 | 0.2  | 1.15  | 0.098388 | 0.096602 | 0.369057 | 0.354126 |
| MmugDNA.31520.1.S1_at   | MmugDNA.31520.1 | 6.16  | 6.05  | 0.28 | 0.25 | 1.08  | 0.945866 | 0.889059 | 0.977159 | 0.936779 |
| MmugDNA.31521.1.S1_at   | MmugDNA.31521.1 | 3.68  | 3.68  | 0.3  | 0.07 | -1    | 0.368754 | 0.504407 | 0.642367 | 0.701557 |
| MmugDNA.31522.1.S1_s_at | MmugDNA.31522.1 | 8.51  | 8.28  | 0.09 | 0.2  | 1.17  | 0.03986  | 0.045516 | 0.256302 | 0.257513 |
| MmugDNA.31525.1.S1_s_at | MmugDNA.31525.1 | 14.39 | 14.35 | 0.06 | 0.03 | 1.03  | 0.417705 | 0.722983 | 0.677723 | 0.839513 |
| MmugDNA.31526.1.S1_at   | MmugDNA.31526.1 | 3.18  | 3.05  | 0.17 | 0.06 | 1.1   | 0.095512 | 0.048844 | 0.364961 | 0.265858 |
| MmugDNA.31527.1.S1_at   | MmugDNA.31527.1 | 3.16  | 3.12  | 0.44 | 0.08 | 1.03  | 0.388582 | 0.743059 | 0.656578 | 0.851135 |
| MmugDNA.3153.1.S1_at    | MmugDNA.3153.1  | 7.07  | 6.55  | 0.28 | 0.16 | 1.43  | 0.070161 | 0.100869 | 0.323175 | 0.360398 |
| MmugDNA.31530.1.S1_at   | MmugDNA.31530.1 | 5.79  | 6.57  | 0.98 | 0.01 | -1.71 | 0.723977 | 0.283908 | 0.870376 | 0.546237 |
| MmugDNA.31537.1.S1_at   | MmugDNA.31537.1 | 5.46  | 5.39  | 0.61 | 0.1  | 1.05  | 0.390585 | 0.320214 | 0.658154 | 0.572561 |
| MmugDNA.31539.1.S1_at   | MmugDNA.31539.1 | 6.92  | 6.74  | 0.18 | 0.07 | 1.14  | 0.044742 | 0.071153 | 0.268892 | 0.313041 |
| MmugDNA.3154.1.S1_at    | MmugDNA.3154.1  | 4.96  | 4.98  | 0.07 | 0.03 | -1.02 | 0.208198 | 0.317197 | 0.505958 | 0.570458 |
| MmugDNA.31541.1.S1_at   | MmugDNA.31541.1 | 7.39  | 6.66  | 1.24 | 0.23 | 1.66  | 0.125953 | 0.109302 | 0.406905 | 0.37308  |
| MmugDNA.31542.1.S1_at   | MmugDNA.31542.1 | 11.82 | 12.19 | 0.14 | 0.06 | -1.3  | 0.005409 | 0.109803 | 0.118701 | 0.373758 |
| MmugDNA.31543.1.S1_at   | MmugDNA.31543.1 | 2.71  | 2.68  | 0.22 | 0.03 | 1.02  | 0.280294 | 0.418649 | 0.57143  | 0.643031 |
| MmugDNA.31544.1.S1_at   | MmugDNA.31544.1 | 3.61  | 3.58  | 0.17 | 0.54 | 1.02  | 0.445131 | 0.285672 | 0.697715 | 0.547395 |
| MmugDNA.31547.1.S1_at   | MmugDNA.31547.1 | 7.98  | 7.32  | 0.86 | 0.44 | 1.58  | 0.385901 | 0.185805 | 0.654498 | 0.461631 |
| MmugDNA.31548.1.S1_at   | MmugDNA.31548.1 | 3.08  | 3.15  | 0.02 | 0.17 | -1.05 | 0.524207 | 0.315351 | 0.751005 | 0.568939 |
| MmugDNA.31549.1.S1_at   | MmugDNA.31549.1 | 2.74  | 2.67  | 0.09 | 0.07 | 1.05  | 0.280872 | 0.198057 | 0.571843 | 0.473041 |
| MmugDNA.3155.1.S1_at    | MmugDNA.3155.1  | 5.43  | 5.32  | 0.3  | 0.21 | 1.08  | 0.647025 | 0.738904 | 0.828492 | 0.84866  |
| MmugDNA.31550.1.S1_at   | MmugDNA.31550.1 | 5.52  | 5.05  | 0.33 | 0.05 | 1.38  | 0.152695 | 0.395543 | 0.442388 | 0.627563 |
| MmugDNA.31551.1.S1_at   | MmugDNA.31551.1 | 6     | 6.13  | 0.13 | 0.01 | -1.09 | 0.195793 | 0.070506 | 0.49272  | 0.311777 |
| MmugDNA.31552.1.S1_at   | MmugDNA.31552.1 | 10.59 | 9.93  | 0.49 | 0.05 | 1.58  | 0.278284 | 0.483502 | 0.569595 | 0.687943 |
| MmugDNA.3156.1.S1_at    | MmugDNA.3156.1  | 3.61  | 3.61  | 0.07 | 0.06 | 1     | 0.230704 | 0.366966 | 0.529522 | 0.606583 |



|                         |                 |       |       |      |      |       |          |          |          |          |
|-------------------------|-----------------|-------|-------|------|------|-------|----------|----------|----------|----------|
| MmugDNA.31561.1.S1_at   | MmugDNA.31561.1 | 3.34  | 3.39  | 0.03 | 0.05 | -1.04 | 0.888685 | 0.067283 | 0.952542 | 0.305408 |
| MmugDNA.31565.1.S1_at   | MmugDNA.31565.1 | 7.54  | 7.41  | 0.26 | 0.03 | 1.09  | 0.137471 | 0.019171 | 0.422465 | 0.1742   |
| MmugDNA.31567.1.S1_s_at | MmugDNA.31567.1 | 10.36 | 9.95  | 0.23 | 0.14 | 1.33  | 0.049286 | 0.348546 | 0.279456 | 0.592609 |
| MmugDNA.42447.1.S1_s_at | MmugDNA.42447.1 | 10.6  | 11.88 | 0.61 | 0.17 | -2.42 | 0.070314 | 0.117442 | 0.323556 | 0.385147 |
| MmugDNA.31569.1.S1_at   | MmugDNA.31569.1 | 4.41  | 4.99  | 0.1  | 0.63 | -1.49 | 0.485972 | 0.616673 | 0.725405 | 0.772869 |
| MmugDNA.3157.1.S1_at    | MmugDNA.3157.1  | 3.74  | 3.69  | 0.09 | 0.02 | 1.04  | 0.107187 | 0.114429 | 0.381659 | 0.38101  |
| MmugDNA.31570.1.S1_at   | MmugDNA.31570.1 | 4.31  | 4.43  | 0.1  | 0.07 | -1.08 | 0.177    | 0.255352 | 0.471604 | 0.523406 |
| MmugDNA.31572.1.S1_at   | MmugDNA.31572.1 | 10.6  | 11.62 | 0.13 | 0.18 | -2.03 | 0.001672 | 0.001255 | 0.084462 | 0.055001 |
| MmugDNA.31573.1.S1_at   | MmugDNA.31573.1 | 4.05  | 4.08  | 0.1  | 0.18 | -1.02 | 0.601122 | 0.525134 | 0.799362 | 0.714766 |
| MmugDNA.31574.1.S1_at   | MmugDNA.31574.1 | 3.82  | 3.78  | 0.16 | 0.09 | 1.03  | 0.563102 | 0.765667 | 0.775306 | 0.863841 |
| MmugDNA.31575.1.S1_at   | MmugDNA.31575.1 | 6.67  | 6.3   | 0.2  | 0.15 | 1.29  | 0.095256 | 0.396437 | 0.364694 | 0.628227 |
| MmugDNA.31576.1.S1_at   | MmugDNA.31576.1 | 3.18  | 3.25  | 0.24 | 0.12 | -1.05 | 0.973541 | 0.47019  | 0.989336 | 0.678572 |
| MmugDNA.31577.1.S1_at   | MmugDNA.31577.1 | 4.33  | 4.11  | 0.41 | 0.21 | 1.17  | 0.404243 | 0.333535 | 0.668073 | 0.581753 |
| MmugDNA.31578.1.S1_at   | MmugDNA.31578.1 | 7.82  | 7.57  | 0.19 | 0.16 | 1.19  | 0.072412 | 0.243079 | 0.327004 | 0.513356 |
| MmugDNA.31579.1.S1_at   | MmugDNA.31579.1 | 5.45  | 5.61  | 0.06 | 0.13 | -1.12 | 0.078733 | 0.054932 | 0.338559 | 0.279821 |
| MmugDNA.31580.1.S1_at   | MmugDNA.31580.1 | 6.26  | 6.34  | 0.33 | 0.07 | -1.06 | 0.625231 | 0.498639 | 0.815253 | 0.697648 |
| MmugDNA.31581.1.S1_at   | MmugDNA.31581.1 | 8     | 6.94  | 0.25 | 0.09 | 2.09  | 0.002179 | 0.000466 | 0.090576 | 0.038572 |
| MmugDNA.31582.1.S1_at   | MmugDNA.31582.1 | 4.44  | 4.45  | 0.04 | 0.18 | -1.01 | 0.394273 | 0.368585 | 0.660955 | 0.608098 |
| MmugDNA.31584.1.S1_at   | MmugDNA.31584.1 | 4.94  | 4.79  | 0.12 | 0.04 | 1.11  | 0.033248 | 0.026901 | 0.236446 | 0.205158 |
| MmugDNA.31585.1.S1_at   | MmugDNA.31585.1 | 3.48  | 3.43  | 0.22 | 0.07 | 1.03  | 0.955246 | 0.984127 | 0.981655 | 0.991189 |
| MmugDNA.6631.1.S1_s_at  | MmugDNA.6631.1  | 13.29 | 13.16 | 0.04 | 0.01 | 1.09  | 0.008714 | 0.240251 | 0.143064 | 0.510851 |
| MmugDNA.31587.1.S1_at   | MmugDNA.31587.1 | 8.47  | 9.52  | 1.37 | 0.22 | -2.07 | 0.372489 | 0.327223 | 0.64495  | 0.577173 |
| MmugDNA.31589.1.S1_at   | MmugDNA.31589.1 | 4.26  | 4.35  | 0.57 | 0.42 | -1.07 | 0.99515  | 0.657102 | 0.998014 | 0.799439 |
| MmugDNA.3159.1.S1_at    | MmugDNA.3159.1  | 6.65  | 6.59  | 0.35 | 0.02 | 1.04  | 0.360917 | 0.264181 | 0.63639  | 0.530257 |
| MmugDNA.31590.1.S1_at   | MmugDNA.31590.1 | 3.49  | 3.4   | 0.23 | 0.07 | 1.06  | 0.267277 | 0.075272 | 0.560075 | 0.319441 |
| MmugDNA.31592.1.S1_at   | MmugDNA.31592.1 | 4.07  | 4.08  | 0.05 | 0.19 | -1.01 | 0.569866 | 0.460993 | 0.779153 | 0.672825 |
| MmugDNA.31594.1.S1_at   | MmugDNA.31594.1 | 4.49  | 4.6   | 0.07 | 0.03 | -1.08 | 0.045067 | 0.306904 | 0.269602 | 0.563427 |
| MmugDNA.31595.1.S1_at   | MmugDNA.31595.1 | 6.05  | 5.9   | 0.31 | 0.04 | 1.11  | 0.537836 | 0.409652 | 0.759948 | 0.636687 |
| MmugDNA.31596.1.S1_at   | MmugDNA.31596.1 | 8.23  | 8.46  | 0.09 | 0.02 | -1.17 | 0.007429 | 0.038009 | 0.134411 | 0.239495 |
| MmugDNA.31598.1.S1_at   | MmugDNA.31598.1 | 6.09  | 6.18  | 0.19 | 0.09 | -1.06 | 0.920019 | 0.256377 | 0.965821 | 0.524114 |
| MmugDNA.31599.1.S1_at   | MmugDNA.31599.1 | 5.57  | 5.59  | 0.28 | 0.21 | -1.01 | 0.533234 | 0.481866 | 0.756887 | 0.686812 |
| MmugDNA.31600.1.S1_at   | MmugDNA.31600.1 | 6.09  | 6.2   | 0.02 | 0.07 | -1.07 | 0.081371 | 0.008704 | 0.342325 | 0.123697 |
| MmugDNA.31601.1.S1_at   | MmugDNA.31601.1 | 3.75  | 3.61  | 0.11 | 0.2  | 1.1   | 0.472936 | 0.110623 | 0.716389 | 0.374854 |
| MmugDNA.31602.1.S1_at   | MmugDNA.31602.1 | 5.13  | 5.3   | 0.13 | 0.05 | -1.12 | 0.071543 | 0.33525  | 0.325561 | 0.583031 |
| MmugDNA.31604.1.S1_at   | MmugDNA.31604.1 | 7.08  | 7.03  | 0.11 | 0.01 | 1.04  | 0.438476 | 0.250601 | 0.693038 | 0.51941  |
| MmugDNA.31605.1.S1_at   | MmugDNA.31605.1 | 12.61 | 13.18 | 0.03 | 0.07 | -1.48 | 0.000233 | 0.006033 | 0.054608 | 0.106089 |
| MmugDNA.31606.1.S1_at   | MmugDNA.31606.1 | 8.97  | 9.05  | 0.17 | 0.19 | -1.05 | 0.300389 | 0.346178 | 0.588556 | 0.591195 |
| MmugDNA.31607.1.S1_at   | MmugDNA.31607.1 | 3.15  | 3.19  | 0.1  | 0.08 | -1.03 | 0.44375  | 0.635485 | 0.696811 | 0.785405 |
| MmugDNA.31608.1.S1_at   | MmugDNA.31608.1 | 3.97  | 3.75  | 0.18 | 0.21 | 1.16  | 0.133428 | 0.198734 | 0.416977 | 0.473391 |
| MmugDNA.31609.1.S1_at   | MmugDNA.31609.1 | 3.6   | 3.73  | 0.1  | 0.25 | -1.1  | 0.397497 | 0.359527 | 0.663081 | 0.600802 |
| MmugDNA.3161.1.S1_at    | MmugDNA.3161.1  | 5.13  | 5.19  | 0.2  | 0.45 | -1.04 | 0.343387 | 0.437303 | 0.622974 | 0.656613 |
| MmugDNA.31610.1.S1_at   | MmugDNA.31610.1 | 4.29  | 4.22  | 0.14 | 0.08 | 1.05  | 0.7068   | 0.926405 | 0.861202 | 0.958291 |
| MmugDNA.31611.1.S1_at   | MmugDNA.31611.1 | 9.84  | 9.29  | 0.18 | 0.17 | 1.46  | 0.011725 | 0.008956 | 0.15815  | 0.125084 |

|                         |                 |       |       |      |      |       |          |          |          |          |
|-------------------------|-----------------|-------|-------|------|------|-------|----------|----------|----------|----------|
| MmugDNA.31612.1.S1_at   | MmugDNA.31612.1 | 3     | 2.96  | 0.09 | 0.03 | 1.03  | 0.889347 | 0.962514 | 0.952884 | 0.978958 |
| MmugDNA.31614.1.S1_at   | MmugDNA.31614.1 | 4     | 4.13  | 0.15 | 0.06 | -1.09 | 0.212473 | 0.656855 | 0.51051  | 0.799401 |
| MmugDNA.31615.1.S1_at   | MmugDNA.31615.1 | 3.68  | 3.5   | 0.13 | 0.11 | 1.14  | 0.320953 | 0.307368 | 0.605315 | 0.563635 |
| MmugDNA.31616.1.S1_at   | MmugDNA.31616.1 | 4.37  | 3.84  | 0.13 | 0.31 | 1.45  | 0.222151 | 0.182486 | 0.520231 | 0.459065 |
| MmugDNA.31617.1.S1_at   | MmugDNA.31617.1 | 2.97  | 3.04  | 0.12 | 0.04 | -1.05 | 0.539484 | 0.680539 | 0.760837 | 0.813481 |
| MmugDNA.3162.1.S1_at    | MmugDNA.3162.1  | 4.07  | 3.98  | 0.1  | 0.19 | 1.07  | 0.739394 | 0.91246  | 0.879245 | 0.950692 |
| MmugDNA.31620.1.S1_s_at | MmugDNA.31620.1 | 4.43  | 4.35  | 0.66 | 0.27 | 1.05  | 0.650237 | 0.824322 | 0.830259 | 0.899073 |
| MmugDNA.31621.1.S1_at   | MmugDNA.31621.1 | 3.61  | 3.67  | 0.05 | 0.07 | -1.04 | 0.113634 | 0.190886 | 0.390328 | 0.466264 |
| MmugDNA.31622.1.S1_at   | MmugDNA.31622.1 | 4.77  | 4.78  | 0.15 | 0.09 | -1.01 | 0.861402 | 0.951609 | 0.93982  | 0.972522 |
| MmugDNA.31623.1.S1_at   | MmugDNA.31623.1 | 11.59 | 11.28 | 0.05 | 0.16 | 1.24  | 0.046096 | 0.088519 | 0.272431 | 0.341947 |
| MmugDNA.31626.1.S1_at   | MmugDNA.31626.1 | 5.48  | 5.83  | 0.2  | 0.28 | -1.28 | 0.080799 | 0.102428 | 0.341497 | 0.362627 |
| MmugDNA.31627.1.S1_at   | MmugDNA.31627.1 | 6.99  | 7.03  | 0.05 | 0.06 | -1.03 | 0.63704  | 0.925452 | 0.822336 | 0.957811 |
| MmugDNA.31628.1.S1_at   | MmugDNA.31628.1 | 7.97  | 7.48  | 0.4  | 0.02 | 1.4   | 0.331137 | 0.376312 | 0.613047 | 0.614156 |
| MmugDNA.31629.1.S1_at   | MmugDNA.31629.1 | 5.36  | 6.27  | 0.53 | 0.45 | -1.87 | 0.098948 | 0.224207 | 0.369803 | 0.497164 |
| MmugDNA.3163.1.S1_x_at  | MmugDNA.3163.1  | 9.8   | 9.68  | 0.73 | 0.28 | 1.09  | 0.298427 | 0.230579 | 0.586735 | 0.502269 |
| MmugDNA.31632.1.S1_at   | MmugDNA.31632.1 | 6.41  | 5.48  | 0.34 | 0.15 | 1.9   | 0.027555 | 0.016917 | 0.218525 | 0.164969 |
| MmugDNA.31634.1.S1_at   | MmugDNA.31634.1 | 4.19  | 4.14  | 0.7  | 0.21 | 1.03  | 0.251765 | 0.339278 | 0.546475 | 0.585968 |
| MmugDNA.31635.1.S1_at   | MmugDNA.31635.1 | 7.93  | 9.11  | 0.41 | 0.35 | -2.26 | 0.035571 | 0.075051 | 0.243489 | 0.31921  |
| MmugDNA.31637.1.S1_s_at | MmugDNA.31637.1 | 11.13 | 11.01 | 0.11 | 0.17 | 1.09  | 0.668041 | 0.000155 | 0.840528 | 0.030109 |
| MmugDNA.31638.1.S1_at   | MmugDNA.31638.1 | 9.4   | 9.14  | 0.23 | 0.11 | 1.19  | 0.097671 | 0.003195 | 0.368024 | 0.08199  |
| MmugDNA.31639.1.S1_at   | MmugDNA.31639.1 | 5.82  | 5.81  | 0.08 | 0.03 | 1.01  | 0.492565 | 0.085088 | 0.729806 | 0.336891 |
| MmugDNA.31640.1.S1_at   | MmugDNA.31640.1 | 9.26  | 9.16  | 0.26 | 0.09 | 1.08  | 0.3744   | 0.246786 | 0.64551  | 0.516126 |
| MmugDNA.31641.1.S1_at   | MmugDNA.31641.1 | 4.5   | 4.45  | 0.21 | 0.39 | 1.04  | 0.702894 | 0.801022 | 0.858997 | 0.885548 |
| MmugDNA.31642.1.S1_at   | MmugDNA.31642.1 | 5.65  | 5.54  | 0.35 | 0.07 | 1.08  | 0.251004 | 0.7268   | 0.54571  | 0.841963 |
| MmugDNA.31643.1.S1_at   | MmugDNA.31643.1 | 5.85  | 5.54  | 0.14 | 0.1  | 1.24  | 0.059231 | 0.024265 | 0.300418 | 0.194952 |
| MmugDNA.31646.1.S1_at   | MmugDNA.31646.1 | 6.56  | 6.63  | 0.14 | 0.08 | -1.05 | 0.395045 | 0.417478 | 0.661557 | 0.64224  |
| MmugDNA.31648.1.S1_at   | MmugDNA.31648.1 | 11.02 | 10.53 | 0.56 | 0.14 | 1.41  | 0.637167 | 0.608296 | 0.822365 | 0.766989 |
| MmugDNA.3165.1.S1_s_at  | MmugDNA.3165.1  | 7.84  | 7.81  | 0.19 | 0.08 | 1.02  | 0.363787 | 0.414035 | 0.638393 | 0.639981 |
| MmugDNA.31650.1.S1_at   | MmugDNA.31650.1 | 9.87  | 9.17  | 0.07 | 0.14 | 1.63  | 0.00131  | 0.024899 | 0.078631 | 0.197685 |
| MmugDNA.31651.1.S1_at   | MmugDNA.31651.1 | 4.47  | 4.43  | 0.01 | 0.03 | 1.03  | 0.100854 | 0.631771 | 0.37201  | 0.782957 |
| MmugDNA.31653.1.S1_at   | MmugDNA.31653.1 | 9.36  | 9.17  | 0.63 | 0.08 | 1.14  | 0.600957 | 0.312948 | 0.799295 | 0.567546 |
| MmugDNA.31656.1.S1_at   | MmugDNA.31656.1 | 9.8   | 9.39  | 0.13 | 0.09 | 1.33  | 0.023353 | 0.05333  | 0.20583  | 0.276484 |
| MmugDNA.31658.1.S1_at   | MmugDNA.31658.1 | 3.19  | 3.2   | 0.06 | 0.02 | -1.01 | 0.557733 | 0.747023 | 0.772387 | 0.853124 |
| MmugDNA.3166.1.S1_at    | MmugDNA.3166.1  | 4     | 4.02  | 0.15 | 0.02 | -1.01 | 0.294835 | 0.300423 | 0.583784 | 0.558748 |
| MmugDNA.31661.1.S1_at   | MmugDNA.31661.1 | 9.07  | 9.02  | 0.36 | 0.03 | 1.03  | 0.587223 | 0.892843 | 0.790419 | 0.93888  |
| MmugDNA.31663.1.S1_at   | MmugDNA.31663.1 | 10.76 | 11.97 | 0.37 | 0.12 | -2.31 | 0.005623 | 0.055185 | 0.120803 | 0.280555 |
| MmugDNA.31664.1.S1_at   | MmugDNA.31664.1 | 4.36  | 3.82  | 0.09 | 0.64 | 1.45  | 0.238031 | 0.042927 | 0.535485 | 0.251759 |
| MmugDNA.31665.1.S1_at   | MmugDNA.31665.1 | 4.65  | 4.57  | 0.04 | 0.12 | 1.06  | 0.157241 | 0.621383 | 0.447994 | 0.775982 |
| MmugDNA.31667.1.S1_at   | MmugDNA.31667.1 | 5.05  | 4.85  | 0.19 | 0.03 | 1.15  | 0.135496 | 0.474605 | 0.419375 | 0.681571 |
| MmugDNA.31668.1.S1_at   | MmugDNA.31668.1 | 8.74  | 8.48  | 0.47 | 0.09 | 1.2   | 0.244329 | 0.347095 | 0.540909 | 0.591815 |
| MmugDNA.31669.1.S1_at   | MmugDNA.31669.1 | 4.83  | 4.87  | 0.2  | 0.07 | -1.03 | 0.609158 | 0.843609 | 0.804998 | 0.910913 |
| MmugDNA.3167.1.S1_at    | MmugDNA.3167.1  | 6.3   | 5.67  | 0.3  | 0.06 | 1.55  | 0.057767 | 0.063183 | 0.297529 | 0.298115 |
| MmugDNA.31670.1.S1_at   | MmugDNA.31670.1 | 4.95  | 5.61  | 0.56 | 0.55 | -1.59 | 0.045931 | 0.013004 | 0.271942 | 0.146803 |

|                         |                 |       |       |      |      |       |          |          |          |          |
|-------------------------|-----------------|-------|-------|------|------|-------|----------|----------|----------|----------|
| MmugDNA.31672.1.S1_at   | MmugDNA.31672.1 | 10.88 | 10.77 | 0.14 | 0.05 | 1.08  | 0.264033 | 0.458298 | 0.557422 | 0.671096 |
| MmugDNA.31673.1.S1_at   | MmugDNA.31673.1 | 8.43  | 8.9   | 0.2  | 0.13 | -1.38 | 0.096095 | 0.190211 | 0.36555  | 0.465854 |
| MmugDNA.31673.1.S1_x_at | MmugDNA.31673.1 | 8.34  | 8.48  | 0.26 | 0.14 | -1.11 | 0.365456 | 0.31185  | 0.639967 | 0.56683  |
| MmugDNA.31674.1.S1_at   | MmugDNA.31674.1 | 3.44  | 3.46  | 0.13 | 0.15 | -1.01 | 0.290771 | 0.415352 | 0.580217 | 0.640835 |
| MmugDNA.31675.1.S1_at   | MmugDNA.31675.1 | 4.48  | 4.46  | 0.12 | 0.11 | 1.01  | 0.384901 | 0.833463 | 0.653828 | 0.904502 |
| MmugDNA.31676.1.S1_at   | MmugDNA.31676.1 | 5.4   | 5.36  | 0.09 | 0.24 | 1.03  | 0.922582 | 0.259236 | 0.966932 | 0.526368 |
| MmugDNA.31678.1.S1_at   | MmugDNA.31678.1 | 5.6   | 5.75  | 0.16 | 0.04 | -1.11 | 0.495444 | 0.084899 | 0.731814 | 0.336494 |
| MmugDNA.3168.1.S1_at    | MmugDNA.3168.1  | 5.96  | 5.47  | 0.5  | 0.2  | 1.4   | 0.468158 | 0.679232 | 0.713381 | 0.81275  |
| MmugDNA.31680.1.S1_at   | MmugDNA.31680.1 | 10.82 | 10.74 | 0.04 | 0.07 | 1.06  | 0.111623 | 0.745129 | 0.387683 | 0.852267 |
| MmugDNA.31681.1.S1_at   | MmugDNA.31681.1 | 4.23  | 4.22  | 0.06 | 0.11 | 1     | 0.736411 | 0.669849 | 0.877494 | 0.806933 |
| MmugDNA.31683.1.S1_at   | MmugDNA.31683.1 | 3.21  | 3.25  | 0.04 | 0.07 | -1.03 | 0.387877 | 0.197563 | 0.655933 | 0.472564 |
| MmugDNA.31686.1.S1_at   | MmugDNA.31686.1 | 5.74  | 5.44  | 0.21 | 0.02 | 1.24  | 0.085187 | 0.080329 | 0.349307 | 0.327965 |
| MmugDNA.31687.1.S1_at   | MmugDNA.31687.1 | 7.15  | 7     | 0.42 | 0.15 | 1.11  | 0.135069 | 0.072466 | 0.419042 | 0.315294 |
| MmugDNA.31688.1.S1_at   | MmugDNA.31688.1 | 11.2  | 11.46 | 0.33 | 0.18 | -1.19 | 0.479791 | 0.639256 | 0.7209   | 0.788125 |
| MmugDNA.31691.1.S1_at   | MmugDNA.31691.1 | 6.03  | 5.81  | 0.15 | 0.32 | 1.16  | 0.793582 | 0.202711 | 0.906654 | 0.477172 |
| MmugDNA.31691.1.S1_x_at | MmugDNA.31691.1 | 6.89  | 6.58  | 0.11 | 0.16 | 1.24  | 0.099802 | 0.265425 | 0.370801 | 0.531363 |
| MmugDNA.31693.1.S1_at   | MmugDNA.31693.1 | 6.23  | 5.76  | 0.11 | 0.14 | 1.38  | 0.012292 | 0.012806 | 0.161126 | 0.145832 |
| MmugDNA.31694.1.S1_at   | MmugDNA.31694.1 | 11.86 | 11.97 | 0.11 | 0.01 | -1.08 | 0.168233 | 0.354429 | 0.461466 | 0.59721  |
| MmugDNA.31695.1.S1_at   | MmugDNA.31695.1 | 9.57  | 9.89  | 0.07 | 0.06 | -1.25 | 0.004569 | 0.219519 | 0.113728 | 0.493168 |
| MmugDNA.31697.1.S1_at   | MmugDNA.31697.1 | 3.85  | 3.64  | 0.27 | 0.13 | 1.16  | 0.465271 | 0.65597  | 0.711393 | 0.798771 |
| MmugDNA.31698.1.S1_at   | MmugDNA.31698.1 | 7.25  | 7.13  | 0.62 | 0.21 | 1.09  | 0.695354 | 0.375473 | 0.854801 | 0.613412 |
| MmugDNA.317.1.S1_at     | MmugDNA.317.1   | 3.12  | 2.97  | 0.86 | 0.19 | 1.1   | 0.400305 | 0.405034 | 0.665392 | 0.633457 |
| MmugDNA.3170.1.S1_at    | MmugDNA.3170.1  | 7.21  | 7.51  | 0.83 | 0.22 | -1.24 | 0.431054 | 0.397806 | 0.687225 | 0.629114 |
| MmugDNA.31700.1.S1_at   | MmugDNA.31700.1 | 9.98  | 10.5  | 0.08 | 0.14 | -1.43 | 0.004638 | 0.227856 | 0.114524 | 0.500191 |
| MmugDNA.31701.1.S1_at   | MmugDNA.31701.1 | 6.57  | 7.21  | 0.25 | 0.34 | -1.56 | 0.107956 | 0.327795 | 0.382542 | 0.577604 |
| MmugDNA.31702.1.S1_at   | MmugDNA.31702.1 | 5.98  | 6.08  | 0.31 | 0.04 | -1.07 | 0.693228 | 0.866361 | 0.853369 | 0.923996 |
| MmugDNA.31703.1.S1_at   | MmugDNA.31703.1 | 10.42 | 9.75  | 1.11 | 0.16 | 1.6   | 0.981284 | 0.741183 | 0.992959 | 0.850135 |
| MmugDNA.31705.1.S1_at   | MmugDNA.31705.1 | 4.3   | 4.37  | 0.21 | 0.15 | -1.05 | 0.565517 | 0.754905 | 0.776724 | 0.857334 |
| MmugDNA.31706.1.S1_at   | MmugDNA.31706.1 | 6.95  | 6.66  | 0.08 | 0.09 | 1.23  | 0.018054 | 0.015541 | 0.187368 | 0.158053 |
| MmugDNA.31707.1.S1_at   | MmugDNA.31707.1 | 11.11 | 11.35 | 0.13 | 0.08 | -1.18 | 0.038318 | 0.02289  | 0.251853 | 0.189338 |
| MmugDNA.31708.1.S1_at   | MmugDNA.31708.1 | 6.46  | 6.23  | 0.08 | 0.07 | 1.17  | 0.011618 | 0.026003 | 0.157638 | 0.202179 |
| MmugDNA.3171.1.S1_at    | MmugDNA.3171.1  | 6.7   | 6.35  | 0.09 | 0.4  | 1.27  | 0.102111 | 0.105254 | 0.37396  | 0.366999 |
| MmugDNA.31710.1.S1_at   | MmugDNA.31710.1 | 5.38  | 4.93  | 0.28 | 0.16 | 1.37  | 0.078838 | 0.084105 | 0.338706 | 0.335133 |
| MmugDNA.31711.1.S1_at   | MmugDNA.31711.1 | 3.32  | 3.49  | 0.03 | 0.06 | -1.12 | 0.015804 | 0.274098 | 0.178173 | 0.538565 |
| MmugDNA.31712.1.S1_at   | MmugDNA.31712.1 | 5.62  | 6.15  | 0.24 | 0.17 | -1.45 | 0.055611 | 0.32873  | 0.292902 | 0.578255 |
| MmugDNA.31714.1.S1_at   | MmugDNA.31714.1 | 5.32  | 5.32  | 0.18 | 0.17 | -1    | 0.91728  | 0.614453 | 0.964746 | 0.771275 |
| MmugDNA.31715.1.S1_at   | MmugDNA.31715.1 | 4.52  | 4.83  | 0.07 | 0.13 | -1.23 | 0.056609 | 0.113863 | 0.295477 | 0.380084 |
| MmugDNA.31717.1.S1_at   | MmugDNA.31717.1 | 8.73  | 9.48  | 0.51 | 0.32 | -1.68 | 0.141858 | 0.674938 | 0.427804 | 0.810089 |
| MmugDNA.31720.1.S1_at   | MmugDNA.31720.1 | 8.29  | 7.92  | 0.33 | 0.16 | 1.3   | 0.175838 | 0.241905 | 0.470167 | 0.512489 |
| MmugDNA.31721.1.S1_at   | MmugDNA.31721.1 | 5.7   | 5.65  | 0.2  | 0.21 | 1.04  | 0.761566 | 0.321227 | 0.890633 | 0.573144 |
| MmugDNA.31722.1.S1_at   | MmugDNA.31722.1 | 11.22 | 11.03 | 0.22 | 0.15 | 1.14  | 0.268674 | 0.0021   | 0.561268 | 0.067779 |
| MmugDNA.31722.1.S1_s_at | MmugDNA.31722.1 | 11.44 | 11.2  | 0.09 | 0.15 | 1.18  | 0.064184 | 0.000643 | 0.309799 | 0.042928 |
| MmugDNA.31723.1.S1_at   | MmugDNA.31723.1 | 4.33  | 4.27  | 0.13 | 0.06 | 1.04  | 0.483518 | 0.325376 | 0.72362  | 0.575785 |

|                         |                 |       |       |      |      |       |          |          |          |          |
|-------------------------|-----------------|-------|-------|------|------|-------|----------|----------|----------|----------|
| MmugDNA.31724.1.S1_at   | MmugDNA.31724.1 | 6.75  | 7.15  | 0.67 | 0.27 | -1.32 | 0.422248 | 0.810494 | 0.680473 | 0.890812 |
| MmugDNA.31726.1.S1_at   | MmugDNA.31726.1 | 5.81  | 5.71  | 0.27 | 0.23 | 1.07  | 0.359006 | 0.355421 | 0.634639 | 0.597738 |
| MmugDNA.31727.1.S1_at   | MmugDNA.31727.1 | 7.88  | 7.76  | 0.47 | 0.05 | 1.08  | 0.235406 | 0.256788 | 0.533284 | 0.524607 |
| MmugDNA.31729.1.S1_at   | MmugDNA.31729.1 | 3.49  | 3.56  | 0.1  | 0.02 | -1.05 | 0.9533   | 0.175618 | 0.980807 | 0.45218  |
| MmugDNA.3173.1.S1_at    | MmugDNA.3173.1  | 11.08 | 10.96 | 0.12 | 0.01 | 1.09  | 0.050864 | 0.333725 | 0.283144 | 0.581892 |
| MmugDNA.31730.1.S1_at   | MmugDNA.31730.1 | 5.66  | 6.01  | 0.58 | 0.06 | -1.27 | 0.112826 | 0.000797 | 0.389309 | 0.046064 |
| MmugDNA.31731.1.S1_at   | MmugDNA.31731.1 | 12.24 | 11.99 | 0.23 | 0.1  | 1.19  | 0.221802 | 0.011485 | 0.519797 | 0.138627 |
| MmugDNA.31731.1.S1_s_at | MmugDNA.31731.1 | 11.88 | 11.68 | 0.16 | 0.07 | 1.15  | 0.071273 | 0.006093 | 0.324861 | 0.106327 |
| MmugDNA.31732.1.S1_at   | MmugDNA.31732.1 | 4.47  | 4.15  | 0.05 | 0.2  | 1.25  | 0.08446  | 0.067729 | 0.348093 | 0.306339 |
| MmugDNA.31734.1.S1_at   | MmugDNA.31734.1 | 9.8   | 9.68  | 0.58 | 0.21 | 1.09  | 0.748442 | 0.030353 | 0.883514 | 0.216116 |
| MmugDNA.31735.1.S1_at   | MmugDNA.31735.1 | 3.57  | 3.92  | 0.11 | 0.36 | -1.27 | 0.555919 | 0.225687 | 0.771458 | 0.498159 |
| MmugDNA.31736.1.S1_at   | MmugDNA.31736.1 | 8.47  | 8.08  | 0.11 | 0.17 | 1.31  | 0.024707 | 0.771607 | 0.210294 | 0.867303 |
| MmugDNA.31737.1.S1_at   | MmugDNA.31737.1 | 10.33 | 9.99  | 0.04 | 0.04 | 1.27  | 0.000466 | 0.049648 | 0.066672 | 0.267876 |
| MmugDNA.3174.1.S1_at    | MmugDNA.3174.1  | 3.39  | 3.34  | 0.04 | 0.13 | 1.03  | 0.456874 | 0.608955 | 0.706051 | 0.767418 |
| MmugDNA.31740.1.S1_at   | MmugDNA.31740.1 | 4.53  | 5.3   | 0.96 | 0.58 | -1.71 | 0.183867 | 0.163916 | 0.479745 | 0.440105 |
| MmugDNA.31740.1.S1_s_at | MmugDNA.31740.1 | 10.89 | 10.69 | 0.25 | 0.24 | 1.15  | 0.979283 | 0.884711 | 0.992117 | 0.934321 |
| MmugDNA.31741.1.S1_at   | MmugDNA.31741.1 | 7.66  | 7.52  | 0.12 | 0.23 | 1.1   | 0.49733  | 0.59374  | 0.733023 | 0.758418 |
| MmugDNA.31742.1.S1_at   | MmugDNA.31742.1 | 5.77  | 5.84  | 0.09 | 0.07 | -1.05 | 0.501638 | 0.076745 | 0.735457 | 0.322168 |
| MmugDNA.31744.1.S1_at   | MmugDNA.31744.1 | 3.84  | 4.31  | 0.2  | 0.28 | -1.38 | 0.20363  | 0.151858 | 0.501321 | 0.426512 |
| MmugDNA.31745.1.S1_at   | MmugDNA.31745.1 | 3.11  | 3.24  | 0.2  | 0.11 | -1.09 | 0.470516 | 0.358901 | 0.71497  | 0.600291 |
| MmugDNA.31747.1.S1_at   | MmugDNA.31747.1 | 4.12  | 4.23  | 0.17 | 0.09 | -1.08 | 0.374614 | 0.297973 | 0.645606 | 0.556695 |
| MmugDNA.31748.1.S1_at   | MmugDNA.31748.1 | 4.46  | 4.4   | 0.13 | 0.06 | 1.05  | 0.168913 | 0.582822 | 0.462098 | 0.751399 |
| MmugDNA.3175.1.S1_at    | MmugDNA.3175.1  | 9.91  | 9.87  | 0.09 | 0.07 | 1.03  | 0.192242 | 0.761734 | 0.488787 | 0.861459 |
| MmugDNA.31750.1.S1_at   | MmugDNA.31750.1 | 9.89  | 9.59  | 0.42 | 0.16 | 1.23  | 0.231996 | 0.306133 | 0.530597 | 0.562854 |
| MmugDNA.31751.1.S1_at   | MmugDNA.31751.1 | 7.69  | 7.23  | 0.26 | 0.13 | 1.37  | 0.105308 | 0.087118 | 0.379205 | 0.340073 |
| MmugDNA.31751.1.S1_s_at | MmugDNA.31751.1 | 7.13  | 6.75  | 0.11 | 0.07 | 1.3   | 0.003335 | 0.009196 | 0.102526 | 0.126573 |
| MmugDNA.31752.1.S1_s_at | MmugDNA.31752.1 | 9.38  | 9.34  | 0.27 | 0.09 | 1.02  | 0.54361  | 0.013636 | 0.763516 | 0.149433 |
| MmugDNA.31755.1.S1_at   | MmugDNA.31755.1 | 6.84  | 6.51  | 0.47 | 0.28 | 1.26  | 0.229998 | 0.290782 | 0.528967 | 0.551399 |
| MmugDNA.31756.1.S1_at   | MmugDNA.31756.1 | 10.14 | 10.03 | 0.74 | 0.36 | 1.08  | 0.723874 | 0.821145 | 0.870311 | 0.897064 |
| MmugDNA.31757.1.S1_at   | MmugDNA.31757.1 | 4.96  | 5.07  | 0.37 | 0.11 | -1.08 | 0.515861 | 0.704869 | 0.745496 | 0.828846 |
| MmugDNA.31759.1.S1_at   | MmugDNA.31759.1 | 6.21  | 5.95  | 0.01 | 0.3  | 1.2   | 0.268415 | 0.023377 | 0.561069 | 0.191629 |
| MmugDNA.31760.1.S1_at   | MmugDNA.31760.1 | 6.26  | 6.31  | 0.12 | 0.12 | -1.03 | 0.660766 | 0.957688 | 0.836259 | 0.976059 |
| MmugDNA.31762.1.S1_at   | MmugDNA.31762.1 | 4.78  | 5.55  | 0.63 | 0.16 | -1.71 | 0.11469  | 0.329756 | 0.391699 | 0.578874 |
| MmugDNA.31763.1.S1_at   | MmugDNA.31763.1 | 10.18 | 10.03 | 0.19 | 0.1  | 1.12  | 0.481249 | 0.819991 | 0.72184  | 0.896303 |
| MmugDNA.31766.1.S1_at   | MmugDNA.31766.1 | 7.01  | 6.99  | 0.22 | 0.01 | 1.01  | 0.471056 | 0.571878 | 0.71541  | 0.744056 |
| MmugDNA.31768.1.S1_at   | MmugDNA.31768.1 | 3.03  | 2.95  | 0.29 | 0.19 | 1.05  | 0.515577 | 0.729969 | 0.745406 | 0.843733 |
| MmugDNA.31769.1.S1_at   | MmugDNA.31769.1 | 3.36  | 3.32  | 0.2  | 0.19 | 1.03  | 0.559507 | 0.835463 | 0.773349 | 0.905836 |
| MmugDNA.3177.1.S1_at    | MmugDNA.3177.1  | 6.73  | 7.33  | 0.33 | 0.02 | -1.51 | 0.106304 | 0.097796 | 0.380284 | 0.355639 |
| MmugDNA.31770.1.S1_at   | MmugDNA.31770.1 | 12.92 | 12.94 | 0.05 | 0.04 | -1.01 | 0.954147 | 0.586888 | 0.98117  | 0.753893 |
| MmugDNA.31771.1.S1_at   | MmugDNA.31771.1 | 12.78 | 12.78 | 0.19 | 0.09 | 1     | 0.800669 | 0.148411 | 0.910305 | 0.423003 |
| MmugDNA.31771.1.S1_s_at | MmugDNA.31771.1 | 12.41 | 12.38 | 0.06 | 0.07 | 1.02  | 0.149475 | 0.373972 | 0.438403 | 0.612588 |
| MmugDNA.31773.1.S1_at   | MmugDNA.31773.1 | 5.02  | 4.92  | 0.21 | 0.02 | 1.07  | 0.498804 | 0.104315 | 0.733927 | 0.365519 |
| MmugDNA.31774.1.S1_at   | MmugDNA.31774.1 | 5.64  | 5.19  | 1.04 | 0.49 | 1.37  | 0.424745 | 0.201014 | 0.682288 | 0.475442 |

|                         |                 |       |       |      |      |       |          |          |          |          |
|-------------------------|-----------------|-------|-------|------|------|-------|----------|----------|----------|----------|
| MmugDNA.31775.1.S1_at   | MmugDNA.31775.1 | 9.63  | 9.12  | 0.14 | 0.02 | 1.42  | 0.005703 | 0.522934 | 0.121173 | 0.713429 |
| MmugDNA.31776.1.S1_at   | MmugDNA.31776.1 | 6.57  | 6.56  | 0.06 | 0.01 | 1     | 0.346812 | 0.294168 | 0.625079 | 0.553974 |
| MmugDNA.31777.1.S1_at   | MmugDNA.31777.1 | 9.87  | 9.71  | 0.25 | 0.08 | 1.12  | 0.369343 | 0.812291 | 0.642818 | 0.891561 |
| MmugDNA.31778.1.S1_at   | MmugDNA.31778.1 | 3.67  | 3.65  | 0.58 | 0.02 | 1.02  | 0.339327 | 0.449439 | 0.619638 | 0.665069 |
| MmugDNA.3178.1.S1_at    | MmugDNA.3178.1  | 4.26  | 4.14  | 0.23 | 0.19 | 1.09  | 0.56469  | 0.502172 | 0.776286 | 0.70006  |
| MmugDNA.31780.1.S1_at   | MmugDNA.31780.1 | 9.7   | 9.99  | 0.19 | 0.12 | -1.22 | 0.08235  | 0.135293 | 0.34399  | 0.407381 |
| MmugDNA.31780.1.S1_s_at | MmugDNA.31780.1 | 11.67 | 12.07 | 0.38 | 0.14 | -1.32 | 0.070671 | 0.013333 | 0.324153 | 0.148042 |
| MmugDNA.31782.1.S1_at   | MmugDNA.31782.1 | 11.05 | 10.86 | 0.27 | 0.23 | 1.14  | 0.449105 | 0.114251 | 0.700435 | 0.380761 |
| MmugDNA.31783.1.S1_at   | MmugDNA.31783.1 | 6.95  | 6.93  | 0.53 | 0.35 | 1.02  | 0.842936 | 0.284838 | 0.931186 | 0.546966 |
| MmugDNA.31785.1.S1_at   | MmugDNA.31785.1 | 10.25 | 9.63  | 0.18 | 0.12 | 1.53  | 0.022681 | 0.08469  | 0.203642 | 0.336196 |
| MmugDNA.31786.1.S1_at   | MmugDNA.31786.1 | 7.44  | 7.68  | 0.28 | 0.15 | -1.18 | 0.929402 | 0.974787 | 0.970065 | 0.986245 |
| MmugDNA.31787.1.S1_at   | MmugDNA.31787.1 | 4.56  | 4.51  | 0.25 | 0.18 | 1.04  | 0.784329 | 0.605892 | 0.901636 | 0.765543 |
| MmugDNA.31788.1.S1_at   | MmugDNA.31788.1 | 6.42  | 6.45  | 0.1  | 0.1  | -1.02 | 0.355617 | 0.674411 | 0.632237 | 0.809775 |
| MmugDNA.3179.1.S1_at    | MmugDNA.3179.1  | 5.6   | 5.6   | 0.15 | 0.08 | 1     | 0.250249 | 0.469343 | 0.544972 | 0.678197 |
| MmugDNA.31790.1.S1_at   | MmugDNA.31790.1 | 5.99  | 5.96  | 0.07 | 0.07 | 1.02  | 0.447925 | 0.457919 | 0.699731 | 0.670999 |
| MmugDNA.31792.1.S1_at   | MmugDNA.31792.1 | 11.27 | 11.49 | 0.39 | 0.07 | -1.16 | 0.281617 | 0.032473 | 0.572497 | 0.223254 |
| MmugDNA.31793.1.S1_at   | MmugDNA.31793.1 | 3.8   | 3.78  | 0.27 | 0.07 | 1.02  | 0.662979 | 0.713366 | 0.837397 | 0.833698 |
| MmugDNA.31794.1.S1_at   | MmugDNA.31794.1 | 6.05  | 5.92  | 0.13 | 0.11 | 1.09  | 0.805368 | 0.0561   | 0.9127   | 0.282723 |
| MmugDNA.31795.1.S1_at   | MmugDNA.31795.1 | 13.18 | 12.93 | 0.07 | 0.05 | 1.19  | 0.009417 | 0.01921  | 0.146817 | 0.174431 |
| MmugDNA.31796.1.S1_at   | MmugDNA.31796.1 | 6.23  | 5.76  | 0.48 | 0.2  | 1.38  | 0.130512 | 0.243438 | 0.412931 | 0.513479 |
| MmugDNA.31797.1.S1_at   | MmugDNA.31797.1 | 7.16  | 7.28  | 0.21 | 0.08 | -1.09 | 0.558913 | 0.261682 | 0.773075 | 0.528129 |
| MmugDNA.31798.1.S1_at   | MmugDNA.31798.1 | 8.25  | 8.14  | 0.16 | 0.11 | 1.08  | 0.188835 | 0.275073 | 0.485417 | 0.539482 |
| MmugDNA.31799.1.S1_at   | MmugDNA.31799.1 | 5.58  | 5.56  | 0.32 | 0.02 | 1.01  | 0.690991 | 0.83455  | 0.852272 | 0.905227 |
| MmugDNA.318.1.S1_at     | MmugDNA.318.1   | 3.34  | 3.21  | 0.08 | 0.11 | 1.1   | 0.162565 | 0.157301 | 0.454561 | 0.432782 |
| MmugDNA.31800.1.S1_at   | MmugDNA.31800.1 | 12.71 | 12.5  | 0.09 | 0.19 | 1.15  | 0.079896 | 0.015494 | 0.340107 | 0.158044 |
| MmugDNA.31801.1.S1_at   | MmugDNA.31801.1 | 7.99  | 8.32  | 0.4  | 0.1  | -1.26 | 0.305689 | 0.65429  | 0.592779 | 0.797979 |
| MmugDNA.31802.1.S1_at   | MmugDNA.31802.1 | 10.27 | 10.57 | 0.38 | 0.1  | -1.24 | 0.112044 | 0.021764 | 0.388221 | 0.184565 |
| MmugDNA.31803.1.S1_at   | MmugDNA.31803.1 | 8.03  | 9.01  | 0.4  | 0.2  | -1.97 | 0.071679 | 0.043884 | 0.325611 | 0.254098 |
| MmugDNA.31804.1.S1_at   | MmugDNA.31804.1 | 4.33  | 4.2   | 0.03 | 0.11 | 1.1   | 0.078595 | 0.108872 | 0.338457 | 0.372496 |
| MmugDNA.31805.1.S1_at   | MmugDNA.31805.1 | 6.01  | 5.53  | 0.68 | 0.07 | 1.39  | 0.126324 | 0.198935 | 0.407549 | 0.473521 |
| MmugDNA.31807.1.S1_at   | MmugDNA.31807.1 | 6.2   | 6.25  | 0.66 | 0.28 | -1.04 | 0.307805 | 0.411729 | 0.594654 | 0.638434 |
| MmugDNA.31808.1.S1_at   | MmugDNA.31808.1 | 6.55  | 5.98  | 0.28 | 0.29 | 1.48  | 0.093147 | 0.082361 | 0.361736 | 0.331354 |
| MmugDNA.31809.1.S1_at   | MmugDNA.31809.1 | 6.14  | 6.11  | 0.05 | 0.13 | 1.02  | 0.990776 | 0.146289 | 0.996659 | 0.420301 |
| MmugDNA.3181.1.S1_at    | MmugDNA.3181.1  | 3.99  | 4.3   | 0.22 | 0.42 | -1.24 | 0.517867 | 0.131859 | 0.746966 | 0.403891 |
| MmugDNA.31810.1.S1_at   | MmugDNA.31810.1 | 5.76  | 6.42  | 0.85 | 0.43 | -1.58 | 0.679965 | 0.897129 | 0.847291 | 0.941305 |
| MmugDNA.31811.1.S1_at   | MmugDNA.31811.1 | 3.27  | 3.4   | 0.12 | 0.1  | -1.09 | 0.501557 | 0.144528 | 0.735399 | 0.418408 |
| MmugDNA.31812.1.S1_at   | MmugDNA.31812.1 | 4.73  | 4.94  | 0.21 | 0.14 | -1.16 | 0.647366 | 0.631812 | 0.828696 | 0.78297  |
| MmugDNA.31813.1.S1_at   | MmugDNA.31813.1 | 3.5   | 3.5   | 0    | 0.01 | 1     | 0.373901 | 0.103546 | 0.645118 | 0.364346 |
| MmugDNA.31814.1.S1_at   | MmugDNA.31814.1 | 5.58  | 5.23  | 0.27 | 0.06 | 1.27  | 0.116205 | 0.050644 | 0.393335 | 0.270317 |
| MmugDNA.31815.1.S1_at   | MmugDNA.31815.1 | 6.12  | 5.96  | 0.36 | 0.21 | 1.11  | 0.46166  | 0.265326 | 0.709034 | 0.531314 |
| MmugDNA.31817.1.S1_at   | MmugDNA.31817.1 | 8.57  | 8.95  | 0.13 | 0.06 | -1.3  | 0.004778 | 0.051881 | 0.115098 | 0.273151 |
| MmugDNA.31818.1.S1_at   | MmugDNA.31818.1 | 4.28  | 4.2   | 0.19 | 0.02 | 1.06  | 0.159219 | 0.073523 | 0.450505 | 0.316799 |
| MmugDNA.31819.1.S1_at   | MmugDNA.31819.1 | 10.92 | 10.18 | 3.91 | 0.31 | 1.67  | 0.599943 | 0.800257 | 0.798469 | 0.885129 |

|                         |                 |       |       |      |      |       |          |          |          |          |
|-------------------------|-----------------|-------|-------|------|------|-------|----------|----------|----------|----------|
| MmugDNA.31820.1.S1_at   | MmugDNA.31820.1 | 5.01  | 4.87  | 0.43 | 0.18 | 1.1   | 0.419641 | 0.494171 | 0.678954 | 0.694704 |
| MmugDNA.31821.1.S1_at   | MmugDNA.31821.1 | 3.77  | 3.75  | 0.06 | 0.17 | 1.01  | 0.383527 | 0.533143 | 0.652858 | 0.719436 |
| MmugDNA.31822.1.S1_at   | MmugDNA.31822.1 | 6.16  | 6.02  | 0.1  | 0.05 | 1.11  | 0.110213 | 0.166658 | 0.38556  | 0.443133 |
| MmugDNA.31823.1.S1_at   | MmugDNA.31823.1 | 4.12  | 5.7   | 0.69 | 0.37 | -2.99 | 0.075741 | 0.00128  | 0.33353  | 0.055351 |
| MmugDNA.31824.1.S1_at   | MmugDNA.31824.1 | 8.33  | 8.94  | 0.16 | 0.16 | -1.52 | 0.013091 | 0.113555 | 0.165061 | 0.379632 |
| MmugDNA.31825.1.S1_at   | MmugDNA.31825.1 | 4.75  | 7.38  | 1.04 | 0.65 | -6.17 | 0.060931 | 0.131602 | 0.303761 | 0.403716 |
| MmugDNA.31826.1.S1_at   | MmugDNA.31826.1 | 3.17  | 3.39  | 0.1  | 0.13 | -1.16 | 0.140595 | 0.162412 | 0.426348 | 0.438575 |
| MmugDNA.31827.1.S1_at   | MmugDNA.31827.1 | 10.08 | 10.09 | 0.32 | 0.07 | -1    | 0.966696 | 0.257641 | 0.986533 | 0.525332 |
| MmugDNA.31828.1.S1_at   | MmugDNA.31828.1 | 9.11  | 9.07  | 0.87 | 0.02 | 1.03  | 0.468229 | 0.606972 | 0.713381 | 0.766178 |
| MmugDNA.31829.1.S1_at   | MmugDNA.31829.1 | 5.4   | 5.61  | 0.62 | 0.22 | -1.15 | 0.732019 | 0.464937 | 0.874717 | 0.675523 |
| MmugDNA.3183.1.S1_at    | MmugDNA.3183.1  | 3.51  | 3.64  | 0.13 | 0.12 | -1.09 | 0.693697 | 0.046529 | 0.853632 | 0.260221 |
| MmugDNA.31830.1.S1_at   | MmugDNA.31830.1 | 10.17 | 9.97  | 0.2  | 0.07 | 1.15  | 0.204937 | 0.002448 | 0.502761 | 0.073228 |
| MmugDNA.31831.1.S1_at   | MmugDNA.31831.1 | 7.42  | 6.21  | 0.41 | 0.11 | 2.31  | 0.007397 | 0.001019 | 0.134211 | 0.050911 |
| MmugDNA.31832.1.S1_at   | MmugDNA.31832.1 | 4.88  | 4.77  | 0.03 | 0.06 | 1.08  | 0.049455 | 0.252649 | 0.279829 | 0.521174 |
| MmugDNA.31833.1.S1_s_at | MmugDNA.31833.1 | 11.79 | 12.17 | 0.23 | 0.03 | -1.3  | 0.157276 | 0.624364 | 0.448021 | 0.778577 |
| MmugDNA.31834.1.S1_at   | MmugDNA.31834.1 | 8.36  | 7.73  | 0.39 | 0.14 | 1.55  | 0.056638 | 0.003714 | 0.295477 | 0.086832 |
| MmugDNA.31835.1.S1_at   | MmugDNA.31835.1 | 4.46  | 4.47  | 0.62 | 0.13 | -1    | 0.493485 | 0.57286  | 0.730431 | 0.74478  |
| MmugDNA.31835.1.S1_x_at | MmugDNA.31835.1 | 4.55  | 4.5   | 0.79 | 0.22 | 1.04  | 0.397389 | 0.521303 | 0.663    | 0.712346 |
| MmugDNA.31836.1.S1_at   | MmugDNA.31836.1 | 3.28  | 3.54  | 0.68 | 0.23 | -1.19 | 0.908762 | 0.506952 | 0.961332 | 0.702692 |
| MmugDNA.31836.1.S1_x_at | MmugDNA.31836.1 | 3.56  | 3.94  | 0.8  | 0.03 | -1.3  | 0.843462 | 0.831071 | 0.931492 | 0.903111 |
| MmugDNA.31838.1.S1_at   | MmugDNA.31838.1 | 5.16  | 5.19  | 0.16 | 0.07 | -1.02 | 0.888524 | 0.333851 | 0.952483 | 0.581995 |
| MmugDNA.31838.1.S1_s_at | MmugDNA.31838.1 | 8.95  | 10.69 | 0.38 | 0.21 | -3.35 | 0.004724 | 0.076228 | 0.115008 | 0.321127 |
| MmugDNA.31839.1.S1_at   | MmugDNA.31839.1 | 5.58  | 4.74  | 0.59 | 0.05 | 1.79  | 0.224725 | 0.609219 | 0.522708 | 0.767677 |
| MmugDNA.3184.1.S1_at    | MmugDNA.3184.1  | 8.81  | 8.58  | 0.17 | 0.09 | 1.17  | 0.314629 | 0.063068 | 0.600032 | 0.297788 |
| MmugDNA.31840.1.S1_at   | MmugDNA.31840.1 | 5.75  | 5.75  | 0.39 | 0.09 | 1     | 0.370968 | 0.363118 | 0.643773 | 0.60356  |
| MmugDNA.31843.1.S1_at   | MmugDNA.31843.1 | 7.78  | 7.96  | 0.32 | 0.36 | -1.14 | 0.896185 | 0.070481 | 0.955775 | 0.311777 |
| MmugDNA.31844.1.S1_at   | MmugDNA.31844.1 | 5.88  | 5.76  | 0.08 | 0.1  | 1.09  | 0.463328 | 0.578565 | 0.710027 | 0.748589 |
| MmugDNA.31845.1.S1_at   | MmugDNA.31845.1 | 6.27  | 6.47  | 0.35 | 0.25 | -1.14 | 0.475035 | 0.02429  | 0.717773 | 0.195066 |
| MmugDNA.31846.1.S1_at   | MmugDNA.31846.1 | 6.55  | 6.36  | 0.1  | 0.16 | 1.14  | 0.106664 | 0.671192 | 0.380862 | 0.807707 |
| MmugDNA.31847.1.S1_at   | MmugDNA.31847.1 | 4.33  | 6.19  | 0.02 | 0.26 | -3.62 | 0.000256 | 0.001721 | 0.055035 | 0.062866 |
| MmugDNA.31848.1.S1_at   | MmugDNA.31848.1 | 4.57  | 4.31  | 0.25 | 0.36 | 1.19  | 0.438127 | 0.225252 | 0.692786 | 0.497892 |
| MmugDNA.31849.1.S1_at   | MmugDNA.31849.1 | 9.87  | 9.47  | 0.31 | 0.07 | 1.32  | 0.102723 | 0.183308 | 0.375107 | 0.459553 |
| MmugDNA.3185.1.S1_at    | MmugDNA.3185.1  | 3.57  | 3.45  | 0.08 | 0.1  | 1.09  | 0.10477  | 0.495377 | 0.378347 | 0.695435 |
| MmugDNA.31851.1.S1_x_at | MmugDNA.31851.1 | 8.79  | 8.41  | 0.33 | 0.16 | 1.3   | 0.271371 | 0.15406  | 0.563296 | 0.428867 |
| MmugDNA.31852.1.S1_at   | MmugDNA.31852.1 | 7.94  | 8.22  | 0.41 | 0.17 | -1.21 | 0.326541 | 0.733383 | 0.609577 | 0.845627 |
| MmugDNA.31854.1.S1_at   | MmugDNA.31854.1 | 6.82  | 6.86  | 0.13 | 0.15 | -1.03 | 0.740106 | 0.375668 | 0.879525 | 0.613577 |
| MmugDNA.31855.1.S1_at   | MmugDNA.31855.1 | 5.34  | 5.22  | 0.69 | 0.61 | 1.09  | 0.713281 | 0.741117 | 0.864604 | 0.850131 |
| MmugDNA.31856.1.S1_at   | MmugDNA.31856.1 | 11.41 | 11.07 | 0.13 | 0.07 | 1.26  | 0.012317 | 0.02051  | 0.161255 | 0.179742 |
| MmugDNA.31857.1.S1_at   | MmugDNA.31857.1 | 4.72  | 4.78  | 0.33 | 0.19 | -1.04 | 0.828208 | 0.742752 | 0.92397  | 0.851023 |
| MmugDNA.31858.1.S1_at   | MmugDNA.31858.1 | 7     | 6.98  | 0.3  | 0.06 | 1.01  | 0.268146 | 0.399128 | 0.560852 | 0.62969  |
| MmugDNA.31859.1.S1_at   | MmugDNA.31859.1 | 3.54  | 3.65  | 0.1  | 0.25 | -1.08 | 0.184463 | 0.271608 | 0.480429 | 0.536577 |
| MmugDNA.3186.1.S1_at    | MmugDNA.3186.1  | 10.7  | 9.94  | 0.18 | 0.2  | 1.69  | 0.008291 | 0.123006 | 0.13996  | 0.392923 |
| MmugDNA.31860.1.S1_at   | MmugDNA.31860.1 | 5.95  | 6     | 0.33 | 0.12 | -1.04 | 0.356159 | 0.580389 | 0.632499 | 0.749646 |

|                         |                 |       |       |      |      |        |          |          |          |          |
|-------------------------|-----------------|-------|-------|------|------|--------|----------|----------|----------|----------|
| MmugDNA.31862.1.S1_at   | MmugDNA.31862.1 | 3.53  | 3.61  | 0.15 | 0.08 | -1.05  | 0.603122 | 0.525033 | 0.800785 | 0.71475  |
| MmugDNA.31863.1.S1_at   | MmugDNA.31863.1 | 9.01  | 8.97  | 0.32 | 0.07 | 1.03   | 0.744229 | 0.103909 | 0.881397 | 0.364582 |
| MmugDNA.31864.1.S1_at   | MmugDNA.31864.1 | 6.42  | 6.08  | 0.64 | 0.29 | 1.26   | 0.153688 | 0.153366 | 0.443756 | 0.428186 |
| MmugDNA.31864.1.S1_x_at | MmugDNA.31864.1 | 6.04  | 5.7   | 0.63 | 0.3  | 1.26   | 0.168967 | 0.219583 | 0.46215  | 0.493192 |
| MmugDNA.31865.1.S1_at   | MmugDNA.31865.1 | 7.83  | 6.93  | 0.89 | 0.66 | 1.86   | 0.584272 | 0.565831 | 0.788555 | 0.740112 |
| MmugDNA.31866.1.S1_at   | MmugDNA.31866.1 | 5.84  | 6.08  | 0.35 | 0.1  | -1.18  | 0.098827 | 0.435392 | 0.369716 | 0.655194 |
| MmugDNA.31868.1.S1_at   | MmugDNA.31868.1 | 6.82  | 6.87  | 0.34 | 0.11 | -1.04  | 0.3747   | 0.411881 | 0.645606 | 0.638434 |
| MmugDNA.31869.1.S1_at   | MmugDNA.31869.1 | 5.52  | 4.92  | 1.05 | 0.26 | 1.51   | 0.168731 | 0.095058 | 0.462055 | 0.352124 |
| MmugDNA.3187.1.S1_at    | MmugDNA.3187.1  | 9.61  | 8.84  | 0.43 | 0.14 | 1.7    | 0.034318 | 0.033244 | 0.239848 | 0.225803 |
| MmugDNA.31870.1.S1_at   | MmugDNA.31870.1 | 6.22  | 6.41  | 0.19 | 0.07 | -1.14  | 0.217695 | 0.329287 | 0.515507 | 0.57869  |
| MmugDNA.31871.1.S1_at   | MmugDNA.31871.1 | 3.48  | 3.09  | 0.7  | 0.12 | 1.3    | 0.160534 | 0.1644   | 0.452057 | 0.440678 |
| MmugDNA.31872.1.S1_at   | MmugDNA.31872.1 | 4.4   | 3.92  | 0.29 | 0.11 | 1.4    | 0.052656 | 0.041364 | 0.286412 | 0.247995 |
| MmugDNA.31873.1.S1_at   | MmugDNA.31873.1 | 2.97  | 8.66  | 2.57 | 0.44 | -51.66 | 0.058382 | 0.157827 | 0.298756 | 0.433475 |
| MmugDNA.31874.1.S1_at   | MmugDNA.31874.1 | 5.35  | 5.58  | 0.97 | 0.11 | -1.17  | 0.658451 | 0.5326   | 0.834958 | 0.719144 |
| MmugDNA.31875.1.S1_at   | MmugDNA.31875.1 | 4.23  | 4.15  | 0.15 | 0.01 | 1.06   | 0.355522 | 0.408418 | 0.632237 | 0.635685 |
| MmugDNA.31876.1.S1_at   | MmugDNA.31876.1 | 4.95  | 5.2   | 0.14 | 0.03 | -1.18  | 0.09713  | 0.280043 | 0.367275 | 0.543369 |
| MmugDNA.31878.1.S1_at   | MmugDNA.31878.1 | 3.53  | 3.38  | 0.43 | 0.12 | 1.11   | 0.17253  | 0.238722 | 0.466621 | 0.509386 |
| MmugDNA.31879.1.S1_at   | MmugDNA.31879.1 | 6.93  | 7.51  | 0.33 | 0.12 | -1.5   | 0.122175 | 0.046902 | 0.400941 | 0.261281 |
| MmugDNA.3188.1.S1_at    | MmugDNA.3188.1  | 5.01  | 5.01  | 0.08 | 0.12 | 1      | 0.235051 | 0.212758 | 0.533056 | 0.486769 |
| MmugDNA.31880.1.S1_at   | MmugDNA.31880.1 | 7.21  | 7.3   | 0.38 | 0.4  | -1.06  | 0.915664 | 0.017436 | 0.964127 | 0.167111 |
| MmugDNA.31881.1.S1_at   | MmugDNA.31881.1 | 3.07  | 3.01  | 0.11 | 0.04 | 1.05   | 0.336184 | 0.176435 | 0.616839 | 0.45282  |
| MmugDNA.31882.1.S1_at   | MmugDNA.31882.1 | 3.15  | 3.08  | 0.07 | 0.1  | 1.05   | 0.154296 | 0.082748 | 0.44462  | 0.332206 |
| MmugDNA.31883.1.S1_at   | MmugDNA.31883.1 | 8.16  | 8.22  | 0.49 | 0.16 | -1.04  | 0.660467 | 0.796513 | 0.83613  | 0.882705 |
| MmugDNA.31884.1.S1_at   | MmugDNA.31884.1 | 3.42  | 3.46  | 0.01 | 0.13 | -1.03  | 0.71873  | 0.950678 | 0.867276 | 0.972007 |
| MmugDNA.31885.1.S1_at   | MmugDNA.31885.1 | 11.1  | 10.86 | 0.09 | 0.07 | 1.18   | 0.021414 | 0.062023 | 0.199957 | 0.295897 |
| MmugDNA.31886.1.S1_at   | MmugDNA.31886.1 | 5.85  | 6.36  | 0.19 | 0.28 | -1.42  | 0.101859 | 0.094766 | 0.373468 | 0.35164  |
| MmugDNA.31887.1.S1_at   | MmugDNA.31887.1 | 9.01  | 9.25  | 0.06 | 0.03 | -1.18  | 0.004434 | 0.14107  | 0.112974 | 0.414592 |
| MmugDNA.31888.1.S1_at   | MmugDNA.31888.1 | 5.28  | 4.48  | 0.44 | 0.28 | 1.75   | 0.033428 | 0.014881 | 0.236786 | 0.155055 |
| MmugDNA.31889.1.S1_s_at | MmugDNA.31889.1 | 3.21  | 3.2   | 0.09 | 0.15 | 1.01   | 0.833365 | 0.385203 | 0.926598 | 0.620695 |
| MmugDNA.3189.1.S1_at    | MmugDNA.3189.1  | 5.02  | 4.83  | 0.44 | 0.11 | 1.14   | 0.378015 | 0.505774 | 0.648368 | 0.702218 |
| MmugDNA.31890.1.S1_at   | MmugDNA.31890.1 | 6.56  | 6.23  | 0.32 | 0.06 | 1.25   | 0.159987 | 0.12631  | 0.451279 | 0.396786 |
| MmugDNA.31891.1.S1_at   | MmugDNA.31891.1 | 8.06  | 7.88  | 0.05 | 0.17 | 1.13   | 0.286102 | 0.000511 | 0.575963 | 0.039357 |
| MmugDNA.31892.1.S1_at   | MmugDNA.31892.1 | 4.17  | 4.18  | 0.12 | 0.21 | -1.01  | 0.881735 | 0.70632  | 0.949714 | 0.829634 |
| MmugDNA.31894.1.S1_at   | MmugDNA.31894.1 | 11.15 | 12.12 | 0.42 | 0.19 | -1.97  | 0.026333 | 0.065577 | 0.215391 | 0.301476 |
| MmugDNA.31894.1.S1_s_at | MmugDNA.31894.1 | 10.89 | 11.91 | 0.31 | 0.18 | -2.04  | 0.01279  | 0.043946 | 0.163393 | 0.254098 |
| MmugDNA.31895.1.S1_at   | MmugDNA.31895.1 | 3.84  | 3.49  | 0.42 | 0.27 | 1.28   | 0.541604 | 0.341775 | 0.762335 | 0.587862 |
| MmugDNA.31896.1.S1_at   | MmugDNA.31896.1 | 6.21  | 6.23  | 0.07 | 0.1  | -1.02  | 0.263389 | 0.146767 | 0.556958 | 0.420799 |
| MmugDNA.31897.1.S1_at   | MmugDNA.31897.1 | 11.75 | 12.46 | 0.32 | 0.13 | -1.63  | 0.022774 | 0.068089 | 0.204093 | 0.307142 |
| MmugDNA.31898.1.S1_s_at | MmugDNA.31898.1 | 11.79 | 12.52 | 0.48 | 0.05 | -1.65  | 0.046385 | 0.092834 | 0.273156 | 0.349024 |
| MmugDNA.31900.1.S1_at   | MmugDNA.31900.1 | 5.11  | 5.26  | 0.32 | 0    | -1.11  | 0.557096 | 0.427985 | 0.772016 | 0.649602 |
| MmugDNA.31901.1.S1_at   | MmugDNA.31901.1 | 9.6   | 9.89  | 0.58 | 0.32 | -1.22  | 0.833037 | 0.005382 | 0.926464 | 0.101199 |
| MmugDNA.31902.1.S1_at   | MmugDNA.31902.1 | 11.42 | 11.82 | 0.11 | 0.02 | -1.32  | 0.006047 | 0.02559  | 0.124182 | 0.200684 |
| MmugDNA.31904.1.S1_x_at | MmugDNA.31904.1 | 13    | 13.23 | 0.18 | 0.13 | -1.18  | 0.154784 | 0.290218 | 0.445047 | 0.551169 |

|                         |                 |       |       |      |      |       |          |          |          |          |
|-------------------------|-----------------|-------|-------|------|------|-------|----------|----------|----------|----------|
| MmugDNA.31907.1.S1_at   | MmugDNA.31907.1 | 4.12  | 4.09  | 0.23 | 0.2  | 1.02  | 0.682153 | 0.567279 | 0.848429 | 0.741185 |
| MmugDNA.31908.1.S1_at   | MmugDNA.31908.1 | 6.12  | 6.73  | 0.51 | 0.04 | -1.52 | 0.111622 | 0.012234 | 0.387683 | 0.142996 |
| MmugDNA.31909.1.S1_at   | MmugDNA.31909.1 | 3.4   | 3.42  | 0.14 | 0.06 | -1.01 | 0.877366 | 0.346374 | 0.947596 | 0.59124  |
| MmugDNA.3191.1.S1_at    | MmugDNA.3191.1  | 12.23 | 12.22 | 0.09 | 0.03 | 1.01  | 0.658003 | 0.318078 | 0.834845 | 0.571046 |
| MmugDNA.31910.1.S1_at   | MmugDNA.31910.1 | 6.86  | 7.07  | 0.44 | 0.35 | -1.16 | 0.249077 | 0.380248 | 0.544401 | 0.616941 |
| MmugDNA.31911.1.S1_at   | MmugDNA.31911.1 | 5.7   | 5.9   | 0.29 | 0.14 | -1.15 | 0.126802 | 0.694084 | 0.408298 | 0.82208  |
| MmugDNA.31912.1.S1_at   | MmugDNA.31912.1 | 10.33 | 10.26 | 0.16 | 0.07 | 1.05  | 0.848943 | 0.511861 | 0.934209 | 0.705797 |
| MmugDNA.31914.1.S1_at   | MmugDNA.31914.1 | 5.99  | 5.63  | 0.22 | 0.16 | 1.28  | 0.022695 | 0.044259 | 0.203662 | 0.25493  |
| MmugDNA.31915.1.S1_at   | MmugDNA.31915.1 | 7.08  | 6.96  | 0.05 | 0.18 | 1.09  | 0.144685 | 0.185112 | 0.431647 | 0.460962 |
| MmugDNA.31917.1.S1_at   | MmugDNA.31917.1 | 6.84  | 6.8   | 0.07 | 0.02 | 1.03  | 0.779416 | 0.152468 | 0.899222 | 0.42728  |
| MmugDNA.31919.1.S1_at   | MmugDNA.31919.1 | 7.75  | 7.92  | 0.17 | 0.11 | -1.12 | 0.090549 | 0.307391 | 0.357339 | 0.563638 |
| MmugDNA.3192.1.S1_at    | MmugDNA.3192.1  | 2.8   | 2.85  | 0.35 | 0.09 | -1.03 | 0.504324 | 0.642773 | 0.737554 | 0.790476 |
| MmugDNA.31921.1.S1_at   | MmugDNA.31921.1 | 4.68  | 4.9   | 0.23 | 0.25 | -1.16 | 0.17579  | 0.198426 | 0.470151 | 0.473302 |
| MmugDNA.31922.1.S1_at   | MmugDNA.31922.1 | 4.27  | 4.2   | 0.38 | 0.15 | 1.05  | 0.332341 | 0.427989 | 0.614085 | 0.649602 |
| MmugDNA.31923.1.S1_at   | MmugDNA.31923.1 | 7.73  | 7.34  | 0.16 | 0.15 | 1.31  | 0.032888 | 0.076714 | 0.235584 | 0.322127 |
| MmugDNA.31924.1.S1_at   | MmugDNA.31924.1 | 7.22  | 7.26  | 0.22 | 0.02 | -1.03 | 0.984294 | 0.849961 | 0.994129 | 0.914673 |
| MmugDNA.31925.1.S1_at   | MmugDNA.31925.1 | 10.26 | 10.05 | 0.17 | 0.19 | 1.15  | 0.326712 | 0.401717 | 0.609643 | 0.631068 |
| MmugDNA.31925.1.S1_s_at | MmugDNA.31925.1 | 11.83 | 11.8  | 0.08 | 0.07 | 1.02  | 0.337112 | 0.32102  | 0.617686 | 0.573025 |
| MmugDNA.31926.1.S1_at   | MmugDNA.31926.1 | 12.53 | 12.66 | 0.09 | 0.02 | -1.09 | 0.08488  | 0.4206   | 0.348829 | 0.644287 |
| MmugDNA.31926.1.S1_x_at | MmugDNA.31926.1 | 12.48 | 12.63 | 0.07 | 0.03 | -1.11 | 0.048046 | 0.451982 | 0.27653  | 0.666724 |
| MmugDNA.31927.1.S1_at   | MmugDNA.31927.1 | 4.01  | 4.01  | 0.08 | 0.1  | -1    | 0.248965 | 0.315382 | 0.544234 | 0.568939 |
| MmugDNA.31928.1.S1_at   | MmugDNA.31928.1 | 5.59  | 6.85  | 0.18 | 0.16 | -2.39 | 0.000604 | 0.005803 | 0.070727 | 0.104597 |
| MmugDNA.31929.1.S1_at   | MmugDNA.31929.1 | 6.33  | 6.33  | 0.03 | 0.1  | -1    | 0.711702 | 0.273394 | 0.863994 | 0.537845 |
| MmugDNA.31929.1.S1_s_at | MmugDNA.31929.1 | 7.31  | 6.09  | 0.75 | 0.13 | 2.33  | 0.056585 | 0.193669 | 0.295446 | 0.468785 |
| MmugDNA.3193.1.S1_at    | MmugDNA.3193.1  | 4.08  | 4.02  | 0.36 | 0.2  | 1.04  | 0.32649  | 0.440598 | 0.609577 | 0.659029 |
| MmugDNA.3193.1.S1_x_at  | MmugDNA.3193.1  | 3.99  | 3.88  | 0.29 | 0.28 | 1.08  | 0.834005 | 0.963403 | 0.926972 | 0.979599 |
| MmugDNA.31930.1.S1_at   | MmugDNA.31930.1 | 4.28  | 3.6   | 0.26 | 0.37 | 1.6   | 0.11638  | 0.08651  | 0.393554 | 0.33907  |
| MmugDNA.31932.1.S1_at   | MmugDNA.31932.1 | 3.49  | 3.46  | 0.23 | 0.03 | 1.03  | 0.893418 | 0.726795 | 0.954549 | 0.841963 |
| MmugDNA.31933.1.S1_at   | MmugDNA.31933.1 | 9.2   | 10.79 | 0.33 | 0.18 | -2.99 | 0.003394 | 0.06313  | 0.102989 | 0.29795  |
| MmugDNA.31935.1.S1_at   | MmugDNA.31935.1 | 3.93  | 3.63  | 0.56 | 0.08 | 1.22  | 0.221975 | 0.464239 | 0.520064 | 0.674983 |
| MmugDNA.31937.1.S1_at   | MmugDNA.31937.1 | 12.63 | 12.5  | 0.13 | 0.08 | 1.1   | 0.384639 | 0.074722 | 0.653612 | 0.318465 |
| MmugDNA.31938.1.S1_at   | MmugDNA.31938.1 | 10.4  | 10.14 | 0.39 | 0.08 | 1.2   | 0.860021 | 0.865314 | 0.939228 | 0.923554 |
| MmugDNA.31939.1.S1_at   | MmugDNA.31939.1 | 4.33  | 3.98  | 0.17 | 0.06 | 1.27  | 0.026901 | 0.022284 | 0.217016 | 0.186724 |
| MmugDNA.3194.1.S1_at    | MmugDNA.3194.1  | 7.69  | 7.6   | 0.49 | 0.11 | 1.06  | 0.537185 | 0.235968 | 0.759433 | 0.507056 |
| MmugDNA.31940.1.S1_at   | MmugDNA.31940.1 | 3.7   | 3.47  | 0.3  | 0.11 | 1.17  | 0.095916 | 0.108677 | 0.365529 | 0.372171 |
| MmugDNA.31941.1.S1_at   | MmugDNA.31941.1 | 6.22  | 6.12  | 0.22 | 0.04 | 1.07  | 0.581901 | 0.773884 | 0.786858 | 0.868533 |
| MmugDNA.31942.1.S1_at   | MmugDNA.31942.1 | 6.43  | 6.89  | 0.48 | 0.29 | -1.37 | 0.619643 | 0.237804 | 0.811329 | 0.508309 |
| MmugDNA.31943.1.S1_at   | MmugDNA.31943.1 | 5.2   | 4.32  | 0.53 | 0.6  | 1.83  | 0.06188  | 0.05183  | 0.305263 | 0.273151 |
| MmugDNA.31947.1.S1_at   | MmugDNA.31947.1 | 5.06  | 4.94  | 0.22 | 0.6  | 1.09  | 0.592138 | 0.706882 | 0.793234 | 0.829968 |
| MmugDNA.31949.1.S1_at   | MmugDNA.31949.1 | 9.69  | 8.75  | 0.2  | 0.19 | 1.92  | 0.004423 | 0.00104  | 0.112741 | 0.051426 |
| MmugDNA.3195.1.S1_at    | MmugDNA.3195.1  | 4.88  | 4.67  | 0.43 | 0.04 | 1.15  | 0.135666 | 0.033425 | 0.419659 | 0.226484 |
| MmugDNA.31950.1.S1_at   | MmugDNA.31950.1 | 12.31 | 12.16 | 0.03 | 0.05 | 1.11  | 0.019922 | 0.740079 | 0.19445  | 0.849396 |
| MmugDNA.31951.1.S1_at   | MmugDNA.31951.1 | 10    | 10.25 | 0.09 | 0.17 | -1.19 | 0.104601 | 0.149804 | 0.377932 | 0.424394 |



|                         |                 |       |       |      |      |       |          |          |          |          |
|-------------------------|-----------------|-------|-------|------|------|-------|----------|----------|----------|----------|
| MmugDNA.31952.1.S1_s_at | MmugDNA.31952.1 | 10.46 | 9.35  | 0.24 | 0.18 | 2.16  | 0.007536 | 0.010256 | 0.135041 | 0.132655 |
| MmugDNA.31953.1.S1_at   | MmugDNA.31953.1 | 9.52  | 6.8   | 0.6  | 0.21 | 6.57  | 0.003632 | 0.019976 | 0.10567  | 0.177532 |
| MmugDNA.31954.1.S1_at   | MmugDNA.31954.1 | 6.13  | 5.94  | 0.89 | 0.18 | 1.14  | 0.505274 | 0.065214 | 0.73829  | 0.301239 |
| MmugDNA.31956.1.S1_at   | MmugDNA.31956.1 | 7.24  | 7.01  | 0.26 | 0.15 | 1.17  | 0.149791 | 0.164307 | 0.438771 | 0.440539 |
| MmugDNA.31957.1.S1_at   | MmugDNA.31957.1 | 7.21  | 7.56  | 0.1  | 0.2  | -1.27 | 0.099673 | 0.035645 | 0.370627 | 0.233217 |
| MmugDNA.31958.1.S1_at   | MmugDNA.31958.1 | 2.97  | 2.83  | 0.16 | 0.14 | 1.1   | 0.354798 | 0.490355 | 0.631821 | 0.692363 |
| MmugDNA.31959.1.S1_at   | MmugDNA.31959.1 | 12.28 | 11.39 | 0.26 | 0.1  | 1.86  | 0.003606 | 0.000573 | 0.105447 | 0.041171 |
| MmugDNA.3196.1.S1_at    | MmugDNA.3196.1  | 6.92  | 6.52  | 0.48 | 0.22 | 1.32  | 0.587332 | 0.563968 | 0.79044  | 0.738913 |
| MmugDNA.31960.1.S1_at   | MmugDNA.31960.1 | 6.25  | 6.18  | 0.33 | 0.33 | 1.05  | 0.838693 | 0.250927 | 0.929157 | 0.519612 |
| MmugDNA.31961.1.S1_at   | MmugDNA.31961.1 | 7.66  | 8     | 0.25 | 0.09 | -1.26 | 0.099463 | 0.008087 | 0.370342 | 0.119519 |
| MmugDNA.31963.1.S1_at   | MmugDNA.31963.1 | 8.32  | 7.11  | 0.97 | 0.22 | 2.33  | 0.313876 | 0.181552 | 0.599699 | 0.458105 |
| MmugDNA.31966.1.S1_at   | MmugDNA.31966.1 | 10.16 | 11.38 | 0.54 | 0.07 | -2.34 | 0.017516 | 0.063953 | 0.185974 | 0.29906  |
| MmugDNA.31967.1.S1_at   | MmugDNA.31967.1 | 12.58 | 12.76 | 0.18 | 0.09 | -1.13 | 0.377393 | 0.027316 | 0.647924 | 0.206625 |
| MmugDNA.31969.1.S1_at   | MmugDNA.31969.1 | 7.55  | 7.95  | 0.64 | 0.23 | -1.32 | 0.84534  | 0.228155 | 0.932457 | 0.500327 |
| MmugDNA.3197.1.S1_at    | MmugDNA.3197.1  | 5.38  | 5.99  | 0.59 | 0.29 | -1.52 | 0.794899 | 0.275898 | 0.907378 | 0.540035 |
| MmugDNA.31971.1.S1_at   | MmugDNA.31971.1 | 9.11  | 9.08  | 0.22 | 0.18 | 1.02  | 0.45663  | 0.179256 | 0.705861 | 0.45567  |
| MmugDNA.31972.1.S1_at   | MmugDNA.31972.1 | 9.01  | 8.56  | 0.26 | 0.24 | 1.37  | 0.206548 | 0.34271  | 0.504232 | 0.588666 |
| MmugDNA.31973.1.S1_at   | MmugDNA.31973.1 | 6.99  | 6.18  | 0.31 | 0.12 | 1.76  | 0.023643 | 0.132451 | 0.207074 | 0.404483 |
| MmugDNA.31974.1.S1_at   | MmugDNA.31974.1 | 7.33  | 7.34  | 0.06 | 0.07 | -1.01 | 0.820595 | 0.075517 | 0.919941 | 0.319941 |
| MmugDNA.31975.1.S1_at   | MmugDNA.31975.1 | 9.13  | 9.17  | 0.12 | 0.56 | -1.02 | 0.349401 | 0.039488 | 0.62731  | 0.243642 |
| MmugDNA.31976.1.S1_at   | MmugDNA.31976.1 | 4.31  | 4.44  | 0.15 | 0.22 | -1.09 | 0.558142 | 0.751258 | 0.772616 | 0.855385 |
| MmugDNA.31977.1.S1_at   | MmugDNA.31977.1 | 4.93  | 4.77  | 0.28 | 0.1  | 1.11  | 0.152013 | 0.178889 | 0.441547 | 0.455208 |
| MmugDNA.31978.1.S1_at   | MmugDNA.31978.1 | 3.16  | 3.42  | 0.17 | 0.24 | -1.19 | 0.235928 | 0.355737 | 0.533552 | 0.597864 |
| MmugDNA.3198.1.S1_at    | MmugDNA.3198.1  | 9.02  | 10.98 | 1.23 | 0.39 | -3.89 | 0.071753 | 0.014696 | 0.325716 | 0.154371 |
| MmugDNA.31980.1.S1_at   | MmugDNA.31980.1 | 3.23  | 3.36  | 0.08 | 0.05 | -1.09 | 0.11712  | 0.222036 | 0.394287 | 0.495083 |
| MmugDNA.31981.1.S1_at   | MmugDNA.31981.1 | 11.74 | 11.8  | 0.15 | 0.15 | -1.04 | 0.798963 | 0.944536 | 0.909384 | 0.968614 |
| MmugDNA.31982.1.S1_at   | MmugDNA.31982.1 | 3.88  | 3.95  | 0.96 | 0.16 | -1.05 | 0.440566 | 0.219508 | 0.694572 | 0.493168 |
| MmugDNA.31983.1.S1_at   | MmugDNA.31983.1 | 4.34  | 4.37  | 0.05 | 0.03 | -1.02 | 0.557593 | 0.086221 | 0.77226  | 0.33863  |
| MmugDNA.31984.1.S1_at   | MmugDNA.31984.1 | 4.06  | 3.72  | 0.5  | 0.09 | 1.26  | 0.311616 | 0.473766 | 0.597735 | 0.68101  |
| MmugDNA.31985.1.S1_at   | MmugDNA.31985.1 | 8.81  | 8.65  | 0.28 | 0.15 | 1.11  | 0.16271  | 0.745247 | 0.454777 | 0.852317 |
| MmugDNA.31986.1.S1_s_at | MmugDNA.31986.1 | 9.75  | 8.48  | 0.04 | 0.17 | 2.41  | 0.000186 | 0.000192 | 0.053494 | 0.030888 |
| MmugDNA.31988.1.S1_at   | MmugDNA.31988.1 | 5.85  | 5.86  | 0.16 | 0.01 | -1    | 0.392595 | 0.555951 | 0.659492 | 0.734244 |
| MmugDNA.3199.1.S1_at    | MmugDNA.3199.1  | 3.32  | 3.29  | 0.14 | 0.08 | 1.02  | 0.50172  | 0.658118 | 0.735507 | 0.800181 |
| MmugDNA.31990.1.S1_at   | MmugDNA.31990.1 | 6.78  | 6.64  | 0.07 | 0.08 | 1.11  | 0.089212 | 0.254502 | 0.355966 | 0.522829 |
| MmugDNA.31991.1.S1_at   | MmugDNA.31991.1 | 9.93  | 9.53  | 0.06 | 0.09 | 1.32  | 0.003568 | 0.006166 | 0.104895 | 0.106774 |
| MmugDNA.31992.1.S1_at   | MmugDNA.31992.1 | 4.86  | 4.27  | 0.69 | 0.22 | 1.51  | 0.23213  | 0.222515 | 0.530631 | 0.495588 |
| MmugDNA.31994.1.S1_at   | MmugDNA.31994.1 | 3.02  | 3.31  | 0.08 | 0.21 | -1.22 | 0.165887 | 0.295684 | 0.458853 | 0.555113 |
| MmugDNA.31998.1.S1_at   | MmugDNA.31998.1 | 10.69 | 10.7  | 0.26 | 0.2  | -1    | 0.609482 | 0.057239 | 0.805285 | 0.285059 |
| MmugDNA.31999.1.S1_at   | MmugDNA.31999.1 | 6.21  | 6.32  | 0.29 | 0.1  | -1.08 | 0.412671 | 0.659081 | 0.674202 | 0.800513 |
| MmugDNA.31999.1.S1_s_at | MmugDNA.31999.1 | 3.85  | 4.44  | 0.09 | 0.64 | -1.5  | 0.166155 | 0.249542 | 0.459234 | 0.518596 |
| MmugDNA.32.1.S1_at      | MmugDNA.32.1    | 3.42  | 3.39  | 0.43 | 0.3  | 1.03  | 0.407307 | 0.60628  | 0.670391 | 0.765727 |
| MmugDNA.320.1.S1_at     | MmugDNA.320.1   | 7.46  | 8.01  | 0.32 | 0.09 | -1.47 | 0.123384 | 0.143314 | 0.402711 | 0.417294 |
| MmugDNA.3200.1.S1_at    | MmugDNA.3200.1  | 5.11  | 4.49  | 0.21 | 0.24 | 1.54  | 0.05716  | 0.064145 | 0.296384 | 0.29954  |

|                         |                 |       |       |      |      |       |          |          |          |          |
|-------------------------|-----------------|-------|-------|------|------|-------|----------|----------|----------|----------|
| MmugDNA.32000.1.S1_at   | MmugDNA.32000.1 | 6.88  | 6.68  | 0.29 | 0.11 | 1.15  | 0.213341 | 0.424677 | 0.511138 | 0.647214 |
| MmugDNA.32001.1.S1_at   | MmugDNA.32001.1 | 3.47  | 3.5   | 0.09 | 0.1  | -1.02 | 0.626252 | 0.455149 | 0.815861 | 0.669135 |
| MmugDNA.32003.1.S1_at   | MmugDNA.32003.1 | 5.22  | 5.09  | 0.39 | 0.07 | 1.09  | 0.549832 | 0.458181 | 0.767442 | 0.671077 |
| MmugDNA.32005.1.S1_at   | MmugDNA.32005.1 | 7.81  | 7.79  | 0.07 | 0.02 | 1.02  | 0.362649 | 0.577013 | 0.63739  | 0.747605 |
| MmugDNA.32006.1.S1_at   | MmugDNA.32006.1 | 7.69  | 7.6   | 0.27 | 0.02 | 1.07  | 0.662019 | 0.822607 | 0.836881 | 0.89799  |
| MmugDNA.32006.1.S1_s_at | MmugDNA.32006.1 | 6.53  | 6.59  | 0.3  | 0.08 | -1.05 | 0.564649 | 0.829555 | 0.776277 | 0.902076 |
| MmugDNA.32008.1.S1_at   | MmugDNA.32008.1 | 8.66  | 8.53  | 0.24 | 0.17 | 1.09  | 0.534746 | 0.01786  | 0.757913 | 0.168774 |
| MmugDNA.32009.1.S1_at   | MmugDNA.32009.1 | 8.91  | 7.99  | 0.36 | 0.07 | 1.89  | 0.013094 | 0.004323 | 0.165061 | 0.092241 |
| MmugDNA.3201.1.S1_at    | MmugDNA.3201.1  | 4.27  | 4.18  | 0.39 | 0.33 | 1.06  | 0.317826 | 0.257661 | 0.602606 | 0.525332 |
| MmugDNA.32010.1.S1_at   | MmugDNA.32010.1 | 3.83  | 4.18  | 0.18 | 0.19 | -1.27 | 0.079635 | 0.075596 | 0.33985  | 0.32003  |
| MmugDNA.32011.1.S1_at   | MmugDNA.32011.1 | 6.47  | 6.56  | 0.1  | 0.1  | -1.07 | 0.312883 | 0.419185 | 0.598797 | 0.643394 |
| MmugDNA.32012.1.S1_at   | MmugDNA.32012.1 | 6.05  | 6.26  | 0.19 | 0.12 | -1.15 | 0.779822 | 0.953643 | 0.899487 | 0.973626 |
| MmugDNA.32015.1.S1_at   | MmugDNA.32015.1 | 6.7   | 7.2   | 0.43 | 0.17 | -1.41 | 0.092782 | 0.348208 | 0.361241 | 0.592413 |
| MmugDNA.32016.1.S1_at   | MmugDNA.32016.1 | 9.57  | 10.71 | 0.57 | 0.26 | -2.2  | 0.041813 | 0.122943 | 0.261223 | 0.392923 |
| MmugDNA.32017.1.S1_at   | MmugDNA.32017.1 | 4.05  | 4.41  | 0.18 | 0.12 | -1.29 | 0.081394 | 0.075828 | 0.342343 | 0.320436 |
| MmugDNA.3202.1.S1_at    | MmugDNA.3202.1  | 8.01  | 7.75  | 0.28 | 0.26 | 1.21  | 0.49573  | 0.266344 | 0.73183  | 0.532114 |
| MmugDNA.32020.1.S1_at   | MmugDNA.32020.1 | 6.23  | 6.33  | 0.12 | 0.13 | -1.07 | 0.147553 | 0.553737 | 0.43548  | 0.732785 |
| MmugDNA.32021.1.S1_at   | MmugDNA.32021.1 | 3.14  | 3.14  | 0.08 | 0.08 | -1    | 0.520462 | 0.417309 | 0.748788 | 0.642143 |
| MmugDNA.32023.1.S1_at   | MmugDNA.32023.1 | 10.79 | 10.92 | 0.2  | 0.08 | -1.1  | 0.287669 | 0.405284 | 0.577473 | 0.633642 |
| MmugDNA.32025.1.S1_at   | MmugDNA.32025.1 | 3.59  | 3.51  | 0.21 | 0.08 | 1.05  | 0.767058 | 0.919792 | 0.893102 | 0.954906 |
| MmugDNA.32026.1.S1_at   | MmugDNA.32026.1 | 5.58  | 5.68  | 0.25 | 0    | -1.07 | 0.764917 | 0.811858 | 0.892125 | 0.891451 |
| MmugDNA.32027.1.S1_at   | MmugDNA.32027.1 | 7.66  | 7.29  | 0.27 | 0.4  | 1.3   | 0.257273 | 0.222622 | 0.551586 | 0.495617 |
| MmugDNA.32028.1.S1_at   | MmugDNA.32028.1 | 8.1   | 6.96  | 0.49 | 0.18 | 2.21  | 0.046792 | 0.154778 | 0.273939 | 0.42979  |
| MmugDNA.32029.1.S1_at   | MmugDNA.32029.1 | 6.45  | 6.62  | 0.37 | 0.12 | -1.13 | 0.42322  | 0.59196  | 0.68131  | 0.757386 |
| MmugDNA.3203.1.S1_at    | MmugDNA.3203.1  | 11.43 | 12.39 | 0.28 | 0.23 | -1.94 | 0.009231 | 0.023996 | 0.145865 | 0.194183 |
| MmugDNA.32030.1.S1_at   | MmugDNA.32030.1 | 6.54  | 6.67  | 0.08 | 0.2  | -1.09 | 0.628523 | 0.827099 | 0.81747  | 0.900721 |
| MmugDNA.32032.1.S1_at   | MmugDNA.32032.1 | 3.62  | 3.38  | 0.28 | 0.1  | 1.18  | 0.145364 | 0.168724 | 0.432667 | 0.445379 |
| MmugDNA.32033.1.S1_at   | MmugDNA.32033.1 | 6.16  | 6.16  | 0.19 | 0.06 | 1     | 0.773818 | 0.140384 | 0.896356 | 0.413586 |
| MmugDNA.32034.1.S1_at   | MmugDNA.32034.1 | 7.55  | 7.34  | 0.27 | 0.09 | 1.16  | 0.256346 | 0.297074 | 0.550839 | 0.555996 |
| MmugDNA.32035.1.S1_at   | MmugDNA.32035.1 | 5.76  | 5.76  | 0.05 | 0.14 | 1     | 0.846794 | 0.712776 | 0.933126 | 0.8335   |
| MmugDNA.32036.1.S1_at   | MmugDNA.32036.1 | 3.96  | 3.95  | 0.35 | 0.11 | 1     | 0.269397 | 0.71418  | 0.561735 | 0.834155 |
| MmugDNA.32038.1.S1_at   | MmugDNA.32038.1 | 8.96  | 8.67  | 0.08 | 0.13 | 1.22  | 0.068659 | 0.235603 | 0.319908 | 0.506671 |
| MmugDNA.32039.1.S1_at   | MmugDNA.32039.1 | 13.56 | 13.59 | 0.28 | 0.08 | -1.02 | 0.959285 | 0.954455 | 0.983355 | 0.974155 |
| MmugDNA.32039.1.S1_x_at | MmugDNA.32039.1 | 14.08 | 14.07 | 0.14 | 0.03 | 1.01  | 0.555571 | 0.76165  | 0.771368 | 0.861459 |
| MmugDNA.3204.1.S1_at    | MmugDNA.3204.1  | 8.61  | 10.2  | 0.65 | 0.17 | -3.03 | 0.042755 | 0.12359  | 0.263924 | 0.393637 |
| MmugDNA.32040.1.S1_at   | MmugDNA.32040.1 | 12.46 | 12.07 | 0.12 | 0.05 | 1.31  | 0.012272 | 0.005195 | 0.161109 | 0.099895 |
| MmugDNA.32041.1.S1_at   | MmugDNA.32041.1 | 5.64  | 5.39  | 0.28 | 0.05 | 1.19  | 0.516154 | 0.685608 | 0.745613 | 0.816542 |
| MmugDNA.32043.1.S1_at   | MmugDNA.32043.1 | 6.65  | 6.24  | 0.33 | 0.07 | 1.33  | 0.103747 | 0.085004 | 0.377036 | 0.336712 |
| MmugDNA.32044.1.S1_at   | MmugDNA.32044.1 | 5.19  | 5.11  | 0.22 | 0.15 | 1.06  | 0.637227 | 0.333989 | 0.822365 | 0.582063 |
| MmugDNA.32045.1.S1_x_at | MmugDNA.32045.1 | 9.98  | 9.89  | 0.45 | 0.07 | 1.07  | 0.210265 | 0.134062 | 0.507866 | 0.406276 |
| MmugDNA.32046.1.S1_at   | MmugDNA.32046.1 | 4.67  | 5.02  | 0.33 | 0.04 | -1.27 | 0.407085 | 0.588417 | 0.670235 | 0.754907 |
| MmugDNA.32047.1.S1_at   | MmugDNA.32047.1 | 11.53 | 11.43 | 0.04 | 0.04 | 1.07  | 0.021333 | 0.173604 | 0.199674 | 0.449956 |
| MmugDNA.32048.1.S1_at   | MmugDNA.32048.1 | 4.92  | 4.99  | 0.22 | 0.11 | -1.05 | 0.711519 | 0.70028  | 0.863886 | 0.826033 |

|                         |                 |       |       |      |      |       |          |          |          |          |
|-------------------------|-----------------|-------|-------|------|------|-------|----------|----------|----------|----------|
| MmugDNA.32049.1.S1_at   | MmugDNA.32049.1 | 11.05 | 11.02 | 0.22 | 0.05 | 1.02  | 0.23668  | 0.780363 | 0.534328 | 0.872597 |
| MmugDNA.3205.1.S1_at    | MmugDNA.3205.1  | 4.21  | 4.21  | 0.1  | 0.03 | 1     | 0.536038 | 0.106954 | 0.75873  | 0.369526 |
| MmugDNA.32050.1.S1_at   | MmugDNA.32050.1 | 8.86  | 9.04  | 0.59 | 0.13 | -1.13 | 0.863292 | 0.000975 | 0.940581 | 0.04983  |
| MmugDNA.32052.1.S1_at   | MmugDNA.32052.1 | 4.31  | 4.3   | 0.08 | 0.15 | 1.01  | 0.852965 | 0.940234 | 0.936004 | 0.966105 |
| MmugDNA.32053.1.S1_at   | MmugDNA.32053.1 | 4.16  | 4.15  | 0.11 | 0.08 | 1.01  | 0.794088 | 0.866047 | 0.906998 | 0.923791 |
| MmugDNA.32055.1.S1_at   | MmugDNA.32055.1 | 5.65  | 6.28  | 0.26 | 0.46 | -1.55 | 0.084346 | 0.082346 | 0.347729 | 0.331322 |
| MmugDNA.32056.1.S1_at   | MmugDNA.32056.1 | 6.76  | 6.95  | 0.22 | 0.38 | -1.14 | 0.476143 | 0.000176 | 0.718688 | 0.030511 |
| MmugDNA.32057.1.S1_at   | MmugDNA.32057.1 | 6.18  | 5.99  | 0.34 | 0.08 | 1.14  | 0.773217 | 0.958265 | 0.89602  | 0.976345 |
| MmugDNA.3206.1.S1_at    | MmugDNA.3206.1  | 3.48  | 3.3   | 0.24 | 0.1  | 1.13  | 0.370829 | 0.308359 | 0.643657 | 0.564428 |
| MmugDNA.32060.1.S1_s_at | MmugDNA.32060.1 | 10.82 | 11.06 | 0.08 | 0.08 | -1.17 | 0.021788 | 0.061866 | 0.200878 | 0.295577 |
| MmugDNA.32061.1.S1_at   | MmugDNA.32061.1 | 4.86  | 4.85  | 0.07 | 0.12 | 1.01  | 0.727775 | 0.463928 | 0.87256  | 0.674716 |
| MmugDNA.32062.1.S1_at   | MmugDNA.32062.1 | 5.69  | 5.44  | 0.07 | 0.04 | 1.2   | 0.005303 | 0.080398 | 0.11776  | 0.328028 |
| MmugDNA.32066.1.S1_at   | MmugDNA.32066.1 | 9.37  | 9.5   | 0.06 | 0.24 | -1.1  | 0.169427 | 0.052605 | 0.462642 | 0.274853 |
| MmugDNA.32068.1.S1_at   | MmugDNA.32068.1 | 5.91  | 5.87  | 0.49 | 0.14 | 1.03  | 0.934972 | 0.18062  | 0.972797 | 0.457245 |
| MmugDNA.32069.1.S1_at   | MmugDNA.32069.1 | 8.53  | 8.98  | 0.28 | 0.14 | -1.37 | 0.034773 | 0.104212 | 0.241036 | 0.365373 |
| MmugDNA.3207.1.S1_at    | MmugDNA.3207.1  | 5.62  | 5.54  | 0.12 | 0.16 | 1.05  | 0.235809 | 0.213328 | 0.533475 | 0.487225 |
| MmugDNA.32070.1.S1_at   | MmugDNA.32070.1 | 5.18  | 6.19  | 0.26 | 0.14 | -2.02 | 0.00226  | 0.00055  | 0.091423 | 0.040948 |
| MmugDNA.32071.1.S1_at   | MmugDNA.32071.1 | 5.88  | 6.4   | 0.4  | 0.25 | -1.44 | 0.092183 | 0.364909 | 0.360155 | 0.60517  |
| MmugDNA.32072.1.S1_at   | MmugDNA.32072.1 | 10.14 | 9.76  | 0.31 | 0.05 | 1.3   | 0.281296 | 0.411808 | 0.572148 | 0.638434 |
| MmugDNA.32075.1.S1_at   | MmugDNA.32075.1 | 10.16 | 9.93  | 0.26 | 0.24 | 1.17  | 0.831465 | 0.123147 | 0.925902 | 0.393174 |
| MmugDNA.32075.1.S1_x_at | MmugDNA.32075.1 | 10.19 | 10.08 | 0.23 | 0.19 | 1.08  | 0.896387 | 0.081616 | 0.955914 | 0.329824 |
| MmugDNA.32076.1.S1_at   | MmugDNA.32076.1 | 11.11 | 10.55 | 0.15 | 0.05 | 1.48  | 0.008205 | 0.017027 | 0.139704 | 0.165384 |
| MmugDNA.32077.1.S1_at   | MmugDNA.32077.1 | 4.43  | 4.23  | 0.36 | 0.22 | 1.15  | 0.1798   | 0.334689 | 0.474853 | 0.582592 |
| MmugDNA.32078.1.S1_at   | MmugDNA.32078.1 | 8.95  | 7.23  | 0.47 | 0.28 | 3.3   | 0.010001 | 0.004007 | 0.149381 | 0.089969 |
| MmugDNA.32080.1.S1_at   | MmugDNA.32080.1 | 2.96  | 2.96  | 0.13 | 0.1  | -1    | 0.324197 | 0.360619 | 0.607883 | 0.601657 |
| MmugDNA.32082.1.S1_at   | MmugDNA.32082.1 | 6.59  | 5.97  | 0.93 | 0.12 | 1.53  | 0.117191 | 0.131627 | 0.394442 | 0.403716 |
| MmugDNA.32083.1.S1_at   | MmugDNA.32083.1 | 3.23  | 3.16  | 0.17 | 0.22 | 1.04  | 0.644645 | 0.712903 | 0.827017 | 0.833557 |
| MmugDNA.32087.1.S1_at   | MmugDNA.32087.1 | 5.65  | 5.65  | 0.12 | 0.02 | -1    | 0.464087 | 0.385692 | 0.710505 | 0.621079 |
| MmugDNA.32088.1.S1_at   | MmugDNA.32088.1 | 3.04  | 2.96  | 0.03 | 0.18 | 1.06  | 0.498897 | 0.717885 | 0.733962 | 0.836699 |
| MmugDNA.32092.1.S1_at   | MmugDNA.32092.1 | 6.16  | 6.35  | 0.11 | 0.28 | -1.15 | 0.285435 | 0.477103 | 0.575167 | 0.683209 |
| MmugDNA.32095.1.S1_at   | MmugDNA.32095.1 | 12.47 | 12.24 | 0.05 | 0.06 | 1.17  | 0.008645 | 0.009201 | 0.142384 | 0.126579 |
| MmugDNA.32096.1.S1_at   | MmugDNA.32096.1 | 6.85  | 7.11  | 0.29 | 0.75 | -1.2  | 0.475686 | 0.128863 | 0.718263 | 0.400277 |
| MmugDNA.321.1.S1_at     | MmugDNA.321.1   | 4.01  | 4.9   | 0.62 | 0.24 | -1.86 | 0.043764 | 0.176798 | 0.266264 | 0.45321  |
| MmugDNA.3210.1.S1_at    | MmugDNA.3210.1  | 4.95  | 4.86  | 0.05 | 0.07 | 1.07  | 0.24156  | 0.010014 | 0.538663 | 0.131262 |
| MmugDNA.32100.1.S1_at   | MmugDNA.32100.1 | 7.73  | 6.5   | 0.23 | 0.15 | 2.36  | 0.002977 | 0.012579 | 0.099641 | 0.14463  |
| MmugDNA.32102.1.S1_at   | MmugDNA.32102.1 | 3.52  | 3.47  | 0.14 | 0.07 | 1.04  | 0.335532 | 0.503453 | 0.616435 | 0.700892 |
| MmugDNA.32104.1.S1_at   | MmugDNA.32104.1 | 5.36  | 5.86  | 0.41 | 0.17 | -1.41 | 0.094659 | 0.160943 | 0.363621 | 0.437116 |
| MmugDNA.32105.1.S1_at   | MmugDNA.32105.1 | 13.98 | 14.12 | 0.05 | 0.05 | -1.1  | 0.050489 | 0.041286 | 0.282507 | 0.247995 |
| MmugDNA.32107.1.S1_at   | MmugDNA.32107.1 | 5.79  | 5.74  | 0.15 | 0.11 | 1.04  | 0.12767  | 0.14224  | 0.409569 | 0.415754 |
| MmugDNA.32108.1.S1_at   | MmugDNA.32108.1 | 7.45  | 7.57  | 0.3  | 0.2  | -1.08 | 0.15732  | 0.341387 | 0.448021 | 0.587526 |
| MmugDNA.32109.1.S1_at   | MmugDNA.32109.1 | 5.36  | 5.38  | 0.15 | 0.05 | -1.01 | 0.490659 | 0.632604 | 0.728737 | 0.783658 |
| MmugDNA.3211.1.S1_x_at  | MmugDNA.3211.1  | 6.37  | 5.48  | 0.81 | 0.39 | 1.85  | 0.096067 | 0.108237 | 0.365529 | 0.371557 |
| MmugDNA.32110.1.S1_at   | MmugDNA.32110.1 | 3.83  | 3.83  | 0.81 | 0.32 | -1.01 | 0.371652 | 0.423861 | 0.644295 | 0.646555 |

|                         |                 |       |       |      |      |       |          |          |          |          |
|-------------------------|-----------------|-------|-------|------|------|-------|----------|----------|----------|----------|
| MmugDNA.32111.1.S1_at   | MmugDNA.32111.1 | 5.24  | 4.74  | 0.21 | 0.38 | 1.41  | 0.298844 | 0.559904 | 0.587038 | 0.736439 |
| MmugDNA.32112.1.S1_at   | MmugDNA.32112.1 | 4.24  | 4.5   | 0.13 | 0.06 | -1.19 | 0.027573 | 0.456492 | 0.218571 | 0.670197 |
| MmugDNA.32113.1.S1_at   | MmugDNA.32113.1 | 5.39  | 5.4   | 0.13 | 0.03 | -1.01 | 0.835062 | 0.764001 | 0.927448 | 0.86279  |
| MmugDNA.32114.1.S1_at   | MmugDNA.32114.1 | 8.42  | 7.41  | 0.22 | 0.19 | 2.02  | 0.003562 | 0.00357  | 0.104891 | 0.085525 |
| MmugDNA.32115.1.S1_at   | MmugDNA.32115.1 | 9.46  | 10.01 | 0.32 | 0.06 | -1.47 | 0.04078  | 0.017261 | 0.258464 | 0.166393 |
| MmugDNA.32117.1.S1_at   | MmugDNA.32117.1 | 6.08  | 5.72  | 0.4  | 0.34 | 1.28  | 0.574478 | 0.239631 | 0.781968 | 0.510315 |
| MmugDNA.32118.1.S1_at   | MmugDNA.32118.1 | 4.32  | 3.98  | 0.23 | 0.1  | 1.26  | 0.088654 | 0.087846 | 0.355022 | 0.341218 |
| MmugDNA.32119.1.S1_at   | MmugDNA.32119.1 | 9.37  | 8.88  | 0.48 | 0.09 | 1.41  | 0.064248 | 0.135913 | 0.309883 | 0.408103 |
| MmugDNA.32120.1.S1_at   | MmugDNA.32120.1 | 4.43  | 6.34  | 0.84 | 0.37 | -3.76 | 0.048019 | 0.022243 | 0.276495 | 0.18659  |
| MmugDNA.32121.1.S1_at   | MmugDNA.32121.1 | 4.23  | 4.2   | 0.42 | 0.32 | 1.02  | 0.978625 | 0.998388 | 0.991776 | 0.999091 |
| MmugDNA.32122.1.S1_at   | MmugDNA.32122.1 | 7.19  | 6.96  | 0.09 | 0.2  | 1.17  | 0.235504 | 0.574192 | 0.533339 | 0.745679 |
| MmugDNA.32123.1.S1_at   | MmugDNA.32123.1 | 7.36  | 7.33  | 0.27 | 0.26 | 1.02  | 0.491051 | 0.119671 | 0.729    | 0.388324 |
| MmugDNA.32125.1.S1_at   | MmugDNA.32125.1 | 7.44  | 7.33  | 0.21 | 0.1  | 1.08  | 0.274495 | 0.016672 | 0.566378 | 0.163492 |
| MmugDNA.32126.1.S1_at   | MmugDNA.32126.1 | 3.73  | 3.81  | 0.22 | 0.02 | -1.06 | 0.389803 | 0.504429 | 0.657536 | 0.701557 |
| MmugDNA.3213.1.S1_at    | MmugDNA.3213.1  | 6.52  | 6.5   | 0.15 | 0.02 | 1.02  | 0.448358 | 0.482896 | 0.699971 | 0.68765  |
| MmugDNA.32130.1.S1_at   | MmugDNA.32130.1 | 5.41  | 5.7   | 0.23 | 0.13 | -1.22 | 0.445651 | 0.114786 | 0.698076 | 0.381311 |
| MmugDNA.32133.1.S1_at   | MmugDNA.32133.1 | 11.61 | 11.79 | 0.09 | 0.09 | -1.13 | 0.073233 | 0.044955 | 0.328341 | 0.256489 |
| MmugDNA.32134.1.S1_at   | MmugDNA.32134.1 | 3.72  | 3.58  | 0.18 | 0.15 | 1.1   | 0.343398 | 0.242019 | 0.622974 | 0.512573 |
| MmugDNA.32135.1.S1_at   | MmugDNA.32135.1 | 8.67  | 8.46  | 0.22 | 0.01 | 1.15  | 0.167698 | 0.145721 | 0.460921 | 0.419653 |
| MmugDNA.32136.1.S1_at   | MmugDNA.32136.1 | 4.25  | 4.16  | 0.3  | 0.06 | 1.07  | 0.87527  | 0.747312 | 0.946453 | 0.853149 |
| MmugDNA.32137.1.S1_at   | MmugDNA.32137.1 | 4.87  | 4.75  | 0.11 | 0.03 | 1.09  | 0.305616 | 0.214039 | 0.592699 | 0.487633 |
| MmugDNA.32138.1.S1_at   | MmugDNA.32138.1 | 7.85  | 7.77  | 0.11 | 0.32 | 1.06  | 0.167031 | 0.347185 | 0.460288 | 0.591815 |
| MmugDNA.32139.1.S1_at   | MmugDNA.32139.1 | 3.7   | 3.88  | 0.21 | 0.34 | -1.13 | 0.250843 | 0.214007 | 0.545477 | 0.487633 |
| MmugDNA.32140.1.S1_at   | MmugDNA.32140.1 | 4.69  | 4.75  | 0.09 | 0    | -1.05 | 0.221235 | 0.384268 | 0.519232 | 0.619994 |
| MmugDNA.32141.1.S1_at   | MmugDNA.32141.1 | 5.23  | 6.13  | 0.39 | 0.72 | -1.86 | 0.24887  | 0.04438  | 0.544234 | 0.255157 |
| MmugDNA.32142.1.S1_at   | MmugDNA.32142.1 | 5.58  | 5.58  | 0.12 | 0.06 | 1     | 0.692949 | 0.1503   | 0.853254 | 0.424877 |
| MmugDNA.32143.1.S1_at   | MmugDNA.32143.1 | 5.75  | 5.91  | 0.1  | 0.04 | -1.12 | 0.165301 | 0.399911 | 0.458322 | 0.63009  |
| MmugDNA.32146.1.S1_at   | MmugDNA.32146.1 | 8.74  | 7.88  | 0.31 | 0.23 | 1.81  | 0.037569 | 0.184222 | 0.249272 | 0.460382 |
| MmugDNA.32147.1.S1_at   | MmugDNA.32147.1 | 5.27  | 5.26  | 0.03 | 0.05 | 1.01  | 0.419519 | 0.124864 | 0.678845 | 0.395219 |
| MmugDNA.32149.1.S1_at   | MmugDNA.32149.1 | 6.65  | 5.82  | 0.39 | 0.37 | 1.77  | 0.124002 | 0.033565 | 0.403906 | 0.226764 |
| MmugDNA.3215.1.S1_at    | MmugDNA.3215.1  | 4.4   | 4.47  | 0.19 | 0.04 | -1.05 | 0.505614 | 0.779446 | 0.738603 | 0.87211  |
| MmugDNA.32151.1.S1_at   | MmugDNA.32151.1 | 3.76  | 3.92  | 0.16 | 0.12 | -1.12 | 0.21028  | 0.158668 | 0.507879 | 0.4347   |
| MmugDNA.17076.1.S1_s_at | MmugDNA.17076.1 | 4.97  | 5.01  | 0.5  | 0.17 | -1.02 | 0.446722 | 0.374836 | 0.698851 | 0.613091 |
| MmugDNA.32153.1.S1_at   | MmugDNA.32153.1 | 5.17  | 5.42  | 0.36 | 0.6  | -1.18 | 0.518846 | 0.215679 | 0.747765 | 0.489477 |
| MmugDNA.32154.1.S1_s_at | MmugDNA.32154.1 | 9.46  | 9.64  | 0.17 | 0.14 | -1.14 | 0.187318 | 0.213103 | 0.483405 | 0.487054 |
| MmugDNA.32155.1.S1_at   | MmugDNA.32155.1 | 9.71  | 9.01  | 0.18 | 0.13 | 1.63  | 0.013057 | 0.0003   | 0.165004 | 0.034892 |
| MmugDNA.32156.1.S1_at   | MmugDNA.32156.1 | 4.6   | 4.58  | 0.1  | 0.12 | 1.01  | 0.766532 | 0.55533  | 0.892905 | 0.733767 |
| MmugDNA.32157.1.S1_at   | MmugDNA.32157.1 | 9.93  | 10.17 | 0.17 | 0.12 | -1.18 | 0.057606 | 0.004277 | 0.297348 | 0.091847 |
| MmugDNA.32157.1.S1_s_at | MmugDNA.32157.1 | 7.95  | 8.36  | 0.33 | 0.07 | -1.33 | 0.312275 | 0.032372 | 0.59826  | 0.222746 |
| MmugDNA.32158.1.S1_at   | MmugDNA.32158.1 | 4.08  | 4.01  | 0.16 | 0.1  | 1.05  | 0.576355 | 0.617167 | 0.783164 | 0.773242 |
| MmugDNA.32159.1.S1_at   | MmugDNA.32159.1 | 3.62  | 3.33  | 0.5  | 0.1  | 1.21  | 0.191871 | 0.194027 | 0.488386 | 0.469151 |
| MmugDNA.3216.1.S1_at    | MmugDNA.3216.1  | 5.53  | 5.06  | 0.72 | 0.08 | 1.38  | 0.335287 | 0.064764 | 0.61622  | 0.300435 |
| MmugDNA.32160.1.S1_at   | MmugDNA.32160.1 | 3.17  | 3     | 0.21 | 0.12 | 1.12  | 0.317333 | 0.170669 | 0.602095 | 0.447252 |

|                         |                 |       |       |      |      |       |          |          |          |          |
|-------------------------|-----------------|-------|-------|------|------|-------|----------|----------|----------|----------|
| MmugDNA.32161.1.S1_at   | MmugDNA.32161.1 | 4.59  | 4.57  | 0.15 | 0.12 | 1.01  | 0.346464 | 0.495987 | 0.624993 | 0.695851 |
| MmugDNA.32162.1.S1_at   | MmugDNA.32162.1 | 6.42  | 6.11  | 0.31 | 0.41 | 1.24  | 0.688907 | 0.898568 | 0.851438 | 0.942254 |
| MmugDNA.32164.1.S1_at   | MmugDNA.32164.1 | 2.99  | 2.86  | 0.46 | 0.4  | 1.09  | 0.671006 | 0.885836 | 0.842207 | 0.93508  |
| MmugDNA.32165.1.S1_at   | MmugDNA.32165.1 | 5.28  | 5.04  | 0.19 | 0.55 | 1.19  | 0.699874 | 0.630626 | 0.857467 | 0.782345 |
| MmugDNA.32166.1.S1_at   | MmugDNA.32166.1 | 4.89  | 4.46  | 0.69 | 0.45 | 1.34  | 0.479559 | 0.427453 | 0.720736 | 0.649291 |
| MmugDNA.32168.1.S1_at   | MmugDNA.32168.1 | 3.76  | 3.78  | 0.7  | 0.12 | -1.01 | 0.886584 | 0.966094 | 0.951718 | 0.981014 |
| MmugDNA.3217.1.S1_at    | MmugDNA.3217.1  | 10.65 | 11.03 | 0.35 | 0.15 | -1.29 | 0.296911 | 0.013563 | 0.585528 | 0.149001 |
| MmugDNA.32171.1.S1_s_at | MmugDNA.32171.1 | 11.74 | 11.58 | 0.13 | 0.07 | 1.12  | 0.370227 | 0.129359 | 0.643257 | 0.400748 |
| MmugDNA.32173.1.S1_at   | MmugDNA.32173.1 | 5.75  | 5.67  | 0.12 | 0.04 | 1.06  | 0.537322 | 0.100274 | 0.759526 | 0.359318 |
| MmugDNA.32174.1.S1_at   | MmugDNA.32174.1 | 3.59  | 3.27  | 0.33 | 0    | 1.25  | 0.16498  | 0.080734 | 0.457897 | 0.328632 |
| MmugDNA.32175.1.S1_at   | MmugDNA.32175.1 | 7.49  | 7.06  | 0.79 | 0.36 | 1.35  | 0.969899 | 0.872307 | 0.98803  | 0.927429 |
| MmugDNA.32176.1.S1_at   | MmugDNA.32176.1 | 10.24 | 10.2  | 0.14 | 0.12 | 1.03  | 0.687174 | 0.002153 | 0.850763 | 0.068739 |
| MmugDNA.32177.1.S1_at   | MmugDNA.32177.1 | 3.98  | 3.94  | 0.25 | 0.08 | 1.03  | 0.893326 | 0.974073 | 0.954498 | 0.985859 |
| MmugDNA.32178.1.S1_at   | MmugDNA.32178.1 | 7.2   | 6.94  | 0.44 | 0.21 | 1.2   | 0.402773 | 0.070154 | 0.667011 | 0.311081 |
| MmugDNA.32179.1.S1_at   | MmugDNA.32179.1 | 4.04  | 3.54  | 0.47 | 0.12 | 1.41  | 0.219845 | 0.17926  | 0.51762  | 0.45567  |
| MmugDNA.3218.1.S1_at    | MmugDNA.3218.1  | 4.59  | 3.83  | 0.77 | 0.11 | 1.69  | 0.512505 | 0.405707 | 0.742975 | 0.633894 |
| MmugDNA.32181.1.S1_at   | MmugDNA.32181.1 | 4.85  | 5.27  | 0.47 | 0.05 | -1.34 | 0.372806 | 0.563739 | 0.645067 | 0.738808 |
| MmugDNA.32183.1.S1_at   | MmugDNA.32183.1 | 5.84  | 4.99  | 0.12 | 0.05 | 1.81  | 0.000374 | 0.018449 | 0.062479 | 0.170868 |
| MmugDNA.32184.1.S1_at   | MmugDNA.32184.1 | 8.63  | 8.24  | 0.22 | 0.15 | 1.31  | 0.086772 | 0.023912 | 0.351991 | 0.193701 |
| MmugDNA.32185.1.S1_s_at | MmugDNA.32185.1 | 6.81  | 6.77  | 0.25 | 0.04 | 1.03  | 0.91993  | 0.583763 | 0.96576  | 0.751983 |
| MmugDNA.32187.1.S1_at   | MmugDNA.32187.1 | 6.62  | 6.3   | 0.14 | 0.07 | 1.24  | 0.064083 | 0.362175 | 0.309716 | 0.602827 |
| MmugDNA.32188.1.S1_at   | MmugDNA.32188.1 | 10.41 | 10.6  | 0.22 | 0.11 | -1.14 | 0.259825 | 0.410571 | 0.554139 | 0.637403 |
| MmugDNA.32189.1.S1_at   | MmugDNA.32189.1 | 10.18 | 11.23 | 0.85 | 0.25 | -2.07 | 0.457012 | 0.285857 | 0.706061 | 0.547484 |
| MmugDNA.3219.1.S1_at    | MmugDNA.3219.1  | 3.42  | 3.41  | 0.16 | 0.01 | 1.01  | 0.914193 | 0.986472 | 0.963609 | 0.992348 |
| MmugDNA.32190.1.S1_at   | MmugDNA.32190.1 | 7.2   | 7.44  | 0.12 | 0.41 | -1.18 | 0.401161 | 0.820057 | 0.665914 | 0.89632  |
| MmugDNA.32192.1.S1_at   | MmugDNA.32192.1 | 5.49  | 6.02  | 0.24 | 0.09 | -1.44 | 0.025651 | 0.020161 | 0.212966 | 0.178414 |
| MmugDNA.32193.1.S1_at   | MmugDNA.32193.1 | 6.38  | 6.21  | 0.18 | 0.47 | 1.13  | 0.617485 | 0.090658 | 0.810046 | 0.345151 |
| MmugDNA.32196.1.S1_at   | MmugDNA.32196.1 | 6.5   | 6.12  | 0.3  | 0.2  | 1.29  | 0.080477 | 0.099099 | 0.341026 | 0.357241 |
| MmugDNA.32197.1.S1_at   | MmugDNA.32197.1 | 5     | 5.08  | 0.65 | 0.59 | -1.06 | 0.462035 | 0.435658 | 0.7093   | 0.655446 |
| MmugDNA.32198.1.S1_at   | MmugDNA.32198.1 | 5.43  | 5.4   | 0.42 | 0.15 | 1.02  | 0.493371 | 0.889689 | 0.730385 | 0.937154 |
| MmugDNA.32199.1.S1_at   | MmugDNA.32199.1 | 3.71  | 3.73  | 0.39 | 0.13 | -1.01 | 0.817258 | 0.882244 | 0.918362 | 0.932845 |
| MmugDNA.32200.1.S1_at   | MmugDNA.32200.1 | 4.21  | 5     | 0.32 | 0.18 | -1.74 | 0.046324 | 0.096525 | 0.272999 | 0.354096 |
| MmugDNA.32201.1.S1_at   | MmugDNA.32201.1 | 4.32  | 4.24  | 0.21 | 0.06 | 1.06  | 0.407429 | 0.615013 | 0.670508 | 0.771689 |
| MmugDNA.32202.1.S1_at   | MmugDNA.32202.1 | 3.55  | 3.25  | 0.7  | 0.24 | 1.23  | 0.328327 | 0.445683 | 0.610675 | 0.662478 |
| MmugDNA.32203.1.S1_at   | MmugDNA.32203.1 | 6.3   | 6.2   | 0.05 | 0.03 | 1.07  | 0.056794 | 0.158852 | 0.295745 | 0.43496  |
| MmugDNA.32204.1.S1_at   | MmugDNA.32204.1 | 4.74  | 4.74  | 0.08 | 0.08 | 1     | 0.324039 | 0.645545 | 0.607761 | 0.792392 |
| MmugDNA.32205.1.S1_at   | MmugDNA.32205.1 | 6.69  | 6.51  | 0.31 | 0.11 | 1.14  | 0.367154 | 0.550064 | 0.64128  | 0.730241 |
| MmugDNA.32205.1.S1_s_at | MmugDNA.32205.1 | 12.38 | 12.08 | 0.19 | 0.05 | 1.23  | 0.021274 | 0.074936 | 0.199615 | 0.31891  |
| MmugDNA.32205.1.S1_x_at | MmugDNA.32205.1 | 7.95  | 7.67  | 0.24 | 0.03 | 1.22  | 0.04593  | 0.109958 | 0.271942 | 0.374038 |
| MmugDNA.32207.1.S1_at   | MmugDNA.32207.1 | 3.34  | 3.35  | 0.33 | 0.1  | -1.01 | 0.560664 | 0.267549 | 0.773972 | 0.533272 |
| MmugDNA.32208.1.S1_at   | MmugDNA.32208.1 | 8.28  | 8.09  | 0.14 | 0.12 | 1.14  | 0.335363 | 0.105079 | 0.616317 | 0.366755 |
| MmugDNA.32209.1.S1_at   | MmugDNA.32209.1 | 3.83  | 3.83  | 0.28 | 0.18 | 1     | 0.680197 | 0.54541  | 0.847421 | 0.727521 |
| MmugDNA.3221.1.S1_at    | MmugDNA.3221.1  | 3.57  | 3.66  | 0.06 | 0.11 | -1.06 | 0.108402 | 0.093928 | 0.383016 | 0.350445 |

|                         |                 |       |       |      |      |        |          |          |          |          |
|-------------------------|-----------------|-------|-------|------|------|--------|----------|----------|----------|----------|
| MmugDNA.32210.1.S1_at   | MmugDNA.32210.1 | 6.36  | 6     | 0.06 | 0.23 | 1.29   | 0.059576 | 0.31738  | 0.301206 | 0.570613 |
| MmugDNA.32211.1.S1_at   | MmugDNA.32211.1 | 5.65  | 4.43  | 0.69 | 0.28 | 2.32   | 0.034762 | 0.133417 | 0.241036 | 0.405246 |
| MmugDNA.32212.1.S1_at   | MmugDNA.32212.1 | 6.07  | 6.05  | 0.44 | 0.11 | 1.01   | 0.404678 | 0.423638 | 0.668353 | 0.646464 |
| MmugDNA.32213.1.S1_at   | MmugDNA.32213.1 | 7.1   | 7     | 0.76 | 0.17 | 1.07   | 0.30278  | 0.195115 | 0.590415 | 0.470241 |
| MmugDNA.32214.1.S1_at   | MmugDNA.32214.1 | 8.97  | 8.62  | 0.12 | 0.01 | 1.27   | 0.003479 | 0.166432 | 0.103559 | 0.442887 |
| MmugDNA.32214.1.S1_s_at | MmugDNA.32214.1 | 10.68 | 10.42 | 0.13 | 0.11 | 1.2    | 0.021891 | 0.161653 | 0.201211 | 0.437771 |
| MmugDNA.32215.1.S1_at   | MmugDNA.32215.1 | 4.21  | 4.09  | 0.62 | 0.12 | 1.09   | 0.421119 | 0.587792 | 0.679846 | 0.75454  |
| MmugDNA.32216.1.S1_at   | MmugDNA.32216.1 | 6.88  | 8.74  | 0.58 | 0.3  | -3.64  | 0.011644 | 0.233597 | 0.157734 | 0.50492  |
| MmugDNA.32217.1.S1_at   | MmugDNA.32217.1 | 3.63  | 4.75  | 0.07 | 0.87 | -2.17  | 0.035236 | 0.021626 | 0.242389 | 0.184333 |
| MmugDNA.32218.1.S1_at   | MmugDNA.32218.1 | 9.55  | 10.02 | 0.8  | 0.35 | -1.39  | 0.341795 | 0.138924 | 0.621589 | 0.412037 |
| MmugDNA.29742.1.S1_at   | MmugDNA.29742.1 | 7.74  | 11.27 | 1.35 | 0.36 | -11.54 | 0.034108 | 0.193405 | 0.239433 | 0.468711 |
| MmugDNA.29742.1.S1_s_at | MmugDNA.29742.1 | 7.28  | 11.72 | 1.93 | 0.29 | -21.8  | 0.047507 | 0.203884 | 0.275243 | 0.478102 |
| MmugDNA.3222.1.S1_at    | MmugDNA.3222.1  | 7.36  | 7.19  | 0.72 | 0.22 | 1.12   | 0.675477 | 0.654294 | 0.845076 | 0.797979 |
| MmugDNA.32222.1.S1_at   | MmugDNA.32222.1 | 9.07  | 9.46  | 0.21 | 0.33 | -1.31  | 0.739467 | 0.007595 | 0.879245 | 0.11661  |
| MmugDNA.32224.1.S1_at   | MmugDNA.32224.1 | 9.86  | 9.47  | 0.27 | 0.06 | 1.31   | 0.132935 | 0.647834 | 0.416351 | 0.793789 |
| MmugDNA.32225.1.S1_at   | MmugDNA.32225.1 | 4.17  | 4.75  | 0.25 | 0.22 | -1.5   | 0.182745 | 0.132318 | 0.478544 | 0.404294 |
| MmugDNA.32227.1.S1_at   | MmugDNA.32227.1 | 3.34  | 3.41  | 0.15 | 0.1  | -1.05  | 0.671432 | 0.855694 | 0.842413 | 0.917683 |
| MmugDNA.32228.1.S1_at   | MmugDNA.32228.1 | 5.08  | 5     | 0.15 | 0.27 | 1.05   | 0.6107   | 0.409438 | 0.805939 | 0.636503 |
| MmugDNA.32231.1.S1_at   | MmugDNA.32231.1 | 2.93  | 2.77  | 0.11 | 0.09 | 1.12   | 0.301916 | 0.019862 | 0.589851 | 0.177189 |
| MmugDNA.32232.1.S1_at   | MmugDNA.32232.1 | 4.58  | 4.54  | 0.07 | 0.04 | 1.03   | 0.225217 | 0.648868 | 0.52312  | 0.794491 |
| MmugDNA.32233.1.S1_at   | MmugDNA.32233.1 | 12.21 | 12.24 | 0.09 | 0.06 | -1.02  | 0.283015 | 0.692609 | 0.573538 | 0.821061 |
| MmugDNA.32233.1.S1_s_at | MmugDNA.32233.1 | 11.68 | 11.69 | 0.01 | 0.02 | -1.01  | 0.714701 | 0.206946 | 0.865166 | 0.481058 |
| MmugDNA.32234.1.S1_at   | MmugDNA.32234.1 | 7.14  | 6.34  | 0.21 | 0.27 | 1.74   | 0.008426 | 0.014768 | 0.140949 | 0.154596 |
| MmugDNA.32235.1.S1_at   | MmugDNA.32235.1 | 3.2   | 3.15  | 0.05 | 0.01 | 1.04   | 0.036042 | 0.747447 | 0.244865 | 0.853149 |
| MmugDNA.32236.1.S1_at   | MmugDNA.32236.1 | 5.22  | 5.31  | 0.41 | 0.09 | -1.06  | 0.545147 | 0.746031 | 0.764467 | 0.852688 |
| MmugDNA.32237.1.S1_at   | MmugDNA.32237.1 | 2.81  | 2.79  | 0.08 | 0.12 | 1.01   | 0.963393 | 0.254574 | 0.985159 | 0.522867 |
| MmugDNA.32238.1.S1_at   | MmugDNA.32238.1 | 6.59  | 6.48  | 0.25 | 0.52 | 1.07   | 0.474524 | 0.046154 | 0.717514 | 0.259257 |
| MmugDNA.3224.1.S1_at    | MmugDNA.3224.1  | 6.98  | 7.58  | 0.3  | 0.12 | -1.51  | 0.122141 | 0.419189 | 0.400937 | 0.643394 |
| MmugDNA.32240.1.S1_at   | MmugDNA.32240.1 | 3.68  | 4.1   | 0.41 | 0.37 | -1.33  | 0.430122 | 0.66996  | 0.686504 | 0.806982 |
| MmugDNA.32241.1.S1_at   | MmugDNA.32241.1 | 4.61  | 4.87  | 0.64 | 0.31 | -1.2   | 0.825029 | 0.578753 | 0.922272 | 0.748611 |
| MmugDNA.32244.1.S1_at   | MmugDNA.32244.1 | 3.59  | 3.57  | 0.18 | 0.08 | 1.02   | 0.3356   | 0.631038 | 0.616515 | 0.782599 |
| MmugDNA.32246.1.S1_at   | MmugDNA.32246.1 | 4.95  | 4.91  | 0.36 | 0.07 | 1.03   | 0.577999 | 0.305244 | 0.783846 | 0.562255 |
| MmugDNA.32247.1.S1_at   | MmugDNA.32247.1 | 5.12  | 5.08  | 0.17 | 0.13 | 1.02   | 0.767107 | 0.865011 | 0.893102 | 0.923442 |
| MmugDNA.3225.1.S1_at    | MmugDNA.3225.1  | 9.84  | 10.15 | 0.04 | 0.29 | -1.23  | 0.182632 | 0.015104 | 0.478431 | 0.156008 |
| MmugDNA.32250.1.S1_at   | MmugDNA.32250.1 | 7.93  | 7.91  | 0.27 | 0.05 | 1.01   | 0.337244 | 0.52621  | 0.617762 | 0.715449 |
| MmugDNA.32252.1.S1_at   | MmugDNA.32252.1 | 5.67  | 5.55  | 0.43 | 0.22 | 1.09   | 0.657145 | 0.821723 | 0.834252 | 0.897343 |
| MmugDNA.32253.1.S1_at   | MmugDNA.32253.1 | 4.79  | 4.77  | 0.12 | 0.17 | 1.02   | 0.443035 | 0.383757 | 0.696412 | 0.619734 |
| MmugDNA.32256.1.S1_at   | MmugDNA.32256.1 | 8.56  | 8.37  | 0.07 | 0.02 | 1.14   | 0.0118   | 0.021667 | 0.158436 | 0.184333 |
| MmugDNA.32257.1.S1_at   | MmugDNA.32257.1 | 5.63  | 6.12  | 0.25 | 0.37 | -1.41  | 0.065934 | 0.071252 | 0.314244 | 0.313293 |
| MmugDNA.32259.1.S1_at   | MmugDNA.32259.1 | 10.34 | 10.15 | 0.05 | 0.02 | 1.15   | 0.003124 | 0.109221 | 0.100879 | 0.37308  |
| MmugDNA.32259.1.S1_s_at | MmugDNA.32259.1 | 11.52 | 11.43 | 0.12 | 0.08 | 1.07   | 0.136791 | 0.452496 | 0.42156  | 0.667111 |
| MmugDNA.32260.1.S1_at   | MmugDNA.32260.1 | 10.82 | 8     | 0.59 | 1.12 | 7.06   | 0.018477 | 0.01801  | 0.189088 | 0.169233 |
| MmugDNA.32261.1.S1_at   | MmugDNA.32261.1 | 2.97  | 2.92  | 0.08 | 0.1  | 1.03   | 0.287395 | 0.213185 | 0.577247 | 0.487069 |

|                         |                 |       |       |      |      |       |          |          |          |          |
|-------------------------|-----------------|-------|-------|------|------|-------|----------|----------|----------|----------|
| MmugDNA.32262.1.S1_at   | MmugDNA.32262.1 | 8.96  | 8.71  | 0.34 | 0.05 | 1.19  | 0.265138 | 0.366966 | 0.557962 | 0.606583 |
| MmugDNA.32263.1.S1_at   | MmugDNA.32263.1 | 5.43  | 5.25  | 0.71 | 0.09 | 1.13  | 0.226999 | 0.250049 | 0.524952 | 0.519111 |
| MmugDNA.32265.1.S1_at   | MmugDNA.32265.1 | 10.26 | 9.98  | 0.16 | 0.1  | 1.21  | 0.095449 | 0.009852 | 0.364958 | 0.130274 |
| MmugDNA.32266.1.S1_at   | MmugDNA.32266.1 | 5.75  | 6.35  | 0.78 | 0.22 | -1.51 | 0.212467 | 0.498894 | 0.51051  | 0.697855 |
| MmugDNA.32267.1.S1_at   | MmugDNA.32267.1 | 6.54  | 6.15  | 0.12 | 0.13 | 1.31  | 0.047564 | 0.037344 | 0.275414 | 0.237683 |
| MmugDNA.32268.1.S1_at   | MmugDNA.32268.1 | 3.16  | 3.13  | 0.07 | 0.15 | 1.02  | 0.804183 | 0.406251 | 0.912015 | 0.634225 |
| MmugDNA.32269.1.S1_at   | MmugDNA.32269.1 | 5.02  | 5.04  | 0.03 | 0.1  | -1.02 | 0.835526 | 0.492314 | 0.927709 | 0.693485 |
| MmugDNA.3227.1.S1_at    | MmugDNA.3227.1  | 5.79  | 5.45  | 0.31 | 0.04 | 1.26  | 0.205077 | 0.288781 | 0.502895 | 0.549936 |
| MmugDNA.32270.1.S1_at   | MmugDNA.32270.1 | 6.89  | 6.47  | 0.54 | 0.03 | 1.33  | 0.274752 | 0.363358 | 0.566556 | 0.60375  |
| MmugDNA.32271.1.S1_at   | MmugDNA.32271.1 | 5.18  | 5.36  | 0.07 | 0.08 | -1.13 | 0.043785 | 0.040182 | 0.266363 | 0.245709 |
| MmugDNA.32272.1.S1_at   | MmugDNA.32272.1 | 5.97  | 5.89  | 0.13 | 0.19 | 1.06  | 0.948556 | 0.073953 | 0.978472 | 0.317462 |
| MmugDNA.32273.1.S1_at   | MmugDNA.32273.1 | 4.24  | 4.35  | 0.14 | 0.1  | -1.08 | 0.350967 | 0.514754 | 0.628649 | 0.707865 |
| MmugDNA.32275.1.S1_at   | MmugDNA.32275.1 | 10.89 | 10.78 | 0.16 | 0.07 | 1.08  | 0.20362  | 0.037186 | 0.501321 | 0.237285 |
| MmugDNA.32279.1.S1_at   | MmugDNA.32279.1 | 5.82  | 5.96  | 0.07 | 0.08 | -1.11 | 0.035305 | 0.035231 | 0.242607 | 0.231941 |
| MmugDNA.3228.1.S1_at    | MmugDNA.3228.1  | 9.8   | 9.5   | 0.07 | 0.36 | 1.23  | 0.558835 | 0.978708 | 0.773051 | 0.988411 |
| MmugDNA.32281.1.S1_at   | MmugDNA.32281.1 | 3.79  | 4.01  | 0.27 | 0.89 | -1.16 | 0.217821 | 0.239925 | 0.515633 | 0.510627 |
| MmugDNA.32282.1.S1_s_at | MmugDNA.32282.1 | 5.95  | 6.08  | 0.32 | 0.03 | -1.09 | 0.721637 | 0.878477 | 0.868926 | 0.930638 |
| MmugDNA.32284.1.S1_at   | MmugDNA.32284.1 | 4.17  | 4.48  | 0.59 | 0.6  | -1.24 | 0.967012 | 0.849969 | 0.986741 | 0.914673 |
| MmugDNA.32285.1.S1_at   | MmugDNA.32285.1 | 4.57  | 4.42  | 0.95 | 0.2  | 1.11  | 0.731037 | 0.85632  | 0.87435  | 0.917926 |
| MmugDNA.32286.1.S1_at   | MmugDNA.32286.1 | 6.43  | 6.31  | 0.13 | 0.39 | 1.09  | 0.519261 | 0.001162 | 0.747956 | 0.053615 |
| MmugDNA.32287.1.S1_at   | MmugDNA.32287.1 | 12.23 | 12.61 | 0.08 | 0.05 | -1.31 | 0.004404 | 0.050701 | 0.1125   | 0.270338 |
| MmugDNA.32288.1.S1_at   | MmugDNA.32288.1 | 6.85  | 6.96  | 0.13 | 0.11 | -1.08 | 0.25158  | 0.131621 | 0.546344 | 0.403716 |
| MmugDNA.3229.1.S1_at    | MmugDNA.3229.1  | 5.92  | 5.86  | 0.15 | 0.19 | 1.05  | 0.777253 | 0.319481 | 0.898237 | 0.571823 |
| MmugDNA.32290.1.S1_at   | MmugDNA.32290.1 | 5.37  | 5.49  | 0.18 | 0.14 | -1.09 | 0.204436 | 0.188529 | 0.502137 | 0.464458 |
| MmugDNA.32291.1.S1_at   | MmugDNA.32291.1 | 4.87  | 3.91  | 0.5  | 0.16 | 1.94  | 0.01534  | 0.005144 | 0.176072 | 0.099496 |
| MmugDNA.32292.1.S1_at   | MmugDNA.32292.1 | 8.04  | 9.11  | 0.05 | 0.05 | -2.1  | 0.000019 | 5.67E-07 | 0.045594 | 0.005999 |
| MmugDNA.32294.1.S1_at   | MmugDNA.32294.1 | 10.04 | 9.78  | 0.27 | 0.14 | 1.2   | 0.348342 | 0.09928  | 0.626353 | 0.357546 |
| MmugDNA.32296.1.S1_at   | MmugDNA.32296.1 | 10.48 | 10.37 | 0.18 | 0.14 | 1.08  | 0.348224 | 0.210232 | 0.626326 | 0.484056 |
| MmugDNA.32297.1.S1_s_at | MmugDNA.32297.1 | 8.64  | 9.88  | 0.42 | 0.16 | -2.36 | 0.025155 | 0.025866 | 0.211649 | 0.201654 |
| MmugDNA.32298.1.S1_at   | MmugDNA.32298.1 | 3.55  | 3.13  | 0.75 | 0.21 | 1.34  | 0.431142 | 0.415002 | 0.687274 | 0.640594 |
| MmugDNA.32299.1.S1_at   | MmugDNA.32299.1 | 8.48  | 8.55  | 0.1  | 0.02 | -1.05 | 0.318498 | 0.273123 | 0.603167 | 0.537732 |
| MmugDNA.3230.1.S1_at    | MmugDNA.3230.1  | 3.97  | 3.97  | 0.12 | 0.03 | -1    | 0.366152 | 0.444751 | 0.640626 | 0.662072 |
| MmugDNA.32301.1.S1_at   | MmugDNA.32301.1 | 8.69  | 8.64  | 0.07 | 0.05 | 1.03  | 0.185005 | 0.148671 | 0.4811   | 0.423201 |
| MmugDNA.32303.1.S1_at   | MmugDNA.32303.1 | 11.06 | 10.41 | 0.3  | 0.1  | 1.57  | 0.028753 | 0.099342 | 0.222261 | 0.35761  |
| MmugDNA.32304.1.S1_at   | MmugDNA.32304.1 | 4.83  | 4.28  | 0.3  | 0.28 | 1.46  | 0.118454 | 0.103883 | 0.396104 | 0.364538 |
| MmugDNA.32304.1.S1_x_at | MmugDNA.32304.1 | 4.18  | 4.09  | 0.47 | 0.08 | 1.06  | 0.225531 | 0.164025 | 0.523384 | 0.440161 |
| MmugDNA.32305.1.S1_at   | MmugDNA.32305.1 | 10.38 | 10.36 | 0.24 | 0.24 | 1.02  | 0.56147  | 0.281803 | 0.774424 | 0.544844 |
| MmugDNA.32308.1.S1_at   | MmugDNA.32308.1 | 4.32  | 4.33  | 0.57 | 0.37 | -1.01 | 0.863442 | 0.452365 | 0.940655 | 0.667046 |
| MmugDNA.32310.1.S1_at   | MmugDNA.32310.1 | 4.04  | 2.97  | 0.81 | 0.35 | 2.1   | 0.479926 | 0.73066  | 0.720994 | 0.844055 |
| MmugDNA.32311.1.S1_at   | MmugDNA.32311.1 | 7.02  | 7.03  | 0.07 | 0.05 | -1.01 | 0.364509 | 0.503514 | 0.639104 | 0.700904 |
| MmugDNA.32312.1.S1_at   | MmugDNA.32312.1 | 3.4   | 3.14  | 0.13 | 0.19 | 1.2   | 0.137662 | 0.28939  | 0.422743 | 0.550431 |
| MmugDNA.32313.1.S1_at   | MmugDNA.32313.1 | 8.03  | 8.01  | 0.11 | 0.02 | 1.01  | 0.635101 | 0.345702 | 0.821137 | 0.590854 |
| MmugDNA.32314.1.S1_at   | MmugDNA.32314.1 | 5.91  | 6.13  | 0.16 | 0.08 | -1.16 | 0.275416 | 0.287313 | 0.567073 | 0.548589 |

|                         |                 |       |       |      |      |       |          |          |          |          |
|-------------------------|-----------------|-------|-------|------|------|-------|----------|----------|----------|----------|
| MmugDNA.32315.1.S1_at   | MmugDNA.32315.1 | 7.18  | 7.46  | 0.65 | 0.1  | -1.21 | 0.615266 | 0.735511 | 0.808784 | 0.846953 |
| MmugDNA.32316.1.S1_at   | MmugDNA.32316.1 | 5.72  | 5.74  | 0.17 | 0.09 | -1.01 | 0.821361 | 0.585293 | 0.92039  | 0.752844 |
| MmugDNA.32317.1.S1_at   | MmugDNA.32317.1 | 6.22  | 6.54  | 0.14 | 0.44 | -1.25 | 0.346651 | 0.596009 | 0.625    | 0.759321 |
| MmugDNA.32319.1.S1_at   | MmugDNA.32319.1 | 8     | 8.18  | 0.2  | 0.11 | -1.13 | 0.198265 | 0.534401 | 0.495463 | 0.720351 |
| MmugDNA.32320.1.S1_at   | MmugDNA.32320.1 | 10.8  | 10.54 | 0.23 | 0.07 | 1.2   | 0.407266 | 0.828202 | 0.67039  | 0.901235 |
| MmugDNA.32322.1.S1_at   | MmugDNA.32322.1 | 3.68  | 3.65  | 0.44 | 0.18 | 1.02  | 0.79346  | 0.940819 | 0.906582 | 0.966506 |
| MmugDNA.32323.1.S1_at   | MmugDNA.32323.1 | 5.6   | 5.55  | 0.05 | 0.01 | 1.04  | 0.124709 | 0.200088 | 0.404983 | 0.474603 |
| MmugDNA.32324.1.S1_at   | MmugDNA.32324.1 | 4.13  | 4.05  | 0.44 | 0.22 | 1.06  | 0.512275 | 0.475444 | 0.742933 | 0.682155 |
| MmugDNA.32325.1.S1_at   | MmugDNA.32325.1 | 7.7   | 7.36  | 0.12 | 0.11 | 1.27  | 0.083259 | 0.009815 | 0.345528 | 0.130205 |
| MmugDNA.32326.1.S1_at   | MmugDNA.32326.1 | 5.47  | 5.72  | 0.26 | 0.37 | -1.19 | 0.38346  | 0.404185 | 0.652801 | 0.632691 |
| MmugDNA.32327.1.S1_at   | MmugDNA.32327.1 | 6.58  | 6.54  | 0.2  | 0.16 | 1.03  | 0.855421 | 0.920839 | 0.937004 | 0.955412 |
| MmugDNA.3233.1.S1_at    | MmugDNA.3233.1  | 4.36  | 4.46  | 0.1  | 0.05 | -1.07 | 0.063642 | 0.273171 | 0.308797 | 0.537787 |
| MmugDNA.32330.1.S1_at   | MmugDNA.32330.1 | 4.43  | 4.59  | 0.16 | 0.43 | -1.12 | 0.316439 | 0.308903 | 0.60114  | 0.564656 |
| MmugDNA.32331.1.S1_at   | MmugDNA.32331.1 | 4.61  | 4.32  | 1.01 | 0.41 | 1.22  | 0.381823 | 0.458954 | 0.651337 | 0.671504 |
| MmugDNA.32332.1.S1_at   | MmugDNA.32332.1 | 10.86 | 10.76 | 0.13 | 0.12 | 1.07  | 0.141098 | 0.17094  | 0.426942 | 0.447561 |
| MmugDNA.32335.1.S1_at   | MmugDNA.32335.1 | 5.64  | 5.61  | 0.24 | 0.07 | 1.02  | 0.428328 | 0.644892 | 0.685338 | 0.791927 |
| MmugDNA.32336.1.S1_at   | MmugDNA.32336.1 | 2.74  | 2.81  | 0.03 | 0    | -1.05 | 0.0495   | 0.045199 | 0.279951 | 0.256979 |
| MmugDNA.32337.1.S1_at   | MmugDNA.32337.1 | 6.87  | 6.81  | 0.2  | 0.16 | 1.04  | 0.810326 | 0.830399 | 0.915066 | 0.902659 |
| MmugDNA.32338.1.S1_at   | MmugDNA.32338.1 | 8.73  | 8.97  | 0.42 | 0.1  | -1.18 | 0.283272 | 0.894359 | 0.573695 | 0.939704 |
| MmugDNA.3234.1.S1_at    | MmugDNA.3234.1  | 8.97  | 8.59  | 0.36 | 0.06 | 1.3   | 0.522982 | 0.163381 | 0.750168 | 0.43955  |
| MmugDNA.32340.1.S1_at   | MmugDNA.32340.1 | 7.37  | 7.37  | 0.15 | 0.1  | -1    | 0.466099 | 0.976798 | 0.712021 | 0.987389 |
| MmugDNA.32341.1.S1_at   | MmugDNA.32341.1 | 3.74  | 3.68  | 0.66 | 0.12 | 1.04  | 0.344128 | 0.44738  | 0.623409 | 0.66348  |
| MmugDNA.32342.1.S1_at   | MmugDNA.32342.1 | 6.59  | 6.65  | 0.86 | 0.51 | -1.04 | 0.903491 | 0.371334 | 0.959099 | 0.610172 |
| MmugDNA.32343.1.S1_at   | MmugDNA.32343.1 | 7.49  | 6.72  | 0.73 | 0.2  | 1.71  | 0.153423 | 0.0968   | 0.443218 | 0.354207 |
| MmugDNA.32343.1.S1_x_at | MmugDNA.32343.1 | 8.12  | 7.47  | 0.47 | 0.18 | 1.57  | 0.166054 | 0.050664 | 0.459099 | 0.270317 |
| MmugDNA.32348.1.S1_at   | MmugDNA.32348.1 | 4.33  | 4.33  | 0    | 0    | 1     | 0.373901 | 0.965789 | 0.645118 | 0.980824 |
| MmugDNA.32349.1.S1_at   | MmugDNA.32349.1 | 4.8   | 4.79  | 0.02 | 0.16 | 1.01  | 0.535527 | 0.355106 | 0.758389 | 0.597508 |
| MmugDNA.22766.1.S1_at   | MmugDNA.22766.1 | 12.35 | 12.23 | 0.11 | 0.08 | 1.09  | 0.109337 | 0.066313 | 0.384419 | 0.303177 |
| MmugDNA.22766.1.S1_s_at | MmugDNA.22766.1 | 11.32 | 11.35 | 0.1  | 0.08 | -1.02 | 0.54199  | 0.161879 | 0.762538 | 0.437979 |
| MmugDNA.32350.1.S1_at   | MmugDNA.32350.1 | 4.93  | 5.24  | 0.86 | 0.45 | -1.24 | 0.869257 | 0.9748   | 0.943687 | 0.986245 |
| MmugDNA.32351.1.S1_at   | MmugDNA.32351.1 | 8.07  | 7.52  | 0.62 | 0.38 | 1.46  | 0.355598 | 0.18391  | 0.632237 | 0.460057 |
| MmugDNA.32352.1.S1_at   | MmugDNA.32352.1 | 5.88  | 5.79  | 0.2  | 0.12 | 1.06  | 0.591336 | 0.294587 | 0.792481 | 0.554282 |
| MmugDNA.32353.1.S1_at   | MmugDNA.32353.1 | 3.3   | 3.09  | 0.13 | 0.03 | 1.16  | 0.194854 | 0.222002 | 0.49141  | 0.49507  |
| MmugDNA.32356.1.S1_at   | MmugDNA.32356.1 | 6.26  | 6.32  | 0.28 | 0.1  | -1.04 | 0.392795 | 0.451302 | 0.659693 | 0.66613  |
| MmugDNA.32357.1.S1_at   | MmugDNA.32357.1 | 6.9   | 6.57  | 0.66 | 0.1  | 1.26  | 0.891843 | 0.315405 | 0.953838 | 0.568939 |
| MmugDNA.32358.1.S1_at   | MmugDNA.32358.1 | 9.65  | 10.32 | 0.25 | 0.23 | -1.6  | 0.058042 | 0.002858 | 0.298044 | 0.078756 |
| MmugDNA.3236.1.S1_at    | MmugDNA.3236.1  | 4.83  | 4.92  | 0.12 | 0.13 | -1.07 | 0.184128 | 0.487984 | 0.480065 | 0.690839 |
| MmugDNA.32360.1.S1_at   | MmugDNA.32360.1 | 4.36  | 5     | 0.39 | 0.17 | -1.56 | 0.175226 | 0.021761 | 0.469551 | 0.184563 |
| MmugDNA.32361.1.S1_at   | MmugDNA.32361.1 | 5.87  | 6.34  | 1.08 | 0.08 | -1.39 | 0.757436 | 0.882198 | 0.888727 | 0.932845 |
| MmugDNA.32363.1.S1_at   | MmugDNA.32363.1 | 2.97  | 3.04  | 0.03 | 0.05 | -1.05 | 0.128409 | 0.533212 | 0.410319 | 0.719483 |
| MmugDNA.32365.1.S1_at   | MmugDNA.32365.1 | 4.73  | 4.67  | 0.64 | 0.11 | 1.04  | 0.311045 | 0.262925 | 0.597264 | 0.529325 |
| MmugDNA.32367.1.S1_at   | MmugDNA.32367.1 | 5.41  | 5.87  | 0.12 | 0.16 | -1.37 | 0.02193  | 0.036846 | 0.201275 | 0.236451 |
| MmugDNA.32368.1.S1_at   | MmugDNA.32368.1 | 5.49  | 4.41  | 0.68 | 0.22 | 2.12  | 0.159513 | 0.20647  | 0.450798 | 0.480571 |



|                         |                 |       |       |      |      |       |          |          |          |          |
|-------------------------|-----------------|-------|-------|------|------|-------|----------|----------|----------|----------|
| MmugDNA.32369.1.S1_at   | MmugDNA.32369.1 | 6.51  | 6.65  | 0.22 | 0.23 | -1.1  | 0.950688 | 0.757173 | 0.979586 | 0.858648 |
| MmugDNA.3237.1.S1_at    | MmugDNA.3237.1  | 5.19  | 5.26  | 0.2  | 0.31 | -1.04 | 0.723174 | 0.375541 | 0.869925 | 0.613485 |
| MmugDNA.32370.1.S1_at   | MmugDNA.32370.1 | 4.74  | 5.07  | 0.37 | 0.54 | -1.26 | 0.527107 | 0.584562 | 0.752918 | 0.752462 |
| MmugDNA.32371.1.S1_at   | MmugDNA.32371.1 | 6.56  | 6.22  | 0.41 | 0.28 | 1.26  | 0.369917 | 0.502854 | 0.643182 | 0.700392 |
| MmugDNA.41435.1.S1_s_at | MmugDNA.41435.1 | 10.73 | 10.83 | 0.29 | 0.16 | -1.07 | 0.785035 | 0.329914 | 0.901955 | 0.578874 |
| MmugDNA.32373.1.S1_at   | MmugDNA.32373.1 | 8.33  | 8.54  | 0.36 | 0.19 | -1.16 | 0.344091 | 0.791096 | 0.623407 | 0.879263 |
| MmugDNA.32376.1.S1_at   | MmugDNA.32376.1 | 8.32  | 8.12  | 0.25 | 0.16 | 1.15  | 0.209793 | 0.390704 | 0.507187 | 0.624496 |
| MmugDNA.32378.1.S1_at   | MmugDNA.32378.1 | 3.95  | 4.11  | 0.24 | 0.14 | -1.12 | 0.159924 | 0.176023 | 0.451279 | 0.452526 |
| MmugDNA.32379.1.S1_s_at | MmugDNA.32379.1 | 12.21 | 12.28 | 0.08 | 0.11 | -1.05 | 0.748004 | 0.222892 | 0.883193 | 0.495791 |
| MmugDNA.3238.1.S1_s_at  | MmugDNA.3238.1  | 3.25  | 3.26  | 0.14 | 0.21 | -1    | 0.920594 | 0.43384  | 0.966056 | 0.654032 |
| MmugDNA.32380.1.S1_at   | MmugDNA.32380.1 | 9.45  | 8.71  | 0.48 | 0.15 | 1.67  | 0.047025 | 0.035801 | 0.274544 | 0.233625 |
| MmugDNA.32382.1.S1_at   | MmugDNA.32382.1 | 11.04 | 11.33 | 0.33 | 0.09 | -1.22 | 0.30984  | 0.101104 | 0.596102 | 0.360724 |
| MmugDNA.32383.1.S1_at   | MmugDNA.32383.1 | 8.59  | 8.44  | 0.39 | 0.03 | 1.11  | 0.498416 | 0.639601 | 0.733621 | 0.788354 |
| MmugDNA.32389.1.S1_at   | MmugDNA.32389.1 | 8.86  | 10.1  | 0.23 | 0.15 | -2.37 | 0.002145 | 0.010007 | 0.090208 | 0.131262 |
| MmugDNA.3239.1.S1_at    | MmugDNA.3239.1  | 10.25 | 9.7   | 0.01 | 0.17 | 1.47  | 0.007501 | 0.105913 | 0.134856 | 0.368216 |
| MmugDNA.32392.1.S1_at   | MmugDNA.32392.1 | 7.07  | 6.91  | 0.45 | 0.18 | 1.12  | 0.700078 | 0.882978 | 0.857518 | 0.933236 |
| MmugDNA.32396.1.S1_at   | MmugDNA.32396.1 | 5.45  | 5.42  | 0.03 | 0.19 | 1.02  | 0.318939 | 0.539973 | 0.603613 | 0.723995 |
| MmugDNA.32397.1.S1_at   | MmugDNA.32397.1 | 3.89  | 3.87  | 0.09 | 0.17 | 1.01  | 0.349478 | 0.725862 | 0.627311 | 0.841285 |
| MmugDNA.32399.1.S1_at   | MmugDNA.32399.1 | 6.22  | 6.16  | 0.11 | 0.19 | 1.05  | 0.998668 | 0.813589 | 0.999519 | 0.892313 |
| MmugDNA.324.1.S1_at     | MmugDNA.324.1   | 8.02  | 7.98  | 0.19 | 0.07 | 1.03  | 0.803686 | 0.596291 | 0.911852 | 0.75946  |
| MmugDNA.3240.1.S1_at    | MmugDNA.3240.1  | 6.81  | 7.36  | 0.11 | 0.21 | -1.47 | 0.022511 | 0.019022 | 0.203286 | 0.173623 |
| MmugDNA.32401.1.S1_at   | MmugDNA.32401.1 | 3.76  | 3.84  | 0.3  | 0.29 | -1.06 | 0.808227 | 0.944531 | 0.914178 | 0.968614 |
| MmugDNA.32402.1.S1_at   | MmugDNA.32402.1 | 4.2   | 3.66  | 0.47 | 0.08 | 1.46  | 0.174219 | 0.201645 | 0.468371 | 0.476208 |
| MmugDNA.32403.1.S1_at   | MmugDNA.32403.1 | 3.4   | 3.34  | 0.33 | 0.09 | 1.04  | 0.284414 | 0.369926 | 0.574402 | 0.609164 |
| MmugDNA.32404.1.S1_at   | MmugDNA.32404.1 | 3.83  | 4.06  | 0.06 | 0.1  | -1.18 | 0.054567 | 0.153548 | 0.290604 | 0.428309 |
| MmugDNA.32406.1.S1_at   | MmugDNA.32406.1 | 6.9   | 7.13  | 0.04 | 0.23 | -1.18 | 0.103501 | 0.080751 | 0.37665  | 0.328632 |
| MmugDNA.32407.1.S1_at   | MmugDNA.32407.1 | 4.58  | 4.48  | 0.18 | 0.17 | 1.08  | 0.504246 | 0.50672  | 0.73746  | 0.702574 |
| MmugDNA.32409.1.S1_s_at | MmugDNA.32409.1 | 10.14 | 11.49 | 0.21 | 0.15 | -2.55 | 0.001163 | 0.160012 | 0.077718 | 0.436167 |
| MmugDNA.3241.1.S1_at    | MmugDNA.3241.1  | 9.86  | 9.78  | 0.06 | 0    | 1.05  | 0.114411 | 0.050243 | 0.391352 | 0.269432 |
| MmugDNA.32411.1.S1_at   | MmugDNA.32411.1 | 6.37  | 6.21  | 0.17 | 0.06 | 1.12  | 0.07088  | 0.06781  | 0.324317 | 0.306548 |
| MmugDNA.32414.1.S1_at   | MmugDNA.32414.1 | 4.45  | 4.7   | 0.49 | 0.14 | -1.19 | 0.735779 | 0.677782 | 0.877005 | 0.811816 |
| MmugDNA.32416.1.S1_at   | MmugDNA.32416.1 | 7.68  | 7.75  | 0.18 | 0.05 | -1.05 | 0.247933 | 0.188876 | 0.543295 | 0.464789 |
| MmugDNA.32417.1.S1_at   | MmugDNA.32417.1 | 3.18  | 3.23  | 0.05 | 0.08 | -1.04 | 0.261642 | 0.423549 | 0.555806 | 0.646445 |
| MmugDNA.32418.1.S1_at   | MmugDNA.32418.1 | 4.76  | 4.65  | 0.2  | 0.2  | 1.07  | 0.665136 | 0.566537 | 0.839018 | 0.740639 |
| MmugDNA.3242.1.S1_at    | MmugDNA.3242.1  | 5.8   | 5.77  | 0.56 | 0.2  | 1.02  | 0.333331 | 0.475312 | 0.614762 | 0.682031 |
| MmugDNA.32421.1.S1_at   | MmugDNA.32421.1 | 11.34 | 11.24 | 0.02 | 0.09 | 1.07  | 0.175519 | 0.411276 | 0.469981 | 0.637991 |
| MmugDNA.32424.1.S1_at   | MmugDNA.32424.1 | 6.85  | 6.66  | 0.33 | 0.29 | 1.14  | 0.498887 | 0.367443 | 0.733962 | 0.607095 |
| MmugDNA.32425.1.S1_at   | MmugDNA.32425.1 | 7.29  | 7.08  | 0.71 | 0.13 | 1.16  | 0.552477 | 0.172869 | 0.769177 | 0.449431 |
| MmugDNA.32426.1.S1_at   | MmugDNA.32426.1 | 6.06  | 6.11  | 0.13 | 0.09 | -1.04 | 0.753581 | 0.087224 | 0.886373 | 0.340206 |
| MmugDNA.32427.1.S1_at   | MmugDNA.32427.1 | 5.08  | 5.12  | 0.44 | 0.19 | -1.03 | 0.503804 | 0.529673 | 0.73721  | 0.717463 |
| MmugDNA.32428.1.S1_at   | MmugDNA.32428.1 | 5.09  | 5.01  | 0.23 | 0.04 | 1.06  | 0.195259 | 0.260086 | 0.491893 | 0.52675  |
| MmugDNA.32429.1.S1_at   | MmugDNA.32429.1 | 8.09  | 8.44  | 0.2  | 0.34 | -1.28 | 0.043034 | 0.191277 | 0.264642 | 0.466553 |
| MmugDNA.3243.1.S1_at    | MmugDNA.3243.1  | 3.34  | 3.46  | 0.47 | 0.13 | -1.09 | 0.710549 | 0.493412 | 0.86316  | 0.694107 |

|                         |                 |       |       |      |      |       |          |          |          |          |
|-------------------------|-----------------|-------|-------|------|------|-------|----------|----------|----------|----------|
| MmugDNA.32431.1.S1_at   | MmugDNA.32431.1 | 5.32  | 5.1   | 0.1  | 0.04 | 1.16  | 0.016497 | 0.004375 | 0.181431 | 0.092619 |
| MmugDNA.32434.1.S1_at   | MmugDNA.32434.1 | 7.93  | 8.14  | 0.16 | 0.06 | -1.16 | 0.085652 | 0.326498 | 0.350073 | 0.576576 |
| MmugDNA.32436.1.S1_at   | MmugDNA.32436.1 | 4.29  | 4.99  | 1.05 | 0.46 | -1.64 | 0.911193 | 0.924767 | 0.962269 | 0.957465 |
| MmugDNA.32437.1.S1_at   | MmugDNA.32437.1 | 3.75  | 3.41  | 0.69 | 0.72 | 1.26  | 0.974791 | 0.979978 | 0.989924 | 0.989229 |
| MmugDNA.32438.1.S1_at   | MmugDNA.32438.1 | 8.8   | 8.44  | 0.16 | 0.13 | 1.29  | 0.067392 | 0.059686 | 0.317287 | 0.290919 |
| MmugDNA.32439.1.S1_at   | MmugDNA.32439.1 | 7.14  | 7.19  | 0.1  | 0.06 | -1.03 | 0.446776 | 0.117679 | 0.698851 | 0.385399 |
| MmugDNA.3244.1.S1_s_at  | MmugDNA.3244.1  | 7.1   | 6.93  | 0.16 | 0.02 | 1.13  | 0.366191 | 0.46298  | 0.640626 | 0.674149 |
| MmugDNA.32440.1.S1_at   | MmugDNA.32440.1 | 6.95  | 7.07  | 0.41 | 0.64 | -1.09 | 0.690612 | 0.772651 | 0.852093 | 0.867785 |
| MmugDNA.32441.1.S1_at   | MmugDNA.32441.1 | 3.19  | 3.19  | 0.09 | 0.12 | 1     | 0.428021 | 0.759282 | 0.68508  | 0.860036 |
| MmugDNA.32443.1.S1_at   | MmugDNA.32443.1 | 5.08  | 5.24  | 0.13 | 0.06 | -1.12 | 0.57817  | 0.019654 | 0.784018 | 0.176187 |
| MmugDNA.32444.1.S1_at   | MmugDNA.32444.1 | 4.66  | 4.5   | 0.13 | 0.06 | 1.12  | 0.049045 | 0.087179 | 0.279093 | 0.340133 |
| MmugDNA.32445.1.S1_at   | MmugDNA.32445.1 | 3.78  | 3.31  | 0.21 | 0.19 | 1.39  | 0.106306 | 0.095333 | 0.380284 | 0.35236  |
| MmugDNA.32446.1.S1_at   | MmugDNA.32446.1 | 3.48  | 3.72  | 0.23 | 0.05 | -1.18 | 0.189106 | 0.33648  | 0.485766 | 0.583831 |
| MmugDNA.32447.1.S1_at   | MmugDNA.32447.1 | 3.68  | 3.69  | 0.17 | 0.03 | -1.01 | 0.398126 | 0.46523  | 0.663626 | 0.675638 |
| MmugDNA.32448.1.S1_at   | MmugDNA.32448.1 | 5.76  | 6.33  | 0.81 | 0.09 | -1.49 | 0.850249 | 0.825052 | 0.934945 | 0.899488 |
| MmugDNA.32449.1.S1_at   | MmugDNA.32449.1 | 8.96  | 7.32  | 0.49 | 0.35 | 3.13  | 0.010472 | 0.005349 | 0.152254 | 0.101092 |
| MmugDNA.32449.1.S1_s_at | MmugDNA.32449.1 | 11.01 | 8.82  | 2.51 | 0.71 | 4.58  | 0.829101 | 0.527612 | 0.924609 | 0.716154 |
| MmugDNA.32451.1.S1_at   | MmugDNA.32451.1 | 9.87  | 9.49  | 0.17 | 0.05 | 1.3   | 0.058347 | 0.000235 | 0.298712 | 0.03241  |
| MmugDNA.32455.1.S1_s_at | MmugDNA.32455.1 | 11.43 | 11.37 | 0.2  | 0.07 | 1.05  | 0.792308 | 0.082181 | 0.905814 | 0.331036 |
| MmugDNA.32456.1.S1_at   | MmugDNA.32456.1 | 9.31  | 9.18  | 0.15 | 0.07 | 1.09  | 0.068162 | 0.015538 | 0.318913 | 0.158053 |
| MmugDNA.32457.1.S1_at   | MmugDNA.32457.1 | 3.76  | 3.72  | 0.14 | 0.02 | 1.03  | 0.770025 | 0.675382 | 0.894469 | 0.81026  |
| MmugDNA.3246.1.S1_at    | MmugDNA.3246.1  | 5.51  | 4.88  | 0.17 | 0.14 | 1.55  | 0.008669 | 0.008347 | 0.142597 | 0.121193 |
| MmugDNA.32461.1.S1_at   | MmugDNA.32461.1 | 10.79 | 10.73 | 0.18 | 0.19 | 1.04  | 0.760139 | 0.959191 | 0.890106 | 0.976862 |
| MmugDNA.32462.1.S1_at   | MmugDNA.32462.1 | 4.05  | 4.07  | 0.07 | 0.11 | -1.01 | 0.548855 | 0.483281 | 0.766747 | 0.687887 |
| MmugDNA.32463.1.S1_at   | MmugDNA.32463.1 | 10.81 | 10.75 | 0.14 | 0.08 | 1.04  | 0.675371 | 0.901426 | 0.845075 | 0.943931 |
| MmugDNA.32464.1.S1_at   | MmugDNA.32464.1 | 5.39  | 5.05  | 0.46 | 0.36 | 1.27  | 0.305409 | 0.220005 | 0.59245  | 0.49344  |
| MmugDNA.32465.1.S1_at   | MmugDNA.32465.1 | 8.8   | 8.44  | 0.25 | 0.07 | 1.29  | 0.220958 | 0.611867 | 0.518969 | 0.769622 |
| MmugDNA.32467.1.S1_at   | MmugDNA.32467.1 | 13.15 | 13    | 0.04 | 0.07 | 1.11  | 0.024997 | 0.45964  | 0.211194 | 0.671926 |
| MmugDNA.32468.1.S1_at   | MmugDNA.32468.1 | 5.94  | 5.92  | 0.04 | 0.1  | 1.02  | 0.589576 | 0.220845 | 0.791627 | 0.494262 |
| MmugDNA.32469.1.S1_at   | MmugDNA.32469.1 | 8.65  | 8.47  | 0.34 | 0.19 | 1.13  | 0.17414  | 0.233617 | 0.468365 | 0.50492  |
| MmugDNA.32471.1.S1_at   | MmugDNA.32471.1 | 3.21  | 3.26  | 0.11 | 0.06 | -1.03 | 0.966217 | 0.878276 | 0.986349 | 0.930529 |
| MmugDNA.32472.1.S1_at   | MmugDNA.32472.1 | 4.73  | 4.33  | 0.85 | 0.2  | 1.32  | 0.210574 | 0.304439 | 0.5081   | 0.561712 |
| MmugDNA.32473.1.S1_at   | MmugDNA.32473.1 | 4.74  | 4.54  | 0.15 | 0.13 | 1.14  | 0.111484 | 0.107602 | 0.387457 | 0.370497 |
| MmugDNA.32474.1.S1_at   | MmugDNA.32474.1 | 4.11  | 4.17  | 0.05 | 0.15 | -1.04 | 0.536755 | 0.730569 | 0.75909  | 0.844055 |
| MmugDNA.32475.1.S1_at   | MmugDNA.32475.1 | 6.2   | 6.19  | 0.23 | 0.12 | 1     | 0.799592 | 0.770891 | 0.909612 | 0.866807 |
| MmugDNA.32476.1.S1_at   | MmugDNA.32476.1 | 4.14  | 3.62  | 0.39 | 0.22 | 1.43  | 0.178485 | 0.286703 | 0.47327  | 0.548077 |
| MmugDNA.32477.1.S1_at   | MmugDNA.32477.1 | 5.53  | 5.22  | 0.6  | 1.08 | 1.25  | 0.712763 | 0.861256 | 0.864413 | 0.921088 |
| MmugDNA.32478.1.S1_at   | MmugDNA.32478.1 | 5.51  | 5.65  | 0.34 | 0.29 | -1.1  | 0.911082 | 0.165477 | 0.962223 | 0.441726 |
| MmugDNA.32479.1.S1_at   | MmugDNA.32479.1 | 8.78  | 7.91  | 0.22 | 0.29 | 1.84  | 0.013587 | 0.011163 | 0.167335 | 0.137551 |
| MmugDNA.3248.1.S1_at    | MmugDNA.3248.1  | 3.43  | 3.23  | 0.12 | 0.08 | 1.15  | 0.094102 | 0.201929 | 0.363099 | 0.476412 |
| MmugDNA.3248.1.S1_x_at  | MmugDNA.3248.1  | 4.29  | 4.28  | 0.14 | 0.07 | 1     | 0.989242 | 0.425659 | 0.996252 | 0.648    |
| MmugDNA.32480.1.S1_at   | MmugDNA.32480.1 | 3.67  | 3.64  | 0.03 | 0.14 | 1.02  | 0.675257 | 0.572146 | 0.84505  | 0.744268 |
| MmugDNA.32481.1.S1_s_at | MmugDNA.32481.1 | 11.81 | 11.13 | 0.35 | 0.18 | 1.59  | 0.088961 | 0.569424 | 0.355552 | 0.742382 |

|                         |                 |       |       |      |      |       |          |          |          |          |
|-------------------------|-----------------|-------|-------|------|------|-------|----------|----------|----------|----------|
| MmugDNA.32482.1.S1_s_at | MmugDNA.32482.1 | 9.61  | 10.28 | 0.32 | 0.3  | -1.59 | 0.115381 | 0.125787 | 0.392461 | 0.396313 |
| MmugDNA.32483.1.S1_at   | MmugDNA.32483.1 | 5.34  | 5.33  | 0.23 | 0.51 | 1     | 0.71928  | 0.115846 | 0.867628 | 0.382929 |
| MmugDNA.32484.1.S1_s_at | MmugDNA.32484.1 | 12.21 | 12.68 | 0.09 | 0.17 | -1.39 | 0.030718 | 0.015425 | 0.228035 | 0.157699 |
| MmugDNA.32486.1.S1_at   | MmugDNA.32486.1 | 5.28  | 5.26  | 0.21 | 0.27 | 1.02  | 0.694375 | 0.876827 | 0.85409  | 0.92983  |
| MmugDNA.32488.1.S1_at   | MmugDNA.32488.1 | 7.51  | 7.64  | 0.91 | 0.58 | -1.09 | 0.598566 | 0.459833 | 0.7975   | 0.671989 |
| MmugDNA.32489.1.S1_at   | MmugDNA.32489.1 | 10.8  | 11.04 | 0.04 | 0.06 | -1.18 | 0.003699 | 0.137091 | 0.106124 | 0.409869 |
| MmugDNA.3249.1.S1_at    | MmugDNA.3249.1  | 8.33  | 8.01  | 0.28 | 0.21 | 1.25  | 0.364577 | 0.296969 | 0.639143 | 0.555904 |
| MmugDNA.3249.1.S1_x_at  | MmugDNA.3249.1  | 7.06  | 6.73  | 0.23 | 0.14 | 1.26  | 0.101356 | 0.246465 | 0.372742 | 0.515899 |
| MmugDNA.32490.1.S1_at   | MmugDNA.32490.1 | 4.54  | 4.38  | 0.24 | 0.18 | 1.12  | 0.267589 | 0.451239 | 0.560384 | 0.666095 |
| MmugDNA.32491.1.S1_at   | MmugDNA.32491.1 | 4.61  | 4.28  | 0.18 | 0.09 | 1.26  | 0.044901 | 0.031867 | 0.269294 | 0.220909 |
| MmugDNA.32492.1.S1_at   | MmugDNA.32492.1 | 3.51  | 3.51  | 0.2  | 0.07 | 1     | 0.56917  | 0.676833 | 0.778726 | 0.811172 |
| MmugDNA.32494.1.S1_at   | MmugDNA.32494.1 | 6.4   | 7.94  | 0.67 | 0.24 | -2.91 | 0.048981 | 0.296461 | 0.278936 | 0.555528 |
| MmugDNA.32494.1.S1_s_at | MmugDNA.32494.1 | 8.52  | 10.06 | 0.66 | 0.14 | -2.92 | 0.03653  | 0.254098 | 0.246142 | 0.522439 |
| MmugDNA.32497.1.S1_at   | MmugDNA.32497.1 | 4.46  | 4.41  | 0.58 | 0.11 | 1.03  | 0.323856 | 0.254556 | 0.607567 | 0.522863 |
| MmugDNA.32498.1.S1_at   | MmugDNA.32498.1 | 5.65  | 5.63  | 0.27 | 0.06 | 1.02  | 0.885478 | 0.588362 | 0.95111  | 0.754874 |
| MmugDNA.32499.1.S1_at   | MmugDNA.32499.1 | 5.06  | 5.05  | 0.12 | 0.05 | 1     | 0.365345 | 0.009852 | 0.639887 | 0.130274 |
| MmugDNA.325.1.S1_at     | MmugDNA.325.1   | 4.67  | 4.65  | 0.05 | 0.04 | 1.02  | 0.882739 | 0.068114 | 0.950145 | 0.307163 |
| MmugDNA.3250.1.S1_at    | MmugDNA.3250.1  | 4.78  | 4.88  | 0.09 | 0.11 | -1.07 | 0.472663 | 0.321421 | 0.716236 | 0.573207 |
| MmugDNA.32500.1.S1_at   | MmugDNA.32500.1 | 7.47  | 8.05  | 0.4  | 0.16 | -1.49 | 0.137025 | 0.183403 | 0.421892 | 0.459553 |
| MmugDNA.32500.1.S1_x_at | MmugDNA.32500.1 | 9.46  | 10.02 | 0.4  | 0.18 | -1.48 | 0.154201 | 0.230879 | 0.444557 | 0.502546 |
| MmugDNA.32502.1.S1_at   | MmugDNA.32502.1 | 6.05  | 5.01  | 0.53 | 0.34 | 2.06  | 0.135354 | 0.057119 | 0.419307 | 0.284945 |
| MmugDNA.32503.1.S1_at   | MmugDNA.32503.1 | 4.69  | 4.7   | 0.28 | 0.07 | -1    | 0.39685  | 0.582984 | 0.662712 | 0.751492 |
| MmugDNA.32505.1.S1_at   | MmugDNA.32505.1 | 10.73 | 10.81 | 0.23 | 0.16 | -1.06 | 0.67132  | 0.820623 | 0.842357 | 0.89668  |
| MmugDNA.32506.1.S1_at   | MmugDNA.32506.1 | 3.25  | 3.3   | 0    | 0.03 | -1.04 | 0.11989  | 0.053558 | 0.398101 | 0.277065 |
| MmugDNA.32507.1.S1_at   | MmugDNA.32507.1 | 6.97  | 6.2   | 0.14 | 0.09 | 1.7   | 0.001497 | 0.007068 | 0.081111 | 0.113284 |
| MmugDNA.32508.1.S1_at   | MmugDNA.32508.1 | 10.86 | 11.19 | 0.27 | 0.07 | -1.26 | 0.307305 | 0.09469  | 0.594036 | 0.351481 |
| MmugDNA.32508.1.S1_s_at | MmugDNA.32508.1 | 10.2  | 10.36 | 0.23 | 0.17 | -1.12 | 0.885257 | 0.24326  | 0.951028 | 0.513356 |
| MmugDNA.32509.1.S1_at   | MmugDNA.32509.1 | 5.73  | 5.73  | 0.06 | 0.09 | -1    | 0.520267 | 0.877341 | 0.74869  | 0.930105 |
| MmugDNA.32510.1.S1_at   | MmugDNA.32510.1 | 8.68  | 8.28  | 0.08 | 0.17 | 1.32  | 0.054685 | 0.204663 | 0.290604 | 0.479016 |
| MmugDNA.32512.1.S1_at   | MmugDNA.32512.1 | 7.26  | 7.71  | 0.3  | 0.04 | -1.37 | 0.197149 | 0.227274 | 0.494276 | 0.499589 |
| MmugDNA.32513.1.S1_at   | MmugDNA.32513.1 | 3.64  | 3.7   | 0.38 | 0.37 | -1.04 | 0.939733 | 0.879455 | 0.974537 | 0.931144 |
| MmugDNA.32514.1.S1_at   | MmugDNA.32514.1 | 4.13  | 4.07  | 0.14 | 0.09 | 1.04  | 0.310016 | 0.235122 | 0.596339 | 0.50629  |
| MmugDNA.32517.1.S1_at   | MmugDNA.32517.1 | 4.99  | 4.99  | 0.07 | 0    | 1     | 0.373901 | 0.653397 | 0.645118 | 0.797435 |
| MmugDNA.32518.1.S1_at   | MmugDNA.32518.1 | 7.69  | 6.74  | 0.43 | 0.08 | 1.94  | 0.047207 | 0.029888 | 0.274594 | 0.214558 |
| MmugDNA.32519.1.S1_at   | MmugDNA.32519.1 | 6.08  | 6.3   | 0.19 | 0.17 | -1.16 | 0.044857 | 0.089573 | 0.269165 | 0.343811 |
| MmugDNA.32520.1.S1_at   | MmugDNA.32520.1 | 5.3   | 5.24  | 0.15 | 0.13 | 1.05  | 0.928214 | 0.220376 | 0.969706 | 0.493783 |
| MmugDNA.32521.1.S1_s_at | MmugDNA.32521.1 | 8.24  | 8.82  | 0.17 | 0.24 | -1.49 | 0.061064 | 0.148252 | 0.303985 | 0.422749 |
| MmugDNA.32523.1.S1_at   | MmugDNA.32523.1 | 4.91  | 5.09  | 0.93 | 0.22 | -1.13 | 0.686327 | 0.684519 | 0.850512 | 0.81598  |
| MmugDNA.32524.1.S1_at   | MmugDNA.32524.1 | 5.73  | 5.69  | 0.1  | 0.14 | 1.03  | 0.9797   | 0.141026 | 0.992265 | 0.414507 |
| MmugDNA.32525.1.S1_at   | MmugDNA.32525.1 | 5.26  | 5.22  | 0.14 | 0.27 | 1.03  | 0.552812 | 0.630098 | 0.769449 | 0.782148 |
| MmugDNA.32526.1.S1_at   | MmugDNA.32526.1 | 12.02 | 11.26 | 0.1  | 0.11 | 1.68  | 0.001035 | 0.030796 | 0.076321 | 0.217376 |
| MmugDNA.32527.1.S1_at   | MmugDNA.32527.1 | 10.38 | 10.22 | 0.14 | 0.07 | 1.12  | 0.169961 | 0.466175 | 0.463459 | 0.676147 |
| MmugDNA.3253.1.S1_at    | MmugDNA.3253.1  | 9.38  | 9.15  | 0.15 | 0.16 | 1.17  | 0.273855 | 0.005564 | 0.565917 | 0.103062 |



|                         |                 |       |       |      |      |       |          |          |          |          |
|-------------------------|-----------------|-------|-------|------|------|-------|----------|----------|----------|----------|
| MmugDNA.32593.1.S1_at   | MmugDNA.32593.1 | 3.54  | 3.67  | 0.13 | 0.13 | -1.09 | 0.613156 | 0.792962 | 0.807283 | 0.88043  |
| MmugDNA.32595.1.S1_at   | MmugDNA.32595.1 | 11.51 | 10.76 | 0.02 | 0.11 | 1.69  | 0.000357 | 0.011366 | 0.062105 | 0.138214 |
| MmugDNA.32597.1.S1_at   | MmugDNA.32597.1 | 6.02  | 5.77  | 0.52 | 0.34 | 1.19  | 0.52618  | 0.184858 | 0.752424 | 0.460776 |
| MmugDNA.32598.1.S1_at   | MmugDNA.32598.1 | 6.71  | 6.68  | 0.06 | 0.13 | 1.02  | 0.639027 | 0.716176 | 0.823331 | 0.835515 |
| MmugDNA.32599.1.S1_at   | MmugDNA.32599.1 | 5.26  | 4.91  | 0.19 | 0.16 | 1.28  | 0.112017 | 0.075482 | 0.388221 | 0.319868 |
| MmugDNA.3260.1.S1_at    | MmugDNA.3260.1  | 9.78  | 9.27  | 2.27 | 0.21 | 1.42  | 0.582978 | 0.725952 | 0.787708 | 0.841316 |
| MmugDNA.32600.1.S1_at   | MmugDNA.32600.1 | 5     | 5.04  | 0.13 | 0.08 | -1.03 | 0.31281  | 0.151675 | 0.598778 | 0.426383 |
| MmugDNA.32602.1.S1_at   | MmugDNA.32602.1 | 9.59  | 9.95  | 0.19 | 0.05 | -1.28 | 0.087983 | 0.152269 | 0.354218 | 0.42706  |
| MmugDNA.32603.1.S1_at   | MmugDNA.32603.1 | 6.21  | 6.09  | 0.27 | 0.07 | 1.08  | 0.513348 | 0.859911 | 0.743653 | 0.92017  |
| MmugDNA.32604.1.S1_at   | MmugDNA.32604.1 | 7.95  | 7.31  | 0.22 | 0.2  | 1.57  | 0.011508 | 0.015256 | 0.15722  | 0.15693  |
| MmugDNA.32605.1.S1_at   | MmugDNA.32605.1 | 6.64  | 6.5   | 0.41 | 0.17 | 1.1   | 0.457587 | 0.659543 | 0.706421 | 0.800801 |
| MmugDNA.32606.1.S1_s_at | MmugDNA.32606.1 | 11.96 | 11.38 | 0.08 | 0.36 | 1.49  | 0.119109 | 0.166222 | 0.396716 | 0.442775 |
| MmugDNA.32607.1.S1_s_at | MmugDNA.32607.1 | 9.45  | 9.34  | 0.36 | 0.11 | 1.08  | 0.841514 | 0.942756 | 0.930364 | 0.967499 |
| MmugDNA.32609.1.S1_at   | MmugDNA.32609.1 | 9.7   | 9.34  | 0.76 | 0.34 | 1.29  | 0.678764 | 0.1681   | 0.846793 | 0.444698 |
| MmugDNA.3261.1.S1_at    | MmugDNA.3261.1  | 7.39  | 7.32  | 0.31 | 0.1  | 1.05  | 0.752261 | 0.415248 | 0.885542 | 0.640769 |
| MmugDNA.32610.1.S1_at   | MmugDNA.32610.1 | 7.18  | 7.4   | 0.4  | 0    | -1.16 | 0.394544 | 0.469338 | 0.661066 | 0.678197 |
| MmugDNA.32611.1.S1_at   | MmugDNA.32611.1 | 4.87  | 4.87  | 0.1  | 0.24 | 1     | 0.844363 | 0.131612 | 0.931864 | 0.403716 |
| MmugDNA.32611.1.S1_s_at | MmugDNA.32611.1 | 4.08  | 3.99  | 0.1  | 0.2  | 1.06  | 0.497399 | 0.115357 | 0.733085 | 0.382394 |
| MmugDNA.32614.1.S1_at   | MmugDNA.32614.1 | 4.36  | 4.45  | 0.26 | 0.08 | -1.06 | 0.899792 | 0.219847 | 0.95742  | 0.493388 |
| MmugDNA.32615.1.S1_at   | MmugDNA.32615.1 | 5.65  | 5.61  | 0.08 | 0.06 | 1.03  | 0.105411 | 0.203103 | 0.379375 | 0.477371 |
| MmugDNA.32616.1.S1_at   | MmugDNA.32616.1 | 6.32  | 6.84  | 0.25 | 0.17 | -1.43 | 0.043421 | 0.280783 | 0.265644 | 0.543952 |
| MmugDNA.32617.1.S1_at   | MmugDNA.32617.1 | 4.95  | 5.13  | 0.14 | 0    | -1.14 | 0.129191 | 0.043548 | 0.411529 | 0.253261 |
| MmugDNA.32618.1.S1_at   | MmugDNA.32618.1 | 7.77  | 6.79  | 0.69 | 0.1  | 1.98  | 0.088658 | 0.086083 | 0.355022 | 0.33835  |
| MmugDNA.32619.1.S1_at   | MmugDNA.32619.1 | 7.54  | 9.2   | 0.28 | 0.04 | -3.16 | 0.000709 | 0.02878  | 0.071903 | 0.21152  |
| MmugDNA.3262.1.S1_at    | MmugDNA.3262.1  | 6     | 5.94  | 0.38 | 0.08 | 1.04  | 0.295813 | 0.389201 | 0.584581 | 0.623403 |
| MmugDNA.32620.1.S1_at   | MmugDNA.32620.1 | 7.97  | 7.05  | 0.67 | 0.09 | 1.89  | 0.20296  | 0.336717 | 0.500692 | 0.584045 |
| MmugDNA.32621.1.S1_at   | MmugDNA.32621.1 | 3.13  | 3.15  | 0.16 | 0.04 | -1.01 | 0.983988 | 0.990384 | 0.994033 | 0.994548 |
| MmugDNA.32622.1.S1_at   | MmugDNA.32622.1 | 12.58 | 12.78 | 0.07 | 0.03 | -1.15 | 0.030069 | 0.474254 | 0.226565 | 0.68135  |
| MmugDNA.32623.1.S1_at   | MmugDNA.32623.1 | 9.24  | 9.7   | 0.14 | 0.15 | -1.38 | 0.032001 | 0.001628 | 0.23267  | 0.060983 |
| MmugDNA.32625.1.S1_at   | MmugDNA.32625.1 | 9.14  | 9.35  | 0.1  | 0.09 | -1.15 | 0.069355 | 0.928001 | 0.321649 | 0.959116 |
| MmugDNA.32627.1.S1_at   | MmugDNA.32627.1 | 6.36  | 7.03  | 0.21 | 0.19 | -1.59 | 0.048803 | 0.520489 | 0.278475 | 0.711799 |
| MmugDNA.32628.1.S1_at   | MmugDNA.32628.1 | 4.56  | 4.43  | 0.2  | 0.07 | 1.09  | 0.182596 | 0.512821 | 0.478389 | 0.70653  |
| MmugDNA.32628.1.S1_x_at | MmugDNA.32628.1 | 5.07  | 4.94  | 0.3  | 0.22 | 1.1   | 0.534403 | 0.721368 | 0.757649 | 0.838685 |
| MmugDNA.32629.1.S1_at   | MmugDNA.32629.1 | 9.21  | 8.45  | 0.39 | 0.2  | 1.68  | 0.047264 | 0.083806 | 0.274631 | 0.334647 |
| MmugDNA.3263.1.S1_at    | MmugDNA.3263.1  | 5.35  | 5.55  | 0.2  | 0.12 | -1.15 | 0.304045 | 0.546538 | 0.59132  | 0.728079 |
| MmugDNA.32630.1.S1_at   | MmugDNA.32630.1 | 10.53 | 10.46 | 0.07 | 0.12 | 1.05  | 0.623092 | 0.279919 | 0.81385  | 0.543342 |
| MmugDNA.32631.1.S1_at   | MmugDNA.32631.1 | 12.64 | 12.8  | 0.09 | 0    | -1.12 | 0.061583 | 0.006029 | 0.30471  | 0.106089 |
| MmugDNA.32632.1.S1_at   | MmugDNA.32632.1 | 4.47  | 4.49  | 0.21 | 0.31 | -1.01 | 0.528712 | 0.531436 | 0.753764 | 0.718636 |
| MmugDNA.32633.1.S1_at   | MmugDNA.32633.1 | 4.38  | 6.38  | 1.56 | 0.12 | -3.98 | 0.300396 | 0.263951 | 0.588556 | 0.530153 |
| MmugDNA.32634.1.S1_at   | MmugDNA.32634.1 | 8.52  | 8.5   | 0.2  | 0.28 | 1.02  | 0.241835 | 0.532114 | 0.538882 | 0.718995 |
| MmugDNA.32634.1.S1_s_at | MmugDNA.32634.1 | 9.6   | 9.5   | 0.18 | 0.03 | 1.07  | 0.456437 | 0.550318 | 0.705769 | 0.730382 |
| MmugDNA.32635.1.S1_at   | MmugDNA.32635.1 | 3.2   | 3.04  | 0.33 | 0.36 | 1.12  | 0.963312 | 0.867758 | 0.985134 | 0.924861 |
| MmugDNA.32636.1.S1_at   | MmugDNA.32636.1 | 6.5   | 6.1   | 0.41 | 0.07 | 1.32  | 0.157486 | 0.216061 | 0.448161 | 0.489671 |

|                         |                 |       |       |      |      |       |          |          |          |          |
|-------------------------|-----------------|-------|-------|------|------|-------|----------|----------|----------|----------|
| MmugDNA.32637.1.S1_at   | MmugDNA.32637.1 | 9.91  | 8.47  | 0.56 | 0.69 | 2.71  | 0.075478 | 0.209914 | 0.332995 | 0.483701 |
| MmugDNA.32638.1.S1_at   | MmugDNA.32638.1 | 10.94 | 11.09 | 0.14 | 0.06 | -1.11 | 0.239727 | 0.061623 | 0.537227 | 0.295095 |
| MmugDNA.32639.1.S1_at   | MmugDNA.32639.1 | 3.39  | 3.52  | 0.03 | 0.35 | -1.1  | 0.661824 | 0.71872  | 0.836822 | 0.837211 |
| MmugDNA.3264.1.S1_at    | MmugDNA.3264.1  | 6.08  | 5.8   | 0.15 | 0.11 | 1.22  | 0.123392 | 0.383774 | 0.402711 | 0.619734 |
| MmugDNA.5862.1.S1_s_at  | MmugDNA.5862.1  | 6.55  | 6.33  | 0.1  | 0.34 | 1.17  | 0.97731  | 0.138566 | 0.991128 | 0.411557 |
| MmugDNA.32644.1.S1_at   | MmugDNA.32644.1 | 10.82 | 10.62 | 0.1  | 0.02 | 1.15  | 0.021289 | 0.007075 | 0.199623 | 0.113284 |
| MmugDNA.32646.1.S1_at   | MmugDNA.32646.1 | 12.93 | 12.9  | 0.07 | 0.04 | 1.02  | 0.180947 | 0.387161 | 0.476193 | 0.621935 |
| MmugDNA.32647.1.S1_at   | MmugDNA.32647.1 | 5.57  | 6.3   | 0.04 | 0.4  | -1.66 | 0.110034 | 0.081793 | 0.385253 | 0.330177 |
| MmugDNA.32647.1.S1_s_at | MmugDNA.32647.1 | 8.58  | 8.38  | 0.08 | 0.03 | 1.14  | 0.031335 | 0.059339 | 0.23018  | 0.29054  |
| MmugDNA.32648.1.S1_at   | MmugDNA.32648.1 | 5.42  | 4.99  | 0.27 | 0.12 | 1.36  | 0.107964 | 0.114238 | 0.382542 | 0.380761 |
| MmugDNA.3265.1.S1_at    | MmugDNA.3265.1  | 8.52  | 7.06  | 0.93 | 0.69 | 2.75  | 0.076292 | 0.107583 | 0.33441  | 0.370497 |
| MmugDNA.32650.1.S1_at   | MmugDNA.32650.1 | 9.85  | 9.66  | 0.25 | 0.1  | 1.14  | 0.187129 | 0.028318 | 0.483249 | 0.21008  |
| MmugDNA.32651.1.S1_at   | MmugDNA.32651.1 | 3.06  | 3.18  | 0.71 | 0.05 | -1.09 | 0.529254 | 0.456355 | 0.754165 | 0.670145 |
| MmugDNA.32652.1.S1_at   | MmugDNA.32652.1 | 8.81  | 8.69  | 0.18 | 0.12 | 1.09  | 0.353261 | 0.223984 | 0.630388 | 0.497025 |
| MmugDNA.32654.1.S1_at   | MmugDNA.32654.1 | 5.17  | 5.14  | 0.1  | 0.09 | 1.02  | 0.34376  | 0.134964 | 0.623063 | 0.406951 |
| MmugDNA.32655.1.S1_at   | MmugDNA.32655.1 | 4.22  | 3.48  | 0.55 | 0.55 | 1.67  | 0.420433 | 0.596776 | 0.679414 | 0.759804 |
| MmugDNA.32657.1.S1_at   | MmugDNA.32657.1 | 5.47  | 5.46  | 0.12 | 0.12 | 1.01  | 0.453547 | 0.342538 | 0.703709 | 0.588543 |
| MmugDNA.32658.1.S1_at   | MmugDNA.32658.1 | 6.29  | 5.71  | 0.32 | 0.35 | 1.5   | 0.046578 | 0.436658 | 0.273564 | 0.656148 |
| MmugDNA.32659.1.S1_at   | MmugDNA.32659.1 | 4.11  | 4.14  | 0.38 | 0.18 | -1.02 | 0.636333 | 0.839586 | 0.822077 | 0.908582 |
| MmugDNA.3266.1.S1_at    | MmugDNA.3266.1  | 6.02  | 6.02  | 0.13 | 0.02 | -1    | 0.342181 | 0.266681 | 0.622034 | 0.53241  |
| MmugDNA.32661.1.S1_at   | MmugDNA.32661.1 | 4.06  | 4.05  | 0.1  | 0    | 1.01  | 0.420315 | 0.720671 | 0.679364 | 0.838368 |
| MmugDNA.32662.1.S1_at   | MmugDNA.32662.1 | 3.01  | 3.08  | 0.28 | 0.09 | -1.05 | 0.582719 | 0.766234 | 0.787461 | 0.864167 |
| MmugDNA.32663.1.S1_at   | MmugDNA.32663.1 | 3.31  | 3.25  | 0.17 | 0.6  | 1.04  | 0.730847 | 0.423731 | 0.874262 | 0.646518 |
| MmugDNA.32664.1.S1_at   | MmugDNA.32664.1 | 9.66  | 9.67  | 0.11 | 0.06 | -1    | 0.461218 | 0.923958 | 0.708726 | 0.957162 |
| MmugDNA.32665.1.S1_at   | MmugDNA.32665.1 | 6.98  | 6.73  | 0.16 | 0.19 | 1.19  | 0.331901 | 0.114116 | 0.613772 | 0.380543 |
| MmugDNA.32667.1.S1_at   | MmugDNA.32667.1 | 7.62  | 7.61  | 0.21 | 0.39 | 1     | 0.767027 | 0.002443 | 0.893102 | 0.073201 |
| MmugDNA.32668.1.S1_at   | MmugDNA.32668.1 | 6.11  | 5.86  | 0.11 | 0.14 | 1.19  | 0.186085 | 0.175738 | 0.482202 | 0.452344 |
| MmugDNA.32669.1.S1_at   | MmugDNA.32669.1 | 9.07  | 9.12  | 0.21 | 0.01 | -1.04 | 0.836452 | 0.92155  | 0.928289 | 0.955761 |
| MmugDNA.3267.1.S1_at    | MmugDNA.3267.1  | 9.59  | 9.56  | 0.19 | 0.15 | 1.02  | 0.284493 | 0.076585 | 0.574425 | 0.321733 |
| MmugDNA.32670.1.S1_at   | MmugDNA.32670.1 | 6.88  | 6.9   | 0.39 | 0.2  | -1.01 | 0.447606 | 0.232643 | 0.699562 | 0.504359 |
| MmugDNA.32671.1.S1_at   | MmugDNA.32671.1 | 4.15  | 4.15  | 0.09 | 0.05 | -1    | 0.265789 | 0.635134 | 0.558375 | 0.785229 |
| MmugDNA.32672.1.S1_at   | MmugDNA.32672.1 | 4.71  | 4.73  | 0.15 | 0.15 | -1.02 | 0.650551 | 0.314609 | 0.830274 | 0.568415 |
| MmugDNA.32674.1.S1_at   | MmugDNA.32674.1 | 5.05  | 5.14  | 0.07 | 0.06 | -1.06 | 0.800072 | 0.440334 | 0.90992  | 0.658899 |
| MmugDNA.32675.1.S1_at   | MmugDNA.32675.1 | 3.8   | 3.73  | 0.24 | 0.07 | 1.05  | 0.2244   | 0.28187  | 0.522615 | 0.544844 |
| MmugDNA.32676.1.S1_at   | MmugDNA.32676.1 | 3.04  | 3.06  | 0.14 | 0.06 | -1.02 | 0.618622 | 0.559809 | 0.810696 | 0.736394 |
| MmugDNA.32677.1.S1_s_at | MmugDNA.32677.1 | 7.37  | 6.63  | 0.77 | 0.07 | 1.67  | 0.325519 | 0.631546 | 0.608744 | 0.782845 |
| MmugDNA.32679.1.S1_at   | MmugDNA.32679.1 | 3.81  | 3.63  | 0.28 | 0.13 | 1.13  | 0.356409 | 0.663527 | 0.632723 | 0.803016 |
| MmugDNA.3268.1.S1_at    | MmugDNA.3268.1  | 3.38  | 3.38  | 0.09 | 0.01 | 1     | 0.457745 | 0.752203 | 0.706531 | 0.855787 |
| MmugDNA.32680.1.S1_at   | MmugDNA.32680.1 | 7.72  | 8.78  | 1.01 | 0.22 | -2.08 | 0.110345 | 0.225785 | 0.385646 | 0.498159 |
| MmugDNA.32681.1.S1_at   | MmugDNA.32681.1 | 5.58  | 5.48  | 0.92 | 0.38 | 1.07  | 0.571619 | 0.578782 | 0.780017 | 0.748614 |
| MmugDNA.32682.1.S1_at   | MmugDNA.32682.1 | 4.54  | 4.25  | 0.45 | 0.16 | 1.23  | 0.273876 | 0.301256 | 0.565917 | 0.559356 |
| MmugDNA.32684.1.S1_at   | MmugDNA.32684.1 | 4.03  | 4.11  | 0.36 | 0.06 | -1.06 | 0.568831 | 0.849944 | 0.778625 | 0.914673 |
| MmugDNA.32685.1.S1_at   | MmugDNA.32685.1 | 9.38  | 9.28  | 0.48 | 0.21 | 1.07  | 0.851368 | 0.81339  | 0.935336 | 0.89215  |

|                         |                 |       |       |      |      |        |          |          |          |          |
|-------------------------|-----------------|-------|-------|------|------|--------|----------|----------|----------|----------|
| MmugDNA.32686.1.S1_at   | MmugDNA.32686.1 | 5.09  | 5.62  | 0.07 | 0.38 | -1.44  | 0.185806 | 0.274991 | 0.481966 | 0.539402 |
| MmugDNA.32687.1.S1_at   | MmugDNA.32687.1 | 4.21  | 4.38  | 0.21 | 0.11 | -1.12  | 0.312354 | 0.373472 | 0.598326 | 0.61228  |
| MmugDNA.32688.1.S1_at   | MmugDNA.32688.1 | 9.8   | 10.33 | 0.04 | 0.13 | -1.44  | 0.002233 | 0.073681 | 0.091055 | 0.317014 |
| MmugDNA.32689.1.S1_at   | MmugDNA.32689.1 | 5.25  | 5.62  | 0.22 | 0.09 | -1.29  | 0.042007 | 0.006382 | 0.261908 | 0.108551 |
| MmugDNA.3269.1.S1_at    | MmugDNA.3269.1  | 4.74  | 4.86  | 0.2  | 0.09 | -1.09  | 0.619867 | 0.922723 | 0.811502 | 0.956468 |
| MmugDNA.32691.1.S1_at   | MmugDNA.32691.1 | 9.13  | 8.95  | 0.46 | 0.14 | 1.13   | 0.191524 | 0.053506 | 0.487896 | 0.276963 |
| MmugDNA.32692.1.S1_at   | MmugDNA.32692.1 | 4.42  | 4.21  | 0.17 | 0.06 | 1.16   | 0.477198 | 0.206987 | 0.719314 | 0.481111 |
| MmugDNA.32693.1.S1_at   | MmugDNA.32693.1 | 6.79  | 6.69  | 0.2  | 0.1  | 1.07   | 0.53337  | 0.868616 | 0.75697  | 0.925383 |
| MmugDNA.32694.1.S1_at   | MmugDNA.32694.1 | 8.26  | 10.03 | 0.68 | 0.35 | -3.4   | 0.025318 | 0.237306 | 0.212168 | 0.508027 |
| MmugDNA.32694.1.S1_s_at | MmugDNA.32694.1 | 9.82  | 11.33 | 0.55 | 0.24 | -2.86  | 0.017511 | 0.244307 | 0.185974 | 0.514184 |
| MmugDNA.32695.1.S1_at   | MmugDNA.32695.1 | 5.22  | 5.17  | 0.33 | 0.05 | 1.03   | 0.285193 | 0.347562 | 0.575141 | 0.592019 |
| MmugDNA.32696.1.S1_at   | MmugDNA.32696.1 | 5.35  | 4.99  | 0.12 | 0.2  | 1.29   | 0.062053 | 0.124817 | 0.305631 | 0.395219 |
| MmugDNA.32698.1.S1_at   | MmugDNA.32698.1 | 5.06  | 5.18  | 0.27 | 0.14 | -1.08  | 0.609466 | 0.193657 | 0.805285 | 0.468785 |
| MmugDNA.32699.1.S1_at   | MmugDNA.32699.1 | 4.6   | 9.03  | 1.98 | 0.41 | -21.54 | 0.058583 | 0.263263 | 0.299197 | 0.529531 |
| MmugDNA.3270.1.S1_at    | MmugDNA.3270.1  | 11.26 | 11.33 | 0.1  | 0.1  | -1.05  | 0.817548 | 0.143151 | 0.918474 | 0.417029 |
| MmugDNA.32700.1.S1_at   | MmugDNA.32700.1 | 4.33  | 4.17  | 0.18 | 0.13 | 1.11   | 0.499691 | 0.168287 | 0.734372 | 0.444935 |
| MmugDNA.32701.1.S1_at   | MmugDNA.32701.1 | 4.04  | 4.15  | 0.06 | 0.06 | -1.07  | 0.101311 | 0.635317 | 0.372655 | 0.785344 |
| MmugDNA.32702.1.S1_at   | MmugDNA.32702.1 | 6.31  | 7.55  | 0.28 | 0.08 | -2.36  | 0.001235 | 0.021044 | 0.078631 | 0.181869 |
| MmugDNA.32704.1.S1_at   | MmugDNA.32704.1 | 12.81 | 12.96 | 0.12 | 0.09 | -1.11  | 0.125036 | 0.069575 | 0.405516 | 0.309848 |
| MmugDNA.7703.1.S1_s_at  | MmugDNA.7703.1  | 9.86  | 9.94  | 0.1  | 0.1  | -1.05  | 0.680303 | 0.416413 | 0.847493 | 0.641587 |
| MmugDNA.32706.1.S1_at   | MmugDNA.32706.1 | 6.88  | 6.93  | 0.41 | 0.03 | -1.04  | 0.660833 | 0.811939 | 0.836325 | 0.891493 |
| MmugDNA.32707.1.S1_at   | MmugDNA.32707.1 | 3.95  | 3.87  | 0.13 | 0.14 | 1.06   | 0.471063 | 0.669892 | 0.71541  | 0.806933 |
| MmugDNA.32708.1.S1_at   | MmugDNA.32708.1 | 3.39  | 3.36  | 0.12 | 0.02 | 1.02   | 0.250997 | 0.608883 | 0.54571  | 0.767364 |
| MmugDNA.3271.1.S1_at    | MmugDNA.3271.1  | 4.78  | 4.78  | 0.02 | 0.01 | 1      | 0.244288 | 0.86     | 0.540909 | 0.920191 |
| MmugDNA.32710.1.S1_at   | MmugDNA.32710.1 | 3.92  | 3.71  | 0.03 | 0.15 | 1.15   | 0.238796 | 0.009682 | 0.53601  | 0.12945  |
| MmugDNA.32711.1.S1_at   | MmugDNA.32711.1 | 6.13  | 7.29  | 0.43 | 0.14 | -2.24  | 0.023736 | 0.008993 | 0.207099 | 0.125485 |
| MmugDNA.32712.1.S1_at   | MmugDNA.32712.1 | 4.48  | 4.49  | 0.18 | 0.13 | -1     | 0.831137 | 0.172281 | 0.925713 | 0.448666 |
| MmugDNA.32713.1.S1_at   | MmugDNA.32713.1 | 5.01  | 5.03  | 0.17 | 0.11 | -1.02  | 0.471157 | 0.538009 | 0.715413 | 0.72281  |
| MmugDNA.32714.1.S1_at   | MmugDNA.32714.1 | 2.9   | 2.8   | 0.04 | 0.17 | 1.07   | 0.880879 | 0.778594 | 0.949372 | 0.871488 |
| MmugDNA.32717.1.S1_at   | MmugDNA.32717.1 | 11.19 | 11.38 | 0.41 | 0.04 | -1.15  | 0.81844  | 0.965037 | 0.918952 | 0.980558 |
| MmugDNA.32718.1.S1_at   | MmugDNA.32718.1 | 3.14  | 3.17  | 0.18 | 0.05 | -1.02  | 0.743732 | 0.035124 | 0.881384 | 0.231645 |
| MmugDNA.32719.1.S1_at   | MmugDNA.32719.1 | 3.85  | 3.95  | 0.2  | 0.03 | -1.07  | 0.768922 | 0.639414 | 0.893877 | 0.788289 |
| MmugDNA.32720.1.S1_at   | MmugDNA.32720.1 | 10.07 | 10.06 | 0.06 | 0.25 | 1.01   | 0.606053 | 0.960177 | 0.802902 | 0.977425 |
| MmugDNA.32721.1.S1_at   | MmugDNA.32721.1 | 5.61  | 5.79  | 0.43 | 0.44 | -1.13  | 0.45907  | 0.526848 | 0.707358 | 0.715627 |
| MmugDNA.32722.1.S1_at   | MmugDNA.32722.1 | 6.72  | 6.74  | 0.04 | 0.11 | -1.01  | 0.61394  | 0.170199 | 0.807824 | 0.446906 |
| MmugDNA.32723.1.S1_at   | MmugDNA.32723.1 | 7.78  | 7.83  | 0.31 | 0.08 | -1.04  | 0.27562  | 0.505871 | 0.567274 | 0.702226 |
| MmugDNA.32726.1.S1_at   | MmugDNA.32726.1 | 10.06 | 8.49  | 0.12 | 0.11 | 2.96   | 0.000084 | 0.000108 | 0.051196 | 0.028099 |
| MmugDNA.32727.1.S1_at   | MmugDNA.32727.1 | 7.5   | 6.86  | 1.31 | 0.14 | 1.56   | 0.763782 | 0.399587 | 0.891841 | 0.629912 |
| MmugDNA.32729.1.S1_at   | MmugDNA.32729.1 | 10.83 | 8.79  | 0.51 | 0.21 | 4.12   | 0.001836 | 0.00024  | 0.086666 | 0.032579 |
| MmugDNA.32730.1.S1_at   | MmugDNA.32730.1 | 4.95  | 5.11  | 0.07 | 0.27 | -1.12  | 0.992785 | 0.375196 | 0.997263 | 0.613249 |
| MmugDNA.32733.1.S1_at   | MmugDNA.32733.1 | 6.67  | 6.41  | 0.3  | 0.79 | 1.2    | 0.470938 | 0.606444 | 0.715282 | 0.765747 |
| MmugDNA.32736.1.S1_at   | MmugDNA.32736.1 | 7.71  | 7.74  | 0.13 | 0.02 | -1.02  | 0.321058 | 0.002231 | 0.60539  | 0.069565 |
| MmugDNA.32737.1.S1_at   | MmugDNA.32737.1 | 5.7   | 5.59  | 0.13 | 0.06 | 1.08   | 0.240266 | 0.096025 | 0.537838 | 0.353302 |

|                         |                 |       |       |      |      |       |          |          |          |          |
|-------------------------|-----------------|-------|-------|------|------|-------|----------|----------|----------|----------|
| MmugDNA.32738.1.S1_at   | MmugDNA.32738.1 | 7.19  | 7.3   | 0.09 | 0.09 | -1.08 | 0.109662 | 0.603994 | 0.384767 | 0.764427 |
| MmugDNA.3274.1.S1_at    | MmugDNA.3274.1  | 3.53  | 3.1   | 0.45 | 0.46 | 1.34  | 0.674632 | 0.842676 | 0.84465  | 0.910333 |
| MmugDNA.32743.1.S1_at   | MmugDNA.32743.1 | 6.9   | 5.54  | 0.38 | 0.3  | 2.56  | 0.010672 | 0.002209 | 0.153062 | 0.069408 |
| MmugDNA.32744.1.S1_at   | MmugDNA.32744.1 | 14.54 | 14.54 | 0.01 | 0.02 | 1     | 0.495744 | 0.384105 | 0.73183  | 0.619926 |
| MmugDNA.32745.1.S1_at   | MmugDNA.32745.1 | 7.19  | 8.34  | 0.7  | 0.03 | -2.21 | 0.05415  | 0.084798 | 0.289903 | 0.336325 |
| MmugDNA.32746.1.S1_at   | MmugDNA.32746.1 | 7.01  | 7.79  | 0.42 | 0.11 | -1.71 | 0.030367 | 0.089078 | 0.227199 | 0.343006 |
| MmugDNA.32747.1.S1_s_at | MmugDNA.32747.1 | 9.87  | 10.35 | 0.34 | 0.05 | -1.39 | 0.214845 | 0.002356 | 0.512419 | 0.071631 |
| MmugDNA.32749.1.S1_at   | MmugDNA.32749.1 | 7.33  | 8.95  | 1.02 | 0.41 | -3.08 | 0.080298 | 0.119028 | 0.34088  | 0.387296 |
| MmugDNA.3275.1.S1_at    | MmugDNA.3275.1  | 7.19  | 6.78  | 0.35 | 0.19 | 1.32  | 0.139692 | 0.154551 | 0.42522  | 0.429429 |
| MmugDNA.32750.1.S1_at   | MmugDNA.32750.1 | 5.91  | 5.82  | 0.2  | 0.26 | 1.07  | 0.335429 | 0.494448 | 0.616395 | 0.694872 |
| MmugDNA.32751.1.S1_at   | MmugDNA.32751.1 | 8.33  | 7.81  | 0.27 | 0.11 | 1.43  | 0.040032 | 0.035976 | 0.256732 | 0.234155 |
| MmugDNA.32752.1.S1_at   | MmugDNA.32752.1 | 5.72  | 5.89  | 0.09 | 0.04 | -1.13 | 0.032122 | 0.01634  | 0.233098 | 0.161886 |
| MmugDNA.32753.1.S1_s_at | MmugDNA.32753.1 | 13.23 | 13.22 | 0.01 | 0.03 | 1.01  | 0.92184  | 0.563638 | 0.966523 | 0.738768 |
| MmugDNA.32754.1.S1_at   | MmugDNA.32754.1 | 3.3   | 3.29  | 0.11 | 0.22 | 1     | 0.257467 | 0.094922 | 0.551704 | 0.352044 |
| MmugDNA.32755.1.S1_at   | MmugDNA.32755.1 | 5.15  | 5.13  | 0.05 | 0.03 | 1.01  | 0.366223 | 0.392682 | 0.640626 | 0.625813 |
| MmugDNA.32757.1.S1_at   | MmugDNA.32757.1 | 5.88  | 5.72  | 0.25 | 0.16 | 1.11  | 0.289097 | 0.328096 | 0.578755 | 0.577871 |
| MmugDNA.32758.1.S1_at   | MmugDNA.32758.1 | 7.59  | 7.25  | 0.27 | 0.2  | 1.26  | 0.208077 | 0.054502 | 0.505909 | 0.278959 |
| MmugDNA.32759.1.S1_at   | MmugDNA.32759.1 | 5.7   | 5.75  | 0.06 | 0.04 | -1.03 | 0.38387  | 0.377208 | 0.65303  | 0.61484  |
| MmugDNA.32760.1.S1_at   | MmugDNA.32760.1 | 7.14  | 7.95  | 0.4  | 0.59 | -1.75 | 0.132578 | 0.33679  | 0.415892 | 0.584093 |
| MmugDNA.32762.1.S1_at   | MmugDNA.32762.1 | 9.36  | 9.06  | 0.83 | 0.28 | 1.23  | 0.765732 | 0.736799 | 0.892564 | 0.847693 |
| MmugDNA.32764.1.S1_at   | MmugDNA.32764.1 | 3.73  | 3.52  | 0.1  | 0.06 | 1.16  | 0.042499 | 0.137431 | 0.263254 | 0.410368 |
| MmugDNA.32765.1.S1_at   | MmugDNA.32765.1 | 3.36  | 3.44  | 0.07 | 0.02 | -1.06 | 0.140404 | 0.029543 | 0.426111 | 0.213535 |
| MmugDNA.32766.1.S1_at   | MmugDNA.32766.1 | 4.82  | 4.9   | 0.05 | 0.18 | -1.06 | 0.206236 | 0.387526 | 0.503856 | 0.622163 |
| MmugDNA.32767.1.S1_at   | MmugDNA.32767.1 | 6.65  | 6.92  | 0.39 | 0.29 | -1.21 | 0.157766 | 0.424947 | 0.448587 | 0.647439 |
| MmugDNA.32768.1.S1_at   | MmugDNA.32768.1 | 3.48  | 3.25  | 0.51 | 0.1  | 1.17  | 0.312989 | 0.380932 | 0.598891 | 0.617426 |
| MmugDNA.32769.1.S1_at   | MmugDNA.32769.1 | 4.36  | 4.8   | 0.25 | 0.11 | -1.36 | 0.055227 | 0.022354 | 0.291993 | 0.187159 |
| MmugDNA.3277.1.S1_at    | MmugDNA.3277.1  | 3.97  | 3.9   | 0.32 | 0    | 1.05  | 0.595343 | 0.72417  | 0.79519  | 0.840374 |
| MmugDNA.32771.1.S1_at   | MmugDNA.32771.1 | 5.19  | 5.2   | 0    | 0.14 | -1.01 | 0.481851 | 0.846311 | 0.722245 | 0.912526 |
| MmugDNA.32772.1.S1_at   | MmugDNA.32772.1 | 4.31  | 4.21  | 0.16 | 0    | 1.07  | 0.224436 | 0.388975 | 0.522615 | 0.623278 |
| MmugDNA.32773.1.S1_at   | MmugDNA.32773.1 | 12.2  | 11.73 | 0.16 | 0.05 | 1.39  | 0.005355 | 0.000402 | 0.118246 | 0.037471 |
| MmugDNA.32774.1.S1_at   | MmugDNA.32774.1 | 7.71  | 7.65  | 0.31 | 0.18 | 1.04  | 0.392285 | 0.688044 | 0.659275 | 0.817896 |
| MmugDNA.32775.1.S1_at   | MmugDNA.32775.1 | 7.14  | 7.17  | 0.02 | 0.06 | -1.02 | 0.14351  | 0.370735 | 0.429994 | 0.609721 |
| MmugDNA.32778.1.S1_at   | MmugDNA.32778.1 | 4.86  | 4.88  | 0.16 | 0.07 | -1.01 | 0.490472 | 0.755238 | 0.728542 | 0.857509 |
| MmugDNA.32779.1.S1_at   | MmugDNA.32779.1 | 6.36  | 6.35  | 0.32 | 0.27 | 1.01  | 0.873918 | 0.759606 | 0.945842 | 0.860234 |
| MmugDNA.3278.1.S1_at    | MmugDNA.3278.1  | 4.31  | 4.2   | 0    | 0.11 | 1.08  | 0.071118 | 0.014626 | 0.324551 | 0.154176 |
| MmugDNA.32780.1.S1_at   | MmugDNA.32780.1 | 5.32  | 4.56  | 0.61 | 0.14 | 1.69  | 0.106992 | 0.036944 | 0.38138  | 0.236659 |
| MmugDNA.32781.1.S1_at   | MmugDNA.32781.1 | 4.19  | 4.19  | 0.3  | 0.38 | 1     | 0.833273 | 0.96304  | 0.926589 | 0.979361 |
| MmugDNA.32782.1.S1_at   | MmugDNA.32782.1 | 6.62  | 6.56  | 0.36 | 0.07 | 1.04  | 0.262782 | 0.346089 | 0.556683 | 0.591166 |
| MmugDNA.32783.1.S1_at   | MmugDNA.32783.1 | 3.39  | 3.03  | 0.37 | 0.04 | 1.28  | 0.503442 | 0.600752 | 0.736977 | 0.76224  |
| MmugDNA.32785.1.S1_at   | MmugDNA.32785.1 | 4.02  | 3.97  | 0.27 | 0.04 | 1.04  | 0.240336 | 0.454449 | 0.537839 | 0.668603 |
| MmugDNA.32787.1.S1_at   | MmugDNA.32787.1 | 5.4   | 5.28  | 0.16 | 0.03 | 1.08  | 0.160801 | 0.205047 | 0.452392 | 0.47934  |
| MmugDNA.32788.1.S1_at   | MmugDNA.32788.1 | 6.1   | 5.67  | 0.1  | 0.09 | 1.34  | 0.006999 | 0.524454 | 0.130977 | 0.714384 |
| MmugDNA.32789.1.S1_at   | MmugDNA.32789.1 | 3.13  | 3.09  | 0.21 | 0.07 | 1.03  | 0.914125 | 0.882101 | 0.963571 | 0.932794 |



|                         |                 |       |       |      |      |       |          |          |          |          |
|-------------------------|-----------------|-------|-------|------|------|-------|----------|----------|----------|----------|
| MmugDNA.32790.1.S1_at   | MmugDNA.32790.1 | 3.61  | 3.46  | 0.15 | 0.04 | 1.11  | 0.19358  | 0.183571 | 0.490232 | 0.459681 |
| MmugDNA.32791.1.S1_at   | MmugDNA.32791.1 | 5.08  | 4.83  | 0.88 | 0.14 | 1.2   | 0.745966 | 0.189103 | 0.882206 | 0.464934 |
| MmugDNA.32792.1.S1_at   | MmugDNA.32792.1 | 6.85  | 7.04  | 0.18 | 0.06 | -1.14 | 0.096759 | 0.291739 | 0.366756 | 0.552054 |
| MmugDNA.32793.1.S1_at   | MmugDNA.32793.1 | 6.88  | 6.56  | 0.18 | 0.03 | 1.25  | 0.035958 | 0.041738 | 0.244614 | 0.24892  |
| MmugDNA.32794.1.S1_at   | MmugDNA.32794.1 | 4.27  | 4.42  | 0.19 | 0.01 | -1.11 | 0.514581 | 0.701599 | 0.744522 | 0.826955 |
| MmugDNA.32795.1.S1_at   | MmugDNA.32795.1 | 5.25  | 5.7   | 0.18 | 0.22 | -1.36 | 0.027956 | 0.016576 | 0.219792 | 0.163023 |
| MmugDNA.32796.1.S1_at   | MmugDNA.32796.1 | 8.24  | 8.34  | 0.29 | 0.01 | -1.07 | 0.562645 | 0.365111 | 0.775027 | 0.605299 |
| MmugDNA.32797.1.S1_at   | MmugDNA.32797.1 | 9.82  | 9.78  | 0.04 | 0.19 | 1.03  | 0.738418 | 0.379801 | 0.87879  | 0.616576 |
| MmugDNA.32798.1.S1_at   | MmugDNA.32798.1 | 4.21  | 4.25  | 0.18 | 0.34 | -1.03 | 0.417353 | 0.502173 | 0.677553 | 0.70006  |
| MmugDNA.3280.1.S1_at    | MmugDNA.3280.1  | 3.39  | 3.26  | 0.22 | 0.1  | 1.1   | 0.412647 | 0.507108 | 0.674202 | 0.70277  |
| MmugDNA.32801.1.S1_at   | MmugDNA.32801.1 | 3.75  | 3.86  | 0.11 | 0.12 | -1.07 | 0.773263 | 0.060852 | 0.896039 | 0.293437 |
| MmugDNA.32802.1.S1_at   | MmugDNA.32802.1 | 10.25 | 10.01 | 0.13 | 0.14 | 1.18  | 0.189281 | 0.006698 | 0.485819 | 0.110751 |
| MmugDNA.32806.1.S1_at   | MmugDNA.32806.1 | 3.32  | 3.25  | 0.08 | 0.06 | 1.05  | 0.193717 | 0.368808 | 0.490322 | 0.608313 |
| MmugDNA.32809.1.S1_at   | MmugDNA.32809.1 | 6.1   | 6.07  | 0.18 | 0.03 | 1.02  | 0.328149 | 0.424603 | 0.61059  | 0.647158 |
| MmugDNA.3281.1.S1_at    | MmugDNA.3281.1  | 4.3   | 4     | 0.66 | 0.1  | 1.23  | 0.563153 | 0.658676 | 0.775309 | 0.800473 |
| MmugDNA.32810.1.S1_at   | MmugDNA.32810.1 | 9.27  | 7.98  | 0.61 | 0.09 | 2.44  | 0.06317  | 0.104643 | 0.30807  | 0.365941 |
| MmugDNA.32811.1.S1_at   | MmugDNA.32811.1 | 8.3   | 8.44  | 0.35 | 0.22 | -1.1  | 0.65662  | 0.465419 | 0.833907 | 0.675748 |
| MmugDNA.32813.1.S1_at   | MmugDNA.32813.1 | 5.02  | 5.13  | 0.3  | 0.07 | -1.09 | 0.621234 | 0.43275  | 0.81255  | 0.653101 |
| MmugDNA.32814.1.S1_at   | MmugDNA.32814.1 | 8.09  | 8.33  | 0.57 | 0.21 | -1.17 | 0.427953 | 0.233878 | 0.685045 | 0.505169 |
| MmugDNA.32816.1.S1_s_at | MmugDNA.32816.1 | 4.09  | 5.99  | 0.81 | 0.59 | -3.73 | 0.057114 | 0.246457 | 0.296303 | 0.515899 |
| MmugDNA.32817.1.S1_at   | MmugDNA.32817.1 | 5.92  | 5.49  | 0.26 | 0.61 | 1.34  | 0.839437 | 0.876893 | 0.929585 | 0.929855 |
| MmugDNA.32818.1.S1_at   | MmugDNA.32818.1 | 4.17  | 5.03  | 0.73 | 0.46 | -1.81 | 0.30035  | 0.486236 | 0.588556 | 0.689657 |
| MmugDNA.32819.1.S1_at   | MmugDNA.32819.1 | 4.29  | 4.27  | 0.13 | 0.16 | 1.01  | 0.491643 | 0.266474 | 0.729331 | 0.532234 |
| MmugDNA.32820.1.S1_at   | MmugDNA.32820.1 | 5.65  | 5.95  | 0.19 | 0.08 | -1.23 | 0.077569 | 0.034437 | 0.336371 | 0.229602 |
| MmugDNA.32822.1.S1_at   | MmugDNA.32822.1 | 5.05  | 6.52  | 1.05 | 0.27 | -2.77 | 0.102925 | 0.336107 | 0.37552  | 0.583652 |
| MmugDNA.32823.1.S1_at   | MmugDNA.32823.1 | 6.92  | 7.1   | 0.21 | 0.19 | -1.14 | 0.693694 | 0.011014 | 0.853632 | 0.13671  |
| MmugDNA.32824.1.S1_at   | MmugDNA.32824.1 | 10.98 | 11.13 | 0.57 | 0.12 | -1.11 | 0.695672 | 0.302585 | 0.854985 | 0.560201 |
| MmugDNA.32825.1.S1_at   | MmugDNA.32825.1 | 5.94  | 5.93  | 0.11 | 0.1  | 1.01  | 0.856793 | 0.981759 | 0.937791 | 0.989984 |
| MmugDNA.32826.1.S1_at   | MmugDNA.32826.1 | 9.82  | 12.32 | 1.41 | 0.17 | -5.65 | 0.044838 | 0.05338  | 0.269084 | 0.276606 |
| MmugDNA.32829.1.S1_at   | MmugDNA.32829.1 | 5.4   | 5.29  | 0.34 | 0.42 | 1.08  | 0.841089 | 0.335862 | 0.930114 | 0.583533 |
| MmugDNA.3283.1.S1_at    | MmugDNA.3283.1  | 4.6   | 4.15  | 1    | 0.28 | 1.37  | 0.433602 | 0.79521  | 0.688989 | 0.882    |
| MmugDNA.32830.1.S1_at   | MmugDNA.32830.1 | 6.69  | 5.75  | 0.14 | 0.72 | 1.91  | 0.109703 | 0.296564 | 0.384826 | 0.555566 |
| MmugDNA.32831.1.S1_at   | MmugDNA.32831.1 | 5.22  | 5.32  | 0.4  | 0.3  | -1.07 | 0.993025 | 0.926148 | 0.997288 | 0.95813  |
| MmugDNA.32832.1.S1_at   | MmugDNA.32832.1 | 3.46  | 3.49  | 0.17 | 0.18 | -1.02 | 0.421446 | 0.077852 | 0.679956 | 0.324093 |
| MmugDNA.32833.1.S1_at   | MmugDNA.32833.1 | 4.28  | 4.02  | 0.18 | 0.08 | 1.19  | 0.118093 | 0.284311 | 0.395593 | 0.546589 |
| MmugDNA.32834.1.S1_at   | MmugDNA.32834.1 | 3.7   | 3.39  | 0.23 | 0.07 | 1.25  | 0.276342 | 0.180741 | 0.567928 | 0.457294 |
| MmugDNA.32835.1.S1_at   | MmugDNA.32835.1 | 3.94  | 3.91  | 0.09 | 0.05 | 1.02  | 0.36556  | 0.707776 | 0.640017 | 0.830472 |
| MmugDNA.32836.1.S1_at   | MmugDNA.32836.1 | 10.65 | 10.9  | 0.63 | 0.08 | -1.19 | 0.682877 | 0.771732 | 0.848772 | 0.867344 |
| MmugDNA.32838.1.S1_at   | MmugDNA.32838.1 | 4.04  | 4.04  | 0.01 | 0.11 | 1     | 0.401729 | 0.250434 | 0.666287 | 0.519391 |
| MmugDNA.32839.1.S1_at   | MmugDNA.32839.1 | 8.19  | 7.94  | 0.11 | 0.04 | 1.19  | 0.017914 | 0.001166 | 0.187151 | 0.053615 |
| MmugDNA.3284.1.S1_at    | MmugDNA.3284.1  | 5.71  | 5.02  | 0.32 | 0.1  | 1.62  | 0.021475 | 0.225088 | 0.200265 | 0.497741 |
| MmugDNA.32842.1.S1_at   | MmugDNA.32842.1 | 3.06  | 3.05  | 0.32 | 0.05 | 1     | 0.304477 | 0.435253 | 0.59162  | 0.655127 |
| MmugDNA.32843.1.S1_at   | MmugDNA.32843.1 | 10.4  | 10.3  | 0.17 | 0.06 | 1.07  | 0.613659 | 0.12199  | 0.807564 | 0.391416 |

|                         |                 |       |       |      |      |       |          |          |          |          |
|-------------------------|-----------------|-------|-------|------|------|-------|----------|----------|----------|----------|
| MmugDNA.32844.1.S1_at   | MmugDNA.32844.1 | 4.99  | 5.24  | 0.29 | 0.04 | -1.19 | 0.720473 | 0.168302 | 0.868055 | 0.444942 |
| MmugDNA.32845.1.S1_at   | MmugDNA.32845.1 | 5.56  | 5.29  | 0.19 | 0.16 | 1.21  | 0.132539 | 0.20245  | 0.415892 | 0.476786 |
| MmugDNA.32846.1.S1_at   | MmugDNA.32846.1 | 4.84  | 3.68  | 1.14 | 0.42 | 2.22  | 0.23072  | 0.259017 | 0.529522 | 0.526218 |
| MmugDNA.32847.1.S1_at   | MmugDNA.32847.1 | 5.45  | 4.86  | 0.27 | 0.05 | 1.5   | 0.018939 | 0.135909 | 0.19119  | 0.408103 |
| MmugDNA.32849.1.S1_at   | MmugDNA.32849.1 | 4.53  | 4.72  | 1.24 | 0.12 | -1.14 | 0.497351 | 0.376609 | 0.733034 | 0.614432 |
| MmugDNA.3285.1.S1_at    | MmugDNA.3285.1  | 6.75  | 7.43  | 0.67 | 0.26 | -1.6  | 0.162387 | 0.090377 | 0.454428 | 0.344827 |
| MmugDNA.32850.1.S1_at   | MmugDNA.32850.1 | 4.66  | 4.58  | 0.43 | 0.19 | 1.05  | 0.654817 | 0.848626 | 0.832898 | 0.914061 |
| MmugDNA.32851.1.S1_at   | MmugDNA.32851.1 | 9.95  | 9.93  | 0.12 | 0.06 | 1.01  | 0.322102 | 0.027517 | 0.606278 | 0.207161 |
| MmugDNA.32853.1.S1_at   | MmugDNA.32853.1 | 9.5   | 9.15  | 0.07 | 0.12 | 1.28  | 0.012288 | 0.030935 | 0.161126 | 0.217705 |
| MmugDNA.32854.1.S1_at   | MmugDNA.32854.1 | 6.77  | 6.06  | 0.07 | 0.11 | 1.63  | 0.001097 | 0.073479 | 0.077278 | 0.316769 |
| MmugDNA.32855.1.S1_at   | MmugDNA.32855.1 | 8.94  | 9.65  | 0.19 | 0.21 | -1.63 | 0.004804 | 0.084721 | 0.115098 | 0.336196 |
| MmugDNA.32857.1.S1_at   | MmugDNA.32857.1 | 12.9  | 12.66 | 0.14 | 0.11 | 1.18  | 0.059841 | 0.219118 | 0.301916 | 0.492868 |
| MmugDNA.32858.1.S1_at   | MmugDNA.32858.1 | 6.66  | 6.2   | 0.19 | 0.46 | 1.37  | 0.756678 | 0.109756 | 0.88812  | 0.373701 |
| MmugDNA.32859.1.S1_at   | MmugDNA.32859.1 | 6.72  | 5.52  | 0.36 | 0.07 | 2.31  | 0.00806  | 0.090754 | 0.138956 | 0.345227 |
| MmugDNA.3286.1.S1_at    | MmugDNA.3286.1  | 7.5   | 7.19  | 0.29 | 0.09 | 1.24  | 0.620026 | 0.557834 | 0.81161  | 0.735262 |
| MmugDNA.32860.1.S1_at   | MmugDNA.32860.1 | 5.34  | 5.29  | 0.08 | 0.1  | 1.03  | 0.920591 | 0.959374 | 0.966056 | 0.976959 |
| MmugDNA.32861.1.S1_at   | MmugDNA.32861.1 | 9.38  | 9.06  | 0.25 | 0.17 | 1.25  | 0.326992 | 0.18607  | 0.609778 | 0.461931 |
| MmugDNA.32862.1.S1_at   | MmugDNA.32862.1 | 6.49  | 6.15  | 0.12 | 0.09 | 1.27  | 0.01794  | 0.047504 | 0.187151 | 0.262578 |
| MmugDNA.32862.1.S1_s_at | MmugDNA.32862.1 | 8.05  | 7.73  | 0.25 | 0.14 | 1.24  | 0.05663  | 0.023841 | 0.295477 | 0.193392 |
| MmugDNA.32863.1.S1_at   | MmugDNA.32863.1 | 10.14 | 9.85  | 0.29 | 0.16 | 1.22  | 0.48829  | 0.8475   | 0.726812 | 0.913321 |
| MmugDNA.32864.1.S1_at   | MmugDNA.32864.1 | 6     | 5.79  | 0.39 | 0.15 | 1.16  | 0.257178 | 0.304339 | 0.551586 | 0.561645 |
| MmugDNA.32865.1.S1_at   | MmugDNA.32865.1 | 7.3   | 8.53  | 0.45 | 0.06 | -2.34 | 0.020992 | 0.057011 | 0.198347 | 0.284868 |
| MmugDNA.32867.1.S1_at   | MmugDNA.32867.1 | 4.99  | 4.93  | 0.07 | 0.25 | 1.04  | 0.57002  | 0.792837 | 0.779266 | 0.880387 |
| MmugDNA.32868.1.S1_x_at | MmugDNA.32868.1 | 11.4  | 11.41 | 0.51 | 0.13 | -1.01 | 0.398714 | 0.246292 | 0.664251 | 0.515889 |
| MmugDNA.32869.1.S1_at   | MmugDNA.32869.1 | 5.09  | 5.13  | 0.32 | 0.01 | -1.03 | 0.857977 | 0.941346 | 0.938213 | 0.966765 |
| MmugDNA.3287.1.S1_at    | MmugDNA.3287.1  | 4.36  | 4.37  | 0.09 | 0.05 | -1.01 | 0.638395 | 0.728909 | 0.823011 | 0.8433   |
| MmugDNA.32871.1.S1_at   | MmugDNA.32871.1 | 4     | 4.15  | 0.17 | 0.02 | -1.11 | 0.2341   | 0.151028 | 0.532201 | 0.425681 |
| MmugDNA.32872.1.S1_at   | MmugDNA.32872.1 | 3.41  | 3.22  | 0.83 | 0.11 | 1.14  | 0.687564 | 0.883613 | 0.850804 | 0.93366  |
| MmugDNA.32874.1.S1_at   | MmugDNA.32874.1 | 3.05  | 2.94  | 0.15 | 0.06 | 1.08  | 0.398068 | 0.299363 | 0.663593 | 0.557857 |
| MmugDNA.32875.1.S1_at   | MmugDNA.32875.1 | 12.08 | 11.83 | 0.08 | 0.06 | 1.19  | 0.007305 | 0.003652 | 0.13327  | 0.086526 |
| MmugDNA.32875.1.S1_x_at | MmugDNA.32875.1 | 12.22 | 11.93 | 0.06 | 0.08 | 1.22  | 0.007207 | 0.002694 | 0.132536 | 0.076455 |
| MmugDNA.32879.1.S1_at   | MmugDNA.32879.1 | 3.66  | 3.43  | 0.07 | 0.07 | 1.17  | 0.072151 | 0.149146 | 0.326565 | 0.423585 |
| MmugDNA.3288.1.S1_at    | MmugDNA.3288.1  | 4.76  | 4.78  | 0.09 | 0.18 | -1.01 | 0.644687 | 0.803846 | 0.827017 | 0.887148 |
| MmugDNA.32880.1.S1_at   | MmugDNA.32880.1 | 8.36  | 9.06  | 0.4  | 0.04 | -1.63 | 0.030669 | 0.001009 | 0.228035 | 0.050657 |
| MmugDNA.32881.1.S1_at   | MmugDNA.32881.1 | 4.3   | 4.25  | 0.02 | 0.13 | 1.03  | 0.844628 | 0.777616 | 0.932048 | 0.870762 |
| MmugDNA.32882.1.S1_at   | MmugDNA.32882.1 | 9.37  | 10.51 | 0.41 | 0.24 | -2.21 | 0.025743 | 0.069354 | 0.213043 | 0.309558 |
| MmugDNA.32884.1.S1_at   | MmugDNA.32884.1 | 6.69  | 6.64  | 0.23 | 0.08 | 1.04  | 0.600857 | 0.250687 | 0.799202 | 0.51941  |
| MmugDNA.32886.1.S1_at   | MmugDNA.32886.1 | 5.68  | 5.72  | 0.28 | 0.43 | -1.03 | 0.873749 | 0.826609 | 0.945733 | 0.900429 |
| MmugDNA.32887.1.S1_at   | MmugDNA.32887.1 | 10.72 | 10.82 | 0.21 | 0.12 | -1.07 | 0.993374 | 0.773537 | 0.997386 | 0.868348 |
| MmugDNA.3289.1.S1_at    | MmugDNA.3289.1  | 11.24 | 11.23 | 0.61 | 0.17 | 1     | 0.886976 | 0.985503 | 0.951849 | 0.991808 |
| MmugDNA.32891.1.S1_at   | MmugDNA.32891.1 | 6.02  | 6.04  | 0.38 | 0.13 | -1.01 | 0.414375 | 0.150234 | 0.675629 | 0.42486  |
| MmugDNA.32892.1.S1_at   | MmugDNA.32892.1 | 8.58  | 8.58  | 0.42 | 0.23 | 1     | 0.605827 | 0.12596  | 0.802743 | 0.396505 |
| MmugDNA.32893.1.S1_at   | MmugDNA.32893.1 | 3.46  | 3.45  | 0.77 | 0.46 | 1.01  | 0.476481 | 0.482111 | 0.71885  | 0.687016 |

|                         |                 |       |       |      |      |       |          |          |          |          |
|-------------------------|-----------------|-------|-------|------|------|-------|----------|----------|----------|----------|
| MmugDNA.32895.1.S1_at   | MmugDNA.32895.1 | 11.93 | 11.67 | 0.14 | 0.1  | 1.2   | 0.107899 | 0.144355 | 0.382524 | 0.418293 |
| MmugDNA.32896.1.S1_at   | MmugDNA.32896.1 | 7.94  | 7.94  | 0.19 | 0.34 | -1    | 0.88534  | 0.761083 | 0.951028 | 0.861205 |
| MmugDNA.32897.1.S1_at   | MmugDNA.32897.1 | 4.3   | 5.66  | 1.13 | 1.02 | -2.56 | 0.887351 | 0.681711 | 0.951911 | 0.814123 |
| MmugDNA.32898.1.S1_at   | MmugDNA.32898.1 | 8.26  | 7.82  | 0.24 | 0.16 | 1.36  | 0.050394 | 0.139484 | 0.282331 | 0.412743 |
| MmugDNA.32899.1.S1_at   | MmugDNA.32899.1 | 6.63  | 6.04  | 0.25 | 0.44 | 1.51  | 0.201766 | 0.241619 | 0.49925  | 0.512217 |
| MmugDNA.329.1.S1_at     | MmugDNA.329.1   | 6.84  | 6.74  | 0.11 | 0.08 | 1.07  | 0.942424 | 0.00791  | 0.975651 | 0.118534 |
| MmugDNA.329.1.S1_s_at   | MmugDNA.329.1   | 8.25  | 8.12  | 0.12 | 0.03 | 1.09  | 0.048795 | 0.007628 | 0.278475 | 0.116869 |
| MmugDNA.3290.1.S1_at    | MmugDNA.3290.1  | 4.06  | 3.97  | 0.09 | 0.03 | 1.06  | 0.334066 | 0.012849 | 0.615174 | 0.145986 |
| MmugDNA.32900.1.S1_at   | MmugDNA.32900.1 | 10.58 | 10.69 | 0.1  | 0.04 | -1.08 | 0.463124 | 0.353083 | 0.709925 | 0.596369 |
| MmugDNA.32901.1.S1_at   | MmugDNA.32901.1 | 4.72  | 4.62  | 0.54 | 0.23 | 1.07  | 0.221877 | 0.134877 | 0.519926 | 0.406878 |
| MmugDNA.32905.1.S1_at   | MmugDNA.32905.1 | 6.74  | 6.68  | 0.24 | 0.2  | 1.04  | 0.407144 | 0.451279 | 0.670282 | 0.666113 |
| MmugDNA.32905.1.S1_s_at | MmugDNA.32905.1 | 5.21  | 5.18  | 0.22 | 0.03 | 1.02  | 0.747597 | 0.714617 | 0.883101 | 0.834436 |
| MmugDNA.32906.1.S1_at   | MmugDNA.32906.1 | 9     | 7.48  | 0.31 | 0.33 | 2.88  | 0.00737  | 0.00355  | 0.134067 | 0.085371 |
| MmugDNA.32909.1.S1_at   | MmugDNA.32909.1 | 4.53  | 4.68  | 0.12 | 0.09 | -1.1  | 0.525616 | 0.029477 | 0.752022 | 0.213368 |
| MmugDNA.3291.1.S1_at    | MmugDNA.3291.1  | 4.44  | 4.53  | 0.89 | 0.43 | -1.06 | 0.630395 | 0.677474 | 0.818636 | 0.81167  |
| MmugDNA.32911.1.S1_at   | MmugDNA.32911.1 | 9.68  | 10.53 | 0.14 | 0.02 | -1.8  | 0.000317 | 0.061111 | 0.058857 | 0.293975 |
| MmugDNA.32912.1.S1_at   | MmugDNA.32912.1 | 4.46  | 4.47  | 0.17 | 0.12 | -1.01 | 0.634522 | 0.826678 | 0.820812 | 0.900485 |
| MmugDNA.32913.1.S1_at   | MmugDNA.32913.1 | 5.82  | 5.9   | 0.16 | 0.06 | -1.06 | 0.296814 | 0.11544  | 0.585524 | 0.382557 |
| MmugDNA.32915.1.S1_at   | MmugDNA.32915.1 | 6.77  | 6.66  | 0.38 | 0.11 | 1.08  | 0.313986 | 0.158261 | 0.599734 | 0.43403  |
| MmugDNA.32916.1.S1_at   | MmugDNA.32916.1 | 5.32  | 5.93  | 1.08 | 0.58 | -1.53 | 0.711728 | 0.551202 | 0.864    | 0.73084  |
| MmugDNA.32918.1.S1_at   | MmugDNA.32918.1 | 7.75  | 8.63  | 0.27 | 0.16 | -1.84 | 0.008281 | 0.106277 | 0.13996  | 0.368729 |
| MmugDNA.32919.1.S1_at   | MmugDNA.32919.1 | 4.52  | 4.54  | 0.19 | 0.09 | -1.01 | 0.995958 | 0.84831  | 0.998468 | 0.91389  |
| MmugDNA.3292.1.S1_at    | MmugDNA.3292.1  | 4.83  | 4.87  | 0.29 | 0.16 | -1.03 | 0.683901 | 0.900431 | 0.849273 | 0.94344  |
| MmugDNA.32922.1.S1_at   | MmugDNA.32922.1 | 7.01  | 6.66  | 0.69 | 0.27 | 1.28  | 0.224594 | 0.18492  | 0.522693 | 0.460776 |
| MmugDNA.32923.1.S1_at   | MmugDNA.32923.1 | 9.83  | 9.73  | 0.26 | 0.25 | 1.07  | 0.312762 | 0.196939 | 0.598778 | 0.472072 |
| MmugDNA.32924.1.S1_at   | MmugDNA.32924.1 | 3.39  | 3.11  | 0.22 | 0.26 | 1.21  | 0.242483 | 0.31932  | 0.539382 | 0.571724 |
| MmugDNA.32926.1.S1_at   | MmugDNA.32926.1 | 6.58  | 5.65  | 0.29 | 0.47 | 1.9   | 0.024848 | 0.029954 | 0.210692 | 0.214833 |
| MmugDNA.32927.1.S1_at   | MmugDNA.32927.1 | 4.16  | 4.15  | 0.12 | 0.03 | 1.01  | 0.244919 | 0.520132 | 0.541109 | 0.711472 |
| MmugDNA.32928.1.S1_at   | MmugDNA.32928.1 | 3.62  | 3.52  | 0.08 | 0.03 | 1.07  | 0.074563 | 0.000727 | 0.331249 | 0.044699 |
| MmugDNA.32929.1.S1_at   | MmugDNA.32929.1 | 3.17  | 2.91  | 0.07 | 0.13 | 1.19  | 0.070494 | 0.089822 | 0.323891 | 0.34404  |
| MmugDNA.3293.1.S1_at    | MmugDNA.3293.1  | 4.84  | 4.68  | 0.59 | 0.37 | 1.12  | 0.862059 | 0.922037 | 0.940146 | 0.956039 |
| MmugDNA.32930.1.S1_at   | MmugDNA.32930.1 | 4.18  | 3.57  | 0.42 | 0.16 | 1.53  | 0.029289 | 0.018603 | 0.223944 | 0.171539 |
| MmugDNA.32930.1.S1_s_at | MmugDNA.32930.1 | 2.98  | 2.79  | 0.05 | 0.17 | 1.14  | 0.27637  | 0.549271 | 0.567964 | 0.729744 |
| MmugDNA.32931.1.S1_at   | MmugDNA.32931.1 | 7.69  | 7.47  | 0.1  | 0.15 | 1.17  | 0.200352 | 0.320276 | 0.497792 | 0.572606 |
| MmugDNA.32932.1.S1_at   | MmugDNA.32932.1 | 8.17  | 7.96  | 0.05 | 0.19 | 1.16  | 0.194281 | 0.433788 | 0.490878 | 0.653992 |
| MmugDNA.32933.1.S1_at   | MmugDNA.32933.1 | 10.7  | 10.52 | 0.18 | 0.12 | 1.14  | 0.127903 | 0.00127  | 0.409819 | 0.055241 |
| MmugDNA.32933.1.S1_s_at | MmugDNA.32933.1 | 8.36  | 8.41  | 0.11 | 0.35 | -1.04 | 0.413829 | 0.002135 | 0.67514  | 0.068391 |
| MmugDNA.32934.1.S1_at   | MmugDNA.32934.1 | 10.25 | 10.03 | 0.29 | 0.2  | 1.16  | 0.424137 | 0.215088 | 0.681872 | 0.488932 |
| MmugDNA.32935.1.S1_at   | MmugDNA.32935.1 | 4.41  | 4.88  | 0.46 | 0.89 | -1.39 | 0.362683 | 0.48585  | 0.63739  | 0.689442 |
| MmugDNA.32936.1.S1_at   | MmugDNA.32936.1 | 10.91 | 10.27 | 0.17 | 0.27 | 1.56  | 0.10422  | 0.411455 | 0.377566 | 0.638189 |
| MmugDNA.32937.1.S1_at   | MmugDNA.32937.1 | 6.9   | 7.03  | 0.11 | 0.05 | -1.1  | 0.328595 | 0.000984 | 0.61093  | 0.050067 |
| MmugDNA.3294.1.S1_s_at  | MmugDNA.3294.1  | 12.96 | 12.81 | 0.15 | 0.02 | 1.11  | 0.145264 | 0.359855 | 0.432569 | 0.601104 |
| MmugDNA.32941.1.S1_at   | MmugDNA.32941.1 | 10.6  | 9.47  | 0.49 | 0.25 | 2.2   | 0.026702 | 0.016005 | 0.216593 | 0.160458 |

|                       |                 |       |       |      |      |       |          |          |          |          |
|-----------------------|-----------------|-------|-------|------|------|-------|----------|----------|----------|----------|
| MmugDNA.32942.1.S1_at | MmugDNA.32942.1 | 6.87  | 7.03  | 0.23 | 0.09 | -1.12 | 0.65515  | 0.04523  | 0.833121 | 0.257005 |
| MmugDNA.32943.1.S1_at | MmugDNA.32943.1 | 3.28  | 3.47  | 0.09 | 0.25 | -1.14 | 0.189446 | 0.233867 | 0.485933 | 0.505169 |
| MmugDNA.32945.1.S1_at | MmugDNA.32945.1 | 5.88  | 5.91  | 0.11 | 0.1  | -1.02 | 0.508342 | 0.777709 | 0.740317 | 0.870845 |
| MmugDNA.32946.1.S1_at | MmugDNA.32946.1 | 5.59  | 5.62  | 0.13 | 0    | -1.02 | 0.674972 | 0.923442 | 0.844854 | 0.956981 |
| MmugDNA.32947.1.S1_at | MmugDNA.32947.1 | 10.66 | 10.43 | 0.08 | 0.11 | 1.17  | 0.024628 | 0.01044  | 0.209989 | 0.133573 |
| MmugDNA.32948.1.S1_at | MmugDNA.32948.1 | 8.55  | 8.69  | 0.05 | 0.16 | -1.11 | 0.422596 | 0.006262 | 0.680699 | 0.107376 |
| MmugDNA.32949.1.S1_at | MmugDNA.32949.1 | 13.11 | 13.09 | 0.04 | 0.01 | 1.01  | 0.64039  | 0.661453 | 0.824285 | 0.801791 |
| MmugDNA.3295.1.S1_at  | MmugDNA.3295.1  | 4.17  | 3.97  | 0.08 | 0.11 | 1.15  | 0.320156 | 0.165759 | 0.604769 | 0.442032 |
| MmugDNA.32951.1.S1_at | MmugDNA.32951.1 | 10.47 | 10.67 | 0.23 | 0.16 | -1.15 | 0.658916 | 0.037836 | 0.835278 | 0.238912 |
| MmugDNA.32952.1.S1_at | MmugDNA.32952.1 | 4.53  | 4.49  | 0.13 | 0.14 | 1.03  | 0.735284 | 0.45503  | 0.876788 | 0.66903  |
| MmugDNA.32955.1.S1_at | MmugDNA.32955.1 | 4.58  | 4.55  | 0.11 | 0.13 | 1.02  | 0.860626 | 0.925087 | 0.939526 | 0.957602 |
| MmugDNA.32956.1.S1_at | MmugDNA.32956.1 | 8.59  | 8.23  | 0.18 | 0.27 | 1.28  | 0.085822 | 0.024091 | 0.350131 | 0.194493 |
| MmugDNA.32957.1.S1_at | MmugDNA.32957.1 | 4.32  | 4.25  | 0.19 | 0.07 | 1.05  | 0.614018 | 0.232932 | 0.807838 | 0.50445  |
| MmugDNA.32959.1.S1_at | MmugDNA.32959.1 | 8.91  | 8.96  | 0.3  | 0.14 | -1.04 | 0.573368 | 0.873134 | 0.781098 | 0.927823 |
| MmugDNA.3296.1.S1_at  | MmugDNA.3296.1  | 11.86 | 11.94 | 0.15 | 0.04 | -1.06 | 0.618321 | 0.017028 | 0.810659 | 0.165384 |
| MmugDNA.32961.1.S1_at | MmugDNA.32961.1 | 4.8   | 5.38  | 0.58 | 0.25 | -1.49 | 0.146035 | 0.066425 | 0.433778 | 0.303385 |
| MmugDNA.32963.1.S1_at | MmugDNA.32963.1 | 8.78  | 8.87  | 0.15 | 0.14 | -1.07 | 0.634045 | 0.051847 | 0.820633 | 0.273151 |
| MmugDNA.32964.1.S1_at | MmugDNA.32964.1 | 6.8   | 6.96  | 0.03 | 0.28 | -1.12 | 0.533903 | 0.850096 | 0.757384 | 0.914709 |
| MmugDNA.32965.1.S1_at | MmugDNA.32965.1 | 12.85 | 13.01 | 0.06 | 0.08 | -1.11 | 0.016177 | 0.27168  | 0.179848 | 0.536577 |
| MmugDNA.32967.1.S1_at | MmugDNA.32967.1 | 10.92 | 10.83 | 0.23 | 0.06 | 1.06  | 0.590118 | 0.386763 | 0.791771 | 0.621895 |
| MmugDNA.32969.1.S1_at | MmugDNA.32969.1 | 5.33  | 5.33  | 0.04 | 0.01 | -1    | 0.363939 | 0.427274 | 0.638554 | 0.649175 |
| MmugDNA.3297.1.S1_at  | MmugDNA.3297.1  | 3.29  | 3.16  | 0.02 | 0.03 | 1.09  | 0.003119 | 0.019253 | 0.100877 | 0.174522 |
| MmugDNA.32970.1.S1_at | MmugDNA.32970.1 | 7.15  | 6.12  | 0.25 | 0.14 | 2.04  | 0.002304 | 0.000553 | 0.092394 | 0.040962 |
| MmugDNA.32971.1.S1_at | MmugDNA.32971.1 | 6.79  | 6.83  | 0.09 | 0.03 | -1.03 | 0.405225 | 0.091936 | 0.668717 | 0.347267 |
| MmugDNA.32972.1.S1_at | MmugDNA.32972.1 | 7.13  | 8.54  | 0.57 | 0.16 | -2.66 | 0.033379 | 0.094515 | 0.236603 | 0.351276 |
| MmugDNA.32973.1.S1_at | MmugDNA.32973.1 | 7.03  | 7.31  | 0.33 | 0.25 | -1.21 | 0.0647   | 0.033022 | 0.31107  | 0.224983 |
| MmugDNA.32974.1.S1_at | MmugDNA.32974.1 | 3.93  | 3.93  | 0.48 | 0.19 | 1     | 0.484905 | 0.512999 | 0.724507 | 0.706665 |
| MmugDNA.32975.1.S1_at | MmugDNA.32975.1 | 3.5   | 3.54  | 0.01 | 0.06 | -1.03 | 0.317694 | 0.109146 | 0.602424 | 0.373004 |
| MmugDNA.32976.1.S1_at | MmugDNA.32976.1 | 7.66  | 9.36  | 0.86 | 0.28 | -3.26 | 0.108524 | 0.091311 | 0.383243 | 0.346281 |
| MmugDNA.32978.1.S1_at | MmugDNA.32978.1 | 7.22  | 7.17  | 0.35 | 0.15 | 1.04  | 0.515753 | 0.12483  | 0.745426 | 0.395219 |
| MmugDNA.32979.1.S1_at | MmugDNA.32979.1 | 5.42  | 5.64  | 0.69 | 0.09 | -1.17 | 0.594242 | 0.500307 | 0.794623 | 0.699009 |
| MmugDNA.32980.1.S1_at | MmugDNA.32980.1 | 5.25  | 5.23  | 0.32 | 0.08 | 1.01  | 0.703526 | 0.552628 | 0.859276 | 0.731885 |
| MmugDNA.32981.1.S1_at | MmugDNA.32981.1 | 4.72  | 4.77  | 0.12 | 0.16 | -1.04 | 0.686965 | 0.925059 | 0.850763 | 0.957602 |
| MmugDNA.32982.1.S1_at | MmugDNA.32982.1 | 4.26  | 3.85  | 0.27 | 0.07 | 1.33  | 0.103786 | 0.054836 | 0.377045 | 0.279675 |
| MmugDNA.32983.1.S1_at | MmugDNA.32983.1 | 3.84  | 4.48  | 0.4  | 0.36 | -1.55 | 0.557085 | 0.548954 | 0.772016 | 0.729505 |
| MmugDNA.32985.1.S1_at | MmugDNA.32985.1 | 6.25  | 6.18  | 0.67 | 0.31 | 1.06  | 0.535194 | 0.282585 | 0.758211 | 0.545292 |
| MmugDNA.32986.1.S1_at | MmugDNA.32986.1 | 3.62  | 3.6   | 0.13 | 0.1  | 1.01  | 0.918748 | 0.213862 | 0.965349 | 0.48758  |
| MmugDNA.32987.1.S1_at | MmugDNA.32987.1 | 3.15  | 3.01  | 0.27 | 0.23 | 1.11  | 0.664158 | 0.737555 | 0.838325 | 0.847993 |
| MmugDNA.32989.1.S1_at | MmugDNA.32989.1 | 6.98  | 6.96  | 0.21 | 0.03 | 1.01  | 0.328028 | 0.239514 | 0.61059  | 0.510191 |
| MmugDNA.3299.1.S1_at  | MmugDNA.3299.1  | 5.37  | 5.19  | 0.17 | 0.29 | 1.14  | 0.156401 | 0.277431 | 0.446993 | 0.541336 |
| MmugDNA.32992.1.S1_at | MmugDNA.32992.1 | 3.03  | 2.87  | 0.12 | 0.04 | 1.12  | 0.204774 | 0.263551 | 0.502525 | 0.529826 |
| MmugDNA.32993.1.S1_at | MmugDNA.32993.1 | 3.53  | 3.5   | 0.26 | 0.12 | 1.03  | 0.454625 | 0.399576 | 0.704426 | 0.629912 |
| MmugDNA.32994.1.S1_at | MmugDNA.32994.1 | 7.03  | 7.59  | 0.33 | 0.13 | -1.48 | 0.053592 | 0.011175 | 0.288683 | 0.137551 |

|                         |                 |       |       |      |      |       |          |          |          |          |
|-------------------------|-----------------|-------|-------|------|------|-------|----------|----------|----------|----------|
| MmugDNA.32995.1.S1_at   | MmugDNA.32995.1 | 4.39  | 4.06  | 0.51 | 0.38 | 1.26  | 0.77404  | 0.858015 | 0.896534 | 0.919035 |
| MmugDNA.32996.1.S1_at   | MmugDNA.32996.1 | 7.55  | 7.32  | 0.28 | 0.14 | 1.18  | 0.491274 | 0.774627 | 0.729196 | 0.868797 |
| MmugDNA.32997.1.S1_at   | MmugDNA.32997.1 | 4.16  | 3.91  | 0.04 | 0.24 | 1.19  | 0.437137 | 0.503044 | 0.691977 | 0.700559 |
| MmugDNA.32999.1.S1_at   | MmugDNA.32999.1 | 3.51  | 3.49  | 0.26 | 0.19 | 1.01  | 0.465675 | 0.584777 | 0.711644 | 0.752534 |
| MmugDNA.33.1.S1_at      | MmugDNA.33.1    | 3.91  | 4.22  | 0.57 | 0.17 | -1.24 | 0.782912 | 0.937771 | 0.900922 | 0.964687 |
| MmugDNA.330.1.S1_at     | MmugDNA.330.1   | 5.54  | 5.45  | 0.27 | 0.15 | 1.07  | 0.177414 | 0.252422 | 0.472172 | 0.521061 |
| MmugDNA.3300.1.S1_at    | MmugDNA.3300.1  | 4.51  | 4.45  | 0.06 | 0.19 | 1.05  | 0.771509 | 0.829202 | 0.895289 | 0.901809 |
| MmugDNA.33000.1.S1_at   | MmugDNA.33000.1 | 3.54  | 3.5   | 0.18 | 0.14 | 1.03  | 0.347555 | 0.73104  | 0.625672 | 0.844197 |
| MmugDNA.33002.1.S1_at   | MmugDNA.33002.1 | 5.61  | 6.69  | 0.02 | 0.13 | -2.11 | 0.000216 | 0.000168 | 0.054064 | 0.030511 |
| MmugDNA.33005.1.S1_at   | MmugDNA.33005.1 | 6.82  | 6.97  | 0.37 | 0.18 | -1.11 | 0.274974 | 0.20923  | 0.566702 | 0.48303  |
| MmugDNA.33006.1.S1_at   | MmugDNA.33006.1 | 5.31  | 5.3   | 0.37 | 0.15 | 1.01  | 0.63788  | 0.260813 | 0.822597 | 0.52721  |
| MmugDNA.33007.1.S1_at   | MmugDNA.33007.1 | 4.4   | 4.13  | 0.17 | 0.08 | 1.2   | 0.074731 | 0.076833 | 0.331458 | 0.322319 |
| MmugDNA.33008.1.S1_at   | MmugDNA.33008.1 | 5.97  | 5.97  | 0.04 | 0.07 | -1    | 0.381135 | 0.519566 | 0.650671 | 0.711134 |
| MmugDNA.33009.1.S1_at   | MmugDNA.33009.1 | 5.99  | 5.77  | 0.46 | 0.14 | 1.16  | 0.497966 | 0.417868 | 0.733379 | 0.642449 |
| MmugDNA.3301.1.S1_at    | MmugDNA.3301.1  | 11.9  | 11.71 | 0.29 | 0.09 | 1.14  | 0.121219 | 0.340032 | 0.399891 | 0.586516 |
| MmugDNA.33012.1.S1_at   | MmugDNA.33012.1 | 4.48  | 4.36  | 0.21 | 0.07 | 1.09  | 0.969429 | 0.421385 | 0.987881 | 0.644994 |
| MmugDNA.33013.1.S1_at   | MmugDNA.33013.1 | 8.36  | 8.65  | 0.14 | 0.32 | -1.23 | 0.111696 | 0.532082 | 0.38771  | 0.718995 |
| MmugDNA.33015.1.S1_at   | MmugDNA.33015.1 | 7.43  | 7.27  | 0.16 | 0.04 | 1.11  | 0.311227 | 0.088467 | 0.597394 | 0.341922 |
| MmugDNA.33016.1.S1_at   | MmugDNA.33016.1 | 12.85 | 12.57 | 0.15 | 0.1  | 1.21  | 0.117293 | 0.099345 | 0.39452  | 0.35761  |
| MmugDNA.33018.1.S1_at   | MmugDNA.33018.1 | 3.7   | 3.84  | 0.12 | 0.02 | -1.1  | 0.117245 | 0.095553 | 0.39452  | 0.352627 |
| MmugDNA.3302.1.S1_at    | MmugDNA.3302.1  | 5.41  | 5.59  | 1.43 | 0.36 | -1.14 | 0.652359 | 0.4759   | 0.831273 | 0.682387 |
| MmugDNA.33020.1.S1_at   | MmugDNA.33020.1 | 4.52  | 4.67  | 0.22 | 0.64 | -1.11 | 0.531662 | 0.745447 | 0.755921 | 0.852398 |
| MmugDNA.33021.1.S1_at   | MmugDNA.33021.1 | 4.87  | 4.86  | 0.59 | 0.14 | 1.01  | 0.75147  | 0.786358 | 0.885332 | 0.876293 |
| MmugDNA.33022.1.S1_at   | MmugDNA.33022.1 | 3.71  | 3.75  | 0.04 | 0.2  | -1.02 | 0.810504 | 0.943603 | 0.91511  | 0.967955 |
| MmugDNA.33023.1.S1_at   | MmugDNA.33023.1 | 9.53  | 9.1   | 0.13 | 0.16 | 1.34  | 0.017342 | 0.02143  | 0.184946 | 0.183342 |
| MmugDNA.33023.1.S1_s_at | MmugDNA.33023.1 | 9.49  | 9.22  | 0.09 | 0.14 | 1.2   | 0.023686 | 0.042856 | 0.207081 | 0.251591 |
| MmugDNA.33024.1.S1_at   | MmugDNA.33024.1 | 4.15  | 4.61  | 0.77 | 0.36 | -1.38 | 0.846008 | 0.264788 | 0.932726 | 0.530791 |
| MmugDNA.33024.1.S1_s_at | MmugDNA.33024.1 | 5.98  | 6.45  | 0.47 | 0.08 | -1.39 | 0.402656 | 0.731977 | 0.666951 | 0.844751 |
| MmugDNA.33025.1.S1_at   | MmugDNA.33025.1 | 4.12  | 3.61  | 0.62 | 0.11 | 1.43  | 0.233042 | 0.284775 | 0.531299 | 0.546966 |
| MmugDNA.33026.1.S1_at   | MmugDNA.33026.1 | 8.15  | 7.62  | 0.16 | 0.03 | 1.45  | 0.004603 | 0.005328 | 0.114035 | 0.100928 |
| MmugDNA.33027.1.S1_at   | MmugDNA.33027.1 | 3.86  | 3.96  | 0.07 | 0.13 | -1.07 | 0.13426  | 0.606188 | 0.417818 | 0.765727 |
| MmugDNA.33027.1.S1_s_at | MmugDNA.33027.1 | 4.7   | 4.4   | 0.1  | 0.18 | 1.23  | 0.187611 | 0.169225 | 0.483874 | 0.445815 |
| MmugDNA.33028.1.S1_at   | MmugDNA.33028.1 | 11.22 | 11.38 | 0.07 | 0.05 | -1.12 | 0.02196  | 0.002353 | 0.201313 | 0.07161  |
| MmugDNA.33029.1.S1_at   | MmugDNA.33029.1 | 3.84  | 3.93  | 0.06 | 0.19 | -1.06 | 0.542103 | 0.269129 | 0.762635 | 0.534447 |
| MmugDNA.33030.1.S1_at   | MmugDNA.33030.1 | 5.93  | 5.77  | 0.15 | 0.05 | 1.12  | 0.144834 | 0.158991 | 0.431848 | 0.43518  |
| MmugDNA.33033.1.S1_at   | MmugDNA.33033.1 | 4.44  | 4.48  | 0.14 | 0.19 | -1.03 | 0.679832 | 0.593614 | 0.847268 | 0.758334 |
| MmugDNA.33034.1.S1_at   | MmugDNA.33034.1 | 3.01  | 2.99  | 0.07 | 0.09 | 1.02  | 0.90493  | 0.056902 | 0.959758 | 0.284672 |
| MmugDNA.33035.1.S1_at   | MmugDNA.33035.1 | 8.91  | 9.31  | 0.24 | 0.45 | -1.32 | 0.379026 | 0.15333  | 0.649062 | 0.428139 |
| MmugDNA.33038.1.S1_at   | MmugDNA.33038.1 | 6.86  | 6.93  | 0.09 | 0.14 | -1.05 | 0.975742 | 0.772605 | 0.990389 | 0.867785 |
| MmugDNA.33039.1.S1_at   | MmugDNA.33039.1 | 8.54  | 8.63  | 0.19 | 0.01 | -1.06 | 0.264131 | 0.431997 | 0.557422 | 0.652738 |
| MmugDNA.33041.1.S1_at   | MmugDNA.33041.1 | 10.78 | 9.94  | 0.04 | 0.09 | 1.79  | 0.000091 | 0.195074 | 0.051196 | 0.470207 |
| MmugDNA.33043.1.S1_at   | MmugDNA.33043.1 | 7.78  | 7.2   | 1.59 | 0.36 | 1.49  | 0.27837  | 0.295105 | 0.569692 | 0.554551 |
| MmugDNA.33044.1.S1_at   | MmugDNA.33044.1 | 4.5   | 4.5   | 0.02 | 0.04 | 1     | 0.908831 | 0.665059 | 0.961349 | 0.803733 |

|                         |                 |       |       |      |      |       |          |          |          |          |
|-------------------------|-----------------|-------|-------|------|------|-------|----------|----------|----------|----------|
| MmugDNA.33045.1.S1_at   | MmugDNA.33045.1 | 5.69  | 5.7   | 0.01 | 0.1  | -1    | 0.878147 | 0.866328 | 0.947963 | 0.923989 |
| MmugDNA.33046.1.S1_at   | MmugDNA.33046.1 | 5.02  | 4.77  | 0.21 | 0.32 | 1.19  | 0.1552   | 0.165322 | 0.445396 | 0.441514 |
| MmugDNA.33047.1.S1_at   | MmugDNA.33047.1 | 5.16  | 5.18  | 0.2  | 0.1  | -1.01 | 0.609795 | 0.369068 | 0.805498 | 0.608608 |
| MmugDNA.33048.1.S1_at   | MmugDNA.33048.1 | 6.16  | 6.27  | 0.32 | 0.49 | -1.08 | 0.774069 | 0.895332 | 0.896549 | 0.940185 |
| MmugDNA.27649.1.S1_s_at | MmugDNA.27649.1 | 9.51  | 9.03  | 0.37 | 0.06 | 1.39  | 0.114793 | 0.21584  | 0.391813 | 0.489536 |
| MmugDNA.33050.1.S1_at   | MmugDNA.33050.1 | 2.87  | 3.01  | 0.22 | 0.39 | -1.1  | 0.687372 | 0.684835 | 0.850804 | 0.816189 |
| MmugDNA.33050.1.S1_x_at | MmugDNA.33050.1 | 3.3   | 3.07  | 0.13 | 0.17 | 1.18  | 0.60957  | 0.855223 | 0.805361 | 0.917457 |
| MmugDNA.33051.1.S1_at   | MmugDNA.33051.1 | 4.13  | 4.16  | 0.25 | 0.1  | -1.02 | 0.952527 | 0.854528 | 0.980442 | 0.917099 |
| MmugDNA.33052.1.S1_at   | MmugDNA.33052.1 | 6.31  | 6.15  | 0.04 | 0.1  | 1.12  | 0.056514 | 0.056828 | 0.295242 | 0.284531 |
| MmugDNA.33053.1.S1_at   | MmugDNA.33053.1 | 3.19  | 2.94  | 0.13 | 0.02 | 1.19  | 0.035152 | 0.304352 | 0.242214 | 0.561649 |
| MmugDNA.33054.1.S1_at   | MmugDNA.33054.1 | 7.41  | 7.02  | 0.11 | 0.05 | 1.31  | 0.00421  | 0.110336 | 0.110618 | 0.374457 |
| MmugDNA.33055.1.S1_at   | MmugDNA.33055.1 | 6.68  | 6.33  | 0.33 | 0.18 | 1.27  | 0.567355 | 0.064409 | 0.777711 | 0.300001 |
| MmugDNA.33056.1.S1_at   | MmugDNA.33056.1 | 6.64  | 6.81  | 0.74 | 0.28 | -1.12 | 0.887742 | 0.435729 | 0.952052 | 0.655496 |
| MmugDNA.33057.1.S1_at   | MmugDNA.33057.1 | 8.34  | 6.99  | 0.12 | 0.56 | 2.54  | 0.030954 | 0.028353 | 0.229015 | 0.210223 |
| MmugDNA.33061.1.S1_at   | MmugDNA.33061.1 | 5.44  | 5.44  | 0.08 | 0.28 | 1     | 0.280533 | 0.578767 | 0.571609 | 0.748611 |
| MmugDNA.33062.1.S1_at   | MmugDNA.33062.1 | 6.45  | 6.38  | 0.09 | 0.16 | 1.05  | 0.109653 | 0.075837 | 0.384762 | 0.320447 |
| MmugDNA.33063.1.S1_at   | MmugDNA.33063.1 | 5.61  | 5.61  | 0.23 | 0.1  | 1     | 0.943469 | 0.912588 | 0.976209 | 0.950764 |
| MmugDNA.33064.1.S1_at   | MmugDNA.33064.1 | 10.14 | 10.2  | 0.16 | 0.22 | -1.04 | 0.864401 | 0.290728 | 0.9413   | 0.551382 |
| MmugDNA.33064.1.S1_x_at | MmugDNA.33064.1 | 10.1  | 10.15 | 0.12 | 0.27 | -1.03 | 0.952281 | 0.216475 | 0.980339 | 0.490084 |
| MmugDNA.33066.1.S1_at   | MmugDNA.33066.1 | 5.64  | 5.36  | 0.22 | 0.32 | 1.22  | 0.271866 | 0.421272 | 0.56377  | 0.644906 |
| MmugDNA.33068.1.S1_at   | MmugDNA.33068.1 | 3.46  | 3.54  | 0.09 | 0.16 | -1.06 | 0.793354 | 0.678298 | 0.906582 | 0.812081 |
| MmugDNA.33069.1.S1_at   | MmugDNA.33069.1 | 5.83  | 5.75  | 0.22 | 0.01 | 1.06  | 0.570224 | 0.415638 | 0.779298 | 0.641007 |
| MmugDNA.3307.1.S1_at    | MmugDNA.3307.1  | 5.99  | 5.33  | 1.05 | 0.8  | 1.58  | 0.576292 | 0.746771 | 0.783164 | 0.852952 |
| MmugDNA.33070.1.S1_at   | MmugDNA.33070.1 | 5.51  | 5.32  | 0.1  | 0.14 | 1.14  | 0.087929 | 0.17972  | 0.35408  | 0.456204 |
| MmugDNA.33072.1.S1_at   | MmugDNA.33072.1 | 4.24  | 4.01  | 0.12 | 0.06 | 1.17  | 0.061468 | 0.077193 | 0.304484 | 0.322773 |
| MmugDNA.33073.1.S1_at   | MmugDNA.33073.1 | 2.98  | 2.87  | 0.2  | 0.13 | 1.07  | 0.420844 | 0.670564 | 0.67979  | 0.80741  |
| MmugDNA.33074.1.S1_at   | MmugDNA.33074.1 | 10.59 | 10.64 | 0.09 | 0.2  | -1.03 | 0.200489 | 0.258146 | 0.497869 | 0.525574 |
| MmugDNA.33075.1.S1_at   | MmugDNA.33075.1 | 3.75  | 3.63  | 0.04 | 0.08 | 1.08  | 0.386804 | 0.057132 | 0.655097 | 0.284945 |
| MmugDNA.33076.1.S1_at   | MmugDNA.33076.1 | 10.34 | 9.54  | 0.02 | 0.14 | 1.74  | 0.000443 | 0.002165 | 0.065442 | 0.068812 |
| MmugDNA.33077.1.S1_at   | MmugDNA.33077.1 | 5.23  | 5.25  | 0.22 | 0    | -1.02 | 0.613079 | 0.640159 | 0.807233 | 0.788733 |
| MmugDNA.33078.1.S1_at   | MmugDNA.33078.1 | 5.32  | 5.41  | 0.16 | 0.13 | -1.06 | 0.105501 | 0.097811 | 0.379408 | 0.355639 |
| MmugDNA.3308.1.S1_at    | MmugDNA.3308.1  | 4.58  | 4.71  | 0.08 | 0.2  | -1.1  | 0.839282 | 0.989503 | 0.929506 | 0.994037 |
| MmugDNA.33080.1.S1_at   | MmugDNA.33080.1 | 9.38  | 9.5   | 0.2  | 0.19 | -1.09 | 0.520323 | 0.00855  | 0.74869  | 0.122656 |
| MmugDNA.33081.1.S1_at   | MmugDNA.33081.1 | 4.85  | 4.91  | 0.11 | 0.07 | -1.04 | 0.184941 | 0.398526 | 0.481073 | 0.629458 |
| MmugDNA.33084.1.S1_at   | MmugDNA.33084.1 | 2.91  | 2.9   | 0.07 | 0.12 | 1.01  | 0.566833 | 0.17708  | 0.777544 | 0.453598 |
| MmugDNA.33086.1.S1_at   | MmugDNA.33086.1 | 7.48  | 7.24  | 0.24 | 0.18 | 1.18  | 0.435331 | 0.017616 | 0.690435 | 0.16783  |
| MmugDNA.33087.1.S1_at   | MmugDNA.33087.1 | 2.7   | 2.75  | 0.05 | 0.09 | -1.03 | 0.477999 | 0.405382 | 0.719742 | 0.633701 |
| MmugDNA.3309.1.S1_at    | MmugDNA.3309.1  | 8.79  | 8.88  | 0.09 | 0.24 | -1.06 | 0.632448 | 0.350371 | 0.819792 | 0.594122 |
| MmugDNA.33090.1.S1_at   | MmugDNA.33090.1 | 6.26  | 5.79  | 0.16 | 0.09 | 1.38  | 0.018222 | 0.00927  | 0.187999 | 0.127091 |
| MmugDNA.33091.1.S1_at   | MmugDNA.33091.1 | 6.31  | 6.25  | 0.03 | 0.05 | 1.04  | 0.047639 | 0.005298 | 0.275691 | 0.100787 |
| MmugDNA.33092.1.S1_s_at | MmugDNA.33092.1 | 5.9   | 5.84  | 0.27 | 0.04 | 1.04  | 0.73016  | 0.643442 | 0.873891 | 0.790931 |
| MmugDNA.33094.1.S1_at   | MmugDNA.33094.1 | 5.56  | 5.53  | 0.27 | 0.06 | 1.02  | 0.996279 | 0.511703 | 0.998602 | 0.705797 |
| MmugDNA.33096.1.S1_s_at | MmugDNA.33096.1 | 10.93 | 10.98 | 0.22 | 0.23 | -1.04 | 0.810451 | 0.0743   | 0.915089 | 0.318046 |

|                         |                 |       |       |      |      |       |          |          |          |          |
|-------------------------|-----------------|-------|-------|------|------|-------|----------|----------|----------|----------|
| MmugDNA.30891.1.S1_s_at | MmugDNA.30891.1 | 12.28 | 12.19 | 0.14 | 0.06 | 1.06  | 0.518502 | 0.082823 | 0.747576 | 0.332331 |
| MmugDNA.331.1.S1_at     | MmugDNA.331.1   | 6.27  | 6.15  | 0.18 | 0.06 | 1.08  | 0.960295 | 0.175862 | 0.983703 | 0.452475 |
| MmugDNA.33100.1.S1_at   | MmugDNA.33100.1 | 7.04  | 7.03  | 0.11 | 0.07 | 1     | 0.801336 | 0.464776 | 0.910753 | 0.675419 |
| MmugDNA.33100.1.S1_s_at | MmugDNA.33100.1 | 6.13  | 6.05  | 0.24 | 0.16 | 1.05  | 0.164836 | 0.204109 | 0.457897 | 0.478418 |
| MmugDNA.33101.1.S1_s_at | MmugDNA.33101.1 | 4.5   | 4.26  | 0.05 | 0.08 | 1.18  | 0.022171 | 0.380162 | 0.201977 | 0.616839 |
| MmugDNA.33103.1.S1_at   | MmugDNA.33103.1 | 7.72  | 6.57  | 0.12 | 0.47 | 2.21  | 0.027619 | 0.009759 | 0.21866  | 0.129958 |
| MmugDNA.33104.1.S1_at   | MmugDNA.33104.1 | 3.29  | 3.48  | 0.63 | 0.03 | -1.14 | 0.676268 | 0.852905 | 0.845415 | 0.916372 |
| MmugDNA.33105.1.S1_at   | MmugDNA.33105.1 | 4.38  | 3.96  | 0.93 | 0.28 | 1.34  | 0.228522 | 0.248781 | 0.52688  | 0.517931 |
| MmugDNA.33106.1.S1_at   | MmugDNA.33106.1 | 11.33 | 11.41 | 0.05 | 0.04 | -1.06 | 0.196224 | 0.155726 | 0.49329  | 0.431086 |
| MmugDNA.33107.1.S1_at   | MmugDNA.33107.1 | 8.46  | 9.89  | 0.71 | 0.1  | -2.7  | 0.011612 | 0.369749 | 0.157638 | 0.609048 |
| MmugDNA.33108.1.S1_at   | MmugDNA.33108.1 | 4.99  | 4.93  | 0.09 | 0.03 | 1.04  | 0.644843 | 0.781407 | 0.827097 | 0.873256 |
| MmugDNA.33109.1.S1_at   | MmugDNA.33109.1 | 5.48  | 5.43  | 0.14 | 0.06 | 1.04  | 0.73016  | 0.459381 | 0.873891 | 0.671741 |
| MmugDNA.3311.1.S1_at    | MmugDNA.3311.1  | 9.64  | 9.04  | 0.43 | 0.04 | 1.52  | 0.082744 | 0.243083 | 0.34462  | 0.513356 |
| MmugDNA.33110.1.S1_at   | MmugDNA.33110.1 | 8.22  | 8.32  | 0.12 | 0.16 | -1.07 | 0.262981 | 0.258936 | 0.556723 | 0.526162 |
| MmugDNA.33111.1.S1_at   | MmugDNA.33111.1 | 3.39  | 3.47  | 0.05 | 0.22 | -1.06 | 0.800199 | 0.221635 | 0.909986 | 0.494901 |
| MmugDNA.33112.1.S1_at   | MmugDNA.33112.1 | 5.49  | 5.65  | 0.12 | 0.35 | -1.12 | 0.851409 | 0.753969 | 0.935336 | 0.856768 |
| MmugDNA.33113.1.S1_at   | MmugDNA.33113.1 | 12.6  | 12.6  | 0.05 | 0.02 | -1    | 0.889165 | 0.701899 | 0.95279  | 0.827167 |
| MmugDNA.33117.1.S1_at   | MmugDNA.33117.1 | 10.14 | 10.33 | 0.1  | 0.27 | -1.15 | 0.202072 | 0.024183 | 0.499672 | 0.194673 |
| MmugDNA.33118.1.S1_s_at | MmugDNA.33118.1 | 8.14  | 8.43  | 0.3  | 0.07 | -1.22 | 0.229465 | 0.036515 | 0.528269 | 0.235526 |
| MmugDNA.3312.1.S1_at    | MmugDNA.3312.1  | 4.53  | 4.92  | 0.31 | 0.19 | -1.31 | 0.078359 | 0.058202 | 0.338023 | 0.287988 |
| MmugDNA.3312.1.S1_s_at  | MmugDNA.3312.1  | 5.63  | 6.01  | 0.2  | 0.31 | -1.3  | 0.159678 | 0.263972 | 0.450981 | 0.530153 |
| MmugDNA.33121.1.S1_at   | MmugDNA.33121.1 | 5.58  | 6.06  | 0.15 | 0.02 | -1.4  | 0.003434 | 0.001439 | 0.103385 | 0.057876 |
| MmugDNA.33124.1.S1_at   | MmugDNA.33124.1 | 12.2  | 12.31 | 0.06 | 0.01 | -1.08 | 0.026896 | 0.032519 | 0.217016 | 0.223323 |
| MmugDNA.33125.1.S1_at   | MmugDNA.33125.1 | 10.6  | 10.62 | 0.08 | 0.08 | -1.01 | 0.752543 | 0.111421 | 0.885704 | 0.376126 |
| MmugDNA.33125.1.S1_s_at | MmugDNA.33125.1 | 10.83 | 10.82 | 0.05 | 0.05 | 1.01  | 0.615477 | 0.136503 | 0.808923 | 0.408969 |
| MmugDNA.33126.1.S1_at   | MmugDNA.33126.1 | 4.99  | 5.2   | 0.38 | 0.18 | -1.16 | 0.091019 | 0.071889 | 0.358265 | 0.314189 |
| MmugDNA.33127.1.S1_at   | MmugDNA.33127.1 | 7.67  | 7.9   | 0.57 | 0.61 | -1.18 | 0.609882 | 0.036764 | 0.805512 | 0.236291 |
| MmugDNA.33129.1.S1_at   | MmugDNA.33129.1 | 6.68  | 6.65  | 0.05 | 0.12 | 1.02  | 0.178776 | 0.182725 | 0.473583 | 0.459215 |
| MmugDNA.3313.1.S1_at    | MmugDNA.3313.1  | 5.34  | 5.54  | 0.32 | 0.12 | -1.14 | 0.357638 | 0.509427 | 0.633636 | 0.704167 |
| MmugDNA.33131.1.S1_at   | MmugDNA.33131.1 | 6.73  | 6.73  | 0.06 | 0.11 | 1     | 0.244525 | 0.66619  | 0.540909 | 0.804415 |
| MmugDNA.33132.1.S1_at   | MmugDNA.33132.1 | 9.59  | 9.65  | 0.13 | 0.08 | -1.04 | 0.357478 | 0.639689 | 0.633546 | 0.788389 |
| MmugDNA.33133.1.S1_at   | MmugDNA.33133.1 | 7.86  | 5.48  | 0.58 | 0.22 | 5.19  | 0.004531 | 0.000292 | 0.113436 | 0.034892 |
| MmugDNA.33138.1.S1_at   | MmugDNA.33138.1 | 6.35  | 5.95  | 0.35 | 0.12 | 1.32  | 0.125859 | 0.157613 | 0.406771 | 0.433131 |
| MmugDNA.3314.1.S1_at    | MmugDNA.3314.1  | 5.01  | 5.63  | 0.73 | 0.38 | -1.54 | 0.27995  | 0.399891 | 0.571191 | 0.63009  |
| MmugDNA.33142.1.S1_at   | MmugDNA.33142.1 | 7.24  | 6.77  | 0.97 | 0.66 | 1.39  | 0.727482 | 0.886169 | 0.872348 | 0.935211 |
| MmugDNA.33144.1.S1_at   | MmugDNA.33144.1 | 4.56  | 4.35  | 0.2  | 0.02 | 1.16  | 0.441282 | 0.47562  | 0.694813 | 0.682288 |
| MmugDNA.33145.1.S1_at   | MmugDNA.33145.1 | 8.7   | 7.98  | 0.1  | 0.19 | 1.64  | 0.003187 | 0.001014 | 0.101477 | 0.050767 |
| MmugDNA.33146.1.S1_s_at | MmugDNA.33146.1 | 11.07 | 10.74 | 0.11 | 0.1  | 1.25  | 0.008001 | 0.015268 | 0.138479 | 0.156987 |
| MmugDNA.33147.1.S1_at   | MmugDNA.33147.1 | 5.22  | 5.33  | 0.43 | 0.02 | -1.08 | 0.832267 | 0.928208 | 0.926055 | 0.959209 |
| MmugDNA.33148.1.S1_at   | MmugDNA.33148.1 | 9.71  | 9.32  | 0.08 | 0.07 | 1.31  | 0.001992 | 0.058938 | 0.089614 | 0.28962  |
| MmugDNA.33150.1.S1_at   | MmugDNA.33150.1 | 9.39  | 9.72  | 0.2  | 0.08 | -1.26 | 0.169515 | 0.864143 | 0.462756 | 0.922925 |
| MmugDNA.33151.1.S1_at   | MmugDNA.33151.1 | 3.12  | 3.26  | 0.16 | 0.14 | -1.1  | 0.809829 | 0.898476 | 0.914789 | 0.942214 |
| MmugDNA.33152.1.S1_at   | MmugDNA.33152.1 | 7.18  | 7.32  | 0.13 | 0.09 | -1.11 | 0.14262  | 0.010323 | 0.428696 | 0.132968 |

|                         |                 |       |       |      |      |       |          |          |          |          |
|-------------------------|-----------------|-------|-------|------|------|-------|----------|----------|----------|----------|
| MmugDNA.33153.1.S1_at   | MmugDNA.33153.1 | 4.58  | 4.22  | 0.25 | 0.16 | 1.28  | 0.164661 | 0.066781 | 0.457714 | 0.304293 |
| MmugDNA.33154.1.S1_at   | MmugDNA.33154.1 | 4.17  | 4.11  | 0.11 | 0.02 | 1.04  | 0.473068 | 0.770662 | 0.71646  | 0.866801 |
| MmugDNA.33155.1.S1_at   | MmugDNA.33155.1 | 7.87  | 7.26  | 0.37 | 0.36 | 1.53  | 0.377509 | 0.034335 | 0.648004 | 0.229266 |
| MmugDNA.33156.1.S1_at   | MmugDNA.33156.1 | 11.19 | 10.63 | 0.13 | 0.37 | 1.48  | 0.03714  | 0.436803 | 0.247978 | 0.65629  |
| MmugDNA.33156.1.S1_s_at | MmugDNA.33156.1 | 11.88 | 11.62 | 0.09 | 0.12 | 1.2   | 0.044183 | 0.534006 | 0.267275 | 0.720046 |
| MmugDNA.33157.1.S1_at   | MmugDNA.33157.1 | 10.2  | 9.92  | 0.36 | 0.19 | 1.21  | 0.494311 | 0.160289 | 0.731121 | 0.436406 |
| MmugDNA.33158.1.S1_at   | MmugDNA.33158.1 | 8.2   | 8.39  | 0.16 | 0.1  | -1.14 | 0.306709 | 0.63349  | 0.593535 | 0.784173 |
| MmugDNA.3316.1.S1_at    | MmugDNA.3316.1  | 5.77  | 5.85  | 0.11 | 0.11 | -1.05 | 0.387162 | 0.09367  | 0.655438 | 0.350103 |
| MmugDNA.3316.1.S1_x_at  | MmugDNA.3316.1  | 5.5   | 5.7   | 0.03 | 0.08 | -1.15 | 0.040246 | 0.003469 | 0.257139 | 0.084806 |
| MmugDNA.33160.1.S1_at   | MmugDNA.33160.1 | 5.6   | 5.41  | 0.08 | 0.06 | 1.14  | 0.057548 | 0.013049 | 0.297215 | 0.14696  |
| MmugDNA.33164.1.S1_at   | MmugDNA.33164.1 | 5.1   | 5.04  | 0.11 | 0.05 | 1.04  | 0.271176 | 0.085476 | 0.563112 | 0.337473 |
| MmugDNA.33165.1.S1_at   | MmugDNA.33165.1 | 6     | 6.6   | 1.33 | 0.4  | -1.51 | 0.803952 | 0.410215 | 0.91192  | 0.637131 |
| MmugDNA.33166.1.S1_x_at | MmugDNA.33166.1 | 14.25 | 14.25 | 0.05 | 0    | -1    | 0.941961 | 0.975958 | 0.975589 | 0.986856 |
| MmugDNA.33167.1.S1_at   | MmugDNA.33167.1 | 8.11  | 8.65  | 0.76 | 0.37 | -1.46 | 0.137175 | 0.037138 | 0.422016 | 0.2372   |
| MmugDNA.33168.1.S1_at   | MmugDNA.33168.1 | 5.67  | 5.77  | 0.17 | 0.09 | -1.07 | 0.622117 | 0.463437 | 0.813025 | 0.674419 |
| MmugDNA.33169.1.S1_at   | MmugDNA.33169.1 | 9.03  | 9.41  | 0.23 | 0.16 | -1.3  | 0.087844 | 0.03008  | 0.353954 | 0.215243 |
| MmugDNA.3317.1.S1_at    | MmugDNA.3317.1  | 4.22  | 4.07  | 0.19 | 0.06 | 1.11  | 0.188154 | 0.496669 | 0.484438 | 0.696119 |
| MmugDNA.33170.1.S1_at   | MmugDNA.33170.1 | 7.07  | 7.26  | 0.29 | 0.02 | -1.15 | 0.795642 | 0.414029 | 0.907596 | 0.639981 |
| MmugDNA.33173.1.S1_at   | MmugDNA.33173.1 | 6.25  | 5.98  | 0.04 | 0.12 | 1.21  | 0.024784 | 0.267514 | 0.210464 | 0.533242 |
| MmugDNA.33174.1.S1_at   | MmugDNA.33174.1 | 8.86  | 8.53  | 0.19 | 0.08 | 1.26  | 0.055422 | 0.007923 | 0.292344 | 0.11857  |
| MmugDNA.33175.1.S1_at   | MmugDNA.33175.1 | 10.62 | 10.74 | 0.08 | 0.06 | -1.09 | 0.20952  | 0.299345 | 0.50704  | 0.557842 |
| MmugDNA.33176.1.S1_at   | MmugDNA.33176.1 | 3.23  | 3.21  | 0.1  | 0.04 | 1.01  | 0.744242 | 0.886018 | 0.881397 | 0.935122 |
| MmugDNA.33177.1.S1_at   | MmugDNA.33177.1 | 7.19  | 6.58  | 0.32 | 0.24 | 1.52  | 0.060735 | 0.071569 | 0.303419 | 0.313714 |
| MmugDNA.33178.1.S1_at   | MmugDNA.33178.1 | 8.27  | 7.98  | 0.22 | 0.15 | 1.22  | 0.160061 | 0.015421 | 0.451382 | 0.157699 |
| MmugDNA.33178.1.S1_x_at | MmugDNA.33178.1 | 8.28  | 8.19  | 0.27 | 0.18 | 1.07  | 0.495838 | 0.208496 | 0.731886 | 0.482435 |
| MmugDNA.3318.1.S1_at    | MmugDNA.3318.1  | 6.42  | 6.79  | 0.21 | 0.14 | -1.3  | 0.108433 | 0.112672 | 0.383021 | 0.378255 |
| MmugDNA.33180.1.S1_at   | MmugDNA.33180.1 | 3.84  | 3.33  | 0.81 | 0.09 | 1.42  | 0.389471 | 0.233009 | 0.657329 | 0.50445  |
| MmugDNA.33181.1.S1_at   | MmugDNA.33181.1 | 4.3   | 3.99  | 1.11 | 0.28 | 1.23  | 0.572863 | 0.776095 | 0.780889 | 0.869726 |
| MmugDNA.33182.1.S1_at   | MmugDNA.33182.1 | 5.96  | 6.07  | 0.32 | 0.07 | -1.08 | 0.421085 | 0.241034 | 0.679846 | 0.511657 |
| MmugDNA.33185.1.S1_at   | MmugDNA.33185.1 | 11.18 | 11.69 | 0.06 | 0.1  | -1.43 | 0.002001 | 0.328577 | 0.089729 | 0.578148 |
| MmugDNA.33186.1.S1_at   | MmugDNA.33186.1 | 10.43 | 10.66 | 0.15 | 0.12 | -1.17 | 0.071521 | 0.001107 | 0.325523 | 0.052714 |
| MmugDNA.33186.1.S1_s_at | MmugDNA.33186.1 | 8.41  | 8.36  | 0.36 | 0.09 | 1.04  | 0.551175 | 0.052615 | 0.768269 | 0.27488  |
| MmugDNA.33187.1.S1_at   | MmugDNA.33187.1 | 4.22  | 4.25  | 0.06 | 0.06 | -1.02 | 0.961284 | 0.10692  | 0.984145 | 0.369499 |
| MmugDNA.36880.1.S1_s_at | MmugDNA.36880.1 | 11.09 | 10.96 | 0.24 | 0.22 | 1.1   | 0.421692 | 0.032602 | 0.680117 | 0.223643 |
| MmugDNA.33189.1.S1_at   | MmugDNA.33189.1 | 13    | 13.14 | 0.05 | 0.02 | -1.1  | 0.009477 | 0.125848 | 0.147356 | 0.396315 |
| MmugDNA.3319.1.S1_at    | MmugDNA.3319.1  | 4.6   | 4.32  | 0.07 | 0.16 | 1.21  | 0.081755 | 0.077721 | 0.342963 | 0.323851 |
| MmugDNA.33190.1.S1_at   | MmugDNA.33190.1 | 5.4   | 5.47  | 0.19 | 0.28 | -1.05 | 0.573942 | 0.636443 | 0.781504 | 0.786176 |
| MmugDNA.33192.1.S1_at   | MmugDNA.33192.1 | 8.53  | 9.67  | 0.57 | 0.2  | -2.21 | 0.047428 | 0.374049 | 0.275072 | 0.612676 |
| MmugDNA.33196.1.S1_at   | MmugDNA.33196.1 | 7.08  | 6.42  | 0.57 | 0.33 | 1.59  | 0.078342 | 0.104463 | 0.338004 | 0.365719 |
| MmugDNA.33197.1.S1_at   | MmugDNA.33197.1 | 9.96  | 9.7   | 0.33 | 0.04 | 1.19  | 0.656914 | 0.003021 | 0.834039 | 0.080204 |
| MmugDNA.33198.1.S1_at   | MmugDNA.33198.1 | 3.51  | 3.21  | 0.38 | 0.07 | 1.23  | 0.181012 | 0.284881 | 0.476233 | 0.54701  |
| MmugDNA.2144.1.S1_s_at  | MmugDNA.2144.1  | 14.04 | 13.98 | 0.04 | 0.03 | 1.04  | 0.112229 | 0.000596 | 0.388387 | 0.041941 |
| MmugDNA.332.1.S1_at     | MmugDNA.332.1   | 4.12  | 4.2   | 0.04 | 0.17 | -1.06 | 0.373917 | 0.800624 | 0.645119 | 0.885312 |



|                         |                 |       |       |      |      |       |          |          |          |          |
|-------------------------|-----------------|-------|-------|------|------|-------|----------|----------|----------|----------|
| MmugDNA.3320.1.S1_at    | MmugDNA.3320.1  | 11.96 | 11.73 | 0.07 | 0.05 | 1.17  | 0.005127 | 0.001855 | 0.116951 | 0.064629 |
| MmugDNA.33200.1.S1_at   | MmugDNA.33200.1 | 4.82  | 4.68  | 0.14 | 0.11 | 1.1   | 0.284276 | 0.068844 | 0.574388 | 0.308714 |
| MmugDNA.33201.1.S1_at   | MmugDNA.33201.1 | 3.93  | 4.08  | 0.26 | 0.17 | -1.11 | 0.441163 | 0.619324 | 0.694766 | 0.774577 |
| MmugDNA.33202.1.S1_at   | MmugDNA.33202.1 | 3.09  | 3.15  | 0.05 | 0.06 | -1.04 | 0.115617 | 0.314929 | 0.392723 | 0.56872  |
| MmugDNA.33203.1.S1_at   | MmugDNA.33203.1 | 5.38  | 5.19  | 0.07 | 0.3  | 1.14  | 0.748885 | 0.918101 | 0.883751 | 0.954068 |
| MmugDNA.33204.1.S1_at   | MmugDNA.33204.1 | 7.64  | 7.69  | 0.02 | 0.03 | -1.03 | 0.09649  | 0.730982 | 0.366344 | 0.844172 |
| MmugDNA.33205.1.S1_at   | MmugDNA.33205.1 | 4.06  | 4.07  | 0.37 | 0.1  | -1.01 | 0.963189 | 0.998763 | 0.985129 | 0.999349 |
| MmugDNA.33207.1.S1_at   | MmugDNA.33207.1 | 5.29  | 5.35  | 0.16 | 0.04 | -1.04 | 0.590733 | 0.685799 | 0.792009 | 0.816612 |
| MmugDNA.33208.1.S1_at   | MmugDNA.33208.1 | 10.86 | 11.31 | 0.11 | 0.11 | -1.37 | 0.009334 | 0.012333 | 0.146531 | 0.143659 |
| MmugDNA.33209.1.S1_at   | MmugDNA.33209.1 | 6.54  | 6.65  | 0.16 | 0.18 | -1.07 | 0.519791 | 0.502498 | 0.748271 | 0.700192 |
| MmugDNA.3321.1.S1_at    | MmugDNA.3321.1  | 5.51  | 5.45  | 0.18 | 0.07 | 1.04  | 0.882875 | 0.28866  | 0.950199 | 0.549827 |
| MmugDNA.33211.1.S1_s_at | MmugDNA.33211.1 | 13.47 | 13.35 | 0.09 | 0.07 | 1.09  | 0.069583 | 0.17619  | 0.322194 | 0.4527   |
| MmugDNA.33213.1.S1_at   | MmugDNA.33213.1 | 5.21  | 4.63  | 0.19 | 0.02 | 1.49  | 0.011502 | 0.044468 | 0.15722  | 0.255242 |
| MmugDNA.33215.1.S1_at   | MmugDNA.33215.1 | 11.24 | 11.05 | 0.03 | 0.19 | 1.14  | 0.410765 | 0.155609 | 0.672759 | 0.430977 |
| MmugDNA.33217.1.S1_at   | MmugDNA.33217.1 | 3.99  | 3.83  | 0.1  | 0.03 | 1.12  | 0.141361 | 0.000679 | 0.427324 | 0.04413  |
| MmugDNA.33219.1.S1_at   | MmugDNA.33219.1 | 10.12 | 9.92  | 0.28 | 0.06 | 1.15  | 0.550796 | 0.940376 | 0.768119 | 0.966182 |
| MmugDNA.3322.1.S1_at    | MmugDNA.3322.1  | 4     | 4     | 0.03 | 0.02 | 1     | 0.24121  | 0.465158 | 0.538538 | 0.675621 |
| MmugDNA.33220.1.S1_at   | MmugDNA.33220.1 | 7.01  | 7.21  | 0.14 | 0.05 | -1.15 | 0.243952 | 0.032931 | 0.540712 | 0.22466  |
| MmugDNA.33221.1.S1_at   | MmugDNA.33221.1 | 6.84  | 6.62  | 0.66 | 0.16 | 1.17  | 0.650686 | 0.364349 | 0.830313 | 0.604693 |
| MmugDNA.15044.1.S1_s_at | MmugDNA.15044.1 | 5.27  | 5.22  | 0.25 | 0.06 | 1.03  | 0.646838 | 0.321668 | 0.82845  | 0.573346 |
| MmugDNA.33223.1.S1_at   | MmugDNA.33223.1 | 11.03 | 11.13 | 0.01 | 0.1  | -1.07 | 0.164449 | 0.104844 | 0.457583 | 0.36638  |
| MmugDNA.33224.1.S1_at   | MmugDNA.33224.1 | 11.04 | 10.98 | 0.26 | 0.1  | 1.05  | 0.976338 | 0.661918 | 0.990598 | 0.802024 |
| MmugDNA.33227.1.S1_at   | MmugDNA.33227.1 | 3.5   | 3.57  | 0.05 | 0.02 | -1.05 | 0.043929 | 0.4125   | 0.266567 | 0.638915 |
| MmugDNA.33228.1.S1_at   | MmugDNA.33228.1 | 9.46  | 9.41  | 0.13 | 0.23 | 1.03  | 0.964613 | 0.068851 | 0.985701 | 0.308721 |
| MmugDNA.33229.1.S1_at   | MmugDNA.33229.1 | 7.67  | 7.63  | 0.46 | 0.2  | 1.03  | 0.701933 | 0.011496 | 0.858577 | 0.138685 |
| MmugDNA.3323.1.S1_at    | MmugDNA.3323.1  | 3.11  | 2.8   | 0.18 | 0.04 | 1.23  | 0.06215  | 0.033494 | 0.305945 | 0.226577 |
| MmugDNA.33230.1.S1_at   | MmugDNA.33230.1 | 3.66  | 3.57  | 0.05 | 0.15 | 1.07  | 0.603158 | 0.217366 | 0.800813 | 0.490978 |
| MmugDNA.33231.1.S1_at   | MmugDNA.33231.1 | 3.9   | 3.9   | 0.1  | 0.02 | 1     | 0.765633 | 0.6013   | 0.892487 | 0.762661 |
| MmugDNA.33232.1.S1_at   | MmugDNA.33232.1 | 4.33  | 3.78  | 0.99 | 0.14 | 1.46  | 0.127498 | 0.14471  | 0.409437 | 0.418546 |
| MmugDNA.33234.1.S1_at   | MmugDNA.33234.1 | 9.99  | 10.12 | 0.21 | 0.11 | -1.1  | 0.620964 | 0.150642 | 0.812334 | 0.425195 |
| MmugDNA.953.1.S1_s_at   | MmugDNA.953.1   | 6.19  | 6.46  | 0.14 | 0.06 | -1.21 | 0.027421 | 0.013911 | 0.218449 | 0.151286 |
| MmugDNA.33239.1.S1_at   | MmugDNA.33239.1 | 10.89 | 10.79 | 0.27 | 0.23 | 1.08  | 0.278696 | 0.632232 | 0.570013 | 0.783289 |
| MmugDNA.3324.1.S1_at    | MmugDNA.3324.1  | 2.94  | 2.87  | 0.08 | 0.04 | 1.05  | 0.223328 | 0.551961 | 0.521145 | 0.731387 |
| MmugDNA.33241.1.S1_at   | MmugDNA.33241.1 | 11.65 | 11.14 | 0.15 | 0.09 | 1.43  | 0.005698 | 0.107133 | 0.12117  | 0.369808 |
| MmugDNA.33244.1.S1_at   | MmugDNA.33244.1 | 5.76  | 5.83  | 1.07 | 0.14 | -1.05 | 0.786325 | 0.948116 | 0.902518 | 0.970446 |
| MmugDNA.33245.1.S1_at   | MmugDNA.33245.1 | 6.99  | 6.89  | 0.06 | 0.05 | 1.08  | 0.208397 | 0.329619 | 0.506128 | 0.578813 |
| MmugDNA.33246.1.S1_at   | MmugDNA.33246.1 | 10.77 | 10.8  | 0.18 | 0.08 | -1.02 | 0.90414  | 0.211511 | 0.959379 | 0.48563  |
| MmugDNA.33247.1.S1_at   | MmugDNA.33247.1 | 9.21  | 9.15  | 0.1  | 0.08 | 1.04  | 0.462657 | 0.029237 | 0.70975  | 0.212898 |
| MmugDNA.33247.1.S1_s_at | MmugDNA.33247.1 | 9     | 8.93  | 0.09 | 0.09 | 1.05  | 0.371486 | 0.134499 | 0.64419  | 0.406626 |
| MmugDNA.33248.1.S1_at   | MmugDNA.33248.1 | 10.94 | 10.89 | 0.12 | 0.16 | 1.04  | 0.410226 | 0.035979 | 0.672349 | 0.234155 |
| MmugDNA.3325.1.S1_at    | MmugDNA.3325.1  | 7.26  | 7.43  | 0.75 | 0.26 | -1.12 | 0.414056 | 0.570903 | 0.675365 | 0.743422 |
| MmugDNA.33250.1.S1_at   | MmugDNA.33250.1 | 5.97  | 5.94  | 0.13 | 0.07 | 1.02  | 0.154014 | 0.093269 | 0.444262 | 0.349412 |
| MmugDNA.33253.1.S1_at   | MmugDNA.33253.1 | 6.43  | 6.21  | 0.16 | 0.12 | 1.16  | 0.322584 | 0.266206 | 0.606572 | 0.53202  |

|                       |                 |       |       |      |      |       |          |          |          |          |
|-----------------------|-----------------|-------|-------|------|------|-------|----------|----------|----------|----------|
| MmugDNA.33254.1.S1_at | MmugDNA.33254.1 | 6.68  | 5.69  | 0.84 | 0.19 | 1.99  | 0.141651 | 0.078592 | 0.427605 | 0.325343 |
| MmugDNA.33256.1.S1_at | MmugDNA.33256.1 | 3.25  | 3.2   | 0.07 | 0.03 | 1.03  | 0.176834 | 0.39938  | 0.471327 | 0.629776 |
| MmugDNA.33257.1.S1_at | MmugDNA.33257.1 | 8.67  | 8.46  | 0.16 | 0.09 | 1.16  | 0.125448 | 0.342621 | 0.405937 | 0.588644 |
| MmugDNA.33258.1.S1_at | MmugDNA.33258.1 | 13.29 | 12.82 | 0.1  | 0.07 | 1.39  | 0.003559 | 0.323485 | 0.104863 | 0.574473 |
| MmugDNA.33259.1.S1_at | MmugDNA.33259.1 | 4.99  | 5.07  | 0.17 | 0.06 | -1.05 | 0.169941 | 0.325983 | 0.463446 | 0.576235 |
| MmugDNA.3326.1.S1_at  | MmugDNA.3326.1  | 4.49  | 4.31  | 0.07 | 0.04 | 1.13  | 0.03945  | 0.044573 | 0.25509  | 0.255512 |
| MmugDNA.33261.1.S1_at | MmugDNA.33261.1 | 5.82  | 6.09  | 0.09 | 0.46 | -1.21 | 0.980874 | 0.830535 | 0.992889 | 0.902753 |
| MmugDNA.33265.1.S1_at | MmugDNA.33265.1 | 4.89  | 4.55  | 0.17 | 0.19 | 1.27  | 0.047353 | 0.035456 | 0.274971 | 0.232564 |
| MmugDNA.33266.1.S1_at | MmugDNA.33266.1 | 10.65 | 10.44 | 0.41 | 0.26 | 1.15  | 0.222948 | 0.504696 | 0.520904 | 0.701774 |
| MmugDNA.33267.1.S1_at | MmugDNA.33267.1 | 3.83  | 3.78  | 0.1  | 0.17 | 1.04  | 0.207432 | 0.348657 | 0.505141 | 0.592661 |
| MmugDNA.33268.1.S1_at | MmugDNA.33268.1 | 5.4   | 5.39  | 0.17 | 0.21 | 1.01  | 0.466414 | 0.324331 | 0.712237 | 0.574924 |
| MmugDNA.33269.1.S1_at | MmugDNA.33269.1 | 4.85  | 4.95  | 0.19 | 0.52 | -1.08 | 0.617595 | 0.519811 | 0.810076 | 0.711135 |
| MmugDNA.3327.1.S1_at  | MmugDNA.3327.1  | 4.59  | 4.78  | 0.18 | 0.65 | -1.14 | 0.972338 | 0.991331 | 0.988877 | 0.995189 |
| MmugDNA.33271.1.S1_at | MmugDNA.33271.1 | 7.66  | 6.31  | 0.85 | 0.09 | 2.54  | 0.05276  | 0.044174 | 0.286707 | 0.254605 |
| MmugDNA.33273.1.S1_at | MmugDNA.33273.1 | 5.24  | 5.34  | 0.31 | 0.49 | -1.07 | 0.566852 | 0.863158 | 0.777544 | 0.922263 |
| MmugDNA.33275.1.S1_at | MmugDNA.33275.1 | 12.06 | 12.33 | 0.1  | 0.09 | -1.2  | 0.129237 | 0.007004 | 0.411589 | 0.112985 |
| MmugDNA.33277.1.S1_at | MmugDNA.33277.1 | 8.23  | 8.28  | 0.27 | 0.29 | -1.04 | 0.803979 | 0.056921 | 0.911931 | 0.284712 |
| MmugDNA.33278.1.S1_at | MmugDNA.33278.1 | 4.83  | 4.82  | 0.23 | 0.12 | 1     | 0.606202 | 0.646661 | 0.802939 | 0.793044 |
| MmugDNA.3328.1.S1_at  | MmugDNA.3328.1  | 3.13  | 2.94  | 0.08 | 0.06 | 1.14  | 0.023262 | 0.01466  | 0.205562 | 0.154231 |
| MmugDNA.33280.1.S1_at | MmugDNA.33280.1 | 6.75  | 7.02  | 0.17 | 0.08 | -1.2  | 0.210137 | 0.014725 | 0.507675 | 0.154415 |
| MmugDNA.33282.1.S1_at | MmugDNA.33282.1 | 11.13 | 11.03 | 0.15 | 0.11 | 1.08  | 0.729251 | 0.945634 | 0.873518 | 0.969098 |
| MmugDNA.33284.1.S1_at | MmugDNA.33284.1 | 6.38  | 6.01  | 0.87 | 0.16 | 1.29  | 0.605147 | 0.806375 | 0.802264 | 0.888642 |
| MmugDNA.33285.1.S1_at | MmugDNA.33285.1 | 6.44  | 6.43  | 0.1  | 0.19 | 1.01  | 0.836451 | 0.778433 | 0.928289 | 0.871327 |
| MmugDNA.33287.1.S1_at | MmugDNA.33287.1 | 3.61  | 3.88  | 0.04 | 0.39 | -1.21 | 0.126429 | 0.164582 | 0.407815 | 0.440829 |
| MmugDNA.33288.1.S1_at | MmugDNA.33288.1 | 8.45  | 9.22  | 0.26 | 0.06 | -1.7  | 0.019185 | 0.030362 | 0.191978 | 0.216116 |
| MmugDNA.33289.1.S1_at | MmugDNA.33289.1 | 6.18  | 6.11  | 0.35 | 0.08 | 1.05  | 0.848841 | 0.968277 | 0.934155 | 0.982549 |
| MmugDNA.3329.1.S1_at  | MmugDNA.3329.1  | 4.15  | 4.14  | 0.37 | 0.15 | 1.01  | 0.386715 | 0.618664 | 0.655058 | 0.774185 |
| MmugDNA.33291.1.S1_at | MmugDNA.33291.1 | 8.85  | 8.6   | 0.07 | 0.05 | 1.18  | 0.006933 | 0.335531 | 0.130411 | 0.583326 |
| MmugDNA.33293.1.S1_at | MmugDNA.33293.1 | 5.91  | 5.59  | 1.49 | 0.45 | 1.25  | 0.769701 | 0.735351 | 0.894341 | 0.846916 |
| MmugDNA.33294.1.S1_at | MmugDNA.33294.1 | 5.63  | 6.47  | 0.19 | 0.42 | -1.78 | 0.015397 | 0.002569 | 0.176257 | 0.075084 |
| MmugDNA.33295.1.S1_at | MmugDNA.33295.1 | 8.4   | 8.25  | 0.08 | 0.08 | 1.11  | 0.093603 | 0.909143 | 0.362254 | 0.948564 |
| MmugDNA.33297.1.S1_at | MmugDNA.33297.1 | 9     | 8.98  | 0.05 | 0.12 | 1.02  | 0.272276 | 0.418056 | 0.564289 | 0.642569 |
| MmugDNA.33298.1.S1_at | MmugDNA.33298.1 | 8.7   | 8.11  | 0.19 | 0.11 | 1.5   | 0.011623 | 0.054974 | 0.157638 | 0.279898 |
| MmugDNA.33299.1.S1_at | MmugDNA.33299.1 | 4.86  | 4.35  | 1.17 | 0.18 | 1.42  | 0.194879 | 0.209989 | 0.49141  | 0.483748 |
| MmugDNA.3330.1.S1_at  | MmugDNA.3330.1  | 11.21 | 10.07 | 0.08 | 0.09 | 2.2   | 0.000104 | 0.033384 | 0.051196 | 0.226396 |
| MmugDNA.33300.1.S1_at | MmugDNA.33300.1 | 8.21  | 8.73  | 0.24 | 0.07 | -1.43 | 0.028846 | 0.018052 | 0.22259  | 0.169372 |
| MmugDNA.33301.1.S1_at | MmugDNA.33301.1 | 5.63  | 5.57  | 0.09 | 0.11 | 1.04  | 0.387231 | 0.019688 | 0.655462 | 0.176286 |
| MmugDNA.33304.1.S1_at | MmugDNA.33304.1 | 6.26  | 6.03  | 0.33 | 0.04 | 1.17  | 0.779252 | 0.509525 | 0.899222 | 0.704233 |
| MmugDNA.33305.1.S1_at | MmugDNA.33305.1 | 6.06  | 5.91  | 0.14 | 0.05 | 1.11  | 0.062667 | 0.06415  | 0.306978 | 0.29954  |
| MmugDNA.33306.1.S1_at | MmugDNA.33306.1 | 3.51  | 3.39  | 0.12 | 0.02 | 1.09  | 0.542232 | 0.352886 | 0.762647 | 0.596217 |
| MmugDNA.33309.1.S1_at | MmugDNA.33309.1 | 3.46  | 3.27  | 0.07 | 0.15 | 1.14  | 0.062246 | 0.150353 | 0.306164 | 0.42489  |
| MmugDNA.33310.1.S1_at | MmugDNA.33310.1 | 4.09  | 4.09  | 0.03 | 0.08 | 1     | 0.563622 | 0.515849 | 0.775596 | 0.708504 |
| MmugDNA.33313.1.S1_at | MmugDNA.33313.1 | 5.71  | 5.91  | 0.1  | 0.1  | -1.15 | 0.074783 | 0.166033 | 0.331577 | 0.442606 |

|                         |                 |       |       |      |      |       |          |          |          |          |
|-------------------------|-----------------|-------|-------|------|------|-------|----------|----------|----------|----------|
| MmugDNA.33314.1.S1_at   | MmugDNA.33314.1 | 6.18  | 5.88  | 0.17 | 0.17 | 1.23  | 0.222335 | 0.133345 | 0.520299 | 0.405139 |
| MmugDNA.33315.1.S1_at   | MmugDNA.33315.1 | 4.09  | 3.87  | 0.34 | 0.18 | 1.17  | 0.147631 | 0.174114 | 0.435556 | 0.450431 |
| MmugDNA.33316.1.S1_at   | MmugDNA.33316.1 | 13.44 | 13.75 | 0.29 | 0    | -1.25 | 0.13227  | 0.142373 | 0.4155   | 0.415965 |
| MmugDNA.33317.1.S1_at   | MmugDNA.33317.1 | 5.41  | 5.54  | 0.07 | 0.06 | -1.09 | 0.07179  | 0.085367 | 0.325792 | 0.337246 |
| MmugDNA.33319.1.S1_at   | MmugDNA.33319.1 | 5.64  | 5.69  | 0.25 | 0.04 | -1.03 | 0.616259 | 0.5519   | 0.809428 | 0.731343 |
| MmugDNA.3332.1.S1_at    | MmugDNA.3332.1  | 5.98  | 5.63  | 0.88 | 0.19 | 1.27  | 0.224399 | 0.229402 | 0.522615 | 0.501527 |
| MmugDNA.33321.1.S1_at   | MmugDNA.33321.1 | 4.61  | 4.76  | 0.24 | 0.49 | -1.11 | 0.986739 | 0.924355 | 0.995228 | 0.957351 |
| MmugDNA.33322.1.S1_at   | MmugDNA.33322.1 | 5.94  | 5.36  | 0.56 | 0.42 | 1.49  | 0.452513 | 0.353292 | 0.702951 | 0.596477 |
| MmugDNA.33324.1.S1_at   | MmugDNA.33324.1 | 6.94  | 7.57  | 0.1  | 0.36 | -1.56 | 0.118551 | 0.102263 | 0.396229 | 0.36236  |
| MmugDNA.33328.1.S1_at   | MmugDNA.33328.1 | 10.37 | 10.43 | 0.29 | 0.05 | -1.04 | 0.459451 | 0.644439 | 0.707614 | 0.791578 |
| MmugDNA.3333.1.S1_s_at  | MmugDNA.3333.1  | 11.12 | 10.9  | 0.23 | 0.08 | 1.16  | 0.049051 | 0.042929 | 0.279094 | 0.251759 |
| MmugDNA.33332.1.S1_at   | MmugDNA.33332.1 | 5.83  | 5.86  | 0.18 | 0.11 | -1.02 | 0.892355 | 0.683614 | 0.954155 | 0.815387 |
| MmugDNA.33334.1.S1_at   | MmugDNA.33334.1 | 4.03  | 3.97  | 0.17 | 0.35 | 1.04  | 0.66627  | 0.410385 | 0.839607 | 0.637245 |
| MmugDNA.33335.1.S1_at   | MmugDNA.33335.1 | 10.34 | 9.98  | 0.25 | 0.12 | 1.28  | 0.089413 | 0.0376   | 0.356406 | 0.238367 |
| MmugDNA.33339.1.S1_at   | MmugDNA.33339.1 | 7.4   | 7.02  | 0.36 | 0.02 | 1.3   | 0.046789 | 0.042971 | 0.273939 | 0.251849 |
| MmugDNA.3334.1.S1_at    | MmugDNA.3334.1  | 10.74 | 10.44 | 0.26 | 0.1  | 1.23  | 0.089203 | 0.727534 | 0.355956 | 0.84241  |
| MmugDNA.33340.1.S1_at   | MmugDNA.33340.1 | 9.1   | 9.29  | 0.38 | 0.27 | -1.14 | 0.486046 | 0.758659 | 0.725473 | 0.859716 |
| MmugDNA.33337.1.S1_at   | MmugDNA.33337.1 | 11.69 | 12.51 | 0.32 | 0.03 | -1.76 | 0.012624 | 0.120427 | 0.162521 | 0.38925  |
| MmugDNA.33337.1.S1_s_at | MmugDNA.33337.1 | 12.09 | 12.84 | 0.3  | 0.06 | -1.68 | 0.014036 | 0.102182 | 0.169878 | 0.362273 |
| MmugDNA.33342.1.S1_at   | MmugDNA.33342.1 | 6.09  | 5.95  | 0.18 | 0.09 | 1.1   | 0.170502 | 0.391748 | 0.46418  | 0.625301 |
| MmugDNA.33344.1.S1_at   | MmugDNA.33344.1 | 6.4   | 6.47  | 0.25 | 0.09 | -1.05 | 0.882906 | 0.630092 | 0.950199 | 0.782148 |
| MmugDNA.33345.1.S1_at   | MmugDNA.33345.1 | 12.53 | 12.18 | 0.05 | 0.19 | 1.27  | 0.039343 | 0.28435  | 0.254835 | 0.54659  |
| MmugDNA.33347.1.S1_at   | MmugDNA.33347.1 | 5.09  | 5.08  | 0.21 | 0.07 | 1.01  | 0.49816  | 0.484395 | 0.733511 | 0.688478 |
| MmugDNA.33348.1.S1_at   | MmugDNA.33348.1 | 2.8   | 2.74  | 0.07 | 0.34 | 1.04  | 0.541045 | 0.691762 | 0.761875 | 0.820691 |
| MmugDNA.33349.1.S1_at   | MmugDNA.33349.1 | 6.82  | 6.67  | 0.27 | 0.08 | 1.1   | 0.320195 | 0.44317  | 0.604773 | 0.661011 |
| MmugDNA.3335.1.S1_s_at  | MmugDNA.3335.1  | 13.78 | 13.67 | 0.04 | 0.02 | 1.08  | 0.022243 | 0.168963 | 0.202353 | 0.445519 |
| MmugDNA.33350.1.S1_at   | MmugDNA.33350.1 | 3.51  | 3.41  | 0.07 | 0.19 | 1.08  | 0.235016 | 0.237697 | 0.533056 | 0.50826  |
| MmugDNA.33351.1.S1_at   | MmugDNA.33351.1 | 12.2  | 12.38 | 0.11 | 0.06 | -1.13 | 0.218431 | 0.005524 | 0.516059 | 0.102531 |
| MmugDNA.33353.1.S1_at   | MmugDNA.33353.1 | 5.19  | 5.12  | 0.18 | 0.07 | 1.05  | 0.557633 | 0.58374  | 0.772295 | 0.751983 |
| MmugDNA.33354.1.S1_at   | MmugDNA.33354.1 | 9.68  | 9.35  | 0.25 | 0.1  | 1.26  | 0.096212 | 0.132037 | 0.365761 | 0.404043 |
| MmugDNA.33356.1.S1_at   | MmugDNA.33356.1 | 6.06  | 6.41  | 0.52 | 0.26 | -1.28 | 0.441729 | 0.274766 | 0.695187 | 0.539225 |
| MmugDNA.33357.1.S1_at   | MmugDNA.33357.1 | 3.63  | 3.72  | 0.14 | 0.07 | -1.06 | 0.486603 | 0.616899 | 0.725773 | 0.773025 |
| MmugDNA.33358.1.S1_at   | MmugDNA.33358.1 | 3.28  | 3.17  | 0.02 | 0.19 | 1.08  | 0.476288 | 0.309119 | 0.718743 | 0.564788 |
| MmugDNA.33359.1.S1_at   | MmugDNA.33359.1 | 3.28  | 3.22  | 0.07 | 0.11 | 1.04  | 0.20855  | 0.214693 | 0.506194 | 0.48856  |
| MmugDNA.3336.1.S1_at    | MmugDNA.3336.1  | 6.52  | 7.19  | 0.44 | 0.16 | -1.59 | 0.058739 | 0.152728 | 0.299483 | 0.427571 |
| MmugDNA.33361.1.S1_at   | MmugDNA.33361.1 | 4.82  | 5.03  | 0.19 | 0.11 | -1.15 | 0.193067 | 0.114682 | 0.489615 | 0.381227 |
| MmugDNA.33362.1.S1_at   | MmugDNA.33362.1 | 4.94  | 5.03  | 0    | 0.13 | -1.06 | 0.831079 | 0.49805  | 0.925668 | 0.697228 |
| MmugDNA.33363.1.S1_at   | MmugDNA.33363.1 | 3.97  | 3.8   | 0.31 | 0.04 | 1.13  | 0.30783  | 0.362306 | 0.594658 | 0.602931 |
| MmugDNA.33364.1.S1_at   | MmugDNA.33364.1 | 8.3   | 8.6   | 0.53 | 0.49 | -1.23 | 0.544906 | 0.324125 | 0.764361 | 0.574823 |
| MmugDNA.33365.1.S1_at   | MmugDNA.33365.1 | 5.81  | 5.02  | 1.33 | 0.5  | 1.73  | 0.315994 | 0.516975 | 0.600791 | 0.709346 |
| MmugDNA.33368.1.S1_at   | MmugDNA.33368.1 | 7.14  | 7.08  | 0.15 | 0.08 | 1.04  | 0.399608 | 0.578601 | 0.664839 | 0.748595 |
| MmugDNA.33369.1.S1_at   | MmugDNA.33369.1 | 4.81  | 4.77  | 0.02 | 0.18 | 1.03  | 0.262641 | 0.734929 | 0.556683 | 0.846588 |
| MmugDNA.3337.1.S1_at    | MmugDNA.3337.1  | 8.47  | 8.23  | 0.29 | 0.25 | 1.18  | 0.235331 | 0.042255 | 0.533252 | 0.250023 |

|                         |                 |       |       |      |      |       |          |          |          |          |
|-------------------------|-----------------|-------|-------|------|------|-------|----------|----------|----------|----------|
| MmugDNA.33372.1.S1_at   | MmugDNA.33372.1 | 3.94  | 4.01  | 0.04 | 0.02 | -1.05 | 0.048216 | 0.228778 | 0.276915 | 0.501008 |
| MmugDNA.33374.1.S1_at   | MmugDNA.33374.1 | 7.42  | 7.75  | 0.34 | 0.22 | -1.26 | 0.458891 | 0.835717 | 0.707292 | 0.905981 |
| MmugDNA.33375.1.S1_at   | MmugDNA.33375.1 | 8.99  | 9     | 0.12 | 0.23 | -1.01 | 0.388122 | 0.29786  | 0.656158 | 0.556546 |
| MmugDNA.33377.1.S1_at   | MmugDNA.33377.1 | 3.61  | 3.46  | 0.85 | 0.1  | 1.11  | 0.25383  | 0.223755 | 0.548106 | 0.496696 |
| MmugDNA.33378.1.S1_s_at | MmugDNA.33378.1 | 9.68  | 9.59  | 0.03 | 0.03 | 1.07  | 0.046742 | 0.091439 | 0.273798 | 0.346417 |
| MmugDNA.33379.1.S1_at   | MmugDNA.33379.1 | 10.64 | 10.07 | 0.31 | 0.23 | 1.48  | 0.304747 | 0.055494 | 0.591803 | 0.281404 |
| MmugDNA.3338.1.S1_at    | MmugDNA.3338.1  | 5.86  | 5.16  | 0.49 | 0.45 | 1.63  | 0.577261 | 0.597464 | 0.783509 | 0.760203 |
| MmugDNA.33380.1.S1_at   | MmugDNA.33380.1 | 8.01  | 7.03  | 0.22 | 0.18 | 1.98  | 0.004706 | 0.00542  | 0.115008 | 0.10157  |
| MmugDNA.33381.1.S1_at   | MmugDNA.33381.1 | 10.13 | 9.76  | 0.62 | 0.17 | 1.3   | 0.399453 | 0.725306 | 0.664811 | 0.840954 |
| MmugDNA.33382.1.S1_at   | MmugDNA.33382.1 | 3.2   | 3.19  | 0.03 | 0.06 | 1.01  | 0.445962 | 0.605918 | 0.698308 | 0.765543 |
| MmugDNA.33382.1.S1_s_at | MmugDNA.33382.1 | 6.74  | 6.84  | 0.31 | 0.09 | -1.07 | 0.799438 | 0.685632 | 0.909571 | 0.816553 |
| MmugDNA.33383.1.S1_at   | MmugDNA.33383.1 | 6.16  | 8.53  | 0.32 | 0.23 | -5.16 | 0.000586 | 0.000108 | 0.070727 | 0.028099 |
| MmugDNA.33384.1.S1_at   | MmugDNA.33384.1 | 6.38  | 7.06  | 0.43 | 0.13 | -1.6  | 0.04557  | 0.071304 | 0.270962 | 0.31334  |
| MmugDNA.33384.1.S1_s_at | MmugDNA.33384.1 | 7.56  | 8     | 0.3  | 0.08 | -1.36 | 0.100706 | 0.491034 | 0.371829 | 0.692751 |
| MmugDNA.33385.1.S1_at   | MmugDNA.33385.1 | 3.4   | 3.46  | 0.5  | 0.09 | -1.04 | 0.393403 | 0.558274 | 0.660249 | 0.735506 |
| MmugDNA.33386.1.S1_at   | MmugDNA.33386.1 | 12.78 | 12.68 | 0.07 | 0.04 | 1.07  | 0.456105 | 0.272417 | 0.705665 | 0.537122 |
| MmugDNA.33388.1.S1_at   | MmugDNA.33388.1 | 5.33  | 5.21  | 0.19 | 0.1  | 1.09  | 0.295283 | 0.416339 | 0.584116 | 0.641553 |
| MmugDNA.33389.1.S1_at   | MmugDNA.33389.1 | 4.34  | 4.92  | 0.17 | 0.19 | -1.5  | 0.030036 | 0.221318 | 0.226564 | 0.494644 |
| MmugDNA.3339.1.S1_at    | MmugDNA.3339.1  | 6.75  | 6.68  | 0.18 | 0.02 | 1.05  | 0.562424 | 0.231417 | 0.774894 | 0.503138 |
| MmugDNA.33391.1.S1_at   | MmugDNA.33391.1 | 5.84  | 6.47  | 0.13 | 0.37 | -1.55 | 0.093256 | 0.042146 | 0.361736 | 0.249753 |
| MmugDNA.33393.1.S1_at   | MmugDNA.33393.1 | 5.5   | 5.08  | 0.13 | 0.22 | 1.34  | 0.086396 | 0.081565 | 0.351225 | 0.329764 |
| MmugDNA.33394.1.S1_at   | MmugDNA.33394.1 | 4.75  | 4.79  | 0.02 | 0.15 | -1.03 | 0.201687 | 0.115737 | 0.499203 | 0.382814 |
| MmugDNA.33396.1.S1_at   | MmugDNA.33396.1 | 6.7   | 7.19  | 0.37 | 0.49 | -1.4  | 0.278931 | 0.008128 | 0.570256 | 0.11972  |
| MmugDNA.33397.1.S1_at   | MmugDNA.33397.1 | 7.11  | 6.86  | 0.36 | 0.16 | 1.18  | 0.377955 | 0.503834 | 0.648321 | 0.701184 |
| MmugDNA.33398.1.S1_at   | MmugDNA.33398.1 | 3.16  | 3.09  | 0.05 | 0.11 | 1.05  | 0.503813 | 0.412812 | 0.73721  | 0.639121 |
| MmugDNA.33399.1.S1_at   | MmugDNA.33399.1 | 6.21  | 5.91  | 0.17 | 0.16 | 1.23  | 0.042973 | 0.148155 | 0.264496 | 0.422678 |
| MmugDNA.3340.1.S1_at    | MmugDNA.3340.1  | 10.67 | 9.97  | 0.47 | 0.2  | 1.62  | 0.189828 | 0.660952 | 0.486238 | 0.801643 |
| MmugDNA.33400.1.S1_at   | MmugDNA.33400.1 | 11.89 | 11.8  | 0.07 | 0.06 | 1.07  | 0.040373 | 0.175736 | 0.257247 | 0.452344 |
| MmugDNA.33401.1.S1_at   | MmugDNA.33401.1 | 6.13  | 4.82  | 0.23 | 0.18 | 2.48  | 0.001341 | 0.000076 | 0.079218 | 0.027016 |
| MmugDNA.33402.1.S1_at   | MmugDNA.33402.1 | 6     | 5.38  | 0.51 | 0.27 | 1.54  | 0.232344 | 0.004688 | 0.530886 | 0.095363 |
| MmugDNA.33403.1.S1_at   | MmugDNA.33403.1 | 11.75 | 12.08 | 0.07 | 0.06 | -1.25 | 0.003462 | 0.001523 | 0.103385 | 0.059307 |
| MmugDNA.33404.1.S1_at   | MmugDNA.33404.1 | 12.82 | 12.04 | 0.21 | 0.06 | 1.71  | 0.003031 | 0.000436 | 0.100141 | 0.038359 |
| MmugDNA.33405.1.S1_at   | MmugDNA.33405.1 | 5.34  | 4.67  | 0.54 | 0.21 | 1.59  | 0.094331 | 0.068733 | 0.363345 | 0.308711 |
| MmugDNA.33406.1.S1_at   | MmugDNA.33406.1 | 9.49  | 10.02 | 0.04 | 0.09 | -1.44 | 0.001172 | 0.033159 | 0.077718 | 0.225374 |
| MmugDNA.33407.1.S1_at   | MmugDNA.33407.1 | 6.24  | 6.42  | 0.11 | 0.11 | -1.13 | 0.097525 | 0.050088 | 0.367761 | 0.268916 |
| MmugDNA.3341.1.S1_at    | MmugDNA.3341.1  | 2.96  | 2.97  | 0.01 | 0    | -1    | 0.348424 | 0.331098 | 0.626378 | 0.579816 |
| MmugDNA.33411.1.S1_at   | MmugDNA.33411.1 | 2.85  | 2.81  | 0.09 | 0.18 | 1.03  | 0.78187  | 0.491498 | 0.900356 | 0.693004 |
| MmugDNA.33412.1.S1_at   | MmugDNA.33412.1 | 4.45  | 4.3   | 0.19 | 0.11 | 1.11  | 0.168896 | 0.251984 | 0.462098 | 0.520646 |
| MmugDNA.33413.1.S1_at   | MmugDNA.33413.1 | 9.08  | 10.22 | 0.54 | 0.11 | -2.21 | 0.057725 | 0.131028 | 0.297463 | 0.403053 |
| MmugDNA.33414.1.S1_at   | MmugDNA.33414.1 | 4.23  | 3.94  | 0.16 | 0.18 | 1.22  | 0.065944 | 0.021758 | 0.314251 | 0.184563 |
| MmugDNA.33415.1.S1_at   | MmugDNA.33415.1 | 7.43  | 7.21  | 0.17 | 0.18 | 1.16  | 0.275744 | 0.180585 | 0.567274 | 0.457191 |
| MmugDNA.33416.1.S1_at   | MmugDNA.33416.1 | 7.56  | 7.63  | 0.36 | 0.32 | -1.05 | 0.769703 | 0.946815 | 0.894341 | 0.969783 |
| MmugDNA.33417.1.S1_at   | MmugDNA.33417.1 | 6.1   | 5.48  | 0.31 | 0.34 | 1.54  | 0.105783 | 0.115304 | 0.379853 | 0.382354 |

|                         |                 |       |       |      |      |       |          |          |          |          |
|-------------------------|-----------------|-------|-------|------|------|-------|----------|----------|----------|----------|
| MmugDNA.33418.1.S1_at   | MmugDNA.33418.1 | 8.75  | 9     | 0.33 | 0.03 | -1.19 | 0.331675 | 0.003002 | 0.613555 | 0.079958 |
| MmugDNA.33419.1.S1_at   | MmugDNA.33419.1 | 3.48  | 3.41  | 0.05 | 0.24 | 1.05  | 0.8648   | 0.223733 | 0.94142  | 0.496672 |
| MmugDNA.33420.1.S1_at   | MmugDNA.33420.1 | 5.7   | 5.63  | 0.57 | 0.14 | 1.05  | 0.299721 | 0.500532 | 0.588062 | 0.69911  |
| MmugDNA.33421.1.S1_at   | MmugDNA.33421.1 | 12.69 | 12.47 | 0.16 | 0.08 | 1.16  | 0.267743 | 0.312602 | 0.560475 | 0.567268 |
| MmugDNA.33422.1.S1_at   | MmugDNA.33422.1 | 4.76  | 4.17  | 0.46 | 1.04 | 1.51  | 0.726722 | 0.583662 | 0.871852 | 0.751908 |
| MmugDNA.33424.1.S1_at   | MmugDNA.33424.1 | 7.22  | 7.31  | 0.16 | 0.12 | -1.06 | 0.498967 | 0.041854 | 0.733984 | 0.249172 |
| MmugDNA.33425.1.S1_at   | MmugDNA.33425.1 | 11.3  | 11.28 | 0.33 | 0.05 | 1.02  | 0.761375 | 0.48604  | 0.890581 | 0.689563 |
| MmugDNA.33427.1.S1_at   | MmugDNA.33427.1 | 8.45  | 9.11  | 0.29 | 0.2  | -1.58 | 0.061985 | 0.422562 | 0.305504 | 0.645762 |
| MmugDNA.33428.1.S1_at   | MmugDNA.33428.1 | 12.04 | 12.14 | 0.13 | 0.08 | -1.07 | 0.289951 | 0.314758 | 0.579519 | 0.568489 |
| MmugDNA.33431.1.S1_at   | MmugDNA.33431.1 | 4.75  | 5.07  | 0.21 | 0.1  | -1.25 | 0.067014 | 0.205741 | 0.316508 | 0.48007  |
| MmugDNA.33435.1.S1_at   | MmugDNA.33435.1 | 6.24  | 5.53  | 0.97 | 0.74 | 1.64  | 0.414258 | 0.427532 | 0.675539 | 0.649318 |
| MmugDNA.33437.1.S1_at   | MmugDNA.33437.1 | 7.09  | 7.33  | 0.19 | 0.11 | -1.17 | 0.058474 | 0.038324 | 0.298936 | 0.240641 |
| MmugDNA.33437.1.S1_s_at | MmugDNA.33437.1 | 9.14  | 9.51  | 0.19 | 0.05 | -1.29 | 0.017139 | 0.094082 | 0.184186 | 0.350727 |
| MmugDNA.3344.1.S1_at    | MmugDNA.3344.1  | 9.41  | 9.21  | 0.25 | 0.13 | 1.15  | 0.226586 | 0.342927 | 0.524382 | 0.588745 |
| MmugDNA.33440.1.S1_at   | MmugDNA.33440.1 | 4.02  | 3.99  | 0    | 0.09 | 1.02  | 0.950973 | 0.764915 | 0.979679 | 0.863324 |
| MmugDNA.33441.1.S1_at   | MmugDNA.33441.1 | 3.78  | 3.79  | 0.02 | 0.1  | -1.01 | 0.844822 | 0.988204 | 0.932176 | 0.993428 |
| MmugDNA.33442.1.S1_at   | MmugDNA.33442.1 | 7.61  | 7.82  | 0.25 | 0.12 | -1.16 | 0.423894 | 0.325797 | 0.681773 | 0.576049 |
| MmugDNA.33444.1.S1_at   | MmugDNA.33444.1 | 7.48  | 7.77  | 0.13 | 0.09 | -1.23 | 0.039127 | 0.160445 | 0.254238 | 0.436569 |
| MmugDNA.33445.1.S1_at   | MmugDNA.33445.1 | 8.23  | 7.8   | 0.61 | 0.05 | 1.35  | 0.162873 | 0.148849 | 0.45497  | 0.423218 |
| MmugDNA.33446.1.S1_at   | MmugDNA.33446.1 | 6.08  | 5.45  | 0.17 | 0.22 | 1.54  | 0.020224 | 0.077791 | 0.195882 | 0.323933 |
| MmugDNA.33447.1.S1_at   | MmugDNA.33447.1 | 3.38  | 3.29  | 0.31 | 0.1  | 1.07  | 0.702491 | 0.880819 | 0.858822 | 0.931979 |
| MmugDNA.33448.1.S1_s_at | MmugDNA.33448.1 | 8.93  | 9.75  | 1.75 | 0.1  | -1.76 | 0.82013  | 0.856645 | 0.919784 | 0.918123 |
| MmugDNA.3345.1.S1_at    | MmugDNA.3345.1  | 6.64  | 6.3   | 0.29 | 0.12 | 1.26  | 0.065876 | 0.06996  | 0.314165 | 0.31072  |
| MmugDNA.33450.1.S1_at   | MmugDNA.33450.1 | 5.03  | 4.59  | 0.37 | 0.08 | 1.36  | 0.10375  | 0.085198 | 0.377036 | 0.337096 |
| MmugDNA.33452.1.S1_at   | MmugDNA.33452.1 | 4.13  | 4.2   | 0.24 | 0.28 | -1.05 | 0.838315 | 0.771993 | 0.929053 | 0.867436 |
| MmugDNA.33453.1.S1_at   | MmugDNA.33453.1 | 6.52  | 8.03  | 0.35 | 0.16 | -2.85 | 0.004258 | 0.016241 | 0.111107 | 0.161591 |
| MmugDNA.33454.1.S1_at   | MmugDNA.33454.1 | 5.31  | 5.21  | 0.07 | 0.12 | 1.07  | 0.240664 | 0.553973 | 0.538163 | 0.732896 |
| MmugDNA.33455.1.S1_at   | MmugDNA.33455.1 | 4.33  | 4.29  | 0.06 | 0.16 | 1.02  | 0.273716 | 0.483887 | 0.565814 | 0.688227 |
| MmugDNA.33456.1.S1_s_at | MmugDNA.33456.1 | 7.54  | 7.46  | 0.1  | 0.07 | 1.05  | 0.111401 | 0.21271  | 0.387378 | 0.486686 |
| MmugDNA.33457.1.S1_at   | MmugDNA.33457.1 | 7.58  | 7.13  | 0.16 | 0.3  | 1.36  | 0.092063 | 0.073924 | 0.360151 | 0.317364 |
| MmugDNA.33458.1.S1_at   | MmugDNA.33458.1 | 5.22  | 5.24  | 0.14 | 0.15 | -1.01 | 0.18875  | 0.235175 | 0.485343 | 0.50629  |
| MmugDNA.33459.1.S1_at   | MmugDNA.33459.1 | 3.89  | 4.02  | 0.33 | 0.05 | -1.1  | 0.839198 | 0.927505 | 0.929483 | 0.958809 |
| MmugDNA.3346.1.S1_at    | MmugDNA.3346.1  | 8.36  | 8.42  | 0.2  | 0.12 | -1.04 | 0.678437 | 0.101634 | 0.846605 | 0.361529 |
| MmugDNA.33461.1.S1_at   | MmugDNA.33461.1 | 6.04  | 5.97  | 0.28 | 0.17 | 1.05  | 0.153409 | 0.163902 | 0.443218 | 0.440105 |
| MmugDNA.33462.1.S1_at   | MmugDNA.33462.1 | 7.98  | 7.64  | 0.16 | 0.22 | 1.26  | 0.125961 | 0.038084 | 0.406905 | 0.239753 |
| MmugDNA.33464.1.S1_at   | MmugDNA.33464.1 | 9.25  | 8.87  | 0.19 | 0.02 | 1.3   | 0.027073 | 0.072905 | 0.217303 | 0.315942 |
| MmugDNA.33468.1.S1_at   | MmugDNA.33468.1 | 4.62  | 4.62  | 0.15 | 0.21 | -1    | 0.835668 | 0.796039 | 0.927786 | 0.882493 |
| MmugDNA.33469.1.S1_at   | MmugDNA.33469.1 | 3.01  | 3.09  | 0.08 | 0.1  | -1.06 | 0.136867 | 0.159571 | 0.421672 | 0.435774 |
| MmugDNA.3347.1.S1_at    | MmugDNA.3347.1  | 4.15  | 4.38  | 0.69 | 0.16 | -1.17 | 0.705669 | 0.506602 | 0.860499 | 0.702503 |
| MmugDNA.33470.1.S1_at   | MmugDNA.33470.1 | 4.57  | 4.5   | 0.03 | 0    | 1.05  | 0.010798 | 0.182068 | 0.153792 | 0.45857  |
| MmugDNA.33471.1.S1_at   | MmugDNA.33471.1 | 5.14  | 4.96  | 0.09 | 0.09 | 1.14  | 0.079755 | 0.317991 | 0.339935 | 0.571046 |
| MmugDNA.33473.1.S1_at   | MmugDNA.33473.1 | 4.2   | 4.46  | 0.33 | 0.09 | -1.2  | 0.73378  | 0.801745 | 0.875906 | 0.885903 |
| MmugDNA.33474.1.S1_at   | MmugDNA.33474.1 | 9.34  | 9.27  | 0.27 | 0.07 | 1.05  | 0.904007 | 0.790186 | 0.959361 | 0.878732 |

|                         |                 |       |       |      |      |       |          |          |          |          |
|-------------------------|-----------------|-------|-------|------|------|-------|----------|----------|----------|----------|
| MmugDNA.33475.1.S1_at   | MmugDNA.33475.1 | 7.06  | 6.92  | 0.18 | 0.04 | 1.1   | 0.213501 | 0.139097 | 0.511324 | 0.412205 |
| MmugDNA.33476.1.S1_at   | MmugDNA.33476.1 | 8.71  | 8.73  | 0.25 | 0.06 | -1.01 | 0.789601 | 0.25513  | 0.904456 | 0.52317  |
| MmugDNA.33477.1.S1_at   | MmugDNA.33477.1 | 4.9   | 4.68  | 0.1  | 0.1  | 1.16  | 0.113193 | 0.258023 | 0.389883 | 0.52557  |
| MmugDNA.33478.1.S1_at   | MmugDNA.33478.1 | 5.38  | 5.14  | 0.25 | 0.18 | 1.19  | 0.310664 | 0.411617 | 0.596946 | 0.638328 |
| MmugDNA.33479.1.S1_at   | MmugDNA.33479.1 | 2.76  | 2.84  | 0.09 | 0.14 | -1.06 | 0.280005 | 0.401619 | 0.571213 | 0.631068 |
| MmugDNA.3348.1.S1_at    | MmugDNA.3348.1  | 4.89  | 4.78  | 0.14 | 0.07 | 1.08  | 0.168225 | 0.234526 | 0.461466 | 0.505718 |
| MmugDNA.33480.1.S1_at   | MmugDNA.33480.1 | 3.88  | 3.89  | 0.32 | 0.03 | -1.01 | 0.435165 | 0.6523   | 0.690293 | 0.796682 |
| MmugDNA.33481.1.S1_at   | MmugDNA.33481.1 | 9.28  | 7.79  | 1.13 | 0.78 | 2.8   | 0.176386 | 0.15872  | 0.470765 | 0.434797 |
| MmugDNA.33481.1.S1_x_at | MmugDNA.33481.1 | 9.63  | 8.23  | 1.06 | 0.76 | 2.63  | 0.189881 | 0.177126 | 0.486238 | 0.453611 |
| MmugDNA.33482.1.S1_at   | MmugDNA.33482.1 | 3.86  | 4.18  | 0.24 | 0.25 | -1.25 | 0.887777 | 0.245054 | 0.952052 | 0.514835 |
| MmugDNA.33485.1.S1_at   | MmugDNA.33485.1 | 11.14 | 11.33 | 0.07 | 0.11 | -1.14 | 0.055689 | 0.010433 | 0.293105 | 0.133551 |
| MmugDNA.33486.1.S1_at   | MmugDNA.33486.1 | 11.24 | 11.57 | 0.1  | 0.06 | -1.26 | 0.004181 | 0.119898 | 0.11023  | 0.388593 |
| MmugDNA.32770.1.S1_s_at | MmugDNA.32770.1 | 2.91  | 3.01  | 0.4  | 0.03 | -1.08 | 0.616154 | 0.811164 | 0.809387 | 0.89102  |
| MmugDNA.33488.1.S1_at   | MmugDNA.33488.1 | 6.2   | 6.13  | 0.32 | 0.04 | 1.05  | 0.227684 | 0.340612 | 0.525818 | 0.586796 |
| MmugDNA.33489.1.S1_at   | MmugDNA.33489.1 | 12.88 | 12.84 | 0.11 | 0.06 | 1.03  | 0.628002 | 0.263784 | 0.817194 | 0.530066 |
| MmugDNA.3349.1.S1_at    | MmugDNA.3349.1  | 4.21  | 4.21  | 0.08 | 0.04 | 1     | 0.678413 | 0.741881 | 0.846605 | 0.850527 |
| MmugDNA.33490.1.S1_at   | MmugDNA.33490.1 | 6.86  | 5.95  | 0.77 | 0.3  | 1.87  | 0.079005 | 0.081417 | 0.338745 | 0.329613 |
| MmugDNA.33491.1.S1_at   | MmugDNA.33491.1 | 3.1   | 3.1   | 0.05 | 0.1  | 1     | 0.692847 | 0.902994 | 0.853208 | 0.944941 |
| MmugDNA.33492.1.S1_at   | MmugDNA.33492.1 | 4.97  | 5.6   | 0.24 | 0.25 | -1.55 | 0.066993 | 0.523606 | 0.316461 | 0.713854 |
| MmugDNA.33493.1.S1_at   | MmugDNA.33493.1 | 7.03  | 6.83  | 0.76 | 0.48 | 1.15  | 0.465822 | 0.832674 | 0.711766 | 0.904017 |
| MmugDNA.33494.1.S1_at   | MmugDNA.33494.1 | 10.95 | 10.26 | 0.46 | 0.11 | 1.61  | 0.225638 | 0.196925 | 0.523395 | 0.472072 |
| MmugDNA.33495.1.S1_at   | MmugDNA.33495.1 | 8.44  | 6.47  | 1.22 | 0.22 | 3.92  | 0.150358 | 0.594036 | 0.43942  | 0.758517 |
| MmugDNA.33496.1.S1_at   | MmugDNA.33496.1 | 3.32  | 3.24  | 0.09 | 0.07 | 1.05  | 0.511303 | 0.077728 | 0.742401 | 0.323851 |
| MmugDNA.33497.1.S1_at   | MmugDNA.33497.1 | 7.45  | 7.38  | 0.21 | 0.06 | 1.05  | 0.280404 | 0.405429 | 0.571521 | 0.633757 |
| MmugDNA.33498.1.S1_at   | MmugDNA.33498.1 | 7.07  | 6.97  | 0.05 | 0.04 | 1.07  | 0.152432 | 0.017948 | 0.442085 | 0.168998 |
| MmugDNA.33498.1.S1_s_at | MmugDNA.33498.1 | 6.09  | 6.23  | 0.1  | 0.12 | -1.11 | 0.151277 | 0.024757 | 0.440863 | 0.197104 |
| MmugDNA.33499.1.S1_at   | MmugDNA.33499.1 | 3.13  | 3.12  | 0.04 | 0.05 | 1.01  | 0.335684 | 0.166219 | 0.616542 | 0.442775 |
| MmugDNA.335.1.S1_at     | MmugDNA.335.1   | 4.88  | 5.16  | 0.17 | 0.27 | -1.21 | 0.551097 | 0.781216 | 0.768269 | 0.873073 |
| MmugDNA.33500.1.S1_at   | MmugDNA.33500.1 | 3.95  | 4.6   | 0.03 | 0.55 | -1.56 | 0.353809 | 0.377915 | 0.631    | 0.615264 |
| MmugDNA.33501.1.S1_at   | MmugDNA.33501.1 | 7.96  | 7.89  | 0.66 | 0.32 | 1.05  | 0.34352  | 0.377509 | 0.622989 | 0.614989 |
| MmugDNA.33502.1.S1_at   | MmugDNA.33502.1 | 3.99  | 4.04  | 0.33 | 0.11 | -1.03 | 0.367756 | 0.514608 | 0.641588 | 0.707767 |
| MmugDNA.33503.1.S1_at   | MmugDNA.33503.1 | 5.37  | 3.12  | 1.56 | 0.42 | 4.74  | 0.08954  | 0.080054 | 0.356406 | 0.327429 |
| MmugDNA.33504.1.S1_at   | MmugDNA.33504.1 | 5.29  | 5.31  | 0.09 | 0.16 | -1.02 | 0.747991 | 0.159235 | 0.883193 | 0.435217 |
| MmugDNA.33505.1.S1_at   | MmugDNA.33505.1 | 5.72  | 5.8   | 0.11 | 0.13 | -1.06 | 0.848921 | 0.975562 | 0.934204 | 0.986686 |
| MmugDNA.33506.1.S1_at   | MmugDNA.33506.1 | 5.17  | 4.8   | 0.34 | 0.04 | 1.29  | 0.438933 | 0.871783 | 0.693384 | 0.927058 |
| MmugDNA.33507.1.S1_at   | MmugDNA.33507.1 | 5.39  | 5.36  | 0.56 | 0.14 | 1.02  | 0.266164 | 0.303512 | 0.558674 | 0.561    |
| MmugDNA.33508.1.S1_at   | MmugDNA.33508.1 | 3.81  | 3.8   | 0.19 | 0.09 | 1.01  | 0.808719 | 0.506387 | 0.914357 | 0.702371 |
| MmugDNA.33509.1.S1_at   | MmugDNA.33509.1 | 6.75  | 6.81  | 0.66 | 0.23 | -1.04 | 0.741565 | 0.901204 | 0.880267 | 0.943829 |
| MmugDNA.3351.1.S1_at    | MmugDNA.3351.1  | 9.91  | 10.62 | 0.19 | 0.17 | -1.64 | 0.009341 | 0.427489 | 0.146531 | 0.649302 |
| MmugDNA.33510.1.S1_at   | MmugDNA.33510.1 | 7.16  | 7.1   | 0.33 | 0.01 | 1.04  | 0.518902 | 0.776143 | 0.747806 | 0.869726 |
| MmugDNA.33511.1.S1_at   | MmugDNA.33511.1 | 7.39  | 7.79  | 0.16 | 0.06 | -1.32 | 0.013667 | 0.026605 | 0.167793 | 0.204008 |
| MmugDNA.33512.1.S1_at   | MmugDNA.33512.1 | 11.98 | 11.87 | 0.38 | 0.12 | 1.08  | 0.501303 | 0.6601   | 0.735287 | 0.801083 |
| MmugDNA.33514.1.S1_at   | MmugDNA.33514.1 | 3.81  | 3.84  | 1.13 | 0.01 | -1.02 | 0.399296 | 0.458671 | 0.664753 | 0.671276 |

|                         |                 |       |       |      |      |       |          |          |          |          |
|-------------------------|-----------------|-------|-------|------|------|-------|----------|----------|----------|----------|
| MmugDNA.33516.1.S1_s_at | MmugDNA.33516.1 | 6.37  | 6.49  | 0.32 | 0.22 | -1.09 | 0.236696 | 0.121906 | 0.534328 | 0.391291 |
| MmugDNA.33517.1.S1_at   | MmugDNA.33517.1 | 3.19  | 3.38  | 0.07 | 0.29 | -1.15 | 0.290057 | 0.144453 | 0.579597 | 0.418323 |
| MmugDNA.33519.1.S1_at   | MmugDNA.33519.1 | 6.2   | 6.5   | 0.32 | 0.21 | -1.23 | 0.102263 | 0.199426 | 0.374258 | 0.47402  |
| MmugDNA.3352.1.S1_at    | MmugDNA.3352.1  | 10.73 | 10.68 | 0.03 | 0.14 | 1.03  | 0.579705 | 0.181767 | 0.785294 | 0.458373 |
| MmugDNA.3352.1.S1_s_at  | MmugDNA.3352.1  | 9.99  | 9.86  | 0.13 | 0.1  | 1.1   | 0.247478 | 0.153439 | 0.542973 | 0.42827  |
| MmugDNA.33520.1.S1_at   | MmugDNA.33520.1 | 5.42  | 5.46  | 0.13 | 0.04 | -1.02 | 0.590065 | 0.41239  | 0.791771 | 0.6388   |
| MmugDNA.33521.1.S1_at   | MmugDNA.33521.1 | 5.93  | 5.99  | 0.16 | 0.12 | -1.04 | 0.74313  | 0.925409 | 0.881225 | 0.957803 |
| MmugDNA.33522.1.S1_at   | MmugDNA.33522.1 | 10.74 | 11.07 | 0.07 | 0.06 | -1.25 | 0.003535 | 0.132054 | 0.104465 | 0.404043 |
| MmugDNA.33523.1.S1_at   | MmugDNA.33523.1 | 6.87  | 6.16  | 1.12 | 0.87 | 1.63  | 0.593233 | 0.306991 | 0.793939 | 0.563427 |
| MmugDNA.33524.1.S1_at   | MmugDNA.33524.1 | 8.76  | 9.16  | 0.32 | 0.1  | -1.32 | 0.07009  | 0.013234 | 0.323085 | 0.147534 |
| MmugDNA.33525.1.S1_at   | MmugDNA.33525.1 | 5.23  | 5.16  | 0.16 | 0.08 | 1.05  | 0.3959   | 0.563826 | 0.662088 | 0.73888  |
| MmugDNA.33526.1.S1_at   | MmugDNA.33526.1 | 4.38  | 4.5   | 0.12 | 0.11 | -1.08 | 0.601036 | 0.066832 | 0.799309 | 0.304399 |
| MmugDNA.33527.1.S1_s_at | MmugDNA.33527.1 | 8.15  | 9.27  | 0.48 | 0.13 | -2.17 | 0.051881 | 0.245115 | 0.285209 | 0.514861 |
| MmugDNA.33528.1.S1_at   | MmugDNA.33528.1 | 11.3  | 10.89 | 0.31 | 0.07 | 1.33  | 0.078838 | 0.090535 | 0.338706 | 0.345015 |
| MmugDNA.3353.1.S1_at    | MmugDNA.3353.1  | 3.31  | 3.31  | 0.22 | 0.19 | -1    | 0.842956 | 0.531601 | 0.931186 | 0.718783 |
| MmugDNA.33530.1.S1_at   | MmugDNA.33530.1 | 6.07  | 5.85  | 0.14 | 0.15 | 1.17  | 0.121527 | 0.080616 | 0.400293 | 0.328427 |
| MmugDNA.33531.1.S1_at   | MmugDNA.33531.1 | 6.73  | 6.71  | 0.06 | 0.02 | 1.02  | 0.193706 | 0.318139 | 0.490322 | 0.571046 |
| MmugDNA.33532.1.S1_at   | MmugDNA.33532.1 | 4.17  | 3.44  | 0.68 | 0.18 | 1.65  | 0.202    | 0.182753 | 0.499566 | 0.459215 |
| MmugDNA.33533.1.S1_at   | MmugDNA.33533.1 | 9.17  | 9.35  | 0.09 | 0.14 | -1.13 | 0.223292 | 0.422971 | 0.521135 | 0.646141 |
| MmugDNA.33533.1.S1_x_at | MmugDNA.33533.1 | 8.99  | 9.11  | 0.1  | 0.06 | -1.08 | 0.19754  | 0.315445 | 0.494763 | 0.568953 |
| MmugDNA.33534.1.S1_at   | MmugDNA.33534.1 | 4.97  | 4.85  | 0.09 | 0.09 | 1.09  | 0.151651 | 0.134731 | 0.441196 | 0.406772 |
| MmugDNA.33539.1.S1_at   | MmugDNA.33539.1 | 4.93  | 5.2   | 0.78 | 0.47 | -1.2  | 0.747745 | 0.963457 | 0.883144 | 0.979631 |
| MmugDNA.3354.1.S1_at    | MmugDNA.3354.1  | 6.03  | 5.81  | 0.13 | 0.27 | 1.17  | 0.27614  | 0.141807 | 0.567734 | 0.415331 |
| MmugDNA.33542.1.S1_at   | MmugDNA.33542.1 | 3.66  | 3.5   | 0.16 | 0.22 | 1.12  | 0.451049 | 0.719406 | 0.701934 | 0.837629 |
| MmugDNA.33545.1.S1_at   | MmugDNA.33545.1 | 2.85  | 2.97  | 0.02 | 0.06 | -1.09 | 0.020235 | 0.025087 | 0.195886 | 0.19842  |
| MmugDNA.33547.1.S1_at   | MmugDNA.33547.1 | 4.25  | 3.81  | 0.37 | 0.05 | 1.35  | 0.08453  | 0.195053 | 0.348217 | 0.470179 |
| MmugDNA.33548.1.S1_at   | MmugDNA.33548.1 | 8.77  | 9.36  | 0.33 | 0.09 | -1.51 | 0.025192 | 0.143797 | 0.211801 | 0.417593 |
| MmugDNA.33549.1.S1_at   | MmugDNA.33549.1 | 8.67  | 8.62  | 0.3  | 0.2  | 1.03  | 0.772472 | 0.673882 | 0.895784 | 0.809483 |
| MmugDNA.3355.1.S1_at    | MmugDNA.3355.1  | 5.73  | 6     | 0.22 | 0.13 | -1.21 | 0.584396 | 0.151641 | 0.788586 | 0.426383 |
| MmugDNA.33550.1.S1_at   | MmugDNA.33550.1 | 7.03  | 7.38  | 0.24 | 0.06 | -1.28 | 0.083832 | 0.048787 | 0.34664  | 0.26581  |
| MmugDNA.33551.1.S1_at   | MmugDNA.33551.1 | 3.23  | 3.32  | 0.2  | 0.06 | -1.07 | 0.855247 | 0.737071 | 0.93691  | 0.847791 |
| MmugDNA.33552.1.S1_at   | MmugDNA.33552.1 | 4.37  | 4.62  | 0.07 | 0.16 | -1.2  | 0.073017 | 0.553934 | 0.327873 | 0.732896 |
| MmugDNA.33553.1.S1_at   | MmugDNA.33553.1 | 8.78  | 7.97  | 1.42 | 0.47 | 1.76  | 0.474662 | 0.235977 | 0.717592 | 0.507056 |
| MmugDNA.33554.1.S1_at   | MmugDNA.33554.1 | 6.38  | 6.07  | 0.95 | 0.27 | 1.23  | 0.207866 | 0.251572 | 0.505752 | 0.520309 |
| MmugDNA.33555.1.S1_at   | MmugDNA.33555.1 | 3.33  | 3.4   | 0.06 | 0.12 | -1.05 | 0.433908 | 0.414702 | 0.689233 | 0.640456 |
| MmugDNA.33556.1.S1_at   | MmugDNA.33556.1 | 5.88  | 5.86  | 0.21 | 0.21 | 1.02  | 0.587109 | 0.522445 | 0.790341 | 0.713139 |
| MmugDNA.33557.1.S1_at   | MmugDNA.33557.1 | 3.85  | 4.03  | 0.21 | 0.21 | -1.13 | 0.154099 | 0.310182 | 0.444383 | 0.565379 |
| MmugDNA.33559.1.S1_at   | MmugDNA.33559.1 | 4.08  | 4.03  | 0.08 | 0.07 | 1.03  | 0.43435  | 0.216403 | 0.68963  | 0.489999 |
| MmugDNA.3356.1.S1_at    | MmugDNA.3356.1  | 7.19  | 7     | 0.9  | 0.29 | 1.14  | 0.582363 | 0.474668 | 0.78718  | 0.681643 |
| MmugDNA.33560.1.S1_at   | MmugDNA.33560.1 | 3.92  | 4.04  | 0.13 | 0.06 | -1.08 | 0.947676 | 0.348632 | 0.977978 | 0.592648 |
| MmugDNA.33561.1.S1_at   | MmugDNA.33561.1 | 3.6   | 3.49  | 0.06 | 0.11 | 1.08  | 0.180572 | 0.181573 | 0.475728 | 0.458137 |
| MmugDNA.33564.1.S1_at   | MmugDNA.33564.1 | 6.54  | 6.59  | 0.46 | 0.28 | -1.03 | 0.494353 | 0.065061 | 0.731164 | 0.301009 |
| MmugDNA.33565.1.S1_at   | MmugDNA.33565.1 | 10.75 | 10.63 | 0.04 | 0.15 | 1.09  | 0.564685 | 0.12397  | 0.776286 | 0.394262 |

|                         |                 |       |       |      |      |       |          |          |          |          |
|-------------------------|-----------------|-------|-------|------|------|-------|----------|----------|----------|----------|
| MmugDNA.33566.1.S1_at   | MmugDNA.33566.1 | 5.57  | 5.6   | 0.15 | 0.1  | -1.02 | 0.295997 | 0.392829 | 0.584702 | 0.625854 |
| MmugDNA.33567.1.S1_at   | MmugDNA.33567.1 | 6.41  | 6.26  | 0.03 | 0.07 | 1.11  | 0.062975 | 0.113336 | 0.307685 | 0.379426 |
| MmugDNA.33568.1.S1_at   | MmugDNA.33568.1 | 4.01  | 4.15  | 0.12 | 0.04 | -1.1  | 0.081831 | 0.045298 | 0.343105 | 0.257157 |
| MmugDNA.3357.1.S1_at    | MmugDNA.3357.1  | 5.13  | 5.28  | 0.17 | 0.01 | -1.11 | 0.200204 | 0.091111 | 0.497733 | 0.345945 |
| MmugDNA.33570.1.S1_at   | MmugDNA.33570.1 | 4.87  | 4.32  | 0.71 | 0.44 | 1.46  | 0.394908 | 0.396067 | 0.661454 | 0.627885 |
| MmugDNA.33574.1.S1_at   | MmugDNA.33574.1 | 4.06  | 3.67  | 0.3  | 0.05 | 1.32  | 0.042696 | 0.04485  | 0.263867 | 0.256375 |
| MmugDNA.33576.1.S1_at   | MmugDNA.33576.1 | 6.15  | 5.42  | 0.46 | 0.39 | 1.66  | 0.269372 | 0.263051 | 0.561706 | 0.529402 |
| MmugDNA.33577.1.S1_at   | MmugDNA.33577.1 | 5.63  | 5.44  | 0.12 | 0.14 | 1.14  | 0.292651 | 0.310886 | 0.581743 | 0.565881 |
| MmugDNA.33578.1.S1_at   | MmugDNA.33578.1 | 11.85 | 11.42 | 0.11 | 0.05 | 1.35  | 0.003359 | 0.164653 | 0.10283  | 0.440952 |
| MmugDNA.33579.1.S1_at   | MmugDNA.33579.1 | 4.65  | 4.6   | 0.13 | 0.06 | 1.03  | 0.198672 | 0.849195 | 0.495836 | 0.914405 |
| MmugDNA.3358.1.S1_at    | MmugDNA.3358.1  | 11.04 | 10.83 | 0.09 | 0.05 | 1.16  | 0.015403 | 0.000063 | 0.176257 | 0.025805 |
| MmugDNA.33580.1.S1_at   | MmugDNA.33580.1 | 4.12  | 4.14  | 0.8  | 0.06 | -1.02 | 0.376732 | 0.483619 | 0.647368 | 0.688067 |
| MmugDNA.33581.1.S1_at   | MmugDNA.33581.1 | 6.48  | 6.45  | 0.14 | 0.02 | 1.02  | 0.538632 | 0.177206 | 0.760315 | 0.453647 |
| MmugDNA.33583.1.S1_at   | MmugDNA.33583.1 | 4.6   | 4.42  | 0.99 | 0.18 | 1.14  | 0.282906 | 0.299502 | 0.573503 | 0.557918 |
| MmugDNA.33584.1.S1_at   | MmugDNA.33584.1 | 8.3   | 8.27  | 0.81 | 0.41 | 1.02  | 0.793221 | 0.814739 | 0.906516 | 0.893092 |
| MmugDNA.33585.1.S1_at   | MmugDNA.33585.1 | 11.32 | 11.21 | 0.08 | 0.02 | 1.08  | 0.035032 | 0.04     | 0.241832 | 0.245193 |
| MmugDNA.33586.1.S1_at   | MmugDNA.33586.1 | 10.88 | 11.08 | 0.11 | 0.01 | -1.16 | 0.101562 | 0.462074 | 0.372929 | 0.673537 |
| MmugDNA.33587.1.S1_at   | MmugDNA.33587.1 | 5.52  | 6.45  | 0.35 | 0.24 | -1.91 | 0.025545 | 0.55902  | 0.212881 | 0.735981 |
| MmugDNA.33588.1.S1_at   | MmugDNA.33588.1 | 5.22  | 5.16  | 0.26 | 0.16 | 1.04  | 0.553165 | 0.7123   | 0.769696 | 0.833332 |
| MmugDNA.3359.1.S1_at    | MmugDNA.3359.1  | 7.25  | 7.37  | 0.16 | 0.04 | -1.09 | 0.347135 | 0.393849 | 0.6253   | 0.626605 |
| MmugDNA.33591.1.S1_at   | MmugDNA.33591.1 | 8.02  | 8     | 0.21 | 0.05 | 1.01  | 0.902691 | 0.664524 | 0.958703 | 0.803413 |
| MmugDNA.33594.1.S1_at   | MmugDNA.33594.1 | 5.52  | 5.27  | 0.19 | 0.09 | 1.19  | 0.270878 | 0.295144 | 0.562868 | 0.554551 |
| MmugDNA.33596.1.S1_at   | MmugDNA.33596.1 | 3.45  | 3.4   | 0.13 | 0.21 | 1.04  | 0.994284 | 0.612595 | 0.997657 | 0.770091 |
| MmugDNA.33597.1.S1_at   | MmugDNA.33597.1 | 7.2   | 7.02  | 0.07 | 0.11 | 1.13  | 0.17235  | 0.040551 | 0.466593 | 0.246264 |
| MmugDNA.33598.1.S1_at   | MmugDNA.33598.1 | 3.57  | 3.68  | 0.27 | 0.15 | -1.08 | 0.873027 | 0.661266 | 0.945555 | 0.801687 |
| MmugDNA.336.1.S1_at     | MmugDNA.336.1   | 4.06  | 4.35  | 0.31 | 0.2  | -1.22 | 0.083628 | 0.092878 | 0.346254 | 0.349024 |
| MmugDNA.336.1.S1_s_at   | MmugDNA.336.1   | 5.69  | 6.51  | 0.23 | 0.34 | -1.77 | 0.031561 | 0.075785 | 0.231056 | 0.320354 |
| MmugDNA.3360.1.S1_at    | MmugDNA.3360.1  | 8.09  | 8.09  | 0.11 | 0.06 | -1    | 0.943397 | 0.516091 | 0.976201 | 0.708704 |
| MmugDNA.33601.1.S1_at   | MmugDNA.33601.1 | 5.96  | 5.98  | 0.35 | 0.14 | -1.01 | 0.373782 | 0.211887 | 0.645118 | 0.485898 |
| MmugDNA.33602.1.S1_at   | MmugDNA.33602.1 | 3.2   | 3.2   | 0.11 | 0.01 | 1     | 0.36626  | 0.730244 | 0.640628 | 0.843884 |
| MmugDNA.33603.1.S1_at   | MmugDNA.33603.1 | 4.8   | 4.71  | 1.07 | 0.48 | 1.06  | 0.428738 | 0.593037 | 0.685503 | 0.758    |
| MmugDNA.33604.1.S1_at   | MmugDNA.33604.1 | 10.07 | 9.79  | 0.39 | 0.2  | 1.21  | 0.145871 | 0.040406 | 0.433576 | 0.246134 |
| MmugDNA.33605.1.S1_at   | MmugDNA.33605.1 | 3.85  | 3.95  | 0.17 | 0.16 | -1.07 | 0.993418 | 0.021645 | 0.997386 | 0.184333 |
| MmugDNA.33606.1.S1_at   | MmugDNA.33606.1 | 3.58  | 3.45  | 0.07 | 0.1  | 1.1   | 0.095909 | 0.329001 | 0.365529 | 0.578482 |
| MmugDNA.33608.1.S1_at   | MmugDNA.33608.1 | 9.78  | 9.42  | 0.19 | 0.1  | 1.28  | 0.037169 | 0.140968 | 0.248068 | 0.414474 |
| MmugDNA.16959.1.S1_s_at | MmugDNA.16959.1 | 11.6  | 11.37 | 0.09 | 0    | 1.17  | 0.00571  | 0.06006  | 0.121179 | 0.291744 |
| MmugDNA.3361.1.S1_at    | MmugDNA.3361.1  | 5.63  | 5.77  | 0.15 | 0.19 | -1.1  | 0.993639 | 0.228356 | 0.997413 | 0.50054  |
| MmugDNA.33610.1.S1_at   | MmugDNA.33610.1 | 4.37  | 4.24  | 0.22 | 0.21 | 1.09  | 0.271046 | 0.396761 | 0.562988 | 0.628438 |
| MmugDNA.27790.1.S1_s_at | MmugDNA.27790.1 | 5.99  | 5.89  | 0.16 | 0.07 | 1.07  | 0.882993 | 0.220995 | 0.95022  | 0.494389 |
| MmugDNA.33613.1.S1_at   | MmugDNA.33613.1 | 7.96  | 8.04  | 0.82 | 0.18 | -1.06 | 0.996738 | 0.605661 | 0.99893  | 0.765377 |
| MmugDNA.33613.1.S1_x_at | MmugDNA.33613.1 | 7.81  | 7.93  | 0.75 | 0.11 | -1.09 | 0.7626   | 0.549912 | 0.891323 | 0.730154 |
| MmugDNA.33614.1.S1_at   | MmugDNA.33614.1 | 4.94  | 4.97  | 0.6  | 0.21 | -1.02 | 0.564524 | 0.85498  | 0.776201 | 0.917383 |
| MmugDNA.33615.1.S1_at   | MmugDNA.33615.1 | 8.64  | 8.64  | 0.78 | 0.11 | 1     | 0.446602 | 0.637259 | 0.698779 | 0.786769 |



|                         |                 |       |       |      |      |        |          |          |          |          |
|-------------------------|-----------------|-------|-------|------|------|--------|----------|----------|----------|----------|
| MmugDNA.33616.1.S1_at   | MmugDNA.33616.1 | 7.34  | 8.58  | 0.88 | 0.09 | -2.37  | 0.071856 | 0.136294 | 0.325953 | 0.408711 |
| MmugDNA.33617.1.S1_at   | MmugDNA.33617.1 | 9.31  | 9.27  | 0.19 | 0.25 | 1.03   | 0.394162 | 0.221729 | 0.660857 | 0.494901 |
| MmugDNA.33617.1.S1_s_at | MmugDNA.33617.1 | 10.25 | 9.99  | 0.24 | 0.21 | 1.2    | 0.476792 | 0.209047 | 0.719108 | 0.482842 |
| MmugDNA.3362.1.S1_at    | MmugDNA.3362.1  | 4.22  | 4.37  | 0.24 | 0.04 | -1.11  | 0.331136 | 0.313118 | 0.613047 | 0.567684 |
| MmugDNA.33620.1.S1_at   | MmugDNA.33620.1 | 6.45  | 6.42  | 0.13 | 0.19 | 1.02   | 0.349073 | 0.634291 | 0.62702  | 0.784742 |
| MmugDNA.33621.1.S1_at   | MmugDNA.33621.1 | 7.51  | 7.46  | 0.36 | 0.07 | 1.04   | 0.689362 | 0.106058 | 0.851686 | 0.368438 |
| MmugDNA.33622.1.S1_at   | MmugDNA.33622.1 | 8.45  | 9.03  | 0.15 | 0.09 | -1.49  | 0.007835 | 0.000426 | 0.137244 | 0.038359 |
| MmugDNA.33623.1.S1_at   | MmugDNA.33623.1 | 3.44  | 3.43  | 0.38 | 0.05 | 1      | 0.322179 | 0.440283 | 0.606295 | 0.658899 |
| MmugDNA.33624.1.S1_at   | MmugDNA.33624.1 | 4.67  | 4.68  | 0.02 | 0.09 | -1.01  | 0.364262 | 0.274715 | 0.638845 | 0.53918  |
| MmugDNA.33626.1.S1_at   | MmugDNA.33626.1 | 5.82  | 9.69  | 2    | 0.31 | -14.66 | 0.045459 | 0.152599 | 0.270804 | 0.427435 |
| MmugDNA.33627.1.S1_at   | MmugDNA.33627.1 | 4.99  | 6.11  | 0.33 | 0.37 | -2.18  | 0.021743 | 0.156994 | 0.200743 | 0.432467 |
| MmugDNA.33629.1.S1_at   | MmugDNA.33629.1 | 8.82  | 8.59  | 0.16 | 0.12 | 1.18   | 0.06997  | 0.088011 | 0.322968 | 0.341482 |
| MmugDNA.3363.1.S1_at    | MmugDNA.3363.1  | 3.66  | 3.55  | 0.07 | 0.04 | 1.08   | 0.081321 | 0.24673  | 0.342222 | 0.51609  |
| MmugDNA.33631.1.S1_at   | MmugDNA.33631.1 | 3.49  | 3.27  | 0.15 | 0.04 | 1.16   | 0.029627 | 0.024461 | 0.225228 | 0.195724 |
| MmugDNA.33632.1.S1_at   | MmugDNA.33632.1 | 10.53 | 10.33 | 0.12 | 0.08 | 1.15   | 0.18363  | 0.361986 | 0.479553 | 0.602725 |
| MmugDNA.33634.1.S1_at   | MmugDNA.33634.1 | 6.08  | 6.44  | 0.17 | 0.36 | -1.28  | 0.500561 | 0.865499 | 0.734794 | 0.923598 |
| MmugDNA.33635.1.S1_at   | MmugDNA.33635.1 | 8.25  | 7.22  | 0.05 | 0.29 | 2.05   | 0.007966 | 0.033913 | 0.138304 | 0.227771 |
| MmugDNA.33636.1.S1_at   | MmugDNA.33636.1 | 9.12  | 8.25  | 0.03 | 0.09 | 1.83   | 0.000093 | 0.00049  | 0.051196 | 0.038921 |
| MmugDNA.33638.1.S1_at   | MmugDNA.33638.1 | 5.29  | 4.85  | 0.33 | 0.12 | 1.35   | 0.073475 | 0.066481 | 0.328846 | 0.303576 |
| MmugDNA.33639.1.S1_at   | MmugDNA.33639.1 | 10.27 | 10.18 | 0.1  | 0.01 | 1.06   | 0.231837 | 0.741915 | 0.530482 | 0.850533 |
| MmugDNA.3364.1.S1_at    | MmugDNA.3364.1  | 3.23  | 3.06  | 0.05 | 0.32 | 1.12   | 0.915489 | 0.992466 | 0.964085 | 0.995715 |
| MmugDNA.33641.1.S1_at   | MmugDNA.33641.1 | 6.85  | 6.94  | 0.12 | 0.18 | -1.07  | 0.368487 | 0.449982 | 0.642207 | 0.665414 |
| MmugDNA.33642.1.S1_at   | MmugDNA.33642.1 | 6.24  | 6.78  | 0.22 | 0.34 | -1.45  | 0.127745 | 0.05281  | 0.409611 | 0.275434 |
| MmugDNA.33642.1.S1_s_at | MmugDNA.33642.1 | 7.53  | 7.89  | 0.06 | 0.16 | -1.29  | 0.038556 | 0.013163 | 0.252331 | 0.147338 |
| MmugDNA.33645.1.S1_at   | MmugDNA.33645.1 | 7.92  | 7.81  | 0.29 | 0.51 | 1.08   | 0.522492 | 0.345787 | 0.749811 | 0.590937 |
| MmugDNA.33647.1.S1_at   | MmugDNA.33647.1 | 7.48  | 7.44  | 0.1  | 0.01 | 1.03   | 0.490176 | 0.871541 | 0.728328 | 0.926874 |
| MmugDNA.33647.1.S1_s_at | MmugDNA.33647.1 | 7.72  | 7.71  | 0.18 | 0.09 | 1.01   | 0.910924 | 0.597967 | 0.962223 | 0.760532 |
| MmugDNA.33648.1.S1_at   | MmugDNA.33648.1 | 3.83  | 3.71  | 0.21 | 0.03 | 1.08   | 0.463022 | 0.667498 | 0.709909 | 0.805333 |
| MmugDNA.33649.1.S1_at   | MmugDNA.33649.1 | 4.75  | 4.72  | 0.27 | 0.38 | 1.02   | 0.522403 | 0.220363 | 0.749806 | 0.493783 |
| MmugDNA.3365.1.S1_at    | MmugDNA.3365.1  | 3.6   | 3.6   | 0.11 | 0.06 | -1     | 0.617499 | 0.450787 | 0.810046 | 0.665869 |
| MmugDNA.33650.1.S1_at   | MmugDNA.33650.1 | 10.18 | 10.19 | 0.11 | 0.07 | -1.01  | 0.453182 | 0.010025 | 0.703473 | 0.131279 |
| MmugDNA.33651.1.S1_at   | MmugDNA.33651.1 | 4.72  | 4.79  | 0.08 | 0.1  | -1.05  | 0.472832 | 0.702126 | 0.716348 | 0.827304 |
| MmugDNA.33652.1.S1_at   | MmugDNA.33652.1 | 3.36  | 3.34  | 0.15 | 0.12 | 1.01   | 0.979968 | 0.328886 | 0.992376 | 0.578452 |
| MmugDNA.33654.1.S1_at   | MmugDNA.33654.1 | 10.16 | 10.11 | 0.18 | 0.14 | 1.03   | 0.927565 | 0.646168 | 0.969315 | 0.792676 |
| MmugDNA.33656.1.S1_at   | MmugDNA.33656.1 | 6.27  | 6.29  | 0.1  | 0.15 | -1.01  | 0.300143 | 0.20878  | 0.588392 | 0.482626 |
| MmugDNA.33657.1.S1_at   | MmugDNA.33657.1 | 4.46  | 4.54  | 0.16 | 0.21 | -1.06  | 0.496689 | 0.427632 | 0.732536 | 0.649406 |
| MmugDNA.3366.1.S1_at    | MmugDNA.3366.1  | 7.98  | 8.37  | 0.12 | 0.1  | -1.31  | 0.00524  | 0.000006 | 0.117387 | 0.016421 |
| MmugDNA.33660.1.S1_at   | MmugDNA.33660.1 | 6.28  | 6.42  | 0.23 | 0.16 | -1.1   | 0.841073 | 0.91191  | 0.930114 | 0.950311 |
| MmugDNA.33662.1.S1_at   | MmugDNA.33662.1 | 3.72  | 3.76  | 1.04 | 0.27 | -1.03  | 0.463381 | 0.438896 | 0.710048 | 0.657753 |
| MmugDNA.33664.1.S1_at   | MmugDNA.33664.1 | 6.4   | 6.3   | 0.41 | 0.13 | 1.08   | 0.227756 | 0.690503 | 0.525852 | 0.819604 |
| MmugDNA.33665.1.S1_at   | MmugDNA.33665.1 | 5.99  | 6     | 0.24 | 0.1  | -1     | 0.270792 | 0.328391 | 0.56285  | 0.578066 |
| MmugDNA.33667.1.S1_at   | MmugDNA.33667.1 | 5.2   | 5.15  | 0.3  | 0.04 | 1.03   | 0.915396 | 0.987173 | 0.96405  | 0.992807 |
| MmugDNA.33668.1.S1_at   | MmugDNA.33668.1 | 6.18  | 6.1   | 0.13 | 0.11 | 1.05   | 0.536469 | 0.36126  | 0.759061 | 0.602104 |

|                         |                 |       |       |      |      |       |          |          |          |          |
|-------------------------|-----------------|-------|-------|------|------|-------|----------|----------|----------|----------|
| MmugDNA.3367.1.S1_at    | MmugDNA.3367.1  | 3.62  | 3.62  | 0.09 | 0.31 | -1    | 0.285161 | 0.507191 | 0.57512  | 0.702821 |
| MmugDNA.33671.1.S1_at   | MmugDNA.33671.1 | 10.63 | 11.23 | 0.14 | 0.23 | -1.52 | 0.048418 | 0.264016 | 0.277466 | 0.530183 |
| MmugDNA.33672.1.S1_at   | MmugDNA.33672.1 | 5.01  | 4.16  | 0.68 | 0.49 | 1.81  | 0.12394  | 0.444851 | 0.403751 | 0.662072 |
| MmugDNA.33673.1.S1_at   | MmugDNA.33673.1 | 10.08 | 9.71  | 0.18 | 0.03 | 1.29  | 0.021741 | 0.000123 | 0.200743 | 0.029087 |
| MmugDNA.33674.1.S1_at   | MmugDNA.33674.1 | 4.29  | 4.62  | 0.06 | 0.2  | -1.26 | 0.056489 | 0.04744  | 0.295149 | 0.262486 |
| MmugDNA.33676.1.S1_at   | MmugDNA.33676.1 | 7.73  | 7.66  | 0.21 | 0.34 | 1.05  | 0.554735 | 0.609556 | 0.770788 | 0.767864 |
| MmugDNA.33679.1.S1_at   | MmugDNA.33679.1 | 5.07  | 5.06  | 0.56 | 0.42 | 1     | 0.462964 | 0.628685 | 0.709909 | 0.781367 |
| MmugDNA.3368.1.S1_at    | MmugDNA.3368.1  | 5.6   | 5.5   | 0.47 | 0.24 | 1.08  | 0.376766 | 0.555985 | 0.647386 | 0.734254 |
| MmugDNA.33680.1.S1_at   | MmugDNA.33680.1 | 5.87  | 5.94  | 0.2  | 0.07 | -1.05 | 0.200024 | 0.242114 | 0.497566 | 0.512652 |
| MmugDNA.33681.1.S1_at   | MmugDNA.33681.1 | 5.37  | 5.42  | 0.22 | 0.24 | -1.04 | 0.928318 | 0.979278 | 0.969727 | 0.988845 |
| MmugDNA.33682.1.S1_at   | MmugDNA.33682.1 | 11.66 | 11.81 | 0.13 | 0.04 | -1.11 | 0.18823  | 0.446579 | 0.484563 | 0.662862 |
| MmugDNA.33683.1.S1_at   | MmugDNA.33683.1 | 6.97  | 6.99  | 0.75 | 0.21 | -1.02 | 0.305549 | 0.375107 | 0.592635 | 0.613186 |
| MmugDNA.33684.1.S1_at   | MmugDNA.33684.1 | 5.92  | 6.17  | 0.09 | 0.29 | -1.19 | 0.1742   | 0.492559 | 0.468371 | 0.693633 |
| MmugDNA.33686.1.S1_at   | MmugDNA.33686.1 | 10.97 | 11.05 | 0.91 | 0.46 | -1.06 | 0.900476 | 0.374171 | 0.957767 | 0.612678 |
| MmugDNA.33686.1.S1_s_at | MmugDNA.33686.1 | 12.63 | 12.57 | 0.48 | 0.3  | 1.04  | 0.549534 | 0.39873  | 0.767209 | 0.629464 |
| MmugDNA.33688.1.S1_at   | MmugDNA.33688.1 | 8.05  | 8.52  | 1.05 | 0.26 | -1.38 | 0.678326 | 0.416618 | 0.846605 | 0.641647 |
| MmugDNA.33689.1.S1_at   | MmugDNA.33689.1 | 4.83  | 4.77  | 0.09 | 0.18 | 1.04  | 0.915049 | 0.956707 | 0.963913 | 0.975397 |
| MmugDNA.33690.1.S1_at   | MmugDNA.33690.1 | 9.54  | 9.22  | 0.16 | 0.02 | 1.25  | 0.033019 | 0.039893 | 0.236089 | 0.244852 |
| MmugDNA.35062.1.S1_s_at | MmugDNA.35062.1 | 9.91  | 9.64  | 0.07 | 0.09 | 1.21  | 0.012095 | 0.025047 | 0.160017 | 0.198316 |
| MmugDNA.33691.1.S1_at   | MmugDNA.33691.1 | 4.27  | 4.01  | 0.38 | 0.08 | 1.19  | 0.358567 | 0.46813  | 0.63435  | 0.677624 |
| MmugDNA.33692.1.S1_at   | MmugDNA.33692.1 | 4.1   | 4.06  | 0.03 | 0.16 | 1.03  | 0.651673 | 0.240206 | 0.830755 | 0.51084  |
| MmugDNA.33693.1.S1_at   | MmugDNA.33693.1 | 4.86  | 4.41  | 0.33 | 0.04 | 1.36  | 0.283475 | 0.483734 | 0.573865 | 0.688112 |
| MmugDNA.33694.1.S1_at   | MmugDNA.33694.1 | 5.77  | 5.49  | 0.17 | 0.13 | 1.21  | 0.049203 | 0.020457 | 0.279271 | 0.179597 |
| MmugDNA.33696.1.S1_at   | MmugDNA.33696.1 | 7.44  | 8.41  | 0.52 | 0.25 | -1.95 | 0.088063 | 0.048236 | 0.354244 | 0.264686 |
| MmugDNA.33697.1.S1_at   | MmugDNA.33697.1 | 3.34  | 3.31  | 0.13 | 0.25 | 1.02  | 0.910328 | 0.969894 | 0.961971 | 0.983513 |
| MmugDNA.33698.1.S1_at   | MmugDNA.33698.1 | 3.73  | 4.12  | 0.12 | 0.48 | -1.31 | 0.60367  | 0.350879 | 0.801171 | 0.594584 |
| MmugDNA.33699.1.S1_at   | MmugDNA.33699.1 | 10.46 | 9.8   | 0.05 | 0.02 | 1.59  | 0.000023 | 0.00481  | 0.045594 | 0.096859 |
| MmugDNA.33700.1.S1_at   | MmugDNA.33700.1 | 2.8   | 2.81  | 0.14 | 0.17 | -1.01 | 0.256036 | 0.375334 | 0.550543 | 0.613336 |
| MmugDNA.33701.1.S1_at   | MmugDNA.33701.1 | 2.96  | 2.96  | 0.01 | 0.12 | 1     | 0.33142  | 0.452864 | 0.613386 | 0.667359 |
| MmugDNA.33702.1.S1_at   | MmugDNA.33702.1 | 6.03  | 6.34  | 0.24 | 0.26 | -1.23 | 0.478761 | 0.681583 | 0.720253 | 0.814092 |
| MmugDNA.33704.1.S1_at   | MmugDNA.33704.1 | 3.76  | 3.71  | 0.25 | 0.16 | 1.03  | 0.449895 | 0.080301 | 0.701168 | 0.32796  |
| MmugDNA.33705.1.S1_at   | MmugDNA.33705.1 | 6.43  | 6.15  | 0.46 | 0.17 | 1.22  | 0.332177 | 0.494577 | 0.613975 | 0.694909 |
| MmugDNA.33706.1.S1_at   | MmugDNA.33706.1 | 3.46  | 3.03  | 0.4  | 0.11 | 1.34  | 0.423019 | 0.357007 | 0.681122 | 0.598736 |
| MmugDNA.33707.1.S1_at   | MmugDNA.33707.1 | 2.96  | 2.92  | 0.2  | 0.17 | 1.03  | 0.170676 | 0.309708 | 0.464374 | 0.565005 |
| MmugDNA.33708.1.S1_at   | MmugDNA.33708.1 | 3.91  | 3.95  | 0.92 | 0.51 | -1.03 | 0.768356 | 0.604314 | 0.893594 | 0.764558 |
| MmugDNA.33709.1.S1_at   | MmugDNA.33709.1 | 12.53 | 12.61 | 0.08 | 0.01 | -1.06 | 0.581985 | 0.738342 | 0.786897 | 0.848258 |
| MmugDNA.3371.1.S1_at    | MmugDNA.3371.1  | 9.31  | 8.14  | 0.38 | 0.21 | 2.25  | 0.007363 | 0.003753 | 0.134    | 0.08732  |
| MmugDNA.33710.1.S1_at   | MmugDNA.33710.1 | 6.12  | 6.14  | 0.15 | 0.12 | -1.02 | 0.822222 | 0.871482 | 0.920847 | 0.926844 |
| MmugDNA.33711.1.S1_at   | MmugDNA.33711.1 | 5.26  | 5.07  | 0.26 | 0.11 | 1.14  | 0.345415 | 0.154593 | 0.624408 | 0.429489 |
| MmugDNA.33713.1.S1_at   | MmugDNA.33713.1 | 3.87  | 4.5   | 1.09 | 0.35 | -1.55 | 0.938056 | 0.823878 | 0.973844 | 0.898817 |
| MmugDNA.33716.1.S1_at   | MmugDNA.33716.1 | 5.7   | 5.45  | 0.38 | 0.21 | 1.2   | 0.111125 | 0.10677  | 0.3869   | 0.369349 |
| MmugDNA.33717.1.S1_at   | MmugDNA.33717.1 | 3.51  | 3.52  | 0.09 | 0.15 | -1    | 0.602158 | 0.751898 | 0.800027 | 0.855714 |
| MmugDNA.33718.1.S1_at   | MmugDNA.33718.1 | 3.92  | 3.98  | 0.25 | 0.18 | -1.04 | 0.667922 | 0.79994  | 0.840528 | 0.884981 |

|                         |                 |       |       |      |      |       |          |          |          |          |
|-------------------------|-----------------|-------|-------|------|------|-------|----------|----------|----------|----------|
| MmugDNA.33719.1.S1_at   | MmugDNA.33719.1 | 7.22  | 6.92  | 0.28 | 0.12 | 1.23  | 0.180798 | 0.030584 | 0.47597  | 0.216849 |
| MmugDNA.3372.1.S1_at    | MmugDNA.3372.1  | 13.88 | 13.92 | 0.14 | 0.07 | -1.02 | 0.380184 | 0.600251 | 0.649909 | 0.762007 |
| MmugDNA.33720.1.S1_at   | MmugDNA.33720.1 | 7.67  | 7.52  | 0.14 | 0.26 | 1.1   | 0.13586  | 0.475598 | 0.419983 | 0.68228  |
| MmugDNA.33721.1.S1_at   | MmugDNA.33721.1 | 7.62  | 7.45  | 0.11 | 0.06 | 1.12  | 0.056051 | 0.027346 | 0.293789 | 0.206637 |
| MmugDNA.33722.1.S1_at   | MmugDNA.33722.1 | 3.57  | 3.57  | 0.12 | 0.09 | 1     | 0.902617 | 0.36548  | 0.958703 | 0.605587 |
| MmugDNA.33724.1.S1_at   | MmugDNA.33724.1 | 4.59  | 4.71  | 0.27 | 0.16 | -1.09 | 0.530618 | 0.50084  | 0.755142 | 0.699296 |
| MmugDNA.33725.1.S1_at   | MmugDNA.33725.1 | 5.96  | 6.05  | 0.08 | 0.03 | -1.06 | 0.054678 | 0.012654 | 0.290604 | 0.145088 |
| MmugDNA.33726.1.S1_at   | MmugDNA.33726.1 | 4.97  | 4.9   | 0.21 | 0.03 | 1.05  | 0.473994 | 0.717316 | 0.717191 | 0.836349 |
| MmugDNA.33728.1.S1_at   | MmugDNA.33728.1 | 6.69  | 6.76  | 0.17 | 0.01 | -1.05 | 0.741924 | 0.817199 | 0.880459 | 0.894546 |
| MmugDNA.3373.1.S1_at    | MmugDNA.3373.1  | 4.23  | 5.25  | 0.48 | 0.73 | -2.03 | 0.325418 | 0.461655 | 0.608731 | 0.673228 |
| MmugDNA.33730.1.S1_at   | MmugDNA.33730.1 | 3.48  | 3.47  | 0.22 | 0.12 | 1.01  | 0.282575 | 0.354231 | 0.573229 | 0.597105 |
| MmugDNA.33731.1.S1_at   | MmugDNA.33731.1 | 4.94  | 4.62  | 0.23 | 0.08 | 1.25  | 0.062118 | 0.030273 | 0.305844 | 0.215828 |
| MmugDNA.33733.1.S1_at   | MmugDNA.33733.1 | 4.55  | 4.01  | 0.72 | 0.21 | 1.45  | 0.094925 | 0.187913 | 0.363903 | 0.464026 |
| MmugDNA.33734.1.S1_at   | MmugDNA.33734.1 | 5.4   | 5.26  | 0.13 | 0.36 | 1.1   | 0.720944 | 0.367859 | 0.868408 | 0.607469 |
| MmugDNA.33735.1.S1_at   | MmugDNA.33735.1 | 3.64  | 3.76  | 0.13 | 0.38 | -1.09 | 0.638571 | 0.771429 | 0.823106 | 0.867177 |
| MmugDNA.33736.1.S1_at   | MmugDNA.33736.1 | 3.31  | 3.21  | 0.12 | 0.13 | 1.08  | 0.913935 | 0.800256 | 0.963451 | 0.885129 |
| MmugDNA.33739.1.S1_at   | MmugDNA.33739.1 | 4.94  | 5.03  | 0.14 | 0.28 | -1.07 | 0.394696 | 0.692595 | 0.661142 | 0.821061 |
| MmugDNA.3374.1.S1_at    | MmugDNA.3374.1  | 7.87  | 8.07  | 0.14 | 0.18 | -1.15 | 0.090161 | 0.664365 | 0.356864 | 0.803354 |
| MmugDNA.33740.1.S1_at   | MmugDNA.33740.1 | 5.5   | 5.03  | 0.19 | 0.27 | 1.39  | 0.025684 | 0.014877 | 0.212966 | 0.155055 |
| MmugDNA.33741.1.S1_at   | MmugDNA.33741.1 | 4.8   | 4.68  | 0.04 | 0.05 | 1.09  | 0.018978 | 0.030894 | 0.19121  | 0.217584 |
| MmugDNA.33742.1.S1_at   | MmugDNA.33742.1 | 6.26  | 6.21  | 0.02 | 0.05 | 1.03  | 0.26418  | 0.731483 | 0.557422 | 0.844356 |
| MmugDNA.33743.1.S1_at   | MmugDNA.33743.1 | 9.05  | 8.71  | 0.04 | 0.17 | 1.27  | 0.024803 | 0.010148 | 0.210464 | 0.132001 |
| MmugDNA.33744.1.S1_at   | MmugDNA.33744.1 | 6.69  | 7.82  | 0.15 | 0.2  | -2.19 | 0.001455 | 0.086059 | 0.079991 | 0.338305 |
| MmugDNA.33745.1.S1_at   | MmugDNA.33745.1 | 8.4   | 9.29  | 0.37 | 0.11 | -1.85 | 0.021906 | 0.498741 | 0.201211 | 0.697733 |
| MmugDNA.33747.1.S1_at   | MmugDNA.33747.1 | 4.25  | 4.25  | 0.3  | 0.38 | -1    | 0.799554 | 0.933776 | 0.909612 | 0.9623   |
| MmugDNA.33748.1.S1_at   | MmugDNA.33748.1 | 4.02  | 3.94  | 0.69 | 0.06 | 1.06  | 0.332493 | 0.463355 | 0.614123 | 0.674373 |
| MmugDNA.33749.1.S1_s_at | MmugDNA.33749.1 | 6.57  | 6.71  | 0.19 | 0.06 | -1.1  | 0.098448 | 0.042671 | 0.369095 | 0.251037 |
| MmugDNA.3375.1.S1_at    | MmugDNA.3375.1  | 6.13  | 6.01  | 0.21 | 0.31 | 1.08  | 0.490796 | 0.927215 | 0.728854 | 0.958627 |
| MmugDNA.33750.1.S1_at   | MmugDNA.33750.1 | 6.64  | 6.62  | 0.14 | 0.07 | 1.01  | 0.853618 | 0.642796 | 0.936335 | 0.790486 |
| MmugDNA.33752.1.S1_at   | MmugDNA.33752.1 | 6     | 6.18  | 0.11 | 0.04 | -1.13 | 0.107825 | 0.076881 | 0.382472 | 0.322368 |
| MmugDNA.33754.1.S1_at   | MmugDNA.33754.1 | 4.42  | 4.36  | 0.16 | 0.13 | 1.04  | 0.164808 | 0.328352 | 0.457897 | 0.578045 |
| MmugDNA.33755.1.S1_at   | MmugDNA.33755.1 | 5.34  | 5.23  | 0    | 0.08 | 1.08  | 0.124782 | 0.103537 | 0.405073 | 0.364346 |
| MmugDNA.33756.1.S1_at   | MmugDNA.33756.1 | 4.45  | 4.5   | 0.2  | 0.07 | -1.04 | 0.577486 | 0.765037 | 0.783633 | 0.863388 |
| MmugDNA.33757.1.S1_at   | MmugDNA.33757.1 | 3.89  | 3.84  | 0.23 | 0.57 | 1.03  | 0.528694 | 0.351491 | 0.753764 | 0.595087 |
| MmugDNA.37348.1.S1_s_at | MmugDNA.37348.1 | 5.95  | 5.56  | 0.7  | 0.37 | 1.31  | 0.857598 | 0.977099 | 0.938079 | 0.987542 |
| MmugDNA.33759.1.S1_at   | MmugDNA.33759.1 | 11.14 | 11.23 | 0.09 | 0.19 | -1.07 | 0.96182  | 0.650345 | 0.984432 | 0.795586 |
| MmugDNA.33759.1.S1_s_at | MmugDNA.33759.1 | 11.64 | 11.61 | 0.1  | 0.12 | 1.02  | 0.637344 | 0.09774  | 0.822407 | 0.355598 |
| MmugDNA.3376.1.S1_at    | MmugDNA.3376.1  | 2.92  | 2.9   | 0.25 | 0    | 1.01  | 0.904261 | 0.982479 | 0.959379 | 0.99036  |
| MmugDNA.33760.1.S1_at   | MmugDNA.33760.1 | 8.92  | 8.78  | 0.26 | 0.16 | 1.1   | 0.275039 | 0.077436 | 0.566763 | 0.323236 |
| MmugDNA.33761.1.S1_at   | MmugDNA.33761.1 | 11.86 | 11.86 | 0.1  | 0.01 | 1     | 0.742558 | 0.167165 | 0.880855 | 0.443636 |
| MmugDNA.33763.1.S1_at   | MmugDNA.33763.1 | 7.34  | 7.5   | 0.26 | 0.04 | -1.11 | 0.286884 | 0.017482 | 0.576637 | 0.167476 |
| MmugDNA.33764.1.S1_at   | MmugDNA.33764.1 | 9.15  | 9.04  | 0.17 | 0.11 | 1.08  | 0.411273 | 0.082395 | 0.67323  | 0.331368 |
| MmugDNA.33764.1.S1_s_at | MmugDNA.33764.1 | 8.52  | 8.3   | 0.09 | 0.07 | 1.16  | 0.021344 | 0.020901 | 0.199702 | 0.181404 |

|                         |                 |       |       |      |      |       |          |          |          |          |
|-------------------------|-----------------|-------|-------|------|------|-------|----------|----------|----------|----------|
| MmugDNA.33765.1.S1_at   | MmugDNA.33765.1 | 9.05  | 8.56  | 0.82 | 0.37 | 1.41  | 0.236283 | 0.360573 | 0.533943 | 0.601624 |
| MmugDNA.33766.1.S1_at   | MmugDNA.33766.1 | 10.42 | 10.09 | 0.26 | 0.11 | 1.25  | 0.346738 | 0.252158 | 0.625011 | 0.520837 |
| MmugDNA.33767.1.S1_at   | MmugDNA.33767.1 | 9.77  | 10.04 | 0.22 | 0.16 | -1.21 | 0.117085 | 0.110452 | 0.394266 | 0.374684 |
| MmugDNA.33768.1.S1_at   | MmugDNA.33768.1 | 10.59 | 10.42 | 0.11 | 0.11 | 1.13  | 0.602143 | 0.15492  | 0.800027 | 0.429909 |
| MmugDNA.33769.1.S1_at   | MmugDNA.33769.1 | 5.27  | 5.28  | 0.24 | 0.25 | -1.01 | 0.544671 | 0.397585 | 0.764193 | 0.628973 |
| MmugDNA.3377.1.S1_at    | MmugDNA.3377.1  | 9.03  | 8.74  | 0.93 | 0.48 | 1.22  | 0.703375 | 0.747507 | 0.859267 | 0.853149 |
| MmugDNA.33770.1.S1_at   | MmugDNA.33770.1 | 2.84  | 2.7   | 0.17 | 0.08 | 1.1   | 0.240974 | 0.341047 | 0.538362 | 0.587164 |
| MmugDNA.33771.1.S1_at   | MmugDNA.33771.1 | 4.86  | 5     | 0.2  | 0.26 | -1.1  | 0.969249 | 0.930943 | 0.987766 | 0.960748 |
| MmugDNA.33772.1.S1_at   | MmugDNA.33772.1 | 7.57  | 7.76  | 0.57 | 0.18 | -1.15 | 0.545767 | 0.736938 | 0.764919 | 0.847766 |
| MmugDNA.33774.1.S1_at   | MmugDNA.33774.1 | 3.68  | 3.78  | 0.11 | 0.09 | -1.08 | 0.588181 | 0.108676 | 0.790919 | 0.372171 |
| MmugDNA.33775.1.S1_at   | MmugDNA.33775.1 | 6.08  | 6.25  | 0.29 | 0.17 | -1.12 | 0.435921 | 0.395351 | 0.690925 | 0.627409 |
| MmugDNA.33777.1.S1_at   | MmugDNA.33777.1 | 6.97  | 7.1   | 0.14 | 0.1  | -1.09 | 0.638903 | 0.06626  | 0.823293 | 0.303012 |
| MmugDNA.33778.1.S1_at   | MmugDNA.33778.1 | 5.16  | 4.26  | 0.4  | 0.12 | 1.85  | 0.01175  | 0.007032 | 0.158219 | 0.113112 |
| MmugDNA.3378.1.S1_at    | MmugDNA.3378.1  | 13.73 | 13.79 | 0.06 | 0.06 | -1.04 | 0.286814 | 0.004055 | 0.576587 | 0.090288 |
| MmugDNA.3378.1.S1_s_at  | MmugDNA.3378.1  | 13.69 | 13.77 | 0.08 | 0.02 | -1.06 | 0.224843 | 0.015528 | 0.522793 | 0.158053 |
| MmugDNA.33780.1.S1_at   | MmugDNA.33780.1 | 12.78 | 12.55 | 0.18 | 0.03 | 1.18  | 0.100197 | 0.006117 | 0.370983 | 0.106503 |
| MmugDNA.33781.1.S1_at   | MmugDNA.33781.1 | 6.1   | 6.14  | 0.26 | 0.09 | -1.03 | 0.425491 | 0.692796 | 0.682927 | 0.821217 |
| MmugDNA.33783.1.S1_at   | MmugDNA.33783.1 | 6.08  | 5.18  | 0.9  | 0.15 | 1.87  | 0.10943  | 0.041296 | 0.384489 | 0.247995 |
| MmugDNA.33784.1.S1_s_at | MmugDNA.33784.1 | 9.83  | 10.61 | 0.1  | 0.09 | -1.72 | 0.000498 | 0.162025 | 0.068271 | 0.438108 |
| MmugDNA.33786.1.S1_at   | MmugDNA.33786.1 | 7.83  | 7.5   | 0.44 | 0.07 | 1.26  | 0.199687 | 0.14922  | 0.497171 | 0.423728 |
| MmugDNA.33788.1.S1_at   | MmugDNA.33788.1 | 8.51  | 8.5   | 0.14 | 0.16 | 1     | 0.457031 | 0.131861 | 0.706061 | 0.403891 |
| MmugDNA.33789.1.S1_at   | MmugDNA.33789.1 | 6.73  | 6.92  | 0.11 | 0.01 | -1.13 | 0.095956 | 0.014706 | 0.365529 | 0.154379 |
| MmugDNA.33789.1.S1_x_at | MmugDNA.33789.1 | 7.19  | 7.51  | 0.05 | 0.06 | -1.25 | 0.003735 | 0.03723  | 0.106332 | 0.237329 |
| MmugDNA.3379.1.S1_at    | MmugDNA.3379.1  | 4.32  | 4.08  | 0.18 | 0.48 | 1.18  | 0.286649 | 0.582114 | 0.576492 | 0.750784 |
| MmugDNA.33790.1.S1_at   | MmugDNA.33790.1 | 8.87  | 9.05  | 0.25 | 0.09 | -1.13 | 0.613937 | 0.096595 | 0.807824 | 0.354126 |
| MmugDNA.33791.1.S1_at   | MmugDNA.33791.1 | 10.16 | 9.89  | 0.23 | 0.1  | 1.21  | 0.230083 | 0.115228 | 0.528979 | 0.3822   |
| MmugDNA.33792.1.S1_s_at | MmugDNA.33792.1 | 7.98  | 9.3   | 0.3  | 0.21 | -2.48 | 0.005287 | 0.162579 | 0.117714 | 0.43872  |
| MmugDNA.33793.1.S1_at   | MmugDNA.33793.1 | 9.83  | 7.95  | 0.26 | 0.2  | 3.69  | 0.00054  | 0.000089 | 0.069927 | 0.027016 |
| MmugDNA.33793.1.S1_s_at | MmugDNA.33793.1 | 9.54  | 7.9   | 0.35 | 0.07 | 3.12  | 0.001249 | 0.000253 | 0.078631 | 0.033375 |
| MmugDNA.33796.1.S1_s_at | MmugDNA.33796.1 | 4.15  | 4.15  | 0.24 | 0.39 | -1    | 0.576549 | 0.760271 | 0.783247 | 0.86071  |
| MmugDNA.33797.1.S1_at   | MmugDNA.33797.1 | 5.57  | 5.33  | 0.03 | 0.31 | 1.18  | 0.727365 | 0.792172 | 0.872303 | 0.879905 |
| MmugDNA.33799.1.S1_at   | MmugDNA.33799.1 | 3.91  | 3.61  | 0.18 | 0.44 | 1.23  | 0.592743 | 0.612772 | 0.793615 | 0.770189 |
| MmugDNA.338.1.S1_s_at   | MmugDNA.338.1   | 8.96  | 8.78  | 0.02 | 0.13 | 1.13  | 0.259079 | 0.817715 | 0.553337 | 0.894815 |
| MmugDNA.3380.1.S1_at    | MmugDNA.3380.1  | 12.59 | 12.7  | 0.12 | 0.03 | -1.08 | 0.435957 | 0.609579 | 0.690935 | 0.767875 |
| MmugDNA.33802.1.S1_at   | MmugDNA.33802.1 | 6.04  | 5.63  | 0.4  | 0    | 1.32  | 0.493365 | 0.433431 | 0.730385 | 0.653681 |
| MmugDNA.33803.1.S1_at   | MmugDNA.33803.1 | 4.17  | 3.99  | 0.2  | 0.08 | 1.13  | 0.321945 | 0.205895 | 0.606135 | 0.480109 |
| MmugDNA.33804.1.S1_at   | MmugDNA.33804.1 | 4.7   | 4.09  | 0.46 | 0.13 | 1.53  | 0.093899 | 0.140135 | 0.362759 | 0.413394 |
| MmugDNA.33805.1.S1_at   | MmugDNA.33805.1 | 5.68  | 5.68  | 0.07 | 0    | 1     | 0.373901 | 0.307179 | 0.645118 | 0.563487 |
| MmugDNA.33807.1.S1_at   | MmugDNA.33807.1 | 8.96  | 7.38  | 0.75 | 0.32 | 2.98  | 0.032309 | 0.015198 | 0.233816 | 0.156676 |
| MmugDNA.33808.1.S1_at   | MmugDNA.33808.1 | 5.54  | 5.55  | 0.16 | 0.02 | -1.01 | 0.999811 | 0.706709 | 0.999962 | 0.829857 |
| MmugDNA.33809.1.S1_at   | MmugDNA.33809.1 | 4.32  | 3.69  | 0.84 | 0.16 | 1.56  | 0.301856 | 0.515692 | 0.589831 | 0.708451 |
| MmugDNA.3381.1.S1_at    | MmugDNA.3381.1  | 6.98  | 7.12  | 0.13 | 0.08 | -1.1  | 0.302981 | 0.444686 | 0.590448 | 0.662072 |
| MmugDNA.33810.1.S1_at   | MmugDNA.33810.1 | 5.37  | 5.38  | 0.41 | 0.21 | -1.01 | 0.453652 | 0.580821 | 0.703813 | 0.749953 |

|                         |                 |       |       |      |      |       |          |          |          |          |
|-------------------------|-----------------|-------|-------|------|------|-------|----------|----------|----------|----------|
| MmugDNA.33811.1.S1_at   | MmugDNA.33811.1 | 7.02  | 6.73  | 0.92 | 0.61 | 1.22  | 0.298832 | 0.125585 | 0.587037 | 0.396226 |
| MmugDNA.33812.1.S1_at   | MmugDNA.33812.1 | 4.21  | 4.33  | 1.34 | 0.19 | -1.09 | 0.442907 | 0.346922 | 0.696315 | 0.591728 |
| MmugDNA.33813.1.S1_at   | MmugDNA.33813.1 | 4.43  | 4.17  | 0.14 | 0.46 | 1.2   | 0.783453 | 0.934748 | 0.901128 | 0.963039 |
| MmugDNA.33814.1.S1_at   | MmugDNA.33814.1 | 13.31 | 13.19 | 0.03 | 0.05 | 1.09  | 0.035402 | 0.003122 | 0.24293  | 0.081345 |
| MmugDNA.33815.1.S1_at   | MmugDNA.33815.1 | 7.65  | 7.41  | 0.27 | 0.05 | 1.18  | 0.085898 | 0.015727 | 0.350251 | 0.158912 |
| MmugDNA.33818.1.S1_at   | MmugDNA.33818.1 | 6.37  | 6.6   | 0.49 | 0.5  | -1.17 | 0.930177 | 0.457216 | 0.970568 | 0.670746 |
| MmugDNA.3382.1.S1_at    | MmugDNA.3382.1  | 9.17  | 9.2   | 0.61 | 0.27 | -1.02 | 0.610669 | 0.889247 | 0.805939 | 0.936852 |
| MmugDNA.33821.1.S1_at   | MmugDNA.33821.1 | 5.39  | 5.4   | 0.19 | 0.09 | -1.01 | 0.862299 | 0.982546 | 0.940186 | 0.99036  |
| MmugDNA.33822.1.S1_s_at | MmugDNA.33822.1 | 5.06  | 7.33  | 0.86 | 0.52 | -4.82 | 0.06469  | 0.222328 | 0.31107  | 0.495357 |
| MmugDNA.33823.1.S1_s_at | MmugDNA.33823.1 | 11.61 | 10.58 | 0.14 | 0.18 | 2.05  | 0.001372 | 0.00141  | 0.079595 | 0.057335 |
| MmugDNA.33824.1.S1_at   | MmugDNA.33824.1 | 3.81  | 3.72  | 0.19 | 0.12 | 1.06  | 0.740092 | 0.070518 | 0.879525 | 0.311777 |
| MmugDNA.33825.1.S1_at   | MmugDNA.33825.1 | 4.33  | 3.97  | 0.21 | 0.16 | 1.28  | 0.19651  | 0.300721 | 0.493586 | 0.558959 |
| MmugDNA.33827.1.S1_at   | MmugDNA.33827.1 | 4.5   | 4.25  | 0.57 | 0.28 | 1.19  | 0.318882 | 0.313209 | 0.603556 | 0.567753 |
| MmugDNA.33828.1.S1_at   | MmugDNA.33828.1 | 3.11  | 2.9   | 0.2  | 0.08 | 1.16  | 0.461084 | 0.65267  | 0.708593 | 0.796937 |
| MmugDNA.3383.1.S1_at    | MmugDNA.3383.1  | 5.32  | 5.24  | 0.13 | 0.07 | 1.06  | 0.291372 | 0.338327 | 0.580647 | 0.585417 |
| MmugDNA.33831.1.S1_at   | MmugDNA.33831.1 | 5.73  | 5.86  | 0.12 | 0.05 | -1.09 | 0.438962 | 0.025706 | 0.693384 | 0.200966 |
| MmugDNA.33833.1.S1_at   | MmugDNA.33833.1 | 6.64  | 7.06  | 0.48 | 0.39 | -1.34 | 0.55729  | 0.001253 | 0.772057 | 0.055001 |
| MmugDNA.33834.1.S1_at   | MmugDNA.33834.1 | 4.35  | 4.39  | 0.32 | 0.15 | -1.03 | 0.79908  | 0.869466 | 0.909433 | 0.925991 |
| MmugDNA.33835.1.S1_at   | MmugDNA.33835.1 | 3.51  | 3.43  | 0.05 | 0.18 | 1.06  | 0.400134 | 0.644519 | 0.665274 | 0.791629 |
| MmugDNA.33839.1.S1_at   | MmugDNA.33839.1 | 4.62  | 4.47  | 0.16 | 0.1  | 1.1   | 0.163237 | 0.590034 | 0.455527 | 0.756081 |
| MmugDNA.3384.1.S1_at    | MmugDNA.3384.1  | 8.71  | 8.89  | 0.3  | 0.08 | -1.13 | 0.794808 | 0.563725 | 0.907378 | 0.738808 |
| MmugDNA.33840.1.S1_at   | MmugDNA.33840.1 | 8.67  | 7.4   | 0.02 | 0.3  | 2.41  | 0.001491 | 0.004179 | 0.081104 | 0.091073 |
| MmugDNA.33841.1.S1_at   | MmugDNA.33841.1 | 4.15  | 4.31  | 0.05 | 0.07 | -1.11 | 0.035492 | 0.000764 | 0.243211 | 0.04544  |
| MmugDNA.33842.1.S1_at   | MmugDNA.33842.1 | 6.47  | 6.41  | 0.12 | 0.06 | 1.04  | 0.479148 | 0.122916 | 0.720456 | 0.392923 |
| MmugDNA.33844.1.S1_at   | MmugDNA.33844.1 | 9.58  | 9.61  | 0.63 | 0.15 | -1.02 | 0.358601 | 0.546802 | 0.63439  | 0.728203 |
| MmugDNA.33847.1.S1_at   | MmugDNA.33847.1 | 4.9   | 4.71  | 0.21 | 0.19 | 1.14  | 0.566678 | 0.007852 | 0.777529 | 0.118059 |
| MmugDNA.33848.1.S1_at   | MmugDNA.33848.1 | 12.48 | 12.45 | 0.02 | 0.06 | 1.03  | 0.40839  | 0.124999 | 0.671192 | 0.395386 |
| MmugDNA.33849.1.S1_at   | MmugDNA.33849.1 | 11.4  | 11.22 | 0.22 | 0.04 | 1.13  | 0.414692 | 0.059524 | 0.675681 | 0.290548 |
| MmugDNA.33849.1.S1_s_at | MmugDNA.33849.1 | 12.57 | 12.46 | 0.17 | 0.03 | 1.08  | 0.710385 | 0.148958 | 0.863063 | 0.423294 |
| MmugDNA.3385.1.S1_at    | MmugDNA.3385.1  | 3.54  | 3.65  | 0.28 | 0.03 | -1.08 | 0.853425 | 0.408772 | 0.936276 | 0.6359   |
| MmugDNA.33852.1.S1_at   | MmugDNA.33852.1 | 8.02  | 7.73  | 0.28 | 0.19 | 1.22  | 0.32787  | 0.527138 | 0.610527 | 0.715861 |
| MmugDNA.33853.1.S1_s_at | MmugDNA.33853.1 | 4.16  | 4.1   | 0.16 | 0.04 | 1.05  | 0.998229 | 0.206229 | 0.999344 | 0.480382 |
| MmugDNA.33854.1.S1_at   | MmugDNA.33854.1 | 5.69  | 5.56  | 0.24 | 0.1  | 1.09  | 0.211227 | 0.299788 | 0.509003 | 0.558081 |
| MmugDNA.33856.1.S1_at   | MmugDNA.33856.1 | 12.4  | 12.15 | 0.06 | 0.02 | 1.18  | 0.002003 | 0.095581 | 0.089739 | 0.352645 |
| MmugDNA.3386.1.S1_at    | MmugDNA.3386.1  | 9.74  | 9.94  | 0.18 | 0.15 | -1.15 | 0.306393 | 0.555602 | 0.593269 | 0.733967 |
| MmugDNA.33860.1.S1_at   | MmugDNA.33860.1 | 7.39  | 7.42  | 0.21 | 0    | -1.02 | 0.700955 | 0.801992 | 0.857901 | 0.885995 |
| MmugDNA.33861.1.S1_at   | MmugDNA.33861.1 | 7.68  | 8.58  | 0.54 | 0.17 | -1.87 | 0.048391 | 0.08328  | 0.277466 | 0.333372 |
| MmugDNA.33862.1.S1_at   | MmugDNA.33862.1 | 12.59 | 12.33 | 0.12 | 0.06 | 1.2   | 0.020325 | 0.008609 | 0.196136 | 0.123102 |
| MmugDNA.33863.1.S1_at   | MmugDNA.33863.1 | 8.38  | 8.1   | 0.45 | 0.4  | 1.22  | 0.445998 | 0.07142  | 0.698308 | 0.313555 |
| MmugDNA.33863.1.S1_s_at | MmugDNA.33863.1 | 8.73  | 8.54  | 0.33 | 0.37 | 1.14  | 0.350644 | 0.043928 | 0.628492 | 0.254098 |
| MmugDNA.33864.1.S1_at   | MmugDNA.33864.1 | 5.24  | 5.26  | 0.05 | 0.07 | -1.01 | 0.568616 | 0.560702 | 0.778487 | 0.736921 |
| MmugDNA.33865.1.S1_s_at | MmugDNA.33865.1 | 12.02 | 11.85 | 0.05 | 0.06 | 1.12  | 0.022896 | 0.013343 | 0.204235 | 0.148061 |
| MmugDNA.33866.1.S1_at   | MmugDNA.33866.1 | 8.2   | 8.27  | 0.22 | 0.12 | -1.05 | 0.644358 | 0.519082 | 0.826816 | 0.710813 |

|                         |                 |       |       |      |      |       |          |          |          |          |
|-------------------------|-----------------|-------|-------|------|------|-------|----------|----------|----------|----------|
| MmugDNA.33867.1.S1_at   | MmugDNA.33867.1 | 4.7   | 4.12  | 0.43 | 0.09 | 1.49  | 0.208985 | 0.36519  | 0.506432 | 0.605348 |
| MmugDNA.33868.1.S1_at   | MmugDNA.33868.1 | 11.35 | 11.23 | 0.3  | 0.02 | 1.09  | 0.958814 | 0.899506 | 0.983234 | 0.942863 |
| MmugDNA.33869.1.S1_at   | MmugDNA.33869.1 | 5.8   | 5.8   | 0.14 | 0.14 | -1    | 0.995421 | 0.639266 | 0.99814  | 0.788125 |
| MmugDNA.3387.1.S1_at    | MmugDNA.3387.1  | 8.26  | 10.19 | 0.27 | 0.09 | -3.8  | 0.000346 | 0.097404 | 0.061509 | 0.355097 |
| MmugDNA.33870.1.S1_at   | MmugDNA.33870.1 | 4.55  | 4.3   | 0.16 | 0.03 | 1.2   | 0.021852 | 0.007181 | 0.201103 | 0.113932 |
| MmugDNA.33871.1.S1_at   | MmugDNA.33871.1 | 4.53  | 4.64  | 0.4  | 0.57 | -1.08 | 0.746622 | 0.586005 | 0.882646 | 0.753172 |
| MmugDNA.33872.1.S1_at   | MmugDNA.33872.1 | 2.84  | 2.8   | 0.08 | 0.03 | 1.03  | 0.694275 | 0.357011 | 0.854084 | 0.598736 |
| MmugDNA.33873.1.S1_at   | MmugDNA.33873.1 | 5.83  | 6.8   | 0.42 | 0.19 | -1.97 | 0.01484  | 0.005144 | 0.173991 | 0.099496 |
| MmugDNA.33874.1.S1_at   | MmugDNA.33874.1 | 6.18  | 5.98  | 0.08 | 0.09 | 1.15  | 0.060191 | 0.305875 | 0.302487 | 0.562731 |
| MmugDNA.33875.1.S1_at   | MmugDNA.33875.1 | 7.06  | 7.07  | 0.48 | 0.18 | -1.01 | 0.521605 | 0.351279 | 0.749394 | 0.594937 |
| MmugDNA.33877.1.S1_at   | MmugDNA.33877.1 | 10    | 10.91 | 0.2  | 0.14 | -1.88 | 0.00755  | 0.371476 | 0.135126 | 0.610204 |
| MmugDNA.33878.1.S1_at   | MmugDNA.33878.1 | 5.73  | 5.47  | 0.81 | 0.22 | 1.2   | 0.695474 | 0.924148 | 0.854867 | 0.957248 |
| MmugDNA.3388.1.S1_at    | MmugDNA.3388.1  | 4.79  | 4.79  | 0.1  | 0.22 | 1     | 0.998549 | 0.963491 | 0.999475 | 0.979631 |
| MmugDNA.33880.1.S1_at   | MmugDNA.33880.1 | 5.38  | 5.76  | 0.05 | 0.15 | -1.3  | 0.012878 | 0.584267 | 0.164083 | 0.752357 |
| MmugDNA.33881.1.S1_at   | MmugDNA.33881.1 | 8.84  | 8.96  | 0.22 | 0.14 | -1.09 | 0.384736 | 0.013857 | 0.653674 | 0.150977 |
| MmugDNA.33883.1.S1_at   | MmugDNA.33883.1 | 7.36  | 8     | 0.18 | 0.18 | -1.56 | 0.011864 | 0.020535 | 0.159011 | 0.179788 |
| MmugDNA.33883.1.S1_x_at | MmugDNA.33883.1 | 7.22  | 7.63  | 0.13 | 0.15 | -1.33 | 0.044075 | 0.047919 | 0.267012 | 0.26377  |
| MmugDNA.33884.1.S1_at   | MmugDNA.33884.1 | 10.18 | 10.29 | 0.11 | 0.06 | -1.07 | 0.157114 | 0.021696 | 0.447994 | 0.184333 |
| MmugDNA.33886.1.S1_at   | MmugDNA.33886.1 | 8.08  | 8.05  | 0.02 | 0.04 | 1.02  | 0.271602 | 0.0001   | 0.563425 | 0.027996 |
| MmugDNA.33887.1.S1_at   | MmugDNA.33887.1 | 7.05  | 7.03  | 0.05 | 0.12 | 1.02  | 0.851275 | 0.963169 | 0.935334 | 0.979435 |
| MmugDNA.33888.1.S1_at   | MmugDNA.33888.1 | 7.2   | 7.28  | 0.16 | 0.24 | -1.05 | 0.653432 | 0.308416 | 0.832146 | 0.564479 |
| MmugDNA.33889.1.S1_at   | MmugDNA.33889.1 | 5.51  | 5.41  | 0.12 | 0.09 | 1.07  | 0.190858 | 0.169191 | 0.487048 | 0.445812 |
| MmugDNA.3389.1.S1_at    | MmugDNA.3389.1  | 12.06 | 12.58 | 0.07 | 0.07 | -1.44 | 0.001148 | 0.000055 | 0.077533 | 0.025666 |
| MmugDNA.33890.1.S1_at   | MmugDNA.33890.1 | 7.98  | 6.58  | 0.56 | 0.15 | 2.63  | 0.024286 | 0.009851 | 0.208905 | 0.130274 |
| MmugDNA.33891.1.S1_at   | MmugDNA.33891.1 | 4.9   | 4.74  | 0.12 | 0.15 | 1.12  | 0.179287 | 0.176885 | 0.47435  | 0.453303 |
| MmugDNA.33892.1.S1_at   | MmugDNA.33892.1 | 6.3   | 6.02  | 0.46 | 0.17 | 1.22  | 0.314909 | 0.363061 | 0.600177 | 0.603503 |
| MmugDNA.33894.1.S1_at   | MmugDNA.33894.1 | 5.52  | 5.55  | 0.15 | 0.19 | -1.02 | 0.772456 | 0.101103 | 0.895784 | 0.360724 |
| MmugDNA.33895.1.S1_at   | MmugDNA.33895.1 | 5.79  | 6.13  | 0.31 | 0.22 | -1.27 | 0.218757 | 0.019853 | 0.516415 | 0.177189 |
| MmugDNA.33896.1.S1_at   | MmugDNA.33896.1 | 10.74 | 10.83 | 0.45 | 0.16 | -1.07 | 0.615423 | 0.351241 | 0.808909 | 0.594937 |
| MmugDNA.33898.1.S1_at   | MmugDNA.33898.1 | 4.4   | 4.36  | 0.04 | 0.07 | 1.03  | 0.294292 | 0.309231 | 0.583302 | 0.564807 |
| MmugDNA.339.1.S1_at     | MmugDNA.339.1   | 5.51  | 3.86  | 0.63 | 0.91 | 3.14  | 0.120173 | 0.200008 | 0.398502 | 0.474603 |
| MmugDNA.3390.1.S1_at    | MmugDNA.3390.1  | 3.3   | 3.3   | 0.1  | 0.06 | 1     | 0.396748 | 0.691706 | 0.662694 | 0.820652 |
| MmugDNA.33901.1.S1_at   | MmugDNA.33901.1 | 11.73 | 11.68 | 0.06 | 0.05 | 1.03  | 0.267809 | 0.030613 | 0.560554 | 0.216906 |
| MmugDNA.33903.1.S1_at   | MmugDNA.33903.1 | 4.09  | 3.84  | 0.14 | 0.07 | 1.19  | 0.086476 | 0.107854 | 0.351333 | 0.370945 |
| MmugDNA.33904.1.S1_at   | MmugDNA.33904.1 | 10.98 | 11.13 | 0.2  | 0.07 | -1.11 | 0.395824 | 0.013787 | 0.662054 | 0.150462 |
| MmugDNA.33906.1.S1_at   | MmugDNA.33906.1 | 11.43 | 11.36 | 0.05 | 0.03 | 1.05  | 0.237236 | 0.054584 | 0.534656 | 0.279153 |
| MmugDNA.33909.1.S1_at   | MmugDNA.33909.1 | 3.85  | 3.75  | 0.04 | 0.09 | 1.07  | 0.107054 | 0.508595 | 0.381491 | 0.703719 |
| MmugDNA.3391.1.S1_at    | MmugDNA.3391.1  | 3.94  | 3.72  | 0.14 | 0.05 | 1.17  | 0.095663 | 0.533405 | 0.365168 | 0.719587 |
| MmugDNA.33910.1.S1_at   | MmugDNA.33910.1 | 11.57 | 11.52 | 0.15 | 0.06 | 1.03  | 0.919456 | 0.851188 | 0.965499 | 0.915364 |
| MmugDNA.33911.1.S1_s_at | MmugDNA.33911.1 | 11.05 | 11.01 | 0.1  | 0.1  | 1.03  | 0.571641 | 0.894781 | 0.780018 | 0.939961 |
| MmugDNA.33912.1.S1_at   | MmugDNA.33912.1 | 3.64  | 3.75  | 0.32 | 0.07 | -1.08 | 0.755795 | 0.492619 | 0.887438 | 0.693666 |
| MmugDNA.33913.1.S1_at   | MmugDNA.33913.1 | 6.53  | 6.51  | 0.37 | 0.09 | 1.02  | 0.99052  | 0.285527 | 0.996572 | 0.547395 |
| MmugDNA.33914.1.S1_at   | MmugDNA.33914.1 | 5.66  | 5.62  | 0.15 | 0.25 | 1.03  | 0.853324 | 0.756289 | 0.93623  | 0.858165 |

|                         |                 |       |       |      |      |       |          |          |          |          |
|-------------------------|-----------------|-------|-------|------|------|-------|----------|----------|----------|----------|
| MmugDNA.33915.1.S1_at   | MmugDNA.33915.1 | 11.07 | 11.28 | 0.12 | 0.23 | -1.16 | 0.595173 | 0.679066 | 0.795096 | 0.812614 |
| MmugDNA.33916.1.S1_at   | MmugDNA.33916.1 | 4.79  | 4.6   | 0.05 | 0.07 | 1.14  | 0.016905 | 0.079384 | 0.183348 | 0.32676  |
| MmugDNA.33917.1.S1_at   | MmugDNA.33917.1 | 11.14 | 10.76 | 0.15 | 0.05 | 1.31  | 0.028988 | 0.173416 | 0.223033 | 0.449918 |
| MmugDNA.33919.1.S1_at   | MmugDNA.33919.1 | 8.19  | 8.51  | 0.19 | 0.34 | -1.25 | 0.262497 | 0.16458  | 0.556605 | 0.440829 |
| MmugDNA.3392.1.S1_at    | MmugDNA.3392.1  | 3.36  | 3.4   | 0.34 | 0.08 | -1.03 | 0.500208 | 0.651413 | 0.734575 | 0.796212 |
| MmugDNA.33921.1.S1_s_at | MmugDNA.33921.1 | 7.38  | 6.85  | 0.13 | 0.15 | 1.44  | 0.013174 | 0.027747 | 0.165334 | 0.208003 |
| MmugDNA.33922.1.S1_at   | MmugDNA.33922.1 | 5.79  | 5.71  | 0.11 | 0.08 | 1.06  | 0.262202 | 0.395736 | 0.556354 | 0.627639 |
| MmugDNA.33923.1.S1_at   | MmugDNA.33923.1 | 10.48 | 10.64 | 0.53 | 0.07 | -1.12 | 0.561781 | 0.576292 | 0.77459  | 0.747148 |
| MmugDNA.33924.1.S1_at   | MmugDNA.33924.1 | 4.52  | 4.28  | 1.94 | 0.13 | 1.18  | 0.287722 | 0.320421 | 0.577473 | 0.572648 |
| MmugDNA.33925.1.S1_at   | MmugDNA.33925.1 | 4     | 4.06  | 0.16 | 0.22 | -1.04 | 0.775661 | 0.674696 | 0.89744  | 0.809969 |
| MmugDNA.33925.1.S1_s_at | MmugDNA.33925.1 | 7.05  | 6.84  | 0.2  | 0.04 | 1.16  | 0.130028 | 0.124812 | 0.41213  | 0.395219 |
| MmugDNA.3393.1.S1_at    | MmugDNA.3393.1  | 8.61  | 7.92  | 0.45 | 0.14 | 1.61  | 0.183816 | 0.30722  | 0.479745 | 0.563499 |
| MmugDNA.33930.1.S1_at   | MmugDNA.33930.1 | 6.39  | 9.51  | 1.03 | 0.21 | -8.71 | 0.007555 | 0.040872 | 0.135165 | 0.247049 |
| MmugDNA.33930.1.S1_s_at | MmugDNA.33930.1 | 7.19  | 8.99  | 0.48 | 0.2  | -3.48 | 0.004594 | 0.021338 | 0.11389  | 0.182856 |
| MmugDNA.33933.1.S1_at   | MmugDNA.33933.1 | 5.34  | 5.28  | 0.29 | 0.07 | 1.05  | 0.825509 | 0.959577 | 0.922477 | 0.977061 |
| MmugDNA.33936.1.S1_at   | MmugDNA.33936.1 | 4.62  | 4.31  | 0.07 | 0.19 | 1.24  | 0.24953  | 0.322867 | 0.544627 | 0.574209 |
| MmugDNA.33937.1.S1_at   | MmugDNA.33937.1 | 3.99  | 3.48  | 0.6  | 0.27 | 1.43  | 0.212599 | 0.161192 | 0.510654 | 0.437378 |
| MmugDNA.33938.1.S1_at   | MmugDNA.33938.1 | 6.68  | 6.62  | 0.13 | 0.02 | 1.04  | 0.426632 | 0.747254 | 0.684012 | 0.853149 |
| MmugDNA.33939.1.S1_at   | MmugDNA.33939.1 | 6.27  | 6.42  | 0.13 | 0.1  | -1.11 | 0.151466 | 0.229948 | 0.440961 | 0.501802 |
| MmugDNA.33940.1.S1_at   | MmugDNA.33940.1 | 7.78  | 7.75  | 0.16 | 0.07 | 1.02  | 0.503377 | 0.561046 | 0.736931 | 0.737088 |
| MmugDNA.33942.1.S1_at   | MmugDNA.33942.1 | 4.14  | 4.22  | 0.08 | 0    | -1.06 | 0.142967 | 0.12931  | 0.429137 | 0.400726 |
| MmugDNA.33943.1.S1_at   | MmugDNA.33943.1 | 3.89  | 3.86  | 0.04 | 0.12 | 1.02  | 0.271561 | 0.744418 | 0.563425 | 0.852014 |
| MmugDNA.33944.1.S1_at   | MmugDNA.33944.1 | 7.49  | 7.43  | 0.29 | 0.12 | 1.05  | 0.467908 | 0.775492 | 0.713242 | 0.86936  |
| MmugDNA.33945.1.S1_at   | MmugDNA.33945.1 | 9.81  | 9.6   | 0.1  | 0.11 | 1.16  | 0.165293 | 0.414588 | 0.458322 | 0.640431 |
| MmugDNA.33946.1.S1_at   | MmugDNA.33946.1 | 3.51  | 3.45  | 0.06 | 0.18 | 1.05  | 0.539791 | 0.535222 | 0.761062 | 0.720824 |
| MmugDNA.33947.1.S1_at   | MmugDNA.33947.1 | 6.37  | 6.37  | 0.07 | 0    | 1     | 0.442003 | 0.358723 | 0.695411 | 0.60018  |
| MmugDNA.33948.1.S1_at   | MmugDNA.33948.1 | 8.07  | 7.66  | 0.37 | 0.16 | 1.33  | 0.276691 | 0.412138 | 0.568226 | 0.63856  |
| MmugDNA.3395.1.S1_at    | MmugDNA.3395.1  | 5.7   | 5.52  | 0.16 | 0.03 | 1.13  | 0.161403 | 0.117544 | 0.452991 | 0.38531  |
| MmugDNA.33955.1.S1_at   | MmugDNA.33955.1 | 4.21  | 4.01  | 0.03 | 0.09 | 1.15  | 0.026846 | 0.318361 | 0.216925 | 0.571192 |
| MmugDNA.33956.1.S1_at   | MmugDNA.33956.1 | 3.07  | 3.05  | 0.1  | 0.19 | 1.02  | 0.832063 | 0.965535 | 0.926049 | 0.980739 |
| MmugDNA.33957.1.S1_at   | MmugDNA.33957.1 | 4.05  | 4.18  | 0.22 | 0.73 | -1.1  | 0.396242 | 0.739664 | 0.662345 | 0.849146 |
| MmugDNA.33958.1.S1_at   | MmugDNA.33958.1 | 3.19  | 3.2   | 0.1  | 0.1  | -1.01 | 0.587511 | 0.3524   | 0.790485 | 0.595722 |
| MmugDNA.33959.1.S1_at   | MmugDNA.33959.1 | 5.29  | 5.05  | 0.2  | 0.03 | 1.19  | 0.11161  | 0.037394 | 0.387683 | 0.237776 |
| MmugDNA.3396.1.S1_at    | MmugDNA.3396.1  | 5.98  | 6.32  | 0.19 | 0.06 | -1.26 | 0.068309 | 0.009358 | 0.319145 | 0.127602 |
| MmugDNA.33960.1.S1_at   | MmugDNA.33960.1 | 4.46  | 4.32  | 0.12 | 0.13 | 1.11  | 0.352717 | 0.818802 | 0.630029 | 0.895578 |
| MmugDNA.33961.1.S1_at   | MmugDNA.33961.1 | 12.22 | 11.71 | 0.04 | 0.03 | 1.43  | 0.000079 | 0.121288 | 0.051196 | 0.390351 |
| MmugDNA.33963.1.S1_at   | MmugDNA.33963.1 | 4.09  | 3.9   | 0.08 | 0.11 | 1.14  | 0.197811 | 0.277178 | 0.49515  | 0.541154 |
| MmugDNA.33964.1.S1_at   | MmugDNA.33964.1 | 6.16  | 6.35  | 0.08 | 0.02 | -1.14 | 0.019159 | 0.260576 | 0.191932 | 0.527084 |
| MmugDNA.33968.1.S1_at   | MmugDNA.33968.1 | 4.16  | 4.2   | 0.17 | 0.02 | -1.03 | 0.703582 | 0.493615 | 0.859276 | 0.694288 |
| MmugDNA.33970.1.S1_at   | MmugDNA.33970.1 | 6.92  | 7.02  | 0.35 | 0.12 | -1.07 | 0.185906 | 0.239856 | 0.482074 | 0.510611 |
| MmugDNA.33971.1.S1_at   | MmugDNA.33971.1 | 6.49  | 6.7   | 0.61 | 0.39 | -1.16 | 0.764433 | 0.91452  | 0.891963 | 0.951957 |
| MmugDNA.33972.1.S1_at   | MmugDNA.33972.1 | 5.85  | 5.84  | 0.12 | 0.01 | 1.01  | 0.837783 | 0.902764 | 0.928907 | 0.944798 |
| MmugDNA.33974.1.S1_at   | MmugDNA.33974.1 | 12.57 | 12.43 | 0.05 | 0.19 | 1.1   | 0.674324 | 0.531928 | 0.844482 | 0.718995 |

|                         |                 |       |       |      |      |       |          |          |          |          |
|-------------------------|-----------------|-------|-------|------|------|-------|----------|----------|----------|----------|
| MmugDNA.33974.1.S1_s_at | MmugDNA.33974.1 | 10.86 | 10.64 | 0.06 | 0.17 | 1.17  | 0.108666 | 0.098769 | 0.383537 | 0.356875 |
| MmugDNA.33976.1.S1_at   | MmugDNA.33976.1 | 3.59  | 3.85  | 0.16 | 0.13 | -1.2  | 0.084478 | 0.10518  | 0.348133 | 0.366971 |
| MmugDNA.29933.1.S1_s_at | MmugDNA.29933.1 | 7.3   | 7.37  | 0.14 | 0.01 | -1.05 | 0.796538 | 0.644439 | 0.908118 | 0.791578 |
| MmugDNA.33977.1.S1_at   | MmugDNA.33977.1 | 4.33  | 4.3   | 0.2  | 0.02 | 1.02  | 0.244951 | 0.402232 | 0.541134 | 0.631261 |
| MmugDNA.3398.1.S1_at    | MmugDNA.3398.1  | 11.55 | 11.55 | 0.16 | 0.05 | 1     | 0.375962 | 0.170117 | 0.646644 | 0.446868 |
| MmugDNA.33980.1.S1_at   | MmugDNA.33980.1 | 6.93  | 7.27  | 0.71 | 0.33 | -1.27 | 0.32735  | 0.4041   | 0.609988 | 0.632614 |
| MmugDNA.33981.1.S1_at   | MmugDNA.33981.1 | 4.14  | 4.06  | 0.23 | 0.05 | 1.05  | 0.260133 | 0.369621 | 0.554308 | 0.608957 |
| MmugDNA.33983.1.S1_at   | MmugDNA.33983.1 | 5.72  | 5.68  | 0.22 | 0.21 | 1.03  | 0.906334 | 0.554373 | 0.960316 | 0.733168 |
| MmugDNA.33984.1.S1_at   | MmugDNA.33984.1 | 4.7   | 4.89  | 0.16 | 0.28 | -1.14 | 0.937654 | 0.898368 | 0.973776 | 0.942175 |
| MmugDNA.33985.1.S1_at   | MmugDNA.33985.1 | 5.58  | 5.37  | 0.16 | 0.2  | 1.16  | 0.978925 | 0.310387 | 0.992004 | 0.56558  |
| MmugDNA.33986.1.S1_at   | MmugDNA.33986.1 | 3.3   | 3.27  | 0.17 | 0.07 | 1.02  | 0.314136 | 0.266307 | 0.599848 | 0.532099 |
| MmugDNA.33988.1.S1_at   | MmugDNA.33988.1 | 5.13  | 5.28  | 0.69 | 0.65 | -1.11 | 0.710565 | 0.267001 | 0.86316  | 0.532541 |
| MmugDNA.3399.1.S1_at    | MmugDNA.3399.1  | 3.56  | 3.54  | 0.04 | 0.27 | 1.02  | 0.91655  | 0.557703 | 0.964497 | 0.735173 |
| MmugDNA.33990.1.S1_at   | MmugDNA.33990.1 | 6.06  | 5.92  | 0.1  | 0.15 | 1.1   | 0.971067 | 0.636525 | 0.988523 | 0.786247 |
| MmugDNA.33991.1.S1_at   | MmugDNA.33991.1 | 8.38  | 8.09  | 0.28 | 0.12 | 1.22  | 0.043299 | 0.548149 | 0.265362 | 0.728911 |
| MmugDNA.33992.1.S1_at   | MmugDNA.33992.1 | 8.5   | 8.14  | 0.14 | 0.12 | 1.28  | 0.077816 | 0.027025 | 0.336917 | 0.205533 |
| MmugDNA.33993.1.S1_at   | MmugDNA.33993.1 | 4.61  | 4.65  | 0.39 | 0.13 | -1.03 | 0.330472 | 0.47785  | 0.612509 | 0.683843 |
| MmugDNA.33995.1.S1_at   | MmugDNA.33995.1 | 6.25  | 6.36  | 0.16 | 0.09 | -1.08 | 0.487707 | 0.548301 | 0.726421 | 0.729053 |
| MmugDNA.33998.1.S1_at   | MmugDNA.33998.1 | 7.33  | 7.41  | 0.13 | 0.1  | -1.05 | 0.79345  | 0.532857 | 0.906582 | 0.71927  |
| MmugDNA.33999.1.S1_at   | MmugDNA.33999.1 | 3.91  | 3.99  | 0.07 | 0.09 | -1.06 | 0.487882 | 0.180889 | 0.726532 | 0.457394 |
| MmugDNA.340.1.S1_at     | MmugDNA.340.1   | 4.97  | 4.96  | 0.32 | 0.06 | 1.01  | 0.351086 | 0.526852 | 0.628776 | 0.715627 |
| MmugDNA.3400.1.S1_at    | MmugDNA.3400.1  | 7.15  | 7.34  | 0.3  | 0.02 | -1.14 | 0.89995  | 0.899686 | 0.957478 | 0.942903 |
| MmugDNA.34000.1.S1_at   | MmugDNA.34000.1 | 5.25  | 5.37  | 0.69 | 0.09 | -1.09 | 0.472405 | 0.664905 | 0.716189 | 0.803709 |
| MmugDNA.34001.1.S1_at   | MmugDNA.34001.1 | 8.9   | 8.55  | 0.22 | 0.37 | 1.28  | 0.237278 | 0.085231 | 0.534708 | 0.337096 |
| MmugDNA.34002.1.S1_at   | MmugDNA.34002.1 | 7.99  | 8.14  | 0.18 | 0.25 | -1.11 | 0.283711 | 0.153329 | 0.574001 | 0.428139 |
| MmugDNA.34002.1.S1_s_at | MmugDNA.34002.1 | 8.93  | 9.18  | 0.11 | 0.14 | -1.19 | 0.121321 | 0.382806 | 0.400026 | 0.618907 |
| MmugDNA.34005.1.S1_at   | MmugDNA.34005.1 | 10.96 | 11.15 | 0.15 | 0.24 | -1.15 | 0.65927  | 0.142238 | 0.835567 | 0.415754 |
| MmugDNA.34007.1.S1_at   | MmugDNA.34007.1 | 10.11 | 10.03 | 0.27 | 0.13 | 1.06  | 0.987267 | 0.542861 | 0.995376 | 0.725834 |
| MmugDNA.3401.1.S1_at    | MmugDNA.3401.1  | 10.35 | 10.81 | 0.07 | 0.13 | -1.38 | 0.005537 | 0.005423 | 0.119965 | 0.101583 |
| MmugDNA.34010.1.S1_at   | MmugDNA.34010.1 | 5.45  | 5.77  | 0.34 | 0.44 | -1.24 | 0.860043 | 0.529856 | 0.939228 | 0.717526 |
| MmugDNA.34013.1.S1_at   | MmugDNA.34013.1 | 6.87  | 6.85  | 0.22 | 0.09 | 1.02  | 0.333913 | 0.864935 | 0.615174 | 0.923415 |
| MmugDNA.34015.1.S1_at   | MmugDNA.34015.1 | 7.24  | 7.42  | 0.33 | 0.11 | -1.13 | 0.409055 | 0.474284 | 0.671637 | 0.68135  |
| MmugDNA.34017.1.S1_at   | MmugDNA.34017.1 | 3.8   | 3.8   | 0.03 | 0.06 | -1.01 | 0.566898 | 0.873063 | 0.777544 | 0.927822 |
| MmugDNA.34018.1.S1_at   | MmugDNA.34018.1 | 5.15  | 5.09  | 0.07 | 0.09 | 1.04  | 0.702203 | 0.845987 | 0.858658 | 0.912303 |
| MmugDNA.34019.1.S1_at   | MmugDNA.34019.1 | 4.46  | 4.41  | 0.35 | 0.11 | 1.04  | 0.252123 | 0.537522 | 0.546788 | 0.722606 |
| MmugDNA.34020.1.S1_at   | MmugDNA.34020.1 | 3.07  | 3.05  | 0.2  | 0.05 | 1.01  | 0.734176 | 0.579485 | 0.876102 | 0.74918  |
| MmugDNA.34021.1.S1_at   | MmugDNA.34021.1 | 8.1   | 8.49  | 0.11 | 0.25 | -1.31 | 0.084954 | 0.028456 | 0.348877 | 0.210487 |
| MmugDNA.34022.1.S1_at   | MmugDNA.34022.1 | 6.89  | 6.7   | 0.09 | 0.08 | 1.14  | 0.095326 | 0.154162 | 0.364763 | 0.428913 |
| MmugDNA.34023.1.S1_s_at | MmugDNA.34023.1 | 12.19 | 12.5  | 0.03 | 0.06 | -1.24 | 0.00142  | 0.002646 | 0.07964  | 0.076027 |
| MmugDNA.34024.1.S1_at   | MmugDNA.34024.1 | 3.9   | 4     | 0.08 | 0.09 | -1.07 | 0.281048 | 0.081671 | 0.571931 | 0.329886 |
| MmugDNA.34025.1.S1_at   | MmugDNA.34025.1 | 3.07  | 3.02  | 0.12 | 0.04 | 1.04  | 0.277615 | 0.649565 | 0.569151 | 0.795    |
| MmugDNA.34028.1.S1_at   | MmugDNA.34028.1 | 9.39  | 8.76  | 0.38 | 0.13 | 1.55  | 0.047691 | 0.070833 | 0.275876 | 0.31231  |
| MmugDNA.3403.1.S1_at    | MmugDNA.3403.1  | 5.36  | 4.96  | 0.12 | 0.09 | 1.32  | 0.010272 | 0.113563 | 0.151176 | 0.379632 |



|                         |                 |       |       |      |      |       |          |          |          |          |
|-------------------------|-----------------|-------|-------|------|------|-------|----------|----------|----------|----------|
| MmugDNA.34031.1.S1_at   | MmugDNA.34031.1 | 6.33  | 6.39  | 0.22 | 0.09 | -1.04 | 0.440133 | 0.196276 | 0.694203 | 0.471236 |
| MmugDNA.34036.1.S1_at   | MmugDNA.34036.1 | 7.98  | 8.09  | 0.65 | 0.02 | -1.08 | 0.661009 | 0.427059 | 0.836427 | 0.649087 |
| MmugDNA.34037.1.S1_at   | MmugDNA.34037.1 | 6.93  | 6.87  | 0.1  | 0.05 | 1.04  | 0.621858 | 0.11003  | 0.812905 | 0.374163 |
| MmugDNA.34038.1.S1_at   | MmugDNA.34038.1 | 6.04  | 6.2   | 0.22 | 0.15 | -1.11 | 0.839192 | 0.773485 | 0.929483 | 0.868325 |
| MmugDNA.34039.1.S1_at   | MmugDNA.34039.1 | 4.5   | 4.69  | 0.81 | 0.13 | -1.14 | 0.499769 | 0.685606 | 0.734372 | 0.816542 |
| MmugDNA.3404.1.S1_at    | MmugDNA.3404.1  | 7.87  | 7.97  | 0.07 | 0.02 | -1.07 | 0.178755 | 0.55791  | 0.47356  | 0.735292 |
| MmugDNA.34041.1.S1_at   | MmugDNA.34041.1 | 9.47  | 9.26  | 0.11 | 0.03 | 1.16  | 0.040232 | 0.075192 | 0.257084 | 0.319384 |
| MmugDNA.34042.1.S1_at   | MmugDNA.34042.1 | 10.95 | 11.15 | 0.09 | 0.16 | -1.14 | 0.149667 | 0.00174  | 0.438613 | 0.062895 |
| MmugDNA.34043.1.S1_at   | MmugDNA.34043.1 | 3.97  | 3.88  | 0.19 | 0.3  | 1.07  | 0.627812 | 0.15701  | 0.817007 | 0.432467 |
| MmugDNA.34044.1.S1_at   | MmugDNA.34044.1 | 6.9   | 7.03  | 0.31 | 0.06 | -1.09 | 0.6089   | 0.793432 | 0.804797 | 0.880785 |
| MmugDNA.34045.1.S1_at   | MmugDNA.34045.1 | 4.94  | 4.95  | 0.19 | 0.17 | -1.01 | 0.572619 | 0.749415 | 0.780716 | 0.854404 |
| MmugDNA.34046.1.S1_at   | MmugDNA.34046.1 | 7.8   | 8.12  | 0.33 | 0.03 | -1.24 | 0.614001 | 0.93136  | 0.807838 | 0.961034 |
| MmugDNA.34047.1.S1_at   | MmugDNA.34047.1 | 2.65  | 2.68  | 0.44 | 0.04 | -1.02 | 0.400651 | 0.492096 | 0.665527 | 0.693442 |
| MmugDNA.34048.1.S1_at   | MmugDNA.34048.1 | 6.28  | 6.26  | 0.09 | 0.01 | 1.01  | 0.68897  | 0.829342 | 0.851448 | 0.901879 |
| MmugDNA.34049.1.S1_at   | MmugDNA.34049.1 | 10.23 | 10.99 | 0.44 | 0.08 | -1.69 | 0.017634 | 0.208198 | 0.186416 | 0.482086 |
| MmugDNA.34051.1.S1_at   | MmugDNA.34051.1 | 3.5   | 3.44  | 0.22 | 0.11 | 1.04  | 0.58944  | 0.787094 | 0.791592 | 0.876832 |
| MmugDNA.34052.1.S1_at   | MmugDNA.34052.1 | 4.51  | 4.56  | 0.55 | 0.2  | -1.04 | 0.624026 | 0.83676  | 0.814567 | 0.906703 |
| MmugDNA.34053.1.S1_at   | MmugDNA.34053.1 | 3.2   | 3.05  | 0.12 | 0.2  | 1.11  | 0.316133 | 0.393791 | 0.600927 | 0.626565 |
| MmugDNA.34054.1.S1_at   | MmugDNA.34054.1 | 3.5   | 3.47  | 0.22 | 0.03 | 1.02  | 0.957398 | 0.96298  | 0.982581 | 0.979319 |
| MmugDNA.34058.1.S1_at   | MmugDNA.34058.1 | 11.7  | 11.39 | 0.1  | 0.26 | 1.24  | 0.23993  | 0.0003   | 0.537473 | 0.034892 |
| MmugDNA.34059.1.S1_at   | MmugDNA.34059.1 | 4.55  | 3.71  | 0.36 | 1.07 | 1.79  | 0.346022 | 0.472286 | 0.624806 | 0.67994  |
| MmugDNA.34060.1.S1_at   | MmugDNA.34060.1 | 9.71  | 10.09 | 0.45 | 0.12 | -1.31 | 0.504085 | 0.538638 | 0.737367 | 0.723301 |
| MmugDNA.34060.1.S1_s_at | MmugDNA.34060.1 | 11.23 | 11.59 | 0.4  | 0.08 | -1.28 | 0.507311 | 0.509902 | 0.739612 | 0.704492 |
| MmugDNA.34061.1.S1_s_at | MmugDNA.34061.1 | 7.85  | 8.23  | 0.29 | 0.13 | -1.3  | 0.057529 | 0.002646 | 0.297199 | 0.076027 |
| MmugDNA.34062.1.S1_at   | MmugDNA.34062.1 | 5.23  | 5.2   | 0.19 | 0.2  | 1.02  | 0.846957 | 0.633152 | 0.933208 | 0.783969 |
| MmugDNA.34066.1.S1_at   | MmugDNA.34066.1 | 6.65  | 6.56  | 0.15 | 0.05 | 1.06  | 0.775617 | 0.733433 | 0.89744  | 0.845666 |
| MmugDNA.34069.1.S1_at   | MmugDNA.34069.1 | 7.48  | 7.4   | 0.25 | 0.03 | 1.05  | 0.328574 | 0.318597 | 0.610911 | 0.571258 |
| MmugDNA.3407.1.S1_at    | MmugDNA.3407.1  | 8.59  | 8.45  | 0.14 | 0.09 | 1.11  | 0.65653  | 0.22906  | 0.833833 | 0.501378 |
| MmugDNA.34072.1.S1_at   | MmugDNA.34072.1 | 5.25  | 5.29  | 1.01 | 0.1  | -1.02 | 0.414306 | 0.44453  | 0.675558 | 0.662072 |
| MmugDNA.34073.1.S1_at   | MmugDNA.34073.1 | 5.09  | 5.04  | 0.39 | 0.08 | 1.04  | 0.705607 | 0.108067 | 0.860482 | 0.371281 |
| MmugDNA.34074.1.S1_at   | MmugDNA.34074.1 | 3.81  | 3.79  | 0.27 | 0.09 | 1.01  | 0.739518 | 0.917207 | 0.879245 | 0.953758 |
| MmugDNA.34075.1.S1_at   | MmugDNA.34075.1 | 7.68  | 7.51  | 0.32 | 0    | 1.12  | 0.136824 | 0.038762 | 0.421639 | 0.241916 |
| MmugDNA.34077.1.S1_at   | MmugDNA.34077.1 | 6.99  | 7.14  | 0.76 | 0.12 | -1.11 | 0.474809 | 0.582077 | 0.717692 | 0.750784 |
| MmugDNA.34078.1.S1_at   | MmugDNA.34078.1 | 3.79  | 3.77  | 0.1  | 0.12 | 1.01  | 0.840388 | 0.496743 | 0.929923 | 0.696173 |
| MmugDNA.34079.1.S1_at   | MmugDNA.34079.1 | 5.5   | 5.42  | 0.08 | 0.05 | 1.06  | 0.132786 | 0.002084 | 0.416223 | 0.067486 |
| MmugDNA.34080.1.S1_at   | MmugDNA.34080.1 | 11.91 | 12.05 | 0.07 | 0.06 | -1.1  | 0.017467 | 0.036982 | 0.185942 | 0.236733 |
| MmugDNA.34081.1.S1_at   | MmugDNA.34081.1 | 8.75  | 8.65  | 0.29 | 0.29 | 1.07  | 0.633369 | 0.048721 | 0.820372 | 0.265744 |
| MmugDNA.34082.1.S1_at   | MmugDNA.34082.1 | 3.37  | 3.27  | 0.23 | 0.38 | 1.07  | 0.961204 | 0.94585  | 0.984145 | 0.969225 |
| MmugDNA.34083.1.S1_at   | MmugDNA.34083.1 | 6.87  | 6.63  | 0.01 | 0.09 | 1.18  | 0.01394  | 0.385746 | 0.169182 | 0.621079 |
| MmugDNA.34083.1.S1_s_at | MmugDNA.34083.1 | 5.82  | 5.27  | 0.34 | 0.25 | 1.45  | 0.11709  | 0.29041  | 0.394266 | 0.551169 |
| MmugDNA.34084.1.S1_at   | MmugDNA.34084.1 | 6.41  | 6.41  | 0.02 | 0.04 | -1    | 0.560674 | 0.452448 | 0.773972 | 0.667111 |
| MmugDNA.34084.1.S1_x_at | MmugDNA.34084.1 | 7.31  | 7.27  | 0.16 | 0.06 | 1.03  | 0.372728 | 0.25392  | 0.645067 | 0.522274 |
| MmugDNA.34086.1.S1_at   | MmugDNA.34086.1 | 7.09  | 6.29  | 0.17 | 0.44 | 1.74  | 0.081264 | 0.069832 | 0.342222 | 0.310353 |

|                         |                 |       |       |      |      |       |          |          |          |          |
|-------------------------|-----------------|-------|-------|------|------|-------|----------|----------|----------|----------|
| MmugDNA.34087.1.S1_at   | MmugDNA.34087.1 | 3.94  | 3.94  | 0.2  | 0.03 | -1    | 0.378377 | 0.859278 | 0.648638 | 0.919791 |
| MmugDNA.34088.1.S1_at   | MmugDNA.34088.1 | 7.61  | 8.46  | 0.22 | 0.39 | -1.8  | 0.08008  | 0.190697 | 0.340446 | 0.466141 |
| MmugDNA.3409.1.S1_at    | MmugDNA.3409.1  | 8.34  | 8.02  | 0.26 | 0.38 | 1.25  | 0.851252 | 0.557143 | 0.935334 | 0.734957 |
| MmugDNA.34090.1.S1_at   | MmugDNA.34090.1 | 3.74  | 3.72  | 0.17 | 0.08 | 1.02  | 0.439741 | 0.613078 | 0.693902 | 0.770391 |
| MmugDNA.34091.1.S1_at   | MmugDNA.34091.1 | 2.59  | 2.71  | 0.2  | 0    | -1.08 | 0.968572 | 0.77818  | 0.987532 | 0.871209 |
| MmugDNA.34091.1.S1_s_at | MmugDNA.34091.1 | 6.05  | 5.57  | 0.24 | 0.18 | 1.39  | 0.085885 | 0.108093 | 0.350251 | 0.371281 |
| MmugDNA.34093.1.S1_at   | MmugDNA.34093.1 | 4.23  | 3.93  | 0.07 | 0.08 | 1.23  | 0.006758 | 0.003565 | 0.128994 | 0.085525 |
| MmugDNA.34094.1.S1_at   | MmugDNA.34094.1 | 5.81  | 5.41  | 0.19 | 0.2  | 1.32  | 0.16255  | 0.04529  | 0.454561 | 0.25714  |
| MmugDNA.34096.1.S1_at   | MmugDNA.34096.1 | 4.58  | 4.62  | 0.11 | 0.06 | -1.03 | 0.804185 | 0.802119 | 0.912015 | 0.886056 |
| MmugDNA.34099.1.S1_at   | MmugDNA.34099.1 | 10    | 9.56  | 0.17 | 0.11 | 1.35  | 0.01306  | 0.001034 | 0.165004 | 0.051305 |
| MmugDNA.34100.1.S1_at   | MmugDNA.34100.1 | 9.89  | 9.62  | 0.21 | 0.06 | 1.21  | 0.13786  | 0.007212 | 0.422931 | 0.11412  |
| MmugDNA.34101.1.S1_at   | MmugDNA.34101.1 | 7.15  | 6.73  | 0.85 | 0.2  | 1.34  | 0.118741 | 0.048001 | 0.396516 | 0.264109 |
| MmugDNA.34102.1.S1_at   | MmugDNA.34102.1 | 9.1   | 8.91  | 0.16 | 0.04 | 1.14  | 0.150579 | 0.020825 | 0.439629 | 0.180995 |
| MmugDNA.34103.1.S1_at   | MmugDNA.34103.1 | 4.69  | 4     | 0.76 | 0.11 | 1.61  | 0.256066 | 0.166131 | 0.550543 | 0.442694 |
| MmugDNA.34104.1.S1_at   | MmugDNA.34104.1 | 5.1   | 5.2   | 0.26 | 0.02 | -1.07 | 0.749216 | 0.792841 | 0.883888 | 0.880387 |
| MmugDNA.34106.1.S1_s_at | MmugDNA.34106.1 | 5.72  | 6.5   | 0.51 | 0.29 | -1.71 | 0.125287 | 0.502216 | 0.405737 | 0.70006  |
| MmugDNA.34109.1.S1_at   | MmugDNA.34109.1 | 3.61  | 3.72  | 0.07 | 0.15 | -1.08 | 0.527242 | 0.61875  | 0.753009 | 0.774185 |
| MmugDNA.3411.1.S1_at    | MmugDNA.3411.1  | 6.18  | 6.13  | 0.12 | 0.05 | 1.04  | 0.500715 | 0.716573 | 0.734918 | 0.835815 |
| MmugDNA.34110.1.S1_at   | MmugDNA.34110.1 | 6.75  | 6.46  | 0.39 | 0.26 | 1.22  | 0.822004 | 0.533358 | 0.920741 | 0.719567 |
| MmugDNA.34111.1.S1_s_at | MmugDNA.34111.1 | 12.11 | 12.21 | 0.28 | 0.17 | -1.07 | 0.688032 | 0.002585 | 0.851005 | 0.075213 |
| MmugDNA.34112.1.S1_at   | MmugDNA.34112.1 | 3.65  | 3.72  | 0.09 | 0.12 | -1.05 | 0.155181 | 0.300058 | 0.445365 | 0.558262 |
| MmugDNA.34113.1.S1_at   | MmugDNA.34113.1 | 9.2   | 8.93  | 0.09 | 0.11 | 1.2   | 0.052247 | 0.460052 | 0.285979 | 0.671989 |
| MmugDNA.34114.1.S1_at   | MmugDNA.34114.1 | 10.04 | 9.65  | 0.82 | 0.09 | 1.31  | 0.864557 | 0.450112 | 0.941377 | 0.665505 |
| MmugDNA.34115.1.S1_at   | MmugDNA.34115.1 | 4.52  | 4.54  | 0.19 | 0    | -1.02 | 0.566709 | 0.663189 | 0.777534 | 0.802857 |
| MmugDNA.34117.1.S1_at   | MmugDNA.34117.1 | 5.11  | 5.06  | 0.11 | 0.04 | 1.03  | 0.354971 | 0.198272 | 0.631875 | 0.473234 |
| MmugDNA.34118.1.S1_at   | MmugDNA.34118.1 | 7.69  | 7.67  | 0.29 | 0.24 | 1.02  | 0.372759 | 0.471131 | 0.645067 | 0.679183 |
| MmugDNA.3412.1.S1_at    | MmugDNA.3412.1  | 4.71  | 4.68  | 0.67 | 0.37 | 1.02  | 0.834068 | 0.389682 | 0.926972 | 0.623748 |
| MmugDNA.3412.1.S1_s_at  | MmugDNA.3412.1  | 3.08  | 3     | 0.22 | 0.11 | 1.06  | 0.203288 | 0.32379  | 0.501192 | 0.574609 |
| MmugDNA.34122.1.S1_at   | MmugDNA.34122.1 | 8.12  | 8.07  | 0.54 | 0.21 | 1.04  | 0.661259 | 0.909956 | 0.836453 | 0.949206 |
| MmugDNA.34124.1.S1_at   | MmugDNA.34124.1 | 8.08  | 7.23  | 0.42 | 0.18 | 1.79  | 0.055004 | 0.03026  | 0.291539 | 0.215828 |
| MmugDNA.34125.1.S1_at   | MmugDNA.34125.1 | 7.64  | 5.47  | 0.23 | 1.15 | 4.5   | 0.086001 | 0.04954  | 0.35042  | 0.267514 |
| MmugDNA.34126.1.S1_at   | MmugDNA.34126.1 | 6.51  | 7.17  | 0.18 | 0.15 | -1.59 | 0.013468 | 0.000364 | 0.166746 | 0.037273 |
| MmugDNA.34127.1.S1_at   | MmugDNA.34127.1 | 5.04  | 4.82  | 0.25 | 0.1  | 1.16  | 0.084692 | 0.075604 | 0.348607 | 0.32003  |
| MmugDNA.34128.1.S1_at   | MmugDNA.34128.1 | 5.21  | 5.41  | 0.29 | 0.1  | -1.15 | 0.212772 | 0.08212  | 0.510725 | 0.330937 |
| MmugDNA.34129.1.S1_at   | MmugDNA.34129.1 | 4.7   | 5.26  | 0.11 | 0.25 | -1.47 | 0.017955 | 0.098908 | 0.187151 | 0.357049 |
| MmugDNA.3413.1.S1_at    | MmugDNA.3413.1  | 6.64  | 6.66  | 0.72 | 0.18 | -1.01 | 0.404217 | 0.458243 | 0.66805  | 0.671091 |
| MmugDNA.34130.1.S1_at   | MmugDNA.34130.1 | 6.56  | 6.46  | 0.03 | 0.08 | 1.07  | 0.113717 | 0.533363 | 0.390392 | 0.719567 |
| MmugDNA.34131.1.S1_at   | MmugDNA.34131.1 | 3.32  | 3.34  | 0.05 | 0.2  | -1.01 | 0.988075 | 0.54768  | 0.995736 | 0.7286   |
| MmugDNA.34132.1.S1_at   | MmugDNA.34132.1 | 5.05  | 5.1   | 0.03 | 0.3  | -1.04 | 0.790028 | 0.962234 | 0.90449  | 0.978768 |
| MmugDNA.34134.1.S1_at   | MmugDNA.34134.1 | 7.61  | 9.12  | 0.44 | 0.07 | -2.86 | 0.006976 | 0.008072 | 0.130826 | 0.119402 |
| MmugDNA.34137.1.S1_at   | MmugDNA.34137.1 | 5.27  | 5.1   | 0.14 | 0.2  | 1.12  | 0.70268  | 0.840791 | 0.858892 | 0.909237 |
| MmugDNA.34138.1.S1_at   | MmugDNA.34138.1 | 3.77  | 3.75  | 0.11 | 0.23 | 1.01  | 0.301379 | 0.426134 | 0.589325 | 0.648331 |
| MmugDNA.34139.1.S1_at   | MmugDNA.34139.1 | 3.64  | 3.37  | 0.17 | 0.2  | 1.2   | 0.144538 | 0.043707 | 0.431524 | 0.253799 |

|                         |                 |       |       |      |      |       |          |          |          |          |
|-------------------------|-----------------|-------|-------|------|------|-------|----------|----------|----------|----------|
| MmugDNA.3414.1.S1_at    | MmugDNA.3414.1  | 4.44  | 4.31  | 0.11 | 0.09 | 1.1   | 0.114099 | 0.264144 | 0.390869 | 0.530214 |
| MmugDNA.34140.1.S1_at   | MmugDNA.34140.1 | 4.33  | 4.26  | 0.04 | 0.05 | 1.05  | 0.116327 | 0.642576 | 0.393451 | 0.790343 |
| MmugDNA.34141.1.S1_at   | MmugDNA.34141.1 | 4.43  | 4.06  | 0.11 | 0.06 | 1.29  | 0.009273 | 0.003704 | 0.146077 | 0.086769 |
| MmugDNA.34142.1.S1_at   | MmugDNA.34142.1 | 12.31 | 11.6  | 0.62 | 0.58 | 1.64  | 0.19543  | 0.268862 | 0.492136 | 0.534319 |
| MmugDNA.34146.1.S1_at   | MmugDNA.34146.1 | 6.86  | 6.84  | 0.24 | 0.16 | 1.01  | 0.862186 | 0.844446 | 0.940177 | 0.911482 |
| MmugDNA.34147.1.S1_at   | MmugDNA.34147.1 | 3.38  | 3.41  | 0.72 | 0.1  | -1.01 | 0.374334 | 0.670914 | 0.645481 | 0.807629 |
| MmugDNA.34149.1.S1_at   | MmugDNA.34149.1 | 3.44  | 3.02  | 0.23 | 0.23 | 1.33  | 0.34014  | 0.346978 | 0.620352 | 0.591769 |
| MmugDNA.3415.1.S1_s_at  | MmugDNA.3415.1  | 9.44  | 9.52  | 0.18 | 0.12 | -1.06 | 0.521703 | 0.344253 | 0.749403 | 0.589762 |
| MmugDNA.34150.1.S1_s_at | MmugDNA.34150.1 | 10.53 | 11.25 | 0.22 | 0.14 | -1.65 | 0.008427 | 0.000688 | 0.140949 | 0.044166 |
| MmugDNA.34152.1.S1_at   | MmugDNA.34152.1 | 8.69  | 8.69  | 0.12 | 0.28 | -1    | 0.942243 | 0.671823 | 0.975628 | 0.808157 |
| MmugDNA.34154.1.S1_at   | MmugDNA.34154.1 | 2.7   | 2.88  | 0.54 | 0.08 | -1.13 | 0.639036 | 0.769799 | 0.823331 | 0.866339 |
| MmugDNA.34155.1.S1_at   | MmugDNA.34155.1 | 11.71 | 11.98 | 0.37 | 0.07 | -1.21 | 0.702617 | 0.957042 | 0.858877 | 0.975699 |
| MmugDNA.34156.1.S1_at   | MmugDNA.34156.1 | 4.06  | 4.34  | 0.22 | 0.02 | -1.22 | 0.081731 | 0.108701 | 0.342963 | 0.372228 |
| MmugDNA.34157.1.S1_at   | MmugDNA.34157.1 | 4.3   | 4.3   | 0.1  | 0.13 | 1.01  | 0.213155 | 0.545731 | 0.511046 | 0.727653 |
| MmugDNA.34158.1.S1_at   | MmugDNA.34158.1 | 4.3   | 4.45  | 0.67 | 0.21 | -1.12 | 0.640531 | 0.810633 | 0.824322 | 0.890812 |
| MmugDNA.34159.1.S1_at   | MmugDNA.34159.1 | 3.1   | 3.02  | 0.23 | 0.06 | 1.06  | 0.189004 | 0.265219 | 0.485623 | 0.531172 |
| MmugDNA.34161.1.S1_at   | MmugDNA.34161.1 | 4.29  | 4.31  | 0.02 | 0.06 | -1.01 | 0.664841 | 0.208473 | 0.838806 | 0.482421 |
| MmugDNA.34162.1.S1_at   | MmugDNA.34162.1 | 6.64  | 6.15  | 0.3  | 0.28 | 1.4   | 0.084317 | 0.097048 | 0.347695 | 0.354531 |
| MmugDNA.34163.1.S1_at   | MmugDNA.34163.1 | 6.44  | 6.29  | 0.29 | 0.11 | 1.11  | 0.691856 | 0.037904 | 0.852762 | 0.239203 |
| MmugDNA.34164.1.S1_at   | MmugDNA.34164.1 | 6     | 6.12  | 0.25 | 0.28 | -1.09 | 0.600322 | 0.044515 | 0.798793 | 0.255346 |
| MmugDNA.34166.1.S1_at   | MmugDNA.34166.1 | 6.93  | 6.78  | 0.21 | 0.15 | 1.11  | 0.854455 | 0.406303 | 0.936705 | 0.63426  |
| MmugDNA.34167.1.S1_at   | MmugDNA.34167.1 | 3.21  | 3.1   | 0.13 | 0.29 | 1.08  | 0.869396 | 0.429566 | 0.94371  | 0.650961 |
| MmugDNA.34169.1.S1_at   | MmugDNA.34169.1 | 10.04 | 10.49 | 0.18 | 0.03 | -1.37 | 0.023506 | 0.00031  | 0.206519 | 0.035145 |
| MmugDNA.3417.1.S1_at    | MmugDNA.3417.1  | 9.01  | 9.71  | 0.32 | 0.18 | -1.63 | 0.030303 | 0.081625 | 0.227117 | 0.329824 |
| MmugDNA.34170.1.S1_at   | MmugDNA.34170.1 | 7.87  | 7.66  | 0.03 | 0.15 | 1.15  | 0.10004  | 0.192873 | 0.37088  | 0.468379 |
| MmugDNA.34172.1.S1_at   | MmugDNA.34172.1 | 3.49  | 3.56  | 0.06 | 0.01 | -1.05 | 0.164045 | 0.023491 | 0.456843 | 0.19207  |
| MmugDNA.34173.1.S1_at   | MmugDNA.34173.1 | 5.65  | 5.26  | 0.6  | 0.1  | 1.31  | 0.334471 | 0.393947 | 0.615598 | 0.6267   |
| MmugDNA.34175.1.S1_at   | MmugDNA.34175.1 | 4.74  | 6.22  | 0.75 | 0.27 | -2.79 | 0.082193 | 0.264994 | 0.343732 | 0.530973 |
| MmugDNA.34176.1.S1_at   | MmugDNA.34176.1 | 4.14  | 4.23  | 0.32 | 0.08 | -1.07 | 0.512402 | 0.646875 | 0.742962 | 0.793178 |
| MmugDNA.34177.1.S1_at   | MmugDNA.34177.1 | 7.2   | 7.36  | 0.05 | 0    | -1.12 | 0.004288 | 0.004271 | 0.111617 | 0.091847 |
| MmugDNA.34178.1.S1_at   | MmugDNA.34178.1 | 6.43  | 6.21  | 0.96 | 0.31 | 1.17  | 0.522442 | 0.643897 | 0.749811 | 0.791202 |
| MmugDNA.34179.1.S1_at   | MmugDNA.34179.1 | 3.25  | 3.49  | 0.04 | 0.17 | -1.18 | 0.304136 | 0.092132 | 0.591333 | 0.347799 |
| MmugDNA.34180.1.S1_at   | MmugDNA.34180.1 | 4.71  | 4.97  | 0.11 | 0.22 | -1.2  | 0.231221 | 0.069568 | 0.530003 | 0.309848 |
| MmugDNA.34181.1.S1_at   | MmugDNA.34181.1 | 8.65  | 9.36  | 0.42 | 0.14 | -1.63 | 0.086007 | 0.07155  | 0.35042  | 0.313714 |
| MmugDNA.34182.1.S1_at   | MmugDNA.34182.1 | 6.61  | 6.59  | 0.09 | 0.16 | 1.01  | 0.517276 | 0.810692 | 0.74652  | 0.890836 |
| MmugDNA.34183.1.S1_at   | MmugDNA.34183.1 | 3.9   | 3.84  | 0.05 | 0.17 | 1.04  | 0.916788 | 0.779707 | 0.964555 | 0.872303 |
| MmugDNA.34185.1.S1_at   | MmugDNA.34185.1 | 6.09  | 6.34  | 0.22 | 0.02 | -1.19 | 0.42455  | 0.18209  | 0.682267 | 0.45857  |
| MmugDNA.34186.1.S1_at   | MmugDNA.34186.1 | 5.41  | 5.35  | 0.13 | 0.19 | 1.04  | 0.288253 | 0.418237 | 0.577961 | 0.642683 |
| MmugDNA.34187.1.S1_at   | MmugDNA.34187.1 | 9.96  | 10.51 | 0.26 | 0.36 | -1.46 | 0.124325 | 0.043024 | 0.404432 | 0.252067 |
| MmugDNA.34188.1.S1_at   | MmugDNA.34188.1 | 3.68  | 3.66  | 0.12 | 0.12 | 1.02  | 0.840659 | 0.985614 | 0.930057 | 0.991824 |
| MmugDNA.34189.1.S1_at   | MmugDNA.34189.1 | 4.57  | 4.67  | 1.78 | 0.09 | -1.08 | 0.441016 | 0.575081 | 0.694685 | 0.746309 |
| MmugDNA.3419.1.S1_at    | MmugDNA.3419.1  | 6.43  | 6.32  | 0.2  | 0.05 | 1.08  | 0.825628 | 0.259555 | 0.922496 | 0.526469 |
| MmugDNA.34190.1.S1_at   | MmugDNA.34190.1 | 4.26  | 3.99  | 0.03 | 0.03 | 1.21  | 0.000718 | 0.137873 | 0.072175 | 0.410838 |

|                         |                 |       |       |      |      |       |          |          |          |          |
|-------------------------|-----------------|-------|-------|------|------|-------|----------|----------|----------|----------|
| MmugDNA.34191.1.S1_at   | MmugDNA.34191.1 | 5.21  | 5.2   | 0.13 | 0.04 | 1.01  | 0.645664 | 0.770685 | 0.827528 | 0.866801 |
| MmugDNA.34192.1.S1_at   | MmugDNA.34192.1 | 6.8   | 7.81  | 0.25 | 0.07 | -2.01 | 0.002413 | 0.095548 | 0.093606 | 0.352627 |
| MmugDNA.34193.1.S1_at   | MmugDNA.34193.1 | 10.75 | 10.82 | 0.06 | 0.02 | -1.05 | 0.154354 | 0.717429 | 0.444633 | 0.836425 |
| MmugDNA.34194.1.S1_at   | MmugDNA.34194.1 | 7.64  | 7.79  | 0.84 | 0.04 | -1.11 | 0.820885 | 0.096491 | 0.920074 | 0.35409  |
| MmugDNA.34195.1.S1_at   | MmugDNA.34195.1 | 6.25  | 5.83  | 0.42 | 0.21 | 1.34  | 0.345211 | 0.410479 | 0.624322 | 0.637335 |
| MmugDNA.34196.1.S1_at   | MmugDNA.34196.1 | 4.05  | 4.19  | 0.28 | 0.1  | -1.1  | 0.976313 | 0.786344 | 0.990591 | 0.876293 |
| MmugDNA.34198.1.S1_at   | MmugDNA.34198.1 | 5.66  | 5.41  | 0.28 | 0.04 | 1.19  | 0.514627 | 0.737819 | 0.744547 | 0.848096 |
| MmugDNA.34199.1.S1_at   | MmugDNA.34199.1 | 3.84  | 3.8   | 0    | 0.1  | 1.03  | 0.508841 | 0.541389 | 0.740635 | 0.7249   |
| MmugDNA.342.1.S1_at     | MmugDNA.342.1   | 7     | 7.18  | 0.73 | 0.45 | -1.13 | 0.955556 | 0.492477 | 0.981771 | 0.693583 |
| MmugDNA.34200.1.S1_at   | MmugDNA.34200.1 | 5.7   | 8.41  | 1.05 | 0.3  | -6.51 | 0.038216 | 0.064948 | 0.251526 | 0.300855 |
| MmugDNA.34201.1.S1_s_at | MmugDNA.34201.1 | 3.32  | 3.27  | 0.38 | 0.02 | 1.04  | 0.297746 | 0.328594 | 0.586227 | 0.578151 |
| MmugDNA.34202.1.S1_at   | MmugDNA.34202.1 | 6.35  | 6.19  | 1.05 | 0.13 | 1.11  | 0.493511 | 0.483984 | 0.730437 | 0.688262 |
| MmugDNA.34203.1.S1_at   | MmugDNA.34203.1 | 3.43  | 3.62  | 0.15 | 0.13 | -1.15 | 0.167452 | 0.354913 | 0.460677 | 0.597466 |
| MmugDNA.34205.1.S1_at   | MmugDNA.34205.1 | 7.16  | 6.7   | 0.33 | 0.2  | 1.38  | 0.048895 | 0.21504  | 0.278728 | 0.488898 |
| MmugDNA.34206.1.S1_at   | MmugDNA.34206.1 | 5.99  | 5.99  | 0.6  | 0.7  | 1     | 0.9976   | 0.998814 | 0.999129 | 0.999367 |
| MmugDNA.34207.1.S1_at   | MmugDNA.34207.1 | 5.9   | 5.49  | 0.29 | 0.18 | 1.33  | 0.154403 | 0.398777 | 0.444671 | 0.629482 |
| MmugDNA.34208.1.S1_at   | MmugDNA.34208.1 | 3.33  | 3.32  | 0.02 | 0.1  | 1.01  | 0.781824 | 0.661658 | 0.900329 | 0.801903 |
| MmugDNA.3421.1.S1_at    | MmugDNA.3421.1  | 5.91  | 6.03  | 0.23 | 0.1  | -1.09 | 0.703455 | 0.229324 | 0.859271 | 0.501527 |
| MmugDNA.34210.1.S1_at   | MmugDNA.34210.1 | 8.4   | 8.49  | 0.97 | 0.31 | -1.07 | 0.925209 | 0.142658 | 0.968231 | 0.416389 |
| MmugDNA.34211.1.S1_at   | MmugDNA.34211.1 | 4.73  | 4.38  | 0.18 | 0.1  | 1.28  | 0.052077 | 0.060828 | 0.285735 | 0.293348 |
| MmugDNA.34212.1.S1_at   | MmugDNA.34212.1 | 5.02  | 4.71  | 0.31 | 0.18 | 1.24  | 0.175096 | 0.17963  | 0.469373 | 0.456062 |
| MmugDNA.34213.1.S1_at   | MmugDNA.34213.1 | 8.23  | 7.87  | 0.1  | 0.23 | 1.28  | 0.072868 | 0.026677 | 0.327658 | 0.204238 |
| MmugDNA.34214.1.S1_at   | MmugDNA.34214.1 | 4.23  | 4.63  | 0.22 | 0.22 | -1.32 | 0.106262 | 0.096318 | 0.380284 | 0.353798 |
| MmugDNA.34215.1.S1_at   | MmugDNA.34215.1 | 5.23  | 5.09  | 0.23 | 0.13 | 1.1   | 0.159522 | 0.127165 | 0.450802 | 0.397922 |
| MmugDNA.34217.1.S1_at   | MmugDNA.34217.1 | 4.01  | 4.03  | 0.04 | 0.07 | -1.01 | 0.234363 | 0.398138 | 0.532475 | 0.629206 |
| MmugDNA.34218.1.S1_at   | MmugDNA.34218.1 | 2.67  | 2.63  | 0.01 | 0.12 | 1.03  | 0.628804 | 0.342969 | 0.817507 | 0.588786 |
| MmugDNA.34219.1.S1_at   | MmugDNA.34219.1 | 5.42  | 5.3   | 0.13 | 0.11 | 1.09  | 0.700096 | 0.110786 | 0.85752  | 0.375046 |
| MmugDNA.3422.1.S1_at    | MmugDNA.3422.1  | 3.82  | 3.7   | 0.17 | 0.01 | 1.09  | 0.795014 | 0.960899 | 0.907466 | 0.977791 |
| MmugDNA.34220.1.S1_at   | MmugDNA.34220.1 | 4.8   | 4.7   | 0.25 | 0.06 | 1.07  | 0.184081 | 0.704338 | 0.480042 | 0.828435 |
| MmugDNA.34221.1.S1_at   | MmugDNA.34221.1 | 3.86  | 3.5   | 0.36 | 0.1  | 1.29  | 0.264874 | 0.317758 | 0.557962 | 0.570922 |
| MmugDNA.34223.1.S1_at   | MmugDNA.34223.1 | 4.96  | 4.53  | 0.29 | 0.12 | 1.34  | 0.17607  | 0.290287 | 0.470426 | 0.551169 |
| MmugDNA.34224.1.S1_at   | MmugDNA.34224.1 | 9.37  | 9.43  | 0.12 | 0.04 | -1.04 | 0.808863 | 0.873241 | 0.914357 | 0.92788  |
| MmugDNA.34225.1.S1_at   | MmugDNA.34225.1 | 6.03  | 5.97  | 0.04 | 0.08 | 1.04  | 0.432896 | 0.260233 | 0.68855  | 0.526807 |
| MmugDNA.34226.1.S1_at   | MmugDNA.34226.1 | 5.16  | 11.49 | 2.51 | 0.23 | -80.5 | 0.028666 | 0.175649 | 0.221856 | 0.452211 |
| MmugDNA.34228.1.S1_at   | MmugDNA.34228.1 | 4.65  | 4.64  | 0.19 | 0.16 | 1.01  | 0.504196 | 0.564813 | 0.737428 | 0.739427 |
| MmugDNA.34229.1.S1_at   | MmugDNA.34229.1 | 2.85  | 2.83  | 1.6  | 0.61 | 1.02  | 0.573473 | 0.517387 | 0.781136 | 0.709493 |
| MmugDNA.34230.1.S1_at   | MmugDNA.34230.1 | 10.22 | 9.97  | 0.2  | 0.16 | 1.19  | 0.145925 | 0.294018 | 0.433634 | 0.553909 |
| MmugDNA.34231.1.S1_at   | MmugDNA.34231.1 | 6.48  | 6.35  | 0.14 | 0.09 | 1.09  | 0.424734 | 0.087179 | 0.682288 | 0.340133 |
| MmugDNA.34232.1.S1_at   | MmugDNA.34232.1 | 5.88  | 6.18  | 0.64 | 0.24 | -1.23 | 0.566951 | 0.944787 | 0.777544 | 0.968794 |
| MmugDNA.34234.1.S1_at   | MmugDNA.34234.1 | 4.16  | 4.43  | 0.17 | 0.54 | -1.21 | 0.709868 | 0.064707 | 0.862704 | 0.300314 |
| MmugDNA.34235.1.S1_at   | MmugDNA.34235.1 | 5.29  | 5.46  | 0.46 | 0.27 | -1.13 | 0.9633   | 0.629959 | 0.985134 | 0.782031 |
| MmugDNA.34236.1.S1_at   | MmugDNA.34236.1 | 4.53  | 4.75  | 0.82 | 0.29 | -1.16 | 0.676896 | 0.425217 | 0.84582  | 0.647647 |
| MmugDNA.34237.1.S1_at   | MmugDNA.34237.1 | 7.25  | 7     | 0.17 | 0.07 | 1.19  | 0.202123 | 0.335274 | 0.499683 | 0.58304  |

|                         |                 |       |       |      |      |       |          |          |          |          |
|-------------------------|-----------------|-------|-------|------|------|-------|----------|----------|----------|----------|
| MmugDNA.34238.1.S1_at   | MmugDNA.34238.1 | 4.44  | 4.49  | 0.67 | 0.36 | -1.04 | 0.846048 | 0.92245  | 0.932751 | 0.956333 |
| MmugDNA.34239.1.S1_at   | MmugDNA.34239.1 | 4.88  | 4.6   | 0.15 | 0.18 | 1.22  | 0.318483 | 0.521216 | 0.603161 | 0.712304 |
| MmugDNA.3424.1.S1_s_at  | MmugDNA.3424.1  | 9.36  | 9.22  | 0.27 | 0.11 | 1.1   | 0.678026 | 0.787287 | 0.846372 | 0.876929 |
| MmugDNA.34242.1.S1_at   | MmugDNA.34242.1 | 4.9   | 4.8   | 0.28 | 0.04 | 1.07  | 0.503475 | 0.674032 | 0.736984 | 0.809503 |
| MmugDNA.34244.1.S1_at   | MmugDNA.34244.1 | 3.23  | 3.53  | 0.36 | 0.11 | -1.23 | 0.507586 | 0.766666 | 0.739827 | 0.864438 |
| MmugDNA.34246.1.S1_at   | MmugDNA.34246.1 | 4.95  | 4.35  | 0.25 | 0.36 | 1.51  | 0.071754 | 0.560718 | 0.325716 | 0.736921 |
| MmugDNA.34247.1.S1_at   | MmugDNA.34247.1 | 6.27  | 7.94  | 0.45 | 0.42 | -3.17 | 0.011905 | 0.006813 | 0.159222 | 0.111444 |
| MmugDNA.34248.1.S1_at   | MmugDNA.34248.1 | 7.4   | 7.15  | 0.2  | 0.23 | 1.19  | 0.093644 | 0.264548 | 0.362277 | 0.53051  |
| MmugDNA.34249.1.S1_at   | MmugDNA.34249.1 | 3.85  | 3.92  | 0.33 | 0.12 | -1.05 | 0.584608 | 0.504747 | 0.788682 | 0.701808 |
| MmugDNA.3425.1.S1_at    | MmugDNA.3425.1  | 9.63  | 10.09 | 0.3  | 0.19 | -1.38 | 0.141695 | 0.499095 | 0.427634 | 0.697988 |
| MmugDNA.34250.1.S1_at   | MmugDNA.34250.1 | 6.13  | 5.96  | 0.22 | 0.05 | 1.13  | 0.728773 | 0.169911 | 0.873272 | 0.446569 |
| MmugDNA.34251.1.S1_at   | MmugDNA.34251.1 | 8.74  | 6.53  | 0.12 | 0.19 | 4.64  | 0.000054 | 0.035519 | 0.045594 | 0.232735 |
| MmugDNA.34252.1.S1_at   | MmugDNA.34252.1 | 5.32  | 6.13  | 1.11 | 0.35 | -1.76 | 0.788609 | 0.934501 | 0.903962 | 0.962878 |
| MmugDNA.34253.1.S1_at   | MmugDNA.34253.1 | 4.4   | 4.5   | 0.3  | 0.21 | -1.07 | 0.689428 | 0.293489 | 0.851703 | 0.553445 |
| MmugDNA.34255.1.S1_at   | MmugDNA.34255.1 | 6.07  | 6.03  | 0.46 | 0.18 | 1.03  | 0.841105 | 0.738184 | 0.930114 | 0.848203 |
| MmugDNA.34257.1.S1_at   | MmugDNA.34257.1 | 5.33  | 5.13  | 0.36 | 0.19 | 1.15  | 0.364968 | 0.365174 | 0.639649 | 0.605348 |
| MmugDNA.34258.1.S1_at   | MmugDNA.34258.1 | 10.08 | 10.32 | 0.62 | 0.1  | -1.17 | 0.698697 | 0.84731  | 0.856789 | 0.913262 |
| MmugDNA.3426.1.S1_at    | MmugDNA.3426.1  | 5.77  | 5.41  | 0.22 | 0.12 | 1.28  | 0.299608 | 0.154591 | 0.587907 | 0.429489 |
| MmugDNA.34261.1.S1_at   | MmugDNA.34261.1 | 3.72  | 3.87  | 0.27 | 0.16 | -1.11 | 0.963926 | 0.591439 | 0.985358 | 0.756977 |
| MmugDNA.34262.1.S1_at   | MmugDNA.34262.1 | 10.23 | 9.94  | 0.24 | 0.05 | 1.22  | 0.405554 | 0.188647 | 0.668984 | 0.464569 |
| MmugDNA.34263.1.S1_at   | MmugDNA.34263.1 | 8.52  | 8     | 0.1  | 0.1  | 1.44  | 0.002506 | 0.00595  | 0.094326 | 0.105513 |
| MmugDNA.34266.1.S1_at   | MmugDNA.34266.1 | 10.87 | 10.99 | 0.28 | 0.05 | -1.08 | 0.689708 | 0.257919 | 0.851884 | 0.525495 |
| MmugDNA.34267.1.S1_at   | MmugDNA.34267.1 | 5.55  | 5.45  | 0.03 | 0.06 | 1.07  | 0.273658 | 0.126441 | 0.565755 | 0.396995 |
| MmugDNA.34268.1.S1_at   | MmugDNA.34268.1 | 8.58  | 8.65  | 0.33 | 0.11 | -1.05 | 0.549143 | 0.392519 | 0.766994 | 0.625813 |
| MmugDNA.34270.1.S1_at   | MmugDNA.34270.1 | 6.2   | 4.92  | 0.65 | 0.28 | 2.42  | 0.08887  | 0.091138 | 0.355488 | 0.345997 |
| MmugDNA.34271.1.S1_at   | MmugDNA.34271.1 | 4.12  | 4.33  | 0.09 | 0.13 | -1.16 | 0.077179 | 0.303765 | 0.335786 | 0.561174 |
| MmugDNA.34272.1.S1_s_at | MmugDNA.34272.1 | 6.92  | 6.95  | 0.14 | 0.46 | -1.02 | 0.455345 | 0.612005 | 0.705091 | 0.76972  |
| MmugDNA.34273.1.S1_at   | MmugDNA.34273.1 | 5.48  | 5.17  | 0.52 | 0.26 | 1.24  | 0.966131 | 0.10206  | 0.986317 | 0.362122 |
| MmugDNA.34274.1.S1_at   | MmugDNA.34274.1 | 4.12  | 4.16  | 0.59 | 0.16 | -1.03 | 0.474438 | 0.508828 | 0.717455 | 0.703867 |
| MmugDNA.34275.1.S1_at   | MmugDNA.34275.1 | 12.17 | 12.11 | 0.11 | 0.03 | 1.04  | 0.330296 | 0.929091 | 0.612348 | 0.959604 |
| MmugDNA.34276.1.S1_at   | MmugDNA.34276.1 | 3.31  | 3.64  | 0.29 | 0.62 | -1.25 | 0.659379 | 0.299501 | 0.835644 | 0.557918 |
| MmugDNA.34277.1.S1_at   | MmugDNA.34277.1 | 9.44  | 8.58  | 0.25 | 0.48 | 1.81  | 0.078242 | 0.076501 | 0.33782  | 0.321584 |
| MmugDNA.34278.1.S1_at   | MmugDNA.34278.1 | 6.03  | 5.93  | 0.12 | 0.01 | 1.07  | 0.299774 | 0.798759 | 0.5881   | 0.884072 |
| MmugDNA.34279.1.S1_at   | MmugDNA.34279.1 | 10.46 | 8.92  | 0.77 | 0.35 | 2.91  | 0.118972 | 0.553954 | 0.396683 | 0.732896 |
| MmugDNA.34281.1.S1_at   | MmugDNA.34281.1 | 5.28  | 5.2   | 0.18 | 0.05 | 1.06  | 0.855868 | 0.114326 | 0.93725  | 0.380835 |
| MmugDNA.34282.1.S1_at   | MmugDNA.34282.1 | 4.93  | 4.77  | 0.36 | 0.14 | 1.12  | 0.880916 | 0.88277  | 0.949377 | 0.93317  |
| MmugDNA.34284.1.S1_at   | MmugDNA.34284.1 | 5.92  | 5.93  | 0    | 0.22 | -1.01 | 0.550137 | 0.330859 | 0.767664 | 0.57958  |
| MmugDNA.34285.1.S1_at   | MmugDNA.34285.1 | 12.41 | 12.82 | 0.03 | 0.15 | -1.33 | 0.015327 | 0.253602 | 0.176072 | 0.521956 |
| MmugDNA.34286.1.S1_at   | MmugDNA.34286.1 | 7.7   | 7.61  | 0.15 | 0.19 | 1.06  | 0.176099 | 0.211754 | 0.470444 | 0.485757 |
| MmugDNA.34288.1.S1_at   | MmugDNA.34288.1 | 3.62  | 3.31  | 0.09 | 0.1  | 1.24  | 0.009717 | 0.03096  | 0.148542 | 0.217817 |
| MmugDNA.34289.1.S1_at   | MmugDNA.34289.1 | 5.43  | 5.09  | 0.37 | 0.05 | 1.26  | 0.181718 | 0.358903 | 0.477223 | 0.600291 |
| MmugDNA.3429.1.S1_at    | MmugDNA.3429.1  | 5.27  | 5.29  | 0.16 | 0.08 | -1.01 | 0.640508 | 0.371979 | 0.824317 | 0.6108   |
| MmugDNA.34291.1.S1_at   | MmugDNA.34291.1 | 12.77 | 13.1  | 0.24 | 0.14 | -1.26 | 0.220869 | 0.116373 | 0.518833 | 0.383671 |

|                         |                 |       |       |      |      |       |          |          |          |          |
|-------------------------|-----------------|-------|-------|------|------|-------|----------|----------|----------|----------|
| MmugDNA.34294.1.S1_at   | MmugDNA.34294.1 | 5.55  | 5.56  | 0.62 | 0.12 | -1.01 | 0.315601 | 0.255525 | 0.600423 | 0.523538 |
| MmugDNA.34295.1.S1_at   | MmugDNA.34295.1 | 3.25  | 3.17  | 0.29 | 0.17 | 1.06  | 0.602667 | 0.698054 | 0.800362 | 0.824584 |
| MmugDNA.34296.1.S1_at   | MmugDNA.34296.1 | 7.97  | 7.19  | 0.13 | 0.02 | 1.71  | 0.000557 | 0.080456 | 0.070119 | 0.328159 |
| MmugDNA.34297.1.S1_at   | MmugDNA.34297.1 | 3.82  | 3.85  | 0.11 | 0.02 | -1.02 | 0.282737 | 0.04734  | 0.573338 | 0.262303 |
| MmugDNA.34298.1.S1_at   | MmugDNA.34298.1 | 4.43  | 4.32  | 0.1  | 0.04 | 1.08  | 0.693236 | 0.002075 | 0.853369 | 0.067389 |
| MmugDNA.34299.1.S1_at   | MmugDNA.34299.1 | 3.23  | 2.93  | 0.13 | 0.08 | 1.24  | 0.074326 | 0.163673 | 0.330856 | 0.439841 |
| MmugDNA.343.1.S1_at     | MmugDNA.343.1   | 6.43  | 6.43  | 0.13 | 0.1  | -1    | 0.368059 | 0.710828 | 0.641778 | 0.832271 |
| MmugDNA.343.1.S1_s_at   | MmugDNA.343.1   | 6.12  | 6.27  | 0.1  | 0.06 | -1.11 | 0.104776 | 0.70338  | 0.378347 | 0.828007 |
| MmugDNA.3430.1.S1_at    | MmugDNA.3430.1  | 6.96  | 6.96  | 0.21 | 0.02 | 1     | 0.380551 | 0.572558 | 0.65023  | 0.744566 |
| MmugDNA.34300.1.S1_at   | MmugDNA.34300.1 | 9.43  | 9.69  | 0.38 | 0.08 | -1.2  | 0.102661 | 0.005839 | 0.37496  | 0.10467  |
| MmugDNA.34301.1.S1_at   | MmugDNA.34301.1 | 4.36  | 4.06  | 0.41 | 0.05 | 1.23  | 0.279522 | 0.212849 | 0.570786 | 0.486774 |
| MmugDNA.34302.1.S1_at   | MmugDNA.34302.1 | 4.75  | 4.72  | 0.18 | 0.27 | 1.02  | 0.980188 | 0.995432 | 0.992552 | 0.997149 |
| MmugDNA.34303.1.S1_at   | MmugDNA.34303.1 | 5.86  | 6.98  | 0.88 | 0.39 | -2.17 | 0.166811 | 0.323283 | 0.460006 | 0.574408 |
| MmugDNA.34304.1.S1_at   | MmugDNA.34304.1 | 3.27  | 3.06  | 0.17 | 0.02 | 1.15  | 0.115102 | 0.195139 | 0.392115 | 0.470241 |
| MmugDNA.34305.1.S1_at   | MmugDNA.34305.1 | 5.94  | 5.93  | 0.14 | 0.1  | 1.01  | 0.6465   | 0.100933 | 0.828197 | 0.360509 |
| MmugDNA.34306.1.S1_at   | MmugDNA.34306.1 | 4.47  | 4.43  | 1.02 | 0.08 | 1.03  | 0.982711 | 0.928165 | 0.993625 | 0.959209 |
| MmugDNA.34307.1.S1_at   | MmugDNA.34307.1 | 6.41  | 5.66  | 0.37 | 0.41 | 1.68  | 0.23205  | 0.323611 | 0.530631 | 0.574525 |
| MmugDNA.34308.1.S1_at   | MmugDNA.34308.1 | 4.44  | 4.19  | 0.23 | 0.27 | 1.19  | 0.144876 | 0.277888 | 0.431907 | 0.541664 |
| MmugDNA.34311.1.S1_at   | MmugDNA.34311.1 | 8.91  | 8.67  | 0.12 | 0.13 | 1.18  | 0.40283  | 0.008727 | 0.667051 | 0.12389  |
| MmugDNA.34312.1.S1_at   | MmugDNA.34312.1 | 3.35  | 3.49  | 0.06 | 0.06 | -1.1  | 0.022367 | 0.105027 | 0.202817 | 0.366726 |
| MmugDNA.34313.1.S1_at   | MmugDNA.34313.1 | 3.51  | 3.28  | 0.14 | 0.11 | 1.17  | 0.046887 | 0.034544 | 0.27425  | 0.229979 |
| MmugDNA.34314.1.S1_at   | MmugDNA.34314.1 | 7.62  | 7.36  | 0.17 | 0.26 | 1.2   | 0.154545 | 0.001757 | 0.444802 | 0.063134 |
| MmugDNA.34315.1.S1_at   | MmugDNA.34315.1 | 9.15  | 9.14  | 0.21 | 0.03 | 1.01  | 0.750751 | 0.037842 | 0.884876 | 0.238912 |
| MmugDNA.34316.1.S1_at   | MmugDNA.34316.1 | 11.08 | 11    | 0.28 | 0.06 | 1.05  | 0.629548 | 0.014899 | 0.818032 | 0.155137 |
| MmugDNA.34317.1.S1_at   | MmugDNA.34317.1 | 10.3  | 10.18 | 0.22 | 0.14 | 1.08  | 0.499953 | 0.927451 | 0.734494 | 0.958791 |
| MmugDNA.34318.1.S1_at   | MmugDNA.34318.1 | 7.05  | 6.82  | 0.06 | 0.11 | 1.18  | 0.060458 | 0.32307  | 0.30301  | 0.574351 |
| MmugDNA.34319.1.S1_at   | MmugDNA.34319.1 | 12.78 | 12.7  | 0.09 | 0.05 | 1.05  | 0.404341 | 0.154927 | 0.66813  | 0.429909 |
| MmugDNA.3432.1.S1_at    | MmugDNA.3432.1  | 13.47 | 12.83 | 0.11 | 0.02 | 1.56  | 0.000606 | 0.001453 | 0.070727 | 0.058079 |
| MmugDNA.34320.1.S1_at   | MmugDNA.34320.1 | 11.75 | 11.54 | 0.06 | 0.14 | 1.16  | 0.028728 | 0.026145 | 0.222132 | 0.202721 |
| MmugDNA.11828.1.S1_at   | MmugDNA.11828.1 | 11.19 | 11.01 | 0.05 | 0.1  | 1.13  | 0.029994 | 0.036512 | 0.226453 | 0.235526 |
| MmugDNA.11828.1.S1_s_at | MmugDNA.11828.1 | 11.06 | 10.81 | 0.08 | 0.12 | 1.19  | 0.026994 | 0.019815 | 0.217138 | 0.177045 |
| MmugDNA.34322.1.S1_at   | MmugDNA.34322.1 | 5.18  | 4.97  | 0.1  | 0.25 | 1.16  | 0.08923  | 0.08931  | 0.356011 | 0.343499 |
| MmugDNA.34323.1.S1_at   | MmugDNA.34323.1 | 5.46  | 5.41  | 0.3  | 0.1  | 1.03  | 0.913011 | 0.50837  | 0.963229 | 0.703589 |
| MmugDNA.34324.1.S1_at   | MmugDNA.34324.1 | 3.74  | 3.78  | 0.63 | 0.11 | -1.03 | 0.526358 | 0.557596 | 0.752549 | 0.735113 |
| MmugDNA.34325.1.S1_at   | MmugDNA.34325.1 | 6.82  | 6.77  | 0.23 | 0.02 | 1.03  | 0.555913 | 0.774261 | 0.771458 | 0.868735 |
| MmugDNA.34327.1.S1_at   | MmugDNA.34327.1 | 4.76  | 4.86  | 0.17 | 0.08 | -1.07 | 0.743663 | 0.891625 | 0.881384 | 0.938242 |
| MmugDNA.34329.1.S1_at   | MmugDNA.34329.1 | 4.75  | 4.6   | 0.19 | 0.09 | 1.11  | 0.145406 | 0.116684 | 0.432699 | 0.383864 |
| MmugDNA.34331.1.S1_at   | MmugDNA.34331.1 | 6.55  | 6.42  | 0.05 | 0.1  | 1.09  | 0.362189 | 0.009849 | 0.637219 | 0.130274 |
| MmugDNA.34334.1.S1_at   | MmugDNA.34334.1 | 6.87  | 6.93  | 0.27 | 0.07 | -1.04 | 0.743795 | 0.377672 | 0.881384 | 0.615086 |
| MmugDNA.34334.1.S1_x_at | MmugDNA.34334.1 | 6.85  | 6.78  | 0.23 | 0.09 | 1.05  | 0.681459 | 0.474037 | 0.848075 | 0.681181 |
| MmugDNA.34335.1.S1_at   | MmugDNA.34335.1 | 4.97  | 4.93  | 0.53 | 0.56 | 1.03  | 0.943835 | 0.783214 | 0.976378 | 0.874547 |
| MmugDNA.34336.1.S1_at   | MmugDNA.34336.1 | 5.47  | 6.24  | 1.25 | 0.12 | -1.7  | 0.99041  | 0.879163 | 0.996555 | 0.931052 |
| MmugDNA.34337.1.S1_at   | MmugDNA.34337.1 | 3.51  | 3.26  | 0.4  | 0.09 | 1.19  | 0.337715 | 0.528458 | 0.61806  | 0.716643 |

|                         |                 |       |       |      |      |       |          |          |          |          |
|-------------------------|-----------------|-------|-------|------|------|-------|----------|----------|----------|----------|
| MmugDNA.34339.1.S1_at   | MmugDNA.34339.1 | 3.59  | 3.65  | 0.06 | 0.07 | -1.04 | 0.765175 | 0.121325 | 0.892308 | 0.390351 |
| MmugDNA.34341.1.S1_at   | MmugDNA.34341.1 | 4.93  | 5.63  | 0.21 | 0.38 | -1.62 | 0.116794 | 0.076359 | 0.39382  | 0.321368 |
| MmugDNA.34342.1.S1_at   | MmugDNA.34342.1 | 4.01  | 3.96  | 0.15 | 0.06 | 1.04  | 0.512404 | 0.34432  | 0.742962 | 0.589762 |
| MmugDNA.34343.1.S1_at   | MmugDNA.34343.1 | 7.61  | 7.72  | 0.35 | 0.41 | -1.08 | 0.645744 | 0.278241 | 0.82755  | 0.541916 |
| MmugDNA.34344.1.S1_at   | MmugDNA.34344.1 | 4.81  | 4.69  | 0.32 | 0.03 | 1.08  | 0.415874 | 0.474288 | 0.676488 | 0.68135  |
| MmugDNA.34345.1.S1_at   | MmugDNA.34345.1 | 5.33  | 5.46  | 0.25 | 0.19 | -1.09 | 0.527844 | 0.23923  | 0.75334  | 0.509935 |
| MmugDNA.34346.1.S1_at   | MmugDNA.34346.1 | 6.13  | 5.68  | 0.35 | 0.19 | 1.36  | 0.112589 | 0.147066 | 0.388892 | 0.421208 |
| MmugDNA.34347.1.S1_at   | MmugDNA.34347.1 | 8.3   | 8.02  | 0.24 | 0.14 | 1.22  | 0.349525 | 0.191597 | 0.627316 | 0.466918 |
| MmugDNA.34347.1.S1_s_at | MmugDNA.34347.1 | 8.35  | 8.06  | 0.16 | 0.11 | 1.23  | 0.062076 | 0.062629 | 0.305669 | 0.297022 |
| MmugDNA.34348.1.S1_at   | MmugDNA.34348.1 | 9.22  | 9.69  | 0.38 | 0.29 | -1.38 | 0.786928 | 0.600693 | 0.902818 | 0.762238 |
| MmugDNA.34349.1.S1_at   | MmugDNA.34349.1 | 4.57  | 3.85  | 0.82 | 0.14 | 1.64  | 0.23261  | 0.38962  | 0.531064 | 0.623668 |
| MmugDNA.34350.1.S1_at   | MmugDNA.34350.1 | 3.72  | 3.81  | 0.11 | 0.17 | -1.07 | 0.193154 | 0.210944 | 0.489738 | 0.484934 |
| MmugDNA.34351.1.S1_at   | MmugDNA.34351.1 | 3.98  | 3.99  | 0.01 | 0.08 | -1.01 | 0.857473 | 0.560377 | 0.938079 | 0.736645 |
| MmugDNA.34352.1.S1_at   | MmugDNA.34352.1 | 5.01  | 5.05  | 0.24 | 0.05 | -1.03 | 0.994161 | 0.39262  | 0.997585 | 0.625813 |
| MmugDNA.34354.1.S1_at   | MmugDNA.34354.1 | 5.55  | 5.94  | 0.29 | 0.29 | -1.32 | 0.284407 | 0.013171 | 0.574402 | 0.14735  |
| MmugDNA.34355.1.S1_at   | MmugDNA.34355.1 | 9.13  | 7.8   | 0.96 | 0.88 | 2.52  | 0.283211 | 0.416358 | 0.573616 | 0.641563 |
| MmugDNA.34357.1.S1_s_at | MmugDNA.34357.1 | 11.98 | 11.68 | 0.12 | 0.14 | 1.23  | 0.029773 | 0.215209 | 0.225784 | 0.488977 |
| MmugDNA.34358.1.S1_at   | MmugDNA.34358.1 | 8.31  | 8.25  | 0.54 | 0.16 | 1.04  | 0.937054 | 0.42563  | 0.973631 | 0.647993 |
| MmugDNA.34359.1.S1_at   | MmugDNA.34359.1 | 4.71  | 4.66  | 0.03 | 0.1  | 1.03  | 0.903802 | 0.923806 | 0.959255 | 0.957119 |
| MmugDNA.34360.1.S1_at   | MmugDNA.34360.1 | 7.98  | 8.06  | 1.06 | 0.52 | -1.06 | 0.479195 | 0.702299 | 0.720456 | 0.827417 |
| MmugDNA.34361.1.S1_at   | MmugDNA.34361.1 | 9.68  | 10.24 | 0.34 | 0.18 | -1.47 | 0.135246 | 0.411973 | 0.419109 | 0.638434 |
| MmugDNA.34362.1.S1_at   | MmugDNA.34362.1 | 6.68  | 6.3   | 0.3  | 0.25 | 1.3   | 0.085281 | 0.145339 | 0.34932  | 0.419365 |
| MmugDNA.34363.1.S1_at   | MmugDNA.34363.1 | 4.9   | 4.91  | 0.07 | 0.05 | -1    | 0.833319 | 0.223032 | 0.926598 | 0.495861 |
| MmugDNA.34365.1.S1_at   | MmugDNA.34365.1 | 5.19  | 5.19  | 0.68 | 0.02 | -1    | 0.394726 | 0.360465 | 0.66117  | 0.601534 |
| MmugDNA.34366.1.S1_at   | MmugDNA.34366.1 | 7.26  | 7.19  | 0.38 | 0.23 | 1.05  | 0.377702 | 0.214767 | 0.64816  | 0.488624 |
| MmugDNA.34367.1.S1_at   | MmugDNA.34367.1 | 4.58  | 4.46  | 0    | 0.11 | 1.09  | 0.144666 | 0.149069 | 0.43164  | 0.423434 |
| MmugDNA.34368.1.S1_at   | MmugDNA.34368.1 | 4.02  | 4.03  | 0.17 | 0.11 | -1.01 | 0.876368 | 0.213419 | 0.947059 | 0.48728  |
| MmugDNA.34369.1.S1_at   | MmugDNA.34369.1 | 5.95  | 5.97  | 0.13 | 0.07 | -1.01 | 0.526836 | 0.593415 | 0.752776 | 0.758267 |
| MmugDNA.3437.1.S1_at    | MmugDNA.3437.1  | 7.37  | 7.68  | 0.8  | 0.25 | -1.25 | 0.587366 | 0.115071 | 0.790452 | 0.381944 |
| MmugDNA.34370.1.S1_at   | MmugDNA.34370.1 | 5.75  | 5.78  | 0.14 | 0.05 | -1.02 | 0.841049 | 0.576251 | 0.930114 | 0.747148 |
| MmugDNA.34371.1.S1_s_at | MmugDNA.34371.1 | 13.73 | 13.66 | 0.16 | 0.11 | 1.05  | 0.981186 | 0.762021 | 0.992918 | 0.861597 |
| MmugDNA.34372.1.S1_at   | MmugDNA.34372.1 | 6.02  | 5.73  | 0.3  | 0.05 | 1.22  | 0.12112  | 0.133611 | 0.39967  | 0.405565 |
| MmugDNA.34373.1.S1_at   | MmugDNA.34373.1 | 3.92  | 3.92  | 0.04 | 0.17 | -1.01 | 0.281595 | 0.570097 | 0.572497 | 0.742887 |
| MmugDNA.34374.1.S1_at   | MmugDNA.34374.1 | 4.86  | 4.86  | 0.01 | 0.05 | -1    | 0.523402 | 0.064981 | 0.750397 | 0.300855 |
| MmugDNA.34375.1.S1_at   | MmugDNA.34375.1 | 10.05 | 9.7   | 0.24 | 0.09 | 1.27  | 0.123043 | 0.02983  | 0.402192 | 0.214378 |
| MmugDNA.11716.1.S1_s_at | MmugDNA.11716.1 | 12.08 | 12.16 | 0.18 | 0.05 | -1.06 | 0.864662 | 0.029512 | 0.941395 | 0.213486 |
| MmugDNA.34377.1.S1_at   | MmugDNA.34377.1 | 6.56  | 6.11  | 0.67 | 0.23 | 1.37  | 0.109319 | 0.080036 | 0.384379 | 0.327429 |
| MmugDNA.34378.1.S1_at   | MmugDNA.34378.1 | 5.58  | 5.67  | 0.23 | 0.12 | -1.07 | 0.840791 | 0.964782 | 0.930069 | 0.980435 |
| MmugDNA.34379.1.S1_at   | MmugDNA.34379.1 | 11.06 | 10.89 | 0.24 | 0.06 | 1.12  | 0.354341 | 0.029398 | 0.631518 | 0.213352 |
| MmugDNA.3438.1.S1_at    | MmugDNA.3438.1  | 5.9   | 6.02  | 0.37 | 0.23 | -1.09 | 0.684793 | 0.230952 | 0.849802 | 0.502584 |
| MmugDNA.34381.1.S1_at   | MmugDNA.34381.1 | 3.1   | 3.2   | 0.28 | 0.1  | -1.08 | 0.772448 | 0.355223 | 0.895784 | 0.597576 |
| MmugDNA.34383.1.S1_at   | MmugDNA.34383.1 | 3.46  | 3.32  | 0.09 | 0.08 | 1.1   | 0.260814 | 0.321213 | 0.554996 | 0.573137 |
| MmugDNA.34385.1.S1_at   | MmugDNA.34385.1 | 6.34  | 5.48  | 0.4  | 0.39 | 1.81  | 0.127634 | 0.29759  | 0.409551 | 0.556238 |

|                         |                 |       |       |      |      |       |          |          |          |          |
|-------------------------|-----------------|-------|-------|------|------|-------|----------|----------|----------|----------|
| MmugDNA.34386.1.S1_at   | MmugDNA.34386.1 | 8.66  | 9.2   | 0.4  | 0.05 | -1.46 | 0.079179 | 0.098667 | 0.338988 | 0.356751 |
| MmugDNA.34387.1.S1_at   | MmugDNA.34387.1 | 5.51  | 5.21  | 0.66 | 0.09 | 1.23  | 0.535102 | 0.749922 | 0.758193 | 0.854631 |
| MmugDNA.34388.1.S1_at   | MmugDNA.34388.1 | 5.35  | 5.4   | 0.27 | 0.2  | -1.04 | 0.380427 | 0.478041 | 0.650177 | 0.684055 |
| MmugDNA.3439.1.S1_at    | MmugDNA.3439.1  | 4.03  | 3.94  | 0.56 | 0.17 | 1.06  | 0.299911 | 0.469664 | 0.588233 | 0.678327 |
| MmugDNA.34390.1.S1_at   | MmugDNA.34390.1 | 3.33  | 3.31  | 0.13 | 0.22 | 1.02  | 0.624636 | 0.807634 | 0.814918 | 0.889237 |
| MmugDNA.34391.1.S1_at   | MmugDNA.34391.1 | 9.02  | 8.98  | 0.45 | 0.23 | 1.02  | 0.978113 | 0.989764 | 0.991503 | 0.994108 |
| MmugDNA.34392.1.S1_at   | MmugDNA.34392.1 | 4.2   | 4.09  | 0.22 | 0.03 | 1.07  | 0.487696 | 0.625156 | 0.726421 | 0.779025 |
| MmugDNA.34393.1.S1_at   | MmugDNA.34393.1 | 5.89  | 5.83  | 0.03 | 0.05 | 1.04  | 0.101103 | 0.043873 | 0.372328 | 0.254088 |
| MmugDNA.34394.1.S1_at   | MmugDNA.34394.1 | 4.4   | 4.79  | 0.41 | 0.4  | -1.31 | 0.972297 | 0.481421 | 0.988877 | 0.686436 |
| MmugDNA.34395.1.S1_at   | MmugDNA.34395.1 | 7.67  | 7.4   | 0.51 | 0.18 | 1.2   | 0.325293 | 0.070444 | 0.608663 | 0.311737 |
| MmugDNA.34396.1.S1_at   | MmugDNA.34396.1 | 5.49  | 5.25  | 0.14 | 0.03 | 1.18  | 0.081842 | 0.071424 | 0.343105 | 0.313555 |
| MmugDNA.34398.1.S1_at   | MmugDNA.34398.1 | 7.05  | 6.78  | 0.26 | 0.01 | 1.21  | 0.158542 | 0.01815  | 0.449641 | 0.169673 |
| MmugDNA.34399.1.S1_at   | MmugDNA.34399.1 | 8.41  | 8.23  | 0.31 | 0.17 | 1.13  | 0.122293 | 0.181306 | 0.40112  | 0.457834 |
| MmugDNA.344.1.S1_at     | MmugDNA.344.1   | 5.63  | 5.88  | 0.14 | 0.17 | -1.19 | 0.587507 | 0.082533 | 0.790485 | 0.33167  |
| MmugDNA.34400.1.S1_at   | MmugDNA.34400.1 | 7.34  | 7.51  | 0.11 | 0.11 | -1.13 | 0.149662 | 0.000755 | 0.438613 | 0.045364 |
| MmugDNA.34401.1.S1_at   | MmugDNA.34401.1 | 7.24  | 8.38  | 0.45 | 0.22 | -2.21 | 0.055492 | 0.142971 | 0.292516 | 0.416854 |
| MmugDNA.34403.1.S1_at   | MmugDNA.34403.1 | 3.87  | 3.79  | 0.52 | 0.14 | 1.06  | 0.400839 | 0.553696 | 0.665577 | 0.732777 |
| MmugDNA.34404.1.S1_at   | MmugDNA.34404.1 | 6.46  | 6.29  | 0.18 | 0.39 | 1.12  | 0.356593 | 0.406752 | 0.632869 | 0.634492 |
| MmugDNA.34404.1.S1_s_at | MmugDNA.34404.1 | 6.76  | 6.23  | 0.35 | 0.21 | 1.44  | 0.230554 | 0.181889 | 0.529462 | 0.45842  |
| MmugDNA.34406.1.S1_at   | MmugDNA.34406.1 | 3.48  | 3.44  | 0.02 | 0.12 | 1.03  | 0.541187 | 0.698702 | 0.761994 | 0.824944 |
| MmugDNA.34408.1.S1_at   | MmugDNA.34408.1 | 8.15  | 8.05  | 0.42 | 0.33 | 1.07  | 0.495917 | 0.513283 | 0.731941 | 0.706881 |
| MmugDNA.3441.1.S1_at    | MmugDNA.3441.1  | 5.15  | 3.67  | 0.42 | 0.4  | 2.79  | 0.027402 | 0.018377 | 0.218385 | 0.170499 |
| MmugDNA.34410.1.S1_at   | MmugDNA.34410.1 | 10.01 | 10.05 | 0.3  | 0.19 | -1.03 | 0.343693 | 0.942936 | 0.623048 | 0.967574 |
| MmugDNA.34411.1.S1_at   | MmugDNA.34411.1 | 8.21  | 7.58  | 0.78 | 0.12 | 1.55  | 0.180293 | 0.171499 | 0.475456 | 0.447895 |
| MmugDNA.34412.1.S1_at   | MmugDNA.34412.1 | 6.9   | 6.53  | 0.41 | 0.27 | 1.29  | 0.808488 | 0.930881 | 0.914284 | 0.960739 |
| MmugDNA.34413.1.S1_at   | MmugDNA.34413.1 | 5.2   | 5.05  | 0.2  | 0.09 | 1.11  | 0.132717 | 0.162117 | 0.416078 | 0.438267 |
| MmugDNA.34414.1.S1_at   | MmugDNA.34414.1 | 3.66  | 3.8   | 0.18 | 0.14 | -1.1  | 0.175403 | 0.251288 | 0.469836 | 0.519984 |
| MmugDNA.34416.1.S1_at   | MmugDNA.34416.1 | 5.16  | 5.56  | 0.08 | 0.25 | -1.32 | 0.054854 | 0.090689 | 0.291033 | 0.345151 |
| MmugDNA.34417.1.S1_at   | MmugDNA.34417.1 | 5.92  | 5.95  | 0    | 0.11 | -1.02 | 0.626083 | 0.81003  | 0.815802 | 0.890518 |
| MmugDNA.34418.1.S1_s_at | MmugDNA.34418.1 | 7.35  | 7.08  | 0.17 | 0.06 | 1.21  | 0.031432 | 0.017808 | 0.230499 | 0.168588 |
| MmugDNA.34419.1.S1_at   | MmugDNA.34419.1 | 7.39  | 6.93  | 0.08 | 0.12 | 1.38  | 0.008306 | 0.011428 | 0.140083 | 0.138437 |
| MmugDNA.3442.1.S1_at    | MmugDNA.3442.1  | 5.26  | 4.99  | 0.37 | 0.07 | 1.2   | 0.314769 | 0.432179 | 0.600124 | 0.652775 |
| MmugDNA.34421.1.S1_at   | MmugDNA.34421.1 | 3.44  | 3.42  | 0.15 | 0.04 | 1.01  | 0.231065 | 0.232304 | 0.52984  | 0.504031 |
| MmugDNA.34422.1.S1_at   | MmugDNA.34422.1 | 3.79  | 4.03  | 0.16 | 0.44 | -1.18 | 0.413446 | 0.408144 | 0.674789 | 0.635482 |
| MmugDNA.34423.1.S1_at   | MmugDNA.34423.1 | 4.68  | 4.73  | 0.29 | 0.16 | -1.04 | 0.637031 | 0.777373 | 0.822336 | 0.87064  |
| MmugDNA.34424.1.S1_at   | MmugDNA.34424.1 | 6.09  | 6.29  | 0.4  | 0.17 | -1.15 | 0.12939  | 0.106573 | 0.411701 | 0.369107 |
| MmugDNA.34425.1.S1_at   | MmugDNA.34425.1 | 3.81  | 3.8   | 0.1  | 0.01 | 1     | 0.668674 | 0.749562 | 0.841033 | 0.854499 |
| MmugDNA.34426.1.S1_at   | MmugDNA.34426.1 | 4.67  | 4.67  | 0.08 | 0.13 | -1    | 0.251453 | 0.440327 | 0.546299 | 0.658899 |
| MmugDNA.34427.1.S1_at   | MmugDNA.34427.1 | 4.15  | 3.82  | 0.21 | 0.18 | 1.26  | 0.265214 | 0.188222 | 0.557962 | 0.464251 |
| MmugDNA.34429.1.S1_at   | MmugDNA.34429.1 | 5.83  | 6.05  | 0.28 | 0.09 | -1.16 | 0.350227 | 0.181392 | 0.628033 | 0.457919 |
| MmugDNA.3443.1.S1_at    | MmugDNA.3443.1  | 4.6   | 4.75  | 0.75 | 0.09 | -1.11 | 0.526384 | 0.306348 | 0.752556 | 0.562971 |
| MmugDNA.34430.1.S1_at   | MmugDNA.34430.1 | 4.64  | 4.64  | 0.06 | 0.02 | -1    | 0.873238 | 0.980444 | 0.945619 | 0.989333 |
| MmugDNA.34432.1.S1_at   | MmugDNA.34432.1 | 5.96  | 5.83  | 0.19 | 0.13 | 1.1   | 0.167412 | 0.319408 | 0.46059  | 0.571762 |



|                         |                 |       |       |      |      |        |          |          |          |          |
|-------------------------|-----------------|-------|-------|------|------|--------|----------|----------|----------|----------|
| MmugDNA.34433.1.S1_at   | MmugDNA.34433.1 | 10.51 | 10.41 | 0.05 | 0.02 | 1.07   | 0.034275 | 0.657317 | 0.239767 | 0.799638 |
| MmugDNA.34434.1.S1_at   | MmugDNA.34434.1 | 7.65  | 7.62  | 0.09 | 0.05 | 1.02   | 0.903832 | 0.092889 | 0.959266 | 0.349024 |
| MmugDNA.34435.1.S1_at   | MmugDNA.34435.1 | 5.66  | 5.55  | 0.22 | 0.07 | 1.08   | 0.584338 | 0.610897 | 0.788579 | 0.768948 |
| MmugDNA.34436.1.S1_at   | MmugDNA.34436.1 | 9.88  | 9.88  | 0.21 | 0.15 | 1      | 0.946937 | 0.963265 | 0.977699 | 0.979477 |
| MmugDNA.34437.1.S1_at   | MmugDNA.34437.1 | 4.88  | 4.43  | 0.29 | 0.21 | 1.36   | 0.115379 | 0.328678 | 0.392461 | 0.578213 |
| MmugDNA.34438.1.S1_at   | MmugDNA.34438.1 | 4.02  | 4.02  | 0.02 | 0.04 | -1     | 0.619574 | 0.773226 | 0.811315 | 0.868163 |
| MmugDNA.34439.1.S1_at   | MmugDNA.34439.1 | 4.45  | 4.48  | 0.26 | 0.01 | -1.02  | 0.8644   | 0.964997 | 0.9413   | 0.980553 |
| MmugDNA.3444.1.S1_at    | MmugDNA.3444.1  | 4.37  | 4.52  | 0.06 | 0.09 | -1.11  | 0.03573  | 0.031167 | 0.243972 | 0.218378 |
| MmugDNA.34441.1.S1_at   | MmugDNA.34441.1 | 4.35  | 4.4   | 0.56 | 0.28 | -1.03  | 0.838775 | 0.94536  | 0.929209 | 0.968942 |
| MmugDNA.34443.1.S1_at   | MmugDNA.34443.1 | 4.5   | 4.51  | 0.05 | 0.09 | -1.01  | 0.538574 | 0.180781 | 0.760315 | 0.457306 |
| MmugDNA.34444.1.S1_at   | MmugDNA.34444.1 | 4.2   | 3.93  | 0.21 | 0.02 | 1.21   | 0.205437 | 0.217831 | 0.503171 | 0.491385 |
| MmugDNA.34445.1.S1_at   | MmugDNA.34445.1 | 5.97  | 5.98  | 0.13 | 0.07 | -1.01  | 0.757596 | 0.30527  | 0.888802 | 0.562255 |
| MmugDNA.34446.1.S1_at   | MmugDNA.34446.1 | 3.55  | 3.52  | 0.04 | 0.12 | 1.02   | 0.550538 | 0.261976 | 0.767859 | 0.52836  |
| MmugDNA.34447.1.S1_at   | MmugDNA.34447.1 | 4.01  | 3.87  | 0.27 | 0.11 | 1.1    | 0.406444 | 0.503627 | 0.669756 | 0.700988 |
| MmugDNA.34448.1.S1_at   | MmugDNA.34448.1 | 5.77  | 6.91  | 0.67 | 0.29 | -2.21  | 0.056205 | 0.380292 | 0.294294 | 0.616975 |
| MmugDNA.34449.1.S1_at   | MmugDNA.34449.1 | 7.09  | 6.83  | 0.32 | 0.24 | 1.19   | 0.766484 | 0.677429 | 0.892885 | 0.81167  |
| MmugDNA.3445.1.S1_at    | MmugDNA.3445.1  | 3.23  | 3.25  | 0.09 | 0.14 | -1.01  | 0.59661  | 0.57242  | 0.795916 | 0.744497 |
| MmugDNA.34450.1.S1_at   | MmugDNA.34450.1 | 3.57  | 3.58  | 0.14 | 0.11 | -1     | 0.218237 | 0.344538 | 0.515982 | 0.589909 |
| MmugDNA.34452.1.S1_s_at | MmugDNA.34452.1 | 8.4   | 8.22  | 0.18 | 0.1  | 1.13   | 0.101882 | 0.252353 | 0.373482 | 0.520998 |
| MmugDNA.34453.1.S1_at   | MmugDNA.34453.1 | 3.65  | 3.63  | 0.16 | 0    | 1.02   | 0.93512  | 0.926722 | 0.972864 | 0.958404 |
| MmugDNA.34454.1.S1_at   | MmugDNA.34454.1 | 7.99  | 7.29  | 0.75 | 0.18 | 1.63   | 0.437063 | 0.086808 | 0.691921 | 0.339583 |
| MmugDNA.34455.1.S1_at   | MmugDNA.34455.1 | 4.38  | 4.34  | 0.39 | 0.27 | 1.03   | 0.508119 | 0.089894 | 0.740257 | 0.344073 |
| MmugDNA.34457.1.S1_at   | MmugDNA.34457.1 | 4.2   | 4.05  | 0.25 | 0.03 | 1.11   | 0.988103 | 0.627896 | 0.995736 | 0.780849 |
| MmugDNA.34458.1.S1_at   | MmugDNA.34458.1 | 8.41  | 8.48  | 0.09 | 0.19 | -1.04  | 0.779718 | 0.000183 | 0.899387 | 0.030511 |
| MmugDNA.34459.1.S1_x_at | MmugDNA.34459.1 | 12.04 | 12.02 | 0.46 | 0.2  | 1.02   | 0.381481 | 0.192898 | 0.651094 | 0.468379 |
| MmugDNA.3446.1.S1_at    | MmugDNA.3446.1  | 12.08 | 12.06 | 0.08 | 0.1  | 1.02   | 0.655516 | 0.14153  | 0.833421 | 0.415063 |
| MmugDNA.34460.1.S1_at   | MmugDNA.34460.1 | 5.02  | 4.83  | 0.26 | 0.34 | 1.14   | 0.851321 | 0.688835 | 0.935336 | 0.818338 |
| MmugDNA.34461.1.S1_at   | MmugDNA.34461.1 | 6.76  | 7.71  | 1.29 | 0.71 | -1.94  | 0.498312 | 0.593398 | 0.733585 | 0.758267 |
| MmugDNA.34462.1.S1_at   | MmugDNA.34462.1 | 5.38  | 5.36  | 0.18 | 0.02 | 1.01   | 0.776835 | 0.919606 | 0.89806  | 0.954848 |
| MmugDNA.34463.1.S1_at   | MmugDNA.34463.1 | 4.51  | 4.14  | 0.07 | 0.04 | 1.29   | 0.00174  | 0.012904 | 0.085035 | 0.146232 |
| MmugDNA.34464.1.S1_at   | MmugDNA.34464.1 | 4.18  | 3.89  | 0.64 | 0.04 | 1.22   | 0.303472 | 0.475648 | 0.590969 | 0.682309 |
| MmugDNA.34465.1.S1_at   | MmugDNA.34465.1 | 3.97  | 3.84  | 0.29 | 0.09 | 1.09   | 0.398044 | 0.755057 | 0.663593 | 0.857434 |
| MmugDNA.34466.1.S1_at   | MmugDNA.34466.1 | 2.96  | 3.05  | 0.05 | 0.08 | -1.06  | 0.107843 | 0.293362 | 0.382472 | 0.553285 |
| MmugDNA.34467.1.S1_at   | MmugDNA.34467.1 | 4.15  | 3.9   | 0.26 | 0.25 | 1.19   | 0.253721 | 0.250631 | 0.547981 | 0.51941  |
| MmugDNA.34469.1.S1_at   | MmugDNA.34469.1 | 3.99  | 4.05  | 0.18 | 0    | -1.05  | 0.754892 | 0.877442 | 0.886949 | 0.930156 |
| MmugDNA.3447.1.S1_at    | MmugDNA.3447.1  | 5.6   | 6.06  | 0.21 | 0.19 | -1.37  | 0.047953 | 0.173805 | 0.276361 | 0.450128 |
| MmugDNA.34470.1.S1_at   | MmugDNA.34470.1 | 10.1  | 9.86  | 0.18 | 0.1  | 1.18   | 0.172521 | 0.594231 | 0.466621 | 0.758517 |
| MmugDNA.34470.1.S1_s_at | MmugDNA.34470.1 | 9.03  | 8.67  | 0.22 | 0.1  | 1.28   | 0.089163 | 0.295188 | 0.3559   | 0.554568 |
| MmugDNA.34472.1.S1_at   | MmugDNA.34472.1 | 4.25  | 8.49  | 1.44 | 0.21 | -18.82 | 0.015413 | 0.045235 | 0.176257 | 0.257005 |
| MmugDNA.34473.1.S1_at   | MmugDNA.34473.1 | 10.52 | 10.54 | 0.49 | 0.05 | -1.01  | 0.630797 | 0.559361 | 0.818647 | 0.736242 |
| MmugDNA.34475.1.S1_at   | MmugDNA.34475.1 | 6.05  | 6.1   | 0.2  | 0.05 | -1.03  | 0.707566 | 0.059664 | 0.861502 | 0.290919 |
| MmugDNA.34477.1.S1_at   | MmugDNA.34477.1 | 5.91  | 6.01  | 0.15 | 0.31 | -1.07  | 0.744172 | 0.875508 | 0.881397 | 0.929262 |
| MmugDNA.34478.1.S1_at   | MmugDNA.34478.1 | 3.89  | 3.92  | 0.12 | 0.21 | -1.02  | 0.350849 | 0.614021 | 0.628649 | 0.771026 |

|                         |                 |       |       |      |      |       |          |          |          |          |
|-------------------------|-----------------|-------|-------|------|------|-------|----------|----------|----------|----------|
| MmugDNA.34479.1.S1_at   | MmugDNA.34479.1 | 4.44  | 4.32  | 0.02 | 0.23 | 1.09  | 0.359367 | 0.466653 | 0.634935 | 0.676425 |
| MmugDNA.34480.1.S1_at   | MmugDNA.34480.1 | 10.56 | 11.97 | 0.24 | 0.09 | -2.66 | 0.000717 | 0.008184 | 0.072175 | 0.120053 |
| MmugDNA.34484.1.S1_at   | MmugDNA.34484.1 | 7.07  | 7.02  | 0.12 | 0.03 | 1.03  | 0.73421  | 0.235197 | 0.876106 | 0.50629  |
| MmugDNA.34485.1.S1_at   | MmugDNA.34485.1 | 6.93  | 7.04  | 0.14 | 0.15 | -1.08 | 0.811613 | 0.302524 | 0.915647 | 0.560201 |
| MmugDNA.34486.1.S1_at   | MmugDNA.34486.1 | 6.9   | 6.91  | 0.88 | 0.05 | -1    | 0.719606 | 0.870281 | 0.867731 | 0.926392 |
| MmugDNA.34487.1.S1_at   | MmugDNA.34487.1 | 6.7   | 6.63  | 0.17 | 0.09 | 1.05  | 0.4013   | 0.610171 | 0.665992 | 0.768419 |
| MmugDNA.11382.1.S1_at   | MmugDNA.11382.1 | 10.57 | 10.62 | 0.27 | 0.02 | -1.04 | 0.957029 | 0.734782 | 0.982369 | 0.846446 |
| MmugDNA.11382.1.S1_s_at | MmugDNA.11382.1 | 12.36 | 12.06 | 0.3  | 0.14 | 1.23  | 0.234863 | 0.198651 | 0.532901 | 0.473391 |
| MmugDNA.34489.1.S1_at   | MmugDNA.34489.1 | 4.16  | 3.83  | 0.43 | 0.09 | 1.25  | 0.068948 | 0.060329 | 0.320591 | 0.292254 |
| MmugDNA.3449.1.S1_at    | MmugDNA.3449.1  | 6.58  | 6.63  | 0.16 | 0.05 | -1.04 | 0.998996 | 0.644269 | 0.999637 | 0.791506 |
| MmugDNA.34490.1.S1_at   | MmugDNA.34490.1 | 6.87  | 6.9   | 0.3  | 0.27 | -1.02 | 0.770041 | 0.054759 | 0.894469 | 0.279506 |
| MmugDNA.34491.1.S1_at   | MmugDNA.34491.1 | 4.16  | 3.18  | 0.94 | 0.16 | 1.97  | 0.189214 | 0.236453 | 0.485786 | 0.507314 |
| MmugDNA.34492.1.S1_at   | MmugDNA.34492.1 | 3.46  | 3.34  | 0.26 | 0.1  | 1.08  | 0.184752 | 0.234489 | 0.480792 | 0.505674 |
| MmugDNA.34494.1.S1_at   | MmugDNA.34494.1 | 5.42  | 5.49  | 0.17 | 0.04 | -1.05 | 0.529862 | 0.696673 | 0.75451  | 0.823818 |
| MmugDNA.34495.1.S1_at   | MmugDNA.34495.1 | 7.45  | 8.36  | 0.17 | 0.16 | -1.88 | 0.006357 | 0.020725 | 0.126104 | 0.180645 |
| MmugDNA.34497.1.S1_at   | MmugDNA.34497.1 | 9.28  | 9.68  | 0.19 | 0.24 | -1.32 | 0.21287  | 0.545076 | 0.510857 | 0.727313 |
| MmugDNA.34499.1.S1_at   | MmugDNA.34499.1 | 5.57  | 5     | 0.07 | 0.39 | 1.47  | 0.093078 | 0.055851 | 0.361726 | 0.282172 |
| MmugDNA.345.1.S1_s_at   | MmugDNA.345.1   | 9.89  | 9.33  | 0.05 | 0.22 | 1.48  | 0.01247  | 0.027061 | 0.161927 | 0.205689 |
| MmugDNA.34502.1.S1_at   | MmugDNA.34502.1 | 7.22  | 7.14  | 1.02 | 0.09 | 1.06  | 0.617529 | 0.747984 | 0.810046 | 0.853341 |
| MmugDNA.34504.1.S1_at   | MmugDNA.34504.1 | 11.48 | 11.29 | 0.19 | 0.03 | 1.14  | 0.500275 | 0.646389 | 0.734595 | 0.792839 |
| MmugDNA.34506.1.S1_at   | MmugDNA.34506.1 | 6.31  | 6.28  | 0.21 | 0.24 | 1.02  | 0.406371 | 0.026555 | 0.669705 | 0.203915 |
| MmugDNA.34507.1.S1_at   | MmugDNA.34507.1 | 5.22  | 5.89  | 0.43 | 0.1  | -1.6  | 0.07435  | 0.135634 | 0.330891 | 0.40775  |
| MmugDNA.34508.1.S1_at   | MmugDNA.34508.1 | 7.93  | 8.56  | 0.11 | 0.3  | -1.55 | 0.044761 | 0.018909 | 0.268899 | 0.173002 |
| MmugDNA.3451.1.S1_at    | MmugDNA.3451.1  | 4.6   | 4.6   | 0.05 | 0.01 | 1     | 0.311764 | 0.655152 | 0.597888 | 0.798309 |
| MmugDNA.34511.1.S1_at   | MmugDNA.34511.1 | 7.18  | 6.6   | 0.56 | 0.14 | 1.49  | 0.442571 | 0.202844 | 0.696014 | 0.477312 |
| MmugDNA.34512.1.S1_at   | MmugDNA.34512.1 | 2.92  | 2.81  | 0.15 | 0.17 | 1.07  | 0.891407 | 0.97035  | 0.95372  | 0.983843 |
| MmugDNA.34513.1.S1_at   | MmugDNA.34513.1 | 7.45  | 7.32  | 0.12 | 0.18 | 1.09  | 0.491584 | 0.008021 | 0.729312 | 0.119047 |
| MmugDNA.34514.1.S1_at   | MmugDNA.34514.1 | 3.79  | 3.79  | 0.1  | 0.03 | -1    | 0.41693  | 0.624044 | 0.677228 | 0.778361 |
| MmugDNA.34515.1.S1_at   | MmugDNA.34515.1 | 3.42  | 3.96  | 1.17 | 0.51 | -1.45 | 0.911806 | 0.913732 | 0.962655 | 0.951474 |
| MmugDNA.34516.1.S1_at   | MmugDNA.34516.1 | 3.95  | 3.96  | 0.11 | 0.06 | -1    | 0.723808 | 0.132299 | 0.870272 | 0.404294 |
| MmugDNA.34518.1.S1_at   | MmugDNA.34518.1 | 3.3   | 3.25  | 0.05 | 0.05 | 1.03  | 0.167131 | 0.18472  | 0.460327 | 0.460645 |
| MmugDNA.34519.1.S1_at   | MmugDNA.34519.1 | 3.18  | 3.87  | 0.08 | 0.81 | -1.61 | 0.238759 | 0.118581 | 0.536007 | 0.38654  |
| MmugDNA.3452.1.S1_at    | MmugDNA.3452.1  | 8.05  | 7.64  | 0.32 | 0.1  | 1.33  | 0.216846 | 0.358543 | 0.514637 | 0.600068 |
| MmugDNA.34520.1.S1_at   | MmugDNA.34520.1 | 4.27  | 4.2   | 0.05 | 0.13 | 1.04  | 0.883208 | 0.184513 | 0.950338 | 0.460559 |
| MmugDNA.34521.1.S1_at   | MmugDNA.34521.1 | 6.33  | 6.56  | 0.31 | 0.23 | -1.18 | 0.44328  | 0.095018 | 0.696549 | 0.352124 |
| MmugDNA.34522.1.S1_at   | MmugDNA.34522.1 | 12.25 | 12.27 | 0.02 | 0.07 | -1.02 | 0.902619 | 0.099833 | 0.958703 | 0.358464 |
| MmugDNA.34524.1.S1_at   | MmugDNA.34524.1 | 4.88  | 4.77  | 0.13 | 0.07 | 1.08  | 0.311418 | 0.414929 | 0.597508 | 0.640538 |
| MmugDNA.34525.1.S1_at   | MmugDNA.34525.1 | 11.76 | 11.46 | 0.08 | 0.11 | 1.23  | 0.018583 | 0.02683  | 0.189536 | 0.204912 |
| MmugDNA.34526.1.S1_at   | MmugDNA.34526.1 | 5.27  | 5.2   | 0.1  | 0.13 | 1.05  | 0.644958 | 0.384307 | 0.827097 | 0.619996 |
| MmugDNA.34527.1.S1_at   | MmugDNA.34527.1 | 3.72  | 3.19  | 1.03 | 0.06 | 1.44  | 0.324291 | 0.327971 | 0.607951 | 0.577785 |
| MmugDNA.34529.1.S1_at   | MmugDNA.34529.1 | 5.5   | 5.44  | 0.12 | 0.05 | 1.05  | 0.300704 | 0.356703 | 0.588854 | 0.598516 |
| MmugDNA.3453.1.S1_at    | MmugDNA.3453.1  | 4.76  | 4.55  | 0.08 | 0.04 | 1.15  | 0.014457 | 0.180477 | 0.171923 | 0.457115 |
| MmugDNA.34530.1.S1_at   | MmugDNA.34530.1 | 4.47  | 3.82  | 0.57 | 0.1  | 1.57  | 0.113382 | 0.090444 | 0.390192 | 0.344925 |

|                         |                 |       |       |      |      |       |          |          |          |          |
|-------------------------|-----------------|-------|-------|------|------|-------|----------|----------|----------|----------|
| MmugDNA.34530.1.S1_s_at | MmugDNA.34530.1 | 8.22  | 7.64  | 0.17 | 0.13 | 1.49  | 0.009911 | 0.155836 | 0.148933 | 0.431211 |
| MmugDNA.34531.1.S1_at   | MmugDNA.34531.1 | 10.79 | 11.29 | 0.38 | 0.18 | -1.42 | 0.211817 | 0.04457  | 0.509683 | 0.255512 |
| MmugDNA.34532.1.S1_at   | MmugDNA.34532.1 | 6.55  | 6.81  | 1.03 | 0.79 | -1.2  | 0.849133 | 0.73544  | 0.93432  | 0.846919 |
| MmugDNA.34533.1.S1_at   | MmugDNA.34533.1 | 7.7   | 8.45  | 0.18 | 0.14 | -1.68 | 0.007325 | 0.11391  | 0.133538 | 0.38018  |
| MmugDNA.34535.1.S1_at   | MmugDNA.34535.1 | 5.14  | 5.22  | 0.04 | 0.08 | -1.06 | 0.115859 | 0.649881 | 0.392974 | 0.795273 |
| MmugDNA.34536.1.S1_at   | MmugDNA.34536.1 | 7.15  | 6.96  | 0.25 | 0.11 | 1.14  | 0.782685 | 0.184955 | 0.900843 | 0.460776 |
| MmugDNA.34537.1.S1_at   | MmugDNA.34537.1 | 3.96  | 3.85  | 0.08 | 0.06 | 1.08  | 0.085783 | 0.131103 | 0.350079 | 0.403084 |
| MmugDNA.34539.1.S1_s_at | MmugDNA.34539.1 | 11.4  | 11.05 | 0.16 | 0.15 | 1.27  | 0.037013 | 0.143716 | 0.247652 | 0.417583 |
| MmugDNA.3454.1.S1_at    | MmugDNA.3454.1  | 4.99  | 4.47  | 0.31 | 0.15 | 1.43  | 0.068906 | 0.078841 | 0.320539 | 0.325821 |
| MmugDNA.34540.1.S1_at   | MmugDNA.34540.1 | 3.39  | 3.4   | 0.03 | 0.04 | -1    | 0.264803 | 0.207643 | 0.557962 | 0.481906 |
| MmugDNA.34541.1.S1_at   | MmugDNA.34541.1 | 6.97  | 6.64  | 0.33 | 0.14 | 1.26  | 0.332847 | 0.378387 | 0.614402 | 0.615443 |
| MmugDNA.34543.1.S1_at   | MmugDNA.34543.1 | 5.24  | 5.02  | 0.36 | 0.24 | 1.17  | 0.683843 | 0.794116 | 0.84925  | 0.881296 |
| MmugDNA.34544.1.S1_at   | MmugDNA.34544.1 | 4.46  | 4.53  | 0.15 | 0.09 | -1.05 | 0.868738 | 0.960399 | 0.943559 | 0.977488 |
| MmugDNA.34545.1.S1_s_at | MmugDNA.34545.1 | 6.2   | 6.52  | 0.18 | 0.07 | -1.25 | 0.055304 | 0.005673 | 0.292072 | 0.103959 |
| MmugDNA.34547.1.S1_at   | MmugDNA.34547.1 | 6.73  | 5.12  | 0.66 | 0.64 | 3.03  | 0.026785 | 0.059475 | 0.216901 | 0.290548 |
| MmugDNA.34548.1.S1_at   | MmugDNA.34548.1 | 4.21  | 4.48  | 0.25 | 0.3  | -1.21 | 0.638811 | 0.82516  | 0.823276 | 0.899551 |
| MmugDNA.34549.1.S1_at   | MmugDNA.34549.1 | 5.59  | 5.46  | 0.35 | 0.11 | 1.09  | 0.819637 | 0.771183 | 0.919644 | 0.866992 |
| MmugDNA.3455.1.S1_at    | MmugDNA.3455.1  | 5.74  | 5.67  | 0.67 | 0.26 | 1.06  | 0.356562 | 0.562467 | 0.632857 | 0.738025 |
| MmugDNA.34552.1.S1_at   | MmugDNA.34552.1 | 4.88  | 4.78  | 0.09 | 0.02 | 1.07  | 0.174465 | 0.053362 | 0.468676 | 0.27654  |
| MmugDNA.34553.1.S1_at   | MmugDNA.34553.1 | 5.72  | 5.49  | 0.24 | 0.14 | 1.17  | 0.062771 | 0.034702 | 0.307182 | 0.230497 |
| MmugDNA.34555.1.S1_at   | MmugDNA.34555.1 | 4.24  | 4.41  | 0.09 | 0.03 | -1.13 | 0.116066 | 0.635949 | 0.393069 | 0.785795 |
| MmugDNA.34556.1.S1_at   | MmugDNA.34556.1 | 9.7   | 8.94  | 0.27 | 0.09 | 1.7   | 0.020374 | 0.555824 | 0.196305 | 0.734119 |
| MmugDNA.34558.1.S1_at   | MmugDNA.34558.1 | 6.71  | 7.02  | 1.29 | 0.16 | -1.24 | 0.944433 | 0.506203 | 0.976597 | 0.702368 |
| MmugDNA.34559.1.S1_at   | MmugDNA.34559.1 | 7.6   | 7.88  | 0.29 | 0.05 | -1.21 | 0.330011 | 0.265061 | 0.612081 | 0.531    |
| MmugDNA.34560.1.S1_at   | MmugDNA.34560.1 | 10.4  | 9.36  | 0.05 | 0.06 | 2.06  | 0.000018 | 0.000469 | 0.045594 | 0.038572 |
| MmugDNA.34561.1.S1_at   | MmugDNA.34561.1 | 6.38  | 6.29  | 0.23 | 0.05 | 1.06  | 0.994403 | 0.671841 | 0.997657 | 0.808157 |
| MmugDNA.34562.1.S1_at   | MmugDNA.34562.1 | 10.46 | 10.62 | 0.12 | 0.08 | -1.12 | 0.127081 | 0.273322 | 0.408596 | 0.537788 |
| MmugDNA.34563.1.S1_at   | MmugDNA.34563.1 | 5.9   | 6     | 0.11 | 0.01 | -1.07 | 0.198372 | 0.145899 | 0.495518 | 0.419889 |
| MmugDNA.34565.1.S1_at   | MmugDNA.34565.1 | 4.53  | 3.85  | 0.3  | 1.03 | 1.6   | 0.89077  | 0.804736 | 0.95342  | 0.887712 |
| MmugDNA.34568.1.S1_at   | MmugDNA.34568.1 | 8.29  | 8.03  | 0.19 | 0.13 | 1.2   | 0.168797 | 0.213918 | 0.462083 | 0.487596 |
| MmugDNA.36272.1.S1_at   | MmugDNA.36272.1 | 11.2  | 11.1  | 0.14 | 0.04 | 1.07  | 0.257018 | 0.013172 | 0.551586 | 0.14735  |
| MmugDNA.36272.1.S1_s_at | MmugDNA.36272.1 | 9.23  | 8.91  | 0.15 | 0.07 | 1.25  | 0.016734 | 0.006097 | 0.182634 | 0.106342 |
| MmugDNA.34569.1.S1_at   | MmugDNA.34569.1 | 4.43  | 4.33  | 0.42 | 0.26 | 1.07  | 0.723023 | 0.860585 | 0.869843 | 0.920573 |
| MmugDNA.3457.1.S1_at    | MmugDNA.3457.1  | 3.67  | 3.8   | 0.13 | 0.16 | -1.09 | 0.190432 | 0.005914 | 0.48676  | 0.105265 |
| MmugDNA.34570.1.S1_at   | MmugDNA.34570.1 | 4.38  | 4.4   | 0.24 | 0.16 | -1.01 | 0.879435 | 0.497605 | 0.948738 | 0.696935 |
| MmugDNA.34571.1.S1_at   | MmugDNA.34571.1 | 6.37  | 6.45  | 0.13 | 0.15 | -1.06 | 0.440012 | 0.111217 | 0.694079 | 0.375856 |
| MmugDNA.34572.1.S1_at   | MmugDNA.34572.1 | 11.03 | 11.56 | 0.21 | 0.15 | -1.44 | 0.01943  | 0.003953 | 0.192344 | 0.089462 |
| MmugDNA.34573.1.S1_at   | MmugDNA.34573.1 | 3.85  | 3.84  | 0.09 | 0.16 | 1.01  | 0.357992 | 0.425924 | 0.633833 | 0.648123 |
| MmugDNA.34574.1.S1_at   | MmugDNA.34574.1 | 10.55 | 10.36 | 0.05 | 0.09 | 1.14  | 0.081053 | 0.031407 | 0.341998 | 0.219107 |
| MmugDNA.34576.1.S1_at   | MmugDNA.34576.1 | 5.5   | 5.73  | 0.8  | 0.34 | -1.17 | 0.713249 | 0.507484 | 0.864601 | 0.703044 |
| MmugDNA.34577.1.S1_at   | MmugDNA.34577.1 | 3.54  | 3.07  | 0.17 | 0.21 | 1.39  | 0.035454 | 0.019164 | 0.243084 | 0.1742   |
| MmugDNA.34578.1.S1_at   | MmugDNA.34578.1 | 5.12  | 5.25  | 0.09 | 0.1  | -1.09 | 0.252841 | 0.486201 | 0.547424 | 0.689643 |
| MmugDNA.34579.1.S1_at   | MmugDNA.34579.1 | 5.1   | 5.22  | 0.05 | 0.04 | -1.09 | 0.07529  | 0.498272 | 0.332541 | 0.697403 |

|                         |                 |       |       |      |      |       |          |          |          |          |
|-------------------------|-----------------|-------|-------|------|------|-------|----------|----------|----------|----------|
| MmugDNA.3458.1.S1_at    | MmugDNA.3458.1  | 9.1   | 9.71  | 1.7  | 0.28 | -1.53 | 0.223287 | 0.074189 | 0.521135 | 0.317933 |
| MmugDNA.34580.1.S1_at   | MmugDNA.34580.1 | 6.35  | 6.46  | 0.22 | 0.06 | -1.08 | 0.888784 | 0.26208  | 0.95259  | 0.528374 |
| MmugDNA.34581.1.S1_at   | MmugDNA.34581.1 | 4.21  | 4.42  | 0.07 | 0.1  | -1.16 | 0.023369 | 0.01654  | 0.205869 | 0.162827 |
| MmugDNA.34584.1.S1_at   | MmugDNA.34584.1 | 6.35  | 5.66  | 0.83 | 0.12 | 1.61  | 0.231261 | 0.111057 | 0.530005 | 0.375588 |
| MmugDNA.34585.1.S1_at   | MmugDNA.34585.1 | 5.3   | 5.29  | 0.18 | 0.1  | 1.01  | 0.948894 | 0.980601 | 0.978649 | 0.989397 |
| MmugDNA.34586.1.S1_at   | MmugDNA.34586.1 | 6.99  | 5.83  | 1.01 | 0.17 | 2.23  | 0.109515 | 0.058613 | 0.384571 | 0.288819 |
| MmugDNA.34586.1.S1_s_at | MmugDNA.34586.1 | 4.88  | 4.92  | 0.92 | 0.23 | -1.02 | 0.454515 | 0.297608 | 0.704405 | 0.55624  |
| MmugDNA.3459.1.S1_at    | MmugDNA.3459.1  | 10.23 | 10.18 | 0.23 | 0.2  | 1.04  | 0.79688  | 0.09561  | 0.908267 | 0.352645 |
| MmugDNA.34590.1.S1_at   | MmugDNA.34590.1 | 9.03  | 9     | 0.23 | 0.13 | 1.02  | 0.570458 | 0.281134 | 0.779298 | 0.544261 |
| MmugDNA.34591.1.S1_s_at | MmugDNA.34591.1 | 10.52 | 9.4   | 0.11 | 0.1  | 2.19  | 0.000226 | 0.004077 | 0.054608 | 0.090418 |
| MmugDNA.34592.1.S1_at   | MmugDNA.34592.1 | 7.48  | 7.43  | 0.05 | 0.15 | 1.03  | 0.953591 | 0.627757 | 0.981    | 0.780727 |
| MmugDNA.34593.1.S1_at   | MmugDNA.34593.1 | 7.55  | 8.01  | 0.83 | 0.25 | -1.37 | 0.820474 | 0.846536 | 0.919941 | 0.912676 |
| MmugDNA.34594.1.S1_at   | MmugDNA.34594.1 | 4.33  | 3.92  | 0.24 | 0.1  | 1.33  | 0.147295 | 0.168856 | 0.435385 | 0.445458 |
| MmugDNA.34595.1.S1_at   | MmugDNA.34595.1 | 8.83  | 8.59  | 0.53 | 0.21 | 1.19  | 0.139446 | 0.118266 | 0.425004 | 0.386244 |
| MmugDNA.34596.1.S1_at   | MmugDNA.34596.1 | 5.41  | 5.97  | 0.23 | 0.13 | -1.47 | 0.03072  | 0.411982 | 0.228035 | 0.638434 |
| MmugDNA.346.1.S1_at     | MmugDNA.346.1   | 3.97  | 3.82  | 0.09 | 0.08 | 1.11  | 0.075838 | 0.190734 | 0.333731 | 0.466168 |
| MmugDNA.3460.1.S1_at    | MmugDNA.3460.1  | 5.28  | 5.01  | 0.56 | 0.51 | 1.2   | 0.994623 | 0.899365 | 0.997813 | 0.942791 |
| MmugDNA.34600.1.S1_at   | MmugDNA.34600.1 | 5.01  | 4.82  | 0.54 | 0.41 | 1.14  | 0.522457 | 0.615683 | 0.749811 | 0.772141 |
| MmugDNA.34601.1.S1_at   | MmugDNA.34601.1 | 7.27  | 6.91  | 0.45 | 0.25 | 1.28  | 0.176862 | 0.431218 | 0.47138  | 0.652219 |
| MmugDNA.34602.1.S1_at   | MmugDNA.34602.1 | 3.21  | 3.04  | 0.14 | 0.1  | 1.13  | 0.21573  | 0.470097 | 0.513483 | 0.678572 |
| MmugDNA.34604.1.S1_at   | MmugDNA.34604.1 | 4.85  | 4.64  | 0.49 | 0.26 | 1.16  | 0.310716 | 0.468515 | 0.59698  | 0.677755 |
| MmugDNA.34605.1.S1_at   | MmugDNA.34605.1 | 13.02 | 13.05 | 0.01 | 0.02 | -1.02 | 0.03902  | 9.87E-07 | 0.25388  | 0.007307 |
| MmugDNA.34606.1.S1_at   | MmugDNA.34606.1 | 5.75  | 5.85  | 0.07 | 0.04 | -1.07 | 0.319479 | 0.070044 | 0.604137 | 0.310932 |
| MmugDNA.34607.1.S1_at   | MmugDNA.34607.1 | 10.07 | 10.01 | 0.13 | 0.04 | 1.04  | 0.241534 | 0.347233 | 0.538648 | 0.591857 |
| MmugDNA.3461.1.S1_at    | MmugDNA.3461.1  | 11.74 | 11.65 | 0.23 | 0.07 | 1.06  | 0.482906 | 0.014752 | 0.723175 | 0.154493 |
| MmugDNA.34610.1.S1_at   | MmugDNA.34610.1 | 3.46  | 3.39  | 0.15 | 0.08 | 1.05  | 0.919488 | 0.991387 | 0.965512 | 0.995189 |
| MmugDNA.34611.1.S1_at   | MmugDNA.34611.1 | 5.96  | 6.23  | 0.36 | 0.07 | -1.2  | 0.518586 | 0.773654 | 0.747601 | 0.868422 |
| MmugDNA.34612.1.S1_at   | MmugDNA.34612.1 | 4.58  | 4.58  | 0    | 0.04 | 1     | 0.373901 | 0.068817 | 0.645118 | 0.308714 |
| MmugDNA.34613.1.S1_at   | MmugDNA.34613.1 | 9.26  | 8.82  | 0.25 | 0.05 | 1.35  | 0.041147 | 0.091057 | 0.259372 | 0.345842 |
| MmugDNA.34614.1.S1_at   | MmugDNA.34614.1 | 4.05  | 4.1   | 0.6  | 0.23 | -1.03 | 0.490868 | 0.773398 | 0.728864 | 0.868269 |
| MmugDNA.34615.1.S1_at   | MmugDNA.34615.1 | 3.19  | 3.18  | 0.02 | 0.01 | 1.01  | 0.143863 | 0.639574 | 0.430555 | 0.788351 |
| MmugDNA.34616.1.S1_at   | MmugDNA.34616.1 | 8.22  | 9.18  | 1.02 | 0.21 | -1.94 | 0.175033 | 0.722487 | 0.469344 | 0.839261 |
| MmugDNA.34617.1.S1_at   | MmugDNA.34617.1 | 6.21  | 6.54  | 0.39 | 0.03 | -1.25 | 0.618541 | 0.748244 | 0.810678 | 0.853492 |
| MmugDNA.34618.1.S1_at   | MmugDNA.34618.1 | 3.21  | 2.99  | 0.03 | 0.09 | 1.16  | 0.015289 | 0.009349 | 0.175986 | 0.127602 |
| MmugDNA.34619.1.S1_at   | MmugDNA.34619.1 | 5.46  | 5.54  | 0.19 | 0.12 | -1.06 | 0.69906  | 0.700733 | 0.857026 | 0.82642  |
| MmugDNA.3462.1.S1_at    | MmugDNA.3462.1  | 11.17 | 11.33 | 0.24 | 0.07 | -1.12 | 0.907637 | 0.107504 | 0.960932 | 0.370387 |
| MmugDNA.34620.1.S1_at   | MmugDNA.34620.1 | 5.98  | 5.89  | 0.34 | 0.03 | 1.06  | 0.219646 | 0.306927 | 0.51742  | 0.563427 |
| MmugDNA.34621.1.S1_at   | MmugDNA.34621.1 | 6.15  | 6.17  | 0.1  | 0.22 | -1.01 | 0.47714  | 0.647126 | 0.71929  | 0.793279 |
| MmugDNA.34624.1.S1_at   | MmugDNA.34624.1 | 4.66  | 4.23  | 0.2  | 0.24 | 1.35  | 0.073499 | 0.23493  | 0.328921 | 0.506136 |
| MmugDNA.34625.1.S1_at   | MmugDNA.34625.1 | 5.34  | 5.02  | 0.26 | 0.23 | 1.25  | 0.306829 | 0.160497 | 0.593617 | 0.436679 |
| MmugDNA.34626.1.S1_at   | MmugDNA.34626.1 | 3.2   | 3.09  | 0.05 | 0.06 | 1.08  | 0.078323 | 0.474823 | 0.337998 | 0.681736 |
| MmugDNA.34628.1.S1_at   | MmugDNA.34628.1 | 6.96  | 6.28  | 1.2  | 0.58 | 1.61  | 0.4385   | 0.47374  | 0.693055 | 0.68101  |
| MmugDNA.34629.1.S1_at   | MmugDNA.34629.1 | 8.21  | 9.06  | 0.09 | 0.37 | -1.81 | 0.012994 | 0.000675 | 0.16477  | 0.04413  |

|                         |                 |       |       |      |      |       |          |          |          |          |
|-------------------------|-----------------|-------|-------|------|------|-------|----------|----------|----------|----------|
| MmugDNA.34630.1.S1_at   | MmugDNA.34630.1 | 6.53  | 6.53  | 0.1  | 0.11 | -1    | 0.551363 | 0.095597 | 0.768403 | 0.352645 |
| MmugDNA.34631.1.S1_at   | MmugDNA.34631.1 | 8.64  | 8.33  | 0.29 | 0.08 | 1.24  | 0.133315 | 0.234425 | 0.416875 | 0.505674 |
| MmugDNA.34632.1.S1_at   | MmugDNA.34632.1 | 8.64  | 8.29  | 0.55 | 0.15 | 1.28  | 0.872308 | 0.523051 | 0.945259 | 0.713429 |
| MmugDNA.34632.1.S1_s_at | MmugDNA.34632.1 | 9.69  | 9.39  | 0.45 | 0.08 | 1.23  | 0.884584 | 0.415197 | 0.950923 | 0.640746 |
| MmugDNA.34633.1.S1_at   | MmugDNA.34633.1 | 4.82  | 4.58  | 0.3  | 0.1  | 1.18  | 0.845568 | 0.356335 | 0.932611 | 0.598324 |
| MmugDNA.34634.1.S1_at   | MmugDNA.34634.1 | 8.75  | 7.77  | 0.25 | 0.09 | 1.97  | 0.00503  | 0.009592 | 0.116222 | 0.129058 |
| MmugDNA.34636.1.S1_at   | MmugDNA.34636.1 | 4.47  | 4.42  | 0.45 | 0.19 | 1.04  | 0.610702 | 0.571772 | 0.805939 | 0.743987 |
| MmugDNA.34637.1.S1_at   | MmugDNA.34637.1 | 3.93  | 3.85  | 0.68 | 0.08 | 1.06  | 0.274652 | 0.30428  | 0.566523 | 0.561599 |
| MmugDNA.34638.1.S1_at   | MmugDNA.34638.1 | 4.23  | 4.08  | 0.12 | 0.07 | 1.11  | 0.130384 | 0.221182 | 0.41274  | 0.494511 |
| MmugDNA.3464.1.S1_at    | MmugDNA.3464.1  | 4.17  | 3.89  | 0.36 | 0.07 | 1.21  | 0.228185 | 0.273361 | 0.526409 | 0.5378   |
| MmugDNA.34640.1.S1_at   | MmugDNA.34640.1 | 5.49  | 5.19  | 0.39 | 0.05 | 1.23  | 0.200594 | 0.057017 | 0.497869 | 0.284868 |
| MmugDNA.34641.1.S1_at   | MmugDNA.34641.1 | 5.42  | 5.28  | 0.15 | 0.14 | 1.1   | 0.821335 | 0.000171 | 0.920381 | 0.030511 |
| MmugDNA.34642.1.S1_at   | MmugDNA.34642.1 | 3.08  | 3.08  | 0.03 | 0.07 | 1     | 0.772079 | 0.804802 | 0.89559  | 0.887741 |
| MmugDNA.34643.1.S1_at   | MmugDNA.34643.1 | 10.59 | 12.27 | 0.38 | 0.05 | -3.22 | 0.001576 | 0.049041 | 0.08257  | 0.266367 |
| MmugDNA.34644.1.S1_at   | MmugDNA.34644.1 | 5.59  | 4.91  | 0.44 | 0.14 | 1.6   | 0.063258 | 0.062061 | 0.308158 | 0.29597  |
| MmugDNA.34646.1.S1_at   | MmugDNA.34646.1 | 9.16  | 9.18  | 0.16 | 0.1  | -1.01 | 0.626139 | 0.394927 | 0.815822 | 0.627216 |
| MmugDNA.34647.1.S1_at   | MmugDNA.34647.1 | 9.52  | 10.06 | 0.25 | 0.06 | -1.46 | 0.05532  | 0.008774 | 0.292097 | 0.124022 |
| MmugDNA.34648.1.S1_at   | MmugDNA.34648.1 | 7.38  | 7.55  | 0.28 | 0.34 | -1.13 | 0.988981 | 0.731774 | 0.99618  | 0.844619 |
| MmugDNA.3465.1.S1_at    | MmugDNA.3465.1  | 4.44  | 4.48  | 0.15 | 0    | -1.02 | 0.678462 | 0.934372 | 0.846605 | 0.962766 |
| MmugDNA.34651.1.S1_at   | MmugDNA.34651.1 | 2.75  | 2.83  | 0.07 | 0.06 | -1.06 | 0.331306 | 0.19108  | 0.613274 | 0.466364 |
| MmugDNA.34653.1.S1_at   | MmugDNA.34653.1 | 10.04 | 9.89  | 0.14 | 0.07 | 1.11  | 0.72995  | 0.059192 | 0.873865 | 0.290208 |
| MmugDNA.34654.1.S1_at   | MmugDNA.34654.1 | 8.64  | 9.07  | 0.24 | 0.12 | -1.35 | 0.131658 | 0.145075 | 0.414491 | 0.419047 |
| MmugDNA.34657.1.S1_at   | MmugDNA.34657.1 | 4.6   | 4.6   | 0.09 | 0.11 | 1     | 0.990747 | 0.458433 | 0.996659 | 0.671165 |
| MmugDNA.3466.1.S1_at    | MmugDNA.3466.1  | 3.81  | 3.72  | 0.08 | 0.08 | 1.07  | 0.218084 | 0.079049 | 0.515931 | 0.326117 |
| MmugDNA.34660.1.S1_at   | MmugDNA.34660.1 | 8.98  | 7.76  | 0.22 | 0.09 | 2.34  | 0.000772 | 0.002176 | 0.072818 | 0.068956 |
| MmugDNA.34661.1.S1_at   | MmugDNA.34661.1 | 4.69  | 4.13  | 0.29 | 0.14 | 1.47  | 0.108718 | 0.12593  | 0.383665 | 0.396461 |
| MmugDNA.34662.1.S1_at   | MmugDNA.34662.1 | 6.59  | 6.3   | 0.67 | 0.22 | 1.23  | 0.525938 | 0.480065 | 0.752178 | 0.68565  |
| MmugDNA.34664.1.S1_at   | MmugDNA.34664.1 | 10.93 | 11.44 | 0.37 | 0.19 | -1.42 | 0.236845 | 0.677707 | 0.534416 | 0.811777 |
| MmugDNA.69.1.S1_s_at    | MmugDNA.69.1    | 9.25  | 8.83  | 0.25 | 0.13 | 1.34  | 0.099236 | 0.539738 | 0.370254 | 0.723926 |
| MmugDNA.34666.1.S1_at   | MmugDNA.34666.1 | 6.42  | 6.53  | 0.2  | 0.03 | -1.08 | 0.376803 | 0.176872 | 0.647386 | 0.453303 |
| MmugDNA.34667.1.S1_at   | MmugDNA.34667.1 | 5.24  | 4.65  | 0.45 | 0.1  | 1.51  | 0.264159 | 0.19274  | 0.557422 | 0.468231 |
| MmugDNA.34668.1.S1_at   | MmugDNA.34668.1 | 4.92  | 4.12  | 0.4  | 0.66 | 1.74  | 0.689372 | 0.266844 | 0.851686 | 0.53241  |
| MmugDNA.34669.1.S1_at   | MmugDNA.34669.1 | 4.87  | 4.86  | 0.12 | 0.18 | 1.01  | 0.802263 | 0.289267 | 0.911218 | 0.550293 |
| MmugDNA.34670.1.S1_at   | MmugDNA.34670.1 | 4.3   | 4.47  | 0.25 | 0.28 | -1.12 | 0.776264 | 0.743367 | 0.897687 | 0.85129  |
| MmugDNA.34673.1.S1_at   | MmugDNA.34673.1 | 5.47  | 5.22  | 0.2  | 0.13 | 1.19  | 0.644646 | 0.815209 | 0.827017 | 0.893385 |
| MmugDNA.34675.1.S1_at   | MmugDNA.34675.1 | 5.25  | 5.2   | 0.34 | 0.15 | 1.03  | 0.576749 | 0.744566 | 0.783377 | 0.852091 |
| MmugDNA.34677.1.S1_at   | MmugDNA.34677.1 | 8.05  | 7.57  | 0.34 | 0.09 | 1.4   | 0.112146 | 0.159322 | 0.388251 | 0.43532  |
| MmugDNA.34678.1.S1_at   | MmugDNA.34678.1 | 5     | 5.46  | 0.65 | 0.56 | -1.38 | 0.839466 | 0.963151 | 0.929585 | 0.979435 |
| MmugDNA.34682.1.S1_at   | MmugDNA.34682.1 | 3.09  | 3.27  | 0.13 | 0.11 | -1.13 | 0.129213 | 0.118496 | 0.411571 | 0.386469 |
| MmugDNA.34683.1.S1_at   | MmugDNA.34683.1 | 5.26  | 5.31  | 0.05 | 0.06 | -1.03 | 0.446191 | 0.248768 | 0.698417 | 0.517931 |
| MmugDNA.34684.1.S1_at   | MmugDNA.34684.1 | 4.78  | 4.54  | 0.7  | 0.18 | 1.18  | 0.270703 | 0.401055 | 0.562838 | 0.630667 |
| MmugDNA.34685.1.S1_at   | MmugDNA.34685.1 | 4.34  | 4.41  | 0.14 | 0.12 | -1.05 | 0.388922 | 0.177725 | 0.656881 | 0.454083 |
| MmugDNA.34686.1.S1_at   | MmugDNA.34686.1 | 13.48 | 13.33 | 0.03 | 0.06 | 1.11  | 0.038128 | 0.246353 | 0.251236 | 0.515899 |

|                         |                 |       |      |      |      |       |          |          |          |          |
|-------------------------|-----------------|-------|------|------|------|-------|----------|----------|----------|----------|
| MmugDNA.34687.1.S1_at   | MmugDNA.34687.1 | 3.54  | 3.33 | 0.21 | 0.07 | 1.16  | 0.128592 | 0.231879 | 0.410681 | 0.503594 |
| MmugDNA.34688.1.S1_at   | MmugDNA.34688.1 | 6.18  | 5.86 | 0.21 | 0.16 | 1.25  | 0.116621 | 0.249676 | 0.393693 | 0.518765 |
| MmugDNA.34689.1.S1_at   | MmugDNA.34689.1 | 3.46  | 3.46 | 0.03 | 0.16 | -1    | 0.857538 | 0.948688 | 0.938079 | 0.970685 |
| MmugDNA.3469.1.S1_at    | MmugDNA.3469.1  | 3.67  | 3.44 | 0.25 | 0.15 | 1.17  | 0.692086 | 0.166376 | 0.852876 | 0.442884 |
| MmugDNA.34690.1.S1_at   | MmugDNA.34690.1 | 8.43  | 8.15 | 0.17 | 0.14 | 1.21  | 0.093736 | 0.202327 | 0.362418 | 0.476691 |
| MmugDNA.34691.1.S1_at   | MmugDNA.34691.1 | 3.81  | 3.85 | 0.26 | 0.09 | -1.02 | 0.744252 | 0.912974 | 0.881397 | 0.951043 |
| MmugDNA.34693.1.S1_at   | MmugDNA.34693.1 | 6.58  | 6.08 | 0.25 | 0.03 | 1.41  | 0.025876 | 0.037677 | 0.213641 | 0.23859  |
| MmugDNA.34694.1.S1_at   | MmugDNA.34694.1 | 7.76  | 7.69 | 0.5  | 0.2  | 1.05  | 0.55977  | 0.100432 | 0.773535 | 0.359541 |
| MmugDNA.34695.1.S1_at   | MmugDNA.34695.1 | 7.56  | 8.53 | 0.94 | 0.45 | -1.96 | 0.216276 | 0.413924 | 0.514047 | 0.63994  |
| MmugDNA.34698.1.S1_at   | MmugDNA.34698.1 | 5.04  | 5.61 | 0.21 | 0.34 | -1.48 | 0.052817 | 0.042095 | 0.286839 | 0.249638 |
| MmugDNA.347.1.S1_at     | MmugDNA.347.1   | 4.45  | 4.56 | 0.43 | 0.14 | -1.08 | 0.493931 | 0.311223 | 0.730862 | 0.566264 |
| MmugDNA.3470.1.S1_at    | MmugDNA.3470.1  | 6.72  | 6.73 | 0.06 | 0.01 | -1    | 0.882746 | 0.203608 | 0.950145 | 0.477879 |
| MmugDNA.34700.1.S1_at   | MmugDNA.34700.1 | 3.41  | 3.33 | 0.25 | 0.16 | 1.06  | 0.15803  | 0.190337 | 0.448816 | 0.465906 |
| MmugDNA.34702.1.S1_at   | MmugDNA.34702.1 | 4.98  | 4.85 | 0.31 | 0.01 | 1.1   | 0.729544 | 0.836981 | 0.87368  | 0.906826 |
| MmugDNA.40729.1.S1_s_at | MmugDNA.40729.1 | 3.29  | 3.54 | 0.14 | 0.08 | -1.19 | 0.095401 | 0.27112  | 0.364909 | 0.536259 |
| MmugDNA.34705.1.S1_at   | MmugDNA.34705.1 | 8.45  | 8.63 | 0.36 | 0.17 | -1.13 | 0.888948 | 0.762837 | 0.952689 | 0.862064 |
| MmugDNA.34706.1.S1_at   | MmugDNA.34706.1 | 7.25  | 7.03 | 0.1  | 0.08 | 1.16  | 0.019881 | 0.153215 | 0.194289 | 0.428058 |
| MmugDNA.34707.1.S1_at   | MmugDNA.34707.1 | 4.87  | 4.76 | 0.66 | 0.31 | 1.08  | 0.314259 | 0.376664 | 0.599959 | 0.614483 |
| MmugDNA.34708.1.S1_at   | MmugDNA.34708.1 | 4.79  | 4.73 | 0.09 | 0.01 | 1.04  | 0.250468 | 0.906291 | 0.54512  | 0.946953 |
| MmugDNA.34709.1.S1_at   | MmugDNA.34709.1 | 5.29  | 5.41 | 0.3  | 0.4  | -1.09 | 0.389432 | 0.221119 | 0.657321 | 0.494498 |
| MmugDNA.34710.1.S1_at   | MmugDNA.34710.1 | 8.27  | 8.46 | 0.26 | 0.04 | -1.14 | 0.294132 | 0.324335 | 0.583157 | 0.574924 |
| MmugDNA.34711.1.S1_at   | MmugDNA.34711.1 | 4.1   | 4.22 | 0.08 | 0.01 | -1.08 | 0.02096  | 0.016406 | 0.198328 | 0.162188 |
| MmugDNA.34712.1.S1_at   | MmugDNA.34712.1 | 7.01  | 7.3  | 0.18 | 0.44 | -1.22 | 0.494481 | 0.289487 | 0.731233 | 0.550495 |
| MmugDNA.34713.1.S1_at   | MmugDNA.34713.1 | 7.56  | 7.45 | 0.21 | 0.25 | 1.08  | 0.99993  | 0.154753 | 1        | 0.429764 |
| MmugDNA.34714.1.S1_at   | MmugDNA.34714.1 | 11.47 | 11.2 | 0.23 | 0.16 | 1.21  | 0.129999 | 0.063959 | 0.412127 | 0.29906  |
| MmugDNA.34715.1.S1_at   | MmugDNA.34715.1 | 7.79  | 7.01 | 0.23 | 0.42 | 1.72  | 0.041581 | 0.166462 | 0.260296 | 0.442903 |
| MmugDNA.34716.1.S1_at   | MmugDNA.34716.1 | 4.98  | 4.74 | 0.14 | 0.2  | 1.18  | 0.12631  | 0.230303 | 0.407529 | 0.502102 |
| MmugDNA.34719.1.S1_at   | MmugDNA.34719.1 | 5.76  | 5.71 | 0.05 | 0.04 | 1.03  | 0.300116 | 0.070619 | 0.588392 | 0.311913 |
| MmugDNA.3472.1.S1_at    | MmugDNA.3472.1  | 4.41  | 4.18 | 1.18 | 1.1  | 1.18  | 0.520308 | 0.778326 | 0.74869  | 0.871276 |
| MmugDNA.34720.1.S1_at   | MmugDNA.34720.1 | 2.9   | 2.9  | 0.02 | 0.1  | -1    | 0.467907 | 0.753553 | 0.713242 | 0.856527 |
| MmugDNA.34722.1.S1_at   | MmugDNA.34722.1 | 6.34  | 5.83 | 0.86 | 0.31 | 1.43  | 0.550766 | 0.729765 | 0.76811  | 0.843679 |
| MmugDNA.34723.1.S1_at   | MmugDNA.34723.1 | 3.75  | 3.82 | 0.25 | 0.16 | -1.05 | 0.406824 | 0.533691 | 0.670117 | 0.719848 |
| MmugDNA.34724.1.S1_at   | MmugDNA.34724.1 | 4.48  | 4.6  | 0.06 | 0.1  | -1.09 | 0.32191  | 0.110064 | 0.606132 | 0.374179 |
| MmugDNA.34725.1.S1_at   | MmugDNA.34725.1 | 7.99  | 8.15 | 0.73 | 0.39 | -1.11 | 0.599491 | 0.826811 | 0.798168 | 0.900529 |
| MmugDNA.34726.1.S1_at   | MmugDNA.34726.1 | 3.95  | 3.8  | 0.03 | 0.24 | 1.1   | 0.281049 | 0.40757  | 0.571931 | 0.63505  |
| MmugDNA.34726.1.S1_s_at | MmugDNA.34726.1 | 4.28  | 4.29 | 0.42 | 0.35 | -1    | 0.914674 | 0.721751 | 0.963731 | 0.83882  |
| MmugDNA.34727.1.S1_at   | MmugDNA.34727.1 | 10.26 | 9    | 0.17 | 0.05 | 2.4   | 0.000211 | 0.026093 | 0.053494 | 0.20248  |
| MmugDNA.34728.1.S1_at   | MmugDNA.34728.1 | 4.26  | 4.06 | 0.35 | 0.29 | 1.15  | 0.26101  | 0.321777 | 0.555198 | 0.573428 |
| MmugDNA.3473.1.S1_at    | MmugDNA.3473.1  | 5.54  | 5.76 | 0.26 | 0.15 | -1.17 | 0.498322 | 0.647036 | 0.733585 | 0.793279 |
| MmugDNA.34730.1.S1_at   | MmugDNA.34730.1 | 4.24  | 4.23 | 0.31 | 0.13 | 1.01  | 0.682162 | 0.187649 | 0.848429 | 0.463663 |
| MmugDNA.34731.1.S1_at   | MmugDNA.34731.1 | 5.84  | 6.06 | 0.23 | 0.24 | -1.16 | 0.105821 | 0.100938 | 0.379857 | 0.360509 |
| MmugDNA.34733.1.S1_at   | MmugDNA.34733.1 | 7.93  | 6.72 | 0.59 | 0.24 | 2.32  | 0.027167 | 0.01968  | 0.217696 | 0.176276 |
| MmugDNA.34734.1.S1_at   | MmugDNA.34734.1 | 5.69  | 5.46 | 0.06 | 0.3  | 1.17  | 0.147395 | 0.10929  | 0.435407 | 0.37308  |

|                         |                 |       |       |      |      |       |          |          |          |          |
|-------------------------|-----------------|-------|-------|------|------|-------|----------|----------|----------|----------|
| MmugDNA.34734.1.S1_s_at | MmugDNA.34734.1 | 8.49  | 8.18  | 0.36 | 0.28 | 1.24  | 0.325305 | 0.165359 | 0.608663 | 0.441544 |
| MmugDNA.34737.1.S1_at   | MmugDNA.34737.1 | 4.53  | 4.19  | 0.28 | 0.03 | 1.27  | 0.1041   | 0.114711 | 0.377398 | 0.381252 |
| MmugDNA.34738.1.S1_at   | MmugDNA.34738.1 | 10.72 | 10.52 | 0.17 | 0.21 | 1.15  | 0.380977 | 0.002998 | 0.650527 | 0.079958 |
| MmugDNA.3474.1.S1_at    | MmugDNA.3474.1  | 4.69  | 4.67  | 0.07 | 0.18 | 1.01  | 0.922422 | 0.197291 | 0.966846 | 0.472213 |
| MmugDNA.34740.1.S1_at   | MmugDNA.34740.1 | 8.64  | 7     | 0.4  | 0.1  | 3.11  | 0.002272 | 0.000475 | 0.091735 | 0.038572 |
| MmugDNA.34741.1.S1_at   | MmugDNA.34741.1 | 6.31  | 7.22  | 0.97 | 0.22 | -1.88 | 0.080765 | 0.097851 | 0.34149  | 0.355646 |
| MmugDNA.34742.1.S1_at   | MmugDNA.34742.1 | 4.49  | 4.47  | 0.42 | 0.13 | 1.02  | 0.456605 | 0.602129 | 0.705861 | 0.763172 |
| MmugDNA.34744.1.S1_at   | MmugDNA.34744.1 | 5.12  | 5.08  | 0.21 | 0.1  | 1.03  | 0.292847 | 0.228444 | 0.58186  | 0.500631 |
| MmugDNA.34745.1.S1_at   | MmugDNA.34745.1 | 7.99  | 6.98  | 0.12 | 0.23 | 2.01  | 0.002059 | 0.047472 | 0.090098 | 0.262486 |
| MmugDNA.34746.1.S1_at   | MmugDNA.34746.1 | 6.6   | 6.74  | 0.32 | 0.14 | -1.11 | 0.516101 | 0.579961 | 0.745613 | 0.749354 |
| MmugDNA.34749.1.S1_at   | MmugDNA.34749.1 | 9.43  | 9.95  | 0.27 | 0.24 | -1.43 | 0.059778 | 0.005928 | 0.301716 | 0.105331 |
| MmugDNA.3475.1.S1_at    | MmugDNA.3475.1  | 5.28  | 5.12  | 0.26 | 0.19 | 1.12  | 0.225487 | 0.262268 | 0.523339 | 0.528586 |
| MmugDNA.34750.1.S1_at   | MmugDNA.34750.1 | 4.71  | 4.34  | 0.34 | 0.24 | 1.28  | 0.104526 | 0.116567 | 0.377881 | 0.383705 |
| MmugDNA.34751.1.S1_at   | MmugDNA.34751.1 | 5.61  | 5.39  | 0.41 | 0.23 | 1.17  | 0.371796 | 0.316927 | 0.644405 | 0.570275 |
| MmugDNA.34752.1.S1_at   | MmugDNA.34752.1 | 4.54  | 4.53  | 0.22 | 0.07 | 1.01  | 0.943951 | 0.350638 | 0.976384 | 0.594384 |
| MmugDNA.34754.1.S1_at   | MmugDNA.34754.1 | 7.52  | 4.79  | 0.31 | 0.32 | 6.63  | 0.000368 | 0.000082 | 0.062479 | 0.027016 |
| MmugDNA.34755.1.S1_at   | MmugDNA.34755.1 | 6.93  | 7.04  | 0.19 | 0.05 | -1.08 | 0.957325 | 0.70178  | 0.982565 | 0.827048 |
| MmugDNA.34756.1.S1_at   | MmugDNA.34756.1 | 5.83  | 5.44  | 0.17 | 0.07 | 1.3   | 0.01112  | 0.13118  | 0.155073 | 0.403211 |
| MmugDNA.34758.1.S1_at   | MmugDNA.34758.1 | 5.64  | 5.68  | 0.04 | 0.09 | -1.03 | 0.497196 | 0.190581 | 0.732907 | 0.465963 |
| MmugDNA.3476.1.S1_at    | MmugDNA.3476.1  | 6.73  | 6.65  | 0.79 | 0.11 | 1.06  | 0.785403 | 0.262746 | 0.90204  | 0.529086 |
| MmugDNA.34760.1.S1_at   | MmugDNA.34760.1 | 10.82 | 10.88 | 0.08 | 0.15 | -1.04 | 0.836376 | 0.309741 | 0.928245 | 0.565044 |
| MmugDNA.34762.1.S1_at   | MmugDNA.34762.1 | 8.21  | 8.37  | 0.13 | 0.1  | -1.12 | 0.125735 | 0.321187 | 0.406504 | 0.573111 |
| MmugDNA.34764.1.S1_s_at | MmugDNA.34764.1 | 3.87  | 3.91  | 0.09 | 0.15 | -1.02 | 0.569193 | 0.489565 | 0.778726 | 0.691824 |
| MmugDNA.34765.1.S1_at   | MmugDNA.34765.1 | 5.18  | 5.22  | 0.18 | 0.01 | -1.02 | 0.261218 | 0.140574 | 0.555294 | 0.413822 |
| MmugDNA.34769.1.S1_at   | MmugDNA.34769.1 | 4.58  | 4.62  | 0.14 | 0.21 | -1.03 | 0.837396 | 0.916147 | 0.928726 | 0.953065 |
| MmugDNA.3477.1.S1_at    | MmugDNA.3477.1  | 3.85  | 3.75  | 0.1  | 0.03 | 1.08  | 0.173469 | 0.290899 | 0.467808 | 0.551473 |
| MmugDNA.34770.1.S1_at   | MmugDNA.34770.1 | 6.69  | 6.77  | 0.72 | 0.29 | -1.06 | 0.364533 | 0.591797 | 0.639109 | 0.757276 |
| MmugDNA.34771.1.S1_at   | MmugDNA.34771.1 | 7.54  | 7.54  | 0.11 | 0.09 | -1    | 0.889401 | 0.99095  | 0.952886 | 0.994921 |
| MmugDNA.34772.1.S1_at   | MmugDNA.34772.1 | 4.19  | 3.93  | 0.33 | 0.25 | 1.19  | 0.213726 | 0.296006 | 0.511664 | 0.555295 |
| MmugDNA.34774.1.S1_at   | MmugDNA.34774.1 | 3.39  | 3.37  | 0.16 | 0.14 | 1.02  | 0.310999 | 0.414316 | 0.597245 | 0.640189 |
| MmugDNA.34777.1.S1_at   | MmugDNA.34777.1 | 11.09 | 11.64 | 0.19 | 0.12 | -1.47 | 0.025038 | 0.661161 | 0.211204 | 0.801687 |
| MmugDNA.34779.1.S1_at   | MmugDNA.34779.1 | 3.94  | 3.63  | 0.26 | 0.02 | 1.23  | 0.083804 | 0.094242 | 0.346577 | 0.350889 |
| MmugDNA.3478.1.S1_at    | MmugDNA.3478.1  | 5.43  | 4.72  | 0.36 | 0.24 | 1.64  | 0.064116 | 0.114333 | 0.309726 | 0.380835 |
| MmugDNA.34782.1.S1_at   | MmugDNA.34782.1 | 6.24  | 6.27  | 0.29 | 0.52 | -1.02 | 0.922052 | 0.688817 | 0.96665  | 0.818338 |
| MmugDNA.34783.1.S1_at   | MmugDNA.34783.1 | 4.87  | 4.86  | 0.13 | 0.08 | 1.01  | 0.279935 | 0.24561  | 0.571191 | 0.515348 |
| MmugDNA.34784.1.S1_at   | MmugDNA.34784.1 | 6.09  | 6.35  | 0.61 | 0.22 | -1.2  | 0.852821 | 0.956287 | 0.935956 | 0.975137 |
| MmugDNA.34785.1.S1_at   | MmugDNA.34785.1 | 9.34  | 8.95  | 0.34 | 0.27 | 1.31  | 0.227269 | 0.374664 | 0.525273 | 0.613    |
| MmugDNA.34786.1.S1_at   | MmugDNA.34786.1 | 3.51  | 3.55  | 0.1  | 0.24 | -1.03 | 0.559062 | 0.702376 | 0.77314  | 0.827489 |
| MmugDNA.34788.1.S1_at   | MmugDNA.34788.1 | 3.91  | 4.01  | 0.11 | 0.14 | -1.07 | 0.508229 | 0.851975 | 0.740295 | 0.91585  |
| MmugDNA.34789.1.S1_at   | MmugDNA.34789.1 | 3.48  | 5.78  | 1.05 | 0.23 | -4.93 | 0.042741 | 0.006053 | 0.263901 | 0.106152 |
| MmugDNA.3479.1.S1_at    | MmugDNA.3479.1  | 3.44  | 3.45  | 0.27 | 0.04 | -1.01 | 0.345929 | 0.362724 | 0.624741 | 0.603245 |
| MmugDNA.34790.1.S1_at   | MmugDNA.34790.1 | 4.31  | 4.34  | 0.09 | 0.13 | -1.02 | 0.65437  | 0.865603 | 0.83271  | 0.923598 |
| MmugDNA.34791.1.S1_at   | MmugDNA.34791.1 | 6.87  | 6.8   | 0.3  | 0.02 | 1.05  | 0.706716 | 0.871237 | 0.861133 | 0.926834 |

|                         |                 |       |       |      |      |        |          |          |          |          |
|-------------------------|-----------------|-------|-------|------|------|--------|----------|----------|----------|----------|
| MmugDNA.34792.1.S1_at   | MmugDNA.34792.1 | 6.51  | 6.18  | 0.91 | 0.26 | 1.26   | 0.747637 | 0.691454 | 0.883101 | 0.820491 |
| MmugDNA.34793.1.S1_at   | MmugDNA.34793.1 | 8.57  | 9.7   | 0.5  | 0.1  | -2.19  | 0.018259 | 0.007628 | 0.188157 | 0.116869 |
| MmugDNA.34794.1.S1_at   | MmugDNA.34794.1 | 8.59  | 8.26  | 0.07 | 0.05 | 1.26   | 0.005172 | 0.064279 | 0.116998 | 0.299722 |
| MmugDNA.34794.1.S1_s_at | MmugDNA.34794.1 | 8.82  | 8.64  | 0.09 | 0.11 | 1.14   | 0.039221 | 0.188876 | 0.254503 | 0.464789 |
| MmugDNA.34795.1.S1_at   | MmugDNA.34795.1 | 4.28  | 8.15  | 2.23 | 0.43 | -14.63 | 0.148369 | 0.358398 | 0.436978 | 0.59994  |
| MmugDNA.34797.1.S1_at   | MmugDNA.34797.1 | 3.42  | 3.5   | 0.05 | 0.04 | -1.06  | 0.244419 | 0.229715 | 0.540909 | 0.501729 |
| MmugDNA.34799.1.S1_at   | MmugDNA.34799.1 | 6.43  | 6.27  | 0.18 | 0.12 | 1.11   | 0.28173  | 0.22119  | 0.572546 | 0.494511 |
| MmugDNA.34801.1.S1_at   | MmugDNA.34801.1 | 3.2   | 3.2   | 0.05 | 0.04 | 1      | 0.636914 | 0.913232 | 0.822282 | 0.951146 |
| MmugDNA.34802.1.S1_at   | MmugDNA.34802.1 | 5.25  | 4.44  | 0.61 | 0.22 | 1.75   | 0.41634  | 0.364217 | 0.67685  | 0.604513 |
| MmugDNA.34803.1.S1_at   | MmugDNA.34803.1 | 2.9   | 2.89  | 0.05 | 0.04 | 1.01   | 0.749009 | 0.379045 | 0.883781 | 0.616011 |
| MmugDNA.34806.1.S1_at   | MmugDNA.34806.1 | 12.03 | 11.7  | 0.15 | 0.03 | 1.26   | 0.017128 | 0.086948 | 0.184186 | 0.339802 |
| MmugDNA.34808.1.S1_at   | MmugDNA.34808.1 | 3.72  | 3.86  | 0.12 | 0.17 | -1.11  | 0.170166 | 0.146173 | 0.463807 | 0.420124 |
| MmugDNA.34809.1.S1_at   | MmugDNA.34809.1 | 6.39  | 6.99  | 0.17 | 0.09 | -1.52  | 0.012109 | 0.001925 | 0.160161 | 0.065609 |
| MmugDNA.3481.1.S1_at    | MmugDNA.3481.1  | 4.66  | 4.14  | 0.08 | 0.37 | 1.43   | 0.064407 | 0.085044 | 0.310347 | 0.336812 |
| MmugDNA.34810.1.S1_at   | MmugDNA.34810.1 | 12.45 | 12.18 | 0.07 | 0.02 | 1.2    | 0.003146 | 0.185892 | 0.101284 | 0.461752 |
| MmugDNA.34812.1.S1_at   | MmugDNA.34812.1 | 7.76  | 8.15  | 0.21 | 0.14 | -1.31  | 0.057967 | 0.004992 | 0.297866 | 0.098466 |
| MmugDNA.34817.1.S1_at   | MmugDNA.34817.1 | 5.35  | 5.56  | 0.29 | 0.06 | -1.16  | 0.776483 | 0.923438 | 0.89778  | 0.956981 |
| MmugDNA.34817.1.S1_s_at | MmugDNA.34817.1 | 7.05  | 7.16  | 0.05 | 0.02 | -1.08  | 0.034    | 0.2944   | 0.238985 | 0.554156 |
| MmugDNA.34818.1.S1_at   | MmugDNA.34818.1 | 6.93  | 6.67  | 0.08 | 0.2  | 1.19   | 0.116258 | 0.151201 | 0.393343 | 0.425873 |
| MmugDNA.3482.1.S1_at    | MmugDNA.3482.1  | 7.02  | 7.11  | 0.08 | 0.09 | -1.07  | 0.305078 | 0.035739 | 0.592048 | 0.233422 |
| MmugDNA.34820.1.S1_at   | MmugDNA.34820.1 | 6.94  | 6.25  | 0.9  | 0.18 | 1.61   | 0.200788 | 0.323207 | 0.498149 | 0.574408 |
| MmugDNA.34821.1.S1_at   | MmugDNA.34821.1 | 5.69  | 5.14  | 0.42 | 0.16 | 1.46   | 0.220195 | 0.287611 | 0.517758 | 0.548885 |
| MmugDNA.34822.1.S1_at   | MmugDNA.34822.1 | 5.22  | 5.22  | 0.03 | 0.13 | -1     | 0.367911 | 0.221131 | 0.641667 | 0.494498 |
| MmugDNA.34823.1.S1_at   | MmugDNA.34823.1 | 3.09  | 3.1   | 0.02 | 0.17 | -1.01  | 0.780864 | 0.791771 | 0.899982 | 0.879741 |
| MmugDNA.34823.1.S1_x_at | MmugDNA.34823.1 | 3.25  | 3.31  | 0.03 | 0.06 | -1.04  | 0.359664 | 0.741917 | 0.635313 | 0.850533 |
| MmugDNA.34824.1.S1_at   | MmugDNA.34824.1 | 6.75  | 5.52  | 0.68 | 0.4  | 2.35   | 0.057149 | 0.20855  | 0.296384 | 0.482453 |
| MmugDNA.34825.1.S1_at   | MmugDNA.34825.1 | 7.13  | 7.12  | 0.43 | 0.16 | 1.01   | 0.566968 | 0.147208 | 0.777544 | 0.421455 |
| MmugDNA.34826.1.S1_at   | MmugDNA.34826.1 | 9.35  | 9.94  | 0.29 | 0.11 | -1.51  | 0.111774 | 0.170551 | 0.387879 | 0.447179 |
| MmugDNA.34827.1.S1_at   | MmugDNA.34827.1 | 3.31  | 3.2   | 0.25 | 0.15 | 1.08   | 0.716272 | 0.938416 | 0.866094 | 0.965059 |
| MmugDNA.34828.1.S1_at   | MmugDNA.34828.1 | 5.78  | 7.08  | 0.24 | 0.18 | -2.46  | 0.001851 | 0.017922 | 0.087    | 0.168998 |
| MmugDNA.34828.1.S1_s_at | MmugDNA.34828.1 | 9.05  | 9.44  | 0.22 | 0.23 | -1.31  | 0.0592   | 0.005241 | 0.300404 | 0.100307 |
| MmugDNA.34829.1.S1_at   | MmugDNA.34829.1 | 3.67  | 3.67  | 0.02 | 0.03 | 1      | 0.226416 | 0.429954 | 0.524218 | 0.65111  |
| MmugDNA.3483.1.S1_at    | MmugDNA.3483.1  | 5.63  | 5.64  | 0.28 | 0.23 | -1     | 0.487663 | 0.619664 | 0.726421 | 0.774873 |
| MmugDNA.34830.1.S1_at   | MmugDNA.34830.1 | 11.66 | 11.48 | 0.08 | 0.08 | 1.13   | 0.023152 | 0.249827 | 0.205291 | 0.518876 |
| MmugDNA.34831.1.S1_at   | MmugDNA.34831.1 | 7.66  | 7.3   | 0.42 | 0.09 | 1.29   | 0.771469 | 0.79288  | 0.895263 | 0.880387 |
| MmugDNA.34832.1.S1_at   | MmugDNA.34832.1 | 3.93  | 3.94  | 0.19 | 0.1  | -1.01  | 0.928525 | 0.898839 | 0.969772 | 0.942448 |
| MmugDNA.34833.1.S1_at   | MmugDNA.34833.1 | 7.62  | 7.43  | 0.45 | 0.13 | 1.15   | 0.352039 | 0.278886 | 0.629611 | 0.542633 |
| MmugDNA.34834.1.S1_at   | MmugDNA.34834.1 | 12.95 | 12.59 | 0.08 | 0.02 | 1.28   | 0.001547 | 0.000298 | 0.081983 | 0.034892 |
| MmugDNA.34835.1.S1_at   | MmugDNA.34835.1 | 5.22  | 5.61  | 0.35 | 0.22 | -1.31  | 0.417964 | 0.281791 | 0.677972 | 0.544844 |
| MmugDNA.34836.1.S1_at   | MmugDNA.34836.1 | 7.16  | 7.11  | 0.28 | 0.22 | 1.04   | 0.775491 | 0.347723 | 0.897425 | 0.592083 |
| MmugDNA.34837.1.S1_at   | MmugDNA.34837.1 | 6.3   | 6.35  | 0.06 | 0.03 | -1.03  | 0.89025  | 0.971329 | 0.953253 | 0.984419 |
| MmugDNA.34838.1.S1_at   | MmugDNA.34838.1 | 4.27  | 4.1   | 0.12 | 0.2  | 1.12   | 0.899222 | 0.090921 | 0.957083 | 0.345545 |
| MmugDNA.34839.1.S1_at   | MmugDNA.34839.1 | 6.08  | 6.61  | 0.18 | 0.14 | -1.44  | 0.009599 | 0.296358 | 0.148199 | 0.555492 |



|                         |                 |       |       |      |      |       |          |          |          |          |
|-------------------------|-----------------|-------|-------|------|------|-------|----------|----------|----------|----------|
| MmugDNA.3484.1.S1_at    | MmugDNA.3484.1  | 4.99  | 5.03  | 0.12 | 0.04 | -1.03 | 0.354687 | 0.462011 | 0.631756 | 0.673527 |
| MmugDNA.34840.1.S1_at   | MmugDNA.34840.1 | 7.3   | 7.75  | 1.1  | 0.37 | -1.36 | 0.816584 | 0.845841 | 0.918047 | 0.912246 |
| MmugDNA.34841.1.S1_at   | MmugDNA.34841.1 | 5.74  | 5.71  | 0.21 | 0.04 | 1.02  | 0.390973 | 0.505681 | 0.658472 | 0.702218 |
| MmugDNA.34842.1.S1_at   | MmugDNA.34842.1 | 4.94  | 4.79  | 0.08 | 0.04 | 1.11  | 0.062448 | 0.204453 | 0.306597 | 0.478821 |
| MmugDNA.34843.1.S1_at   | MmugDNA.34843.1 | 3.84  | 3.74  | 0.71 | 0.12 | 1.07  | 0.561021 | 0.737376 | 0.774148 | 0.847889 |
| MmugDNA.34844.1.S1_at   | MmugDNA.34844.1 | 3.75  | 4.05  | 0.19 | 0.54 | -1.22 | 0.347454 | 0.370072 | 0.625532 | 0.609333 |
| MmugDNA.34845.1.S1_at   | MmugDNA.34845.1 | 4.11  | 4.26  | 1.13 | 0.27 | -1.11 | 0.537856 | 0.711698 | 0.759956 | 0.832794 |
| MmugDNA.34846.1.S1_at   | MmugDNA.34846.1 | 5.75  | 5.88  | 0.26 | 0.01 | -1.1  | 0.933793 | 0.623302 | 0.972191 | 0.777693 |
| MmugDNA.34847.1.S1_at   | MmugDNA.34847.1 | 5.64  | 5.38  | 0.29 | 0.46 | 1.2   | 0.743305 | 0.912601 | 0.881285 | 0.950764 |
| MmugDNA.34849.1.S1_at   | MmugDNA.34849.1 | 4.61  | 4.65  | 0.23 | 0.05 | -1.02 | 0.650377 | 0.548639 | 0.830266 | 0.729318 |
| MmugDNA.3485.1.S1_at    | MmugDNA.3485.1  | 7.56  | 8.45  | 0.69 | 0.54 | -1.85 | 0.071966 | 0.11531  | 0.326151 | 0.382354 |
| MmugDNA.34851.1.S1_at   | MmugDNA.34851.1 | 3.66  | 3.68  | 0.15 | 0.1  | -1.02 | 0.85038  | 0.365816 | 0.935011 | 0.60574  |
| MmugDNA.34852.1.S1_at   | MmugDNA.34852.1 | 10.84 | 10.83 | 0.05 | 0.08 | 1.01  | 0.861983 | 0.001051 | 0.940104 | 0.051467 |
| MmugDNA.34853.1.S1_at   | MmugDNA.34853.1 | 3.45  | 3.56  | 0.06 | 0.05 | -1.08 | 0.094836 | 0.155694 | 0.363741 | 0.431054 |
| MmugDNA.34855.1.S1_at   | MmugDNA.34855.1 | 3.73  | 3.58  | 0.29 | 0.22 | 1.11  | 0.176709 | 0.155432 | 0.471201 | 0.430802 |
| MmugDNA.34856.1.S1_at   | MmugDNA.34856.1 | 5.18  | 4.45  | 0.36 | 0.32 | 1.67  | 0.063226 | 0.017979 | 0.308134 | 0.169137 |
| MmugDNA.34857.1.S1_at   | MmugDNA.34857.1 | 5.47  | 6.25  | 0.12 | 0.27 | -1.72 | 0.02137  | 0.141637 | 0.199771 | 0.415196 |
| MmugDNA.34857.1.S1_s_at | MmugDNA.34857.1 | 6.91  | 7.43  | 0.18 | 0.04 | -1.44 | 0.013633 | 0.09038  | 0.16753  | 0.344827 |
| MmugDNA.34858.1.S1_at   | MmugDNA.34858.1 | 6.64  | 6.68  | 0.77 | 0.19 | -1.03 | 0.554621 | 0.405085 | 0.770769 | 0.633481 |
| MmugDNA.34859.1.S1_at   | MmugDNA.34859.1 | 6.67  | 6.28  | 0.38 | 0.23 | 1.3   | 0.610391 | 0.873126 | 0.805838 | 0.927823 |
| MmugDNA.3486.1.S1_at    | MmugDNA.3486.1  | 3.01  | 3.03  | 0.45 | 0.07 | -1.02 | 0.500524 | 0.505307 | 0.734782 | 0.702073 |
| MmugDNA.34860.1.S1_at   | MmugDNA.34860.1 | 3.37  | 3.54  | 0.25 | 0.11 | -1.12 | 0.46822  | 0.462957 | 0.713381 | 0.674149 |
| MmugDNA.34861.1.S1_at   | MmugDNA.34861.1 | 9.14  | 9.15  | 0.45 | 0.03 | -1.01 | 0.410782 | 0.306357 | 0.672759 | 0.562971 |
| MmugDNA.34863.1.S1_at   | MmugDNA.34863.1 | 11.6  | 10.1  | 0.21 | 0.31 | 2.82  | 0.004315 | 0.036986 | 0.111813 | 0.236733 |
| MmugDNA.34864.1.S1_at   | MmugDNA.34864.1 | 6.21  | 5.37  | 0.77 | 0.32 | 1.78  | 0.265273 | 0.317035 | 0.557962 | 0.570317 |
| MmugDNA.34865.1.S1_at   | MmugDNA.34865.1 | 4.09  | 4.27  | 0.11 | 0.15 | -1.13 | 0.060465 | 0.022959 | 0.30301  | 0.189548 |
| MmugDNA.34866.1.S1_at   | MmugDNA.34866.1 | 3.93  | 3.88  | 0.12 | 0.02 | 1.03  | 0.346468 | 0.286336 | 0.624993 | 0.547784 |
| MmugDNA.34867.1.S1_at   | MmugDNA.34867.1 | 4.14  | 3.93  | 0.13 | 0.19 | 1.16  | 0.127064 | 0.14666  | 0.408591 | 0.420683 |
| MmugDNA.34868.1.S1_at   | MmugDNA.34868.1 | 10.13 | 10.31 | 0.13 | 0.12 | -1.13 | 0.743909 | 0.443658 | 0.881384 | 0.661364 |
| MmugDNA.34869.1.S1_at   | MmugDNA.34869.1 | 6.23  | 5.88  | 0.1  | 0.07 | 1.27  | 0.006016 | 0.010606 | 0.124151 | 0.134301 |
| MmugDNA.3487.1.S1_at    | MmugDNA.3487.1  | 6.85  | 6.87  | 1.25 | 0.42 | -1.02 | 0.98528  | 0.90107  | 0.994723 | 0.943717 |
| MmugDNA.34870.1.S1_at   | MmugDNA.34870.1 | 7.22  | 7.43  | 0.24 | 0.05 | -1.15 | 0.195313 | 0.018868 | 0.491959 | 0.172782 |
| MmugDNA.34871.1.S1_at   | MmugDNA.34871.1 | 6.85  | 6.81  | 0.28 | 0.26 | 1.02  | 0.318174 | 0.092427 | 0.602917 | 0.348313 |
| MmugDNA.34872.1.S1_at   | MmugDNA.34872.1 | 12.37 | 12.29 | 0.05 | 0.04 | 1.06  | 0.077291 | 0.007193 | 0.335964 | 0.114057 |
| MmugDNA.34875.1.S1_at   | MmugDNA.34875.1 | 5.27  | 5.24  | 0.12 | 0.09 | 1.02  | 0.664382 | 0.127565 | 0.838389 | 0.39847  |
| MmugDNA.34876.1.S1_at   | MmugDNA.34876.1 | 9.37  | 9.46  | 0.4  | 0.26 | -1.07 | 0.556238 | 0.005939 | 0.771576 | 0.105426 |
| MmugDNA.34877.1.S1_at   | MmugDNA.34877.1 | 5.73  | 5.75  | 0.72 | 0.4  | -1.02 | 0.418668 | 0.641377 | 0.678527 | 0.789506 |
| MmugDNA.34878.1.S1_at   | MmugDNA.34878.1 | 6.92  | 6.41  | 0.26 | 0.12 | 1.42  | 0.019666 | 0.055678 | 0.193139 | 0.28179  |
| MmugDNA.3488.1.S1_at    | MmugDNA.3488.1  | 4.92  | 4.97  | 0.73 | 0.05 | -1.04 | 0.41469  | 0.441847 | 0.675681 | 0.659939 |
| MmugDNA.34881.1.S1_at   | MmugDNA.34881.1 | 6.59  | 6.59  | 0.17 | 0.09 | -1    | 0.400213 | 0.337962 | 0.665349 | 0.585166 |
| MmugDNA.34883.1.S1_at   | MmugDNA.34883.1 | 3.81  | 3.79  | 0.34 | 0.1  | 1.01  | 0.688969 | 0.828141 | 0.851448 | 0.901214 |
| MmugDNA.34885.1.S1_at   | MmugDNA.34885.1 | 5.14  | 4.84  | 0.91 | 0.35 | 1.23  | 0.785907 | 0.090646 | 0.902293 | 0.345151 |
| MmugDNA.34887.1.S1_at   | MmugDNA.34887.1 | 2.97  | 2.92  | 0.05 | 0.09 | 1.04  | 0.160386 | 0.324076 | 0.451792 | 0.574761 |

|                         |                 |       |       |      |      |       |          |          |          |          |
|-------------------------|-----------------|-------|-------|------|------|-------|----------|----------|----------|----------|
| MmugDNA.34888.1.S1_at   | MmugDNA.34888.1 | 7.95  | 8.17  | 0.04 | 0.07 | -1.17 | 0.006157 | 0.01545  | 0.12462  | 0.157803 |
| MmugDNA.3489.1.S1_at    | MmugDNA.3489.1  | 5.84  | 5.66  | 0.15 | 0.33 | 1.14  | 0.438528 | 0.682153 | 0.693058 | 0.814372 |
| MmugDNA.34890.1.S1_at   | MmugDNA.34890.1 | 3.66  | 3.66  | 0.03 | 0.07 | 1     | 0.256068 | 0.237506 | 0.550543 | 0.508165 |
| MmugDNA.34891.1.S1_at   | MmugDNA.34891.1 | 3.31  | 3.51  | 0.21 | 0.06 | -1.15 | 0.231512 | 0.362119 | 0.530229 | 0.602821 |
| MmugDNA.34892.1.S1_at   | MmugDNA.34892.1 | 7.35  | 8.23  | 1.23 | 0.11 | -1.84 | 0.24793  | 0.324457 | 0.543295 | 0.575063 |
| MmugDNA.34893.1.S1_at   | MmugDNA.34893.1 | 10.26 | 10.31 | 0.3  | 0.12 | -1.04 | 0.434135 | 0.028812 | 0.68945  | 0.211578 |
| MmugDNA.34894.1.S1_at   | MmugDNA.34894.1 | 2.95  | 3.06  | 0    | 0.06 | -1.08 | 0.038295 | 0.005869 | 0.251796 | 0.104856 |
| MmugDNA.34896.1.S1_at   | MmugDNA.34896.1 | 5.58  | 5.35  | 0.1  | 0.18 | 1.17  | 0.147577 | 0.263687 | 0.43548  | 0.52997  |
| MmugDNA.34897.1.S1_at   | MmugDNA.34897.1 | 3.85  | 4.05  | 0.09 | 0.1  | -1.15 | 0.072422 | 0.163754 | 0.327004 | 0.439924 |
| MmugDNA.34898.1.S1_at   | MmugDNA.34898.1 | 3.5   | 3.59  | 0.77 | 0.08 | -1.07 | 0.550415 | 0.563179 | 0.767803 | 0.738441 |
| MmugDNA.34899.1.S1_at   | MmugDNA.34899.1 | 5.17  | 5.15  | 0.48 | 0.07 | 1.01  | 0.312679 | 0.451185 | 0.598753 | 0.666085 |
| MmugDNA.349.1.S1_at     | MmugDNA.349.1   | 4.59  | 4.36  | 0.2  | 0.16 | 1.17  | 0.227538 | 0.293744 | 0.525651 | 0.553748 |
| MmugDNA.34900.1.S1_at   | MmugDNA.34900.1 | 5.64  | 5.51  | 0.21 | 0.02 | 1.09  | 0.239221 | 0.120745 | 0.53651  | 0.389579 |
| MmugDNA.34902.1.S1_at   | MmugDNA.34902.1 | 3.37  | 3.35  | 0.21 | 0.1  | 1.01  | 0.971647 | 0.573971 | 0.98857  | 0.745491 |
| MmugDNA.34904.1.S1_at   | MmugDNA.34904.1 | 6.78  | 5.43  | 1.1  | 0.09 | 2.55  | 0.09921  | 0.103384 | 0.370183 | 0.3643   |
| MmugDNA.34906.1.S1_at   | MmugDNA.34906.1 | 5.52  | 5.14  | 0.45 | 0.05 | 1.3   | 0.081444 | 0.092649 | 0.342467 | 0.34868  |
| MmugDNA.34907.1.S1_at   | MmugDNA.34907.1 | 7.03  | 6.59  | 0.14 | 0.3  | 1.36  | 0.22685  | 0.048482 | 0.524763 | 0.265407 |
| MmugDNA.34908.1.S1_at   | MmugDNA.34908.1 | 4.69  | 5.02  | 0.35 | 0.25 | -1.26 | 0.436632 | 0.50139  | 0.691566 | 0.69955  |
| MmugDNA.34909.1.S1_s_at | MmugDNA.34909.1 | 4.78  | 5.09  | 0.26 | 0.16 | -1.24 | 0.432945 | 0.1061   | 0.688558 | 0.368498 |
| MmugDNA.34909.1.S1_x_at | MmugDNA.34909.1 | 7.6   | 7.62  | 0.02 | 0.05 | -1.02 | 0.521514 | 0.192733 | 0.749377 | 0.468231 |
| MmugDNA.34910.1.S1_at   | MmugDNA.34910.1 | 5.71  | 5.54  | 0.01 | 0.26 | 1.12  | 0.852392 | 0.510252 | 0.935873 | 0.704773 |
| MmugDNA.34911.1.S1_at   | MmugDNA.34911.1 | 8.66  | 8.62  | 0.28 | 0.13 | 1.03  | 0.434566 | 0.720599 | 0.68975  | 0.838346 |
| MmugDNA.34912.1.S1_at   | MmugDNA.34912.1 | 6.95  | 8.08  | 0.25 | 0.03 | -2.18 | 0.001322 | 0.173935 | 0.078867 | 0.450247 |
| MmugDNA.34913.1.S1_at   | MmugDNA.34913.1 | 4.4   | 4.36  | 0.17 | 0.08 | 1.03  | 0.529352 | 0.721922 | 0.754208 | 0.838904 |
| MmugDNA.34914.1.S1_s_at | MmugDNA.34914.1 | 11.75 | 11.78 | 0.28 | 0.22 | -1.02 | 0.574713 | 0.792507 | 0.782159 | 0.880128 |
| MmugDNA.34915.1.S1_at   | MmugDNA.34915.1 | 3.26  | 3.23  | 0.17 | 0.29 | 1.02  | 0.964771 | 0.953634 | 0.985755 | 0.973626 |
| MmugDNA.34918.1.S1_at   | MmugDNA.34918.1 | 4.11  | 4.04  | 0.21 | 0.03 | 1.05  | 0.670016 | 0.486525 | 0.841673 | 0.689881 |
| MmugDNA.34919.1.S1_at   | MmugDNA.34919.1 | 3.77  | 3.77  | 0.04 | 0.21 | -1    | 0.385937 | 0.534535 | 0.654498 | 0.720431 |
| MmugDNA.3492.1.S1_at    | MmugDNA.3492.1  | 2.86  | 2.72  | 0.07 | 0.09 | 1.1   | 0.099386 | 0.093109 | 0.370316 | 0.349292 |
| MmugDNA.34920.1.S1_at   | MmugDNA.34920.1 | 7.73  | 7.15  | 1.05 | 0.55 | 1.5   | 0.503754 | 0.572568 | 0.73721  | 0.744566 |
| MmugDNA.34922.1.S1_at   | MmugDNA.34922.1 | 3.21  | 3.21  | 0.15 | 0    | 1     | 0.581343 | 0.814196 | 0.786474 | 0.892849 |
| MmugDNA.34923.1.S1_at   | MmugDNA.34923.1 | 7.3   | 6.86  | 0.17 | 0.07 | 1.36  | 0.015471 | 0.299143 | 0.176499 | 0.557663 |
| MmugDNA.34924.1.S1_at   | MmugDNA.34924.1 | 7.82  | 8     | 0.32 | 0.17 | -1.13 | 0.673624 | 0.845957 | 0.843946 | 0.912303 |
| MmugDNA.34927.1.S1_at   | MmugDNA.34927.1 | 3.71  | 3.69  | 0.1  | 0.12 | 1.01  | 0.857243 | 0.957306 | 0.937984 | 0.975838 |
| MmugDNA.34928.1.S1_at   | MmugDNA.34928.1 | 3.08  | 3.18  | 0.46 | 0.18 | -1.07 | 0.41158  | 0.46607  | 0.673503 | 0.67611  |
| MmugDNA.3493.1.S1_at    | MmugDNA.3493.1  | 3.19  | 3.25  | 0.13 | 0.1  | -1.04 | 0.497842 | 0.723208 | 0.73333  | 0.839645 |
| MmugDNA.34931.1.S1_at   | MmugDNA.34931.1 | 5.32  | 5.36  | 0.14 | 0.03 | -1.03 | 0.590219 | 0.253829 | 0.791777 | 0.522173 |
| MmugDNA.34934.1.S1_at   | MmugDNA.34934.1 | 4.62  | 4.86  | 0.21 | 0.06 | -1.18 | 0.425224 | 0.310909 | 0.682686 | 0.565887 |
| MmugDNA.34936.1.S1_at   | MmugDNA.34936.1 | 5.68  | 6.32  | 0.15 | 0.33 | -1.56 | 0.093604 | 0.083017 | 0.362254 | 0.332753 |
| MmugDNA.34937.1.S1_at   | MmugDNA.34937.1 | 6.93  | 7.23  | 0.29 | 0.26 | -1.23 | 0.556085 | 0.03932  | 0.771459 | 0.243401 |
| MmugDNA.34938.1.S1_at   | MmugDNA.34938.1 | 10    | 9.44  | 0.18 | 0.27 | 1.47  | 0.053784 | 0.227    | 0.289059 | 0.499286 |
| MmugDNA.34939.1.S1_at   | MmugDNA.34939.1 | 5.98  | 5.92  | 0.09 | 0.57 | 1.04  | 0.670796 | 0.899666 | 0.842083 | 0.942903 |
| MmugDNA.34941.1.S1_at   | MmugDNA.34941.1 | 5.01  | 4.88  | 0.15 | 0.07 | 1.09  | 0.811458 | 0.817576 | 0.915561 | 0.894755 |

|                         |                 |       |       |      |      |       |          |          |          |          |
|-------------------------|-----------------|-------|-------|------|------|-------|----------|----------|----------|----------|
| MmugDNA.34942.1.S1_at   | MmugDNA.34942.1 | 3.12  | 3.12  | 0.1  | 0.16 | 1     | 0.489328 | 0.513193 | 0.727626 | 0.706841 |
| MmugDNA.34943.1.S1_at   | MmugDNA.34943.1 | 5.92  | 5.97  | 0.05 | 0.07 | -1.04 | 0.137948 | 0.03647  | 0.423113 | 0.235458 |
| MmugDNA.34944.1.S1_at   | MmugDNA.34944.1 | 5.69  | 5.35  | 0.18 | 0.18 | 1.27  | 0.021594 | 0.032158 | 0.200598 | 0.222021 |
| MmugDNA.34945.1.S1_at   | MmugDNA.34945.1 | 6.53  | 6.36  | 0.12 | 0.07 | 1.12  | 0.087425 | 0.061094 | 0.353207 | 0.293958 |
| MmugDNA.34946.1.S1_at   | MmugDNA.34946.1 | 5.96  | 5.8   | 0.22 | 0.25 | 1.12  | 0.823868 | 0.952001 | 0.921695 | 0.972758 |
| MmugDNA.34948.1.S1_at   | MmugDNA.34948.1 | 13.39 | 13.52 | 0.04 | 0.06 | -1.09 | 0.041306 | 0.059232 | 0.259651 | 0.290341 |
| MmugDNA.3495.1.S1_at    | MmugDNA.3495.1  | 3.96  | 3.66  | 0.58 | 0.23 | 1.23  | 0.625967 | 0.82048  | 0.81567  | 0.896597 |
| MmugDNA.39745.1.S1_at   | MmugDNA.39745.1 | 11.06 | 11.48 | 0.07 | 0.05 | -1.34 | 0.001035 | 0.021097 | 0.076321 | 0.181869 |
| MmugDNA.39745.1.S1_s_at | MmugDNA.39745.1 | 10.84 | 11.17 | 0.12 | 0.05 | -1.25 | 0.0178   | 0.189565 | 0.187001 | 0.465286 |
| MmugDNA.34952.1.S1_at   | MmugDNA.34952.1 | 6.62  | 5.95  | 0.16 | 0.07 | 1.59  | 0.002795 | 0.30162  | 0.097799 | 0.55955  |
| MmugDNA.34952.1.S1_s_at | MmugDNA.34952.1 | 9.45  | 8.35  | 0.4  | 0.21 | 2.15  | 0.013236 | 0.020896 | 0.165657 | 0.181404 |
| MmugDNA.34953.1.S1_at   | MmugDNA.34953.1 | 3.9   | 3.9   | 0.08 | 0.04 | 1     | 0.253266 | 0.045773 | 0.547649 | 0.258302 |
| MmugDNA.34956.1.S1_x_at | MmugDNA.34956.1 | 7.42  | 7.12  | 1.16 | 0.28 | 1.24  | 0.292692 | 0.305211 | 0.581763 | 0.562255 |
| MmugDNA.34957.1.S1_at   | MmugDNA.34957.1 | 3.47  | 3.23  | 0.11 | 1.26 | 1.18  | 0.614252 | 0.718485 | 0.808034 | 0.837066 |
| MmugDNA.34958.1.S1_at   | MmugDNA.34958.1 | 4.52  | 4.23  | 0.39 | 0.09 | 1.22  | 0.172385 | 0.153174 | 0.466621 | 0.428011 |
| MmugDNA.34959.1.S1_at   | MmugDNA.34959.1 | 4.29  | 4.15  | 0.07 | 0.08 | 1.1   | 0.045834 | 0.074422 | 0.271553 | 0.318058 |
| MmugDNA.3496.1.S1_at    | MmugDNA.3496.1  | 3.24  | 3.12  | 0.13 | 0.15 | 1.09  | 0.335979 | 0.578138 | 0.616626 | 0.748311 |
| MmugDNA.34960.1.S1_at   | MmugDNA.34960.1 | 7.77  | 7.38  | 0.04 | 0.32 | 1.31  | 0.099958 | 0.10577  | 0.370858 | 0.36796  |
| MmugDNA.34962.1.S1_at   | MmugDNA.34962.1 | 6.04  | 5.52  | 0.42 | 0.47 | 1.43  | 0.43566  | 0.15592  | 0.690714 | 0.431329 |
| MmugDNA.34963.1.S1_at   | MmugDNA.34963.1 | 5.25  | 5.25  | 0.09 | 0.05 | 1     | 0.277542 | 0.38217  | 0.569083 | 0.618361 |
| MmugDNA.34964.1.S1_at   | MmugDNA.34964.1 | 4.09  | 3.77  | 0.4  | 0.14 | 1.25  | 0.082421 | 0.067153 | 0.344143 | 0.305165 |
| MmugDNA.34965.1.S1_x_at | MmugDNA.34965.1 | 12.29 | 12.31 | 0.37 | 0.18 | -1.01 | 0.484676 | 0.227369 | 0.72443  | 0.499659 |
| MmugDNA.28840.1.S1_s_at | MmugDNA.28840.1 | 6.96  | 6.95  | 0.21 | 0.02 | 1.01  | 0.377092 | 0.61148  | 0.647659 | 0.769353 |
| MmugDNA.34967.1.S1_at   | MmugDNA.34967.1 | 5.8   | 5.81  | 0.08 | 0.08 | -1.01 | 0.831337 | 0.777532 | 0.925813 | 0.870732 |
| MmugDNA.34969.1.S1_at   | MmugDNA.34969.1 | 6.28  | 6.12  | 0.67 | 0.46 | 1.12  | 0.748752 | 0.815908 | 0.883741 | 0.893781 |
| MmugDNA.3497.1.S1_at    | MmugDNA.3497.1  | 5.51  | 5.49  | 0.59 | 0.34 | 1.02  | 0.232703 | 0.297367 | 0.531068 | 0.556072 |
| MmugDNA.34972.1.S1_at   | MmugDNA.34972.1 | 8.11  | 7.9   | 0.2  | 0.02 | 1.16  | 0.099517 | 0.258527 | 0.370394 | 0.525796 |
| MmugDNA.34973.1.S1_at   | MmugDNA.34973.1 | 6.27  | 6.3   | 0.06 | 0.11 | -1.02 | 0.894443 | 0.221739 | 0.954958 | 0.494901 |
| MmugDNA.34974.1.S1_at   | MmugDNA.34974.1 | 7.25  | 6.72  | 0.52 | 0.59 | 1.45  | 0.580719 | 0.880053 | 0.786042 | 0.931486 |
| MmugDNA.34975.1.S1_s_at | MmugDNA.34975.1 | 9.05  | 7.24  | 0.14 | 0.62 | 3.52  | 0.010206 | 0.013117 | 0.150739 | 0.147286 |
| MmugDNA.34976.1.S1_at   | MmugDNA.34976.1 | 6.61  | 6.8   | 0.19 | 0.11 | -1.14 | 0.06049  | 0.091985 | 0.30301  | 0.347348 |
| MmugDNA.34977.1.S1_at   | MmugDNA.34977.1 | 5.86  | 5.89  | 0.15 | 0.09 | -1.02 | 0.536246 | 0.783438 | 0.758857 | 0.874577 |
| MmugDNA.34979.1.S1_at   | MmugDNA.34979.1 | 8.63  | 9.07  | 0.02 | 0.13 | -1.35 | 0.005281 | 0.013008 | 0.117696 | 0.146803 |
| MmugDNA.3498.1.S1_at    | MmugDNA.3498.1  | 4.63  | 4.56  | 0.6  | 0.14 | 1.05  | 0.94357  | 0.973412 | 0.976276 | 0.985537 |
| MmugDNA.34980.1.S1_at   | MmugDNA.34980.1 | 3.38  | 3.32  | 0.07 | 0.05 | 1.05  | 0.509752 | 0.562877 | 0.741244 | 0.738191 |
| MmugDNA.34982.1.S1_at   | MmugDNA.34982.1 | 5.89  | 5.91  | 0.09 | 0.11 | -1.01 | 0.933602 | 0.825027 | 0.972111 | 0.899488 |
| MmugDNA.34983.1.S1_at   | MmugDNA.34983.1 | 5.9   | 5.72  | 0.37 | 0.03 | 1.13  | 0.382636 | 0.323653 | 0.652037 | 0.574525 |
| MmugDNA.34984.1.S1_at   | MmugDNA.34984.1 | 5.12  | 5.6   | 0.3  | 0.33 | -1.39 | 0.042279 | 0.290566 | 0.262598 | 0.551297 |
| MmugDNA.34985.1.S1_at   | MmugDNA.34985.1 | 3.91  | 3.9   | 0.26 | 0.18 | 1     | 0.689989 | 0.629091 | 0.851891 | 0.781597 |
| MmugDNA.34987.1.S1_at   | MmugDNA.34987.1 | 6.85  | 6.95  | 0.17 | 0.02 | -1.07 | 0.931856 | 0.7932   | 0.97138  | 0.880602 |
| MmugDNA.34988.1.S1_at   | MmugDNA.34988.1 | 8.41  | 8.31  | 0.24 | 0.26 | 1.07  | 0.469896 | 0.597726 | 0.714563 | 0.760358 |
| MmugDNA.34989.1.S1_at   | MmugDNA.34989.1 | 8.2   | 8.38  | 0.33 | 0.09 | -1.13 | 0.424676 | 0.063799 | 0.682288 | 0.29906  |
| MmugDNA.34991.1.S1_at   | MmugDNA.34991.1 | 5.64  | 5.59  | 0.09 | 0.03 | 1.03  | 0.201303 | 0.314176 | 0.498822 | 0.568185 |

|                         |                 |       |       |      |      |       |          |          |          |          |
|-------------------------|-----------------|-------|-------|------|------|-------|----------|----------|----------|----------|
| MmugDNA.34993.1.S1_at   | MmugDNA.34993.1 | 11.37 | 11.65 | 0.29 | 0.03 | -1.21 | 0.171176 | 0.498338 | 0.465064 | 0.697442 |
| MmugDNA.34994.1.S1_s_at | MmugDNA.34994.1 | 8.69  | 8.64  | 0.06 | 0.02 | 1.03  | 0.287096 | 0.080503 | 0.576783 | 0.328159 |
| MmugDNA.34995.1.S1_s_at | MmugDNA.34995.1 | 13.93 | 13.93 | 0.09 | 0.02 | 1     | 0.288721 | 0.121065 | 0.578459 | 0.390064 |
| MmugDNA.34996.1.S1_at   | MmugDNA.34996.1 | 4.41  | 4.5   | 0.18 | 0.52 | -1.06 | 0.286436 | 0.061948 | 0.576218 | 0.295734 |
| MmugDNA.34997.1.S1_at   | MmugDNA.34997.1 | 6.2   | 6.29  | 0.17 | 0.13 | -1.06 | 0.519202 | 0.160253 | 0.747956 | 0.436398 |
| MmugDNA.350.1.S1_at     | MmugDNA.350.1   | 7.24  | 7.02  | 0.89 | 0.53 | 1.16  | 0.526816 | 0.443039 | 0.752776 | 0.660947 |
| MmugDNA.35002.1.S1_at   | MmugDNA.35002.1 | 12.52 | 12.15 | 0.13 | 0.1  | 1.3   | 0.018199 | 0.10486  | 0.18787  | 0.366397 |
| MmugDNA.35006.1.S1_at   | MmugDNA.35006.1 | 3.53  | 3.54  | 0.24 | 0.25 | -1.01 | 0.651024 | 0.460092 | 0.830545 | 0.671993 |
| MmugDNA.35007.1.S1_at   | MmugDNA.35007.1 | 3.5   | 3.63  | 0.03 | 0.07 | -1.1  | 0.062471 | 0.520024 | 0.306597 | 0.711472 |
| MmugDNA.35008.1.S1_at   | MmugDNA.35008.1 | 10.32 | 10.36 | 0.09 | 0.04 | -1.03 | 0.310568 | 0.055509 | 0.596884 | 0.281404 |
| MmugDNA.3501.1.S1_at    | MmugDNA.3501.1  | 10.1  | 10.56 | 0.77 | 0.06 | -1.37 | 0.725533 | 0.958124 | 0.871197 | 0.976277 |
| MmugDNA.35010.1.S1_at   | MmugDNA.35010.1 | 5.39  | 5.37  | 0.2  | 0.08 | 1.02  | 0.803918 | 0.562693 | 0.911913 | 0.7381   |
| MmugDNA.35012.1.S1_at   | MmugDNA.35012.1 | 11.14 | 11.1  | 0.01 | 0.07 | 1.03  | 0.29919  | 0.002184 | 0.587565 | 0.069035 |
| MmugDNA.35013.1.S1_at   | MmugDNA.35013.1 | 5.31  | 5     | 1.49 | 0.1  | 1.24  | 0.259702 | 0.323974 | 0.554019 | 0.574672 |
| MmugDNA.35016.1.S1_at   | MmugDNA.35016.1 | 5.61  | 5.8   | 0.58 | 0.12 | -1.14 | 0.635788 | 0.252709 | 0.821683 | 0.521174 |
| MmugDNA.35018.1.S1_at   | MmugDNA.35018.1 | 3.7   | 3.69  | 0.07 | 0.09 | 1.01  | 0.907437 | 0.909466 | 0.960894 | 0.948845 |
| MmugDNA.35021.1.S1_at   | MmugDNA.35021.1 | 5.05  | 5.09  | 0.14 | 0.03 | -1.02 | 0.557455 | 0.56191  | 0.77215  | 0.737659 |
| MmugDNA.35023.1.S1_at   | MmugDNA.35023.1 | 6.15  | 5.9   | 0.57 | 0.07 | 1.19  | 0.489079 | 0.913125 | 0.727556 | 0.951134 |
| MmugDNA.35023.1.S1_s_at | MmugDNA.35023.1 | 9.42  | 10.3  | 0.4  | 0.11 | -1.85 | 0.034394 | 0.131018 | 0.24006  | 0.403053 |
| MmugDNA.35024.1.S1_at   | MmugDNA.35024.1 | 7.44  | 7.37  | 0.17 | 0.11 | 1.04  | 0.372086 | 0.251016 | 0.644717 | 0.519638 |
| MmugDNA.35025.1.S1_at   | MmugDNA.35025.1 | 6.48  | 6.28  | 0.17 | 0.54 | 1.15  | 0.520697 | 0.625886 | 0.748943 | 0.779391 |
| MmugDNA.35026.1.S1_s_at | MmugDNA.35026.1 | 10.7  | 10.82 | 0.23 | 0.1  | -1.09 | 0.148741 | 0.086591 | 0.437306 | 0.33911  |
| MmugDNA.35027.1.S1_at   | MmugDNA.35027.1 | 4.78  | 4.67  | 0.43 | 0.33 | 1.08  | 0.381816 | 0.707873 | 0.651337 | 0.830504 |
| MmugDNA.35028.1.S1_at   | MmugDNA.35028.1 | 7.96  | 7.54  | 0.18 | 0.08 | 1.33  | 0.052673 | 0.125062 | 0.286476 | 0.395506 |
| MmugDNA.35029.1.S1_at   | MmugDNA.35029.1 | 12.53 | 12.7  | 0.06 | 0.02 | -1.12 | 0.01259  | 0.196964 | 0.162521 | 0.472072 |
| MmugDNA.3503.1.S1_at    | MmugDNA.3503.1  | 3.56  | 3.5   | 0.16 | 0.51 | 1.05  | 0.429253 | 0.573829 | 0.685718 | 0.745417 |
| MmugDNA.35030.1.S1_at   | MmugDNA.35030.1 | 8.35  | 8.13  | 0.14 | 0.02 | 1.17  | 0.032272 | 0.092256 | 0.233644 | 0.348042 |
| MmugDNA.35030.1.S1_s_at | MmugDNA.35030.1 | 6.67  | 6.54  | 0.09 | 0.1  | 1.1   | 0.36656  | 0.235079 | 0.640793 | 0.50629  |
| MmugDNA.35031.1.S1_at   | MmugDNA.35031.1 | 9.58  | 10.85 | 0.32 | 0.11 | -2.41 | 0.004004 | 0.020936 | 0.108676 | 0.181465 |
| MmugDNA.35032.1.S1_at   | MmugDNA.35032.1 | 10.77 | 10.09 | 0.34 | 0.06 | 1.6   | 0.064452 | 0.00745  | 0.31037  | 0.115872 |
| MmugDNA.35033.1.S1_at   | MmugDNA.35033.1 | 5.1   | 5.12  | 0.21 | 0.2  | -1.01 | 0.739637 | 0.891471 | 0.879308 | 0.93818  |
| MmugDNA.35034.1.S1_at   | MmugDNA.35034.1 | 8.58  | 8.06  | 0.34 | 0.11 | 1.44  | 0.021106 | 0.043557 | 0.198834 | 0.253261 |
| MmugDNA.35036.1.S1_at   | MmugDNA.35036.1 | 12.01 | 11.64 | 0.47 | 0.06 | 1.29  | 0.675819 | 0.127481 | 0.845248 | 0.398349 |
| MmugDNA.35037.1.S1_at   | MmugDNA.35037.1 | 3.99  | 3.69  | 0.3  | 0.04 | 1.23  | 0.141856 | 0.096545 | 0.427804 | 0.354115 |
| MmugDNA.35038.1.S1_at   | MmugDNA.35038.1 | 3.49  | 3.46  | 0.17 | 0.06 | 1.02  | 0.211078 | 0.343616 | 0.508876 | 0.589322 |
| MmugDNA.3504.1.S1_at    | MmugDNA.3504.1  | 7.53  | 7.24  | 0.06 | 0.1  | 1.23  | 0.031738 | 0.095778 | 0.231584 | 0.352753 |
| MmugDNA.35041.1.S1_at   | MmugDNA.35041.1 | 3.34  | 3.16  | 0.11 | 0.14 | 1.14  | 0.105305 | 0.151779 | 0.379205 | 0.426413 |
| MmugDNA.35042.1.S1_at   | MmugDNA.35042.1 | 5.48  | 5.5   | 0.95 | 0.25 | -1.01 | 0.543695 | 0.530126 | 0.763572 | 0.717729 |
| MmugDNA.35043.1.S1_at   | MmugDNA.35043.1 | 4.28  | 4.08  | 0.07 | 0.12 | 1.15  | 0.051462 | 0.03919  | 0.284331 | 0.243089 |
| MmugDNA.35044.1.S1_at   | MmugDNA.35044.1 | 9.65  | 9.59  | 0.15 | 0.06 | 1.04  | 0.477611 | 0.706231 | 0.719533 | 0.829634 |
| MmugDNA.35045.1.S1_at   | MmugDNA.35045.1 | 4.61  | 3.82  | 0.8  | 0.13 | 1.73  | 0.197043 | 0.156098 | 0.494219 | 0.431551 |
| MmugDNA.35047.1.S1_at   | MmugDNA.35047.1 | 6.15  | 6.61  | 0.14 | 0.14 | -1.37 | 0.034174 | 0.092301 | 0.239537 | 0.348137 |
| MmugDNA.35048.1.S1_at   | MmugDNA.35048.1 | 3.3   | 3.21  | 0.13 | 0.03 | 1.06  | 0.55233  | 0.122202 | 0.769112 | 0.391921 |

|                        |                 |       |       |      |      |       |          |          |          |          |
|------------------------|-----------------|-------|-------|------|------|-------|----------|----------|----------|----------|
| MmugDNA.35049.1.S1_at  | MmugDNA.35049.1 | 7.48  | 7.09  | 0.32 | 0.04 | 1.31  | 0.116081 | 0.06392  | 0.393069 | 0.29906  |
| MmugDNA.35051.1.S1_at  | MmugDNA.35051.1 | 9.7   | 10.43 | 0.54 | 0.17 | -1.66 | 0.099459 | 0.385859 | 0.370342 | 0.621161 |
| MmugDNA.35055.1.S1_at  | MmugDNA.35055.1 | 6.6   | 5.5   | 0.41 | 0.11 | 2.14  | 0.017629 | 0.077982 | 0.186416 | 0.324306 |
| MmugDNA.35056.1.S1_at  | MmugDNA.35056.1 | 5.96  | 6.14  | 0.21 | 0.19 | -1.13 | 0.409877 | 0.175929 | 0.67213  | 0.452486 |
| MmugDNA.35057.1.S1_at  | MmugDNA.35057.1 | 3.55  | 3.66  | 0.15 | 0.24 | -1.08 | 0.532618 | 0.549731 | 0.75668  | 0.730006 |
| MmugDNA.35058.1.S1_at  | MmugDNA.35058.1 | 6.72  | 6.74  | 0.11 | 0.04 | -1.01 | 0.915928 | 0.130915 | 0.964264 | 0.403037 |
| MmugDNA.3506.1.S1_at   | MmugDNA.3506.1  | 4.16  | 4.32  | 0.2  | 0.03 | -1.12 | 0.628281 | 0.452911 | 0.817377 | 0.667359 |
| MmugDNA.35060.1.S1_at  | MmugDNA.35060.1 | 5.62  | 5.95  | 0.58 | 0.17 | -1.26 | 0.474975 | 0.608444 | 0.717746 | 0.767074 |
| MmugDNA.35065.1.S1_at  | MmugDNA.35065.1 | 11.9  | 11.59 | 0.22 | 0.03 | 1.24  | 0.200005 | 0.241477 | 0.497566 | 0.512148 |
| MmugDNA.35068.1.S1_at  | MmugDNA.35068.1 | 9.18  | 8.57  | 0.19 | 0.15 | 1.54  | 0.021675 | 0.391981 | 0.20067  | 0.625477 |
| MmugDNA.3507.1.S1_at   | MmugDNA.3507.1  | 3.92  | 3.17  | 0.57 | 0.09 | 1.68  | 0.323771 | 0.359431 | 0.607494 | 0.600736 |
| MmugDNA.35070.1.S1_at  | MmugDNA.35070.1 | 4.23  | 4.21  | 0.18 | 0.06 | 1.02  | 0.53405  | 0.931826 | 0.757384 | 0.961265 |
| MmugDNA.35071.1.S1_at  | MmugDNA.35071.1 | 5.19  | 5.25  | 0.09 | 0.01 | -1.04 | 0.198092 | 0.211296 | 0.495359 | 0.485418 |
| MmugDNA.35072.1.S1_at  | MmugDNA.35072.1 | 10.72 | 10.75 | 0.13 | 0.05 | -1.02 | 0.498651 | 0.542172 | 0.733846 | 0.725325 |
| MmugDNA.35073.1.S1_at  | MmugDNA.35073.1 | 5.09  | 4.89  | 0.36 | 0.24 | 1.15  | 0.957633 | 0.884707 | 0.982604 | 0.934321 |
| MmugDNA.35074.1.S1_at  | MmugDNA.35074.1 | 3.27  | 3.27  | 0.03 | 0.02 | 1     | 0.312331 | 0.725259 | 0.598323 | 0.840954 |
| MmugDNA.35075.1.S1_at  | MmugDNA.35075.1 | 10.64 | 10.14 | 0.08 | 0.07 | 1.41  | 0.000892 | 0.008153 | 0.075114 | 0.119754 |
| MmugDNA.35076.1.S1_at  | MmugDNA.35076.1 | 6.41  | 6.28  | 0.41 | 0.19 | 1.09  | 0.883167 | 0.490891 | 0.950338 | 0.692666 |
| MmugDNA.35078.1.S1_at  | MmugDNA.35078.1 | 4.76  | 4.68  | 0.01 | 0.04 | 1.06  | 0.099249 | 0.383889 | 0.370274 | 0.61978  |
| MmugDNA.35079.1.S1_at  | MmugDNA.35079.1 | 3.02  | 3.19  | 0.1  | 0.07 | -1.13 | 0.151182 | 0.064659 | 0.440703 | 0.300314 |
| MmugDNA.3508.1.S1_at   | MmugDNA.3508.1  | 3.73  | 3.72  | 0.19 | 0.02 | 1     | 0.985946 | 0.874176 | 0.994999 | 0.928519 |
| MmugDNA.35080.1.S1_at  | MmugDNA.35080.1 | 11.04 | 11.37 | 0.48 | 0.05 | -1.26 | 0.302218 | 0.333246 | 0.590132 | 0.581498 |
| MmugDNA.35082.1.S1_at  | MmugDNA.35082.1 | 3.08  | 3.03  | 0.11 | 0.07 | 1.03  | 0.921901 | 0.859473 | 0.966549 | 0.919962 |
| MmugDNA.35083.1.S1_at  | MmugDNA.35083.1 | 4.01  | 3.66  | 0.1  | 0.1  | 1.27  | 0.012929 | 0.006574 | 0.164364 | 0.10994  |
| MmugDNA.35084.1.S1_at  | MmugDNA.35084.1 | 3.48  | 3.63  | 0.03 | 0.16 | -1.11 | 0.192534 | 0.309707 | 0.489105 | 0.565005 |
| MmugDNA.35085.1.S1_at  | MmugDNA.35085.1 | 8.73  | 9.96  | 0.83 | 0.33 | -2.35 | 0.120609 | 0.378744 | 0.398976 | 0.615748 |
| MmugDNA.35087.1.S1_at  | MmugDNA.35087.1 | 6.53  | 6.66  | 0.12 | 0.04 | -1.09 | 0.241714 | 0.049675 | 0.538882 | 0.267892 |
| MmugDNA.35088.1.S1_at  | MmugDNA.35088.1 | 5.98  | 5.87  | 0.26 | 0.11 | 1.08  | 0.173771 | 0.252749 | 0.468215 | 0.521174 |
| MmugDNA.35089.1.S1_at  | MmugDNA.35089.1 | 5.42  | 5.42  | 0.02 | 0.13 | 1     | 0.404661 | 0.758089 | 0.668345 | 0.859252 |
| MmugDNA.3509.1.S1_at   | MmugDNA.3509.1  | 7.77  | 8.33  | 0.08 | 0.14 | -1.48 | 0.002854 | 0.189901 | 0.098362 | 0.465424 |
| MmugDNA.3509.1.S1_s_at | MmugDNA.3509.1  | 6.92  | 8.21  | 0.37 | 0.24 | -2.44 | 0.020695 | 0.12461  | 0.197469 | 0.394995 |
| MmugDNA.35090.1.S1_at  | MmugDNA.35090.1 | 4.08  | 3.96  | 0.17 | 0.07 | 1.09  | 0.396604 | 0.713135 | 0.662637 | 0.833644 |
| MmugDNA.35091.1.S1_at  | MmugDNA.35091.1 | 4.71  | 4.46  | 0.93 | 0.48 | 1.19  | 0.50322  | 0.404245 | 0.736835 | 0.632691 |
| MmugDNA.35092.1.S1_at  | MmugDNA.35092.1 | 4.82  | 5.35  | 0.51 | 0.2  | -1.45 | 0.169752 | 0.427819 | 0.463121 | 0.649582 |
| MmugDNA.35093.1.S1_at  | MmugDNA.35093.1 | 12.88 | 12.81 | 0.11 | 0.09 | 1.05  | 0.686133 | 0.811167 | 0.850502 | 0.89102  |
| MmugDNA.35094.1.S1_at  | MmugDNA.35094.1 | 4.09  | 4.13  | 0.24 | 0.37 | -1.03 | 0.953942 | 0.164291 | 0.981106 | 0.440539 |
| MmugDNA.35095.1.S1_at  | MmugDNA.35095.1 | 6.54  | 6.74  | 1.31 | 0.33 | -1.15 | 0.997348 | 0.304664 | 0.999086 | 0.561872 |
| MmugDNA.35096.1.S1_at  | MmugDNA.35096.1 | 3.51  | 3.55  | 0.11 | 0.18 | -1.02 | 0.338504 | 0.634406 | 0.618883 | 0.784787 |
| MmugDNA.35097.1.S1_at  | MmugDNA.35097.1 | 3.95  | 3.7   | 0.1  | 0.21 | 1.19  | 0.362588 | 0.461794 | 0.63739  | 0.673361 |
| MmugDNA.35099.1.S1_at  | MmugDNA.35099.1 | 3.95  | 3.8   | 0.43 | 0.43 | 1.11  | 0.871008 | 0.955881 | 0.944472 | 0.975006 |
| MmugDNA.351.1.S1_at    | MmugDNA.351.1   | 3.67  | 3.41  | 0.23 | 0.15 | 1.19  | 0.174357 | 0.348341 | 0.468531 | 0.592504 |
| MmugDNA.3510.1.S1_at   | MmugDNA.3510.1  | 4.88  | 4.68  | 0.28 | 0.05 | 1.15  | 0.357477 | 0.415718 | 0.633546 | 0.641045 |
| MmugDNA.35100.1.S1_at  | MmugDNA.35100.1 | 5.67  | 5.41  | 0.04 | 0.22 | 1.2   | 0.09645  | 0.174179 | 0.366267 | 0.450479 |

|                         |                 |       |       |      |      |        |          |          |          |          |
|-------------------------|-----------------|-------|-------|------|------|--------|----------|----------|----------|----------|
| MmugDNA.35101.1.S1_at   | MmugDNA.35101.1 | 5.94  | 6.07  | 0.11 | 0.26 | -1.1   | 0.865018 | 0.903812 | 0.941423 | 0.945402 |
| MmugDNA.35102.1.S1_at   | MmugDNA.35102.1 | 4.11  | 3.39  | 0.5  | 0.08 | 1.66   | 0.202341 | 0.201005 | 0.499919 | 0.475442 |
| MmugDNA.35104.1.S1_at   | MmugDNA.35104.1 | 5.08  | 5.27  | 0.55 | 0.31 | -1.14  | 0.428935 | 0.084054 | 0.685557 | 0.33503  |
| MmugDNA.35107.1.S1_at   | MmugDNA.35107.1 | 5.22  | 5.14  | 0.23 | 0.07 | 1.06   | 0.212343 | 0.235203 | 0.510367 | 0.50629  |
| MmugDNA.35109.1.S1_at   | MmugDNA.35109.1 | 5.62  | 5.44  | 0.08 | 0.1  | 1.13   | 0.075177 | 0.132556 | 0.332294 | 0.404544 |
| MmugDNA.35110.1.S1_at   | MmugDNA.35110.1 | 11.15 | 11.31 | 0.06 | 0.19 | -1.11  | 0.721286 | 0.089244 | 0.868661 | 0.34333  |
| MmugDNA.35112.1.S1_at   | MmugDNA.35112.1 | 8.46  | 8.32  | 0.14 | 0.13 | 1.1    | 0.255041 | 0.458081 | 0.549576 | 0.671038 |
| MmugDNA.35113.1.S1_at   | MmugDNA.35113.1 | 5.1   | 5.22  | 0.23 | 0    | -1.09  | 0.973076 | 0.361875 | 0.989226 | 0.60265  |
| MmugDNA.35115.1.S1_at   | MmugDNA.35115.1 | 13.03 | 11.87 | 0.16 | 0.08 | 2.23   | 0.000421 | 0.000013 | 0.063209 | 0.017532 |
| MmugDNA.35116.1.S1_at   | MmugDNA.35116.1 | 8.45  | 8.02  | 0.18 | 0.15 | 1.35   | 0.031118 | 0.032814 | 0.229371 | 0.22427  |
| MmugDNA.35117.1.S1_at   | MmugDNA.35117.1 | 5.67  | 5.94  | 0.4  | 0.29 | -1.2   | 0.375468 | 0.00989  | 0.646344 | 0.130644 |
| MmugDNA.35118.1.S1_at   | MmugDNA.35118.1 | 10.94 | 10.92 | 0.43 | 0.06 | 1.01   | 0.992206 | 0.607078 | 0.997129 | 0.766185 |
| MmugDNA.35119.1.S1_at   | MmugDNA.35119.1 | 3.43  | 3.25  | 0.09 | 0.07 | 1.13   | 0.057446 | 0.209944 | 0.296977 | 0.48371  |
| MmugDNA.35122.1.S1_at   | MmugDNA.35122.1 | 11.22 | 11.4  | 0.36 | 0.06 | -1.14  | 0.29808  | 0.374358 | 0.5865   | 0.61282  |
| MmugDNA.35123.1.S1_s_at | MmugDNA.35123.1 | 11.36 | 11.02 | 0.26 | 0.02 | 1.26   | 0.095628 | 0.077114 | 0.365116 | 0.322673 |
| MmugDNA.35124.1.S1_at   | MmugDNA.35124.1 | 5.97  | 5.79  | 0.81 | 0.12 | 1.13   | 0.715679 | 0.735023 | 0.865874 | 0.846631 |
| MmugDNA.35125.1.S1_at   | MmugDNA.35125.1 | 4.51  | 4.34  | 0.19 | 0.54 | 1.12   | 0.409377 | 0.406915 | 0.671738 | 0.634629 |
| MmugDNA.35126.1.S1_at   | MmugDNA.35126.1 | 4.08  | 4.09  | 0.07 | 0    | -1.01  | 0.746002 | 0.800993 | 0.882229 | 0.885538 |
| MmugDNA.35127.1.S1_at   | MmugDNA.35127.1 | 4.22  | 4.64  | 0.18 | 0.18 | -1.34  | 0.054207 | 0.34216  | 0.289903 | 0.588332 |
| MmugDNA.35128.1.S1_at   | MmugDNA.35128.1 | 7.22  | 7.2   | 0.37 | 0.07 | 1.01   | 0.390553 | 0.270542 | 0.658142 | 0.535837 |
| MmugDNA.22636.1.S1_s_at | MmugDNA.22636.1 | 9.4   | 9.47  | 0.22 | 0.36 | -1.05  | 0.369206 | 0.657521 | 0.642795 | 0.799757 |
| MmuSTS.2023.1.S1_at     | MmuSTS.2023.1   | 7.23  | 11.75 | 1.94 | 0.28 | -22.99 | 0.043685 | 0.319758 | 0.266089 | 0.572105 |
| MmuSTS.2023.1.S1_s_at   | MmuSTS.2023.1   | 6.94  | 11.1  | 1.68 | 0.3  | -17.8  | 0.036551 | 0.301922 | 0.246142 | 0.55986  |
| MmugDNA.35134.1.S1_at   | MmugDNA.35134.1 | 3.63  | 3.55  | 0.08 | 0.02 | 1.06   | 0.067961 | 0.067539 | 0.318434 | 0.305949 |
| MmugDNA.35135.1.S1_at   | MmugDNA.35135.1 | 11.98 | 11.71 | 0.07 | 0.08 | 1.21   | 0.017744 | 0.285222 | 0.18688  | 0.547165 |
| MmugDNA.35137.1.S1_at   | MmugDNA.35137.1 | 9.61  | 10.12 | 0.23 | 0.26 | -1.42  | 0.153335 | 0.002658 | 0.4431   | 0.076211 |
| MmugDNA.35138.1.S1_at   | MmugDNA.35138.1 | 9.54  | 9.25  | 0.26 | 0.19 | 1.22   | 0.376057 | 0.162874 | 0.646765 | 0.438966 |
| MmugDNA.35139.1.S1_at   | MmugDNA.35139.1 | 5.45  | 5.53  | 0.04 | 0.26 | -1.05  | 0.721362 | 0.80422  | 0.868694 | 0.887395 |
| MmugDNA.3514.1.S1_at    | MmugDNA.3514.1  | 2.95  | 2.95  | 0.12 | 0.05 | 1      | 0.257113 | 0.346046 | 0.551586 | 0.59115  |
| MmugDNA.35140.1.S1_at   | MmugDNA.35140.1 | 9.58  | 9.56  | 0.21 | 0.06 | 1.01   | 0.334078 | 0.568509 | 0.615174 | 0.741988 |
| MmugDNA.35142.1.S1_at   | MmugDNA.35142.1 | 4.61  | 5.1   | 0.58 | 0.38 | -1.4   | 0.686908 | 0.230551 | 0.850752 | 0.50226  |
| MmugDNA.35143.1.S1_at   | MmugDNA.35143.1 | 6.58  | 5.05  | 0.82 | 0.29 | 2.89   | 0.077943 | 0.062153 | 0.337174 | 0.296237 |
| MmugDNA.35144.1.S1_at   | MmugDNA.35144.1 | 5.71  | 5.45  | 0.08 | 0.11 | 1.2    | 0.012271 | 0.058504 | 0.161109 | 0.288585 |
| MmugDNA.35146.1.S1_at   | MmugDNA.35146.1 | 11.19 | 11.29 | 0    | 0.06 | -1.07  | 0.0514   | 0.045337 | 0.284155 | 0.257242 |
| MmugDNA.35147.1.S1_at   | MmugDNA.35147.1 | 7.76  | 7.78  | 0.26 | 0.14 | -1.01  | 0.368438 | 0.3974   | 0.64218  | 0.628812 |
| MmugDNA.35148.1.S1_at   | MmugDNA.35148.1 | 9.18  | 9.16  | 0.28 | 0.11 | 1.01   | 0.646396 | 0.590561 | 0.828104 | 0.756311 |
| MmugDNA.35148.1.S1_s_at | MmugDNA.35148.1 | 8.92  | 8.76  | 0.31 | 0.07 | 1.12   | 0.5115   | 0.202252 | 0.742421 | 0.476665 |
| MmugDNA.3515.1.S1_at    | MmugDNA.3515.1  | 4.73  | 4.21  | 0.21 | 0.26 | 1.43   | 0.054312 | 0.093552 | 0.290104 | 0.349884 |
| MmugDNA.35151.1.S1_at   | MmugDNA.35151.1 | 8.1   | 8.66  | 0.23 | 0.3  | -1.48  | 0.113568 | 0.019399 | 0.390238 | 0.175068 |
| MmugDNA.35152.1.S1_at   | MmugDNA.35152.1 | 4.67  | 4.47  | 0.16 | 0.09 | 1.15   | 0.23404  | 0.133278 | 0.532201 | 0.405049 |
| MmugDNA.35153.1.S1_at   | MmugDNA.35153.1 | 5.18  | 4.82  | 0.39 | 0.12 | 1.28   | 0.260847 | 0.340828 | 0.555006 | 0.586978 |
| MmugDNA.35154.1.S1_at   | MmugDNA.35154.1 | 7.19  | 6.27  | 0.58 | 1.01 | 1.89   | 0.993266 | 0.800107 | 0.997379 | 0.885076 |
| MmugDNA.35155.1.S1_at   | MmugDNA.35155.1 | 4.42  | 4.36  | 0.27 | 0.12 | 1.04   | 0.177832 | 0.331574 | 0.47256  | 0.580188 |

|                         |                 |       |       |      |      |       |          |          |          |          |
|-------------------------|-----------------|-------|-------|------|------|-------|----------|----------|----------|----------|
| MmugDNA.35157.1.S1_at   | MmugDNA.35157.1 | 5.49  | 5.19  | 0.29 | 0.04 | 1.24  | 0.398525 | 0.627289 | 0.664041 | 0.780361 |
| MmugDNA.35158.1.S1_at   | MmugDNA.35158.1 | 7.65  | 7.09  | 1.14 | 0.04 | 1.48  | 0.49715  | 0.652652 | 0.732899 | 0.796933 |
| MmugDNA.35159.1.S1_at   | MmugDNA.35159.1 | 5.13  | 5.08  | 0.14 | 0.08 | 1.04  | 0.870119 | 0.018425 | 0.944195 | 0.170755 |
| MmugDNA.35160.1.S1_at   | MmugDNA.35160.1 | 5.62  | 5.65  | 0.17 | 0.05 | -1.02 | 0.542648 | 0.3007   | 0.762914 | 0.558959 |
| MmugDNA.35162.1.S1_at   | MmugDNA.35162.1 | 6.29  | 7.18  | 0.2  | 0.19 | -1.85 | 0.008179 | 0.361105 | 0.139381 | 0.602069 |
| MmugDNA.35163.1.S1_at   | MmugDNA.35163.1 | 4.03  | 3.94  | 0.07 | 0.11 | 1.07  | 0.258235 | 0.287648 | 0.552453 | 0.548886 |
| MmugDNA.35164.1.S1_at   | MmugDNA.35164.1 | 11.2  | 11.65 | 0.06 | 0.12 | -1.37 | 0.006815 | 0.080819 | 0.129236 | 0.32873  |
| MmugDNA.35166.1.S1_at   | MmugDNA.35166.1 | 3.41  | 3.45  | 0.13 | 0.12 | -1.03 | 0.687052 | 0.829138 | 0.850763 | 0.901771 |
| MmugDNA.35167.1.S1_at   | MmugDNA.35167.1 | 7.01  | 6.85  | 0.3  | 0.12 | 1.12  | 0.337184 | 0.073174 | 0.617723 | 0.316064 |
| MmugDNA.35168.1.S1_at   | MmugDNA.35168.1 | 6.79  | 6.55  | 0.69 | 0.31 | 1.18  | 0.453196 | 0.565612 | 0.703473 | 0.739997 |
| MmugDNA.35170.1.S1_at   | MmugDNA.35170.1 | 8.02  | 8     | 0.11 | 0.18 | 1.01  | 0.814684 | 0.05591  | 0.917175 | 0.282221 |
| MmugDNA.35171.1.S1_at   | MmugDNA.35171.1 | 4.76  | 4.32  | 1.16 | 0.36 | 1.35  | 0.2715   | 0.265851 | 0.563425 | 0.531705 |
| MmugDNA.35172.1.S1_at   | MmugDNA.35172.1 | 8.6   | 7.99  | 0.04 | 0.08 | 1.53  | 0.000281 | 0.001262 | 0.056985 | 0.05521  |
| MmugDNA.35173.1.S1_at   | MmugDNA.35173.1 | 7.21  | 7.36  | 0.2  | 0.1  | -1.11 | 0.318896 | 0.561969 | 0.603556 | 0.737666 |
| MmugDNA.35174.1.S1_at   | MmugDNA.35174.1 | 8     | 7.92  | 0.15 | 0.06 | 1.06  | 0.263181 | 0.436105 | 0.556921 | 0.655802 |
| MmugDNA.35175.1.S1_at   | MmugDNA.35175.1 | 6.93  | 7.13  | 0.04 | 0.12 | -1.15 | 0.19078  | 0.072297 | 0.486956 | 0.314983 |
| MmugDNA.35176.1.S1_at   | MmugDNA.35176.1 | 9.91  | 9.63  | 0.06 | 0.08 | 1.22  | 0.005741 | 0.012751 | 0.121457 | 0.145496 |
| MmugDNA.35177.1.S1_at   | MmugDNA.35177.1 | 7.02  | 6.81  | 1.17 | 0.34 | 1.15  | 0.285085 | 0.40294  | 0.575098 | 0.631696 |
| MmugDNA.35179.1.S1_at   | MmugDNA.35179.1 | 9.38  | 9.76  | 0.29 | 0.13 | -1.3  | 0.141025 | 0.320466 | 0.42688  | 0.572648 |
| MmugDNA.35180.1.S1_at   | MmugDNA.35180.1 | 4.09  | 4.45  | 0.19 | 0.11 | -1.28 | 0.021249 | 0.044952 | 0.199565 | 0.256489 |
| MmugDNA.35181.1.S1_at   | MmugDNA.35181.1 | 11.75 | 11.65 | 0.13 | 0.09 | 1.07  | 0.368159 | 0.014327 | 0.64189  | 0.152764 |
| MmugDNA.35181.1.S1_s_at | MmugDNA.35181.1 | 10.95 | 10.84 | 0.25 | 0.06 | 1.08  | 0.540905 | 0.050087 | 0.7618   | 0.268916 |
| MmugDNA.35183.1.S1_at   | MmugDNA.35183.1 | 4.15  | 4.11  | 0.04 | 0.16 | 1.03  | 0.763672 | 0.375438 | 0.891841 | 0.61341  |
| MmugDNA.35185.1.S1_at   | MmugDNA.35185.1 | 10.16 | 10.45 | 0.06 | 0.16 | -1.23 | 0.035642 | 0.000477 | 0.243635 | 0.038572 |
| MmugDNA.35186.1.S1_at   | MmugDNA.35186.1 | 7.37  | 7.03  | 0.25 | 0.14 | 1.26  | 0.265084 | 0.101505 | 0.557962 | 0.361325 |
| MmugDNA.35187.1.S1_at   | MmugDNA.35187.1 | 6.94  | 7.02  | 0.29 | 0.34 | -1.06 | 0.678581 | 0.921427 | 0.846705 | 0.955761 |
| MmugDNA.35188.1.S1_at   | MmugDNA.35188.1 | 3.79  | 3.56  | 0.44 | 0.31 | 1.17  | 0.78682  | 0.569837 | 0.902753 | 0.742694 |
| MmugDNA.35190.1.S1_at   | MmugDNA.35190.1 | 8.52  | 8.5   | 0.3  | 0.01 | 1.01  | 0.9597   | 0.067436 | 0.983565 | 0.305694 |
| MmugDNA.35191.1.S1_at   | MmugDNA.35191.1 | 4     | 3.85  | 0.07 | 0.14 | 1.11  | 0.242296 | 0.446036 | 0.539326 | 0.662668 |
| MmugDNA.35193.1.S1_at   | MmugDNA.35193.1 | 6.34  | 6.33  | 0.25 | 0.18 | 1.01  | 0.784664 | 0.938209 | 0.901788 | 0.964949 |
| MmugDNA.35195.1.S1_at   | MmugDNA.35195.1 | 4.65  | 4.3   | 0.11 | 0.02 | 1.27  | 0.004801 | 0.010234 | 0.115098 | 0.1326   |
| MmugDNA.35196.1.S1_at   | MmugDNA.35196.1 | 4.28  | 5.16  | 1.19 | 0.57 | -1.85 | 0.764232 | 0.834858 | 0.891902 | 0.905477 |
| MmugDNA.35197.1.S1_at   | MmugDNA.35197.1 | 4.37  | 4.24  | 0.2  | 0.07 | 1.1   | 0.994782 | 0.789957 | 0.997935 | 0.878631 |
| MmugDNA.35198.1.S1_at   | MmugDNA.35198.1 | 6.5   | 6.49  | 0.21 | 0.03 | 1     | 0.306535 | 0.601002 | 0.593328 | 0.762462 |
| MmugDNA.35199.1.S1_at   | MmugDNA.35199.1 | 5.23  | 5.22  | 0.37 | 0.3  | 1.01  | 0.841579 | 0.664607 | 0.930364 | 0.803459 |
| MmugDNA.352.1.S1_at     | MmugDNA.352.1   | 6.44  | 6.85  | 0.93 | 0.32 | -1.33 | 0.620259 | 0.299269 | 0.811767 | 0.557769 |
| MmugDNA.3520.1.S1_at    | MmugDNA.3520.1  | 7.1   | 7.13  | 0.1  | 0.1  | -1.02 | 0.515159 | 0.650766 | 0.745032 | 0.795801 |
| MmugDNA.35200.1.S1_at   | MmugDNA.35200.1 | 10.92 | 9.72  | 0.09 | 0.35 | 2.3   | 0.009259 | 0.013898 | 0.145977 | 0.151243 |
| MmugDNA.35201.1.S1_at   | MmugDNA.35201.1 | 8.59  | 9.46  | 0.61 | 0.13 | -1.82 | 0.139306 | 0.198691 | 0.424942 | 0.473391 |
| MmugDNA.35202.1.S1_at   | MmugDNA.35202.1 | 7.49  | 6.74  | 0.37 | 0.37 | 1.68  | 0.103717 | 0.059697 | 0.377025 | 0.290945 |
| MmugDNA.35204.1.S1_at   | MmugDNA.35204.1 | 6.75  | 6.86  | 0.16 | 0.06 | -1.08 | 0.421743 | 0.019794 | 0.680117 | 0.176951 |
| MmugDNA.35205.1.S1_at   | MmugDNA.35205.1 | 5.18  | 5.55  | 0.36 | 0.18 | -1.29 | 0.416796 | 0.886213 | 0.677133 | 0.935235 |
| MmugDNA.3521.1.S1_at    | MmugDNA.3521.1  | 4.74  | 4.45  | 0.47 | 0.29 | 1.23  | 0.459504 | 0.649755 | 0.707635 | 0.79516  |

|                         |                 |       |       |      |      |       |          |          |          |          |
|-------------------------|-----------------|-------|-------|------|------|-------|----------|----------|----------|----------|
| MmugDNA.35211.1.S1_at   | MmugDNA.35211.1 | 6.92  | 6.94  | 0.7  | 0.25 | -1.02 | 0.833026 | 0.886487 | 0.926464 | 0.93543  |
| MmugDNA.35212.1.S1_at   | MmugDNA.35212.1 | 6.78  | 6.52  | 0.53 | 0.5  | 1.2   | 0.942295 | 0.026272 | 0.975644 | 0.203033 |
| MmugDNA.35213.1.S1_at   | MmugDNA.35213.1 | 13    | 12.99 | 0.09 | 0.02 | 1     | 0.803009 | 0.077335 | 0.911626 | 0.323135 |
| MmugDNA.35215.1.S1_at   | MmugDNA.35215.1 | 3.43  | 3.46  | 0.24 | 0.04 | -1.02 | 0.688669 | 0.782136 | 0.851333 | 0.873787 |
| MmugDNA.35216.1.S1_at   | MmugDNA.35216.1 | 3.32  | 4.42  | 0.3  | 0.79 | -2.14 | 0.054919 | 0.214634 | 0.291293 | 0.488448 |
| MmugDNA.35217.1.S1_at   | MmugDNA.35217.1 | 4.65  | 4.56  | 0.12 | 0.1  | 1.07  | 0.327339 | 0.596131 | 0.609988 | 0.759357 |
| MmugDNA.35218.1.S1_at   | MmugDNA.35218.1 | 6.08  | 6.03  | 0.2  | 0.1  | 1.04  | 0.488464 | 0.68416  | 0.726931 | 0.815791 |
| MmugDNA.35219.1.S1_at   | MmugDNA.35219.1 | 3.51  | 3.69  | 0.06 | 0.14 | -1.13 | 0.096322 | 0.444226 | 0.366014 | 0.661895 |
| MmugDNA.3522.1.S1_at    | MmugDNA.3522.1  | 7.34  | 7.24  | 0.18 | 0.04 | 1.07  | 0.990544 | 0.019657 | 0.996577 | 0.176187 |
| MmugDNA.35220.1.S1_at   | MmugDNA.35220.1 | 5     | 4.81  | 0.1  | 0.18 | 1.14  | 0.440568 | 0.016521 | 0.694572 | 0.16273  |
| MmugDNA.35221.1.S1_at   | MmugDNA.35221.1 | 7.18  | 7.08  | 0.9  | 0.27 | 1.07  | 0.789875 | 0.818292 | 0.90449  | 0.895205 |
| MmugDNA.35222.1.S1_at   | MmugDNA.35222.1 | 4.93  | 4.85  | 0.14 | 0.04 | 1.06  | 0.167097 | 0.27073  | 0.460327 | 0.53602  |
| MmugDNA.35223.1.S1_at   | MmugDNA.35223.1 | 4.84  | 4.85  | 0.58 | 0.08 | -1.01 | 0.466918 | 0.596604 | 0.712527 | 0.759694 |
| MmugDNA.35224.1.S1_at   | MmugDNA.35224.1 | 6.97  | 7.03  | 0.04 | 0.07 | -1.04 | 0.112108 | 0.098647 | 0.388227 | 0.356743 |
| MmugDNA.35225.1.S1_at   | MmugDNA.35225.1 | 11.73 | 11.9  | 0.08 | 0.06 | -1.12 | 0.03243  | 0.543698 | 0.234344 | 0.726281 |
| MmugDNA.35226.1.S1_at   | MmugDNA.35226.1 | 7.87  | 8.15  | 0.27 | 0.14 | -1.21 | 0.233909 | 0.014972 | 0.532128 | 0.155472 |
| MmugDNA.35227.1.S1_at   | MmugDNA.35227.1 | 4.3   | 4.33  | 0.04 | 0.13 | -1.02 | 0.36534  | 0.335433 | 0.639887 | 0.583234 |
| MmugDNA.35229.1.S1_at   | MmugDNA.35229.1 | 5.36  | 5.15  | 0.14 | 0.06 | 1.15  | 0.067512 | 0.177376 | 0.317446 | 0.453742 |
| MmugDNA.3523.1.S1_at    | MmugDNA.3523.1  | 9.56  | 9.42  | 0.27 | 0.16 | 1.1   | 0.222047 | 0.250968 | 0.520162 | 0.519638 |
| MmugDNA.35230.1.S1_at   | MmugDNA.35230.1 | 6.64  | 6.61  | 0.18 | 0    | 1.02  | 0.539904 | 0.000363 | 0.761141 | 0.037273 |
| MmugDNA.35231.1.S1_at   | MmugDNA.35231.1 | 4.69  | 4.71  | 0.23 | 0.07 | -1.01 | 0.950263 | 0.530404 | 0.979348 | 0.717957 |
| MmugDNA.35233.1.S1_at   | MmugDNA.35233.1 | 4.95  | 4.79  | 0.54 | 0.51 | 1.12  | 0.698907 | 0.227224 | 0.856898 | 0.499572 |
| MmugDNA.35234.1.S1_at   | MmugDNA.35234.1 | 5.35  | 5.15  | 0.34 | 0.11 | 1.15  | 0.509124 | 0.347711 | 0.740884 | 0.592082 |
| MmugDNA.35235.1.S1_at   | MmugDNA.35235.1 | 5.61  | 5.91  | 0.07 | 0.13 | -1.22 | 0.020286 | 0.513996 | 0.196136 | 0.707375 |
| MmugDNA.35237.1.S1_at   | MmugDNA.35237.1 | 7.14  | 7.54  | 0.38 | 0.1  | -1.32 | 0.049724 | 0.041742 | 0.280409 | 0.24892  |
| MmugDNA.35238.1.S1_x_at | MmugDNA.35238.1 | 7.1   | 6.99  | 0.55 | 0.11 | 1.08  | 0.259744 | 0.279222 | 0.554041 | 0.542886 |
| MmugDNA.39875.1.S1_s_at | MmugDNA.39875.1 | 8.03  | 8.49  | 0.38 | 0.04 | -1.38 | 0.077663 | 0.596311 | 0.336558 | 0.759468 |
| MmugDNA.3524.1.S1_at    | MmugDNA.3524.1  | 6.37  | 6.44  | 0.24 | 0.21 | -1.05 | 0.805261 | 0.132756 | 0.91266  | 0.404544 |
| MmugDNA.35240.1.S1_at   | MmugDNA.35240.1 | 5.87  | 5.84  | 0.42 | 0.34 | 1.02  | 0.850701 | 0.465093 | 0.935209 | 0.67557  |
| MmugDNA.35242.1.S1_at   | MmugDNA.35242.1 | 3.51  | 3.51  | 0.05 | 0.25 | -1    | 0.453872 | 0.30094  | 0.703883 | 0.559178 |
| MmugDNA.35244.1.S1_at   | MmugDNA.35244.1 | 8.28  | 8.11  | 0.35 | 0.17 | 1.13  | 0.916956 | 0.026078 | 0.964649 | 0.202453 |
| MmugDNA.35246.1.S1_at   | MmugDNA.35246.1 | 5.63  | 5.81  | 0.49 | 0.14 | -1.13 | 0.765865 | 0.157775 | 0.89262  | 0.433423 |
| MmugDNA.35247.1.S1_at   | MmugDNA.35247.1 | 6.03  | 5.86  | 0.06 | 0.13 | 1.13  | 0.08665  | 0.000762 | 0.351711 | 0.04544  |
| MmugDNA.35248.1.S1_at   | MmugDNA.35248.1 | 6.96  | 6.65  | 0.22 | 0.14 | 1.24  | 0.14916  | 0.530566 | 0.437947 | 0.718042 |
| MmugDNA.35249.1.S1_at   | MmugDNA.35249.1 | 3.58  | 3.78  | 0.2  | 0.29 | -1.15 | 0.345327 | 0.42957  | 0.624363 | 0.650961 |
| MmugDNA.3525.1.S1_at    | MmugDNA.3525.1  | 5.33  | 4.8   | 0.27 | 0.16 | 1.44  | 0.034827 | 0.109767 | 0.241113 | 0.373701 |
| MmugDNA.35250.1.S1_at   | MmugDNA.35250.1 | 7.28  | 7.3   | 0.07 | 0.03 | -1.01 | 0.377432 | 0.103699 | 0.647959 | 0.364519 |
| MmugDNA.35251.1.S1_at   | MmugDNA.35251.1 | 4.02  | 4.3   | 0.2  | 0.39 | -1.21 | 0.251342 | 0.373738 | 0.546147 | 0.61241  |
| MmugDNA.35252.1.S1_at   | MmugDNA.35252.1 | 8.53  | 8.4   | 0.04 | 0.04 | 1.09  | 0.013964 | 0.602356 | 0.169233 | 0.763342 |
| MmugDNA.35253.1.S1_at   | MmugDNA.35253.1 | 5.66  | 5.27  | 0.2  | 0.05 | 1.31  | 0.04797  | 0.199307 | 0.276383 | 0.474002 |
| MmugDNA.35254.1.S1_at   | MmugDNA.35254.1 | 4.9   | 5.28  | 0.09 | 0.23 | -1.3  | 0.023452 | 0.019656 | 0.206249 | 0.176187 |
| MmugDNA.35255.1.S1_at   | MmugDNA.35255.1 | 5.42  | 5.14  | 0.69 | 0.1  | 1.21  | 0.508934 | 0.607993 | 0.74075  | 0.766717 |
| MmugDNA.35256.1.S1_at   | MmugDNA.35256.1 | 4.95  | 4.98  | 0.18 | 0.07 | -1.02 | 0.564797 | 0.902524 | 0.776359 | 0.944622 |



|                         |                 |       |       |      |      |       |          |          |          |          |
|-------------------------|-----------------|-------|-------|------|------|-------|----------|----------|----------|----------|
| MmugDNA.35257.1.S1_at   | MmugDNA.35257.1 | 7.77  | 7.83  | 0.25 | 0.15 | -1.04 | 0.73476  | 0.634541 | 0.876463 | 0.784881 |
| MmugDNA.35258.1.S1_at   | MmugDNA.35258.1 | 4.25  | 4.38  | 0.09 | 0.13 | -1.09 | 0.107232 | 0.132957 | 0.381693 | 0.404626 |
| MmugDNA.35259.1.S1_at   | MmugDNA.35259.1 | 3.1   | 3.14  | 0.28 | 0.06 | -1.03 | 0.79148  | 0.949514 | 0.905298 | 0.971135 |
| MmugDNA.35262.1.S1_at   | MmugDNA.35262.1 | 8.03  | 7.96  | 0.26 | 0.06 | 1.05  | 0.387319 | 0.028541 | 0.655535 | 0.210754 |
| MmugDNA.35264.1.S1_at   | MmugDNA.35264.1 | 6.69  | 6.58  | 0.2  | 0.09 | 1.08  | 0.312167 | 0.475939 | 0.598229 | 0.682387 |
| MmugDNA.35265.1.S1_at   | MmugDNA.35265.1 | 3.4   | 3.43  | 0.09 | 0.07 | -1.02 | 0.233711 | 0.296207 | 0.531845 | 0.555413 |
| MmugDNA.35266.1.S1_at   | MmugDNA.35266.1 | 4.65  | 4.36  | 0.71 | 0.01 | 1.22  | 0.168649 | 0.199683 | 0.461921 | 0.474335 |
| MmugDNA.35268.1.S1_at   | MmugDNA.35268.1 | 11.82 | 11.08 | 0.24 | 0.33 | 1.67  | 0.052642 | 0.029805 | 0.286412 | 0.214318 |
| MmugDNA.35269.1.S1_at   | MmugDNA.35269.1 | 3.46  | 3.55  | 0.22 | 0.16 | -1.06 | 0.871168 | 0.794032 | 0.944568 | 0.881267 |
| MmugDNA.3527.1.S1_at    | MmugDNA.3527.1  | 5.4   | 5.55  | 0.08 | 0.13 | -1.11 | 0.107318 | 0.072417 | 0.381866 | 0.31528  |
| MmugDNA.35271.1.S1_x_at | MmugDNA.35271.1 | 9.48  | 9.44  | 0.92 | 0.23 | 1.03  | 0.380966 | 0.402729 | 0.650527 | 0.631543 |
| MmugDNA.35272.1.S1_at   | MmugDNA.35272.1 | 3.96  | 3.23  | 0.55 | 0.13 | 1.66  | 0.08822  | 0.105831 | 0.354244 | 0.368111 |
| MmugDNA.35273.1.S1_at   | MmugDNA.35273.1 | 5.56  | 5.67  | 0.28 | 0.06 | -1.08 | 0.644227 | 0.664588 | 0.826727 | 0.803454 |
| MmugDNA.35274.1.S1_at   | MmugDNA.35274.1 | 8.91  | 8.45  | 0.23 | 0.24 | 1.38  | 0.084175 | 0.182957 | 0.347528 | 0.459434 |
| MmugDNA.35275.1.S1_at   | MmugDNA.35275.1 | 6.41  | 6.39  | 0.13 | 0.05 | 1.02  | 0.232127 | 0.312444 | 0.530631 | 0.567197 |
| MmugDNA.35276.1.S1_at   | MmugDNA.35276.1 | 6.13  | 6.2   | 0.09 | 0.11 | -1.05 | 0.247452 | 0.028139 | 0.542973 | 0.209306 |
| MmugDNA.35277.1.S1_s_at | MmugDNA.35277.1 | 10.88 | 11.6  | 0.15 | 0.19 | -1.65 | 0.01112  | 0.199053 | 0.155073 | 0.473621 |
| MmugDNA.35278.1.S1_at   | MmugDNA.35278.1 | 3.89  | 3.85  | 0.23 | 0.08 | 1.03  | 0.326293 | 0.345582 | 0.609478 | 0.590816 |
| MmugDNA.35279.1.S1_at   | MmugDNA.35279.1 | 3.91  | 4.01  | 0.16 | 0.06 | -1.08 | 0.512589 | 0.73348  | 0.743056 | 0.845679 |
| MmugDNA.3528.1.S1_at    | MmugDNA.3528.1  | 6.23  | 6.19  | 0.13 | 0.04 | 1.03  | 0.236718 | 0.286849 | 0.534328 | 0.548162 |
| MmugDNA.35280.1.S1_at   | MmugDNA.35280.1 | 4.45  | 4.44  | 0.3  | 0.34 | 1     | 0.500109 | 0.65727  | 0.734575 | 0.799611 |
| MmugDNA.35281.1.S1_at   | MmugDNA.35281.1 | 8     | 8.07  | 0.52 | 0.13 | -1.05 | 0.403717 | 0.711537 | 0.667788 | 0.832752 |
| MmugDNA.35281.1.S1_s_at | MmugDNA.35281.1 | 10.71 | 10.85 | 0.38 | 0.19 | -1.1  | 0.900777 | 0.985642 | 0.957967 | 0.991833 |
| MmugDNA.35282.1.S1_at   | MmugDNA.35282.1 | 6.1   | 5.94  | 0.18 | 0.19 | 1.12  | 0.146452 | 0.336808 | 0.43432  | 0.584093 |
| MmugDNA.35283.1.S1_at   | MmugDNA.35283.1 | 10.34 | 10.4  | 0.03 | 0.05 | -1.04 | 0.185583 | 0.353794 | 0.481798 | 0.596815 |
| MmugDNA.35284.1.S1_at   | MmugDNA.35284.1 | 4.85  | 4.68  | 0.35 | 0.14 | 1.13  | 0.936212 | 0.401023 | 0.973312 | 0.630667 |
| MmugDNA.35285.1.S1_at   | MmugDNA.35285.1 | 7.17  | 6.91  | 0.19 | 0.11 | 1.2   | 0.050308 | 0.087909 | 0.282151 | 0.341312 |
| MmugDNA.35287.1.S1_at   | MmugDNA.35287.1 | 8.01  | 8.35  | 0.29 | 0.17 | -1.27 | 0.198531 | 0.231822 | 0.495717 | 0.503592 |
| MmugDNA.35288.1.S1_at   | MmugDNA.35288.1 | 7.01  | 7     | 0.23 | 0.22 | 1.01  | 0.50075  | 0.509242 | 0.734926 | 0.704039 |
| MmugDNA.35288.1.S1_s_at | MmugDNA.35288.1 | 6.2   | 6.14  | 0.12 | 0.08 | 1.04  | 0.268433 | 0.120815 | 0.561069 | 0.389657 |
| MmugDNA.35289.1.S1_at   | MmugDNA.35289.1 | 7.84  | 7.83  | 0.09 | 0.01 | 1.01  | 0.627327 | 0.363289 | 0.816803 | 0.60371  |
| MmugDNA.35290.1.S1_at   | MmugDNA.35290.1 | 8.06  | 7.17  | 0.42 | 0.19 | 1.86  | 0.04283  | 0.018314 | 0.264108 | 0.170178 |
| MmugDNA.35291.1.S1_s_at | MmugDNA.35291.1 | 11.31 | 11.4  | 0.23 | 0.05 | -1.06 | 0.628452 | 0.731371 | 0.817452 | 0.84431  |
| MmugDNA.35292.1.S1_at   | MmugDNA.35292.1 | 4.1   | 4.15  | 0.07 | 0.16 | -1.03 | 0.685992 | 0.47959  | 0.850432 | 0.685315 |
| MmugDNA.35295.1.S1_at   | MmugDNA.35295.1 | 6.68  | 6.78  | 0.14 | 0.26 | -1.07 | 0.970514 | 0.001011 | 0.988339 | 0.050657 |
| MmugDNA.35296.1.S1_at   | MmugDNA.35296.1 | 5.28  | 5.01  | 0.44 | 0.36 | 1.21  | 0.44851  | 0.592743 | 0.700064 | 0.75786  |
| MmugDNA.35297.1.S1_at   | MmugDNA.35297.1 | 13.97 | 14    | 0.1  | 0.05 | -1.02 | 0.595555 | 0.877885 | 0.795312 | 0.93029  |
| MmugDNA.35298.1.S1_at   | MmugDNA.35298.1 | 3.9   | 3.89  | 0.24 | 0.07 | 1.01  | 0.436226 | 0.192642 | 0.691155 | 0.468144 |
| MmugDNA.35299.1.S1_at   | MmugDNA.35299.1 | 4.83  | 4.68  | 0.34 | 0.09 | 1.11  | 0.717055 | 0.014386 | 0.866435 | 0.153115 |
| MmugDNA.353.1.S1_at     | MmugDNA.353.1   | 2.87  | 2.85  | 0.05 | 0.05 | 1.01  | 0.381838 | 0.262803 | 0.651337 | 0.529139 |
| MmugDNA.3530.1.S1_at    | MmugDNA.3530.1  | 6.42  | 6.61  | 0.11 | 0.23 | -1.15 | 0.702782 | 0.198906 | 0.85894  | 0.473506 |
| MmugDNA.35300.1.S1_at   | MmugDNA.35300.1 | 4.86  | 4.89  | 0.09 | 0.16 | -1.02 | 0.970797 | 0.376856 | 0.988411 | 0.614606 |
| MmugDNA.35301.1.S1_at   | MmugDNA.35301.1 | 5.25  | 5.49  | 0.34 | 0.06 | -1.18 | 0.910305 | 0.928093 | 0.961971 | 0.959154 |

|                         |                 |       |       |      |      |       |          |          |          |          |
|-------------------------|-----------------|-------|-------|------|------|-------|----------|----------|----------|----------|
| MmugDNA.35303.1.S1_at   | MmugDNA.35303.1 | 6.37  | 6     | 0.27 | 0.1  | 1.29  | 0.103743 | 0.133583 | 0.377036 | 0.405542 |
| MmugDNA.35305.1.S1_at   | MmugDNA.35305.1 | 6.18  | 6.07  | 0.09 | 0.04 | 1.09  | 0.066462 | 0.029748 | 0.315341 | 0.214138 |
| MmugDNA.35306.1.S1_at   | MmugDNA.35306.1 | 6.77  | 6.37  | 0.79 | 0.28 | 1.32  | 0.225216 | 0.143603 | 0.52312  | 0.41751  |
| MmugDNA.35308.1.S1_at   | MmugDNA.35308.1 | 7.69  | 7.3   | 0.14 | 0.17 | 1.31  | 0.106168 | 0.074726 | 0.380284 | 0.318465 |
| MmugDNA.35309.1.S1_at   | MmugDNA.35309.1 | 8.88  | 8.72  | 0.37 | 0.04 | 1.11  | 0.346439 | 0.506594 | 0.624993 | 0.702503 |
| MmugDNA.3531.1.S1_at    | MmugDNA.3531.1  | 9.94  | 10.43 | 0.14 | 0.14 | -1.4  | 0.016423 | 0.109269 | 0.181069 | 0.37308  |
| MmugDNA.35310.1.S1_at   | MmugDNA.35310.1 | 9.71  | 9.76  | 0.31 | 0.04 | -1.04 | 0.852067 | 0.746605 | 0.93566  | 0.852873 |
| MmugDNA.35310.1.S1_s_at | MmugDNA.35310.1 | 10.42 | 10.59 | 0.28 | 0.07 | -1.12 | 0.918689 | 0.882935 | 0.96532  | 0.933228 |
| MmugDNA.35312.1.S1_at   | MmugDNA.35312.1 | 3.36  | 3.09  | 1.17 | 0.09 | 1.21  | 0.217766 | 0.536862 | 0.515573 | 0.722119 |
| MmugDNA.35314.1.S1_at   | MmugDNA.35314.1 | 3.1   | 3.1   | 0.03 | 0.24 | 1     | 0.322809 | 0.376377 | 0.606637 | 0.614243 |
| MmugDNA.35315.1.S1_at   | MmugDNA.35315.1 | 8.26  | 7.96  | 0.15 | 0.15 | 1.23  | 0.030418 | 0.242083 | 0.227279 | 0.512652 |
| MmugDNA.35316.1.S1_at   | MmugDNA.35316.1 | 7.59  | 6.73  | 0.66 | 0.16 | 1.82  | 0.283189 | 0.480916 | 0.573616 | 0.686018 |
| MmugDNA.35317.1.S1_at   | MmugDNA.35317.1 | 6.97  | 6.43  | 0.26 | 0.17 | 1.45  | 0.100333 | 0.11682  | 0.371104 | 0.384133 |
| MmugDNA.35319.1.S1_at   | MmugDNA.35319.1 | 7.13  | 5.29  | 1.29 | 1.03 | 3.58  | 0.25044  | 0.24702  | 0.54512  | 0.516238 |
| MmugDNA.3532.1.S1_at    | MmugDNA.3532.1  | 6.94  | 6.62  | 0.23 | 0.44 | 1.25  | 0.258236 | 0.445629 | 0.552453 | 0.662468 |
| MmugDNA.35320.1.S1_at   | MmugDNA.35320.1 | 9.77  | 9.63  | 0.52 | 0.08 | 1.1   | 0.799781 | 0.245793 | 0.909667 | 0.515519 |
| MmugDNA.35322.1.S1_at   | MmugDNA.35322.1 | 6.69  | 6.57  | 0.2  | 0.04 | 1.09  | 0.527388 | 0.584452 | 0.753064 | 0.752435 |
| MmugDNA.35323.1.S1_at   | MmugDNA.35323.1 | 3.86  | 3.76  | 0.48 | 0.36 | 1.07  | 0.492297 | 0.413823 | 0.729633 | 0.639821 |
| MmugDNA.35324.1.S1_at   | MmugDNA.35324.1 | 6.73  | 6.74  | 0.05 | 0.08 | -1.01 | 0.537997 | 0.267842 | 0.760013 | 0.533607 |
| MmugDNA.35325.1.S1_at   | MmugDNA.35325.1 | 10.83 | 10.62 | 0.09 | 0.15 | 1.15  | 0.029425 | 0.575483 | 0.2245   | 0.746538 |
| MmugDNA.35326.1.S1_at   | MmugDNA.35326.1 | 6.86  | 6.6   | 1.12 | 0.37 | 1.19  | 0.538671 | 0.750168 | 0.760315 | 0.854731 |
| MmugDNA.35327.1.S1_at   | MmugDNA.35327.1 | 11.75 | 11.79 | 0.39 | 0.09 | -1.03 | 0.954643 | 0.617503 | 0.981374 | 0.773477 |
| MmugDNA.35329.1.S1_at   | MmugDNA.35329.1 | 6.43  | 6.49  | 0.15 | 0.05 | -1.04 | 0.990407 | 0.36782  | 0.996555 | 0.607466 |
| MmugDNA.3533.1.S1_at    | MmugDNA.3533.1  | 4.78  | 4.78  | 0.37 | 0.2  | 1     | 0.295445 | 0.379687 | 0.584245 | 0.616523 |
| MmugDNA.35330.1.S1_at   | MmugDNA.35330.1 | 4.64  | 4.66  | 0.12 | 0.11 | -1.01 | 0.921137 | 0.812794 | 0.966268 | 0.891795 |
| MmugDNA.35332.1.S1_at   | MmugDNA.35332.1 | 3.74  | 3.83  | 0.08 | 0.09 | -1.06 | 0.340892 | 0.555346 | 0.620908 | 0.733767 |
| MmugDNA.35333.1.S1_at   | MmugDNA.35333.1 | 3.85  | 4.05  | 0.06 | 0.09 | -1.15 | 0.020546 | 0.117848 | 0.196858 | 0.38576  |
| MmugDNA.35335.1.S1_at   | MmugDNA.35335.1 | 3.34  | 3.28  | 0.08 | 0.18 | 1.05  | 0.80243  | 0.017737 | 0.91128  | 0.168367 |
| MmugDNA.35336.1.S1_at   | MmugDNA.35336.1 | 4.87  | 4.92  | 0.02 | 0.11 | -1.04 | 0.618345 | 0.480349 | 0.810659 | 0.68574  |
| MmugDNA.35337.1.S1_at   | MmugDNA.35337.1 | 5.95  | 6.2   | 1.14 | 0.27 | -1.19 | 0.492146 | 0.723115 | 0.72956  | 0.839592 |
| MmugDNA.35340.1.S1_at   | MmugDNA.35340.1 | 3.39  | 3.42  | 0.53 | 0.25 | -1.02 | 0.775856 | 0.458615 | 0.897461 | 0.671246 |
| MmugDNA.35342.1.S1_at   | MmugDNA.35342.1 | 4.66  | 4.68  | 0.02 | 0.1  | -1.01 | 0.371505 | 0.645161 | 0.64419  | 0.792081 |
| MmugDNA.35343.1.S1_at   | MmugDNA.35343.1 | 10.24 | 10.31 | 0.04 | 0.01 | -1.05 | 0.062595 | 0.170327 | 0.306862 | 0.447103 |
| MmugDNA.35343.1.S1_s_at | MmugDNA.35343.1 | 8.37  | 8.52  | 0.03 | 0.24 | -1.11 | 0.866684 | 0.628209 | 0.942451 | 0.781087 |
| MmugDNA.35344.1.S1_at   | MmugDNA.35344.1 | 3.74  | 3.6   | 0.16 | 0.03 | 1.1   | 0.250416 | 0.079206 | 0.54512  | 0.32639  |
| MmugDNA.35345.1.S1_at   | MmugDNA.35345.1 | 3.34  | 3.43  | 0.08 | 0.05 | -1.06 | 0.183168 | 0.152441 | 0.479152 | 0.427274 |
| MmugDNA.35346.1.S1_at   | MmugDNA.35346.1 | 13.18 | 13.14 | 0.15 | 0.04 | 1.03  | 0.613666 | 0.768329 | 0.807564 | 0.865493 |
| MmugDNA.35346.1.S1_s_at | MmugDNA.35346.1 | 13.81 | 13.61 | 0.2  | 0.07 | 1.15  | 0.503697 | 0.750289 | 0.737208 | 0.854766 |
| MmugDNA.35347.1.S1_at   | MmugDNA.35347.1 | 3.59  | 3.43  | 0.21 | 0.28 | 1.12  | 0.36253  | 0.566833 | 0.637372 | 0.740807 |
| MmugDNA.35348.1.S1_at   | MmugDNA.35348.1 | 7.2   | 6.63  | 0.3  | 0.01 | 1.48  | 0.088123 | 0.347924 | 0.354244 | 0.592196 |
| MmugDNA.35349.1.S1_at   | MmugDNA.35349.1 | 7.3   | 7.17  | 0.07 | 0.16 | 1.1   | 0.091112 | 0.11663  | 0.35846  | 0.383829 |
| MmugDNA.3535.1.S1_at    | MmugDNA.3535.1  | 4.94  | 4.93  | 0.95 | 0.04 | 1.01  | 0.386459 | 0.496268 | 0.654936 | 0.695931 |
| MmugDNA.35350.1.S1_at   | MmugDNA.35350.1 | 2.87  | 2.91  | 0.09 | 0.03 | -1.03 | 0.279556 | 0.665052 | 0.570786 | 0.803733 |

|                         |                 |       |       |      |      |       |          |          |          |          |
|-------------------------|-----------------|-------|-------|------|------|-------|----------|----------|----------|----------|
| MmugDNA.35351.1.S1_at   | MmugDNA.35351.1 | 9.79  | 9.95  | 0.14 | 0.09 | -1.12 | 0.083055 | 0.104705 | 0.345372 | 0.366086 |
| MmugDNA.35352.1.S1_at   | MmugDNA.35352.1 | 10.43 | 10.53 | 0.17 | 0.08 | -1.07 | 0.224479 | 0.114632 | 0.52264  | 0.381156 |
| MmugDNA.35353.1.S1_at   | MmugDNA.35353.1 | 4.07  | 4.05  | 0.12 | 0.18 | 1.01  | 0.336743 | 0.242881 | 0.617287 | 0.513274 |
| MmugDNA.35354.1.S1_at   | MmugDNA.35354.1 | 10.61 | 10.88 | 0.02 | 0.05 | -1.21 | 0.001003 | 0.036549 | 0.076321 | 0.235649 |
| MmugDNA.35355.1.S1_at   | MmugDNA.35355.1 | 7.34  | 7.4   | 0.32 | 0.12 | -1.05 | 0.58515  | 0.280447 | 0.789051 | 0.543648 |
| MmugDNA.35356.1.S1_at   | MmugDNA.35356.1 | 7.92  | 8.07  | 0.38 | 0.1  | -1.11 | 0.788842 | 0.173524 | 0.904019 | 0.449938 |
| MmugDNA.35357.1.S1_at   | MmugDNA.35357.1 | 6.48  | 6.47  | 0.1  | 0.07 | 1.01  | 0.731994 | 0.094048 | 0.874717 | 0.350674 |
| MmugDNA.35357.1.S1_s_at | MmugDNA.35357.1 | 12.36 | 12.29 | 0.06 | 0.03 | 1.05  | 0.101918 | 0.444497 | 0.373552 | 0.662072 |
| MmugDNA.35358.1.S1_at   | MmugDNA.35358.1 | 6.55  | 6.32  | 0.21 | 0.1  | 1.17  | 0.34073  | 0.314625 | 0.620859 | 0.568415 |
| MmugDNA.35359.1.S1_at   | MmugDNA.35359.1 | 5.51  | 5.44  | 0.73 | 0.72 | 1.05  | 0.993147 | 0.834267 | 0.997354 | 0.905059 |
| MmugDNA.3536.1.S1_at    | MmugDNA.3536.1  | 7.8   | 7.44  | 0.28 | 0.14 | 1.28  | 0.129043 | 0.565159 | 0.411326 | 0.739748 |
| MmugDNA.35360.1.S1_at   | MmugDNA.35360.1 | 6.35  | 6.32  | 0.25 | 0.11 | 1.02  | 0.885448 | 0.18089  | 0.95111  | 0.457394 |
| MmugDNA.35364.1.S1_at   | MmugDNA.35364.1 | 4.72  | 4.72  | 0.06 | 0.25 | 1     | 0.490659 | 0.442338 | 0.728737 | 0.660347 |
| MmugDNA.35365.1.S1_at   | MmugDNA.35365.1 | 4.11  | 3.93  | 0.19 | 0.07 | 1.13  | 0.354838 | 0.214974 | 0.631821 | 0.488898 |
| MmugDNA.35366.1.S1_at   | MmugDNA.35366.1 | 4.36  | 4.57  | 0.24 | 0.03 | -1.16 | 0.198266 | 0.02534  | 0.495463 | 0.199522 |
| MmugDNA.35369.1.S1_at   | MmugDNA.35369.1 | 9.67  | 9.86  | 0.18 | 0.1  | -1.14 | 0.494731 | 0.000066 | 0.731345 | 0.025805 |
| MmugDNA.3537.1.S1_at    | MmugDNA.3537.1  | 3.2   | 3.21  | 0.09 | 0.16 | -1.01 | 0.809118 | 0.29105  | 0.914463 | 0.551574 |
| MmugDNA.35370.1.S1_at   | MmugDNA.35370.1 | 3.11  | 3.24  | 0.11 | 0.19 | -1.09 | 0.130135 | 0.146147 | 0.412377 | 0.420099 |
| MmugDNA.35371.1.S1_at   | MmugDNA.35371.1 | 4.74  | 4.71  | 0.08 | 0.21 | 1.02  | 0.528977 | 0.057912 | 0.753919 | 0.287117 |
| MmugDNA.35372.1.S1_at   | MmugDNA.35372.1 | 4.53  | 4.59  | 0.26 | 0.38 | -1.04 | 0.221085 | 0.509595 | 0.519102 | 0.704267 |
| MmugDNA.35373.1.S1_at   | MmugDNA.35373.1 | 4.42  | 4.28  | 0.02 | 0.16 | 1.1   | 0.257473 | 0.12898  | 0.551704 | 0.400455 |
| MmugDNA.35374.1.S1_at   | MmugDNA.35374.1 | 8.13  | 7.87  | 0.1  | 0.03 | 1.2   | 0.012465 | 0.022531 | 0.161927 | 0.187928 |
| MmugDNA.35375.1.S1_at   | MmugDNA.35375.1 | 12.65 | 12.44 | 0.13 | 0.04 | 1.16  | 0.070665 | 0.003372 | 0.324153 | 0.083569 |
| MmugDNA.35376.1.S1_at   | MmugDNA.35376.1 | 12.85 | 12.76 | 0.12 | 0.03 | 1.06  | 0.105533 | 0.005733 | 0.379497 | 0.104271 |
| MmugDNA.35377.1.S1_at   | MmugDNA.35377.1 | 4.64  | 4.64  | 0.23 | 0.08 | 1     | 0.372067 | 0.347616 | 0.644705 | 0.592039 |
| MmugDNA.35378.1.S1_at   | MmugDNA.35378.1 | 3.91  | 3.91  | 0.01 | 0.04 | 1     | 0.431046 | 0.748056 | 0.687225 | 0.853351 |
| MmugDNA.35379.1.S1_at   | MmugDNA.35379.1 | 3.72  | 3.61  | 0.05 | 0.16 | 1.08  | 0.203437 | 0.522839 | 0.501192 | 0.713416 |
| MmugDNA.3538.1.S1_at    | MmugDNA.3538.1  | 9.79  | 8.74  | 0.67 | 0.5  | 2.07  | 0.224196 | 0.129243 | 0.522333 | 0.400635 |
| MmugDNA.35380.1.S1_at   | MmugDNA.35380.1 | 5.53  | 5.06  | 0.18 | 0.52 | 1.39  | 0.119957 | 0.343886 | 0.398202 | 0.589575 |
| MmugDNA.35381.1.S1_at   | MmugDNA.35381.1 | 4.17  | 3.99  | 0.19 | 0.15 | 1.13  | 0.805417 | 0.933568 | 0.9127   | 0.962229 |
| MmugDNA.35382.1.S1_at   | MmugDNA.35382.1 | 5.22  | 5.1   | 0.21 | 0.1  | 1.09  | 0.664063 | 0.85567  | 0.838245 | 0.917683 |
| MmugDNA.35384.1.S1_at   | MmugDNA.35384.1 | 5.52  | 5.65  | 0.27 | 0.07 | -1.1  | 0.612015 | 0.275798 | 0.806675 | 0.540035 |
| MmugDNA.35385.1.S1_at   | MmugDNA.35385.1 | 7.77  | 8.34  | 0.51 | 0.2  | -1.49 | 0.134073 | 0.039244 | 0.417577 | 0.243274 |
| MmugDNA.35386.1.S1_at   | MmugDNA.35386.1 | 3.71  | 2.91  | 0.68 | 0.11 | 1.74  | 0.101589 | 0.096966 | 0.37295  | 0.354453 |
| MmugDNA.35387.1.S1_at   | MmugDNA.35387.1 | 9.07  | 8.71  | 0.17 | 0.12 | 1.28  | 0.108264 | 0.144871 | 0.382964 | 0.418762 |
| MmugDNA.35388.1.S1_at   | MmugDNA.35388.1 | 4.27  | 4.03  | 0.03 | 0.27 | 1.18  | 0.166936 | 0.088881 | 0.460143 | 0.34272  |
| MmugDNA.3539.1.S1_at    | MmugDNA.3539.1  | 10.53 | 10.4  | 0.11 | 0.01 | 1.09  | 0.060094 | 0.400095 | 0.302405 | 0.630158 |
| MmugDNA.35390.1.S1_at   | MmugDNA.35390.1 | 3.56  | 3.7   | 0.12 | 0.16 | -1.11 | 0.513419 | 0.695653 | 0.743659 | 0.823091 |
| MmugDNA.35391.1.S1_at   | MmugDNA.35391.1 | 4.06  | 4.43  | 0.54 | 0.18 | -1.3  | 0.864024 | 0.388639 | 0.941049 | 0.622947 |
| MmugDNA.35392.1.S1_at   | MmugDNA.35392.1 | 6.01  | 6.06  | 0.17 | 0.23 | -1.03 | 0.93565  | 0.937055 | 0.973033 | 0.964514 |
| MmugDNA.35393.1.S1_at   | MmugDNA.35393.1 | 4.43  | 4.44  | 0.03 | 0.08 | -1.01 | 0.347394 | 0.893378 | 0.625488 | 0.939163 |
| MmugDNA.35396.1.S1_at   | MmugDNA.35396.1 | 9.43  | 9.54  | 0.11 | 0.12 | -1.08 | 0.305753 | 0.545443 | 0.592808 | 0.727546 |
| MmugDNA.35397.1.S1_at   | MmugDNA.35397.1 | 5.83  | 5.78  | 0.88 | 0.2  | 1.03  | 0.267787 | 0.277728 | 0.560544 | 0.541648 |

|                         |                 |       |       |      |      |       |          |          |          |          |
|-------------------------|-----------------|-------|-------|------|------|-------|----------|----------|----------|----------|
| MmugDNA.35398.1.S1_at   | MmugDNA.35398.1 | 7.53  | 7.39  | 0.16 | 0.19 | 1.1   | 0.94458  | 0.158746 | 0.976633 | 0.434824 |
| MmugDNA.35399.1.S1_at   | MmugDNA.35399.1 | 6.36  | 6.46  | 0.06 | 0.03 | -1.08 | 0.23094  | 0.051781 | 0.529768 | 0.273124 |
| MmugDNA.354.1.S1_at     | MmugDNA.354.1   | 5.29  | 5.56  | 0.09 | 0.31 | -1.2  | 0.222127 | 0.179097 | 0.520231 | 0.455436 |
| MmugDNA.3540.1.S1_at    | MmugDNA.3540.1  | 4.66  | 4.42  | 0.17 | 0.19 | 1.18  | 0.154057 | 0.034307 | 0.444332 | 0.229145 |
| MmugDNA.35400.1.S1_at   | MmugDNA.35400.1 | 5.31  | 5.34  | 0.07 | 0.16 | -1.02 | 0.784789 | 0.664082 | 0.901812 | 0.803247 |
| MmugDNA.35401.1.S1_at   | MmugDNA.35401.1 | 6.08  | 6.11  | 0.56 | 0.12 | -1.02 | 0.877939 | 0.955378 | 0.947885 | 0.974645 |
| MmugDNA.35403.1.S1_at   | MmugDNA.35403.1 | 4.15  | 4.14  | 0.32 | 0.07 | 1     | 0.364493 | 0.442096 | 0.639104 | 0.660153 |
| MmugDNA.35405.1.S1_at   | MmugDNA.35405.1 | 6.79  | 6.69  | 0.16 | 0.13 | 1.07  | 0.763164 | 0.707858 | 0.891497 | 0.830504 |
| MmugDNA.35406.1.S1_at   | MmugDNA.35406.1 | 4.24  | 4.26  | 0.26 | 0.2  | -1.01 | 0.894992 | 0.991774 | 0.955264 | 0.995392 |
| MmugDNA.35407.1.S1_at   | MmugDNA.35407.1 | 7.97  | 6.28  | 0.94 | 0.23 | 3.23  | 0.044819 | 0.218527 | 0.269024 | 0.492142 |
| MmugDNA.35408.1.S1_at   | MmugDNA.35408.1 | 5.44  | 5.48  | 0.11 | 0.1  | -1.03 | 0.421494 | 0.281221 | 0.679956 | 0.544374 |
| MmugDNA.35409.1.S1_at   | MmugDNA.35409.1 | 4.11  | 4.1   | 0.19 | 0.09 | 1.01  | 0.232167 | 0.333194 | 0.530631 | 0.581467 |
| MmugDNA.3541.1.S1_at    | MmugDNA.3541.1  | 6.28  | 6.12  | 0.23 | 0.16 | 1.12  | 0.168014 | 0.225177 | 0.461204 | 0.497846 |
| MmugDNA.35410.1.S1_at   | MmugDNA.35410.1 | 4.27  | 4.14  | 0.23 | 0.1  | 1.09  | 0.657583 | 0.800955 | 0.834607 | 0.885538 |
| MmugDNA.35411.1.S1_at   | MmugDNA.35411.1 | 3.54  | 3.4   | 0.15 | 0.07 | 1.11  | 0.193519 | 0.244518 | 0.490126 | 0.51432  |
| MmugDNA.35412.1.S1_at   | MmugDNA.35412.1 | 5.33  | 5.17  | 0.28 | 0.09 | 1.12  | 0.357432 | 0.462213 | 0.633528 | 0.673601 |
| MmugDNA.35413.1.S1_at   | MmugDNA.35413.1 | 5.7   | 5.76  | 0.22 | 0.43 | -1.05 | 0.525921 | 0.461849 | 0.752178 | 0.673368 |
| MmugDNA.35414.1.S1_at   | MmugDNA.35414.1 | 8.17  | 8.19  | 0.18 | 0.34 | -1.01 | 0.971489 | 0.001032 | 0.98857  | 0.051297 |
| MmugDNA.35415.1.S1_at   | MmugDNA.35415.1 | 2.98  | 3.07  | 0.12 | 0.08 | -1.06 | 0.186161 | 0.485947 | 0.482328 | 0.689542 |
| MmugDNA.35416.1.S1_at   | MmugDNA.35416.1 | 8.33  | 7.74  | 0.79 | 0.21 | 1.51  | 0.268077 | 0.363795 | 0.560779 | 0.604189 |
| MmugDNA.35417.1.S1_at   | MmugDNA.35417.1 | 4.51  | 4.1   | 0.33 | 0.19 | 1.34  | 0.316866 | 0.426608 | 0.601585 | 0.648739 |
| MmugDNA.35418.1.S1_at   | MmugDNA.35418.1 | 9.45  | 9.57  | 0.25 | 0.24 | -1.09 | 0.440786 | 0.000806 | 0.694673 | 0.04607  |
| MmugDNA.35418.1.S1_s_at | MmugDNA.35418.1 | 9.96  | 9.77  | 0.23 | 0.1  | 1.15  | 0.766024 | 0.000419 | 0.89269  | 0.038093 |
| MmugDNA.35419.1.S1_at   | MmugDNA.35419.1 | 4.71  | 4.76  | 0.09 | 0.05 | -1.03 | 0.107686 | 0.045505 | 0.382296 | 0.2575   |
| MmugDNA.3542.1.S1_at    | MmugDNA.3542.1  | 9.24  | 8     | 0.23 | 0.23 | 2.35  | 0.002582 | 0.041143 | 0.094992 | 0.247669 |
| MmugDNA.35420.1.S1_at   | MmugDNA.35420.1 | 5.27  | 5.39  | 0.07 | 0.09 | -1.09 | 0.10376  | 0.302614 | 0.377045 | 0.560201 |
| MmugDNA.35421.1.S1_at   | MmugDNA.35421.1 | 5.65  | 5.62  | 0.22 | 0.03 | 1.02  | 0.429899 | 0.550748 | 0.686234 | 0.730611 |
| MmugDNA.35422.1.S1_at   | MmugDNA.35422.1 | 5.15  | 5.17  | 0.11 | 0.16 | -1.02 | 0.706918 | 0.147256 | 0.861306 | 0.421464 |
| MmugDNA.35423.1.S1_at   | MmugDNA.35423.1 | 5.73  | 5.73  | 0.17 | 0.1  | -1    | 0.832258 | 0.956066 | 0.926055 | 0.975045 |
| MmugDNA.35425.1.S1_at   | MmugDNA.35425.1 | 6.54  | 7     | 0.22 | 0.26 | -1.38 | 0.1181   | 0.259326 | 0.395593 | 0.526418 |
| MmugDNA.35428.1.S1_at   | MmugDNA.35428.1 | 5.82  | 5.73  | 0.22 | 0.19 | 1.07  | 0.233992 | 0.33466  | 0.532201 | 0.582581 |
| MmugDNA.35429.1.S1_at   | MmugDNA.35429.1 | 4.86  | 5.19  | 0.1  | 0.37 | -1.27 | 0.612837 | 0.002989 | 0.807098 | 0.079958 |
| MmugDNA.3543.1.S1_at    | MmugDNA.3543.1  | 10.35 | 10.08 | 0.23 | 0.28 | 1.21  | 0.118551 | 0.104542 | 0.396229 | 0.365805 |
| MmugDNA.35433.1.S1_at   | MmugDNA.35433.1 | 6.47  | 6.44  | 0.06 | 0.45 | 1.03  | 0.457449 | 0.623427 | 0.706397 | 0.777776 |
| MmugDNA.35434.1.S1_at   | MmugDNA.35434.1 | 3.49  | 3.45  | 0.29 | 0.12 | 1.03  | 0.330344 | 0.370173 | 0.612383 | 0.609371 |
| MmugDNA.35435.1.S1_at   | MmugDNA.35435.1 | 3.49  | 3.22  | 0.3  | 0.03 | 1.2   | 0.068366 | 0.10072  | 0.319307 | 0.360108 |
| MmugDNA.35436.1.S1_at   | MmugDNA.35436.1 | 5.52  | 4.75  | 0.74 | 0.67 | 1.71  | 0.999571 | 0.435933 | 0.999849 | 0.655636 |
| MmugDNA.35437.1.S1_at   | MmugDNA.35437.1 | 3.39  | 3.35  | 0.16 | 0.04 | 1.03  | 0.651169 | 0.865139 | 0.830616 | 0.923484 |
| MmugDNA.35438.1.S1_at   | MmugDNA.35438.1 | 4.06  | 4.13  | 0.2  | 0.12 | -1.04 | 0.211761 | 0.317967 | 0.509664 | 0.571046 |
| MmugDNA.35439.1.S1_s_at | MmugDNA.35439.1 | 11.09 | 11.45 | 0.08 | 0.08 | -1.28 | 0.005944 | 0.000134 | 0.123663 | 0.029087 |
| MmugDNA.35440.1.S1_at   | MmugDNA.35440.1 | 4.72  | 4.69  | 0.96 | 0.54 | 1.02  | 0.499458 | 0.582478 | 0.734175 | 0.751115 |
| MmugDNA.35441.1.S1_at   | MmugDNA.35441.1 | 4.46  | 4.59  | 0.17 | 0.11 | -1.1  | 0.270983 | 0.398498 | 0.562977 | 0.629458 |
| MmugDNA.35442.1.S1_at   | MmugDNA.35442.1 | 4.4   | 4.07  | 0.33 | 0.37 | 1.26  | 0.650399 | 0.63953  | 0.830274 | 0.788329 |

|                         |                 |       |       |      |      |       |          |          |          |          |
|-------------------------|-----------------|-------|-------|------|------|-------|----------|----------|----------|----------|
| MmugDNA.35443.1.S1_at   | MmugDNA.35443.1 | 5.42  | 5.52  | 0.51 | 0.2  | -1.07 | 0.593176 | 0.708576 | 0.79392  | 0.830979 |
| MmugDNA.35445.1.S1_at   | MmugDNA.35445.1 | 6.57  | 6.79  | 0.13 | 0.26 | -1.17 | 0.592394 | 0.686045 | 0.793395 | 0.81675  |
| MmugDNA.35445.1.S1_s_at | MmugDNA.35445.1 | 7.23  | 7.13  | 0.2  | 0.17 | 1.07  | 0.787303 | 0.177385 | 0.903071 | 0.453742 |
| MmugDNA.35446.1.S1_at   | MmugDNA.35446.1 | 9.22  | 9.04  | 0.47 | 0.25 | 1.13  | 0.67532  | 0.877407 | 0.845075 | 0.930139 |
| MmugDNA.35449.1.S1_at   | MmugDNA.35449.1 | 10.37 | 10.18 | 0.15 | 0.12 | 1.14  | 0.158269 | 0.08591  | 0.449228 | 0.338068 |
| MmugDNA.3545.1.S1_at    | MmugDNA.3545.1  | 8.2   | 7.82  | 0.32 | 0.33 | 1.3   | 0.243366 | 0.141074 | 0.540029 | 0.414592 |
| MmugDNA.35451.1.S1_at   | MmugDNA.35451.1 | 6.95  | 6.77  | 0.03 | 0.22 | 1.14  | 0.225495 | 0.064445 | 0.523339 | 0.300008 |
| MmugDNA.35452.1.S1_at   | MmugDNA.35452.1 | 3.26  | 3.36  | 0.11 | 0.01 | -1.08 | 0.340234 | 0.084075 | 0.620459 | 0.335065 |
| MmugDNA.35454.1.S1_at   | MmugDNA.35454.1 | 5.56  | 5.11  | 0.14 | 0.01 | 1.37  | 0.005784 | 0.000916 | 0.121963 | 0.048475 |
| MmugDNA.35456.1.S1_at   | MmugDNA.35456.1 | 6.94  | 6.98  | 0.19 | 0.01 | -1.03 | 0.765072 | 0.499819 | 0.892236 | 0.698538 |
| MmugDNA.3546.1.S1_at    | MmugDNA.3546.1  | 3.91  | 3.94  | 0.46 | 0.14 | -1.02 | 0.325059 | 0.51678  | 0.608523 | 0.70925  |
| MmugDNA.35460.1.S1_at   | MmugDNA.35460.1 | 6.11  | 6.03  | 0.17 | 0.07 | 1.06  | 0.577734 | 0.743299 | 0.783728 | 0.851281 |
| MmugDNA.35461.1.S1_at   | MmugDNA.35461.1 | 3.53  | 3.43  | 0.19 | 0.19 | 1.07  | 0.466368 | 0.542972 | 0.712193 | 0.725861 |
| MmugDNA.35462.1.S1_at   | MmugDNA.35462.1 | 4.11  | 4.04  | 0.84 | 0.1  | 1.05  | 0.317007 | 0.361954 | 0.601691 | 0.602725 |
| MmugDNA.35463.1.S1_at   | MmugDNA.35463.1 | 4.86  | 4.89  | 0.12 | 0.14 | -1.02 | 0.410674 | 0.543361 | 0.672707 | 0.72607  |
| MmugDNA.35464.1.S1_at   | MmugDNA.35464.1 | 7.31  | 7.12  | 0.15 | 0.05 | 1.15  | 0.102366 | 0.141418 | 0.374399 | 0.414874 |
| MmugDNA.35465.1.S1_at   | MmugDNA.35465.1 | 5.98  | 7.05  | 0.4  | 0.53 | -2.1  | 0.086185 | 0.306894 | 0.350717 | 0.563427 |
| MmugDNA.35466.1.S1_at   | MmugDNA.35466.1 | 3.62  | 3.49  | 0.19 | 0.02 | 1.09  | 0.827262 | 0.918343 | 0.923507 | 0.954227 |
| MmugDNA.35471.1.S1_at   | MmugDNA.35471.1 | 9.46  | 9.08  | 0.15 | 0.14 | 1.31  | 0.0207   | 0.12364  | 0.197469 | 0.393692 |
| MmugDNA.35472.1.S1_at   | MmugDNA.35472.1 | 3.54  | 4     | 0.62 | 0.27 | -1.37 | 0.914387 | 0.449771 | 0.963616 | 0.665263 |
| MmugDNA.35474.1.S1_at   | MmugDNA.35474.1 | 5.62  | 5.29  | 0.46 | 0.07 | 1.26  | 0.38005  | 0.502272 | 0.649803 | 0.70006  |
| MmugDNA.35475.1.S1_at   | MmugDNA.35475.1 | 5.24  | 5.12  | 0.18 | 0.08 | 1.09  | 0.347702 | 0.513935 | 0.625846 | 0.707322 |
| MmugDNA.35476.1.S1_at   | MmugDNA.35476.1 | 8.86  | 9.83  | 0.52 | 0.09 | -1.95 | 0.108987 | 0.14115  | 0.383953 | 0.414665 |
| MmugDNA.35477.1.S1_at   | MmugDNA.35477.1 | 13    | 12.98 | 0.13 | 0.03 | 1.02  | 0.67429  | 0.313552 | 0.84446  | 0.56796  |
| MmugDNA.35478.1.S1_at   | MmugDNA.35478.1 | 7.61  | 6.88  | 0.33 | 0.21 | 1.65  | 0.015297 | 0.001533 | 0.175986 | 0.059437 |
| MmugDNA.35479.1.S1_at   | MmugDNA.35479.1 | 3.59  | 3.62  | 0.15 | 0.1  | -1.02 | 0.298751 | 0.412756 | 0.586965 | 0.63909  |
| MmugDNA.35481.1.S1_at   | MmugDNA.35481.1 | 4.63  | 4.2   | 0.24 | 0.19 | 1.34  | 0.178413 | 0.10384  | 0.473151 | 0.364519 |
| MmugDNA.35482.1.S1_at   | MmugDNA.35482.1 | 3.42  | 3.58  | 0.17 | 0.14 | -1.12 | 0.213849 | 0.126269 | 0.511674 | 0.39678  |
| MmugDNA.35483.1.S1_at   | MmugDNA.35483.1 | 3.28  | 3.47  | 1.1  | 0.71 | -1.14 | 0.648393 | 0.406159 | 0.829176 | 0.634211 |
| MmugDNA.35485.1.S1_at   | MmugDNA.35485.1 | 4.03  | 4.17  | 0.05 | 0.04 | -1.1  | 0.011969 | 0.090859 | 0.159466 | 0.345474 |
| MmugDNA.35486.1.S1_at   | MmugDNA.35486.1 | 4.94  | 4.7   | 0.28 | 0.16 | 1.19  | 0.088877 | 0.120999 | 0.35549  | 0.389991 |
| MmugDNA.35487.1.S1_at   | MmugDNA.35487.1 | 7.78  | 7.79  | 0.19 | 0.04 | -1.01 | 0.436694 | 0.771794 | 0.691585 | 0.867347 |
| MmugDNA.35489.1.S1_at   | MmugDNA.35489.1 | 4.53  | 4.56  | 0.29 | 0.28 | -1.02 | 0.932864 | 0.789424 | 0.971855 | 0.878366 |
| MmugDNA.35491.1.S1_at   | MmugDNA.35491.1 | 9.78  | 10.12 | 0.1  | 0.07 | -1.26 | 0.009232 | 0.072663 | 0.145865 | 0.31561  |
| MmugDNA.35492.1.S1_at   | MmugDNA.35492.1 | 8.44  | 7.65  | 0.18 | 0.15 | 1.73  | 0.004646 | 0.001237 | 0.114622 | 0.05478  |
| MmugDNA.35493.1.S1_at   | MmugDNA.35493.1 | 2.86  | 3.25  | 0.25 | 0.21 | -1.31 | 0.07887  | 0.090657 | 0.338733 | 0.345151 |
| MmugDNA.35495.1.S1_at   | MmugDNA.35495.1 | 7.67  | 7.94  | 0.16 | 0.14 | -1.21 | 0.101541 | 0.630466 | 0.372929 | 0.782237 |
| MmugDNA.35497.1.S1_at   | MmugDNA.35497.1 | 4.59  | 4.75  | 0.25 | 0.15 | -1.12 | 0.996911 | 0.209944 | 0.99899  | 0.48371  |
| MmugDNA.35499.1.S1_at   | MmugDNA.35499.1 | 5.15  | 5.22  | 0.22 | 0.09 | -1.05 | 0.768183 | 0.503622 | 0.893506 | 0.700988 |
| MmugDNA.3550.1.S1_at    | MmugDNA.3550.1  | 6.41  | 6.43  | 0.03 | 0.03 | -1.01 | 0.165328 | 0.894287 | 0.458328 | 0.939697 |
| MmugDNA.35500.1.S1_at   | MmugDNA.35500.1 | 5.57  | 7.07  | 0.57 | 0.37 | -2.82 | 0.013122 | 0.252819 | 0.16521  | 0.521174 |
| MmugDNA.35501.1.S1_at   | MmugDNA.35501.1 | 7.61  | 7.34  | 0.25 | 0.17 | 1.2   | 0.07901  | 0.022473 | 0.338745 | 0.187564 |
| MmugDNA.35502.1.S1_at   | MmugDNA.35502.1 | 2.55  | 2.67  | 0.07 | 0.06 | -1.08 | 0.240425 | 0.068183 | 0.537968 | 0.307314 |

|                         |                 |       |       |      |      |       |          |          |          |          |
|-------------------------|-----------------|-------|-------|------|------|-------|----------|----------|----------|----------|
| MmugDNA.35505.1.S1_at   | MmugDNA.35505.1 | 8.34  | 8.17  | 0.38 | 0.27 | 1.12  | 0.879526 | 0.585827 | 0.948758 | 0.753068 |
| MmugDNA.35506.1.S1_at   | MmugDNA.35506.1 | 3.34  | 3.64  | 0.16 | 0.05 | -1.23 | 0.072724 | 0.067469 | 0.327657 | 0.305764 |
| MmugDNA.35507.1.S1_at   | MmugDNA.35507.1 | 5.8   | 5.54  | 0.12 | 0.14 | 1.2   | 0.067333 | 0.142886 | 0.31711  | 0.416846 |
| MmugDNA.35508.1.S1_at   | MmugDNA.35508.1 | 5.6   | 5.68  | 0.09 | 0.12 | -1.05 | 0.910464 | 0.062938 | 0.962075 | 0.297579 |
| MmugDNA.35509.1.S1_at   | MmugDNA.35509.1 | 10.74 | 10.71 | 0.08 | 0.32 | 1.02  | 0.852538 | 0.968909 | 0.935873 | 0.982889 |
| MmugDNA.35510.1.S1_at   | MmugDNA.35510.1 | 5.58  | 5.22  | 0.17 | 0.14 | 1.29  | 0.072842 | 0.342239 | 0.327658 | 0.588375 |
| MmugDNA.35511.1.S1_at   | MmugDNA.35511.1 | 9.64  | 9.6   | 0.06 | 0.09 | 1.03  | 0.902093 | 0.001804 | 0.958556 | 0.063714 |
| MmugDNA.35512.1.S1_at   | MmugDNA.35512.1 | 6.87  | 6.9   | 0.42 | 0.25 | -1.02 | 0.700985 | 0.801735 | 0.857901 | 0.885903 |
| MmugDNA.35513.1.S1_at   | MmugDNA.35513.1 | 5.48  | 5.38  | 0.37 | 0.17 | 1.07  | 0.159823 | 0.217451 | 0.451208 | 0.491035 |
| MmugDNA.35514.1.S1_at   | MmugDNA.35514.1 | 6.35  | 6.35  | 0.09 | 0.04 | 1.01  | 0.841433 | 0.786906 | 0.930364 | 0.876732 |
| MmugDNA.35515.1.S1_at   | MmugDNA.35515.1 | 6.73  | 6.76  | 0.16 | 0.1  | -1.02 | 0.743466 | 0.306468 | 0.88138  | 0.563029 |
| MmugDNA.35517.1.S1_at   | MmugDNA.35517.1 | 10.97 | 11.99 | 0.12 | 0.1  | -2.02 | 0.000299 | 0.00002  | 0.057974 | 0.019635 |
| MmugDNA.35518.1.S1_at   | MmugDNA.35518.1 | 5.06  | 5.05  | 0.09 | 0.22 | 1.01  | 0.356778 | 0.31251  | 0.633028 | 0.56722  |
| MmugDNA.35519.1.S1_at   | MmugDNA.35519.1 | 5.71  | 5.63  | 0.18 | 0.13 | 1.05  | 0.632655 | 0.162968 | 0.819919 | 0.439131 |
| MmugDNA.3552.1.S1_at    | MmugDNA.3552.1  | 4.4   | 4.29  | 0.44 | 0.07 | 1.08  | 0.557025 | 0.752702 | 0.771998 | 0.855968 |
| MmugDNA.35520.1.S1_at   | MmugDNA.35520.1 | 8.02  | 8.29  | 0.25 | 0.14 | -1.2  | 0.212445 | 0.307035 | 0.510496 | 0.563427 |
| MmugDNA.35521.1.S1_at   | MmugDNA.35521.1 | 3.7   | 3.6   | 0.26 | 0.07 | 1.07  | 0.137277 | 0.309796 | 0.422149 | 0.565044 |
| MmugDNA.35523.1.S1_at   | MmugDNA.35523.1 | 7.08  | 7.07  | 0.1  | 0.15 | 1.01  | 0.701797 | 0.148486 | 0.858431 | 0.423016 |
| MmugDNA.35524.1.S1_at   | MmugDNA.35524.1 | 5.03  | 5.01  | 0.18 | 0.05 | 1.01  | 0.395857 | 0.594712 | 0.662078 | 0.758628 |
| MmugDNA.35527.1.S1_at   | MmugDNA.35527.1 | 4.23  | 4.2   | 0.15 | 0.14 | 1.02  | 0.310833 | 0.447754 | 0.597104 | 0.66382  |
| MmugDNA.35528.1.S1_at   | MmugDNA.35528.1 | 9.4   | 9.37  | 0.2  | 0.09 | 1.02  | 0.745702 | 0.036805 | 0.882051 | 0.236386 |
| MmugDNA.3553.1.S1_at    | MmugDNA.3553.1  | 9.02  | 8.95  | 0.23 | 0.2  | 1.05  | 0.399416 | 0.582033 | 0.664771 | 0.750784 |
| MmugDNA.35531.1.S1_s_at | MmugDNA.35531.1 | 7.45  | 7.38  | 0.2  | 0.07 | 1.05  | 0.665849 | 0.397423 | 0.839437 | 0.628828 |
| MmugDNA.35533.1.S1_at   | MmugDNA.35533.1 | 7.93  | 8.11  | 0.17 | 0.19 | -1.13 | 0.440729 | 0.29668  | 0.694666 | 0.555697 |
| MmugDNA.35535.1.S1_at   | MmugDNA.35535.1 | 6.06  | 6.31  | 0.19 | 0.12 | -1.19 | 0.109211 | 0.011882 | 0.384375 | 0.141097 |
| MmugDNA.35536.1.S1_at   | MmugDNA.35536.1 | 11.34 | 11.47 | 0.11 | 0.1  | -1.09 | 0.178952 | 0.300475 | 0.473892 | 0.55882  |
| MmugDNA.35538.1.S1_at   | MmugDNA.35538.1 | 4.3   | 4.02  | 0.68 | 0.13 | 1.21  | 0.547656 | 0.708641 | 0.766193 | 0.831019 |
| MmugDNA.35539.1.S1_at   | MmugDNA.35539.1 | 4.8   | 4.39  | 0.26 | 0.16 | 1.32  | 0.179049 | 0.199954 | 0.474016 | 0.474603 |
| MmugDNA.3554.1.S1_at    | MmugDNA.3554.1  | 6.3   | 8     | 0.61 | 0.01 | -3.25 | 0.008556 | 0.030701 | 0.141834 | 0.217148 |
| MmugDNA.35540.1.S1_at   | MmugDNA.35540.1 | 6.31  | 6     | 0.4  | 0.11 | 1.24  | 0.211904 | 0.263259 | 0.509822 | 0.529531 |
| MmugDNA.35541.1.S1_at   | MmugDNA.35541.1 | 5.77  | 5.5   | 0.24 | 0.11 | 1.21  | 0.056708 | 0.048618 | 0.295663 | 0.265602 |
| MmugDNA.35542.1.S1_at   | MmugDNA.35542.1 | 8.9   | 9.31  | 0.24 | 0.09 | -1.33 | 0.057668 | 0.228869 | 0.297426 | 0.501124 |
| MmugDNA.35543.1.S1_at   | MmugDNA.35543.1 | 7.36  | 10.93 | 1.91 | 0.34 | -11.9 | 0.040963 | 0.193155 | 0.258845 | 0.468554 |
| MmugDNA.35545.1.S1_at   | MmugDNA.35545.1 | 10.9  | 10.87 | 0.03 | 0.09 | 1.02  | 0.408354 | 0.601317 | 0.671174 | 0.762665 |
| MmugDNA.35546.1.S1_at   | MmugDNA.35546.1 | 4.76  | 4.49  | 0.63 | 0.24 | 1.2   | 0.487947 | 0.403799 | 0.726567 | 0.632386 |
| MmugDNA.35547.1.S1_at   | MmugDNA.35547.1 | 3.67  | 3.65  | 0.15 | 0.19 | 1.02  | 0.6387   | 0.901332 | 0.823252 | 0.943898 |
| MmugDNA.35549.1.S1_at   | MmugDNA.35549.1 | 3.41  | 3.15  | 0.3  | 0.15 | 1.2   | 0.381536 | 0.537947 | 0.651152 | 0.7228   |
| MmugDNA.3555.1.S1_at    | MmugDNA.3555.1  | 9.78  | 10.68 | 1.05 | 0.5  | -1.87 | 0.613043 | 0.924207 | 0.807224 | 0.957283 |
| MmugDNA.35550.1.S1_at   | MmugDNA.35550.1 | 3.65  | 3.65  | 0.16 | 0.09 | -1    | 0.963792 | 0.992358 | 0.985338 | 0.995673 |
| MmugDNA.35551.1.S1_at   | MmugDNA.35551.1 | 6.14  | 6.74  | 0.24 | 0.41 | -1.52 | 0.090094 | 0.3192   | 0.356863 | 0.571688 |
| MmugDNA.35552.1.S1_at   | MmugDNA.35552.1 | 11.1  | 10.94 | 0.16 | 0.01 | 1.12  | 0.11729  | 0.000002 | 0.39452  | 0.011297 |
| MmugDNA.35553.1.S1_at   | MmugDNA.35553.1 | 6.39  | 6.3   | 0.13 | 0.16 | 1.06  | 0.164176 | 0.277735 | 0.45709  | 0.541648 |
| MmugDNA.35555.1.S1_at   | MmugDNA.35555.1 | 8.37  | 8.47  | 0.05 | 0.02 | -1.07 | 0.109384 | 0.000005 | 0.384456 | 0.016085 |

|                         |                 |       |       |      |      |        |          |          |          |          |
|-------------------------|-----------------|-------|-------|------|------|--------|----------|----------|----------|----------|
| MmugDNA.35556.1.S1_at   | MmugDNA.35556.1 | 8.04  | 7.53  | 0.55 | 0.26 | 1.42   | 0.447396 | 0.093012 | 0.699412 | 0.349175 |
| MmugDNA.3556.1.S1_at    | MmugDNA.3556.1  | 9.4   | 9.26  | 0.03 | 0.04 | 1.11   | 0.002918 | 0.512751 | 0.099212 | 0.7065   |
| MmugDNA.35560.1.S1_at   | MmugDNA.35560.1 | 4.04  | 3.61  | 0.46 | 0.45 | 1.35   | 0.411885 | 0.332543 | 0.673728 | 0.580954 |
| MmugDNA.35561.1.S1_at   | MmugDNA.35561.1 | 4.49  | 4.46  | 0.08 | 0.18 | 1.02   | 0.745342 | 0.973694 | 0.881842 | 0.985648 |
| MmugDNA.35563.1.S1_at   | MmugDNA.35563.1 | 11.16 | 10.04 | 0.2  | 0.19 | 2.17   | 0.003065 | 0.005404 | 0.100449 | 0.101457 |
| MmugDNA.35564.1.S1_at   | MmugDNA.35564.1 | 6.04  | 6.21  | 0.06 | 0.12 | -1.13  | 0.093206 | 0.093736 | 0.361736 | 0.350201 |
| MmugDNA.35565.1.S1_at   | MmugDNA.35565.1 | 6.82  | 10.65 | 2.16 | 0.3  | -14.26 | 0.108942 | 0.360988 | 0.383909 | 0.60201  |
| MmugDNA.35567.1.S1_at   | MmugDNA.35567.1 | 3.75  | 4.77  | 0.59 | 0.43 | -2.04  | 0.146798 | 0.190415 | 0.434827 | 0.465906 |
| MmugDNA.35568.1.S1_at   | MmugDNA.35568.1 | 6.26  | 6.18  | 0.08 | 0.05 | 1.06   | 0.112481 | 0.083024 | 0.388747 | 0.332758 |
| MmugDNA.35569.1.S1_at   | MmugDNA.35569.1 | 4.83  | 4.83  | 0.03 | 0.08 | -1.01  | 0.441012 | 0.468436 | 0.694685 | 0.677714 |
| MmugDNA.3557.1.S1_at    | MmugDNA.3557.1  | 8.39  | 8.29  | 0.14 | 0.22 | 1.07   | 0.90852  | 0.217051 | 0.961215 | 0.490668 |
| MmugDNA.3557.1.S1_x_at  | MmugDNA.3557.1  | 8.65  | 8.46  | 0.22 | 0.17 | 1.14   | 0.974297 | 0.258529 | 0.989741 | 0.525796 |
| MmugDNA.35570.1.S1_at   | MmugDNA.35570.1 | 7.54  | 6.75  | 0.75 | 0.03 | 1.73   | 0.097889 | 0.065393 | 0.368354 | 0.301415 |
| MmugDNA.35572.1.S1_at   | MmugDNA.35572.1 | 9.64  | 8.9   | 0.22 | 0.17 | 1.66   | 0.027077 | 0.08416  | 0.217303 | 0.335181 |
| MmugDNA.35574.1.S1_at   | MmugDNA.35574.1 | 6.83  | 6.56  | 0.95 | 0.69 | 1.21   | 0.862759 | 0.270383 | 0.940274 | 0.53571  |
| MmugDNA.35575.1.S1_at   | MmugDNA.35575.1 | 4.07  | 4.15  | 0.11 | 0.15 | -1.06  | 0.408145 | 0.322429 | 0.671019 | 0.573972 |
| MmugDNA.35577.1.S1_at   | MmugDNA.35577.1 | 3.99  | 3.96  | 0.38 | 0.17 | 1.02   | 0.830654 | 0.755515 | 0.925496 | 0.857658 |
| MmugDNA.35578.1.S1_at   | MmugDNA.35578.1 | 9.07  | 9.1   | 0.1  | 0.07 | -1.02  | 0.882398 | 0.977647 | 0.949987 | 0.987833 |
| MmugDNA.35581.1.S1_at   | MmugDNA.35581.1 | 5.26  | 5.09  | 0.25 | 0.05 | 1.12   | 0.908306 | 0.729408 | 0.961181 | 0.843541 |
| MmugDNA.35582.1.S1_at   | MmugDNA.35582.1 | 10.37 | 10.12 | 0.13 | 0.04 | 1.19   | 0.134767 | 0.002884 | 0.418624 | 0.078985 |
| MmugDNA.35584.1.S1_at   | MmugDNA.35584.1 | 4.41  | 4.34  | 0.19 | 0.08 | 1.05   | 0.843737 | 0.7562   | 0.931554 | 0.858123 |
| MmugDNA.35586.1.S1_at   | MmugDNA.35586.1 | 3.27  | 3.39  | 0.36 | 0.29 | -1.09  | 0.688269 | 0.486601 | 0.851105 | 0.689934 |
| MmugDNA.35587.1.S1_at   | MmugDNA.35587.1 | 5.22  | 5.26  | 0.2  | 0.03 | -1.03  | 0.88746  | 0.41405  | 0.951963 | 0.639985 |
| MmugDNA.35590.1.S1_at   | MmugDNA.35590.1 | 10.62 | 11.27 | 0.44 | 0.15 | -1.57  | 0.210551 | 0.163209 | 0.5081   | 0.439324 |
| MmugDNA.35591.1.S1_at   | MmugDNA.35591.1 | 12.34 | 12.05 | 0.18 | 0.05 | 1.22   | 0.080746 | 0.422428 | 0.341441 | 0.645722 |
| MmugDNA.35593.1.S1_at   | MmugDNA.35593.1 | 7.75  | 7.5   | 0.12 | 0.07 | 1.2    | 0.025048 | 0.442046 | 0.211212 | 0.660148 |
| MmugDNA.35593.1.S1_s_at | MmugDNA.35593.1 | 5.81  | 5.68  | 0.19 | 0.07 | 1.1    | 0.107948 | 0.411517 | 0.382542 | 0.638215 |
| MmugDNA.35595.1.S1_at   | MmugDNA.35595.1 | 9.29  | 8.73  | 0.28 | 0.16 | 1.47   | 0.034592 | 0.27056  | 0.240553 | 0.535837 |
| MmugDNA.35596.1.S1_at   | MmugDNA.35596.1 | 5.07  | 4.99  | 0    | 0.1  | 1.05   | 0.336414 | 0.140396 | 0.617028 | 0.413586 |
| MmugDNA.35597.1.S1_at   | MmugDNA.35597.1 | 3.53  | 3.78  | 0.22 | 0.05 | -1.18  | 0.540702 | 0.5444   | 0.761662 | 0.726798 |
| MmugDNA.35599.1.S1_at   | MmugDNA.35599.1 | 3.33  | 3.3   | 0.21 | 0.03 | 1.02   | 0.333445 | 0.599649 | 0.614877 | 0.761524 |
| MmugDNA.35600.1.S1_at   | MmugDNA.35600.1 | 9.51  | 10.37 | 0.55 | 0.12 | -1.81  | 0.200118 | 0.334345 | 0.497633 | 0.582352 |
| MmugDNA.35601.1.S1_at   | MmugDNA.35601.1 | 8.76  | 9.32  | 0.06 | 0.12 | -1.47  | 0.003199 | 0.011308 | 0.101477 | 0.138076 |
| MmugDNA.35602.1.S1_at   | MmugDNA.35602.1 | 4.33  | 4.42  | 0.08 | 0.08 | -1.06  | 0.203482 | 0.306934 | 0.501192 | 0.563427 |
| MmugDNA.35603.1.S1_at   | MmugDNA.35603.1 | 9.54  | 8.49  | 0.13 | 0.29 | 2.07   | 0.004139 | 0.000718 | 0.10978  | 0.044419 |
| MmugDNA.35604.1.S1_at   | MmugDNA.35604.1 | 4.43  | 4.33  | 0.23 | 0.12 | 1.07   | 0.896301 | 0.470121 | 0.955841 | 0.678572 |
| MmugDNA.35606.1.S1_at   | MmugDNA.35606.1 | 4.92  | 4.9   | 0.07 | 0.06 | 1.01   | 0.556235 | 0.040947 | 0.771576 | 0.24719  |
| MmugDNA.35608.1.S1_at   | MmugDNA.35608.1 | 3.71  | 3.84  | 0.07 | 0.22 | -1.09  | 0.315605 | 0.108514 | 0.600423 | 0.37207  |
| MmugDNA.35609.1.S1_at   | MmugDNA.35609.1 | 4.24  | 4.23  | 0.11 | 0.08 | 1.01   | 0.94449  | 0.911151 | 0.976597 | 0.94989  |
| MmugDNA.3561.1.S1_at    | MmugDNA.3561.1  | 5.88  | 5.49  | 0.51 | 0.11 | 1.31   | 0.201844 | 0.165664 | 0.499297 | 0.441925 |
| MmugDNA.35611.1.S1_at   | MmugDNA.35611.1 | 7.64  | 7.31  | 0.94 | 0.08 | 1.25   | 0.267659 | 0.327527 | 0.56043  | 0.57733  |
| MmugDNA.35612.1.S1_x_at | MmugDNA.35612.1 | 10.72 | 10.55 | 0.59 | 0.15 | 1.12   | 0.528405 | 0.331611 | 0.753652 | 0.580208 |
| MmugDNA.35614.1.S1_at   | MmugDNA.35614.1 | 4.45  | 4.44  | 0.14 | 0.27 | 1.01   | 0.407349 | 0.294351 | 0.670418 | 0.554083 |

|                         |                 |       |       |      |      |       |          |          |          |          |
|-------------------------|-----------------|-------|-------|------|------|-------|----------|----------|----------|----------|
| MmugDNA.35615.1.S1_at   | MmugDNA.35615.1 | 5.3   | 5.19  | 0.37 | 0.29 | 1.08  | 0.531454 | 0.162771 | 0.755718 | 0.438913 |
| MmugDNA.35616.1.S1_at   | MmugDNA.35616.1 | 4.49  | 4.42  | 0.31 | 0.07 | 1.05  | 0.873443 | 0.703832 | 0.945619 | 0.828251 |
| MmugDNA.35618.1.S1_at   | MmugDNA.35618.1 | 6.26  | 5.43  | 0.23 | 0.3  | 1.78  | 0.024315 | 0.033787 | 0.209024 | 0.227489 |
| MmugDNA.3562.1.S1_at    | MmugDNA.3562.1  | 11.1  | 11.08 | 0.17 | 0.12 | 1.02  | 0.818292 | 0.237404 | 0.918879 | 0.508117 |
| MmugDNA.35620.1.S1_at   | MmugDNA.35620.1 | 9.23  | 8.91  | 0.26 | 0.09 | 1.25  | 0.133709 | 0.000403 | 0.417096 | 0.037471 |
| MmugDNA.35621.1.S1_s_at | MmugDNA.35621.1 | 11.01 | 11.01 | 0.1  | 0.06 | 1     | 0.225249 | 0.132822 | 0.52312  | 0.404544 |
| MmugDNA.35622.1.S1_at   | MmugDNA.35622.1 | 10.49 | 9.36  | 0.52 | 0.23 | 2.2   | 0.01704  | 0.00427  | 0.183882 | 0.091847 |
| MmugDNA.35623.1.S1_at   | MmugDNA.35623.1 | 4.29  | 4.98  | 0.46 | 0.63 | -1.62 | 0.876155 | 0.930937 | 0.946984 | 0.960748 |
| MmugDNA.35624.1.S1_at   | MmugDNA.35624.1 | 6.03  | 6.35  | 0.57 | 0.22 | -1.24 | 0.768742 | 0.798608 | 0.893807 | 0.884032 |
| MmugDNA.35625.1.S1_s_at | MmugDNA.35625.1 | 12.63 | 12.78 | 0.01 | 0.06 | -1.1  | 0.028757 | 0.017452 | 0.222261 | 0.167229 |
| MmugDNA.35626.1.S1_at   | MmugDNA.35626.1 | 3.3   | 4.21  | 0.08 | 0.41 | -1.88 | 0.009638 | 0.082316 | 0.14832  | 0.331257 |
| MmugDNA.35626.1.S1_s_at | MmugDNA.35626.1 | 4.51  | 5.34  | 0.08 | 0.4  | -1.78 | 0.063177 | 0.044894 | 0.308076 | 0.256424 |
| MmugDNA.35627.1.S1_at   | MmugDNA.35627.1 | 11.62 | 11.59 | 0.03 | 0.1  | 1.02  | 0.307279 | 0.766142 | 0.594006 | 0.864118 |
| MmugDNA.35628.1.S1_at   | MmugDNA.35628.1 | 7.21  | 6.73  | 0.08 | 0.12 | 1.39  | 0.00526  | 0.001416 | 0.117461 | 0.057432 |
| MmugDNA.35630.1.S1_at   | MmugDNA.35630.1 | 3.25  | 3.09  | 0.28 | 0.06 | 1.12  | 0.456891 | 0.719752 | 0.706051 | 0.837888 |
| MmugDNA.35631.1.S1_at   | MmugDNA.35631.1 | 3.86  | 3.52  | 0.81 | 0.13 | 1.27  | 0.370157 | 0.108222 | 0.643242 | 0.371557 |
| MmugDNA.35632.1.S1_at   | MmugDNA.35632.1 | 6.32  | 6.25  | 0.26 | 0.11 | 1.05  | 0.612029 | 0.41004  | 0.806675 | 0.637064 |
| MmugDNA.35633.1.S1_at   | MmugDNA.35633.1 | 5.95  | 5.66  | 0.65 | 0.13 | 1.23  | 0.604942 | 0.774614 | 0.802092 | 0.868797 |
| MmugDNA.35634.1.S1_at   | MmugDNA.35634.1 | 3.95  | 3.81  | 1.08 | 0.27 | 1.09  | 0.319734 | 0.352421 | 0.604318 | 0.595722 |
| MmugDNA.35635.1.S1_at   | MmugDNA.35635.1 | 4.28  | 4.39  | 0.09 | 0.32 | -1.08 | 0.388055 | 0.564469 | 0.656101 | 0.739306 |
| MmugDNA.35636.1.S1_at   | MmugDNA.35636.1 | 6.95  | 6.79  | 0.16 | 0.26 | 1.12  | 0.240792 | 0.316084 | 0.538182 | 0.569541 |
| MmugDNA.35639.1.S1_at   | MmugDNA.35639.1 | 5.86  | 6.09  | 0.17 | 0.22 | -1.17 | 0.200537 | 0.140237 | 0.497869 | 0.413405 |
| MmugDNA.3564.1.S1_at    | MmugDNA.3564.1  | 7.86  | 8.19  | 0.7  | 0.08 | -1.26 | 0.514025 | 0.721485 | 0.744131 | 0.838713 |
| MmugDNA.35640.1.S1_at   | MmugDNA.35640.1 | 6.6   | 6.86  | 0.84 | 0.22 | -1.2  | 0.869166 | 0.776148 | 0.943687 | 0.869726 |
| MmugDNA.35641.1.S1_at   | MmugDNA.35641.1 | 4.68  | 4.7   | 0.19 | 0.36 | -1.02 | 0.881586 | 0.980665 | 0.949631 | 0.989424 |
| MmugDNA.35642.1.S1_at   | MmugDNA.35642.1 | 7.97  | 7.97  | 0.28 | 0.11 | 1     | 0.975435 | 0.839899 | 0.990215 | 0.908708 |
| MmugDNA.35644.1.S1_at   | MmugDNA.35644.1 | 9.72  | 9.32  | 0.25 | 0.24 | 1.31  | 0.154943 | 0.397942 | 0.445143 | 0.629138 |
| MmugDNA.35646.1.S1_at   | MmugDNA.35646.1 | 4.9   | 4.93  | 0.08 | 0.04 | -1.02 | 0.252788 | 0.277645 | 0.547383 | 0.541633 |
| MmugDNA.35649.1.S1_at   | MmugDNA.35649.1 | 5.26  | 5.52  | 0.23 | 0.03 | -1.2  | 0.393625 | 0.589588 | 0.660389 | 0.755749 |
| MmugDNA.3565.1.S1_at    | MmugDNA.3565.1  | 4.84  | 4.76  | 0.23 | 0.27 | 1.06  | 0.979482 | 0.612687 | 0.992184 | 0.770138 |
| MmugDNA.35650.1.S1_at   | MmugDNA.35650.1 | 11.21 | 11.62 | 0.13 | 0.04 | -1.33 | 0.005715 | 0.016318 | 0.121179 | 0.161818 |
| MmugDNA.35650.1.S1_s_at | MmugDNA.35650.1 | 11.63 | 12.06 | 0.09 | 0.07 | -1.34 | 0.004502 | 0.016562 | 0.113436 | 0.162955 |
| MmugDNA.35652.1.S1_at   | MmugDNA.35652.1 | 4.03  | 4     | 0.12 | 0.09 | 1.02  | 0.861953 | 0.188081 | 0.940091 | 0.464169 |
| MmugDNA.35652.1.S1_s_at | MmugDNA.35652.1 | 11.89 | 11.19 | 0.18 | 0.08 | 1.63  | 0.004055 | 0.080352 | 0.108999 | 0.327965 |
| MmugDNA.35653.1.S1_at   | MmugDNA.35653.1 | 6.33  | 6.06  | 0.31 | 0.24 | 1.21  | 0.25431  | 0.268542 | 0.548754 | 0.534123 |
| MmugDNA.35654.1.S1_at   | MmugDNA.35654.1 | 12.35 | 11.4  | 0.01 | 0.04 | 1.92  | 0.000002 | 0.000181 | 0.037385 | 0.030511 |
| MmugDNA.35655.1.S1_at   | MmugDNA.35655.1 | 5.16  | 5.28  | 0.46 | 0.28 | -1.09 | 0.548088 | 0.679283 | 0.766347 | 0.81275  |
| MmugDNA.35657.1.S1_at   | MmugDNA.35657.1 | 6.05  | 5.9   | 0.36 | 0.22 | 1.11  | 0.260086 | 0.320852 | 0.554279 | 0.572849 |
| MmugDNA.35658.1.S1_at   | MmugDNA.35658.1 | 6.27  | 6.26  | 0.03 | 0.34 | 1     | 0.426885 | 0.597533 | 0.684257 | 0.760237 |
| MmugDNA.35659.1.S1_at   | MmugDNA.35659.1 | 4.17  | 3.88  | 0.33 | 0.74 | 1.23  | 0.904302 | 0.744888 | 0.959379 | 0.852201 |
| MmugDNA.35660.1.S1_at   | MmugDNA.35660.1 | 11.6  | 11.47 | 0.08 | 0.06 | 1.09  | 0.263614 | 0.403464 | 0.557104 | 0.632162 |
| MmugDNA.35661.1.S1_at   | MmugDNA.35661.1 | 7.55  | 8.48  | 0.6  | 0.25 | -1.9  | 0.109514 | 0.088439 | 0.384571 | 0.341877 |
| MmugDNA.35662.1.S1_at   | MmugDNA.35662.1 | 4.65  | 4.65  | 0.12 | 0.12 | 1     | 0.790446 | 0.942136 | 0.904792 | 0.967154 |



|                         |                 |       |       |      |      |       |          |          |          |          |
|-------------------------|-----------------|-------|-------|------|------|-------|----------|----------|----------|----------|
| MmugDNA.35663.1.S1_at   | MmugDNA.35663.1 | 5.8   | 5.78  | 0.18 | 0.08 | 1.01  | 0.545898 | 0.248738 | 0.765042 | 0.517931 |
| MmugDNA.35664.1.S1_s_at | MmugDNA.35664.1 | 11.22 | 11.52 | 0.18 | 0.09 | -1.23 | 0.036101 | 0.363311 | 0.244978 | 0.60371  |
| MmugDNA.35665.1.S1_at   | MmugDNA.35665.1 | 6.3   | 6.31  | 0.17 | 0.05 | -1.01 | 0.974127 | 0.714714 | 0.989627 | 0.8345   |
| MmugDNA.35666.1.S1_at   | MmugDNA.35666.1 | 8.46  | 8.18  | 0.18 | 0.06 | 1.21  | 0.081299 | 0.361673 | 0.342222 | 0.602408 |
| MmugDNA.35667.1.S1_at   | MmugDNA.35667.1 | 7.82  | 8.38  | 0.48 | 0.06 | -1.47 | 0.04043  | 0.026706 | 0.257381 | 0.204345 |
| MmugDNA.35668.1.S1_at   | MmugDNA.35668.1 | 4.3   | 4.31  | 0.12 | 0.14 | -1    | 0.571163 | 0.530597 | 0.779757 | 0.718052 |
| MmugDNA.35670.1.S1_at   | MmugDNA.35670.1 | 7.12  | 6.92  | 1.38 | 0.16 | 1.15  | 0.870305 | 0.777309 | 0.944208 | 0.87064  |
| MmugDNA.35671.1.S1_at   | MmugDNA.35671.1 | 5.09  | 5.12  | 0.34 | 0.15 | -1.02 | 0.583007 | 0.150671 | 0.787708 | 0.42522  |
| MmugDNA.35671.1.S1_at   | MmugDNA.35671.1 | 4.73  | 4.72  | 0.13 | 0.07 | 1.01  | 0.746201 | 0.411882 | 0.882365 | 0.638434 |
| MmugDNA.35672.1.S1_at   | MmugDNA.35672.1 | 3.99  | 4.02  | 0.62 | 0.08 | -1.02 | 0.357624 | 0.432254 | 0.633636 | 0.652778 |
| MmugDNA.35673.1.S1_at   | MmugDNA.35673.1 | 9.94  | 10.07 | 0.32 | 0.06 | -1.09 | 0.394605 | 0.400102 | 0.661066 | 0.630158 |
| MmugDNA.35674.1.S1_at   | MmugDNA.35674.1 | 5.41  | 5.09  | 0.41 | 0.2  | 1.25  | 0.260478 | 0.5154   | 0.554576 | 0.708274 |
| MmugDNA.35675.1.S1_at   | MmugDNA.35675.1 | 5.36  | 4.99  | 0.17 | 0.15 | 1.29  | 0.045877 | 0.046238 | 0.271767 | 0.259397 |
| MmugDNA.35677.1.S1_at   | MmugDNA.35677.1 | 5.32  | 5.22  | 0.59 | 0.09 | 1.07  | 0.335914 | 0.432349 | 0.616626 | 0.652794 |
| MmugDNA.35678.1.S1_at   | MmugDNA.35678.1 | 6.22  | 6.86  | 0.94 | 0.34 | -1.56 | 0.75803  | 0.463858 | 0.889015 | 0.674663 |
| MmugDNA.3568.1.S1_at    | MmugDNA.3568.1  | 10.63 | 10.67 | 0.17 | 0.07 | -1.03 | 0.226188 | 0.536903 | 0.523944 | 0.722119 |
| MmugDNA.35684.1.S1_at   | MmugDNA.35684.1 | 8.75  | 8.76  | 0.2  | 0.17 | -1.01 | 0.52313  | 0.629751 | 0.750197 | 0.781989 |
| MmugDNA.35686.1.S1_at   | MmugDNA.35686.1 | 3.8   | 3.75  | 0.06 | 0.09 | 1.04  | 0.147627 | 0.136147 | 0.435556 | 0.408473 |
| MmugDNA.35688.1.S1_at   | MmugDNA.35688.1 | 5.31  | 4.77  | 0.86 | 0.69 | 1.46  | 0.367652 | 0.56547  | 0.641471 | 0.739886 |
| MmugDNA.35689.1.S1_at   | MmugDNA.35689.1 | 3.3   | 3.15  | 0.06 | 0.04 | 1.11  | 0.020927 | 0.052446 | 0.198295 | 0.274539 |
| MmugDNA.3569.1.S1_at    | MmugDNA.3569.1  | 6.91  | 6.74  | 0.15 | 0.57 | 1.13  | 0.843624 | 0.041438 | 0.931553 | 0.248368 |
| MmugDNA.35690.1.S1_at   | MmugDNA.35690.1 | 4.31  | 4.31  | 0.13 | 0.01 | 1     | 0.406491 | 0.621441 | 0.669756 | 0.77603  |
| MmugDNA.35691.1.S1_at   | MmugDNA.35691.1 | 3.68  | 3.57  | 0.16 | 0.03 | 1.08  | 0.220201 | 0.341745 | 0.517758 | 0.587862 |
| MmugDNA.35692.1.S1_s_at | MmugDNA.35692.1 | 6.04  | 5.63  | 0.28 | 0.14 | 1.33  | 0.131604 | 0.113639 | 0.414491 | 0.379775 |
| MmugDNA.35693.1.S1_at   | MmugDNA.35693.1 | 6.63  | 6.6   | 0.01 | 0.04 | 1.02  | 0.714152 | 0.078979 | 0.864977 | 0.325986 |
| MmugDNA.35694.1.S1_at   | MmugDNA.35694.1 | 4.95  | 4.95  | 0.08 | 0.15 | -1    | 0.625676 | 0.772274 | 0.815532 | 0.867647 |
| MmugDNA.35696.1.S1_at   | MmugDNA.35696.1 | 11.91 | 12.13 | 0.13 | 0.08 | -1.17 | 0.110796 | 0.007217 | 0.386305 | 0.114121 |
| MmugDNA.35698.1.S1_at   | MmugDNA.35698.1 | 7.37  | 7.61  | 0.44 | 0.07 | -1.19 | 0.254095 | 0.474508 | 0.548454 | 0.681511 |
| MmugDNA.35699.1.S1_at   | MmugDNA.35699.1 | 3.38  | 3.39  | 0.1  | 0.05 | -1.01 | 0.953825 | 0.840393 | 0.981068 | 0.909015 |
| MmugDNA.357.1.S1_at     | MmugDNA.357.1   | 9     | 8.09  | 0.55 | 0.06 | 1.88  | 0.043269 | 0.143466 | 0.265331 | 0.417442 |
| MmugDNA.3570.1.S1_at    | MmugDNA.3570.1  | 4.71  | 4.7   | 0.2  | 0.04 | 1.01  | 0.979223 | 0.590545 | 0.992078 | 0.756311 |
| MmugDNA.35703.1.S1_at   | MmugDNA.35703.1 | 6.61  | 6.59  | 0.22 | 0.08 | 1.01  | 0.319246 | 0.402163 | 0.603854 | 0.631246 |
| MmugDNA.35705.1.S1_at   | MmugDNA.35705.1 | 2.66  | 2.65  | 0.37 | 0.14 | 1.01  | 0.526471 | 0.725899 | 0.752619 | 0.84131  |
| MmugDNA.35706.1.S1_at   | MmugDNA.35706.1 | 4.6   | 4.59  | 0.21 | 0.05 | 1     | 0.371058 | 0.697143 | 0.6438   | 0.824045 |
| MmugDNA.35707.1.S1_at   | MmugDNA.35707.1 | 9.26  | 9.86  | 0.34 | 0.23 | -1.52 | 0.087231 | 0.358475 | 0.35291  | 0.600011 |
| MmugDNA.35708.1.S1_at   | MmugDNA.35708.1 | 3.88  | 3.85  | 1.07 | 0.12 | 1.02  | 0.410047 | 0.501973 | 0.672242 | 0.699986 |
| MmugDNA.35710.1.S1_at   | MmugDNA.35710.1 | 13.08 | 12.96 | 0.13 | 0.09 | 1.09  | 0.989422 | 0.161671 | 0.996339 | 0.437771 |
| MmugDNA.35712.1.S1_at   | MmugDNA.35712.1 | 4.89  | 4.25  | 1.04 | 0.31 | 1.56  | 0.202554 | 0.279761 | 0.500235 | 0.543235 |
| MmugDNA.35713.1.S1_at   | MmugDNA.35713.1 | 5.96  | 6.02  | 0.47 | 0.02 | -1.04 | 0.31456  | 0.071551 | 0.599987 | 0.313714 |
| MmugDNA.35714.1.S1_at   | MmugDNA.35714.1 | 7.24  | 6.46  | 0.62 | 0.42 | 1.72  | 0.484847 | 0.794844 | 0.724497 | 0.88178  |
| MmugDNA.35714.1.S1_x_at | MmugDNA.35714.1 | 6.92  | 5.85  | 0.69 | 0.47 | 2.1   | 0.406043 | 0.66813  | 0.669478 | 0.805782 |
| MmugDNA.35715.1.S1_at   | MmugDNA.35715.1 | 5.83  | 6     | 0.06 | 0.13 | -1.12 | 0.308016 | 0.009572 | 0.594714 | 0.128995 |
| MmugDNA.35716.1.S1_at   | MmugDNA.35716.1 | 7.09  | 7.13  | 0.08 | 0.09 | -1.03 | 0.512033 | 0.465389 | 0.742848 | 0.675748 |

|                         |                 |       |       |      |      |       |          |          |          |          |
|-------------------------|-----------------|-------|-------|------|------|-------|----------|----------|----------|----------|
| MmugDNA.35716.1.S1_s_at | MmugDNA.35716.1 | 5.17  | 5.9   | 0.78 | 0.17 | -1.65 | 0.559539 | 0.781714 | 0.773349 | 0.873463 |
| MmugDNA.35717.1.S1_at   | MmugDNA.35717.1 | 5.62  | 4.88  | 0.74 | 0.29 | 1.67  | 0.132112 | 0.181818 | 0.415302 | 0.458382 |
| MmugDNA.35718.1.S1_at   | MmugDNA.35718.1 | 4.16  | 3.58  | 1.1  | 0.72 | 1.49  | 0.353685 | 0.212174 | 0.63089  | 0.486072 |
| MmugDNA.35719.1.S1_at   | MmugDNA.35719.1 | 7.91  | 7.47  | 0.34 | 0.22 | 1.36  | 0.054483 | 0.00567  | 0.290603 | 0.103959 |
| MmugDNA.35721.1.S1_at   | MmugDNA.35721.1 | 10.19 | 10.08 | 0.13 | 0.02 | 1.08  | 0.338301 | 0.243095 | 0.61869  | 0.513356 |
| MmugDNA.35722.1.S1_at   | MmugDNA.35722.1 | 6.47  | 6.8   | 0.28 | 0.03 | -1.26 | 0.044425 | 0.170125 | 0.267911 | 0.446868 |
| MmugDNA.35723.1.S1_s_at | MmugDNA.35723.1 | 6.65  | 5.96  | 0.29 | 0.25 | 1.61  | 0.02613  | 0.011213 | 0.214757 | 0.137948 |
| MmugDNA.35725.1.S1_at   | MmugDNA.35725.1 | 5.07  | 4.51  | 0.58 | 0.35 | 1.47  | 0.380165 | 0.280687 | 0.649909 | 0.543874 |
| MmugDNA.35726.1.S1_at   | MmugDNA.35726.1 | 4.41  | 4.42  | 0.25 | 0.2  | -1    | 0.656188 | 0.129853 | 0.833605 | 0.401509 |
| MmugDNA.35727.1.S1_at   | MmugDNA.35727.1 | 5.42  | 5.06  | 0.18 | 0.24 | 1.28  | 0.086096 | 0.401041 | 0.350603 | 0.630667 |
| MmugDNA.35728.1.S1_at   | MmugDNA.35728.1 | 6.2   | 6.11  | 0.08 | 0.07 | 1.07  | 0.122707 | 0.331855 | 0.401591 | 0.580411 |
| MmugDNA.35729.1.S1_at   | MmugDNA.35729.1 | 6.08  | 6.12  | 0.31 | 0.11 | -1.03 | 0.870145 | 0.674873 | 0.944195 | 0.810065 |
| MmugDNA.3573.1.S1_at    | MmugDNA.3573.1  | 3.51  | 3.33  | 0.07 | 0.08 | 1.14  | 0.085636 | 0.316866 | 0.350073 | 0.570214 |
| MmugDNA.35731.1.S1_a_at | MmugDNA.35731.1 | 5.29  | 5.17  | 0.49 | 0.34 | 1.09  | 0.159377 | 0.1879   | 0.450703 | 0.464023 |
| MmugDNA.35731.1.S1_at   | MmugDNA.35731.1 | 5.02  | 5.25  | 0.24 | 0.07 | -1.17 | 0.746872 | 0.87591  | 0.882818 | 0.929502 |
| MmugDNA.35732.1.S1_at   | MmugDNA.35732.1 | 5.63  | 4.65  | 0.95 | 0.24 | 1.97  | 0.133631 | 0.178201 | 0.41701  | 0.454531 |
| MmugDNA.35735.1.S1_at   | MmugDNA.35735.1 | 8     | 7.19  | 0.38 | 0.21 | 1.75  | 0.069401 | 0.337263 | 0.32176  | 0.584455 |
| MmugDNA.35736.1.S1_at   | MmugDNA.35736.1 | 9.66  | 9.47  | 0.28 | 0.06 | 1.14  | 0.258894 | 0.264995 | 0.553144 | 0.530973 |
| MmugDNA.35737.1.S1_at   | MmugDNA.35737.1 | 7.12  | 7.13  | 0.38 | 0.03 | -1.01 | 0.994044 | 0.066678 | 0.997578 | 0.304031 |
| MmugDNA.35739.1.S1_at   | MmugDNA.35739.1 | 3.08  | 3.05  | 0.07 | 0.1  | 1.02  | 0.284433 | 0.359275 | 0.574416 | 0.600575 |
| MmugDNA.35739.1.S1_x_at | MmugDNA.35739.1 | 2.83  | 2.7   | 0.1  | 0.05 | 1.09  | 0.09774  | 0.098515 | 0.368111 | 0.356636 |
| MmugDNA.3574.1.S1_at    | MmugDNA.3574.1  | 3.74  | 3.68  | 0.08 | 0.19 | 1.04  | 0.646927 | 0.852485 | 0.828492 | 0.916174 |
| MmugDNA.35740.1.S1_at   | MmugDNA.35740.1 | 8.01  | 8.06  | 0.22 | 0.26 | -1.03 | 0.909368 | 0.129334 | 0.961565 | 0.400748 |
| MmugDNA.35743.1.S1_at   | MmugDNA.35743.1 | 5.2   | 5.13  | 0.16 | 0.04 | 1.05  | 0.390883 | 0.226546 | 0.658414 | 0.499001 |
| MmugDNA.35744.1.S1_at   | MmugDNA.35744.1 | 7.17  | 7.22  | 0.09 | 0.04 | -1.03 | 0.880966 | 0.851243 | 0.949388 | 0.915366 |
| MmugDNA.35746.1.S1_at   | MmugDNA.35746.1 | 8.12  | 7.99  | 0.22 | 0.1  | 1.1   | 0.357129 | 0.395581 | 0.633338 | 0.627566 |
| MmugDNA.35747.1.S1_at   | MmugDNA.35747.1 | 4.49  | 4.49  | 0.11 | 0.12 | 1     | 0.854355 | 0.31144  | 0.936628 | 0.566456 |
| MmugDNA.35748.1.S1_at   | MmugDNA.35748.1 | 4.24  | 4.92  | 0.3  | 0.29 | -1.61 | 0.046497 | 0.25252  | 0.273545 | 0.521079 |
| MmugDNA.35749.1.S1_at   | MmugDNA.35749.1 | 5.36  | 5.36  | 0.21 | 0.26 | -1    | 0.607452 | 0.239284 | 0.803755 | 0.509995 |
| MmugDNA.35750.1.S1_at   | MmugDNA.35750.1 | 4.56  | 4.72  | 0.07 | 0.18 | -1.11 | 0.544002 | 0.688563 | 0.763753 | 0.818218 |
| MmugDNA.35752.1.S1_at   | MmugDNA.35752.1 | 7.01  | 7.01  | 0.03 | 0.1  | -1    | 0.731423 | 0.699605 | 0.874476 | 0.825531 |
| MmugDNA.35754.1.S1_s_at | MmugDNA.35754.1 | 8.52  | 8.79  | 0.13 | 0.14 | -1.2  | 0.049161 | 0.171791 | 0.279211 | 0.448198 |
| MmugDNA.35755.1.S1_at   | MmugDNA.35755.1 | 4.61  | 4.15  | 0.39 | 0.17 | 1.38  | 0.330216 | 0.41121  | 0.612242 | 0.637945 |
| MmugDNA.35756.1.S1_at   | MmugDNA.35756.1 | 4.24  | 4.32  | 0.17 | 0.07 | -1.06 | 0.731079 | 0.243426 | 0.87436  | 0.513476 |
| MmugDNA.35757.1.S1_at   | MmugDNA.35757.1 | 5.95  | 6.36  | 0.26 | 0.24 | -1.33 | 0.101972 | 0.147257 | 0.373707 | 0.421464 |
| MmugDNA.35761.1.S1_at   | MmugDNA.35761.1 | 3.38  | 3.26  | 0.09 | 0.2  | 1.09  | 0.69545  | 0.714256 | 0.854867 | 0.834198 |
| MmugDNA.35762.1.S1_at   | MmugDNA.35762.1 | 3.39  | 3.38  | 0.28 | 0.11 | 1.01  | 0.499413 | 0.690821 | 0.734175 | 0.819889 |
| MmugDNA.35764.1.S1_at   | MmugDNA.35764.1 | 8.01  | 8.86  | 0.36 | 0.17 | -1.8  | 0.07232  | 0.474782 | 0.326854 | 0.681695 |
| MmugDNA.35764.1.S1_s_at | MmugDNA.35764.1 | 9.34  | 12.89 | 1.55 | 0.21 | -11.7 | 0.048226 | 0.33876  | 0.276915 | 0.58582  |
| MmugDNA.35765.1.S1_at   | MmugDNA.35765.1 | 5.98  | 6.59  | 0.49 | 0.23 | -1.52 | 0.090166 | 0.34918  | 0.356864 | 0.593225 |
| MmugDNA.35766.1.S1_at   | MmugDNA.35766.1 | 6.34  | 6.32  | 0.13 | 0.06 | 1.01  | 0.396285 | 0.25942  | 0.662375 | 0.526418 |
| MmugDNA.35768.1.S1_at   | MmugDNA.35768.1 | 4.21  | 3.99  | 0.22 | 0.24 | 1.16  | 0.450029 | 0.071351 | 0.701214 | 0.313391 |
| MmugDNA.35769.1.S1_at   | MmugDNA.35769.1 | 7.63  | 7.29  | 0.11 | 0.23 | 1.26  | 0.094997 | 0.040511 | 0.364047 | 0.246264 |

|                         |                 |       |       |      |      |       |          |          |          |          |
|-------------------------|-----------------|-------|-------|------|------|-------|----------|----------|----------|----------|
| MmugDNA.3577.1.S1_at    | MmugDNA.3577.1  | 5.09  | 4.95  | 0.18 | 0.22 | 1.1   | 0.159705 | 0.295175 | 0.45103  | 0.554568 |
| MmugDNA.35770.1.S1_at   | MmugDNA.35770.1 | 5.19  | 5.15  | 0.17 | 0.06 | 1.03  | 0.781527 | 0.126309 | 0.900216 | 0.396786 |
| MmugDNA.35772.1.S1_at   | MmugDNA.35772.1 | 8.56  | 8.36  | 0.35 | 0.06 | 1.14  | 0.526817 | 0.034921 | 0.752776 | 0.231062 |
| MmugDNA.35774.1.S1_at   | MmugDNA.35774.1 | 4.38  | 4.28  | 0.27 | 0.16 | 1.07  | 0.712533 | 0.656242 | 0.864309 | 0.798973 |
| MmugDNA.35775.1.S1_at   | MmugDNA.35775.1 | 8.19  | 7.88  | 0.4  | 0.27 | 1.24  | 0.422356 | 0.871188 | 0.680562 | 0.926817 |
| MmugDNA.35777.1.S1_at   | MmugDNA.35777.1 | 3.59  | 3.5   | 0.13 | 0.03 | 1.07  | 0.32374  | 0.288668 | 0.607479 | 0.549827 |
| MmugDNA.35778.1.S1_at   | MmugDNA.35778.1 | 6.08  | 6.08  | 0.05 | 0.03 | 1     | 0.823411 | 0.576763 | 0.921516 | 0.74741  |
| MmugDNA.35780.1.S1_at   | MmugDNA.35780.1 | 7.06  | 6.93  | 0.22 | 0.09 | 1.09  | 0.41673  | 0.193846 | 0.677089 | 0.468894 |
| MmugDNA.35781.1.S1_at   | MmugDNA.35781.1 | 3.16  | 3.08  | 0.1  | 0.12 | 1.06  | 0.390449 | 0.714178 | 0.658105 | 0.834155 |
| MmugDNA.35781.1.S1_s_at | MmugDNA.35781.1 | 6.45  | 6.43  | 0.36 | 0.25 | 1.01  | 0.516303 | 0.538818 | 0.745706 | 0.723368 |
| MmugDNA.35782.1.S1_at   | MmugDNA.35782.1 | 6.82  | 6.63  | 0.09 | 0.04 | 1.14  | 0.049956 | 0.331967 | 0.281126 | 0.58053  |
| MmugDNA.35784.1.S1_at   | MmugDNA.35784.1 | 10.85 | 11.08 | 0.24 | 0.02 | -1.17 | 0.182713 | 0.54165  | 0.478507 | 0.725033 |
| MmugDNA.35785.1.S1_at   | MmugDNA.35785.1 | 10.85 | 9.6   | 0.18 | 0.08 | 2.37  | 0.000619 | 0.09376  | 0.070727 | 0.350241 |
| MmugDNA.35786.1.S1_at   | MmugDNA.35786.1 | 10.39 | 10.81 | 0.27 | 0.18 | -1.34 | 0.154672 | 0.119785 | 0.444927 | 0.388567 |
| MmugDNA.35786.1.S1_s_at | MmugDNA.35786.1 | 10.47 | 10.61 | 0.21 | 0.23 | -1.1  | 0.435689 | 0.28184  | 0.690719 | 0.544844 |
| MmugDNA.35787.1.S1_at   | MmugDNA.35787.1 | 9.84  | 10.17 | 0.2  | 0.14 | -1.25 | 0.132935 | 0.339213 | 0.416351 | 0.585918 |
| MmugDNA.35788.1.S1_at   | MmugDNA.35788.1 | 6.89  | 7.22  | 0.6  | 0.23 | -1.26 | 0.634829 | 0.190848 | 0.820985 | 0.466228 |
| MmugDNA.35789.1.S1_at   | MmugDNA.35789.1 | 7.12  | 7.34  | 0.16 | 0.1  | -1.16 | 0.222756 | 0.038188 | 0.520671 | 0.240129 |
| MmugDNA.35789.1.S1_s_at | MmugDNA.35789.1 | 8.33  | 8.59  | 0.34 | 0.22 | -1.19 | 0.470097 | 0.597426 | 0.714683 | 0.760197 |
| MmugDNA.3579.1.S1_at    | MmugDNA.3579.1  | 4.22  | 3.77  | 0.4  | 0.24 | 1.36  | 0.243833 | 0.47021  | 0.540592 | 0.678572 |
| MmugDNA.35792.1.S1_at   | MmugDNA.35792.1 | 4.19  | 4.08  | 0.11 | 0.12 | 1.08  | 0.130288 | 0.195037 | 0.412585 | 0.470179 |
| MmugDNA.35793.1.S1_at   | MmugDNA.35793.1 | 3.33  | 3.36  | 0.05 | 0.08 | -1.02 | 0.872415 | 0.460831 | 0.94528  | 0.672749 |
| MmugDNA.35795.1.S1_at   | MmugDNA.35795.1 | 5     | 5.83  | 0.83 | 0.13 | -1.78 | 0.201492 | 0.729495 | 0.49907  | 0.843554 |
| MmugDNA.35797.1.S1_at   | MmugDNA.35797.1 | 5.43  | 7.2   | 0.26 | 0.29 | -3.4  | 0.001872 | 0.000608 | 0.087496 | 0.042176 |
| MmugDNA.35798.1.S1_at   | MmugDNA.35798.1 | 5.02  | 5.07  | 0.13 | 0.07 | -1.04 | 0.742706 | 0.414015 | 0.880952 | 0.639981 |
| MmugDNA.35799.1.S1_at   | MmugDNA.35799.1 | 8.23  | 8.24  | 0.22 | 0.29 | -1.01 | 0.221136 | 0.698529 | 0.519102 | 0.824852 |
| MmugDNA.358.1.S1_at     | MmugDNA.358.1   | 3.62  | 3.66  | 0.16 | 0.61 | -1.02 | 0.914378 | 0.043088 | 0.963616 | 0.252227 |
| MmugDNA.35800.1.S1_at   | MmugDNA.35800.1 | 3.1   | 2.75  | 0.78 | 0.44 | 1.27  | 0.301222 | 0.305962 | 0.589242 | 0.562732 |
| MmugDNA.35801.1.S1_at   | MmugDNA.35801.1 | 9.25  | 8.88  | 0.26 | 0.13 | 1.29  | 0.416447 | 0.462989 | 0.676959 | 0.674149 |
| MmugDNA.35802.1.S1_at   | MmugDNA.35802.1 | 5.04  | 5.19  | 0.03 | 0.04 | -1.1  | 0.00813  | 0.051507 | 0.138956 | 0.272373 |
| MmugDNA.35803.1.S1_at   | MmugDNA.35803.1 | 5.19  | 5.14  | 0.26 | 0.61 | 1.04  | 0.709912 | 0.159222 | 0.862704 | 0.435217 |
| MmugDNA.35805.1.S1_at   | MmugDNA.35805.1 | 11.46 | 11.72 | 0.22 | 0.17 | -1.2  | 0.179534 | 0.089002 | 0.474704 | 0.342876 |
| MmugDNA.35805.1.S1_s_at | MmugDNA.35805.1 | 12.68 | 13.06 | 0.26 | 0.15 | -1.3  | 0.088681 | 0.041697 | 0.355022 | 0.24887  |
| MmugDNA.35806.1.S1_at   | MmugDNA.35806.1 | 3.73  | 3.57  | 0.12 | 0.09 | 1.12  | 0.143632 | 0.392955 | 0.430108 | 0.625917 |
| MmugDNA.35809.1.S1_at   | MmugDNA.35809.1 | 3.77  | 3.71  | 0.29 | 0.24 | 1.05  | 0.428383 | 0.687078 | 0.685363 | 0.817434 |
| MmugDNA.3581.1.S1_at    | MmugDNA.3581.1  | 4.24  | 4.71  | 0.17 | 0.33 | -1.38 | 0.334699 | 0.396404 | 0.615791 | 0.628193 |
| MmugDNA.35811.1.S1_at   | MmugDNA.35811.1 | 4.31  | 4.25  | 0.25 | 0.24 | 1.04  | 0.692272 | 0.485212 | 0.852937 | 0.688981 |
| MmugDNA.35813.1.S1_at   | MmugDNA.35813.1 | 8.64  | 7.96  | 0.4  | 0.28 | 1.6   | 0.062927 | 0.219455 | 0.307612 | 0.493156 |
| MmugDNA.35815.1.S1_at   | MmugDNA.35815.1 | 4.09  | 3.98  | 1.17 | 0.03 | 1.08  | 0.322062 | 0.403129 | 0.606224 | 0.631937 |
| MmugDNA.35817.1.S1_at   | MmugDNA.35817.1 | 7.5   | 7.42  | 0.35 | 0.32 | 1.06  | 0.829148 | 0.629215 | 0.924609 | 0.781713 |
| MmugDNA.35819.1.S1_at   | MmugDNA.35819.1 | 8.51  | 8.57  | 0.17 | 0.05 | -1.05 | 0.741594 | 0.27257  | 0.880267 | 0.537323 |
| MmugDNA.3582.1.S1_at    | MmugDNA.3582.1  | 4.46  | 4.46  | 0.06 | 0.08 | -1    | 0.832139 | 0.630435 | 0.926055 | 0.782237 |
| MmugDNA.35820.1.S1_at   | MmugDNA.35820.1 | 4.69  | 4.31  | 0.22 | 0.14 | 1.3   | 0.104607 | 0.010189 | 0.377932 | 0.132348 |

|                         |                 |       |       |      |      |        |          |          |          |          |
|-------------------------|-----------------|-------|-------|------|------|--------|----------|----------|----------|----------|
| MmugDNA.35821.1.S1_at   | MmugDNA.35821.1 | 5.04  | 4.69  | 0.59 | 0.06 | 1.27   | 0.109411 | 0.109763 | 0.384489 | 0.373701 |
| MmugDNA.35822.1.S1_at   | MmugDNA.35822.1 | 4.68  | 4.44  | 0.37 | 0.14 | 1.18   | 0.307974 | 0.506864 | 0.59471  | 0.702627 |
| MmugDNA.35824.1.S1_at   | MmugDNA.35824.1 | 10.75 | 10.89 | 0.18 | 0.15 | -1.1   | 0.395371 | 0.008744 | 0.661853 | 0.123975 |
| MmugDNA.35825.1.S1_at   | MmugDNA.35825.1 | 4.31  | 4.17  | 0.13 | 0.13 | 1.1    | 0.089741 | 0.088309 | 0.356703 | 0.341721 |
| MmugDNA.35826.1.S1_at   | MmugDNA.35826.1 | 7.57  | 7.63  | 0.12 | 0.08 | -1.04  | 0.661192 | 0.256298 | 0.836453 | 0.524079 |
| MmugDNA.35827.1.S1_at   | MmugDNA.35827.1 | 4.21  | 4.36  | 0.45 | 0.22 | -1.11  | 0.879731 | 0.537679 | 0.948777 | 0.722661 |
| MmugDNA.35827.1.S1_s_at | MmugDNA.35827.1 | 3.45  | 3.69  | 0.45 | 0.06 | -1.18  | 0.85384  | 0.890293 | 0.93644  | 0.937505 |
| MmugDNA.35829.1.S1_at   | MmugDNA.35829.1 | 5.21  | 5.15  | 0.13 | 0.18 | 1.04   | 0.806027 | 0.91989  | 0.91309  | 0.954953 |
| MmugDNA.35830.1.S1_at   | MmugDNA.35830.1 | 8.51  | 8.73  | 0.24 | 0.19 | -1.16  | 0.597101 | 0.109694 | 0.796351 | 0.373675 |
| MmugDNA.35832.1.S1_at   | MmugDNA.35832.1 | 5.35  | 6.16  | 0.8  | 0.46 | -1.75  | 0.453398 | 0.457768 | 0.703592 | 0.670897 |
| MmugDNA.35833.1.S1_at   | MmugDNA.35833.1 | 5.96  | 6.23  | 0.7  | 0.14 | -1.2   | 0.899419 | 0.074135 | 0.957197 | 0.31781  |
| MmugDNA.35834.1.S1_at   | MmugDNA.35834.1 | 6.52  | 10.66 | 1.52 | 0.21 | -17.62 | 0.022107 | 0.216769 | 0.201889 | 0.490311 |
| MmugDNA.35835.1.S1_at   | MmugDNA.35835.1 | 5.38  | 5.49  | 0.14 | 0.16 | -1.08  | 0.587093 | 0.727363 | 0.790341 | 0.842286 |
| MmugDNA.35836.1.S1_at   | MmugDNA.35836.1 | 6.96  | 7.07  | 0.15 | 0.1  | -1.09  | 0.163008 | 0.375697 | 0.455153 | 0.613587 |
| MmugDNA.35838.1.S1_at   | MmugDNA.35838.1 | 4.91  | 4.9   | 0.1  | 0.18 | 1.01   | 0.542479 | 0.151867 | 0.762838 | 0.426512 |
| MmugDNA.35840.1.S1_at   | MmugDNA.35840.1 | 4.1   | 4.09  | 0.08 | 0.04 | 1.01   | 0.36878  | 0.639536 | 0.642367 | 0.788329 |
| MmugDNA.35841.1.S1_at   | MmugDNA.35841.1 | 9.39  | 9.15  | 0.18 | 0.05 | 1.19   | 0.116797 | 0.23723  | 0.39382  | 0.507954 |
| MmugDNA.35842.1.S1_at   | MmugDNA.35842.1 | 11.34 | 11.17 | 0.09 | 0.12 | 1.13   | 0.049568 | 0.175064 | 0.280028 | 0.451724 |
| MmugDNA.35845.1.S1_at   | MmugDNA.35845.1 | 12.15 | 12.21 | 0.21 | 0.05 | -1.04  | 0.884822 | 0.272264 | 0.951005 | 0.537    |
| MmugDNA.35848.1.S1_at   | MmugDNA.35848.1 | 8.72  | 8.51  | 0.4  | 0.09 | 1.15   | 0.231678 | 0.180026 | 0.530333 | 0.456564 |
| MmugDNA.3585.1.S1_at    | MmugDNA.3585.1  | 4.39  | 4.59  | 0.28 | 0.29 | -1.15  | 0.356884 | 0.045482 | 0.633131 | 0.2575   |
| MmugDNA.35855.1.S1_at   | MmugDNA.35855.1 | 11.63 | 11.89 | 0.17 | 0.05 | -1.2   | 0.029496 | 0.207377 | 0.224759 | 0.481594 |
| MmugDNA.35856.1.S1_at   | MmugDNA.35856.1 | 8.96  | 8.6   | 0.11 | 0.16 | 1.29   | 0.02077  | 0.022721 | 0.197768 | 0.188739 |
| MmugDNA.35857.1.S1_at   | MmugDNA.35857.1 | 5.25  | 6.08  | 0.65 | 0.62 | -1.79  | 0.067236 | 0.067882 | 0.316963 | 0.306745 |
| MmugDNA.35858.1.S1_at   | MmugDNA.35858.1 | 2.98  | 2.85  | 0.12 | 0.1  | 1.09   | 0.575627 | 0.693757 | 0.782893 | 0.8219   |
| MmugDNA.35859.1.S1_at   | MmugDNA.35859.1 | 5.31  | 5.14  | 0.07 | 0.13 | 1.13   | 0.101156 | 0.270346 | 0.372334 | 0.535681 |
| MmugDNA.3586.1.S1_at    | MmugDNA.3586.1  | 7.33  | 6.87  | 0.34 | 0.15 | 1.38   | 0.104848 | 0.079503 | 0.378397 | 0.32681  |
| MmugDNA.35860.1.S1_at   | MmugDNA.35860.1 | 8.15  | 7.85  | 0.39 | 0.08 | 1.23   | 0.412329 | 0.607881 | 0.674115 | 0.766631 |
| MmugDNA.35861.1.S1_at   | MmugDNA.35861.1 | 2.86  | 2.8   | 0.15 | 0.07 | 1.04   | 0.486686 | 0.797364 | 0.725795 | 0.883167 |
| MmugDNA.35862.1.S1_at   | MmugDNA.35862.1 | 6.97  | 7.13  | 0.12 | 0.02 | -1.12  | 0.043993 | 0.203981 | 0.266772 | 0.478265 |
| MmugDNA.35863.1.S1_at   | MmugDNA.35863.1 | 5.71  | 5.77  | 0.28 | 0.29 | -1.04  | 0.731416 | 0.005315 | 0.874476 | 0.100896 |
| MmugDNA.35864.1.S1_at   | MmugDNA.35864.1 | 10.19 | 10.29 | 0.23 | 0.13 | -1.07  | 0.695385 | 0.469512 | 0.85482  | 0.678273 |
| MmugDNA.35865.1.S1_at   | MmugDNA.35865.1 | 3.38  | 3.2   | 0.22 | 0.26 | 1.13   | 0.561583 | 0.561502 | 0.774505 | 0.737449 |
| MmugDNA.35866.1.S1_at   | MmugDNA.35866.1 | 12.59 | 12.34 | 0.07 | 0.04 | 1.18   | 0.00829  | 0.02151  | 0.13996  | 0.18373  |
| MmugDNA.35869.1.S1_at   | MmugDNA.35869.1 | 5.97  | 6.04  | 0.09 | 0.1  | -1.05  | 0.549642 | 0.371246 | 0.76733  | 0.610135 |
| MmugDNA.3587.1.S1_at    | MmugDNA.3587.1  | 7.56  | 7.47  | 0.25 | 0.17 | 1.06   | 0.834765 | 0.312138 | 0.927335 | 0.566904 |
| MmugDNA.35872.1.S1_at   | MmugDNA.35872.1 | 8.77  | 8.06  | 0.25 | 0.29 | 1.64   | 0.032942 | 0.061128 | 0.235804 | 0.293981 |
| MmugDNA.35873.1.S1_at   | MmugDNA.35873.1 | 3.52  | 3.51  | 0.16 | 0.01 | 1.01   | 0.589883 | 0.802252 | 0.791747 | 0.886115 |
| MmugDNA.35878.1.S1_at   | MmugDNA.35878.1 | 10.34 | 10.14 | 0.23 | 0.11 | 1.15   | 0.205403 | 0.023249 | 0.503171 | 0.191114 |
| MmugDNA.35879.1.S1_at   | MmugDNA.35879.1 | 5.53  | 5.59  | 0.13 | 0.01 | -1.04  | 0.865085 | 0.87259  | 0.941423 | 0.927568 |
| MmugDNA.35880.1.S1_at   | MmugDNA.35880.1 | 4.39  | 4.4   | 0.22 | 0.07 | -1.01  | 0.56064  | 0.719886 | 0.773965 | 0.837941 |
| MmugDNA.35881.1.S1_at   | MmugDNA.35881.1 | 5.6   | 4.51  | 1.73 | 0.79 | 2.13   | 0.347205 | 0.246289 | 0.625341 | 0.515889 |
| MmugDNA.35882.1.S1_at   | MmugDNA.35882.1 | 5.18  | 5.43  | 0.31 | 0.21 | -1.19  | 0.446959 | 0.679611 | 0.699027 | 0.812952 |

|                         |                 |       |       |      |      |       |          |          |          |          |
|-------------------------|-----------------|-------|-------|------|------|-------|----------|----------|----------|----------|
| MmugDNA.35883.1.S1_s_at | MmugDNA.35883.1 | 10.54 | 10.5  | 0.07 | 0.07 | 1.03  | 0.514326 | 0.301372 | 0.74429  | 0.559391 |
| MmugDNA.35884.1.S1_at   | MmugDNA.35884.1 | 13.02 | 12.97 | 0.08 | 0.02 | 1.04  | 0.286276 | 0.330388 | 0.576122 | 0.579149 |
| MmugDNA.35884.1.S1_x_at | MmugDNA.35884.1 | 13.1  | 13.1  | 0.08 | 0.01 | 1     | 0.271726 | 0.252812 | 0.563594 | 0.521174 |
| MmugDNA.35885.1.S1_at   | MmugDNA.35885.1 | 5.88  | 5.88  | 0.36 | 0.02 | 1     | 0.351239 | 0.480881 | 0.628877 | 0.686    |
| MmugDNA.35886.1.S1_at   | MmugDNA.35886.1 | 3.5   | 3.33  | 0.27 | 0.05 | 1.13  | 0.304769 | 0.4301   | 0.591803 | 0.651143 |
| MmugDNA.35888.1.S1_at   | MmugDNA.35888.1 | 9.25  | 9.12  | 0.43 | 0.03 | 1.1   | 0.523827 | 0.631936 | 0.750688 | 0.783032 |
| MmugDNA.3589.1.S1_at    | MmugDNA.3589.1  | 5.45  | 5.73  | 0.24 | 0.15 | -1.22 | 0.110655 | 0.155362 | 0.386022 | 0.430754 |
| MmugDNA.35892.1.S1_at   | MmugDNA.35892.1 | 6.03  | 5.14  | 0.51 | 0.18 | 1.85  | 0.062662 | 0.097797 | 0.306978 | 0.355639 |
| MmugDNA.35893.1.S1_at   | MmugDNA.35893.1 | 6.68  | 6.38  | 0.12 | 0.1  | 1.23  | 0.051008 | 0.052795 | 0.283499 | 0.275408 |
| MmugDNA.35894.1.S1_at   | MmugDNA.35894.1 | 7.52  | 7.67  | 0.27 | 0.18 | -1.11 | 0.471481 | 0.649859 | 0.715544 | 0.795269 |
| MmugDNA.35895.1.S1_at   | MmugDNA.35895.1 | 3.28  | 3.29  | 0.18 | 0.06 | -1.01 | 0.839277 | 0.57356  | 0.929506 | 0.745213 |
| MmugDNA.35898.1.S1_at   | MmugDNA.35898.1 | 3.51  | 3.43  | 0.04 | 0.06 | 1.06  | 0.084215 | 0.190879 | 0.347597 | 0.466264 |
| MmugDNA.35899.1.S1_at   | MmugDNA.35899.1 | 4.86  | 5.05  | 0.36 | 0.02 | -1.14 | 0.898746 | 0.988549 | 0.956973 | 0.993572 |
| MmugDNA.359.1.S1_at     | MmugDNA.359.1   | 3.4   | 3.55  | 0.33 | 0.18 | -1.11 | 0.983365 | 0.955953 | 0.99383  | 0.975016 |
| MmugDNA.35900.1.S1_at   | MmugDNA.35900.1 | 4.42  | 4.28  | 0.22 | 0.11 | 1.1   | 0.605996 | 0.88663  | 0.802847 | 0.935519 |
| MmugDNA.35901.1.S1_at   | MmugDNA.35901.1 | 4.81  | 5.07  | 0.24 | 0.16 | -1.19 | 0.286814 | 0.14756  | 0.576587 | 0.421872 |
| MmugDNA.35902.1.S1_at   | MmugDNA.35902.1 | 5.39  | 5.57  | 0.2  | 0.37 | -1.13 | 0.229328 | 0.123598 | 0.528116 | 0.393639 |
| MmugDNA.35903.1.S1_at   | MmugDNA.35903.1 | 12.89 | 12.44 | 0.04 | 0.09 | 1.37  | 0.001772 | 0.049129 | 0.085481 | 0.266534 |
| MmugDNA.35904.1.S1_at   | MmugDNA.35904.1 | 3.71  | 3.69  | 0.5  | 0.09 | 1.01  | 0.369561 | 0.539317 | 0.642934 | 0.723689 |
| MmugDNA.35905.1.S1_at   | MmugDNA.35905.1 | 5.89  | 5.88  | 0.18 | 0.01 | 1     | 0.974432 | 0.301035 | 0.989763 | 0.559198 |
| MmugDNA.35907.1.S1_at   | MmugDNA.35907.1 | 3.27  | 3.1   | 0.32 | 0.16 | 1.12  | 0.44318  | 0.592817 | 0.696527 | 0.75792  |
| MmugDNA.35908.1.S1_at   | MmugDNA.35908.1 | 6.79  | 6.69  | 0.08 | 0.06 | 1.07  | 0.060244 | 0.001518 | 0.302621 | 0.059307 |
| MmugDNA.35909.1.S1_at   | MmugDNA.35909.1 | 4.1   | 4.15  | 0.33 | 0.11 | -1.03 | 0.372616 | 0.375077 | 0.645023 | 0.613186 |
| MmugDNA.3591.1.S1_at    | MmugDNA.3591.1  | 9.82  | 9.46  | 0.19 | 0.06 | 1.28  | 0.060493 | 0.196416 | 0.30301  | 0.471423 |
| MmugDNA.35911.1.S1_at   | MmugDNA.35911.1 | 7.72  | 7.66  | 0.25 | 0.13 | 1.04  | 0.298016 | 0.157425 | 0.586466 | 0.432911 |
| MmugDNA.35912.1.S1_at   | MmugDNA.35912.1 | 4.37  | 4.22  | 0.51 | 0.18 | 1.11  | 0.247195 | 0.326446 | 0.542786 | 0.576576 |
| MmugDNA.35913.1.S1_at   | MmugDNA.35913.1 | 5.19  | 5.19  | 0.64 | 0.52 | 1.01  | 0.75323  | 0.672462 | 0.886    | 0.808572 |
| MmugDNA.35914.1.S1_at   | MmugDNA.35914.1 | 3.24  | 3.1   | 0.15 | 0.1  | 1.11  | 0.122328 | 0.116273 | 0.40112  | 0.38367  |
| MmugDNA.35915.1.S1_at   | MmugDNA.35915.1 | 10.86 | 10.84 | 0.12 | 0.12 | 1.02  | 0.771335 | 0.050645 | 0.895232 | 0.270317 |
| MmugDNA.35918.1.S1_at   | MmugDNA.35918.1 | 12.02 | 12.06 | 0.14 | 0.12 | -1.03 | 0.303844 | 0.431603 | 0.591195 | 0.652439 |
| MmugDNA.35919.1.S1_at   | MmugDNA.35919.1 | 7.06  | 7.15  | 0.41 | 0.37 | -1.06 | 0.552049 | 0.627399 | 0.768852 | 0.780374 |
| MmugDNA.3592.1.S1_at    | MmugDNA.3592.1  | 9.64  | 9.36  | 0.59 | 0.11 | 1.22  | 0.860087 | 0.984491 | 0.939238 | 0.991297 |
| MmugDNA.35920.1.S1_at   | MmugDNA.35920.1 | 8.29  | 8.3   | 0.38 | 0.18 | -1.01 | 0.526907 | 0.805688 | 0.752836 | 0.888324 |
| MmugDNA.35921.1.S1_at   | MmugDNA.35921.1 | 3.59  | 3.65  | 0.11 | 0.19 | -1.04 | 0.697636 | 0.396668 | 0.856021 | 0.628434 |
| MmugDNA.35922.1.S1_at   | MmugDNA.35922.1 | 4.23  | 4.22  | 0.11 | 0.13 | 1.01  | 0.985072 | 0.218218 | 0.994613 | 0.491764 |
| MmugDNA.35923.1.S1_at   | MmugDNA.35923.1 | 6.36  | 6.41  | 0.3  | 0.21 | -1.04 | 0.683075 | 0.819901 | 0.848853 | 0.896279 |
| MmugDNA.35924.1.S1_at   | MmugDNA.35924.1 | 4.1   | 3.55  | 0.67 | 0.41 | 1.47  | 0.143666 | 0.233101 | 0.430161 | 0.504456 |
| MmugDNA.35925.1.S1_at   | MmugDNA.35925.1 | 12.54 | 12.39 | 0.35 | 0.02 | 1.11  | 0.824959 | 0.932262 | 0.922259 | 0.961583 |
| MmugDNA.35926.1.S1_at   | MmugDNA.35926.1 | 5.5   | 5.27  | 0.24 | 0.19 | 1.18  | 0.296337 | 0.037386 | 0.585059 | 0.237776 |
| MmugDNA.35927.1.S1_at   | MmugDNA.35927.1 | 5.24  | 5.04  | 0.1  | 0.08 | 1.15  | 0.046195 | 0.459042 | 0.27268  | 0.671535 |
| MmugDNA.35928.1.S1_at   | MmugDNA.35928.1 | 12.91 | 12.63 | 0.05 | 0.06 | 1.22  | 0.007319 | 0.007078 | 0.133469 | 0.113284 |
| MmugDNA.35929.1.S1_s_at | MmugDNA.35929.1 | 12.28 | 12.3  | 0.14 | 0.03 | -1.01 | 0.469316 | 0.061358 | 0.714096 | 0.29448  |
| MmugDNA.3593.1.S1_at    | MmugDNA.3593.1  | 4.65  | 4.81  | 0.27 | 0.02 | -1.12 | 0.982998 | 0.999495 | 0.993693 | 0.999836 |

|                         |                 |       |       |      |      |       |          |          |          |          |
|-------------------------|-----------------|-------|-------|------|------|-------|----------|----------|----------|----------|
| MmugDNA.35930.1.S1_at   | MmugDNA.35930.1 | 6.73  | 5.88  | 0.84 | 0.52 | 1.8   | 0.220444 | 0.268622 | 0.518152 | 0.534138 |
| MmugDNA.35931.1.S1_at   | MmugDNA.35931.1 | 5     | 5     | 0.18 | 0.15 | 1     | 0.439852 | 0.578115 | 0.693926 | 0.7483   |
| MmugDNA.35932.1.S1_at   | MmugDNA.35932.1 | 4.95  | 5.17  | 0.17 | 0.06 | -1.17 | 0.202755 | 0.1276   | 0.500451 | 0.398533 |
| MmugDNA.35933.1.S1_at   | MmugDNA.35933.1 | 3.89  | 4.02  | 0.24 | 0.37 | -1.09 | 0.345789 | 0.479263 | 0.624644 | 0.68506  |
| MmugDNA.35935.1.S1_at   | MmugDNA.35935.1 | 3.23  | 3.09  | 0.08 | 0.05 | 1.1   | 0.191322 | 0.199301 | 0.487575 | 0.474002 |
| MmugDNA.35936.1.S1_at   | MmugDNA.35936.1 | 7.08  | 8.03  | 1.31 | 0.36 | -1.94 | 0.333024 | 0.011172 | 0.614568 | 0.137551 |
| MmugDNA.35938.1.S1_at   | MmugDNA.35938.1 | 6.37  | 6.55  | 0.35 | 0.17 | -1.13 | 0.916721 | 0.983617 | 0.964555 | 0.990902 |
| MmugDNA.35939.1.S1_at   | MmugDNA.35939.1 | 2.77  | 2.85  | 0.13 | 0.11 | -1.05 | 0.531373 | 0.262718 | 0.75568  | 0.52907  |
| MmugDNA.35941.1.S1_at   | MmugDNA.35941.1 | 9.08  | 11.76 | 1.26 | 0.27 | -6.39 | 0.071862 | 0.124731 | 0.325953 | 0.39513  |
| MmugDNA.35943.1.S1_at   | MmugDNA.35943.1 | 5.04  | 4.97  | 0.17 | 0.13 | 1.05  | 0.764612 | 0.096486 | 0.892005 | 0.35409  |
| MmugDNA.35944.1.S1_at   | MmugDNA.35944.1 | 4.66  | 4.92  | 0.78 | 0.24 | -1.19 | 0.690414 | 0.555054 | 0.851998 | 0.733629 |
| MmugDNA.35945.1.S1_at   | MmugDNA.35945.1 | 3.69  | 3.34  | 0.41 | 0.15 | 1.28  | 0.115293 | 0.107755 | 0.392357 | 0.370816 |
| MmugDNA.35946.1.S1_at   | MmugDNA.35946.1 | 8.98  | 8.82  | 0.43 | 0.03 | 1.12  | 0.747877 | 0.159666 | 0.883182 | 0.435785 |
| MmugDNA.35947.1.S1_at   | MmugDNA.35947.1 | 4.32  | 4.25  | 0.06 | 0.09 | 1.05  | 0.443354 | 0.154075 | 0.696549 | 0.428867 |
| MmugDNA.35948.1.S1_at   | MmugDNA.35948.1 | 3.04  | 3.41  | 0.2  | 0.14 | -1.29 | 0.059332 | 0.052232 | 0.300756 | 0.274065 |
| MmugDNA.3595.1.S1_at    | MmugDNA.3595.1  | 4.19  | 4.15  | 0.41 | 0.05 | 1.03  | 0.673498 | 0.226904 | 0.843844 | 0.499276 |
| MmugDNA.35952.1.S1_at   | MmugDNA.35952.1 | 4.18  | 4.03  | 0.34 | 0.15 | 1.11  | 0.495647 | 0.441141 | 0.73183  | 0.659375 |
| MmugDNA.35953.1.S1_at   | MmugDNA.35953.1 | 8.82  | 8.56  | 0.29 | 0.02 | 1.2   | 0.211402 | 0.573957 | 0.509171 | 0.745491 |
| MmugDNA.35954.1.S1_at   | MmugDNA.35954.1 | 7.13  | 7.51  | 0.27 | 0.08 | -1.3  | 0.047865 | 0.038704 | 0.276176 | 0.24169  |
| MmugDNA.35955.1.S1_at   | MmugDNA.35955.1 | 7.71  | 7.74  | 0.77 | 0.06 | -1.02 | 0.444509 | 0.206596 | 0.697403 | 0.480624 |
| MmugDNA.35956.1.S1_at   | MmugDNA.35956.1 | 4     | 4.19  | 0.12 | 0.06 | -1.14 | 0.192427 | 0.15358  | 0.488958 | 0.428341 |
| MmugDNA.35957.1.S1_at   | MmugDNA.35957.1 | 10.6  | 10.16 | 0.41 | 0.17 | 1.35  | 0.237803 | 0.023492 | 0.53519  | 0.19207  |
| MmugDNA.35958.1.S1_at   | MmugDNA.35958.1 | 7.64  | 6.75  | 0.48 | 0.05 | 1.85  | 0.013207 | 0.001971 | 0.165408 | 0.065871 |
| MmugDNA.35960.1.S1_at   | MmugDNA.35960.1 | 3.69  | 3.51  | 0.75 | 0.19 | 1.13  | 0.318218 | 0.467259 | 0.602917 | 0.677016 |
| MmugDNA.35961.1.S1_at   | MmugDNA.35961.1 | 3.1   | 3.23  | 0.5  | 0.16 | -1.1  | 0.471398 | 0.328822 | 0.715544 | 0.578398 |
| MmugDNA.35962.1.S1_at   | MmugDNA.35962.1 | 3.1   | 2.93  | 0.27 | 0.11 | 1.13  | 0.196451 | 0.226434 | 0.493531 | 0.498888 |
| MmugDNA.35964.1.S1_at   | MmugDNA.35964.1 | 3.89  | 3.93  | 0.2  | 0.05 | -1.03 | 0.306385 | 0.265928 | 0.593269 | 0.531796 |
| MmugDNA.35966.1.S1_at   | MmugDNA.35966.1 | 4.63  | 4.69  | 0.27 | 0.13 | -1.05 | 0.194002 | 0.296932 | 0.490595 | 0.555895 |
| MmugDNA.35967.1.S1_at   | MmugDNA.35967.1 | 7.35  | 7.08  | 0.2  | 0.07 | 1.2   | 0.048581 | 0.029607 | 0.277796 | 0.213742 |
| MmugDNA.35968.1.S1_at   | MmugDNA.35968.1 | 8.23  | 8.82  | 1.27 | 0.37 | -1.5  | 0.225353 | 0.334916 | 0.523235 | 0.58275  |
| MmugDNA.35969.1.S1_at   | MmugDNA.35969.1 | 5.78  | 5.77  | 0.12 | 0.07 | 1.01  | 0.527191 | 0.392403 | 0.752978 | 0.625811 |
| MmugDNA.3597.1.S1_at    | MmugDNA.3597.1  | 10.87 | 10.78 | 0.37 | 0.34 | 1.06  | 0.731076 | 0.018206 | 0.87436  | 0.169746 |
| MmugDNA.35970.1.S1_at   | MmugDNA.35970.1 | 3.77  | 3.73  | 0.19 | 0.18 | 1.03  | 0.41777  | 0.525503 | 0.677757 | 0.715076 |
| MmugDNA.35971.1.S1_s_at | MmugDNA.35971.1 | 2.6   | 2.6   | 0.07 | 0.03 | -1    | 0.559845 | 0.262451 | 0.773535 | 0.528713 |
| MmugDNA.35973.1.S1_at   | MmugDNA.35973.1 | 8.82  | 9.31  | 0.13 | 0.27 | -1.4  | 0.02286  | 0.089489 | 0.204235 | 0.343811 |
| MmugDNA.35974.1.S1_at   | MmugDNA.35974.1 | 11.78 | 11.67 | 0.26 | 0.08 | 1.07  | 0.530028 | 0.453911 | 0.754645 | 0.668338 |
| MmugDNA.35975.1.S1_at   | MmugDNA.35975.1 | 6.77  | 6.63  | 0.18 | 0.08 | 1.11  | 0.355337 | 0.099564 | 0.632127 | 0.35796  |
| MmugDNA.35976.1.S1_at   | MmugDNA.35976.1 | 4.5   | 4.56  | 0.15 | 0.24 | -1.04 | 0.959106 | 0.333665 | 0.983307 | 0.581825 |
| MmugDNA.35978.1.S1_at   | MmugDNA.35978.1 | 4.3   | 4.29  | 0.14 | 0.12 | 1.01  | 0.860331 | 0.215743 | 0.93941  | 0.489503 |
| MmugDNA.35979.1.S1_at   | MmugDNA.35979.1 | 6.96  | 7.01  | 0.11 | 0.13 | -1.03 | 0.77025  | 0.652942 | 0.894561 | 0.797125 |
| MmugDNA.3598.1.S1_at    | MmugDNA.3598.1  | 3.89  | 3.78  | 0.19 | 0.02 | 1.08  | 0.900989 | 0.896624 | 0.958105 | 0.940929 |
| MmugDNA.35980.1.S1_at   | MmugDNA.35980.1 | 3.91  | 3.41  | 0.44 | 0.13 | 1.41  | 0.169003 | 0.205443 | 0.462154 | 0.479764 |
| MmugDNA.35981.1.S1_at   | MmugDNA.35981.1 | 4.32  | 4.82  | 0.14 | 0.14 | -1.42 | 0.035643 | 0.212954 | 0.243635 | 0.4869   |

|                         |                 |       |       |      |      |       |          |          |          |          |
|-------------------------|-----------------|-------|-------|------|------|-------|----------|----------|----------|----------|
| MmugDNA.35982.1.S1_at   | MmugDNA.35982.1 | 5.89  | 5.98  | 0.08 | 0.06 | -1.06 | 0.168121 | 0.1476   | 0.461413 | 0.421901 |
| MmugDNA.11019.1.S1_at   | MmugDNA.11019.1 | 6.66  | 6.73  | 0.04 | 0.01 | -1.05 | 0.018898 | 0.015626 | 0.191054 | 0.158433 |
| MmugDNA.11019.1.S1_s_at | MmugDNA.11019.1 | 6.64  | 6.63  | 0.04 | 0.02 | 1.01  | 0.364725 | 0.429847 | 0.639382 | 0.651082 |
| MmugDNA.35985.1.S1_s_at | MmugDNA.35985.1 | 11.67 | 11.89 | 0.12 | 0.13 | -1.16 | 0.119371 | 0.350763 | 0.397207 | 0.594501 |
| MmugDNA.35987.1.S1_at   | MmugDNA.35987.1 | 3.67  | 3.87  | 0.66 | 0.58 | -1.15 | 0.776188 | 0.854098 | 0.897646 | 0.916957 |
| MmugDNA.35988.1.S1_at   | MmugDNA.35988.1 | 4.78  | 4.66  | 0.11 | 0.01 | 1.08  | 0.486299 | 0.037687 | 0.725583 | 0.23859  |
| MmugDNA.35989.1.S1_at   | MmugDNA.35989.1 | 5.44  | 5.21  | 0.84 | 0.05 | 1.17  | 0.218715 | 0.20777  | 0.51636  | 0.482018 |
| MmugDNA.3599.1.S1_at    | MmugDNA.3599.1  | 3.07  | 3.13  | 0.14 | 0.47 | -1.04 | 0.569418 | 0.809006 | 0.778858 | 0.889981 |
| MmugDNA.35990.1.S1_at   | MmugDNA.35990.1 | 6.35  | 6.07  | 0.3  | 0.16 | 1.21  | 0.127134 | 0.611292 | 0.408728 | 0.769207 |
| MmugDNA.35991.1.S1_at   | MmugDNA.35991.1 | 3.39  | 3.3   | 0.16 | 0.09 | 1.06  | 0.166539 | 0.31919  | 0.459742 | 0.571688 |
| MmugDNA.35991.1.S1_x_at | MmugDNA.35991.1 | 3.28  | 3.14  | 0.21 | 0.04 | 1.1   | 0.105931 | 0.119579 | 0.379974 | 0.388247 |
| MmugDNA.35992.1.S1_at   | MmugDNA.35992.1 | 5.17  | 4.74  | 0.29 | 0.03 | 1.35  | 0.088769 | 0.185795 | 0.355162 | 0.461631 |
| MmugDNA.35994.1.S1_at   | MmugDNA.35994.1 | 5.06  | 4.9   | 0.16 | 0.04 | 1.11  | 0.184873 | 0.19798  | 0.480995 | 0.472936 |
| MmugDNA.35995.1.S1_x_at | MmugDNA.35995.1 | 11.51 | 11.69 | 0.2  | 0.12 | -1.14 | 0.238505 | 0.472299 | 0.535882 | 0.679941 |
| MmugDNA.35996.1.S1_at   | MmugDNA.35996.1 | 7.88  | 7.68  | 0.02 | 0.15 | 1.15  | 0.091021 | 0.614634 | 0.358265 | 0.771375 |
| MmugDNA.35997.1.S1_at   | MmugDNA.35997.1 | 3.86  | 3.61  | 0.26 | 0.13 | 1.18  | 0.135216 | 0.189419 | 0.419109 | 0.465117 |
| MmugDNA.35998.1.S1_at   | MmugDNA.35998.1 | 4.75  | 4.91  | 0.13 | 0.38 | -1.12 | 0.189072 | 0.583894 | 0.485727 | 0.752043 |
| MmugDNA.360.1.S1_at     | MmugDNA.360.1   | 5.92  | 5.5   | 0.15 | 0.12 | 1.34  | 0.007888 | 0.006242 | 0.137847 | 0.107169 |
| MmugDNA.3600.1.S1_at    | MmugDNA.3600.1  | 8.18  | 8.2   | 0.04 | 0.23 | -1.01 | 0.861864 | 0.015567 | 0.940071 | 0.15814  |
| MmugDNA.36000.1.S1_at   | MmugDNA.36000.1 | 8.4   | 8.03  | 0.17 | 0.11 | 1.29  | 0.163377 | 0.13877  | 0.455676 | 0.411885 |
| MmugDNA.36002.1.S1_at   | MmugDNA.36002.1 | 3.55  | 3.22  | 0.32 | 0.06 | 1.26  | 0.13972  | 0.213524 | 0.42522  | 0.48741  |
| MmugDNA.36003.1.S1_at   | MmugDNA.36003.1 | 5.06  | 4.99  | 0.15 | 0.09 | 1.05  | 0.890359 | 0.079521 | 0.953294 | 0.32682  |
| MmugDNA.36004.1.S1_at   | MmugDNA.36004.1 | 5.47  | 5.38  | 0.06 | 0.13 | 1.06  | 0.301982 | 0.429723 | 0.589915 | 0.651001 |
| MmugDNA.36006.1.S1_at   | MmugDNA.36006.1 | 5.13  | 5.18  | 0.11 | 0    | -1.04 | 0.419753 | 0.777041 | 0.679035 | 0.870487 |
| MmugDNA.36007.1.S1_at   | MmugDNA.36007.1 | 5.47  | 5.34  | 0.84 | 0.62 | 1.1   | 0.831297 | 0.873688 | 0.925813 | 0.928169 |
| MmugDNA.36008.1.S1_at   | MmugDNA.36008.1 | 8.19  | 8.87  | 0.64 | 0.33 | -1.6  | 0.370615 | 0.017752 | 0.643477 | 0.168367 |
| MmugDNA.36009.1.S1_at   | MmugDNA.36009.1 | 9.41  | 9.11  | 0.71 | 0.21 | 1.24  | 0.658842 | 0.957381 | 0.835253 | 0.975878 |
| MmugDNA.36011.1.S1_at   | MmugDNA.36011.1 | 5.05  | 4.9   | 0.21 | 0.13 | 1.11  | 0.264057 | 0.347161 | 0.557422 | 0.591815 |
| MmugDNA.36012.1.S1_at   | MmugDNA.36012.1 | 8.86  | 8.14  | 0.08 | 0.11 | 1.65  | 0.00059  | 0.000263 | 0.070727 | 0.033786 |
| MmugDNA.36014.1.S1_at   | MmugDNA.36014.1 | 2.92  | 2.96  | 0.06 | 0.03 | -1.03 | 0.171353 | 0.088233 | 0.465251 | 0.341721 |
| MmugDNA.36015.1.S1_at   | MmugDNA.36015.1 | 6.15  | 6.37  | 0.22 | 0.02 | -1.17 | 0.163323 | 0.13745  | 0.455649 | 0.41037  |
| MmugDNA.36016.1.S1_at   | MmugDNA.36016.1 | 5.38  | 5.61  | 0.1  | 0.1  | -1.17 | 0.100257 | 0.393879 | 0.371075 | 0.626615 |
| MmugDNA.36019.1.S1_at   | MmugDNA.36019.1 | 5.05  | 4.99  | 0.33 | 0.62 | 1.04  | 0.640074 | 0.011453 | 0.824018 | 0.13846  |
| MmugDNA.3602.1.S1_at    | MmugDNA.3602.1  | 6.39  | 6.44  | 0.14 | 0.08 | -1.03 | 0.366475 | 0.660993 | 0.640792 | 0.801674 |
| MmugDNA.36020.1.S1_at   | MmugDNA.36020.1 | 11.22 | 11.03 | 0.31 | 0.22 | 1.14  | 0.139316 | 0.479451 | 0.424942 | 0.685199 |
| MmugDNA.36021.1.S1_at   | MmugDNA.36021.1 | 8.03  | 8.52  | 0.4  | 0.14 | -1.4  | 0.348663 | 0.831815 | 0.626599 | 0.903511 |
| MmugDNA.36022.1.S1_at   | MmugDNA.36022.1 | 6.65  | 6.37  | 0.37 | 0.12 | 1.21  | 0.346335 | 0.459872 | 0.624923 | 0.671989 |
| MmugDNA.36023.1.S1_at   | MmugDNA.36023.1 | 10.08 | 9.51  | 0.09 | 0.15 | 1.49  | 0.004042 | 0.000198 | 0.108999 | 0.031116 |
| MmugDNA.36024.1.S1_at   | MmugDNA.36024.1 | 7.15  | 7.1   | 0.16 | 0.09 | 1.04  | 0.24933  | 0.567702 | 0.544528 | 0.741576 |
| MmugDNA.36025.1.S1_at   | MmugDNA.36025.1 | 9.9   | 8.93  | 1.43 | 0.5  | 1.95  | 0.651416 | 0.253354 | 0.830699 | 0.521677 |
| MmugDNA.36027.1.S1_at   | MmugDNA.36027.1 | 5.13  | 4.34  | 0.58 | 0.23 | 1.73  | 0.095428 | 0.309446 | 0.364958 | 0.564979 |
| MmugDNA.36027.1.S1_x_at | MmugDNA.36027.1 | 5.87  | 4.81  | 0.98 | 0.59 | 2.09  | 0.290809 | 0.436338 | 0.580217 | 0.655923 |
| MmugDNA.36028.1.S1_at   | MmugDNA.36028.1 | 11.39 | 11.46 | 0.17 | 0.04 | -1.05 | 0.366032 | 0.207843 | 0.640526 | 0.482049 |

|                         |                 |       |       |      |      |       |          |          |          |          |
|-------------------------|-----------------|-------|-------|------|------|-------|----------|----------|----------|----------|
| MmugDNA.36029.1.S1_at   | MmugDNA.36029.1 | 3.6   | 3.26  | 0.4  | 0.25 | 1.27  | 0.511283 | 0.383841 | 0.742401 | 0.61978  |
| MmugDNA.3603.1.S1_at    | MmugDNA.3603.1  | 6.48  | 6.42  | 0.26 | 0.45 | 1.04  | 0.959987 | 0.323099 | 0.983565 | 0.574351 |
| MmugDNA.36030.1.S1_at   | MmugDNA.36030.1 | 4.74  | 4.81  | 0.09 | 0.03 | -1.05 | 0.331715 | 0.063361 | 0.613601 | 0.298403 |
| MmugDNA.36032.1.S1_at   | MmugDNA.36032.1 | 3.1   | 3.24  | 0.15 | 0.1  | -1.1  | 0.109473 | 0.193757 | 0.384538 | 0.468828 |
| MmugDNA.36033.1.S1_at   | MmugDNA.36033.1 | 3.96  | 3.98  | 0.14 | 0.12 | -1.02 | 0.81688  | 0.002138 | 0.918133 | 0.068424 |
| MmugDNA.36036.1.S1_at   | MmugDNA.36036.1 | 5.17  | 5.57  | 0.49 | 0.21 | -1.32 | 0.493288 | 0.106452 | 0.730324 | 0.368999 |
| MmugDNA.3604.1.S1_at    | MmugDNA.3604.1  | 5.52  | 5.75  | 0.2  | 0.49 | -1.17 | 0.855233 | 0.256804 | 0.93691  | 0.524607 |
| MmugDNA.3604.1.S1_x_at  | MmugDNA.3604.1  | 5.63  | 5.72  | 0.08 | 0.35 | -1.06 | 0.868564 | 0.319928 | 0.943525 | 0.572274 |
| MmugDNA.36040.1.S1_at   | MmugDNA.36040.1 | 3.82  | 3.51  | 0.09 | 0.15 | 1.23  | 0.094174 | 0.346488 | 0.363211 | 0.591351 |
| MmugDNA.36043.1.S1_at   | MmugDNA.36043.1 | 5.68  | 5.78  | 0.06 | 0.01 | -1.07 | 0.117525 | 0.059852 | 0.394826 | 0.291297 |
| MmugDNA.36045.1.S1_at   | MmugDNA.36045.1 | 3.84  | 4.24  | 0.3  | 0.21 | -1.32 | 0.066671 | 0.06379  | 0.315848 | 0.29906  |
| MmugDNA.36048.1.S1_at   | MmugDNA.36048.1 | 4.29  | 4.37  | 0.04 | 0.13 | -1.06 | 0.110516 | 0.23955  | 0.385867 | 0.510209 |
| MmugDNA.3605.1.S1_at    | MmugDNA.3605.1  | 4.07  | 4.06  | 0.14 | 0.03 | 1.01  | 0.742494 | 0.920621 | 0.880829 | 0.955258 |
| MmugDNA.3605.1.S1_x_at  | MmugDNA.3605.1  | 4.23  | 4.25  | 0.07 | 0.02 | -1.01 | 0.205819 | 0.079508 | 0.503593 | 0.32681  |
| MmugDNA.36050.1.S1_at   | MmugDNA.36050.1 | 3.83  | 3.79  | 0.21 | 0.03 | 1.03  | 0.574485 | 0.747123 | 0.781968 | 0.853124 |
| MmugDNA.36051.1.S1_at   | MmugDNA.36051.1 | 10.21 | 10.23 | 0.25 | 0.03 | -1.01 | 0.843001 | 0.755744 | 0.931217 | 0.857771 |
| MmugDNA.36052.1.S1_at   | MmugDNA.36052.1 | 6.12  | 6.02  | 0.04 | 0.07 | 1.07  | 0.075876 | 0.046862 | 0.333792 | 0.261272 |
| MmugDNA.36054.1.S1_at   | MmugDNA.36054.1 | 6.97  | 6.81  | 0.11 | 0.08 | 1.11  | 0.25866  | 0.298892 | 0.552799 | 0.557509 |
| MmugDNA.36056.1.S1_at   | MmugDNA.36056.1 | 10.56 | 10.32 | 0.27 | 0.03 | 1.18  | 0.628505 | 0.003056 | 0.81747  | 0.08061  |
| MmugDNA.36057.1.S1_at   | MmugDNA.36057.1 | 5.18  | 5.18  | 0.22 | 0.09 | -1    | 0.258971 | 0.197199 | 0.55325  | 0.472213 |
| MmugDNA.3606.1.S1_at    | MmugDNA.3606.1  | 4.52  | 4.41  | 0.13 | 0.13 | 1.08  | 0.158922 | 0.127117 | 0.450204 | 0.397922 |
| MmugDNA.36060.1.S1_at   | MmugDNA.36060.1 | 4.43  | 4.44  | 0.25 | 0.16 | -1.01 | 0.476099 | 0.763359 | 0.718656 | 0.862471 |
| MmugDNA.36061.1.S1_at   | MmugDNA.36061.1 | 8.89  | 8.81  | 0.21 | 0.06 | 1.05  | 0.99166  | 0.195441 | 0.996963 | 0.470259 |
| MmugDNA.36062.1.S1_at   | MmugDNA.36062.1 | 3.72  | 3.52  | 0.17 | 0.31 | 1.15  | 0.648947 | 0.815727 | 0.829463 | 0.893731 |
| MmugDNA.36063.1.S1_at   | MmugDNA.36063.1 | 7.87  | 8     | 0.2  | 0.1  | -1.1  | 0.190582 | 0.249858 | 0.486767 | 0.518876 |
| MmugDNA.36066.1.S1_at   | MmugDNA.36066.1 | 3.71  | 3.8   | 0.07 | 0.08 | -1.06 | 0.32055  | 0.53157  | 0.605112 | 0.718781 |
| MmugDNA.36067.1.S1_at   | MmugDNA.36067.1 | 12.22 | 12.58 | 0.61 | 0.26 | -1.28 | 0.215412 | 0.046584 | 0.513072 | 0.260267 |
| MmugDNA.36068.1.S1_at   | MmugDNA.36068.1 | 6.94  | 6.93  | 0.07 | 0.08 | 1.01  | 0.700747 | 0.808449 | 0.857861 | 0.889757 |
| MmugDNA.36069.1.S1_at   | MmugDNA.36069.1 | 3.69  | 3.64  | 0.13 | 0.07 | 1.04  | 0.765986 | 0.741648 | 0.89269  | 0.850409 |
| MmugDNA.3607.1.S1_at    | MmugDNA.3607.1  | 4.21  | 4.21  | 0.34 | 0.02 | -1    | 0.902551 | 0.745177 | 0.958703 | 0.852292 |
| MmugDNA.36070.1.S1_at   | MmugDNA.36070.1 | 6.21  | 6.09  | 0.1  | 0.04 | 1.08  | 0.083477 | 0.078084 | 0.345905 | 0.324578 |
| MmugDNA.36071.1.S1_at   | MmugDNA.36071.1 | 10.08 | 9.61  | 0.06 | 0.14 | 1.39  | 0.004126 | 0.006771 | 0.10967  | 0.111342 |
| MmugDNA.36072.1.S1_at   | MmugDNA.36072.1 | 9.71  | 9.71  | 0.1  | 0.13 | 1     | 0.408878 | 0.786099 | 0.671451 | 0.876104 |
| MmugDNA.36075.1.S1_at   | MmugDNA.36075.1 | 6.39  | 6.13  | 0.61 | 0.59 | 1.19  | 0.530842 | 0.039703 | 0.755314 | 0.244271 |
| MmugDNA.36077.1.S1_at   | MmugDNA.36077.1 | 5.46  | 5.64  | 0.14 | 0.04 | -1.14 | 0.272534 | 0.645045 | 0.564646 | 0.791993 |
| MmugDNA.36078.1.S1_at   | MmugDNA.36078.1 | 3.09  | 3.02  | 0.07 | 0.06 | 1.05  | 0.125782 | 0.081253 | 0.406597 | 0.329351 |
| MmugDNA.36079.1.S1_at   | MmugDNA.36079.1 | 5     | 5.13  | 0.12 | 0    | -1.1  | 0.143614 | 0.056291 | 0.430076 | 0.283274 |
| MmugDNA.3608.1.S1_at    | MmugDNA.3608.1  | 7.66  | 7.61  | 0.47 | 0.12 | 1.03  | 0.675305 | 0.874563 | 0.845075 | 0.9288   |
| MmugDNA.36080.1.S1_at   | MmugDNA.36080.1 | 8.57  | 9.06  | 0.14 | 0.32 | -1.4  | 0.107918 | 0.05364  | 0.382524 | 0.277224 |
| MmugDNA.36081.1.S1_s_at | MmugDNA.36081.1 | 9.37  | 10.11 | 0.45 | 0.2  | -1.67 | 0.124121 | 0.438944 | 0.40411  | 0.657787 |
| MmugDNA.36082.1.S1_at   | MmugDNA.36082.1 | 2.81  | 2.67  | 0.07 | 0.09 | 1.11  | 0.079212 | 0.233828 | 0.339072 | 0.505169 |
| MmugDNA.36083.1.S1_at   | MmugDNA.36083.1 | 6.68  | 7.18  | 1.07 | 0.34 | -1.42 | 0.227368 | 0.23298  | 0.525433 | 0.50445  |
| MmugDNA.36083.1.S1_s_at | MmugDNA.36083.1 | 5.76  | 6.45  | 0.84 | 0.24 | -1.61 | 0.209903 | 0.353774 | 0.50734  | 0.596815 |



|                         |                 |       |       |      |      |       |          |          |          |          |
|-------------------------|-----------------|-------|-------|------|------|-------|----------|----------|----------|----------|
| MmugDNA.36084.1.S1_at   | MmugDNA.36084.1 | 8.39  | 8.38  | 0.69 | 0.17 | 1.01  | 0.855999 | 0.924106 | 0.937346 | 0.957224 |
| MmugDNA.36087.1.S1_at   | MmugDNA.36087.1 | 5.66  | 5.76  | 0.17 | 0.13 | -1.07 | 0.198041 | 0.551548 | 0.495303 | 0.731027 |
| MmugDNA.36088.1.S1_at   | MmugDNA.36088.1 | 5.81  | 5.47  | 0.1  | 0.14 | 1.26  | 0.055724 | 0.141704 | 0.293205 | 0.415265 |
| MmugDNA.36089.1.S1_at   | MmugDNA.36089.1 | 6.59  | 6.46  | 0.13 | 0.13 | 1.09  | 0.621599 | 0.835193 | 0.812837 | 0.905636 |
| MmugDNA.3609.1.S1_at    | MmugDNA.3609.1  | 9.55  | 9.19  | 0.19 | 0.33 | 1.28  | 0.256759 | 0.26154  | 0.5513   | 0.52802  |
| MmugDNA.36090.1.S1_at   | MmugDNA.36090.1 | 5.73  | 5.55  | 0.41 | 0.12 | 1.13  | 0.545225 | 0.095128 | 0.764503 | 0.352151 |
| MmugDNA.36091.1.S1_at   | MmugDNA.36091.1 | 11.07 | 11.19 | 0.13 | 0.05 | -1.09 | 0.141125 | 0.081825 | 0.426954 | 0.330204 |
| MmugDNA.36092.1.S1_at   | MmugDNA.36092.1 | 4.13  | 4.04  | 0.15 | 0.29 | 1.07  | 0.869773 | 0.502839 | 0.943985 | 0.700392 |
| MmugDNA.36093.1.S1_at   | MmugDNA.36093.1 | 5.21  | 5.27  | 0.1  | 0.42 | -1.04 | 0.518278 | 0.551146 | 0.747407 | 0.730819 |
| MmugDNA.36094.1.S1_at   | MmugDNA.36094.1 | 4.14  | 4.3   | 0.08 | 0.08 | -1.12 | 0.162579 | 0.132944 | 0.454561 | 0.404616 |
| MmugDNA.36096.1.S1_at   | MmugDNA.36096.1 | 4.66  | 4.63  | 0.23 | 0.04 | 1.02  | 0.763216 | 0.885596 | 0.891517 | 0.934982 |
| MmugDNA.36097.1.S1_at   | MmugDNA.36097.1 | 3.77  | 4.02  | 0.18 | 0.21 | -1.19 | 0.426469 | 0.368738 | 0.683874 | 0.608236 |
| MmugDNA.36099.1.S1_at   | MmugDNA.36099.1 | 3.03  | 3     | 0.18 | 0.08 | 1.03  | 0.770804 | 0.69644  | 0.894865 | 0.823672 |
| MmugDNA.361.1.S1_at     | MmugDNA.361.1   | 4.71  | 5.23  | 0.73 | 0.35 | -1.43 | 0.34642  | 0.292714 | 0.624993 | 0.552783 |
| MmugDNA.36104.1.S1_at   | MmugDNA.36104.1 | 5.25  | 5.25  | 0.09 | 0.18 | -1    | 0.30382  | 0.628336 | 0.591195 | 0.781112 |
| MmugDNA.11157.1.S1_at   | MmugDNA.11157.1 | 8.36  | 8.28  | 0.26 | 0.15 | 1.06  | 0.61287  | 0.237847 | 0.807098 | 0.508341 |
| MmugDNA.11157.1.S1_s_at | MmugDNA.11157.1 | 8.76  | 8.71  | 0.15 | 0.12 | 1.03  | 0.910984 | 0.031113 | 0.962223 | 0.218175 |
| MmugDNA.36106.1.S1_at   | MmugDNA.36106.1 | 5.3   | 5.35  | 0.08 | 0.22 | -1.04 | 0.370611 | 0.44208  | 0.643477 | 0.660148 |
| MmugDNA.36107.1.S1_at   | MmugDNA.36107.1 | 3.65  | 3.38  | 0.07 | 0.06 | 1.21  | 0.01025  | 0.228507 | 0.150937 | 0.500748 |
| MmugDNA.36109.1.S1_at   | MmugDNA.36109.1 | 8.92  | 8.41  | 0.23 | 0.11 | 1.43  | 0.041276 | 0.032242 | 0.259648 | 0.222229 |
| MmugDNA.3611.1.S1_at    | MmugDNA.3611.1  | 5.89  | 6.67  | 1.45 | 0.17 | -1.71 | 0.141025 | 0.043438 | 0.42688  | 0.253043 |
| MmugDNA.36111.1.S1_at   | MmugDNA.36111.1 | 3.27  | 3.27  | 0.11 | 0.05 | 1     | 0.959769 | 0.666365 | 0.983565 | 0.804499 |
| MmugDNA.36112.1.S1_at   | MmugDNA.36112.1 | 3.78  | 3.43  | 0.47 | 1.29 | 1.28  | 0.90286  | 0.593378 | 0.958791 | 0.758267 |
| MmugDNA.11166.1.S1_s_at | MmugDNA.11166.1 | 10.82 | 11    | 0.16 | 0.19 | -1.13 | 0.157379 | 0.297806 | 0.448026 | 0.556484 |
| MmugDNA.36115.1.S1_at   | MmugDNA.36115.1 | 4.67  | 4.57  | 0.25 | 0.15 | 1.08  | 0.700307 | 0.343647 | 0.85768  | 0.589357 |
| MmugDNA.36117.1.S1_at   | MmugDNA.36117.1 | 6.51  | 6.72  | 0.15 | 0.05 | -1.15 | 0.236145 | 0.161743 | 0.533746 | 0.437816 |
| MmugDNA.36119.1.S1_at   | MmugDNA.36119.1 | 6.78  | 6.22  | 0.43 | 0.18 | 1.48  | 0.074588 | 0.125549 | 0.331249 | 0.396226 |
| MmugDNA.3612.1.S1_at    | MmugDNA.3612.1  | 9.7   | 9.44  | 0.07 | 0.24 | 1.2   | 0.093272 | 0.088922 | 0.361736 | 0.34275  |
| MmugDNA.36121.1.S1_at   | MmugDNA.36121.1 | 8.59  | 8.22  | 0.6  | 0.2  | 1.29  | 0.917271 | 0.876204 | 0.964746 | 0.929606 |
| MmugDNA.36122.1.S1_at   | MmugDNA.36122.1 | 8.2   | 8.79  | 0.08 | 0.15 | -1.5  | 0.005008 | 0.109948 | 0.115961 | 0.374029 |
| MmugDNA.36123.1.S1_at   | MmugDNA.36123.1 | 5.25  | 4.58  | 0.33 | 0.39 | 1.6   | 0.045001 | 0.024828 | 0.269447 | 0.197402 |
| MmugDNA.36124.1.S1_at   | MmugDNA.36124.1 | 8.53  | 7.74  | 0.5  | 0.15 | 1.73  | 0.062764 | 0.135353 | 0.307182 | 0.40745  |
| MmugDNA.36125.1.S1_at   | MmugDNA.36125.1 | 11.56 | 11.6  | 0.19 | 0.11 | -1.03 | 0.604764 | 0.093324 | 0.801978 | 0.349412 |
| MmugDNA.36125.1.S1_s_at | MmugDNA.36125.1 | 12.42 | 12.45 | 0.17 | 0.12 | -1.02 | 0.647912 | 0.071625 | 0.829089 | 0.313735 |
| MmugDNA.36126.1.S1_at   | MmugDNA.36126.1 | 4.14  | 4.12  | 0.16 | 0.02 | 1.01  | 0.922448 | 0.381621 | 0.966854 | 0.617824 |
| MmugDNA.36128.1.S1_at   | MmugDNA.36128.1 | 3.76  | 3.62  | 0.11 | 0.03 | 1.1   | 0.226424 | 0.346244 | 0.524218 | 0.591201 |
| MmugDNA.26577.1.S1_at   | MmugDNA.26577.1 | 14.28 | 14.26 | 0.03 | 0.01 | 1.02  | 0.927034 | 0.446054 | 0.969143 | 0.662676 |
| MmugDNA.26577.1.S1_s_at | MmugDNA.26577.1 | 14.44 | 14.44 | 0.05 | 0.01 | -1    | 0.992447 | 0.733023 | 0.997182 | 0.845498 |
| MmugDNA.36133.1.S1_at   | MmugDNA.36133.1 | 4.31  | 4.34  | 0.29 | 0.16 | -1.02 | 0.63728  | 0.547797 | 0.822365 | 0.728701 |
| MmugDNA.36134.1.S1_at   | MmugDNA.36134.1 | 4.91  | 4.42  | 0.44 | 0.06 | 1.4   | 0.145491 | 0.0899   | 0.432829 | 0.344073 |
| MmugDNA.36135.1.S1_at   | MmugDNA.36135.1 | 8.6   | 10.36 | 0.51 | 0.2  | -3.38 | 0.007112 | 0.021254 | 0.131735 | 0.182488 |
| MmugDNA.36136.1.S1_at   | MmugDNA.36136.1 | 3.71  | 3.72  | 0.03 | 0.04 | -1    | 0.919634 | 0.374665 | 0.965621 | 0.613    |
| MmugDNA.36137.1.S1_at   | MmugDNA.36137.1 | 3.1   | 2.83  | 0.1  | 0.43 | 1.2   | 0.99066  | 0.972586 | 0.996621 | 0.98526  |

|                         |                 |       |       |      |      |       |          |          |          |          |
|-------------------------|-----------------|-------|-------|------|------|-------|----------|----------|----------|----------|
| MmugDNA.36138.1.S1_at   | MmugDNA.36138.1 | 6.24  | 6.86  | 0.71 | 0.38 | -1.54 | 0.167991 | 0.394402 | 0.461204 | 0.626982 |
| MmugDNA.36139.1.S1_at   | MmugDNA.36139.1 | 5.46  | 5.22  | 0.34 | 0.1  | 1.18  | 0.273057 | 0.327366 | 0.565221 | 0.577284 |
| MmugDNA.3614.1.S1_at    | MmugDNA.3614.1  | 8.7   | 8.97  | 0.05 | 0.25 | -1.21 | 0.151902 | 0.070471 | 0.441418 | 0.311777 |
| MmugDNA.36141.1.S1_at   | MmugDNA.36141.1 | 6.76  | 8.03  | 1.96 | 0.21 | -2.41 | 0.403962 | 0.39055  | 0.667897 | 0.624329 |
| MmugDNA.36142.1.S1_at   | MmugDNA.36142.1 | 7.42  | 7.48  | 0.3  | 0.19 | -1.04 | 0.994369 | 0.905047 | 0.997657 | 0.946165 |
| MmugDNA.36145.1.S1_at   | MmugDNA.36145.1 | 7.28  | 6.75  | 1.09 | 0.47 | 1.45  | 0.206513 | 0.288101 | 0.504184 | 0.549319 |
| MmugDNA.36146.1.S1_at   | MmugDNA.36146.1 | 3.81  | 3.91  | 0.1  | 0.09 | -1.07 | 0.677683 | 0.06018  | 0.846284 | 0.291882 |
| MmugDNA.36147.1.S1_at   | MmugDNA.36147.1 | 8.52  | 8.77  | 0.79 | 0.24 | -1.2  | 0.632418 | 0.688722 | 0.819792 | 0.818296 |
| MmugDNA.36149.1.S1_at   | MmugDNA.36149.1 | 6.56  | 6.87  | 0.76 | 0.38 | -1.24 | 0.752893 | 0.942505 | 0.88588  | 0.967399 |
| MmugDNA.36150.1.S1_at   | MmugDNA.36150.1 | 3.39  | 3.31  | 0.06 | 0.18 | 1.05  | 0.467063 | 0.914016 | 0.712594 | 0.951658 |
| MmugDNA.36151.1.S1_at   | MmugDNA.36151.1 | 4.3   | 3.73  | 0.59 | 0.07 | 1.49  | 0.156133 | 0.122933 | 0.446669 | 0.392923 |
| MmugDNA.36152.1.S1_at   | MmugDNA.36152.1 | 4.96  | 5.37  | 0.38 | 0.58 | -1.34 | 0.293712 | 0.044317 | 0.582695 | 0.255021 |
| MmugDNA.36153.1.S1_at   | MmugDNA.36153.1 | 3.47  | 3.22  | 0.56 | 0.06 | 1.19  | 0.249175 | 0.316391 | 0.544437 | 0.569809 |
| MmugDNA.36154.1.S1_at   | MmugDNA.36154.1 | 3.8   | 3.74  | 0.01 | 0.11 | 1.04  | 0.113507 | 0.339632 | 0.390238 | 0.586217 |
| MmugDNA.36155.1.S1_at   | MmugDNA.36155.1 | 3.84  | 4.05  | 0.22 | 0.32 | -1.15 | 0.293572 | 0.37376  | 0.582549 | 0.61241  |
| MmugDNA.36156.1.S1_at   | MmugDNA.36156.1 | 4.85  | 5.24  | 0.43 | 0.12 | -1.31 | 0.267131 | 0.398491 | 0.559858 | 0.629458 |
| MmugDNA.36157.1.S1_at   | MmugDNA.36157.1 | 8.34  | 8.53  | 0.12 | 0.03 | -1.15 | 0.053196 | 0.006407 | 0.287986 | 0.108767 |
| MmugDNA.36158.1.S1_s_at | MmugDNA.36158.1 | 10.21 | 9.6   | 0.29 | 0.14 | 1.53  | 0.014023 | 0.019322 | 0.169838 | 0.174723 |
| MmugDNA.36159.1.S1_at   | MmugDNA.36159.1 | 4.79  | 3.95  | 1.73 | 0.05 | 1.79  | 0.209707 | 0.208168 | 0.507182 | 0.482086 |
| MmugDNA.3616.1.S1_at    | MmugDNA.3616.1  | 4.19  | 4.08  | 0.06 | 0.16 | 1.08  | 0.430291 | 0.361614 | 0.686609 | 0.602374 |
| MmugDNA.36160.1.S1_at   | MmugDNA.36160.1 | 9.34  | 9.71  | 0.24 | 0.08 | -1.29 | 0.092339 | 0.018134 | 0.360374 | 0.16964  |
| MmugDNA.36162.1.S1_at   | MmugDNA.36162.1 | 4.52  | 4.57  | 0.18 | 0    | -1.04 | 0.883329 | 0.987063 | 0.950405 | 0.992715 |
| MmugDNA.36163.1.S1_at   | MmugDNA.36163.1 | 3.66  | 3.46  | 0.63 | 0.32 | 1.16  | 0.323374 | 0.245626 | 0.607168 | 0.51536  |
| MmugDNA.36164.1.S1_at   | MmugDNA.36164.1 | 6.64  | 7.01  | 0.18 | 0.14 | -1.3  | 0.094463 | 0.369079 | 0.363371 | 0.608608 |
| MmugDNA.36165.1.S1_at   | MmugDNA.36165.1 | 5.92  | 3.68  | 2.42 | 0.12 | 4.7   | 0.226582 | 0.277428 | 0.524382 | 0.541336 |
| MmugDNA.36166.1.S1_at   | MmugDNA.36166.1 | 5.68  | 5.82  | 0.07 | 0.14 | -1.1  | 0.079923 | 0.046913 | 0.340107 | 0.261301 |
| MmugDNA.36169.1.S1_at   | MmugDNA.36169.1 | 4.75  | 4.02  | 0.34 | 0.34 | 1.66  | 0.206464 | 0.401714 | 0.504097 | 0.631068 |
| MmugDNA.3617.1.S1_at    | MmugDNA.3617.1  | 5.81  | 5.41  | 0.29 | 0.1  | 1.32  | 0.089025 | 0.114468 | 0.355648 | 0.381021 |
| MmugDNA.36170.1.S1_at   | MmugDNA.36170.1 | 6.01  | 5.97  | 0.15 | 0.04 | 1.03  | 0.39183  | 0.570672 | 0.658845 | 0.743269 |
| MmugDNA.36172.1.S1_at   | MmugDNA.36172.1 | 5.42  | 5.5   | 0.25 | 0.15 | -1.05 | 0.936213 | 0.574414 | 0.973312 | 0.745847 |
| MmugDNA.36173.1.S1_at   | MmugDNA.36173.1 | 3.26  | 3.27  | 0.07 | 0.03 | -1    | 0.318335 | 0.843299 | 0.603003 | 0.910767 |
| MmugDNA.36174.1.S1_at   | MmugDNA.36174.1 | 10.24 | 10.9  | 0.24 | 0.12 | -1.58 | 0.011019 | 0.028439 | 0.154661 | 0.210443 |
| MmugDNA.36174.1.S1_s_at | MmugDNA.36174.1 | 9     | 9.65  | 0.33 | 0.13 | -1.57 | 0.044744 | 0.035717 | 0.268892 | 0.233368 |
| MmugDNA.36176.1.S1_s_at | MmugDNA.36176.1 | 10.86 | 11.05 | 0.47 | 0.07 | -1.14 | 0.832251 | 0.807448 | 0.926055 | 0.889121 |
| MmugDNA.36177.1.S1_at   | MmugDNA.36177.1 | 8.36  | 8.48  | 0.19 | 0.12 | -1.08 | 0.94536  | 0.973341 | 0.977063 | 0.985515 |
| MmugDNA.36178.1.S1_at   | MmugDNA.36178.1 | 5.92  | 6.44  | 1.22 | 0.07 | -1.44 | 0.851035 | 0.973762 | 0.935277 | 0.985656 |
| MmugDNA.36179.1.S1_at   | MmugDNA.36179.1 | 3.22  | 3.22  | 0.02 | 0.03 | 1     | 0.581784 | 0.986137 | 0.78684  | 0.992143 |
| MmugDNA.3618.1.S1_at    | MmugDNA.3618.1  | 12.38 | 12.63 | 0.43 | 0.09 | -1.2  | 0.369047 | 0.347893 | 0.642611 | 0.592196 |
| MmugDNA.36180.1.S1_at   | MmugDNA.36180.1 | 9.92  | 10.58 | 0.34 | 0.08 | -1.58 | 0.087245 | 0.026016 | 0.352917 | 0.202179 |
| MmugDNA.36180.1.S1_s_at | MmugDNA.36180.1 | 12.95 | 13.35 | 0.18 | 0.03 | -1.32 | 0.053533 | 0.020238 | 0.288636 | 0.178669 |
| MmugDNA.36181.1.S1_at   | MmugDNA.36181.1 | 4.2   | 4.28  | 0.13 | 0.2  | -1.06 | 0.981079 | 0.910509 | 0.992909 | 0.949465 |
| MmugDNA.36184.1.S1_at   | MmugDNA.36184.1 | 4.03  | 4.31  | 0.19 | 0.09 | -1.21 | 0.228223 | 0.770806 | 0.526419 | 0.866807 |
| MmugDNA.36187.1.S1_at   | MmugDNA.36187.1 | 4.22  | 4.09  | 0.01 | 0.01 | 1.1   | 0.000196 | 0.001626 | 0.053494 | 0.060962 |

|                         |                 |       |       |      |      |       |          |          |          |          |
|-------------------------|-----------------|-------|-------|------|------|-------|----------|----------|----------|----------|
| MmugDNA.36189.1.S1_at   | MmugDNA.36189.1 | 6.86  | 6.67  | 0.24 | 0.1  | 1.14  | 0.72985  | 0.759089 | 0.873808 | 0.859979 |
| MmugDNA.3619.1.S1_at    | MmugDNA.3619.1  | 5.66  | 5.5   | 0.2  | 0.03 | 1.12  | 0.152432 | 0.13432  | 0.442085 | 0.406599 |
| MmugDNA.36190.1.S1_at   | MmugDNA.36190.1 | 3.68  | 3.71  | 0.19 | 0.2  | -1.03 | 0.353085 | 0.353397 | 0.630347 | 0.596499 |
| MmugDNA.36191.1.S1_at   | MmugDNA.36191.1 | 4.43  | 4.94  | 0.89 | 0.03 | -1.43 | 0.997168 | 0.987274 | 0.999081 | 0.992852 |
| MmugDNA.36192.1.S1_at   | MmugDNA.36192.1 | 3.24  | 3.15  | 0.07 | 0.04 | 1.07  | 0.346861 | 0.054208 | 0.625079 | 0.278222 |
| MmugDNA.36193.1.S1_at   | MmugDNA.36193.1 | 5.76  | 5.76  | 0.27 | 0.08 | 1     | 0.803525 | 0.750456 | 0.911852 | 0.854834 |
| MmugDNA.36194.1.S1_at   | MmugDNA.36194.1 | 6.84  | 8.85  | 0.73 | 0.06 | -4.03 | 0.012653 | 0.002361 | 0.162529 | 0.071732 |
| MmugDNA.36195.1.S1_at   | MmugDNA.36195.1 | 3.39  | 3.36  | 0.03 | 0.17 | 1.02  | 0.477884 | 0.658157 | 0.719648 | 0.800181 |
| MmugDNA.36198.1.S1_at   | MmugDNA.36198.1 | 3.07  | 3.08  | 0.08 | 0.09 | -1.01 | 0.697244 | 0.554514 | 0.855904 | 0.733263 |
| MmugDNA.36199.1.S1_at   | MmugDNA.36199.1 | 6.18  | 6.18  | 0.08 | 0.08 | 1     | 0.216574 | 0.59019  | 0.514338 | 0.756117 |
| MmugDNA.362.1.S1_at     | MmugDNA.362.1   | 2.94  | 2.92  | 0.11 | 0.58 | 1.02  | 0.501485 | 0.613799 | 0.735314 | 0.770876 |
| MmugDNA.3620.1.S1_at    | MmugDNA.3620.1  | 5.68  | 5.67  | 0.07 | 0.11 | 1     | 0.758943 | 0.034416 | 0.889555 | 0.229493 |
| MmugDNA.36200.1.S1_at   | MmugDNA.36200.1 | 7.17  | 7.48  | 0.09 | 0.06 | -1.24 | 0.024183 | 0.098359 | 0.208755 | 0.356466 |
| MmugDNA.36202.1.S1_at   | MmugDNA.36202.1 | 6.14  | 6.27  | 0.72 | 0.17 | -1.09 | 0.372737 | 0.115592 | 0.645067 | 0.382674 |
| MmugDNA.36203.1.S1_at   | MmugDNA.36203.1 | 8.34  | 8.99  | 0.19 | 0.2  | -1.56 | 0.053841 | 0.231148 | 0.289169 | 0.5029   |
| MmugDNA.36204.1.S1_at   | MmugDNA.36204.1 | 4.56  | 4.45  | 0.29 | 0.15 | 1.08  | 0.233989 | 0.318492 | 0.532201 | 0.571239 |
| MmugDNA.36205.1.S1_at   | MmugDNA.36205.1 | 5.78  | 6.1   | 0.13 | 0.12 | -1.25 | 0.025603 | 0.160987 | 0.212928 | 0.437116 |
| MmugDNA.36206.1.S1_s_at | MmugDNA.36206.1 | 10.48 | 10.52 | 0.16 | 0.23 | -1.03 | 0.637197 | 0.029962 | 0.822365 | 0.214858 |
| MmugDNA.36207.1.S1_at   | MmugDNA.36207.1 | 7.76  | 7.71  | 0.11 | 0.27 | 1.04  | 0.389357 | 0.480798 | 0.657321 | 0.686    |
| MmugDNA.36208.1.S1_at   | MmugDNA.36208.1 | 10.79 | 10.57 | 0.17 | 0.07 | 1.16  | 0.133596 | 0.461438 | 0.41701  | 0.673122 |
| MmugDNA.36208.1.S1_s_at | MmugDNA.36208.1 | 10.13 | 9.92  | 0.14 | 0.03 | 1.16  | 0.027088 | 0.333622 | 0.217323 | 0.581808 |
| MmugDNA.36209.1.S1_at   | MmugDNA.36209.1 | 5.36  | 5.32  | 0.21 | 0.3  | 1.03  | 0.768777 | 0.835263 | 0.893807 | 0.905675 |
| MmugDNA.36210.1.S1_at   | MmugDNA.36210.1 | 8.74  | 6.73  | 0.21 | 0.33 | 4.02  | 0.001474 | 0.000255 | 0.080516 | 0.033475 |
| MmugDNA.36211.1.S1_at   | MmugDNA.36211.1 | 8.3   | 8.07  | 0.05 | 0.07 | 1.17  | 0.012691 | 0.021796 | 0.162687 | 0.184765 |
| MmugDNA.36214.1.S1_at   | MmugDNA.36214.1 | 5.66  | 4.84  | 0.92 | 0.22 | 1.76  | 0.271894 | 0.08604  | 0.563783 | 0.338256 |
| MmugDNA.36215.1.S1_at   | MmugDNA.36215.1 | 5.16  | 4.98  | 0.08 | 0.17 | 1.13  | 0.110621 | 0.072975 | 0.385979 | 0.315986 |
| MmugDNA.36217.1.S1_at   | MmugDNA.36217.1 | 7.89  | 7.65  | 0.12 | 0.08 | 1.18  | 0.022724 | 0.018771 | 0.203836 | 0.172216 |
| MmugDNA.36218.1.S1_at   | MmugDNA.36218.1 | 9.63  | 9.77  | 0.25 | 0.14 | -1.1  | 0.681672 | 0.141916 | 0.8482   | 0.415437 |
| MmugDNA.36220.1.S1_at   | MmugDNA.36220.1 | 3.27  | 3.31  | 0.22 | 0.44 | -1.03 | 0.761467 | 0.803979 | 0.890616 | 0.887203 |
| MmugDNA.36221.1.S1_at   | MmugDNA.36221.1 | 5.58  | 5.48  | 0.04 | 0.15 | 1.07  | 0.170853 | 0.110704 | 0.464646 | 0.374854 |
| MmugDNA.36223.1.S1_at   | MmugDNA.36223.1 | 6.16  | 5.23  | 0.38 | 0.12 | 1.91  | 0.013075 | 0.015513 | 0.165045 | 0.158053 |
| MmugDNA.36224.1.S1_at   | MmugDNA.36224.1 | 3.11  | 3.22  | 0.42 | 0.5  | -1.08 | 0.698455 | 0.805501 | 0.856592 | 0.888234 |
| MmugDNA.36225.1.S1_at   | MmugDNA.36225.1 | 2.95  | 2.92  | 0.15 | 0.03 | 1.02  | 0.674144 | 0.825174 | 0.844381 | 0.899551 |
| MmugDNA.36226.1.S1_at   | MmugDNA.36226.1 | 4.73  | 4.73  | 0.08 | 0    | 1     | 0.373901 | 0.502628 | 0.645118 | 0.700236 |
| MmugDNA.36227.1.S1_at   | MmugDNA.36227.1 | 5.68  | 5.71  | 0.29 | 0.01 | -1.02 | 0.659768 | 0.73316  | 0.835796 | 0.845555 |
| MmugDNA.36228.1.S1_at   | MmugDNA.36228.1 | 6.73  | 7.05  | 0.24 | 0.21 | -1.24 | 0.26562  | 0.611079 | 0.558222 | 0.769031 |
| MmugDNA.36229.1.S1_at   | MmugDNA.36229.1 | 6.01  | 6.58  | 0.17 | 0.25 | -1.49 | 0.032309 | 0.127078 | 0.233816 | 0.397913 |
| MmugDNA.36230.1.S1_at   | MmugDNA.36230.1 | 3.32  | 3.23  | 0.39 | 0.53 | 1.06  | 0.864127 | 0.776563 | 0.941122 | 0.870099 |
| MmugDNA.36231.1.S1_at   | MmugDNA.36231.1 | 4.87  | 4.91  | 0.1  | 0.07 | -1.03 | 0.579884 | 0.830351 | 0.785416 | 0.902644 |
| MmugDNA.36232.1.S1_at   | MmugDNA.36232.1 | 9.23  | 10.14 | 0.42 | 0.04 | -1.88 | 0.051177 | 0.144777 | 0.283595 | 0.41862  |
| MmugDNA.36235.1.S1_at   | MmugDNA.36235.1 | 3.2   | 3.16  | 0.06 | 0.03 | 1.03  | 0.116451 | 0.4029   | 0.393611 | 0.631652 |
| MmugDNA.21227.1.S1_s_at | MmugDNA.21227.1 | 9.96  | 9.95  | 0.14 | 0.1  | 1     | 0.779274 | 0.726069 | 0.899222 | 0.841415 |
| MmugDNA.36237.1.S1_at   | MmugDNA.36237.1 | 6.2   | 6.71  | 0.75 | 0.5  | -1.42 | 0.709563 | 0.844678 | 0.862601 | 0.911602 |

|                         |                 |       |       |      |      |       |          |          |          |          |
|-------------------------|-----------------|-------|-------|------|------|-------|----------|----------|----------|----------|
| MmugDNA.36238.1.S1_at   | MmugDNA.36238.1 | 3.23  | 3.23  | 0.32 | 0.18 | 1     | 0.788416 | 0.878469 | 0.903819 | 0.930638 |
| MmugDNA.36239.1.S1_at   | MmugDNA.36239.1 | 4.41  | 4.3   | 0.1  | 0.2  | 1.08  | 0.167243 | 0.201933 | 0.460436 | 0.476412 |
| MmugDNA.36240.1.S1_at   | MmugDNA.36240.1 | 2.99  | 2.78  | 0.12 | 0.05 | 1.16  | 0.042585 | 0.033948 | 0.263459 | 0.227893 |
| MmugDNA.36242.1.S1_at   | MmugDNA.36242.1 | 4.27  | 3.99  | 0.22 | 0.05 | 1.22  | 0.098705 | 0.127748 | 0.36955  | 0.398596 |
| MmugDNA.36243.1.S1_at   | MmugDNA.36243.1 | 5.71  | 4.83  | 0.64 | 0.34 | 1.84  | 0.225869 | 0.148146 | 0.523617 | 0.422673 |
| MmugDNA.36244.1.S1_at   | MmugDNA.36244.1 | 6.33  | 6.37  | 0.14 | 0.04 | -1.03 | 0.156726 | 0.092023 | 0.447274 | 0.34746  |
| MmugDNA.36245.1.S1_at   | MmugDNA.36245.1 | 4.6   | 4.39  | 0.11 | 0.16 | 1.16  | 0.074401 | 0.169014 | 0.331004 | 0.445589 |
| MmugDNA.36246.1.S1_at   | MmugDNA.36246.1 | 9.14  | 9.14  | 0.27 | 0.14 | -1    | 0.948425 | 0.000922 | 0.978408 | 0.048692 |
| MmugDNA.36247.1.S1_at   | MmugDNA.36247.1 | 6.5   | 6.6   | 0.21 | 0.13 | -1.07 | 0.862116 | 0.249507 | 0.940168 | 0.518544 |
| MmugDNA.36248.1.S1_at   | MmugDNA.36248.1 | 5.65  | 5.31  | 0.36 | 0.21 | 1.27  | 0.083382 | 0.007588 | 0.345808 | 0.11658  |
| MmugDNA.36249.1.S1_at   | MmugDNA.36249.1 | 3.81  | 3.75  | 0.17 | 0.17 | 1.04  | 0.337451 | 0.578016 | 0.617875 | 0.748226 |
| MmugDNA.3625.1.S1_at    | MmugDNA.3625.1  | 11.84 | 11.88 | 0.1  | 0.05 | -1.03 | 0.349615 | 0.629334 | 0.627381 | 0.781818 |
| MmugDNA.36252.1.S1_at   | MmugDNA.36252.1 | 6.78  | 7.19  | 0.55 | 0.19 | -1.33 | 0.423056 | 0.515634 | 0.681133 | 0.708449 |
| MmugDNA.36253.1.S1_at   | MmugDNA.36253.1 | 4.75  | 4.71  | 0.14 | 0.02 | 1.03  | 0.679912 | 0.25157  | 0.847268 | 0.520309 |
| MmugDNA.36255.1.S1_at   | MmugDNA.36255.1 | 6.4   | 6.35  | 0.38 | 0.01 | 1.03  | 0.930123 | 0.890213 | 0.97055  | 0.937473 |
| MmugDNA.36258.1.S1_at   | MmugDNA.36258.1 | 4.11  | 3.84  | 1.09 | 0.66 | 1.21  | 0.168852 | 0.276159 | 0.462083 | 0.540169 |
| MmugDNA.36259.1.S1_at   | MmugDNA.36259.1 | 5.97  | 5.8   | 0.41 | 0.83 | 1.13  | 0.63998  | 0.259989 | 0.823951 | 0.52675  |
| MmugDNA.3626.1.S1_at    | MmugDNA.3626.1  | 10.01 | 9.44  | 0.2  | 0.3  | 1.48  | 0.194171 | 0.233064 | 0.490738 | 0.50445  |
| MmugDNA.36260.1.S1_at   | MmugDNA.36260.1 | 10.24 | 11.17 | 0.11 | 0.14 | -1.91 | 0.000772 | 0.173553 | 0.072818 | 0.449947 |
| MmugDNA.36261.1.S1_at   | MmugDNA.36261.1 | 6.48  | 6.5   | 0.23 | 0.19 | -1.01 | 0.989308 | 0.976141 | 0.996277 | 0.98697  |
| MmugDNA.36262.1.S1_at   | MmugDNA.36262.1 | 4.2   | 3.72  | 0.78 | 0.13 | 1.4   | 0.264753 | 0.31813  | 0.55795  | 0.571046 |
| MmugDNA.36264.1.S1_at   | MmugDNA.36264.1 | 5.91  | 8.61  | 1.21 | 0.2  | -6.5  | 0.043722 | 0.206227 | 0.266107 | 0.480382 |
| MmugDNA.36265.1.S1_at   | MmugDNA.36265.1 | 5.44  | 5.31  | 0.16 | 0.26 | 1.09  | 0.332207 | 0.533141 | 0.613975 | 0.719436 |
| MmugDNA.36267.1.S1_at   | MmugDNA.36267.1 | 8.66  | 8.53  | 0.36 | 0.03 | 1.09  | 0.547239 | 0.458296 | 0.765823 | 0.671096 |
| MmugDNA.36268.1.S1_at   | MmugDNA.36268.1 | 5.74  | 5.57  | 0.19 | 0.13 | 1.12  | 0.114233 | 0.176492 | 0.39103  | 0.452836 |
| MmugDNA.36269.1.S1_s_at | MmugDNA.36269.1 | 13    | 12.85 | 0.04 | 0.12 | 1.11  | 0.101619 | 0.150238 | 0.37296  | 0.42486  |
| MmugDNA.3627.1.S1_s_at  | MmugDNA.3627.1  | 11.54 | 11.68 | 0.12 | 0.05 | -1.1  | 0.521307 | 0.203861 | 0.749308 | 0.478102 |
| MmugDNA.36270.1.S1_at   | MmugDNA.36270.1 | 7.07  | 6.74  | 0.1  | 0.06 | 1.25  | 0.003898 | 0.01924  | 0.108173 | 0.174494 |
| MmugDNA.36273.1.S1_at   | MmugDNA.36273.1 | 6.79  | 6.61  | 0.47 | 0.27 | 1.14  | 0.77705  | 0.041301 | 0.898158 | 0.247995 |
| MmugDNA.36274.1.S1_at   | MmugDNA.36274.1 | 13.96 | 14.29 | 0.26 | 0.05 | -1.26 | 0.090681 | 0.187303 | 0.357658 | 0.463323 |
| MmugDNA.36275.1.S1_at   | MmugDNA.36275.1 | 6.36  | 6.23  | 0.12 | 0.14 | 1.09  | 0.143827 | 0.138953 | 0.430495 | 0.412048 |
| MmugDNA.36277.1.S1_at   | MmugDNA.36277.1 | 10.48 | 10.54 | 0.48 | 0.19 | -1.04 | 0.631541 | 0.002508 | 0.819098 | 0.074142 |
| MmugDNA.3628.1.S1_at    | MmugDNA.3628.1  | 7.24  | 6.88  | 0.35 | 0.12 | 1.28  | 0.350904 | 0.395758 | 0.628649 | 0.627639 |
| MmugDNA.36287.1.S1_at   | MmugDNA.36287.1 | 4.26  | 4.04  | 0.75 | 0.17 | 1.17  | 0.281643 | 0.36459  | 0.572503 | 0.604917 |
| MmugDNA.36288.1.S1_at   | MmugDNA.36288.1 | 3.28  | 3.35  | 0.11 | 0.1  | -1.05 | 0.623987 | 0.317011 | 0.814557 | 0.570298 |
| MmugDNA.3629.1.S1_at    | MmugDNA.3629.1  | 7.52  | 6.48  | 0.2  | 0.62 | 2.04  | 0.051877 | 0.027463 | 0.285209 | 0.20705  |
| MmugDNA.36290.1.S1_at   | MmugDNA.36290.1 | 6.13  | 7.58  | 0.52 | 0.13 | -2.73 | 0.013835 | 0.014512 | 0.168627 | 0.153682 |
| MmugDNA.36291.1.S1_at   | MmugDNA.36291.1 | 5.69  | 4.77  | 0.6  | 0.34 | 1.9   | 0.077901 | 0.028798 | 0.337108 | 0.211552 |
| MmugDNA.36292.1.S1_at   | MmugDNA.36292.1 | 4.71  | 4.84  | 1.59 | 0.31 | -1.1  | 0.666065 | 0.595092 | 0.839504 | 0.758939 |
| MmugDNA.36295.1.S1_at   | MmugDNA.36295.1 | 5.43  | 5.71  | 0.14 | 0.09 | -1.21 | 0.075735 | 0.267469 | 0.33353  | 0.533212 |
| MmugDNA.36296.1.S1_at   | MmugDNA.36296.1 | 6.55  | 6.64  | 0.34 | 0.05 | -1.07 | 0.503846 | 0.741563 | 0.73721  | 0.850329 |
| MmugDNA.363.1.S1_at     | MmugDNA.363.1   | 3.99  | 4     | 0.13 | 0.07 | -1.01 | 0.441956 | 0.324359 | 0.695379 | 0.574948 |
| MmugDNA.3630.1.S1_at    | MmugDNA.3630.1  | 4.51  | 4.62  | 0.2  | 0.08 | -1.08 | 0.494818 | 0.135536 | 0.731438 | 0.407655 |

|                         |                 |       |       |      |      |       |          |          |          |          |
|-------------------------|-----------------|-------|-------|------|------|-------|----------|----------|----------|----------|
| MmugDNA.36300.1.S1_at   | MmugDNA.36300.1 | 3.77  | 3.82  | 0.12 | 0.31 | -1.03 | 0.916137 | 0.954857 | 0.964383 | 0.974414 |
| MmugDNA.36302.1.S1_at   | MmugDNA.36302.1 | 5.35  | 5.43  | 0.06 | 0.24 | -1.06 | 0.522362 | 0.726766 | 0.749806 | 0.841963 |
| MmugDNA.36304.1.S1_at   | MmugDNA.36304.1 | 10.97 | 11.13 | 0.21 | 0.09 | -1.12 | 0.098541 | 0.518809 | 0.36925  | 0.710724 |
| MmugDNA.36305.1.S1_at   | MmugDNA.36305.1 | 4.91  | 4.91  | 0.04 | 0    | 1     | 0.373901 | 0.091862 | 0.645118 | 0.34715  |
| MmugDNA.36306.1.S1_at   | MmugDNA.36306.1 | 10.07 | 10.2  | 0.26 | 0.1  | -1.1  | 0.543645 | 0.846593 | 0.763544 | 0.912699 |
| MmugDNA.36307.1.S1_at   | MmugDNA.36307.1 | 6.66  | 6.26  | 0.31 | 0.13 | 1.32  | 0.250693 | 0.018604 | 0.545228 | 0.171539 |
| MmugDNA.36309.1.S1_at   | MmugDNA.36309.1 | 6.49  | 6.68  | 0.47 | 0.13 | -1.13 | 0.781283 | 0.874932 | 0.900076 | 0.929042 |
| MmugDNA.36310.1.S1_at   | MmugDNA.36310.1 | 3.23  | 3.25  | 0.18 | 0.13 | -1.01 | 0.758989 | 0.822763 | 0.889555 | 0.898071 |
| MmugDNA.36311.1.S1_at   | MmugDNA.36311.1 | 5.6   | 5.46  | 0.23 | 0.08 | 1.1   | 0.217078 | 0.276286 | 0.51492  | 0.540277 |
| MmugDNA.36312.1.S1_s_at | MmugDNA.36312.1 | 8.59  | 8.49  | 0.2  | 0.07 | 1.08  | 0.618904 | 0.680283 | 0.810884 | 0.813346 |
| MmugDNA.36313.1.S1_at   | MmugDNA.36313.1 | 5.95  | 6.02  | 0.1  | 0.08 | -1.05 | 0.688239 | 0.023557 | 0.851102 | 0.192238 |
| MmugDNA.36314.1.S1_at   | MmugDNA.36314.1 | 7.34  | 6.3   | 0.32 | 0.54 | 2.06  | 0.045192 | 0.152393 | 0.270005 | 0.427184 |
| MmugDNA.36315.1.S1_at   | MmugDNA.36315.1 | 7.43  | 7.43  | 0.19 | 0.05 | -1    | 0.399928 | 0.095398 | 0.665139 | 0.352428 |
| MmugDNA.36316.1.S1_at   | MmugDNA.36316.1 | 11.9  | 12.4  | 0.13 | 0.12 | -1.41 | 0.011328 | 0.052786 | 0.156654 | 0.27539  |
| MmugDNA.36317.1.S1_at   | MmugDNA.36317.1 | 3.78  | 4.01  | 0.05 | 0.05 | -1.17 | 0.006653 | 0.036552 | 0.127957 | 0.235649 |
| MmugDNA.3632.1.S1_at    | MmugDNA.3632.1  | 4.19  | 4.23  | 0.08 | 0.05 | -1.03 | 0.14199  | 0.264573 | 0.427953 | 0.530541 |
| MmugDNA.36320.1.S1_at   | MmugDNA.36320.1 | 3.84  | 4.07  | 0.24 | 0.17 | -1.18 | 0.457632 | 0.529821 | 0.706449 | 0.717498 |
| MmugDNA.36321.1.S1_at   | MmugDNA.36321.1 | 11.21 | 11.13 | 0.23 | 0.08 | 1.06  | 0.694701 | 0.204822 | 0.854337 | 0.479209 |
| MmugDNA.36322.1.S1_at   | MmugDNA.36322.1 | 4.43  | 4.4   | 0.02 | 0.01 | 1.02  | 0.390892 | 0.307234 | 0.658414 | 0.563506 |
| MmugDNA.36323.1.S1_at   | MmugDNA.36323.1 | 6.89  | 6.54  | 1.12 | 0.12 | 1.28  | 0.390277 | 0.502551 | 0.657953 | 0.700192 |
| MmugDNA.36324.1.S1_at   | MmugDNA.36324.1 | 10.09 | 10.16 | 0.11 | 0.06 | -1.05 | 0.375499 | 0.420204 | 0.646352 | 0.644036 |
| MmugDNA.36325.1.S1_at   | MmugDNA.36325.1 | 4.42  | 4.08  | 0.16 | 0.11 | 1.27  | 0.057894 | 0.064498 | 0.29778  | 0.300147 |
| MmugDNA.36326.1.S1_at   | MmugDNA.36326.1 | 5.34  | 5.31  | 0.2  | 0.07 | 1.02  | 0.835737 | 0.719314 | 0.927795 | 0.837566 |
| MmugDNA.36327.1.S1_at   | MmugDNA.36327.1 | 10.78 | 10.71 | 0.09 | 0.12 | 1.05  | 0.486427 | 0.030935 | 0.725653 | 0.217705 |
| MmugDNA.36328.1.S1_at   | MmugDNA.36328.1 | 11.07 | 11.07 | 0.06 | 0.03 | -1    | 0.714466 | 0.75242  | 0.86508  | 0.855873 |
| MmugDNA.36329.1.S1_at   | MmugDNA.36329.1 | 8.97  | 8.85  | 0.11 | 0.21 | 1.09  | 0.290559 | 0.08982  | 0.579965 | 0.34404  |
| MmugDNA.36330.1.S1_at   | MmugDNA.36330.1 | 3.82  | 3.88  | 0.04 | 0.02 | -1.04 | 0.093167 | 0.178118 | 0.361736 | 0.454504 |
| MmugDNA.36331.1.S1_at   | MmugDNA.36331.1 | 10.2  | 10.41 | 0.21 | 0.05 | -1.16 | 0.187388 | 0.034112 | 0.483539 | 0.228618 |
| MmugDNA.36331.1.S1_s_at | MmugDNA.36331.1 | 8.88  | 8.87  | 0.12 | 0    | 1.01  | 0.32524  | 0.102242 | 0.608663 | 0.36236  |
| MmugDNA.36332.1.S1_at   | MmugDNA.36332.1 | 4.69  | 4.57  | 0.45 | 0.22 | 1.08  | 0.557228 | 0.692227 | 0.772057 | 0.820929 |
| MmugDNA.36333.1.S1_at   | MmugDNA.36333.1 | 6.4   | 6.48  | 0.25 | 0.02 | -1.06 | 0.717364 | 0.942121 | 0.866489 | 0.967154 |
| MmugDNA.36334.1.S1_at   | MmugDNA.36334.1 | 4.85  | 4.5   | 0.54 | 0.24 | 1.27  | 0.301392 | 0.489622 | 0.589325 | 0.691862 |
| MmugDNA.36335.1.S1_at   | MmugDNA.36335.1 | 3.22  | 3.05  | 0.17 | 0.09 | 1.13  | 0.229171 | 0.188148 | 0.527892 | 0.464251 |
| MmugDNA.36336.1.S1_at   | MmugDNA.36336.1 | 3.68  | 3.96  | 0.18 | 0.11 | -1.21 | 0.181709 | 0.229945 | 0.477223 | 0.501802 |
| MmugDNA.36337.1.S1_at   | MmugDNA.36337.1 | 5.53  | 5.51  | 0.15 | 0.15 | 1.01  | 0.277986 | 0.489749 | 0.569395 | 0.69191  |
| MmugDNA.36338.1.S1_at   | MmugDNA.36338.1 | 5.21  | 5     | 0.24 | 0.11 | 1.16  | 0.160173 | 0.169455 | 0.45153  | 0.446075 |
| MmugDNA.36339.1.S1_at   | MmugDNA.36339.1 | 4.36  | 4.3   | 0.98 | 0.07 | 1.04  | 0.493995 | 0.597282 | 0.7309   | 0.76013  |
| MmugDNA.36340.1.S1_at   | MmugDNA.36340.1 | 7.07  | 6.98  | 0.61 | 0.09 | 1.06  | 0.661207 | 0.598283 | 0.836453 | 0.760715 |
| MmugDNA.36341.1.S1_at   | MmugDNA.36341.1 | 4.58  | 4.54  | 0.13 | 0.24 | 1.03  | 0.469551 | 0.736459 | 0.71427  | 0.84751  |
| MmugDNA.36344.1.S1_at   | MmugDNA.36344.1 | 8.34  | 6.91  | 0.58 | 0.48 | 2.7   | 0.06608  | 0.151399 | 0.314442 | 0.426104 |
| MmugDNA.36346.1.S1_at   | MmugDNA.36346.1 | 5.33  | 5.6   | 1.04 | 0.26 | -1.21 | 0.675044 | 0.573188 | 0.844902 | 0.744964 |
| MmugDNA.36347.1.S1_at   | MmugDNA.36347.1 | 4.58  | 4.84  | 0.2  | 0.22 | -1.2  | 0.097204 | 0.406479 | 0.367275 | 0.634352 |
| MmugDNA.36348.1.S1_at   | MmugDNA.36348.1 | 4.88  | 5.41  | 0.18 | 0.14 | -1.44 | 0.015066 | 0.036794 | 0.174736 | 0.236372 |

|                         |                 |       |       |      |      |       |          |          |          |          |
|-------------------------|-----------------|-------|-------|------|------|-------|----------|----------|----------|----------|
| MmugDNA.36349.1.S1_at   | MmugDNA.36349.1 | 6.68  | 6.81  | 0.03 | 0.11 | -1.1  | 0.101377 | 0.11096  | 0.372796 | 0.375392 |
| MmugDNA.36350.1.S1_at   | MmugDNA.36350.1 | 3.96  | 3.9   | 0.15 | 0.06 | 1.05  | 0.371971 | 0.435307 | 0.644644 | 0.655142 |
| MmugDNA.36351.1.S1_at   | MmugDNA.36351.1 | 3.22  | 3.23  | 0.33 | 0.11 | -1    | 0.282811 | 0.398572 | 0.573377 | 0.629458 |
| MmugDNA.36352.1.S1_at   | MmugDNA.36352.1 | 9.92  | 9.83  | 0.19 | 0.13 | 1.07  | 0.554536 | 0.00093  | 0.770723 | 0.048945 |
| MmugDNA.36353.1.S1_at   | MmugDNA.36353.1 | 6.61  | 6.62  | 0.92 | 0.12 | -1    | 0.892693 | 0.99274  | 0.954303 | 0.995715 |
| MmugDNA.36357.1.S1_at   | MmugDNA.36357.1 | 3.55  | 3.47  | 0.11 | 0.08 | 1.06  | 0.136055 | 0.118448 | 0.420353 | 0.386431 |
| MmugDNA.36358.1.S1_at   | MmugDNA.36358.1 | 4.42  | 4.21  | 0.16 | 0.09 | 1.16  | 0.048486 | 0.053415 | 0.277584 | 0.276707 |
| MmugDNA.36359.1.S1_at   | MmugDNA.36359.1 | 6.97  | 7.36  | 0.36 | 0.11 | -1.31 | 0.047713 | 0.151057 | 0.275878 | 0.425718 |
| MmugDNA.36360.1.S1_at   | MmugDNA.36360.1 | 3.76  | 4.01  | 0.15 | 0.23 | -1.19 | 0.58737  | 0.140793 | 0.790452 | 0.414168 |
| MmugDNA.36361.1.S1_at   | MmugDNA.36361.1 | 4.86  | 4.55  | 0.23 | 0.15 | 1.24  | 0.566935 | 0.700096 | 0.777544 | 0.825946 |
| MmugDNA.36362.1.S1_at   | MmugDNA.36362.1 | 3.69  | 3.68  | 0.02 | 0.08 | 1.01  | 0.902893 | 0.418299 | 0.958791 | 0.642707 |
| MmugDNA.36363.1.S1_at   | MmugDNA.36363.1 | 11.56 | 11.92 | 0.1  | 0.03 | -1.29 | 0.003374 | 0.001199 | 0.102989 | 0.054315 |
| MmugDNA.36365.1.S1_at   | MmugDNA.36365.1 | 4.71  | 3.88  | 0.58 | 0.57 | 1.78  | 0.368058 | 0.088736 | 0.641778 | 0.34241  |
| MmugDNA.36366.1.S1_at   | MmugDNA.36366.1 | 9.47  | 9.17  | 0.11 | 0.03 | 1.23  | 0.005346 | 0.002019 | 0.118207 | 0.06682  |
| MmugDNA.36367.1.S1_at   | MmugDNA.36367.1 | 10.41 | 9.78  | 0.06 | 0.06 | 1.55  | 0.000245 | 0.00604  | 0.054642 | 0.106089 |
| MmugDNA.3637.1.S1_at    | MmugDNA.3637.1  | 6.19  | 6.13  | 0.28 | 0.43 | 1.05  | 0.654089 | 0.841279 | 0.832513 | 0.909576 |
| MmugDNA.36370.1.S1_a_at | MmugDNA.36370.1 | 4.31  | 4.33  | 1.33 | 0.25 | -1.01 | 0.350058 | 0.438212 | 0.627869 | 0.657196 |
| MmugDNA.36373.1.S1_at   | MmugDNA.36373.1 | 3.47  | 3.46  | 0.25 | 0.09 | 1.01  | 0.882615 | 0.599174 | 0.950093 | 0.761359 |
| MmugDNA.36374.1.S1_at   | MmugDNA.36374.1 | 5.08  | 5.21  | 0.14 | 0.25 | -1.09 | 0.313065 | 0.441526 | 0.598916 | 0.659675 |
| MmugDNA.36376.1.S1_at   | MmugDNA.36376.1 | 3.56  | 3.83  | 0.01 | 0.29 | -1.21 | 0.062057 | 0.246524 | 0.305631 | 0.515917 |
| MmugDNA.36377.1.S1_at   | MmugDNA.36377.1 | 9.43  | 9.34  | 0.18 | 0.18 | 1.06  | 0.958259 | 0.481438 | 0.982932 | 0.686442 |
| MmugDNA.36379.1.S1_at   | MmugDNA.36379.1 | 7.91  | 8.6   | 0.42 | 0.12 | -1.61 | 0.022166 | 0.005628 | 0.201977 | 0.103694 |
| MmugDNA.3638.1.S1_at    | MmugDNA.3638.1  | 8.02  | 7.38  | 0.1  | 0.16 | 1.56  | 0.004726 | 0.029996 | 0.115008 | 0.214956 |
| MmugDNA.36380.1.S1_at   | MmugDNA.36380.1 | 3.38  | 3.15  | 0.13 | 0.1  | 1.17  | 0.093202 | 0.080358 | 0.361736 | 0.327965 |
| MmugDNA.36381.1.S1_at   | MmugDNA.36381.1 | 5.31  | 5.2   | 0.09 | 0.05 | 1.08  | 0.23536  | 0.146471 | 0.533272 | 0.420523 |
| MmugDNA.36384.1.S1_at   | MmugDNA.36384.1 | 3.34  | 3.47  | 0.07 | 0.08 | -1.09 | 0.088687 | 0.089544 | 0.355022 | 0.343811 |
| MmugDNA.36385.1.S1_at   | MmugDNA.36385.1 | 2.98  | 2.92  | 0.03 | 0.07 | 1.04  | 0.41472  | 0.043328 | 0.675681 | 0.252847 |
| MmugDNA.36386.1.S1_at   | MmugDNA.36386.1 | 8.51  | 8.62  | 0.17 | 0.11 | -1.08 | 0.624892 | 0.114567 | 0.815077 | 0.38111  |
| MmugDNA.36387.1.S1_at   | MmugDNA.36387.1 | 6.93  | 6.64  | 0.28 | 0.1  | 1.22  | 0.44186  | 0.341132 | 0.69534  | 0.587233 |
| MmugDNA.36388.1.S1_at   | MmugDNA.36388.1 | 7.4   | 7.32  | 0.14 | 0.09 | 1.06  | 0.3405   | 0.064585 | 0.620818 | 0.300314 |
| MmugDNA.3639.1.S1_at    | MmugDNA.3639.1  | 2.97  | 2.97  | 0.08 | 0.17 | 1     | 0.500214 | 0.583525 | 0.734575 | 0.751822 |
| MmugDNA.36390.1.S1_at   | MmugDNA.36390.1 | 2.76  | 2.79  | 0.03 | 0.13 | -1.03 | 0.584154 | 0.546711 | 0.788484 | 0.728136 |
| MmugDNA.36393.1.S1_at   | MmugDNA.36393.1 | 3.54  | 3.7   | 0.01 | 0.09 | -1.12 | 0.105879 | 0.090487 | 0.379885 | 0.345002 |
| MmugDNA.36396.1.S1_at   | MmugDNA.36396.1 | 4.36  | 4.02  | 0.09 | 0.06 | 1.27  | 0.003378 | 0.000551 | 0.102989 | 0.040948 |
| MmugDNA.36397.1.S1_at   | MmugDNA.36397.1 | 8.25  | 8.29  | 0.14 | 0.06 | -1.03 | 0.245964 | 0.007573 | 0.541732 | 0.116509 |
| MmugDNA.36398.1.S1_at   | MmugDNA.36398.1 | 5.58  | 5.63  | 0.07 | 0.04 | -1.03 | 0.24752  | 0.601844 | 0.542974 | 0.763113 |
| MmugDNA.36399.1.S1_at   | MmugDNA.36399.1 | 8.17  | 8.4   | 0.33 | 0.16 | -1.17 | 0.806007 | 0.232672 | 0.91309  | 0.504359 |
| MmugDNA.3640.1.S1_at    | MmugDNA.3640.1  | 7.45  | 7.3   | 0.11 | 0.15 | 1.11  | 0.121354 | 0.55087  | 0.40008  | 0.730625 |
| MmugDNA.36400.1.S1_at   | MmugDNA.36400.1 | 6.56  | 6.56  | 0.12 | 0.1  | -1.01 | 0.934743 | 0.164201 | 0.972682 | 0.440466 |
| MmugDNA.36401.1.S1_at   | MmugDNA.36401.1 | 3.58  | 3.67  | 0.02 | 0.08 | -1.06 | 0.175804 | 0.095222 | 0.470151 | 0.35218  |
| MmugDNA.36402.1.S1_at   | MmugDNA.36402.1 | 6.73  | 7.05  | 0.2  | 0.55 | -1.24 | 0.990639 | 0.053684 | 0.996621 | 0.277304 |
| MmugDNA.36403.1.S1_at   | MmugDNA.36403.1 | 6.26  | 6.43  | 0.3  | 0.19 | -1.12 | 0.932408 | 0.079571 | 0.971649 | 0.326922 |
| MmugDNA.36407.1.S1_at   | MmugDNA.36407.1 | 4.2   | 4.24  | 0.11 | 0.28 | -1.02 | 0.493419 | 0.544591 | 0.730391 | 0.72696  |

|                         |                 |       |       |      |      |       |          |          |          |          |
|-------------------------|-----------------|-------|-------|------|------|-------|----------|----------|----------|----------|
| MmugDNA.3641.1.S1_at    | MmugDNA.3641.1  | 4.46  | 4.3   | 0.37 | 0.07 | 1.12  | 0.358184 | 0.569525 | 0.633969 | 0.742452 |
| MmugDNA.36410.1.S1_at   | MmugDNA.36410.1 | 7.47  | 7.03  | 0.13 | 0.05 | 1.36  | 0.003148 | 0.141374 | 0.101284 | 0.414874 |
| MmugDNA.36412.1.S1_at   | MmugDNA.36412.1 | 2.89  | 2.89  | 0.1  | 0.04 | -1    | 0.411151 | 0.799257 | 0.673134 | 0.884448 |
| MmugDNA.36414.1.S1_at   | MmugDNA.36414.1 | 3.47  | 3.45  | 0.19 | 0.05 | 1.01  | 0.424128 | 0.264676 | 0.681872 | 0.530686 |
| MmugDNA.36415.1.S1_at   | MmugDNA.36415.1 | 7.49  | 7.57  | 0.28 | 0.01 | -1.06 | 0.816403 | 0.933571 | 0.917994 | 0.962229 |
| MmugDNA.36416.1.S1_at   | MmugDNA.36416.1 | 12.78 | 12.02 | 0.09 | 0.23 | 1.7   | 0.008236 | 0.325443 | 0.139904 | 0.575807 |
| MmugDNA.36417.1.S1_at   | MmugDNA.36417.1 | 4.09  | 3.94  | 0.17 | 0.34 | 1.11  | 0.510796 | 0.45144  | 0.742113 | 0.666221 |
| MmugDNA.36419.1.S1_at   | MmugDNA.36419.1 | 3.72  | 5.27  | 0.83 | 0.16 | -2.92 | 0.09343  | 0.182246 | 0.361985 | 0.458762 |
| MmugDNA.3642.1.S1_at    | MmugDNA.3642.1  | 4.17  | 4.42  | 0.17 | 0.07 | -1.19 | 0.066817 | 0.096599 | 0.316219 | 0.354126 |
| MmugDNA.36420.1.S1_at   | MmugDNA.36420.1 | 3.98  | 3.89  | 0.26 | 0.06 | 1.06  | 0.329829 | 0.466142 | 0.611933 | 0.676144 |
| MmugDNA.36422.1.S1_at   | MmugDNA.36422.1 | 7.37  | 7.43  | 0.09 | 0.07 | -1.05 | 0.682339 | 0.000225 | 0.84853  | 0.032385 |
| MmugDNA.36423.1.S1_at   | MmugDNA.36423.1 | 11.46 | 11.8  | 0.25 | 0.08 | -1.27 | 0.042429 | 0.004566 | 0.26312  | 0.094375 |
| MmugDNA.36424.1.S1_at   | MmugDNA.36424.1 | 6.74  | 6.58  | 0.1  | 0.05 | 1.12  | 0.040749 | 0.152321 | 0.258451 | 0.427072 |
| MmugDNA.36426.1.S1_at   | MmugDNA.36426.1 | 7.07  | 7.17  | 0.11 | 0.02 | -1.08 | 0.429485 | 0.477081 | 0.685902 | 0.683196 |
| MmugDNA.36427.1.S1_at   | MmugDNA.36427.1 | 5.45  | 6.19  | 0.47 | 0.22 | -1.67 | 0.090573 | 0.108281 | 0.357339 | 0.371557 |
| MmugDNA.36428.1.S1_at   | MmugDNA.36428.1 | 5.14  | 4.78  | 0.29 | 0.28 | 1.28  | 0.199575 | 0.297113 | 0.496963 | 0.555996 |
| MmugDNA.36429.1.S1_at   | MmugDNA.36429.1 | 6.67  | 6.68  | 1.08 | 0.35 | -1.01 | 0.771757 | 0.884087 | 0.895421 | 0.933904 |
| MmugDNA.3643.1.S1_at    | MmugDNA.3643.1  | 6.27  | 5.9   | 0.97 | 0.19 | 1.3   | 0.539946 | 0.427972 | 0.761159 | 0.649602 |
| MmugDNA.36431.1.S1_s_at | MmugDNA.36431.1 | 10.2  | 10.01 | 0.15 | 0.11 | 1.14  | 0.058398 | 0.139401 | 0.298756 | 0.412691 |
| MmugDNA.36432.1.S1_at   | MmugDNA.36432.1 | 7.72  | 7.52  | 0.14 | 0.01 | 1.15  | 0.108878 | 0.225479 | 0.383806 | 0.498129 |
| MmugDNA.36436.1.S1_at   | MmugDNA.36436.1 | 3.66  | 3.61  | 0.34 | 0.12 | 1.04  | 0.417582 | 0.659145 | 0.677702 | 0.800572 |
| MmugDNA.36437.1.S1_at   | MmugDNA.36437.1 | 3.92  | 3.88  | 0.13 | 0.15 | 1.03  | 0.747863 | 0.863735 | 0.883182 | 0.922638 |
| MmugDNA.36438.1.S1_at   | MmugDNA.36438.1 | 4.28  | 4.17  | 0.06 | 0.11 | 1.08  | 0.234211 | 0.249909 | 0.532289 | 0.518889 |
| MmugDNA.36439.1.S1_at   | MmugDNA.36439.1 | 6.95  | 6.89  | 0.72 | 0.16 | 1.04  | 0.505847 | 0.168487 | 0.738724 | 0.445108 |
| MmugDNA.36440.1.S1_at   | MmugDNA.36440.1 | 4.18  | 3.91  | 0.23 | 0.03 | 1.21  | 0.115636 | 0.109916 | 0.392723 | 0.37398  |
| MmugDNA.36441.1.S1_at   | MmugDNA.36441.1 | 4.09  | 4.12  | 0.12 | 0.07 | -1.02 | 0.495404 | 0.420286 | 0.731814 | 0.644084 |
| MmugDNA.5017.1.S1_at    | MmugDNA.5017.1  | 6.32  | 6.14  | 0.89 | 0.54 | 1.13  | 0.573376 | 0.736799 | 0.781098 | 0.847693 |
| MmugDNA.5017.1.S1_s_at  | MmugDNA.5017.1  | 4.92  | 4.61  | 1.22 | 0.44 | 1.24  | 0.855213 | 0.975293 | 0.93691  | 0.986527 |
| MmugDNA.36446.1.S1_s_at | MmugDNA.36446.1 | 10.34 | 10.07 | 0.23 | 0.04 | 1.21  | 0.095529 | 0.049716 | 0.365    | 0.267995 |
| MmugDNA.36447.1.S1_at   | MmugDNA.36447.1 | 6.81  | 6.81  | 0.02 | 0.06 | 1     | 0.222184 | 0.487438 | 0.520231 | 0.690508 |
| MmugDNA.36449.1.S1_at   | MmugDNA.36449.1 | 5.61  | 5.53  | 0.38 | 0.17 | 1.06  | 0.267963 | 0.027092 | 0.560719 | 0.205797 |
| MmugDNA.36450.1.S1_at   | MmugDNA.36450.1 | 9.31  | 9.03  | 0.3  | 0.22 | 1.21  | 0.28529  | 0.052761 | 0.575167 | 0.275315 |
| MmugDNA.36452.1.S1_at   | MmugDNA.36452.1 | 11.55 | 10.91 | 0.2  | 0.05 | 1.56  | 0.011362 | 0.150424 | 0.156784 | 0.424955 |
| MmugDNA.36453.1.S1_at   | MmugDNA.36453.1 | 5.9   | 5.45  | 0.23 | 0.26 | 1.36  | 0.074421 | 0.191449 | 0.331004 | 0.466812 |
| MmugDNA.36455.1.S1_at   | MmugDNA.36455.1 | 7.25  | 6.68  | 0.48 | 0.07 | 1.49  | 0.12516  | 0.241812 | 0.405579 | 0.51238  |
| MmugDNA.36457.1.S1_at   | MmugDNA.36457.1 | 7.34  | 5.55  | 1    | 0.79 | 3.45  | 0.345307 | 0.61619  | 0.624363 | 0.772513 |
| MmugDNA.3646.1.S1_at    | MmugDNA.3646.1  | 4.19  | 4.33  | 0.36 | 0.07 | -1.11 | 0.855141 | 0.666615 | 0.93691  | 0.804709 |
| MmugDNA.36460.1.S1_at   | MmugDNA.36460.1 | 5.88  | 5.9   | 0.02 | 0.07 | -1.01 | 0.820889 | 0.143594 | 0.920074 | 0.41751  |
| MmugDNA.36461.1.S1_at   | MmugDNA.36461.1 | 3.32  | 3.33  | 0.1  | 0.06 | -1.01 | 0.735841 | 0.365187 | 0.877059 | 0.605348 |
| MmugDNA.36462.1.S1_at   | MmugDNA.36462.1 | 5.11  | 5.17  | 0.11 | 0.05 | -1.05 | 0.382872 | 0.658889 | 0.652248 | 0.800473 |
| MmugDNA.36464.1.S1_at   | MmugDNA.36464.1 | 4.25  | 3.97  | 0.23 | 0.03 | 1.21  | 0.222215 | 0.45644  | 0.520231 | 0.670188 |
| MmugDNA.36465.1.S1_at   | MmugDNA.36465.1 | 8.81  | 7.92  | 0.38 | 0.27 | 1.84  | 0.034176 | 0.010508 | 0.239537 | 0.133936 |
| MmugDNA.36465.1.S1_s_at | MmugDNA.36465.1 | 10.03 | 9.17  | 0.24 | 0.37 | 1.82  | 0.034293 | 0.011418 | 0.239767 | 0.138384 |

|                         |                 |       |       |      |      |       |          |          |          |          |
|-------------------------|-----------------|-------|-------|------|------|-------|----------|----------|----------|----------|
| MmugDNA.36466.1.S1_at   | MmugDNA.36466.1 | 4.53  | 4.42  | 0.23 | 0.11 | 1.08  | 0.907713 | 0.697523 | 0.960977 | 0.824234 |
| MmugDNA.36467.1.S1_s_at | MmugDNA.36467.1 | 10.93 | 10.25 | 0.37 | 0.56 | 1.61  | 0.139014 | 0.500977 | 0.424645 | 0.699362 |
| MmugDNA.3647.1.S1_at    | MmugDNA.3647.1  | 5.25  | 4.96  | 0.29 | 0.16 | 1.22  | 0.175097 | 0.28331  | 0.469373 | 0.545836 |
| MmugDNA.36472.1.S1_at   | MmugDNA.36472.1 | 6.56  | 6.71  | 0.08 | 0.24 | -1.11 | 0.266271 | 0.001249 | 0.558747 | 0.054879 |
| MmugDNA.36473.1.S1_at   | MmugDNA.36473.1 | 5.29  | 5.4   | 1.19 | 0.41 | -1.07 | 0.894161 | 0.894643 | 0.954822 | 0.939853 |
| MmugDNA.36476.1.S1_at   | MmugDNA.36476.1 | 7.86  | 8.17  | 0.09 | 0.11 | -1.24 | 0.010602 | 0.012558 | 0.152762 | 0.144501 |
| MmugDNA.36478.1.S1_at   | MmugDNA.36478.1 | 9.56  | 9.36  | 0.12 | 0.17 | 1.15  | 0.433353 | 0.126772 | 0.68886  | 0.397446 |
| MmugDNA.36478.1.S1_s_at | MmugDNA.36478.1 | 7.69  | 7.71  | 0.09 | 0.17 | -1.01 | 0.936106 | 0.126413 | 0.973295 | 0.396936 |
| MmugDNA.36479.1.S1_at   | MmugDNA.36479.1 | 7.27  | 6.68  | 0.86 | 0.51 | 1.51  | 0.240543 | 0.094319 | 0.53802  | 0.350889 |
| MmugDNA.3648.1.S1_at    | MmugDNA.3648.1  | 4.54  | 4.43  | 0.2  | 0.08 | 1.08  | 0.280532 | 0.349736 | 0.571609 | 0.593566 |
| MmugDNA.36480.1.S1_at   | MmugDNA.36480.1 | 4.19  | 3.9   | 0.41 | 0.18 | 1.23  | 0.555337 | 0.763105 | 0.771201 | 0.862257 |
| MmugDNA.36484.1.S1_at   | MmugDNA.36484.1 | 4.8   | 4.99  | 0.22 | 0.04 | -1.14 | 0.251609 | 0.260081 | 0.546344 | 0.52675  |
| MmugDNA.36485.1.S1_at   | MmugDNA.36485.1 | 3.08  | 3.14  | 0.06 | 0.09 | -1.04 | 0.427881 | 0.223676 | 0.684996 | 0.496603 |
| MmugDNA.36486.1.S1_at   | MmugDNA.36486.1 | 2.75  | 2.76  | 0.13 | 0.04 | -1    | 0.305856 | 0.378079 | 0.592861 | 0.615387 |
| MmugDNA.36487.1.S1_at   | MmugDNA.36487.1 | 7.81  | 7.78  | 0.42 | 0.18 | 1.02  | 0.274716 | 0.663469 | 0.566556 | 0.803016 |
| MmugDNA.36488.1.S1_at   | MmugDNA.36488.1 | 5.64  | 6.21  | 0.73 | 0.48 | -1.49 | 0.697933 | 0.909309 | 0.856252 | 0.948719 |
| MmugDNA.3649.1.S1_at    | MmugDNA.3649.1  | 3.68  | 3.39  | 0.56 | 0.11 | 1.22  | 0.240333 | 0.297502 | 0.537839 | 0.556122 |
| MmugDNA.36490.1.S1_at   | MmugDNA.36490.1 | 3.09  | 3.17  | 0.1  | 0.02 | -1.05 | 0.763602 | 0.400182 | 0.891841 | 0.630158 |
| MmugDNA.36491.1.S1_s_at | MmugDNA.36491.1 | 9.85  | 10.73 | 0.79 | 0.44 | -1.85 | 0.136889 | 0.29408  | 0.421672 | 0.553929 |
| MmugDNA.36493.1.S1_at   | MmugDNA.36493.1 | 6.24  | 5.94  | 0.21 | 0.1  | 1.23  | 0.054466 | 0.154089 | 0.290603 | 0.428867 |
| MmugDNA.36494.1.S1_at   | MmugDNA.36494.1 | 5.48  | 5.25  | 0.26 | 0.09 | 1.17  | 0.295454 | 0.564001 | 0.584245 | 0.738932 |
| MmugDNA.36498.1.S1_at   | MmugDNA.36498.1 | 4.54  | 4.57  | 0.34 | 0.3  | -1.02 | 0.941305 | 0.980462 | 0.975402 | 0.989333 |
| MmugDNA.36499.1.S1_at   | MmugDNA.36499.1 | 4.26  | 4.84  | 0.09 | 0.31 | -1.49 | 0.097995 | 0.05758  | 0.36856  | 0.286115 |
| MmugDNA.365.1.S1_at     | MmugDNA.365.1   | 5.55  | 5.57  | 0.55 | 0.05 | -1.02 | 0.412493 | 0.591398 | 0.67412  | 0.756977 |
| MmugDNA.3650.1.S1_at    | MmugDNA.3650.1  | 7.53  | 6.91  | 0.1  | 0.3  | 1.54  | 0.075161 | 0.266807 | 0.332294 | 0.53241  |
| MmugDNA.36500.1.S1_at   | MmugDNA.36500.1 | 12.53 | 12.54 | 0.11 | 0.14 | -1.01 | 0.692014 | 0.437516 | 0.852857 | 0.656769 |
| MmugDNA.36504.1.S1_at   | MmugDNA.36504.1 | 6.38  | 6.46  | 0.1  | 0.11 | -1.06 | 0.164894 | 0.269477 | 0.457897 | 0.534777 |
| MmugDNA.36506.1.S1_at   | MmugDNA.36506.1 | 9.59  | 9.34  | 0.23 | 0.11 | 1.19  | 0.10673  | 0.226327 | 0.380925 | 0.498781 |
| MmugDNA.36508.1.S1_at   | MmugDNA.36508.1 | 12.04 | 12.06 | 0.1  | 0    | -1.02 | 0.983276 | 0.041726 | 0.99383  | 0.248911 |
| MmugDNA.36509.1.S1_at   | MmugDNA.36509.1 | 4.83  | 4.88  | 0.71 | 0.22 | -1.03 | 0.653612 | 0.50971  | 0.832286 | 0.704318 |
| MmugDNA.3651.1.S1_s_at  | MmugDNA.3651.1  | 7.03  | 6.9   | 0.11 | 0.3  | 1.09  | 0.190252 | 0.366894 | 0.486654 | 0.606566 |
| MmugDNA.36510.1.S1_at   | MmugDNA.36510.1 | 5.38  | 6.27  | 0.89 | 0.41 | -1.86 | 0.25666  | 0.117556 | 0.551177 | 0.38531  |
| MmugDNA.36512.1.S1_at   | MmugDNA.36512.1 | 4.89  | 7.8   | 0.56 | 0.35 | -7.47 | 0.002511 | 0.150639 | 0.094326 | 0.425195 |
| MmugDNA.36513.1.S1_at   | MmugDNA.36513.1 | 6.61  | 6.43  | 0.07 | 0.07 | 1.13  | 0.06764  | 0.287267 | 0.317875 | 0.548526 |
| MmugDNA.36514.1.S1_at   | MmugDNA.36514.1 | 9.2   | 9.12  | 0.53 | 0.04 | 1.06  | 0.77226  | 0.274604 | 0.895748 | 0.539059 |
| MmugDNA.36515.1.S1_s_at | MmugDNA.36515.1 | 4.69  | 4.56  | 0.53 | 0.31 | 1.1   | 0.703148 | 0.80304  | 0.859149 | 0.886557 |
| MmugDNA.36519.1.S1_at   | MmugDNA.36519.1 | 6.15  | 7.11  | 0.71 | 0.09 | -1.95 | 0.249364 | 0.520129 | 0.544534 | 0.711472 |
| MmugDNA.36520.1.S1_at   | MmugDNA.36520.1 | 10.27 | 9.97  | 0.02 | 0.08 | 1.22  | 0.003766 | 0.721398 | 0.106813 | 0.838685 |
| MmugDNA.36522.1.S1_at   | MmugDNA.36522.1 | 5.05  | 4.98  | 0.07 | 0.14 | 1.05  | 0.638414 | 0.299119 | 0.823011 | 0.557663 |
| MmugDNA.36524.1.S1_at   | MmugDNA.36524.1 | 7.31  | 7.42  | 0.07 | 0.15 | -1.08 | 0.463975 | 0.574611 | 0.710381 | 0.74601  |
| MmugDNA.36526.1.S1_at   | MmugDNA.36526.1 | 6.36  | 6.69  | 0.76 | 0.11 | -1.26 | 0.925672 | 0.979726 | 0.968524 | 0.989119 |
| MmugDNA.36527.1.S1_at   | MmugDNA.36527.1 | 2.8   | 2.79  | 0.03 | 0.07 | 1     | 0.484204 | 0.699032 | 0.724135 | 0.825113 |
| MmugDNA.36528.1.S1_at   | MmugDNA.36528.1 | 4.8   | 4.86  | 0.22 | 0.12 | -1.04 | 0.484885 | 0.556167 | 0.724507 | 0.73442  |



|                         |                 |       |       |      |      |       |          |          |          |          |
|-------------------------|-----------------|-------|-------|------|------|-------|----------|----------|----------|----------|
| MmugDNA.3653.1.S1_at    | MmugDNA.3653.1  | 4.2   | 4     | 0.32 | 0.13 | 1.15  | 0.349539 | 0.458982 | 0.627316 | 0.671504 |
| MmugDNA.36530.1.S1_at   | MmugDNA.36530.1 | 6.18  | 6.43  | 0.5  | 0.2  | -1.19 | 0.293905 | 0.391967 | 0.582903 | 0.625473 |
| MmugDNA.36531.1.S1_at   | MmugDNA.36531.1 | 6.81  | 6.79  | 0.44 | 0.19 | 1.01  | 0.664344 | 0.051945 | 0.838381 | 0.273349 |
| MmugDNA.36532.1.S1_at   | MmugDNA.36532.1 | 6.04  | 5.55  | 0.39 | 0.2  | 1.4   | 0.12043  | 0.169423 | 0.398818 | 0.446067 |
| MmugDNA.36533.1.S1_at   | MmugDNA.36533.1 | 5.18  | 6.11  | 0.59 | 0.18 | -1.9  | 0.035073 | 0.249492 | 0.241969 | 0.518532 |
| MmugDNA.36534.1.S1_at   | MmugDNA.36534.1 | 5.55  | 5.43  | 0.12 | 0.06 | 1.09  | 0.107186 | 0.086277 | 0.381659 | 0.338734 |
| MmugDNA.36535.1.S1_at   | MmugDNA.36535.1 | 11.88 | 11.69 | 0.4  | 0.11 | 1.14  | 0.864225 | 0.921943 | 0.941209 | 0.955975 |
| MmugDNA.36536.1.S1_at   | MmugDNA.36536.1 | 2.83  | 2.84  | 0    | 0.06 | -1.01 | 0.527884 | 0.252007 | 0.753377 | 0.520646 |
| MmugDNA.36537.1.S1_at   | MmugDNA.36537.1 | 3.35  | 3.39  | 0.3  | 0.04 | -1.03 | 0.581339 | 0.233063 | 0.786474 | 0.50445  |
| MmugDNA.36538.1.S1_at   | MmugDNA.36538.1 | 7.47  | 7.14  | 0.04 | 0.07 | 1.25  | 0.002333 | 0.050665 | 0.092789 | 0.270317 |
| MmugDNA.36539.1.S1_at   | MmugDNA.36539.1 | 8.7   | 8.32  | 0.6  | 0.08 | 1.3   | 0.925014 | 0.60606  | 0.968143 | 0.765632 |
| MmugDNA.36540.1.S1_at   | MmugDNA.36540.1 | 3.43  | 3.44  | 0.08 | 0.18 | -1    | 0.879115 | 0.461289 | 0.948529 | 0.672971 |
| MmugDNA.36541.1.S1_at   | MmugDNA.36541.1 | 4.56  | 4.72  | 1.09 | 0.41 | -1.11 | 0.521241 | 0.624834 | 0.749292 | 0.778924 |
| MmugDNA.36542.1.S1_at   | MmugDNA.36542.1 | 9.07  | 8.95  | 0.28 | 0.09 | 1.09  | 0.667587 | 0.409523 | 0.840426 | 0.636543 |
| MmugDNA.36543.1.S1_at   | MmugDNA.36543.1 | 8.13  | 8.83  | 0.46 | 0.34 | -1.62 | 0.244118 | 0.48444  | 0.540834 | 0.688478 |
| MmugDNA.36543.1.S1_s_at | MmugDNA.36543.1 | 6.74  | 7.52  | 0.44 | 0.34 | -1.72 | 0.16874  | 0.317218 | 0.462056 | 0.570458 |
| MmugDNA.36549.1.S1_at   | MmugDNA.36549.1 | 5.75  | 5.85  | 0.41 | 0.25 | -1.07 | 0.69438  | 0.584347 | 0.85409  | 0.752414 |
| MmugDNA.3655.1.S1_at    | MmugDNA.3655.1  | 6.75  | 6.46  | 0.47 | 0.59 | 1.23  | 0.828248 | 0.633184 | 0.923994 | 0.783991 |
| MmugDNA.36551.1.S1_at   | MmugDNA.36551.1 | 6     | 6.58  | 0.58 | 0.19 | -1.5  | 0.320569 | 0.122253 | 0.605112 | 0.39196  |
| MmugDNA.36552.1.S1_at   | MmugDNA.36552.1 | 3.49  | 3.45  | 0.15 | 0.05 | 1.02  | 0.513058 | 0.545337 | 0.743445 | 0.727505 |
| MmugDNA.36553.1.S1_at   | MmugDNA.36553.1 | 4.12  | 4.1   | 0.13 | 0.1  | 1.01  | 0.577116 | 0.220193 | 0.783459 | 0.493655 |
| MmugDNA.36557.1.S1_at   | MmugDNA.36557.1 | 7.33  | 6.82  | 0.27 | 0.08 | 1.42  | 0.067255 | 0.216198 | 0.316995 | 0.489765 |
| MmugDNA.36558.1.S1_at   | MmugDNA.36558.1 | 5.55  | 5.26  | 0.11 | 0.13 | 1.22  | 0.044272 | 0.033119 | 0.267433 | 0.225287 |
| MmugDNA.3656.1.S1_at    | MmugDNA.3656.1  | 4.86  | 4.97  | 0.58 | 0.16 | -1.07 | 0.737003 | 0.888928 | 0.877851 | 0.936725 |
| MmugDNA.36560.1.S1_at   | MmugDNA.36560.1 | 4.8   | 4.73  | 0.05 | 0.15 | 1.05  | 0.438027 | 0.699383 | 0.692763 | 0.825344 |
| MmugDNA.36561.1.S1_at   | MmugDNA.36561.1 | 3.25  | 3.17  | 0.05 | 0.15 | 1.06  | 0.283412 | 0.569387 | 0.573857 | 0.742382 |
| MmugDNA.36562.1.S1_at   | MmugDNA.36562.1 | 5.1   | 4.62  | 0.44 | 0.23 | 1.39  | 0.254858 | 0.370625 | 0.549392 | 0.609664 |
| MmugDNA.36564.1.S1_at   | MmugDNA.36564.1 | 5.31  | 5.44  | 0.15 | 0.1  | -1.1  | 0.420171 | 0.533131 | 0.679329 | 0.719436 |
| MmugDNA.36565.1.S1_at   | MmugDNA.36565.1 | 4.05  | 4.16  | 0.73 | 0.35 | -1.08 | 0.519211 | 0.741288 | 0.747956 | 0.850236 |
| MmugDNA.36568.1.S1_at   | MmugDNA.36568.1 | 7.16  | 6.73  | 0.08 | 0.05 | 1.35  | 0.001331 | 0.014635 | 0.079164 | 0.154176 |
| MmugDNA.36569.1.S1_at   | MmugDNA.36569.1 | 5.04  | 5.25  | 0.41 | 0.14 | -1.16 | 0.394923 | 0.602104 | 0.661458 | 0.763172 |
| MmugDNA.3657.1.S1_at    | MmugDNA.3657.1  | 6.07  | 5.98  | 1.66 | 0.09 | 1.06  | 0.362151 | 0.317764 | 0.637194 | 0.570922 |
| MmugDNA.36571.1.S1_at   | MmugDNA.36571.1 | 6.62  | 6.58  | 0.06 | 0.05 | 1.03  | 0.429564 | 0.098147 | 0.685945 | 0.356253 |
| MmugDNA.36572.1.S1_at   | MmugDNA.36572.1 | 3.51  | 3.52  | 0.08 | 0.11 | -1    | 0.245077 | 0.526538 | 0.541271 | 0.715583 |
| MmugDNA.36575.1.S1_at   | MmugDNA.36575.1 | 4.35  | 4.16  | 0.38 | 0.11 | 1.14  | 0.530256 | 0.301709 | 0.754826 | 0.559643 |
| MmugDNA.36577.1.S1_at   | MmugDNA.36577.1 | 8.55  | 8.28  | 0.52 | 0.08 | 1.21  | 0.478205 | 0.071882 | 0.719847 | 0.314181 |
| MmugDNA.36577.1.S1_s_at | MmugDNA.36577.1 | 8.19  | 8.29  | 0.4  | 0.01 | -1.07 | 0.584918 | 0.025288 | 0.788879 | 0.199502 |
| MmugDNA.36579.1.S1_at   | MmugDNA.36579.1 | 3.45  | 4.12  | 0.03 | 0.07 | -1.59 | 0.000143 | 0.000149 | 0.051196 | 0.029832 |
| MmugDNA.3658.1.S1_at    | MmugDNA.3658.1  | 10.66 | 10.67 | 0.19 | 0.01 | -1.01 | 0.906336 | 0.113726 | 0.960316 | 0.379889 |
| MmugDNA.36581.1.S1_at   | MmugDNA.36581.1 | 3.55  | 3.65  | 0.36 | 0.43 | -1.07 | 0.770341 | 0.196061 | 0.894589 | 0.471082 |
| MmugDNA.36582.1.S1_at   | MmugDNA.36582.1 | 4.91  | 5.09  | 0.43 | 0.21 | -1.14 | 0.336979 | 0.453087 | 0.617568 | 0.667533 |
| MmugDNA.36583.1.S1_at   | MmugDNA.36583.1 | 12.19 | 12.25 | 0.42 | 0.03 | -1.04 | 0.30595  | 0.385264 | 0.592927 | 0.620718 |
| MmugDNA.36584.1.S1_at   | MmugDNA.36584.1 | 5.38  | 5.26  | 0.17 | 0.1  | 1.08  | 0.518475 | 0.059406 | 0.747557 | 0.290548 |

|                         |                 |       |       |      |      |       |          |          |          |          |
|-------------------------|-----------------|-------|-------|------|------|-------|----------|----------|----------|----------|
| MmugDNA.36585.1.S1_at   | MmugDNA.36585.1 | 5.1   | 5.21  | 0.07 | 0.07 | -1.08 | 0.085466 | 0.233473 | 0.34989  | 0.504828 |
| MmugDNA.36586.1.S1_at   | MmugDNA.36586.1 | 3.42  | 3.35  | 0.19 | 0.16 | 1.05  | 0.753648 | 0.79044  | 0.886413 | 0.878867 |
| MmugDNA.36587.1.S1_at   | MmugDNA.36587.1 | 3.03  | 3.1   | 0.06 | 0.05 | -1.05 | 0.20723  | 0.568776 | 0.504965 | 0.74211  |
| MmugDNA.36589.1.S1_at   | MmugDNA.36589.1 | 5.52  | 5.33  | 0.13 | 0.29 | 1.14  | 0.49893  | 0.123761 | 0.73397  | 0.393908 |
| MmugDNA.36590.1.S1_at   | MmugDNA.36590.1 | 6.7   | 6.6   | 0.16 | 0.01 | 1.07  | 0.421019 | 0.242389 | 0.679818 | 0.51282  |
| MmugDNA.36591.1.S1_at   | MmugDNA.36591.1 | 5.84  | 6.65  | 0.9  | 0.23 | -1.76 | 0.262655 | 0.452908 | 0.556683 | 0.667359 |
| MmugDNA.36592.1.S1_at   | MmugDNA.36592.1 | 5.26  | 5.35  | 0.3  | 0.15 | -1.07 | 0.606769 | 0.619712 | 0.803313 | 0.774893 |
| MmugDNA.36594.1.S1_at   | MmugDNA.36594.1 | 6.61  | 6.59  | 0.24 | 0.05 | 1.01  | 0.719021 | 0.670661 | 0.867436 | 0.807454 |
| MmugDNA.36595.1.S1_at   | MmugDNA.36595.1 | 5.17  | 5.26  | 0.29 | 0.31 | -1.07 | 0.779132 | 0.971318 | 0.89919  | 0.984419 |
| MmugDNA.36596.1.S1_at   | MmugDNA.36596.1 | 5.69  | 5.56  | 0.11 | 0.18 | 1.1   | 0.18041  | 0.182494 | 0.475556 | 0.459065 |
| MmugDNA.36598.1.S1_at   | MmugDNA.36598.1 | 6.92  | 6.2   | 0.7  | 0.04 | 1.65  | 0.140898 | 0.117465 | 0.426729 | 0.385175 |
| MmugDNA.7570.1.S1_s_at  | MmugDNA.7570.1  | 11.97 | 11.92 | 0.09 | 0.04 | 1.04  | 0.163351 | 0.073826 | 0.455676 | 0.317146 |
| MmugDNA.36600.1.S1_at   | MmugDNA.36600.1 | 3.46  | 3.21  | 0.22 | 0.06 | 1.19  | 0.508014 | 0.380403 | 0.740166 | 0.617061 |
| MmugDNA.36602.1.S1_at   | MmugDNA.36602.1 | 8.08  | 8.14  | 0.28 | 0.09 | -1.04 | 0.795104 | 0.943482 | 0.907466 | 0.967907 |
| MmugDNA.36603.1.S1_at   | MmugDNA.36603.1 | 5.46  | 5.14  | 0.15 | 0.2  | 1.25  | 0.038785 | 0.008539 | 0.253262 | 0.122564 |
| MmugDNA.36604.1.S1_at   | MmugDNA.36604.1 | 6.55  | 6.13  | 0.2  | 0.36 | 1.35  | 0.242804 | 0.035269 | 0.539559 | 0.232016 |
| MmugDNA.36605.1.S1_at   | MmugDNA.36605.1 | 7.45  | 7.41  | 0.11 | 0.12 | 1.03  | 0.465034 | 0.134637 | 0.711158 | 0.406629 |
| MmugDNA.36606.1.S1_at   | MmugDNA.36606.1 | 4.29  | 4.16  | 0.1  | 0.26 | 1.09  | 0.779149 | 0.883491 | 0.89919  | 0.933594 |
| MmugDNA.36607.1.S1_at   | MmugDNA.36607.1 | 7.08  | 5.82  | 0.31 | 0.12 | 2.38  | 0.002907 | 0.157146 | 0.099208 | 0.432616 |
| MmugDNA.36611.1.S1_at   | MmugDNA.36611.1 | 7.09  | 6.55  | 0.23 | 0.06 | 1.46  | 0.049377 | 0.046652 | 0.279595 | 0.260512 |
| MmugDNA.36614.1.S1_s_at | MmugDNA.36614.1 | 7.9   | 7.98  | 0.05 | 0.05 | -1.06 | 0.123909 | 0.353371 | 0.403734 | 0.596477 |
| MmugDNA.36615.1.S1_at   | MmugDNA.36615.1 | 5.39  | 5.01  | 0.81 | 0.29 | 1.31  | 0.293441 | 0.277678 | 0.582399 | 0.541636 |
| MmugDNA.36616.1.S1_at   | MmugDNA.36616.1 | 10.15 | 9.21  | 0.65 | 0.31 | 1.91  | 0.128529 | 0.449189 | 0.410529 | 0.664892 |
| MmugDNA.36619.1.S1_at   | MmugDNA.36619.1 | 3.44  | 3.41  | 0.06 | 0.18 | 1.02  | 0.889794 | 0.21224  | 0.953112 | 0.486137 |
| MmugDNA.3662.1.S1_at    | MmugDNA.3662.1  | 11.91 | 11.87 | 0.04 | 0.15 | 1.03  | 0.564946 | 0.004883 | 0.776448 | 0.097564 |
| MmugDNA.36622.1.S1_s_at | MmugDNA.36622.1 | 4.78  | 4.76  | 0.04 | 0.12 | 1.01  | 0.994156 | 0.343396 | 0.997585 | 0.589163 |
| MmugDNA.36624.1.S1_at   | MmugDNA.36624.1 | 5.91  | 5.64  | 0.24 | 0.13 | 1.21  | 0.250238 | 0.325067 | 0.544972 | 0.575545 |
| MmugDNA.36625.1.S1_at   | MmugDNA.36625.1 | 4.17  | 4.16  | 0.16 | 0.02 | 1.01  | 0.869267 | 0.525756 | 0.943687 | 0.715217 |
| MmugDNA.36627.1.S1_at   | MmugDNA.36627.1 | 5.65  | 5.64  | 0.02 | 0.07 | 1.01  | 0.897598 | 0.146656 | 0.95653  | 0.420683 |
| MmugDNA.36628.1.S1_at   | MmugDNA.36628.1 | 6.99  | 6.32  | 0.12 | 0.41 | 1.59  | 0.047998 | 0.277197 | 0.276467 | 0.541157 |
| MmugDNA.3663.1.S1_at    | MmugDNA.3663.1  | 7.07  | 7.42  | 0.91 | 0.22 | -1.28 | 0.641537 | 0.31048  | 0.824898 | 0.565691 |
| MmugDNA.36635.1.S1_at   | MmugDNA.36635.1 | 3.9   | 3.76  | 0.27 | 0.12 | 1.1   | 0.611777 | 0.565214 | 0.806523 | 0.739754 |
| MmugDNA.36637.1.S1_at   | MmugDNA.36637.1 | 5.87  | 5.7   | 1.1  | 0.25 | 1.13  | 0.300677 | 0.402735 | 0.588854 | 0.631543 |
| MmugDNA.36638.1.S1_at   | MmugDNA.36638.1 | 4.86  | 4.83  | 0.37 | 0.12 | 1.01  | 0.732385 | 0.352453 | 0.874977 | 0.595723 |
| MmugDNA.36641.1.S1_at   | MmugDNA.36641.1 | 4.13  | 3.77  | 0.84 | 0.19 | 1.29  | 0.379799 | 0.390385 | 0.649566 | 0.624156 |
| MmugDNA.36646.1.S1_at   | MmugDNA.36646.1 | 7.27  | 7.03  | 0.22 | 0.07 | 1.18  | 0.474403 | 0.382002 | 0.717451 | 0.618258 |
| MmugDNA.3665.1.S1_at    | MmugDNA.3665.1  | 3.84  | 3.84  | 0.01 | 0.02 | 1     | 0.250096 | 0.736291 | 0.544879 | 0.847409 |
| MmugDNA.36651.1.S1_at   | MmugDNA.36651.1 | 4.25  | 4.19  | 0.18 | 0.13 | 1.04  | 0.753331 | 0.441139 | 0.886099 | 0.659375 |
| MmugDNA.36652.1.S1_at   | MmugDNA.36652.1 | 7.01  | 6.86  | 0.14 | 0.17 | 1.11  | 0.33032  | 0.185535 | 0.612371 | 0.461566 |
| MmugDNA.36653.1.S1_at   | MmugDNA.36653.1 | 6.21  | 6.33  | 0.23 | 0.07 | -1.09 | 0.361543 | 0.265915 | 0.636982 | 0.531796 |
| MmugDNA.36654.1.S1_at   | MmugDNA.36654.1 | 9.02  | 9.01  | 0.2  | 0.1  | 1     | 0.409169 | 0.170945 | 0.671657 | 0.447561 |
| MmugDNA.36656.1.S1_at   | MmugDNA.36656.1 | 9.61  | 9.92  | 0.02 | 0.03 | -1.24 | 0.000114 | 0.008799 | 0.051196 | 0.124117 |
| MmugDNA.36658.1.S1_at   | MmugDNA.36658.1 | 5.06  | 6.08  | 0.7  | 2.33 | -2.02 | 0.424075 | 0.276377 | 0.681872 | 0.540334 |

|                         |                 |       |       |      |      |       |          |          |          |          |
|-------------------------|-----------------|-------|-------|------|------|-------|----------|----------|----------|----------|
| MmugDNA.36659.1.S1_at   | MmugDNA.36659.1 | 5.18  | 5.03  | 0.25 | 0    | 1.11  | 0.924691 | 0.993803 | 0.967957 | 0.996274 |
| MmugDNA.36661.1.S1_at   | MmugDNA.36661.1 | 5.29  | 5.71  | 0.29 | 0.31 | -1.34 | 0.449999 | 0.592241 | 0.701214 | 0.757642 |
| MmugDNA.36663.1.S1_at   | MmugDNA.36663.1 | 9.81  | 9.81  | 0.06 | 0.04 | 1     | 0.878416 | 0.009519 | 0.94811  | 0.1285   |
| MmugDNA.36665.1.S1_at   | MmugDNA.36665.1 | 3.73  | 3.65  | 0.05 | 0.19 | 1.05  | 0.823516 | 0.946442 | 0.921555 | 0.969629 |
| MmugDNA.36666.1.S1_at   | MmugDNA.36666.1 | 6.78  | 5.92  | 0.17 | 0.08 | 1.81  | 0.000967 | 0.000701 | 0.076222 | 0.04424  |
| MmugDNA.24328.1.S1_s_at | MmugDNA.24328.1 | 9.54  | 9.78  | 0.19 | 0.16 | -1.18 | 0.123529 | 0.248964 | 0.40296  | 0.518026 |
| MmugDNA.36669.1.S1_at   | MmugDNA.36669.1 | 3.71  | 3.67  | 0.03 | 0.05 | 1.03  | 0.055871 | 0.020036 | 0.293434 | 0.177812 |
| MmugDNA.3667.1.S1_at    | MmugDNA.3667.1  | 3.76  | 3.72  | 0.18 | 0.06 | 1.03  | 0.595027 | 0.328679 | 0.795076 | 0.578213 |
| MmugDNA.36670.1.S1_at   | MmugDNA.36670.1 | 5.84  | 7.67  | 0.14 | 0.54 | -3.54 | 0.011016 | 0.104323 | 0.154661 | 0.365523 |
| MmugDNA.36671.1.S1_at   | MmugDNA.36671.1 | 3.91  | 3.42  | 0.35 | 0.12 | 1.4   | 0.118256 | 0.140237 | 0.395722 | 0.413405 |
| MmugDNA.36674.1.S1_at   | MmugDNA.36674.1 | 11.66 | 11.42 | 0.06 | 0.02 | 1.18  | 0.002477 | 4.43E-07 | 0.094225 | 0.005999 |
| MmugDNA.36675.1.S1_at   | MmugDNA.36675.1 | 12.46 | 12.47 | 0.14 | 0.03 | -1.01 | 0.945755 | 0.992729 | 0.977159 | 0.995715 |
| MmugDNA.36677.1.S1_at   | MmugDNA.36677.1 | 9.11  | 9.01  | 0.45 | 0.21 | 1.08  | 0.969525 | 0.175317 | 0.987896 | 0.45207  |
| MmugDNA.36679.1.S1_at   | MmugDNA.36679.1 | 5.96  | 6.28  | 0.11 | 0.09 | -1.25 | 0.022888 | 0.455934 | 0.204235 | 0.669712 |
| MmugDNA.3668.1.S1_at    | MmugDNA.3668.1  | 6.78  | 6.27  | 0.29 | 0.1  | 1.42  | 0.069869 | 0.211301 | 0.322787 | 0.485418 |
| MmugDNA.36681.1.S1_at   | MmugDNA.36681.1 | 7.8   | 6.7   | 0.16 | 1.17 | 2.15  | 0.171172 | 0.436961 | 0.465064 | 0.656361 |
| MmugDNA.36682.1.S1_at   | MmugDNA.36682.1 | 4.2   | 4.22  | 0.1  | 0.09 | -1.01 | 0.873128 | 0.138056 | 0.945586 | 0.410919 |
| MmugDNA.36683.1.S1_at   | MmugDNA.36683.1 | 3.35  | 3.37  | 0.11 | 0.06 | -1.02 | 0.768619 | 0.096914 | 0.893721 | 0.354311 |
| MmugDNA.36683.1.S1_x_at | MmugDNA.36683.1 | 3.87  | 3.83  | 0.2  | 0.13 | 1.03  | 0.629986 | 0.73944  | 0.818285 | 0.848995 |
| MmugDNA.36684.1.S1_at   | MmugDNA.36684.1 | 3.91  | 3.86  | 0.12 | 0.08 | 1.04  | 0.40289  | 0.534046 | 0.667108 | 0.720066 |
| MmugDNA.36685.1.S1_at   | MmugDNA.36685.1 | 10.49 | 10.88 | 0.18 | 0.07 | -1.31 | 0.057411 | 0.760444 | 0.296977 | 0.860814 |
| MmugDNA.36686.1.S1_at   | MmugDNA.36686.1 | 3.72  | 3.8   | 0.13 | 0.05 | -1.06 | 0.385199 | 0.855394 | 0.65405  | 0.917566 |
| MmugDNA.36687.1.S1_at   | MmugDNA.36687.1 | 10.42 | 10.47 | 0.21 | 0.04 | -1.04 | 0.295158 | 0.071806 | 0.584058 | 0.314082 |
| MmugDNA.36688.1.S1_at   | MmugDNA.36688.1 | 5.07  | 4.88  | 0.4  | 0.39 | 1.14  | 0.343458 | 0.659845 | 0.622974 | 0.800897 |
| MmugDNA.36688.1.S1_s_at | MmugDNA.36688.1 | 6.39  | 5.86  | 0.3  | 0.09 | 1.44  | 0.078925 | 0.079664 | 0.338745 | 0.326981 |
| MmugDNA.36689.1.S1_at   | MmugDNA.36689.1 | 5.77  | 6.02  | 0.93 | 0.24 | -1.19 | 0.654935 | 0.56824  | 0.832997 | 0.741866 |
| MmugDNA.3669.1.S1_at    | MmugDNA.3669.1  | 5.86  | 5.35  | 0.72 | 0.72 | 1.43  | 0.442528 | 0.595474 | 0.695967 | 0.759091 |
| MmugDNA.36690.1.S1_at   | MmugDNA.36690.1 | 7.61  | 7.48  | 0.08 | 0.03 | 1.09  | 0.052273 | 0.080523 | 0.285979 | 0.328189 |
| MmugDNA.36691.1.S1_at   | MmugDNA.36691.1 | 10.74 | 10.61 | 0.07 | 0.12 | 1.1   | 0.504196 | 0.340104 | 0.737428 | 0.586572 |
| MmugDNA.36692.1.S1_at   | MmugDNA.36692.1 | 5.79  | 5.78  | 0.24 | 0.12 | 1.01  | 0.913304 | 0.943354 | 0.963363 | 0.967832 |
| MmugDNA.36694.1.S1_at   | MmugDNA.36694.1 | 4.61  | 4.53  | 0.14 | 0.12 | 1.06  | 0.789545 | 0.568723 | 0.904456 | 0.742084 |
| MmugDNA.36695.1.S1_at   | MmugDNA.36695.1 | 8.54  | 8.82  | 1.04 | 0.08 | -1.21 | 0.201296 | 0.094941 | 0.498822 | 0.352054 |
| MmugDNA.36695.1.S1_s_at | MmugDNA.36695.1 | 9.54  | 9.84  | 0.15 | 0.1  | -1.23 | 0.050755 | 0.003661 | 0.283078 | 0.086526 |
| MmugDNA.36696.1.S1_at   | MmugDNA.36696.1 | 6.16  | 6.06  | 0.29 | 0.14 | 1.07  | 0.366576 | 0.073159 | 0.6408   | 0.316064 |
| MmugDNA.36697.1.S1_at   | MmugDNA.36697.1 | 5.41  | 5.18  | 0.29 | 0.06 | 1.17  | 0.166849 | 0.202073 | 0.460015 | 0.476539 |
| MmugDNA.36698.1.S1_at   | MmugDNA.36698.1 | 5.97  | 5.98  | 0.22 | 0.08 | -1.01 | 0.983933 | 0.450874 | 0.99403  | 0.665869 |
| MmugDNA.367.1.S1_at     | MmugDNA.367.1   | 3.39  | 3.33  | 0.07 | 0.16 | 1.04  | 0.35846  | 0.356385 | 0.634231 | 0.59839  |
| MmugDNA.3670.1.S1_at    | MmugDNA.3670.1  | 4.87  | 4.81  | 0.35 | 0.11 | 1.04  | 0.96669  | 0.519083 | 0.986533 | 0.710813 |
| MmugDNA.36700.1.S1_at   | MmugDNA.36700.1 | 6.41  | 6.4   | 0.11 | 0.02 | 1.01  | 0.48718  | 0.040311 | 0.726032 | 0.245936 |
| MmugDNA.36702.1.S1_at   | MmugDNA.36702.1 | 5.65  | 5.66  | 0.24 | 0.22 | -1.01 | 0.976394 | 0.564075 | 0.990635 | 0.738956 |
| MmugDNA.36703.1.S1_at   | MmugDNA.36703.1 | 3.97  | 4.2   | 0.24 | 0.01 | -1.18 | 0.541118 | 0.384598 | 0.761929 | 0.62023  |
| MmugDNA.36706.1.S1_at   | MmugDNA.36706.1 | 4.9   | 6.4   | 0.51 | 0.11 | -2.83 | 0.016298 | 0.121793 | 0.180457 | 0.391074 |
| MmugDNA.36708.1.S1_at   | MmugDNA.36708.1 | 4.56  | 4.72  | 0.08 | 0.16 | -1.12 | 0.312083 | 0.205805 | 0.598196 | 0.480072 |

|                         |                 |       |       |      |      |       |          |          |          |          |
|-------------------------|-----------------|-------|-------|------|------|-------|----------|----------|----------|----------|
| MmugDNA.36709.1.S1_at   | MmugDNA.36709.1 | 10.61 | 10.71 | 0.07 | 0.25 | -1.07 | 0.931723 | 0.398254 | 0.971318 | 0.629296 |
| MmugDNA.3671.1.S1_at    | MmugDNA.3671.1  | 11.37 | 11.28 | 0.06 | 0    | 1.06  | 0.027009 | 0.000176 | 0.217188 | 0.030511 |
| MmugDNA.36710.1.S1_at   | MmugDNA.36710.1 | 3.83  | 3.84  | 0.17 | 0.01 | -1.01 | 0.826053 | 0.772842 | 0.922773 | 0.867917 |
| MmugDNA.36712.1.S1_at   | MmugDNA.36712.1 | 5.62  | 5.72  | 0.07 | 0.07 | -1.07 | 0.235584 | 0.000899 | 0.533367 | 0.047964 |
| MmugDNA.36713.1.S1_at   | MmugDNA.36713.1 | 2.89  | 2.9   | 0.07 | 0.02 | -1.01 | 0.611148 | 0.556679 | 0.806132 | 0.734714 |
| MmugDNA.36715.1.S1_at   | MmugDNA.36715.1 | 5.06  | 5.11  | 0.17 | 0.31 | -1.03 | 0.362585 | 0.250142 | 0.63739  | 0.519168 |
| MmugDNA.36716.1.S1_at   | MmugDNA.36716.1 | 5.68  | 5.89  | 1    | 0.34 | -1.15 | 0.810567 | 0.940944 | 0.915142 | 0.966553 |
| MmugDNA.36717.1.S1_at   | MmugDNA.36717.1 | 6.1   | 6.03  | 0.19 | 0.05 | 1.05  | 0.401327 | 0.21531  | 0.665994 | 0.489058 |
| MmugDNA.3672.1.S1_x_at  | MmugDNA.3672.1  | 7.56  | 7.18  | 0.16 | 0.24 | 1.31  | 0.020474 | 0.020926 | 0.196586 | 0.181439 |
| MmugDNA.36722.1.S1_at   | MmugDNA.36722.1 | 6.39  | 5.88  | 0.61 | 0.23 | 1.43  | 0.168643 | 0.194467 | 0.461921 | 0.469557 |
| MmugDNA.36723.1.S1_at   | MmugDNA.36723.1 | 3.48  | 3.67  | 0.08 | 0.06 | -1.14 | 0.022791 | 0.262083 | 0.204142 | 0.528374 |
| MmugDNA.36724.1.S1_at   | MmugDNA.36724.1 | 5.75  | 5.7   | 0.08 | 0.02 | 1.04  | 0.304734 | 0.00177  | 0.591803 | 0.063359 |
| MmugDNA.36728.1.S1_at   | MmugDNA.36728.1 | 5.68  | 5.7   | 0.04 | 0.07 | -1.02 | 0.546873 | 0.521314 | 0.765598 | 0.712346 |
| MmugDNA.36729.1.S1_s_at | MmugDNA.36729.1 | 7.86  | 7.54  | 0.22 | 0.3  | 1.24  | 0.713834 | 0.145891 | 0.864758 | 0.419889 |
| MmugDNA.36734.1.S1_at   | MmugDNA.36734.1 | 5.15  | 4.67  | 1.23 | 0.64 | 1.39  | 0.627389 | 0.817689 | 0.816819 | 0.894805 |
| MmugDNA.36735.1.S1_at   | MmugDNA.36735.1 | 8.72  | 8.5   | 0.19 | 0.14 | 1.16  | 0.11641  | 0.144286 | 0.393578 | 0.418196 |
| MmugDNA.36738.1.S1_at   | MmugDNA.36738.1 | 9.66  | 9.7   | 0.13 | 0.02 | -1.03 | 0.232097 | 0.110259 | 0.530631 | 0.374403 |
| MmugDNA.36739.1.S1_at   | MmugDNA.36739.1 | 6.71  | 8.72  | 0.75 | 0.3  | -4.02 | 0.014367 | 0.250913 | 0.171567 | 0.519606 |
| MmugDNA.3674.1.S1_s_at  | MmugDNA.3674.1  | 12.91 | 12.99 | 0.03 | 0.08 | -1.05 | 0.547708 | 0.236884 | 0.766197 | 0.507595 |
| MmugDNA.36741.1.S1_at   | MmugDNA.36741.1 | 6.57  | 6.55  | 0.74 | 0.09 | 1.02  | 0.313423 | 0.44686  | 0.599245 | 0.663053 |
| MmugDNA.36742.1.S1_at   | MmugDNA.36742.1 | 8.38  | 4.82  | 0.43 | 0.58 | 11.81 | 0.001287 | 0.000466 | 0.078631 | 0.038572 |
| MmugDNA.36745.1.S1_at   | MmugDNA.36745.1 | 9.18  | 9.88  | 0.37 | 0.14 | -1.62 | 0.035437 | 0.210713 | 0.243018 | 0.48478  |
| MmugDNA.36746.1.S1_at   | MmugDNA.36746.1 | 7.59  | 8.83  | 0.33 | 0.21 | -2.36 | 0.004684 | 0.040711 | 0.115008 | 0.246709 |
| MmugDNA.3675.1.S1_at    | MmugDNA.3675.1  | 3.28  | 3.33  | 0.07 | 0.07 | -1.04 | 0.421951 | 0.439279 | 0.680233 | 0.658029 |
| MmugDNA.36750.1.S1_at   | MmugDNA.36750.1 | 5.86  | 6.35  | 0.29 | 0.2  | -1.4  | 0.071078 | 0.302496 | 0.324551 | 0.56018  |
| MmugDNA.36751.1.S1_at   | MmugDNA.36751.1 | 6.2   | 6.47  | 0.87 | 0.32 | -1.2  | 0.666829 | 0.861831 | 0.840039 | 0.92146  |
| MmugDNA.36755.1.S1_at   | MmugDNA.36755.1 | 9.35  | 8.99  | 0.4  | 0.13 | 1.28  | 0.608709 | 0.029867 | 0.804644 | 0.214498 |
| MmugDNA.36757.1.S1_at   | MmugDNA.36757.1 | 4.24  | 4.27  | 0.15 | 0.17 | -1.02 | 0.302284 | 0.288372 | 0.590132 | 0.549656 |
| MmugDNA.36758.1.S1_s_at | MmugDNA.36758.1 | 2.96  | 2.95  | 0.16 | 0.04 | 1.01  | 0.326497 | 0.502079 | 0.609577 | 0.700051 |
| MmugDNA.36759.1.S1_at   | MmugDNA.36759.1 | 5.81  | 5.74  | 0.45 | 0.32 | 1.05  | 0.939191 | 0.993779 | 0.974332 | 0.996274 |
| MmugDNA.3676.1.S1_at    | MmugDNA.3676.1  | 4.08  | 3.96  | 0.49 | 0.32 | 1.08  | 0.616809 | 0.462403 | 0.809664 | 0.673748 |
| MmugDNA.36760.1.S1_s_at | MmugDNA.36760.1 | 11.32 | 11.42 | 0.26 | 0.03 | -1.07 | 0.388689 | 0.501211 | 0.656675 | 0.699449 |
| MmugDNA.36761.1.S1_at   | MmugDNA.36761.1 | 4.23  | 3.96  | 0.34 | 0.24 | 1.2   | 0.299439 | 0.275378 | 0.58771  | 0.539663 |
| MmugDNA.36762.1.S1_at   | MmugDNA.36762.1 | 5.75  | 5.72  | 0.11 | 0.09 | 1.02  | 0.75154  | 0.231931 | 0.885332 | 0.503616 |
| MmugDNA.36763.1.S1_at   | MmugDNA.36763.1 | 4.95  | 4.63  | 0.2  | 0.32 | 1.25  | 0.176975 | 0.456544 | 0.471563 | 0.67024  |
| MmugDNA.36764.1.S1_at   | MmugDNA.36764.1 | 5.09  | 5.08  | 0.04 | 0.11 | 1.01  | 0.700011 | 0.423034 | 0.857509 | 0.646145 |
| MmugDNA.36765.1.S1_at   | MmugDNA.36765.1 | 10.83 | 9.73  | 0.1  | 0.07 | 2.15  | 0.000121 | 0.000185 | 0.051196 | 0.030511 |
| MmugDNA.36768.1.S1_at   | MmugDNA.36768.1 | 7.14  | 7.13  | 0.19 | 0.06 | 1.01  | 0.482453 | 0.824996 | 0.722804 | 0.899487 |
| MmugDNA.36769.1.S1_at   | MmugDNA.36769.1 | 4.62  | 4.66  | 0.25 | 0.23 | -1.02 | 0.192814 | 0.257795 | 0.489396 | 0.52542  |
| MmugDNA.3677.1.S1_at    | MmugDNA.3677.1  | 4.92  | 5.02  | 0.03 | 0.08 | -1.07 | 0.245072 | 0.033687 | 0.541271 | 0.227152 |
| MmugDNA.36770.1.S1_at   | MmugDNA.36770.1 | 5.01  | 4.66  | 0.48 | 0.33 | 1.27  | 0.136242 | 0.006509 | 0.420629 | 0.109521 |
| MmugDNA.36771.1.S1_at   | MmugDNA.36771.1 | 4.14  | 4.12  | 0.16 | 0.06 | 1.01  | 0.621873 | 0.49715  | 0.812905 | 0.696484 |
| MmugDNA.36772.1.S1_at   | MmugDNA.36772.1 | 4.88  | 5.06  | 0.11 | 0.18 | -1.14 | 0.547138 | 0.265829 | 0.765801 | 0.531695 |

|                         |                 |       |       |      |      |       |          |          |          |          |
|-------------------------|-----------------|-------|-------|------|------|-------|----------|----------|----------|----------|
| MmugDNA.36773.1.S1_at   | MmugDNA.36773.1 | 5.97  | 6     | 0.2  | 0.14 | -1.02 | 0.758971 | 0.932952 | 0.889555 | 0.961911 |
| MmugDNA.36774.1.S1_at   | MmugDNA.36774.1 | 6.66  | 6.78  | 0.07 | 0.1  | -1.09 | 0.09349  | 0.113905 | 0.362078 | 0.38018  |
| MmugDNA.36775.1.S1_at   | MmugDNA.36775.1 | 11.96 | 12.01 | 0.02 | 0.03 | -1.03 | 0.094289 | 0.179068 | 0.363294 | 0.455436 |
| MmugDNA.36777.1.S1_at   | MmugDNA.36777.1 | 5.15  | 5.18  | 0.23 | 0.09 | -1.02 | 0.349424 | 0.567978 | 0.62731  | 0.74176  |
| MmugDNA.36778.1.S1_at   | MmugDNA.36778.1 | 6.58  | 6.61  | 0.26 | 0.36 | -1.02 | 0.210111 | 0.531866 | 0.507655 | 0.71896  |
| MmugDNA.3678.1.S1_at    | MmugDNA.3678.1  | 2.7   | 2.56  | 0.09 | 0.14 | 1.1   | 0.343619 | 0.577948 | 0.622989 | 0.748185 |
| MmugDNA.36780.1.S1_at   | MmugDNA.36780.1 | 5.41  | 5.07  | 0.77 | 0.56 | 1.26  | 0.472071 | 0.212596 | 0.71594  | 0.486531 |
| MmugDNA.36781.1.S1_at   | MmugDNA.36781.1 | 5.27  | 5.03  | 0.62 | 0.32 | 1.18  | 0.365078 | 0.27699  | 0.639741 | 0.540995 |
| MmugDNA.36782.1.S1_at   | MmugDNA.36782.1 | 8.69  | 8.62  | 0.28 | 0.06 | 1.05  | 0.428396 | 0.053303 | 0.685363 | 0.276463 |
| MmugDNA.36785.1.S1_a_at | MmugDNA.36785.1 | 7.98  | 6.73  | 0.53 | 0.35 | 2.39  | 0.025029 | 0.054088 | 0.211194 | 0.277914 |
| MmugDNA.36786.1.S1_at   | MmugDNA.36786.1 | 4.45  | 3.49  | 0.7  | 0.08 | 1.94  | 0.101727 | 0.071881 | 0.373208 | 0.314181 |
| MmugDNA.36787.1.S1_at   | MmugDNA.36787.1 | 5.1   | 5.52  | 0.29 | 0.44 | -1.33 | 0.404743 | 0.295402 | 0.668391 | 0.554855 |
| MmugDNA.36788.1.S1_at   | MmugDNA.36788.1 | 4.29  | 4.15  | 0.23 | 0.02 | 1.1   | 0.204676 | 0.354346 | 0.502423 | 0.597166 |
| MmugDNA.3679.1.S1_at    | MmugDNA.3679.1  | 10.78 | 9.79  | 0.09 | 0.19 | 1.99  | 0.001119 | 0.000365 | 0.077306 | 0.037273 |
| MmugDNA.36790.1.S1_at   | MmugDNA.36790.1 | 6.51  | 6.46  | 0.17 | 0.35 | 1.04  | 0.679393 | 0.820745 | 0.847057 | 0.896776 |
| MmugDNA.36791.1.S1_at   | MmugDNA.36791.1 | 4.22  | 4.33  | 0.07 | 0.25 | -1.08 | 0.452354 | 0.679969 | 0.702807 | 0.813105 |
| MmugDNA.36792.1.S1_at   | MmugDNA.36792.1 | 10.43 | 10.34 | 0.32 | 0.06 | 1.06  | 0.323014 | 0.323493 | 0.606893 | 0.574473 |
| MmugDNA.36798.1.S1_at   | MmugDNA.36798.1 | 8.1   | 7.88  | 1.15 | 0.51 | 1.17  | 0.457651 | 0.376942 | 0.706449 | 0.614678 |
| MmugDNA.36799.1.S1_at   | MmugDNA.36799.1 | 9.43  | 9.09  | 0.32 | 0.53 | 1.26  | 0.757681 | 0.027821 | 0.888862 | 0.208337 |
| MmugDNA.368.1.S1_at     | MmugDNA.368.1   | 6.19  | 6.3   | 0.25 | 0.12 | -1.08 | 0.796918 | 0.852369 | 0.908267 | 0.916105 |
| MmugDNA.3680.1.S1_at    | MmugDNA.3680.1  | 5.14  | 6.47  | 1.34 | 0.08 | -2.52 | 0.347105 | 0.008874 | 0.625268 | 0.124662 |
| MmugDNA.36800.1.S1_at   | MmugDNA.36800.1 | 3.34  | 3.28  | 0.19 | 0.05 | 1.04  | 0.232443 | 0.350655 | 0.530886 | 0.594394 |
| MmugDNA.36801.1.S1_at   | MmugDNA.36801.1 | 11.09 | 11.06 | 0.21 | 0.07 | 1.02  | 0.763265 | 0.671079 | 0.891555 | 0.80765  |
| MmugDNA.36802.1.S1_at   | MmugDNA.36802.1 | 5.95  | 5.92  | 0.14 | 0.16 | 1.02  | 0.776965 | 0.603984 | 0.898112 | 0.764427 |
| MmugDNA.36803.1.S1_at   | MmugDNA.36803.1 | 5.38  | 5.59  | 0.15 | 0.09 | -1.15 | 0.200868 | 0.306674 | 0.498259 | 0.563241 |
| MmugDNA.36804.1.S1_at   | MmugDNA.36804.1 | 3.42  | 3.37  | 0.55 | 0.19 | 1.04  | 0.842696 | 0.975171 | 0.931055 | 0.986441 |
| MmugDNA.36805.1.S1_at   | MmugDNA.36805.1 | 7.43  | 7.81  | 0.06 | 0.09 | -1.3  | 0.004385 | 0.000568 | 0.112426 | 0.041092 |
| MmugDNA.36807.1.S1_at   | MmugDNA.36807.1 | 6.61  | 6.35  | 0.26 | 0.17 | 1.2   | 0.047137 | 0.026437 | 0.274594 | 0.203765 |
| MmugDNA.36808.1.S1_at   | MmugDNA.36808.1 | 6.65  | 6.53  | 0.68 | 0.17 | 1.09  | 0.545456 | 0.834805 | 0.764705 | 0.905439 |
| MmugDNA.36809.1.S1_at   | MmugDNA.36809.1 | 4.19  | 4.19  | 0.12 | 0.05 | 1     | 0.262833 | 0.606323 | 0.556683 | 0.765746 |
| MmugDNA.3681.1.S1_at    | MmugDNA.3681.1  | 10.87 | 10.88 | 0.29 | 0.12 | -1.01 | 0.7773   | 0.841287 | 0.898237 | 0.909576 |
| MmugDNA.3681.1.S1_s_at  | MmugDNA.3681.1  | 10.55 | 10.8  | 0.25 | 0.16 | -1.19 | 0.554213 | 0.750287 | 0.770567 | 0.854766 |
| MmugDNA.36810.1.S1_at   | MmugDNA.36810.1 | 7.81  | 7.56  | 0.48 | 0.26 | 1.19  | 0.273277 | 0.508065 | 0.565388 | 0.703358 |
| MmugDNA.36810.1.S1_s_at | MmugDNA.36810.1 | 9.75  | 9.58  | 0.17 | 0.26 | 1.13  | 0.448125 | 0.45935  | 0.699793 | 0.671726 |
| MmugDNA.36812.1.S1_at   | MmugDNA.36812.1 | 7.26  | 6.63  | 0.31 | 0.04 | 1.55  | 0.05917  | 0.379684 | 0.30037  | 0.616523 |
| MmugDNA.36813.1.S1_at   | MmugDNA.36813.1 | 3.5   | 3.56  | 0.38 | 0.05 | -1.04 | 0.460093 | 0.637912 | 0.708064 | 0.787226 |
| MmugDNA.36814.1.S1_at   | MmugDNA.36814.1 | 5.58  | 5.38  | 0.46 | 0.22 | 1.15  | 0.170906 | 0.198389 | 0.464646 | 0.473292 |
| MmugDNA.36815.1.S1_at   | MmugDNA.36815.1 | 6.55  | 6.09  | 0.86 | 0.17 | 1.38  | 0.415603 | 0.095068 | 0.676296 | 0.352124 |
| MmugDNA.36816.1.S1_at   | MmugDNA.36816.1 | 4.17  | 4.53  | 0.32 | 0.13 | -1.29 | 0.544623 | 0.763966 | 0.764167 | 0.862769 |
| MmugDNA.36817.1.S1_at   | MmugDNA.36817.1 | 4.63  | 4.3   | 0.27 | 0.09 | 1.26  | 0.170746 | 0.215724 | 0.464486 | 0.489503 |
| MmugDNA.36818.1.S1_at   | MmugDNA.36818.1 | 5.38  | 4.73  | 0.45 | 0.06 | 1.57  | 0.213753 | 0.221576 | 0.511664 | 0.494901 |
| MmugDNA.36819.1.S1_at   | MmugDNA.36819.1 | 7.54  | 7.09  | 0.61 | 0.15 | 1.37  | 0.339054 | 0.444598 | 0.619372 | 0.662072 |
| MmugDNA.3682.1.S1_at    | MmugDNA.3682.1  | 8.24  | 7.95  | 0.79 | 0.16 | 1.23  | 0.231385 | 0.36931  | 0.530173 | 0.6087   |

|                         |                 |       |       |      |      |       |          |          |          |          |
|-------------------------|-----------------|-------|-------|------|------|-------|----------|----------|----------|----------|
| MmugDNA.3682.1.S1_s_at  | MmugDNA.3682.1  | 7.47  | 7.29  | 0.84 | 0.06 | 1.13  | 0.451008 | 0.633114 | 0.701926 | 0.78396  |
| MmugDNA.36820.1.S1_at   | MmugDNA.36820.1 | 7.71  | 7.68  | 0.37 | 0.11 | 1.02  | 0.815679 | 0.048471 | 0.917707 | 0.265396 |
| MmugDNA.36821.1.S1_at   | MmugDNA.36821.1 | 3.08  | 3.1   | 0.12 | 0.19 | -1.02 | 0.730246 | 0.545638 | 0.873918 | 0.727579 |
| MmugDNA.36822.1.S1_at   | MmugDNA.36822.1 | 10.35 | 10.34 | 0.06 | 0.05 | 1.01  | 0.749291 | 0.019445 | 0.883904 | 0.175136 |
| MmugDNA.36823.1.S1_at   | MmugDNA.36823.1 | 6.82  | 6.7   | 0.33 | 0.07 | 1.09  | 0.617259 | 0.523212 | 0.809973 | 0.713594 |
| MmugDNA.36824.1.S1_at   | MmugDNA.36824.1 | 7.38  | 6.93  | 0.21 | 0.11 | 1.36  | 0.030505 | 0.022333 | 0.227551 | 0.187046 |
| MmugDNA.36825.1.S1_at   | MmugDNA.36825.1 | 4.04  | 4     | 0.17 | 0.14 | 1.03  | 0.473292 | 0.506131 | 0.716573 | 0.702359 |
| MmugDNA.36826.1.S1_at   | MmugDNA.36826.1 | 11.35 | 11.24 | 0.11 | 0.11 | 1.08  | 0.291882 | 0.171346 | 0.581311 | 0.447813 |
| MmugDNA.36829.1.S1_at   | MmugDNA.36829.1 | 3.48  | 3.55  | 0.33 | 0.25 | -1.05 | 0.391625 | 0.559101 | 0.658751 | 0.736046 |
| MmugDNA.3683.1.S1_at    | MmugDNA.3683.1  | 9     | 9.01  | 0.48 | 0.1  | -1.01 | 0.847557 | 0.223073 | 0.933572 | 0.49588  |
| MmugDNA.36830.1.S1_at   | MmugDNA.36830.1 | 4.06  | 4.53  | 0.24 | 0.64 | -1.39 | 0.293154 | 0.558476 | 0.58211  | 0.735631 |
| MmugDNA.36831.1.S1_at   | MmugDNA.36831.1 | 3.36  | 3.29  | 0.09 | 0.09 | 1.05  | 0.157973 | 0.423791 | 0.448708 | 0.646542 |
| MmugDNA.36832.1.S1_at   | MmugDNA.36832.1 | 6.73  | 6.76  | 0.67 | 0.19 | -1.02 | 0.265968 | 0.479237 | 0.558529 | 0.68504  |
| MmugDNA.36833.1.S1_at   | MmugDNA.36833.1 | 8.01  | 8.1   | 0.16 | 0.02 | -1.07 | 0.37306  | 0.04331  | 0.645118 | 0.252847 |
| MmugDNA.36835.1.S1_at   | MmugDNA.36835.1 | 5.48  | 5.44  | 0.12 | 0.21 | 1.03  | 0.395514 | 0.124014 | 0.661903 | 0.394273 |
| MmugDNA.36836.1.S1_at   | MmugDNA.36836.1 | 3.84  | 3.83  | 0.04 | 0.09 | 1.01  | 0.995383 | 0.917645 | 0.99814  | 0.953933 |
| MmugDNA.36837.1.S1_at   | MmugDNA.36837.1 | 6.87  | 7.4   | 0.79 | 0.19 | -1.45 | 0.952364 | 0.609376 | 0.980367 | 0.767746 |
| MmugDNA.36839.1.S1_at   | MmugDNA.36839.1 | 7.15  | 7.43  | 0.99 | 0.13 | -1.22 | 0.183464 | 0.423104 | 0.479356 | 0.646145 |
| MmugDNA.3684.1.S1_at    | MmugDNA.3684.1  | 7.03  | 7.05  | 0.56 | 0.5  | -1.02 | 0.884089 | 0.0401   | 0.950662 | 0.245388 |
| MmugDNA.36840.1.S1_at   | MmugDNA.36840.1 | 6     | 5.61  | 0.19 | 0.2  | 1.32  | 0.037008 | 0.216598 | 0.247648 | 0.490237 |
| MmugDNA.36841.1.S1_at   | MmugDNA.36841.1 | 5.99  | 5.92  | 0.47 | 0.16 | 1.05  | 0.723869 | 0.890725 | 0.870311 | 0.937712 |
| MmugDNA.36842.1.S1_at   | MmugDNA.36842.1 | 5.94  | 5.75  | 0.04 | 0.2  | 1.14  | 0.210562 | 0.387195 | 0.5081   | 0.621953 |
| MmugDNA.36843.1.S1_at   | MmugDNA.36843.1 | 8.43  | 8.58  | 0.13 | 0.21 | -1.11 | 0.900393 | 0.076925 | 0.957767 | 0.322421 |
| MmugDNA.36844.1.S1_at   | MmugDNA.36844.1 | 4.99  | 5.23  | 0.15 | 0.43 | -1.18 | 0.157143 | 0.027662 | 0.447994 | 0.207691 |
| MmugDNA.36846.1.S1_at   | MmugDNA.36846.1 | 5.63  | 5.68  | 0.18 | 0.13 | -1.04 | 0.608684 | 0.512848 | 0.804644 | 0.706549 |
| MmugDNA.36848.1.S1_at   | MmugDNA.36848.1 | 7.79  | 9.37  | 0.59 | 0.45 | -2.99 | 0.049682 | 0.000664 | 0.28036  | 0.0439   |
| MmugDNA.36849.1.S1_at   | MmugDNA.36849.1 | 4.64  | 4.71  | 0.22 | 0.31 | -1.05 | 0.669548 | 0.155384 | 0.841491 | 0.430771 |
| MmugDNA.36850.1.S1_at   | MmugDNA.36850.1 | 6.46  | 7.46  | 0.67 | 0.51 | -2    | 0.220212 | 0.005306 | 0.517758 | 0.10082  |
| MmugDNA.36851.1.S1_at   | MmugDNA.36851.1 | 3.57  | 3.54  | 0.17 | 0.13 | 1.02  | 0.824971 | 0.222376 | 0.922259 | 0.495444 |
| MmugDNA.36852.1.S1_at   | MmugDNA.36852.1 | 8.69  | 10.1  | 0.15 | 0.36 | -2.66 | 0.005119 | 0.028677 | 0.116889 | 0.211053 |
| MmugDNA.36853.1.S1_at   | MmugDNA.36853.1 | 5.34  | 5.47  | 0.3  | 0.14 | -1.09 | 0.86097  | 0.928721 | 0.939567 | 0.959449 |
| MmugDNA.36855.1.S1_at   | MmugDNA.36855.1 | 4.89  | 5.91  | 0.25 | 0.2  | -2.03 | 0.005631 | 0.219998 | 0.120803 | 0.49344  |
| MmugDNA.36856.1.S1_at   | MmugDNA.36856.1 | 12.84 | 11.89 | 0.05 | 0.28 | 1.93  | 0.003857 | 0.006548 | 0.107592 | 0.109707 |
| MmugDNA.36856.1.S1_s_at | MmugDNA.36856.1 | 13.12 | 12.18 | 0.08 | 0.26 | 1.92  | 0.003405 | 0.003222 | 0.103083 | 0.082115 |
| MmugDNA.36857.1.S1_at   | MmugDNA.36857.1 | 12.03 | 11.7  | 0.13 | 0.1  | 1.26  | 0.011458 | 0.018709 | 0.157203 | 0.171763 |
| MmugDNA.36859.1.S1_at   | MmugDNA.36859.1 | 8.36  | 8.3   | 0.57 | 0.28 | 1.04  | 0.62883  | 0.033866 | 0.817507 | 0.227662 |
| MmugDNA.3686.1.S1_at    | MmugDNA.3686.1  | 11.38 | 11.04 | 0.09 | 0.1  | 1.26  | 0.010747 | 0.087406 | 0.153406 | 0.340589 |
| MmugDNA.36860.1.S1_at   | MmugDNA.36860.1 | 4.6   | 4.29  | 0.47 | 0.58 | 1.24  | 0.853366 | 0.919734 | 0.93623  | 0.954884 |
| MmugDNA.17452.1.S1_s_at | MmugDNA.17452.1 | 9.87  | 9.33  | 0.4  | 0.34 | 1.45  | 0.277918 | 0.409002 | 0.569352 | 0.636073 |
| MmugDNA.36862.1.S1_at   | MmugDNA.36862.1 | 6.3   | 6.18  | 0.31 | 0.18 | 1.08  | 0.815251 | 0.257922 | 0.91753  | 0.525495 |
| MmugDNA.36865.1.S1_at   | MmugDNA.36865.1 | 5.19  | 5.19  | 0.03 | 0.04 | 1     | 0.845763 | 0.965235 | 0.932611 | 0.980613 |
| MmugDNA.36866.1.S1_at   | MmugDNA.36866.1 | 3.36  | 3.22  | 0.7  | 0.32 | 1.1   | 0.50197  | 0.590834 | 0.735658 | 0.756484 |
| MmugDNA.36868.1.S1_at   | MmugDNA.36868.1 | 5.02  | 5.33  | 0.73 | 0.64 | -1.24 | 0.607175 | 0.19201  | 0.803563 | 0.467382 |

|                         |                 |       |       |      |      |       |          |          |          |          |
|-------------------------|-----------------|-------|-------|------|------|-------|----------|----------|----------|----------|
| MmugDNA.36869.1.S1_at   | MmugDNA.36869.1 | 9.48  | 9     | 0.08 | 0.02 | 1.4   | 0.000613 | 0.000004 | 0.070727 | 0.014484 |
| MmugDNA.36870.1.S1_at   | MmugDNA.36870.1 | 3.8   | 3.92  | 0.37 | 0.07 | -1.08 | 0.895013 | 0.957842 | 0.955264 | 0.976177 |
| MmugDNA.36871.1.S1_at   | MmugDNA.36871.1 | 3.05  | 2.8   | 0.21 | 0.07 | 1.19  | 0.357701 | 0.300727 | 0.633636 | 0.558959 |
| MmugDNA.36872.1.S1_at   | MmugDNA.36872.1 | 6.34  | 6.59  | 0.26 | 0.24 | -1.19 | 0.098861 | 0.053578 | 0.369716 | 0.277127 |
| MmugDNA.36873.1.S1_at   | MmugDNA.36873.1 | 4.36  | 4.37  | 0.19 | 0.2  | -1    | 0.486682 | 0.38174  | 0.725795 | 0.617941 |
| MmugDNA.36874.1.S1_at   | MmugDNA.36874.1 | 8.02  | 8.3   | 0.2  | 0.16 | -1.22 | 0.590725 | 0.021942 | 0.792009 | 0.185351 |
| MmugDNA.36876.1.S1_at   | MmugDNA.36876.1 | 6.43  | 6.78  | 0.52 | 0.12 | -1.27 | 0.156462 | 0.271375 | 0.446993 | 0.536507 |
| MmugDNA.36877.1.S1_at   | MmugDNA.36877.1 | 9.19  | 9.88  | 0.24 | 0.12 | -1.61 | 0.004555 | 0.010425 | 0.113693 | 0.133525 |
| MmugDNA.36879.1.S1_at   | MmugDNA.36879.1 | 6.89  | 8.57  | 0.62 | 0.48 | -3.21 | 0.020819 | 0.008054 | 0.197847 | 0.119277 |
| MmugDNA.3688.1.S1_at    | MmugDNA.3688.1  | 7.18  | 7.66  | 0.16 | 0.06 | -1.39 | 0.009304 | 0.026452 | 0.146273 | 0.203779 |
| MmugDNA.36881.1.S1_at   | MmugDNA.36881.1 | 5.62  | 5.44  | 0.14 | 0.12 | 1.13  | 0.237806 | 0.153787 | 0.53519  | 0.428488 |
| MmugDNA.36882.1.S1_at   | MmugDNA.36882.1 | 6.09  | 6.43  | 0.28 | 0.03 | -1.26 | 0.278629 | 0.254862 | 0.569962 | 0.523051 |
| MmugDNA.36884.1.S1_at   | MmugDNA.36884.1 | 3.01  | 3.06  | 0.05 | 0.12 | -1.03 | 0.819735 | 0.96759  | 0.919644 | 0.982093 |
| MmugDNA.36885.1.S1_at   | MmugDNA.36885.1 | 6.03  | 6.01  | 0.07 | 0.09 | 1.02  | 0.697883 | 0.027869 | 0.856237 | 0.208453 |
| MmugDNA.36888.1.S1_at   | MmugDNA.36888.1 | 6.85  | 6.89  | 0.09 | 0.12 | -1.03 | 0.706726 | 0.238717 | 0.861133 | 0.509386 |
| MmugDNA.36889.1.S1_at   | MmugDNA.36889.1 | 5.32  | 5.36  | 0.2  | 0.08 | -1.02 | 0.703801 | 0.585597 | 0.859383 | 0.752934 |
| MmugDNA.36890.1.S1_at   | MmugDNA.36890.1 | 4.6   | 4.59  | 0.21 | 0.24 | 1.01  | 0.94072  | 0.899804 | 0.975102 | 0.942989 |
| MmugDNA.36891.1.S1_at   | MmugDNA.36891.1 | 3.08  | 3.18  | 0.06 | 0.19 | -1.07 | 0.489024 | 0.718266 | 0.727508 | 0.83694  |
| MmugDNA.36892.1.S1_at   | MmugDNA.36892.1 | 6.41  | 6.19  | 0.13 | 0.08 | 1.16  | 0.183153 | 0.394715 | 0.479137 | 0.627208 |
| MmugDNA.36893.1.S1_at   | MmugDNA.36893.1 | 4.17  | 4.48  | 0.15 | 0.23 | -1.24 | 0.151179 | 0.279476 | 0.440703 | 0.543055 |
| MmugDNA.36895.1.S1_at   | MmugDNA.36895.1 | 6.44  | 5.94  | 0.53 | 0.49 | 1.41  | 0.284266 | 0.419396 | 0.574388 | 0.643466 |
| MmugDNA.36896.1.S1_at   | MmugDNA.36896.1 | 3.58  | 3.65  | 0.06 | 0.13 | -1.05 | 0.711873 | 0.316411 | 0.864078 | 0.569809 |
| MmugDNA.36898.1.S1_s_at | MmugDNA.36898.1 | 9.32  | 9.09  | 0.17 | 0.16 | 1.17  | 0.07983  | 0.016181 | 0.34004  | 0.161214 |
| MmugDNA.369.1.S1_at     | MmugDNA.369.1   | 9.93  | 9.41  | 0.16 | 0.04 | 1.43  | 0.004362 | 0.051429 | 0.112174 | 0.272204 |
| MmugDNA.36900.1.S1_at   | MmugDNA.36900.1 | 5.4   | 5.52  | 0.13 | 0.03 | -1.08 | 0.267612 | 0.339584 | 0.5604   | 0.586188 |
| MmugDNA.36901.1.S1_at   | MmugDNA.36901.1 | 6.99  | 6.52  | 0.35 | 0.07 | 1.38  | 0.026935 | 0.021706 | 0.217062 | 0.184333 |
| MmugDNA.36902.1.S1_at   | MmugDNA.36902.1 | 3.78  | 3.6   | 0.19 | 0.02 | 1.13  | 0.203854 | 0.295316 | 0.501449 | 0.554734 |
| MmugDNA.36903.1.S1_at   | MmugDNA.36903.1 | 6.36  | 5.89  | 0.18 | 0.28 | 1.39  | 0.019314 | 0.052344 | 0.192077 | 0.274277 |
| MmugDNA.36904.1.S1_at   | MmugDNA.36904.1 | 4.99  | 4.81  | 0.29 | 0.19 | 1.13  | 0.226483 | 0.460049 | 0.524301 | 0.671989 |
| MmugDNA.36908.1.S1_at   | MmugDNA.36908.1 | 4.15  | 4.45  | 0.29 | 0.17 | -1.23 | 0.859718 | 0.252822 | 0.939203 | 0.521174 |
| MmugDNA.27229.1.S1_s_at | MmugDNA.27229.1 | 7.93  | 8.18  | 0.53 | 0.36 | -1.19 | 0.3246   | 0.391782 | 0.60824  | 0.625301 |
| MmugDNA.3691.1.S1_at    | MmugDNA.3691.1  | 5.1   | 5.05  | 0.09 | 0.25 | 1.04  | 0.866771 | 0.686327 | 0.942468 | 0.816939 |
| MmugDNA.36910.1.S1_at   | MmugDNA.36910.1 | 12.4  | 12.12 | 0.13 | 0.04 | 1.21  | 0.027496 | 0.02429  | 0.218484 | 0.195066 |
| MmugDNA.36911.1.S1_at   | MmugDNA.36911.1 | 5.53  | 5.54  | 0.08 | 0.08 | -1    | 0.505052 | 0.328263 | 0.738131 | 0.577992 |
| MmugDNA.36913.1.S1_at   | MmugDNA.36913.1 | 4.92  | 4.75  | 0.45 | 0.18 | 1.13  | 0.765151 | 0.956163 | 0.892299 | 0.975058 |
| MmugDNA.36914.1.S1_at   | MmugDNA.36914.1 | 9.48  | 8.75  | 1.09 | 0.14 | 1.65  | 0.741114 | 0.930742 | 0.880012 | 0.960672 |
| MmugDNA.36915.1.S1_at   | MmugDNA.36915.1 | 6.04  | 5.87  | 0.07 | 0.05 | 1.13  | 0.050015 | 0.33072  | 0.28128  | 0.579519 |
| MmugDNA.36916.1.S1_at   | MmugDNA.36916.1 | 10.86 | 10.61 | 0.1  | 0.02 | 1.19  | 0.011425 | 0.402458 | 0.157067 | 0.631481 |
| MmugDNA.36917.1.S1_at   | MmugDNA.36917.1 | 4.33  | 4.25  | 0.15 | 0.05 | 1.06  | 0.194096 | 0.380885 | 0.490694 | 0.617426 |
| MmugDNA.36919.1.S1_s_at | MmugDNA.36919.1 | 5.99  | 7.19  | 0.75 | 0.24 | -2.31 | 0.108955 | 0.318593 | 0.383909 | 0.571258 |
| MmugDNA.3692.1.S1_at    | MmugDNA.3692.1  | 5.4   | 5.3   | 0.15 | 0.14 | 1.07  | 0.308797 | 0.09723  | 0.595283 | 0.3549   |
| MmugDNA.36920.1.S1_at   | MmugDNA.36920.1 | 3.62  | 3.73  | 0.02 | 0.16 | -1.08 | 0.907385 | 0.977516 | 0.960877 | 0.987792 |
| MmugDNA.36921.1.S1_at   | MmugDNA.36921.1 | 5.78  | 6.03  | 0.18 | 0.09 | -1.19 | 0.095607 | 0.311907 | 0.365116 | 0.566833 |

|                         |                 |       |       |      |      |       |          |          |          |          |
|-------------------------|-----------------|-------|-------|------|------|-------|----------|----------|----------|----------|
| MmugDNA.36922.1.S1_at   | MmugDNA.36922.1 | 6.76  | 6.75  | 0.05 | 0.02 | 1     | 0.369329 | 0.337751 | 0.642818 | 0.584925 |
| MmugDNA.30873.1.S1_s_at | MmugDNA.30873.1 | 11.78 | 11.74 | 0.21 | 0.14 | 1.03  | 0.909151 | 0.094347 | 0.961496 | 0.350889 |
| MmugDNA.36925.1.S1_at   | MmugDNA.36925.1 | 5.98  | 5.89  | 0.33 | 0.06 | 1.06  | 0.593539 | 0.761997 | 0.794024 | 0.861597 |
| MmugDNA.36926.1.S1_at   | MmugDNA.36926.1 | 3.52  | 3.43  | 0.22 | 0.24 | 1.06  | 0.986303 | 0.922713 | 0.995212 | 0.956468 |
| MmugDNA.36927.1.S1_at   | MmugDNA.36927.1 | 8.64  | 8.62  | 0.07 | 0.09 | 1.02  | 0.668972 | 0.879947 | 0.841208 | 0.931461 |
| MmugDNA.36928.1.S1_at   | MmugDNA.36928.1 | 4.81  | 4.76  | 0.13 | 0.03 | 1.04  | 0.794856 | 0.180497 | 0.907378 | 0.457128 |
| MmugDNA.36929.1.S1_at   | MmugDNA.36929.1 | 9.06  | 9.45  | 0.18 | 0.22 | -1.31 | 0.174686 | 0.178882 | 0.468957 | 0.455208 |
| MmugDNA.3693.1.S1_at    | MmugDNA.3693.1  | 11.1  | 10.93 | 0.1  | 0.05 | 1.12  | 0.161308 | 0.307784 | 0.452845 | 0.56397  |
| MmugDNA.36930.1.S1_s_at | MmugDNA.36930.1 | 2.98  | 3.04  | 0.16 | 0.15 | -1.04 | 0.487753 | 0.714213 | 0.726421 | 0.834167 |
| MmugDNA.36931.1.S1_at   | MmugDNA.36931.1 | 3.42  | 3.47  | 0.06 | 0.06 | -1.03 | 0.52175  | 0.123306 | 0.749403 | 0.393386 |
| MmugDNA.36932.1.S1_at   | MmugDNA.36932.1 | 7.07  | 7.13  | 0.18 | 0.01 | -1.04 | 0.663783 | 0.243295 | 0.838011 | 0.513356 |
| MmugDNA.36933.1.S1_at   | MmugDNA.36933.1 | 5.15  | 4.49  | 0.37 | 0.08 | 1.58  | 0.145346 | 0.233318 | 0.432645 | 0.50468  |
| MmugDNA.36935.1.S1_at   | MmugDNA.36935.1 | 5.35  | 4.74  | 0.8  | 0.41 | 1.53  | 0.900289 | 0.295015 | 0.957718 | 0.554551 |
| MmugDNA.36936.1.S1_at   | MmugDNA.36936.1 | 8.52  | 8.45  | 0.14 | 0.13 | 1.05  | 0.684407 | 0.188823 | 0.849603 | 0.464789 |
| MmugDNA.36937.1.S1_at   | MmugDNA.36937.1 | 7.69  | 7.93  | 0.17 | 0.18 | -1.19 | 0.207102 | 0.268938 | 0.50484  | 0.534369 |
| MmugDNA.36938.1.S1_at   | MmugDNA.36938.1 | 7.3   | 7.2   | 0.28 | 0.06 | 1.08  | 0.342223 | 0.211821 | 0.622047 | 0.485788 |
| MmugDNA.36938.1.S1_s_at | MmugDNA.36938.1 | 5.23  | 5.16  | 0.03 | 0.05 | 1.05  | 0.081904 | 0.178539 | 0.343177 | 0.454778 |
| MmugDNA.3694.1.S1_s_at  | MmugDNA.3694.1  | 13.14 | 13.13 | 0.15 | 0.05 | 1     | 0.425858 | 0.162276 | 0.683122 | 0.438447 |
| MmugDNA.36941.1.S1_at   | MmugDNA.36941.1 | 5.16  | 5     | 0.07 | 0.16 | 1.12  | 0.30109  | 0.052639 | 0.589084 | 0.274934 |
| MmugDNA.36942.1.S1_at   | MmugDNA.36942.1 | 4.91  | 4.89  | 0.19 | 0.11 | 1.02  | 0.844106 | 0.43485  | 0.931718 | 0.654846 |
| MmugDNA.36943.1.S1_at   | MmugDNA.36943.1 | 3.75  | 3.67  | 0.39 | 0.14 | 1.06  | 0.26348  | 0.380501 | 0.556984 | 0.617165 |
| MmugDNA.36945.1.S1_at   | MmugDNA.36945.1 | 5.7   | 5.96  | 0.2  | 0.07 | -1.19 | 0.071473 | 0.460086 | 0.325377 | 0.671993 |
| MmugDNA.36949.1.S1_at   | MmugDNA.36949.1 | 9.91  | 9.38  | 0.25 | 0.15 | 1.44  | 0.016352 | 0.032775 | 0.180774 | 0.224149 |
| MmugDNA.36950.1.S1_at   | MmugDNA.36950.1 | 4.6   | 4.43  | 0.09 | 0.35 | 1.12  | 0.415751 | 0.361094 | 0.676389 | 0.602069 |
| MmugDNA.36951.1.S1_at   | MmugDNA.36951.1 | 5.94  | 5.9   | 1.12 | 0.38 | 1.03  | 0.834086 | 0.845544 | 0.926972 | 0.912145 |
| MmugDNA.36952.1.S1_at   | MmugDNA.36952.1 | 5.21  | 5.47  | 0.26 | 0.05 | -1.2  | 0.113217 | 0.411944 | 0.389917 | 0.638434 |
| MmugDNA.36953.1.S1_at   | MmugDNA.36953.1 | 4.4   | 5.28  | 0.96 | 0.49 | -1.85 | 0.536496 | 0.698293 | 0.759061 | 0.824756 |
| MmugDNA.36955.1.S1_at   | MmugDNA.36955.1 | 5.06  | 4.72  | 0.05 | 0.39 | 1.27  | 0.227011 | 0.383813 | 0.524952 | 0.619759 |
| MmugDNA.36956.1.S1_at   | MmugDNA.36956.1 | 3.05  | 3.19  | 0.61 | 0.17 | -1.1  | 0.619254 | 0.795157 | 0.811061 | 0.88196  |
| MmugDNA.36957.1.S1_at   | MmugDNA.36957.1 | 6.69  | 6.8   | 0.52 | 0.19 | -1.08 | 0.518554 | 0.658143 | 0.747593 | 0.800181 |
| MmugDNA.36957.1.S1_x_at | MmugDNA.36957.1 | 7.2   | 7.23  | 0.72 | 0.19 | -1.02 | 0.422252 | 0.394145 | 0.680473 | 0.62675  |
| MmugDNA.36958.1.S1_at   | MmugDNA.36958.1 | 3.45  | 3.39  | 0.06 | 0.21 | 1.04  | 0.944962 | 0.816531 | 0.976855 | 0.894202 |
| MmugDNA.36959.1.S1_at   | MmugDNA.36959.1 | 4.13  | 4.14  | 0.14 | 0.06 | -1.01 | 0.923217 | 0.40759  | 0.967296 | 0.63505  |
| MmugDNA.3696.1.S1_at    | MmugDNA.3696.1  | 7.19  | 7.15  | 0.05 | 0.21 | 1.03  | 0.554706 | 0.413587 | 0.770788 | 0.639662 |
| MmugDNA.36960.1.S1_at   | MmugDNA.36960.1 | 7.43  | 8.15  | 0.37 | 0.3  | -1.65 | 0.064142 | 0.255543 | 0.309726 | 0.523538 |
| MmugDNA.36961.1.S1_at   | MmugDNA.36961.1 | 6.97  | 6.95  | 0.17 | 0.05 | 1.01  | 0.900853 | 0.974411 | 0.958009 | 0.986069 |
| MmugDNA.36962.1.S1_at   | MmugDNA.36962.1 | 10.31 | 10.55 | 0.13 | 0.19 | -1.18 | 0.054665 | 0.017747 | 0.290604 | 0.168367 |
| MmugDNA.36964.1.S1_at   | MmugDNA.36964.1 | 5.6   | 6.21  | 0.28 | 0.28 | -1.53 | 0.057795 | 0.078906 | 0.297543 | 0.325912 |
| MmugDNA.36969.1.S1_s_at | MmugDNA.36969.1 | 11.67 | 11.47 | 0.08 | 0.08 | 1.15  | 0.031085 | 0.115996 | 0.229324 | 0.383164 |
| MmugDNA.3697.1.S1_at    | MmugDNA.3697.1  | 3.54  | 3.66  | 0.56 | 0.09 | -1.08 | 0.66097  | 0.623041 | 0.83642  | 0.777477 |
| MmugDNA.36970.1.S1_at   | MmugDNA.36970.1 | 6.31  | 6.31  | 0.09 | 0.05 | 1.01  | 0.287781 | 0.762103 | 0.577473 | 0.86164  |
| MmugDNA.36972.1.S1_at   | MmugDNA.36972.1 | 6.43  | 6.66  | 0.11 | 0.04 | -1.17 | 0.0234   | 0.057288 | 0.205967 | 0.285198 |
| MmugDNA.36973.1.S1_at   | MmugDNA.36973.1 | 10.76 | 10.3  | 0.16 | 0.06 | 1.38  | 0.010956 | 0.001848 | 0.154561 | 0.064494 |



|                         |                 |       |       |      |      |       |          |          |          |          |
|-------------------------|-----------------|-------|-------|------|------|-------|----------|----------|----------|----------|
| MmugDNA.36974.1.S1_at   | MmugDNA.36974.1 | 11.2  | 11.28 | 0.08 | 0.12 | -1.05 | 0.480372 | 0.179868 | 0.721302 | 0.456425 |
| MmugDNA.36975.1.S1_at   | MmugDNA.36975.1 | 8.05  | 8.12  | 0.32 | 0.04 | -1.05 | 0.279243 | 0.152064 | 0.570643 | 0.42682  |
| MmugDNA.36976.1.S1_at   | MmugDNA.36976.1 | 5.34  | 5.36  | 0.24 | 0.14 | -1.01 | 0.83169  | 0.928566 | 0.925994 | 0.959399 |
| MmugDNA.36978.1.S1_at   | MmugDNA.36978.1 | 5.41  | 6.89  | 0.18 | 0.19 | -2.8  | 0.000702 | 0.000271 | 0.071759 | 0.033839 |
| MmugDNA.3698.1.S1_at    | MmugDNA.3698.1  | 9.61  | 9.23  | 0.16 | 0.07 | 1.3   | 0.026469 | 0.005777 | 0.215773 | 0.104378 |
| MmugDNA.36980.1.S1_at   | MmugDNA.36980.1 | 6.12  | 5.99  | 0.28 | 0.06 | 1.09  | 0.516028 | 0.666524 | 0.745613 | 0.804636 |
| MmugDNA.36981.1.S1_at   | MmugDNA.36981.1 | 11.64 | 11.83 | 0.24 | 0.08 | -1.15 | 0.100728 | 0.177566 | 0.371857 | 0.453962 |
| MmugDNA.36984.1.S1_at   | MmugDNA.36984.1 | 3.79  | 3.73  | 0.37 | 0.11 | 1.04  | 0.640807 | 0.499253 | 0.824509 | 0.698117 |
| MmugDNA.36987.1.S1_at   | MmugDNA.36987.1 | 2.96  | 2.87  | 0.1  | 0.16 | 1.06  | 0.801102 | 0.598339 | 0.910582 | 0.76075  |
| MmugDNA.36988.1.S1_x_at | MmugDNA.36988.1 | 10.71 | 10.58 | 0.5  | 0.21 | 1.09  | 0.41455  | 0.285632 | 0.675681 | 0.547395 |
| MmugDNA.3699.1.S1_at    | MmugDNA.3699.1  | 4.79  | 4.73  | 0.41 | 0.22 | 1.04  | 0.570325 | 0.718501 | 0.779298 | 0.837066 |
| MmugDNA.36993.1.S1_at   | MmugDNA.36993.1 | 5.39  | 5.29  | 0.11 | 0.05 | 1.07  | 0.224717 | 0.314119 | 0.522708 | 0.568185 |
| MmugDNA.36995.1.S1_at   | MmugDNA.36995.1 | 4.78  | 4.35  | 0.42 | 0.16 | 1.36  | 0.201487 | 0.197825 | 0.49907  | 0.472721 |
| MmugDNA.36996.1.S1_at   | MmugDNA.36996.1 | 4.68  | 4.8   | 0.19 | 0.07 | -1.09 | 0.907635 | 0.231836 | 0.960932 | 0.503592 |
| MmugDNA.36997.1.S1_at   | MmugDNA.36997.1 | 7.13  | 7.83  | 0.59 | 0.07 | -1.63 | 0.221772 | 0.079914 | 0.519772 | 0.327213 |
| MmugDNA.36998.1.S1_at   | MmugDNA.36998.1 | 3.45  | 3.39  | 0.12 | 0.03 | 1.04  | 0.340864 | 0.151152 | 0.620908 | 0.425805 |
| MmugDNA.36999.1.S1_at   | MmugDNA.36999.1 | 5.67  | 5.72  | 0.31 | 0.35 | -1.03 | 0.789959 | 0.901301 | 0.90449  | 0.943884 |
| MmugDNA.37.1.S1_at      | MmugDNA.37.1    | 10.34 | 9.85  | 0.19 | 0.09 | 1.41  | 0.034832 | 0.286342 | 0.241113 | 0.547784 |
| MmugDNA.370.1.S1_at     | MmugDNA.370.1   | 3.67  | 3.68  | 0.09 | 0.04 | -1.01 | 0.569849 | 0.632745 | 0.779151 | 0.783777 |
| MmugDNA.3700.1.S1_at    | MmugDNA.3700.1  | 10.84 | 10.68 | 0.24 | 0.18 | 1.12  | 0.16835  | 0.265973 | 0.461584 | 0.531796 |
| MmugDNA.37000.1.S1_at   | MmugDNA.37000.1 | 4.69  | 4.96  | 0.18 | 0.21 | -1.21 | 0.1378   | 0.086253 | 0.422876 | 0.338664 |
| MmugDNA.37001.1.S1_at   | MmugDNA.37001.1 | 4.95  | 4.89  | 0.32 | 0.05 | 1.04  | 0.268447 | 0.332012 | 0.561069 | 0.580557 |
| MmugDNA.37005.1.S1_at   | MmugDNA.37005.1 | 8.11  | 8.3   | 0.33 | 0.02 | -1.14 | 0.994115 | 0.278859 | 0.997585 | 0.542599 |
| MmugDNA.37006.1.S1_at   | MmugDNA.37006.1 | 10.61 | 10.99 | 0.53 | 0.2  | -1.3  | 0.306442 | 0.266662 | 0.593297 | 0.532407 |
| MmugDNA.37007.1.S1_at   | MmugDNA.37007.1 | 3.51  | 3.4   | 0.13 | 0.17 | 1.08  | 0.261676 | 0.339087 | 0.55583  | 0.585891 |
| MmugDNA.37008.1.S1_at   | MmugDNA.37008.1 | 6.12  | 5.91  | 0.8  | 0.02 | 1.15  | 0.612177 | 0.801181 | 0.806709 | 0.885679 |
| MmugDNA.37009.1.S1_at   | MmugDNA.37009.1 | 5.73  | 5.72  | 0.02 | 0.09 | 1.01  | 0.576538 | 0.634879 | 0.783247 | 0.785042 |
| MmugDNA.3701.1.S1_at    | MmugDNA.3701.1  | 8.68  | 8.64  | 0.8  | 0.11 | 1.03  | 0.890618 | 0.467906 | 0.953319 | 0.677398 |
| MmugDNA.20818.1.S1_s_at | MmugDNA.20818.1 | 8.93  | 8.98  | 0.69 | 0.2  | -1.04 | 0.897758 | 0.609979 | 0.956586 | 0.768269 |
| MmugDNA.37010.1.S1_at   | MmugDNA.37010.1 | 6.97  | 6.79  | 0.17 | 0.1  | 1.13  | 0.086712 | 0.20577  | 0.351806 | 0.48007  |
| MmugDNA.37011.1.S1_at   | MmugDNA.37011.1 | 6.42  | 6.82  | 0.21 | 0.14 | -1.31 | 0.036864 | 0.037481 | 0.247118 | 0.237853 |
| MmugDNA.37012.1.S1_at   | MmugDNA.37012.1 | 2.84  | 2.76  | 0.09 | 0.09 | 1.06  | 0.774957 | 0.717546 | 0.897172 | 0.836463 |
| MmugDNA.37013.1.S1_at   | MmugDNA.37013.1 | 5.21  | 5.2   | 0.15 | 0.57 | 1.01  | 0.392036 | 0.373152 | 0.659024 | 0.612003 |
| MmugDNA.37014.1.S1_at   | MmugDNA.37014.1 | 3.62  | 4.15  | 0.26 | 0.34 | -1.45 | 0.070784 | 0.062636 | 0.324317 | 0.297022 |
| MmugDNA.37015.1.S1_at   | MmugDNA.37015.1 | 6.65  | 7.09  | 0.68 | 0.17 | -1.35 | 0.923771 | 0.989349 | 0.967605 | 0.993956 |
| MmugDNA.37018.1.S1_at   | MmugDNA.37018.1 | 6.85  | 6.17  | 0.4  | 0.26 | 1.6   | 0.067167 | 0.143418 | 0.316853 | 0.41743  |
| MmugDNA.37019.1.S1_at   | MmugDNA.37019.1 | 5.04  | 5.05  | 0.14 | 0.07 | -1.01 | 0.519503 | 0.587874 | 0.748059 | 0.754542 |
| MmugDNA.3702.1.S1_at    | MmugDNA.3702.1  | 6.61  | 7.62  | 0.85 | 0.24 | -2.01 | 0.141045 | 0.082054 | 0.426881 | 0.330802 |
| MmugDNA.37021.1.S1_at   | MmugDNA.37021.1 | 12.15 | 11.84 | 0.28 | 0.06 | 1.25  | 0.108603 | 0.675912 | 0.383391 | 0.810619 |
| MmugDNA.37023.1.S1_at   | MmugDNA.37023.1 | 10.01 | 9.35  | 0.16 | 0.07 | 1.58  | 0.002516 | 0.138073 | 0.094326 | 0.410924 |
| MmugDNA.37024.1.S1_at   | MmugDNA.37024.1 | 3.42  | 3.23  | 0.27 | 0.22 | 1.14  | 0.180786 | 0.190735 | 0.47597  | 0.466168 |
| MmugDNA.37025.1.S1_at   | MmugDNA.37025.1 | 5.19  | 4.89  | 0.17 | 0.12 | 1.23  | 0.017094 | 0.008656 | 0.184186 | 0.12341  |
| MmugDNA.37026.1.S1_at   | MmugDNA.37026.1 | 7.36  | 7.19  | 1.01 | 0.31 | 1.12  | 0.729992 | 0.701782 | 0.873871 | 0.827048 |

|                         |                 |       |       |      |      |       |          |          |          |          |
|-------------------------|-----------------|-------|-------|------|------|-------|----------|----------|----------|----------|
| MmugDNA.37029.1.S1_at   | MmugDNA.37029.1 | 3.31  | 3.28  | 0.19 | 0.02 | 1.02  | 0.482662 | 0.434755 | 0.722974 | 0.654819 |
| MmugDNA.37030.1.S1_at   | MmugDNA.37030.1 | 4.82  | 4.47  | 0.83 | 0.23 | 1.28  | 0.188841 | 0.251016 | 0.485417 | 0.519638 |
| MmugDNA.37033.1.S1_at   | MmugDNA.37033.1 | 5.36  | 4.97  | 0.52 | 0.06 | 1.31  | 0.353937 | 0.492173 | 0.631122 | 0.693477 |
| MmugDNA.37036.1.S1_at   | MmugDNA.37036.1 | 3.88  | 3.91  | 0.08 | 0.02 | -1.02 | 0.384789 | 0.18731  | 0.653701 | 0.463323 |
| MmugDNA.37037.1.S1_at   | MmugDNA.37037.1 | 5.53  | 5.54  | 0.18 | 0    | -1.01 | 0.880724 | 0.963598 | 0.949283 | 0.979721 |
| MmugDNA.37038.1.S1_at   | MmugDNA.37038.1 | 12.68 | 13.05 | 0.16 | 0.09 | -1.29 | 0.02346  | 0.073605 | 0.206286 | 0.316945 |
| MmugDNA.37039.1.S1_at   | MmugDNA.37039.1 | 3.29  | 3.43  | 0.4  | 0.11 | -1.1  | 0.739829 | 0.913143 | 0.879454 | 0.951134 |
| MmugDNA.3704.1.S1_at    | MmugDNA.3704.1  | 8.15  | 8.58  | 0.26 | 0.32 | -1.36 | 0.16846  | 0.00834  | 0.461766 | 0.121147 |
| MmugDNA.37040.1.S1_at   | MmugDNA.37040.1 | 3.52  | 3.7   | 0.14 | 0.12 | -1.14 | 0.122544 | 0.132685 | 0.401258 | 0.404544 |
| MmugDNA.37041.1.S1_at   | MmugDNA.37041.1 | 4.36  | 4.32  | 0.11 | 0.03 | 1.03  | 0.516684 | 0.38694  | 0.74601  | 0.621935 |
| MmugDNA.37043.1.S1_at   | MmugDNA.37043.1 | 6.37  | 6.5   | 0.12 | 0.15 | -1.09 | 0.72533  | 0.073512 | 0.871137 | 0.316778 |
| MmugDNA.37046.1.S1_at   | MmugDNA.37046.1 | 3.68  | 3.37  | 0.19 | 0.18 | 1.24  | 0.212939 | 0.315337 | 0.510909 | 0.568939 |
| MmugDNA.37047.1.S1_at   | MmugDNA.37047.1 | 6.08  | 6.65  | 0.74 | 0.38 | -1.48 | 0.379317 | 0.485241 | 0.649287 | 0.689003 |
| MmugDNA.37048.1.S1_at   | MmugDNA.37048.1 | 4.79  | 4.2   | 1.18 | 0.28 | 1.51  | 0.44523  | 0.365072 | 0.697742 | 0.605267 |
| MmugDNA.37049.1.S1_at   | MmugDNA.37049.1 | 3.65  | 4.24  | 0.31 | 0.19 | -1.5  | 0.105943 | 0.129615 | 0.379981 | 0.401223 |
| MmugDNA.3705.1.S1_at    | MmugDNA.3705.1  | 2.71  | 2.71  | 0.06 | 0.04 | -1    | 0.265526 | 0.441375 | 0.558187 | 0.659552 |
| MmugDNA.37051.1.S1_at   | MmugDNA.37051.1 | 7.04  | 7.03  | 0.06 | 0.01 | 1.01  | 0.532056 | 0.79235  | 0.756167 | 0.880015 |
| MmugDNA.37052.1.S1_at   | MmugDNA.37052.1 | 4.26  | 4.2   | 0.15 | 0.03 | 1.04  | 0.530456 | 0.753534 | 0.75503  | 0.856527 |
| MmugDNA.37056.1.S1_at   | MmugDNA.37056.1 | 8.69  | 9.64  | 0.2  | 0.06 | -1.92 | 0.00137  | 0.422872 | 0.079595 | 0.646054 |
| MmugDNA.37057.1.S1_at   | MmugDNA.37057.1 | 6.04  | 6.58  | 0.32 | 0.3  | -1.46 | 0.267322 | 0.298982 | 0.560149 | 0.557628 |
| MmugDNA.37058.1.S1_at   | MmugDNA.37058.1 | 3.69  | 3.67  | 0.11 | 0.1  | 1.02  | 0.247918 | 0.395953 | 0.543295 | 0.627798 |
| MmugDNA.37059.1.S1_at   | MmugDNA.37059.1 | 6.1   | 6.2   | 0.61 | 0.35 | -1.07 | 0.332715 | 0.405566 | 0.614336 | 0.633804 |
| MmugDNA.3706.1.S1_at    | MmugDNA.3706.1  | 6.98  | 6.57  | 0.2  | 0.26 | 1.33  | 0.088156 | 0.3002   | 0.354244 | 0.558413 |
| MmugDNA.37060.1.S1_at   | MmugDNA.37060.1 | 13.6  | 13.85 | 0.2  | 0.09 | -1.19 | 0.207867 | 0.41995  | 0.505752 | 0.643765 |
| MmugDNA.37062.1.S1_at   | MmugDNA.37062.1 | 6.66  | 6.52  | 0.3  | 0.13 | 1.1   | 0.247691 | 0.339785 | 0.543078 | 0.586394 |
| MmugDNA.37063.1.S1_at   | MmugDNA.37063.1 | 8.26  | 8.41  | 1.11 | 0.3  | -1.12 | 0.445262 | 0.618303 | 0.697742 | 0.774002 |
| MmugDNA.37065.1.S1_at   | MmugDNA.37065.1 | 5.42  | 5.4   | 0.02 | 0.15 | 1.01  | 0.691199 | 0.925216 | 0.85233  | 0.957716 |
| MmugDNA.37066.1.S1_at   | MmugDNA.37066.1 | 6.1   | 6.06  | 0.06 | 0.07 | 1.03  | 0.737297 | 0.00198  | 0.878082 | 0.066005 |
| MmugDNA.37067.1.S1_at   | MmugDNA.37067.1 | 6.6   | 6.07  | 0.25 | 0.17 | 1.44  | 0.094585 | 0.003744 | 0.363543 | 0.087219 |
| MmugDNA.37070.1.S1_at   | MmugDNA.37070.1 | 11.77 | 11.34 | 0.23 | 0.12 | 1.35  | 0.054317 | 0.163938 | 0.290104 | 0.440105 |
| MmugDNA.37071.1.S1_at   | MmugDNA.37071.1 | 4.18  | 3.62  | 0.23 | 0.35 | 1.48  | 0.06881  | 0.073621 | 0.320411 | 0.316952 |
| MmugDNA.37073.1.S1_at   | MmugDNA.37073.1 | 3.84  | 3.85  | 0.15 | 0.15 | -1.01 | 0.960997 | 0.478198 | 0.98408  | 0.684221 |
| MmugDNA.37075.1.S1_at   | MmugDNA.37075.1 | 5.22  | 5.23  | 0.27 | 0.14 | -1.01 | 0.70293  | 0.524881 | 0.859021 | 0.714635 |
| MmugDNA.37079.1.S1_at   | MmugDNA.37079.1 | 6.67  | 6.66  | 0.17 | 0.27 | 1.01  | 0.221468 | 0.325072 | 0.519474 | 0.575545 |
| MmugDNA.37079.1.S1_x_at | MmugDNA.37079.1 | 6.61  | 6.53  | 0.17 | 0.29 | 1.06  | 0.298819 | 0.344208 | 0.587033 | 0.589762 |
| MmugDNA.3708.1.S1_at    | MmugDNA.3708.1  | 11.27 | 11.54 | 0.19 | 0.02 | -1.21 | 0.071697 | 0.246623 | 0.325611 | 0.515957 |
| MmugDNA.37080.1.S1_at   | MmugDNA.37080.1 | 9.01  | 9.65  | 0.15 | 0.16 | -1.56 | 0.016871 | 0.025257 | 0.183253 | 0.199403 |
| MmugDNA.37081.1.S1_at   | MmugDNA.37081.1 | 6.54  | 6.58  | 0.06 | 0.02 | -1.02 | 0.354648 | 0.01515  | 0.631745 | 0.156391 |
| MmugDNA.29930.1.S1_s_at | MmugDNA.29930.1 | 9.42  | 9.3   | 0.46 | 0.15 | 1.09  | 0.862015 | 0.97247  | 0.94012  | 0.985179 |
| MmugDNA.37084.1.S1_at   | MmugDNA.37084.1 | 3.95  | 3.81  | 0.08 | 0.07 | 1.11  | 0.126675 | 0.82895  | 0.408085 | 0.901678 |
| MmugDNA.37085.1.S1_at   | MmugDNA.37085.1 | 8.56  | 9.47  | 0.06 | 0.16 | -1.89 | 0.001235 | 0.260776 | 0.078631 | 0.52721  |
| MmugDNA.37086.1.S1_at   | MmugDNA.37086.1 | 11.64 | 12.01 | 0.52 | 0.04 | -1.29 | 0.454985 | 0.160141 | 0.704823 | 0.436296 |
| MmugDNA.37087.1.S1_at   | MmugDNA.37087.1 | 10.08 | 9.64  | 0.18 | 0.07 | 1.36  | 0.013629 | 0.285075 | 0.16753  | 0.547096 |

|                         |                 |       |       |      |      |        |          |          |          |          |
|-------------------------|-----------------|-------|-------|------|------|--------|----------|----------|----------|----------|
| MmugDNA.37088.1.S1_at   | MmugDNA.37088.1 | 5.75  | 5.75  | 0.19 | 0.08 | -1.01  | 0.672502 | 0.881753 | 0.843239 | 0.932538 |
| MmugDNA.3709.1.S1_at    | MmugDNA.3709.1  | 3.93  | 3.94  | 0.18 | 0.14 | -1     | 0.604173 | 0.795482 | 0.801436 | 0.882189 |
| MmugDNA.37090.1.S1_at   | MmugDNA.37090.1 | 7.47  | 7.69  | 0.03 | 0.04 | -1.17  | 0.000684 | 0.00002  | 0.071248 | 0.019635 |
| MmugDNA.37091.1.S1_at   | MmugDNA.37091.1 | 5.84  | 5.72  | 1.05 | 0.27 | 1.08   | 0.772964 | 0.837912 | 0.896007 | 0.907449 |
| MmugDNA.37092.1.S1_at   | MmugDNA.37092.1 | 10.4  | 9.78  | 0.43 | 0.27 | 1.54   | 0.154317 | 0.131792 | 0.444624 | 0.403891 |
| MmugDNA.37093.1.S1_at   | MmugDNA.37093.1 | 3.11  | 2.94  | 0.2  | 0.14 | 1.13   | 0.204127 | 0.224861 | 0.501706 | 0.497653 |
| MmugDNA.37095.1.S1_at   | MmugDNA.37095.1 | 5.18  | 4.71  | 0.16 | 0.31 | 1.38   | 0.178938 | 0.326842 | 0.473878 | 0.576848 |
| MmugDNA.37096.1.S1_at   | MmugDNA.37096.1 | 6.57  | 6.33  | 0.32 | 0.43 | 1.19   | 0.28453  | 0.263651 | 0.57446  | 0.529938 |
| MmugDNA.37098.1.S1_at   | MmugDNA.37098.1 | 4.62  | 4.57  | 0.34 | 0.11 | 1.03   | 0.427004 | 0.355744 | 0.684319 | 0.597864 |
| MmugDNA.37099.1.S1_at   | MmugDNA.37099.1 | 4.71  | 4.77  | 0.05 | 0.09 | -1.04  | 0.151816 | 0.138367 | 0.441292 | 0.411244 |
| MmugDNA.3710.1.S1_at    | MmugDNA.3710.1  | 3.82  | 3.46  | 0.42 | 0.05 | 1.28   | 0.67122  | 0.86953  | 0.842316 | 0.925994 |
| MmugDNA.37100.1.S1_at   | MmugDNA.37100.1 | 4.03  | 3.68  | 0.47 | 0.08 | 1.28   | 0.246254 | 0.269584 | 0.542013 | 0.534868 |
| MmugDNA.6900.1.S1_s_at  | MmugDNA.6900.1  | 5.35  | 5.44  | 0.12 | 0.08 | -1.06  | 0.747018 | 0.147851 | 0.882818 | 0.422197 |
| MmugDNA.37102.1.S1_at   | MmugDNA.37102.1 | 5.88  | 6.01  | 0.49 | 0.17 | -1.09  | 0.93819  | 0.994727 | 0.973844 | 0.996726 |
| MmugDNA.37103.1.S1_at   | MmugDNA.37103.1 | 3.48  | 3.44  | 0.22 | 0.21 | 1.03   | 0.787104 | 0.93241  | 0.902961 | 0.961699 |
| MmugDNA.37105.1.S1_at   | MmugDNA.37105.1 | 4.18  | 4.02  | 0.14 | 0    | 1.11   | 0.10046  | 0.08873  | 0.371411 | 0.34241  |
| MmugDNA.37107.1.S1_at   | MmugDNA.37107.1 | 5.28  | 5.28  | 0.2  | 0.01 | 1      | 0.554512 | 0.743718 | 0.770723 | 0.851465 |
| MmugDNA.37108.1.S1_at   | MmugDNA.37108.1 | 11.55 | 11.6  | 0.45 | 0.16 | -1.04  | 0.421474 | 0.140917 | 0.679956 | 0.414394 |
| MmugDNA.37108.1.S1_s_at | MmugDNA.37108.1 | 12.76 | 12.77 | 0.06 | 0.01 | -1.01  | 0.502194 | 0.510026 | 0.735922 | 0.704549 |
| MmugDNA.37109.1.S1_at   | MmugDNA.37109.1 | 3.87  | 7.21  | 1.53 | 0.53 | -10.09 | 0.083968 | 0.292723 | 0.347068 | 0.552783 |
| MmugDNA.3711.1.S1_at    | MmugDNA.3711.1  | 3.66  | 3.85  | 0.12 | 0.06 | -1.14  | 0.326921 | 0.282383 | 0.609778 | 0.545076 |
| MmugDNA.37111.1.S1_at   | MmugDNA.37111.1 | 6.81  | 6.66  | 0.22 | 0.11 | 1.12   | 0.742577 | 0.030552 | 0.880858 | 0.216711 |
| MmugDNA.37112.1.S1_at   | MmugDNA.37112.1 | 6.68  | 7.06  | 0.33 | 0.2  | -1.3   | 0.060029 | 0.000686 | 0.302259 | 0.044166 |
| MmugDNA.37112.1.S1_s_at | MmugDNA.37112.1 | 6.62  | 6.77  | 0.38 | 0.16 | -1.11  | 0.484574 | 0.004174 | 0.72436  | 0.091064 |
| MmugDNA.37113.1.S1_at   | MmugDNA.37113.1 | 5.62  | 6.05  | 0.34 | 0.37 | -1.35  | 0.120586 | 0.279411 | 0.398948 | 0.543033 |
| MmugDNA.37115.1.S1_x_at | MmugDNA.37115.1 | 5.11  | 5.01  | 0.08 | 0.12 | 1.07   | 0.120459 | 0.399271 | 0.398818 | 0.629735 |
| MmugDNA.37117.1.S1_at   | MmugDNA.37117.1 | 9.98  | 10.42 | 0.32 | 0.09 | -1.36  | 0.095783 | 0.362304 | 0.365399 | 0.602931 |
| MmugDNA.37119.1.S1_at   | MmugDNA.37119.1 | 9.56  | 9.26  | 0.17 | 0.1  | 1.23   | 0.060568 | 0.221969 | 0.303184 | 0.495044 |
| MmugDNA.37122.1.S1_at   | MmugDNA.37122.1 | 3.03  | 3.05  | 0.15 | 0.09 | -1.01  | 0.366452 | 0.475266 | 0.640772 | 0.682031 |
| MmugDNA.37123.1.S1_at   | MmugDNA.37123.1 | 3.63  | 3.52  | 0.05 | 0.23 | 1.08   | 0.52687  | 0.833851 | 0.752804 | 0.904774 |
| MmugDNA.37124.1.S1_at   | MmugDNA.37124.1 | 3.47  | 3.63  | 0.01 | 0.1  | -1.12  | 0.048678 | 0.191348 | 0.278061 | 0.466673 |
| MmugDNA.37125.1.S1_at   | MmugDNA.37125.1 | 7.67  | 7.01  | 0.34 | 0.18 | 1.58   | 0.024755 | 0.01464  | 0.210464 | 0.154176 |
| MmugDNA.37126.1.S1_at   | MmugDNA.37126.1 | 4.54  | 4.38  | 0.08 | 0.15 | 1.11   | 0.066835 | 0.042487 | 0.316219 | 0.25075  |
| MmugDNA.37129.1.S1_at   | MmugDNA.37129.1 | 3.85  | 3.84  | 0.05 | 0.11 | 1.01   | 0.231706 | 0.608583 | 0.530334 | 0.767142 |
| MmugDNA.3713.1.S1_at    | MmugDNA.3713.1  | 4.94  | 5.19  | 0.08 | 0.13 | -1.19  | 0.042429 | 0.121782 | 0.26312  | 0.391074 |
| MmugDNA.37130.1.S1_at   | MmugDNA.37130.1 | 6.17  | 7     | 0.52 | 0.21 | -1.78  | 0.051148 | 0.063663 | 0.283595 | 0.298817 |
| MmugDNA.37131.1.S1_at   | MmugDNA.37131.1 | 6.42  | 5.93  | 1.31 | 0.5  | 1.4    | 0.525676 | 0.741411 | 0.75203  | 0.850285 |
| MmugDNA.37132.1.S1_at   | MmugDNA.37132.1 | 4     | 3.97  | 0.24 | 0.04 | 1.02   | 0.663308 | 0.827761 | 0.837643 | 0.901144 |
| MmugDNA.37133.1.S1_at   | MmugDNA.37133.1 | 10.18 | 8.84  | 0.28 | 0.13 | 2.53   | 0.002096 | 0.253319 | 0.090208 | 0.521662 |
| MmugDNA.37134.1.S1_at   | MmugDNA.37134.1 | 10.25 | 10.44 | 0.18 | 0.18 | -1.14  | 0.634032 | 0.749056 | 0.820633 | 0.854105 |
| MmugDNA.37136.1.S1_at   | MmugDNA.37136.1 | 9.57  | 9.73  | 0.27 | 0.08 | -1.12  | 0.299432 | 0.916252 | 0.58771  | 0.953103 |
| MmugDNA.37139.1.S1_at   | MmugDNA.37139.1 | 4.08  | 3.75  | 0.55 | 0.47 | 1.26   | 0.412386 | 0.21369  | 0.674115 | 0.487473 |
| MmugDNA.37139.1.S1_x_at | MmugDNA.37139.1 | 5.16  | 5.22  | 0.42 | 0.2  | -1.04  | 0.328263 | 0.200038 | 0.610662 | 0.474603 |

|                       |                 |       |       |      |      |       |          |          |          |          |
|-----------------------|-----------------|-------|-------|------|------|-------|----------|----------|----------|----------|
| MmugDNA.3714.1.S1_at  | MmugDNA.3714.1  | 3.53  | 3.39  | 0.06 | 0.19 | 1.1   | 0.284673 | 0.334075 | 0.574573 | 0.582104 |
| MmugDNA.37140.1.S1_at | MmugDNA.37140.1 | 5.9   | 5.91  | 0.34 | 0.06 | -1.01 | 0.399586 | 0.438202 | 0.664835 | 0.657196 |
| MmugDNA.37141.1.S1_at | MmugDNA.37141.1 | 8.1   | 8.21  | 0.14 | 0.14 | -1.08 | 0.604899 | 0.021699 | 0.802092 | 0.184333 |
| MmugDNA.37142.1.S1_at | MmugDNA.37142.1 | 8.65  | 7.81  | 0.05 | 0.08 | 1.79  | 0.000085 | 0.00583  | 0.051196 | 0.104661 |
| MmugDNA.37143.1.S1_at | MmugDNA.37143.1 | 6.17  | 6.65  | 0.47 | 0.1  | -1.39 | 0.610984 | 0.810835 | 0.80604  | 0.890845 |
| MmugDNA.37145.1.S1_at | MmugDNA.37145.1 | 5.4   | 5.4   | 0.13 | 0.31 | 1     | 0.359778 | 0.271706 | 0.635365 | 0.536577 |
| MmugDNA.37146.1.S1_at | MmugDNA.37146.1 | 3.63  | 3.62  | 0.07 | 0    | 1.01  | 0.701482 | 0.968967 | 0.858224 | 0.982912 |
| MmugDNA.37148.1.S1_at | MmugDNA.37148.1 | 2.67  | 2.67  | 0.48 | 0.11 | -1    | 0.298146 | 0.441257 | 0.586554 | 0.659477 |
| MmugDNA.3715.1.S1_at  | MmugDNA.3715.1  | 6.9   | 7.11  | 0.08 | 0.16 | -1.15 | 0.316664 | 0.02803  | 0.601415 | 0.208941 |
| MmugDNA.37150.1.S1_at | MmugDNA.37150.1 | 2.77  | 2.71  | 0.07 | 0.05 | 1.04  | 0.288682 | 0.221433 | 0.578446 | 0.49472  |
| MmugDNA.37151.1.S1_at | MmugDNA.37151.1 | 9.88  | 10.64 | 0.08 | 0.22 | -1.7  | 0.005661 | 0.002791 | 0.120889 | 0.077966 |
| MmugDNA.37152.1.S1_at | MmugDNA.37152.1 | 6.95  | 6.89  | 0.14 | 0.14 | 1.04  | 0.361074 | 0.664217 | 0.636561 | 0.803247 |
| MmugDNA.37155.1.S1_at | MmugDNA.37155.1 | 11.34 | 11.53 | 0.06 | 0.07 | -1.14 | 0.047867 | 0.043741 | 0.276176 | 0.253863 |
| MmugDNA.37157.1.S1_at | MmugDNA.37157.1 | 7.36  | 7.81  | 0.42 | 0.06 | -1.37 | 0.108206 | 0.127577 | 0.382964 | 0.398486 |
| MmugDNA.37158.1.S1_at | MmugDNA.37158.1 | 9.2   | 8.86  | 0.18 | 0.11 | 1.26  | 0.05227  | 0.357621 | 0.285979 | 0.599228 |
| MmugDNA.37159.1.S1_at | MmugDNA.37159.1 | 3.92  | 3.78  | 0.61 | 0.23 | 1.1   | 0.24423  | 0.327444 | 0.540874 | 0.577284 |
| MmugDNA.3716.1.S1_at  | MmugDNA.3716.1  | 11.45 | 11.31 | 0.16 | 0.03 | 1.1   | 0.139658 | 0.129182 | 0.42522  | 0.400611 |
| MmugDNA.37160.1.S1_at | MmugDNA.37160.1 | 5.51  | 5.46  | 0.12 | 0.13 | 1.03  | 0.140741 | 0.113478 | 0.426473 | 0.379588 |
| MmugDNA.37161.1.S1_at | MmugDNA.37161.1 | 5.2   | 5.19  | 0.17 | 0.11 | 1     | 0.6702   | 0.419059 | 0.841785 | 0.643266 |
| MmugDNA.37162.1.S1_at | MmugDNA.37162.1 | 5.57  | 5.82  | 0.72 | 0.27 | -1.19 | 0.518757 | 0.71357  | 0.747719 | 0.83382  |
| MmugDNA.37163.1.S1_at | MmugDNA.37163.1 | 6.21  | 6.01  | 0.16 | 0.18 | 1.15  | 0.355787 | 0.434758 | 0.632428 | 0.654819 |
| MmugDNA.37164.1.S1_at | MmugDNA.37164.1 | 11.36 | 10.95 | 0.09 | 0.11 | 1.32  | 0.009009 | 0.009846 | 0.144777 | 0.130274 |
| MmugDNA.37165.1.S1_at | MmugDNA.37165.1 | 2.79  | 2.84  | 0.09 | 0.06 | -1.04 | 0.972179 | 0.874134 | 0.988864 | 0.928493 |
| MmugDNA.37166.1.S1_at | MmugDNA.37166.1 | 6.19  | 6.15  | 0.28 | 0.05 | 1.03  | 0.658123 | 0.747602 | 0.834894 | 0.853201 |
| MmugDNA.37169.1.S1_at | MmugDNA.37169.1 | 3.93  | 4.45  | 0.02 | 0.52 | -1.43 | 0.278899 | 0.426197 | 0.570239 | 0.648388 |
| MmugDNA.37170.1.S1_at | MmugDNA.37170.1 | 12.48 | 12.44 | 0.11 | 0.06 | 1.03  | 0.397283 | 0.291405 | 0.662987 | 0.551823 |
| MmugDNA.37172.1.S1_at | MmugDNA.37172.1 | 5.9   | 5.73  | 0.09 | 0.05 | 1.12  | 0.072198 | 0.092371 | 0.326665 | 0.348294 |
| MmugDNA.37174.1.S1_at | MmugDNA.37174.1 | 6.91  | 6.96  | 0.09 | 0.14 | -1.04 | 0.295129 | 0.408217 | 0.584039 | 0.635527 |
| MmugDNA.37177.1.S1_at | MmugDNA.37177.1 | 5.75  | 5.76  | 0.03 | 0.03 | -1    | 0.839461 | 0.997452 | 0.929585 | 0.998661 |
| MmugDNA.3718.1.S1_at  | MmugDNA.3718.1  | 3.73  | 3.5   | 0.31 | 0.1  | 1.18  | 0.31522  | 0.39477  | 0.600287 | 0.627208 |
| MmugDNA.37180.1.S1_at | MmugDNA.37180.1 | 10.69 | 10.37 | 0.05 | 0.1  | 1.25  | 0.008241 | 0.00828  | 0.139904 | 0.12078  |
| MmugDNA.37181.1.S1_at | MmugDNA.37181.1 | 4.44  | 4.41  | 0.09 | 0.2  | 1.02  | 0.972554 | 0.454099 | 0.988961 | 0.668398 |
| MmugDNA.37182.1.S1_at | MmugDNA.37182.1 | 3.71  | 3.66  | 0.08 | 0.25 | 1.03  | 0.533464 | 0.600278 | 0.757039 | 0.762019 |
| MmugDNA.37183.1.S1_at | MmugDNA.37183.1 | 6.22  | 6.58  | 1.08 | 0.21 | -1.28 | 0.742904 | 0.548933 | 0.881088 | 0.729496 |
| MmugDNA.37184.1.S1_at | MmugDNA.37184.1 | 4.36  | 3.8   | 0.25 | 0.51 | 1.48  | 0.41914  | 0.017484 | 0.678626 | 0.167476 |
| MmugDNA.37185.1.S1_at | MmugDNA.37185.1 | 6.12  | 6.13  | 0.4  | 0.08 | -1.01 | 0.321534 | 0.418708 | 0.605857 | 0.643066 |
| MmugDNA.37186.1.S1_at | MmugDNA.37186.1 | 3.76  | 3.73  | 0.05 | 0.23 | 1.02  | 0.810861 | 0.606456 | 0.915259 | 0.765747 |
| MmugDNA.37187.1.S1_at | MmugDNA.37187.1 | 4.11  | 4.15  | 0.03 | 0.04 | -1.03 | 0.117762 | 0.306085 | 0.395125 | 0.562804 |
| MmugDNA.3719.1.S1_at  | MmugDNA.3719.1  | 5.68  | 5.71  | 0.08 | 0.07 | -1.02 | 0.736978 | 0.032306 | 0.87784  | 0.222524 |
| MmugDNA.37190.1.S1_at | MmugDNA.37190.1 | 11.57 | 11.53 | 0.24 | 0.06 | 1.03  | 0.837146 | 0.651054 | 0.928581 | 0.795994 |
| MmugDNA.37191.1.S1_at | MmugDNA.37191.1 | 8.47  | 9.02  | 0.22 | 0.09 | -1.46 | 0.043082 | 0.038683 | 0.264735 | 0.24169  |
| MmugDNA.37192.1.S1_at | MmugDNA.37192.1 | 5.19  | 5.05  | 0.18 | 0.21 | 1.11  | 0.152066 | 0.526788 | 0.441589 | 0.715627 |
| MmugDNA.37193.1.S1_at | MmugDNA.37193.1 | 5.77  | 5.65  | 0.3  | 0.04 | 1.09  | 0.516093 | 0.570912 | 0.745613 | 0.743422 |

|                         |                 |       |       |      |      |       |          |          |          |          |
|-------------------------|-----------------|-------|-------|------|------|-------|----------|----------|----------|----------|
| MmugDNA.37194.1.S1_at   | MmugDNA.37194.1 | 8.33  | 8     | 0.08 | 0.2  | 1.26  | 0.075539 | 0.00925  | 0.333134 | 0.126966 |
| MmugDNA.37195.1.S1_at   | MmugDNA.37195.1 | 6.42  | 6.3   | 0.12 | 0.16 | 1.09  | 0.150646 | 0.116908 | 0.439728 | 0.384277 |
| MmugDNA.37196.1.S1_at   | MmugDNA.37196.1 | 4.23  | 4.17  | 0.35 | 0.28 | 1.04  | 0.422454 | 0.334375 | 0.680619 | 0.582372 |
| MmugDNA.37197.1.S1_at   | MmugDNA.37197.1 | 9.02  | 8.48  | 0.19 | 0.06 | 1.45  | 0.008209 | 0.037444 | 0.139723 | 0.237777 |
| MmugDNA.37198.1.S1_at   | MmugDNA.37198.1 | 5.8   | 5.81  | 0.2  | 0.03 | -1.01 | 0.744124 | 0.561941 | 0.881397 | 0.737659 |
| MmugDNA.37199.1.S1_at   | MmugDNA.37199.1 | 4.86  | 4.25  | 0.48 | 0.04 | 1.53  | 0.084134 | 0.034364 | 0.347427 | 0.229289 |
| MmugDNA.372.1.S1_at     | MmugDNA.372.1   | 7.7   | 7.05  | 0.41 | 0.32 | 1.57  | 0.383053 | 0.180225 | 0.652427 | 0.456784 |
| MmugDNA.3720.1.S1_at    | MmugDNA.3720.1  | 11.37 | 10.86 | 0.22 | 0.09 | 1.42  | 0.028805 | 0.149407 | 0.222494 | 0.423825 |
| MmugDNA.37202.1.S1_at   | MmugDNA.37202.1 | 5.52  | 4.9   | 0.62 | 0.57 | 1.54  | 0.165594 | 0.15803  | 0.458665 | 0.433785 |
| MmugDNA.37203.1.S1_at   | MmugDNA.37203.1 | 4.73  | 4.64  | 0.15 | 0.04 | 1.06  | 0.294159 | 0.685088 | 0.583189 | 0.816309 |
| MmugDNA.37204.1.S1_at   | MmugDNA.37204.1 | 7.42  | 7.07  | 0.06 | 0.12 | 1.28  | 0.027221 | 0.072432 | 0.217938 | 0.315282 |
| MmugDNA.43000.1.S1_at   | MmugDNA.43000.1 | 7.36  | 7.91  | 0.17 | 0.13 | -1.46 | 0.003995 | 0.388013 | 0.108676 | 0.622548 |
| MmugDNA.43000.1.S1_s_at | MmugDNA.43000.1 | 7.64  | 8.15  | 0.16 | 0.11 | -1.43 | 0.005194 | 0.565853 | 0.117047 | 0.740112 |
| MmugDNA.37208.1.S1_at   | MmugDNA.37208.1 | 4.73  | 5.13  | 0.58 | 0.09 | -1.31 | 0.32292  | 0.435382 | 0.606803 | 0.655194 |
| MmugDNA.3721.1.S1_at    | MmugDNA.3721.1  | 6.88  | 6.68  | 0.37 | 0.1  | 1.15  | 0.523642 | 0.698323 | 0.750504 | 0.824773 |
| MmugDNA.37210.1.S1_at   | MmugDNA.37210.1 | 3.36  | 3.44  | 0.01 | 0.14 | -1.06 | 0.997509 | 0.939009 | 0.999096 | 0.965397 |
| MmugDNA.37211.1.S1_at   | MmugDNA.37211.1 | 2.89  | 2.76  | 0.34 | 0.03 | 1.09  | 0.508779 | 0.725628 | 0.740566 | 0.84112  |
| MmugDNA.37213.1.S1_at   | MmugDNA.37213.1 | 10.28 | 10.61 | 0.27 | 0.28 | -1.26 | 0.338706 | 0.013009 | 0.619173 | 0.146803 |
| MmugDNA.37214.1.S1_at   | MmugDNA.37214.1 | 4.16  | 4.43  | 0.17 | 0.41 | -1.2  | 0.162064 | 0.032285 | 0.453933 | 0.222435 |
| MmugDNA.37215.1.S1_at   | MmugDNA.37215.1 | 6.08  | 6.32  | 0.97 | 0.33 | -1.18 | 0.274028 | 0.421521 | 0.566013 | 0.645138 |
| MmugDNA.37216.1.S1_at   | MmugDNA.37216.1 | 3.35  | 3.25  | 0.18 | 0.27 | 1.07  | 0.810844 | 0.482549 | 0.915259 | 0.68734  |
| MmugDNA.37217.1.S1_at   | MmugDNA.37217.1 | 4.54  | 4.66  | 0.11 | 0.33 | -1.09 | 0.520967 | 0.545783 | 0.749066 | 0.727653 |
| MmugDNA.37218.1.S1_at   | MmugDNA.37218.1 | 7.04  | 5.6   | 0.52 | 0.39 | 2.72  | 0.023104 | 0.038764 | 0.205038 | 0.241916 |
| MmugDNA.3722.1.S1_at    | MmugDNA.3722.1  | 10.34 | 10.03 | 0.12 | 0.05 | 1.24  | 0.027021 | 0.078459 | 0.217188 | 0.325212 |
| MmugDNA.37220.1.S1_at   | MmugDNA.37220.1 | 3.62  | 3.63  | 0.03 | 0.07 | -1.01 | 0.981588 | 0.746591 | 0.99316  | 0.852873 |
| MmugDNA.37221.1.S1_at   | MmugDNA.37221.1 | 11.71 | 11.31 | 0.16 | 0.09 | 1.32  | 0.013878 | 0.116223 | 0.168813 | 0.38353  |
| MmugDNA.37222.1.S1_s_at | MmugDNA.37222.1 | 12.82 | 12.68 | 0.1  | 0.07 | 1.1   | 0.108139 | 0.560412 | 0.382878 | 0.736658 |
| MmugDNA.37223.1.S1_at   | MmugDNA.37223.1 | 9.92  | 10.26 | 0.16 | 0.18 | -1.27 | 0.249663 | 0.098952 | 0.544715 | 0.357049 |
| MmugDNA.37224.1.S1_at   | MmugDNA.37224.1 | 4.64  | 4.48  | 0.13 | 0.15 | 1.12  | 0.263823 | 0.311796 | 0.557349 | 0.56678  |
| MmugDNA.37226.1.S1_at   | MmugDNA.37226.1 | 6.74  | 6.58  | 0.14 | 0.04 | 1.12  | 0.147434 | 0.175215 | 0.435407 | 0.452011 |
| MmugDNA.34006.1.S1_at   | MmugDNA.34006.1 | 7.79  | 7.26  | 0.23 | 0.38 | 1.45  | 0.277427 | 0.168237 | 0.568941 | 0.444893 |
| MmugDNA.34006.1.S1_s_at | MmugDNA.34006.1 | 7.7   | 7.4   | 0.11 | 0.1  | 1.24  | 0.045146 | 0.039171 | 0.269891 | 0.243072 |
| MmugDNA.37227.1.S1_at   | MmugDNA.37227.1 | 9.58  | 9.61  | 0.38 | 0.26 | -1.02 | 0.465432 | 0.013416 | 0.711479 | 0.148424 |
| MmugDNA.37229.1.S1_at   | MmugDNA.37229.1 | 5.26  | 4.26  | 0.7  | 0.31 | 1.99  | 0.121314 | 0.146546 | 0.400026 | 0.420583 |
| MmugDNA.3723.1.S1_at    | MmugDNA.3723.1  | 3.57  | 3.57  | 0.05 | 0.04 | 1     | 0.983528 | 0.334595 | 0.99383  | 0.582581 |
| MmugDNA.37230.1.S1_at   | MmugDNA.37230.1 | 8.22  | 7.99  | 0.38 | 0.16 | 1.17  | 0.616523 | 0.089165 | 0.809516 | 0.343188 |
| MmugDNA.37231.1.S1_at   | MmugDNA.37231.1 | 7.2   | 7     | 0.23 | 0.17 | 1.15  | 0.77798  | 0.106539 | 0.898504 | 0.369099 |
| MmugDNA.37232.1.S1_at   | MmugDNA.37232.1 | 5.74  | 5.69  | 0.52 | 0.32 | 1.04  | 0.838105 | 0.464846 | 0.929038 | 0.675463 |
| MmugDNA.37233.1.S1_at   | MmugDNA.37233.1 | 6.14  | 6.77  | 0.33 | 0.08 | -1.55 | 0.027655 | 0.116443 | 0.218792 | 0.383671 |
| MmugDNA.37234.1.S1_at   | MmugDNA.37234.1 | 5.04  | 5.18  | 0.11 | 0.17 | -1.1  | 0.84024  | 0.845578 | 0.929894 | 0.912145 |
| MmugDNA.37235.1.S1_at   | MmugDNA.37235.1 | 4.55  | 4.6   | 0.05 | 0.09 | -1.03 | 0.967573 | 0.164528 | 0.987066 | 0.44076  |
| MmugDNA.37236.1.S1_at   | MmugDNA.37236.1 | 4.76  | 4.99  | 0.91 | 0.59 | -1.17 | 0.755906 | 0.265461 | 0.887548 | 0.531363 |
| MmugDNA.37238.1.S1_at   | MmugDNA.37238.1 | 5.95  | 6.02  | 0.12 | 0.03 | -1.05 | 0.75054  | 0.069373 | 0.884725 | 0.309591 |

|                         |                 |       |       |      |      |       |          |          |          |          |
|-------------------------|-----------------|-------|-------|------|------|-------|----------|----------|----------|----------|
| MmugDNA.37239.1.S1_at   | MmugDNA.37239.1 | 9.88  | 9.91  | 0.19 | 0.12 | -1.02 | 0.559054 | 0.150084 | 0.77314  | 0.424698 |
| MmugDNA.3724.1.S1_at    | MmugDNA.3724.1  | 4.21  | 4.42  | 0.11 | 0.06 | -1.16 | 0.057558 | 0.057938 | 0.297234 | 0.287157 |
| MmugDNA.37240.1.S1_at   | MmugDNA.37240.1 | 10.02 | 10.24 | 0.13 | 0.02 | -1.16 | 0.029247 | 0.481971 | 0.223819 | 0.686909 |
| MmugDNA.37241.1.S1_at   | MmugDNA.37241.1 | 6.93  | 7.19  | 0.09 | 0.29 | -1.2  | 0.153407 | 0.689995 | 0.443218 | 0.819235 |
| MmugDNA.37242.1.S1_at   | MmugDNA.37242.1 | 3.9   | 3.83  | 0    | 0.58 | 1.05  | 0.536039 | 0.894388 | 0.75873  | 0.939717 |
| MmugDNA.37244.1.S1_at   | MmugDNA.37244.1 | 4.38  | 4.4   | 0.14 | 0.06 | -1.01 | 0.339526 | 0.451904 | 0.619787 | 0.666683 |
| MmugDNA.37245.1.S1_at   | MmugDNA.37245.1 | 4.34  | 4.14  | 0.12 | 0.08 | 1.15  | 0.082879 | 0.502393 | 0.344979 | 0.700138 |
| MmugDNA.37247.1.S1_at   | MmugDNA.37247.1 | 4.57  | 4.54  | 0.02 | 0.07 | 1.03  | 0.46345  | 0.777724 | 0.710084 | 0.870845 |
| MmugDNA.37249.1.S1_at   | MmugDNA.37249.1 | 3.49  | 3.53  | 0.23 | 0.31 | -1.03 | 0.993667 | 0.795531 | 0.997422 | 0.882189 |
| MmugDNA.3725.1.S1_at    | MmugDNA.3725.1  | 4.32  | 4.24  | 0.37 | 0.07 | 1.06  | 0.74147  | 0.893693 | 0.880217 | 0.939323 |
| MmugDNA.37250.1.S1_at   | MmugDNA.37250.1 | 4.24  | 4.17  | 0.86 | 0.1  | 1.05  | 0.321147 | 0.394542 | 0.60545  | 0.627068 |
| MmugDNA.37252.1.S1_at   | MmugDNA.37252.1 | 3.27  | 3.33  | 0.01 | 0.14 | -1.05 | 0.352547 | 0.65815  | 0.630029 | 0.800181 |
| MmugDNA.37254.1.S1_at   | MmugDNA.37254.1 | 6.25  | 5.68  | 0.43 | 0.08 | 1.49  | 0.050586 | 0.010212 | 0.282639 | 0.132485 |
| MmugDNA.37255.1.S1_at   | MmugDNA.37255.1 | 5.75  | 5.77  | 0.16 | 0.08 | -1.01 | 0.326037 | 0.547737 | 0.609265 | 0.728658 |
| MmugDNA.37256.1.S1_at   | MmugDNA.37256.1 | 5.97  | 5.63  | 0.1  | 0.21 | 1.27  | 0.104029 | 0.89213  | 0.377324 | 0.938526 |
| MmugDNA.37258.1.S1_at   | MmugDNA.37258.1 | 6.42  | 6.05  | 0.24 | 0.17 | 1.29  | 0.040366 | 0.002605 | 0.257247 | 0.075487 |
| MmugDNA.37259.1.S1_at   | MmugDNA.37259.1 | 8.47  | 8.65  | 0.22 | 0.25 | -1.13 | 0.590242 | 0.318345 | 0.791777 | 0.571192 |
| MmugDNA.3726.1.S1_at    | MmugDNA.3726.1  | 7.44  | 7.47  | 0.07 | 0.07 | -1.02 | 0.685824 | 0.103235 | 0.850363 | 0.364143 |
| MmugDNA.37260.1.S1_at   | MmugDNA.37260.1 | 6.48  | 6.17  | 0.28 | 0.21 | 1.24  | 0.278615 | 0.645172 | 0.569962 | 0.792081 |
| MmugDNA.37263.1.S1_at   | MmugDNA.37263.1 | 6.05  | 5.73  | 0.48 | 0.1  | 1.25  | 0.30946  | 0.391329 | 0.595823 | 0.625003 |
| MmugDNA.37264.1.S1_at   | MmugDNA.37264.1 | 7.66  | 7.7   | 0.09 | 0.07 | -1.03 | 0.663757 | 0.656955 | 0.837999 | 0.799401 |
| MmugDNA.37266.1.S1_at   | MmugDNA.37266.1 | 5.13  | 5.05  | 0.03 | 0.05 | 1.05  | 0.273152 | 0.387023 | 0.565251 | 0.621935 |
| MmugDNA.37267.1.S1_at   | MmugDNA.37267.1 | 3.42  | 3.39  | 0.37 | 0.02 | 1.02  | 0.340538 | 0.556233 | 0.620818 | 0.734449 |
| MmugDNA.3727.1.S1_at    | MmugDNA.3727.1  | 3.92  | 3.98  | 0.04 | 0.04 | -1.04 | 0.14049  | 0.354542 | 0.426202 | 0.59726  |
| MmugDNA.37273.1.S1_at   | MmugDNA.37273.1 | 6.52  | 6.58  | 0.35 | 0.22 | -1.05 | 0.608141 | 0.738169 | 0.804287 | 0.848203 |
| MmugDNA.37275.1.S1_at   | MmugDNA.37275.1 | 9.06  | 8.67  | 0.64 | 0.32 | 1.31  | 0.451494 | 0.431692 | 0.702357 | 0.652516 |
| MmugDNA.37278.1.S1_at   | MmugDNA.37278.1 | 9.36  | 9.07  | 0.11 | 0.1  | 1.23  | 0.026146 | 0.033623 | 0.214757 | 0.227006 |
| MmugDNA.37279.1.S1_at   | MmugDNA.37279.1 | 6.3   | 6.61  | 0.16 | 0.05 | -1.23 | 0.043626 | 0.138728 | 0.265882 | 0.411807 |
| MmugDNA.3728.1.S1_at    | MmugDNA.3728.1  | 3.08  | 3.03  | 0.16 | 0.08 | 1.04  | 0.290133 | 0.334668 | 0.579635 | 0.582581 |
| MmugDNA.37280.1.S1_at   | MmugDNA.37280.1 | 3.04  | 3.16  | 0.2  | 0.05 | -1.09 | 0.742879 | 0.348932 | 0.881088 | 0.592945 |
| MmugDNA.37282.1.S1_at   | MmugDNA.37282.1 | 4.83  | 4.83  | 0.08 | 0.22 | -1    | 0.816747 | 0.745537 | 0.918114 | 0.852445 |
| MmugDNA.37283.1.S1_at   | MmugDNA.37283.1 | 7.36  | 6.78  | 0.92 | 0.31 | 1.49  | 0.49873  | 0.655802 | 0.7339   | 0.798709 |
| MmugDNA.37284.1.S1_at   | MmugDNA.37284.1 | 4.44  | 4.15  | 0.45 | 0.36 | 1.23  | 0.352094 | 0.464078 | 0.62962  | 0.67485  |
| MmugDNA.37285.1.S1_at   | MmugDNA.37285.1 | 8.78  | 8.56  | 0.2  | 0.04 | 1.16  | 0.09983  | 0.033542 | 0.370801 | 0.226764 |
| MmugDNA.37287.1.S1_at   | MmugDNA.37287.1 | 5.91  | 5.91  | 0.52 | 0.05 | 1     | 0.607548 | 0.474537 | 0.803785 | 0.681511 |
| MmugDNA.37287.1.S1_s_at | MmugDNA.37287.1 | 5.98  | 6     | 0.58 | 0.09 | -1.02 | 0.761171 | 0.610037 | 0.890565 | 0.768323 |
| MmugDNA.37288.1.S1_at   | MmugDNA.37288.1 | 7.76  | 6.36  | 0.3  | 0.58 | 2.64  | 0.056955 | 0.074915 | 0.295915 | 0.318845 |
| MmugDNA.3729.1.S1_at    | MmugDNA.3729.1  | 7.32  | 6.66  | 0.42 | 0.18 | 1.57  | 0.145562 | 0.239306 | 0.432943 | 0.509995 |
| MmugDNA.37291.1.S1_at   | MmugDNA.37291.1 | 2.81  | 2.82  | 1.01 | 0.19 | -1.01 | 0.487367 | 0.551775 | 0.726153 | 0.73122  |
| MmugDNA.37291.1.S1_x_at | MmugDNA.37291.1 | 3.09  | 3     | 0.68 | 0.27 | 1.07  | 0.33181  | 0.304776 | 0.613734 | 0.561922 |
| MmugDNA.37293.1.S1_at   | MmugDNA.37293.1 | 8.48  | 9.48  | 0.24 | 0.21 | -1.99 | 0.010454 | 0.004452 | 0.152221 | 0.092997 |
| MmugDNA.37294.1.S1_at   | MmugDNA.37294.1 | 6.15  | 6.19  | 0.2  | 0.04 | -1.02 | 0.211063 | 0.287624 | 0.508865 | 0.548885 |
| MmugDNA.37295.1.S1_at   | MmugDNA.37295.1 | 4.61  | 4.39  | 0.3  | 0.32 | 1.17  | 0.141037 | 0.35499  | 0.426881 | 0.597466 |

|                       |                 |       |       |      |      |       |          |          |          |          |
|-----------------------|-----------------|-------|-------|------|------|-------|----------|----------|----------|----------|
| MmugDNA.37296.1.S1_at | MmugDNA.37296.1 | 11.83 | 11.33 | 0.11 | 0.01 | 1.41  | 0.002048 | 0.122713 | 0.090054 | 0.392719 |
| MmugDNA.37298.1.S1_at | MmugDNA.37298.1 | 4.37  | 4.34  | 0.91 | 0.1  | 1.02  | 0.522465 | 0.713295 | 0.749811 | 0.833666 |
| MmugDNA.37299.1.S1_at | MmugDNA.37299.1 | 4.49  | 4.11  | 0.28 | 0.08 | 1.3   | 0.07618  | 0.064877 | 0.334238 | 0.300746 |
| MmugDNA.373.1.S1_at   | MmugDNA.373.1   | 7.05  | 6.82  | 0.17 | 0.09 | 1.17  | 0.146886 | 0.345152 | 0.434875 | 0.590424 |
| MmugDNA.3730.1.S1_at  | MmugDNA.3730.1  | 5.58  | 5.55  | 0.34 | 0.17 | 1.02  | 0.493452 | 0.712526 | 0.730403 | 0.833383 |
| MmugDNA.37300.1.S1_at | MmugDNA.37300.1 | 4.84  | 4.75  | 0.26 | 0.05 | 1.06  | 0.895161 | 0.202006 | 0.955278 | 0.476444 |
| MmugDNA.37301.1.S1_at | MmugDNA.37301.1 | 4.8   | 4.68  | 0.2  | 0.07 | 1.09  | 0.144033 | 0.193954 | 0.430892 | 0.469068 |
| MmugDNA.37302.1.S1_at | MmugDNA.37302.1 | 5.19  | 5.09  | 0.1  | 0.16 | 1.07  | 0.885063 | 0.973565 | 0.951023 | 0.985645 |
| MmugDNA.37303.1.S1_at | MmugDNA.37303.1 | 10.35 | 9.67  | 0.2  | 0.11 | 1.6   | 0.003799 | 0.356909 | 0.106813 | 0.598699 |
| MmugDNA.37305.1.S1_at | MmugDNA.37305.1 | 3.86  | 3.59  | 0.54 | 0.2  | 1.21  | 0.301652 | 0.512623 | 0.589509 | 0.706442 |
| MmugDNA.37309.1.S1_at | MmugDNA.37309.1 | 3.81  | 3.63  | 0.19 | 0.15 | 1.13  | 0.242449 | 0.212048 | 0.539382 | 0.486013 |
| MmugDNA.3731.1.S1_at  | MmugDNA.3731.1  | 11.87 | 11.63 | 0.03 | 0.05 | 1.19  | 0.001339 | 0.005302 | 0.079218 | 0.100817 |
| MmugDNA.37311.1.S1_at | MmugDNA.37311.1 | 7.95  | 7.79  | 0.12 | 0.11 | 1.12  | 0.181154 | 0.062156 | 0.476453 | 0.296237 |
| MmugDNA.37312.1.S1_at | MmugDNA.37312.1 | 3.97  | 3.9   | 0.03 | 0.16 | 1.05  | 0.153426 | 0.2522   | 0.443218 | 0.520864 |
| MmugDNA.37313.1.S1_at | MmugDNA.37313.1 | 9.92  | 9.28  | 0.08 | 0.21 | 1.56  | 0.015595 | 0.081529 | 0.177369 | 0.329764 |
| MmugDNA.37314.1.S1_at | MmugDNA.37314.1 | 7.45  | 7.39  | 0.35 | 0.24 | 1.04  | 0.890957 | 0.156214 | 0.95346  | 0.43161  |
| MmugDNA.37315.1.S1_at | MmugDNA.37315.1 | 6.77  | 7.14  | 0.75 | 0.08 | -1.29 | 0.965019 | 0.914644 | 0.985888 | 0.952011 |
| MmugDNA.37318.1.S1_at | MmugDNA.37318.1 | 11.32 | 11.75 | 0.26 | 0.04 | -1.34 | 0.022644 | 0.02635  | 0.203573 | 0.203321 |
| MmugDNA.37319.1.S1_at | MmugDNA.37319.1 | 4.69  | 4.67  | 0.02 | 0.17 | 1.02  | 0.273389 | 0.306456 | 0.565532 | 0.563029 |
| MmugDNA.3732.1.S1_at  | MmugDNA.3732.1  | 9.69  | 9.71  | 0.18 | 0.11 | -1.02 | 0.817575 | 0.080654 | 0.918483 | 0.328444 |
| MmugDNA.37320.1.S1_at | MmugDNA.37320.1 | 4.96  | 4.93  | 0.06 | 0.17 | 1.02  | 0.568398 | 0.747821 | 0.77836  | 0.853252 |
| MmugDNA.37323.1.S1_at | MmugDNA.37323.1 | 3.33  | 3.36  | 0.59 | 0.29 | -1.02 | 0.275788 | 0.411843 | 0.567342 | 0.638434 |
| MmugDNA.37324.1.S1_at | MmugDNA.37324.1 | 4.09  | 4.11  | 0.08 | 0.12 | -1.01 | 0.986296 | 0.687424 | 0.995212 | 0.817583 |
| MmugDNA.37325.1.S1_at | MmugDNA.37325.1 | 6.47  | 6.55  | 0.38 | 0.02 | -1.05 | 0.870488 | 0.839309 | 0.944238 | 0.908404 |
| MmugDNA.37326.1.S1_at | MmugDNA.37326.1 | 4.57  | 4.82  | 0.27 | 0.07 | -1.19 | 0.145242 | 0.314156 | 0.432542 | 0.568185 |
| MmugDNA.37328.1.S1_at | MmugDNA.37328.1 | 5.68  | 6.22  | 0.56 | 0.2  | -1.46 | 0.384645 | 0.529272 | 0.653612 | 0.717233 |
| MmugDNA.37329.1.S1_at | MmugDNA.37329.1 | 3.86  | 3.34  | 0.77 | 0.11 | 1.43  | 0.29802  | 0.322683 | 0.586466 | 0.574036 |
| MmugDNA.37330.1.S1_at | MmugDNA.37330.1 | 4.92  | 4.77  | 0.29 | 0.12 | 1.11  | 0.682531 | 0.505624 | 0.848621 | 0.702218 |
| MmugDNA.37331.1.S1_at | MmugDNA.37331.1 | 3.42  | 3.15  | 0.13 | 0.11 | 1.2   | 0.085726 | 0.103582 | 0.350079 | 0.364346 |
| MmugDNA.37333.1.S1_at | MmugDNA.37333.1 | 4.82  | 4.77  | 0.29 | 0.16 | 1.03  | 0.424794 | 0.517314 | 0.682288 | 0.709435 |
| MmugDNA.37334.1.S1_at | MmugDNA.37334.1 | 8.98  | 8.77  | 0.11 | 0.15 | 1.16  | 0.270388 | 0.202025 | 0.562581 | 0.476448 |
| MmugDNA.37335.1.S1_at | MmugDNA.37335.1 | 4.73  | 4.72  | 0.54 | 0.06 | 1.01  | 0.521435 | 0.675034 | 0.749331 | 0.810141 |
| MmugDNA.37338.1.S1_at | MmugDNA.37338.1 | 7.81  | 7.87  | 0.08 | 0.12 | -1.04 | 0.475456 | 0.682096 | 0.718106 | 0.814349 |
| MmugDNA.37339.1.S1_at | MmugDNA.37339.1 | 13.91 | 13.84 | 0.04 | 0.05 | 1.05  | 0.03696  | 0.015934 | 0.247484 | 0.160235 |
| MmugDNA.3734.1.S1_at  | MmugDNA.3734.1  | 9.06  | 9.75  | 0.32 | 0.09 | -1.62 | 0.045828 | 0.002185 | 0.271553 | 0.069035 |
| MmugDNA.37340.1.S1_at | MmugDNA.37340.1 | 10.66 | 10.59 | 0.17 | 0.26 | 1.05  | 0.992593 | 0.095706 | 0.997226 | 0.352725 |
| MmugDNA.37342.1.S1_at | MmugDNA.37342.1 | 5.17  | 5.13  | 0.26 | 0.05 | 1.03  | 0.286611 | 0.482779 | 0.576462 | 0.687556 |
| MmugDNA.37344.1.S1_at | MmugDNA.37344.1 | 4.02  | 3.78  | 0.07 | 0.04 | 1.18  | 0.006079 | 0.039478 | 0.124422 | 0.243642 |
| MmugDNA.37347.1.S1_at | MmugDNA.37347.1 | 5.57  | 5.69  | 0.39 | 0.18 | -1.09 | 0.917754 | 0.517542 | 0.96488  | 0.709668 |
| MmugDNA.37349.1.S1_at | MmugDNA.37349.1 | 8.87  | 8.47  | 0.07 | 0.13 | 1.33  | 0.011909 | 0.007508 | 0.159222 | 0.116291 |
| MmugDNA.3735.1.S1_at  | MmugDNA.3735.1  | 8.69  | 8.57  | 0.05 | 0.12 | 1.09  | 0.069146 | 0.539469 | 0.321044 | 0.723763 |
| MmugDNA.37350.1.S1_at | MmugDNA.37350.1 | 8.01  | 6.76  | 0.55 | 0.23 | 2.38  | 0.023187 | 0.009418 | 0.205385 | 0.127871 |
| MmugDNA.37351.1.S1_at | MmugDNA.37351.1 | 3.74  | 3.55  | 0.25 | 0.14 | 1.14  | 0.175067 | 0.369644 | 0.469373 | 0.608957 |

|                         |                 |       |       |      |      |       |          |          |          |          |
|-------------------------|-----------------|-------|-------|------|------|-------|----------|----------|----------|----------|
| MmugDNA.37352.1.S1_at   | MmugDNA.37352.1 | 11.61 | 11.36 | 0.22 | 0.08 | 1.19  | 0.066777 | 0.073072 | 0.31618  | 0.316017 |
| MmugDNA.37353.1.S1_at   | MmugDNA.37353.1 | 6.98  | 6.85  | 0.12 | 0.11 | 1.09  | 0.117254 | 0.156297 | 0.39452  | 0.43161  |
| MmugDNA.37354.1.S1_at   | MmugDNA.37354.1 | 4.94  | 4.76  | 0.18 | 0.14 | 1.13  | 0.56173  | 0.53434  | 0.774566 | 0.720334 |
| MmugDNA.37355.1.S1_at   | MmugDNA.37355.1 | 2.98  | 2.92  | 0.01 | 0.09 | 1.04  | 0.103771 | 0.231531 | 0.377045 | 0.503325 |
| MmugDNA.37356.1.S1_at   | MmugDNA.37356.1 | 5.26  | 5.09  | 0.14 | 0.2  | 1.13  | 0.466505 | 0.828582 | 0.712253 | 0.901537 |
| MmugDNA.37357.1.S1_at   | MmugDNA.37357.1 | 3.84  | 3.76  | 0.23 | 0.05 | 1.05  | 0.543418 | 0.6598   | 0.763461 | 0.800871 |
| MmugDNA.37358.1.S1_at   | MmugDNA.37358.1 | 3.85  | 3.63  | 0.35 | 0.32 | 1.16  | 0.832221 | 0.357341 | 0.926055 | 0.598949 |
| MmugDNA.37359.1.S1_at   | MmugDNA.37359.1 | 5.98  | 6.02  | 0.12 | 0.34 | -1.03 | 0.879698 | 0.774552 | 0.948777 | 0.868769 |
| MmugDNA.37360.1.S1_at   | MmugDNA.37360.1 | 8.28  | 7.85  | 0.07 | 0.09 | 1.34  | 0.001861 | 0.108599 | 0.087387 | 0.372171 |
| MmugDNA.37361.1.S1_at   | MmugDNA.37361.1 | 11.2  | 11.19 | 0.18 | 0.16 | 1.01  | 0.455454 | 0.063692 | 0.705136 | 0.298842 |
| MmugDNA.37363.1.S1_s_at | MmugDNA.37363.1 | 7.08  | 6.92  | 0.11 | 0.11 | 1.12  | 0.128264 | 0.027147 | 0.410227 | 0.205893 |
| MmugDNA.37365.1.S1_at   | MmugDNA.37365.1 | 5.2   | 5.77  | 0.29 | 0.47 | -1.49 | 0.153745 | 0.111217 | 0.443798 | 0.375856 |
| MmugDNA.37367.1.S1_at   | MmugDNA.37367.1 | 6.65  | 6.76  | 0.24 | 0.06 | -1.08 | 0.577078 | 0.154106 | 0.783459 | 0.42887  |
| MmugDNA.37368.1.S1_at   | MmugDNA.37368.1 | 8.22  | 9.06  | 0.41 | 0.25 | -1.79 | 0.040227 | 0.011017 | 0.257084 | 0.136715 |
| MmugDNA.37369.1.S1_x_at | MmugDNA.37369.1 | 8.16  | 8.14  | 0.36 | 0.07 | 1.01  | 0.725987 | 0.913411 | 0.871415 | 0.951233 |
| MmugDNA.3737.1.S1_at    | MmugDNA.3737.1  | 10.79 | 11.01 | 0.05 | 0.06 | -1.17 | 0.017165 | 0.153233 | 0.184254 | 0.428062 |
| MmugDNA.37370.1.S1_at   | MmugDNA.37370.1 | 5.68  | 5.57  | 0.11 | 0.04 | 1.08  | 0.242064 | 0.024718 | 0.539116 | 0.19685  |
| MmugDNA.37371.1.S1_at   | MmugDNA.37371.1 | 6.81  | 6.77  | 0.24 | 0.13 | 1.03  | 0.890784 | 0.50729  | 0.95342  | 0.702917 |
| MmugDNA.37372.1.S1_at   | MmugDNA.37372.1 | 6.34  | 6.94  | 0.62 | 0.17 | -1.52 | 0.360874 | 0.160876 | 0.636345 | 0.437116 |
| MmugDNA.37373.1.S1_at   | MmugDNA.37373.1 | 5.65  | 5.66  | 0.14 | 0.16 | -1.01 | 0.903884 | 0.812729 | 0.959303 | 0.891794 |
| MmugDNA.37375.1.S1_at   | MmugDNA.37375.1 | 6.45  | 6.7   | 0.53 | 0.54 | -1.19 | 0.326542 | 0.030968 | 0.609577 | 0.217844 |
| MmugDNA.37376.1.S1_at   | MmugDNA.37376.1 | 3.68  | 3.69  | 0.06 | 0.22 | -1.01 | 0.663115 | 0.800973 | 0.837472 | 0.885538 |
| MmugDNA.37377.1.S1_at   | MmugDNA.37377.1 | 4.17  | 3.95  | 0.29 | 0.14 | 1.17  | 0.488142 | 0.6315   | 0.726694 | 0.782845 |
| MmugDNA.37378.1.S1_at   | MmugDNA.37378.1 | 7.05  | 7.52  | 0.36 | 0.16 | -1.39 | 0.312573 | 0.161895 | 0.598615 | 0.437979 |
| MmugDNA.37379.1.S1_at   | MmugDNA.37379.1 | 4.32  | 3.93  | 0.2  | 0.2  | 1.31  | 0.057249 | 0.043105 | 0.296612 | 0.25227  |
| MmugDNA.3738.1.S1_at    | MmugDNA.3738.1  | 4.5   | 4.86  | 0.21 | 0.06 | -1.28 | 0.157195 | 0.154326 | 0.447994 | 0.429188 |
| MmugDNA.37380.1.S1_at   | MmugDNA.37380.1 | 4.98  | 5.14  | 0.16 | 0.02 | -1.12 | 0.194223 | 0.210794 | 0.490803 | 0.484883 |
| MmugDNA.37381.1.S1_at   | MmugDNA.37381.1 | 6.28  | 6.68  | 0.25 | 0.22 | -1.32 | 0.30794  | 0.051783 | 0.59471  | 0.273124 |
| MmugDNA.37382.1.S1_s_at | MmugDNA.37382.1 | 11.83 | 12.3  | 0.16 | 0.04 | -1.39 | 0.006781 | 0.250421 | 0.129089 | 0.519391 |
| MmugDNA.37383.1.S1_at   | MmugDNA.37383.1 | 6.75  | 6.54  | 0.47 | 0.43 | 1.16  | 0.639835 | 0.846836 | 0.823812 | 0.912887 |
| MmugDNA.37384.1.S1_at   | MmugDNA.37384.1 | 3.29  | 3.35  | 0.09 | 0.25 | -1.04 | 0.687518 | 0.319914 | 0.850804 | 0.572268 |
| MmugDNA.37386.1.S1_at   | MmugDNA.37386.1 | 8.45  | 10.12 | 0.9  | 0.3  | -3.18 | 0.070107 | 0.124443 | 0.323085 | 0.394865 |
| MmugDNA.37387.1.S1_at   | MmugDNA.37387.1 | 9.08  | 8.75  | 0.54 | 0.09 | 1.25  | 0.285498 | 0.120393 | 0.575251 | 0.38925  |
| MmugDNA.37387.1.S1_x_at | MmugDNA.37387.1 | 10.83 | 10.79 | 0.51 | 0.08 | 1.03  | 0.270136 | 0.13288  | 0.562321 | 0.404544 |
| MmugDNA.37388.1.S1_at   | MmugDNA.37388.1 | 10.52 | 10.36 | 0.35 | 0.14 | 1.12  | 0.949414 | 0.101493 | 0.978893 | 0.361307 |
| MmugDNA.3739.1.S1_at    | MmugDNA.3739.1  | 9.59  | 9.55  | 0.05 | 0.03 | 1.02  | 0.41742  | 0.642605 | 0.677553 | 0.790344 |
| MmugDNA.37390.1.S1_at   | MmugDNA.37390.1 | 9.76  | 8.1   | 0.18 | 0.23 | 3.16  | 0.000533 | 0.000134 | 0.069726 | 0.029087 |
| MmugDNA.37392.1.S1_at   | MmugDNA.37392.1 | 3.12  | 3.25  | 0.27 | 0.18 | -1.09 | 0.860477 | 0.979325 | 0.939526 | 0.988846 |
| MmugDNA.37394.1.S1_at   | MmugDNA.37394.1 | 4.79  | 4.82  | 0.06 | 0.11 | -1.02 | 0.328756 | 0.118139 | 0.611086 | 0.386045 |
| MmugDNA.37395.1.S1_at   | MmugDNA.37395.1 | 4.42  | 4.39  | 0.22 | 0.18 | 1.03  | 0.991219 | 0.798614 | 0.996767 | 0.884032 |
| MmugDNA.37396.1.S1_at   | MmugDNA.37396.1 | 2.9   | 2.9   | 0    | 0.12 | -1    | 0.403409 | 0.652534 | 0.66755  | 0.796827 |
| MmugDNA.37397.1.S1_at   | MmugDNA.37397.1 | 6.32  | 6.37  | 0.09 | 0.04 | -1.03 | 0.567843 | 0.306642 | 0.777977 | 0.563221 |
| MmugDNA.37398.1.S1_at   | MmugDNA.37398.1 | 8.97  | 8.95  | 0.08 | 0.07 | 1.02  | 0.635178 | 0.251967 | 0.821215 | 0.520646 |



|                         |                 |       |       |      |      |       |          |          |          |          |
|-------------------------|-----------------|-------|-------|------|------|-------|----------|----------|----------|----------|
| MmugDNA.37399.1.S1_at   | MmugDNA.37399.1 | 8.34  | 8.18  | 0.38 | 0.08 | 1.11  | 0.246208 | 0.268478 | 0.541963 | 0.534123 |
| MmugDNA.374.1.S1_at     | MmugDNA.374.1   | 5.3   | 5.23  | 0.08 | 0.15 | 1.05  | 0.105834 | 0.116431 | 0.379857 | 0.383671 |
| MmugDNA.3740.1.S1_at    | MmugDNA.3740.1  | 4.87  | 4.86  | 0.19 | 0.08 | 1.01  | 0.92225  | 0.804344 | 0.966724 | 0.887476 |
| MmugDNA.37400.1.S1_at   | MmugDNA.37400.1 | 9.69  | 9.67  | 0.26 | 0.06 | 1.02  | 0.817518 | 0.960134 | 0.918474 | 0.977408 |
| MmugDNA.37401.1.S1_at   | MmugDNA.37401.1 | 4.16  | 4.19  | 0.22 | 0.43 | -1.02 | 0.969188 | 0.942511 | 0.98776  | 0.967399 |
| MmugDNA.37402.1.S1_at   | MmugDNA.37402.1 | 7     | 6.56  | 0.34 | 0.05 | 1.35  | 0.081306 | 0.215469 | 0.342222 | 0.489168 |
| MmugDNA.37405.1.S1_at   | MmugDNA.37405.1 | 9.46  | 9.73  | 0.14 | 0.27 | -1.2  | 0.180253 | 0.261726 | 0.475396 | 0.528157 |
| MmugDNA.37409.1.S1_at   | MmugDNA.37409.1 | 4.12  | 3.97  | 0.1  | 0.04 | 1.11  | 0.076856 | 0.599354 | 0.335302 | 0.761418 |
| MmugDNA.37411.1.S1_at   | MmugDNA.37411.1 | 7.17  | 7.45  | 0.07 | 0.04 | -1.22 | 0.002625 | 0.002246 | 0.095228 | 0.069739 |
| MmugDNA.37412.1.S1_at   | MmugDNA.37412.1 | 9.37  | 9.05  | 0.21 | 0.17 | 1.25  | 0.552495 | 0.173451 | 0.769177 | 0.449938 |
| MmugDNA.37413.1.S1_at   | MmugDNA.37413.1 | 4.84  | 4.79  | 0.21 | 0.08 | 1.04  | 0.258445 | 0.312584 | 0.552539 | 0.567268 |
| MmugDNA.37415.1.S1_at   | MmugDNA.37415.1 | 7.99  | 8.03  | 0.17 | 0.04 | -1.03 | 0.534515 | 0.828293 | 0.757746 | 0.901315 |
| MmugDNA.37416.1.S1_at   | MmugDNA.37416.1 | 6.37  | 6.72  | 0.66 | 0.44 | -1.27 | 0.223905 | 0.155698 | 0.521914 | 0.431054 |
| MmugDNA.37417.1.S1_s_at | MmugDNA.37417.1 | 8.5   | 8.19  | 0.27 | 0.08 | 1.24  | 0.475327 | 0.694354 | 0.71807  | 0.822254 |
| MmugDNA.37418.1.S1_at   | MmugDNA.37418.1 | 10.63 | 10.24 | 0.26 | 0.06 | 1.31  | 0.204549 | 0.180214 | 0.502251 | 0.456777 |
| MmugDNA.37419.1.S1_at   | MmugDNA.37419.1 | 3.12  | 2.76  | 0.28 | 0.07 | 1.28  | 0.219948 | 0.408819 | 0.517641 | 0.6359   |
| MmugDNA.3742.1.S1_at    | MmugDNA.3742.1  | 12.51 | 12.48 | 0.05 | 0.09 | 1.02  | 0.139473 | 0.071304 | 0.425004 | 0.31334  |
| MmugDNA.37421.1.S1_at   | MmugDNA.37421.1 | 4.99  | 4.94  | 0.4  | 0.13 | 1.03  | 0.225613 | 0.284339 | 0.523395 | 0.54659  |
| MmugDNA.37423.1.S1_at   | MmugDNA.37423.1 | 3.24  | 3.38  | 0.04 | 0.07 | -1.1  | 0.043918 | 0.537027 | 0.266559 | 0.722236 |
| MmugDNA.37424.1.S1_at   | MmugDNA.37424.1 | 5.3   | 4.28  | 0.19 | 0.17 | 2.04  | 0.002202 | 0.000804 | 0.090729 | 0.04607  |
| MmugDNA.37425.1.S1_at   | MmugDNA.37425.1 | 5.23  | 5.25  | 0.04 | 0.12 | -1.01 | 0.260583 | 0.591264 | 0.554645 | 0.75685  |
| MmugDNA.37427.1.S1_at   | MmugDNA.37427.1 | 6.76  | 6.73  | 0.36 | 0.05 | 1.02  | 0.714767 | 0.889698 | 0.865187 | 0.937154 |
| MmugDNA.37428.1.S1_at   | MmugDNA.37428.1 | 8.62  | 8.56  | 0.22 | 0.15 | 1.04  | 0.838451 | 0.988727 | 0.929122 | 0.993595 |
| MmugDNA.37429.1.S1_at   | MmugDNA.37429.1 | 3.05  | 3.02  | 0.12 | 0.05 | 1.02  | 0.866348 | 0.394048 | 0.942279 | 0.626734 |
| MmugDNA.37432.1.S1_at   | MmugDNA.37432.1 | 4.18  | 4.03  | 0.08 | 0.07 | 1.11  | 0.260498 | 0.342861 | 0.554576 | 0.588712 |
| MmugDNA.37433.1.S1_at   | MmugDNA.37433.1 | 4.51  | 4.51  | 0.18 | 0.08 | 1     | 0.65006  | 0.337258 | 0.830164 | 0.584455 |
| MmugDNA.37434.1.S1_at   | MmugDNA.37434.1 | 11.38 | 11.31 | 0.18 | 0.15 | 1.05  | 0.914908 | 0.733836 | 0.963876 | 0.845891 |
| MmugDNA.37435.1.S1_s_at | MmugDNA.37435.1 | 2.5   | 2.51  | 0    | 0.1  | -1.01 | 0.794033 | 0.711125 | 0.906975 | 0.832417 |
| MmugDNA.37436.1.S1_at   | MmugDNA.37436.1 | 10.83 | 10.89 | 0.33 | 0.13 | -1.04 | 0.912681 | 0.70464  | 0.963141 | 0.828661 |
| MmugDNA.37437.1.S1_at   | MmugDNA.37437.1 | 3.25  | 3.12  | 0.28 | 0.08 | 1.09  | 0.943814 | 0.992643 | 0.976378 | 0.995715 |
| MmugDNA.37438.1.S1_at   | MmugDNA.37438.1 | 4.39  | 4.27  | 0.76 | 0.1  | 1.09  | 0.491708 | 0.694082 | 0.729361 | 0.82208  |
| MmugDNA.37439.1.S1_at   | MmugDNA.37439.1 | 10.03 | 10.11 | 0.27 | 0.12 | -1.06 | 0.536431 | 0.192793 | 0.759058 | 0.468274 |
| MmugDNA.3744.1.S1_at    | MmugDNA.3744.1  | 5.57  | 6.14  | 0.84 | 0.36 | -1.49 | 0.887132 | 0.802945 | 0.951902 | 0.886524 |
| MmugDNA.37440.1.S1_at   | MmugDNA.37440.1 | 8.77  | 8.82  | 0.15 | 0.23 | -1.03 | 0.653729 | 0.055622 | 0.832375 | 0.281649 |
| MmugDNA.37441.1.S1_s_at | MmugDNA.37441.1 | 7.74  | 7.65  | 0.14 | 0.1  | 1.07  | 0.773147 | 0.800143 | 0.89602  | 0.885076 |
| MmugDNA.37442.1.S1_at   | MmugDNA.37442.1 | 7.45  | 7.67  | 0.35 | 0.11 | -1.16 | 0.510979 | 0.32408  | 0.742253 | 0.574761 |
| MmugDNA.37443.1.S1_at   | MmugDNA.37443.1 | 6.06  | 6.35  | 0.57 | 0.19 | -1.22 | 0.328762 | 0.887298 | 0.611086 | 0.93582  |
| MmugDNA.37445.1.S1_at   | MmugDNA.37445.1 | 6.68  | 6.74  | 0.17 | 0.05 | -1.05 | 0.494483 | 0.019458 | 0.731233 | 0.175136 |
| MmugDNA.37446.1.S1_at   | MmugDNA.37446.1 | 5.86  | 5.61  | 0.44 | 0.51 | 1.19  | 0.836908 | 0.252767 | 0.928541 | 0.521174 |
| MmugDNA.37447.1.S1_at   | MmugDNA.37447.1 | 12.24 | 12.18 | 0.03 | 0.04 | 1.05  | 0.049902 | 0.004563 | 0.281011 | 0.094373 |
| MmugDNA.37449.1.S1_s_at | MmugDNA.37449.1 | 7.8   | 6.99  | 0.01 | 0.14 | 1.75  | 0.000782 | 0.001316 | 0.072818 | 0.055939 |
| MmugDNA.3745.1.S1_at    | MmugDNA.3745.1  | 6.68  | 6.57  | 0.16 | 0.08 | 1.08  | 0.152097 | 0.304223 | 0.441609 | 0.561558 |
| MmugDNA.37452.1.S1_at   | MmugDNA.37452.1 | 3.06  | 3.15  | 0.05 | 0.12 | -1.07 | 0.161855 | 0.27088  | 0.453651 | 0.536026 |

|                         |                 |       |       |      |      |       |          |          |          |          |
|-------------------------|-----------------|-------|-------|------|------|-------|----------|----------|----------|----------|
| MmugDNA.37453.1.S1_at   | MmugDNA.37453.1 | 11.27 | 11.11 | 0.05 | 0.02 | 1.12  | 0.004921 | 0.350085 | 0.115175 | 0.593862 |
| MmugDNA.37453.1.S1_s_at | MmugDNA.37453.1 | 5.7   | 5.72  | 0.16 | 0.34 | -1.01 | 0.875235 | 0.969791 | 0.946453 | 0.983498 |
| MmugDNA.37454.1.S1_at   | MmugDNA.37454.1 | 6.08  | 7.33  | 0.53 | 0.16 | -2.39 | 0.044036 | 0.188212 | 0.266926 | 0.464251 |
| MmugDNA.37455.1.S1_at   | MmugDNA.37455.1 | 8.3   | 7.55  | 0.36 | 0.11 | 1.68  | 0.034224 | 0.546917 | 0.239698 | 0.728281 |
| MmugDNA.37456.1.S1_at   | MmugDNA.37456.1 | 2.92  | 3.03  | 0.08 | 0.06 | -1.08 | 0.149199 | 0.162009 | 0.437947 | 0.438108 |
| MmugDNA.37457.1.S1_at   | MmugDNA.37457.1 | 5.08  | 5.47  | 0.1  | 0.49 | -1.3  | 0.289563 | 0.398411 | 0.579093 | 0.629374 |
| MmugDNA.37458.1.S1_at   | MmugDNA.37458.1 | 6.52  | 6.46  | 0.2  | 0.08 | 1.04  | 0.616543 | 0.549686 | 0.809516 | 0.730002 |
| MmugDNA.37459.1.S1_at   | MmugDNA.37459.1 | 4.71  | 4.63  | 0.14 | 0.1  | 1.05  | 0.792039 | 0.418833 | 0.905632 | 0.643118 |
| MmugDNA.37460.1.S1_at   | MmugDNA.37460.1 | 6.95  | 6.81  | 0.11 | 0.17 | 1.1   | 0.301932 | 0.036262 | 0.589861 | 0.235    |
| MmugDNA.37462.1.S1_at   | MmugDNA.37462.1 | 9.66  | 8.96  | 0.28 | 0.13 | 1.62  | 0.025012 | 0.296401 | 0.211194 | 0.555509 |
| MmugDNA.37463.1.S1_at   | MmugDNA.37463.1 | 8.42  | 8.69  | 0.13 | 0.08 | -1.21 | 0.01054  | 0.000644 | 0.152509 | 0.042928 |
| MmugDNA.37464.1.S1_at   | MmugDNA.37464.1 | 5.8   | 5.77  | 0.12 | 0.08 | 1.02  | 0.936149 | 0.986901 | 0.973303 | 0.992589 |
| MmugDNA.37465.1.S1_at   | MmugDNA.37465.1 | 4.16  | 3.97  | 0.29 | 0.06 | 1.14  | 0.314934 | 0.49529  | 0.600177 | 0.695411 |
| MmugDNA.37466.1.S1_at   | MmugDNA.37466.1 | 5.6   | 5.41  | 0.18 | 0.09 | 1.14  | 0.069252 | 0.156308 | 0.321336 | 0.43161  |
| MmugDNA.37468.1.S1_at   | MmugDNA.37468.1 | 3.76  | 3.37  | 0.19 | 0.2  | 1.31  | 0.264709 | 0.088215 | 0.55795  | 0.341721 |
| MmugDNA.37469.1.S1_at   | MmugDNA.37469.1 | 8.02  | 7.45  | 0.47 | 0.3  | 1.48  | 0.235298 | 0.171937 | 0.533201 | 0.448352 |
| MmugDNA.37469.1.S1_x_at | MmugDNA.37469.1 | 7.57  | 7.48  | 0.27 | 0.29 | 1.07  | 0.700985 | 0.430999 | 0.857901 | 0.651988 |
| MmugDNA.3747.1.S1_at    | MmugDNA.3747.1  | 9.43  | 9.68  | 0.23 | 0.19 | -1.19 | 0.121095 | 0.000941 | 0.399629 | 0.049026 |
| MmugDNA.37471.1.S1_at   | MmugDNA.37471.1 | 4.68  | 4.53  | 0.14 | 0.1  | 1.11  | 0.154489 | 0.301496 | 0.444782 | 0.559542 |
| MmugDNA.37473.1.S1_at   | MmugDNA.37473.1 | 4.22  | 3.8   | 0.56 | 0.19 | 1.34  | 0.282148 | 0.195646 | 0.572942 | 0.470491 |
| MmugDNA.37476.1.S1_at   | MmugDNA.37476.1 | 5.34  | 5.38  | 0.39 | 0.01 | -1.02 | 0.67873  | 0.872597 | 0.846793 | 0.927568 |
| MmugDNA.37477.1.S1_at   | MmugDNA.37477.1 | 4.4   | 4.32  | 0.1  | 0.09 | 1.06  | 0.100102 | 0.405126 | 0.37088  | 0.633482 |
| MmugDNA.37478.1.S1_at   | MmugDNA.37478.1 | 4.48  | 4.37  | 0.34 | 0.14 | 1.08  | 0.146954 | 0.152601 | 0.434942 | 0.427435 |
| MmugDNA.37479.1.S1_at   | MmugDNA.37479.1 | 7.76  | 8.48  | 0.61 | 0.18 | -1.64 | 0.129633 | 0.396647 | 0.412005 | 0.628434 |
| MmugDNA.3748.1.S1_at    | MmugDNA.3748.1  | 9.55  | 9.85  | 0.26 | 0.04 | -1.23 | 0.357689 | 0.550316 | 0.633636 | 0.730382 |
| MmugDNA.37480.1.S1_at   | MmugDNA.37480.1 | 6.29  | 6.19  | 0.29 | 0.05 | 1.07  | 0.612285 | 0.870344 | 0.80677  | 0.92644  |
| MmugDNA.37481.1.S1_at   | MmugDNA.37481.1 | 3.99  | 3.9   | 0.22 | 0.06 | 1.06  | 0.380476 | 0.76208  | 0.650225 | 0.861632 |
| MmugDNA.37482.1.S1_at   | MmugDNA.37482.1 | 6.29  | 6.16  | 0.21 | 0.15 | 1.1   | 0.303904 | 0.395784 | 0.591266 | 0.627643 |
| MmugDNA.37483.1.S1_at   | MmugDNA.37483.1 | 7.35  | 7.8   | 0.07 | 0.16 | -1.36 | 0.012314 | 0.000164 | 0.161247 | 0.030506 |
| MmugDNA.37484.1.S1_at   | MmugDNA.37484.1 | 5.44  | 5.48  | 0.21 | 0.07 | -1.03 | 0.707528 | 0.628992 | 0.861502 | 0.781575 |
| MmugDNA.37485.1.S1_at   | MmugDNA.37485.1 | 7.58  | 7.19  | 0.69 | 0.1  | 1.3   | 0.5625   | 0.246396 | 0.774894 | 0.515899 |
| MmugDNA.37486.1.S1_at   | MmugDNA.37486.1 | 8.9   | 9.51  | 0.09 | 0.11 | -1.53 | 0.002442 | 0.000718 | 0.093763 | 0.044419 |
| MmugDNA.37487.1.S1_at   | MmugDNA.37487.1 | 5.1   | 5.24  | 0.92 | 0.84 | -1.11 | 0.903644 | 0.929445 | 0.959207 | 0.959707 |
| MmugDNA.37489.1.S1_at   | MmugDNA.37489.1 | 11.3  | 12.2  | 0.43 | 0.07 | -1.87 | 0.03319  | 0.179108 | 0.236343 | 0.455436 |
| MmugDNA.37490.1.S1_at   | MmugDNA.37490.1 | 4.23  | 4.25  | 0.18 | 0.08 | -1.01 | 0.964129 | 0.58583  | 0.985473 | 0.753068 |
| MmugDNA.37491.1.S1_at   | MmugDNA.37491.1 | 2.91  | 2.9   | 0.04 | 0.23 | 1.01  | 0.9155   | 0.190254 | 0.964085 | 0.465897 |
| MmugDNA.37492.1.S1_at   | MmugDNA.37492.1 | 4.32  | 4.27  | 0.08 | 0.05 | 1.04  | 0.393647 | 0.860157 | 0.660389 | 0.920266 |
| MmugDNA.37493.1.S1_at   | MmugDNA.37493.1 | 3.81  | 3.58  | 0.24 | 0.16 | 1.17  | 0.400753 | 0.202303 | 0.665557 | 0.476691 |
| MmugDNA.37495.1.S1_at   | MmugDNA.37495.1 | 4.69  | 4.52  | 0.08 | 0.23 | 1.13  | 0.437634 | 0.39314  | 0.692452 | 0.626102 |
| MmugDNA.37496.1.S1_at   | MmugDNA.37496.1 | 7.39  | 7.37  | 0.18 | 0.01 | 1.02  | 0.519721 | 0.120768 | 0.748231 | 0.389579 |
| MmugDNA.3750.1.S1_at    | MmugDNA.3750.1  | 8.24  | 8.26  | 0.15 | 0.17 | -1.01 | 0.642171 | 0.044916 | 0.825492 | 0.256424 |
| MmugDNA.37501.1.S1_at   | MmugDNA.37501.1 | 4.59  | 4.32  | 0.08 | 0.05 | 1.21  | 0.00653  | 0.041348 | 0.127373 | 0.247995 |
| MmugDNA.37506.1.S1_at   | MmugDNA.37506.1 | 6.81  | 6.63  | 0.15 | 0    | 1.13  | 0.135519 | 0.085314 | 0.419375 | 0.337155 |

|                         |                 |       |       |      |      |       |          |          |          |          |
|-------------------------|-----------------|-------|-------|------|------|-------|----------|----------|----------|----------|
| MmugDNA.37507.1.S1_at   | MmugDNA.37507.1 | 7.42  | 7.89  | 0.33 | 0.13 | -1.39 | 0.079163 | 0.088658 | 0.338971 | 0.342186 |
| MmugDNA.37508.1.S1_at   | MmugDNA.37508.1 | 3.19  | 3.06  | 0.07 | 0.22 | 1.09  | 0.732645 | 0.823175 | 0.875145 | 0.898361 |
| MmugDNA.37509.1.S1_at   | MmugDNA.37509.1 | 5.45  | 5.45  | 0.06 | 0.1  | -1    | 0.428628 | 0.858044 | 0.685445 | 0.919048 |
| MmugDNA.3751.1.S1_at    | MmugDNA.3751.1  | 8.66  | 8.67  | 0.1  | 0.08 | -1.01 | 0.473787 | 0.455559 | 0.717056 | 0.669553 |
| MmugDNA.37510.1.S1_at   | MmugDNA.37510.1 | 4.5   | 4.08  | 0.8  | 0.61 | 1.34  | 0.195829 | 0.468768 | 0.49272  | 0.677885 |
| MmugDNA.37511.1.S1_at   | MmugDNA.37511.1 | 9.81  | 8.85  | 0.62 | 0.2  | 1.94  | 0.184153 | 0.245285 | 0.480065 | 0.515054 |
| MmugDNA.37514.1.S1_at   | MmugDNA.37514.1 | 5.76  | 5.72  | 0.09 | 0.08 | 1.02  | 0.522296 | 0.551959 | 0.749753 | 0.731387 |
| MmugDNA.37515.1.S1_at   | MmugDNA.37515.1 | 11.82 | 12.02 | 0.1  | 0.03 | -1.15 | 0.015139 | 0.001044 | 0.175122 | 0.051426 |
| MmugDNA.37518.1.S1_s_at | MmugDNA.37518.1 | 11.93 | 11.76 | 0.15 | 0.15 | 1.12  | 0.137266 | 0.237007 | 0.422139 | 0.507675 |
| MmugDNA.37519.1.S1_at   | MmugDNA.37519.1 | 8.73  | 8.63  | 0.27 | 0.32 | 1.07  | 0.615716 | 0.819794 | 0.809106 | 0.896181 |
| MmugDNA.3752.1.S1_at    | MmugDNA.3752.1  | 7     | 6.5   | 0.31 | 0.42 | 1.42  | 0.195621 | 0.047607 | 0.492382 | 0.262982 |
| MmugDNA.37521.1.S1_at   | MmugDNA.37521.1 | 4.26  | 4.12  | 0.3  | 0.18 | 1.1   | 0.434737 | 0.672983 | 0.689913 | 0.808905 |
| MmugDNA.37523.1.S1_at   | MmugDNA.37523.1 | 5.56  | 6.34  | 0.58 | 0.49 | -1.72 | 0.325398 | 0.622122 | 0.608731 | 0.77667  |
| MmugDNA.37524.1.S1_at   | MmugDNA.37524.1 | 5.39  | 5.36  | 0.73 | 0.45 | 1.02  | 0.898379 | 0.183877 | 0.956764 | 0.460019 |
| MmugDNA.37525.1.S1_at   | MmugDNA.37525.1 | 3.56  | 3.57  | 0.05 | 0.03 | -1    | 0.26635  | 0.421686 | 0.558799 | 0.645222 |
| MmugDNA.37526.1.S1_at   | MmugDNA.37526.1 | 5.87  | 5.93  | 0.14 | 0.04 | -1.04 | 0.176232 | 0.750814 | 0.470611 | 0.855074 |
| MmugDNA.37527.1.S1_at   | MmugDNA.37527.1 | 6.45  | 6.6   | 0.33 | 0.42 | -1.11 | 0.725972 | 0.955333 | 0.871415 | 0.974645 |
| MmugDNA.37528.1.S1_at   | MmugDNA.37528.1 | 7.59  | 6.8   | 1.01 | 0.61 | 1.73  | 0.637134 | 0.316099 | 0.822365 | 0.569548 |
| MmugDNA.3753.1.S1_at    | MmugDNA.3753.1  | 9.71  | 9.71  | 0.06 | 0.04 | -1    | 0.405014 | 0.14111  | 0.668594 | 0.414602 |
| MmugDNA.37530.1.S1_at   | MmugDNA.37530.1 | 4.91  | 4.57  | 0.43 | 0.44 | 1.27  | 0.396936 | 0.146011 | 0.662771 | 0.420006 |
| MmugDNA.37531.1.S1_at   | MmugDNA.37531.1 | 5.68  | 5.62  | 0.07 | 0.06 | 1.04  | 0.337933 | 0.317367 | 0.618374 | 0.570608 |
| MmugDNA.37532.1.S1_at   | MmugDNA.37532.1 | 3.11  | 3.12  | 0.09 | 0.04 | -1    | 0.286232 | 0.638562 | 0.576094 | 0.787698 |
| MmugDNA.37533.1.S1_at   | MmugDNA.37533.1 | 3.62  | 3.61  | 0.09 | 0.05 | 1.01  | 0.50054  | 0.386795 | 0.734784 | 0.621895 |
| MmugDNA.37534.1.S1_at   | MmugDNA.37534.1 | 10.27 | 10.18 | 0.32 | 0    | 1.06  | 0.597    | 0.427037 | 0.796257 | 0.649087 |
| MmugDNA.37535.1.S1_at   | MmugDNA.37535.1 | 5.34  | 5.34  | 0.67 | 0.74 | 1     | 0.930835 | 0.832191 | 0.97089  | 0.903715 |
| MmugDNA.37536.1.S1_at   | MmugDNA.37536.1 | 9.96  | 9.82  | 0.56 | 0.3  | 1.1   | 0.955639 | 0.984817 | 0.981771 | 0.991445 |
| MmugDNA.37538.1.S1_at   | MmugDNA.37538.1 | 4.55  | 4.18  | 0.38 | 0.11 | 1.3   | 0.317225 | 0.410517 | 0.601944 | 0.637357 |
| MmugDNA.37539.1.S1_at   | MmugDNA.37539.1 | 4.32  | 4.42  | 0.16 | 0.24 | -1.07 | 0.144092 | 0.093847 | 0.430916 | 0.350298 |
| MmugDNA.37540.1.S1_at   | MmugDNA.37540.1 | 6.81  | 6.64  | 0.07 | 0.12 | 1.12  | 0.328113 | 0.077983 | 0.61059  | 0.324306 |
| MmugDNA.37541.1.S1_at   | MmugDNA.37541.1 | 4.79  | 3.91  | 0.82 | 0.15 | 1.84  | 0.171253 | 0.171158 | 0.465154 | 0.447735 |
| MmugDNA.37545.1.S1_at   | MmugDNA.37545.1 | 5.32  | 5.13  | 0.02 | 0.15 | 1.14  | 0.12941  | 0.067571 | 0.411701 | 0.306045 |
| MmugDNA.37547.1.S1_at   | MmugDNA.37547.1 | 7.38  | 7.84  | 0.49 | 0.13 | -1.38 | 0.183433 | 0.328399 | 0.479356 | 0.578066 |
| MmugDNA.37548.1.S1_at   | MmugDNA.37548.1 | 6.09  | 5.96  | 0.11 | 0.26 | 1.1   | 0.405719 | 0.446251 | 0.669103 | 0.662743 |
| MmugDNA.37549.1.S1_at   | MmugDNA.37549.1 | 4.99  | 4.65  | 0.33 | 0.38 | 1.27  | 0.171518 | 0.570059 | 0.465492 | 0.742855 |
| MmugDNA.3755.1.S1_at    | MmugDNA.3755.1  | 4.89  | 4.74  | 0.16 | 0.22 | 1.11  | 0.411985 | 0.370717 | 0.673787 | 0.609721 |
| MmugDNA.37550.1.S1_at   | MmugDNA.37550.1 | 4.64  | 4.54  | 0.15 | 0.13 | 1.07  | 0.269919 | 0.377904 | 0.562204 | 0.615264 |
| MmugDNA.37551.1.S1_at   | MmugDNA.37551.1 | 7.5   | 7.81  | 0.24 | 0.3  | -1.24 | 0.364927 | 0.01822  | 0.639607 | 0.169777 |
| MmugDNA.37551.1.S1_s_at | MmugDNA.37551.1 | 7.48  | 7.53  | 0.18 | 0.21 | -1.04 | 0.856342 | 0.005759 | 0.937477 | 0.104378 |
| MmugDNA.37552.1.S1_at   | MmugDNA.37552.1 | 5.52  | 5.36  | 0.57 | 0.12 | 1.11  | 0.259914 | 0.381385 | 0.554139 | 0.617681 |
| MmugDNA.37555.1.S1_at   | MmugDNA.37555.1 | 5.37  | 6.03  | 1.2  | 0.09 | -1.58 | 0.942113 | 0.683325 | 0.975589 | 0.815238 |
| MmugDNA.37556.1.S1_at   | MmugDNA.37556.1 | 5.18  | 5.01  | 0.3  | 0.17 | 1.13  | 0.967469 | 0.132853 | 0.986998 | 0.404544 |
| MmugDNA.37559.1.S1_at   | MmugDNA.37559.1 | 4.35  | 4.46  | 0    | 0.14 | -1.08 | 0.201119 | 0.46436  | 0.498623 | 0.67504  |
| MmugDNA.3756.1.S1_at    | MmugDNA.3756.1  | 11.88 | 11.79 | 0.07 | 0.12 | 1.06  | 0.690114 | 0.002591 | 0.851908 | 0.075326 |



|                         |                 |       |       |      |      |       |          |          |          |          |
|-------------------------|-----------------|-------|-------|------|------|-------|----------|----------|----------|----------|
| MmugDNA.37611.1.S1_at   | MmugDNA.37611.1 | 3.43  | 3.16  | 0.27 | 0.09 | 1.2   | 0.131148 | 0.131864 | 0.413871 | 0.403891 |
| MmugDNA.37612.1.S1_at   | MmugDNA.37612.1 | 5.03  | 5.5   | 0.33 | 0.55 | -1.38 | 0.803243 | 0.236289 | 0.911741 | 0.507287 |
| MmugDNA.37613.1.S1_at   | MmugDNA.37613.1 | 4.57  | 4.47  | 0.26 | 0.12 | 1.07  | 0.515006 | 0.802859 | 0.74485  | 0.886465 |
| MmugDNA.37614.1.S1_at   | MmugDNA.37614.1 | 9.22  | 9.39  | 0.44 | 0.25 | -1.12 | 0.857078 | 0.441381 | 0.937933 | 0.659552 |
| MmugDNA.37615.1.S1_at   | MmugDNA.37615.1 | 6.05  | 5.99  | 0.23 | 0.03 | 1.04  | 0.250147 | 0.407558 | 0.544879 | 0.63505  |
| MmugDNA.37616.1.S1_at   | MmugDNA.37616.1 | 5.9   | 6.9   | 0.16 | 0.09 | -1.99 | 0.000605 | 0.017045 | 0.070727 | 0.165455 |
| MmugDNA.37616.1.S1_s_at | MmugDNA.37616.1 | 5.66  | 7.11  | 0.17 | 0.27 | -2.74 | 0.001308 | 0.026203 | 0.078631 | 0.202874 |
| MmugDNA.37617.1.S1_at   | MmugDNA.37617.1 | 4.7   | 4.25  | 0.42 | 0.24 | 1.36  | 0.104562 | 0.118698 | 0.377911 | 0.38672  |
| MmugDNA.37618.1.S1_at   | MmugDNA.37618.1 | 11.59 | 11.58 | 0.13 | 0.04 | 1     | 0.871093 | 0.03938  | 0.944525 | 0.243406 |
| MmugDNA.37619.1.S1_at   | MmugDNA.37619.1 | 9.77  | 9.9   | 0.1  | 0.06 | -1.09 | 0.223016 | 0.480579 | 0.520954 | 0.685902 |
| MmugDNA.3762.1.S1_at    | MmugDNA.3762.1  | 11.2  | 11.31 | 0.27 | 0.17 | -1.08 | 0.588311 | 0.548162 | 0.790985 | 0.728911 |
| MmugDNA.37620.1.S1_at   | MmugDNA.37620.1 | 4.31  | 4.16  | 0.01 | 0.06 | 1.11  | 0.004817 | 0.309613 | 0.115098 | 0.564987 |
| MmugDNA.37623.1.S1_at   | MmugDNA.37623.1 | 9.95  | 9.63  | 0.37 | 0.23 | 1.25  | 0.665621 | 0.363152 | 0.839333 | 0.60356  |
| MmugDNA.37625.1.S1_at   | MmugDNA.37625.1 | 6.39  | 6.39  | 0.27 | 0.02 | 1     | 0.949799 | 0.996148 | 0.979097 | 0.997658 |
| MmugDNA.37626.1.S1_at   | MmugDNA.37626.1 | 6.61  | 6.86  | 0.36 | 0.12 | -1.19 | 0.408072 | 0.490709 | 0.670981 | 0.692666 |
| MmugDNA.37628.1.S1_at   | MmugDNA.37628.1 | 10.13 | 9.91  | 0.46 | 0.17 | 1.17  | 0.899496 | 0.057725 | 0.957234 | 0.2866   |
| MmugDNA.37629.1.S1_at   | MmugDNA.37629.1 | 13.11 | 13.36 | 0.17 | 0.04 | -1.19 | 0.243542 | 0.458461 | 0.54025  | 0.671168 |
| MmugDNA.37630.1.S1_at   | MmugDNA.37630.1 | 11.71 | 11.34 | 0.1  | 0.08 | 1.29  | 0.013109 | 0.00573  | 0.165173 | 0.104271 |
| MmugDNA.37631.1.S1_at   | MmugDNA.37631.1 | 6.37  | 5.71  | 0.07 | 0.64 | 1.58  | 0.058409 | 0.192652 | 0.298773 | 0.468148 |
| MmugDNA.37632.1.S1_at   | MmugDNA.37632.1 | 11.69 | 11.89 | 0.09 | 0.03 | -1.16 | 0.04335  | 0.073872 | 0.265553 | 0.317241 |
| MmugDNA.37633.1.S1_at   | MmugDNA.37633.1 | 6.05  | 6.07  | 0.23 | 0.06 | -1.02 | 0.440622 | 0.707089 | 0.694602 | 0.830137 |
| MmugDNA.37634.1.S1_at   | MmugDNA.37634.1 | 8.33  | 8.38  | 0.42 | 0.2  | -1.03 | 0.422558 | 0.360158 | 0.680692 | 0.601268 |
| MmugDNA.37635.1.S1_at   | MmugDNA.37635.1 | 4.66  | 4.72  | 0.12 | 0.04 | -1.05 | 0.926186 | 0.361665 | 0.968794 | 0.602408 |
| MmugDNA.37636.1.S1_at   | MmugDNA.37636.1 | 10.42 | 10.48 | 0.04 | 0.11 | -1.04 | 0.949267 | 0.000792 | 0.97884  | 0.046023 |
| MmugDNA.37637.1.S1_at   | MmugDNA.37637.1 | 4.8   | 4.51  | 0.12 | 0.35 | 1.22  | 0.738569 | 0.90062  | 0.878825 | 0.943473 |
| MmugDNA.37638.1.S1_at   | MmugDNA.37638.1 | 9.27  | 9.73  | 0.58 | 0.17 | -1.37 | 0.602633 | 0.924356 | 0.800338 | 0.957351 |
| MmugDNA.37639.1.S1_at   | MmugDNA.37639.1 | 7.19  | 7.58  | 0.11 | 0.56 | -1.32 | 0.349644 | 0.54073  | 0.627381 | 0.724514 |
| MmugDNA.37641.1.S1_at   | MmugDNA.37641.1 | 6.15  | 5.79  | 0.42 | 0.29 | 1.28  | 0.102739 | 0.043292 | 0.375129 | 0.252847 |
| MmugDNA.37642.1.S1_at   | MmugDNA.37642.1 | 7.95  | 7.27  | 0.48 | 0.28 | 1.61  | 0.212747 | 0.147484 | 0.510725 | 0.421765 |
| MmugDNA.37643.1.S1_at   | MmugDNA.37643.1 | 5.32  | 5.35  | 0.09 | 0.11 | -1.01 | 0.322037 | 0.206047 | 0.606199 | 0.480273 |
| MmugDNA.37644.1.S1_at   | MmugDNA.37644.1 | 4.68  | 4.65  | 0.35 | 0.07 | 1.03  | 0.439948 | 0.325087 | 0.694023 | 0.575545 |
| MmugDNA.37645.1.S1_at   | MmugDNA.37645.1 | 6.81  | 6.85  | 0.23 | 0.04 | -1.03 | 0.468621 | 0.696562 | 0.713671 | 0.823774 |
| MmugDNA.37646.1.S1_at   | MmugDNA.37646.1 | 7.83  | 7.71  | 0.26 | 0.17 | 1.09  | 0.563053 | 0.556786 | 0.775287 | 0.734796 |
| MmugDNA.37647.1.S1_at   | MmugDNA.37647.1 | 7.31  | 7.3   | 0.16 | 0.05 | 1.01  | 0.918503 | 0.145344 | 0.965302 | 0.419365 |
| MmugDNA.37649.1.S1_at   | MmugDNA.37649.1 | 3.2   | 3.12  | 0.12 | 0.06 | 1.05  | 0.354656 | 0.832007 | 0.631745 | 0.903589 |
| MmugDNA.37650.1.S1_at   | MmugDNA.37650.1 | 4.45  | 4     | 0.36 | 0.06 | 1.37  | 0.101413 | 0.125799 | 0.372883 | 0.396313 |
| MmugDNA.37651.1.S1_at   | MmugDNA.37651.1 | 3.96  | 4.13  | 0.27 | 0.53 | -1.12 | 0.289672 | 0.386456 | 0.57918  | 0.621593 |
| MmugDNA.37652.1.S1_at   | MmugDNA.37652.1 | 3.74  | 3.72  | 0.24 | 0    | 1.01  | 0.870364 | 0.978201 | 0.944208 | 0.98807  |
| MmugDNA.37653.1.S1_at   | MmugDNA.37653.1 | 4.67  | 4.68  | 0.05 | 0.05 | -1.01 | 0.851142 | 0.050004 | 0.935277 | 0.268843 |
| MmugDNA.37654.1.S1_at   | MmugDNA.37654.1 | 12.11 | 11.94 | 0.17 | 0.06 | 1.13  | 0.133159 | 0.563751 | 0.416662 | 0.738808 |
| MmugDNA.37657.1.S1_at   | MmugDNA.37657.1 | 3.16  | 3.01  | 0.31 | 0.11 | 1.11  | 0.157309 | 0.197047 | 0.448021 | 0.472208 |
| MmugDNA.37658.1.S1_at   | MmugDNA.37658.1 | 3.63  | 3.8   | 0.23 | 0.13 | -1.13 | 0.656215 | 0.632479 | 0.833605 | 0.783558 |
| MmugDNA.37659.1.S1_at   | MmugDNA.37659.1 | 8.08  | 7.9   | 0.91 | 0.18 | 1.13  | 0.689545 | 0.959839 | 0.851801 | 0.977272 |

|                         |                 |       |       |      |      |       |          |          |          |          |
|-------------------------|-----------------|-------|-------|------|------|-------|----------|----------|----------|----------|
| MmugDNA.37660.1.S1_at   | MmugDNA.37660.1 | 7.49  | 7.44  | 0.25 | 0.18 | 1.04  | 0.819787 | 0.089247 | 0.919644 | 0.34333  |
| MmugDNA.37661.1.S1_at   | MmugDNA.37661.1 | 5.57  | 5.6   | 0.13 | 0.15 | -1.02 | 0.867984 | 0.650122 | 0.943108 | 0.795406 |
| MmugDNA.37662.1.S1_at   | MmugDNA.37662.1 | 4.92  | 4.99  | 0.17 | 0.01 | -1.05 | 0.428064 | 0.499132 | 0.68508  | 0.698006 |
| MmugDNA.37664.1.S1_at   | MmugDNA.37664.1 | 6.46  | 6.43  | 0.6  | 0.17 | 1.02  | 0.776525 | 0.719793 | 0.89778  | 0.837888 |
| MmugDNA.37665.1.S1_at   | MmugDNA.37665.1 | 3.31  | 3.27  | 0.16 | 0.05 | 1.03  | 0.397677 | 0.361301 | 0.663192 | 0.602104 |
| MmugDNA.37666.1.S1_at   | MmugDNA.37666.1 | 6.56  | 6.51  | 0.12 | 0.03 | 1.04  | 0.657848 | 0.067041 | 0.834785 | 0.304872 |
| MmugDNA.37668.1.S1_at   | MmugDNA.37668.1 | 10.31 | 10.25 | 0.13 | 0.02 | 1.04  | 0.774556 | 0.84857  | 0.896932 | 0.91405  |
| MmugDNA.37669.1.S1_at   | MmugDNA.37669.1 | 9.55  | 9.43  | 0.2  | 0.04 | 1.09  | 0.472826 | 0.843567 | 0.716348 | 0.910905 |
| MmugDNA.3767.1.S1_at    | MmugDNA.3767.1  | 4.16  | 4     | 0.57 | 0.16 | 1.12  | 0.688468 | 0.863127 | 0.851235 | 0.922249 |
| MmugDNA.37673.1.S1_at   | MmugDNA.37673.1 | 6.52  | 7.55  | 0.28 | 0.18 | -2.04 | 0.005085 | 0.014417 | 0.116572 | 0.15326  |
| MmugDNA.37675.1.S1_at   | MmugDNA.37675.1 | 3.86  | 3.92  | 0.07 | 0.05 | -1.05 | 0.192063 | 0.605995 | 0.488697 | 0.765567 |
| MmugDNA.37676.1.S1_at   | MmugDNA.37676.1 | 6.2   | 5.94  | 0.31 | 0.04 | 1.2   | 0.73285  | 0.90123  | 0.875331 | 0.943829 |
| MmugDNA.37677.1.S1_at   | MmugDNA.37677.1 | 10.58 | 10.66 | 0.05 | 0.07 | -1.06 | 0.085791 | 0.521543 | 0.350082 | 0.712483 |
| MmugDNA.37679.1.S1_at   | MmugDNA.37679.1 | 3.51  | 3.59  | 0.1  | 0.05 | -1.06 | 0.218368 | 0.413562 | 0.516054 | 0.639648 |
| MmugDNA.37681.1.S1_at   | MmugDNA.37681.1 | 4.64  | 4.57  | 0.18 | 0.45 | 1.05  | 0.264474 | 0.397084 | 0.55774  | 0.628611 |
| MmugDNA.37682.1.S1_at   | MmugDNA.37682.1 | 4.75  | 4.44  | 0.35 | 0.18 | 1.24  | 0.99998  | 0.992773 | 1        | 0.995715 |
| MmugDNA.37683.1.S1_at   | MmugDNA.37683.1 | 9.7   | 10.47 | 0.65 | 0.11 | -1.71 | 0.100432 | 0.08581  | 0.371336 | 0.337901 |
| MmugDNA.37684.1.S1_at   | MmugDNA.37684.1 | 6.24  | 6.09  | 0.27 | 0.25 | 1.11  | 0.115847 | 0.00195  | 0.392964 | 0.065813 |
| MmugDNA.37685.1.S1_at   | MmugDNA.37685.1 | 9.02  | 8.86  | 0.58 | 0.24 | 1.12  | 0.609872 | 0.482    | 0.805512 | 0.686928 |
| MmugDNA.37686.1.S1_at   | MmugDNA.37686.1 | 6.09  | 6.12  | 0.03 | 0.07 | -1.02 | 0.588382 | 0.025672 | 0.791007 | 0.200834 |
| MmugDNA.37687.1.S1_at   | MmugDNA.37687.1 | 4.7   | 4.47  | 0.83 | 0.13 | 1.17  | 0.246948 | 0.287242 | 0.542575 | 0.548526 |
| MmugDNA.37688.1.S1_at   | MmugDNA.37688.1 | 5.06  | 5.19  | 0.25 | 0.23 | -1.09 | 0.917298 | 0.803806 | 0.964746 | 0.887124 |
| MmugDNA.37689.1.S1_at   | MmugDNA.37689.1 | 11.54 | 11.85 | 0.07 | 0.1  | -1.25 | 0.005551 | 0.004027 | 0.119965 | 0.090171 |
| MmugDNA.3769.1.S1_at    | MmugDNA.3769.1  | 8.26  | 7.64  | 0.11 | 0.03 | 1.55  | 0.000948 | 0.000009 | 0.076054 | 0.016421 |
| MmugDNA.37691.1.S1_at   | MmugDNA.37691.1 | 5.25  | 5.29  | 0.08 | 0.05 | -1.03 | 0.400012 | 0.048598 | 0.665173 | 0.265572 |
| MmugDNA.37692.1.S1_at   | MmugDNA.37692.1 | 4.76  | 4.87  | 0.1  | 0.05 | -1.08 | 0.446071 | 0.310078 | 0.698352 | 0.565307 |
| MmugDNA.37693.1.S1_at   | MmugDNA.37693.1 | 7.16  | 7.35  | 0.52 | 0.05 | -1.14 | 0.483658 | 0.301753 | 0.723727 | 0.559687 |
| MmugDNA.37694.1.S1_at   | MmugDNA.37694.1 | 8.58  | 7.8   | 0.29 | 0.38 | 1.72  | 0.093213 | 0.13351  | 0.361736 | 0.405422 |
| MmugDNA.37695.1.S1_at   | MmugDNA.37695.1 | 7.66  | 7.67  | 0.19 | 0.14 | -1    | 0.859943 | 0.066006 | 0.939228 | 0.302324 |
| MmugDNA.37697.1.S1_at   | MmugDNA.37697.1 | 3.14  | 3.37  | 0.03 | 0.31 | -1.17 | 0.148715 | 0.196861 | 0.437305 | 0.471976 |
| MmugDNA.37699.1.S1_at   | MmugDNA.37699.1 | 11.23 | 10.9  | 0.23 | 0.17 | 1.25  | 0.059786 | 0.171246 | 0.301729 | 0.447792 |
| MmugDNA.3770.1.S1_at    | MmugDNA.3770.1  | 12.24 | 11.86 | 0.34 | 0.11 | 1.3   | 0.415765 | 0.160286 | 0.676389 | 0.436406 |
| MmugDNA.37700.1.S1_at   | MmugDNA.37700.1 | 2.77  | 2.88  | 0.05 | 0.12 | -1.08 | 0.120295 | 0.091181 | 0.398733 | 0.346097 |
| MmugDNA.37701.1.S1_at   | MmugDNA.37701.1 | 4.63  | 4.5   | 0.11 | 0.1  | 1.1   | 0.209722 | 0.414773 | 0.507182 | 0.640456 |
| MmugDNA.37702.1.S1_at   | MmugDNA.37702.1 | 6.14  | 6.03  | 0.09 | 0.15 | 1.07  | 0.28583  | 0.447869 | 0.575634 | 0.663881 |
| MmugDNA.37703.1.S1_at   | MmugDNA.37703.1 | 3.85  | 3.84  | 0.09 | 0.24 | 1     | 0.862503 | 0.750481 | 0.940245 | 0.854844 |
| MmugDNA.37704.1.S1_at   | MmugDNA.37704.1 | 7.06  | 6.92  | 0.29 | 0.07 | 1.1   | 0.143799 | 0.041282 | 0.430437 | 0.247995 |
| MmugDNA.37705.1.S1_at   | MmugDNA.37705.1 | 7.64  | 8.2   | 0.07 | 0.14 | -1.47 | 0.00401  | 0.003963 | 0.108676 | 0.089522 |
| MmugDNA.37706.1.S1_at   | MmugDNA.37706.1 | 3.99  | 3.79  | 0.2  | 0.03 | 1.15  | 0.152179 | 0.268349 | 0.44169  | 0.534041 |
| MmugDNA.37707.1.S1_at   | MmugDNA.37707.1 | 8.6   | 8.92  | 0.12 | 0.11 | -1.24 | 0.014607 | 0.344802 | 0.172728 | 0.590142 |
| MmugDNA.37707.1.S1_s_at | MmugDNA.37707.1 | 8.31  | 8.64  | 0.09 | 0.11 | -1.26 | 0.025701 | 0.55771  | 0.212966 | 0.735173 |
| MmugDNA.37709.1.S1_at   | MmugDNA.37709.1 | 4.8   | 3.88  | 0.57 | 0.29 | 1.89  | 0.049665 | 0.018281 | 0.280343 | 0.170051 |
| MmugDNA.3771.1.S1_at    | MmugDNA.3771.1  | 3.88  | 3.77  | 0.03 | 0.14 | 1.08  | 0.225768 | 0.230069 | 0.523482 | 0.50194  |

|                         |                 |       |       |      |      |       |          |          |          |          |
|-------------------------|-----------------|-------|-------|------|------|-------|----------|----------|----------|----------|
| MmugDNA.37711.1.S1_at   | MmugDNA.37711.1 | 10.1  | 10.15 | 0.24 | 0.09 | -1.03 | 0.463173 | 0.071369 | 0.709935 | 0.313445 |
| MmugDNA.37712.1.S1_at   | MmugDNA.37712.1 | 6.2   | 6.92  | 0.35 | 0.08 | -1.65 | 0.026304 | 0.137169 | 0.215228 | 0.410045 |
| MmugDNA.37713.1.S1_s_at | MmugDNA.37713.1 | 6.2   | 5.82  | 0.09 | 0.15 | 1.31  | 0.022847 | 0.057791 | 0.204235 | 0.286756 |
| MmugDNA.37714.1.S1_at   | MmugDNA.37714.1 | 6.12  | 6.02  | 0.34 | 0.01 | 1.08  | 0.705219 | 0.780378 | 0.860193 | 0.872597 |
| MmugDNA.37716.1.S1_at   | MmugDNA.37716.1 | 3.32  | 3.25  | 0.06 | 0.01 | 1.05  | 0.114036 | 0.099536 | 0.390801 | 0.357957 |
| MmugDNA.37717.1.S1_at   | MmugDNA.37717.1 | 4.14  | 4.17  | 0.2  | 0.03 | -1.02 | 0.524865 | 0.337609 | 0.751591 | 0.584788 |
| MmugDNA.37718.1.S1_at   | MmugDNA.37718.1 | 4.83  | 4.68  | 1.31 | 0.29 | 1.11  | 0.39418  | 0.350094 | 0.660863 | 0.593862 |
| MmugDNA.37719.1.S1_at   | MmugDNA.37719.1 | 4.48  | 4.47  | 0.01 | 0.16 | 1.01  | 0.842224 | 0.940064 | 0.930767 | 0.965955 |
| MmugDNA.3772.1.S1_at    | MmugDNA.3772.1  | 5.27  | 6.19  | 0.13 | 0.42 | -1.89 | 0.051458 | 0.218065 | 0.284331 | 0.491683 |
| MmugDNA.37720.1.S1_at   | MmugDNA.37720.1 | 5.32  | 4.65  | 0.54 | 0.26 | 1.59  | 0.164556 | 0.323557 | 0.457688 | 0.574497 |
| MmugDNA.37721.1.S1_at   | MmugDNA.37721.1 | 5.65  | 5.61  | 0.14 | 0.04 | 1.03  | 0.809915 | 0.808755 | 0.914836 | 0.889895 |
| MmugDNA.37722.1.S1_at   | MmugDNA.37722.1 | 5.81  | 5.82  | 0.03 | 0.21 | -1.01 | 0.997215 | 0.294106 | 0.999086 | 0.553936 |
| MmugDNA.37723.1.S1_at   | MmugDNA.37723.1 | 5.27  | 5.22  | 0.43 | 0.1  | 1.03  | 0.720987 | 0.926905 | 0.86844  | 0.958424 |
| MmugDNA.37724.1.S1_at   | MmugDNA.37724.1 | 6.81  | 6.49  | 0.19 | 0.13 | 1.25  | 0.060483 | 0.029428 | 0.30301  | 0.213368 |
| MmugDNA.37725.1.S1_at   | MmugDNA.37725.1 | 7.96  | 6.69  | 0.12 | 0.07 | 2.41  | 0.000119 | 0.003101 | 0.051196 | 0.081277 |
| MmugDNA.37726.1.S1_at   | MmugDNA.37726.1 | 4.36  | 4.08  | 0.14 | 0.22 | 1.21  | 0.094182 | 0.083577 | 0.363213 | 0.334152 |
| MmugDNA.37727.1.S1_at   | MmugDNA.37727.1 | 3.99  | 3.79  | 0.06 | 0.07 | 1.15  | 0.035796 | 0.016043 | 0.244149 | 0.160532 |
| MmugDNA.37729.1.S1_at   | MmugDNA.37729.1 | 4.82  | 4.69  | 0.06 | 0.04 | 1.09  | 0.060147 | 0.147743 | 0.302422 | 0.42203  |
| MmugDNA.3773.1.S1_at    | MmugDNA.3773.1  | 4.45  | 4.8   | 0.14 | 0.17 | -1.27 | 0.028278 | 0.117395 | 0.220719 | 0.38505  |
| MmugDNA.37730.1.S1_at   | MmugDNA.37730.1 | 6.22  | 6.23  | 0.11 | 0.57 | -1.01 | 0.847351 | 0.052317 | 0.933429 | 0.274201 |
| MmugDNA.37731.1.S1_at   | MmugDNA.37731.1 | 3.23  | 3.18  | 0.32 | 0.2  | 1.03  | 0.396079 | 0.454986 | 0.662207 | 0.669026 |
| MmugDNA.37734.1.S1_at   | MmugDNA.37734.1 | 3.84  | 4.01  | 0.09 | 0.13 | -1.12 | 0.047479 | 0.048961 | 0.275186 | 0.26607  |
| MmugDNA.37735.1.S1_at   | MmugDNA.37735.1 | 9.15  | 9.3   | 0.1  | 0.05 | -1.11 | 0.02827  | 0.074368 | 0.220719 | 0.318053 |
| MmugDNA.37736.1.S1_at   | MmugDNA.37736.1 | 4     | 4     | 0.07 | 0.14 | 1     | 0.667438 | 0.310728 | 0.840413 | 0.565809 |
| MmugDNA.37738.1.S1_at   | MmugDNA.37738.1 | 6.14  | 6.76  | 0.92 | 0.2  | -1.53 | 0.870347 | 0.263664 | 0.944208 | 0.529945 |
| MmugDNA.37739.1.S1_at   | MmugDNA.37739.1 | 6.87  | 6.75  | 0.84 | 0.17 | 1.09  | 0.939554 | 0.982403 | 0.974477 | 0.99036  |
| MmugDNA.3774.1.S1_at    | MmugDNA.3774.1  | 5.7   | 6.03  | 0.28 | 0.1  | -1.26 | 0.116993 | 0.871124 | 0.394139 | 0.926785 |
| MmugDNA.37740.1.S1_at   | MmugDNA.37740.1 | 6.92  | 6.27  | 0.4  | 0.43 | 1.57  | 0.408568 | 0.07402  | 0.671316 | 0.317579 |
| MmugDNA.37742.1.S1_at   | MmugDNA.37742.1 | 11.82 | 12.67 | 0.17 | 0.24 | -1.8  | 0.02277  | 0.010374 | 0.204093 | 0.133236 |
| MmugDNA.37743.1.S1_at   | MmugDNA.37743.1 | 9.86  | 9.59  | 0.16 | 0.06 | 1.21  | 0.023651 | 0.276861 | 0.207074 | 0.540761 |
| MmugDNA.37745.1.S1_at   | MmugDNA.37745.1 | 7.18  | 7.32  | 1.22 | 0.71 | -1.1  | 0.860334 | 0.845481 | 0.93941  | 0.912096 |
| MmugDNA.37746.1.S1_at   | MmugDNA.37746.1 | 5.46  | 5.15  | 0.11 | 0.19 | 1.24  | 0.048219 | 0.038811 | 0.276915 | 0.241916 |
| MmugDNA.37747.1.S1_at   | MmugDNA.37747.1 | 3.76  | 3.72  | 0.68 | 0.16 | 1.03  | 0.258485 | 0.323226 | 0.552539 | 0.574408 |
| MmugDNA.37749.1.S1_at   | MmugDNA.37749.1 | 7.86  | 7.5   | 0.28 | 0.08 | 1.28  | 0.037541 | 0.097284 | 0.249196 | 0.354959 |
| MmugDNA.37750.1.S1_x_at | MmugDNA.37750.1 | 10.91 | 10.74 | 0.52 | 0.21 | 1.13  | 0.30285  | 0.219855 | 0.590429 | 0.493388 |
| MmugDNA.37751.1.S1_at   | MmugDNA.37751.1 | 4.44  | 4.37  | 0.32 | 0.1  | 1.05  | 0.611968 | 0.50667  | 0.806634 | 0.702542 |
| MmugDNA.37752.1.S1_at   | MmugDNA.37752.1 | 8.34  | 8.28  | 0.11 | 0.07 | 1.04  | 0.57702  | 0.003558 | 0.783459 | 0.085459 |
| MmugDNA.37753.1.S1_at   | MmugDNA.37753.1 | 6.47  | 6.32  | 0.24 | 0.07 | 1.11  | 0.337655 | 0.788939 | 0.618015 | 0.878011 |
| MmugDNA.37754.1.S1_at   | MmugDNA.37754.1 | 12.38 | 12.27 | 0.11 | 0.04 | 1.08  | 0.281515 | 0.036756 | 0.572441 | 0.236291 |
| MmugDNA.37755.1.S1_at   | MmugDNA.37755.1 | 3.74  | 3.72  | 0.14 | 0.19 | 1.01  | 0.279557 | 0.467312 | 0.570786 | 0.677035 |
| MmugDNA.37757.1.S1_at   | MmugDNA.37757.1 | 3.31  | 3.18  | 0.04 | 0.11 | 1.09  | 0.17582  | 0.396221 | 0.470151 | 0.628068 |
| MmugDNA.37758.1.S1_at   | MmugDNA.37758.1 | 7.02  | 6.78  | 0.86 | 0.12 | 1.18  | 0.648937 | 0.413358 | 0.829463 | 0.639626 |
| MmugDNA.37760.1.S1_at   | MmugDNA.37760.1 | 4.76  | 5.06  | 0.33 | 0.32 | -1.23 | 0.775387 | 0.406264 | 0.897425 | 0.634225 |

|                         |                 |       |       |      |      |       |          |          |          |          |
|-------------------------|-----------------|-------|-------|------|------|-------|----------|----------|----------|----------|
| MmugDNA.37761.1.S1_x_at | MmugDNA.37761.1 | 7.3   | 6.99  | 0.68 | 0.4  | 1.24  | 0.410733 | 0.25668  | 0.672759 | 0.524502 |
| MmugDNA.37764.1.S1_at   | MmugDNA.37764.1 | 9.2   | 8.95  | 0.29 | 0.02 | 1.19  | 0.170069 | 0.087902 | 0.46363  | 0.341309 |
| MmugDNA.37767.1.S1_at   | MmugDNA.37767.1 | 5.21  | 5.05  | 0.4  | 0.15 | 1.12  | 0.449282 | 0.618886 | 0.700621 | 0.774212 |
| MmugDNA.37768.1.S1_at   | MmugDNA.37768.1 | 6.48  | 6.38  | 0.1  | 0.07 | 1.08  | 0.402134 | 0.797733 | 0.666552 | 0.883466 |
| MmugDNA.37769.1.S1_at   | MmugDNA.37769.1 | 3.24  | 3.3   | 0.1  | 0.05 | -1.04 | 0.277094 | 0.514993 | 0.56859  | 0.708004 |
| MmugDNA.3777.1.S1_at    | MmugDNA.3777.1  | 5.56  | 5.57  | 0.08 | 0.18 | -1.01 | 0.867347 | 0.138245 | 0.942651 | 0.411198 |
| MmugDNA.37770.1.S1_at   | MmugDNA.37770.1 | 4.32  | 4.31  | 0.2  | 0.03 | 1.01  | 0.539516 | 0.826873 | 0.760858 | 0.900568 |
| MmugDNA.37771.1.S1_at   | MmugDNA.37771.1 | 4.55  | 5.8   | 1.52 | 0.49 | -2.37 | 0.686459 | 0.304906 | 0.850611 | 0.562044 |
| MmugDNA.37772.1.S1_at   | MmugDNA.37772.1 | 10.43 | 10.6  | 0.06 | 0.08 | -1.13 | 0.188935 | 0.010256 | 0.485516 | 0.132655 |
| MmugDNA.37773.1.S1_at   | MmugDNA.37773.1 | 8.2   | 8.35  | 0.35 | 0.3  | -1.11 | 0.874951 | 0.468898 | 0.946341 | 0.677924 |
| MmugDNA.37774.1.S1_at   | MmugDNA.37774.1 | 4.9   | 4.85  | 0.18 | 0.07 | 1.04  | 0.369526 | 0.468426 | 0.642934 | 0.677714 |
| MmugDNA.37775.1.S1_at   | MmugDNA.37775.1 | 6.77  | 8.78  | 1.13 | 0.4  | -4.02 | 0.045045 | 0.078516 | 0.26959  | 0.325285 |
| MmugDNA.37776.1.S1_at   | MmugDNA.37776.1 | 4.58  | 4.64  | 0.03 | 0.13 | -1.04 | 0.647505 | 0.303479 | 0.82876  | 0.560979 |
| MmugDNA.37777.1.S1_at   | MmugDNA.37777.1 | 8.05  | 8.05  | 0.56 | 0.22 | 1     | 0.538609 | 0.612542 | 0.760315 | 0.770077 |
| MmugDNA.37777.1.S1_s_at | MmugDNA.37777.1 | 7.82  | 8.21  | 0.49 | 0.2  | -1.31 | 0.778666 | 0.397774 | 0.898859 | 0.629114 |
| MmugDNA.37778.1.S1_at   | MmugDNA.37778.1 | 10.49 | 10.52 | 0.13 | 0.06 | -1.02 | 0.414738 | 0.046792 | 0.675681 | 0.261042 |
| MmugDNA.3778.1.S1_at    | MmugDNA.3778.1  | 5.87  | 5.94  | 0.1  | 0.04 | -1.05 | 0.687176 | 0.608865 | 0.850763 | 0.76736  |
| MmugDNA.37780.1.S1_at   | MmugDNA.37780.1 | 7.76  | 8.72  | 0.19 | 0.39 | -1.95 | 0.01894  | 0.287479 | 0.19119  | 0.548718 |
| MmugDNA.37781.1.S1_at   | MmugDNA.37781.1 | 3.59  | 3.32  | 0.19 | 0.13 | 1.21  | 0.409093 | 0.11196  | 0.671651 | 0.377063 |
| MmugDNA.37782.1.S1_at   | MmugDNA.37782.1 | 3.45  | 3.33  | 0.07 | 0.01 | 1.09  | 0.133026 | 0.070503 | 0.41649  | 0.311777 |
| MmugDNA.37782.1.S1_s_at | MmugDNA.37782.1 | 5.3   | 5.14  | 0.07 | 0.03 | 1.12  | 0.018215 | 0.191786 | 0.187996 | 0.467133 |
| MmugDNA.37785.1.S1_at   | MmugDNA.37785.1 | 3.19  | 3.17  | 0.05 | 0.09 | 1.01  | 0.345711 | 0.541736 | 0.624565 | 0.725057 |
| MmugDNA.37787.1.S1_at   | MmugDNA.37787.1 | 7.52  | 7.62  | 0.18 | 0.11 | -1.07 | 0.391495 | 0.155826 | 0.658699 | 0.431211 |
| MmugDNA.37788.1.S1_at   | MmugDNA.37788.1 | 3.02  | 2.95  | 0.11 | 0.04 | 1.05  | 0.120955 | 0.175999 | 0.399467 | 0.452526 |
| MmugDNA.37789.1.S1_at   | MmugDNA.37789.1 | 4.83  | 5.05  | 0.18 | 0.12 | -1.17 | 0.186133 | 0.089064 | 0.482278 | 0.342977 |
| MmugDNA.3779.1.S1_at    | MmugDNA.3779.1  | 4.92  | 5.16  | 0.01 | 0.07 | -1.18 | 0.009128 | 0.205181 | 0.145428 | 0.47957  |
| MmugDNA.37790.1.S1_at   | MmugDNA.37790.1 | 3.92  | 3.94  | 0.07 | 0.02 | -1.01 | 0.436883 | 0.063636 | 0.691764 | 0.298815 |
| MmugDNA.37791.1.S1_at   | MmugDNA.37791.1 | 4.89  | 5.03  | 0.1  | 0.24 | -1.1  | 0.376397 | 0.903961 | 0.647133 | 0.945472 |
| MmugDNA.37792.1.S1_at   | MmugDNA.37792.1 | 3.86  | 4.02  | 0.03 | 0.22 | -1.12 | 0.471455 | 0.683178 | 0.715544 | 0.815172 |
| MmugDNA.37793.1.S1_x_at | MmugDNA.37793.1 | 13.09 | 13.21 | 0.06 | 0.08 | -1.09 | 0.246495 | 0.291831 | 0.542393 | 0.552086 |
| MmugDNA.37794.1.S1_at   | MmugDNA.37794.1 | 6.42  | 5.07  | 0.7  | 0.72 | 2.56  | 0.148441 | 0.103408 | 0.436978 | 0.3643   |
| MmugDNA.37796.1.S1_at   | MmugDNA.37796.1 | 10.07 | 10.32 | 0.05 | 0.08 | -1.19 | 0.024509 | 0.017769 | 0.209655 | 0.168461 |
| MmugDNA.37799.1.S1_at   | MmugDNA.37799.1 | 4.26  | 3.95  | 0.67 | 0.69 | 1.23  | 0.766464 | 0.767529 | 0.892885 | 0.865037 |
| MmugDNA.378.1.S1_at     | MmugDNA.378.1   | 4.52  | 4.2   | 0.64 | 0.47 | 1.25  | 0.545865 | 0.685277 | 0.765031 | 0.816424 |
| MmugDNA.3780.1.S1_at    | MmugDNA.3780.1  | 4.75  | 4.73  | 0.56 | 0.48 | 1.01  | 0.571318 | 0.764486 | 0.779864 | 0.863128 |
| MmugDNA.37800.1.S1_at   | MmugDNA.37800.1 | 2.92  | 2.89  | 0.25 | 0.06 | 1.02  | 0.76383  | 0.908014 | 0.891841 | 0.947889 |
| MmugDNA.37801.1.S1_at   | MmugDNA.37801.1 | 3.11  | 2.87  | 0.14 | 0.09 | 1.18  | 0.092193 | 0.11919  | 0.360155 | 0.387634 |
| MmugDNA.37804.1.S1_at   | MmugDNA.37804.1 | 3.74  | 4     | 0.15 | 0.08 | -1.2  | 0.056356 | 0.275162 | 0.29472  | 0.539576 |
| MmugDNA.37805.1.S1_at   | MmugDNA.37805.1 | 6.86  | 6.72  | 0.25 | 0.05 | 1.1   | 0.319619 | 0.448986 | 0.604208 | 0.664771 |
| MmugDNA.37806.1.S1_at   | MmugDNA.37806.1 | 3.95  | 3.95  | 0.23 | 0.02 | -1    | 0.909013 | 0.956115 | 0.961446 | 0.975053 |
| MmugDNA.37808.1.S1_at   | MmugDNA.37808.1 | 4.33  | 4.43  | 0.12 | 0.02 | -1.07 | 0.228035 | 0.232874 | 0.526169 | 0.50445  |
| MmugDNA.37809.1.S1_at   | MmugDNA.37809.1 | 3.25  | 3.34  | 0    | 0.13 | -1.06 | 0.377159 | 0.703063 | 0.64767  | 0.827866 |
| MmugDNA.3781.1.S1_at    | MmugDNA.3781.1  | 5.54  | 5.25  | 0.39 | 0.08 | 1.22  | 0.185537 | 0.226608 | 0.481745 | 0.499067 |



|                         |                 |       |       |      |      |       |          |          |          |          |
|-------------------------|-----------------|-------|-------|------|------|-------|----------|----------|----------|----------|
| MmugDNA.37810.1.S1_at   | MmugDNA.37810.1 | 6.79  | 6.12  | 0.46 | 0.13 | 1.59  | 0.09144  | 0.132874 | 0.359118 | 0.404544 |
| MmugDNA.37812.1.S1_at   | MmugDNA.37812.1 | 6.94  | 6.75  | 0.46 | 0.1  | 1.14  | 0.165234 | 0.152809 | 0.458247 | 0.427601 |
| MmugDNA.37815.1.S1_at   | MmugDNA.37815.1 | 4.03  | 3.89  | 0.13 | 0.08 | 1.1   | 0.463156 | 0.879021 | 0.709929 | 0.93099  |
| MmugDNA.37816.1.S1_at   | MmugDNA.37816.1 | 3.05  | 3.06  | 0.08 | 0.06 | -1.01 | 0.85951  | 0.155722 | 0.93919  | 0.431086 |
| MmugDNA.37817.1.S1_at   | MmugDNA.37817.1 | 4.72  | 4.71  | 0.27 | 0.04 | 1     | 0.944051 | 0.919609 | 0.976429 | 0.954848 |
| MmugDNA.37818.1.S1_at   | MmugDNA.37818.1 | 12.18 | 12.03 | 0.17 | 0.04 | 1.11  | 0.283821 | 0.853191 | 0.574077 | 0.916521 |
| MmugDNA.37821.1.S1_at   | MmugDNA.37821.1 | 5.58  | 5.53  | 0.01 | 0.29 | 1.03  | 0.768039 | 0.895975 | 0.893479 | 0.940569 |
| MmugDNA.37822.1.S1_at   | MmugDNA.37822.1 | 5.02  | 3.6   | 1.27 | 0.34 | 2.68  | 0.129718 | 0.160413 | 0.412052 | 0.436528 |
| MmugDNA.37824.1.S1_at   | MmugDNA.37824.1 | 6.53  | 6.17  | 0.72 | 0.27 | 1.28  | 0.452564 | 0.553449 | 0.702975 | 0.732588 |
| MmugDNA.37825.1.S1_at   | MmugDNA.37825.1 | 4.07  | 3.9   | 0.13 | 0.11 | 1.13  | 0.301041 | 0.098205 | 0.589075 | 0.356253 |
| MmugDNA.37826.1.S1_at   | MmugDNA.37826.1 | 8.99  | 7.97  | 0.19 | 0.03 | 2.04  | 0.000708 | 0.013137 | 0.071903 | 0.147338 |
| MmugDNA.37827.1.S1_at   | MmugDNA.37827.1 | 7.24  | 7.26  | 0.13 | 0.05 | -1.02 | 0.500698 | 0.703559 | 0.734918 | 0.828139 |
| MmugDNA.37828.1.S1_at   | MmugDNA.37828.1 | 9.24  | 9.34  | 0.48 | 0.03 | -1.07 | 0.713104 | 0.695592 | 0.864548 | 0.823073 |
| MmugDNA.3783.1.S1_at    | MmugDNA.3783.1  | 7.44  | 7.05  | 0.11 | 0.21 | 1.32  | 0.073432 | 0.081271 | 0.328846 | 0.329351 |
| MmugDNA.37830.1.S1_at   | MmugDNA.37830.1 | 6.41  | 6.21  | 0.08 | 0.1  | 1.15  | 0.049127 | 0.052007 | 0.27921  | 0.273539 |
| MmugDNA.37831.1.S1_at   | MmugDNA.37831.1 | 11.26 | 10.94 | 0.54 | 0.15 | 1.25  | 0.333473 | 0.430215 | 0.614895 | 0.651279 |
| MmugDNA.37832.1.S1_at   | MmugDNA.37832.1 | 6.18  | 5.79  | 0.18 | 0.15 | 1.32  | 0.069619 | 0.329992 | 0.322287 | 0.578915 |
| MmugDNA.37833.1.S1_at   | MmugDNA.37833.1 | 9.2   | 7.86  | 1.17 | 0.86 | 2.53  | 0.307952 | 0.642082 | 0.59471  | 0.789995 |
| MmugDNA.37836.1.S1_at   | MmugDNA.37836.1 | 5.53  | 4.21  | 0.98 | 0.61 | 2.5   | 0.194959 | 0.334883 | 0.491466 | 0.58275  |
| MmugDNA.37838.1.S1_at   | MmugDNA.37838.1 | 7.02  | 6.6   | 0.96 | 0.12 | 1.34  | 0.850523 | 0.284687 | 0.935091 | 0.5469   |
| MmugDNA.37839.1.S1_s_at | MmugDNA.37839.1 | 11.56 | 11.62 | 0.13 | 0.07 | -1.05 | 0.916308 | 0.757961 | 0.964395 | 0.859199 |
| MmugDNA.37841.1.S1_at   | MmugDNA.37841.1 | 5.53  | 5.75  | 0.15 | 0.04 | -1.16 | 0.077142 | 0.106517 | 0.335779 | 0.369078 |
| MmugDNA.37842.1.S1_at   | MmugDNA.37842.1 | 8.83  | 8.48  | 0.14 | 0.13 | 1.27  | 0.03392  | 0.039037 | 0.23872  | 0.242786 |
| MmugDNA.37843.1.S1_at   | MmugDNA.37843.1 | 2.94  | 2.89  | 0.14 | 0.27 | 1.03  | 0.732948 | 0.878734 | 0.875348 | 0.930817 |
| MmugDNA.37844.1.S1_at   | MmugDNA.37844.1 | 11.47 | 11.58 | 0.28 | 0.05 | -1.08 | 0.661204 | 0.139595 | 0.836453 | 0.41286  |
| MmugDNA.37846.1.S1_at   | MmugDNA.37846.1 | 3.48  | 3.3   | 0.22 | 0.09 | 1.14  | 0.197912 | 0.246459 | 0.49515  | 0.515899 |
| MmugDNA.37847.1.S1_at   | MmugDNA.37847.1 | 12.52 | 12.25 | 0.03 | 0.04 | 1.21  | 0.001421 | 0.00083  | 0.07964  | 0.046851 |
| MmugDNA.37848.1.S1_at   | MmugDNA.37848.1 | 3.65  | 3.63  | 0.32 | 0.05 | 1.02  | 0.353734 | 0.597729 | 0.630929 | 0.760358 |
| MmugDNA.37849.1.S1_at   | MmugDNA.37849.1 | 9.83  | 10.45 | 0.22 | 0.16 | -1.54 | 0.018916 | 0.245601 | 0.191115 | 0.515348 |
| MmugDNA.3785.1.S1_at    | MmugDNA.3785.1  | 5.43  | 5.43  | 0.06 | 0.07 | 1     | 0.946088 | 0.193148 | 0.977211 | 0.468554 |
| MmugDNA.37850.1.S1_at   | MmugDNA.37850.1 | 4.76  | 4.75  | 0.1  | 0.18 | 1.01  | 0.785731 | 0.671093 | 0.902158 | 0.80765  |
| MmugDNA.37851.1.S1_at   | MmugDNA.37851.1 | 4.72  | 4.72  | 0.09 | 0.04 | 1     | 0.641112 | 0.331401 | 0.824661 | 0.580076 |
| MmugDNA.37852.1.S1_at   | MmugDNA.37852.1 | 4.99  | 4.98  | 0    | 0.04 | 1     | 0.880019 | 0.720447 | 0.948926 | 0.838261 |
| MmugDNA.37854.1.S1_at   | MmugDNA.37854.1 | 5.54  | 5.31  | 0.58 | 0.11 | 1.17  | 0.754138 | 0.528186 | 0.886723 | 0.716462 |
| MmugDNA.37855.1.S1_at   | MmugDNA.37855.1 | 5.55  | 5.54  | 0.09 | 0.15 | 1.01  | 0.451159 | 0.177378 | 0.702043 | 0.453742 |
| MmugDNA.37856.1.S1_at   | MmugDNA.37856.1 | 3.87  | 3.83  | 0.16 | 0.05 | 1.03  | 0.656174 | 0.503826 | 0.833605 | 0.701184 |
| MmugDNA.37857.1.S1_at   | MmugDNA.37857.1 | 4.49  | 4.23  | 0.24 | 0.27 | 1.2   | 0.120763 | 0.171603 | 0.399159 | 0.448034 |
| MmugDNA.37858.1.S1_at   | MmugDNA.37858.1 | 6.45  | 6.49  | 0.56 | 0.24 | -1.03 | 0.483235 | 0.439028 | 0.723431 | 0.657802 |
| MmugDNA.37859.1.S1_at   | MmugDNA.37859.1 | 12.41 | 12.3  | 0.17 | 0.04 | 1.08  | 0.677805 | 0.875392 | 0.846315 | 0.929245 |
| MmugDNA.37860.1.S1_at   | MmugDNA.37860.1 | 7.01  | 6.77  | 0.16 | 0.09 | 1.18  | 0.021883 | 0.23263  | 0.201211 | 0.504359 |
| MmugDNA.37862.1.S1_at   | MmugDNA.37862.1 | 5.26  | 5     | 0.61 | 0.44 | 1.2   | 0.712502 | 0.803352 | 0.864309 | 0.886825 |
| MmugDNA.37863.1.S1_at   | MmugDNA.37863.1 | 4.42  | 3.83  | 0.63 | 0.81 | 1.51  | 0.998646 | 0.214385 | 0.999516 | 0.48807  |
| MmugDNA.37864.1.S1_at   | MmugDNA.37864.1 | 9.36  | 9.22  | 0.05 | 0.22 | 1.1   | 0.343734 | 0.748797 | 0.623058 | 0.853901 |

|                         |                 |       |       |      |      |       |          |          |          |          |
|-------------------------|-----------------|-------|-------|------|------|-------|----------|----------|----------|----------|
| MmugDNA.37866.1.S1_at   | MmugDNA.37866.1 | 9.12  | 8.94  | 0.19 | 0.06 | 1.14  | 0.138868 | 0.14319  | 0.424523 | 0.417088 |
| MmugDNA.37867.1.S1_at   | MmugDNA.37867.1 | 9.99  | 9.77  | 0.15 | 0.07 | 1.17  | 0.279986 | 0.135489 | 0.571213 | 0.407591 |
| MmugDNA.37868.1.S1_at   | MmugDNA.37868.1 | 4.4   | 4.35  | 0.19 | 0.12 | 1.03  | 0.289048 | 0.438213 | 0.578735 | 0.657196 |
| MmugDNA.37870.1.S1_at   | MmugDNA.37870.1 | 4.57  | 4.47  | 0.38 | 0.07 | 1.07  | 0.421371 | 0.580388 | 0.679927 | 0.749646 |
| MmugDNA.37872.1.S1_at   | MmugDNA.37872.1 | 6.68  | 6.36  | 0.09 | 0.08 | 1.25  | 0.020704 | 0.179245 | 0.197469 | 0.45567  |
| MmugDNA.37873.1.S1_at   | MmugDNA.37873.1 | 12.43 | 12.92 | 0.42 | 0.13 | -1.4  | 0.096    | 0.177101 | 0.365529 | 0.453611 |
| MmugDNA.37874.1.S1_at   | MmugDNA.37874.1 | 4.75  | 4.35  | 1.19 | 0.15 | 1.31  | 0.313098 | 0.274188 | 0.598926 | 0.538685 |
| MmugDNA.37875.1.S1_at   | MmugDNA.37875.1 | 6.21  | 6.57  | 0.28 | 0.33 | -1.28 | 0.220697 | 0.075317 | 0.518493 | 0.319475 |
| MmugDNA.37876.1.S1_at   | MmugDNA.37876.1 | 10.08 | 10.23 | 0.09 | 0.05 | -1.11 | 0.114394 | 0.218906 | 0.391343 | 0.492675 |
| MmugDNA.37877.1.S1_at   | MmugDNA.37877.1 | 8.96  | 8.76  | 0.32 | 0.06 | 1.15  | 0.102491 | 0.042718 | 0.374663 | 0.251141 |
| MmugDNA.12574.1.S1_s_at | MmugDNA.12574.1 | 5.79  | 5.9   | 0.62 | 0.08 | -1.08 | 0.462714 | 0.68362  | 0.70975  | 0.815387 |
| MmugDNA.37879.1.S1_at   | MmugDNA.37879.1 | 4.74  | 4.85  | 0.19 | 0.13 | -1.08 | 0.464849 | 0.401796 | 0.711025 | 0.631068 |
| MmugDNA.3788.1.S1_at    | MmugDNA.3788.1  | 7.47  | 7.71  | 0.69 | 0.21 | -1.18 | 0.445267 | 0.56356  | 0.697742 | 0.738718 |
| MmugDNA.37881.1.S1_at   | MmugDNA.37881.1 | 3.5   | 3.23  | 0.29 | 0.2  | 1.21  | 0.44313  | 0.379642 | 0.69649  | 0.616523 |
| MmugDNA.37882.1.S1_at   | MmugDNA.37882.1 | 7.8   | 7.35  | 0.28 | 0.72 | 1.36  | 0.192699 | 0.233866 | 0.489313 | 0.505169 |
| MmugDNA.37882.1.S1_s_at | MmugDNA.37882.1 | 13.09 | 12.82 | 0.07 | 0.21 | 1.21  | 0.186876 | 0.388292 | 0.482992 | 0.62274  |
| MmugDNA.37883.1.S1_at   | MmugDNA.37883.1 | 6.08  | 6.01  | 0.22 | 0.11 | 1.05  | 0.260347 | 0.334933 | 0.554485 | 0.58275  |
| MmugDNA.37884.1.S1_at   | MmugDNA.37884.1 | 3.6   | 3.8   | 0.17 | 0.09 | -1.15 | 0.196095 | 0.252993 | 0.493082 | 0.521279 |
| MmugDNA.37885.1.S1_at   | MmugDNA.37885.1 | 11.02 | 11.49 | 0.15 | 0.1  | -1.39 | 0.010893 | 0.049115 | 0.154136 | 0.266522 |
| MmugDNA.37886.1.S1_at   | MmugDNA.37886.1 | 2.7   | 2.64  | 0.12 | 0.06 | 1.04  | 0.275655 | 0.392659 | 0.567274 | 0.625813 |
| MmugDNA.37887.1.S1_at   | MmugDNA.37887.1 | 4.16  | 4.49  | 0.63 | 0.56 | -1.26 | 0.864991 | 0.737398 | 0.941423 | 0.847889 |
| MmugDNA.37888.1.S1_at   | MmugDNA.37888.1 | 9.87  | 9.74  | 0.24 | 0.07 | 1.09  | 0.536891 | 0.17778  | 0.759199 | 0.454111 |
| MmugDNA.37889.1.S1_at   | MmugDNA.37889.1 | 5.79  | 4.69  | 0.94 | 0.58 | 2.14  | 0.421872 | 0.59537  | 0.680196 | 0.759091 |
| MmugDNA.3789.1.S1_at    | MmugDNA.3789.1  | 10.41 | 10.72 | 0.15 | 0.1  | -1.23 | 0.05898  | 0.318709 | 0.300005 | 0.57133  |
| MmugDNA.37890.1.S1_at   | MmugDNA.37890.1 | 5.84  | 5.78  | 0.31 | 0.04 | 1.05  | 0.210365 | 0.335705 | 0.507935 | 0.583458 |
| MmugDNA.37892.1.S1_at   | MmugDNA.37892.1 | 5.25  | 5.25  | 0.31 | 0.16 | -1    | 0.422394 | 0.321631 | 0.680602 | 0.573342 |
| MmugDNA.37893.1.S1_at   | MmugDNA.37893.1 | 9.85  | 10.1  | 0.09 | 0.14 | -1.19 | 0.161213 | 0.197149 | 0.452749 | 0.472213 |
| MmugDNA.37894.1.S1_at   | MmugDNA.37894.1 | 4.32  | 4.26  | 0.21 | 0.14 | 1.04  | 0.295906 | 0.313813 | 0.584657 | 0.568083 |
| MmugDNA.37895.1.S1_at   | MmugDNA.37895.1 | 7.92  | 7.82  | 0.13 | 0.16 | 1.07  | 0.449081 | 0.00061  | 0.700431 | 0.042176 |
| MmugDNA.37896.1.S1_at   | MmugDNA.37896.1 | 6.32  | 6.26  | 0.1  | 0.25 | 1.04  | 0.458738 | 0.563076 | 0.707204 | 0.738345 |
| MmugDNA.37897.1.S1_at   | MmugDNA.37897.1 | 7.04  | 6.97  | 0.1  | 0.09 | 1.05  | 0.174991 | 0.599781 | 0.469297 | 0.761575 |
| MmugDNA.37898.1.S1_at   | MmugDNA.37898.1 | 3.95  | 3.95  | 0.04 | 0.04 | 1     | 0.99179  | 0.087917 | 0.997004 | 0.341318 |
| MmugDNA.379.1.S1_at     | MmugDNA.379.1   | 3.24  | 3.21  | 0.03 | 0.08 | 1.02  | 0.499656 | 0.749659 | 0.734372 | 0.854534 |
| MmugDNA.3790.1.S1_at    | MmugDNA.3790.1  | 6.11  | 6.65  | 0.29 | 0.15 | -1.45 | 0.020705 | 0.007032 | 0.197469 | 0.113112 |
| MmugDNA.37901.1.S1_at   | MmugDNA.37901.1 | 8.6   | 8.34  | 0.16 | 0.12 | 1.2   | 0.088094 | 0.269663 | 0.354244 | 0.534924 |
| MmugDNA.37902.1.S1_at   | MmugDNA.37902.1 | 8.71  | 9.5   | 0.36 | 0.35 | -1.73 | 0.103406 | 0.24704  | 0.376538 | 0.516238 |
| MmugDNA.37903.1.S1_at   | MmugDNA.37903.1 | 4.9   | 4.81  | 0.23 | 0.07 | 1.06  | 0.182417 | 0.386454 | 0.478114 | 0.621593 |
| MmugDNA.37905.1.S1_at   | MmugDNA.37905.1 | 4.07  | 4.09  | 0.24 | 0.17 | -1.02 | 0.860625 | 0.443737 | 0.939526 | 0.661427 |
| MmugDNA.37906.1.S1_at   | MmugDNA.37906.1 | 6.17  | 6.27  | 0.1  | 0.14 | -1.07 | 0.310034 | 0.255666 | 0.596339 | 0.523619 |
| MmugDNA.37907.1.S1_at   | MmugDNA.37907.1 | 6.08  | 6.06  | 0.1  | 0.02 | 1.02  | 0.733926 | 0.582095 | 0.875982 | 0.750784 |
| MmugDNA.37908.1.S1_at   | MmugDNA.37908.1 | 5.76  | 5.75  | 0.05 | 0.1  | 1.01  | 0.371183 | 0.036297 | 0.643902 | 0.235094 |
| MmugDNA.37910.1.S1_at   | MmugDNA.37910.1 | 3.94  | 4.11  | 0.71 | 0.3  | -1.13 | 0.864589 | 0.928287 | 0.941377 | 0.959243 |
| MmugDNA.37911.1.S1_at   | MmugDNA.37911.1 | 3.65  | 3.64  | 0.07 | 0.05 | 1.01  | 0.607563 | 0.49529  | 0.803785 | 0.695411 |

|                         |                 |       |       |      |      |       |          |          |          |          |
|-------------------------|-----------------|-------|-------|------|------|-------|----------|----------|----------|----------|
| MmugDNA.37912.1.S1_at   | MmugDNA.37912.1 | 5.36  | 5.34  | 0.22 | 0.1  | 1.01  | 0.575423 | 0.788965 | 0.782823 | 0.878011 |
| MmugDNA.37913.1.S1_at   | MmugDNA.37913.1 | 5.32  | 4.43  | 0.99 | 0.4  | 1.86  | 0.139292 | 0.142242 | 0.424942 | 0.415754 |
| MmugDNA.37914.1.S1_at   | MmugDNA.37914.1 | 6.45  | 6.64  | 0.1  | 0.06 | -1.14 | 0.049398 | 0.007612 | 0.279687 | 0.116745 |
| MmugDNA.37915.1.S1_at   | MmugDNA.37915.1 | 3.6   | 3.49  | 0.11 | 0.04 | 1.08  | 0.495435 | 0.423587 | 0.731814 | 0.646459 |
| MmugDNA.37916.1.S1_at   | MmugDNA.37916.1 | 5.13  | 5.58  | 0.57 | 0.19 | -1.36 | 0.408777 | 0.618523 | 0.671414 | 0.774147 |
| MmugDNA.37917.1.S1_at   | MmugDNA.37917.1 | 12.46 | 12.34 | 0.38 | 0.15 | 1.09  | 0.647293 | 0.377074 | 0.828637 | 0.614793 |
| MmugDNA.37918.1.S1_at   | MmugDNA.37918.1 | 5.37  | 5.31  | 0.06 | 0.11 | 1.04  | 0.523933 | 0.60719  | 0.75074  | 0.766271 |
| MmugDNA.37919.1.S1_at   | MmugDNA.37919.1 | 5.69  | 5.6   | 0.12 | 0.11 | 1.06  | 0.35855  | 0.807069 | 0.634341 | 0.888946 |
| MmugDNA.3792.1.S1_at    | MmugDNA.3792.1  | 5.52  | 5.59  | 0.14 | 0.22 | -1.05 | 0.380384 | 0.552333 | 0.650146 | 0.73166  |
| MmugDNA.37920.1.S1_at   | MmugDNA.37920.1 | 6.57  | 7.08  | 0.31 | 0.01 | -1.42 | 0.109313 | 0.027971 | 0.384379 | 0.208777 |
| MmugDNA.37924.1.S1_at   | MmugDNA.37924.1 | 3.72  | 3.88  | 0.05 | 0.15 | -1.11 | 0.495225 | 0.627073 | 0.731695 | 0.780185 |
| MmugDNA.37926.1.S1_at   | MmugDNA.37926.1 | 10.64 | 10.52 | 0.17 | 0.04 | 1.09  | 0.310708 | 0.064692 | 0.59698  | 0.300314 |
| MmugDNA.37928.1.S1_at   | MmugDNA.37928.1 | 4.68  | 4.46  | 0.08 | 0.57 | 1.16  | 0.546027 | 0.510598 | 0.7651   | 0.70503  |
| MmugDNA.37929.1.S1_at   | MmugDNA.37929.1 | 3.23  | 3.18  | 0.24 | 0.29 | 1.03  | 0.757594 | 0.190385 | 0.888802 | 0.465906 |
| MmugDNA.3793.1.S1_at    | MmugDNA.3793.1  | 5.37  | 5.24  | 0.39 | 0.06 | 1.09  | 0.511931 | 0.593856 | 0.742821 | 0.758418 |
| MmugDNA.37930.1.S1_at   | MmugDNA.37930.1 | 3.77  | 3.52  | 0.35 | 0.57 | 1.19  | 0.517308 | 0.707798 | 0.746526 | 0.830472 |
| MmugDNA.37931.1.S1_at   | MmugDNA.37931.1 | 3.5   | 3.46  | 0.39 | 0.14 | 1.03  | 0.492585 | 0.614838 | 0.729815 | 0.771576 |
| MmugDNA.37932.1.S1_at   | MmugDNA.37932.1 | 3.28  | 3.14  | 0.18 | 0.09 | 1.1   | 0.133893 | 0.388609 | 0.417214 | 0.622917 |
| MmugDNA.37933.1.S1_at   | MmugDNA.37933.1 | 3.7   | 3.49  | 0.24 | 0.14 | 1.16  | 0.549108 | 0.768276 | 0.766978 | 0.865456 |
| MmugDNA.37934.1.S1_at   | MmugDNA.37934.1 | 6.67  | 6.63  | 0.13 | 0.15 | 1.03  | 0.441135 | 0.6607   | 0.694766 | 0.80151  |
| MmugDNA.37937.1.S1_at   | MmugDNA.37937.1 | 4     | 3.64  | 0.64 | 0.1  | 1.28  | 0.167216 | 0.13663  | 0.460434 | 0.409162 |
| MmugDNA.37938.1.S1_at   | MmugDNA.37938.1 | 9.21  | 9.34  | 0.02 | 0.12 | -1.09 | 0.412855 | 0.07118  | 0.674373 | 0.31311  |
| MmugDNA.37939.1.S1_at   | MmugDNA.37939.1 | 11.35 | 11.62 | 0.25 | 0.02 | -1.2  | 0.080023 | 0.551159 | 0.340337 | 0.730819 |
| MmugDNA.3794.1.S1_at    | MmugDNA.3794.1  | 6.32  | 6.26  | 0.13 | 0.07 | 1.04  | 0.886325 | 0.128515 | 0.951537 | 0.399854 |
| MmugDNA.37940.1.S1_at   | MmugDNA.37940.1 | 10.62 | 10.12 | 0.23 | 0.27 | 1.42  | 0.117946 | 0.000203 | 0.395518 | 0.031734 |
| MmugDNA.37941.1.S1_at   | MmugDNA.37941.1 | 10.63 | 10.77 | 0.28 | 0.06 | -1.1  | 0.244181 | 0.046923 | 0.540864 | 0.261301 |
| MmugDNA.37942.1.S1_at   | MmugDNA.37942.1 | 6.79  | 6.96  | 0.1  | 0.22 | -1.13 | 0.063593 | 0.230014 | 0.308797 | 0.501865 |
| MmugDNA.37943.1.S1_at   | MmugDNA.37943.1 | 5.25  | 4.8   | 0.48 | 0.25 | 1.36  | 0.240152 | 0.207346 | 0.537781 | 0.481563 |
| MmugDNA.37944.1.S1_at   | MmugDNA.37944.1 | 9.95  | 9.49  | 0.27 | 0.06 | 1.38  | 0.118153 | 0.534223 | 0.39564  | 0.720204 |
| MmugDNA.37945.1.S1_at   | MmugDNA.37945.1 | 3.92  | 5.94  | 1.37 | 0.08 | -4.03 | 0.180525 | 0.41612  | 0.475675 | 0.64135  |
| MmugDNA.37946.1.S1_s_at | MmugDNA.37946.1 | 4.69  | 4.54  | 0.32 | 0.04 | 1.1   | 0.162534 | 0.196836 | 0.454561 | 0.471968 |
| MmugDNA.37948.1.S1_at   | MmugDNA.37948.1 | 4.06  | 4.26  | 0.22 | 0.09 | -1.15 | 0.900565 | 0.255176 | 0.95778  | 0.523228 |
| MmugDNA.37949.1.S1_at   | MmugDNA.37949.1 | 6.56  | 6.37  | 0.01 | 0.09 | 1.14  | 0.024009 | 0.265788 | 0.208141 | 0.531667 |
| MmugDNA.3795.1.S1_at    | MmugDNA.3795.1  | 12.18 | 12.1  | 0.1  | 0.02 | 1.06  | 0.301671 | 0.266808 | 0.589524 | 0.53241  |
| MmugDNA.37950.1.S1_at   | MmugDNA.37950.1 | 3.77  | 3.67  | 0.12 | 0.08 | 1.07  | 0.449907 | 0.553045 | 0.701168 | 0.732309 |
| MmugDNA.37951.1.S1_at   | MmugDNA.37951.1 | 5.4   | 4.86  | 0.52 | 0.34 | 1.46  | 0.379331 | 0.382119 | 0.64929  | 0.618346 |
| MmugDNA.37952.1.S1_at   | MmugDNA.37952.1 | 4.67  | 4.4   | 0.21 | 0.12 | 1.21  | 0.155039 | 0.252848 | 0.445174 | 0.521174 |
| MmugDNA.37953.1.S1_at   | MmugDNA.37953.1 | 8.98  | 8.4   | 0.14 | 0.21 | 1.49  | 0.009399 | 0.079502 | 0.146817 | 0.32681  |
| MmugDNA.37955.1.S1_at   | MmugDNA.37955.1 | 3.19  | 3.23  | 1.05 | 0.24 | -1.03 | 0.428756 | 0.49692  | 0.685503 | 0.696273 |
| MmugDNA.37956.1.S1_at   | MmugDNA.37956.1 | 3.96  | 3.79  | 0.25 | 0.24 | 1.12  | 0.433781 | 0.766387 | 0.689189 | 0.864265 |
| MmugDNA.37958.1.S1_at   | MmugDNA.37958.1 | 6.68  | 6.95  | 0.34 | 0.07 | -1.2  | 0.691371 | 0.270323 | 0.852423 | 0.535676 |
| MmugDNA.3796.1.S1_at    | MmugDNA.3796.1  | 6.29  | 6.17  | 0.33 | 0.12 | 1.09  | 0.172137 | 0.408475 | 0.466213 | 0.635694 |
| MmugDNA.37964.1.S1_at   | MmugDNA.37964.1 | 3.95  | 3.93  | 0.08 | 0.16 | 1.02  | 0.355627 | 0.721319 | 0.632237 | 0.838685 |

|                         |                 |       |       |      |      |        |          |          |          |          |
|-------------------------|-----------------|-------|-------|------|------|--------|----------|----------|----------|----------|
| MmugDNA.37966.1.S1_at   | MmugDNA.37966.1 | 8.01  | 7.67  | 0.28 | 0.12 | 1.27   | 0.049023 | 0.025727 | 0.279025 | 0.201029 |
| MmugDNA.37967.1.S1_at   | MmugDNA.37967.1 | 6.56  | 6     | 0.33 | 0.09 | 1.47   | 0.162478 | 0.181487 | 0.454544 | 0.458028 |
| MmugDNA.37968.1.S1_at   | MmugDNA.37968.1 | 10.69 | 10.65 | 0.31 | 0.01 | 1.03   | 0.862663 | 0.073073 | 0.940274 | 0.316017 |
| MmugDNA.37969.1.S1_at   | MmugDNA.37969.1 | 4.74  | 4.63  | 0.08 | 0.04 | 1.08   | 0.095438 | 0.076978 | 0.364958 | 0.322421 |
| MmugDNA.3797.1.S1_at    | MmugDNA.3797.1  | 11.25 | 10.5  | 0.64 | 0.57 | 1.68   | 0.186558 | 0.202203 | 0.482692 | 0.476613 |
| MmugDNA.3797.1.S1_x_at  | MmugDNA.3797.1  | 11.18 | 10.77 | 0.66 | 0.49 | 1.33   | 0.195746 | 0.189062 | 0.492639 | 0.464897 |
| MmugDNA.37970.1.S1_at   | MmugDNA.37970.1 | 5.16  | 4.92  | 0.17 | 0.17 | 1.18   | 0.08128  | 0.084115 | 0.342222 | 0.335147 |
| MmugDNA.37971.1.S1_at   | MmugDNA.37971.1 | 11.8  | 11.43 | 0.04 | 0.07 | 1.29   | 0.001099 | 0.259934 | 0.077278 | 0.52675  |
| MmugDNA.37972.1.S1_at   | MmugDNA.37972.1 | 11.09 | 11.34 | 0.4  | 0.11 | -1.19  | 0.118502 | 0.005481 | 0.396177 | 0.102081 |
| MmugDNA.37975.1.S1_at   | MmugDNA.37975.1 | 7.17  | 7.17  | 0.07 | 0.1  | 1      | 0.832627 | 0.242394 | 0.9263   | 0.51282  |
| MmugDNA.37976.1.S1_at   | MmugDNA.37976.1 | 3.59  | 3.2   | 0.25 | 0.1  | 1.31   | 0.067725 | 0.040485 | 0.318077 | 0.246264 |
| MmugDNA.37977.1.S1_at   | MmugDNA.37977.1 | 4.27  | 4.16  | 0.34 | 0.12 | 1.08   | 0.56146  | 0.705573 | 0.774424 | 0.829315 |
| MmugDNA.37978.1.S1_at   | MmugDNA.37978.1 | 6.11  | 5.61  | 1.02 | 0.87 | 1.41   | 0.504931 | 0.717105 | 0.738034 | 0.836232 |
| MmugDNA.37979.1.S1_at   | MmugDNA.37979.1 | 8.67  | 8.55  | 0.3  | 0.14 | 1.08   | 0.393042 | 0.347164 | 0.659917 | 0.591815 |
| MmugDNA.37979.1.S1_s_at | MmugDNA.37979.1 | 10.22 | 10.04 | 0.27 | 0.06 | 1.13   | 0.344406 | 0.841063 | 0.623699 | 0.909427 |
| MmugDNA.3798.1.S1_at    | MmugDNA.3798.1  | 4.16  | 3.65  | 0.36 | 0.09 | 1.43   | 0.293375 | 0.402056 | 0.582333 | 0.631153 |
| MmugDNA.37981.1.S1_at   | MmugDNA.37981.1 | 4.32  | 4.16  | 0.22 | 0.12 | 1.12   | 0.319273 | 0.117289 | 0.603877 | 0.38486  |
| MmugDNA.37983.1.S1_at   | MmugDNA.37983.1 | 6     | 5.81  | 0.14 | 0.17 | 1.14   | 0.321562 | 0.610344 | 0.605866 | 0.768564 |
| MmugDNA.37984.1.S1_at   | MmugDNA.37984.1 | 8.89  | 8.89  | 0.1  | 0.07 | -1     | 0.790595 | 0.020913 | 0.904916 | 0.181415 |
| MmugDNA.37985.1.S1_at   | MmugDNA.37985.1 | 9.26  | 9.42  | 0.77 | 0.06 | -1.12  | 0.664805 | 0.881543 | 0.83878  | 0.932407 |
| MmugDNA.37985.1.S1_s_at | MmugDNA.37985.1 | 10.35 | 10.45 | 0.56 | 0.19 | -1.07  | 0.593637 | 0.809325 | 0.794115 | 0.890103 |
| MmugDNA.37986.1.S1_at   | MmugDNA.37986.1 | 3.85  | 8.15  | 1.21 | 0.09 | -19.69 | 0.00378  | 0.011369 | 0.106813 | 0.138214 |
| MmugDNA.37987.1.S1_at   | MmugDNA.37987.1 | 7.91  | 7.78  | 0.33 | 1.07 | 1.09   | 0.654778 | 0.860398 | 0.832889 | 0.920449 |
| MmugDNA.37988.1.S1_x_at | MmugDNA.37988.1 | 11.44 | 11.58 | 0.58 | 0.19 | -1.11  | 0.616259 | 0.563556 | 0.809428 | 0.738718 |
| MmugDNA.37989.1.S1_at   | MmugDNA.37989.1 | 4     | 3.68  | 0.64 | 0.19 | 1.25   | 0.32723  | 0.435092 | 0.609871 | 0.655005 |
| MmugDNA.3799.1.S1_at    | MmugDNA.3799.1  | 7.66  | 7.51  | 1.02 | 0.65 | 1.12   | 0.665458 | 0.59646  | 0.839236 | 0.759592 |
| MmugDNA.37990.1.S1_at   | MmugDNA.37990.1 | 4.05  | 4.25  | 0.11 | 0.16 | -1.15  | 0.088112 | 0.041181 | 0.354244 | 0.247733 |
| MmugDNA.37991.1.S1_at   | MmugDNA.37991.1 | 6.75  | 6.54  | 0.39 | 0.2  | 1.16   | 0.799175 | 0.133232 | 0.909452 | 0.404999 |
| MmugDNA.37994.1.S1_at   | MmugDNA.37994.1 | 3.92  | 4.66  | 0.13 | 0.35 | -1.67  | 0.061168 | 0.201533 | 0.304172 | 0.476036 |
| MmugDNA.37997.1.S1_at   | MmugDNA.37997.1 | 3.58  | 3.5   | 0.5  | 0.22 | 1.06   | 0.265898 | 0.261989 | 0.55847  | 0.52836  |
| MmugDNA.380.1.S1_at     | MmugDNA.380.1   | 4.85  | 4.59  | 0.23 | 0.37 | 1.2    | 0.299519 | 0.088248 | 0.587812 | 0.341721 |
| MmugDNA.3800.1.S1_at    | MmugDNA.3800.1  | 5.98  | 5.96  | 0.06 | 0.15 | 1.02   | 0.383716 | 0.283296 | 0.652948 | 0.545836 |
| MmugDNA.38002.1.S1_at   | MmugDNA.38002.1 | 4.29  | 4.27  | 0.05 | 0.18 | 1.01   | 0.844165 | 0.969848 | 0.931743 | 0.983503 |
| MmugDNA.38004.1.S1_at   | MmugDNA.38004.1 | 5.85  | 5.72  | 1.01 | 0.36 | 1.1    | 0.458702 | 0.143722 | 0.707202 | 0.417583 |
| MmugDNA.38005.1.S1_at   | MmugDNA.38005.1 | 6.68  | 7.15  | 1.32 | 0.13 | -1.38  | 0.674961 | 0.851117 | 0.844854 | 0.915337 |
| MmugDNA.38007.1.S1_at   | MmugDNA.38007.1 | 2.98  | 2.97  | 0.04 | 0.1  | 1      | 0.275712 | 0.232712 | 0.567274 | 0.504359 |
| MmugDNA.38009.1.S1_at   | MmugDNA.38009.1 | 4.57  | 4.74  | 0.23 | 0.1  | -1.13  | 0.566385 | 0.802278 | 0.777306 | 0.886115 |
| MmugDNA.3801.1.S1_at    | MmugDNA.3801.1  | 4.93  | 4.41  | 0.57 | 0.11 | 1.43   | 0.066468 | 0.071841 | 0.315341 | 0.314082 |
| MmugDNA.38011.1.S1_at   | MmugDNA.38011.1 | 4.57  | 4.08  | 0.2  | 0.1  | 1.4    | 0.013319 | 0.006873 | 0.166232 | 0.111996 |
| MmugDNA.38012.1.S1_at   | MmugDNA.38012.1 | 4.63  | 4.61  | 0.4  | 0.23 | 1.01   | 0.683986 | 0.095072 | 0.849339 | 0.352124 |
| MmugDNA.38015.1.S1_at   | MmugDNA.38015.1 | 3.33  | 3.33  | 0.01 | 0    | 1      | 0.373901 | 0.129066 | 0.645118 | 0.400548 |
| MmugDNA.38015.1.S1_x_at | MmugDNA.38015.1 | 4.03  | 4.08  | 0.11 | 0.05 | -1.04  | 0.623961 | 0.955254 | 0.814557 | 0.974611 |
| MmugDNA.38016.1.S1_at   | MmugDNA.38016.1 | 4.6   | 4.58  | 0.18 | 0.08 | 1.01   | 0.460055 | 0.483818 | 0.708029 | 0.688165 |

|                         |                 |       |       |      |      |       |          |          |          |          |
|-------------------------|-----------------|-------|-------|------|------|-------|----------|----------|----------|----------|
| MmugDNA.38017.1.S1_at   | MmugDNA.38017.1 | 3.93  | 3.92  | 0.2  | 0.06 | 1.01  | 0.998039 | 0.15259  | 0.999236 | 0.427435 |
| MmugDNA.38018.1.S1_at   | MmugDNA.38018.1 | 3.77  | 3.87  | 0.11 | 0.23 | -1.07 | 0.418855 | 0.584065 | 0.678622 | 0.752189 |
| MmugDNA.38019.1.S1_at   | MmugDNA.38019.1 | 10.06 | 9.88  | 0.12 | 0.08 | 1.14  | 0.131075 | 0.908567 | 0.413841 | 0.948227 |
| MmugDNA.3802.1.S1_at    | MmugDNA.3802.1  | 10.21 | 9.8   | 0.08 | 0.28 | 1.32  | 0.052222 | 0.08526  | 0.285979 | 0.337096 |
| MmugDNA.38020.1.S1_at   | MmugDNA.38020.1 | 10.84 | 11.23 | 0.48 | 0.07 | -1.3  | 0.081198 | 0.082815 | 0.342222 | 0.332331 |
| MmugDNA.38021.1.S1_at   | MmugDNA.38021.1 | 5.8   | 5.78  | 0.15 | 0    | 1.01  | 0.7852   | 0.947956 | 0.902006 | 0.970406 |
| MmugDNA.38022.1.S1_at   | MmugDNA.38022.1 | 7.76  | 7.61  | 0.19 | 0.04 | 1.11  | 0.183216 | 0.206661 | 0.479206 | 0.480711 |
| MmugDNA.38023.1.S1_at   | MmugDNA.38023.1 | 7.26  | 7.76  | 0.21 | 0.08 | -1.42 | 0.017856 | 0.013224 | 0.187044 | 0.147534 |
| MmugDNA.38024.1.S1_at   | MmugDNA.38024.1 | 12.3  | 11.06 | 0.2  | 0.23 | 2.37  | 0.004074 | 0.006193 | 0.108999 | 0.106774 |
| MmugDNA.38025.1.S1_at   | MmugDNA.38025.1 | 7.4   | 7.43  | 0.18 | 0.06 | -1.02 | 0.319304 | 0.06128  | 0.603915 | 0.294247 |
| MmugDNA.38025.1.S1_s_at | MmugDNA.38025.1 | 7.64  | 7.86  | 0.35 | 0.13 | -1.16 | 0.336283 | 0.084673 | 0.616957 | 0.33618  |
| MmugDNA.38027.1.S1_at   | MmugDNA.38027.1 | 4.72  | 4.59  | 0.12 | 0.09 | 1.09  | 0.550855 | 0.12565  | 0.76815  | 0.396249 |
| MmugDNA.38028.1.S1_at   | MmugDNA.38028.1 | 2.92  | 2.84  | 0.35 | 0.04 | 1.06  | 0.713158 | 0.875256 | 0.864585 | 0.929211 |
| MmugDNA.38028.1.S1_x_at | MmugDNA.38028.1 | 2.85  | 2.93  | 0.24 | 0.24 | -1.06 | 0.771661 | 0.911863 | 0.895388 | 0.950295 |
| MmugDNA.3803.1.S1_at    | MmugDNA.3803.1  | 9.56  | 9.55  | 0.2  | 0.08 | 1     | 0.402037 | 0.382175 | 0.666532 | 0.618361 |
| MmugDNA.38030.1.S1_at   | MmugDNA.38030.1 | 10.86 | 11.04 | 0.12 | 0.08 | -1.13 | 0.163054 | 0.600746 | 0.455234 | 0.76224  |
| MmugDNA.38031.1.S1_at   | MmugDNA.38031.1 | 4.3   | 4.24  | 0.08 | 0.03 | 1.04  | 0.16662  | 0.198343 | 0.459798 | 0.473267 |
| MmugDNA.38032.1.S1_at   | MmugDNA.38032.1 | 5.25  | 5.39  | 0.26 | 0.21 | -1.1  | 0.898226 | 0.981413 | 0.956732 | 0.989775 |
| MmugDNA.38033.1.S1_at   | MmugDNA.38033.1 | 4.22  | 4.24  | 0.07 | 0.17 | -1.01 | 0.819643 | 0.937397 | 0.919644 | 0.964687 |
| MmugDNA.38034.1.S1_at   | MmugDNA.38034.1 | 3.93  | 3.93  | 0.09 | 0.21 | 1     | 0.252962 | 0.12438  | 0.547557 | 0.394857 |
| MmugDNA.38035.1.S1_at   | MmugDNA.38035.1 | 5.46  | 6.26  | 1.6  | 0.12 | -1.74 | 0.645819 | 0.208837 | 0.827606 | 0.482717 |
| MmugDNA.38036.1.S1_at   | MmugDNA.38036.1 | 3.52  | 3.16  | 0.3  | 0.07 | 1.28  | 0.471786 | 0.654767 | 0.715809 | 0.798154 |
| MmugDNA.38037.1.S1_at   | MmugDNA.38037.1 | 10.53 | 10.68 | 0.05 | 0.04 | -1.11 | 0.02425  | 0.005805 | 0.20883  | 0.104597 |
| MmugDNA.38038.1.S1_at   | MmugDNA.38038.1 | 5.29  | 5.32  | 0.1  | 0.12 | -1.02 | 0.848966 | 0.892659 | 0.934214 | 0.938777 |
| MmugDNA.38039.1.S1_at   | MmugDNA.38039.1 | 6.96  | 6.61  | 0.16 | 0.12 | 1.27  | 0.047023 | 0.036079 | 0.274544 | 0.234413 |
| MmugDNA.3804.1.S1_at    | MmugDNA.3804.1  | 6.1   | 5.95  | 0.06 | 0.09 | 1.11  | 0.095066 | 0.253711 | 0.364251 | 0.522067 |
| MmugDNA.38040.1.S1_at   | MmugDNA.38040.1 | 4.03  | 4.06  | 0.03 | 0    | -1.02 | 0.179945 | 0.71929  | 0.475023 | 0.837561 |
| MmugDNA.38041.1.S1_at   | MmugDNA.38041.1 | 11.88 | 11.4  | 0.04 | 0.05 | 1.39  | 0.000281 | 0.00028  | 0.056985 | 0.03453  |
| MmugDNA.38042.1.S1_at   | MmugDNA.38042.1 | 8.72  | 8.72  | 0.32 | 0.09 | 1     | 0.860316 | 0.741944 | 0.93941  | 0.850545 |
| MmugDNA.38043.1.S1_at   | MmugDNA.38043.1 | 10.47 | 10.6  | 0.16 | 0.1  | -1.1  | 0.830979 | 0.961443 | 0.925596 | 0.978245 |
| MmugDNA.38044.1.S1_at   | MmugDNA.38044.1 | 5.01  | 4.25  | 0.65 | 0.12 | 1.69  | 0.121828 | 0.481638 | 0.400523 | 0.686561 |
| MmugDNA.38045.1.S1_at   | MmugDNA.38045.1 | 7.05  | 6.96  | 1.07 | 0.06 | 1.06  | 0.438143 | 0.656017 | 0.692786 | 0.79881  |
| MmugDNA.38046.1.S1_at   | MmugDNA.38046.1 | 5.96  | 6.01  | 0.06 | 0.07 | -1.04 | 0.16654  | 0.306998 | 0.459742 | 0.563427 |
| MmugDNA.38048.1.S1_at   | MmugDNA.38048.1 | 6.32  | 6.13  | 0.35 | 0.1  | 1.14  | 0.348311 | 0.411082 | 0.626353 | 0.637877 |
| MmugDNA.3805.1.S1_at    | MmugDNA.3805.1  | 3.73  | 3.89  | 0.2  | 0.22 | -1.11 | 0.974549 | 0.476378 | 0.98978  | 0.682695 |
| MmugDNA.38050.1.S1_s_at | MmugDNA.38050.1 | 10.89 | 10.54 | 0.08 | 0.04 | 1.28  | 0.002659 | 0.008542 | 0.095754 | 0.122583 |
| MmugDNA.38051.1.S1_at   | MmugDNA.38051.1 | 4.55  | 4.54  | 0.14 | 0.13 | 1     | 0.485647 | 0.838184 | 0.725109 | 0.907595 |
| MmugDNA.38055.1.S1_at   | MmugDNA.38055.1 | 7.67  | 7.61  | 0.11 | 0.1  | 1.04  | 0.583783 | 0.084318 | 0.788356 | 0.335576 |
| MmugDNA.38056.1.S1_at   | MmugDNA.38056.1 | 7     | 7.18  | 0.66 | 0.2  | -1.13 | 0.332776 | 0.455183 | 0.61438  | 0.669157 |
| MmugDNA.38057.1.S1_at   | MmugDNA.38057.1 | 5.86  | 5.86  | 0.16 | 0.23 | 1     | 0.62726  | 0.735807 | 0.816769 | 0.847147 |
| MmugDNA.38058.1.S1_at   | MmugDNA.38058.1 | 9.86  | 10.41 | 0.26 | 0.21 | -1.47 | 0.051884 | 0.098711 | 0.285209 | 0.356809 |
| MmugDNA.38059.1.S1_at   | MmugDNA.38059.1 | 6.25  | 6.31  | 0.01 | 0.03 | -1.05 | 0.03217  | 0.01343  | 0.233272 | 0.148471 |
| MmugDNA.3806.1.S1_at    | MmugDNA.3806.1  | 6.08  | 6.07  | 0.18 | 0.08 | 1.01  | 0.486301 | 0.715975 | 0.725583 | 0.835339 |

|                         |                 |       |       |      |      |       |          |          |          |          |
|-------------------------|-----------------|-------|-------|------|------|-------|----------|----------|----------|----------|
| MmugDNA.38060.1.S1_at   | MmugDNA.38060.1 | 4.24  | 4.25  | 0.1  | 0.12 | -1.01 | 0.420406 | 0.255115 | 0.679414 | 0.52317  |
| MmugDNA.38061.1.S1_at   | MmugDNA.38061.1 | 7.06  | 7.51  | 0.25 | 0.14 | -1.36 | 0.049887 | 0.050738 | 0.281011 | 0.270387 |
| MmugDNA.38064.1.S1_s_at | MmugDNA.38064.1 | 7.11  | 7.12  | 0.11 | 0.05 | -1.01 | 0.320582 | 0.471013 | 0.605112 | 0.679162 |
| MmugDNA.38065.1.S1_at   | MmugDNA.38065.1 | 5.15  | 5.04  | 0.12 | 0.03 | 1.08  | 0.051011 | 0.007293 | 0.283499 | 0.114639 |
| MmugDNA.38066.1.S1_at   | MmugDNA.38066.1 | 4.36  | 4.13  | 0.21 | 0.05 | 1.18  | 0.11607  | 0.088254 | 0.393069 | 0.341721 |
| MmugDNA.38067.1.S1_at   | MmugDNA.38067.1 | 5.58  | 5.3   | 0.28 | 0.11 | 1.22  | 0.22251  | 0.230282 | 0.52044  | 0.502102 |
| MmugDNA.38068.1.S1_at   | MmugDNA.38068.1 | 6.41  | 6.32  | 0.08 | 0.05 | 1.06  | 0.113828 | 0.464841 | 0.390524 | 0.675463 |
| MmugDNA.3807.1.S1_at    | MmugDNA.3807.1  | 11.36 | 11.33 | 0.69 | 0.13 | 1.02  | 0.421231 | 0.640038 | 0.679846 | 0.788671 |
| MmugDNA.38071.1.S1_s_at | MmugDNA.38071.1 | 12.08 | 11.7  | 0.13 | 0.02 | 1.3   | 0.007632 | 0.014008 | 0.135893 | 0.151595 |
| MmugDNA.38073.1.S1_at   | MmugDNA.38073.1 | 3.35  | 3.45  | 0.4  | 0.03 | -1.07 | 0.567208 | 0.745223 | 0.77771  | 0.852308 |
| MmugDNA.38074.1.S1_at   | MmugDNA.38074.1 | 4.43  | 4.03  | 0.41 | 0.4  | 1.31  | 0.136629 | 0.107896 | 0.421269 | 0.370945 |
| MmugDNA.38075.1.S1_at   | MmugDNA.38075.1 | 10.38 | 10.02 | 0.29 | 0.02 | 1.29  | 0.302871 | 0.277161 | 0.590429 | 0.541154 |
| MmugDNA.38076.1.S1_at   | MmugDNA.38076.1 | 4.48  | 4.37  | 0.05 | 0.04 | 1.07  | 0.020812 | 0.017382 | 0.197825 | 0.166949 |
| MmugDNA.38077.1.S1_at   | MmugDNA.38077.1 | 4.93  | 4.29  | 0.66 | 0.13 | 1.56  | 0.210761 | 0.314047 | 0.508406 | 0.568178 |
| MmugDNA.38078.1.S1_at   | MmugDNA.38078.1 | 9.18  | 9.25  | 0.17 | 0.2  | -1.05 | 0.777787 | 0.661777 | 0.898434 | 0.801943 |
| MmugDNA.38079.1.S1_at   | MmugDNA.38079.1 | 6.91  | 6.38  | 0.42 | 0.1  | 1.45  | 0.097279 | 0.050721 | 0.367386 | 0.270355 |
| MmugDNA.3808.1.S1_at    | MmugDNA.3808.1  | 6.15  | 6.15  | 0.02 | 0.15 | -1    | 0.625708 | 0.811026 | 0.815534 | 0.890966 |
| MmugDNA.38080.1.S1_at   | MmugDNA.38080.1 | 7.7   | 6.67  | 0.32 | 0.07 | 2.04  | 0.005747 | 0.004378 | 0.121528 | 0.092619 |
| MmugDNA.38082.1.S1_at   | MmugDNA.38082.1 | 8.19  | 8.19  | 0.03 | 0.04 | 1     | 0.509122 | 0.77239  | 0.740884 | 0.867685 |
| MmugDNA.38083.1.S1_at   | MmugDNA.38083.1 | 3.44  | 3.57  | 0.17 | 0.11 | -1.09 | 0.121222 | 0.155969 | 0.399891 | 0.431376 |
| MmugDNA.38084.1.S1_at   | MmugDNA.38084.1 | 5.8   | 5.95  | 0.41 | 0.41 | -1.11 | 0.222411 | 0.634806 | 0.520349 | 0.785036 |
| MmugDNA.38084.1.S1_s_at | MmugDNA.38084.1 | 4.81  | 4.81  | 0.03 | 0.21 | 1     | 0.831419 | 0.90641  | 0.925872 | 0.94704  |
| MmugDNA.38085.1.S1_at   | MmugDNA.38085.1 | 6.34  | 6.43  | 0.18 | 0.06 | -1.07 | 0.241895 | 0.411414 | 0.538882 | 0.638149 |
| MmugDNA.38087.1.S1_at   | MmugDNA.38087.1 | 6.66  | 5.98  | 1.09 | 0.35 | 1.6   | 0.383021 | 0.345139 | 0.652427 | 0.590422 |
| MmugDNA.38088.1.S1_at   | MmugDNA.38088.1 | 6.09  | 6.17  | 0.18 | 0.1  | -1.06 | 0.855874 | 0.44316  | 0.93725  | 0.661011 |
| MmugDNA.38089.1.S1_at   | MmugDNA.38089.1 | 7.01  | 7.07  | 0.02 | 0.14 | -1.05 | 0.636342 | 0.717424 | 0.822077 | 0.836425 |
| MmugDNA.3809.1.S1_at    | MmugDNA.3809.1  | 3.62  | 3.62  | 0.03 | 0.08 | 1     | 0.229664 | 0.166361 | 0.528636 | 0.442884 |
| MmugDNA.38090.1.S1_at   | MmugDNA.38090.1 | 2.96  | 5.2   | 0.43 | 0.68 | -4.73 | 0.012737 | 0.003801 | 0.163022 | 0.087835 |
| MmugDNA.38091.1.S1_at   | MmugDNA.38091.1 | 8.43  | 8.95  | 0.75 | 0.12 | -1.43 | 0.658274 | 0.83837  | 0.834924 | 0.907759 |
| MmugDNA.38092.1.S1_at   | MmugDNA.38092.1 | 5.34  | 5.65  | 0.11 | 0.09 | -1.24 | 0.011961 | 0.148447 | 0.159466 | 0.423007 |
| MmugDNA.38093.1.S1_at   | MmugDNA.38093.1 | 3.59  | 3.72  | 0.22 | 0.17 | -1.1  | 0.568254 | 0.594704 | 0.778237 | 0.758628 |
| MmugDNA.38094.1.S1_at   | MmugDNA.38094.1 | 6.73  | 6.65  | 1.29 | 0.45 | 1.06  | 0.667271 | 0.513847 | 0.840276 | 0.707281 |
| MmugDNA.38095.1.S1_at   | MmugDNA.38095.1 | 11.48 | 11.32 | 0.02 | 0.08 | 1.12  | 0.015189 | 0.015245 | 0.175284 | 0.156859 |
| MmugDNA.38096.1.S1_s_at | MmugDNA.38096.1 | 11.9  | 11.76 | 0.05 | 0.06 | 1.1   | 0.018677 | 0.277899 | 0.189833 | 0.541664 |
| MmugDNA.38097.1.S1_at   | MmugDNA.38097.1 | 10.88 | 10.97 | 0.15 | 0.06 | -1.07 | 0.753956 | 0.601871 | 0.886637 | 0.763115 |
| MmugDNA.38098.1.S1_at   | MmugDNA.38098.1 | 2.96  | 2.96  | 0.15 | 0.06 | -1    | 0.605764 | 0.423642 | 0.80268  | 0.646464 |
| MmugDNA.381.1.S1_at     | MmugDNA.381.1   | 6.46  | 6.39  | 0.2  | 0.06 | 1.05  | 0.446634 | 0.456017 | 0.698786 | 0.669779 |
| MmugDNA.3810.1.S1_at    | MmugDNA.3810.1  | 9.47  | 9.48  | 0.17 | 0.07 | -1.01 | 0.313195 | 0.808989 | 0.598982 | 0.889981 |
| MmugDNA.38100.1.S1_at   | MmugDNA.38100.1 | 5     | 5.22  | 0.79 | 0.05 | -1.16 | 0.632892 | 0.812313 | 0.820065 | 0.891561 |
| MmugDNA.38101.1.S1_at   | MmugDNA.38101.1 | 12.09 | 11.84 | 0.08 | 0.04 | 1.19  | 0.016378 | 0.038431 | 0.180807 | 0.240918 |
| MmugDNA.38104.1.S1_at   | MmugDNA.38104.1 | 6.81  | 7.62  | 0.42 | 0.1  | -1.76 | 0.080057 | 0.241658 | 0.340402 | 0.512225 |
| MmugDNA.38105.1.S1_at   | MmugDNA.38105.1 | 7.9   | 8.04  | 0.21 | 0.04 | -1.1  | 0.816684 | 0.805137 | 0.918088 | 0.887962 |
| MmugDNA.38106.1.S1_at   | MmugDNA.38106.1 | 3.95  | 3.3   | 0.23 | 0.26 | 1.57  | 0.086526 | 0.11012  | 0.351483 | 0.374244 |

|                         |                 |       |       |      |      |       |          |          |          |          |
|-------------------------|-----------------|-------|-------|------|------|-------|----------|----------|----------|----------|
| MmugDNA.38108.1.S1_at   | MmugDNA.38108.1 | 4.48  | 4.24  | 1.57 | 0.79 | 1.18  | 0.541391 | 0.51373  | 0.76214  | 0.707217 |
| MmugDNA.38109.1.S1_at   | MmugDNA.38109.1 | 3.1   | 3.05  | 0.32 | 0.18 | 1.04  | 0.852545 | 0.659762 | 0.935873 | 0.800854 |
| MmugDNA.38110.1.S1_at   | MmugDNA.38110.1 | 6.12  | 6.15  | 0.2  | 0.24 | -1.03 | 0.925321 | 0.984221 | 0.968315 | 0.991233 |
| MmugDNA.38111.1.S1_at   | MmugDNA.38111.1 | 4.14  | 3.94  | 0.79 | 0.21 | 1.15  | 0.239816 | 0.272975 | 0.537289 | 0.53761  |
| MmugDNA.38112.1.S1_at   | MmugDNA.38112.1 | 3.27  | 3.27  | 0.08 | 0    | 1     | 0.872171 | 0.981114 | 0.945171 | 0.989575 |
| MmugDNA.38114.1.S1_at   | MmugDNA.38114.1 | 4.62  | 4.59  | 0.23 | 0.09 | 1.02  | 0.878155 | 0.717038 | 0.947963 | 0.836191 |
| MmugDNA.38116.1.S1_at   | MmugDNA.38116.1 | 7.84  | 7.71  | 0.17 | 0.32 | 1.1   | 0.530286 | 0.143599 | 0.754848 | 0.41751  |
| MmugDNA.38118.1.S1_at   | MmugDNA.38118.1 | 3.36  | 3.23  | 0.1  | 0.1  | 1.1   | 0.238502 | 0.267265 | 0.535882 | 0.532909 |
| MmugDNA.38119.1.S1_s_at | MmugDNA.38119.1 | 11.43 | 11.61 | 0.15 | 0.01 | -1.13 | 0.072018 | 0.028953 | 0.326241 | 0.212051 |
| MmugDNA.3812.1.S1_at    | MmugDNA.3812.1  | 3.63  | 3.67  | 0.15 | 0.07 | -1.03 | 0.444455 | 0.267684 | 0.69736  | 0.533467 |
| MmugDNA.38120.1.S1_at   | MmugDNA.38120.1 | 4.72  | 5.42  | 0.11 | 0.27 | -1.62 | 0.048268 | 0.039113 | 0.277025 | 0.24303  |
| MmugDNA.38122.1.S1_at   | MmugDNA.38122.1 | 6.12  | 5.91  | 0.36 | 0.12 | 1.16  | 0.145379 | 0.115969 | 0.432667 | 0.383164 |
| MmugDNA.38123.1.S1_at   | MmugDNA.38123.1 | 3.71  | 3.46  | 0.21 | 0.24 | 1.2   | 0.208755 | 0.340828 | 0.506255 | 0.586978 |
| MmugDNA.38125.1.S1_at   | MmugDNA.38125.1 | 3.39  | 3.4   | 0.18 | 0.12 | -1    | 0.631408 | 0.484219 | 0.819025 | 0.688408 |
| MmugDNA.38126.1.S1_at   | MmugDNA.38126.1 | 6.21  | 6.44  | 0.68 | 0.1  | -1.18 | 0.965331 | 0.524622 | 0.985931 | 0.714463 |
| MmugDNA.38127.1.S1_at   | MmugDNA.38127.1 | 4.84  | 4.45  | 0.18 | 0.25 | 1.31  | 0.119422 | 0.10682  | 0.397285 | 0.369425 |
| MmugDNA.38128.1.S1_at   | MmugDNA.38128.1 | 4.59  | 5.15  | 0.93 | 0.51 | -1.47 | 0.617702 | 0.809835 | 0.810132 | 0.890412 |
| MmugDNA.38129.1.S1_at   | MmugDNA.38129.1 | 7.99  | 7.94  | 0.64 | 0.31 | 1.04  | 0.456146 | 0.199392 | 0.705665 | 0.474002 |
| MmugDNA.3813.1.S1_at    | MmugDNA.3813.1  | 7.17  | 8.21  | 0.11 | 0.37 | -2.07 | 0.01768  | 0.014962 | 0.186535 | 0.155453 |
| MmugDNA.38130.1.S1_at   | MmugDNA.38130.1 | 3.27  | 3.23  | 0.09 | 0.26 | 1.03  | 0.712798 | 0.898564 | 0.864426 | 0.942254 |
| MmugDNA.38131.1.S1_at   | MmugDNA.38131.1 | 10.99 | 10.78 | 0.24 | 0.02 | 1.15  | 0.657552 | 0.550097 | 0.834589 | 0.730241 |
| MmugDNA.38131.1.S1_s_at | MmugDNA.38131.1 | 10.35 | 10.36 | 0.12 | 0.07 | -1    | 0.896806 | 0.795659 | 0.956167 | 0.882258 |
| MmugDNA.38133.1.S1_at   | MmugDNA.38133.1 | 4.01  | 4.04  | 0.35 | 0.01 | -1.02 | 0.933615 | 0.989235 | 0.972111 | 0.993878 |
| MmugDNA.38134.1.S1_at   | MmugDNA.38134.1 | 3.27  | 3.44  | 0.07 | 0.15 | -1.13 | 0.143068 | 0.661583 | 0.429317 | 0.801876 |
| MmugDNA.38139.1.S1_at   | MmugDNA.38139.1 | 5.44  | 5.37  | 0.06 | 0.13 | 1.05  | 0.365867 | 0.086572 | 0.640385 | 0.33911  |
| MmugDNA.3814.1.S1_at    | MmugDNA.3814.1  | 8.19  | 9.12  | 0.26 | 0.24 | -1.9  | 0.019236 | 0.302207 | 0.192035 | 0.560092 |
| MmugDNA.38140.1.S1_at   | MmugDNA.38140.1 | 6.33  | 6.2   | 0.02 | 0.13 | 1.09  | 0.451789 | 0.463368 | 0.702507 | 0.674373 |
| MmugDNA.38141.1.S1_at   | MmugDNA.38141.1 | 8.22  | 9.09  | 0.44 | 0.02 | -1.84 | 0.063447 | 0.084524 | 0.308622 | 0.335916 |
| MmugDNA.38141.1.S1_x_at | MmugDNA.38141.1 | 8.53  | 9.34  | 0.33 | 0.01 | -1.76 | 0.030949 | 0.048022 | 0.229015 | 0.264118 |
| MmugDNA.38142.1.S1_at   | MmugDNA.38142.1 | 4.87  | 4.91  | 0.11 | 0.1  | -1.03 | 0.465773 | 0.251292 | 0.711732 | 0.519984 |
| MmugDNA.3247.1.S1_at    | MmugDNA.3247.1  | 13.01 | 12.68 | 0.07 | 0.25 | 1.26  | 0.260845 | 0.21677  | 0.555006 | 0.490311 |
| MmugDNA.3247.1.S1_s_at  | MmugDNA.3247.1  | 11.4  | 11.02 | 0.19 | 0.34 | 1.3   | 0.480092 | 0.443591 | 0.721146 | 0.661336 |
| MmugDNA.38144.1.S1_at   | MmugDNA.38144.1 | 6.46  | 6.45  | 0.16 | 0.06 | 1.01  | 0.756044 | 0.733554 | 0.887592 | 0.845731 |
| MmugDNA.38145.1.S1_at   | MmugDNA.38145.1 | 3.66  | 3.67  | 0.1  | 0    | -1.01 | 0.52897  | 0.553953 | 0.753919 | 0.732896 |
| MmugDNA.38146.1.S1_at   | MmugDNA.38146.1 | 11.36 | 11.25 | 0.1  | 0.14 | 1.08  | 0.219654 | 0.002423 | 0.51742  | 0.073058 |
| MmugDNA.38146.1.S1_s_at | MmugDNA.38146.1 | 10.17 | 9.93  | 0.09 | 0.11 | 1.17  | 0.055336 | 0.001164 | 0.292123 | 0.053615 |
| MmugDNA.38147.1.S1_at   | MmugDNA.38147.1 | 8.52  | 8.29  | 0.21 | 0.2  | 1.17  | 0.247316 | 0.397983 | 0.542869 | 0.629138 |
| MmugDNA.38149.1.S1_at   | MmugDNA.38149.1 | 4.33  | 4.37  | 0.36 | 0.23 | -1.03 | 0.293217 | 0.343841 | 0.582128 | 0.589516 |
| MmugDNA.38149.1.S1_x_at | MmugDNA.38149.1 | 4.26  | 4.29  | 0.52 | 0.05 | -1.03 | 0.494597 | 0.677786 | 0.731278 | 0.811816 |
| MmugDNA.38150.1.S1_at   | MmugDNA.38150.1 | 7.32  | 7.31  | 0.02 | 0.06 | 1     | 0.986898 | 0.62963  | 0.995238 | 0.781989 |
| MmugDNA.38151.1.S1_at   | MmugDNA.38151.1 | 7.6   | 5.6   | 0.57 | 0.33 | 4     | 0.012193 | 0.025033 | 0.160755 | 0.198273 |
| MmugDNA.38152.1.S1_at   | MmugDNA.38152.1 | 12.45 | 12.5  | 0.01 | 0.05 | -1.04 | 0.129035 | 0.189043 | 0.411326 | 0.464897 |
| MmugDNA.38154.1.S1_at   | MmugDNA.38154.1 | 8.5   | 9.36  | 0.45 | 0.33 | -1.82 | 0.100109 | 0.060472 | 0.37088  | 0.292553 |

|                         |                 |       |       |      |      |       |          |          |          |          |
|-------------------------|-----------------|-------|-------|------|------|-------|----------|----------|----------|----------|
| MmugDNA.3343.1.S1_at    | MmugDNA.3343.1  | 12.97 | 13.39 | 0.49 | 0.11 | -1.34 | 0.108678 | 0.08024  | 0.383555 | 0.327838 |
| MmugDNA.3343.1.S1_s_at  | MmugDNA.3343.1  | 11.53 | 12.35 | 0.46 | 0.16 | -1.77 | 0.029992 | 0.03207  | 0.226453 | 0.22165  |
| MmugDNA.38155.1.S1_at   | MmugDNA.38155.1 | 4.53  | 4.37  | 0.23 | 0.13 | 1.12  | 0.399536 | 0.547453 | 0.664824 | 0.728464 |
| MmugDNA.38156.1.S1_at   | MmugDNA.38156.1 | 5.77  | 5.48  | 0.11 | 0.11 | 1.22  | 0.031062 | 0.019118 | 0.22922  | 0.17401  |
| MmugDNA.38157.1.S1_at   | MmugDNA.38157.1 | 9.98  | 10.84 | 0.41 | 0.16 | -1.82 | 0.073679 | 0.00586  | 0.329223 | 0.104856 |
| MmugDNA.38159.1.S1_at   | MmugDNA.38159.1 | 3.66  | 3.63  | 0.14 | 0.02 | 1.02  | 0.232476 | 0.526365 | 0.530886 | 0.71555  |
| MmugDNA.38160.1.S1_at   | MmugDNA.38160.1 | 4.46  | 4.45  | 0.22 | 0.05 | 1.01  | 0.57941  | 0.464368 | 0.785078 | 0.67504  |
| MmugDNA.38162.1.S1_at   | MmugDNA.38162.1 | 8.52  | 10.47 | 0.87 | 0.4  | -3.86 | 0.036397 | 0.065657 | 0.24584  | 0.301631 |
| MmugDNA.38163.1.S1_at   | MmugDNA.38163.1 | 6.67  | 6.3   | 0.21 | 0.12 | 1.29  | 0.090383 | 0.103853 | 0.357131 | 0.364519 |
| MmugDNA.38164.1.S1_at   | MmugDNA.38164.1 | 5.87  | 5.75  | 0.29 | 0.63 | 1.09  | 0.753192 | 0.558407 | 0.885975 | 0.735596 |
| MmugDNA.38166.1.S1_at   | MmugDNA.38166.1 | 3.88  | 3.89  | 0.09 | 0.16 | -1.01 | 0.303656 | 0.541695 | 0.591084 | 0.725057 |
| MmugDNA.38168.1.S1_at   | MmugDNA.38168.1 | 7.43  | 7.51  | 0.14 | 0.07 | -1.05 | 0.940924 | 0.996676 | 0.975218 | 0.998092 |
| MmugDNA.38169.1.S1_at   | MmugDNA.38169.1 | 8.25  | 7.86  | 0.13 | 0.38 | 1.31  | 0.076729 | 0.021202 | 0.335121 | 0.182326 |
| MmugDNA.3817.1.S1_at    | MmugDNA.3817.1  | 7.46  | 8.18  | 0.21 | 0.13 | -1.65 | 0.012124 | 0.050662 | 0.160268 | 0.270317 |
| MmugDNA.38171.1.S1_at   | MmugDNA.38171.1 | 5.19  | 5.13  | 0.14 | 0    | 1.04  | 0.526816 | 0.311516 | 0.752776 | 0.566505 |
| MmugDNA.38172.1.S1_at   | MmugDNA.38172.1 | 5.75  | 5.82  | 0.03 | 0.14 | -1.05 | 0.877085 | 0.121518 | 0.947453 | 0.39064  |
| MmugDNA.38173.1.S1_at   | MmugDNA.38173.1 | 7.21  | 7.1   | 0.1  | 0.13 | 1.08  | 0.397403 | 0.309156 | 0.663    | 0.564807 |
| MmugDNA.38174.1.S1_at   | MmugDNA.38174.1 | 5.33  | 5.25  | 0.24 | 0.16 | 1.05  | 0.273935 | 0.417942 | 0.565983 | 0.642499 |
| MmugDNA.38175.1.S1_at   | MmugDNA.38175.1 | 3.92  | 3.56  | 0.16 | 0.34 | 1.28  | 0.283688 | 0.471013 | 0.574001 | 0.679162 |
| MmugDNA.38176.1.S1_at   | MmugDNA.38176.1 | 8.32  | 8.13  | 0.6  | 0.37 | 1.14  | 0.898852 | 0.597011 | 0.957017 | 0.759993 |
| MmugDNA.38176.1.S1_s_at | MmugDNA.38176.1 | 8.07  | 7.94  | 0.41 | 0.2  | 1.09  | 0.486282 | 0.077966 | 0.725583 | 0.324306 |
| MmugDNA.38177.1.S1_at   | MmugDNA.38177.1 | 8     | 8.56  | 0.34 | 0.18 | -1.47 | 0.128403 | 0.260175 | 0.410319 | 0.526807 |
| MmugDNA.38178.1.S1_at   | MmugDNA.38178.1 | 5.31  | 4.89  | 0.38 | 0.01 | 1.34  | 0.388511 | 0.514985 | 0.656522 | 0.708004 |
| MmugDNA.38179.1.S1_at   | MmugDNA.38179.1 | 6.53  | 6.31  | 0.39 | 0.29 | 1.16  | 0.128206 | 0.085723 | 0.410227 | 0.337761 |
| MmugDNA.3818.1.S1_s_at  | MmugDNA.3818.1  | 11.64 | 11.9  | 0.24 | 0.04 | -1.2  | 0.121343 | 0.175363 | 0.400074 | 0.452114 |
| MmugDNA.38180.1.S1_at   | MmugDNA.38180.1 | 9.98  | 9.79  | 0.47 | 0.06 | 1.14  | 0.540544 | 0.474895 | 0.761555 | 0.681784 |
| MmugDNA.38184.1.S1_at   | MmugDNA.38184.1 | 10.88 | 10.99 | 0.22 | 0.15 | -1.08 | 0.988181 | 0.259813 | 0.995748 | 0.52669  |
| MmugDNA.38185.1.S1_at   | MmugDNA.38185.1 | 10.7  | 9.92  | 0.24 | 0.01 | 1.72  | 0.004784 | 0.143028 | 0.115098 | 0.416892 |
| MmugDNA.38187.1.S1_at   | MmugDNA.38187.1 | 5.56  | 5.51  | 0.47 | 0.35 | 1.03  | 0.752806 | 0.186224 | 0.885809 | 0.462108 |
| MmugDNA.38188.1.S1_at   | MmugDNA.38188.1 | 3.57  | 3.1   | 0.52 | 0.16 | 1.39  | 0.104332 | 0.279438 | 0.377773 | 0.543049 |
| MmugDNA.38189.1.S1_at   | MmugDNA.38189.1 | 6.08  | 5.79  | 0.65 | 0.09 | 1.22  | 0.187878 | 0.413653 | 0.484145 | 0.639688 |
| MmugDNA.3819.1.S1_at    | MmugDNA.3819.1  | 6.89  | 7.61  | 0.38 | 0.1  | -1.65 | 0.028406 | 0.137057 | 0.221039 | 0.409836 |
| MmugDNA.38190.1.S1_at   | MmugDNA.38190.1 | 5.92  | 6.31  | 0.16 | 0.13 | -1.32 | 0.041489 | 0.098445 | 0.260097 | 0.356564 |
| MmugDNA.38191.1.S1_at   | MmugDNA.38191.1 | 4.96  | 5.07  | 0.07 | 0.02 | -1.08 | 0.045366 | 0.021058 | 0.270535 | 0.181869 |
| MmugDNA.38192.1.S1_at   | MmugDNA.38192.1 | 4.84  | 4.7   | 0.42 | 0.16 | 1.1   | 0.338216 | 0.387671 | 0.618658 | 0.622281 |
| MmugDNA.38193.1.S1_at   | MmugDNA.38193.1 | 12.25 | 12.71 | 0.14 | 0.1  | -1.38 | 0.022948 | 0.098613 | 0.204353 | 0.356743 |
| MmugDNA.38194.1.S1_at   | MmugDNA.38194.1 | 7.11  | 6.81  | 0.14 | 0.04 | 1.23  | 0.023292 | 0.193156 | 0.205593 | 0.468554 |
| MmugDNA.38197.1.S1_at   | MmugDNA.38197.1 | 6.32  | 6.58  | 0.22 | 0.04 | -1.2  | 0.106137 | 0.136454 | 0.380221 | 0.408866 |
| MmugDNA.38198.1.S1_at   | MmugDNA.38198.1 | 5.36  | 4.77  | 0.55 | 0.1  | 1.51  | 0.185524 | 0.229243 | 0.481739 | 0.501527 |
| MmugDNA.38199.1.S1_at   | MmugDNA.38199.1 | 3.11  | 3.09  | 0.35 | 0.05 | 1.01  | 0.361765 | 0.599397 | 0.637071 | 0.76144  |
| MmugDNA.3820.1.S1_at    | MmugDNA.3820.1  | 5.68  | 5.36  | 0.15 | 0.06 | 1.25  | 0.083476 | 0.156892 | 0.345905 | 0.432372 |
| MmugDNA.38200.1.S1_at   | MmugDNA.38200.1 | 4.52  | 4.4   | 0.35 | 0.05 | 1.09  | 0.170955 | 0.26491  | 0.464717 | 0.530909 |
| MmugDNA.38201.1.S1_at   | MmugDNA.38201.1 | 11.64 | 11.39 | 0.14 | 0.09 | 1.18  | 0.066687 | 0.072492 | 0.315866 | 0.315339 |



|                         |                 |       |       |      |      |       |          |          |          |          |
|-------------------------|-----------------|-------|-------|------|------|-------|----------|----------|----------|----------|
| MmugDNA.8357.1.S1_at    | MmugDNA.8357.1  | 7.55  | 7.52  | 0.33 | 0.06 | 1.02  | 0.497447 | 0.648465 | 0.733134 | 0.79428  |
| MmugDNA.8357.1.S1_s_at  | MmugDNA.8357.1  | 7.58  | 7.28  | 0.11 | 0.14 | 1.24  | 0.18366  | 0.774326 | 0.479607 | 0.868752 |
| MmugDNA.38204.1.S1_at   | MmugDNA.38204.1 | 6.93  | 6.57  | 0.64 | 0.32 | 1.28  | 0.595031 | 0.274488 | 0.795076 | 0.538987 |
| MmugDNA.38205.1.S1_at   | MmugDNA.38205.1 | 4.42  | 4.46  | 0.44 | 0.4  | -1.03 | 0.650325 | 0.741554 | 0.830259 | 0.850329 |
| MmugDNA.38206.1.S1_at   | MmugDNA.38206.1 | 9.73  | 9.55  | 0.03 | 0.02 | 1.13  | 0.000959 | 0.178953 | 0.076054 | 0.455243 |
| MmugDNA.38207.1.S1_at   | MmugDNA.38207.1 | 6.07  | 6.08  | 0.25 | 0.04 | -1    | 0.46495  | 0.761738 | 0.71105  | 0.861459 |
| MmugDNA.38208.1.S1_at   | MmugDNA.38208.1 | 7.91  | 8.71  | 0.77 | 0.42 | -1.74 | 0.194722 | 0.01441  | 0.491311 | 0.153215 |
| MmugDNA.38209.1.S1_at   | MmugDNA.38209.1 | 4.61  | 5.05  | 0.24 | 0.07 | -1.35 | 0.084181 | 0.085726 | 0.347528 | 0.337761 |
| MmugDNA.38210.1.S1_at   | MmugDNA.38210.1 | 7.67  | 7.95  | 0.08 | 0.4  | -1.21 | 0.819709 | 0.767965 | 0.919644 | 0.865284 |
| MmugDNA.38211.1.S1_at   | MmugDNA.38211.1 | 2.61  | 2.63  | 0.08 | 0.08 | -1.01 | 0.449781 | 0.816786 | 0.701096 | 0.894329 |
| MmugDNA.38211.1.S1_s_at | MmugDNA.38211.1 | 6.59  | 6.58  | 0.06 | 0.46 | 1     | 0.945032 | 0.262685 | 0.976877 | 0.529054 |
| MmugDNA.38212.1.S1_at   | MmugDNA.38212.1 | 6.26  | 6.32  | 0.2  | 0.86 | -1.04 | 0.901033 | 0.444435 | 0.958105 | 0.662056 |
| MmugDNA.38213.1.S1_at   | MmugDNA.38213.1 | 5.35  | 5.27  | 0.84 | 0.06 | 1.05  | 0.373136 | 0.351479 | 0.645118 | 0.595084 |
| MmugDNA.38214.1.S1_at   | MmugDNA.38214.1 | 5.99  | 6.1   | 0.47 | 0.54 | -1.08 | 0.90179  | 0.862412 | 0.958353 | 0.921765 |
| MmugDNA.38215.1.S1_at   | MmugDNA.38215.1 | 6.06  | 8.42  | 1.24 | 0.13 | -5.13 | 0.082903 | 0.267897 | 0.345009 | 0.533607 |
| MmugDNA.38218.1.S1_at   | MmugDNA.38218.1 | 5.81  | 4.04  | 0.95 | 0.25 | 3.42  | 0.049446 | 0.035675 | 0.279817 | 0.233296 |
| MmugDNA.38219.1.S1_at   | MmugDNA.38219.1 | 3.03  | 3.24  | 0.35 | 0.2  | -1.16 | 0.518789 | 0.079452 | 0.747723 | 0.326766 |
| MmugDNA.38220.1.S1_at   | MmugDNA.38220.1 | 4.47  | 4.37  | 0.25 | 0.13 | 1.07  | 0.327646 | 0.296624 | 0.610321 | 0.555612 |
| MmugDNA.38221.1.S1_at   | MmugDNA.38221.1 | 3.15  | 3.1   | 0.06 | 0.11 | 1.03  | 0.319083 | 0.510555 | 0.603736 | 0.705007 |
| MmugDNA.38222.1.S1_at   | MmugDNA.38222.1 | 4.14  | 4.42  | 0.14 | 0.3  | -1.21 | 0.621625 | 0.303159 | 0.812837 | 0.56066  |
| MmugDNA.38225.1.S1_at   | MmugDNA.38225.1 | 4.17  | 4.6   | 0.15 | 0.3  | -1.35 | 0.061415 | 0.066312 | 0.304438 | 0.303177 |
| MmugDNA.38226.1.S1_at   | MmugDNA.38226.1 | 3.1   | 3.05  | 0.12 | 0.08 | 1.04  | 0.521649 | 0.695433 | 0.749394 | 0.822978 |
| MmugDNA.38227.1.S1_at   | MmugDNA.38227.1 | 4.07  | 4.09  | 0.37 | 0.08 | -1.01 | 0.431572 | 0.475734 | 0.687567 | 0.682332 |
| MmugDNA.38228.1.S1_at   | MmugDNA.38228.1 | 6.59  | 6.59  | 0.05 | 0.06 | 1     | 0.770792 | 0.073043 | 0.894865 | 0.316017 |
| MmugDNA.38229.1.S1_at   | MmugDNA.38229.1 | 5.79  | 5.83  | 0.1  | 0.12 | -1.03 | 0.378136 | 0.27239  | 0.648422 | 0.537122 |
| MmugDNA.38229.1.S1_x_at | MmugDNA.38229.1 | 6.15  | 6.02  | 0.18 | 0.12 | 1.1   | 0.159592 | 0.209074 | 0.450926 | 0.482861 |
| MmugDNA.38230.1.S1_at   | MmugDNA.38230.1 | 4.03  | 4.02  | 0.33 | 0.3  | 1.01  | 0.936889 | 0.258392 | 0.973612 | 0.525642 |
| MmugDNA.38231.1.S1_s_at | MmugDNA.38231.1 | 10.26 | 10.03 | 0.06 | 0.06 | 1.17  | 0.00754  | 0.417988 | 0.135071 | 0.642531 |
| MmugDNA.38232.1.S1_at   | MmugDNA.38232.1 | 4.68  | 4.76  | 0.04 | 0.18 | -1.05 | 0.614961 | 0.881194 | 0.808603 | 0.93219  |
| MmugDNA.38233.1.S1_at   | MmugDNA.38233.1 | 7.77  | 8.24  | 0.26 | 0.08 | -1.38 | 0.040497 | 0.081653 | 0.257655 | 0.329836 |
| MmugDNA.38234.1.S1_at   | MmugDNA.38234.1 | 7.78  | 7.92  | 0.15 | 0.03 | -1.1  | 0.620514 | 0.193472 | 0.811995 | 0.468739 |
| MmugDNA.38235.1.S1_at   | MmugDNA.38235.1 | 11.61 | 11.41 | 0.1  | 0.01 | 1.15  | 0.032691 | 0.029714 | 0.234993 | 0.214029 |
| MmugDNA.38236.1.S1_at   | MmugDNA.38236.1 | 8.2   | 8.27  | 0.06 | 0.03 | -1.05 | 0.377892 | 0.302222 | 0.648293 | 0.560092 |
| MmugDNA.38237.1.S1_at   | MmugDNA.38237.1 | 3.25  | 3.25  | 0    | 0.03 | -1    | 0.539249 | 0.093003 | 0.760684 | 0.349174 |
| MmugDNA.38238.1.S1_at   | MmugDNA.38238.1 | 13.04 | 12.42 | 0.38 | 0.22 | 1.54  | 0.329547 | 0.540401 | 0.611796 | 0.724366 |
| MmugDNA.3824.1.S1_at    | MmugDNA.3824.1  | 5.77  | 4.54  | 0.59 | 0.72 | 2.35  | 0.231997 | 0.254831 | 0.530597 | 0.523051 |
| MmugDNA.38241.1.S1_at   | MmugDNA.38241.1 | 4     | 3.17  | 0.44 | 0.17 | 1.78  | 0.042049 | 0.01916  | 0.262044 | 0.1742   |
| MmugDNA.38242.1.S1_at   | MmugDNA.38242.1 | 6.15  | 6.15  | 0.17 | 0.09 | 1     | 0.943406 | 0.721945 | 0.976201 | 0.838904 |
| MmugDNA.38243.1.S1_at   | MmugDNA.38243.1 | 3.47  | 3.58  | 0.12 | 0.16 | -1.08 | 0.174167 | 0.147169 | 0.468365 | 0.421389 |
| MmugDNA.38245.1.S1_at   | MmugDNA.38245.1 | 5.53  | 6.42  | 0.26 | 0.26 | -1.86 | 0.009625 | 0.08312  | 0.14832  | 0.332999 |
| MmugDNA.38246.1.S1_at   | MmugDNA.38246.1 | 8.16  | 8.73  | 0.25 | 0.09 | -1.48 | 0.042495 | 0.022074 | 0.263254 | 0.185927 |
| MmugDNA.38247.1.S1_s_at | MmugDNA.38247.1 | 8.14  | 9.59  | 0.36 | 0.03 | -2.73 | 0.00194  | 0.042024 | 0.08845  | 0.249463 |
| MmugDNA.38248.1.S1_at   | MmugDNA.38248.1 | 9.11  | 9.56  | 0.56 | 0.13 | -1.37 | 0.292529 | 0.524318 | 0.581743 | 0.714254 |

|                         |                 |       |       |      |      |       |          |          |          |          |
|-------------------------|-----------------|-------|-------|------|------|-------|----------|----------|----------|----------|
| MmugDNA.38249.1.S1_at   | MmugDNA.38249.1 | 3.04  | 3.15  | 0.11 | 0.06 | -1.08 | 0.204518 | 0.256798 | 0.502251 | 0.524607 |
| MmugDNA.38250.1.S1_at   | MmugDNA.38250.1 | 6.37  | 5.65  | 0.25 | 0.13 | 1.64  | 0.033358 | 0.069577 | 0.236556 | 0.309848 |
| MmugDNA.38251.1.S1_at   | MmugDNA.38251.1 | 5.91  | 6.08  | 1.39 | 0.61 | -1.12 | 0.769585 | 0.50962  | 0.894281 | 0.704267 |
| MmugDNA.38253.1.S1_at   | MmugDNA.38253.1 | 3.25  | 3.13  | 0.04 | 0.09 | 1.08  | 0.076998 | 0.077974 | 0.335492 | 0.324306 |
| MmugDNA.38259.1.S1_at   | MmugDNA.38259.1 | 5.99  | 5.88  | 0.25 | 0.06 | 1.08  | 0.155745 | 0.221641 | 0.446095 | 0.494901 |
| MmugDNA.38261.1.S1_at   | MmugDNA.38261.1 | 3.83  | 3.81  | 0.15 | 0.08 | 1.01  | 0.81173  | 0.912557 | 0.915712 | 0.950757 |
| MmugDNA.38262.1.S1_at   | MmugDNA.38262.1 | 4.94  | 4.91  | 0.18 | 0.07 | 1.02  | 0.516138 | 0.716918 | 0.745613 | 0.836147 |
| MmugDNA.38263.1.S1_at   | MmugDNA.38263.1 | 6.09  | 6.3   | 0.16 | 0.31 | -1.16 | 0.151756 | 0.17047  | 0.441235 | 0.447103 |
| MmugDNA.38264.1.S1_at   | MmugDNA.38264.1 | 7.88  | 8.06  | 0.39 | 0.08 | -1.14 | 0.427783 | 0.594227 | 0.68494  | 0.758517 |
| MmugDNA.38265.1.S1_at   | MmugDNA.38265.1 | 7.46  | 7.46  | 0.14 | 0.05 | -1    | 0.378609 | 0.134843 | 0.648732 | 0.406878 |
| MmugDNA.38267.1.S1_at   | MmugDNA.38267.1 | 5.82  | 6.07  | 0.63 | 0.38 | -1.19 | 0.577236 | 0.663782 | 0.783495 | 0.80314  |
| MmugDNA.38268.1.S1_at   | MmugDNA.38268.1 | 8.49  | 8.89  | 0.5  | 0.1  | -1.32 | 0.20605  | 0.344287 | 0.50382  | 0.589762 |
| MmugDNA.38269.1.S1_at   | MmugDNA.38269.1 | 4.7   | 5.09  | 0.19 | 0.14 | -1.31 | 0.060934 | 0.505288 | 0.303761 | 0.702073 |
| MmugDNA.3827.1.S1_at    | MmugDNA.3827.1  | 7.35  | 7.35  | 0.08 | 0.05 | -1    | 0.739014 | 0.760736 | 0.879058 | 0.860996 |
| MmugDNA.38271.1.S1_at   | MmugDNA.38271.1 | 9.33  | 9.75  | 0.41 | 0.25 | -1.34 | 0.623712 | 0.11226  | 0.814418 | 0.37755  |
| MmugDNA.38272.1.S1_at   | MmugDNA.38272.1 | 7.71  | 7.54  | 0.14 | 0.23 | 1.13  | 0.177542 | 0.184534 | 0.472191 | 0.460574 |
| MmugDNA.38273.1.S1_at   | MmugDNA.38273.1 | 11.63 | 12.63 | 0.44 | 0.17 | -2.01 | 0.024948 | 0.066821 | 0.211179 | 0.304395 |
| MmugDNA.38274.1.S1_s_at | MmugDNA.38274.1 | 9.78  | 9.57  | 0.08 | 0.03 | 1.16  | 0.015454 | 0.108889 | 0.176435 | 0.372511 |
| MmugDNA.38275.1.S1_at   | MmugDNA.38275.1 | 9.05  | 8.74  | 0.14 | 0.13 | 1.24  | 0.049234 | 0.039108 | 0.279387 | 0.24303  |
| MmugDNA.38276.1.S1_at   | MmugDNA.38276.1 | 4.78  | 4.67  | 0.25 | 0.09 | 1.07  | 0.546426 | 0.412679 | 0.765236 | 0.639042 |
| MmugDNA.38278.1.S1_at   | MmugDNA.38278.1 | 6.5   | 6.49  | 0.97 | 0.54 | 1     | 0.941706 | 0.169469 | 0.975589 | 0.446075 |
| MmugDNA.19568.1.S1_s_at | MmugDNA.19568.1 | 7.23  | 7.27  | 0.15 | 0.13 | -1.03 | 0.248959 | 0.685404 | 0.544234 | 0.816513 |
| MmugDNA.3828.1.S1_at    | MmugDNA.3828.1  | 3.15  | 3     | 0.3  | 0.56 | 1.11  | 0.648366 | 0.661824 | 0.829161 | 0.801965 |
| MmugDNA.38280.1.S1_at   | MmugDNA.38280.1 | 4.98  | 5.08  | 0.13 | 0.42 | -1.07 | 0.579551 | 0.119898 | 0.785166 | 0.388593 |
| MmugDNA.38285.1.S1_at   | MmugDNA.38285.1 | 6.89  | 6.71  | 0.14 | 0.17 | 1.14  | 0.046323 | 0.07282  | 0.272999 | 0.315699 |
| MmugDNA.38286.1.S1_at   | MmugDNA.38286.1 | 10.57 | 10.37 | 0.09 | 0.09 | 1.15  | 0.051168 | 0.072619 | 0.283595 | 0.315578 |
| MmugDNA.38287.1.S1_x_at | MmugDNA.38287.1 | 8.94  | 8.54  | 0.72 | 0.2  | 1.32  | 0.31879  | 0.244826 | 0.603489 | 0.514655 |
| MmugDNA.38288.1.S1_at   | MmugDNA.38288.1 | 4.83  | 4.79  | 0.07 | 0.02 | 1.03  | 0.791554 | 0.161237 | 0.905355 | 0.437386 |
| MmugDNA.38289.1.S1_at   | MmugDNA.38289.1 | 4.79  | 4.82  | 0.62 | 0.45 | -1.02 | 0.870598 | 0.580139 | 0.944318 | 0.749506 |
| MmugDNA.12789.1.S1_s_at | MmugDNA.12789.1 | 6.01  | 6.06  | 0.1  | 0.02 | -1.04 | 0.335657 | 0.50975  | 0.616542 | 0.704356 |
| MmugDNA.38291.1.S1_at   | MmugDNA.38291.1 | 3.05  | 2.97  | 0.03 | 0.05 | 1.06  | 0.086113 | 0.367377 | 0.350603 | 0.607012 |
| MmugDNA.38292.1.S1_at   | MmugDNA.38292.1 | 4.97  | 4.31  | 0.13 | 0.14 | 1.59  | 0.004451 | 0.016039 | 0.113116 | 0.160532 |
| MmugDNA.38294.1.S1_at   | MmugDNA.38294.1 | 8.75  | 8.98  | 0.35 | 0.08 | -1.17 | 0.968521 | 0.972954 | 0.987529 | 0.985389 |
| MmugDNA.38295.1.S1_at   | MmugDNA.38295.1 | 3.66  | 3.69  | 0.18 | 0.09 | -1.02 | 0.961655 | 0.43051  | 0.984372 | 0.65152  |
| MmugDNA.38296.1.S1_at   | MmugDNA.38296.1 | 7.33  | 7.74  | 0.64 | 0.24 | -1.33 | 0.107825 | 0.206317 | 0.382472 | 0.480524 |
| MmugDNA.38297.1.S1_at   | MmugDNA.38297.1 | 9.22  | 10.02 | 0.3  | 0.08 | -1.74 | 0.012184 | 0.073869 | 0.160718 | 0.317241 |
| MmugDNA.38299.1.S1_at   | MmugDNA.38299.1 | 4.85  | 4.82  | 0.19 | 0.18 | 1.03  | 0.790026 | 0.30476  | 0.90449  | 0.561921 |
| MmugDNA.3830.1.S1_at    | MmugDNA.3830.1  | 6.09  | 5.85  | 0.28 | 0.07 | 1.18  | 0.649231 | 0.879497 | 0.829606 | 0.931158 |
| MmugDNA.38300.1.S1_at   | MmugDNA.38300.1 | 10.69 | 10.44 | 0.71 | 0.35 | 1.19  | 0.68154  | 0.644448 | 0.848112 | 0.791578 |
| MmugDNA.38302.1.S1_at   | MmugDNA.38302.1 | 3.65  | 3.54  | 0.13 | 0.16 | 1.08  | 0.56794  | 0.74373  | 0.778069 | 0.851465 |
| MmugDNA.38303.1.S1_at   | MmugDNA.38303.1 | 6.41  | 5.92  | 0.04 | 0.21 | 1.4   | 0.042705 | 0.147962 | 0.263867 | 0.422364 |
| MmugDNA.38304.1.S1_at   | MmugDNA.38304.1 | 6.08  | 7.11  | 0.27 | 0.2  | -2.03 | 0.004446 | 0.078735 | 0.113055 | 0.325689 |
| MmugDNA.38305.1.S1_at   | MmugDNA.38305.1 | 3.46  | 3.47  | 0.16 | 0.14 | -1    | 0.918673 | 0.889591 | 0.96532  | 0.937097 |

|                         |                 |       |       |      |      |       |          |          |          |          |
|-------------------------|-----------------|-------|-------|------|------|-------|----------|----------|----------|----------|
| MmugDNA.38306.1.S1_at   | MmugDNA.38306.1 | 3.13  | 3.12  | 0.09 | 0.11 | 1.01  | 0.593928 | 0.899022 | 0.794343 | 0.942524 |
| MmugDNA.38307.1.S1_x_at | MmugDNA.38307.1 | 10.92 | 10.71 | 0.58 | 0.2  | 1.15  | 0.29597  | 0.152452 | 0.584695 | 0.42728  |
| MmugDNA.38308.1.S1_at   | MmugDNA.38308.1 | 5.3   | 5.16  | 0.08 | 0.15 | 1.1   | 0.300818 | 0.17548  | 0.588968 | 0.452157 |
| MmugDNA.38310.1.S1_at   | MmugDNA.38310.1 | 3.42  | 3.38  | 0.35 | 0.11 | 1.03  | 0.481885 | 0.70417  | 0.722245 | 0.828349 |
| MmugDNA.38311.1.S1_at   | MmugDNA.38311.1 | 5.21  | 5.4   | 0.12 | 0.09 | -1.15 | 0.126447 | 0.018157 | 0.407818 | 0.169673 |
| MmugDNA.38312.1.S1_at   | MmugDNA.38312.1 | 6.3   | 6.54  | 0.28 | 0.02 | -1.19 | 0.173299 | 0.097218 | 0.467493 | 0.354886 |
| MmugDNA.38314.1.S1_at   | MmugDNA.38314.1 | 5.24  | 5.24  | 0.02 | 0.1  | 1     | 0.848272 | 0.953601 | 0.933956 | 0.973621 |
| MmugDNA.38315.1.S1_at   | MmugDNA.38315.1 | 8.69  | 9.25  | 0.45 | 0.05 | -1.47 | 0.035636 | 0.09035  | 0.243635 | 0.34479  |
| MmugDNA.38316.1.S1_at   | MmugDNA.38316.1 | 6.53  | 6.8   | 0.65 | 0.17 | -1.2  | 0.301906 | 0.491485 | 0.589851 | 0.693004 |
| MmugDNA.38317.1.S1_at   | MmugDNA.38317.1 | 9.65  | 10.37 | 0.31 | 0.1  | -1.65 | 0.01406  | 0.019405 | 0.169968 | 0.17509  |
| MmugDNA.38318.1.S1_at   | MmugDNA.38318.1 | 8.76  | 8.55  | 0.16 | 0.09 | 1.16  | 0.049581 | 0.002958 | 0.280032 | 0.079945 |
| MmugDNA.38319.1.S1_at   | MmugDNA.38319.1 | 6.56  | 6.68  | 0.05 | 0.22 | -1.08 | 0.57043  | 0.467868 | 0.779298 | 0.677386 |
| MmugDNA.3832.1.S1_at    | MmugDNA.3832.1  | 3.25  | 3.15  | 0.32 | 0.13 | 1.07  | 0.303048 | 0.382018 | 0.590511 | 0.618258 |
| MmugDNA.38320.1.S1_at   | MmugDNA.38320.1 | 6.5   | 5.87  | 0.34 | 0.21 | 1.54  | 0.07059  | 0.03113  | 0.324085 | 0.218175 |
| MmugDNA.38321.1.S1_at   | MmugDNA.38321.1 | 4.2   | 4.43  | 0.14 | 0.12 | -1.17 | 0.082402 | 0.091357 | 0.344143 | 0.346281 |
| MmugDNA.38322.1.S1_at   | MmugDNA.38322.1 | 11.71 | 11.39 | 0.05 | 0.08 | 1.25  | 0.00396  | 0.019557 | 0.108453 | 0.175563 |
| MmugDNA.38324.1.S1_at   | MmugDNA.38324.1 | 5.86  | 5.79  | 0.02 | 0.09 | 1.05  | 0.195063 | 0.216519 | 0.491609 | 0.490141 |
| MmugDNA.38325.1.S1_at   | MmugDNA.38325.1 | 5.97  | 6.08  | 0.13 | 0.08 | -1.08 | 0.299386 | 0.12781  | 0.587709 | 0.398694 |
| MmugDNA.38325.1.S1_s_at | MmugDNA.38325.1 | 7.03  | 7.19  | 0.19 | 0.02 | -1.12 | 0.193468 | 0.31442  | 0.490072 | 0.568319 |
| MmugDNA.38326.1.S1_at   | MmugDNA.38326.1 | 4.64  | 4.53  | 0.7  | 0.59 | 1.08  | 0.374576 | 0.541424 | 0.645606 | 0.724911 |
| MmugDNA.38329.1.S1_at   | MmugDNA.38329.1 | 11.71 | 11.4  | 0.18 | 0.13 | 1.24  | 0.349053 | 0.004577 | 0.62702  | 0.094474 |
| MmugDNA.3833.1.S1_at    | MmugDNA.3833.1  | 9.67  | 10.18 | 0.59 | 0.01 | -1.42 | 0.189884 | 0.312479 | 0.486238 | 0.567211 |
| MmugDNA.38330.1.S1_at   | MmugDNA.38330.1 | 8.46  | 8.67  | 0.21 | 0.08 | -1.16 | 0.185448 | 0.568141 | 0.48166  | 0.741855 |
| MmugDNA.38331.1.S1_at   | MmugDNA.38331.1 | 4.08  | 4.09  | 0.09 | 0    | -1.01 | 0.513702 | 0.574825 | 0.743872 | 0.746142 |
| MmugDNA.38333.1.S1_at   | MmugDNA.38333.1 | 3.05  | 3.11  | 0.17 | 0.08 | -1.04 | 0.649664 | 0.222994 | 0.829838 | 0.495821 |
| MmugDNA.38335.1.S1_at   | MmugDNA.38335.1 | 8.36  | 8.57  | 0.33 | 0.14 | -1.16 | 0.273865 | 0.549602 | 0.565917 | 0.729956 |
| MmugDNA.38336.1.S1_at   | MmugDNA.38336.1 | 8.2   | 8.05  | 0.05 | 0.08 | 1.11  | 0.06027  | 0.017359 | 0.302636 | 0.166764 |
| MmugDNA.38337.1.S1_at   | MmugDNA.38337.1 | 7.38  | 7.37  | 0.36 | 0.09 | 1.01  | 0.485372 | 0.40686  | 0.724918 | 0.634579 |
| MmugDNA.38338.1.S1_at   | MmugDNA.38338.1 | 3.33  | 3.5   | 0.24 | 0.18 | -1.13 | 0.719434 | 0.766043 | 0.867677 | 0.864085 |
| MmugDNA.3834.1.S1_at    | MmugDNA.3834.1  | 8.99  | 7.8   | 0.37 | 0.13 | 2.27  | 0.009768 | 0.023441 | 0.148542 | 0.191956 |
| MmugDNA.38340.1.S1_at   | MmugDNA.38340.1 | 5.27  | 5.49  | 0.28 | 0.07 | -1.16 | 0.258383 | 0.395932 | 0.552539 | 0.627788 |
| MmugDNA.38341.1.S1_at   | MmugDNA.38341.1 | 10.52 | 10.49 | 0.1  | 0.09 | 1.02  | 0.803929 | 0.24583  | 0.911913 | 0.515519 |
| MmugDNA.38342.1.S1_at   | MmugDNA.38342.1 | 6.52  | 6.33  | 0.49 | 0.34 | 1.14  | 0.704755 | 0.505825 | 0.859827 | 0.702218 |
| MmugDNA.38344.1.S1_at   | MmugDNA.38344.1 | 11.47 | 11.3  | 0.15 | 0.04 | 1.13  | 0.228837 | 0.527731 | 0.52733  | 0.716246 |
| MmugDNA.38345.1.S1_at   | MmugDNA.38345.1 | 10    | 10.04 | 0.06 | 0.2  | -1.03 | 0.575499 | 0.069091 | 0.782846 | 0.309061 |
| MmugDNA.38347.1.S1_at   | MmugDNA.38347.1 | 4.3   | 4.12  | 0.77 | 0.14 | 1.13  | 0.314371 | 0.641686 | 0.599959 | 0.789672 |
| MmugDNA.38348.1.S1_at   | MmugDNA.38348.1 | 12.6  | 12.7  | 0.13 | 0.06 | -1.07 | 0.153235 | 0.248428 | 0.442946 | 0.517725 |
| MmugDNA.38349.1.S1_at   | MmugDNA.38349.1 | 7.69  | 7.49  | 0.26 | 0.14 | 1.15  | 0.066853 | 0.00437  | 0.316258 | 0.092586 |
| MmugDNA.3835.1.S1_at    | MmugDNA.3835.1  | 7.58  | 7.66  | 0.26 | 0.1  | -1.05 | 0.788213 | 0.320423 | 0.903684 | 0.572648 |
| MmugDNA.38350.1.S1_s_at | MmugDNA.38350.1 | 7.4   | 10.69 | 1.5  | 0.36 | -9.76 | 0.066886 | 0.09716  | 0.316296 | 0.354796 |
| MmugDNA.38351.1.S1_at   | MmugDNA.38351.1 | 6.69  | 6.69  | 0.22 | 0.07 | -1.01 | 0.297874 | 0.357008 | 0.586352 | 0.598736 |
| MmugDNA.38352.1.S1_at   | MmugDNA.38352.1 | 5.84  | 5.19  | 0.5  | 0.16 | 1.57  | 0.138349 | 0.150623 | 0.423598 | 0.425195 |
| MmugDNA.38353.1.S1_at   | MmugDNA.38353.1 | 8.71  | 8.74  | 0.07 | 0.19 | -1.02 | 0.547389 | 0.053233 | 0.765933 | 0.276445 |

|                         |                 |       |       |      |      |       |          |          |          |          |
|-------------------------|-----------------|-------|-------|------|------|-------|----------|----------|----------|----------|
| MmugDNA.38354.1.S1_at   | MmugDNA.38354.1 | 9.22  | 9.27  | 0.03 | 0.15 | -1.03 | 0.651299 | 0.000552 | 0.830638 | 0.040948 |
| MmugDNA.38355.1.S1_at   | MmugDNA.38355.1 | 6.87  | 6.85  | 0.51 | 0.02 | 1.01  | 0.33572  | 0.098327 | 0.616567 | 0.356397 |
| MmugDNA.38356.1.S1_at   | MmugDNA.38356.1 | 6.47  | 6.53  | 0.04 | 0.16 | -1.05 | 0.813453 | 0.862468 | 0.91658  | 0.921787 |
| MmugDNA.38359.1.S1_at   | MmugDNA.38359.1 | 8.35  | 8.88  | 0.87 | 0.15 | -1.44 | 0.586919 | 0.685815 | 0.790207 | 0.816612 |
| MmugDNA.3836.1.S1_at    | MmugDNA.3836.1  | 11.09 | 11.05 | 0.18 | 0.09 | 1.03  | 0.933304 | 0.659008 | 0.972051 | 0.800479 |
| MmugDNA.38360.1.S1_s_at | MmugDNA.38360.1 | 11.17 | 11.08 | 0.21 | 0.15 | 1.07  | 0.114647 | 0.070893 | 0.391643 | 0.312417 |
| MmugDNA.38362.1.S1_at   | MmugDNA.38362.1 | 8.03  | 7.63  | 0.42 | 0.09 | 1.32  | 0.077412 | 0.049199 | 0.336144 | 0.266627 |
| MmugDNA.38363.1.S1_at   | MmugDNA.38363.1 | 6.01  | 6.09  | 0.2  | 0.05 | -1.06 | 0.408737 | 0.323441 | 0.671414 | 0.574466 |
| MmugDNA.38364.1.S1_at   | MmugDNA.38364.1 | 7     | 7.11  | 0.16 | 0    | -1.08 | 0.383587 | 0.36472  | 0.652919 | 0.605044 |
| MmugDNA.38365.1.S1_at   | MmugDNA.38365.1 | 5.99  | 5.26  | 0.56 | 0.16 | 1.66  | 0.071689 | 0.134237 | 0.325611 | 0.406457 |
| MmugDNA.38369.1.S1_at   | MmugDNA.38369.1 | 3.55  | 3.38  | 0.31 | 0.08 | 1.12  | 0.487192 | 0.61294  | 0.726032 | 0.770327 |
| MmugDNA.38372.1.S1_at   | MmugDNA.38372.1 | 4.15  | 4.21  | 0.21 | 0.08 | -1.04 | 0.940965 | 0.822687 | 0.975229 | 0.898006 |
| MmugDNA.38373.1.S1_at   | MmugDNA.38373.1 | 6     | 5.91  | 0.31 | 0.07 | 1.06  | 0.232166 | 0.109819 | 0.530631 | 0.373758 |
| MmugDNA.38376.1.S1_at   | MmugDNA.38376.1 | 8.57  | 8.33  | 0.18 | 0.1  | 1.18  | 0.269577 | 0.439723 | 0.561922 | 0.65842  |
| MmugDNA.38377.1.S1_s_at | MmugDNA.38377.1 | 11.96 | 11.88 | 0.21 | 0.06 | 1.06  | 0.243301 | 0.178141 | 0.539969 | 0.454508 |
| MmugDNA.38378.1.S1_at   | MmugDNA.38378.1 | 6.59  | 6.49  | 0.07 | 0.13 | 1.07  | 0.909514 | 0.136396 | 0.96159  | 0.408839 |
| MmugDNA.3838.1.S1_at    | MmugDNA.3838.1  | 6.4   | 6.07  | 0.36 | 0.47 | 1.26  | 0.154645 | 0.283401 | 0.444927 | 0.545936 |
| MmugDNA.38380.1.S1_at   | MmugDNA.38380.1 | 4.41  | 3.98  | 0.2  | 0.47 | 1.35  | 0.357768 | 0.532804 | 0.633636 | 0.719235 |
| MmugDNA.38381.1.S1_at   | MmugDNA.38381.1 | 4.29  | 4.33  | 0.04 | 0.1  | -1.03 | 0.797347 | 0.934293 | 0.908463 | 0.96272  |
| MmugDNA.38382.1.S1_at   | MmugDNA.38382.1 | 4.57  | 4.78  | 0.18 | 0.12 | -1.16 | 0.164245 | 0.08474  | 0.457197 | 0.336218 |
| MmugDNA.38383.1.S1_at   | MmugDNA.38383.1 | 12.2  | 11.75 | 0.47 | 0.11 | 1.36  | 0.43337  | 0.847744 | 0.68886  | 0.913501 |
| MmugDNA.38384.1.S1_at   | MmugDNA.38384.1 | 9.66  | 9.67  | 0.08 | 0.14 | -1.01 | 0.823806 | 0.741716 | 0.921686 | 0.850468 |
| MmugDNA.5137.1.S1_s_at  | MmugDNA.5137.1  | 11.14 | 11.15 | 0.09 | 0.03 | -1.01 | 0.585579 | 0.975731 | 0.789283 | 0.98677  |
| MmugDNA.38385.1.S1_at   | MmugDNA.38385.1 | 8.59  | 8.93  | 0.17 | 0.11 | -1.27 | 0.043843 | 0.177491 | 0.266411 | 0.453881 |
| MmugDNA.38389.1.S1_at   | MmugDNA.38389.1 | 5.78  | 5.24  | 0.47 | 0.18 | 1.45  | 0.056888 | 0.040713 | 0.295858 | 0.246709 |
| MmugDNA.3839.1.S1_at    | MmugDNA.3839.1  | 3.51  | 3.46  | 0.09 | 0.17 | 1.04  | 0.414873 | 0.587513 | 0.675816 | 0.754278 |
| MmugDNA.40036.1.S1_s_at | MmugDNA.40036.1 | 13.2  | 13.13 | 0.12 | 0.07 | 1.05  | 0.624243 | 0.486798 | 0.814749 | 0.690091 |
| MmugDNA.38391.1.S1_at   | MmugDNA.38391.1 | 5.11  | 4.42  | 1.32 | 0.14 | 1.61  | 0.387483 | 0.548896 | 0.65561  | 0.729483 |
| MmugDNA.38392.1.S1_at   | MmugDNA.38392.1 | 13.08 | 13.03 | 0.09 | 0.13 | 1.04  | 0.521426 | 0.01236  | 0.749331 | 0.143761 |
| MmugDNA.8080.1.S1_s_at  | MmugDNA.8080.1  | 13.3  | 13.28 | 0.1  | 0.12 | 1.02  | 0.687118 | 0.008448 | 0.850763 | 0.121922 |
| MmugDNA.38393.1.S1_at   | MmugDNA.38393.1 | 12.22 | 12.61 | 0.13 | 0.08 | -1.31 | 0.018233 | 0.149975 | 0.188054 | 0.424616 |
| MmugDNA.38394.1.S1_at   | MmugDNA.38394.1 | 5.49  | 5.27  | 0.25 | 0.11 | 1.17  | 0.260538 | 0.213666 | 0.554617 | 0.487441 |
| MmugDNA.38395.1.S1_at   | MmugDNA.38395.1 | 5.41  | 5.37  | 0.11 | 0.09 | 1.03  | 0.137921 | 0.261548 | 0.423071 | 0.52802  |
| MmugDNA.38398.1.S1_at   | MmugDNA.38398.1 | 6.36  | 5.94  | 0.55 | 0.13 | 1.34  | 0.113547 | 0.034876 | 0.390238 | 0.230985 |
| MmugDNA.38399.1.S1_at   | MmugDNA.38399.1 | 3.9   | 3.94  | 0.04 | 0.09 | -1.03 | 0.405386 | 0.544341 | 0.668832 | 0.726752 |
| MmugDNA.384.1.S1_at     | MmugDNA.384.1   | 6.31  | 6.32  | 0.13 | 0.02 | -1.01 | 0.814337 | 0.913158 | 0.91702  | 0.951134 |
| MmugDNA.3840.1.S1_at    | MmugDNA.3840.1  | 3.25  | 3.2   | 0.03 | 0.07 | 1.03  | 0.728365 | 0.738378 | 0.873011 | 0.848278 |
| MmugDNA.38400.1.S1_at   | MmugDNA.38400.1 | 8.44  | 8.37  | 0.13 | 0.3  | 1.05  | 0.703883 | 0.040663 | 0.859443 | 0.246578 |
| MmugDNA.38402.1.S1_at   | MmugDNA.38402.1 | 9.57  | 9.5   | 0.07 | 0.04 | 1.04  | 0.277155 | 0.762892 | 0.568672 | 0.862108 |
| MmugDNA.38403.1.S1_at   | MmugDNA.38403.1 | 4.72  | 4.71  | 0.23 | 0.11 | 1.01  | 0.475612 | 0.441717 | 0.718263 | 0.659854 |
| MmugDNA.38405.1.S1_at   | MmugDNA.38405.1 | 6.17  | 5.32  | 0.52 | 0.21 | 1.81  | 0.086923 | 0.133922 | 0.352318 | 0.406043 |
| MmugDNA.38406.1.S1_at   | MmugDNA.38406.1 | 3.97  | 4.06  | 0.16 | 0.19 | -1.07 | 0.446768 | 0.489455 | 0.698851 | 0.691824 |
| MmugDNA.38407.1.S1_at   | MmugDNA.38407.1 | 8.76  | 8.6   | 0.39 | 0.09 | 1.12  | 0.284816 | 0.044269 | 0.574797 | 0.254932 |

|                         |                 |       |       |      |      |       |          |          |          |          |
|-------------------------|-----------------|-------|-------|------|------|-------|----------|----------|----------|----------|
| MmugDNA.38408.1.S1_at   | MmugDNA.38408.1 | 3.69  | 3.8   | 0.42 | 0.01 | -1.08 | 0.628463 | 0.787077 | 0.817452 | 0.876832 |
| MmugDNA.38409.1.S1_at   | MmugDNA.38409.1 | 6.91  | 6.56  | 0.17 | 0.06 | 1.27  | 0.117278 | 0.127945 | 0.39452  | 0.398894 |
| MmugDNA.3841.1.S1_at    | MmugDNA.3841.1  | 5.51  | 5.63  | 0.28 | 0.05 | -1.08 | 0.52622  | 0.543024 | 0.752424 | 0.725879 |
| MmugDNA.38410.1.S1_at   | MmugDNA.38410.1 | 4.64  | 4.48  | 0.42 | 0.07 | 1.12  | 0.16633  | 0.320321 | 0.45955  | 0.572648 |
| MmugDNA.38413.1.S1_at   | MmugDNA.38413.1 | 3.88  | 3.75  | 0.12 | 0.18 | 1.09  | 0.682538 | 0.628074 | 0.848621 | 0.780937 |
| MmugDNA.38414.1.S1_at   | MmugDNA.38414.1 | 7.93  | 8.73  | 0.25 | 0.06 | -1.74 | 0.005819 | 0.265361 | 0.122179 | 0.531336 |
| MmugDNA.38415.1.S1_at   | MmugDNA.38415.1 | 6.49  | 6.58  | 0.19 | 0.04 | -1.06 | 0.466533 | 0.315584 | 0.712276 | 0.569053 |
| MmugDNA.38418.1.S1_at   | MmugDNA.38418.1 | 11.66 | 11.24 | 0.19 | 0.08 | 1.34  | 0.024039 | 0.002956 | 0.208189 | 0.079945 |
| MmugDNA.38419.1.S1_at   | MmugDNA.38419.1 | 5.41  | 5.25  | 0.11 | 0.12 | 1.12  | 0.381473 | 0.715665 | 0.651094 | 0.835159 |
| MmugDNA.38420.1.S1_s_at | MmugDNA.38420.1 | 11.44 | 11.92 | 0.27 | 0.15 | -1.39 | 0.133183 | 0.158878 | 0.416708 | 0.434982 |
| MmugDNA.38421.1.S1_at   | MmugDNA.38421.1 | 5.29  | 7.21  | 0.63 | 0.04 | -3.8  | 0.012978 | 0.043407 | 0.164687 | 0.253    |
| MmugDNA.38422.1.S1_at   | MmugDNA.38422.1 | 12.06 | 11.79 | 0.05 | 0.12 | 1.2   | 0.038623 | 0.018074 | 0.252573 | 0.169379 |
| MmugDNA.38423.1.S1_at   | MmugDNA.38423.1 | 6.89  | 6.9   | 0.4  | 0.01 | -1.01 | 0.549794 | 0.732561 | 0.767442 | 0.845084 |
| MmugDNA.38424.1.S1_at   | MmugDNA.38424.1 | 10.86 | 10.76 | 0.04 | 0.05 | 1.07  | 0.09795  | 0.000026 | 0.368472 | 0.020518 |
| MmugDNA.38425.1.S1_at   | MmugDNA.38425.1 | 3.12  | 3.13  | 0.49 | 0.09 | -1.01 | 0.500217 | 0.581139 | 0.734575 | 0.75023  |
| MmugDNA.38427.1.S1_at   | MmugDNA.38427.1 | 4.35  | 4.26  | 0.09 | 0.39 | 1.06  | 0.56548  | 0.436313 | 0.776724 | 0.655923 |
| MmugDNA.38428.1.S1_at   | MmugDNA.38428.1 | 10.8  | 9.87  | 0.08 | 0.28 | 1.9   | 0.00955  | 0.180007 | 0.147873 | 0.456552 |
| MmugDNA.38429.1.S1_at   | MmugDNA.38429.1 | 8.06  | 9.48  | 0.74 | 0.2  | -2.69 | 0.03196  | 0.04053  | 0.232562 | 0.246264 |
| MmugDNA.3843.1.S1_s_at  | MmugDNA.3843.1  | 8.85  | 8.83  | 0.11 | 0.07 | 1.02  | 0.862295 | 0.630796 | 0.940186 | 0.782446 |
| MmugDNA.38430.1.S1_at   | MmugDNA.38430.1 | 6.08  | 5.89  | 0.13 | 0.06 | 1.14  | 0.06753  | 0.439244 | 0.3175   | 0.658013 |
| MmugDNA.38431.1.S1_at   | MmugDNA.38431.1 | 7.96  | 7.76  | 0.68 | 0.26 | 1.15  | 0.885693 | 0.98467  | 0.951226 | 0.991346 |
| MmugDNA.38432.1.S1_at   | MmugDNA.38432.1 | 10.09 | 10.58 | 0.19 | 0.2  | -1.4  | 0.079908 | 0.397311 | 0.340107 | 0.628781 |
| MmugDNA.38434.1.S1_at   | MmugDNA.38434.1 | 5.2   | 4.83  | 0.22 | 0.32 | 1.29  | 0.20284  | 0.007693 | 0.500586 | 0.117169 |
| MmugDNA.38435.1.S1_at   | MmugDNA.38435.1 | 6.72  | 6.84  | 0    | 0.03 | -1.09 | 0.00178  | 0.001599 | 0.085481 | 0.060468 |
| MmugDNA.38436.1.S1_at   | MmugDNA.38436.1 | 7.43  | 7.46  | 0.27 | 0.04 | -1.02 | 0.316369 | 0.743921 | 0.601116 | 0.851592 |
| MmugDNA.38437.1.S1_at   | MmugDNA.38437.1 | 5.77  | 5.7   | 0.16 | 0.22 | 1.05  | 0.409723 | 0.505808 | 0.672003 | 0.702218 |
| MmugDNA.38438.1.S1_at   | MmugDNA.38438.1 | 3.59  | 3.98  | 0.11 | 0.45 | -1.31 | 0.237581 | 0.45069  | 0.535034 | 0.665844 |
| MmugDNA.3844.1.S1_at    | MmugDNA.3844.1  | 6.56  | 6.24  | 0.3  | 0.39 | 1.25  | 0.221522 | 0.098355 | 0.519484 | 0.356466 |
| MmugDNA.38440.1.S1_at   | MmugDNA.38440.1 | 7.4   | 6.44  | 0.53 | 0.18 | 1.95  | 0.050959 | 0.031386 | 0.283415 | 0.219065 |
| MmugDNA.38441.1.S1_at   | MmugDNA.38441.1 | 10.67 | 10.86 | 0.17 | 0.16 | -1.14 | 0.231449 | 0.011238 | 0.530229 | 0.138014 |
| MmugDNA.38442.1.S1_at   | MmugDNA.38442.1 | 10.51 | 10.16 | 0.12 | 0.25 | 1.28  | 0.030935 | 0.007127 | 0.229015 | 0.113654 |
| MmugDNA.38442.1.S1_s_at | MmugDNA.38442.1 | 11.32 | 11.14 | 0.11 | 0.33 | 1.13  | 0.102031 | 0.041683 | 0.373848 | 0.24887  |
| MmugDNA.38443.1.S1_at   | MmugDNA.38443.1 | 3.31  | 3.4   | 0.17 | 0.06 | -1.07 | 0.998409 | 0.9956   | 0.999429 | 0.997264 |
| MmugDNA.38444.1.S1_at   | MmugDNA.38444.1 | 5.64  | 5.76  | 0.45 | 0.09 | -1.09 | 0.564141 | 0.768236 | 0.775892 | 0.865447 |
| MmugDNA.38445.1.S1_at   | MmugDNA.38445.1 | 3.64  | 3.46  | 0.48 | 0.15 | 1.13  | 0.175883 | 0.245409 | 0.470216 | 0.515213 |
| MmugDNA.38446.1.S1_at   | MmugDNA.38446.1 | 7.93  | 6.97  | 0.47 | 0.14 | 1.94  | 0.101061 | 0.007445 | 0.372328 | 0.115858 |
| MmugDNA.38447.1.S1_at   | MmugDNA.38447.1 | 10.45 | 10.28 | 0.27 | 0.15 | 1.13  | 0.68018  | 0.088266 | 0.84742  | 0.341721 |
| MmugDNA.38449.1.S1_at   | MmugDNA.38449.1 | 3.1   | 3.19  | 0.05 | 0.15 | -1.06 | 0.621808 | 0.870489 | 0.812905 | 0.926446 |
| MmugDNA.3845.1.S1_at    | MmugDNA.3845.1  | 8.91  | 8.9   | 0.11 | 0.08 | 1.01  | 0.864806 | 0.123794 | 0.94142  | 0.393929 |
| MmugDNA.38451.1.S1_at   | MmugDNA.38451.1 | 10.15 | 10.75 | 0.15 | 0.07 | -1.52 | 0.003721 | 0.520804 | 0.106276 | 0.711942 |
| MmugDNA.38452.1.S1_at   | MmugDNA.38452.1 | 5.08  | 5.35  | 0.36 | 0.17 | -1.2  | 0.446689 | 0.013146 | 0.698851 | 0.147338 |
| MmugDNA.38453.1.S1_at   | MmugDNA.38453.1 | 7.96  | 7.41  | 0.28 | 0.09 | 1.46  | 0.059921 | 0.004175 | 0.302148 | 0.091064 |
| MmugDNA.38456.1.S1_at   | MmugDNA.38456.1 | 5.55  | 5.1   | 0.24 | 0.2  | 1.36  | 0.192097 | 0.213883 | 0.488697 | 0.48758  |

|                         |                 |       |       |      |      |       |          |          |          |          |
|-------------------------|-----------------|-------|-------|------|------|-------|----------|----------|----------|----------|
| MmugDNA.38457.1.S1_at   | MmugDNA.38457.1 | 3.61  | 3.59  | 0.09 | 0.28 | 1.02  | 0.403809 | 0.502723 | 0.667853 | 0.700289 |
| MmugDNA.38458.1.S1_at   | MmugDNA.38458.1 | 4.89  | 4.89  | 0.06 | 0.02 | -1    | 0.986727 | 0.296447 | 0.995228 | 0.555528 |
| MmugDNA.3846.1.S1_at    | MmugDNA.3846.1  | 12.52 | 12.56 | 0.05 | 0.04 | -1.03 | 0.220159 | 0.079794 | 0.517758 | 0.327113 |
| MmugDNA.38461.1.S1_at   | MmugDNA.38461.1 | 4.17  | 4.15  | 0.15 | 0.06 | 1.01  | 0.764633 | 0.695607 | 0.89201  | 0.823073 |
| MmugDNA.38462.1.S1_at   | MmugDNA.38462.1 | 3.66  | 3.67  | 0.17 | 0.21 | -1    | 0.937493 | 0.574786 | 0.973767 | 0.746142 |
| MmugDNA.38463.1.S1_at   | MmugDNA.38463.1 | 9.42  | 10.49 | 0.5  | 0.25 | -2.09 | 0.121628 | 0.093378 | 0.400464 | 0.34958  |
| MmugDNA.38464.1.S1_at   | MmugDNA.38464.1 | 6.74  | 5.98  | 0.36 | 0.22 | 1.69  | 0.027685 | 0.021077 | 0.218903 | 0.181869 |
| MmugDNA.38465.1.S1_at   | MmugDNA.38465.1 | 13.32 | 13.49 | 0.1  | 0.04 | -1.13 | 0.01926  | 0.382342 | 0.192035 | 0.618498 |
| MmugDNA.2707.1.S1_at    | MmugDNA.2707.1  | 10.76 | 11.06 | 0.25 | 0.11 | -1.23 | 0.105154 | 0.561621 | 0.3789   | 0.73751  |
| MmugDNA.2707.1.S1_s_at  | MmugDNA.2707.1  | 10.94 | 11.11 | 0.25 | 0.14 | -1.12 | 0.229187 | 0.676526 | 0.527906 | 0.81095  |
| MmugDNA.38466.1.S1_at   | MmugDNA.38466.1 | 5.84  | 5.92  | 0.02 | 0.02 | -1.06 | 0.005198 | 0.020438 | 0.117073 | 0.179564 |
| MmugDNA.38467.1.S1_at   | MmugDNA.38467.1 | 5.44  | 5.28  | 0.21 | 0.08 | 1.11  | 0.33895  | 0.603319 | 0.619313 | 0.764049 |
| MmugDNA.38468.1.S1_at   | MmugDNA.38468.1 | 8.6   | 8.45  | 0.13 | 0.03 | 1.11  | 0.167817 | 0.397948 | 0.461127 | 0.629138 |
| MmugDNA.3847.1.S1_at    | MmugDNA.3847.1  | 10.61 | 10.32 | 0.26 | 0.06 | 1.22  | 0.387077 | 0.04517  | 0.655397 | 0.256979 |
| MmugDNA.38470.1.S1_at   | MmugDNA.38470.1 | 6.87  | 7.39  | 0.51 | 0.26 | -1.44 | 0.150276 | 0.443605 | 0.439399 | 0.661336 |
| MmugDNA.38471.1.S1_at   | MmugDNA.38471.1 | 12.49 | 12.3  | 0.09 | 0.04 | 1.14  | 0.026841 | 0.249001 | 0.216925 | 0.518083 |
| MmugDNA.38472.1.S1_at   | MmugDNA.38472.1 | 10.29 | 9.94  | 0.03 | 0.12 | 1.28  | 0.006148 | 0.00583  | 0.12462  | 0.104661 |
| MmugDNA.38473.1.S1_at   | MmugDNA.38473.1 | 9.5   | 9.21  | 0.13 | 0.01 | 1.22  | 0.00881  | 0.103533 | 0.143663 | 0.364346 |
| MmugDNA.38476.1.S1_at   | MmugDNA.38476.1 | 3.5   | 3.42  | 0.04 | 0.06 | 1.06  | 0.148735 | 0.862634 | 0.437306 | 0.92189  |
| MmugDNA.38477.1.S1_at   | MmugDNA.38477.1 | 8.18  | 8.6   | 0.18 | 0.16 | -1.34 | 0.030208 | 0.020363 | 0.226955 | 0.17912  |
| MmugDNA.38478.1.S1_s_at | MmugDNA.38478.1 | 13.67 | 13.44 | 0.34 | 0.13 | 1.18  | 0.503884 | 0.512618 | 0.73721  | 0.706442 |
| MmugDNA.3848.1.S1_at    | MmugDNA.3848.1  | 5.67  | 5.7   | 0.4  | 0.07 | -1.02 | 0.436321 | 0.864688 | 0.691284 | 0.923276 |
| MmugDNA.38480.1.S1_at   | MmugDNA.38480.1 | 3.36  | 3.15  | 0.12 | 0.17 | 1.16  | 0.097839 | 0.120094 | 0.368268 | 0.388803 |
| MmugDNA.38482.1.S1_at   | MmugDNA.38482.1 | 6.35  | 6.56  | 0.86 | 0.17 | -1.16 | 0.751866 | 0.656065 | 0.885488 | 0.798847 |
| MmugDNA.38483.1.S1_at   | MmugDNA.38483.1 | 7.15  | 7.27  | 0.05 | 0.07 | -1.08 | 0.211307 | 0.049076 | 0.509081 | 0.266501 |
| MmugDNA.38485.1.S1_at   | MmugDNA.38485.1 | 6.34  | 6.18  | 0    | 0.06 | 1.12  | 0.020385 | 0.308582 | 0.196305 | 0.564575 |
| MmugDNA.38486.1.S1_at   | MmugDNA.38486.1 | 5.86  | 5.39  | 0.14 | 0.17 | 1.39  | 0.028113 | 0.03027  | 0.22011  | 0.215828 |
| MmugDNA.38487.1.S1_at   | MmugDNA.38487.1 | 10.66 | 10.85 | 0.15 | 0.04 | -1.15 | 0.081487 | 0.037983 | 0.342512 | 0.239357 |
| MmugDNA.3849.1.S1_at    | MmugDNA.3849.1  | 5.63  | 5.62  | 0.06 | 0.12 | 1     | 0.967152 | 0.208093 | 0.986785 | 0.482082 |
| MmugDNA.38490.1.S1_at   | MmugDNA.38490.1 | 7.04  | 7.04  | 0.07 | 0.07 | 1     | 0.922653 | 0.643735 | 0.966935 | 0.791112 |
| MmugDNA.38491.1.S1_at   | MmugDNA.38491.1 | 5.36  | 4.78  | 0.42 | 0.14 | 1.5   | 0.098168 | 0.094142 | 0.36881  | 0.350851 |
| MmugDNA.38493.1.S1_at   | MmugDNA.38493.1 | 10.61 | 10.29 | 0.34 | 0.06 | 1.25  | 0.242743 | 0.780191 | 0.539526 | 0.872539 |
| MmugDNA.38494.1.S1_at   | MmugDNA.38494.1 | 5.47  | 5.62  | 0.29 | 0.15 | -1.11 | 0.869283 | 0.470894 | 0.943687 | 0.679128 |
| MmugDNA.38495.1.S1_at   | MmugDNA.38495.1 | 5.94  | 5.62  | 0.71 | 0.36 | 1.25  | 0.265885 | 0.254048 | 0.558465 | 0.522387 |
| MmugDNA.38496.1.S1_at   | MmugDNA.38496.1 | 3.54  | 3.66  | 0.07 | 0.05 | -1.09 | 0.318898 | 0.382998 | 0.603556 | 0.61904  |
| MmugDNA.38497.1.S1_at   | MmugDNA.38497.1 | 5.91  | 5.88  | 0.28 | 0.06 | 1.02  | 0.297145 | 0.390086 | 0.585605 | 0.624002 |
| MmugDNA.38499.1.S1_at   | MmugDNA.38499.1 | 7.2   | 7.98  | 0.47 | 0.16 | -1.71 | 0.094369 | 0.037769 | 0.363345 | 0.238746 |
| MmugDNA.385.1.S1_at     | MmugDNA.385.1   | 11.7  | 11.4  | 0.13 | 0.1  | 1.23  | 0.034126 | 0.187934 | 0.239433 | 0.464041 |
| MmugDNA.3850.1.S1_at    | MmugDNA.3850.1  | 6.44  | 6.09  | 0.27 | 0.22 | 1.28  | 0.720252 | 0.012046 | 0.868039 | 0.142044 |
| MmugDNA.38500.1.S1_at   | MmugDNA.38500.1 | 4.56  | 4.47  | 0.14 | 0.04 | 1.07  | 0.717322 | 0.009525 | 0.866489 | 0.128521 |
| MmugDNA.38502.1.S1_at   | MmugDNA.38502.1 | 2.83  | 2.81  | 0.09 | 0.01 | 1.02  | 0.82378  | 0.257446 | 0.921686 | 0.52521  |
| MmugDNA.38503.1.S1_at   | MmugDNA.38503.1 | 8.65  | 8.63  | 0.28 | 0.01 | 1.01  | 0.932508 | 0.647354 | 0.971734 | 0.793415 |
| MmugDNA.38504.1.S1_at   | MmugDNA.38504.1 | 6.62  | 6.77  | 0.16 | 0.06 | -1.11 | 0.128101 | 0.13746  | 0.41013  | 0.41037  |

|                         |                 |       |       |      |      |       |          |          |          |          |
|-------------------------|-----------------|-------|-------|------|------|-------|----------|----------|----------|----------|
| MmugDNA.38505.1.S1_at   | MmugDNA.38505.1 | 4.21  | 4.13  | 0.04 | 0.07 | 1.06  | 0.103663 | 0.559983 | 0.376952 | 0.736439 |
| MmugDNA.38507.1.S1_at   | MmugDNA.38507.1 | 7.04  | 7.01  | 0.85 | 0.28 | 1.03  | 0.692259 | 0.70816  | 0.852937 | 0.830731 |
| MmugDNA.38509.1.S1_at   | MmugDNA.38509.1 | 3.45  | 3.4   | 0.06 | 0.09 | 1.04  | 0.899013 | 0.461285 | 0.957024 | 0.672971 |
| MmugDNA.38511.1.S1_at   | MmugDNA.38511.1 | 3.09  | 3.08  | 0.09 | 0.14 | 1     | 0.735491 | 0.437288 | 0.87688  | 0.656613 |
| MmugDNA.38511.1.S1_x_at | MmugDNA.38511.1 | 2.82  | 2.87  | 0.1  | 0.08 | -1.04 | 0.384102 | 0.334503 | 0.653221 | 0.582498 |
| MmugDNA.38512.1.S1_at   | MmugDNA.38512.1 | 5.18  | 5.05  | 0.04 | 0.08 | 1.09  | 0.046708 | 0.046183 | 0.273657 | 0.259345 |
| MmugDNA.38514.1.S1_at   | MmugDNA.38514.1 | 5.53  | 5.59  | 0.22 | 0.03 | -1.04 | 0.809327 | 0.471928 | 0.914582 | 0.679793 |
| MmugDNA.38517.1.S1_at   | MmugDNA.38517.1 | 9.36  | 8.82  | 0.22 | 0.13 | 1.45  | 0.059512 | 0.128671 | 0.301091 | 0.400083 |
| MmugDNA.38519.1.S1_at   | MmugDNA.38519.1 | 5.31  | 5.26  | 0.15 | 0.04 | 1.03  | 0.212096 | 0.160113 | 0.510004 | 0.436296 |
| MmugDNA.3852.1.S1_at    | MmugDNA.3852.1  | 6.95  | 6.79  | 0.09 | 0.08 | 1.12  | 0.036165 | 0.013231 | 0.245264 | 0.147534 |
| MmugDNA.38520.1.S1_at   | MmugDNA.38520.1 | 5.2   | 5.21  | 0.22 | 0.16 | -1.01 | 0.271541 | 0.260798 | 0.563425 | 0.52721  |
| MmugDNA.38521.1.S1_at   | MmugDNA.38521.1 | 6.4   | 6.49  | 0.08 | 0.12 | -1.06 | 0.679123 | 0.17994  | 0.846979 | 0.456476 |
| MmugDNA.38523.1.S1_at   | MmugDNA.38523.1 | 3.81  | 3.8   | 0.08 | 0.05 | 1.01  | 0.793761 | 0.542767 | 0.906781 | 0.725734 |
| MmugDNA.38529.1.S1_at   | MmugDNA.38529.1 | 6.84  | 7.16  | 0.45 | 0.35 | -1.25 | 0.50557  | 0.751002 | 0.738603 | 0.855235 |
| MmugDNA.38531.1.S1_at   | MmugDNA.38531.1 | 6.44  | 6.59  | 0.24 | 0.07 | -1.11 | 0.597544 | 0.620655 | 0.796761 | 0.775525 |
| MmugDNA.38532.1.S1_at   | MmugDNA.38532.1 | 4.69  | 4.63  | 0.21 | 0.18 | 1.04  | 0.218201 | 0.363011 | 0.515982 | 0.603478 |
| MmugDNA.38533.1.S1_at   | MmugDNA.38533.1 | 7.13  | 7.15  | 0.25 | 0.12 | -1.01 | 0.700597 | 0.891253 | 0.857793 | 0.938045 |
| MmugDNA.38536.1.S1_at   | MmugDNA.38536.1 | 4.31  | 4.34  | 0.06 | 0.06 | -1.02 | 0.933692 | 0.946652 | 0.972136 | 0.969766 |
| MmugDNA.38537.1.S1_at   | MmugDNA.38537.1 | 4.02  | 4.03  | 0.22 | 0.14 | -1.01 | 0.44599  | 0.83719  | 0.698308 | 0.906927 |
| MmugDNA.38538.1.S1_at   | MmugDNA.38538.1 | 6.63  | 6.61  | 0.12 | 0.43 | 1.01  | 0.362    | 0.715214 | 0.637175 | 0.834912 |
| MmugDNA.3854.1.S1_at    | MmugDNA.3854.1  | 6.88  | 8.59  | 0.53 | 0.76 | -3.26 | 0.139023 | 0.158423 | 0.424645 | 0.434313 |
| MmugDNA.38540.1.S1_at   | MmugDNA.38540.1 | 6.17  | 6.78  | 0.17 | 0.12 | -1.53 | 0.011439 | 0.012427 | 0.157106 | 0.144095 |
| MmugDNA.38541.1.S1_at   | MmugDNA.38541.1 | 7.26  | 7.15  | 0.18 | 0.34 | 1.08  | 0.257475 | 0.308941 | 0.551704 | 0.564656 |
| MmugDNA.38542.1.S1_at   | MmugDNA.38542.1 | 7.42  | 7.17  | 0.65 | 0.2  | 1.19  | 0.992938 | 0.768635 | 0.997263 | 0.865637 |
| MmugDNA.38543.1.S1_x_at | MmugDNA.38543.1 | 4.4   | 3.48  | 0.6  | 0.14 | 1.9   | 0.179785 | 0.238578 | 0.474837 | 0.509192 |
| MmugDNA.38544.1.S1_at   | MmugDNA.38544.1 | 5.52  | 5.58  | 0.15 | 0.09 | -1.04 | 0.901793 | 0.069281 | 0.958353 | 0.309468 |
| MmugDNA.38545.1.S1_at   | MmugDNA.38545.1 | 4.51  | 4.53  | 0.2  | 0.19 | -1.02 | 0.429633 | 0.707917 | 0.686015 | 0.830538 |
| MmugDNA.38546.1.S1_s_at | MmugDNA.38546.1 | 4.01  | 3.51  | 0.21 | 0.16 | 1.41  | 0.016728 | 0.005225 | 0.182634 | 0.10016  |
| MmugDNA.38547.1.S1_at   | MmugDNA.38547.1 | 11.78 | 11.3  | 0.39 | 0.08 | 1.4   | 0.329654 | 0.568406 | 0.611807 | 0.741962 |
| MmugDNA.3855.1.S1_at    | MmugDNA.3855.1  | 3.73  | 3.56  | 0.09 | 0.17 | 1.12  | 0.234105 | 0.341553 | 0.532201 | 0.587748 |
| MmugDNA.38550.1.S1_s_at | MmugDNA.38550.1 | 12.24 | 12.24 | 0.24 | 0.33 | -1    | 0.825542 | 0.226909 | 0.922494 | 0.499276 |
| MmugDNA.38551.1.S1_at   | MmugDNA.38551.1 | 6.66  | 6.62  | 0.26 | 0.06 | 1.02  | 0.768754 | 0.736179 | 0.893807 | 0.847335 |
| MmugDNA.38552.1.S1_at   | MmugDNA.38552.1 | 12.07 | 10.96 | 0.24 | 0.06 | 2.16  | 0.002604 | 0.001778 | 0.095164 | 0.06341  |
| MmugDNA.38553.1.S1_at   | MmugDNA.38553.1 | 10.58 | 10.47 | 0.05 | 0.03 | 1.08  | 0.031606 | 0.001962 | 0.23116  | 0.065832 |
| MmugDNA.38555.1.S1_at   | MmugDNA.38555.1 | 5.53  | 5.24  | 0.33 | 0.08 | 1.22  | 0.229863 | 0.126379 | 0.528728 | 0.396902 |
| MmugDNA.38557.1.S1_at   | MmugDNA.38557.1 | 11.43 | 11.61 | 0.22 | 0.05 | -1.13 | 0.715163 | 0.376752 | 0.865467 | 0.614541 |
| MmugDNA.38559.1.S1_at   | MmugDNA.38559.1 | 3.59  | 3.43  | 0.16 | 0.16 | 1.12  | 0.638088 | 0.802066 | 0.822724 | 0.886016 |
| MmugDNA.3856.1.S1_at    | MmugDNA.3856.1  | 6.49  | 6.33  | 0.18 | 0.05 | 1.12  | 0.801852 | 0.680042 | 0.911061 | 0.813156 |
| MmugDNA.38560.1.S1_at   | MmugDNA.38560.1 | 6.91  | 6.42  | 0.55 | 0.2  | 1.41  | 0.280845 | 0.555144 | 0.571843 | 0.733715 |
| MmugDNA.38561.1.S1_at   | MmugDNA.38561.1 | 7.47  | 7.36  | 0.02 | 0.04 | 1.08  | 0.007495 | 0.456473 | 0.134856 | 0.670188 |
| MmugDNA.38566.1.S1_at   | MmugDNA.38566.1 | 6.95  | 6.13  | 1.51 | 0.84 | 1.76  | 0.72841  | 0.591374 | 0.873043 | 0.756973 |
| MmugDNA.38567.1.S1_at   | MmugDNA.38567.1 | 3.48  | 3.4   | 0.37 | 0.03 | 1.06  | 0.599183 | 0.600029 | 0.7979   | 0.761762 |
| MmugDNA.38568.1.S1_at   | MmugDNA.38568.1 | 10.38 | 10.32 | 0.37 | 0.07 | 1.04  | 0.702375 | 0.594506 | 0.858741 | 0.758623 |

|                         |                 |       |       |      |      |       |          |          |          |          |
|-------------------------|-----------------|-------|-------|------|------|-------|----------|----------|----------|----------|
| MmugDNA.38569.1.S1_at   | MmugDNA.38569.1 | 8.23  | 7.97  | 0.14 | 0.02 | 1.19  | 0.053603 | 0.125412 | 0.288683 | 0.396075 |
| MmugDNA.3857.1.S1_at    | MmugDNA.3857.1  | 4.66  | 4.75  | 0.08 | 0.11 | -1.06 | 0.871666 | 0.116398 | 0.944779 | 0.383671 |
| MmugDNA.38570.1.S1_s_at | MmugDNA.38570.1 | 6.89  | 8.16  | 1.16 | 0.24 | -2.41 | 0.087511 | 0.07638  | 0.353349 | 0.321368 |
| MmugDNA.38571.1.S1_at   | MmugDNA.38571.1 | 3.41  | 3.61  | 0.35 | 0.05 | -1.15 | 0.955724 | 0.543499 | 0.981818 | 0.726175 |
| MmugDNA.38572.1.S1_at   | MmugDNA.38572.1 | 6.31  | 6.37  | 0.06 | 0.05 | -1.04 | 0.145873 | 0.14977  | 0.433576 | 0.424394 |
| MmugDNA.38574.1.S1_at   | MmugDNA.38574.1 | 4.38  | 4.4   | 0.17 | 0.18 | -1.01 | 0.980888 | 0.959384 | 0.992889 | 0.976959 |
| MmugDNA.38575.1.S1_at   | MmugDNA.38575.1 | 10.59 | 10.66 | 0.12 | 0.04 | -1.05 | 0.937204 | 0.999206 | 0.973667 | 0.99966  |
| MmugDNA.38576.1.S1_s_at | MmugDNA.38576.1 | 12.64 | 12.74 | 0.19 | 0.06 | -1.06 | 0.572526 | 0.365792 | 0.78065  | 0.60572  |
| MmugDNA.38577.1.S1_at   | MmugDNA.38577.1 | 4.97  | 5.14  | 0.7  | 0.08 | -1.13 | 0.609008 | 0.614332 | 0.8049   | 0.771206 |
| MmugDNA.38578.1.S1_at   | MmugDNA.38578.1 | 8.94  | 9.13  | 0.22 | 0.09 | -1.14 | 0.109717 | 0.197225 | 0.384834 | 0.472213 |
| MmugDNA.3858.1.S1_at    | MmugDNA.3858.1  | 3.64  | 3.67  | 0.11 | 0.02 | -1.02 | 0.911117 | 0.444965 | 0.962223 | 0.662174 |
| MmugDNA.38580.1.S1_at   | MmugDNA.38580.1 | 8.86  | 8.31  | 0.24 | 0.29 | 1.46  | 0.05611  | 0.154524 | 0.294009 | 0.429405 |
| MmugDNA.38582.1.S1_at   | MmugDNA.38582.1 | 4.64  | 4.73  | 0.04 | 0.13 | -1.06 | 0.15546  | 0.844005 | 0.445869 | 0.911155 |
| MmugDNA.38583.1.S1_s_at | MmugDNA.38583.1 | 10.56 | 10.17 | 0.17 | 0.07 | 1.31  | 0.06127  | 0.038072 | 0.304306 | 0.239748 |
| MmugDNA.18685.1.S1_at   | MmugDNA.18685.1 | 8.45  | 7.84  | 0.68 | 0.2  | 1.52  | 0.070263 | 0.111239 | 0.323459 | 0.375882 |
| MmugDNA.18685.1.S1_s_at | MmugDNA.18685.1 | 10.6  | 10.19 | 0.42 | 0.13 | 1.33  | 0.046116 | 0.071699 | 0.272515 | 0.313904 |
| MmugDNA.38585.1.S1_at   | MmugDNA.38585.1 | 6.26  | 6.24  | 0.13 | 0.16 | 1.02  | 0.698073 | 0.504428 | 0.856372 | 0.701557 |
| MmugDNA.38586.1.S1_at   | MmugDNA.38586.1 | 8.55  | 8.65  | 0.15 | 0.25 | -1.07 | 0.54846  | 0.192191 | 0.766574 | 0.467651 |
| MmugDNA.38588.1.S1_at   | MmugDNA.38588.1 | 11.87 | 12.09 | 0.07 | 0.17 | -1.16 | 0.182473 | 0.010676 | 0.478161 | 0.134919 |
| MmugDNA.38588.1.S1_s_at | MmugDNA.38588.1 | 10.79 | 10.98 | 0.18 | 0.19 | -1.14 | 0.186631 | 0.012152 | 0.48274  | 0.142648 |
| MmugDNA.38589.1.S1_at   | MmugDNA.38589.1 | 11.28 | 11.39 | 0.14 | 0.09 | -1.08 | 0.651054 | 0.00353  | 0.830545 | 0.085242 |
| MmugDNA.3859.1.S1_at    | MmugDNA.3859.1  | 10.57 | 10.38 | 0.1  | 0.15 | 1.13  | 0.684679 | 0.097838 | 0.84972  | 0.355639 |
| MmugDNA.38590.1.S1_at   | MmugDNA.38590.1 | 7.26  | 7.1   | 0.04 | 0.08 | 1.12  | 0.084317 | 0.479632 | 0.347695 | 0.685331 |
| MmugDNA.38591.1.S1_at   | MmugDNA.38591.1 | 5.17  | 6     | 0.59 | 0.24 | -1.78 | 0.080878 | 0.114289 | 0.341668 | 0.38083  |
| MmugDNA.38592.1.S1_at   | MmugDNA.38592.1 | 6.36  | 6.98  | 1.05 | 0.11 | -1.54 | 0.912787 | 0.976975 | 0.963144 | 0.987472 |
| MmugDNA.38593.1.S1_at   | MmugDNA.38593.1 | 8.43  | 8.69  | 0.13 | 0.35 | -1.2  | 0.71534  | 0.451079 | 0.865623 | 0.666023 |
| MmugDNA.38594.1.S1_at   | MmugDNA.38594.1 | 6.61  | 7.11  | 0.4  | 0.25 | -1.42 | 0.10577  | 0.478911 | 0.379853 | 0.684779 |
| MmugDNA.38596.1.S1_at   | MmugDNA.38596.1 | 5.47  | 5.5   | 0.05 | 0.07 | -1.02 | 0.567565 | 0.268388 | 0.777818 | 0.534086 |
| MmugDNA.38597.1.S1_at   | MmugDNA.38597.1 | 3.46  | 3.46  | 0.59 | 0.25 | 1     | 0.627806 | 0.746726 | 0.817007 | 0.852931 |
| MmugDNA.38598.1.S1_at   | MmugDNA.38598.1 | 6.15  | 5.62  | 0.58 | 0.26 | 1.44  | 0.477142 | 0.710089 | 0.71929  | 0.831904 |
| MmugDNA.3860.1.S1_at    | MmugDNA.3860.1  | 6.87  | 6.05  | 0.37 | 0.5  | 1.77  | 0.197871 | 0.145083 | 0.49515  | 0.419047 |
| MmugDNA.13629.1.S1_at   | MmugDNA.13629.1 | 4.94  | 4.53  | 0.95 | 0.32 | 1.33  | 0.253104 | 0.131496 | 0.547579 | 0.403658 |
| MmugDNA.13629.1.S1_s_at | MmugDNA.13629.1 | 11.23 | 11.05 | 0.24 | 0.09 | 1.13  | 0.245844 | 0.20532  | 0.541732 | 0.479639 |
| MmugDNA.38604.1.S1_at   | MmugDNA.38604.1 | 4.28  | 4     | 0.25 | 0.02 | 1.22  | 0.114575 | 0.160677 | 0.391622 | 0.436758 |
| MmugDNA.38605.1.S1_at   | MmugDNA.38605.1 | 6.46  | 6.2   | 0.14 | 0.14 | 1.2   | 0.420903 | 0.574889 | 0.67979  | 0.746177 |
| MmugDNA.38607.1.S1_at   | MmugDNA.38607.1 | 5.41  | 5.76  | 0.87 | 0.46 | -1.27 | 0.701407 | 0.267762 | 0.858211 | 0.533553 |
| MmugDNA.38608.1.S1_at   | MmugDNA.38608.1 | 4.29  | 4.01  | 1    | 0.42 | 1.21  | 0.618547 | 0.688787 | 0.810678 | 0.818337 |
| MmugDNA.38609.1.S1_at   | MmugDNA.38609.1 | 6.09  | 6.09  | 0.19 | 0.04 | 1     | 0.954748 | 0.998412 | 0.981406 | 0.999092 |
| MmugDNA.3861.1.S1_at    | MmugDNA.3861.1  | 5.37  | 5.41  | 0.1  | 0.38 | -1.02 | 0.797792 | 0.222313 | 0.908735 | 0.495346 |
| MmugDNA.38610.1.S1_at   | MmugDNA.38610.1 | 4.82  | 4.79  | 0.31 | 0.21 | 1.02  | 0.288911 | 0.493858 | 0.578652 | 0.694433 |
| MmugDNA.38612.1.S1_at   | MmugDNA.38612.1 | 3.04  | 3.08  | 0.13 | 0.03 | -1.03 | 0.675333 | 0.614858 | 0.845075 | 0.771583 |
| MmugDNA.38613.1.S1_at   | MmugDNA.38613.1 | 3.94  | 4.16  | 0.36 | 0.02 | -1.16 | 0.832124 | 0.667409 | 0.926055 | 0.805333 |
| MmugDNA.38614.1.S1_at   | MmugDNA.38614.1 | 6.61  | 4.59  | 0.42 | 0.7  | 4.07  | 0.043155 | 0.038352 | 0.26497  | 0.240736 |



|                        |                 |       |       |      |      |       |          |          |          |          |
|------------------------|-----------------|-------|-------|------|------|-------|----------|----------|----------|----------|
| MmugDNA.38616.1.S1_at  | MmugDNA.38616.1 | 4.44  | 4.73  | 0.09 | 0.11 | -1.22 | 0.014925 | 0.23745  | 0.174272 | 0.508127 |
| MmugDNA.38617.1.S1_at  | MmugDNA.38617.1 | 4.1   | 4.72  | 0.22 | 0.68 | -1.53 | 0.134338 | 0.15473  | 0.417974 | 0.429723 |
| MmugDNA.38619.1.S1_at  | MmugDNA.38619.1 | 6.01  | 6.01  | 0.19 | 0.04 | -1    | 0.81191  | 0.978119 | 0.915788 | 0.988066 |
| MmugDNA.3862.1.S1_at   | MmugDNA.3862.1  | 5.02  | 5     | 0.14 | 0.08 | 1.02  | 0.585189 | 0.15763  | 0.789052 | 0.433131 |
| MmugDNA.38620.1.S1_at  | MmugDNA.38620.1 | 11.97 | 12.21 | 0.15 | 0.03 | -1.18 | 0.057935 | 0.15708  | 0.297852 | 0.432547 |
| MmugDNA.38622.1.S1_at  | MmugDNA.38622.1 | 8.39  | 8.38  | 0.31 | 0.13 | 1.01  | 0.825028 | 0.616261 | 0.922272 | 0.772555 |
| MmugDNA.38623.1.S1_at  | MmugDNA.38623.1 | 4.18  | 4.15  | 0.17 | 0.1  | 1.02  | 0.347026 | 0.491554 | 0.625212 | 0.693034 |
| MmugDNA.38624.1.S1_at  | MmugDNA.38624.1 | 5.11  | 4.2   | 1.21 | 0.28 | 1.88  | 0.094096 | 0.098659 | 0.363099 | 0.356743 |
| MmugDNA.38625.1.S1_at  | MmugDNA.38625.1 | 6.59  | 6.46  | 0.12 | 0.02 | 1.1   | 0.039649 | 0.112226 | 0.255709 | 0.377537 |
| MmugDNA.38627.1.S1_at  | MmugDNA.38627.1 | 9.3   | 9.15  | 0.28 | 0.09 | 1.11  | 0.145744 | 0.544924 | 0.433266 | 0.727184 |
| MmugDNA.38629.1.S1_at  | MmugDNA.38629.1 | 11.93 | 11.41 | 0.07 | 0.05 | 1.43  | 0.000633 | 0.176053 | 0.070727 | 0.452526 |
| MmugDNA.3863.1.S1_at   | MmugDNA.3863.1  | 5.96  | 6.14  | 0.48 | 0.64 | -1.14 | 0.67615  | 0.003217 | 0.845327 | 0.082088 |
| MmugDNA.38631.1.S1_at  | MmugDNA.38631.1 | 4.04  | 3.86  | 0.42 | 0.2  | 1.13  | 0.186213 | 0.476034 | 0.482438 | 0.682473 |
| MmugDNA.38632.1.S1_at  | MmugDNA.38632.1 | 7.06  | 7.04  | 0.1  | 0.02 | 1.02  | 0.719876 | 0.440323 | 0.867794 | 0.658899 |
| MmugDNA.38633.1.S1_at  | MmugDNA.38633.1 | 11.08 | 11.37 | 0.35 | 0.19 | -1.22 | 0.663542 | 0.120396 | 0.837827 | 0.38925  |
| MmugDNA.38634.1.S1_at  | MmugDNA.38634.1 | 6.54  | 6.58  | 0.17 | 0.03 | -1.03 | 0.58105  | 0.460499 | 0.786351 | 0.672364 |
| MmugDNA.38635.1.S1_at  | MmugDNA.38635.1 | 3.4   | 3.11  | 0.09 | 0.14 | 1.22  | 0.10547  | 0.028026 | 0.37939  | 0.208941 |
| MmugDNA.38636.1.S1_at  | MmugDNA.38636.1 | 9.68  | 9.28  | 0.16 | 0.14 | 1.32  | 0.026713 | 0.234025 | 0.216593 | 0.505312 |
| MmugDNA.38637.1.S1_at  | MmugDNA.38637.1 | 3.25  | 3.23  | 0.02 | 0.15 | 1.01  | 0.267482 | 0.615315 | 0.560299 | 0.771918 |
| MmugDNA.38639.1.S1_at  | MmugDNA.38639.1 | 4.11  | 4.23  | 0.18 | 0.06 | -1.08 | 0.839684 | 0.351909 | 0.92965  | 0.595331 |
| MmugDNA.3864.1.S1_at   | MmugDNA.3864.1  | 3.92  | 3.78  | 0.16 | 0.38 | 1.1   | 0.997113 | 0.756516 | 0.999078 | 0.858223 |
| MmugDNA.38642.1.S1_at  | MmugDNA.38642.1 | 9.04  | 9.82  | 0.37 | 0.2  | -1.72 | 0.042793 | 0.003433 | 0.264078 | 0.084252 |
| MmugDNA.38643.1.S1_at  | MmugDNA.38643.1 | 5.56  | 5.74  | 0.22 | 0.22 | -1.13 | 0.989773 | 0.151844 | 0.996439 | 0.42651  |
| MmugDNA.38645.1.S1_at  | MmugDNA.38645.1 | 5.65  | 6.1   | 1.27 | 0.77 | -1.37 | 0.739079 | 0.70885  | 0.879096 | 0.831167 |
| MmugDNA.38646.1.S1_at  | MmugDNA.38646.1 | 6.34  | 6.76  | 0.18 | 0.05 | -1.34 | 0.014542 | 0.026888 | 0.172573 | 0.205141 |
| MmugDNA.38647.1.S1_at  | MmugDNA.38647.1 | 3.1   | 3.02  | 0.55 | 0.04 | 1.06  | 0.285615 | 0.167519 | 0.575349 | 0.443968 |
| MmugDNA.38648.1.S1_at  | MmugDNA.38648.1 | 10.63 | 10.13 | 0.23 | 0.03 | 1.41  | 0.019287 | 0.008704 | 0.192035 | 0.123697 |
| MmugDNA.38649.1.S1_at  | MmugDNA.38649.1 | 7.17  | 6.93  | 0.53 | 0.03 | 1.18  | 0.49779  | 0.229538 | 0.73333  | 0.501534 |
| MmugDNA.3865.1.S1_at   | MmugDNA.3865.1  | 10.43 | 10.7  | 0.05 | 0.19 | -1.2  | 0.224944 | 0.467396 | 0.522872 | 0.677085 |
| MmugDNA.38650.1.S1_at  | MmugDNA.38650.1 | 7.15  | 7.59  | 0.3  | 0.52 | -1.35 | 0.367491 | 0.692089 | 0.641471 | 0.82091  |
| MmugDNA.38651.1.S1_at  | MmugDNA.38651.1 | 9.07  | 8.7   | 0.23 | 0.07 | 1.29  | 0.169713 | 0.369208 | 0.463088 | 0.608669 |
| MmugDNA.38652.1.S1_at  | MmugDNA.38652.1 | 6.42  | 6.25  | 0.18 | 0.26 | 1.13  | 0.164265 | 0.138356 | 0.457197 | 0.411244 |
| MmugDNA.38653.1.S1_at  | MmugDNA.38653.1 | 7.13  | 7.46  | 0.42 | 0.28 | -1.26 | 0.666842 | 0.041613 | 0.840039 | 0.24887  |
| MmugDNA.38655.1.S1_at  | MmugDNA.38655.1 | 6.27  | 6.29  | 0.1  | 0.09 | -1.01 | 0.847828 | 0.933169 | 0.93374  | 0.962032 |
| MmugDNA.38656.1.S1_at  | MmugDNA.38656.1 | 2.54  | 2.54  | 0.07 | 0.04 | -1    | 0.538335 | 0.82801  | 0.760247 | 0.901214 |
| MmugDNA.38657.1.S1_at  | MmugDNA.38657.1 | 7.67  | 7.8   | 0.01 | 0.24 | -1.09 | 0.530336 | 0.504271 | 0.754899 | 0.701474 |
| MmugDNA.38659.1.S1_at  | MmugDNA.38659.1 | 12.37 | 12.34 | 0.32 | 0.02 | 1.03  | 0.803872 | 0.322675 | 0.911913 | 0.574036 |
| MmugDNA.3866.1.S1_s_at | MmugDNA.3866.1  | 11.28 | 11    | 0.25 | 0.01 | 1.22  | 0.109915 | 0.104876 | 0.385165 | 0.366419 |
| MmugDNA.38665.1.S1_at  | MmugDNA.38665.1 | 9.42  | 9.48  | 0.16 | 0.14 | -1.04 | 0.884137 | 0.9816   | 0.95069  | 0.989914 |
| MmugDNA.38667.1.S1_at  | MmugDNA.38667.1 | 7.35  | 7.93  | 1.37 | 0.28 | -1.49 | 0.587085 | 0.506158 | 0.790341 | 0.702359 |
| MmugDNA.38668.1.S1_at  | MmugDNA.38668.1 | 3.52  | 3.41  | 0.13 | 0.07 | 1.08  | 0.140814 | 0.343092 | 0.426579 | 0.588883 |
| MmugDNA.38669.1.S1_at  | MmugDNA.38669.1 | 5.95  | 5.82  | 0.17 | 0.07 | 1.09  | 0.150252 | 0.172302 | 0.439399 | 0.448666 |
| MmugDNA.3867.1.S1_at   | MmugDNA.3867.1  | 9.92  | 9.49  | 0.17 | 0.02 | 1.35  | 0.029201 | 0.026503 | 0.22368  | 0.203897 |

|                         |                 |       |       |      |      |       |          |          |          |          |
|-------------------------|-----------------|-------|-------|------|------|-------|----------|----------|----------|----------|
| MmugDNA.38670.1.S1_at   | MmugDNA.38670.1 | 10.76 | 10.65 | 0.11 | 0.06 | 1.07  | 0.310982 | 0.397251 | 0.597234 | 0.628763 |
| MmugDNA.38671.1.S1_at   | MmugDNA.38671.1 | 4.12  | 4.04  | 0.16 | 0.07 | 1.06  | 0.530575 | 0.327622 | 0.755142 | 0.577448 |
| MmugDNA.38672.1.S1_at   | MmugDNA.38672.1 | 11.9  | 11.83 | 0.18 | 0.05 | 1.04  | 0.247672 | 0.54937  | 0.543078 | 0.72982  |
| MmugDNA.38673.1.S1_s_at | MmugDNA.38673.1 | 8.85  | 8.81  | 0.16 | 0.14 | 1.03  | 0.668319 | 0.788144 | 0.840766 | 0.877471 |
| MmugDNA.38674.1.S1_at   | MmugDNA.38674.1 | 9.75  | 9.46  | 0.08 | 0.11 | 1.22  | 0.024023 | 0.153172 | 0.208189 | 0.428011 |
| MmugDNA.38676.1.S1_at   | MmugDNA.38676.1 | 11.75 | 10.9  | 0.28 | 0.04 | 1.8   | 0.006953 | 0.109815 | 0.130571 | 0.373758 |
| MmugDNA.38677.1.S1_at   | MmugDNA.38677.1 | 5.21  | 5.39  | 0.14 | 0.05 | -1.13 | 0.327263 | 0.432056 | 0.609912 | 0.652775 |
| MmugDNA.38678.1.S1_at   | MmugDNA.38678.1 | 4.19  | 4.52  | 0.16 | 0.18 | -1.25 | 0.168571 | 0.492333 | 0.46188  | 0.693485 |
| MmugDNA.3868.1.S1_at    | MmugDNA.3868.1  | 8.85  | 8.63  | 0.24 | 0.14 | 1.16  | 0.656224 | 0.663297 | 0.833605 | 0.802921 |
| MmugDNA.38680.1.S1_at   | MmugDNA.38680.1 | 6.98  | 6.63  | 0.69 | 0.36 | 1.28  | 0.872878 | 0.686361 | 0.945492 | 0.816948 |
| MmugDNA.38681.1.S1_at   | MmugDNA.38681.1 | 6.56  | 5.91  | 0.25 | 0.38 | 1.57  | 0.154236 | 0.186092 | 0.444562 | 0.461931 |
| MmugDNA.38682.1.S1_at   | MmugDNA.38682.1 | 6.44  | 6.46  | 0.39 | 0.09 | -1.02 | 0.757131 | 0.532666 | 0.888525 | 0.719186 |
| MmugDNA.38683.1.S1_at   | MmugDNA.38683.1 | 9.73  | 10.47 | 0.19 | 0.05 | -1.66 | 0.004119 | 0.013019 | 0.10967  | 0.146821 |
| MmugDNA.38684.1.S1_at   | MmugDNA.38684.1 | 6.65  | 6.55  | 1.12 | 0.38 | 1.07  | 0.645265 | 0.692116 | 0.827256 | 0.82091  |
| MmugDNA.38685.1.S1_at   | MmugDNA.38685.1 | 3.87  | 3.67  | 0.17 | 0.12 | 1.15  | 0.440719 | 0.226436 | 0.694666 | 0.498888 |
| MmugDNA.38687.1.S1_at   | MmugDNA.38687.1 | 5.94  | 5.85  | 0.06 | 0.1  | 1.06  | 0.992897 | 0.060291 | 0.997263 | 0.292225 |
| MmugDNA.38689.1.S1_at   | MmugDNA.38689.1 | 7.18  | 7.12  | 0.15 | 0.03 | 1.04  | 0.221387 | 0.427351 | 0.519398 | 0.649175 |
| MmugDNA.3869.1.S1_at    | MmugDNA.3869.1  | 5.76  | 5.79  | 0.39 | 0.07 | -1.02 | 0.36188  | 0.019378 | 0.637126 | 0.174992 |
| MmugDNA.38691.1.S1_at   | MmugDNA.38691.1 | 8.23  | 8.45  | 0.05 | 0.14 | -1.16 | 0.089551 | 0.258258 | 0.356406 | 0.52558  |
| MmugDNA.38695.1.S1_at   | MmugDNA.38695.1 | 11.96 | 11.88 | 0.2  | 0.22 | 1.06  | 0.805239 | 0.498961 | 0.912655 | 0.697912 |
| MmugDNA.38696.1.S1_at   | MmugDNA.38696.1 | 7.56  | 7.54  | 0.2  | 0.04 | 1.01  | 0.981939 | 0.932218 | 0.993307 | 0.961557 |
| MmugDNA.387.1.S1_at     | MmugDNA.387.1   | 8.22  | 8.24  | 0.22 | 0.14 | -1.01 | 0.693716 | 0.045509 | 0.853632 | 0.2575   |
| MmugDNA.3870.1.S1_at    | MmugDNA.3870.1  | 3.28  | 3.16  | 0.45 | 0.22 | 1.09  | 0.258275 | 0.491382 | 0.552483 | 0.692976 |
| MmugDNA.38702.1.S1_at   | MmugDNA.38702.1 | 11.1  | 10.83 | 0.15 | 0.1  | 1.21  | 0.035398 | 0.895044 | 0.24293  | 0.940055 |
| MmugDNA.38703.1.S1_at   | MmugDNA.38703.1 | 3.27  | 3.14  | 0.16 | 0.07 | 1.1   | 0.08784  | 0.119268 | 0.353954 | 0.387769 |
| MmugDNA.38704.1.S1_at   | MmugDNA.38704.1 | 5.24  | 3.77  | 0.54 | 0.38 | 2.78  | 0.008864 | 0.003193 | 0.143995 | 0.08199  |
| MmugDNA.38705.1.S1_at   | MmugDNA.38705.1 | 7.28  | 7.3   | 0.13 | 0.09 | -1.01 | 0.765805 | 0.769588 | 0.892599 | 0.866212 |
| MmugDNA.29620.1.S1_s_at | MmugDNA.29620.1 | 6.76  | 6.83  | 0.17 | 0.02 | -1.05 | 0.766244 | 0.888104 | 0.892786 | 0.936183 |
| MmugDNA.38707.1.S1_at   | MmugDNA.38707.1 | 4.12  | 4.27  | 0.15 | 0.03 | -1.11 | 0.494879 | 0.65824  | 0.731438 | 0.800244 |
| MmugDNA.38708.1.S1_at   | MmugDNA.38708.1 | 11.63 | 11.43 | 0.16 | 0.09 | 1.15  | 0.103986 | 0.016113 | 0.377283 | 0.160891 |
| MmugDNA.38708.1.S1_s_at | MmugDNA.38708.1 | 12.83 | 12.88 | 0.11 | 0.03 | -1.03 | 0.752793 | 0.048837 | 0.885809 | 0.265858 |
| MmugDNA.38709.1.S1_at   | MmugDNA.38709.1 | 4.21  | 4.3   | 0.07 | 0.11 | -1.07 | 0.699539 | 0.892511 | 0.857319 | 0.938696 |
| MmugDNA.38711.1.S1_at   | MmugDNA.38711.1 | 4.97  | 4.69  | 0.22 | 0.24 | 1.21  | 0.484407 | 0.134169 | 0.724255 | 0.406421 |
| MmugDNA.38713.1.S1_at   | MmugDNA.38713.1 | 3.87  | 3.82  | 0.06 | 0.1  | 1.03  | 0.115632 | 0.352236 | 0.392723 | 0.595568 |
| MmugDNA.38716.1.S1_at   | MmugDNA.38716.1 | 6.45  | 6.35  | 0.7  | 0.28 | 1.07  | 0.467446 | 0.523024 | 0.712929 | 0.713429 |
| MmugDNA.38717.1.S1_at   | MmugDNA.38717.1 | 4.76  | 4.79  | 0.18 | 0.03 | -1.02 | 0.889403 | 0.277159 | 0.952886 | 0.541154 |
| MmugDNA.38718.1.S1_at   | MmugDNA.38718.1 | 4.59  | 4.39  | 0.19 | 0.13 | 1.15  | 0.108387 | 0.297267 | 0.383016 | 0.556067 |
| MmugDNA.3872.1.S1_at    | MmugDNA.3872.1  | 11.83 | 11.43 | 0.23 | 0.09 | 1.33  | 0.200296 | 0.064186 | 0.497792 | 0.299592 |
| MmugDNA.38720.1.S1_at   | MmugDNA.38720.1 | 3.7   | 3.59  | 0.08 | 0.09 | 1.08  | 0.194116 | 0.367947 | 0.49072  | 0.607537 |
| MmugDNA.38721.1.S1_at   | MmugDNA.38721.1 | 5.41  | 5.31  | 0.05 | 0.16 | 1.07  | 0.379481 | 0.376855 | 0.649328 | 0.614606 |
| MmugDNA.38724.1.S1_at   | MmugDNA.38724.1 | 4.35  | 4.23  | 0.35 | 0.15 | 1.09  | 0.3023   | 0.368364 | 0.590132 | 0.607917 |
| MmugDNA.38726.1.S1_at   | MmugDNA.38726.1 | 3.94  | 4.15  | 0.08 | 0.19 | -1.16 | 0.053409 | 0.029862 | 0.288383 | 0.214491 |
| MmugDNA.38727.1.S1_at   | MmugDNA.38727.1 | 5.41  | 5.4   | 0.17 | 0.15 | 1     | 0.502636 | 0.177922 | 0.736287 | 0.454259 |

|                         |                 |       |       |      |      |       |          |          |          |          |
|-------------------------|-----------------|-------|-------|------|------|-------|----------|----------|----------|----------|
| MmugDNA.38728.1.S1_at   | MmugDNA.38728.1 | 10.01 | 9.32  | 0.09 | 0.1  | 1.61  | 0.001133 | 0.414963 | 0.077306 | 0.640553 |
| MmugDNA.38730.1.S1_at   | MmugDNA.38730.1 | 5.63  | 5.53  | 0.3  | 0.11 | 1.07  | 0.308685 | 0.318917 | 0.595227 | 0.571531 |
| MmugDNA.38731.1.S1_at   | MmugDNA.38731.1 | 6.5   | 6.35  | 0.92 | 0.25 | 1.11  | 0.325723 | 0.397396 | 0.608885 | 0.628812 |
| MmugDNA.38732.1.S1_at   | MmugDNA.38732.1 | 3.89  | 3.73  | 0.27 | 0.15 | 1.12  | 0.445433 | 0.463695 | 0.69792  | 0.674615 |
| MmugDNA.38734.1.S1_at   | MmugDNA.38734.1 | 5.88  | 6.08  | 0.38 | 0.09 | -1.15 | 0.406954 | 0.028318 | 0.670192 | 0.21008  |
| MmugDNA.38738.1.S1_at   | MmugDNA.38738.1 | 5.35  | 5.23  | 0.1  | 0.14 | 1.08  | 0.912863 | 0.034359 | 0.963186 | 0.229283 |
| MmugDNA.38739.1.S1_at   | MmugDNA.38739.1 | 8.41  | 8.95  | 1.09 | 0.18 | -1.45 | 0.199246 | 0.278351 | 0.496613 | 0.542089 |
| MmugDNA.3874.1.S1_at    | MmugDNA.3874.1  | 12.7  | 12.63 | 0.14 | 0.06 | 1.05  | 0.352077 | 0.116437 | 0.629611 | 0.383671 |
| MmugDNA.38740.1.S1_at   | MmugDNA.38740.1 | 12.89 | 13.36 | 0.22 | 0.09 | -1.39 | 0.071205 | 0.354602 | 0.324758 | 0.597297 |
| MmugDNA.38741.1.S1_at   | MmugDNA.38741.1 | 4.21  | 3.88  | 0.32 | 0.63 | 1.26  | 0.565733 | 0.468391 | 0.776817 | 0.677714 |
| MmugDNA.38742.1.S1_at   | MmugDNA.38742.1 | 5.3   | 5.36  | 0.18 | 0.03 | -1.04 | 0.819873 | 0.481973 | 0.919678 | 0.686909 |
| MmugDNA.38743.1.S1_at   | MmugDNA.38743.1 | 10.17 | 10.3  | 0.29 | 0.23 | -1.1  | 0.774389 | 0.863328 | 0.896801 | 0.922371 |
| MmugDNA.38744.1.S1_at   | MmugDNA.38744.1 | 5.5   | 5.56  | 0.55 | 0.06 | -1.04 | 0.45646  | 0.524307 | 0.705772 | 0.714254 |
| MmugDNA.38745.1.S1_at   | MmugDNA.38745.1 | 11.29 | 11.78 | 0.16 | 0.07 | -1.41 | 0.009762 | 0.072559 | 0.148542 | 0.315511 |
| MmugDNA.38746.1.S1_at   | MmugDNA.38746.1 | 7.83  | 8.08  | 0.09 | 0.3  | -1.18 | 0.771243 | 0.486851 | 0.895207 | 0.690091 |
| MmugDNA.38748.1.S1_at   | MmugDNA.38748.1 | 4.44  | 4.35  | 0.4  | 0.6  | 1.06  | 0.715738 | 0.918963 | 0.86589  | 0.954477 |
| MmugDNA.38749.1.S1_at   | MmugDNA.38749.1 | 7.98  | 7.77  | 0.14 | 0.09 | 1.15  | 0.25738  | 0.119312 | 0.551692 | 0.387834 |
| MmugDNA.3875.1.S1_at    | MmugDNA.3875.1  | 5.36  | 5.29  | 0.25 | 0.06 | 1.05  | 0.47441  | 0.742932 | 0.717451 | 0.851083 |
| MmugDNA.38750.1.S1_at   | MmugDNA.38750.1 | 7.24  | 7.48  | 0.23 | 0.07 | -1.18 | 0.22143  | 0.05231  | 0.519474 | 0.274201 |
| MmugDNA.38751.1.S1_at   | MmugDNA.38751.1 | 10.69 | 10.15 | 0.04 | 0.09 | 1.45  | 0.000687 | 0.019816 | 0.071248 | 0.177045 |
| MmugDNA.38753.1.S1_s_at | MmugDNA.38753.1 | 12.1  | 13.13 | 0.53 | 0.09 | -2.05 | 0.027495 | 0.051011 | 0.218484 | 0.271158 |
| MmugDNA.38754.1.S1_at   | MmugDNA.38754.1 | 4.61  | 6.17  | 1.13 | 0.15 | -2.97 | 0.081829 | 0.023229 | 0.343105 | 0.191039 |
| MmugDNA.38755.1.S1_at   | MmugDNA.38755.1 | 7.5   | 7.43  | 0.64 | 0.24 | 1.05  | 0.343355 | 0.216666 | 0.622974 | 0.490307 |
| MmugDNA.38755.1.S1_x_at | MmugDNA.38755.1 | 7.11  | 6.98  | 0.72 | 0.12 | 1.09  | 0.304759 | 0.329079 | 0.591803 | 0.578482 |
| MmugDNA.38757.1.S1_at   | MmugDNA.38757.1 | 6.75  | 7.63  | 0.57 | 0.29 | -1.83 | 0.063745 | 0.050654 | 0.308957 | 0.270317 |
| MmugDNA.38758.1.S1_at   | MmugDNA.38758.1 | 3.99  | 4.12  | 0.21 | 0.13 | -1.09 | 0.913842 | 0.518901 | 0.96343  | 0.710789 |
| MmugDNA.38759.1.S1_at   | MmugDNA.38759.1 | 4.77  | 5.11  | 0.28 | 0.14 | -1.26 | 0.166495 | 0.019892 | 0.459694 | 0.177357 |
| MmugDNA.3876.1.S1_at    | MmugDNA.3876.1  | 5.63  | 5.51  | 0.34 | 0.27 | 1.09  | 0.246918 | 0.351829 | 0.542575 | 0.595274 |
| MmugDNA.38760.1.S1_at   | MmugDNA.38760.1 | 4.11  | 4.07  | 0.16 | 0.08 | 1.03  | 0.488554 | 0.668396 | 0.726931 | 0.805938 |
| MmugDNA.38762.1.S1_s_at | MmugDNA.38762.1 | 10.13 | 10.07 | 0.12 | 0.01 | 1.04  | 0.715746 | 0.816151 | 0.86589  | 0.893955 |
| MmugDNA.38763.1.S1_at   | MmugDNA.38763.1 | 3.4   | 3.49  | 0.15 | 0.14 | -1.06 | 0.439179 | 0.053022 | 0.69348  | 0.27592  |
| MmugDNA.38764.1.S1_at   | MmugDNA.38764.1 | 6.83  | 6.48  | 0.46 | 0.05 | 1.28  | 0.739381 | 0.676919 | 0.879245 | 0.811237 |
| MmugDNA.38765.1.S1_at   | MmugDNA.38765.1 | 7.08  | 7.17  | 0.94 | 0.33 | -1.07 | 0.685126 | 0.557422 | 0.849957 | 0.735031 |
| MmugDNA.38766.1.S1_at   | MmugDNA.38766.1 | 6.76  | 6.66  | 1.2  | 0.65 | 1.07  | 0.890984 | 0.984296 | 0.95346  | 0.991271 |
| MmugDNA.38767.1.S1_at   | MmugDNA.38767.1 | 5.5   | 6.06  | 0.36 | 0.23 | -1.47 | 0.091819 | 0.064598 | 0.359608 | 0.300314 |
| MmugDNA.38768.1.S1_at   | MmugDNA.38768.1 | 9.07  | 8.83  | 0.02 | 0.03 | 1.19  | 0.000274 | 0.014639 | 0.056654 | 0.154176 |
| MmugDNA.38769.1.S1_at   | MmugDNA.38769.1 | 7.67  | 7.73  | 0.1  | 0.11 | -1.04 | 0.477137 | 0.129115 | 0.71929  | 0.400611 |
| MmugDNA.3877.1.S1_at    | MmugDNA.3877.1  | 10.73 | 11.06 | 0.48 | 0.12 | -1.25 | 0.100082 | 0.478548 | 0.37088  | 0.684556 |
| MmugDNA.38771.1.S1_at   | MmugDNA.38771.1 | 7.9   | 7.91  | 0.13 | 0.07 | -1    | 0.293995 | 0.189495 | 0.582994 | 0.465237 |
| MmugDNA.38772.1.S1_at   | MmugDNA.38772.1 | 3.69  | 4.02  | 0.05 | 0.19 | -1.26 | 0.066998 | 0.050267 | 0.316461 | 0.269509 |
| MmugDNA.38773.1.S1_at   | MmugDNA.38773.1 | 6.06  | 6.44  | 0.75 | 0.13 | -1.3  | 0.229983 | 0.529419 | 0.528956 | 0.717276 |
| MmugDNA.38774.1.S1_at   | MmugDNA.38774.1 | 5.58  | 5.76  | 0.14 | 0.01 | -1.13 | 0.1415   | 0.125149 | 0.427475 | 0.395577 |
| MmugDNA.38775.1.S1_at   | MmugDNA.38775.1 | 6.48  | 6.33  | 0.12 | 0.09 | 1.11  | 0.071501 | 0.088364 | 0.32546  | 0.341824 |

|                         |                 |       |       |      |      |       |          |          |          |          |
|-------------------------|-----------------|-------|-------|------|------|-------|----------|----------|----------|----------|
| MmugDNA.38776.1.S1_at   | MmugDNA.38776.1 | 9.82  | 10.31 | 0.38 | 0.17 | -1.4  | 0.106128 | 0.050195 | 0.380217 | 0.269263 |
| MmugDNA.38777.1.S1_at   | MmugDNA.38777.1 | 11.51 | 11.68 | 0.1  | 0.09 | -1.12 | 0.106386 | 0.201951 | 0.380418 | 0.476412 |
| MmugDNA.3878.1.S1_at    | MmugDNA.3878.1  | 6.79  | 6.57  | 0.05 | 0.13 | 1.16  | 0.061917 | 0.031403 | 0.305366 | 0.219107 |
| MmugDNA.38781.1.S1_at   | MmugDNA.38781.1 | 4.08  | 3.95  | 0.11 | 0.16 | 1.09  | 0.507184 | 0.529266 | 0.739547 | 0.717233 |
| MmugDNA.38782.1.S1_at   | MmugDNA.38782.1 | 6.84  | 7.09  | 0.29 | 0.14 | -1.19 | 0.219371 | 0.220267 | 0.517148 | 0.493701 |
| MmugDNA.38783.1.S1_at   | MmugDNA.38783.1 | 4.57  | 4.37  | 0.16 | 0.1  | 1.15  | 0.085933 | 0.237435 | 0.350263 | 0.508117 |
| MmugDNA.38784.1.S1_at   | MmugDNA.38784.1 | 4.08  | 4     | 0.11 | 0.14 | 1.06  | 0.865811 | 0.354643 | 0.941889 | 0.597326 |
| MmugDNA.38785.1.S1_at   | MmugDNA.38785.1 | 8.24  | 7.37  | 0.86 | 0.46 | 1.83  | 0.111155 | 0.076382 | 0.386964 | 0.321368 |
| MmugDNA.38787.1.S1_at   | MmugDNA.38787.1 | 11.6  | 11.25 | 0.31 | 0.01 | 1.28  | 0.098207 | 0.044768 | 0.36881  | 0.256021 |
| MmugDNA.38788.1.S1_at   | MmugDNA.38788.1 | 6.5   | 6.45  | 0.03 | 0.04 | 1.04  | 0.130009 | 0.003663 | 0.412127 | 0.086527 |
| MmugDNA.38789.1.S1_at   | MmugDNA.38789.1 | 12.27 | 12.07 | 0.1  | 0.09 | 1.15  | 0.064867 | 0.019566 | 0.311366 | 0.175612 |
| MmugDNA.38790.1.S1_at   | MmugDNA.38790.1 | 7.42  | 6.65  | 0.31 | 0.33 | 1.71  | 0.102045 | 0.273879 | 0.373874 | 0.538438 |
| MmugDNA.38792.1.S1_at   | MmugDNA.38792.1 | 3.34  | 3.4   | 0.16 | 0.32 | -1.04 | 0.562773 | 0.761513 | 0.775125 | 0.861416 |
| MmugDNA.38794.1.S1_s_at | MmugDNA.38794.1 | 4.37  | 4.34  | 0.22 | 0.02 | 1.02  | 0.298746 | 0.195316 | 0.586965 | 0.470253 |
| MmugDNA.38795.1.S1_at   | MmugDNA.38795.1 | 4.02  | 3.98  | 0.3  | 0.1  | 1.03  | 0.568527 | 0.649672 | 0.77843  | 0.795076 |
| MmugDNA.38796.1.S1_s_at | MmugDNA.38796.1 | 8.49  | 9.39  | 0.3  | 0.16 | -1.86 | 0.020083 | 0.236705 | 0.195301 | 0.507459 |
| MmugDNA.38797.1.S1_at   | MmugDNA.38797.1 | 3.31  | 3.46  | 0.14 | 0.15 | -1.11 | 0.30746  | 0.297327 | 0.594204 | 0.556071 |
| MmugDNA.38798.1.S1_at   | MmugDNA.38798.1 | 7.6   | 7.81  | 0.94 | 0.34 | -1.16 | 0.695973 | 0.030596 | 0.855205 | 0.216887 |
| MmugDNA.388.1.S1_at     | MmugDNA.388.1   | 10.37 | 9.65  | 0.04 | 0.12 | 1.65  | 0.000554 | 0.000552 | 0.070113 | 0.040948 |
| MmugDNA.3880.1.S1_at    | MmugDNA.3880.1  | 4.54  | 4.76  | 0.24 | 0.25 | -1.16 | 0.451973 | 0.538903 | 0.702668 | 0.723368 |
| MmugDNA.38802.1.S1_at   | MmugDNA.38802.1 | 5.74  | 5.26  | 1.15 | 0.73 | 1.39  | 0.409262 | 0.585492 | 0.671686 | 0.752852 |
| MmugDNA.38803.1.S1_at   | MmugDNA.38803.1 | 7.95  | 7.62  | 0.31 | 0.22 | 1.26  | 0.506582 | 0.421602 | 0.739179 | 0.645173 |
| MmugDNA.38804.1.S1_at   | MmugDNA.38804.1 | 5.38  | 5.95  | 0.4  | 0.33 | -1.49 | 0.62621  | 0.224888 | 0.815846 | 0.497657 |
| MmugDNA.38805.1.S1_at   | MmugDNA.38805.1 | 3.69  | 3.41  | 0.27 | 0.21 | 1.21  | 0.518897 | 0.469157 | 0.747806 | 0.67815  |
| MmugDNA.38806.1.S1_at   | MmugDNA.38806.1 | 11.21 | 11.55 | 0.14 | 0.05 | -1.27 | 0.013563 | 0.000092 | 0.167258 | 0.027225 |
| MmugDNA.38807.1.S1_at   | MmugDNA.38807.1 | 4.36  | 4.41  | 0.41 | 0.41 | -1.03 | 0.706985 | 0.866073 | 0.861311 | 0.923791 |
| MmugDNA.38808.1.S1_at   | MmugDNA.38808.1 | 6.03  | 6.09  | 0.08 | 0.13 | -1.05 | 0.164723 | 0.18133  | 0.457791 | 0.457834 |
| MmugDNA.38809.1.S1_at   | MmugDNA.38809.1 | 6.86  | 6.64  | 0.23 | 0.08 | 1.17  | 0.408792 | 0.490854 | 0.671414 | 0.692666 |
| MmugDNA.3881.1.S1_at    | MmugDNA.3881.1  | 3.27  | 3.14  | 0.2  | 0.24 | 1.09  | 0.576388 | 0.364146 | 0.783169 | 0.604488 |
| MmugDNA.38811.1.S1_at   | MmugDNA.38811.1 | 7.06  | 6.92  | 0.19 | 0.06 | 1.11  | 0.285816 | 0.450442 | 0.575629 | 0.665643 |
| MmugDNA.38812.1.S1_at   | MmugDNA.38812.1 | 10.82 | 10.96 | 0.16 | 0.1  | -1.1  | 0.950141 | 0.000835 | 0.979278 | 0.046851 |
| MmugDNA.38814.1.S1_at   | MmugDNA.38814.1 | 5.01  | 5.12  | 0.53 | 0.12 | -1.08 | 0.713582 | 0.824051 | 0.864722 | 0.898901 |
| MmugDNA.38815.1.S1_at   | MmugDNA.38815.1 | 6.07  | 5.99  | 0.21 | 0.08 | 1.06  | 0.529826 | 0.729468 | 0.7545   | 0.843541 |
| MmugDNA.38817.1.S1_at   | MmugDNA.38817.1 | 10.33 | 10.34 | 0.03 | 0    | -1.01 | 0.585811 | 0.264348 | 0.789438 | 0.530385 |
| MmugDNA.38819.1.S1_at   | MmugDNA.38819.1 | 6.68  | 7.11  | 0.35 | 0.08 | -1.34 | 0.107568 | 0.774469 | 0.382272 | 0.868766 |
| MmugDNA.38820.1.S1_at   | MmugDNA.38820.1 | 5.47  | 6.13  | 0.49 | 0.13 | -1.58 | 0.071706 | 0.060007 | 0.325611 | 0.291649 |
| MmugDNA.38822.1.S1_at   | MmugDNA.38822.1 | 5.2   | 5.18  | 0.14 | 0.05 | 1.01  | 0.478111 | 0.785914 | 0.719818 | 0.87599  |
| MmugDNA.38823.1.S1_at   | MmugDNA.38823.1 | 4.89  | 4.42  | 0.11 | 0.28 | 1.38  | 0.059045 | 0.559467 | 0.30011  | 0.736301 |
| MmugDNA.38824.1.S1_at   | MmugDNA.38824.1 | 6.74  | 6.97  | 0.85 | 0.14 | -1.18 | 0.712449 | 0.547356 | 0.864309 | 0.728426 |
| MmugDNA.38827.1.S1_at   | MmugDNA.38827.1 | 5.01  | 5.04  | 0.04 | 0.12 | -1.02 | 0.748812 | 0.189867 | 0.883748 | 0.465403 |
| MmugDNA.38828.1.S1_at   | MmugDNA.38828.1 | 6.06  | 6     | 0.1  | 0.2  | 1.04  | 0.932615 | 0.225752 | 0.971784 | 0.498159 |
| MmugDNA.38829.1.S1_at   | MmugDNA.38829.1 | 4.15  | 4.08  | 0.02 | 0.35 | 1.05  | 0.872799 | 0.604521 | 0.945492 | 0.764655 |
| MmugDNA.38832.1.S1_at   | MmugDNA.38832.1 | 5.97  | 5.52  | 0.34 | 0.19 | 1.36  | 0.078323 | 0.018589 | 0.337998 | 0.171539 |

|                         |                 |       |       |      |      |       |          |          |          |          |
|-------------------------|-----------------|-------|-------|------|------|-------|----------|----------|----------|----------|
| MmugDNA.38834.1.S1_at   | MmugDNA.38834.1 | 4.38  | 4.22  | 0.08 | 0.04 | 1.11  | 0.063369 | 0.587671 | 0.308359 | 0.754425 |
| MmugDNA.38835.1.S1_at   | MmugDNA.38835.1 | 11.95 | 11.34 | 0.21 | 0.05 | 1.53  | 0.003981 | 0.001652 | 0.108676 | 0.061436 |
| MmugDNA.38836.1.S1_at   | MmugDNA.38836.1 | 7.15  | 7.11  | 0.13 | 0.03 | 1.03  | 0.160901 | 0.171639 | 0.452408 | 0.448044 |
| MmugDNA.38837.1.S1_at   | MmugDNA.38837.1 | 9.55  | 10.36 | 0.36 | 0.09 | -1.75 | 0.014984 | 0.027024 | 0.174543 | 0.205533 |
| MmugDNA.38838.1.S1_at   | MmugDNA.38838.1 | 4.82  | 4.9   | 0.04 | 0.08 | -1.06 | 0.121094 | 0.132811 | 0.399629 | 0.404544 |
| MmugDNA.3884.1.S1_at    | MmugDNA.3884.1  | 12.22 | 12.36 | 0.08 | 0.14 | -1.1  | 0.115407 | 0.171256 | 0.392523 | 0.447792 |
| MmugDNA.38842.1.S1_at   | MmugDNA.38842.1 | 4.05  | 3.86  | 0.07 | 0.12 | 1.14  | 0.116782 | 0.125804 | 0.39382  | 0.396313 |
| MmugDNA.38843.1.S1_at   | MmugDNA.38843.1 | 4.76  | 4.9   | 0.13 | 0.07 | -1.1  | 0.330905 | 0.012463 | 0.612891 | 0.14417  |
| MmugDNA.38844.1.S1_at   | MmugDNA.38844.1 | 3.52  | 3.04  | 0.55 | 0.16 | 1.39  | 0.263141 | 0.315014 | 0.556921 | 0.568759 |
| MmugDNA.38846.1.S1_at   | MmugDNA.38846.1 | 5.57  | 5.59  | 0.27 | 0.04 | -1.01 | 0.936805 | 0.507822 | 0.973607 | 0.703346 |
| MmugDNA.38847.1.S1_at   | MmugDNA.38847.1 | 5.83  | 5.91  | 0.42 | 0.07 | -1.06 | 0.554609 | 0.700182 | 0.770769 | 0.825987 |
| MmugDNA.38848.1.S1_at   | MmugDNA.38848.1 | 4.74  | 4.71  | 0.16 | 0.04 | 1.02  | 0.581873 | 0.106621 | 0.786843 | 0.36916  |
| MmugDNA.38849.1.S1_at   | MmugDNA.38849.1 | 7.34  | 7.16  | 0.14 | 0.16 | 1.13  | 0.130626 | 0.366552 | 0.413084 | 0.606293 |
| MmugDNA.3885.1.S1_at    | MmugDNA.3885.1  | 5.39  | 5.15  | 0.22 | 0.09 | 1.19  | 0.128062 | 0.2913   | 0.410031 | 0.551803 |
| MmugDNA.38850.1.S1_s_at | MmugDNA.38850.1 | 12.07 | 12.35 | 0.21 | 0.2  | -1.22 | 0.286669 | 0.060151 | 0.576512 | 0.291882 |
| MmugDNA.38852.1.S1_at   | MmugDNA.38852.1 | 4.11  | 3.95  | 0.24 | 0    | 1.11  | 0.515543 | 0.437844 | 0.745383 | 0.656977 |
| MmugDNA.38854.1.S1_at   | MmugDNA.38854.1 | 6.82  | 6.68  | 1.2  | 0.24 | 1.1   | 0.930802 | 0.922486 | 0.97089  | 0.956333 |
| MmugDNA.38855.1.S1_at   | MmugDNA.38855.1 | 4.78  | 4.8   | 0.04 | 0.26 | -1.02 | 0.401383 | 0.514572 | 0.666016 | 0.707767 |
| MmugDNA.38857.1.S1_at   | MmugDNA.38857.1 | 4.71  | 5.38  | 0.09 | 0.31 | -1.59 | 0.043033 | 0.067787 | 0.264642 | 0.306471 |
| MmugDNA.38858.1.S1_at   | MmugDNA.38858.1 | 8.95  | 8.79  | 0.32 | 0.13 | 1.12  | 0.41267  | 0.758996 | 0.674202 | 0.859948 |
| MmugDNA.38859.1.S1_at   | MmugDNA.38859.1 | 4.39  | 4.29  | 0.15 | 0.19 | 1.07  | 0.661146 | 0.868235 | 0.836453 | 0.925234 |
| MmugDNA.3886.1.S1_at    | MmugDNA.3886.1  | 8.93  | 9.13  | 0.18 | 0.17 | -1.15 | 0.617468 | 0.047588 | 0.810046 | 0.262934 |
| MmugDNA.38860.1.S1_at   | MmugDNA.38860.1 | 5.29  | 5.07  | 0.04 | 0.1  | 1.16  | 0.065923 | 0.163963 | 0.314244 | 0.440107 |
| MmugDNA.38861.1.S1_at   | MmugDNA.38861.1 | 12.41 | 12.54 | 0.19 | 0.01 | -1.09 | 0.399221 | 0.011313 | 0.664718 | 0.138076 |
| MmugDNA.38862.1.S1_at   | MmugDNA.38862.1 | 6.21  | 6.23  | 0.11 | 0.04 | -1.02 | 0.621451 | 0.079684 | 0.812691 | 0.326981 |
| MmugDNA.38864.1.S1_at   | MmugDNA.38864.1 | 3.4   | 3.39  | 0.17 | 0.1  | 1.01  | 0.264112 | 0.288683 | 0.557422 | 0.549835 |
| MmugDNA.38865.1.S1_at   | MmugDNA.38865.1 | 5.45  | 5.22  | 0.49 | 0.15 | 1.18  | 0.740616 | 0.747127 | 0.879776 | 0.853124 |
| MmugDNA.38866.1.S1_at   | MmugDNA.38866.1 | 9.1   | 8.67  | 0.07 | 0    | 1.35  | 0.000466 | 0.003674 | 0.066672 | 0.086568 |
| MmugDNA.38867.1.S1_at   | MmugDNA.38867.1 | 5.42  | 5.66  | 0.3  | 0.3  | -1.18 | 0.650672 | 0.669469 | 0.830313 | 0.806626 |
| MmugDNA.38868.1.S1_at   | MmugDNA.38868.1 | 3.57  | 3.74  | 0.14 | 0.2  | -1.13 | 0.593475 | 0.373501 | 0.79401  | 0.612309 |
| MmugDNA.38869.1.S1_at   | MmugDNA.38869.1 | 4.54  | 4.56  | 0.1  | 0.16 | -1.02 | 0.734212 | 0.49339  | 0.876106 | 0.694105 |
| MmugDNA.3887.1.S1_at    | MmugDNA.3887.1  | 4.84  | 5.41  | 0.03 | 0.09 | -1.48 | 0.000418 | 0.009003 | 0.063209 | 0.125499 |
| MmugDNA.38871.1.S1_at   | MmugDNA.38871.1 | 8.85  | 8.77  | 0.16 | 0.17 | 1.06  | 0.427713 | 0.197698 | 0.684935 | 0.472633 |
| MmugDNA.38872.1.S1_at   | MmugDNA.38872.1 | 11.77 | 11.74 | 0.09 | 0.05 | 1.02  | 0.395638 | 0.05983  | 0.661945 | 0.291286 |
| MmugDNA.38873.1.S1_at   | MmugDNA.38873.1 | 4.14  | 4.12  | 0.09 | 0.12 | 1.01  | 0.363687 | 0.466162 | 0.638302 | 0.676147 |
| MmugDNA.38874.1.S1_at   | MmugDNA.38874.1 | 4.26  | 4.3   | 0.02 | 0.06 | -1.03 | 0.169576 | 0.382336 | 0.462882 | 0.618498 |
| MmugDNA.38876.1.S1_at   | MmugDNA.38876.1 | 4.67  | 4.08  | 0.18 | 0.16 | 1.5   | 0.014282 | 0.006023 | 0.171355 | 0.106089 |
| MmugDNA.38877.1.S1_at   | MmugDNA.38877.1 | 6.94  | 6.92  | 0.18 | 0.03 | 1.02  | 0.550106 | 0.800752 | 0.767642 | 0.885417 |
| MmugDNA.38878.1.S1_at   | MmugDNA.38878.1 | 7.11  | 7.26  | 0.25 | 0.3  | -1.11 | 0.715974 | 0.264092 | 0.865989 | 0.530214 |
| MmugDNA.3888.1.S1_at    | MmugDNA.3888.1  | 4.95  | 4.9   | 0.31 | 0.05 | 1.04  | 0.22248  | 0.340533 | 0.52041  | 0.586776 |
| MmugDNA.38880.1.S1_at   | MmugDNA.38880.1 | 2.93  | 2.97  | 0.04 | 0.09 | -1.03 | 0.565454 | 0.653075 | 0.776724 | 0.79718  |
| MmugDNA.38881.1.S1_at   | MmugDNA.38881.1 | 7.15  | 7.12  | 0.09 | 0.23 | 1.02  | 0.649748 | 0.717034 | 0.829921 | 0.836191 |
| MmugDNA.38882.1.S1_at   | MmugDNA.38882.1 | 7.9   | 7.86  | 0.11 | 0.16 | 1.03  | 0.809981 | 0.014666 | 0.91487  | 0.154231 |

|                         |                 |       |       |      |      |       |          |          |          |          |
|-------------------------|-----------------|-------|-------|------|------|-------|----------|----------|----------|----------|
| MmugDNA.38883.1.S1_at   | MmugDNA.38883.1 | 9.08  | 8.95  | 0.08 | 0.15 | 1.09  | 0.602468 | 0.913437 | 0.800278 | 0.951242 |
| MmugDNA.38884.1.S1_at   | MmugDNA.38884.1 | 7.38  | 6.32  | 0.53 | 0.92 | 2.08  | 0.166463 | 0.405897 | 0.45963  | 0.634037 |
| MmugDNA.38888.1.S1_at   | MmugDNA.38888.1 | 8.74  | 9.16  | 0.41 | 0.11 | -1.34 | 0.222679 | 0.018681 | 0.520555 | 0.171717 |
| MmugDNA.3889.1.S1_at    | MmugDNA.3889.1  | 5.88  | 5.86  | 0.77 | 0.13 | 1.01  | 0.355994 | 0.339326 | 0.632435 | 0.585984 |
| MmugDNA.38890.1.S1_at   | MmugDNA.38890.1 | 5.26  | 5.23  | 0.01 | 0.2  | 1.02  | 0.262894 | 0.533176 | 0.556718 | 0.719462 |
| MmugDNA.38891.1.S1_at   | MmugDNA.38891.1 | 10.61 | 10.38 | 0.13 | 0.16 | 1.17  | 0.154293 | 0.297401 | 0.44462  | 0.556078 |
| MmugDNA.38893.1.S1_at   | MmugDNA.38893.1 | 4.86  | 4.54  | 0.41 | 0.1  | 1.25  | 0.266226 | 0.35693  | 0.558722 | 0.5987   |
| MmugDNA.38894.1.S1_at   | MmugDNA.38894.1 | 7.49  | 7.15  | 0.34 | 0.05 | 1.27  | 0.131108 | 0.151728 | 0.413841 | 0.426383 |
| MmugDNA.38895.1.S1_at   | MmugDNA.38895.1 | 6.63  | 6.83  | 0.4  | 0.07 | -1.15 | 0.137206 | 0.291332 | 0.422038 | 0.551803 |
| MmugDNA.38896.1.S1_at   | MmugDNA.38896.1 | 4.99  | 5.28  | 0.12 | 0.18 | -1.22 | 0.269979 | 0.143566 | 0.562262 | 0.417492 |
| MmugDNA.38897.1.S1_at   | MmugDNA.38897.1 | 8.38  | 9.24  | 0.16 | 0.28 | -1.81 | 0.028981 | 0.017542 | 0.223008 | 0.167632 |
| MmugDNA.38898.1.S1_at   | MmugDNA.38898.1 | 3.01  | 2.94  | 0.08 | 0.11 | 1.05  | 0.235751 | 0.384334 | 0.533475 | 0.620012 |
| MmugDNA.389.1.S1_at     | MmugDNA.389.1   | 9.52  | 9.35  | 0.19 | 0.14 | 1.12  | 0.219319 | 0.020321 | 0.517071 | 0.178954 |
| MmugDNA.3890.1.S1_at    | MmugDNA.3890.1  | 4.35  | 4.45  | 0.19 | 0.14 | -1.07 | 0.559939 | 0.605102 | 0.773584 | 0.764917 |
| MmugDNA.38901.1.S1_at   | MmugDNA.38901.1 | 6.41  | 6.32  | 0.06 | 0.08 | 1.06  | 0.460666 | 0.630219 | 0.708331 | 0.782181 |
| MmugDNA.38902.1.S1_at   | MmugDNA.38902.1 | 3.2   | 3.27  | 0.08 | 0.08 | -1.05 | 0.307639 | 0.750952 | 0.594464 | 0.855196 |
| MmugDNA.38903.1.S1_at   | MmugDNA.38903.1 | 4.17  | 4.15  | 0.06 | 0.12 | 1.01  | 0.604327 | 0.803778 | 0.801559 | 0.887124 |
| MmugDNA.38904.1.S1_at   | MmugDNA.38904.1 | 6.13  | 5.99  | 0.25 | 0.16 | 1.1   | 0.339901 | 0.573243 | 0.620086 | 0.744985 |
| MmugDNA.38905.1.S1_at   | MmugDNA.38905.1 | 4.39  | 4.26  | 0.21 | 0.03 | 1.1   | 0.322704 | 0.438053 | 0.606575 | 0.657068 |
| MmugDNA.38906.1.S1_at   | MmugDNA.38906.1 | 6.62  | 6.68  | 0.2  | 0.02 | -1.04 | 0.636804 | 0.858245 | 0.822272 | 0.919151 |
| MmugDNA.38907.1.S1_at   | MmugDNA.38907.1 | 5.82  | 5.79  | 0.32 | 0.04 | 1.02  | 0.642289 | 0.587757 | 0.825507 | 0.754518 |
| MmugDNA.38908.1.S1_at   | MmugDNA.38908.1 | 3.74  | 3.75  | 0    | 0.07 | -1.01 | 0.503924 | 0.497171 | 0.73721  | 0.696495 |
| MmugDNA.38909.1.S1_at   | MmugDNA.38909.1 | 9.28  | 9.32  | 0.14 | 0.23 | -1.03 | 0.852091 | 0.899644 | 0.935667 | 0.942903 |
| MmugDNA.38912.1.S1_at   | MmugDNA.38912.1 | 5.98  | 6.34  | 0.17 | 0.11 | -1.29 | 0.088448 | 0.171016 | 0.354575 | 0.447561 |
| MmugDNA.38913.1.S1_at   | MmugDNA.38913.1 | 5.68  | 6.07  | 0.61 | 0.05 | -1.31 | 0.870281 | 0.776921 | 0.944208 | 0.870408 |
| MmugDNA.38915.1.S1_s_at | MmugDNA.38915.1 | 6.87  | 7.28  | 0.3  | 0.43 | -1.33 | 0.7509   | 0.029414 | 0.884992 | 0.213368 |
| MmugDNA.38916.1.S1_at   | MmugDNA.38916.1 | 7.51  | 8.16  | 1.1  | 0.28 | -1.57 | 0.490665 | 0.226173 | 0.728737 | 0.49867  |
| MmugDNA.38917.1.S1_at   | MmugDNA.38917.1 | 12.07 | 12.33 | 0.05 | 0.02 | -1.19 | 0.001172 | 0.67833  | 0.077718 | 0.8121   |
| MmugDNA.38918.1.S1_at   | MmugDNA.38918.1 | 3.7   | 3.6   | 0.06 | 0.02 | 1.07  | 0.084227 | 0.443933 | 0.347616 | 0.661553 |
| MmugDNA.38921.1.S1_at   | MmugDNA.38921.1 | 3.95  | 3.9   | 0.05 | 0.09 | 1.04  | 0.959738 | 0.081078 | 0.983565 | 0.329249 |
| MmugDNA.38922.1.S1_at   | MmugDNA.38922.1 | 6.45  | 6.43  | 0.23 | 0.13 | 1.01  | 0.620086 | 0.108815 | 0.811648 | 0.372379 |
| MmugDNA.38924.1.S1_at   | MmugDNA.38924.1 | 12.6  | 12.68 | 0.4  | 0.16 | -1.06 | 0.54347  | 0.19895  | 0.763461 | 0.473526 |
| MmugDNA.38925.1.S1_at   | MmugDNA.38925.1 | 9.42  | 8.76  | 0.27 | 0.16 | 1.58  | 0.021385 | 0.022717 | 0.199804 | 0.188736 |
| MmugDNA.38926.1.S1_at   | MmugDNA.38926.1 | 6.97  | 6.99  | 0.33 | 0.2  | -1.02 | 0.549095 | 0.381294 | 0.766978 | 0.617616 |
| MmugDNA.38927.1.S1_at   | MmugDNA.38927.1 | 5.36  | 5.31  | 0.11 | 0.12 | 1.04  | 0.813139 | 0.145132 | 0.916452 | 0.419097 |
| MmugDNA.38928.1.S1_at   | MmugDNA.38928.1 | 8     | 9.53  | 0.24 | 0.25 | -2.89 | 0.001523 | 0.063478 | 0.081668 | 0.298441 |
| MmugDNA.38929.1.S1_at   | MmugDNA.38929.1 | 11.07 | 11.22 | 0.15 | 0.1  | -1.11 | 0.088076 | 0.075728 | 0.354244 | 0.320322 |
| MmugDNA.38931.1.S1_at   | MmugDNA.38931.1 | 4.68  | 4.75  | 0.11 | 0.24 | -1.05 | 0.758761 | 0.938064 | 0.889478 | 0.964913 |
| MmugDNA.38932.1.S1_at   | MmugDNA.38932.1 | 7.39  | 7.5   | 0.24 | 0.02 | -1.08 | 0.857926 | 0.923146 | 0.938213 | 0.956773 |
| MmugDNA.38933.1.S1_at   | MmugDNA.38933.1 | 6.39  | 6.39  | 0.09 | 0.07 | 1     | 0.547166 | 0.222305 | 0.765803 | 0.495346 |
| MmugDNA.38934.1.S1_at   | MmugDNA.38934.1 | 7.19  | 6.98  | 0.46 | 0.04 | 1.16  | 0.142548 | 0.182701 | 0.428633 | 0.459186 |
| MmugDNA.38935.1.S1_at   | MmugDNA.38935.1 | 7.41  | 7.44  | 0.15 | 0.05 | -1.02 | 0.793212 | 0.174483 | 0.906516 | 0.450952 |
| MmugDNA.38936.1.S1_at   | MmugDNA.38936.1 | 4.87  | 4.7   | 0.33 | 0.15 | 1.12  | 0.317844 | 0.426507 | 0.602619 | 0.648694 |

|                         |                 |       |       |      |      |       |          |          |          |          |
|-------------------------|-----------------|-------|-------|------|------|-------|----------|----------|----------|----------|
| MmugDNA.38937.1.S1_at   | MmugDNA.38937.1 | 6.29  | 7.37  | 0.41 | 0.29 | -2.11 | 0.035381 | 0.170148 | 0.242914 | 0.446906 |
| MmugDNA.38938.1.S1_at   | MmugDNA.38938.1 | 7.7   | 7.96  | 0.43 | 0.18 | -1.2  | 0.509121 | 0.067712 | 0.740884 | 0.30629  |
| MmugDNA.3894.1.S1_at    | MmugDNA.3894.1  | 3.63  | 3.58  | 0.29 | 0.49 | 1.04  | 0.797683 | 0.928    | 0.908708 | 0.959116 |
| MmugDNA.38941.1.S1_at   | MmugDNA.38941.1 | 4.35  | 4.43  | 0.06 | 0.2  | -1.06 | 0.62344  | 0.838565 | 0.814203 | 0.907933 |
| MmugDNA.38943.1.S1_at   | MmugDNA.38943.1 | 3.99  | 4     | 0.01 | 0.11 | -1.01 | 0.474458 | 0.482609 | 0.717455 | 0.687368 |
| MmugDNA.38944.1.S1_at   | MmugDNA.38944.1 | 6.73  | 5.57  | 0.74 | 0.04 | 2.24  | 0.147958 | 0.117174 | 0.436193 | 0.384627 |
| MmugDNA.38946.1.S1_at   | MmugDNA.38946.1 | 11.85 | 11.3  | 0.16 | 0.1  | 1.46  | 0.007953 | 0.015278 | 0.138304 | 0.156987 |
| MmugDNA.38947.1.S1_at   | MmugDNA.38947.1 | 6.52  | 6.67  | 0.2  | 0.29 | -1.11 | 0.807351 | 0.958752 | 0.913717 | 0.976654 |
| MmugDNA.38948.1.S1_at   | MmugDNA.38948.1 | 13.28 | 13.16 | 0.09 | 0.02 | 1.09  | 0.126577 | 0.15013  | 0.407993 | 0.424714 |
| MmugDNA.38948.1.S1_s_at | MmugDNA.38948.1 | 13.39 | 13.31 | 0.08 | 0.01 | 1.06  | 0.130019 | 0.098175 | 0.412127 | 0.356253 |
| MmugDNA.38949.1.S1_at   | MmugDNA.38949.1 | 5.51  | 5.33  | 0.34 | 0.16 | 1.13  | 0.265103 | 0.305158 | 0.557962 | 0.562255 |
| MmugDNA.3895.1.S1_at    | MmugDNA.3895.1  | 8.66  | 8.61  | 0.37 | 0.11 | 1.04  | 0.327776 | 0.338307 | 0.610481 | 0.585417 |
| MmugDNA.38951.1.S1_at   | MmugDNA.38951.1 | 10.6  | 10.65 | 0.1  | 0.36 | -1.04 | 0.501124 | 0.040749 | 0.73526  | 0.246735 |
| MmugDNA.38952.1.S1_at   | MmugDNA.38952.1 | 4.13  | 4.06  | 0.14 | 0.18 | 1.05  | 0.947212 | 0.441517 | 0.977805 | 0.659675 |
| MmugDNA.38954.1.S1_at   | MmugDNA.38954.1 | 4.91  | 4.73  | 0.13 | 0.07 | 1.13  | 0.272774 | 0.340959 | 0.564857 | 0.587051 |
| MmugDNA.38955.1.S1_at   | MmugDNA.38955.1 | 4.09  | 4.03  | 0.11 | 0.06 | 1.04  | 0.158429 | 0.186802 | 0.449548 | 0.46263  |
| MmugDNA.38957.1.S1_at   | MmugDNA.38957.1 | 8.3   | 7.19  | 0.97 | 0.53 | 2.16  | 0.105489 | 0.15422  | 0.37939  | 0.428967 |
| MmugDNA.38958.1.S1_at   | MmugDNA.38958.1 | 5.34  | 5.22  | 0.21 | 0.35 | 1.09  | 0.622584 | 0.803042 | 0.813407 | 0.886557 |
| MmugDNA.3896.1.S1_at    | MmugDNA.3896.1  | 3.75  | 3.54  | 1.02 | 0.64 | 1.16  | 0.80545  | 0.605539 | 0.912706 | 0.765302 |
| MmugDNA.38961.1.S1_at   | MmugDNA.38961.1 | 10.66 | 10.81 | 0.18 | 0.06 | -1.11 | 0.54261  | 0.026242 | 0.762884 | 0.202991 |
| MmugDNA.38964.1.S1_at   | MmugDNA.38964.1 | 7.98  | 7.64  | 0.2  | 0.34 | 1.26  | 0.19347  | 0.329852 | 0.490072 | 0.578874 |
| MmugDNA.38965.1.S1_at   | MmugDNA.38965.1 | 5.18  | 5.18  | 0.73 | 0.51 | 1.01  | 0.979701 | 0.849886 | 0.992265 | 0.914673 |
| MmugDNA.38967.1.S1_at   | MmugDNA.38967.1 | 3.97  | 3.94  | 0.14 | 0.17 | 1.02  | 0.731666 | 0.722446 | 0.874589 | 0.839239 |
| MmugDNA.38969.1.S1_at   | MmugDNA.38969.1 | 5.48  | 5.45  | 0.17 | 0.13 | 1.02  | 0.981114 | 0.898071 | 0.992909 | 0.941957 |
| MmugDNA.3897.1.S1_at    | MmugDNA.3897.1  | 6.03  | 5.02  | 0.39 | 0.18 | 2.01  | 0.051662 | 0.101091 | 0.284589 | 0.360724 |
| MmugDNA.38970.1.S1_at   | MmugDNA.38970.1 | 10.31 | 10.86 | 0.37 | 0.24 | -1.47 | 0.114216 | 0.010913 | 0.391012 | 0.136002 |
| MmugDNA.38970.1.S1_x_at | MmugDNA.38970.1 | 10.26 | 10.76 | 0.37 | 0.24 | -1.41 | 0.103604 | 0.011451 | 0.376791 | 0.13846  |
| MmugDNA.38973.1.S1_at   | MmugDNA.38973.1 | 5.07  | 4.59  | 0.32 | 0.48 | 1.4   | 0.541914 | 0.624574 | 0.762538 | 0.778729 |
| MmugDNA.38974.1.S1_at   | MmugDNA.38974.1 | 5.59  | 4.03  | 0.75 | 0.47 | 2.95  | 0.134775 | 0.161706 | 0.418624 | 0.437771 |
| MmugDNA.38975.1.S1_at   | MmugDNA.38975.1 | 3.05  | 3.05  | 0.1  | 0.15 | 1     | 0.616793 | 0.595564 | 0.809664 | 0.759091 |
| MmugDNA.38976.1.S1_at   | MmugDNA.38976.1 | 5.64  | 5.38  | 0.4  | 0.47 | 1.2   | 0.384703 | 0.2824   | 0.653656 | 0.545076 |
| MmugDNA.38977.1.S1_at   | MmugDNA.38977.1 | 5.45  | 6.67  | 0.27 | 0.48 | -2.33 | 0.068303 | 0.216114 | 0.319145 | 0.489686 |
| MmugDNA.38978.1.S1_at   | MmugDNA.38978.1 | 3.14  | 3.05  | 0.3  | 0.11 | 1.06  | 0.187858 | 0.29083  | 0.484145 | 0.551431 |
| MmugDNA.38979.1.S1_at   | MmugDNA.38979.1 | 11.86 | 11.92 | 0.09 | 0.02 | -1.04 | 0.118071 | 0.597943 | 0.395593 | 0.760521 |
| MmugDNA.3898.1.S1_at    | MmugDNA.3898.1  | 6.03  | 6.36  | 0.9  | 0.23 | -1.25 | 0.792553 | 0.730339 | 0.905995 | 0.843976 |
| MmugDNA.38980.1.S1_at   | MmugDNA.38980.1 | 10.61 | 10.52 | 0.12 | 0.05 | 1.07  | 0.174631 | 0.620123 | 0.468862 | 0.775227 |
| MmugDNA.38982.1.S1_at   | MmugDNA.38982.1 | 10.96 | 10.2  | 0.14 | 0.17 | 1.69  | 0.00236  | 0.116077 | 0.092906 | 0.383336 |
| MmugDNA.38983.1.S1_at   | MmugDNA.38983.1 | 6.44  | 6.53  | 0.32 | 0.29 | -1.07 | 0.674559 | 0.935413 | 0.844617 | 0.963536 |
| MmugDNA.38985.1.S1_at   | MmugDNA.38985.1 | 4.25  | 4.25  | 0.2  | 0.09 | 1     | 0.721789 | 0.709705 | 0.86899  | 0.831749 |
| MmugDNA.38986.1.S1_at   | MmugDNA.38986.1 | 6.41  | 5.84  | 0.34 | 0.13 | 1.48  | 0.038858 | 0.071522 | 0.253396 | 0.313706 |
| MmugDNA.38988.1.S1_at   | MmugDNA.38988.1 | 8.1   | 8.23  | 0.2  | 0.01 | -1.09 | 0.876269 | 0.038406 | 0.94701  | 0.240877 |
| MmugDNA.38988.1.S1_s_at | MmugDNA.38988.1 | 9.1   | 9.16  | 0.27 | 0.1  | -1.04 | 0.566937 | 0.033386 | 0.777544 | 0.226396 |
| MmugDNA.38989.1.S1_at   | MmugDNA.38989.1 | 3.24  | 2.98  | 0.17 | 0.05 | 1.2   | 0.191822 | 0.122434 | 0.488321 | 0.392278 |

|                         |                 |       |       |      |      |       |          |          |          |          |
|-------------------------|-----------------|-------|-------|------|------|-------|----------|----------|----------|----------|
| MmugDNA.38990.1.S1_at   | MmugDNA.38990.1 | 3.33  | 3.2   | 0.19 | 0.07 | 1.09  | 0.099946 | 0.091671 | 0.370858 | 0.346875 |
| MmugDNA.38991.1.S1_at   | MmugDNA.38991.1 | 6.24  | 6.52  | 1.34 | 0.57 | -1.21 | 0.490998 | 0.685236 | 0.728974 | 0.816411 |
| MmugDNA.38992.1.S1_at   | MmugDNA.38992.1 | 3.66  | 3.64  | 0    | 0.02 | 1.02  | 0.214222 | 0.081136 | 0.51193  | 0.32931  |
| MmugDNA.38993.1.S1_at   | MmugDNA.38993.1 | 6.2   | 6.87  | 0.55 | 0.34 | -1.59 | 0.243263 | 0.335277 | 0.539969 | 0.58304  |
| MmugDNA.38994.1.S1_at   | MmugDNA.38994.1 | 4.41  | 4.32  | 0.62 | 0.39 | 1.06  | 0.356092 | 0.596547 | 0.632435 | 0.759659 |
| MmugDNA.38995.1.S1_at   | MmugDNA.38995.1 | 3.39  | 3.39  | 0.19 | 0.04 | 1     | 0.48593  | 0.303598 | 0.725383 | 0.561061 |
| MmugDNA.38996.1.S1_at   | MmugDNA.38996.1 | 3     | 2.99  | 0.02 | 0.12 | 1.01  | 0.365498 | 0.284532 | 0.639969 | 0.546715 |
| MmugDNA.38997.1.S1_at   | MmugDNA.38997.1 | 11.6  | 11.55 | 0.17 | 0.11 | 1.03  | 0.459205 | 0.864262 | 0.707418 | 0.922977 |
| MmugDNA.38998.1.S1_at   | MmugDNA.38998.1 | 10.22 | 8.95  | 0.29 | 0.09 | 2.4   | 0.001476 | 0.00548  | 0.080516 | 0.102081 |
| MmugDNA.38999.1.S1_at   | MmugDNA.38999.1 | 10.65 | 10.93 | 0.13 | 0.14 | -1.21 | 0.077804 | 0.00329  | 0.336917 | 0.082553 |
| MmugDNA.39.1.S1_at      | MmugDNA.39.1    | 6.42  | 6.41  | 0.01 | 0.06 | 1     | 0.452777 | 0.362152 | 0.703182 | 0.602827 |
| MmugDNA.390.1.S1_at     | MmugDNA.390.1   | 5.66  | 5.72  | 0.5  | 0.16 | -1.04 | 0.666627 | 0.049112 | 0.839898 | 0.266522 |
| MmugDNA.3900.1.S1_at    | MmugDNA.3900.1  | 3.89  | 3.7   | 0.14 | 0.1  | 1.14  | 0.129277 | 0.340591 | 0.411613 | 0.586789 |
| MmugDNA.39001.1.S1_at   | MmugDNA.39001.1 | 4.68  | 4.63  | 0.2  | 0.17 | 1.03  | 0.378157 | 0.251759 | 0.648422 | 0.520444 |
| MmugDNA.39002.1.S1_at   | MmugDNA.39002.1 | 2.97  | 2.94  | 0.17 | 0.03 | 1.02  | 0.575981 | 0.170656 | 0.783032 | 0.44724  |
| MmugDNA.39003.1.S1_at   | MmugDNA.39003.1 | 6.18  | 6.2   | 0.06 | 0.07 | -1.01 | 0.420191 | 0.749531 | 0.67933  | 0.854499 |
| MmugDNA.39005.1.S1_at   | MmugDNA.39005.1 | 5.34  | 5.42  | 0.11 | 0.12 | -1.05 | 0.729025 | 0.458924 | 0.873426 | 0.671504 |
| MmugDNA.39006.1.S1_at   | MmugDNA.39006.1 | 5.88  | 5.53  | 0.18 | 0.13 | 1.27  | 0.129675 | 0.06442  | 0.412005 | 0.300001 |
| MmugDNA.39007.1.S1_at   | MmugDNA.39007.1 | 5.25  | 6.01  | 0.91 | 0.1  | -1.69 | 0.072736 | 0.061445 | 0.327657 | 0.294704 |
| MmugDNA.39008.1.S1_at   | MmugDNA.39008.1 | 5.71  | 5.33  | 0.18 | 0.22 | 1.3   | 0.148823 | 0.379917 | 0.437337 | 0.616659 |
| MmugDNA.3901.1.S1_at    | MmugDNA.3901.1  | 8.23  | 7.68  | 0.1  | 0.1  | 1.46  | 0.002615 | 0.064986 | 0.095176 | 0.300855 |
| MmugDNA.39010.1.S1_at   | MmugDNA.39010.1 | 4.21  | 4.13  | 0.35 | 0.1  | 1.06  | 0.276316 | 0.366377 | 0.567926 | 0.606087 |
| MmugDNA.39011.1.S1_at   | MmugDNA.39011.1 | 4.79  | 4.76  | 0.24 | 0.03 | 1.02  | 0.476808 | 0.09578  | 0.719108 | 0.352753 |
| MmugDNA.39013.1.S1_at   | MmugDNA.39013.1 | 4.05  | 4.17  | 0.34 | 0.12 | -1.08 | 0.769591 | 0.92262  | 0.894281 | 0.956416 |
| MmugDNA.39017.1.S1_at   | MmugDNA.39017.1 | 10.79 | 10.92 | 0.13 | 0.18 | -1.1  | 0.616539 | 0.024911 | 0.809516 | 0.19771  |
| MmugDNA.39019.1.S1_at   | MmugDNA.39019.1 | 3.75  | 3.74  | 0.11 | 0.07 | 1.01  | 0.746587 | 0.891005 | 0.882643 | 0.937877 |
| MmugDNA.39020.1.S1_at   | MmugDNA.39020.1 | 5.33  | 5.15  | 0.1  | 0.18 | 1.13  | 0.178871 | 0.200954 | 0.473748 | 0.475426 |
| MmugDNA.39021.1.S1_at   | MmugDNA.39021.1 | 8.96  | 8.12  | 0.14 | 0.28 | 1.79  | 0.014088 | 0.00425  | 0.170085 | 0.091707 |
| MmugDNA.39023.1.S1_at   | MmugDNA.39023.1 | 6.29  | 5.78  | 0.4  | 0.33 | 1.42  | 0.30223  | 0.220129 | 0.590132 | 0.493578 |
| MmugDNA.39024.1.S1_at   | MmugDNA.39024.1 | 4.34  | 4.04  | 0.24 | 0.5  | 1.23  | 0.667574 | 0.861637 | 0.840426 | 0.921365 |
| MmugDNA.39026.1.S1_at   | MmugDNA.39026.1 | 3.98  | 3.39  | 0.34 | 0.04 | 1.5   | 0.103817 | 0.059533 | 0.377089 | 0.290548 |
| MmugDNA.39027.1.S1_at   | MmugDNA.39027.1 | 4.67  | 4.46  | 0.33 | 0.13 | 1.16  | 0.188642 | 0.220059 | 0.485282 | 0.493485 |
| MmugDNA.39028.1.S1_at   | MmugDNA.39028.1 | 3.79  | 3.59  | 0.14 | 0.11 | 1.15  | 0.27212  | 0.369476 | 0.564053 | 0.608861 |
| MmugDNA.39028.1.S1_x_at | MmugDNA.39028.1 | 3.39  | 3.39  | 0.06 | 0.05 | 1     | 0.232521 | 0.23046  | 0.530913 | 0.502232 |
| MmugDNA.3903.1.S1_at    | MmugDNA.3903.1  | 5.91  | 5.82  | 0.09 | 0.09 | 1.06  | 0.59687  | 0.393175 | 0.796143 | 0.626117 |
| MmugDNA.39030.1.S1_at   | MmugDNA.39030.1 | 4.19  | 4.14  | 0.25 | 0.19 | 1.03  | 0.19871  | 0.277967 | 0.495861 | 0.541664 |
| MmugDNA.39032.1.S1_at   | MmugDNA.39032.1 | 3.27  | 3.21  | 0.24 | 0.17 | 1.04  | 0.801948 | 0.592903 | 0.911061 | 0.757939 |
| MmugDNA.39033.1.S1_at   | MmugDNA.39033.1 | 8.52  | 8.43  | 0.35 | 0.33 | 1.06  | 0.898338 | 0.696594 | 0.956759 | 0.823774 |
| MmugDNA.39035.1.S1_at   | MmugDNA.39035.1 | 6.43  | 6.38  | 0.11 | 0.14 | 1.04  | 0.937491 | 0.078091 | 0.973767 | 0.324578 |
| MmugDNA.39037.1.S1_at   | MmugDNA.39037.1 | 8.47  | 8.11  | 0.13 | 0.23 | 1.29  | 0.043168 | 0.132879 | 0.265021 | 0.404544 |
| MmugDNA.39037.1.S1_s_at | MmugDNA.39037.1 | 8.8   | 8.44  | 0.05 | 0.12 | 1.28  | 0.011471 | 0.142822 | 0.15722  | 0.416786 |
| MmugDNA.39038.1.S1_at   | MmugDNA.39038.1 | 4.12  | 4.09  | 0.27 | 0    | 1.02  | 0.786159 | 0.956584 | 0.902386 | 0.975329 |
| MmugDNA.3904.1.S1_at    | MmugDNA.3904.1  | 9.67  | 8.58  | 0.33 | 0.16 | 2.14  | 0.006083 | 0.001526 | 0.124422 | 0.059327 |



|                         |                 |       |       |      |      |       |          |          |          |          |
|-------------------------|-----------------|-------|-------|------|------|-------|----------|----------|----------|----------|
| MmugDNA.39040.1.S1_at   | MmugDNA.39040.1 | 9.58  | 10.06 | 0.13 | 0.12 | -1.39 | 0.013455 | 0.031434 | 0.166741 | 0.219107 |
| MmugDNA.39040.1.S1_x_at | MmugDNA.39040.1 | 9.83  | 10.07 | 0.21 | 0.03 | -1.18 | 0.040805 | 0.062989 | 0.258464 | 0.297633 |
| MmugDNA.39041.1.S1_at   | MmugDNA.39041.1 | 6.01  | 5.81  | 0.04 | 0.07 | 1.15  | 0.015728 | 0.213768 | 0.177811 | 0.487564 |
| MmugDNA.39042.1.S1_at   | MmugDNA.39042.1 | 3.3   | 3.26  | 0.14 | 0.07 | 1.03  | 0.292507 | 0.390626 | 0.581743 | 0.624409 |
| MmugDNA.39043.1.S1_at   | MmugDNA.39043.1 | 5.25  | 5.33  | 0.13 | 0.15 | -1.05 | 0.479809 | 0.178178 | 0.720906 | 0.454531 |
| MmugDNA.39044.1.S1_x_at | MmugDNA.39044.1 | 5.72  | 6.09  | 0.19 | 0.07 | -1.3  | 0.127049 | 0.075557 | 0.408591 | 0.319982 |
| MmugDNA.39045.1.S1_at   | MmugDNA.39045.1 | 6.59  | 6.77  | 0.16 | 0.04 | -1.13 | 0.290492 | 0.233502 | 0.579919 | 0.504835 |
| MmugDNA.39046.1.S1_at   | MmugDNA.39046.1 | 3.59  | 3.45  | 0.1  | 0.04 | 1.1   | 0.084643 | 0.097112 | 0.348521 | 0.35467  |
| MmugDNA.39047.1.S1_at   | MmugDNA.39047.1 | 4.98  | 4.59  | 0.31 | 0.03 | 1.31  | 0.333838 | 0.533677 | 0.615174 | 0.719848 |
| MmugDNA.39048.1.S1_at   | MmugDNA.39048.1 | 11.15 | 10.94 | 0.14 | 0.04 | 1.16  | 0.185695 | 0.376733 | 0.481945 | 0.614539 |
| MmugDNA.3905.1.S1_at    | MmugDNA.3905.1  | 3.25  | 3.32  | 0.07 | 0.1  | -1.05 | 0.577126 | 0.889927 | 0.783459 | 0.937302 |
| MmugDNA.39050.1.S1_at   | MmugDNA.39050.1 | 4.24  | 4.08  | 0.46 | 0.12 | 1.12  | 0.188743 | 0.208314 | 0.485343 | 0.482199 |
| MmugDNA.39051.1.S1_at   | MmugDNA.39051.1 | 3.42  | 3.05  | 0.38 | 0.21 | 1.3   | 0.170899 | 0.206326 | 0.464646 | 0.480524 |
| MmugDNA.39052.1.S1_at   | MmugDNA.39052.1 | 3.8   | 3.34  | 0.1  | 0.14 | 1.38  | 0.025482 | 0.016248 | 0.212784 | 0.161608 |
| MmugDNA.39053.1.S1_at   | MmugDNA.39053.1 | 5.42  | 5.39  | 0    | 0.28 | 1.02  | 0.785063 | 0.613276 | 0.901955 | 0.770491 |
| MmugDNA.39054.1.S1_at   | MmugDNA.39054.1 | 7.21  | 7.73  | 0.44 | 0.13 | -1.43 | 0.181882 | 0.103559 | 0.477403 | 0.364346 |
| MmugDNA.39055.1.S1_at   | MmugDNA.39055.1 | 9.5   | 9.5   | 0.22 | 0.19 | 1     | 0.56444  | 0.508054 | 0.776131 | 0.703358 |
| MmugDNA.39056.1.S1_at   | MmugDNA.39056.1 | 9.41  | 9.2   | 0.4  | 0.08 | 1.15  | 0.927721 | 0.675983 | 0.969412 | 0.810632 |
| MmugDNA.39056.1.S1_s_at | MmugDNA.39056.1 | 10.2  | 9.84  | 0.33 | 0.16 | 1.28  | 0.654442 | 0.707457 | 0.832755 | 0.830361 |
| MmugDNA.39058.1.S1_at   | MmugDNA.39058.1 | 3.71  | 3.48  | 0.18 | 0.07 | 1.17  | 0.056698 | 0.07379  | 0.295663 | 0.317146 |
| MmugDNA.39059.1.S1_at   | MmugDNA.39059.1 | 6.76  | 8.41  | 0.53 | 0.27 | -3.13 | 0.009289 | 0.011687 | 0.146233 | 0.140104 |
| MmugDNA.39060.1.S1_at   | MmugDNA.39060.1 | 9.75  | 10    | 0.21 | 0.2  | -1.19 | 0.229562 | 0.13516  | 0.528448 | 0.407181 |
| MmugDNA.39063.1.S1_at   | MmugDNA.39063.1 | 7.18  | 7.19  | 0.18 | 0.15 | -1.01 | 0.595418 | 0.222021 | 0.795236 | 0.495071 |
| MmugDNA.39064.1.S1_at   | MmugDNA.39064.1 | 5.44  | 5.31  | 0.11 | 0.09 | 1.1   | 0.344751 | 0.244808 | 0.624009 | 0.514644 |
| MmugDNA.39065.1.S1_at   | MmugDNA.39065.1 | 5.83  | 6.03  | 0.12 | 0.1  | -1.15 | 0.427677 | 0.085069 | 0.684918 | 0.336843 |
| MmugDNA.39066.1.S1_at   | MmugDNA.39066.1 | 6.4   | 6.24  | 0.59 | 0.14 | 1.11  | 0.69705  | 0.853091 | 0.855772 | 0.916487 |
| MmugDNA.39067.1.S1_at   | MmugDNA.39067.1 | 4.45  | 4.48  | 0.07 | 0.16 | -1.03 | 0.343961 | 0.579131 | 0.623256 | 0.748917 |
| MmugDNA.39069.1.S1_at   | MmugDNA.39069.1 | 4.33  | 4.48  | 0.33 | 0.27 | -1.11 | 0.423827 | 0.48855  | 0.681747 | 0.691222 |
| MmugDNA.3907.1.S1_at    | MmugDNA.3907.1  | 7.33  | 6.62  | 0.27 | 0.16 | 1.64  | 0.036934 | 0.01108  | 0.247406 | 0.137013 |
| MmugDNA.39071.1.S1_at   | MmugDNA.39071.1 | 7.53  | 7.28  | 0.27 | 0.1  | 1.19  | 0.141714 | 0.137848 | 0.427634 | 0.410832 |
| MmugDNA.39072.1.S1_at   | MmugDNA.39072.1 | 3.7   | 3.85  | 0.12 | 0.2  | -1.1  | 0.312202 | 0.183921 | 0.598235 | 0.460064 |
| MmugDNA.39073.1.S1_at   | MmugDNA.39073.1 | 4.71  | 5     | 0.17 | 0.18 | -1.22 | 0.120011 | 0.083497 | 0.398318 | 0.33402  |
| MmugDNA.39075.1.S1_at   | MmugDNA.39075.1 | 4.21  | 4.23  | 0.18 | 0.15 | -1.01 | 0.983673 | 0.664979 | 0.993901 | 0.803726 |
| MmugDNA.39076.1.S1_at   | MmugDNA.39076.1 | 5.69  | 5.64  | 0.12 | 0.04 | 1.04  | 0.162746 | 0.41076  | 0.454811 | 0.637584 |
| MmugDNA.39077.1.S1_at   | MmugDNA.39077.1 | 7.07  | 7.27  | 0.11 | 0.22 | -1.14 | 0.30271  | 0.096256 | 0.590379 | 0.353644 |
| MmugDNA.39078.1.S1_at   | MmugDNA.39078.1 | 5.19  | 5.25  | 0.04 | 0.03 | -1.05 | 0.021267 | 0.176742 | 0.199615 | 0.453171 |
| MmugDNA.39079.1.S1_at   | MmugDNA.39079.1 | 5.25  | 4.73  | 0.43 | 0.32 | 1.43  | 0.803627 | 0.861868 | 0.911852 | 0.921482 |
| MmugDNA.3908.1.S1_at    | MmugDNA.3908.1  | 3.32  | 3.55  | 0.12 | 0.14 | -1.17 | 0.042679 | 0.02088  | 0.263867 | 0.181338 |
| MmugDNA.39080.1.S1_at   | MmugDNA.39080.1 | 2.81  | 2.79  | 0.16 | 0.16 | 1.01  | 0.397006 | 0.714492 | 0.662823 | 0.834363 |
| MmugDNA.39081.1.S1_at   | MmugDNA.39081.1 | 3.32  | 2.95  | 0.22 | 0.08 | 1.29  | 0.220979 | 0.247086 | 0.518972 | 0.516259 |
| MmugDNA.39082.1.S1_at   | MmugDNA.39082.1 | 6.13  | 6.05  | 0.06 | 0.15 | 1.06  | 0.662064 | 0.133062 | 0.836881 | 0.404726 |
| MmugDNA.39083.1.S1_at   | MmugDNA.39083.1 | 4.57  | 4.12  | 0.02 | 0.32 | 1.37  | 0.027243 | 0.107601 | 0.217978 | 0.370497 |
| MmugDNA.39084.1.S1_at   | MmugDNA.39084.1 | 9     | 8.79  | 0.15 | 0.17 | 1.16  | 0.136966 | 0.292834 | 0.421782 | 0.552832 |

|                         |                 |       |       |      |      |       |          |          |          |          |
|-------------------------|-----------------|-------|-------|------|------|-------|----------|----------|----------|----------|
| MmugDNA.39086.1.S1_at   | MmugDNA.39086.1 | 4.24  | 4.37  | 0.14 | 0.06 | -1.09 | 0.051059 | 0.096102 | 0.283595 | 0.353322 |
| MmugDNA.39087.1.S1_at   | MmugDNA.39087.1 | 9.19  | 8.99  | 0.05 | 0.16 | 1.14  | 0.182929 | 0.885921 | 0.47874  | 0.935113 |
| MmugDNA.39088.1.S1_at   | MmugDNA.39088.1 | 4.41  | 5.47  | 0.43 | 0.15 | -2.09 | 0.035544 | 0.398245 | 0.243391 | 0.629296 |
| MmugDNA.39089.1.S1_at   | MmugDNA.39089.1 | 11.74 | 11.44 | 0.21 | 0.11 | 1.23  | 0.076897 | 0.5686   | 0.335352 | 0.742052 |
| MmugDNA.3909.1.S1_at    | MmugDNA.3909.1  | 9.11  | 9.3   | 0.33 | 0.02 | -1.15 | 0.975023 | 0.495554 | 0.990062 | 0.695538 |
| MmugDNA.14177.1.S1_at   | MmugDNA.14177.1 | 5.58  | 5.52  | 0.11 | 0.11 | 1.04  | 0.868863 | 0.208711 | 0.943567 | 0.482595 |
| MmugDNA.14177.1.S1_s_at | MmugDNA.14177.1 | 3.56  | 3.53  | 0.32 | 0.2  | 1.02  | 0.203561 | 0.170467 | 0.501247 | 0.447103 |
| MmugDNA.39096.1.S1_at   | MmugDNA.39096.1 | 3.22  | 3.09  | 0.43 | 0.08 | 1.09  | 0.262973 | 0.391397 | 0.556723 | 0.625086 |
| MmugDNA.39097.1.S1_at   | MmugDNA.39097.1 | 9.28  | 9.53  | 0.05 | 0.11 | -1.19 | 0.008001 | 0.14003  | 0.138479 | 0.413372 |
| MmugDNA.39098.1.S1_at   | MmugDNA.39098.1 | 4.26  | 3.86  | 0.79 | 0.18 | 1.32  | 0.345039 | 0.394082 | 0.624097 | 0.626734 |
| MmugDNA.39099.1.S1_at   | MmugDNA.39099.1 | 5.79  | 6.2   | 0.92 | 0.41 | -1.33 | 0.6205   | 0.827602 | 0.811995 | 0.901081 |
| MmugDNA.3910.1.S1_at    | MmugDNA.3910.1  | 3.67  | 3.93  | 0.02 | 0.31 | -1.2  | 0.203382 | 0.030502 | 0.501192 | 0.216644 |
| MmugDNA.39101.1.S1_at   | MmugDNA.39101.1 | 7.61  | 7.87  | 0.57 | 0.16 | -1.2  | 0.667114 | 0.103044 | 0.8402   | 0.363891 |
| MmugDNA.39102.1.S1_at   | MmugDNA.39102.1 | 4.42  | 4.4   | 0.07 | 0.1  | 1.02  | 0.55854  | 0.638426 | 0.772919 | 0.787641 |
| MmugDNA.39103.1.S1_at   | MmugDNA.39103.1 | 7.88  | 7.71  | 0.36 | 0.36 | 1.12  | 0.380401 | 0.462567 | 0.650154 | 0.673876 |
| MmugDNA.39104.1.S1_at   | MmugDNA.39104.1 | 3.48  | 3.65  | 0.41 | 0.11 | -1.12 | 0.991326 | 0.480329 | 0.996794 | 0.68574  |
| MmugDNA.39105.1.S1_at   | MmugDNA.39105.1 | 11.74 | 12    | 0.29 | 0.07 | -1.19 | 0.192543 | 0.100567 | 0.489105 | 0.359845 |
| MmugDNA.39106.1.S1_at   | MmugDNA.39106.1 | 7.1   | 6.83  | 0.31 | 0.23 | 1.2   | 0.882917 | 0.035938 | 0.950199 | 0.234032 |
| MmugDNA.39107.1.S1_at   | MmugDNA.39107.1 | 12.86 | 12.78 | 0.21 | 0.17 | 1.05  | 0.558616 | 0.047468 | 0.772947 | 0.262486 |
| MmugDNA.39108.1.S1_at   | MmugDNA.39108.1 | 3.9   | 3.88  | 0.36 | 0.17 | 1.02  | 0.868802 | 0.974622 | 0.943567 | 0.986197 |
| MmugDNA.39109.1.S1_at   | MmugDNA.39109.1 | 6.27  | 6.68  | 0.51 | 0.17 | -1.33 | 0.738423 | 0.842599 | 0.87879  | 0.910315 |
| MmugDNA.3911.1.S1_at    | MmugDNA.3911.1  | 10.11 | 10.21 | 0.27 | 0.03 | -1.08 | 0.387546 | 0.50202  | 0.655656 | 0.700006 |
| MmugDNA.39110.1.S1_at   | MmugDNA.39110.1 | 10.62 | 10.51 | 0.02 | 0.07 | 1.08  | 0.083482 | 0.172838 | 0.345905 | 0.449424 |
| MmugDNA.39111.1.S1_at   | MmugDNA.39111.1 | 7.15  | 7.81  | 0.7  | 0.19 | -1.58 | 0.291273 | 0.4636   | 0.580618 | 0.674537 |
| MmugDNA.39113.1.S1_at   | MmugDNA.39113.1 | 7.02  | 7.57  | 0.11 | 0.16 | -1.46 | 0.008485 | 0.148026 | 0.141304 | 0.422418 |
| MmugDNA.39114.1.S1_at   | MmugDNA.39114.1 | 7.08  | 7.1   | 0.29 | 0.11 | -1.01 | 0.238346 | 0.563161 | 0.53577  | 0.738435 |
| MmugDNA.39115.1.S1_at   | MmugDNA.39115.1 | 6.36  | 6.78  | 0.25 | 0.15 | -1.34 | 0.033067 | 0.14519  | 0.236099 | 0.41919  |
| MmugDNA.39116.1.S1_at   | MmugDNA.39116.1 | 7.21  | 8.14  | 0.33 | 0.19 | -1.9  | 0.007104 | 0.078906 | 0.131735 | 0.325912 |
| MmugDNA.39117.1.S1_at   | MmugDNA.39117.1 | 4.82  | 4.66  | 0.15 | 0.1  | 1.12  | 0.137695 | 0.153986 | 0.422774 | 0.428739 |
| MmugDNA.39118.1.S1_at   | MmugDNA.39118.1 | 5.56  | 5.78  | 0.51 | 0.09 | -1.17 | 0.906149 | 0.401399 | 0.960257 | 0.631018 |
| MmugDNA.39119.1.S1_at   | MmugDNA.39119.1 | 9.58  | 9.53  | 0.18 | 0.11 | 1.03  | 0.745792 | 0.003143 | 0.882129 | 0.081652 |
| MmugDNA.3912.1.S1_at    | MmugDNA.3912.1  | 3.9   | 3.54  | 0.06 | 0.17 | 1.28  | 0.053983 | 0.062614 | 0.289412 | 0.297022 |
| MmugDNA.39120.1.S1_s_at | MmugDNA.39120.1 | 5.67  | 8.48  | 1.62 | 0.34 | -7.01 | 0.046015 | 0.087181 | 0.272164 | 0.340133 |
| MmugDNA.39123.1.S1_at   | MmugDNA.39123.1 | 5.61  | 5.61  | 0.11 | 0.03 | -1    | 0.378621 | 0.485656 | 0.648732 | 0.68924  |
| MmugDNA.20100.1.S1_s_at | MmugDNA.20100.1 | 8.72  | 8.37  | 0.21 | 0.13 | 1.27  | 0.025259 | 0.133421 | 0.211954 | 0.405246 |
| MmugDNA.39125.1.S1_at   | MmugDNA.39125.1 | 8.02  | 7.55  | 0.18 | 0.18 | 1.38  | 0.027047 | 0.313839 | 0.217254 | 0.568091 |
| MmugDNA.39126.1.S1_at   | MmugDNA.39126.1 | 2.9   | 2.95  | 0.02 | 0.11 | -1.03 | 0.150043 | 0.217086 | 0.439035 | 0.490668 |
| MmugDNA.39127.1.S1_at   | MmugDNA.39127.1 | 6.35  | 6.24  | 0.19 | 0.12 | 1.08  | 0.311487 | 0.275825 | 0.597553 | 0.540035 |
| MmugDNA.39128.1.S1_at   | MmugDNA.39128.1 | 12.38 | 12.98 | 0.23 | 0.02 | -1.51 | 0.011967 | 0.031118 | 0.159466 | 0.218175 |
| MmugDNA.39129.1.S1_at   | MmugDNA.39129.1 | 11.53 | 12.02 | 0.22 | 0.03 | -1.41 | 0.045423 | 0.078749 | 0.270752 | 0.325716 |
| MmugDNA.3913.1.S1_at    | MmugDNA.3913.1  | 6.54  | 6.49  | 0.23 | 0.14 | 1.03  | 0.595292 | 0.915316 | 0.795142 | 0.952467 |
| MmugDNA.39130.1.S1_at   | MmugDNA.39130.1 | 3.28  | 3.27  | 0.11 | 0.14 | 1.01  | 0.973953 | 0.338185 | 0.989549 | 0.58536  |
| MmugDNA.39134.1.S1_at   | MmugDNA.39134.1 | 4.42  | 4.54  | 0.27 | 0.17 | -1.08 | 0.916157 | 0.873555 | 0.964383 | 0.928102 |

|                         |                 |       |       |      |      |       |          |          |          |          |
|-------------------------|-----------------|-------|-------|------|------|-------|----------|----------|----------|----------|
| MmugDNA.39135.1.S1_at   | MmugDNA.39135.1 | 5     | 4.47  | 0.24 | 0.17 | 1.44  | 0.028969 | 0.020101 | 0.222981 | 0.178084 |
| MmugDNA.39137.1.S1_at   | MmugDNA.39137.1 | 6.59  | 6.07  | 0.46 | 0.32 | 1.44  | 0.06885  | 0.048122 | 0.32046  | 0.264417 |
| MmugDNA.3914.1.S1_at    | MmugDNA.3914.1  | 10.3  | 9.33  | 0.28 | 0.19 | 1.96  | 0.009248 | 0.042414 | 0.145977 | 0.25061  |
| MmugDNA.39140.1.S1_at   | MmugDNA.39140.1 | 5.63  | 5.3   | 0.3  | 0.04 | 1.25  | 0.496849 | 0.672636 | 0.732662 | 0.808671 |
| MmugDNA.39142.1.S1_at   | MmugDNA.39142.1 | 5.42  | 5.4   | 0.24 | 0.07 | 1.02  | 0.870969 | 0.961125 | 0.944458 | 0.977997 |
| MmugDNA.39143.1.S1_at   | MmugDNA.39143.1 | 5.09  | 4.92  | 0.79 | 0.22 | 1.13  | 0.933827 | 0.991101 | 0.972208 | 0.994997 |
| MmugDNA.39144.1.S1_at   | MmugDNA.39144.1 | 7.11  | 6.52  | 0.52 | 0.11 | 1.5   | 0.121208 | 0.196413 | 0.399891 | 0.471423 |
| MmugDNA.39145.1.S1_at   | MmugDNA.39145.1 | 6.46  | 6.4   | 0.3  | 0.11 | 1.04  | 0.821015 | 0.322229 | 0.920123 | 0.573807 |
| MmugDNA.39146.1.S1_at   | MmugDNA.39146.1 | 9.12  | 9.17  | 0.2  | 0.14 | -1.04 | 0.668763 | 0.009409 | 0.841085 | 0.127841 |
| MmugDNA.39147.1.S1_at   | MmugDNA.39147.1 | 2.81  | 2.9   | 0.04 | 0.25 | -1.06 | 0.738713 | 0.93594  | 0.878914 | 0.963892 |
| MmugDNA.39148.1.S1_at   | MmugDNA.39148.1 | 5.89  | 6.08  | 0.72 | 0.22 | -1.14 | 0.725514 | 0.624631 | 0.871194 | 0.778781 |
| MmugDNA.3915.1.S1_at    | MmugDNA.3915.1  | 5.03  | 5.59  | 0.95 | 0.31 | -1.47 | 0.745536 | 0.924816 | 0.881954 | 0.957467 |
| MmugDNA.39150.1.S1_at   | MmugDNA.39150.1 | 8.08  | 7.99  | 0.26 | 0.04 | 1.07  | 0.80883  | 0.627941 | 0.914357 | 0.780883 |
| MmugDNA.39151.1.S1_at   | MmugDNA.39151.1 | 5.23  | 5.36  | 0.24 | 0.15 | -1.09 | 0.809307 | 0.960055 | 0.91458  | 0.977408 |
| MmugDNA.39153.1.S1_at   | MmugDNA.39153.1 | 7.48  | 7.34  | 0.27 | 0.07 | 1.1   | 0.345102 | 0.74032  | 0.624148 | 0.849596 |
| MmugDNA.39155.1.S1_at   | MmugDNA.39155.1 | 9.96  | 9.88  | 0.15 | 0.13 | 1.05  | 0.583876 | 0.001407 | 0.788399 | 0.057264 |
| MmugDNA.39156.1.S1_at   | MmugDNA.39156.1 | 8.71  | 8.47  | 0.34 | 0.11 | 1.18  | 0.850442 | 0.169438 | 0.935044 | 0.446075 |
| MmugDNA.3916.1.S1_at    | MmugDNA.3916.1  | 6.71  | 6.68  | 0.21 | 0.05 | 1.02  | 0.420557 | 0.543645 | 0.679563 | 0.726239 |
| MmugDNA.39161.1.S1_at   | MmugDNA.39161.1 | 5.66  | 5.65  | 0.33 | 0.04 | 1.01  | 0.304795 | 0.459863 | 0.591803 | 0.671989 |
| MmugDNA.39162.1.S1_at   | MmugDNA.39162.1 | 4.71  | 4.61  | 0.1  | 0.07 | 1.07  | 0.10791  | 0.189187 | 0.382524 | 0.464997 |
| MmugDNA.39164.1.S1_at   | MmugDNA.39164.1 | 6.16  | 6.13  | 0    | 0.21 | 1.02  | 0.70448  | 0.917386 | 0.859723 | 0.953814 |
| MmugDNA.39165.1.S1_s_at | MmugDNA.39165.1 | 7.44  | 7.34  | 0.67 | 0.24 | 1.08  | 0.968731 | 0.275085 | 0.987638 | 0.539485 |
| MmugDNA.3917.1.S1_at    | MmugDNA.3917.1  | 4.05  | 3.74  | 0.29 | 0.37 | 1.24  | 0.400638 | 0.556245 | 0.665527 | 0.734449 |
| MmugDNA.16397.1.S1_s_at | MmugDNA.16397.1 | 9.85  | 10.64 | 0.43 | 0.13 | -1.73 | 0.026954 | 0.328404 | 0.217062 | 0.578066 |
| MmugDNA.39173.1.S1_at   | MmugDNA.39173.1 | 11.11 | 11.59 | 0.11 | 0.05 | -1.4  | 0.003649 | 0.018163 | 0.105789 | 0.169673 |
| MmugDNA.39174.1.S1_at   | MmugDNA.39174.1 | 9.02  | 8.88  | 0.05 | 0.02 | 1.09  | 0.011485 | 0.22496  | 0.15722  | 0.49773  |
| MmugDNA.39174.1.S1_s_at | MmugDNA.39174.1 | 8.08  | 7.96  | 0.18 | 0.02 | 1.08  | 0.325274 | 0.692585 | 0.608663 | 0.821061 |
| MmugDNA.39175.1.S1_at   | MmugDNA.39175.1 | 10.26 | 9.97  | 0.14 | 0.14 | 1.22  | 0.12629  | 0.214208 | 0.407515 | 0.487856 |
| MmugDNA.39176.1.S1_at   | MmugDNA.39176.1 | 6.2   | 6.96  | 0.35 | 0.53 | -1.7  | 0.270066 | 0.287617 | 0.562292 | 0.548885 |
| MmugDNA.39177.1.S1_at   | MmugDNA.39177.1 | 3.62  | 3.71  | 0.85 | 0.08 | -1.07 | 0.41771  | 0.432616 | 0.677723 | 0.653025 |
| MmugDNA.39178.1.S1_at   | MmugDNA.39178.1 | 3.2   | 3.29  | 0.06 | 0.28 | -1.06 | 0.490934 | 0.653649 | 0.728942 | 0.797546 |
| MmugDNA.39179.1.S1_at   | MmugDNA.39179.1 | 3.69  | 3.67  | 0.08 | 0.18 | 1.02  | 0.829975 | 0.676465 | 0.92519  | 0.81095  |
| MmugDNA.39183.1.S1_at   | MmugDNA.39183.1 | 5.62  | 4.56  | 0.78 | 0.73 | 2.08  | 0.166618 | 0.186687 | 0.459798 | 0.462471 |
| MmugDNA.39184.1.S1_at   | MmugDNA.39184.1 | 5.49  | 5.5   | 0.05 | 0.1  | -1.01 | 0.303968 | 0.655649 | 0.591303 | 0.7987   |
| MmugDNA.39185.1.S1_at   | MmugDNA.39185.1 | 8.67  | 8.47  | 0.2  | 0.06 | 1.15  | 0.146098 | 0.554026 | 0.433854 | 0.73293  |
| MmugDNA.39186.1.S1_at   | MmugDNA.39186.1 | 7.39  | 7.53  | 0.4  | 0.26 | -1.1  | 0.462485 | 0.002684 | 0.709682 | 0.076408 |
| MmugDNA.3919.1.S1_at    | MmugDNA.3919.1  | 7.08  | 6.78  | 0.22 | 0.13 | 1.24  | 0.184678 | 0.079614 | 0.480751 | 0.326981 |
| MmugDNA.39190.1.S1_at   | MmugDNA.39190.1 | 3.1   | 3.1   | 0.08 | 0    | 1     | 0.373901 | 0.333415 | 0.645118 | 0.581677 |
| MmugDNA.39191.1.S1_at   | MmugDNA.39191.1 | 6.87  | 7.58  | 0.22 | 0.18 | -1.63 | 0.022688 | 0.403944 | 0.203642 | 0.632538 |
| MmugDNA.39193.1.S1_at   | MmugDNA.39193.1 | 3.87  | 3.75  | 0.17 | 0.12 | 1.09  | 0.342387 | 0.34268  | 0.622192 | 0.588666 |
| MmugDNA.39194.1.S1_at   | MmugDNA.39194.1 | 9.69  | 10.02 | 0.42 | 0.19 | -1.26 | 0.236074 | 0.345246 | 0.5337   | 0.590546 |
| MmugDNA.39195.1.S1_at   | MmugDNA.39195.1 | 4.89  | 4.95  | 0.08 | 0.16 | -1.05 | 0.849251 | 0.058861 | 0.934333 | 0.289381 |
| MmugDNA.39196.1.S1_at   | MmugDNA.39196.1 | 4.63  | 4.38  | 0.09 | 0.11 | 1.19  | 0.040405 | 0.040303 | 0.257326 | 0.245928 |

|                         |                 |       |       |      |      |       |          |          |          |          |
|-------------------------|-----------------|-------|-------|------|------|-------|----------|----------|----------|----------|
| MmugDNA.39197.1.S1_at   | MmugDNA.39197.1 | 10.79 | 10.46 | 0.21 | 0.04 | 1.26  | 0.049233 | 0.108238 | 0.279387 | 0.371557 |
| MmugDNA.39198.1.S1_at   | MmugDNA.39198.1 | 5.02  | 5.27  | 0.23 | 0.18 | -1.19 | 0.466979 | 0.092142 | 0.712587 | 0.34781  |
| MmugDNA.39199.1.S1_at   | MmugDNA.39199.1 | 6.85  | 6.86  | 0.12 | 0.06 | -1.01 | 0.548658 | 0.675605 | 0.766613 | 0.810429 |
| MmugDNA.392.1.S1_at     | MmugDNA.392.1   | 5.2   | 5.38  | 0.25 | 0.32 | -1.14 | 0.354101 | 0.571492 | 0.631266 | 0.743807 |
| MmugDNA.3920.1.S1_at    | MmugDNA.3920.1  | 6.17  | 5.85  | 0.11 | 0.03 | 1.25  | 0.009631 | 0.00826  | 0.14832  | 0.12078  |
| MmugDNA.39200.1.S1_at   | MmugDNA.39200.1 | 12.8  | 13.09 | 0.12 | 0.04 | -1.22 | 0.011651 | 0.000021 | 0.157734 | 0.019635 |
| MmugDNA.39201.1.S1_at   | MmugDNA.39201.1 | 6.29  | 5.44  | 0.47 | 0.15 | 1.8   | 0.11709  | 0.191996 | 0.394266 | 0.467382 |
| MmugDNA.39202.1.S1_at   | MmugDNA.39202.1 | 4.22  | 4.05  | 0.06 | 0.23 | 1.12  | 0.657517 | 0.654661 | 0.834589 | 0.798114 |
| MmugDNA.39204.1.S1_at   | MmugDNA.39204.1 | 6.58  | 6.52  | 0.57 | 0.15 | 1.04  | 0.445784 | 0.017189 | 0.698211 | 0.166089 |
| MmugDNA.39205.1.S1_at   | MmugDNA.39205.1 | 10.54 | 10.62 | 0.09 | 0.3  | -1.05 | 0.358409 | 0.373112 | 0.634198 | 0.61196  |
| MmugDNA.39206.1.S1_at   | MmugDNA.39206.1 | 3.59  | 3.43  | 0.26 | 0.16 | 1.12  | 0.315173 | 0.327153 | 0.600287 | 0.577136 |
| MmugDNA.39207.1.S1_at   | MmugDNA.39207.1 | 4.41  | 4.48  | 0.15 | 0.04 | -1.05 | 0.178094 | 0.300826 | 0.472824 | 0.559046 |
| MmugDNA.39209.1.S1_at   | MmugDNA.39209.1 | 6.99  | 6.99  | 0.25 | 0.32 | -1    | 0.807448 | 0.646277 | 0.913788 | 0.792738 |
| MmugDNA.39210.1.S1_at   | MmugDNA.39210.1 | 11.41 | 11.59 | 0.11 | 0.18 | -1.13 | 0.079676 | 0.0106   | 0.33985  | 0.134272 |
| MmugDNA.39212.1.S1_at   | MmugDNA.39212.1 | 7.25  | 8.21  | 0.53 | 0.08 | -1.95 | 0.043469 | 0.143745 | 0.265658 | 0.417583 |
| MmugDNA.39213.1.S1_at   | MmugDNA.39213.1 | 10.54 | 9.3   | 0.35 | 0.3  | 2.36  | 0.012432 | 0.009734 | 0.161829 | 0.129786 |
| MmugDNA.39214.1.S1_at   | MmugDNA.39214.1 | 3.96  | 4.19  | 0.36 | 0.18 | -1.18 | 0.918645 | 0.938377 | 0.965318 | 0.965059 |
| MmugDNA.39215.1.S1_at   | MmugDNA.39215.1 | 9.4   | 9.13  | 0.24 | 0    | 1.21  | 0.118397 | 0.07543  | 0.395991 | 0.319774 |
| MmugDNA.39218.1.S1_at   | MmugDNA.39218.1 | 8.26  | 9.02  | 0.06 | 0.26 | -1.69 | 0.005482 | 0.000737 | 0.119547 | 0.044855 |
| MmugDNA.39219.1.S1_at   | MmugDNA.39219.1 | 6.53  | 6.67  | 0.18 | 0.09 | -1.11 | 0.724528 | 0.809113 | 0.870643 | 0.889995 |
| MmugDNA.3922.1.S1_at    | MmugDNA.3922.1  | 7.26  | 6.99  | 0.35 | 0.42 | 1.21  | 0.859947 | 0.980283 | 0.939228 | 0.989317 |
| MmugDNA.39220.1.S1_at   | MmugDNA.39220.1 | 11.42 | 10.72 | 0.14 | 0.03 | 1.63  | 0.00101  | 0.005009 | 0.076321 | 0.098626 |
| MmugDNA.39222.1.S1_at   | MmugDNA.39222.1 | 12.18 | 12.16 | 0.21 | 0.02 | 1.01  | 0.897843 | 0.820095 | 0.956621 | 0.896336 |
| MmugDNA.39224.1.S1_at   | MmugDNA.39224.1 | 4.61  | 4.49  | 0.15 | 0.07 | 1.09  | 0.712405 | 0.447554 | 0.864309 | 0.663579 |
| MmugDNA.39225.1.S1_at   | MmugDNA.39225.1 | 3.7   | 3.18  | 0.34 | 0.22 | 1.43  | 0.068373 | 0.059414 | 0.319307 | 0.290548 |
| MmugDNA.39226.1.S1_at   | MmugDNA.39226.1 | 9.51  | 9.74  | 0.05 | 0.26 | -1.17 | 0.104922 | 0.048337 | 0.378561 | 0.265024 |
| MmugDNA.39228.1.S1_at   | MmugDNA.39228.1 | 7.59  | 7.28  | 1.22 | 0.25 | 1.24  | 0.18464  | 0.251735 | 0.480719 | 0.520444 |
| MmugDNA.39229.1.S1_at   | MmugDNA.39229.1 | 11.22 | 11.6  | 0.14 | 0.06 | -1.3  | 0.024967 | 0.035705 | 0.211179 | 0.233368 |
| MmugDNA.3923.1.S1_at    | MmugDNA.3923.1  | 3.6   | 3.76  | 0.1  | 0.04 | -1.12 | 0.102516 | 0.588294 | 0.374714 | 0.754859 |
| MmugDNA.39230.1.S1_at   | MmugDNA.39230.1 | 5.07  | 4.55  | 0.35 | 0.22 | 1.43  | 0.141819 | 0.165279 | 0.427793 | 0.441488 |
| MmugDNA.39231.1.S1_at   | MmugDNA.39231.1 | 9.98  | 9.74  | 0.14 | 0.17 | 1.18  | 0.074352 | 0.62112  | 0.330891 | 0.775813 |
| MmugDNA.39232.1.S1_at   | MmugDNA.39232.1 | 4.34  | 4.35  | 0.11 | 0.09 | -1.01 | 0.767587 | 0.935192 | 0.893341 | 0.963346 |
| MmugDNA.39233.1.S1_at   | MmugDNA.39233.1 | 4.67  | 4.67  | 0.13 | 0.07 | 1     | 0.955588 | 0.954577 | 0.981771 | 0.974203 |
| MmugDNA.39234.1.S1_at   | MmugDNA.39234.1 | 8.16  | 7.36  | 0.44 | 0.11 | 1.74  | 0.117872 | 0.174302 | 0.395361 | 0.450696 |
| MmugDNA.39235.1.S1_at   | MmugDNA.39235.1 | 9.17  | 9.26  | 0.08 | 0.08 | -1.07 | 0.916705 | 0.39275  | 0.964555 | 0.625846 |
| MmugDNA.39236.1.S1_at   | MmugDNA.39236.1 | 7.77  | 7.72  | 0.05 | 0.26 | 1.04  | 0.955981 | 0.988368 | 0.981979 | 0.993461 |
| MmugDNA.39237.1.S1_at   | MmugDNA.39237.1 | 4.87  | 4.64  | 0.66 | 0.1  | 1.17  | 0.448923 | 0.634423 | 0.700275 | 0.784787 |
| MmugDNA.39238.1.S1_at   | MmugDNA.39238.1 | 6.26  | 6.28  | 0.21 | 0.06 | -1.01 | 0.629096 | 0.708892 | 0.817692 | 0.831167 |
| MmugDNA.39239.1.S1_at   | MmugDNA.39239.1 | 8.68  | 8.85  | 0.26 | 0.13 | -1.12 | 0.104931 | 0.63342  | 0.378561 | 0.784154 |
| MmugDNA.3924.1.S1_at    | MmugDNA.3924.1  | 6.8   | 7.44  | 1.16 | 0.58 | -1.56 | 0.920831 | 0.473963 | 0.966204 | 0.681148 |
| MmugDNA.39240.1.S1_at   | MmugDNA.39240.1 | 7.49  | 8.33  | 0.47 | 0.37 | -1.79 | 0.157979 | 0.128159 | 0.448708 | 0.399148 |
| MmugDNA.39242.1.S1_at   | MmugDNA.39242.1 | 9.99  | 9.74  | 0.2  | 0.2  | 1.19  | 0.170973 | 0.255239 | 0.464728 | 0.523284 |
| MmugDNA.39242.1.S1_s_at | MmugDNA.39242.1 | 8.43  | 8.25  | 0.28 | 0.29 | 1.13  | 0.265531 | 0.356412 | 0.558187 | 0.598396 |

|                        |                 |      |       |      |      |        |          |          |          |          |
|------------------------|-----------------|------|-------|------|------|--------|----------|----------|----------|----------|
| MmugDNA.39245.1.S1_at  | MmugDNA.39245.1 | 4.52 | 4.34  | 0.27 | 0.34 | 1.13   | 0.938077 | 0.973929 | 0.973844 | 0.985754 |
| MmugDNA.39246.1.S1_at  | MmugDNA.39246.1 | 3.26 | 3.09  | 0.07 | 0.01 | 1.13   | 0.009212 | 0.179591 | 0.145865 | 0.45603  |
| MmugDNA.39248.1.S1_at  | MmugDNA.39248.1 | 2.9  | 2.84  | 0.12 | 0.13 | 1.04   | 0.6514   | 0.504848 | 0.830699 | 0.701897 |
| MmugDNA.39249.1.S1_at  | MmugDNA.39249.1 | 5.06 | 5.16  | 0.14 | 0.08 | -1.07  | 0.7204   | 0.006768 | 0.868039 | 0.111322 |
| MmugDNA.3925.1.S1_at   | MmugDNA.3925.1  | 4.66 | 4.34  | 0.63 | 0.33 | 1.25   | 0.690636 | 0.803082 | 0.852093 | 0.886577 |
| MmugDNA.39250.1.S1_at  | MmugDNA.39250.1 | 4.29 | 4.31  | 0.08 | 0.1  | -1.01  | 0.412725 | 0.465689 | 0.674256 | 0.675863 |
| MmugDNA.39252.1.S1_at  | MmugDNA.39252.1 | 4.81 | 4.73  | 0.24 | 0.24 | 1.06   | 0.458718 | 0.804253 | 0.707204 | 0.887401 |
| MmugDNA.39254.1.S1_at  | MmugDNA.39254.1 | 3.77 | 4.11  | 0.14 | 0.16 | -1.27  | 0.141712 | 0.185528 | 0.427634 | 0.461566 |
| MmugDNA.39255.1.S1_at  | MmugDNA.39255.1 | 3.24 | 3.24  | 0.02 | 0.07 | 1      | 0.274406 | 0.431841 | 0.566281 | 0.6526   |
| MmugDNA.39256.1.S1_at  | MmugDNA.39256.1 | 7.96 | 7.33  | 0.77 | 0.32 | 1.55   | 0.182898 | 0.239377 | 0.47869  | 0.510039 |
| MmugDNA.39259.1.S1_at  | MmugDNA.39259.1 | 9.43 | 9.79  | 0.45 | 0.34 | -1.28  | 0.370472 | 0.023869 | 0.643441 | 0.193495 |
| MmugDNA.3926.1.S1_at   | MmugDNA.3926.1  | 2.72 | 2.63  | 0.07 | 0.05 | 1.07   | 0.598688 | 0.06598  | 0.797541 | 0.302282 |
| MmugDNA.39260.1.S1_at  | MmugDNA.39260.1 | 9.53 | 8.57  | 0.21 | 0.04 | 1.94   | 0.00271  | 0.285649 | 0.096803 | 0.547395 |
| MmugDNA.39261.1.S1_at  | MmugDNA.39261.1 | 5.75 | 6.35  | 1.31 | 0.05 | -1.52  | 0.898989 | 0.752789 | 0.957024 | 0.855968 |
| MmugDNA.7381.1.S1_at   | MmugDNA.7381.1  | 6.26 | 6.32  | 0.13 | 0.07 | -1.04  | 0.296995 | 0.100888 | 0.585548 | 0.360442 |
| MmugDNA.7381.1.S1_s_at | MmugDNA.7381.1  | 8.2  | 11.62 | 1.34 | 0.07 | -10.69 | 0.02161  | 0.198263 | 0.20067  | 0.473234 |
| MmugDNA.39264.1.S1_at  | MmugDNA.39264.1 | 4.28 | 3.99  | 0.1  | 0.11 | 1.22   | 0.015    | 0.005496 | 0.174543 | 0.102081 |
| MmugDNA.39266.1.S1_at  | MmugDNA.39266.1 | 3.83 | 3.91  | 0.17 | 0.1  | -1.06  | 0.599716 | 0.496164 | 0.798347 | 0.695877 |
| MmugDNA.39267.1.S1_at  | MmugDNA.39267.1 | 9.51 | 9.06  | 0.29 | 0.03 | 1.36   | 0.060653 | 0.000891 | 0.303292 | 0.047789 |
| MmugDNA.39268.1.S1_at  | MmugDNA.39268.1 | 6.29 | 6.68  | 0.69 | 0.12 | -1.31  | 0.982114 | 0.936098 | 0.993403 | 0.96396  |
| MmugDNA.39269.1.S1_at  | MmugDNA.39269.1 | 4.64 | 4.63  | 0.31 | 0.12 | 1.01   | 0.902702 | 0.109041 | 0.958703 | 0.372838 |
| MmugDNA.3927.1.S1_at   | MmugDNA.3927.1  | 6.23 | 4.84  | 1.08 | 0.17 | 2.62   | 0.083785 | 0.054503 | 0.346549 | 0.278959 |
| MmugDNA.39270.1.S1_at  | MmugDNA.39270.1 | 3.78 | 4.03  | 0.31 | 0.14 | -1.19  | 0.31439  | 0.236829 | 0.599959 | 0.507559 |
| MmugDNA.39271.1.S1_at  | MmugDNA.39271.1 | 4.31 | 4.37  | 0.12 | 0.5  | -1.04  | 0.667987 | 0.779431 | 0.840528 | 0.87211  |
| MmugDNA.39272.1.S1_at  | MmugDNA.39272.1 | 3.58 | 3.57  | 0.24 | 0.07 | 1.01   | 0.264986 | 0.288842 | 0.557962 | 0.549981 |
| MmugDNA.39274.1.S1_at  | MmugDNA.39274.1 | 5.05 | 4.99  | 0.2  | 0.01 | 1.04   | 0.632945 | 0.366816 | 0.820074 | 0.606522 |
| MmugDNA.39275.1.S1_at  | MmugDNA.39275.1 | 3.32 | 3.32  | 0.48 | 0.13 | 1      | 0.326334 | 0.356103 | 0.609498 | 0.598107 |
| MmugDNA.39276.1.S1_at  | MmugDNA.39276.1 | 4.78 | 4.78  | 0.18 | 0.15 | -1     | 0.840896 | 0.930301 | 0.930077 | 0.960385 |
| MmugDNA.39277.1.S1_at  | MmugDNA.39277.1 | 6.76 | 6.57  | 0.48 | 0.37 | 1.14   | 0.613514 | 0.68725  | 0.807464 | 0.817523 |
| MmugDNA.39279.1.S1_at  | MmugDNA.39279.1 | 6.75 | 6.85  | 0.25 | 0.23 | -1.07  | 0.926935 | 0.32247  | 0.969098 | 0.573991 |
| MmugDNA.3928.1.S1_at   | MmugDNA.3928.1  | 3.57 | 3.4   | 0.12 | 0.19 | 1.13   | 0.257454 | 0.238069 | 0.551704 | 0.508649 |
| MmugDNA.39280.1.S1_at  | MmugDNA.39280.1 | 5.55 | 5.35  | 0.23 | 0.21 | 1.15   | 0.127723 | 0.316543 | 0.409611 | 0.569938 |
| MmugDNA.39284.1.S1_at  | MmugDNA.39284.1 | 3.78 | 3.93  | 0.46 | 0.26 | -1.11  | 0.676007 | 0.825944 | 0.845314 | 0.900001 |
| MmugDNA.39286.1.S1_at  | MmugDNA.39286.1 | 5.97 | 5.71  | 0.47 | 0.34 | 1.2    | 0.639625 | 0.131225 | 0.823651 | 0.403252 |
| MmugDNA.39287.1.S1_at  | MmugDNA.39287.1 | 7.68 | 7.8   | 0.19 | 0.2  | -1.08  | 0.64818  | 0.000393 | 0.829161 | 0.037471 |
| MmugDNA.39288.1.S1_at  | MmugDNA.39288.1 | 3.73 | 3.84  | 0.11 | 0.04 | -1.08  | 0.418447 | 0.679964 | 0.678418 | 0.813105 |
| MmugDNA.39289.1.S1_at  | MmugDNA.39289.1 | 7.42 | 7.68  | 0.86 | 0.31 | -1.2   | 0.881713 | 0.877699 | 0.94971  | 0.930219 |
| MmugDNA.3929.1.S1_at   | MmugDNA.3929.1  | 7.19 | 7.19  | 0.05 | 0.13 | 1      | 0.582522 | 0.310601 | 0.787305 | 0.565787 |
| MmugDNA.39290.1.S1_at  | MmugDNA.39290.1 | 6.64 | 7.3   | 0.17 | 0.31 | -1.57  | 0.076758 | 0.030768 | 0.335134 | 0.217307 |
| MmugDNA.39292.1.S1_at  | MmugDNA.39292.1 | 5.33 | 5.42  | 0.11 | 0.49 | -1.06  | 0.676089 | 0.07019  | 0.845327 | 0.311186 |
| MmugDNA.39293.1.S1_at  | MmugDNA.39293.1 | 5.78 | 7.25  | 0.84 | 0.2  | -2.77  | 0.045075 | 0.155635 | 0.269621 | 0.430993 |
| MmugDNA.39294.1.S1_at  | MmugDNA.39294.1 | 4.52 | 4.27  | 0.28 | 0.11 | 1.19   | 0.23697  | 0.303824 | 0.534591 | 0.561225 |
| MmugDNA.39295.1.S1_at  | MmugDNA.39295.1 | 7.64 | 8.41  | 0.22 | 0.17 | -1.71  | 0.009231 | 0.005492 | 0.145865 | 0.102081 |

|                         |                 |       |       |      |      |       |          |          |          |          |
|-------------------------|-----------------|-------|-------|------|------|-------|----------|----------|----------|----------|
| MmugDNA.39296.1.S1_at   | MmugDNA.39296.1 | 5.06  | 4.78  | 0.13 | 0.07 | 1.21  | 0.049109 | 0.052383 | 0.279154 | 0.274345 |
| MmugDNA.39299.1.S1_at   | MmugDNA.39299.1 | 5.49  | 4.34  | 0.36 | 0.45 | 2.21  | 0.052328 | 0.036173 | 0.286005 | 0.234778 |
| MmugDNA.393.1.S1_at     | MmugDNA.393.1   | 6.09  | 6.79  | 0.71 | 0.22 | -1.62 | 0.081992 | 0.041599 | 0.343272 | 0.248852 |
| MmugDNA.3930.1.S1_at    | MmugDNA.3930.1  | 6.48  | 6.41  | 0.17 | 0.04 | 1.05  | 0.5529   | 0.340527 | 0.769522 | 0.586776 |
| MmugDNA.39301.1.S1_at   | MmugDNA.39301.1 | 4.81  | 4.46  | 0.25 | 0.15 | 1.27  | 0.274385 | 0.354296 | 0.566281 | 0.597158 |
| MmugDNA.39302.1.S1_at   | MmugDNA.39302.1 | 3.93  | 3.93  | 0.11 | 0.06 | 1.01  | 0.803852 | 0.948223 | 0.911913 | 0.970472 |
| MmugDNA.39303.1.S1_at   | MmugDNA.39303.1 | 7.68  | 7.5   | 0.29 | 0.19 | 1.13  | 0.219921 | 0.500548 | 0.517641 | 0.699114 |
| MmugDNA.39304.1.S1_at   | MmugDNA.39304.1 | 6.24  | 6.31  | 0.21 | 0.07 | -1.05 | 0.927424 | 0.397583 | 0.969284 | 0.628973 |
| MmugDNA.39308.1.S1_at   | MmugDNA.39308.1 | 9.51  | 9.51  | 0.37 | 0.08 | -1    | 0.423632 | 0.066151 | 0.681578 | 0.302699 |
| MmugDNA.3931.1.S1_at    | MmugDNA.3931.1  | 7.08  | 6.99  | 0.23 | 0.06 | 1.06  | 0.840773 | 0.983001 | 0.930069 | 0.990691 |
| MmugDNA.39311.1.S1_at   | MmugDNA.39311.1 | 6.98  | 7.31  | 1.01 | 0.3  | -1.25 | 0.630575 | 0.365603 | 0.818647 | 0.605617 |
| MmugDNA.39313.1.S1_at   | MmugDNA.39313.1 | 6.53  | 6.77  | 0.27 | 0.11 | -1.18 | 0.250414 | 0.349987 | 0.54512  | 0.593743 |
| MmugDNA.39314.1.S1_at   | MmugDNA.39314.1 | 9.94  | 10.26 | 0.55 | 0.07 | -1.25 | 0.947473 | 0.268332 | 0.977941 | 0.534041 |
| MmugDNA.39315.1.S1_at   | MmugDNA.39315.1 | 12.75 | 12.41 | 0.12 | 0.09 | 1.26  | 0.026993 | 0.013153 | 0.217138 | 0.147338 |
| MmugDNA.39318.1.S1_at   | MmugDNA.39318.1 | 6.35  | 6.37  | 0.11 | 0    | -1.02 | 0.254257 | 0.046574 | 0.548737 | 0.260267 |
| MmugDNA.39319.1.S1_at   | MmugDNA.39319.1 | 8.22  | 8.45  | 0.21 | 0.19 | -1.17 | 0.542675 | 0.089991 | 0.762932 | 0.34429  |
| MmugDNA.3932.1.S1_at    | MmugDNA.3932.1  | 5.87  | 5.49  | 0.21 | 0.1  | 1.3   | 0.026637 | 0.018284 | 0.216412 | 0.170051 |
| MmugDNA.39321.1.S1_at   | MmugDNA.39321.1 | 7.58  | 7.97  | 0.5  | 0.2  | -1.31 | 0.770027 | 0.455794 | 0.894469 | 0.669659 |
| MmugDNA.39323.1.S1_at   | MmugDNA.39323.1 | 7.67  | 7.39  | 0.14 | 0.09 | 1.21  | 0.196929 | 0.012023 | 0.494083 | 0.141889 |
| MmugDNA.39324.1.S1_at   | MmugDNA.39324.1 | 8.9   | 8.93  | 0.28 | 0.18 | -1.02 | 0.794307 | 0.000848 | 0.90713  | 0.047089 |
| MmugDNA.39326.1.S1_at   | MmugDNA.39326.1 | 3.61  | 3.68  | 0.08 | 0.08 | -1.05 | 0.259677 | 0.488996 | 0.554019 | 0.691529 |
| MmugDNA.39327.1.S1_at   | MmugDNA.39327.1 | 3.47  | 3.19  | 0.2  | 0.08 | 1.21  | 0.061416 | 0.059914 | 0.304438 | 0.291408 |
| MmugDNA.39329.1.S1_at   | MmugDNA.39329.1 | 3.44  | 3.42  | 0.04 | 0.24 | 1.02  | 0.977304 | 0.841532 | 0.991128 | 0.909663 |
| MmugDNA.39330.1.S1_at   | MmugDNA.39330.1 | 9.86  | 9.2   | 0.25 | 0.09 | 1.58  | 0.011534 | 0.00478  | 0.157227 | 0.096453 |
| MmugDNA.39332.1.S1_at   | MmugDNA.39332.1 | 7.17  | 7.77  | 0.32 | 0.48 | -1.52 | 0.211997 | 0.343401 | 0.50986  | 0.589163 |
| MmugDNA.39333.1.S1_at   | MmugDNA.39333.1 | 6.18  | 6.3   | 0.08 | 0.39 | -1.09 | 0.632564 | 0.471059 | 0.819853 | 0.679172 |
| MmugDNA.39334.1.S1_at   | MmugDNA.39334.1 | 3.18  | 3.22  | 0.01 | 0.13 | -1.03 | 0.380753 | 0.518092 | 0.650323 | 0.710138 |
| MmugDNA.39335.1.S1_at   | MmugDNA.39335.1 | 3.9   | 3.88  | 0    | 0.16 | 1.01  | 0.796942 | 0.482259 | 0.908267 | 0.687144 |
| MmugDNA.39338.1.S1_at   | MmugDNA.39338.1 | 10.1  | 9.44  | 0.45 | 0.23 | 1.57  | 0.100042 | 0.229131 | 0.37088  | 0.501438 |
| MmugDNA.39339.1.S1_at   | MmugDNA.39339.1 | 5.42  | 5.48  | 0.07 | 0.08 | -1.04 | 0.174207 | 0.212821 | 0.468371 | 0.486772 |
| MmugDNA.3934.1.S1_at    | MmugDNA.3934.1  | 9.78  | 9.75  | 0.16 | 0.04 | 1.02  | 0.939068 | 0.686542 | 0.974306 | 0.817066 |
| MmugDNA.39340.1.S1_at   | MmugDNA.39340.1 | 6.3   | 6.23  | 1.32 | 0.6  | 1.05  | 0.76892  | 0.633701 | 0.893877 | 0.784372 |
| MmugDNA.39341.1.S1_at   | MmugDNA.39341.1 | 4.24  | 4.26  | 0.03 | 0.14 | -1.01 | 0.389868 | 0.696093 | 0.657536 | 0.823446 |
| MmugDNA.39342.1.S1_s_at | MmugDNA.39342.1 | 11.33 | 12.35 | 0.38 | 0.13 | -2.03 | 0.034697 | 0.033002 | 0.240907 | 0.224908 |
| MmugDNA.39343.1.S1_at   | MmugDNA.39343.1 | 4.5   | 5.6   | 0.65 | 0.2  | -2.14 | 0.080994 | 0.072945 | 0.341848 | 0.315986 |
| MmugDNA.39344.1.S1_at   | MmugDNA.39344.1 | 10.96 | 11.35 | 0.29 | 0.2  | -1.31 | 0.122058 | 0.007998 | 0.400783 | 0.118865 |
| MmugDNA.39346.1.S1_at   | MmugDNA.39346.1 | 7.14  | 7.09  | 0.16 | 0.05 | 1.04  | 0.593045 | 0.241218 | 0.793805 | 0.511821 |
| MmugDNA.39347.1.S1_at   | MmugDNA.39347.1 | 6.71  | 6.55  | 0    | 0.4  | 1.11  | 0.768408 | 0.713811 | 0.893594 | 0.833937 |
| MmugDNA.39348.1.S1_at   | MmugDNA.39348.1 | 6.94  | 6.85  | 0.21 | 0.03 | 1.06  | 0.949036 | 0.337847 | 0.97875  | 0.585027 |
| MmugDNA.39349.1.S1_at   | MmugDNA.39349.1 | 9.35  | 9.63  | 0.29 | 0.11 | -1.22 | 0.079528 | 0.195114 | 0.339662 | 0.470241 |
| MmugDNA.3935.1.S1_at    | MmugDNA.3935.1  | 5.8   | 5.37  | 0.22 | 0.33 | 1.35  | 0.344577 | 0.595706 | 0.623903 | 0.759191 |
| MmugDNA.39350.1.S1_at   | MmugDNA.39350.1 | 4.29  | 4.25  | 0.17 | 0.19 | 1.03  | 0.964653 | 0.98836  | 0.985723 | 0.993461 |
| MmugDNA.39351.1.S1_at   | MmugDNA.39351.1 | 3.5   | 3.47  | 0.2  | 0.22 | 1.02  | 0.678449 | 0.56867  | 0.846605 | 0.742052 |

|                         |                 |       |       |      |      |       |          |          |          |          |
|-------------------------|-----------------|-------|-------|------|------|-------|----------|----------|----------|----------|
| MmugDNA.39353.1.S1_at   | MmugDNA.39353.1 | 11.02 | 10.96 | 0.08 | 0.11 | 1.04  | 0.521252 | 0.790906 | 0.749292 | 0.879071 |
| MmugDNA.39355.1.S1_at   | MmugDNA.39355.1 | 5.01  | 4.86  | 0.12 | 0.07 | 1.11  | 0.211474 | 0.342863 | 0.509249 | 0.588712 |
| MmugDNA.39357.1.S1_at   | MmugDNA.39357.1 | 6.48  | 6.39  | 0.16 | 0.3  | 1.07  | 0.749371 | 0.103666 | 0.883959 | 0.364465 |
| MmugDNA.39358.1.S1_at   | MmugDNA.39358.1 | 5.42  | 5.48  | 0.17 | 0.03 | -1.04 | 0.949818 | 0.467779 | 0.979097 | 0.677307 |
| MmugDNA.39359.1.S1_at   | MmugDNA.39359.1 | 6.56  | 6.5   | 0.14 | 0.21 | 1.04  | 0.680897 | 0.746547 | 0.847795 | 0.852872 |
| MmugDNA.39360.1.S1_at   | MmugDNA.39360.1 | 3.7   | 3.86  | 0.11 | 0.13 | -1.12 | 0.091795 | 0.081504 | 0.359594 | 0.329764 |
| MmugDNA.39361.1.S1_at   | MmugDNA.39361.1 | 6.65  | 6.61  | 0.22 | 0.43 | 1.03  | 0.712066 | 0.7631   | 0.864188 | 0.862257 |
| MmugDNA.39362.1.S1_at   | MmugDNA.39362.1 | 3.76  | 3.78  | 0.23 | 0.12 | -1.01 | 0.489637 | 0.585451 | 0.727859 | 0.752852 |
| MmugDNA.39363.1.S1_at   | MmugDNA.39363.1 | 11.26 | 11.51 | 0.11 | 0.09 | -1.19 | 0.041159 | 0.013318 | 0.259372 | 0.148042 |
| MmugDNA.39364.1.S1_at   | MmugDNA.39364.1 | 5.83  | 5.82  | 0.02 | 0.14 | 1.01  | 0.362128 | 0.530078 | 0.637183 | 0.717729 |
| MmugDNA.39365.1.S1_at   | MmugDNA.39365.1 | 5.92  | 6     | 0.15 | 0.02 | -1.06 | 0.191609 | 0.459738 | 0.488    | 0.671948 |
| MmugDNA.39368.1.S1_at   | MmugDNA.39368.1 | 6.91  | 6.43  | 0.93 | 0.31 | 1.4   | 0.469994 | 0.504983 | 0.714636 | 0.70197  |
| MmugDNA.3937.1.S1_at    | MmugDNA.3937.1  | 5.95  | 6.44  | 0.83 | 0.25 | -1.4  | 0.522963 | 0.731418 | 0.750166 | 0.84431  |
| MmugDNA.39370.1.S1_at   | MmugDNA.39370.1 | 5.26  | 4.8   | 0.14 | 0.27 | 1.38  | 0.091994 | 0.002482 | 0.360023 | 0.073652 |
| MmugDNA.39372.1.S1_at   | MmugDNA.39372.1 | 9.12  | 9.05  | 0.17 | 0.11 | 1.05  | 0.675524 | 0.306738 | 0.845076 | 0.5633   |
| MmugDNA.39373.1.S1_at   | MmugDNA.39373.1 | 12.96 | 12.24 | 0.15 | 0.07 | 1.64  | 0.001819 | 0.055364 | 0.08633  | 0.281125 |
| MmugDNA.39374.1.S1_at   | MmugDNA.39374.1 | 5.69  | 5.78  | 0.06 | 0.01 | -1.06 | 0.04078  | 0.419614 | 0.258464 | 0.643568 |
| MmugDNA.39376.1.S1_at   | MmugDNA.39376.1 | 12.68 | 12.42 | 0.14 | 0.15 | 1.2   | 0.094787 | 0.194624 | 0.36369  | 0.469744 |
| MmugDNA.10262.1.S1_at   | MmugDNA.10262.1 | 6.87  | 6.93  | 0.14 | 0.14 | -1.04 | 0.884649 | 0.161821 | 0.950934 | 0.437937 |
| MmugDNA.10262.1.S1_s_at | MmugDNA.10262.1 | 4.82  | 5.17  | 0.16 | 0.09 | -1.28 | 0.031102 | 0.039271 | 0.229371 | 0.243338 |
| MmugDNA.39380.1.S1_at   | MmugDNA.39380.1 | 3.77  | 3.8   | 0.21 | 0.03 | -1.02 | 0.451765 | 0.452732 | 0.702502 | 0.66729  |
| MmugDNA.39381.1.S1_at   | MmugDNA.39381.1 | 9.98  | 9.95  | 0.3  | 0.09 | 1.02  | 0.291121 | 0.737301 | 0.58049  | 0.847869 |
| MmugDNA.39383.1.S1_at   | MmugDNA.39383.1 | 6.85  | 6.81  | 0.19 | 0.11 | 1.02  | 0.539082 | 0.655882 | 0.76053  | 0.798739 |
| MmugDNA.39384.1.S1_at   | MmugDNA.39384.1 | 6.69  | 6.59  | 0.19 | 0.16 | 1.07  | 0.165528 | 0.336182 | 0.458533 | 0.583712 |
| MmugDNA.39385.1.S1_at   | MmugDNA.39385.1 | 4.34  | 4.3   | 0.27 | 0.15 | 1.03  | 0.31538  | 0.498692 | 0.600334 | 0.697702 |
| MmugDNA.39386.1.S1_at   | MmugDNA.39386.1 | 6.62  | 6.76  | 0.18 | 0.04 | -1.1  | 0.786778 | 0.308056 | 0.902743 | 0.56421  |
| MmugDNA.39387.1.S1_at   | MmugDNA.39387.1 | 6.65  | 6.73  | 0.63 | 0.12 | -1.06 | 0.994874 | 0.118567 | 0.997957 | 0.38654  |
| MmugDNA.39387.1.S1_x_at | MmugDNA.39387.1 | 6.39  | 6.45  | 0.4  | 0.04 | -1.05 | 0.800598 | 0.202868 | 0.910296 | 0.477312 |
| MmugDNA.39388.1.S1_at   | MmugDNA.39388.1 | 3.9   | 3.87  | 0.02 | 0.09 | 1.02  | 0.755981 | 0.728536 | 0.88758  | 0.843072 |
| MmugDNA.39389.1.S1_at   | MmugDNA.39389.1 | 5.71  | 5.13  | 0.92 | 0.02 | 1.49  | 0.107149 | 0.155743 | 0.381659 | 0.431111 |
| MmugDNA.3939.1.S1_at    | MmugDNA.3939.1  | 6.84  | 7.03  | 0.14 | 0.07 | -1.14 | 0.385754 | 0.042098 | 0.654416 | 0.249638 |
| MmugDNA.39390.1.S1_at   | MmugDNA.39390.1 | 5.3   | 5.33  | 0.11 | 0.06 | -1.02 | 0.601147 | 0.189782 | 0.799362 | 0.465403 |
| MmugDNA.39391.1.S1_at   | MmugDNA.39391.1 | 4.89  | 4.76  | 0.16 | 0.25 | 1.09  | 0.938812 | 0.176715 | 0.974191 | 0.453168 |
| MmugDNA.39393.1.S1_at   | MmugDNA.39393.1 | 8.62  | 8.07  | 0.1  | 0.24 | 1.46  | 0.056089 | 0.007413 | 0.293931 | 0.115758 |
| MmugDNA.39394.1.S1_at   | MmugDNA.39394.1 | 4.16  | 4.07  | 0.23 | 0.07 | 1.07  | 0.926981 | 0.334525 | 0.969126 | 0.582498 |
| MmugDNA.39395.1.S1_s_at | MmugDNA.39395.1 | 11.98 | 12.16 | 0.09 | 0.03 | -1.13 | 0.097142 | 0.110054 | 0.367275 | 0.374179 |
| MmugDNA.39398.1.S1_at   | MmugDNA.39398.1 | 11.37 | 12.4  | 0.48 | 0.11 | -2.04 | 0.016987 | 0.009583 | 0.183793 | 0.129001 |
| MmugDNA.39399.1.S1_at   | MmugDNA.39399.1 | 6.13  | 6.07  | 0.18 | 0.03 | 1.04  | 0.208473 | 0.293273 | 0.506143 | 0.553216 |
| MmugDNA.394.1.S1_at     | MmugDNA.394.1   | 9.85  | 10.68 | 0.09 | 0.22 | -1.77 | 0.007222 | 0.004162 | 0.132536 | 0.091036 |
| MmugDNA.3940.1.S1_at    | MmugDNA.3940.1  | 6.26  | 6.23  | 0.2  | 0.11 | 1.02  | 0.555825 | 0.650584 | 0.771458 | 0.795663 |
| MmugDNA.39400.1.S1_at   | MmugDNA.39400.1 | 5.53  | 5.74  | 0.62 | 0.25 | -1.16 | 0.763125 | 0.545205 | 0.891497 | 0.727441 |
| MmugDNA.39402.1.S1_at   | MmugDNA.39402.1 | 11.59 | 11.48 | 0.1  | 0.13 | 1.08  | 0.130517 | 0.124218 | 0.412931 | 0.394521 |
| MmugDNA.39406.1.S1_at   | MmugDNA.39406.1 | 4.88  | 4.87  | 0.11 | 0.13 | 1.01  | 0.298717 | 0.387809 | 0.586964 | 0.622484 |

|                         |                 |       |       |      |      |       |          |          |          |          |
|-------------------------|-----------------|-------|-------|------|------|-------|----------|----------|----------|----------|
| MmugDNA.39407.1.S1_at   | MmugDNA.39407.1 | 3.66  | 3.69  | 0.12 | 0.09 | -1.03 | 0.682054 | 0.323218 | 0.848343 | 0.574408 |
| MmugDNA.39408.1.S1_at   | MmugDNA.39408.1 | 3.3   | 3.2   | 0.63 | 0.06 | 1.07  | 0.324979 | 0.430022 | 0.608444 | 0.65111  |
| MmugDNA.39409.1.S1_at   | MmugDNA.39409.1 | 3.89  | 4.06  | 0.14 | 0.15 | -1.12 | 0.222941 | 0.330865 | 0.520904 | 0.57958  |
| MmugDNA.3941.1.S1_at    | MmugDNA.3941.1  | 2.82  | 2.94  | 0.18 | 0.06 | -1.09 | 0.245843 | 0.290736 | 0.541732 | 0.551382 |
| MmugDNA.39410.1.S1_at   | MmugDNA.39410.1 | 4.05  | 4.03  | 0.03 | 0.07 | 1.02  | 0.21984  | 0.070784 | 0.51762  | 0.312275 |
| MmugDNA.39411.1.S1_at   | MmugDNA.39411.1 | 4.53  | 4.79  | 0.22 | 0.09 | -1.2  | 0.50674  | 0.176919 | 0.739271 | 0.453317 |
| MmugDNA.39413.1.S1_at   | MmugDNA.39413.1 | 7.1   | 7.13  | 0.28 | 0.13 | -1.02 | 0.980645 | 0.24987  | 0.992776 | 0.518876 |
| MmugDNA.39417.1.S1_at   | MmugDNA.39417.1 | 5.12  | 5.05  | 0.19 | 0.08 | 1.05  | 0.793322 | 0.163808 | 0.906582 | 0.440049 |
| MmugDNA.39418.1.S1_at   | MmugDNA.39418.1 | 5.81  | 5.78  | 0.03 | 0.14 | 1.02  | 0.264445 | 0.208943 | 0.5577   | 0.482751 |
| MmugDNA.3942.1.S1_at    | MmugDNA.3942.1  | 6.47  | 6.12  | 0.41 | 0.18 | 1.28  | 0.269275 | 0.379388 | 0.561615 | 0.61636  |
| MmugDNA.39420.1.S1_at   | MmugDNA.39420.1 | 3.72  | 3.7   | 0.07 | 0.11 | 1.01  | 0.680868 | 0.720845 | 0.847795 | 0.838368 |
| MmugDNA.39421.1.S1_at   | MmugDNA.39421.1 | 3.54  | 3.57  | 0.08 | 0.06 | -1.02 | 0.720747 | 0.931869 | 0.86825  | 0.96129  |
| MmugDNA.39423.1.S1_at   | MmugDNA.39423.1 | 5.67  | 5.63  | 0.18 | 0.09 | 1.03  | 0.452782 | 0.484081 | 0.703182 | 0.688318 |
| MmugDNA.39426.1.S1_at   | MmugDNA.39426.1 | 7.09  | 7.32  | 0.24 | 0.13 | -1.17 | 0.206101 | 0.170217 | 0.503843 | 0.44691  |
| MmugDNA.39428.1.S1_at   | MmugDNA.39428.1 | 6.79  | 5.94  | 1    | 0.61 | 1.81  | 0.22014  | 0.28999  | 0.517758 | 0.550995 |
| MmugDNA.39429.1.S1_at   | MmugDNA.39429.1 | 5.66  | 5.48  | 0.41 | 0.22 | 1.13  | 0.341068 | 0.540562 | 0.620991 | 0.724459 |
| MmugDNA.3943.1.S1_at    | MmugDNA.3943.1  | 6.82  | 6.88  | 0.22 | 0.04 | -1.04 | 0.64646  | 0.836212 | 0.828166 | 0.906332 |
| MmugDNA.39431.1.S1_at   | MmugDNA.39431.1 | 2.96  | 3.01  | 0.25 | 0.08 | -1.03 | 0.80483  | 0.948025 | 0.91238  | 0.970439 |
| MmugDNA.39432.1.S1_at   | MmugDNA.39432.1 | 5.59  | 5.59  | 0.51 | 0.21 | -1    | 0.269198 | 0.552931 | 0.561608 | 0.732201 |
| MmugDNA.39433.1.S1_at   | MmugDNA.39433.1 | 3.08  | 2.98  | 0.06 | 0.08 | 1.07  | 0.365895 | 0.124551 | 0.640394 | 0.394987 |
| MmugDNA.39434.1.S1_at   | MmugDNA.39434.1 | 7.02  | 7.03  | 0.38 | 0.18 | -1.01 | 0.69693  | 0.304746 | 0.855721 | 0.561921 |
| MmugDNA.39435.1.S1_at   | MmugDNA.39435.1 | 4.44  | 4.5   | 0.12 | 0.14 | -1.04 | 0.497202 | 0.516053 | 0.732907 | 0.708694 |
| MmugDNA.39436.1.S1_at   | MmugDNA.39436.1 | 6.85  | 6.65  | 0.08 | 0.29 | 1.14  | 0.866841 | 0.166445 | 0.942479 | 0.4429   |
| MmugDNA.39437.1.S1_at   | MmugDNA.39437.1 | 10.47 | 9.94  | 0.11 | 0.1  | 1.44  | 0.003917 | 0.000992 | 0.108352 | 0.050398 |
| MmugDNA.39437.1.S1_s_at | MmugDNA.39437.1 | 11.07 | 10.68 | 0.14 | 0.08 | 1.31  | 0.015644 | 0.00606  | 0.177553 | 0.106152 |
| MmugDNA.39438.1.S1_at   | MmugDNA.39438.1 | 5.67  | 5.65  | 0.02 | 0.15 | 1.02  | 0.308476 | 0.393244 | 0.595066 | 0.626174 |
| MmugDNA.39438.1.S1_x_at | MmugDNA.39438.1 | 4.05  | 4.06  | 0.05 | 0.06 | -1.01 | 0.784703 | 0.938462 | 0.901788 | 0.965059 |
| MmugDNA.39439.1.S1_at   | MmugDNA.39439.1 | 8.52  | 8     | 0.2  | 0.31 | 1.44  | 0.178182 | 0.005598 | 0.472847 | 0.10339  |
| MmugDNA.39441.1.S1_at   | MmugDNA.39441.1 | 6.82  | 6.62  | 0.1  | 0.15 | 1.14  | 0.45729  | 0.150093 | 0.706262 | 0.424698 |
| MmugDNA.39441.1.S1_s_at | MmugDNA.39441.1 | 5.62  | 5.6   | 0.09 | 0.18 | 1.01  | 0.930428 | 0.595069 | 0.970762 | 0.758928 |
| MmugDNA.39442.1.S1_at   | MmugDNA.39442.1 | 4.45  | 4.19  | 0.1  | 0.12 | 1.2   | 0.05734  | 0.042647 | 0.296814 | 0.251037 |
| MmugDNA.39444.1.S1_at   | MmugDNA.39444.1 | 3.45  | 3.51  | 0.05 | 0.09 | -1.04 | 0.423119 | 0.595421 | 0.681168 | 0.759091 |
| MmugDNA.39445.1.S1_at   | MmugDNA.39445.1 | 4.21  | 4.24  | 0.12 | 0.16 | -1.03 | 0.343908 | 0.631709 | 0.623214 | 0.782953 |
| MmugDNA.39447.1.S1_at   | MmugDNA.39447.1 | 8.4   | 8.43  | 0.07 | 0.13 | -1.02 | 0.748906 | 0.910371 | 0.883751 | 0.949414 |
| MmugDNA.39448.1.S1_at   | MmugDNA.39448.1 | 6.55  | 6.44  | 0.42 | 0.19 | 1.08  | 0.428599 | 0.705039 | 0.685425 | 0.828945 |
| MmugDNA.39449.1.S1_at   | MmugDNA.39449.1 | 8.55  | 7.91  | 0.2  | 0.06 | 1.57  | 0.011554 | 0.353483 | 0.157336 | 0.596547 |
| MmugDNA.3945.1.S1_at    | MmugDNA.3945.1  | 8.41  | 8.35  | 0.54 | 0.09 | 1.04  | 0.750097 | 0.721482 | 0.88442  | 0.838713 |
| MmugDNA.39451.1.S1_at   | MmugDNA.39451.1 | 5.1   | 5.2   | 0.06 | 0.1  | -1.07 | 0.61074  | 0.311683 | 0.805939 | 0.566653 |
| MmugDNA.39452.1.S1_at   | MmugDNA.39452.1 | 5.89  | 5.89  | 0    | 0.1  | 1     | 0.386773 | 0.254115 | 0.655097 | 0.522439 |
| MmugDNA.39453.1.S1_s_at | MmugDNA.39453.1 | 13.8  | 13.65 | 0.07 | 0.02 | 1.11  | 0.009339 | 0.012866 | 0.146531 | 0.146025 |
| MmugDNA.39454.1.S1_at   | MmugDNA.39454.1 | 3.86  | 3.95  | 0.34 | 0.13 | -1.06 | 0.687231 | 0.552774 | 0.850791 | 0.732052 |
| MmugDNA.39456.1.S1_at   | MmugDNA.39456.1 | 3.73  | 3.62  | 0.08 | 0.06 | 1.08  | 0.100068 | 0.456957 | 0.37088  | 0.670592 |
| MmugDNA.39458.1.S1_at   | MmugDNA.39458.1 | 9.33  | 8.63  | 0.22 | 0.04 | 1.62  | 0.009564 | 0.079513 | 0.147964 | 0.32681  |



|                         |                 |       |       |      |      |       |          |          |          |          |
|-------------------------|-----------------|-------|-------|------|------|-------|----------|----------|----------|----------|
| MmugDNA.39459.1.S1_at   | MmugDNA.39459.1 | 10.78 | 11.05 | 0.09 | 0.2  | -1.21 | 0.166388 | 0.177712 | 0.45963  | 0.454073 |
| MmugDNA.3946.1.S1_at    | MmugDNA.3946.1  | 4.9   | 4.93  | 0.24 | 0.17 | -1.02 | 0.192091 | 0.200975 | 0.488697 | 0.475434 |
| MmugDNA.39461.1.S1_at   | MmugDNA.39461.1 | 6.86  | 6.49  | 0.16 | 0.02 | 1.3   | 0.017707 | 0.03662  | 0.186733 | 0.235943 |
| MmugDNA.39462.1.S1_at   | MmugDNA.39462.1 | 6.06  | 5.9   | 0.21 | 0.14 | 1.12  | 0.129939 | 0.156164 | 0.412108 | 0.43161  |
| MmugDNA.39463.1.S1_at   | MmugDNA.39463.1 | 7.07  | 6.9   | 0.05 | 0.05 | 1.12  | 0.01345  | 0.052567 | 0.166741 | 0.274848 |
| MmugDNA.39464.1.S1_at   | MmugDNA.39464.1 | 3.4   | 3.49  | 0.07 | 0.19 | -1.07 | 0.161211 | 0.444551 | 0.452749 | 0.662072 |
| MmugDNA.39466.1.S1_at   | MmugDNA.39466.1 | 3.05  | 2.77  | 0.13 | 0.08 | 1.22  | 0.062353 | 0.148904 | 0.306441 | 0.423284 |
| MmugDNA.39467.1.S1_at   | MmugDNA.39467.1 | 10.1  | 10.38 | 0.07 | 0.29 | -1.21 | 0.050153 | 0.221699 | 0.281727 | 0.494901 |
| MmugDNA.39468.1.S1_at   | MmugDNA.39468.1 | 10.72 | 10.79 | 0.13 | 0.12 | -1.05 | 0.447474 | 0.484236 | 0.69948  | 0.688408 |
| MmugDNA.39469.1.S1_at   | MmugDNA.39469.1 | 9.09  | 8.77  | 0.27 | 0.08 | 1.25  | 0.096067 | 0.44466  | 0.365529 | 0.662072 |
| MmugDNA.3947.1.S1_at    | MmugDNA.3947.1  | 4.44  | 4.28  | 0.1  | 0.04 | 1.12  | 0.045804 | 0.107195 | 0.271515 | 0.36989  |
| MmugDNA.39470.1.S1_at   | MmugDNA.39470.1 | 5.42  | 5.7   | 0.31 | 0.13 | -1.21 | 0.90218  | 0.654585 | 0.958582 | 0.798087 |
| MmugDNA.39471.1.S1_s_at | MmugDNA.39471.1 | 12.33 | 12.75 | 0.1  | 0.04 | -1.33 | 0.003197 | 0.02659  | 0.101477 | 0.204008 |
| MmugDNA.39472.1.S1_at   | MmugDNA.39472.1 | 11.72 | 11.53 | 0.53 | 0.3  | 1.14  | 0.327113 | 0.809532 | 0.609783 | 0.890191 |
| MmugDNA.39473.1.S1_at   | MmugDNA.39473.1 | 4.78  | 4.57  | 0.42 | 0.06 | 1.15  | 0.153849 | 0.068768 | 0.444014 | 0.308711 |
| MmugDNA.39474.1.S1_at   | MmugDNA.39474.1 | 11.18 | 11.01 | 0.19 | 0.08 | 1.12  | 0.087725 | 0.125549 | 0.353844 | 0.396226 |
| MmugDNA.39475.1.S1_at   | MmugDNA.39475.1 | 5.85  | 5.52  | 0.13 | 0.1  | 1.26  | 0.058978 | 0.391674 | 0.300005 | 0.62529  |
| MmugDNA.39478.1.S1_at   | MmugDNA.39478.1 | 2.93  | 2.84  | 0.21 | 0.09 | 1.06  | 0.259336 | 0.526995 | 0.553684 | 0.715759 |
| MmugDNA.39479.1.S1_at   | MmugDNA.39479.1 | 11.3  | 11.69 | 0.2  | 0.08 | -1.31 | 0.12597  | 0.097348 | 0.406905 | 0.355066 |
| MmugDNA.3948.1.S1_at    | MmugDNA.3948.1  | 7.32  | 7.09  | 0.93 | 0.35 | 1.17  | 0.63128  | 0.147701 | 0.8189   | 0.422007 |
| MmugDNA.39480.1.S1_at   | MmugDNA.39480.1 | 6.02  | 6.09  | 0.19 | 0.14 | -1.05 | 0.418673 | 0.554793 | 0.678527 | 0.733501 |
| MmugDNA.39481.1.S1_at   | MmugDNA.39481.1 | 11.55 | 11.79 | 0.18 | 0.1  | -1.19 | 0.301829 | 0.20383  | 0.589812 | 0.478081 |
| MmugDNA.39482.1.S1_at   | MmugDNA.39482.1 | 4.07  | 4.07  | 0.25 | 0.09 | -1    | 0.481728 | 0.312627 | 0.722169 | 0.567268 |
| MmugDNA.39483.1.S1_at   | MmugDNA.39483.1 | 11.95 | 11.83 | 0.23 | 0.05 | 1.08  | 0.900434 | 0.76963  | 0.957767 | 0.866223 |
| MmugDNA.39484.1.S1_at   | MmugDNA.39484.1 | 7.79  | 7.82  | 0.12 | 0.31 | -1.02 | 0.512479 | 0.06937  | 0.742975 | 0.309591 |
| MmugDNA.39485.1.S1_s_at | MmugDNA.39485.1 | 13.03 | 12.84 | 0.08 | 0.03 | 1.15  | 0.067471 | 0.000604 | 0.317394 | 0.042002 |
| MmugDNA.39486.1.S1_at   | MmugDNA.39486.1 | 8.86  | 8.95  | 0.14 | 0.05 | -1.06 | 0.386122 | 0.911584 | 0.654632 | 0.950173 |
| MmugDNA.39488.1.S1_at   | MmugDNA.39488.1 | 5.01  | 5.18  | 0.25 | 0.08 | -1.12 | 0.192743 | 0.057985 | 0.489336 | 0.287289 |
| MmugDNA.39489.1.S1_at   | MmugDNA.39489.1 | 3.57  | 3.51  | 0.08 | 0.03 | 1.05  | 0.139874 | 0.259127 | 0.425463 | 0.526264 |
| MmugDNA.3949.1.S1_at    | MmugDNA.3949.1  | 5.47  | 5.66  | 0.15 | 0.3  | -1.14 | 0.877022 | 0.054176 | 0.947453 | 0.278114 |
| MmugDNA.39491.1.S1_at   | MmugDNA.39491.1 | 3.8   | 3.49  | 0.01 | 0.34 | 1.24  | 0.596422 | 0.01186  | 0.795816 | 0.140973 |
| MmugDNA.39492.1.S1_at   | MmugDNA.39492.1 | 3.24  | 3.42  | 0.61 | 0.3  | -1.13 | 0.686309 | 0.341813 | 0.850512 | 0.587908 |
| MmugDNA.39493.1.S1_at   | MmugDNA.39493.1 | 3.62  | 3.6   | 0.26 | 0.3  | 1.02  | 0.563024 | 0.764513 | 0.775272 | 0.863128 |
| MmugDNA.39495.1.S1_x_at | MmugDNA.39495.1 | 6.61  | 5.94  | 0.43 | 0.22 | 1.6   | 0.0833   | 0.073718 | 0.345547 | 0.317068 |
| MmugDNA.39496.1.S1_at   | MmugDNA.39496.1 | 5.66  | 5.78  | 0.37 | 0.57 | -1.09 | 0.815308 | 0.585483 | 0.917536 | 0.752852 |
| MmugDNA.39497.1.S1_at   | MmugDNA.39497.1 | 9.6   | 9.71  | 0.11 | 0.07 | -1.08 | 0.053927 | 0.040268 | 0.28932  | 0.245902 |
| MmugDNA.39498.1.S1_at   | MmugDNA.39498.1 | 3.67  | 3.51  | 0.15 | 0.12 | 1.12  | 0.107893 | 0.407004 | 0.382524 | 0.63468  |
| MmugDNA.39499.1.S1_at   | MmugDNA.39499.1 | 2.63  | 2.63  | 0.01 | 0.02 | -1    | 0.63646  | 0.832403 | 0.822111 | 0.90389  |
| MmugDNA.3950.1.S1_at    | MmugDNA.3950.1  | 5.34  | 5.48  | 1.46 | 0.23 | -1.1  | 0.83469  | 0.629795 | 0.927306 | 0.781989 |
| MmugDNA.39500.1.S1_at   | MmugDNA.39500.1 | 4.52  | 4.66  | 0.35 | 0.03 | -1.1  | 0.528136 | 0.713757 | 0.753492 | 0.833937 |
| MmugDNA.39502.1.S1_at   | MmugDNA.39502.1 | 7.56  | 10.01 | 1.3  | 0.23 | -5.47 | 0.055492 | 0.246418 | 0.292516 | 0.515899 |
| MmugDNA.39505.1.S1_at   | MmugDNA.39505.1 | 5.34  | 5.39  | 0.4  | 0.21 | -1.04 | 0.942435 | 0.223864 | 0.975651 | 0.496812 |
| MmugDNA.39506.1.S1_at   | MmugDNA.39506.1 | 4.24  | 4.38  | 0.05 | 0.07 | -1.1  | 0.024212 | 0.123935 | 0.208762 | 0.394212 |

|                         |                 |       |       |      |      |       |          |          |          |          |
|-------------------------|-----------------|-------|-------|------|------|-------|----------|----------|----------|----------|
| MmugDNA.39508.1.S1_x_at | MmugDNA.39508.1 | 7.68  | 7.53  | 0.27 | 0.21 | 1.11  | 0.476645 | 0.628726 | 0.718951 | 0.781399 |
| MmugDNA.39511.1.S1_at   | MmugDNA.39511.1 | 12.6  | 12.89 | 0.08 | 0.09 | -1.22 | 0.007534 | 0.091616 | 0.135041 | 0.346715 |
| MmugDNA.39512.1.S1_at   | MmugDNA.39512.1 | 4.74  | 4.88  | 0.67 | 0.12 | -1.1  | 0.669969 | 0.638057 | 0.84164  | 0.787332 |
| MmugDNA.39513.1.S1_at   | MmugDNA.39513.1 | 4.57  | 4.68  | 0.02 | 0.09 | -1.08 | 0.458219 | 0.19186  | 0.706883 | 0.467233 |
| MmugDNA.39514.1.S1_at   | MmugDNA.39514.1 | 11.37 | 11.38 | 0.06 | 0.06 | -1.01 | 0.89054  | 0.155332 | 0.953316 | 0.430693 |
| MmugDNA.39515.1.S1_at   | MmugDNA.39515.1 | 10.64 | 10.73 | 0.04 | 0.32 | -1.07 | 0.820361 | 0.473865 | 0.919887 | 0.681082 |
| MmugDNA.39516.1.S1_at   | MmugDNA.39516.1 | 5.96  | 6.19  | 0.1  | 0.15 | -1.18 | 0.201834 | 0.177712 | 0.499297 | 0.454073 |
| MmugDNA.39517.1.S1_at   | MmugDNA.39517.1 | 9.63  | 9.64  | 0.18 | 0.09 | -1    | 0.783827 | 0.967602 | 0.901393 | 0.982093 |
| MmugDNA.39518.1.S1_at   | MmugDNA.39518.1 | 3.96  | 3.73  | 0.19 | 0.45 | 1.17  | 0.945246 | 0.537227 | 0.977023 | 0.72233  |
| MmugDNA.39519.1.S1_at   | MmugDNA.39519.1 | 4.45  | 4.48  | 0.13 | 0.06 | -1.02 | 0.295091 | 0.137041 | 0.584039 | 0.409836 |
| MmugDNA.3952.1.S1_at    | MmugDNA.3952.1  | 9.56  | 9.94  | 0.2  | 0.07 | -1.3  | 0.035957 | 0.323004 | 0.244614 | 0.574313 |
| MmugDNA.39520.1.S1_at   | MmugDNA.39520.1 | 9.26  | 12.05 | 1.31 | 0.21 | -6.93 | 0.058898 | 0.363518 | 0.299819 | 0.603941 |
| MmugDNA.39521.1.S1_at   | MmugDNA.39521.1 | 3.6   | 3.48  | 0.1  | 0.2  | 1.09  | 0.721122 | 0.922821 | 0.868544 | 0.956549 |
| MmugDNA.39522.1.S1_s_at | MmugDNA.39522.1 | 11.29 | 10.78 | 0.23 | 0.09 | 1.43  | 0.082352 | 0.066427 | 0.34399  | 0.303385 |
| MmugDNA.39523.1.S1_at   | MmugDNA.39523.1 | 5.73  | 5.77  | 0.1  | 0.12 | -1.03 | 0.941429 | 0.006973 | 0.975495 | 0.112743 |
| MmugDNA.39524.1.S1_at   | MmugDNA.39524.1 | 9.56  | 9.52  | 0.3  | 0.44 | 1.03  | 0.45329  | 0.215176 | 0.703496 | 0.488943 |
| MmugDNA.39526.1.S1_at   | MmugDNA.39526.1 | 6     | 5.58  | 0.54 | 0.23 | 1.33  | 0.944914 | 0.182878 | 0.976844 | 0.459362 |
| MmugDNA.39527.1.S1_at   | MmugDNA.39527.1 | 5.87  | 5.48  | 0.41 | 0.15 | 1.31  | 0.778001 | 0.144046 | 0.898504 | 0.417912 |
| MmugDNA.39528.1.S1_at   | MmugDNA.39528.1 | 4.56  | 4.61  | 0.16 | 0.06 | -1.04 | 0.823381 | 0.933764 | 0.921502 | 0.9623   |
| MmugDNA.3953.1.S1_at    | MmugDNA.3953.1  | 3.21  | 3.53  | 0.1  | 0.14 | -1.25 | 0.055106 | 0.110134 | 0.291755 | 0.374244 |
| MmugDNA.3953.1.S1_x_at  | MmugDNA.3953.1  | 11.5  | 11.62 | 0.1  | 0.16 | -1.09 | 0.358822 | 0.539927 | 0.634504 | 0.723995 |
| MmugDNA.39531.1.S1_at   | MmugDNA.39531.1 | 4.37  | 3.84  | 0.47 | 0.62 | 1.44  | 0.404184 | 0.616703 | 0.66805  | 0.77288  |
| MmugDNA.39533.1.S1_at   | MmugDNA.39533.1 | 5.09  | 4.96  | 0.04 | 0.06 | 1.09  | 0.039495 | 0.00079  | 0.255214 | 0.045969 |
| MmugDNA.39535.1.S1_at   | MmugDNA.39535.1 | 2.62  | 2.64  | 0.04 | 0.07 | -1.01 | 0.156737 | 0.056074 | 0.447283 | 0.282697 |
| MmugDNA.39537.1.S1_at   | MmugDNA.39537.1 | 8.85  | 8.67  | 0.12 | 0.01 | 1.13  | 0.06359  | 0.738042 | 0.308797 | 0.848158 |
| MmugDNA.39538.1.S1_at   | MmugDNA.39538.1 | 5.25  | 5.29  | 0.19 | 0.12 | -1.03 | 0.374943 | 0.266197 | 0.645792 | 0.53202  |
| MmugDNA.3954.1.S1_s_at  | MmugDNA.3954.1  | 7.22  | 7.29  | 0.31 | 0.08 | -1.05 | 0.658264 | 0.804052 | 0.834924 | 0.887265 |
| MmugDNA.39541.1.S1_at   | MmugDNA.39541.1 | 6.31  | 5.76  | 0.15 | 0.23 | 1.46  | 0.059753 | 0.054886 | 0.301675 | 0.279748 |
| MmugDNA.39543.1.S1_at   | MmugDNA.39543.1 | 5.65  | 5.36  | 0.07 | 0.11 | 1.22  | 0.042086 | 0.045471 | 0.262198 | 0.2575   |
| MmugDNA.39544.1.S1_at   | MmugDNA.39544.1 | 4.96  | 5.58  | 0.28 | 0.06 | -1.53 | 0.034982 | 0.214819 | 0.241699 | 0.4887   |
| MmugDNA.39546.1.S1_at   | MmugDNA.39546.1 | 2.74  | 2.72  | 0.12 | 0.12 | 1.02  | 0.796588 | 0.532427 | 0.908127 | 0.719057 |
| MmugDNA.39549.1.S1_at   | MmugDNA.39549.1 | 6.28  | 6.55  | 0.16 | 0.27 | -1.21 | 0.393781 | 0.584308 | 0.660508 | 0.752392 |
| MmugDNA.3955.1.S1_at    | MmugDNA.3955.1  | 9.86  | 9.52  | 0.22 | 0.17 | 1.26  | 0.098451 | 0.32911  | 0.369095 | 0.578482 |
| MmugDNA.39550.1.S1_at   | MmugDNA.39550.1 | 3.88  | 3.88  | 0.08 | 0    | 1     | 0.57717  | 0.762606 | 0.783459 | 0.861896 |
| MmugDNA.39551.1.S1_at   | MmugDNA.39551.1 | 4.64  | 4.46  | 0.39 | 0    | 1.14  | 0.243601 | 0.200731 | 0.54025  | 0.47524  |
| MmugDNA.39552.1.S1_at   | MmugDNA.39552.1 | 8.73  | 8.38  | 0.2  | 0.26 | 1.27  | 0.191393 | 0.027566 | 0.487732 | 0.20732  |
| MmugDNA.39553.1.S1_at   | MmugDNA.39553.1 | 3.81  | 3.83  | 0.47 | 0.18 | -1.01 | 0.2862   | 0.284471 | 0.576072 | 0.546637 |
| MmugDNA.39556.1.S1_at   | MmugDNA.39556.1 | 5.05  | 4.99  | 0.14 | 0.03 | 1.04  | 0.167959 | 0.091804 | 0.461204 | 0.346977 |
| MmugDNA.39557.1.S1_at   | MmugDNA.39557.1 | 5.52  | 5.34  | 0.23 | 0.18 | 1.14  | 0.927678 | 0.336629 | 0.969395 | 0.583988 |
| MmugDNA.39558.1.S1_s_at | MmugDNA.39558.1 | 11.66 | 11.52 | 0.09 | 0.04 | 1.1   | 0.222316 | 0.041921 | 0.520287 | 0.249343 |
| MmugDNA.39561.1.S1_at   | MmugDNA.39561.1 | 6.28  | 5.74  | 0.67 | 0.15 | 1.46  | 0.190192 | 0.225164 | 0.48657  | 0.497837 |
| MmugDNA.39562.1.S1_at   | MmugDNA.39562.1 | 4.82  | 4.02  | 1.35 | 0.15 | 1.75  | 0.2439   | 0.153823 | 0.540688 | 0.428488 |
| MmugDNA.39563.1.S1_at   | MmugDNA.39563.1 | 3     | 3.05  | 0.05 | 0.06 | -1.04 | 0.260859 | 0.215382 | 0.555006 | 0.489067 |

|                         |                 |       |       |      |      |       |          |          |          |          |
|-------------------------|-----------------|-------|-------|------|------|-------|----------|----------|----------|----------|
| MmugDNA.39564.1.S1_at   | MmugDNA.39564.1 | 2.88  | 3.18  | 0.18 | 0.14 | -1.23 | 0.24025  | 0.39526  | 0.537838 | 0.62738  |
| MmugDNA.39565.1.S1_at   | MmugDNA.39565.1 | 6.68  | 6.58  | 1.03 | 0.31 | 1.07  | 0.777821 | 0.583429 | 0.898434 | 0.751772 |
| MmugDNA.39565.1.S1_s_at | MmugDNA.39565.1 | 12.91 | 12.73 | 0.06 | 0.07 | 1.13  | 0.084244 | 0.056596 | 0.347637 | 0.283947 |
| MmugDNA.39566.1.S1_at   | MmugDNA.39566.1 | 8.21  | 8.52  | 0.29 | 0.09 | -1.23 | 0.226306 | 0.003314 | 0.524102 | 0.082825 |
| MmugDNA.39567.1.S1_at   | MmugDNA.39567.1 | 4.07  | 4.54  | 0.77 | 0.36 | -1.39 | 0.974375 | 0.144418 | 0.989745 | 0.418323 |
| MmugDNA.39568.1.S1_at   | MmugDNA.39568.1 | 4.36  | 3.79  | 0.85 | 0.77 | 1.49  | 0.402464 | 0.485004 | 0.666779 | 0.688893 |
| MmugDNA.39569.1.S1_at   | MmugDNA.39569.1 | 8.17  | 7.9   | 0.06 | 0.11 | 1.2   | 0.021571 | 0.392611 | 0.200582 | 0.625813 |
| MmugDNA.3957.1.S1_at    | MmugDNA.3957.1  | 12.52 | 12.61 | 0.1  | 0.03 | -1.06 | 0.144707 | 0.003944 | 0.431664 | 0.089335 |
| MmugDNA.39570.1.S1_at   | MmugDNA.39570.1 | 5.91  | 6.19  | 0.17 | 0.14 | -1.21 | 0.281089 | 0.028633 | 0.571991 | 0.210901 |
| MmugDNA.39572.1.S1_at   | MmugDNA.39572.1 | 5.89  | 5.76  | 0.23 | 0.11 | 1.09  | 0.259037 | 0.526169 | 0.553321 | 0.715411 |
| MmugDNA.39573.1.S1_s_at | MmugDNA.39573.1 | 9.87  | 10.04 | 0.33 | 0.29 | -1.13 | 0.603854 | 0.173449 | 0.801334 | 0.449938 |
| MmugDNA.39575.1.S1_at   | MmugDNA.39575.1 | 5.28  | 5.38  | 0.06 | 0.09 | -1.07 | 0.829695 | 0.067666 | 0.925023 | 0.306199 |
| MmugDNA.39576.1.S1_at   | MmugDNA.39576.1 | 10.05 | 9.27  | 0.19 | 0.19 | 1.72  | 0.010848 | 0.059853 | 0.153918 | 0.291297 |
| MmugDNA.39577.1.S1_s_at | MmugDNA.39577.1 | 6.75  | 6.66  | 0.21 | 0.09 | 1.06  | 0.453405 | 0.605011 | 0.703592 | 0.764917 |
| MmugDNA.39578.1.S1_at   | MmugDNA.39578.1 | 6.07  | 6.11  | 0.22 | 0.13 | -1.03 | 0.8727   | 0.340153 | 0.945454 | 0.58661  |
| MmugDNA.39579.1.S1_at   | MmugDNA.39579.1 | 4.64  | 5.54  | 0.16 | 0.38 | -1.87 | 0.036849 | 0.181137 | 0.247114 | 0.457582 |
| MmugDNA.3958.1.S1_at    | MmugDNA.3958.1  | 4.78  | 4.75  | 0.33 | 0.09 | 1.02  | 0.708089 | 0.714601 | 0.86174  | 0.834435 |
| MmugDNA.39581.1.S1_at   | MmugDNA.39581.1 | 4.8   | 4.57  | 0.09 | 0.38 | 1.17  | 0.934044 | 0.941777 | 0.972331 | 0.96702  |
| MmugDNA.39583.1.S1_at   | MmugDNA.39583.1 | 3.47  | 3.44  | 0.31 | 0.03 | 1.02  | 0.577377 | 0.684264 | 0.783566 | 0.815842 |
| MmugDNA.39585.1.S1_at   | MmugDNA.39585.1 | 11.91 | 11.92 | 0.12 | 0.12 | -1    | 0.720102 | 0.003658 | 0.867947 | 0.086526 |
| MmugDNA.39587.1.S1_at   | MmugDNA.39587.1 | 8.42  | 8.24  | 0.22 | 0.06 | 1.14  | 0.114647 | 0.208035 | 0.391643 | 0.482049 |
| MmugDNA.39589.1.S1_at   | MmugDNA.39589.1 | 5.35  | 5.41  | 0.6  | 0.15 | -1.04 | 0.36185  | 0.53209  | 0.637126 | 0.718995 |
| MmugDNA.3959.1.S1_at    | MmugDNA.3959.1  | 8.85  | 7.84  | 0.51 | 0.15 | 2.01  | 0.025613 | 0.015036 | 0.212928 | 0.155766 |
| MmugDNA.39590.1.S1_at   | MmugDNA.39590.1 | 2.86  | 2.83  | 0.3  | 0.15 | 1.03  | 0.36192  | 0.364079 | 0.637126 | 0.604449 |
| MmugDNA.39591.1.S1_at   | MmugDNA.39591.1 | 3.21  | 3.25  | 0.26 | 0.04 | -1.03 | 0.657623 | 0.665082 | 0.834607 | 0.803733 |
| MmugDNA.39592.1.S1_at   | MmugDNA.39592.1 | 3.87  | 3.64  | 0.2  | 0.08 | 1.17  | 0.124467 | 0.671586 | 0.404646 | 0.807997 |
| MmugDNA.39593.1.S1_x_at | MmugDNA.39593.1 | 8.85  | 8.33  | 0.55 | 0.22 | 1.43  | 0.178151 | 0.201218 | 0.472847 | 0.475667 |
| MmugDNA.39594.1.S1_at   | MmugDNA.39594.1 | 6.96  | 6.78  | 0.13 | 0.24 | 1.13  | 0.292156 | 0.078436 | 0.581449 | 0.325193 |
| MmugDNA.39595.1.S1_at   | MmugDNA.39595.1 | 4.09  | 4.01  | 0.09 | 0.13 | 1.06  | 0.165308 | 0.496025 | 0.458322 | 0.695877 |
| MmugDNA.39596.1.S1_at   | MmugDNA.39596.1 | 4.12  | 3.92  | 0.34 | 0.18 | 1.14  | 0.090897 | 0.07171  | 0.358094 | 0.313925 |
| MmugDNA.39597.1.S1_at   | MmugDNA.39597.1 | 11.52 | 11.26 | 0.06 | 0.08 | 1.21  | 0.008791 | 0.006685 | 0.143564 | 0.110612 |
| MmugDNA.39598.1.S1_at   | MmugDNA.39598.1 | 11.73 | 11.48 | 0.1  | 0.06 | 1.19  | 0.017111 | 0.012067 | 0.184186 | 0.14211  |
| MmugDNA.39599.1.S1_at   | MmugDNA.39599.1 | 3.3   | 3.22  | 0.26 | 0.11 | 1.05  | 0.92157  | 0.851939 | 0.966402 | 0.915848 |
| MmugDNA.3960.1.S1_at    | MmugDNA.3960.1  | 4.54  | 4.63  | 0.11 | 0.22 | -1.07 | 0.832682 | 0.936989 | 0.926317 | 0.964492 |
| MmugDNA.39600.1.S1_at   | MmugDNA.39600.1 | 5.09  | 5.1   | 0.18 | 0.07 | -1.01 | 0.495707 | 0.446455 | 0.73183  | 0.662842 |
| MmugDNA.16141.1.S1_at   | MmugDNA.16141.1 | 9.65  | 9.74  | 0.1  | 0.08 | -1.06 | 0.303255 | 0.148963 | 0.590656 | 0.423294 |
| MmugDNA.16141.1.S1_s_at | MmugDNA.16141.1 | 11.78 | 11.7  | 0.08 | 0.07 | 1.06  | 0.69733  | 0.022135 | 0.855921 | 0.186245 |
| MmugDNA.39602.1.S1_at   | MmugDNA.39602.1 | 5.46  | 5.58  | 0.24 | 0.07 | -1.09 | 0.890592 | 0.996395 | 0.953318 | 0.997887 |
| MmugDNA.39603.1.S1_at   | MmugDNA.39603.1 | 5.49  | 5.22  | 0.16 | 0    | 1.2   | 0.057435 | 0.007161 | 0.296977 | 0.113794 |
| MmugDNA.39604.1.S1_at   | MmugDNA.39604.1 | 7.4   | 6.78  | 0.12 | 0.22 | 1.54  | 0.018187 | 0.329449 | 0.187817 | 0.578781 |
| MmugDNA.39605.1.S1_at   | MmugDNA.39605.1 | 11.08 | 11.09 | 0.23 | 0.18 | -1    | 0.624882 | 0.077562 | 0.815077 | 0.323421 |
| MmugDNA.39608.1.S1_at   | MmugDNA.39608.1 | 11.53 | 11.66 | 0.08 | 0.09 | -1.09 | 0.396673 | 0.931898 | 0.662694 | 0.9613   |
| MmugDNA.3961.1.S1_at    | MmugDNA.3961.1  | 5.04  | 4.23  | 0.33 | 0.1  | 1.76  | 0.039862 | 0.014619 | 0.256302 | 0.154176 |

|                         |                 |       |       |      |      |       |          |          |          |          |
|-------------------------|-----------------|-------|-------|------|------|-------|----------|----------|----------|----------|
| MmugDNA.39610.1.S1_at   | MmugDNA.39610.1 | 5.66  | 4.95  | 0.34 | 0.38 | 1.63  | 0.070879 | 0.060335 | 0.324317 | 0.292254 |
| MmugDNA.39611.1.S1_at   | MmugDNA.39611.1 | 4.25  | 5.57  | 0.39 | 0.1  | -2.49 | 0.005531 | 0.003649 | 0.119873 | 0.086526 |
| MmugDNA.39612.1.S1_at   | MmugDNA.39612.1 | 3.35  | 3.78  | 0.21 | 0.43 | -1.35 | 0.238378 | 0.182211 | 0.535771 | 0.458739 |
| MmugDNA.39613.1.S1_at   | MmugDNA.39613.1 | 5.02  | 5.54  | 0.07 | 0.43 | -1.44 | 0.201584 | 0.196241 | 0.499145 | 0.471236 |
| MmugDNA.39614.1.S1_at   | MmugDNA.39614.1 | 5.15  | 4.85  | 0.65 | 0.05 | 1.23  | 0.847926 | 0.785831 | 0.933789 | 0.875982 |
| MmugDNA.39615.1.S1_at   | MmugDNA.39615.1 | 11.68 | 11.64 | 0.25 | 0.1  | 1.03  | 0.968956 | 0.911971 | 0.987691 | 0.950333 |
| MmugDNA.39617.1.S1_at   | MmugDNA.39617.1 | 6.19  | 6.26  | 0.11 | 0.14 | -1.05 | 0.159247 | 0.410645 | 0.450505 | 0.637463 |
| MmugDNA.39620.1.S1_at   | MmugDNA.39620.1 | 5.24  | 5.47  | 0.77 | 0.06 | -1.17 | 0.624115 | 0.365966 | 0.814663 | 0.605818 |
| MmugDNA.39622.1.S1_at   | MmugDNA.39622.1 | 8.8   | 9.57  | 1.52 | 0.08 | -1.71 | 0.202847 | 0.261013 | 0.500586 | 0.527371 |
| MmugDNA.39623.1.S1_at   | MmugDNA.39623.1 | 5.11  | 5.1   | 0.08 | 0.15 | 1     | 0.708065 | 0.018504 | 0.86174  | 0.171136 |
| MmugDNA.39624.1.S1_at   | MmugDNA.39624.1 | 8.17  | 8.84  | 0.68 | 0.19 | -1.6  | 0.567992 | 0.887682 | 0.77808  | 0.93601  |
| MmugDNA.39625.1.S1_at   | MmugDNA.39625.1 | 7.52  | 7.5   | 0.16 | 0.08 | 1.01  | 0.788649 | 0.847419 | 0.903969 | 0.913316 |
| MmugDNA.39628.1.S1_at   | MmugDNA.39628.1 | 6.06  | 5.68  | 0.25 | 0.16 | 1.3   | 0.101548 | 0.210882 | 0.372929 | 0.484934 |
| MmugDNA.39629.1.S1_at   | MmugDNA.39629.1 | 3.6   | 3.31  | 0.27 | 0.13 | 1.22  | 0.292749 | 0.4378   | 0.581832 | 0.656968 |
| MmugDNA.39630.1.S1_at   | MmugDNA.39630.1 | 6.66  | 5.55  | 0.49 | 0.24 | 2.15  | 0.040302 | 0.019716 | 0.257247 | 0.176461 |
| MmugDNA.39633.1.S1_at   | MmugDNA.39633.1 | 5.66  | 6.49  | 0.47 | 0.05 | -1.78 | 0.022494 | 0.094972 | 0.203275 | 0.352056 |
| MmugDNA.39633.1.S1_s_at | MmugDNA.39633.1 | 5.38  | 7.16  | 0.17 | 0.23 | -3.43 | 0.00041  | 0.004526 | 0.06311  | 0.093974 |
| MmugDNA.39635.1.S1_at   | MmugDNA.39635.1 | 9.88  | 9.15  | 0.34 | 0.05 | 1.66  | 0.025164 | 0.01402  | 0.211658 | 0.151595 |
| MmugDNA.39636.1.S1_at   | MmugDNA.39636.1 | 10.25 | 10.34 | 0.15 | 0.15 | -1.06 | 0.482339 | 0.722855 | 0.722654 | 0.839464 |
| MmugDNA.39638.1.S1_at   | MmugDNA.39638.1 | 5.46  | 5.33  | 0.31 | 0.25 | 1.09  | 0.296969 | 0.08651  | 0.585548 | 0.33907  |
| MmugDNA.39639.1.S1_at   | MmugDNA.39639.1 | 9.9   | 10.05 | 0.48 | 0.23 | -1.11 | 0.628121 | 0.054466 | 0.817269 | 0.278959 |
| MmugDNA.3964.1.S1_at    | MmugDNA.3964.1  | 10.49 | 10.33 | 0.05 | 0.1  | 1.11  | 0.043105 | 0.261412 | 0.264779 | 0.527887 |
| MmugDNA.39640.1.S1_at   | MmugDNA.39640.1 | 4.61  | 4.43  | 0.13 | 0.19 | 1.13  | 0.268707 | 0.251554 | 0.561271 | 0.520309 |
| MmugDNA.39641.1.S1_at   | MmugDNA.39641.1 | 3.1   | 3.27  | 0.23 | 0.04 | -1.12 | 0.51394  | 0.505748 | 0.744054 | 0.702218 |
| MmugDNA.39642.1.S1_at   | MmugDNA.39642.1 | 8.32  | 8.41  | 0.99 | 0.14 | -1.06 | 0.839506 | 0.645957 | 0.929609 | 0.792676 |
| MmugDNA.39644.1.S1_at   | MmugDNA.39644.1 | 7.76  | 7.9   | 1.46 | 0.5  | -1.1  | 0.935404 | 0.768977 | 0.97298  | 0.865764 |
| MmugDNA.39646.1.S1_s_at | MmugDNA.39646.1 | 9.95  | 9.76  | 0.37 | 0.04 | 1.14  | 0.553514 | 0.13856  | 0.770019 | 0.411557 |
| MmugDNA.39647.1.S1_at   | MmugDNA.39647.1 | 4.53  | 4.53  | 0.15 | 0.14 | 1     | 0.931939 | 0.514863 | 0.971428 | 0.707923 |
| MmugDNA.39648.1.S1_at   | MmugDNA.39648.1 | 3.57  | 3.37  | 0.71 | 0.07 | 1.15  | 0.244546 | 0.303969 | 0.540909 | 0.561344 |
| MmugDNA.39649.1.S1_at   | MmugDNA.39649.1 | 3.2   | 3.1   | 0.31 | 0.1  | 1.07  | 0.208528 | 0.315474 | 0.506191 | 0.568985 |
| MmugDNA.39650.1.S1_at   | MmugDNA.39650.1 | 10.23 | 10.4  | 0.2  | 0.06 | -1.12 | 0.414703 | 0.002356 | 0.675681 | 0.071631 |
| MmugDNA.39651.1.S1_at   | MmugDNA.39651.1 | 3.58  | 3.73  | 0.02 | 0.21 | -1.11 | 0.88899  | 0.982857 | 0.952715 | 0.990596 |
| MmugDNA.39654.1.S1_at   | MmugDNA.39654.1 | 6.34  | 5.61  | 0.63 | 0.32 | 1.65  | 0.130372 | 0.09759  | 0.41274  | 0.355456 |
| MmugDNA.39655.1.S1_at   | MmugDNA.39655.1 | 8.02  | 7.44  | 0.6  | 0.2  | 1.5   | 0.175697 | 0.292572 | 0.470151 | 0.552628 |
| MmugDNA.39656.1.S1_at   | MmugDNA.39656.1 | 7.37  | 7.22  | 0.06 | 0.07 | 1.12  | 0.040695 | 0.051551 | 0.258356 | 0.272469 |
| MmugDNA.39657.1.S1_at   | MmugDNA.39657.1 | 6.15  | 5.85  | 0.13 | 0.7  | 1.23  | 0.29595  | 0.173297 | 0.584679 | 0.449791 |
| MmugDNA.39658.1.S1_at   | MmugDNA.39658.1 | 5.48  | 5.36  | 0.08 | 0.16 | 1.08  | 0.149853 | 0.544653 | 0.43879  | 0.727006 |
| MmugDNA.39659.1.S1_at   | MmugDNA.39659.1 | 3.71  | 3.71  | 0.09 | 0.12 | -1    | 0.483019 | 0.32737  | 0.723292 | 0.577284 |
| MmugDNA.39660.1.S1_at   | MmugDNA.39660.1 | 3.27  | 3.4   | 0.22 | 0.08 | -1.09 | 0.949775 | 0.980103 | 0.979093 | 0.989236 |
| MmugDNA.39661.1.S1_at   | MmugDNA.39661.1 | 10.63 | 9.81  | 0.16 | 0.18 | 1.77  | 0.002246 | 0.002408 | 0.091175 | 0.07278  |
| MmugDNA.39662.1.S1_at   | MmugDNA.39662.1 | 11.8  | 11.09 | 0.14 | 0.08 | 1.64  | 0.00174  | 0.000429 | 0.085035 | 0.038359 |
| MmugDNA.39665.1.S1_at   | MmugDNA.39665.1 | 5.23  | 4.88  | 0.37 | 0.25 | 1.27  | 0.137375 | 0.299109 | 0.422351 | 0.557663 |
| MmugDNA.39666.1.S1_at   | MmugDNA.39666.1 | 11.02 | 10.98 | 0.18 | 0.19 | 1.03  | 0.388352 | 0.625053 | 0.656369 | 0.778973 |

|                         |                 |       |       |      |      |       |          |          |          |          |
|-------------------------|-----------------|-------|-------|------|------|-------|----------|----------|----------|----------|
| MmugDNA.39667.1.S1_at   | MmugDNA.39667.1 | 5.73  | 5.9   | 0.27 | 0.02 | -1.12 | 0.907232 | 0.880133 | 0.960792 | 0.931533 |
| MmugDNA.39668.1.S1_at   | MmugDNA.39668.1 | 5.49  | 5.38  | 0.03 | 0.11 | 1.08  | 0.234357 | 0.39337  | 0.532475 | 0.626258 |
| MmugDNA.3967.1.S1_at    | MmugDNA.3967.1  | 12.95 | 12.95 | 0.05 | 0.05 | -1    | 0.499776 | 0.088102 | 0.734372 | 0.341641 |
| MmugDNA.3967.1.S1_s_at  | MmugDNA.3967.1  | 11.74 | 11.83 | 0.13 | 0.11 | -1.07 | 0.78643  | 0.007528 | 0.902599 | 0.1163   |
| MmugDNA.39670.1.S1_at   | MmugDNA.39670.1 | 10.23 | 10.44 | 0.15 | 0.16 | -1.16 | 0.054188 | 0.10226  | 0.289903 | 0.36236  |
| MmugDNA.39671.1.S1_at   | MmugDNA.39671.1 | 10.6  | 10.49 | 0.19 | 0.23 | 1.08  | 0.668785 | 0.898234 | 0.841092 | 0.942072 |
| MmugDNA.39672.1.S1_at   | MmugDNA.39672.1 | 11.3  | 11.31 | 0.05 | 0.05 | -1.01 | 0.674185 | 0.002972 | 0.844392 | 0.079958 |
| MmugDNA.39673.1.S1_at   | MmugDNA.39673.1 | 7.58  | 7.03  | 0.41 | 0.25 | 1.46  | 0.389385 | 0.592468 | 0.657321 | 0.757832 |
| MmugDNA.39674.1.S1_at   | MmugDNA.39674.1 | 5.35  | 5.75  | 0.4  | 0.63 | -1.32 | 0.193759 | 0.140478 | 0.490333 | 0.413679 |
| MmugDNA.39675.1.S1_at   | MmugDNA.39675.1 | 5.42  | 5.43  | 0.04 | 0.1  | -1.01 | 0.844945 | 0.209282 | 0.932176 | 0.483303 |
| MmugDNA.39676.1.S1_at   | MmugDNA.39676.1 | 4.23  | 4.37  | 0.14 | 0.11 | -1.1  | 0.929195 | 0.012432 | 0.969943 | 0.144098 |
| MmugDNA.39677.1.S1_at   | MmugDNA.39677.1 | 3.73  | 3.38  | 0.22 | 0.42 | 1.27  | 0.384058 | 0.619952 | 0.653215 | 0.775141 |
| MmugDNA.39680.1.S1_at   | MmugDNA.39680.1 | 4.89  | 4.7   | 0.18 | 0.06 | 1.14  | 0.075064 | 0.017783 | 0.332128 | 0.168549 |
| MmugDNA.39681.1.S1_at   | MmugDNA.39681.1 | 6.44  | 6.68  | 0.65 | 0.25 | -1.18 | 0.781021 | 0.260703 | 0.900006 | 0.527199 |
| MmugDNA.39682.1.S1_at   | MmugDNA.39682.1 | 3.11  | 3.18  | 0.11 | 0.16 | -1.05 | 0.170425 | 0.185574 | 0.464074 | 0.461566 |
| MmugDNA.39683.1.S1_at   | MmugDNA.39683.1 | 3.3   | 3.34  | 0.04 | 0.04 | -1.03 | 0.13575  | 0.577171 | 0.419782 | 0.747682 |
| MmugDNA.39684.1.S1_at   | MmugDNA.39684.1 | 5.96  | 5.97  | 0.2  | 0.06 | -1    | 0.415349 | 0.456842 | 0.67607  | 0.670521 |
| MmugDNA.39685.1.S1_at   | MmugDNA.39685.1 | 5.84  | 5.76  | 0.56 | 0.26 | 1.06  | 0.463139 | 0.191262 | 0.709925 | 0.466553 |
| MmugDNA.39686.1.S1_at   | MmugDNA.39686.1 | 8.86  | 8.9   | 0.35 | 0.05 | -1.03 | 0.255026 | 0.267494 | 0.549576 | 0.533223 |
| MmugDNA.39688.1.S1_at   | MmugDNA.39688.1 | 7.07  | 7.43  | 0.05 | 0.23 | -1.29 | 0.085595 | 0.059898 | 0.350053 | 0.291387 |
| MmugDNA.39689.1.S1_at   | MmugDNA.39689.1 | 3.9   | 3.7   | 0.11 | 0.39 | 1.15  | 0.589844 | 0.269518 | 0.791747 | 0.534806 |
| MmugDNA.3969.1.S1_at    | MmugDNA.3969.1  | 6.51  | 6.55  | 0.1  | 0.08 | -1.03 | 0.700923 | 0.196536 | 0.857901 | 0.471582 |
| MmugDNA.39690.1.S1_at   | MmugDNA.39690.1 | 3.73  | 3.65  | 0.3  | 0.18 | 1.06  | 0.281379 | 0.34263  | 0.572229 | 0.588644 |
| MmugDNA.39691.1.S1_at   | MmugDNA.39691.1 | 9.59  | 9.61  | 0.13 | 0.24 | -1.01 | 0.821771 | 0.424982 | 0.920616 | 0.647458 |
| MmugDNA.39691.1.S1_s_at | MmugDNA.39691.1 | 8.97  | 9.17  | 0.2  | 0.21 | -1.14 | 0.910701 | 0.662598 | 0.962201 | 0.802443 |
| MmugDNA.39692.1.S1_at   | MmugDNA.39692.1 | 4.15  | 3.96  | 0.92 | 0.42 | 1.14  | 0.462668 | 0.722515 | 0.70975  | 0.839261 |
| MmugDNA.39693.1.S1_at   | MmugDNA.39693.1 | 3.13  | 3.15  | 0.14 | 0.12 | -1.01 | 0.804134 | 0.291319 | 0.912015 | 0.551803 |
| MmugDNA.39694.1.S1_at   | MmugDNA.39694.1 | 7.76  | 7.94  | 0.09 | 0.13 | -1.13 | 0.065982 | 0.157656 | 0.314318 | 0.433137 |
| MmugDNA.39695.1.S1_at   | MmugDNA.39695.1 | 9.17  | 9.01  | 0.09 | 0.13 | 1.12  | 0.187822 | 0.041779 | 0.484114 | 0.248981 |
| MmugDNA.39695.1.S1_s_at | MmugDNA.39695.1 | 7.64  | 7.44  | 0.13 | 0.24 | 1.15  | 0.381636 | 0.061066 | 0.651274 | 0.293952 |
| MmugDNA.39696.1.S1_at   | MmugDNA.39696.1 | 8.6   | 8.21  | 0.6  | 0.32 | 1.31  | 0.588859 | 0.675462 | 0.791302 | 0.810337 |
| MmugDNA.39697.1.S1_at   | MmugDNA.39697.1 | 7.1   | 7.11  | 0.21 | 0.19 | -1.01 | 0.625147 | 0.404713 | 0.815225 | 0.633217 |
| MmugDNA.39698.1.S1_at   | MmugDNA.39698.1 | 5.25  | 5.33  | 0.05 | 0.1  | -1.06 | 0.703729 | 0.224053 | 0.859331 | 0.497048 |
| MmugDNA.397.1.S1_at     | MmugDNA.397.1   | 5.07  | 4.67  | 0.3  | 0.64 | 1.33  | 0.634312 | 0.680022 | 0.820718 | 0.81315  |
| MmugDNA.3970.1.S1_at    | MmugDNA.3970.1  | 9.07  | 8.96  | 0.25 | 0.01 | 1.08  | 0.581876 | 0.736677 | 0.786843 | 0.847687 |
| MmugDNA.39700.1.S1_at   | MmugDNA.39700.1 | 5.32  | 5.12  | 0.03 | 0.15 | 1.15  | 0.099706 | 0.05509  | 0.370699 | 0.280248 |
| MmugDNA.39702.1.S1_at   | MmugDNA.39702.1 | 3.83  | 3.73  | 0.66 | 0.09 | 1.07  | 0.239487 | 0.283776 | 0.536847 | 0.546196 |
| MmugDNA.39703.1.S1_at   | MmugDNA.39703.1 | 10.9  | 10.28 | 0.15 | 0.02 | 1.53  | 0.001908 | 0.000309 | 0.087869 | 0.035119 |
| MmugDNA.39704.1.S1_at   | MmugDNA.39704.1 | 5.64  | 5.49  | 0.2  | 0.2  | 1.11  | 0.637279 | 0.23556  | 0.822365 | 0.506633 |
| MmugDNA.39705.1.S1_at   | MmugDNA.39705.1 | 4.81  | 5.02  | 0.28 | 0.36 | -1.15 | 0.235514 | 0.210912 | 0.533339 | 0.484934 |
| MmugDNA.39706.1.S1_at   | MmugDNA.39706.1 | 4.81  | 4.74  | 0.56 | 0.18 | 1.05  | 0.328484 | 0.621189 | 0.610835 | 0.775813 |
| MmugDNA.39707.1.S1_at   | MmugDNA.39707.1 | 7.86  | 7.47  | 0.09 | 0.28 | 1.32  | 0.121833 | 0.491067 | 0.400523 | 0.692753 |
| MmugDNA.39710.1.S1_at   | MmugDNA.39710.1 | 7.95  | 8.07  | 0.04 | 0.49 | -1.09 | 0.6425   | 0.415485 | 0.82562  | 0.64091  |

|                         |                 |       |       |      |      |       |          |          |          |          |
|-------------------------|-----------------|-------|-------|------|------|-------|----------|----------|----------|----------|
| MmugDNA.39711.1.S1_at   | MmugDNA.39711.1 | 5.17  | 5.09  | 0.16 | 0.11 | 1.06  | 0.362632 | 0.447491 | 0.63739  | 0.663561 |
| MmugDNA.39712.1.S1_at   | MmugDNA.39712.1 | 4.73  | 4.67  | 0.05 | 0    | 1.04  | 0.129943 | 0.767483 | 0.412108 | 0.865004 |
| MmugDNA.39715.1.S1_at   | MmugDNA.39715.1 | 7.85  | 7.65  | 0.15 | 0.08 | 1.15  | 0.072849 | 0.113425 | 0.327658 | 0.379509 |
| MmugDNA.39716.1.S1_at   | MmugDNA.39716.1 | 6.95  | 6.47  | 0.28 | 0.05 | 1.4   | 0.044171 | 0.050646 | 0.267233 | 0.270317 |
| MmugDNA.39717.1.S1_at   | MmugDNA.39717.1 | 4.91  | 4.33  | 0.78 | 0.13 | 1.49  | 0.640869 | 0.743823 | 0.824509 | 0.851535 |
| MmugDNA.39718.1.S1_at   | MmugDNA.39718.1 | 10.91 | 10.25 | 0.28 | 0.13 | 1.58  | 0.054621 | 0.185697 | 0.290604 | 0.46163  |
| MmugDNA.39720.1.S1_at   | MmugDNA.39720.1 | 4.01  | 4.05  | 0.19 | 0.21 | -1.03 | 0.453776 | 0.447318 | 0.703857 | 0.663434 |
| MmugDNA.39721.1.S1_at   | MmugDNA.39721.1 | 11.33 | 11.04 | 0.07 | 0.13 | 1.22  | 0.00923  | 0.186769 | 0.145865 | 0.46257  |
| MmugDNA.39722.1.S1_at   | MmugDNA.39722.1 | 9.59  | 9.05  | 0.16 | 0.4  | 1.45  | 0.20599  | 0.505903 | 0.50382  | 0.702252 |
| MmugDNA.39723.1.S1_at   | MmugDNA.39723.1 | 2.96  | 2.91  | 0.1  | 0.19 | 1.04  | 0.909426 | 0.362024 | 0.961571 | 0.602727 |
| MmugDNA.39724.1.S1_at   | MmugDNA.39724.1 | 6.19  | 6.25  | 0.18 | 0.08 | -1.04 | 0.371526 | 0.187582 | 0.64419  | 0.463628 |
| MmugDNA.39725.1.S1_at   | MmugDNA.39725.1 | 11.63 | 11.61 | 0.06 | 0.1  | 1.01  | 0.498079 | 0.059672 | 0.733453 | 0.290919 |
| MmugDNA.39726.1.S1_at   | MmugDNA.39726.1 | 10.1  | 9.94  | 0.3  | 0.14 | 1.12  | 0.715791 | 0.030405 | 0.86589  | 0.216319 |
| MmugDNA.39727.1.S1_at   | MmugDNA.39727.1 | 6.21  | 6.9   | 0.13 | 0.14 | -1.61 | 0.003391 | 0.002232 | 0.102989 | 0.069565 |
| MmugDNA.39728.1.S1_at   | MmugDNA.39728.1 | 4.2   | 4.06  | 0.26 | 0.27 | 1.11  | 0.958951 | 0.951593 | 0.983299 | 0.972522 |
| MmugDNA.39729.1.S1_at   | MmugDNA.39729.1 | 4.33  | 3.9   | 0.38 | 0.11 | 1.35  | 0.092823 | 0.153341 | 0.361346 | 0.428139 |
| MmugDNA.39730.1.S1_at   | MmugDNA.39730.1 | 6.79  | 6.62  | 0.2  | 0.03 | 1.13  | 0.562492 | 0.322328 | 0.774894 | 0.57392  |
| MmugDNA.39731.1.S1_at   | MmugDNA.39731.1 | 6.22  | 6.11  | 0.5  | 0.11 | 1.08  | 0.313174 | 0.445258 | 0.598964 | 0.662338 |
| MmugDNA.39732.1.S1_at   | MmugDNA.39732.1 | 4.97  | 4.7   | 0.28 | 0.08 | 1.2   | 0.463389 | 0.632774 | 0.710048 | 0.783788 |
| MmugDNA.39733.1.S1_at   | MmugDNA.39733.1 | 10.29 | 9.71  | 0.26 | 0.27 | 1.49  | 0.100584 | 0.478291 | 0.371612 | 0.684289 |
| MmugDNA.39734.1.S1_at   | MmugDNA.39734.1 | 3.58  | 3.57  | 0.07 | 0.19 | 1     | 0.927965 | 0.909748 | 0.969567 | 0.949083 |
| MmugDNA.39735.1.S1_at   | MmugDNA.39735.1 | 6.81  | 6.67  | 0.23 | 0.09 | 1.11  | 0.268098 | 0.299559 | 0.560779 | 0.557945 |
| MmugDNA.39736.1.S1_at   | MmugDNA.39736.1 | 4.18  | 4.18  | 0.24 | 0.14 | -1    | 0.90871  | 0.883551 | 0.961317 | 0.933618 |
| MmugDNA.39737.1.S1_at   | MmugDNA.39737.1 | 5.69  | 5.9   | 0.24 | 0.04 | -1.16 | 0.618769 | 0.262553 | 0.810795 | 0.528878 |
| MmugDNA.39738.1.S1_at   | MmugDNA.39738.1 | 6.76  | 8.85  | 0.5  | 0.36 | -4.26 | 0.005673 | 0.1776   | 0.120889 | 0.453962 |
| MmugDNA.39739.1.S1_at   | MmugDNA.39739.1 | 6.01  | 5.39  | 0.66 | 0.36 | 1.53  | 0.24583  | 0.306248 | 0.541732 | 0.562907 |
| MmugDNA.3974.1.S1_at    | MmugDNA.3974.1  | 11.13 | 11    | 0.2  | 0.06 | 1.09  | 0.718285 | 0.73434  | 0.867043 | 0.846084 |
| MmugDNA.39740.1.S1_at   | MmugDNA.39740.1 | 7.44  | 7.21  | 0.26 | 0.06 | 1.18  | 0.463964 | 0.730412 | 0.710381 | 0.844017 |
| MmugDNA.39741.1.S1_at   | MmugDNA.39741.1 | 7.08  | 7.08  | 0.24 | 0.12 | 1     | 0.244456 | 0.465619 | 0.540909 | 0.675863 |
| MmugDNA.39742.1.S1_at   | MmugDNA.39742.1 | 3.22  | 3.25  | 0.28 | 0.07 | -1.02 | 0.377033 | 0.487365 | 0.647622 | 0.690461 |
| MmugDNA.39743.1.S1_at   | MmugDNA.39743.1 | 10.89 | 10.88 | 0.11 | 0.06 | 1.01  | 0.631452 | 0.302277 | 0.819043 | 0.560092 |
| MmugDNA.39746.1.S1_at   | MmugDNA.39746.1 | 5.04  | 5.13  | 0.58 | 0.29 | -1.06 | 0.834817 | 0.853361 | 0.927337 | 0.916579 |
| MmugDNA.39747.1.S1_at   | MmugDNA.39747.1 | 3.53  | 3.66  | 0.1  | 0.15 | -1.09 | 0.118621 | 0.662489 | 0.396265 | 0.802356 |
| MmugDNA.39748.1.S1_at   | MmugDNA.39748.1 | 3.03  | 3.1   | 0.06 | 0.11 | -1.05 | 0.575583 | 0.76792  | 0.782893 | 0.865256 |
| MmugDNA.39749.1.S1_at   | MmugDNA.39749.1 | 11.26 | 11.79 | 0.18 | 0.11 | -1.44 | 0.020551 | 0.132478 | 0.196858 | 0.404534 |
| MmugDNA.3975.1.S1_at    | MmugDNA.3975.1  | 5.32  | 5.36  | 0.18 | 0.2  | -1.03 | 0.751301 | 0.150017 | 0.885256 | 0.424621 |
| MmugDNA.39750.1.S1_at   | MmugDNA.39750.1 | 3.52  | 3.72  | 0.22 | 0.02 | -1.15 | 0.218423 | 0.322477 | 0.516059 | 0.573991 |
| MmugDNA.39751.1.S1_at   | MmugDNA.39751.1 | 8.57  | 8.21  | 0.34 | 0.2  | 1.28  | 0.169936 | 0.090819 | 0.463446 | 0.345355 |
| MmugDNA.39752.1.S1_at   | MmugDNA.39752.1 | 5.56  | 5.45  | 0.35 | 0.1  | 1.08  | 0.616025 | 0.685494 | 0.809258 | 0.816536 |
| MmugDNA.39753.1.S1_s_at | MmugDNA.39753.1 | 12.98 | 12.8  | 0.04 | 0.11 | 1.13  | 0.076913 | 0.035582 | 0.33537  | 0.232862 |
| MmugDNA.39754.1.S1_s_at | MmugDNA.39754.1 | 3.13  | 2.68  | 0.4  | 0.03 | 1.37  | 0.104491 | 0.098289 | 0.377808 | 0.356337 |
| MmugDNA.39755.1.S1_at   | MmugDNA.39755.1 | 5.51  | 5.51  | 0.27 | 0.1  | 1     | 0.862963 | 0.746142 | 0.940416 | 0.852688 |
| MmugDNA.39756.1.S1_at   | MmugDNA.39756.1 | 3.86  | 3.74  | 0.69 | 0.27 | 1.08  | 0.482753 | 0.706024 | 0.723028 | 0.829633 |

|                       |                 |       |       |      |      |       |          |          |          |          |
|-----------------------|-----------------|-------|-------|------|------|-------|----------|----------|----------|----------|
| MmugDNA.39757.1.S1_at | MmugDNA.39757.1 | 9.15  | 9.19  | 0.63 | 0.04 | -1.03 | 0.783246 | 0.830121 | 0.901127 | 0.902487 |
| MmugDNA.39758.1.S1_at | MmugDNA.39758.1 | 4.31  | 3.5   | 0.1  | 0.19 | 1.76  | 0.004516 | 0.010298 | 0.113436 | 0.132854 |
| MmugDNA.39759.1.S1_at | MmugDNA.39759.1 | 3.96  | 3.98  | 0.03 | 0.03 | -1.02 | 0.579162 | 0.084396 | 0.78492  | 0.335713 |
| MmugDNA.3976.1.S1_at  | MmugDNA.3976.1  | 8.29  | 9.65  | 0.4  | 0.36 | -2.58 | 0.039141 | 0.026518 | 0.25427  | 0.203899 |
| MmugDNA.39760.1.S1_at | MmugDNA.39760.1 | 5.98  | 5.81  | 0.1  | 0.04 | 1.13  | 0.105582 | 0.17691  | 0.379596 | 0.453317 |
| MmugDNA.39761.1.S1_at | MmugDNA.39761.1 | 6.32  | 6.37  | 0.22 | 0.04 | -1.03 | 0.583814 | 0.347212 | 0.788356 | 0.591841 |
| MmugDNA.39762.1.S1_at | MmugDNA.39762.1 | 7.87  | 9.99  | 0.22 | 0.3  | -4.33 | 0.000883 | 0.024061 | 0.074796 | 0.194434 |
| MmugDNA.39764.1.S1_at | MmugDNA.39764.1 | 3.63  | 3.56  | 0.27 | 0.09 | 1.05  | 0.779607 | 0.753647 | 0.899345 | 0.856589 |
| MmugDNA.39765.1.S1_at | MmugDNA.39765.1 | 8.04  | 7.33  | 0.63 | 0.24 | 1.64  | 0.270765 | 0.274044 | 0.56285  | 0.538527 |
| MmugDNA.39766.1.S1_at | MmugDNA.39766.1 | 6.35  | 6.8   | 1.02 | 0.24 | -1.36 | 0.516682 | 0.730932 | 0.74601  | 0.844163 |
| MmugDNA.39767.1.S1_at | MmugDNA.39767.1 | 4.17  | 4.28  | 0.12 | 0.12 | -1.08 | 0.486381 | 0.025899 | 0.725626 | 0.201714 |
| MmugDNA.39768.1.S1_at | MmugDNA.39768.1 | 10.73 | 10.96 | 0.17 | 0.1  | -1.17 | 0.188881 | 0.322547 | 0.485448 | 0.573991 |
| MmugDNA.39769.1.S1_at | MmugDNA.39769.1 | 5.94  | 5.93  | 0.13 | 0.12 | 1     | 0.535844 | 0.725515 | 0.75867  | 0.841043 |
| MmugDNA.3977.1.S1_at  | MmugDNA.3977.1  | 5.48  | 4.79  | 0.32 | 0.34 | 1.61  | 0.047179 | 0.122282 | 0.274594 | 0.391973 |
| MmugDNA.39770.1.S1_at | MmugDNA.39770.1 | 9.14  | 9.48  | 0.11 | 0.08 | -1.27 | 0.009809 | 0.001805 | 0.148542 | 0.063714 |
| MmugDNA.39771.1.S1_at | MmugDNA.39771.1 | 7.29  | 7.44  | 1.34 | 0.65 | -1.11 | 0.872877 | 0.530692 | 0.945492 | 0.718104 |
| MmugDNA.39773.1.S1_at | MmugDNA.39773.1 | 3.76  | 3.77  | 0.09 | 0.04 | -1.01 | 0.216541 | 0.633314 | 0.51433  | 0.784071 |
| MmugDNA.39775.1.S1_at | MmugDNA.39775.1 | 6.62  | 6.72  | 0.05 | 0.06 | -1.07 | 0.120818 | 0.039487 | 0.399267 | 0.243642 |
| MmugDNA.39777.1.S1_at | MmugDNA.39777.1 | 9.37  | 9.88  | 0.61 | 0.15 | -1.42 | 0.076408 | 0.118653 | 0.334699 | 0.386673 |
| MmugDNA.39778.1.S1_at | MmugDNA.39778.1 | 5.47  | 4.12  | 0.39 | 0.2  | 2.55  | 0.007204 | 0.059839 | 0.132536 | 0.291286 |
| MmugDNA.3978.1.S1_at  | MmugDNA.3978.1  | 4.42  | 4.28  | 0.09 | 0.08 | 1.1   | 0.057406 | 0.080059 | 0.296977 | 0.327429 |
| MmugDNA.39780.1.S1_at | MmugDNA.39780.1 | 4.79  | 4.74  | 0.19 | 0.1  | 1.03  | 0.472507 | 0.173295 | 0.716189 | 0.449791 |
| MmugDNA.39781.1.S1_at | MmugDNA.39781.1 | 6.93  | 6.35  | 0.66 | 0.53 | 1.49  | 0.713068 | 0.238473 | 0.864548 | 0.509084 |
| MmugDNA.39783.1.S1_at | MmugDNA.39783.1 | 3.18  | 3.11  | 0.11 | 0.11 | 1.05  | 0.936855 | 0.424584 | 0.973607 | 0.647146 |
| MmugDNA.39784.1.S1_at | MmugDNA.39784.1 | 11.4  | 11.35 | 0.03 | 0.15 | 1.03  | 0.43443  | 0.836415 | 0.689698 | 0.906441 |
| MmugDNA.39785.1.S1_at | MmugDNA.39785.1 | 4.8   | 4.74  | 0.07 | 0.12 | 1.04  | 0.971182 | 0.434687 | 0.988523 | 0.654756 |
| MmugDNA.39786.1.S1_at | MmugDNA.39786.1 | 2.84  | 2.85  | 0.06 | 0.03 | -1    | 0.592739 | 0.087694 | 0.793615 | 0.340941 |
| MmugDNA.39787.1.S1_at | MmugDNA.39787.1 | 6.76  | 6.91  | 0.16 | 0.05 | -1.11 | 0.252904 | 0.47269  | 0.547493 | 0.68007  |
| MmugDNA.39788.1.S1_at | MmugDNA.39788.1 | 8.46  | 8.59  | 0.17 | 0.15 | -1.09 | 0.355303 | 0.085645 | 0.632127 | 0.337706 |
| MmugDNA.3979.1.S1_at  | MmugDNA.3979.1  | 4.41  | 4.69  | 0.2  | 0.22 | -1.21 | 0.097469 | 0.239113 | 0.36763  | 0.509827 |
| MmugDNA.39790.1.S1_at | MmugDNA.39790.1 | 5.29  | 5.5   | 0.26 | 0.05 | -1.15 | 0.304111 | 0.144501 | 0.59132  | 0.418394 |
| MmugDNA.39792.1.S1_at | MmugDNA.39792.1 | 4.01  | 3.25  | 1.44 | 0.55 | 1.69  | 0.486826 | 0.513734 | 0.725872 | 0.707217 |
| MmugDNA.39793.1.S1_at | MmugDNA.39793.1 | 4.87  | 5.13  | 0.29 | 0.16 | -1.2  | 0.382285 | 0.54307  | 0.651772 | 0.72592  |
| MmugDNA.39795.1.S1_at | MmugDNA.39795.1 | 5.78  | 5.45  | 0.12 | 0.21 | 1.26  | 0.079531 | 0.063808 | 0.339662 | 0.29906  |
| MmugDNA.39797.1.S1_at | MmugDNA.39797.1 | 4.47  | 3.74  | 1.4  | 0.74 | 1.65  | 0.296387 | 0.506334 | 0.585125 | 0.702371 |
| MmugDNA.39798.1.S1_at | MmugDNA.39798.1 | 5.38  | 5.51  | 0.4  | 0.31 | -1.09 | 0.495002 | 0.044964 | 0.731489 | 0.256489 |
| MmugDNA.39799.1.S1_at | MmugDNA.39799.1 | 4     | 3.94  | 0.22 | 0.04 | 1.04  | 0.872549 | 0.627516 | 0.945368 | 0.780488 |
| MmugDNA.398.1.S1_at   | MmugDNA.398.1   | 3.83  | 3.84  | 0.07 | 0.16 | -1.01 | 0.296494 | 0.612488 | 0.585206 | 0.770071 |
| MmugDNA.3980.1.S1_at  | MmugDNA.3980.1  | 2.98  | 2.93  | 0.02 | 0.06 | 1.04  | 0.114981 | 0.109852 | 0.392008 | 0.373823 |
| MmugDNA.39800.1.S1_at | MmugDNA.39800.1 | 9.89  | 9.95  | 0.17 | 0.21 | -1.04 | 0.721333 | 0.00777  | 0.868685 | 0.117732 |
| MmugDNA.39801.1.S1_at | MmugDNA.39801.1 | 10.85 | 10.7  | 0.22 | 0.01 | 1.1   | 0.31366  | 0.361398 | 0.599524 | 0.602196 |
| MmugDNA.39802.1.S1_at | MmugDNA.39802.1 | 3.45  | 3.44  | 0.22 | 0.06 | 1.01  | 0.343391 | 0.727976 | 0.622974 | 0.842711 |
| MmugDNA.39803.1.S1_at | MmugDNA.39803.1 | 7.09  | 7.14  | 0.24 | 0.11 | -1.03 | 0.789761 | 0.680735 | 0.904456 | 0.813572 |

|                         |                 |       |       |      |      |       |          |          |          |          |
|-------------------------|-----------------|-------|-------|------|------|-------|----------|----------|----------|----------|
| MmugDNA.39804.1.S1_at   | MmugDNA.39804.1 | 10.59 | 10.93 | 0.13 | 0.14 | -1.27 | 0.071586 | 0.009633 | 0.325595 | 0.129267 |
| MmugDNA.39805.1.S1_at   | MmugDNA.39805.1 | 8.87  | 7.41  | 0.31 | 0.07 | 2.75  | 0.001015 | 0.000466 | 0.076321 | 0.038572 |
| MmugDNA.39806.1.S1_at   | MmugDNA.39806.1 | 4.05  | 4.03  | 0.28 | 0.12 | 1.01  | 0.675193 | 0.825643 | 0.845011 | 0.899784 |
| MmugDNA.39808.1.S1_at   | MmugDNA.39808.1 | 8.86  | 8.38  | 0.24 | 0.08 | 1.4   | 0.114475 | 0.512301 | 0.391512 | 0.706182 |
| MmugDNA.39809.1.S1_at   | MmugDNA.39809.1 | 4.02  | 3.29  | 0.25 | 0.08 | 1.67  | 0.012405 | 0.016305 | 0.161664 | 0.161818 |
| MmugDNA.3981.1.S1_at    | MmugDNA.3981.1  | 5.65  | 5.47  | 0.03 | 0.13 | 1.13  | 0.026646 | 0.032492 | 0.216412 | 0.223254 |
| MmugDNA.39810.1.S1_s_at | MmugDNA.39810.1 | 8.39  | 7.61  | 0.2  | 0.14 | 1.72  | 0.003119 | 0.006085 | 0.100877 | 0.106308 |
| MmugDNA.39812.1.S1_at   | MmugDNA.39812.1 | 8.05  | 8.18  | 0.41 | 0.21 | -1.1  | 0.578683 | 0.132821 | 0.784534 | 0.404544 |
| MmugDNA.39814.1.S1_at   | MmugDNA.39814.1 | 4.3   | 4.37  | 0.25 | 0.08 | -1.04 | 0.647451 | 0.543508 | 0.828733 | 0.726175 |
| MmugDNA.39815.1.S1_at   | MmugDNA.39815.1 | 11.03 | 10.82 | 0.01 | 0.08 | 1.15  | 0.034465 | 0.196389 | 0.24024  | 0.471418 |
| MmugDNA.39816.1.S1_at   | MmugDNA.39816.1 | 7.57  | 7.2   | 0.27 | 0.09 | 1.29  | 0.082446 | 0.375455 | 0.344191 | 0.613412 |
| MmugDNA.39817.1.S1_at   | MmugDNA.39817.1 | 6.55  | 6.75  | 0.09 | 0.18 | -1.15 | 0.479021 | 0.662643 | 0.720418 | 0.802461 |
| MmugDNA.39818.1.S1_at   | MmugDNA.39818.1 | 6.42  | 6.62  | 0.53 | 0.21 | -1.15 | 0.612555 | 0.519372 | 0.806905 | 0.710998 |
| MmugDNA.39819.1.S1_at   | MmugDNA.39819.1 | 3.8   | 3.59  | 0.12 | 0.08 | 1.16  | 0.066025 | 0.134204 | 0.314397 | 0.406453 |
| MmugDNA.3982.1.S1_at    | MmugDNA.3982.1  | 6     | 5.58  | 1.2  | 0.32 | 1.35  | 0.255045 | 0.387324 | 0.549576 | 0.622027 |
| MmugDNA.39820.1.S1_at   | MmugDNA.39820.1 | 6.19  | 6.19  | 0.08 | 0.06 | 1.01  | 0.278032 | 0.361715 | 0.569395 | 0.602422 |
| MmugDNA.39824.1.S1_at   | MmugDNA.39824.1 | 4.8   | 4.9   | 0.11 | 0.13 | -1.08 | 0.174775 | 0.219242 | 0.469009 | 0.493013 |
| MmugDNA.39825.1.S1_at   | MmugDNA.39825.1 | 10.16 | 10.31 | 0.37 | 0.06 | -1.11 | 0.439749 | 0.512284 | 0.693902 | 0.706182 |
| MmugDNA.22347.1.S1_at   | MmugDNA.22347.1 | 13.12 | 13.08 | 0.13 | 0.06 | 1.03  | 0.633823 | 0.0994   | 0.820508 | 0.357686 |
| MmugDNA.22347.1.S1_s_at | MmugDNA.22347.1 | 12.83 | 12.69 | 0.11 | 0.05 | 1.1   | 0.085163 | 0.281266 | 0.349307 | 0.544385 |
| MmugDNA.39827.1.S1_at   | MmugDNA.39827.1 | 5.25  | 5.19  | 0.27 | 0.02 | 1.04  | 0.688096 | 0.720575 | 0.851038 | 0.838346 |
| MmugDNA.39829.1.S1_at   | MmugDNA.39829.1 | 4.16  | 4.56  | 0.29 | 0.51 | -1.32 | 0.168986 | 0.387899 | 0.462154 | 0.622509 |
| MmugDNA.39830.1.S1_at   | MmugDNA.39830.1 | 5.76  | 5.46  | 0.69 | 0.35 | 1.23  | 0.397125 | 0.503662 | 0.66292  | 0.701018 |
| MmugDNA.39831.1.S1_at   | MmugDNA.39831.1 | 5.55  | 5.54  | 0.12 | 0.09 | 1.01  | 0.833816 | 0.035936 | 0.926861 | 0.234032 |
| MmugDNA.39833.1.S1_at   | MmugDNA.39833.1 | 10.08 | 9.99  | 0.12 | 0.36 | 1.06  | 0.58199  | 0.187585 | 0.786897 | 0.463628 |
| MmugDNA.39835.1.S1_at   | MmugDNA.39835.1 | 3.08  | 3.07  | 0.04 | 0.12 | 1.01  | 0.521899 | 0.731089 | 0.749453 | 0.844197 |
| MmugDNA.39836.1.S1_at   | MmugDNA.39836.1 | 9.85  | 9.77  | 0.01 | 0.05 | 1.06  | 0.186361 | 0.956648 | 0.482562 | 0.975375 |
| MmugDNA.39837.1.S1_s_at | MmugDNA.39837.1 | 6.93  | 7.63  | 0.45 | 0.16 | -1.62 | 0.200223 | 0.276695 | 0.497733 | 0.540617 |
| MmugDNA.3984.1.S1_at    | MmugDNA.3984.1  | 4.17  | 4.13  | 0.39 | 0.33 | 1.03  | 0.719671 | 0.607273 | 0.867731 | 0.766339 |
| MmugDNA.39840.1.S1_at   | MmugDNA.39840.1 | 12.57 | 13.2  | 0.2  | 0.15 | -1.54 | 0.030001 | 0.159901 | 0.226472 | 0.435987 |
| MmugDNA.17139.1.S1_s_at | MmugDNA.17139.1 | 13.04 | 13.56 | 0.07 | 0.16 | -1.44 | 0.014415 | 0.139993 | 0.171743 | 0.413309 |
| MmugDNA.39841.1.S1_at   | MmugDNA.39841.1 | 10.69 | 11.26 | 0.31 | 0.15 | -1.48 | 0.021408 | 0.043431 | 0.199957 | 0.253043 |
| MmugDNA.39843.1.S1_at   | MmugDNA.39843.1 | 4.35  | 4.36  | 0.09 | 0    | -1.01 | 0.754442 | 0.754599 | 0.886787 | 0.857244 |
| MmugDNA.39844.1.S1_at   | MmugDNA.39844.1 | 5.77  | 5.85  | 0.21 | 0.02 | -1.06 | 0.770715 | 0.893988 | 0.894865 | 0.939464 |
| MmugDNA.39845.1.S1_at   | MmugDNA.39845.1 | 4.37  | 4.29  | 0.4  | 0.07 | 1.06  | 0.722506 | 0.894201 | 0.869499 | 0.939665 |
| MmugDNA.39846.1.S1_at   | MmugDNA.39846.1 | 3     | 2.98  | 0.18 | 0.13 | 1.01  | 0.9757   | 0.709392 | 0.990389 | 0.831622 |
| MmugDNA.39848.1.S1_at   | MmugDNA.39848.1 | 9.65  | 9.38  | 0.14 | 0.13 | 1.21  | 0.167899 | 0.075254 | 0.461188 | 0.319434 |
| MmugDNA.3985.1.S1_at    | MmugDNA.3985.1  | 8.11  | 8.3   | 0.1  | 0.03 | -1.14 | 0.05237  | 0.165005 | 0.286127 | 0.44123  |
| MmugDNA.39850.1.S1_at   | MmugDNA.39850.1 | 6.16  | 5.21  | 1.03 | 0.07 | 1.93  | 0.166458 | 0.107014 | 0.45963  | 0.369588 |
| MmugDNA.39852.1.S1_at   | MmugDNA.39852.1 | 6.96  | 6.93  | 0.1  | 0.12 | 1.02  | 0.174407 | 0.175465 | 0.468617 | 0.452157 |
| MmugDNA.39853.1.S1_at   | MmugDNA.39853.1 | 7.25  | 7.8   | 0.95 | 0.17 | -1.46 | 0.882885 | 0.837374 | 0.950199 | 0.907089 |
| MmugDNA.39854.1.S1_at   | MmugDNA.39854.1 | 6.65  | 6.64  | 0.33 | 0.21 | 1     | 0.658562 | 0.230139 | 0.835049 | 0.502007 |
| MmugDNA.39855.1.S1_at   | MmugDNA.39855.1 | 10.07 | 9.49  | 0.17 | 0.23 | 1.49  | 0.033071 | 0.003791 | 0.236099 | 0.087708 |



|                         |                 |       |       |      |      |       |          |          |          |          |
|-------------------------|-----------------|-------|-------|------|------|-------|----------|----------|----------|----------|
| MmugDNA.39856.1.S1_at   | MmugDNA.39856.1 | 3.73  | 4.19  | 0.24 | 0.24 | -1.37 | 0.139871 | 0.125581 | 0.425463 | 0.396226 |
| MmugDNA.39857.1.S1_at   | MmugDNA.39857.1 | 6.6   | 6.99  | 0.22 | 0.14 | -1.31 | 0.029015 | 0.047814 | 0.223177 | 0.263649 |
| MmugDNA.39860.1.S1_at   | MmugDNA.39860.1 | 4.8   | 4.66  | 0.44 | 0.14 | 1.1   | 0.321862 | 0.417317 | 0.606128 | 0.642143 |
| MmugDNA.39862.1.S1_at   | MmugDNA.39862.1 | 9.88  | 10.18 | 0.81 | 0.4  | -1.22 | 0.415788 | 0.050626 | 0.676389 | 0.270317 |
| MmugDNA.39863.1.S1_at   | MmugDNA.39863.1 | 10.18 | 8.88  | 0.21 | 0.02 | 2.45  | 0.000404 | 0.002685 | 0.06311  | 0.076408 |
| MmugDNA.39865.1.S1_at   | MmugDNA.39865.1 | 3.57  | 3.51  | 0.09 | 0.05 | 1.04  | 0.222099 | 0.200316 | 0.520216 | 0.474705 |
| MmugDNA.39866.1.S1_at   | MmugDNA.39866.1 | 7.88  | 8.48  | 0.33 | 0.11 | -1.52 | 0.03797  | 0.120475 | 0.25063  | 0.38925  |
| MmugDNA.39867.1.S1_at   | MmugDNA.39867.1 | 8.05  | 7.9   | 0.05 | 0.14 | 1.11  | 0.213657 | 0.074409 | 0.511594 | 0.318058 |
| MmugDNA.39868.1.S1_at   | MmugDNA.39868.1 | 5.39  | 5.4   | 0.36 | 0.2  | -1.01 | 0.460033 | 0.222016 | 0.708015 | 0.495071 |
| MmugDNA.39869.1.S1_at   | MmugDNA.39869.1 | 3.38  | 3.13  | 0.16 | 0.01 | 1.19  | 0.099034 | 0.228575 | 0.36989  | 0.500752 |
| MmugDNA.3987.1.S1_at    | MmugDNA.3987.1  | 4.27  | 4.38  | 0.14 | 0.02 | -1.08 | 0.170655 | 0.078459 | 0.464374 | 0.325212 |
| MmugDNA.39870.1.S1_x_at | MmugDNA.39870.1 | 8.83  | 8.73  | 0.73 | 0.21 | 1.07  | 0.310592 | 0.281642 | 0.596898 | 0.544706 |
| MmugDNA.39872.1.S1_at   | MmugDNA.39872.1 | 9.04  | 9.39  | 0.44 | 0.1  | -1.28 | 0.619019 | 0.753837 | 0.810974 | 0.856692 |
| MmugDNA.39872.1.S1_s_at | MmugDNA.39872.1 | 9.08  | 9.27  | 0.29 | 0.12 | -1.14 | 0.644343 | 0.930899 | 0.826816 | 0.96074  |
| MmugDNA.39873.1.S1_at   | MmugDNA.39873.1 | 11.76 | 11.7  | 0.16 | 0.07 | 1.05  | 0.361478 | 0.028851 | 0.636937 | 0.211661 |
| MmugDNA.39873.1.S1_s_at | MmugDNA.39873.1 | 12.38 | 12.34 | 0.17 | 0.06 | 1.03  | 0.373343 | 0.050906 | 0.645118 | 0.270955 |
| MmugDNA.39877.1.S1_at   | MmugDNA.39877.1 | 4.46  | 4.53  | 0.08 | 0.2  | -1.05 | 0.612122 | 0.264427 | 0.806682 | 0.530385 |
| MmugDNA.39877.1.S1_s_at | MmugDNA.39877.1 | 6.86  | 6.9   | 0.19 | 0.12 | -1.02 | 0.865253 | 0.373332 | 0.941476 | 0.612164 |
| MmugDNA.39878.1.S1_at   | MmugDNA.39878.1 | 9.17  | 8.74  | 0.08 | 0    | 1.34  | 0.000546 | 0.000701 | 0.070087 | 0.04424  |
| MmugDNA.39879.1.S1_at   | MmugDNA.39879.1 | 4.19  | 4.19  | 0.21 | 0.03 | 1     | 0.852758 | 0.577599 | 0.935952 | 0.748013 |
| MmugDNA.3988.1.S1_at    | MmugDNA.3988.1  | 4.07  | 6.57  | 0.16 | 0.51 | -5.64 | 0.001298 | 0.010723 | 0.078631 | 0.135271 |
| MmugDNA.39880.1.S1_at   | MmugDNA.39880.1 | 4.73  | 4.68  | 0.18 | 0.1  | 1.03  | 0.465515 | 0.147377 | 0.711552 | 0.421554 |
| MmugDNA.39882.1.S1_at   | MmugDNA.39882.1 | 4.51  | 3.69  | 1.02 | 0.09 | 1.76  | 0.407593 | 0.372313 | 0.67059  | 0.611225 |
| MmugDNA.39883.1.S1_at   | MmugDNA.39883.1 | 4.25  | 4.37  | 0.19 | 0.05 | -1.09 | 0.891781 | 0.961678 | 0.953838 | 0.978408 |
| MmugDNA.39884.1.S1_at   | MmugDNA.39884.1 | 6.27  | 6.88  | 0.08 | 0.09 | -1.53 | 0.000727 | 0.007982 | 0.07226  | 0.118766 |
| MmugDNA.39885.1.S1_at   | MmugDNA.39885.1 | 8.48  | 8.69  | 0.45 | 0.13 | -1.16 | 0.518436 | 0.245093 | 0.747521 | 0.514861 |
| MmugDNA.39886.1.S1_at   | MmugDNA.39886.1 | 10.83 | 10.62 | 0.33 | 0.29 | 1.15  | 0.418169 | 0.488046 | 0.678114 | 0.69087  |
| MmugDNA.39887.1.S1_s_at | MmugDNA.39887.1 | 13.22 | 13.22 | 0.14 | 0.02 | 1     | 0.827867 | 0.903081 | 0.923803 | 0.944962 |
| MmugDNA.39888.1.S1_at   | MmugDNA.39888.1 | 3.94  | 4.09  | 0.13 | 0.15 | -1.12 | 0.538732 | 0.69875  | 0.76036  | 0.824973 |
| MmugDNA.39889.1.S1_at   | MmugDNA.39889.1 | 3.15  | 3.15  | 0.02 | 0.02 | -1    | 0.300844 | 0.725918 | 0.588975 | 0.841313 |
| MmugDNA.3989.1.S1_at    | MmugDNA.3989.1  | 3.97  | 3.86  | 0.41 | 0.08 | 1.07  | 0.853767 | 0.657854 | 0.936379 | 0.800051 |
| MmugDNA.39891.1.S1_at   | MmugDNA.39891.1 | 3.62  | 3.65  | 0.17 | 0.3  | -1.02 | 0.421543 | 0.287088 | 0.679956 | 0.548379 |
| MmugDNA.39892.1.S1_at   | MmugDNA.39892.1 | 4.45  | 4.63  | 0.69 | 0.05 | -1.13 | 0.713863 | 0.146047 | 0.864758 | 0.420064 |
| MmugDNA.39893.1.S1_at   | MmugDNA.39893.1 | 10.36 | 10.04 | 0.16 | 0.12 | 1.24  | 0.051988 | 0.197883 | 0.285543 | 0.472818 |
| MmugDNA.39894.1.S1_at   | MmugDNA.39894.1 | 6.64  | 6.76  | 0.18 | 0.01 | -1.09 | 0.228715 | 0.180706 | 0.527163 | 0.457258 |
| MmugDNA.39895.1.S1_at   | MmugDNA.39895.1 | 9.68  | 10    | 0.45 | 0.09 | -1.25 | 0.227785 | 0.385131 | 0.525854 | 0.620662 |
| MmugDNA.39896.1.S1_at   | MmugDNA.39896.1 | 3.89  | 3.26  | 0.88 | 0.22 | 1.54  | 0.412428 | 0.473981 | 0.674115 | 0.681155 |
| MmugDNA.39899.1.S1_at   | MmugDNA.39899.1 | 6.17  | 5.89  | 1.41 | 0.33 | 1.22  | 0.26639  | 0.444198 | 0.558813 | 0.661871 |
| MmugDNA.39901.1.S1_at   | MmugDNA.39901.1 | 6.54  | 6.66  | 0.09 | 0.21 | -1.08 | 0.742974 | 0.29115  | 0.881112 | 0.551652 |
| MmugDNA.39902.1.S1_at   | MmugDNA.39902.1 | 7.01  | 8.17  | 0.5  | 0.35 | -2.23 | 0.070847 | 0.399295 | 0.324317 | 0.629737 |
| MmugDNA.39903.1.S1_at   | MmugDNA.39903.1 | 5.6   | 5.6   | 0.02 | 0.05 | 1     | 0.719673 | 0.789135 | 0.867731 | 0.878136 |
| MmugDNA.39904.1.S1_at   | MmugDNA.39904.1 | 5.5   | 5.76  | 0.92 | 0.17 | -1.2  | 0.546613 | 0.702622 | 0.765406 | 0.827641 |
| MmugDNA.39906.1.S1_at   | MmugDNA.39906.1 | 2.95  | 2.95  | 0.1  | 0.1  | 1     | 0.653532 | 0.231193 | 0.832228 | 0.5029   |

|                         |                 |      |      |      |      |        |          |          |          |          |
|-------------------------|-----------------|------|------|------|------|--------|----------|----------|----------|----------|
| MmugDNA.39908.1.S1_at   | MmugDNA.39908.1 | 5.32 | 5.14 | 0.44 | 0.87 | 1.13   | 0.854246 | 0.811603 | 0.936616 | 0.891244 |
| MmugDNA.39909.1.S1_at   | MmugDNA.39909.1 | 7.34 | 7.15 | 0.35 | 0.13 | 1.14   | 0.333246 | 0.491039 | 0.614682 | 0.692751 |
| MmugDNA.3991.1.S1_at    | MmugDNA.3991.1  | 5.09 | 5.19 | 0.1  | 0.05 | -1.07  | 0.115529 | 0.181679 | 0.392712 | 0.458271 |
| MmugDNA.39910.1.S1_at   | MmugDNA.39910.1 | 4.9  | 4.85 | 0.09 | 0.12 | 1.03   | 0.547995 | 0.610928 | 0.766338 | 0.768948 |
| MmugDNA.39911.1.S1_at   | MmugDNA.39911.1 | 7.25 | 6.87 | 0.8  | 0.29 | 1.3    | 0.992163 | 0.922564 | 0.997104 | 0.956376 |
| MmugDNA.39912.1.S1_at   | MmugDNA.39912.1 | 5.77 | 5.8  | 0.6  | 0.2  | -1.02  | 0.458312 | 0.353799 | 0.70694  | 0.596815 |
| MmugDNA.39915.1.S1_at   | MmugDNA.39915.1 | 7.7  | 7.29 | 0.23 | 0.19 | 1.32   | 0.041758 | 0.191628 | 0.26097  | 0.466918 |
| MmugDNA.39916.1.S1_at   | MmugDNA.39916.1 | 3.39 | 3.26 | 0.44 | 0.22 | 1.09   | 0.466307 | 0.566685 | 0.712157 | 0.740723 |
| MmugDNA.39917.1.S1_at   | MmugDNA.39917.1 | 4.31 | 4.31 | 0.02 | 0.05 | -1     | 0.957707 | 0.199577 | 0.982604 | 0.474208 |
| MmugDNA.21083.1.S1_at   | MmugDNA.21083.1 | 5.92 | 5.87 | 0.02 | 0.15 | 1.03   | 0.206664 | 0.514377 | 0.504305 | 0.707675 |
| MmugDNA.21083.1.S1_s_at | MmugDNA.21083.1 | 6.41 | 6.46 | 0.13 | 0.16 | -1.03  | 0.693066 | 0.673089 | 0.853323 | 0.808977 |
| MmugDNA.3992.1.S1_at    | MmugDNA.3992.1  | 4.64 | 4.86 | 0.41 | 0.29 | -1.16  | 0.937984 | 0.688835 | 0.973844 | 0.818338 |
| MmugDNA.39921.1.S1_at   | MmugDNA.39921.1 | 7.48 | 7.33 | 0.13 | 0.13 | 1.11   | 0.64634  | 0.069148 | 0.828104 | 0.30917  |
| MmugDNA.39922.1.S1_at   | MmugDNA.39922.1 | 6.47 | 6.06 | 0.2  | 0.1  | 1.32   | 0.062684 | 0.431422 | 0.307025 | 0.652359 |
| MmugDNA.39923.1.S1_at   | MmugDNA.39923.1 | 5.09 | 5.5  | 0.38 | 0.07 | -1.33  | 0.055929 | 0.163433 | 0.293437 | 0.439629 |
| MmugDNA.39926.1.S1_at   | MmugDNA.39926.1 | 3.54 | 3.54 | 0.06 | 0.05 | 1      | 0.403293 | 0.657862 | 0.667463 | 0.800051 |
| MmugDNA.39928.1.S1_at   | MmugDNA.39928.1 | 7.56 | 7.26 | 0.46 | 0.17 | 1.23   | 0.415574 | 0.605503 | 0.676271 | 0.765274 |
| MmugDNA.3993.1.S1_at    | MmugDNA.3993.1  | 5.58 | 6.04 | 0.16 | 0.11 | -1.37  | 0.033999 | 0.312768 | 0.238985 | 0.567314 |
| MmugDNA.39930.1.S1_at   | MmugDNA.39930.1 | 4.72 | 5.74 | 0.42 | 0.28 | -2.03  | 0.022436 | 0.074768 | 0.203119 | 0.318526 |
| MmugDNA.39931.1.S1_at   | MmugDNA.39931.1 | 7.8  | 8.5  | 0.18 | 0.46 | -1.62  | 0.131015 | 0.024564 | 0.413746 | 0.196128 |
| MmugDNA.39932.1.S1_at   | MmugDNA.39932.1 | 9.76 | 9.57 | 0.39 | 0.15 | 1.14   | 0.738414 | 0.016986 | 0.87879  | 0.165245 |
| MmugDNA.39933.1.S1_at   | MmugDNA.39933.1 | 6.26 | 5.81 | 0.18 | 0.22 | 1.36   | 0.048034 | 0.046744 | 0.276525 | 0.260886 |
| MmugDNA.39934.1.S1_at   | MmugDNA.39934.1 | 5.32 | 5.37 | 0.38 | 0.19 | -1.04  | 0.539731 | 0.557898 | 0.76104  | 0.735292 |
| MmugDNA.39936.1.S1_at   | MmugDNA.39936.1 | 3.2  | 3.2  | 0.28 | 0.07 | -1     | 0.540578 | 0.556144 | 0.761563 | 0.734408 |
| MmugDNA.39937.1.S1_at   | MmugDNA.39937.1 | 4.48 | 4.82 | 0.31 | 0.27 | -1.26  | 0.41345  | 0.297242 | 0.674789 | 0.556067 |
| MmugDNA.39938.1.S1_at   | MmugDNA.39938.1 | 4.4  | 4.3  | 0.15 | 0.13 | 1.07   | 0.160907 | 0.209286 | 0.452408 | 0.48303  |
| MmugDNA.39940.1.S1_at   | MmugDNA.39940.1 | 9.29 | 9.91 | 0.33 | 0.14 | -1.53  | 0.061245 | 0.092909 | 0.304296 | 0.349024 |
| MmugDNA.39941.1.S1_at   | MmugDNA.39941.1 | 5.52 | 5.54 | 0.06 | 0.02 | -1.01  | 0.956061 | 0.114711 | 0.981979 | 0.381252 |
| MmugDNA.39942.1.S1_at   | MmugDNA.39942.1 | 5.96 | 5.91 | 0.09 | 0.13 | 1.04   | 0.565211 | 0.108295 | 0.776544 | 0.371557 |
| MmugDNA.39943.1.S1_at   | MmugDNA.39943.1 | 9.55 | 9.11 | 0.49 | 0.13 | 1.35   | 0.217139 | 0.049598 | 0.514939 | 0.267713 |
| MmugDNA.39944.1.S1_at   | MmugDNA.39944.1 | 5.1  | 5.5  | 0.47 | 0.31 | -1.32  | 0.627355 | 0.81754  | 0.816803 | 0.894746 |
| MmugDNA.39945.1.S1_at   | MmugDNA.39945.1 | 4.64 | 9    | 1.57 | 0.53 | -20.51 | 0.022416 | 0.18841  | 0.202983 | 0.464416 |
| MmugDNA.39946.1.S1_at   | MmugDNA.39946.1 | 4.3  | 3.97 | 0.34 | 0.11 | 1.26   | 0.10629  | 0.043532 | 0.380284 | 0.253227 |
| MmugDNA.39947.1.S1_at   | MmugDNA.39947.1 | 5.47 | 5.46 | 0.17 | 0.09 | 1      | 0.895508 | 0.567504 | 0.9554   | 0.74139  |
| MmugDNA.39949.1.S1_at   | MmugDNA.39949.1 | 4.49 | 4.51 | 0.17 | 0.04 | -1.02  | 0.619821 | 0.725295 | 0.811482 | 0.840954 |
| MmugDNA.3995.1.S1_s_at  | MmugDNA.3995.1  | 8.87 | 8.43 | 0.35 | 0.26 | 1.36   | 0.061289 | 0.056387 | 0.304318 | 0.283382 |
| MmugDNA.39950.1.S1_at   | MmugDNA.39950.1 | 3.35 | 3.31 | 0.39 | 0.09 | 1.03   | 0.700447 | 0.646022 | 0.857753 | 0.792676 |
| MmugDNA.39951.1.S1_at   | MmugDNA.39951.1 | 5.73 | 5.7  | 0.4  | 0.03 | 1.02   | 0.910691 | 0.67601  | 0.962201 | 0.810632 |
| MmugDNA.39951.1.S1_s_at | MmugDNA.39951.1 | 7.81 | 7.84 | 0.2  | 0.06 | -1.02  | 0.508515 | 0.587643 | 0.740425 | 0.754408 |
| MmugDNA.39952.1.S1_at   | MmugDNA.39952.1 | 3.33 | 3.06 | 0.3  | 0.16 | 1.21   | 0.217972 | 0.403422 | 0.515795 | 0.632114 |
| MmugDNA.39953.1.S1_at   | MmugDNA.39953.1 | 5.34 | 5.52 | 0.42 | 0.16 | -1.13  | 0.864714 | 0.814076 | 0.94142  | 0.892736 |
| MmugDNA.39954.1.S1_at   | MmugDNA.39954.1 | 8.39 | 8.78 | 0.15 | 0.32 | -1.31  | 0.232165 | 0.431962 | 0.530631 | 0.652723 |
| MmugDNA.39954.1.S1_s_at | MmugDNA.39954.1 | 9.02 | 9.42 | 0.16 | 0.2  | -1.32  | 0.12961  | 0.651714 | 0.412005 | 0.796356 |

|                       |                 |       |       |      |      |       |          |          |          |          |
|-----------------------|-----------------|-------|-------|------|------|-------|----------|----------|----------|----------|
| MmugDNA.39955.1.S1_at | MmugDNA.39955.1 | 9.74  | 9.83  | 0.21 | 0.16 | -1.07 | 0.116824 | 0.814902 | 0.393847 | 0.893213 |
| MmugDNA.39956.1.S1_at | MmugDNA.39956.1 | 4.88  | 4.99  | 0.09 | 0    | -1.08 | 0.124588 | 0.276661 | 0.404785 | 0.540596 |
| MmugDNA.39959.1.S1_at | MmugDNA.39959.1 | 3.65  | 3.46  | 0.08 | 0.3  | 1.14  | 0.708439 | 0.895558 | 0.861947 | 0.94031  |
| MmugDNA.39960.1.S1_at | MmugDNA.39960.1 | 6.66  | 6.63  | 0.24 | 0.03 | 1.02  | 0.812393 | 0.166402 | 0.916089 | 0.442884 |
| MmugDNA.39961.1.S1_at | MmugDNA.39961.1 | 9.17  | 9.04  | 0.3  | 0.06 | 1.09  | 0.319164 | 0.376392 | 0.603812 | 0.614243 |
| MmugDNA.39962.1.S1_at | MmugDNA.39962.1 | 5.13  | 4.63  | 0.33 | 0.24 | 1.41  | 0.176234 | 0.137546 | 0.470611 | 0.410509 |
| MmugDNA.39963.1.S1_at | MmugDNA.39963.1 | 11.81 | 11.38 | 0.36 | 0.23 | 1.35  | 0.048183 | 0.02091  | 0.276908 | 0.181415 |
| MmugDNA.39964.1.S1_at | MmugDNA.39964.1 | 4.19  | 4.18  | 0.03 | 0.13 | 1.01  | 0.378404 | 0.571895 | 0.648648 | 0.744056 |
| MmugDNA.39965.1.S1_at | MmugDNA.39965.1 | 7.56  | 7.43  | 0.03 | 0.04 | 1.09  | 0.026857 | 0.055863 | 0.216925 | 0.282172 |
| MmugDNA.39966.1.S1_at | MmugDNA.39966.1 | 3.44  | 3.49  | 0.07 | 0.25 | -1.03 | 0.684423 | 0.143753 | 0.849603 | 0.417583 |
| MmugDNA.39968.1.S1_at | MmugDNA.39968.1 | 11.57 | 11.59 | 0.23 | 0.1  | -1.01 | 0.529253 | 0.069583 | 0.754165 | 0.309848 |
| MmugDNA.3997.1.S1_at  | MmugDNA.3997.1  | 4.19  | 4.14  | 0.05 | 0.1  | 1.04  | 0.765727 | 0.078221 | 0.892564 | 0.324765 |
| MmugDNA.39970.1.S1_at | MmugDNA.39970.1 | 7.86  | 9.32  | 0.33 | 0.18 | -2.76 | 0.002877 | 0.05064  | 0.098572 | 0.270317 |
| MmugDNA.39971.1.S1_at | MmugDNA.39971.1 | 5.01  | 4.88  | 0.42 | 0.14 | 1.1   | 0.373428 | 0.331667 | 0.645118 | 0.580237 |
| MmugDNA.39972.1.S1_at | MmugDNA.39972.1 | 9.92  | 9.67  | 0.22 | 0.15 | 1.19  | 0.304883 | 0.730777 | 0.591903 | 0.844057 |
| MmugDNA.39973.1.S1_at | MmugDNA.39973.1 | 11.67 | 11.63 | 0.13 | 0.02 | 1.02  | 0.665779 | 0.551058 | 0.839433 | 0.730772 |
| MmugDNA.39976.1.S1_at | MmugDNA.39976.1 | 3.06  | 3.1   | 0.39 | 0.08 | -1.03 | 0.506104 | 0.691662 | 0.738808 | 0.820652 |
| MmugDNA.39977.1.S1_at | MmugDNA.39977.1 | 5.17  | 5.13  | 0.03 | 0.08 | 1.03  | 0.500154 | 0.505681 | 0.734575 | 0.702218 |
| MmugDNA.39978.1.S1_at | MmugDNA.39978.1 | 4.24  | 3.59  | 0.39 | 0.13 | 1.57  | 0.143642 | 0.309783 | 0.430113 | 0.565044 |
| MmugDNA.39979.1.S1_at | MmugDNA.39979.1 | 5.91  | 5.94  | 0.04 | 0.03 | -1.02 | 0.688836 | 0.3466   | 0.851433 | 0.591427 |
| MmugDNA.39980.1.S1_at | MmugDNA.39980.1 | 3.77  | 4.15  | 0.27 | 0.21 | -1.29 | 0.187367 | 0.226559 | 0.483509 | 0.499001 |
| MmugDNA.39981.1.S1_at | MmugDNA.39981.1 | 9.53  | 9.89  | 0.16 | 0.2  | -1.29 | 0.185223 | 0.572533 | 0.481385 | 0.744566 |
| MmugDNA.39982.1.S1_at | MmugDNA.39982.1 | 6.83  | 9.53  | 0.97 | 0.2  | -6.48 | 0.023868 | 0.186571 | 0.207529 | 0.462364 |
| MmugDNA.39983.1.S1_at | MmugDNA.39983.1 | 7.05  | 6.53  | 0.34 | 0.16 | 1.43  | 0.081942 | 0.452273 | 0.343216 | 0.667023 |
| MmugDNA.39984.1.S1_at | MmugDNA.39984.1 | 3.86  | 3.67  | 0.15 | 0.07 | 1.14  | 0.149815 | 0.206367 | 0.438771 | 0.480546 |
| MmugDNA.39986.1.S1_at | MmugDNA.39986.1 | 4.78  | 4.63  | 0.02 | 0.14 | 1.11  | 0.099902 | 0.418328 | 0.370826 | 0.642707 |
| MmugDNA.39987.1.S1_at | MmugDNA.39987.1 | 4.14  | 4.23  | 0.26 | 0.12 | -1.07 | 0.842587 | 0.700873 | 0.930973 | 0.826529 |
| MmugDNA.39988.1.S1_at | MmugDNA.39988.1 | 7.47  | 7.64  | 0.61 | 0.32 | -1.12 | 0.712255 | 0.35967  | 0.864309 | 0.600946 |
| MmugDNA.39989.1.S1_at | MmugDNA.39989.1 | 3.27  | 3.27  | 0.13 | 0    | 1     | 0.364181 | 0.478483 | 0.638791 | 0.684481 |
| MmugDNA.3999.1.S1_at  | MmugDNA.3999.1  | 3.82  | 3.91  | 0.09 | 0.14 | -1.07 | 0.678438 | 0.341291 | 0.846605 | 0.587393 |
| MmugDNA.39990.1.S1_at | MmugDNA.39990.1 | 7.35  | 6.65  | 1.01 | 0.25 | 1.62  | 0.265982 | 0.357076 | 0.558536 | 0.59875  |
| MmugDNA.39991.1.S1_at | MmugDNA.39991.1 | 4.41  | 4.27  | 0.11 | 0.14 | 1.11  | 0.54983  | 0.120702 | 0.767442 | 0.389556 |
| MmugDNA.39992.1.S1_at | MmugDNA.39992.1 | 8.28  | 9.26  | 0.38 | 0.19 | -1.97 | 0.023341 | 0.200097 | 0.20579  | 0.474603 |
| MmugDNA.39993.1.S1_at | MmugDNA.39993.1 | 6.28  | 5.95  | 0.19 | 0.19 | 1.26  | 0.35967  | 0.398572 | 0.635313 | 0.629458 |
| MmugDNA.39995.1.S1_at | MmugDNA.39995.1 | 7.82  | 8.17  | 0.62 | 0.17 | -1.28 | 0.188243 | 0.074735 | 0.484563 | 0.318465 |
| MmugDNA.39997.1.S1_at | MmugDNA.39997.1 | 4.78  | 4.52  | 0.53 | 0.11 | 1.2   | 0.443924 | 0.480057 | 0.696899 | 0.68565  |
| MmugDNA.39998.1.S1_at | MmugDNA.39998.1 | 10.23 | 10.54 | 0.45 | 0.06 | -1.24 | 0.770269 | 0.87111  | 0.894561 | 0.926785 |
| MmugDNA.39999.1.S1_at | MmugDNA.39999.1 | 4.61  | 4.49  | 0.28 | 0.14 | 1.09  | 0.487709 | 0.453317 | 0.726421 | 0.667688 |
| MmugDNA.4.1.S1_at     | MmugDNA.4.1     | 7.84  | 8.16  | 0.9  | 0.29 | -1.25 | 0.927816 | 0.97663  | 0.969482 | 0.987237 |
| MmugDNA.40.1.S1_at    | MmugDNA.40.1    | 4.81  | 4.91  | 0.34 | 0.05 | -1.07 | 0.861911 | 0.706522 | 0.940083 | 0.829711 |
| MmugDNA.400.1.S1_at   | MmugDNA.400.1   | 3.5   | 3.45  | 0.05 | 0.02 | 1.04  | 0.109677 | 0.018462 | 0.384769 | 0.170923 |
| MmugDNA.4000.1.S1_at  | MmugDNA.4000.1  | 6.1   | 5.94  | 0.11 | 0.17 | 1.11  | 0.092134 | 0.382168 | 0.360155 | 0.618361 |
| MmugDNA.40000.1.S1_at | MmugDNA.40000.1 | 9.12  | 8.6   | 0.19 | 0.04 | 1.43  | 0.02371  | 0.48031  | 0.207081 | 0.68574  |

|                         |                 |       |       |      |      |       |          |          |          |          |
|-------------------------|-----------------|-------|-------|------|------|-------|----------|----------|----------|----------|
| MmugDNA.40002.1.S1_at   | MmugDNA.40002.1 | 4.02  | 4.02  | 0.2  | 0.05 | -1    | 0.821291 | 0.754103 | 0.92035  | 0.856848 |
| MmugDNA.40003.1.S1_at   | MmugDNA.40003.1 | 6.11  | 5.96  | 0.07 | 0.14 | 1.11  | 0.171676 | 0.097068 | 0.465636 | 0.354556 |
| MmugDNA.40004.1.S1_at   | MmugDNA.40004.1 | 11.7  | 11.58 | 0.22 | 0.12 | 1.08  | 0.538296 | 0.50628  | 0.760232 | 0.702368 |
| MmugDNA.40005.1.S1_at   | MmugDNA.40005.1 | 4.09  | 4.06  | 0    | 0.09 | 1.02  | 0.566943 | 0.451766 | 0.777544 | 0.66661  |
| MmugDNA.40006.1.S1_at   | MmugDNA.40006.1 | 3.11  | 3.1   | 0.15 | 0.13 | 1.01  | 0.700497 | 0.784023 | 0.857773 | 0.874963 |
| MmugDNA.40007.1.S1_at   | MmugDNA.40007.1 | 3.61  | 3.53  | 0.24 | 0.09 | 1.06  | 0.349035 | 0.459087 | 0.62702  | 0.671544 |
| MmugDNA.40008.1.S1_at   | MmugDNA.40008.1 | 5.91  | 5.79  | 0.29 | 0.4  | 1.08  | 0.720928 | 0.827669 | 0.868408 | 0.901081 |
| MmugDNA.40009.1.S1_at   | MmugDNA.40009.1 | 5.94  | 5.74  | 0.42 | 0.5  | 1.15  | 0.819432 | 0.4384   | 0.919554 | 0.657383 |
| MmugDNA.4001.1.S1_at    | MmugDNA.4001.1  | 5.71  | 5.99  | 0.31 | 0.34 | -1.21 | 0.925559 | 0.37449  | 0.968463 | 0.6129   |
| MmugDNA.40010.1.S1_at   | MmugDNA.40010.1 | 6.05  | 5.59  | 0.25 | 0.15 | 1.37  | 0.036985 | 0.056891 | 0.247586 | 0.284642 |
| MmugDNA.40011.1.S1_s_at | MmugDNA.40011.1 | 12.76 | 12.34 | 0.21 | 0.11 | 1.34  | 0.057917 | 0.196808 | 0.297837 | 0.471956 |
| MmugDNA.40012.1.S1_at   | MmugDNA.40012.1 | 6.99  | 6.7   | 0.2  | 0.15 | 1.22  | 0.176686 | 0.166723 | 0.471177 | 0.443215 |
| MmugDNA.40013.1.S1_at   | MmugDNA.40013.1 | 3.25  | 3.27  | 0.13 | 0.02 | -1.01 | 0.265618 | 0.282977 | 0.558222 | 0.545692 |
| MmugDNA.40014.1.S1_at   | MmugDNA.40014.1 | 4.93  | 4.75  | 0.19 | 0.44 | 1.13  | 0.37366  | 0.256523 | 0.645118 | 0.524275 |
| MmugDNA.40015.1.S1_at   | MmugDNA.40015.1 | 3.69  | 3.57  | 0.56 | 0.09 | 1.09  | 0.533449 | 0.72715  | 0.757039 | 0.842187 |
| MmugDNA.40016.1.S1_at   | MmugDNA.40016.1 | 6.67  | 6.59  | 0.26 | 0.08 | 1.06  | 0.598131 | 0.958258 | 0.797181 | 0.976345 |
| MmugDNA.40018.1.S1_at   | MmugDNA.40018.1 | 11.03 | 11.21 | 0.12 | 0.09 | -1.13 | 0.590286 | 0.481563 | 0.791804 | 0.686528 |
| MmugDNA.40019.1.S1_at   | MmugDNA.40019.1 | 11.59 | 11.75 | 0.04 | 0.11 | -1.12 | 0.169608 | 0.113581 | 0.462918 | 0.379668 |
| MmugDNA.40020.1.S1_at   | MmugDNA.40020.1 | 8.25  | 8.38  | 0.13 | 0.01 | -1.09 | 0.172613 | 0.037324 | 0.466715 | 0.237622 |
| MmugDNA.20053.1.S1_at   | MmugDNA.20053.1 | 9.45  | 9.37  | 0.24 | 0.06 | 1.06  | 0.835971 | 0.15955  | 0.928028 | 0.435763 |
| MmugDNA.20053.1.S1_s_at | MmugDNA.20053.1 | 9.68  | 9.63  | 0.3  | 0.03 | 1.03  | 0.957214 | 0.188041 | 0.982499 | 0.464144 |
| MmugDNA.40021.1.S1_at   | MmugDNA.40021.1 | 3.67  | 3.14  | 0.32 | 0.04 | 1.44  | 0.038788 | 0.029552 | 0.253262 | 0.213572 |
| MmugDNA.40022.1.S1_at   | MmugDNA.40022.1 | 13.31 | 13.29 | 0.06 | 0.01 | 1.01  | 0.562447 | 0.373211 | 0.774894 | 0.612042 |
| MmugDNA.40023.1.S1_at   | MmugDNA.40023.1 | 4.8   | 4.72  | 0.12 | 0.03 | 1.06  | 0.429901 | 0.657108 | 0.686234 | 0.799439 |
| MmugDNA.40025.1.S1_at   | MmugDNA.40025.1 | 6.22  | 6.37  | 0.18 | 0.24 | -1.11 | 0.288223 | 0.33681  | 0.577949 | 0.584093 |
| MmugDNA.40027.1.S1_at   | MmugDNA.40027.1 | 6.97  | 5.88  | 0.73 | 0.69 | 2.13  | 0.102593 | 0.29703  | 0.374919 | 0.555979 |
| MmugDNA.40028.1.S1_at   | MmugDNA.40028.1 | 7.09  | 7.75  | 0.2  | 0.3  | -1.59 | 0.090918 | 0.367198 | 0.358149 | 0.606851 |
| MmugDNA.40029.1.S1_at   | MmugDNA.40029.1 | 4.51  | 4.77  | 0.15 | 0.18 | -1.19 | 0.65456  | 0.210574 | 0.832797 | 0.484527 |
| MmugDNA.4003.1.S1_at    | MmugDNA.4003.1  | 4.34  | 4.49  | 0.76 | 0.13 | -1.11 | 0.457972 | 0.703073 | 0.706717 | 0.827866 |
| MmugDNA.40030.1.S1_at   | MmugDNA.40030.1 | 6.15  | 7.89  | 1.36 | 0.32 | -3.35 | 0.204618 | 0.36568  | 0.502362 | 0.605684 |
| MmugDNA.40031.1.S1_at   | MmugDNA.40031.1 | 5.01  | 4.8   | 0.21 | 0.26 | 1.16  | 0.275419 | 0.579912 | 0.567073 | 0.749335 |
| MmugDNA.40032.1.S1_x_at | MmugDNA.40032.1 | 9.27  | 8.56  | 0.75 | 0.16 | 1.63  | 0.161023 | 0.077332 | 0.452489 | 0.323135 |
| MmugDNA.40033.1.S1_at   | MmugDNA.40033.1 | 8.1   | 7.72  | 0.4  | 0.16 | 1.31  | 0.065815 | 0.429636 | 0.314024 | 0.650973 |
| MmugDNA.40034.1.S1_at   | MmugDNA.40034.1 | 9     | 9.55  | 0.49 | 0.18 | -1.46 | 0.067406 | 0.201253 | 0.317287 | 0.47571  |
| MmugDNA.40035.1.S1_at   | MmugDNA.40035.1 | 3.98  | 4.09  | 0.04 | 0.01 | -1.08 | 0.010748 | 0.146476 | 0.153406 | 0.420523 |
| MmugDNA.40037.1.S1_at   | MmugDNA.40037.1 | 4.47  | 4.54  | 0.21 | 0.07 | -1.05 | 0.704967 | 0.142966 | 0.860039 | 0.416854 |
| MmugDNA.40038.1.S1_at   | MmugDNA.40038.1 | 7.31  | 7.27  | 0.16 | 0.14 | 1.03  | 0.466575 | 0.604687 | 0.712278 | 0.764769 |
| MmugDNA.40039.1.S1_at   | MmugDNA.40039.1 | 4.72  | 4.51  | 0.29 | 0.44 | 1.16  | 0.652815 | 0.474213 | 0.831632 | 0.68135  |
| MmugDNA.4004.1.S1_at    | MmugDNA.4004.1  | 4.26  | 4.09  | 0.27 | 0.18 | 1.12  | 0.176004 | 0.350408 | 0.470421 | 0.594161 |
| MmugDNA.40040.1.S1_at   | MmugDNA.40040.1 | 5.78  | 5.75  | 0.21 | 0.15 | 1.02  | 0.58989  | 0.341895 | 0.791747 | 0.587972 |
| MmugDNA.40041.1.S1_at   | MmugDNA.40041.1 | 5.13  | 4.91  | 0.15 | 0.07 | 1.16  | 0.229295 | 0.540279 | 0.528085 | 0.724221 |
| MmugDNA.40042.1.S1_at   | MmugDNA.40042.1 | 7.04  | 6.18  | 1.26 | 0.47 | 1.81  | 0.335611 | 0.455816 | 0.616515 | 0.669659 |
| MmugDNA.40043.1.S1_at   | MmugDNA.40043.1 | 8.87  | 9.52  | 0.59 | 0.12 | -1.57 | 0.420622 | 0.018197 | 0.679563 | 0.169696 |

|                         |                 |       |       |      |      |       |          |          |          |          |
|-------------------------|-----------------|-------|-------|------|------|-------|----------|----------|----------|----------|
| MmugDNA.40044.1.S1_at   | MmugDNA.40044.1 | 3.19  | 3.17  | 0.17 | 0.22 | 1.02  | 0.647407 | 0.777007 | 0.828696 | 0.870467 |
| MmugDNA.40046.1.S1_at   | MmugDNA.40046.1 | 3.11  | 3.2   | 0.06 | 0.21 | -1.06 | 0.445076 | 0.591978 | 0.697712 | 0.757386 |
| MmugDNA.40048.1.S1_at   | MmugDNA.40048.1 | 8.93  | 7.29  | 0.25 | 0.08 | 3.13  | 0.000295 | 0.005677 | 0.057381 | 0.103959 |
| MmugDNA.40049.1.S1_at   | MmugDNA.40049.1 | 10.35 | 9.63  | 0.11 | 0.1  | 1.64  | 0.001388 | 0.24196  | 0.079595 | 0.512489 |
| MmugDNA.4005.1.S1_at    | MmugDNA.4005.1  | 7.7   | 7.73  | 0.04 | 0.07 | -1.02 | 0.78599  | 0.991715 | 0.902329 | 0.995392 |
| MmugDNA.4005.1.S1_x_at  | MmugDNA.4005.1  | 7.77  | 7.78  | 0.09 | 0.07 | -1.01 | 0.379632 | 0.224864 | 0.649406 | 0.497653 |
| MmugDNA.40050.1.S1_at   | MmugDNA.40050.1 | 5.21  | 4.84  | 0.35 | 0.27 | 1.29  | 0.22938  | 0.261412 | 0.528143 | 0.527887 |
| MmugDNA.40051.1.S1_at   | MmugDNA.40051.1 | 12.27 | 12.5  | 0.3  | 0.18 | -1.17 | 0.481344 | 0.483489 | 0.721905 | 0.687943 |
| MmugDNA.40052.1.S1_at   | MmugDNA.40052.1 | 3.79  | 3.67  | 0.07 | 0.05 | 1.08  | 0.049569 | 0.352501 | 0.280028 | 0.595747 |
| MmugDNA.40053.1.S1_at   | MmugDNA.40053.1 | 8.46  | 8.26  | 0.26 | 0.17 | 1.15  | 0.172949 | 0.532343 | 0.467041 | 0.719017 |
| MmugDNA.40053.1.S1_x_at | MmugDNA.40053.1 | 8.63  | 8.4   | 0.28 | 0.16 | 1.17  | 0.288734 | 0.608444 | 0.578463 | 0.767074 |
| MmugDNA.40054.1.S1_at   | MmugDNA.40054.1 | 4.34  | 4.68  | 1.04 | 0.37 | -1.26 | 0.887224 | 0.244978 | 0.951902 | 0.514782 |
| MmugDNA.40055.1.S1_at   | MmugDNA.40055.1 | 4.05  | 4.13  | 0.37 | 0.45 | -1.05 | 0.723408 | 0.675629 | 0.870006 | 0.810429 |
| MmugDNA.40056.1.S1_at   | MmugDNA.40056.1 | 5.69  | 5.51  | 0.52 | 0.19 | 1.13  | 0.26323  | 0.274505 | 0.556921 | 0.538987 |
| MmugDNA.40057.1.S1_at   | MmugDNA.40057.1 | 10.96 | 10.51 | 0.1  | 0.08 | 1.36  | 0.002869 | 0.12052  | 0.098485 | 0.38929  |
| MmugDNA.40062.1.S1_at   | MmugDNA.40062.1 | 5.45  | 5.55  | 0.29 | 0.08 | -1.07 | 0.731652 | 0.71415  | 0.874589 | 0.834155 |
| MmugDNA.40063.1.S1_at   | MmugDNA.40063.1 | 5.48  | 6.22  | 0.52 | 0.38 | -1.67 | 0.089824 | 0.253811 | 0.356705 | 0.52217  |
| MmugDNA.40064.1.S1_at   | MmugDNA.40064.1 | 2.77  | 2.76  | 0.05 | 0.04 | 1.01  | 0.836237 | 0.242202 | 0.928236 | 0.51267  |
| MmugDNA.40065.1.S1_at   | MmugDNA.40065.1 | 3.27  | 3.22  | 0.01 | 0.06 | 1.03  | 0.901707 | 0.900896 | 0.958307 | 0.943591 |
| MmugDNA.40067.1.S1_at   | MmugDNA.40067.1 | 7.07  | 6.38  | 0.61 | 0.25 | 1.61  | 0.639135 | 0.029747 | 0.823331 | 0.214138 |
| MmugDNA.40068.1.S1_at   | MmugDNA.40068.1 | 10.85 | 10.91 | 0.34 | 0.07 | -1.05 | 0.503001 | 0.280883 | 0.736653 | 0.544054 |
| MmugDNA.40069.1.S1_at   | MmugDNA.40069.1 | 8.91  | 8.79  | 0.11 | 0.12 | 1.09  | 0.537085 | 0.050844 | 0.759385 | 0.27076  |
| MmugDNA.4007.1.S1_at    | MmugDNA.4007.1  | 3.82  | 3.62  | 0.09 | 0.05 | 1.15  | 0.013821 | 0.00938  | 0.168505 | 0.127634 |
| MmugDNA.40070.1.S1_at   | MmugDNA.40070.1 | 4.85  | 4.78  | 0.17 | 0.27 | 1.05  | 0.706385 | 0.829207 | 0.861004 | 0.901809 |
| MmugDNA.40071.1.S1_at   | MmugDNA.40071.1 | 5.1   | 5.24  | 0.2  | 0.05 | -1.11 | 0.341573 | 0.451002 | 0.621378 | 0.665965 |
| MmugDNA.40072.1.S1_at   | MmugDNA.40072.1 | 8.02  | 8.34  | 0.29 | 0.11 | -1.25 | 0.188027 | 0.432302 | 0.484319 | 0.652778 |
| MmugDNA.40073.1.S1_at   | MmugDNA.40073.1 | 8.44  | 7.42  | 0.24 | 0.04 | 2.02  | 0.001732 | 0.015786 | 0.085035 | 0.159295 |
| MmugDNA.40074.1.S1_at   | MmugDNA.40074.1 | 6.64  | 6.23  | 0.65 | 0.46 | 1.33  | 0.331425 | 0.358249 | 0.613386 | 0.599765 |
| MmugDNA.40075.1.S1_at   | MmugDNA.40075.1 | 3.4   | 3.4   | 0.26 | 0.04 | -1    | 0.330869 | 0.333462 | 0.612852 | 0.581683 |
| MmugDNA.40076.1.S1_at   | MmugDNA.40076.1 | 3.75  | 3.47  | 0.39 | 0.19 | 1.22  | 0.070082 | 0.063709 | 0.323085 | 0.298899 |
| MmugDNA.40079.1.S1_at   | MmugDNA.40079.1 | 3.14  | 2.88  | 0.25 | 0.15 | 1.2   | 0.371594 | 0.258321 | 0.644245 | 0.5256   |
| MmugDNA.4008.1.S1_at    | MmugDNA.4008.1  | 4.07  | 4.08  | 0.24 | 0.21 | -1.01 | 0.642519 | 0.303702 | 0.82562  | 0.561115 |
| MmugDNA.40081.1.S1_at   | MmugDNA.40081.1 | 5.75  | 5.49  | 0.01 | 0.17 | 1.2   | 0.179537 | 0.124533 | 0.474704 | 0.394987 |
| MmugDNA.26770.1.S1_s_at | MmugDNA.26770.1 | 12.96 | 12.7  | 0.04 | 0.09 | 1.2   | 0.005206 | 0.003263 | 0.117171 | 0.082278 |
| MmugDNA.40082.1.S1_s_at | MmugDNA.40082.1 | 5.32  | 5.31  | 0.2  | 0.08 | 1     | 0.985296 | 0.052242 | 0.994723 | 0.274065 |
| MmugDNA.40083.1.S1_at   | MmugDNA.40083.1 | 3.2   | 3.2   | 0.03 | 0    | -1    | 0.292407 | 0.810491 | 0.581701 | 0.890812 |
| MmugDNA.40084.1.S1_at   | MmugDNA.40084.1 | 3.44  | 3.39  | 0.18 | 0.23 | 1.03  | 0.950716 | 0.432241 | 0.979586 | 0.652776 |
| MmugDNA.40087.1.S1_at   | MmugDNA.40087.1 | 3.58  | 3.58  | 0.05 | 0.05 | 1     | 0.999586 | 0.494167 | 0.999849 | 0.694704 |
| MmugDNA.40089.1.S1_at   | MmugDNA.40089.1 | 12.07 | 11.74 | 0.2  | 0.18 | 1.26  | 0.11166  | 0.152345 | 0.38771  | 0.427072 |
| MmugDNA.4009.1.S1_at    | MmugDNA.4009.1  | 5.6   | 5.52  | 1.34 | 0.24 | 1.06  | 0.782941 | 0.295645 | 0.900922 | 0.555108 |
| MmugDNA.40092.1.S1_at   | MmugDNA.40092.1 | 7.25  | 7.04  | 0.23 | 0.16 | 1.16  | 0.424801 | 0.398883 | 0.682288 | 0.629593 |
| MmugDNA.40093.1.S1_at   | MmugDNA.40093.1 | 5.79  | 5.94  | 0.32 | 0.22 | -1.1  | 0.841646 | 0.714375 | 0.930382 | 0.834282 |
| MmugDNA.40094.1.S1_at   | MmugDNA.40094.1 | 8.67  | 8.49  | 0.16 | 0.18 | 1.14  | 0.562479 | 0.012876 | 0.774894 | 0.146098 |

|                         |                 |       |       |      |      |       |          |          |          |          |
|-------------------------|-----------------|-------|-------|------|------|-------|----------|----------|----------|----------|
| MmugDNA.40095.1.S1_at   | MmugDNA.40095.1 | 9.59  | 9.57  | 0.09 | 0.06 | 1.01  | 0.777234 | 0.029151 | 0.898237 | 0.212767 |
| MmugDNA.40096.1.S1_at   | MmugDNA.40096.1 | 7.72  | 7.55  | 0.04 | 0.21 | 1.13  | 0.397338 | 0.011303 | 0.662987 | 0.138076 |
| MmugDNA.40098.1.S1_at   | MmugDNA.40098.1 | 8.02  | 8.2   | 0.13 | 0.14 | -1.14 | 0.157953 | 0.107335 | 0.448708 | 0.370219 |
| MmugDNA.40099.1.S1_at   | MmugDNA.40099.1 | 9.28  | 9.5   | 0.45 | 0.3  | -1.17 | 0.366723 | 0.033917 | 0.640955 | 0.227775 |
| MmugDNA.401.1.S1_at     | MmugDNA.401.1   | 3.69  | 4.34  | 0.24 | 0.44 | -1.57 | 0.079395 | 0.164942 | 0.339427 | 0.44123  |
| MmugDNA.4010.1.S1_at    | MmugDNA.4010.1  | 3.13  | 3.15  | 0.02 | 0.07 | -1.01 | 0.23971  | 0.305587 | 0.537211 | 0.562504 |
| MmugDNA.40100.1.S1_at   | MmugDNA.40100.1 | 9.4   | 9.5   | 0.13 | 0.04 | -1.07 | 0.350619 | 0.487201 | 0.628479 | 0.690322 |
| MmugDNA.40101.1.S1_at   | MmugDNA.40101.1 | 4.86  | 4.83  | 0.18 | 0.15 | 1.02  | 0.279942 | 0.334143 | 0.571191 | 0.582198 |
| MmugDNA.40102.1.S1_at   | MmugDNA.40102.1 | 8.19  | 9.85  | 0.59 | 0.13 | -3.16 | 0.011992 | 0.010405 | 0.159499 | 0.133414 |
| MmugDNA.40103.1.S1_at   | MmugDNA.40103.1 | 3.24  | 3.19  | 0    | 0.05 | 1.04  | 0.166458 | 0.193677 | 0.45963  | 0.468785 |
| MmugDNA.40104.1.S1_at   | MmugDNA.40104.1 | 3.84  | 3.82  | 0.04 | 0.06 | 1.02  | 0.529969 | 0.067125 | 0.754621 | 0.305093 |
| MmugDNA.40106.1.S1_at   | MmugDNA.40106.1 | 4.52  | 4.64  | 0.48 | 0.22 | -1.09 | 0.715987 | 0.949094 | 0.865989 | 0.970837 |
| MmugDNA.40107.1.S1_at   | MmugDNA.40107.1 | 5.02  | 5.42  | 0.79 | 0.27 | -1.31 | 0.939342 | 0.680744 | 0.974419 | 0.813572 |
| MmugDNA.40108.1.S1_at   | MmugDNA.40108.1 | 4.03  | 3.99  | 0.06 | 0.21 | 1.03  | 0.758945 | 0.532227 | 0.889555 | 0.718999 |
| MmugDNA.4011.1.S1_at    | MmugDNA.4011.1  | 4.45  | 4.37  | 0.67 | 0.04 | 1.06  | 0.733913 | 0.759121 | 0.875982 | 0.859979 |
| MmugDNA.40110.1.S1_at   | MmugDNA.40110.1 | 6.54  | 6.46  | 0.21 | 0.18 | 1.06  | 0.692868 | 0.810561 | 0.853214 | 0.890812 |
| MmugDNA.40111.1.S1_at   | MmugDNA.40111.1 | 5.27  | 4.79  | 0.9  | 0.45 | 1.4   | 0.238639 | 0.263008 | 0.53598  | 0.529397 |
| MmugDNA.40112.1.S1_at   | MmugDNA.40112.1 | 4.08  | 4.03  | 0.33 | 0.15 | 1.04  | 0.560126 | 0.467515 | 0.773651 | 0.677091 |
| MmugDNA.40114.1.S1_at   | MmugDNA.40114.1 | 10.98 | 10.76 | 0.07 | 0.08 | 1.16  | 0.026124 | 0.013882 | 0.214757 | 0.151137 |
| MmugDNA.40115.1.S1_at   | MmugDNA.40115.1 | 8.42  | 7.85  | 0.23 | 0.19 | 1.48  | 0.027323 | 0.137316 | 0.218069 | 0.41024  |
| MmugDNA.40116.1.S1_at   | MmugDNA.40116.1 | 6.66  | 6.28  | 0.19 | 0.21 | 1.31  | 0.08247  | 0.04592  | 0.344209 | 0.258722 |
| MmugDNA.40117.1.S1_at   | MmugDNA.40117.1 | 5.6   | 5.45  | 0.05 | 0.17 | 1.1   | 0.073376 | 0.295038 | 0.328797 | 0.554551 |
| MmugDNA.40119.1.S1_s_at | MmugDNA.40119.1 | 10.25 | 10.19 | 0.18 | 0.15 | 1.05  | 0.722951 | 0.282356 | 0.869776 | 0.545076 |
| MmugDNA.4012.1.S1_at    | MmugDNA.4012.1  | 7.61  | 7.53  | 0.25 | 0.09 | 1.05  | 0.607262 | 0.024763 | 0.803617 | 0.197124 |
| MmugDNA.40120.1.S1_at   | MmugDNA.40120.1 | 3.72  | 3.73  | 0.07 | 0.07 | -1.01 | 0.766077 | 0.890621 | 0.89269  | 0.937649 |
| MmugDNA.40121.1.S1_at   | MmugDNA.40121.1 | 11.91 | 11.8  | 0.08 | 0.15 | 1.08  | 0.137759 | 0.009285 | 0.422844 | 0.127101 |
| MmugDNA.40122.1.S1_at   | MmugDNA.40122.1 | 3.73  | 3.77  | 0.07 | 0.01 | -1.03 | 0.426265 | 0.634466 | 0.68362  | 0.784807 |
| MmugDNA.40123.1.S1_at   | MmugDNA.40123.1 | 11.5  | 11.91 | 0.27 | 0.16 | -1.33 | 0.122071 | 0.04404  | 0.400802 | 0.254195 |
| MmugDNA.40125.1.S1_at   | MmugDNA.40125.1 | 5.3   | 4.86  | 0.26 | 0.14 | 1.36  | 0.049981 | 0.050569 | 0.281207 | 0.27025  |
| MmugDNA.40126.1.S1_at   | MmugDNA.40126.1 | 3.51  | 3.51  | 0.07 | 0.01 | -1    | 0.346895 | 0.683606 | 0.62508  | 0.815387 |
| MmugDNA.40127.1.S1_at   | MmugDNA.40127.1 | 2.96  | 2.99  | 0.1  | 0.06 | -1.02 | 0.650633 | 0.810636 | 0.830313 | 0.890812 |
| MmugDNA.40128.1.S1_at   | MmugDNA.40128.1 | 4.11  | 4.13  | 0.15 | 0.16 | -1.02 | 0.479688 | 0.48852  | 0.720829 | 0.691222 |
| MmugDNA.40129.1.S1_at   | MmugDNA.40129.1 | 4.65  | 4.88  | 0.21 | 0.16 | -1.17 | 0.115248 | 0.119373 | 0.392284 | 0.387887 |
| MmugDNA.4013.1.S1_at    | MmugDNA.4013.1  | 4.09  | 3.99  | 0.19 | 0.1  | 1.07  | 0.53865  | 0.277781 | 0.760315 | 0.541664 |
| MmugDNA.40130.1.S1_at   | MmugDNA.40130.1 | 2.95  | 2.92  | 0.37 | 0.06 | 1.01  | 0.280393 | 0.315001 | 0.571521 | 0.568759 |
| MmugDNA.40131.1.S1_at   | MmugDNA.40131.1 | 4.75  | 4.94  | 0.27 | 0.14 | -1.14 | 0.223508 | 0.246591 | 0.521345 | 0.515917 |
| MmugDNA.40132.1.S1_at   | MmugDNA.40132.1 | 4.54  | 4.54  | 0.44 | 0.12 | 1     | 0.386145 | 0.609408 | 0.654632 | 0.767768 |
| MmugDNA.40133.1.S1_at   | MmugDNA.40133.1 | 11.82 | 11.63 | 0.04 | 0.05 | 1.14  | 0.003456 | 0.029184 | 0.103385 | 0.212861 |
| MmugDNA.40133.1.S1_s_at | MmugDNA.40133.1 | 12.11 | 12    | 0.06 | 0.02 | 1.08  | 0.014237 | 0.045188 | 0.171042 | 0.256979 |
| MmugDNA.40135.1.S1_at   | MmugDNA.40135.1 | 3.92  | 3.83  | 1.37 | 0.8  | 1.06  | 0.66853  | 0.514113 | 0.840951 | 0.707434 |
| MmugDNA.40136.1.S1_at   | MmugDNA.40136.1 | 8.25  | 9.68  | 0.81 | 0.2  | -2.71 | 0.064271 | 0.108301 | 0.309888 | 0.371557 |
| MmugDNA.4014.1.S1_at    | MmugDNA.4014.1  | 10.57 | 10.33 | 0.45 | 0.1  | 1.18  | 0.190302 | 0.296129 | 0.486666 | 0.555339 |
| MmugDNA.40140.1.S1_at   | MmugDNA.40140.1 | 3.03  | 3.02  | 0.04 | 0.15 | 1     | 0.877975 | 0.749775 | 0.947905 | 0.854593 |

|                         |                 |       |       |      |      |       |          |          |          |          |
|-------------------------|-----------------|-------|-------|------|------|-------|----------|----------|----------|----------|
| MmugDNA.40141.1.S1_at   | MmugDNA.40141.1 | 4.73  | 4.95  | 0.22 | 0.14 | -1.16 | 0.252985 | 0.209017 | 0.547557 | 0.482814 |
| MmugDNA.40142.1.S1_at   | MmugDNA.40142.1 | 7.95  | 7.59  | 0.06 | 0.05 | 1.29  | 0.001444 | 0.000369 | 0.079991 | 0.037273 |
| MmugDNA.40143.1.S1_at   | MmugDNA.40143.1 | 8.71  | 8.35  | 0.1  | 0.09 | 1.29  | 0.009907 | 0.132219 | 0.148933 | 0.404274 |
| MmugDNA.40145.1.S1_at   | MmugDNA.40145.1 | 11.97 | 11.98 | 0.03 | 0.04 | -1.01 | 0.364557 | 0.882145 | 0.63913  | 0.932822 |
| MmugDNA.40148.1.S1_at   | MmugDNA.40148.1 | 6.78  | 6.58  | 0.15 | 0.09 | 1.15  | 0.425702 | 0.296516 | 0.682976 | 0.555528 |
| MmugDNA.40149.1.S1_at   | MmugDNA.40149.1 | 5.26  | 5.31  | 0.3  | 0.2  | -1.03 | 0.740881 | 0.856051 | 0.879892 | 0.917823 |
| MmugDNA.4015.1.S1_at    | MmugDNA.4015.1  | 4.19  | 4.28  | 0.15 | 0.14 | -1.07 | 0.352686 | 0.654776 | 0.630029 | 0.798154 |
| MmugDNA.40150.1.S1_at   | MmugDNA.40150.1 | 6.22  | 6.34  | 0.09 | 0.11 | -1.08 | 0.148568 | 0.070064 | 0.437111 | 0.310966 |
| MmugDNA.40151.1.S1_at   | MmugDNA.40151.1 | 11.51 | 11.43 | 0.17 | 0.11 | 1.05  | 0.583976 | 0.818724 | 0.788472 | 0.895529 |
| MmugDNA.40152.1.S1_at   | MmugDNA.40152.1 | 4.89  | 4.91  | 0.08 | 0.02 | -1.01 | 0.851004 | 0.750065 | 0.935277 | 0.854684 |
| MmugDNA.40154.1.S1_at   | MmugDNA.40154.1 | 7.55  | 7.46  | 0.11 | 0.3  | 1.06  | 0.46644  | 0.647798 | 0.712237 | 0.793775 |
| MmugDNA.40155.1.S1_at   | MmugDNA.40155.1 | 10.41 | 10.18 | 0.07 | 0.09 | 1.18  | 0.014693 | 0.111954 | 0.173151 | 0.377063 |
| MmugDNA.40156.1.S1_at   | MmugDNA.40156.1 | 13.25 | 13.31 | 0.16 | 0.03 | -1.04 | 0.804003 | 0.133381 | 0.911938 | 0.405193 |
| MmugDNA.40157.1.S1_at   | MmugDNA.40157.1 | 7.24  | 7.09  | 0.18 | 0.02 | 1.11  | 0.296912 | 0.299274 | 0.585528 | 0.557769 |
| MmugDNA.40158.1.S1_at   | MmugDNA.40158.1 | 4.87  | 4.38  | 0.85 | 0.16 | 1.41  | 0.156799 | 0.212038 | 0.44741  | 0.486013 |
| MmugDNA.40159.1.S1_s_at | MmugDNA.40159.1 | 7.85  | 7.64  | 0.05 | 0.09 | 1.15  | 0.017551 | 0.059517 | 0.186083 | 0.290548 |
| MmugDNA.4016.1.S1_at    | MmugDNA.4016.1  | 9.79  | 10.12 | 0.23 | 0.16 | -1.26 | 0.131888 | 0.002968 | 0.414967 | 0.079958 |
| MmugDNA.40160.1.S1_at   | MmugDNA.40160.1 | 5.86  | 4.6   | 0.35 | 0.36 | 2.39  | 0.019923 | 0.056697 | 0.19445  | 0.284213 |
| MmugDNA.40161.1.S1_at   | MmugDNA.40161.1 | 4.25  | 4.03  | 0.22 | 0.1  | 1.17  | 0.331998 | 0.560024 | 0.613809 | 0.736441 |
| MmugDNA.40162.1.S1_at   | MmugDNA.40162.1 | 6.12  | 6.02  | 0.1  | 0.1  | 1.07  | 0.127745 | 0.166313 | 0.409611 | 0.442861 |
| MmugDNA.40163.1.S1_at   | MmugDNA.40163.1 | 7.01  | 7.06  | 0.09 | 0.11 | -1.04 | 0.67152  | 0.334796 | 0.842415 | 0.582702 |
| MmugDNA.40165.1.S1_at   | MmugDNA.40165.1 | 12.19 | 12.28 | 0.16 | 0.07 | -1.07 | 0.654468 | 0.42482  | 0.832755 | 0.64729  |
| MmugDNA.40166.1.S1_at   | MmugDNA.40166.1 | 8.26  | 8.28  | 1.21 | 0.16 | -1.02 | 0.409706 | 0.225724 | 0.672003 | 0.498159 |
| MmugDNA.40167.1.S1_at   | MmugDNA.40167.1 | 6.88  | 6.69  | 0.57 | 0.26 | 1.14  | 0.279489 | 0.547998 | 0.570786 | 0.72884  |
| MmugDNA.40168.1.S1_at   | MmugDNA.40168.1 | 4.06  | 4.09  | 0.11 | 0.01 | -1.02 | 0.186914 | 0.076949 | 0.482992 | 0.322421 |
| MmugDNA.40169.1.S1_at   | MmugDNA.40169.1 | 8.09  | 7.95  | 0.26 | 0.04 | 1.1   | 0.549947 | 0.756022 | 0.767502 | 0.857974 |
| MmugDNA.4017.1.S1_at    | MmugDNA.4017.1  | 3.6   | 3.74  | 0.2  | 0.15 | -1.1  | 0.781156 | 0.410331 | 0.900025 | 0.637216 |
| MmugDNA.40171.1.S1_at   | MmugDNA.40171.1 | 7.04  | 7.37  | 0.69 | 0.09 | -1.25 | 0.423512 | 0.230155 | 0.681468 | 0.502007 |
| MmugDNA.40172.1.S1_at   | MmugDNA.40172.1 | 4.71  | 4.58  | 0.1  | 0.07 | 1.1   | 0.056617 | 0.152934 | 0.295477 | 0.42777  |
| MmugDNA.40173.1.S1_at   | MmugDNA.40173.1 | 3.36  | 3.13  | 0.27 | 0.11 | 1.17  | 0.148862 | 0.226022 | 0.437372 | 0.498465 |
| MmugDNA.40174.1.S1_at   | MmugDNA.40174.1 | 5.51  | 5.41  | 0.13 | 0.13 | 1.07  | 0.667459 | 0.62176  | 0.840413 | 0.776338 |
| MmugDNA.40175.1.S1_at   | MmugDNA.40175.1 | 5.65  | 5.41  | 0.77 | 0.35 | 1.18  | 0.989133 | 0.555841 | 0.996231 | 0.734119 |
| MmugDNA.40176.1.S1_at   | MmugDNA.40176.1 | 9.29  | 7.82  | 0.29 | 0.12 | 2.77  | 0.001221 | 0.044433 | 0.078414 | 0.25521  |
| MmugDNA.40177.1.S1_at   | MmugDNA.40177.1 | 5.61  | 6.16  | 0.49 | 0.18 | -1.47 | 0.071461 | 0.014196 | 0.325377 | 0.152173 |
| MmugDNA.40179.1.S1_at   | MmugDNA.40179.1 | 3.83  | 3.75  | 0.45 | 0.25 | 1.06  | 0.831331 | 0.929325 | 0.925813 | 0.959675 |
| MmugDNA.4018.1.S1_at    | MmugDNA.4018.1  | 4.49  | 4.49  | 1.05 | 0.28 | 1     | 0.399363 | 0.652852 | 0.664766 | 0.797104 |
| MmugDNA.40180.1.S1_at   | MmugDNA.40180.1 | 4.51  | 5.47  | 0.72 | 0.4  | -1.95 | 0.539823 | 0.740585 | 0.761072 | 0.849805 |
| MmugDNA.40181.1.S1_at   | MmugDNA.40181.1 | 7.09  | 7.14  | 0.05 | 0.03 | -1.04 | 0.468572 | 0.41757  | 0.713637 | 0.642252 |
| MmugDNA.40181.1.S1_s_at | MmugDNA.40181.1 | 5.38  | 5.51  | 0.22 | 0.21 | -1.1  | 0.227887 | 0.486073 | 0.525966 | 0.689573 |
| MmugDNA.40182.1.S1_at   | MmugDNA.40182.1 | 4.27  | 4.06  | 0.17 | 0.1  | 1.16  | 0.087564 | 0.118781 | 0.353496 | 0.386875 |
| MmugDNA.40183.1.S1_at   | MmugDNA.40183.1 | 7.72  | 7.59  | 0.13 | 0.02 | 1.09  | 0.216096 | 0.398988 | 0.513849 | 0.629665 |
| MmugDNA.40184.1.S1_at   | MmugDNA.40184.1 | 3.24  | 3.26  | 0.03 | 0.11 | -1.02 | 0.625874 | 0.266125 | 0.81559  | 0.531957 |
| MmugDNA.40185.1.S1_at   | MmugDNA.40185.1 | 4.75  | 4.66  | 0.42 | 0.08 | 1.06  | 0.505481 | 0.304238 | 0.738531 | 0.561558 |

|                         |                 |       |       |      |      |       |          |          |          |          |
|-------------------------|-----------------|-------|-------|------|------|-------|----------|----------|----------|----------|
| MmugDNA.40186.1.S1_at   | MmugDNA.40186.1 | 7.03  | 6.87  | 0.19 | 0.06 | 1.12  | 0.702198 | 0.58333  | 0.858658 | 0.751719 |
| MmugDNA.40187.1.S1_at   | MmugDNA.40187.1 | 3.37  | 3.03  | 0.23 | 0.06 | 1.27  | 0.067986 | 0.055965 | 0.318434 | 0.28236  |
| MmugDNA.40188.1.S1_at   | MmugDNA.40188.1 | 11.58 | 10.54 | 0.45 | 0.16 | 2.06  | 0.020564 | 0.267876 | 0.196858 | 0.533607 |
| MmugDNA.40189.1.S1_at   | MmugDNA.40189.1 | 11.55 | 11.18 | 0.13 | 0.38 | 1.29  | 0.217189 | 0.085477 | 0.515012 | 0.337473 |
| MmugDNA.40191.1.S1_at   | MmugDNA.40191.1 | 5.78  | 5.78  | 0.09 | 0.23 | 1     | 0.501172 | 0.584482 | 0.735283 | 0.752435 |
| MmugDNA.40191.1.S1_x_at | MmugDNA.40191.1 | 6.22  | 6.39  | 0.04 | 0.13 | -1.13 | 0.092661 | 0.103098 | 0.361022 | 0.364006 |
| MmugDNA.40194.1.S1_at   | MmugDNA.40194.1 | 11.62 | 11.66 | 0.12 | 0.05 | -1.03 | 0.755557 | 0.006317 | 0.887352 | 0.107907 |
| MmugDNA.36623.1.S1_s_at | MmugDNA.36623.1 | 11.07 | 10.98 | 0.1  | 0.06 | 1.07  | 0.294284 | 0.00171  | 0.583302 | 0.062657 |
| MmugDNA.40195.1.S1_at   | MmugDNA.40195.1 | 7.03  | 6.57  | 0.55 | 0.45 | 1.37  | 0.794585 | 0.520641 | 0.907212 | 0.711831 |
| MmugDNA.40196.1.S1_at   | MmugDNA.40196.1 | 3.56  | 3.91  | 0.29 | 0.05 | -1.27 | 0.114046 | 0.008289 | 0.390811 | 0.120788 |
| MmugDNA.40197.1.S1_at   | MmugDNA.40197.1 | 7.47  | 8.37  | 0.32 | 0.19 | -1.86 | 0.010597 | 0.017043 | 0.152762 | 0.165455 |
| MmugDNA.40199.1.S1_at   | MmugDNA.40199.1 | 7.14  | 6.92  | 0.23 | 0.04 | 1.16  | 0.15096  | 0.52175  | 0.440305 | 0.712623 |
| MmugDNA.402.1.S1_at     | MmugDNA.402.1   | 6.03  | 5.97  | 0.46 | 0.15 | 1.04  | 0.343287 | 0.326893 | 0.622953 | 0.576848 |
| MmugDNA.4020.1.S1_at    | MmugDNA.4020.1  | 3.27  | 3.29  | 0.21 | 0.24 | -1.01 | 0.616954 | 0.81963  | 0.809734 | 0.896113 |
| MmugDNA.40200.1.S1_at   | MmugDNA.40200.1 | 9.15  | 8.84  | 0.68 | 0.22 | 1.24  | 0.960694 | 0.744787 | 0.983922 | 0.852198 |
| MmugDNA.21349.1.S1_s_at | MmugDNA.21349.1 | 3.21  | 3.17  | 0.05 | 0.2  | 1.03  | 0.748911 | 0.160148 | 0.883751 | 0.436296 |
| MmugDNA.40202.1.S1_at   | MmugDNA.40202.1 | 4.28  | 4.62  | 0.15 | 0.14 | -1.27 | 0.102412 | 0.169918 | 0.37449  | 0.446569 |
| MmugDNA.40203.1.S1_at   | MmugDNA.40203.1 | 10.74 | 10.67 | 0.25 | 0.08 | 1.05  | 0.83746  | 0.056137 | 0.928764 | 0.282825 |
| MmugDNA.40205.1.S1_at   | MmugDNA.40205.1 | 4.84  | 4.94  | 0.12 | 0.09 | -1.07 | 0.310114 | 0.396752 | 0.596363 | 0.628438 |
| MmugDNA.40207.1.S1_at   | MmugDNA.40207.1 | 13    | 12.89 | 0.11 | 0.03 | 1.08  | 0.095918 | 0.080747 | 0.365529 | 0.328632 |
| MmugDNA.40207.1.S1_s_at | MmugDNA.40207.1 | 12.87 | 12.88 | 0.18 | 0    | -1.01 | 0.44897  | 0.379167 | 0.700328 | 0.616153 |
| MmugDNA.40209.1.S1_at   | MmugDNA.40209.1 | 4.6   | 4.52  | 0.02 | 0.07 | 1.06  | 0.216802 | 0.101315 | 0.514637 | 0.361094 |
| MmugDNA.4021.1.S1_at    | MmugDNA.4021.1  | 4.58  | 4.5   | 0.15 | 0.09 | 1.06  | 0.487183 | 0.557663 | 0.726032 | 0.735165 |
| MmugDNA.40210.1.S1_at   | MmugDNA.40210.1 | 5.74  | 5.73  | 0.23 | 0.09 | 1     | 0.420949 | 0.418164 | 0.679818 | 0.642638 |
| MmugDNA.40211.1.S1_at   | MmugDNA.40211.1 | 5.98  | 5.97  | 0.23 | 0.1  | 1.01  | 0.320669 | 0.505672 | 0.605178 | 0.702218 |
| MmugDNA.40212.1.S1_at   | MmugDNA.40212.1 | 6.03  | 6.09  | 0.12 | 0.18 | -1.04 | 0.475291 | 0.658392 | 0.71804  | 0.800319 |
| MmugDNA.40214.1.S1_at   | MmugDNA.40214.1 | 3.12  | 4.51  | 0.31 | 0.45 | -2.63 | 0.035594 | 0.018016 | 0.243518 | 0.169255 |
| MmugDNA.40215.1.S1_at   | MmugDNA.40215.1 | 3.41  | 3.42  | 0.25 | 0.25 | -1.01 | 0.990445 | 0.999321 | 0.996572 | 0.999756 |
| MmugDNA.40216.1.S1_at   | MmugDNA.40216.1 | 6.27  | 6.21  | 0.19 | 0.07 | 1.04  | 0.346657 | 0.69288  | 0.625    | 0.82128  |
| MmugDNA.40217.1.S1_at   | MmugDNA.40217.1 | 5.79  | 5.53  | 0.13 | 0.2  | 1.19  | 0.361254 | 0.504851 | 0.636739 | 0.701897 |
| MmugDNA.4022.1.S1_at    | MmugDNA.4022.1  | 3.44  | 3.39  | 0.08 | 0.01 | 1.04  | 0.105344 | 0.118306 | 0.379256 | 0.386327 |
| MmugDNA.40220.1.S1_at   | MmugDNA.40220.1 | 4.28  | 4.17  | 0.12 | 0.18 | 1.07  | 0.602997 | 0.581807 | 0.800659 | 0.750781 |
| MmugDNA.40221.1.S1_at   | MmugDNA.40221.1 | 4.52  | 4.24  | 0.39 | 0.11 | 1.21  | 0.999561 | 0.003888 | 0.999849 | 0.088775 |
| MmugDNA.40222.1.S1_at   | MmugDNA.40222.1 | 6.1   | 6.18  | 0.76 | 0.05 | -1.06 | 0.506913 | 0.640685 | 0.739358 | 0.789053 |
| MmugDNA.40223.1.S1_at   | MmugDNA.40223.1 | 4.26  | 4.36  | 0.27 | 0.28 | -1.08 | 0.655995 | 0.453318 | 0.83356  | 0.667688 |
| MmugDNA.40224.1.S1_at   | MmugDNA.40224.1 | 7.15  | 7.51  | 0.32 | 0.22 | -1.29 | 0.23712  | 0.484538 | 0.534591 | 0.688536 |
| MmugDNA.40226.1.S1_at   | MmugDNA.40226.1 | 4.09  | 4.47  | 0.08 | 0.12 | -1.31 | 0.008134 | 0.005752 | 0.138956 | 0.104378 |
| MmugDNA.40229.1.S1_s_at | MmugDNA.40229.1 | 8.94  | 8.98  | 0.22 | 0.15 | -1.03 | 0.514368 | 0.66863  | 0.744316 | 0.806111 |
| MmugDNA.4023.1.S1_at    | MmugDNA.4023.1  | 4.18  | 5.25  | 0.36 | 0.74 | -2.1  | 0.359214 | 0.55966  | 0.634811 | 0.736365 |
| MmugDNA.40231.1.S1_at   | MmugDNA.40231.1 | 3.5   | 3.51  | 0.15 | 0.05 | -1.01 | 0.85777  | 0.169366 | 0.938173 | 0.445983 |
| MmugDNA.40234.1.S1_at   | MmugDNA.40234.1 | 5.82  | 5.59  | 0.14 | 0.18 | 1.17  | 0.162147 | 0.117577 | 0.454019 | 0.38531  |
| MmugDNA.40235.1.S1_at   | MmugDNA.40235.1 | 7.93  | 7.56  | 0.15 | 0.29 | 1.29  | 0.307679 | 0.141549 | 0.594485 | 0.415063 |
| MmugDNA.40237.1.S1_at   | MmugDNA.40237.1 | 5     | 5.63  | 1.45 | 0.57 | -1.55 | 0.861247 | 0.664624 | 0.939728 | 0.803461 |



|                         |                 |      |       |      |      |       |          |          |          |          |
|-------------------------|-----------------|------|-------|------|------|-------|----------|----------|----------|----------|
| MmugDNA.40238.1.S1_at   | MmugDNA.40238.1 | 5.75 | 5.9   | 0.14 | 0.17 | -1.11 | 0.764126 | 0.471305 | 0.891902 | 0.679323 |
| MmugDNA.40239.1.S1_at   | MmugDNA.40239.1 | 4.24 | 4.41  | 0.31 | 0.1  | -1.13 | 0.95742  | 0.917004 | 0.982581 | 0.953623 |
| MmugDNA.21359.1.S1_s_at | MmugDNA.21359.1 | 6.13 | 6.11  | 0.01 | 0.04 | 1.02  | 0.541626 | 0.262073 | 0.762335 | 0.528374 |
| MmugDNA.40240.1.S1_at   | MmugDNA.40240.1 | 5.69 | 5.68  | 0.1  | 0.1  | 1.01  | 0.192429 | 0.737317 | 0.488958 | 0.847869 |
| MmugDNA.40241.1.S1_at   | MmugDNA.40241.1 | 9.75 | 10.11 | 0.12 | 0.09 | -1.29 | 0.019742 | 0.000765 | 0.193486 | 0.04544  |
| MmugDNA.40242.1.S1_at   | MmugDNA.40242.1 | 5.18 | 6.18  | 0.03 | 0.26 | -2    | 0.003064 | 0.136666 | 0.100449 | 0.409207 |
| MmugDNA.40243.1.S1_at   | MmugDNA.40243.1 | 4.53 | 4.6   | 1.11 | 0    | -1.04 | 0.419765 | 0.849919 | 0.679035 | 0.914673 |
| MmugDNA.40244.1.S1_at   | MmugDNA.40244.1 | 5.44 | 5.33  | 0.4  | 0.12 | 1.07  | 0.973309 | 0.250719 | 0.989309 | 0.51941  |
| MmugDNA.40245.1.S1_at   | MmugDNA.40245.1 | 4.05 | 3.8   | 1.19 | 0.11 | 1.19  | 0.275634 | 0.305387 | 0.567274 | 0.562397 |
| MmugDNA.40247.1.S1_at   | MmugDNA.40247.1 | 2.88 | 3.03  | 0.03 | 0.15 | -1.11 | 0.060403 | 0.340332 | 0.302968 | 0.586725 |
| MmugDNA.40248.1.S1_at   | MmugDNA.40248.1 | 6.38 | 6.15  | 0.2  | 0.22 | 1.17  | 0.476379 | 0.60245  | 0.718756 | 0.763411 |
| MmugDNA.40249.1.S1_at   | MmugDNA.40249.1 | 8.51 | 6.4   | 0.56 | 0.23 | 4.32  | 0.004786 | 0.004441 | 0.115098 | 0.092958 |
| MmugDNA.4025.1.S1_at    | MmugDNA.4025.1  | 3.61 | 3.17  | 0.1  | 0.14 | 1.36  | 0.025268 | 0.136068 | 0.211966 | 0.408363 |
| MmugDNA.40250.1.S1_at   | MmugDNA.40250.1 | 5.27 | 5.18  | 0.12 | 0.09 | 1.07  | 0.367515 | 0.485544 | 0.641471 | 0.689192 |
| MmugDNA.40251.1.S1_at   | MmugDNA.40251.1 | 9.47 | 9.81  | 0.11 | 0.07 | -1.27 | 0.008256 | 0.016786 | 0.139927 | 0.164091 |
| MmugDNA.40252.1.S1_at   | MmugDNA.40252.1 | 7.32 | 7.24  | 0.17 | 0.03 | 1.06  | 0.473211 | 0.699591 | 0.716569 | 0.825531 |
| MmugDNA.40253.1.S1_at   | MmugDNA.40253.1 | 5.42 | 5.51  | 0.08 | 0.03 | -1.07 | 0.304666 | 0.01325  | 0.591791 | 0.147683 |
| MmugDNA.40255.1.S1_at   | MmugDNA.40255.1 | 3.35 | 3.28  | 0.13 | 0.1  | 1.05  | 0.202458 | 0.507362 | 0.500091 | 0.702917 |
| MmugDNA.40256.1.S1_at   | MmugDNA.40256.1 | 5.97 | 5.93  | 0.12 | 0.05 | 1.03  | 0.508292 | 0.098964 | 0.740303 | 0.357049 |
| MmugDNA.40257.1.S1_at   | MmugDNA.40257.1 | 8.1  | 8.37  | 0.32 | 0.23 | -1.2  | 0.306242 | 0.803972 | 0.593226 | 0.887203 |
| MmugDNA.40260.1.S1_at   | MmugDNA.40260.1 | 4.56 | 4.39  | 0.27 | 1.08 | 1.12  | 0.676618 | 0.534367 | 0.845573 | 0.720341 |
| MmugDNA.40262.1.S1_at   | MmugDNA.40262.1 | 3.18 | 3.15  | 0.07 | 0.03 | 1.03  | 0.171026 | 0.483745 | 0.464849 | 0.688112 |
| MmugDNA.40263.1.S1_at   | MmugDNA.40263.1 | 4.08 | 4.13  | 0.04 | 0.04 | -1.03 | 0.239255 | 0.167739 | 0.53651  | 0.444282 |
| MmugDNA.40265.1.S1_at   | MmugDNA.40265.1 | 9.29 | 9.46  | 0.03 | 0.14 | -1.13 | 0.097393 | 0.004047 | 0.367528 | 0.090281 |
| MmugDNA.40266.1.S1_at   | MmugDNA.40266.1 | 3.91 | 4.16  | 0.14 | 0.11 | -1.19 | 0.066541 | 0.009969 | 0.315478 | 0.131094 |
| MmugDNA.40267.1.S1_at   | MmugDNA.40267.1 | 4.2  | 4.55  | 0.18 | 0.01 | -1.28 | 0.072819 | 0.029942 | 0.327658 | 0.214776 |
| MmugDNA.40268.1.S1_at   | MmugDNA.40268.1 | 6.28 | 5.89  | 0.41 | 0.15 | 1.32  | 0.13138  | 0.117908 | 0.414229 | 0.385837 |
| MmugDNA.40268.1.S1_x_at | MmugDNA.40268.1 | 6.19 | 6.04  | 0.45 | 0.08 | 1.11  | 0.192823 | 0.157343 | 0.489396 | 0.432821 |
| MmugDNA.40269.1.S1_at   | MmugDNA.40269.1 | 4.57 | 4.43  | 0.16 | 0.06 | 1.1   | 0.839368 | 0.941591 | 0.929554 | 0.966886 |
| MmugDNA.4027.1.S1_at    | MmugDNA.4027.1  | 5.48 | 5.33  | 0.13 | 0.1  | 1.11  | 0.077836 | 0.122012 | 0.336934 | 0.391465 |
| MmugDNA.40270.1.S1_at   | MmugDNA.40270.1 | 5.34 | 5.27  | 0.5  | 0.05 | 1.05  | 0.242889 | 0.355841 | 0.539651 | 0.597864 |
| MmugDNA.40270.1.S1_x_at | MmugDNA.40270.1 | 5.15 | 5.09  | 0.51 | 0.07 | 1.05  | 0.252103 | 0.237663 | 0.546788 | 0.50826  |
| MmugDNA.40271.1.S1_at   | MmugDNA.40271.1 | 8.5  | 8.35  | 0.22 | 0.22 | 1.11  | 0.604118 | 0.547089 | 0.801436 | 0.728283 |
| MmugDNA.40272.1.S1_at   | MmugDNA.40272.1 | 3.95 | 3.9   | 0.06 | 0.1  | 1.04  | 0.754324 | 0.102888 | 0.886774 | 0.363508 |
| MmugDNA.40273.1.S1_at   | MmugDNA.40273.1 | 7.44 | 8.01  | 0.55 | 0.21 | -1.49 | 0.16791  | 0.093793 | 0.461188 | 0.350281 |
| MmugDNA.40275.1.S1_at   | MmugDNA.40275.1 | 8.76 | 8.49  | 0.7  | 0.12 | 1.2   | 0.762963 | 0.925914 | 0.891457 | 0.958059 |
| MmugDNA.40276.1.S1_at   | MmugDNA.40276.1 | 9.2  | 9.3   | 0.13 | 0.08 | -1.07 | 0.201886 | 0.418937 | 0.499378 | 0.643157 |
| MmugDNA.40277.1.S1_at   | MmugDNA.40277.1 | 4.47 | 4.03  | 0.57 | 0.2  | 1.36  | 0.275479 | 0.414856 | 0.567161 | 0.640481 |
| MmugDNA.40278.1.S1_at   | MmugDNA.40278.1 | 3.97 | 3.78  | 0.18 | 0.34 | 1.14  | 0.288576 | 0.240817 | 0.578301 | 0.511521 |
| MmugDNA.40279.1.S1_at   | MmugDNA.40279.1 | 7.44 | 7.34  | 0.14 | 0.14 | 1.07  | 0.08972  | 0.071057 | 0.356703 | 0.312724 |
| MmugDNA.4028.1.S1_at    | MmugDNA.4028.1  | 6.29 | 6.22  | 0.1  | 0.26 | 1.05  | 0.425677 | 0.634653 | 0.682976 | 0.784964 |
| MmugDNA.4028.1.S1_s_at  | MmugDNA.4028.1  | 9.03 | 8.96  | 0.92 | 0.63 | 1.05  | 0.565139 | 0.889252 | 0.776513 | 0.936852 |
| MmugDNA.40280.1.S1_at   | MmugDNA.40280.1 | 5.24 | 5.06  | 0.11 | 0.11 | 1.13  | 0.056972 | 0.029316 | 0.295936 | 0.21321  |

|                         |                 |       |       |      |      |       |          |          |          |          |
|-------------------------|-----------------|-------|-------|------|------|-------|----------|----------|----------|----------|
| MmugDNA.40281.1.S1_at   | MmugDNA.40281.1 | 4.43  | 4.18  | 0.31 | 0.06 | 1.19  | 0.19647  | 0.249867 | 0.493557 | 0.518876 |
| MmugDNA.40282.1.S1_at   | MmugDNA.40282.1 | 5.98  | 5.06  | 0.82 | 0.34 | 1.9   | 0.204422 | 0.083146 | 0.502127 | 0.332999 |
| MmugDNA.40284.1.S1_at   | MmugDNA.40284.1 | 4.6   | 4.57  | 0.03 | 0.16 | 1.02  | 0.626642 | 0.857297 | 0.816168 | 0.918526 |
| MmugDNA.40285.1.S1_at   | MmugDNA.40285.1 | 10.41 | 10.58 | 0.08 | 0.08 | -1.13 | 0.033496 | 0.021389 | 0.237024 | 0.183143 |
| MmugDNA.40286.1.S1_at   | MmugDNA.40286.1 | 7.37  | 8.42  | 0.85 | 0.16 | -2.07 | 0.381835 | 0.390115 | 0.651337 | 0.624002 |
| MmugDNA.40287.1.S1_at   | MmugDNA.40287.1 | 5.15  | 5.14  | 0.13 | 0.11 | 1     | 0.901547 | 0.806455 | 0.958284 | 0.888651 |
| MmugDNA.40289.1.S1_at   | MmugDNA.40289.1 | 7.19  | 7.47  | 0.82 | 0.28 | -1.21 | 0.76193  | 0.122216 | 0.890783 | 0.391921 |
| MmugDNA.40290.1.S1_at   | MmugDNA.40290.1 | 5.64  | 6.55  | 0.51 | 0.32 | -1.89 | 0.064132 | 0.073141 | 0.309726 | 0.316064 |
| MmugDNA.40293.1.S1_x_at | MmugDNA.40293.1 | 6.62  | 6.57  | 0.58 | 0.16 | 1.04  | 0.306382 | 0.257865 | 0.593269 | 0.525467 |
| MmugDNA.40295.1.S1_at   | MmugDNA.40295.1 | 4.8   | 4.81  | 0.13 | 0.09 | -1.01 | 0.329825 | 0.36771  | 0.611933 | 0.607374 |
| MmugDNA.40296.1.S1_at   | MmugDNA.40296.1 | 7.88  | 7.76  | 1.22 | 0.31 | 1.08  | 0.522204 | 0.309379 | 0.749642 | 0.564912 |
| MmugDNA.40298.1.S1_at   | MmugDNA.40298.1 | 3.72  | 3.7   | 0.06 | 0.14 | 1.01  | 0.741833 | 0.287655 | 0.88039  | 0.548886 |
| MmugDNA.40299.1.S1_at   | MmugDNA.40299.1 | 7.64  | 7.68  | 0.24 | 0.21 | -1.03 | 0.439529 | 0.587867 | 0.693727 | 0.754542 |
| MmugDNA.4030.1.S1_at    | MmugDNA.4030.1  | 5.44  | 5.17  | 0.32 | 0.14 | 1.21  | 0.31061  | 0.29425  | 0.59691  | 0.55405  |
| MmugDNA.40300.1.S1_at   | MmugDNA.40300.1 | 4.01  | 3.95  | 0.09 | 0.02 | 1.04  | 0.675421 | 0.862794 | 0.845075 | 0.922006 |
| MmugDNA.40301.1.S1_at   | MmugDNA.40301.1 | 10.03 | 9.97  | 0.49 | 0.05 | 1.05  | 0.30944  | 0.449823 | 0.59582  | 0.665284 |
| MmugDNA.40301.1.S1_s_at | MmugDNA.40301.1 | 9.41  | 9.2   | 0.53 | 0.12 | 1.15  | 0.208893 | 0.330423 | 0.506356 | 0.579191 |
| MmugDNA.40302.1.S1_s_at | MmugDNA.40302.1 | 4.88  | 6.12  | 0.43 | 0.33 | -2.37 | 0.029286 | 0.150343 | 0.223944 | 0.42489  |
| MmugDNA.40303.1.S1_at   | MmugDNA.40303.1 | 8.01  | 7.94  | 0.26 | 0.24 | 1.05  | 0.985516 | 0.45466  | 0.994793 | 0.668763 |
| MmugDNA.40304.1.S1_at   | MmugDNA.40304.1 | 4.21  | 4     | 0.85 | 0.76 | 1.16  | 0.707781 | 0.698896 | 0.861544 | 0.825026 |
| MmugDNA.40306.1.S1_at   | MmugDNA.40306.1 | 6.5   | 6.67  | 0.17 | 0.21 | -1.12 | 0.691134 | 0.400139 | 0.85229  | 0.630158 |
| MmugDNA.40308.1.S1_at   | MmugDNA.40308.1 | 4.59  | 4.57  | 0.2  | 0.05 | 1.02  | 0.545477 | 0.717035 | 0.764715 | 0.836191 |
| MmugDNA.40312.1.S1_at   | MmugDNA.40312.1 | 4.57  | 4.78  | 0.33 | 0.14 | -1.15 | 0.122936 | 0.472891 | 0.402018 | 0.680219 |
| MmugDNA.40313.1.S1_at   | MmugDNA.40313.1 | 8.13  | 8.76  | 0.66 | 0.17 | -1.55 | 0.206602 | 0.705434 | 0.504256 | 0.829222 |
| MmugDNA.40316.1.S1_at   | MmugDNA.40316.1 | 3.99  | 3.68  | 0.4  | 0.13 | 1.24  | 0.238417 | 0.36246  | 0.535783 | 0.603016 |
| MmugDNA.40317.1.S1_at   | MmugDNA.40317.1 | 10.99 | 10.98 | 0.04 | 0.06 | 1.01  | 0.64242  | 0.00083  | 0.825599 | 0.046851 |
| MmugDNA.40318.1.S1_at   | MmugDNA.40318.1 | 4.55  | 4.59  | 0.55 | 0.2  | -1.03 | 0.878847 | 0.663911 | 0.948382 | 0.803242 |
| MmugDNA.40320.1.S1_at   | MmugDNA.40320.1 | 3.97  | 3.28  | 1.26 | 0.21 | 1.61  | 0.246471 | 0.241719 | 0.54236  | 0.512306 |
| MmugDNA.40321.1.S1_at   | MmugDNA.40321.1 | 4.04  | 4.1   | 0.15 | 0.03 | -1.04 | 0.53893  | 0.16447  | 0.76048  | 0.440679 |
| MmugDNA.40322.1.S1_at   | MmugDNA.40322.1 | 5.87  | 8.33  | 1.02 | 0.46 | -5.52 | 0.025426 | 0.351983 | 0.212448 | 0.595366 |
| MmugDNA.40323.1.S1_at   | MmugDNA.40323.1 | 6.81  | 6.53  | 0.99 | 0.56 | 1.22  | 0.745959 | 0.482988 | 0.882206 | 0.687687 |
| MmugDNA.40324.1.S1_at   | MmugDNA.40324.1 | 4.47  | 3.62  | 0.57 | 0.42 | 1.8   | 0.306612 | 0.409882 | 0.593411 | 0.636913 |
| MmugDNA.40325.1.S1_at   | MmugDNA.40325.1 | 6.44  | 6.49  | 0.08 | 0.01 | -1.03 | 0.273592 | 0.072936 | 0.565728 | 0.315986 |
| MmugDNA.40326.1.S1_at   | MmugDNA.40326.1 | 4.27  | 3.87  | 0.41 | 0.29 | 1.32  | 0.18127  | 0.360995 | 0.476616 | 0.60201  |
| MmugDNA.40327.1.S1_at   | MmugDNA.40327.1 | 4.31  | 4.3   | 0.03 | 0    | 1.01  | 0.232915 | 0.728738 | 0.531154 | 0.843195 |
| MmugDNA.40328.1.S1_at   | MmugDNA.40328.1 | 6.36  | 6.27  | 0.28 | 0.01 | 1.06  | 0.385455 | 0.528258 | 0.654225 | 0.716462 |
| MmugDNA.4033.1.S1_at    | MmugDNA.4033.1  | 7.07  | 7.47  | 0.29 | 0.22 | -1.32 | 0.329702 | 0.008803 | 0.611807 | 0.124117 |
| MmugDNA.40330.1.S1_at   | MmugDNA.40330.1 | 5.13  | 5.04  | 0.65 | 0.19 | 1.07  | 0.336276 | 0.459773 | 0.616957 | 0.671958 |
| MmugDNA.40332.1.S1_at   | MmugDNA.40332.1 | 10.69 | 10.45 | 0.23 | 0.03 | 1.17  | 0.556083 | 0.622307 | 0.771459 | 0.776819 |
| MmugDNA.40335.1.S1_at   | MmugDNA.40335.1 | 5.47  | 5.64  | 0.64 | 0.19 | -1.12 | 0.234576 | 0.484726 | 0.532707 | 0.688659 |
| MmugDNA.40336.1.S1_at   | MmugDNA.40336.1 | 11.97 | 12.01 | 0.08 | 0.04 | -1.03 | 0.66474  | 0.745826 | 0.838719 | 0.852591 |
| MmugDNA.40339.1.S1_at   | MmugDNA.40339.1 | 10.44 | 10.05 | 0.23 | 0.14 | 1.31  | 0.055074 | 0.015652 | 0.291693 | 0.158576 |
| MmugDNA.4034.1.S1_at    | MmugDNA.4034.1  | 3.19  | 3.16  | 0.17 | 0.13 | 1.02  | 0.563279 | 0.490161 | 0.775382 | 0.692233 |

|                         |                 |       |       |      |      |       |          |          |          |          |
|-------------------------|-----------------|-------|-------|------|------|-------|----------|----------|----------|----------|
| MmugDNA.40340.1.S1_at   | MmugDNA.40340.1 | 5.73  | 5.68  | 0.09 | 0.09 | 1.03  | 0.107212 | 0.281031 | 0.381691 | 0.544179 |
| MmugDNA.40341.1.S1_at   | MmugDNA.40341.1 | 5.22  | 5.25  | 0.13 | 0.2  | -1.02 | 0.873487 | 0.479862 | 0.945647 | 0.68549  |
| MmugDNA.40342.1.S1_at   | MmugDNA.40342.1 | 13.4  | 13.5  | 0.23 | 0.09 | -1.07 | 0.47898  | 0.712891 | 0.720418 | 0.833557 |
| MmugDNA.40343.1.S1_at   | MmugDNA.40343.1 | 4.13  | 4.14  | 0.21 | 0.06 | -1.01 | 0.618445 | 0.803368 | 0.810674 | 0.886825 |
| MmugDNA.40344.1.S1_at   | MmugDNA.40344.1 | 6.07  | 5.91  | 0.12 | 0.06 | 1.12  | 0.204045 | 0.283838 | 0.501596 | 0.546237 |
| MmugDNA.40345.1.S1_at   | MmugDNA.40345.1 | 5.75  | 5.76  | 0.31 | 0.16 | -1.01 | 0.729672 | 0.373682 | 0.873728 | 0.612403 |
| MmugDNA.40346.1.S1_at   | MmugDNA.40346.1 | 8.07  | 7.58  | 0.15 | 0.18 | 1.4   | 0.013797 | 0.021248 | 0.168392 | 0.182465 |
| MmugDNA.40347.1.S1_at   | MmugDNA.40347.1 | 5.41  | 5.65  | 0.13 | 0.08 | -1.18 | 0.138341 | 0.301282 | 0.423598 | 0.559356 |
| MmugDNA.40348.1.S1_at   | MmugDNA.40348.1 | 5.73  | 5.73  | 0.3  | 0.16 | 1     | 0.619678 | 0.915162 | 0.811355 | 0.952344 |
| MmugDNA.40349.1.S1_at   | MmugDNA.40349.1 | 6.26  | 6.1   | 0.01 | 0.1  | 1.12  | 0.083103 | 0.036194 | 0.345372 | 0.234827 |
| MmugDNA.4035.1.S1_at    | MmugDNA.4035.1  | 10.53 | 10.7  | 0.05 | 0.07 | -1.12 | 0.027507 | 0.58408  | 0.218484 | 0.752189 |
| MmugDNA.40350.1.S1_s_at | MmugDNA.40350.1 | 9.83  | 9.83  | 0.13 | 0.08 | -1    | 0.845944 | 0.013117 | 0.932703 | 0.147286 |
| MmugDNA.40351.1.S1_at   | MmugDNA.40351.1 | 3.51  | 3.21  | 0.13 | 0.19 | 1.23  | 0.213467 | 0.198936 | 0.511324 | 0.473521 |
| MmugDNA.40352.1.S1_at   | MmugDNA.40352.1 | 5.86  | 6.13  | 0.06 | 0.45 | -1.21 | 0.382566 | 0.488826 | 0.652037 | 0.6914   |
| MmugDNA.40353.1.S1_at   | MmugDNA.40353.1 | 3.9   | 3.76  | 0.13 | 0.08 | 1.1   | 0.129913 | 0.475928 | 0.412108 | 0.682387 |
| MmugDNA.40355.1.S1_at   | MmugDNA.40355.1 | 6.16  | 5.93  | 0.15 | 0.11 | 1.18  | 0.398872 | 0.124729 | 0.664389 | 0.39513  |
| MmugDNA.40356.1.S1_at   | MmugDNA.40356.1 | 8.44  | 8.78  | 0.18 | 0.13 | -1.27 | 0.12408  | 0.24103  | 0.404084 | 0.511657 |
| MmugDNA.40358.1.S1_at   | MmugDNA.40358.1 | 5.11  | 5.27  | 0.24 | 0.06 | -1.12 | 0.851268 | 0.575546 | 0.935334 | 0.746587 |
| MmugDNA.4036.1.S1_at    | MmugDNA.4036.1  | 9.82  | 9.47  | 0.1  | 0.15 | 1.27  | 0.046364 | 0.173087 | 0.273076 | 0.449765 |
| MmugDNA.40360.1.S1_at   | MmugDNA.40360.1 | 5.87  | 5.61  | 0.36 | 0.07 | 1.19  | 0.123827 | 0.235565 | 0.403563 | 0.506633 |
| MmugDNA.40362.1.S1_at   | MmugDNA.40362.1 | 6.35  | 6.35  | 0.35 | 0.14 | -1    | 0.977544 | 0.350149 | 0.991189 | 0.593918 |
| MmugDNA.40363.1.S1_at   | MmugDNA.40363.1 | 5.82  | 5.92  | 0.3  | 0.12 | -1.07 | 0.581245 | 0.633323 | 0.786433 | 0.784071 |
| MmugDNA.40367.1.S1_at   | MmugDNA.40367.1 | 3.77  | 3.75  | 0.11 | 0.1  | 1.02  | 0.933592 | 0.984866 | 0.972111 | 0.991449 |
| MmugDNA.40368.1.S1_at   | MmugDNA.40368.1 | 6.15  | 6.13  | 0.22 | 0.4  | 1.01  | 0.789498 | 0.450756 | 0.90444  | 0.665844 |
| MmugDNA.40369.1.S1_at   | MmugDNA.40369.1 | 12.37 | 12.03 | 0.11 | 0.06 | 1.26  | 0.031574 | 0.182806 | 0.231124 | 0.459317 |
| MmugDNA.4037.1.S1_at    | MmugDNA.4037.1  | 7.31  | 7.88  | 0.1  | 0.1  | -1.48 | 0.001737 | 0.000232 | 0.085035 | 0.03241  |
| MmugDNA.40370.1.S1_at   | MmugDNA.40370.1 | 3.65  | 3.51  | 0.29 | 0.36 | 1.1   | 0.698748 | 0.763308 | 0.856806 | 0.86245  |
| MmugDNA.40372.1.S1_at   | MmugDNA.40372.1 | 4.99  | 4.98  | 0.08 | 0.08 | 1.01  | 0.908924 | 0.028708 | 0.961371 | 0.211165 |
| MmugDNA.40373.1.S1_at   | MmugDNA.40373.1 | 3     | 2.97  | 0.07 | 0.77 | 1.02  | 0.448505 | 0.529476 | 0.700064 | 0.717289 |
| MmugDNA.40374.1.S1_at   | MmugDNA.40374.1 | 4.67  | 4.46  | 0.23 | 0.07 | 1.16  | 0.378877 | 0.49533  | 0.648993 | 0.695427 |
| MmugDNA.40375.1.S1_at   | MmugDNA.40375.1 | 4.57  | 4.17  | 1.08 | 0.26 | 1.32  | 0.187468 | 0.158187 | 0.483723 | 0.433986 |
| MmugDNA.40376.1.S1_at   | MmugDNA.40376.1 | 5.1   | 4.11  | 0.58 | 0.4  | 1.99  | 0.049648 | 0.04202  | 0.280318 | 0.249463 |
| MmugDNA.40377.1.S1_at   | MmugDNA.40377.1 | 6.65  | 6.1   | 0.62 | 0.37 | 1.46  | 0.202262 | 0.189227 | 0.499812 | 0.464997 |
| MmugDNA.40378.1.S1_at   | MmugDNA.40378.1 | 3.28  | 3.25  | 0.1  | 0.3  | 1.02  | 0.616483 | 0.782116 | 0.809516 | 0.873783 |
| MmugDNA.40379.1.S1_at   | MmugDNA.40379.1 | 12.46 | 12.16 | 0.06 | 0.1  | 1.23  | 0.03438  | 0.003093 | 0.240032 | 0.081194 |
| MmugDNA.4038.1.S1_at    | MmugDNA.4038.1  | 6.08  | 6.06  | 0.24 | 0.21 | 1.01  | 0.570035 | 0.233505 | 0.779266 | 0.504835 |
| MmugDNA.40380.1.S1_at   | MmugDNA.40380.1 | 6.5   | 6.24  | 0.26 | 0.25 | 1.2   | 0.255058 | 0.311378 | 0.549576 | 0.566448 |
| MmugDNA.40382.1.S1_at   | MmugDNA.40382.1 | 4.29  | 4.15  | 0.43 | 0.15 | 1.11  | 0.503802 | 0.392527 | 0.73721  | 0.625813 |
| MmugDNA.40385.1.S1_at   | MmugDNA.40385.1 | 10.63 | 10.76 | 0.16 | 0.11 | -1.1  | 0.418919 | 0.069125 | 0.678622 | 0.309162 |
| MmugDNA.40387.1.S1_at   | MmugDNA.40387.1 | 10.83 | 10.79 | 0.21 | 0.22 | 1.03  | 0.530146 | 0.054058 | 0.754771 | 0.277914 |
| MmugDNA.40389.1.S1_at   | MmugDNA.40389.1 | 6.69  | 6.1   | 0.56 | 0.26 | 1.51  | 0.151658 | 0.188854 | 0.441196 | 0.464789 |
| MmugDNA.40390.1.S1_at   | MmugDNA.40390.1 | 2.78  | 2.76  | 0.14 | 0    | 1.01  | 0.509993 | 0.421132 | 0.741352 | 0.644766 |
| MmugDNA.40393.1.S1_at   | MmugDNA.40393.1 | 8.98  | 9.05  | 0.15 | 0.06 | -1.05 | 0.506034 | 0.083795 | 0.738797 | 0.334647 |

|                         |                 |       |       |      |      |       |          |          |          |          |
|-------------------------|-----------------|-------|-------|------|------|-------|----------|----------|----------|----------|
| MmugDNA.40395.1.S1_at   | MmugDNA.40395.1 | 11.81 | 11.96 | 0.18 | 0.02 | -1.11 | 0.118923 | 0.455378 | 0.396589 | 0.669361 |
| MmugDNA.40396.1.S1_at   | MmugDNA.40396.1 | 4.18  | 4.12  | 0.31 | 0.07 | 1.05  | 0.850548 | 0.975346 | 0.935099 | 0.986553 |
| MmugDNA.40398.1.S1_at   | MmugDNA.40398.1 | 5.64  | 5.48  | 0.16 | 0.16 | 1.12  | 0.577116 | 0.127067 | 0.783459 | 0.397902 |
| MmugDNA.40399.1.S1_at   | MmugDNA.40399.1 | 3.53  | 3.62  | 0.38 | 0.04 | -1.06 | 0.532132 | 0.743659 | 0.756226 | 0.851456 |
| MmugDNA.404.1.S1_at     | MmugDNA.404.1   | 5.25  | 5.24  | 0.05 | 0.12 | 1.01  | 0.215833 | 0.123638 | 0.513611 | 0.393692 |
| MmugDNA.40401.1.S1_at   | MmugDNA.40401.1 | 11.66 | 11.33 | 0.08 | 0.07 | 1.26  | 0.007109 | 0.000159 | 0.131735 | 0.030319 |
| MmugDNA.40402.1.S1_at   | MmugDNA.40402.1 | 3.66  | 3.66  | 0    | 0    | 1     | 0.979299 | 0.112483 | 0.992117 | 0.377815 |
| MmugDNA.40404.1.S1_x_at | MmugDNA.40404.1 | 10.54 | 10.08 | 0.56 | 0.13 | 1.37  | 0.19365  | 0.153501 | 0.490317 | 0.42827  |
| MmugDNA.40409.1.S1_at   | MmugDNA.40409.1 | 7.13  | 7.87  | 0.6  | 0.32 | -1.66 | 0.167692 | 0.171976 | 0.460921 | 0.448364 |
| MmugDNA.4041.1.S1_at    | MmugDNA.4041.1  | 6.27  | 5.88  | 0.3  | 0.11 | 1.31  | 0.13254  | 0.571533 | 0.415892 | 0.743824 |
| MmugDNA.40411.1.S1_at   | MmugDNA.40411.1 | 6.98  | 7.73  | 0.9  | 0.03 | -1.68 | 0.121406 | 0.385291 | 0.400206 | 0.620743 |
| MmugDNA.40412.1.S1_at   | MmugDNA.40412.1 | 3.95  | 4.04  | 0.17 | 0.23 | -1.06 | 0.791487 | 0.135387 | 0.905298 | 0.407478 |
| MmugDNA.40413.1.S1_at   | MmugDNA.40413.1 | 4.45  | 4.31  | 0.96 | 0.1  | 1.1   | 0.286229 | 0.406641 | 0.576094 | 0.634468 |
| MmugDNA.40414.1.S1_at   | MmugDNA.40414.1 | 6.67  | 6.59  | 0.18 | 0.07 | 1.06  | 0.341152 | 0.505466 | 0.621105 | 0.702161 |
| MmugDNA.40415.1.S1_at   | MmugDNA.40415.1 | 5     | 4.43  | 0.49 | 0.08 | 1.48  | 0.107229 | 0.087697 | 0.381693 | 0.340941 |
| MmugDNA.40416.1.S1_at   | MmugDNA.40416.1 | 3.47  | 3.39  | 0.51 | 0.08 | 1.06  | 0.312423 | 0.299962 | 0.598392 | 0.558262 |
| MmugDNA.40418.1.S1_at   | MmugDNA.40418.1 | 4.82  | 4.57  | 0.36 | 0.27 | 1.18  | 0.639498 | 0.658009 | 0.823589 | 0.80013  |
| MmugDNA.40419.1.S1_at   | MmugDNA.40419.1 | 10.21 | 9.78  | 0.4  | 0.04 | 1.35  | 0.142807 | 0.04035  | 0.428908 | 0.245984 |
| MmugDNA.40420.1.S1_at   | MmugDNA.40420.1 | 9.47  | 9.22  | 0.48 | 0.02 | 1.19  | 0.13117  | 0.129027 | 0.413871 | 0.400513 |
| MmugDNA.40420.1.S1_s_at | MmugDNA.40420.1 | 10.24 | 9.98  | 0.34 | 0.07 | 1.2   | 0.084233 | 0.115467 | 0.347616 | 0.382611 |
| MmugDNA.40422.1.S1_at   | MmugDNA.40422.1 | 8.17  | 8.5   | 0.46 | 0.25 | -1.26 | 0.552552 | 0.521789 | 0.769193 | 0.712646 |
| MmugDNA.40423.1.S1_at   | MmugDNA.40423.1 | 4.85  | 4.44  | 0.16 | 0.16 | 1.33  | 0.044875 | 0.253639 | 0.269187 | 0.52198  |
| MmugDNA.40425.1.S1_at   | MmugDNA.40425.1 | 4.25  | 4.25  | 0.19 | 0.11 | -1    | 0.461365 | 0.429986 | 0.708826 | 0.65111  |
| MmugDNA.40426.1.S1_at   | MmugDNA.40426.1 | 4.55  | 5.03  | 0.47 | 0.32 | -1.4  | 0.300363 | 0.562012 | 0.588556 | 0.737679 |
| MmugDNA.40428.1.S1_at   | MmugDNA.40428.1 | 5.78  | 5.93  | 0.23 | 0.12 | -1.11 | 0.601033 | 0.136887 | 0.799309 | 0.409583 |
| MmugDNA.4043.1.S1_at    | MmugDNA.4043.1  | 3.53  | 3.42  | 0.34 | 0.07 | 1.08  | 0.202233 | 0.222068 | 0.499812 | 0.495112 |
| MmugDNA.4043.1.S1_s_at  | MmugDNA.4043.1  | 9.08  | 8.79  | 0.27 | 0.02 | 1.22  | 0.053719 | 0.032039 | 0.288972 | 0.221576 |
| MmugDNA.32666.1.S1_s_at | MmugDNA.32666.1 | 13.46 | 13.6  | 0.01 | 0.06 | -1.1  | 0.012559 | 0.038641 | 0.162479 | 0.241683 |
| MmugDNA.40432.1.S1_at   | MmugDNA.40432.1 | 7.19  | 7.2   | 0.07 | 0.05 | -1.01 | 0.80249  | 0.054117 | 0.911317 | 0.277968 |
| MmugDNA.40433.1.S1_at   | MmugDNA.40433.1 | 4.54  | 4.59  | 0.58 | 0.18 | -1.03 | 0.973706 | 0.771986 | 0.989447 | 0.867436 |
| MmugDNA.40434.1.S1_at   | MmugDNA.40434.1 | 7.07  | 7.19  | 0.57 | 0.09 | -1.09 | 0.818419 | 0.897315 | 0.918952 | 0.941407 |
| MmugDNA.40435.1.S1_at   | MmugDNA.40435.1 | 7.25  | 6.93  | 0.59 | 0.25 | 1.24  | 0.686282 | 0.284083 | 0.850512 | 0.546309 |
| MmugDNA.40436.1.S1_at   | MmugDNA.40436.1 | 6.43  | 6.51  | 0.2  | 0.11 | -1.05 | 0.648298 | 0.798505 | 0.829161 | 0.884012 |
| MmugDNA.40436.1.S1_s_at | MmugDNA.40436.1 | 8.56  | 8.56  | 0.08 | 0.04 | 1     | 0.309641 | 0.327824 | 0.595927 | 0.577604 |
| MmugDNA.40437.1.S1_at   | MmugDNA.40437.1 | 3.83  | 3.35  | 0.31 | 0.06 | 1.4   | 0.088191 | 0.088877 | 0.354244 | 0.34272  |
| MmugDNA.40439.1.S1_at   | MmugDNA.40439.1 | 4.91  | 5.05  | 0.19 | 0.72 | -1.1  | 0.199434 | 0.207898 | 0.496775 | 0.482049 |
| MmugDNA.4044.1.S1_at    | MmugDNA.4044.1  | 8.07  | 8.65  | 0.27 | 0.29 | -1.49 | 0.070266 | 0.002529 | 0.323459 | 0.074291 |
| MmugDNA.40440.1.S1_at   | MmugDNA.40440.1 | 5.73  | 5.76  | 0.27 | 0.03 | -1.02 | 0.882212 | 0.973648 | 0.949899 | 0.985648 |
| MmugDNA.40441.1.S1_at   | MmugDNA.40441.1 | 7.83  | 7.5   | 0.25 | 0.11 | 1.25  | 0.309185 | 0.040844 | 0.5956   | 0.246991 |
| MmugDNA.40443.1.S1_at   | MmugDNA.40443.1 | 5.86  | 5.74  | 0.07 | 0.12 | 1.09  | 0.193134 | 0.173146 | 0.489713 | 0.449765 |
| MmugDNA.40444.1.S1_at   | MmugDNA.40444.1 | 4.47  | 4.3   | 0.85 | 0.13 | 1.12  | 0.779247 | 0.832535 | 0.899222 | 0.903934 |
| MmugDNA.40445.1.S1_at   | MmugDNA.40445.1 | 3.93  | 4.09  | 1.32 | 0.29 | -1.12 | 0.532006 | 0.67991  | 0.756137 | 0.8131   |
| MmugDNA.40446.1.S1_at   | MmugDNA.40446.1 | 3.87  | 3.67  | 0.07 | 0.1  | 1.15  | 0.023721 | 0.018064 | 0.207099 | 0.169379 |

|                         |                 |       |       |      |      |       |          |          |          |          |
|-------------------------|-----------------|-------|-------|------|------|-------|----------|----------|----------|----------|
| MmugDNA.40447.1.S1_at   | MmugDNA.40447.1 | 13.09 | 13.72 | 0.1  | 0.04 | -1.55 | 0.000574 | 0.00797  | 0.070727 | 0.118702 |
| MmugDNA.40448.1.S1_at   | MmugDNA.40448.1 | 6.93  | 6.32  | 1.09 | 0.8  | 1.53  | 0.42226  | 0.545964 | 0.680473 | 0.727708 |
| MmugDNA.4045.1.S1_at    | MmugDNA.4045.1  | 9.65  | 10.95 | 0.27 | 0.32 | -2.45 | 0.00767  | 0.000691 | 0.13621  | 0.044166 |
| MmugDNA.40450.1.S1_at   | MmugDNA.40450.1 | 6.58  | 6.63  | 0.05 | 0.06 | -1.04 | 0.789064 | 0.126095 | 0.904091 | 0.39672  |
| MmugDNA.40450.1.S1_s_at | MmugDNA.40450.1 | 5.67  | 5.64  | 0.24 | 0.08 | 1.02  | 0.489928 | 0.77717  | 0.728122 | 0.870539 |
| MmugDNA.40452.1.S1_at   | MmugDNA.40452.1 | 6.26  | 6.27  | 0.06 | 0.12 | -1    | 0.378005 | 0.375623 | 0.648368 | 0.613562 |
| MmugDNA.40453.1.S1_at   | MmugDNA.40453.1 | 5.13  | 5.21  | 0.04 | 0.08 | -1.06 | 0.288957 | 0.926398 | 0.578669 | 0.958291 |
| MmugDNA.40454.1.S1_at   | MmugDNA.40454.1 | 3.74  | 3.63  | 0.11 | 0.05 | 1.08  | 0.113682 | 0.15694  | 0.390392 | 0.432372 |
| MmugDNA.40455.1.S1_at   | MmugDNA.40455.1 | 7.55  | 7.54  | 0.14 | 0.05 | 1.01  | 0.327801 | 0.006812 | 0.610488 | 0.111444 |
| MmugDNA.40458.1.S1_at   | MmugDNA.40458.1 | 6.65  | 6.62  | 0.45 | 0.09 | 1.02  | 0.420371 | 0.573233 | 0.679392 | 0.744985 |
| MmugDNA.4046.1.S1_at    | MmugDNA.4046.1  | 11.99 | 12.79 | 0.14 | 0.09 | -1.75 | 0.001593 | 0.000798 | 0.083368 | 0.046064 |
| MmugDNA.40460.1.S1_at   | MmugDNA.40460.1 | 10.79 | 10.72 | 0.12 | 0.1  | 1.05  | 0.168018 | 0.136748 | 0.461204 | 0.409308 |
| MmugDNA.40461.1.S1_at   | MmugDNA.40461.1 | 12.39 | 12.24 | 0.15 | 0.04 | 1.11  | 0.2029   | 0.273612 | 0.500645 | 0.538053 |
| MmugDNA.40463.1.S1_at   | MmugDNA.40463.1 | 6.34  | 6.04  | 1.48 | 0.61 | 1.23  | 0.906136 | 0.943301 | 0.960257 | 0.967814 |
| MmugDNA.40464.1.S1_at   | MmugDNA.40464.1 | 6.29  | 6.17  | 0.05 | 0.13 | 1.09  | 0.815174 | 0.079851 | 0.917477 | 0.327179 |
| MmugDNA.40465.1.S1_at   | MmugDNA.40465.1 | 3.32  | 3.26  | 0.1  | 0.12 | 1.04  | 0.539858 | 0.462533 | 0.761096 | 0.673854 |
| MmugDNA.40466.1.S1_at   | MmugDNA.40466.1 | 6.68  | 8.21  | 0.32 | 0.47 | -2.88 | 0.020451 | 0.014521 | 0.19653  | 0.153711 |
| MmugDNA.40467.1.S1_at   | MmugDNA.40467.1 | 6.77  | 7.46  | 0.33 | 0.29 | -1.62 | 0.057842 | 0.053965 | 0.297685 | 0.27777  |
| MmugDNA.40468.1.S1_at   | MmugDNA.40468.1 | 6.71  | 7.05  | 0.29 | 0.16 | -1.26 | 0.066371 | 0.007214 | 0.315162 | 0.11412  |
| MmugDNA.40469.1.S1_at   | MmugDNA.40469.1 | 5.13  | 4.85  | 1.11 | 0.22 | 1.22  | 0.619477 | 0.564513 | 0.811271 | 0.739347 |
| MmugDNA.4047.1.S1_at    | MmugDNA.4047.1  | 6.61  | 6.56  | 0.76 | 0.28 | 1.03  | 0.457525 | 0.052878 | 0.706421 | 0.275541 |
| MmugDNA.40471.1.S1_at   | MmugDNA.40471.1 | 6.13  | 6.16  | 0.13 | 0.4  | -1.02 | 0.819791 | 0.669459 | 0.919644 | 0.806626 |
| MmugDNA.40472.1.S1_at   | MmugDNA.40472.1 | 7.74  | 7.56  | 0.76 | 0.09 | 1.14  | 0.237475 | 0.193431 | 0.534988 | 0.468711 |
| MmugDNA.40473.1.S1_at   | MmugDNA.40473.1 | 8.6   | 7.62  | 0.23 | 0.29 | 1.96  | 0.013543 | 0.026857 | 0.167195 | 0.205049 |
| MmugDNA.40474.1.S1_at   | MmugDNA.40474.1 | 4.15  | 4.15  | 0.11 | 0.1  | 1     | 0.230317 | 0.42031  | 0.529161 | 0.644086 |
| MmugDNA.40475.1.S1_at   | MmugDNA.40475.1 | 6.99  | 6.98  | 0.06 | 0.07 | 1     | 0.561662 | 0.89463  | 0.774547 | 0.939853 |
| MmugDNA.40476.1.S1_at   | MmugDNA.40476.1 | 7.78  | 7.99  | 0.27 | 0.16 | -1.16 | 0.126481 | 0.385151 | 0.407881 | 0.620662 |
| MmugDNA.40478.1.S1_at   | MmugDNA.40478.1 | 8.09  | 8.2   | 0.42 | 0.07 | -1.08 | 0.242453 | 0.222688 | 0.539382 | 0.495617 |
| MmugDNA.40479.1.S1_at   | MmugDNA.40479.1 | 4.05  | 4.03  | 0.23 | 0.19 | 1.01  | 0.81162  | 0.923941 | 0.915647 | 0.957162 |
| MmugDNA.4048.1.S1_at    | MmugDNA.4048.1  | 8.11  | 7.88  | 0.27 | 0.19 | 1.17  | 0.107528 | 0.116959 | 0.382272 | 0.384343 |
| MmugDNA.40483.1.S1_at   | MmugDNA.40483.1 | 4.42  | 4.81  | 0.06 | 0.46 | -1.31 | 0.084483 | 0.122585 | 0.348133 | 0.39249  |
| MmugDNA.40484.1.S1_at   | MmugDNA.40484.1 | 6.05  | 5.68  | 1.05 | 0.02 | 1.29  | 0.376797 | 0.392775 | 0.647386 | 0.625846 |
| MmugDNA.4049.1.S1_at    | MmugDNA.4049.1  | 8.94  | 9.03  | 0.58 | 0.26 | -1.07 | 0.491387 | 0.574912 | 0.729201 | 0.746181 |
| MmugDNA.40490.1.S1_at   | MmugDNA.40490.1 | 3.24  | 3.24  | 0.05 | 0.14 | 1     | 0.982966 | 0.381117 | 0.993693 | 0.617478 |
| MmugDNA.40491.1.S1_at   | MmugDNA.40491.1 | 3.74  | 3.81  | 0.08 | 0.02 | -1.05 | 0.235833 | 0.126214 | 0.533475 | 0.396751 |
| MmugDNA.40494.1.S1_x_at | MmugDNA.40494.1 | 7.77  | 7.74  | 0.7  | 0.24 | 1.02  | 0.35513  | 0.384385 | 0.631992 | 0.620058 |
| MmugDNA.40496.1.S1_at   | MmugDNA.40496.1 | 3.98  | 3.9   | 0.21 | 0.09 | 1.05  | 0.76949  | 0.896001 | 0.894266 | 0.940569 |
| MmugDNA.40497.1.S1_at   | MmugDNA.40497.1 | 13.25 | 13.33 | 0.14 | 0.08 | -1.05 | 0.435621 | 0.534577 | 0.690707 | 0.720452 |
| MmugDNA.40498.1.S1_at   | MmugDNA.40498.1 | 8.48  | 8.26  | 0.69 | 0.23 | 1.17  | 0.668841 | 0.150191 | 0.841122 | 0.424841 |
| MmugDNA.40499.1.S1_at   | MmugDNA.40499.1 | 4.39  | 3.91  | 0.13 | 0.12 | 1.39  | 0.030729 | 0.037944 | 0.228035 | 0.239302 |
| MmugDNA.4050.1.S1_at    | MmugDNA.4050.1  | 3.32  | 3.24  | 0.27 | 0.09 | 1.06  | 0.214244 | 0.218963 | 0.51193  | 0.492722 |
| MmugDNA.40500.1.S1_at   | MmugDNA.40500.1 | 9.52  | 9.45  | 0.91 | 0.24 | 1.05  | 0.917736 | 0.37449  | 0.96488  | 0.6129   |
| MmugDNA.40501.1.S1_at   | MmugDNA.40501.1 | 5.18  | 5.1   | 0.1  | 0.06 | 1.05  | 0.3766   | 0.20014  | 0.647284 | 0.474603 |

|                         |                 |       |       |      |      |       |          |          |          |          |
|-------------------------|-----------------|-------|-------|------|------|-------|----------|----------|----------|----------|
| MmugDNA.40501.1.S1_s_at | MmugDNA.40501.1 | 8.03  | 7.99  | 0.06 | 0.03 | 1.03  | 0.967618 | 0.502234 | 0.987092 | 0.70006  |
| MmugDNA.40502.1.S1_at   | MmugDNA.40502.1 | 7.85  | 8.06  | 0.34 | 0.08 | -1.16 | 0.924227 | 0.252443 | 0.967791 | 0.521061 |
| MmugDNA.40503.1.S1_at   | MmugDNA.40503.1 | 11.86 | 11.78 | 0.24 | 0.26 | 1.06  | 0.748325 | 0.19047  | 0.883435 | 0.465906 |
| MmugDNA.40505.1.S1_at   | MmugDNA.40505.1 | 4.25  | 4.32  | 0.05 | 0.2  | -1.05 | 0.198862 | 0.719118 | 0.496017 | 0.837453 |
| MmugDNA.40507.1.S1_at   | MmugDNA.40507.1 | 6.18  | 6     | 0.29 | 0.03 | 1.13  | 0.120984 | 0.028838 | 0.399514 | 0.211661 |
| MmugDNA.40508.1.S1_at   | MmugDNA.40508.1 | 5.25  | 5.3   | 0.03 | 0.11 | -1.04 | 0.853361 | 0.469359 | 0.93623  | 0.678201 |
| MmugDNA.4051.1.S1_s_at  | MmugDNA.4051.1  | 4.67  | 4.65  | 0.28 | 0.14 | 1.02  | 0.505738 | 0.107855 | 0.738658 | 0.370945 |
| MmugDNA.40510.1.S1_at   | MmugDNA.40510.1 | 4.8   | 4.84  | 0    | 0.12 | -1.03 | 0.481472 | 0.698831 | 0.721957 | 0.825022 |
| MmugDNA.40511.1.S1_at   | MmugDNA.40511.1 | 5.33  | 5.52  | 0.1  | 0.19 | -1.14 | 0.438772 | 0.224713 | 0.69332  | 0.497614 |
| MmugDNA.40514.1.S1_at   | MmugDNA.40514.1 | 6.16  | 7.37  | 0.37 | 0.32 | -2.32 | 0.020249 | 0.000104 | 0.19595  | 0.028099 |
| MmugDNA.40515.1.S1_at   | MmugDNA.40515.1 | 10.04 | 10.78 | 0.18 | 0.02 | -1.67 | 0.002071 | 0.002957 | 0.0902   | 0.079945 |
| MmugDNA.40516.1.S1_at   | MmugDNA.40516.1 | 2.82  | 2.85  | 0    | 0.05 | -1.02 | 0.718706 | 0.025375 | 0.867276 | 0.199677 |
| MmugDNA.40517.1.S1_at   | MmugDNA.40517.1 | 4.27  | 4.65  | 0.3  | 0.08 | -1.3  | 0.10648  | 0.118996 | 0.380663 | 0.387269 |
| MmugDNA.40518.1.S1_at   | MmugDNA.40518.1 | 6.74  | 6.84  | 0.19 | 0.59 | -1.07 | 0.282466 | 0.103096 | 0.573183 | 0.364006 |
| MmugDNA.40519.1.S1_at   | MmugDNA.40519.1 | 12.2  | 11.92 | 0.25 | 0.15 | 1.22  | 0.380914 | 0.537737 | 0.650484 | 0.722664 |
| MmugDNA.40521.1.S1_at   | MmugDNA.40521.1 | 6.6   | 6.34  | 0.03 | 0.19 | 1.2   | 0.093558 | 0.088649 | 0.362157 | 0.342176 |
| MmugDNA.40522.1.S1_at   | MmugDNA.40522.1 | 5.99  | 6.04  | 0.02 | 0.28 | -1.03 | 0.634125 | 0.848754 | 0.820636 | 0.914116 |
| MmugDNA.40523.1.S1_s_at | MmugDNA.40523.1 | 12.53 | 12.41 | 0.13 | 0.15 | 1.09  | 0.577008 | 0.740825 | 0.783459 | 0.849962 |
| MmugDNA.40524.1.S1_at   | MmugDNA.40524.1 | 3.29  | 2.75  | 0.33 | 0.11 | 1.45  | 0.025726 | 0.05137  | 0.212979 | 0.272083 |
| MmugDNA.40525.1.S1_at   | MmugDNA.40525.1 | 4     | 3.91  | 0.28 | 0.08 | 1.06  | 0.446178 | 0.185547 | 0.698417 | 0.461566 |
| MmugDNA.40526.1.S1_at   | MmugDNA.40526.1 | 2.99  | 2.94  | 0.05 | 0.1  | 1.03  | 0.25367  | 0.497876 | 0.547927 | 0.697077 |
| MmugDNA.40528.1.S1_at   | MmugDNA.40528.1 | 6.38  | 6.3   | 0.3  | 0.02 | 1.06  | 0.234659 | 0.124846 | 0.532768 | 0.395219 |
| MmugDNA.40529.1.S1_at   | MmugDNA.40529.1 | 5.82  | 5.84  | 0.19 | 0.05 | -1.01 | 0.432598 | 0.320975 | 0.688358 | 0.572964 |
| MmugDNA.4053.1.S1_at    | MmugDNA.4053.1  | 4.14  | 4.31  | 0.54 | 0.1  | -1.13 | 0.485665 | 0.685599 | 0.725109 | 0.816542 |
| MmugDNA.40530.1.S1_at   | MmugDNA.40530.1 | 5.7   | 5.61  | 0.16 | 0.06 | 1.07  | 0.093279 | 0.084131 | 0.361736 | 0.335181 |
| MmugDNA.40533.1.S1_at   | MmugDNA.40533.1 | 3.18  | 3.31  | 0.11 | 0.13 | -1.09 | 0.329612 | 0.491772 | 0.611807 | 0.693268 |
| MmugDNA.40534.1.S1_s_at | MmugDNA.40534.1 | 11.64 | 10.89 | 0.17 | 0.13 | 1.68  | 0.00247  | 0.005219 | 0.094063 | 0.100105 |
| MmugDNA.40535.1.S1_at   | MmugDNA.40535.1 | 7.16  | 7.78  | 0.11 | 0.06 | -1.54 | 0.001116 | 0.000151 | 0.077306 | 0.029832 |
| MmugDNA.40537.1.S1_at   | MmugDNA.40537.1 | 11.64 | 11.91 | 0.15 | 0.07 | -1.21 | 0.04794  | 0.118036 | 0.276361 | 0.385881 |
| MmugDNA.40538.1.S1_at   | MmugDNA.40538.1 | 4.59  | 4.53  | 0.02 | 0.06 | 1.04  | 0.142123 | 0.5413   | 0.428166 | 0.724837 |
| MmugDNA.40539.1.S1_at   | MmugDNA.40539.1 | 9.49  | 10.18 | 0.18 | 0.28 | -1.61 | 0.043046 | 0.173607 | 0.264642 | 0.449956 |
| MmugDNA.4054.1.S1_at    | MmugDNA.4054.1  | 8.76  | 8.74  | 0.22 | 0.06 | 1.01  | 0.786036 | 0.220632 | 0.902343 | 0.494069 |
| MmugDNA.40540.1.S1_at   | MmugDNA.40540.1 | 4.82  | 4.76  | 0.14 | 0.02 | 1.04  | 0.370055 | 0.534952 | 0.643241 | 0.720644 |
| MmugDNA.40541.1.S1_at   | MmugDNA.40541.1 | 9.99  | 9.68  | 0.21 | 0.08 | 1.25  | 0.097124 | 0.524072 | 0.367275 | 0.714177 |
| MmugDNA.40542.1.S1_at   | MmugDNA.40542.1 | 5.45  | 6.19  | 0.38 | 0.31 | -1.67 | 0.064527 | 0.389346 | 0.310585 | 0.62342  |
| MmugDNA.40543.1.S1_at   | MmugDNA.40543.1 | 6.26  | 5.56  | 0.56 | 0.25 | 1.63  | 0.069668 | 0.107214 | 0.322305 | 0.369902 |
| MmugDNA.40544.1.S1_at   | MmugDNA.40544.1 | 7.13  | 7.21  | 0.5  | 0.31 | -1.06 | 0.949182 | 0.262115 | 0.978825 | 0.528397 |
| MmugDNA.40545.1.S1_at   | MmugDNA.40545.1 | 3.32  | 3.26  | 0.44 | 0.15 | 1.04  | 0.473008 | 0.686142 | 0.716437 | 0.81681  |
| MmugDNA.40546.1.S1_at   | MmugDNA.40546.1 | 5.22  | 5.14  | 0.13 | 0.05 | 1.06  | 0.54496  | 0.408773 | 0.764374 | 0.6359   |
| MmugDNA.40547.1.S1_at   | MmugDNA.40547.1 | 3.64  | 3.45  | 0.13 | 0.04 | 1.14  | 0.079985 | 0.149378 | 0.340234 | 0.423811 |
| MmugDNA.40548.1.S1_at   | MmugDNA.40548.1 | 5.93  | 5.98  | 0.16 | 0.16 | -1.04 | 0.743269 | 0.913464 | 0.881285 | 0.951252 |
| MmugDNA.40549.1.S1_at   | MmugDNA.40549.1 | 4.45  | 4.58  | 0.36 | 0.11 | -1.1  | 0.746422 | 0.087113 | 0.88254  | 0.340073 |
| MmugDNA.4055.1.S1_at    | MmugDNA.4055.1  | 4.01  | 4.09  | 0.33 | 0.13 | -1.06 | 0.506935 | 0.283127 | 0.739367 | 0.545694 |

|                         |                 |       |       |      |      |       |          |          |          |          |
|-------------------------|-----------------|-------|-------|------|------|-------|----------|----------|----------|----------|
| MmugDNA.40550.1.S1_at   | MmugDNA.40550.1 | 6.7   | 6.7   | 0.09 | 0.04 | 1     | 0.607487 | 0.152344 | 0.803755 | 0.427072 |
| MmugDNA.40553.1.S1_at   | MmugDNA.40553.1 | 6.02  | 6.12  | 0.13 | 0.08 | -1.07 | 0.342821 | 0.554483 | 0.622552 | 0.733245 |
| MmugDNA.40555.1.S1_at   | MmugDNA.40555.1 | 7.83  | 8.09  | 0.09 | 0.1  | -1.2  | 0.052914 | 0.26342  | 0.287075 | 0.529715 |
| MmugDNA.40556.1.S1_at   | MmugDNA.40556.1 | 5.98  | 5.93  | 0    | 0.07 | 1.04  | 0.770083 | 0.529387 | 0.894499 | 0.71726  |
| MmugDNA.40557.1.S1_at   | MmugDNA.40557.1 | 6.4   | 6.57  | 0.06 | 0.12 | -1.13 | 0.139249 | 0.017437 | 0.424942 | 0.167111 |
| MmugDNA.40558.1.S1_at   | MmugDNA.40558.1 | 5.51  | 5.19  | 0.17 | 0.16 | 1.25  | 0.089071 | 0.470225 | 0.355757 | 0.678572 |
| MmugDNA.40559.1.S1_at   | MmugDNA.40559.1 | 6.08  | 5.88  | 0.24 | 0.02 | 1.15  | 0.067999 | 0.063566 | 0.318434 | 0.298653 |
| MmugDNA.4056.1.S1_at    | MmugDNA.4056.1  | 9.99  | 9.99  | 0.04 | 0.16 | -1    | 0.959136 | 0.292412 | 0.983317 | 0.552498 |
| MmugDNA.40560.1.S1_at   | MmugDNA.40560.1 | 3.54  | 3.45  | 0.21 | 0.1  | 1.06  | 0.711774 | 0.393692 | 0.864026 | 0.626522 |
| MmugDNA.40561.1.S1_at   | MmugDNA.40561.1 | 9.17  | 9.11  | 0.18 | 0.07 | 1.04  | 0.216834 | 0.540598 | 0.514637 | 0.724459 |
| MmugDNA.40562.1.S1_at   | MmugDNA.40562.1 | 4.73  | 4.57  | 0.18 | 0.12 | 1.11  | 0.915473 | 0.323013 | 0.964085 | 0.574313 |
| MmugDNA.40563.1.S1_at   | MmugDNA.40563.1 | 13.43 | 13.37 | 0.1  | 0.15 | 1.04  | 0.805577 | 0.61813  | 0.912789 | 0.773929 |
| MmugDNA.40564.1.S1_at   | MmugDNA.40564.1 | 3.98  | 4.23  | 0.1  | 0.17 | -1.19 | 0.093077 | 0.096751 | 0.361726 | 0.354171 |
| MmugDNA.40565.1.S1_at   | MmugDNA.40565.1 | 4.21  | 4.72  | 1.21 | 0.16 | -1.43 | 0.733369 | 0.72168  | 0.875693 | 0.838808 |
| MmugDNA.40566.1.S1_at   | MmugDNA.40566.1 | 3.72  | 3.9   | 0.29 | 0.25 | -1.13 | 0.097243 | 0.193724 | 0.367303 | 0.468818 |
| MmugDNA.40567.1.S1_at   | MmugDNA.40567.1 | 9.49  | 9.29  | 0.23 | 0.03 | 1.15  | 0.24704  | 0.62624  | 0.542659 | 0.779684 |
| MmugDNA.40567.1.S1_s_at | MmugDNA.40567.1 | 10.01 | 9.82  | 0.19 | 0.03 | 1.14  | 0.188871 | 0.512508 | 0.485448 | 0.706375 |
| MmugDNA.40568.1.S1_at   | MmugDNA.40568.1 | 4.56  | 4.22  | 0.23 | 0.11 | 1.27  | 0.1156   | 0.363355 | 0.392723 | 0.60375  |
| MmugDNA.4057.1.S1_at    | MmugDNA.4057.1  | 9.55  | 9.87  | 0.11 | 0.08 | -1.25 | 0.013728 | 0.230693 | 0.16797  | 0.502381 |
| MmugDNA.40570.1.S1_at   | MmugDNA.40570.1 | 3.86  | 3.78  | 0.04 | 0.07 | 1.06  | 0.182612 | 0.046492 | 0.478408 | 0.260164 |
| MmugDNA.40571.1.S1_at   | MmugDNA.40571.1 | 10.94 | 10.91 | 0.26 | 0.2  | 1.03  | 0.944143 | 0.854543 | 0.976486 | 0.917099 |
| MmugDNA.40573.1.S1_at   | MmugDNA.40573.1 | 6.41  | 6.2   | 0.34 | 0.12 | 1.16  | 0.542958 | 0.424516 | 0.763126 | 0.647118 |
| MmugDNA.40574.1.S1_at   | MmugDNA.40574.1 | 5.18  | 5.13  | 0.24 | 0.09 | 1.04  | 0.615191 | 0.109459 | 0.80876  | 0.373326 |
| MmugDNA.40575.1.S1_at   | MmugDNA.40575.1 | 5.53  | 5.39  | 0.03 | 0.09 | 1.1   | 0.182773 | 0.208125 | 0.478544 | 0.482082 |
| MmugDNA.40576.1.S1_at   | MmugDNA.40576.1 | 5.25  | 4.86  | 0.24 | 0.06 | 1.31  | 0.141179 | 0.013529 | 0.427044 | 0.148875 |
| MmugDNA.40577.1.S1_at   | MmugDNA.40577.1 | 2.94  | 2.95  | 0.23 | 0.13 | -1.01 | 0.475971 | 0.629807 | 0.71855  | 0.781989 |
| MmugDNA.40578.1.S1_at   | MmugDNA.40578.1 | 10.31 | 10.05 | 0.17 | 0.04 | 1.2   | 0.025219 | 0.425103 | 0.211843 | 0.647579 |
| MmugDNA.40579.1.S1_at   | MmugDNA.40579.1 | 8.14  | 8.12  | 0.1  | 0.11 | 1.01  | 0.479477 | 0.175366 | 0.720709 | 0.452114 |
| MmugDNA.4058.1.S1_at    | MmugDNA.4058.1  | 10.22 | 10.35 | 0.41 | 0.03 | -1.09 | 0.687158 | 0.047076 | 0.850763 | 0.261469 |
| MmugDNA.4058.1.S1_s_at  | MmugDNA.4058.1  | 4.77  | 4.77  | 0.6  | 0.06 | -1    | 0.908405 | 0.791892 | 0.961215 | 0.87976  |
| MmugDNA.40580.1.S1_at   | MmugDNA.40580.1 | 5.11  | 4.85  | 0.2  | 0.08 | 1.19  | 0.106058 | 0.16643  | 0.38012  | 0.442887 |
| MmugDNA.40582.1.S1_at   | MmugDNA.40582.1 | 8.89  | 9.02  | 0.33 | 0.44 | -1.1  | 0.840699 | 0.882766 | 0.930069 | 0.93317  |
| MmugDNA.40583.1.S1_at   | MmugDNA.40583.1 | 3.86  | 3.65  | 0.74 | 0.27 | 1.15  | 0.159936 | 0.181131 | 0.451279 | 0.457582 |
| MmugDNA.40585.1.S1_at   | MmugDNA.40585.1 | 4.15  | 4.18  | 0    | 0.09 | -1.02 | 0.683901 | 0.701046 | 0.849273 | 0.826613 |
| MmugDNA.40587.1.S1_at   | MmugDNA.40587.1 | 5.58  | 5.74  | 0.24 | 0.07 | -1.12 | 0.923297 | 0.743103 | 0.967341 | 0.851135 |
| MmugDNA.40588.1.S1_at   | MmugDNA.40588.1 | 11.32 | 10.6  | 0.08 | 0.1  | 1.65  | 0.000921 | 0.344808 | 0.075607 | 0.590142 |
| MmugDNA.19545.1.S1_s_at | MmugDNA.19545.1 | 2.88  | 2.85  | 0.14 | 0.07 | 1.02  | 0.618637 | 0.405151 | 0.810696 | 0.633491 |
| MmugDNA.40590.1.S1_at   | MmugDNA.40590.1 | 9.05  | 9.32  | 0.18 | 0.18 | -1.21 | 0.137637 | 0.360352 | 0.422708 | 0.601402 |
| MmugDNA.40591.1.S1_s_at | MmugDNA.40591.1 | 6.17  | 9.15  | 0.96 | 0.38 | -7.89 | 0.009955 | 0.00439  | 0.149006 | 0.092744 |
| MmugDNA.40593.1.S1_at   | MmugDNA.40593.1 | 8.37  | 7.6   | 0.06 | 0.19 | 1.7   | 0.001848 | 0.012942 | 0.086938 | 0.146416 |
| MmugDNA.40594.1.S1_at   | MmugDNA.40594.1 | 3.11  | 3.03  | 0.18 | 0.12 | 1.06  | 0.395133 | 0.490518 | 0.661643 | 0.692497 |
| MmugDNA.40595.1.S1_at   | MmugDNA.40595.1 | 9.74  | 9.32  | 0.12 | 0.17 | 1.33  | 0.042135 | 0.032829 | 0.262198 | 0.22434  |
| MmugDNA.40596.1.S1_at   | MmugDNA.40596.1 | 4.8   | 4.36  | 0.13 | 0.12 | 1.36  | 0.01354  | 0.040852 | 0.167195 | 0.247004 |

|                         |                 |       |       |      |      |       |          |          |          |          |
|-------------------------|-----------------|-------|-------|------|------|-------|----------|----------|----------|----------|
| MmugDNA.40597.1.S1_at   | MmugDNA.40597.1 | 4.27  | 4.17  | 0.15 | 0.15 | 1.08  | 0.564765 | 0.380734 | 0.776348 | 0.61739  |
| MmugDNA.40599.1.S1_at   | MmugDNA.40599.1 | 4.57  | 4.51  | 0.13 | 0.05 | 1.05  | 0.177641 | 0.267152 | 0.472289 | 0.532773 |
| MmugDNA.4060.1.S1_at    | MmugDNA.4060.1  | 12.79 | 12.86 | 0.11 | 0.09 | -1.05 | 0.252715 | 0.395161 | 0.547383 | 0.627379 |
| MmugDNA.40601.1.S1_at   | MmugDNA.40601.1 | 4.09  | 3.89  | 0.45 | 0.11 | 1.14  | 0.495484 | 0.695633 | 0.731829 | 0.823085 |
| MmugDNA.40602.1.S1_at   | MmugDNA.40602.1 | 5.61  | 8.62  | 0.82 | 0.23 | -8.04 | 0.00673  | 0.098928 | 0.128806 | 0.357049 |
| MmugDNA.40604.1.S1_at   | MmugDNA.40604.1 | 3.94  | 3.64  | 0.36 | 0.21 | 1.23  | 0.341508 | 0.573199 | 0.621345 | 0.744964 |
| MmugDNA.40606.1.S1_at   | MmugDNA.40606.1 | 7.68  | 9.25  | 0.75 | 0.07 | -2.96 | 0.060753 | 0.608709 | 0.303425 | 0.767217 |
| MmugDNA.40608.1.S1_at   | MmugDNA.40608.1 | 4.75  | 4.88  | 0.05 | 0.05 | -1.09 | 0.022456 | 0.097545 | 0.203164 | 0.355398 |
| MmugDNA.40609.1.S1_at   | MmugDNA.40609.1 | 8.76  | 8.51  | 0.85 | 0.35 | 1.19  | 0.596606 | 0.142046 | 0.795916 | 0.415633 |
| MmugDNA.4061.1.S1_at    | MmugDNA.4061.1  | 10.81 | 11.66 | 0.73 | 0.09 | -1.8  | 0.080689 | 0.233499 | 0.34144  | 0.504835 |
| MmugDNA.40611.1.S1_at   | MmugDNA.40611.1 | 3.46  | 3.51  | 0.31 | 0.36 | -1.04 | 0.396098 | 0.163223 | 0.662207 | 0.439324 |
| MmugDNA.40612.1.S1_at   | MmugDNA.40612.1 | 4.97  | 5.02  | 0.06 | 0    | -1.03 | 0.302327 | 0.022449 | 0.590132 | 0.187515 |
| MmugDNA.40613.1.S1_x_at | MmugDNA.40613.1 | 11.66 | 11.88 | 0.56 | 0.16 | -1.17 | 0.723079 | 0.577129 | 0.86989  | 0.747646 |
| MmugDNA.40617.1.S1_at   | MmugDNA.40617.1 | 9.61  | 9.38  | 0.19 | 0.23 | 1.17  | 0.207888 | 0.553961 | 0.505752 | 0.732896 |
| MmugDNA.40618.1.S1_at   | MmugDNA.40618.1 | 4.72  | 4.97  | 0.39 | 0.27 | -1.19 | 0.223063 | 0.275819 | 0.52097  | 0.540035 |
| MmugDNA.40619.1.S1_at   | MmugDNA.40619.1 | 12.11 | 11.99 | 0.17 | 0.07 | 1.09  | 0.233351 | 0.560388 | 0.531615 | 0.736645 |
| MmugDNA.4062.1.S1_at    | MmugDNA.4062.1  | 4.31  | 4.55  | 0.16 | 0.09 | -1.18 | 0.302651 | 0.318695 | 0.590379 | 0.571326 |
| MmugDNA.40620.1.S1_at   | MmugDNA.40620.1 | 3.52  | 3.5   | 0.13 | 0.12 | 1.01  | 0.607479 | 0.400245 | 0.803755 | 0.630158 |
| MmugDNA.40621.1.S1_at   | MmugDNA.40621.1 | 4.46  | 4.46  | 0.12 | 0.07 | 1     | 0.229278 | 0.830918 | 0.528085 | 0.903001 |
| MmugDNA.40622.1.S1_at   | MmugDNA.40622.1 | 4.96  | 4.98  | 0.19 | 0.51 | -1.02 | 0.924348 | 0.865134 | 0.967845 | 0.923484 |
| MmugDNA.40624.1.S1_at   | MmugDNA.40624.1 | 4.05  | 3.97  | 0.1  | 0.11 | 1.06  | 0.650333 | 0.146405 | 0.830259 | 0.420454 |
| MmugDNA.40627.1.S1_at   | MmugDNA.40627.1 | 4.9   | 5.05  | 0.18 | 0.1  | -1.11 | 0.429319 | 0.464645 | 0.68574  | 0.675303 |
| MmugDNA.40627.1.S1_s_at | MmugDNA.40627.1 | 5.43  | 5.53  | 0.16 | 0.28 | -1.07 | 0.576964 | 0.204065 | 0.783459 | 0.478386 |
| MmugDNA.40629.1.S1_at   | MmugDNA.40629.1 | 4.2   | 4.28  | 0.42 | 0.07 | -1.06 | 0.920378 | 0.836259 | 0.965987 | 0.906346 |
| MmugDNA.4063.1.S1_at    | MmugDNA.4063.1  | 6.63  | 6.61  | 0.03 | 0.08 | 1.02  | 0.703736 | 0.111312 | 0.859331 | 0.375989 |
| MmugDNA.40631.1.S1_at   | MmugDNA.40631.1 | 8.56  | 8.59  | 0.39 | 0.27 | -1.03 | 0.759286 | 0.86715  | 0.889659 | 0.924511 |
| MmugDNA.40632.1.S1_at   | MmugDNA.40632.1 | 7.02  | 7.29  | 0.09 | 0.21 | -1.21 | 0.089318 | 0.120485 | 0.356227 | 0.38925  |
| MmugDNA.40634.1.S1_at   | MmugDNA.40634.1 | 6.27  | 6.17  | 0.07 | 0.2  | 1.07  | 0.457242 | 0.277015 | 0.706249 | 0.541023 |
| MmugDNA.40635.1.S1_at   | MmugDNA.40635.1 | 6.07  | 5.83  | 0.11 | 0.18 | 1.18  | 0.167286 | 0.343969 | 0.460507 | 0.58962  |
| MmugDNA.40636.1.S1_at   | MmugDNA.40636.1 | 5.6   | 5.74  | 0.71 | 0.26 | -1.1  | 0.766124 | 0.93592  | 0.892703 | 0.96389  |
| MmugDNA.40637.1.S1_at   | MmugDNA.40637.1 | 6.93  | 7.5   | 0.59 | 0.16 | -1.49 | 0.077331 | 0.097586 | 0.335992 | 0.355456 |
| MmugDNA.40638.1.S1_at   | MmugDNA.40638.1 | 4.09  | 4.05  | 0.38 | 0.02 | 1.02  | 0.325301 | 0.440541 | 0.608663 | 0.65901  |
| MmugDNA.40639.1.S1_at   | MmugDNA.40639.1 | 4.91  | 4.94  | 0.18 | 0.03 | -1.02 | 0.281372 | 0.201006 | 0.572229 | 0.475442 |
| MmugDNA.4064.1.S1_at    | MmugDNA.4064.1  | 5.94  | 5.97  | 0.05 | 0.03 | -1.02 | 0.165113 | 0.658875 | 0.458103 | 0.800473 |
| MmugDNA.40641.1.S1_at   | MmugDNA.40641.1 | 4.18  | 3.86  | 0.2  | 0.06 | 1.25  | 0.028136 | 0.044477 | 0.220165 | 0.255242 |
| MmugDNA.40642.1.S1_at   | MmugDNA.40642.1 | 5.1   | 5.13  | 0.07 | 0.09 | -1.02 | 0.38467  | 0.691492 | 0.653625 | 0.820518 |
| MmugDNA.40643.1.S1_at   | MmugDNA.40643.1 | 4.25  | 4.23  | 0.15 | 0.12 | 1.01  | 0.604648 | 0.668218 | 0.801884 | 0.805834 |
| MmugDNA.40646.1.S1_at   | MmugDNA.40646.1 | 6.08  | 6.07  | 0.25 | 0.02 | 1     | 0.61548  | 0.491123 | 0.808923 | 0.692777 |
| MmugDNA.4065.1.S1_at    | MmugDNA.4065.1  | 3.08  | 3.1   | 0.1  | 0.1  | -1.01 | 0.776467 | 0.899659 | 0.89778  | 0.942903 |
| MmugDNA.40650.1.S1_at   | MmugDNA.40650.1 | 4.77  | 4.61  | 0.12 | 0.18 | 1.12  | 0.627113 | 0.621029 | 0.81666  | 0.775754 |
| MmugDNA.40651.1.S1_at   | MmugDNA.40651.1 | 3.28  | 3.19  | 0.02 | 0.34 | 1.06  | 0.576301 | 0.749011 | 0.783164 | 0.854072 |
| MmugDNA.40652.1.S1_at   | MmugDNA.40652.1 | 8.44  | 7.14  | 0.8  | 0.38 | 2.46  | 0.074318 | 0.022989 | 0.330856 | 0.189624 |
| MmugDNA.40653.1.S1_at   | MmugDNA.40653.1 | 7.67  | 7.72  | 0.23 | 0.02 | -1.04 | 0.733417 | 0.774719 | 0.875708 | 0.868833 |



|                         |                 |       |       |      |      |       |          |          |          |          |
|-------------------------|-----------------|-------|-------|------|------|-------|----------|----------|----------|----------|
| MmugDNA.40654.1.S1_at   | MmugDNA.40654.1 | 6.41  | 6.56  | 0.51 | 0.19 | -1.11 | 0.938777 | 0.573641 | 0.974191 | 0.745229 |
| MmugDNA.40655.1.S1_at   | MmugDNA.40655.1 | 9.12  | 8.23  | 0.13 | 0.15 | 1.85  | 0.002184 | 0.003765 | 0.090636 | 0.087403 |
| MmugDNA.40656.1.S1_s_at | MmugDNA.40656.1 | 6.5   | 6.55  | 0.05 | 0.08 | -1.04 | 0.671337 | 0.046578 | 0.842358 | 0.260267 |
| MmugDNA.40657.1.S1_at   | MmugDNA.40657.1 | 12.86 | 12.75 | 0.04 | 0.07 | 1.09  | 0.033417 | 0.328992 | 0.236786 | 0.578482 |
| MmugDNA.40658.1.S1_at   | MmugDNA.40658.1 | 4.77  | 4.9   | 0.23 | 0.09 | -1.09 | 0.752761 | 0.604953 | 0.885809 | 0.764917 |
| MmugDNA.40659.1.S1_at   | MmugDNA.40659.1 | 3.9   | 3.39  | 0.27 | 0.1  | 1.42  | 0.017215 | 0.11007  | 0.184359 | 0.374179 |
| MmugDNA.4066.1.S1_at    | MmugDNA.4066.1  | 9     | 8.99  | 0.07 | 0.12 | 1     | 0.680288 | 0.178635 | 0.847493 | 0.454847 |
| MmugDNA.40660.1.S1_at   | MmugDNA.40660.1 | 5.08  | 5.21  | 0.13 | 0    | -1.09 | 0.146398 | 0.063282 | 0.434238 | 0.298244 |
| MmugDNA.40664.1.S1_at   | MmugDNA.40664.1 | 5.7   | 5.67  | 0.24 | 0.02 | 1.02  | 0.400922 | 0.553124 | 0.665684 | 0.73239  |
| MmugDNA.40665.1.S1_at   | MmugDNA.40665.1 | 12.12 | 11.9  | 0.1  | 0    | 1.17  | 0.012403 | 0.001218 | 0.161664 | 0.054583 |
| MmugDNA.40666.1.S1_at   | MmugDNA.40666.1 | 3.49  | 3.24  | 0.15 | 0.12 | 1.19  | 0.075001 | 0.131875 | 0.332071 | 0.403891 |
| MmugDNA.40667.1.S1_at   | MmugDNA.40667.1 | 6.82  | 7.15  | 0.44 | 0.26 | -1.25 | 0.251758 | 0.258748 | 0.546475 | 0.525949 |
| MmugDNA.40674.1.S1_s_at | MmugDNA.40674.1 | 11.43 | 11.61 | 0.17 | 0.12 | -1.13 | 0.42437  | 0.047721 | 0.682102 | 0.263325 |
| MmugDNA.40675.1.S1_at   | MmugDNA.40675.1 | 5.38  | 5.46  | 0.18 | 0.11 | -1.06 | 0.172374 | 0.176475 | 0.466615 | 0.452836 |
| MmugDNA.40676.1.S1_at   | MmugDNA.40676.1 | 5.25  | 5.54  | 0.1  | 0.09 | -1.22 | 0.011914 | 0.004683 | 0.159254 | 0.095363 |
| MmugDNA.40677.1.S1_s_at | MmugDNA.40677.1 | 10.39 | 10.49 | 0.22 | 0.06 | -1.07 | 0.513211 | 0.041627 | 0.743537 | 0.24887  |
| MmugDNA.40678.1.S1_at   | MmugDNA.40678.1 | 13.01 | 12.92 | 0.07 | 0.03 | 1.06  | 0.107845 | 0.116928 | 0.382472 | 0.384297 |
| MmugDNA.40679.1.S1_at   | MmugDNA.40679.1 | 4.23  | 4.02  | 0.33 | 0.04 | 1.16  | 0.333634 | 0.588309 | 0.614974 | 0.754859 |
| MmugDNA.4068.1.S1_at    | MmugDNA.4068.1  | 4.26  | 4.24  | 0.31 | 0.22 | 1.01  | 0.871321 | 0.97421  | 0.944612 | 0.985922 |
| MmugDNA.40680.1.S1_at   | MmugDNA.40680.1 | 3.94  | 3.95  | 0.06 | 0.15 | -1.01 | 0.313218 | 0.238426 | 0.598982 | 0.50907  |
| MmugDNA.40681.1.S1_at   | MmugDNA.40681.1 | 5.18  | 5.17  | 0.06 | 0.11 | 1.01  | 0.86478  | 0.909853 | 0.94142  | 0.949148 |
| MmugDNA.40682.1.S1_at   | MmugDNA.40682.1 | 3.51  | 3.28  | 0.47 | 0.53 | 1.17  | 0.624276 | 0.496808 | 0.814772 | 0.696208 |
| MmugDNA.40683.1.S1_at   | MmugDNA.40683.1 | 7.3   | 6.81  | 0.44 | 0.51 | 1.41  | 0.308505 | 0.034158 | 0.595071 | 0.228708 |
| MmugDNA.40684.1.S1_at   | MmugDNA.40684.1 | 3.58  | 3.43  | 0.19 | 0.21 | 1.11  | 0.841803 | 0.757265 | 0.93049  | 0.858672 |
| MmugDNA.40685.1.S1_at   | MmugDNA.40685.1 | 3.83  | 3.56  | 0.22 | 0.02 | 1.2   | 0.296212 | 0.425017 | 0.584934 | 0.647471 |
| MmugDNA.40687.1.S1_at   | MmugDNA.40687.1 | 3.82  | 3.85  | 0.14 | 0.08 | -1.02 | 0.617471 | 0.883746 | 0.810046 | 0.933691 |
| MmugDNA.40689.1.S1_at   | MmugDNA.40689.1 | 5.48  | 5.25  | 0.08 | 0.1  | 1.17  | 0.024041 | 0.004159 | 0.208189 | 0.091036 |
| MmugDNA.4069.1.S1_at    | MmugDNA.4069.1  | 7.21  | 7.29  | 0.02 | 0.03 | -1.06 | 0.013587 | 0.242769 | 0.167335 | 0.513112 |
| MmugDNA.40691.1.S1_at   | MmugDNA.40691.1 | 6.77  | 6.6   | 0.25 | 0.09 | 1.12  | 0.241374 | 0.258789 | 0.538538 | 0.525949 |
| MmugDNA.2735.1.S1_s_at  | MmugDNA.2735.1  | 12.42 | 12.35 | 0.23 | 0.04 | 1.05  | 0.584192 | 0.302302 | 0.788484 | 0.560092 |
| MmugDNA.40694.1.S1_at   | MmugDNA.40694.1 | 4.18  | 3.66  | 0.19 | 0.36 | 1.44  | 0.278046 | 0.303239 | 0.569395 | 0.560731 |
| MmugDNA.40695.1.S1_at   | MmugDNA.40695.1 | 3.29  | 3.51  | 0.07 | 0.12 | -1.16 | 0.138697 | 0.168076 | 0.42426  | 0.444666 |
| MmugDNA.40696.1.S1_at   | MmugDNA.40696.1 | 11.62 | 11.61 | 0.03 | 0.1  | 1.01  | 0.462814 | 0.88673  | 0.709796 | 0.935519 |
| MmugDNA.40697.1.S1_at   | MmugDNA.40697.1 | 6.03  | 6.14  | 0.66 | 0.27 | -1.08 | 0.368177 | 0.424818 | 0.6419   | 0.64729  |
| MmugDNA.22260.1.S1_s_at | MmugDNA.22260.1 | 8.62  | 8.51  | 0.24 | 0.11 | 1.07  | 0.327021 | 0.451836 | 0.609778 | 0.66662  |
| MmugDNA.40699.1.S1_at   | MmugDNA.40699.1 | 4.91  | 5.39  | 0.39 | 0.39 | -1.39 | 0.176226 | 0.233544 | 0.470611 | 0.504878 |
| MmugDNA.407.1.S1_at     | MmugDNA.407.1   | 9.27  | 7.18  | 1.25 | 0.08 | 4.25  | 0.028075 | 0.255326 | 0.219913 | 0.523394 |
| MmugDNA.4070.1.S1_at    | MmugDNA.4070.1  | 4.64  | 4.61  | 0.13 | 0.14 | 1.02  | 0.760867 | 0.859963 | 0.890368 | 0.920188 |
| MmugDNA.40700.1.S1_at   | MmugDNA.40700.1 | 4.77  | 4.3   | 0.4  | 0.63 | 1.38  | 0.793447 | 0.20075  | 0.906582 | 0.475264 |
| MmugDNA.40701.1.S1_at   | MmugDNA.40701.1 | 7.34  | 7.81  | 0.22 | 0.18 | -1.38 | 0.022147 | 0.073606 | 0.20197  | 0.316945 |
| MmugDNA.40702.1.S1_at   | MmugDNA.40702.1 | 12.64 | 11.86 | 0.1  | 0.09 | 1.72  | 0.000529 | 0.000123 | 0.069726 | 0.029087 |
| MmugDNA.40705.1.S1_at   | MmugDNA.40705.1 | 3.26  | 3.3   | 0.07 | 0.08 | -1.03 | 0.817681 | 0.953832 | 0.918584 | 0.973705 |
| MmugDNA.4071.1.S1_at    | MmugDNA.4071.1  | 5.84  | 5.87  | 0.17 | 0.22 | -1.02 | 0.76483  | 0.92311  | 0.892078 | 0.956754 |

|                         |                 |       |       |      |      |        |          |          |          |          |
|-------------------------|-----------------|-------|-------|------|------|--------|----------|----------|----------|----------|
| MmugDNA.4071.1.S1_s_at  | MmugDNA.4071.1  | 5.81  | 5.82  | 0.1  | 0.06 | -1.01  | 0.802319 | 0.58203  | 0.911235 | 0.750784 |
| MmugDNA.40710.1.S1_at   | MmugDNA.40710.1 | 3.72  | 3.48  | 0.16 | 0.22 | 1.18   | 0.178324 | 0.255921 | 0.473057 | 0.523862 |
| MmugDNA.40712.1.S1_at   | MmugDNA.40712.1 | 6.13  | 6.26  | 0.12 | 0.03 | -1.1   | 0.138994 | 0.185539 | 0.424645 | 0.461566 |
| MmugDNA.40713.1.S1_at   | MmugDNA.40713.1 | 4.9   | 5.83  | 1.18 | 0.21 | -1.9   | 0.267418 | 0.077866 | 0.560238 | 0.324099 |
| MmugDNA.40715.1.S1_at   | MmugDNA.40715.1 | 4.2   | 4.02  | 0.04 | 0.14 | 1.13   | 0.109382 | 0.137864 | 0.384456 | 0.410833 |
| MmugDNA.40716.1.S1_at   | MmugDNA.40716.1 | 5.86  | 5.9   | 0.16 | 0.07 | -1.03  | 0.957041 | 0.661083 | 0.982369 | 0.801683 |
| MmugDNA.4072.1.S1_at    | MmugDNA.4072.1  | 4.17  | 4.24  | 0.7  | 0.4  | -1.05  | 0.59861  | 0.801788 | 0.797518 | 0.885932 |
| MmugDNA.40721.1.S1_at   | MmugDNA.40721.1 | 9.04  | 8.6   | 0.09 | 0.13 | 1.36   | 0.012612 | 0.040113 | 0.162521 | 0.245438 |
| MmugDNA.40721.1.S1_s_at | MmugDNA.40721.1 | 9.5   | 9.21  | 0.16 | 0.02 | 1.22   | 0.03025  | 0.068785 | 0.227028 | 0.308711 |
| MmugDNA.40723.1.S1_at   | MmugDNA.40723.1 | 3.66  | 3.64  | 0.15 | 0.11 | 1.01   | 0.46817  | 0.645326 | 0.713381 | 0.792179 |
| MmugDNA.40706.1.S1_s_at | MmugDNA.40706.1 | 7.41  | 5.96  | 0.36 | 1.14 | 2.74   | 0.257289 | 0.421904 | 0.551586 | 0.645369 |
| MmugDNA.40726.1.S1_at   | MmugDNA.40726.1 | 7.64  | 9.01  | 0.27 | 0.3  | -2.58  | 0.010076 | 0.021827 | 0.149988 | 0.184799 |
| MmugDNA.40727.1.S1_at   | MmugDNA.40727.1 | 4.28  | 7.13  | 0.42 | 0.5  | -7.24  | 0.001246 | 0.000352 | 0.078631 | 0.037121 |
| MmugDNA.40730.1.S1_at   | MmugDNA.40730.1 | 4.33  | 4.71  | 0.19 | 0.1  | -1.3   | 0.027049 | 0.007525 | 0.217254 | 0.1163   |
| MmugDNA.40731.1.S1_at   | MmugDNA.40731.1 | 3.73  | 3.8   | 0.14 | 0.01 | -1.05  | 0.942156 | 0.896416 | 0.975589 | 0.940875 |
| MmugDNA.40732.1.S1_at   | MmugDNA.40732.1 | 6.18  | 6.84  | 0.14 | 0.01 | -1.58  | 0.002106 | 0.01928  | 0.090208 | 0.174698 |
| MmugDNA.40733.1.S1_at   | MmugDNA.40733.1 | 4.66  | 4.71  | 0.08 | 0.08 | -1.04  | 0.418693 | 0.354253 | 0.678527 | 0.597105 |
| MmugDNA.40735.1.S1_at   | MmugDNA.40735.1 | 8.53  | 8.51  | 0.44 | 0.04 | 1.02   | 0.461091 | 0.926883 | 0.708593 | 0.958424 |
| MmugDNA.40736.1.S1_at   | MmugDNA.40736.1 | 7.59  | 7.76  | 0.2  | 0.14 | -1.13  | 0.206091 | 0.671813 | 0.503843 | 0.808157 |
| MmugDNA.40738.1.S1_at   | MmugDNA.40738.1 | 8.48  | 7.65  | 0.34 | 0.27 | 1.77   | 0.053813 | 0.068649 | 0.289104 | 0.308548 |
| MmugDNA.40740.1.S1_at   | MmugDNA.40740.1 | 5.12  | 5.29  | 0.1  | 0.04 | -1.12  | 0.089182 | 0.068716 | 0.3559   | 0.308711 |
| MmugDNA.40741.1.S1_at   | MmugDNA.40741.1 | 5.63  | 5.65  | 0.1  | 0.06 | -1.01  | 0.325391 | 0.50807  | 0.608731 | 0.703358 |
| MmugDNA.40746.1.S1_at   | MmugDNA.40746.1 | 7.98  | 8.03  | 0.14 | 0.12 | -1.04  | 0.557371 | 0.229056 | 0.772093 | 0.501378 |
| MmugDNA.40747.1.S1_at   | MmugDNA.40747.1 | 4.39  | 4.33  | 0.14 | 0.19 | 1.04   | 0.866608 | 0.28586  | 0.942426 | 0.547484 |
| MmugDNA.40748.1.S1_at   | MmugDNA.40748.1 | 5.7   | 5.38  | 0.73 | 0.23 | 1.25   | 0.244376 | 0.243193 | 0.540909 | 0.513356 |
| MmugDNA.40749.1.S1_at   | MmugDNA.40749.1 | 11.84 | 11.9  | 0.09 | 0.09 | -1.04  | 0.744993 | 0.967486 | 0.881771 | 0.982071 |
| MmugDNA.4075.1.S1_at    | MmugDNA.4075.1  | 6.63  | 6.61  | 0.29 | 0.12 | 1.01   | 0.497283 | 0.747943 | 0.732974 | 0.853333 |
| MmugDNA.40750.1.S1_at   | MmugDNA.40750.1 | 3.08  | 3.07  | 0.09 | 0.04 | 1.01   | 0.487747 | 0.341252 | 0.726421 | 0.587344 |
| MmugDNA.40750.1.S1_s_at | MmugDNA.40750.1 | 10.31 | 10.24 | 0.14 | 0.14 | 1.05   | 0.738543 | 0.12715  | 0.878825 | 0.397922 |
| MmugDNA.40750.1.S1_x_at | MmugDNA.40750.1 | 3.27  | 3.22  | 0.12 | 0.14 | 1.04   | 0.948346 | 0.21677  | 0.978363 | 0.490311 |
| MmugDNA.40751.1.S1_at   | MmugDNA.40751.1 | 3.29  | 3.42  | 0.1  | 0.1  | -1.1   | 0.339513 | 0.030762 | 0.619785 | 0.217296 |
| MmugDNA.40754.1.S1_at   | MmugDNA.40754.1 | 6.76  | 6.8   | 0.34 | 0.24 | -1.02  | 0.736524 | 0.183999 | 0.877553 | 0.460195 |
| MmugDNA.40755.1.S1_at   | MmugDNA.40755.1 | 3.91  | 3.98  | 0.08 | 0.05 | -1.05  | 0.63471  | 0.233589 | 0.820892 | 0.50492  |
| MmugDNA.40756.1.S1_at   | MmugDNA.40756.1 | 4.96  | 4.97  | 0.15 | 0.14 | -1.01  | 0.992962 | 0.248271 | 0.997263 | 0.517596 |
| MmugDNA.40757.1.S1_x_at | MmugDNA.40757.1 | 12.12 | 12.26 | 0.39 | 0.15 | -1.11  | 0.854098 | 0.431783 | 0.9366   | 0.652556 |
| MmugDNA.40758.1.S1_at   | MmugDNA.40758.1 | 9.62  | 9.63  | 0.26 | 0.14 | -1     | 0.807824 | 0.711994 | 0.914017 | 0.833066 |
| MmugDNA.40759.1.S1_at   | MmugDNA.40759.1 | 11.18 | 11.02 | 0.26 | 0.14 | 1.12   | 0.879237 | 0.002077 | 0.948589 | 0.067404 |
| MmugDNA.4076.1.S1_at    | MmugDNA.4076.1  | 7.14  | 7.06  | 0.5  | 0.43 | 1.05   | 0.628656 | 0.418489 | 0.817502 | 0.642898 |
| MmugDNA.40761.1.S1_at   | MmugDNA.40761.1 | 6.44  | 6.41  | 0.08 | 0.06 | 1.02   | 0.579321 | 0.108301 | 0.785017 | 0.371557 |
| MmugDNA.40762.1.S1_at   | MmugDNA.40762.1 | 5.95  | 5.45  | 1.29 | 0.35 | 1.41   | 0.483821 | 0.282566 | 0.723767 | 0.545292 |
| MmugDNA.40766.1.S1_at   | MmugDNA.40766.1 | 6.64  | 6.41  | 0.64 | 0.27 | 1.18   | 0.133699 | 0.071439 | 0.417096 | 0.313597 |
| MmugDNA.40767.1.S1_at   | MmugDNA.40767.1 | 10.95 | 10.49 | 0.02 | 0.16 | 1.38   | 0.004041 | 0.014604 | 0.108999 | 0.15408  |
| MmugDNA.40768.1.S1_at   | MmugDNA.40768.1 | 6.25  | 9.86  | 1.57 | 0.42 | -12.24 | 0.058795 | 0.339173 | 0.299609 | 0.585918 |

|                         |                 |       |       |      |      |       |          |          |          |          |
|-------------------------|-----------------|-------|-------|------|------|-------|----------|----------|----------|----------|
| MmugDNA.40769.1.S1_s_at | MmugDNA.40769.1 | 12.59 | 11.6  | 0.56 | 0.13 | 1.99  | 0.109229 | 0.174156 | 0.384375 | 0.450451 |
| MmugDNA.40771.1.S1_at   | MmugDNA.40771.1 | 6.52  | 6.51  | 0.13 | 0.43 | 1     | 0.935255 | 0.496066 | 0.972947 | 0.695877 |
| MmugDNA.40772.1.S1_at   | MmugDNA.40772.1 | 4.64  | 4.35  | 0.25 | 0.38 | 1.23  | 0.20519  | 0.354156 | 0.503054 | 0.597059 |
| MmugDNA.40773.1.S1_at   | MmugDNA.40773.1 | 7.74  | 7.48  | 0.48 | 0.13 | 1.2   | 0.164655 | 0.179006 | 0.457714 | 0.455354 |
| MmugDNA.40774.1.S1_at   | MmugDNA.40774.1 | 5.97  | 5.66  | 0.34 | 0.37 | 1.24  | 0.313835 | 0.249209 | 0.599699 | 0.518313 |
| MmugDNA.40775.1.S1_at   | MmugDNA.40775.1 | 3.49  | 3.51  | 0.22 | 0.03 | -1.01 | 0.856777 | 0.603592 | 0.937791 | 0.764204 |
| MmugDNA.40776.1.S1_at   | MmugDNA.40776.1 | 6.98  | 7.11  | 0.17 | 0.26 | -1.1  | 0.857143 | 0.519005 | 0.937945 | 0.710813 |
| MmugDNA.40777.1.S1_at   | MmugDNA.40777.1 | 4.72  | 4.29  | 0.66 | 0.5  | 1.35  | 0.67847  | 0.495522 | 0.846605 | 0.695527 |
| MmugDNA.40777.1.S1_x_at | MmugDNA.40777.1 | 7.29  | 6.95  | 0.79 | 0.51 | 1.27  | 0.571057 | 0.385385 | 0.779652 | 0.620818 |
| MmugDNA.40778.1.S1_at   | MmugDNA.40778.1 | 6.68  | 6.78  | 0.15 | 0.12 | -1.07 | 0.344027 | 0.008944 | 0.623312 | 0.12502  |
| MmugDNA.40779.1.S1_at   | MmugDNA.40779.1 | 6.29  | 6     | 0.25 | 0.5  | 1.23  | 0.848376 | 0.217607 | 0.93398  | 0.491216 |
| MmugDNA.4078.1.S1_at    | MmugDNA.4078.1  | 7.07  | 6.91  | 0.33 | 0.26 | 1.12  | 0.544985 | 0.097772 | 0.764374 | 0.355638 |
| MmugDNA.40780.1.S1_at   | MmugDNA.40780.1 | 6.37  | 6.29  | 0.05 | 0.1  | 1.05  | 0.290871 | 0.432193 | 0.580217 | 0.652775 |
| MmugDNA.40781.1.S1_at   | MmugDNA.40781.1 | 5.83  | 6.04  | 1.3  | 0.46 | -1.16 | 0.748361 | 0.839045 | 0.883455 | 0.908268 |
| MmugDNA.40782.1.S1_at   | MmugDNA.40782.1 | 10.07 | 9.55  | 0.26 | 0.13 | 1.44  | 0.080747 | 0.750408 | 0.341441 | 0.854798 |
| MmugDNA.40783.1.S1_at   | MmugDNA.40783.1 | 3.51  | 3.5   | 0.08 | 0.01 | 1     | 0.331516 | 0.658721 | 0.613457 | 0.800473 |
| MmugDNA.40784.1.S1_at   | MmugDNA.40784.1 | 6.67  | 6.75  | 0.33 | 0.11 | -1.06 | 0.477666 | 0.785665 | 0.719543 | 0.875916 |
| MmugDNA.40785.1.S1_at   | MmugDNA.40785.1 | 3.53  | 3.62  | 0.03 | 0.07 | -1.06 | 0.250276 | 0.02027  | 0.544994 | 0.17872  |
| MmugDNA.40786.1.S1_at   | MmugDNA.40786.1 | 7.27  | 6.99  | 0.42 | 0.12 | 1.22  | 0.273777 | 0.056365 | 0.565868 | 0.283382 |
| MmugDNA.40787.1.S1_at   | MmugDNA.40787.1 | 6.72  | 6.72  | 0.03 | 0.07 | 1     | 0.859448 | 0.384915 | 0.93919  | 0.620515 |
| MmugDNA.40788.1.S1_at   | MmugDNA.40788.1 | 5.55  | 5.56  | 0.72 | 0.37 | -1.01 | 0.701431 | 0.187542 | 0.858213 | 0.463628 |
| MmugDNA.40789.1.S1_at   | MmugDNA.40789.1 | 4.08  | 4.21  | 0.13 | 0.24 | -1.09 | 0.179138 | 0.215813 | 0.474075 | 0.489536 |
| MmugDNA.4079.1.S1_at    | MmugDNA.4079.1  | 3.68  | 3.6   | 0.32 | 0.12 | 1.06  | 0.772449 | 0.916753 | 0.895784 | 0.9534   |
| MmugDNA.40790.1.S1_at   | MmugDNA.40790.1 | 12.23 | 11.93 | 0.06 | 0.07 | 1.23  | 0.003827 | 0.091002 | 0.107129 | 0.345755 |
| MmugDNA.40790.1.S1_s_at | MmugDNA.40790.1 | 13.03 | 12.94 | 0.03 | 0.02 | 1.06  | 0.021574 | 0.569339 | 0.200582 | 0.742375 |
| MmugDNA.40791.1.S1_at   | MmugDNA.40791.1 | 3.78  | 3.8   | 0.24 | 0.19 | -1.01 | 0.526634 | 0.340583 | 0.75269  | 0.586789 |
| MmugDNA.40792.1.S1_at   | MmugDNA.40792.1 | 3.56  | 3.6   | 0.01 | 0.19 | -1.03 | 0.57932  | 0.205257 | 0.785017 | 0.479599 |
| MmugDNA.40793.1.S1_at   | MmugDNA.40793.1 | 3.91  | 4.01  | 0.4  | 0.14 | -1.07 | 0.632423 | 0.843137 | 0.819792 | 0.910701 |
| MmugDNA.40794.1.S1_at   | MmugDNA.40794.1 | 4.71  | 4.55  | 0.3  | 0.14 | 1.11  | 0.140354 | 0.166413 | 0.426075 | 0.442884 |
| MmugDNA.40795.1.S1_at   | MmugDNA.40795.1 | 5.52  | 5.85  | 0.17 | 0.39 | -1.26 | 0.660737 | 0.490928 | 0.836243 | 0.692666 |
| MmugDNA.40796.1.S1_at   | MmugDNA.40796.1 | 5.15  | 5.05  | 0.13 | 0.07 | 1.07  | 0.705313 | 0.44393  | 0.860243 | 0.661553 |
| MmugDNA.40797.1.S1_at   | MmugDNA.40797.1 | 6.15  | 6.61  | 0.51 | 0.48 | -1.38 | 0.156289 | 0.108807 | 0.446893 | 0.372374 |
| MmugDNA.40799.1.S1_at   | MmugDNA.40799.1 | 8.55  | 9.15  | 0.29 | 0.28 | -1.51 | 0.061136 | 0.001613 | 0.304069 | 0.060683 |
| MmugDNA.408.1.S1_at     | MmugDNA.408.1   | 4.38  | 4.26  | 0.04 | 0.12 | 1.08  | 0.439061 | 0.217795 | 0.693444 | 0.491368 |
| MmugDNA.40801.1.S1_at   | MmugDNA.40801.1 | 4.47  | 4.53  | 0.21 | 0.2  | -1.04 | 0.778682 | 0.161222 | 0.898859 | 0.437386 |
| MmugDNA.40804.1.S1_at   | MmugDNA.40804.1 | 3.28  | 3.1   | 0.09 | 0.15 | 1.13  | 0.099155 | 0.086864 | 0.370086 | 0.339651 |
| MmugDNA.40805.1.S1_at   | MmugDNA.40805.1 | 3.63  | 3.72  | 0.1  | 0.1  | -1.06 | 0.274393 | 0.371274 | 0.566281 | 0.610135 |
| MmugDNA.40807.1.S1_at   | MmugDNA.40807.1 | 4.22  | 3.81  | 0.1  | 0.1  | 1.32  | 0.014689 | 0.055146 | 0.173148 | 0.280451 |
| MmugDNA.40808.1.S1_at   | MmugDNA.40808.1 | 5.14  | 5.02  | 0.04 | 0.18 | 1.09  | 0.194681 | 0.250474 | 0.491303 | 0.519391 |
| MmugDNA.40809.1.S1_at   | MmugDNA.40809.1 | 3.82  | 4.35  | 0.08 | 0.44 | -1.44 | 0.259937 | 0.236241 | 0.554139 | 0.507252 |
| MmugDNA.4081.1.S1_at    | MmugDNA.4081.1  | 5.45  | 5.47  | 0.18 | 0.28 | -1.02 | 0.528122 | 0.532498 | 0.753492 | 0.719065 |
| MmugDNA.40810.1.S1_at   | MmugDNA.40810.1 | 6.74  | 6.53  | 0.16 | 0.18 | 1.16  | 0.173872 | 0.268392 | 0.468273 | 0.534086 |
| MmugDNA.40812.1.S1_at   | MmugDNA.40812.1 | 12.09 | 12.04 | 0.06 | 0.01 | 1.03  | 0.085923 | 0.024069 | 0.350263 | 0.194468 |

|                         |                 |       |       |      |      |       |          |          |          |          |
|-------------------------|-----------------|-------|-------|------|------|-------|----------|----------|----------|----------|
| MmugDNA.40813.1.S1_at   | MmugDNA.40813.1 | 5.22  | 5.25  | 0.18 | 0.23 | -1.02 | 0.838095 | 0.890206 | 0.929038 | 0.937473 |
| MmugDNA.40815.1.S1_at   | MmugDNA.40815.1 | 2.99  | 2.97  | 0.1  | 0.06 | 1.01  | 0.440463 | 0.101762 | 0.694477 | 0.361632 |
| MmugDNA.40817.1.S1_at   | MmugDNA.40817.1 | 5.65  | 5.36  | 0.54 | 0.28 | 1.22  | 0.281183 | 0.252729 | 0.572073 | 0.521174 |
| MmugDNA.40818.1.S1_at   | MmugDNA.40818.1 | 6.77  | 7.15  | 0.31 | 0.45 | -1.31 | 0.370085 | 0.721457 | 0.643241 | 0.838713 |
| MmugDNA.4082.1.S1_at    | MmugDNA.4082.1  | 9.45  | 9.47  | 0.24 | 0.11 | -1.01 | 0.808153 | 0.951355 | 0.914141 | 0.972417 |
| MmugDNA.40820.1.S1_at   | MmugDNA.40820.1 | 4.74  | 5.02  | 0.13 | 0.38 | -1.21 | 0.273101 | 0.369497 | 0.565251 | 0.608861 |
| MmugDNA.40821.1.S1_at   | MmugDNA.40821.1 | 8.79  | 8.76  | 0.25 | 0.12 | 1.02  | 0.747003 | 0.0155   | 0.882818 | 0.158044 |
| MmugDNA.40822.1.S1_at   | MmugDNA.40822.1 | 3.33  | 3.4   | 0.15 | 0.1  | -1.05 | 0.500252 | 0.755585 | 0.734586 | 0.857719 |
| MmugDNA.40823.1.S1_at   | MmugDNA.40823.1 | 2.63  | 2.62  | 0.29 | 0.11 | 1.01  | 0.262623 | 0.44479  | 0.556683 | 0.662072 |
| MmugDNA.40824.1.S1_at   | MmugDNA.40824.1 | 3.54  | 3.6   | 0.23 | 0.12 | -1.04 | 0.625108 | 0.646792 | 0.815208 | 0.793117 |
| MmugDNA.40825.1.S1_at   | MmugDNA.40825.1 | 7.82  | 8.31  | 0.47 | 0.13 | -1.4  | 0.221588 | 0.10651  | 0.51957  | 0.369078 |
| MmugDNA.40826.1.S1_at   | MmugDNA.40826.1 | 3.47  | 3.4   | 0.08 | 0.16 | 1.05  | 0.177164 | 0.213965 | 0.471804 | 0.487596 |
| MmugDNA.40827.1.S1_at   | MmugDNA.40827.1 | 11.21 | 11.45 | 0.17 | 0.03 | -1.18 | 0.068742 | 0.046226 | 0.320125 | 0.259397 |
| MmugDNA.40828.1.S1_at   | MmugDNA.40828.1 | 5.89  | 5.92  | 0.22 | 0.06 | -1.02 | 0.632706 | 0.819173 | 0.819945 | 0.895796 |
| MmugDNA.40829.1.S1_at   | MmugDNA.40829.1 | 5.48  | 5.49  | 0.13 | 0.05 | -1.01 | 0.768228 | 0.65999  | 0.893506 | 0.80101  |
| MmugDNA.4083.1.S1_s_at  | MmugDNA.4083.1  | 11.43 | 11.64 | 0.34 | 0.25 | -1.16 | 0.634324 | 0.079674 | 0.820718 | 0.326981 |
| MmugDNA.40830.1.S1_at   | MmugDNA.40830.1 | 8.7   | 8.5   | 0.18 | 0.19 | 1.15  | 0.519237 | 0.002005 | 0.747956 | 0.066428 |
| MmugDNA.40831.1.S1_at   | MmugDNA.40831.1 | 5.1   | 5.21  | 0.02 | 0.23 | -1.08 | 0.887324 | 0.563078 | 0.951911 | 0.738345 |
| MmugDNA.40832.1.S1_at   | MmugDNA.40832.1 | 5.5   | 5.62  | 0.13 | 0.02 | -1.09 | 0.148993 | 0.062233 | 0.437657 | 0.296307 |
| MmugDNA.40833.1.S1_at   | MmugDNA.40833.1 | 4.26  | 4.36  | 0.13 | 0.05 | -1.07 | 0.278054 | 0.185782 | 0.569395 | 0.461631 |
| MmugDNA.40834.1.S1_at   | MmugDNA.40834.1 | 7.94  | 7.52  | 0.18 | 0.36 | 1.34  | 0.164769 | 0.321436 | 0.457869 | 0.573207 |
| MmugDNA.40835.1.S1_at   | MmugDNA.40835.1 | 5.93  | 6.18  | 0.56 | 0.04 | -1.19 | 0.886177 | 0.882865 | 0.95147  | 0.933206 |
| MmugDNA.40836.1.S1_at   | MmugDNA.40836.1 | 8.83  | 8.56  | 0.28 | 0.24 | 1.2   | 0.58602  | 0.744649 | 0.78964  | 0.852121 |
| MmugDNA.40837.1.S1_at   | MmugDNA.40837.1 | 6.56  | 6.92  | 0.25 | 0.02 | -1.29 | 0.072753 | 0.059094 | 0.327658 | 0.289985 |
| MmugDNA.40838.1.S1_at   | MmugDNA.40838.1 | 4.13  | 4.43  | 0.9  | 0.13 | -1.23 | 0.713004 | 0.40119  | 0.864537 | 0.630823 |
| MmugDNA.40838.1.S1_s_at | MmugDNA.40838.1 | 12.47 | 12.32 | 0.02 | 0.02 | 1.11  | 0.001169 | 0.050058 | 0.077718 | 0.268916 |
| MmugDNA.40839.1.S1_at   | MmugDNA.40839.1 | 5.16  | 5.03  | 0.1  | 0.01 | 1.1   | 0.097737 | 0.138345 | 0.368111 | 0.411244 |
| MmugDNA.40840.1.S1_at   | MmugDNA.40840.1 | 9.42  | 9.89  | 0.15 | 0.17 | -1.39 | 0.022884 | 0.597598 | 0.204235 | 0.760265 |
| MmugDNA.40841.1.S1_at   | MmugDNA.40841.1 | 11.49 | 12.43 | 0.19 | 0.1  | -1.92 | 0.00206  | 0.003967 | 0.090098 | 0.089593 |
| MmugDNA.40842.1.S1_at   | MmugDNA.40842.1 | 12.51 | 13.14 | 0.06 | 0.13 | -1.55 | 0.002642 | 0.014078 | 0.095518 | 0.151885 |
| MmugDNA.40843.1.S1_at   | MmugDNA.40843.1 | 3.8   | 4.39  | 0.53 | 0.12 | -1.5  | 0.405684 | 0.33624  | 0.669103 | 0.583736 |
| MmugDNA.40844.1.S1_at   | MmugDNA.40844.1 | 6.64  | 6.43  | 0.28 | 0.38 | 1.16  | 0.24197  | 0.203065 | 0.539009 | 0.477343 |
| MmugDNA.40845.1.S1_at   | MmugDNA.40845.1 | 4.82  | 4.5   | 0.17 | 0.15 | 1.25  | 0.159145 | 0.149803 | 0.450505 | 0.424394 |
| MmugDNA.40847.1.S1_at   | MmugDNA.40847.1 | 6.99  | 6.97  | 0.11 | 0.27 | 1.01  | 0.844414 | 0.606423 | 0.931888 | 0.765747 |
| MmugDNA.40848.1.S1_at   | MmugDNA.40848.1 | 6.07  | 5.97  | 0.12 | 0.04 | 1.07  | 0.072984 | 0.076883 | 0.327866 | 0.322368 |
| MmugDNA.40849.1.S1_at   | MmugDNA.40849.1 | 8.17  | 6.67  | 0.18 | 0.14 | 2.84  | 0.000486 | 0.010454 | 0.068183 | 0.133648 |
| MmugDNA.40850.1.S1_at   | MmugDNA.40850.1 | 9.78  | 10.1  | 0.07 | 0.1  | -1.25 | 0.005409 | 0.240013 | 0.118701 | 0.510717 |
| MmugDNA.40851.1.S1_at   | MmugDNA.40851.1 | 10.05 | 10.03 | 0.27 | 0.03 | 1.01  | 0.855405 | 0.518922 | 0.937004 | 0.710789 |
| MmugDNA.40852.1.S1_at   | MmugDNA.40852.1 | 4.57  | 4.89  | 0.27 | 0.42 | -1.24 | 0.486475 | 0.031966 | 0.725664 | 0.221191 |
| MmugDNA.40853.1.S1_at   | MmugDNA.40853.1 | 3.67  | 3.59  | 0.19 | 0.05 | 1.06  | 0.299946 | 0.633592 | 0.588233 | 0.784275 |
| MmugDNA.40854.1.S1_at   | MmugDNA.40854.1 | 5.69  | 5.69  | 0.24 | 0.09 | 1     | 0.979634 | 0.108669 | 0.992247 | 0.372171 |
| MmugDNA.40854.1.S1_s_at | MmugDNA.40854.1 | 7.82  | 8.02  | 0.38 | 0.17 | -1.15 | 0.972064 | 0.274597 | 0.988792 | 0.539059 |
| MmugDNA.40856.1.S1_at   | MmugDNA.40856.1 | 3.39  | 3.51  | 1.02 | 0.21 | -1.09 | 0.491415 | 0.608363 | 0.729201 | 0.767055 |

|                         |                 |       |       |      |      |       |          |          |          |          |
|-------------------------|-----------------|-------|-------|------|------|-------|----------|----------|----------|----------|
| MmugDNA.40857.1.S1_at   | MmugDNA.40857.1 | 10.75 | 10.38 | 0.18 | 0.12 | 1.29  | 0.175703 | 0.026607 | 0.470151 | 0.204008 |
| MmugDNA.40859.1.S1_at   | MmugDNA.40859.1 | 6.91  | 6.89  | 0.1  | 0.05 | 1.01  | 0.863829 | 0.325522 | 0.940894 | 0.575827 |
| MmugDNA.40860.1.S1_at   | MmugDNA.40860.1 | 8.04  | 7.85  | 0.02 | 0.15 | 1.14  | 0.1547   | 0.044202 | 0.444927 | 0.254711 |
| MmugDNA.40861.1.S1_at   | MmugDNA.40861.1 | 3.76  | 3.66  | 0.28 | 0.07 | 1.07  | 0.544255 | 0.607952 | 0.763954 | 0.766684 |
| MmugDNA.40862.1.S1_at   | MmugDNA.40862.1 | 7.7   | 7.35  | 0.48 | 0.06 | 1.28  | 0.346538 | 0.082024 | 0.624998 | 0.330729 |
| MmugDNA.40863.1.S1_at   | MmugDNA.40863.1 | 4.43  | 4.18  | 0.11 | 0.14 | 1.19  | 0.174698 | 0.238768 | 0.468957 | 0.509442 |
| MmugDNA.40864.1.S1_at   | MmugDNA.40864.1 | 3.69  | 3.46  | 0.38 | 0.15 | 1.17  | 0.174082 | 0.184946 | 0.468351 | 0.460776 |
| MmugDNA.40865.1.S1_at   | MmugDNA.40865.1 | 2.66  | 2.96  | 0.08 | 0.2  | -1.23 | 0.239778 | 0.294142 | 0.53725  | 0.553962 |
| MmugDNA.8441.1.S1_at    | MmugDNA.8441.1  | 3.87  | 3.76  | 0.22 | 0.2  | 1.08  | 0.623796 | 0.799006 | 0.814467 | 0.884263 |
| MmugDNA.8441.1.S1_s_at  | MmugDNA.8441.1  | 3.81  | 4.07  | 0.1  | 0.19 | -1.2  | 0.271262 | 0.566397 | 0.563159 | 0.740513 |
| MmugDNA.40866.1.S1_at   | MmugDNA.40866.1 | 4.93  | 4.88  | 0.12 | 0.1  | 1.03  | 0.504363 | 0.628655 | 0.73759  | 0.781348 |
| MmugDNA.40867.1.S1_at   | MmugDNA.40867.1 | 7.55  | 7.05  | 0.53 | 0.06 | 1.41  | 0.103497 | 0.096634 | 0.37665  | 0.354145 |
| MmugDNA.40869.1.S1_at   | MmugDNA.40869.1 | 8.12  | 8.43  | 0.12 | 0.27 | -1.24 | 0.113639 | 0.071147 | 0.390328 | 0.313041 |
| MmugDNA.4087.1.S1_at    | MmugDNA.4087.1  | 2.9   | 2.88  | 0.23 | 0.57 | 1.01  | 0.632446 | 0.77256  | 0.819792 | 0.867784 |
| MmugDNA.40870.1.S1_at   | MmugDNA.40870.1 | 2.93  | 2.81  | 0.23 | 0.05 | 1.09  | 0.367866 | 0.680952 | 0.641612 | 0.813691 |
| MmugDNA.40873.1.S1_at   | MmugDNA.40873.1 | 8.95  | 9.26  | 0.24 | 0.02 | -1.24 | 0.088207 | 0.457648 | 0.354244 | 0.670889 |
| MmugDNA.40874.1.S1_at   | MmugDNA.40874.1 | 5.32  | 5.33  | 0.35 | 0.07 | -1    | 0.337287 | 0.405568 | 0.617813 | 0.633804 |
| MmugDNA.40875.1.S1_at   | MmugDNA.40875.1 | 6.83  | 8.01  | 0.15 | 0.19 | -2.26 | 0.000943 | 0.006791 | 0.076054 | 0.111388 |
| MmugDNA.40877.1.S1_at   | MmugDNA.40877.1 | 4.98  | 4.92  | 0.6  | 0.21 | 1.04  | 0.6104   | 0.915337 | 0.805838 | 0.952467 |
| MmugDNA.40878.1.S1_at   | MmugDNA.40878.1 | 8.52  | 8.56  | 0.29 | 0.07 | -1.03 | 0.540799 | 0.001975 | 0.761732 | 0.065871 |
| MmugDNA.40878.1.S1_s_at | MmugDNA.40878.1 | 8.58  | 8.96  | 0.19 | 0.14 | -1.3  | 0.092193 | 0.000349 | 0.360155 | 0.037097 |
| MmugDNA.40879.1.S1_at   | MmugDNA.40879.1 | 7.27  | 7.25  | 0.27 | 0.04 | 1.01  | 0.35472  | 0.497606 | 0.631771 | 0.696935 |
| MmugDNA.40880.1.S1_at   | MmugDNA.40880.1 | 11.39 | 11.25 | 0.29 | 0.19 | 1.11  | 0.917346 | 0.730466 | 0.964764 | 0.844017 |
| MmugDNA.40881.1.S1_at   | MmugDNA.40881.1 | 3.04  | 3.05  | 0.08 | 0.1  | -1.01 | 0.536623 | 0.466988 | 0.759061 | 0.676755 |
| MmugDNA.40883.1.S1_at   | MmugDNA.40883.1 | 4.12  | 3.96  | 0.09 | 0.08 | 1.12  | 0.077462 | 0.48729  | 0.336173 | 0.690391 |
| MmugDNA.40884.1.S1_at   | MmugDNA.40884.1 | 4.28  | 4.17  | 0.3  | 0.17 | 1.08  | 0.659987 | 0.790828 | 0.835974 | 0.87902  |
| MmugDNA.40887.1.S1_at   | MmugDNA.40887.1 | 8.94  | 9.53  | 0.56 | 0.24 | -1.5  | 0.106745 | 0.016324 | 0.380952 | 0.16183  |
| MmugDNA.40888.1.S1_at   | MmugDNA.40888.1 | 10.87 | 10.65 | 0.16 | 0.07 | 1.17  | 0.093285 | 0.569908 | 0.361736 | 0.742739 |
| MmugDNA.40889.1.S1_at   | MmugDNA.40889.1 | 4.41  | 4.17  | 0.87 | 0.07 | 1.17  | 0.245379 | 0.210921 | 0.541446 | 0.484934 |
| MmugDNA.40890.1.S1_at   | MmugDNA.40890.1 | 7.37  | 7.92  | 0.55 | 0.06 | -1.46 | 0.49504  | 0.004871 | 0.731524 | 0.097453 |
| MmugDNA.40891.1.S1_at   | MmugDNA.40891.1 | 5.18  | 5.28  | 1.52 | 0.36 | -1.07 | 0.447576 | 0.306049 | 0.699537 | 0.562782 |
| MmugDNA.40892.1.S1_at   | MmugDNA.40892.1 | 5.77  | 6.44  | 0.62 | 0.23 | -1.59 | 0.344115 | 0.643823 | 0.623409 | 0.791142 |
| MmugDNA.40894.1.S1_at   | MmugDNA.40894.1 | 6.99  | 9.46  | 1.06 | 0.24 | -5.52 | 0.020298 | 0.073183 | 0.196136 | 0.316064 |
| MmugDNA.40895.1.S1_at   | MmugDNA.40895.1 | 5.93  | 6.04  | 0.06 | 0.13 | -1.08 | 0.181702 | 0.000434 | 0.477223 | 0.038359 |
| MmugDNA.40896.1.S1_at   | MmugDNA.40896.1 | 2.76  | 2.85  | 0.05 | 0.04 | -1.07 | 0.072128 | 0.187    | 0.326541 | 0.462938 |
| MmugDNA.40897.1.S1_at   | MmugDNA.40897.1 | 5.04  | 4.57  | 0.49 | 0.08 | 1.38  | 0.202259 | 0.205777 | 0.499812 | 0.48007  |
| MmugDNA.40898.1.S1_at   | MmugDNA.40898.1 | 5.28  | 4.95  | 0.32 | 0.1  | 1.26  | 0.091761 | 0.091203 | 0.359517 | 0.346119 |
| MmugDNA.409.1.S1_at     | MmugDNA.409.1   | 5.45  | 5.55  | 0.03 | 0.16 | -1.08 | 0.184027 | 0.56702  | 0.480022 | 0.740959 |
| MmugDNA.40900.1.S1_at   | MmugDNA.40900.1 | 5.44  | 5.14  | 0.25 | 0.28 | 1.23  | 0.575892 | 0.695005 | 0.78296  | 0.822711 |
| MmugDNA.40901.1.S1_at   | MmugDNA.40901.1 | 9.18  | 9.46  | 0.01 | 0.18 | -1.22 | 0.173168 | 0.001431 | 0.467373 | 0.057607 |
| MmugDNA.40902.1.S1_at   | MmugDNA.40902.1 | 8.42  | 8.31  | 0.25 | 0.04 | 1.08  | 0.256497 | 0.469617 | 0.551012 | 0.678314 |
| MmugDNA.40903.1.S1_at   | MmugDNA.40903.1 | 5.93  | 6.46  | 0.39 | 0.09 | -1.44 | 0.062968 | 0.035976 | 0.307682 | 0.234155 |
| MmugDNA.40904.1.S1_at   | MmugDNA.40904.1 | 4.47  | 4.46  | 0.17 | 0.02 | 1.01  | 0.656262 | 0.59699  | 0.833632 | 0.759993 |

|                         |                 |       |       |      |      |       |          |          |          |          |
|-------------------------|-----------------|-------|-------|------|------|-------|----------|----------|----------|----------|
| MmugDNA.40905.1.S1_at   | MmugDNA.40905.1 | 4.33  | 4.19  | 0.16 | 0.12 | 1.1   | 0.562655 | 0.517186 | 0.775027 | 0.709435 |
| MmugDNA.40906.1.S1_at   | MmugDNA.40906.1 | 10.1  | 8.34  | 0.18 | 0.47 | 3.39  | 0.005437 | 0.003313 | 0.119074 | 0.082825 |
| MmugDNA.40907.1.S1_at   | MmugDNA.40907.1 | 7.52  | 6.51  | 0.86 | 1.03 | 2.02  | 0.327084 | 0.479783 | 0.609782 | 0.68541  |
| MmugDNA.40908.1.S1_s_at | MmugDNA.40908.1 | 8.54  | 8.55  | 0.04 | 0.03 | -1.01 | 0.519852 | 0.014773 | 0.748277 | 0.154616 |
| MmugDNA.40910.1.S1_at   | MmugDNA.40910.1 | 8.02  | 7.42  | 0.13 | 0.08 | 1.51  | 0.002415 | 0.0039   | 0.093606 | 0.088806 |
| MmugDNA.40911.1.S1_at   | MmugDNA.40911.1 | 5.57  | 5.6   | 0.16 | 0.12 | -1.02 | 0.581633 | 0.778028 | 0.786737 | 0.871075 |
| MmugDNA.40912.1.S1_at   | MmugDNA.40912.1 | 4     | 3.8   | 0.17 | 0.15 | 1.15  | 0.257899 | 0.289665 | 0.552089 | 0.550733 |
| MmugDNA.40913.1.S1_at   | MmugDNA.40913.1 | 3.3   | 3.27  | 0.03 | 0.06 | 1.02  | 0.468184 | 0.068407 | 0.713381 | 0.307955 |
| MmugDNA.40914.1.S1_at   | MmugDNA.40914.1 | 5.43  | 5.33  | 0.4  | 0.13 | 1.07  | 0.485519 | 0.633032 | 0.725036 | 0.783894 |
| MmugDNA.40915.1.S1_at   | MmugDNA.40915.1 | 5.75  | 5.74  | 0.03 | 0.11 | 1.01  | 0.231819 | 0.36927  | 0.530482 | 0.608695 |
| MmugDNA.40916.1.S1_at   | MmugDNA.40916.1 | 5.59  | 5.57  | 0.19 | 0.27 | 1.02  | 0.634763 | 0.794179 | 0.82094  | 0.881296 |
| MmugDNA.40918.1.S1_at   | MmugDNA.40918.1 | 6.93  | 6.79  | 0.13 | 0.04 | 1.11  | 0.126086 | 0.182971 | 0.40715  | 0.459449 |
| MmugDNA.40919.1.S1_at   | MmugDNA.40919.1 | 4.28  | 4.3   | 0.03 | 0.14 | -1.02 | 0.520902 | 0.440826 | 0.749023 | 0.659138 |
| MmugDNA.40920.1.S1_at   | MmugDNA.40920.1 | 8.99  | 9.44  | 0.63 | 0.3  | -1.36 | 0.539687 | 0.254375 | 0.761018 | 0.522681 |
| MmugDNA.40921.1.S1_at   | MmugDNA.40921.1 | 3.41  | 3.28  | 0.35 | 0.14 | 1.09  | 0.44119  | 0.630411 | 0.694766 | 0.782237 |
| MmugDNA.40923.1.S1_at   | MmugDNA.40923.1 | 3.27  | 3.28  | 0.31 | 0.14 | -1    | 0.371299 | 0.651445 | 0.644008 | 0.796213 |
| MmugDNA.40924.1.S1_at   | MmugDNA.40924.1 | 5.19  | 4.43  | 0.24 | 0.06 | 1.68  | 0.01103  | 0.004929 | 0.154669 | 0.097846 |
| MmugDNA.40925.1.S1_at   | MmugDNA.40925.1 | 5.08  | 4.94  | 0.21 | 0.07 | 1.11  | 0.433803 | 0.13829  | 0.689189 | 0.411198 |
| MmugDNA.40927.1.S1_at   | MmugDNA.40927.1 | 3.05  | 3.13  | 0.18 | 0.08 | -1.06 | 0.852802 | 0.295038 | 0.935956 | 0.554551 |
| MmugDNA.40928.1.S1_at   | MmugDNA.40928.1 | 10.16 | 10.05 | 0.13 | 0.14 | 1.08  | 0.35233  | 0.046731 | 0.629914 | 0.260843 |
| MmugDNA.40928.1.S1_s_at | MmugDNA.40928.1 | 10.58 | 10.56 | 0.14 | 0.1  | 1.02  | 0.637476 | 0.084686 | 0.822534 | 0.336196 |
| MmugDNA.40929.1.S1_at   | MmugDNA.40929.1 | 10.52 | 10.42 | 0.14 | 0.12 | 1.08  | 0.460592 | 0.140375 | 0.708278 | 0.413583 |
| MmugDNA.40930.1.S1_at   | MmugDNA.40930.1 | 4.7   | 4.89  | 0.19 | 0.22 | -1.14 | 0.773151 | 0.224199 | 0.89602  | 0.497164 |
| MmugDNA.40931.1.S1_at   | MmugDNA.40931.1 | 5.82  | 6     | 0.06 | 0.06 | -1.13 | 0.014466 | 0.001358 | 0.171923 | 0.056687 |
| MmugDNA.40932.1.S1_at   | MmugDNA.40932.1 | 9.17  | 8.81  | 0.08 | 0.11 | 1.29  | 0.0098   | 0.000162 | 0.148542 | 0.030478 |
| MmugDNA.40933.1.S1_at   | MmugDNA.40933.1 | 5.95  | 5.61  | 0.53 | 0.04 | 1.27  | 0.650884 | 0.874654 | 0.830453 | 0.928837 |
| MmugDNA.40934.1.S1_at   | MmugDNA.40934.1 | 7.44  | 7.4   | 0.22 | 0.27 | 1.03  | 0.842219 | 0.963232 | 0.930767 | 0.979462 |
| MmugDNA.40935.1.S1_at   | MmugDNA.40935.1 | 5.76  | 5.19  | 0.06 | 0.57 | 1.48  | 0.070528 | 0.073476 | 0.323989 | 0.316769 |
| MmugDNA.40936.1.S1_at   | MmugDNA.40936.1 | 5.14  | 5.04  | 0.1  | 0.53 | 1.07  | 0.877083 | 0.850407 | 0.947453 | 0.914927 |
| MmugDNA.40938.1.S1_at   | MmugDNA.40938.1 | 3.03  | 2.91  | 0.07 | 0.27 | 1.09  | 0.804287 | 0.852464 | 0.912045 | 0.916174 |
| MmugDNA.40939.1.S1_at   | MmugDNA.40939.1 | 3.95  | 3.95  | 0.19 | 0.23 | 1     | 0.231519 | 0.379349 | 0.530229 | 0.616334 |
| MmugDNA.4094.1.S1_at    | MmugDNA.4094.1  | 5.54  | 5.66  | 0.15 | 0.13 | -1.09 | 0.407955 | 0.141705 | 0.670893 | 0.415265 |
| MmugDNA.40940.1.S1_at   | MmugDNA.40940.1 | 6.96  | 6.94  | 0.2  | 0.13 | 1.01  | 0.245922 | 0.306269 | 0.541732 | 0.562907 |
| MmugDNA.40941.1.S1_at   | MmugDNA.40941.1 | 3.83  | 3.32  | 0.8  | 0.5  | 1.42  | 0.193623 | 0.194329 | 0.49027  | 0.46946  |
| MmugDNA.40942.1.S1_at   | MmugDNA.40942.1 | 8.14  | 9.72  | 0.25 | 0.16 | -3    | 0.001099 | 0.000473 | 0.077278 | 0.038572 |
| MmugDNA.40944.1.S1_at   | MmugDNA.40944.1 | 5.01  | 4.71  | 0.36 | 0.15 | 1.24  | 0.344519 | 0.409756 | 0.62386  | 0.636811 |
| MmugDNA.40946.1.S1_at   | MmugDNA.40946.1 | 6.9   | 6.9   | 0.14 | 0    | -1    | 0.896015 | 0.911754 | 0.955633 | 0.950257 |
| MmugDNA.40947.1.S1_at   | MmugDNA.40947.1 | 4.61  | 4.66  | 0.13 | 0.24 | -1.03 | 0.868449 | 0.145714 | 0.943445 | 0.419653 |
| MmugDNA.40948.1.S1_at   | MmugDNA.40948.1 | 2.76  | 2.81  | 0.03 | 0.03 | -1.03 | 0.655023 | 0.22024  | 0.83306  | 0.493681 |
| MmugDNA.40949.1.S1_at   | MmugDNA.40949.1 | 6.64  | 6.13  | 0.68 | 0.2  | 1.43  | 0.249255 | 0.132807 | 0.544486 | 0.404544 |
| MmugDNA.4095.1.S1_at    | MmugDNA.4095.1  | 6.03  | 6.04  | 0.07 | 0.08 | -1    | 0.431865 | 0.668939 | 0.687729 | 0.806317 |
| MmugDNA.40950.1.S1_at   | MmugDNA.40950.1 | 6.42  | 6.7   | 0.12 | 0.42 | -1.21 | 0.239795 | 0.230268 | 0.537265 | 0.502102 |
| MmugDNA.40951.1.S1_at   | MmugDNA.40951.1 | 5.26  | 5.12  | 0.75 | 0.56 | 1.1   | 0.391847 | 0.602997 | 0.658853 | 0.763857 |

|                        |                 |       |       |      |      |       |          |          |          |          |
|------------------------|-----------------|-------|-------|------|------|-------|----------|----------|----------|----------|
| MmugDNA.40952.1.S1_at  | MmugDNA.40952.1 | 4.82  | 4.1   | 0.07 | 0.27 | 1.64  | 0.012683 | 0.06408  | 0.162687 | 0.299311 |
| MmugDNA.40953.1.S1_at  | MmugDNA.40953.1 | 6.41  | 6.61  | 0.14 | 0.12 | -1.14 | 0.667195 | 0.326327 | 0.840252 | 0.576503 |
| MmugDNA.40955.1.S1_at  | MmugDNA.40955.1 | 5     | 3.95  | 0.83 | 0.16 | 2.08  | 0.110804 | 0.258051 | 0.386305 | 0.525574 |
| MmugDNA.40956.1.S1_at  | MmugDNA.40956.1 | 11.71 | 11.68 | 0.22 | 0.06 | 1.02  | 0.723477 | 0.002785 | 0.870006 | 0.077966 |
| MmugDNA.40958.1.S1_at  | MmugDNA.40958.1 | 3.45  | 3.56  | 0.24 | 0.06 | -1.08 | 0.454622 | 0.186462 | 0.704426 | 0.462306 |
| MmugDNA.40959.1.S1_at  | MmugDNA.40959.1 | 4.57  | 4.56  | 0.01 | 0.14 | 1.01  | 0.999512 | 0.335101 | 0.999849 | 0.582853 |
| MmugDNA.4096.1.S1_at   | MmugDNA.4096.1  | 4.94  | 4.71  | 0.06 | 0.04 | 1.18  | 0.007466 | 0.007272 | 0.134751 | 0.114408 |
| MmugDNA.40960.1.S1_at  | MmugDNA.40960.1 | 3.17  | 3.1   | 0.37 | 0.22 | 1.05  | 0.421288 | 0.388702 | 0.679877 | 0.622991 |
| MmugDNA.40961.1.S1_at  | MmugDNA.40961.1 | 8.47  | 7.08  | 0.79 | 0.36 | 2.63  | 0.076635 | 0.034531 | 0.334928 | 0.229979 |
| MmugDNA.40963.1.S1_at  | MmugDNA.40963.1 | 10.87 | 11.35 | 0.3  | 0.08 | -1.39 | 0.096074 | 0.378889 | 0.365529 | 0.615852 |
| MmugDNA.40964.1.S1_at  | MmugDNA.40964.1 | 4.84  | 5.01  | 0.1  | 0.41 | -1.12 | 0.615701 | 0.791383 | 0.809106 | 0.879472 |
| MmugDNA.40965.1.S1_at  | MmugDNA.40965.1 | 9.32  | 9.14  | 0.26 | 0.19 | 1.13  | 0.26408  | 0.093931 | 0.557422 | 0.350445 |
| MmugDNA.40966.1.S1_at  | MmugDNA.40966.1 | 5.92  | 5.94  | 0.02 | 0.03 | -1.01 | 0.17875  | 0.253243 | 0.47356  | 0.521614 |
| MmugDNA.40967.1.S1_at  | MmugDNA.40967.1 | 4.77  | 4.69  | 0.02 | 0.09 | 1.05  | 0.27824  | 0.512759 | 0.56957  | 0.7065   |
| MmugDNA.40968.1.S1_at  | MmugDNA.40968.1 | 4.34  | 4.54  | 0.05 | 0.09 | -1.15 | 0.020609 | 0.262336 | 0.197032 | 0.528633 |
| MmugDNA.40969.1.S1_at  | MmugDNA.40969.1 | 9.53  | 9.36  | 0.27 | 0.02 | 1.12  | 0.463241 | 0.038926 | 0.709976 | 0.242297 |
| MmugDNA.4097.1.S1_at   | MmugDNA.4097.1  | 10.12 | 9.78  | 0.37 | 0.09 | 1.26  | 0.077491 | 0.510955 | 0.336195 | 0.705302 |
| MmugDNA.40970.1.S1_at  | MmugDNA.40970.1 | 7.37  | 7.21  | 0.07 | 0.12 | 1.12  | 0.055456 | 0.072107 | 0.292419 | 0.314595 |
| MmugDNA.40971.1.S1_at  | MmugDNA.40971.1 | 8.04  | 8.58  | 0.19 | 0.04 | -1.45 | 0.006353 | 0.005841 | 0.126104 | 0.10467  |
| MmugDNA.40972.1.S1_at  | MmugDNA.40972.1 | 5.49  | 5.72  | 0.3  | 0.09 | -1.18 | 0.411472 | 0.513627 | 0.673409 | 0.707143 |
| MmugDNA.40974.1.S1_at  | MmugDNA.40974.1 | 5.56  | 5.93  | 0.31 | 0.15 | -1.29 | 0.135756 | 0.333243 | 0.419782 | 0.581498 |
| MmugDNA.40976.1.S1_at  | MmugDNA.40976.1 | 6.16  | 5.96  | 0.14 | 0.05 | 1.15  | 0.091442 | 0.700956 | 0.359118 | 0.826604 |
| MmugDNA.40978.1.S1_at  | MmugDNA.40978.1 | 4.16  | 3.99  | 0.19 | 0.05 | 1.13  | 0.72377  | 0.737925 | 0.870246 | 0.848145 |
| MmugDNA.4098.1.S1_s_at | MmugDNA.4098.1  | 11.81 | 11.41 | 0.21 | 0.03 | 1.31  | 0.097094 | 0.001853 | 0.367275 | 0.064616 |
| MmugDNA.40980.1.S1_at  | MmugDNA.40980.1 | 4.14  | 3.46  | 0.43 | 0.11 | 1.6   | 0.050202 | 0.033806 | 0.281792 | 0.227489 |
| MmugDNA.40982.1.S1_at  | MmugDNA.40982.1 | 4.54  | 4.4   | 0.17 | 0.17 | 1.1   | 0.161692 | 0.059084 | 0.453419 | 0.289985 |
| MmugDNA.40983.1.S1_at  | MmugDNA.40983.1 | 3.99  | 3.56  | 0.41 | 0.11 | 1.35  | 0.128139 | 0.215566 | 0.410203 | 0.489304 |
| MmugDNA.40985.1.S1_at  | MmugDNA.40985.1 | 7.42  | 7.96  | 0.16 | 0.06 | -1.46 | 0.009943 | 0.461183 | 0.149006 | 0.67288  |
| MmugDNA.40986.1.S1_at  | MmugDNA.40986.1 | 9.89  | 9.17  | 0.06 | 0.15 | 1.65  | 0.001889 | 0.000175 | 0.087741 | 0.030511 |
| MmugDNA.40988.1.S1_at  | MmugDNA.40988.1 | 3.28  | 3.35  | 0.29 | 0.16 | -1.05 | 0.503382 | 0.724558 | 0.736931 | 0.840552 |
| MmugDNA.40989.1.S1_at  | MmugDNA.40989.1 | 8.09  | 7.97  | 0.31 | 0.06 | 1.08  | 0.589957 | 0.211496 | 0.791771 | 0.48563  |
| MmugDNA.4099.1.S1_at   | MmugDNA.4099.1  | 6.26  | 6.42  | 0.11 | 0.07 | -1.12 | 0.181451 | 0.194501 | 0.476903 | 0.469597 |
| MmugDNA.40990.1.S1_at  | MmugDNA.40990.1 | 4.71  | 4.53  | 0.1  | 0.17 | 1.13  | 0.855658 | 0.68444  | 0.93713  | 0.815943 |
| MmugDNA.40991.1.S1_at  | MmugDNA.40991.1 | 7.37  | 7.26  | 0.14 | 0.18 | 1.07  | 0.286696 | 0.14663  | 0.576528 | 0.420664 |
| MmugDNA.40992.1.S1_at  | MmugDNA.40992.1 | 4.16  | 4.2   | 0.1  | 0.06 | -1.03 | 0.472601 | 0.039289 | 0.716214 | 0.243338 |
| MmugDNA.40993.1.S1_at  | MmugDNA.40993.1 | 6.84  | 7.33  | 0.25 | 0.35 | -1.4  | 0.315498 | 0.583282 | 0.600423 | 0.751682 |
| MmugDNA.40994.1.S1_at  | MmugDNA.40994.1 | 4.51  | 4.18  | 0.46 | 0.23 | 1.26  | 0.312547 | 0.043333 | 0.598609 | 0.252847 |
| MmugDNA.40995.1.S1_at  | MmugDNA.40995.1 | 6.65  | 6.66  | 0.16 | 0.12 | -1.01 | 0.581155 | 0.444784 | 0.786393 | 0.662072 |
| MmugDNA.40996.1.S1_at  | MmugDNA.40996.1 | 4.61  | 4.67  | 0.09 | 0    | -1.05 | 0.258211 | 0.016614 | 0.552443 | 0.163117 |
| MmugDNA.40997.1.S1_at  | MmugDNA.40997.1 | 6.32  | 5.84  | 0.72 | 0.3  | 1.4   | 0.329374 | 0.42259  | 0.61165  | 0.645764 |
| MmugDNA.40998.1.S1_at  | MmugDNA.40998.1 | 2.48  | 2.49  | 0.02 | 0    | -1    | 0.769906 | 0.952866 | 0.894412 | 0.973271 |
| MmugDNA.41.1.S1_at     | MmugDNA.41.1    | 5.73  | 6.26  | 1.04 | 0.16 | -1.44 | 0.171763 | 0.252766 | 0.465678 | 0.521174 |
| MmugDNA.410.1.S1_s_at  | MmugDNA.410.1   | 9.05  | 10.85 | 0.82 | 0.22 | -3.47 | 0.070428 | 0.660725 | 0.323757 | 0.801516 |

|                         |                 |       |       |      |      |        |          |          |          |          |
|-------------------------|-----------------|-------|-------|------|------|--------|----------|----------|----------|----------|
| MmugDNA.4100.1.S1_at    | MmugDNA.4100.1  | 5.98  | 5.46  | 0.49 | 0.29 | 1.43   | 0.234664 | 0.186153 | 0.532768 | 0.461995 |
| MmugDNA.4100.1.S1_x_at  | MmugDNA.4100.1  | 6.48  | 5.61  | 0.56 | 0.44 | 1.83   | 0.270205 | 0.215789 | 0.562365 | 0.489536 |
| MmugDNA.41002.1.S1_at   | MmugDNA.41002.1 | 3.66  | 3.66  | 0.02 | 0.18 | -1     | 0.350936 | 0.367805 | 0.628649 | 0.607466 |
| MmugDNA.41004.1.S1_at   | MmugDNA.41004.1 | 3.27  | 3.25  | 0.07 | 0.05 | 1.01   | 0.376578 | 0.310274 | 0.647284 | 0.565461 |
| MmugDNA.29165.1.S1_s_at | MmugDNA.29165.1 | 7.28  | 12.12 | 1.8  | 0.19 | -28.69 | 0.022632 | 0.201342 | 0.203548 | 0.47589  |
| MmugDNA.41006.1.S1_at   | MmugDNA.41006.1 | 6.18  | 6.06  | 0.14 | 0.09 | 1.08   | 0.124732 | 0.189562 | 0.405027 | 0.465286 |
| MmugDNA.41007.1.S1_at   | MmugDNA.41007.1 | 4.85  | 5.01  | 0.09 | 0.1  | -1.11  | 0.093481 | 0.08279  | 0.362078 | 0.332323 |
| MmugDNA.41008.1.S1_at   | MmugDNA.41008.1 | 5.59  | 4.75  | 0.63 | 0.19 | 1.79   | 0.115728 | 0.141887 | 0.392831 | 0.415403 |
| MmugDNA.41009.1.S1_at   | MmugDNA.41009.1 | 5.16  | 5.36  | 0.29 | 0.16 | -1.15  | 0.858189 | 0.378372 | 0.938377 | 0.615443 |
| MmugDNA.41010.1.S1_at   | MmugDNA.41010.1 | 5.9   | 4.91  | 0.96 | 0.38 | 1.99   | 0.233429 | 0.303647 | 0.53162  | 0.561088 |
| MmugDNA.41011.1.S1_at   | MmugDNA.41011.1 | 4.98  | 4.43  | 1    | 0.12 | 1.47   | 0.329908 | 0.365934 | 0.611993 | 0.605798 |
| MmugDNA.41013.1.S1_at   | MmugDNA.41013.1 | 5.06  | 5.09  | 0.08 | 0.13 | -1.02  | 0.996205 | 0.806449 | 0.998547 | 0.888651 |
| MmugDNA.41015.1.S1_at   | MmugDNA.41015.1 | 7.24  | 7.13  | 0.44 | 0.05 | 1.08   | 0.265091 | 0.00152  | 0.557962 | 0.059307 |
| MmugDNA.41016.1.S1_at   | MmugDNA.41016.1 | 3.86  | 3.99  | 0.36 | 0.16 | -1.1   | 0.921833 | 0.939539 | 0.966523 | 0.965642 |
| MmugDNA.41017.1.S1_at   | MmugDNA.41017.1 | 5.98  | 6.28  | 0.51 | 0.14 | -1.24  | 0.48628  | 0.041299 | 0.725583 | 0.247995 |
| MmugDNA.41019.1.S1_at   | MmugDNA.41019.1 | 7.65  | 7.18  | 0.54 | 0.39 | 1.38   | 0.204319 | 0.225523 | 0.502025 | 0.498153 |
| MmugDNA.4102.1.S1_at    | MmugDNA.4102.1  | 8.98  | 9.46  | 0.39 | 0.22 | -1.39  | 0.477168 | 0.029253 | 0.71929  | 0.212978 |
| MmugDNA.4102.1.S1_s_at  | MmugDNA.4102.1  | 9.58  | 9.8   | 0.32 | 0.13 | -1.16  | 0.353924 | 0.019932 | 0.63112  | 0.177448 |
| MmugDNA.41020.1.S1_at   | MmugDNA.41020.1 | 4.26  | 4.33  | 0.53 | 0.26 | -1.05  | 0.537292 | 0.559786 | 0.759504 | 0.736394 |
| MmugDNA.41021.1.S1_at   | MmugDNA.41021.1 | 2.92  | 2.9   | 0.06 | 0.12 | 1.01   | 0.456623 | 0.80741  | 0.705861 | 0.889121 |
| MmugDNA.41022.1.S1_at   | MmugDNA.41022.1 | 6.04  | 6.37  | 0.5  | 0.08 | -1.26  | 0.27081  | 0.729621 | 0.56285  | 0.843613 |
| MmugDNA.41023.1.S1_at   | MmugDNA.41023.1 | 4.37  | 4.37  | 0.1  | 0.07 | -1     | 0.317944 | 0.32726  | 0.602765 | 0.577173 |
| MmugDNA.41025.1.S1_at   | MmugDNA.41025.1 | 3.85  | 3.51  | 0.36 | 0.28 | 1.27   | 0.576549 | 0.575743 | 0.783247 | 0.746758 |
| MmugDNA.41027.1.S1_at   | MmugDNA.41027.1 | 4.46  | 4.46  | 0.44 | 0.13 | 1      | 0.385998 | 0.423964 | 0.654513 | 0.646612 |
| MmugDNA.41028.1.S1_s_at | MmugDNA.41028.1 | 7.93  | 7.99  | 0.21 | 0.12 | -1.05  | 0.391359 | 0.550358 | 0.658628 | 0.730398 |
| MmugDNA.41029.1.S1_at   | MmugDNA.41029.1 | 6.3   | 6.42  | 0.26 | 0.07 | -1.09  | 0.393647 | 0.501566 | 0.660389 | 0.699719 |
| MmugDNA.4103.1.S1_at    | MmugDNA.4103.1  | 5.02  | 4.79  | 0.14 | 0.03 | 1.17   | 0.072178 | 0.051863 | 0.32663  | 0.273151 |
| MmugDNA.41030.1.S1_at   | MmugDNA.41030.1 | 10    | 9.9   | 0.12 | 0.06 | 1.07   | 0.244906 | 0.816806 | 0.541101 | 0.894329 |
| MmugDNA.41031.1.S1_at   | MmugDNA.41031.1 | 3.59  | 3.35  | 0.15 | 0.26 | 1.18   | 0.233884 | 0.646728 | 0.532099 | 0.793089 |
| MmugDNA.41032.1.S1_at   | MmugDNA.41032.1 | 4.19  | 4.04  | 0.25 | 0.2  | 1.11   | 0.982433 | 0.701703 | 0.993559 | 0.826991 |
| MmugDNA.41033.1.S1_at   | MmugDNA.41033.1 | 3.64  | 3.51  | 0.11 | 0    | 1.09   | 0.131642 | 0.308404 | 0.414491 | 0.564476 |
| MmugDNA.41034.1.S1_at   | MmugDNA.41034.1 | 6.54  | 6.22  | 0.3  | 0.12 | 1.25   | 0.186051 | 0.078348 | 0.482202 | 0.325007 |
| MmugDNA.41035.1.S1_at   | MmugDNA.41035.1 | 9.19  | 9.07  | 0.01 | 0.07 | 1.09   | 0.02911  | 0.097569 | 0.223385 | 0.355455 |
| MmugDNA.41036.1.S1_at   | MmugDNA.41036.1 | 7.68  | 8.43  | 0.9  | 0.2  | -1.68  | 0.268549 | 0.653926 | 0.561073 | 0.797715 |
| MmugDNA.41037.1.S1_at   | MmugDNA.41037.1 | 12.16 | 11.92 | 0.09 | 0.03 | 1.18   | 0.034584 | 0.311861 | 0.24053  | 0.56683  |
| MmugDNA.41038.1.S1_at   | MmugDNA.41038.1 | 8.95  | 8.54  | 0.26 | 0.11 | 1.33   | 0.026854 | 0.046069 | 0.216925 | 0.258977 |
| MmugDNA.41039.1.S1_at   | MmugDNA.41039.1 | 5.05  | 4.97  | 0.13 | 0    | 1.06   | 0.136448 | 0.66434  | 0.421005 | 0.803354 |
| MmugDNA.4104.1.S1_at    | MmugDNA.4104.1  | 9.6   | 8.67  | 0.17 | 0.17 | 1.9    | 0.00259  | 0.016354 | 0.094992 | 0.161943 |
| MmugDNA.41040.1.S1_at   | MmugDNA.41040.1 | 7.2   | 6.98  | 0.07 | 0.09 | 1.17   | 0.021127 | 0.00955  | 0.198834 | 0.128764 |
| MmugDNA.41041.1.S1_at   | MmugDNA.41041.1 | 6.81  | 6.95  | 0.29 | 0.07 | -1.1   | 0.958526 | 0.868294 | 0.983129 | 0.925241 |
| MmugDNA.41043.1.S1_at   | MmugDNA.41043.1 | 10.11 | 10.02 | 0.17 | 0.02 | 1.07   | 0.143322 | 0.426366 | 0.42964  | 0.648535 |
| MmugDNA.41044.1.S1_at   | MmugDNA.41044.1 | 10.96 | 11.04 | 0.08 | 0.08 | -1.06  | 0.316903 | 0.236971 | 0.601612 | 0.507675 |
| MmugDNA.41045.1.S1_at   | MmugDNA.41045.1 | 3.72  | 3.82  | 0.73 | 0.2  | -1.07  | 0.906783 | 0.9888   | 0.960562 | 0.993611 |



|                         |                 |       |       |      |      |       |          |          |          |          |
|-------------------------|-----------------|-------|-------|------|------|-------|----------|----------|----------|----------|
| MmugDNA.41047.1.S1_at   | MmugDNA.41047.1 | 5.81  | 5.71  | 0.53 | 0.08 | 1.07  | 0.512076 | 0.717754 | 0.742866 | 0.836602 |
| MmugDNA.41048.1.S1_at   | MmugDNA.41048.1 | 6.42  | 6.37  | 0.5  | 0.24 | 1.03  | 0.571824 | 0.539425 | 0.780082 | 0.723763 |
| MmugDNA.41049.1.S1_at   | MmugDNA.41049.1 | 5.31  | 4.1   | 1.22 | 0.29 | 2.32  | 0.240794 | 0.334735 | 0.538182 | 0.582615 |
| MmugDNA.41049.1.S1_s_at | MmugDNA.41049.1 | 6.82  | 6.1   | 0.7  | 0.22 | 1.64  | 0.149745 | 0.22445  | 0.438721 | 0.497444 |
| MmugDNA.4105.1.S1_at    | MmugDNA.4105.1  | 5.56  | 6.01  | 0.48 | 0.43 | -1.36 | 0.322655 | 0.553575 | 0.606572 | 0.732717 |
| MmugDNA.41050.1.S1_at   | MmugDNA.41050.1 | 3.24  | 3.21  | 0.19 | 0.13 | 1.02  | 0.367768 | 0.609922 | 0.641588 | 0.768216 |
| MmugDNA.41052.1.S1_at   | MmugDNA.41052.1 | 6.17  | 6.09  | 0.23 | 0.07 | 1.05  | 0.380799 | 0.540277 | 0.65037  | 0.724221 |
| MmugDNA.41053.1.S1_at   | MmugDNA.41053.1 | 4.78  | 5.04  | 0.41 | 0.12 | -1.19 | 0.379133 | 0.402615 | 0.649162 | 0.631505 |
| MmugDNA.41054.1.S1_at   | MmugDNA.41054.1 | 3.66  | 3.65  | 0.11 | 0.07 | 1.01  | 0.273019 | 0.451177 | 0.565185 | 0.666085 |
| MmugDNA.41057.1.S1_at   | MmugDNA.41057.1 | 5.96  | 5.68  | 0.65 | 0.42 | 1.21  | 0.396354 | 0.71077  | 0.662427 | 0.832259 |
| MmugDNA.41058.1.S1_at   | MmugDNA.41058.1 | 4.03  | 4.17  | 0.21 | 0.08 | -1.11 | 0.818105 | 0.94352  | 0.918751 | 0.967926 |
| MmugDNA.41059.1.S1_at   | MmugDNA.41059.1 | 7.13  | 7.17  | 0.04 | 0.08 | -1.03 | 0.685336 | 0.032929 | 0.849991 | 0.22466  |
| MmugDNA.41059.1.S1_s_at | MmugDNA.41059.1 | 7.56  | 7.16  | 0.11 | 0.09 | 1.32  | 0.009102 | 0.002415 | 0.145159 | 0.072905 |
| MmugDNA.4106.1.S1_at    | MmugDNA.4106.1  | 4.15  | 4.26  | 0.44 | 0.01 | -1.08 | 0.590416 | 0.698018 | 0.791861 | 0.82456  |
| MmugDNA.41060.1.S1_at   | MmugDNA.41060.1 | 4.53  | 4.82  | 0.05 | 0.29 | -1.22 | 0.523476 | 0.018946 | 0.750424 | 0.17317  |
| MmugDNA.41061.1.S1_at   | MmugDNA.41061.1 | 5.25  | 5.46  | 0.18 | 0.18 | -1.15 | 0.10866  | 0.1877   | 0.383537 | 0.46368  |
| MmugDNA.41062.1.S1_at   | MmugDNA.41062.1 | 5.37  | 5.36  | 0.08 | 0.12 | 1.01  | 0.805191 | 0.625074 | 0.91264  | 0.778973 |
| MmugDNA.41063.1.S1_at   | MmugDNA.41063.1 | 10.13 | 9.95  | 0.11 | 0.1  | 1.13  | 0.046332 | 0.037214 | 0.272999 | 0.237285 |
| MmugDNA.41064.1.S1_at   | MmugDNA.41064.1 | 3.68  | 3.83  | 0.16 | 0.05 | -1.11 | 0.168184 | 0.31985  | 0.461465 | 0.572213 |
| MmugDNA.41065.1.S1_at   | MmugDNA.41065.1 | 7.56  | 8.69  | 0.49 | 0.29 | -2.18 | 0.055952 | 0.336681 | 0.293472 | 0.584037 |
| MmugDNA.41068.1.S1_at   | MmugDNA.41068.1 | 4.66  | 5.07  | 0.14 | 0.13 | -1.33 | 0.025051 | 0.027429 | 0.211212 | 0.206851 |
| MmugDNA.41069.1.S1_at   | MmugDNA.41069.1 | 4.94  | 4.81  | 0.25 | 0.2  | 1.09  | 0.492238 | 0.634347 | 0.729603 | 0.784758 |
| MmugDNA.4107.1.S1_at    | MmugDNA.4107.1  | 3.38  | 3.22  | 0.16 | 0.31 | 1.12  | 0.898719 | 0.479522 | 0.956971 | 0.685262 |
| MmugDNA.41070.1.S1_at   | MmugDNA.41070.1 | 3.05  | 2.99  | 0.17 | 0.1  | 1.05  | 0.258416 | 0.628056 | 0.552539 | 0.780934 |
| MmugDNA.7061.1.S1_at    | MmugDNA.7061.1  | 9.9   | 9.83  | 0.08 | 0.04 | 1.05  | 0.140194 | 0.281322 | 0.425843 | 0.544391 |
| MmugDNA.7061.1.S1_s_at  | MmugDNA.7061.1  | 11.96 | 11.91 | 0.08 | 0.02 | 1.04  | 0.507978 | 0.860096 | 0.740166 | 0.920245 |
| MmugDNA.41072.1.S1_at   | MmugDNA.41072.1 | 6.47  | 5.81  | 0.46 | 0.15 | 1.58  | 0.300102 | 0.235134 | 0.588392 | 0.50629  |
| MmugDNA.41073.1.S1_at   | MmugDNA.41073.1 | 11.5  | 11.44 | 0.12 | 0.12 | 1.04  | 0.375402 | 0.91339  | 0.646269 | 0.951231 |
| MmugDNA.41074.1.S1_at   | MmugDNA.41074.1 | 4.05  | 4.06  | 0.1  | 0.07 | -1.01 | 0.361998 | 0.663563 | 0.637175 | 0.803017 |
| MmugDNA.41075.1.S1_at   | MmugDNA.41075.1 | 6.13  | 6.71  | 0.2  | 0.27 | -1.49 | 0.051339 | 0.36662  | 0.283923 | 0.606387 |
| MmugDNA.41077.1.S1_at   | MmugDNA.41077.1 | 10.84 | 10.85 | 0.2  | 0.08 | -1.01 | 0.683621 | 0.262639 | 0.849206 | 0.52899  |
| MmugDNA.14249.1.S1_s_at | MmugDNA.14249.1 | 11.95 | 11.88 | 0.12 | 0.02 | 1.05  | 0.410546 | 0.101192 | 0.672532 | 0.36084  |
| MmugDNA.41078.1.S1_at   | MmugDNA.41078.1 | 3.66  | 3.5   | 0.2  | 0.01 | 1.12  | 0.07362  | 0.164777 | 0.329086 | 0.441105 |
| MmugDNA.4108.1.S1_at    | MmugDNA.4108.1  | 9.16  | 9.33  | 0.21 | 0.14 | -1.12 | 0.200356 | 0.000757 | 0.497792 | 0.045403 |
| MmugDNA.41080.1.S1_at   | MmugDNA.41080.1 | 3.72  | 3.72  | 0.04 | 0.05 | 1     | 0.231108 | 0.595446 | 0.529883 | 0.759091 |
| MmugDNA.41081.1.S1_at   | MmugDNA.41081.1 | 4.26  | 4.2   | 0.23 | 0.11 | 1.04  | 0.388371 | 0.431699 | 0.656369 | 0.652516 |
| MmugDNA.41083.1.S1_at   | MmugDNA.41083.1 | 5.73  | 5.73  | 0.06 | 0.06 | -1    | 0.463197 | 0.076028 | 0.709949 | 0.320716 |
| MmugDNA.41084.1.S1_at   | MmugDNA.41084.1 | 5.47  | 5.46  | 0.01 | 0.18 | 1.01  | 0.429224 | 0.496631 | 0.685711 | 0.696119 |
| MmugDNA.41085.1.S1_at   | MmugDNA.41085.1 | 5.85  | 5.85  | 0.05 | 0.24 | -1    | 0.846813 | 0.977591 | 0.933126 | 0.987812 |
| MmugDNA.41086.1.S1_at   | MmugDNA.41086.1 | 8.61  | 8.74  | 0.12 | 0.24 | -1.1  | 0.999603 | 0.704998 | 0.999849 | 0.828934 |
| MmugDNA.41088.1.S1_at   | MmugDNA.41088.1 | 6.15  | 6.16  | 0.07 | 0.03 | -1    | 0.713402 | 0.445042 | 0.864604 | 0.66224  |
| MmugDNA.41089.1.S1_at   | MmugDNA.41089.1 | 4.25  | 4.41  | 0.33 | 0.16 | -1.12 | 0.902134 | 0.884351 | 0.958581 | 0.9341   |
| MmugDNA.4109.1.S1_at    | MmugDNA.4109.1  | 5.64  | 5.24  | 0.74 | 0.19 | 1.32  | 0.369731 | 0.417339 | 0.643039 | 0.642147 |

|                         |                 |       |       |      |      |       |          |          |          |          |
|-------------------------|-----------------|-------|-------|------|------|-------|----------|----------|----------|----------|
| MmugDNA.41092.1.S1_at   | MmugDNA.41092.1 | 3.79  | 3.59  | 0.32 | 0.04 | 1.15  | 0.390511 | 0.494498 | 0.658113 | 0.694905 |
| MmugDNA.41095.1.S1_at   | MmugDNA.41095.1 | 8.89  | 9.73  | 0.29 | 0.13 | -1.8  | 0.014369 | 0.036224 | 0.171567 | 0.234909 |
| MmugDNA.41096.1.S1_at   | MmugDNA.41096.1 | 8.7   | 9.24  | 0.22 | 0.35 | -1.45 | 0.021707 | 0.030809 | 0.200687 | 0.217376 |
| MmugDNA.41098.1.S1_at   | MmugDNA.41098.1 | 4.55  | 4.58  | 0.12 | 0.13 | -1.02 | 0.601549 | 0.715066 | 0.799701 | 0.834794 |
| MmugDNA.41099.1.S1_at   | MmugDNA.41099.1 | 4.95  | 5     | 0.03 | 0.03 | -1.04 | 0.486725 | 0.111067 | 0.725795 | 0.375588 |
| MmugDNA.411.1.S1_at     | MmugDNA.411.1   | 4.85  | 4.87  | 0.03 | 0.17 | -1.01 | 0.82894  | 0.325716 | 0.924548 | 0.57602  |
| MmugDNA.4110.1.S1_at    | MmugDNA.4110.1  | 6.78  | 6.61  | 0.23 | 0.17 | 1.13  | 0.262856 | 0.377187 | 0.556683 | 0.614825 |
| MmugDNA.41103.1.S1_at   | MmugDNA.41103.1 | 3.08  | 3.18  | 0.12 | 0.05 | -1.07 | 0.265801 | 0.147358 | 0.558378 | 0.421554 |
| MmugDNA.41107.1.S1_at   | MmugDNA.41107.1 | 6.26  | 5.99  | 0.25 | 0.41 | 1.21  | 0.556392 | 0.000711 | 0.771647 | 0.044419 |
| MmugDNA.41108.1.S1_at   | MmugDNA.41108.1 | 5.81  | 5.68  | 0.05 | 0.1  | 1.09  | 0.129485 | 0.031864 | 0.411793 | 0.220909 |
| MmugDNA.41109.1.S1_at   | MmugDNA.41109.1 | 4.99  | 4.9   | 0.13 | 0.17 | 1.07  | 0.312717 | 0.083911 | 0.598778 | 0.334814 |
| MmugDNA.4111.1.S1_at    | MmugDNA.4111.1  | 6.21  | 5.78  | 0.2  | 0.05 | 1.34  | 0.058177 | 0.034991 | 0.298273 | 0.231175 |
| MmugDNA.41112.1.S1_at   | MmugDNA.41112.1 | 3.74  | 3.62  | 0.15 | 0.01 | 1.09  | 0.272357 | 0.357593 | 0.564376 | 0.599221 |
| MmugDNA.41113.1.S1_at   | MmugDNA.41113.1 | 6.54  | 5.5   | 0.3  | 0.17 | 2.06  | 0.007344 | 0.009157 | 0.133765 | 0.126264 |
| MmugDNA.41115.1.S1_at   | MmugDNA.41115.1 | 12.67 | 12.76 | 0.18 | 0.06 | -1.07 | 0.453308 | 0.646109 | 0.7035   | 0.792676 |
| MmugDNA.41116.1.S1_at   | MmugDNA.41116.1 | 6.11  | 5.25  | 0.52 | 0.12 | 1.82  | 0.029402 | 0.019283 | 0.224424 | 0.174698 |
| MmugDNA.41117.1.S1_at   | MmugDNA.41117.1 | 4.68  | 4.51  | 0.67 | 0.17 | 1.13  | 0.238302 | 0.227361 | 0.53577  | 0.499659 |
| MmugDNA.41118.1.S1_at   | MmugDNA.41118.1 | 4.67  | 4.44  | 0.21 | 0.14 | 1.18  | 0.323953 | 0.224639 | 0.607685 | 0.497613 |
| MmugDNA.4112.1.S1_at    | MmugDNA.4112.1  | 3.96  | 5.43  | 0.3  | 0.5  | -2.77 | 0.013814 | 0.487855 | 0.168497 | 0.69073  |
| MmugDNA.4112.1.S1_s_at  | MmugDNA.4112.1  | 6.91  | 7.63  | 0.37 | 0.14 | -1.65 | 0.028057 | 0.39724  | 0.219909 | 0.628763 |
| MmugDNA.4112.1.S1_x_at  | MmugDNA.4112.1  | 6.44  | 7.15  | 0.11 | 0.4  | -1.64 | 0.026309 | 0.624916 | 0.215229 | 0.778939 |
| MmugDNA.41121.1.S1_at   | MmugDNA.41121.1 | 5.56  | 5.46  | 0.08 | 0.2  | 1.07  | 0.632533 | 0.576528 | 0.819841 | 0.747267 |
| MmugDNA.41123.1.S1_at   | MmugDNA.41123.1 | 4.28  | 4.31  | 0.16 | 0.24 | -1.02 | 0.881915 | 0.151279 | 0.949737 | 0.426026 |
| MmugDNA.41124.1.S1_at   | MmugDNA.41124.1 | 4.5   | 4.61  | 0.11 | 0.02 | -1.08 | 0.18832  | 0.036454 | 0.484627 | 0.235423 |
| MmugDNA.41125.1.S1_at   | MmugDNA.41125.1 | 10.76 | 11.04 | 0.14 | 0.03 | -1.22 | 0.025996 | 0.017198 | 0.214194 | 0.166145 |
| MmugDNA.41126.1.S1_at   | MmugDNA.41126.1 | 3.93  | 3.83  | 0.13 | 0.08 | 1.07  | 0.808912 | 0.361304 | 0.914357 | 0.602104 |
| MmugDNA.41127.1.S1_at   | MmugDNA.41127.1 | 8.84  | 8.53  | 0.12 | 0.06 | 1.24  | 0.015066 | 0.037378 | 0.174736 | 0.237776 |
| MmugDNA.38950.1.S1_s_at | MmugDNA.38950.1 | 9.41  | 9.56  | 0.17 | 0.01 | -1.11 | 0.621278 | 0.486252 | 0.81255  | 0.689661 |
| MmugDNA.41130.1.S1_at   | MmugDNA.41130.1 | 7.42  | 7.41  | 0.45 | 0.05 | 1.01  | 0.851441 | 0.303992 | 0.935336 | 0.561344 |
| MmugDNA.41131.1.S1_at   | MmugDNA.41131.1 | 5.17  | 5.14  | 0.44 | 0.16 | 1.02  | 0.524083 | 0.595879 | 0.750921 | 0.759258 |
| MmugDNA.41132.1.S1_at   | MmugDNA.41132.1 | 3.57  | 3.37  | 0.06 | 0.16 | 1.14  | 0.151988 | 0.213421 | 0.441547 | 0.48728  |
| MmugDNA.41133.1.S1_at   | MmugDNA.41133.1 | 6.53  | 7.05  | 0.53 | 0.2  | -1.43 | 0.219079 | 0.429106 | 0.51676  | 0.65062  |
| MmugDNA.41135.1.S1_at   | MmugDNA.41135.1 | 6.29  | 6.15  | 0.3  | 0.47 | 1.1   | 0.599236 | 0.800131 | 0.79793  | 0.885076 |
| MmugDNA.41137.1.S1_at   | MmugDNA.41137.1 | 7.95  | 8.2   | 0.48 | 0.03 | -1.19 | 0.146836 | 0.383901 | 0.434827 | 0.61978  |
| MmugDNA.41139.1.S1_at   | MmugDNA.41139.1 | 12.13 | 12.18 | 0.13 | 0.02 | -1.04 | 0.910246 | 0.890491 | 0.96196  | 0.937597 |
| MmugDNA.4114.1.S1_at    | MmugDNA.4114.1  | 12.95 | 12.55 | 0.09 | 0.08 | 1.32  | 0.014044 | 0.048113 | 0.169894 | 0.264398 |
| MmugDNA.41140.1.S1_at   | MmugDNA.41140.1 | 4.68  | 4.59  | 0.22 | 0.06 | 1.07  | 0.638477 | 0.72634  | 0.823011 | 0.841617 |
| MmugDNA.41141.1.S1_at   | MmugDNA.41141.1 | 4.86  | 4.77  | 0.17 | 0.06 | 1.07  | 0.28777  | 0.090538 | 0.577473 | 0.345015 |
| MmugDNA.41142.1.S1_at   | MmugDNA.41142.1 | 5.37  | 5.42  | 0.2  | 0.14 | -1.03 | 0.894815 | 0.669245 | 0.955181 | 0.806502 |
| MmugDNA.41143.1.S1_at   | MmugDNA.41143.1 | 5.62  | 5.77  | 0.09 | 0.12 | -1.11 | 0.241903 | 0.15351  | 0.538882 | 0.42827  |
| MmugDNA.41143.1.S1_s_at | MmugDNA.41143.1 | 5.64  | 5.7   | 0.05 | 0.11 | -1.05 | 0.902394 | 0.251992 | 0.958703 | 0.520646 |
| MmugDNA.41144.1.S1_at   | MmugDNA.41144.1 | 7.39  | 8.82  | 0.55 | 0.47 | -2.69 | 0.034963 | 0.030796 | 0.24161  | 0.217376 |
| MmugDNA.41145.1.S1_at   | MmugDNA.41145.1 | 3.04  | 2.82  | 0.04 | 0.12 | 1.16  | 0.071095 | 0.434968 | 0.324551 | 0.654901 |

|                         |                 |       |       |      |      |       |          |          |          |          |
|-------------------------|-----------------|-------|-------|------|------|-------|----------|----------|----------|----------|
| MmugDNA.41146.1.S1_at   | MmugDNA.41146.1 | 8.95  | 9.82  | 0.11 | 0.03 | -1.83 | 0.000188 | 0.005255 | 0.053494 | 0.100401 |
| MmugDNA.41147.1.S1_at   | MmugDNA.41147.1 | 4.69  | 4.58  | 0.22 | 0.02 | 1.08  | 0.967898 | 0.65247  | 0.987302 | 0.796793 |
| MmugDNA.4115.1.S1_at    | MmugDNA.4115.1  | 3.51  | 3.36  | 0.48 | 0.09 | 1.11  | 0.49028  | 0.588132 | 0.728387 | 0.754761 |
| MmugDNA.41150.1.S1_a_at | MmugDNA.41150.1 | 3.53  | 2.81  | 0.49 | 0.03 | 1.64  | 0.073069 | 0.060795 | 0.327998 | 0.293295 |
| MmugDNA.41150.1.S1_at   | MmugDNA.41150.1 | 6.36  | 7.31  | 0.27 | 0.15 | -1.93 | 0.005673 | 0.170203 | 0.120889 | 0.446906 |
| MmugDNA.41151.1.S1_at   | MmugDNA.41151.1 | 6.49  | 6.63  | 0.14 | 0.13 | -1.1  | 0.385388 | 0.163898 | 0.654158 | 0.440105 |
| MmugDNA.41152.1.S1_at   | MmugDNA.41152.1 | 4.5   | 4.47  | 0.23 | 0.17 | 1.02  | 0.791057 | 0.918647 | 0.90506  | 0.954356 |
| MmugDNA.41153.1.S1_at   | MmugDNA.41153.1 | 12.71 | 12.44 | 0.12 | 0.11 | 1.21  | 0.191079 | 0.154973 | 0.487272 | 0.429973 |
| MmugDNA.41154.1.S1_at   | MmugDNA.41154.1 | 4.83  | 4.19  | 0.18 | 0.28 | 1.56  | 0.028386 | 0.003233 | 0.221039 | 0.08214  |
| MmugDNA.41158.1.S1_at   | MmugDNA.41158.1 | 5.94  | 5.94  | 0.18 | 0.16 | -1    | 0.891935 | 0.678173 | 0.953879 | 0.812022 |
| MmugDNA.41159.1.S1_at   | MmugDNA.41159.1 | 5.2   | 5.37  | 0.3  | 0.06 | -1.13 | 0.225732 | 0.243299 | 0.523438 | 0.513356 |
| MmugDNA.4116.1.S1_at    | MmugDNA.4116.1  | 14.3  | 14.29 | 0.06 | 0.01 | 1.01  | 0.910909 | 0.432724 | 0.962223 | 0.653094 |
| MmugDNA.41160.1.S1_at   | MmugDNA.41160.1 | 9.76  | 9.25  | 0.18 | 0.05 | 1.43  | 0.011478 | 0.001096 | 0.15722  | 0.052317 |
| MmugDNA.41162.1.S1_at   | MmugDNA.41162.1 | 7.53  | 7.25  | 0.58 | 0.25 | 1.22  | 0.386715 | 0.417283 | 0.655058 | 0.642141 |
| MmugDNA.41163.1.S1_at   | MmugDNA.41163.1 | 6.56  | 5.99  | 1.15 | 0.63 | 1.49  | 0.362045 | 0.332113 | 0.637175 | 0.580584 |
| MmugDNA.41165.1.S1_at   | MmugDNA.41165.1 | 3.72  | 3.72  | 0.06 | 0.04 | -1    | 0.939163 | 0.810569 | 0.974332 | 0.890812 |
| MmugDNA.41166.1.S1_x_at | MmugDNA.41166.1 | 8.12  | 7.8   | 0.51 | 0.18 | 1.25  | 0.190721 | 0.208763 | 0.48691  | 0.482608 |
| MmugDNA.41167.1.S1_at   | MmugDNA.41167.1 | 5.89  | 5.59  | 0.04 | 0.41 | 1.23  | 0.332131 | 0.661791 | 0.613957 | 0.801943 |
| MmugDNA.41168.1.S1_at   | MmugDNA.41168.1 | 9.57  | 9.26  | 0.34 | 0.07 | 1.24  | 0.613904 | 0.438968 | 0.807817 | 0.657787 |
| MmugDNA.41169.1.S1_at   | MmugDNA.41169.1 | 8.78  | 8.67  | 0.23 | 0.31 | 1.08  | 0.678757 | 0.591983 | 0.846793 | 0.757386 |
| MmugDNA.4117.1.S1_at    | MmugDNA.4117.1  | 7.28  | 7.36  | 0.18 | 0.04 | -1.06 | 0.924539 | 0.915352 | 0.967895 | 0.952467 |
| MmugDNA.41171.1.S1_s_at | MmugDNA.41171.1 | 12.29 | 12.44 | 0.12 | 0.16 | -1.11 | 0.527532 | 0.684441 | 0.753112 | 0.815943 |
| MmugDNA.41176.1.S1_at   | MmugDNA.41176.1 | 10.26 | 10.59 | 0.14 | 0.14 | -1.26 | 0.075471 | 0.001025 | 0.332995 | 0.051079 |
| MmugDNA.41177.1.S1_at   | MmugDNA.41177.1 | 10.61 | 10.22 | 0.07 | 0.15 | 1.31  | 0.009738 | 0.003173 | 0.148542 | 0.081873 |
| MmugDNA.41178.1.S1_at   | MmugDNA.41178.1 | 9.88  | 9.71  | 0.14 | 0.13 | 1.12  | 0.090034 | 0.366288 | 0.356863 | 0.606048 |
| MmugDNA.41179.1.S1_at   | MmugDNA.41179.1 | 11.27 | 11.2  | 0.13 | 0.07 | 1.05  | 0.351303 | 0.065746 | 0.628948 | 0.301766 |
| MmugDNA.4118.1.S1_at    | MmugDNA.4118.1  | 5.19  | 4.94  | 0.19 | 0.1  | 1.19  | 0.190972 | 0.010113 | 0.48719  | 0.131859 |
| MmugDNA.41180.1.S1_at   | MmugDNA.41180.1 | 5.32  | 5.23  | 0.29 | 0.28 | 1.07  | 0.475718 | 0.641993 | 0.718292 | 0.78994  |
| MmugDNA.41181.1.S1_at   | MmugDNA.41181.1 | 7.11  | 7.52  | 0.16 | 0.08 | -1.33 | 0.033058 | 0.111823 | 0.236091 | 0.376856 |
| MmugDNA.41182.1.S1_at   | MmugDNA.41182.1 | 2.97  | 3.18  | 0.1  | 0.16 | -1.15 | 0.076267 | 0.177923 | 0.334387 | 0.454259 |
| MmugDNA.41183.1.S1_at   | MmugDNA.41183.1 | 4.36  | 4.41  | 0.02 | 0.39 | -1.03 | 0.713359 | 0.895066 | 0.864604 | 0.940055 |
| MmugDNA.41184.1.S1_at   | MmugDNA.41184.1 | 3.66  | 3.73  | 0.16 | 0.12 | -1.05 | 0.215681 | 0.295679 | 0.513483 | 0.555113 |
| MmugDNA.41185.1.S1_at   | MmugDNA.41185.1 | 5.3   | 5.38  | 0    | 0.07 | -1.06 | 0.18044  | 0.285332 | 0.475556 | 0.547198 |
| MmugDNA.41186.1.S1_at   | MmugDNA.41186.1 | 3.16  | 3.15  | 0.06 | 0.01 | 1.01  | 0.989648 | 0.999575 | 0.99638  | 0.999859 |
| MmugDNA.41187.1.S1_at   | MmugDNA.41187.1 | 10.04 | 9.99  | 0.09 | 0.05 | 1.04  | 0.796463 | 0.001196 | 0.908112 | 0.05421  |
| MmugDNA.4119.1.S1_at    | MmugDNA.4119.1  | 13.73 | 13.66 | 0.04 | 0.03 | 1.05  | 0.026226 | 0.018319 | 0.214951 | 0.170201 |
| MmugDNA.41190.1.S1_at   | MmugDNA.41190.1 | 3.94  | 3.73  | 0.07 | 0.1  | 1.16  | 0.052435 | 0.085906 | 0.286213 | 0.338068 |
| MmugDNA.41191.1.S1_at   | MmugDNA.41191.1 | 3.69  | 3.62  | 0.16 | 0.06 | 1.05  | 0.19375  | 0.328287 | 0.490333 | 0.578012 |
| MmugDNA.41193.1.S1_at   | MmugDNA.41193.1 | 7.99  | 8.07  | 0.35 | 0.12 | -1.06 | 0.642114 | 0.618633 | 0.825439 | 0.774185 |
| MmugDNA.41195.1.S1_at   | MmugDNA.41195.1 | 5.16  | 5.27  | 0.24 | 0.22 | -1.08 | 0.637187 | 0.799516 | 0.822365 | 0.884661 |
| MmugDNA.41196.1.S1_at   | MmugDNA.41196.1 | 8.06  | 8.52  | 0.1  | 0.03 | -1.37 | 0.002363 | 0.322053 | 0.092906 | 0.57365  |
| MmugDNA.41199.1.S1_at   | MmugDNA.41199.1 | 3.71  | 3.35  | 1.01 | 0.38 | 1.28  | 0.539209 | 0.524306 | 0.760647 | 0.714254 |
| MmugDNA.412.1.S1_at     | MmugDNA.412.1   | 5.59  | 5.51  | 0.1  | 0.04 | 1.06  | 0.264121 | 0.324032 | 0.557422 | 0.57473  |

|                       |                 |       |       |      |      |       |          |          |          |          |
|-----------------------|-----------------|-------|-------|------|------|-------|----------|----------|----------|----------|
| MmugDNA.41200.1.S1_at | MmugDNA.41200.1 | 4.04  | 3.62  | 0.49 | 0.25 | 1.34  | 0.098809 | 0.105848 | 0.369716 | 0.368111 |
| MmugDNA.41201.1.S1_at | MmugDNA.41201.1 | 9.04  | 8.92  | 0.25 | 0.17 | 1.09  | 0.37476  | 0.138827 | 0.645667 | 0.412015 |
| MmugDNA.41202.1.S1_at | MmugDNA.41202.1 | 6.59  | 6.61  | 1.07 | 0.34 | -1.01 | 0.886686 | 0.579993 | 0.95177  | 0.749373 |
| MmugDNA.41204.1.S1_at | MmugDNA.41204.1 | 5.53  | 5.3   | 0.2  | 0.13 | 1.18  | 0.439713 | 0.632838 | 0.693902 | 0.783788 |
| MmugDNA.41206.1.S1_at | MmugDNA.41206.1 | 7.36  | 7.44  | 0.71 | 0.09 | -1.05 | 0.354934 | 0.533011 | 0.631855 | 0.719367 |
| MmugDNA.41207.1.S1_at | MmugDNA.41207.1 | 6.72  | 6.52  | 0.07 | 0.04 | 1.14  | 0.017847 | 0.000306 | 0.187044 | 0.034907 |
| MmugDNA.41208.1.S1_at | MmugDNA.41208.1 | 6.18  | 6.19  | 0.09 | 0.06 | -1.01 | 0.294926 | 0.502108 | 0.583869 | 0.700054 |
| MmugDNA.41209.1.S1_at | MmugDNA.41209.1 | 6.54  | 6.27  | 0.18 | 0.28 | 1.21  | 0.553988 | 0.260817 | 0.770355 | 0.52721  |
| MmugDNA.4121.1.S1_at  | MmugDNA.4121.1  | 4.61  | 4.6   | 0.06 | 0.15 | 1.01  | 0.922302 | 0.686175 | 0.966743 | 0.816831 |
| MmugDNA.41210.1.S1_at | MmugDNA.41210.1 | 5.49  | 5.88  | 0.21 | 0.43 | -1.31 | 0.772878 | 0.577064 | 0.895994 | 0.747635 |
| MmugDNA.41212.1.S1_at | MmugDNA.41212.1 | 3.66  | 3.66  | 0.05 | 0.01 | -1    | 0.967195 | 0.918166 | 0.986795 | 0.954096 |
| MmugDNA.41213.1.S1_at | MmugDNA.41213.1 | 3.98  | 3.9   | 0.07 | 0.03 | 1.05  | 0.117721 | 0.106555 | 0.395125 | 0.369099 |
| MmugDNA.41214.1.S1_at | MmugDNA.41214.1 | 6.54  | 6.82  | 0.21 | 0.18 | -1.21 | 0.363007 | 0.238177 | 0.637701 | 0.508818 |
| MmugDNA.41215.1.S1_at | MmugDNA.41215.1 | 10.67 | 10.64 | 0.01 | 0.2  | 1.02  | 0.284473 | 0.269407 | 0.574425 | 0.534737 |
| MmugDNA.41216.1.S1_at | MmugDNA.41216.1 | 9.58  | 9.33  | 0.24 | 0.09 | 1.19  | 0.440672 | 0.33626  | 0.694639 | 0.583736 |
| MmugDNA.41218.1.S1_at | MmugDNA.41218.1 | 6.01  | 5.29  | 0.88 | 0.16 | 1.65  | 0.154064 | 0.218569 | 0.444332 | 0.492172 |
| MmugDNA.41219.1.S1_at | MmugDNA.41219.1 | 4.38  | 3.84  | 0.56 | 0.43 | 1.45  | 0.642241 | 0.447905 | 0.825502 | 0.663881 |
| MmugDNA.4122.1.S1_at  | MmugDNA.4122.1  | 5.93  | 5.94  | 0.1  | 0.05 | -1.01 | 0.953744 | 0.952834 | 0.981032 | 0.97327  |
| MmugDNA.41221.1.S1_at | MmugDNA.41221.1 | 5.12  | 5.05  | 0.02 | 0.19 | 1.06  | 0.220031 | 0.421403 | 0.517666 | 0.644994 |
| MmugDNA.41223.1.S1_at | MmugDNA.41223.1 | 9.1   | 8.74  | 0.44 | 0.07 | 1.29  | 0.785348 | 0.031251 | 0.90204  | 0.218668 |
| MmugDNA.41224.1.S1_at | MmugDNA.41224.1 | 3.62  | 3.79  | 0.24 | 0.41 | -1.13 | 0.214471 | 0.231814 | 0.512129 | 0.503592 |
| MmugDNA.41225.1.S1_at | MmugDNA.41225.1 | 4.45  | 4.42  | 0.07 | 0.18 | 1.02  | 0.283026 | 0.309777 | 0.573538 | 0.565044 |
| MmugDNA.41226.1.S1_at | MmugDNA.41226.1 | 6.72  | 7.7   | 0.4  | 0.27 | -1.98 | 0.066483 | 0.220925 | 0.315343 | 0.494337 |
| MmugDNA.41227.1.S1_at | MmugDNA.41227.1 | 5.95  | 5.67  | 0.8  | 0.1  | 1.21  | 0.204844 | 0.089613 | 0.502623 | 0.343811 |
| MmugDNA.41228.1.S1_at | MmugDNA.41228.1 | 4.41  | 4.24  | 1.1  | 0.15 | 1.13  | 0.282068 | 0.495176 | 0.572815 | 0.69534  |
| MmugDNA.41229.1.S1_at | MmugDNA.41229.1 | 4.7   | 4.8   | 0.31 | 0.06 | -1.08 | 0.359764 | 0.311787 | 0.635363 | 0.56678  |
| MmugDNA.4123.1.S1_at  | MmugDNA.4123.1  | 6.7   | 6.76  | 0.2  | 0.16 | -1.04 | 0.68892  | 0.896869 | 0.851438 | 0.941126 |
| MmugDNA.41230.1.S1_at | MmugDNA.41230.1 | 5.25  | 5.14  | 0.52 | 0.33 | 1.08  | 0.168976 | 0.094341 | 0.462151 | 0.350889 |
| MmugDNA.41231.1.S1_at | MmugDNA.41231.1 | 5.18  | 5.16  | 0.23 | 0.02 | 1.01  | 0.682891 | 0.683575 | 0.848772 | 0.815387 |
| MmugDNA.41232.1.S1_at | MmugDNA.41232.1 | 3.37  | 3.17  | 0.22 | 0.14 | 1.15  | 0.167991 | 0.189196 | 0.461204 | 0.464997 |
| MmugDNA.41233.1.S1_at | MmugDNA.41233.1 | 10.99 | 10.31 | 0.11 | 0.2  | 1.6   | 0.009645 | 0.16737  | 0.14832  | 0.443785 |
| MmuSTS.2204.1.S1_at   | MmuSTS.2204.1   | 13.05 | 12.69 | 0.08 | 0.14 | 1.28  | 0.019634 | 0.177249 | 0.193067 | 0.453679 |
| MmuSTS.2204.1.S1_s_at | MmuSTS.2204.1   | 12    | 11.54 | 0.1  | 0.18 | 1.37  | 0.015098 | 0.189051 | 0.174809 | 0.464897 |
| MmugDNA.41234.1.S1_at | MmugDNA.41234.1 | 5.74  | 5.73  | 0.3  | 0.1  | 1     | 0.484408 | 0.661304 | 0.724255 | 0.801687 |
| MmugDNA.41235.1.S1_at | MmugDNA.41235.1 | 6.67  | 6.7   | 0.2  | 0.03 | -1.02 | 0.363567 | 0.127382 | 0.638251 | 0.398205 |
| MmugDNA.41236.1.S1_at | MmugDNA.41236.1 | 5.02  | 5.06  | 0.87 | 0.17 | -1.03 | 0.560846 | 0.285159 | 0.774056 | 0.547098 |
| MmugDNA.41237.1.S1_at | MmugDNA.41237.1 | 3.19  | 3.19  | 0.2  | 0.13 | -1    | 0.510669 | 0.685852 | 0.742029 | 0.816612 |
| MmugDNA.41238.1.S1_at | MmugDNA.41238.1 | 5.48  | 5.57  | 0.07 | 0.06 | -1.07 | 0.360834 | 0.314025 | 0.636338 | 0.568178 |
| MmugDNA.41239.1.S1_at | MmugDNA.41239.1 | 3.32  | 3.68  | 0.19 | 0.06 | -1.29 | 0.09454  | 0.191256 | 0.363527 | 0.466553 |
| MmugDNA.41240.1.S1_at | MmugDNA.41240.1 | 11.83 | 11.64 | 0.25 | 0.09 | 1.14  | 0.855227 | 0.011939 | 0.93691  | 0.141357 |
| MmugDNA.41241.1.S1_at | MmugDNA.41241.1 | 3.33  | 3.4   | 0.04 | 0.06 | -1.05 | 0.13324  | 0.37994  | 0.416749 | 0.616659 |
| MmugDNA.41242.1.S1_at | MmugDNA.41242.1 | 8.8   | 9.08  | 0.26 | 0.1  | -1.21 | 0.104131 | 0.466806 | 0.377457 | 0.676543 |
| MmugDNA.41243.1.S1_at | MmugDNA.41243.1 | 5.75  | 4.76  | 0.61 | 0.3  | 1.98  | 0.07363  | 0.181162 | 0.329086 | 0.457601 |

|                         |                 |       |       |      |      |       |          |          |          |          |
|-------------------------|-----------------|-------|-------|------|------|-------|----------|----------|----------|----------|
| MmugDNA.41246.1.S1_at   | MmugDNA.41246.1 | 5.52  | 5.99  | 0.67 | 0.5  | -1.39 | 0.504548 | 0.842866 | 0.737745 | 0.910483 |
| MmugDNA.41247.1.S1_at   | MmugDNA.41247.1 | 3.67  | 3.62  | 0.24 | 0.19 | 1.03  | 0.626414 | 0.275058 | 0.815991 | 0.539481 |
| MmugDNA.41249.1.S1_at   | MmugDNA.41249.1 | 3.2   | 3.31  | 0.22 | 0.09 | -1.08 | 0.82909  | 0.61763  | 0.924609 | 0.773538 |
| MmugDNA.4125.1.S1_at    | MmugDNA.4125.1  | 6.11  | 6.42  | 0.95 | 0.08 | -1.24 | 0.752128 | 0.751285 | 0.885542 | 0.855391 |
| MmugDNA.41251.1.S1_at   | MmugDNA.41251.1 | 9.55  | 7.79  | 0.11 | 0.43 | 3.39  | 0.004051 | 0.017115 | 0.108999 | 0.165769 |
| MmugDNA.41253.1.S1_at   | MmugDNA.41253.1 | 8.29  | 7.67  | 0.24 | 0.22 | 1.53  | 0.063123 | 0.040454 | 0.307954 | 0.246241 |
| MmugDNA.41255.1.S1_at   | MmugDNA.41255.1 | 8.33  | 9.11  | 0.55 | 0.19 | -1.71 | 0.071836 | 0.060102 | 0.325942 | 0.291829 |
| MmugDNA.41256.1.S1_at   | MmugDNA.41256.1 | 6.84  | 6.8   | 0.38 | 0.06 | 1.02  | 0.981145 | 0.937614 | 0.992909 | 0.964687 |
| MmugDNA.41259.1.S1_at   | MmugDNA.41259.1 | 3.99  | 4.01  | 0.18 | 0.07 | -1.01 | 0.900752 | 0.940371 | 0.957959 | 0.966182 |
| MmugDNA.4126.1.S1_at    | MmugDNA.4126.1  | 4.47  | 4.55  | 0.2  | 0.05 | -1.05 | 0.860818 | 0.720244 | 0.939561 | 0.838202 |
| MmugDNA.41260.1.S1_at   | MmugDNA.41260.1 | 4.69  | 4.47  | 0.33 | 0.05 | 1.16  | 0.795747 | 0.932731 | 0.907656 | 0.961786 |
| MmugDNA.41261.1.S1_at   | MmugDNA.41261.1 | 6.88  | 6.89  | 0.38 | 0.04 | -1    | 0.777385 | 0.567792 | 0.898303 | 0.741656 |
| MmugDNA.41262.1.S1_at   | MmugDNA.41262.1 | 5.58  | 5.87  | 0.4  | 0.29 | -1.22 | 0.271016 | 0.544191 | 0.562988 | 0.726643 |
| MmugDNA.41263.1.S1_at   | MmugDNA.41263.1 | 7.46  | 7.64  | 0.04 | 0.1  | -1.13 | 0.196446 | 0.302423 | 0.493531 | 0.560109 |
| MmugDNA.41266.1.S1_at   | MmugDNA.41266.1 | 6.6   | 6.17  | 0.26 | 0.4  | 1.34  | 0.263759 | 0.131644 | 0.557319 | 0.403746 |
| MmugDNA.41268.1.S1_at   | MmugDNA.41268.1 | 12.96 | 11.68 | 0.15 | 0.18 | 2.42  | 0.000632 | 0.000464 | 0.070727 | 0.038572 |
| MmugDNA.41269.1.S1_at   | MmugDNA.41269.1 | 6.52  | 7.33  | 0.84 | 0.25 | -1.75 | 0.274153 | 0.42372  | 0.566119 | 0.646518 |
| MmugDNA.41270.1.S1_at   | MmugDNA.41270.1 | 5.71  | 5.84  | 0.11 | 0.29 | -1.1  | 0.262222 | 0.396458 | 0.556354 | 0.628241 |
| MmugDNA.41271.1.S1_at   | MmugDNA.41271.1 | 7.98  | 7.71  | 0.2  | 0.1  | 1.21  | 0.166909 | 0.067691 | 0.460115 | 0.306219 |
| MmugDNA.41271.1.S1_s_at | MmugDNA.41271.1 | 6.41  | 6.4   | 0.05 | 0.08 | 1.01  | 0.64707  | 0.98093  | 0.828492 | 0.989478 |
| MmugDNA.41271.1.S1_x_at | MmugDNA.41271.1 | 7.39  | 7.39  | 0.11 | 0.07 | 1     | 0.393495 | 0.308367 | 0.660319 | 0.564428 |
| MmugDNA.41272.1.S1_at   | MmugDNA.41272.1 | 3.51  | 3.51  | 0.02 | 0.02 | 1     | 0.315007 | 0.923533 | 0.600177 | 0.956997 |
| MmugDNA.41273.1.S1_at   | MmugDNA.41273.1 | 4.97  | 7.01  | 0.52 | 0.33 | -4.12 | 0.011589 | 0.015277 | 0.15753  | 0.156987 |
| MmugDNA.41274.1.S1_at   | MmugDNA.41274.1 | 4.95  | 5.15  | 0.18 | 0.29 | -1.15 | 0.947847 | 0.646752 | 0.978044 | 0.7931   |
| MmugDNA.41276.1.S1_at   | MmugDNA.41276.1 | 6.13  | 6.1   | 0.12 | 0.05 | 1.02  | 0.418907 | 0.074259 | 0.678622 | 0.318046 |
| MmugDNA.41277.1.S1_at   | MmugDNA.41277.1 | 5.13  | 5.11  | 0.16 | 0.1  | 1.01  | 0.279094 | 0.342935 | 0.570478 | 0.588745 |
| MmugDNA.41278.1.S1_at   | MmugDNA.41278.1 | 6.56  | 8.84  | 1.81 | 0.46 | -4.88 | 0.192364 | 0.572542 | 0.488949 | 0.744566 |
| MmugDNA.41279.1.S1_at   | MmugDNA.41279.1 | 12.65 | 12.55 | 0.05 | 0.03 | 1.07  | 0.059473 | 0.039419 | 0.300954 | 0.243529 |
| MmugDNA.4128.1.S1_at    | MmugDNA.4128.1  | 4.35  | 4.57  | 0.28 | 0.14 | -1.17 | 0.363568 | 0.683323 | 0.638251 | 0.815238 |
| MmugDNA.41280.1.S1_at   | MmugDNA.41280.1 | 11.38 | 11.48 | 0.12 | 0.01 | -1.07 | 0.277938 | 0.345778 | 0.569371 | 0.590937 |
| MmugDNA.41281.1.S1_at   | MmugDNA.41281.1 | 3.33  | 3.34  | 0.08 | 0.02 | -1    | 0.260378 | 0.954457 | 0.554516 | 0.974155 |
| MmugDNA.41282.1.S1_at   | MmugDNA.41282.1 | 4.17  | 4.21  | 0.16 | 0.03 | -1.03 | 0.23353  | 0.549902 | 0.531632 | 0.730154 |
| MmugDNA.41283.1.S1_at   | MmugDNA.41283.1 | 6.25  | 6.41  | 0.28 | 0.16 | -1.12 | 0.257323 | 0.470315 | 0.551637 | 0.678599 |
| MmugDNA.41284.1.S1_at   | MmugDNA.41284.1 | 5.71  | 5.9   | 0.44 | 0.16 | -1.14 | 0.749451 | 0.837456 | 0.884034 | 0.907122 |
| MmugDNA.41285.1.S1_at   | MmugDNA.41285.1 | 4.26  | 4.28  | 0.17 | 0.14 | -1.01 | 0.818377 | 0.001593 | 0.918936 | 0.06044  |
| MmugDNA.41285.1.S1_s_at | MmugDNA.41285.1 | 5.36  | 5.45  | 0.1  | 0.09 | -1.06 | 0.715576 | 0.000866 | 0.865789 | 0.047425 |
| MmugDNA.41287.1.S1_at   | MmugDNA.41287.1 | 4.4   | 4.35  | 0.29 | 0.03 | 1.03  | 0.665048 | 0.827981 | 0.838958 | 0.901214 |
| MmugDNA.41289.1.S1_at   | MmugDNA.41289.1 | 7.72  | 7.87  | 0.11 | 0.16 | -1.11 | 0.238538 | 0.351724 | 0.535904 | 0.595164 |
| MmugDNA.4129.1.S1_at    | MmugDNA.4129.1  | 3.3   | 2.95  | 0.26 | 0.09 | 1.27  | 0.134938 | 0.142655 | 0.418904 | 0.416389 |
| MmugDNA.41290.1.S1_at   | MmugDNA.41290.1 | 4.08  | 4.41  | 0.45 | 0.22 | -1.25 | 0.28733  | 0.091891 | 0.57716  | 0.347237 |
| MmugDNA.41291.1.S1_at   | MmugDNA.41291.1 | 3.85  | 3.72  | 0.07 | 0.09 | 1.1   | 0.09576  | 0.097426 | 0.365353 | 0.355097 |
| MmugDNA.41292.1.S1_at   | MmugDNA.41292.1 | 3.84  | 3.83  | 0.03 | 0.09 | 1.01  | 0.391712 | 0.653042 | 0.658752 | 0.79718  |
| MmugDNA.41294.1.S1_at   | MmugDNA.41294.1 | 5.61  | 5.55  | 0.2  | 0.08 | 1.04  | 0.640104 | 0.197243 | 0.824018 | 0.472213 |

|                         |                 |       |       |      |      |       |          |          |          |          |
|-------------------------|-----------------|-------|-------|------|------|-------|----------|----------|----------|----------|
| MmugDNA.41295.1.S1_at   | MmugDNA.41295.1 | 3.78  | 3.68  | 0.07 | 0.37 | 1.07  | 0.723194 | 0.806047 | 0.86993  | 0.888465 |
| MmugDNA.41298.1.S1_at   | MmugDNA.41298.1 | 6.49  | 6.51  | 0.57 | 0.14 | -1.02 | 0.541631 | 0.352416 | 0.762335 | 0.595722 |
| MmugDNA.413.1.S1_at     | MmugDNA.413.1   | 8.65  | 7.88  | 0.57 | 0.38 | 1.7   | 0.080481 | 0.11984  | 0.341026 | 0.388577 |
| MmugDNA.41300.1.S1_at   | MmugDNA.41300.1 | 4.53  | 3.47  | 0.59 | 0.35 | 2.08  | 0.136721 | 0.101198 | 0.421401 | 0.36084  |
| MmugDNA.41301.1.S1_at   | MmugDNA.41301.1 | 3.58  | 3.52  | 0.06 | 0.02 | 1.04  | 0.12136  | 0.167461 | 0.40008  | 0.443861 |
| MmugDNA.41302.1.S1_at   | MmugDNA.41302.1 | 4.84  | 4.55  | 0.22 | 0.02 | 1.22  | 0.262835 | 0.26534  | 0.556683 | 0.531314 |
| MmugDNA.41303.1.S1_at   | MmugDNA.41303.1 | 6.17  | 6.13  | 0.09 | 0.09 | 1.03  | 0.235446 | 0.494532 | 0.53333  | 0.694909 |
| MmugDNA.14800.1.S1_s_at | MmugDNA.14800.1 | 9.14  | 9.21  | 0.25 | 0.17 | -1.05 | 0.654743 | 0.020792 | 0.832889 | 0.1809   |
| MmugDNA.41304.1.S1_at   | MmugDNA.41304.1 | 6.64  | 6.83  | 0.14 | 0.19 | -1.14 | 0.480733 | 0.003759 | 0.721501 | 0.087393 |
| MmugDNA.41305.1.S1_at   | MmugDNA.41305.1 | 5.38  | 4.55  | 0.15 | 0.06 | 1.78  | 0.000758 | 0.000382 | 0.072567 | 0.037273 |
| MmugDNA.41306.1.S1_at   | MmugDNA.41306.1 | 10.21 | 9.86  | 0.22 | 0.05 | 1.27  | 0.045303 | 0.001222 | 0.270318 | 0.054593 |
| MmugDNA.41307.1.S1_at   | MmugDNA.41307.1 | 11.9  | 11.75 | 0.16 | 0.1  | 1.11  | 0.202952 | 0.003222 | 0.500692 | 0.082115 |
| MmugDNA.41309.1.S1_at   | MmugDNA.41309.1 | 5.89  | 6.31  | 0.66 | 0.28 | -1.34 | 0.905726 | 0.878211 | 0.960077 | 0.93052  |
| MmugDNA.4131.1.S1_at    | MmugDNA.4131.1  | 3.75  | 3.75  | 0.15 | 0.24 | 1     | 0.767885 | 0.456752 | 0.893418 | 0.67043  |
| MmugDNA.41316.1.S1_at   | MmugDNA.41316.1 | 7.51  | 7.22  | 0.11 | 0.04 | 1.23  | 0.042115 | 0.009419 | 0.262198 | 0.127871 |
| MmugDNA.41317.1.S1_s_at | MmugDNA.41317.1 | 9.05  | 8.96  | 0.34 | 0.04 | 1.06  | 0.739462 | 0.064679 | 0.879245 | 0.300314 |
| MmugDNA.41319.1.S1_at   | MmugDNA.41319.1 | 6.16  | 6.19  | 0.17 | 0.11 | -1.02 | 0.725491 | 0.897372 | 0.871194 | 0.94143  |
| MmugDNA.4132.1.S1_at    | MmugDNA.4132.1  | 5.9   | 5.82  | 0.14 | 0.1  | 1.06  | 0.529759 | 0.743507 | 0.7545   | 0.851395 |
| MmugDNA.41320.1.S1_at   | MmugDNA.41320.1 | 8.93  | 8.47  | 0.65 | 0.26 | 1.37  | 0.181004 | 0.147979 | 0.476233 | 0.42238  |
| MmugDNA.41321.1.S1_at   | MmugDNA.41321.1 | 3.96  | 5.82  | 0.74 | 0.24 | -3.62 | 0.029876 | 0.208876 | 0.226143 | 0.482717 |
| MmugDNA.41322.1.S1_at   | MmugDNA.41322.1 | 4.37  | 4.25  | 0.26 | 0.11 | 1.09  | 0.17908  | 0.162616 | 0.474018 | 0.43872  |
| MmugDNA.41323.1.S1_at   | MmugDNA.41323.1 | 11.48 | 11.56 | 0.11 | 0.11 | -1.06 | 0.16256  | 0.1523   | 0.454561 | 0.427072 |
| MmugDNA.41324.1.S1_at   | MmugDNA.41324.1 | 4.13  | 4.09  | 0.19 | 0.05 | 1.02  | 0.418896 | 0.100302 | 0.678622 | 0.359368 |
| MmugDNA.41325.1.S1_at   | MmugDNA.41325.1 | 7.94  | 7.97  | 0.55 | 0.14 | -1.02 | 0.779422 | 0.30591  | 0.899222 | 0.562732 |
| MmugDNA.41326.1.S1_at   | MmugDNA.41326.1 | 4.96  | 4.88  | 0.33 | 0.08 | 1.05  | 0.729596 | 0.851793 | 0.873713 | 0.915766 |
| MmugDNA.41327.1.S1_at   | MmugDNA.41327.1 | 4.58  | 4.42  | 0.18 | 0.14 | 1.12  | 0.598491 | 0.485313 | 0.79748  | 0.689049 |
| MmugDNA.41328.1.S1_at   | MmugDNA.41328.1 | 9.04  | 7.81  | 0.79 | 0.64 | 2.34  | 0.311031 | 0.174944 | 0.597264 | 0.451599 |
| MmugDNA.4133.1.S1_at    | MmugDNA.4133.1  | 5.17  | 5.17  | 0.1  | 0.15 | -1    | 0.818346 | 0.546685 | 0.918921 | 0.728135 |
| MmugDNA.41330.1.S1_at   | MmugDNA.41330.1 | 3.37  | 3.08  | 0.22 | 0.11 | 1.22  | 0.152271 | 0.260932 | 0.44186  | 0.527351 |
| MmugDNA.41331.1.S1_at   | MmugDNA.41331.1 | 4.96  | 4.54  | 0.14 | 0.6  | 1.33  | 0.423696 | 0.326502 | 0.68166  | 0.576576 |
| MmugDNA.41332.1.S1_at   | MmugDNA.41332.1 | 4.23  | 3.85  | 0.38 | 0.07 | 1.3   | 0.1411   | 0.102215 | 0.426942 | 0.362343 |
| MmugDNA.41333.1.S1_at   | MmugDNA.41333.1 | 3.36  | 3.35  | 0.1  | 0.1  | 1.01  | 0.995338 | 0.455856 | 0.99814  | 0.669664 |
| MmugDNA.41335.1.S1_at   | MmugDNA.41335.1 | 3.89  | 4.85  | 0.29 | 0.3  | -1.95 | 0.00896  | 0.207732 | 0.144364 | 0.481994 |
| MmugDNA.41337.1.S1_at   | MmugDNA.41337.1 | 8.9   | 9.21  | 0.27 | 0.02 | -1.24 | 0.107101 | 0.018327 | 0.381616 | 0.170218 |
| MmugDNA.41338.1.S1_at   | MmugDNA.41338.1 | 6.92  | 7.43  | 1.16 | 0.12 | -1.42 | 0.773769 | 0.786723 | 0.896356 | 0.876633 |
| MmugDNA.4134.1.S1_at    | MmugDNA.4134.1  | 7.8   | 7.6   | 0.08 | 0.22 | 1.15  | 0.306594 | 0.085721 | 0.593399 | 0.337761 |
| MmugDNA.41340.1.S1_at   | MmugDNA.41340.1 | 3.2   | 3.2   | 0.05 | 0.03 | 1     | 0.264309 | 0.346242 | 0.557592 | 0.591201 |
| MmugDNA.41341.1.S1_at   | MmugDNA.41341.1 | 4.96  | 4.71  | 0.17 | 0.31 | 1.19  | 0.276116 | 0.537621 | 0.567711 | 0.722616 |
| MmugDNA.41343.1.S1_at   | MmugDNA.41343.1 | 5.41  | 5.05  | 0.24 | 0.13 | 1.28  | 0.07745  | 0.143679 | 0.336173 | 0.417555 |
| MmugDNA.41344.1.S1_at   | MmugDNA.41344.1 | 5.81  | 5.74  | 0.21 | 0.06 | 1.05  | 0.47382  | 0.203224 | 0.717085 | 0.477415 |
| MmugDNA.41346.1.S1_at   | MmugDNA.41346.1 | 6.11  | 6.22  | 0.08 | 0.1  | -1.08 | 0.685808 | 0.062016 | 0.850363 | 0.295892 |
| MmugDNA.41348.1.S1_at   | MmugDNA.41348.1 | 10.08 | 9.76  | 0.17 | 0.07 | 1.25  | 0.031488 | 0.100572 | 0.230812 | 0.359845 |
| MmugDNA.41349.1.S1_at   | MmugDNA.41349.1 | 4.19  | 4.37  | 0.23 | 0    | -1.13 | 0.759389 | 0.737725 | 0.889659 | 0.848062 |

|                         |                 |       |       |      |      |       |          |          |          |          |
|-------------------------|-----------------|-------|-------|------|------|-------|----------|----------|----------|----------|
| MmugDNA.4135.1.S1_at    | MmugDNA.4135.1  | 5.23  | 4.95  | 0.76 | 0.31 | 1.22  | 0.312413 | 0.326736 | 0.598392 | 0.576725 |
| MmugDNA.41350.1.S1_at   | MmugDNA.41350.1 | 5.47  | 5.43  | 0.03 | 0.14 | 1.03  | 0.766045 | 0.931237 | 0.89269  | 0.96095  |
| MmugDNA.41351.1.S1_at   | MmugDNA.41351.1 | 6.62  | 6.17  | 0.41 | 0.33 | 1.37  | 0.198222 | 0.407813 | 0.495463 | 0.63521  |
| MmugDNA.41352.1.S1_at   | MmugDNA.41352.1 | 5.9   | 6.23  | 0.54 | 0.16 | -1.26 | 0.31403  | 0.434787 | 0.59977  | 0.654826 |
| MmugDNA.41353.1.S1_at   | MmugDNA.41353.1 | 10.75 | 10.35 | 0.24 | 0.14 | 1.31  | 0.068625 | 0.01759  | 0.319786 | 0.167721 |
| MmugDNA.41354.1.S1_at   | MmugDNA.41354.1 | 3.34  | 3.57  | 0.3  | 0.23 | -1.17 | 0.401739 | 0.631442 | 0.666287 | 0.782839 |
| MmugDNA.41355.1.S1_at   | MmugDNA.41355.1 | 7.97  | 8.46  | 0.3  | 0.21 | -1.4  | 0.083124 | 0.223292 | 0.345384 | 0.496105 |
| MmugDNA.4136.1.S1_at    | MmugDNA.4136.1  | 9.26  | 8.85  | 0.14 | 0.16 | 1.33  | 0.018843 | 0.527007 | 0.190832 | 0.715759 |
| MmugDNA.41362.1.S1_at   | MmugDNA.41362.1 | 3.38  | 3.36  | 0.19 | 0.06 | 1.01  | 0.435629 | 0.581195 | 0.690707 | 0.750266 |
| MmugDNA.41363.1.S1_at   | MmugDNA.41363.1 | 6.65  | 7.29  | 1.03 | 0.22 | -1.56 | 0.78893  | 0.941848 | 0.904019 | 0.967075 |
| MmugDNA.41365.1.S1_at   | MmugDNA.41365.1 | 11.42 | 11.49 | 0.22 | 0.16 | -1.05 | 0.936806 | 0.562199 | 0.973607 | 0.737871 |
| MmugDNA.41366.1.S1_at   | MmugDNA.41366.1 | 6.44  | 6.08  | 0.22 | 0.27 | 1.28  | 0.684402 | 0.879633 | 0.849603 | 0.931253 |
| MmugDNA.41367.1.S1_at   | MmugDNA.41367.1 | 4.34  | 5.05  | 0.3  | 0.14 | -1.64 | 0.007499 | 0.016617 | 0.134856 | 0.163117 |
| MmugDNA.41368.1.S1_at   | MmugDNA.41368.1 | 9.77  | 9.88  | 0.14 | 0.05 | -1.08 | 0.66583  | 0.918756 | 0.839433 | 0.954387 |
| MmugDNA.41369.1.S1_at   | MmugDNA.41369.1 | 6.37  | 6.16  | 0.09 | 0.17 | 1.16  | 0.132837 | 0.271916 | 0.416267 | 0.536655 |
| MmugDNA.4137.1.S1_at    | MmugDNA.4137.1  | 6.3   | 6.59  | 0.16 | 0.14 | -1.22 | 0.195089 | 0.096541 | 0.491628 | 0.354115 |
| MmugDNA.41370.1.S1_at   | MmugDNA.41370.1 | 4.37  | 4.23  | 0.15 | 0.17 | 1.1   | 0.743136 | 0.648879 | 0.881225 | 0.794491 |
| MmugDNA.41370.1.S1_x_at | MmugDNA.41370.1 | 5.36  | 5.04  | 0.14 | 0.11 | 1.24  | 0.054954 | 0.200623 | 0.291359 | 0.475176 |
| MmugDNA.41372.1.S1_at   | MmugDNA.41372.1 | 7.4   | 7.93  | 0.92 | 0.09 | -1.44 | 0.999754 | 0.349509 | 0.999962 | 0.593484 |
| MmugDNA.41373.1.S1_at   | MmugDNA.41373.1 | 4.83  | 4.89  | 0.08 | 0.06 | -1.04 | 0.177223 | 0.335883 | 0.471817 | 0.583537 |
| MmugDNA.41375.1.S1_at   | MmugDNA.41375.1 | 5.38  | 5.17  | 0.7  | 0.5  | 1.16  | 0.552475 | 0.507335 | 0.769177 | 0.702917 |
| MmugDNA.41377.1.S1_at   | MmugDNA.41377.1 | 5.39  | 5.44  | 0.08 | 0.22 | -1.03 | 0.992855 | 0.570152 | 0.997263 | 0.742922 |
| MmugDNA.41378.1.S1_at   | MmugDNA.41378.1 | 5.72  | 5.68  | 0.26 | 0.08 | 1.03  | 0.512515 | 0.173236 | 0.742975 | 0.449791 |
| MmugDNA.41380.1.S1_at   | MmugDNA.41380.1 | 7.67  | 7.38  | 0.3  | 0.09 | 1.23  | 0.518556 | 0.607137 | 0.747593 | 0.766223 |
| MmugDNA.41381.1.S1_at   | MmugDNA.41381.1 | 4.66  | 4.15  | 1.47 | 0.31 | 1.42  | 0.217851 | 0.299716 | 0.515656 | 0.558037 |
| MmugDNA.41382.1.S1_at   | MmugDNA.41382.1 | 5.9   | 5.85  | 0.09 | 0.06 | 1.03  | 0.471373 | 0.076179 | 0.715544 | 0.321047 |
| MmugDNA.41385.1.S1_at   | MmugDNA.41385.1 | 8.63  | 8.4   | 0.12 | 0.13 | 1.17  | 0.20634  | 0.017399 | 0.503982 | 0.16699  |
| MmugDNA.41386.1.S1_at   | MmugDNA.41386.1 | 5.55  | 5.54  | 0.12 | 0.12 | 1.01  | 0.433303 | 0.039732 | 0.68886  | 0.244323 |
| MmugDNA.41387.1.S1_at   | MmugDNA.41387.1 | 11.56 | 11.53 | 0.1  | 0.12 | 1.02  | 0.72088  | 0.023596 | 0.868371 | 0.192397 |
| MmugDNA.41388.1.S1_at   | MmugDNA.41388.1 | 3.76  | 3.76  | 0.12 | 0.12 | -1    | 0.946011 | 0.125091 | 0.977211 | 0.395506 |
| MmugDNA.41389.1.S1_at   | MmugDNA.41389.1 | 12.04 | 11.74 | 0.35 | 0.05 | 1.23  | 0.634149 | 0.074118 | 0.820636 | 0.317794 |
| MmugDNA.41390.1.S1_at   | MmugDNA.41390.1 | 7.84  | 9.28  | 0.59 | 0.15 | -2.72 | 0.013958 | 0.012808 | 0.169198 | 0.145832 |
| MmugDNA.41392.1.S1_at   | MmugDNA.41392.1 | 8.61  | 8.15  | 0.75 | 0.08 | 1.37  | 0.103344 | 0.060891 | 0.376388 | 0.293504 |
| MmugDNA.41393.1.S1_at   | MmugDNA.41393.1 | 6.26  | 6.45  | 0.1  | 0    | -1.14 | 0.043449 | 0.007562 | 0.265644 | 0.116437 |
| MmugDNA.41394.1.S1_at   | MmugDNA.41394.1 | 5.51  | 5.36  | 0.1  | 0.08 | 1.11  | 0.092494 | 0.444033 | 0.360707 | 0.661644 |
| MmugDNA.41396.1.S1_at   | MmugDNA.41396.1 | 7.54  | 8.12  | 0.27 | 0.18 | -1.49 | 0.063664 | 0.274661 | 0.308797 | 0.539133 |
| MmugDNA.41398.1.S1_at   | MmugDNA.41398.1 | 10.48 | 10.33 | 0.08 | 0.2  | 1.11  | 0.141478 | 0.09231  | 0.427458 | 0.348147 |
| MmugDNA.41399.1.S1_s_at | MmugDNA.41399.1 | 11.12 | 11.34 | 0.03 | 0.08 | -1.16 | 0.016833 | 0.665966 | 0.183101 | 0.80431  |
| MmugDNA.414.1.S1_at     | MmugDNA.414.1   | 8.44  | 7.74  | 0.21 | 0.07 | 1.62  | 0.005294 | 0.075473 | 0.117714 | 0.319857 |
| MmugDNA.4140.1.S1_at    | MmugDNA.4140.1  | 4.25  | 4.41  | 1.18 | 0.49 | -1.12 | 0.928657 | 0.63105  | 0.969805 | 0.782599 |
| MmugDNA.41400.1.S1_at   | MmugDNA.41400.1 | 3.33  | 3.16  | 0.27 | 0.07 | 1.13  | 0.304261 | 0.261859 | 0.59146  | 0.528265 |
| MmugDNA.41401.1.S1_at   | MmugDNA.41401.1 | 3.39  | 3.32  | 0.18 | 0.02 | 1.05  | 0.603506 | 0.604225 | 0.801013 | 0.764555 |
| MmugDNA.41403.1.S1_at   | MmugDNA.41403.1 | 5.43  | 6.17  | 0.26 | 0.24 | -1.67 | 0.047082 | 0.124955 | 0.274594 | 0.395386 |

|                         |                 |       |       |      |      |       |          |          |          |          |
|-------------------------|-----------------|-------|-------|------|------|-------|----------|----------|----------|----------|
| MmugDNA.41404.1.S1_at   | MmugDNA.41404.1 | 5.56  | 4.69  | 0.82 | 0.08 | 1.83  | 0.444306 | 0.465483 | 0.697186 | 0.675774 |
| MmugDNA.41406.1.S1_at   | MmugDNA.41406.1 | 6.74  | 6.79  | 0.16 | 0.1  | -1.04 | 0.99916  | 0.213342 | 0.999708 | 0.487225 |
| MmugDNA.41408.1.S1_at   | MmugDNA.41408.1 | 4.93  | 4.52  | 0.26 | 0.35 | 1.32  | 0.234729 | 0.252664 | 0.532848 | 0.521174 |
| MmugDNA.41409.1.S1_at   | MmugDNA.41409.1 | 3.44  | 3.49  | 0.67 | 0.28 | -1.04 | 0.706559 | 0.827437 | 0.861067 | 0.900959 |
| MmugDNA.4141.1.S1_at    | MmugDNA.4141.1  | 4.18  | 3.87  | 0.63 | 0.08 | 1.24  | 0.205357 | 0.218707 | 0.503171 | 0.492438 |
| MmugDNA.41410.1.S1_at   | MmugDNA.41410.1 | 6.28  | 7.21  | 1    | 0.25 | -1.91 | 0.184765 | 0.372866 | 0.480792 | 0.611735 |
| MmugDNA.41411.1.S1_at   | MmugDNA.41411.1 | 4.79  | 4.94  | 0.49 | 0.16 | -1.11 | 0.638833 | 0.6179   | 0.823276 | 0.773765 |
| MmugDNA.41415.1.S1_at   | MmugDNA.41415.1 | 5.27  | 4.88  | 0.38 | 0.06 | 1.31  | 0.159634 | 0.207632 | 0.450943 | 0.481906 |
| MmugDNA.4142.1.S1_at    | MmugDNA.4142.1  | 7.16  | 7.17  | 0.18 | 0.04 | -1.01 | 0.8344   | 0.968294 | 0.92718  | 0.982549 |
| MmugDNA.41421.1.S1_at   | MmugDNA.41421.1 | 10.59 | 10.16 | 0.23 | 0.15 | 1.35  | 0.096757 | 0.080495 | 0.366756 | 0.328159 |
| MmugDNA.41423.1.S1_at   | MmugDNA.41423.1 | 3.79  | 3.65  | 0.43 | 0.13 | 1.1   | 0.216611 | 0.198134 | 0.514403 | 0.473135 |
| MmugDNA.41425.1.S1_at   | MmugDNA.41425.1 | 7.06  | 8.09  | 0.23 | 0.23 | -2.04 | 0.007642 | 0.005478 | 0.135934 | 0.102081 |
| MmugDNA.41426.1.S1_s_at | MmugDNA.41426.1 | 12    | 11.88 | 0.07 | 0.09 | 1.08  | 0.249062 | 0.661239 | 0.544391 | 0.801687 |
| MmugDNA.41427.1.S1_at   | MmugDNA.41427.1 | 4.94  | 5.07  | 0.11 | 0.12 | -1.1  | 0.196801 | 0.35871  | 0.493895 | 0.600178 |
| MmugDNA.41428.1.S1_at   | MmugDNA.41428.1 | 5.34  | 5.31  | 0.05 | 0.26 | 1.02  | 0.398804 | 0.659973 | 0.664317 | 0.801008 |
| MmugDNA.41429.1.S1_at   | MmugDNA.41429.1 | 4.11  | 4.39  | 0.1  | 0.18 | -1.21 | 0.073465 | 0.048213 | 0.328846 | 0.264671 |
| MmugDNA.4143.1.S1_at    | MmugDNA.4143.1  | 4.59  | 4.53  | 0.12 | 0.15 | 1.04  | 0.761511 | 0.79511  | 0.890628 | 0.881926 |
| MmugDNA.41431.1.S1_at   | MmugDNA.41431.1 | 6.67  | 7.71  | 0.75 | 0.05 | -2.06 | 0.029253 | 0.156844 | 0.223819 | 0.432372 |
| MmugDNA.41432.1.S1_s_at | MmugDNA.41432.1 | 10.3  | 9.76  | 0.35 | 0.04 | 1.45  | 0.193797 | 0.238756 | 0.490336 | 0.509438 |
| MmugDNA.41437.1.S1_at   | MmugDNA.41437.1 | 12.17 | 11.99 | 0.04 | 0.11 | 1.13  | 0.024644 | 0.049529 | 0.210032 | 0.267481 |
| MmugDNA.41438.1.S1_at   | MmugDNA.41438.1 | 3.76  | 3.85  | 0.72 | 0.25 | -1.06 | 0.654136 | 0.742971 | 0.832533 | 0.851094 |
| MmugDNA.41439.1.S1_at   | MmugDNA.41439.1 | 11.11 | 11.91 | 0.39 | 0.1  | -1.74 | 0.032834 | 0.00321  | 0.235264 | 0.082023 |
| MmugDNA.4144.1.S1_s_at  | MmugDNA.4144.1  | 6.47  | 6.29  | 0.27 | 0.37 | 1.13  | 0.673189 | 0.487484 | 0.843641 | 0.690556 |
| MmugDNA.41440.1.S1_at   | MmugDNA.41440.1 | 6.32  | 6.12  | 0.63 | 0.57 | 1.15  | 0.690027 | 0.208585 | 0.851894 | 0.482512 |
| MmugDNA.41441.1.S1_at   | MmugDNA.41441.1 | 4.1   | 4.07  | 0.29 | 0.19 | 1.02  | 0.508699 | 0.671232 | 0.740531 | 0.807737 |
| MmugDNA.41442.1.S1_at   | MmugDNA.41442.1 | 4.84  | 4.77  | 0.05 | 0.27 | 1.05  | 0.275012 | 0.4661   | 0.566754 | 0.676117 |
| MmugDNA.6164.1.S1_s_at  | MmugDNA.6164.1  | 11.13 | 10.97 | 0.07 | 0.11 | 1.12  | 0.174087 | 0.525782 | 0.468351 | 0.715217 |
| MmugDNA.41444.1.S1_at   | MmugDNA.41444.1 | 8.06  | 8.22  | 0.09 | 0.19 | -1.12 | 0.661175 | 0.038129 | 0.836453 | 0.239923 |
| MmugDNA.41445.1.S1_at   | MmugDNA.41445.1 | 5.85  | 6     | 0.06 | 0.01 | -1.11 | 0.026282 | 0.018433 | 0.215228 | 0.170756 |
| MmugDNA.41446.1.S1_at   | MmugDNA.41446.1 | 5.67  | 5.79  | 0.57 | 0.32 | -1.09 | 0.413123 | 0.679341 | 0.674504 | 0.812775 |
| MmugDNA.41449.1.S1_at   | MmugDNA.41449.1 | 5.09  | 5.09  | 0.04 | 0    | 1     | 0.856699 | 0.675383 | 0.937746 | 0.81026  |
| MmugDNA.4145.1.S1_at    | MmugDNA.4145.1  | 3.98  | 3.96  | 0.25 | 0.16 | 1.02  | 0.423413 | 0.599954 | 0.681371 | 0.761722 |
| MmugDNA.41450.1.S1_at   | MmugDNA.41450.1 | 3.62  | 3.42  | 0.19 | 0.13 | 1.14  | 0.346543 | 0.367488 | 0.624998 | 0.607139 |
| MmugDNA.41451.1.S1_at   | MmugDNA.41451.1 | 8.08  | 7.97  | 0.29 | 0.41 | 1.08  | 0.499987 | 0.054122 | 0.734497 | 0.277968 |
| MmugDNA.41451.1.S1_s_at | MmugDNA.41451.1 | 7.85  | 7.61  | 0.45 | 0.25 | 1.18  | 0.963276 | 0.086744 | 0.985134 | 0.339484 |
| MmugDNA.41455.1.S1_at   | MmugDNA.41455.1 | 3.28  | 3.25  | 0.06 | 0.25 | 1.03  | 0.906838 | 0.800337 | 0.960577 | 0.885129 |
| MmugDNA.41456.1.S1_at   | MmugDNA.41456.1 | 9.44  | 9     | 0.47 | 0.04 | 1.35  | 0.058193 | 0.2328   | 0.298273 | 0.504426 |
| MmugDNA.41458.1.S1_at   | MmugDNA.41458.1 | 9.42  | 10    | 0.12 | 0.16 | -1.5  | 0.005455 | 0.007756 | 0.119321 | 0.117622 |
| MmugDNA.41460.1.S1_at   | MmugDNA.41460.1 | 3.09  | 3.01  | 0.03 | 0.08 | 1.06  | 0.111606 | 0.115394 | 0.387683 | 0.382441 |
| MmugDNA.41463.1.S1_at   | MmugDNA.41463.1 | 3.53  | 3.29  | 0.05 | 0.09 | 1.18  | 0.018344 | 0.512652 | 0.188509 | 0.706448 |
| MmugDNA.41464.1.S1_at   | MmugDNA.41464.1 | 7.25  | 7.22  | 0.19 | 0.03 | 1.02  | 0.272115 | 0.59862  | 0.564053 | 0.760996 |
| MmugDNA.41465.1.S1_at   | MmugDNA.41465.1 | 3.8   | 3.16  | 0.03 | 0.12 | 1.56  | 0.001095 | 0.00022  | 0.077278 | 0.032385 |
| MmugDNA.41466.1.S1_at   | MmugDNA.41466.1 | 7.81  | 6.96  | 0.76 | 0.16 | 1.8   | 0.130151 | 0.121499 | 0.412397 | 0.39064  |



|                         |                 |       |       |      |      |       |          |          |          |          |
|-------------------------|-----------------|-------|-------|------|------|-------|----------|----------|----------|----------|
| MmugDNA.41467.1.S1_at   | MmugDNA.41467.1 | 6.35  | 5.32  | 0.71 | 0.19 | 2.04  | 0.070731 | 0.048197 | 0.324274 | 0.264665 |
| MmugDNA.4147.1.S1_at    | MmugDNA.4147.1  | 9.64  | 9.72  | 1.01 | 0.2  | -1.06 | 0.268485 | 0.143542 | 0.561073 | 0.41747  |
| MmugDNA.41470.1.S1_at   | MmugDNA.41470.1 | 4.15  | 3.7   | 0.55 | 0.23 | 1.37  | 0.382336 | 0.610478 | 0.651817 | 0.768677 |
| MmugDNA.41471.1.S1_at   | MmugDNA.41471.1 | 4.51  | 4.47  | 0.14 | 0.01 | 1.03  | 0.839655 | 0.256376 | 0.92965  | 0.524114 |
| MmugDNA.41473.1.S1_at   | MmugDNA.41473.1 | 5.14  | 4.96  | 0.8  | 0.43 | 1.13  | 0.50012  | 0.2974   | 0.734575 | 0.556078 |
| MmugDNA.41474.1.S1_at   | MmugDNA.41474.1 | 3.62  | 3.58  | 0.24 | 0.01 | 1.03  | 0.264246 | 0.590122 | 0.557504 | 0.756117 |
| MmugDNA.41476.1.S1_at   | MmugDNA.41476.1 | 6.04  | 5.97  | 0.14 | 0.19 | 1.04  | 0.908087 | 0.6215   | 0.961081 | 0.776067 |
| MmugDNA.41477.1.S1_at   | MmugDNA.41477.1 | 3.19  | 3.11  | 0.23 | 0.08 | 1.06  | 0.384074 | 0.500725 | 0.653221 | 0.699242 |
| MmugDNA.41477.1.S1_s_at | MmugDNA.41477.1 | 3.74  | 3.8   | 0.09 | 0.01 | -1.04 | 0.326361 | 0.171668 | 0.609498 | 0.448048 |
| MmugDNA.41478.1.S1_at   | MmugDNA.41478.1 | 6.2   | 5.73  | 0.71 | 0.46 | 1.38  | 0.146334 | 0.196765 | 0.434192 | 0.471873 |
| MmugDNA.41479.1.S1_at   | MmugDNA.41479.1 | 3.6   | 3.16  | 0.23 | 0.05 | 1.36  | 0.084332 | 0.069803 | 0.347699 | 0.310331 |
| MmugDNA.4148.1.S1_at    | MmugDNA.4148.1  | 4.88  | 5.58  | 0.26 | 0.34 | -1.63 | 0.08798  | 0.132617 | 0.354218 | 0.404544 |
| MmugDNA.41480.1.S1_at   | MmugDNA.41480.1 | 7.45  | 8.12  | 1.09 | 0.14 | -1.59 | 0.803751 | 0.721218 | 0.911907 | 0.838628 |
| MmugDNA.41482.1.S1_at   | MmugDNA.41482.1 | 4.16  | 4.21  | 0.03 | 0.05 | -1.03 | 0.140141 | 0.79715  | 0.425829 | 0.883004 |
| MmugDNA.41483.1.S1_at   | MmugDNA.41483.1 | 5.91  | 6.86  | 0.39 | 0.37 | -1.93 | 0.167564 | 0.085575 | 0.46081  | 0.337567 |
| MmugDNA.41483.1.S1_x_at | MmugDNA.41483.1 | 5.99  | 6.76  | 0.37 | 0.53 | -1.71 | 0.280193 | 0.09536  | 0.571399 | 0.35239  |
| MmugDNA.41484.1.S1_at   | MmugDNA.41484.1 | 10.5  | 10.1  | 0.43 | 0.23 | 1.31  | 0.250629 | 0.688088 | 0.545228 | 0.817914 |
| MmugDNA.41485.1.S1_at   | MmugDNA.41485.1 | 7.02  | 6.95  | 0.14 | 0.05 | 1.05  | 0.342461 | 0.772885 | 0.622192 | 0.867946 |
| MmugDNA.41489.1.S1_at   | MmugDNA.41489.1 | 7.33  | 8.4   | 0.13 | 0.23 | -2.1  | 0.0018   | 0.00106  | 0.086149 | 0.05171  |
| MmugDNA.4149.1.S1_at    | MmugDNA.4149.1  | 5.48  | 5.45  | 0.12 | 0.21 | 1.02  | 0.957032 | 0.460207 | 0.982369 | 0.672105 |
| MmugDNA.41490.1.S1_at   | MmugDNA.41490.1 | 4.93  | 5.08  | 0.19 | 0.16 | -1.11 | 0.503299 | 0.489647 | 0.73687  | 0.691862 |
| MmugDNA.41492.1.S1_at   | MmugDNA.41492.1 | 3.82  | 3.74  | 0.15 | 0.1  | 1.06  | 0.173978 | 0.343599 | 0.468349 | 0.589322 |
| MmugDNA.41493.1.S1_at   | MmugDNA.41493.1 | 7.36  | 6.05  | 0.29 | 0.75 | 2.48  | 0.141978 | 0.192157 | 0.427943 | 0.467632 |
| MmugDNA.41494.1.S1_at   | MmugDNA.41494.1 | 5.62  | 5.9   | 0.83 | 0.47 | -1.22 | 0.821434 | 0.884961 | 0.920411 | 0.934455 |
| MmugDNA.41495.1.S1_at   | MmugDNA.41495.1 | 6.26  | 6.29  | 0.18 | 0.36 | -1.02 | 0.30148  | 0.184894 | 0.589355 | 0.460776 |
| MmugDNA.41496.1.S1_at   | MmugDNA.41496.1 | 3.04  | 2.99  | 0.07 | 0.29 | 1.03  | 0.764516 | 0.865061 | 0.891992 | 0.923476 |
| MmugDNA.41497.1.S1_at   | MmugDNA.41497.1 | 6.56  | 6.49  | 0.16 | 0.05 | 1.05  | 0.921057 | 0.992701 | 0.966268 | 0.995715 |
| MmugDNA.41499.1.S1_at   | MmugDNA.41499.1 | 10.21 | 10.26 | 0.1  | 0.16 | -1.03 | 0.894719 | 0.706226 | 0.955118 | 0.829634 |
| MmugDNA.415.1.S1_at     | MmugDNA.415.1   | 5.34  | 4.62  | 0.56 | 0.34 | 1.65  | 0.193615 | 0.218732 | 0.49027  | 0.492438 |
| MmugDNA.4150.1.S1_at    | MmugDNA.4150.1  | 7.6   | 6.86  | 0.27 | 0.77 | 1.67  | 0.327569 | 0.089231 | 0.610266 | 0.34333  |
| MmugDNA.41500.1.S1_at   | MmugDNA.41500.1 | 3.81  | 3.64  | 0.22 | 0.19 | 1.12  | 0.074599 | 0.064647 | 0.331249 | 0.300314 |
| MmugDNA.41501.1.S1_at   | MmugDNA.41501.1 | 7.45  | 7.75  | 0.3  | 0.17 | -1.24 | 0.481148 | 0.028525 | 0.72184  | 0.210754 |
| MmugDNA.41503.1.S1_at   | MmugDNA.41503.1 | 5.72  | 5.33  | 0.63 | 0.08 | 1.31  | 0.112455 | 0.13669  | 0.388708 | 0.409226 |
| MmugDNA.41504.1.S1_at   | MmugDNA.41504.1 | 12.17 | 12.28 | 0.17 | 0.06 | -1.08 | 0.687123 | 0.928073 | 0.850763 | 0.959154 |
| MmugDNA.41505.1.S1_at   | MmugDNA.41505.1 | 4.89  | 4.67  | 0.37 | 0.23 | 1.16  | 0.444737 | 0.307206 | 0.697566 | 0.563499 |
| MmugDNA.41508.1.S1_at   | MmugDNA.41508.1 | 3.52  | 3.32  | 0.14 | 0.12 | 1.14  | 0.072889 | 0.089718 | 0.327658 | 0.34398  |
| MmugDNA.4151.1.S1_at    | MmugDNA.4151.1  | 4.76  | 5.03  | 0.02 | 0.28 | -1.21 | 0.544311 | 0.527967 | 0.763992 | 0.716382 |
| MmugDNA.41511.1.S1_at   | MmugDNA.41511.1 | 3.17  | 3.11  | 0.03 | 0.58 | 1.04  | 0.597486 | 0.717082 | 0.796724 | 0.836224 |
| MmugDNA.41512.1.S1_at   | MmugDNA.41512.1 | 8.3   | 7.63  | 0.03 | 0.04 | 1.59  | 0.000022 | 0.000711 | 0.045594 | 0.044419 |
| MmugDNA.41513.1.S1_at   | MmugDNA.41513.1 | 5.93  | 5.84  | 0.07 | 0.1  | 1.06  | 0.275126 | 0.065238 | 0.566774 | 0.301239 |
| MmugDNA.41360.1.S1_s_at | MmugDNA.41360.1 | 9.81  | 8.87  | 0.05 | 0.26 | 1.93  | 0.006538 | 0.003955 | 0.127373 | 0.089462 |
| MmugDNA.41516.1.S1_at   | MmugDNA.41516.1 | 3.59  | 3.6   | 0.23 | 0.12 | -1    | 0.938971 | 0.913887 | 0.974244 | 0.951561 |
| MmugDNA.41517.1.S1_at   | MmugDNA.41517.1 | 3.63  | 3.47  | 0.06 | 0.13 | 1.12  | 0.043176 | 0.354449 | 0.265035 | 0.597225 |

|                         |                 |       |       |      |      |       |          |          |          |          |
|-------------------------|-----------------|-------|-------|------|------|-------|----------|----------|----------|----------|
| MmugDNA.41519.1.S1_at   | MmugDNA.41519.1 | 4.31  | 4.26  | 0.04 | 0.05 | 1.03  | 0.268903 | 0.006189 | 0.561347 | 0.106774 |
| MmugDNA.41520.1.S1_at   | MmugDNA.41520.1 | 5.75  | 5.47  | 0.55 | 0.27 | 1.21  | 0.455992 | 0.19312  | 0.705597 | 0.468554 |
| MmugDNA.41521.1.S1_at   | MmugDNA.41521.1 | 4.75  | 4.88  | 0.45 | 0.14 | -1.09 | 0.696758 | 0.135787 | 0.855632 | 0.407979 |
| MmugDNA.41523.1.S1_at   | MmugDNA.41523.1 | 5.84  | 5.7   | 0.82 | 0.15 | 1.1   | 0.418539 | 0.272663 | 0.678425 | 0.537433 |
| MmugDNA.41524.1.S1_at   | MmugDNA.41524.1 | 4.85  | 4.85  | 0.27 | 0.11 | 1     | 0.613471 | 0.428215 | 0.807435 | 0.649721 |
| MmugDNA.41525.1.S1_at   | MmugDNA.41525.1 | 6.8   | 5.94  | 0.62 | 0.29 | 1.81  | 0.064954 | 0.190008 | 0.311598 | 0.465619 |
| MmugDNA.41526.1.S1_at   | MmugDNA.41526.1 | 6.64  | 7.51  | 1.42 | 0.56 | -1.84 | 0.271454 | 0.152252 | 0.563402 | 0.427045 |
| MmugDNA.41527.1.S1_at   | MmugDNA.41527.1 | 5.35  | 5.69  | 1.04 | 0.26 | -1.26 | 0.780802 | 0.329077 | 0.899949 | 0.578482 |
| MmugDNA.41528.1.S1_at   | MmugDNA.41528.1 | 4.56  | 4.6   | 0.55 | 0.26 | -1.03 | 0.977459 | 0.987526 | 0.991176 | 0.993022 |
| MmugDNA.41529.1.S1_at   | MmugDNA.41529.1 | 4.2   | 4.02  | 0.44 | 0.12 | 1.13  | 0.58892  | 0.795857 | 0.791341 | 0.882403 |
| MmugDNA.4153.1.S1_at    | MmugDNA.4153.1  | 4.4   | 3.9   | 0.34 | 0.54 | 1.41  | 0.367248 | 0.485171 | 0.641323 | 0.688969 |
| MmugDNA.41530.1.S1_at   | MmugDNA.41530.1 | 10.46 | 11.1  | 0.69 | 0.26 | -1.55 | 0.24674  | 0.553598 | 0.54248  | 0.73273  |
| MmugDNA.41531.1.S1_at   | MmugDNA.41531.1 | 9.49  | 9.75  | 0.61 | 0.15 | -1.2  | 0.649492 | 0.329958 | 0.829674 | 0.578874 |
| MmugDNA.41533.1.S1_at   | MmugDNA.41533.1 | 6.53  | 6.35  | 0.21 | 0.05 | 1.13  | 0.789711 | 0.947864 | 0.904456 | 0.970378 |
| MmugDNA.41534.1.S1_at   | MmugDNA.41534.1 | 5.61  | 5.48  | 0.19 | 0.12 | 1.1   | 0.481797 | 0.489515 | 0.722231 | 0.691824 |
| MmugDNA.41535.1.S1_at   | MmugDNA.41535.1 | 6.52  | 6.74  | 0.26 | 0.04 | -1.17 | 0.760538 | 0.934218 | 0.890254 | 0.962662 |
| MmugDNA.41536.1.S1_at   | MmugDNA.41536.1 | 4.93  | 4.72  | 0.28 | 0.12 | 1.16  | 0.097663 | 0.197607 | 0.368021 | 0.472564 |
| MmugDNA.41537.1.S1_at   | MmugDNA.41537.1 | 6.56  | 6.29  | 0.22 | 0.21 | 1.2   | 0.139815 | 0.316505 | 0.425392 | 0.569913 |
| MmugDNA.41538.1.S1_at   | MmugDNA.41538.1 | 6.51  | 6.17  | 0.28 | 0.26 | 1.26  | 0.284374 | 0.396576 | 0.574388 | 0.628409 |
| MmugDNA.41539.1.S1_at   | MmugDNA.41539.1 | 7.06  | 7.09  | 0.26 | 0.16 | -1.02 | 0.564351 | 0.149902 | 0.776031 | 0.424522 |
| MmugDNA.41541.1.S1_at   | MmugDNA.41541.1 | 5.85  | 5.54  | 0.12 | 0.1  | 1.24  | 0.023444 | 0.09008  | 0.206217 | 0.344402 |
| MmugDNA.41542.1.S1_at   | MmugDNA.41542.1 | 5.23  | 5.1   | 0.06 | 0.08 | 1.1   | 0.085896 | 0.156739 | 0.350251 | 0.432216 |
| MmugDNA.41543.1.S1_at   | MmugDNA.41543.1 | 3.75  | 3.74  | 0.49 | 0.26 | 1     | 0.246617 | 0.335684 | 0.542477 | 0.583441 |
| MmugDNA.13982.1.S1_s_at | MmugDNA.13982.1 | 10.78 | 10.71 | 0.18 | 0.05 | 1.05  | 0.913713 | 0.065199 | 0.963391 | 0.301239 |
| MmugDNA.41545.1.S1_at   | MmugDNA.41545.1 | 8.86  | 7.86  | 1.41 | 0.48 | 2     | 0.298507 | 0.362592 | 0.58679  | 0.603141 |
| MmugDNA.41549.1.S1_at   | MmugDNA.41549.1 | 4.02  | 4.06  | 0.15 | 0.18 | -1.02 | 0.750061 | 0.749617 | 0.884397 | 0.854505 |
| MmugDNA.4155.1.S1_at    | MmugDNA.4155.1  | 4.16  | 4.24  | 0.23 | 0.06 | -1.06 | 0.833035 | 0.983281 | 0.926464 | 0.990726 |
| MmugDNA.41550.1.S1_at   | MmugDNA.41550.1 | 7.61  | 7.46  | 0.28 | 0.17 | 1.11  | 0.280422 | 0.771958 | 0.571536 | 0.867436 |
| MmugDNA.41551.1.S1_at   | MmugDNA.41551.1 | 8.09  | 8.08  | 0.16 | 0.08 | 1.01  | 0.262549 | 0.32143  | 0.556605 | 0.573207 |
| MmugDNA.41552.1.S1_at   | MmugDNA.41552.1 | 5.28  | 5.24  | 0.18 | 0.11 | 1.03  | 0.770803 | 0.425409 | 0.894865 | 0.647807 |
| MmugDNA.41553.1.S1_at   | MmugDNA.41553.1 | 6.11  | 6.07  | 0.09 | 0.03 | 1.03  | 0.917249 | 0.73308  | 0.964746 | 0.845503 |
| MmugDNA.41555.1.S1_at   | MmugDNA.41555.1 | 10.29 | 10.44 | 0.27 | 0.05 | -1.11 | 0.378161 | 0.130784 | 0.648422 | 0.402959 |
| MmugDNA.41556.1.S1_at   | MmugDNA.41556.1 | 5.28  | 5.28  | 0.23 | 0.1  | -1    | 0.830683 | 0.161054 | 0.925496 | 0.437227 |
| MmugDNA.41557.1.S1_at   | MmugDNA.41557.1 | 3.32  | 3.2   | 0.11 | 0.03 | 1.09  | 0.192227 | 0.544873 | 0.488787 | 0.727183 |
| MmugDNA.22773.1.S1_s_at | MmugDNA.22773.1 | 5.8   | 5.78  | 0.05 | 0.11 | 1.01  | 0.479689 | 0.23323  | 0.720829 | 0.504591 |
| MmugDNA.41558.1.S1_at   | MmugDNA.41558.1 | 3.26  | 3.26  | 0.16 | 0.14 | 1     | 0.231598 | 0.423607 | 0.530249 | 0.646459 |
| MmugDNA.41558.1.S1_s_at | MmugDNA.41558.1 | 11.12 | 10.38 | 0.12 | 0.1  | 1.67  | 0.000772 | 0.051916 | 0.072818 | 0.273306 |
| MmugDNA.41560.1.S1_at   | MmugDNA.41560.1 | 8.34  | 8.14  | 0.06 | 0.2  | 1.15  | 0.189603 | 0.591442 | 0.486064 | 0.756977 |
| MmugDNA.41561.1.S1_at   | MmugDNA.41561.1 | 7.28  | 7.02  | 0.55 | 0.17 | 1.2   | 0.180362 | 0.208414 | 0.475506 | 0.482316 |
| MmugDNA.41563.1.S1_at   | MmugDNA.41563.1 | 3.97  | 3.89  | 0.1  | 0.13 | 1.06  | 0.513582 | 0.730952 | 0.743768 | 0.844168 |
| MmugDNA.41564.1.S1_at   | MmugDNA.41564.1 | 3.58  | 3.61  | 0.05 | 0.33 | -1.02 | 0.571745 | 0.822055 | 0.780048 | 0.89765  |
| MmugDNA.41565.1.S1_at   | MmugDNA.41565.1 | 13.25 | 13.04 | 0.07 | 0.02 | 1.16  | 0.007227 | 0.003002 | 0.132536 | 0.079958 |
| MmugDNA.41566.1.S1_at   | MmugDNA.41566.1 | 11.78 | 11.62 | 0.08 | 0.06 | 1.11  | 0.073804 | 0.268534 | 0.329577 | 0.534123 |

|                         |                 |       |       |      |      |       |          |          |          |          |
|-------------------------|-----------------|-------|-------|------|------|-------|----------|----------|----------|----------|
| MmugDNA.41567.1.S1_at   | MmugDNA.41567.1 | 3.26  | 3.1   | 0.13 | 0.45 | 1.12  | 0.69552  | 0.20584  | 0.854867 | 0.480094 |
| MmugDNA.41569.1.S1_at   | MmugDNA.41569.1 | 12.7  | 12.72 | 0.14 | 0.04 | -1.02 | 0.7524   | 0.774501 | 0.885576 | 0.868769 |
| MmugDNA.41569.1.S1_s_at | MmugDNA.41569.1 | 12.86 | 12.83 | 0.04 | 0.04 | 1.02  | 0.243043 | 0.475895 | 0.539753 | 0.682387 |
| MmugDNA.41571.1.S1_s_at | MmugDNA.41571.1 | 11.02 | 10.64 | 0.16 | 0.01 | 1.3   | 0.040027 | 0.482229 | 0.256732 | 0.687128 |
| MmugDNA.41573.1.S1_at   | MmugDNA.41573.1 | 3.72  | 3.78  | 0.01 | 0    | -1.05 | 0.000884 | 0.04029  | 0.074796 | 0.245902 |
| MmugDNA.41574.1.S1_at   | MmugDNA.41574.1 | 8.43  | 7.54  | 0.34 | 0.02 | 1.85  | 0.021308 | 0.014099 | 0.199623 | 0.15195  |
| MmugDNA.41575.1.S1_at   | MmugDNA.41575.1 | 3.87  | 3.87  | 0.13 | 0.07 | -1    | 0.411371 | 0.30998  | 0.673306 | 0.565227 |
| MmugDNA.41577.1.S1_at   | MmugDNA.41577.1 | 7.99  | 8.27  | 0.4  | 0.37 | -1.21 | 0.39967  | 0.011694 | 0.664845 | 0.140155 |
| MmugDNA.41578.1.S1_at   | MmugDNA.41578.1 | 6.24  | 6.32  | 0.32 | 0.11 | -1.06 | 0.640544 | 0.466701 | 0.824322 | 0.676431 |
| MmugDNA.41580.1.S1_x_at | MmugDNA.41580.1 | 7.56  | 7.33  | 0.79 | 0.25 | 1.17  | 0.218041 | 0.197324 | 0.515866 | 0.472251 |
| MmugDNA.41583.1.S1_at   | MmugDNA.41583.1 | 3.88  | 3.63  | 0.13 | 0.07 | 1.2   | 0.036057 | 0.028056 | 0.244886 | 0.20903  |
| MmugDNA.41584.1.S1_at   | MmugDNA.41584.1 | 7.02  | 7.02  | 0.12 | 0.06 | -1    | 0.706726 | 0.569079 | 0.861133 | 0.742239 |
| MmugDNA.41585.1.S1_at   | MmugDNA.41585.1 | 5.05  | 6.02  | 0.1  | 0.4  | -1.95 | 0.045319 | 0.097842 | 0.270342 | 0.355639 |
| MmugDNA.41586.1.S1_at   | MmugDNA.41586.1 | 3.57  | 3.55  | 0    | 0.19 | 1.01  | 0.599879 | 0.745194 | 0.798444 | 0.852293 |
| MmugDNA.41587.1.S1_at   | MmugDNA.41587.1 | 5.99  | 5.92  | 0.06 | 0.09 | 1.05  | 0.131648 | 0.505694 | 0.414491 | 0.702218 |
| MmugDNA.41589.1.S1_at   | MmugDNA.41589.1 | 6.14  | 5.89  | 0.17 | 0.15 | 1.19  | 0.315323 | 0.389018 | 0.600287 | 0.623288 |
| MmugDNA.4159.1.S1_at    | MmugDNA.4159.1  | 4.7   | 4.75  | 0.04 | 0.08 | -1.03 | 0.488595 | 0.073809 | 0.726958 | 0.317146 |
| MmugDNA.41590.1.S1_at   | MmugDNA.41590.1 | 3.01  | 2.95  | 0.08 | 0.13 | 1.04  | 0.21308  | 0.067185 | 0.511045 | 0.305204 |
| MmugDNA.41591.1.S1_at   | MmugDNA.41591.1 | 3.45  | 3.25  | 0.12 | 0.03 | 1.15  | 0.080326 | 0.131218 | 0.340941 | 0.403252 |
| MmugDNA.41592.1.S1_at   | MmugDNA.41592.1 | 11.58 | 11.67 | 0.33 | 0.11 | -1.06 | 0.326304 | 0.621148 | 0.609478 | 0.775813 |
| MmugDNA.41593.1.S1_at   | MmugDNA.41593.1 | 3.87  | 3.95  | 0.55 | 0.07 | -1.06 | 0.462183 | 0.624828 | 0.709467 | 0.778924 |
| MmugDNA.41596.1.S1_at   | MmugDNA.41596.1 | 6.44  | 7.07  | 0.62 | 0.24 | -1.55 | 0.131196 | 0.124924 | 0.413871 | 0.395313 |
| MmugDNA.41597.1.S1_at   | MmugDNA.41597.1 | 4.55  | 4.76  | 0.36 | 0.13 | -1.16 | 0.519023 | 0.642586 | 0.747877 | 0.790343 |
| MmugDNA.41598.1.S1_at   | MmugDNA.41598.1 | 5.2   | 5.09  | 0.17 | 0.12 | 1.08  | 0.473407 | 0.138965 | 0.716686 | 0.412048 |
| MmugDNA.41599.1.S1_at   | MmugDNA.41599.1 | 7.32  | 7.16  | 0.2  | 0.13 | 1.12  | 0.982566 | 0.317566 | 0.993625 | 0.570774 |
| MmugDNA.4160.1.S1_at    | MmugDNA.4160.1  | 11.67 | 11.51 | 0.03 | 0.08 | 1.12  | 0.089483 | 0.650872 | 0.356406 | 0.795849 |
| MmugDNA.41600.1.S1_at   | MmugDNA.41600.1 | 5.13  | 4.92  | 0.41 | 0.2  | 1.16  | 0.272609 | 0.388563 | 0.564685 | 0.622897 |
| MmugDNA.41602.1.S1_at   | MmugDNA.41602.1 | 4.61  | 4.66  | 0.03 | 0.02 | -1.04 | 0.072927 | 0.512192 | 0.327717 | 0.706087 |
| MmugDNA.41603.1.S1_at   | MmugDNA.41603.1 | 8.34  | 8.02  | 0.22 | 0.2  | 1.25  | 0.159395 | 0.861568 | 0.450703 | 0.921322 |
| MmugDNA.41604.1.S1_at   | MmugDNA.41604.1 | 5.55  | 5.29  | 0.15 | 0.14 | 1.2   | 0.100093 | 0.133695 | 0.37088  | 0.405647 |
| MmugDNA.41605.1.S1_at   | MmugDNA.41605.1 | 3.48  | 3.72  | 0.32 | 0.41 | -1.18 | 0.790052 | 0.855204 | 0.904494 | 0.917457 |
| MmugDNA.41605.1.S1_s_at | MmugDNA.41605.1 | 10.07 | 9.96  | 0.11 | 0.18 | 1.08  | 0.227708 | 0.187849 | 0.525826 | 0.46394  |
| MmugDNA.41607.1.S1_at   | MmugDNA.41607.1 | 10.44 | 10.39 | 0.06 | 0.01 | 1.04  | 0.244602 | 0.936564 | 0.540942 | 0.964214 |
| MmugDNA.41608.1.S1_at   | MmugDNA.41608.1 | 6.36  | 7.28  | 0.36 | 0.27 | -1.89 | 0.024582 | 0.31135  | 0.209791 | 0.566418 |
| MmugDNA.41609.1.S1_at   | MmugDNA.41609.1 | 11.73 | 11.43 | 0.17 | 0.02 | 1.23  | 0.104792 | 0.01758  | 0.378347 | 0.167721 |
| MmugDNA.4161.1.S1_at    | MmugDNA.4161.1  | 5.44  | 5.45  | 0.1  | 0.03 | -1    | 0.726628 | 0.04569  | 0.871818 | 0.258049 |
| MmugDNA.41610.1.S1_at   | MmugDNA.41610.1 | 4.75  | 4.78  | 0.03 | 0.28 | -1.02 | 0.929768 | 0.99308  | 0.970294 | 0.995925 |
| MmugDNA.41611.1.S1_at   | MmugDNA.41611.1 | 3.13  | 3.15  | 0.15 | 0    | -1.01 | 0.526026 | 0.537848 | 0.752249 | 0.722758 |
| MmugDNA.41612.1.S1_at   | MmugDNA.41612.1 | 6.92  | 5.87  | 0.5  | 0.07 | 2.08  | 0.020118 | 0.091611 | 0.195301 | 0.346715 |
| MmugDNA.41613.1.S1_at   | MmugDNA.41613.1 | 3.01  | 2.78  | 0.23 | 0.2  | 1.17  | 0.576685 | 0.510508 | 0.783351 | 0.704979 |
| MmugDNA.41614.1.S1_at   | MmugDNA.41614.1 | 7.15  | 6.97  | 0.17 | 0.22 | 1.13  | 0.39495  | 0.025007 | 0.661483 | 0.198121 |
| MmugDNA.41615.1.S1_at   | MmugDNA.41615.1 | 5.03  | 4.93  | 0.14 | 0.12 | 1.07  | 0.209284 | 0.169929 | 0.506775 | 0.446574 |
| MmugDNA.41616.1.S1_at   | MmugDNA.41616.1 | 4.88  | 4.85  | 0.13 | 0.18 | 1.02  | 0.945923 | 0.18571  | 0.977199 | 0.46163  |

|                         |                 |       |       |      |      |       |          |          |          |          |
|-------------------------|-----------------|-------|-------|------|------|-------|----------|----------|----------|----------|
| MmugDNA.41617.1.S1_at   | MmugDNA.41617.1 | 3.91  | 3.84  | 0.13 | 0.28 | 1.05  | 0.165818 | 0.178488 | 0.45879  | 0.454778 |
| MmugDNA.41618.1.S1_at   | MmugDNA.41618.1 | 3.52  | 3.36  | 0.22 | 0.02 | 1.12  | 0.30856  | 0.500412 | 0.595135 | 0.699036 |
| MmugDNA.41619.1.S1_at   | MmugDNA.41619.1 | 3.76  | 3.65  | 0.06 | 0.03 | 1.08  | 0.059597 | 0.109789 | 0.301206 | 0.373751 |
| MmugDNA.41620.1.S1_at   | MmugDNA.41620.1 | 6.66  | 7.53  | 0.94 | 0.27 | -1.82 | 0.321981 | 0.227246 | 0.606179 | 0.499574 |
| MmugDNA.41621.1.S1_at   | MmugDNA.41621.1 | 6.45  | 6.06  | 0.24 | 0.17 | 1.31  | 0.234441 | 0.00062  | 0.532559 | 0.042444 |
| MmugDNA.41622.1.S1_at   | MmugDNA.41622.1 | 3.1   | 2.97  | 0.1  | 0.25 | 1.09  | 0.791768 | 0.971464 | 0.905423 | 0.984481 |
| MmugDNA.41623.1.S1_at   | MmugDNA.41623.1 | 10.85 | 10.14 | 0.63 | 0.23 | 1.63  | 0.224565 | 0.087608 | 0.522686 | 0.340846 |
| MmugDNA.41624.1.S1_at   | MmugDNA.41624.1 | 7.76  | 7.94  | 0.24 | 0.23 | -1.13 | 0.658131 | 0.417751 | 0.834894 | 0.642391 |
| MmugDNA.41627.1.S1_at   | MmugDNA.41627.1 | 6.56  | 6.39  | 0.3  | 0.3  | 1.12  | 0.188457 | 0.167562 | 0.484854 | 0.443998 |
| MmugDNA.41628.1.S1_at   | MmugDNA.41628.1 | 8     | 7.51  | 0.77 | 0.33 | 1.41  | 0.542604 | 0.751107 | 0.762884 | 0.855317 |
| MmugDNA.41629.1.S1_at   | MmugDNA.41629.1 | 8.51  | 8.04  | 0.15 | 0.14 | 1.39  | 0.016735 | 0.102928 | 0.182634 | 0.363601 |
| MmugDNA.4163.1.S1_at    | MmugDNA.4163.1  | 7.61  | 8.13  | 0.16 | 0.11 | -1.43 | 0.007187 | 0.018814 | 0.132432 | 0.172431 |
| MmugDNA.41630.1.S1_at   | MmugDNA.41630.1 | 4.09  | 4.57  | 0.47 | 0.38 | -1.39 | 0.358847 | 0.211647 | 0.634521 | 0.485681 |
| MmugDNA.41631.1.S1_at   | MmugDNA.41631.1 | 4.48  | 4.53  | 0.04 | 0.2  | -1.04 | 0.62459  | 0.404007 | 0.81488  | 0.632558 |
| MmugDNA.41634.1.S1_at   | MmugDNA.41634.1 | 3.51  | 3.46  | 0    | 0.05 | 1.03  | 0.14281  | 0.007348 | 0.428908 | 0.115137 |
| MmugDNA.41635.1.S1_at   | MmugDNA.41635.1 | 6.13  | 6.07  | 0.08 | 0.05 | 1.04  | 0.500407 | 0.655093 | 0.73465  | 0.798291 |
| MmugDNA.41637.1.S1_at   | MmugDNA.41637.1 | 4.48  | 4.39  | 0.36 | 0.31 | 1.07  | 0.457459 | 0.503465 | 0.706397 | 0.700892 |
| MmugDNA.41638.1.S1_at   | MmugDNA.41638.1 | 4.84  | 4.9   | 0.43 | 0.12 | -1.04 | 0.371617 | 0.285958 | 0.644264 | 0.547505 |
| MmugDNA.41639.1.S1_at   | MmugDNA.41639.1 | 5.97  | 5.94  | 0.2  | 0.02 | 1.02  | 0.909659 | 0.852065 | 0.961647 | 0.915854 |
| MmugDNA.4164.1.S1_at    | MmugDNA.4164.1  | 8.02  | 8.09  | 0.72 | 0.17 | -1.05 | 0.905411 | 0.843699 | 0.960065 | 0.910955 |
| MmugDNA.4164.1.S1_s_at  | MmugDNA.4164.1  | 7.27  | 7.2   | 0.45 | 0.18 | 1.05  | 0.252309 | 0.628589 | 0.546837 | 0.781302 |
| MmugDNA.41642.1.S1_at   | MmugDNA.41642.1 | 9.41  | 8.86  | 0.21 | 0.21 | 1.47  | 0.025486 | 0.222895 | 0.212784 | 0.495791 |
| MmugDNA.41643.1.S1_at   | MmugDNA.41643.1 | 7.02  | 7.48  | 0.48 | 0.35 | -1.37 | 0.458241 | 0.209715 | 0.706883 | 0.483433 |
| MmugDNA.41644.1.S1_at   | MmugDNA.41644.1 | 9.99  | 9.35  | 0.07 | 0.03 | 1.56  | 0.000105 | 0.062763 | 0.051196 | 0.297193 |
| MmugDNA.19802.1.S1_at   | MmugDNA.19802.1 | 10.82 | 10.3  | 0.24 | 0.31 | 1.44  | 0.060431 | 0.068017 | 0.302968 | 0.307083 |
| MmugDNA.19802.1.S1_s_at | MmugDNA.19802.1 | 10.79 | 10.23 | 0.2  | 0.15 | 1.47  | 0.015405 | 0.024132 | 0.176257 | 0.1945   |
| MmugDNA.41645.1.S1_at   | MmugDNA.41645.1 | 5.1   | 4.61  | 0.04 | 0.14 | 1.4   | 0.006249 | 0.072419 | 0.125292 | 0.31528  |
| MmugDNA.41649.1.S1_at   | MmugDNA.41649.1 | 5.73  | 5.65  | 0.13 | 0.08 | 1.06  | 0.350624 | 0.328472 | 0.628479 | 0.57809  |
| MmugDNA.4165.1.S1_at    | MmugDNA.4165.1  | 6.65  | 7.09  | 0.39 | 0.28 | -1.36 | 0.1804   | 0.326506 | 0.475556 | 0.576576 |
| MmugDNA.41650.1.S1_at   | MmugDNA.41650.1 | 4.39  | 4.09  | 0.54 | 0.05 | 1.23  | 0.342108 | 0.244946 | 0.621924 | 0.514752 |
| MmugDNA.41651.1.S1_at   | MmugDNA.41651.1 | 5.03  | 5.02  | 0.2  | 0.18 | 1.01  | 0.929185 | 0.925442 | 0.969943 | 0.957811 |
| MmugDNA.41653.1.S1_at   | MmugDNA.41653.1 | 6.81  | 5.86  | 0.28 | 0.5  | 1.93  | 0.031412 | 0.02484  | 0.230385 | 0.19744  |
| MmugDNA.41654.1.S1_at   | MmugDNA.41654.1 | 5.2   | 4.9   | 0.3  | 0.24 | 1.23  | 0.342815 | 0.300532 | 0.622552 | 0.558852 |
| MmugDNA.41655.1.S1_at   | MmugDNA.41655.1 | 9.04  | 8.8   | 0.05 | 0.19 | 1.18  | 0.401538 | 0.727144 | 0.666079 | 0.842187 |
| MmugDNA.41656.1.S1_at   | MmugDNA.41656.1 | 6.85  | 7.02  | 0.46 | 0.33 | -1.13 | 0.302927 | 0.05211  | 0.590429 | 0.273866 |
| MmugDNA.41657.1.S1_at   | MmugDNA.41657.1 | 9.75  | 9.47  | 0.34 | 0.05 | 1.21  | 0.193055 | 0.340381 | 0.489606 | 0.586725 |
| MmugDNA.41658.1.S1_at   | MmugDNA.41658.1 | 9.91  | 9.73  | 0.11 | 0.12 | 1.13  | 0.08345  | 0.835543 | 0.345905 | 0.905864 |
| MmugDNA.41659.1.S1_at   | MmugDNA.41659.1 | 2.92  | 2.85  | 0.24 | 0.04 | 1.05  | 0.228541 | 0.347465 | 0.526901 | 0.592019 |
| MmugDNA.4166.1.S1_at    | MmugDNA.4166.1  | 7.33  | 6.71  | 0.48 | 0.25 | 1.54  | 0.192824 | 0.295686 | 0.489396 | 0.555113 |
| MmugDNA.41660.1.S1_at   | MmugDNA.41660.1 | 5.36  | 5.38  | 0.21 | 0    | -1.01 | 0.324169 | 0.354088 | 0.607853 | 0.597048 |
| MmugDNA.41662.1.S1_at   | MmugDNA.41662.1 | 3.05  | 3.03  | 0.04 | 0.04 | 1.01  | 0.806833 | 0.766307 | 0.913502 | 0.864212 |
| MmugDNA.41663.1.S1_at   | MmugDNA.41663.1 | 5.19  | 5.19  | 0.12 | 0    | 1     | 0.386569 | 0.303525 | 0.654936 | 0.561004 |
| MmugDNA.41664.1.S1_at   | MmugDNA.41664.1 | 6.96  | 6.86  | 0.17 | 0.16 | 1.07  | 0.224448 | 0.066149 | 0.522615 | 0.302699 |

|                         |                 |       |       |      |      |       |          |          |          |          |
|-------------------------|-----------------|-------|-------|------|------|-------|----------|----------|----------|----------|
| MmugDNA.41665.1.S1_at   | MmugDNA.41665.1 | 8.28  | 8.53  | 0.2  | 0.01 | -1.19 | 0.285549 | 0.083635 | 0.575288 | 0.334255 |
| MmugDNA.41666.1.S1_at   | MmugDNA.41666.1 | 5.02  | 5.35  | 0.05 | 0.37 | -1.26 | 0.211351 | 0.183649 | 0.50914  | 0.459681 |
| MmugDNA.41667.1.S1_at   | MmugDNA.41667.1 | 6.94  | 8.62  | 0.91 | 0.33 | -3.21 | 0.052559 | 0.165332 | 0.286297 | 0.441518 |
| MmugDNA.41668.1.S1_at   | MmugDNA.41668.1 | 3.8   | 3.72  | 0.29 | 0.04 | 1.06  | 0.832696 | 0.790103 | 0.926317 | 0.878677 |
| MmugDNA.41669.1.S1_at   | MmugDNA.41669.1 | 3.54  | 3.25  | 0.01 | 0.03 | 1.22  | 0.000067 | 0.000061 | 0.051142 | 0.025666 |
| MmugDNA.41670.1.S1_at   | MmugDNA.41670.1 | 7.43  | 6.79  | 0.32 | 0.28 | 1.56  | 0.027589 | 0.081231 | 0.21866  | 0.329351 |
| MmugDNA.41671.1.S1_at   | MmugDNA.41671.1 | 3.94  | 3.75  | 0.26 | 0.1  | 1.14  | 0.461036 | 0.711433 | 0.708593 | 0.832667 |
| MmugDNA.41673.1.S1_at   | MmugDNA.41673.1 | 4.51  | 4.57  | 0.22 | 0.28 | -1.04 | 0.879764 | 0.72857  | 0.948789 | 0.843093 |
| MmugDNA.41675.1.S1_at   | MmugDNA.41675.1 | 8.43  | 8.23  | 0.73 | 0.4  | 1.15  | 0.54805  | 0.56995  | 0.766347 | 0.742751 |
| MmugDNA.41676.1.S1_at   | MmugDNA.41676.1 | 3.13  | 3.15  | 0.13 | 0.09 | -1.01 | 0.8583   | 0.138847 | 0.938469 | 0.412022 |
| MmugDNA.41677.1.S1_at   | MmugDNA.41677.1 | 3.47  | 3.8   | 0.24 | 0.45 | -1.25 | 0.486722 | 0.509999 | 0.725795 | 0.704549 |
| MmugDNA.41678.1.S1_at   | MmugDNA.41678.1 | 5.74  | 5.98  | 0.72 | 0.6  | -1.19 | 0.907953 | 0.92302  | 0.961052 | 0.956698 |
| MmugDNA.41679.1.S1_at   | MmugDNA.41679.1 | 9.07  | 8.61  | 0.14 | 0.11 | 1.37  | 0.032723 | 0.48502  | 0.234993 | 0.688893 |
| MmugDNA.4168.1.S1_at    | MmugDNA.4168.1  | 5.68  | 5.03  | 0.56 | 0.1  | 1.57  | 0.315749 | 0.343039 | 0.600522 | 0.588868 |
| MmugDNA.4168.1.S1_s_at  | MmugDNA.4168.1  | 6.54  | 6.47  | 0.08 | 0.13 | 1.05  | 0.18101  | 0.162438 | 0.476233 | 0.438575 |
| MmugDNA.41680.1.S1_at   | MmugDNA.41680.1 | 6.54  | 6.39  | 0.76 | 0.34 | 1.11  | 0.554772 | 0.594565 | 0.770797 | 0.758623 |
| MmugDNA.41681.1.S1_at   | MmugDNA.41681.1 | 11.1  | 11.11 | 0.01 | 0.04 | -1.01 | 0.277382 | 0.190007 | 0.568909 | 0.465619 |
| MmugDNA.41682.1.S1_at   | MmugDNA.41682.1 | 5.15  | 5.13  | 0.11 | 0.23 | 1.01  | 0.963588 | 0.593672 | 0.985244 | 0.758391 |
| MmugDNA.41684.1.S1_at   | MmugDNA.41684.1 | 4.37  | 4.14  | 0.17 | 0.29 | 1.17  | 0.618039 | 0.806172 | 0.810434 | 0.88857  |
| MmugDNA.41686.1.S1_at   | MmugDNA.41686.1 | 9.8   | 9.75  | 0.5  | 0.04 | 1.03  | 0.68727  | 0.6748   | 0.850804 | 0.810039 |
| MmugDNA.41687.1.S1_at   | MmugDNA.41687.1 | 5.76  | 6.62  | 1.97 | 0.15 | -1.81 | 0.758097 | 0.916232 | 0.889024 | 0.953102 |
| MmugDNA.41688.1.S1_at   | MmugDNA.41688.1 | 8.97  | 8.41  | 0.2  | 0.05 | 1.47  | 0.00976  | 0.079725 | 0.148542 | 0.326982 |
| MmugDNA.41690.1.S1_at   | MmugDNA.41690.1 | 5.51  | 5.53  | 0.12 | 0.07 | -1.01 | 0.417747 | 0.004011 | 0.677741 | 0.089969 |
| MmugDNA.41692.1.S1_at   | MmugDNA.41692.1 | 6.05  | 5.58  | 0.08 | 0.33 | 1.39  | 0.047808 | 0.034539 | 0.276035 | 0.229979 |
| MmugDNA.41693.1.S1_at   | MmugDNA.41693.1 | 4.94  | 5.02  | 0.35 | 0.09 | -1.06 | 0.741333 | 0.884427 | 0.880128 | 0.934152 |
| MmugDNA.41694.1.S1_at   | MmugDNA.41694.1 | 11.06 | 10.91 | 0.61 | 0.18 | 1.1   | 0.343378 | 0.083881 | 0.622974 | 0.334771 |
| MmugDNA.41694.1.S1_s_at | MmugDNA.41694.1 | 13.72 | 13.52 | 0.12 | 0.03 | 1.15  | 0.064226 | 0.11936  | 0.309876 | 0.387887 |
| MmugDNA.41695.1.S1_at   | MmugDNA.41695.1 | 4     | 3.64  | 0.02 | 0.2  | 1.28  | 0.096192 | 0.02285  | 0.365761 | 0.189246 |
| MmugDNA.41696.1.S1_at   | MmugDNA.41696.1 | 4.73  | 4.6   | 0.12 | 0.01 | 1.1   | 0.239686 | 0.405989 | 0.537179 | 0.634136 |
| MmugDNA.41697.1.S1_at   | MmugDNA.41697.1 | 5.31  | 5.2   | 0.49 | 0.3  | 1.08  | 0.167905 | 0.1593   | 0.461188 | 0.43531  |
| MmugDNA.41698.1.S1_at   | MmugDNA.41698.1 | 6.19  | 8.72  | 1.07 | 0.28 | -5.78 | 0.052505 | 0.201143 | 0.286269 | 0.475534 |
| MmugDNA.41699.1.S1_at   | MmugDNA.41699.1 | 4.2   | 4.25  | 0.21 | 0.13 | -1.04 | 0.373173 | 0.423102 | 0.645118 | 0.646145 |
| MmugDNA.417.1.S1_at     | MmugDNA.417.1   | 5.87  | 6.13  | 0.29 | 0.17 | -1.2  | 0.667216 | 0.213042 | 0.840259 | 0.487005 |
| MmugDNA.4170.1.S1_at    | MmugDNA.4170.1  | 5.36  | 5.29  | 0.09 | 0.13 | 1.05  | 0.760115 | 0.530121 | 0.890106 | 0.717729 |
| MmugDNA.41700.1.S1_at   | MmugDNA.41700.1 | 8.37  | 8.23  | 0.35 | 0.15 | 1.1   | 0.774795 | 0.847788 | 0.897036 | 0.913522 |
| MmugDNA.41702.1.S1_at   | MmugDNA.41702.1 | 4.92  | 4.81  | 0.05 | 0.15 | 1.08  | 0.940391 | 0.58593  | 0.974856 | 0.753141 |
| MmugDNA.41703.1.S1_at   | MmugDNA.41703.1 | 11.36 | 10.87 | 0.36 | 0.12 | 1.41  | 0.07502  | 0.433434 | 0.332088 | 0.653681 |
| MmugDNA.41704.1.S1_at   | MmugDNA.41704.1 | 4.09  | 2.93  | 1.24 | 0.29 | 2.24  | 0.207897 | 0.203273 | 0.505752 | 0.477494 |
| MmugDNA.41705.1.S1_at   | MmugDNA.41705.1 | 5.4   | 5.47  | 0.07 | 0.08 | -1.04 | 0.373008 | 0.048589 | 0.645118 | 0.265572 |
| MmugDNA.41706.1.S1_at   | MmugDNA.41706.1 | 8.21  | 7.87  | 0.62 | 0.3  | 1.27  | 0.433865 | 0.659312 | 0.689223 | 0.800647 |
| MmugDNA.41707.1.S1_at   | MmugDNA.41707.1 | 4.9   | 4.69  | 0.07 | 0.37 | 1.16  | 0.41504  | 0.605351 | 0.675916 | 0.765119 |
| MmugDNA.41708.1.S1_at   | MmugDNA.41708.1 | 8.19  | 7.98  | 0.34 | 0.1  | 1.15  | 0.125608 | 0.213281 | 0.406238 | 0.487179 |
| MmugDNA.41709.1.S1_at   | MmugDNA.41709.1 | 4.3   | 4.28  | 0.15 | 0.04 | 1.02  | 0.665597 | 0.392781 | 0.839333 | 0.625846 |

|                         |                 |       |       |      |      |       |          |          |          |          |
|-------------------------|-----------------|-------|-------|------|------|-------|----------|----------|----------|----------|
| MmugDNA.4171.1.S1_at    | MmugDNA.4171.1  | 4.82  | 4.53  | 0.25 | 0.15 | 1.22  | 0.162028 | 0.116683 | 0.453899 | 0.383864 |
| MmugDNA.41711.1.S1_at   | MmugDNA.41711.1 | 6.06  | 7.11  | 0.38 | 0.66 | -2.07 | 0.122473 | 0.000539 | 0.401174 | 0.040469 |
| MmugDNA.41712.1.S1_at   | MmugDNA.41712.1 | 4.37  | 4.4   | 0.15 | 0.04 | -1.02 | 0.62551  | 0.183486 | 0.815436 | 0.459627 |
| MmugDNA.41713.1.S1_at   | MmugDNA.41713.1 | 10.55 | 10.65 | 1.19 | 0.24 | -1.07 | 0.256128 | 0.324743 | 0.550621 | 0.575287 |
| MmugDNA.41714.1.S1_at   | MmugDNA.41714.1 | 3.63  | 3.73  | 0.04 | 0.04 | -1.08 | 0.06416  | 0.184993 | 0.309783 | 0.460814 |
| MmugDNA.41714.1.S1_s_at | MmugDNA.41714.1 | 3.39  | 3.13  | 0.74 | 0.76 | 1.19  | 0.899484 | 0.865385 | 0.957234 | 0.923579 |
| MmugDNA.41715.1.S1_at   | MmugDNA.41715.1 | 8.63  | 9.02  | 0.33 | 0.13 | -1.3  | 0.132586 | 0.368467 | 0.415892 | 0.60798  |
| MmugDNA.41716.1.S1_at   | MmugDNA.41716.1 | 6.58  | 6.77  | 0.15 | 0.15 | -1.14 | 0.072555 | 0.131761 | 0.327336 | 0.403891 |
| MmugDNA.41718.1.S1_at   | MmugDNA.41718.1 | 8.25  | 8.26  | 0.34 | 0.07 | -1.01 | 0.883935 | 0.402769 | 0.950642 | 0.63156  |
| MmugDNA.41719.1.S1_at   | MmugDNA.41719.1 | 7.65  | 7.4   | 0.09 | 0.08 | 1.19  | 0.015956 | 0.029439 | 0.178824 | 0.213368 |
| MmugDNA.41720.1.S1_at   | MmugDNA.41720.1 | 6.56  | 6.31  | 0.21 | 0.19 | 1.19  | 0.237494 | 0.773932 | 0.534988 | 0.868568 |
| MmugDNA.41721.1.S1_at   | MmugDNA.41721.1 | 3.26  | 3.29  | 0.1  | 0.07 | -1.02 | 0.686666 | 0.965564 | 0.850709 | 0.980739 |
| MmugDNA.41722.1.S1_at   | MmugDNA.41722.1 | 3.24  | 2.91  | 0.36 | 0.08 | 1.26  | 0.270687 | 0.333918 | 0.562838 | 0.582056 |
| MmugDNA.41723.1.S1_at   | MmugDNA.41723.1 | 5.81  | 6.11  | 0.24 | 0.04 | -1.24 | 0.032177 | 0.001103 | 0.233272 | 0.052576 |
| MmugDNA.41724.1.S1_at   | MmugDNA.41724.1 | 3.82  | 3.54  | 0.13 | 0.1  | 1.21  | 0.02191  | 0.040446 | 0.201211 | 0.246223 |
| MmugDNA.41725.1.S1_at   | MmugDNA.41725.1 | 4.33  | 4.1   | 0.02 | 0.09 | 1.17  | 0.007731 | 0.002463 | 0.13671  | 0.073515 |
| MmugDNA.41727.1.S1_at   | MmugDNA.41727.1 | 3.93  | 3.97  | 0.21 | 0.06 | -1.03 | 0.632927 | 0.647741 | 0.820074 | 0.793723 |
| MmugDNA.41729.1.S1_at   | MmugDNA.41729.1 | 7.14  | 7.7   | 0.16 | 0.11 | -1.48 | 0.005908 | 0.119292 | 0.123246 | 0.387799 |
| MmugDNA.4173.1.S1_at    | MmugDNA.4173.1  | 6.57  | 6.03  | 1.19 | 0.24 | 1.45  | 0.366205 | 0.467253 | 0.640626 | 0.677016 |
| MmugDNA.41730.1.S1_at   | MmugDNA.41730.1 | 3.58  | 3.57  | 0.12 | 0.12 | 1.01  | 0.205639 | 0.486921 | 0.503384 | 0.690118 |
| MmugDNA.41733.1.S1_s_at | MmugDNA.41733.1 | 10.39 | 10.61 | 0.07 | 0.12 | -1.16 | 0.048551 | 0.133801 | 0.277767 | 0.405793 |
| MmugDNA.41735.1.S1_at   | MmugDNA.41735.1 | 5.25  | 5.05  | 0.35 | 0.12 | 1.15  | 0.468126 | 0.179491 | 0.713381 | 0.455951 |
| MmugDNA.41736.1.S1_at   | MmugDNA.41736.1 | 4.56  | 4.58  | 0.03 | 0.22 | -1.01 | 0.63393  | 0.224608 | 0.820606 | 0.497613 |
| MmugDNA.41737.1.S1_at   | MmugDNA.41737.1 | 3.75  | 3.32  | 0.57 | 0.11 | 1.34  | 0.197235 | 0.11752  | 0.494351 | 0.385295 |
| MmugDNA.41739.1.S1_at   | MmugDNA.41739.1 | 6.22  | 6.76  | 0.75 | 0.2  | -1.45 | 0.276874 | 0.48036  | 0.568359 | 0.68574  |
| MmugDNA.4174.1.S1_at    | MmugDNA.4174.1  | 7.74  | 7.73  | 0.3  | 0.23 | 1.01  | 0.985615 | 0.954171 | 0.994817 | 0.973959 |
| MmugDNA.41740.1.S1_at   | MmugDNA.41740.1 | 12.61 | 11.79 | 0.1  | 0.13 | 1.76  | 0.002234 | 0.003688 | 0.091055 | 0.086591 |
| MmugDNA.41742.1.S1_at   | MmugDNA.41742.1 | 6.12  | 5.97  | 0.15 | 0.1  | 1.11  | 0.477013 | 0.148361 | 0.71922  | 0.422945 |
| MmugDNA.41743.1.S1_at   | MmugDNA.41743.1 | 8.28  | 8.43  | 0.3  | 0.07 | -1.11 | 0.758072 | 0.579768 | 0.889024 | 0.749284 |
| MmugDNA.41744.1.S1_at   | MmugDNA.41744.1 | 12.12 | 12.38 | 0.05 | 0.07 | -1.2  | 0.007028 | 0.089619 | 0.131283 | 0.343811 |
| MmugDNA.41745.1.S1_at   | MmugDNA.41745.1 | 3.72  | 3.84  | 0.15 | 0.05 | -1.09 | 0.098947 | 0.101557 | 0.369803 | 0.361407 |
| MmugDNA.41746.1.S1_at   | MmugDNA.41746.1 | 5.96  | 6.1   | 0.14 | 0.32 | -1.1  | 0.8342   | 0.160161 | 0.927018 | 0.436296 |
| MmugDNA.41747.1.S1_at   | MmugDNA.41747.1 | 2.62  | 2.67  | 0.21 | 0.21 | -1.04 | 0.499285 | 0.535235 | 0.734113 | 0.720824 |
| MmugDNA.41748.1.S1_at   | MmugDNA.41748.1 | 5.93  | 5.75  | 0.17 | 0.13 | 1.13  | 0.277682 | 0.385159 | 0.569172 | 0.620662 |
| MmugDNA.41749.1.S1_at   | MmugDNA.41749.1 | 3.16  | 3.27  | 0.25 | 0.03 | -1.08 | 0.928034 | 0.907955 | 0.969595 | 0.947889 |
| MmugDNA.4175.1.S1_at    | MmugDNA.4175.1  | 5.37  | 5     | 0.03 | 0.38 | 1.29  | 0.451691 | 0.502261 | 0.702488 | 0.70006  |
| MmugDNA.41751.1.S1_at   | MmugDNA.41751.1 | 5.38  | 5.37  | 0.06 | 0.06 | 1.01  | 0.314209 | 0.406268 | 0.599901 | 0.634225 |
| MmugDNA.41753.1.S1_at   | MmugDNA.41753.1 | 3.67  | 3.65  | 0.04 | 0.1  | 1.01  | 0.207907 | 0.548085 | 0.505752 | 0.728874 |
| MmugDNA.41754.1.S1_at   | MmugDNA.41754.1 | 4.91  | 4.7   | 0.21 | 0.24 | 1.16  | 0.569605 | 0.642824 | 0.778998 | 0.790502 |
| MmugDNA.41755.1.S1_at   | MmugDNA.41755.1 | 6.48  | 5.71  | 0.42 | 0.48 | 1.7   | 0.248432 | 0.248869 | 0.543845 | 0.517951 |
| MmugDNA.41757.1.S1_at   | MmugDNA.41757.1 | 4.97  | 5.02  | 0.26 | 0.2  | -1.03 | 0.624819 | 0.429906 | 0.815077 | 0.651109 |
| MmugDNA.41758.1.S1_at   | MmugDNA.41758.1 | 3.3   | 3.2   | 0.05 | 0.12 | 1.07  | 0.292058 | 0.179444 | 0.581449 | 0.455929 |
| MmugDNA.41759.1.S1_at   | MmugDNA.41759.1 | 8.74  | 8.47  | 0.4  | 0.18 | 1.2   | 0.374644 | 0.404028 | 0.645606 | 0.632558 |

|                         |                 |       |       |      |      |       |          |          |          |          |
|-------------------------|-----------------|-------|-------|------|------|-------|----------|----------|----------|----------|
| MmugDNA.4176.1.S1_at    | MmugDNA.4176.1  | 5.42  | 5.52  | 0.3  | 0.12 | -1.07 | 0.934697 | 0.690823 | 0.972654 | 0.819889 |
| MmugDNA.41760.1.S1_at   | MmugDNA.41760.1 | 6.07  | 6.22  | 0.1  | 0.03 | -1.11 | 0.154527 | 0.360055 | 0.444802 | 0.601204 |
| MmugDNA.41761.1.S1_at   | MmugDNA.41761.1 | 3.8   | 3.84  | 0.14 | 0.06 | -1.02 | 0.766139 | 0.953881 | 0.892703 | 0.973725 |
| MmugDNA.41762.1.S1_at   | MmugDNA.41762.1 | 9.97  | 9.36  | 0.24 | 0.09 | 1.52  | 0.02523  | 0.251436 | 0.211843 | 0.520175 |
| MmugDNA.41763.1.S1_at   | MmugDNA.41763.1 | 6.94  | 6.97  | 0.28 | 0.07 | -1.02 | 0.778803 | 0.930855 | 0.898959 | 0.960732 |
| MmugDNA.41765.1.S1_at   | MmugDNA.41765.1 | 8.77  | 7.24  | 0.24 | 0.08 | 2.88  | 0.000471 | 0.000131 | 0.066782 | 0.029087 |
| MmugDNA.41766.1.S1_at   | MmugDNA.41766.1 | 5.79  | 5.83  | 0.11 | 0.25 | -1.03 | 0.741    | 0.353944 | 0.879955 | 0.596907 |
| MmugDNA.41767.1.S1_at   | MmugDNA.41767.1 | 6.1   | 5.67  | 0.58 | 0.32 | 1.35  | 0.290146 | 0.194923 | 0.579635 | 0.470059 |
| MmugDNA.41769.1.S1_at   | MmugDNA.41769.1 | 2.85  | 2.74  | 0.21 | 0.22 | 1.08  | 0.748198 | 0.874617 | 0.883325 | 0.928837 |
| MmugDNA.4177.1.S1_at    | MmugDNA.4177.1  | 4.7   | 4.73  | 0.08 | 0.09 | -1.02 | 0.378107 | 0.76698  | 0.648422 | 0.864663 |
| MmugDNA.41770.1.S1_at   | MmugDNA.41770.1 | 5.76  | 5.9   | 0.14 | 0.01 | -1.11 | 0.161041 | 0.206929 | 0.452504 | 0.481052 |
| MmugDNA.41771.1.S1_at   | MmugDNA.41771.1 | 7.12  | 6.97  | 0.05 | 0.14 | 1.12  | 0.059055 | 0.423261 | 0.30011  | 0.646277 |
| MmugDNA.41772.1.S1_s_at | MmugDNA.41772.1 | 10.13 | 9.77  | 0.43 | 0.25 | 1.29  | 0.931174 | 0.884361 | 0.971043 | 0.9341   |
| MmugDNA.41775.1.S1_at   | MmugDNA.41775.1 | 8.29  | 8.31  | 0.45 | 0.12 | -1.02 | 0.339031 | 0.22275  | 0.619372 | 0.49569  |
| MmugDNA.41777.1.S1_at   | MmugDNA.41777.1 | 3.29  | 3.31  | 0.37 | 0.23 | -1.01 | 0.698479 | 0.856309 | 0.856592 | 0.917926 |
| MmugDNA.41778.1.S1_at   | MmugDNA.41778.1 | 6.24  | 6.1   | 0.13 | 0.11 | 1.1   | 0.248153 | 0.323805 | 0.543486 | 0.574609 |
| MmugDNA.41779.1.S1_at   | MmugDNA.41779.1 | 4.86  | 4.1   | 0.37 | 0.5  | 1.69  | 0.203727 | 0.202393 | 0.501439 | 0.476763 |
| MmugDNA.41779.1.S1_s_at | MmugDNA.41779.1 | 5.5   | 5.22  | 0.31 | 0.15 | 1.22  | 0.051505 | 0.064402 | 0.284376 | 0.300001 |
| MmugDNA.4178.1.S1_at    | MmugDNA.4178.1  | 3.46  | 3.38  | 0.13 | 0.33 | 1.05  | 0.874108 | 0.981761 | 0.945969 | 0.989984 |
| MmugDNA.41780.1.S1_at   | MmugDNA.41780.1 | 10.41 | 10.96 | 0.22 | 0.18 | -1.47 | 0.046427 | 0.000272 | 0.273253 | 0.033875 |
| MmugDNA.41781.1.S1_at   | MmugDNA.41781.1 | 3.97  | 3.8   | 0.55 | 0.08 | 1.13  | 0.32613  | 0.403089 | 0.60931  | 0.631893 |
| MmugDNA.41784.1.S1_at   | MmugDNA.41784.1 | 3.37  | 3.39  | 0.47 | 0.14 | -1.01 | 0.695483 | 0.930985 | 0.854867 | 0.960769 |
| MmugDNA.41785.1.S1_at   | MmugDNA.41785.1 | 5.07  | 5.15  | 0.2  | 0.24 | -1.06 | 0.656366 | 0.821644 | 0.833745 | 0.897303 |
| MmugDNA.41787.1.S1_at   | MmugDNA.41787.1 | 5.08  | 6.09  | 0.49 | 0.11 | -2.01 | 0.0695   | 0.126055 | 0.322002 | 0.39672  |
| MmugDNA.41788.1.S1_at   | MmugDNA.41788.1 | 4.57  | 4.5   | 0.05 | 0.25 | 1.05  | 0.970274 | 0.030535 | 0.988239 | 0.216711 |
| MmugDNA.41789.1.S1_at   | MmugDNA.41789.1 | 7.95  | 7.28  | 0.14 | 0.16 | 1.59  | 0.005304 | 0.034687 | 0.11776  | 0.230454 |
| MmugDNA.4179.1.S1_at    | MmugDNA.4179.1  | 3.42  | 3.3   | 0.25 | 0.04 | 1.09  | 0.400612 | 0.551127 | 0.665527 | 0.730813 |
| MmugDNA.41790.1.S1_at   | MmugDNA.41790.1 | 12.16 | 12.41 | 0.18 | 0.05 | -1.19 | 0.079786 | 0.005077 | 0.339935 | 0.099077 |
| MmugDNA.41793.1.S1_at   | MmugDNA.41793.1 | 4.48  | 4.51  | 0.44 | 0.1  | -1.02 | 0.899778 | 0.467621 | 0.95742  | 0.677203 |
| MmugDNA.41795.1.S1_at   | MmugDNA.41795.1 | 4.36  | 4.37  | 0.11 | 0.08 | -1    | 0.235861 | 0.386046 | 0.533514 | 0.621296 |
| MmugDNA.41796.1.S1_at   | MmugDNA.41796.1 | 5.14  | 5.19  | 0.35 | 0.15 | -1.03 | 0.340738 | 0.509223 | 0.620859 | 0.704032 |
| MmugDNA.41797.1.S1_at   | MmugDNA.41797.1 | 5.16  | 5.51  | 0.94 | 0.36 | -1.27 | 0.841702 | 0.486824 | 0.930405 | 0.690091 |
| MmugDNA.41798.1.S1_at   | MmugDNA.41798.1 | 5.84  | 5.3   | 0.22 | 0.15 | 1.45  | 0.056436 | 0.142857 | 0.294998 | 0.416786 |
| MmugDNA.4180.1.S1_at    | MmugDNA.4180.1  | 4.16  | 4.29  | 0.06 | 0.32 | -1.09 | 0.556915 | 0.854605 | 0.771968 | 0.917148 |
| MmugDNA.41800.1.S1_at   | MmugDNA.41800.1 | 3.93  | 3.32  | 0.28 | 0.08 | 1.52  | 0.075932 | 0.185572 | 0.333899 | 0.461566 |
| MmugDNA.41801.1.S1_at   | MmugDNA.41801.1 | 3.25  | 3.25  | 0.09 | 0.12 | -1    | 0.869918 | 0.57301  | 0.944045 | 0.74492  |
| MmugDNA.41802.1.S1_at   | MmugDNA.41802.1 | 11.26 | 11.16 | 0.06 | 0.12 | 1.07  | 0.259459 | 0.568882 | 0.553789 | 0.742129 |
| MmugDNA.41803.1.S1_at   | MmugDNA.41803.1 | 5.01  | 4.98  | 0.33 | 0.16 | 1.02  | 0.636491 | 0.770713 | 0.822111 | 0.866807 |
| MmugDNA.41804.1.S1_at   | MmugDNA.41804.1 | 7.78  | 7.58  | 0.34 | 0.36 | 1.15  | 0.582333 | 0.794303 | 0.78718  | 0.881364 |
| MmugDNA.41805.1.S1_at   | MmugDNA.41805.1 | 7.05  | 7     | 0.31 | 0.28 | 1.04  | 0.891818 | 0.074777 | 0.953838 | 0.318527 |
| MmugDNA.41806.1.S1_s_at | MmugDNA.41806.1 | 12.27 | 12.36 | 0.06 | 0.05 | -1.06 | 0.136055 | 0.148032 | 0.420353 | 0.422418 |
| MmugDNA.41807.1.S1_at   | MmugDNA.41807.1 | 12.94 | 13.08 | 0.05 | 0.09 | -1.1  | 0.193207 | 0.343944 | 0.489751 | 0.589617 |
| MmugDNA.41808.1.S1_at   | MmugDNA.41808.1 | 2.88  | 2.99  | 0.1  | 0.08 | -1.07 | 0.194615 | 0.131017 | 0.491247 | 0.403053 |

|                         |                 |       |       |      |      |       |          |          |          |          |
|-------------------------|-----------------|-------|-------|------|------|-------|----------|----------|----------|----------|
| MmugDNA.4181.1.S1_at    | MmugDNA.4181.1  | 7.9   | 7.6   | 0.37 | 0.1  | 1.22  | 0.252794 | 0.074304 | 0.547383 | 0.318046 |
| MmugDNA.41810.1.S1_at   | MmugDNA.41810.1 | 9.41  | 9.1   | 0.35 | 0.02 | 1.24  | 0.131175 | 0.020244 | 0.413871 | 0.178671 |
| MmugDNA.41813.1.S1_at   | MmugDNA.41813.1 | 10.34 | 10.06 | 0.11 | 0.18 | 1.21  | 0.129258 | 0.070831 | 0.411589 | 0.31231  |
| MmugDNA.41814.1.S1_at   | MmugDNA.41814.1 | 7.34  | 7.82  | 0.27 | 0.16 | -1.39 | 0.239569 | 0.289442 | 0.536985 | 0.55046  |
| MmugDNA.41815.1.S1_at   | MmugDNA.41815.1 | 4.1   | 3.97  | 0.22 | 0.04 | 1.1   | 0.815186 | 0.676862 | 0.917477 | 0.811188 |
| MmugDNA.41816.1.S1_at   | MmugDNA.41816.1 | 6.57  | 6.49  | 0.27 | 0.01 | 1.06  | 0.187705 | 0.263026 | 0.48393  | 0.529397 |
| MmugDNA.41817.1.S1_at   | MmugDNA.41817.1 | 7.15  | 7.29  | 0.44 | 0.01 | -1.1  | 0.946119 | 0.006134 | 0.977211 | 0.106665 |
| MmugDNA.4182.1.S1_at    | MmugDNA.4182.1  | 13.54 | 13.72 | 0    | 0.12 | -1.13 | 0.024126 | 0.023618 | 0.208473 | 0.19253  |
| MmugDNA.41820.1.S1_at   | MmugDNA.41820.1 | 6.17  | 6.24  | 0.07 | 0.06 | -1.05 | 0.368818 | 0.079005 | 0.642381 | 0.326018 |
| MmugDNA.41822.1.S1_at   | MmugDNA.41822.1 | 8.88  | 8.7   | 0.19 | 0.11 | 1.14  | 0.155499 | 0.091126 | 0.445869 | 0.345977 |
| MmugDNA.41824.1.S1_s_at | MmugDNA.41824.1 | 5.97  | 6.15  | 0.11 | 0.04 | -1.14 | 0.057532 | 0.018645 | 0.297199 | 0.171648 |
| MmugDNA.41825.1.S1_at   | MmugDNA.41825.1 | 6.33  | 6.64  | 0.04 | 0.17 | -1.24 | 0.03221  | 0.116512 | 0.23342  | 0.383671 |
| MmugDNA.41826.1.S1_at   | MmugDNA.41826.1 | 3.66  | 3.68  | 0.13 | 0.06 | -1.01 | 0.656884 | 0.864822 | 0.834022 | 0.923333 |
| MmugDNA.41827.1.S1_at   | MmugDNA.41827.1 | 8.53  | 8.41  | 0.18 | 0.19 | 1.09  | 0.208589 | 0.379947 | 0.506194 | 0.616659 |
| MmugDNA.41828.1.S1_at   | MmugDNA.41828.1 | 6.33  | 6.25  | 0.25 | 0.09 | 1.06  | 0.666173 | 0.517224 | 0.839554 | 0.709435 |
| MmugDNA.41829.1.S1_at   | MmugDNA.41829.1 | 12.71 | 12.72 | 0.03 | 0.02 | -1.01 | 0.970132 | 0.376477 | 0.988151 | 0.614293 |
| MmugDNA.41830.1.S1_at   | MmugDNA.41830.1 | 4.51  | 4.26  | 0.27 | 0.34 | 1.19  | 0.155981 | 0.101422 | 0.446335 | 0.361202 |
| MmugDNA.41831.1.S1_at   | MmugDNA.41831.1 | 6.32  | 6.61  | 0.25 | 0.23 | -1.22 | 0.362941 | 0.720879 | 0.637611 | 0.838368 |
| MmugDNA.41834.1.S1_at   | MmugDNA.41834.1 | 11.18 | 11.56 | 0.16 | 0.18 | -1.31 | 0.162421 | 0.329293 | 0.454494 | 0.57869  |
| MmugDNA.41836.1.S1_at   | MmugDNA.41836.1 | 8.71  | 7.84  | 0.28 | 0.11 | 1.82  | 0.004804 | 0.004952 | 0.115098 | 0.098015 |
| MmugDNA.41839.1.S1_at   | MmugDNA.41839.1 | 4.66  | 4.67  | 0.2  | 0.18 | -1    | 0.249284 | 0.623357 | 0.544494 | 0.777726 |
| MmugDNA.4184.1.S1_at    | MmugDNA.4184.1  | 11.75 | 11.83 | 0.11 | 0.04 | -1.05 | 0.225584 | 0.275601 | 0.523395 | 0.539837 |
| MmugDNA.41841.1.S1_at   | MmugDNA.41841.1 | 4.09  | 4.26  | 0.08 | 0.03 | -1.12 | 0.050884 | 0.025397 | 0.283216 | 0.199747 |
| MmugDNA.41845.1.S1_at   | MmugDNA.41845.1 | 11.98 | 11.94 | 0.06 | 0.04 | 1.03  | 0.216319 | 0.377683 | 0.514104 | 0.615086 |
| MmugDNA.41845.1.S1_s_at | MmugDNA.41845.1 | 12.2  | 12.24 | 0.04 | 0.02 | -1.03 | 0.917176 | 0.511309 | 0.964746 | 0.705495 |
| MmugDNA.41846.1.S1_at   | MmugDNA.41846.1 | 6.67  | 6.64  | 0.14 | 0.05 | 1.02  | 0.529081 | 0.081437 | 0.754044 | 0.329632 |
| MmugDNA.41847.1.S1_at   | MmugDNA.41847.1 | 5.37  | 5.44  | 0.15 | 0.16 | -1.05 | 0.742925 | 0.245866 | 0.881093 | 0.51552  |
| MmugDNA.41850.1.S1_at   | MmugDNA.41850.1 | 4.93  | 4.54  | 0.21 | 0.07 | 1.32  | 0.037941 | 0.027733 | 0.250592 | 0.207987 |
| MmugDNA.41851.1.S1_at   | MmugDNA.41851.1 | 3.91  | 3.9   | 0.04 | 0.04 | 1     | 0.450106 | 0.945075 | 0.701214 | 0.968834 |
| MmugDNA.41852.1.S1_at   | MmugDNA.41852.1 | 4.59  | 4.52  | 0.1  | 0.09 | 1.05  | 0.187741 | 0.524908 | 0.483978 | 0.714646 |
| MmugDNA.41853.1.S1_at   | MmugDNA.41853.1 | 4.21  | 4.22  | 0.05 | 0.06 | -1.01 | 0.76659  | 0.402868 | 0.892926 | 0.631631 |
| MmugDNA.41854.1.S1_at   | MmugDNA.41854.1 | 3.78  | 3.96  | 0.12 | 0.15 | -1.13 | 0.065101 | 0.085827 | 0.311972 | 0.337901 |
| MmugDNA.41854.1.S1_s_at | MmugDNA.41854.1 | 5.99  | 4.78  | 0.38 | 0.12 | 2.32  | 0.012202 | 0.080473 | 0.160817 | 0.328159 |
| MmugDNA.41855.1.S1_at   | MmugDNA.41855.1 | 9.64  | 10.56 | 0.34 | 0.19 | -1.88 | 0.019252 | 0.026234 | 0.192035 | 0.202965 |
| MmugDNA.41856.1.S1_at   | MmugDNA.41856.1 | 5.83  | 5.75  | 0.48 | 0.05 | 1.06  | 0.773019 | 0.93742  | 0.89602  | 0.964687 |
| MmugDNA.41857.1.S1_at   | MmugDNA.41857.1 | 6.65  | 6.53  | 0.17 | 0.12 | 1.08  | 0.315012 | 0.150264 | 0.600177 | 0.424877 |
| MmugDNA.41859.1.S1_at   | MmugDNA.41859.1 | 11.18 | 11.55 | 0.1  | 0.11 | -1.29 | 0.011935 | 0.003811 | 0.159288 | 0.08794  |
| MmugDNA.4186.1.S1_at    | MmugDNA.4186.1  | 9     | 8.58  | 0.23 | 0.1  | 1.34  | 0.029959 | 0.040021 | 0.22635  | 0.245241 |
| MmugDNA.41860.1.S1_at   | MmugDNA.41860.1 | 7.33  | 7.57  | 0.38 | 0.04 | -1.18 | 0.392918 | 0.38075  | 0.659778 | 0.617396 |
| MmugDNA.41861.1.S1_at   | MmugDNA.41861.1 | 5.22  | 4.99  | 0.28 | 0.22 | 1.17  | 0.136528 | 0.150273 | 0.421143 | 0.424877 |
| MmugDNA.41862.1.S1_at   | MmugDNA.41862.1 | 4.9   | 4.8   | 0.13 | 0.02 | 1.07  | 0.146759 | 0.131027 | 0.434815 | 0.403053 |
| MmugDNA.41864.1.S1_at   | MmugDNA.41864.1 | 3.45  | 3.4   | 0.32 | 0.16 | 1.04  | 0.336478 | 0.413778 | 0.617078 | 0.639771 |
| MmugDNA.41867.1.S1_at   | MmugDNA.41867.1 | 5.18  | 5.12  | 0.27 | 0.02 | 1.05  | 0.234377 | 0.221619 | 0.532479 | 0.494901 |



|                         |                 |       |       |      |      |       |          |          |          |          |
|-------------------------|-----------------|-------|-------|------|------|-------|----------|----------|----------|----------|
| MmugDNA.41869.1.S1_at   | MmugDNA.41869.1 | 5.65  | 6.29  | 0.36 | 0.41 | -1.56 | 0.230476 | 0.198615 | 0.529421 | 0.473391 |
| MmugDNA.4187.1.S1_at    | MmugDNA.4187.1  | 5.54  | 5.59  | 0.16 | 0.08 | -1.04 | 0.860579 | 0.36477  | 0.939526 | 0.605071 |
| MmugDNA.41871.1.S1_at   | MmugDNA.41871.1 | 3.51  | 3.64  | 0.13 | 0.13 | -1.09 | 0.562274 | 0.204285 | 0.774871 | 0.478541 |
| MmugDNA.41872.1.S1_at   | MmugDNA.41872.1 | 10.86 | 10.8  | 0.62 | 0.09 | 1.04  | 0.803091 | 0.070249 | 0.911652 | 0.311287 |
| MmugDNA.41873.1.S1_at   | MmugDNA.41873.1 | 5.18  | 5     | 0.39 | 0.08 | 1.13  | 0.16048  | 0.01422  | 0.452011 | 0.152283 |
| MmugDNA.41874.1.S1_at   | MmugDNA.41874.1 | 4.15  | 4.15  | 0.02 | 0.07 | 1     | 0.51985  | 0.48856  | 0.748277 | 0.691222 |
| MmugDNA.41875.1.S1_at   | MmugDNA.41875.1 | 8.77  | 9.38  | 0.2  | 0.12 | -1.52 | 0.017165 | 0.000671 | 0.184254 | 0.04413  |
| MmugDNA.41876.1.S1_at   | MmugDNA.41876.1 | 10.05 | 9.46  | 0.36 | 0.21 | 1.51  | 0.058195 | 0.019455 | 0.298273 | 0.175136 |
| MmugDNA.41877.1.S1_at   | MmugDNA.41877.1 | 3.63  | 3.72  | 0.11 | 0.14 | -1.06 | 0.972071 | 0.373394 | 0.988792 | 0.61221  |
| MmugDNA.41878.1.S1_at   | MmugDNA.41878.1 | 3.86  | 4.07  | 0.1  | 0.24 | -1.15 | 0.435019 | 0.60855  | 0.690214 | 0.767127 |
| MmugDNA.41879.1.S1_at   | MmugDNA.41879.1 | 12.74 | 12.74 | 0.01 | 0.15 | 1     | 0.423084 | 0.637608 | 0.681133 | 0.787067 |
| MmugDNA.41880.1.S1_at   | MmugDNA.41880.1 | 7.6   | 7.37  | 0.29 | 0.25 | 1.17  | 0.375588 | 0.191417 | 0.646358 | 0.466776 |
| MmugDNA.41881.1.S1_at   | MmugDNA.41881.1 | 4.49  | 4.45  | 0.35 | 0.09 | 1.03  | 0.323684 | 0.327031 | 0.607438 | 0.577033 |
| MmugDNA.41883.1.S1_at   | MmugDNA.41883.1 | 7.2   | 7.54  | 0.2  | 0.3  | -1.27 | 0.205807 | 0.27159  | 0.503593 | 0.536577 |
| MmugDNA.29591.1.S1_s_at | MmugDNA.29591.1 | 3.61  | 3.5   | 0.12 | 0.06 | 1.08  | 0.616608 | 0.744806 | 0.809561 | 0.852198 |
| MmugDNA.41885.1.S1_at   | MmugDNA.41885.1 | 5.57  | 5.54  | 0.27 | 0.08 | 1.02  | 0.747245 | 0.926509 | 0.882955 | 0.958312 |
| MmugDNA.41886.1.S1_at   | MmugDNA.41886.1 | 7     | 7.19  | 0.54 | 0.14 | -1.14 | 0.760682 | 0.077558 | 0.890308 | 0.323421 |
| MmugDNA.41888.1.S1_at   | MmugDNA.41888.1 | 4.1   | 6.08  | 0.37 | 0.18 | -3.92 | 0.001113 | 0.003721 | 0.077306 | 0.086946 |
| MmugDNA.41889.1.S1_at   | MmugDNA.41889.1 | 7.68  | 7.33  | 0.31 | 0.06 | 1.28  | 0.105735 | 0.089653 | 0.379811 | 0.343842 |
| MmugDNA.4189.1.S1_at    | MmugDNA.4189.1  | 10.59 | 10.47 | 0.12 | 0.05 | 1.09  | 0.308384 | 0.225722 | 0.595031 | 0.498159 |
| MmugDNA.41891.1.S1_at   | MmugDNA.41891.1 | 4.82  | 4.78  | 0.15 | 0.02 | 1.03  | 0.827757 | 0.18207  | 0.923717 | 0.45857  |
| MmugDNA.41892.1.S1_at   | MmugDNA.41892.1 | 8.48  | 8.65  | 0.16 | 0.11 | -1.13 | 0.058934 | 0.373718 | 0.299917 | 0.612403 |
| MmugDNA.41893.1.S1_at   | MmugDNA.41893.1 | 4.15  | 4.15  | 0.1  | 0.22 | -1    | 0.856345 | 0.773732 | 0.937477 | 0.868448 |
| MmugDNA.41894.1.S1_at   | MmugDNA.41894.1 | 3.86  | 3.76  | 0.02 | 0.06 | 1.07  | 0.074529 | 0.069041 | 0.331249 | 0.309017 |
| MmugDNA.41895.1.S1_at   | MmugDNA.41895.1 | 11.7  | 11.73 | 0.17 | 0.03 | -1.02 | 0.235531 | 0.190035 | 0.533339 | 0.465661 |
| MmugDNA.41896.1.S1_at   | MmugDNA.41896.1 | 12.5  | 12.42 | 0.19 | 0.05 | 1.06  | 0.367146 | 0.199569 | 0.64128  | 0.474208 |
| MmugDNA.41896.1.S1_s_at | MmugDNA.41896.1 | 11.71 | 11.25 | 0.2  | 0.03 | 1.37  | 0.034518 | 0.057225 | 0.24039  | 0.285059 |
| MmugDNA.41897.1.S1_at   | MmugDNA.41897.1 | 3.19  | 3.07  | 0.09 | 0.11 | 1.09  | 0.147515 | 0.260507 | 0.435443 | 0.527026 |
| MmugDNA.41898.1.S1_at   | MmugDNA.41898.1 | 4.49  | 4.31  | 0.54 | 0.12 | 1.13  | 0.196265 | 0.168812 | 0.493346 | 0.445458 |
| MmugDNA.41899.1.S1_at   | MmugDNA.41899.1 | 9.14  | 8.17  | 0.65 | 0.17 | 1.96  | 0.050125 | 0.048574 | 0.281629 | 0.265572 |
| MmugDNA.419.1.S1_at     | MmugDNA.419.1   | 3.75  | 3.74  | 0.06 | 0.09 | 1     | 0.589679 | 0.252668 | 0.791665 | 0.521174 |
| MmugDNA.37696.1.S1_s_at | MmugDNA.37696.1 | 7.99  | 9.43  | 0.51 | 0.04 | -2.71 | 0.009873 | 0.153254 | 0.148832 | 0.428077 |
| MmugDNA.41901.1.S1_at   | MmugDNA.41901.1 | 5     | 5.46  | 0.31 | 0.1  | -1.38 | 0.142353 | 0.172855 | 0.428351 | 0.449424 |
| MmugDNA.41902.1.S1_at   | MmugDNA.41902.1 | 6.79  | 6.86  | 0.3  | 0.03 | -1.05 | 0.801637 | 0.652345 | 0.910974 | 0.796688 |
| MmugDNA.41903.1.S1_at   | MmugDNA.41903.1 | 9.51  | 8.56  | 0.39 | 0.14 | 1.93  | 0.026219 | 0.01316  | 0.214951 | 0.147338 |
| MmugDNA.41904.1.S1_at   | MmugDNA.41904.1 | 5.24  | 5.88  | 0.26 | 0.08 | -1.56 | 0.01716  | 0.073698 | 0.184254 | 0.317051 |
| MmugDNA.41905.1.S1_at   | MmugDNA.41905.1 | 6.81  | 6.22  | 0.3  | 0.12 | 1.5   | 0.075703 | 0.097667 | 0.33345  | 0.355554 |
| MmugDNA.41906.1.S1_at   | MmugDNA.41906.1 | 7.59  | 7.51  | 0.29 | 0.13 | 1.05  | 0.334704 | 0.150828 | 0.615791 | 0.425346 |
| MmugDNA.41907.1.S1_at   | MmugDNA.41907.1 | 7.33  | 7.81  | 0.34 | 0.07 | -1.4  | 0.069287 | 0.021398 | 0.321418 | 0.183193 |
| MmugDNA.41908.1.S1_at   | MmugDNA.41908.1 | 4.76  | 4.72  | 0.03 | 0.15 | 1.03  | 0.254887 | 0.311552 | 0.549392 | 0.566532 |
| MmugDNA.4191.1.S1_at    | MmugDNA.4191.1  | 4.56  | 4.53  | 0.25 | 0.04 | 1.02  | 0.569317 | 0.772994 | 0.778786 | 0.867995 |
| MmugDNA.41910.1.S1_at   | MmugDNA.41910.1 | 3.88  | 4.17  | 0.16 | 0.22 | -1.22 | 0.345025 | 0.559371 | 0.624093 | 0.736242 |
| MmugDNA.41911.1.S1_at   | MmugDNA.41911.1 | 6.52  | 5.6   | 0.57 | 0.35 | 1.89  | 0.151306 | 0.216469 | 0.440914 | 0.490084 |

|                         |                 |       |       |      |      |       |          |          |          |          |
|-------------------------|-----------------|-------|-------|------|------|-------|----------|----------|----------|----------|
| MmugDNA.41915.1.S1_at   | MmugDNA.41915.1 | 6.39  | 6.52  | 0.27 | 0.07 | -1.1  | 0.162578 | 0.214078 | 0.454561 | 0.487645 |
| MmugDNA.41916.1.S1_at   | MmugDNA.41916.1 | 2.93  | 3     | 0.07 | 0.13 | -1.05 | 0.469614 | 0.420392 | 0.714298 | 0.644099 |
| MmugDNA.41916.1.S1_s_at | MmugDNA.41916.1 | 3.16  | 3.1   | 0.17 | 0.05 | 1.05  | 0.72213  | 0.541153 | 0.869249 | 0.724768 |
| MmugDNA.41917.1.S1_at   | MmugDNA.41917.1 | 4.06  | 4.08  | 0.07 | 0.22 | -1.01 | 0.670305 | 0.729778 | 0.841785 | 0.843679 |
| MmugDNA.41918.1.S1_at   | MmugDNA.41918.1 | 7.83  | 7.37  | 1.04 | 0.31 | 1.37  | 0.433136 | 0.141236 | 0.688757 | 0.414749 |
| MmugDNA.41919.1.S1_at   | MmugDNA.41919.1 | 7.51  | 7.44  | 0.11 | 0.01 | 1.05  | 0.769505 | 0.54538  | 0.894266 | 0.727517 |
| MmugDNA.41920.1.S1_at   | MmugDNA.41920.1 | 4.13  | 4.08  | 0.4  | 0.09 | 1.04  | 0.653663 | 0.321243 | 0.832332 | 0.573152 |
| MmugDNA.41921.1.S1_at   | MmugDNA.41921.1 | 6.71  | 6.69  | 0.1  | 0.1  | 1.01  | 0.905646 | 0.313897 | 0.960065 | 0.568094 |
| MmugDNA.41923.1.S1_at   | MmugDNA.41923.1 | 9.39  | 8.95  | 0.13 | 0.09 | 1.36  | 0.016061 | 0.008008 | 0.179245 | 0.118976 |
| MmugDNA.41924.1.S1_at   | MmugDNA.41924.1 | 3.39  | 3.39  | 0.02 | 0.03 | 1     | 0.791427 | 0.112309 | 0.905298 | 0.377592 |
| MmugDNA.41925.1.S1_at   | MmugDNA.41925.1 | 5.06  | 4.71  | 0.31 | 0.39 | 1.27  | 0.686119 | 0.080054 | 0.850502 | 0.327429 |
| MmugDNA.41927.1.S1_at   | MmugDNA.41927.1 | 5.55  | 5.67  | 0.12 | 0.05 | -1.08 | 0.214984 | 0.329862 | 0.512613 | 0.578874 |
| MmugDNA.41928.1.S1_at   | MmugDNA.41928.1 | 9.4   | 8.98  | 0.17 | 0.11 | 1.34  | 0.026833 | 0.00467  | 0.216925 | 0.095314 |
| MmugDNA.41929.1.S1_at   | MmugDNA.41929.1 | 7.22  | 4.93  | 1.11 | 0.22 | 4.9   | 0.025602 | 0.007219 | 0.212928 | 0.114121 |
| MmugDNA.4193.1.S1_at    | MmugDNA.4193.1  | 3.75  | 3.45  | 0.72 | 0.64 | 1.23  | 0.965485 | 0.502475 | 0.986001 | 0.700192 |
| MmugDNA.41930.1.S1_at   | MmugDNA.41930.1 | 6.97  | 6.77  | 0.2  | 0.14 | 1.15  | 0.173258 | 0.240522 | 0.467457 | 0.511144 |
| MmugDNA.41931.1.S1_at   | MmugDNA.41931.1 | 8.36  | 8.31  | 0.39 | 0.01 | 1.03  | 0.282563 | 0.131227 | 0.573229 | 0.403252 |
| MmugDNA.41932.1.S1_s_at | MmugDNA.41932.1 | 6.67  | 6.53  | 0.41 | 0.08 | 1.1   | 0.544768 | 0.296362 | 0.764258 | 0.555492 |
| MmugDNA.41933.1.S1_at   | MmugDNA.41933.1 | 3.56  | 3.55  | 0.1  | 0.02 | 1.01  | 0.530781 | 0.442532 | 0.75531  | 0.660487 |
| MmugDNA.41935.1.S1_at   | MmugDNA.41935.1 | 6.67  | 6     | 0.36 | 0.6  | 1.59  | 0.400659 | 0.647094 | 0.665527 | 0.793279 |
| MmugDNA.41936.1.S1_at   | MmugDNA.41936.1 | 5.34  | 5.44  | 0.19 | 0.05 | -1.07 | 0.927443 | 0.347141 | 0.969284 | 0.591815 |
| MmugDNA.41937.1.S1_at   | MmugDNA.41937.1 | 8.57  | 8.48  | 0.67 | 0.05 | 1.06  | 0.287687 | 0.344278 | 0.577473 | 0.589762 |
| MmugDNA.41938.1.S1_at   | MmugDNA.41938.1 | 6.79  | 5.88  | 0.15 | 0.03 | 1.88  | 0.00039  | 0.000365 | 0.062519 | 0.037273 |
| MmugDNA.41939.1.S1_at   | MmugDNA.41939.1 | 7.33  | 7.59  | 0.53 | 0.23 | -1.2  | 0.172554 | 0.53565  | 0.466621 | 0.721199 |
| MmugDNA.4194.1.S1_at    | MmugDNA.4194.1  | 4.93  | 6.26  | 0.37 | 0.71 | -2.52 | 0.046604 | 0.106113 | 0.273564 | 0.368498 |
| MmugDNA.41940.1.S1_at   | MmugDNA.41940.1 | 6.67  | 6.73  | 0.17 | 0.03 | -1.05 | 0.497578 | 0.112121 | 0.733204 | 0.377398 |
| MmugDNA.41941.1.S1_at   | MmugDNA.41941.1 | 7.01  | 7.01  | 0.11 | 0.14 | 1     | 0.506041 | 0.660758 | 0.738797 | 0.801537 |
| MmugDNA.41942.1.S1_at   | MmugDNA.41942.1 | 3.35  | 3.58  | 1.29 | 0.65 | -1.17 | 0.604085 | 0.590331 | 0.801436 | 0.756166 |
| MmugDNA.41943.1.S1_at   | MmugDNA.41943.1 | 7.99  | 7.7   | 0.21 | 0.15 | 1.22  | 0.576432 | 0.59191  | 0.783208 | 0.757386 |
| MmugDNA.41944.1.S1_at   | MmugDNA.41944.1 | 5.85  | 5.16  | 0.31 | 0.28 | 1.61  | 0.049856 | 0.0697   | 0.280954 | 0.310164 |
| MmugDNA.41945.1.S1_at   | MmugDNA.41945.1 | 5.92  | 5.92  | 0.03 | 0.08 | 1     | 0.265922 | 0.784193 | 0.5585   | 0.875049 |
| MmugDNA.41945.1.S1_s_at | MmugDNA.41945.1 | 9.9   | 10.08 | 0.21 | 0.14 | -1.13 | 0.576193 | 0.697418 | 0.783141 | 0.824183 |
| MmugDNA.41947.1.S1_at   | MmugDNA.41947.1 | 3.05  | 3.05  | 0.07 | 0.04 | 1     | 0.95752  | 0.908234 | 0.982581 | 0.948008 |
| MmugDNA.41948.1.S1_at   | MmugDNA.41948.1 | 8.25  | 8.36  | 0.43 | 0.2  | -1.08 | 0.939849 | 0.924218 | 0.9746   | 0.957283 |
| MmugDNA.4195.1.S1_at    | MmugDNA.4195.1  | 10.16 | 9.64  | 0.37 | 0.06 | 1.42  | 0.120994 | 0.143046 | 0.399514 | 0.416922 |
| MmugDNA.41950.1.S1_at   | MmugDNA.41950.1 | 6.17  | 5.61  | 0.4  | 0.22 | 1.47  | 0.098855 | 0.277207 | 0.369716 | 0.541157 |
| MmugDNA.41951.1.S1_at   | MmugDNA.41951.1 | 10.16 | 9.76  | 0.41 | 0.11 | 1.31  | 0.207993 | 0.450111 | 0.505845 | 0.665505 |
| MmugDNA.41951.1.S1_s_at | MmugDNA.41951.1 | 12.41 | 11.87 | 0.37 | 0.11 | 1.45  | 0.25317  | 0.447411 | 0.547579 | 0.66348  |
| MmugDNA.41952.1.S1_at   | MmugDNA.41952.1 | 5.7   | 5.45  | 0.23 | 0.28 | 1.19  | 0.174829 | 0.321677 | 0.469082 | 0.573346 |
| MmugDNA.41954.1.S1_at   | MmugDNA.41954.1 | 6.75  | 6.64  | 0.4  | 0.09 | 1.07  | 0.298687 | 0.400914 | 0.586964 | 0.630658 |
| MmugDNA.41955.1.S1_at   | MmugDNA.41955.1 | 4.61  | 3.33  | 0.75 | 0.66 | 2.42  | 0.459139 | 0.138287 | 0.707406 | 0.411198 |
| MmugDNA.41956.1.S1_at   | MmugDNA.41956.1 | 3.8   | 3.7   | 0.08 | 0.09 | 1.07  | 0.528206 | 0.070346 | 0.753543 | 0.311541 |
| MmugDNA.41957.1.S1_at   | MmugDNA.41957.1 | 12.07 | 11.02 | 0.31 | 0.25 | 2.07  | 0.018335 | 0.009096 | 0.188498 | 0.125944 |

|                         |                 |       |       |      |      |       |          |          |          |          |
|-------------------------|-----------------|-------|-------|------|------|-------|----------|----------|----------|----------|
| MmugDNA.41958.1.S1_at   | MmugDNA.41958.1 | 8.51  | 8.46  | 0.19 | 0.24 | 1.04  | 0.335217 | 0.342511 | 0.616202 | 0.588539 |
| MmugDNA.41959.1.S1_at   | MmugDNA.41959.1 | 9.08  | 9.1   | 0.08 | 0.11 | -1.01 | 0.780455 | 0.146477 | 0.899851 | 0.420523 |
| MmugDNA.4196.1.S1_at    | MmugDNA.4196.1  | 4.68  | 4.55  | 0.19 | 0.08 | 1.09  | 0.155673 | 0.502311 | 0.446052 | 0.700078 |
| MmugDNA.41960.1.S1_at   | MmugDNA.41960.1 | 4.64  | 4.62  | 0.09 | 0.13 | 1.01  | 0.400844 | 0.46459  | 0.665577 | 0.675241 |
| MmugDNA.41961.1.S1_at   | MmugDNA.41961.1 | 4.85  | 4.83  | 0.12 | 0.08 | 1.02  | 0.818834 | 0.901863 | 0.919247 | 0.944154 |
| MmugDNA.41962.1.S1_at   | MmugDNA.41962.1 | 6.5   | 6.38  | 0.36 | 0.32 | 1.09  | 0.253452 | 0.363816 | 0.547829 | 0.604189 |
| MmugDNA.41964.1.S1_at   | MmugDNA.41964.1 | 6.76  | 7.08  | 0.41 | 0.12 | -1.25 | 0.196851 | 0.225642 | 0.493996 | 0.498155 |
| MmugDNA.41965.1.S1_at   | MmugDNA.41965.1 | 9.86  | 9.64  | 0.13 | 0.11 | 1.16  | 0.134638 | 0.367239 | 0.418463 | 0.606869 |
| MmugDNA.41967.1.S1_at   | MmugDNA.41967.1 | 4.92  | 5.73  | 0.15 | 0.32 | -1.76 | 0.043216 | 0.053453 | 0.265157 | 0.27685  |
| MmugDNA.41968.1.S1_at   | MmugDNA.41968.1 | 6.87  | 6.72  | 0.12 | 0.05 | 1.1   | 0.166012 | 0.162186 | 0.459032 | 0.43834  |
| MmugDNA.41969.1.S1_at   | MmugDNA.41969.1 | 3.34  | 3.26  | 0.17 | 0.12 | 1.06  | 0.870728 | 0.635046 | 0.94442  | 0.785156 |
| MmugDNA.41970.1.S1_at   | MmugDNA.41970.1 | 3.23  | 3.27  | 0.54 | 0.03 | -1.03 | 0.443054 | 0.618335 | 0.696421 | 0.774009 |
| MmugDNA.41971.1.S1_at   | MmugDNA.41971.1 | 3.18  | 2.96  | 0.55 | 0.07 | 1.17  | 0.186532 | 0.305968 | 0.482692 | 0.562732 |
| MmugDNA.41972.1.S1_at   | MmugDNA.41972.1 | 4.35  | 4.5   | 0.13 | 0.34 | -1.11 | 0.23507  | 0.39701  | 0.533056 | 0.62857  |
| MmugDNA.41973.1.S1_s_at | MmugDNA.41973.1 | 4.78  | 4.49  | 0.06 | 0.23 | 1.22  | 0.315102 | 0.759485 | 0.600283 | 0.860133 |
| MmugDNA.41974.1.S1_at   | MmugDNA.41974.1 | 6.41  | 6.18  | 0.24 | 0.03 | 1.18  | 0.590599 | 0.609274 | 0.791991 | 0.76771  |
| MmugDNA.41975.1.S1_at   | MmugDNA.41975.1 | 6.39  | 6.43  | 0.34 | 0.03 | -1.03 | 0.968707 | 0.790518 | 0.987632 | 0.878895 |
| MmugDNA.41976.1.S1_s_at | MmugDNA.41976.1 | 10.99 | 9.82  | 0.31 | 0.18 | 2.25  | 0.004198 | 0.008262 | 0.110422 | 0.12078  |
| MmugDNA.41977.1.S1_at   | MmugDNA.41977.1 | 5.26  | 5.13  | 0.24 | 0.2  | 1.1   | 0.830766 | 0.879177 | 0.925496 | 0.931052 |
| MmugDNA.41978.1.S1_at   | MmugDNA.41978.1 | 4.31  | 4.28  | 0.22 | 0.06 | 1.02  | 0.968012 | 0.173988 | 0.987324 | 0.450247 |
| MmugDNA.41979.1.S1_at   | MmugDNA.41979.1 | 10.36 | 10.07 | 0.05 | 0.28 | 1.22  | 0.260509 | 0.737839 | 0.554576 | 0.848101 |
| MmugDNA.4198.1.S1_at    | MmugDNA.4198.1  | 6.44  | 6.31  | 0.29 | 0.08 | 1.09  | 0.444817 | 0.548912 | 0.697566 | 0.729486 |
| MmugDNA.41980.1.S1_at   | MmugDNA.41980.1 | 3.01  | 3.06  | 0.21 | 0.1  | -1.03 | 0.88145  | 0.790465 | 0.949601 | 0.878876 |
| MmugDNA.41981.1.S1_at   | MmugDNA.41981.1 | 7.22  | 7.27  | 0.14 | 0.03 | -1.04 | 0.867865 | 0.092177 | 0.943095 | 0.347894 |
| MmugDNA.41982.1.S1_at   | MmugDNA.41982.1 | 5.48  | 5.56  | 0.12 | 0.16 | -1.06 | 0.955365 | 0.331061 | 0.981711 | 0.579791 |
| MmugDNA.41983.1.S1_at   | MmugDNA.41983.1 | 5.14  | 5.22  | 0.11 | 0.39 | -1.05 | 0.743498 | 0.935504 | 0.88138  | 0.96359  |
| MmugDNA.41985.1.S1_at   | MmugDNA.41985.1 | 5.63  | 5.63  | 0.43 | 0.28 | 1     | 0.338365 | 0.247756 | 0.61869  | 0.517199 |
| MmugDNA.41987.1.S1_at   | MmugDNA.41987.1 | 3.64  | 3.69  | 0.04 | 0.04 | -1.03 | 0.117592 | 0.759949 | 0.39494  | 0.860511 |
| MmugDNA.41988.1.S1_at   | MmugDNA.41988.1 | 9.25  | 8.78  | 0.23 | 0.06 | 1.38  | 0.057871 | 0.181417 | 0.297745 | 0.457923 |
| MmugDNA.41989.1.S1_at   | MmugDNA.41989.1 | 4.24  | 3.42  | 1.01 | 0.13 | 1.76  | 0.181135 | 0.233385 | 0.476426 | 0.504741 |
| MmugDNA.4199.1.S1_at    | MmugDNA.4199.1  | 4.18  | 3.78  | 0.35 | 0.36 | 1.32  | 0.092474 | 0.110831 | 0.360679 | 0.375126 |
| MmugDNA.41990.1.S1_at   | MmugDNA.41990.1 | 6.41  | 6.22  | 0.41 | 0.09 | 1.14  | 0.793202 | 0.422218 | 0.906516 | 0.645588 |
| MmugDNA.41991.1.S1_at   | MmugDNA.41991.1 | 8.42  | 8.38  | 0.21 | 0.12 | 1.03  | 0.491727 | 0.294529 | 0.729361 | 0.554265 |
| MmugDNA.41992.1.S1_at   | MmugDNA.41992.1 | 5.01  | 5.81  | 0.62 | 0.2  | -1.74 | 0.100118 | 0.079077 | 0.37088  | 0.326161 |
| MmugDNA.41993.1.S1_at   | MmugDNA.41993.1 | 10.77 | 11.23 | 0.15 | 0.15 | -1.37 | 0.044904 | 0.043271 | 0.269294 | 0.252793 |
| MmugDNA.41995.1.S1_s_at | MmugDNA.41995.1 | 8.1   | 8.02  | 0.22 | 0.05 | 1.06  | 0.886893 | 0.767126 | 0.951794 | 0.864712 |
| MmugDNA.41996.1.S1_at   | MmugDNA.41996.1 | 3.18  | 3.03  | 0.07 | 0.17 | 1.11  | 0.73952  | 0.624745 | 0.879245 | 0.77888  |
| MmugDNA.41997.1.S1_at   | MmugDNA.41997.1 | 3.29  | 3.21  | 0.32 | 0.14 | 1.05  | 0.729156 | 0.82993  | 0.873447 | 0.902299 |
| MmugDNA.41998.1.S1_at   | MmugDNA.41998.1 | 4.4   | 4.42  | 0.45 | 0.09 | -1.01 | 0.384776 | 0.545487 | 0.653701 | 0.727564 |
| MmugDNA.41999.1.S1_at   | MmugDNA.41999.1 | 4.82  | 4.75  | 0.34 | 0.14 | 1.05  | 0.577539 | 0.812444 | 0.783666 | 0.891649 |
| MmugDNA.42.1.S1_at      | MmugDNA.42.1    | 9.28  | 9.31  | 0.21 | 0.06 | -1.02 | 0.557801 | 0.057691 | 0.772407 | 0.286531 |
| MmugDNA.420.1.S1_at     | MmugDNA.420.1   | 3.42  | 3.24  | 0.1  | 0.06 | 1.13  | 0.129933 | 0.336404 | 0.412108 | 0.583831 |
| MmugDNA.4200.1.S1_at    | MmugDNA.4200.1  | 8.43  | 8.31  | 0.27 | 0.05 | 1.09  | 0.430645 | 0.60062  | 0.686902 | 0.762183 |

|                         |                 |       |       |      |      |       |          |          |          |          |
|-------------------------|-----------------|-------|-------|------|------|-------|----------|----------|----------|----------|
| MmugDNA.42000.1.S1_at   | MmugDNA.42000.1 | 8.3   | 8.4   | 0.17 | 0.11 | -1.07 | 0.446574 | 0.872456 | 0.698757 | 0.927474 |
| MmugDNA.42001.1.S1_at   | MmugDNA.42001.1 | 10.9  | 10.96 | 0.12 | 0.13 | -1.04 | 0.803827 | 0.911666 | 0.911913 | 0.950222 |
| MmugDNA.42002.1.S1_at   | MmugDNA.42002.1 | 6.36  | 6.33  | 0.41 | 0.12 | 1.02  | 0.246719 | 0.364846 | 0.54248  | 0.605139 |
| MmugDNA.42002.1.S1_x_at | MmugDNA.42002.1 | 7.06  | 6.66  | 0.16 | 0.14 | 1.33  | 0.029425 | 0.028486 | 0.2245   | 0.21056  |
| MmugDNA.42003.1.S1_at   | MmugDNA.42003.1 | 7.83  | 7.16  | 0.13 | 0.12 | 1.59  | 0.002874 | 0.000169 | 0.098572 | 0.030511 |
| MmugDNA.42004.1.S1_at   | MmugDNA.42004.1 | 3.72  | 3.86  | 0.14 | 0.02 | -1.1  | 0.154812 | 0.417042 | 0.44505  | 0.641944 |
| MmugDNA.42005.1.S1_at   | MmugDNA.42005.1 | 9.34  | 9.55  | 0.18 | 0.09 | -1.16 | 0.037565 | 0.056081 | 0.249272 | 0.282707 |
| MmugDNA.42007.1.S1_at   | MmugDNA.42007.1 | 6.98  | 7.2   | 0.09 | 0.08 | -1.16 | 0.062968 | 0.041678 | 0.307682 | 0.24887  |
| MmugDNA.42010.1.S1_at   | MmugDNA.42010.1 | 5.66  | 5.51  | 0.6  | 0.35 | 1.11  | 0.292083 | 0.156374 | 0.581449 | 0.431659 |
| MmugDNA.42011.1.S1_at   | MmugDNA.42011.1 | 3.96  | 3.89  | 0.27 | 0.18 | 1.05  | 0.642001 | 0.846492 | 0.825362 | 0.912665 |
| MmugDNA.42012.1.S1_at   | MmugDNA.42012.1 | 6.2   | 6.23  | 0.28 | 0.15 | -1.02 | 0.706557 | 0.017728 | 0.861067 | 0.168367 |
| MmugDNA.42013.1.S1_at   | MmugDNA.42013.1 | 6.05  | 5.58  | 0.15 | 0.18 | 1.39  | 0.048273 | 0.267274 | 0.277027 | 0.532909 |
| MmugDNA.42014.1.S1_at   | MmugDNA.42014.1 | 3.87  | 3.13  | 0.52 | 0.29 | 1.67  | 0.280958 | 0.415099 | 0.571858 | 0.640707 |
| MmugDNA.42017.1.S1_at   | MmugDNA.42017.1 | 3.51  | 3.56  | 0.13 | 0.09 | -1.04 | 0.3604   | 0.663573 | 0.635954 | 0.803017 |
| MmugDNA.4202.1.S1_at    | MmugDNA.4202.1  | 5.98  | 5.89  | 0.3  | 0.27 | 1.07  | 0.481067 | 0.398101 | 0.721792 | 0.629185 |
| MmugDNA.42020.1.S1_at   | MmugDNA.42020.1 | 12.16 | 12.39 | 0.19 | 0.07 | -1.17 | 0.082142 | 0.204251 | 0.3436   | 0.478541 |
| MmugDNA.42021.1.S1_at   | MmugDNA.42021.1 | 12.8  | 12.85 | 0.12 | 0.03 | -1.03 | 0.464296 | 0.619681 | 0.710598 | 0.774876 |
| MmugDNA.42022.1.S1_at   | MmugDNA.42022.1 | 3.82  | 3.59  | 0.32 | 0.15 | 1.17  | 0.259446 | 0.403249 | 0.553789 | 0.631996 |
| MmugDNA.42023.1.S1_at   | MmugDNA.42023.1 | 4.09  | 3.92  | 0.49 | 0.18 | 1.12  | 0.321946 | 0.356506 | 0.606135 | 0.598459 |
| MmugDNA.42024.1.S1_at   | MmugDNA.42024.1 | 12.12 | 12.26 | 0.16 | 0.04 | -1.1  | 0.207186 | 0.48713  | 0.504881 | 0.690277 |
| MmugDNA.42025.1.S1_at   | MmugDNA.42025.1 | 10.87 | 11.1  | 0.13 | 0.07 | -1.17 | 0.237009 | 0.046369 | 0.534591 | 0.259844 |
| MmugDNA.42028.1.S1_at   | MmugDNA.42028.1 | 10.79 | 11.13 | 0.15 | 0.06 | -1.27 | 0.020048 | 0.382705 | 0.195082 | 0.618858 |
| MmugDNA.42029.1.S1_at   | MmugDNA.42029.1 | 3.65  | 3.73  | 0.17 | 0.27 | -1.06 | 0.613056 | 0.71854  | 0.807224 | 0.837072 |
| MmugDNA.42030.1.S1_at   | MmugDNA.42030.1 | 3.91  | 3.9   | 0.07 | 0.22 | 1     | 0.364783 | 0.30383  | 0.63944  | 0.561225 |
| MmugDNA.42031.1.S1_at   | MmugDNA.42031.1 | 5     | 5.07  | 0.19 | 0.03 | -1.05 | 0.8263   | 0.832739 | 0.922907 | 0.904032 |
| MmugDNA.42032.1.S1_at   | MmugDNA.42032.1 | 6.92  | 7.44  | 0.34 | 0.16 | -1.44 | 0.039932 | 0.00894  | 0.256628 | 0.125013 |
| MmugDNA.42033.1.S1_at   | MmugDNA.42033.1 | 4.77  | 4.52  | 0.71 | 0.16 | 1.19  | 0.60977  | 0.258293 | 0.805498 | 0.525596 |
| MmugDNA.42034.1.S1_at   | MmugDNA.42034.1 | 5.59  | 5.63  | 0.26 | 0.06 | -1.03 | 0.689826 | 0.747337 | 0.851884 | 0.853149 |
| MmugDNA.42035.1.S1_at   | MmugDNA.42035.1 | 4.13  | 3.04  | 0.76 | 0.18 | 2.14  | 0.284056 | 0.463053 | 0.574388 | 0.674193 |
| MmugDNA.42037.1.S1_at   | MmugDNA.42037.1 | 6.42  | 6.01  | 1.29 | 0.5  | 1.34  | 0.428923 | 0.489063 | 0.685557 | 0.691588 |
| MmugDNA.42038.1.S1_at   | MmugDNA.42038.1 | 4.61  | 4.79  | 0.18 | 0.4  | -1.14 | 0.77562  | 0.865612 | 0.89744  | 0.923598 |
| MmugDNA.42039.1.S1_at   | MmugDNA.42039.1 | 4.16  | 3.64  | 0.47 | 0.26 | 1.43  | 0.250463 | 0.183412 | 0.54512  | 0.459553 |
| MmugDNA.4204.1.S1_at    | MmugDNA.4204.1  | 5.87  | 5.58  | 0.55 | 0.18 | 1.22  | 0.517308 | 0.476074 | 0.746526 | 0.682475 |
| MmugDNA.42040.1.S1_at   | MmugDNA.42040.1 | 4.61  | 6.55  | 0.81 | 0.32 | -3.85 | 0.040379 | 0.033618 | 0.257247 | 0.227006 |
| MmugDNA.42041.1.S1_at   | MmugDNA.42041.1 | 6.81  | 7.06  | 0.7  | 0.04 | -1.19 | 0.469171 | 0.774543 | 0.713994 | 0.868769 |
| MmugDNA.42042.1.S1_at   | MmugDNA.42042.1 | 3.67  | 3.6   | 0.06 | 0.11 | 1.04  | 0.349858 | 0.11252  | 0.627596 | 0.377914 |
| MmugDNA.42043.1.S1_at   | MmugDNA.42043.1 | 5.32  | 5.41  | 0.16 | 0.05 | -1.07 | 0.278145 | 0.47883  | 0.569485 | 0.684739 |
| MmugDNA.42045.1.S1_at   | MmugDNA.42045.1 | 12.29 | 11.91 | 0.31 | 0.07 | 1.3   | 0.057432 | 0.067057 | 0.296977 | 0.304872 |
| MmugDNA.42047.1.S1_at   | MmugDNA.42047.1 | 6.2   | 6.08  | 0.29 | 0.14 | 1.09  | 0.607136 | 0.520836 | 0.803551 | 0.711942 |
| MmugDNA.42048.1.S1_at   | MmugDNA.42048.1 | 3.3   | 3.12  | 0.13 | 0.08 | 1.13  | 0.216951 | 0.299137 | 0.514819 | 0.557663 |
| MmugDNA.4205.1.S1_at    | MmugDNA.4205.1  | 6.36  | 6.29  | 0.15 | 0.21 | 1.05  | 0.587254 | 0.46648  | 0.790419 | 0.676333 |
| MmugDNA.42050.1.S1_at   | MmugDNA.42050.1 | 9.69  | 9.03  | 0.28 | 0.04 | 1.58  | 0.044121 | 0.013384 | 0.26718  | 0.14827  |
| MmugDNA.42052.1.S1_at   | MmugDNA.42052.1 | 5.08  | 5.11  | 0.52 | 0.09 | -1.02 | 0.418755 | 0.448308 | 0.678606 | 0.664195 |

|                         |                 |       |       |      |      |       |          |          |          |          |
|-------------------------|-----------------|-------|-------|------|------|-------|----------|----------|----------|----------|
| MmugDNA.42052.1.S1_s_at | MmugDNA.42052.1 | 6.56  | 6.4   | 0.38 | 0.13 | 1.11  | 0.19042  | 0.250555 | 0.486753 | 0.519395 |
| MmugDNA.42053.1.S1_at   | MmugDNA.42053.1 | 5.88  | 5.24  | 0.69 | 0.49 | 1.57  | 0.232764 | 0.331629 | 0.531068 | 0.580208 |
| MmugDNA.42054.1.S1_at   | MmugDNA.42054.1 | 4.86  | 4.97  | 0.18 | 0.04 | -1.08 | 0.180138 | 0.074283 | 0.475236 | 0.318046 |
| MmugDNA.42055.1.S1_at   | MmugDNA.42055.1 | 6.38  | 6.23  | 0.16 | 0.07 | 1.11  | 0.134124 | 0.05927  | 0.417578 | 0.29047  |
| MmugDNA.42056.1.S1_at   | MmugDNA.42056.1 | 3.06  | 2.96  | 0.07 | 0.06 | 1.07  | 0.374966 | 0.306835 | 0.645792 | 0.563399 |
| MmugDNA.42057.1.S1_at   | MmugDNA.42057.1 | 6.99  | 7.55  | 0.58 | 0.46 | -1.48 | 0.419617 | 0.030816 | 0.678954 | 0.217376 |
| MmugDNA.42059.1.S1_at   | MmugDNA.42059.1 | 6.66  | 5.85  | 0.07 | 0.7  | 1.75  | 0.120917 | 0.079698 | 0.399442 | 0.326981 |
| MmugDNA.4206.1.S1_at    | MmugDNA.4206.1  | 9     | 9.02  | 0.07 | 0.1  | -1.01 | 0.873146 | 0.552178 | 0.945586 | 0.73155  |
| MmugDNA.42060.1.S1_at   | MmugDNA.42060.1 | 5.93  | 6.03  | 0.2  | 0.24 | -1.08 | 0.430321 | 0.399742 | 0.686627 | 0.629951 |
| MmugDNA.42061.1.S1_at   | MmugDNA.42061.1 | 3.56  | 3.31  | 0.82 | 0.25 | 1.2   | 0.218113 | 0.220873 | 0.51594  | 0.494262 |
| MmugDNA.42062.1.S1_at   | MmugDNA.42062.1 | 10.44 | 9.61  | 0.17 | 0.28 | 1.79  | 0.008434 | 0.004872 | 0.140955 | 0.097453 |
| MmugDNA.42063.1.S1_at   | MmugDNA.42063.1 | 3.28  | 3.37  | 0.17 | 0.27 | -1.07 | 0.772964 | 0.900171 | 0.896007 | 0.943311 |
| MmugDNA.42066.1.S1_at   | MmugDNA.42066.1 | 4.88  | 4.82  | 0.08 | 0.67 | 1.04  | 0.506849 | 0.620538 | 0.739358 | 0.77547  |
| MmugDNA.42067.1.S1_at   | MmugDNA.42067.1 | 8.14  | 8.3   | 0.2  | 0.28 | -1.11 | 0.246737 | 0.00311  | 0.54248  | 0.081305 |
| MmugDNA.42068.1.S1_at   | MmugDNA.42068.1 | 9.79  | 9.2   | 0.15 | 0.05 | 1.51  | 0.001828 | 0.049859 | 0.086456 | 0.268413 |
| MmugDNA.4207.1.S1_at    | MmugDNA.4207.1  | 11.4  | 11.44 | 0.06 | 0.02 | -1.02 | 0.189257 | 0.212698 | 0.485811 | 0.486681 |
| MmugDNA.42072.1.S1_at   | MmugDNA.42072.1 | 5.89  | 5.7   | 0.03 | 0.13 | 1.14  | 0.061557 | 0.027408 | 0.304701 | 0.206752 |
| MmugDNA.42073.1.S1_at   | MmugDNA.42073.1 | 6.13  | 6.97  | 0.55 | 0.15 | -1.79 | 0.134089 | 0.216735 | 0.417577 | 0.490311 |
| MmugDNA.42074.1.S1_at   | MmugDNA.42074.1 | 5.18  | 5.14  | 0.18 | 0.08 | 1.03  | 0.980877 | 0.116953 | 0.992889 | 0.384343 |
| MmugDNA.42075.1.S1_at   | MmugDNA.42075.1 | 3.01  | 3.01  | 0.01 | 0    | -1    | 0.249966 | 0.091784 | 0.544859 | 0.346977 |
| MmugDNA.42076.1.S1_at   | MmugDNA.42076.1 | 3.15  | 3.06  | 0.13 | 0.14 | 1.06  | 0.210816 | 0.653493 | 0.50843  | 0.797464 |
| MmugDNA.42077.1.S1_at   | MmugDNA.42077.1 | 4.55  | 4.54  | 0.14 | 0.13 | 1.01  | 0.887516 | 0.433833 | 0.951977 | 0.654032 |
| MmugDNA.42078.1.S1_at   | MmugDNA.42078.1 | 8.13  | 8.2   | 0.51 | 0.26 | -1.05 | 0.580665 | 0.846138 | 0.786011 | 0.912395 |
| MmugDNA.42079.1.S1_at   | MmugDNA.42079.1 | 3.36  | 3.88  | 0.48 | 0.36 | -1.43 | 0.557859 | 0.640366 | 0.772446 | 0.788874 |
| MmugDNA.42080.1.S1_at   | MmugDNA.42080.1 | 4.3   | 4.31  | 0.11 | 0.12 | -1.01 | 0.361674 | 0.445632 | 0.637014 | 0.662468 |
| MmugDNA.42081.1.S1_at   | MmugDNA.42081.1 | 3.38  | 3.39  | 0.12 | 0.07 | -1    | 0.668369 | 0.877722 | 0.840809 | 0.930219 |
| MmugDNA.42082.1.S1_at   | MmugDNA.42082.1 | 4.23  | 4.34  | 0.08 | 0.27 | -1.08 | 0.421746 | 0.630189 | 0.680117 | 0.782181 |
| MmugDNA.42083.1.S1_at   | MmugDNA.42083.1 | 4.91  | 5.51  | 0.36 | 0.09 | -1.52 | 0.141246 | 0.145236 | 0.427147 | 0.419256 |
| MmugDNA.42084.1.S1_at   | MmugDNA.42084.1 | 6.08  | 6.02  | 0.1  | 0.05 | 1.04  | 0.168303 | 0.801312 | 0.461553 | 0.885696 |
| MmugDNA.42085.1.S1_at   | MmugDNA.42085.1 | 4.71  | 4.86  | 0.32 | 0.02 | -1.11 | 0.894285 | 0.888607 | 0.954905 | 0.936492 |
| MmugDNA.42086.1.S1_at   | MmugDNA.42086.1 | 5.94  | 5.86  | 0.52 | 0.12 | 1.06  | 0.654025 | 0.238264 | 0.832505 | 0.508825 |
| MmugDNA.42087.1.S1_at   | MmugDNA.42087.1 | 7.01  | 7.01  | 0.49 | 0.04 | 1     | 0.962874 | 0.854931 | 0.984964 | 0.917368 |
| MmugDNA.42089.1.S1_at   | MmugDNA.42089.1 | 3.26  | 2.97  | 0.18 | 0.09 | 1.22  | 0.076782 | 0.071212 | 0.335141 | 0.31317  |
| MmugDNA.42090.1.S1_at   | MmugDNA.42090.1 | 5.22  | 5.31  | 0.18 | 0.21 | -1.07 | 0.728873 | 0.198976 | 0.873303 | 0.473566 |
| MmugDNA.42091.1.S1_at   | MmugDNA.42091.1 | 8.88  | 8.33  | 0.22 | 0.05 | 1.47  | 0.03732  | 0.003567 | 0.248625 | 0.085525 |
| MmugDNA.42092.1.S1_at   | MmugDNA.42092.1 | 11.78 | 11.63 | 0.21 | 0.05 | 1.11  | 0.10663  | 0.003066 | 0.380851 | 0.080758 |
| MmugDNA.42093.1.S1_at   | MmugDNA.42093.1 | 4.71  | 4.56  | 0.07 | 0.03 | 1.1   | 0.068951 | 0.24462  | 0.320591 | 0.514435 |
| MmugDNA.42094.1.S1_at   | MmugDNA.42094.1 | 4.68  | 4.86  | 0.05 | 0.1  | -1.13 | 0.078999 | 0.07297  | 0.338745 | 0.315986 |
| MmugDNA.42096.1.S1_s_at | MmugDNA.42096.1 | 13.52 | 13.53 | 0.06 | 0.01 | -1.01 | 0.584455 | 0.748867 | 0.788586 | 0.853944 |
| MmugDNA.42097.1.S1_at   | MmugDNA.42097.1 | 8.05  | 7.53  | 0.67 | 0.2  | 1.44  | 0.197745 | 0.215789 | 0.495065 | 0.489536 |
| MmugDNA.42098.1.S1_at   | MmugDNA.42098.1 | 9.77  | 10.62 | 0.35 | 0.13 | -1.8  | 0.01749  | 0.000442 | 0.185974 | 0.038359 |
| MmugDNA.42099.1.S1_at   | MmugDNA.42099.1 | 4.48  | 4.67  | 0.09 | 0.1  | -1.14 | 0.074561 | 0.0902   | 0.331249 | 0.344588 |
| MmugDNA.4210.1.S1_at    | MmugDNA.4210.1  | 3.31  | 3.04  | 0.22 | 0.3  | 1.21  | 0.529098 | 0.611924 | 0.754044 | 0.769636 |

|                         |                 |       |       |      |      |       |          |          |          |          |
|-------------------------|-----------------|-------|-------|------|------|-------|----------|----------|----------|----------|
| MmugDNA.42101.1.S1_at   | MmugDNA.42101.1 | 4.37  | 4.83  | 0.4  | 0.45 | -1.38 | 0.961239 | 0.404586 | 0.984145 | 0.633075 |
| MmugDNA.42102.1.S1_at   | MmugDNA.42102.1 | 10.49 | 10.38 | 0.14 | 0.1  | 1.08  | 0.316497 | 0.011133 | 0.601203 | 0.137297 |
| MmugDNA.42103.1.S1_at   | MmugDNA.42103.1 | 10.69 | 11.09 | 0.17 | 0.27 | -1.32 | 0.143499 | 0.183132 | 0.429994 | 0.459531 |
| MmugDNA.42104.1.S1_at   | MmugDNA.42104.1 | 7.18  | 8.1   | 0.28 | 0.03 | -1.89 | 0.006035 | 0.000683 | 0.124151 | 0.044166 |
| MmugDNA.42105.1.S1_at   | MmugDNA.42105.1 | 11.24 | 11.58 | 0.3  | 0.14 | -1.26 | 0.211211 | 0.358129 | 0.509003 | 0.59966  |
| MmugDNA.42106.1.S1_at   | MmugDNA.42106.1 | 11.17 | 10.89 | 0.21 | 0.07 | 1.22  | 0.068885 | 0.074024 | 0.320479 | 0.317579 |
| MmugDNA.42109.1.S1_at   | MmugDNA.42109.1 | 10.78 | 10.59 | 0.12 | 0.13 | 1.14  | 0.130436 | 0.39761  | 0.412855 | 0.628973 |
| MmugDNA.42110.1.S1_at   | MmugDNA.42110.1 | 6.14  | 6.06  | 0.77 | 0.03 | 1.06  | 0.932673 | 0.50111  | 0.971802 | 0.699443 |
| MmugDNA.42111.1.S1_at   | MmugDNA.42111.1 | 6.92  | 6.24  | 0.2  | 0.16 | 1.61  | 0.012407 | 0.004011 | 0.161664 | 0.089969 |
| MmugDNA.42112.1.S1_at   | MmugDNA.42112.1 | 6.53  | 6.54  | 0.08 | 0    | -1.01 | 0.795228 | 0.110132 | 0.907495 | 0.374244 |
| MmugDNA.42113.1.S1_at   | MmugDNA.42113.1 | 3.22  | 3.21  | 0.13 | 0.07 | 1     | 0.686926 | 0.871459 | 0.850752 | 0.926844 |
| MmugDNA.42114.1.S1_s_at | MmugDNA.42114.1 | 3.23  | 3.14  | 0.17 | 0.1  | 1.07  | 0.490971 | 0.526557 | 0.728974 | 0.71559  |
| MmugDNA.42115.1.S1_at   | MmugDNA.42115.1 | 5.72  | 5.65  | 0.11 | 0.02 | 1.05  | 0.225177 | 0.331622 | 0.523113 | 0.580208 |
| MmugDNA.42116.1.S1_at   | MmugDNA.42116.1 | 5.92  | 8.05  | 0.88 | 0.15 | -4.37 | 0.02047  | 0.250671 | 0.196586 | 0.51941  |
| MmugDNA.42118.1.S1_at   | MmugDNA.42118.1 | 6.62  | 6.5   | 0.31 | 0.28 | 1.08  | 0.718746 | 0.03459  | 0.867276 | 0.230072 |
| MmugDNA.42119.1.S1_at   | MmugDNA.42119.1 | 8.3   | 8.56  | 0.09 | 0.1  | -1.2  | 0.027029 | 0.037712 | 0.217188 | 0.23859  |
| MmugDNA.4212.1.S1_at    | MmugDNA.4212.1  | 2.76  | 2.76  | 0.04 | 0.03 | 1     | 0.519251 | 0.789631 | 0.747956 | 0.87847  |
| MmugDNA.42120.1.S1_at   | MmugDNA.42120.1 | 8.11  | 7.88  | 0.2  | 0.16 | 1.17  | 0.486861 | 0.015669 | 0.725872 | 0.158598 |
| MmugDNA.42121.1.S1_at   | MmugDNA.42121.1 | 7.9   | 7.71  | 0.27 | 0.15 | 1.14  | 0.254042 | 0.264615 | 0.548382 | 0.530605 |
| MmugDNA.42121.1.S1_x_at | MmugDNA.42121.1 | 7.51  | 7.35  | 0.85 | 0.28 | 1.12  | 0.352828 | 0.401769 | 0.630102 | 0.631068 |
| MmugDNA.42122.1.S1_at   | MmugDNA.42122.1 | 3.66  | 3.55  | 0.47 | 0.18 | 1.08  | 0.737065 | 0.590817 | 0.877905 | 0.75648  |
| MmugDNA.42123.1.S1_at   | MmugDNA.42123.1 | 4.33  | 3.83  | 0.46 | 0.11 | 1.42  | 0.419365 | 0.61422  | 0.67873  | 0.771166 |
| MmugDNA.42124.1.S1_at   | MmugDNA.42124.1 | 8.07  | 8.11  | 0.46 | 0.11 | -1.03 | 0.63075  | 0.842593 | 0.818647 | 0.910315 |
| MmugDNA.42125.1.S1_at   | MmugDNA.42125.1 | 4.55  | 4.45  | 0.16 | 0.02 | 1.07  | 0.385873 | 0.548051 | 0.654498 | 0.728874 |
| MmugDNA.42126.1.S1_at   | MmugDNA.42126.1 | 3.53  | 3.38  | 0.27 | 0.26 | 1.11  | 0.931395 | 0.865612 | 0.971098 | 0.923598 |
| MmugDNA.42127.1.S1_at   | MmugDNA.42127.1 | 6.57  | 6.69  | 0.15 | 0.2  | -1.09 | 0.25093  | 0.684403 | 0.54561  | 0.815943 |
| MmugDNA.4213.1.S1_at    | MmugDNA.4213.1  | 2.64  | 2.71  | 0.05 | 0.02 | -1.06 | 0.085187 | 0.715415 | 0.349307 | 0.835033 |
| MmugDNA.42131.1.S1_at   | MmugDNA.42131.1 | 8.66  | 8.21  | 0.19 | 0.11 | 1.36  | 0.034358 | 0.151502 | 0.240004 | 0.426223 |
| MmugDNA.42132.1.S1_at   | MmugDNA.42132.1 | 5.06  | 4.84  | 0.11 | 0.01 | 1.17  | 0.023672 | 0.05505  | 0.207081 | 0.280138 |
| MmugDNA.42133.1.S1_at   | MmugDNA.42133.1 | 4.84  | 4.82  | 0.13 | 0.12 | 1.01  | 0.600876 | 0.429209 | 0.799208 | 0.650726 |
| MmugDNA.42134.1.S1_at   | MmugDNA.42134.1 | 3.72  | 3.72  | 0.06 | 0    | 1     | 0.355621 | 0.465533 | 0.632237 | 0.675802 |
| MmugDNA.42135.1.S1_at   | MmugDNA.42135.1 | 10.27 | 9.1   | 0.1  | 0.23 | 2.25  | 0.001416 | 0.005661 | 0.07964  | 0.103959 |
| MmugDNA.42136.1.S1_at   | MmugDNA.42136.1 | 3.05  | 3.05  | 0.1  | 0.1  | 1     | 0.461377 | 0.664    | 0.708826 | 0.803247 |
| MmugDNA.42137.1.S1_at   | MmugDNA.42137.1 | 7.29  | 7.19  | 0.06 | 0.11 | 1.08  | 0.411533 | 0.152    | 0.673488 | 0.426741 |
| MmugDNA.42138.1.S1_at   | MmugDNA.42138.1 | 7.67  | 7.44  | 0.22 | 0.24 | 1.17  | 0.85335  | 0.424856 | 0.93623  | 0.647319 |
| MmugDNA.4214.1.S1_at    | MmugDNA.4214.1  | 3.69  | 3.57  | 0.36 | 0.18 | 1.09  | 0.927099 | 0.910734 | 0.969143 | 0.949643 |
| MmugDNA.42140.1.S1_at   | MmugDNA.42140.1 | 4.88  | 4.92  | 0.13 | 0.07 | -1.03 | 0.176102 | 0.153846 | 0.470444 | 0.428506 |
| MmugDNA.42142.1.S1_at   | MmugDNA.42142.1 | 6.9   | 6.87  | 0.04 | 0.02 | 1.02  | 0.665167 | 0.051341 | 0.839019 | 0.272052 |
| MmugDNA.42144.1.S1_s_at | MmugDNA.42144.1 | 10.83 | 10.58 | 0.15 | 0.11 | 1.19  | 0.093061 | 0.014281 | 0.361713 | 0.152609 |
| MmugDNA.42145.1.S1_at   | MmugDNA.42145.1 | 6.73  | 6.73  | 0.62 | 0.24 | 1     | 0.271191 | 0.450866 | 0.563122 | 0.665869 |
| MmugDNA.42146.1.S1_at   | MmugDNA.42146.1 | 5.15  | 5.05  | 0.17 | 0.16 | 1.07  | 0.47268  | 0.388934 | 0.716241 | 0.623249 |
| MmugDNA.42148.1.S1_at   | MmugDNA.42148.1 | 6.56  | 7.75  | 0.52 | 0.09 | -2.27 | 0.023487 | 0.020722 | 0.206437 | 0.180645 |
| MmugDNA.30407.1.S1_s_at | MmugDNA.30407.1 | 6.86  | 6.58  | 0.55 | 0.16 | 1.21  | 0.502988 | 0.114618 | 0.736653 | 0.381156 |

|                         |                 |       |       |      |      |       |          |          |          |          |
|-------------------------|-----------------|-------|-------|------|------|-------|----------|----------|----------|----------|
| MmugDNA.42152.1.S1_at   | MmugDNA.42152.1 | 11.8  | 11.51 | 0.07 | 0.04 | 1.23  | 0.001405 | 0.026438 | 0.07964  | 0.203765 |
| MmugDNA.42154.1.S1_at   | MmugDNA.42154.1 | 6.73  | 6.44  | 0.19 | 0.25 | 1.23  | 0.191546 | 0.576906 | 0.487902 | 0.747521 |
| MmugDNA.42155.1.S1_at   | MmugDNA.42155.1 | 5.08  | 4.99  | 0.12 | 0.1  | 1.06  | 0.486525 | 0.748588 | 0.725718 | 0.853719 |
| MmugDNA.42156.1.S1_at   | MmugDNA.42156.1 | 4.04  | 3.91  | 0.19 | 0.35 | 1.09  | 0.93888  | 0.881497 | 0.974191 | 0.932382 |
| MmugDNA.42157.1.S1_at   | MmugDNA.42157.1 | 4.89  | 4.51  | 0.13 | 0.38 | 1.31  | 0.481672 | 0.080662 | 0.722105 | 0.328444 |
| MmugDNA.42158.1.S1_at   | MmugDNA.42158.1 | 8.58  | 8.16  | 0.1  | 0.06 | 1.34  | 0.003011 | 0.081883 | 0.099974 | 0.330339 |
| MmugDNA.42159.1.S1_at   | MmugDNA.42159.1 | 6.65  | 6.62  | 0.08 | 0.03 | 1.02  | 0.373329 | 0.459967 | 0.645118 | 0.671989 |
| MmugDNA.4216.1.S1_at    | MmugDNA.4216.1  | 5.89  | 5.73  | 0.23 | 0.1  | 1.11  | 0.515502 | 0.650579 | 0.745364 | 0.795663 |
| MmugDNA.42160.1.S1_at   | MmugDNA.42160.1 | 8.62  | 8.42  | 0.34 | 0.21 | 1.14  | 0.616889 | 0.955684 | 0.809705 | 0.974899 |
| MmugDNA.42161.1.S1_at   | MmugDNA.42161.1 | 3.79  | 3.59  | 0.21 | 0.24 | 1.15  | 0.782762 | 0.835929 | 0.90089  | 0.906135 |
| MmugDNA.42163.1.S1_at   | MmugDNA.42163.1 | 5.17  | 5.07  | 0.25 | 0.19 | 1.07  | 0.580285 | 0.668472 | 0.785727 | 0.805975 |
| MmugDNA.42164.1.S1_s_at | MmugDNA.42164.1 | 4.89  | 5.26  | 0.11 | 0.12 | -1.29 | 0.017744 | 0.034084 | 0.18688  | 0.228514 |
| MmugDNA.42165.1.S1_at   | MmugDNA.42165.1 | 4.51  | 4.36  | 0.21 | 0.07 | 1.11  | 0.58887  | 0.778781 | 0.791302 | 0.871617 |
| MmugDNA.42166.1.S1_at   | MmugDNA.42166.1 | 7.57  | 7.61  | 0.32 | 0.29 | -1.03 | 0.191742 | 0.041153 | 0.488196 | 0.247702 |
| MmugDNA.42167.1.S1_at   | MmugDNA.42167.1 | 4.72  | 4.65  | 0    | 0.06 | 1.05  | 0.126611 | 0.409311 | 0.408002 | 0.636437 |
| MmugDNA.42168.1.S1_at   | MmugDNA.42168.1 | 3.57  | 3.59  | 0.16 | 0.1  | -1.01 | 0.649807 | 0.508014 | 0.829934 | 0.703358 |
| MmugDNA.42169.1.S1_at   | MmugDNA.42169.1 | 7.12  | 6.99  | 0.09 | 0.11 | 1.09  | 0.10174  | 0.013142 | 0.373208 | 0.147338 |
| MmugDNA.4217.1.S1_at    | MmugDNA.4217.1  | 3.58  | 3.5   | 0.01 | 0.1  | 1.06  | 0.761661 | 0.713418 | 0.890644 | 0.833698 |
| MmugDNA.42170.1.S1_at   | MmugDNA.42170.1 | 4.57  | 4.63  | 1.09 | 0.51 | -1.04 | 0.625009 | 0.706191 | 0.815146 | 0.829634 |
| MmugDNA.42171.1.S1_at   | MmugDNA.42171.1 | 5.23  | 5.28  | 0.39 | 0.03 | -1.04 | 0.509178 | 0.677801 | 0.740889 | 0.811816 |
| MmugDNA.42172.1.S1_at   | MmugDNA.42172.1 | 5.42  | 5.35  | 0.24 | 0.14 | 1.05  | 0.673013 | 0.659578 | 0.84348  | 0.800802 |
| MmugDNA.42173.1.S1_at   | MmugDNA.42173.1 | 5.19  | 5.01  | 0.18 | 0.22 | 1.13  | 0.296902 | 0.484429 | 0.585528 | 0.688478 |
| MmugDNA.42176.1.S1_at   | MmugDNA.42176.1 | 3.66  | 3.9   | 0.35 | 0.42 | -1.18 | 0.780923 | 0.51411  | 0.900006 | 0.707434 |
| MmugDNA.42178.1.S1_at   | MmugDNA.42178.1 | 6.18  | 6.17  | 0.17 | 0.03 | 1.01  | 0.71938  | 0.439802 | 0.867651 | 0.658439 |
| MmugDNA.42179.1.S1_at   | MmugDNA.42179.1 | 5.54  | 5.45  | 0.08 | 0.1  | 1.07  | 0.273963 | 0.217858 | 0.565987 | 0.491406 |
| MmugDNA.4218.1.S1_at    | MmugDNA.4218.1  | 9.37  | 9.41  | 0.25 | 0.06 | -1.03 | 0.672781 | 0.965664 | 0.843387 | 0.980751 |
| MmugDNA.42180.1.S1_at   | MmugDNA.42180.1 | 7.11  | 7.08  | 0.18 | 0.02 | 1.02  | 0.556346 | 0.421478 | 0.771647 | 0.64509  |
| MmugDNA.42182.1.S1_at   | MmugDNA.42182.1 | 11.04 | 11.68 | 0.16 | 0.16 | -1.57 | 0.022408 | 0.095927 | 0.202983 | 0.353204 |
| MmugDNA.42183.1.S1_at   | MmugDNA.42183.1 | 6.18  | 6.19  | 0.23 | 0.1  | -1.01 | 0.368538 | 0.312736 | 0.642226 | 0.567299 |
| MmugDNA.42184.1.S1_at   | MmugDNA.42184.1 | 9.1   | 9.4   | 0.19 | 0.29 | -1.23 | 0.284559 | 0.545981 | 0.574495 | 0.727708 |
| MmugDNA.42185.1.S1_at   | MmugDNA.42185.1 | 6.11  | 6.01  | 1.08 | 0.42 | 1.07  | 0.953657 | 0.290967 | 0.981026 | 0.551525 |
| MmugDNA.42187.1.S1_at   | MmugDNA.42187.1 | 7.54  | 7.56  | 0.1  | 0.28 | -1.01 | 0.801801 | 0.596081 | 0.911061 | 0.759339 |
| MmugDNA.42188.1.S1_at   | MmugDNA.42188.1 | 3.86  | 3.95  | 0.28 | 0.26 | -1.07 | 0.876244 | 0.610364 | 0.94701  | 0.768571 |
| MmugDNA.42192.1.S1_at   | MmugDNA.42192.1 | 6.28  | 6.28  | 0.07 | 0.04 | 1     | 0.752816 | 0.895843 | 0.885809 | 0.940479 |
| MmugDNA.42193.1.S1_at   | MmugDNA.42193.1 | 9.16  | 8.76  | 0.16 | 0.35 | 1.32  | 0.36312  | 0.004047 | 0.637794 | 0.090281 |
| MmugDNA.42194.1.S1_at   | MmugDNA.42194.1 | 6.35  | 6.5   | 0.16 | 0.05 | -1.11 | 0.573976 | 0.905286 | 0.781504 | 0.946296 |
| MmugDNA.42195.1.S1_at   | MmugDNA.42195.1 | 9.3   | 9.2   | 0.14 | 0.04 | 1.07  | 0.392189 | 0.368372 | 0.659198 | 0.607917 |
| MmugDNA.42197.1.S1_s_at | MmugDNA.42197.1 | 11.77 | 11.94 | 0.19 | 0.03 | -1.12 | 0.169149 | 0.213963 | 0.462385 | 0.487596 |
| MmugDNA.42199.1.S1_at   | MmugDNA.42199.1 | 4.62  | 4.52  | 0.33 | 0.27 | 1.07  | 0.517546 | 0.676015 | 0.746748 | 0.810632 |
| MmugDNA.4220.1.S1_at    | MmugDNA.4220.1  | 4.32  | 4.42  | 0.09 | 0.05 | -1.07 | 0.181825 | 0.259093 | 0.47739  | 0.526263 |
| MmugDNA.42200.1.S1_at   | MmugDNA.42200.1 | 7.78  | 7.47  | 0.29 | 0.25 | 1.24  | 0.406899 | 0.667294 | 0.670175 | 0.805297 |
| MmugDNA.42201.1.S1_at   | MmugDNA.42201.1 | 11.47 | 11.32 | 0.19 | 0.11 | 1.11  | 0.456352 | 0.04503  | 0.705741 | 0.256697 |
| MmugDNA.42204.1.S1_at   | MmugDNA.42204.1 | 5.65  | 7.09  | 1.17 | 0.2  | -2.7  | 0.093259 | 0.118844 | 0.361736 | 0.387009 |

|                       |                 |       |       |      |      |       |          |          |          |          |
|-----------------------|-----------------|-------|-------|------|------|-------|----------|----------|----------|----------|
| MmugDNA.42208.1.S1_at | MmugDNA.42208.1 | 3.25  | 3.27  | 0.12 | 0.02 | -1.01 | 0.527182 | 0.754024 | 0.752978 | 0.856812 |
| MmugDNA.42209.1.S1_at | MmugDNA.42209.1 | 6.16  | 6.6   | 0.15 | 0.08 | -1.36 | 0.013602 | 0.013846 | 0.167414 | 0.150924 |
| MmugDNA.4221.1.S1_at  | MmugDNA.4221.1  | 2.69  | 2.81  | 0.1  | 0.01 | -1.08 | 0.113715 | 0.292508 | 0.390392 | 0.55258  |
| MmugDNA.42210.1.S1_at | MmugDNA.42210.1 | 6.02  | 5.98  | 0.14 | 0.05 | 1.03  | 0.337621 | 0.302206 | 0.618005 | 0.560092 |
| MmugDNA.42211.1.S1_at | MmugDNA.42211.1 | 10.76 | 10.56 | 0.25 | 0.2  | 1.15  | 0.823018 | 0.160643 | 0.921328 | 0.436745 |
| MmugDNA.42212.1.S1_at | MmugDNA.42212.1 | 4.53  | 4.6   | 0.11 | 0.21 | -1.05 | 0.196286 | 0.33002  | 0.493359 | 0.578915 |
| MmugDNA.42213.1.S1_at | MmugDNA.42213.1 | 3.45  | 3.34  | 0.11 | 0.2  | 1.08  | 0.625404 | 0.499366 | 0.815359 | 0.698219 |
| MmugDNA.42214.1.S1_at | MmugDNA.42214.1 | 3.07  | 3.06  | 0.07 | 0    | 1.01  | 0.702512 | 0.74778  | 0.858828 | 0.853252 |
| MmugDNA.42216.1.S1_at | MmugDNA.42216.1 | 4.41  | 4.39  | 0.08 | 0.02 | 1.01  | 0.609238 | 0.230565 | 0.805084 | 0.50226  |
| MmugDNA.42217.1.S1_at | MmugDNA.42217.1 | 5.35  | 5.3   | 0.3  | 0.03 | 1.04  | 0.836576 | 0.949173 | 0.928302 | 0.970886 |
| MmugDNA.42218.1.S1_at | MmugDNA.42218.1 | 4.14  | 5.38  | 0.11 | 0.23 | -2.37 | 0.002082 | 0.06529  | 0.090206 | 0.301249 |
| MmugDNA.42219.1.S1_at | MmugDNA.42219.1 | 4.52  | 4     | 0.51 | 0.08 | 1.43  | 0.485957 | 0.270775 | 0.725403 | 0.536026 |
| MmugDNA.4222.1.S1_at  | MmugDNA.4222.1  | 4.31  | 4.32  | 0.12 | 0.12 | -1.01 | 0.481661 | 0.677321 | 0.722105 | 0.811609 |
| MmugDNA.42220.1.S1_at | MmugDNA.42220.1 | 5.86  | 5.68  | 0.48 | 0.19 | 1.14  | 0.759658 | 0.940956 | 0.889819 | 0.966553 |
| MmugDNA.42221.1.S1_at | MmugDNA.42221.1 | 10.93 | 10.77 | 0.1  | 0.29 | 1.12  | 0.197289 | 0.244483 | 0.494391 | 0.514295 |
| MmugDNA.42223.1.S1_at | MmugDNA.42223.1 | 4.84  | 5.55  | 0.24 | 0.21 | -1.64 | 0.049932 | 0.651004 | 0.281083 | 0.795969 |
| MmugDNA.42224.1.S1_at | MmugDNA.42224.1 | 6.26  | 6.41  | 1.09 | 0.12 | -1.11 | 0.504733 | 0.328107 | 0.737875 | 0.577872 |
| MmugDNA.42225.1.S1_at | MmugDNA.42225.1 | 7.09  | 9.75  | 1.11 | 0.25 | -6.32 | 0.045304 | 0.017404 | 0.270318 | 0.166995 |
| MmugDNA.42226.1.S1_at | MmugDNA.42226.1 | 10.16 | 9.88  | 0.23 | 0.18 | 1.22  | 0.134433 | 0.190843 | 0.418098 | 0.466228 |
| MmugDNA.42227.1.S1_at | MmugDNA.42227.1 | 8.66  | 8.86  | 0.5  | 0.16 | -1.16 | 0.503098 | 0.202457 | 0.736714 | 0.476786 |
| MmugDNA.42228.1.S1_at | MmugDNA.42228.1 | 13.42 | 13.21 | 0.09 | 0.01 | 1.16  | 0.020249 | 0.009346 | 0.19595  | 0.127602 |
| MmugDNA.42229.1.S1_at | MmugDNA.42229.1 | 3.09  | 3.07  | 0.08 | 0.12 | 1.01  | 0.403825 | 0.664199 | 0.667853 | 0.803247 |
| MmugDNA.4223.1.S1_at  | MmugDNA.4223.1  | 4.44  | 4.52  | 0.06 | 0.04 | -1.06 | 0.096413 | 0.22623  | 0.366176 | 0.498692 |
| MmugDNA.42231.1.S1_at | MmugDNA.42231.1 | 4.82  | 4.75  | 0.1  | 0.19 | 1.05  | 0.230069 | 0.618042 | 0.528979 | 0.773852 |
| MmugDNA.42232.1.S1_at | MmugDNA.42232.1 | 5.77  | 5.61  | 0.14 | 0.08 | 1.12  | 0.661977 | 0.391646 | 0.836881 | 0.625282 |
| MmugDNA.42234.1.S1_at | MmugDNA.42234.1 | 3.33  | 3.32  | 0.07 | 0.05 | 1.01  | 0.679784 | 0.864699 | 0.847268 | 0.923276 |
| MmugDNA.42235.1.S1_at | MmugDNA.42235.1 | 7.84  | 8.14  | 0.21 | 0.16 | -1.23 | 0.140342 | 0.285953 | 0.426075 | 0.547505 |
| MmugDNA.42236.1.S1_at | MmugDNA.42236.1 | 5.55  | 5.84  | 1.86 | 0.68 | -1.23 | 0.539565 | 0.68954  | 0.760886 | 0.818901 |
| MmugDNA.42237.1.S1_at | MmugDNA.42237.1 | 5     | 5.3   | 0.83 | 0.07 | -1.23 | 0.661828 | 0.853123 | 0.836822 | 0.916487 |
| MmugDNA.42238.1.S1_at | MmugDNA.42238.1 | 5.51  | 4.88  | 0.28 | 0.19 | 1.55  | 0.023641 | 0.119084 | 0.207074 | 0.387386 |
| MmugDNA.42239.1.S1_at | MmugDNA.42239.1 | 6.21  | 5.73  | 1.24 | 0.13 | 1.39  | 0.195184 | 0.172304 | 0.491775 | 0.448666 |
| MmugDNA.42242.1.S1_at | MmugDNA.42242.1 | 4.5   | 4.49  | 0.38 | 0.36 | 1.01  | 0.216808 | 0.320038 | 0.514637 | 0.572412 |
| MmugDNA.42244.1.S1_at | MmugDNA.42244.1 | 4.2   | 4.75  | 0.86 | 0.34 | -1.47 | 0.833901 | 0.745025 | 0.926916 | 0.852262 |
| MmugDNA.42246.1.S1_at | MmugDNA.42246.1 | 4.79  | 4.49  | 0.34 | 0.14 | 1.23  | 0.133364 | 0.151681 | 0.41693  | 0.426383 |
| MmugDNA.42248.1.S1_at | MmugDNA.42248.1 | 3.91  | 4.16  | 0.04 | 0.11 | -1.19 | 0.056745 | 0.050329 | 0.295724 | 0.269595 |
| MmugDNA.4225.1.S1_at  | MmugDNA.4225.1  | 4.44  | 4.48  | 0.12 | 0.12 | -1.03 | 0.748718 | 0.90803  | 0.883741 | 0.947889 |
| MmugDNA.42252.1.S1_at | MmugDNA.42252.1 | 11.28 | 11.22 | 0.34 | 0.05 | 1.04  | 0.530883 | 0.848812 | 0.755352 | 0.914141 |
| MmugDNA.42253.1.S1_at | MmugDNA.42253.1 | 5.53  | 5.45  | 0.22 | 0.15 | 1.06  | 0.250351 | 0.164298 | 0.54509  | 0.440539 |
| MmugDNA.42254.1.S1_at | MmugDNA.42254.1 | 4.25  | 4.42  | 0.23 | 0.28 | -1.13 | 0.391455 | 0.618733 | 0.658679 | 0.774185 |
| MmugDNA.42256.1.S1_at | MmugDNA.42256.1 | 4.66  | 4.72  | 0.65 | 0.01 | -1.04 | 0.434335 | 0.652194 | 0.689627 | 0.796592 |
| MmugDNA.42258.1.S1_at | MmugDNA.42258.1 | 4.71  | 4.76  | 0.44 | 0.1  | -1.03 | 0.94614  | 0.921883 | 0.977211 | 0.955951 |
| MmugDNA.42259.1.S1_at | MmugDNA.42259.1 | 3.89  | 3.27  | 0.75 | 0.22 | 1.54  | 0.117289 | 0.169026 | 0.39452  | 0.445593 |
| MmugDNA.4226.1.S1_at  | MmugDNA.4226.1  | 9.6   | 7.62  | 0.19 | 0.49 | 3.94  | 0.003891 | 0.00051  | 0.108041 | 0.039357 |



|                         |                 |       |       |      |      |        |          |          |          |          |
|-------------------------|-----------------|-------|-------|------|------|--------|----------|----------|----------|----------|
| MmugDNA.42260.1.S1_at   | MmugDNA.42260.1 | 10.28 | 10.75 | 0.16 | 0.05 | -1.39  | 0.007716 | 0.021139 | 0.136707 | 0.182036 |
| MmugDNA.42261.1.S1_at   | MmugDNA.42261.1 | 4.06  | 4.04  | 0.14 | 0.2  | 1.01   | 0.713872 | 0.39772  | 0.864758 | 0.62909  |
| MmugDNA.42262.1.S1_at   | MmugDNA.42262.1 | 4.53  | 4.54  | 0.08 | 0.1  | -1.01  | 0.97673  | 0.556279 | 0.990824 | 0.734476 |
| MmugDNA.42263.1.S1_at   | MmugDNA.42263.1 | 4.63  | 4.65  | 0    | 0.16 | -1.01  | 0.537473 | 0.790034 | 0.759639 | 0.878637 |
| MmugDNA.42264.1.S1_s_at | MmugDNA.42264.1 | 5.15  | 9.61  | 2.71 | 0.2  | -22.01 | 0.139487 | 0.400289 | 0.425004 | 0.630158 |
| MmugDNA.42264.1.S1_x_at | MmugDNA.42264.1 | 4.36  | 5.5   | 0.45 | 0.24 | -2.2   | 0.066065 | 0.308937 | 0.314442 | 0.564656 |
| MmugDNA.42266.1.S1_at   | MmugDNA.42266.1 | 3.58  | 3.57  | 0.11 | 0.02 | 1.01   | 0.675122 | 0.860482 | 0.844941 | 0.920521 |
| MmugDNA.42267.1.S1_at   | MmugDNA.42267.1 | 4.49  | 4.77  | 0.62 | 0.66 | -1.21  | 0.556978 | 0.683357 | 0.771975 | 0.815239 |
| MmugDNA.42268.1.S1_at   | MmugDNA.42268.1 | 4.04  | 4.09  | 0.19 | 0.25 | -1.04  | 0.63632  | 0.505273 | 0.822077 | 0.702073 |
| MmugDNA.42271.1.S1_at   | MmugDNA.42271.1 | 4.15  | 4.41  | 1.33 | 0.79 | -1.2   | 0.717105 | 0.55782  | 0.866448 | 0.735261 |
| MmugDNA.42272.1.S1_at   | MmugDNA.42272.1 | 7.76  | 7.45  | 0.67 | 0.26 | 1.24   | 0.306988 | 0.486922 | 0.593746 | 0.690118 |
| MmugDNA.42273.1.S1_at   | MmugDNA.42273.1 | 6.78  | 6.89  | 0.07 | 0.08 | -1.08  | 0.324712 | 0.314094 | 0.608332 | 0.568185 |
| MmugDNA.42274.1.S1_at   | MmugDNA.42274.1 | 6.67  | 6.74  | 0.23 | 0.16 | -1.05  | 0.884889 | 0.110621 | 0.951005 | 0.374854 |
| MmugDNA.42275.1.S1_at   | MmugDNA.42275.1 | 9.09  | 7.81  | 0.27 | 0.13 | 2.44   | 0.001673 | 0.000418 | 0.084462 | 0.038093 |
| MmugDNA.42276.1.S1_at   | MmugDNA.42276.1 | 5.63  | 5.52  | 0.12 | 0.03 | 1.08   | 0.577951 | 0.556387 | 0.783846 | 0.734507 |
| MmugDNA.42277.1.S1_at   | MmugDNA.42277.1 | 3.83  | 3.98  | 0.18 | 0.29 | -1.11  | 0.589542 | 0.628947 | 0.791613 | 0.781556 |
| MmugDNA.42278.1.S1_at   | MmugDNA.42278.1 | 11.56 | 10.89 | 0.1  | 0.14 | 1.59   | 0.003903 | 0.000059 | 0.108214 | 0.025666 |
| MmugDNA.42278.1.S1_s_at | MmugDNA.42278.1 | 11.18 | 10.64 | 0.02 | 0.1  | 1.46   | 0.000775 | 0.000018 | 0.072818 | 0.019635 |
| MmugDNA.42279.1.S1_at   | MmugDNA.42279.1 | 4.94  | 4.97  | 0.35 | 0.23 | -1.03  | 0.958345 | 0.690327 | 0.983001 | 0.819503 |
| MmugDNA.4228.1.S1_at    | MmugDNA.4228.1  | 6.25  | 6.86  | 1.17 | 0.4  | -1.52  | 0.928492 | 0.985026 | 0.969772 | 0.991497 |
| MmugDNA.42280.1.S1_at   | MmugDNA.42280.1 | 5.71  | 5.88  | 0.49 | 0.29 | -1.12  | 0.573297 | 0.603483 | 0.781077 | 0.764189 |
| MmugDNA.42282.1.S1_at   | MmugDNA.42282.1 | 5.66  | 5.48  | 0.27 | 0.19 | 1.14   | 0.170137 | 0.197271 | 0.463766 | 0.472213 |
| MmugDNA.42285.1.S1_at   | MmugDNA.42285.1 | 3.47  | 3.44  | 0.36 | 0.17 | 1.02   | 0.244089 | 0.251644 | 0.540834 | 0.520387 |
| MmugDNA.42286.1.S1_at   | MmugDNA.42286.1 | 3.79  | 4.02  | 1.3  | 0.34 | -1.18  | 0.831046 | 0.759266 | 0.925651 | 0.860036 |
| MmugDNA.42286.1.S1_s_at | MmugDNA.42286.1 | 12.92 | 12.72 | 0.09 | 0.08 | 1.15   | 0.047239 | 0.061076 | 0.274594 | 0.293952 |
| MmugDNA.42288.1.S1_at   | MmugDNA.42288.1 | 3.02  | 3.01  | 0.12 | 0.06 | 1      | 0.688123 | 0.630445 | 0.851038 | 0.782237 |
| MmugDNA.42289.1.S1_at   | MmugDNA.42289.1 | 6.82  | 6.95  | 0.89 | 0.48 | -1.09  | 0.571722 | 0.672682 | 0.780036 | 0.808708 |
| MmugDNA.4229.1.S1_at    | MmugDNA.4229.1  | 7.08  | 7.37  | 0.13 | 0.33 | -1.22  | 0.749227 | 0.129835 | 0.883888 | 0.401506 |
| MmugDNA.42290.1.S1_at   | MmugDNA.42290.1 | 3.46  | 3.4   | 0    | 0.12 | 1.04   | 0.681892 | 0.514188 | 0.848273 | 0.70751  |
| MmugDNA.42291.1.S1_at   | MmugDNA.42291.1 | 6.87  | 6.83  | 0.18 | 0.26 | 1.02   | 0.786637 | 0.074712 | 0.902743 | 0.318465 |
| MmugDNA.42292.1.S1_at   | MmugDNA.42292.1 | 6.37  | 6.35  | 0.07 | 0.04 | 1.01   | 0.467065 | 0.224334 | 0.712594 | 0.497249 |
| MmugDNA.42293.1.S1_at   | MmugDNA.42293.1 | 5.42  | 5.41  | 0.49 | 0.08 | 1      | 0.371214 | 0.302881 | 0.643902 | 0.560356 |
| MmugDNA.42294.1.S1_at   | MmugDNA.42294.1 | 3.21  | 3.27  | 0.3  | 0.16 | -1.04  | 0.526364 | 0.737538 | 0.752549 | 0.847993 |
| MmugDNA.42296.1.S1_at   | MmugDNA.42296.1 | 4.9   | 4.91  | 0.06 | 0.05 | -1     | 0.992296 | 0.204505 | 0.997161 | 0.478845 |
| MmugDNA.42297.1.S1_at   | MmugDNA.42297.1 | 4.96  | 4.88  | 0.21 | 0.21 | 1.06   | 0.797084 | 0.946105 | 0.9083   | 0.969374 |
| MmugDNA.42298.1.S1_at   | MmugDNA.42298.1 | 5.86  | 6.27  | 0.61 | 0.29 | -1.32  | 0.791582 | 0.404268 | 0.905367 | 0.632709 |
| MmugDNA.42299.1.S1_at   | MmugDNA.42299.1 | 5.13  | 4.41  | 0.1  | 0.64 | 1.65   | 0.286615 | 0.187197 | 0.576462 | 0.463153 |
| MmugDNA.423.1.S1_at     | MmugDNA.423.1   | 5.37  | 5.25  | 0.24 | 0.09 | 1.09   | 0.826256 | 0.812653 | 0.922883 | 0.891778 |
| MmugDNA.4230.1.S1_at    | MmugDNA.4230.1  | 4.43  | 4.15  | 0.41 | 0.12 | 1.21   | 0.926136 | 0.992715 | 0.968794 | 0.995715 |
| MmugDNA.42300.1.S1_at   | MmugDNA.42300.1 | 11.64 | 11.66 | 0.2  | 0.09 | -1.02  | 0.934982 | 0.471571 | 0.972797 | 0.679522 |
| MmugDNA.42303.1.S1_at   | MmugDNA.42303.1 | 11.65 | 11.62 | 0.04 | 0.08 | 1.02   | 0.620263 | 0.001059 | 0.811767 | 0.05171  |
| MmugDNA.42305.1.S1_at   | MmugDNA.42305.1 | 6.86  | 6.71  | 0.74 | 0.2  | 1.11   | 0.318623 | 0.449471 | 0.603338 | 0.665087 |
| MmugDNA.42306.1.S1_at   | MmugDNA.42306.1 | 8.77  | 8.4   | 0.16 | 0.1  | 1.29   | 0.037656 | 0.291449 | 0.249552 | 0.551823 |

|                         |                 |       |       |      |      |       |          |          |          |          |
|-------------------------|-----------------|-------|-------|------|------|-------|----------|----------|----------|----------|
| MmugDNA.42307.1.S1_s_at | MmugDNA.42307.1 | 4.1   | 3.79  | 0.23 | 0.23 | 1.24  | 0.532879 | 0.143324 | 0.7567   | 0.417294 |
| MmugDNA.42310.1.S1_at   | MmugDNA.42310.1 | 10.53 | 10.57 | 0.14 | 0.03 | -1.03 | 0.771982 | 0.324245 | 0.895533 | 0.57488  |
| MmugDNA.42312.1.S1_at   | MmugDNA.42312.1 | 12.6  | 12.6  | 0.06 | 0.02 | -1    | 0.582631 | 0.04201  | 0.787361 | 0.249463 |
| MmugDNA.42315.1.S1_at   | MmugDNA.42315.1 | 5.74  | 4.57  | 0.43 | 0.74 | 2.24  | 0.181822 | 0.241954 | 0.47739  | 0.512489 |
| MmugDNA.42316.1.S1_at   | MmugDNA.42316.1 | 3.9   | 3.9   | 0    | 0.16 | 1     | 0.373901 | 0.189834 | 0.645118 | 0.465403 |
| MmugDNA.42317.1.S1_at   | MmugDNA.42317.1 | 5.6   | 5.49  | 0.17 | 0.08 | 1.08  | 0.611356 | 0.836696 | 0.806237 | 0.906689 |
| MmugDNA.42318.1.S1_at   | MmugDNA.42318.1 | 4.72  | 4.68  | 0.22 | 0.02 | 1.03  | 0.234846 | 0.451753 | 0.532896 | 0.666609 |
| MmugDNA.42319.1.S1_at   | MmugDNA.42319.1 | 4.44  | 4.54  | 0.24 | 0.12 | -1.07 | 0.822045 | 0.927475 | 0.920741 | 0.958797 |
| MmugDNA.4232.1.S1_at    | MmugDNA.4232.1  | 6.35  | 6.21  | 0.2  | 0.05 | 1.11  | 0.260606 | 0.525912 | 0.554648 | 0.715246 |
| MmugDNA.42320.1.S1_at   | MmugDNA.42320.1 | 7.49  | 6.88  | 0.38 | 0.05 | 1.53  | 0.135929 | 0.117498 | 0.420081 | 0.38526  |
| MmugDNA.42322.1.S1_at   | MmugDNA.42322.1 | 5.84  | 5.88  | 0.06 | 0.3  | -1.03 | 0.4022   | 0.301931 | 0.666556 | 0.55986  |
| MmugDNA.42324.1.S1_at   | MmugDNA.42324.1 | 6.33  | 5.92  | 0.44 | 0.53 | 1.32  | 0.530138 | 0.683884 | 0.754771 | 0.815591 |
| MmugDNA.42325.1.S1_at   | MmugDNA.42325.1 | 7.4   | 7.22  | 0.11 | 0.24 | 1.14  | 0.46751  | 0.589825 | 0.712964 | 0.755973 |
| MmugDNA.4233.1.S1_at    | MmugDNA.4233.1  | 6.07  | 6.14  | 0.13 | 0.05 | -1.05 | 0.370233 | 0.540809 | 0.643257 | 0.724565 |
| MmugDNA.42330.1.S1_at   | MmugDNA.42330.1 | 3.82  | 4.21  | 0.22 | 0.09 | -1.31 | 0.126453 | 0.453994 | 0.407818 | 0.668362 |
| MmugDNA.42331.1.S1_at   | MmugDNA.42331.1 | 2.92  | 2.91  | 0.1  | 0.04 | 1.01  | 0.906164 | 0.993202 | 0.960257 | 0.995946 |
| MmugDNA.42332.1.S1_at   | MmugDNA.42332.1 | 4.09  | 3.96  | 0.1  | 0.08 | 1.1   | 0.122444 | 0.247021 | 0.401149 | 0.516238 |
| MmugDNA.42333.1.S1_at   | MmugDNA.42333.1 | 6     | 5.97  | 0.15 | 0.06 | 1.03  | 0.431175 | 0.200301 | 0.687292 | 0.474689 |
| MmugDNA.42334.1.S1_at   | MmugDNA.42334.1 | 3.22  | 3.2   | 0.15 | 0.18 | 1.01  | 0.62804  | 0.791845 | 0.817223 | 0.87976  |
| MmugDNA.42335.1.S1_at   | MmugDNA.42335.1 | 8.68  | 8.45  | 0.36 | 0.32 | 1.18  | 0.430407 | 0.177143 | 0.686649 | 0.453611 |
| MmugDNA.42338.1.S1_at   | MmugDNA.42338.1 | 8.45  | 9.57  | 0.25 | 0.13 | -2.17 | 0.003079 | 0.040556 | 0.100578 | 0.246268 |
| MmugDNA.42339.1.S1_at   | MmugDNA.42339.1 | 4.58  | 4.58  | 0.11 | 0    | -1    | 0.923566 | 0.969305 | 0.96747  | 0.983179 |
| MmugDNA.42340.1.S1_at   | MmugDNA.42340.1 | 6.2   | 6.41  | 0.37 | 0.14 | -1.15 | 0.44032  | 0.867576 | 0.694416 | 0.924742 |
| MmugDNA.42342.1.S1_at   | MmugDNA.42342.1 | 7.69  | 8.17  | 0.76 | 0.45 | -1.4  | 0.658202 | 0.77314  | 0.834894 | 0.868084 |
| MmugDNA.42342.1.S1_s_at | MmugDNA.42342.1 | 9.3   | 9.57  | 0.78 | 0.12 | -1.2  | 0.610481 | 0.676326 | 0.805859 | 0.810904 |
| MmugDNA.42343.1.S1_at   | MmugDNA.42343.1 | 9.34  | 9.65  | 0.79 | 0.17 | -1.25 | 0.592256 | 0.75624  | 0.793329 | 0.85815  |
| MmugDNA.42344.1.S1_at   | MmugDNA.42344.1 | 8.22  | 8.33  | 0.16 | 0.24 | -1.08 | 0.767511 | 0.862116 | 0.893318 | 0.921635 |
| MmugDNA.42346.1.S1_at   | MmugDNA.42346.1 | 3     | 3.88  | 0.39 | 0.53 | -1.84 | 0.15246  | 0.111454 | 0.442142 | 0.376126 |
| MmugDNA.42347.1.S1_at   | MmugDNA.42347.1 | 4.63  | 4.8   | 0.81 | 0.22 | -1.12 | 0.425672 | 0.650056 | 0.682976 | 0.795399 |
| MmugDNA.42348.1.S1_at   | MmugDNA.42348.1 | 10.51 | 10.73 | 0.22 | 0.1  | -1.17 | 0.112612 | 0.135375 | 0.388947 | 0.407478 |
| MmugDNA.42349.1.S1_at   | MmugDNA.42349.1 | 3.6   | 3.72  | 0.06 | 0.29 | -1.09 | 0.178465 | 0.338814 | 0.473243 | 0.585875 |
| MmugDNA.4235.1.S1_at    | MmugDNA.4235.1  | 3.19  | 2.92  | 0.21 | 0.21 | 1.21  | 0.429221 | 0.201535 | 0.685711 | 0.476036 |
| MmugDNA.42350.1.S1_at   | MmugDNA.42350.1 | 7.09  | 7.12  | 0.1  | 0.24 | -1.02 | 0.73071  | 0.006984 | 0.874137 | 0.112771 |
| MmugDNA.42351.1.S1_at   | MmugDNA.42351.1 | 4.81  | 4.76  | 0.82 | 0.5  | 1.04  | 0.581027 | 0.42586  | 0.78634  | 0.6481   |
| MmugDNA.42352.1.S1_at   | MmugDNA.42352.1 | 5.55  | 5.62  | 0.84 | 0.24 | -1.06 | 0.509486 | 0.357419 | 0.741117 | 0.599041 |
| MmugDNA.42353.1.S1_at   | MmugDNA.42353.1 | 7.11  | 7.09  | 0.23 | 0.09 | 1.02  | 0.807272 | 0.399189 | 0.913693 | 0.629699 |
| MmugDNA.42354.1.S1_at   | MmugDNA.42354.1 | 5.08  | 5.04  | 0.1  | 0.18 | 1.03  | 0.332692 | 0.407586 | 0.614336 | 0.63505  |
| MmugDNA.42356.1.S1_at   | MmugDNA.42356.1 | 4.7   | 4.63  | 0.38 | 0.25 | 1.04  | 0.568424 | 0.68195  | 0.77836  | 0.81424  |
| MmugDNA.42357.1.S1_at   | MmugDNA.42357.1 | 5.17  | 5.09  | 0.12 | 0.03 | 1.05  | 0.183462 | 0.144757 | 0.479356 | 0.418609 |
| MmugDNA.42358.1.S1_s_at | MmugDNA.42358.1 | 6.09  | 6.13  | 0.3  | 0.07 | -1.03 | 0.968372 | 0.943383 | 0.987529 | 0.967843 |
| MmugDNA.42359.1.S1_at   | MmugDNA.42359.1 | 4.68  | 4.71  | 0.08 | 0.04 | -1.02 | 0.413004 | 0.311896 | 0.674478 | 0.566833 |
| MmugDNA.4236.1.S1_at    | MmugDNA.4236.1  | 4.49  | 4.2   | 0.19 | 0.08 | 1.22  | 0.209656 | 0.322142 | 0.507135 | 0.573743 |
| MmugDNA.42360.1.S1_at   | MmugDNA.42360.1 | 3.52  | 3.62  | 0.13 | 0.11 | -1.07 | 0.3807   | 0.444768 | 0.650314 | 0.662072 |

|                         |                 |       |       |      |      |       |          |          |          |          |
|-------------------------|-----------------|-------|-------|------|------|-------|----------|----------|----------|----------|
| MmugDNA.42362.1.S1_at   | MmugDNA.42362.1 | 10.22 | 10.3  | 0.29 | 0.07 | -1.05 | 0.512598 | 0.492421 | 0.743056 | 0.693534 |
| MmugDNA.42363.1.S1_at   | MmugDNA.42363.1 | 3.8   | 3.68  | 0.14 | 0.11 | 1.09  | 0.729846 | 0.189347 | 0.873808 | 0.465092 |
| MmugDNA.42364.1.S1_at   | MmugDNA.42364.1 | 6.06  | 5.9   | 0.19 | 0.08 | 1.12  | 0.195073 | 0.264782 | 0.491612 | 0.530791 |
| MmugDNA.42365.1.S1_s_at | MmugDNA.42365.1 | 3.72  | 3.7   | 0.28 | 0.08 | 1.02  | 0.424899 | 0.592707 | 0.682288 | 0.757854 |
| MmugDNA.42366.1.S1_at   | MmugDNA.42366.1 | 13.32 | 13.24 | 0.04 | 0.07 | 1.06  | 0.084719 | 0.113439 | 0.348607 | 0.379509 |
| MmugDNA.42367.1.S1_at   | MmugDNA.42367.1 | 8.12  | 8.05  | 0.24 | 0.16 | 1.05  | 0.69431  | 0.118343 | 0.854084 | 0.386395 |
| MmugDNA.42368.1.S1_at   | MmugDNA.42368.1 | 4.71  | 4.59  | 0.09 | 0.23 | 1.09  | 0.304388 | 0.230288 | 0.591617 | 0.502102 |
| MmugDNA.42369.1.S1_s_at | MmugDNA.42369.1 | 11.69 | 11.42 | 0.19 | 0.07 | 1.21  | 0.042216 | 0.062591 | 0.262423 | 0.297022 |
| MmugDNA.4237.1.S1_at    | MmugDNA.4237.1  | 3.88  | 3.5   | 0.43 | 0.13 | 1.3   | 0.131395 | 0.134426 | 0.414229 | 0.406603 |
| MmugDNA.42370.1.S1_at   | MmugDNA.42370.1 | 5.99  | 5.83  | 0.32 | 0.03 | 1.11  | 0.379019 | 0.53662  | 0.649062 | 0.721934 |
| MmugDNA.42372.1.S1_at   | MmugDNA.42372.1 | 6.36  | 4.63  | 0.9  | 0.16 | 3.33  | 0.060007 | 0.023064 | 0.302259 | 0.190066 |
| MmugDNA.42373.1.S1_at   | MmugDNA.42373.1 | 8.09  | 8.04  | 0.14 | 0.23 | 1.04  | 0.760505 | 0.893378 | 0.890254 | 0.939163 |
| MmugDNA.42374.1.S1_at   | MmugDNA.42374.1 | 3.51  | 3.49  | 0.05 | 0.07 | 1.02  | 0.687744 | 0.232973 | 0.850865 | 0.50445  |
| MmugDNA.42377.1.S1_at   | MmugDNA.42377.1 | 10.07 | 9.9   | 0.2  | 0.06 | 1.12  | 0.64448  | 0.091324 | 0.826933 | 0.346281 |
| MmugDNA.42379.1.S1_at   | MmugDNA.42379.1 | 4.11  | 3.97  | 0.09 | 0.3  | 1.1   | 0.653198 | 0.42427  | 0.831999 | 0.646855 |
| MmugDNA.4238.1.S1_at    | MmugDNA.4238.1  | 3.7   | 3.71  | 0.2  | 0.22 | -1.01 | 0.452946 | 0.495852 | 0.703333 | 0.695754 |
| MmugDNA.42384.1.S1_at   | MmugDNA.42384.1 | 5.53  | 5.52  | 0.15 | 0.2  | 1.01  | 0.569073 | 0.550129 | 0.778679 | 0.730241 |
| MmugDNA.42386.1.S1_at   | MmugDNA.42386.1 | 6.2   | 6.05  | 0.2  | 0.01 | 1.11  | 0.294725 | 0.214579 | 0.58372  | 0.488385 |
| MmugDNA.42387.1.S1_at   | MmugDNA.42387.1 | 4.68  | 4.91  | 0.29 | 0.1  | -1.17 | 0.368023 | 0.03889  | 0.641778 | 0.242159 |
| MmugDNA.42388.1.S1_at   | MmugDNA.42388.1 | 5.73  | 5.76  | 0.05 | 0.05 | -1.02 | 0.730084 | 0.49646  | 0.873891 | 0.696071 |
| MmugDNA.42389.1.S1_at   | MmugDNA.42389.1 | 4.12  | 3.98  | 0.08 | 0.05 | 1.1   | 0.095329 | 0.236377 | 0.364763 | 0.507308 |
| MmugDNA.4239.1.S1_at    | MmugDNA.4239.1  | 5.96  | 5.92  | 0.18 | 0.04 | 1.03  | 0.752648 | 0.803968 | 0.885782 | 0.887203 |
| MmugDNA.42390.1.S1_at   | MmugDNA.42390.1 | 4.64  | 4.49  | 0.2  | 0.03 | 1.1   | 0.099937 | 0.381109 | 0.370858 | 0.617478 |
| MmugDNA.42391.1.S1_at   | MmugDNA.42391.1 | 8.77  | 8.65  | 0.28 | 0.06 | 1.09  | 0.503075 | 0.132777 | 0.736705 | 0.404544 |
| MmugDNA.42392.1.S1_at   | MmugDNA.42392.1 | 4.19  | 4.34  | 0.35 | 0.15 | -1.11 | 0.771411 | 0.262708 | 0.895235 | 0.529069 |
| MmugDNA.42393.1.S1_at   | MmugDNA.42393.1 | 5.85  | 6.18  | 0.19 | 0.06 | -1.25 | 0.140486 | 0.29881  | 0.426202 | 0.557415 |
| MmugDNA.42394.1.S1_at   | MmugDNA.42394.1 | 5.85  | 6.61  | 0.8  | 0.51 | -1.69 | 0.402372 | 0.329018 | 0.6667   | 0.578482 |
| MmugDNA.42395.1.S1_at   | MmugDNA.42395.1 | 10.79 | 10.95 | 0.09 | 0.19 | -1.12 | 0.655644 | 0.398763 | 0.833509 | 0.629478 |
| MmugDNA.42396.1.S1_at   | MmugDNA.42396.1 | 9.31  | 8.89  | 0.15 | 0.16 | 1.34  | 0.052653 | 0.046445 | 0.286412 | 0.260042 |
| MmugDNA.42397.1.S1_at   | MmugDNA.42397.1 | 4.09  | 4.12  | 0.08 | 0.2  | -1.02 | 0.986368 | 0.97731  | 0.995228 | 0.987656 |
| MmugDNA.42398.1.S1_at   | MmugDNA.42398.1 | 6.16  | 6.27  | 0.26 | 0.12 | -1.08 | 0.835313 | 0.964152 | 0.927563 | 0.980052 |
| MmugDNA.424.1.S1_at     | MmugDNA.424.1   | 10.04 | 10.83 | 0.25 | 0.13 | -1.73 | 0.005778 | 0.193207 | 0.121938 | 0.468578 |
| MmugDNA.9557.1.S1_at    | MmugDNA.9557.1  | 12.31 | 12.67 | 0.2  | 0.02 | -1.28 | 0.059399 | 0.041942 | 0.300867 | 0.249397 |
| MmugDNA.9557.1.S1_s_at  | MmugDNA.9557.1  | 11.72 | 12.1  | 0.22 | 0.05 | -1.31 | 0.108774 | 0.020435 | 0.383665 | 0.179564 |
| MmugDNA.42400.1.S1_at   | MmugDNA.42400.1 | 4.96  | 4.28  | 0.65 | 0.25 | 1.61  | 0.07425  | 0.141349 | 0.330658 | 0.414874 |
| MmugDNA.42402.1.S1_at   | MmugDNA.42402.1 | 9.55  | 9.41  | 0.22 | 0.16 | 1.1   | 0.520295 | 0.0876   | 0.74869  | 0.340846 |
| MmugDNA.27577.1.S1_s_at | MmugDNA.27577.1 | 9.75  | 9.69  | 0.14 | 0.09 | 1.04  | 0.76823  | 0.1401   | 0.893506 | 0.413394 |
| MmugDNA.42403.1.S1_at   | MmugDNA.42403.1 | 9.51  | 9.39  | 0.16 | 0.14 | 1.08  | 0.083508 | 0.004386 | 0.345905 | 0.092719 |
| MmugDNA.42404.1.S1_at   | MmugDNA.42404.1 | 8.47  | 8.25  | 0.45 | 0.12 | 1.16  | 0.411802 | 0.542964 | 0.673678 | 0.725861 |
| MmugDNA.42406.1.S1_at   | MmugDNA.42406.1 | 10.35 | 10.53 | 0.46 | 0.03 | -1.13 | 0.44591  | 0.372873 | 0.698308 | 0.611735 |
| MmugDNA.42407.1.S1_at   | MmugDNA.42407.1 | 10.94 | 11    | 0.1  | 0.12 | -1.04 | 0.543877 | 0.944555 | 0.763667 | 0.968614 |
| MmugDNA.42408.1.S1_at   | MmugDNA.42408.1 | 7.86  | 7.65  | 0.48 | 0.18 | 1.16  | 0.684511 | 0.693197 | 0.84962  | 0.821545 |
| MmugDNA.42409.1.S1_at   | MmugDNA.42409.1 | 6.7   | 6.71  | 0.26 | 0.06 | -1.01 | 0.321033 | 0.49541  | 0.605387 | 0.695448 |

|                         |                 |       |       |      |      |       |          |          |          |          |
|-------------------------|-----------------|-------|-------|------|------|-------|----------|----------|----------|----------|
| MmugDNA.4241.1.S1_at    | MmugDNA.4241.1  | 4.32  | 4.6   | 0.13 | 0.23 | -1.22 | 0.320157 | 0.537972 | 0.604769 | 0.72281  |
| MmugDNA.42413.1.S1_at   | MmugDNA.42413.1 | 3.86  | 3.18  | 0.49 | 0.29 | 1.6   | 0.12408  | 0.186508 | 0.404084 | 0.462364 |
| MmugDNA.42414.1.S1_at   | MmugDNA.42414.1 | 9.47  | 9.25  | 0.29 | 0.21 | 1.17  | 0.095814 | 0.163123 | 0.365401 | 0.43928  |
| MmugDNA.42415.1.S1_at   | MmugDNA.42415.1 | 6.37  | 6.32  | 0.19 | 0.05 | 1.04  | 0.330577 | 0.064969 | 0.612589 | 0.300855 |
| MmugDNA.42416.1.S1_at   | MmugDNA.42416.1 | 12.8  | 12.61 | 0.13 | 0.06 | 1.14  | 0.060694 | 0.058745 | 0.303386 | 0.289049 |
| MmugDNA.42416.1.S1_s_at | MmugDNA.42416.1 | 12.15 | 11.89 | 0.14 | 0.14 | 1.19  | 0.036017 | 0.050761 | 0.244831 | 0.270455 |
| MmugDNA.42417.1.S1_at   | MmugDNA.42417.1 | 3.47  | 3.48  | 0.31 | 0.33 | -1.01 | 0.518332 | 0.704395 | 0.747433 | 0.828446 |
| MmugDNA.42419.1.S1_at   | MmugDNA.42419.1 | 4.25  | 4.38  | 0.18 | 0.12 | -1.1  | 0.134725 | 0.268099 | 0.418618 | 0.533862 |
| MmugDNA.4242.1.S1_at    | MmugDNA.4242.1  | 8.66  | 8.95  | 0.07 | 0.04 | -1.22 | 0.003446 | 0.037968 | 0.103385 | 0.239302 |
| MmugDNA.42420.1.S1_at   | MmugDNA.42420.1 | 4.63  | 4.62  | 0.11 | 0.11 | 1.01  | 0.604956 | 0.053898 | 0.802092 | 0.277685 |
| MmugDNA.42421.1.S1_at   | MmugDNA.42421.1 | 11.05 | 10.82 | 0.18 | 0.14 | 1.17  | 0.433279 | 0.038596 | 0.68886  | 0.241492 |
| MmugDNA.42422.1.S1_at   | MmugDNA.42422.1 | 5.91  | 5.55  | 0.12 | 0.12 | 1.28  | 0.07097  | 0.150574 | 0.324424 | 0.425106 |
| MmugDNA.42424.1.S1_x_at | MmugDNA.42424.1 | 8.33  | 7.93  | 1.06 | 0.27 | 1.32  | 0.286357 | 0.20292  | 0.576174 | 0.477343 |
| MmugDNA.42425.1.S1_at   | MmugDNA.42425.1 | 5.15  | 5.1   | 0.09 | 0.12 | 1.03  | 0.292065 | 0.549714 | 0.581449 | 0.730002 |
| MmugDNA.42426.1.S1_at   | MmugDNA.42426.1 | 5.77  | 6.18  | 0.17 | 0.23 | -1.32 | 0.128643 | 0.344064 | 0.410774 | 0.58962  |
| MmugDNA.42427.1.S1_at   | MmugDNA.42427.1 | 5.15  | 4.66  | 0.16 | 0.22 | 1.4   | 0.026534 | 0.074149 | 0.216097 | 0.31781  |
| MmugDNA.42428.1.S1_at   | MmugDNA.42428.1 | 9.63  | 9.87  | 0.14 | 0.29 | -1.18 | 0.346573 | 0.000456 | 0.624998 | 0.038572 |
| MmugDNA.42429.1.S1_at   | MmugDNA.42429.1 | 6.33  | 6.74  | 0.25 | 0.19 | -1.33 | 0.208047 | 0.08848  | 0.505907 | 0.341946 |
| MmugDNA.42430.1.S1_at   | MmugDNA.42430.1 | 7.36  | 7.18  | 0.24 | 0.17 | 1.13  | 0.804322 | 0.015992 | 0.912045 | 0.160458 |
| MmugDNA.42431.1.S1_at   | MmugDNA.42431.1 | 3.25  | 3.05  | 0.15 | 0.04 | 1.14  | 0.300765 | 0.425218 | 0.588909 | 0.647647 |
| MmugDNA.42432.1.S1_at   | MmugDNA.42432.1 | 10.91 | 10.62 | 0.19 | 0.11 | 1.22  | 0.031909 | 0.101687 | 0.232348 | 0.361562 |
| MmugDNA.42433.1.S1_at   | MmugDNA.42433.1 | 3.26  | 2.93  | 0.18 | 0.37 | 1.25  | 0.722464 | 0.766933 | 0.869499 | 0.864661 |
| MmugDNA.42434.1.S1_at   | MmugDNA.42434.1 | 8.27  | 8.46  | 0.13 | 0.13 | -1.14 | 0.147253 | 0.39484  | 0.435327 | 0.627216 |
| MmugDNA.42435.1.S1_at   | MmugDNA.42435.1 | 5.02  | 4.95  | 0.48 | 0.29 | 1.05  | 0.614562 | 0.039845 | 0.80824  | 0.244732 |
| MmugDNA.42436.1.S1_at   | MmugDNA.42436.1 | 3.1   | 3.07  | 0.06 | 0.12 | 1.02  | 0.552591 | 0.867601 | 0.769201 | 0.924749 |
| MmugDNA.42437.1.S1_at   | MmugDNA.42437.1 | 8.86  | 8.97  | 0.11 | 0.07 | -1.07 | 0.177491 | 0.031126 | 0.472186 | 0.218175 |
| MmugDNA.42438.1.S1_at   | MmugDNA.42438.1 | 7.33  | 6.97  | 0.47 | 0.7  | 1.29  | 0.667696 | 0.732491 | 0.840503 | 0.84504  |
| MmugDNA.42439.1.S1_at   | MmugDNA.42439.1 | 4.59  | 4.29  | 0.17 | 0.13 | 1.23  | 0.334061 | 0.438775 | 0.615174 | 0.657683 |
| MmugDNA.4244.1.S1_at    | MmugDNA.4244.1  | 3.63  | 3.72  | 0.16 | 0.02 | -1.06 | 0.901123 | 0.855117 | 0.958162 | 0.917418 |
| MmugDNA.42440.1.S1_at   | MmugDNA.42440.1 | 13.03 | 13.15 | 0.08 | 0.05 | -1.09 | 0.164442 | 0.041273 | 0.457583 | 0.247995 |
| MmugDNA.42441.1.S1_at   | MmugDNA.42441.1 | 4.07  | 4.06  | 0.1  | 0.15 | 1.01  | 0.232    | 0.314082 | 0.530597 | 0.568185 |
| MmugDNA.42443.1.S1_at   | MmugDNA.42443.1 | 4.35  | 4.31  | 0.08 | 0.03 | 1.03  | 0.438108 | 0.636223 | 0.692786 | 0.785986 |
| MmugDNA.42444.1.S1_at   | MmugDNA.42444.1 | 5.82  | 5.65  | 0.31 | 0.2  | 1.12  | 0.477429 | 0.608227 | 0.719417 | 0.766957 |
| MmugDNA.42445.1.S1_at   | MmugDNA.42445.1 | 3.53  | 3.45  | 0.12 | 0.11 | 1.06  | 0.220397 | 0.447853 | 0.518093 | 0.663881 |
| MmugDNA.42448.1.S1_at   | MmugDNA.42448.1 | 5.92  | 5.26  | 0.78 | 0.13 | 1.58  | 0.289587 | 0.305261 | 0.579116 | 0.562255 |
| MmugDNA.42449.1.S1_at   | MmugDNA.42449.1 | 7.32  | 7.63  | 0.46 | 0.09 | -1.24 | 0.468069 | 0.85282  | 0.713381 | 0.91634  |
| MmugDNA.42450.1.S1_at   | MmugDNA.42450.1 | 5.02  | 4.71  | 1.03 | 0.11 | 1.24  | 0.23371  | 0.294322 | 0.531845 | 0.55407  |
| MmugDNA.42451.1.S1_at   | MmugDNA.42451.1 | 3.92  | 3.87  | 0.31 | 0.18 | 1.04  | 0.93294  | 0.703656 | 0.971897 | 0.828186 |
| MmugDNA.42452.1.S1_at   | MmugDNA.42452.1 | 8.71  | 8.76  | 0.42 | 0.27 | -1.03 | 0.296969 | 0.375965 | 0.585548 | 0.613797 |
| MmugDNA.42453.1.S1_at   | MmugDNA.42453.1 | 11.09 | 11    | 0.15 | 0.13 | 1.06  | 0.902276 | 0.983843 | 0.958636 | 0.991004 |
| MmugDNA.42455.1.S1_at   | MmugDNA.42455.1 | 6.22  | 6.37  | 0.43 | 0.4  | -1.12 | 0.857131 | 0.123477 | 0.937945 | 0.393518 |
| MmugDNA.42456.1.S1_at   | MmugDNA.42456.1 | 6.79  | 6.89  | 0.14 | 0.05 | -1.08 | 0.974824 | 0.020681 | 0.989924 | 0.1805   |
| MmugDNA.42457.1.S1_at   | MmugDNA.42457.1 | 10.92 | 10.28 | 0.05 | 0.16 | 1.56  | 0.004882 | 0.004663 | 0.115123 | 0.095301 |

|                         |                 |       |       |      |      |        |          |          |          |          |
|-------------------------|-----------------|-------|-------|------|------|--------|----------|----------|----------|----------|
| MmugDNA.42457.1.S1_x_at | MmugDNA.42457.1 | 11.44 | 10.9  | 0.05 | 0.19 | 1.45   | 0.016398 | 0.023789 | 0.18094  | 0.193119 |
| MmugDNA.42459.1.S1_at   | MmugDNA.42459.1 | 10.5  | 10.27 | 0.17 | 0.06 | 1.17   | 0.255644 | 0.571607 | 0.550202 | 0.743847 |
| MmugDNA.4246.1.S1_at    | MmugDNA.4246.1  | 6.44  | 6.42  | 0.04 | 0.12 | 1.01   | 0.347039 | 0.660302 | 0.625212 | 0.801241 |
| MmugDNA.42460.1.S1_at   | MmugDNA.42460.1 | 8.44  | 8.73  | 0.18 | 0.23 | -1.22  | 0.197124 | 0.575588 | 0.494235 | 0.746619 |
| MmugDNA.42461.1.S1_at   | MmugDNA.42461.1 | 5.3   | 5.75  | 0.66 | 0.11 | -1.37  | 0.222631 | 0.286012 | 0.520511 | 0.547512 |
| MmugDNA.42462.1.S1_at   | MmugDNA.42462.1 | 4.83  | 4.67  | 0.33 | 0.19 | 1.11   | 0.341494 | 0.472159 | 0.621345 | 0.679874 |
| MmugDNA.42463.1.S1_at   | MmugDNA.42463.1 | 5.27  | 5.18  | 0.25 | 0.11 | 1.07   | 0.570052 | 0.018053 | 0.779266 | 0.169372 |
| MmugDNA.42464.1.S1_at   | MmugDNA.42464.1 | 4.55  | 4.13  | 0.7  | 0.15 | 1.34   | 0.286963 | 0.405778 | 0.576707 | 0.633964 |
| MmugDNA.42465.1.S1_at   | MmugDNA.42465.1 | 4.89  | 5.19  | 0.56 | 0.23 | -1.23  | 0.709526 | 0.893969 | 0.862596 | 0.939462 |
| MmugDNA.42466.1.S1_at   | MmugDNA.42466.1 | 6.13  | 5.98  | 0.56 | 0.07 | 1.11   | 0.79302  | 0.266874 | 0.906404 | 0.53244  |
| MmugDNA.42467.1.S1_at   | MmugDNA.42467.1 | 6.52  | 6.65  | 0.42 | 0.19 | -1.09  | 0.247956 | 0.005281 | 0.543303 | 0.10068  |
| MmugDNA.4247.1.S1_at    | MmugDNA.4247.1  | 11.28 | 11.41 | 0.45 | 0.04 | -1.1   | 0.427484 | 0.031942 | 0.684792 | 0.221125 |
| MmugDNA.4247.1.S1_s_at  | MmugDNA.4247.1  | 10.77 | 10.9  | 0.52 | 0.01 | -1.09  | 0.601322 | 0.08714  | 0.799529 | 0.340123 |
| MmugDNA.42470.1.S1_at   | MmugDNA.42470.1 | 5.41  | 5.43  | 0.32 | 0.02 | -1.02  | 0.95603  | 0.997931 | 0.981979 | 0.998971 |
| MmugDNA.42471.1.S1_at   | MmugDNA.42471.1 | 5.08  | 8.43  | 1.59 | 0.27 | -10.21 | 0.051231 | 0.149375 | 0.283682 | 0.423811 |
| MmugDNA.42472.1.S1_at   | MmugDNA.42472.1 | 4.76  | 4.79  | 0.15 | 0.01 | -1.02  | 0.662792 | 0.490854 | 0.83726  | 0.692666 |
| MmugDNA.42473.1.S1_at   | MmugDNA.42473.1 | 5.85  | 6.28  | 0.24 | 0.22 | -1.35  | 0.187713 | 0.449551 | 0.48393  | 0.665113 |
| MmugDNA.42474.1.S1_at   | MmugDNA.42474.1 | 4.71  | 4.74  | 0.05 | 0.11 | -1.02  | 0.339671 | 0.25647  | 0.619902 | 0.524234 |
| MmugDNA.42475.1.S1_at   | MmugDNA.42475.1 | 7.56  | 7.42  | 0.35 | 0.42 | 1.1    | 0.175347 | 0.210441 | 0.469734 | 0.484317 |
| MmugDNA.42477.1.S1_at   | MmugDNA.42477.1 | 5.58  | 5.13  | 0.95 | 0.19 | 1.37   | 0.168332 | 0.214495 | 0.461584 | 0.488257 |
| MmugDNA.42478.1.S1_at   | MmugDNA.42478.1 | 4.95  | 4.71  | 0.47 | 0.29 | 1.18   | 0.57529  | 0.777335 | 0.782764 | 0.87064  |
| MmugDNA.42479.1.S1_at   | MmugDNA.42479.1 | 9.23  | 8.71  | 0.12 | 0.24 | 1.43   | 0.058706 | 0.025664 | 0.299451 | 0.200834 |
| MmugDNA.4248.1.S1_at    | MmugDNA.4248.1  | 7.92  | 7.81  | 0.2  | 0.42 | 1.08   | 0.277331 | 0.054061 | 0.568874 | 0.277914 |
| MmugDNA.42483.1.S1_at   | MmugDNA.42483.1 | 6.45  | 6.4   | 0.12 | 0.28 | 1.03   | 0.3978   | 0.572834 | 0.663304 | 0.744765 |
| MmugDNA.42486.1.S1_at   | MmugDNA.42486.1 | 5.71  | 5.7   | 0.31 | 0.13 | 1.01   | 0.713111 | 0.819739 | 0.864548 | 0.896139 |
| MmugDNA.42487.1.S1_at   | MmugDNA.42487.1 | 4.02  | 3.66  | 0.63 | 0.01 | 1.28   | 0.390068 | 0.292277 | 0.657745 | 0.552389 |
| MmugDNA.42488.1.S1_at   | MmugDNA.42488.1 | 10.02 | 9.84  | 0.29 | 0.11 | 1.14   | 0.462744 | 0.695363 | 0.70975  | 0.82295  |
| MmugDNA.42490.1.S1_at   | MmugDNA.42490.1 | 6.69  | 6.61  | 0.21 | 0.14 | 1.06   | 0.488098 | 0.701361 | 0.726687 | 0.826814 |
| MmugDNA.42491.1.S1_at   | MmugDNA.42491.1 | 5.54  | 5.59  | 0.21 | 0.21 | -1.03  | 0.852437 | 0.448793 | 0.935873 | 0.664615 |
| MmugDNA.42492.1.S1_at   | MmugDNA.42492.1 | 10.72 | 9.79  | 0.11 | 0.35 | 1.91   | 0.022719 | 0.305233 | 0.203836 | 0.562255 |
| MmugDNA.42493.1.S1_at   | MmugDNA.42493.1 | 3.4   | 3.4   | 0.16 | 0.11 | 1      | 0.628582 | 0.601874 | 0.817486 | 0.763115 |
| MmugDNA.42494.1.S1_at   | MmugDNA.42494.1 | 9.44  | 9.35  | 0.31 | 0.19 | 1.06   | 0.96176  | 0.362458 | 0.984403 | 0.603016 |
| MmugDNA.42495.1.S1_at   | MmugDNA.42495.1 | 4.73  | 4.37  | 0.47 | 0.14 | 1.29   | 0.15615  | 0.25534  | 0.446693 | 0.523403 |
| MmugDNA.42495.1.S1_x_at | MmugDNA.42495.1 | 4.75  | 4.6   | 0.53 | 0.11 | 1.11   | 0.521821 | 0.637628 | 0.749403 | 0.787067 |
| MmugDNA.42496.1.S1_at   | MmugDNA.42496.1 | 4.92  | 4.55  | 0.28 | 0.14 | 1.29   | 0.301018 | 0.513332 | 0.589063 | 0.706881 |
| MmugDNA.17880.1.S1_at   | MmugDNA.17880.1 | 11.53 | 11.63 | 0.7  | 0.01 | -1.07  | 0.913108 | 0.892573 | 0.963271 | 0.938742 |
| MmugDNA.17880.1.S1_s_at | MmugDNA.17880.1 | 11.98 | 12.04 | 0.58 | 0.04 | -1.04  | 0.868392 | 0.903014 | 0.943415 | 0.944941 |
| MmugDNA.42498.1.S1_at   | MmugDNA.42498.1 | 13.49 | 13.42 | 0.02 | 0.04 | 1.05   | 0.024555 | 0.027406 | 0.209655 | 0.206752 |
| MmugDNA.425.1.S1_at     | MmugDNA.425.1   | 5.48  | 5.4   | 0.5  | 0.14 | 1.06   | 0.831791 | 0.20605  | 0.925994 | 0.480273 |
| MmugDNA.4250.1.S1_at    | MmugDNA.4250.1  | 9.59  | 9.44  | 0.38 | 0.1  | 1.11   | 0.70276  | 0.573151 | 0.85894  | 0.744941 |
| MmugDNA.42500.1.S1_at   | MmugDNA.42500.1 | 6.76  | 6.99  | 0.58 | 0.36 | -1.17  | 0.463097 | 0.57867  | 0.709925 | 0.748603 |
| MmugDNA.42501.1.S1_at   | MmugDNA.42501.1 | 10.1  | 10.11 | 0.57 | 0.06 | -1.01  | 0.377614 | 0.819063 | 0.648114 | 0.895738 |
| MmugDNA.42502.1.S1_at   | MmugDNA.42502.1 | 8.09  | 7.67  | 0.69 | 0.39 | 1.34   | 0.427954 | 0.381134 | 0.685045 | 0.617478 |

|                         |                 |       |       |      |      |       |          |          |          |          |
|-------------------------|-----------------|-------|-------|------|------|-------|----------|----------|----------|----------|
| MmugDNA.42503.1.S1_at   | MmugDNA.42503.1 | 6.13  | 4.91  | 0.39 | 0.47 | 2.33  | 0.036686 | 0.011916 | 0.246648 | 0.141283 |
| MmugDNA.42504.1.S1_at   | MmugDNA.42504.1 | 6.25  | 6.19  | 0.21 | 0.13 | 1.04  | 0.660457 | 0.237958 | 0.83613  | 0.508495 |
| MmugDNA.42508.1.S1_at   | MmugDNA.42508.1 | 6.6   | 7.22  | 0.13 | 0.36 | -1.53 | 0.141004 | 0.051231 | 0.42688  | 0.271799 |
| MmugDNA.42509.1.S1_at   | MmugDNA.42509.1 | 11.65 | 11.6  | 0.18 | 0.11 | 1.03  | 0.691317 | 0.193941 | 0.852399 | 0.469058 |
| MmugDNA.42509.1.S1_s_at | MmugDNA.42509.1 | 12.47 | 12.37 | 0.12 | 0.09 | 1.07  | 0.261354 | 0.02408  | 0.555482 | 0.194487 |
| MmugDNA.4251.1.S1_at    | MmugDNA.4251.1  | 7.59  | 7.34  | 0.34 | 0.1  | 1.19  | 0.211807 | 0.286851 | 0.509683 | 0.548162 |
| MmugDNA.42510.1.S1_at   | MmugDNA.42510.1 | 4.17  | 4.06  | 0.2  | 0.09 | 1.08  | 0.379929 | 0.251238 | 0.649662 | 0.519984 |
| MmugDNA.42512.1.S1_at   | MmugDNA.42512.1 | 6.52  | 5.91  | 0.22 | 0.61 | 1.52  | 0.060053 | 0.144018 | 0.302267 | 0.417912 |
| MmugDNA.42513.1.S1_at   | MmugDNA.42513.1 | 8.29  | 7.99  | 0.13 | 0.06 | 1.23  | 0.014186 | 0.01386  | 0.170827 | 0.15098  |
| MmugDNA.42514.1.S1_at   | MmugDNA.42514.1 | 11.63 | 11.57 | 0.12 | 0.07 | 1.04  | 0.683265 | 0.001921 | 0.848962 | 0.06556  |
| MmugDNA.42515.1.S1_at   | MmugDNA.42515.1 | 3.04  | 3.29  | 0.06 | 0.09 | -1.19 | 0.009229 | 0.048107 | 0.145865 | 0.264394 |
| MmugDNA.42515.1.S1_s_at | MmugDNA.42515.1 | 4.79  | 5.23  | 0.17 | 0.2  | -1.36 | 0.043589 | 0.024943 | 0.265765 | 0.197799 |
| MmugDNA.42516.1.S1_at   | MmugDNA.42516.1 | 3.31  | 3.24  | 0.07 | 0.08 | 1.05  | 0.808646 | 0.317119 | 0.914357 | 0.570377 |
| MmugDNA.42518.1.S1_at   | MmugDNA.42518.1 | 4.93  | 7.12  | 0.79 | 0.22 | -4.55 | 0.01083  | 0.09885  | 0.153877 | 0.357002 |
| MmugDNA.4252.1.S1_at    | MmugDNA.4252.1  | 6.56  | 6.7   | 0.24 | 0.14 | -1.1  | 0.395647 | 0.021173 | 0.661945 | 0.182268 |
| MmugDNA.42520.1.S1_at   | MmugDNA.42520.1 | 5.36  | 5.75  | 0.84 | 0.31 | -1.31 | 0.868048 | 0.660156 | 0.943138 | 0.801083 |
| MmugDNA.42523.1.S1_at   | MmugDNA.42523.1 | 2.81  | 2.86  | 0.12 | 0.06 | -1.03 | 0.501637 | 0.635472 | 0.735457 | 0.785405 |
| MmugDNA.42524.1.S1_at   | MmugDNA.42524.1 | 7.55  | 7.63  | 0.07 | 0.13 | -1.06 | 0.371024 | 0.545234 | 0.6438   | 0.727441 |
| MmugDNA.42526.1.S1_at   | MmugDNA.42526.1 | 4.28  | 4.31  | 0.26 | 0.06 | -1.02 | 0.371131 | 0.349258 | 0.643885 | 0.593267 |
| MmugDNA.42527.1.S1_at   | MmugDNA.42527.1 | 6.08  | 5.8   | 0.75 | 0.66 | 1.22  | 0.966441 | 0.838637 | 0.98642  | 0.907993 |
| MmugDNA.42529.1.S1_at   | MmugDNA.42529.1 | 5.21  | 5.21  | 0.13 | 0.41 | 1     | 0.941632 | 0.831548 | 0.975589 | 0.903407 |
| MmugDNA.4253.1.S1_at    | MmugDNA.4253.1  | 4.58  | 4.64  | 0.01 | 0.39 | -1.04 | 0.497928 | 0.654145 | 0.733373 | 0.79789  |
| MmugDNA.42531.1.S1_at   | MmugDNA.42531.1 | 6.46  | 6.6   | 0.29 | 0.26 | -1.1  | 0.766323 | 0.805045 | 0.892818 | 0.887934 |
| MmugDNA.42532.1.S1_at   | MmugDNA.42532.1 | 4.61  | 4.63  | 0.14 | 0.01 | -1.01 | 0.563399 | 0.760252 | 0.775443 | 0.86071  |
| MmugDNA.42533.1.S1_at   | MmugDNA.42533.1 | 5.88  | 5.72  | 0.29 | 0.18 | 1.12  | 0.916498 | 0.994225 | 0.96448  | 0.99645  |
| MmugDNA.42534.1.S1_at   | MmugDNA.42534.1 | 4.77  | 4.35  | 1.23 | 0.6  | 1.34  | 0.374627 | 0.40029  | 0.645606 | 0.630158 |
| MmugDNA.42535.1.S1_at   | MmugDNA.42535.1 | 5.02  | 4.74  | 0.25 | 0.13 | 1.21  | 0.531304 | 0.665958 | 0.75568  | 0.80431  |
| MmugDNA.29047.1.S1_s_at | MmugDNA.29047.1 | 7.2   | 7.27  | 0.45 | 0.19 | -1.05 | 0.85329  | 0.173156 | 0.936225 | 0.449765 |
| MmugDNA.42537.1.S1_at   | MmugDNA.42537.1 | 3.46  | 3.46  | 0.18 | 0.01 | -1    | 0.846221 | 0.911335 | 0.932845 | 0.950008 |
| MmugDNA.42538.1.S1_at   | MmugDNA.42538.1 | 3.74  | 3.91  | 0.08 | 0.18 | -1.13 | 0.075955 | 0.096149 | 0.333917 | 0.353422 |
| MmugDNA.42539.1.S1_at   | MmugDNA.42539.1 | 3.68  | 3.17  | 0.19 | 0.1  | 1.43  | 0.017823 | 0.008336 | 0.187044 | 0.121147 |
| MmugDNA.4254.1.S1_at    | MmugDNA.4254.1  | 11.82 | 11.85 | 0.14 | 0.09 | -1.02 | 0.344367 | 0.001296 | 0.623699 | 0.055585 |
| MmugDNA.42540.1.S1_at   | MmugDNA.42540.1 | 3.93  | 3.93  | 0.03 | 0.08 | 1     | 0.535147 | 0.809025 | 0.758211 | 0.889981 |
| MmugDNA.42541.1.S1_at   | MmugDNA.42541.1 | 3.73  | 3.48  | 0.25 | 0.07 | 1.19  | 0.356041 | 0.479576 | 0.632435 | 0.685315 |
| MmugDNA.42542.1.S1_at   | MmugDNA.42542.1 | 4.43  | 4.51  | 0.05 | 0.16 | -1.06 | 0.562181 | 0.728124 | 0.774838 | 0.842779 |
| MmugDNA.42543.1.S1_at   | MmugDNA.42543.1 | 5.9   | 6.83  | 0.34 | 0.19 | -1.9  | 0.012518 | 0.328176 | 0.16232  | 0.577935 |
| MmugDNA.42545.1.S1_at   | MmugDNA.42545.1 | 5.79  | 5.82  | 0.12 | 0.01 | -1.02 | 0.597095 | 0.384117 | 0.796351 | 0.619926 |
| MmugDNA.42546.1.S1_at   | MmugDNA.42546.1 | 3.44  | 3.5   | 0.17 | 0.17 | -1.04 | 0.696066 | 0.880951 | 0.855244 | 0.932026 |
| MmugDNA.30294.1.S1_s_at | MmugDNA.30294.1 | 12.69 | 12.61 | 0.03 | 0.07 | 1.06  | 0.326644 | 0.000348 | 0.609643 | 0.037097 |
| MmugDNA.42550.1.S1_at   | MmugDNA.42550.1 | 4.5   | 4.41  | 0.17 | 0.07 | 1.07  | 0.984145 | 0.977729 | 0.994112 | 0.98787  |
| MmugDNA.42551.1.S1_at   | MmugDNA.42551.1 | 6.77  | 6.45  | 0.17 | 0.01 | 1.25  | 0.037947 | 0.161936 | 0.250599 | 0.438029 |
| MmugDNA.42552.1.S1_x_at | MmugDNA.42552.1 | 7.96  | 7.76  | 0.23 | 0.11 | 1.15  | 0.070189 | 0.050589 | 0.323244 | 0.270301 |
| MmugDNA.42554.1.S1_at   | MmugDNA.42554.1 | 5.27  | 5.07  | 0.17 | 0.1  | 1.15  | 0.088439 | 0.037299 | 0.354567 | 0.237622 |

|                         |                 |       |       |      |      |       |          |          |          |          |
|-------------------------|-----------------|-------|-------|------|------|-------|----------|----------|----------|----------|
| MmugDNA.42556.1.S1_at   | MmugDNA.42556.1 | 4.7   | 4.95  | 0.17 | 0.3  | -1.19 | 0.915627 | 0.279958 | 0.964127 | 0.543359 |
| MmugDNA.42557.1.S1_at   | MmugDNA.42557.1 | 5.19  | 5.24  | 0.3  | 0.14 | -1.04 | 0.348273 | 0.298015 | 0.626353 | 0.556695 |
| MmugDNA.42558.1.S1_at   | MmugDNA.42558.1 | 5.05  | 5.03  | 0.21 | 0.13 | 1.02  | 0.448082 | 0.362746 | 0.699768 | 0.603246 |
| MmugDNA.42559.1.S1_at   | MmugDNA.42559.1 | 5.92  | 5.67  | 0.11 | 0.11 | 1.19  | 0.045902 | 0.19412  | 0.27186  | 0.469266 |
| MmugDNA.4256.1.S1_at    | MmugDNA.4256.1  | 9.21  | 9.04  | 0.23 | 0.18 | 1.12  | 0.567339 | 0.319189 | 0.77771  | 0.571688 |
| MmugDNA.42560.1.S1_at   | MmugDNA.42560.1 | 3.62  | 3.97  | 0.19 | 0.11 | -1.28 | 0.06887  | 0.058696 | 0.320468 | 0.288956 |
| MmugDNA.42561.1.S1_at   | MmugDNA.42561.1 | 5.55  | 5.56  | 0.13 | 0.14 | -1.01 | 0.336806 | 0.422036 | 0.617337 | 0.645422 |
| MmugDNA.42563.1.S1_at   | MmugDNA.42563.1 | 5.59  | 5.61  | 0.07 | 0.04 | -1.01 | 0.959085 | 0.458983 | 0.983307 | 0.671504 |
| MmugDNA.42564.1.S1_at   | MmugDNA.42564.1 | 6.93  | 7.14  | 0.47 | 0.16 | -1.15 | 0.181488 | 0.035023 | 0.476952 | 0.231264 |
| MmugDNA.42565.1.S1_at   | MmugDNA.42565.1 | 7.67  | 7.71  | 0.52 | 0.16 | -1.03 | 0.311088 | 0.361101 | 0.597308 | 0.602069 |
| MmugDNA.42566.1.S1_at   | MmugDNA.42566.1 | 5.42  | 5.73  | 0.27 | 0.07 | -1.24 | 0.108384 | 0.027169 | 0.383016 | 0.205893 |
| MmugDNA.42567.1.S1_at   | MmugDNA.42567.1 | 13.04 | 12.97 | 0.06 | 0.07 | 1.05  | 0.757141 | 0.193204 | 0.888525 | 0.468578 |
| MmugDNA.42567.1.S1_s_at | MmugDNA.42567.1 | 12.16 | 12.12 | 0.14 | 0.05 | 1.03  | 0.67101  | 0.459483 | 0.842207 | 0.671789 |
| MmugDNA.42568.1.S1_at   | MmugDNA.42568.1 | 9.57  | 9     | 0.35 | 0.12 | 1.48  | 0.11554  | 0.088834 | 0.392723 | 0.342662 |
| MmugDNA.42569.1.S1_at   | MmugDNA.42569.1 | 6     | 6.06  | 0.52 | 0.19 | -1.05 | 0.465523 | 0.4739   | 0.711552 | 0.681111 |
| MmugDNA.4257.1.S1_at    | MmugDNA.4257.1  | 4.65  | 4.66  | 0.17 | 0.1  | -1.01 | 0.494379 | 0.118563 | 0.731182 | 0.38654  |
| MmugDNA.42570.1.S1_at   | MmugDNA.42570.1 | 10.19 | 10.03 | 0.1  | 0.1  | 1.11  | 0.220558 | 0.004802 | 0.518282 | 0.096745 |
| MmugDNA.42572.1.S1_at   | MmugDNA.42572.1 | 8.38  | 8.14  | 0.23 | 0.22 | 1.18  | 0.680885 | 0.790219 | 0.847795 | 0.878751 |
| MmugDNA.42573.1.S1_at   | MmugDNA.42573.1 | 6.47  | 5.75  | 0.13 | 0.2  | 1.64  | 0.003873 | 0.002222 | 0.107741 | 0.069434 |
| MmugDNA.42574.1.S1_at   | MmugDNA.42574.1 | 5.12  | 4.63  | 0.4  | 0.16 | 1.41  | 0.243595 | 0.742775 | 0.54025  | 0.851023 |
| MmugDNA.42576.1.S1_at   | MmugDNA.42576.1 | 4.63  | 4.61  | 0.01 | 0.33 | 1.02  | 0.956169 | 0.938536 | 0.981989 | 0.965059 |
| MmugDNA.42577.1.S1_at   | MmugDNA.42577.1 | 5.15  | 6.16  | 0.27 | 0.47 | -2.02 | 0.057199 | 0.041718 | 0.296538 | 0.248893 |
| MmugDNA.42578.1.S1_at   | MmugDNA.42578.1 | 13.74 | 13.63 | 0.02 | 0.05 | 1.08  | 0.029396 | 0.303045 | 0.224424 | 0.56049  |
| MmugDNA.42579.1.S1_at   | MmugDNA.42579.1 | 3.92  | 4.19  | 1.13 | 0.56 | -1.21 | 0.766723 | 0.811153 | 0.892936 | 0.89102  |
| MmugDNA.42580.1.S1_at   | MmugDNA.42580.1 | 6.92  | 6.79  | 0.3  | 0.16 | 1.09  | 0.493051 | 0.841211 | 0.730194 | 0.909568 |
| MmugDNA.42580.1.S1_x_at | MmugDNA.42580.1 | 8.09  | 7.62  | 0.14 | 0.13 | 1.38  | 0.012628 | 0.063532 | 0.162521 | 0.298571 |
| MmugDNA.42582.1.S1_at   | MmugDNA.42582.1 | 5.34  | 5.29  | 0.43 | 0.02 | 1.04  | 0.434462 | 0.670044 | 0.689698 | 0.807023 |
| MmugDNA.42583.1.S1_at   | MmugDNA.42583.1 | 5.42  | 5.26  | 0.1  | 0.18 | 1.11  | 0.251438 | 0.315    | 0.546288 | 0.568759 |
| MmugDNA.42584.1.S1_at   | MmugDNA.42584.1 | 5.78  | 5.52  | 0.02 | 0.23 | 1.2   | 0.098666 | 0.044761 | 0.369483 | 0.256009 |
| MmugDNA.42585.1.S1_at   | MmugDNA.42585.1 | 4.07  | 4.44  | 0.58 | 0.09 | -1.29 | 0.817156 | 0.364865 | 0.918286 | 0.605148 |
| MmugDNA.42586.1.S1_at   | MmugDNA.42586.1 | 3.4   | 2.78  | 0.85 | 0.24 | 1.53  | 0.367641 | 0.399261 | 0.641471 | 0.629735 |
| MmugDNA.42587.1.S1_at   | MmugDNA.42587.1 | 6.89  | 7.03  | 0.24 | 0.38 | -1.1  | 0.21306  | 0.377401 | 0.51103  | 0.6149   |
| MmugDNA.42589.1.S1_at   | MmugDNA.42589.1 | 3.03  | 3     | 0.15 | 0.25 | 1.02  | 0.944951 | 0.513401 | 0.976855 | 0.706881 |
| MmugDNA.4259.1.S1_at    | MmugDNA.4259.1  | 10.18 | 9.42  | 0.23 | 0.02 | 1.69  | 0.00965  | 0.004113 | 0.14832  | 0.090887 |
| MmugDNA.10392.1.S1_at   | MmugDNA.10392.1 | 12.71 | 12.47 | 0.04 | 0.1  | 1.18  | 0.013633 | 0.011817 | 0.16753  | 0.140829 |
| MmugDNA.10392.1.S1_s_at | MmugDNA.10392.1 | 11.74 | 11.12 | 0.1  | 0.02 | 1.53  | 0.000408 | 0.006992 | 0.06311  | 0.112858 |
| MmugDNA.42590.1.S1_at   | MmugDNA.42590.1 | 5.46  | 4.12  | 0.34 | 0.1  | 2.52  | 0.00436  | 0.000296 | 0.112174 | 0.034892 |
| MmugDNA.42591.1.S1_at   | MmugDNA.42591.1 | 10.98 | 10.8  | 0.12 | 0.15 | 1.13  | 0.459635 | 0.08017  | 0.707732 | 0.327755 |
| MmugDNA.42592.1.S1_at   | MmugDNA.42592.1 | 8.07  | 9.81  | 1.03 | 0.2  | -3.34 | 0.05691  | 0.048541 | 0.295858 | 0.265534 |
| MmugDNA.42592.1.S1_s_at | MmugDNA.42592.1 | 6.23  | 7.78  | 0.29 | 0.15 | -2.94 | 0.001866 | 0.014701 | 0.087447 | 0.154371 |
| MmugDNA.42593.1.S1_at   | MmugDNA.42593.1 | 9.66  | 11.41 | 0.57 | 0.16 | -3.37 | 0.01491  | 0.020352 | 0.174233 | 0.179112 |
| MmugDNA.42594.1.S1_at   | MmugDNA.42594.1 | 3.16  | 3.15  | 0.19 | 0.13 | 1.01  | 0.214117 | 0.170201 | 0.511862 | 0.446906 |
| MmugDNA.42595.1.S1_at   | MmugDNA.42595.1 | 5.89  | 5.85  | 0.14 | 0.17 | 1.03  | 0.37637  | 0.49386  | 0.647113 | 0.694433 |

|                       |                 |       |       |      |      |       |          |          |          |          |
|-----------------------|-----------------|-------|-------|------|------|-------|----------|----------|----------|----------|
| MmugDNA.42596.1.S1_at | MmugDNA.42596.1 | 13.46 | 13.29 | 0.18 | 0.05 | 1.13  | 0.350154 | 0.292402 | 0.627978 | 0.552498 |
| MmugDNA.42597.1.S1_at | MmugDNA.42597.1 | 3.64  | 3.5   | 0.07 | 0.21 | 1.1   | 0.164995 | 0.283878 | 0.457897 | 0.546237 |
| MmugDNA.42598.1.S1_at | MmugDNA.42598.1 | 4.36  | 3.62  | 0.37 | 0.29 | 1.67  | 0.060169 | 0.084768 | 0.302467 | 0.336278 |
| MmugDNA.42599.1.S1_at | MmugDNA.42599.1 | 8.04  | 9.55  | 0.7  | 0.33 | -2.86 | 0.048571 | 0.209159 | 0.277767 | 0.482953 |
| MmugDNA.426.1.S1_at   | MmugDNA.426.1   | 6.86  | 6.89  | 0.32 | 0.21 | -1.02 | 0.727054 | 0.011116 | 0.872072 | 0.137241 |
| MmugDNA.42600.1.S1_at | MmugDNA.42600.1 | 5.02  | 5.09  | 0.48 | 0.17 | -1.05 | 0.823238 | 0.625515 | 0.921458 | 0.779204 |
| MmugDNA.42601.1.S1_at | MmugDNA.42601.1 | 4.25  | 4.04  | 0.68 | 0.13 | 1.16  | 0.20449  | 0.219883 | 0.502244 | 0.493401 |
| MmugDNA.42602.1.S1_at | MmugDNA.42602.1 | 4.61  | 4.42  | 0.18 | 0.12 | 1.14  | 0.198653 | 0.273014 | 0.495836 | 0.537638 |
| MmugDNA.42603.1.S1_at | MmugDNA.42603.1 | 7.64  | 7.56  | 0.49 | 0.25 | 1.06  | 0.920397 | 0.858715 | 0.965987 | 0.919548 |
| MmugDNA.42604.1.S1_at | MmugDNA.42604.1 | 4.81  | 4.66  | 0.38 | 0.1  | 1.11  | 0.320179 | 0.559736 | 0.604769 | 0.736365 |
| MmugDNA.42605.1.S1_at | MmugDNA.42605.1 | 5.71  | 5.69  | 0.19 | 0.1  | 1.01  | 0.812849 | 0.94829  | 0.916222 | 0.970522 |
| MmugDNA.42606.1.S1_at | MmugDNA.42606.1 | 6.78  | 6.31  | 0.14 | 0.11 | 1.38  | 0.01672  | 0.00961  | 0.182634 | 0.129157 |
| MmugDNA.42609.1.S1_at | MmugDNA.42609.1 | 10.1  | 9.72  | 0.14 | 0.1  | 1.3   | 0.033742 | 0.065502 | 0.237928 | 0.301415 |
| MmugDNA.4261.1.S1_at  | MmugDNA.4261.1  | 6.91  | 6.72  | 0.24 | 0.14 | 1.14  | 0.311122 | 0.004144 | 0.597323 | 0.091027 |
| MmugDNA.42610.1.S1_at | MmugDNA.42610.1 | 4.24  | 4     | 0.09 | 0.05 | 1.18  | 0.019273 | 0.028673 | 0.192035 | 0.211053 |
| MmugDNA.42611.1.S1_at | MmugDNA.42611.1 | 6.89  | 6.54  | 0.86 | 0.11 | 1.27  | 0.437217 | 0.419653 | 0.692041 | 0.643583 |
| MmugDNA.42612.1.S1_at | MmugDNA.42612.1 | 6     | 5.41  | 0.35 | 0.42 | 1.51  | 0.339029 | 0.518389 | 0.619372 | 0.71038  |
| MmugDNA.42614.1.S1_at | MmugDNA.42614.1 | 4.8   | 4.89  | 0.1  | 0.12 | -1.06 | 0.372789 | 0.575315 | 0.645067 | 0.74643  |
| MmugDNA.42616.1.S1_at | MmugDNA.42616.1 | 4.55  | 4.53  | 0.07 | 0.04 | 1.02  | 0.764699 | 0.573149 | 0.892064 | 0.744941 |
| MmugDNA.42617.1.S1_at | MmugDNA.42617.1 | 3.29  | 3.17  | 0.28 | 0.28 | 1.09  | 0.280523 | 0.411626 | 0.571609 | 0.638328 |
| MmugDNA.42618.1.S1_at | MmugDNA.42618.1 | 4.85  | 4.8   | 0.09 | 0.19 | 1.04  | 0.637554 | 0.812166 | 0.822536 | 0.89155  |
| MmugDNA.42619.1.S1_at | MmugDNA.42619.1 | 6.24  | 6.3   | 0.81 | 0.09 | -1.05 | 0.560611 | 0.625843 | 0.773964 | 0.779355 |
| MmugDNA.4262.1.S1_at  | MmugDNA.4262.1  | 4.96  | 5.09  | 0.2  | 0    | -1.09 | 0.875913 | 0.687611 | 0.946819 | 0.817624 |
| MmugDNA.42620.1.S1_at | MmugDNA.42620.1 | 3.78  | 3.79  | 0.03 | 0.09 | -1.01 | 0.571244 | 0.511123 | 0.779828 | 0.705399 |
| MmugDNA.42621.1.S1_at | MmugDNA.42621.1 | 4.96  | 5.05  | 0.15 | 0.11 | -1.07 | 0.605741 | 0.697379 | 0.80267  | 0.824174 |
| MmugDNA.42622.1.S1_at | MmugDNA.42622.1 | 2.81  | 2.95  | 0.08 | 0.14 | -1.1  | 0.732293 | 0.855882 | 0.874932 | 0.917744 |
| MmugDNA.42623.1.S1_at | MmugDNA.42623.1 | 5.64  | 5.33  | 0.67 | 0.3  | 1.24  | 0.144897 | 0.266763 | 0.431932 | 0.53241  |
| MmugDNA.42625.1.S1_at | MmugDNA.42625.1 | 5.89  | 5.52  | 0.32 | 0.33 | 1.29  | 0.304659 | 0.014235 | 0.591791 | 0.152364 |
| MmugDNA.42626.1.S1_at | MmugDNA.42626.1 | 12.89 | 12.83 | 0.25 | 0.04 | 1.04  | 0.258175 | 0.29955  | 0.552434 | 0.557945 |
| MmugDNA.42627.1.S1_at | MmugDNA.42627.1 | 4.49  | 4.39  | 0.16 | 0.28 | 1.08  | 0.738007 | 0.773319 | 0.878538 | 0.868249 |
| MmugDNA.42628.1.S1_at | MmugDNA.42628.1 | 6.62  | 6.52  | 0.11 | 0.07 | 1.07  | 0.173889 | 0.178566 | 0.468296 | 0.454803 |
| MmugDNA.42629.1.S1_at | MmugDNA.42629.1 | 3.18  | 3.35  | 0.07 | 0.12 | -1.12 | 0.165313 | 0.227647 | 0.458322 | 0.499898 |
| MmugDNA.4263.1.S1_at  | MmugDNA.4263.1  | 4.77  | 4.55  | 0.08 | 0.14 | 1.17  | 0.062416 | 0.301318 | 0.306582 | 0.559356 |
| MmugDNA.42630.1.S1_at | MmugDNA.42630.1 | 7     | 6.49  | 0.68 | 0.1  | 1.42  | 0.472516 | 0.419223 | 0.716189 | 0.643398 |
| MmugDNA.42631.1.S1_at | MmugDNA.42631.1 | 7.46  | 7.35  | 0.95 | 0.09 | 1.08  | 0.313746 | 0.238175 | 0.599637 | 0.508818 |
| MmugDNA.42632.1.S1_at | MmugDNA.42632.1 | 9.93  | 9.69  | 0.06 | 0.11 | 1.18  | 0.022572 | 0.013472 | 0.203331 | 0.148627 |
| MmugDNA.42633.1.S1_at | MmugDNA.42633.1 | 6.19  | 6.13  | 0.06 | 0.09 | 1.04  | 0.196801 | 0.191935 | 0.493895 | 0.467295 |
| MmugDNA.42636.1.S1_at | MmugDNA.42636.1 | 13.48 | 13.37 | 0.05 | 0.06 | 1.08  | 0.058386 | 0.170748 | 0.298756 | 0.447316 |
| MmugDNA.42637.1.S1_at | MmugDNA.42637.1 | 5.3   | 4.96  | 0.28 | 0.19 | 1.26  | 0.218915 | 0.259709 | 0.516629 | 0.5266   |
| MmugDNA.42640.1.S1_at | MmugDNA.42640.1 | 7.82  | 7.84  | 0.08 | 0.19 | -1.02 | 0.918552 | 0.075119 | 0.965302 | 0.319301 |
| MmugDNA.42641.1.S1_at | MmugDNA.42641.1 | 6.52  | 6.61  | 0.06 | 0.03 | -1.06 | 0.085748 | 0.330577 | 0.350079 | 0.579307 |
| MmugDNA.42642.1.S1_at | MmugDNA.42642.1 | 5.49  | 5.45  | 0.18 | 0.05 | 1.03  | 0.591326 | 0.798406 | 0.792481 | 0.883979 |
| MmugDNA.42643.1.S1_at | MmugDNA.42643.1 | 3.79  | 3.72  | 0.2  | 0.1  | 1.05  | 0.243247 | 0.168228 | 0.539969 | 0.44489  |



|                         |                 |       |       |      |      |       |          |          |          |          |
|-------------------------|-----------------|-------|-------|------|------|-------|----------|----------|----------|----------|
| MmugDNA.42644.1.S1_at   | MmugDNA.42644.1 | 3.5   | 3.52  | 0.2  | 0.1  | -1.01 | 0.678124 | 0.062225 | 0.846434 | 0.296307 |
| MmugDNA.42645.1.S1_at   | MmugDNA.42645.1 | 10.52 | 8.09  | 0.22 | 2.31 | 5.39  | 0.044104 | 0.071805 | 0.267107 | 0.314082 |
| MmugDNA.42646.1.S1_at   | MmugDNA.42646.1 | 7.51  | 6.95  | 0.24 | 0.29 | 1.47  | 0.093262 | 0.063413 | 0.361736 | 0.298441 |
| MmugDNA.42648.1.S1_at   | MmugDNA.42648.1 | 6.63  | 6.69  | 0.2  | 0.1  | -1.04 | 0.95602  | 0.129869 | 0.981979 | 0.401509 |
| MmugDNA.42649.1.S1_at   | MmugDNA.42649.1 | 4.01  | 4.04  | 0.58 | 0.18 | -1.02 | 0.463763 | 0.637454 | 0.710222 | 0.786937 |
| MmugDNA.4265.1.S1_at    | MmugDNA.4265.1  | 5     | 5.01  | 0.12 | 0.09 | -1.01 | 0.984286 | 0.120344 | 0.994129 | 0.38925  |
| MmugDNA.42650.1.S1_at   | MmugDNA.42650.1 | 6.42  | 6.38  | 0.04 | 0.09 | 1.03  | 0.448746 | 0.888929 | 0.700162 | 0.936725 |
| MmugDNA.42651.1.S1_at   | MmugDNA.42651.1 | 3.9   | 3.96  | 0.17 | 0.18 | -1.04 | 0.162744 | 0.196522 | 0.454811 | 0.471577 |
| MmugDNA.42652.1.S1_at   | MmugDNA.42652.1 | 12.55 | 12.87 | 0.04 | 0.04 | -1.25 | 0.000932 | 0.124453 | 0.075806 | 0.394865 |
| MmugDNA.42653.1.S1_at   | MmugDNA.42653.1 | 4.29  | 3.69  | 1    | 0.15 | 1.51  | 0.267552 | 0.346163 | 0.56038  | 0.591195 |
| MmugDNA.42654.1.S1_at   | MmugDNA.42654.1 | 3.88  | 3.73  | 0.13 | 0.21 | 1.11  | 0.362118 | 0.419744 | 0.637183 | 0.643666 |
| MmugDNA.42655.1.S1_at   | MmugDNA.42655.1 | 6.37  | 6.37  | 0.2  | 0.24 | 1     | 0.552048 | 0.842487 | 0.768852 | 0.910315 |
| MmugDNA.42656.1.S1_at   | MmugDNA.42656.1 | 5.24  | 6.3   | 0.29 | 0.43 | -2.09 | 0.015576 | 0.176361 | 0.177262 | 0.45282  |
| MmugDNA.42658.1.S1_at   | MmugDNA.42658.1 | 3.26  | 3.2   | 0.1  | 0.14 | 1.04  | 0.460817 | 0.613239 | 0.708419 | 0.770484 |
| MmugDNA.42659.1.S1_at   | MmugDNA.42659.1 | 8.11  | 7.39  | 0.11 | 0.12 | 1.65  | 0.001945 | 0.013467 | 0.08845  | 0.148626 |
| MmugDNA.4266.1.S1_at    | MmugDNA.4266.1  | 4.5   | 4.32  | 0.05 | 0.21 | 1.13  | 0.784614 | 0.206798 | 0.901768 | 0.480945 |
| MmugDNA.42660.1.S1_at   | MmugDNA.42660.1 | 7.74  | 7.81  | 0.54 | 0.44 | -1.05 | 0.951404 | 0.740682 | 0.979913 | 0.849853 |
| MmugDNA.42661.1.S1_at   | MmugDNA.42661.1 | 3.67  | 3.68  | 0.02 | 0.07 | -1    | 0.344844 | 0.106422 | 0.624058 | 0.368978 |
| MmugDNA.42662.1.S1_at   | MmugDNA.42662.1 | 7.12  | 7.71  | 0.61 | 0.26 | -1.5  | 0.167142 | 0.077271 | 0.460327 | 0.322945 |
| MmugDNA.42665.1.S1_at   | MmugDNA.42665.1 | 6.84  | 6.81  | 0.58 | 0.08 | 1.02  | 0.427135 | 0.377454 | 0.684465 | 0.614937 |
| MmugDNA.42666.1.S1_at   | MmugDNA.42666.1 | 8.37  | 8.07  | 1.07 | 0.36 | 1.24  | 0.613381 | 0.475087 | 0.807369 | 0.681892 |
| MmugDNA.42667.1.S1_at   | MmugDNA.42667.1 | 3.33  | 3.69  | 0.07 | 0.24 | -1.28 | 0.118224 | 0.110135 | 0.395722 | 0.374244 |
| MmugDNA.42669.1.S1_at   | MmugDNA.42669.1 | 5.62  | 5.5   | 0.3  | 0.1  | 1.08  | 0.693225 | 0.558929 | 0.853369 | 0.735944 |
| MmugDNA.42670.1.S1_s_at | MmugDNA.42670.1 | 3.77  | 3.79  | 0.1  | 0.15 | -1.02 | 0.683723 | 0.457874 | 0.849222 | 0.670996 |
| MmugDNA.42671.1.S1_at   | MmugDNA.42671.1 | 6.95  | 5.62  | 0.72 | 0.12 | 2.5   | 0.087759 | 0.148754 | 0.353879 | 0.423201 |
| MmugDNA.42672.1.S1_at   | MmugDNA.42672.1 | 6.48  | 6.3   | 0.1  | 0.22 | 1.13  | 0.40553  | 0.327809 | 0.668984 | 0.577604 |
| MmugDNA.42673.1.S1_at   | MmugDNA.42673.1 | 3.92  | 3.74  | 0.54 | 0.17 | 1.14  | 0.282154 | 0.219318 | 0.572942 | 0.493094 |
| MmugDNA.42674.1.S1_at   | MmugDNA.42674.1 | 9.97  | 10.35 | 0.06 | 0.16 | -1.3  | 0.020674 | 0.359901 | 0.19742  | 0.601142 |
| MmugDNA.15704.1.S1_at   | MmugDNA.15704.1 | 11.52 | 11.97 | 0.06 | 0.02 | -1.37 | 0.00021  | 0.168441 | 0.053494 | 0.445092 |
| MmugDNA.15704.1.S1_s_at | MmugDNA.15704.1 | 10.3  | 10.74 | 0.13 | 0.13 | -1.36 | 0.027999 | 0.39038  | 0.219887 | 0.624156 |
| MmugDNA.42675.1.S1_at   | MmugDNA.42675.1 | 8.05  | 8.38  | 0.45 | 0.37 | -1.26 | 0.245894 | 0.478084 | 0.541732 | 0.684096 |
| MmugDNA.42676.1.S1_at   | MmugDNA.42676.1 | 3.05  | 3     | 0.08 | 0.11 | 1.04  | 0.325483 | 0.04513  | 0.608731 | 0.256979 |
| MmugDNA.42677.1.S1_at   | MmugDNA.42677.1 | 4.25  | 3.75  | 0.57 | 0.43 | 1.42  | 0.327437 | 0.433692 | 0.610085 | 0.65392  |
| MmugDNA.42678.1.S1_at   | MmugDNA.42678.1 | 3.42  | 3.33  | 0.05 | 0.04 | 1.07  | 0.071421 | 0.1876   | 0.325264 | 0.463628 |
| MmugDNA.42679.1.S1_at   | MmugDNA.42679.1 | 9.93  | 9.6   | 0.32 | 0.05 | 1.25  | 0.28643  | 0.384902 | 0.576218 | 0.620513 |
| MmugDNA.4268.1.S1_at    | MmugDNA.4268.1  | 5.46  | 5.35  | 0.35 | 0.06 | 1.08  | 0.821501 | 0.629424 | 0.920411 | 0.781862 |
| MmugDNA.42680.1.S1_at   | MmugDNA.42680.1 | 10.35 | 10.76 | 0.04 | 0.04 | -1.33 | 0.000413 | 0.000049 | 0.063208 | 0.025273 |
| MmugDNA.42681.1.S1_at   | MmugDNA.42681.1 | 10.48 | 10.38 | 0.02 | 0.14 | 1.07  | 0.244552 | 0.523019 | 0.540909 | 0.713429 |
| MmugDNA.42681.1.S1_s_at | MmugDNA.42681.1 | 10.87 | 10.8  | 0.03 | 0.1  | 1.05  | 0.261583 | 0.367889 | 0.555789 | 0.607469 |
| MmugDNA.42685.1.S1_at   | MmugDNA.42685.1 | 4.84  | 4.41  | 0.54 | 0.47 | 1.34  | 0.194643 | 0.25573  | 0.491253 | 0.523675 |
| MmugDNA.42686.1.S1_at   | MmugDNA.42686.1 | 6.92  | 6.82  | 0.38 | 0.27 | 1.07  | 0.402276 | 0.744806 | 0.666655 | 0.852198 |
| MmugDNA.42687.1.S1_at   | MmugDNA.42687.1 | 13.86 | 13.9  | 0.03 | 0.05 | -1.03 | 0.409534 | 0.186085 | 0.671909 | 0.461931 |
| MmugDNA.42688.1.S1_at   | MmugDNA.42688.1 | 3.8   | 3.55  | 0.13 | 0.07 | 1.19  | 0.065919 | 0.096741 | 0.314244 | 0.354171 |

|                         |                 |       |       |      |      |       |          |          |          |          |
|-------------------------|-----------------|-------|-------|------|------|-------|----------|----------|----------|----------|
| MmugDNA.42689.1.S1_at   | MmugDNA.42689.1 | 5.87  | 5.85  | 1    | 0.34 | 1.01  | 0.388792 | 0.32404  | 0.656749 | 0.57473  |
| MmugDNA.4269.1.S1_at    | MmugDNA.4269.1  | 12.77 | 12.54 | 0.01 | 0.07 | 1.17  | 0.004531 | 0.005185 | 0.113436 | 0.099739 |
| MmugDNA.42690.1.S1_s_at | MmugDNA.42690.1 | 7.31  | 7.33  | 0.26 | 0    | -1.01 | 0.326356 | 0.193367 | 0.609498 | 0.468698 |
| MmugDNA.42691.1.S1_at   | MmugDNA.42691.1 | 4.96  | 4.71  | 0.37 | 0.19 | 1.19  | 0.277564 | 0.262959 | 0.569091 | 0.529372 |
| MmugDNA.42692.1.S1_at   | MmugDNA.42692.1 | 3.39  | 3.49  | 0.74 | 0.11 | -1.07 | 0.475741 | 0.702995 | 0.718305 | 0.827866 |
| MmugDNA.42693.1.S1_at   | MmugDNA.42693.1 | 2.97  | 2.92  | 0.42 | 0.06 | 1.03  | 0.269583 | 0.278716 | 0.561922 | 0.542421 |
| MmugDNA.42695.1.S1_at   | MmugDNA.42695.1 | 3.48  | 3.34  | 0.31 | 0.07 | 1.1   | 0.667989 | 0.695422 | 0.840528 | 0.822978 |
| MmugDNA.42696.1.S1_at   | MmugDNA.42696.1 | 3.34  | 3.54  | 0.62 | 0.38 | -1.15 | 0.8818   | 0.897936 | 0.949726 | 0.941871 |
| MmugDNA.42697.1.S1_at   | MmugDNA.42697.1 | 3.33  | 3.38  | 0.13 | 0.01 | -1.04 | 0.889853 | 0.520598 | 0.953112 | 0.711831 |
| MmugDNA.4270.1.S1_at    | MmugDNA.4270.1  | 10.5  | 10.14 | 0.25 | 0.09 | 1.29  | 0.080376 | 0.163946 | 0.341026 | 0.440105 |
| MmugDNA.42700.1.S1_at   | MmugDNA.42700.1 | 4.85  | 5.83  | 0.62 | 0.26 | -1.97 | 0.202673 | 0.281305 | 0.500389 | 0.544391 |
| MmugDNA.42701.1.S1_at   | MmugDNA.42701.1 | 5.31  | 5.37  | 0.13 | 0.02 | -1.04 | 0.519599 | 0.047456 | 0.748147 | 0.262486 |
| MmugDNA.42702.1.S1_at   | MmugDNA.42702.1 | 3.72  | 3.69  | 0.12 | 0.07 | 1.02  | 0.653908 | 0.83987  | 0.832423 | 0.908703 |
| MmugDNA.42703.1.S1_at   | MmugDNA.42703.1 | 11.66 | 11.65 | 0.02 | 0.06 | 1.01  | 0.25865  | 0.229805 | 0.552799 | 0.501802 |
| MmugDNA.42704.1.S1_at   | MmugDNA.42704.1 | 5.62  | 5.68  | 0.11 | 0.15 | -1.04 | 0.675632 | 0.052235 | 0.845101 | 0.274065 |
| MmugDNA.42707.1.S1_at   | MmugDNA.42707.1 | 9.53  | 9.27  | 0.37 | 0.04 | 1.2   | 0.251137 | 0.189377 | 0.545902 | 0.465117 |
| MmugDNA.42708.1.S1_at   | MmugDNA.42708.1 | 5.76  | 5.79  | 0.3  | 0.1  | -1.02 | 0.867222 | 0.735903 | 0.94259  | 0.847202 |
| MmugDNA.42709.1.S1_at   | MmugDNA.42709.1 | 9.34  | 9.33  | 0.07 | 0    | 1     | 0.764087 | 0.616843 | 0.891902 | 0.772992 |
| MmugDNA.42709.1.S1_s_at | MmugDNA.42709.1 | 10.91 | 10.88 | 0.07 | 0.02 | 1.02  | 0.742161 | 0.301403 | 0.880582 | 0.55943  |
| MmugDNA.42710.1.S1_at   | MmugDNA.42710.1 | 3.84  | 3.72  | 0.26 | 0.07 | 1.09  | 0.616712 | 0.735802 | 0.80962  | 0.847147 |
| MmugDNA.42711.1.S1_at   | MmugDNA.42711.1 | 3.51  | 3.5   | 0.05 | 0.15 | 1.01  | 0.837699 | 0.583905 | 0.928861 | 0.752043 |
| MmugDNA.42712.1.S1_at   | MmugDNA.42712.1 | 8.58  | 8.23  | 0.47 | 0.09 | 1.28  | 0.284114 | 0.052283 | 0.574388 | 0.274146 |
| MmugDNA.42713.1.S1_at   | MmugDNA.42713.1 | 4.35  | 4.36  | 0.32 | 0.1  | -1.01 | 0.875871 | 0.730988 | 0.946812 | 0.844172 |
| MmugDNA.42714.1.S1_at   | MmugDNA.42714.1 | 3.82  | 3.33  | 0.68 | 0.1  | 1.4   | 0.231069 | 0.290691 | 0.52984  | 0.551382 |
| MmugDNA.42715.1.S1_at   | MmugDNA.42715.1 | 2.85  | 2.81  | 0    | 0.02 | 1.03  | 0.106313 | 0.673443 | 0.380284 | 0.8092   |
| MmugDNA.42716.1.S1_at   | MmugDNA.42716.1 | 4.91  | 5.64  | 0.66 | 0.34 | -1.66 | 0.461691 | 0.631347 | 0.709041 | 0.78278  |
| MmugDNA.42718.1.S1_at   | MmugDNA.42718.1 | 10.59 | 10.19 | 0.14 | 0.15 | 1.32  | 0.028447 | 0.064865 | 0.221125 | 0.300719 |
| MmugDNA.42719.1.S1_at   | MmugDNA.42719.1 | 5.86  | 5.94  | 0.09 | 0.06 | -1.06 | 0.112368 | 0.517232 | 0.388536 | 0.709435 |
| MmugDNA.4272.1.S1_at    | MmugDNA.4272.1  | 11.85 | 11.55 | 0.25 | 0.03 | 1.23  | 0.037343 | 0.179808 | 0.248641 | 0.456339 |
| MmugDNA.42720.1.S1_at   | MmugDNA.42720.1 | 8.3   | 8.14  | 0.23 | 0.23 | 1.11  | 0.827459 | 0.041961 | 0.923641 | 0.24943  |
| MmugDNA.42721.1.S1_at   | MmugDNA.42721.1 | 5.52  | 5.62  | 0.26 | 0.01 | -1.07 | 0.764226 | 0.888072 | 0.891902 | 0.936183 |
| MmugDNA.42722.1.S1_at   | MmugDNA.42722.1 | 12.14 | 12.35 | 0.19 | 0.05 | -1.16 | 0.346265 | 0.534448 | 0.624882 | 0.720369 |
| MmugDNA.42723.1.S1_at   | MmugDNA.42723.1 | 3.52  | 3.44  | 0.07 | 0.21 | 1.06  | 0.680032 | 0.653493 | 0.847315 | 0.797464 |
| MmugDNA.42725.1.S1_at   | MmugDNA.42725.1 | 8.63  | 9.69  | 0.35 | 0.18 | -2.1  | 0.00774  | 0.163658 | 0.136735 | 0.439841 |
| MmugDNA.42727.1.S1_at   | MmugDNA.42727.1 | 5.93  | 6.88  | 1.17 | 0.53 | -1.93 | 0.23331  | 0.197709 | 0.531567 | 0.472633 |
| MmugDNA.42728.1.S1_at   | MmugDNA.42728.1 | 3.82  | 3.61  | 0.17 | 0.09 | 1.16  | 0.099047 | 0.12791  | 0.36989  | 0.398865 |
| MmugDNA.42729.1.S1_at   | MmugDNA.42729.1 | 4.09  | 4.09  | 0.05 | 0.04 | 1     | 0.869538 | 0.385689 | 0.943768 | 0.621079 |
| MmugDNA.4273.1.S1_at    | MmugDNA.4273.1  | 4.35  | 4.3   | 0.38 | 0.18 | 1.04  | 0.352054 | 0.526424 | 0.629611 | 0.715557 |
| MmugDNA.26826.1.S1_s_at | MmugDNA.26826.1 | 8.25  | 9.21  | 0.43 | 0.1  | -1.94 | 0.053726 | 0.577359 | 0.288972 | 0.747871 |
| MmugDNA.16686.1.S1_at   | MmugDNA.16686.1 | 10.91 | 11.66 | 0.22 | 0.15 | -1.69 | 0.010179 | 0.003561 | 0.150739 | 0.085503 |
| MmugDNA.16686.1.S1_s_at | MmugDNA.16686.1 | 10.9  | 11.55 | 0.24 | 0.13 | -1.57 | 0.014272 | 0.005726 | 0.171317 | 0.104271 |
| MmugDNA.42732.1.S1_at   | MmugDNA.42732.1 | 4.27  | 4.24  | 0.07 | 0.06 | 1.02  | 0.558906 | 0.068596 | 0.773075 | 0.308466 |
| MmugDNA.42733.1.S1_at   | MmugDNA.42733.1 | 9.89  | 9.95  | 0.17 | 0.16 | -1.04 | 0.41661  | 0.000182 | 0.677057 | 0.030511 |



|                         |                 |       |       |      |      |       |          |          |          |          |
|-------------------------|-----------------|-------|-------|------|------|-------|----------|----------|----------|----------|
| MmugDNA.42788.1.S1_at   | MmugDNA.42788.1 | 11.22 | 11.61 | 0.24 | 0.02 | -1.31 | 0.052618 | 0.10006  | 0.286356 | 0.358961 |
| MmugDNA.4279.1.S1_at    | MmugDNA.4279.1  | 5.65  | 5.55  | 0.36 | 0.33 | 1.07  | 0.798895 | 0.696283 | 0.909361 | 0.823545 |
| MmugDNA.42790.1.S1_at   | MmugDNA.42790.1 | 4.02  | 4.23  | 0.06 | 0.2  | -1.16 | 0.538047 | 0.677898 | 0.760043 | 0.811841 |
| MmugDNA.42791.1.S1_at   | MmugDNA.42791.1 | 4.48  | 4.45  | 0.03 | 0.03 | 1.03  | 0.306582 | 0.328612 | 0.593397 | 0.578163 |
| MmugDNA.42792.1.S1_at   | MmugDNA.42792.1 | 9.88  | 9.68  | 0.23 | 0.31 | 1.15  | 0.505628 | 0.055629 | 0.738603 | 0.281649 |
| MmugDNA.42797.1.S1_at   | MmugDNA.42797.1 | 5.41  | 5.18  | 0.45 | 0.05 | 1.17  | 0.160502 | 0.236561 | 0.452024 | 0.507364 |
| MmugDNA.42798.1.S1_at   | MmugDNA.42798.1 | 10.58 | 10.64 | 0.1  | 0.04 | -1.04 | 0.295307 | 0.589519 | 0.58412  | 0.755696 |
| MmugDNA.4280.1.S1_at    | MmugDNA.4280.1  | 11.53 | 11.82 | 0.07 | 0.06 | -1.22 | 0.006794 | 0.000343 | 0.129178 | 0.036856 |
| MmugDNA.42800.1.S1_at   | MmugDNA.42800.1 | 8.75  | 8.4   | 0.14 | 0.3  | 1.28  | 0.094259 | 0.765469 | 0.363294 | 0.863679 |
| MmugDNA.42802.1.S1_at   | MmugDNA.42802.1 | 7.79  | 7.79  | 0.32 | 0.28 | 1     | 0.543985 | 0.003141 | 0.763753 | 0.081652 |
| MmugDNA.42803.1.S1_at   | MmugDNA.42803.1 | 4.09  | 3.99  | 0.06 | 0.12 | 1.08  | 0.121964 | 0.081809 | 0.400622 | 0.330192 |
| MmugDNA.42804.1.S1_at   | MmugDNA.42804.1 | 5.64  | 5.72  | 0.21 | 0.08 | -1.05 | 0.959009 | 0.873362 | 0.983307 | 0.927953 |
| MmugDNA.42805.1.S1_at   | MmugDNA.42805.1 | 9.24  | 9.06  | 0.11 | 0.08 | 1.13  | 0.155734 | 0.402349 | 0.446095 | 0.631387 |
| MmugDNA.42806.1.S1_at   | MmugDNA.42806.1 | 8.21  | 7.16  | 0.89 | 0.31 | 2.07  | 0.539007 | 0.065889 | 0.760514 | 0.302126 |
| MmugDNA.42807.1.S1_at   | MmugDNA.42807.1 | 8.09  | 7.95  | 0.25 | 0.12 | 1.1   | 0.595827 | 0.832769 | 0.795488 | 0.904046 |
| MmugDNA.42808.1.S1_at   | MmugDNA.42808.1 | 12.16 | 12.15 | 0.15 | 0.08 | 1     | 0.68861  | 0.222758 | 0.851289 | 0.49569  |
| MmugDNA.42809.1.S1_at   | MmugDNA.42809.1 | 7.34  | 7.37  | 0    | 0.11 | -1.02 | 0.841558 | 0.917521 | 0.930364 | 0.953879 |
| MmugDNA.4281.1.S1_at    | MmugDNA.4281.1  | 6.81  | 6.81  | 0.03 | 0.21 | 1     | 0.891302 | 0.953289 | 0.953665 | 0.973509 |
| MmugDNA.42812.1.S1_at   | MmugDNA.42812.1 | 3.85  | 3.92  | 0.29 | 0.28 | -1.05 | 0.937034 | 0.588064 | 0.97363  | 0.754719 |
| MmugDNA.42813.1.S1_at   | MmugDNA.42813.1 | 12.76 | 12.3  | 0.07 | 0.1  | 1.38  | 0.00321  | 0.00588  | 0.101676 | 0.104899 |
| MmugDNA.42814.1.S1_at   | MmugDNA.42814.1 | 3.68  | 3.61  | 0.12 | 0.1  | 1.04  | 0.950776 | 0.12281  | 0.979595 | 0.392786 |
| MmugDNA.42817.1.S1_at   | MmugDNA.42817.1 | 4.23  | 3.91  | 0.77 | 0.22 | 1.25  | 0.336484 | 0.340826 | 0.617078 | 0.586978 |
| MmugDNA.42818.1.S1_at   | MmugDNA.42818.1 | 8.73  | 8.93  | 0.15 | 0.17 | -1.15 | 0.641276 | 0.048825 | 0.82473  | 0.265858 |
| MmugDNA.42819.1.S1_at   | MmugDNA.42819.1 | 9.31  | 9.39  | 0.03 | 0.06 | -1.06 | 0.242806 | 0.1149   | 0.539559 | 0.381615 |
| MmugDNA.42820.1.S1_s_at | MmugDNA.42820.1 | 10.39 | 10.41 | 0.19 | 0.08 | -1.01 | 0.408821 | 0.123982 | 0.671419 | 0.394262 |
| MmugDNA.42821.1.S1_at   | MmugDNA.42821.1 | 7.51  | 7.41  | 0.08 | 0.04 | 1.07  | 0.077958 | 0.071573 | 0.3372   | 0.313714 |
| MmugDNA.42822.1.S1_s_at | MmugDNA.42822.1 | 7.83  | 7.48  | 0.28 | 0.08 | 1.27  | 0.070943 | 0.067158 | 0.324377 | 0.305165 |
| MmugDNA.42824.1.S1_at   | MmugDNA.42824.1 | 5.07  | 4.85  | 0.14 | 0.1  | 1.16  | 0.207082 | 0.264917 | 0.504814 | 0.530909 |
| MmugDNA.42825.1.S1_at   | MmugDNA.42825.1 | 4.1   | 4.09  | 0.11 | 0.11 | 1.01  | 0.878614 | 0.090444 | 0.948226 | 0.344925 |
| MmugDNA.42826.1.S1_at   | MmugDNA.42826.1 | 8.23  | 8.73  | 0.22 | 0.09 | -1.42 | 0.040154 | 0.227944 | 0.256842 | 0.500211 |
| MmugDNA.42827.1.S1_at   | MmugDNA.42827.1 | 7.38  | 7.25  | 0.66 | 0.14 | 1.1   | 0.329238 | 0.385557 | 0.611528 | 0.621027 |
| MmugDNA.4283.1.S1_at    | MmugDNA.4283.1  | 7.89  | 7.55  | 0.05 | 0.14 | 1.26  | 0.023054 | 0.257003 | 0.204831 | 0.524781 |
| MmugDNA.42830.1.S1_at   | MmugDNA.42830.1 | 3.71  | 3.67  | 0.04 | 0.1  | 1.03  | 0.862824 | 0.97479  | 0.940301 | 0.986245 |
| MmugDNA.42831.1.S1_at   | MmugDNA.42831.1 | 5.38  | 5.27  | 0.09 | 0.19 | 1.08  | 0.901497 | 0.249386 | 0.95827  | 0.518496 |
| MmugDNA.42833.1.S1_at   | MmugDNA.42833.1 | 8.12  | 8.25  | 0.17 | 0.11 | -1.09 | 0.491767 | 0.40698  | 0.729386 | 0.634661 |
| MmugDNA.42834.1.S1_at   | MmugDNA.42834.1 | 5.97  | 7.23  | 0.35 | 0.26 | -2.41 | 0.0109   | 0.019786 | 0.154148 | 0.176951 |
| MmugDNA.42835.1.S1_at   | MmugDNA.42835.1 | 6.57  | 6.67  | 0.1  | 0.09 | -1.07 | 0.580645 | 0.143237 | 0.786011 | 0.417179 |
| MmugDNA.42836.1.S1_at   | MmugDNA.42836.1 | 4.43  | 3.82  | 0.18 | 0.33 | 1.53  | 0.209296 | 0.371467 | 0.506775 | 0.610204 |
| MmugDNA.42837.1.S1_at   | MmugDNA.42837.1 | 7.37  | 7.22  | 0.58 | 0.34 | 1.11  | 0.496507 | 0.505069 | 0.732382 | 0.70197  |
| MmugDNA.76.1.S1_at      | MmugDNA.76.1    | 3.22  | 3.16  | 0.18 | 0.14 | 1.04  | 0.449955 | 0.652513 | 0.701198 | 0.796819 |
| MmugDNA.76.1.S1_s_at    | MmugDNA.76.1    | 7.9   | 7.9   | 0.75 | 0.19 | 1.01  | 0.399266 | 0.456547 | 0.66473  | 0.67024  |
| MmugDNA.42839.1.S1_at   | MmugDNA.42839.1 | 8.34  | 8.25  | 0.14 | 0.24 | 1.07  | 0.596158 | 0.13181  | 0.795655 | 0.403891 |
| MmugDNA.4284.1.S1_at    | MmugDNA.4284.1  | 4.13  | 3.29  | 0.26 | 0.63 | 1.79  | 0.355563 | 0.46028  | 0.632237 | 0.672148 |

|                         |                 |       |       |      |      |       |          |          |          |          |
|-------------------------|-----------------|-------|-------|------|------|-------|----------|----------|----------|----------|
| MmugDNA.42840.1.S1_at   | MmugDNA.42840.1 | 9     | 8.83  | 0.22 | 0.12 | 1.13  | 0.263789 | 0.466458 | 0.55734  | 0.67632  |
| MmugDNA.42841.1.S1_at   | MmugDNA.42841.1 | 5.1   | 5.03  | 0.14 | 0.13 | 1.05  | 0.451247 | 0.561666 | 0.702098 | 0.73751  |
| MmugDNA.42842.1.S1_at   | MmugDNA.42842.1 | 5.86  | 5.89  | 0.06 | 0.05 | -1.02 | 0.483763 | 0.897503 | 0.723753 | 0.941525 |
| MmugDNA.42844.1.S1_at   | MmugDNA.42844.1 | 7.57  | 7.03  | 0.29 | 0.27 | 1.46  | 0.129132 | 0.19468  | 0.411506 | 0.469765 |
| MmugDNA.42844.1.S1_s_at | MmugDNA.42844.1 | 10.17 | 9.55  | 0.27 | 0.32 | 1.54  | 0.113877 | 0.116392 | 0.390587 | 0.383671 |
| MmugDNA.42845.1.S1_at   | MmugDNA.42845.1 | 6.11  | 6.1   | 0.18 | 0.09 | 1.01  | 0.970481 | 0.536802 | 0.988339 | 0.722119 |
| MmugDNA.42846.1.S1_at   | MmugDNA.42846.1 | 9.27  | 9.75  | 0.42 | 0.18 | -1.39 | 0.080184 | 0.261581 | 0.340584 | 0.528047 |
| MmugDNA.42848.1.S1_at   | MmugDNA.42848.1 | 7.06  | 6.9   | 0.2  | 0.29 | 1.12  | 0.762161 | 0.430443 | 0.890955 | 0.651438 |
| MmugDNA.42849.1.S1_at   | MmugDNA.42849.1 | 10.02 | 9.99  | 0.05 | 0.19 | 1.02  | 0.998022 | 0.195392 | 0.999236 | 0.470253 |
| MmugDNA.4285.1.S1_at    | MmugDNA.4285.1  | 7.46  | 8.02  | 0.88 | 0.47 | -1.48 | 0.327022 | 0.66006  | 0.609778 | 0.801057 |
| MmugDNA.42850.1.S1_at   | MmugDNA.42850.1 | 11.14 | 10.83 | 0.17 | 0.22 | 1.24  | 0.161973 | 0.000463 | 0.453821 | 0.038572 |
| MmugDNA.42853.1.S1_at   | MmugDNA.42853.1 | 4.26  | 5.36  | 0.67 | 0.37 | -2.13 | 0.19496  | 0.289218 | 0.491466 | 0.550293 |
| MmugDNA.42854.1.S1_at   | MmugDNA.42854.1 | 12.44 | 12.26 | 0.08 | 0.08 | 1.13  | 0.10111  | 0.556904 | 0.372328 | 0.734847 |
| MmugDNA.42855.1.S1_at   | MmugDNA.42855.1 | 9.53  | 8.45  | 0.18 | 0.08 | 2.12  | 0.000712 | 0.00253  | 0.071988 | 0.074291 |
| MmugDNA.42856.1.S1_at   | MmugDNA.42856.1 | 6.08  | 6.86  | 0.14 | 0.08 | -1.72 | 0.00098  | 0.036338 | 0.076291 | 0.235105 |
| MmugDNA.42857.1.S1_at   | MmugDNA.42857.1 | 6.84  | 6.71  | 0.03 | 0.26 | 1.1   | 0.248164 | 0.530698 | 0.543486 | 0.718104 |
| MmugDNA.42858.1.S1_at   | MmugDNA.42858.1 | 5.08  | 5.47  | 0.75 | 0.16 | -1.31 | 0.918213 | 0.857035 | 0.965152 | 0.91832  |
| MmugDNA.4286.1.S1_at    | MmugDNA.4286.1  | 5.95  | 5.6   | 0.2  | 0.15 | 1.27  | 0.05513  | 0.092903 | 0.291849 | 0.349024 |
| MmugDNA.42861.1.S1_at   | MmugDNA.42861.1 | 10.51 | 10.46 | 0.15 | 0.02 | 1.03  | 0.560624 | 0.129751 | 0.773964 | 0.401362 |
| MmugDNA.42862.1.S1_s_at | MmugDNA.42862.1 | 9.2   | 9.12  | 0.08 | 0.1  | 1.06  | 0.361676 | 0.068169 | 0.637014 | 0.307314 |
| MmugDNA.42863.1.S1_at   | MmugDNA.42863.1 | 6.59  | 7.09  | 1.04 | 0.18 | -1.41 | 0.53271  | 0.393709 | 0.756693 | 0.626522 |
| MmugDNA.42864.1.S1_at   | MmugDNA.42864.1 | 3.69  | 3.67  | 0.22 | 0.58 | 1.02  | 0.915125 | 0.989696 | 0.963917 | 0.994108 |
| MmugDNA.42865.1.S1_at   | MmugDNA.42865.1 | 11.08 | 10.91 | 0.99 | 0.06 | 1.13  | 0.626992 | 0.565169 | 0.816544 | 0.739748 |
| MmugDNA.42866.1.S1_at   | MmugDNA.42866.1 | 8.08  | 8.56  | 0.18 | 0.22 | -1.4  | 0.036815 | 0.091489 | 0.247012 | 0.346533 |
| MmugDNA.42867.1.S1_at   | MmugDNA.42867.1 | 4.73  | 4.77  | 0.2  | 0.08 | -1.02 | 0.861479 | 0.027235 | 0.939844 | 0.206279 |
| MmugDNA.42868.1.S1_at   | MmugDNA.42868.1 | 4.22  | 4.2   | 0.15 | 0.05 | 1.01  | 0.585385 | 0.743096 | 0.789198 | 0.851135 |
| MmugDNA.42869.1.S1_at   | MmugDNA.42869.1 | 8.01  | 7.95  | 0.22 | 0.06 | 1.04  | 0.695897 | 0.897641 | 0.855131 | 0.941618 |
| MmugDNA.4287.1.S1_at    | MmugDNA.4287.1  | 4.18  | 4.47  | 0.11 | 0.06 | -1.22 | 0.018168 | 0.232249 | 0.18774  | 0.503975 |
| MmugDNA.42871.1.S1_at   | MmugDNA.42871.1 | 4.83  | 4.84  | 0.13 | 0.19 | -1    | 0.943028 | 0.757269 | 0.976001 | 0.858672 |
| MmugDNA.42874.1.S1_at   | MmugDNA.42874.1 | 6.13  | 6.13  | 0.25 | 0.07 | 1     | 0.53693  | 0.244213 | 0.759215 | 0.514167 |
| MmugDNA.42875.1.S1_at   | MmugDNA.42875.1 | 4.35  | 3.94  | 0.79 | 0.02 | 1.33  | 0.320682 | 0.261358 | 0.605178 | 0.527858 |
| MmugDNA.42878.1.S1_at   | MmugDNA.42878.1 | 7.8   | 8.02  | 0.12 | 0.03 | -1.16 | 0.094727 | 0.021875 | 0.36369  | 0.185121 |
| MmugDNA.42879.1.S1_at   | MmugDNA.42879.1 | 7.69  | 8.36  | 1.57 | 0.32 | -1.59 | 0.808587 | 0.883438 | 0.914352 | 0.933594 |
| MmugDNA.4288.1.S1_at    | MmugDNA.4288.1  | 3.89  | 3.96  | 0.12 | 0.07 | -1.04 | 0.531209 | 0.334406 | 0.75565  | 0.582387 |
| MmugDNA.42882.1.S1_at   | MmugDNA.42882.1 | 5.05  | 5.09  | 0.17 | 0.13 | -1.03 | 0.486876 | 0.092827 | 0.725872 | 0.349024 |
| MmugDNA.42882.1.S1_x_at | MmugDNA.42882.1 | 5.16  | 5.22  | 0.07 | 0.01 | -1.04 | 0.17172  | 0.477079 | 0.465674 | 0.683196 |
| MmugDNA.42884.1.S1_at   | MmugDNA.42884.1 | 7.9   | 7.91  | 0.06 | 0.11 | -1.01 | 0.959482 | 0.036509 | 0.9835   | 0.235526 |
| MmugDNA.42886.1.S1_at   | MmugDNA.42886.1 | 6.69  | 6.16  | 0.17 | 0.07 | 1.45  | 0.007375 | 0.000057 | 0.134072 | 0.025666 |
| MmugDNA.42887.1.S1_at   | MmugDNA.42887.1 | 5.25  | 6.67  | 0.7  | 0.54 | -2.67 | 0.061685 | 0.156554 | 0.304942 | 0.43196  |
| MmugDNA.42888.1.S1_at   | MmugDNA.42888.1 | 10.53 | 11.82 | 0.38 | 0.05 | -2.44 | 0.003725 | 0.010782 | 0.106283 | 0.135512 |
| MmugDNA.4289.1.S1_at    | MmugDNA.4289.1  | 8.25  | 8.16  | 0.1  | 0.13 | 1.06  | 0.634543 | 0.952824 | 0.820816 | 0.97327  |
| MmugDNA.42892.1.S1_at   | MmugDNA.42892.1 | 5.87  | 5.44  | 0.22 | 0.26 | 1.34  | 0.498803 | 0.656494 | 0.733927 | 0.799097 |
| MmugDNA.42893.1.S1_at   | MmugDNA.42893.1 | 5.42  | 5.28  | 1.03 | 0.52 | 1.11  | 0.966455 | 0.849841 | 0.98642  | 0.914673 |

|                         |                 |       |       |      |      |       |          |          |          |          |
|-------------------------|-----------------|-------|-------|------|------|-------|----------|----------|----------|----------|
| MmugDNA.42894.1.S1_at   | MmugDNA.42894.1 | 4.6   | 4.53  | 0.11 | 0.12 | 1.05  | 0.174617 | 0.509414 | 0.468862 | 0.704167 |
| MmugDNA.42895.1.S1_at   | MmugDNA.42895.1 | 3.9   | 4.79  | 0.08 | 0.41 | -1.86 | 0.042153 | 0.242301 | 0.262198 | 0.512739 |
| MmugDNA.42896.1.S1_at   | MmugDNA.42896.1 | 3.99  | 3.86  | 0.12 | 0.21 | 1.1   | 0.460589 | 0.314401 | 0.708278 | 0.56831  |
| MmugDNA.42898.1.S1_at   | MmugDNA.42898.1 | 9.64  | 10.09 | 0.49 | 0.18 | -1.37 | 0.565993 | 0.394835 | 0.77703  | 0.627216 |
| MmugDNA.429.1.S1_at     | MmugDNA.429.1   | 2.9   | 2.9   | 0.02 | 0.1  | -1    | 0.779939 | 0.954501 | 0.899563 | 0.974181 |
| MmugDNA.4290.1.S1_at    | MmugDNA.4290.1  | 9.74  | 9.33  | 0.36 | 0.18 | 1.33  | 0.207125 | 0.213579 | 0.504847 | 0.48741  |
| MmugDNA.42900.1.S1_at   | MmugDNA.42900.1 | 5.47  | 5.54  | 0.18 | 0.1  | -1.05 | 0.585914 | 0.344363 | 0.789537 | 0.589762 |
| MmugDNA.42904.1.S1_at   | MmugDNA.42904.1 | 7.34  | 6.67  | 0.21 | 0.06 | 1.6   | 0.006103 | 0.000419 | 0.124422 | 0.038093 |
| MmugDNA.42906.1.S1_at   | MmugDNA.42906.1 | 6.31  | 7.69  | 0.11 | 0.15 | -2.61 | 0.000194 | 0.013941 | 0.053494 | 0.151391 |
| MmugDNA.42907.1.S1_at   | MmugDNA.42907.1 | 3.92  | 3.96  | 0.21 | 0.04 | -1.03 | 0.474333 | 0.577483 | 0.717451 | 0.747923 |
| MmugDNA.42908.1.S1_at   | MmugDNA.42908.1 | 6.8   | 6.72  | 0.21 | 0.48 | 1.05  | 0.808673 | 0.129608 | 0.914357 | 0.401223 |
| MmugDNA.42909.1.S1_at   | MmugDNA.42909.1 | 4.63  | 4.46  | 0.2  | 0.2  | 1.13  | 0.140364 | 0.141381 | 0.426075 | 0.414874 |
| MmugDNA.4291.1.S1_at    | MmugDNA.4291.1  | 9.54  | 9.45  | 0.08 | 0.04 | 1.06  | 0.268372 | 0.002346 | 0.561061 | 0.07161  |
| MmugDNA.42911.1.S1_at   | MmugDNA.42911.1 | 5.55  | 5.6   | 0.14 | 0.03 | -1.03 | 0.571305 | 0.853071 | 0.779864 | 0.916487 |
| MmugDNA.42912.1.S1_at   | MmugDNA.42912.1 | 8.41  | 8.09  | 0.45 | 0.27 | 1.25  | 0.886901 | 0.027073 | 0.951794 | 0.205754 |
| MmugDNA.42914.1.S1_at   | MmugDNA.42914.1 | 7.24  | 7.22  | 0.2  | 0.22 | 1.01  | 0.381666 | 0.439301 | 0.651304 | 0.658043 |
| MmugDNA.42915.1.S1_at   | MmugDNA.42915.1 | 6.16  | 6.11  | 0.04 | 0.03 | 1.03  | 0.036787 | 0.08452  | 0.246861 | 0.335916 |
| MmugDNA.42916.1.S1_at   | MmugDNA.42916.1 | 8.8   | 8.91  | 0.07 | 0.04 | -1.08 | 0.210679 | 0.9082   | 0.5083   | 0.947992 |
| MmugDNA.42917.1.S1_at   | MmugDNA.42917.1 | 4.53  | 4.65  | 0.29 | 0.81 | -1.08 | 0.596741 | 0.77422  | 0.796023 | 0.868735 |
| MmugDNA.42918.1.S1_at   | MmugDNA.42918.1 | 4.73  | 4.73  | 0.06 | 0.08 | 1     | 0.220399 | 0.450976 | 0.518093 | 0.665946 |
| MmugDNA.42919.1.S1_at   | MmugDNA.42919.1 | 12.87 | 12.99 | 0.27 | 0.09 | -1.09 | 0.168966 | 0.070873 | 0.46215  | 0.312373 |
| MmugDNA.4292.1.S1_at    | MmugDNA.4292.1  | 7.86  | 7.75  | 0.14 | 0.14 | 1.08  | 0.604219 | 0.449674 | 0.801436 | 0.665156 |
| MmugDNA.42920.1.S1_at   | MmugDNA.42920.1 | 13.73 | 13.78 | 0.06 | 0.02 | -1.04 | 0.320885 | 0.439728 | 0.605315 | 0.65842  |
| MmugDNA.42922.1.S1_at   | MmugDNA.42922.1 | 7.63  | 6.98  | 0.4  | 0.12 | 1.57  | 0.16883  | 0.298518 | 0.462083 | 0.557175 |
| MmugDNA.42923.1.S1_at   | MmugDNA.42923.1 | 10.97 | 11.3  | 0.12 | 0.1  | -1.25 | 0.067118 | 0.145671 | 0.316802 | 0.419644 |
| MmugDNA.42927.1.S1_at   | MmugDNA.42927.1 | 3.32  | 3.26  | 0.27 | 0.25 | 1.04  | 0.442755 | 0.761439 | 0.696138 | 0.861416 |
| MmugDNA.42929.1.S1_at   | MmugDNA.42929.1 | 3.45  | 3.56  | 0.1  | 0.12 | -1.08 | 0.511424 | 0.539496 | 0.742401 | 0.723763 |
| MmugDNA.42930.1.S1_at   | MmugDNA.42930.1 | 10.59 | 12.46 | 0.47 | 0.06 | -3.65 | 0.003462 | 0.090758 | 0.103385 | 0.345227 |
| MmugDNA.5636.1.S1_s_at  | MmugDNA.5636.1  | 5.9   | 5.44  | 0.26 | 0.27 | 1.38  | 0.470473 | 0.553221 | 0.714968 | 0.73239  |
| MmugDNA.42932.1.S1_at   | MmugDNA.42932.1 | 4.08  | 5.22  | 0.74 | 0.45 | -2.21 | 0.208435 | 0.151001 | 0.506128 | 0.425628 |
| MmugDNA.42933.1.S1_at   | MmugDNA.42933.1 | 7.25  | 6.97  | 0.66 | 0.31 | 1.22  | 0.546138 | 0.047023 | 0.765159 | 0.261469 |
| MmugDNA.42935.1.S1_at   | MmugDNA.42935.1 | 3.56  | 3.49  | 0.07 | 0.03 | 1.04  | 0.177191 | 0.534018 | 0.471808 | 0.720046 |
| MmugDNA.42936.1.S1_at   | MmugDNA.42936.1 | 4.43  | 4.43  | 0.07 | 0.13 | -1    | 0.986615 | 0.496157 | 0.995228 | 0.695877 |
| MmugDNA.42937.1.S1_at   | MmugDNA.42937.1 | 8.02  | 8.1   | 0.3  | 0.05 | -1.05 | 0.441354 | 0.373631 | 0.694906 | 0.612389 |
| MmugDNA.4294.1.S1_at    | MmugDNA.4294.1  | 2.96  | 2.98  | 0.11 | 0.12 | -1.01 | 0.65528  | 0.777361 | 0.833226 | 0.87064  |
| MmugDNA.42940.1.S1_at   | MmugDNA.42940.1 | 11.53 | 11.47 | 0.33 | 0.1  | 1.04  | 0.54178  | 0.068401 | 0.762424 | 0.307955 |
| MmugDNA.42941.1.S1_at   | MmugDNA.42941.1 | 10.83 | 10.85 | 0.26 | 0.13 | -1.01 | 0.589401 | 0.328304 | 0.791592 | 0.578012 |
| MmugDNA.42943.1.S1_at   | MmugDNA.42943.1 | 6.93  | 6.46  | 0.76 | 0.29 | 1.39  | 0.400528 | 0.543973 | 0.66549  | 0.72652  |
| MmugDNA.42944.1.S1_at   | MmugDNA.42944.1 | 3.33  | 3.19  | 0.27 | 0.12 | 1.11  | 0.545318 | 0.613831 | 0.764553 | 0.77088  |
| MmugDNA.42945.1.S1_at   | MmugDNA.42945.1 | 9.8   | 9.35  | 0.59 | 0.37 | 1.37  | 0.816124 | 0.565538 | 0.917947 | 0.739956 |
| MmugDNA.42946.1.S1_at   | MmugDNA.42946.1 | 7.44  | 7.44  | 0.18 | 0.22 | 1.01  | 0.639258 | 0.357758 | 0.82339  | 0.599382 |
| MmugDNA.42947.1.S1_at   | MmugDNA.42947.1 | 3.39  | 2.85  | 0.36 | 0.04 | 1.45  | 0.211361 | 0.23445  | 0.509141 | 0.505674 |
| MmugDNA.42948.1.S1_x_at | MmugDNA.42948.1 | 7.59  | 7.16  | 0.49 | 0.2  | 1.35  | 0.189125 | 0.200291 | 0.485774 | 0.474689 |

|                         |                 |       |       |      |      |       |          |          |          |          |
|-------------------------|-----------------|-------|-------|------|------|-------|----------|----------|----------|----------|
| MmugDNA.42949.1.S1_at   | MmugDNA.42949.1 | 7.36  | 8.13  | 1.29 | 0.34 | -1.7  | 0.836663 | 0.957642 | 0.928328 | 0.976031 |
| MmugDNA.4295.1.S1_at    | MmugDNA.4295.1  | 5.32  | 5.34  | 0.25 | 0.15 | -1.01 | 0.997385 | 0.987799 | 0.999086 | 0.993191 |
| MmugDNA.42950.1.S1_at   | MmugDNA.42950.1 | 3.86  | 3.81  | 0.14 | 0.29 | 1.04  | 0.717883 | 0.76627  | 0.866736 | 0.864189 |
| MmugDNA.42951.1.S1_at   | MmugDNA.42951.1 | 8.82  | 8.32  | 0.49 | 0.1  | 1.41  | 0.090038 | 0.096698 | 0.356863 | 0.35417  |
| MmugDNA.42952.1.S1_at   | MmugDNA.42952.1 | 12.94 | 12.91 | 0.16 | 0.01 | 1.02  | 0.384229 | 0.280762 | 0.653292 | 0.543952 |
| MmugDNA.42953.1.S1_at   | MmugDNA.42953.1 | 10.31 | 10.32 | 0.25 | 0.08 | -1.01 | 0.749786 | 0.101262 | 0.884144 | 0.360998 |
| MmugDNA.42954.1.S1_at   | MmugDNA.42954.1 | 10.06 | 9.11  | 0.18 | 0.15 | 1.93  | 0.002064 | 0.000568 | 0.090098 | 0.041092 |
| MmugDNA.42955.1.S1_at   | MmugDNA.42955.1 | 4.34  | 4.2   | 0.41 | 0.17 | 1.1   | 0.592507 | 0.590965 | 0.793487 | 0.75656  |
| MmugDNA.42956.1.S1_at   | MmugDNA.42956.1 | 3.47  | 3.45  | 0.13 | 0.06 | 1.01  | 0.232104 | 0.436957 | 0.530631 | 0.656361 |
| MmugDNA.42958.1.S1_at   | MmugDNA.42958.1 | 4.89  | 4.69  | 0.25 | 0.63 | 1.15  | 0.666494 | 0.648492 | 0.83985  | 0.794294 |
| MmugDNA.42959.1.S1_at   | MmugDNA.42959.1 | 6.17  | 6.15  | 0.21 | 0.08 | 1.01  | 0.521202 | 0.755939 | 0.749281 | 0.8579   |
| MmugDNA.4296.1.S1_at    | MmugDNA.4296.1  | 3.34  | 3.49  | 0.11 | 0.14 | -1.11 | 0.258683 | 0.476669 | 0.552804 | 0.682847 |
| MmugDNA.42961.1.S1_at   | MmugDNA.42961.1 | 10.05 | 10.18 | 0.23 | 0.08 | -1.09 | 0.112124 | 0.685839 | 0.388227 | 0.816612 |
| MmugDNA.42962.1.S1_at   | MmugDNA.42962.1 | 8.38  | 8.53  | 0.12 | 0.34 | -1.11 | 0.857219 | 0.92483  | 0.937984 | 0.957467 |
| MmugDNA.42963.1.S1_at   | MmugDNA.42963.1 | 4.89  | 4.71  | 0.09 | 0.23 | 1.14  | 0.795246 | 0.390473 | 0.907497 | 0.624267 |
| MmugDNA.42964.1.S1_at   | MmugDNA.42964.1 | 6.68  | 6.22  | 0.28 | 0.17 | 1.38  | 0.029688 | 0.013528 | 0.225494 | 0.148875 |
| MmugDNA.42965.1.S1_at   | MmugDNA.42965.1 | 4.06  | 4.37  | 0.28 | 0.28 | -1.24 | 0.279799 | 0.200151 | 0.571082 | 0.474603 |
| MmugDNA.42966.1.S1_at   | MmugDNA.42966.1 | 5.5   | 5.51  | 0.15 | 0.15 | -1    | 0.767669 | 0.967621 | 0.893363 | 0.982093 |
| MmugDNA.42967.1.S1_at   | MmugDNA.42967.1 | 8.77  | 8.67  | 0.33 | 0.07 | 1.07  | 0.71851  | 0.524862 | 0.867253 | 0.714635 |
| MmugDNA.42967.1.S1_s_at | MmugDNA.42967.1 | 9.77  | 9.61  | 0.24 | 0.03 | 1.11  | 0.870212 | 0.979794 | 0.944208 | 0.989168 |
| MmugDNA.42969.1.S1_at   | MmugDNA.42969.1 | 3.84  | 3.74  | 0.21 | 0.07 | 1.07  | 0.251377 | 0.340009 | 0.5462   | 0.586516 |
| MmugDNA.42970.1.S1_at   | MmugDNA.42970.1 | 5.99  | 5.93  | 0.03 | 0.23 | 1.04  | 0.582565 | 0.817907 | 0.787333 | 0.894951 |
| MmugDNA.42971.1.S1_at   | MmugDNA.42971.1 | 5.91  | 5.78  | 0.21 | 0.11 | 1.1   | 0.341501 | 0.490248 | 0.621345 | 0.692301 |
| MmugDNA.42972.1.S1_at   | MmugDNA.42972.1 | 7.5   | 7.98  | 0.2  | 0.01 | -1.39 | 0.01437  | 0.017964 | 0.171567 | 0.169043 |
| MmugDNA.42973.1.S1_at   | MmugDNA.42973.1 | 8.98  | 8.84  | 0.08 | 0.06 | 1.11  | 0.207819 | 0.03988  | 0.505752 | 0.244852 |
| MmugDNA.42974.1.S1_at   | MmugDNA.42974.1 | 3.25  | 3.05  | 0.9  | 0.45 | 1.14  | 0.478726 | 0.672329 | 0.720221 | 0.808488 |
| MmugDNA.42975.1.S1_at   | MmugDNA.42975.1 | 5.05  | 5.16  | 0.09 | 0.14 | -1.08 | 0.770244 | 0.001109 | 0.894561 | 0.052745 |
| MmugDNA.42976.1.S1_at   | MmugDNA.42976.1 | 4.96  | 4.95  | 0.12 | 0.1  | 1.01  | 0.955498 | 0.378341 | 0.981771 | 0.615443 |
| MmugDNA.42978.1.S1_at   | MmugDNA.42978.1 | 5.16  | 5.2   | 0.1  | 0.62 | -1.02 | 0.356775 | 0.260313 | 0.633028 | 0.526876 |
| MmugDNA.42981.1.S1_at   | MmugDNA.42981.1 | 9.39  | 9.81  | 0.22 | 0.17 | -1.33 | 0.066407 | 0.098608 | 0.31527  | 0.356743 |
| MmugDNA.42982.1.S1_at   | MmugDNA.42982.1 | 13.64 | 13.57 | 0.1  | 0.04 | 1.05  | 0.722649 | 0.062361 | 0.86961  | 0.296504 |
| MmugDNA.42983.1.S1_s_at | MmugDNA.42983.1 | 10.87 | 11.78 | 0.32 | 0.17 | -1.89 | 0.017992 | 0.277632 | 0.187151 | 0.541628 |
| MmugDNA.42984.1.S1_at   | MmugDNA.42984.1 | 6.26  | 6.22  | 0.32 | 0.07 | 1.03  | 0.471822 | 0.594133 | 0.715824 | 0.758517 |
| MmugDNA.42985.1.S1_at   | MmugDNA.42985.1 | 4.18  | 3.96  | 0.21 | 0.17 | 1.16  | 0.050342 | 0.041316 | 0.282311 | 0.247995 |
| MmugDNA.42986.1.S1_at   | MmugDNA.42986.1 | 3.9   | 3.78  | 0.07 | 0.12 | 1.08  | 0.395078 | 0.480111 | 0.66157  | 0.685659 |
| MmugDNA.42987.1.S1_at   | MmugDNA.42987.1 | 5.21  | 5.32  | 0.04 | 0.24 | -1.08 | 0.492897 | 0.079655 | 0.730073 | 0.326981 |
| MmugDNA.42988.1.S1_at   | MmugDNA.42988.1 | 5.7   | 5.43  | 0.16 | 0.09 | 1.2   | 0.091959 | 0.380138 | 0.359946 | 0.616819 |
| MmugDNA.42989.1.S1_at   | MmugDNA.42989.1 | 3.88  | 3.67  | 0.22 | 0.28 | 1.15  | 0.239762 | 0.288132 | 0.53725  | 0.54936  |
| MmugDNA.4299.1.S1_at    | MmugDNA.4299.1  | 5.55  | 5.64  | 1.05 | 0.25 | -1.06 | 0.467791 | 0.585658 | 0.713187 | 0.752957 |
| MmugDNA.42991.1.S1_at   | MmugDNA.42991.1 | 6.36  | 6.2   | 0.55 | 0.36 | 1.11  | 0.867735 | 0.010537 | 0.942992 | 0.134072 |
| MmugDNA.42992.1.S1_at   | MmugDNA.42992.1 | 5.17  | 4.47  | 0.59 | 0.47 | 1.62  | 0.187845 | 0.385692 | 0.484145 | 0.621079 |
| MmugDNA.42993.1.S1_at   | MmugDNA.42993.1 | 9.18  | 9.1   | 0.22 | 0.2  | 1.06  | 0.839918 | 0.277674 | 0.929832 | 0.541636 |
| MmugDNA.42994.1.S1_at   | MmugDNA.42994.1 | 7.44  | 7.63  | 0.28 | 0.12 | -1.14 | 0.913908 | 0.001867 | 0.963451 | 0.06479  |

|                         |                 |       |       |      |      |       |          |          |          |          |
|-------------------------|-----------------|-------|-------|------|------|-------|----------|----------|----------|----------|
| MmugDNA.42995.1.S1_at   | MmugDNA.42995.1 | 5.44  | 5.26  | 0.55 | 0.14 | 1.13  | 0.397327 | 0.591642 | 0.662987 | 0.75717  |
| MmugDNA.42996.1.S1_at   | MmugDNA.42996.1 | 3.45  | 3.18  | 0.43 | 0.08 | 1.21  | 0.246565 | 0.319557 | 0.542456 | 0.571875 |
| MmugDNA.42997.1.S1_at   | MmugDNA.42997.1 | 6.91  | 5.04  | 0.64 | 0.29 | 3.65  | 0.027615 | 0.024087 | 0.21866  | 0.194493 |
| MmugDNA.42998.1.S1_at   | MmugDNA.42998.1 | 5.47  | 5.55  | 0.18 | 0.03 | -1.06 | 0.695629 | 0.820042 | 0.85496  | 0.89632  |
| MmugDNA.42999.1.S1_at   | MmugDNA.42999.1 | 5.33  | 5.38  | 0.16 | 0.07 | -1.03 | 0.722266 | 0.903445 | 0.869355 | 0.945185 |
| MmugDNA.430.1.S1_at     | MmugDNA.430.1   | 5.3   | 5.03  | 0.13 | 0.2  | 1.21  | 0.305783 | 0.319372 | 0.59281  | 0.571724 |
| MmugDNA.4300.1.S1_at    | MmugDNA.4300.1  | 5.65  | 5.36  | 0.09 | 0.19 | 1.22  | 0.08089  | 0.025147 | 0.341691 | 0.198717 |
| MmugDNA.43002.1.S1_at   | MmugDNA.43002.1 | 9.45  | 10.27 | 0.25 | 0.18 | -1.77 | 0.009841 | 0.028078 | 0.148635 | 0.209118 |
| MmugDNA.43003.1.S1_at   | MmugDNA.43003.1 | 3.99  | 4     | 0.17 | 0.38 | -1    | 0.991171 | 0.72062  | 0.996767 | 0.838352 |
| MmugDNA.43004.1.S1_at   | MmugDNA.43004.1 | 2.79  | 2.74  | 0.14 | 0.17 | 1.03  | 0.763879 | 0.844621 | 0.891841 | 0.91156  |
| MmugDNA.43005.1.S1_at   | MmugDNA.43005.1 | 6.17  | 5.68  | 0.26 | 0.13 | 1.41  | 0.11069  | 0.633908 | 0.386068 | 0.784538 |
| MmugDNA.43006.1.S1_at   | MmugDNA.43006.1 | 4.57  | 4.89  | 0.22 | 0.35 | -1.25 | 0.069631 | 0.02735  | 0.322287 | 0.206637 |
| MmugDNA.43007.1.S1_at   | MmugDNA.43007.1 | 7.91  | 7.64  | 0.29 | 0.15 | 1.21  | 0.192161 | 0.452766 | 0.488749 | 0.667321 |
| MmugDNA.43008.1.S1_at   | MmugDNA.43008.1 | 3.25  | 3.24  | 0.16 | 0.08 | 1.01  | 0.832832 | 0.945905 | 0.926352 | 0.969245 |
| MmugDNA.4301.1.S1_at    | MmugDNA.4301.1  | 8.51  | 8.9   | 0.03 | 0.14 | -1.31 | 0.008126 | 0.425186 | 0.138956 | 0.647647 |
| MmugDNA.43011.1.S1_at   | MmugDNA.43011.1 | 6.63  | 6.5   | 0.59 | 0.22 | 1.09  | 0.374258 | 0.373384 | 0.645448 | 0.61221  |
| MmugDNA.43013.1.S1_at   | MmugDNA.43013.1 | 5.68  | 5.28  | 0.16 | 0.17 | 1.32  | 0.185448 | 0.195259 | 0.48166  | 0.470253 |
| MmugDNA.43014.1.S1_at   | MmugDNA.43014.1 | 6.82  | 6.83  | 0.69 | 0.32 | -1.01 | 0.895339 | 0.306818 | 0.95534  | 0.563387 |
| MmugDNA.43015.1.S1_at   | MmugDNA.43015.1 | 10.48 | 10.18 | 0.09 | 0.05 | 1.23  | 0.009135 | 0.523632 | 0.145497 | 0.713871 |
| MmugDNA.43016.1.S1_at   | MmugDNA.43016.1 | 4.73  | 5.4   | 0.53 | 0.26 | -1.59 | 0.052692 | 0.014168 | 0.28655  | 0.152143 |
| MmugDNA.43017.1.S1_at   | MmugDNA.43017.1 | 11.7  | 11.78 | 0.09 | 0.05 | -1.05 | 0.090576 | 0.307164 | 0.357339 | 0.563487 |
| MmugDNA.43018.1.S1_at   | MmugDNA.43018.1 | 6.03  | 5.94  | 0.08 | 0.07 | 1.07  | 0.11432  | 0.167745 | 0.391223 | 0.444282 |
| MmugDNA.4302.1.S1_at    | MmugDNA.4302.1  | 3.2   | 3.73  | 0.1  | 0.41 | -1.44 | 0.029963 | 0.010364 | 0.22635  | 0.133236 |
| MmugDNA.43020.1.S1_at   | MmugDNA.43020.1 | 5.66  | 6.12  | 0.44 | 0.42 | -1.38 | 0.831862 | 0.063034 | 0.925994 | 0.297739 |
| MmugDNA.43021.1.S1_at   | MmugDNA.43021.1 | 9.13  | 9.88  | 0.16 | 0.09 | -1.69 | 0.002117 | 0.01373  | 0.090208 | 0.150093 |
| MmugDNA.43022.1.S1_at   | MmugDNA.43022.1 | 10.01 | 9.84  | 0.16 | 0.16 | 1.12  | 0.192366 | 0.647032 | 0.488949 | 0.793279 |
| MmugDNA.43023.1.S1_at   | MmugDNA.43023.1 | 8.85  | 8.85  | 0.13 | 0.23 | 1     | 0.740204 | 0.015958 | 0.879526 | 0.16035  |
| MmugDNA.43025.1.S1_at   | MmugDNA.43025.1 | 8.91  | 9.11  | 0.3  | 0.29 | -1.14 | 0.224504 | 0.193551 | 0.52264  | 0.468785 |
| MmugDNA.43026.1.S1_at   | MmugDNA.43026.1 | 4.36  | 4.3   | 0.24 | 0.03 | 1.04  | 0.657925 | 0.738345 | 0.834819 | 0.848258 |
| MmugDNA.43028.1.S1_at   | MmugDNA.43028.1 | 8.09  | 7.25  | 0.33 | 0.29 | 1.78  | 0.077536 | 0.093718 | 0.336282 | 0.350192 |
| MmugDNA.43029.1.S1_at   | MmugDNA.43029.1 | 4.22  | 4.23  | 0.14 | 0.24 | -1.01 | 0.483795 | 0.517906 | 0.723753 | 0.710027 |
| MmugDNA.4303.1.S1_at    | MmugDNA.4303.1  | 10.77 | 10.55 | 0.02 | 0.12 | 1.16  | 0.03998  | 0.000059 | 0.256645 | 0.025666 |
| MmugDNA.43030.1.S1_at   | MmugDNA.43030.1 | 8.88  | 8.96  | 0.07 | 0.21 | -1.06 | 0.657366 | 0.17577  | 0.834434 | 0.452344 |
| MmugDNA.43031.1.S1_at   | MmugDNA.43031.1 | 3.17  | 3.06  | 0.15 | 0.17 | 1.08  | 0.160647 | 0.160354 | 0.452231 | 0.436528 |
| MmugDNA.43032.1.S1_at   | MmugDNA.43032.1 | 9.64  | 9.84  | 0.03 | 0.12 | -1.15 | 0.093875 | 0.521846 | 0.362691 | 0.712654 |
| MmugDNA.43034.1.S1_at   | MmugDNA.43034.1 | 8.99  | 9.27  | 0.11 | 0.05 | -1.21 | 0.024889 | 0.156938 | 0.21096  | 0.432372 |
| MmugDNA.43036.1.S1_s_at | MmugDNA.43036.1 | 9.26  | 8.88  | 0.31 | 0.23 | 1.3   | 0.062375 | 0.029752 | 0.306481 | 0.21414  |
| MmugDNA.43039.1.S1_at   | MmugDNA.43039.1 | 8.25  | 8.33  | 0.26 | 0.01 | -1.06 | 0.469071 | 0.682439 | 0.71396  | 0.814526 |
| MmugDNA.4304.1.S1_at    | MmugDNA.4304.1  | 5.71  | 5.93  | 0.07 | 0.17 | -1.16 | 0.028143 | 0.217191 | 0.220181 | 0.490843 |
| MmugDNA.43042.1.S1_at   | MmugDNA.43042.1 | 7.84  | 8.07  | 0.12 | 0.15 | -1.17 | 0.104118 | 0.030241 | 0.377439 | 0.215784 |
| MmugDNA.43043.1.S1_at   | MmugDNA.43043.1 | 6.16  | 5.5   | 0.25 | 0.06 | 1.59  | 0.023301 | 0.012403 | 0.205593 | 0.144058 |
| MmugDNA.43044.1.S1_at   | MmugDNA.43044.1 | 3.31  | 3.28  | 0.1  | 0.08 | 1.02  | 0.944866 | 0.38183  | 0.976826 | 0.618047 |
| MmugDNA.43045.1.S1_at   | MmugDNA.43045.1 | 6.02  | 5.85  | 0.09 | 0.16 | 1.13  | 0.183875 | 0.078651 | 0.479745 | 0.325522 |



|                         |                 |       |       |      |      |       |          |          |          |          |
|-------------------------|-----------------|-------|-------|------|------|-------|----------|----------|----------|----------|
| MmugDNA.43046.1.S1_at   | MmugDNA.43046.1 | 4.09  | 4.1   | 0.05 | 0.08 | -1.01 | 0.851974 | 0.859179 | 0.93566  | 0.919754 |
| MmugDNA.43047.1.S1_at   | MmugDNA.43047.1 | 6.13  | 6.14  | 0.04 | 0.07 | -1    | 0.755282 | 0.809997 | 0.887223 | 0.890518 |
| MmugDNA.43048.1.S1_at   | MmugDNA.43048.1 | 6.34  | 5.93  | 0.29 | 0.36 | 1.33  | 0.083156 | 0.053531 | 0.345425 | 0.277016 |
| MmugDNA.43049.1.S1_at   | MmugDNA.43049.1 | 6.01  | 5.82  | 0.57 | 0.18 | 1.14  | 0.444142 | 0.361713 | 0.697037 | 0.602422 |
| MmugDNA.4305.1.S1_at    | MmugDNA.4305.1  | 11.88 | 11.89 | 0.14 | 0.11 | -1.01 | 0.778003 | 0.595902 | 0.898504 | 0.759258 |
| MmugDNA.4305.1.S1_s_at  | MmugDNA.4305.1  | 12.46 | 12.47 | 0.08 | 0.1  | -1.01 | 0.648238 | 0.500948 | 0.829161 | 0.69936  |
| MmugDNA.43051.1.S1_at   | MmugDNA.43051.1 | 10.13 | 9.38  | 0.31 | 0.16 | 1.68  | 0.025392 | 0.070768 | 0.21227  | 0.312257 |
| MmugDNA.43051.1.S1_s_at | MmugDNA.43051.1 | 13.14 | 12.8  | 0.1  | 0.17 | 1.27  | 0.055836 | 0.090129 | 0.293385 | 0.344432 |
| MmugDNA.43052.1.S1_at   | MmugDNA.43052.1 | 6.05  | 5.86  | 0.75 | 0.26 | 1.14  | 0.454636 | 0.532006 | 0.704426 | 0.718995 |
| MmugDNA.43053.1.S1_at   | MmugDNA.43053.1 | 9.11  | 9.28  | 0.18 | 0.14 | -1.12 | 0.096047 | 0.000917 | 0.365529 | 0.048499 |
| MmugDNA.43056.1.S1_at   | MmugDNA.43056.1 | 6.16  | 6.32  | 0.07 | 0.05 | -1.11 | 0.062222 | 0.523042 | 0.306099 | 0.713429 |
| MmugDNA.43057.1.S1_at   | MmugDNA.43057.1 | 5.31  | 5.13  | 0.09 | 0.16 | 1.13  | 0.100676 | 0.268955 | 0.371742 | 0.534369 |
| MmugDNA.43058.1.S1_at   | MmugDNA.43058.1 | 6.97  | 7.03  | 0.18 | 0.38 | -1.04 | 0.900468 | 0.095077 | 0.957767 | 0.352124 |
| MmugDNA.43059.1.S1_at   | MmugDNA.43059.1 | 4.58  | 4.6   | 0.16 | 0.08 | -1.01 | 0.312904 | 0.458326 | 0.598814 | 0.671119 |
| MmugDNA.4306.1.S1_at    | MmugDNA.4306.1  | 6.41  | 7.55  | 0.67 | 0.23 | -2.2  | 0.068513 | 0.099631 | 0.319562 | 0.358128 |
| MmugDNA.43061.1.S1_at   | MmugDNA.43061.1 | 3.47  | 3.31  | 0.1  | 0.14 | 1.12  | 0.174469 | 0.193742 | 0.468676 | 0.468828 |
| MmugDNA.43062.1.S1_at   | MmugDNA.43062.1 | 5.97  | 5.74  | 0.44 | 0.01 | 1.17  | 0.292522 | 0.347568 | 0.581743 | 0.592019 |
| MmugDNA.43063.1.S1_s_at | MmugDNA.43063.1 | 9.09  | 8.73  | 0.38 | 0.29 | 1.28  | 0.448027 | 0.014511 | 0.699768 | 0.153682 |
| MmugDNA.43064.1.S1_at   | MmugDNA.43064.1 | 3.83  | 3.84  | 0.05 | 0.06 | -1.01 | 0.857972 | 0.00049  | 0.938213 | 0.038921 |
| MmugDNA.43066.1.S1_at   | MmugDNA.43066.1 | 5.09  | 4.93  | 1.17 | 1.1  | 1.12  | 0.878146 | 0.925065 | 0.947963 | 0.957602 |
| MmugDNA.43068.1.S1_at   | MmugDNA.43068.1 | 8.23  | 8.14  | 0.19 | 0.04 | 1.07  | 0.285424 | 0.342859 | 0.575167 | 0.588712 |
| MmugDNA.43069.1.S1_at   | MmugDNA.43069.1 | 5.3   | 5.36  | 0.14 | 0.07 | -1.04 | 0.320328 | 0.244009 | 0.604943 | 0.514069 |
| MmugDNA.4307.1.S1_at    | MmugDNA.4307.1  | 11.07 | 10.69 | 0.42 | 0.22 | 1.29  | 0.087211 | 0.288798 | 0.352892 | 0.549936 |
| MmugDNA.43071.1.S1_at   | MmugDNA.43071.1 | 8.33  | 7.81  | 0.23 | 0.16 | 1.43  | 0.03944  | 0.012548 | 0.25509  | 0.144487 |
| MmugDNA.43072.1.S1_at   | MmugDNA.43072.1 | 8.66  | 8.7   | 0.1  | 0.15 | -1.03 | 0.985582 | 0.339485 | 0.994817 | 0.586095 |
| MmugDNA.43073.1.S1_at   | MmugDNA.43073.1 | 6.09  | 6.13  | 0.18 | 0.27 | -1.03 | 0.794411 | 0.936715 | 0.90713  | 0.964332 |
| MmugDNA.43074.1.S1_at   | MmugDNA.43074.1 | 8.29  | 8.3   | 0.22 | 0.23 | -1.01 | 0.548546 | 0.135803 | 0.766578 | 0.407979 |
| MmugDNA.43075.1.S1_at   | MmugDNA.43075.1 | 6.85  | 6.88  | 0.24 | 0.14 | -1.02 | 0.684896 | 0.903824 | 0.849863 | 0.945402 |
| MmugDNA.43076.1.S1_at   | MmugDNA.43076.1 | 7.77  | 6.68  | 0.48 | 0.08 | 2.13  | 0.03898  | 0.029434 | 0.253751 | 0.213368 |
| MmugDNA.43077.1.S1_at   | MmugDNA.43077.1 | 6.29  | 6.92  | 0.77 | 0.1  | -1.55 | 0.263261 | 0.468859 | 0.556921 | 0.677906 |
| MmugDNA.43078.1.S1_at   | MmugDNA.43078.1 | 7.48  | 6.87  | 0.4  | 0.09 | 1.53  | 0.142357 | 0.098917 | 0.428351 | 0.357049 |
| MmugDNA.43079.1.S1_at   | MmugDNA.43079.1 | 6     | 5.94  | 0.12 | 0.05 | 1.04  | 0.841127 | 0.59455  | 0.930119 | 0.758623 |
| MmugDNA.43080.1.S1_at   | MmugDNA.43080.1 | 5.26  | 5.01  | 0.1  | 0.21 | 1.18  | 0.263341 | 0.332443 | 0.556921 | 0.58087  |
| MmugDNA.43081.1.S1_at   | MmugDNA.43081.1 | 3.99  | 3.95  | 0.31 | 0.16 | 1.03  | 0.32227  | 0.763094 | 0.606311 | 0.862257 |
| MmugDNA.43082.1.S1_at   | MmugDNA.43082.1 | 4.09  | 3.54  | 0.34 | 0.14 | 1.46  | 0.265878 | 0.040436 | 0.558465 | 0.24621  |
| MmugDNA.43083.1.S1_at   | MmugDNA.43083.1 | 8.86  | 8.3   | 0.3  | 0.3  | 1.47  | 0.067744 | 0.011525 | 0.318083 | 0.138822 |
| MmugDNA.43084.1.S1_at   | MmugDNA.43084.1 | 3.71  | 3.44  | 0.4  | 0.06 | 1.21  | 0.094414 | 0.217077 | 0.363345 | 0.490668 |
| MmugDNA.43086.1.S1_at   | MmugDNA.43086.1 | 5.85  | 5.64  | 0.16 | 0.14 | 1.16  | 0.122844 | 0.07942  | 0.401841 | 0.326766 |
| MmugDNA.43087.1.S1_at   | MmugDNA.43087.1 | 10.78 | 10.79 | 0.19 | 0.08 | -1.01 | 0.219466 | 0.538139 | 0.5172   | 0.722911 |
| MmugDNA.43088.1.S1_at   | MmugDNA.43088.1 | 5.66  | 5.77  | 0.11 | 0.08 | -1.08 | 0.140215 | 0.134417 | 0.425881 | 0.406603 |
| MmugDNA.4309.1.S1_at    | MmugDNA.4309.1  | 8.19  | 7.61  | 0.68 | 0.28 | 1.49  | 0.161363 | 0.061162 | 0.452953 | 0.293981 |
| MmugDNA.43090.1.S1_at   | MmugDNA.43090.1 | 6.81  | 7.31  | 0.31 | 0.08 | -1.42 | 0.033044 | 0.08153  | 0.236091 | 0.329764 |
| MmugDNA.43091.1.S1_at   | MmugDNA.43091.1 | 11.84 | 11.77 | 0.03 | 0.03 | 1.05  | 0.018474 | 0.455952 | 0.189088 | 0.66972  |

|                         |                 |       |       |      |      |       |          |          |          |          |
|-------------------------|-----------------|-------|-------|------|------|-------|----------|----------|----------|----------|
| MmugDNA.43092.1.S1_at   | MmugDNA.43092.1 | 5.87  | 5.91  | 0.18 | 0.04 | -1.03 | 0.708847 | 0.280477 | 0.862097 | 0.543671 |
| MmugDNA.43093.1.S1_at   | MmugDNA.43093.1 | 6.27  | 5.95  | 0.57 | 0.33 | 1.25  | 0.416913 | 0.751625 | 0.677228 | 0.855539 |
| MmugDNA.43095.1.S1_at   | MmugDNA.43095.1 | 9.02  | 8.74  | 0.27 | 0.16 | 1.21  | 0.19121  | 0.079819 | 0.487409 | 0.327154 |
| MmugDNA.43097.1.S1_at   | MmugDNA.43097.1 | 8.03  | 7.59  | 0.21 | 0.17 | 1.36  | 0.026597 | 0.066532 | 0.216314 | 0.303705 |
| MmugDNA.431.1.S1_at     | MmugDNA.431.1   | 9.95  | 10.42 | 0.18 | 0    | -1.39 | 0.005589 | 0.002215 | 0.120456 | 0.069424 |
| MmugDNA.431.1.S1_s_at   | MmugDNA.431.1   | 11.07 | 11.43 | 0.23 | 0.06 | -1.28 | 0.047628 | 0.057888 | 0.275691 | 0.287025 |
| MmugDNA.43100.1.S1_at   | MmugDNA.43100.1 | 4.48  | 5.14  | 0.33 | 0.36 | -1.58 | 0.14893  | 0.129233 | 0.437498 | 0.400635 |
| MmugDNA.43101.1.S1_at   | MmugDNA.43101.1 | 7.84  | 8.24  | 0.3  | 0.03 | -1.32 | 0.100316 | 0.1412   | 0.371099 | 0.414709 |
| MmugDNA.43102.1.S1_at   | MmugDNA.43102.1 | 4.55  | 4.24  | 0.17 | 0.12 | 1.24  | 0.067509 | 0.313327 | 0.317446 | 0.567787 |
| MmugDNA.43103.1.S1_at   | MmugDNA.43103.1 | 6.11  | 5.14  | 0.7  | 0.78 | 1.96  | 0.199508 | 0.311614 | 0.496887 | 0.566586 |
| MmugDNA.43104.1.S1_at   | MmugDNA.43104.1 | 5.04  | 4.23  | 0.56 | 0.06 | 1.75  | 0.071691 | 0.057834 | 0.325611 | 0.286866 |
| MmugDNA.43105.1.S1_at   | MmugDNA.43105.1 | 4.58  | 4.58  | 0.14 | 0.16 | -1    | 0.505856 | 0.259866 | 0.738724 | 0.526737 |
| MmugDNA.43106.1.S1_at   | MmugDNA.43106.1 | 3.22  | 3.25  | 0.11 | 0.02 | -1.02 | 0.55651  | 0.216043 | 0.771669 | 0.48965  |
| MmugDNA.43108.1.S1_at   | MmugDNA.43108.1 | 2.97  | 2.95  | 0.1  | 0.19 | 1.01  | 0.420995 | 0.444023 | 0.679818 | 0.661644 |
| MmugDNA.4311.1.S1_at    | MmugDNA.4311.1  | 4.6   | 4.8   | 0.32 | 0.23 | -1.15 | 0.931373 | 0.555986 | 0.971098 | 0.734254 |
| MmugDNA.43110.1.S1_at   | MmugDNA.43110.1 | 4.56  | 4.69  | 0.29 | 0.34 | -1.09 | 0.471736 | 0.784401 | 0.715777 | 0.87518  |
| MmugDNA.43111.1.S1_at   | MmugDNA.43111.1 | 3.27  | 3.26  | 0.18 | 0.18 | 1.01  | 0.520122 | 0.767741 | 0.748625 | 0.865182 |
| MmugDNA.43114.1.S1_at   | MmugDNA.43114.1 | 8.83  | 8.28  | 0.21 | 0.11 | 1.46  | 0.013713 | 0.077544 | 0.16797  | 0.323421 |
| MmugDNA.43115.1.S1_at   | MmugDNA.43115.1 | 7.92  | 7.99  | 0.03 | 0.1  | -1.05 | 0.158234 | 0.001676 | 0.44918  | 0.061986 |
| MmugDNA.43118.1.S1_at   | MmugDNA.43118.1 | 5.29  | 4.66  | 0.49 | 0.06 | 1.54  | 0.095472 | 0.275601 | 0.364961 | 0.539837 |
| MmugDNA.43119.1.S1_at   | MmugDNA.43119.1 | 4.18  | 4.22  | 0.08 | 0.08 | -1.03 | 0.558548 | 0.662496 | 0.772919 | 0.802356 |
| MmugDNA.4312.1.S1_at    | MmugDNA.4312.1  | 8.2   | 9.48  | 0.4  | 0.21 | -2.43 | 0.010822 | 0.173982 | 0.153877 | 0.450247 |
| MmugDNA.43122.1.S1_at   | MmugDNA.43122.1 | 5.62  | 6.27  | 0.22 | 0.31 | -1.57 | 0.080506 | 0.091507 | 0.341026 | 0.346552 |
| MmugDNA.43123.1.S1_at   | MmugDNA.43123.1 | 8.43  | 8.5   | 0.11 | 0.33 | -1.05 | 0.271476 | 0.906713 | 0.563425 | 0.947216 |
| MmugDNA.43124.1.S1_at   | MmugDNA.43124.1 | 3.77  | 4.26  | 0.55 | 0.17 | -1.4  | 0.463077 | 0.785069 | 0.709925 | 0.875577 |
| MmugDNA.43125.1.S1_at   | MmugDNA.43125.1 | 4.6   | 4.96  | 0.86 | 0.17 | -1.28 | 0.726318 | 0.831928 | 0.871526 | 0.90356  |
| MmugDNA.43127.1.S1_at   | MmugDNA.43127.1 | 3.19  | 2.92  | 0.34 | 0.09 | 1.21  | 0.113704 | 0.118334 | 0.390392 | 0.386393 |
| MmugDNA.43129.1.S1_at   | MmugDNA.43129.1 | 7.86  | 7.33  | 0.2  | 0.03 | 1.44  | 0.013062 | 0.01104  | 0.165004 | 0.136821 |
| MmugDNA.43130.1.S1_at   | MmugDNA.43130.1 | 6.77  | 7.5   | 1.7  | 0.53 | -1.66 | 0.897286 | 0.971451 | 0.956456 | 0.984481 |
| MmugDNA.43134.1.S1_at   | MmugDNA.43134.1 | 11.14 | 11.01 | 0.34 | 0.14 | 1.09  | 0.804191 | 0.917776 | 0.912015 | 0.954011 |
| MmugDNA.43135.1.S1_at   | MmugDNA.43135.1 | 4.35  | 4     | 0.3  | 0.1  | 1.27  | 0.178509 | 0.305044 | 0.47328  | 0.562201 |
| MmugDNA.43136.1.S1_at   | MmugDNA.43136.1 | 8.49  | 8.35  | 0.36 | 0.16 | 1.1   | 0.512018 | 0.415267 | 0.742848 | 0.640769 |
| MmugDNA.43137.1.S1_at   | MmugDNA.43137.1 | 7.37  | 7.45  | 0.26 | 0.26 | -1.05 | 0.867978 | 0.762489 | 0.943108 | 0.861855 |
| MmugDNA.43139.1.S1_at   | MmugDNA.43139.1 | 10.82 | 10.85 | 0.1  | 0.11 | -1.02 | 0.737277 | 0.000542 | 0.878078 | 0.040617 |
| MmugDNA.4314.1.S1_s_at  | MmugDNA.4314.1  | 4.84  | 7.02  | 1.33 | 0.41 | -4.55 | 0.199285 | 0.485021 | 0.496613 | 0.688893 |
| MmugDNA.43140.1.S1_at   | MmugDNA.43140.1 | 4.7   | 3.9   | 0.88 | 0.31 | 1.74  | 0.102861 | 0.097303 | 0.375378 | 0.354999 |
| MmugDNA.43141.1.S1_at   | MmugDNA.43141.1 | 5.29  | 5.28  | 0.14 | 0.15 | 1.01  | 0.422877 | 0.69792  | 0.680985 | 0.824518 |
| MmugDNA.43142.1.S1_at   | MmugDNA.43142.1 | 7.05  | 6.99  | 0.25 | 0.23 | 1.05  | 0.635256 | 0.63555  | 0.821253 | 0.785437 |
| MmugDNA.43143.1.S1_s_at | MmugDNA.43143.1 | 7.35  | 7.57  | 0.2  | 0.19 | -1.17 | 0.104458 | 0.62827  | 0.377773 | 0.781109 |
| MmugDNA.43144.1.S1_at   | MmugDNA.43144.1 | 10.97 | 10.97 | 0.2  | 0.08 | -1    | 0.566748 | 0.436191 | 0.777544 | 0.655879 |
| MmugDNA.43145.1.S1_at   | MmugDNA.43145.1 | 5.21  | 5.58  | 0.15 | 0.07 | -1.29 | 0.033009 | 0.00924  | 0.236089 | 0.126946 |
| MmugDNA.43146.1.S1_at   | MmugDNA.43146.1 | 6.47  | 6.43  | 0.27 | 0.03 | 1.03  | 0.919351 | 0.687504 | 0.965499 | 0.817606 |
| MmugDNA.43147.1.S1_at   | MmugDNA.43147.1 | 5.45  | 5.35  | 0.14 | 0.1  | 1.07  | 0.509735 | 0.42919  | 0.741244 | 0.650715 |

|                         |                 |       |       |      |      |       |          |          |          |          |
|-------------------------|-----------------|-------|-------|------|------|-------|----------|----------|----------|----------|
| MmugDNA.43148.1.S1_at   | MmugDNA.43148.1 | 7.43  | 7.44  | 0.14 | 0.08 | -1.01 | 0.349107 | 0.285592 | 0.62702  | 0.547395 |
| MmugDNA.43149.1.S1_at   | MmugDNA.43149.1 | 5.12  | 5.08  | 0.07 | 0.14 | 1.03  | 0.504917 | 0.518924 | 0.738034 | 0.710789 |
| MmugDNA.4315.1.S1_at    | MmugDNA.4315.1  | 5.92  | 6.01  | 0.07 | 0.17 | -1.06 | 0.794542 | 0.622948 | 0.907212 | 0.777422 |
| MmugDNA.43150.1.S1_at   | MmugDNA.43150.1 | 10.86 | 8.72  | 0.86 | 0.94 | 4.4   | 0.094254 | 0.065072 | 0.363294 | 0.301017 |
| MmugDNA.43151.1.S1_at   | MmugDNA.43151.1 | 4.27  | 4.56  | 0.26 | 0.49 | -1.22 | 0.388794 | 0.635585 | 0.656749 | 0.785437 |
| MmugDNA.43152.1.S1_at   | MmugDNA.43152.1 | 11.94 | 12.01 | 0.07 | 0.04 | -1.05 | 0.329686 | 0.147538 | 0.611807 | 0.421872 |
| MmugDNA.43153.1.S1_at   | MmugDNA.43153.1 | 6.21  | 6.36  | 0.11 | 0.16 | -1.11 | 0.596516 | 0.049378 | 0.795864 | 0.267126 |
| MmugDNA.43154.1.S1_at   | MmugDNA.43154.1 | 2.99  | 2.97  | 0.18 | 0.05 | 1.01  | 0.584476 | 0.65305  | 0.788586 | 0.79718  |
| MmugDNA.24978.1.S1_at   | MmugDNA.24978.1 | 7.5   | 7.45  | 0.2  | 0.16 | 1.04  | 0.725961 | 0.376593 | 0.871415 | 0.614425 |
| MmugDNA.24978.1.S1_s_at | MmugDNA.24978.1 | 6.57  | 6.63  | 0.09 | 0.11 | -1.05 | 0.918843 | 0.161557 | 0.965374 | 0.43767  |
| MmugDNA.43156.1.S1_at   | MmugDNA.43156.1 | 4.04  | 4.04  | 0.04 | 0.03 | -1    | 0.696597 | 0.320241 | 0.855534 | 0.572583 |
| MmugDNA.43157.1.S1_at   | MmugDNA.43157.1 | 6.03  | 5.9   | 0.19 | 0.06 | 1.09  | 0.833372 | 0.633792 | 0.926598 | 0.784449 |
| MmugDNA.43159.1.S1_at   | MmugDNA.43159.1 | 6.19  | 6.01  | 0.11 | 0.12 | 1.13  | 0.211957 | 0.047853 | 0.509822 | 0.263679 |
| MmugDNA.4316.1.S1_at    | MmugDNA.4316.1  | 3.69  | 3.92  | 0.51 | 0.02 | -1.17 | 0.861434 | 0.971161 | 0.939835 | 0.984325 |
| MmugDNA.43160.1.S1_at   | MmugDNA.43160.1 | 4.31  | 3.88  | 0.21 | 0.12 | 1.35  | 0.034224 | 0.03868  | 0.239698 | 0.24169  |
| MmugDNA.43161.1.S1_at   | MmugDNA.43161.1 | 4.45  | 4.43  | 0.27 | 0.1  | 1.01  | 0.881947 | 0.001469 | 0.949737 | 0.058429 |
| MmugDNA.43162.1.S1_at   | MmugDNA.43162.1 | 4.29  | 4.08  | 0.39 | 0.13 | 1.16  | 0.284878 | 0.751582 | 0.574835 | 0.855508 |
| MmugDNA.43163.1.S1_at   | MmugDNA.43163.1 | 7.23  | 7.39  | 0.1  | 0.14 | -1.11 | 0.085507 | 0.004058 | 0.349904 | 0.090288 |
| MmugDNA.43164.1.S1_at   | MmugDNA.43164.1 | 3.28  | 3.28  | 0.02 | 0.18 | 1     | 0.349807 | 0.300621 | 0.627551 | 0.558921 |
| MmugDNA.43165.1.S1_at   | MmugDNA.43165.1 | 4.78  | 4.8   | 0.95 | 0.31 | -1.02 | 0.63379  | 0.595573 | 0.8205   | 0.759091 |
| MmugDNA.43166.1.S1_at   | MmugDNA.43166.1 | 12.95 | 12.56 | 0.21 | 0.1  | 1.31  | 0.024734 | 0.075753 | 0.210421 | 0.320347 |
| MmugDNA.43168.1.S1_at   | MmugDNA.43168.1 | 7.11  | 5.32  | 0.88 | 0.27 | 3.45  | 0.070443 | 0.062517 | 0.323797 | 0.29687  |
| MmugDNA.4317.1.S1_at    | MmugDNA.4317.1  | 5.4   | 5.53  | 0.18 | 0.03 | -1.1  | 0.79686  | 0.286323 | 0.908267 | 0.547784 |
| MmugDNA.43170.1.S1_at   | MmugDNA.43170.1 | 3.61  | 3.54  | 0    | 0.36 | 1.05  | 0.533792 | 0.752085 | 0.75727  | 0.855744 |
| MmugDNA.43171.1.S1_at   | MmugDNA.43171.1 | 3.33  | 3.48  | 0.07 | 0.29 | -1.11 | 0.513437 | 0.757143 | 0.743659 | 0.858648 |
| MmugDNA.43173.1.S1_at   | MmugDNA.43173.1 | 5.4   | 5.54  | 0.34 | 0.14 | -1.1  | 0.543723 | 0.472729 | 0.763572 | 0.680077 |
| MmugDNA.43174.1.S1_at   | MmugDNA.43174.1 | 4.59  | 4.59  | 0    | 0.06 | 1     | 0.355335 | 0.184212 | 0.632127 | 0.460382 |
| MmugDNA.43175.1.S1_at   | MmugDNA.43175.1 | 9.06  | 9.14  | 0.44 | 0.06 | -1.06 | 0.619491 | 0.28104  | 0.811271 | 0.544179 |
| MmugDNA.43176.1.S1_at   | MmugDNA.43176.1 | 5.2   | 5.33  | 0.16 | 0.05 | -1.09 | 0.842688 | 0.908944 | 0.931055 | 0.948471 |
| MmugDNA.43177.1.S1_at   | MmugDNA.43177.1 | 4.5   | 4.65  | 0.35 | 0.07 | -1.11 | 0.783101 | 0.488447 | 0.901029 | 0.691147 |
| MmugDNA.43178.1.S1_at   | MmugDNA.43178.1 | 4.1   | 4.08  | 0.25 | 0.1  | 1.01  | 0.310915 | 0.439704 | 0.597192 | 0.65842  |
| MmugDNA.43179.1.S1_at   | MmugDNA.43179.1 | 7.03  | 7.03  | 0.01 | 0.05 | 1     | 0.266457 | 0.226668 | 0.558813 | 0.499139 |
| MmugDNA.43180.1.S1_at   | MmugDNA.43180.1 | 3.83  | 3.63  | 0.17 | 0.18 | 1.15  | 0.430515 | 0.243053 | 0.686765 | 0.513356 |
| MmugDNA.43181.1.S1_at   | MmugDNA.43181.1 | 6.12  | 6.23  | 0.08 | 0.04 | -1.07 | 0.277239 | 0.064444 | 0.568765 | 0.300008 |
| MmugDNA.43182.1.S1_at   | MmugDNA.43182.1 | 4.46  | 4.03  | 0.3  | 0.13 | 1.35  | 0.181451 | 0.242894 | 0.476903 | 0.513274 |
| MmugDNA.43183.1.S1_at   | MmugDNA.43183.1 | 5.06  | 4.97  | 0.13 | 0.1  | 1.06  | 0.716945 | 0.192224 | 0.866434 | 0.467665 |
| MmugDNA.43185.1.S1_at   | MmugDNA.43185.1 | 10.62 | 10.07 | 0.04 | 0.03 | 1.46  | 0.000062 | 0.011553 | 0.048536 | 0.139091 |
| MmugDNA.43186.1.S1_at   | MmugDNA.43186.1 | 5.13  | 5.12  | 0.21 | 0    | 1     | 0.991218 | 0.886371 | 0.996767 | 0.935364 |
| MmugDNA.43188.1.S1_at   | MmugDNA.43188.1 | 3.87  | 3.86  | 0.42 | 0.1  | 1     | 0.376233 | 0.517123 | 0.646919 | 0.709435 |
| MmugDNA.43189.1.S1_at   | MmugDNA.43189.1 | 3.84  | 3.84  | 0.4  | 0.15 | 1     | 0.904654 | 0.58052  | 0.959549 | 0.74976  |
| MmugDNA.43191.1.S1_at   | MmugDNA.43191.1 | 9.28  | 8.89  | 0.44 | 0.04 | 1.31  | 0.077415 | 0.667877 | 0.336144 | 0.80568  |
| MmugDNA.43192.1.S1_at   | MmugDNA.43192.1 | 11.32 | 11.7  | 0.14 | 0.01 | -1.3  | 0.010311 | 0.0048   | 0.151336 | 0.096735 |
| MmugDNA.43194.1.S1_at   | MmugDNA.43194.1 | 6.51  | 6.91  | 0.47 | 0.09 | -1.32 | 0.069824 | 0.073794 | 0.322718 | 0.317146 |

|                         |                 |       |       |      |      |       |          |          |          |          |
|-------------------------|-----------------|-------|-------|------|------|-------|----------|----------|----------|----------|
| MmugDNA.43196.1.S1_at   | MmugDNA.43196.1 | 6.99  | 6.83  | 0.23 | 0.07 | 1.11  | 0.3958   | 0.37014  | 0.662054 | 0.609369 |
| MmugDNA.43197.1.S1_at   | MmugDNA.43197.1 | 7.2   | 6.98  | 0.18 | 0.13 | 1.16  | 0.116479 | 0.147294 | 0.39363  | 0.421493 |
| MmugDNA.43198.1.S1_at   | MmugDNA.43198.1 | 8.02  | 7.89  | 0.18 | 0.1  | 1.1   | 0.701655 | 0.317599 | 0.858329 | 0.570787 |
| MmugDNA.43199.1.S1_at   | MmugDNA.43199.1 | 3.76  | 3.67  | 0.06 | 0.1  | 1.06  | 0.16937  | 0.453951 | 0.462608 | 0.668338 |
| MmugDNA.432.1.S1_at     | MmugDNA.432.1   | 4.44  | 4.26  | 0.22 | 0.34 | 1.13  | 0.54921  | 0.767642 | 0.76701  | 0.865109 |
| MmugDNA.39419.1.S1_s_at | MmugDNA.39419.1 | 12.22 | 12.62 | 0.2  | 0.13 | -1.32 | 0.082205 | 0.066006 | 0.343755 | 0.302324 |
| MmugDNA.43202.1.S1_at   | MmugDNA.43202.1 | 5.53  | 5.42  | 0.04 | 0.08 | 1.08  | 0.234936 | 0.805944 | 0.532974 | 0.888397 |
| MmugDNA.43203.1.S1_at   | MmugDNA.43203.1 | 11.87 | 11.5  | 0.09 | 0.06 | 1.29  | 0.006432 | 0.00845  | 0.126872 | 0.121922 |
| MmugDNA.43204.1.S1_at   | MmugDNA.43204.1 | 4.59  | 4.51  | 0.21 | 0.15 | 1.06  | 0.999272 | 0.907269 | 0.999783 | 0.947562 |
| MmugDNA.43205.1.S1_at   | MmugDNA.43205.1 | 3.8   | 3.87  | 0.04 | 0.16 | -1.05 | 0.812731 | 0.273467 | 0.916216 | 0.537868 |
| MmugDNA.43207.1.S1_at   | MmugDNA.43207.1 | 9.77  | 9.48  | 0.16 | 0.09 | 1.23  | 0.122771 | 0.001818 | 0.401676 | 0.063958 |
| MmugDNA.43208.1.S1_at   | MmugDNA.43208.1 | 5.61  | 5.72  | 0.61 | 0.43 | -1.08 | 0.649021 | 0.854159 | 0.829498 | 0.916964 |
| MmugDNA.26435.1.S1_s_at | MmugDNA.26435.1 | 7.13  | 6.86  | 0.1  | 0.09 | 1.2   | 0.048014 | 0.384637 | 0.276495 | 0.620255 |
| MmugDNA.43212.1.S1_at   | MmugDNA.43212.1 | 5.31  | 5.05  | 0.41 | 0.15 | 1.19  | 0.180021 | 0.542712 | 0.475116 | 0.725698 |
| MmugDNA.43214.1.S1_at   | MmugDNA.43214.1 | 5.22  | 5.22  | 0.28 | 0.26 | 1     | 0.576375 | 0.631054 | 0.783169 | 0.782599 |
| MmugDNA.43215.1.S1_at   | MmugDNA.43215.1 | 3.94  | 4.11  | 0.27 | 0.11 | -1.12 | 0.72484  | 0.471528 | 0.870879 | 0.6795   |
| MmugDNA.43216.1.S1_at   | MmugDNA.43216.1 | 6.33  | 7.79  | 1.01 | 0.34 | -2.76 | 0.222635 | 0.00304  | 0.520511 | 0.080419 |
| MmugDNA.43218.1.S1_at   | MmugDNA.43218.1 | 10.71 | 10.37 | 0.1  | 0.22 | 1.26  | 0.133538 | 0.014554 | 0.41701  | 0.153907 |
| MmugDNA.4322.1.S1_at    | MmugDNA.4322.1  | 12.63 | 12.66 | 0.07 | 0.06 | -1.02 | 0.962366 | 0.94159  | 0.984644 | 0.966886 |
| MmugDNA.4322.1.S1_s_at  | MmugDNA.4322.1  | 12.6  | 12.62 | 0.08 | 0.06 | -1.01 | 0.730209 | 0.965535 | 0.873913 | 0.980739 |
| MmugDNA.43220.1.S1_at   | MmugDNA.43220.1 | 5.38  | 5.49  | 0.41 | 0.12 | -1.08 | 0.640969 | 0.824027 | 0.824528 | 0.898894 |
| MmugDNA.43221.1.S1_at   | MmugDNA.43221.1 | 6.86  | 7.49  | 0.23 | 0.15 | -1.55 | 0.030311 | 0.126985 | 0.227117 | 0.397741 |
| MmugDNA.43222.1.S1_at   | MmugDNA.43222.1 | 4.13  | 4.23  | 0.18 | 0.18 | -1.07 | 0.237103 | 0.415682 | 0.534591 | 0.641027 |
| MmugDNA.43223.1.S1_at   | MmugDNA.43223.1 | 4.61  | 4.62  | 0.08 | 0.07 | -1    | 0.865111 | 0.085908 | 0.941423 | 0.338068 |
| MmugDNA.43224.1.S1_at   | MmugDNA.43224.1 | 3.8   | 3.56  | 0.38 | 0.08 | 1.18  | 0.276059 | 0.439099 | 0.5677   | 0.657854 |
| MmugDNA.43226.1.S1_at   | MmugDNA.43226.1 | 2.94  | 2.91  | 0.1  | 0.06 | 1.02  | 0.967394 | 0.853716 | 0.98696  | 0.916773 |
| MmugDNA.43227.1.S1_at   | MmugDNA.43227.1 | 4.18  | 4.1   | 0.28 | 0.15 | 1.06  | 0.147027 | 0.170431 | 0.434974 | 0.447103 |
| MmugDNA.43228.1.S1_at   | MmugDNA.43228.1 | 5.22  | 5.22  | 0.14 | 0.02 | 1     | 0.329252 | 0.604401 | 0.611528 | 0.764613 |
| MmugDNA.43229.1.S1_at   | MmugDNA.43229.1 | 4.22  | 4.2   | 0.17 | 0.5  | 1.02  | 0.936072 | 0.087694 | 0.97328  | 0.340941 |
| MmugDNA.4323.1.S1_at    | MmugDNA.4323.1  | 3.25  | 3.2   | 0.07 | 0.06 | 1.04  | 0.528473 | 0.741557 | 0.753689 | 0.850329 |
| MmugDNA.43230.1.S1_at   | MmugDNA.43230.1 | 3.84  | 3.82  | 0.24 | 0.28 | 1.01  | 0.768479 | 0.029462 | 0.893625 | 0.213368 |
| MmugDNA.43231.1.S1_at   | MmugDNA.43231.1 | 2.74  | 2.83  | 0.12 | 0.12 | -1.07 | 0.40448  | 0.180808 | 0.668214 | 0.457306 |
| MmugDNA.43232.1.S1_at   | MmugDNA.43232.1 | 4.24  | 4.22  | 0.17 | 0.2  | 1.01  | 0.956067 | 0.693813 | 0.981979 | 0.821925 |
| MmugDNA.43234.1.S1_at   | MmugDNA.43234.1 | 5.25  | 5.25  | 0.11 | 0.07 | 1     | 0.301069 | 0.273276 | 0.589084 | 0.537788 |
| MmugDNA.43235.1.S1_at   | MmugDNA.43235.1 | 2.72  | 2.77  | 0.03 | 0.07 | -1.04 | 0.320841 | 0.399737 | 0.605306 | 0.629951 |
| MmugDNA.43236.1.S1_at   | MmugDNA.43236.1 | 4.3   | 4.1   | 0.87 | 0.13 | 1.15  | 0.200737 | 0.270527 | 0.498074 | 0.535835 |
| MmugDNA.43240.1.S1_s_at | MmugDNA.43240.1 | 6.03  | 6.2   | 0.4  | 0.3  | -1.13 | 0.691078 | 0.81445  | 0.852289 | 0.892923 |
| MmugDNA.43241.1.S1_at   | MmugDNA.43241.1 | 10.39 | 10.28 | 0.08 | 0.06 | 1.08  | 0.057606 | 0.403377 | 0.297348 | 0.632083 |
| MmugDNA.43243.1.S1_at   | MmugDNA.43243.1 | 11.73 | 11.72 | 0.06 | 0.03 | 1     | 0.60703  | 0.075458 | 0.803512 | 0.319857 |
| MmugDNA.43245.1.S1_at   | MmugDNA.43245.1 | 4.04  | 4.21  | 0.25 | 0.3  | -1.13 | 0.99017  | 0.429237 | 0.996449 | 0.650729 |
| MmugDNA.43247.1.S1_at   | MmugDNA.43247.1 | 6.44  | 6.53  | 0.05 | 0.14 | -1.07 | 0.31498  | 0.338003 | 0.600177 | 0.5852   |
| MmugDNA.4325.1.S1_at    | MmugDNA.4325.1  | 4.77  | 4.69  | 0.08 | 0.07 | 1.05  | 0.118733 | 0.60845  | 0.396513 | 0.767074 |
| MmugDNA.43250.1.S1_at   | MmugDNA.43250.1 | 7.9   | 7.88  | 0.18 | 0.11 | 1.01  | 0.49544  | 0.952047 | 0.731814 | 0.972785 |

|                       |                 |       |       |      |      |       |          |          |          |          |
|-----------------------|-----------------|-------|-------|------|------|-------|----------|----------|----------|----------|
| MmugDNA.43252.1.S1_at | MmugDNA.43252.1 | 8.99  | 8.95  | 0.01 | 0.06 | 1.03  | 0.622916 | 0.98001  | 0.81368  | 0.989229 |
| MmugDNA.43256.1.S1_at | MmugDNA.43256.1 | 3.9   | 3.54  | 0.21 | 0.09 | 1.28  | 0.12561  | 0.086319 | 0.406238 | 0.338771 |
| MmugDNA.43257.1.S1_at | MmugDNA.43257.1 | 7.47  | 7.47  | 0.14 | 0.02 | 1     | 0.446807 | 0.288477 | 0.698851 | 0.54977  |
| MmugDNA.43258.1.S1_at | MmugDNA.43258.1 | 4.06  | 3.99  | 0.16 | 0.21 | 1.05  | 0.899131 | 0.298613 | 0.957051 | 0.557225 |
| MmugDNA.43259.1.S1_at | MmugDNA.43259.1 | 10.52 | 10.35 | 0.31 | 0.23 | 1.12  | 0.428958 | 0.392161 | 0.685557 | 0.625652 |
| MmugDNA.4326.1.S1_at  | MmugDNA.4326.1  | 7.91  | 9.24  | 0.38 | 0.42 | -2.51 | 0.024663 | 0.037745 | 0.210126 | 0.238716 |
| MmugDNA.43261.1.S1_at | MmugDNA.43261.1 | 7.3   | 8.15  | 0.37 | 0.12 | -1.8  | 0.016893 | 0.007973 | 0.183348 | 0.118702 |
| MmugDNA.43262.1.S1_at | MmugDNA.43262.1 | 8.1   | 8.15  | 0.08 | 0.08 | -1.04 | 0.493562 | 0.849825 | 0.730484 | 0.914673 |
| MmugDNA.43264.1.S1_at | MmugDNA.43264.1 | 5.39  | 5.37  | 0.2  | 0.03 | 1.01  | 0.973393 | 0.752768 | 0.989318 | 0.855968 |
| MmugDNA.43268.1.S1_at | MmugDNA.43268.1 | 8.65  | 8.68  | 0.21 | 0.31 | -1.02 | 0.92184  | 0.224013 | 0.966523 | 0.497045 |
| MmugDNA.43269.1.S1_at | MmugDNA.43269.1 | 12.91 | 12.67 | 0.01 | 0.04 | 1.18  | 0.000317 | 0.005702 | 0.058857 | 0.104102 |
| MmugDNA.43270.1.S1_at | MmugDNA.43270.1 | 8.07  | 7.33  | 0.37 | 0.18 | 1.68  | 0.031178 | 0.022437 | 0.229656 | 0.187441 |
| MmugDNA.43271.1.S1_at | MmugDNA.43271.1 | 5.04  | 4.23  | 1.15 | 0.07 | 1.76  | 0.265256 | 0.306052 | 0.557962 | 0.562782 |
| MmugDNA.43272.1.S1_at | MmugDNA.43272.1 | 5.83  | 5.85  | 0.1  | 0    | -1.01 | 0.514078 | 0.372836 | 0.744131 | 0.611735 |
| MmugDNA.43274.1.S1_at | MmugDNA.43274.1 | 7.58  | 6.94  | 0.43 | 0.07 | 1.55  | 0.055781 | 0.081694 | 0.293357 | 0.329928 |
| MmugDNA.43275.1.S1_at | MmugDNA.43275.1 | 12.11 | 12.18 | 0.16 | 0.08 | -1.05 | 0.34538  | 0.567673 | 0.624372 | 0.74156  |
| MmugDNA.43276.1.S1_at | MmugDNA.43276.1 | 4.63  | 4.65  | 0.23 | 0.09 | -1.01 | 0.521277 | 0.515171 | 0.7493   | 0.708145 |
| MmugDNA.43277.1.S1_at | MmugDNA.43277.1 | 6.33  | 6.65  | 0.25 | 0.32 | -1.25 | 0.14171  | 0.020533 | 0.427634 | 0.179788 |
| MmugDNA.43278.1.S1_at | MmugDNA.43278.1 | 3.79  | 3.6   | 0.15 | 0.18 | 1.14  | 0.258118 | 0.281878 | 0.552402 | 0.544844 |
| MmugDNA.43279.1.S1_at | MmugDNA.43279.1 | 3.63  | 3.62  | 0.14 | 0.12 | 1.01  | 0.342095 | 0.571001 | 0.621921 | 0.743479 |
| MmugDNA.43280.1.S1_at | MmugDNA.43280.1 | 4     | 4     | 0    | 0    | 1     | 1        | 0.44115  | 1        | 0.659375 |
| MmugDNA.43281.1.S1_at | MmugDNA.43281.1 | 5.07  | 4.47  | 0.29 | 0.75 | 1.51  | 0.58884  | 0.774521 | 0.791302 | 0.868769 |
| MmugDNA.43282.1.S1_at | MmugDNA.43282.1 | 3.84  | 3.75  | 0.05 | 0.16 | 1.07  | 0.179481 | 0.394124 | 0.474649 | 0.62675  |
| MmugDNA.43284.1.S1_at | MmugDNA.43284.1 | 6.31  | 6.26  | 0.24 | 0.16 | 1.04  | 0.345756 | 0.171497 | 0.624624 | 0.447895 |
| MmugDNA.43285.1.S1_at | MmugDNA.43285.1 | 3.72  | 3.71  | 0.22 | 0    | 1.01  | 0.892922 | 0.908288 | 0.954374 | 0.948047 |
| MmugDNA.43287.1.S1_at | MmugDNA.43287.1 | 3.55  | 3.45  | 0.19 | 0.05 | 1.07  | 0.422277 | 0.377281 | 0.680475 | 0.614869 |
| MmugDNA.43289.1.S1_at | MmugDNA.43289.1 | 9.41  | 9.88  | 0.13 | 0.15 | -1.39 | 0.0112   | 0.154315 | 0.155478 | 0.429188 |
| MmugDNA.4329.1.S1_at  | MmugDNA.4329.1  | 6.25  | 6.27  | 0.18 | 0.16 | -1.01 | 0.619465 | 0.71608  | 0.811271 | 0.835424 |
| MmugDNA.43292.1.S1_at | MmugDNA.43292.1 | 4.95  | 5.01  | 0.28 | 0.3  | -1.04 | 0.695717 | 0.82968  | 0.85501  | 0.902187 |
| MmugDNA.43293.1.S1_at | MmugDNA.43293.1 | 6.92  | 6.69  | 0.13 | 0.22 | 1.17  | 0.71371  | 0.063559 | 0.864758 | 0.298646 |
| MmugDNA.43294.1.S1_at | MmugDNA.43294.1 | 3.57  | 3.34  | 0.16 | 0.13 | 1.18  | 0.120166 | 0.193442 | 0.398502 | 0.468711 |
| MmugDNA.43295.1.S1_at | MmugDNA.43295.1 | 5.97  | 4.38  | 0.87 | 0.59 | 3     | 0.044791 | 0.040465 | 0.268924 | 0.246264 |
| MmugDNA.43296.1.S1_at | MmugDNA.43296.1 | 7.9   | 7.34  | 1.07 | 0.48 | 1.48  | 0.255171 | 0.310874 | 0.549651 | 0.565881 |
| MmugDNA.43298.1.S1_at | MmugDNA.43298.1 | 6.56  | 6.53  | 0.19 | 0.07 | 1.02  | 0.459687 | 0.575004 | 0.707772 | 0.746227 |
| MmugDNA.43299.1.S1_at | MmugDNA.43299.1 | 4.16  | 4.04  | 0.44 | 0.07 | 1.08  | 0.266336 | 0.362857 | 0.558799 | 0.603373 |
| MmugDNA.433.1.S1_at   | MmugDNA.433.1   | 9.77  | 9.54  | 0.19 | 0.15 | 1.18  | 0.099022 | 0.388334 | 0.36989  | 0.62274  |
| MmugDNA.4330.1.S1_at  | MmugDNA.4330.1  | 8.01  | 7.78  | 0.09 | 0.02 | 1.17  | 0.034252 | 0.112229 | 0.239765 | 0.377537 |
| MmugDNA.43300.1.S1_at | MmugDNA.43300.1 | 6.15  | 5.62  | 0.52 | 0.08 | 1.44  | 0.180799 | 0.154441 | 0.47597  | 0.429327 |
| MmugDNA.43301.1.S1_at | MmugDNA.43301.1 | 9.28  | 11.07 | 0.35 | 0.18 | -3.46 | 0.001429 | 0.005068 | 0.07964  | 0.09907  |
| MmugDNA.43302.1.S1_at | MmugDNA.43302.1 | 4.71  | 4.56  | 0.06 | 0.13 | 1.11  | 0.196557 | 0.019702 | 0.493604 | 0.176386 |
| MmugDNA.43303.1.S1_at | MmugDNA.43303.1 | 9.34  | 12.02 | 0.88 | 0.35 | -6.42 | 0.020023 | 0.011897 | 0.194982 | 0.141211 |
| MmugDNA.43304.1.S1_at | MmugDNA.43304.1 | 4.46  | 3.33  | 1.26 | 0.18 | 2.18  | 0.2196   | 0.239243 | 0.517388 | 0.509941 |
| MmugDNA.43305.1.S1_at | MmugDNA.43305.1 | 5.18  | 6.12  | 0.52 | 0.22 | -1.92 | 0.128735 | 0.440632 | 0.410916 | 0.659029 |

|                         |                 |       |       |      |      |       |          |          |          |          |
|-------------------------|-----------------|-------|-------|------|------|-------|----------|----------|----------|----------|
| MmugDNA.43306.1.S1_at   | MmugDNA.43306.1 | 7.74  | 8.83  | 0.12 | 0.11 | -2.13 | 0.000443 | 0.068968 | 0.065442 | 0.308954 |
| MmugDNA.43307.1.S1_at   | MmugDNA.43307.1 | 3.83  | 4.02  | 0.68 | 0.17 | -1.14 | 0.661124 | 0.661968 | 0.836453 | 0.802047 |
| MmugDNA.43309.1.S1_at   | MmugDNA.43309.1 | 9.1   | 8.98  | 0.12 | 0.05 | 1.09  | 0.142343 | 0.197172 | 0.428351 | 0.472213 |
| MmugDNA.4331.1.S1_at    | MmugDNA.4331.1  | 3.16  | 3.33  | 0.18 | 0.06 | -1.13 | 0.741115 | 0.698192 | 0.880012 | 0.824655 |
| MmugDNA.43311.1.S1_at   | MmugDNA.43311.1 | 7.26  | 7.44  | 0.24 | 0.2  | -1.13 | 0.326193 | 0.527602 | 0.609341 | 0.716154 |
| MmugDNA.43312.1.S1_at   | MmugDNA.43312.1 | 3.47  | 3.54  | 0.07 | 0.12 | -1.05 | 0.882336 | 0.028828 | 0.949974 | 0.211661 |
| MmugDNA.43314.1.S1_at   | MmugDNA.43314.1 | 5.53  | 5.45  | 0.03 | 0.05 | 1.06  | 0.118874 | 0.00045  | 0.396589 | 0.038539 |
| MmugDNA.43315.1.S1_at   | MmugDNA.43315.1 | 6.76  | 8.02  | 0.52 | 0.09 | -2.4  | 0.017494 | 0.023866 | 0.185974 | 0.193495 |
| MmugDNA.43317.1.S1_at   | MmugDNA.43317.1 | 5.45  | 8.38  | 1.97 | 0.38 | -7.65 | 0.095096 | 0.018474 | 0.364251 | 0.170946 |
| MmugDNA.43319.1.S1_at   | MmugDNA.43319.1 | 5.18  | 4.89  | 0.31 | 0.15 | 1.22  | 0.161064 | 0.06161  | 0.452522 | 0.295094 |
| MmugDNA.4332.1.S1_at    | MmugDNA.4332.1  | 10.4  | 10.44 | 0.11 | 0.1  | -1.02 | 0.383943 | 0.013143 | 0.653082 | 0.147338 |
| MmugDNA.43320.1.S1_at   | MmugDNA.43320.1 | 6.85  | 7.4   | 0.3  | 0.4  | -1.46 | 0.136895 | 0.045059 | 0.421672 | 0.256789 |
| MmugDNA.43321.1.S1_at   | MmugDNA.43321.1 | 3.12  | 2.96  | 0.09 | 0.09 | 1.11  | 0.089777 | 0.102725 | 0.356705 | 0.363175 |
| MmugDNA.43322.1.S1_at   | MmugDNA.43322.1 | 11.11 | 11.96 | 0.37 | 0.14 | -1.8  | 0.02107  | 0.338922 | 0.198726 | 0.585891 |
| MmugDNA.43323.1.S1_at   | MmugDNA.43323.1 | 4.08  | 3.91  | 0.14 | 0.25 | 1.12  | 0.992409 | 0.515737 | 0.997182 | 0.708479 |
| MmugDNA.43324.1.S1_at   | MmugDNA.43324.1 | 3.46  | 3.36  | 0.42 | 0.19 | 1.07  | 0.515492 | 0.302854 | 0.745364 | 0.560356 |
| MmugDNA.43325.1.S1_at   | MmugDNA.43325.1 | 5.28  | 5.26  | 0.14 | 0.17 | 1.02  | 0.546889 | 0.207213 | 0.765598 | 0.48136  |
| MmugDNA.43326.1.S1_at   | MmugDNA.43326.1 | 3.96  | 3.58  | 0.27 | 0.09 | 1.3   | 0.192966 | 0.144463 | 0.489545 | 0.418323 |
| MmugDNA.43328.1.S1_at   | MmugDNA.43328.1 | 6.32  | 6.55  | 0.07 | 0.51 | -1.18 | 0.418068 | 0.602352 | 0.678074 | 0.763342 |
| MmugDNA.43329.1.S1_at   | MmugDNA.43329.1 | 5.17  | 5.04  | 0.2  | 0.04 | 1.1   | 0.102447 | 0.08229  | 0.374592 | 0.331223 |
| MmugDNA.4333.1.S1_at    | MmugDNA.4333.1  | 9.09  | 8.98  | 0.3  | 0.03 | 1.08  | 0.591977 | 0.174899 | 0.793093 | 0.451576 |
| MmugDNA.43330.1.S1_at   | MmugDNA.43330.1 | 9.71  | 9.62  | 0.09 | 0.03 | 1.07  | 0.334793 | 0.237317 | 0.615826 | 0.508029 |
| MmugDNA.43331.1.S1_at   | MmugDNA.43331.1 | 7.69  | 7.6   | 0.9  | 0.33 | 1.06  | 0.813148 | 0.882211 | 0.916452 | 0.932845 |
| MmugDNA.43332.1.S1_at   | MmugDNA.43332.1 | 7.04  | 6.06  | 0.18 | 0.22 | 1.97  | 0.008099 | 0.003118 | 0.138956 | 0.081345 |
| MmugDNA.43333.1.S1_at   | MmugDNA.43333.1 | 5     | 5.67  | 0.43 | 0.39 | -1.59 | 0.097557 | 0.115118 | 0.367778 | 0.382004 |
| MmugDNA.43334.1.S1_at   | MmugDNA.43334.1 | 8.58  | 7.84  | 0.33 | 0.25 | 1.67  | 0.020667 | 0.012426 | 0.19739  | 0.144095 |
| MmugDNA.43335.1.S1_at   | MmugDNA.43335.1 | 4.38  | 4.5   | 0.16 | 0.4  | -1.08 | 0.452319 | 0.519167 | 0.702807 | 0.710878 |
| MmugDNA.43336.1.S1_at   | MmugDNA.43336.1 | 7.08  | 7.96  | 0.24 | 0.06 | -1.83 | 0.006603 | 0.001553 | 0.127762 | 0.059606 |
| MmugDNA.43337.1.S1_at   | MmugDNA.43337.1 | 6.3   | 6.23  | 0.17 | 0.1  | 1.05  | 0.908854 | 0.01164  | 0.961354 | 0.139789 |
| MmugDNA.43338.1.S1_at   | MmugDNA.43338.1 | 9.29  | 9.5   | 0.34 | 0.06 | -1.15 | 0.96566  | 0.50861  | 0.986096 | 0.703719 |
| MmugDNA.43341.1.S1_s_at | MmugDNA.43341.1 | 9.38  | 9.27  | 0.21 | 0.17 | 1.08  | 0.413518 | 0.011723 | 0.674836 | 0.140206 |
| MmugDNA.43342.1.S1_at   | MmugDNA.43342.1 | 6.49  | 6.48  | 0.2  | 0.08 | 1.01  | 0.575575 | 0.638131 | 0.782893 | 0.787396 |
| MmugDNA.43344.1.S1_at   | MmugDNA.43344.1 | 8.47  | 7.34  | 0.07 | 0.31 | 2.19  | 0.003236 | 0.003971 | 0.101775 | 0.089595 |
| MmugDNA.43344.1.S1_s_at | MmugDNA.43344.1 | 8.24  | 7.2   | 0.14 | 0.25 | 2.06  | 0.001904 | 0.003974 | 0.087869 | 0.089634 |
| MmugDNA.43345.1.S1_at   | MmugDNA.43345.1 | 12.24 | 11.99 | 0.09 | 0.15 | 1.19  | 0.042955 | 0.062519 | 0.264449 | 0.29687  |
| MmugDNA.43346.1.S1_at   | MmugDNA.43346.1 | 4.19  | 4.12  | 0.09 | 0.21 | 1.05  | 0.755292 | 0.6355   | 0.887223 | 0.785405 |
| MmugDNA.43347.1.S1_at   | MmugDNA.43347.1 | 7.46  | 7.68  | 0.32 | 0.24 | -1.17 | 0.408556 | 0.066234 | 0.671316 | 0.302921 |
| MmugDNA.43348.1.S1_at   | MmugDNA.43348.1 | 9.81  | 8.41  | 0.31 | 0.57 | 2.63  | 0.020116 | 0.008745 | 0.195301 | 0.123975 |
| MmugDNA.43349.1.S1_at   | MmugDNA.43349.1 | 5.2   | 6.74  | 0.66 | 0.08 | -2.91 | 0.016742 | 0.011341 | 0.182674 | 0.138148 |
| MmugDNA.4335.1.S1_at    | MmugDNA.4335.1  | 6.42  | 6.79  | 0.31 | 0.31 | -1.29 | 0.278796 | 0.385713 | 0.57009  | 0.621079 |
| MmugDNA.43350.1.S1_at   | MmugDNA.43350.1 | 7.7   | 7.7   | 0.2  | 0.23 | 1     | 0.895019 | 0.400428 | 0.955264 | 0.630206 |
| MmugDNA.43351.1.S1_at   | MmugDNA.43351.1 | 6.25  | 6.34  | 0.21 | 0.04 | -1.07 | 0.548435 | 0.226653 | 0.766568 | 0.499139 |
| MmugDNA.43352.1.S1_at   | MmugDNA.43352.1 | 6.7   | 6.41  | 0.2  | 0.23 | 1.22  | 0.091192 | 0.264382 | 0.358606 | 0.530385 |

|                         |                 |       |       |      |      |       |          |          |          |          |
|-------------------------|-----------------|-------|-------|------|------|-------|----------|----------|----------|----------|
| MmugDNA.43353.1.S1_at   | MmugDNA.43353.1 | 3.97  | 3.97  | 0.11 | 0.14 | -1.01 | 0.260386 | 0.670977 | 0.554516 | 0.807635 |
| MmugDNA.43355.1.S1_at   | MmugDNA.43355.1 | 4.55  | 4.43  | 0.03 | 0.09 | 1.09  | 0.202269 | 0.003609 | 0.499812 | 0.085933 |
| MmugDNA.43356.1.S1_at   | MmugDNA.43356.1 | 7.67  | 7.54  | 0.08 | 0.05 | 1.09  | 0.082926 | 0.297505 | 0.345052 | 0.556122 |
| MmugDNA.43357.1.S1_at   | MmugDNA.43357.1 | 5.38  | 5.3   | 0.37 | 0.3  | 1.06  | 0.605682 | 0.808862 | 0.802615 | 0.889935 |
| MmugDNA.43358.1.S1_at   | MmugDNA.43358.1 | 7.56  | 6.69  | 0.32 | 0.48 | 1.82  | 0.207186 | 0.020073 | 0.504881 | 0.177957 |
| MmugDNA.43359.1.S1_at   | MmugDNA.43359.1 | 6.76  | 6.33  | 0.32 | 0.07 | 1.34  | 0.071564 | 0.116513 | 0.325567 | 0.383671 |
| MmugDNA.4336.1.S1_at    | MmugDNA.4336.1  | 9.87  | 9.81  | 1.16 | 0.01 | 1.04  | 0.424848 | 0.709175 | 0.682288 | 0.831405 |
| MmugDNA.43360.1.S1_at   | MmugDNA.43360.1 | 7.02  | 6.75  | 0.27 | 0.26 | 1.2   | 0.556835 | 0.216938 | 0.771968 | 0.490566 |
| MmugDNA.43361.1.S1_at   | MmugDNA.43361.1 | 8.29  | 8.2   | 0.52 | 0.06 | 1.06  | 0.721891 | 0.902093 | 0.869054 | 0.944306 |
| MmugDNA.43362.1.S1_at   | MmugDNA.43362.1 | 3.54  | 3.2   | 0.48 | 0.17 | 1.26  | 0.095818 | 0.1002   | 0.365401 | 0.359195 |
| MmugDNA.43363.1.S1_at   | MmugDNA.43363.1 | 12.38 | 9.99  | 0.77 | 0.13 | 5.25  | 0.005499 | 0.005162 | 0.119627 | 0.0997   |
| MmugDNA.43364.1.S1_at   | MmugDNA.43364.1 | 6.03  | 7.26  | 0.45 | 0.2  | -2.34 | 0.025743 | 0.2786   | 0.213043 | 0.542329 |
| MmugDNA.43365.1.S1_at   | MmugDNA.43365.1 | 11.83 | 12.11 | 0.69 | 0.25 | -1.21 | 0.181713 | 0.080132 | 0.477223 | 0.327639 |
| MmugDNA.43366.1.S1_at   | MmugDNA.43366.1 | 4.69  | 4.24  | 0.29 | 0.2  | 1.37  | 0.09113  | 0.108944 | 0.358504 | 0.372637 |
| MmugDNA.43367.1.S1_at   | MmugDNA.43367.1 | 11.5  | 10.31 | 0.13 | 0.04 | 2.28  | 0.000095 | 0.000713 | 0.051196 | 0.044419 |
| MmugDNA.43369.1.S1_at   | MmugDNA.43369.1 | 11.12 | 11.15 | 0.08 | 0.04 | -1.02 | 0.254892 | 0.885913 | 0.549392 | 0.935113 |
| MmugDNA.43370.1.S1_at   | MmugDNA.43370.1 | 5.97  | 5.68  | 0.23 | 0.18 | 1.23  | 0.210805 | 0.241424 | 0.50843  | 0.512072 |
| MmugDNA.43371.1.S1_at   | MmugDNA.43371.1 | 6.09  | 6.7   | 0.23 | 0.68 | -1.53 | 0.166241 | 0.354837 | 0.459426 | 0.59746  |
| MmugDNA.43372.1.S1_at   | MmugDNA.43372.1 | 3.15  | 3.14  | 0.06 | 0.11 | 1.01  | 0.338028 | 0.188928 | 0.618398 | 0.464854 |
| MmugDNA.43375.1.S1_at   | MmugDNA.43375.1 | 3.25  | 3.48  | 0.08 | 0.21 | -1.17 | 0.089786 | 0.058122 | 0.356705 | 0.287755 |
| MmugDNA.43376.1.S1_s_at | MmugDNA.43376.1 | 5.92  | 5.98  | 0.5  | 0.33 | -1.04 | 0.799263 | 0.157133 | 0.909484 | 0.432616 |
| MmugDNA.43377.1.S1_at   | MmugDNA.43377.1 | 6.37  | 6.33  | 0.52 | 0.37 | 1.03  | 0.468408 | 0.020623 | 0.713531 | 0.180141 |
| MmugDNA.43378.1.S1_at   | MmugDNA.43378.1 | 3.39  | 3.27  | 0.38 | 0.07 | 1.09  | 0.179159 | 0.25822  | 0.474107 | 0.52558  |
| MmugDNA.43379.1.S1_at   | MmugDNA.43379.1 | 6.8   | 6.67  | 0.26 | 0.08 | 1.1   | 0.106278 | 0.116853 | 0.380284 | 0.384192 |
| MmugDNA.4338.1.S1_at    | MmugDNA.4338.1  | 4.12  | 3.3   | 0.4  | 0.22 | 1.77  | 0.100289 | 0.105462 | 0.371099 | 0.367324 |
| MmugDNA.43380.1.S1_at   | MmugDNA.43380.1 | 8.89  | 8.86  | 0.08 | 0.08 | 1.02  | 0.792182 | 0.999672 | 0.90574  | 0.99988  |
| MmugDNA.43381.1.S1_at   | MmugDNA.43381.1 | 5.29  | 5.53  | 0.15 | 0.07 | -1.18 | 0.083216 | 0.061902 | 0.345461 | 0.295668 |
| MmugDNA.43382.1.S1_at   | MmugDNA.43382.1 | 4.37  | 4.42  | 0.32 | 0.13 | -1.03 | 0.915129 | 0.879637 | 0.963917 | 0.931253 |
| MmugDNA.43383.1.S1_at   | MmugDNA.43383.1 | 4.68  | 4.54  | 0.14 | 0.13 | 1.1   | 0.252322 | 0.3181   | 0.546837 | 0.571046 |
| MmugDNA.43384.1.S1_at   | MmugDNA.43384.1 | 8.14  | 8.11  | 0.25 | 0.05 | 1.02  | 0.401309 | 0.525239 | 0.665992 | 0.714809 |
| MmugDNA.43385.1.S1_at   | MmugDNA.43385.1 | 9.92  | 9.62  | 0.16 | 0.05 | 1.23  | 0.014736 | 0.048849 | 0.173341 | 0.265858 |
| MmugDNA.43386.1.S1_at   | MmugDNA.43386.1 | 6.58  | 8.12  | 0.77 | 0.2  | -2.91 | 0.036208 | 0.001991 | 0.245341 | 0.066247 |
| MmugDNA.43387.1.S1_at   | MmugDNA.43387.1 | 5.03  | 5.09  | 0.06 | 0.1  | -1.05 | 0.136844 | 0.23499  | 0.421672 | 0.506162 |
| MmugDNA.43388.1.S1_at   | MmugDNA.43388.1 | 5.96  | 5.64  | 0.07 | 0.24 | 1.25  | 0.207008 | 0.006672 | 0.504796 | 0.110605 |
| MmugDNA.43389.1.S1_at   | MmugDNA.43389.1 | 9.18  | 8.83  | 0.05 | 0.22 | 1.28  | 0.025551 | 0.043632 | 0.212881 | 0.253531 |
| MmugDNA.4339.1.S1_at    | MmugDNA.4339.1  | 3.62  | 3.71  | 0.21 | 0.04 | -1.06 | 0.196391 | 0.229838 | 0.493473 | 0.501802 |
| MmugDNA.43390.1.S1_at   | MmugDNA.43390.1 | 3.93  | 3.86  | 0.2  | 0.16 | 1.05  | 0.927068 | 0.949689 | 0.969143 | 0.97122  |
| MmugDNA.43391.1.S1_at   | MmugDNA.43391.1 | 4.17  | 4.27  | 0.15 | 0.12 | -1.07 | 0.387326 | 0.459252 | 0.655535 | 0.671675 |
| MmugDNA.43392.1.S1_at   | MmugDNA.43392.1 | 4.43  | 4.56  | 0.07 | 0.15 | -1.1  | 0.620572 | 0.710248 | 0.812011 | 0.831904 |
| MmugDNA.43393.1.S1_at   | MmugDNA.43393.1 | 3.05  | 3.08  | 0.05 | 0.03 | -1.02 | 0.146508 | 0.356104 | 0.434403 | 0.598107 |
| MmugDNA.43394.1.S1_at   | MmugDNA.43394.1 | 7.56  | 7.58  | 0.51 | 0.21 | -1.01 | 0.5275   | 0.723287 | 0.753093 | 0.839718 |
| MmugDNA.43395.1.S1_at   | MmugDNA.43395.1 | 4.76  | 4.62  | 0.23 | 0.28 | 1.1   | 0.725687 | 0.895417 | 0.871263 | 0.940218 |
| MmugDNA.43396.1.S1_at   | MmugDNA.43396.1 | 5.11  | 5.03  | 0.28 | 0.14 | 1.06  | 0.754055 | 0.5882   | 0.886688 | 0.754811 |

|                         |                 |       |       |      |      |       |          |          |          |          |
|-------------------------|-----------------|-------|-------|------|------|-------|----------|----------|----------|----------|
| MmugDNA.43397.1.S1_at   | MmugDNA.43397.1 | 4.42  | 4.42  | 0.07 | 0.08 | 1     | 0.918575 | 0.923186 | 0.965302 | 0.956796 |
| MmugDNA.43398.1.S1_at   | MmugDNA.43398.1 | 3.51  | 3.44  | 0.18 | 0.05 | 1.05  | 0.592592 | 0.496194 | 0.79358  | 0.695883 |
| MmugDNA.43399.1.S1_at   | MmugDNA.43399.1 | 8.72  | 8.76  | 1.04 | 0.06 | -1.02 | 0.767237 | 0.417867 | 0.893195 | 0.642449 |
| MmugDNA.434.1.S1_at     | MmugDNA.434.1   | 5.31  | 5.28  | 0.18 | 0.08 | 1.02  | 0.779137 | 0.953365 | 0.89919  | 0.97351  |
| MmugDNA.4340.1.S1_at    | MmugDNA.4340.1  | 8.2   | 7.81  | 0.2  | 0.2  | 1.31  | 0.089044 | 0.006189 | 0.355697 | 0.106774 |
| MmugDNA.43400.1.S1_at   | MmugDNA.43400.1 | 3.2   | 3.12  | 0.15 | 0.02 | 1.06  | 0.381552 | 0.439779 | 0.651152 | 0.658439 |
| MmugDNA.43401.1.S1_at   | MmugDNA.43401.1 | 5.21  | 5.6   | 0.21 | 0.13 | -1.31 | 0.051956 | 0.095316 | 0.285424 | 0.35236  |
| MmugDNA.43403.1.S1_at   | MmugDNA.43403.1 | 4.52  | 4.23  | 0.21 | 0.07 | 1.22  | 0.067734 | 0.117231 | 0.318083 | 0.384766 |
| MmugDNA.43405.1.S1_at   | MmugDNA.43405.1 | 2.97  | 2.85  | 0.1  | 0.03 | 1.08  | 0.597862 | 0.116218 | 0.797008 | 0.38353  |
| MmugDNA.43406.1.S1_at   | MmugDNA.43406.1 | 7.58  | 6.74  | 0.38 | 0.12 | 1.79  | 0.048674 | 0.202422 | 0.278061 | 0.476768 |
| MmugDNA.43408.1.S1_at   | MmugDNA.43408.1 | 7.34  | 7.51  | 0.18 | 0.01 | -1.12 | 0.559797 | 0.343161 | 0.773535 | 0.588905 |
| MmugDNA.43408.1.S1_s_at | MmugDNA.43408.1 | 5.28  | 5.21  | 0.03 | 0.05 | 1.05  | 0.083722 | 0.00576  | 0.346423 | 0.104378 |
| MmugDNA.4341.1.S1_at    | MmugDNA.4341.1  | 8.07  | 8.37  | 0.7  | 0.16 | -1.23 | 0.621915 | 0.819424 | 0.812905 | 0.89598  |
| MmugDNA.43410.1.S1_at   | MmugDNA.43410.1 | 3.72  | 3.6   | 0.24 | 0.07 | 1.09  | 0.206051 | 0.488657 | 0.50382  | 0.691273 |
| MmugDNA.43411.1.S1_at   | MmugDNA.43411.1 | 4.11  | 4     | 0.16 | 0.36 | 1.08  | 0.684901 | 0.757998 | 0.849863 | 0.859223 |
| MmugDNA.43413.1.S1_at   | MmugDNA.43413.1 | 6.02  | 6.21  | 0.12 | 0.08 | -1.14 | 0.103279 | 0.032352 | 0.376204 | 0.222667 |
| MmugDNA.43414.1.S1_at   | MmugDNA.43414.1 | 3.9   | 4     | 0.07 | 0.08 | -1.07 | 0.189489 | 0.446962 | 0.485955 | 0.663167 |
| MmugDNA.43415.1.S1_at   | MmugDNA.43415.1 | 11.42 | 11.47 | 0.12 | 0.03 | -1.04 | 0.788245 | 0.383154 | 0.903701 | 0.619153 |
| MmugDNA.43416.1.S1_at   | MmugDNA.43416.1 | 6.67  | 6.14  | 0.56 | 0.43 | 1.44  | 0.137233 | 0.153817 | 0.422085 | 0.428488 |
| MmugDNA.43417.1.S1_at   | MmugDNA.43417.1 | 6.71  | 6.57  | 0.38 | 0.05 | 1.1   | 0.424894 | 0.591449 | 0.682288 | 0.756977 |
| MmugDNA.43418.1.S1_at   | MmugDNA.43418.1 | 4.38  | 4.26  | 0.84 | 0.56 | 1.09  | 0.447926 | 0.525854 | 0.699731 | 0.715222 |
| MmugDNA.43419.1.S1_at   | MmugDNA.43419.1 | 11.77 | 11.13 | 0.22 | 0.06 | 1.56  | 0.013817 | 0.010011 | 0.1685   | 0.131262 |
| MmugDNA.4342.1.S1_at    | MmugDNA.4342.1  | 6.21  | 5.8   | 0.12 | 0.14 | 1.33  | 0.02056  | 0.141649 | 0.196858 | 0.415207 |
| MmugDNA.43420.1.S1_at   | MmugDNA.43420.1 | 5.11  | 5.08  | 0.13 | 0.09 | 1.02  | 0.843571 | 0.069987 | 0.931516 | 0.310754 |
| MmugDNA.18976.1.S1_s_at | MmugDNA.18976.1 | 6.07  | 6.17  | 0.09 | 0.16 | -1.08 | 0.89651  | 0.382536 | 0.955936 | 0.618735 |
| MmugDNA.43421.1.S1_at   | MmugDNA.43421.1 | 8.85  | 8.48  | 0.22 | 0.15 | 1.29  | 0.130262 | 0.049795 | 0.412564 | 0.268228 |
| MmugDNA.43422.1.S1_at   | MmugDNA.43422.1 | 11.12 | 11.32 | 0.22 | 0.05 | -1.15 | 0.544039 | 0.744542 | 0.763753 | 0.852091 |
| MmugDNA.43422.1.S1_s_at | MmugDNA.43422.1 | 10.46 | 11.05 | 0.35 | 0.04 | -1.51 | 0.144738 | 0.16957  | 0.431682 | 0.446186 |
| MmugDNA.43423.1.S1_at   | MmugDNA.43423.1 | 5.88  | 5.69  | 0.17 | 0.26 | 1.14  | 0.717023 | 0.426208 | 0.866435 | 0.648388 |
| MmugDNA.43423.1.S1_s_at | MmugDNA.43423.1 | 4.7   | 4.67  | 0.43 | 0.16 | 1.02  | 0.36733  | 0.445719 | 0.641394 | 0.662489 |
| MmugDNA.43425.1.S1_at   | MmugDNA.43425.1 | 5.23  | 5.21  | 0.31 | 0.35 | 1.01  | 0.517815 | 0.741175 | 0.746932 | 0.850135 |
| MmugDNA.43426.1.S1_at   | MmugDNA.43426.1 | 4.65  | 4.71  | 0.17 | 0.04 | -1.04 | 0.803373 | 0.949585 | 0.911802 | 0.97117  |
| MmugDNA.43427.1.S1_at   | MmugDNA.43427.1 | 3.46  | 3.35  | 0.29 | 0.16 | 1.07  | 0.283104 | 0.369314 | 0.573595 | 0.6087   |
| MmugDNA.43428.1.S1_at   | MmugDNA.43428.1 | 4.03  | 3.87  | 0.04 | 0.09 | 1.12  | 0.057301 | 0.03856  | 0.296778 | 0.241357 |
| MmugDNA.4343.1.S1_at    | MmugDNA.4343.1  | 10.83 | 10.63 | 0.09 | 0.01 | 1.15  | 0.018877 | 0.073818 | 0.190967 | 0.317146 |
| MmugDNA.43430.1.S1_at   | MmugDNA.43430.1 | 5.87  | 5.89  | 0.09 | 0.03 | -1.02 | 0.688531 | 0.348528 | 0.851246 | 0.592609 |
| MmugDNA.43432.1.S1_at   | MmugDNA.43432.1 | 6.05  | 6.28  | 0.05 | 0.51 | -1.17 | 0.499122 | 0.485046 | 0.734029 | 0.688908 |
| MmugDNA.43434.1.S1_at   | MmugDNA.43434.1 | 6.06  | 6.14  | 0.07 | 0.08 | -1.05 | 0.164022 | 0.288639 | 0.456843 | 0.549827 |
| MmugDNA.43435.1.S1_at   | MmugDNA.43435.1 | 5.76  | 5.65  | 0.41 | 0.54 | 1.08  | 0.866523 | 0.574394 | 0.942395 | 0.745847 |
| MmugDNA.43437.1.S1_at   | MmugDNA.43437.1 | 6.24  | 6.21  | 0.2  | 0.1  | 1.02  | 0.89116  | 0.794224 | 0.953555 | 0.881314 |
| MmugDNA.43438.1.S1_at   | MmugDNA.43438.1 | 5.53  | 5.52  | 0.14 | 0.2  | 1     | 0.95735  | 0.900431 | 0.982571 | 0.94344  |
| MmugDNA.43439.1.S1_at   | MmugDNA.43439.1 | 11.7  | 11.75 | 0.18 | 0.02 | -1.04 | 0.707429 | 0.559338 | 0.861472 | 0.736241 |
| MmugDNA.4344.1.S1_at    | MmugDNA.4344.1  | 3.67  | 3.46  | 0.3  | 0.02 | 1.16  | 0.247367 | 0.270887 | 0.542869 | 0.536026 |



|                         |                 |       |       |      |      |       |          |          |          |          |
|-------------------------|-----------------|-------|-------|------|------|-------|----------|----------|----------|----------|
| MmugDNA.43440.1.S1_at   | MmugDNA.43440.1 | 11.47 | 11.97 | 0.26 | 0.08 | -1.42 | 0.081119 | 0.021662 | 0.342138 | 0.184333 |
| MmugDNA.43441.1.S1_at   | MmugDNA.43441.1 | 6.93  | 7.01  | 0.14 | 0.01 | -1.06 | 0.490263 | 0.202477 | 0.728387 | 0.476811 |
| MmugDNA.43442.1.S1_at   | MmugDNA.43442.1 | 8.59  | 9.55  | 0.32 | 0.21 | -1.95 | 0.018141 | 0.016496 | 0.187667 | 0.162577 |
| MmugDNA.43443.1.S1_at   | MmugDNA.43443.1 | 6.92  | 5.85  | 0.78 | 0.05 | 2.11  | 0.088383 | 0.075591 | 0.354479 | 0.32003  |
| MmugDNA.43444.1.S1_at   | MmugDNA.43444.1 | 3.73  | 3.71  | 0.04 | 0.2  | 1.01  | 0.536007 | 0.811318 | 0.75873  | 0.891133 |
| MmugDNA.43445.1.S1_at   | MmugDNA.43445.1 | 8.08  | 6.47  | 0.49 | 0.38 | 3.04  | 0.019457 | 0.021346 | 0.192344 | 0.182894 |
| MmugDNA.43446.1.S1_at   | MmugDNA.43446.1 | 2.99  | 3.08  | 0.12 | 0.22 | -1.06 | 0.751525 | 0.32241  | 0.885332 | 0.573972 |
| MmugDNA.43447.1.S1_at   | MmugDNA.43447.1 | 4     | 3.89  | 0.09 | 0.17 | 1.08  | 0.585169 | 0.594636 | 0.789052 | 0.758623 |
| MmugDNA.43448.1.S1_at   | MmugDNA.43448.1 | 4.78  | 4.41  | 1.03 | 0.14 | 1.3   | 0.378887 | 0.728456 | 0.648993 | 0.843019 |
| MmugDNA.43449.1.S1_at   | MmugDNA.43449.1 | 3.6   | 3.55  | 0.04 | 0.17 | 1.04  | 0.21049  | 0.417778 | 0.5081   | 0.642404 |
| MmugDNA.4345.1.S1_at    | MmugDNA.4345.1  | 9.16  | 9.32  | 0.45 | 0.11 | -1.12 | 0.692347 | 0.839869 | 0.852986 | 0.908703 |
| MmugDNA.43450.1.S1_at   | MmugDNA.43450.1 | 7.02  | 6.98  | 0.1  | 0.1  | 1.03  | 0.701162 | 0.311213 | 0.858031 | 0.566264 |
| MmugDNA.43451.1.S1_at   | MmugDNA.43451.1 | 4.17  | 4.15  | 0.08 | 0.03 | 1.01  | 0.861514 | 0.446268 | 0.939844 | 0.662743 |
| MmugDNA.43452.1.S1_at   | MmugDNA.43452.1 | 5.71  | 5.63  | 0    | 0.07 | 1.06  | 0.138996 | 0.314641 | 0.424645 | 0.568415 |
| MmugDNA.43453.1.S1_at   | MmugDNA.43453.1 | 5.77  | 5.73  | 0.02 | 0.03 | 1.02  | 0.652167 | 0.033976 | 0.831147 | 0.227969 |
| MmugDNA.43454.1.S1_at   | MmugDNA.43454.1 | 3.09  | 3.06  | 0.01 | 0.18 | 1.02  | 0.709471 | 0.778348 | 0.862548 | 0.871276 |
| MmugDNA.43455.1.S1_at   | MmugDNA.43455.1 | 2.93  | 3.03  | 0.19 | 0.16 | -1.08 | 0.931975 | 0.981162 | 0.971431 | 0.989586 |
| MmugDNA.43456.1.S1_at   | MmugDNA.43456.1 | 6.45  | 6.12  | 0.04 | 0.05 | 1.26  | 0.000993 | 0.000794 | 0.076321 | 0.046064 |
| MmugDNA.43457.1.S1_at   | MmugDNA.43457.1 | 4.24  | 4.46  | 0.53 | 0.06 | -1.17 | 0.719971 | 0.784032 | 0.867869 | 0.874963 |
| MmugDNA.43459.1.S1_at   | MmugDNA.43459.1 | 4.75  | 4.7   | 0.15 | 0.14 | 1.04  | 0.156088 | 0.272829 | 0.446588 | 0.537554 |
| MmugDNA.4346.1.S1_at    | MmugDNA.4346.1  | 5.55  | 4.75  | 0.8  | 0.48 | 1.74  | 0.39797  | 0.585132 | 0.663514 | 0.752755 |
| MmugDNA.43460.1.S1_at   | MmugDNA.43460.1 | 7.59  | 7.25  | 0.36 | 0.08 | 1.27  | 0.071013 | 0.124409 | 0.324424 | 0.394857 |
| MmugDNA.43462.1.S1_at   | MmugDNA.43462.1 | 11.5  | 11.42 | 0.08 | 0.05 | 1.05  | 0.104438 | 0.004872 | 0.377773 | 0.097453 |
| MmugDNA.43463.1.S1_x_at | MmugDNA.43463.1 | 12.16 | 12.24 | 0.07 | 0.08 | -1.05 | 0.326934 | 0.722366 | 0.609778 | 0.839202 |
| MmugDNA.43465.1.S1_at   | MmugDNA.43465.1 | 10.25 | 9.9   | 0.07 | 0.14 | 1.27  | 0.025862 | 0.006305 | 0.213557 | 0.107813 |
| MmugDNA.43467.1.S1_at   | MmugDNA.43467.1 | 5.73  | 6.24  | 0.5  | 0.26 | -1.42 | 0.087007 | 0.482398 | 0.352559 | 0.687259 |
| MmugDNA.43470.1.S1_at   | MmugDNA.43470.1 | 4.63  | 4.56  | 0.14 | 0.12 | 1.05  | 0.31622  | 0.049682 | 0.600997 | 0.267892 |
| MmugDNA.43471.1.S1_s_at | MmugDNA.43471.1 | 4.16  | 4.23  | 0.05 | 0.09 | -1.05 | 0.834661 | 0.721055 | 0.927306 | 0.838489 |
| MmugDNA.43472.1.S1_at   | MmugDNA.43472.1 | 8.38  | 8.95  | 0.28 | 0.18 | -1.49 | 0.066003 | 0.077947 | 0.314318 | 0.324283 |
| MmugDNA.43473.1.S1_at   | MmugDNA.43473.1 | 4.01  | 3.55  | 0.32 | 0.5  | 1.38  | 0.648696 | 0.751263 | 0.829342 | 0.855385 |
| MmugDNA.43474.1.S1_at   | MmugDNA.43474.1 | 10.01 | 9.67  | 0.06 | 0.07 | 1.26  | 0.002081 | 0.005959 | 0.090206 | 0.105573 |
| MmugDNA.43475.1.S1_at   | MmugDNA.43475.1 | 8.08  | 8.28  | 0.32 | 0.17 | -1.15 | 0.240549 | 0.424298 | 0.53802  | 0.646878 |
| MmugDNA.43476.1.S1_at   | MmugDNA.43476.1 | 10.15 | 10.3  | 0.07 | 0.06 | -1.11 | 0.015144 | 0.118037 | 0.175141 | 0.385881 |
| MmugDNA.43479.1.S1_at   | MmugDNA.43479.1 | 10.77 | 11.64 | 0.97 | 0.23 | -1.82 | 0.088483 | 0.047075 | 0.35461  | 0.261469 |
| MmugDNA.4348.1.S1_at    | MmugDNA.4348.1  | 5.8   | 5.47  | 0.82 | 0.21 | 1.26  | 0.289283 | 0.282801 | 0.578884 | 0.545524 |
| MmugDNA.43480.1.S1_at   | MmugDNA.43480.1 | 6.51  | 6.91  | 0.3  | 0.23 | -1.32 | 0.131247 | 0.074559 | 0.413985 | 0.318185 |
| MmugDNA.43481.1.S1_at   | MmugDNA.43481.1 | 10.96 | 10.76 | 0.15 | 0.02 | 1.15  | 0.257214 | 0.074145 | 0.551586 | 0.31781  |
| MmugDNA.43482.1.S1_at   | MmugDNA.43482.1 | 3.72  | 3.67  | 0.06 | 0.03 | 1.03  | 0.164924 | 0.281973 | 0.457897 | 0.544868 |
| MmugDNA.43483.1.S1_at   | MmugDNA.43483.1 | 10.88 | 10.63 | 0.06 | 0.05 | 1.19  | 0.009955 | 0.104433 | 0.149006 | 0.365719 |
| MmugDNA.43484.1.S1_at   | MmugDNA.43484.1 | 9.59  | 9.76  | 0.24 | 0.07 | -1.12 | 0.232413 | 0.225499 | 0.530886 | 0.498141 |
| MmugDNA.43485.1.S1_at   | MmugDNA.43485.1 | 5.03  | 4.96  | 0.64 | 0.54 | 1.05  | 0.718107 | 0.271739 | 0.866934 | 0.536577 |
| MmugDNA.43488.1.S1_at   | MmugDNA.43488.1 | 2.91  | 2.78  | 0.11 | 0.16 | 1.1   | 0.973077 | 0.266807 | 0.989226 | 0.53241  |
| MmugDNA.43489.1.S1_at   | MmugDNA.43489.1 | 7.42  | 7.6   | 0.11 | 0.03 | -1.13 | 0.03014  | 0.013389 | 0.226716 | 0.14827  |

|                         |                 |       |       |      |      |       |          |          |          |          |
|-------------------------|-----------------|-------|-------|------|------|-------|----------|----------|----------|----------|
| MmugDNA.4349.1.S1_at    | MmugDNA.4349.1  | 3.05  | 3.08  | 0.13 | 0.08 | -1.02 | 0.695057 | 0.846757 | 0.854556 | 0.91284  |
| MmugDNA.43490.1.S1_at   | MmugDNA.43490.1 | 5.12  | 5.02  | 0.19 | 0.03 | 1.07  | 0.125034 | 0.638495 | 0.405516 | 0.78765  |
| MmugDNA.43491.1.S1_at   | MmugDNA.43491.1 | 3.11  | 3.02  | 0.25 | 0.1  | 1.06  | 0.347982 | 0.474314 | 0.626142 | 0.68135  |
| MmugDNA.43492.1.S1_at   | MmugDNA.43492.1 | 3.02  | 2.94  | 0.19 | 0.08 | 1.06  | 0.484788 | 0.680589 | 0.724478 | 0.813515 |
| MmugDNA.43493.1.S1_at   | MmugDNA.43493.1 | 4     | 3.99  | 0.02 | 0.05 | 1.01  | 0.976297 | 0.547555 | 0.990591 | 0.728511 |
| MmugDNA.43494.1.S1_at   | MmugDNA.43494.1 | 12.16 | 12.22 | 0.06 | 0.12 | -1.04 | 0.74129  | 0.00045  | 0.880122 | 0.038539 |
| MmugDNA.43494.1.S1_x_at | MmugDNA.43494.1 | 12.23 | 12.36 | 0.06 | 0.09 | -1.09 | 0.307551 | 0.000221 | 0.594316 | 0.032385 |
| MmugDNA.43495.1.S1_at   | MmugDNA.43495.1 | 5.98  | 5.9   | 0.06 | 0.08 | 1.05  | 0.13324  | 0.190842 | 0.416749 | 0.466228 |
| MmugDNA.43496.1.S1_at   | MmugDNA.43496.1 | 5.12  | 4.95  | 0.09 | 0.12 | 1.12  | 0.267909 | 0.000146 | 0.560667 | 0.029509 |
| MmugDNA.43497.1.S1_at   | MmugDNA.43497.1 | 11.36 | 11.06 | 0.06 | 0.03 | 1.23  | 0.001406 | 0.038847 | 0.07964  | 0.242022 |
| MmugDNA.43499.1.S1_at   | MmugDNA.43499.1 | 5.71  | 4.92  | 0.63 | 0.13 | 1.73  | 0.095497 | 0.134653 | 0.364961 | 0.406629 |
| MmugDNA.435.1.S1_at     | MmugDNA.435.1   | 4.2   | 4.31  | 0.23 | 0.09 | -1.08 | 0.842224 | 0.966015 | 0.930767 | 0.98099  |
| MmugDNA.4350.1.S1_at    | MmugDNA.4350.1  | 7.88  | 7.77  | 0.08 | 0.05 | 1.08  | 0.189337 | 0.340281 | 0.485819 | 0.586666 |
| MmugDNA.43501.1.S1_at   | MmugDNA.43501.1 | 4.6   | 4.44  | 0.12 | 0.15 | 1.11  | 0.102306 | 0.115765 | 0.374317 | 0.382814 |
| MmugDNA.43502.1.S1_at   | MmugDNA.43502.1 | 5.52  | 5.59  | 0.07 | 0.05 | -1.05 | 0.282063 | 0.008843 | 0.572815 | 0.124493 |
| MmugDNA.43503.1.S1_at   | MmugDNA.43503.1 | 3.52  | 3.24  | 0.11 | 0.09 | 1.21  | 0.095926 | 0.095219 | 0.365529 | 0.35218  |
| MmugDNA.43504.1.S1_at   | MmugDNA.43504.1 | 4.55  | 4.55  | 0.03 | 0.12 | 1     | 0.301972 | 0.434384 | 0.589915 | 0.654536 |
| MmugDNA.43505.1.S1_at   | MmugDNA.43505.1 | 3.57  | 3.64  | 0.1  | 0.1  | -1.05 | 0.760065 | 0.773825 | 0.890079 | 0.868485 |
| MmugDNA.43506.1.S1_at   | MmugDNA.43506.1 | 5.87  | 5.39  | 0.2  | 0.25 | 1.4   | 0.110564 | 0.436922 | 0.385979 | 0.656357 |
| MmugDNA.43507.1.S1_at   | MmugDNA.43507.1 | 6.09  | 6.03  | 0.1  | 0.09 | 1.05  | 0.686089 | 0.300542 | 0.850502 | 0.558852 |
| MmugDNA.43508.1.S1_at   | MmugDNA.43508.1 | 6.18  | 5.81  | 0.47 | 0.05 | 1.29  | 0.311611 | 0.495834 | 0.597735 | 0.695746 |
| MmugDNA.43509.1.S1_at   | MmugDNA.43509.1 | 6.06  | 6.18  | 0.25 | 0.15 | -1.08 | 0.799179 | 0.419321 | 0.909452 | 0.643447 |
| MmugDNA.4351.1.S1_at    | MmugDNA.4351.1  | 5.88  | 5.42  | 0.14 | 0.12 | 1.37  | 0.016102 | 0.00997  | 0.179436 | 0.131094 |
| MmugDNA.43512.1.S1_at   | MmugDNA.43512.1 | 9.1   | 9.85  | 0.3  | 0.3  | -1.68 | 0.164472 | 0.382665 | 0.457599 | 0.618843 |
| MmugDNA.43515.1.S1_at   | MmugDNA.43515.1 | 4.92  | 4.94  | 0.15 | 0.12 | -1.02 | 0.995951 | 0.660398 | 0.998468 | 0.801302 |
| MmugDNA.43516.1.S1_at   | MmugDNA.43516.1 | 4.86  | 4.88  | 0.23 | 0.08 | -1.01 | 0.469977 | 0.414147 | 0.714636 | 0.640063 |
| MmugDNA.43517.1.S1_at   | MmugDNA.43517.1 | 5.67  | 5.68  | 0.12 | 0.11 | -1.01 | 0.96532  | 0.276184 | 0.985931 | 0.540179 |
| MmugDNA.43520.1.S1_at   | MmugDNA.43520.1 | 6.51  | 6.45  | 0.34 | 0.07 | 1.05  | 0.600473 | 0.817065 | 0.798905 | 0.894492 |
| MmugDNA.43522.1.S1_at   | MmugDNA.43522.1 | 8.97  | 8.68  | 0.46 | 0.13 | 1.22  | 0.323228 | 0.059476 | 0.607062 | 0.290548 |
| MmugDNA.43523.1.S1_at   | MmugDNA.43523.1 | 6.03  | 5.74  | 0.13 | 0.03 | 1.22  | 0.020153 | 0.025929 | 0.195486 | 0.201872 |
| MmugDNA.43524.1.S1_at   | MmugDNA.43524.1 | 3.77  | 3.35  | 0.16 | 0.6  | 1.34  | 0.754323 | 0.47138  | 0.886774 | 0.679413 |
| MmugDNA.43525.1.S1_at   | MmugDNA.43525.1 | 4.96  | 4.95  | 0.07 | 0.17 | 1.01  | 0.590546 | 0.014659 | 0.791943 | 0.154231 |
| MmugDNA.43527.1.S1_at   | MmugDNA.43527.1 | 7.73  | 8.14  | 0.06 | 0.08 | -1.33 | 0.002824 | 0.20144  | 0.09805  | 0.475963 |
| MmugDNA.43528.1.S1_at   | MmugDNA.43528.1 | 3.17  | 3.27  | 0.03 | 0.04 | -1.07 | 0.057647 | 0.333889 | 0.297348 | 0.582024 |
| MmugDNA.43530.1.S1_at   | MmugDNA.43530.1 | 5.63  | 6     | 0.28 | 0.21 | -1.29 | 0.108206 | 0.042459 | 0.382964 | 0.250702 |
| MmugDNA.43531.1.S1_at   | MmugDNA.43531.1 | 4.92  | 4.64  | 0.16 | 0.03 | 1.22  | 0.039572 | 0.054245 | 0.255492 | 0.278331 |
| MmugDNA.43534.1.S1_at   | MmugDNA.43534.1 | 12.43 | 12.51 | 0.01 | 0.07 | -1.05 | 0.13316  | 0.565216 | 0.416662 | 0.739754 |
| MmugDNA.43535.1.S1_at   | MmugDNA.43535.1 | 3.82  | 3.83  | 0.21 | 0.03 | -1.01 | 0.401772 | 0.525585 | 0.666301 | 0.715132 |
| MmugDNA.43538.1.S1_at   | MmugDNA.43538.1 | 4.96  | 7.76  | 1.19 | 0.24 | -6.94 | 0.046752 | 0.342491 | 0.273824 | 0.588539 |
| MmugDNA.43539.1.S1_at   | MmugDNA.43539.1 | 5.8   | 6.2   | 0.12 | 0.27 | -1.32 | 0.139538 | 0.37255  | 0.425071 | 0.61149  |
| MmugDNA.4354.1.S1_at    | MmugDNA.4354.1  | 4.51  | 4.54  | 0.23 | 0.1  | -1.03 | 0.780354 | 0.673884 | 0.899768 | 0.809483 |
| MmugDNA.43540.1.S1_at   | MmugDNA.43540.1 | 4.47  | 4.17  | 0.27 | 0.11 | 1.23  | 0.093118 | 0.106729 | 0.361736 | 0.369337 |
| MmugDNA.43541.1.S1_at   | MmugDNA.43541.1 | 4.53  | 4.44  | 0.1  | 0.23 | 1.06  | 0.223154 | 0.357247 | 0.520981 | 0.598867 |

|                         |                 |       |       |      |      |       |          |          |          |          |
|-------------------------|-----------------|-------|-------|------|------|-------|----------|----------|----------|----------|
| MmugDNA.43542.1.S1_at   | MmugDNA.43542.1 | 5.17  | 4.88  | 0.02 | 0.11 | 1.22  | 0.009652 | 0.035921 | 0.14832  | 0.234021 |
| MmugDNA.43543.1.S1_at   | MmugDNA.43543.1 | 8.75  | 7.26  | 0.89 | 0.69 | 2.8   | 0.246865 | 0.288037 | 0.542566 | 0.54928  |
| MmugDNA.43544.1.S1_at   | MmugDNA.43544.1 | 9.34  | 9.22  | 0.25 | 0.05 | 1.09  | 0.621698 | 0.622953 | 0.812872 | 0.777422 |
| MmugDNA.43545.1.S1_at   | MmugDNA.43545.1 | 12.01 | 11.33 | 0.16 | 0.09 | 1.6   | 0.006644 | 0.206088 | 0.127957 | 0.480306 |
| MmugDNA.43547.1.S1_at   | MmugDNA.43547.1 | 4     | 3.8   | 0.15 | 0.41 | 1.15  | 0.897274 | 0.402688 | 0.956456 | 0.631543 |
| MmugDNA.43548.1.S1_at   | MmugDNA.43548.1 | 3.29  | 3.38  | 0.16 | 0.05 | -1.06 | 0.991238 | 0.619367 | 0.996767 | 0.774611 |
| MmugDNA.43549.1.S1_at   | MmugDNA.43549.1 | 3.33  | 3.29  | 0.12 | 0.15 | 1.02  | 0.800822 | 0.398676 | 0.91042  | 0.629458 |
| MmugDNA.4355.1.S1_at    | MmugDNA.4355.1  | 3.87  | 3.49  | 0.31 | 0.17 | 1.3   | 0.610383 | 0.340923 | 0.805838 | 0.587035 |
| MmugDNA.43550.1.S1_at   | MmugDNA.43550.1 | 5.12  | 4.85  | 0.28 | 0.09 | 1.21  | 0.136856 | 0.144973 | 0.421672 | 0.418913 |
| MmugDNA.43552.1.S1_at   | MmugDNA.43552.1 | 5.83  | 5.82  | 0.13 | 0    | 1.01  | 0.329156 | 0.208672 | 0.611499 | 0.482544 |
| MmugDNA.43553.1.S1_at   | MmugDNA.43553.1 | 7.02  | 7.36  | 0.63 | 0.28 | -1.27 | 0.545317 | 0.488322 | 0.764553 | 0.691058 |
| MmugDNA.43554.1.S1_at   | MmugDNA.43554.1 | 4.72  | 4.51  | 0.09 | 0.08 | 1.16  | 0.055391 | 0.064961 | 0.292327 | 0.300855 |
| MmugDNA.43555.1.S1_at   | MmugDNA.43555.1 | 4.57  | 4.74  | 0.15 | 0.19 | -1.13 | 0.342881 | 0.493598 | 0.622601 | 0.694286 |
| MmugDNA.43558.1.S1_at   | MmugDNA.43558.1 | 5     | 4.29  | 0.35 | 0.34 | 1.64  | 0.060194 | 0.190567 | 0.302487 | 0.46595  |
| MmugDNA.43559.1.S1_at   | MmugDNA.43559.1 | 6.28  | 6.26  | 0.12 | 0.05 | 1.01  | 0.541924 | 0.766884 | 0.762538 | 0.864635 |
| MmugDNA.4356.1.S1_x_at  | MmugDNA.4356.1  | 9.84  | 10.01 | 0.97 | 0.21 | -1.13 | 0.550413 | 0.285847 | 0.767803 | 0.547484 |
| MmugDNA.43561.1.S1_at   | MmugDNA.43561.1 | 5.05  | 5.07  | 0.42 | 0.17 | -1.01 | 0.47005  | 0.39265  | 0.714665 | 0.625813 |
| MmugDNA.43562.1.S1_at   | MmugDNA.43562.1 | 4.43  | 4.42  | 0.05 | 0.03 | 1     | 0.298407 | 0.18924  | 0.586735 | 0.465007 |
| MmugDNA.43563.1.S1_at   | MmugDNA.43563.1 | 4.35  | 4.34  | 0.17 | 0.01 | 1.01  | 0.399837 | 0.020056 | 0.665032 | 0.177898 |
| MmugDNA.43564.1.S1_at   | MmugDNA.43564.1 | 5.67  | 5.53  | 0.18 | 0.2  | 1.1   | 0.241359 | 0.21281  | 0.538538 | 0.486769 |
| MmugDNA.43565.1.S1_at   | MmugDNA.43565.1 | 4.65  | 4.64  | 0.09 | 0.24 | 1     | 0.962924 | 0.711398 | 0.984984 | 0.832662 |
| MmugDNA.43566.1.S1_x_at | MmugDNA.43566.1 | 5.9   | 5.78  | 0.27 | 0.07 | 1.08  | 0.551823 | 0.215866 | 0.768719 | 0.489536 |
| MmugDNA.43567.1.S1_at   | MmugDNA.43567.1 | 3.17  | 2.86  | 0.2  | 0.14 | 1.24  | 0.133501 | 0.193483 | 0.416989 | 0.468745 |
| MmugDNA.43568.1.S1_at   | MmugDNA.43568.1 | 5.69  | 5.81  | 0.74 | 0.41 | -1.09 | 0.51612  | 0.731277 | 0.745613 | 0.84425  |
| MmugDNA.43569.1.S1_at   | MmugDNA.43569.1 | 3.93  | 4.1   | 0.22 | 0.24 | -1.12 | 0.368952 | 0.543182 | 0.642509 | 0.725996 |
| MmugDNA.4721.1.S1_s_at  | MmugDNA.4721.1  | 4.16  | 4.18  | 0.22 | 0.13 | -1.01 | 0.557013 | 0.254722 | 0.771998 | 0.522987 |
| MmugDNA.4357.1.S1_at    | MmugDNA.4357.1  | 5.29  | 5.33  | 0.61 | 0.17 | -1.03 | 0.857263 | 0.721774 | 0.937984 | 0.838827 |
| MmugDNA.43570.1.S1_at   | MmugDNA.43570.1 | 4.51  | 4.49  | 0.21 | 0.09 | 1.01  | 0.333911 | 0.332065 | 0.615174 | 0.580584 |
| MmugDNA.43571.1.S1_at   | MmugDNA.43571.1 | 6.27  | 6.02  | 0.62 | 0.62 | 1.19  | 0.570775 | 0.350453 | 0.779429 | 0.594161 |
| MmugDNA.43572.1.S1_at   | MmugDNA.43572.1 | 10.16 | 9.73  | 0.13 | 0.18 | 1.35  | 0.05501  | 0.004767 | 0.29154  | 0.096325 |
| MmugDNA.43573.1.S1_at   | MmugDNA.43573.1 | 4.15  | 3.88  | 1.13 | 0.12 | 1.21  | 0.663004 | 0.332151 | 0.837408 | 0.580584 |
| MmugDNA.43574.1.S1_at   | MmugDNA.43574.1 | 5.15  | 4.81  | 0.23 | 0.1  | 1.27  | 0.088264 | 0.081285 | 0.354311 | 0.329351 |
| MmugDNA.43575.1.S1_at   | MmugDNA.43575.1 | 7.23  | 7.1   | 0.06 | 0.24 | 1.09  | 0.882574 | 0.432543 | 0.950089 | 0.65297  |
| MmugDNA.43576.1.S1_at   | MmugDNA.43576.1 | 4.5   | 4.35  | 0.2  | 0.22 | 1.11  | 0.37053  | 0.558036 | 0.643448 | 0.735346 |
| MmugDNA.43577.1.S1_at   | MmugDNA.43577.1 | 3.43  | 3.19  | 0.06 | 0.14 | 1.18  | 0.047486 | 0.038043 | 0.275199 | 0.239624 |
| MmugDNA.43578.1.S1_at   | MmugDNA.43578.1 | 3.66  | 3.48  | 0.04 | 0.02 | 1.13  | 0.001226 | 0.009674 | 0.078547 | 0.129405 |
| MmugDNA.4358.1.S1_at    | MmugDNA.4358.1  | 4.35  | 3.75  | 0.77 | 0.19 | 1.52  | 0.244257 | 0.273068 | 0.540909 | 0.537644 |
| MmugDNA.43580.1.S1_at   | MmugDNA.43580.1 | 5.48  | 6.22  | 0.19 | 0.07 | -1.67 | 0.003882 | 0.00378  | 0.107896 | 0.08754  |
| MmugDNA.43581.1.S1_at   | MmugDNA.43581.1 | 10.55 | 10.86 | 0.21 | 0.03 | -1.24 | 0.088067 | 0.24437  | 0.354244 | 0.514215 |
| MmugDNA.43583.1.S1_at   | MmugDNA.43583.1 | 4.42  | 4.22  | 0.06 | 0.12 | 1.15  | 0.187957 | 0.07197  | 0.484275 | 0.314305 |
| MmugDNA.43583.1.S1_x_at | MmugDNA.43583.1 | 5.46  | 5.52  | 0.36 | 0.11 | -1.04 | 0.399769 | 0.547445 | 0.664961 | 0.728464 |
| MmugDNA.43584.1.S1_at   | MmugDNA.43584.1 | 5.25  | 4.01  | 0.64 | 0.82 | 2.35  | 0.133478 | 0.143635 | 0.416989 | 0.417555 |
| MmugDNA.43586.1.S1_at   | MmugDNA.43586.1 | 3.72  | 3.78  | 0.01 | 0.02 | -1.04 | 0.0066   | 0.098213 | 0.127762 | 0.356253 |

|                         |                 |       |       |      |      |       |          |          |          |          |
|-------------------------|-----------------|-------|-------|------|------|-------|----------|----------|----------|----------|
| MmugDNA.43587.1.S1_at   | MmugDNA.43587.1 | 4.81  | 4.75  | 0.42 | 0.5  | 1.04  | 0.474885 | 0.334261 | 0.7177   | 0.582308 |
| MmugDNA.43590.1.S1_at   | MmugDNA.43590.1 | 4.43  | 4.29  | 0.06 | 0.09 | 1.1   | 0.090215 | 0.175999 | 0.356864 | 0.452526 |
| MmugDNA.43592.1.S1_at   | MmugDNA.43592.1 | 7.39  | 7.31  | 1.1  | 0.35 | 1.06  | 0.581843 | 0.860573 | 0.786843 | 0.920573 |
| MmugDNA.43593.1.S1_at   | MmugDNA.43593.1 | 5.85  | 5.85  | 0.14 | 0.13 | 1     | 0.950948 | 0.332561 | 0.979672 | 0.580954 |
| MmugDNA.43594.1.S1_at   | MmugDNA.43594.1 | 6.46  | 6.26  | 0.42 | 0.08 | 1.15  | 0.615119 | 0.903116 | 0.808731 | 0.94497  |
| MmugDNA.43595.1.S1_at   | MmugDNA.43595.1 | 7.29  | 7.24  | 0.09 | 0.03 | 1.03  | 0.600438 | 0.088509 | 0.798905 | 0.341947 |
| MmugDNA.43596.1.S1_at   | MmugDNA.43596.1 | 5.25  | 5.47  | 0.16 | 0.13 | -1.17 | 0.308972 | 0.550857 | 0.595457 | 0.730625 |
| MmugDNA.43598.1.S1_at   | MmugDNA.43598.1 | 11.1  | 11.94 | 0.37 | 0.21 | -1.8  | 0.013789 | 0.208236 | 0.168346 | 0.482126 |
| MmugDNA.43599.1.S1_at   | MmugDNA.43599.1 | 3.45  | 3.41  | 0.07 | 0.05 | 1.03  | 0.453686 | 0.710176 | 0.703821 | 0.831904 |
| MmugDNA.436.1.S1_at     | MmugDNA.436.1   | 4.43  | 4.28  | 0.08 | 0.06 | 1.11  | 0.07042  | 0.222681 | 0.323757 | 0.495617 |
| MmugDNA.43600.1.S1_at   | MmugDNA.43600.1 | 4.37  | 4.26  | 0.29 | 0.21 | 1.07  | 0.817209 | 0.333709 | 0.918326 | 0.581882 |
| MmugDNA.43602.1.S1_at   | MmugDNA.43602.1 | 11.11 | 10.91 | 0.08 | 0.05 | 1.15  | 0.039886 | 0.505267 | 0.256392 | 0.702073 |
| MmugDNA.43603.1.S1_at   | MmugDNA.43603.1 | 5.11  | 5.06  | 0.33 | 0.34 | 1.04  | 0.854691 | 0.906185 | 0.936785 | 0.94693  |
| MmugDNA.43605.1.S1_at   | MmugDNA.43605.1 | 3     | 2.82  | 0.03 | 0.01 | 1.14  | 0.000363 | 0.000244 | 0.06234  | 0.032798 |
| MmugDNA.43606.1.S1_at   | MmugDNA.43606.1 | 5.78  | 7.45  | 0.35 | 0.58 | -3.17 | 0.033001 | 0.036993 | 0.236075 | 0.236733 |
| MmugDNA.43607.1.S1_at   | MmugDNA.43607.1 | 5.97  | 5.94  | 0.12 | 0.08 | 1.02  | 0.455383 | 0.48578  | 0.705129 | 0.689398 |
| MmugDNA.43608.1.S1_at   | MmugDNA.43608.1 | 5.13  | 5.14  | 0.19 | 0.12 | -1.01 | 0.389566 | 0.176428 | 0.657359 | 0.45282  |
| MmugDNA.43609.1.S1_at   | MmugDNA.43609.1 | 5.24  | 5.22  | 0.23 | 0.11 | 1.01  | 0.738466 | 0.706434 | 0.878801 | 0.829634 |
| MmugDNA.4361.1.S1_at    | MmugDNA.4361.1  | 4.25  | 4.6   | 0.91 | 0.46 | -1.28 | 0.766498 | 0.966046 | 0.892885 | 0.980991 |
| MmugDNA.43610.1.S1_at   | MmugDNA.43610.1 | 4     | 3.98  | 0.25 | 0.03 | 1.01  | 0.543697 | 0.712988 | 0.763572 | 0.833583 |
| MmugDNA.43611.1.S1_at   | MmugDNA.43611.1 | 4.03  | 3.87  | 0.16 | 0.13 | 1.11  | 0.307062 | 0.366649 | 0.593773 | 0.606417 |
| MmugDNA.43612.1.S1_at   | MmugDNA.43612.1 | 3.64  | 3.31  | 0.53 | 0.21 | 1.26  | 0.362227 | 0.423169 | 0.637219 | 0.646183 |
| MmugDNA.43614.1.S1_at   | MmugDNA.43614.1 | 3.5   | 3.83  | 0.46 | 0.28 | -1.26 | 0.620605 | 0.501515 | 0.812011 | 0.699688 |
| MmugDNA.43615.1.S1_at   | MmugDNA.43615.1 | 5.71  | 5.02  | 0.26 | 0.33 | 1.61  | 0.130523 | 0.346336 | 0.412931 | 0.59124  |
| MmugDNA.43616.1.S1_at   | MmugDNA.43616.1 | 4.65  | 4.73  | 0.09 | 0.2  | -1.06 | 0.838915 | 0.535702 | 0.929305 | 0.721232 |
| MmugDNA.43617.1.S1_at   | MmugDNA.43617.1 | 11.67 | 11.7  | 0.12 | 0.02 | -1.02 | 0.725708 | 0.614381 | 0.871268 | 0.771226 |
| MmugDNA.43618.1.S1_at   | MmugDNA.43618.1 | 4.52  | 3.8   | 0.8  | 0.83 | 1.65  | 0.779648 | 0.876598 | 0.899345 | 0.929709 |
| MmugDNA.43619.1.S1_at   | MmugDNA.43619.1 | 8.71  | 8.52  | 0.18 | 0.08 | 1.14  | 0.095216 | 0.117834 | 0.364593 | 0.38576  |
| MmugDNA.4362.1.S1_at    | MmugDNA.4362.1  | 7.44  | 7.47  | 0.25 | 0.15 | -1.02 | 0.667787 | 0.948941 | 0.840528 | 0.97078  |
| MmugDNA.43620.1.S1_at   | MmugDNA.43620.1 | 12.13 | 11.75 | 0.07 | 0.05 | 1.3   | 0.001399 | 0.001005 | 0.07964  | 0.050657 |
| MmugDNA.43621.1.S1_at   | MmugDNA.43621.1 | 3.15  | 3.16  | 0.18 | 0.11 | -1.01 | 0.582523 | 0.594342 | 0.787305 | 0.758587 |
| MmugDNA.43622.1.S1_at   | MmugDNA.43622.1 | 5.44  | 5.53  | 0.24 | 0.08 | -1.06 | 0.185921 | 0.258407 | 0.482083 | 0.525654 |
| MmugDNA.43623.1.S1_s_at | MmugDNA.43623.1 | 10.23 | 11.11 | 0.34 | 0.16 | -1.84 | 0.044875 | 0.516305 | 0.269187 | 0.708836 |
| MmugDNA.4363.1.S1_at    | MmugDNA.4363.1  | 5.17  | 5.23  | 0.59 | 0.07 | -1.05 | 0.533237 | 0.641141 | 0.756887 | 0.789442 |
| MmugDNA.4365.1.S1_s_at  | MmugDNA.4365.1  | 8.03  | 7.42  | 0.81 | 0.1  | 1.53  | 0.262363 | 0.412577 | 0.556466 | 0.638941 |
| MmugDNA.4366.1.S1_at    | MmugDNA.4366.1  | 5.68  | 5.77  | 0.55 | 0.71 | -1.06 | 0.608259 | 0.703859 | 0.804344 | 0.828259 |
| MmugDNA.4367.1.S1_at    | MmugDNA.4367.1  | 4.74  | 6.75  | 0.61 | 0.59 | -4.03 | 0.053887 | 0.278017 | 0.289266 | 0.541699 |
| MmugDNA.4369.1.S1_at    | MmugDNA.4369.1  | 5.66  | 4.81  | 0.31 | 0.15 | 1.8   | 0.018799 | 0.066052 | 0.190563 | 0.302401 |
| MmugDNA.437.1.S1_at     | MmugDNA.437.1   | 8.98  | 9.06  | 0.38 | 0.19 | -1.06 | 0.26114  | 0.65153  | 0.555269 | 0.796245 |
| MmugDNA.4371.1.S1_at    | MmugDNA.4371.1  | 4.75  | 4.65  | 0.06 | 0.06 | 1.08  | 0.10369  | 0.797968 | 0.376999 | 0.883669 |
| MmugDNA.4372.1.S1_at    | MmugDNA.4372.1  | 5.19  | 5.52  | 1.25 | 0.16 | -1.26 | 0.635746 | 0.816911 | 0.821649 | 0.894398 |
| MmugDNA.4373.1.S1_at    | MmugDNA.4373.1  | 5.35  | 5.6   | 0.32 | 0.19 | -1.19 | 0.120138 | 0.101867 | 0.398476 | 0.361836 |
| MmugDNA.4376.1.S1_at    | MmugDNA.4376.1  | 6.48  | 6.42  | 0.04 | 0.07 | 1.04  | 0.525354 | 0.067195 | 0.751919 | 0.305204 |

|                        |                |       |       |      |      |       |          |          |          |          |
|------------------------|----------------|-------|-------|------|------|-------|----------|----------|----------|----------|
| MmugDNA.4377.1.S1_at   | MmugDNA.4377.1 | 3.76  | 3.77  | 0.11 | 0.06 | -1.01 | 0.241375 | 0.005177 | 0.538538 | 0.099727 |
| MmugDNA.438.1.S1_at    | MmugDNA.438.1  | 6.07  | 5.7   | 0.47 | 0.25 | 1.29  | 0.105827 | 0.291767 | 0.379857 | 0.552054 |
| MmugDNA.4380.1.S1_at   | MmugDNA.4380.1 | 4.56  | 4.57  | 0.43 | 0.13 | -1.01 | 0.409932 | 0.566664 | 0.67218  | 0.740723 |
| MmugDNA.4381.1.S1_at   | MmugDNA.4381.1 | 9.69  | 9.77  | 0.05 | 0.02 | -1.06 | 0.097834 | 0.924009 | 0.368268 | 0.957162 |
| MmugDNA.4382.1.S1_at   | MmugDNA.4382.1 | 3.3   | 3.21  | 0.58 | 0.06 | 1.06  | 0.337981 | 0.305584 | 0.618376 | 0.562504 |
| MmugDNA.4383.1.S1_at   | MmugDNA.4383.1 | 5.53  | 5.67  | 0.15 | 0.02 | -1.1  | 0.227292 | 0.067385 | 0.525303 | 0.305618 |
| MmugDNA.4384.1.S1_at   | MmugDNA.4384.1 | 8.67  | 9.87  | 0.83 | 0.12 | -2.3  | 0.120343 | 0.051444 | 0.398774 | 0.272231 |
| MmugDNA.4386.1.S1_at   | MmugDNA.4386.1 | 3.2   | 3.11  | 0.79 | 0.03 | 1.06  | 0.308666 | 0.374086 | 0.595227 | 0.612678 |
| MmugDNA.4387.1.S1_at   | MmugDNA.4387.1 | 5.06  | 5.2   | 0.12 | 0.13 | -1.1  | 0.205993 | 0.017386 | 0.50382  | 0.166963 |
| MmugDNA.4388.1.S1_at   | MmugDNA.4388.1 | 5.17  | 5.1   | 0.13 | 0.29 | 1.05  | 0.276093 | 0.351526 | 0.567711 | 0.595094 |
| MmugDNA.439.1.S1_at    | MmugDNA.439.1  | 6.74  | 6.42  | 0.78 | 0.15 | 1.25  | 0.278779 | 0.226996 | 0.57008  | 0.499286 |
| MmugDNA.4391.1.S1_at   | MmugDNA.4391.1 | 6.79  | 6.5   | 0.15 | 0.08 | 1.22  | 0.044448 | 0.016525 | 0.267911 | 0.162738 |
| MmugDNA.4392.1.S1_at   | MmugDNA.4392.1 | 5.03  | 6.3   | 1.55 | 0.18 | -2.41 | 0.692912 | 0.52827  | 0.853249 | 0.716462 |
| MmugDNA.4393.1.S1_at   | MmugDNA.4393.1 | 4.33  | 4.34  | 0.08 | 0.18 | -1.01 | 0.656739 | 0.893358 | 0.833998 | 0.939163 |
| MmugDNA.4396.1.S1_at   | MmugDNA.4396.1 | 12.46 | 12.29 | 0.19 | 0.11 | 1.13  | 0.121433 | 0.476249 | 0.400247 | 0.682616 |
| MmugDNA.4397.1.S1_at   | MmugDNA.4397.1 | 4.55  | 4.52  | 0.11 | 0.11 | 1.02  | 0.754252 | 0.951112 | 0.886768 | 0.972319 |
| MmugDNA.4399.1.S1_at   | MmugDNA.4399.1 | 4.55  | 4.58  | 0.1  | 0.09 | -1.02 | 0.683033 | 0.851032 | 0.848853 | 0.915265 |
| MmugDNA.44.1.S1_at     | MmugDNA.44.1   | 5.3   | 5.27  | 0.1  | 0.11 | 1.02  | 0.360854 | 0.466272 | 0.636345 | 0.676227 |
| MmugDNA.4400.1.S1_at   | MmugDNA.4400.1 | 5.71  | 6.87  | 1.17 | 0.68 | -2.24 | 0.266454 | 0.211167 | 0.558813 | 0.485195 |
| MmugDNA.4401.1.S1_at   | MmugDNA.4401.1 | 5.9   | 5.86  | 0.11 | 0.43 | 1.03  | 0.469141 | 0.701027 | 0.713969 | 0.826613 |
| MmugDNA.4402.1.S1_at   | MmugDNA.4402.1 | 11.86 | 11.35 | 0.22 | 0.08 | 1.43  | 0.037833 | 0.036376 | 0.250187 | 0.235146 |
| MmugDNA.4402.1.S1_s_at | MmugDNA.4402.1 | 11.52 | 10.91 | 0.18 | 0.07 | 1.53  | 0.010624 | 0.041851 | 0.152818 | 0.249172 |
| MmugDNA.4403.1.S1_at   | MmugDNA.4403.1 | 6.79  | 6.77  | 0.3  | 0.28 | 1.01  | 0.645383 | 0.881874 | 0.827328 | 0.93263  |
| MmugDNA.4407.1.S1_s_at | MmugDNA.4407.1 | 8.99  | 8.93  | 0.08 | 0.27 | 1.04  | 0.708716 | 0.909008 | 0.862067 | 0.948484 |
| MmugDNA.4408.1.S1_at   | MmugDNA.4408.1 | 5.6   | 5.56  | 0.1  | 0.08 | 1.03  | 0.343847 | 0.11142  | 0.623157 | 0.376126 |
| MmugDNA.4410.1.S1_at   | MmugDNA.4410.1 | 2.98  | 2.76  | 0.26 | 0.06 | 1.17  | 0.242578 | 0.347888 | 0.539382 | 0.592196 |
| MmugDNA.4411.1.S1_at   | MmugDNA.4411.1 | 3.99  | 3.75  | 0.11 | 0.19 | 1.18  | 0.440943 | 0.482537 | 0.694673 | 0.68734  |
| MmugDNA.4412.1.S1_at   | MmugDNA.4412.1 | 8.19  | 7.93  | 0.3  | 0.21 | 1.2   | 0.258282 | 0.009965 | 0.552483 | 0.131094 |
| MmugDNA.4413.1.S1_at   | MmugDNA.4413.1 | 3.95  | 4.05  | 0.2  | 0.04 | -1.07 | 0.728812 | 0.604018 | 0.873272 | 0.764427 |
| MmugDNA.4414.1.S1_at   | MmugDNA.4414.1 | 3.64  | 3.65  | 0.1  | 0.18 | -1.01 | 0.276298 | 0.512439 | 0.567926 | 0.706299 |
| MmugDNA.4415.1.S1_at   | MmugDNA.4415.1 | 5.06  | 4.86  | 0.54 | 0.05 | 1.15  | 0.593434 | 0.094735 | 0.79401  | 0.351549 |
| MmugDNA.4417.1.S1_at   | MmugDNA.4417.1 | 4.94  | 4.92  | 0.14 | 0.02 | 1.01  | 0.879821 | 0.02132  | 0.948813 | 0.182772 |
| MmugDNA.4418.1.S1_at   | MmugDNA.4418.1 | 10.22 | 10.22 | 0.37 | 0.07 | 1     | 0.378486 | 0.578107 | 0.648694 | 0.7483   |
| MmugDNA.4421.1.S1_at   | MmugDNA.4421.1 | 5.18  | 7.55  | 1.09 | 0.19 | -5.16 | 0.052064 | 0.172282 | 0.285691 | 0.448666 |
| MmugDNA.4423.1.S1_at   | MmugDNA.4423.1 | 5.29  | 5.32  | 0.39 | 0.05 | -1.02 | 0.78456  | 0.937723 | 0.901768 | 0.964687 |
| MmugDNA.4424.1.S1_at   | MmugDNA.4424.1 | 7.18  | 7.73  | 0.25 | 0.36 | -1.46 | 0.071998 | 0.07198  | 0.326208 | 0.314305 |
| MmugDNA.4425.1.S1_at   | MmugDNA.4425.1 | 4.73  | 4.7   | 0.35 | 0.37 | 1.02  | 0.808085 | 0.169054 | 0.91414  | 0.445593 |
| MmugDNA.4426.1.S1_at   | MmugDNA.4426.1 | 3.45  | 3.52  | 1.17 | 0.17 | -1.06 | 0.432578 | 0.587876 | 0.688358 | 0.754542 |
| MmugDNA.4428.1.S1_at   | MmugDNA.4428.1 | 7.44  | 6.73  | 0.17 | 0.19 | 1.64  | 0.013381 | 0.194041 | 0.166322 | 0.469151 |
| MmugDNA.4429.1.S1_at   | MmugDNA.4429.1 | 3.65  | 3.53  | 0.29 | 0.18 | 1.09  | 0.159425 | 0.241479 | 0.450703 | 0.512148 |
| MmugDNA.443.1.S1_at    | MmugDNA.443.1  | 12.91 | 12.78 | 0.13 | 0.04 | 1.1   | 0.09326  | 0.160245 | 0.361736 | 0.436398 |
| MmugDNA.4431.1.S1_at   | MmugDNA.4431.1 | 6.23  | 6.23  | 0.31 | 0.04 | 1     | 0.865733 | 0.991689 | 0.941862 | 0.995392 |
| MmugDNA.4432.1.S1_at   | MmugDNA.4432.1 | 8.24  | 8.24  | 0.33 | 0.06 | -1.01 | 0.880864 | 0.156335 | 0.949372 | 0.43161  |

|                        |                |       |       |      |      |       |          |          |          |          |
|------------------------|----------------|-------|-------|------|------|-------|----------|----------|----------|----------|
| MmugDNA.4435.1.S1_at   | MmugDNA.4435.1 | 3.44  | 3.44  | 0.21 | 0    | 1     | 0.729638 | 0.874043 | 0.873728 | 0.928462 |
| MmugDNA.4436.1.S1_at   | MmugDNA.4436.1 | 3.56  | 3.55  | 0.03 | 0.11 | 1.01  | 0.613967 | 0.476382 | 0.807838 | 0.682695 |
| MmugDNA.4437.1.S1_at   | MmugDNA.4437.1 | 6.05  | 5.76  | 0.15 | 0.06 | 1.22  | 0.053705 | 0.132287 | 0.288946 | 0.404294 |
| MmugDNA.4439.1.S1_at   | MmugDNA.4439.1 | 4.36  | 4.47  | 0.08 | 0.05 | -1.08 | 0.042798 | 0.030119 | 0.264078 | 0.215399 |
| MmugDNA.444.1.S1_s_at  | MmugDNA.444.1  | 11.67 | 11.75 | 0.15 | 0.07 | -1.05 | 0.237111 | 0.394268 | 0.534591 | 0.626868 |
| MmugDNA.4440.1.S1_at   | MmugDNA.4440.1 | 5.17  | 5.08  | 0.31 | 0.14 | 1.06  | 0.630209 | 0.707728 | 0.818475 | 0.830472 |
| MmugDNA.4441.1.S1_at   | MmugDNA.4441.1 | 2.89  | 3.01  | 0.03 | 0.1  | -1.08 | 0.106668 | 0.075658 | 0.380862 | 0.320125 |
| MmugDNA.4442.1.S1_at   | MmugDNA.4442.1 | 3.31  | 3.16  | 0.16 | 0.46 | 1.11  | 0.76208  | 0.837026 | 0.8909   | 0.906826 |
| MmugDNA.4443.1.S1_at   | MmugDNA.4443.1 | 7.26  | 8.27  | 0.36 | 0.14 | -2.02 | 0.014863 | 0.149802 | 0.174061 | 0.424394 |
| MmugDNA.4444.1.S1_at   | MmugDNA.4444.1 | 7.46  | 6.93  | 0.19 | 0.37 | 1.45  | 0.059188 | 0.316358 | 0.30037  | 0.569809 |
| MmugDNA.4445.1.S1_at   | MmugDNA.4445.1 | 9.92  | 10.34 | 0.2  | 0.09 | -1.34 | 0.019483 | 0.006082 | 0.192357 | 0.106306 |
| MmugDNA.4446.1.S1_s_at | MmugDNA.4446.1 | 7.88  | 6.7   | 0.2  | 0.23 | 2.27  | 0.003961 | 0.002843 | 0.108453 | 0.078566 |
| MmugDNA.4447.1.S1_at   | MmugDNA.4447.1 | 3.41  | 3.34  | 0.28 | 0.05 | 1.05  | 0.984631 | 0.993989 | 0.994336 | 0.996372 |
| MmugDNA.445.1.S1_at    | MmugDNA.445.1  | 2.9   | 2.88  | 0    | 0.07 | 1.02  | 0.4437   | 0.780923 | 0.696774 | 0.872893 |
| MmugDNA.4450.1.S1_at   | MmugDNA.4450.1 | 3.38  | 3.23  | 0.21 | 0.31 | 1.11  | 0.904803 | 0.418125 | 0.959661 | 0.642619 |
| MmugDNA.4451.1.S1_at   | MmugDNA.4451.1 | 3.68  | 3.71  | 0.4  | 0.12 | -1.02 | 0.643977 | 0.681611 | 0.826524 | 0.814092 |
| MmugDNA.4452.1.S1_at   | MmugDNA.4452.1 | 8.77  | 8.17  | 0.06 | 0.1  | 1.51  | 0.001019 | 0.029351 | 0.076321 | 0.213228 |
| MmugDNA.4453.1.S1_at   | MmugDNA.4453.1 | 3.43  | 3.47  | 0.08 | 0.24 | -1.03 | 0.687758 | 0.736722 | 0.850865 | 0.847693 |
| MmugDNA.4454.1.S1_at   | MmugDNA.4454.1 | 10.5  | 9.82  | 0.06 | 0.11 | 1.6   | 0.00057  | 0.075812 | 0.070727 | 0.320402 |
| MmugDNA.4455.1.S1_at   | MmugDNA.4455.1 | 13.33 | 13.46 | 0    | 0.03 | -1.09 | 0.001362 | 0.075589 | 0.079595 | 0.32003  |
| MmugDNA.4456.1.S1_at   | MmugDNA.4456.1 | 9.3   | 8.83  | 0.12 | 0.1  | 1.39  | 0.004875 | 0.096593 | 0.115123 | 0.354126 |
| MmugDNA.4457.1.S1_at   | MmugDNA.4457.1 | 3.99  | 4.11  | 0.38 | 0.1  | -1.09 | 0.729117 | 0.605013 | 0.873447 | 0.764917 |
| MmugDNA.4458.1.S1_at   | MmugDNA.4458.1 | 6.66  | 6.78  | 0.42 | 0.08 | -1.08 | 0.617839 | 0.603234 | 0.810238 | 0.764033 |
| MmugDNA.4459.1.S1_at   | MmugDNA.4459.1 | 6.14  | 5.79  | 0.36 | 0.7  | 1.27  | 0.513064 | 0.55558  | 0.743445 | 0.733957 |
| MmugDNA.446.1.S1_at    | MmugDNA.446.1  | 3.42  | 3.28  | 0.17 | 0.26 | 1.1   | 0.186077 | 0.127536 | 0.482202 | 0.398407 |
| MmugDNA.4460.1.S1_at   | MmugDNA.4460.1 | 6.32  | 6     | 0.55 | 0.11 | 1.25  | 0.399078 | 0.398057 | 0.664607 | 0.629148 |
| MmugDNA.4462.1.S1_at   | MmugDNA.4462.1 | 4.96  | 5.82  | 0.41 | 0.26 | -1.81 | 0.086108 | 0.348548 | 0.350603 | 0.592609 |
| MmugDNA.4464.1.S1_at   | MmugDNA.4464.1 | 3.46  | 3.46  | 0.98 | 0.22 | -1    | 0.390841 | 0.395887 | 0.658414 | 0.627749 |
| MmugDNA.4465.1.S1_at   | MmugDNA.4465.1 | 4.49  | 4.91  | 0.13 | 0.08 | -1.34 | 0.011417 | 0.124599 | 0.157067 | 0.394995 |
| MmugDNA.4466.1.S1_at   | MmugDNA.4466.1 | 2.74  | 2.72  | 0.25 | 0.03 | 1.01  | 0.28088  | 0.428851 | 0.571843 | 0.650408 |
| MmugDNA.4467.1.S1_at   | MmugDNA.4467.1 | 5.17  | 5.02  | 0.43 | 0.23 | 1.1   | 0.483201 | 0.3814   | 0.723431 | 0.617681 |
| MmugDNA.4468.1.S1_at   | MmugDNA.4468.1 | 4.99  | 4.42  | 0.3  | 0.15 | 1.48  | 0.026284 | 0.015629 | 0.215228 | 0.158437 |
| MmugDNA.4469.1.S1_at   | MmugDNA.4469.1 | 4.17  | 3.98  | 0.22 | 0.11 | 1.15  | 0.437568 | 0.640535 | 0.692421 | 0.78899  |
| MmugDNA.447.1.S1_at    | MmugDNA.447.1  | 10.98 | 11.1  | 0.1  | 0.02 | -1.08 | 0.155807 | 0.003683 | 0.446193 | 0.086591 |
| MmugDNA.4470.1.S1_at   | MmugDNA.4470.1 | 3.5   | 3.4   | 0.03 | 0.09 | 1.07  | 0.313968 | 0.650601 | 0.599734 | 0.795663 |
| MmugDNA.4471.1.S1_at   | MmugDNA.4471.1 | 4.07  | 3.88  | 0.03 | 0.2  | 1.14  | 0.199795 | 0.248128 | 0.497301 | 0.517567 |
| MmugDNA.4472.1.S1_at   | MmugDNA.4472.1 | 4.78  | 4.78  | 0.11 | 0.05 | 1     | 0.550507 | 0.39967  | 0.76784  | 0.629933 |
| MmugDNA.4474.1.S1_at   | MmugDNA.4474.1 | 4.09  | 5.19  | 1.09 | 0.43 | -2.15 | 0.340003 | 0.488125 | 0.620186 | 0.690902 |
| MmugDNA.4475.1.S1_at   | MmugDNA.4475.1 | 5.49  | 5.63  | 0.54 | 0.13 | -1.1  | 0.651098 | 0.832087 | 0.830545 | 0.903658 |
| MmugDNA.4476.1.S1_at   | MmugDNA.4476.1 | 6.07  | 5.9   | 0.43 | 0.18 | 1.13  | 0.474908 | 0.011704 | 0.7177   | 0.140174 |
| MmugDNA.4477.1.S1_at   | MmugDNA.4477.1 | 11.22 | 9.06  | 1.75 | 0.92 | 4.47  | 0.496089 | 0.606214 | 0.732072 | 0.765727 |
| MmugDNA.448.1.S1_at    | MmugDNA.448.1  | 7.24  | 9.14  | 0.21 | 0.41 | -3.74 | 0.003234 | 0.000722 | 0.101775 | 0.044531 |
| MmugDNA.4480.1.S1_at   | MmugDNA.4480.1 | 4.66  | 4.69  | 0.14 | 0.01 | -1.02 | 0.739371 | 0.939821 | 0.879245 | 0.965805 |

|                        |                 |       |       |      |      |       |          |          |          |          |
|------------------------|-----------------|-------|-------|------|------|-------|----------|----------|----------|----------|
| MmugDNA.4481.1.S1_at   | MmugDNA.4481.1  | 11.37 | 13.15 | 0.8  | 0.14 | -3.44 | 0.033497 | 0.222526 | 0.237024 | 0.495591 |
| MmugDNA.4482.1.S1_at   | MmugDNA.4482.1  | 7.92  | 6.52  | 0.29 | 0.25 | 2.64  | 0.002054 | 0.003275 | 0.090098 | 0.082366 |
| MmugDNA.4483.1.S1_at   | MmugDNA.4483.1  | 4.31  | 4.37  | 0.14 | 0    | -1.04 | 0.830576 | 0.170117 | 0.925496 | 0.446868 |
| MmugDNA.4484.1.S1_at   | MmugDNA.4484.1  | 8.96  | 8.56  | 0.33 | 0.23 | 1.32  | 0.166817 | 0.021666 | 0.460006 | 0.184333 |
| MmugDNA.4485.1.S1_at   | MmugDNA.4485.1  | 9.88  | 10.1  | 0.13 | 0.16 | -1.17 | 0.148606 | 0.307828 | 0.437177 | 0.56397  |
| MmugDNA.4486.1.S1_at   | MmugDNA.4486.1  | 4.42  | 4.37  | 0.09 | 0.05 | 1.03  | 0.235993 | 0.118155 | 0.533595 | 0.386071 |
| MmugDNA.4488.1.S1_at   | MmugDNA.4488.1  | 10.23 | 10.73 | 0.17 | 0.11 | -1.42 | 0.023695 | 0.024152 | 0.207081 | 0.194572 |
| MmugDNA.4489.1.S1_at   | MmugDNA.4489.1  | 5.31  | 5.17  | 0.13 | 0.08 | 1.1   | 0.192448 | 0.232054 | 0.488977 | 0.503781 |
| MmugDNA.449.1.S1_at    | MmugDNA.449.1   | 5.98  | 5.79  | 0.09 | 0.07 | 1.14  | 0.068288 | 0.07176  | 0.319105 | 0.314014 |
| MmugDNA.4490.1.S1_at   | MmugDNA.4490.1  | 3.91  | 4.09  | 0.15 | 0.05 | -1.13 | 0.103848 | 0.020207 | 0.377157 | 0.178561 |
| MmugDNA.4490.1.S1_x_at | MmugDNA.4490.1  | 3.71  | 3.62  | 0.14 | 0.03 | 1.06  | 0.893912 | 0.04545  | 0.954747 | 0.2575   |
| MmugDNA.4491.1.S1_s_at | MmugDNA.4491.1  | 11.35 | 11.47 | 0.18 | 0.07 | -1.08 | 0.290983 | 0.214785 | 0.580345 | 0.488643 |
| MmugDNA.4492.1.S1_at   | MmugDNA.4492.1  | 5.25  | 5.2   | 0.05 | 0.06 | 1.03  | 0.738556 | 0.144444 | 0.878825 | 0.418323 |
| MmugDNA.4493.1.S1_at   | MmugDNA.4493.1  | 2.84  | 2.95  | 0.05 | 0.15 | -1.08 | 0.592768 | 0.223109 | 0.793615 | 0.49588  |
| MmugDNA.4494.1.S1_at   | MmugDNA.4494.1  | 5.31  | 6.4   | 1.81 | 0.52 | -2.13 | 0.965804 | 0.32338  | 0.986156 | 0.574453 |
| MmugDNA.4495.1.S1_at   | MmugDNA.4495.1  | 3.26  | 3.21  | 0.06 | 0.02 | 1.03  | 0.264105 | 0.788405 | 0.557422 | 0.877619 |
| MmugDNA.4497.1.S1_at   | MmugDNA.4497.1  | 3.75  | 3.53  | 0.7  | 0.2  | 1.16  | 0.456812 | 0.662061 | 0.705979 | 0.802105 |
| MmugDNA.4498.1.S1_at   | MmugDNA.4498.1  | 3.58  | 3.45  | 0.48 | 0.03 | 1.09  | 0.491726 | 0.615388 | 0.729361 | 0.771962 |
| MmugDNA.4499.1.S1_at   | MmugDNA.4499.1  | 7.73  | 8.31  | 0.19 | 0.08 | -1.5  | 0.009313 | 0.189354 | 0.146315 | 0.465092 |
| MmugDNA.450.1.S1_at    | MmugDNA.450.1   | 6.96  | 6.96  | 0.11 | 0.07 | 1     | 0.237186 | 0.313905 | 0.534591 | 0.568094 |
| MmugDNA.4500.1.S1_at   | MmugDNA.4500.1  | 4.25  | 5.3   | 0.32 | 0.43 | -2.06 | 0.119085 | 0.070544 | 0.396713 | 0.311777 |
| MmugDNA.4502.1.S1_at   | MmugDNA.4502.1  | 3.93  | 3.92  | 0.26 | 0.15 | 1     | 0.394314 | 0.386903 | 0.660956 | 0.621935 |
| MmugDNA.4503.1.S1_at   | MmugDNA.4503.1  | 5.92  | 5.68  | 0.12 | 0.01 | 1.18  | 0.051285 | 0.032532 | 0.283861 | 0.223378 |
| MmugDNA.4504.1.S1_at   | MmugDNA.4504.1  | 8.06  | 9.01  | 0.52 | 0.08 | -1.93 | 0.116428 | 0.009251 | 0.39359  | 0.126966 |
| MmugDNA.4505.1.S1_at   | MmugDNA.4505.1  | 6.61  | 7.15  | 0.48 | 0.41 | -1.45 | 0.523012 | 0.455697 | 0.750171 | 0.669654 |
| MmugDNA.4506.1.S1_at   | MmugDNA.4506.1  | 6.16  | 6.08  | 0.19 | 0.06 | 1.06  | 0.232008 | 0.288094 | 0.530597 | 0.549319 |
| MmugDNA.4507.1.S1_at   | MmugDNA.4507.1  | 8.93  | 8.99  | 0.06 | 0.12 | -1.05 | 0.286616 | 0.788237 | 0.576462 | 0.877514 |
| MmugDNA.4508.1.S1_at   | MmugDNA.4508.1  | 12.56 | 12.52 | 0.04 | 0.01 | 1.03  | 0.39355  | 0.022965 | 0.660319 | 0.189548 |
| MmugDNA.4509.1.S1_at   | MmugDNA.4509.1  | 8.47  | 8.1   | 0.25 | 0.16 | 1.29  | 0.101753 | 0.455776 | 0.373209 | 0.669659 |
| MmugDNA.451.1.S1_at    | MmugDNA.451.1   | 4.55  | 4.87  | 1.1  | 0.26 | -1.24 | 0.818002 | 0.297348 | 0.918705 | 0.556071 |
| MmugDNA.4511.1.S1_at   | MmugDNA.4511.1  | 10.03 | 10.49 | 0.37 | 0.31 | -1.38 | 0.157408 | 0.118653 | 0.448037 | 0.386673 |
| MmugDNA.4512.1.S1_at   | MmugDNA.4512.1  | 7.67  | 7.62  | 0.11 | 0.29 | 1.03  | 0.438616 | 0.036099 | 0.693134 | 0.234417 |
| MmugDNA.4513.1.S1_at   | MmugDNA.4513.1  | 7.21  | 6.85  | 0.03 | 0.17 | 1.28  | 0.078783 | 0.013418 | 0.338647 | 0.148424 |
| MmugDNA.4514.1.S1_at   | MmugDNA.4514.1  | 4.54  | 4.54  | 0.03 | 0.07 | 1     | 0.624989 | 0.150113 | 0.81514  | 0.42471  |
| MmugDNA.4516.1.S1_at   | MmugDNA.4516.1  | 7.17  | 6.66  | 0.36 | 0.2  | 1.42  | 0.039609 | 0.024679 | 0.255628 | 0.196662 |
| MmugDNA.4517.1.S1_s_at | MmugDNA.4517.1  | 9.55  | 9.81  | 0.51 | 0.06 | -1.2  | 0.51346  | 0.732959 | 0.743659 | 0.84547  |
| MmugDNA.4518.1.S1_at   | MmugDNA.4518.1  | 3.79  | 3.83  | 0.34 | 0.13 | -1.03 | 0.891551 | 0.967663 | 0.953744 | 0.982117 |
| MmugDNA.4519.1.S1_at   | MmugDNA.4519.1  | 8.29  | 8.13  | 0.05 | 0.02 | 1.11  | 0.004376 | 0.160541 | 0.112249 | 0.436708 |
| MmugDNA.4520.1.S1_at   | MmugDNA.4520.1  | 5.06  | 4.9   | 0.51 | 0.1  | 1.11  | 0.528268 | 0.753721 | 0.753547 | 0.856634 |
| MmugDNA.4521.1.S1_at   | MmugDNA.4521.1  | 8.22  | 8.64  | 0.14 | 0.23 | -1.34 | 0.1748   | 0.658913 | 0.469037 | 0.800473 |
| MmugDNA.4522.1.S1_at   | MmugDNA.4522.1  | 3.03  | 3.2   | 0.14 | 0.14 | -1.13 | 0.770201 | 0.743616 | 0.894561 | 0.851428 |
| MmugDNA.4523.1.S1_at   | MmugDNA.4523.1  | 10.12 | 9.32  | 0.26 | 0.2  | 1.73  | 0.024719 | 0.040986 | 0.210329 | 0.247202 |
| MmugDNA.29813.1.S1_at  | MmugDNA.29813.1 | 11.41 | 10.95 | 0.32 | 0.32 | 1.38  | 0.32829  | 0.107745 | 0.610662 | 0.370816 |

|                         |                 |       |       |      |      |       |          |          |          |          |
|-------------------------|-----------------|-------|-------|------|------|-------|----------|----------|----------|----------|
| MmugDNA.29813.1.S1_s_at | MmugDNA.29813.1 | 11.07 | 10.41 | 0.24 | 0.28 | 1.58  | 0.075682 | 0.090047 | 0.333384 | 0.344402 |
| MmugDNA.4524.1.S1_at    | MmugDNA.4524.1  | 8.05  | 8.17  | 0.03 | 0.13 | -1.09 | 0.095806 | 0.23022  | 0.365401 | 0.502084 |
| MmugDNA.4525.1.S1_at    | MmugDNA.4525.1  | 12.09 | 12.22 | 0.02 | 0.04 | -1.09 | 0.014409 | 0.082022 | 0.171721 | 0.330729 |
| MmugDNA.4526.1.S1_at    | MmugDNA.4526.1  | 7.96  | 8.65  | 0.11 | 0.18 | -1.61 | 0.005174 | 0.021803 | 0.116998 | 0.184765 |
| MmugDNA.4527.1.S1_at    | MmugDNA.4527.1  | 5.96  | 6.13  | 0.19 | 0.07 | -1.12 | 0.215056 | 0.653493 | 0.512738 | 0.797464 |
| MmugDNA.4528.1.S1_at    | MmugDNA.4528.1  | 5.06  | 4.66  | 0.15 | 0.11 | 1.32  | 0.045719 | 0.353671 | 0.271293 | 0.596752 |
| MmugDNA.4529.1.S1_at    | MmugDNA.4529.1  | 4.1   | 3.61  | 0.29 | 0.13 | 1.4   | 0.085415 | 0.103918 | 0.349738 | 0.36459  |
| MmugDNA.453.1.S1_at     | MmugDNA.453.1   | 11.27 | 10.38 | 0.7  | 0.63 | 1.85  | 0.371187 | 0.516835 | 0.643902 | 0.709251 |
| MmugDNA.4530.1.S1_at    | MmugDNA.4530.1  | 4.21  | 4.08  | 0.07 | 0.14 | 1.09  | 0.137643 | 0.263293 | 0.422708 | 0.529561 |
| MmugDNA.4532.1.S1_at    | MmugDNA.4532.1  | 12.06 | 12.06 | 0.18 | 0.02 | 1.01  | 0.671533 | 0.392294 | 0.842415 | 0.625694 |
| MmugDNA.4533.1.S1_at    | MmugDNA.4533.1  | 7.17  | 7.03  | 0.08 | 0.07 | 1.11  | 0.05452  | 0.291345 | 0.290603 | 0.551803 |
| MmugDNA.4534.1.S1_at    | MmugDNA.4534.1  | 10.61 | 10.23 | 0.11 | 0.08 | 1.3   | 0.005714 | 0.339308 | 0.121179 | 0.585982 |
| MmugDNA.4535.1.S1_at    | MmugDNA.4535.1  | 5.72  | 5.72  | 0.7  | 0.31 | 1     | 0.83     | 0.652722 | 0.92519  | 0.796982 |
| MmugDNA.4536.1.S1_at    | MmugDNA.4536.1  | 6.59  | 6.6   | 0.06 | 0.41 | -1.01 | 0.338166 | 0.41425  | 0.61862  | 0.640163 |
| MmugDNA.4537.1.S1_at    | MmugDNA.4537.1  | 7.96  | 7.21  | 0.24 | 0.17 | 1.68  | 0.024817 | 0.240894 | 0.210553 | 0.511584 |
| MmugDNA.4538.1.S1_at    | MmugDNA.4538.1  | 10.15 | 9.91  | 0.32 | 0.18 | 1.18  | 0.550302 | 0.61858  | 0.767803 | 0.774158 |
| MmugDNA.4539.1.S1_at    | MmugDNA.4539.1  | 6.94  | 6.81  | 0.3  | 0.03 | 1.09  | 0.916239 | 0.989561 | 0.964383 | 0.994055 |
| MmugDNA.454.1.S1_at     | MmugDNA.454.1   | 10.21 | 10.93 | 0.3  | 0.17 | -1.65 | 0.0217   | 0.002455 | 0.20067  | 0.073314 |
| MmugDNA.4540.1.S1_at    | MmugDNA.4540.1  | 11.85 | 11.62 | 0.18 | 0.06 | 1.17  | 0.043473 | 0.001151 | 0.265658 | 0.053529 |
| MmugDNA.4541.1.S1_at    | MmugDNA.4541.1  | 4.34  | 4.31  | 0.6  | 0.39 | 1.03  | 0.482964 | 0.859518 | 0.723242 | 0.919992 |
| MmugDNA.4542.1.S1_at    | MmugDNA.4542.1  | 2.93  | 3.15  | 0.11 | 0.07 | -1.16 | 0.065929 | 0.060241 | 0.314244 | 0.292091 |
| MmugDNA.4543.1.S1_at    | MmugDNA.4543.1  | 9.86  | 9.37  | 0.14 | 0.11 | 1.4   | 0.015816 | 0.012898 | 0.178242 | 0.146225 |
| MmugDNA.4544.1.S1_at    | MmugDNA.4544.1  | 5.76  | 5.85  | 0.14 | 0.23 | -1.06 | 0.123084 | 0.379734 | 0.402202 | 0.616543 |
| MmugDNA.4545.1.S1_at    | MmugDNA.4545.1  | 9.83  | 9.92  | 0.04 | 0.05 | -1.06 | 0.208928 | 0.000592 | 0.506372 | 0.041912 |
| MmugDNA.4546.1.S1_at    | MmugDNA.4546.1  | 6.13  | 6.13  | 0.12 | 0.05 | 1     | 0.607124 | 0.185711 | 0.803551 | 0.46163  |
| MmugDNA.4548.1.S1_at    | MmugDNA.4548.1  | 5.31  | 5.14  | 0.33 | 0.29 | 1.13  | 0.259678 | 0.311457 | 0.554019 | 0.566456 |
| MmugDNA.4549.1.S1_at    | MmugDNA.4549.1  | 3.17  | 3.29  | 0.23 | 0.12 | -1.09 | 0.387332 | 0.605045 | 0.655535 | 0.764917 |
| MmugDNA.455.1.S1_at     | MmugDNA.455.1   | 6.11  | 6.08  | 0.17 | 0.24 | 1.02  | 0.856142 | 0.645879 | 0.937374 | 0.792632 |
| MmugDNA.4550.1.S1_at    | MmugDNA.4550.1  | 5.5   | 4.79  | 0.34 | 0.23 | 1.63  | 0.107511 | 0.103868 | 0.382242 | 0.364519 |
| MmugDNA.4551.1.S1_at    | MmugDNA.4551.1  | 2.7   | 2.95  | 0.06 | 0.13 | -1.19 | 0.154922 | 0.272249 | 0.445131 | 0.536992 |
| MmugDNA.4553.1.S1_at    | MmugDNA.4553.1  | 6.13  | 5.81  | 0.21 | 0.17 | 1.25  | 0.218674 | 0.395678 | 0.516351 | 0.627623 |
| MmugDNA.4555.1.S1_at    | MmugDNA.4555.1  | 4.64  | 4.53  | 0.01 | 0.03 | 1.08  | 0.005648 | 0.004622 | 0.120879 | 0.094974 |
| MmugDNA.4556.1.S1_at    | MmugDNA.4556.1  | 7.49  | 6.07  | 0.6  | 0.25 | 2.66  | 0.022814 | 0.12973  | 0.204235 | 0.401362 |
| MmugDNA.4557.1.S1_at    | MmugDNA.4557.1  | 8.28  | 7.77  | 0.41 | 0.51 | 1.42  | 0.562951 | 0.219511 | 0.775246 | 0.493168 |
| MmugDNA.4558.1.S1_at    | MmugDNA.4558.1  | 8.71  | 8.15  | 0.16 | 0.09 | 1.47  | 0.007279 | 0.449898 | 0.132985 | 0.665343 |
| MmugDNA.4559.1.S1_at    | MmugDNA.4559.1  | 5.21  | 7.1   | 1.53 | 0.12 | -3.72 | 0.290381 | 0.29107  | 0.579851 | 0.551574 |
| MmugDNA.4560.1.S1_at    | MmugDNA.4560.1  | 4.42  | 4.76  | 0.02 | 0.12 | -1.27 | 0.020958 | 0.004065 | 0.198328 | 0.090288 |
| MmugDNA.4561.1.S1_at    | MmugDNA.4561.1  | 4.42  | 4.28  | 0.23 | 0.13 | 1.1   | 0.224612 | 0.395336 | 0.522693 | 0.627404 |
| MmugDNA.4563.1.S1_at    | MmugDNA.4563.1  | 6.15  | 6.22  | 0.09 | 0.05 | -1.04 | 0.07064  | 0.00733  | 0.324085 | 0.115015 |
| MmugDNA.4564.1.S1_at    | MmugDNA.4564.1  | 8.15  | 7.51  | 0.41 | 0.53 | 1.56  | 0.273148 | 0.136325 | 0.565251 | 0.408746 |
| MmugDNA.4565.1.S1_at    | MmugDNA.4565.1  | 5.5   | 5.63  | 0.33 | 0.08 | -1.09 | 0.447043 | 0.67964  | 0.69909  | 0.812969 |
| MmugDNA.4566.1.S1_at    | MmugDNA.4566.1  | 7.25  | 7.38  | 0.72 | 0.11 | -1.09 | 0.907588 | 0.676453 | 0.960932 | 0.81095  |
| MmugDNA.4568.1.S1_at    | MmugDNA.4568.1  | 3.43  | 3.4   | 1.03 | 0.14 | 1.02  | 0.305028 | 0.432652 | 0.592015 | 0.653054 |



|                         |                 |       |       |      |      |       |          |          |          |          |
|-------------------------|-----------------|-------|-------|------|------|-------|----------|----------|----------|----------|
| MmugDNA.4569.1.S1_at    | MmugDNA.4569.1  | 11.15 | 10.72 | 0.05 | 0.09 | 1.35  | 0.001653 | 0.008567 | 0.084462 | 0.122809 |
| MmugDNA.4570.1.S1_at    | MmugDNA.4570.1  | 4.8   | 4.81  | 0.17 | 0.12 | -1    | 0.644535 | 0.745038 | 0.826962 | 0.852262 |
| MmugDNA.4571.1.S1_at    | MmugDNA.4571.1  | 6.11  | 5.81  | 0.06 | 0.08 | 1.23  | 0.009391 | 0.028939 | 0.146803 | 0.21198  |
| MmugDNA.4572.1.S1_at    | MmugDNA.4572.1  | 6.85  | 6.64  | 0.34 | 0.06 | 1.16  | 0.292643 | 0.002997 | 0.581743 | 0.079958 |
| MmugDNA.4575.1.S1_at    | MmugDNA.4575.1  | 4.04  | 5.07  | 0.49 | 0.25 | -2.04 | 0.055754 | 0.124922 | 0.29328  | 0.395313 |
| MmugDNA.4577.1.S1_at    | MmugDNA.4577.1  | 5.97  | 5.86  | 0.02 | 0.05 | 1.08  | 0.022459 | 0.206928 | 0.203164 | 0.481052 |
| MmugDNA.4579.1.S1_at    | MmugDNA.4579.1  | 3.77  | 3.76  | 0.11 | 0.09 | 1.01  | 0.213502 | 0.42026  | 0.511324 | 0.64407  |
| MmugDNA.458.1.S1_at     | MmugDNA.458.1   | 5.77  | 6.47  | 0.59 | 0.14 | -1.62 | 0.067926 | 0.00885  | 0.318429 | 0.124493 |
| MmugDNA.4580.1.S1_at    | MmugDNA.4580.1  | 6.45  | 6.51  | 0.32 | 0.48 | -1.05 | 0.594848 | 0.883849 | 0.794991 | 0.933709 |
| MmugDNA.4582.1.S1_at    | MmugDNA.4582.1  | 5.18  | 5.42  | 1.08 | 0.28 | -1.19 | 0.921679 | 0.993607 | 0.966451 | 0.996218 |
| MmugDNA.4585.1.S1_at    | MmugDNA.4585.1  | 6.05  | 5.32  | 0.92 | 0.5  | 1.66  | 0.352508 | 0.360203 | 0.630029 | 0.601275 |
| MmugDNA.4586.1.S1_at    | MmugDNA.4586.1  | 12.52 | 12.26 | 0.08 | 0.02 | 1.19  | 0.004925 | 0.008044 | 0.115175 | 0.119181 |
| MmugDNA.4587.1.S1_at    | MmugDNA.4587.1  | 5.62  | 5.47  | 0.08 | 0.09 | 1.11  | 0.191931 | 0.186852 | 0.488491 | 0.462707 |
| MmugDNA.4588.1.S1_at    | MmugDNA.4588.1  | 8.34  | 8.26  | 0.21 | 0.19 | 1.05  | 0.325786 | 0.01796  | 0.608941 | 0.169043 |
| MmugDNA.459.1.S1_at     | MmugDNA.459.1   | 3.92  | 3.95  | 0.21 | 0.06 | -1.02 | 0.946398 | 0.81755  | 0.977365 | 0.894746 |
| MmugDNA.4590.1.S1_at    | MmugDNA.4590.1  | 3.94  | 3.92  | 0.05 | 0.23 | 1.01  | 0.978551 | 0.484453 | 0.991753 | 0.688478 |
| MmugDNA.4591.1.S1_at    | MmugDNA.4591.1  | 5.45  | 6.39  | 0.4  | 0.38 | -1.92 | 0.140862 | 0.207096 | 0.426669 | 0.481189 |
| MmugDNA.4593.1.S1_at    | MmugDNA.4593.1  | 8.68  | 8.44  | 0.7  | 0.19 | 1.18  | 0.350016 | 0.444685 | 0.627837 | 0.662072 |
| MmugDNA.29515.1.S1_at   | MmugDNA.29515.1 | 8.83  | 8.24  | 0.11 | 0.1  | 1.5   | 0.002049 | 0.008769 | 0.090054 | 0.124009 |
| MmugDNA.29515.1.S1_s_at | MmugDNA.29515.1 | 10.19 | 9.54  | 0.18 | 0.1  | 1.57  | 0.006823 | 0.003643 | 0.129236 | 0.086518 |
| MmugDNA.4595.1.S1_at    | MmugDNA.4595.1  | 6.47  | 6.52  | 0.21 | 0.06 | -1.03 | 0.808492 | 0.971559 | 0.914284 | 0.984558 |
| MmugDNA.4596.1.S1_at    | MmugDNA.4596.1  | 3.26  | 3.26  | 0.04 | 0.01 | 1     | 0.357886 | 0.200117 | 0.633697 | 0.474603 |
| MmugDNA.4597.1.S1_at    | MmugDNA.4597.1  | 12.34 | 12.69 | 0.18 | 0.03 | -1.27 | 0.070427 | 0.002653 | 0.323757 | 0.076147 |
| MmugDNA.4598.1.S1_at    | MmugDNA.4598.1  | 4.69  | 4.5   | 0.13 | 0.09 | 1.14  | 0.157983 | 0.242156 | 0.448708 | 0.512652 |
| MmugDNA.4599.1.S1_at    | MmugDNA.4599.1  | 6.26  | 5.58  | 0.26 | 0.47 | 1.6   | 0.201655 | 0.240389 | 0.499203 | 0.510966 |
| MmugDNA.46.1.S1_at      | MmugDNA.46.1    | 9.92  | 9.16  | 0.29 | 0.16 | 1.69  | 0.032697 | 0.028423 | 0.234993 | 0.210385 |
| MmugDNA.460.1.S1_at     | MmugDNA.460.1   | 5.98  | 6.22  | 0.16 | 0.18 | -1.18 | 0.12767  | 0.07529  | 0.409569 | 0.319441 |
| MmugDNA.4600.1.S1_at    | MmugDNA.4600.1  | 3.64  | 3.71  | 0.14 | 0.15 | -1.05 | 0.984629 | 0.2259   | 0.994336 | 0.498298 |
| MmugDNA.4601.1.S1_at    | MmugDNA.4601.1  | 6.06  | 6.15  | 0.14 | 0.05 | -1.06 | 0.850997 | 0.936016 | 0.935277 | 0.963932 |
| MmugDNA.4602.1.S1_at    | MmugDNA.4602.1  | 5.76  | 6.74  | 0.23 | 0.42 | -1.98 | 0.050593 | 0.168827 | 0.282639 | 0.445458 |
| MmugDNA.4603.1.S1_at    | MmugDNA.4603.1  | 7.45  | 6.55  | 0.41 | 0.27 | 1.87  | 0.025374 | 0.01212  | 0.21227  | 0.142442 |
| MmugDNA.4604.1.S1_at    | MmugDNA.4604.1  | 6.01  | 6.04  | 0.03 | 0.03 | -1.02 | 0.49483  | 0.38983  | 0.731438 | 0.623878 |
| MmugDNA.4605.1.S1_at    | MmugDNA.4605.1  | 4.43  | 4.4   | 0.2  | 0.55 | 1.03  | 0.453477 | 0.075112 | 0.703642 | 0.319301 |
| MmugDNA.4606.1.S1_at    | MmugDNA.4606.1  | 6.07  | 6.04  | 0.15 | 0.19 | 1.02  | 0.319373 | 0.799633 | 0.604001 | 0.884762 |
| MmugDNA.4607.1.S1_at    | MmugDNA.4607.1  | 9.09  | 8.76  | 0.26 | 0.18 | 1.26  | 0.519416 | 0.732152 | 0.748036 | 0.844852 |
| MmugDNA.4608.1.S1_at    | MmugDNA.4608.1  | 5.49  | 5.53  | 0.3  | 0.03 | -1.02 | 0.809282 | 0.025606 | 0.914571 | 0.200784 |
| MmugDNA.461.1.S1_at     | MmugDNA.461.1   | 9.96  | 10.76 | 0.58 | 0.24 | -1.75 | 0.127945 | 0.080627 | 0.409866 | 0.328427 |
| MmugDNA.4610.1.S1_at    | MmugDNA.4610.1  | 3.13  | 3.18  | 0.06 | 0.14 | -1.03 | 0.303797 | 0.2609   | 0.591195 | 0.527351 |
| MmugDNA.4611.1.S1_at    | MmugDNA.4611.1  | 5.87  | 5.69  | 0.59 | 0.08 | 1.13  | 0.217425 | 0.269915 | 0.515324 | 0.535204 |
| MmugDNA.4612.1.S1_at    | MmugDNA.4612.1  | 8.35  | 7     | 0.64 | 0.07 | 2.54  | 0.055792 | 0.017725 | 0.293362 | 0.168367 |
| MmugDNA.4613.1.S1_at    | MmugDNA.4613.1  | 12.88 | 12.91 | 0.08 | 0.01 | -1.02 | 0.707184 | 0.738397 | 0.861311 | 0.848281 |
| MmugDNA.4614.1.S1_at    | MmugDNA.4614.1  | 11.88 | 11.85 | 0.1  | 0.03 | 1.02  | 0.969165 | 0.175302 | 0.98776  | 0.452064 |
| MmugDNA.4616.1.S1_at    | MmugDNA.4616.1  | 10.38 | 10.28 | 0.23 | 0.08 | 1.07  | 0.481461 | 0.129979 | 0.721957 | 0.401549 |

|                      |                |       |       |      |      |       |          |          |          |          |
|----------------------|----------------|-------|-------|------|------|-------|----------|----------|----------|----------|
| MmugDNA.4617.1.S1_at | MmugDNA.4617.1 | 3.95  | 3.9   | 0.05 | 0.03 | 1.04  | 0.369655 | 0.332862 | 0.642969 | 0.581266 |
| MmugDNA.4619.1.S1_at | MmugDNA.4619.1 | 3.54  | 3.44  | 0.45 | 0.14 | 1.07  | 0.233089 | 0.126109 | 0.531318 | 0.39672  |
| MmugDNA.462.1.S1_at  | MmugDNA.462.1  | 7.29  | 7.49  | 1.11 | 0.41 | -1.15 | 0.767819 | 0.936075 | 0.893381 | 0.963958 |
| MmugDNA.4620.1.S1_at | MmugDNA.4620.1 | 4.05  | 4.21  | 0.09 | 0.13 | -1.12 | 0.063867 | 0.132972 | 0.309245 | 0.404626 |
| MmugDNA.4621.1.S1_at | MmugDNA.4621.1 | 11.84 | 11.72 | 0.26 | 0.14 | 1.09  | 0.662059 | 0.469109 | 0.836881 | 0.678117 |
| MmugDNA.4623.1.S1_at | MmugDNA.4623.1 | 4.04  | 4     | 0.24 | 0.08 | 1.03  | 0.752288 | 0.907684 | 0.885542 | 0.947753 |
| MmugDNA.4624.1.S1_at | MmugDNA.4624.1 | 6.01  | 6.01  | 0.17 | 0.1  | -1    | 0.639302 | 0.514339 | 0.823426 | 0.707645 |
| MmugDNA.4625.1.S1_at | MmugDNA.4625.1 | 4.69  | 4.41  | 0.13 | 0.07 | 1.21  | 0.069347 | 0.115751 | 0.321649 | 0.382814 |
| MmugDNA.4626.1.S1_at | MmugDNA.4626.1 | 7.96  | 7.86  | 0.07 | 0.11 | 1.08  | 0.055912 | 0.630916 | 0.293437 | 0.782539 |
| MmugDNA.4627.1.S1_at | MmugDNA.4627.1 | 5.31  | 4.99  | 0.28 | 0.32 | 1.24  | 0.307978 | 0.34149  | 0.59471  | 0.587676 |
| MmugDNA.4628.1.S1_at | MmugDNA.4628.1 | 4.73  | 4.06  | 0.67 | 0.17 | 1.59  | 0.202915 | 0.647922 | 0.500659 | 0.793872 |
| MmugDNA.4629.1.S1_at | MmugDNA.4629.1 | 4.33  | 4.17  | 0.11 | 0.04 | 1.12  | 0.101424 | 0.019174 | 0.372888 | 0.1742   |
| MmugDNA.4631.1.S1_at | MmugDNA.4631.1 | 5.58  | 6.02  | 1.03 | 0.06 | -1.35 | 0.890361 | 0.038581 | 0.953294 | 0.241429 |
| MmugDNA.4632.1.S1_at | MmugDNA.4632.1 | 9.58  | 9.71  | 0.06 | 0.01 | -1.1  | 0.02535  | 0.041704 | 0.21227  | 0.24887  |
| MmugDNA.4633.1.S1_at | MmugDNA.4633.1 | 7.55  | 7.07  | 0.39 | 0.12 | 1.4   | 0.415767 | 0.097137 | 0.676389 | 0.354735 |
| MmugDNA.4634.1.S1_at | MmugDNA.4634.1 | 3.24  | 3.32  | 0.07 | 0.07 | -1.06 | 0.297026 | 0.16636  | 0.585548 | 0.442884 |
| MmugDNA.4635.1.S1_at | MmugDNA.4635.1 | 4.95  | 5.34  | 1.07 | 0.09 | -1.31 | 0.692803 | 0.195508 | 0.853193 | 0.470351 |
| MmugDNA.4638.1.S1_at | MmugDNA.4638.1 | 6.27  | 6.18  | 0.82 | 0.36 | 1.07  | 0.597639 | 0.672443 | 0.796847 | 0.808568 |
| MmugDNA.4639.1.S1_at | MmugDNA.4639.1 | 2.78  | 3.11  | 0.09 | 0.38 | -1.26 | 0.149857 | 0.132328 | 0.43879  | 0.404294 |
| MmugDNA.464.1.S1_at  | MmugDNA.464.1  | 9.21  | 8.56  | 0.23 | 0.25 | 1.57  | 0.12591  | 0.162656 | 0.406859 | 0.43876  |
| MmugDNA.4640.1.S1_at | MmugDNA.4640.1 | 6.5   | 6.63  | 0.17 | 0.28 | -1.1  | 0.955531 | 0.400832 | 0.981771 | 0.630658 |
| MmugDNA.4641.1.S1_at | MmugDNA.4641.1 | 5.08  | 5.09  | 0.06 | 0.01 | -1.01 | 0.22719  | 0.770194 | 0.525206 | 0.86656  |
| MmugDNA.4642.1.S1_at | MmugDNA.4642.1 | 5.47  | 5.38  | 0.07 | 0.12 | 1.07  | 0.224193 | 0.000505 | 0.522333 | 0.039158 |
| MmugDNA.4643.1.S1_at | MmugDNA.4643.1 | 7.65  | 6.92  | 0.62 | 0.02 | 1.65  | 0.329039 | 0.49352  | 0.611346 | 0.694195 |
| MmugDNA.4644.1.S1_at | MmugDNA.4644.1 | 3.33  | 3.32  | 0.05 | 0.12 | 1.01  | 0.999787 | 0.059515 | 0.999962 | 0.290548 |
| MmugDNA.4648.1.S1_at | MmugDNA.4648.1 | 4.12  | 3.34  | 0.69 | 0.21 | 1.72  | 0.343422 | 0.3759   | 0.622974 | 0.613749 |
| MmugDNA.4649.1.S1_at | MmugDNA.4649.1 | 9.05  | 6.69  | 1.44 | 0.43 | 5.13  | 0.077931 | 0.138675 | 0.337174 | 0.411742 |
| MmugDNA.465.1.S1_at  | MmugDNA.465.1  | 4.54  | 4.43  | 0.35 | 0.06 | 1.08  | 0.648463 | 0.161613 | 0.829221 | 0.437771 |
| MmugDNA.4650.1.S1_at | MmugDNA.4650.1 | 8.79  | 8.43  | 0.87 | 0.2  | 1.28  | 0.651307 | 0.848649 | 0.830638 | 0.914061 |
| MmugDNA.4652.1.S1_at | MmugDNA.4652.1 | 10.51 | 10.45 | 0.17 | 0.08 | 1.04  | 0.350827 | 0.386399 | 0.628649 | 0.621593 |
| MmugDNA.4653.1.S1_at | MmugDNA.4653.1 | 4.16  | 4.04  | 0.42 | 0.03 | 1.09  | 0.637727 | 0.522493 | 0.822594 | 0.713164 |
| MmugDNA.4654.1.S1_at | MmugDNA.4654.1 | 7.13  | 7.63  | 0.37 | 0.17 | -1.42 | 0.253236 | 0.42412  | 0.547616 | 0.646737 |
| MmugDNA.4655.1.S1_at | MmugDNA.4655.1 | 11.46 | 10.51 | 0.44 | 0.07 | 1.93  | 0.018709 | 0.00714  | 0.190054 | 0.113735 |
| MmugDNA.4656.1.S1_at | MmugDNA.4656.1 | 6.69  | 6.11  | 0.92 | 0.27 | 1.5   | 0.200323 | 0.429894 | 0.497792 | 0.651109 |
| MmugDNA.4658.1.S1_at | MmugDNA.4658.1 | 7.06  | 6.62  | 0.35 | 0.12 | 1.35  | 0.049174 | 0.004183 | 0.279211 | 0.091084 |
| MmugDNA.4659.1.S1_at | MmugDNA.4659.1 | 4.42  | 4.38  | 0.07 | 0.11 | 1.02  | 0.265235 | 0.053793 | 0.557962 | 0.277457 |
| MmugDNA.466.1.S1_at  | MmugDNA.466.1  | 6.85  | 7     | 0.44 | 0.19 | -1.11 | 0.73897  | 0.444676 | 0.879058 | 0.662072 |
| MmugDNA.4660.1.S1_at | MmugDNA.4660.1 | 7.48  | 6.76  | 0.79 | 0.4  | 1.64  | 0.244668 | 0.41468  | 0.540961 | 0.640456 |
| MmugDNA.4661.1.S1_at | MmugDNA.4661.1 | 6.94  | 6.4   | 0.91 | 0.54 | 1.45  | 0.283181 | 0.192425 | 0.573616 | 0.467919 |
| MmugDNA.4662.1.S1_at | MmugDNA.4662.1 | 3.42  | 3.39  | 0.03 | 0.07 | 1.02  | 0.168773 | 0.302322 | 0.462083 | 0.560092 |
| MmugDNA.4663.1.S1_at | MmugDNA.4663.1 | 4.44  | 4.39  | 0.12 | 0.03 | 1.04  | 0.12387  | 0.145582 | 0.403672 | 0.419456 |
| MmugDNA.4665.1.S1_at | MmugDNA.4665.1 | 7.2   | 6.45  | 1.37 | 0.23 | 1.68  | 0.498213 | 0.69052  | 0.733548 | 0.819604 |
| MmugDNA.4666.1.S1_at | MmugDNA.4666.1 | 2.88  | 2.86  | 0.11 | 0.11 | 1.01  | 0.708377 | 0.941101 | 0.861893 | 0.96664  |

|                        |                |       |       |      |      |       |          |          |          |          |
|------------------------|----------------|-------|-------|------|------|-------|----------|----------|----------|----------|
| MmugDNA.4668.1.S1_at   | MmugDNA.4668.1 | 9.7   | 9.08  | 0.15 | 0.12 | 1.54  | 0.004758 | 0.001193 | 0.115098 | 0.054172 |
| MmugDNA.4669.1.S1_at   | MmugDNA.4669.1 | 11.3  | 11.15 | 0.28 | 0.08 | 1.11  | 0.361911 | 0.498502 | 0.637126 | 0.697582 |
| MmugDNA.4672.1.S1_at   | MmugDNA.4672.1 | 6.84  | 6.67  | 0.39 | 0.28 | 1.12  | 0.230584 | 0.32662  | 0.529468 | 0.576649 |
| MmugDNA.4673.1.S1_at   | MmugDNA.4673.1 | 3.58  | 3.39  | 0.27 | 0.05 | 1.14  | 0.446722 | 0.322648 | 0.698851 | 0.574024 |
| MmugDNA.4674.1.S1_at   | MmugDNA.4674.1 | 8.71  | 8.79  | 0.28 | 0.15 | -1.06 | 0.890916 | 0.561009 | 0.95346  | 0.737076 |
| MmugDNA.4675.1.S1_at   | MmugDNA.4675.1 | 8.27  | 8.39  | 0.15 | 0.2  | -1.09 | 0.40659  | 0.259436 | 0.669837 | 0.526418 |
| MmugDNA.4675.1.S1_s_at | MmugDNA.4675.1 | 8.87  | 8.82  | 0.42 | 0.11 | 1.04  | 0.390291 | 0.397653 | 0.657953 | 0.629023 |
| MmugDNA.4676.1.S1_at   | MmugDNA.4676.1 | 6.75  | 6.62  | 0.18 | 0.3  | 1.1   | 0.290829 | 0.50607  | 0.580217 | 0.702355 |
| MmugDNA.4677.1.S1_at   | MmugDNA.4677.1 | 4.91  | 4.7   | 0.27 | 0.09 | 1.16  | 0.164039 | 0.139329 | 0.456843 | 0.412525 |
| MmugDNA.4678.1.S1_at   | MmugDNA.4678.1 | 4.01  | 4.11  | 0.08 | 0.22 | -1.07 | 0.231572 | 0.427321 | 0.530249 | 0.649175 |
| MmugDNA.4680.1.S1_s_at | MmugDNA.4680.1 | 9.81  | 9.78  | 0.1  | 0.17 | 1.02  | 0.625748 | 0.362097 | 0.815546 | 0.602821 |
| MmugDNA.4682.1.S1_at   | MmugDNA.4682.1 | 5.6   | 5.79  | 0.18 | 0.17 | -1.14 | 0.248157 | 0.069007 | 0.543486 | 0.309017 |
| MmugDNA.4683.1.S1_at   | MmugDNA.4683.1 | 3.59  | 3.54  | 0.22 | 0.14 | 1.04  | 0.1572   | 0.189821 | 0.447994 | 0.465403 |
| MmugDNA.4684.1.S1_at   | MmugDNA.4684.1 | 9.75  | 9.81  | 0.07 | 0.06 | -1.04 | 0.11905  | 0.586603 | 0.396713 | 0.753603 |
| MmugDNA.4685.1.S1_at   | MmugDNA.4685.1 | 3.59  | 3.35  | 0.12 | 0.27 | 1.18  | 0.394525 | 0.665826 | 0.661066 | 0.804196 |
| MmugDNA.4687.1.S1_at   | MmugDNA.4687.1 | 11.48 | 11.34 | 0.23 | 0.17 | 1.1   | 0.685959 | 0.036678 | 0.850432 | 0.235973 |
| MmugDNA.4688.1.S1_at   | MmugDNA.4688.1 | 10.46 | 9.73  | 0.14 | 0.12 | 1.66  | 0.003829 | 0.001298 | 0.107129 | 0.055585 |
| MmugDNA.4689.1.S1_at   | MmugDNA.4689.1 | 6.71  | 6.52  | 0.7  | 0.07 | 1.14  | 0.661033 | 0.681338 | 0.836437 | 0.813957 |
| MmugDNA.469.1.S1_at    | MmugDNA.469.1  | 10.83 | 10.64 | 0.12 | 0.09 | 1.14  | 0.171301 | 0.110292 | 0.465234 | 0.374403 |
| MmugDNA.4690.1.S1_at   | MmugDNA.4690.1 | 4     | 3.98  | 0.48 | 0.18 | 1.01  | 0.251771 | 0.322336 | 0.546475 | 0.57392  |
| MmugDNA.4691.1.S1_at   | MmugDNA.4691.1 | 4.33  | 4.04  | 0.13 | 0.09 | 1.22  | 0.0581   | 0.125911 | 0.298185 | 0.396452 |
| MmugDNA.4692.1.S1_at   | MmugDNA.4692.1 | 11.45 | 11.41 | 0.12 | 0.06 | 1.03  | 0.447629 | 0.122755 | 0.699576 | 0.39274  |
| MmugDNA.4694.1.S1_at   | MmugDNA.4694.1 | 7.9   | 7.91  | 0.28 | 0.06 | -1.01 | 0.983382 | 0.496046 | 0.99383  | 0.695877 |
| MmugDNA.4695.1.S1_at   | MmugDNA.4695.1 | 7.43  | 7.76  | 0.13 | 0.25 | -1.25 | 0.134611 | 0.520496 | 0.418463 | 0.711799 |
| MmugDNA.4697.1.S1_at   | MmugDNA.4697.1 | 3.15  | 3.12  | 0.02 | 0.1  | 1.02  | 0.209603 | 0.601125 | 0.507107 | 0.762531 |
| MmugDNA.4699.1.S1_at   | MmugDNA.4699.1 | 4.04  | 3.6   | 0.37 | 0.11 | 1.36  | 0.185494 | 0.27938  | 0.481731 | 0.543014 |
| MmugDNA.47.1.S1_at     | MmugDNA.47.1   | 12.38 | 12.13 | 0.01 | 0.07 | 1.19  | 0.008957 | 0.010369 | 0.144364 | 0.133236 |
| MmugDNA.470.1.S1_at    | MmugDNA.470.1  | 4.39  | 4.43  | 0.27 | 0.02 | -1.02 | 0.585872 | 0.852989 | 0.789501 | 0.916437 |
| MmugDNA.4700.1.S1_at   | MmugDNA.4700.1 | 4.13  | 3.64  | 0.18 | 0.22 | 1.4   | 0.047703 | 0.348764 | 0.275878 | 0.592786 |
| MmugDNA.4701.1.S1_at   | MmugDNA.4701.1 | 7.73  | 7.63  | 0.1  | 0.05 | 1.07  | 0.925712 | 0.070923 | 0.968535 | 0.312444 |
| MmugDNA.4702.1.S1_at   | MmugDNA.4702.1 | 6.47  | 6.28  | 0.17 | 0.03 | 1.14  | 0.340537 | 0.568704 | 0.620818 | 0.742078 |
| MmugDNA.4704.1.S1_at   | MmugDNA.4704.1 | 3.61  | 3.57  | 0.35 | 0.1  | 1.03  | 0.445962 | 0.354467 | 0.698308 | 0.597237 |
| MmugDNA.4705.1.S1_s_at | MmugDNA.4705.1 | 6.48  | 6.69  | 0.31 | 0.38 | -1.16 | 0.95355  | 0.987395 | 0.980976 | 0.992936 |
| MmugDNA.4706.1.S1_at   | MmugDNA.4706.1 | 5.8   | 5.69  | 0.18 | 0.13 | 1.08  | 0.222284 | 0.4722   | 0.520257 | 0.679876 |
| MmugDNA.4708.1.S1_at   | MmugDNA.4708.1 | 4.86  | 4.78  | 0.3  | 0.11 | 1.06  | 0.595882 | 0.71578  | 0.795488 | 0.835258 |
| MmugDNA.4709.1.S1_at   | MmugDNA.4709.1 | 3.45  | 3.33  | 0.14 | 0.19 | 1.08  | 0.537526 | 0.476734 | 0.759693 | 0.682885 |
| MmugDNA.471.1.S1_at    | MmugDNA.471.1  | 3.76  | 3.62  | 0.35 | 0.09 | 1.1   | 0.171328 | 0.228401 | 0.465234 | 0.500587 |
| MmugDNA.4710.1.S1_at   | MmugDNA.4710.1 | 9.37  | 9.19  | 0.22 | 0.12 | 1.13  | 0.818568 | 0.004209 | 0.918995 | 0.091368 |
| MmugDNA.4711.1.S1_at   | MmugDNA.4711.1 | 2.86  | 2.85  | 0.11 | 0.08 | 1     | 0.525459 | 0.715662 | 0.75194  | 0.835159 |
| MmugDNA.4712.1.S1_at   | MmugDNA.4712.1 | 3.52  | 3.52  | 0.15 | 0.15 | -1.01 | 0.428656 | 0.687507 | 0.685446 | 0.817606 |
| MmugDNA.4713.1.S1_at   | MmugDNA.4713.1 | 3.33  | 3.36  | 0    | 0.13 | -1.03 | 0.637531 | 0.547855 | 0.822534 | 0.728723 |
| MmugDNA.4714.1.S1_at   | MmugDNA.4714.1 | 11.62 | 11.18 | 0.23 | 0.02 | 1.36  | 0.079374 | 0.116812 | 0.339398 | 0.384133 |
| MmugDNA.4715.1.S1_at   | MmugDNA.4715.1 | 3.38  | 3.36  | 0    | 0.01 | 1.01  | 0.061279 | 0.281341 | 0.304318 | 0.544391 |

|                        |                |       |       |      |      |       |          |          |          |          |
|------------------------|----------------|-------|-------|------|------|-------|----------|----------|----------|----------|
| MmugDNA.4716.1.S1_at   | MmugDNA.4716.1 | 4.05  | 4.24  | 0.15 | 0.11 | -1.14 | 0.740873 | 0.059745 | 0.879892 | 0.29107  |
| MmugDNA.4717.1.S1_at   | MmugDNA.4717.1 | 5.83  | 4.84  | 1.26 | 0.67 | 1.99  | 0.33762  | 0.467973 | 0.618005 | 0.677457 |
| MmugDNA.4718.1.S1_s_at | MmugDNA.4718.1 | 10.09 | 10.53 | 0.32 | 0.13 | -1.36 | 0.154656 | 0.236817 | 0.444927 | 0.507555 |
| MmugDNA.472.1.S1_at    | MmugDNA.472.1  | 5.61  | 5.88  | 0.39 | 0.24 | -1.21 | 0.866656 | 0.970915 | 0.94244  | 0.984133 |
| MmugDNA.4720.1.S1_s_at | MmugDNA.4720.1 | 3.54  | 3.48  | 0.05 | 0.04 | 1.04  | 0.648268 | 0.194286 | 0.829161 | 0.469384 |
| MmugDNA.4722.1.S1_at   | MmugDNA.4722.1 | 10.99 | 9.05  | 0.43 | 0.3  | 3.86  | 0.004223 | 0.004636 | 0.11079  | 0.094988 |
| MmugDNA.4723.1.S1_at   | MmugDNA.4723.1 | 3.98  | 4     | 0.15 | 0.01 | -1.01 | 0.489736 | 0.530904 | 0.72796  | 0.718247 |
| MmugDNA.4724.1.S1_at   | MmugDNA.4724.1 | 6.53  | 6.33  | 0.1  | 0.04 | 1.15  | 0.047129 | 0.047199 | 0.274594 | 0.261823 |
| MmugDNA.4726.1.S1_at   | MmugDNA.4726.1 | 9.14  | 8.07  | 0.54 | 0.35 | 2.1   | 0.04478  | 0.044606 | 0.268918 | 0.255589 |
| MmugDNA.4727.1.S1_at   | MmugDNA.4727.1 | 4.61  | 4.55  | 0.68 | 0.37 | 1.04  | 0.2911   | 0.27638  | 0.58049  | 0.540334 |
| MmugDNA.4729.1.S1_at   | MmugDNA.4729.1 | 4.66  | 4.57  | 0.1  | 0.07 | 1.06  | 0.326474 | 0.235487 | 0.609577 | 0.506551 |
| MmugDNA.473.1.S1_at    | MmugDNA.473.1  | 5.74  | 5.72  | 0.21 | 0.07 | 1.01  | 0.478722 | 0.320432 | 0.720221 | 0.572648 |
| MmugDNA.4730.1.S1_at   | MmugDNA.4730.1 | 11.79 | 11.79 | 0.17 | 0.12 | -1    | 0.830617 | 0.057172 | 0.925496 | 0.284974 |
| MmugDNA.4733.1.S1_at   | MmugDNA.4733.1 | 9.72  | 8.82  | 0.09 | 0.13 | 1.87  | 0.001137 | 0.015357 | 0.077306 | 0.157392 |
| MmugDNA.4734.1.S1_at   | MmugDNA.4734.1 | 4.92  | 4.68  | 0.42 | 0.13 | 1.18  | 0.556911 | 0.321406 | 0.771968 | 0.573207 |
| MmugDNA.4735.1.S1_at   | MmugDNA.4735.1 | 3.41  | 3.49  | 0.16 | 0.03 | -1.06 | 0.882996 | 0.734412 | 0.95022  | 0.846131 |
| MmugDNA.4736.1.S1_at   | MmugDNA.4736.1 | 6.05  | 5.16  | 0.27 | 0.42 | 1.86  | 0.047426 | 0.042063 | 0.275072 | 0.249599 |
| MmugDNA.4737.1.S1_at   | MmugDNA.4737.1 | 5.62  | 5.72  | 0.62 | 0.22 | -1.07 | 0.691674 | 0.875184 | 0.852609 | 0.929179 |
| MmugDNA.4738.1.S1_at   | MmugDNA.4738.1 | 4.98  | 5.24  | 0.26 | 0.18 | -1.2  | 0.313171 | 0.297481 | 0.598964 | 0.556122 |
| MmugDNA.4739.1.S1_at   | MmugDNA.4739.1 | 4.85  | 4.77  | 0.27 | 0.23 | 1.06  | 0.528438 | 0.624913 | 0.753659 | 0.778939 |
| MmugDNA.4741.1.S1_at   | MmugDNA.4741.1 | 3.13  | 3.13  | 0.03 | 0.03 | 1     | 0.982743 | 0.502898 | 0.993625 | 0.700417 |
| MmugDNA.4743.1.S1_at   | MmugDNA.4743.1 | 8.48  | 8.39  | 0.44 | 0.14 | 1.06  | 0.718712 | 0.125185 | 0.867276 | 0.395666 |
| MmugDNA.4744.1.S1_at   | MmugDNA.4744.1 | 3.62  | 3.55  | 0.13 | 0.13 | 1.05  | 0.387402 | 0.714295 | 0.655563 | 0.834226 |
| MmugDNA.4746.1.S1_at   | MmugDNA.4746.1 | 7.56  | 7.49  | 0.28 | 0.15 | 1.05  | 0.441928 | 0.009539 | 0.695365 | 0.12867  |
| MmugDNA.4747.1.S1_at   | MmugDNA.4747.1 | 8.13  | 8.37  | 0.08 | 0.13 | -1.18 | 0.031274 | 0.026347 | 0.230061 | 0.203321 |
| MmugDNA.4748.1.S1_at   | MmugDNA.4748.1 | 7.12  | 7.44  | 0.22 | 0.21 | -1.25 | 0.072269 | 0.201822 | 0.326794 | 0.476367 |
| MmugDNA.475.1.S1_at    | MmugDNA.475.1  | 6.91  | 7.34  | 0.21 | 0.12 | -1.35 | 0.024202 | 0.052095 | 0.208762 | 0.273841 |
| MmugDNA.4751.1.S1_at   | MmugDNA.4751.1 | 11.33 | 11.82 | 0.11 | 0.14 | -1.4  | 0.008336 | 0.142388 | 0.140263 | 0.415965 |
| MmugDNA.4753.1.S1_at   | MmugDNA.4753.1 | 4.89  | 4.79  | 0.25 | 0.04 | 1.08  | 0.419246 | 0.487571 | 0.67873  | 0.690565 |
| MmugDNA.4754.1.S1_at   | MmugDNA.4754.1 | 7.62  | 7.68  | 0.2  | 0.03 | -1.04 | 0.555334 | 0.19663  | 0.771201 | 0.471656 |
| MmugDNA.4755.1.S1_at   | MmugDNA.4755.1 | 3.1   | 3.15  | 0.08 | 0.01 | -1.04 | 0.115921 | 0.169253 | 0.392991 | 0.445863 |
| MmugDNA.4756.1.S1_at   | MmugDNA.4756.1 | 3.98  | 4.02  | 0.05 | 0.15 | -1.03 | 0.819163 | 0.865587 | 0.919481 | 0.923598 |
| MmugDNA.4758.1.S1_at   | MmugDNA.4758.1 | 5.91  | 6.69  | 0.41 | 0.32 | -1.72 | 0.128525 | 0.351733 | 0.410529 | 0.595164 |
| MmugDNA.4759.1.S1_at   | MmugDNA.4759.1 | 6.63  | 6.48  | 0.2  | 0.13 | 1.11  | 0.457867 | 0.578958 | 0.706638 | 0.748786 |
| MmugDNA.4763.1.S1_at   | MmugDNA.4763.1 | 4.67  | 5.16  | 0.16 | 0.1  | -1.41 | 0.010141 | 0.024245 | 0.150466 | 0.194936 |
| MmugDNA.4764.1.S1_at   | MmugDNA.4764.1 | 4.89  | 4.87  | 0.15 | 0.06 | 1.02  | 0.369161 | 0.42437  | 0.642768 | 0.646933 |
| MmugDNA.4765.1.S1_at   | MmugDNA.4765.1 | 10.92 | 10.89 | 0.16 | 0.12 | 1.02  | 0.345023 | 0.899653 | 0.624093 | 0.942903 |
| MmugDNA.4767.1.S1_at   | MmugDNA.4767.1 | 5.67  | 5.75  | 0.71 | 0.22 | -1.05 | 0.746998 | 0.938448 | 0.882818 | 0.965059 |
| MmugDNA.4768.1.S1_at   | MmugDNA.4768.1 | 3.1   | 3.06  | 0.11 | 0.13 | 1.03  | 0.158192 | 0.148764 | 0.449156 | 0.423201 |
| MmugDNA.4769.1.S1_at   | MmugDNA.4769.1 | 6.05  | 6.31  | 0.11 | 0.05 | -1.2  | 0.026961 | 0.051227 | 0.217062 | 0.271799 |
| MmugDNA.4770.1.S1_at   | MmugDNA.4770.1 | 6.44  | 6.59  | 0.1  | 0.05 | -1.11 | 0.298524 | 0.04019  | 0.586803 | 0.245709 |
| MmugDNA.4771.1.S1_at   | MmugDNA.4771.1 | 9.91  | 9.67  | 0.29 | 0.02 | 1.18  | 0.646105 | 0.649287 | 0.827851 | 0.794734 |
| MmugDNA.4772.1.S1_at   | MmugDNA.4772.1 | 6.48  | 6.53  | 0.06 | 0.26 | -1.03 | 0.208034 | 0.128863 | 0.505907 | 0.400277 |

|                        |                |       |       |      |      |       |          |          |          |          |
|------------------------|----------------|-------|-------|------|------|-------|----------|----------|----------|----------|
| MmugDNA.4774.1.S1_at   | MmugDNA.4774.1 | 8.7   | 8.31  | 0.06 | 0.19 | 1.31  | 0.022362 | 0.000834 | 0.202812 | 0.046851 |
| MmugDNA.4775.1.S1_at   | MmugDNA.4775.1 | 6.78  | 6.81  | 0.03 | 0.01 | -1.02 | 0.695035 | 0.15931  | 0.854548 | 0.43531  |
| MmugDNA.4776.1.S1_at   | MmugDNA.4776.1 | 5.33  | 5.35  | 0.32 | 0.15 | -1.01 | 0.57301  | 0.278097 | 0.781008 | 0.541754 |
| MmugDNA.4777.1.S1_at   | MmugDNA.4777.1 | 5.74  | 5.19  | 0.51 | 0.47 | 1.46  | 0.689207 | 0.684582 | 0.851576 | 0.816019 |
| MmugDNA.4779.1.S1_at   | MmugDNA.4779.1 | 3.52  | 3.45  | 0.54 | 0.18 | 1.04  | 0.244962 | 0.313266 | 0.541136 | 0.567753 |
| MmugDNA.478.1.S1_at    | MmugDNA.478.1  | 8.14  | 8.37  | 0.25 | 0.03 | -1.18 | 0.200266 | 0.799841 | 0.497771 | 0.884906 |
| MmugDNA.4780.1.S1_at   | MmugDNA.4780.1 | 3.63  | 3.43  | 0.37 | 0.13 | 1.15  | 0.160016 | 0.194242 | 0.451279 | 0.469357 |
| MmugDNA.4781.1.S1_at   | MmugDNA.4781.1 | 9.23  | 9.05  | 0.55 | 0.13 | 1.13  | 0.973373 | 0.382152 | 0.989318 | 0.618361 |
| MmugDNA.4782.1.S1_at   | MmugDNA.4782.1 | 4.63  | 4.31  | 0.84 | 0.33 | 1.25  | 0.199568 | 0.140681 | 0.496963 | 0.413978 |
| MmugDNA.4783.1.S1_at   | MmugDNA.4783.1 | 7.13  | 6.55  | 0.36 | 0.41 | 1.5   | 0.105734 | 0.110857 | 0.379811 | 0.375187 |
| MmugDNA.4785.1.S1_at   | MmugDNA.4785.1 | 5.62  | 5.56  | 0.56 | 0.22 | 1.04  | 0.511596 | 0.67233  | 0.74252  | 0.808488 |
| MmugDNA.4786.1.S1_at   | MmugDNA.4786.1 | 7.11  | 7.1   | 0.18 | 0.13 | 1     | 0.680833 | 0.869464 | 0.847795 | 0.925991 |
| MmugDNA.4787.1.S1_at   | MmugDNA.4787.1 | 7.57  | 7.42  | 0.15 | 0.21 | 1.11  | 0.208074 | 0.153173 | 0.505909 | 0.428011 |
| MmugDNA.4788.1.S1_at   | MmugDNA.4788.1 | 4.48  | 4.39  | 0.09 | 0.16 | 1.06  | 0.256904 | 0.343483 | 0.55141  | 0.589246 |
| MmugDNA.479.1.S1_at    | MmugDNA.479.1  | 11.06 | 11.06 | 0.18 | 0.06 | -1    | 0.860698 | 0.150325 | 0.939536 | 0.424878 |
| MmugDNA.4790.1.S1_at   | MmugDNA.4790.1 | 3.76  | 3.72  | 0.06 | 0.15 | 1.02  | 0.43483  | 0.52938  | 0.689966 | 0.71726  |
| MmugDNA.4792.1.S1_at   | MmugDNA.4792.1 | 8.26  | 8.91  | 0.53 | 0.05 | -1.56 | 0.288853 | 0.32356  | 0.57857  | 0.574497 |
| MmugDNA.4793.1.S1_at   | MmugDNA.4793.1 | 9.75  | 9.99  | 0.33 | 0.16 | -1.18 | 0.335469 | 0.293074 | 0.616405 | 0.552978 |
| MmugDNA.4794.1.S1_at   | MmugDNA.4794.1 | 4.06  | 3.94  | 0.79 | 0.24 | 1.09  | 0.475669 | 0.618766 | 0.718263 | 0.774185 |
| MmugDNA.4795.1.S1_at   | MmugDNA.4795.1 | 3.99  | 4     | 0.06 | 0.02 | -1    | 0.826498 | 0.456473 | 0.923036 | 0.670188 |
| MmugDNA.4796.1.S1_at   | MmugDNA.4796.1 | 8.04  | 8.01  | 0.25 | 0.15 | 1.02  | 0.723321 | 0.3532   | 0.869971 | 0.596432 |
| MmugDNA.4797.1.S1_at   | MmugDNA.4797.1 | 3.4   | 3.41  | 0.03 | 0.06 | -1.01 | 0.160293 | 0.171928 | 0.451651 | 0.448352 |
| MmugDNA.4798.1.S1_at   | MmugDNA.4798.1 | 8.07  | 8.03  | 0.18 | 0.03 | 1.03  | 0.616476 | 0.88903  | 0.809516 | 0.936779 |
| MmugDNA.48.1.S1_at     | MmugDNA.48.1   | 4.22  | 4.08  | 0.52 | 0.18 | 1.1   | 0.356097 | 0.323076 | 0.632435 | 0.574351 |
| MmugDNA.4800.1.S1_at   | MmugDNA.4800.1 | 4.02  | 4.16  | 0.36 | 0.03 | -1.11 | 0.745507 | 0.895156 | 0.881939 | 0.940131 |
| MmugDNA.4802.1.S1_at   | MmugDNA.4802.1 | 5.68  | 5.83  | 0.11 | 0.11 | -1.11 | 0.081903 | 0.168035 | 0.343177 | 0.444641 |
| MmugDNA.4802.1.S1_s_at | MmugDNA.4802.1 | 3.33  | 3.26  | 0.04 | 0.02 | 1.05  | 0.087786 | 0.625276 | 0.353927 | 0.779099 |
| MmugDNA.4803.1.S1_at   | MmugDNA.4803.1 | 3.73  | 3.74  | 0.11 | 0.07 | -1.01 | 0.200843 | 0.309484 | 0.498242 | 0.564987 |
| MmugDNA.4805.1.S1_at   | MmugDNA.4805.1 | 4.45  | 4.43  | 1.17 | 0.2  | 1.01  | 0.373417 | 0.420861 | 0.645118 | 0.644535 |
| MmugDNA.4807.1.S1_at   | MmugDNA.4807.1 | 8.74  | 9.24  | 0.41 | 0.1  | -1.41 | 0.332286 | 0.239297 | 0.614056 | 0.509995 |
| MmugDNA.4808.1.S1_at   | MmugDNA.4808.1 | 3.04  | 2.88  | 0.1  | 0.18 | 1.12  | 0.307068 | 0.214495 | 0.593773 | 0.488257 |
| MmugDNA.4809.1.S1_s_at | MmugDNA.4809.1 | 12.69 | 12.56 | 0.13 | 0.02 | 1.1   | 0.177702 | 0.177211 | 0.472357 | 0.453647 |
| MmugDNA.481.1.S1_at    | MmugDNA.481.1  | 6.19  | 6.42  | 0.19 | 0.22 | -1.17 | 0.71043  | 0.910945 | 0.863079 | 0.94975  |
| MmugDNA.4810.1.S1_at   | MmugDNA.4810.1 | 12.62 | 12.11 | 0.12 | 0.15 | 1.42  | 0.014987 | 0.250353 | 0.174543 | 0.519362 |
| MmugDNA.4811.1.S1_at   | MmugDNA.4811.1 | 5.83  | 5.64  | 0.32 | 0.09 | 1.15  | 0.376738 | 0.491804 | 0.647368 | 0.693275 |
| MmugDNA.4812.1.S1_at   | MmugDNA.4812.1 | 7.8   | 6.51  | 0.74 | 0.04 | 2.44  | 0.109882 | 0.123779 | 0.385105 | 0.393908 |
| MmugDNA.4813.1.S1_at   | MmugDNA.4813.1 | 4.46  | 4.52  | 0.09 | 0.01 | -1.04 | 0.835089 | 0.325267 | 0.927458 | 0.575648 |
| MmugDNA.4814.1.S1_at   | MmugDNA.4814.1 | 9.6   | 10.41 | 0.43 | 0.13 | -1.76 | 0.033356 | 0.203142 | 0.236556 | 0.477415 |
| MmugDNA.4816.1.S1_at   | MmugDNA.4816.1 | 10.76 | 9.93  | 0.07 | 0.18 | 1.78  | 0.001596 | 0.000443 | 0.083466 | 0.038359 |
| MmugDNA.4817.1.S1_at   | MmugDNA.4817.1 | 4.41  | 4.37  | 0.18 | 0.07 | 1.03  | 0.688197 | 0.192401 | 0.85107  | 0.467881 |
| MmugDNA.4819.1.S1_at   | MmugDNA.4819.1 | 3.84  | 4.1   | 0.29 | 0.34 | -1.2  | 0.826624 | 0.904526 | 0.923133 | 0.945875 |
| MmugDNA.482.1.S1_at    | MmugDNA.482.1  | 2.82  | 2.75  | 0.11 | 0.02 | 1.05  | 0.301578 | 0.399359 | 0.589431 | 0.629776 |
| MmugDNA.4821.1.S1_at   | MmugDNA.4821.1 | 4.47  | 4.46  | 0.86 | 0.23 | 1     | 0.920555 | 0.859192 | 0.966056 | 0.919754 |

|                         |                 |       |       |      |      |       |          |          |          |          |
|-------------------------|-----------------|-------|-------|------|------|-------|----------|----------|----------|----------|
| MmugDNA.4824.1.S1_at    | MmugDNA.4824.1  | 10.89 | 10.97 | 0.07 | 0.06 | -1.06 | 0.759908 | 0.000265 | 0.890046 | 0.033786 |
| MmugDNA.4825.1.S1_at    | MmugDNA.4825.1  | 7.89  | 7.68  | 0.15 | 0.08 | 1.15  | 0.047138 | 0.040998 | 0.274594 | 0.247202 |
| MmugDNA.4826.1.S1_at    | MmugDNA.4826.1  | 4.15  | 4.21  | 0.06 | 0.08 | -1.04 | 0.297345 | 0.525376 | 0.585786 | 0.714977 |
| MmugDNA.4829.1.S1_at    | MmugDNA.4829.1  | 9.12  | 8.8   | 0.19 | 0.06 | 1.25  | 0.058301 | 0.786927 | 0.298595 | 0.876732 |
| MmugDNA.4831.1.S1_at    | MmugDNA.4831.1  | 4.69  | 4.54  | 0.06 | 0.11 | 1.11  | 0.468757 | 0.559835 | 0.713733 | 0.736394 |
| MmugDNA.4832.1.S1_at    | MmugDNA.4832.1  | 7.31  | 7.99  | 0.49 | 0.1  | -1.61 | 0.034526 | 0.107071 | 0.24039  | 0.369728 |
| MmugDNA.4833.1.S1_at    | MmugDNA.4833.1  | 6.53  | 5.88  | 0.2  | 0.27 | 1.56  | 0.020554 | 0.015998 | 0.196858 | 0.160458 |
| MmugDNA.4835.1.S1_at    | MmugDNA.4835.1  | 3.56  | 3.67  | 0.14 | 0.11 | -1.08 | 0.314455 | 0.592697 | 0.599959 | 0.757854 |
| MmugDNA.4835.1.S1_s_at  | MmugDNA.4835.1  | 10.51 | 10.28 | 0.18 | 0.08 | 1.18  | 0.193195 | 0.269009 | 0.48975  | 0.53441  |
| MmugDNA.4838.1.S1_at    | MmugDNA.4838.1  | 12.38 | 12.45 | 0.33 | 0.18 | -1.05 | 0.897403 | 0.986607 | 0.956476 | 0.992446 |
| MmugDNA.4840.1.S1_at    | MmugDNA.4840.1  | 12.43 | 12.06 | 0.06 | 0    | 1.3   | 0.00032  | 0.003399 | 0.059131 | 0.083992 |
| MmugDNA.4841.1.S1_at    | MmugDNA.4841.1  | 3.74  | 3.37  | 0.29 | 0.12 | 1.29  | 0.098579 | 0.098948 | 0.369312 | 0.357049 |
| MmugDNA.4842.1.S1_at    | MmugDNA.4842.1  | 3.66  | 3.53  | 0.3  | 0.15 | 1.1   | 0.13806  | 0.184717 | 0.423226 | 0.460645 |
| MmugDNA.25793.1.S1_x_at | MmugDNA.25793.1 | 14.3  | 14.28 | 0.03 | 0.02 | 1.01  | 0.297381 | 0.351402 | 0.585798 | 0.595054 |
| MmugDNA.4844.1.S1_at    | MmugDNA.4844.1  | 9.71  | 7.69  | 0.62 | 0.1  | 4.05  | 0.011337 | 0.013755 | 0.156654 | 0.150235 |
| MmugDNA.4845.1.S1_at    | MmugDNA.4845.1  | 12.61 | 12.63 | 0.05 | 0.06 | -1.01 | 0.627523 | 0.046868 | 0.816887 | 0.261272 |
| MmugDNA.4845.1.S1_s_at  | MmugDNA.4845.1  | 12.01 | 12.18 | 0.11 | 0.11 | -1.12 | 0.308191 | 0.079727 | 0.594856 | 0.326982 |
| MmugDNA.4846.1.S1_at    | MmugDNA.4846.1  | 4.42  | 4.44  | 0.15 | 0.14 | -1.01 | 0.836339 | 0.48582  | 0.928245 | 0.689436 |
| MmugDNA.4847.1.S1_at    | MmugDNA.4847.1  | 4.57  | 4.38  | 0.32 | 0.08 | 1.15  | 0.373689 | 0.480664 | 0.645118 | 0.68595  |
| MmugDNA.4848.1.S1_s_at  | MmugDNA.4848.1  | 3.68  | 3.78  | 0.02 | 0.04 | -1.07 | 0.030301 | 0.364584 | 0.227117 | 0.604917 |
| MmugDNA.485.1.S1_at     | MmugDNA.485.1   | 3.65  | 3.32  | 0.48 | 0.11 | 1.25  | 0.208335 | 0.217371 | 0.506068 | 0.490978 |
| MmugDNA.4851.1.S1_at    | MmugDNA.4851.1  | 6.97  | 8.17  | 0.96 | 0.48 | -2.3  | 0.206188 | 0.377438 | 0.503843 | 0.61493  |
| MmugDNA.4852.1.S1_at    | MmugDNA.4852.1  | 4.61  | 4.69  | 0.98 | 0.28 | -1.06 | 0.469957 | 0.528545 | 0.714634 | 0.716664 |
| MmugDNA.4853.1.S1_at    | MmugDNA.4853.1  | 9.5   | 9.28  | 0.3  | 0.32 | 1.16  | 0.422482 | 0.220315 | 0.680619 | 0.493766 |
| MmugDNA.4854.1.S1_at    | MmugDNA.4854.1  | 6.11  | 5.79  | 0.25 | 0.1  | 1.25  | 0.167617 | 0.290281 | 0.460814 | 0.551169 |
| MmugDNA.4855.1.S1_at    | MmugDNA.4855.1  | 5.97  | 5.89  | 0.21 | 0.1  | 1.06  | 0.337461 | 0.559927 | 0.617875 | 0.736439 |
| MmugDNA.4856.1.S1_at    | MmugDNA.4856.1  | 4.08  | 3.83  | 0.25 | 0.14 | 1.19  | 0.179358 | 0.213624 | 0.474444 | 0.487441 |
| MmugDNA.4858.1.S1_at    | MmugDNA.4858.1  | 4.04  | 3.24  | 0.72 | 0.2  | 1.74  | 0.119061 | 0.128055 | 0.396713 | 0.399035 |
| MmugDNA.4860.1.S1_at    | MmugDNA.4860.1  | 5.07  | 4.66  | 0.45 | 0.1  | 1.33  | 0.232885 | 0.331479 | 0.531154 | 0.580121 |
| MmugDNA.4861.1.S1_at    | MmugDNA.4861.1  | 4.4   | 3.95  | 0.2  | 0.14 | 1.37  | 0.059628 | 0.323624 | 0.301305 | 0.574525 |
| MmugDNA.4862.1.S1_at    | MmugDNA.4862.1  | 4.74  | 4.62  | 0.25 | 0.11 | 1.08  | 0.293739 | 0.357511 | 0.582728 | 0.599157 |
| MmugDNA.4863.1.S1_at    | MmugDNA.4863.1  | 8.37  | 8.41  | 0.31 | 0.16 | -1.03 | 0.99295  | 0.959685 | 0.997263 | 0.977152 |
| MmugDNA.4864.1.S1_at    | MmugDNA.4864.1  | 11.23 | 11.08 | 0.25 | 0.05 | 1.1   | 0.625698 | 0.043072 | 0.815534 | 0.252157 |
| MmugDNA.4865.1.S1_at    | MmugDNA.4865.1  | 3.61  | 3.64  | 0.1  | 0.04 | -1.02 | 0.644027 | 0.150484 | 0.826551 | 0.42501  |
| MmugDNA.4867.1.S1_at    | MmugDNA.4867.1  | 4.92  | 4.89  | 0.11 | 0.13 | 1.02  | 0.937561 | 0.238032 | 0.973767 | 0.50861  |
| MmugDNA.4868.1.S1_at    | MmugDNA.4868.1  | 7.37  | 9.19  | 0.72 | 0.24 | -3.53 | 0.013197 | 0.152995 | 0.16538  | 0.427805 |
| MmugDNA.4869.1.S1_at    | MmugDNA.4869.1  | 5.38  | 5.82  | 0.08 | 0.07 | -1.35 | 0.002428 | 0.00763  | 0.093606 | 0.116869 |
| MmugDNA.4869.1.S1_s_at  | MmugDNA.4869.1  | 7.77  | 10.56 | 0.88 | 0.24 | -6.92 | 0.013504 | 0.179558 | 0.167058 | 0.456011 |
| MmugDNA.487.1.S1_at     | MmugDNA.487.1   | 6.67  | 7.95  | 0.18 | 0.53 | -2.43 | 0.012458 | 0.005313 | 0.161927 | 0.100896 |
| MmugDNA.4870.1.S1_at    | MmugDNA.4870.1  | 7.17  | 6.63  | 0.34 | 0.32 | 1.46  | 0.251642 | 0.006181 | 0.546364 | 0.106774 |
| MmugDNA.4873.1.S1_at    | MmugDNA.4873.1  | 5.09  | 6.22  | 0.61 | 0.65 | -2.19 | 0.462274 | 0.689444 | 0.709524 | 0.818841 |
| MmugDNA.4875.1.S1_at    | MmugDNA.4875.1  | 4.02  | 4.01  | 0.08 | 0.06 | 1     | 0.964975 | 0.09768  | 0.985862 | 0.355554 |
| MmugDNA.4876.1.S1_at    | MmugDNA.4876.1  | 3.41  | 3.26  | 0.51 | 0.06 | 1.11  | 0.215728 | 0.228208 | 0.513483 | 0.500383 |

|                        |                |       |       |      |      |       |          |          |          |          |
|------------------------|----------------|-------|-------|------|------|-------|----------|----------|----------|----------|
| MmugDNA.4877.1.S1_at   | MmugDNA.4877.1 | 4.17  | 4.12  | 0.1  | 0.06 | 1.03  | 0.9096   | 0.312546 | 0.961643 | 0.567265 |
| MmugDNA.4879.1.S1_at   | MmugDNA.4879.1 | 8.27  | 9.04  | 0.47 | 0.25 | -1.7  | 0.05252  | 0.11244  | 0.286291 | 0.377784 |
| MmugDNA.4880.1.S1_at   | MmugDNA.4880.1 | 12.03 | 12.41 | 0.09 | 0.13 | -1.3  | 0.02777  | 0.196297 | 0.2191   | 0.471264 |
| MmugDNA.4881.1.S1_at   | MmugDNA.4881.1 | 5.23  | 5.34  | 0.2  | 0.33 | -1.08 | 0.573198 | 0.373721 | 0.781077 | 0.612403 |
| MmugDNA.4882.1.S1_at   | MmugDNA.4882.1 | 2.83  | 2.85  | 0.27 | 0.12 | -1.02 | 0.314375 | 0.397999 | 0.599959 | 0.629138 |
| MmugDNA.4883.1.S1_at   | MmugDNA.4883.1 | 6.56  | 6.49  | 0.09 | 0.06 | 1.05  | 0.868845 | 0.019509 | 0.943567 | 0.175439 |
| MmugDNA.4884.1.S1_at   | MmugDNA.4884.1 | 5.51  | 5.59  | 0.18 | 0.41 | -1.06 | 0.877822 | 0.635612 | 0.947831 | 0.785452 |
| MmugDNA.4885.1.S1_at   | MmugDNA.4885.1 | 7.53  | 7.81  | 0.47 | 0.15 | -1.22 | 0.123829 | 0.381977 | 0.403563 | 0.618252 |
| MmugDNA.4886.1.S1_at   | MmugDNA.4886.1 | 7.67  | 9.47  | 0.91 | 0.22 | -3.48 | 0.039374 | 0.177152 | 0.25488  | 0.453611 |
| MmugDNA.4887.1.S1_at   | MmugDNA.4887.1 | 4.7   | 3.81  | 0.36 | 0.34 | 1.85  | 0.113128 | 0.094964 | 0.389736 | 0.352054 |
| MmugDNA.4889.1.S1_s_at | MmugDNA.4889.1 | 9.4   | 9.16  | 0.19 | 0.03 | 1.18  | 0.097434 | 0.184257 | 0.367577 | 0.460382 |
| MmugDNA.489.1.S1_at    | MmugDNA.489.1  | 5.03  | 4.45  | 0.23 | 0.31 | 1.49  | 0.066001 | 0.26615  | 0.314318 | 0.531988 |
| MmugDNA.4890.1.S1_at   | MmugDNA.4890.1 | 5.04  | 5.53  | 0.54 | 0.51 | -1.4  | 0.413091 | 0.642645 | 0.67449  | 0.790374 |
| MmugDNA.4891.1.S1_at   | MmugDNA.4891.1 | 6.02  | 5.24  | 0.62 | 0.32 | 1.72  | 0.103537 | 0.143379 | 0.376729 | 0.417386 |
| MmugDNA.4892.1.S1_at   | MmugDNA.4892.1 | 11.85 | 12.01 | 0.13 | 0.11 | -1.12 | 0.845784 | 0.074297 | 0.932615 | 0.318046 |
| MmugDNA.4893.1.S1_at   | MmugDNA.4893.1 | 7.79  | 7.53  | 0.11 | 0.19 | 1.19  | 0.117762 | 0.620417 | 0.395125 | 0.775393 |
| MmugDNA.4894.1.S1_at   | MmugDNA.4894.1 | 11.06 | 11.29 | 0.13 | 0.12 | -1.17 | 0.05947  | 0.026495 | 0.300954 | 0.203897 |
| MmugDNA.4897.1.S1_s_at | MmugDNA.4897.1 | 11.97 | 11.73 | 0.03 | 0.06 | 1.18  | 0.005048 | 0.004377 | 0.116282 | 0.092619 |
| MmugDNA.4898.1.S1_at   | MmugDNA.4898.1 | 5.78  | 5.52  | 0.12 | 0.12 | 1.2   | 0.110508 | 0.253445 | 0.385867 | 0.521742 |
| MmugDNA.4901.1.S1_at   | MmugDNA.4901.1 | 7.12  | 6.58  | 0.24 | 0.03 | 1.46  | 0.017805 | 0.17252  | 0.187001 | 0.448864 |
| MmugDNA.4902.1.S1_at   | MmugDNA.4902.1 | 4.38  | 4.09  | 0.4  | 0.05 | 1.22  | 0.103425 | 0.131853 | 0.376565 | 0.403891 |
| MmugDNA.4903.1.S1_at   | MmugDNA.4903.1 | 3.39  | 3.32  | 0.09 | 0.24 | 1.05  | 0.912767 | 0.909885 | 0.963144 | 0.94915  |
| MmugDNA.4903.1.S1_x_at | MmugDNA.4903.1 | 5.31  | 5.28  | 0.1  | 0.13 | 1.02  | 0.407175 | 0.301156 | 0.670298 | 0.559356 |
| MmugDNA.4904.1.S1_at   | MmugDNA.4904.1 | 8.91  | 9.04  | 0.07 | 0.03 | -1.09 | 0.047519 | 0.107054 | 0.27527  | 0.369702 |
| MmugDNA.4905.1.S1_at   | MmugDNA.4905.1 | 3.08  | 3.11  | 0.19 | 0.08 | -1.02 | 0.979553 | 0.442121 | 0.992184 | 0.660171 |
| MmugDNA.4906.1.S1_at   | MmugDNA.4906.1 | 11.83 | 11.89 | 0.15 | 0.08 | -1.05 | 0.659436 | 0.053729 | 0.835676 | 0.277384 |
| MmugDNA.4907.1.S1_at   | MmugDNA.4907.1 | 9.87  | 9.42  | 0.18 | 0.21 | 1.37  | 0.113    | 0.196163 | 0.389499 | 0.471236 |
| MmugDNA.4908.1.S1_at   | MmugDNA.4908.1 | 6.69  | 6.63  | 0.38 | 0    | 1.04  | 0.816491 | 0.920154 | 0.918027 | 0.955094 |
| MmugDNA.491.1.S1_at    | MmugDNA.491.1  | 5.64  | 5.78  | 1.02 | 0.35 | -1.11 | 0.717304 | 0.853108 | 0.866489 | 0.916487 |
| MmugDNA.4910.1.S1_at   | MmugDNA.4910.1 | 4.91  | 4.33  | 0.27 | 0.12 | 1.49  | 0.048189 | 0.126146 | 0.276908 | 0.396734 |
| MmugDNA.4911.1.S1_at   | MmugDNA.4911.1 | 5.68  | 6.42  | 0.29 | 0.41 | -1.67 | 0.057887 | 0.083564 | 0.297772 | 0.334152 |
| MmugDNA.4914.1.S1_s_at | MmugDNA.4914.1 | 12.81 | 13.73 | 0.6  | 0.13 | -1.88 | 0.076571 | 0.065455 | 0.334836 | 0.301415 |
| MmugDNA.4915.1.S1_at   | MmugDNA.4915.1 | 6.39  | 7.07  | 0.59 | 0.35 | -1.59 | 0.4507   | 0.630346 | 0.701646 | 0.782217 |
| MmugDNA.4917.1.S1_at   | MmugDNA.4917.1 | 11.19 | 11.54 | 0.13 | 0.01 | -1.28 | 0.018637 | 0.000397 | 0.189736 | 0.037471 |
| MmugDNA.492.1.S1_at    | MmugDNA.492.1  | 6.97  | 7.58  | 0.31 | 0.08 | -1.52 | 0.102744 | 0.0844   | 0.375129 | 0.335713 |
| MmugDNA.4920.1.S1_at   | MmugDNA.4920.1 | 7.08  | 7.22  | 0.16 | 0.22 | -1.1  | 0.641736 | 0.017984 | 0.825093 | 0.169137 |
| MmugDNA.4921.1.S1_at   | MmugDNA.4921.1 | 3.03  | 2.97  | 0.09 | 0.17 | 1.04  | 0.589873 | 0.821992 | 0.791747 | 0.8976   |
| MmugDNA.4922.1.S1_at   | MmugDNA.4922.1 | 4.6   | 4.84  | 0.5  | 0.13 | -1.18 | 0.864414 | 0.892606 | 0.9413   | 0.938758 |
| MmugDNA.4923.1.S1_at   | MmugDNA.4923.1 | 7.89  | 7.6   | 0.2  | 0.13 | 1.23  | 0.158606 | 0.441794 | 0.44975  | 0.659938 |
| MmugDNA.4924.1.S1_at   | MmugDNA.4924.1 | 10.92 | 10.66 | 0.1  | 0.02 | 1.2   | 0.010435 | 0.011462 | 0.152221 | 0.138495 |
| MmugDNA.4925.1.S1_at   | MmugDNA.4925.1 | 9.44  | 8.79  | 0.18 | 0.26 | 1.57  | 0.057487 | 0.211685 | 0.297101 | 0.485708 |
| MmugDNA.4928.1.S1_at   | MmugDNA.4928.1 | 9.06  | 9.13  | 0.12 | 0.04 | -1.05 | 0.329493 | 0.556374 | 0.61176  | 0.734507 |
| MmugDNA.4929.1.S1_at   | MmugDNA.4929.1 | 8.2   | 8.04  | 0.52 | 0.13 | 1.12  | 0.57832  | 0.413327 | 0.784162 | 0.639596 |

|                         |                 |       |       |      |      |       |          |          |          |          |
|-------------------------|-----------------|-------|-------|------|------|-------|----------|----------|----------|----------|
| MmugDNA.493.1.S1_at     | MmugDNA.493.1   | 5.68  | 5.94  | 0.05 | 0.21 | -1.2  | 0.259309 | 0.293924 | 0.55365  | 0.553891 |
| MmugDNA.4931.1.S1_at    | MmugDNA.4931.1  | 7.3   | 7.37  | 0.22 | 0.1  | -1.05 | 0.239058 | 0.021709 | 0.536338 | 0.184333 |
| MmugDNA.4932.1.S1_at    | MmugDNA.4932.1  | 10.01 | 10.13 | 0.07 | 0.11 | -1.09 | 0.146379 | 0.022588 | 0.434224 | 0.188092 |
| MmugDNA.4932.1.S1_s_at  | MmugDNA.4932.1  | 8.8   | 8.82  | 0.08 | 0.21 | -1.01 | 0.772866 | 0.005677 | 0.895994 | 0.103959 |
| MmugDNA.4933.1.S1_at    | MmugDNA.4933.1  | 6.67  | 6.96  | 0.11 | 0.12 | -1.22 | 0.020687 | 0.173517 | 0.197469 | 0.449938 |
| MmugDNA.4934.1.S1_at    | MmugDNA.4934.1  | 9.65  | 9.46  | 0.13 | 0.08 | 1.14  | 0.270789 | 0.100386 | 0.56285  | 0.359541 |
| MmugDNA.4935.1.S1_at    | MmugDNA.4935.1  | 5.38  | 3.88  | 0.75 | 1.02 | 2.83  | 0.138792 | 0.161296 | 0.42437  | 0.437434 |
| MmugDNA.4936.1.S1_at    | MmugDNA.4936.1  | 9.19  | 9.09  | 0.36 | 0.06 | 1.08  | 0.685029 | 0.188193 | 0.849896 | 0.464251 |
| MmugDNA.4937.1.S1_at    | MmugDNA.4937.1  | 5.83  | 5.77  | 0.14 | 0.06 | 1.05  | 0.945795 | 0.815582 | 0.977159 | 0.893609 |
| MmugDNA.4941.1.S1_at    | MmugDNA.4941.1  | 8.8   | 8.36  | 0.11 | 0.14 | 1.35  | 0.010873 | 0.001346 | 0.153933 | 0.056466 |
| MmugDNA.4942.1.S1_at    | MmugDNA.4942.1  | 11.09 | 10.88 | 0.23 | 0.15 | 1.16  | 0.124991 | 0.016139 | 0.405516 | 0.161012 |
| MmugDNA.4942.1.S1_x_at  | MmugDNA.4942.1  | 10.99 | 10.82 | 0.26 | 0.13 | 1.13  | 0.134866 | 0.020497 | 0.418779 | 0.179723 |
| MmugDNA.30842.1.S1_s_at | MmugDNA.30842.1 | 10.9  | 11.96 | 0.1  | 0.06 | -2.08 | 0.000109 | 0.02291  | 0.051196 | 0.189395 |
| MmugDNA.30976.1.S1_s_at | MmugDNA.30976.1 | 10.5  | 10.51 | 0.17 | 0.11 | -1.01 | 0.401412 | 0.007783 | 0.666017 | 0.117732 |
| MmugDNA.19803.1.S1_s_at | MmugDNA.19803.1 | 10.19 | 9.64  | 0.21 | 0.11 | 1.46  | 0.015924 | 0.009421 | 0.17868  | 0.127871 |
| MmugDNA.4947.1.S1_at    | MmugDNA.4947.1  | 3.99  | 3.61  | 0.14 | 0.16 | 1.3   | 0.064444 | 0.215097 | 0.31037  | 0.488932 |
| MmugDNA.4949.1.S1_at    | MmugDNA.4949.1  | 5.82  | 5.69  | 0.3  | 0.3  | 1.09  | 0.124176 | 0.155444 | 0.404171 | 0.430802 |
| MmugDNA.495.1.S1_at     | MmugDNA.495.1   | 11.81 | 11.85 | 0.24 | 0.01 | -1.03 | 0.833771 | 0.001213 | 0.926831 | 0.054455 |
| MmugDNA.495.1.S1_s_at   | MmugDNA.495.1   | 12.37 | 12.5  | 0.24 | 0.04 | -1.1  | 0.369818 | 0.004934 | 0.643125 | 0.097875 |
| MmugDNA.4950.1.S1_at    | MmugDNA.4950.1  | 2.93  | 2.9   | 0.17 | 0.13 | 1.02  | 0.361324 | 0.24683  | 0.636755 | 0.516186 |
| MmugDNA.4951.1.S1_at    | MmugDNA.4951.1  | 4.65  | 4.71  | 0.28 | 0.2  | -1.04 | 0.802589 | 0.891754 | 0.911359 | 0.938272 |
| MmugDNA.4952.1.S1_at    | MmugDNA.4952.1  | 7.96  | 7.89  | 0.68 | 0.39 | 1.05  | 0.46535  | 0.330589 | 0.711415 | 0.579309 |
| MmugDNA.4953.1.S1_at    | MmugDNA.4953.1  | 3.21  | 3.42  | 0.03 | 0.12 | -1.15 | 0.042682 | 0.142279 | 0.263867 | 0.41579  |
| MmugDNA.4955.1.S1_at    | MmugDNA.4955.1  | 4.3   | 4.79  | 0.87 | 0.4  | -1.4  | 0.989161 | 0.851367 | 0.996231 | 0.915439 |
| MmugDNA.4956.1.S1_at    | MmugDNA.4956.1  | 11.69 | 11.62 | 0.13 | 0.02 | 1.05  | 0.116655 | 0.265447 | 0.393779 | 0.531363 |
| MmugDNA.4957.1.S1_at    | MmugDNA.4957.1  | 5.7   | 5.42  | 0.48 | 0.22 | 1.21  | 0.2407   | 0.338422 | 0.538168 | 0.585432 |
| MmugDNA.4958.1.S1_at    | MmugDNA.4958.1  | 7.2   | 7.19  | 0.12 | 0.05 | 1     | 0.235204 | 0.182416 | 0.533078 | 0.45897  |
| MmugDNA.4959.1.S1_at    | MmugDNA.4959.1  | 4.38  | 4.42  | 0.03 | 0.03 | -1.02 | 0.231703 | 0.010748 | 0.530334 | 0.135385 |
| MmugDNA.496.1.S1_at     | MmugDNA.496.1   | 3.27  | 3.15  | 0.08 | 0.16 | 1.09  | 0.549533 | 0.561324 | 0.767209 | 0.737326 |
| MmugDNA.4960.1.S1_at    | MmugDNA.4960.1  | 3.62  | 3.62  | 0.09 | 0.05 | 1     | 0.223803 | 0.151197 | 0.521844 | 0.425873 |
| MmugDNA.4961.1.S1_at    | MmugDNA.4961.1  | 12.09 | 11.3  | 0.13 | 0.19 | 1.73  | 0.005773 | 0.008441 | 0.121922 | 0.121922 |
| MmugDNA.4963.1.S1_at    | MmugDNA.4963.1  | 4.66  | 4.66  | 0.01 | 0    | 1     | 0.403582 | 0.105082 | 0.667695 | 0.366755 |
| MmugDNA.4964.1.S1_at    | MmugDNA.4964.1  | 8.98  | 8.75  | 0.3  | 0.17 | 1.17  | 0.470615 | 0.081196 | 0.715038 | 0.329351 |
| MmugDNA.4965.1.S1_at    | MmugDNA.4965.1  | 4.56  | 4.54  | 0.05 | 0.1  | 1.02  | 0.500205 | 0.755733 | 0.734575 | 0.857771 |
| MmugDNA.4966.1.S1_at    | MmugDNA.4966.1  | 6.98  | 7.32  | 0.24 | 0.19 | -1.26 | 0.631601 | 0.355844 | 0.819136 | 0.597864 |
| MmugDNA.4968.1.S1_at    | MmugDNA.4968.1  | 5.96  | 5.9   | 0.26 | 0.23 | 1.04  | 0.806223 | 0.203547 | 0.913183 | 0.477767 |
| MmugDNA.4970.1.S1_at    | MmugDNA.4970.1  | 6.18  | 7.15  | 0.57 | 0.27 | -1.96 | 0.084797 | 0.307038 | 0.348748 | 0.563427 |
| MmugDNA.4971.1.S1_at    | MmugDNA.4971.1  | 3.18  | 3.08  | 0.36 | 0.35 | 1.07  | 0.8454   | 0.973652 | 0.932464 | 0.985648 |
| MmugDNA.4972.1.S1_at    | MmugDNA.4972.1  | 4.18  | 4.16  | 0.33 | 0.09 | 1.02  | 0.449874 | 0.225931 | 0.701159 | 0.498344 |
| MmugDNA.4975.1.S1_at    | MmugDNA.4975.1  | 7.04  | 7.46  | 0.1  | 0.02 | -1.34 | 0.002277 | 0.036317 | 0.091821 | 0.235105 |
| MmugDNA.4976.1.S1_at    | MmugDNA.4976.1  | 6.09  | 5.61  | 0.8  | 0.21 | 1.39  | 0.86798  | 0.651039 | 0.943108 | 0.795993 |
| MmugDNA.4977.1.S1_at    | MmugDNA.4977.1  | 5.36  | 7.2   | 0.68 | 0.44 | -3.59 | 0.034842 | 0.231137 | 0.241137 | 0.5029   |
| MmugDNA.4978.1.S1_at    | MmugDNA.4978.1  | 4.51  | 4.48  | 0.63 | 0.02 | 1.02  | 0.612398 | 0.687963 | 0.806839 | 0.817831 |



|                         |                 |       |       |      |      |       |          |          |          |          |
|-------------------------|-----------------|-------|-------|------|------|-------|----------|----------|----------|----------|
| MmugDNA.4979.1.S1_at    | MmugDNA.4979.1  | 4.12  | 3.94  | 0.17 | 0.11 | 1.14  | 0.076529 | 0.0738   | 0.334818 | 0.317146 |
| MmugDNA.498.1.S1_at     | MmugDNA.498.1   | 3.01  | 2.89  | 0.21 | 0.05 | 1.09  | 0.297711 | 0.258176 | 0.586207 | 0.525574 |
| MmugDNA.4980.1.S1_at    | MmugDNA.4980.1  | 7.2   | 7.04  | 0.09 | 0.06 | 1.12  | 0.074683 | 0.212802 | 0.331379 | 0.486769 |
| MmugDNA.4981.1.S1_at    | MmugDNA.4981.1  | 3.33  | 3.37  | 0.48 | 0.27 | -1.03 | 0.705566 | 0.735643 | 0.860452 | 0.847031 |
| MmugDNA.4982.1.S1_at    | MmugDNA.4982.1  | 11.53 | 11.54 | 0.05 | 0.1  | -1.01 | 0.597974 | 0.010282 | 0.797053 | 0.132774 |
| MmugDNA.4984.1.S1_at    | MmugDNA.4984.1  | 3.7   | 3.69  | 0.09 | 0.04 | 1     | 0.395172 | 0.761112 | 0.661665 | 0.861205 |
| MmugDNA.4985.1.S1_at    | MmugDNA.4985.1  | 8.45  | 8.52  | 0.26 | 0.24 | -1.05 | 0.676679 | 0.039591 | 0.845628 | 0.244002 |
| MmugDNA.4987.1.S1_at    | MmugDNA.4987.1  | 5.6   | 5.65  | 0.86 | 0.26 | -1.04 | 0.526678 | 0.621812 | 0.752733 | 0.776383 |
| MmugDNA.4988.1.S1_at    | MmugDNA.4988.1  | 4.79  | 3.95  | 0.57 | 0.31 | 1.78  | 0.112968 | 0.08023  | 0.389499 | 0.32783  |
| MmugDNA.4989.1.S1_at    | MmugDNA.4989.1  | 4.08  | 4.28  | 0.21 | 0.09 | -1.14 | 0.511405 | 0.016677 | 0.742401 | 0.163509 |
| MmugDNA.499.1.S1_at     | MmugDNA.499.1   | 3.09  | 3.16  | 0.08 | 0.09 | -1.05 | 0.333537 | 0.593457 | 0.614935 | 0.758299 |
| MmugDNA.4990.1.S1_at    | MmugDNA.4990.1  | 4.33  | 4.29  | 0.06 | 0.52 | 1.03  | 0.885999 | 0.942583 | 0.95136  | 0.967453 |
| MmugDNA.4991.1.S1_at    | MmugDNA.4991.1  | 7.52  | 7.62  | 0.48 | 0.26 | -1.07 | 0.491056 | 0.704844 | 0.729    | 0.828846 |
| MmugDNA.23460.1.S1_s_at | MmugDNA.23460.1 | 9.57  | 9.61  | 0.38 | 0.14 | -1.03 | 0.973287 | 0.816596 | 0.989306 | 0.894202 |
| MmugDNA.4992.1.S1_at    | MmugDNA.4992.1  | 6.96  | 6.75  | 0.26 | 0.28 | 1.16  | 0.4078   | 0.94816  | 0.670804 | 0.97046  |
| MmugDNA.4994.1.S1_at    | MmugDNA.4994.1  | 5.21  | 5.43  | 0.18 | 0.15 | -1.16 | 0.834687 | 0.260134 | 0.927306 | 0.526776 |
| MmugDNA.4995.1.S1_at    | MmugDNA.4995.1  | 7.77  | 7.63  | 0.08 | 0.1  | 1.1   | 0.135777 | 0.4357   | 0.419782 | 0.655471 |
| MmugDNA.5.1.S1_at       | MmugDNA.5.1     | 5.2   | 4.51  | 1.36 | 0.49 | 1.62  | 0.563018 | 0.742177 | 0.775272 | 0.850645 |
| MmugDNA.500.1.S1_at     | MmugDNA.500.1   | 3.74  | 3.61  | 0.08 | 0.13 | 1.09  | 0.417229 | 0.120129 | 0.677441 | 0.388869 |
| MmugDNA.5000.1.S1_at    | MmugDNA.5000.1  | 3.31  | 3.69  | 1.7  | 0.32 | -1.3  | 0.584192 | 0.710224 | 0.788484 | 0.831904 |
| MmugDNA.5001.1.S1_at    | MmugDNA.5001.1  | 5.71  | 5.75  | 0.16 | 0.07 | -1.03 | 0.556391 | 0.675039 | 0.771647 | 0.810141 |
| MmugDNA.5002.1.S1_at    | MmugDNA.5002.1  | 3.25  | 3.31  | 0.29 | 0.18 | -1.04 | 0.712651 | 0.898117 | 0.864347 | 0.941987 |
| MmugDNA.5003.1.S1_at    | MmugDNA.5003.1  | 12.25 | 11.85 | 0.05 | 0.08 | 1.33  | 0.003046 | 0.019858 | 0.100201 | 0.177189 |
| MmugDNA.5004.1.S1_at    | MmugDNA.5004.1  | 10.82 | 11.2  | 0.07 | 0.13 | -1.3  | 0.005506 | 0.406703 | 0.119636 | 0.634487 |
| MmugDNA.5005.1.S1_at    | MmugDNA.5005.1  | 11.91 | 11.8  | 0.11 | 0.12 | 1.08  | 0.669589 | 0.134443 | 0.841503 | 0.406605 |
| MmugDNA.5006.1.S1_x_at  | MmugDNA.5006.1  | 7.33  | 7.34  | 0.79 | 0.19 | -1.01 | 0.393539 | 0.374733 | 0.660319 | 0.613037 |
| MmugDNA.5007.1.S1_at    | MmugDNA.5007.1  | 4.95  | 5.34  | 0.09 | 0.11 | -1.32 | 0.015081 | 0.056685 | 0.174736 | 0.284204 |
| MmugDNA.5008.1.S1_at    | MmugDNA.5008.1  | 3.38  | 3.63  | 0.2  | 0.16 | -1.19 | 0.22135  | 0.224766 | 0.519357 | 0.497617 |
| MmugDNA.5009.1.S1_at    | MmugDNA.5009.1  | 11.55 | 11.19 | 0.26 | 0.12 | 1.29  | 0.147137 | 0.078431 | 0.435192 | 0.325193 |
| MmugDNA.501.1.S1_at     | MmugDNA.501.1   | 4.08  | 4.05  | 0.03 | 0.06 | 1.02  | 0.175918 | 0.410156 | 0.470262 | 0.637086 |
| MmugDNA.5010.1.S1_s_at  | MmugDNA.5010.1  | 8.91  | 8.83  | 0.09 | 0.02 | 1.06  | 0.240495 | 0.290754 | 0.53802  | 0.551395 |
| MmugDNA.5011.1.S1_at    | MmugDNA.5011.1  | 6.03  | 6.62  | 0.58 | 0.15 | -1.5  | 0.196428 | 0.157984 | 0.493531 | 0.433725 |
| MmugDNA.5013.1.S1_at    | MmugDNA.5013.1  | 9.76  | 9.7   | 0.39 | 0.11 | 1.05  | 0.700737 | 0.459977 | 0.857861 | 0.671989 |
| MmugDNA.1879.1.S1_s_at  | MmugDNA.1879.1  | 4.55  | 6.61  | 1.3  | 0.28 | -4.17 | 0.082315 | 0.082141 | 0.343946 | 0.330937 |
| MmugDNA.5015.1.S1_s_at  | MmugDNA.5015.1  | 3.15  | 3.21  | 0.06 | 0.14 | -1.05 | 0.707835 | 0.292723 | 0.86155  | 0.552783 |
| MmugDNA.5016.1.S1_at    | MmugDNA.5016.1  | 5.47  | 5.36  | 0.06 | 0.12 | 1.08  | 0.134956 | 0.165434 | 0.418904 | 0.441634 |
| MmugDNA.5019.1.S1_at    | MmugDNA.5019.1  | 4.46  | 4.94  | 0.04 | 0.58 | -1.4  | 0.195828 | 0.269767 | 0.49272  | 0.53503  |
| MmugDNA.502.1.S1_at     | MmugDNA.502.1   | 6.03  | 6.05  | 0.01 | 0.38 | -1.01 | 0.413034 | 0.507735 | 0.674478 | 0.703317 |
| MmugDNA.5020.1.S1_at    | MmugDNA.5020.1  | 8.23  | 6.3   | 0.63 | 1.53 | 3.8   | 0.32664  | 0.243969 | 0.609643 | 0.514069 |
| MmugDNA.5021.1.S1_at    | MmugDNA.5021.1  | 6.75  | 6.1   | 0.24 | 0.18 | 1.57  | 0.049944 | 0.088375 | 0.281092 | 0.341842 |
| MmugDNA.5022.1.S1_at    | MmugDNA.5022.1  | 4.76  | 5.45  | 0.41 | 0.5  | -1.62 | 0.114176 | 0.091329 | 0.390933 | 0.346281 |
| MmugDNA.5025.1.S1_at    | MmugDNA.5025.1  | 6.02  | 6.16  | 0.82 | 0.27 | -1.1  | 0.38764  | 0.526331 | 0.655725 | 0.71554  |
| MmugDNA.5026.1.S1_at    | MmugDNA.5026.1  | 8.91  | 8.45  | 0.68 | 0.1  | 1.38  | 0.825935 | 0.064027 | 0.92268  | 0.299168 |

|                         |                 |       |       |      |      |       |          |          |          |          |
|-------------------------|-----------------|-------|-------|------|------|-------|----------|----------|----------|----------|
| MmugDNA.5027.1.S1_at    | MmugDNA.5027.1  | 4.6   | 4.54  | 0.31 | 0.08 | 1.04  | 0.304627 | 0.187019 | 0.591779 | 0.462938 |
| MmugDNA.5029.1.S1_at    | MmugDNA.5029.1  | 3.38  | 3.51  | 0.25 | 0.05 | -1.09 | 0.785679 | 0.446216 | 0.902158 | 0.662743 |
| MmugDNA.5030.1.S1_at    | MmugDNA.5030.1  | 5.5   | 5.5   | 0.3  | 0.1  | -1    | 0.406489 | 0.790519 | 0.669756 | 0.878895 |
| MmugDNA.5031.1.S1_at    | MmugDNA.5031.1  | 4.01  | 4.24  | 0.19 | 0.07 | -1.17 | 0.302917 | 0.302383 | 0.590429 | 0.560109 |
| MmugDNA.5032.1.S1_at    | MmugDNA.5032.1  | 4.12  | 3.84  | 0.35 | 0.09 | 1.22  | 0.090243 | 0.034074 | 0.356864 | 0.228505 |
| MmugDNA.5033.1.S1_at    | MmugDNA.5033.1  | 5.66  | 5.83  | 0.1  | 0.28 | -1.13 | 0.489922 | 0.302434 | 0.728122 | 0.560109 |
| MmugDNA.5034.1.S1_at    | MmugDNA.5034.1  | 10    | 9.7   | 0.44 | 0.11 | 1.23  | 0.256622 | 0.110207 | 0.551162 | 0.374349 |
| MmugDNA.5035.1.S1_at    | MmugDNA.5035.1  | 6.55  | 6.57  | 0.02 | 0.06 | -1.02 | 0.834043 | 0.170606 | 0.926972 | 0.447204 |
| MmugDNA.5036.1.S1_at    | MmugDNA.5036.1  | 4.81  | 4.47  | 0.15 | 0.07 | 1.26  | 0.016317 | 0.444859 | 0.18057  | 0.662072 |
| MmugDNA.5038.1.S1_at    | MmugDNA.5038.1  | 4.43  | 4.6   | 0.32 | 0.03 | -1.12 | 0.993783 | 0.920616 | 0.997462 | 0.955258 |
| MmugDNA.5039.1.S1_at    | MmugDNA.5039.1  | 6.72  | 7.19  | 0.14 | 0.11 | -1.39 | 0.028093 | 0.342665 | 0.220018 | 0.588666 |
| MmugDNA.504.1.S1_at     | MmugDNA.504.1   | 5.51  | 5.46  | 0.22 | 0.05 | 1.04  | 0.650548 | 0.419446 | 0.830274 | 0.643474 |
| MmugDNA.5040.1.S1_at    | MmugDNA.5040.1  | 7.07  | 8.07  | 0.59 | 0.33 | -2    | 0.060635 | 0.046578 | 0.303263 | 0.260267 |
| MmugDNA.5041.1.S1_at    | MmugDNA.5041.1  | 6.14  | 6.22  | 0.26 | 0.24 | -1.05 | 0.969158 | 0.762189 | 0.98776  | 0.861664 |
| MmugDNA.5042.1.S1_at    | MmugDNA.5042.1  | 4.28  | 4.4   | 0.98 | 0.28 | -1.09 | 0.39551  | 0.445715 | 0.661903 | 0.662489 |
| MmugDNA.5044.1.S1_at    | MmugDNA.5044.1  | 8.6   | 8.46  | 0.1  | 0.24 | 1.1   | 0.314324 | 0.190142 | 0.599959 | 0.465796 |
| MmugDNA.5046.1.S1_at    | MmugDNA.5046.1  | 6.07  | 5.55  | 0.18 | 0.15 | 1.43  | 0.016484 | 0.062227 | 0.181374 | 0.296307 |
| MmugDNA.5047.1.S1_at    | MmugDNA.5047.1  | 8.32  | 8.06  | 0.34 | 0.26 | 1.2   | 0.399495 | 0.140042 | 0.664823 | 0.413386 |
| MmugDNA.5048.1.S1_at    | MmugDNA.5048.1  | 4.79  | 4.8   | 0.1  | 0.15 | -1.01 | 0.376117 | 0.286024 | 0.646788 | 0.547512 |
| MmugDNA.5049.1.S1_at    | MmugDNA.5049.1  | 5.11  | 5.01  | 0.19 | 0.15 | 1.07  | 0.445617 | 0.558816 | 0.698042 | 0.735887 |
| MmugDNA.5050.1.S1_at    | MmugDNA.5050.1  | 7.07  | 7.24  | 0.25 | 0.04 | -1.12 | 0.912175 | 0.871284 | 0.962825 | 0.926843 |
| MmugDNA.5053.1.S1_at    | MmugDNA.5053.1  | 5.9   | 5.97  | 0.51 | 0.18 | -1.05 | 0.725995 | 0.811998 | 0.871415 | 0.891493 |
| MmugDNA.5054.1.S1_at    | MmugDNA.5054.1  | 7.57  | 7.29  | 0.56 | 0.15 | 1.21  | 0.922249 | 0.661785 | 0.966724 | 0.801943 |
| MmugDNA.5055.1.S1_at    | MmugDNA.5055.1  | 4.73  | 4.42  | 0.11 | 0.15 | 1.24  | 0.07003  | 0.078979 | 0.323085 | 0.325986 |
| MmugDNA.5056.1.S1_at    | MmugDNA.5056.1  | 6.03  | 6.16  | 0.16 | 0.22 | -1.09 | 0.420693 | 0.126399 | 0.679621 | 0.396917 |
| MmugDNA.5057.1.S1_s_at  | MmugDNA.5057.1  | 10.42 | 10.34 | 0.19 | 0.13 | 1.06  | 0.123434 | 0.449392 | 0.4028   | 0.665037 |
| MmugDNA.5060.1.S1_at    | MmugDNA.5060.1  | 9.94  | 10.24 | 0.18 | 0.25 | -1.23 | 0.776088 | 0.072765 | 0.897623 | 0.315651 |
| MmugDNA.5061.1.S1_at    | MmugDNA.5061.1  | 9.79  | 9.74  | 0.23 | 0.09 | 1.03  | 0.73894  | 0.955154 | 0.879058 | 0.9746   |
| MmugDNA.5062.1.S1_at    | MmugDNA.5062.1  | 5.02  | 4.89  | 0.04 | 0.03 | 1.1   | 0.009984 | 0.508421 | 0.149267 | 0.703604 |
| MmugDNA.5065.1.S1_at    | MmugDNA.5065.1  | 2.6   | 2.58  | 0.08 | 0.08 | 1.01  | 0.714696 | 0.924338 | 0.865166 | 0.957351 |
| MmugDNA.5065.1.S1_s_at  | MmugDNA.5065.1  | 6.77  | 7.14  | 0.4  | 0.12 | -1.29 | 0.16614  | 0.425694 | 0.459217 | 0.648009 |
| MmugDNA.5066.1.S1_at    | MmugDNA.5066.1  | 5.31  | 5.63  | 0.29 | 0.17 | -1.25 | 0.172528 | 0.246188 | 0.466621 | 0.515883 |
| MmugDNA.5067.1.S1_at    | MmugDNA.5067.1  | 4.94  | 4.85  | 0.11 | 0.1  | 1.06  | 0.325543 | 0.68954  | 0.608767 | 0.818901 |
| MmugDNA.5068.1.S1_at    | MmugDNA.5068.1  | 7.2   | 7.23  | 0.28 | 0.14 | -1.02 | 0.837582 | 0.452629 | 0.928841 | 0.66723  |
| MmugDNA.5069.1.S1_at    | MmugDNA.5069.1  | 6.1   | 6.5   | 0.18 | 0.14 | -1.31 | 0.190712 | 0.327155 | 0.48691  | 0.577136 |
| MmugDNA.507.1.S1_at     | MmugDNA.507.1   | 8.67  | 8.37  | 0.04 | 0.14 | 1.24  | 0.040361 | 0.017265 | 0.257247 | 0.166406 |
| MmugDNA.5070.1.S1_at    | MmugDNA.5070.1  | 9.58  | 8.73  | 0.7  | 0.12 | 1.8   | 0.418284 | 0.889164 | 0.678208 | 0.936796 |
| MmugDNA.5071.1.S1_s_at  | MmugDNA.5071.1  | 6.54  | 6.48  | 0.23 | 0.05 | 1.04  | 0.612273 | 0.663506 | 0.80677  | 0.803016 |
| MmugDNA.5072.1.S1_at    | MmugDNA.5072.1  | 7.25  | 5.43  | 0.6  | 0.12 | 3.54  | 0.014151 | 0.008284 | 0.170522 | 0.12078  |
| MmugDNA.5073.1.S1_at    | MmugDNA.5073.1  | 4.93  | 4.82  | 0.42 | 0.08 | 1.08  | 0.427867 | 0.594534 | 0.684995 | 0.758623 |
| MmugDNA.19262.1.S1_at   | MmugDNA.19262.1 | 2.73  | 2.64  | 0.01 | 0.01 | 1.07  | 0.000048 | 0.000048 | 0.045594 | 0.025273 |
| MmugDNA.19262.1.S1_s_at | MmugDNA.19262.1 | 2.93  | 2.95  | 0.12 | 0.1  | -1.01 | 0.58895  | 0.758661 | 0.791349 | 0.859716 |
| MmugDNA.5074.1.S1_at    | MmugDNA.5074.1  | 9.23  | 9.25  | 0.01 | 0.09 | -1.01 | 0.250073 | 0.23413  | 0.544879 | 0.505319 |

|                        |                |       |       |      |      |       |          |          |          |          |
|------------------------|----------------|-------|-------|------|------|-------|----------|----------|----------|----------|
| MmugDNA.5076.1.S1_at   | MmugDNA.5076.1 | 7.9   | 7.97  | 0.2  | 0.15 | -1.05 | 0.797762 | 0.774227 | 0.908721 | 0.868735 |
| MmugDNA.5078.1.S1_at   | MmugDNA.5078.1 | 6.81  | 7.69  | 0.37 | 0.24 | -1.84 | 0.102821 | 0.065494 | 0.375328 | 0.301415 |
| MmugDNA.5079.1.S1_at   | MmugDNA.5079.1 | 6.92  | 6.86  | 0.18 | 0.05 | 1.04  | 0.336542 | 0.508132 | 0.617124 | 0.70337  |
| MmugDNA.508.1.S1_at    | MmugDNA.508.1  | 3.61  | 3.58  | 0.1  | 0.02 | 1.02  | 0.727077 | 0.138553 | 0.872076 | 0.411557 |
| MmugDNA.5080.1.S1_s_at | MmugDNA.5080.1 | 10.91 | 11.59 | 0.3  | 0.16 | -1.59 | 0.016701 | 0.016254 | 0.182634 | 0.161612 |
| MmugDNA.5081.1.S1_at   | MmugDNA.5081.1 | 2.76  | 2.8   | 0.05 | 0.08 | -1.03 | 0.58803  | 0.185734 | 0.790776 | 0.461631 |
| MmugDNA.5082.1.S1_at   | MmugDNA.5082.1 | 3.57  | 3.3   | 0.06 | 0.32 | 1.21  | 0.541686 | 0.182517 | 0.762352 | 0.459065 |
| MmugDNA.5083.1.S1_at   | MmugDNA.5083.1 | 3.24  | 3.18  | 0.16 | 0.05 | 1.04  | 0.679903 | 0.325111 | 0.847268 | 0.575547 |
| MmugDNA.5084.1.S1_at   | MmugDNA.5084.1 | 5.85  | 5.85  | 0.02 | 0.14 | 1     | 0.44965  | 0.226991 | 0.700975 | 0.499286 |
| MmugDNA.5085.1.S1_at   | MmugDNA.5085.1 | 9.26  | 9.57  | 0.17 | 0.18 | -1.24 | 0.097987 | 0.868605 | 0.368558 | 0.925383 |
| MmugDNA.5088.1.S1_at   | MmugDNA.5088.1 | 6.32  | 6.26  | 0.24 | 0.08 | 1.04  | 0.704243 | 0.675637 | 0.859667 | 0.810429 |
| MmugDNA.5089.1.S1_at   | MmugDNA.5089.1 | 7.86  | 8.26  | 0.3  | 0.15 | -1.32 | 0.142077 | 0.144619 | 0.428118 | 0.418466 |
| MmugDNA.509.1.S1_at    | MmugDNA.509.1  | 7.1   | 7     | 0.21 | 0.01 | 1.07  | 0.672439 | 0.820371 | 0.843221 | 0.896496 |
| MmugDNA.5092.1.S1_at   | MmugDNA.5092.1 | 8.49  | 8.81  | 0.18 | 0.31 | -1.24 | 0.528274 | 0.493431 | 0.753547 | 0.694107 |
| MmugDNA.5093.1.S1_at   | MmugDNA.5093.1 | 6.93  | 6.78  | 0.16 | 0.17 | 1.11  | 0.653601 | 0.86601  | 0.832286 | 0.923791 |
| MmugDNA.5096.1.S1_at   | MmugDNA.5096.1 | 4.91  | 4.88  | 0.31 | 0.2  | 1.02  | 0.693369 | 0.857579 | 0.85343  | 0.918698 |
| MmugDNA.5097.1.S1_at   | MmugDNA.5097.1 | 5.12  | 5.48  | 0.24 | 0.1  | -1.28 | 0.072633 | 0.12125  | 0.327482 | 0.390351 |
| MmugDNA.5099.1.S1_at   | MmugDNA.5099.1 | 4.67  | 4.27  | 1.2  | 0.2  | 1.32  | 0.198754 | 0.231422 | 0.495887 | 0.503138 |
| MmugDNA.51.1.S1_at     | MmugDNA.51.1   | 11.14 | 11.01 | 0.04 | 0.17 | 1.09  | 0.743336 | 0.615508 | 0.881285 | 0.772025 |
| MmugDNA.5100.1.S1_at   | MmugDNA.5100.1 | 7.5   | 7.59  | 0.64 | 0.12 | -1.07 | 0.409538 | 0.694784 | 0.671909 | 0.822578 |
| MmugDNA.5102.1.S1_at   | MmugDNA.5102.1 | 7.55  | 7.31  | 0.48 | 0.39 | 1.18  | 0.264164 | 0.681074 | 0.557422 | 0.813783 |
| MmugDNA.5104.1.S1_at   | MmugDNA.5104.1 | 3.62  | 3.69  | 0.03 | 0.21 | -1.05 | 0.594291 | 0.588446 | 0.794628 | 0.754925 |
| MmugDNA.5105.1.S1_at   | MmugDNA.5105.1 | 12.92 | 12.79 | 0.07 | 0.04 | 1.09  | 0.05001  | 0.088785 | 0.28128  | 0.342524 |
| MmugDNA.5106.1.S1_at   | MmugDNA.5106.1 | 3.49  | 3.56  | 0.06 | 0.03 | -1.05 | 0.396372 | 0.125836 | 0.662437 | 0.396315 |
| MmugDNA.5107.1.S1_at   | MmugDNA.5107.1 | 11.5  | 11.53 | 0.05 | 0.02 | -1.02 | 0.084703 | 0.752474 | 0.348607 | 0.855897 |
| MmugDNA.5108.1.S1_at   | MmugDNA.5108.1 | 4.95  | 4.54  | 0.16 | 0.12 | 1.33  | 0.036035 | 0.03717  | 0.244857 | 0.237285 |
| MmugDNA.5109.1.S1_at   | MmugDNA.5109.1 | 11.11 | 10.75 | 0.26 | 0.31 | 1.29  | 0.118355 | 0.008199 | 0.395903 | 0.12024  |
| MmugDNA.5110.1.S1_at   | MmugDNA.5110.1 | 12.64 | 12.45 | 0.15 | 0.2  | 1.14  | 0.560163 | 0.256784 | 0.773651 | 0.524607 |
| MmugDNA.5111.1.S1_at   | MmugDNA.5111.1 | 5     | 5.01  | 0.31 | 0.13 | -1    | 0.982719 | 0.945314 | 0.993625 | 0.968942 |
| MmugDNA.5113.1.S1_at   | MmugDNA.5113.1 | 4.09  | 4.08  | 0.15 | 0.19 | 1.01  | 0.634204 | 0.555391 | 0.820638 | 0.733767 |
| MmugDNA.5114.1.S1_at   | MmugDNA.5114.1 | 4.25  | 4.26  | 0.18 | 0.15 | -1.01 | 0.994044 | 0.678572 | 0.997578 | 0.812261 |
| MmugDNA.5115.1.S1_at   | MmugDNA.5115.1 | 3.22  | 3.33  | 0.07 | 0.13 | -1.08 | 0.923504 | 0.635349 | 0.967446 | 0.785362 |
| MmugDNA.5116.1.S1_at   | MmugDNA.5116.1 | 4.29  | 4.18  | 0.11 | 0.06 | 1.08  | 0.095618 | 0.112453 | 0.365116 | 0.377784 |
| MmugDNA.5117.1.S1_at   | MmugDNA.5117.1 | 10.26 | 10.2  | 0.1  | 0.04 | 1.04  | 0.225732 | 0.40609  | 0.523438 | 0.634197 |
| MmugDNA.5117.1.S1_s_at | MmugDNA.5117.1 | 10.53 | 10.53 | 0.06 | 0.12 | 1     | 0.405521 | 0.257879 | 0.668984 | 0.525467 |
| MmugDNA.5118.1.S1_at   | MmugDNA.5118.1 | 5.12  | 5.39  | 0.36 | 0.15 | -1.21 | 0.31649  | 0.595366 | 0.601203 | 0.759091 |
| MmugDNA.5119.1.S1_at   | MmugDNA.5119.1 | 7.98  | 8.27  | 0.21 | 0.08 | -1.23 | 0.2701   | 0.323012 | 0.562292 | 0.574313 |
| MmugDNA.5120.1.S1_at   | MmugDNA.5120.1 | 5.42  | 5.57  | 0.34 | 0.36 | -1.11 | 0.249452 | 0.298084 | 0.544627 | 0.556726 |
| MmugDNA.5121.1.S1_at   | MmugDNA.5121.1 | 9.71  | 9.72  | 0.41 | 0.16 | -1.01 | 0.824088 | 0.201658 | 0.921772 | 0.476208 |
| MmugDNA.5122.1.S1_at   | MmugDNA.5122.1 | 6.83  | 6.52  | 0.23 | 0.13 | 1.24  | 0.139936 | 0.037375 | 0.425524 | 0.237776 |
| MmugDNA.5123.1.S1_at   | MmugDNA.5123.1 | 5.74  | 5.79  | 0.11 | 0.04 | -1.03 | 0.35674  | 0.720269 | 0.633024 | 0.838202 |
| MmugDNA.5124.1.S1_at   | MmugDNA.5124.1 | 4.1   | 4.04  | 0.07 | 0.01 | 1.04  | 0.688521 | 0.21589  | 0.851246 | 0.489536 |
| MmugDNA.5127.1.S1_at   | MmugDNA.5127.1 | 5.29  | 5.29  | 0.23 | 0.07 | -1    | 0.387537 | 0.460852 | 0.655656 | 0.672749 |

|                        |                |       |       |      |      |       |          |          |          |          |
|------------------------|----------------|-------|-------|------|------|-------|----------|----------|----------|----------|
| MmugDNA.5128.1.S1_at   | MmugDNA.5128.1 | 8.53  | 8.48  | 0.17 | 0.19 | 1.04  | 0.53746  | 0.149027 | 0.759639 | 0.423337 |
| MmugDNA.513.1.S1_at    | MmugDNA.513.1  | 4.76  | 3.99  | 0.42 | 0.2  | 1.7   | 0.0217   | 0.021443 | 0.20067  | 0.183342 |
| MmugDNA.5131.1.S1_at   | MmugDNA.5131.1 | 6.2   | 6.58  | 0.23 | 0.15 | -1.3  | 0.250646 | 0.333848 | 0.545228 | 0.581995 |
| MmugDNA.5132.1.S1_at   | MmugDNA.5132.1 | 12.42 | 12.5  | 0.28 | 0.24 | -1.06 | 0.7779   | 0.257492 | 0.898466 | 0.525247 |
| MmugDNA.5133.1.S1_at   | MmugDNA.5133.1 | 8.47  | 7.91  | 0.24 | 0.12 | 1.48  | 0.024351 | 0.364771 | 0.209146 | 0.605071 |
| MmugDNA.5135.1.S1_at   | MmugDNA.5135.1 | 4.03  | 3.54  | 0.77 | 0.06 | 1.4   | 0.2675   | 0.358039 | 0.560299 | 0.599604 |
| MmugDNA.5136.1.S1_at   | MmugDNA.5136.1 | 5.02  | 5     | 0.11 | 0.08 | 1.01  | 0.43846  | 0.291161 | 0.693033 | 0.551652 |
| MmugDNA.5138.1.S1_at   | MmugDNA.5138.1 | 4.48  | 4.77  | 0.12 | 0.18 | -1.22 | 0.242438 | 0.021332 | 0.539382 | 0.182834 |
| MmugDNA.5140.1.S1_at   | MmugDNA.5140.1 | 6.39  | 6.29  | 0.2  | 0.28 | 1.07  | 0.481359 | 0.065546 | 0.721905 | 0.301415 |
| MmugDNA.5141.1.S1_at   | MmugDNA.5141.1 | 11.37 | 11.05 | 0.04 | 0.25 | 1.25  | 0.088567 | 0.110683 | 0.354742 | 0.374854 |
| MmugDNA.5142.1.S1_at   | MmugDNA.5142.1 | 3.01  | 3.08  | 0.55 | 0.17 | -1.05 | 0.372024 | 0.533755 | 0.644659 | 0.719857 |
| MmugDNA.5143.1.S1_at   | MmugDNA.5143.1 | 10.67 | 10.86 | 0.29 | 0.25 | -1.14 | 0.298699 | 0.554079 | 0.586964 | 0.732953 |
| MmugDNA.5143.1.S1_s_at | MmugDNA.5143.1 | 11.22 | 11.49 | 0.3  | 0.19 | -1.2  | 0.203473 | 0.478798 | 0.501192 | 0.684733 |
| MmugDNA.5144.1.S1_at   | MmugDNA.5144.1 | 3.3   | 3.15  | 0.06 | 0.08 | 1.11  | 0.068411 | 0.068406 | 0.319391 | 0.307955 |
| MmugDNA.5145.1.S1_at   | MmugDNA.5145.1 | 3.07  | 3.31  | 0.12 | 0.3  | -1.18 | 0.097847 | 0.119834 | 0.368268 | 0.388577 |
| MmugDNA.5147.1.S1_at   | MmugDNA.5147.1 | 9.63  | 9.53  | 0.04 | 0.07 | 1.07  | 0.065863 | 0.415627 | 0.314134 | 0.641007 |
| MmugDNA.5147.1.S1_s_at | MmugDNA.5147.1 | 9.61  | 9.65  | 0.01 | 0.08 | -1.03 | 0.922632 | 0.144648 | 0.966932 | 0.418477 |
| MmugDNA.5148.1.S1_at   | MmugDNA.5148.1 | 9.86  | 9.81  | 0.32 | 0.12 | 1.04  | 0.561397 | 0.774309 | 0.774384 | 0.868751 |
| MmugDNA.5149.1.S1_at   | MmugDNA.5149.1 | 3.96  | 3.78  | 0.24 | 0.04 | 1.13  | 0.086156 | 0.170895 | 0.350673 | 0.447556 |
| MmugDNA.5150.1.S1_at   | MmugDNA.5150.1 | 6.26  | 5.69  | 0.96 | 0.25 | 1.48  | 0.225043 | 0.401896 | 0.522982 | 0.63109  |
| MmugDNA.5151.1.S1_at   | MmugDNA.5151.1 | 9.43  | 9.02  | 0.36 | 0.06 | 1.33  | 0.076437 | 0.140319 | 0.334699 | 0.413498 |
| MmugDNA.5151.1.S1_x_at | MmugDNA.5151.1 | 9.07  | 8.79  | 0.37 | 0.07 | 1.21  | 0.088044 | 0.119085 | 0.354244 | 0.387386 |
| MmugDNA.5152.1.S1_at   | MmugDNA.5152.1 | 4.59  | 4.72  | 0.58 | 0.12 | -1.09 | 0.633624 | 0.283957 | 0.820437 | 0.546237 |
| MmugDNA.5154.1.S1_at   | MmugDNA.5154.1 | 6.38  | 6.37  | 0.49 | 0.04 | 1.01  | 0.989471 | 0.965183 | 0.996357 | 0.98061  |
| MmugDNA.5156.1.S1_at   | MmugDNA.5156.1 | 10.76 | 10.16 | 0.16 | 0.07 | 1.52  | 0.003025 | 0.205818 | 0.100016 | 0.480083 |
| MmugDNA.5158.1.S1_at   | MmugDNA.5158.1 | 4.45  | 4.66  | 0.88 | 0.59 | -1.16 | 0.947793 | 0.819929 | 0.978041 | 0.896291 |
| MmugDNA.5159.1.S1_x_at | MmugDNA.5159.1 | 7.13  | 7.04  | 0.63 | 0.14 | 1.06  | 0.257939 | 0.395308 | 0.552137 | 0.627396 |
| MmugDNA.516.1.S1_at    | MmugDNA.516.1  | 3.5   | 3.44  | 0.09 | 0.09 | 1.04  | 0.971624 | 0.566626 | 0.98857  | 0.740707 |
| MmugDNA.5161.1.S1_at   | MmugDNA.5161.1 | 6.95  | 7.29  | 0.11 | 0.17 | -1.27 | 0.106535 | 0.049491 | 0.380675 | 0.267375 |
| MmugDNA.5161.1.S1_x_at | MmugDNA.5161.1 | 6.81  | 7.26  | 0.12 | 0.18 | -1.37 | 0.026196 | 0.018915 | 0.21487  | 0.173025 |
| MmugDNA.5162.1.S1_at   | MmugDNA.5162.1 | 3.46  | 3.53  | 0.07 | 0.19 | -1.05 | 0.539013 | 0.443489 | 0.760514 | 0.661262 |
| MmugDNA.5163.1.S1_at   | MmugDNA.5163.1 | 7.3   | 8.26  | 0.4  | 0.24 | -1.93 | 0.025883 | 0.037326 | 0.213649 | 0.237622 |
| MmugDNA.5164.1.S1_at   | MmugDNA.5164.1 | 6     | 6.37  | 0.14 | 0.16 | -1.29 | 0.090698 | 0.067286 | 0.357682 | 0.305408 |
| MmugDNA.5166.1.S1_at   | MmugDNA.5166.1 | 3.51  | 3.35  | 0.12 | 0.1  | 1.12  | 0.113477 | 0.134633 | 0.390238 | 0.406629 |
| MmugDNA.5168.1.S1_at   | MmugDNA.5168.1 | 4.04  | 4.36  | 0.26 | 0.51 | -1.24 | 0.470432 | 0.265609 | 0.714956 | 0.531449 |
| MmugDNA.5171.1.S1_at   | MmugDNA.5171.1 | 5.63  | 5.04  | 0.43 | 0.06 | 1.5   | 0.076207 | 0.050558 | 0.334238 | 0.270222 |
| MmugDNA.5172.1.S1_at   | MmugDNA.5172.1 | 5.92  | 5.82  | 1.16 | 0.15 | 1.07  | 0.321637 | 0.120497 | 0.605956 | 0.38925  |
| MmugDNA.5173.1.S1_at   | MmugDNA.5173.1 | 3.76  | 3.61  | 0.17 | 0.14 | 1.11  | 0.327424 | 0.28567  | 0.610083 | 0.547395 |
| MmugDNA.5175.1.S1_at   | MmugDNA.5175.1 | 5.46  | 5.39  | 0.39 | 0.23 | 1.05  | 0.299236 | 0.400284 | 0.587598 | 0.630158 |
| MmugDNA.5176.1.S1_at   | MmugDNA.5176.1 | 5.05  | 5.22  | 0.19 | 0.08 | -1.13 | 0.586149 | 0.814916 | 0.789675 | 0.893213 |
| MmugDNA.5178.1.S1_at   | MmugDNA.5178.1 | 4.22  | 4.21  | 0.08 | 0.11 | 1.01  | 0.607766 | 0.745674 | 0.803962 | 0.85256  |
| MmugDNA.5180.1.S1_at   | MmugDNA.5180.1 | 4.08  | 3.82  | 0.18 | 0.29 | 1.2   | 0.180025 | 0.17148  | 0.475116 | 0.447895 |
| MmugDNA.5181.1.S1_at   | MmugDNA.5181.1 | 2.97  | 3.09  | 0.21 | 0.08 | -1.08 | 0.412263 | 0.30872  | 0.674035 | 0.564619 |

|                        |                |       |       |      |      |       |          |          |          |          |
|------------------------|----------------|-------|-------|------|------|-------|----------|----------|----------|----------|
| MmugDNA.5182.1.S1_at   | MmugDNA.5182.1 | 8.56  | 8.57  | 0.07 | 0.2  | -1    | 0.817989 | 0.598712 | 0.918705 | 0.761089 |
| MmugDNA.5185.1.S1_at   | MmugDNA.5185.1 | 9.78  | 9.69  | 0.14 | 0.13 | 1.06  | 0.924674 | 0.120892 | 0.967957 | 0.389788 |
| MmugDNA.5185.1.S1_s_at | MmugDNA.5185.1 | 9.43  | 9.4   | 0.1  | 0.09 | 1.02  | 0.742634 | 0.140399 | 0.880907 | 0.413586 |
| MmugDNA.5187.1.S1_at   | MmugDNA.5187.1 | 4.88  | 5.29  | 0.14 | 0.24 | -1.34 | 0.076291 | 0.078446 | 0.33441  | 0.325206 |
| MmugDNA.5188.1.S1_at   | MmugDNA.5188.1 | 5.32  | 5.33  | 0.2  | 0.07 | -1    | 0.415159 | 0.39014  | 0.676032 | 0.624002 |
| MmugDNA.5189.1.S1_at   | MmugDNA.5189.1 | 3.25  | 3.25  | 0.03 | 0.08 | 1     | 0.55257  | 0.012892 | 0.769193 | 0.14622  |
| MmugDNA.519.1.S1_at    | MmugDNA.519.1  | 5.49  | 5.49  | 0.08 | 0.16 | -1    | 0.387487 | 0.086124 | 0.65561  | 0.338459 |
| MmugDNA.5190.1.S1_at   | MmugDNA.5190.1 | 4.55  | 4.6   | 0.1  | 0.07 | -1.04 | 0.665067 | 0.125673 | 0.838958 | 0.396249 |
| MmugDNA.5191.1.S1_at   | MmugDNA.5191.1 | 5.73  | 5.96  | 0.54 | 0.4  | -1.17 | 0.462926 | 0.475077 | 0.709909 | 0.681892 |
| MmugDNA.5192.1.S1_at   | MmugDNA.5192.1 | 3.49  | 3.79  | 0.25 | 0.22 | -1.23 | 0.436433 | 0.257385 | 0.691421 | 0.525191 |
| MmugDNA.5193.1.S1_at   | MmugDNA.5193.1 | 10.59 | 10.37 | 0.25 | 0.03 | 1.17  | 0.066148 | 0.075525 | 0.314574 | 0.31995  |
| MmugDNA.5194.1.S1_at   | MmugDNA.5194.1 | 9.35  | 9.04  | 0.29 | 0.04 | 1.23  | 0.128796 | 0.59421  | 0.410998 | 0.758517 |
| MmugDNA.5198.1.S1_at   | MmugDNA.5198.1 | 9.46  | 9.38  | 0.06 | 0.12 | 1.05  | 0.085546 | 0.372963 | 0.349924 | 0.611806 |
| MmugDNA.5199.1.S1_at   | MmugDNA.5199.1 | 9.56  | 9.53  | 0.94 | 0.39 | 1.02  | 0.89739  | 0.811738 | 0.956476 | 0.891337 |
| MmugDNA.52.1.S1_at     | MmugDNA.52.1   | 5.34  | 5.29  | 0.17 | 0.09 | 1.04  | 0.737627 | 0.087774 | 0.878297 | 0.341037 |
| MmugDNA.520.1.S1_at    | MmugDNA.520.1  | 6.92  | 7.06  | 0.35 | 0.07 | -1.1  | 0.741768 | 0.50568  | 0.880351 | 0.702218 |
| MmugDNA.5200.1.S1_at   | MmugDNA.5200.1 | 5.23  | 4.78  | 0.32 | 0.17 | 1.37  | 0.44592  | 0.205482 | 0.698308 | 0.479764 |
| MmugDNA.5202.1.S1_at   | MmugDNA.5202.1 | 3.94  | 3.93  | 0.55 | 0.06 | 1.01  | 0.94311  | 0.967575 | 0.976029 | 0.982093 |
| MmugDNA.5203.1.S1_at   | MmugDNA.5203.1 | 3.49  | 3.46  | 0.09 | 0    | 1.03  | 0.826611 | 0.981089 | 0.923133 | 0.989568 |
| MmugDNA.5204.1.S1_at   | MmugDNA.5204.1 | 11.01 | 9.45  | 0.3  | 0.37 | 2.95  | 0.005168 | 0.004134 | 0.116998 | 0.090937 |
| MmugDNA.5205.1.S1_at   | MmugDNA.5205.1 | 8.11  | 8.07  | 0.06 | 0.11 | 1.03  | 0.270523 | 0.873122 | 0.562706 | 0.927823 |
| MmugDNA.5206.1.S1_at   | MmugDNA.5206.1 | 6.27  | 6.27  | 0.11 | 0.05 | 1     | 0.234558 | 0.612835 | 0.532688 | 0.770233 |
| MmugDNA.5207.1.S1_at   | MmugDNA.5207.1 | 4.81  | 4.78  | 0.08 | 0.11 | 1.02  | 0.638923 | 0.306296 | 0.823298 | 0.562919 |
| MmugDNA.5208.1.S1_at   | MmugDNA.5208.1 | 8.63  | 8.97  | 0.52 | 0.23 | -1.27 | 0.478477 | 0.148227 | 0.71999  | 0.422745 |
| MmugDNA.5210.1.S1_at   | MmugDNA.5210.1 | 9.66  | 9.88  | 0.1  | 0.12 | -1.16 | 0.130318 | 0.466337 | 0.412628 | 0.67624  |
| MmugDNA.5211.1.S1_at   | MmugDNA.5211.1 | 11.89 | 11.97 | 0.2  | 0.04 | -1.06 | 0.390997 | 0.595413 | 0.658491 | 0.759091 |
| MmugDNA.5212.1.S1_at   | MmugDNA.5212.1 | 6.47  | 6.45  | 0.11 | 0.11 | 1.02  | 0.176829 | 0.310182 | 0.471327 | 0.565379 |
| MmugDNA.5213.1.S1_at   | MmugDNA.5213.1 | 5.78  | 7.97  | 0.75 | 0.26 | -4.55 | 0.019278 | 0.146566 | 0.192035 | 0.420583 |
| MmugDNA.5214.1.S1_at   | MmugDNA.5214.1 | 5.31  | 5.32  | 0.05 | 0.08 | -1.01 | 0.359253 | 0.058692 | 0.634841 | 0.288956 |
| MmugDNA.5215.1.S1_at   | MmugDNA.5215.1 | 6.77  | 7.55  | 0.52 | 0.65 | -1.71 | 0.220795 | 0.35886  | 0.5187   | 0.600291 |
| MmugDNA.5216.1.S1_at   | MmugDNA.5216.1 | 4.54  | 4.64  | 0.11 | 0.08 | -1.07 | 0.242173 | 0.336085 | 0.539187 | 0.583652 |
| MmugDNA.5217.1.S1_at   | MmugDNA.5217.1 | 10.14 | 10.15 | 0.26 | 0.07 | -1.01 | 0.342211 | 0.1737   | 0.622046 | 0.450043 |
| MmugDNA.5219.1.S1_at   | MmugDNA.5219.1 | 5.8   | 4.78  | 0.97 | 0.51 | 2.02  | 0.189681 | 0.288988 | 0.486064 | 0.550099 |
| MmugDNA.5220.1.S1_at   | MmugDNA.5220.1 | 4.76  | 4.81  | 0.03 | 0.06 | -1.03 | 0.740971 | 0.875322 | 0.87994  | 0.929211 |
| MmugDNA.5221.1.S1_at   | MmugDNA.5221.1 | 8.35  | 8.24  | 0.56 | 0.17 | 1.08  | 0.888631 | 0.660502 | 0.952504 | 0.801373 |
| MmugDNA.5223.1.S1_at   | MmugDNA.5223.1 | 6.32  | 6.22  | 0.07 | 0.12 | 1.07  | 0.316748 | 0.650791 | 0.60149  | 0.795801 |
| MmugDNA.5224.1.S1_at   | MmugDNA.5224.1 | 4.67  | 4.64  | 0.33 | 0.09 | 1.02  | 0.42539  | 0.489554 | 0.682786 | 0.691824 |
| MmugDNA.5225.1.S1_at   | MmugDNA.5225.1 | 4.76  | 4.76  | 0.07 | 0.05 | 1     | 0.879693 | 0.465494 | 0.948777 | 0.675774 |
| MmugDNA.5226.1.S1_at   | MmugDNA.5226.1 | 5.57  | 5.94  | 0.25 | 0.11 | -1.29 | 0.347175 | 0.72551  | 0.625329 | 0.841043 |
| MmugDNA.5227.1.S1_at   | MmugDNA.5227.1 | 12.05 | 11.78 | 0.17 | 0.1  | 1.21  | 0.097166 | 0.001267 | 0.367275 | 0.055241 |
| MmugDNA.5228.1.S1_at   | MmugDNA.5228.1 | 6.14  | 6.03  | 0.06 | 0.05 | 1.08  | 0.08346  | 0.25592  | 0.345905 | 0.523862 |
| MmugDNA.5229.1.S1_at   | MmugDNA.5229.1 | 11.22 | 10.89 | 0.1  | 0.14 | 1.26  | 0.040084 | 0.024112 | 0.256783 | 0.1945   |
| MmugDNA.523.1.S1_at    | MmugDNA.523.1  | 4.63  | 4.59  | 0.32 | 0.07 | 1.02  | 0.300739 | 0.26231  | 0.588902 | 0.52863  |

|                        |                |       |       |      |      |       |          |          |          |          |
|------------------------|----------------|-------|-------|------|------|-------|----------|----------|----------|----------|
| MmugDNA.5230.1.S1_at   | MmugDNA.5230.1 | 6.58  | 5.3   | 1.07 | 0.36 | 2.44  | 0.187702 | 0.265939 | 0.48393  | 0.531796 |
| MmugDNA.5232.1.S1_at   | MmugDNA.5232.1 | 4.02  | 3.85  | 0.64 | 0.08 | 1.12  | 0.637686 | 0.411179 | 0.82257  | 0.637937 |
| MmugDNA.5233.1.S1_at   | MmugDNA.5233.1 | 3.09  | 3.15  | 0.13 | 0.06 | -1.05 | 0.730313 | 0.875458 | 0.873938 | 0.929259 |
| MmugDNA.5234.1.S1_at   | MmugDNA.5234.1 | 3.84  | 4.06  | 0.08 | 0.04 | -1.16 | 0.03317  | 0.043618 | 0.236296 | 0.253501 |
| MmugDNA.5235.1.S1_at   | MmugDNA.5235.1 | 9.7   | 9.71  | 0.45 | 0.05 | -1    | 0.835683 | 0.990976 | 0.927786 | 0.994928 |
| MmugDNA.5236.1.S1_at   | MmugDNA.5236.1 | 5.06  | 5.08  | 0.5  | 0.11 | -1.02 | 0.479527 | 0.655775 | 0.720709 | 0.798709 |
| MmugDNA.5237.1.S1_at   | MmugDNA.5237.1 | 3.27  | 3.26  | 0.11 | 0.08 | 1.01  | 0.47119  | 0.783572 | 0.715413 | 0.874671 |
| MmugDNA.524.1.S1_at    | MmugDNA.524.1  | 8.51  | 9.29  | 0.83 | 0.25 | -1.72 | 0.249835 | 0.598091 | 0.544804 | 0.760598 |
| MmugDNA.5240.1.S1_at   | MmugDNA.5240.1 | 5.36  | 5.36  | 0.01 | 0.03 | 1     | 0.48879  | 0.964465 | 0.727208 | 0.980225 |
| MmugDNA.5241.1.S1_at   | MmugDNA.5241.1 | 6     | 5.75  | 0.25 | 0.22 | 1.19  | 0.469121 | 0.096108 | 0.71396  | 0.353322 |
| MmugDNA.5242.1.S1_at   | MmugDNA.5242.1 | 9.66  | 9.56  | 0.34 | 0.15 | 1.08  | 0.398393 | 0.541763 | 0.663859 | 0.725057 |
| MmugDNA.5242.1.S1_s_at | MmugDNA.5242.1 | 10.15 | 10.25 | 0.24 | 0.15 | -1.07 | 0.81947  | 0.874748 | 0.919572 | 0.928902 |
| MmugDNA.5243.1.S1_at   | MmugDNA.5243.1 | 6.34  | 6.11  | 0.17 | 0.09 | 1.17  | 0.282008 | 0.059514 | 0.572752 | 0.290548 |
| MmugDNA.5244.1.S1_at   | MmugDNA.5244.1 | 5.21  | 5.23  | 0.23 | 0.13 | -1.02 | 0.54665  | 0.211711 | 0.765406 | 0.485746 |
| MmugDNA.5245.1.S1_at   | MmugDNA.5245.1 | 5.31  | 5.28  | 0.08 | 0.15 | 1.02  | 0.482614 | 0.696409 | 0.722923 | 0.823653 |
| MmugDNA.5246.1.S1_at   | MmugDNA.5246.1 | 3.59  | 3.6   | 0.02 | 0.28 | -1.01 | 0.96637  | 0.998372 | 0.98641  | 0.999091 |
| MmugDNA.5247.1.S1_at   | MmugDNA.5247.1 | 4.02  | 3.59  | 1.09 | 0.19 | 1.35  | 0.333773 | 0.625408 | 0.615105 | 0.779175 |
| MmugDNA.5248.1.S1_at   | MmugDNA.5248.1 | 3.29  | 3.06  | 0.75 | 0.26 | 1.18  | 0.237636 | 0.245753 | 0.535064 | 0.515519 |
| MmugDNA.5249.1.S1_at   | MmugDNA.5249.1 | 2.91  | 3.03  | 0.1  | 0.17 | -1.09 | 0.235522 | 0.294151 | 0.533339 | 0.553962 |
| MmugDNA.525.1.S1_at    | MmugDNA.525.1  | 4.86  | 4.73  | 0.12 | 0.07 | 1.09  | 0.057348 | 0.063128 | 0.296814 | 0.29795  |
| MmugDNA.5251.1.S1_at   | MmugDNA.5251.1 | 7.06  | 6.95  | 0.03 | 0.07 | 1.08  | 0.053892 | 0.093034 | 0.289266 | 0.3492   |
| MmugDNA.5252.1.S1_at   | MmugDNA.5252.1 | 7.19  | 7.07  | 0.36 | 0.21 | 1.08  | 0.504191 | 0.056188 | 0.737428 | 0.282948 |
| MmugDNA.5254.1.S1_at   | MmugDNA.5254.1 | 7.13  | 6.99  | 0.24 | 0.12 | 1.1   | 0.572512 | 0.680217 | 0.78065  | 0.813309 |
| MmugDNA.5255.1.S1_at   | MmugDNA.5255.1 | 5.59  | 5.08  | 1.13 | 0.47 | 1.43  | 0.501842 | 0.74007  | 0.735564 | 0.849396 |
| MmugDNA.5256.1.S1_at   | MmugDNA.5256.1 | 3.65  | 3.68  | 0.09 | 0.02 | -1.02 | 0.194731 | 0.326891 | 0.491311 | 0.576848 |
| MmugDNA.5257.1.S1_at   | MmugDNA.5257.1 | 4.47  | 4.43  | 0.38 | 0.08 | 1.02  | 0.61076  | 0.788392 | 0.805939 | 0.877619 |
| MmugDNA.5258.1.S1_at   | MmugDNA.5258.1 | 5.04  | 4.84  | 0.2  | 0.12 | 1.15  | 0.314726 | 0.703601 | 0.600113 | 0.828139 |
| MmugDNA.5259.1.S1_at   | MmugDNA.5259.1 | 7.88  | 6.86  | 0.63 | 0.38 | 2.04  | 0.156483 | 0.371672 | 0.446993 | 0.610466 |
| MmugDNA.5260.1.S1_at   | MmugDNA.5260.1 | 6.04  | 5.9   | 0.23 | 0.03 | 1.1   | 0.366282 | 0.443607 | 0.640628 | 0.661336 |
| MmugDNA.5262.1.S1_at   | MmugDNA.5262.1 | 4.18  | 3.74  | 0.58 | 0.19 | 1.35  | 0.46541  | 0.798671 | 0.711465 | 0.884059 |
| MmugDNA.5263.1.S1_at   | MmugDNA.5263.1 | 3.73  | 3.65  | 0.1  | 0.09 | 1.06  | 0.142303 | 0.275349 | 0.428351 | 0.539663 |
| MmugDNA.5266.1.S1_at   | MmugDNA.5266.1 | 3.67  | 3.57  | 0.3  | 0.15 | 1.07  | 0.448496 | 0.618772 | 0.700064 | 0.774185 |
| MmugDNA.5267.1.S1_s_at | MmugDNA.5267.1 | 6.89  | 6.14  | 0.32 | 0.68 | 1.69  | 0.071202 | 0.169317 | 0.324758 | 0.445925 |
| MmugDNA.5268.1.S1_at   | MmugDNA.5268.1 | 4.77  | 5.31  | 0.41 | 0.55 | -1.46 | 0.576066 | 0.677919 | 0.783034 | 0.811843 |
| MmugDNA.5268.1.S1_s_at | MmugDNA.5268.1 | 8.92  | 8.67  | 0.25 | 0.09 | 1.19  | 0.53122  | 0.769926 | 0.75565  | 0.866376 |
| MmugDNA.527.1.S1_at    | MmugDNA.527.1  | 11.43 | 11.34 | 0.46 | 0.03 | 1.06  | 0.767158 | 0.953456 | 0.893123 | 0.97351  |
| MmugDNA.5270.1.S1_at   | MmugDNA.5270.1 | 6.67  | 6.73  | 0.35 | 0.09 | -1.04 | 0.765887 | 0.167228 | 0.892626 | 0.443684 |
| MmugDNA.5271.1.S1_at   | MmugDNA.5271.1 | 3.58  | 3.72  | 0.16 | 0.11 | -1.1  | 0.537753 | 0.217661 | 0.759901 | 0.491255 |
| MmugDNA.5272.1.S1_at   | MmugDNA.5272.1 | 6.56  | 5.25  | 0.66 | 0.82 | 2.48  | 0.180361 | 0.322737 | 0.475506 | 0.574043 |
| MmugDNA.5273.1.S1_at   | MmugDNA.5273.1 | 9     | 9.95  | 0.41 | 0.27 | -1.93 | 0.022949 | 0.030287 | 0.204353 | 0.215899 |
| MmugDNA.5274.1.S1_at   | MmugDNA.5274.1 | 4.48  | 4.36  | 0.02 | 0.11 | 1.09  | 0.102308 | 0.093854 | 0.374317 | 0.350298 |
| MmugDNA.5275.1.S1_at   | MmugDNA.5275.1 | 5.68  | 5.7   | 0.01 | 0.41 | -1.01 | 0.949714 | 0.989726 | 0.979068 | 0.994108 |
| MmugDNA.5276.1.S1_at   | MmugDNA.5276.1 | 11.21 | 10.22 | 0.22 | 0.29 | 1.99  | 0.016654 | 0.016908 | 0.182466 | 0.164917 |

|                        |                |       |       |      |      |       |          |          |          |          |
|------------------------|----------------|-------|-------|------|------|-------|----------|----------|----------|----------|
| MmugDNA.528.1.S1_at    | MmugDNA.528.1  | 9.92  | 9.64  | 0.24 | 0.03 | 1.22  | 0.037295 | 0.019229 | 0.248596 | 0.174494 |
| MmugDNA.5280.1.S1_at   | MmugDNA.5280.1 | 3.74  | 3.54  | 0.15 | 0.22 | 1.15  | 0.667074 | 0.472059 | 0.8402   | 0.679854 |
| MmugDNA.5282.1.S1_at   | MmugDNA.5282.1 | 3.94  | 3.93  | 0.11 | 0.25 | 1.01  | 0.907829 | 0.988374 | 0.961007 | 0.993461 |
| MmugDNA.5283.1.S1_at   | MmugDNA.5283.1 | 10.93 | 11.07 | 0.08 | 0.03 | -1.1  | 0.026018 | 0.018418 | 0.214209 | 0.170755 |
| MmugDNA.5284.1.S1_at   | MmugDNA.5284.1 | 9.93  | 9.54  | 0.1  | 0.12 | 1.31  | 0.00815  | 0.002179 | 0.139116 | 0.06901  |
| MmugDNA.5285.1.S1_at   | MmugDNA.5285.1 | 10.89 | 11.5  | 0.14 | 0.2  | -1.53 | 0.039404 | 0.010567 | 0.254967 | 0.134182 |
| MmugDNA.5287.1.S1_at   | MmugDNA.5287.1 | 8.35  | 8.05  | 0.29 | 0.2  | 1.22  | 0.358355 | 0.071691 | 0.634188 | 0.313904 |
| MmugDNA.5289.1.S1_at   | MmugDNA.5289.1 | 8.49  | 8.75  | 0.34 | 0.31 | -1.2  | 0.638993 | 0.212285 | 0.823331 | 0.486197 |
| MmugDNA.529.1.S1_at    | MmugDNA.529.1  | 4.73  | 4.67  | 0.1  | 0.16 | 1.04  | 0.718811 | 0.404512 | 0.867276 | 0.633004 |
| MmugDNA.5291.1.S1_at   | MmugDNA.5291.1 | 12.88 | 12.81 | 0.13 | 0.01 | 1.05  | 0.410353 | 0.002771 | 0.67241  | 0.077863 |
| MmugDNA.5292.1.S1_at   | MmugDNA.5292.1 | 4.42  | 3.97  | 0.41 | 0.18 | 1.37  | 0.680107 | 0.807894 | 0.847348 | 0.889413 |
| MmugDNA.5295.1.S1_s_at | MmugDNA.5295.1 | 5.17  | 5.7   | 0.3  | 0.27 | -1.44 | 0.200465 | 0.49486  | 0.497869 | 0.695137 |
| MmugDNA.5297.1.S1_at   | MmugDNA.5297.1 | 4.09  | 4.12  | 0.11 | 0.06 | -1.02 | 0.588699 | 0.761955 | 0.791222 | 0.861597 |
| MmugDNA.5298.1.S1_at   | MmugDNA.5298.1 | 3.71  | 3.62  | 0.07 | 0.03 | 1.07  | 0.048202 | 0.086589 | 0.276915 | 0.33911  |
| MmugDNA.5300.1.S1_at   | MmugDNA.5300.1 | 4.21  | 4.2   | 0.23 | 0.09 | 1.01  | 0.93385  | 0.869838 | 0.972213 | 0.926148 |
| MmugDNA.5301.1.S1_at   | MmugDNA.5301.1 | 4.9   | 5.01  | 0.09 | 0.26 | -1.08 | 0.775071 | 0.176429 | 0.897237 | 0.45282  |
| MmugDNA.5302.1.S1_at   | MmugDNA.5302.1 | 8.83  | 8.89  | 0.25 | 0.11 | -1.05 | 0.162981 | 0.411996 | 0.455125 | 0.638434 |
| MmugDNA.5303.1.S1_at   | MmugDNA.5303.1 | 8.69  | 7.58  | 0.29 | 0.11 | 2.16  | 0.00297  | 0.003544 | 0.099562 | 0.085371 |
| MmugDNA.5304.1.S1_at   | MmugDNA.5304.1 | 4.89  | 4.78  | 0.16 | 0.12 | 1.08  | 0.407275 | 0.720728 | 0.67039  | 0.838368 |
| MmugDNA.5305.1.S1_at   | MmugDNA.5305.1 | 9.34  | 9.32  | 0.05 | 0.14 | 1.01  | 0.555364 | 0.076642 | 0.771213 | 0.321918 |
| MmugDNA.5305.1.S1_s_at | MmugDNA.5305.1 | 8.14  | 8.18  | 0.07 | 0.15 | -1.03 | 0.349835 | 0.040539 | 0.627576 | 0.246264 |
| MmugDNA.5306.1.S1_at   | MmugDNA.5306.1 | 5.35  | 5.34  | 0.11 | 0.14 | 1.01  | 0.211678 | 0.273434 | 0.509555 | 0.537863 |
| MmugDNA.5308.1.S1_at   | MmugDNA.5308.1 | 7.35  | 8.51  | 0.4  | 0.19 | -2.23 | 0.031797 | 0.091396 | 0.231822 | 0.34639  |
| MmugDNA.5309.1.S1_at   | MmugDNA.5309.1 | 2.83  | 2.75  | 0.17 | 0.05 | 1.05  | 0.415461 | 0.428216 | 0.676162 | 0.649721 |
| MmugDNA.5310.1.S1_at   | MmugDNA.5310.1 | 4.99  | 5.4   | 0.84 | 0.41 | -1.33 | 0.777507 | 0.869679 | 0.898365 | 0.926106 |
| MmugDNA.5312.1.S1_at   | MmugDNA.5312.1 | 3.54  | 3.5   | 0.1  | 0.15 | 1.02  | 0.768131 | 0.773032 | 0.893506 | 0.868019 |
| MmugDNA.5313.1.S1_at   | MmugDNA.5313.1 | 3.01  | 3.1   | 0.11 | 0.12 | -1.06 | 0.513385 | 0.527623 | 0.743659 | 0.716154 |
| MmugDNA.5314.1.S1_at   | MmugDNA.5314.1 | 7.64  | 7.54  | 0.11 | 0.2  | 1.07  | 0.248665 | 0.140601 | 0.544042 | 0.413833 |
| MmugDNA.5314.1.S1_s_at | MmugDNA.5314.1 | 9.94  | 10.02 | 0.14 | 0.14 | -1.06 | 0.778213 | 0.014951 | 0.89867  | 0.155437 |
| MmugDNA.5315.1.S1_at   | MmugDNA.5315.1 | 4.94  | 5.04  | 0.17 | 0.07 | -1.07 | 0.660546 | 0.053544 | 0.836141 | 0.277021 |
| MmugDNA.5317.1.S1_at   | MmugDNA.5317.1 | 6.52  | 6.33  | 0.07 | 0.18 | 1.14  | 0.16679  | 0.164122 | 0.460006 | 0.440346 |
| MmugDNA.5319.1.S1_at   | MmugDNA.5319.1 | 6.41  | 6.41  | 0.18 | 0.08 | -1    | 0.260601 | 0.246132 | 0.554648 | 0.51585  |
| MmugDNA.532.1.S1_at    | MmugDNA.532.1  | 4.24  | 4.56  | 0.03 | 0.12 | -1.25 | 0.024409 | 0.143019 | 0.209245 | 0.41689  |
| MmugDNA.5320.1.S1_at   | MmugDNA.5320.1 | 9.97  | 9.66  | 0.05 | 0.29 | 1.24  | 0.535847 | 0.635216 | 0.75867  | 0.785279 |
| MmugDNA.5321.1.S1_at   | MmugDNA.5321.1 | 7.52  | 7.99  | 0.13 | 0.16 | -1.38 | 0.035526 | 0.005089 | 0.243371 | 0.099108 |
| MmugDNA.5322.1.S1_at   | MmugDNA.5322.1 | 4.89  | 4.9   | 0.06 | 0.03 | -1.01 | 0.576704 | 0.886003 | 0.783356 | 0.935122 |
| MmugDNA.5323.1.S1_at   | MmugDNA.5323.1 | 4.41  | 3.46  | 0.81 | 0.2  | 1.93  | 0.128368 | 0.139424 | 0.410302 | 0.412714 |
| MmugDNA.5324.1.S1_at   | MmugDNA.5324.1 | 4.32  | 5.22  | 1.06 | 0.16 | -1.87 | 0.642763 | 0.826766 | 0.825715 | 0.900506 |
| MmugDNA.5325.1.S1_at   | MmugDNA.5325.1 | 2.79  | 2.85  | 0.06 | 0.09 | -1.05 | 0.862325 | 0.285916 | 0.940186 | 0.547484 |
| MmugDNA.5328.1.S1_at   | MmugDNA.5328.1 | 5.07  | 5.08  | 0.08 | 0.09 | -1.01 | 0.576312 | 0.88021  | 0.783164 | 0.931571 |
| MmugDNA.533.1.S1_at    | MmugDNA.533.1  | 5.84  | 5.73  | 0.08 | 0.07 | 1.08  | 0.089467 | 0.056055 | 0.356406 | 0.282647 |
| MmugDNA.5330.1.S1_at   | MmugDNA.5330.1 | 4.36  | 4.59  | 0.29 | 0.05 | -1.18 | 0.740052 | 0.845743 | 0.879501 | 0.912241 |
| MmugDNA.5332.1.S1_at   | MmugDNA.5332.1 | 5.69  | 5.71  | 0.99 | 0.13 | -1.01 | 0.633037 | 0.849001 | 0.820132 | 0.914252 |

|                         |                 |       |       |      |      |       |          |          |          |          |
|-------------------------|-----------------|-------|-------|------|------|-------|----------|----------|----------|----------|
| MmugDNA.5333.1.S1_at    | MmugDNA.5333.1  | 7.12  | 7.65  | 0.42 | 0.26 | -1.44 | 0.113626 | 0.050848 | 0.390328 | 0.27076  |
| MmugDNA.5334.1.S1_at    | MmugDNA.5334.1  | 4.88  | 4.52  | 0.47 | 0.02 | 1.28  | 0.197872 | 0.252829 | 0.49515  | 0.521174 |
| MmugDNA.5335.1.S1_at    | MmugDNA.5335.1  | 9.32  | 9.21  | 0.18 | 0.2  | 1.08  | 0.235174 | 0.66549  | 0.533056 | 0.804009 |
| MmugDNA.5336.1.S1_at    | MmugDNA.5336.1  | 3.89  | 4.38  | 0.19 | 0.04 | -1.4  | 0.02467  | 0.043329 | 0.210126 | 0.252847 |
| MmugDNA.5336.1.S1_x_at  | MmugDNA.5336.1  | 9.13  | 9.55  | 0.18 | 0.05 | -1.34 | 0.029811 | 0.033634 | 0.225856 | 0.227006 |
| MmugDNA.5337.1.S1_at    | MmugDNA.5337.1  | 5     | 5.13  | 0.05 | 0.19 | -1.1  | 0.098416 | 0.046122 | 0.36907  | 0.259154 |
| MmugDNA.5339.1.S1_at    | MmugDNA.5339.1  | 11.08 | 10.94 | 0.03 | 0    | 1.1   | 0.001353 | 0.007855 | 0.079562 | 0.118059 |
| MmugDNA.534.1.S1_at     | MmugDNA.534.1   | 6.14  | 5.89  | 0.49 | 0.12 | 1.2   | 0.654269 | 0.41756  | 0.832661 | 0.642252 |
| MmugDNA.5340.1.S1_at    | MmugDNA.5340.1  | 4.33  | 4.29  | 0.15 | 0.05 | 1.03  | 0.763618 | 0.124126 | 0.891841 | 0.394389 |
| MmugDNA.5342.1.S1_at    | MmugDNA.5342.1  | 5.02  | 4.81  | 0.11 | 0.09 | 1.15  | 0.070637 | 0.072562 | 0.324085 | 0.315511 |
| MmugDNA.5346.1.S1_at    | MmugDNA.5346.1  | 5.33  | 6.15  | 0.65 | 0.06 | -1.76 | 0.100585 | 0.338932 | 0.371612 | 0.585891 |
| MmugDNA.5348.1.S1_at    | MmugDNA.5348.1  | 4.23  | 4.19  | 0.31 | 0.12 | 1.03  | 0.465268 | 0.179355 | 0.711393 | 0.455824 |
| MmugDNA.5349.1.S1_at    | MmugDNA.5349.1  | 3.27  | 3.39  | 0.18 | 0.11 | -1.08 | 0.247369 | 0.244119 | 0.542869 | 0.514121 |
| MmugDNA.535.1.S1_at     | MmugDNA.535.1   | 8.97  | 9     | 0.16 | 0.12 | -1.02 | 0.917848 | 0.227967 | 0.964921 | 0.500211 |
| MmugDNA.5350.1.S1_at    | MmugDNA.5350.1  | 6.43  | 5.87  | 0.76 | 0.16 | 1.47  | 0.798156 | 0.558109 | 0.908871 | 0.735404 |
| MmugDNA.5351.1.S1_at    | MmugDNA.5351.1  | 10.37 | 10.78 | 0.67 | 0.18 | -1.33 | 0.817916 | 0.859693 | 0.918705 | 0.920049 |
| MmugDNA.5352.1.S1_at    | MmugDNA.5352.1  | 5.42  | 5.42  | 0.02 | 0.12 | -1    | 0.709187 | 0.75498  | 0.86235  | 0.857383 |
| MmugDNA.5354.1.S1_at    | MmugDNA.5354.1  | 3.69  | 3.64  | 0.41 | 0.22 | 1.04  | 0.34586  | 0.4439   | 0.624702 | 0.661553 |
| MmugDNA.5354.1.S1_x_at  | MmugDNA.5354.1  | 7.4   | 7.27  | 0.56 | 0.16 | 1.09  | 0.307767 | 0.337675 | 0.594601 | 0.584863 |
| MmugDNA.5355.1.S1_at    | MmugDNA.5355.1  | 8.68  | 8.96  | 0.19 | 0.14 | -1.22 | 0.041416 | 0.124113 | 0.259966 | 0.394389 |
| MmugDNA.5356.1.S1_at    | MmugDNA.5356.1  | 4.88  | 5.06  | 0.1  | 0.23 | -1.14 | 0.247585 | 0.549484 | 0.543025 | 0.729879 |
| MmugDNA.5358.1.S1_at    | MmugDNA.5358.1  | 4.09  | 4.09  | 0.43 | 0.3  | 1.01  | 0.806023 | 0.895306 | 0.91309  | 0.940185 |
| MmugDNA.5359.1.S1_at    | MmugDNA.5359.1  | 5.34  | 5.31  | 0.01 | 0.13 | 1.02  | 0.803507 | 0.344955 | 0.911852 | 0.590239 |
| MmugDNA.536.1.S1_at     | MmugDNA.536.1   | 2.92  | 2.94  | 0.56 | 0.05 | -1.01 | 0.455157 | 0.563055 | 0.705006 | 0.738345 |
| MmugDNA.35111.1.S1_s_at | MmugDNA.35111.1 | 14.57 | 14.55 | 0.03 | 0.01 | 1.01  | 0.275725 | 0.169067 | 0.567274 | 0.445593 |
| MmugDNA.5361.1.S1_at    | MmugDNA.5361.1  | 8.09  | 6.74  | 0.76 | 0.32 | 2.56  | 0.08145  | 0.30877  | 0.342467 | 0.56463  |
| MmugDNA.5363.1.S1_at    | MmugDNA.5363.1  | 5.12  | 5.05  | 0.03 | 0.12 | 1.05  | 0.397153 | 0.68512  | 0.662925 | 0.816328 |
| MmugDNA.5364.1.S1_at    | MmugDNA.5364.1  | 3.16  | 3.19  | 0.26 | 0.07 | -1.02 | 0.535194 | 0.551375 | 0.758211 | 0.730922 |
| MmugDNA.5365.1.S1_at    | MmugDNA.5365.1  | 4.57  | 4.4   | 0.31 | 0.12 | 1.13  | 0.367073 | 0.605058 | 0.641242 | 0.764917 |
| MmugDNA.5367.1.S1_at    | MmugDNA.5367.1  | 6.18  | 5.74  | 0.21 | 0.26 | 1.35  | 0.06174  | 0.051624 | 0.304962 | 0.272664 |
| MmugDNA.5368.1.S1_at    | MmugDNA.5368.1  | 5.38  | 6.14  | 0.48 | 0.29 | -1.69 | 0.149539 | 0.170034 | 0.438529 | 0.446784 |
| MmugDNA.5369.1.S1_at    | MmugDNA.5369.1  | 4.93  | 6.5   | 0.96 | 0.21 | -2.97 | 0.07665  | 0.193818 | 0.334938 | 0.468847 |
| MmugDNA.537.1.S1_at     | MmugDNA.537.1   | 4.01  | 4.35  | 0.35 | 0.31 | -1.27 | 0.490155 | 0.757765 | 0.728327 | 0.859014 |
| MmugDNA.537.1.S1_x_at   | MmugDNA.537.1   | 4.52  | 4.73  | 0.45 | 0.1  | -1.15 | 0.393334 | 0.821366 | 0.660177 | 0.897125 |
| MmugDNA.5370.1.S1_at    | MmugDNA.5370.1  | 7.13  | 7.08  | 0.19 | 0.09 | 1.03  | 0.237974 | 0.267347 | 0.53541  | 0.53301  |
| MmugDNA.5371.1.S1_at    | MmugDNA.5371.1  | 6.26  | 6.26  | 0.07 | 0.03 | 1     | 0.502702 | 0.098171 | 0.736322 | 0.356253 |
| MmugDNA.5373.1.S1_at    | MmugDNA.5373.1  | 6.55  | 6.03  | 0.5  | 0.06 | 1.43  | 0.128362 | 0.148806 | 0.410302 | 0.423201 |
| MmugDNA.5374.1.S1_at    | MmugDNA.5374.1  | 6.57  | 6.3   | 0.03 | 0.06 | 1.21  | 0.002395 | 0.000723 | 0.093439 | 0.044531 |
| MmugDNA.5375.1.S1_at    | MmugDNA.5375.1  | 2.9   | 2.87  | 0.13 | 0.09 | 1.02  | 0.75223  | 0.51988  | 0.885542 | 0.711367 |
| MmugDNA.5376.1.S1_at    | MmugDNA.5376.1  | 4.78  | 4.79  | 0.12 | 0.03 | -1    | 0.922136 | 0.01462  | 0.966699 | 0.154176 |
| MmugDNA.5377.1.S1_at    | MmugDNA.5377.1  | 3.15  | 3.4   | 0.13 | 0.45 | -1.19 | 0.340548 | 0.320526 | 0.620818 | 0.572648 |
| MmugDNA.5378.1.S1_at    | MmugDNA.5378.1  | 4.21  | 4.32  | 0.08 | 0.1  | -1.08 | 0.26148  | 0.836443 | 0.55566  | 0.906453 |
| MmugDNA.5379.1.S1_at    | MmugDNA.5379.1  | 4.73  | 5.11  | 0.34 | 0.15 | -1.3  | 0.092952 | 0.072723 | 0.361523 | 0.31565  |



|                        |                |       |       |      |      |       |          |          |          |          |
|------------------------|----------------|-------|-------|------|------|-------|----------|----------|----------|----------|
| MmugDNA.538.1.S1_at    | MmugDNA.538.1  | 3.45  | 3.3   | 0.07 | 0.19 | 1.11  | 0.477614 | 0.673291 | 0.719533 | 0.809091 |
| MmugDNA.5380.1.S1_at   | MmugDNA.5380.1 | 10.38 | 9.93  | 0.41 | 0.25 | 1.37  | 0.131916 | 0.129532 | 0.41503  | 0.401036 |
| MmugDNA.5381.1.S1_at   | MmugDNA.5381.1 | 7.31  | 6.99  | 0.31 | 0.33 | 1.25  | 0.642844 | 0.007169 | 0.825755 | 0.113839 |
| MmugDNA.5383.1.S1_at   | MmugDNA.5383.1 | 2.95  | 3.16  | 0.15 | 0.17 | -1.16 | 0.080131 | 0.080761 | 0.340498 | 0.328634 |
| MmugDNA.5384.1.S1_at   | MmugDNA.5384.1 | 3.53  | 3.57  | 0.07 | 0.12 | -1.03 | 0.521783 | 0.648741 | 0.749403 | 0.794433 |
| MmugDNA.5385.1.S1_at   | MmugDNA.5385.1 | 6.01  | 6     | 0.26 | 0.03 | 1.01  | 0.282679 | 0.210446 | 0.573338 | 0.484317 |
| MmugDNA.5387.1.S1_at   | MmugDNA.5387.1 | 3.32  | 3.29  | 0.07 | 0.27 | 1.02  | 0.768094 | 0.723649 | 0.893506 | 0.840028 |
| MmugDNA.5390.1.S1_at   | MmugDNA.5390.1 | 3.23  | 3.06  | 0.04 | 0.09 | 1.13  | 0.071943 | 0.099264 | 0.326151 | 0.357513 |
| MmugDNA.5392.1.S1_at   | MmugDNA.5392.1 | 4.56  | 4.45  | 0.19 | 0.01 | 1.08  | 0.418687 | 0.443458 | 0.678527 | 0.661234 |
| MmugDNA.5393.1.S1_at   | MmugDNA.5393.1 | 7.97  | 7.97  | 0.39 | 0.21 | -1.01 | 0.772008 | 0.08224  | 0.895535 | 0.331091 |
| MmugDNA.5394.1.S1_at   | MmugDNA.5394.1 | 7.32  | 7.15  | 1.14 | 0.19 | 1.12  | 0.815438 | 0.657462 | 0.917584 | 0.799704 |
| MmugDNA.5395.1.S1_at   | MmugDNA.5395.1 | 4.68  | 4.63  | 0.05 | 0    | 1.03  | 0.520299 | 0.802306 | 0.74869  | 0.886115 |
| MmugDNA.5396.1.S1_at   | MmugDNA.5396.1 | 5.14  | 4.95  | 0.2  | 0.04 | 1.14  | 0.143249 | 0.150324 | 0.429519 | 0.424878 |
| MmugDNA.5397.1.S1_at   | MmugDNA.5397.1 | 4.5   | 4.23  | 0.17 | 0.05 | 1.2   | 0.044605 | 0.037033 | 0.268363 | 0.236886 |
| MmugDNA.5398.1.S1_at   | MmugDNA.5398.1 | 6.31  | 5.37  | 0.39 | 0.03 | 1.92  | 0.032734 | 0.013399 | 0.234993 | 0.148308 |
| MmugDNA.5399.1.S1_at   | MmugDNA.5399.1 | 8.28  | 6.51  | 0.08 | 0.49 | 3.41  | 0.00298  | 0.021921 | 0.099647 | 0.185265 |
| MmugDNA.540.1.S1_at    | MmugDNA.540.1  | 6.39  | 6.22  | 0.21 | 0.05 | 1.13  | 0.155524 | 0.162712 | 0.445885 | 0.43882  |
| MmugDNA.5400.1.S1_at   | MmugDNA.5400.1 | 5.62  | 5.6   | 0.17 | 0.07 | 1.02  | 0.307057 | 0.425175 | 0.593773 | 0.647647 |
| MmugDNA.5401.1.S1_at   | MmugDNA.5401.1 | 3.78  | 3.53  | 0.15 | 0.09 | 1.19  | 0.156629 | 0.154126 | 0.44712  | 0.42887  |
| MmugDNA.5402.1.S1_at   | MmugDNA.5402.1 | 7.53  | 7.46  | 0.11 | 0.06 | 1.05  | 0.621817 | 0.130891 | 0.812905 | 0.403037 |
| MmugDNA.5403.1.S1_at   | MmugDNA.5403.1 | 5.19  | 5.19  | 0.71 | 0.22 | -1    | 0.483463 | 0.252853 | 0.72358  | 0.521174 |
| MmugDNA.5405.1.S1_at   | MmugDNA.5405.1 | 4.58  | 4.55  | 0.11 | 0.12 | 1.02  | 0.785274 | 0.614893 | 0.902017 | 0.771609 |
| MmugDNA.5407.1.S1_at   | MmugDNA.5407.1 | 4.1   | 3.64  | 0.12 | 0.14 | 1.38  | 0.016808 | 0.016858 | 0.182872 | 0.16458  |
| MmugDNA.541.1.S1_at    | MmugDNA.541.1  | 6.65  | 6.68  | 0.05 | 0.42 | -1.02 | 0.43223  | 0.338205 | 0.688061 | 0.58536  |
| MmugDNA.5411.1.S1_at   | MmugDNA.5411.1 | 7.19  | 6.87  | 0.19 | 0.03 | 1.25  | 0.112569 | 0.157627 | 0.388887 | 0.433131 |
| MmugDNA.5412.1.S1_at   | MmugDNA.5412.1 | 9.33  | 9.51  | 0.54 | 0.37 | -1.13 | 0.708825 | 0.03544  | 0.862097 | 0.232561 |
| MmugDNA.5412.1.S1_s_at | MmugDNA.5412.1 | 11    | 11.33 | 0.47 | 0.17 | -1.26 | 0.320002 | 0.126242 | 0.604586 | 0.396778 |
| MmugDNA.5414.1.S1_at   | MmugDNA.5414.1 | 7.1   | 6.84  | 1.24 | 0.46 | 1.19  | 0.38851  | 0.546462 | 0.656522 | 0.728061 |
| MmugDNA.5416.1.S1_at   | MmugDNA.5416.1 | 10.86 | 11.01 | 0.24 | 0.32 | -1.11 | 0.18448  | 0.003874 | 0.480429 | 0.088587 |
| MmugDNA.5417.1.S1_at   | MmugDNA.5417.1 | 7.96  | 6.79  | 0.42 | 0.2  | 2.24  | 0.023003 | 0.014972 | 0.204617 | 0.155472 |
| MmugDNA.5418.1.S1_at   | MmugDNA.5418.1 | 10.06 | 9.91  | 0.29 | 0.12 | 1.11  | 0.32298  | 0.171944 | 0.606849 | 0.448352 |
| MmugDNA.5419.1.S1_at   | MmugDNA.5419.1 | 7.46  | 6.92  | 0.2  | 0.07 | 1.46  | 0.010465 | 0.212564 | 0.152221 | 0.486502 |
| MmugDNA.542.1.S1_at    | MmugDNA.542.1  | 4.94  | 4.7   | 0.14 | 0.1  | 1.18  | 0.212136 | 0.335649 | 0.510039 | 0.583418 |
| MmugDNA.5420.1.S1_at   | MmugDNA.5420.1 | 9.95  | 10.19 | 0.51 | 0.23 | -1.18 | 0.977049 | 0.884755 | 0.99097  | 0.93433  |
| MmugDNA.5421.1.S1_at   | MmugDNA.5421.1 | 4.27  | 4.37  | 0.1  | 0.06 | -1.07 | 0.115073 | 0.144822 | 0.392115 | 0.418704 |
| MmugDNA.5422.1.S1_at   | MmugDNA.5422.1 | 6.04  | 6.79  | 0.9  | 0.25 | -1.69 | 0.646216 | 0.538953 | 0.827974 | 0.723398 |
| MmugDNA.5423.1.S1_at   | MmugDNA.5423.1 | 2.65  | 2.72  | 0.05 | 0.35 | -1.05 | 0.258077 | 0.353879 | 0.552335 | 0.596873 |
| MmugDNA.5424.1.S1_at   | MmugDNA.5424.1 | 5.88  | 5.9   | 0.83 | 0.53 | -1.02 | 0.61645  | 0.777525 | 0.809516 | 0.870732 |
| MmugDNA.5425.1.S1_at   | MmugDNA.5425.1 | 8.19  | 7.55  | 0.34 | 0.07 | 1.56  | 0.040349 | 0.04368  | 0.257247 | 0.253711 |
| MmugDNA.5426.1.S1_at   | MmugDNA.5426.1 | 7.15  | 6.64  | 0.52 | 0.12 | 1.42  | 0.106024 | 0.131114 | 0.380031 | 0.403084 |
| MmugDNA.5427.1.S1_at   | MmugDNA.5427.1 | 6.18  | 6.19  | 0.05 | 0.15 | -1.01 | 0.682389 | 0.02092  | 0.848572 | 0.181419 |
| MmugDNA.5428.1.S1_at   | MmugDNA.5428.1 | 4.33  | 4.31  | 0.14 | 0.09 | 1.02  | 0.936478 | 0.951977 | 0.973489 | 0.972752 |
| MmugDNA.5431.1.S1_at   | MmugDNA.5431.1 | 4.55  | 4.37  | 0.23 | 0.26 | 1.13  | 0.377049 | 0.274898 | 0.647627 | 0.53934  |

|                        |                |       |       |      |      |       |          |          |          |          |
|------------------------|----------------|-------|-------|------|------|-------|----------|----------|----------|----------|
| MmugDNA.5433.1.S1_at   | MmugDNA.5433.1 | 8.15  | 8.28  | 0.06 | 0.17 | -1.1  | 0.29725  | 0.710213 | 0.585714 | 0.831904 |
| MmugDNA.5434.1.S1_at   | MmugDNA.5434.1 | 11.24 | 11.17 | 0.09 | 0.1  | 1.04  | 0.515732 | 0.026224 | 0.745426 | 0.202916 |
| MmugDNA.5434.1.S1_s_at | MmugDNA.5434.1 | 10.17 | 9.95  | 0.11 | 0.1  | 1.17  | 0.057088 | 0.148843 | 0.296257 | 0.423218 |
| MmugDNA.5437.1.S1_at   | MmugDNA.5437.1 | 4.81  | 5.35  | 0.34 | 0.46 | -1.45 | 0.478579 | 0.450866 | 0.720081 | 0.665869 |
| MmugDNA.5439.1.S1_at   | MmugDNA.5439.1 | 10.44 | 10.8  | 0.22 | 0.03 | -1.28 | 0.179764 | 0.223378 | 0.474837 | 0.496172 |
| MmugDNA.544.1.S1_at    | MmugDNA.544.1  | 2.73  | 3.09  | 0.14 | 0.08 | -1.29 | 0.018527 | 0.010829 | 0.189367 | 0.135705 |
| MmugDNA.5440.1.S1_at   | MmugDNA.5440.1 | 12.11 | 12.42 | 0.01 | 0.01 | -1.24 | 0.000003 | 0.087636 | 0.037385 | 0.340903 |
| MmugDNA.5441.1.S1_at   | MmugDNA.5441.1 | 7.68  | 7.37  | 0.18 | 0.04 | 1.24  | 0.131642 | 0.038281 | 0.414491 | 0.24046  |
| MmugDNA.5442.1.S1_at   | MmugDNA.5442.1 | 3.58  | 3.54  | 0.04 | 0.18 | 1.03  | 0.532802 | 0.713099 | 0.756693 | 0.833638 |
| MmugDNA.5443.1.S1_at   | MmugDNA.5443.1 | 6.76  | 6.58  | 0.12 | 0.04 | 1.13  | 0.256472 | 0.655938 | 0.550997 | 0.798758 |
| MmugDNA.5444.1.S1_s_at | MmugDNA.5444.1 | 9.21  | 9.14  | 0.12 | 0.03 | 1.05  | 0.167494 | 0.070729 | 0.460745 | 0.31213  |
| MmugDNA.5446.1.S1_at   | MmugDNA.5446.1 | 6.98  | 6.92  | 0.18 | 0.06 | 1.05  | 0.412164 | 0.697207 | 0.673958 | 0.824045 |
| MmugDNA.5449.1.S1_at   | MmugDNA.5449.1 | 5.39  | 5.1   | 0.29 | 0.37 | 1.23  | 0.696102 | 0.673574 | 0.855244 | 0.809284 |
| MmugDNA.545.1.S1_at    | MmugDNA.545.1  | 3.89  | 4.05  | 0.1  | 0.05 | -1.11 | 0.11567  | 0.555696 | 0.39278  | 0.734    |
| MmugDNA.5450.1.S1_at   | MmugDNA.5450.1 | 4.79  | 4.57  | 0.38 | 0.14 | 1.16  | 0.799335 | 0.369634 | 0.909502 | 0.608957 |
| MmugDNA.5451.1.S1_at   | MmugDNA.5451.1 | 6.75  | 6.64  | 0.11 | 0.02 | 1.08  | 0.23184  | 0.142039 | 0.530482 | 0.415633 |
| MmugDNA.5452.1.S1_at   | MmugDNA.5452.1 | 4.31  | 5.5   | 0.16 | 0.44 | -2.29 | 0.018553 | 0.095398 | 0.189492 | 0.352428 |
| MmugDNA.5454.1.S1_s_at | MmugDNA.5454.1 | 8.14  | 8.93  | 0.38 | 0.13 | -1.73 | 0.032319 | 0.196844 | 0.233856 | 0.471968 |
| MmugDNA.5455.1.S1_at   | MmugDNA.5455.1 | 3.76  | 3.89  | 0.15 | 0.09 | -1.1  | 0.258682 | 0.48371  | 0.552804 | 0.688112 |
| MmugDNA.5456.1.S1_at   | MmugDNA.5456.1 | 4.98  | 7.44  | 0.12 | 0.18 | -5.5  | 0.000043 | 0.003361 | 0.045594 | 0.083405 |
| MmugDNA.5458.1.S1_at   | MmugDNA.5458.1 | 3.86  | 3.73  | 0.09 | 0.08 | 1.1   | 0.18168  | 0.05472  | 0.477223 | 0.279389 |
| MmugDNA.546.1.S1_at    | MmugDNA.546.1  | 11.35 | 10.98 | 0.14 | 0.09 | 1.29  | 0.013039 | 0.016516 | 0.164954 | 0.162717 |
| MmugDNA.5462.1.S1_at   | MmugDNA.5462.1 | 4.48  | 4.36  | 0.56 | 0.13 | 1.09  | 0.250608 | 0.328964 | 0.545228 | 0.578482 |
| MmugDNA.5463.1.S1_at   | MmugDNA.5463.1 | 4.19  | 4.52  | 0.14 | 0.86 | -1.26 | 0.563107 | 0.658886 | 0.775306 | 0.800473 |
| MmugDNA.5465.1.S1_at   | MmugDNA.5465.1 | 8.01  | 8.04  | 0.22 | 0.3  | -1.02 | 0.934498 | 0.99155  | 0.972505 | 0.995297 |
| MmugDNA.5468.1.S1_at   | MmugDNA.5468.1 | 5.02  | 4.7   | 0.88 | 0.39 | 1.25  | 0.339778 | 0.178115 | 0.620001 | 0.454504 |
| MmugDNA.5469.1.S1_at   | MmugDNA.5469.1 | 6.33  | 5.67  | 0.41 | 0.67 | 1.57  | 0.41617  | 0.367985 | 0.676628 | 0.60758  |
| MmugDNA.547.1.S1_at    | MmugDNA.547.1  | 6.05  | 6.53  | 0.26 | 0.04 | -1.4  | 0.02459  | 0.340404 | 0.209803 | 0.586725 |
| MmugDNA.5470.1.S1_at   | MmugDNA.5470.1 | 7.2   | 7.14  | 0.1  | 0.05 | 1.04  | 0.520007 | 0.183169 | 0.74848  | 0.459531 |
| MmugDNA.5471.1.S1_at   | MmugDNA.5471.1 | 9.82  | 9.56  | 0.21 | 0.15 | 1.2   | 0.41381  | 0.088294 | 0.67514  | 0.341721 |
| MmugDNA.5474.1.S1_at   | MmugDNA.5474.1 | 7.54  | 7.25  | 0.06 | 0.18 | 1.22  | 0.052558 | 0.080393 | 0.286297 | 0.328028 |
| MmugDNA.5475.1.S1_at   | MmugDNA.5475.1 | 8.84  | 7.92  | 0.36 | 0.08 | 1.9   | 0.006332 | 0.112419 | 0.125881 | 0.377784 |
| MmugDNA.5476.1.S1_at   | MmugDNA.5476.1 | 3.23  | 3.06  | 0.49 | 0.18 | 1.13  | 0.309666 | 0.424131 | 0.595927 | 0.646737 |
| MmugDNA.5477.1.S1_at   | MmugDNA.5477.1 | 5.12  | 4.39  | 0.59 | 0.34 | 1.65  | 0.151351 | 0.295808 | 0.440956 | 0.555199 |
| MmugDNA.5478.1.S1_at   | MmugDNA.5478.1 | 12.04 | 12.17 | 0.06 | 0.05 | -1.09 | 0.192645 | 0.023277 | 0.489253 | 0.191258 |
| MmugDNA.5479.1.S1_at   | MmugDNA.5479.1 | 4.87  | 4.87  | 0.17 | 0.11 | 1     | 0.459183 | 0.543256 | 0.707418 | 0.726012 |
| MmugDNA.548.1.S1_at    | MmugDNA.548.1  | 4.49  | 4.49  | 0.11 | 0.15 | 1     | 0.961179 | 0.720892 | 0.984145 | 0.838368 |
| MmugDNA.5480.1.S1_at   | MmugDNA.5480.1 | 6.53  | 8.18  | 1.08 | 0.22 | -3.13 | 0.176469 | 0.54058  | 0.470889 | 0.724459 |
| MmugDNA.5481.1.S1_at   | MmugDNA.5481.1 | 8.85  | 8.75  | 0.25 | 0.18 | 1.07  | 0.575798 | 0.824533 | 0.78295  | 0.89925  |
| MmugDNA.5483.1.S1_at   | MmugDNA.5483.1 | 11.06 | 10.91 | 0.15 | 0.05 | 1.11  | 0.203033 | 0.015772 | 0.500786 | 0.159179 |
| MmugDNA.5484.1.S1_at   | MmugDNA.5484.1 | 4.45  | 4.49  | 0.05 | 0.21 | -1.02 | 0.658806 | 0.38098  | 0.835253 | 0.617476 |
| MmugDNA.5487.1.S1_at   | MmugDNA.5487.1 | 4.3   | 3.78  | 0.39 | 0.09 | 1.44  | 0.093171 | 0.289343 | 0.361736 | 0.550378 |
| MmugDNA.5489.1.S1_at   | MmugDNA.5489.1 | 4.08  | 4.09  | 0.12 | 0.04 | -1.01 | 0.381787 | 0.844713 | 0.651337 | 0.911602 |



|                        |                |       |       |      |      |       |          |          |          |          |
|------------------------|----------------|-------|-------|------|------|-------|----------|----------|----------|----------|
| MmugDNA.5543.1.S1_at   | MmugDNA.5543.1 | 10.82 | 10.89 | 0.12 | 0.19 | -1.04 | 0.42409  | 0.404027 | 0.681872 | 0.632558 |
| MmugDNA.5544.1.S1_at   | MmugDNA.5544.1 | 3.7   | 3.52  | 0.23 | 0.07 | 1.13  | 0.255062 | 0.436795 | 0.549576 | 0.65629  |
| MmugDNA.5545.1.S1_at   | MmugDNA.5545.1 | 7.26  | 6.73  | 0.15 | 0.23 | 1.44  | 0.033433 | 0.017496 | 0.236786 | 0.167516 |
| MmugDNA.5546.1.S1_at   | MmugDNA.5546.1 | 3.31  | 3.55  | 0.93 | 0.21 | -1.18 | 0.605864 | 0.568898 | 0.802758 | 0.742129 |
| MmugDNA.5547.1.S1_at   | MmugDNA.5547.1 | 5.17  | 5.22  | 0    | 0.05 | -1.04 | 0.169103 | 0.117038 | 0.462306 | 0.384465 |
| MmugDNA.5548.1.S1_at   | MmugDNA.5548.1 | 6.44  | 6.24  | 0.2  | 0.02 | 1.15  | 0.1905   | 0.107134 | 0.486767 | 0.369808 |
| MmugDNA.5549.1.S1_at   | MmugDNA.5549.1 | 6.38  | 6.42  | 0.17 | 0.03 | -1.02 | 0.581709 | 0.775563 | 0.7868   | 0.869402 |
| MmugDNA.555.1.S1_at    | MmugDNA.555.1  | 4.27  | 4.49  | 0.34 | 0.13 | -1.16 | 0.332303 | 0.71329  | 0.614066 | 0.833666 |
| MmugDNA.5550.1.S1_at   | MmugDNA.5550.1 | 10.65 | 10.04 | 0.11 | 0.19 | 1.53  | 0.018091 | 0.510374 | 0.18753  | 0.704868 |
| MmugDNA.5551.1.S1_at   | MmugDNA.5551.1 | 4.82  | 4     | 0.23 | 0.56 | 1.77  | 0.230071 | 0.649026 | 0.528979 | 0.794525 |
| MmugDNA.5554.1.S1_at   | MmugDNA.5554.1 | 3.79  | 3.83  | 0.12 | 0.16 | -1.03 | 0.897301 | 0.871869 | 0.956456 | 0.927098 |
| MmugDNA.5555.1.S1_at   | MmugDNA.5555.1 | 5.87  | 6.14  | 0.32 | 0.14 | -1.2  | 0.171517 | 0.361514 | 0.465492 | 0.602238 |
| MmugDNA.5556.1.S1_at   | MmugDNA.5556.1 | 6.32  | 6.13  | 0.12 | 0.13 | 1.14  | 0.103178 | 0.292426 | 0.375965 | 0.552506 |
| MmugDNA.5557.1.S1_at   | MmugDNA.5557.1 | 10.64 | 10.77 | 0.11 | 0.04 | -1.1  | 0.312214 | 0.014875 | 0.598235 | 0.155055 |
| MmugDNA.5559.1.S1_at   | MmugDNA.5559.1 | 6.01  | 5.96  | 0.4  | 0.12 | 1.03  | 0.510513 | 0.406355 | 0.741925 | 0.634297 |
| MmugDNA.5560.1.S1_at   | MmugDNA.5560.1 | 5.19  | 7.16  | 0.52 | 0.22 | -3.89 | 0.003851 | 0.059468 | 0.107538 | 0.290548 |
| MmugDNA.5560.1.S1_s_at | MmugDNA.5560.1 | 4.25  | 5.89  | 0.44 | 0.15 | -3.12 | 0.003446 | 0.079709 | 0.103385 | 0.326981 |
| MmugDNA.5561.1.S1_at   | MmugDNA.5561.1 | 5.37  | 5.24  | 0.24 | 0.13 | 1.09  | 0.373869 | 0.493419 | 0.645118 | 0.694107 |
| MmugDNA.5562.1.S1_at   | MmugDNA.5562.1 | 7.07  | 8.8   | 0.68 | 0.24 | -3.33 | 0.013564 | 0.091404 | 0.167258 | 0.34639  |
| MmugDNA.5563.1.S1_at   | MmugDNA.5563.1 | 7.69  | 7.65  | 0.22 | 0.04 | 1.03  | 0.303218 | 0.277949 | 0.590656 | 0.541664 |
| MmugDNA.5564.1.S1_at   | MmugDNA.5564.1 | 9.57  | 9.49  | 0.11 | 0.08 | 1.06  | 0.751576 | 0.118464 | 0.885355 | 0.386457 |
| MmugDNA.5566.1.S1_at   | MmugDNA.5566.1 | 4.67  | 4.49  | 0.2  | 0.24 | 1.13  | 0.725839 | 0.83119  | 0.871346 | 0.903172 |
| MmugDNA.5568.1.S1_at   | MmugDNA.5568.1 | 11.57 | 11.41 | 0.31 | 0.13 | 1.11  | 0.405545 | 0.082432 | 0.668984 | 0.331415 |
| MmugDNA.5569.1.S1_at   | MmugDNA.5569.1 | 6.4   | 6.18  | 0.11 | 0.17 | 1.16  | 0.132615 | 0.031172 | 0.415892 | 0.21838  |
| MmugDNA.557.1.S1_at    | MmugDNA.557.1  | 4.01  | 3.9   | 0.1  | 0.02 | 1.08  | 0.1231   | 0.61094  | 0.402205 | 0.768948 |
| MmugDNA.5570.1.S1_at   | MmugDNA.5570.1 | 5     | 5     | 0.06 | 0.04 | 1     | 0.253007 | 0.354725 | 0.547557 | 0.597422 |
| MmugDNA.5571.1.S1_at   | MmugDNA.5571.1 | 12.15 | 11.82 | 0.03 | 0.04 | 1.26  | 0.000174 | 0.004479 | 0.053494 | 0.093435 |
| MmugDNA.5572.1.S1_at   | MmugDNA.5572.1 | 10.68 | 10.46 | 0.13 | 0.05 | 1.16  | 0.039824 | 0.008085 | 0.256213 | 0.119519 |
| MmugDNA.5573.1.S1_at   | MmugDNA.5573.1 | 4.65  | 4.38  | 0.16 | 0.16 | 1.2   | 0.094486 | 0.069037 | 0.36341  | 0.309017 |
| MmugDNA.5574.1.S1_s_at | MmugDNA.5574.1 | 9.72  | 8.62  | 0.28 | 0.25 | 2.14  | 0.006394 | 0.00165  | 0.126548 | 0.061436 |
| MmugDNA.5575.1.S1_at   | MmugDNA.5575.1 | 3.57  | 3.21  | 0.53 | 0.4  | 1.29  | 0.314911 | 0.451367 | 0.600177 | 0.66617  |
| MmugDNA.5576.1.S1_at   | MmugDNA.5576.1 | 9.55  | 9.4   | 0.1  | 0.09 | 1.11  | 0.068678 | 0.111442 | 0.31994  | 0.376126 |
| MmugDNA.5577.1.S1_at   | MmugDNA.5577.1 | 6.8   | 6.87  | 0.4  | 0.3  | -1.04 | 0.73069  | 0.318918 | 0.874132 | 0.571531 |
| MmugDNA.5578.1.S1_at   | MmugDNA.5578.1 | 3.84  | 3.7   | 0.15 | 0.09 | 1.1   | 0.135418 | 0.296258 | 0.419372 | 0.555423 |
| MmugDNA.5579.1.S1_at   | MmugDNA.5579.1 | 4.89  | 5     | 0.85 | 0.13 | -1.08 | 0.784744 | 0.794156 | 0.901788 | 0.881296 |
| MmugDNA.558.1.S1_at    | MmugDNA.558.1  | 7.26  | 5.8   | 0.88 | 0.39 | 2.77  | 0.064418 | 0.045841 | 0.310347 | 0.258382 |
| MmugDNA.5582.1.S1_s_at | MmugDNA.5582.1 | 10.09 | 10.05 | 0.16 | 0.13 | 1.03  | 0.771101 | 0.362437 | 0.895131 | 0.603016 |
| MmugDNA.5585.1.S1_at   | MmugDNA.5585.1 | 8.79  | 8.51  | 0.34 | 0.08 | 1.21  | 0.070071 | 0.124786 | 0.323085 | 0.395219 |
| MmugDNA.5587.1.S1_at   | MmugDNA.5587.1 | 5.14  | 5.22  | 0.07 | 0.08 | -1.05 | 0.555147 | 0.887628 | 0.771115 | 0.936    |
| MmugDNA.5588.1.S1_x_at | MmugDNA.5588.1 | 6.91  | 6.57  | 0.63 | 0.22 | 1.26  | 0.615262 | 0.589117 | 0.808784 | 0.755393 |
| MmugDNA.5589.1.S1_at   | MmugDNA.5589.1 | 10.35 | 10.4  | 0.02 | 0.2  | -1.03 | 0.77588  | 0.047354 | 0.897461 | 0.262352 |
| MmugDNA.559.1.S1_at    | MmugDNA.559.1  | 8.39  | 7.7   | 0.76 | 0.07 | 1.62  | 0.106416 | 0.356677 | 0.380501 | 0.598516 |
| MmugDNA.5590.1.S1_at   | MmugDNA.5590.1 | 6     | 5.14  | 0.37 | 0.53 | 1.82  | 0.06804  | 0.091759 | 0.318536 | 0.346977 |

|                         |                 |       |       |      |      |       |          |          |          |          |
|-------------------------|-----------------|-------|-------|------|------|-------|----------|----------|----------|----------|
| MmugDNA.5591.1.S1_at    | MmugDNA.5591.1  | 3.59  | 2.95  | 0.42 | 0.19 | 1.56  | 0.196887 | 0.23041  | 0.494061 | 0.502199 |
| MmugDNA.5592.1.S1_at    | MmugDNA.5592.1  | 10.95 | 10.92 | 0.17 | 0.14 | 1.02  | 0.721597 | 0.055875 | 0.868898 | 0.282172 |
| MmugDNA.5593.1.S1_at    | MmugDNA.5593.1  | 12.29 | 11.75 | 0.06 | 0.1  | 1.46  | 0.001743 | 0.005494 | 0.085035 | 0.102081 |
| MmugDNA.5595.1.S1_at    | MmugDNA.5595.1  | 5.85  | 5.33  | 0.2  | 0.19 | 1.43  | 0.053855 | 0.078913 | 0.289214 | 0.325912 |
| MmugDNA.5596.1.S1_at    | MmugDNA.5596.1  | 11.64 | 11.51 | 0.09 | 0.07 | 1.1   | 0.119145 | 0.083892 | 0.396724 | 0.334776 |
| MmugDNA.5597.1.S1_at    | MmugDNA.5597.1  | 5.16  | 5.09  | 0.11 | 0.13 | 1.05  | 0.457018 | 0.540568 | 0.706061 | 0.724459 |
| MmugDNA.5598.1.S1_at    | MmugDNA.5598.1  | 8.95  | 8.92  | 0.02 | 0.26 | 1.02  | 0.294916 | 0.437972 | 0.583869 | 0.657057 |
| MmugDNA.5599.1.S1_s_at  | MmugDNA.5599.1  | 12.2  | 12.54 | 0.13 | 0.08 | -1.27 | 0.030441 | 0.595514 | 0.227311 | 0.759091 |
| MmugDNA.56.1.S1_at      | MmugDNA.56.1    | 3.85  | 3.68  | 0.31 | 0.14 | 1.13  | 0.24026  | 0.354831 | 0.537838 | 0.59746  |
| MmugDNA.560.1.S1_at     | MmugDNA.560.1   | 4.02  | 3.67  | 0.5  | 0.04 | 1.28  | 0.773088 | 0.808942 | 0.89602  | 0.889968 |
| MmugDNA.5602.1.S1_at    | MmugDNA.5602.1  | 8.12  | 7.89  | 0.89 | 0.37 | 1.17  | 0.662121 | 0.162323 | 0.836912 | 0.438466 |
| MmugDNA.5603.1.S1_at    | MmugDNA.5603.1  | 6.16  | 6.15  | 0.13 | 0.14 | 1     | 0.981851 | 0.093509 | 0.993299 | 0.349846 |
| MmugDNA.5604.1.S1_at    | MmugDNA.5604.1  | 6.5   | 6.68  | 0.33 | 0.17 | -1.13 | 0.334574 | 0.035159 | 0.615659 | 0.231667 |
| MmugDNA.5605.1.S1_at    | MmugDNA.5605.1  | 12.75 | 12.83 | 0.28 | 0.16 | -1.06 | 0.583472 | 0.133699 | 0.788116 | 0.405647 |
| MmugDNA.20021.1.S1_at   | MmugDNA.20021.1 | 12.79 | 12.9  | 0.18 | 0.14 | -1.08 | 0.430381 | 0.105698 | 0.686649 | 0.3678   |
| MmugDNA.20021.1.S1_s_at | MmugDNA.20021.1 | 13.5  | 13.52 | 0.13 | 0.1  | -1.02 | 0.520501 | 0.150646 | 0.748804 | 0.425195 |
| MmugDNA.20021.1.S1_x_at | MmugDNA.20021.1 | 13.14 | 13.23 | 0.19 | 0.12 | -1.06 | 0.420208 | 0.08984  | 0.679337 | 0.344058 |
| MmugDNA.5606.1.S1_at    | MmugDNA.5606.1  | 9.52  | 9.58  | 0.14 | 0.18 | -1.04 | 0.570393 | 0.947979 | 0.779298 | 0.970411 |
| MmugDNA.5607.1.S1_at    | MmugDNA.5607.1  | 4.96  | 4.87  | 0.09 | 0.07 | 1.07  | 0.280186 | 0.519217 | 0.571399 | 0.710878 |
| MmugDNA.5608.1.S1_at    | MmugDNA.5608.1  | 9.66  | 9.6   | 0.7  | 0.3  | 1.04  | 0.904271 | 0.146899 | 0.959379 | 0.420934 |
| MmugDNA.5609.1.S1_at    | MmugDNA.5609.1  | 9.37  | 10.3  | 0.25 | 0.07 | -1.9  | 0.008276 | 0.064159 | 0.139959 | 0.299548 |
| MmugDNA.561.1.S1_at     | MmugDNA.561.1   | 5.32  | 5.25  | 0.26 | 0.1  | 1.06  | 0.667492 | 0.74146  | 0.840413 | 0.850285 |
| MmugDNA.5611.1.S1_at    | MmugDNA.5611.1  | 6.89  | 6.98  | 0.11 | 0.06 | -1.06 | 0.725382 | 0.695812 | 0.871154 | 0.823223 |
| MmugDNA.5613.1.S1_at    | MmugDNA.5613.1  | 5.44  | 5.46  | 0.14 | 0.12 | -1.02 | 0.714557 | 0.643543 | 0.865091 | 0.790981 |
| MmugDNA.5615.1.S1_at    | MmugDNA.5615.1  | 6.41  | 6.44  | 0.11 | 0.07 | -1.02 | 0.696727 | 0.162532 | 0.855614 | 0.438649 |
| MmugDNA.5616.1.S1_at    | MmugDNA.5616.1  | 7.43  | 7.75  | 0.13 | 0.1  | -1.25 | 0.029264 | 0.620743 | 0.223819 | 0.775593 |
| MmugDNA.5617.1.S1_at    | MmugDNA.5617.1  | 9.45  | 8.21  | 0.61 | 0.09 | 2.36  | 0.05678  | 0.096367 | 0.295745 | 0.353905 |
| MmugDNA.5619.1.S1_at    | MmugDNA.5619.1  | 10.81 | 11.41 | 0.17 | 0.05 | -1.51 | 0.004498 | 0.536056 | 0.113436 | 0.721454 |
| MmugDNA.5621.1.S1_at    | MmugDNA.5621.1  | 11.09 | 11.05 | 0.1  | 0.05 | 1.02  | 0.229815 | 0.887006 | 0.528728 | 0.93566  |
| MmugDNA.5622.1.S1_at    | MmugDNA.5622.1  | 8.94  | 8.13  | 0.14 | 0.15 | 1.76  | 0.003239 | 0.02341  | 0.101778 | 0.191786 |
| MmugDNA.5623.1.S1_at    | MmugDNA.5623.1  | 4.42  | 4.41  | 0.2  | 0.17 | 1.01  | 0.430406 | 0.445481 | 0.686649 | 0.662401 |
| MmugDNA.5624.1.S1_at    | MmugDNA.5624.1  | 5.91  | 6.07  | 0.17 | 0.24 | -1.11 | 0.431685 | 0.128683 | 0.687592 | 0.400096 |
| MmugDNA.5625.1.S1_at    | MmugDNA.5625.1  | 4.23  | 4.29  | 0.11 | 0.06 | -1.04 | 0.264186 | 0.311441 | 0.557422 | 0.566456 |
| MmugDNA.5626.1.S1_at    | MmugDNA.5626.1  | 5.09  | 4.85  | 0.2  | 0.25 | 1.18  | 0.232476 | 0.250126 | 0.530886 | 0.519168 |
| MmugDNA.5627.1.S1_at    | MmugDNA.5627.1  | 7.26  | 6.97  | 0.18 | 0.19 | 1.22  | 0.128372 | 0.251443 | 0.410302 | 0.520175 |
| MmugDNA.5629.1.S1_at    | MmugDNA.5629.1  | 2.85  | 2.81  | 0.05 | 0.03 | 1.03  | 0.25547  | 0.545891 | 0.549917 | 0.727697 |
| MmugDNA.5630.1.S1_at    | MmugDNA.5630.1  | 4.84  | 4.79  | 0.15 | 0.25 | 1.04  | 0.639121 | 0.654634 | 0.823331 | 0.798101 |
| MmugDNA.5632.1.S1_at    | MmugDNA.5632.1  | 7.88  | 8.23  | 0.24 | 0.11 | -1.28 | 0.078541 | 0.030042 | 0.338335 | 0.21514  |
| MmugDNA.11172.1.S1_s_at | MmugDNA.11172.1 | 12.78 | 13    | 0.26 | 0.08 | -1.16 | 0.378545 | 0.004258 | 0.648732 | 0.091808 |
| MmugDNA.5634.1.S1_at    | MmugDNA.5634.1  | 3.92  | 3.95  | 0.1  | 0.15 | -1.02 | 0.304712 | 0.594244 | 0.591803 | 0.758517 |
| MmugDNA.5635.1.S1_at    | MmugDNA.5635.1  | 6.27  | 6.25  | 0.16 | 0.13 | 1.01  | 0.394614 | 0.569171 | 0.661066 | 0.742303 |
| MmugDNA.5637.1.S1_at    | MmugDNA.5637.1  | 5.95  | 5.7   | 0.21 | 0.27 | 1.19  | 0.265726 | 0.410646 | 0.558335 | 0.637463 |
| MmugDNA.5638.1.S1_at    | MmugDNA.5638.1  | 3.58  | 3.31  | 0.23 | 0.26 | 1.2   | 0.377384 | 0.678259 | 0.647924 | 0.812064 |

|                        |                |       |       |      |      |       |          |          |          |          |
|------------------------|----------------|-------|-------|------|------|-------|----------|----------|----------|----------|
| MmugDNA.5640.1.S1_at   | MmugDNA.5640.1 | 4.1   | 5.33  | 0.04 | 0.6  | -2.35 | 0.027999 | 0.415277 | 0.219887 | 0.640769 |
| MmugDNA.5641.1.S1_at   | MmugDNA.5641.1 | 9.31  | 9.34  | 0.14 | 0.14 | -1.03 | 0.960621 | 0.317648 | 0.983913 | 0.570802 |
| MmugDNA.5644.1.S1_at   | MmugDNA.5644.1 | 6.43  | 6.49  | 0.46 | 0.14 | -1.04 | 0.533021 | 0.56256  | 0.756785 | 0.738069 |
| MmugDNA.5647.1.S1_at   | MmugDNA.5647.1 | 6.68  | 6.69  | 0.37 | 0.23 | -1    | 0.923787 | 0.995062 | 0.967605 | 0.996929 |
| MmugDNA.5648.1.S1_at   | MmugDNA.5648.1 | 3.78  | 3.83  | 0.05 | 0.44 | -1.03 | 0.661627 | 0.78485  | 0.836666 | 0.875432 |
| MmugDNA.5649.1.S1_at   | MmugDNA.5649.1 | 9.96  | 9.91  | 0.3  | 0.03 | 1.03  | 0.561734 | 0.415636 | 0.774566 | 0.641007 |
| MmugDNA.565.1.S1_at    | MmugDNA.565.1  | 7.11  | 6.36  | 0.44 | 0.41 | 1.68  | 0.178588 | 0.097443 | 0.473375 | 0.355118 |
| MmugDNA.5650.1.S1_at   | MmugDNA.5650.1 | 5.74  | 5.71  | 0.06 | 0.11 | 1.02  | 0.521736 | 0.219065 | 0.749403 | 0.49285  |
| MmugDNA.5651.1.S1_at   | MmugDNA.5651.1 | 10.09 | 10.28 | 0.21 | 0.17 | -1.14 | 0.578158 | 0.009714 | 0.784018 | 0.129718 |
| MmugDNA.5652.1.S1_at   | MmugDNA.5652.1 | 4.36  | 3.99  | 0.15 | 0.2  | 1.29  | 0.149732 | 0.169654 | 0.438721 | 0.446229 |
| MmugDNA.5653.1.S1_at   | MmugDNA.5653.1 | 4.72  | 4.57  | 0.18 | 0.19 | 1.11  | 0.368048 | 0.193594 | 0.641778 | 0.468785 |
| MmugDNA.5659.1.S1_at   | MmugDNA.5659.1 | 3.92  | 4.11  | 0.21 | 0.45 | -1.15 | 0.157187 | 0.194434 | 0.447994 | 0.469521 |
| MmugDNA.566.1.S1_at    | MmugDNA.566.1  | 6.77  | 6.34  | 0.37 | 0.27 | 1.35  | 0.178398 | 0.215214 | 0.473151 | 0.488977 |
| MmugDNA.5660.1.S1_at   | MmugDNA.5660.1 | 8.9   | 8.23  | 0.39 | 0.21 | 1.59  | 0.050644 | 0.031125 | 0.282744 | 0.218175 |
| MmugDNA.5664.1.S1_at   | MmugDNA.5664.1 | 5.69  | 5.45  | 0.11 | 0.26 | 1.18  | 0.351453 | 0.490827 | 0.629049 | 0.692666 |
| MmugDNA.5666.1.S1_at   | MmugDNA.5666.1 | 3.66  | 3.53  | 0.7  | 0.08 | 1.1   | 0.225292 | 0.19389  | 0.523198 | 0.468979 |
| MmugDNA.5667.1.S1_at   | MmugDNA.5667.1 | 4.67  | 4.46  | 0.4  | 0.29 | 1.15  | 0.28157  | 0.511564 | 0.572486 | 0.705677 |
| MmugDNA.5668.1.S1_at   | MmugDNA.5668.1 | 6.85  | 6.6   | 0.3  | 0.07 | 1.18  | 0.729678 | 0.532367 | 0.873728 | 0.719017 |
| MmugDNA.5670.1.S1_at   | MmugDNA.5670.1 | 5.45  | 5.41  | 0.91 | 0.29 | 1.03  | 0.384953 | 0.520843 | 0.653852 | 0.711942 |
| MmugDNA.5672.1.S1_at   | MmugDNA.5672.1 | 5.82  | 5.63  | 0.14 | 0.65 | 1.14  | 0.589415 | 0.770371 | 0.791592 | 0.866595 |
| MmugDNA.5673.1.S1_at   | MmugDNA.5673.1 | 4.95  | 7.25  | 0.1  | 0.24 | -4.92 | 0.00013  | 0.00015  | 0.051196 | 0.029832 |
| MmugDNA.5674.1.S1_at   | MmugDNA.5674.1 | 4.83  | 4.82  | 0.13 | 0.09 | 1.01  | 0.382841 | 0.374815 | 0.652236 | 0.613091 |
| MmugDNA.5675.1.S1_at   | MmugDNA.5675.1 | 7.92  | 8.1   | 0.16 | 0.12 | -1.13 | 0.43811  | 0.058976 | 0.692786 | 0.289669 |
| MmugDNA.5676.1.S1_at   | MmugDNA.5676.1 | 3.45  | 3.34  | 0.16 | 0.05 | 1.08  | 0.612595 | 0.505123 | 0.806938 | 0.70197  |
| MmugDNA.5677.1.S1_at   | MmugDNA.5677.1 | 2.85  | 2.98  | 0.25 | 0.08 | -1.09 | 0.859641 | 0.572412 | 0.939203 | 0.744497 |
| MmugDNA.5679.1.S1_at   | MmugDNA.5679.1 | 4.88  | 4.87  | 0.23 | 0.25 | 1.01  | 0.437048 | 0.316867 | 0.691919 | 0.570214 |
| MmugDNA.568.1.S1_at    | MmugDNA.568.1  | 5.97  | 6.28  | 0.15 | 0.21 | -1.24 | 0.071191 | 0.045385 | 0.324758 | 0.257395 |
| MmugDNA.5680.1.S1_s_at | MmugDNA.5680.1 | 10.7  | 10.45 | 0.47 | 0.13 | 1.18  | 0.850649 | 0.984452 | 0.93519  | 0.991287 |
| MmugDNA.5681.1.S1_at   | MmugDNA.5681.1 | 6.91  | 6.88  | 0.12 | 0.03 | 1.02  | 0.808713 | 0.938527 | 0.914357 | 0.965059 |
| MmugDNA.5682.1.S1_at   | MmugDNA.5682.1 | 4.04  | 4.02  | 0.82 | 0.17 | 1.02  | 0.288236 | 0.379388 | 0.577949 | 0.61636  |
| MmugDNA.5682.1.S1_x_at | MmugDNA.5682.1 | 6.06  | 5.13  | 0.89 | 0.18 | 1.91  | 0.113549 | 0.147325 | 0.390238 | 0.421537 |
| MmugDNA.5684.1.S1_at   | MmugDNA.5684.1 | 6.68  | 6.72  | 0.23 | 0.09 | -1.03 | 0.629328 | 0.85576  | 0.817872 | 0.917698 |
| MmugDNA.5686.1.S1_at   | MmugDNA.5686.1 | 3.58  | 3.58  | 0.11 | 0.14 | 1     | 0.232136 | 0.387128 | 0.530631 | 0.621935 |
| MmugDNA.5687.1.S1_at   | MmugDNA.5687.1 | 9.68  | 9.86  | 0.07 | 0.24 | -1.13 | 0.553969 | 0.641384 | 0.770349 | 0.789506 |
| MmugDNA.5689.1.S1_at   | MmugDNA.5689.1 | 3.98  | 3.92  | 0.13 | 0.06 | 1.04  | 0.375846 | 0.806966 | 0.646605 | 0.888903 |
| MmugDNA.5690.1.S1_at   | MmugDNA.5690.1 | 9.89  | 10.04 | 0.23 | 0.06 | -1.11 | 0.933155 | 0.297214 | 0.971968 | 0.556067 |
| MmugDNA.5690.1.S1_s_at | MmugDNA.5690.1 | 10.08 | 10.26 | 0.29 | 0.11 | -1.13 | 0.877853 | 0.228872 | 0.947831 | 0.501124 |
| MmugDNA.5691.1.S1_at   | MmugDNA.5691.1 | 10.17 | 9.98  | 0.15 | 0.04 | 1.14  | 0.116296 | 0.165175 | 0.393384 | 0.441389 |
| MmugDNA.5692.1.S1_at   | MmugDNA.5692.1 | 6.21  | 6.26  | 0.23 | 0.12 | -1.03 | 0.511915 | 0.165229 | 0.74282  | 0.441399 |
| MmugDNA.5693.1.S1_at   | MmugDNA.5693.1 | 6.25  | 6.08  | 0.16 | 0.09 | 1.12  | 0.321237 | 0.270823 | 0.605501 | 0.536026 |
| MmugDNA.5695.1.S1_at   | MmugDNA.5695.1 | 6.94  | 6.89  | 0.33 | 0.03 | 1.04  | 0.772863 | 0.715033 | 0.895994 | 0.834792 |
| MmugDNA.5696.1.S1_at   | MmugDNA.5696.1 | 8.23  | 8.76  | 0.1  | 0.34 | -1.44 | 0.051648 | 0.287713 | 0.284589 | 0.548977 |
| MmugDNA.5698.1.S1_x_at | MmugDNA.5698.1 | 6.25  | 6.12  | 0.76 | 0.29 | 1.09  | 0.194515 | 0.243393 | 0.491166 | 0.513425 |

|                        |                |       |       |      |      |       |          |          |          |          |
|------------------------|----------------|-------|-------|------|------|-------|----------|----------|----------|----------|
| MmugDNA.5699.1.S1_at   | MmugDNA.5699.1 | 7.47  | 7.03  | 0.09 | 0.27 | 1.37  | 0.06172  | 0.234588 | 0.304962 | 0.505792 |
| MmugDNA.57.1.S1_at     | MmugDNA.57.1   | 6.25  | 5.71  | 0.36 | 0.3  | 1.45  | 0.594318 | 0.137946 | 0.794643 | 0.410912 |
| MmugDNA.570.1.S1_at    | MmugDNA.570.1  | 5.39  | 6.19  | 0.39 | 0.35 | -1.74 | 0.08843  | 0.076184 | 0.354567 | 0.321047 |
| MmugDNA.5700.1.S1_at   | MmugDNA.5700.1 | 2.67  | 2.79  | 0.12 | 0.03 | -1.09 | 0.22723  | 0.058697 | 0.525251 | 0.288956 |
| MmugDNA.5701.1.S1_at   | MmugDNA.5701.1 | 5.15  | 5.07  | 0.07 | 0.12 | 1.06  | 0.563225 | 0.133588 | 0.775375 | 0.405542 |
| MmugDNA.5703.1.S1_at   | MmugDNA.5703.1 | 5.13  | 5.46  | 0.07 | 0.1  | -1.25 | 0.00921  | 0.024522 | 0.145865 | 0.196001 |
| MmugDNA.5706.1.S1_s_at | MmugDNA.5706.1 | 11.41 | 10.82 | 0.24 | 0.03 | 1.5   | 0.033621 | 0.384261 | 0.237329 | 0.619994 |
| MmugDNA.5706.1.S1_x_at | MmugDNA.5706.1 | 4.16  | 3.96  | 0.12 | 0.1  | 1.15  | 0.058055 | 0.374657 | 0.298056 | 0.613    |
| MmugDNA.5707.1.S1_at   | MmugDNA.5707.1 | 11.43 | 11.54 | 0.1  | 0.06 | -1.08 | 0.754195 | 0.01419  | 0.886723 | 0.152173 |
| MmugDNA.5708.1.S1_at   | MmugDNA.5708.1 | 8.89  | 8.59  | 0.15 | 0.32 | 1.23  | 0.081113 | 0.046547 | 0.342138 | 0.260267 |
| MmugDNA.5708.1.S1_s_at | MmugDNA.5708.1 | 11.3  | 11.29 | 0.01 | 0.13 | 1     | 0.340476 | 0.614184 | 0.620818 | 0.771143 |
| MmugDNA.5709.1.S1_at   | MmugDNA.5709.1 | 3.46  | 3.19  | 0.12 | 0.15 | 1.2   | 0.334075 | 0.390731 | 0.615174 | 0.624501 |
| MmugDNA.5710.1.S1_at   | MmugDNA.5710.1 | 10.34 | 10.02 | 0.29 | 0.29 | 1.25  | 0.252333 | 0.359164 | 0.546838 | 0.600528 |
| MmugDNA.5712.1.S1_at   | MmugDNA.5712.1 | 10.25 | 8.97  | 0.25 | 0.09 | 2.43  | 0.001375 | 0.003552 | 0.079595 | 0.085398 |
| MmugDNA.5713.1.S1_at   | MmugDNA.5713.1 | 5     | 4.54  | 0.4  | 0.3  | 1.37  | 0.31113  | 0.506594 | 0.597323 | 0.702503 |
| MmugDNA.5717.1.S1_at   | MmugDNA.5717.1 | 5.93  | 5.88  | 0.02 | 0.07 | 1.03  | 0.686717 | 0.021683 | 0.850733 | 0.184333 |
| MmugDNA.5718.1.S1_at   | MmugDNA.5718.1 | 7.83  | 7.25  | 0.04 | 0.19 | 1.5   | 0.005897 | 0.051239 | 0.123151 | 0.271799 |
| MmugDNA.5719.1.S1_at   | MmugDNA.5719.1 | 7     | 6.89  | 0.17 | 0.03 | 1.08  | 0.918489 | 0.487013 | 0.965302 | 0.690176 |
| MmugDNA.572.1.S1_at    | MmugDNA.572.1  | 3.68  | 3.68  | 0.07 | 0.12 | -1    | 0.708456 | 0.72508  | 0.861949 | 0.840867 |
| MmugDNA.5721.1.S1_at   | MmugDNA.5721.1 | 3.91  | 3.78  | 0.11 | 0.04 | 1.1   | 0.235121 | 0.271184 | 0.533056 | 0.536264 |
| MmugDNA.5722.1.S1_at   | MmugDNA.5722.1 | 11.56 | 11.55 | 0.15 | 0.07 | 1     | 0.952869 | 0.111419 | 0.980564 | 0.376126 |
| MmugDNA.5723.1.S1_at   | MmugDNA.5723.1 | 7.13  | 6.98  | 0.29 | 0.07 | 1.12  | 0.263487 | 0.160753 | 0.556984 | 0.436897 |
| MmugDNA.5724.1.S1_at   | MmugDNA.5724.1 | 6.29  | 6.28  | 0.22 | 0.08 | 1     | 0.616877 | 0.582684 | 0.809705 | 0.751307 |
| MmugDNA.5726.1.S1_at   | MmugDNA.5726.1 | 7.33  | 7.05  | 0.51 | 0.12 | 1.22  | 0.506367 | 0.486018 | 0.739124 | 0.689551 |
| MmugDNA.5727.1.S1_at   | MmugDNA.5727.1 | 4.25  | 4.35  | 0.21 | 0.2  | -1.07 | 0.227869 | 0.283586 | 0.525965 | 0.546021 |
| MmugDNA.5728.1.S1_s_at | MmugDNA.5728.1 | 8.37  | 8.19  | 0.16 | 0.1  | 1.13  | 0.717023 | 0.180005 | 0.866435 | 0.456552 |
| MmugDNA.5730.1.S1_at   | MmugDNA.5730.1 | 5.8   | 5.26  | 0.61 | 0.29 | 1.45  | 0.388668 | 0.226505 | 0.656662 | 0.498987 |
| MmugDNA.5732.1.S1_at   | MmugDNA.5732.1 | 4.66  | 5.12  | 1.2  | 0.26 | -1.38 | 0.770513 | 0.9603   | 0.894703 | 0.977459 |
| MmugDNA.5735.1.S1_at   | MmugDNA.5735.1 | 7.13  | 7.04  | 0.18 | 0.24 | 1.07  | 0.951565 | 0.01673  | 0.979984 | 0.163819 |
| MmugDNA.5737.1.S1_at   | MmugDNA.5737.1 | 8.97  | 9.32  | 0.19 | 0.11 | -1.28 | 0.112962 | 0.28298  | 0.389499 | 0.545692 |
| MmugDNA.5737.1.S1_x_at | MmugDNA.5737.1 | 9.13  | 9.36  | 0.16 | 0.08 | -1.17 | 0.089585 | 0.248212 | 0.356511 | 0.517574 |
| MmugDNA.5739.1.S1_at   | MmugDNA.5739.1 | 6.09  | 5.93  | 0.14 | 0.16 | 1.11  | 0.257123 | 0.273226 | 0.551586 | 0.537788 |
| MmugDNA.574.1.S1_at    | MmugDNA.574.1  | 7.67  | 7.54  | 0.06 | 0.09 | 1.09  | 0.121018 | 0.130439 | 0.399514 | 0.402268 |
| MmugDNA.5740.1.S1_s_at | MmugDNA.5740.1 | 4.82  | 6.88  | 0.6  | 0.04 | -4.16 | 0.008264 | 0.000863 | 0.139927 | 0.047401 |
| MmugDNA.5741.1.S1_at   | MmugDNA.5741.1 | 4.96  | 5.05  | 0.24 | 0.06 | -1.06 | 0.603427 | 0.074667 | 0.800968 | 0.318404 |
| MmugDNA.5743.1.S1_at   | MmugDNA.5743.1 | 3.19  | 3.54  | 0.24 | 0.67 | -1.28 | 0.237114 | 0.344149 | 0.534591 | 0.589739 |
| MmugDNA.5744.1.S1_at   | MmugDNA.5744.1 | 5.66  | 5.72  | 0.15 | 0.11 | -1.04 | 0.863395 | 0.79632  | 0.940655 | 0.882625 |
| MmugDNA.5745.1.S1_at   | MmugDNA.5745.1 | 3.88  | 3.92  | 0.11 | 0.08 | -1.03 | 0.834211 | 0.938292 | 0.927018 | 0.965016 |
| MmugDNA.5748.1.S1_at   | MmugDNA.5748.1 | 5.51  | 5.59  | 0.32 | 0.1  | -1.06 | 0.333276 | 0.139829 | 0.614682 | 0.413131 |
| MmugDNA.5749.1.S1_at   | MmugDNA.5749.1 | 7.96  | 8.27  | 0.66 | 0.38 | -1.24 | 0.960372 | 0.274231 | 0.983725 | 0.538709 |
| MmugDNA.5750.1.S1_at   | MmugDNA.5750.1 | 7.81  | 7.98  | 0.28 | 0.07 | -1.12 | 0.539271 | 0.222687 | 0.760695 | 0.495617 |
| MmugDNA.5751.1.S1_at   | MmugDNA.5751.1 | 8.55  | 8.74  | 0.33 | 0.39 | -1.14 | 0.786188 | 0.930444 | 0.9024   | 0.960476 |
| MmugDNA.5752.1.S1_at   | MmugDNA.5752.1 | 3.74  | 3.64  | 0    | 0.18 | 1.07  | 0.240098 | 0.261328 | 0.537736 | 0.527838 |

|                        |                |       |       |      |      |       |          |          |          |          |
|------------------------|----------------|-------|-------|------|------|-------|----------|----------|----------|----------|
| MmugDNA.5753.1.S1_at   | MmugDNA.5753.1 | 5.56  | 5.6   | 0.26 | 0.2  | -1.02 | 0.513006 | 0.629915 | 0.743423 | 0.782013 |
| MmugDNA.5756.1.S1_at   | MmugDNA.5756.1 | 6.83  | 5.94  | 0.97 | 0.35 | 1.86  | 0.19937  | 0.280546 | 0.496686 | 0.543725 |
| MmugDNA.5758.1.S1_at   | MmugDNA.5758.1 | 3.52  | 3.4   | 0.08 | 0.32 | 1.08  | 0.914401 | 0.39337  | 0.963616 | 0.626258 |
| MmugDNA.576.1.S1_at    | MmugDNA.576.1  | 3.48  | 3.2   | 0.27 | 0.06 | 1.22  | 0.272724 | 0.348307 | 0.564796 | 0.592478 |
| MmugDNA.5760.1.S1_at   | MmugDNA.5760.1 | 5.56  | 5.44  | 0.67 | 0.49 | 1.09  | 0.905628 | 0.987966 | 0.960065 | 0.993283 |
| MmugDNA.5762.1.S1_at   | MmugDNA.5762.1 | 11.65 | 11.55 | 0.25 | 0.05 | 1.08  | 0.619528 | 0.364193 | 0.81128  | 0.604513 |
| MmugDNA.5763.1.S1_at   | MmugDNA.5763.1 | 6     | 4.85  | 0.75 | 0.1  | 2.23  | 0.20179  | 0.148342 | 0.49928  | 0.422915 |
| MmugDNA.5764.1.S1_at   | MmugDNA.5764.1 | 5.37  | 5.45  | 0.21 | 0.25 | -1.06 | 0.644752 | 0.753816 | 0.82702  | 0.856687 |
| MmugDNA.5765.1.S1_at   | MmugDNA.5765.1 | 4.19  | 4.24  | 0.06 | 0.13 | -1.04 | 0.622561 | 0.075994 | 0.813398 | 0.320676 |
| MmugDNA.5766.1.S1_at   | MmugDNA.5766.1 | 9.96  | 10.07 | 0.18 | 0.09 | -1.07 | 0.670323 | 0.220301 | 0.841785 | 0.493756 |
| MmugDNA.5767.1.S1_at   | MmugDNA.5767.1 | 4.41  | 6.98  | 0.94 | 0.23 | -5.93 | 0.027369 | 0.042135 | 0.218317 | 0.249753 |
| MmugDNA.577.1.S1_at    | MmugDNA.577.1  | 3.78  | 3.62  | 0.09 | 0.17 | 1.12  | 0.263335 | 0.378225 | 0.556921 | 0.615438 |
| MmugDNA.5770.1.S1_at   | MmugDNA.5770.1 | 7.06  | 7.15  | 0.18 | 0.07 | -1.06 | 0.201469 | 0.648794 | 0.49907  | 0.794478 |
| MmugDNA.5771.1.S1_at   | MmugDNA.5771.1 | 4.62  | 4.65  | 0.26 | 0.03 | -1.02 | 0.551666 | 0.550621 | 0.768597 | 0.730605 |
| MmugDNA.5772.1.S1_at   | MmugDNA.5772.1 | 6.21  | 6.19  | 0.12 | 0.1  | 1.01  | 0.3041   | 0.412442 | 0.59132  | 0.638862 |
| MmugDNA.5773.1.S1_at   | MmugDNA.5773.1 | 5.17  | 5.19  | 0.2  | 0.16 | -1.01 | 0.689218 | 0.729729 | 0.851576 | 0.843658 |
| MmugDNA.5774.1.S1_at   | MmugDNA.5774.1 | 2.9   | 2.93  | 0.14 | 0.32 | -1.02 | 0.73207  | 0.893566 | 0.874755 | 0.939277 |
| MmugDNA.5775.1.S1_at   | MmugDNA.5775.1 | 6.73  | 7.31  | 0.21 | 0.34 | -1.49 | 0.18325  | 0.034914 | 0.479224 | 0.231062 |
| MmugDNA.5776.1.S1_at   | MmugDNA.5776.1 | 3.87  | 3.42  | 0.46 | 0.05 | 1.37  | 0.479969 | 0.554365 | 0.721015 | 0.733168 |
| MmugDNA.5777.1.S1_at   | MmugDNA.5777.1 | 7.79  | 7.77  | 0.19 | 0.13 | 1.01  | 0.21534  | 0.206352 | 0.513001 | 0.480544 |
| MmugDNA.5779.1.S1_at   | MmugDNA.5779.1 | 5.48  | 4.99  | 0.68 | 0.52 | 1.41  | 0.460817 | 0.622999 | 0.708419 | 0.777444 |
| MmugDNA.578.1.S1_at    | MmugDNA.578.1  | 3.66  | 3.55  | 0.14 | 0.1  | 1.08  | 0.145009 | 0.206096 | 0.43215  | 0.480306 |
| MmugDNA.5782.1.S1_at   | MmugDNA.5782.1 | 5.13  | 5.26  | 0.36 | 0.18 | -1.1  | 0.875463 | 0.951251 | 0.946642 | 0.972381 |
| MmugDNA.5785.1.S1_at   | MmugDNA.5785.1 | 5.59  | 5.48  | 0.18 | 0.15 | 1.08  | 0.200265 | 0.200688 | 0.497771 | 0.47524  |
| MmugDNA.5786.1.S1_at   | MmugDNA.5786.1 | 3.95  | 3.95  | 0.11 | 0.06 | -1    | 0.230029 | 0.667475 | 0.528979 | 0.805333 |
| MmugDNA.5787.1.S1_at   | MmugDNA.5787.1 | 3.42  | 3.49  | 0.11 | 0.22 | -1.05 | 0.994849 | 0.105389 | 0.997957 | 0.367262 |
| MmugDNA.5789.1.S1_at   | MmugDNA.5789.1 | 10.43 | 10.48 | 0.03 | 0.05 | -1.03 | 0.169187 | 0.07317  | 0.462429 | 0.316064 |
| MmugDNA.5790.1.S1_at   | MmugDNA.5790.1 | 4.94  | 4.89  | 0.16 | 0.05 | 1.04  | 0.45744  | 0.538891 | 0.706397 | 0.723368 |
| MmugDNA.5791.1.S1_at   | MmugDNA.5791.1 | 6.54  | 6.37  | 0.24 | 0.17 | 1.12  | 0.265152 | 0.183167 | 0.557962 | 0.459531 |
| MmugDNA.5792.1.S1_at   | MmugDNA.5792.1 | 5.82  | 5.93  | 0.1  | 0.06 | -1.08 | 0.21802  | 0.063947 | 0.515851 | 0.29906  |
| MmugDNA.5795.1.S1_at   | MmugDNA.5795.1 | 4.73  | 4.62  | 0.47 | 0.11 | 1.08  | 0.279272 | 0.596006 | 0.570666 | 0.759321 |
| MmugDNA.5797.1.S1_at   | MmugDNA.5797.1 | 7.34  | 7.35  | 0.33 | 0.02 | -1    | 0.48848  | 0.419848 | 0.726931 | 0.643733 |
| MmugDNA.5798.1.S1_at   | MmugDNA.5798.1 | 4.69  | 4.71  | 0.29 | 0.08 | -1.01 | 0.329869 | 0.427654 | 0.611952 | 0.649406 |
| MmugDNA.5799.1.S1_at   | MmugDNA.5799.1 | 5.91  | 5.97  | 0.02 | 0.18 | -1.04 | 0.184562 | 0.215948 | 0.48058  | 0.489582 |
| MmugDNA.58.1.S1_at     | MmugDNA.58.1   | 5.01  | 4.87  | 0.08 | 0.1  | 1.1   | 0.060754 | 0.05377  | 0.303425 | 0.27744  |
| MmugDNA.580.1.S1_at    | MmugDNA.580.1  | 6.16  | 5.55  | 0.77 | 0.75 | 1.53  | 0.93273  | 0.947381 | 0.971802 | 0.970137 |
| MmugDNA.5800.1.S1_at   | MmugDNA.5800.1 | 5.86  | 5.85  | 0.1  | 0.2  | 1.01  | 0.487809 | 0.660135 | 0.726484 | 0.801083 |
| MmugDNA.5801.1.S1_at   | MmugDNA.5801.1 | 3.64  | 3.71  | 0.12 | 0.16 | -1.05 | 0.391724 | 0.415812 | 0.658752 | 0.641133 |
| MmugDNA.5802.1.S1_at   | MmugDNA.5802.1 | 3.01  | 3.02  | 0.09 | 0.03 | -1.01 | 0.340939 | 0.610725 | 0.620931 | 0.768842 |
| MmugDNA.5804.1.S1_at   | MmugDNA.5804.1 | 4.58  | 5.27  | 0.11 | 0.58 | -1.61 | 0.353461 | 0.279497 | 0.630635 | 0.543055 |
| MmugDNA.5804.1.S1_s_at | MmugDNA.5804.1 | 9.91  | 9.08  | 0.15 | 0.13 | 1.78  | 0.001475 | 0.005889 | 0.080516 | 0.104899 |
| MmugDNA.5805.1.S1_at   | MmugDNA.5805.1 | 6.23  | 6.43  | 0.08 | 0.14 | -1.15 | 0.32395  | 0.144127 | 0.607685 | 0.418024 |
| MmugDNA.5806.1.S1_at   | MmugDNA.5806.1 | 4.56  | 4.8   | 0.45 | 0.19 | -1.18 | 0.845615 | 0.936249 | 0.932611 | 0.964059 |



|                         |                 |       |       |      |      |       |          |          |          |          |
|-------------------------|-----------------|-------|-------|------|------|-------|----------|----------|----------|----------|
| MmugDNA.5808.1.S1_at    | MmugDNA.5808.1  | 6.01  | 5.98  | 0.33 | 0.38 | 1.02  | 0.810363 | 0.972189 | 0.915068 | 0.985008 |
| MmugDNA.581.1.S1_at     | MmugDNA.581.1   | 6.47  | 7.4   | 0.26 | 0.45 | -1.9  | 0.026916 | 0.426406 | 0.21704  | 0.648578 |
| MmugDNA.5810.1.S1_at    | MmugDNA.5810.1  | 4.47  | 4.42  | 0.4  | 0.04 | 1.04  | 0.705859 | 0.849342 | 0.860651 | 0.914489 |
| MmugDNA.5811.1.S1_at    | MmugDNA.5811.1  | 8.11  | 8.01  | 0.3  | 0.06 | 1.07  | 0.743637 | 0.184686 | 0.881384 | 0.460645 |
| MmugDNA.5811.1.S1_s_at  | MmugDNA.5811.1  | 10    | 9.74  | 0.21 | 0.09 | 1.2   | 0.365538 | 0.291371 | 0.64     | 0.551823 |
| MmugDNA.5813.1.S1_at    | MmugDNA.5813.1  | 4.86  | 4.53  | 0.21 | 0.06 | 1.25  | 0.165793 | 0.074318 | 0.458762 | 0.318046 |
| MmugDNA.5814.1.S1_at    | MmugDNA.5814.1  | 4.24  | 4.2   | 0.18 | 0.09 | 1.03  | 0.634349 | 0.702819 | 0.820718 | 0.827716 |
| MmugDNA.5815.1.S1_at    | MmugDNA.5815.1  | 3.72  | 3.89  | 0.06 | 0.17 | -1.13 | 0.404442 | 0.744438 | 0.668175 | 0.852018 |
| MmugDNA.27859.1.S1_s_at | MmugDNA.27859.1 | 3.56  | 3.5   | 0.03 | 0.12 | 1.04  | 0.308382 | 0.302758 | 0.595031 | 0.560307 |
| MmugDNA.5817.1.S1_at    | MmugDNA.5817.1  | 5.35  | 5.01  | 0.92 | 0.12 | 1.26  | 0.21424  | 0.182092 | 0.51193  | 0.45857  |
| MmugDNA.5818.1.S1_at    | MmugDNA.5818.1  | 3.04  | 3.28  | 0.14 | 0.09 | -1.18 | 0.158928 | 0.123544 | 0.450204 | 0.393629 |
| MmugDNA.5818.1.S1_s_at  | MmugDNA.5818.1  | 6.46  | 6.66  | 0.15 | 0.07 | -1.15 | 0.29065  | 0.399261 | 0.580105 | 0.629735 |
| MmugDNA.582.1.S1_at     | MmugDNA.582.1   | 9.21  | 8.83  | 0.32 | 0.05 | 1.29  | 0.248743 | 0.157382 | 0.544151 | 0.432859 |
| MmugDNA.5820.1.S1_at    | MmugDNA.5820.1  | 10.74 | 10.97 | 0.18 | 0.06 | -1.17 | 0.101014 | 0.010114 | 0.372328 | 0.131859 |
| MmugDNA.5821.1.S1_at    | MmugDNA.5821.1  | 2.85  | 2.83  | 0.2  | 0.05 | 1.01  | 0.787191 | 0.934201 | 0.902963 | 0.962662 |
| MmugDNA.5822.1.S1_at    | MmugDNA.5822.1  | 8.46  | 8.87  | 0.16 | 0.26 | -1.33 | 0.046955 | 0.067063 | 0.27447  | 0.304872 |
| MmugDNA.5823.1.S1_at    | MmugDNA.5823.1  | 4.32  | 4.4   | 0.19 | 0.01 | -1.06 | 0.76955  | 0.925403 | 0.894281 | 0.957803 |
| MmugDNA.5824.1.S1_at    | MmugDNA.5824.1  | 6.53  | 6.35  | 0.16 | 0.22 | 1.13  | 0.194426 | 0.161064 | 0.491056 | 0.437232 |
| MmugDNA.5826.1.S1_at    | MmugDNA.5826.1  | 7.27  | 7.31  | 0.27 | 0.14 | -1.02 | 0.938095 | 0.138064 | 0.973844 | 0.410919 |
| MmugDNA.5828.1.S1_at    | MmugDNA.5828.1  | 10.18 | 10.13 | 0.22 | 0.25 | 1.04  | 0.721435 | 0.127028 | 0.868762 | 0.397828 |
| MmugDNA.5829.1.S1_at    | MmugDNA.5829.1  | 5.41  | 5.21  | 0.21 | 0.04 | 1.15  | 0.462934 | 0.278854 | 0.709909 | 0.542599 |
| MmugDNA.583.1.S1_at     | MmugDNA.583.1   | 8.46  | 7.61  | 0.48 | 0.36 | 1.81  | 0.297458 | 0.469224 | 0.585862 | 0.678155 |
| MmugDNA.5831.1.S1_at    | MmugDNA.5831.1  | 2.95  | 2.93  | 0.04 | 0.03 | 1.02  | 0.366616 | 0.731427 | 0.640847 | 0.84431  |
| MmugDNA.5832.1.S1_at    | MmugDNA.5832.1  | 5.13  | 4.93  | 0.78 | 0.04 | 1.15  | 0.224686 | 0.280282 | 0.522708 | 0.543528 |
| MmugDNA.5834.1.S1_at    | MmugDNA.5834.1  | 4.43  | 4.42  | 0.21 | 0.03 | 1.01  | 0.290721 | 0.369554 | 0.58018  | 0.608927 |
| MmugDNA.5835.1.S1_at    | MmugDNA.5835.1  | 12.84 | 13.01 | 0.11 | 0.02 | -1.13 | 0.04061  | 0.388664 | 0.258038 | 0.622949 |
| MmugDNA.5836.1.S1_at    | MmugDNA.5836.1  | 10.35 | 8.37  | 0.87 | 0.22 | 3.94  | 0.020946 | 0.017118 | 0.198299 | 0.16577  |
| MmugDNA.5838.1.S1_at    | MmugDNA.5838.1  | 5.22  | 5.62  | 0.07 | 0.07 | -1.33 | 0.003652 | 0.014148 | 0.105789 | 0.15208  |
| MmugDNA.5839.1.S1_at    | MmugDNA.5839.1  | 6.87  | 6.98  | 0.1  | 0.08 | -1.09 | 0.460374 | 0.400968 | 0.708167 | 0.630658 |
| MmugDNA.5840.1.S1_at    | MmugDNA.5840.1  | 3.23  | 3.33  | 0.06 | 0.11 | -1.07 | 0.987337 | 0.294637 | 0.995376 | 0.554306 |
| MmugDNA.30580.1.S1_s_at | MmugDNA.30580.1 | 7.13  | 7.1   | 0.08 | 0.07 | 1.02  | 0.770721 | 0.169463 | 0.894865 | 0.446075 |
| MmugDNA.5846.1.S1_at    | MmugDNA.5846.1  | 10.7  | 10.42 | 0.05 | 0.12 | 1.22  | 0.031702 | 0.018474 | 0.231452 | 0.170946 |
| MmugDNA.5847.1.S1_at    | MmugDNA.5847.1  | 7.98  | 8.18  | 0.56 | 0.12 | -1.14 | 0.195523 | 0.39895  | 0.492277 | 0.629665 |
| MmugDNA.5848.1.S1_at    | MmugDNA.5848.1  | 6.02  | 5.89  | 0.13 | 0.12 | 1.09  | 0.155047 | 0.751315 | 0.445174 | 0.855408 |
| MmugDNA.5849.1.S1_at    | MmugDNA.5849.1  | 4.75  | 4.44  | 0.09 | 0.13 | 1.24  | 0.05754  | 0.093287 | 0.297199 | 0.349412 |
| MmugDNA.5850.1.S1_at    | MmugDNA.5850.1  | 4.58  | 4.89  | 0.24 | 0.18 | -1.24 | 0.410171 | 0.556455 | 0.6723   | 0.734507 |
| MmugDNA.5851.1.S1_at    | MmugDNA.5851.1  | 5.14  | 5.07  | 0    | 0.08 | 1.05  | 0.17569  | 0.018685 | 0.470151 | 0.171717 |
| MmugDNA.5851.1.S1_s_at  | MmugDNA.5851.1  | 4.51  | 4.5   | 0.15 | 0.05 | 1     | 0.714759 | 0.154012 | 0.865187 | 0.428788 |
| MmugDNA.5852.1.S1_at    | MmugDNA.5852.1  | 7.58  | 7.67  | 0.14 | 0.13 | -1.06 | 0.595169 | 0.145872 | 0.795096 | 0.419888 |
| MmugDNA.5853.1.S1_at    | MmugDNA.5853.1  | 2.68  | 2.63  | 0.11 | 0.08 | 1.03  | 0.508057 | 0.536822 | 0.740208 | 0.722119 |
| MmugDNA.5854.1.S1_at    | MmugDNA.5854.1  | 3.98  | 4     | 0.13 | 0.22 | -1.01 | 0.396559 | 0.538646 | 0.662582 | 0.723301 |
| MmugDNA.5855.1.S1_at    | MmugDNA.5855.1  | 11.41 | 11.6  | 0.21 | 0.01 | -1.14 | 0.307443 | 0.287542 | 0.594193 | 0.54881  |
| MmugDNA.5858.1.S1_at    | MmugDNA.5858.1  | 4.09  | 3.66  | 0.36 | 0.14 | 1.34  | 0.066281 | 0.07192  | 0.314934 | 0.314293 |

|                        |                |       |       |      |      |       |          |          |          |          |
|------------------------|----------------|-------|-------|------|------|-------|----------|----------|----------|----------|
| MmugDNA.5859.1.S1_at   | MmugDNA.5859.1 | 9.48  | 9.59  | 0.12 | 0.2  | -1.08 | 0.824693 | 0.528306 | 0.92211  | 0.716493 |
| MmugDNA.586.1.S1_at    | MmugDNA.586.1  | 4.72  | 4.68  | 0.52 | 0.19 | 1.03  | 0.334302 | 0.396319 | 0.615458 | 0.628097 |
| MmugDNA.5860.1.S1_at   | MmugDNA.5860.1 | 7.15  | 9.3   | 0.8  | 0.39 | -4.46 | 0.008137 | 0.032271 | 0.138956 | 0.222395 |
| MmugDNA.5861.1.S1_at   | MmugDNA.5861.1 | 7.73  | 7.67  | 0.14 | 0.12 | 1.04  | 0.535263 | 0.216638 | 0.758219 | 0.490285 |
| MmugDNA.5863.1.S1_at   | MmugDNA.5863.1 | 8.01  | 7.98  | 0.03 | 0.12 | 1.02  | 0.204953 | 0.135658 | 0.502778 | 0.407798 |
| MmugDNA.5864.1.S1_at   | MmugDNA.5864.1 | 5.51  | 5.38  | 0.3  | 0.22 | 1.09  | 0.576025 | 0.377111 | 0.783034 | 0.614795 |
| MmugDNA.5865.1.S1_at   | MmugDNA.5865.1 | 5.86  | 5.85  | 0.17 | 0.04 | 1.01  | 0.744053 | 0.587844 | 0.881384 | 0.754542 |
| MmugDNA.5866.1.S1_at   | MmugDNA.5866.1 | 5.13  | 6     | 0.27 | 0.37 | -1.82 | 0.062564 | 0.123424 | 0.306786 | 0.393441 |
| MmugDNA.5869.1.S1_s_at | MmugDNA.5869.1 | 10.18 | 10.27 | 0.05 | 0.01 | -1.07 | 0.084717 | 0.61445  | 0.348607 | 0.771275 |
| MmugDNA.587.1.S1_at    | MmugDNA.587.1  | 4.87  | 5.56  | 0.52 | 0.16 | -1.61 | 0.093098 | 0.210519 | 0.361736 | 0.484463 |
| MmugDNA.5870.1.S1_at   | MmugDNA.5870.1 | 4.2   | 4.08  | 0.19 | 0.12 | 1.09  | 0.663174 | 0.365871 | 0.837523 | 0.605774 |
| MmugDNA.5871.1.S1_at   | MmugDNA.5871.1 | 5.95  | 5.68  | 0.13 | 0.11 | 1.21  | 0.041179 | 0.074349 | 0.259407 | 0.318046 |
| MmugDNA.5874.1.S1_at   | MmugDNA.5874.1 | 8.49  | 8.48  | 0.35 | 0.25 | 1.01  | 0.575795 | 0.015667 | 0.78295  | 0.158598 |
| MmugDNA.5878.1.S1_at   | MmugDNA.5878.1 | 3.23  | 3.64  | 0.37 | 0.21 | -1.33 | 0.406469 | 0.747493 | 0.669756 | 0.853149 |
| MmugDNA.5882.1.S1_at   | MmugDNA.5882.1 | 3.39  | 3.34  | 0.08 | 0.06 | 1.04  | 0.15984  | 0.188514 | 0.451208 | 0.464458 |
| MmugDNA.5883.1.S1_at   | MmugDNA.5883.1 | 4.66  | 4.49  | 0.08 | 0.16 | 1.13  | 0.284265 | 0.125097 | 0.574388 | 0.395506 |
| MmugDNA.5884.1.S1_at   | MmugDNA.5884.1 | 3.57  | 3.4   | 0.09 | 0.12 | 1.12  | 0.279514 | 0.318574 | 0.570786 | 0.571258 |
| MmugDNA.5886.1.S1_at   | MmugDNA.5886.1 | 10.08 | 10.21 | 0.13 | 0.25 | -1.09 | 0.508421 | 0.023519 | 0.740391 | 0.192225 |
| MmugDNA.5887.1.S1_at   | MmugDNA.5887.1 | 4.56  | 4.28  | 0.34 | 0.07 | 1.21  | 0.235812 | 0.293475 | 0.533475 | 0.55344  |
| MmugDNA.5889.1.S1_at   | MmugDNA.5889.1 | 7.61  | 6.78  | 0.74 | 0.14 | 1.77  | 0.218696 | 0.121884 | 0.516351 | 0.391245 |
| MmugDNA.589.1.S1_at    | MmugDNA.589.1  | 5.33  | 5.39  | 0.17 | 0.09 | -1.04 | 0.418829 | 0.528243 | 0.678622 | 0.716462 |
| MmugDNA.5890.1.S1_at   | MmugDNA.5890.1 | 3.98  | 4.12  | 0.15 | 0.11 | -1.1  | 0.193466 | 0.145415 | 0.490072 | 0.419421 |
| MmugDNA.5891.1.S1_at   | MmugDNA.5891.1 | 5.99  | 5.97  | 0.28 | 0.15 | 1.01  | 0.337638 | 0.443363 | 0.618005 | 0.661168 |
| MmugDNA.5892.1.S1_at   | MmugDNA.5892.1 | 6.31  | 6.66  | 0.41 | 0.21 | -1.28 | 0.202769 | 0.325555 | 0.500462 | 0.575831 |
| MmugDNA.5893.1.S1_at   | MmugDNA.5893.1 | 4.3   | 4.29  | 0.01 | 0.07 | 1.01  | 0.579964 | 0.807467 | 0.785464 | 0.889121 |
| MmugDNA.5894.1.S1_at   | MmugDNA.5894.1 | 4.75  | 4.44  | 0.2  | 0.1  | 1.24  | 0.048152 | 0.100405 | 0.276908 | 0.359541 |
| MmugDNA.5895.1.S1_at   | MmugDNA.5895.1 | 6.21  | 5.46  | 0.44 | 0.74 | 1.69  | 0.302519 | 0.458675 | 0.590329 | 0.671276 |
| MmugDNA.5896.1.S1_at   | MmugDNA.5896.1 | 10.33 | 10.13 | 0.32 | 0.03 | 1.15  | 0.352714 | 0.460841 | 0.630029 | 0.672749 |
| MmugDNA.5897.1.S1_at   | MmugDNA.5897.1 | 4.57  | 4.28  | 0.26 | 0.19 | 1.22  | 0.227173 | 0.0422   | 0.525188 | 0.24989  |
| MmugDNA.5898.1.S1_at   | MmugDNA.5898.1 | 5.42  | 5.49  | 0.41 | 0.04 | -1.05 | 0.524938 | 0.765695 | 0.751591 | 0.863854 |
| MmugDNA.5899.1.S1_at   | MmugDNA.5899.1 | 8.34  | 8.98  | 0.18 | 0.23 | -1.56 | 0.030821 | 0.286219 | 0.228486 | 0.547725 |
| MmugDNA.5899.1.S1_s_at | MmugDNA.5899.1 | 9.86  | 10.4  | 0.15 | 0.13 | -1.46 | 0.01626  | 0.281587 | 0.180322 | 0.544655 |
| MmugDNA.59.1.S1_at     | MmugDNA.59.1   | 8.04  | 8.21  | 0.31 | 0.26 | -1.13 | 0.432745 | 0.003709 | 0.688405 | 0.0868   |
| MmugDNA.590.1.S1_at    | MmugDNA.590.1  | 6.56  | 6.33  | 0.26 | 0.3  | 1.17  | 0.132603 | 0.222637 | 0.415892 | 0.495617 |
| MmugDNA.5900.1.S1_s_at | MmugDNA.5900.1 | 7.88  | 8.08  | 0.29 | 0.07 | -1.15 | 0.331679 | 0.005599 | 0.613555 | 0.10339  |
| MmugDNA.5902.1.S1_at   | MmugDNA.5902.1 | 3.24  | 3.27  | 0.21 | 0    | -1.02 | 0.823124 | 0.847462 | 0.921375 | 0.913316 |
| MmugDNA.5903.1.S1_at   | MmugDNA.5903.1 | 10.31 | 9.74  | 0.16 | 0.13 | 1.48  | 0.010466 | 0.000141 | 0.152221 | 0.029307 |
| MmugDNA.5906.1.S1_at   | MmugDNA.5906.1 | 3.45  | 3.42  | 0.05 | 0.18 | 1.02  | 0.577947 | 0.55889  | 0.783846 | 0.735939 |
| MmugDNA.5907.1.S1_at   | MmugDNA.5907.1 | 3.62  | 3.46  | 0.04 | 0.04 | 1.12  | 0.00514  | 0.003008 | 0.116966 | 0.080074 |
| MmugDNA.5908.1.S1_at   | MmugDNA.5908.1 | 5.75  | 6.23  | 0.9  | 0.45 | -1.4  | 0.530969 | 0.483751 | 0.755455 | 0.688112 |
| MmugDNA.5909.1.S1_at   | MmugDNA.5909.1 | 5.05  | 5.19  | 0.11 | 0.05 | -1.11 | 0.057161 | 0.038809 | 0.296384 | 0.241916 |
| MmugDNA.591.1.S1_at    | MmugDNA.591.1  | 3.84  | 3.84  | 0.08 | 0.13 | 1     | 0.960011 | 0.364945 | 0.983565 | 0.60517  |
| MmugDNA.5910.1.S1_at   | MmugDNA.5910.1 | 6.66  | 6.66  | 0.1  | 0.02 | 1     | 0.795145 | 0.319131 | 0.907466 | 0.57167  |

|                        |                |       |       |      |      |       |          |          |          |          |
|------------------------|----------------|-------|-------|------|------|-------|----------|----------|----------|----------|
| MmugDNA.5911.1.S1_at   | MmugDNA.5911.1 | 5.95  | 6.13  | 0.1  | 0.12 | -1.13 | 0.20036  | 0.085299 | 0.497792 | 0.337139 |
| MmugDNA.5913.1.S1_at   | MmugDNA.5913.1 | 3.81  | 3.76  | 0.14 | 0.11 | 1.03  | 0.570324 | 0.719529 | 0.779298 | 0.83771  |
| MmugDNA.5914.1.S1_at   | MmugDNA.5914.1 | 8.14  | 7.56  | 0.14 | 0.25 | 1.5   | 0.011878 | 0.002736 | 0.159049 | 0.077112 |
| MmugDNA.5915.1.S1_at   | MmugDNA.5915.1 | 4.72  | 4.58  | 0.2  | 0.08 | 1.1   | 0.153966 | 0.233029 | 0.444262 | 0.50445  |
| MmugDNA.5916.1.S1_at   | MmugDNA.5916.1 | 3.07  | 3.22  | 0.19 | 0.16 | -1.11 | 0.126959 | 0.190436 | 0.408535 | 0.465906 |
| MmugDNA.5917.1.S1_at   | MmugDNA.5917.1 | 5.54  | 5.58  | 0.03 | 0    | -1.03 | 0.132674 | 0.786916 | 0.416027 | 0.876732 |
| MmugDNA.5918.1.S1_at   | MmugDNA.5918.1 | 5.69  | 6.02  | 1.12 | 0.36 | -1.26 | 0.814692 | 0.96049  | 0.917175 | 0.97752  |
| MmugDNA.5919.1.S1_at   | MmugDNA.5919.1 | 7.07  | 7.86  | 0.57 | 0.2  | -1.73 | 0.04766  | 0.0098   | 0.275754 | 0.130166 |
| MmugDNA.592.1.S1_at    | MmugDNA.592.1  | 8.95  | 8.47  | 0.18 | 0.31 | 1.39  | 0.193995 | 0.054417 | 0.490595 | 0.278812 |
| MmugDNA.5920.1.S1_at   | MmugDNA.5920.1 | 8.42  | 7.2   | 0.84 | 0.45 | 2.33  | 0.075227 | 0.083527 | 0.332432 | 0.334076 |
| MmugDNA.5921.1.S1_s_at | MmugDNA.5921.1 | 5.76  | 5.72  | 0.14 | 0.06 | 1.02  | 0.271112 | 0.480843 | 0.563072 | 0.686    |
| MmugDNA.5922.1.S1_at   | MmugDNA.5922.1 | 5.47  | 4.56  | 0.7  | 0.21 | 1.88  | 0.160967 | 0.185666 | 0.452489 | 0.46163  |
| MmugDNA.5923.1.S1_at   | MmugDNA.5923.1 | 4.44  | 4.54  | 0.06 | 0.06 | -1.07 | 0.092137 | 0.169042 | 0.360155 | 0.445593 |
| MmugDNA.5923.1.S1_s_at | MmugDNA.5923.1 | 7.55  | 7.71  | 0.17 | 0.07 | -1.12 | 0.35718  | 0.264853 | 0.633338 | 0.530861 |
| MmugDNA.5924.1.S1_at   | MmugDNA.5924.1 | 2.99  | 3.08  | 0.21 | 0.09 | -1.06 | 0.449325 | 0.661103 | 0.700634 | 0.801683 |
| MmugDNA.5925.1.S1_at   | MmugDNA.5925.1 | 8.77  | 8.05  | 0.22 | 0.08 | 1.65  | 0.007082 | 0.002821 | 0.131697 | 0.078275 |
| MmugDNA.5925.1.S1_s_at | MmugDNA.5925.1 | 9.56  | 8.95  | 0.4  | 0.01 | 1.53  | 0.060022 | 0.042231 | 0.302259 | 0.249977 |
| MmugDNA.5926.1.S1_at   | MmugDNA.5926.1 | 5.83  | 6.27  | 0.31 | 0.45 | -1.35 | 0.118928 | 0.444554 | 0.396589 | 0.662072 |
| MmugDNA.5927.1.S1_at   | MmugDNA.5927.1 | 9.06  | 9.26  | 0.11 | 0.01 | -1.15 | 0.03613  | 0.378694 | 0.245065 | 0.615706 |
| MmugDNA.5928.1.S1_at   | MmugDNA.5928.1 | 11.11 | 11.34 | 0.13 | 0.11 | -1.18 | 0.182954 | 0.171248 | 0.478783 | 0.447792 |
| MmugDNA.593.1.S1_at    | MmugDNA.593.1  | 3.41  | 3.51  | 0.11 | 0.14 | -1.07 | 0.739599 | 0.545928 | 0.879307 | 0.727697 |
| MmugDNA.5931.1.S1_at   | MmugDNA.5931.1 | 9.06  | 8.26  | 0.31 | 0.08 | 1.74  | 0.035619 | 0.019217 | 0.243595 | 0.174465 |
| MmugDNA.5932.1.S1_at   | MmugDNA.5932.1 | 4.91  | 4.47  | 0.38 | 0.19 | 1.35  | 0.129438 | 0.166852 | 0.41173  | 0.443311 |
| MmugDNA.5934.1.S1_at   | MmugDNA.5934.1 | 11.21 | 11.57 | 0.16 | 0.06 | -1.28 | 0.057726 | 0.035373 | 0.297463 | 0.232358 |
| MmugDNA.5935.1.S1_at   | MmugDNA.5935.1 | 10.2  | 10.15 | 0.12 | 0.07 | 1.03  | 0.869139 | 0.592047 | 0.943687 | 0.757449 |
| MmugDNA.5937.1.S1_at   | MmugDNA.5937.1 | 5.16  | 4.9   | 0.14 | 0.03 | 1.2   | 0.076576 | 0.40357  | 0.334836 | 0.632215 |
| MmugDNA.5938.1.S1_at   | MmugDNA.5938.1 | 6.7   | 5.98  | 0.53 | 0.18 | 1.64  | 0.134941 | 0.264233 | 0.418904 | 0.530301 |
| MmugDNA.594.1.S1_at    | MmugDNA.594.1  | 7.71  | 8.13  | 0.3  | 0.17 | -1.34 | 0.252264 | 0.115154 | 0.546837 | 0.382052 |
| MmugDNA.5941.1.S1_at   | MmugDNA.5941.1 | 6.52  | 6.51  | 0.11 | 0.01 | 1.01  | 0.956449 | 0.972034 | 0.982106 | 0.984889 |
| MmugDNA.5942.1.S1_at   | MmugDNA.5942.1 | 4     | 3.81  | 0.29 | 0.3  | 1.15  | 0.929241 | 0.93744  | 0.969955 | 0.964687 |
| MmugDNA.5944.1.S1_at   | MmugDNA.5944.1 | 6.57  | 7.06  | 0.33 | 0.54 | -1.4  | 0.268719 | 0.496157 | 0.561274 | 0.695877 |
| MmugDNA.5945.1.S1_at   | MmugDNA.5945.1 | 10.34 | 10.31 | 0.1  | 0.03 | 1.02  | 0.42915  | 0.002661 | 0.685677 | 0.076254 |
| MmugDNA.5946.1.S1_at   | MmugDNA.5946.1 | 5.27  | 5.41  | 0.84 | 0.06 | -1.1  | 0.648283 | 0.538204 | 0.829161 | 0.72298  |
| MmugDNA.5947.1.S1_at   | MmugDNA.5947.1 | 7.85  | 7.84  | 0.48 | 0.2  | 1     | 0.740349 | 0.25089  | 0.879558 | 0.51958  |
| MmugDNA.5948.1.S1_at   | MmugDNA.5948.1 | 4.32  | 4.31  | 0.21 | 0.03 | 1.01  | 0.650146 | 0.323267 | 0.830213 | 0.574408 |
| MmugDNA.5949.1.S1_at   | MmugDNA.5949.1 | 11.51 | 11.68 | 0.06 | 0.32 | -1.13 | 0.337708 | 0.489499 | 0.61806  | 0.691824 |
| MmugDNA.595.1.S1_at    | MmugDNA.595.1  | 3.27  | 3.21  | 0.15 | 0.12 | 1.04  | 0.584452 | 0.720587 | 0.788586 | 0.838346 |
| MmugDNA.5951.1.S1_at   | MmugDNA.5951.1 | 3.53  | 3.68  | 0.28 | 0.25 | -1.11 | 0.573611 | 0.331751 | 0.781203 | 0.580344 |
| MmugDNA.5952.1.S1_at   | MmugDNA.5952.1 | 5.59  | 5.51  | 0.1  | 0.03 | 1.06  | 0.155106 | 0.638822 | 0.445286 | 0.78789  |
| MmugDNA.5953.1.S1_at   | MmugDNA.5953.1 | 3.11  | 3.04  | 0.15 | 0.12 | 1.05  | 0.853554 | 0.916161 | 0.936335 | 0.953065 |
| MmugDNA.5955.1.S1_at   | MmugDNA.5955.1 | 5.8   | 5.77  | 0.31 | 0.11 | 1.02  | 0.517544 | 0.441505 | 0.746748 | 0.659675 |
| MmugDNA.5956.1.S1_at   | MmugDNA.5956.1 | 2.88  | 2.94  | 0.07 | 0.05 | -1.04 | 0.254826 | 0.357922 | 0.549381 | 0.599532 |
| MmugDNA.5957.1.S1_at   | MmugDNA.5957.1 | 4.04  | 4.33  | 0.05 | 0.32 | -1.22 | 0.152143 | 0.086864 | 0.441677 | 0.339651 |

|                        |                |       |       |      |      |       |          |          |          |          |
|------------------------|----------------|-------|-------|------|------|-------|----------|----------|----------|----------|
| MmugDNA.5958.1.S1_at   | MmugDNA.5958.1 | 5.45  | 5.35  | 0.24 | 0.19 | 1.07  | 0.202671 | 0.242134 | 0.500389 | 0.512652 |
| MmugDNA.5959.1.S1_at   | MmugDNA.5959.1 | 4.85  | 4.79  | 0.09 | 0.19 | 1.05  | 0.7942   | 0.849596 | 0.907055 | 0.914595 |
| MmugDNA.596.1.S1_at    | MmugDNA.596.1  | 5.73  | 5.69  | 0.04 | 0.03 | 1.03  | 0.353608 | 0.106108 | 0.630812 | 0.368498 |
| MmugDNA.5960.1.S1_at   | MmugDNA.5960.1 | 8.83  | 8.17  | 0.3  | 0.35 | 1.58  | 0.050373 | 0.200292 | 0.282317 | 0.474689 |
| MmugDNA.5961.1.S1_at   | MmugDNA.5961.1 | 3.94  | 3.9   | 0.15 | 0.2  | 1.03  | 0.655042 | 0.604778 | 0.833063 | 0.764797 |
| MmugDNA.5962.1.S1_at   | MmugDNA.5962.1 | 3.55  | 3.41  | 0.05 | 0.1  | 1.1   | 0.057717 | 0.216825 | 0.297463 | 0.490393 |
| MmugDNA.5964.1.S1_at   | MmugDNA.5964.1 | 7.6   | 7.48  | 0.73 | 0.2  | 1.08  | 0.417555 | 0.492414 | 0.677694 | 0.693534 |
| MmugDNA.5965.1.S1_at   | MmugDNA.5965.1 | 9.23  | 8.4   | 0.09 | 0.28 | 1.78  | 0.009593 | 0.013338 | 0.14818  | 0.148042 |
| MmugDNA.5966.1.S1_at   | MmugDNA.5966.1 | 4.14  | 4.18  | 0.11 | 0.09 | -1.03 | 0.566278 | 0.329208 | 0.777222 | 0.578615 |
| MmugDNA.5967.1.S1_at   | MmugDNA.5967.1 | 9.15  | 8.64  | 0.1  | 0.19 | 1.42  | 0.042132 | 0.012555 | 0.262198 | 0.144501 |
| MmugDNA.5969.1.S1_at   | MmugDNA.5969.1 | 11.86 | 11.65 | 0.21 | 0.05 | 1.16  | 0.203303 | 0.28912  | 0.501192 | 0.55027  |
| MmugDNA.597.1.S1_at    | MmugDNA.597.1  | 4.51  | 4.1   | 0.2  | 0.23 | 1.33  | 0.06457  | 0.052178 | 0.310686 | 0.274032 |
| MmugDNA.5970.1.S1_at   | MmugDNA.5970.1 | 7.16  | 7.79  | 0.93 | 0.02 | -1.55 | 0.84012  | 0.753545 | 0.929875 | 0.856527 |
| MmugDNA.5972.1.S1_at   | MmugDNA.5972.1 | 9.11  | 9.54  | 0.32 | 0.14 | -1.35 | 0.03384  | 0.000398 | 0.238306 | 0.037471 |
| MmugDNA.5973.1.S1_at   | MmugDNA.5973.1 | 12.73 | 13.11 | 0.19 | 0.06 | -1.3  | 0.01704  | 0.001214 | 0.183882 | 0.054455 |
| MmugDNA.5974.1.S1_at   | MmugDNA.5974.1 | 5.82  | 5.82  | 0    | 0.09 | -1    | 0.349518 | 0.692471 | 0.627316 | 0.821053 |
| MmugDNA.5975.1.S1_at   | MmugDNA.5975.1 | 4.25  | 4.34  | 0.25 | 0.08 | -1.06 | 0.772564 | 0.87937  | 0.895806 | 0.931144 |
| MmugDNA.5977.1.S1_at   | MmugDNA.5977.1 | 3.34  | 3.58  | 1.02 | 0.21 | -1.18 | 0.634118 | 0.80753  | 0.820636 | 0.889173 |
| MmugDNA.5978.1.S1_at   | MmugDNA.5978.1 | 3.51  | 3.57  | 0.25 | 0.23 | -1.04 | 0.79074  | 0.810783 | 0.904945 | 0.890845 |
| MmugDNA.5979.1.S1_at   | MmugDNA.5979.1 | 6.26  | 6.15  | 0.24 | 0.11 | 1.08  | 0.838593 | 0.112706 | 0.929155 | 0.378322 |
| MmugDNA.598.1.S1_at    | MmugDNA.598.1  | 7.88  | 8.15  | 0.22 | 0.26 | -1.2  | 0.567339 | 0.314239 | 0.77771  | 0.568211 |
| MmugDNA.5980.1.S1_at   | MmugDNA.5980.1 | 5.43  | 5.45  | 0.16 | 0.27 | -1.01 | 0.599943 | 0.765369 | 0.798469 | 0.863627 |
| MmugDNA.5981.1.S1_at   | MmugDNA.5981.1 | 3.88  | 3.69  | 0.78 | 0.12 | 1.14  | 0.288082 | 0.232927 | 0.577837 | 0.50445  |
| MmugDNA.5982.1.S1_at   | MmugDNA.5982.1 | 6.59  | 6.52  | 0.18 | 0.11 | 1.05  | 0.18882  | 0.396822 | 0.485415 | 0.628452 |
| MmugDNA.5983.1.S1_at   | MmugDNA.5983.1 | 3.65  | 3.84  | 0.17 | 0    | -1.14 | 0.408635 | 0.114455 | 0.671385 | 0.381021 |
| MmugDNA.5984.1.S1_at   | MmugDNA.5984.1 | 3.78  | 3.77  | 0.13 | 0.05 | 1.01  | 0.886744 | 0.984562 | 0.951782 | 0.991313 |
| MmugDNA.5985.1.S1_at   | MmugDNA.5985.1 | 9.99  | 9.04  | 0.28 | 0.05 | 1.92  | 0.004778 | 0.001763 | 0.115098 | 0.063202 |
| MmugDNA.5987.1.S1_at   | MmugDNA.5987.1 | 4.76  | 4.79  | 0.26 | 0.1  | -1.02 | 0.798126 | 0.032485 | 0.908871 | 0.223254 |
| MmugDNA.5989.1.S1_at   | MmugDNA.5989.1 | 3.6   | 3.65  | 0.15 | 0.06 | -1.04 | 0.41965  | 0.42076  | 0.678954 | 0.64442  |
| MmugDNA.599.1.S1_at    | MmugDNA.599.1  | 10.96 | 10.67 | 0.22 | 0.17 | 1.23  | 0.145157 | 0.356678 | 0.432492 | 0.598516 |
| MmugDNA.5991.1.S1_at   | MmugDNA.5991.1 | 3.61  | 3.62  | 0.04 | 0.06 | -1    | 0.277316 | 0.379846 | 0.568868 | 0.616611 |
| MmugDNA.5993.1.S1_at   | MmugDNA.5993.1 | 3.71  | 3.97  | 0.05 | 0.12 | -1.19 | 0.012972 | 0.218794 | 0.164649 | 0.492507 |
| MmugDNA.5994.1.S1_at   | MmugDNA.5994.1 | 5.81  | 6.02  | 0.32 | 0.37 | -1.16 | 0.671486 | 0.668182 | 0.842415 | 0.805827 |
| MmugDNA.5995.1.S1_at   | MmugDNA.5995.1 | 9.32  | 8.94  | 0.22 | 0.02 | 1.3   | 0.078319 | 0.05381  | 0.337998 | 0.2775   |
| MmugDNA.5995.1.S1_s_at | MmugDNA.5995.1 | 9.88  | 9.79  | 0.3  | 0.13 | 1.07  | 0.486455 | 0.063804 | 0.725664 | 0.29906  |
| MmugDNA.5998.1.S1_at   | MmugDNA.5998.1 | 4.55  | 4.24  | 0.44 | 0.07 | 1.25  | 0.12286  | 0.157161 | 0.401843 | 0.432616 |
| MmugDNA.5999.1.S1_at   | MmugDNA.5999.1 | 5.48  | 4.75  | 0.35 | 0.22 | 1.65  | 0.046128 | 0.035877 | 0.272525 | 0.233893 |
| MmugDNA.60.1.S1_at     | MmugDNA.60.1   | 9.62  | 9.73  | 0.19 | 0.06 | -1.08 | 0.942776 | 0.109259 | 0.975902 | 0.37308  |
| MmugDNA.600.1.S1_at    | MmugDNA.600.1  | 7.27  | 7.14  | 0.03 | 0.02 | 1.1   | 0.001773 | 0.258804 | 0.085481 | 0.525954 |
| MmugDNA.6000.1.S1_at   | MmugDNA.6000.1 | 7.11  | 7.06  | 0.46 | 0.27 | 1.04  | 0.204115 | 0.422688 | 0.501698 | 0.645876 |
| MmugDNA.6001.1.S1_at   | MmugDNA.6001.1 | 7.19  | 8     | 0.99 | 0.35 | -1.76 | 0.941952 | 0.195496 | 0.975589 | 0.470351 |
| MmugDNA.6003.1.S1_at   | MmugDNA.6003.1 | 8.09  | 7.01  | 0.68 | 0.5  | 2.12  | 0.164162 | 0.150092 | 0.45709  | 0.424698 |
| MmugDNA.6004.1.S1_at   | MmugDNA.6004.1 | 4.4   | 4.12  | 0.1  | 0.16 | 1.21  | 0.161256 | 0.184221 | 0.452791 | 0.460382 |

|                        |                |       |       |      |      |       |          |          |          |          |
|------------------------|----------------|-------|-------|------|------|-------|----------|----------|----------|----------|
| MmugDNA.6005.1.S1_at   | MmugDNA.6005.1 | 4.76  | 4.88  | 0.5  | 0.19 | -1.09 | 0.430273 | 0.593928 | 0.6866   | 0.758442 |
| MmugDNA.6006.1.S1_at   | MmugDNA.6006.1 | 3.38  | 3.39  | 0.04 | 0.11 | -1    | 0.301346 | 0.69392  | 0.589283 | 0.821989 |
| MmugDNA.6008.1.S1_at   | MmugDNA.6008.1 | 4.57  | 4.56  | 0.45 | 0.19 | 1.01  | 0.796441 | 0.928886 | 0.908112 | 0.959449 |
| MmugDNA.6009.1.S1_at   | MmugDNA.6009.1 | 3.14  | 3.16  | 0.01 | 0.08 | -1.01 | 0.51922  | 0.291313 | 0.747956 | 0.551803 |
| MmugDNA.6011.1.S1_at   | MmugDNA.6011.1 | 9.17  | 8.7   | 0.33 | 0.11 | 1.38  | 0.092987 | 0.312175 | 0.361523 | 0.566915 |
| MmugDNA.6012.1.S1_at   | MmugDNA.6012.1 | 7.39  | 7.37  | 0.44 | 0.23 | 1.01  | 0.458964 | 0.121181 | 0.707304 | 0.390244 |
| MmugDNA.6013.1.S1_at   | MmugDNA.6013.1 | 10.62 | 10.13 | 0.14 | 0.11 | 1.4   | 0.005809 | 0.23608  | 0.122172 | 0.507179 |
| MmugDNA.6014.1.S1_at   | MmugDNA.6014.1 | 3.46  | 3.36  | 0.61 | 0.11 | 1.08  | 0.306811 | 0.429792 | 0.593617 | 0.651036 |
| MmugDNA.6016.1.S1_at   | MmugDNA.6016.1 | 3.31  | 3.35  | 0.11 | 0.06 | -1.02 | 0.838111 | 0.214073 | 0.929038 | 0.487645 |
| MmugDNA.6019.1.S1_at   | MmugDNA.6019.1 | 5.61  | 5.3   | 0.5  | 0.18 | 1.25  | 0.39744  | 0.713865 | 0.663022 | 0.833976 |
| MmugDNA.6020.1.S1_at   | MmugDNA.6020.1 | 9.39  | 9.08  | 0.15 | 0.12 | 1.24  | 0.048896 | 0.43741  | 0.278728 | 0.656699 |
| MmugDNA.6022.1.S1_at   | MmugDNA.6022.1 | 10.95 | 11.19 | 0.19 | 0.1  | -1.18 | 0.154739 | 0.030124 | 0.444943 | 0.215406 |
| MmugDNA.6023.1.S1_at   | MmugDNA.6023.1 | 6.77  | 6.69  | 0.17 | 0.03 | 1.06  | 0.893013 | 0.129308 | 0.954376 | 0.400726 |
| MmugDNA.6024.1.S1_at   | MmugDNA.6024.1 | 5.03  | 4.65  | 0.25 | 0.11 | 1.31  | 0.197193 | 0.23529  | 0.494323 | 0.506336 |
| MmugDNA.6025.1.S1_s_at | MmugDNA.6025.1 | 8.07  | 8.53  | 0.25 | 0.15 | -1.38 | 0.077187 | 0.116136 | 0.335786 | 0.383482 |
| MmugDNA.6026.1.S1_at   | MmugDNA.6026.1 | 8.23  | 9.07  | 0.51 | 0.12 | -1.79 | 0.042138 | 0.03742  | 0.262198 | 0.237777 |
| MmugDNA.6027.1.S1_at   | MmugDNA.6027.1 | 5.77  | 5.82  | 0.4  | 0.07 | -1.03 | 0.6114   | 0.693513 | 0.806248 | 0.82172  |
| MmugDNA.6028.1.S1_at   | MmugDNA.6028.1 | 4.21  | 4.21  | 0.06 | 0.17 | 1     | 0.292576 | 0.224629 | 0.581743 | 0.497613 |
| MmugDNA.6029.1.S1_at   | MmugDNA.6029.1 | 4.95  | 4.94  | 0.09 | 0.06 | 1     | 0.675901 | 0.642968 | 0.845275 | 0.79055  |
| MmugDNA.6030.1.S1_at   | MmugDNA.6030.1 | 6.73  | 6.39  | 0.21 | 0.08 | 1.26  | 0.058888 | 0.017733 | 0.299798 | 0.168367 |
| MmugDNA.6031.1.S1_at   | MmugDNA.6031.1 | 3.48  | 3.46  | 0.33 | 0.08 | 1.02  | 0.699658 | 0.754508 | 0.857361 | 0.857221 |
| MmugDNA.6033.1.S1_at   | MmugDNA.6033.1 | 3.91  | 5.28  | 0.95 | 0.55 | -2.58 | 0.451466 | 0.371254 | 0.702336 | 0.610135 |
| MmugDNA.6034.1.S1_at   | MmugDNA.6034.1 | 4.4   | 4.41  | 0.33 | 0.06 | -1    | 0.921382 | 0.526702 | 0.966381 | 0.715627 |
| MmugDNA.6035.1.S1_at   | MmugDNA.6035.1 | 3.29  | 3.29  | 0.13 | 0.07 | -1    | 0.838948 | 0.515002 | 0.929322 | 0.708004 |
| MmugDNA.6037.1.S1_at   | MmugDNA.6037.1 | 11.28 | 11.57 | 0.21 | 0.15 | -1.22 | 0.356669 | 0.31562  | 0.632981 | 0.569053 |
| MmugDNA.6038.1.S1_at   | MmugDNA.6038.1 | 2.81  | 3.02  | 0.16 | 0.09 | -1.15 | 0.390495 | 0.370132 | 0.658108 | 0.609369 |
| MmugDNA.6039.1.S1_at   | MmugDNA.6039.1 | 10.14 | 9.99  | 0.22 | 0.06 | 1.11  | 0.971123 | 0.003507 | 0.988523 | 0.08503  |
| MmugDNA.604.1.S1_at    | MmugDNA.604.1  | 12.88 | 12.79 | 0.03 | 0.06 | 1.06  | 0.113347 | 0.042609 | 0.390161 | 0.251035 |
| MmugDNA.6040.1.S1_at   | MmugDNA.6040.1 | 7.4   | 6.95  | 0.14 | 0.11 | 1.37  | 0.006227 | 0.111822 | 0.125175 | 0.376856 |
| MmugDNA.6040.1.S1_s_at | MmugDNA.6040.1 | 8.23  | 7.86  | 0.12 | 0.24 | 1.29  | 0.053479 | 0.142103 | 0.28856  | 0.415685 |
| MmugDNA.6041.1.S1_at   | MmugDNA.6041.1 | 2.96  | 2.95  | 0.19 | 0.02 | 1.01  | 0.849347 | 0.859761 | 0.93439  | 0.920085 |
| MmugDNA.6043.1.S1_at   | MmugDNA.6043.1 | 3.22  | 3.2   | 0.16 | 0.07 | 1.01  | 0.533147 | 0.378525 | 0.756823 | 0.615564 |
| MmugDNA.6044.1.S1_at   | MmugDNA.6044.1 | 8.33  | 8.14  | 0.05 | 0.08 | 1.14  | 0.056802 | 0.274963 | 0.295745 | 0.539402 |
| MmugDNA.6045.1.S1_at   | MmugDNA.6045.1 | 4.03  | 4     | 0.25 | 0.07 | 1.02  | 0.373095 | 0.513231 | 0.645118 | 0.706851 |
| MmugDNA.6046.1.S1_at   | MmugDNA.6046.1 | 5.67  | 5.55  | 0.27 | 0.05 | 1.08  | 0.416458 | 0.553226 | 0.676959 | 0.73239  |
| MmugDNA.6047.1.S1_at   | MmugDNA.6047.1 | 11.01 | 10.78 | 0.26 | 0.05 | 1.17  | 0.217596 | 0.637422 | 0.515458 | 0.786916 |
| MmugDNA.6049.1.S1_at   | MmugDNA.6049.1 | 6.75  | 6.75  | 0.02 | 0.18 | -1    | 0.357323 | 0.631514 | 0.633494 | 0.782845 |
| MmugDNA.605.1.S1_at    | MmugDNA.605.1  | 6.64  | 5.84  | 0.47 | 0.21 | 1.75  | 0.098297 | 0.051085 | 0.368888 | 0.271309 |
| MmugDNA.6050.1.S1_at   | MmugDNA.6050.1 | 4.72  | 4.73  | 0.17 | 0.04 | -1.01 | 0.810783 | 0.288192 | 0.91525  | 0.549454 |
| MmugDNA.6052.1.S1_at   | MmugDNA.6052.1 | 3.71  | 3.73  | 0.08 | 0.1  | -1.01 | 0.631594 | 0.270116 | 0.819136 | 0.535401 |
| MmugDNA.6053.1.S1_at   | MmugDNA.6053.1 | 2.71  | 2.66  | 0.1  | 0.04 | 1.03  | 0.119447 | 0.127968 | 0.397328 | 0.398904 |
| MmugDNA.6054.1.S1_at   | MmugDNA.6054.1 | 4.7   | 4.88  | 0.03 | 0.13 | -1.13 | 0.27502  | 0.522114 | 0.566754 | 0.712887 |
| MmugDNA.6055.1.S1_at   | MmugDNA.6055.1 | 5.65  | 5.45  | 0.22 | 0.05 | 1.15  | 0.261645 | 0.291775 | 0.555806 | 0.552054 |

|                         |                 |       |       |      |      |       |          |          |          |          |
|-------------------------|-----------------|-------|-------|------|------|-------|----------|----------|----------|----------|
| MmugDNA.6056.1.S1_at    | MmugDNA.6056.1  | 6.11  | 6.06  | 0.07 | 0.13 | 1.04  | 0.551301 | 0.786816 | 0.768336 | 0.876684 |
| MmugDNA.6057.1.S1_at    | MmugDNA.6057.1  | 5.26  | 5.34  | 0.28 | 0.02 | -1.06 | 0.59941  | 0.837706 | 0.798121 | 0.907263 |
| MmugDNA.6058.1.S1_at    | MmugDNA.6058.1  | 5.42  | 6.35  | 0.97 | 0.31 | -1.91 | 0.271994 | 0.085109 | 0.563903 | 0.336936 |
| MmugDNA.6059.1.S1_at    | MmugDNA.6059.1  | 2.97  | 3.04  | 0.05 | 0.08 | -1.05 | 0.270702 | 0.331195 | 0.562838 | 0.579947 |
| MmugDNA.606.1.S1_at     | MmugDNA.606.1   | 10.5  | 11.5  | 0.09 | 0.07 | -2    | 0.000137 | 0.000043 | 0.051196 | 0.025273 |
| MmugDNA.6060.1.S1_at    | MmugDNA.6060.1  | 4.73  | 4.31  | 0.21 | 0.04 | 1.34  | 0.079506 | 0.099042 | 0.339662 | 0.357183 |
| MmugDNA.6061.1.S1_at    | MmugDNA.6061.1  | 6.39  | 6.33  | 0.11 | 0.08 | 1.04  | 0.534464 | 0.327471 | 0.757694 | 0.577308 |
| MmugDNA.6062.1.S1_at    | MmugDNA.6062.1  | 4.63  | 4.65  | 0.2  | 0.09 | -1.01 | 0.600497 | 0.860102 | 0.798905 | 0.920245 |
| MmugDNA.6064.1.S1_at    | MmugDNA.6064.1  | 4.42  | 4.3   | 0.27 | 0.14 | 1.09  | 0.17839  | 0.215852 | 0.473151 | 0.489536 |
| MmugDNA.6065.1.S1_at    | MmugDNA.6065.1  | 5.78  | 5.49  | 0.18 | 0.34 | 1.23  | 0.335919 | 0.259319 | 0.616626 | 0.526418 |
| MmugDNA.6066.1.S1_at    | MmugDNA.6066.1  | 5.56  | 5.42  | 0.18 | 0.13 | 1.11  | 0.767785 | 0.41718  | 0.893381 | 0.642062 |
| MmugDNA.6067.1.S1_at    | MmugDNA.6067.1  | 8.3   | 6.37  | 0.74 | 0.91 | 3.81  | 0.085259 | 0.022811 | 0.34932  | 0.189214 |
| MmugDNA.6068.1.S1_at    | MmugDNA.6068.1  | 10.32 | 10.23 | 0.17 | 0.12 | 1.06  | 0.625208 | 0.085148 | 0.815247 | 0.336978 |
| MmugDNA.6069.1.S1_at    | MmugDNA.6069.1  | 4.89  | 5.22  | 1.24 | 0.27 | -1.26 | 0.938145 | 0.467885 | 0.973844 | 0.677386 |
| MmugDNA.6071.1.S1_at    | MmugDNA.6071.1  | 2.91  | 2.82  | 0.39 | 0.02 | 1.07  | 0.638876 | 0.768529 | 0.823279 | 0.86561  |
| MmugDNA.6072.1.S1_at    | MmugDNA.6072.1  | 9.38  | 8.56  | 0.18 | 0.12 | 1.77  | 0.002954 | 0.052883 | 0.099482 | 0.275541 |
| MmugDNA.6075.1.S1_at    | MmugDNA.6075.1  | 4.31  | 5.27  | 0.78 | 0.32 | -1.95 | 0.533526 | 0.138289 | 0.757063 | 0.411198 |
| MmugDNA.6076.1.S1_at    | MmugDNA.6076.1  | 10.92 | 10.17 | 0.15 | 0.14 | 1.68  | 0.003039 | 0.403015 | 0.100201 | 0.631795 |
| MmugDNA.6077.1.S1_at    | MmugDNA.6077.1  | 4.59  | 5.68  | 0.69 | 0.36 | -2.12 | 0.124537 | 0.340783 | 0.404726 | 0.586977 |
| MmugDNA.6078.1.S1_at    | MmugDNA.6078.1  | 8.72  | 8.6   | 0.32 | 0.28 | 1.09  | 0.754341 | 0.047721 | 0.886774 | 0.263325 |
| MmugDNA.6079.1.S1_at    | MmugDNA.6079.1  | 4.72  | 4.73  | 0.17 | 0.29 | -1    | 0.971632 | 0.723536 | 0.98857  | 0.839934 |
| MmugDNA.608.1.S1_at     | MmugDNA.608.1   | 8.85  | 9.96  | 0.47 | 0.11 | -2.16 | 0.050836 | 0.000767 | 0.283144 | 0.04544  |
| MmugDNA.6081.1.S1_at    | MmugDNA.6081.1  | 4.89  | 4.93  | 0.21 | 0.26 | -1.02 | 0.289975 | 0.449793 | 0.579523 | 0.665276 |
| MmugDNA.6082.1.S1_at    | MmugDNA.6082.1  | 4.73  | 4.6   | 0.68 | 0.09 | 1.1   | 0.28433  | 0.398746 | 0.574388 | 0.62947  |
| MmugDNA.6084.1.S1_at    | MmugDNA.6084.1  | 3.39  | 3.27  | 0.13 | 0.23 | 1.08  | 0.283723 | 0.371304 | 0.574001 | 0.610165 |
| MmugDNA.6085.1.S1_at    | MmugDNA.6085.1  | 5.73  | 5.23  | 0.11 | 0.41 | 1.41  | 0.35707  | 0.51984  | 0.633283 | 0.71135  |
| MmugDNA.6086.1.S1_at    | MmugDNA.6086.1  | 4.99  | 4.35  | 0.39 | 0.22 | 1.56  | 0.120719 | 0.280911 | 0.399086 | 0.544089 |
| MmugDNA.36838.1.S1_at   | MmugDNA.36838.1 | 5.31  | 4.9   | 0.37 | 0.47 | 1.33  | 0.650138 | 0.698891 | 0.830213 | 0.825026 |
| MmugDNA.36838.1.S1_s_at | MmugDNA.36838.1 | 5.78  | 5.5   | 0.12 | 0.22 | 1.21  | 0.209617 | 0.238495 | 0.507107 | 0.5091   |
| MmugDNA.6087.1.S1_at    | MmugDNA.6087.1  | 4.6   | 4.18  | 0.24 | 0.16 | 1.34  | 0.080496 | 0.088521 | 0.341026 | 0.341947 |
| MmugDNA.6088.1.S1_at    | MmugDNA.6088.1  | 7.5   | 7.3   | 0.85 | 0.28 | 1.14  | 0.972752 | 0.645024 | 0.989086 | 0.791993 |
| MmugDNA.6089.1.S1_at    | MmugDNA.6089.1  | 6.88  | 6.27  | 0.37 | 0.11 | 1.53  | 0.022816 | 0.005671 | 0.204235 | 0.103959 |
| MmugDNA.609.1.S1_at     | MmugDNA.609.1   | 7.79  | 7.81  | 0.2  | 0.03 | -1.01 | 0.798296 | 0.091049 | 0.908936 | 0.345842 |
| MmugDNA.6090.1.S1_at    | MmugDNA.6090.1  | 11.66 | 11.89 | 0.08 | 0.04 | -1.17 | 0.011062 | 0.005446 | 0.154877 | 0.101885 |
| MmugDNA.9974.1.S1_s_at  | MmugDNA.9974.1  | 12.21 | 12.19 | 0.16 | 0.1  | 1.02  | 0.627603 | 0.040536 | 0.816917 | 0.246264 |
| MmugDNA.6093.1.S1_at    | MmugDNA.6093.1  | 10.03 | 10.03 | 0.11 | 0.12 | 1.01  | 0.385906 | 0.000873 | 0.654498 | 0.047471 |
| MmugDNA.6094.1.S1_at    | MmugDNA.6094.1  | 4.34  | 4.42  | 0.01 | 0.05 | -1.06 | 0.075678 | 0.053264 | 0.333384 | 0.276463 |
| MmugDNA.6096.1.S1_at    | MmugDNA.6096.1  | 5.41  | 5.54  | 0.83 | 0.36 | -1.1  | 0.566853 | 0.625691 | 0.777544 | 0.779265 |
| MmugDNA.6098.1.S1_at    | MmugDNA.6098.1  | 6.71  | 4.89  | 1.88 | 0.73 | 3.54  | 0.291171 | 0.358486 | 0.580531 | 0.600011 |
| MmugDNA.6099.1.S1_at    | MmugDNA.6099.1  | 4.18  | 4.18  | 0.22 | 0.31 | 1     | 0.23512  | 0.388537 | 0.533056 | 0.622897 |
| MmugDNA.61.1.S1_at      | MmugDNA.61.1    | 3.35  | 3.44  | 0.05 | 0.14 | -1.06 | 0.674064 | 0.566068 | 0.844337 | 0.740228 |
| MmugDNA.610.1.S1_at     | MmugDNA.610.1   | 3.59  | 3.52  | 0.12 | 0.06 | 1.05  | 0.436793 | 0.266326 | 0.691681 | 0.532099 |
| MmugDNA.6101.1.S1_at    | MmugDNA.6101.1  | 4.22  | 4.21  | 0.11 | 0.02 | 1.01  | 0.743902 | 0.905344 | 0.881384 | 0.946338 |

|                        |                |       |       |      |      |       |          |          |          |          |
|------------------------|----------------|-------|-------|------|------|-------|----------|----------|----------|----------|
| MmugDNA.6103.1.S1_at   | MmugDNA.6103.1 | 6.3   | 6.59  | 0.18 | 0.14 | -1.22 | 0.199193 | 0.181612 | 0.49658  | 0.458213 |
| MmugDNA.6105.1.S1_at   | MmugDNA.6105.1 | 7.25  | 7.3   | 0.2  | 0.04 | -1.03 | 0.690468 | 0.807954 | 0.852045 | 0.889436 |
| MmugDNA.6106.1.S1_at   | MmugDNA.6106.1 | 7.97  | 7.8   | 0.16 | 0.17 | 1.13  | 0.118558 | 0.684258 | 0.396229 | 0.815842 |
| MmugDNA.6109.1.S1_s_at | MmugDNA.6109.1 | 9.37  | 9.23  | 0.18 | 0.19 | 1.1   | 0.437097 | 0.109757 | 0.691954 | 0.373701 |
| MmugDNA.6111.1.S1_at   | MmugDNA.6111.1 | 7.21  | 6.73  | 0.6  | 0.11 | 1.39  | 0.288138 | 0.247329 | 0.577838 | 0.516535 |
| MmugDNA.6112.1.S1_at   | MmugDNA.6112.1 | 3.21  | 3.2   | 0.08 | 0.03 | 1.01  | 0.986584 | 0.561781 | 0.995228 | 0.737614 |
| MmugDNA.6113.1.S1_at   | MmugDNA.6113.1 | 6.59  | 6.59  | 0.04 | 0.07 | 1     | 0.230674 | 0.392535 | 0.529522 | 0.625813 |
| MmugDNA.6114.1.S1_s_at | MmugDNA.6114.1 | 10.75 | 10.44 | 0.16 | 0.16 | 1.24  | 0.034317 | 0.005873 | 0.239848 | 0.10486  |
| MmugDNA.6117.1.S1_at   | MmugDNA.6117.1 | 5.31  | 6.9   | 0.33 | 0.22 | -3.01 | 0.002086 | 0.172424 | 0.090208 | 0.448837 |
| MmugDNA.6118.1.S1_at   | MmugDNA.6118.1 | 4.03  | 4.08  | 0.1  | 0.17 | -1.04 | 0.650113 | 0.54784  | 0.830211 | 0.728723 |
| MmugDNA.6119.1.S1_at   | MmugDNA.6119.1 | 5.04  | 5.15  | 0.09 | 0.15 | -1.07 | 0.678697 | 0.141113 | 0.846793 | 0.414602 |
| MmugDNA.6121.1.S1_at   | MmugDNA.6121.1 | 3.15  | 3.07  | 0.16 | 0.05 | 1.05  | 0.348736 | 0.404229 | 0.626647 | 0.632691 |
| MmugDNA.6122.1.S1_at   | MmugDNA.6122.1 | 10.41 | 10.11 | 0.14 | 0.11 | 1.24  | 0.069605 | 0.118206 | 0.322267 | 0.386168 |
| MmugDNA.6123.1.S1_at   | MmugDNA.6123.1 | 7.26  | 7.16  | 0.98 | 0.29 | 1.07  | 0.535582 | 0.720183 | 0.758426 | 0.838202 |
| MmugDNA.6124.1.S1_at   | MmugDNA.6124.1 | 5.78  | 6.06  | 0.55 | 0.35 | -1.21 | 0.604527 | 0.003986 | 0.801764 | 0.089791 |
| MmugDNA.6126.1.S1_at   | MmugDNA.6126.1 | 3.42  | 3.53  | 0.21 | 0.13 | -1.08 | 0.170035 | 0.252511 | 0.463561 | 0.521079 |
| MmugDNA.6127.1.S1_s_at | MmugDNA.6127.1 | 9.67  | 9.8   | 0.16 | 0.04 | -1.1  | 0.719965 | 0.249598 | 0.867869 | 0.51865  |
| MmugDNA.6128.1.S1_at   | MmugDNA.6128.1 | 4.42  | 4.54  | 0.12 | 0.17 | -1.09 | 0.514611 | 0.320394 | 0.744545 | 0.572648 |
| MmugDNA.6129.1.S1_at   | MmugDNA.6129.1 | 4.13  | 4.34  | 0.04 | 0.33 | -1.16 | 0.858798 | 0.892103 | 0.938801 | 0.938526 |
| MmugDNA.6130.1.S1_at   | MmugDNA.6130.1 | 5.76  | 5.66  | 0.47 | 0.05 | 1.07  | 0.251233 | 0.398206 | 0.546022 | 0.629257 |
| MmugDNA.6131.1.S1_at   | MmugDNA.6131.1 | 9.12  | 8.97  | 0.18 | 0.1  | 1.11  | 0.295593 | 0.001278 | 0.584344 | 0.055351 |
| MmugDNA.6132.1.S1_at   | MmugDNA.6132.1 | 12.74 | 12.29 | 0.21 | 0.06 | 1.36  | 0.021157 | 0.019518 | 0.198948 | 0.175453 |
| MmugDNA.6134.1.S1_at   | MmugDNA.6134.1 | 4.3   | 4.52  | 0.11 | 0.09 | -1.17 | 0.23081  | 0.013163 | 0.529545 | 0.147338 |
| MmugDNA.6135.1.S1_at   | MmugDNA.6135.1 | 6.06  | 6.39  | 0.36 | 0.03 | -1.26 | 0.590241 | 0.733945 | 0.791777 | 0.845896 |
| MmugDNA.6136.1.S1_at   | MmugDNA.6136.1 | 4.63  | 4.85  | 0.09 | 0.17 | -1.16 | 0.044745 | 0.121294 | 0.268892 | 0.390351 |
| MmugDNA.6137.1.S1_at   | MmugDNA.6137.1 | 7.16  | 4.68  | 1.17 | 0.74 | 5.59  | 0.15587  | 0.302363 | 0.446229 | 0.560109 |
| MmugDNA.6139.1.S1_at   | MmugDNA.6139.1 | 7.2   | 7.32  | 0.24 | 0.04 | -1.08 | 0.424389 | 0.329737 | 0.682112 | 0.578874 |
| MmugDNA.614.1.S1_at    | MmugDNA.614.1  | 12.16 | 11.91 | 0.11 | 0.18 | 1.19  | 0.045433 | 0.152069 | 0.270778 | 0.42682  |
| MmugDNA.6140.1.S1_at   | MmugDNA.6140.1 | 7     | 6.52  | 0.23 | 0.1  | 1.4   | 0.050167 | 0.170053 | 0.281748 | 0.446789 |
| MmugDNA.6141.1.S1_at   | MmugDNA.6141.1 | 6.98  | 7.93  | 0.55 | 0.13 | -1.93 | 0.038353 | 0.01786  | 0.251853 | 0.168774 |
| MmugDNA.6142.1.S1_at   | MmugDNA.6142.1 | 9.63  | 12.69 | 1.68 | 0.24 | -8.36 | 0.115238 | 0.474274 | 0.392278 | 0.68135  |
| MmugDNA.6147.1.S1_at   | MmugDNA.6147.1 | 11.9  | 11.8  | 0.1  | 0.05 | 1.07  | 0.155592 | 0.01251  | 0.445915 | 0.144302 |
| MmugDNA.6147.1.S1_s_at | MmugDNA.6147.1 | 7.94  | 8.04  | 0.07 | 0.08 | -1.07 | 0.491828 | 0.00938  | 0.729417 | 0.127634 |
| MmugDNA.6149.1.S1_at   | MmugDNA.6149.1 | 6.09  | 6.08  | 0.52 | 0.29 | 1.01  | 0.351741 | 0.504198 | 0.629371 | 0.701451 |
| MmugDNA.6153.1.S1_at   | MmugDNA.6153.1 | 4.26  | 4.52  | 0.31 | 0.26 | -1.19 | 0.544367 | 0.069276 | 0.764016 | 0.309468 |
| MmugDNA.6154.1.S1_at   | MmugDNA.6154.1 | 6.31  | 6.24  | 0.05 | 0.04 | 1.05  | 0.426897 | 0.060874 | 0.684257 | 0.293488 |
| MmugDNA.6155.1.S1_at   | MmugDNA.6155.1 | 6.3   | 5.91  | 0.12 | 0.06 | 1.31  | 0.005964 | 0.184427 | 0.123893 | 0.460468 |
| MmugDNA.6156.1.S1_at   | MmugDNA.6156.1 | 2.81  | 2.72  | 0.53 | 0.06 | 1.06  | 0.359699 | 0.443754 | 0.635313 | 0.661433 |
| MmugDNA.6157.1.S1_at   | MmugDNA.6157.1 | 5.48  | 5.3   | 0.25 | 0.38 | 1.13  | 0.965942 | 0.326572 | 0.986221 | 0.576612 |
| MmugDNA.6158.1.S1_at   | MmugDNA.6158.1 | 6.42  | 6.54  | 0.19 | 0.05 | -1.09 | 0.294721 | 0.540646 | 0.58372  | 0.724475 |
| MmugDNA.6160.1.S1_at   | MmugDNA.6160.1 | 4.45  | 4.28  | 0.04 | 0.32 | 1.12  | 0.639653 | 0.381415 | 0.823651 | 0.617681 |
| MmugDNA.6162.1.S1_at   | MmugDNA.6162.1 | 5.53  | 5.43  | 0.07 | 0.18 | 1.07  | 0.721114 | 0.686289 | 0.868544 | 0.816911 |
| MmugDNA.6163.1.S1_at   | MmugDNA.6163.1 | 5.78  | 6.49  | 0.56 | 0.2  | -1.64 | 0.094162 | 0.153871 | 0.363191 | 0.428509 |

|                        |                |       |       |      |      |       |          |          |          |          |
|------------------------|----------------|-------|-------|------|------|-------|----------|----------|----------|----------|
| MmugDNA.6165.1.S1_at   | MmugDNA.6165.1 | 6.09  | 6.18  | 0.39 | 0.12 | -1.06 | 0.424729 | 0.538885 | 0.682288 | 0.723368 |
| MmugDNA.6166.1.S1_at   | MmugDNA.6166.1 | 9.73  | 9.7   | 0.11 | 0.19 | 1.02  | 0.371212 | 0.787371 | 0.643902 | 0.876986 |
| MmugDNA.6168.1.S1_at   | MmugDNA.6168.1 | 10.32 | 9.95  | 0.28 | 0.08 | 1.29  | 0.082018 | 0.190946 | 0.343272 | 0.46629  |
| MmugDNA.6169.1.S1_at   | MmugDNA.6169.1 | 4.52  | 4.47  | 1.35 | 0.32 | 1.03  | 0.396506 | 0.402755 | 0.662576 | 0.631555 |
| MmugDNA.6171.1.S1_at   | MmugDNA.6171.1 | 6.74  | 7.46  | 0.46 | 0.44 | -1.64 | 0.076322 | 0.006607 | 0.334426 | 0.110146 |
| MmugDNA.6172.1.S1_at   | MmugDNA.6172.1 | 4.97  | 4.95  | 0.9  | 0.39 | 1.02  | 0.43614  | 0.466534 | 0.691113 | 0.676374 |
| MmugDNA.6173.1.S1_at   | MmugDNA.6173.1 | 6.96  | 6.87  | 0.23 | 0.05 | 1.06  | 0.237639 | 0.5602   | 0.535064 | 0.736544 |
| MmugDNA.6174.1.S1_at   | MmugDNA.6174.1 | 12.04 | 12.15 | 0.1  | 0.09 | -1.08 | 0.346679 | 0.010747 | 0.625    | 0.135385 |
| MmugDNA.6175.1.S1_at   | MmugDNA.6175.1 | 6.65  | 5.93  | 0.4  | 0.53 | 1.65  | 0.099278 | 0.073551 | 0.370274 | 0.316874 |
| MmugDNA.6177.1.S1_at   | MmugDNA.6177.1 | 5.8   | 5.85  | 0.22 | 0.59 | -1.04 | 0.478324 | 0.457661 | 0.719904 | 0.670889 |
| MmugDNA.618.1.S1_at    | MmugDNA.618.1  | 4.72  | 5.09  | 0.39 | 0.19 | -1.29 | 0.373446 | 0.717522 | 0.645118 | 0.836463 |
| MmugDNA.6180.1.S1_at   | MmugDNA.6180.1 | 3.9   | 3.96  | 0.05 | 0.13 | -1.04 | 0.646706 | 0.796531 | 0.828301 | 0.882707 |
| MmugDNA.6181.1.S1_at   | MmugDNA.6181.1 | 8.55  | 9.05  | 0.46 | 0.09 | -1.41 | 0.294362 | 0.016813 | 0.583349 | 0.164291 |
| MmugDNA.6183.1.S1_at   | MmugDNA.6183.1 | 3.53  | 3.52  | 0.14 | 0.07 | 1.01  | 0.573497 | 0.674771 | 0.781149 | 0.810023 |
| MmugDNA.6184.1.S1_at   | MmugDNA.6184.1 | 3.35  | 3.22  | 0.73 | 0.17 | 1.1   | 0.266146 | 0.328575 | 0.558659 | 0.578148 |
| MmugDNA.6185.1.S1_at   | MmugDNA.6185.1 | 9.88  | 10.05 | 0.18 | 0.07 | -1.13 | 0.242783 | 0.10862  | 0.539559 | 0.372171 |
| MmugDNA.6186.1.S1_at   | MmugDNA.6186.1 | 4.7   | 4.74  | 0.33 | 0.17 | -1.03 | 0.835263 | 0.397604 | 0.927553 | 0.628973 |
| MmugDNA.6189.1.S1_at   | MmugDNA.6189.1 | 4.23  | 4.11  | 0.02 | 0.13 | 1.08  | 0.181738 | 0.077129 | 0.477254 | 0.322675 |
| MmugDNA.619.1.S1_at    | MmugDNA.619.1  | 5.25  | 5.12  | 0.27 | 0.45 | 1.09  | 0.690867 | 0.540262 | 0.852238 | 0.724221 |
| MmugDNA.6190.1.S1_at   | MmugDNA.6190.1 | 4     | 3.96  | 0.03 | 0.03 | 1.03  | 0.083426 | 0.112118 | 0.345905 | 0.377398 |
| MmugDNA.6191.1.S1_at   | MmugDNA.6191.1 | 6.17  | 6.15  | 0.16 | 0.06 | 1.01  | 0.623867 | 0.824882 | 0.8145   | 0.899427 |
| MmugDNA.6192.1.S1_at   | MmugDNA.6192.1 | 7.29  | 7.68  | 1.17 | 0.46 | -1.31 | 0.998934 | 0.990265 | 0.999637 | 0.99446  |
| MmugDNA.6193.1.S1_at   | MmugDNA.6193.1 | 3.48  | 3.72  | 1.1  | 0.17 | -1.18 | 0.600286 | 0.302101 | 0.798765 | 0.560071 |
| MmugDNA.6194.1.S1_s_at | MmugDNA.6194.1 | 7.21  | 6.98  | 0.23 | 0.21 | 1.18  | 0.054159 | 0.021083 | 0.289903 | 0.181869 |
| MmugDNA.6195.1.S1_at   | MmugDNA.6195.1 | 5.59  | 5.55  | 0.13 | 0.06 | 1.02  | 0.990358 | 0.168339 | 0.996555 | 0.444985 |
| MmugDNA.6196.1.S1_at   | MmugDNA.6196.1 | 8.54  | 9.13  | 0.12 | 0.05 | -1.51 | 0.002356 | 0.126974 | 0.092906 | 0.397729 |
| MmugDNA.6197.1.S1_at   | MmugDNA.6197.1 | 7.85  | 8.64  | 1    | 0.19 | -1.73 | 0.225423 | 0.151118 | 0.523271 | 0.425795 |
| MmugDNA.6198.1.S1_at   | MmugDNA.6198.1 | 8.29  | 7.6   | 0.15 | 0.06 | 1.61  | 0.004359 | 0.001133 | 0.112174 | 0.053052 |
| MmugDNA.62.1.S1_at     | MmugDNA.62.1   | 5.21  | 6.8   | 0.97 | 0.37 | -3    | 0.074504 | 0.321185 | 0.33123  | 0.573111 |
| MmugDNA.620.1.S1_at    | MmugDNA.620.1  | 4.62  | 4.69  | 0.11 | 0.36 | -1.05 | 0.737357 | 0.732348 | 0.878112 | 0.844986 |
| MmugDNA.6200.1.S1_at   | MmugDNA.6200.1 | 5.1   | 4.5   | 1.01 | 0.17 | 1.51  | 0.2245   | 0.242469 | 0.52264  | 0.512835 |
| MmugDNA.6201.1.S1_at   | MmugDNA.6201.1 | 5.9   | 5.83  | 0.58 | 0.34 | 1.05  | 0.74455  | 0.725483 | 0.881518 | 0.841043 |
| MmugDNA.6204.1.S1_at   | MmugDNA.6204.1 | 6.72  | 6.65  | 0.26 | 0.06 | 1.05  | 0.221237 | 0.336213 | 0.519232 | 0.583736 |
| MmugDNA.6207.1.S1_at   | MmugDNA.6207.1 | 4.69  | 4.67  | 0.23 | 0.09 | 1.02  | 0.458658 | 0.589888 | 0.707171 | 0.755987 |
| MmugDNA.6208.1.S1_at   | MmugDNA.6208.1 | 6.38  | 5.59  | 0.25 | 0.1  | 1.72  | 0.005902 | 0.003388 | 0.123184 | 0.083859 |
| MmugDNA.6208.1.S1_s_at | MmugDNA.6208.1 | 9.51  | 8.45  | 0.19 | 0.16 | 2.08  | 0.002499 | 0.007797 | 0.094326 | 0.117765 |
| MmugDNA.6209.1.S1_at   | MmugDNA.6209.1 | 5.86  | 5.6   | 0.27 | 0.08 | 1.2   | 0.08093  | 0.093826 | 0.341723 | 0.350281 |
| MmugDNA.621.1.S1_at    | MmugDNA.621.1  | 10.94 | 11.04 | 0.06 | 0.06 | -1.07 | 0.332563 | 0.769914 | 0.614224 | 0.866376 |
| MmugDNA.6211.1.S1_at   | MmugDNA.6211.1 | 6.19  | 5.9   | 0.32 | 0.16 | 1.22  | 0.225018 | 0.107942 | 0.522977 | 0.371008 |
| MmugDNA.6213.1.S1_at   | MmugDNA.6213.1 | 10.3  | 9.54  | 0.51 | 0.29 | 1.7   | 0.235997 | 0.248132 | 0.533595 | 0.517567 |
| MmugDNA.6214.1.S1_at   | MmugDNA.6214.1 | 4.68  | 4.34  | 0.23 | 0.17 | 1.27  | 0.222983 | 0.384588 | 0.520934 | 0.62023  |
| MmugDNA.6215.1.S1_at   | MmugDNA.6215.1 | 6.9   | 6.81  | 0.35 | 0.15 | 1.07  | 0.24769  | 0.514449 | 0.543078 | 0.707693 |
| MmugDNA.6216.1.S1_at   | MmugDNA.6216.1 | 6.25  | 6.15  | 1.02 | 0.17 | 1.08  | 0.604429 | 0.536239 | 0.801654 | 0.721587 |



|                      |                |       |       |      |      |        |          |          |          |          |
|----------------------|----------------|-------|-------|------|------|--------|----------|----------|----------|----------|
| MmugDNA.6217.1.S1_at | MmugDNA.6217.1 | 4.54  | 4.52  | 0.12 | 0.05 | 1.02   | 0.63757  | 0.066328 | 0.822536 | 0.303194 |
| MmugDNA.6218.1.S1_at | MmugDNA.6218.1 | 8.22  | 8.66  | 0.2  | 0.04 | -1.35  | 0.017756 | 0.018697 | 0.186892 | 0.171742 |
| MmugDNA.6219.1.S1_at | MmugDNA.6219.1 | 7.35  | 7.18  | 0.15 | 0.21 | 1.13   | 0.565474 | 0.017109 | 0.776724 | 0.165744 |
| MmugDNA.622.1.S1_at  | MmugDNA.622.1  | 5.16  | 5.14  | 0.53 | 0.18 | 1.02   | 0.294871 | 0.293643 | 0.583812 | 0.553638 |
| MmugDNA.6220.1.S1_at | MmugDNA.6220.1 | 5.38  | 4.46  | 0.73 | 0.17 | 1.89   | 0.37439  | 0.350438 | 0.64551  | 0.594161 |
| MmugDNA.6222.1.S1_at | MmugDNA.6222.1 | 6.79  | 6.88  | 0.12 | 0.07 | -1.06  | 0.869868 | 0.886801 | 0.944042 | 0.935553 |
| MmugDNA.6225.1.S1_at | MmugDNA.6225.1 | 4.48  | 4.46  | 0.07 | 0.27 | 1.01   | 0.837908 | 0.949634 | 0.928995 | 0.971202 |
| MmugDNA.6226.1.S1_at | MmugDNA.6226.1 | 5.8   | 6.32  | 0.48 | 0.29 | -1.44  | 0.19798  | 0.257714 | 0.495253 | 0.525343 |
| MmugDNA.6227.1.S1_at | MmugDNA.6227.1 | 8.63  | 9.44  | 0.37 | 0.58 | -1.75  | 0.159854 | 0.000688 | 0.451208 | 0.044166 |
| MmugDNA.6228.1.S1_at | MmugDNA.6228.1 | 9.97  | 10.1  | 0.28 | 0.09 | -1.1   | 0.80218  | 0.390031 | 0.9112   | 0.624002 |
| MmugDNA.623.1.S1_at  | MmugDNA.623.1  | 12.9  | 12.96 | 0.12 | 0.01 | -1.04  | 0.324825 | 0.38372  | 0.608366 | 0.619703 |
| MmugDNA.6231.1.S1_at | MmugDNA.6231.1 | 4.05  | 4.15  | 0.07 | 0.05 | -1.07  | 0.164661 | 0.063647 | 0.457714 | 0.298815 |
| MmugDNA.6232.1.S1_at | MmugDNA.6232.1 | 11.55 | 11.46 | 0.1  | 0.05 | 1.06   | 0.728013 | 0.913182 | 0.872767 | 0.951134 |
| MmugDNA.6233.1.S1_at | MmugDNA.6233.1 | 6.53  | 5.5   | 1.07 | 0.62 | 2.04   | 0.519023 | 0.444546 | 0.747877 | 0.662072 |
| MmugDNA.6234.1.S1_at | MmugDNA.6234.1 | 5.16  | 4.66  | 0.22 | 0.09 | 1.41   | 0.018247 | 0.023401 | 0.188112 | 0.191765 |
| MmugDNA.6236.1.S1_at | MmugDNA.6236.1 | 4.66  | 5.78  | 0.26 | 0.18 | -2.18  | 0.004174 | 0.050689 | 0.110227 | 0.270317 |
| MmugDNA.6237.1.S1_at | MmugDNA.6237.1 | 7.62  | 7.21  | 0.5  | 1.14 | 1.32   | 0.656799 | 0.553421 | 0.834014 | 0.732583 |
| MmugDNA.6238.1.S1_at | MmugDNA.6238.1 | 8.77  | 7.74  | 0.24 | 0.34 | 2.05   | 0.024029 | 0.07563  | 0.208189 | 0.320061 |
| MmugDNA.624.1.S1_at  | MmugDNA.624.1  | 5.55  | 5.46  | 0.7  | 0.18 | 1.07   | 0.668482 | 0.781818 | 0.840912 | 0.873524 |
| MmugDNA.6240.1.S1_at | MmugDNA.6240.1 | 3.39  | 3.28  | 0.14 | 0.19 | 1.08   | 0.160858 | 0.232973 | 0.452392 | 0.50445  |
| MmugDNA.6244.1.S1_at | MmugDNA.6244.1 | 8.12  | 8.22  | 0.33 | 0.02 | -1.08  | 0.676574 | 0.796089 | 0.845558 | 0.882495 |
| MmugDNA.6246.1.S1_at | MmugDNA.6246.1 | 5.11  | 4.14  | 1.13 | 0.21 | 1.96   | 0.177987 | 0.151828 | 0.472782 | 0.426505 |
| MmugDNA.6248.1.S1_at | MmugDNA.6248.1 | 4.27  | 4.58  | 0.29 | 0.18 | -1.24  | 0.273412 | 0.247513 | 0.565557 | 0.516858 |
| MmugDNA.6249.1.S1_at | MmugDNA.6249.1 | 9.2   | 9.13  | 0.28 | 0.23 | 1.05   | 0.556091 | 0.386201 | 0.771459 | 0.621435 |
| MmugDNA.625.1.S1_at  | MmugDNA.625.1  | 4.81  | 4.81  | 0.09 | 0.01 | 1      | 0.318208 | 0.477333 | 0.602917 | 0.683422 |
| MmugDNA.6251.1.S1_at | MmugDNA.6251.1 | 6.06  | 6.07  | 0.14 | 0.27 | -1.01  | 0.805398 | 0.867457 | 0.9127   | 0.924699 |
| MmugDNA.6253.1.S1_at | MmugDNA.6253.1 | 4.35  | 4.22  | 0.2  | 0.16 | 1.09   | 0.197867 | 0.216151 | 0.49515  | 0.489701 |
| MmugDNA.6254.1.S1_at | MmugDNA.6254.1 | 3.54  | 3.62  | 0.18 | 0.14 | -1.05  | 0.844309 | 0.960459 | 0.931825 | 0.977507 |
| MmugDNA.6255.1.S1_at | MmugDNA.6255.1 | 4.32  | 3.74  | 0.66 | 0.19 | 1.5    | 0.1366   | 0.153321 | 0.421269 | 0.428139 |
| MmugDNA.6257.1.S1_at | MmugDNA.6257.1 | 10.65 | 10.39 | 0.63 | 0.04 | 1.2    | 0.187639 | 0.310826 | 0.483874 | 0.565854 |
| MmugDNA.6258.1.S1_at | MmugDNA.6258.1 | 7.77  | 7.63  | 0.24 | 0.1  | 1.11   | 0.958849 | 0.08845  | 0.98325  | 0.341881 |
| MmugDNA.6259.1.S1_at | MmugDNA.6259.1 | 7.92  | 7.54  | 0.37 | 0.51 | 1.3    | 0.846592 | 0.557767 | 0.933078 | 0.735229 |
| MmugDNA.626.1.S1_at  | MmugDNA.626.1  | 4.39  | 4.23  | 0.18 | 0.13 | 1.12   | 0.406589 | 0.285849 | 0.669837 | 0.547484 |
| MmugDNA.6261.1.S1_at | MmugDNA.6261.1 | 5.37  | 5.37  | 0.09 | 0.14 | -1     | 0.357493 | 0.525805 | 0.633553 | 0.715217 |
| MmugDNA.6262.1.S1_at | MmugDNA.6262.1 | 3.44  | 3.25  | 0.14 | 0.1  | 1.14   | 0.636278 | 0.864678 | 0.822077 | 0.923276 |
| MmugDNA.6265.1.S1_at | MmugDNA.6265.1 | 5.16  | 5.02  | 0    | 0.13 | 1.1    | 0.262182 | 0.493135 | 0.556354 | 0.694001 |
| MmugDNA.6266.1.S1_at | MmugDNA.6266.1 | 3.26  | 3.29  | 0.18 | 0.07 | -1.02  | 0.447286 | 0.441016 | 0.699312 | 0.659267 |
| MmugDNA.6268.1.S1_at | MmugDNA.6268.1 | 6.21  | 6.55  | 0.94 | 0.22 | -1.27  | 0.76457  | 0.921648 | 0.892005 | 0.955801 |
| MmugDNA.627.1.S1_at  | MmugDNA.627.1  | 5.32  | 5.01  | 0.38 | 0.08 | 1.24   | 0.189261 | 0.123268 | 0.485811 | 0.393358 |
| MmugDNA.6271.1.S1_at | MmugDNA.6271.1 | 3.12  | 3.07  | 0.16 | 0.14 | 1.04   | 0.382756 | 0.57923  | 0.652134 | 0.748973 |
| MmugDNA.6272.1.S1_at | MmugDNA.6272.1 | 5.26  | 9.06  | 1.54 | 0.33 | -13.93 | 0.039564 | 0.33675  | 0.255471 | 0.584083 |
| MmugDNA.6273.1.S1_at | MmugDNA.6273.1 | 6.88  | 6.44  | 0.23 | 0.08 | 1.36   | 0.080447 | 0.090996 | 0.341026 | 0.345755 |
| MmugDNA.6274.1.S1_at | MmugDNA.6274.1 | 5.66  | 5.72  | 0.12 | 0.08 | -1.04  | 0.717423 | 0.034863 | 0.866517 | 0.230926 |

|                        |                |       |       |      |      |       |          |          |          |          |
|------------------------|----------------|-------|-------|------|------|-------|----------|----------|----------|----------|
| MmugDNA.6275.1.S1_at   | MmugDNA.6275.1 | 9.21  | 8.9   | 0.11 | 0.16 | 1.24  | 0.104503 | 0.761179 | 0.377826 | 0.86123  |
| MmugDNA.6276.1.S1_at   | MmugDNA.6276.1 | 4.59  | 4.54  | 0.42 | 0.05 | 1.03  | 0.790356 | 0.93962  | 0.904709 | 0.965668 |
| MmugDNA.6278.1.S1_at   | MmugDNA.6278.1 | 5.26  | 5.35  | 0.18 | 0.07 | -1.07 | 0.127567 | 0.020916 | 0.409503 | 0.181415 |
| MmugDNA.6279.1.S1_at   | MmugDNA.6279.1 | 3.98  | 3.98  | 0.14 | 0.25 | -1    | 0.425657 | 0.480332 | 0.682976 | 0.68574  |
| MmugDNA.628.1.S1_at    | MmugDNA.628.1  | 5.67  | 5.69  | 0.13 | 0.11 | -1.02 | 0.363626 | 0.176988 | 0.638259 | 0.453416 |
| MmugDNA.6280.1.S1_at   | MmugDNA.6280.1 | 4.95  | 4.53  | 0.96 | 0.36 | 1.34  | 0.354231 | 0.324522 | 0.631413 | 0.57507  |
| MmugDNA.6281.1.S1_at   | MmugDNA.6281.1 | 5.33  | 5.26  | 0.12 | 0.05 | 1.05  | 0.129243 | 0.273653 | 0.411589 | 0.538093 |
| MmugDNA.6283.1.S1_at   | MmugDNA.6283.1 | 10.69 | 10.58 | 0.09 | 0.11 | 1.08  | 0.213189 | 0.134358 | 0.511046 | 0.406603 |
| MmugDNA.6285.1.S1_at   | MmugDNA.6285.1 | 6.51  | 6.45  | 0.04 | 0.09 | 1.04  | 0.876121 | 0.166803 | 0.946972 | 0.443274 |
| MmugDNA.6288.1.S1_at   | MmugDNA.6288.1 | 6.2   | 5.29  | 0.32 | 0.19 | 1.88  | 0.008887 | 0.222979 | 0.143995 | 0.495821 |
| MmugDNA.6289.1.S1_at   | MmugDNA.6289.1 | 12.03 | 12.07 | 0.06 | 0    | -1.03 | 0.292065 | 0.055338 | 0.581449 | 0.281048 |
| MmugDNA.629.1.S1_at    | MmugDNA.629.1  | 4.45  | 4.24  | 0.48 | 0.06 | 1.16  | 0.138345 | 0.166141 | 0.423598 | 0.442694 |
| MmugDNA.6290.1.S1_at   | MmugDNA.6290.1 | 6.66  | 6.66  | 0.08 | 0.12 | 1.01  | 0.833227 | 0.478945 | 0.926558 | 0.684806 |
| MmugDNA.6291.1.S1_at   | MmugDNA.6291.1 | 7.32  | 7.22  | 1.04 | 0.21 | 1.08  | 0.616298 | 0.827843 | 0.809429 | 0.90116  |
| MmugDNA.6292.1.S1_at   | MmugDNA.6292.1 | 6.4   | 5.73  | 0.78 | 0.56 | 1.59  | 0.344754 | 0.450686 | 0.624009 | 0.665844 |
| MmugDNA.6293.1.S1_at   | MmugDNA.6293.1 | 3.15  | 3     | 0.02 | 0.1  | 1.11  | 0.090057 | 0.10584  | 0.356863 | 0.368111 |
| MmugDNA.6294.1.S1_at   | MmugDNA.6294.1 | 5.19  | 5.14  | 0.16 | 0.11 | 1.03  | 0.787817 | 0.146087 | 0.903445 | 0.420092 |
| MmugDNA.6296.1.S1_at   | MmugDNA.6296.1 | 10.41 | 10.34 | 0.17 | 0.08 | 1.05  | 0.539329 | 0.557553 | 0.760725 | 0.73509  |
| MmugDNA.6297.1.S1_at   | MmugDNA.6297.1 | 3.41  | 3.33  | 0.57 | 0.06 | 1.06  | 0.282007 | 0.31263  | 0.572752 | 0.567268 |
| MmugDNA.6298.1.S1_at   | MmugDNA.6298.1 | 3.9   | 3.73  | 0.11 | 0.09 | 1.12  | 0.220617 | 0.165026 | 0.518351 | 0.44123  |
| MmugDNA.6299.1.S1_at   | MmugDNA.6299.1 | 11.11 | 10.13 | 0.24 | 0.05 | 1.97  | 0.002175 | 0.009611 | 0.09055  | 0.129157 |
| MmugDNA.63.1.S1_at     | MmugDNA.63.1   | 4.23  | 4.33  | 0.07 | 0.09 | -1.07 | 0.160489 | 0.334635 | 0.452011 | 0.582581 |
| MmugDNA.630.1.S1_at    | MmugDNA.630.1  | 5.67  | 5.64  | 0.11 | 0.03 | 1.02  | 0.729153 | 0.598722 | 0.873447 | 0.761089 |
| MmugDNA.6300.1.S1_at   | MmugDNA.6300.1 | 7.87  | 7.49  | 0.42 | 0.11 | 1.3   | 0.590331 | 0.422528 | 0.791804 | 0.645745 |
| MmugDNA.6301.1.S1_at   | MmugDNA.6301.1 | 6.57  | 6.13  | 0.13 | 0.5  | 1.36  | 0.544589 | 0.687973 | 0.764159 | 0.817831 |
| MmugDNA.6301.1.S1_s_at | MmugDNA.6301.1 | 9.88  | 9.59  | 0.35 | 0.03 | 1.22  | 0.193945 | 0.414668 | 0.490522 | 0.640456 |
| MmugDNA.6303.1.S1_at   | MmugDNA.6303.1 | 4.41  | 4.48  | 0.15 | 0.38 | -1.05 | 0.59068  | 0.743971 | 0.792009 | 0.851613 |
| MmugDNA.6304.1.S1_at   | MmugDNA.6304.1 | 3.08  | 3.19  | 0.09 | 0.05 | -1.08 | 0.141019 | 0.443417 | 0.42688  | 0.661211 |
| MmugDNA.6305.1.S1_at   | MmugDNA.6305.1 | 4.07  | 3.91  | 0.1  | 0.19 | 1.11  | 0.438016 | 0.081296 | 0.692763 | 0.329351 |
| MmugDNA.6307.1.S1_at   | MmugDNA.6307.1 | 5.93  | 5.88  | 0.04 | 0.05 | 1.03  | 0.340829 | 0.576091 | 0.620908 | 0.74698  |
| MmugDNA.6308.1.S1_at   | MmugDNA.6308.1 | 4.61  | 4.46  | 0.15 | 0.15 | 1.11  | 0.090035 | 0.161555 | 0.356863 | 0.43767  |
| MmugDNA.6309.1.S1_at   | MmugDNA.6309.1 | 4.91  | 4.86  | 0.14 | 0    | 1.04  | 0.38837  | 0.710127 | 0.656369 | 0.831904 |
| MmugDNA.631.1.S1_at    | MmugDNA.631.1  | 3.51  | 3.53  | 0.09 | 0.25 | -1.01 | 0.696442 | 0.89306  | 0.85541  | 0.939012 |
| MmugDNA.6311.1.S1_at   | MmugDNA.6311.1 | 9.68  | 9.56  | 0.1  | 0.06 | 1.09  | 0.591066 | 0.77866  | 0.792239 | 0.871528 |
| MmugDNA.6312.1.S1_at   | MmugDNA.6312.1 | 4.13  | 4.17  | 0.04 | 0.02 | -1.03 | 0.269645 | 0.94162  | 0.562001 | 0.966897 |
| MmugDNA.6315.1.S1_at   | MmugDNA.6315.1 | 4.07  | 3.58  | 0.39 | 0.1  | 1.41  | 0.115448 | 0.104906 | 0.392613 | 0.366451 |
| MmugDNA.632.1.S1_at    | MmugDNA.632.1  | 7.26  | 7.26  | 0.07 | 0.07 | -1.01 | 0.400475 | 0.366747 | 0.665444 | 0.6065   |
| MmugDNA.6320.1.S1_at   | MmugDNA.6320.1 | 6.85  | 7.14  | 0.08 | 0.16 | -1.23 | 0.071277 | 0.059059 | 0.324861 | 0.289927 |
| MmugDNA.6321.1.S1_at   | MmugDNA.6321.1 | 6.37  | 6.56  | 0.16 | 0.11 | -1.13 | 0.232686 | 0.111499 | 0.531068 | 0.376205 |
| MmugDNA.6322.1.S1_at   | MmugDNA.6322.1 | 4.15  | 4.08  | 0.06 | 0.05 | 1.04  | 0.265129 | 0.068894 | 0.557962 | 0.308835 |
| MmugDNA.6323.1.S1_at   | MmugDNA.6323.1 | 5.03  | 5.01  | 0.2  | 0.1  | 1.02  | 0.843269 | 0.583357 | 0.931396 | 0.751729 |
| MmugDNA.6324.1.S1_s_at | MmugDNA.6324.1 | 3.47  | 3.55  | 0.22 | 0.05 | -1.05 | 0.652815 | 0.841526 | 0.831632 | 0.909663 |
| MmugDNA.6325.1.S1_at   | MmugDNA.6325.1 | 7.73  | 7.17  | 0.24 | 0.05 | 1.47  | 0.038431 | 0.123009 | 0.252019 | 0.392923 |

|                         |                 |       |       |      |      |        |          |          |          |          |
|-------------------------|-----------------|-------|-------|------|------|--------|----------|----------|----------|----------|
| MmugDNA.6326.1.S1_at    | MmugDNA.6326.1  | 7.11  | 7.72  | 1.02 | 0.01 | -1.53  | 0.11258  | 0.229597 | 0.388887 | 0.501574 |
| MmugDNA.6327.1.S1_at    | MmugDNA.6327.1  | 4.19  | 4.22  | 0.04 | 0.04 | -1.02  | 0.375909 | 0.577532 | 0.646632 | 0.747966 |
| MmugDNA.20311.1.S1_s_at | MmugDNA.20311.1 | 10.66 | 10.45 | 0.13 | 0.13 | 1.15   | 0.08114  | 0.077933 | 0.342143 | 0.324277 |
| MmugDNA.6330.1.S1_at    | MmugDNA.6330.1  | 3.77  | 3.77  | 0.2  | 0.09 | -1     | 0.674645 | 0.802004 | 0.84465  | 0.885995 |
| MmugDNA.6331.1.S1_at    | MmugDNA.6331.1  | 7.05  | 6.94  | 0.4  | 0.06 | 1.07   | 0.201807 | 0.12424  | 0.49928  | 0.394547 |
| MmugDNA.6333.1.S1_at    | MmugDNA.6333.1  | 6.25  | 6.79  | 1.74 | 0.31 | -1.46  | 0.446199 | 0.465437 | 0.698417 | 0.675748 |
| MmugDNA.6334.1.S1_at    | MmugDNA.6334.1  | 4.63  | 4.54  | 0.33 | 0.26 | 1.06   | 0.301305 | 0.277068 | 0.589246 | 0.541087 |
| MmugDNA.6335.1.S1_at    | MmugDNA.6335.1  | 6.4   | 6.2   | 0.29 | 0.12 | 1.15   | 0.606187 | 0.769777 | 0.802938 | 0.866333 |
| MmugDNA.6336.1.S1_at    | MmugDNA.6336.1  | 8.26  | 8.23  | 0.14 | 0.1  | 1.02   | 0.336639 | 0.495388 | 0.617181 | 0.695435 |
| MmugDNA.6337.1.S1_at    | MmugDNA.6337.1  | 3.79  | 3.73  | 0.02 | 0.08 | 1.05   | 0.410097 | 0.508859 | 0.672283 | 0.703878 |
| MmugDNA.6338.1.S1_at    | MmugDNA.6338.1  | 8.3   | 7.49  | 0.52 | 0.06 | 1.75   | 0.163264 | 0.440826 | 0.455557 | 0.659138 |
| MmugDNA.6339.1.S1_at    | MmugDNA.6339.1  | 5.76  | 5.71  | 0.09 | 0.05 | 1.03   | 0.167886 | 0.219579 | 0.461188 | 0.493192 |
| MmugDNA.634.1.S1_at     | MmugDNA.634.1   | 5.77  | 5.87  | 0.17 | 0.05 | -1.07  | 0.422462 | 0.678735 | 0.680619 | 0.812378 |
| MmugDNA.6340.1.S1_at    | MmugDNA.6340.1  | 9.01  | 8.87  | 0.69 | 0.11 | 1.11   | 0.804157 | 0.562425 | 0.912015 | 0.738025 |
| MmugDNA.6341.1.S1_at    | MmugDNA.6341.1  | 3.48  | 3.48  | 0.22 | 0.05 | -1     | 0.802209 | 0.645097 | 0.911213 | 0.792025 |
| MmugDNA.6348.1.S1_at    | MmugDNA.6348.1  | 3.91  | 3.95  | 0.03 | 0.03 | -1.03  | 0.551526 | 0.947654 | 0.768529 | 0.970284 |
| MmugDNA.635.1.S1_at     | MmugDNA.635.1   | 5.55  | 9.89  | 1.47 | 0.11 | -20.19 | 0.0148   | 0.225807 | 0.173786 | 0.498175 |
| MmugDNA.6351.1.S1_at    | MmugDNA.6351.1  | 4.21  | 4.51  | 0.15 | 0.11 | -1.23  | 0.028447 | 0.070484 | 0.221125 | 0.311777 |
| MmugDNA.6352.1.S1_at    | MmugDNA.6352.1  | 3.65  | 3.45  | 0.19 | 0.24 | 1.15   | 0.142755 | 0.233146 | 0.428866 | 0.504458 |
| MmugDNA.6353.1.S1_at    | MmugDNA.6353.1  | 9.05  | 7.88  | 0.38 | 0.3  | 2.24   | 0.028444 | 0.049221 | 0.221125 | 0.266697 |
| MmugDNA.6354.1.S1_at    | MmugDNA.6354.1  | 10.05 | 9.72  | 0.41 | 0.02 | 1.26   | 0.174458 | 0.337076 | 0.468676 | 0.584337 |
| MmugDNA.6356.1.S1_at    | MmugDNA.6356.1  | 9.93  | 10.04 | 0.12 | 0.02 | -1.08  | 0.128309 | 0.035355 | 0.410227 | 0.232348 |
| MmugDNA.6357.1.S1_at    | MmugDNA.6357.1  | 6.75  | 7.04  | 0.19 | 0.11 | -1.22  | 0.087817 | 0.177353 | 0.353927 | 0.453742 |
| MmugDNA.6358.1.S1_at    | MmugDNA.6358.1  | 7.34  | 7.38  | 0.06 | 0.11 | -1.03  | 0.476174 | 0.83679  | 0.718713 | 0.906717 |
| MmugDNA.6359.1.S1_at    | MmugDNA.6359.1  | 6.65  | 6.47  | 0.25 | 0.28 | 1.13   | 0.431039 | 0.538433 | 0.687225 | 0.723141 |
| MmugDNA.636.1.S1_at     | MmugDNA.636.1   | 3.9   | 3.83  | 0.39 | 0.13 | 1.05   | 0.448688 | 0.335174 | 0.700155 | 0.582938 |
| MmugDNA.6361.1.S1_at    | MmugDNA.6361.1  | 7.44  | 8.22  | 0.29 | 0.33 | -1.72  | 0.036462 | 0.079362 | 0.246053 | 0.3267   |
| MmugDNA.6362.1.S1_at    | MmugDNA.6362.1  | 5.45  | 5.62  | 0.16 | 0.13 | -1.13  | 0.260508 | 0.126182 | 0.554576 | 0.396748 |
| MmugDNA.6363.1.S1_at    | MmugDNA.6363.1  | 3.66  | 3.58  | 0.06 | 0.06 | 1.06   | 0.101452 | 0.091719 | 0.372928 | 0.346977 |
| MmugDNA.6364.1.S1_at    | MmugDNA.6364.1  | 7.05  | 6.45  | 0.98 | 0.24 | 1.52   | 0.782497 | 0.733117 | 0.900765 | 0.845523 |
| MmugDNA.6365.1.S1_at    | MmugDNA.6365.1  | 6.1   | 6.01  | 0.19 | 0.04 | 1.07   | 0.890193 | 0.217653 | 0.953248 | 0.491255 |
| MmugDNA.6366.1.S1_at    | MmugDNA.6366.1  | 4.67  | 4.68  | 0.11 | 0.14 | -1     | 0.884466 | 0.968544 | 0.950854 | 0.982645 |
| MmugDNA.6367.1.S1_at    | MmugDNA.6367.1  | 10.59 | 10.5  | 0.17 | 0.02 | 1.06   | 0.158772 | 0.005918 | 0.449979 | 0.105276 |
| MmugDNA.6369.1.S1_at    | MmugDNA.6369.1  | 2.84  | 2.83  | 0.14 | 0.05 | 1      | 0.8313   | 0.390364 | 0.925813 | 0.624156 |
| MmugDNA.637.1.S1_at     | MmugDNA.637.1   | 2.73  | 2.97  | 0.04 | 0.05 | -1.18  | 0.005955 | 0.075886 | 0.123847 | 0.320523 |
| MmugDNA.6370.1.S1_at    | MmugDNA.6370.1  | 4.97  | 5.78  | 0.3  | 0.5  | -1.76  | 0.060027 | 0.000896 | 0.302259 | 0.047868 |
| MmugDNA.6371.1.S1_at    | MmugDNA.6371.1  | 12.16 | 12    | 0.17 | 0.01 | 1.11   | 0.086589 | 0.037115 | 0.351629 | 0.237165 |
| MmugDNA.6373.1.S1_at    | MmugDNA.6373.1  | 5.34  | 5.27  | 0.35 | 0.19 | 1.05   | 0.394456 | 0.544555 | 0.661066 | 0.726948 |
| MmugDNA.6374.1.S1_at    | MmugDNA.6374.1  | 5.88  | 5.57  | 0.2  | 0.11 | 1.24   | 0.139216 | 0.162424 | 0.424942 | 0.438575 |
| MmugDNA.6375.1.S1_at    | MmugDNA.6375.1  | 7.68  | 6.63  | 0.37 | 0.19 | 2.07   | 0.0085   | 0.043309 | 0.141348 | 0.252847 |
| MmugDNA.6377.1.S1_at    | MmugDNA.6377.1  | 2.95  | 3.02  | 0.03 | 0.03 | -1.05  | 0.052535 | 0.060367 | 0.286297 | 0.292291 |
| MmugDNA.6378.1.S1_at    | MmugDNA.6378.1  | 11.73 | 12.06 | 0.39 | 0.07 | -1.26  | 0.321449 | 0.511274 | 0.605718 | 0.705465 |
| MmugDNA.40297.1.S1_s_at | MmugDNA.40297.1 | 5.82  | 5.77  | 0.28 | 0.08 | 1.03   | 0.423408 | 0.423313 | 0.681371 | 0.646277 |

|                        |                |       |       |      |      |       |          |          |          |          |
|------------------------|----------------|-------|-------|------|------|-------|----------|----------|----------|----------|
| MmugDNA.638.1.S1_at    | MmugDNA.638.1  | 8.25  | 8.07  | 0.15 | 0.04 | 1.13  | 0.106969 | 0.314449 | 0.38134  | 0.568319 |
| MmugDNA.6383.1.S1_at   | MmugDNA.6383.1 | 7.08  | 7.02  | 0.04 | 0.1  | 1.04  | 0.902894 | 0.689194 | 0.958791 | 0.818618 |
| MmugDNA.6383.1.S1_s_at | MmugDNA.6383.1 | 7.89  | 7.82  | 0.78 | 0.26 | 1.05  | 0.654242 | 0.719829 | 0.832647 | 0.837893 |
| MmugDNA.6384.1.S1_at   | MmugDNA.6384.1 | 10.2  | 10.1  | 0.14 | 0.05 | 1.07  | 0.268472 | 0.544128 | 0.561069 | 0.726618 |
| MmugDNA.6386.1.S1_at   | MmugDNA.6386.1 | 11.09 | 10.74 | 0.28 | 0.08 | 1.28  | 0.312939 | 0.602936 | 0.598837 | 0.76382  |
| MmugDNA.6387.1.S1_at   | MmugDNA.6387.1 | 6.73  | 6.64  | 0.09 | 0.11 | 1.06  | 0.692157 | 0.572828 | 0.852894 | 0.744765 |
| MmugDNA.6387.1.S1_x_at | MmugDNA.6387.1 | 7.84  | 7.83  | 0.11 | 0.06 | 1     | 0.409832 | 0.401438 | 0.672078 | 0.631018 |
| MmugDNA.639.1.S1_at    | MmugDNA.639.1  | 7.99  | 7.78  | 0.05 | 0.17 | 1.16  | 0.120907 | 0.436296 | 0.399442 | 0.655923 |
| MmugDNA.6390.1.S1_at   | MmugDNA.6390.1 | 6.86  | 6.48  | 0.21 | 0.24 | 1.31  | 0.064886 | 0.104228 | 0.311382 | 0.365373 |
| MmugDNA.6391.1.S1_at   | MmugDNA.6391.1 | 3.01  | 2.84  | 0.07 | 0.09 | 1.12  | 0.134553 | 0.001898 | 0.41837  | 0.065035 |
| MmugDNA.6392.1.S1_at   | MmugDNA.6392.1 | 8.21  | 7.87  | 0.11 | 0.1  | 1.27  | 0.028214 | 0.115595 | 0.220474 | 0.382674 |
| MmugDNA.6394.1.S1_at   | MmugDNA.6394.1 | 6.88  | 6.93  | 0.44 | 0.03 | -1.03 | 0.425287 | 0.229745 | 0.682745 | 0.501761 |
| MmugDNA.6395.1.S1_at   | MmugDNA.6395.1 | 6.37  | 6.48  | 0.17 | 0.22 | -1.08 | 0.556851 | 0.74626  | 0.771968 | 0.85272  |
| MmugDNA.6396.1.S1_at   | MmugDNA.6396.1 | 4.99  | 4.8   | 0.22 | 0.16 | 1.14  | 0.135526 | 0.186439 | 0.419375 | 0.462293 |
| MmugDNA.6397.1.S1_at   | MmugDNA.6397.1 | 4.22  | 4.16  | 0.11 | 0.06 | 1.05  | 0.930646 | 0.076869 | 0.970846 | 0.322368 |
| MmugDNA.6399.1.S1_at   | MmugDNA.6399.1 | 4.96  | 5.2   | 0.29 | 0.33 | -1.18 | 0.696688 | 0.221812 | 0.855586 | 0.494948 |
| MmugDNA.64.1.S1_at     | MmugDNA.64.1   | 3.93  | 3.96  | 0.27 | 0.12 | -1.02 | 0.88338  | 0.686083 | 0.950421 | 0.816777 |
| MmugDNA.640.1.S1_at    | MmugDNA.640.1  | 4.05  | 4.02  | 0.05 | 0.08 | 1.02  | 0.579225 | 0.702443 | 0.784985 | 0.827532 |
| MmugDNA.6400.1.S1_at   | MmugDNA.6400.1 | 7.42  | 7.24  | 0.15 | 0.06 | 1.13  | 0.262708 | 0.049139 | 0.556683 | 0.266534 |
| MmugDNA.6401.1.S1_at   | MmugDNA.6401.1 | 8.32  | 8.69  | 0.44 | 0.04 | -1.29 | 0.192777 | 0.354644 | 0.489395 | 0.597326 |
| MmugDNA.6403.1.S1_at   | MmugDNA.6403.1 | 4.46  | 4.38  | 0.3  | 0.14 | 1.06  | 0.785739 | 0.918078 | 0.902158 | 0.954068 |
| MmugDNA.6404.1.S1_at   | MmugDNA.6404.1 | 3.07  | 3.19  | 0.09 | 0.1  | -1.08 | 0.17568  | 0.283052 | 0.470151 | 0.545692 |
| MmugDNA.6405.1.S1_at   | MmugDNA.6405.1 | 3.89  | 4.54  | 0.2  | 0.21 | -1.56 | 0.021311 | 0.045582 | 0.199623 | 0.257666 |
| MmugDNA.6406.1.S1_at   | MmugDNA.6406.1 | 4.95  | 4.99  | 0.09 | 0.11 | -1.03 | 0.287088 | 0.484095 | 0.576783 | 0.688318 |
| MmugDNA.6407.1.S1_at   | MmugDNA.6407.1 | 6     | 5.94  | 0.69 | 0.3  | 1.04  | 0.861516 | 0.558161 | 0.939844 | 0.735437 |
| MmugDNA.6409.1.S1_at   | MmugDNA.6409.1 | 6.81  | 6.36  | 0.44 | 0.23 | 1.37  | 0.618775 | 0.488591 | 0.810795 | 0.691222 |
| MmugDNA.6410.1.S1_at   | MmugDNA.6410.1 | 6.26  | 6.19  | 0.1  | 0.16 | 1.05  | 0.21317  | 0.274733 | 0.511046 | 0.539195 |
| MmugDNA.6411.1.S1_at   | MmugDNA.6411.1 | 6.26  | 5.44  | 0.94 | 0.14 | 1.76  | 0.147008 | 0.250994 | 0.434942 | 0.519638 |
| MmugDNA.6414.1.S1_at   | MmugDNA.6414.1 | 6.38  | 6.39  | 0.13 | 0.02 | -1.01 | 0.837172 | 0.907653 | 0.928581 | 0.947753 |
| MmugDNA.6415.1.S1_at   | MmugDNA.6415.1 | 7.77  | 8.28  | 0.11 | 0.33 | -1.43 | 0.262365 | 0.062595 | 0.556466 | 0.297022 |
| MmugDNA.6417.1.S1_at   | MmugDNA.6417.1 | 5.94  | 6.12  | 0.32 | 0.11 | -1.14 | 0.62196  | 0.375915 | 0.812913 | 0.61375  |
| MmugDNA.6419.1.S1_at   | MmugDNA.6419.1 | 10.28 | 10.41 | 0.3  | 0.29 | -1.1  | 0.450326 | 0.032801 | 0.701387 | 0.22427  |
| MmugDNA.642.1.S1_at    | MmugDNA.642.1  | 4.73  | 4.75  | 0.09 | 0.02 | -1.02 | 0.64399  | 0.611871 | 0.826524 | 0.769622 |
| MmugDNA.6420.1.S1_at   | MmugDNA.6420.1 | 8.65  | 8.03  | 0.34 | 0.17 | 1.53  | 0.082642 | 0.04275  | 0.34444  | 0.251238 |
| MmugDNA.6421.1.S1_at   | MmugDNA.6421.1 | 3.69  | 3.83  | 0.2  | 0.18 | -1.1  | 0.355463 | 0.558807 | 0.632237 | 0.735887 |
| MmugDNA.6422.1.S1_at   | MmugDNA.6422.1 | 7.27  | 7.14  | 0.08 | 0.02 | 1.09  | 0.07156  | 0.366146 | 0.325567 | 0.605941 |
| MmugDNA.6423.1.S1_at   | MmugDNA.6423.1 | 6.05  | 5.96  | 0.18 | 0.27 | 1.06  | 0.904024 | 0.800366 | 0.959361 | 0.885129 |
| MmugDNA.6424.1.S1_at   | MmugDNA.6424.1 | 6.55  | 5.9   | 0.75 | 0.1  | 1.56  | 0.069052 | 0.060642 | 0.320891 | 0.292849 |
| MmugDNA.6425.1.S1_at   | MmugDNA.6425.1 | 2.95  | 2.87  | 0.4  | 0.06 | 1.06  | 0.635075 | 0.646498 | 0.821123 | 0.792953 |
| MmugDNA.6427.1.S1_at   | MmugDNA.6427.1 | 4.2   | 3.6   | 1.45 | 0.03 | 1.51  | 0.241827 | 0.327199 | 0.538882 | 0.577156 |
| MmugDNA.643.1.S1_at    | MmugDNA.643.1  | 4.95  | 4.82  | 0.12 | 0.12 | 1.09  | 0.342999 | 0.206064 | 0.622686 | 0.480273 |
| MmugDNA.6432.1.S1_at   | MmugDNA.6432.1 | 8.37  | 9.71  | 0.51 | 0.17 | -2.53 | 0.027429 | 0.018536 | 0.21846  | 0.171256 |
| MmugDNA.6433.1.S1_at   | MmugDNA.6433.1 | 7.62  | 7.4   | 0.15 | 0.17 | 1.16  | 0.565176 | 0.006069 | 0.776536 | 0.106175 |

|                         |                 |       |       |      |      |       |          |          |          |          |
|-------------------------|-----------------|-------|-------|------|------|-------|----------|----------|----------|----------|
| MmugDNA.6433.1.S1_x_at  | MmugDNA.6433.1  | 7.55  | 7.47  | 0.1  | 0.06 | 1.05  | 0.356204 | 0.01932  | 0.632513 | 0.174723 |
| MmugDNA.6434.1.S1_at    | MmugDNA.6434.1  | 6.35  | 5.83  | 0.21 | 0.16 | 1.43  | 0.057942 | 0.036457 | 0.297852 | 0.235423 |
| MmugDNA.6437.1.S1_at    | MmugDNA.6437.1  | 3.87  | 3.78  | 0.17 | 0.06 | 1.06  | 0.978022 | 0.651757 | 0.991451 | 0.796356 |
| MmugDNA.6438.1.S1_at    | MmugDNA.6438.1  | 10.69 | 10.6  | 0.15 | 0.11 | 1.07  | 0.256757 | 0.317516 | 0.5513   | 0.57076  |
| MmugDNA.6441.1.S1_at    | MmugDNA.6441.1  | 6.92  | 6.85  | 0.22 | 0.2  | 1.05  | 0.499239 | 0.07533  | 0.734097 | 0.319507 |
| MmugDNA.6442.1.S1_at    | MmugDNA.6442.1  | 6.78  | 6.46  | 0.11 | 0.01 | 1.25  | 0.014029 | 0.023445 | 0.169859 | 0.191956 |
| MmugDNA.6444.1.S1_at    | MmugDNA.6444.1  | 4.45  | 4.8   | 0.3  | 0.28 | -1.28 | 0.116036 | 0.366967 | 0.393069 | 0.606583 |
| MmugDNA.6445.1.S1_at    | MmugDNA.6445.1  | 6.36  | 5.85  | 0.76 | 0.25 | 1.43  | 0.21396  | 0.166854 | 0.51174  | 0.443311 |
| MmugDNA.6446.1.S1_at    | MmugDNA.6446.1  | 3.56  | 3.47  | 0.03 | 0.18 | 1.06  | 0.479251 | 0.35544  | 0.720499 | 0.597738 |
| MmugDNA.6447.1.S1_at    | MmugDNA.6447.1  | 6.31  | 6.91  | 0.78 | 0.07 | -1.52 | 0.692631 | 0.696622 | 0.853103 | 0.823776 |
| MmugDNA.6448.1.S1_at    | MmugDNA.6448.1  | 2.85  | 2.68  | 0.21 | 0.12 | 1.13  | 0.444868 | 0.553625 | 0.697568 | 0.732748 |
| MmugDNA.6449.1.S1_at    | MmugDNA.6449.1  | 3.21  | 3.22  | 0.22 | 0.42 | -1.01 | 0.387441 | 0.318195 | 0.655573 | 0.571069 |
| MmugDNA.645.1.S1_at     | MmugDNA.645.1   | 4.93  | 4.95  | 0.08 | 0.02 | -1.01 | 0.69729  | 0.545403 | 0.855921 | 0.727521 |
| MmugDNA.6451.1.S1_at    | MmugDNA.6451.1  | 7.49  | 7.31  | 0.18 | 0.03 | 1.14  | 0.479179 | 0.467416 | 0.720456 | 0.677085 |
| MmugDNA.6454.1.S1_at    | MmugDNA.6454.1  | 8.38  | 8.29  | 0.33 | 0.09 | 1.07  | 0.215226 | 0.205495 | 0.512891 | 0.479772 |
| MmugDNA.6454.1.S1_x_at  | MmugDNA.6454.1  | 8.08  | 7.96  | 0.28 | 0.12 | 1.09  | 0.166684 | 0.288715 | 0.459928 | 0.549856 |
| MmugDNA.6455.1.S1_at    | MmugDNA.6455.1  | 4.04  | 4.99  | 0.06 | 0.4  | -1.94 | 0.012488 | 0.110714 | 0.162087 | 0.374854 |
| MmugDNA.6459.1.S1_at    | MmugDNA.6459.1  | 3.45  | 3.26  | 0.22 | 0.03 | 1.14  | 0.560464 | 0.826455 | 0.773879 | 0.900317 |
| MmugDNA.6460.1.S1_at    | MmugDNA.6460.1  | 3.1   | 3.15  | 0.05 | 0.12 | -1.04 | 0.187242 | 0.288056 | 0.483374 | 0.549294 |
| MmugDNA.6461.1.S1_at    | MmugDNA.6461.1  | 3.24  | 3.35  | 0.05 | 0.02 | -1.08 | 0.038644 | 0.022712 | 0.252619 | 0.188723 |
| MmugDNA.6462.1.S1_at    | MmugDNA.6462.1  | 5.57  | 5.31  | 0.77 | 0.05 | 1.19  | 0.19674  | 0.17379  | 0.493859 | 0.450128 |
| MmugDNA.6463.1.S1_at    | MmugDNA.6463.1  | 10.6  | 10.73 | 0.15 | 0.02 | -1.09 | 0.203291 | 0.393863 | 0.501192 | 0.626608 |
| MmugDNA.6464.1.S1_at    | MmugDNA.6464.1  | 6.43  | 6.54  | 1.8  | 0.63 | -1.08 | 0.927427 | 0.986056 | 0.969284 | 0.992099 |
| MmugDNA.6465.1.S1_at    | MmugDNA.6465.1  | 3.63  | 3.92  | 0.1  | 0.19 | -1.23 | 0.100224 | 0.259764 | 0.371033 | 0.526648 |
| MmugDNA.6466.1.S1_at    | MmugDNA.6466.1  | 7.85  | 7.06  | 0.19 | 0.45 | 1.73  | 0.030044 | 0.010457 | 0.226564 | 0.133651 |
| MmugDNA.6467.1.S1_at    | MmugDNA.6467.1  | 3.72  | 3.7   | 1.71 | 0.16 | 1.02  | 0.373853 | 0.340069 | 0.645118 | 0.58653  |
| MmugDNA.6469.1.S1_at    | MmugDNA.6469.1  | 2.92  | 2.75  | 0.04 | 0.12 | 1.12  | 0.406985 | 0.08196  | 0.670192 | 0.330572 |
| MmugDNA.647.1.S1_at     | MmugDNA.647.1   | 2.9   | 2.71  | 0.1  | 0.04 | 1.14  | 0.059412 | 0.153838 | 0.300867 | 0.428506 |
| MmugDNA.6470.1.S1_at    | MmugDNA.6470.1  | 8.35  | 8.23  | 0.04 | 0.13 | 1.08  | 0.078353 | 0.181894 | 0.338023 | 0.45842  |
| MmugDNA.6471.1.S1_at    | MmugDNA.6471.1  | 7.66  | 8.63  | 0.41 | 0.19 | -1.97 | 0.015598 | 0.009758 | 0.177369 | 0.129958 |
| MmugDNA.36463.1.S1_s_at | MmugDNA.36463.1 | 6.37  | 6.57  | 0.13 | 0.19 | -1.15 | 0.28026  | 0.347683 | 0.571426 | 0.592071 |
| MmugDNA.6474.1.S1_at    | MmugDNA.6474.1  | 3.94  | 3.84  | 0.1  | 0.02 | 1.07  | 0.208868 | 0.159224 | 0.506342 | 0.435217 |
| MmugDNA.6475.1.S1_at    | MmugDNA.6475.1  | 4.78  | 4.61  | 0.29 | 0.15 | 1.12  | 0.459733 | 0.168863 | 0.707815 | 0.445458 |
| MmugDNA.6476.1.S1_at    | MmugDNA.6476.1  | 3.74  | 3.34  | 1.17 | 1.11 | 1.32  | 0.664704 | 0.790397 | 0.838694 | 0.878857 |
| MmugDNA.6479.1.S1_at    | MmugDNA.6479.1  | 5.27  | 5.37  | 0.23 | 0.28 | -1.07 | 0.392006 | 0.232644 | 0.659015 | 0.504359 |
| MmugDNA.648.1.S1_at     | MmugDNA.648.1   | 3.73  | 3.78  | 0.35 | 0.21 | -1.04 | 0.900818 | 0.648639 | 0.957991 | 0.794382 |
| MmugDNA.6480.1.S1_at    | MmugDNA.6480.1  | 5.96  | 5.73  | 0.23 | 0.05 | 1.17  | 0.502573 | 0.198697 | 0.736235 | 0.473391 |
| MmugDNA.6481.1.S1_at    | MmugDNA.6481.1  | 11.87 | 12.16 | 0.17 | 0.01 | -1.22 | 0.025548 | 0.00919  | 0.212881 | 0.126573 |
| MmugDNA.6483.1.S1_at    | MmugDNA.6483.1  | 10.61 | 10.4  | 0.14 | 0.16 | 1.15  | 0.338793 | 0.615919 | 0.619178 | 0.772359 |
| MmugDNA.6484.1.S1_at    | MmugDNA.6484.1  | 11.49 | 11.2  | 0.28 | 0.24 | 1.22  | 0.10563  | 0.092515 | 0.379745 | 0.348471 |
| MmugDNA.6485.1.S1_at    | MmugDNA.6485.1  | 9.6   | 9.77  | 0.4  | 0.14 | -1.12 | 0.944878 | 0.143106 | 0.976826 | 0.417006 |
| MmugDNA.6486.1.S1_at    | MmugDNA.6486.1  | 5.29  | 5.21  | 0.61 | 0.08 | 1.06  | 0.280614 | 0.278402 | 0.57173  | 0.542169 |
| MmugDNA.6487.1.S1_at    | MmugDNA.6487.1  | 4.81  | 4.8   | 0.02 | 0.17 | 1.01  | 0.476631 | 0.834958 | 0.718951 | 0.90553  |

|                         |                 |       |      |      |      |       |          |          |          |          |
|-------------------------|-----------------|-------|------|------|------|-------|----------|----------|----------|----------|
| MmugDNA.6488.1.S1_at    | MmugDNA.6488.1  | 6.3   | 6.79 | 0.36 | 0.05 | -1.41 | 0.201702 | 0.113262 | 0.499203 | 0.379297 |
| MmugDNA.6489.1.S1_at    | MmugDNA.6489.1  | 8.51  | 7.42 | 0.07 | 0.22 | 2.13  | 0.001115 | 0.046942 | 0.077306 | 0.261301 |
| MmugDNA.649.1.S1_at     | MmugDNA.649.1   | 5.67  | 5.87 | 0.08 | 0.08 | -1.15 | 0.090474 | 0.029277 | 0.35723  | 0.213122 |
| MmugDNA.6490.1.S1_at    | MmugDNA.6490.1  | 11.08 | 10.7 | 0.19 | 0.11 | 1.3   | 0.042115 | 0.568492 | 0.262198 | 0.741984 |
| MmugDNA.6491.1.S1_at    | MmugDNA.6491.1  | 4.04  | 4.22 | 0.09 | 0.08 | -1.13 | 0.016635 | 0.029714 | 0.182335 | 0.214029 |
| MmugDNA.6492.1.S1_at    | MmugDNA.6492.1  | 9.63  | 9.07 | 0.5  | 0.05 | 1.47  | 0.455231 | 0.883761 | 0.705039 | 0.933691 |
| MmugDNA.6493.1.S1_at    | MmugDNA.6493.1  | 8     | 7.19 | 0.26 | 0.13 | 1.75  | 0.007863 | 0.009804 | 0.137523 | 0.130166 |
| MmugDNA.6495.1.S1_at    | MmugDNA.6495.1  | 7.49  | 7.94 | 0.44 | 0.09 | -1.37 | 0.092001 | 0.082068 | 0.360023 | 0.33083  |
| MmugDNA.6496.1.S1_at    | MmugDNA.6496.1  | 5.31  | 4.67 | 0.73 | 0.18 | 1.56  | 0.504385 | 0.610889 | 0.737601 | 0.768948 |
| MmugDNA.6497.1.S1_at    | MmugDNA.6497.1  | 5.12  | 5.53 | 0.87 | 0.3  | -1.32 | 0.354389 | 0.406325 | 0.631567 | 0.634276 |
| MmugDNA.6499.1.S1_at    | MmugDNA.6499.1  | 4     | 3.95 | 0.05 | 0.08 | 1.03  | 0.946956 | 0.22464  | 0.977699 | 0.497613 |
| MmugDNA.65.1.S1_at      | MmugDNA.65.1    | 3.82  | 3.42 | 0.58 | 0.23 | 1.32  | 0.100623 | 0.089234 | 0.371612 | 0.34333  |
| MmugDNA.650.1.S1_at     | MmugDNA.650.1   | 7.24  | 7.33 | 0.23 | 0.6  | -1.06 | 0.571005 | 0.558454 | 0.779601 | 0.735631 |
| MmugDNA.6500.1.S1_at    | MmugDNA.6500.1  | 11.27 | 11.4 | 0.48 | 0.1  | -1.09 | 0.653014 | 0.812007 | 0.831848 | 0.891493 |
| MmugDNA.6501.1.S1_at    | MmugDNA.6501.1  | 7.14  | 6.89 | 0.32 | 0.01 | 1.19  | 0.223093 | 0.133372 | 0.520981 | 0.405191 |
| MmugDNA.6502.1.S1_at    | MmugDNA.6502.1  | 6.53  | 5.75 | 0.44 | 0.33 | 1.72  | 0.125093 | 0.146207 | 0.405516 | 0.420181 |
| MmugDNA.6503.1.S1_at    | MmugDNA.6503.1  | 5.01  | 5.1  | 0.09 | 0.12 | -1.06 | 0.331556 | 0.347514 | 0.613465 | 0.592019 |
| MmugDNA.6504.1.S1_at    | MmugDNA.6504.1  | 4.95  | 3.61 | 0.87 | 0.17 | 2.53  | 0.19127  | 0.093517 | 0.48749  | 0.349846 |
| MmugDNA.6507.1.S1_at    | MmugDNA.6507.1  | 3.13  | 3.15 | 0.15 | 0.07 | -1.01 | 0.91952  | 0.484412 | 0.965527 | 0.688478 |
| MmugDNA.6508.1.S1_at    | MmugDNA.6508.1  | 4.1   | 4.2  | 0.08 | 0.08 | -1.08 | 0.819727 | 0.018631 | 0.919644 | 0.171647 |
| MmugDNA.6509.1.S1_at    | MmugDNA.6509.1  | 6.09  | 6.19 | 0.22 | 0.07 | -1.07 | 0.644668 | 0.447302 | 0.827017 | 0.663434 |
| MmugDNA.651.1.S1_at     | MmugDNA.651.1   | 2.92  | 2.9  | 0.06 | 0.03 | 1.02  | 0.374935 | 0.469138 | 0.645792 | 0.678141 |
| MmugDNA.6511.1.S1_at    | MmugDNA.6511.1  | 3.9   | 3.8  | 0.07 | 0.12 | 1.07  | 0.453732 | 0.064176 | 0.703831 | 0.299592 |
| MmugDNA.19287.1.S1_at   | MmugDNA.19287.1 | 5.47  | 5.43 | 0.07 | 0.07 | 1.04  | 0.567478 | 0.240053 | 0.77779  | 0.510742 |
| MmugDNA.19287.1.S1_s_at | MmugDNA.19287.1 | 7.03  | 6.82 | 0.18 | 0.07 | 1.16  | 0.44656  | 0.034828 | 0.698757 | 0.230811 |
| MmugDNA.6513.1.S1_at    | MmugDNA.6513.1  | 7.55  | 7.25 | 0.19 | 0.21 | 1.23  | 0.249868 | 0.006442 | 0.544825 | 0.109051 |
| MmugDNA.6514.1.S1_at    | MmugDNA.6514.1  | 3.14  | 3.18 | 0.25 | 0.07 | -1.03 | 0.976821 | 0.991815 | 0.990898 | 0.995392 |
| MmugDNA.6515.1.S1_at    | MmugDNA.6515.1  | 5.15  | 5.22 | 1.58 | 0.15 | -1.05 | 0.373102 | 0.419954 | 0.645118 | 0.643765 |
| MmugDNA.6516.1.S1_at    | MmugDNA.6516.1  | 6.07  | 5.72 | 0.55 | 0.3  | 1.27  | 0.223699 | 0.004246 | 0.521697 | 0.091685 |
| MmugDNA.6518.1.S1_at    | MmugDNA.6518.1  | 3.62  | 3.62 | 0.04 | 0.03 | -1    | 0.650336 | 0.115154 | 0.830259 | 0.382052 |
| MmugDNA.6519.1.S1_at    | MmugDNA.6519.1  | 9.9   | 9.69 | 0.19 | 0.1  | 1.15  | 0.336397 | 0.075463 | 0.617028 | 0.319857 |
| MmugDNA.652.1.S1_at     | MmugDNA.652.1   | 2.92  | 2.99 | 0.04 | 0.09 | -1.05 | 0.09569  | 0.248829 | 0.365214 | 0.517951 |
| MmugDNA.6521.1.S1_at    | MmugDNA.6521.1  | 7.15  | 7.11 | 0.2  | 0.11 | 1.03  | 0.648595 | 0.166405 | 0.829274 | 0.442884 |
| MmugDNA.6523.1.S1_at    | MmugDNA.6523.1  | 5.28  | 5.69 | 0.28 | 0.19 | -1.33 | 0.117478 | 0.24755  | 0.394772 | 0.516895 |
| MmugDNA.6524.1.S1_at    | MmugDNA.6524.1  | 10.18 | 9.13 | 0.24 | 0.15 | 2.07  | 0.003416 | 0.29305  | 0.103083 | 0.552978 |
| MmugDNA.6525.1.S1_at    | MmugDNA.6525.1  | 3.14  | 3.16 | 0.12 | 0.23 | -1.02 | 0.818451 | 0.305717 | 0.918952 | 0.562714 |
| MmugDNA.6526.1.S1_at    | MmugDNA.6526.1  | 7.39  | 8.16 | 0.41 | 0.46 | -1.7  | 0.076422 | 0.043212 | 0.334699 | 0.252647 |
| MmugDNA.6527.1.S1_at    | MmugDNA.6527.1  | 7.36  | 6.94 | 0.32 | 0.1  | 1.35  | 0.091536 | 0.211771 | 0.359221 | 0.485757 |
| MmugDNA.6528.1.S1_at    | MmugDNA.6528.1  | 9.17  | 8.95 | 0.29 | 0.02 | 1.17  | 0.320957 | 0.605592 | 0.605315 | 0.76535  |
| MmugDNA.6529.1.S1_at    | MmugDNA.6529.1  | 4.07  | 3.64 | 0.76 | 0.07 | 1.34  | 0.865924 | 0.983283 | 0.941953 | 0.990726 |
| MmugDNA.653.1.S1_at     | MmugDNA.653.1   | 7.21  | 7.06 | 0.03 | 0.09 | 1.11  | 0.068055 | 0.144889 | 0.318551 | 0.418784 |
| MmugDNA.6530.1.S1_s_at  | MmugDNA.6530.1  | 7.95  | 9.37 | 0.07 | 0.29 | -2.68 | 0.001925 | 0.007263 | 0.088159 | 0.114334 |
| MmugDNA.6531.1.S1_at    | MmugDNA.6531.1  | 3.61  | 3.62 | 0.35 | 0.06 | -1.01 | 0.399977 | 0.534407 | 0.665139 | 0.720351 |

|                      |                |       |       |      |      |       |          |          |          |          |
|----------------------|----------------|-------|-------|------|------|-------|----------|----------|----------|----------|
| MmugDNA.6532.1.S1_at | MmugDNA.6532.1 | 6.2   | 6.14  | 0.18 | 0.12 | 1.04  | 0.957169 | 0.879688 | 0.982482 | 0.931267 |
| MmugDNA.6533.1.S1_at | MmugDNA.6533.1 | 6.95  | 7.56  | 0.4  | 0.33 | -1.53 | 0.152999 | 0.417791 | 0.442719 | 0.642404 |
| MmugDNA.6534.1.S1_at | MmugDNA.6534.1 | 6.28  | 6.26  | 0.25 | 0.1  | 1.01  | 0.97156  | 0.985919 | 0.98857  | 0.99201  |
| MmugDNA.6535.1.S1_at | MmugDNA.6535.1 | 3.42  | 3.28  | 0.52 | 0.08 | 1.1   | 0.227779 | 0.27576  | 0.525854 | 0.540028 |
| MmugDNA.6536.1.S1_at | MmugDNA.6536.1 | 4.82  | 4.77  | 0.02 | 0.04 | 1.04  | 0.385852 | 0.717527 | 0.654498 | 0.836463 |
| MmugDNA.6537.1.S1_at | MmugDNA.6537.1 | 3.14  | 3.17  | 0.28 | 0.05 | -1.02 | 0.639699 | 0.651745 | 0.823657 | 0.796356 |
| MmugDNA.6538.1.S1_at | MmugDNA.6538.1 | 12.59 | 12.44 | 0.1  | 0.02 | 1.11  | 0.117581 | 0.194091 | 0.394938 | 0.46925  |
| MmugDNA.654.1.S1_at  | MmugDNA.654.1  | 5.64  | 5.58  | 0.23 | 0.24 | 1.05  | 0.360398 | 0.52979  | 0.635954 | 0.717498 |
| MmugDNA.6541.1.S1_at | MmugDNA.6541.1 | 7.32  | 7.1   | 1.72 | 0.6  | 1.17  | 0.332384 | 0.17182  | 0.614085 | 0.448224 |
| MmugDNA.6543.1.S1_at | MmugDNA.6543.1 | 6.37  | 6.23  | 0.14 | 0.19 | 1.1   | 0.374094 | 0.611344 | 0.645299 | 0.769255 |
| MmugDNA.6544.1.S1_at | MmugDNA.6544.1 | 3.05  | 3.03  | 0.25 | 0.16 | 1.02  | 0.819807 | 0.947909 | 0.919644 | 0.970378 |
| MmugDNA.6545.1.S1_at | MmugDNA.6545.1 | 11.21 | 11.24 | 0.52 | 0.19 | -1.02 | 0.392606 | 0.774434 | 0.659492 | 0.868766 |
| MmugDNA.6546.1.S1_at | MmugDNA.6546.1 | 4.58  | 4.75  | 1.15 | 0.35 | -1.12 | 0.782903 | 0.493089 | 0.900922 | 0.693996 |
| MmugDNA.6547.1.S1_at | MmugDNA.6547.1 | 5.8   | 5.97  | 1.07 | 0.28 | -1.13 | 0.727926 | 0.792803 | 0.872684 | 0.880383 |
| MmugDNA.6548.1.S1_at | MmugDNA.6548.1 | 4.05  | 4.08  | 0.1  | 0.11 | -1.02 | 0.674962 | 0.235434 | 0.844854 | 0.506489 |
| MmugDNA.6549.1.S1_at | MmugDNA.6549.1 | 12.54 | 12.86 | 0.18 | 0.02 | -1.25 | 0.091206 | 0.581594 | 0.358616 | 0.750589 |
| MmugDNA.655.1.S1_at  | MmugDNA.655.1  | 6.61  | 6.18  | 0.42 | 0.22 | 1.34  | 0.186415 | 0.243873 | 0.482612 | 0.514048 |
| MmugDNA.6550.1.S1_at | MmugDNA.6550.1 | 4.03  | 3.93  | 0.1  | 0.13 | 1.07  | 0.812854 | 0.089284 | 0.916222 | 0.343423 |
| MmugDNA.6551.1.S1_at | MmugDNA.6551.1 | 3.56  | 3.56  | 0.13 | 0.06 | 1     | 0.256466 | 0.489259 | 0.550997 | 0.691754 |
| MmugDNA.6552.1.S1_at | MmugDNA.6552.1 | 9.18  | 9.05  | 0.14 | 0.17 | 1.1   | 0.072527 | 0.000382 | 0.327285 | 0.037273 |
| MmugDNA.6555.1.S1_at | MmugDNA.6555.1 | 3.87  | 3.67  | 0.21 | 0.1  | 1.14  | 0.208843 | 0.0682   | 0.506325 | 0.307338 |
| MmugDNA.6556.1.S1_at | MmugDNA.6556.1 | 7.34  | 7.11  | 0.41 | 0.37 | 1.17  | 0.285041 | 0.115222 | 0.575053 | 0.3822   |
| MmugDNA.6557.1.S1_at | MmugDNA.6557.1 | 11.26 | 11.28 | 0.09 | 0.12 | -1.01 | 0.577606 | 0.045064 | 0.783696 | 0.256789 |
| MmugDNA.6558.1.S1_at | MmugDNA.6558.1 | 6.82  | 5.84  | 0.54 | 0.15 | 1.98  | 0.075171 | 0.068887 | 0.332294 | 0.308829 |
| MmugDNA.6562.1.S1_at | MmugDNA.6562.1 | 4.11  | 3.9   | 0.17 | 0.07 | 1.16  | 0.153252 | 0.205235 | 0.442946 | 0.479596 |
| MmugDNA.6563.1.S1_at | MmugDNA.6563.1 | 6.76  | 6.45  | 0.38 | 0.24 | 1.24  | 0.123247 | 0.298534 | 0.402462 | 0.557175 |
| MmugDNA.6564.1.S1_at | MmugDNA.6564.1 | 6.23  | 6.56  | 0.37 | 0.22 | -1.26 | 0.589968 | 0.016157 | 0.791771 | 0.161102 |
| MmugDNA.6565.1.S1_at | MmugDNA.6565.1 | 5.54  | 5.5   | 0.08 | 0.11 | 1.03  | 0.130476 | 0.044781 | 0.412895 | 0.256066 |
| MmugDNA.6566.1.S1_at | MmugDNA.6566.1 | 6.4   | 6.5   | 0.2  | 0.15 | -1.07 | 0.965562 | 0.243922 | 0.986023 | 0.514069 |
| MmugDNA.6567.1.S1_at | MmugDNA.6567.1 | 5.71  | 5.69  | 0.26 | 0.03 | 1.01  | 0.696273 | 0.776339 | 0.855348 | 0.869885 |
| MmugDNA.6569.1.S1_at | MmugDNA.6569.1 | 11    | 11.11 | 0.07 | 0.07 | -1.08 | 0.10223  | 0.903238 | 0.374232 | 0.945015 |
| MmugDNA.657.1.S1_at  | MmugDNA.657.1  | 6.75  | 6.81  | 0.54 | 0.14 | -1.04 | 0.424748 | 0.411909 | 0.682288 | 0.638434 |
| MmugDNA.6570.1.S1_at | MmugDNA.6570.1 | 11.61 | 11.09 | 0.36 | 0.1  | 1.43  | 0.245322 | 0.282045 | 0.541364 | 0.544937 |
| MmugDNA.6573.1.S1_at | MmugDNA.6573.1 | 3.44  | 2.9   | 0.23 | 0.27 | 1.45  | 0.063555 | 0.269462 | 0.308742 | 0.534767 |
| MmugDNA.6574.1.S1_at | MmugDNA.6574.1 | 8.68  | 8.73  | 0.15 | 0.02 | -1.03 | 0.67509  | 0.233606 | 0.844921 | 0.50492  |
| MmugDNA.6575.1.S1_at | MmugDNA.6575.1 | 3.7   | 3.46  | 0.14 | 0.1  | 1.18  | 0.034522 | 0.029333 | 0.24039  | 0.213228 |
| MmugDNA.6576.1.S1_at | MmugDNA.6576.1 | 7.22  | 6.68  | 0.34 | 0.35 | 1.45  | 0.136174 | 0.260979 | 0.420583 | 0.527354 |
| MmugDNA.6577.1.S1_at | MmugDNA.6577.1 | 4     | 3.76  | 0.19 | 0.1  | 1.18  | 0.051097 | 0.066528 | 0.283595 | 0.303705 |
| MmugDNA.6578.1.S1_at | MmugDNA.6578.1 | 8.22  | 7.46  | 0.19 | 0.29 | 1.69  | 0.027444 | 0.513747 | 0.218468 | 0.707217 |
| MmugDNA.6579.1.S1_at | MmugDNA.6579.1 | 5.52  | 5.6   | 0.22 | 0.08 | -1.06 | 0.554636 | 0.747155 | 0.77077  | 0.853124 |
| MmugDNA.6581.1.S1_at | MmugDNA.6581.1 | 5.61  | 5.63  | 0.16 | 0.05 | -1.01 | 0.60566  | 0.563012 | 0.802615 | 0.738314 |
| MmugDNA.6582.1.S1_at | MmugDNA.6582.1 | 6.24  | 5.84  | 0.53 | 0.4  | 1.32  | 0.190441 | 0.167216 | 0.486761 | 0.443684 |
| MmugDNA.6584.1.S1_at | MmugDNA.6584.1 | 8.7   | 8.55  | 0.23 | 0.09 | 1.11  | 0.134537 | 0.249987 | 0.418347 | 0.519009 |

|                        |                |       |       |      |      |       |          |          |          |          |
|------------------------|----------------|-------|-------|------|------|-------|----------|----------|----------|----------|
| MmugDNA.6585.1.S1_at   | MmugDNA.6585.1 | 10.63 | 11.24 | 0.16 | 0.12 | -1.52 | 0.00988  | 0.283873 | 0.14884  | 0.546237 |
| MmugDNA.6587.1.S1_at   | MmugDNA.6587.1 | 3.6   | 3.65  | 0.14 | 0.08 | -1.04 | 0.75271  | 0.921877 | 0.885782 | 0.955951 |
| MmugDNA.6588.1.S1_at   | MmugDNA.6588.1 | 4.51  | 4.46  | 0.03 | 0.02 | 1.03  | 0.188108 | 0.671435 | 0.48439  | 0.807907 |
| MmugDNA.6589.1.S1_at   | MmugDNA.6589.1 | 10.33 | 9.91  | 0.39 | 0.23 | 1.33  | 0.176368 | 0.037267 | 0.470765 | 0.237506 |
| MmugDNA.6592.1.S1_at   | MmugDNA.6592.1 | 3.95  | 3.97  | 0.24 | 0.09 | -1.01 | 0.321818 | 0.475257 | 0.606128 | 0.682031 |
| MmugDNA.6593.1.S1_at   | MmugDNA.6593.1 | 7.29  | 7.22  | 0.12 | 0.07 | 1.04  | 0.950464 | 0.237008 | 0.97944  | 0.507675 |
| MmugDNA.6594.1.S1_s_at | MmugDNA.6594.1 | 8.48  | 7.47  | 0.25 | 0.15 | 2.01  | 0.004859 | 0.001111 | 0.115123 | 0.052745 |
| MmugDNA.6595.1.S1_at   | MmugDNA.6595.1 | 4.26  | 4.1   | 0.14 | 0.12 | 1.12  | 0.544491 | 0.036823 | 0.764107 | 0.236413 |
| MmugDNA.6596.1.S1_at   | MmugDNA.6596.1 | 4.55  | 4.3   | 0.16 | 0.08 | 1.19  | 0.056046 | 0.058874 | 0.293789 | 0.289391 |
| MmugDNA.6597.1.S1_at   | MmugDNA.6597.1 | 10.64 | 10.97 | 0.21 | 0.07 | -1.25 | 0.072916 | 0.671932 | 0.327698 | 0.808177 |
| MmugDNA.6598.1.S1_at   | MmugDNA.6598.1 | 8.27  | 7.85  | 0.38 | 0.36 | 1.34  | 0.179021 | 0.419068 | 0.474004 | 0.643266 |
| MmugDNA.6599.1.S1_at   | MmugDNA.6599.1 | 3.78  | 3.78  | 0.02 | 0.12 | 1     | 0.497223 | 0.747115 | 0.732907 | 0.853124 |
| MmugDNA.660.1.S1_s_at  | MmugDNA.660.1  | 8.89  | 8.28  | 0.16 | 0.16 | 1.52  | 0.009686 | 0.016    | 0.148335 | 0.160458 |
| MmugDNA.6600.1.S1_at   | MmugDNA.6600.1 | 7.16  | 7.84  | 0.6  | 0.06 | -1.61 | 0.087185 | 0.213215 | 0.352835 | 0.487098 |
| MmugDNA.6602.1.S1_at   | MmugDNA.6602.1 | 5.37  | 5.21  | 0.17 | 0.2  | 1.12  | 0.141947 | 0.201881 | 0.427917 | 0.476373 |
| MmugDNA.6603.1.S1_at   | MmugDNA.6603.1 | 5.49  | 5.43  | 0.21 | 0.19 | 1.04  | 0.344857 | 0.529428 | 0.624058 | 0.717276 |
| MmugDNA.6604.1.S1_at   | MmugDNA.6604.1 | 4.65  | 4.68  | 1.02 | 0.03 | -1.02 | 0.392682 | 0.472115 | 0.659585 | 0.679861 |
| MmugDNA.6606.1.S1_at   | MmugDNA.6606.1 | 6.91  | 7.37  | 0.26 | 0.18 | -1.38 | 0.037329 | 0.01742  | 0.248625 | 0.167044 |
| MmugDNA.6609.1.S1_at   | MmugDNA.6609.1 | 7.23  | 6.26  | 0.34 | 0.25 | 1.96  | 0.03038  | 0.034762 | 0.227249 | 0.230665 |
| MmugDNA.661.1.S1_at    | MmugDNA.661.1  | 4.72  | 4.61  | 0.04 | 0.09 | 1.07  | 0.09974  | 0.345016 | 0.370728 | 0.590268 |
| MmugDNA.6610.1.S1_at   | MmugDNA.6610.1 | 4.98  | 4.94  | 0.3  | 0.23 | 1.03  | 0.702069 | 0.260776 | 0.858655 | 0.52721  |
| MmugDNA.6611.1.S1_at   | MmugDNA.6611.1 | 10.8  | 9.82  | 0.11 | 0.34 | 1.98  | 0.011738 | 0.001163 | 0.158171 | 0.053615 |
| MmugDNA.6612.1.S1_at   | MmugDNA.6612.1 | 4.08  | 4.2   | 0.1  | 0.14 | -1.09 | 0.195155 | 0.240723 | 0.491724 | 0.511447 |
| MmugDNA.6613.1.S1_s_at | MmugDNA.6613.1 | 11.04 | 10.78 | 0.23 | 0.26 | 1.2   | 0.372218 | 0.541969 | 0.644813 | 0.725169 |
| MmugDNA.6615.1.S1_at   | MmugDNA.6615.1 | 7.29  | 7.27  | 0.51 | 0.2  | 1.01  | 0.467426 | 0.444336 | 0.712919 | 0.66198  |
| MmugDNA.6615.1.S1_x_at | MmugDNA.6615.1 | 5.71  | 5.84  | 0.66 | 0.31 | -1.09 | 0.583168 | 0.455871 | 0.787865 | 0.669664 |
| MmugDNA.6617.1.S1_at   | MmugDNA.6617.1 | 5.74  | 5.56  | 0.15 | 0.16 | 1.13  | 0.22624  | 0.328898 | 0.523981 | 0.578456 |
| MmugDNA.5157.1.S1_s_at | MmugDNA.5157.1 | 8.17  | 8.18  | 0.29 | 0.05 | -1.01 | 0.964083 | 0.529789 | 0.985473 | 0.717498 |
| MmugDNA.6619.1.S1_at   | MmugDNA.6619.1 | 4.99  | 4.97  | 0.03 | 0.08 | 1.01  | 0.855111 | 0.827576 | 0.93691  | 0.901078 |
| MmugDNA.662.1.S1_at    | MmugDNA.662.1  | 5.61  | 5.51  | 0.25 | 0.07 | 1.07  | 0.815359 | 0.192373 | 0.917549 | 0.467835 |
| MmugDNA.6620.1.S1_at   | MmugDNA.6620.1 | 7.11  | 6.51  | 0.74 | 0.25 | 1.51  | 0.229767 | 0.179818 | 0.528728 | 0.456342 |
| MmugDNA.6622.1.S1_at   | MmugDNA.6622.1 | 7     | 7.79  | 1.29 | 0.23 | -1.73 | 0.932997 | 0.992681 | 0.971918 | 0.995715 |
| MmugDNA.6624.1.S1_at   | MmugDNA.6624.1 | 7.2   | 7.31  | 1.3  | 0.57 | -1.08 | 0.723505 | 0.594318 | 0.870006 | 0.758574 |
| MmugDNA.6625.1.S1_at   | MmugDNA.6625.1 | 6.73  | 7.19  | 0.09 | 0.29 | -1.37 | 0.091748 | 0.111656 | 0.359517 | 0.376592 |
| MmugDNA.6628.1.S1_at   | MmugDNA.6628.1 | 6.97  | 6.23  | 0.87 | 0.22 | 1.67  | 0.135874 | 0.082089 | 0.419983 | 0.330892 |
| MmugDNA.6629.1.S1_at   | MmugDNA.6629.1 | 3.35  | 3.34  | 0.26 | 0.15 | 1.01  | 0.222798 | 0.099959 | 0.520677 | 0.358768 |
| MmugDNA.663.1.S1_at    | MmugDNA.663.1  | 3.45  | 3.45  | 0.12 | 0.05 | 1     | 0.627362 | 0.301616 | 0.816803 | 0.55955  |
| MmugDNA.6630.1.S1_at   | MmugDNA.6630.1 | 9.5   | 9.31  | 0.01 | 0.01 | 1.14  | 0.000035 | 0.241316 | 0.045594 | 0.511952 |
| MmugDNA.6630.1.S1_s_at | MmugDNA.6630.1 | 9.86  | 9.65  | 0.07 | 0.05 | 1.15  | 0.007551 | 0.03221  | 0.135126 | 0.222139 |
| MmugDNA.6632.1.S1_at   | MmugDNA.6632.1 | 7.86  | 7.35  | 0.35 | 0.28 | 1.42  | 0.244898 | 0.044101 | 0.541101 | 0.254323 |
| MmugDNA.6633.1.S1_at   | MmugDNA.6633.1 | 7.14  | 6.99  | 0.22 | 0.14 | 1.11  | 0.268941 | 0.30783  | 0.561347 | 0.56397  |
| MmugDNA.6636.1.S1_at   | MmugDNA.6636.1 | 6.29  | 6.2   | 0.09 | 0.01 | 1.07  | 0.149865 | 0.370116 | 0.43879  | 0.609369 |
| MmugDNA.6637.1.S1_s_at | MmugDNA.6637.1 | 11.74 | 10.8  | 0.12 | 0.03 | 1.92  | 0.000223 | 0.000475 | 0.054604 | 0.038572 |



|                        |                |       |       |      |      |       |          |          |          |          |
|------------------------|----------------|-------|-------|------|------|-------|----------|----------|----------|----------|
| MmugDNA.6638.1.S1_at   | MmugDNA.6638.1 | 4.92  | 4.81  | 0.65 | 0.14 | 1.08  | 0.669804 | 0.680294 | 0.841529 | 0.813346 |
| MmugDNA.6639.1.S1_at   | MmugDNA.6639.1 | 10.92 | 10.88 | 0.12 | 0.22 | 1.03  | 0.460537 | 0.255071 | 0.708276 | 0.52317  |
| MmugDNA.664.1.S1_at    | MmugDNA.664.1  | 8.5   | 7.51  | 0.29 | 0.4  | 1.99  | 0.025703 | 0.008428 | 0.212966 | 0.121867 |
| MmugDNA.6643.1.S1_at   | MmugDNA.6643.1 | 3.97  | 3.84  | 0.15 | 0.4  | 1.09  | 0.489731 | 0.365871 | 0.72796  | 0.605774 |
| MmugDNA.6644.1.S1_at   | MmugDNA.6644.1 | 4.57  | 4.57  | 0.25 | 0.01 | -1    | 0.960642 | 0.99859  | 0.983913 | 0.999247 |
| MmugDNA.6645.1.S1_at   | MmugDNA.6645.1 | 4.02  | 3.94  | 0.02 | 0.14 | 1.06  | 0.117761 | 0.313298 | 0.395125 | 0.567753 |
| MmugDNA.6646.1.S1_at   | MmugDNA.6646.1 | 7.31  | 7.28  | 0.7  | 0.21 | 1.02  | 0.903492 | 0.413535 | 0.959099 | 0.639648 |
| MmugDNA.6647.1.S1_at   | MmugDNA.6647.1 | 4.25  | 4.29  | 0.21 | 0.14 | -1.03 | 0.634664 | 0.265103 | 0.820892 | 0.531    |
| MmugDNA.6648.1.S1_at   | MmugDNA.6648.1 | 9.58  | 9.64  | 0.09 | 0.1  | -1.04 | 0.343602 | 0.075946 | 0.622989 | 0.320634 |
| MmugDNA.6649.1.S1_at   | MmugDNA.6649.1 | 7.31  | 7.14  | 0.09 | 0.06 | 1.12  | 0.124746 | 0.103789 | 0.405029 | 0.364519 |
| MmugDNA.665.1.S1_at    | MmugDNA.665.1  | 6.67  | 6.6   | 0.12 | 0.13 | 1.05  | 0.741783 | 0.667696 | 0.880351 | 0.80548  |
| MmugDNA.6651.1.S1_at   | MmugDNA.6651.1 | 4.43  | 4.32  | 0.15 | 0.07 | 1.08  | 0.471866 | 0.336433 | 0.71587  | 0.583831 |
| MmugDNA.6652.1.S1_at   | MmugDNA.6652.1 | 7.91  | 7.64  | 0.05 | 0.12 | 1.2   | 0.012074 | 0.059313 | 0.15989  | 0.29054  |
| MmugDNA.6654.1.S1_at   | MmugDNA.6654.1 | 3.42  | 3.34  | 0.62 | 0.07 | 1.05  | 0.298197 | 0.382758 | 0.586574 | 0.618887 |
| MmugDNA.6658.1.S1_at   | MmugDNA.6658.1 | 10.04 | 10.1  | 0.47 | 0.57 | -1.04 | 0.895401 | 0.273061 | 0.955344 | 0.537644 |
| MmugDNA.666.1.S1_at    | MmugDNA.666.1  | 5.26  | 5.2   | 0.13 | 0.04 | 1.04  | 0.540159 | 0.339342 | 0.761298 | 0.585984 |
| MmugDNA.6661.1.S1_at   | MmugDNA.6661.1 | 4.03  | 3.94  | 0.21 | 0.04 | 1.07  | 0.163954 | 0.09782  | 0.456756 | 0.355639 |
| MmugDNA.6663.1.S1_at   | MmugDNA.6663.1 | 4.31  | 4.31  | 0.11 | 0.14 | -1    | 0.545526 | 0.890457 | 0.764745 | 0.93758  |
| MmugDNA.6665.1.S1_at   | MmugDNA.6665.1 | 5.62  | 6.12  | 0.48 | 0.19 | -1.41 | 0.170628 | 0.239203 | 0.464363 | 0.509902 |
| MmugDNA.6666.1.S1_at   | MmugDNA.6666.1 | 6.07  | 6.16  | 0.24 | 0.28 | -1.06 | 0.850918 | 0.279953 | 0.935272 | 0.543359 |
| MmugDNA.6667.1.S1_at   | MmugDNA.6667.1 | 5.15  | 5.12  | 0.45 | 0.16 | 1.02  | 0.315268 | 0.606896 | 0.600287 | 0.76612  |
| MmugDNA.667.1.S1_at    | MmugDNA.667.1  | 6.24  | 6.18  | 0.17 | 0    | 1.05  | 0.169807 | 0.17668  | 0.4632   | 0.453142 |
| MmugDNA.6670.1.S1_at   | MmugDNA.6670.1 | 4.22  | 4.09  | 0.2  | 0.23 | 1.1   | 0.186082 | 0.107533 | 0.482202 | 0.370389 |
| MmugDNA.6671.1.S1_at   | MmugDNA.6671.1 | 6.36  | 6.15  | 0.23 | 0.11 | 1.16  | 0.243971 | 0.370336 | 0.540732 | 0.609407 |
| MmugDNA.6672.1.S1_at   | MmugDNA.6672.1 | 7.91  | 7.26  | 0.27 | 0.17 | 1.57  | 0.069915 | 0.052602 | 0.322915 | 0.274853 |
| MmugDNA.6673.1.S1_at   | MmugDNA.6673.1 | 11.73 | 12.03 | 0.14 | 0.13 | -1.24 | 0.239878 | 0.473392 | 0.537405 | 0.68068  |
| MmugDNA.6676.1.S1_at   | MmugDNA.6676.1 | 5.14  | 5.05  | 0.07 | 0.06 | 1.07  | 0.089514 | 0.300812 | 0.356406 | 0.559039 |
| MmugDNA.668.1.S1_at    | MmugDNA.668.1  | 3.73  | 3.58  | 0.22 | 0.14 | 1.11  | 0.727559 | 0.51005  | 0.872385 | 0.704549 |
| MmugDNA.6680.1.S1_at   | MmugDNA.6680.1 | 4.22  | 4.52  | 0.85 | 0.14 | -1.23 | 0.612088 | 0.809638 | 0.80668  | 0.89027  |
| MmugDNA.6682.1.S1_at   | MmugDNA.6682.1 | 8.2   | 7.78  | 0.22 | 0.09 | 1.34  | 0.035553 | 0.033032 | 0.243398 | 0.225    |
| MmugDNA.6682.1.S1_s_at | MmugDNA.6682.1 | 7.1   | 7.02  | 0.23 | 0.09 | 1.06  | 0.226368 | 0.23756  | 0.524199 | 0.508196 |
| MmugDNA.6684.1.S1_at   | MmugDNA.6684.1 | 5.63  | 5.59  | 0.26 | 0.2  | 1.03  | 0.782637 | 0.973232 | 0.900827 | 0.98548  |
| MmugDNA.6686.1.S1_at   | MmugDNA.6686.1 | 10.26 | 10.39 | 0.14 | 0.21 | -1.09 | 0.322614 | 0.010027 | 0.606572 | 0.131279 |
| MmugDNA.6688.1.S1_at   | MmugDNA.6688.1 | 10.4  | 10.04 | 0.27 | 0.17 | 1.28  | 0.400671 | 0.251505 | 0.665527 | 0.520261 |
| MmugDNA.6689.1.S1_at   | MmugDNA.6689.1 | 3.7   | 3.66  | 0.12 | 0.06 | 1.03  | 0.661614 | 0.762283 | 0.836666 | 0.861726 |
| MmugDNA.669.1.S1_at    | MmugDNA.669.1  | 4.14  | 3.96  | 0.09 | 0.06 | 1.13  | 0.036197 | 0.057234 | 0.245335 | 0.285059 |
| MmugDNA.6690.1.S1_at   | MmugDNA.6690.1 | 8.92  | 8.59  | 0.06 | 0.07 | 1.26  | 0.003338 | 0.033938 | 0.102526 | 0.227853 |
| MmugDNA.6691.1.S1_at   | MmugDNA.6691.1 | 3.85  | 3.86  | 0.01 | 0.1  | -1.01 | 0.460276 | 0.767677 | 0.708163 | 0.86513  |
| MmugDNA.6692.1.S1_at   | MmugDNA.6692.1 | 4.36  | 4.31  | 0.43 | 0.03 | 1.04  | 0.321797 | 0.50049  | 0.606128 | 0.69907  |
| MmugDNA.6693.1.S1_at   | MmugDNA.6693.1 | 10.09 | 10.49 | 0.15 | 0.04 | -1.32 | 0.016574 | 0.109284 | 0.181894 | 0.37308  |
| MmugDNA.6694.1.S1_at   | MmugDNA.6694.1 | 3.37  | 3.37  | 0.1  | 0.2  | 1     | 0.698508 | 0.469888 | 0.856607 | 0.678572 |
| MmugDNA.6696.1.S1_at   | MmugDNA.6696.1 | 8.54  | 8.5   | 0.26 | 0.1  | 1.03  | 0.973014 | 0.068482 | 0.9892   | 0.308214 |
| MmugDNA.6697.1.S1_at   | MmugDNA.6697.1 | 3.43  | 3.51  | 0.17 | 0.03 | -1.06 | 0.291364 | 0.133698 | 0.580647 | 0.405647 |

|                        |                |       |       |      |      |       |          |          |          |          |
|------------------------|----------------|-------|-------|------|------|-------|----------|----------|----------|----------|
| MmugDNA.6698.1.S1_at   | MmugDNA.6698.1 | 8.05  | 8.94  | 1.22 | 0.13 | -1.85 | 0.385928 | 0.563942 | 0.654498 | 0.738913 |
| MmugDNA.6699.1.S1_at   | MmugDNA.6699.1 | 11.01 | 10.72 | 0.06 | 0.08 | 1.22  | 0.022098 | 0.025643 | 0.201888 | 0.200834 |
| MmugDNA.67.1.S1_at     | MmugDNA.67.1   | 5.97  | 6.16  | 0.25 | 0.14 | -1.15 | 0.444254 | 0.10192  | 0.697126 | 0.361927 |
| MmugDNA.670.1.S1_at    | MmugDNA.670.1  | 5.77  | 5.75  | 0.13 | 0.07 | 1.02  | 0.285315 | 0.644483 | 0.575167 | 0.791603 |
| MmugDNA.6700.1.S1_at   | MmugDNA.6700.1 | 10.62 | 10.67 | 0.12 | 0.03 | -1.03 | 0.197888 | 0.755172 | 0.49515  | 0.857488 |
| MmugDNA.6701.1.S1_at   | MmugDNA.6701.1 | 5.99  | 6.39  | 0.17 | 0.14 | -1.31 | 0.042722 | 0.366029 | 0.263882 | 0.605891 |
| MmugDNA.6703.1.S1_s_at | MmugDNA.6703.1 | 13.51 | 13.43 | 0.13 | 0.08 | 1.06  | 0.696412 | 0.893541 | 0.855406 | 0.939277 |
| MmugDNA.6704.1.S1_at   | MmugDNA.6704.1 | 8.09  | 10.66 | 1.57 | 0.23 | -5.94 | 0.072465 | 0.070209 | 0.327132 | 0.311194 |
| MmugDNA.6705.1.S1_at   | MmugDNA.6705.1 | 4.63  | 4.43  | 0.92 | 0.42 | 1.15  | 0.285377 | 0.304205 | 0.575167 | 0.561558 |
| MmugDNA.6707.1.S1_at   | MmugDNA.6707.1 | 3.92  | 3.79  | 0.28 | 0.1  | 1.09  | 0.163247 | 0.202733 | 0.455532 | 0.477174 |
| MmugDNA.6708.1.S1_at   | MmugDNA.6708.1 | 7.71  | 7.67  | 0.15 | 0.06 | 1.03  | 0.29941  | 0.591507 | 0.58771  | 0.757033 |
| MmugDNA.6710.1.S1_at   | MmugDNA.6710.1 | 3.56  | 3.45  | 0.32 | 0.06 | 1.08  | 0.531713 | 0.685265 | 0.755933 | 0.816424 |
| MmugDNA.6711.1.S1_at   | MmugDNA.6711.1 | 11.34 | 10.91 | 0.13 | 0.04 | 1.34  | 0.005541 | 0.004428 | 0.119965 | 0.092934 |
| MmugDNA.6712.1.S1_at   | MmugDNA.6712.1 | 4.36  | 4.67  | 0.2  | 0.14 | -1.23 | 0.249838 | 0.117108 | 0.544804 | 0.384552 |
| MmugDNA.6713.1.S1_at   | MmugDNA.6713.1 | 6.28  | 6.29  | 0.26 | 0.05 | -1.01 | 0.677011 | 0.216287 | 0.845923 | 0.489844 |
| MmugDNA.6715.1.S1_at   | MmugDNA.6715.1 | 6.62  | 6.66  | 0.09 | 0.12 | -1.03 | 0.711436 | 0.921439 | 0.863845 | 0.955761 |
| MmugDNA.6716.1.S1_at   | MmugDNA.6716.1 | 5     | 4.94  | 0.45 | 0.05 | 1.04  | 0.466432 | 0.755085 | 0.712237 | 0.857447 |
| MmugDNA.6718.1.S1_at   | MmugDNA.6718.1 | 4.28  | 4.2   | 0.03 | 0.05 | 1.06  | 0.372207 | 0.1286   | 0.644813 | 0.400027 |
| MmugDNA.6719.1.S1_at   | MmugDNA.6719.1 | 4.9   | 4.69  | 0.67 | 0.28 | 1.15  | 0.244777 | 0.544093 | 0.541082 | 0.726614 |
| MmugDNA.672.1.S1_at    | MmugDNA.672.1  | 4.03  | 4.24  | 0.25 | 0.02 | -1.16 | 0.240147 | 0.149373 | 0.537781 | 0.423811 |
| MmugDNA.6720.1.S1_at   | MmugDNA.6720.1 | 12.93 | 12.74 | 0.07 | 0.02 | 1.14  | 0.006046 | 0.018947 | 0.124182 | 0.17317  |
| MmugDNA.6721.1.S1_at   | MmugDNA.6721.1 | 5.96  | 6.13  | 0.3  | 0.2  | -1.13 | 0.099577 | 0.240393 | 0.370515 | 0.510966 |
| MmugDNA.6722.1.S1_at   | MmugDNA.6722.1 | 4.07  | 4.08  | 0.41 | 0.6  | -1.01 | 0.704451 | 0.688527 | 0.85972  | 0.818201 |
| MmugDNA.6723.1.S1_at   | MmugDNA.6723.1 | 3.68  | 3.66  | 0.14 | 0.06 | 1.01  | 0.569092 | 0.897335 | 0.778679 | 0.941409 |
| MmugDNA.6725.1.S1_at   | MmugDNA.6725.1 | 7.13  | 8.17  | 1.14 | 0.16 | -2.06 | 0.073476 | 0.156257 | 0.328846 | 0.43161  |
| MmugDNA.6726.1.S1_at   | MmugDNA.6726.1 | 5.36  | 5.36  | 0.04 | 0.25 | 1     | 0.366746 | 0.251816 | 0.640964 | 0.520478 |
| MmugDNA.6727.1.S1_at   | MmugDNA.6727.1 | 8.84  | 8.84  | 0.22 | 0.26 | 1     | 0.687539 | 0.859165 | 0.850804 | 0.919754 |
| MmugDNA.6729.1.S1_at   | MmugDNA.6729.1 | 5.57  | 5.43  | 0.18 | 0.23 | 1.1   | 0.321434 | 0.11995  | 0.60571  | 0.388671 |
| MmugDNA.673.1.S1_at    | MmugDNA.673.1  | 3.66  | 3.63  | 0.05 | 0.26 | 1.02  | 0.47324  | 0.492578 | 0.716569 | 0.693633 |
| MmugDNA.6732.1.S1_at   | MmugDNA.6732.1 | 9.39  | 8.55  | 1.39 | 0.09 | 1.78  | 0.183876 | 0.18209  | 0.479745 | 0.45857  |
| MmugDNA.6733.1.S1_at   | MmugDNA.6733.1 | 4.75  | 4.46  | 0.14 | 0.16 | 1.22  | 0.084064 | 0.195416 | 0.34731  | 0.470253 |
| MmugDNA.6736.1.S1_at   | MmugDNA.6736.1 | 3.6   | 3.55  | 0.68 | 0.29 | 1.04  | 0.532198 | 0.618815 | 0.756267 | 0.774185 |
| MmugDNA.6737.1.S1_at   | MmugDNA.6737.1 | 3.26  | 3.3   | 0.07 | 0.1  | -1.03 | 0.794711 | 0.356656 | 0.907322 | 0.598516 |
| MmugDNA.6738.1.S1_s_at | MmugDNA.6738.1 | 10.55 | 10.42 | 0.21 | 0.08 | 1.1   | 0.723431 | 0.661085 | 0.870006 | 0.801683 |
| MmugDNA.6740.1.S1_at   | MmugDNA.6740.1 | 6.76  | 6.8   | 0.07 | 0.06 | -1.03 | 0.153015 | 0.714528 | 0.442719 | 0.834386 |
| MmugDNA.6741.1.S1_at   | MmugDNA.6741.1 | 3.83  | 3.88  | 0.11 | 0.21 | -1.04 | 0.444828 | 0.264033 | 0.697566 | 0.530183 |
| MmugDNA.6742.1.S1_at   | MmugDNA.6742.1 | 11.99 | 12.09 | 0.09 | 0.04 | -1.08 | 0.237861 | 0.675168 | 0.535269 | 0.810205 |
| MmugDNA.6743.1.S1_at   | MmugDNA.6743.1 | 7.45  | 7.86  | 0.12 | 0.07 | -1.33 | 0.015859 | 0.003254 | 0.178315 | 0.082277 |
| MmugDNA.6744.1.S1_at   | MmugDNA.6744.1 | 8.4   | 9.13  | 0.4  | 0.25 | -1.66 | 0.095032 | 0.248576 | 0.364153 | 0.51787  |
| MmugDNA.6746.1.S1_at   | MmugDNA.6746.1 | 10.63 | 10.68 | 0.06 | 0.15 | -1.04 | 0.182746 | 0.430087 | 0.478544 | 0.651143 |
| MmugDNA.6747.1.S1_at   | MmugDNA.6747.1 | 5.06  | 5.09  | 0.79 | 0.48 | -1.03 | 0.68545  | 0.805908 | 0.850067 | 0.888395 |
| MmugDNA.6748.1.S1_at   | MmugDNA.6748.1 | 3.83  | 3.73  | 0.06 | 0.2  | 1.08  | 0.523083 | 0.266318 | 0.750171 | 0.532099 |
| MmugDNA.6749.1.S1_at   | MmugDNA.6749.1 | 4.53  | 4.42  | 0.22 | 0.08 | 1.08  | 0.759175 | 0.382043 | 0.889659 | 0.618279 |

|                        |                |       |       |      |      |       |          |          |          |          |
|------------------------|----------------|-------|-------|------|------|-------|----------|----------|----------|----------|
| MmugDNA.675.1.S1_at    | MmugDNA.675.1  | 5.81  | 5.52  | 0.22 | 0.04 | 1.23  | 0.065982 | 0.043027 | 0.314318 | 0.252067 |
| MmugDNA.6750.1.S1_at   | MmugDNA.6750.1 | 9.28  | 8.5   | 0.99 | 0.31 | 1.72  | 0.063042 | 0.039909 | 0.307843 | 0.244852 |
| MmugDNA.6751.1.S1_at   | MmugDNA.6751.1 | 5.54  | 5.66  | 0.25 | 0.08 | -1.08 | 0.852026 | 0.59554  | 0.93566  | 0.759091 |
| MmugDNA.6752.1.S1_at   | MmugDNA.6752.1 | 8.66  | 8.73  | 0.1  | 0.08 | -1.05 | 0.880595 | 0.005486 | 0.94926  | 0.102081 |
| MmugDNA.6754.1.S1_at   | MmugDNA.6754.1 | 3.95  | 3.96  | 0.46 | 0.1  | -1.01 | 0.439448 | 0.621007 | 0.693687 | 0.775745 |
| MmugDNA.6755.1.S1_at   | MmugDNA.6755.1 | 7.54  | 7.35  | 0.38 | 0.05 | 1.14  | 0.415288 | 0.40165  | 0.676055 | 0.631068 |
| MmugDNA.6758.1.S1_at   | MmugDNA.6758.1 | 4     | 3.98  | 0.37 | 0.03 | 1.02  | 0.902177 | 0.900509 | 0.958582 | 0.943447 |
| MmugDNA.6759.1.S1_at   | MmugDNA.6759.1 | 12.45 | 12.05 | 0.06 | 0.1  | 1.32  | 0.005401 | 0.039871 | 0.118701 | 0.244835 |
| MmugDNA.676.1.S1_at    | MmugDNA.676.1  | 4.32  | 4.25  | 0.11 | 0.15 | 1.05  | 0.900086 | 0.771697 | 0.957559 | 0.867344 |
| MmugDNA.6762.1.S1_at   | MmugDNA.6762.1 | 10.08 | 10.02 | 0.34 | 0.04 | 1.04  | 0.905923 | 0.604335 | 0.960118 | 0.764566 |
| MmugDNA.6763.1.S1_at   | MmugDNA.6763.1 | 9.34  | 9.05  | 0.23 | 0.15 | 1.22  | 0.265147 | 0.079656 | 0.557962 | 0.326981 |
| MmugDNA.6765.1.S1_at   | MmugDNA.6765.1 | 7.24  | 7.69  | 0.23 | 0.15 | -1.36 | 0.024613 | 0.01819  | 0.209931 | 0.169695 |
| MmugDNA.6767.1.S1_at   | MmugDNA.6767.1 | 3.6   | 3.4   | 0.32 | 0.02 | 1.15  | 0.112258 | 0.142167 | 0.388406 | 0.415754 |
| MmugDNA.6769.1.S1_at   | MmugDNA.6769.1 | 3.54  | 3.54  | 0.01 | 0.08 | 1     | 0.312342 | 0.568663 | 0.598323 | 0.742052 |
| MmugDNA.677.1.S1_at    | MmugDNA.677.1  | 5.31  | 5.97  | 0.42 | 0.57 | -1.58 | 0.46432  | 0.266569 | 0.710598 | 0.532301 |
| MmugDNA.6770.1.S1_at   | MmugDNA.6770.1 | 12.66 | 12.22 | 0.12 | 0.01 | 1.36  | 0.003386 | 0.036986 | 0.102989 | 0.236733 |
| MmugDNA.6771.1.S1_at   | MmugDNA.6771.1 | 4.71  | 4.72  | 0.2  | 0.09 | -1.01 | 0.784126 | 0.340226 | 0.901553 | 0.586637 |
| MmugDNA.6773.1.S1_at   | MmugDNA.6773.1 | 7.33  | 6.68  | 0.74 | 0.49 | 1.56  | 0.602146 | 0.656165 | 0.800027 | 0.798919 |
| MmugDNA.6774.1.S1_at   | MmugDNA.6774.1 | 3.72  | 3.56  | 0.14 | 0.3  | 1.12  | 0.720599 | 0.588683 | 0.868132 | 0.755137 |
| MmugDNA.6774.1.S1_s_at | MmugDNA.6774.1 | 5.36  | 5.38  | 0.23 | 0.09 | -1.01 | 0.703594 | 0.389027 | 0.859276 | 0.623288 |
| MmugDNA.6775.1.S1_at   | MmugDNA.6775.1 | 4.48  | 3.92  | 0.77 | 0.31 | 1.48  | 0.341604 | 0.402511 | 0.621414 | 0.631481 |
| MmugDNA.6776.1.S1_at   | MmugDNA.6776.1 | 4.91  | 4.58  | 0.5  | 0.03 | 1.26  | 0.322719 | 0.541915 | 0.606575 | 0.725146 |
| MmugDNA.6777.1.S1_at   | MmugDNA.6777.1 | 3.02  | 3.03  | 0.03 | 0.13 | -1    | 0.348114 | 0.305136 | 0.626294 | 0.562255 |
| MmugDNA.678.1.S1_at    | MmugDNA.678.1  | 11.18 | 10.98 | 0.05 | 0.24 | 1.15  | 0.622667 | 0.124248 | 0.813435 | 0.394547 |
| MmugDNA.6780.1.S1_at   | MmugDNA.6780.1 | 9.85  | 9.81  | 0.18 | 0.03 | 1.03  | 0.957846 | 0.986822 | 0.982662 | 0.992556 |
| MmugDNA.6784.1.S1_at   | MmugDNA.6784.1 | 5.14  | 4.26  | 0.79 | 0.59 | 1.84  | 0.203368 | 0.326119 | 0.501192 | 0.576315 |
| MmugDNA.6785.1.S1_at   | MmugDNA.6785.1 | 5.38  | 5.41  | 0.2  | 0.04 | -1.02 | 0.813259 | 0.855152 | 0.916498 | 0.917436 |
| MmugDNA.6787.1.S1_at   | MmugDNA.6787.1 | 9.03  | 8.79  | 0.18 | 0.09 | 1.18  | 0.027804 | 0.027875 | 0.219187 | 0.208455 |
| MmugDNA.6788.1.S1_at   | MmugDNA.6788.1 | 10.26 | 10.47 | 0.25 | 0.21 | -1.16 | 0.335879 | 0.02065  | 0.616626 | 0.180347 |
| MmugDNA.6789.1.S1_at   | MmugDNA.6789.1 | 8.87  | 8.78  | 0.64 | 0.16 | 1.07  | 0.641282 | 0.51211  | 0.82473  | 0.706076 |
| MmugDNA.679.1.S1_at    | MmugDNA.679.1  | 5.13  | 5.46  | 0.9  | 0.22 | -1.25 | 0.255757 | 0.338018 | 0.550344 | 0.585208 |
| MmugDNA.6791.1.S1_at   | MmugDNA.6791.1 | 3.16  | 3.25  | 0.16 | 0.12 | -1.06 | 0.74354  | 0.947242 | 0.881381 | 0.970103 |
| MmugDNA.6792.1.S1_at   | MmugDNA.6792.1 | 4.54  | 4.67  | 0.13 | 0.15 | -1.1  | 0.598971 | 0.700207 | 0.797745 | 0.825987 |
| MmugDNA.6794.1.S1_at   | MmugDNA.6794.1 | 6.44  | 6.75  | 0.3  | 0.28 | -1.24 | 0.135213 | 0.453221 | 0.419109 | 0.66762  |
| MmugDNA.6795.1.S1_at   | MmugDNA.6795.1 | 6.53  | 7.55  | 1.43 | 0.14 | -2.03 | 0.430902 | 0.59616  | 0.68719  | 0.759367 |
| MmugDNA.6796.1.S1_at   | MmugDNA.6796.1 | 7.25  | 6.27  | 0.04 | 0.23 | 1.98  | 0.001724 | 0.002185 | 0.085035 | 0.069035 |
| MmugDNA.6797.1.S1_at   | MmugDNA.6797.1 | 3.13  | 3.24  | 0.05 | 0.17 | -1.08 | 0.490295 | 0.370688 | 0.728387 | 0.609702 |
| MmugDNA.6798.1.S1_at   | MmugDNA.6798.1 | 8.73  | 7.96  | 0.41 | 0.12 | 1.7   | 0.016111 | 0.074342 | 0.179484 | 0.318046 |
| MmugDNA.6799.1.S1_at   | MmugDNA.6799.1 | 4.7   | 4.5   | 0.31 | 0.09 | 1.15  | 0.393274 | 0.607401 | 0.660139 | 0.766391 |
| MmugDNA.680.1.S1_at    | MmugDNA.680.1  | 4.9   | 4.94  | 0.11 | 0.23 | -1.02 | 0.361487 | 0.5977   | 0.636937 | 0.760358 |
| MmugDNA.6800.1.S1_at   | MmugDNA.6800.1 | 7.79  | 8.02  | 0.33 | 0.07 | -1.18 | 0.387876 | 0.641602 | 0.655933 | 0.789624 |
| MmugDNA.6801.1.S1_at   | MmugDNA.6801.1 | 4.66  | 4.83  | 0.18 | 0.13 | -1.13 | 0.493119 | 0.040937 | 0.730197 | 0.247161 |
| MmugDNA.6802.1.S1_at   | MmugDNA.6802.1 | 11.82 | 12.02 | 0.08 | 0.05 | -1.15 | 0.014629 | 0.060371 | 0.172856 | 0.292291 |

|                       |                |       |       |      |      |       |          |          |          |          |
|-----------------------|----------------|-------|-------|------|------|-------|----------|----------|----------|----------|
| MmugDNA.6803.1.S1_at  | MmugDNA.6803.1 | 5.88  | 5.77  | 0.18 | 0.1  | 1.08  | 0.151767 | 0.333938 | 0.441235 | 0.582063 |
| MmugDNA.6804.1.S1_at  | MmugDNA.6804.1 | 6.94  | 7.16  | 0.26 | 0.16 | -1.17 | 0.679666 | 0.598777 | 0.847179 | 0.761123 |
| MmugDNA.6806.1.S1_at  | MmugDNA.6806.1 | 6.8   | 5.01  | 1.21 | 0.93 | 3.45  | 0.213821 | 0.289433 | 0.511664 | 0.55046  |
| MmugDNA.6807.1.S1_at  | MmugDNA.6807.1 | 11.37 | 11.53 | 0.19 | 0.17 | -1.12 | 0.773501 | 0.770905 | 0.896169 | 0.866807 |
| MmugDNA.681.1.S1_s_at | MmugDNA.681.1  | 4.02  | 4.04  | 0.31 | 0.27 | -1.02 | 0.610781 | 0.385551 | 0.805939 | 0.621027 |
| MmugDNA.6810.1.S1_at  | MmugDNA.6810.1 | 4.28  | 3.77  | 0.49 | 0.39 | 1.42  | 0.387402 | 0.580838 | 0.655563 | 0.749953 |
| MmugDNA.6813.1.S1_at  | MmugDNA.6813.1 | 3.95  | 3.95  | 0.25 | 0.13 | 1     | 0.249958 | 0.424655 | 0.544859 | 0.647214 |
| MmugDNA.6814.1.S1_at  | MmugDNA.6814.1 | 5.3   | 5.16  | 0.18 | 0.05 | 1.1   | 0.264899 | 0.685058 | 0.557962 | 0.816309 |
| MmugDNA.6816.1.S1_at  | MmugDNA.6816.1 | 5.85  | 5     | 0.94 | 0.11 | 1.8   | 0.194386 | 0.046999 | 0.491028 | 0.261469 |
| MmugDNA.6817.1.S1_at  | MmugDNA.6817.1 | 2.89  | 2.81  | 0.12 | 0.04 | 1.06  | 0.366816 | 0.540758 | 0.641007 | 0.724533 |
| MmugDNA.682.1.S1_at   | MmugDNA.682.1  | 9.68  | 9.13  | 0.36 | 0.09 | 1.46  | 0.026192 | 0.09732  | 0.21487  | 0.355034 |
| MmugDNA.6821.1.S1_at  | MmugDNA.6821.1 | 5.18  | 5.15  | 0.15 | 0.23 | 1.02  | 0.80337  | 0.895398 | 0.911802 | 0.940218 |
| MmugDNA.6822.1.S1_at  | MmugDNA.6822.1 | 4.83  | 5.04  | 0.8  | 0.1  | -1.15 | 0.550436 | 0.609898 | 0.767803 | 0.768204 |
| MmugDNA.6824.1.S1_at  | MmugDNA.6824.1 | 10.72 | 10.87 | 0.11 | 0.08 | -1.11 | 0.157625 | 0.010811 | 0.448413 | 0.135636 |
| MmugDNA.6825.1.S1_at  | MmugDNA.6825.1 | 5.84  | 4.22  | 0.1  | 0.22 | 3.06  | 0.000348 | 0.133091 | 0.061612 | 0.404734 |
| MmugDNA.6826.1.S1_at  | MmugDNA.6826.1 | 5.16  | 5.14  | 0.18 | 0.06 | 1.02  | 0.956846 | 0.993559 | 0.982318 | 0.996218 |
| MmugDNA.6827.1.S1_at  | MmugDNA.6827.1 | 3.32  | 3.19  | 0.12 | 0.08 | 1.09  | 0.216563 | 0.066834 | 0.514336 | 0.304399 |
| MmugDNA.6829.1.S1_at  | MmugDNA.6829.1 | 7.81  | 7.72  | 0.27 | 0.32 | 1.07  | 0.696165 | 0.514717 | 0.855291 | 0.707852 |
| MmugDNA.6830.1.S1_at  | MmugDNA.6830.1 | 6.95  | 7.39  | 0.28 | 0.11 | -1.36 | 0.105028 | 0.03067  | 0.378728 | 0.217148 |
| MmugDNA.6831.1.S1_at  | MmugDNA.6831.1 | 5.18  | 4.98  | 0.27 | 0.09 | 1.15  | 0.264033 | 0.154917 | 0.557422 | 0.429909 |
| MmugDNA.6833.1.S1_at  | MmugDNA.6833.1 | 8.78  | 9.32  | 0.23 | 0.09 | -1.46 | 0.01566  | 0.629374 | 0.177578 | 0.781837 |
| MmugDNA.6834.1.S1_at  | MmugDNA.6834.1 | 5.25  | 5.09  | 0.07 | 0.15 | 1.11  | 0.12243  | 0.13969  | 0.401149 | 0.413029 |
| MmugDNA.6835.1.S1_at  | MmugDNA.6835.1 | 6.35  | 6.69  | 1.03 | 0.2  | -1.27 | 0.840131 | 0.85477  | 0.929875 | 0.917232 |
| MmugDNA.6837.1.S1_at  | MmugDNA.6837.1 | 9.44  | 9.41  | 0.23 | 0.14 | 1.02  | 0.992092 | 0.039605 | 0.997076 | 0.24402  |
| MmugDNA.6838.1.S1_at  | MmugDNA.6838.1 | 8.13  | 8.04  | 0.02 | 0.08 | 1.06  | 0.090154 | 0.002796 | 0.356864 | 0.077966 |
| MmugDNA.6839.1.S1_at  | MmugDNA.6839.1 | 6.5   | 6.1   | 0.41 | 0.34 | 1.31  | 0.205739 | 0.344003 | 0.503526 | 0.58962  |
| MmugDNA.6841.1.S1_at  | MmugDNA.6841.1 | 7.33  | 7.64  | 0.17 | 0.27 | -1.24 | 0.180585 | 0.001049 | 0.475737 | 0.051466 |
| MmugDNA.6843.1.S1_at  | MmugDNA.6843.1 | 7.48  | 7.26  | 0.79 | 0.13 | 1.16  | 0.3537   | 0.1895   | 0.63089  | 0.465237 |
| MmugDNA.6844.1.S1_at  | MmugDNA.6844.1 | 4.91  | 5.03  | 0.21 | 0.14 | -1.08 | 0.481813 | 0.668423 | 0.722234 | 0.805952 |
| MmugDNA.6847.1.S1_at  | MmugDNA.6847.1 | 7.11  | 6.69  | 0.48 | 0.11 | 1.34  | 0.221457 | 0.04282  | 0.519474 | 0.251467 |
| MmugDNA.6848.1.S1_at  | MmugDNA.6848.1 | 14.34 | 14.33 | 0.04 | 0.02 | 1.01  | 0.28353  | 0.574584 | 0.573932 | 0.745995 |
| MmugDNA.685.1.S1_at   | MmugDNA.685.1  | 6.86  | 7.33  | 0.2  | 0.26 | -1.38 | 0.107267 | 0.489906 | 0.381761 | 0.692002 |
| MmugDNA.6850.1.S1_at  | MmugDNA.6850.1 | 9.18  | 9.11  | 0.1  | 0.08 | 1.04  | 0.816852 | 0.27568  | 0.918133 | 0.539923 |
| MmugDNA.6851.1.S1_at  | MmugDNA.6851.1 | 6.64  | 6.59  | 0.16 | 0.03 | 1.03  | 0.25395  | 0.284466 | 0.54824  | 0.546637 |
| MmugDNA.6853.1.S1_at  | MmugDNA.6853.1 | 12.5  | 12.43 | 0.05 | 0.02 | 1.05  | 0.046595 | 0.163749 | 0.273564 | 0.439924 |
| MmugDNA.6855.1.S1_at  | MmugDNA.6855.1 | 4.75  | 4.82  | 0.11 | 0.03 | -1.05 | 0.143234 | 0.129876 | 0.429519 | 0.401509 |
| MmugDNA.6856.1.S1_at  | MmugDNA.6856.1 | 2.62  | 2.56  | 0.25 | 0.07 | 1.04  | 0.573285 | 0.587082 | 0.781077 | 0.753998 |
| MmugDNA.6857.1.S1_at  | MmugDNA.6857.1 | 3.53  | 3.44  | 0.15 | 0.21 | 1.07  | 0.705789 | 0.841933 | 0.860625 | 0.909939 |
| MmugDNA.686.1.S1_at   | MmugDNA.686.1  | 4.45  | 4.62  | 0.17 | 0.19 | -1.13 | 0.328149 | 0.778942 | 0.61059  | 0.871711 |
| MmugDNA.6860.1.S1_at  | MmugDNA.6860.1 | 6.06  | 5.99  | 0.21 | 0.29 | 1.05  | 0.80728  | 0.472574 | 0.913693 | 0.68007  |
| MmugDNA.6861.1.S1_at  | MmugDNA.6861.1 | 6.32  | 6.89  | 0.72 | 0.18 | -1.49 | 0.572434 | 0.423133 | 0.780609 | 0.646165 |
| MmugDNA.6862.1.S1_at  | MmugDNA.6862.1 | 3.63  | 3.42  | 0.28 | 0.1  | 1.15  | 0.256577 | 0.406737 | 0.551134 | 0.634487 |
| MmugDNA.6863.1.S1_at  | MmugDNA.6863.1 | 12.05 | 11.82 | 0.17 | 0    | 1.18  | 0.123492 | 0.041979 | 0.402865 | 0.249461 |

|                         |                 |       |       |      |      |       |          |          |          |          |
|-------------------------|-----------------|-------|-------|------|------|-------|----------|----------|----------|----------|
| MmugDNA.6865.1.S1_at    | MmugDNA.6865.1  | 9.65  | 9.75  | 0.25 | 0.16 | -1.07 | 0.236818 | 0.256083 | 0.534416 | 0.524052 |
| MmugDNA.6868.1.S1_at    | MmugDNA.6868.1  | 5.28  | 4.45  | 0.37 | 0.05 | 1.78  | 0.041611 | 0.065512 | 0.260391 | 0.301415 |
| MmugDNA.687.1.S1_at     | MmugDNA.687.1   | 5.1   | 4.86  | 0.03 | 0.07 | 1.18  | 0.002348 | 0.006973 | 0.092906 | 0.112743 |
| MmugDNA.6870.1.S1_at    | MmugDNA.6870.1  | 8.47  | 8.38  | 0.22 | 0.04 | 1.07  | 0.202099 | 0.009638 | 0.499672 | 0.129267 |
| MmugDNA.6871.1.S1_at    | MmugDNA.6871.1  | 9.09  | 9.06  | 0.2  | 0.02 | 1.02  | 0.301401 | 0.301012 | 0.589325 | 0.559198 |
| MmugDNA.6872.1.S1_at    | MmugDNA.6872.1  | 6.85  | 6.87  | 0.19 | 0.07 | -1.01 | 0.49043  | 0.399119 | 0.728506 | 0.62969  |
| MmugDNA.6874.1.S1_at    | MmugDNA.6874.1  | 8.47  | 8.54  | 0.14 | 0.2  | -1.05 | 0.247958 | 0.411477 | 0.543303 | 0.638191 |
| MmugDNA.6877.1.S1_at    | MmugDNA.6877.1  | 4.57  | 4.45  | 1.11 | 0.35 | 1.09  | 0.921663 | 0.964947 | 0.966451 | 0.980546 |
| MmugDNA.6878.1.S1_at    | MmugDNA.6878.1  | 6.87  | 6.99  | 0.24 | 0.06 | -1.08 | 0.946144 | 0.841505 | 0.977211 | 0.909663 |
| MmugDNA.6879.1.S1_at    | MmugDNA.6879.1  | 9.42  | 9.12  | 0.09 | 0.23 | 1.23  | 0.050849 | 0.003136 | 0.283144 | 0.081639 |
| MmugDNA.688.1.S1_at     | MmugDNA.688.1   | 10.02 | 9.92  | 1    | 0.36 | 1.07  | 0.902701 | 0.910146 | 0.958703 | 0.949342 |
| MmugDNA.6881.1.S1_at    | MmugDNA.6881.1  | 5.2   | 5.08  | 0.11 | 0.16 | 1.08  | 0.852873 | 0.721301 | 0.935956 | 0.838683 |
| MmugDNA.6882.1.S1_at    | MmugDNA.6882.1  | 4.24  | 4.24  | 0.39 | 0.14 | -1    | 0.576996 | 0.761042 | 0.783459 | 0.861185 |
| MmugDNA.6883.1.S1_at    | MmugDNA.6883.1  | 7.55  | 8.16  | 1.23 | 0.34 | -1.53 | 0.920087 | 0.946484 | 0.965854 | 0.96965  |
| MmugDNA.6885.1.S1_at    | MmugDNA.6885.1  | 5.62  | 4.74  | 0.39 | 0.3  | 1.85  | 0.054077 | 0.195283 | 0.289645 | 0.470253 |
| MmugDNA.6886.1.S1_at    | MmugDNA.6886.1  | 5.31  | 5.08  | 1.28 | 0.38 | 1.17  | 0.685324 | 0.827998 | 0.849991 | 0.901214 |
| MmugDNA.6888.1.S1_at    | MmugDNA.6888.1  | 5.06  | 4.74  | 0.18 | 0.22 | 1.24  | 0.055163 | 0.03435  | 0.291851 | 0.229283 |
| MmugDNA.6889.1.S1_at    | MmugDNA.6889.1  | 5.63  | 5.18  | 0.63 | 0.23 | 1.36  | 0.440884 | 0.151494 | 0.694673 | 0.426223 |
| MmugDNA.689.1.S1_at     | MmugDNA.689.1   | 5.31  | 5.15  | 0.42 | 0.05 | 1.11  | 0.328089 | 0.432316 | 0.61059  | 0.652778 |
| MmugDNA.6893.1.S1_at    | MmugDNA.6893.1  | 13.27 | 13.3  | 0.04 | 0.06 | -1.02 | 0.586134 | 0.113921 | 0.789675 | 0.38018  |
| MmugDNA.6894.1.S1_at    | MmugDNA.6894.1  | 5.91  | 5.72  | 0.35 | 0.11 | 1.14  | 0.438167 | 0.495641 | 0.692798 | 0.695576 |
| MmugDNA.6895.1.S1_at    | MmugDNA.6895.1  | 2.78  | 2.96  | 0.18 | 0.07 | -1.13 | 0.142827 | 0.15746  | 0.42893  | 0.432984 |
| MmugDNA.6895.1.S1_s_at  | MmugDNA.6895.1  | 11.1  | 11.7  | 0.18 | 0.09 | -1.53 | 0.014418 | 0.133301 | 0.171743 | 0.405049 |
| MmugDNA.6895.1.S1_x_at  | MmugDNA.6895.1  | 8.61  | 9.19  | 0.29 | 0.12 | -1.5  | 0.052422 | 0.132382 | 0.286213 | 0.404344 |
| MmugDNA.6896.1.S1_at    | MmugDNA.6896.1  | 7.63  | 7.57  | 0.09 | 0.05 | 1.04  | 0.399018 | 0.241348 | 0.66455  | 0.511952 |
| MmugDNA.6897.1.S1_at    | MmugDNA.6897.1  | 6.76  | 6.67  | 0.16 | 0.08 | 1.07  | 0.727347 | 0.91504  | 0.872303 | 0.952293 |
| MmugDNA.6897.1.S1_x_at  | MmugDNA.6897.1  | 6.46  | 6.56  | 0.06 | 0.04 | -1.08 | 0.037655 | 0.227505 | 0.249552 | 0.499805 |
| MmugDNA.690.1.S1_at     | MmugDNA.690.1   | 10.54 | 9.96  | 0.17 | 0.08 | 1.5   | 0.007199 | 0.010277 | 0.132536 | 0.132736 |
| MmugDNA.6902.1.S1_at    | MmugDNA.6902.1  | 11.07 | 10.56 | 0.24 | 0.07 | 1.42  | 0.014613 | 0.000357 | 0.172728 | 0.037247 |
| MmugDNA.6903.1.S1_at    | MmugDNA.6903.1  | 2.87  | 2.84  | 0.2  | 0.04 | 1.02  | 0.640787 | 0.437628 | 0.824509 | 0.656821 |
| MmugDNA.6904.1.S1_at    | MmugDNA.6904.1  | 4.95  | 4.33  | 0.73 | 0.06 | 1.54  | 0.069128 | 0.093958 | 0.321019 | 0.350467 |
| MmugDNA.21735.1.S1_s_at | MmugDNA.21735.1 | 4.87  | 4.4   | 0.35 | 0.08 | 1.39  | 0.057518 | 0.220408 | 0.297199 | 0.493818 |
| MmugDNA.6906.1.S1_at    | MmugDNA.6906.1  | 5.4   | 5.4   | 0.23 | 0.1  | -1    | 0.448331 | 0.546102 | 0.699971 | 0.727769 |
| MmugDNA.6907.1.S1_at    | MmugDNA.6907.1  | 3.72  | 3.6   | 0.12 | 0.1  | 1.08  | 0.33618  | 0.295126 | 0.616839 | 0.554551 |
| MmugDNA.6909.1.S1_at    | MmugDNA.6909.1  | 3.92  | 4.16  | 0.19 | 0.24 | -1.18 | 0.094711 | 0.068837 | 0.363689 | 0.308714 |
| MmugDNA.691.1.S1_at     | MmugDNA.691.1   | 3.23  | 3.23  | 0.11 | 0.12 | -1    | 0.523518 | 0.47582  | 0.750433 | 0.682387 |
| MmugDNA.6913.1.S1_at    | MmugDNA.6913.1  | 4.82  | 4.47  | 0.35 | 0.36 | 1.28  | 0.454242 | 0.595447 | 0.704125 | 0.759091 |
| MmugDNA.6914.1.S1_at    | MmugDNA.6914.1  | 10.24 | 10.22 | 0.35 | 0.24 | 1.02  | 0.893207 | 0.621087 | 0.954467 | 0.77579  |
| MmugDNA.6916.1.S1_at    | MmugDNA.6916.1  | 5.2   | 5.01  | 0.14 | 0.11 | 1.14  | 0.40618  | 0.166013 | 0.669555 | 0.442579 |
| MmugDNA.6917.1.S1_at    | MmugDNA.6917.1  | 7.33  | 7.29  | 0.18 | 0.01 | 1.03  | 0.667932 | 0.735417 | 0.840528 | 0.846919 |
| MmugDNA.6918.1.S1_at    | MmugDNA.6918.1  | 2.68  | 2.85  | 0.04 | 0.22 | -1.12 | 0.259568 | 0.176691 | 0.553889 | 0.453142 |
| MmugDNA.692.1.S1_at     | MmugDNA.692.1   | 3.34  | 3.44  | 0.11 | 0.18 | -1.07 | 0.308112 | 0.329564 | 0.594805 | 0.578781 |
| MmugDNA.6920.1.S1_at    | MmugDNA.6920.1  | 3.65  | 3.66  | 0.01 | 0.06 | -1    | 0.431049 | 0.815152 | 0.687225 | 0.89336  |

|                        |                |       |       |      |      |       |          |          |          |          |
|------------------------|----------------|-------|-------|------|------|-------|----------|----------|----------|----------|
| MmugDNA.6921.1.S1_at   | MmugDNA.6921.1 | 5.94  | 5.89  | 0.07 | 0.06 | 1.04  | 0.722297 | 0.045971 | 0.869365 | 0.258818 |
| MmugDNA.6922.1.S1_at   | MmugDNA.6922.1 | 12.21 | 12.04 | 0.19 | 0.05 | 1.13  | 0.067862 | 0.060859 | 0.318295 | 0.293442 |
| MmugDNA.6923.1.S1_at   | MmugDNA.6923.1 | 5.25  | 5.24  | 0.15 | 0.02 | 1     | 0.356024 | 0.532774 | 0.632435 | 0.719235 |
| MmugDNA.6924.1.S1_at   | MmugDNA.6924.1 | 7.62  | 7.54  | 0.28 | 0.1  | 1.06  | 0.96855  | 0.113163 | 0.987529 | 0.379184 |
| MmugDNA.6925.1.S1_at   | MmugDNA.6925.1 | 3.36  | 3.11  | 0.24 | 0.04 | 1.19  | 0.044246 | 0.08918  | 0.267399 | 0.343222 |
| MmugDNA.6926.1.S1_at   | MmugDNA.6926.1 | 5.63  | 4.93  | 0.25 | 0.17 | 1.62  | 0.035091 | 0.04473  | 0.241992 | 0.255998 |
| MmugDNA.6927.1.S1_at   | MmugDNA.6927.1 | 7.14  | 8.96  | 0.23 | 0.17 | -3.52 | 0.000385 | 0.077342 | 0.062479 | 0.323141 |
| MmugDNA.6928.1.S1_at   | MmugDNA.6928.1 | 5.02  | 4.72  | 0.15 | 0.17 | 1.23  | 0.281275 | 0.163073 | 0.572137 | 0.439235 |
| MmugDNA.693.1.S1_at    | MmugDNA.693.1  | 2.86  | 2.89  | 0.16 | 0.02 | -1.02 | 0.674608 | 0.713804 | 0.84465  | 0.833937 |
| MmugDNA.6930.1.S1_at   | MmugDNA.6930.1 | 6.41  | 6.38  | 0.11 | 0.14 | 1.01  | 0.240743 | 0.309217 | 0.538168 | 0.564807 |
| MmugDNA.6933.1.S1_at   | MmugDNA.6933.1 | 3.21  | 3.22  | 0.08 | 0    | -1.01 | 0.815454 | 0.757486 | 0.917584 | 0.858849 |
| MmugDNA.6934.1.S1_at   | MmugDNA.6934.1 | 6.67  | 6.27  | 0.55 | 0.06 | 1.32  | 0.355543 | 0.725088 | 0.632237 | 0.840867 |
| MmugDNA.6935.1.S1_at   | MmugDNA.6935.1 | 11.7  | 11.75 | 0.31 | 0.1  | -1.03 | 0.6604   | 0.043322 | 0.83613  | 0.252847 |
| MmugDNA.6935.1.S1_s_at | MmugDNA.6935.1 | 11.94 | 11.79 | 0.26 | 0.11 | 1.11  | 0.389479 | 0.072629 | 0.657329 | 0.315579 |
| MmugDNA.6936.1.S1_at   | MmugDNA.6936.1 | 4.87  | 4.67  | 0.09 | 0.24 | 1.15  | 0.189815 | 0.486368 | 0.486238 | 0.689764 |
| MmugDNA.6937.1.S1_at   | MmugDNA.6937.1 | 4.65  | 4.82  | 0.75 | 0.64 | -1.12 | 0.80694  | 0.397401 | 0.913559 | 0.628812 |
| MmugDNA.6938.1.S1_at   | MmugDNA.6938.1 | 3.66  | 3.57  | 0.05 | 0.09 | 1.06  | 0.365349 | 0.713781 | 0.639887 | 0.833937 |
| MmugDNA.694.1.S1_at    | MmugDNA.694.1  | 3.95  | 3.62  | 0.4  | 0.15 | 1.25  | 0.23258  | 0.308353 | 0.531026 | 0.564428 |
| MmugDNA.6940.1.S1_at   | MmugDNA.6940.1 | 9.29  | 9.15  | 0.6  | 0.07 | 1.1   | 0.577095 | 0.876315 | 0.783459 | 0.92967  |
| MmugDNA.6942.1.S1_at   | MmugDNA.6942.1 | 3.56  | 3.56  | 0.23 | 0.02 | -1.01 | 0.4569   | 0.697125 | 0.706051 | 0.824045 |
| MmugDNA.6943.1.S1_at   | MmugDNA.6943.1 | 3.72  | 3.66  | 0.03 | 0.08 | 1.04  | 0.189338 | 0.207389 | 0.485819 | 0.481599 |
| MmugDNA.6945.1.S1_at   | MmugDNA.6945.1 | 3.99  | 3.96  | 0.11 | 0.19 | 1.02  | 0.417669 | 0.662253 | 0.67772  | 0.802209 |
| MmugDNA.6946.1.S1_at   | MmugDNA.6946.1 | 6.3   | 6.12  | 0.01 | 0.11 | 1.14  | 0.124132 | 0.014113 | 0.40411  | 0.15195  |
| MmugDNA.6947.1.S1_at   | MmugDNA.6947.1 | 7.88  | 7.48  | 0.52 | 0.12 | 1.33  | 0.082785 | 0.213572 | 0.344735 | 0.48741  |
| MmugDNA.6949.1.S1_at   | MmugDNA.6949.1 | 2.75  | 2.83  | 0.92 | 0.15 | -1.06 | 0.443344 | 0.523283 | 0.696549 | 0.713635 |
| MmugDNA.695.1.S1_at    | MmugDNA.695.1  | 4.84  | 4.77  | 0.17 | 0.1  | 1.05  | 0.503818 | 0.174635 | 0.73721  | 0.45116  |
| MmugDNA.6950.1.S1_s_at | MmugDNA.6950.1 | 11.21 | 11.1  | 0.13 | 0.13 | 1.08  | 0.302627 | 0.45913  | 0.590379 | 0.671589 |
| MmugDNA.6951.1.S1_at   | MmugDNA.6951.1 | 9.7   | 10.27 | 0.25 | 0.12 | -1.48 | 0.030128 | 0.060426 | 0.226716 | 0.292478 |
| MmugDNA.6952.1.S1_at   | MmugDNA.6952.1 | 6.3   | 5.61  | 0.7  | 0.88 | 1.62  | 0.360799 | 0.654799 | 0.636318 | 0.798154 |
| MmugDNA.6953.1.S1_at   | MmugDNA.6953.1 | 5.51  | 4.85  | 0.37 | 0.06 | 1.58  | 0.102983 | 0.113558 | 0.375642 | 0.379632 |
| MmugDNA.6955.1.S1_at   | MmugDNA.6955.1 | 5.27  | 5.17  | 0.09 | 0.18 | 1.07  | 0.14756  | 0.318455 | 0.43548  | 0.571239 |
| MmugDNA.6957.1.S1_at   | MmugDNA.6957.1 | 7.66  | 8.46  | 0.53 | 0.1  | -1.74 | 0.147297 | 0.054698 | 0.435385 | 0.279343 |
| MmugDNA.6958.1.S1_at   | MmugDNA.6958.1 | 4.23  | 4.46  | 0.42 | 0.47 | -1.17 | 0.543764 | 0.594642 | 0.763589 | 0.758623 |
| MmugDNA.696.1.S1_at    | MmugDNA.696.1  | 4.32  | 4.2   | 0.1  | 0.19 | 1.09  | 0.587476 | 0.86602  | 0.790485 | 0.923791 |
| MmugDNA.6960.1.S1_at   | MmugDNA.6960.1 | 5.86  | 5.86  | 0.1  | 0.09 | -1    | 0.235559 | 0.721563 | 0.533358 | 0.838748 |
| MmugDNA.6961.1.S1_s_at | MmugDNA.6961.1 | 9.29  | 9.23  | 0.17 | 0.06 | 1.05  | 0.543752 | 0.237983 | 0.763589 | 0.508528 |
| MmugDNA.6964.1.S1_at   | MmugDNA.6964.1 | 5.38  | 5.14  | 0.11 | 0.09 | 1.19  | 0.029812 | 0.017872 | 0.225856 | 0.168774 |
| MmugDNA.6965.1.S1_at   | MmugDNA.6965.1 | 4.8   | 4.74  | 0.23 | 0.22 | 1.04  | 0.726018 | 0.917543 | 0.871423 | 0.953883 |
| MmugDNA.6966.1.S1_at   | MmugDNA.6966.1 | 4.37  | 4.59  | 0.01 | 0.32 | -1.16 | 0.267593 | 0.447838 | 0.560384 | 0.663881 |
| MmugDNA.6967.1.S1_at   | MmugDNA.6967.1 | 7.25  | 6.79  | 0.37 | 0.07 | 1.38  | 0.101075 | 0.152101 | 0.372328 | 0.426864 |
| MmugDNA.6968.1.S1_at   | MmugDNA.6968.1 | 5.23  | 5.04  | 0.45 | 0.16 | 1.14  | 0.188241 | 0.309679 | 0.484563 | 0.565005 |
| MmugDNA.697.1.S1_at    | MmugDNA.697.1  | 4.17  | 4.25  | 0.77 | 0.06 | -1.05 | 0.8438   | 0.906748 | 0.931554 | 0.947216 |
| MmugDNA.6970.1.S1_at   | MmugDNA.6970.1 | 8.15  | 8.53  | 0.42 | 0.32 | -1.3  | 0.325612 | 0.271799 | 0.608811 | 0.536577 |

|                        |                |       |       |      |      |       |          |          |          |          |
|------------------------|----------------|-------|-------|------|------|-------|----------|----------|----------|----------|
| MmugDNA.6972.1.S1_at   | MmugDNA.6972.1 | 3.55  | 3.67  | 0.21 | 0.08 | -1.09 | 0.439512 | 0.228551 | 0.693727 | 0.500752 |
| MmugDNA.6973.1.S1_at   | MmugDNA.6973.1 | 3.66  | 3.56  | 0.34 | 0.11 | 1.08  | 0.349461 | 0.564801 | 0.62731  | 0.739427 |
| MmugDNA.6977.1.S1_at   | MmugDNA.6977.1 | 5.59  | 5.66  | 0.15 | 0.15 | -1.05 | 0.562902 | 0.329294 | 0.775205 | 0.57869  |
| MmugDNA.698.1.S1_at    | MmugDNA.698.1  | 2.8   | 2.8   | 0    | 0.07 | 1     | 0.378915 | 0.665604 | 0.648999 | 0.804075 |
| MmugDNA.6981.1.S1_at   | MmugDNA.6981.1 | 9.29  | 9.07  | 0.18 | 0.04 | 1.17  | 0.032717 | 0.113416 | 0.234993 | 0.379509 |
| MmugDNA.6982.1.S1_at   | MmugDNA.6982.1 | 3.51  | 3.56  | 0.03 | 0.07 | -1.03 | 0.142425 | 0.174634 | 0.428435 | 0.45116  |
| MmugDNA.6984.1.S1_at   | MmugDNA.6984.1 | 5.2   | 5.17  | 0.27 | 0.05 | 1.02  | 0.622048 | 0.406945 | 0.812986 | 0.634629 |
| MmugDNA.6985.1.S1_at   | MmugDNA.6985.1 | 9.27  | 10.04 | 0.56 | 0.38 | -1.71 | 0.232238 | 0.784811 | 0.530743 | 0.875426 |
| MmugDNA.6986.1.S1_at   | MmugDNA.6986.1 | 7.94  | 8.02  | 0.06 | 0.19 | -1.06 | 0.679242 | 0.057303 | 0.84701  | 0.285248 |
| MmugDNA.6987.1.S1_at   | MmugDNA.6987.1 | 4.99  | 4.65  | 0.62 | 0.45 | 1.27  | 0.733277 | 0.828149 | 0.875643 | 0.901214 |
| MmugDNA.6988.1.S1_at   | MmugDNA.6988.1 | 5.12  | 4.66  | 0.4  | 0.32 | 1.38  | 0.23066  | 0.440739 | 0.529522 | 0.659113 |
| MmugDNA.6989.1.S1_at   | MmugDNA.6989.1 | 6.41  | 6.41  | 0.29 | 0.14 | -1    | 0.260003 | 0.423792 | 0.554191 | 0.646542 |
| MmugDNA.6991.1.S1_at   | MmugDNA.6991.1 | 6.39  | 6.84  | 0.23 | 0    | -1.37 | 0.022121 | 0.03119  | 0.201941 | 0.218392 |
| MmugDNA.6992.1.S1_at   | MmugDNA.6992.1 | 9.48  | 9.33  | 0.15 | 0.22 | 1.11  | 0.850288 | 0.187919 | 0.934949 | 0.464026 |
| MmugDNA.6993.1.S1_at   | MmugDNA.6993.1 | 5.61  | 8.31  | 1.29 | 0.36 | -6.51 | 0.031683 | 0.196221 | 0.231419 | 0.471236 |
| MmugDNA.6994.1.S1_at   | MmugDNA.6994.1 | 9.21  | 10.01 | 0.22 | 0.12 | -1.75 | 0.005998 | 0.53587  | 0.124151 | 0.721366 |
| MmugDNA.6995.1.S1_at   | MmugDNA.6995.1 | 10.13 | 10.82 | 0.49 | 0.01 | -1.62 | 0.216048 | 0.659239 | 0.513759 | 0.80063  |
| MmugDNA.6996.1.S1_at   | MmugDNA.6996.1 | 11.69 | 11.21 | 0.26 | 0.09 | 1.39  | 0.030918 | 0.033983 | 0.228986 | 0.227981 |
| MmugDNA.6999.1.S1_at   | MmugDNA.6999.1 | 7.5   | 8.35  | 1.22 | 0.06 | -1.8  | 0.481041 | 0.560306 | 0.72178  | 0.736628 |
| MmugDNA.7.1.S1_at      | MmugDNA.7.1    | 5.5   | 8.01  | 1.72 | 0.41 | -5.72 | 0.088475 | 0.161718 | 0.35461  | 0.437771 |
| MmugDNA.700.1.S1_at    | MmugDNA.700.1  | 4.91  | 5.16  | 0.35 | 0.07 | -1.19 | 0.968244 | 0.346907 | 0.987446 | 0.591725 |
| MmugDNA.7000.1.S1_at   | MmugDNA.7000.1 | 10.23 | 8.92  | 0.35 | 0.05 | 2.47  | 0.002838 | 0.000839 | 0.098188 | 0.046968 |
| MmugDNA.7003.1.S1_at   | MmugDNA.7003.1 | 10.09 | 9.67  | 0.24 | 0.16 | 1.34  | 0.059186 | 0.154534 | 0.30037  | 0.429405 |
| MmugDNA.7004.1.S1_at   | MmugDNA.7004.1 | 3.09  | 3.11  | 0.05 | 0.18 | -1.01 | 0.879651 | 0.351895 | 0.948777 | 0.595331 |
| MmugDNA.7005.1.S1_at   | MmugDNA.7005.1 | 10.15 | 10.38 | 0.08 | 0.09 | -1.17 | 0.023859 | 0.052966 | 0.207529 | 0.275787 |
| MmugDNA.7006.1.S1_at   | MmugDNA.7006.1 | 4.57  | 4.53  | 0.55 | 0.17 | 1.03  | 0.345001 | 0.758331 | 0.624093 | 0.859416 |
| MmugDNA.7008.1.S1_at   | MmugDNA.7008.1 | 5.58  | 6.59  | 0.53 | 0.51 | -2.01 | 0.136144 | 0.098245 | 0.420564 | 0.356289 |
| MmugDNA.7009.1.S1_at   | MmugDNA.7009.1 | 3.23  | 3.52  | 0.09 | 0.13 | -1.23 | 0.059594 | 0.114341 | 0.301206 | 0.380835 |
| MmugDNA.7010.1.S1_at   | MmugDNA.7010.1 | 2.87  | 2.81  | 0.22 | 0.08 | 1.04  | 0.846751 | 0.849453 | 0.933119 | 0.914533 |
| MmugDNA.7011.1.S1_at   | MmugDNA.7011.1 | 3.1   | 3.32  | 0.15 | 0.1  | -1.17 | 0.29909  | 0.343097 | 0.587413 | 0.588883 |
| MmugDNA.7012.1.S1_at   | MmugDNA.7012.1 | 3.7   | 3.66  | 0.1  | 0.14 | 1.02  | 0.744347 | 0.597445 | 0.881454 | 0.760197 |
| MmugDNA.7013.1.S1_at   | MmugDNA.7013.1 | 5.62  | 5.1   | 0.23 | 0.26 | 1.43  | 0.136686 | 0.334175 | 0.421386 | 0.582235 |
| MmugDNA.7013.1.S1_s_at | MmugDNA.7013.1 | 6.55  | 6.94  | 0.49 | 0.14 | -1.32 | 0.916968 | 0.991356 | 0.964649 | 0.995189 |
| MmugDNA.7014.1.S1_at   | MmugDNA.7014.1 | 6.07  | 5.88  | 0.14 | 0.07 | 1.14  | 0.071456 | 0.074532 | 0.325377 | 0.318173 |
| MmugDNA.7016.1.S1_at   | MmugDNA.7016.1 | 9.54  | 9.42  | 0.14 | 0.12 | 1.09  | 0.402341 | 0.701266 | 0.666681 | 0.826775 |
| MmugDNA.7017.1.S1_at   | MmugDNA.7017.1 | 5.77  | 4.31  | 0.83 | 0.65 | 2.75  | 0.150352 | 0.292223 | 0.43942  | 0.552363 |
| MmugDNA.7019.1.S1_at   | MmugDNA.7019.1 | 2.94  | 3.01  | 0.38 | 0.23 | -1.05 | 0.632832 | 0.521024 | 0.820038 | 0.712115 |
| MmugDNA.702.1.S1_at    | MmugDNA.702.1  | 4.87  | 5.08  | 0.3  | 0.29 | -1.15 | 0.320905 | 0.200173 | 0.605315 | 0.474603 |
| MmugDNA.7020.1.S1_at   | MmugDNA.7020.1 | 6.12  | 5.99  | 0.47 | 0.05 | 1.1   | 0.189671 | 0.557374 | 0.486064 | 0.735031 |
| MmugDNA.7022.1.S1_at   | MmugDNA.7022.1 | 5.16  | 4.49  | 0.18 | 0.12 | 1.6   | 0.009824 | 0.014721 | 0.148542 | 0.154415 |
| MmugDNA.7025.1.S1_at   | MmugDNA.7025.1 | 3.03  | 3.04  | 0.01 | 0.08 | -1.01 | 0.735982 | 0.675707 | 0.877129 | 0.810429 |
| MmugDNA.7026.1.S1_at   | MmugDNA.7026.1 | 4.22  | 4.08  | 0.15 | 0.15 | 1.1   | 0.2534   | 0.26488  | 0.547827 | 0.530874 |
| MmugDNA.7028.1.S1_at   | MmugDNA.7028.1 | 3.64  | 3.6   | 0.17 | 0.08 | 1.02  | 0.976993 | 0.593409 | 0.990958 | 0.758267 |

|                         |                 |       |       |      |      |       |          |          |          |          |
|-------------------------|-----------------|-------|-------|------|------|-------|----------|----------|----------|----------|
| MmugDNA.7030.1.S1_at    | MmugDNA.7030.1  | 4.88  | 4.63  | 0.45 | 0.23 | 1.19  | 0.265053 | 0.343808 | 0.557962 | 0.589508 |
| MmugDNA.7031.1.S1_at    | MmugDNA.7031.1  | 7.76  | 7.78  | 0.62 | 0.14 | -1.02 | 0.402882 | 0.397926 | 0.667108 | 0.629138 |
| MmugDNA.7032.1.S1_at    | MmugDNA.7032.1  | 7.4   | 6.93  | 0.14 | 0.14 | 1.39  | 0.028459 | 0.001163 | 0.22113  | 0.053615 |
| MmugDNA.7033.1.S1_at    | MmugDNA.7033.1  | 10.12 | 9.77  | 0.18 | 0.06 | 1.27  | 0.0144   | 0.056658 | 0.171686 | 0.284094 |
| MmugDNA.7035.1.S1_at    | MmugDNA.7035.1  | 4.15  | 4.13  | 0.24 | 0.2  | 1.02  | 0.37433  | 0.579846 | 0.645481 | 0.74931  |
| MmugDNA.7036.1.S1_at    | MmugDNA.7036.1  | 3.56  | 3.46  | 0.1  | 0.07 | 1.07  | 0.634171 | 0.904652 | 0.820636 | 0.945969 |
| MmugDNA.7039.1.S1_at    | MmugDNA.7039.1  | 4.95  | 4.9   | 0.38 | 0.62 | 1.03  | 0.39952  | 0.531308 | 0.664824 | 0.718555 |
| MmugDNA.704.1.S1_at     | MmugDNA.704.1   | 10.88 | 10.58 | 0.23 | 0.15 | 1.23  | 0.266932 | 0.026632 | 0.559509 | 0.204075 |
| MmugDNA.39687.1.S1_s_at | MmugDNA.39687.1 | 12.85 | 12.84 | 0.15 | 0.07 | 1     | 0.852655 | 0.98288  | 0.935897 | 0.990601 |
| MmugDNA.7041.1.S1_at    | MmugDNA.7041.1  | 6.23  | 6.78  | 0.07 | 0.28 | -1.46 | 0.029912 | 0.500071 | 0.226288 | 0.698818 |
| MmugDNA.7042.1.S1_at    | MmugDNA.7042.1  | 5.88  | 5.83  | 0.19 | 0.07 | 1.04  | 0.214454 | 0.272983 | 0.512121 | 0.53761  |
| MmugDNA.7043.1.S1_at    | MmugDNA.7043.1  | 6.19  | 6.37  | 0.09 | 0.06 | -1.13 | 0.036175 | 0.022541 | 0.245271 | 0.187965 |
| MmugDNA.7047.1.S1_at    | MmugDNA.7047.1  | 4.75  | 4.52  | 0.15 | 0.19 | 1.17  | 0.270553 | 0.092189 | 0.562747 | 0.347912 |
| MmugDNA.7048.1.S1_s_at  | MmugDNA.7048.1  | 5.65  | 4.44  | 0.47 | 0.31 | 2.3   | 0.027308 | 0.05323  | 0.218069 | 0.276445 |
| MmugDNA.7049.1.S1_at    | MmugDNA.7049.1  | 8.17  | 6.13  | 1.56 | 0.19 | 4.1   | 0.26301  | 0.418173 | 0.556761 | 0.642638 |
| MmugDNA.7050.1.S1_at    | MmugDNA.7050.1  | 6.31  | 6.14  | 0.27 | 0.36 | 1.13  | 0.501864 | 0.099715 | 0.735564 | 0.358259 |
| MmugDNA.7051.1.S1_at    | MmugDNA.7051.1  | 2.98  | 2.96  | 0.09 | 0.24 | 1.01  | 0.365476 | 0.22296  | 0.639967 | 0.495821 |
| MmugDNA.7053.1.S1_at    | MmugDNA.7053.1  | 4.02  | 3.92  | 0.23 | 0.17 | 1.07  | 0.916271 | 0.26816  | 0.964383 | 0.533876 |
| MmugDNA.7055.1.S1_at    | MmugDNA.7055.1  | 10.84 | 10.87 | 0.09 | 0.43 | -1.02 | 0.364485 | 0.004164 | 0.639104 | 0.091036 |
| MmugDNA.7056.1.S1_at    | MmugDNA.7056.1  | 10.57 | 11.2  | 0.4  | 0.1  | -1.55 | 0.022971 | 0.046716 | 0.204429 | 0.260831 |
| MmugDNA.7056.1.S1_s_at  | MmugDNA.7056.1  | 10.53 | 11.26 | 0.42 | 0.11 | -1.66 | 0.03244  | 0.071037 | 0.234344 | 0.312704 |
| MmugDNA.706.1.S1_at     | MmugDNA.706.1   | 5.83  | 5.79  | 0.18 | 0.04 | 1.03  | 0.435102 | 0.721354 | 0.690268 | 0.838685 |
| MmugDNA.7062.1.S1_at    | MmugDNA.7062.1  | 6.37  | 6.35  | 0.48 | 0.13 | 1.02  | 0.345658 | 0.33746  | 0.624554 | 0.584663 |
| MmugDNA.7063.1.S1_at    | MmugDNA.7063.1  | 4.82  | 4.77  | 0.17 | 0.17 | 1.04  | 0.33214  | 0.442922 | 0.613957 | 0.660827 |
| MmugDNA.7064.1.S1_at    | MmugDNA.7064.1  | 5.87  | 5.68  | 1.11 | 0.73 | 1.14  | 0.621622 | 0.790843 | 0.812837 | 0.87902  |
| MmugDNA.7065.1.S1_at    | MmugDNA.7065.1  | 4.97  | 4.94  | 0.36 | 0.13 | 1.02  | 0.373214 | 0.502269 | 0.645118 | 0.70006  |
| MmugDNA.7067.1.S1_at    | MmugDNA.7067.1  | 9.46  | 9.62  | 0.1  | 0.11 | -1.12 | 0.152298 | 0.017798 | 0.441909 | 0.168575 |
| MmugDNA.7068.1.S1_at    | MmugDNA.7068.1  | 4.15  | 4.01  | 0.15 | 0.25 | 1.1   | 0.164552 | 0.218326 | 0.457688 | 0.491872 |
| MmugDNA.7069.1.S1_at    | MmugDNA.7069.1  | 7.53  | 7.26  | 0.15 | 0.07 | 1.21  | 0.013986 | 0.013539 | 0.16942  | 0.148928 |
| MmugDNA.707.1.S1_at     | MmugDNA.707.1   | 5.89  | 5.85  | 0    | 0.04 | 1.03  | 0.053291 | 0.625772 | 0.287986 | 0.779322 |
| MmugDNA.7070.1.S1_at    | MmugDNA.7070.1  | 5.98  | 5.97  | 0.07 | 0.01 | 1.01  | 0.257117 | 0.869553 | 0.551586 | 0.925994 |
| MmugDNA.7073.1.S1_at    | MmugDNA.7073.1  | 4.37  | 4.25  | 0.17 | 0.1  | 1.09  | 0.17919  | 0.216631 | 0.474118 | 0.490285 |
| MmugDNA.7074.1.S1_at    | MmugDNA.7074.1  | 5.22  | 4.96  | 0.13 | 0.05 | 1.19  | 0.024787 | 0.021009 | 0.210464 | 0.181715 |
| MmugDNA.7075.1.S1_at    | MmugDNA.7075.1  | 4.16  | 4.41  | 0.21 | 0.05 | -1.19 | 0.371779 | 0.509221 | 0.644397 | 0.704032 |
| MmugDNA.7076.1.S1_at    | MmugDNA.7076.1  | 3.92  | 3.38  | 0.29 | 0.04 | 1.45  | 0.030365 | 0.01307  | 0.227199 | 0.14707  |
| MmugDNA.7077.1.S1_x_at  | MmugDNA.7077.1  | 5.65  | 5.3   | 0.03 | 0.24 | 1.27  | 0.075914 | 0.031802 | 0.333877 | 0.220774 |
| MmugDNA.7078.1.S1_at    | MmugDNA.7078.1  | 5.66  | 6.34  | 0.29 | 0.42 | -1.59 | 0.076166 | 0.194761 | 0.334238 | 0.469774 |
| MmugDNA.7079.1.S1_at    | MmugDNA.7079.1  | 7.52  | 7.23  | 0.22 | 0.1  | 1.22  | 0.09687  | 0.106682 | 0.366938 | 0.369237 |
| MmugDNA.708.1.S1_at     | MmugDNA.708.1   | 5.34  | 5.35  | 0.07 | 0.08 | -1.01 | 0.540033 | 0.150735 | 0.761201 | 0.4253   |
| MmugDNA.7080.1.S1_at    | MmugDNA.7080.1  | 5.02  | 4.99  | 0.19 | 0.11 | 1.02  | 0.536157 | 0.720365 | 0.758845 | 0.838259 |
| MmugDNA.7081.1.S1_at    | MmugDNA.7081.1  | 3.35  | 3.16  | 0.12 | 0.03 | 1.14  | 0.196951 | 0.080396 | 0.494083 | 0.328028 |
| MmugDNA.7082.1.S1_at    | MmugDNA.7082.1  | 5.23  | 5.13  | 0.2  | 0.02 | 1.07  | 0.939446 | 0.951102 | 0.974436 | 0.972319 |
| MmugDNA.7084.1.S1_at    | MmugDNA.7084.1  | 5.97  | 6.26  | 0.42 | 0.32 | -1.22 | 0.40427  | 0.09949  | 0.668096 | 0.357866 |



|                        |                |       |       |      |      |       |          |          |          |          |
|------------------------|----------------|-------|-------|------|------|-------|----------|----------|----------|----------|
| MmugDNA.7085.1.S1_at   | MmugDNA.7085.1 | 5.7   | 5.44  | 0.54 | 0.11 | 1.2   | 0.150882 | 0.186718 | 0.440124 | 0.462497 |
| MmugDNA.7086.1.S1_at   | MmugDNA.7086.1 | 6.77  | 6.31  | 0.27 | 0.09 | 1.38  | 0.091452 | 0.089951 | 0.359119 | 0.344184 |
| MmugDNA.7086.1.S1_s_at | MmugDNA.7086.1 | 7.01  | 6.58  | 0.48 | 0.34 | 1.34  | 0.115202 | 0.319595 | 0.392238 | 0.571885 |
| MmugDNA.7087.1.S1_at   | MmugDNA.7087.1 | 3.2   | 3.17  | 0.19 | 0.08 | 1.02  | 0.88047  | 0.956329 | 0.949183 | 0.975138 |
| MmugDNA.7089.1.S1_at   | MmugDNA.7089.1 | 4.36  | 4.35  | 0.03 | 0.1  | 1.01  | 0.931325 | 0.860681 | 0.971084 | 0.920641 |
| MmugDNA.709.1.S1_at    | MmugDNA.709.1  | 4.51  | 4.44  | 0.19 | 0.02 | 1.05  | 0.582756 | 0.760907 | 0.787488 | 0.86108  |
| MmugDNA.7090.1.S1_at   | MmugDNA.7090.1 | 2.79  | 2.88  | 0.08 | 0.04 | -1.07 | 0.308904 | 0.188199 | 0.595406 | 0.464251 |
| MmugDNA.7091.1.S1_at   | MmugDNA.7091.1 | 6.51  | 6.44  | 0.14 | 0.15 | 1.05  | 0.904752 | 0.239372 | 0.959627 | 0.510039 |
| MmugDNA.7092.1.S1_at   | MmugDNA.7092.1 | 3.36  | 3.13  | 0.48 | 0.05 | 1.18  | 0.280726 | 0.387079 | 0.571782 | 0.621935 |
| MmugDNA.7093.1.S1_at   | MmugDNA.7093.1 | 3.41  | 3.38  | 0.27 | 0.31 | 1.02  | 0.591578 | 0.540144 | 0.792697 | 0.724169 |
| MmugDNA.7094.1.S1_at   | MmugDNA.7094.1 | 3.79  | 3.81  | 0.09 | 0.13 | -1.01 | 0.772902 | 0.67609  | 0.896001 | 0.810704 |
| MmugDNA.7095.1.S1_at   | MmugDNA.7095.1 | 9.86  | 9.82  | 0.04 | 0.03 | 1.03  | 0.167032 | 0.914371 | 0.460288 | 0.951844 |
| MmugDNA.7096.1.S1_at   | MmugDNA.7096.1 | 9.15  | 9.32  | 0.13 | 0.11 | -1.13 | 0.513421 | 0.007553 | 0.743659 | 0.116437 |
| MmugDNA.7097.1.S1_at   | MmugDNA.7097.1 | 3.94  | 4     | 0.12 | 0.03 | -1.04 | 0.338024 | 0.582972 | 0.618398 | 0.751492 |
| MmugDNA.710.1.S1_at    | MmugDNA.710.1  | 3.81  | 3.84  | 0.19 | 0    | -1.03 | 0.528353 | 0.500431 | 0.753618 | 0.699043 |
| MmugDNA.7100.1.S1_at   | MmugDNA.7100.1 | 8.56  | 9.15  | 0.31 | 0.07 | -1.5  | 0.012402 | 0.118093 | 0.161664 | 0.385973 |
| MmugDNA.7101.1.S1_at   | MmugDNA.7101.1 | 5.03  | 4.61  | 0.7  | 0.03 | 1.33  | 0.258344 | 0.224805 | 0.552539 | 0.497617 |
| MmugDNA.7102.1.S1_at   | MmugDNA.7102.1 | 5.64  | 5.25  | 0.71 | 0.43 | 1.31  | 0.433707 | 0.599037 | 0.689126 | 0.761257 |
| MmugDNA.7104.1.S1_at   | MmugDNA.7104.1 | 3.59  | 3.49  | 0.19 | 0.11 | 1.07  | 0.381115 | 0.679866 | 0.650658 | 0.8131   |
| MmugDNA.7105.1.S1_at   | MmugDNA.7105.1 | 10.09 | 9.4   | 0.19 | 0.1  | 1.61  | 0.006899 | 0.025744 | 0.130069 | 0.201029 |
| MmugDNA.711.1.S1_at    | MmugDNA.711.1  | 6.9   | 6.89  | 0.13 | 0.04 | 1.01  | 0.766649 | 0.032501 | 0.892936 | 0.223265 |
| MmugDNA.7110.1.S1_at   | MmugDNA.7110.1 | 3.81  | 3.63  | 0.22 | 0.03 | 1.13  | 0.256277 | 0.306174 | 0.550823 | 0.562889 |
| MmugDNA.7111.1.S1_at   | MmugDNA.7111.1 | 4.85  | 4.87  | 0.32 | 0.04 | -1.01 | 0.973957 | 0.855641 | 0.989549 | 0.917681 |
| MmugDNA.7112.1.S1_at   | MmugDNA.7112.1 | 3.87  | 3.84  | 0.24 | 0.08 | 1.03  | 0.322763 | 0.440773 | 0.606593 | 0.659136 |
| MmugDNA.7113.1.S1_at   | MmugDNA.7113.1 | 3.42  | 3.27  | 0.37 | 0.28 | 1.1   | 0.509746 | 0.580573 | 0.741244 | 0.749782 |
| MmugDNA.7114.1.S1_at   | MmugDNA.7114.1 | 7.56  | 6.38  | 0.57 | 0.17 | 2.27  | 0.028503 | 0.028484 | 0.22113  | 0.21056  |
| MmugDNA.7116.1.S1_at   | MmugDNA.7116.1 | 3.72  | 3.71  | 0.21 | 0.13 | 1.01  | 0.401436 | 0.538062 | 0.666035 | 0.722826 |
| MmugDNA.7119.1.S1_at   | MmugDNA.7119.1 | 3.97  | 4     | 0.05 | 0.05 | -1.02 | 0.958514 | 0.666259 | 0.983129 | 0.804419 |
| MmugDNA.7120.1.S1_at   | MmugDNA.7120.1 | 5.83  | 5.87  | 0.14 | 0.21 | -1.03 | 0.781927 | 0.712379 | 0.900384 | 0.833369 |
| MmugDNA.7122.1.S1_at   | MmugDNA.7122.1 | 3.62  | 3.7   | 0.46 | 0.08 | -1.06 | 0.530181 | 0.418149 | 0.754801 | 0.642638 |
| MmugDNA.7123.1.S1_at   | MmugDNA.7123.1 | 4.15  | 3.81  | 0.36 | 0.3  | 1.27  | 0.576305 | 0.151705 | 0.783164 | 0.426383 |
| MmugDNA.7124.1.S1_at   | MmugDNA.7124.1 | 3.88  | 3.5   | 0.18 | 0.09 | 1.3   | 0.03623  | 0.023144 | 0.245423 | 0.190519 |
| MmugDNA.7125.1.S1_at   | MmugDNA.7125.1 | 9.91  | 8.9   | 0.46 | 0.33 | 2.01  | 0.06499  | 0.058478 | 0.311682 | 0.288549 |
| MmugDNA.7126.1.S1_at   | MmugDNA.7126.1 | 5.61  | 5.01  | 0.29 | 0.24 | 1.51  | 0.111396 | 0.102019 | 0.387378 | 0.362082 |
| MmugDNA.713.1.S1_at    | MmugDNA.713.1  | 6.7   | 6.57  | 0.38 | 0.34 | 1.09  | 0.628255 | 0.144416 | 0.817362 | 0.418323 |
| MmugDNA.7130.1.S1_at   | MmugDNA.7130.1 | 3.53  | 3.61  | 0.43 | 0.28 | -1.06 | 0.863138 | 0.794973 | 0.940491 | 0.881864 |
| MmugDNA.7131.1.S1_at   | MmugDNA.7131.1 | 10.5  | 10.17 | 0.1  | 0.22 | 1.26  | 0.035689 | 0.013603 | 0.243824 | 0.149283 |
| MmugDNA.7132.1.S1_at   | MmugDNA.7132.1 | 4.86  | 5.52  | 0.24 | 0.16 | -1.58 | 0.03193  | 0.020544 | 0.232469 | 0.179837 |
| MmugDNA.7133.1.S1_at   | MmugDNA.7133.1 | 5.83  | 5.84  | 0.25 | 0.21 | -1    | 0.643481 | 0.51868  | 0.826158 | 0.710613 |
| MmugDNA.7134.1.S1_at   | MmugDNA.7134.1 | 4.69  | 4.77  | 1.03 | 0.14 | -1.05 | 0.511418 | 0.525087 | 0.742401 | 0.714766 |
| MmugDNA.7135.1.S1_at   | MmugDNA.7135.1 | 5.29  | 5.46  | 0.1  | 0.18 | -1.12 | 0.287275 | 0.631966 | 0.577072 | 0.783052 |
| MmugDNA.7137.1.S1_s_at | MmugDNA.7137.1 | 6.8   | 7.09  | 0.27 | 0.34 | -1.22 | 0.158748 | 0.061842 | 0.449964 | 0.295514 |
| MmugDNA.7138.1.S1_at   | MmugDNA.7138.1 | 4.65  | 4.51  | 0.07 | 0.12 | 1.1   | 0.097013 | 0.102118 | 0.367217 | 0.362168 |

|                        |                |       |       |      |      |       |          |          |          |          |
|------------------------|----------------|-------|-------|------|------|-------|----------|----------|----------|----------|
| MmugDNA.714.1.S1_at    | MmugDNA.714.1  | 6.18  | 6.65  | 1.1  | 0.02 | -1.39 | 0.798981 | 0.89155  | 0.909384 | 0.938242 |
| MmugDNA.7141.1.S1_at   | MmugDNA.7141.1 | 4.41  | 4.42  | 0.25 | 0.06 | -1.01 | 0.760722 | 0.338934 | 0.890335 | 0.585891 |
| MmugDNA.7142.1.S1_at   | MmugDNA.7142.1 | 6.81  | 6.92  | 0.09 | 0.03 | -1.08 | 0.032047 | 0.158429 | 0.232887 | 0.434313 |
| MmugDNA.7143.1.S1_at   | MmugDNA.7143.1 | 5.96  | 6.02  | 0.23 | 0.12 | -1.04 | 0.723465 | 0.593487 | 0.870006 | 0.758318 |
| MmugDNA.7144.1.S1_at   | MmugDNA.7144.1 | 5.12  | 5.41  | 0.09 | 0.28 | -1.22 | 0.193974 | 0.517969 | 0.490572 | 0.710053 |
| MmugDNA.7145.1.S1_at   | MmugDNA.7145.1 | 10.5  | 11.16 | 0.29 | 0.13 | -1.58 | 0.021013 | 0.019052 | 0.198347 | 0.173688 |
| MmugDNA.7148.1.S1_at   | MmugDNA.7148.1 | 3.88  | 3.97  | 0.14 | 0.06 | -1.06 | 0.335986 | 0.511264 | 0.616626 | 0.705465 |
| MmugDNA.7149.1.S1_at   | MmugDNA.7149.1 | 11.09 | 12.04 | 0.26 | 0.08 | -1.92 | 0.006502 | 0.046775 | 0.127373 | 0.261005 |
| MmugDNA.7149.1.S1_x_at | MmugDNA.7149.1 | 10.51 | 11.35 | 0.3  | 0.07 | -1.78 | 0.01153  | 0.06659  | 0.15722  | 0.303814 |
| MmugDNA.715.1.S1_at    | MmugDNA.715.1  | 4.08  | 4.04  | 0.24 | 0.24 | 1.02  | 0.409771 | 0.692169 | 0.672061 | 0.82091  |
| MmugDNA.7150.1.S1_at   | MmugDNA.7150.1 | 4.17  | 4     | 0.28 | 0.24 | 1.12  | 0.467857 | 0.196156 | 0.713228 | 0.471236 |
| MmugDNA.7151.1.S1_at   | MmugDNA.7151.1 | 6.05  | 5.86  | 0.36 | 0.35 | 1.14  | 0.991306 | 0.999793 | 0.996793 | 0.999948 |
| MmugDNA.7152.1.S1_at   | MmugDNA.7152.1 | 4.05  | 4.01  | 0.07 | 0.04 | 1.03  | 0.826637 | 0.983262 | 0.923133 | 0.990726 |
| MmugDNA.7153.1.S1_at   | MmugDNA.7153.1 | 5.45  | 5.4   | 0.13 | 0.12 | 1.04  | 0.851601 | 0.514751 | 0.93542  | 0.707865 |
| MmugDNA.7154.1.S1_at   | MmugDNA.7154.1 | 7.74  | 8.14  | 0.23 | 0.4  | -1.32 | 0.295864 | 0.007714 | 0.584638 | 0.117387 |
| MmugDNA.7155.1.S1_at   | MmugDNA.7155.1 | 8.09  | 8.31  | 0.31 | 0.04 | -1.16 | 0.278112 | 0.037264 | 0.569462 | 0.237506 |
| MmugDNA.7156.1.S1_at   | MmugDNA.7156.1 | 4.18  | 4     | 0.18 | 0.15 | 1.14  | 0.581939 | 0.921092 | 0.786889 | 0.955543 |
| MmugDNA.7158.1.S1_at   | MmugDNA.7158.1 | 6.47  | 6.24  | 0.73 | 0.46 | 1.18  | 0.88801  | 0.978691 | 0.952167 | 0.988411 |
| MmugDNA.716.1.S1_at    | MmugDNA.716.1  | 5.72  | 5.42  | 0.08 | 0.27 | 1.23  | 0.125503 | 0.492879 | 0.405993 | 0.693817 |
| MmugDNA.7160.1.S1_at   | MmugDNA.7160.1 | 3.77  | 3.7   | 0.25 | 0.03 | 1.05  | 0.594766 | 0.181423 | 0.794991 | 0.457923 |
| MmugDNA.7161.1.S1_at   | MmugDNA.7161.1 | 5.12  | 5.07  | 0.1  | 0.05 | 1.03  | 0.503527 | 0.502543 | 0.73702  | 0.700192 |
| MmugDNA.7162.1.S1_at   | MmugDNA.7162.1 | 4.64  | 4.65  | 0.06 | 0.1  | -1.01 | 0.640681 | 0.446002 | 0.824459 | 0.662635 |
| MmugDNA.7163.1.S1_at   | MmugDNA.7163.1 | 4.05  | 4.15  | 0.44 | 0.09 | -1.08 | 0.553166 | 0.411192 | 0.769696 | 0.637937 |
| MmugDNA.7164.1.S1_at   | MmugDNA.7164.1 | 5.82  | 5.66  | 0.68 | 0.72 | 1.12  | 0.665516 | 0.1297   | 0.839277 | 0.401344 |
| MmugDNA.7165.1.S1_at   | MmugDNA.7165.1 | 13.24 | 13.13 | 0.08 | 0.17 | 1.08  | 0.575789 | 0.551356 | 0.78295  | 0.730922 |
| MmugDNA.7166.1.S1_at   | MmugDNA.7166.1 | 3.22  | 3.44  | 0.13 | 0.11 | -1.17 | 0.079293 | 0.176241 | 0.339252 | 0.452718 |
| MmugDNA.7168.1.S1_at   | MmugDNA.7168.1 | 5.4   | 5.42  | 0.15 | 0.18 | -1.01 | 0.887358 | 0.01958  | 0.951911 | 0.17571  |
| MmugDNA.7169.1.S1_at   | MmugDNA.7169.1 | 4.82  | 4.95  | 0.16 | 0.14 | -1.09 | 0.313525 | 0.335745 | 0.59936  | 0.583489 |
| MmugDNA.717.1.S1_at    | MmugDNA.717.1  | 6.25  | 6.2   | 0.18 | 0.06 | 1.03  | 0.4833   | 0.509528 | 0.723478 | 0.704233 |
| MmugDNA.7173.1.S1_at   | MmugDNA.7173.1 | 8.48  | 8.37  | 0.15 | 0.09 | 1.08  | 0.137804 | 0.426589 | 0.422876 | 0.648739 |
| MmugDNA.7174.1.S1_at   | MmugDNA.7174.1 | 3.96  | 4.02  | 0.1  | 0.14 | -1.04 | 0.826125 | 0.856695 | 0.922814 | 0.918126 |
| MmugDNA.7175.1.S1_at   | MmugDNA.7175.1 | 5.09  | 4.97  | 0.11 | 0.09 | 1.09  | 0.160093 | 0.092395 | 0.451433 | 0.348294 |
| MmugDNA.7176.1.S1_at   | MmugDNA.7176.1 | 8.51  | 8.28  | 0.12 | 0.09 | 1.17  | 0.035188 | 0.004764 | 0.242214 | 0.096313 |
| MmugDNA.7179.1.S1_at   | MmugDNA.7179.1 | 4.26  | 4.19  | 0.25 | 0.23 | 1.05  | 0.15733  | 0.177304 | 0.448021 | 0.453742 |
| MmugDNA.718.1.S1_at    | MmugDNA.718.1  | 6.86  | 6.2   | 0.23 | 0.23 | 1.59  | 0.04469  | 0.029648 | 0.268654 | 0.213852 |
| MmugDNA.7180.1.S1_at   | MmugDNA.7180.1 | 6.66  | 6.95  | 0.06 | 0.04 | -1.22 | 0.002175 | 0.102537 | 0.09055  | 0.362875 |
| MmugDNA.7182.1.S1_at   | MmugDNA.7182.1 | 5.9   | 6.36  | 0.24 | 0.06 | -1.37 | 0.063084 | 0.248218 | 0.307923 | 0.517574 |
| MmugDNA.7185.1.S1_at   | MmugDNA.7185.1 | 4.7   | 4.64  | 0.53 | 0.05 | 1.04  | 0.309418 | 0.531428 | 0.59582  | 0.718636 |
| MmugDNA.7186.1.S1_at   | MmugDNA.7186.1 | 10.48 | 10.28 | 0.15 | 0.02 | 1.15  | 0.073934 | 0.150016 | 0.329963 | 0.424621 |
| MmugDNA.7188.1.S1_at   | MmugDNA.7188.1 | 5.63  | 5.91  | 0.24 | 0.09 | -1.22 | 0.341544 | 0.543026 | 0.621347 | 0.725879 |
| MmugDNA.7189.1.S1_at   | MmugDNA.7189.1 | 10.83 | 10.9  | 0.21 | 0.07 | -1.05 | 0.506624 | 0.475937 | 0.739209 | 0.682387 |
| MmugDNA.719.1.S1_at    | MmugDNA.719.1  | 5.01  | 5.07  | 0.24 | 0.09 | -1.04 | 0.845926 | 0.885658 | 0.932703 | 0.934982 |
| MmugDNA.7191.1.S1_at   | MmugDNA.7191.1 | 6.71  | 6.56  | 0.35 | 0.04 | 1.11  | 0.413701 | 0.507024 | 0.67503  | 0.702701 |

|                        |                |       |       |      |      |       |          |          |          |          |
|------------------------|----------------|-------|-------|------|------|-------|----------|----------|----------|----------|
| MmugDNA.7192.1.S1_at   | MmugDNA.7192.1 | 4.55  | 4.35  | 0.49 | 0.4  | 1.15  | 0.322161 | 0.600542 | 0.606295 | 0.76217  |
| MmugDNA.7193.1.S1_at   | MmugDNA.7193.1 | 8.8   | 7.96  | 0.28 | 0.09 | 1.79  | 0.007493 | 0.003547 | 0.134856 | 0.085371 |
| MmugDNA.7194.1.S1_at   | MmugDNA.7194.1 | 3.41  | 3.39  | 0.1  | 0.11 | 1.01  | 0.245295 | 0.307086 | 0.54135  | 0.563432 |
| MmugDNA.7195.1.S1_at   | MmugDNA.7195.1 | 6.61  | 6.76  | 0.07 | 0.15 | -1.12 | 0.138201 | 0.70033  | 0.423422 | 0.826073 |
| MmugDNA.7197.1.S1_at   | MmugDNA.7197.1 | 6.47  | 6.45  | 0.31 | 0.1  | 1.01  | 0.907316 | 0.765803 | 0.960844 | 0.86393  |
| MmugDNA.7198.1.S1_at   | MmugDNA.7198.1 | 4.3   | 4.19  | 0.14 | 0.13 | 1.08  | 0.219719 | 0.224781 | 0.517494 | 0.497617 |
| MmugDNA.7199.1.S1_at   | MmugDNA.7199.1 | 3.85  | 4.15  | 0.45 | 0.36 | -1.23 | 0.460785 | 0.366731 | 0.708419 | 0.606498 |
| MmugDNA.72.1.S1_at     | MmugDNA.72.1   | 7.7   | 7.6   | 0.51 | 0.04 | 1.07  | 0.78261  | 0.939048 | 0.900816 | 0.9654   |
| MmugDNA.720.1.S1_at    | MmugDNA.720.1  | 7.36  | 7.19  | 0.23 | 0.14 | 1.12  | 0.414855 | 0.662165 | 0.675808 | 0.802157 |
| MmugDNA.7200.1.S1_at   | MmugDNA.7200.1 | 6.5   | 6.53  | 0.18 | 0.1  | -1.02 | 0.513182 | 0.715887 | 0.743514 | 0.83531  |
| MmugDNA.7201.1.S1_at   | MmugDNA.7201.1 | 7.08  | 6.65  | 0.22 | 0.16 | 1.34  | 0.097221 | 0.202145 | 0.367275 | 0.476559 |
| MmugDNA.7202.1.S1_at   | MmugDNA.7202.1 | 6.22  | 6.21  | 0.09 | 0.11 | 1.01  | 0.771167 | 0.328531 | 0.895187 | 0.578137 |
| MmugDNA.7203.1.S1_at   | MmugDNA.7203.1 | 6.28  | 6.8   | 0.48 | 0.3  | -1.43 | 0.08473  | 0.578612 | 0.348607 | 0.748595 |
| MmugDNA.7207.1.S1_at   | MmugDNA.7207.1 | 3.24  | 3.11  | 0.31 | 0.09 | 1.1   | 0.16562  | 0.286432 | 0.458665 | 0.547829 |
| MmugDNA.7209.1.S1_at   | MmugDNA.7209.1 | 10.22 | 10.03 | 0.14 | 0.07 | 1.14  | 0.191872 | 0.599597 | 0.488386 | 0.761524 |
| MmugDNA.721.1.S1_at    | MmugDNA.721.1  | 3.62  | 3.61  | 0.21 | 0.16 | 1.01  | 0.897386 | 0.661105 | 0.956476 | 0.801683 |
| MmugDNA.7210.1.S1_at   | MmugDNA.7210.1 | 9.25  | 9.13  | 0.44 | 0.1  | 1.09  | 0.825178 | 0.739315 | 0.922341 | 0.848911 |
| MmugDNA.7211.1.S1_at   | MmugDNA.7211.1 | 4.15  | 4.16  | 0.13 | 0.1  | -1    | 0.933149 | 0.699225 | 0.971968 | 0.825277 |
| MmugDNA.7212.1.S1_at   | MmugDNA.7212.1 | 4.81  | 4.59  | 0.22 | 0.03 | 1.16  | 0.16572  | 0.108717 | 0.458753 | 0.372257 |
| MmugDNA.7213.1.S1_at   | MmugDNA.7213.1 | 11.36 | 11.3  | 0.19 | 0.16 | 1.04  | 0.795622 | 0.555688 | 0.907596 | 0.734    |
| MmugDNA.7214.1.S1_at   | MmugDNA.7214.1 | 3.99  | 3.81  | 0.16 | 0.24 | 1.13  | 0.378492 | 0.224785 | 0.648694 | 0.497617 |
| MmugDNA.7215.1.S1_at   | MmugDNA.7215.1 | 6.8   | 6.67  | 0.45 | 0.27 | 1.09  | 0.9837   | 0.689227 | 0.993909 | 0.818639 |
| MmugDNA.7216.1.S1_at   | MmugDNA.7216.1 | 6.57  | 5.88  | 0.38 | 0.32 | 1.61  | 0.154638 | 0.103453 | 0.444927 | 0.364346 |
| MmugDNA.7217.1.S1_at   | MmugDNA.7217.1 | 6.5   | 6.19  | 0.37 | 0.09 | 1.24  | 0.171322 | 0.092921 | 0.465234 | 0.349024 |
| MmugDNA.7218.1.S1_at   | MmugDNA.7218.1 | 3.82  | 2.96  | 0.12 | 0.16 | 1.82  | 0.002137 | 0.000501 | 0.090208 | 0.038996 |
| MmugDNA.7219.1.S1_at   | MmugDNA.7219.1 | 3     | 2.94  | 0.06 | 0.05 | 1.04  | 0.371949 | 0.058642 | 0.644628 | 0.288894 |
| MmugDNA.722.1.S1_at    | MmugDNA.722.1  | 7.53  | 7.57  | 0.4  | 0.3  | -1.03 | 0.470034 | 0.788295 | 0.714665 | 0.877534 |
| MmugDNA.7221.1.S1_at   | MmugDNA.7221.1 | 11.35 | 10.72 | 0.17 | 0.06 | 1.54  | 0.003936 | 0.000143 | 0.108453 | 0.029387 |
| MmugDNA.7223.1.S1_at   | MmugDNA.7223.1 | 6.73  | 6.61  | 0    | 0.1  | 1.09  | 0.234878 | 0.070715 | 0.532912 | 0.312128 |
| MmugDNA.7224.1.S1_at   | MmugDNA.7224.1 | 5.22  | 5.35  | 0.28 | 0.05 | -1.1  | 0.545169 | 0.303284 | 0.764467 | 0.560748 |
| MmugDNA.7225.1.S1_at   | MmugDNA.7225.1 | 4.45  | 3.93  | 0.8  | 0.48 | 1.43  | 0.424903 | 0.28469  | 0.682288 | 0.5469   |
| MmugDNA.7226.1.S1_at   | MmugDNA.7226.1 | 7.66  | 7.83  | 0.04 | 0.1  | -1.12 | 0.027079 | 0.526074 | 0.217303 | 0.715374 |
| MmugDNA.7227.1.S1_at   | MmugDNA.7227.1 | 3.49  | 3.24  | 0.2  | 0.26 | 1.19  | 0.637    | 0.78435  | 0.822336 | 0.87518  |
| MmugDNA.7228.1.S1_at   | MmugDNA.7228.1 | 6.08  | 8.68  | 1.35 | 0.28 | -6.03 | 0.023591 | 0.016666 | 0.206924 | 0.163458 |
| MmugDNA.7229.1.S1_at   | MmugDNA.7229.1 | 7.25  | 6.8   | 0.23 | 0.59 | 1.36  | 0.09294  | 0.000416 | 0.361523 | 0.038093 |
| MmugDNA.723.1.S1_at    | MmugDNA.723.1  | 6.64  | 6.57  | 0.2  | 0.08 | 1.05  | 0.361065 | 0.405473 | 0.636561 | 0.633774 |
| MmugDNA.7230.1.S1_at   | MmugDNA.7230.1 | 12.56 | 12.66 | 0.13 | 0.16 | -1.07 | 0.938793 | 0.991063 | 0.974191 | 0.994978 |
| MmugDNA.7231.1.S1_at   | MmugDNA.7231.1 | 5.46  | 5.68  | 0.31 | 0.06 | -1.17 | 0.781353 | 0.194111 | 0.900134 | 0.469266 |
| MmugDNA.7233.1.S1_at   | MmugDNA.7233.1 | 5.14  | 4.91  | 0.08 | 0.16 | 1.17  | 0.10974  | 0.072963 | 0.384862 | 0.315986 |
| MmugDNA.7234.1.S1_at   | MmugDNA.7234.1 | 5.04  | 4.96  | 0.16 | 0.24 | 1.06  | 0.901821 | 0.178557 | 0.958364 | 0.454802 |
| MmugDNA.7235.1.S1_s_at | MmugDNA.7235.1 | 10.71 | 10.18 | 0.3  | 0.09 | 1.45  | 0.036407 | 0.101175 | 0.24584  | 0.360831 |
| MmugDNA.7236.1.S1_at   | MmugDNA.7236.1 | 3.56  | 3.66  | 0.19 | 0.05 | -1.07 | 0.300908 | 0.172524 | 0.589013 | 0.448864 |
| MmugDNA.7237.1.S1_at   | MmugDNA.7237.1 | 3.05  | 3.05  | 0.06 | 0.04 | 1     | 0.863012 | 0.127243 | 0.94045  | 0.397935 |

|                         |                 |       |       |      |      |       |          |          |          |          |
|-------------------------|-----------------|-------|-------|------|------|-------|----------|----------|----------|----------|
| MmugDNA.7240.1.S1_at    | MmugDNA.7240.1  | 2.96  | 2.97  | 0.03 | 0.06 | -1    | 0.909283 | 0.672326 | 0.961553 | 0.808488 |
| MmugDNA.7241.1.S1_at    | MmugDNA.7241.1  | 5.65  | 5.78  | 0.16 | 0.17 | -1.09 | 0.898111 | 0.213632 | 0.956732 | 0.487441 |
| MmugDNA.7242.1.S1_at    | MmugDNA.7242.1  | 5.27  | 5.33  | 0.08 | 0.02 | -1.04 | 0.2603   | 0.255937 | 0.554455 | 0.523874 |
| MmugDNA.7243.1.S1_at    | MmugDNA.7243.1  | 6.63  | 6.57  | 0.25 | 0.12 | 1.04  | 0.679234 | 0.370727 | 0.84701  | 0.609721 |
| MmugDNA.7244.1.S1_at    | MmugDNA.7244.1  | 3.2   | 3.08  | 0.08 | 0.01 | 1.08  | 0.043203 | 0.039385 | 0.265109 | 0.243406 |
| MmugDNA.7245.1.S1_at    | MmugDNA.7245.1  | 8.17  | 9.14  | 0.1  | 0.2  | -1.95 | 0.00162  | 0.140009 | 0.08404  | 0.413333 |
| MmugDNA.7247.1.S1_at    | MmugDNA.7247.1  | 7.96  | 7.45  | 0.17 | 0.12 | 1.43  | 0.011518 | 0.002469 | 0.15722  | 0.073576 |
| MmugDNA.7248.1.S1_s_at  | MmugDNA.7248.1  | 9.63  | 9.49  | 0.1  | 0.21 | 1.11  | 0.177201 | 0.170393 | 0.471808 | 0.447103 |
| MmugDNA.7249.1.S1_at    | MmugDNA.7249.1  | 9.04  | 9.44  | 0.25 | 0.26 | -1.32 | 0.094403 | 0.000481 | 0.363345 | 0.038665 |
| MmugDNA.7251.1.S1_at    | MmugDNA.7251.1  | 8.39  | 8.3   | 0.3  | 0.49 | 1.06  | 0.694978 | 0.921623 | 0.854537 | 0.955794 |
| MmugDNA.7252.1.S1_at    | MmugDNA.7252.1  | 3.27  | 3.19  | 0.07 | 0.05 | 1.05  | 0.076745 | 0.011587 | 0.33513  | 0.139311 |
| MmugDNA.7253.1.S1_at    | MmugDNA.7253.1  | 3.09  | 3.58  | 1.79 | 0.43 | -1.4  | 0.55776  | 0.720343 | 0.772387 | 0.838252 |
| MmugDNA.7255.1.S1_at    | MmugDNA.7255.1  | 3.99  | 3.95  | 0.16 | 0.12 | 1.02  | 0.58769  | 0.664437 | 0.79058  | 0.803396 |
| MmugDNA.7256.1.S1_at    | MmugDNA.7256.1  | 4.13  | 4.14  | 0.33 | 0.21 | -1.01 | 0.466105 | 0.520101 | 0.712021 | 0.711472 |
| MmugDNA.7257.1.S1_at    | MmugDNA.7257.1  | 9.37  | 9.81  | 0.25 | 0.09 | -1.36 | 0.117719 | 0.12837  | 0.395125 | 0.39964  |
| MmugDNA.7258.1.S1_at    | MmugDNA.7258.1  | 3.51  | 3.49  | 0.45 | 0.18 | 1.01  | 0.660341 | 0.869557 | 0.83613  | 0.925994 |
| MmugDNA.7259.1.S1_at    | MmugDNA.7259.1  | 3.28  | 3.26  | 0.17 | 0.18 | 1.01  | 0.675612 | 0.755683 | 0.845101 | 0.85776  |
| MmugDNA.7260.1.S1_at    | MmugDNA.7260.1  | 6.96  | 6.67  | 0.2  | 0.13 | 1.22  | 0.291706 | 0.34705  | 0.581116 | 0.591813 |
| MmugDNA.7261.1.S1_at    | MmugDNA.7261.1  | 12.51 | 12.68 | 0.1  | 0.08 | -1.13 | 0.066947 | 0.387344 | 0.316417 | 0.622027 |
| MmugDNA.7263.1.S1_at    | MmugDNA.7263.1  | 4.29  | 3.59  | 0.56 | 0.09 | 1.62  | 0.169339 | 0.064554 | 0.462593 | 0.300255 |
| MmugDNA.7264.1.S1_at    | MmugDNA.7264.1  | 6.82  | 6.35  | 0.38 | 0.04 | 1.38  | 0.098409 | 0.084805 | 0.36907  | 0.336325 |
| MmugDNA.7265.1.S1_at    | MmugDNA.7265.1  | 3.87  | 3.84  | 0.19 | 0.08 | 1.02  | 0.992519 | 0.923788 | 0.997206 | 0.957119 |
| MmugDNA.7266.1.S1_at    | MmugDNA.7266.1  | 3.85  | 3.71  | 0.05 | 0.13 | 1.1   | 0.283138 | 0.051875 | 0.573595 | 0.273151 |
| MmugDNA.7267.1.S1_at    | MmugDNA.7267.1  | 4.93  | 4.75  | 0.21 | 0.17 | 1.13  | 0.648963 | 0.495532 | 0.829463 | 0.695527 |
| MmugDNA.7268.1.S1_at    | MmugDNA.7268.1  | 5.89  | 5.85  | 0.19 | 0.03 | 1.03  | 0.775789 | 0.33266  | 0.897461 | 0.581046 |
| MmugDNA.7269.1.S1_at    | MmugDNA.7269.1  | 3.97  | 3.97  | 0.05 | 0.13 | -1    | 0.416527 | 0.406095 | 0.676976 | 0.634197 |
| MmugDNA.727.1.S1_at     | MmugDNA.727.1   | 4.56  | 4.57  | 0.24 | 0.09 | -1.01 | 0.887948 | 0.902894 | 0.952119 | 0.944897 |
| MmugDNA.7270.1.S1_at    | MmugDNA.7270.1  | 10.74 | 10.55 | 0.14 | 0.09 | 1.15  | 0.028008 | 0.002216 | 0.219887 | 0.069424 |
| MmugDNA.7271.1.S1_at    | MmugDNA.7271.1  | 7.99  | 7.61  | 0.36 | 0.17 | 1.3   | 0.091196 | 0.250213 | 0.358606 | 0.519235 |
| MmugDNA.7272.1.S1_at    | MmugDNA.7272.1  | 4.62  | 4.61  | 0.13 | 0.08 | 1     | 0.309021 | 0.405134 | 0.595457 | 0.633482 |
| MmugDNA.7273.1.S1_at    | MmugDNA.7273.1  | 3.22  | 3.19  | 0.16 | 0.02 | 1.02  | 0.593755 | 0.630171 | 0.794192 | 0.782181 |
| MmugDNA.16291.1.S1_at   | MmugDNA.16291.1 | 3.77  | 4.47  | 0.57 | 0.04 | -1.63 | 0.293886 | 0.486939 | 0.582887 | 0.690118 |
| MmugDNA.16291.1.S1_s_at | MmugDNA.16291.1 | 4.93  | 4.88  | 0.23 | 0.02 | 1.04  | 0.619217 | 0.802797 | 0.811061 | 0.886441 |
| MmugDNA.7276.1.S1_at    | MmugDNA.7276.1  | 8.74  | 8.69  | 0.08 | 0.16 | 1.04  | 0.724031 | 0.322998 | 0.870379 | 0.574313 |
| MmugDNA.7277.1.S1_at    | MmugDNA.7277.1  | 11.64 | 11.41 | 0.07 | 0.12 | 1.17  | 0.032696 | 0.016855 | 0.234993 | 0.16458  |
| MmugDNA.728.1.S1_at     | MmugDNA.728.1   | 5.61  | 5.62  | 0.46 | 0.05 | -1.01 | 0.960371 | 0.503718 | 0.983725 | 0.701079 |
| MmugDNA.7281.1.S1_at    | MmugDNA.7281.1  | 3.76  | 3.79  | 0.1  | 0.12 | -1.02 | 0.950312 | 0.843282 | 0.97936  | 0.910767 |
| MmugDNA.7282.1.S1_at    | MmugDNA.7282.1  | 8.36  | 8.87  | 0.08 | 0.18 | -1.42 | 0.020411 | 0.089396 | 0.1964   | 0.343637 |
| MmugDNA.7283.1.S1_at    | MmugDNA.7283.1  | 10.91 | 11.37 | 0.12 | 0.05 | -1.37 | 0.003118 | 0.000867 | 0.100877 | 0.047463 |
| MmugDNA.7284.1.S1_at    | MmugDNA.7284.1  | 9.16  | 8.54  | 0.36 | 0.14 | 1.54  | 0.022304 | 0.016781 | 0.202621 | 0.164091 |
| MmugDNA.7285.1.S1_at    | MmugDNA.7285.1  | 3.72  | 3.72  | 0.14 | 0.12 | 1     | 0.230656 | 0.195575 | 0.529522 | 0.470441 |
| MmugDNA.7286.1.S1_s_at  | MmugDNA.7286.1  | 9.63  | 10.03 | 0.13 | 0.14 | -1.32 | 0.05451  | 0.07478  | 0.290603 | 0.318527 |
| MmugDNA.7288.1.S1_s_at  | MmugDNA.7288.1  | 10.07 | 9.7   | 0.09 | 0.03 | 1.29  | 0.002646 | 0.010859 | 0.095608 | 0.13586  |

|                        |                |       |       |      |      |       |          |          |          |          |
|------------------------|----------------|-------|-------|------|------|-------|----------|----------|----------|----------|
| MmugDNA.7289.1.S1_at   | MmugDNA.7289.1 | 4.34  | 4.19  | 0.78 | 0.15 | 1.11  | 0.706013 | 0.639878 | 0.860759 | 0.788512 |
| MmugDNA.7290.1.S1_s_at | MmugDNA.7290.1 | 6.35  | 6.57  | 0.24 | 0.39 | -1.16 | 0.170224 | 0.25802  | 0.463907 | 0.52557  |
| MmugDNA.7292.1.S1_at   | MmugDNA.7292.1 | 4.85  | 7     | 0.15 | 0.59 | -4.45 | 0.007521 | 0.088632 | 0.134968 | 0.342167 |
| MmugDNA.7293.1.S1_at   | MmugDNA.7293.1 | 11.27 | 12.12 | 0.17 | 0.16 | -1.8  | 0.003924 | 0.097547 | 0.108453 | 0.355398 |
| MmugDNA.7294.1.S1_at   | MmugDNA.7294.1 | 4.13  | 3.86  | 0.3  | 0.02 | 1.21  | 0.154989 | 0.155549 | 0.445174 | 0.430888 |
| MmugDNA.7295.1.S1_at   | MmugDNA.7295.1 | 6.34  | 6.33  | 0.09 | 0.17 | 1.01  | 0.970541 | 0.206506 | 0.988339 | 0.480571 |
| MmugDNA.7296.1.S1_at   | MmugDNA.7296.1 | 9.53  | 9     | 0.13 | 0.13 | 1.44  | 0.009898 | 0.003484 | 0.148933 | 0.084834 |
| MmugDNA.7298.1.S1_s_at | MmugDNA.7298.1 | 3.56  | 3.51  | 0.1  | 0.04 | 1.04  | 0.309836 | 0.709624 | 0.596102 | 0.831691 |
| MmugDNA.7299.1.S1_at   | MmugDNA.7299.1 | 3.84  | 3.87  | 0.09 | 0.13 | -1.02 | 0.350244 | 0.66624  | 0.628033 | 0.804419 |
| MmugDNA.73.1.S1_s_at   | MmugDNA.73.1   | 11.15 | 11.1  | 0.17 | 0.03 | 1.04  | 0.777597 | 0.927765 | 0.898391 | 0.958984 |
| MmugDNA.730.1.S1_at    | MmugDNA.730.1  | 10.23 | 10.12 | 0.03 | 0.05 | 1.08  | 0.019375 | 0.141813 | 0.192293 | 0.415331 |
| MmugDNA.7300.1.S1_at   | MmugDNA.7300.1 | 11.59 | 11.38 | 0.91 | 0.17 | 1.16  | 0.70994  | 0.855693 | 0.862704 | 0.917683 |
| MmugDNA.7302.1.S1_at   | MmugDNA.7302.1 | 5.25  | 5.1   | 0.23 | 0.09 | 1.11  | 0.114628 | 0.177361 | 0.391643 | 0.453742 |
| MmugDNA.7303.1.S1_at   | MmugDNA.7303.1 | 12.29 | 12.1  | 0.08 | 0.17 | 1.14  | 0.092204 | 0.018631 | 0.360155 | 0.171647 |
| MmugDNA.7304.1.S1_at   | MmugDNA.7304.1 | 10.39 | 10.2  | 0.23 | 0.05 | 1.14  | 0.223162 | 0.425825 | 0.520981 | 0.6481   |
| MmugDNA.7304.1.S1_s_at | MmugDNA.7304.1 | 10.23 | 9.68  | 0.1  | 0.19 | 1.46  | 0.015906 | 0.098009 | 0.178525 | 0.355954 |
| MmugDNA.7305.1.S1_at   | MmugDNA.7305.1 | 11.47 | 11.51 | 0.13 | 0.05 | -1.03 | 0.247626 | 0.087177 | 0.543027 | 0.340133 |
| MmugDNA.7306.1.S1_at   | MmugDNA.7306.1 | 8.06  | 7.97  | 0.17 | 0.11 | 1.07  | 0.942821 | 0.939298 | 0.975902 | 0.965543 |
| MmugDNA.7307.1.S1_at   | MmugDNA.7307.1 | 3.79  | 3.63  | 0.26 | 0.13 | 1.12  | 0.146612 | 0.260007 | 0.434564 | 0.52675  |
| MmugDNA.7308.1.S1_at   | MmugDNA.7308.1 | 6.57  | 6.47  | 0.19 | 0.06 | 1.07  | 0.674392 | 0.053951 | 0.844507 | 0.277769 |
| MmugDNA.7309.1.S1_at   | MmugDNA.7309.1 | 5.38  | 5.32  | 0.93 | 0.37 | 1.05  | 0.371582 | 0.062694 | 0.644245 | 0.297113 |
| MmugDNA.7310.1.S1_at   | MmugDNA.7310.1 | 7.32  | 7.34  | 0.37 | 0.01 | -1.02 | 0.313311 | 0.268958 | 0.599117 | 0.534369 |
| MmugDNA.7311.1.S1_at   | MmugDNA.7311.1 | 3.55  | 3.37  | 0.04 | 0.28 | 1.13  | 0.471804 | 0.497797 | 0.715817 | 0.697071 |
| MmugDNA.7312.1.S1_at   | MmugDNA.7312.1 | 8.11  | 7.99  | 0.15 | 0.36 | 1.08  | 0.650993 | 0.064195 | 0.830532 | 0.299611 |
| MmugDNA.7313.1.S1_at   | MmugDNA.7313.1 | 9.73  | 9.59  | 0.28 | 0.17 | 1.1   | 0.865792 | 0.92169  | 0.941888 | 0.955826 |
| MmugDNA.7314.1.S1_at   | MmugDNA.7314.1 | 6.9   | 6.91  | 0.07 | 0.08 | -1.01 | 0.948613 | 0.039986 | 0.978506 | 0.245173 |
| MmugDNA.7315.1.S1_at   | MmugDNA.7315.1 | 10.13 | 9.61  | 0.06 | 0.1  | 1.43  | 0.001027 | 0.000714 | 0.076321 | 0.044419 |
| MmugDNA.7317.1.S1_at   | MmugDNA.7317.1 | 4.39  | 4.09  | 0.32 | 0.12 | 1.23  | 0.261199 | 0.425277 | 0.555294 | 0.647679 |
| MmugDNA.7318.1.S1_at   | MmugDNA.7318.1 | 6     | 5.69  | 0.76 | 0.61 | 1.24  | 0.807182 | 0.514835 | 0.913663 | 0.707919 |
| MmugDNA.7321.1.S1_at   | MmugDNA.7321.1 | 6.09  | 6.04  | 0.19 | 0.12 | 1.03  | 0.588527 | 0.483374 | 0.791143 | 0.687904 |
| MmugDNA.7323.1.S1_at   | MmugDNA.7323.1 | 7.22  | 5.28  | 0.58 | 0.96 | 3.84  | 0.045235 | 0.039782 | 0.270208 | 0.244453 |
| MmugDNA.7324.1.S1_at   | MmugDNA.7324.1 | 5.19  | 5.22  | 0.21 | 0.09 | -1.02 | 0.791028 | 0.732534 | 0.905046 | 0.845072 |
| MmugDNA.7326.1.S1_at   | MmugDNA.7326.1 | 5.82  | 5.84  | 0.52 | 0.07 | -1.01 | 0.402378 | 0.561434 | 0.6667   | 0.737397 |
| MmugDNA.7327.1.S1_at   | MmugDNA.7327.1 | 4.11  | 4     | 0.13 | 0.13 | 1.08  | 0.832157 | 0.031282 | 0.926055 | 0.218752 |
| MmugDNA.7328.1.S1_at   | MmugDNA.7328.1 | 6.06  | 6.13  | 0.81 | 0.28 | -1.05 | 0.627724 | 0.726409 | 0.816953 | 0.84168  |
| MmugDNA.733.1.S1_at    | MmugDNA.733.1  | 4.2   | 4.15  | 0.04 | 0.51 | 1.04  | 0.456337 | 0.397081 | 0.705738 | 0.628611 |
| MmugDNA.7331.1.S1_at   | MmugDNA.7331.1 | 3.15  | 3.18  | 0.07 | 0.15 | -1.02 | 0.813768 | 0.947503 | 0.916701 | 0.970206 |
| MmugDNA.7333.1.S1_at   | MmugDNA.7333.1 | 5.63  | 5.6   | 0.18 | 0.14 | 1.02  | 0.711543 | 0.916754 | 0.863896 | 0.9534   |
| MmugDNA.7335.1.S1_at   | MmugDNA.7335.1 | 3.37  | 3.5   | 0.04 | 0.15 | -1.1  | 0.636641 | 0.149995 | 0.822222 | 0.424621 |
| MmugDNA.7336.1.S1_at   | MmugDNA.7336.1 | 5.92  | 7.72  | 0.92 | 0.42 | -3.48 | 0.032704 | 0.041652 | 0.234993 | 0.24887  |
| MmugDNA.7338.1.S1_at   | MmugDNA.7338.1 | 8.04  | 7.83  | 0.87 | 0.24 | 1.15  | 0.811412 | 0.600467 | 0.915561 | 0.762128 |
| MmugDNA.734.1.S1_x_at  | MmugDNA.734.1  | 12.39 | 12.34 | 0.41 | 0.19 | 1.03  | 0.361643 | 0.171705 | 0.637014 | 0.448079 |
| MmugDNA.7340.1.S1_at   | MmugDNA.7340.1 | 8.08  | 8.46  | 0.95 | 0.1  | -1.3  | 0.771715 | 0.93766  | 0.895391 | 0.964687 |

|                        |                |       |       |      |      |       |          |          |          |          |
|------------------------|----------------|-------|-------|------|------|-------|----------|----------|----------|----------|
| MmugDNA.7342.1.S1_at   | MmugDNA.7342.1 | 5.18  | 5.05  | 0.2  | 0.07 | 1.1   | 0.370602 | 0.532235 | 0.643477 | 0.718999 |
| MmugDNA.7343.1.S1_at   | MmugDNA.7343.1 | 6.77  | 6.48  | 0.14 | 0.11 | 1.23  | 0.098888 | 0.231797 | 0.369739 | 0.503592 |
| MmugDNA.7344.1.S1_x_at | MmugDNA.7344.1 | 9.55  | 9.31  | 1.08 | 0.54 | 1.18  | 0.296523 | 0.389309 | 0.585241 | 0.623403 |
| MmugDNA.7345.1.S1_at   | MmugDNA.7345.1 | 8.26  | 8.65  | 0.22 | 0.14 | -1.31 | 0.067853 | 0.354249 | 0.318295 | 0.597105 |
| MmugDNA.7347.1.S1_at   | MmugDNA.7347.1 | 8.73  | 7.99  | 0.68 | 0.58 | 1.67  | 0.26035  | 0.139479 | 0.554485 | 0.412743 |
| MmugDNA.735.1.S1_at    | MmugDNA.735.1  | 7.93  | 6.93  | 0.03 | 0.43 | 1.99  | 0.019122 | 0.035728 | 0.191749 | 0.233412 |
| MmugDNA.7351.1.S1_at   | MmugDNA.7351.1 | 12.14 | 12.44 | 0.32 | 0.14 | -1.23 | 0.322747 | 0.767627 | 0.606593 | 0.865109 |
| MmugDNA.7352.1.S1_at   | MmugDNA.7352.1 | 5.88  | 5.98  | 0.29 | 0.2  | -1.08 | 0.951725 | 0.949044 | 0.980033 | 0.970812 |
| MmugDNA.7353.1.S1_s_at | MmugDNA.7353.1 | 11.62 | 11.58 | 0.2  | 0.09 | 1.03  | 0.734829 | 0.422131 | 0.876525 | 0.645492 |
| MmugDNA.7354.1.S1_at   | MmugDNA.7354.1 | 4.53  | 3.89  | 0.28 | 0.84 | 1.57  | 0.712771 | 0.8348   | 0.864413 | 0.905439 |
| MmugDNA.7355.1.S1_at   | MmugDNA.7355.1 | 7.37  | 6.83  | 0.27 | 0.11 | 1.46  | 0.075556 | 0.015595 | 0.333134 | 0.158262 |
| MmugDNA.7356.1.S1_at   | MmugDNA.7356.1 | 5.82  | 5.06  | 0.24 | 0.22 | 1.69  | 0.029989 | 0.021652 | 0.226453 | 0.184333 |
| MmugDNA.7358.1.S1_at   | MmugDNA.7358.1 | 6.05  | 6.74  | 0.36 | 0.16 | -1.61 | 0.099297 | 0.131354 | 0.370274 | 0.403466 |
| MmugDNA.736.1.S1_at    | MmugDNA.736.1  | 9.73  | 9.52  | 0.19 | 0.08 | 1.16  | 0.109175 | 0.286191 | 0.384284 | 0.547713 |
| MmugDNA.7360.1.S1_at   | MmugDNA.7360.1 | 11.32 | 11.35 | 0.03 | 0.04 | -1.02 | 0.105686 | 0.021197 | 0.379811 | 0.182325 |
| MmugDNA.7362.1.S1_at   | MmugDNA.7362.1 | 13.4  | 13.67 | 0.13 | 0.06 | -1.21 | 0.025819 | 0.358631 | 0.213432 | 0.600139 |
| MmugDNA.7364.1.S1_at   | MmugDNA.7364.1 | 6.64  | 7.27  | 1.47 | 0.48 | -1.55 | 0.85262  | 0.903646 | 0.935897 | 0.945292 |
| MmugDNA.7366.1.S1_at   | MmugDNA.7366.1 | 6.5   | 6.64  | 0.3  | 0.19 | -1.1  | 0.910318 | 0.280789 | 0.961971 | 0.543952 |
| MmugDNA.7367.1.S1_at   | MmugDNA.7367.1 | 5.16  | 5.24  | 0.32 | 0.42 | -1.06 | 0.191735 | 0.193726 | 0.488196 | 0.468818 |
| MmugDNA.7368.1.S1_at   | MmugDNA.7368.1 | 3.37  | 3.16  | 0.03 | 0.09 | 1.16  | 0.022739 | 0.015103 | 0.203916 | 0.156008 |
| MmugDNA.7369.1.S1_at   | MmugDNA.7369.1 | 3.07  | 3.63  | 0.22 | 0.21 | -1.48 | 0.064396 | 0.034635 | 0.310328 | 0.230247 |
| MmugDNA.737.1.S1_at    | MmugDNA.737.1  | 5.22  | 5.19  | 0    | 0.2  | 1.02  | 0.289403 | 0.145006 | 0.578963 | 0.418938 |
| MmugDNA.7370.1.S1_at   | MmugDNA.7370.1 | 6.68  | 6.71  | 0.44 | 0.19 | -1.02 | 0.993194 | 0.865673 | 0.997367 | 0.923638 |
| MmugDNA.7373.1.S1_at   | MmugDNA.7373.1 | 3.31  | 3.22  | 0.17 | 0.17 | 1.07  | 0.936541 | 0.665122 | 0.973499 | 0.803733 |
| MmugDNA.7374.1.S1_at   | MmugDNA.7374.1 | 3.99  | 4.08  | 0.06 | 0.47 | -1.07 | 0.911535 | 0.984655 | 0.962515 | 0.991346 |
| MmugDNA.7375.1.S1_x_at | MmugDNA.7375.1 | 9.28  | 9.03  | 0.98 | 0.27 | 1.19  | 0.243094 | 0.159088 | 0.539753 | 0.435217 |
| MmugDNA.7378.1.S1_at   | MmugDNA.7378.1 | 5.06  | 4.66  | 0.14 | 0.03 | 1.32  | 0.009383 | 0.005052 | 0.146803 | 0.099022 |
| MmugDNA.7379.1.S1_at   | MmugDNA.7379.1 | 8.43  | 8.14  | 0.38 | 0.25 | 1.22  | 0.313124 | 0.022176 | 0.598954 | 0.186409 |
| MmugDNA.738.1.S1_at    | MmugDNA.738.1  | 9.87  | 8.13  | 0.41 | 0.92 | 3.34  | 0.102902 | 0.477856 | 0.375502 | 0.683843 |
| MmugDNA.7380.1.S1_at   | MmugDNA.7380.1 | 4.21  | 4.21  | 0.03 | 0.15 | -1    | 0.48573  | 0.783031 | 0.725165 | 0.874447 |
| MmugDNA.7387.1.S1_at   | MmugDNA.7387.1 | 8.39  | 8.26  | 0.38 | 0.12 | 1.09  | 0.489113 | 0.001973 | 0.727585 | 0.065871 |
| MmugDNA.7388.1.S1_at   | MmugDNA.7388.1 | 6.81  | 7.29  | 0.11 | 0.36 | -1.39 | 0.190269 | 0.078246 | 0.486658 | 0.324785 |
| MmugDNA.7388.1.S1_s_at | MmugDNA.7388.1 | 5.81  | 6.05  | 0.17 | 0.26 | -1.18 | 0.470159 | 0.202486 | 0.714757 | 0.476812 |
| MmugDNA.7389.1.S1_at   | MmugDNA.7389.1 | 11.28 | 11.03 | 0.2  | 0.07 | 1.19  | 0.062451 | 0.211396 | 0.306597 | 0.48553  |
| MmugDNA.739.1.S1_at    | MmugDNA.739.1  | 5.26  | 4.09  | 1.01 | 0.2  | 2.25  | 0.151437 | 0.175936 | 0.440961 | 0.452486 |
| MmugDNA.7391.1.S1_at   | MmugDNA.7391.1 | 5.22  | 4.41  | 0.22 | 0.42 | 1.75  | 0.067743 | 0.063072 | 0.318083 | 0.297788 |
| MmugDNA.7392.1.S1_at   | MmugDNA.7392.1 | 5.27  | 4.79  | 0.18 | 0.14 | 1.4   | 0.018345 | 0.116901 | 0.188509 | 0.384277 |
| MmugDNA.7394.1.S1_s_at | MmugDNA.7394.1 | 7.98  | 8.6   | 0.67 | 0.16 | -1.53 | 0.245637 | 0.245026 | 0.541668 | 0.514813 |
| MmugDNA.7396.1.S1_at   | MmugDNA.7396.1 | 5.98  | 5.2   | 0.26 | 0.17 | 1.72  | 0.009668 | 0.016095 | 0.14832  | 0.160775 |
| MmugDNA.7398.1.S1_at   | MmugDNA.7398.1 | 5.07  | 5.08  | 0.11 | 0.11 | -1.01 | 0.571781 | 0.105883 | 0.780057 | 0.368175 |
| MmugDNA.7399.1.S1_at   | MmugDNA.7399.1 | 5.32  | 5.59  | 0.44 | 0.23 | -1.21 | 0.449413 | 0.139521 | 0.70075  | 0.412743 |
| MmugDNA.74.1.S1_at     | MmugDNA.74.1   | 6.27  | 5.83  | 0.74 | 0.12 | 1.35  | 0.378462 | 0.192885 | 0.648694 | 0.468379 |
| MmugDNA.740.1.S1_at    | MmugDNA.740.1  | 6.18  | 6.31  | 0.17 | 0.1  | -1.09 | 0.580307 | 0.432393 | 0.785727 | 0.652819 |

|                         |                 |       |       |      |      |       |          |          |          |          |
|-------------------------|-----------------|-------|-------|------|------|-------|----------|----------|----------|----------|
| MmugDNA.7400.1.S1_at    | MmugDNA.7400.1  | 12.57 | 12.62 | 0.16 | 0.08 | -1.03 | 0.55411  | 0.698165 | 0.770484 | 0.824649 |
| MmugDNA.7401.1.S1_at    | MmugDNA.7401.1  | 3.24  | 3.3   | 0.2  | 0.1  | -1.04 | 0.455977 | 0.344313 | 0.705594 | 0.589762 |
| MmugDNA.7402.1.S1_at    | MmugDNA.7402.1  | 13.21 | 12.02 | 0.56 | 0.04 | 2.28  | 0.054356 | 0.10277  | 0.290262 | 0.363305 |
| MmugDNA.7404.1.S1_at    | MmugDNA.7404.1  | 6.05  | 5.96  | 0.32 | 0.05 | 1.06  | 0.60143  | 0.68246  | 0.799563 | 0.814526 |
| MmugDNA.7406.1.S1_at    | MmugDNA.7406.1  | 4.22  | 4.21  | 0.1  | 0.05 | 1     | 0.709432 | 0.825724 | 0.86254  | 0.899816 |
| MmugDNA.7409.1.S1_at    | MmugDNA.7409.1  | 6.54  | 6.76  | 0.13 | 0.06 | -1.17 | 0.031593 | 0.017304 | 0.231141 | 0.166509 |
| MmugDNA.741.1.S1_at     | MmugDNA.741.1   | 5.97  | 5.97  | 0.03 | 0.04 | -1    | 0.952226 | 0.180884 | 0.980301 | 0.457394 |
| MmugDNA.7410.1.S1_at    | MmugDNA.7410.1  | 10.55 | 10.69 | 0.1  | 0.05 | -1.11 | 0.047264 | 0.014938 | 0.274631 | 0.155342 |
| MmugDNA.7411.1.S1_at    | MmugDNA.7411.1  | 10.64 | 12.02 | 0.19 | 0.35 | -2.61 | 0.009464 | 0.584119 | 0.147192 | 0.752204 |
| MmugDNA.7412.1.S1_at    | MmugDNA.7412.1  | 3.5   | 3.49  | 0.22 | 0.09 | 1.01  | 0.911242 | 0.712073 | 0.962285 | 0.833139 |
| MmugDNA.7414.1.S1_at    | MmugDNA.7414.1  | 7.27  | 7.23  | 0.29 | 0.11 | 1.03  | 0.855604 | 0.863707 | 0.93709  | 0.922638 |
| MmugDNA.7416.1.S1_at    | MmugDNA.7416.1  | 7.79  | 7.6   | 0.23 | 0.05 | 1.14  | 0.093122 | 0.004785 | 0.361736 | 0.096484 |
| MmugDNA.7417.1.S1_at    | MmugDNA.7417.1  | 5.57  | 6.23  | 0.1  | 0.31 | -1.58 | 0.023312 | 0.128412 | 0.205602 | 0.399676 |
| MmugDNA.7419.1.S1_at    | MmugDNA.7419.1  | 7.34  | 7.3   | 0.23 | 0.03 | 1.03  | 0.710144 | 0.092376 | 0.86289  | 0.348294 |
| MmugDNA.35554.1.S1_s_at | MmugDNA.35554.1 | 4.84  | 4.97  | 0.08 | 0.02 | -1.1  | 0.098487 | 0.197691 | 0.369125 | 0.472633 |
| MmugDNA.7420.1.S1_at    | MmugDNA.7420.1  | 4.41  | 4.41  | 0.43 | 0.11 | -1    | 0.391236 | 0.533879 | 0.658623 | 0.719914 |
| MmugDNA.7421.1.S1_at    | MmugDNA.7421.1  | 4.26  | 4.33  | 0.32 | 0.27 | -1.05 | 0.814689 | 0.305855 | 0.917175 | 0.562731 |
| MmugDNA.7422.1.S1_at    | MmugDNA.7422.1  | 5.24  | 5.01  | 1.12 | 0.28 | 1.18  | 0.604151 | 0.770813 | 0.801436 | 0.866807 |
| MmugDNA.7424.1.S1_at    | MmugDNA.7424.1  | 5.45  | 5.53  | 0.2  | 0.23 | -1.06 | 0.397114 | 0.584664 | 0.66292  | 0.752482 |
| MmugDNA.7425.1.S1_at    | MmugDNA.7425.1  | 4.01  | 3.9   | 0.17 | 0.03 | 1.08  | 0.339799 | 0.040802 | 0.620001 | 0.246935 |
| MmugDNA.7426.1.S1_at    | MmugDNA.7426.1  | 7.48  | 6.62  | 0.21 | 0.09 | 1.82  | 0.00315  | 0.038865 | 0.101284 | 0.242062 |
| MmugDNA.7427.1.S1_at    | MmugDNA.7427.1  | 11.96 | 10.91 | 0.22 | 0.06 | 2.07  | 0.001299 | 0.000949 | 0.078631 | 0.049129 |
| MmugDNA.7428.1.S1_at    | MmugDNA.7428.1  | 11.66 | 10.87 | 0.33 | 0.06 | 1.73  | 0.015404 | 0.031032 | 0.176257 | 0.218074 |
| MmugDNA.7431.1.S1_at    | MmugDNA.7431.1  | 3.73  | 3.84  | 0.13 | 0.1  | -1.08 | 0.131023 | 0.21514  | 0.413747 | 0.488943 |
| MmugDNA.7433.1.S1_at    | MmugDNA.7433.1  | 9.98  | 10.57 | 0.11 | 0.09 | -1.51 | 0.001848 | 0.002289 | 0.086938 | 0.07045  |
| MmugDNA.7434.1.S1_at    | MmugDNA.7434.1  | 9.71  | 9.19  | 0.06 | 0.2  | 1.44  | 0.015078 | 0.153244 | 0.174736 | 0.428072 |
| MmugDNA.7435.1.S1_at    | MmugDNA.7435.1  | 10.91 | 10.95 | 0.38 | 0.29 | -1.03 | 0.764478 | 0.206985 | 0.891967 | 0.481111 |
| MmugDNA.7436.1.S1_at    | MmugDNA.7436.1  | 6.5   | 5.9   | 0.24 | 0.18 | 1.52  | 0.036788 | 0.033143 | 0.246861 | 0.225324 |
| MmugDNA.7437.1.S1_at    | MmugDNA.7437.1  | 4.28  | 4.16  | 0.05 | 0.08 | 1.09  | 0.087645 | 0.087726 | 0.353675 | 0.340979 |
| MmugDNA.7438.1.S1_at    | MmugDNA.7438.1  | 4.54  | 4.7   | 0.17 | 0.06 | -1.12 | 0.380368 | 0.020458 | 0.650146 | 0.179597 |
| MmugDNA.7439.1.S1_at    | MmugDNA.7439.1  | 7.2   | 7.7   | 0.45 | 0.24 | -1.41 | 0.087011 | 0.101434 | 0.352559 | 0.361205 |
| MmugDNA.744.1.S1_at     | MmugDNA.744.1   | 3.73  | 3.64  | 0.08 | 0.04 | 1.06  | 0.143544 | 0.171635 | 0.429995 | 0.448044 |
| MmugDNA.7440.1.S1_at    | MmugDNA.7440.1  | 5.75  | 4.86  | 0.6  | 0.4  | 1.85  | 0.079426 | 0.043811 | 0.339465 | 0.25387  |
| MmugDNA.7441.1.S1_at    | MmugDNA.7441.1  | 5.18  | 4.87  | 0.14 | 0.13 | 1.23  | 0.058531 | 0.103009 | 0.299077 | 0.363812 |
| MmugDNA.7442.1.S1_at    | MmugDNA.7442.1  | 8.07  | 7.43  | 0.39 | 0.22 | 1.57  | 0.097187 | 0.132345 | 0.367275 | 0.404294 |
| MmugDNA.7443.1.S1_at    | MmugDNA.7443.1  | 11.52 | 11.77 | 0.02 | 0.07 | -1.19 | 0.006822 | 0.000269 | 0.129236 | 0.033826 |
| MmugDNA.7444.1.S1_at    | MmugDNA.7444.1  | 10.13 | 10.48 | 0.38 | 0.14 | -1.27 | 0.293203 | 0.446841 | 0.582128 | 0.663044 |
| MmugDNA.7445.1.S1_at    | MmugDNA.7445.1  | 6.29  | 6.23  | 0.09 | 0.06 | 1.04  | 0.343501 | 0.110643 | 0.622989 | 0.374854 |
| MmugDNA.7446.1.S1_at    | MmugDNA.7446.1  | 11.77 | 12.02 | 0.18 | 0.04 | -1.19 | 0.069854 | 0.568403 | 0.322772 | 0.741962 |
| MmugDNA.7447.1.S1_at    | MmugDNA.7447.1  | 12.65 | 12.63 | 0.07 | 0.09 | 1.01  | 0.34969  | 0.032711 | 0.627405 | 0.223942 |
| MmugDNA.7449.1.S1_at    | MmugDNA.7449.1  | 6.31  | 6.08  | 0.64 | 0.38 | 1.18  | 0.547832 | 0.55726  | 0.766242 | 0.735031 |
| MmugDNA.745.1.S1_at     | MmugDNA.745.1   | 8.81  | 8.65  | 0.36 | 0.29 | 1.12  | 0.345652 | 0.014872 | 0.624554 | 0.155055 |
| MmugDNA.7450.1.S1_at    | MmugDNA.7450.1  | 5.41  | 5.25  | 0.28 | 0.13 | 1.11  | 0.966115 | 0.190211 | 0.986317 | 0.465854 |

|                        |                |       |       |      |      |       |          |          |          |          |
|------------------------|----------------|-------|-------|------|------|-------|----------|----------|----------|----------|
| MmugDNA.7452.1.S1_at   | MmugDNA.7452.1 | 9.42  | 8.51  | 0.24 | 0.05 | 1.87  | 0.006735 | 0.013154 | 0.128853 | 0.147338 |
| MmugDNA.7453.1.S1_at   | MmugDNA.7453.1 | 10.12 | 9.63  | 0.12 | 0.08 | 1.4   | 0.005145 | 0.004281 | 0.116998 | 0.091887 |
| MmugDNA.5796.1.S1_s_at | MmugDNA.5796.1 | 13.31 | 13.3  | 0.06 | 0.01 | 1.01  | 0.703459 | 0.871327 | 0.859271 | 0.926844 |
| MmugDNA.7455.1.S1_at   | MmugDNA.7455.1 | 5.13  | 4.93  | 0.18 | 0.42 | 1.15  | 0.351814 | 0.162999 | 0.629439 | 0.439145 |
| MmugDNA.7456.1.S1_at   | MmugDNA.7456.1 | 4.22  | 4.06  | 0.03 | 0.05 | 1.12  | 0.00841  | 0.176767 | 0.140949 | 0.45319  |
| MmugDNA.7457.1.S1_at   | MmugDNA.7457.1 | 5.58  | 5.23  | 0.28 | 0.03 | 1.27  | 0.104249 | 0.081631 | 0.37758  | 0.329824 |
| MmugDNA.7458.1.S1_at   | MmugDNA.7458.1 | 4.8   | 4.47  | 0.27 | 0.13 | 1.26  | 0.110979 | 0.04282  | 0.386642 | 0.251467 |
| MmugDNA.7459.1.S1_at   | MmugDNA.7459.1 | 6.25  | 5.98  | 0.16 | 0.23 | 1.21  | 0.280764 | 0.034634 | 0.571782 | 0.230247 |
| MmugDNA.7460.1.S1_at   | MmugDNA.7460.1 | 5.73  | 6.18  | 0.76 | 0.23 | -1.36 | 0.428603 | 0.534825 | 0.685425 | 0.720557 |
| MmugDNA.7461.1.S1_at   | MmugDNA.7461.1 | 7.18  | 6.54  | 0.46 | 0.24 | 1.56  | 0.144342 | 0.178239 | 0.431205 | 0.45458  |
| MmugDNA.7464.1.S1_at   | MmugDNA.7464.1 | 8.92  | 9.4   | 0.06 | 0.17 | -1.39 | 0.007826 | 0.000296 | 0.137244 | 0.034892 |
| MmugDNA.7465.1.S1_at   | MmugDNA.7465.1 | 6.28  | 6.15  | 0.21 | 0.11 | 1.1   | 0.301599 | 0.413994 | 0.58945  | 0.639979 |
| MmugDNA.7466.1.S1_at   | MmugDNA.7466.1 | 9.2   | 9.73  | 0.11 | 0.16 | -1.44 | 0.010549 | 0.090434 | 0.152509 | 0.344925 |
| MmugDNA.7467.1.S1_at   | MmugDNA.7467.1 | 5.1   | 5.09  | 0.64 | 0.36 | 1     | 0.680965 | 0.5667   | 0.847834 | 0.740724 |
| MmugDNA.7469.1.S1_at   | MmugDNA.7469.1 | 9.82  | 9.76  | 0.03 | 0.08 | 1.05  | 0.154548 | 0.360547 | 0.444802 | 0.601613 |
| MmugDNA.747.1.S1_at    | MmugDNA.747.1  | 5.95  | 7.05  | 0.86 | 0.09 | -2.15 | 0.255778 | 0.283939 | 0.550344 | 0.546237 |
| MmugDNA.7470.1.S1_at   | MmugDNA.7470.1 | 7.13  | 7.31  | 0.27 | 0.17 | -1.13 | 0.594276 | 0.119087 | 0.794628 | 0.387386 |
| MmugDNA.7473.1.S1_at   | MmugDNA.7473.1 | 4.31  | 4.3   | 0.28 | 0.06 | 1.01  | 0.888427 | 0.852583 | 0.952422 | 0.916218 |
| MmugDNA.7474.1.S1_at   | MmugDNA.7474.1 | 6.86  | 7.16  | 0.68 | 0.09 | -1.23 | 0.739943 | 0.344224 | 0.87947  | 0.589762 |
| MmugDNA.7475.1.S1_at   | MmugDNA.7475.1 | 3.69  | 3.65  | 0.18 | 0.11 | 1.03  | 0.551175 | 0.863098 | 0.768269 | 0.922237 |
| MmugDNA.7476.1.S1_at   | MmugDNA.7476.1 | 6.06  | 6.06  | 0.04 | 0.02 | -1    | 0.261966 | 0.396829 | 0.556201 | 0.628452 |
| MmugDNA.7477.1.S1_at   | MmugDNA.7477.1 | 4.05  | 3.81  | 0.03 | 0.25 | 1.18  | 0.577081 | 0.093317 | 0.783459 | 0.349412 |
| MmugDNA.748.1.S1_at    | MmugDNA.748.1  | 3.85  | 4.04  | 1.81 | 0.81 | -1.14 | 0.698138 | 0.91043  | 0.856385 | 0.949439 |
| MmugDNA.7480.1.S1_at   | MmugDNA.7480.1 | 8.78  | 9.85  | 0.57 | 0.19 | -2.09 | 0.046125 | 0.106919 | 0.272525 | 0.369499 |
| MmugDNA.7481.1.S1_at   | MmugDNA.7481.1 | 12.52 | 12.09 | 0.09 | 0.02 | 1.35  | 0.00124  | 0.001446 | 0.078631 | 0.05795  |
| MmugDNA.7482.1.S1_at   | MmugDNA.7482.1 | 11.44 | 11.43 | 0.03 | 0.07 | 1.01  | 0.429336 | 0.244103 | 0.685746 | 0.514121 |
| MmugDNA.7484.1.S1_at   | MmugDNA.7484.1 | 5.22  | 5.19  | 0.08 | 0.25 | 1.02  | 0.628829 | 0.279489 | 0.817507 | 0.543055 |
| MmugDNA.7485.1.S1_at   | MmugDNA.7485.1 | 4.37  | 3.97  | 0.19 | 0.32 | 1.32  | 0.116465 | 0.195797 | 0.393616 | 0.470661 |
| MmugDNA.7487.1.S1_at   | MmugDNA.7487.1 | 6.92  | 7.36  | 0.44 | 0.2  | -1.36 | 0.255713 | 0.163894 | 0.55032  | 0.440105 |
| MmugDNA.7488.1.S1_at   | MmugDNA.7488.1 | 7.45  | 7.66  | 0.32 | 0.14 | -1.15 | 0.21736  | 0.045456 | 0.515257 | 0.2575   |
| MmugDNA.7489.1.S1_at   | MmugDNA.7489.1 | 2.77  | 2.77  | 0.07 | 0.04 | 1     | 0.684496 | 0.918707 | 0.84962  | 0.954387 |
| MmugDNA.749.1.S1_at    | MmugDNA.749.1  | 11.66 | 12    | 0.06 | 0.05 | -1.27 | 0.00415  | 0.037191 | 0.109961 | 0.237285 |
| MmugDNA.7490.1.S1_at   | MmugDNA.7490.1 | 6.46  | 6.01  | 0.36 | 0.13 | 1.37  | 0.275422 | 0.433273 | 0.567073 | 0.653606 |
| MmugDNA.7491.1.S1_at   | MmugDNA.7491.1 | 3.46  | 3.28  | 0.03 | 0.53 | 1.13  | 0.737672 | 0.724826 | 0.878331 | 0.840693 |
| MmugDNA.7492.1.S1_at   | MmugDNA.7492.1 | 8.45  | 7.78  | 0.47 | 0.16 | 1.59  | 0.186507 | 0.55079  | 0.482655 | 0.730611 |
| MmugDNA.7496.1.S1_at   | MmugDNA.7496.1 | 5.75  | 5.92  | 0.25 | 0.03 | -1.12 | 0.980977 | 0.372752 | 0.992903 | 0.611661 |
| MmugDNA.7498.1.S1_at   | MmugDNA.7498.1 | 7.51  | 7.65  | 0.27 | 0.21 | -1.1  | 0.912057 | 0.647584 | 0.962758 | 0.793568 |
| MmugDNA.75.1.S1_at     | MmugDNA.75.1   | 6.31  | 6.25  | 0.22 | 0.05 | 1.05  | 0.415151 | 0.242704 | 0.676032 | 0.513077 |
| MmugDNA.75.1.S1_x_at   | MmugDNA.75.1   | 6.53  | 6.51  | 0.11 | 0.08 | 1.01  | 0.875712 | 0.002676 | 0.946719 | 0.076408 |
| MmugDNA.750.1.S1_at    | MmugDNA.750.1  | 9.42  | 9.41  | 0.27 | 0.1  | 1.01  | 0.935722 | 0.207578 | 0.973043 | 0.481898 |
| MmugDNA.750.1.S1_s_at  | MmugDNA.750.1  | 8.61  | 8.64  | 0.21 | 0.11 | -1.02 | 0.546071 | 0.030606 | 0.765129 | 0.216887 |
| MmugDNA.7500.1.S1_at   | MmugDNA.7500.1 | 3.44  | 3.67  | 0.66 | 0.35 | -1.17 | 0.487839 | 0.631758 | 0.726509 | 0.782957 |
| MmugDNA.7501.1.S1_at   | MmugDNA.7501.1 | 8.84  | 9.53  | 0.29 | 0.11 | -1.62 | 0.010675 | 0.083581 | 0.153062 | 0.334152 |



|                        |                |       |       |      |      |       |          |          |          |          |
|------------------------|----------------|-------|-------|------|------|-------|----------|----------|----------|----------|
| MmugDNA.7505.1.S1_at   | MmugDNA.7505.1 | 10.57 | 10.26 | 0.08 | 0.05 | 1.24  | 0.002665 | 0.069052 | 0.095847 | 0.309017 |
| MmugDNA.7507.1.S1_at   | MmugDNA.7507.1 | 4.92  | 4.77  | 0.39 | 0.03 | 1.11  | 0.929734 | 0.344011 | 0.970278 | 0.58962  |
| MmugDNA.7509.1.S1_at   | MmugDNA.7509.1 | 6.73  | 7.75  | 0.28 | 0.61 | -2.02 | 0.080512 | 0.259233 | 0.341026 | 0.526368 |
| MmugDNA.7510.1.S1_at   | MmugDNA.7510.1 | 9.92  | 9.35  | 0.63 | 0.14 | 1.48  | 0.079128 | 0.035464 | 0.338905 | 0.232564 |
| MmugDNA.7511.1.S1_at   | MmugDNA.7511.1 | 8.42  | 7.67  | 0.16 | 0.06 | 1.69  | 0.002059 | 0.056576 | 0.090098 | 0.283871 |
| MmugDNA.7513.1.S1_at   | MmugDNA.7513.1 | 2.9   | 2.9   | 0.07 | 0    | 1     | 0.356339 | 0.90584  | 0.632632 | 0.946727 |
| MmugDNA.7514.1.S1_at   | MmugDNA.7514.1 | 5.14  | 5.4   | 0.35 | 0.24 | -1.2  | 0.845952 | 0.919583 | 0.932703 | 0.954848 |
| MmugDNA.7515.1.S1_at   | MmugDNA.7515.1 | 13.06 | 13.1  | 0.09 | 0.03 | -1.03 | 0.377248 | 0.019937 | 0.64776  | 0.177457 |
| MmugDNA.7517.1.S1_at   | MmugDNA.7517.1 | 11.63 | 11.35 | 0.05 | 0.12 | 1.22  | 0.032426 | 0.560045 | 0.234344 | 0.73645  |
| MmugDNA.7518.1.S1_at   | MmugDNA.7518.1 | 4.92  | 4.68  | 0.17 | 0.15 | 1.18  | 0.132587 | 0.100178 | 0.415892 | 0.359191 |
| MmugDNA.7519.1.S1_at   | MmugDNA.7519.1 | 11.98 | 11.88 | 0.13 | 0.09 | 1.07  | 0.346446 | 0.01723  | 0.624993 | 0.166331 |
| MmugDNA.752.1.S1_at    | MmugDNA.752.1  | 11.17 | 11.25 | 0.12 | 0.07 | -1.05 | 0.693724 | 0.00106  | 0.853632 | 0.05171  |
| MmugDNA.7520.1.S1_s_at | MmugDNA.7520.1 | 7.35  | 7.45  | 0.1  | 0.16 | -1.07 | 0.97145  | 0.793291 | 0.98857  | 0.880679 |
| MmugDNA.7523.1.S1_at   | MmugDNA.7523.1 | 3.21  | 3.29  | 0.06 | 0.07 | -1.06 | 0.102525 | 0.144729 | 0.374722 | 0.418549 |
| MmugDNA.7525.1.S1_at   | MmugDNA.7525.1 | 9.03  | 8.7   | 0.37 | 0.11 | 1.26  | 0.815884 | 0.929413 | 0.917866 | 0.959707 |
| MmugDNA.7529.1.S1_at   | MmugDNA.7529.1 | 9.81  | 9.8   | 0.22 | 0.36 | 1.01  | 0.719501 | 0.010078 | 0.867718 | 0.13168  |
| MmugDNA.753.1.S1_at    | MmugDNA.753.1  | 6.37  | 6.14  | 0.1  | 0.09 | 1.18  | 0.03899  | 0.148537 | 0.253751 | 0.423074 |
| MmugDNA.7530.1.S1_at   | MmugDNA.7530.1 | 6.92  | 6.93  | 0.03 | 0.04 | -1.01 | 0.361081 | 0.494961 | 0.636561 | 0.695223 |
| MmugDNA.7531.1.S1_at   | MmugDNA.7531.1 | 3.72  | 3.64  | 0.76 | 0.41 | 1.06  | 0.829775 | 0.753345 | 0.925054 | 0.856483 |
| MmugDNA.7532.1.S1_at   | MmugDNA.7532.1 | 8.17  | 8.08  | 0.22 | 0.11 | 1.07  | 0.32228  | 0.427048 | 0.606311 | 0.649087 |
| MmugDNA.7537.1.S1_at   | MmugDNA.7537.1 | 7.41  | 7.13  | 0.45 | 0.18 | 1.22  | 0.36208  | 0.341602 | 0.637175 | 0.587795 |
| MmugDNA.7538.1.S1_at   | MmugDNA.7538.1 | 3.93  | 4.16  | 0.27 | 0.04 | -1.18 | 0.549453 | 0.684902 | 0.767177 | 0.816234 |
| MmugDNA.7539.1.S1_at   | MmugDNA.7539.1 | 4.35  | 4.22  | 0.08 | 0.06 | 1.09  | 0.274155 | 0.028962 | 0.566119 | 0.212061 |
| MmugDNA.7541.1.S1_at   | MmugDNA.7541.1 | 7.05  | 7.17  | 0.26 | 0.03 | -1.09 | 0.547389 | 0.590282 | 0.765933 | 0.756124 |
| MmugDNA.7543.1.S1_at   | MmugDNA.7543.1 | 6.51  | 7.28  | 0.08 | 0.34 | -1.71 | 0.030401 | 0.168072 | 0.227249 | 0.444666 |
| MmugDNA.7545.1.S1_at   | MmugDNA.7545.1 | 6.85  | 7.15  | 0.69 | 0.47 | -1.23 | 0.842322 | 0.49882  | 0.930778 | 0.697807 |
| MmugDNA.7546.1.S1_at   | MmugDNA.7546.1 | 5.47  | 5.32  | 0.18 | 0.16 | 1.11  | 0.133872 | 0.154821 | 0.417214 | 0.429842 |
| MmugDNA.7547.1.S1_at   | MmugDNA.7547.1 | 3.21  | 3.19  | 0.21 | 0.09 | 1.02  | 0.876488 | 0.983685 | 0.947123 | 0.990902 |
| MmugDNA.755.1.S1_at    | MmugDNA.755.1  | 3.38  | 3.26  | 0.07 | 0.04 | 1.09  | 0.079949 | 0.151341 | 0.340163 | 0.426087 |
| MmugDNA.7552.1.S1_at   | MmugDNA.7552.1 | 6.04  | 6.01  | 0.83 | 0.46 | 1.02  | 0.428797 | 0.275247 | 0.685509 | 0.53963  |
| MmugDNA.7553.1.S1_at   | MmugDNA.7553.1 | 4.02  | 3.92  | 0.12 | 0.08 | 1.07  | 0.146021 | 0.094202 | 0.433778 | 0.350889 |
| MmugDNA.7554.1.S1_at   | MmugDNA.7554.1 | 2.93  | 3.02  | 0.08 | 0.17 | -1.07 | 0.255561 | 0.37485  | 0.550047 | 0.613091 |
| MmugDNA.7555.1.S1_at   | MmugDNA.7555.1 | 4.11  | 4.04  | 0.11 | 0.54 | 1.05  | 0.611235 | 0.383594 | 0.806171 | 0.619556 |
| MmugDNA.7556.1.S1_at   | MmugDNA.7556.1 | 7.5   | 7.34  | 0.23 | 0.1  | 1.11  | 0.110574 | 0.520831 | 0.385979 | 0.711942 |
| MmugDNA.7557.1.S1_at   | MmugDNA.7557.1 | 7.09  | 7.13  | 0.12 | 0.09 | -1.03 | 0.540613 | 0.020963 | 0.761592 | 0.181584 |
| MmugDNA.7558.1.S1_at   | MmugDNA.7558.1 | 5.1   | 4.94  | 0.2  | 0.13 | 1.12  | 0.276685 | 0.352217 | 0.568226 | 0.595568 |
| MmugDNA.7559.1.S1_at   | MmugDNA.7559.1 | 5.11  | 4.84  | 0.5  | 0.11 | 1.21  | 0.325437 | 0.281849 | 0.608731 | 0.544844 |
| MmugDNA.756.1.S1_at    | MmugDNA.756.1  | 6.51  | 6.42  | 0.43 | 0.06 | 1.06  | 0.573117 | 0.703778 | 0.781077 | 0.828234 |
| MmugDNA.7560.1.S1_at   | MmugDNA.7560.1 | 4.72  | 4.6   | 0.27 | 0.16 | 1.09  | 0.651067 | 0.418887 | 0.830545 | 0.643141 |
| MmugDNA.7561.1.S1_at   | MmugDNA.7561.1 | 3.09  | 3.08  | 0.05 | 0    | 1     | 0.707241 | 0.936373 | 0.861311 | 0.964131 |
| MmugDNA.7563.1.S1_at   | MmugDNA.7563.1 | 5.07  | 4.93  | 0.17 | 0.1  | 1.1   | 0.512356 | 0.5153   | 0.742962 | 0.70823  |
| MmugDNA.7564.1.S1_at   | MmugDNA.7564.1 | 3.41  | 3.36  | 0.06 | 0.16 | 1.04  | 0.597511 | 0.823152 | 0.796737 | 0.898361 |
| MmugDNA.7565.1.S1_at   | MmugDNA.7565.1 | 4.28  | 4.3   | 0.21 | 0.07 | -1.01 | 0.459755 | 0.785988 | 0.707815 | 0.876026 |

|                        |                |       |       |      |      |       |          |          |          |          |
|------------------------|----------------|-------|-------|------|------|-------|----------|----------|----------|----------|
| MmugDNA.7567.1.S1_at   | MmugDNA.7567.1 | 9.69  | 9.88  | 0.08 | 0.09 | -1.14 | 0.058749 | 0.345407 | 0.29949  | 0.590726 |
| MmugDNA.7568.1.S1_at   | MmugDNA.7568.1 | 7.69  | 8.81  | 0.63 | 0.41 | -2.17 | 0.294482 | 0.503422 | 0.583448 | 0.700888 |
| MmugDNA.757.1.S1_at    | MmugDNA.757.1  | 5.12  | 5.31  | 0.12 | 0.19 | -1.15 | 0.907852 | 0.227279 | 0.961007 | 0.499589 |
| MmugDNA.7571.1.S1_at   | MmugDNA.7571.1 | 5.46  | 4.81  | 0.58 | 0.04 | 1.57  | 0.128661 | 0.042081 | 0.410774 | 0.249638 |
| MmugDNA.7572.1.S1_at   | MmugDNA.7572.1 | 5.82  | 5.55  | 0.22 | 0.12 | 1.21  | 0.101559 | 0.101163 | 0.372929 | 0.360831 |
| MmugDNA.7574.1.S1_at   | MmugDNA.7574.1 | 5.13  | 4.96  | 0.1  | 0.05 | 1.13  | 0.257507 | 0.853777 | 0.551704 | 0.916781 |
| MmugDNA.7575.1.S1_at   | MmugDNA.7575.1 | 4.54  | 4.57  | 0.13 | 0.19 | -1.02 | 0.975969 | 0.724456 | 0.990409 | 0.840485 |
| MmugDNA.7576.1.S1_at   | MmugDNA.7576.1 | 5.64  | 4.4   | 0.68 | 0.24 | 2.36  | 0.059411 | 0.020939 | 0.300867 | 0.181465 |
| MmugDNA.7577.1.S1_at   | MmugDNA.7577.1 | 6.03  | 5.84  | 0.24 | 0.77 | 1.15  | 0.98485  | 0.57046  | 0.994481 | 0.743121 |
| MmugDNA.7578.1.S1_at   | MmugDNA.7578.1 | 5.82  | 5.88  | 0.16 | 0    | -1.04 | 0.749743 | 0.462991 | 0.88413  | 0.674149 |
| MmugDNA.7579.1.S1_at   | MmugDNA.7579.1 | 6.29  | 6.56  | 0.23 | 0.21 | -1.2  | 0.327016 | 0.302262 | 0.609778 | 0.560092 |
| MmugDNA.758.1.S1_at    | MmugDNA.758.1  | 6.73  | 6.67  | 0.2  | 0.17 | 1.04  | 0.510358 | 0.829729 | 0.74172  | 0.902191 |
| MmugDNA.7580.1.S1_at   | MmugDNA.7580.1 | 5.61  | 5.02  | 0.48 | 0.22 | 1.5   | 0.27595  | 0.14613  | 0.567563 | 0.420099 |
| MmugDNA.7581.1.S1_at   | MmugDNA.7581.1 | 3.52  | 3.25  | 0.09 | 0.11 | 1.21  | 0.037824 | 0.069191 | 0.250187 | 0.309298 |
| MmugDNA.7583.1.S1_at   | MmugDNA.7583.1 | 5.14  | 5.01  | 0.12 | 0.13 | 1.1   | 0.165152 | 0.035035 | 0.458108 | 0.231314 |
| MmugDNA.7585.1.S1_at   | MmugDNA.7585.1 | 3.37  | 3.54  | 0.02 | 0.03 | -1.13 | 0.001027 | 0.166337 | 0.076321 | 0.442884 |
| MmugDNA.7586.1.S1_at   | MmugDNA.7586.1 | 10.47 | 10.24 | 0.77 | 0.22 | 1.18  | 0.76816  | 0.093942 | 0.893506 | 0.350453 |
| MmugDNA.7587.1.S1_at   | MmugDNA.7587.1 | 8.14  | 8.19  | 1.16 | 0.21 | -1.04 | 0.932729 | 0.533262 | 0.971802 | 0.719522 |
| MmugDNA.7588.1.S1_at   | MmugDNA.7588.1 | 12.55 | 12.3  | 0.14 | 0.03 | 1.19  | 0.041609 | 0.026796 | 0.260391 | 0.204733 |
| MmugDNA.759.1.S1_at    | MmugDNA.759.1  | 5.42  | 5.45  | 0.16 | 0.17 | -1.02 | 0.528067 | 0.565692 | 0.753463 | 0.740066 |
| MmugDNA.7591.1.S1_at   | MmugDNA.7591.1 | 4     | 4.01  | 0.08 | 0.11 | -1.01 | 0.675439 | 0.184419 | 0.845076 | 0.460468 |
| MmugDNA.7592.1.S1_at   | MmugDNA.7592.1 | 4.47  | 4.17  | 0.53 | 0.12 | 1.23  | 0.395335 | 0.409102 | 0.661847 | 0.63615  |
| MmugDNA.7593.1.S1_at   | MmugDNA.7593.1 | 7.92  | 8.05  | 0.44 | 0.12 | -1.09 | 0.89085  | 0.049679 | 0.953458 | 0.267892 |
| MmugDNA.7594.1.S1_at   | MmugDNA.7594.1 | 12.42 | 12.58 | 0.11 | 0.05 | -1.12 | 0.03496  | 0.022372 | 0.24161  | 0.187176 |
| MmugDNA.7595.1.S1_at   | MmugDNA.7595.1 | 7.77  | 7.71  | 0.23 | 0.23 | 1.04  | 0.404398 | 0.516207 | 0.668151 | 0.708757 |
| MmugDNA.7596.1.S1_at   | MmugDNA.7596.1 | 5.04  | 5.23  | 0.16 | 0.56 | -1.14 | 0.795636 | 0.651202 | 0.907596 | 0.796082 |
| MmugDNA.7597.1.S1_at   | MmugDNA.7597.1 | 7     | 7.12  | 0.03 | 0.38 | -1.09 | 0.679454 | 0.907022 | 0.847094 | 0.947344 |
| MmugDNA.7598.1.S1_at   | MmugDNA.7598.1 | 3.01  | 2.85  | 0.12 | 0.92 | 1.12  | 0.612761 | 0.745761 | 0.807089 | 0.852562 |
| MmugDNA.760.1.S1_at    | MmugDNA.760.1  | 2.85  | 2.85  | 0.08 | 0.03 | -1    | 0.690983 | 0.852021 | 0.852272 | 0.915853 |
| MmugDNA.7600.1.S1_at   | MmugDNA.7600.1 | 12.05 | 12.09 | 0.18 | 0.05 | -1.03 | 0.709863 | 0.867316 | 0.862704 | 0.924651 |
| MmugDNA.7601.1.S1_s_at | MmugDNA.7601.1 | 8.51  | 9.6   | 1.34 | 0.22 | -2.13 | 0.677081 | 0.642435 | 0.845957 | 0.790222 |
| MmugDNA.7603.1.S1_at   | MmugDNA.7603.1 | 4.42  | 4.52  | 0.98 | 0.06 | -1.07 | 0.85324  | 0.838282 | 0.93619  | 0.907682 |
| MmugDNA.7604.1.S1_at   | MmugDNA.7604.1 | 10.27 | 10.12 | 0.13 | 0.14 | 1.11  | 0.597137 | 0.002765 | 0.796379 | 0.077756 |
| MmugDNA.7605.1.S1_at   | MmugDNA.7605.1 | 6.01  | 6.16  | 0.09 | 0.07 | -1.1  | 0.233527 | 0.302556 | 0.531632 | 0.560201 |
| MmugDNA.7606.1.S1_at   | MmugDNA.7606.1 | 4.23  | 4.02  | 0.58 | 0.19 | 1.16  | 0.447161 | 0.481605 | 0.699206 | 0.686557 |
| MmugDNA.7609.1.S1_at   | MmugDNA.7609.1 | 3.81  | 3.58  | 0.1  | 0.05 | 1.17  | 0.094387 | 0.24198  | 0.363345 | 0.512512 |
| MmugDNA.761.1.S1_at    | MmugDNA.761.1  | 6.88  | 6.46  | 0.37 | 0.32 | 1.34  | 0.195196 | 0.220799 | 0.49178  | 0.494262 |
| MmugDNA.7610.1.S1_at   | MmugDNA.7610.1 | 9.32  | 9.21  | 0.11 | 0.18 | 1.08  | 0.554358 | 0.236475 | 0.77064  | 0.507336 |
| MmugDNA.7611.1.S1_at   | MmugDNA.7611.1 | 3.92  | 3.82  | 0.11 | 0.03 | 1.08  | 0.140534 | 0.275463 | 0.426286 | 0.539697 |
| MmugDNA.7612.1.S1_at   | MmugDNA.7612.1 | 4.57  | 4.96  | 1.28 | 0.69 | -1.31 | 0.999129 | 0.354783 | 0.999708 | 0.597445 |
| MmugDNA.7615.1.S1_at   | MmugDNA.7615.1 | 3.77  | 3.97  | 0.2  | 0.07 | -1.15 | 0.258804 | 0.13915  | 0.552973 | 0.412266 |
| MmugDNA.7616.1.S1_x_at | MmugDNA.7616.1 | 7.76  | 7.83  | 0.17 | 0.04 | -1.05 | 0.9888   | 0.653557 | 0.996059 | 0.797506 |
| MmugDNA.7617.1.S1_at   | MmugDNA.7617.1 | 5.77  | 5.6   | 0.32 | 0.17 | 1.13  | 0.632197 | 0.37139  | 0.819633 | 0.610177 |

|                        |                |       |       |      |      |       |          |          |          |          |
|------------------------|----------------|-------|-------|------|------|-------|----------|----------|----------|----------|
| MmugDNA.7618.1.S1_at   | MmugDNA.7618.1 | 7.12  | 7.25  | 0.15 | 0.1  | -1.1  | 0.240724 | 0.821402 | 0.538168 | 0.897141 |
| MmugDNA.762.1.S1_at    | MmugDNA.762.1  | 5.99  | 5.94  | 0.17 | 0.04 | 1.03  | 0.175823 | 0.290835 | 0.470151 | 0.551431 |
| MmugDNA.7620.1.S1_at   | MmugDNA.7620.1 | 4.87  | 4.87  | 0.13 | 0.08 | 1     | 0.243487 | 0.329051 | 0.540203 | 0.578482 |
| MmugDNA.7621.1.S1_at   | MmugDNA.7621.1 | 8.47  | 7.76  | 0.48 | 0.21 | 1.64  | 0.105886 | 0.283141 | 0.379885 | 0.545694 |
| MmugDNA.7622.1.S1_at   | MmugDNA.7622.1 | 11.67 | 11.75 | 0.14 | 0.09 | -1.06 | 0.874447 | 0.402603 | 0.94618  | 0.631505 |
| MmugDNA.7623.1.S1_at   | MmugDNA.7623.1 | 9.18  | 8.91  | 0.44 | 0.1  | 1.21  | 0.906429 | 0.37757  | 0.960343 | 0.615012 |
| MmugDNA.7624.1.S1_at   | MmugDNA.7624.1 | 8.3   | 7.92  | 0.71 | 0.29 | 1.3   | 0.681966 | 0.523496 | 0.848286 | 0.71376  |
| MmugDNA.7626.1.S1_at   | MmugDNA.7626.1 | 9.55  | 10.05 | 0.11 | 0.21 | -1.41 | 0.037397 | 0.073657 | 0.248739 | 0.316988 |
| MmugDNA.7627.1.S1_at   | MmugDNA.7627.1 | 4.17  | 3.62  | 0.52 | 0.14 | 1.46  | 0.12667  | 0.125112 | 0.408085 | 0.395531 |
| MmugDNA.7628.1.S1_at   | MmugDNA.7628.1 | 4.54  | 4.66  | 0.1  | 0.22 | -1.09 | 0.266074 | 0.441538 | 0.558596 | 0.659675 |
| MmugDNA.763.1.S1_at    | MmugDNA.763.1  | 2.81  | 2.91  | 0.03 | 0.19 | -1.07 | 0.370472 | 0.525611 | 0.643441 | 0.715149 |
| MmugDNA.7630.1.S1_at   | MmugDNA.7630.1 | 5.56  | 5.6   | 0.18 | 0.22 | -1.03 | 0.938006 | 0.812508 | 0.973844 | 0.891682 |
| MmugDNA.7631.1.S1_at   | MmugDNA.7631.1 | 7.67  | 6.26  | 0.18 | 0.28 | 2.67  | 0.001452 | 0.029126 | 0.079991 | 0.212733 |
| MmugDNA.7632.1.S1_at   | MmugDNA.7632.1 | 8.53  | 7.99  | 0.46 | 0.44 | 1.46  | 0.500995 | 0.015208 | 0.735146 | 0.156717 |
| MmugDNA.7633.1.S1_at   | MmugDNA.7633.1 | 5.93  | 5.77  | 0.2  | 0.42 | 1.12  | 0.513279 | 0.220258 | 0.743595 | 0.493701 |
| MmugDNA.7634.1.S1_at   | MmugDNA.7634.1 | 6.95  | 7.61  | 0.22 | 0.37 | -1.58 | 0.155222 | 0.026609 | 0.445435 | 0.204008 |
| MmugDNA.7637.1.S1_at   | MmugDNA.7637.1 | 3.32  | 3.1   | 0.12 | 0.22 | 1.16  | 0.848023 | 0.485619 | 0.933832 | 0.68924  |
| MmugDNA.7638.1.S1_at   | MmugDNA.7638.1 | 3.79  | 3.98  | 0.45 | 0.21 | -1.14 | 0.854704 | 0.701521 | 0.936785 | 0.826888 |
| MmugDNA.7640.1.S1_at   | MmugDNA.7640.1 | 5.99  | 6.18  | 0.03 | 0.16 | -1.14 | 0.036341 | 0.058224 | 0.245737 | 0.287988 |
| MmugDNA.7641.1.S1_at   | MmugDNA.7641.1 | 9.31  | 10.53 | 0.75 | 0.17 | -2.32 | 0.050572 | 0.005441 | 0.282639 | 0.101848 |
| MmugDNA.7643.1.S1_at   | MmugDNA.7643.1 | 8.71  | 9.13  | 0.28 | 0.19 | -1.34 | 0.024847 | 0.035825 | 0.210692 | 0.233727 |
| MmugDNA.7644.1.S1_at   | MmugDNA.7644.1 | 9.43  | 10.4  | 0.46 | 0.28 | -1.96 | 0.150025 | 0.121596 | 0.439035 | 0.390723 |
| MmugDNA.7644.1.S1_s_at | MmugDNA.7644.1 | 9.92  | 10.75 | 0.46 | 0.31 | -1.77 | 0.141532 | 0.103863 | 0.427522 | 0.364519 |
| MmugDNA.7645.1.S1_at   | MmugDNA.7645.1 | 3.27  | 3.28  | 0.36 | 0.1  | -1.01 | 0.44363  | 0.504986 | 0.696684 | 0.70197  |
| MmugDNA.7647.1.S1_at   | MmugDNA.7647.1 | 8.22  | 8.36  | 0.48 | 0.07 | -1.1  | 0.182287 | 0.225947 | 0.478038 | 0.49836  |
| MmugDNA.7648.1.S1_at   | MmugDNA.7648.1 | 9.03  | 9.05  | 0.28 | 0.21 | -1.01 | 0.937679 | 0.016374 | 0.973782 | 0.16199  |
| MmugDNA.765.1.S1_at    | MmugDNA.765.1  | 12.85 | 12.8  | 0.05 | 0.08 | 1.03  | 0.516994 | 0.017511 | 0.746216 | 0.167516 |
| MmugDNA.765.1.S1_x_at  | MmugDNA.765.1  | 12.98 | 12.94 | 0.04 | 0.06 | 1.03  | 0.620527 | 0.016646 | 0.811995 | 0.163321 |
| MmugDNA.7650.1.S1_at   | MmugDNA.7650.1 | 3.64  | 5.12  | 0.78 | 0.22 | -2.78 | 0.08641  | 0.122948 | 0.351256 | 0.392923 |
| MmugDNA.7651.1.S1_at   | MmugDNA.7651.1 | 6.96  | 6.88  | 0.14 | 0.1  | 1.06  | 0.224145 | 0.175609 | 0.522277 | 0.45218  |
| MmugDNA.7652.1.S1_at   | MmugDNA.7652.1 | 5.36  | 5.38  | 0.16 | 0.23 | -1.01 | 0.993416 | 0.967846 | 0.997386 | 0.982208 |
| MmugDNA.7653.1.S1_at   | MmugDNA.7653.1 | 4.49  | 4.3   | 0.21 | 0.03 | 1.14  | 0.68146  | 0.260685 | 0.848075 | 0.527199 |
| MmugDNA.7654.1.S1_at   | MmugDNA.7654.1 | 5.34  | 4.8   | 0.2  | 0.12 | 1.45  | 0.049547 | 0.070403 | 0.280022 | 0.311676 |
| MmugDNA.7658.1.S1_at   | MmugDNA.7658.1 | 6.44  | 6.45  | 0.09 | 0.05 | -1    | 0.943514 | 0.106168 | 0.976237 | 0.36856  |
| MmugDNA.7659.1.S1_at   | MmugDNA.7659.1 | 3.84  | 3.81  | 0.1  | 0.27 | 1.02  | 0.837734 | 0.879721 | 0.928873 | 0.93128  |
| MmugDNA.766.1.S1_at    | MmugDNA.766.1  | 4.59  | 4.58  | 0.4  | 0.35 | 1.01  | 0.551939 | 0.708325 | 0.76879  | 0.830869 |
| MmugDNA.7660.1.S1_at   | MmugDNA.7660.1 | 9.6   | 9.2   | 0.2  | 0.07 | 1.32  | 0.026124 | 0.013281 | 0.214757 | 0.147922 |
| MmugDNA.7661.1.S1_at   | MmugDNA.7661.1 | 7.08  | 7.25  | 0.26 | 0.26 | -1.13 | 0.379476 | 0.333605 | 0.649328 | 0.581808 |
| MmugDNA.7662.1.S1_s_at | MmugDNA.7662.1 | 6.68  | 6.63  | 0.1  | 0.04 | 1.04  | 0.673647 | 0.007528 | 0.843954 | 0.1163   |
| MmugDNA.7663.1.S1_at   | MmugDNA.7663.1 | 3.55  | 3.68  | 0.47 | 0.24 | -1.1  | 0.684361 | 0.755923 | 0.849603 | 0.8579   |
| MmugDNA.7665.1.S1_at   | MmugDNA.7665.1 | 4.76  | 4.7   | 0.03 | 0.07 | 1.04  | 0.074943 | 0.060368 | 0.331988 | 0.292291 |
| MmugDNA.7666.1.S1_at   | MmugDNA.7666.1 | 6.1   | 6.24  | 0.66 | 0.38 | -1.1  | 0.802699 | 0.697618 | 0.911408 | 0.82429  |
| MmugDNA.7667.1.S1_at   | MmugDNA.7667.1 | 4.03  | 4.1   | 0.07 | 0.13 | -1.06 | 0.736701 | 0.096478 | 0.87765  | 0.35409  |

|                        |                |       |       |      |      |       |          |          |          |          |
|------------------------|----------------|-------|-------|------|------|-------|----------|----------|----------|----------|
| MmugDNA.7668.1.S1_at   | MmugDNA.7668.1 | 4.83  | 4.69  | 0.22 | 0.16 | 1.11  | 0.306069 | 0.411464 | 0.593012 | 0.638189 |
| MmugDNA.767.1.S1_at    | MmugDNA.767.1  | 6.73  | 6.56  | 0.46 | 0.83 | 1.12  | 0.959516 | 0.321968 | 0.983515 | 0.573575 |
| MmugDNA.7670.1.S1_at   | MmugDNA.7670.1 | 11.22 | 11.33 | 0.17 | 0.03 | -1.08 | 0.419762 | 0.00962  | 0.679035 | 0.12918  |
| MmugDNA.7671.1.S1_at   | MmugDNA.7671.1 | 10.83 | 10.57 | 0.13 | 0.08 | 1.2   | 0.031203 | 0.48767  | 0.229712 | 0.690634 |
| MmugDNA.7672.1.S1_at   | MmugDNA.7672.1 | 9.7   | 8.81  | 0.16 | 0.1  | 1.85  | 0.002498 | 0.001303 | 0.094326 | 0.055624 |
| MmugDNA.7673.1.S1_at   | MmugDNA.7673.1 | 10.38 | 9.55  | 0.35 | 0.01 | 1.78  | 0.018314 | 0.017088 | 0.188364 | 0.165617 |
| MmugDNA.7674.1.S1_at   | MmugDNA.7674.1 | 4.09  | 4.11  | 0.22 | 0.13 | -1.01 | 0.315684 | 0.509792 | 0.600483 | 0.704385 |
| MmugDNA.7675.1.S1_at   | MmugDNA.7675.1 | 6.15  | 6.03  | 0.2  | 0.18 | 1.08  | 0.689159 | 0.922202 | 0.851562 | 0.956169 |
| MmugDNA.7676.1.S1_at   | MmugDNA.7676.1 | 3.48  | 3.52  | 0.19 | 0.02 | -1.03 | 0.977773 | 0.851588 | 0.991292 | 0.915583 |
| MmugDNA.7677.1.S1_at   | MmugDNA.7677.1 | 8.46  | 8.18  | 0.02 | 0.09 | 1.21  | 0.003409 | 0.021004 | 0.103083 | 0.181715 |
| MmugDNA.7678.1.S1_at   | MmugDNA.7678.1 | 4.59  | 4.64  | 0.06 | 0.12 | -1.04 | 0.526212 | 0.718335 | 0.752424 | 0.837002 |
| MmugDNA.7679.1.S1_at   | MmugDNA.7679.1 | 3.86  | 3.64  | 0.56 | 0.15 | 1.17  | 0.463833 | 0.361118 | 0.710246 | 0.60207  |
| MmugDNA.768.1.S1_at    | MmugDNA.768.1  | 4.68  | 4.53  | 0.09 | 0.09 | 1.12  | 0.078709 | 0.166788 | 0.338539 | 0.443274 |
| MmugDNA.7680.1.S1_at   | MmugDNA.7680.1 | 8.02  | 8.06  | 0.09 | 0.11 | -1.03 | 0.988111 | 0.902948 | 0.995736 | 0.944917 |
| MmugDNA.7681.1.S1_at   | MmugDNA.7681.1 | 12.06 | 12.37 | 0.16 | 0.09 | -1.24 | 0.183743 | 0.748414 | 0.47973  | 0.853611 |
| MmugDNA.7682.1.S1_at   | MmugDNA.7682.1 | 4.18  | 4.2   | 0.57 | 0.19 | -1.01 | 0.781007 | 0.808809 | 0.900006 | 0.889895 |
| MmugDNA.7684.1.S1_at   | MmugDNA.7684.1 | 5.71  | 6.38  | 0.11 | 0.33 | -1.59 | 0.077239 | 0.07184  | 0.335929 | 0.314082 |
| MmugDNA.7685.1.S1_at   | MmugDNA.7685.1 | 7.11  | 7.54  | 0.24 | 0.16 | -1.35 | 0.063074 | 0.170413 | 0.307923 | 0.447103 |
| MmugDNA.7685.1.S1_s_at | MmugDNA.7685.1 | 7.67  | 8.53  | 0.3  | 0.28 | -1.82 | 0.035326 | 0.110948 | 0.242657 | 0.375376 |
| MmugDNA.7686.1.S1_at   | MmugDNA.7686.1 | 8.28  | 8.64  | 0.39 | 0.51 | -1.29 | 0.332021 | 0.197776 | 0.613824 | 0.472721 |
| MmugDNA.7687.1.S1_at   | MmugDNA.7687.1 | 8.45  | 8.68  | 0.16 | 0.41 | -1.17 | 0.992604 | 0.633202 | 0.997226 | 0.783995 |
| MmugDNA.7688.1.S1_s_at | MmugDNA.7688.1 | 11.27 | 11.4  | 0.23 | 0.1  | -1.1  | 0.438065 | 0.704237 | 0.692782 | 0.828375 |
| MmugDNA.7689.1.S1_at   | MmugDNA.7689.1 | 6.64  | 6.64  | 0.07 | 0.04 | -1    | 0.370774 | 0.531821 | 0.643582 | 0.718955 |
| MmugDNA.769.1.S1_x_at  | MmugDNA.769.1  | 9.24  | 9.02  | 0.34 | 0.13 | 1.17  | 0.734011 | 0.08852  | 0.876041 | 0.341947 |
| MmugDNA.7690.1.S1_at   | MmugDNA.7690.1 | 7.38  | 8.61  | 0.71 | 0.25 | -2.34 | 0.058625 | 0.537996 | 0.299229 | 0.72281  |
| MmugDNA.7692.1.S1_at   | MmugDNA.7692.1 | 5.57  | 5.57  | 0.29 | 0.06 | -1    | 0.909838 | 0.932775 | 0.961799 | 0.961812 |
| MmugDNA.7693.1.S1_at   | MmugDNA.7693.1 | 4.91  | 4.83  | 0.64 | 0.12 | 1.06  | 0.298716 | 0.397498 | 0.586964 | 0.628923 |
| MmugDNA.7695.1.S1_at   | MmugDNA.7695.1 | 10.12 | 10.13 | 0.32 | 0.02 | -1.01 | 0.363574 | 0.335491 | 0.638251 | 0.583317 |
| MmugDNA.7696.1.S1_at   | MmugDNA.7696.1 | 10.08 | 9.57  | 0.1  | 0.1  | 1.42  | 0.003056 | 0.163542 | 0.10031  | 0.439765 |
| MmugDNA.7697.1.S1_at   | MmugDNA.7697.1 | 4.16  | 4.15  | 0.09 | 0.16 | 1     | 0.785927 | 0.641228 | 0.902296 | 0.789506 |
| MmugDNA.77.1.S1_at     | MmugDNA.77.1   | 6.31  | 6.07  | 0.42 | 0.39 | 1.18  | 0.25329  | 0.249173 | 0.547663 | 0.518302 |
| MmugDNA.770.1.S1_at    | MmugDNA.770.1  | 11.07 | 10.91 | 0.14 | 0.14 | 1.12  | 0.09251  | 0.212107 | 0.360707 | 0.486036 |
| MmugDNA.770.1.S1_s_at  | MmugDNA.770.1  | 11.79 | 11.56 | 0.02 | 0.08 | 1.17  | 0.004005 | 0.081727 | 0.108676 | 0.330011 |
| MmugDNA.7700.1.S1_at   | MmugDNA.7700.1 | 6.24  | 6.19  | 0.2  | 0.12 | 1.04  | 0.523864 | 0.239198 | 0.75072  | 0.509902 |
| MmugDNA.7701.1.S1_at   | MmugDNA.7701.1 | 4.7   | 4.82  | 0.09 | 0.05 | -1.09 | 0.12913  | 0.279721 | 0.411506 | 0.543228 |
| MmugDNA.7704.1.S1_at   | MmugDNA.7704.1 | 7.95  | 7.05  | 0.23 | 0.23 | 1.88  | 0.008016 | 0.010451 | 0.138479 | 0.133645 |
| MmugDNA.7705.1.S1_at   | MmugDNA.7705.1 | 3.55  | 3.57  | 0.04 | 0.05 | -1.01 | 0.940867 | 0.571572 | 0.975178 | 0.743837 |
| MmugDNA.7707.1.S1_at   | MmugDNA.7707.1 | 8.4   | 9.2   | 0.35 | 0.17 | -1.75 | 0.033124 | 0.47574  | 0.236253 | 0.682332 |
| MmugDNA.7708.1.S1_at   | MmugDNA.7708.1 | 3.96  | 4.17  | 0.08 | 0.08 | -1.15 | 0.119171 | 0.562852 | 0.396724 | 0.738191 |
| MmugDNA.7709.1.S1_at   | MmugDNA.7709.1 | 4.78  | 4.63  | 0.1  | 0.14 | 1.11  | 0.095653 | 0.105333 | 0.365159 | 0.367168 |
| MmugDNA.771.1.S1_at    | MmugDNA.771.1  | 8.5   | 8.28  | 0.26 | 0.18 | 1.16  | 0.553893 | 0.906586 | 0.770323 | 0.947167 |
| MmugDNA.7710.1.S1_at   | MmugDNA.7710.1 | 3.96  | 4.02  | 0.07 | 0.07 | -1.04 | 0.146502 | 0.667995 | 0.434403 | 0.8057   |
| MmugDNA.7711.1.S1_at   | MmugDNA.7711.1 | 11.74 | 11.92 | 0.19 | 0.06 | -1.13 | 0.11945  | 0.000603 | 0.397328 | 0.042002 |

|                        |                |       |       |      |      |       |          |          |          |          |
|------------------------|----------------|-------|-------|------|------|-------|----------|----------|----------|----------|
| MmugDNA.7712.1.S1_at   | MmugDNA.7712.1 | 3.76  | 3.07  | 0.5  | 0.15 | 1.61  | 0.129731 | 0.336455 | 0.412052 | 0.583831 |
| MmugDNA.7714.1.S1_at   | MmugDNA.7714.1 | 6.99  | 6.24  | 0.62 | 0.12 | 1.68  | 0.135519 | 0.115577 | 0.419375 | 0.382674 |
| MmugDNA.7715.1.S1_at   | MmugDNA.7715.1 | 6.99  | 6.65  | 0.08 | 0.15 | 1.26  | 0.014303 | 0.006875 | 0.171429 | 0.111996 |
| MmugDNA.7716.1.S1_at   | MmugDNA.7716.1 | 4.61  | 4.03  | 0.62 | 0.17 | 1.5   | 0.441533 | 0.369248 | 0.695043 | 0.608691 |
| MmugDNA.7718.1.S1_at   | MmugDNA.7718.1 | 6.71  | 6.64  | 0.15 | 0.15 | 1.05  | 0.119494 | 0.111879 | 0.397399 | 0.376982 |
| MmugDNA.7719.1.S1_at   | MmugDNA.7719.1 | 6.83  | 6.96  | 0.15 | 0.02 | -1.09 | 0.164606 | 0.102085 | 0.457706 | 0.362122 |
| MmugDNA.772.1.S1_at    | MmugDNA.772.1  | 5.25  | 5.25  | 0.09 | 0.13 | 1     | 0.343269 | 0.565839 | 0.622941 | 0.740112 |
| MmugDNA.7722.1.S1_at   | MmugDNA.7722.1 | 5.94  | 6.02  | 0.1  | 0.16 | -1.06 | 0.444665 | 0.390283 | 0.697502 | 0.624128 |
| MmugDNA.7723.1.S1_at   | MmugDNA.7723.1 | 9.3   | 8.91  | 0.24 | 0.12 | 1.31  | 0.043894 | 0.00786  | 0.266473 | 0.118059 |
| MmugDNA.7724.1.S1_at   | MmugDNA.7724.1 | 5.84  | 5.83  | 0.09 | 0.01 | 1.01  | 0.73185  | 0.528046 | 0.874712 | 0.716428 |
| MmugDNA.7725.1.S1_at   | MmugDNA.7725.1 | 4.62  | 4.46  | 0.05 | 0.75 | 1.12  | 0.841613 | 0.955049 | 0.930364 | 0.974534 |
| MmugDNA.7727.1.S1_at   | MmugDNA.7727.1 | 4.44  | 4.24  | 0.15 | 0.12 | 1.15  | 0.470724 | 0.327627 | 0.715081 | 0.577448 |
| MmugDNA.7728.1.S1_at   | MmugDNA.7728.1 | 2.58  | 2.71  | 0.84 | 0.13 | -1.1  | 0.551886 | 0.666278 | 0.768766 | 0.804419 |
| MmugDNA.7730.1.S1_at   | MmugDNA.7730.1 | 4.25  | 4.27  | 0.16 | 0.07 | -1.01 | 0.367923 | 0.630328 | 0.641667 | 0.782213 |
| MmugDNA.7731.1.S1_at   | MmugDNA.7731.1 | 4.83  | 3.82  | 0.57 | 0.34 | 2.01  | 0.158466 | 0.132018 | 0.449548 | 0.404043 |
| MmugDNA.7732.1.S1_at   | MmugDNA.7732.1 | 5.74  | 5.85  | 0.54 | 0.6  | -1.08 | 0.811165 | 0.91971  | 0.915427 | 0.954878 |
| MmugDNA.7733.1.S1_at   | MmugDNA.7733.1 | 8.2   | 9.08  | 1.06 | 0.05 | -1.84 | 0.119668 | 0.148593 | 0.397626 | 0.423175 |
| MmugDNA.7734.1.S1_at   | MmugDNA.7734.1 | 4.01  | 4.06  | 0.83 | 0.18 | -1.03 | 0.467858 | 0.629001 | 0.713228 | 0.781575 |
| MmugDNA.7735.1.S1_at   | MmugDNA.7735.1 | 7.31  | 8.84  | 1.3  | 0.37 | -2.9  | 0.140592 | 0.344427 | 0.426348 | 0.589813 |
| MmugDNA.7736.1.S1_at   | MmugDNA.7736.1 | 6.28  | 6.3   | 0.25 | 0.13 | -1.02 | 0.291677 | 0.321177 | 0.58108  | 0.573111 |
| MmugDNA.7738.1.S1_at   | MmugDNA.7738.1 | 3.48  | 3.52  | 0.24 | 0.39 | -1.03 | 0.530579 | 0.258983 | 0.755142 | 0.5262   |
| MmugDNA.774.1.S1_at    | MmugDNA.774.1  | 5.36  | 5.4   | 0.1  | 0.14 | -1.03 | 0.516346 | 0.692754 | 0.745748 | 0.821186 |
| MmugDNA.7740.1.S1_at   | MmugDNA.7740.1 | 7.23  | 7.73  | 0.21 | 0.26 | -1.42 | 0.052785 | 0.041564 | 0.286762 | 0.248812 |
| MmugDNA.7741.1.S1_at   | MmugDNA.7741.1 | 3.36  | 3.39  | 0.05 | 0.1  | -1.02 | 0.346012 | 0.467247 | 0.624806 | 0.677016 |
| MmugDNA.7742.1.S1_at   | MmugDNA.7742.1 | 4.04  | 3.52  | 0.74 | 0.3  | 1.43  | 0.169838 | 0.277357 | 0.463262 | 0.541302 |
| MmugDNA.7744.1.S1_at   | MmugDNA.7744.1 | 12.94 | 12.93 | 0.11 | 0.05 | 1     | 0.668884 | 0.111827 | 0.841137 | 0.376856 |
| MmugDNA.7747.1.S1_at   | MmugDNA.7747.1 | 3.07  | 2.95  | 0.63 | 0.13 | 1.09  | 0.233295 | 0.304839 | 0.531554 | 0.561994 |
| MmugDNA.775.1.S1_at    | MmugDNA.775.1  | 4.12  | 4.03  | 0.18 | 0.09 | 1.07  | 0.195901 | 0.539473 | 0.49276  | 0.723763 |
| MmugDNA.7750.1.S1_at   | MmugDNA.7750.1 | 13.38 | 13.33 | 0.12 | 0.02 | 1.03  | 0.322292 | 0.270579 | 0.606311 | 0.535837 |
| MmugDNA.7751.1.S1_at   | MmugDNA.7751.1 | 3.56  | 3.57  | 0    | 0.05 | -1    | 0.758125 | 0.700464 | 0.889026 | 0.826162 |
| MmugDNA.7753.1.S1_at   | MmugDNA.7753.1 | 6.31  | 6.31  | 0.24 | 0.07 | -1    | 0.771962 | 0.563328 | 0.895533 | 0.738544 |
| MmugDNA.7755.1.S1_at   | MmugDNA.7755.1 | 10.31 | 10.47 | 0.99 | 0.5  | -1.11 | 0.852503 | 0.494397 | 0.935873 | 0.694859 |
| MmugDNA.7757.1.S1_at   | MmugDNA.7757.1 | 3.73  | 3.45  | 0.4  | 0.12 | 1.21  | 0.447948 | 0.624382 | 0.699731 | 0.778581 |
| MmugDNA.7758.1.S1_at   | MmugDNA.7758.1 | 9.73  | 9.69  | 0.17 | 0.11 | 1.03  | 0.457731 | 0.011041 | 0.706531 | 0.136821 |
| MmugDNA.7759.1.S1_at   | MmugDNA.7759.1 | 4.17  | 4.06  | 0.23 | 0.11 | 1.08  | 0.430628 | 0.751545 | 0.686898 | 0.855508 |
| MmugDNA.7760.1.S1_at   | MmugDNA.7760.1 | 5.77  | 5.51  | 0.09 | 0.1  | 1.2   | 0.013799 | 0.466502 | 0.168392 | 0.676346 |
| MmugDNA.7761.1.S1_at   | MmugDNA.7761.1 | 5.96  | 6.1   | 0.48 | 0.3  | -1.1  | 0.636683 | 0.272554 | 0.822222 | 0.537323 |
| MmugDNA.7762.1.S1_at   | MmugDNA.7762.1 | 10.3  | 11.08 | 0.12 | 0.23 | -1.72 | 0.00717  | 0.021852 | 0.132203 | 0.184952 |
| MmugDNA.7763.1.S1_at   | MmugDNA.7763.1 | 11.31 | 11.79 | 0.37 | 0.05 | -1.39 | 0.034337 | 0.118757 | 0.23992  | 0.386819 |
| MmugDNA.7766.1.S1_x_at | MmugDNA.7766.1 | 12.87 | 12.93 | 0.06 | 0.1  | -1.04 | 0.739216 | 0.205399 | 0.87922  | 0.479751 |
| MmugDNA.7767.1.S1_at   | MmugDNA.7767.1 | 4.26  | 4.25  | 0.12 | 0.16 | 1.01  | 0.853485 | 0.974809 | 0.936303 | 0.986245 |
| MmugDNA.7770.1.S1_s_at | MmugDNA.7770.1 | 5.62  | 5.53  | 0.19 | 0.07 | 1.06  | 0.39068  | 0.268989 | 0.658264 | 0.534389 |
| MmugDNA.7771.1.S1_at   | MmugDNA.7771.1 | 5.57  | 5.65  | 0.18 | 0.21 | -1.06 | 0.683803 | 0.606496 | 0.84925  | 0.765779 |

|                        |                |       |       |      |      |        |          |          |          |          |
|------------------------|----------------|-------|-------|------|------|--------|----------|----------|----------|----------|
| MmugDNA.7773.1.S1_at   | MmugDNA.7773.1 | 4.8   | 4.76  | 0.3  | 0.11 | 1.03   | 0.584427 | 0.689702 | 0.788586 | 0.819038 |
| MmugDNA.7774.1.S1_at   | MmugDNA.7774.1 | 5.52  | 5.47  | 0.07 | 0.17 | 1.04   | 0.702082 | 0.500994 | 0.858655 | 0.699368 |
| MmugDNA.7775.1.S1_at   | MmugDNA.7775.1 | 8.69  | 8.44  | 0.1  | 0.1  | 1.19   | 0.155853 | 0.283868 | 0.446227 | 0.546237 |
| MmugDNA.7778.1.S1_at   | MmugDNA.7778.1 | 9.16  | 9.04  | 0.06 | 0.13 | 1.09   | 0.080794 | 0.781204 | 0.341497 | 0.873073 |
| MmugDNA.778.1.S1_at    | MmugDNA.778.1  | 6.77  | 5.26  | 0.38 | 0.07 | 2.85   | 0.002057 | 0.000561 | 0.090098 | 0.041049 |
| MmugDNA.7780.1.S1_at   | MmugDNA.7780.1 | 5.2   | 4.34  | 0.32 | 0.27 | 1.82   | 0.01246  | 0.000769 | 0.161927 | 0.04544  |
| MmugDNA.7781.1.S1_at   | MmugDNA.7781.1 | 3.96  | 3.78  | 0.03 | 0.14 | 1.13   | 0.169404 | 0.017929 | 0.462638 | 0.168998 |
| MmugDNA.7781.1.S1_x_at | MmugDNA.7781.1 | 6.22  | 5.98  | 0.05 | 0.25 | 1.18   | 0.138642 | 0.107862 | 0.424224 | 0.370945 |
| MmugDNA.7783.1.S1_at   | MmugDNA.7783.1 | 7.97  | 7.62  | 0.66 | 0.18 | 1.27   | 0.222561 | 0.38957  | 0.520511 | 0.623668 |
| MmugDNA.7785.1.S1_at   | MmugDNA.7785.1 | 11.97 | 11.72 | 0.29 | 0.04 | 1.18   | 0.081507 | 0.276018 | 0.342512 | 0.540071 |
| MmugDNA.7786.1.S1_at   | MmugDNA.7786.1 | 4.25  | 3.45  | 0.46 | 0.23 | 1.73   | 0.046598 | 0.01928  | 0.273564 | 0.174698 |
| MmugDNA.7787.1.S1_at   | MmugDNA.7787.1 | 10.68 | 10.49 | 0.34 | 0.1  | 1.14   | 0.557227 | 0.450756 | 0.772057 | 0.665844 |
| MmugDNA.7788.1.S1_at   | MmugDNA.7788.1 | 4.33  | 4.6   | 0.23 | 0.24 | -1.21  | 0.166089 | 0.262023 | 0.459147 | 0.528374 |
| MmugDNA.7789.1.S1_at   | MmugDNA.7789.1 | 3.62  | 3.85  | 0.21 | 0.03 | -1.17  | 0.395035 | 0.291429 | 0.661557 | 0.551823 |
| MmugDNA.779.1.S1_at    | MmugDNA.779.1  | 5.13  | 5     | 0.03 | 0.1  | 1.1    | 0.109306 | 0.205482 | 0.384379 | 0.479764 |
| MmugDNA.7791.1.S1_at   | MmugDNA.7791.1 | 3.51  | 3.42  | 0.13 | 0.06 | 1.06   | 0.550972 | 0.221827 | 0.768202 | 0.49495  |
| MmugDNA.7792.1.S1_at   | MmugDNA.7792.1 | 8.45  | 8.15  | 0.21 | 0.25 | 1.23   | 0.174117 | 0.159917 | 0.468351 | 0.435987 |
| MmugDNA.7793.1.S1_at   | MmugDNA.7793.1 | 6.77  | 6.48  | 0.18 | 0.18 | 1.23   | 0.278534 | 0.532548 | 0.569907 | 0.719092 |
| MmugDNA.7794.1.S1_at   | MmugDNA.7794.1 | 4.75  | 4.57  | 0.05 | 0.11 | 1.13   | 0.019328 | 0.014106 | 0.192176 | 0.15195  |
| MmugDNA.7795.1.S1_at   | MmugDNA.7795.1 | 10.85 | 10.69 | 0.13 | 0.16 | 1.12   | 0.105826 | 0.173342 | 0.379857 | 0.449791 |
| MmugDNA.7796.1.S1_at   | MmugDNA.7796.1 | 6.43  | 7.82  | 0.93 | 0.11 | -2.63  | 0.192657 | 0.458058 | 0.489253 | 0.671038 |
| MmugDNA.7798.1.S1_at   | MmugDNA.7798.1 | 7.98  | 7.79  | 0.61 | 0.07 | 1.13   | 0.743937 | 0.830966 | 0.881384 | 0.903034 |
| MmugDNA.7799.1.S1_at   | MmugDNA.7799.1 | 3.8   | 3.8   | 0.11 | 0.08 | -1     | 0.477309 | 0.779163 | 0.719345 | 0.871904 |
| MmugDNA.78.1.S1_at     | MmugDNA.78.1   | 9.1   | 8.52  | 0.22 | 0.26 | 1.5    | 0.04188  | 0.000229 | 0.261451 | 0.032385 |
| MmugDNA.780.1.S1_at    | MmugDNA.780.1  | 5.39  | 6.49  | 0.91 | 0.28 | -2.15  | 0.154078 | 0.158731 | 0.444347 | 0.434807 |
| MmugDNA.7800.1.S1_at   | MmugDNA.7800.1 | 4.83  | 4.8   | 0.24 | 0.31 | 1.03   | 0.419795 | 0.311714 | 0.679042 | 0.566689 |
| MmugDNA.7801.1.S1_at   | MmugDNA.7801.1 | 6.07  | 6.4   | 0.23 | 0.22 | -1.26  | 0.44678  | 0.604446 | 0.698851 | 0.76464  |
| MmugDNA.7802.1.S1_at   | MmugDNA.7802.1 | 4.84  | 4.86  | 0.2  | 0.02 | -1.01  | 0.80015  | 0.923942 | 0.909973 | 0.957162 |
| MmugDNA.7802.1.S1_s_at | MmugDNA.7802.1 | 5.31  | 6.29  | 0.25 | 0.22 | -1.98  | 0.0047   | 0.009101 | 0.115008 | 0.125983 |
| MmugDNA.7803.1.S1_at   | MmugDNA.7803.1 | 4.73  | 4.76  | 0.26 | 0.01 | -1.02  | 0.863597 | 0.904375 | 0.940739 | 0.945736 |
| MmugDNA.7804.1.S1_at   | MmugDNA.7804.1 | 2.66  | 2.83  | 0.11 | 0.04 | -1.12  | 0.104366 | 0.171802 | 0.377773 | 0.448198 |
| MmugDNA.7804.1.S1_s_at | MmugDNA.7804.1 | 2.83  | 2.85  | 0.04 | 0.07 | -1.02  | 0.462684 | 0.158805 | 0.70975  | 0.434896 |
| MmugDNA.7809.1.S1_at   | MmugDNA.7809.1 | 4.53  | 4.06  | 0.68 | 0.09 | 1.38   | 0.255141 | 0.592565 | 0.549651 | 0.757844 |
| MmugDNA.781.1.S1_at    | MmugDNA.781.1  | 3.07  | 3.1   | 0.21 | 0.06 | -1.02  | 0.38831  | 0.575343 | 0.656369 | 0.746448 |
| MmugDNA.7814.1.S1_at   | MmugDNA.7814.1 | 8.07  | 7.84  | 0.14 | 0.08 | 1.17   | 0.092665 | 0.064293 | 0.361022 | 0.299748 |
| MmugDNA.7816.1.S1_at   | MmugDNA.7816.1 | 6.78  | 10.43 | 2.15 | 0.29 | -12.57 | 0.064206 | 0.430572 | 0.309807 | 0.651577 |
| MmugDNA.7816.1.S1_s_at | MmugDNA.7816.1 | 5.9   | 10.09 | 1.92 | 0.29 | -18.26 | 0.059317 | 0.328427 | 0.300736 | 0.578066 |
| MmugDNA.7817.1.S1_at   | MmugDNA.7817.1 | 3.52  | 3.53  | 0.78 | 0.15 | -1     | 0.397568 | 0.412254 | 0.66317  | 0.638664 |
| MmugDNA.7818.1.S1_at   | MmugDNA.7818.1 | 5.12  | 5.05  | 0.04 | 0.01 | 1.05   | 0.088074 | 0.496111 | 0.354244 | 0.695877 |
| MmugDNA.7819.1.S1_at   | MmugDNA.7819.1 | 12.17 | 12.02 | 0.04 | 0.05 | 1.11   | 0.020385 | 0.233707 | 0.196305 | 0.505032 |
| MmugDNA.782.1.S1_s_at  | MmugDNA.782.1  | 10.84 | 10.58 | 0.29 | 0.07 | 1.19   | 0.236253 | 0.092455 | 0.5339   | 0.348346 |
| MmugDNA.7822.1.S1_at   | MmugDNA.7822.1 | 6.75  | 7.43  | 0.61 | 0.26 | -1.6   | 0.092766 | 0.253732 | 0.361206 | 0.522091 |
| MmugDNA.7823.1.S1_at   | MmugDNA.7823.1 | 3.69  | 3.74  | 0.16 | 0.07 | -1.03  | 0.816268 | 0.953072 | 0.917991 | 0.973379 |

|                         |                 |       |       |      |      |       |          |          |          |          |
|-------------------------|-----------------|-------|-------|------|------|-------|----------|----------|----------|----------|
| MmugDNA.7824.1.S1_at    | MmugDNA.7824.1  | 9.86  | 9.45  | 0.01 | 0.15 | 1.34  | 0.018329 | 0.000933 | 0.188473 | 0.048962 |
| MmugDNA.7825.1.S1_at    | MmugDNA.7825.1  | 3.03  | 3.15  | 0.18 | 0.11 | -1.09 | 0.4081   | 0.55986  | 0.671004 | 0.736409 |
| MmugDNA.7827.1.S1_at    | MmugDNA.7827.1  | 5.52  | 5.14  | 0.18 | 0.18 | 1.3   | 0.301443 | 0.271315 | 0.589355 | 0.53644  |
| MmugDNA.7829.1.S1_at    | MmugDNA.7829.1  | 5.67  | 5.96  | 0.27 | 0.03 | -1.23 | 0.162136 | 0.068377 | 0.454014 | 0.307955 |
| MmugDNA.7835.1.S1_at    | MmugDNA.7835.1  | 7.66  | 7.67  | 0.48 | 0.62 | -1    | 0.966763 | 0.977742 | 0.986564 | 0.98787  |
| MmugDNA.7835.1.S1_s_at  | MmugDNA.7835.1  | 10.69 | 10.64 | 0.08 | 0.07 | 1.04  | 0.318189 | 0.645848 | 0.602917 | 0.792616 |
| MmugDNA.7836.1.S1_at    | MmugDNA.7836.1  | 4.66  | 4.86  | 0.33 | 0    | -1.15 | 0.408238 | 0.320833 | 0.671087 | 0.572849 |
| MmugDNA.7837.1.S1_at    | MmugDNA.7837.1  | 10.14 | 9.73  | 0.08 | 0.06 | 1.33  | 0.002182 | 0.000026 | 0.090633 | 0.020518 |
| MmugDNA.7838.1.S1_at    | MmugDNA.7838.1  | 3.38  | 3.48  | 0.07 | 0.18 | -1.07 | 0.512116 | 0.730698 | 0.742866 | 0.844055 |
| MmugDNA.784.1.S1_at     | MmugDNA.784.1   | 4.5   | 4.35  | 0.39 | 0.12 | 1.11  | 0.193787 | 0.233748 | 0.490333 | 0.50505  |
| MmugDNA.7842.1.S1_at    | MmugDNA.7842.1  | 4.4   | 3.6   | 0.82 | 0.18 | 1.75  | 0.527319 | 0.52683  | 0.753064 | 0.715627 |
| MmugDNA.11210.1.S1_s_at | MmugDNA.11210.1 | 8.38  | 8.91  | 0.72 | 0.16 | -1.44 | 0.191083 | 0.177952 | 0.487272 | 0.45429  |
| MmugDNA.7844.1.S1_at    | MmugDNA.7844.1  | 6.86  | 7.43  | 0.4  | 0.49 | -1.49 | 0.279742 | 0.043619 | 0.571035 | 0.253501 |
| MmugDNA.7845.1.S1_at    | MmugDNA.7845.1  | 4.05  | 3.87  | 0.23 | 0.06 | 1.14  | 0.222136 | 0.327787 | 0.520231 | 0.577604 |
| MmugDNA.7846.1.S1_at    | MmugDNA.7846.1  | 4     | 4.03  | 0.08 | 0.02 | -1.02 | 0.696448 | 0.671434 | 0.85541  | 0.807907 |
| MmugDNA.7847.1.S1_at    | MmugDNA.7847.1  | 4.76  | 4.84  | 0.24 | 0.2  | -1.05 | 0.707166 | 0.021373 | 0.861311 | 0.18304  |
| MmugDNA.7848.1.S1_at    | MmugDNA.7848.1  | 3.03  | 2.97  | 0    | 0.28 | 1.04  | 0.875793 | 0.951374 | 0.946757 | 0.972418 |
| MmugDNA.785.1.S1_at     | MmugDNA.785.1   | 5.05  | 5.18  | 0.14 | 0.11 | -1.09 | 0.223152 | 0.385581 | 0.520981 | 0.621038 |
| MmugDNA.7850.1.S1_at    | MmugDNA.7850.1  | 2.96  | 3.23  | 0.02 | 0.01 | -1.21 | 0.000022 | 4.32E-07 | 0.045594 | 0.005999 |
| MmugDNA.7851.1.S1_at    | MmugDNA.7851.1  | 3.79  | 3.89  | 0.06 | 0.13 | -1.08 | 0.416923 | 0.326704 | 0.677228 | 0.576725 |
| MmugDNA.7853.1.S1_at    | MmugDNA.7853.1  | 4.73  | 4.73  | 0.2  | 0.03 | 1     | 0.439451 | 0.04715  | 0.693687 | 0.261745 |
| MmugDNA.7854.1.S1_at    | MmugDNA.7854.1  | 6.69  | 6.54  | 0.06 | 0.08 | 1.11  | 0.042239 | 0.047802 | 0.262497 | 0.263649 |
| MmugDNA.7855.1.S1_at    | MmugDNA.7855.1  | 4.2   | 4.1   | 0.42 | 0.07 | 1.07  | 0.237553 | 0.219828 | 0.535008 | 0.493388 |
| MmugDNA.7859.1.S1_at    | MmugDNA.7859.1  | 4.59  | 4.94  | 0.1  | 0.39 | -1.27 | 0.145616 | 0.054792 | 0.433056 | 0.279594 |
| MmugDNA.786.1.S1_at     | MmugDNA.786.1   | 6.67  | 7.05  | 0.82 | 0.27 | -1.3  | 0.572106 | 0.167387 | 0.78032  | 0.443785 |
| MmugDNA.7863.1.S1_at    | MmugDNA.7863.1  | 7.57  | 7.37  | 0.13 | 0.02 | 1.15  | 0.098215 | 0.222839 | 0.36881  | 0.495765 |
| MmugDNA.7865.1.S1_at    | MmugDNA.7865.1  | 8.86  | 8.91  | 0.1  | 0.12 | -1.03 | 0.562855 | 0.019505 | 0.775182 | 0.175439 |
| MmugDNA.7867.1.S1_at    | MmugDNA.7867.1  | 4.21  | 4.05  | 0.19 | 0.16 | 1.12  | 0.576205 | 0.536841 | 0.783141 | 0.722119 |
| MmugDNA.7868.1.S1_at    | MmugDNA.7868.1  | 2.64  | 2.68  | 0.14 | 0.04 | -1.02 | 0.65682  | 0.599355 | 0.834021 | 0.761418 |
| MmugDNA.7869.1.S1_at    | MmugDNA.7869.1  | 6.96  | 6.89  | 0.16 | 0.22 | 1.05  | 0.588706 | 0.062527 | 0.791222 | 0.296884 |
| MmugDNA.787.1.S1_at     | MmugDNA.787.1   | 3.02  | 2.95  | 0.04 | 0.16 | 1.05  | 0.761734 | 0.671841 | 0.890644 | 0.808157 |
| MmugDNA.7870.1.S1_at    | MmugDNA.7870.1  | 5.08  | 4.86  | 0.59 | 0.41 | 1.16  | 0.572417 | 0.40178  | 0.780609 | 0.631068 |
| MmugDNA.7871.1.S1_at    | MmugDNA.7871.1  | 5.25  | 4.02  | 1.02 | 0.26 | 2.35  | 0.125199 | 0.100131 | 0.405629 | 0.359064 |
| MmugDNA.7872.1.S1_at    | MmugDNA.7872.1  | 5.16  | 5.22  | 0.07 | 0.04 | -1.04 | 0.529455 | 0.830379 | 0.754256 | 0.902656 |
| MmugDNA.7873.1.S1_at    | MmugDNA.7873.1  | 8.23  | 7.9   | 1.57 | 0.98 | 1.25  | 0.498765 | 0.396749 | 0.733923 | 0.628438 |
| MmugDNA.7876.1.S1_at    | MmugDNA.7876.1  | 9.87  | 10.02 | 0.21 | 0.05 | -1.11 | 0.867922 | 0.191814 | 0.943108 | 0.467164 |
| MmugDNA.7877.1.S1_at    | MmugDNA.7877.1  | 8.72  | 8.45  | 0.15 | 0.15 | 1.2   | 0.098685 | 0.148731 | 0.369502 | 0.423201 |
| MmugDNA.7879.1.S1_at    | MmugDNA.7879.1  | 7.96  | 8.24  | 0.05 | 0.05 | -1.22 | 0.001567 | 0.110217 | 0.082337 | 0.374349 |
| MmugDNA.788.1.S1_at     | MmugDNA.788.1   | 6.06  | 6.06  | 0.24 | 0.15 | 1     | 0.39551  | 0.641981 | 0.661903 | 0.78994  |
| MmugDNA.7882.1.S1_at    | MmugDNA.7882.1  | 4.36  | 4.04  | 0.06 | 0.45 | 1.25  | 0.7435   | 0.925912 | 0.88138  | 0.958059 |
| MmugDNA.7884.1.S1_at    | MmugDNA.7884.1  | 9.37  | 9.58  | 0.05 | 0.15 | -1.15 | 0.29704  | 0.604516 | 0.585548 | 0.764655 |
| MmugDNA.7884.1.S1_s_at  | MmugDNA.7884.1  | 11.95 | 12.04 | 0.1  | 0.07 | -1.07 | 0.314998 | 0.734528 | 0.600177 | 0.84619  |
| MmugDNA.7885.1.S1_at    | MmugDNA.7885.1  | 4.53  | 4.3   | 0.15 | 0.08 | 1.18  | 0.101558 | 0.104901 | 0.372929 | 0.366451 |

|                        |                |       |       |      |      |       |          |          |          |          |
|------------------------|----------------|-------|-------|------|------|-------|----------|----------|----------|----------|
| MmugDNA.7886.1.S1_at   | MmugDNA.7886.1 | 9.54  | 9.85  | 0.17 | 0.03 | -1.24 | 0.04452  | 0.000011 | 0.26817  | 0.016526 |
| MmugDNA.7887.1.S1_at   | MmugDNA.7887.1 | 8.57  | 8.63  | 0.34 | 0.22 | -1.05 | 0.434822 | 0.625038 | 0.689966 | 0.778973 |
| MmugDNA.7888.1.S1_at   | MmugDNA.7888.1 | 4.91  | 5.58  | 0.12 | 0.3  | -1.59 | 0.019888 | 0.02334  | 0.194289 | 0.191537 |
| MmugDNA.789.1.S1_at    | MmugDNA.789.1  | 7.17  | 8.15  | 0.39 | 0.02 | -1.97 | 0.020096 | 0.0039   | 0.195301 | 0.088806 |
| MmugDNA.7892.1.S1_at   | MmugDNA.7892.1 | 5.4   | 5.26  | 0.36 | 0.3  | 1.1   | 0.953316 | 0.539388 | 0.980807 | 0.723743 |
| MmugDNA.7894.1.S1_at   | MmugDNA.7894.1 | 8.15  | 7     | 0.71 | 0.1  | 2.22  | 0.069838 | 0.087477 | 0.322728 | 0.340617 |
| MmugDNA.7895.1.S1_at   | MmugDNA.7895.1 | 6.9   | 6.98  | 0.21 | 0.06 | -1.06 | 0.928938 | 0.845441 | 0.969935 | 0.912071 |
| MmugDNA.7896.1.S1_at   | MmugDNA.7896.1 | 7.1   | 7.24  | 0.32 | 0.05 | -1.11 | 0.673402 | 0.738138 | 0.843815 | 0.848203 |
| MmugDNA.7898.1.S1_s_at | MmugDNA.7898.1 | 11.97 | 11.96 | 0.15 | 0.19 | 1.01  | 0.217622 | 0.268957 | 0.515458 | 0.534369 |
| MmugDNA.7899.1.S1_at   | MmugDNA.7899.1 | 7.79  | 8.04  | 0.41 | 0.11 | -1.18 | 0.422721 | 0.352787 | 0.680817 | 0.596115 |
| MmugDNA.79.1.S1_at     | MmugDNA.79.1   | 6.58  | 6.6   | 0.08 | 0.03 | -1.02 | 0.987056 | 0.046994 | 0.995283 | 0.261469 |
| MmugDNA.7900.1.S1_at   | MmugDNA.7900.1 | 5.75  | 5.79  | 0.2  | 0.11 | -1.03 | 0.749846 | 0.78676  | 0.884184 | 0.876656 |
| MmugDNA.7901.1.S1_at   | MmugDNA.7901.1 | 4.2   | 4.24  | 0.13 | 0.46 | -1.03 | 0.627688 | 0.686476 | 0.816953 | 0.817043 |
| MmugDNA.7904.1.S1_at   | MmugDNA.7904.1 | 3.32  | 3.13  | 0.78 | 0.03 | 1.14  | 0.374561 | 0.566873 | 0.645606 | 0.74084  |
| MmugDNA.7905.1.S1_at   | MmugDNA.7905.1 | 6.49  | 6.34  | 0.75 | 0.11 | 1.1   | 0.271443 | 0.138929 | 0.563401 | 0.412037 |
| MmugDNA.7906.1.S1_at   | MmugDNA.7906.1 | 12.93 | 13.24 | 0.13 | 0.05 | -1.24 | 0.036326 | 0.075916 | 0.245737 | 0.320576 |
| MmugDNA.7908.1.S1_at   | MmugDNA.7908.1 | 12.88 | 12.87 | 0.06 | 0.09 | 1.01  | 0.345009 | 0.427853 | 0.624093 | 0.649582 |
| MmugDNA.7909.1.S1_at   | MmugDNA.7909.1 | 6.76  | 6.85  | 0.12 | 0.18 | -1.06 | 0.36548  | 0.631786 | 0.639967 | 0.782957 |
| MmugDNA.791.1.S1_at    | MmugDNA.791.1  | 5.44  | 5.37  | 0.24 | 0.29 | 1.05  | 0.962736 | 0.501117 | 0.984869 | 0.699443 |
| MmugDNA.7911.1.S1_at   | MmugDNA.7911.1 | 10.28 | 10.48 | 0.09 | 0.18 | -1.14 | 0.374667 | 0.06896  | 0.645606 | 0.308954 |
| MmugDNA.7912.1.S1_at   | MmugDNA.7912.1 | 4.83  | 4.76  | 0.37 | 0.06 | 1.05  | 0.29617  | 0.106512 | 0.584902 | 0.369078 |
| MmugDNA.7914.1.S1_at   | MmugDNA.7914.1 | 3.72  | 3.37  | 0.26 | 0.46 | 1.27  | 0.786137 | 0.751436 | 0.90238  | 0.85549  |
| MmugDNA.7915.1.S1_at   | MmugDNA.7915.1 | 6.32  | 7     | 0.94 | 0.21 | -1.6  | 0.959903 | 0.973088 | 0.983565 | 0.98541  |
| MmugDNA.7918.1.S1_at   | MmugDNA.7918.1 | 3.81  | 3.7   | 0.06 | 0.16 | 1.08  | 0.215237 | 0.427331 | 0.512891 | 0.649175 |
| MmugDNA.7919.1.S1_at   | MmugDNA.7919.1 | 4.63  | 4.67  | 0.22 | 0.13 | -1.03 | 0.995412 | 0.923285 | 0.99814  | 0.95686  |
| MmugDNA.7920.1.S1_at   | MmugDNA.7920.1 | 10.35 | 10.25 | 0.18 | 0.06 | 1.07  | 0.70243  | 0.72569  | 0.858775 | 0.841142 |
| MmugDNA.7921.1.S1_at   | MmugDNA.7921.1 | 3.57  | 3.6   | 0.34 | 0.04 | -1.02 | 0.522549 | 0.70631  | 0.749811 | 0.829634 |
| MmugDNA.7922.1.S1_at   | MmugDNA.7922.1 | 3.34  | 3.36  | 0.15 | 0.17 | -1.02 | 0.339952 | 0.313592 | 0.620137 | 0.567977 |
| MmugDNA.7923.1.S1_at   | MmugDNA.7923.1 | 8.15  | 8.39  | 0.17 | 0.06 | -1.18 | 0.327171 | 0.219547 | 0.609783 | 0.493192 |
| MmugDNA.7925.1.S1_at   | MmugDNA.7925.1 | 9.29  | 9.11  | 0.1  | 0.15 | 1.13  | 0.160744 | 0.78712  | 0.452359 | 0.876835 |
| MmugDNA.7926.1.S1_at   | MmugDNA.7926.1 | 5.04  | 4.44  | 0.29 | 0.16 | 1.51  | 0.078786 | 0.55691  | 0.338647 | 0.734847 |
| MmugDNA.7927.1.S1_at   | MmugDNA.7927.1 | 7.52  | 7.18  | 0.32 | 0.24 | 1.27  | 0.163368 | 0.249111 | 0.455676 | 0.51821  |
| MmugDNA.7928.1.S1_at   | MmugDNA.7928.1 | 2.79  | 2.67  | 0.3  | 0.09 | 1.08  | 0.334965 | 0.468391 | 0.615998 | 0.677714 |
| MmugDNA.7929.1.S1_at   | MmugDNA.7929.1 | 5.17  | 4.95  | 0.19 | 0.15 | 1.16  | 0.206434 | 0.437693 | 0.504097 | 0.656881 |
| MmugDNA.7931.1.S1_at   | MmugDNA.7931.1 | 3.47  | 3.53  | 0.14 | 0.08 | -1.04 | 0.457396 | 0.6194   | 0.706363 | 0.774634 |
| MmugDNA.7934.1.S1_at   | MmugDNA.7934.1 | 8.1   | 8.08  | 0.44 | 0.15 | 1.02  | 0.296963 | 0.239385 | 0.585548 | 0.510039 |
| MmugDNA.7935.1.S1_at   | MmugDNA.7935.1 | 3.27  | 3.15  | 0.1  | 0.12 | 1.09  | 0.207861 | 0.292761 | 0.505752 | 0.552783 |
| MmugDNA.7936.1.S1_at   | MmugDNA.7936.1 | 11.83 | 11.83 | 0.13 | 0.06 | -1    | 0.964556 | 0.46862  | 0.985701 | 0.677755 |
| MmugDNA.7937.1.S1_at   | MmugDNA.7937.1 | 6.87  | 6.42  | 0.16 | 0.23 | 1.36  | 0.256073 | 0.386447 | 0.550543 | 0.621593 |
| MmugDNA.7938.1.S1_at   | MmugDNA.7938.1 | 5.04  | 4.84  | 0.55 | 0.28 | 1.15  | 0.380968 | 0.546146 | 0.650527 | 0.727787 |
| MmugDNA.7939.1.S1_at   | MmugDNA.7939.1 | 5.65  | 6.03  | 0.37 | 0.21 | -1.3  | 0.058319 | 0.116341 | 0.298627 | 0.383671 |
| MmugDNA.7941.1.S1_at   | MmugDNA.7941.1 | 8.68  | 8.18  | 0.18 | 0.36 | 1.41  | 0.468378 | 0.037704 | 0.713506 | 0.23859  |
| MmugDNA.7942.1.S1_at   | MmugDNA.7942.1 | 4.78  | 4.78  | 0.24 | 0.2  | -1    | 0.938149 | 0.923456 | 0.973844 | 0.956981 |



|                        |                |       |       |      |      |       |          |          |          |          |
|------------------------|----------------|-------|-------|------|------|-------|----------|----------|----------|----------|
| MmugDNA.7943.1.S1_at   | MmugDNA.7943.1 | 4.11  | 4.15  | 0.15 | 0.13 | -1.03 | 0.766683 | 0.457021 | 0.892936 | 0.670619 |
| MmugDNA.7944.1.S1_at   | MmugDNA.7944.1 | 4.9   | 4.7   | 0.19 | 0.09 | 1.16  | 0.440246 | 0.44546  | 0.694362 | 0.662388 |
| MmugDNA.7945.1.S1_at   | MmugDNA.7945.1 | 11.41 | 10.88 | 0.09 | 0.12 | 1.45  | 0.004227 | 0.000585 | 0.110852 | 0.041486 |
| MmugDNA.7946.1.S1_at   | MmugDNA.7946.1 | 3.93  | 3.99  | 0.21 | 0.06 | -1.04 | 0.503053 | 0.899447 | 0.736694 | 0.942858 |
| MmugDNA.7947.1.S1_at   | MmugDNA.7947.1 | 3.99  | 4     | 0.18 | 0.05 | -1.01 | 0.469376 | 0.697245 | 0.714161 | 0.824057 |
| MmugDNA.7949.1.S1_at   | MmugDNA.7949.1 | 4.7   | 4.71  | 0.21 | 0.01 | -1    | 0.383902 | 0.750188 | 0.653055 | 0.854731 |
| MmugDNA.795.1.S1_at    | MmugDNA.795.1  | 3.76  | 3.9   | 0.56 | 0.53 | -1.11 | 0.772248 | 0.612978 | 0.895748 | 0.770331 |
| MmugDNA.7952.1.S1_at   | MmugDNA.7952.1 | 6.99  | 7     | 0.11 | 0.07 | -1.01 | 0.887894 | 0.186379 | 0.952087 | 0.46221  |
| MmugDNA.7953.1.S1_at   | MmugDNA.7953.1 | 4.36  | 4.47  | 0.15 | 0.06 | -1.08 | 0.097659 | 0.159151 | 0.368021 | 0.435217 |
| MmugDNA.7954.1.S1_at   | MmugDNA.7954.1 | 4.87  | 4.55  | 0.07 | 0.05 | 1.25  | 0.004295 | 0.001148 | 0.111625 | 0.05344  |
| MmugDNA.7956.1.S1_at   | MmugDNA.7956.1 | 6.09  | 5.94  | 0.05 | 0.37 | 1.11  | 0.52213  | 0.103739 | 0.749556 | 0.364519 |
| MmugDNA.7957.1.S1_at   | MmugDNA.7957.1 | 10.13 | 9.1   | 0.2  | 0.09 | 2.04  | 0.001179 | 0.015523 | 0.077718 | 0.158053 |
| MmugDNA.7958.1.S1_at   | MmugDNA.7958.1 | 5.7   | 5.32  | 0.57 | 0.22 | 1.3   | 0.079564 | 0.052266 | 0.339726 | 0.274146 |
| MmugDNA.796.1.S1_at    | MmugDNA.796.1  | 3.47  | 3.67  | 0.21 | 0.14 | -1.14 | 0.869917 | 0.852047 | 0.944045 | 0.915853 |
| MmugDNA.7960.1.S1_at   | MmugDNA.7960.1 | 4.45  | 4.23  | 0.14 | 0.09 | 1.16  | 0.149105 | 0.150748 | 0.437914 | 0.4253   |
| MmugDNA.7961.1.S1_at   | MmugDNA.7961.1 | 6.89  | 7.13  | 0.35 | 0.07 | -1.18 | 0.989622 | 0.390035 | 0.99638  | 0.624002 |
| MmugDNA.7963.1.S1_at   | MmugDNA.7963.1 | 4.64  | 4.66  | 0.12 | 0.08 | -1.01 | 0.620075 | 0.339133 | 0.811648 | 0.585891 |
| MmugDNA.7966.1.S1_at   | MmugDNA.7966.1 | 3.89  | 3.99  | 0.2  | 0.34 | -1.07 | 0.238008 | 0.174697 | 0.535463 | 0.451231 |
| MmugDNA.7967.1.S1_at   | MmugDNA.7967.1 | 5.79  | 5.86  | 0.2  | 0.06 | -1.05 | 0.62618  | 0.585863 | 0.815828 | 0.753074 |
| MmugDNA.7968.1.S1_at   | MmugDNA.7968.1 | 3.8   | 3.31  | 0.17 | 0.44 | 1.41  | 0.315667 | 0.264191 | 0.600483 | 0.530258 |
| MmugDNA.7969.1.S1_at   | MmugDNA.7969.1 | 6.24  | 6.3   | 0.07 | 0.05 | -1.05 | 0.220443 | 0.234886 | 0.518152 | 0.506125 |
| MmugDNA.7970.1.S1_at   | MmugDNA.7970.1 | 4.57  | 4.56  | 0.04 | 0.06 | 1.01  | 0.891033 | 0.292503 | 0.953461 | 0.55258  |
| MmugDNA.7971.1.S1_at   | MmugDNA.7971.1 | 8.38  | 8.55  | 0.62 | 0.26 | -1.12 | 0.849012 | 0.034725 | 0.934226 | 0.230506 |
| MmugDNA.7972.1.S1_at   | MmugDNA.7972.1 | 4.78  | 4.66  | 0.14 | 0.04 | 1.09  | 0.687424 | 0.870228 | 0.850804 | 0.926373 |
| MmugDNA.7973.1.S1_at   | MmugDNA.7973.1 | 7.56  | 7.65  | 0.49 | 0.23 | -1.07 | 0.772766 | 0.114549 | 0.895994 | 0.381098 |
| MmugDNA.7975.1.S1_at   | MmugDNA.7975.1 | 3.17  | 3.19  | 0.07 | 0.13 | -1.01 | 0.419053 | 0.572724 | 0.678626 | 0.744687 |
| MmugDNA.7976.1.S1_at   | MmugDNA.7976.1 | 5.53  | 4.75  | 0.86 | 0.28 | 1.71  | 0.460251 | 0.233454 | 0.708163 | 0.504809 |
| MmugDNA.7977.1.S1_at   | MmugDNA.7977.1 | 3.61  | 3.45  | 0.08 | 0.08 | 1.12  | 0.153063 | 0.135159 | 0.442744 | 0.407181 |
| MmugDNA.7978.1.S1_at   | MmugDNA.7978.1 | 12.43 | 12.43 | 0.11 | 0.08 | -1.01 | 0.270311 | 0.555395 | 0.562443 | 0.733767 |
| MmugDNA.7979.1.S1_at   | MmugDNA.7979.1 | 7.3   | 7.12  | 1.21 | 0.46 | 1.14  | 0.819808 | 0.940551 | 0.919644 | 0.966314 |
| MmugDNA.798.1.S1_at    | MmugDNA.798.1  | 6.25  | 6.26  | 0.21 | 0.36 | -1    | 0.992878 | 0.193322 | 0.997263 | 0.468656 |
| MmugDNA.7980.1.S1_at   | MmugDNA.7980.1 | 8.5   | 9.58  | 0.24 | 0.19 | -2.13 | 0.005976 | 0.000401 | 0.124032 | 0.037471 |
| MmugDNA.7982.1.S1_at   | MmugDNA.7982.1 | 3.83  | 3.78  | 0.26 | 0.1  | 1.04  | 0.590018 | 0.594244 | 0.791771 | 0.758517 |
| MmugDNA.7983.1.S1_at   | MmugDNA.7983.1 | 11.58 | 11.22 | 0.13 | 0.14 | 1.29  | 0.029198 | 0.0517   | 0.22368  | 0.272905 |
| MmugDNA.7983.1.S1_s_at | MmugDNA.7983.1 | 11.4  | 11.07 | 0.06 | 0.06 | 1.26  | 0.003655 | 0.034105 | 0.105789 | 0.2286   |
| MmugDNA.7985.1.S1_at   | MmugDNA.7985.1 | 6.29  | 6.48  | 0.18 | 0.15 | -1.14 | 0.133634 | 0.401925 | 0.41701  | 0.631097 |
| MmugDNA.7986.1.S1_at   | MmugDNA.7986.1 | 8.17  | 8.01  | 0.11 | 0.11 | 1.12  | 0.194216 | 0.913113 | 0.490803 | 0.951134 |
| MmugDNA.7987.1.S1_at   | MmugDNA.7987.1 | 7.46  | 7.03  | 0.19 | 0.4  | 1.35  | 0.093037 | 0.058315 | 0.361675 | 0.288276 |
| MmugDNA.7989.1.S1_at   | MmugDNA.7989.1 | 8.13  | 9.88  | 1.69 | 0.19 | -3.36 | 0.377656 | 0.338517 | 0.64816  | 0.585516 |
| MmugDNA.7990.1.S1_at   | MmugDNA.7990.1 | 10.38 | 11.33 | 0.6  | 0.72 | -1.93 | 0.196298 | 0.192187 | 0.493359 | 0.467651 |
| MmugDNA.7990.1.S1_s_at | MmugDNA.7990.1 | 12.27 | 12.99 | 0.3  | 0.4  | -1.65 | 0.069915 | 0.063932 | 0.322915 | 0.29906  |
| MmugDNA.7991.1.S1_at   | MmugDNA.7991.1 | 4     | 3.96  | 0.1  | 0.04 | 1.03  | 0.339088 | 0.773395 | 0.619372 | 0.868269 |
| MmugDNA.7992.1.S1_at   | MmugDNA.7992.1 | 4.72  | 4.26  | 0.12 | 0.24 | 1.37  | 0.012301 | 0.006798 | 0.161126 | 0.111432 |

|                      |                |       |       |      |      |       |          |          |          |          |
|----------------------|----------------|-------|-------|------|------|-------|----------|----------|----------|----------|
| MmugDNA.7994.1.S1_at | MmugDNA.7994.1 | 3.9   | 3.65  | 0.34 | 0.23 | 1.19  | 0.149602 | 0.145894 | 0.43857  | 0.419889 |
| MmugDNA.7995.1.S1_at | MmugDNA.7995.1 | 8.84  | 9.28  | 0.3  | 0.27 | -1.35 | 0.137209 | 0.455632 | 0.422038 | 0.669614 |
| MmugDNA.7997.1.S1_at | MmugDNA.7997.1 | 5.72  | 5.39  | 0.52 | 0.14 | 1.26  | 0.350479 | 0.475001 | 0.628305 | 0.681843 |
| MmugDNA.7998.1.S1_at | MmugDNA.7998.1 | 5.69  | 4.29  | 0.9  | 0.38 | 2.65  | 0.076062 | 0.090055 | 0.33408  | 0.344402 |
| MmugDNA.7999.1.S1_at | MmugDNA.7999.1 | 2.85  | 2.9   | 0.02 | 0.06 | -1.04 | 0.255934 | 0.136207 | 0.55053  | 0.408542 |
| MmugDNA.8.1.S1_at    | MmugDNA.8.1    | 4.41  | 4.44  | 0.15 | 0.15 | -1.02 | 0.755531 | 0.710798 | 0.887352 | 0.832265 |
| MmugDNA.80.1.S1_at   | MmugDNA.80.1   | 10.84 | 10.77 | 0.03 | 0    | 1.05  | 0.015656 | 0.026147 | 0.177578 | 0.202721 |
| MmugDNA.8001.1.S1_at | MmugDNA.8001.1 | 10.16 | 10.02 | 0.09 | 0.02 | 1.1   | 0.150776 | 0.060263 | 0.439937 | 0.292143 |
| MmugDNA.8003.1.S1_at | MmugDNA.8003.1 | 4.78  | 4.86  | 0.74 | 0.26 | -1.06 | 0.573571 | 0.728966 | 0.781176 | 0.84333  |
| MmugDNA.8004.1.S1_at | MmugDNA.8004.1 | 10.25 | 10.28 | 0.21 | 0.14 | -1.02 | 0.801876 | 0.939097 | 0.911061 | 0.965412 |
| MmugDNA.8005.1.S1_at | MmugDNA.8005.1 | 7.08  | 7.18  | 0.1  | 0.18 | -1.08 | 0.464324 | 0.489356 | 0.710598 | 0.691792 |
| MmugDNA.8006.1.S1_at | MmugDNA.8006.1 | 8.3   | 8.25  | 0.13 | 0.4  | 1.03  | 0.316363 | 0.134219 | 0.601116 | 0.406454 |
| MmugDNA.8007.1.S1_at | MmugDNA.8007.1 | 8.44  | 9.16  | 0.09 | 0.29 | -1.65 | 0.035186 | 0.521625 | 0.242214 | 0.712514 |
| MmugDNA.8008.1.S1_at | MmugDNA.8008.1 | 4.2   | 5.46  | 0.27 | 0.36 | -2.38 | 0.010283 | 0.060621 | 0.151176 | 0.292801 |
| MmugDNA.8009.1.S1_at | MmugDNA.8009.1 | 9.45  | 8.85  | 0.41 | 0.25 | 1.51  | 0.313071 | 0.033337 | 0.598916 | 0.22626  |
| MmugDNA.801.1.S1_at  | MmugDNA.801.1  | 11.96 | 12.16 | 0.14 | 0.09 | -1.15 | 0.2159   | 0.140238 | 0.513611 | 0.413405 |
| MmugDNA.8010.1.S1_at | MmugDNA.8010.1 | 5.8   | 8.91  | 2.15 | 0.38 | -8.64 | 0.158767 | 0.251749 | 0.449979 | 0.520444 |
| MmugDNA.8011.1.S1_at | MmugDNA.8011.1 | 4.49  | 4.33  | 0.22 | 0.12 | 1.11  | 0.637637 | 0.831151 | 0.82257  | 0.903172 |
| MmugDNA.8012.1.S1_at | MmugDNA.8012.1 | 9.73  | 10.73 | 0.18 | 0.22 | -2    | 0.008616 | 0.000475 | 0.142375 | 0.038572 |
| MmugDNA.8013.1.S1_at | MmugDNA.8013.1 | 4.4   | 4.33  | 0.24 | 0.14 | 1.05  | 0.393297 | 0.321311 | 0.660156 | 0.57319  |
| MmugDNA.8014.1.S1_at | MmugDNA.8014.1 | 3.92  | 3.83  | 0.24 | 0.08 | 1.06  | 0.241351 | 0.256178 | 0.538538 | 0.524069 |
| MmugDNA.8015.1.S1_at | MmugDNA.8015.1 | 5.76  | 5.82  | 0.41 | 0.08 | -1.05 | 0.430718 | 0.469583 | 0.686979 | 0.67829  |
| MmugDNA.8016.1.S1_at | MmugDNA.8016.1 | 5.18  | 5.2   | 0.18 | 0.32 | -1.02 | 0.55588  | 0.22083  | 0.771458 | 0.494262 |
| MmugDNA.8017.1.S1_at | MmugDNA.8017.1 | 6.76  | 6.75  | 0.15 | 0.1  | 1.01  | 0.992528 | 0.819962 | 0.997206 | 0.896303 |
| MmugDNA.8018.1.S1_at | MmugDNA.8018.1 | 5.9   | 6.19  | 0.13 | 0.25 | -1.22 | 0.079046 | 0.093934 | 0.338745 | 0.350445 |
| MmugDNA.8019.1.S1_at | MmugDNA.8019.1 | 7.66  | 6.65  | 0.79 | 0.33 | 2.01  | 0.148316 | 0.31715  | 0.436932 | 0.570412 |
| MmugDNA.802.1.S1_at  | MmugDNA.802.1  | 10.3  | 10.09 | 0.03 | 0.06 | 1.15  | 0.011049 | 0.001958 | 0.154788 | 0.065832 |
| MmugDNA.8021.1.S1_at | MmugDNA.8021.1 | 4.84  | 4.82  | 0.46 | 0.19 | 1.02  | 0.674927 | 0.355069 | 0.844854 | 0.59749  |
| MmugDNA.8023.1.S1_at | MmugDNA.8023.1 | 4.51  | 4.53  | 0.23 | 0.01 | -1.02 | 0.910856 | 0.47528  | 0.962223 | 0.682031 |
| MmugDNA.8024.1.S1_at | MmugDNA.8024.1 | 3.75  | 3.84  | 0.3  | 0.01 | -1.07 | 0.780773 | 0.396699 | 0.899949 | 0.628434 |
| MmugDNA.8025.1.S1_at | MmugDNA.8025.1 | 4.38  | 4.13  | 0.23 | 0.11 | 1.19  | 0.245225 | 0.355511 | 0.541279 | 0.597777 |
| MmugDNA.8026.1.S1_at | MmugDNA.8026.1 | 5.74  | 5.56  | 0.15 | 0.14 | 1.13  | 0.123042 | 0.150699 | 0.402192 | 0.425277 |
| MmugDNA.8027.1.S1_at | MmugDNA.8027.1 | 4.81  | 5.26  | 0.31 | 0.19 | -1.37 | 0.284363 | 0.353475 | 0.574388 | 0.596547 |
| MmugDNA.8028.1.S1_at | MmugDNA.8028.1 | 6.81  | 6.75  | 0.19 | 0.13 | 1.04  | 0.669081 | 0.746736 | 0.841264 | 0.852931 |
| MmugDNA.8029.1.S1_at | MmugDNA.8029.1 | 7.86  | 6.53  | 1.1  | 0.05 | 2.52  | 0.285346 | 0.141689 | 0.575167 | 0.415265 |
| MmugDNA.8030.1.S1_at | MmugDNA.8030.1 | 3.05  | 2.94  | 0.07 | 0.11 | 1.08  | 0.454543 | 0.328467 | 0.704412 | 0.57809  |
| MmugDNA.8031.1.S1_at | MmugDNA.8031.1 | 6.62  | 6.9   | 0.32 | 0.22 | -1.21 | 0.593265 | 0.722528 | 0.793939 | 0.839261 |
| MmugDNA.8032.1.S1_at | MmugDNA.8032.1 | 6.54  | 6.91  | 0.34 | 0.17 | -1.29 | 0.18728  | 0.342424 | 0.483404 | 0.58848  |
| MmugDNA.8033.1.S1_at | MmugDNA.8033.1 | 6.77  | 6.92  | 0.25 | 0    | -1.11 | 0.30571  | 0.160027 | 0.592779 | 0.436186 |
| MmugDNA.8034.1.S1_at | MmugDNA.8034.1 | 5.17  | 5.21  | 0.17 | 0.13 | -1.03 | 0.438581 | 0.542029 | 0.6931   | 0.725188 |
| MmugDNA.8035.1.S1_at | MmugDNA.8035.1 | 6.61  | 6.3   | 0.73 | 0.16 | 1.24  | 0.850813 | 0.98556  | 0.935218 | 0.991808 |
| MmugDNA.8036.1.S1_at | MmugDNA.8036.1 | 11.37 | 11.27 | 0.1  | 0.1  | 1.08  | 0.308918 | 0.841737 | 0.595411 | 0.909796 |
| MmugDNA.8037.1.S1_at | MmugDNA.8037.1 | 6.51  | 5.64  | 0.77 | 0.06 | 1.82  | 0.11821  | 0.182296 | 0.395722 | 0.458768 |

|                         |                 |       |       |      |      |       |          |          |          |          |
|-------------------------|-----------------|-------|-------|------|------|-------|----------|----------|----------|----------|
| MmugDNA.8039.1.S1_at    | MmugDNA.8039.1  | 7.1   | 6.42  | 0.27 | 0.22 | 1.6   | 0.029149 | 0.063239 | 0.223538 | 0.298202 |
| MmugDNA.8040.1.S1_at    | MmugDNA.8040.1  | 10.26 | 10.92 | 0.13 | 0.2  | -1.58 | 0.017173 | 0.010109 | 0.184293 | 0.131859 |
| MmugDNA.8041.1.S1_at    | MmugDNA.8041.1  | 10.98 | 10.82 | 0.11 | 0.07 | 1.12  | 0.30848  | 0.064699 | 0.595066 | 0.300314 |
| MmugDNA.8042.1.S1_at    | MmugDNA.8042.1  | 4.96  | 5.06  | 0.51 | 0.25 | -1.07 | 0.557336 | 0.775638 | 0.772086 | 0.869465 |
| MmugDNA.8045.1.S1_at    | MmugDNA.8045.1  | 7.27  | 7.46  | 0.24 | 0.07 | -1.14 | 0.75802  | 0.209804 | 0.889015 | 0.483538 |
| MmugDNA.8046.1.S1_at    | MmugDNA.8046.1  | 13.22 | 12.7  | 0.14 | 0.16 | 1.43  | 0.011634 | 0.010493 | 0.157701 | 0.133872 |
| MmugDNA.8047.1.S1_at    | MmugDNA.8047.1  | 4.64  | 4.81  | 0.11 | 0.27 | -1.12 | 0.766565 | 0.897286 | 0.892924 | 0.941396 |
| MmugDNA.805.1.S1_at     | MmugDNA.805.1   | 6.56  | 6.37  | 0.17 | 0.03 | 1.14  | 0.140151 | 0.138314 | 0.425833 | 0.411244 |
| MmugDNA.8050.1.S1_at    | MmugDNA.8050.1  | 10.38 | 10.83 | 0.35 | 0.08 | -1.36 | 0.096588 | 0.002327 | 0.366453 | 0.071272 |
| MmugDNA.8050.1.S1_s_at  | MmugDNA.8050.1  | 9.52  | 9.95  | 0.31 | 0.23 | -1.35 | 0.09684  | 0.001936 | 0.366886 | 0.065795 |
| MmugDNA.8051.1.S1_at    | MmugDNA.8051.1  | 3.18  | 3.15  | 0.1  | 0.15 | 1.02  | 0.715394 | 0.915653 | 0.865649 | 0.952724 |
| MmugDNA.8052.1.S1_at    | MmugDNA.8052.1  | 5.54  | 6.06  | 0.43 | 0.26 | -1.43 | 0.117407 | 0.392329 | 0.394715 | 0.625731 |
| MmugDNA.8053.1.S1_at    | MmugDNA.8053.1  | 4.91  | 5.07  | 0.18 | 0.21 | -1.11 | 0.772413 | 0.04414  | 0.895784 | 0.254496 |
| MmugDNA.8054.1.S1_at    | MmugDNA.8054.1  | 4.35  | 3.97  | 1.02 | 0.14 | 1.3   | 0.560058 | 0.71626  | 0.773651 | 0.835531 |
| MmugDNA.8055.1.S1_at    | MmugDNA.8055.1  | 5.5   | 4.58  | 0.72 | 1.01 | 1.9   | 0.941991 | 0.904943 | 0.975589 | 0.946143 |
| MmugDNA.806.1.S1_at     | MmugDNA.806.1   | 5.66  | 5.58  | 0.29 | 0.13 | 1.05  | 0.926462 | 0.026156 | 0.968882 | 0.202721 |
| MmugDNA.8060.1.S1_at    | MmugDNA.8060.1  | 9.65  | 9.21  | 0.19 | 0.07 | 1.35  | 0.021775 | 0.001189 | 0.200878 | 0.054071 |
| MmugDNA.8061.1.S1_at    | MmugDNA.8061.1  | 6.17  | 6.35  | 0.27 | 0.26 | -1.13 | 0.209931 | 0.009916 | 0.507384 | 0.130767 |
| MmugDNA.8063.1.S1_at    | MmugDNA.8063.1  | 5.89  | 5.7   | 0.09 | 0.08 | 1.14  | 0.120444 | 0.198549 | 0.398818 | 0.473391 |
| MmugDNA.8065.1.S1_at    | MmugDNA.8065.1  | 3.53  | 3.45  | 0.16 | 0.09 | 1.06  | 0.322357 | 0.340528 | 0.606349 | 0.586776 |
| MmugDNA.8066.1.S1_at    | MmugDNA.8066.1  | 3.32  | 3.08  | 0.11 | 0.13 | 1.19  | 0.077407 | 0.098189 | 0.336144 | 0.356253 |
| MmugDNA.8067.1.S1_at    | MmugDNA.8067.1  | 3.75  | 3.69  | 0.3  | 0.22 | 1.04  | 0.488498 | 0.865868 | 0.726931 | 0.923757 |
| MmugDNA.8068.1.S1_at    | MmugDNA.8068.1  | 3.81  | 3.68  | 1.14 | 0.09 | 1.1   | 0.320601 | 0.427675 | 0.605112 | 0.649406 |
| MmugDNA.8069.1.S1_at    | MmugDNA.8069.1  | 6.69  | 6.31  | 0.2  | 0.12 | 1.31  | 0.105032 | 0.06746  | 0.378728 | 0.305749 |
| MmugDNA.8071.1.S1_at    | MmugDNA.8071.1  | 5.96  | 6.06  | 0.04 | 0.13 | -1.07 | 0.297656 | 0.758054 | 0.586122 | 0.859249 |
| MmugDNA.8073.1.S1_at    | MmugDNA.8073.1  | 8.24  | 6.78  | 0.06 | 0.04 | 2.75  | 0.000004 | 0.003428 | 0.042301 | 0.084173 |
| MmugDNA.8074.1.S1_at    | MmugDNA.8074.1  | 8.07  | 8.67  | 0.1  | 0.07 | -1.52 | 0.001025 | 0.001003 | 0.076321 | 0.050657 |
| MmugDNA.8078.1.S1_at    | MmugDNA.8078.1  | 5.24  | 5.27  | 0.2  | 0.18 | -1.03 | 0.898586 | 0.04909  | 0.956888 | 0.266518 |
| MmugDNA.8079.1.S1_at    | MmugDNA.8079.1  | 5.84  | 5.87  | 0.1  | 0.04 | -1.03 | 0.852471 | 0.213959 | 0.935873 | 0.487596 |
| MmugDNA.808.1.S1_at     | MmugDNA.808.1   | 4.7   | 4.57  | 0.13 | 0.09 | 1.09  | 0.149351 | 0.310895 | 0.438222 | 0.565881 |
| MmugDNA.8081.1.S1_at    | MmugDNA.8081.1  | 11.71 | 11.42 | 0.36 | 0    | 1.22  | 0.713944 | 0.707068 | 0.864824 | 0.830132 |
| MmugDNA.8082.1.S1_at    | MmugDNA.8082.1  | 4.79  | 4.94  | 0.67 | 0.62 | -1.1  | 0.857165 | 0.972087 | 0.937945 | 0.984924 |
| MmugDNA.8085.1.S1_at    | MmugDNA.8085.1  | 8.33  | 8.15  | 0.64 | 0.14 | 1.14  | 0.720301 | 0.682119 | 0.868039 | 0.814349 |
| MmugDNA.8086.1.S1_at    | MmugDNA.8086.1  | 9.52  | 9.04  | 0.14 | 0.16 | 1.4   | 0.020505 | 0.170979 | 0.196642 | 0.447561 |
| MmugDNA.16345.1.S1_at   | MmugDNA.16345.1 | 8.56  | 8.54  | 0.13 | 0.06 | 1.02  | 0.358867 | 0.428723 | 0.634521 | 0.650287 |
| MmugDNA.16345.1.S1_s_at | MmugDNA.16345.1 | 10.92 | 10.61 | 0.03 | 0.23 | 1.24  | 0.088477 | 0.193676 | 0.35461  | 0.468785 |
| MmugDNA.8087.1.S1_at    | MmugDNA.8087.1  | 3.82  | 3.86  | 0.26 | 0.15 | -1.03 | 0.816325 | 0.254683 | 0.917994 | 0.522987 |
| MmugDNA.8089.1.S1_at    | MmugDNA.8089.1  | 3.37  | 3.25  | 0.1  | 0.08 | 1.08  | 0.096968 | 0.15969  | 0.367181 | 0.435785 |
| MmugDNA.809.1.S1_at     | MmugDNA.809.1   | 9.83  | 8.55  | 0.29 | 0.63 | 2.43  | 0.082071 | 0.106817 | 0.343387 | 0.369425 |
| MmugDNA.8090.1.S1_at    | MmugDNA.8090.1  | 3.27  | 3.52  | 0.73 | 0.04 | -1.19 | 0.660161 | 0.891161 | 0.836074 | 0.937985 |
| MmugDNA.8091.1.S1_at    | MmugDNA.8091.1  | 10.71 | 10.51 | 0.17 | 0.21 | 1.15  | 0.103038 | 0.003894 | 0.375707 | 0.088806 |
| MmugDNA.8092.1.S1_at    | MmugDNA.8092.1  | 5.1   | 5.72  | 0.31 | 0.1  | -1.54 | 0.025565 | 0.353438 | 0.212928 | 0.596547 |
| MmugDNA.8094.1.S1_at    | MmugDNA.8094.1  | 10.37 | 10.53 | 0.17 | 0.32 | -1.11 | 0.75474  | 0.75453  | 0.88688  | 0.857221 |

|                      |                |       |       |      |      |       |          |          |          |          |
|----------------------|----------------|-------|-------|------|------|-------|----------|----------|----------|----------|
| MmugDNA.8095.1.S1_at | MmugDNA.8095.1 | 9.58  | 9.49  | 0.05 | 0.23 | 1.07  | 0.476706 | 0.114508 | 0.719024 | 0.381056 |
| MmugDNA.8096.1.S1_at | MmugDNA.8096.1 | 5.42  | 5.42  | 0.06 | 0.27 | 1     | 0.30405  | 0.520762 | 0.59132  | 0.711942 |
| MmugDNA.8097.1.S1_at | MmugDNA.8097.1 | 5.19  | 5.07  | 0.24 | 0.14 | 1.08  | 0.913367 | 0.926132 | 0.963369 | 0.95813  |
| MmugDNA.8098.1.S1_at | MmugDNA.8098.1 | 6.37  | 6.34  | 0.17 | 0.03 | 1.02  | 0.484961 | 0.648851 | 0.72455  | 0.794491 |
| MmugDNA.8099.1.S1_at | MmugDNA.8099.1 | 4.47  | 4.83  | 0.27 | 0.98 | -1.28 | 0.436885 | 0.565594 | 0.691764 | 0.739997 |
| MmugDNA.81.1.S1_at   | MmugDNA.81.1   | 12.42 | 12.5  | 0.04 | 0.06 | -1.06 | 0.262154 | 0.040535 | 0.556354 | 0.246264 |
| MmugDNA.81.1.S1_s_at | MmugDNA.81.1   | 12.72 | 12.78 | 0.02 | 0.02 | -1.04 | 0.023583 | 0.066578 | 0.20689  | 0.303784 |
| MmugDNA.810.1.S1_at  | MmugDNA.810.1  | 4.79  | 4.79  | 0.15 | 0.03 | 1     | 0.993197 | 0.748577 | 0.997367 | 0.853719 |
| MmugDNA.8101.1.S1_at | MmugDNA.8101.1 | 4.58  | 5.07  | 0.31 | 0.51 | -1.41 | 0.149481 | 0.034934 | 0.438403 | 0.231062 |
| MmugDNA.8103.1.S1_at | MmugDNA.8103.1 | 7     | 6.95  | 0.05 | 0.1  | 1.04  | 0.289831 | 0.405369 | 0.579378 | 0.6337   |
| MmugDNA.8104.1.S1_at | MmugDNA.8104.1 | 6.57  | 6.67  | 0.07 | 0.08 | -1.08 | 0.089457 | 0.54717  | 0.356406 | 0.728314 |
| MmugDNA.8105.1.S1_at | MmugDNA.8105.1 | 8.36  | 8.36  | 0.41 | 0.13 | -1    | 0.371385 | 0.211992 | 0.644115 | 0.485975 |
| MmugDNA.8108.1.S1_at | MmugDNA.8108.1 | 4.8   | 4.78  | 0.44 | 0.09 | 1.02  | 0.344398 | 0.296107 | 0.623699 | 0.555339 |
| MmugDNA.8109.1.S1_at | MmugDNA.8109.1 | 7.52  | 7.5   | 0.39 | 0.24 | 1.01  | 0.413477 | 0.476442 | 0.67479  | 0.682725 |
| MmugDNA.811.1.S1_at  | MmugDNA.811.1  | 6.59  | 6.09  | 0.13 | 0.12 | 1.41  | 0.017085 | 0.000549 | 0.184179 | 0.040948 |
| MmugDNA.8110.1.S1_at | MmugDNA.8110.1 | 3.64  | 3.43  | 0.2  | 0.2  | 1.16  | 0.205581 | 0.257635 | 0.503337 | 0.525332 |
| MmugDNA.8112.1.S1_at | MmugDNA.8112.1 | 10.56 | 10.64 | 0.21 | 0.05 | -1.06 | 0.355583 | 0.399563 | 0.632237 | 0.629912 |
| MmugDNA.8113.1.S1_at | MmugDNA.8113.1 | 4.16  | 4.18  | 0.07 | 0.07 | -1.01 | 0.347367 | 0.747423 | 0.625483 | 0.853149 |
| MmugDNA.8114.1.S1_at | MmugDNA.8114.1 | 9.73  | 9.52  | 0.19 | 0.35 | 1.15  | 0.089008 | 0.064563 | 0.355608 | 0.300266 |
| MmugDNA.8115.1.S1_at | MmugDNA.8115.1 | 8.91  | 8.3   | 0.38 | 0.09 | 1.53  | 0.189665 | 0.325524 | 0.486064 | 0.575827 |
| MmugDNA.8116.1.S1_at | MmugDNA.8116.1 | 4.64  | 4.59  | 0.02 | 0.07 | 1.04  | 0.708989 | 0.45729  | 0.86222  | 0.670746 |
| MmugDNA.8117.1.S1_at | MmugDNA.8117.1 | 11.93 | 11.91 | 0.12 | 0.04 | 1.01  | 0.504885 | 0.78633  | 0.738027 | 0.876293 |
| MmugDNA.8118.1.S1_at | MmugDNA.8118.1 | 6.38  | 5.97  | 0.6  | 0.2  | 1.33  | 0.96772  | 0.81269  | 0.987178 | 0.891789 |
| MmugDNA.8119.1.S1_at | MmugDNA.8119.1 | 5.39  | 5.4   | 0.17 | 0.14 | -1    | 0.247005 | 0.293327 | 0.542633 | 0.553239 |
| MmugDNA.812.1.S1_at  | MmugDNA.812.1  | 3.02  | 2.95  | 0.07 | 0.12 | 1.05  | 0.704849 | 0.904888 | 0.859915 | 0.946143 |
| MmugDNA.8120.1.S1_at | MmugDNA.8120.1 | 3.97  | 3.95  | 0.23 | 0.12 | 1.02  | 0.78035  | 0.326392 | 0.899768 | 0.57656  |
| MmugDNA.8121.1.S1_at | MmugDNA.8121.1 | 9.51  | 8.74  | 0.21 | 0.1  | 1.71  | 0.004702 | 0.000118 | 0.115008 | 0.028664 |
| MmugDNA.8122.1.S1_at | MmugDNA.8122.1 | 3.47  | 3.59  | 0.09 | 0.04 | -1.09 | 0.052557 | 0.094414 | 0.286297 | 0.351036 |
| MmugDNA.8124.1.S1_at | MmugDNA.8124.1 | 6.63  | 6.38  | 0.54 | 0.29 | 1.19  | 0.485056 | 0.30404  | 0.724671 | 0.561388 |
| MmugDNA.8125.1.S1_at | MmugDNA.8125.1 | 3.82  | 3.87  | 1.01 | 0.23 | -1.04 | 0.426703 | 0.545853 | 0.684084 | 0.72769  |
| MmugDNA.8126.1.S1_at | MmugDNA.8126.1 | 5.64  | 4.91  | 1.33 | 0.82 | 1.66  | 0.215125 | 0.290634 | 0.512856 | 0.551363 |
| MmugDNA.8127.1.S1_at | MmugDNA.8127.1 | 7.67  | 7.98  | 0.96 | 0.04 | -1.23 | 0.942089 | 0.774359 | 0.975589 | 0.868766 |
| MmugDNA.8128.1.S1_at | MmugDNA.8128.1 | 4.46  | 4.74  | 0.32 | 0.1  | -1.22 | 0.283207 | 0.160631 | 0.573616 | 0.436745 |
| MmugDNA.8129.1.S1_at | MmugDNA.8129.1 | 4.66  | 4.81  | 0.3  | 0.33 | -1.11 | 0.354883 | 0.48694  | 0.631833 | 0.690118 |
| MmugDNA.8130.1.S1_at | MmugDNA.8130.1 | 2.91  | 2.82  | 0.1  | 0.19 | 1.07  | 0.283735 | 0.440303 | 0.574001 | 0.658899 |
| MmugDNA.8131.1.S1_at | MmugDNA.8131.1 | 12.41 | 12.72 | 0.03 | 0.05 | -1.24 | 0.000674 | 0.289303 | 0.071248 | 0.550342 |
| MmugDNA.8135.1.S1_at | MmugDNA.8135.1 | 3.23  | 3.15  | 0.79 | 0.02 | 1.05  | 0.310065 | 0.423094 | 0.59634  | 0.646145 |
| MmugDNA.8136.1.S1_at | MmugDNA.8136.1 | 5.04  | 4.5   | 0.23 | 0.19 | 1.45  | 0.088333 | 0.184544 | 0.354438 | 0.460576 |
| MmugDNA.8137.1.S1_at | MmugDNA.8137.1 | 4.42  | 4.41  | 0.08 | 0.06 | 1.01  | 0.409169 | 0.630318 | 0.671657 | 0.782213 |
| MmugDNA.8138.1.S1_at | MmugDNA.8138.1 | 6.67  | 6.65  | 0.52 | 0.18 | 1.02  | 0.670988 | 0.853753 | 0.842207 | 0.916773 |
| MmugDNA.8139.1.S1_at | MmugDNA.8139.1 | 7.86  | 7.67  | 0.11 | 0.16 | 1.14  | 0.040416 | 0.079587 | 0.257326 | 0.326963 |
| MmugDNA.814.1.S1_at  | MmugDNA.814.1  | 5.62  | 5.38  | 0.35 | 0.12 | 1.18  | 0.354655 | 0.506031 | 0.631745 | 0.702337 |
| MmugDNA.8142.1.S1_at | MmugDNA.8142.1 | 5.79  | 5.83  | 0.18 | 0.09 | -1.03 | 0.388619 | 0.463271 | 0.656606 | 0.674323 |

|                        |                |       |       |      |      |       |          |          |          |          |
|------------------------|----------------|-------|-------|------|------|-------|----------|----------|----------|----------|
| MmugDNA.8143.1.S1_at   | MmugDNA.8143.1 | 2.76  | 2.86  | 0.06 | 0.06 | -1.07 | 0.115185 | 0.26182  | 0.392238 | 0.528265 |
| MmugDNA.8144.1.S1_at   | MmugDNA.8144.1 | 10.49 | 10.41 | 0.06 | 0.15 | 1.06  | 0.389697 | 0.002961 | 0.657497 | 0.079958 |
| MmugDNA.8147.1.S1_at   | MmugDNA.8147.1 | 4.7   | 4.72  | 0.04 | 0.01 | -1.01 | 0.511551 | 0.634841 | 0.742475 | 0.785041 |
| MmugDNA.8148.1.S1_at   | MmugDNA.8148.1 | 4.26  | 4.2   | 0.07 | 0.03 | 1.04  | 0.418815 | 0.621084 | 0.678622 | 0.77579  |
| MmugDNA.8149.1.S1_at   | MmugDNA.8149.1 | 7.05  | 5.01  | 0.18 | 0.32 | 4.1   | 0.000753 | 0.009352 | 0.072567 | 0.127602 |
| MmugDNA.815.1.S1_at    | MmugDNA.815.1  | 5.93  | 5.7   | 0.35 | 0.05 | 1.17  | 0.839697 | 0.928837 | 0.92965  | 0.959449 |
| MmugDNA.8150.1.S1_at   | MmugDNA.8150.1 | 9.87  | 9.88  | 0.06 | 0.01 | -1.01 | 0.535831 | 0.750333 | 0.75867  | 0.854768 |
| MmugDNA.8151.1.S1_at   | MmugDNA.8151.1 | 3.6   | 3.52  | 0.02 | 0.09 | 1.06  | 0.274375 | 0.163941 | 0.566281 | 0.440105 |
| MmugDNA.8152.1.S1_at   | MmugDNA.8152.1 | 4.55  | 4.55  | 0.09 | 0    | -1    | 0.537759 | 0.85702  | 0.759901 | 0.91832  |
| MmugDNA.8152.1.S1_x_at | MmugDNA.8152.1 | 4.99  | 4.92  | 0.29 | 0.14 | 1.05  | 0.273958 | 0.356698 | 0.565987 | 0.598516 |
| MmugDNA.8153.1.S1_at   | MmugDNA.8153.1 | 5.55  | 4.79  | 0.91 | 0.46 | 1.7   | 0.33264  | 0.197811 | 0.614302 | 0.472721 |
| MmugDNA.8154.1.S1_at   | MmugDNA.8154.1 | 4.15  | 3.73  | 0.53 | 0.16 | 1.34  | 0.086522 | 0.072053 | 0.351483 | 0.314519 |
| MmugDNA.8155.1.S1_at   | MmugDNA.8155.1 | 11.31 | 12.07 | 0.33 | 0.16 | -1.69 | 0.027111 | 0.050928 | 0.217323 | 0.270955 |
| MmugDNA.8156.1.S1_at   | MmugDNA.8156.1 | 6.55  | 5.96  | 1.15 | 0.16 | 1.5   | 0.379562 | 0.487689 | 0.649328 | 0.690642 |
| MmugDNA.8157.1.S1_at   | MmugDNA.8157.1 | 10.41 | 10.47 | 0.1  | 0.07 | -1.05 | 0.739683 | 0.461061 | 0.87932  | 0.672831 |
| MmugDNA.8158.1.S1_at   | MmugDNA.8158.1 | 7.89  | 8.12  | 0.04 | 0.17 | -1.17 | 0.031356 | 0.019943 | 0.23018  | 0.177463 |
| MmugDNA.8159.1.S1_at   | MmugDNA.8159.1 | 5.46  | 5.42  | 0.05 | 0.02 | 1.03  | 0.936865 | 0.180186 | 0.973607 | 0.456751 |
| MmugDNA.816.1.S1_at    | MmugDNA.816.1  | 5.73  | 5.67  | 0.22 | 0.07 | 1.05  | 0.215952 | 0.29684  | 0.513655 | 0.5558   |
| MmugDNA.8161.1.S1_at   | MmugDNA.8161.1 | 4.87  | 4.91  | 0.4  | 0.09 | -1.03 | 0.363977 | 0.441551 | 0.638599 | 0.659675 |
| MmugDNA.8162.1.S1_at   | MmugDNA.8162.1 | 10.59 | 10.35 | 0.13 | 0.12 | 1.18  | 0.043878 | 0.04942  | 0.266439 | 0.267237 |
| MmugDNA.8163.1.S1_at   | MmugDNA.8163.1 | 4.06  | 4.12  | 0.08 | 0.05 | -1.04 | 0.140033 | 0.337143 | 0.425735 | 0.584348 |
| MmugDNA.8164.1.S1_at   | MmugDNA.8164.1 | 3.53  | 3.52  | 0.14 | 0.08 | 1     | 0.54218  | 0.721927 | 0.762647 | 0.838904 |
| MmugDNA.8168.1.S1_at   | MmugDNA.8168.1 | 6.46  | 6.58  | 0.28 | 0.73 | -1.09 | 0.844925 | 0.903515 | 0.932176 | 0.945192 |
| MmugDNA.817.1.S1_at    | MmugDNA.817.1  | 8.83  | 8.59  | 0.14 | 0.16 | 1.18  | 0.097364 | 0.121954 | 0.367528 | 0.391384 |
| MmugDNA.8173.1.S1_at   | MmugDNA.8173.1 | 8.18  | 8.14  | 0.02 | 0.05 | 1.03  | 0.31925  | 0.05773  | 0.603854 | 0.2866   |
| MmugDNA.8175.1.S1_at   | MmugDNA.8175.1 | 10.8  | 10.67 | 0.14 | 0.07 | 1.09  | 0.966649 | 0.000143 | 0.986533 | 0.029387 |
| MmugDNA.8176.1.S1_at   | MmugDNA.8176.1 | 5.23  | 4.84  | 0.14 | 0.15 | 1.31  | 0.060881 | 0.232679 | 0.303716 | 0.504359 |
| MmugDNA.8177.1.S1_at   | MmugDNA.8177.1 | 4.75  | 4.75  | 0.21 | 0.11 | 1     | 0.426503 | 0.60152  | 0.683874 | 0.762867 |
| MmugDNA.8178.1.S1_at   | MmugDNA.8178.1 | 6.05  | 5.52  | 0.7  | 0.34 | 1.44  | 0.144146 | 0.146357 | 0.430943 | 0.420368 |
| MmugDNA.8179.1.S1_at   | MmugDNA.8179.1 | 2.85  | 2.91  | 0.19 | 0.03 | -1.04 | 0.587841 | 0.785234 | 0.790683 | 0.875672 |
| MmugDNA.818.1.S1_at    | MmugDNA.818.1  | 9.4   | 9.08  | 0.52 | 0.14 | 1.25  | 0.32794  | 0.026044 | 0.610549 | 0.202256 |
| MmugDNA.8180.1.S1_at   | MmugDNA.8180.1 | 6.18  | 6.51  | 0.38 | 0.09 | -1.26 | 0.237517 | 0.003421 | 0.534994 | 0.084124 |
| MmugDNA.8181.1.S1_at   | MmugDNA.8181.1 | 4.1   | 3.49  | 0.31 | 0.08 | 1.53  | 0.030284 | 0.072799 | 0.227112 | 0.315651 |
| MmugDNA.8182.1.S1_at   | MmugDNA.8182.1 | 5.32  | 5.54  | 0.42 | 0.13 | -1.17 | 0.536041 | 0.016318 | 0.75873  | 0.161818 |
| MmugDNA.8185.1.S1_at   | MmugDNA.8185.1 | 11.38 | 11.39 | 0.11 | 0.07 | -1.01 | 0.75199  | 0.588936 | 0.885488 | 0.755275 |
| MmugDNA.8185.1.S1_s_at | MmugDNA.8185.1 | 11.26 | 11.23 | 0.16 | 0.05 | 1.02  | 0.674214 | 0.919374 | 0.844405 | 0.954737 |
| MmugDNA.8186.1.S1_s_at | MmugDNA.8186.1 | 5.86  | 7.76  | 0.97 | 0.21 | -3.73 | 0.089824 | 0.339022 | 0.356705 | 0.585891 |
| MmugDNA.8187.1.S1_at   | MmugDNA.8187.1 | 5.22  | 5.47  | 0.25 | 0.61 | -1.19 | 0.783971 | 0.906718 | 0.901461 | 0.947216 |
| MmugDNA.8188.1.S1_at   | MmugDNA.8188.1 | 7.38  | 7.54  | 0.11 | 0.26 | -1.12 | 0.359347 | 0.002515 | 0.634935 | 0.074158 |
| MmugDNA.8189.1.S1_at   | MmugDNA.8189.1 | 8.33  | 7.57  | 0.33 | 0.24 | 1.69  | 0.102484 | 0.082587 | 0.374663 | 0.331785 |
| MmugDNA.8192.1.S1_at   | MmugDNA.8192.1 | 4.53  | 4.32  | 1.56 | 0.28 | 1.15  | 0.359898 | 0.459204 | 0.635492 | 0.671642 |
| MmugDNA.8193.1.S1_at   | MmugDNA.8193.1 | 3.34  | 3.33  | 0.13 | 0    | 1     | 0.411684 | 0.660844 | 0.673582 | 0.801604 |
| MmugDNA.8194.1.S1_at   | MmugDNA.8194.1 | 4.66  | 4.58  | 0.08 | 0.07 | 1.06  | 0.240589 | 0.377526 | 0.538086 | 0.614997 |

|                        |                |       |       |      |      |       |          |          |          |          |
|------------------------|----------------|-------|-------|------|------|-------|----------|----------|----------|----------|
| MmugDNA.8196.1.S1_at   | MmugDNA.8196.1 | 8.46  | 9.12  | 0.72 | 0.16 | -1.58 | 0.093376 | 0.157078 | 0.361928 | 0.432547 |
| MmugDNA.82.1.S1_at     | MmugDNA.82.1   | 4.41  | 7.82  | 2.45 | 0.24 | -10.7 | 0.1954   | 0.549796 | 0.492108 | 0.730055 |
| MmugDNA.820.1.S1_at    | MmugDNA.820.1  | 8.51  | 7.98  | 0.57 | 0.09 | 1.45  | 0.188158 | 0.468639 | 0.484438 | 0.677755 |
| MmugDNA.8203.1.S1_at   | MmugDNA.8203.1 | 4.78  | 4.78  | 0.18 | 0.12 | 1     | 0.564635 | 0.044966 | 0.776277 | 0.256489 |
| MmugDNA.8204.1.S1_at   | MmugDNA.8204.1 | 4.43  | 4.38  | 0.16 | 0.15 | 1.04  | 0.687425 | 0.125349 | 0.850804 | 0.395994 |
| MmugDNA.8206.1.S1_at   | MmugDNA.8206.1 | 4.01  | 4.42  | 0.29 | 0.45 | -1.32 | 0.240785 | 0.058931 | 0.538182 | 0.289617 |
| MmugDNA.8207.1.S1_at   | MmugDNA.8207.1 | 4.51  | 4.25  | 0.68 | 0.2  | 1.2   | 0.58633  | 0.411044 | 0.789745 | 0.637874 |
| MmugDNA.8212.1.S1_at   | MmugDNA.8212.1 | 8.81  | 9.48  | 0.11 | 0.08 | -1.59 | 0.000742 | 0.043426 | 0.072567 | 0.253043 |
| MmugDNA.8213.1.S1_at   | MmugDNA.8213.1 | 5.59  | 5.63  | 0.16 | 0.2  | -1.03 | 0.68534  | 0.234305 | 0.849991 | 0.505553 |
| MmugDNA.8214.1.S1_at   | MmugDNA.8214.1 | 7.11  | 7.19  | 0.13 | 0.04 | -1.06 | 0.397353 | 0.201722 | 0.662987 | 0.476242 |
| MmugDNA.8215.1.S1_at   | MmugDNA.8215.1 | 10.53 | 11.32 | 0.58 | 0.23 | -1.73 | 0.04845  | 0.058685 | 0.277499 | 0.288956 |
| MmugDNA.8216.1.S1_at   | MmugDNA.8216.1 | 9.41  | 9.23  | 0.21 | 0.3  | 1.13  | 0.585958 | 0.064075 | 0.789576 | 0.299311 |
| MmugDNA.8218.1.S1_at   | MmugDNA.8218.1 | 4.27  | 4.11  | 1.14 | 0.1  | 1.12  | 0.264579 | 0.405924 | 0.557815 | 0.634062 |
| MmugDNA.8219.1.S1_at   | MmugDNA.8219.1 | 11    | 10.53 | 0.06 | 0.02 | 1.38  | 0.000182 | 0.005666 | 0.053494 | 0.103959 |
| MmugDNA.822.1.S1_at    | MmugDNA.822.1  | 7.39  | 7.13  | 0.39 | 0.25 | 1.2   | 0.997371 | 0.437324 | 0.999086 | 0.656613 |
| MmugDNA.8220.1.S1_at   | MmugDNA.8220.1 | 2.97  | 2.98  | 0.06 | 0.17 | -1    | 0.907184 | 0.868581 | 0.960761 | 0.925383 |
| MmugDNA.8222.1.S1_at   | MmugDNA.8222.1 | 5.88  | 6.04  | 0.61 | 0.42 | -1.12 | 0.771989 | 0.07654  | 0.895533 | 0.321619 |
| MmugDNA.8223.1.S1_at   | MmugDNA.8223.1 | 5.38  | 5.41  | 0.18 | 0.02 | -1.02 | 0.834423 | 0.981015 | 0.927185 | 0.989532 |
| MmugDNA.8224.1.S1_at   | MmugDNA.8224.1 | 6.5   | 6.5   | 0.02 | 0.15 | -1    | 0.968796 | 0.650758 | 0.987676 | 0.795801 |
| MmugDNA.8225.1.S1_at   | MmugDNA.8225.1 | 3.44  | 3.73  | 0.17 | 0.07 | -1.22 | 0.058024 | 0.102573 | 0.297981 | 0.362929 |
| MmugDNA.8226.1.S1_s_at | MmugDNA.8226.1 | 7.8   | 7.99  | 0.15 | 0.2  | -1.14 | 0.162663 | 0.590603 | 0.454697 | 0.756315 |
| MmugDNA.8227.1.S1_at   | MmugDNA.8227.1 | 6.5   | 7.63  | 0.7  | 0.64 | -2.2  | 0.195031 | 0.153819 | 0.491564 | 0.428488 |
| MmugDNA.8228.1.S1_at   | MmugDNA.8228.1 | 6.17  | 6.09  | 0.08 | 0.09 | 1.06  | 0.891559 | 0.256381 | 0.953744 | 0.524114 |
| MmugDNA.8229.1.S1_at   | MmugDNA.8229.1 | 7.56  | 7.18  | 0.58 | 0.09 | 1.3   | 0.883526 | 0.980841 | 0.950515 | 0.989478 |
| MmugDNA.823.1.S1_at    | MmugDNA.823.1  | 4.99  | 4.84  | 0.19 | 0.17 | 1.11  | 0.566808 | 0.182091 | 0.777544 | 0.45857  |
| MmugDNA.8232.1.S1_at   | MmugDNA.8232.1 | 11.74 | 11.98 | 0.23 | 0.09 | -1.18 | 0.234127 | 0.034627 | 0.532201 | 0.230247 |
| MmugDNA.8233.1.S1_at   | MmugDNA.8233.1 | 4.09  | 3.92  | 0.01 | 0.06 | 1.13  | 0.010186 | 0.004118 | 0.150739 | 0.090887 |
| MmugDNA.8234.1.S1_at   | MmugDNA.8234.1 | 8.34  | 8.45  | 0.26 | 0.13 | -1.08 | 0.813961 | 0.214927 | 0.91682  | 0.48886  |
| MmugDNA.8236.1.S1_at   | MmugDNA.8236.1 | 11.4  | 11.6  | 0.17 | 0.09 | -1.15 | 0.138107 | 0.212191 | 0.423273 | 0.486081 |
| MmugDNA.8237.1.S1_at   | MmugDNA.8237.1 | 10.3  | 10.14 | 0.06 | 0.05 | 1.12  | 0.047544 | 0.543214 | 0.275381 | 0.726012 |
| MmugDNA.8237.1.S1_s_at | MmugDNA.8237.1 | 9.94  | 9.68  | 0.04 | 0.04 | 1.2   | 0.000992 | 0.079273 | 0.076321 | 0.326444 |
| MmugDNA.8238.1.S1_at   | MmugDNA.8238.1 | 12.14 | 12.36 | 0.15 | 0.04 | -1.17 | 0.200118 | 0.204507 | 0.497633 | 0.478845 |
| MmugDNA.8238.1.S1_s_at | MmugDNA.8238.1 | 11.86 | 12.08 | 0.13 | 0.04 | -1.16 | 0.112271 | 0.115855 | 0.388406 | 0.382936 |
| MmugDNA.8239.1.S1_at   | MmugDNA.8239.1 | 3.56  | 3.24  | 0.19 | 0.18 | 1.25  | 0.109498 | 0.032417 | 0.384571 | 0.223023 |
| MmugDNA.824.1.S1_at    | MmugDNA.824.1  | 3.87  | 3.78  | 0.21 | 0.07 | 1.06  | 0.179876 | 0.323139 | 0.474959 | 0.574351 |
| MmugDNA.8240.1.S1_at   | MmugDNA.8240.1 | 5.48  | 5.28  | 0.09 | 0.03 | 1.15  | 0.028404 | 0.007444 | 0.221039 | 0.115858 |
| MmugDNA.8241.1.S1_at   | MmugDNA.8241.1 | 3.02  | 2.95  | 0.31 | 0.08 | 1.05  | 0.824983 | 0.775388 | 0.922259 | 0.86928  |
| MmugDNA.8243.1.S1_at   | MmugDNA.8243.1 | 6.69  | 6.77  | 0.71 | 0.26 | -1.06 | 0.652748 | 0.845101 | 0.831632 | 0.911854 |
| MmugDNA.8244.1.S1_at   | MmugDNA.8244.1 | 5.7   | 5.89  | 0.21 | 0.25 | -1.14 | 0.168822 | 0.241668 | 0.462083 | 0.512225 |
| MmugDNA.8246.1.S1_at   | MmugDNA.8246.1 | 5.32  | 5.14  | 0.1  | 0.1  | 1.13  | 0.15488  | 0.171402 | 0.445083 | 0.447862 |
| MmugDNA.8248.1.S1_at   | MmugDNA.8248.1 | 9.38  | 9.62  | 0.33 | 0.05 | -1.18 | 0.231531 | 0.33187  | 0.530231 | 0.580419 |
| MmugDNA.8249.1.S1_at   | MmugDNA.8249.1 | 4.21  | 4.32  | 0.2  | 0.13 | -1.08 | 0.742485 | 0.965103 | 0.880829 | 0.980591 |
| MmugDNA.8249.1.S1_s_at | MmugDNA.8249.1 | 8.27  | 8.51  | 0.05 | 0.06 | -1.18 | 0.004898 | 0.794685 | 0.115126 | 0.881658 |

|                         |                 |       |       |      |      |       |          |          |          |          |
|-------------------------|-----------------|-------|-------|------|------|-------|----------|----------|----------|----------|
| MmugDNA.825.1.S1_at     | MmugDNA.825.1   | 5.05  | 4.89  | 0.07 | 0.18 | 1.12  | 0.375884 | 0.07529  | 0.646631 | 0.319441 |
| MmugDNA.8250.1.S1_at    | MmugDNA.8250.1  | 6.29  | 6.15  | 0.14 | 0.21 | 1.1   | 0.544653 | 0.748035 | 0.764189 | 0.853351 |
| MmugDNA.29772.1.S1_s_at | MmugDNA.29772.1 | 6.94  | 6.94  | 0.24 | 0.22 | 1     | 0.431074 | 0.050079 | 0.687235 | 0.268916 |
| MmugDNA.8251.1.S1_at    | MmugDNA.8251.1  | 7.92  | 8.52  | 0.54 | 0.06 | -1.52 | 0.042282 | 0.035529 | 0.262598 | 0.232768 |
| MmugDNA.8252.1.S1_at    | MmugDNA.8252.1  | 7.7   | 7.28  | 0.62 | 0.49 | 1.34  | 0.382325 | 0.1735   | 0.651817 | 0.449938 |
| MmugDNA.8252.1.S1_x_at  | MmugDNA.8252.1  | 7.61  | 6.85  | 0.62 | 0.46 | 1.69  | 0.216518 | 0.182879 | 0.514322 | 0.459362 |
| MmugDNA.8255.1.S1_at    | MmugDNA.8255.1  | 8.46  | 8.74  | 0.44 | 0.1  | -1.22 | 0.201171 | 0.194034 | 0.498709 | 0.469151 |
| MmugDNA.8258.1.S1_at    | MmugDNA.8258.1  | 3.86  | 3.8   | 0.17 | 0.09 | 1.05  | 0.996546 | 0.236358 | 0.998795 | 0.507308 |
| MmugDNA.826.1.S1_at     | MmugDNA.826.1   | 6.27  | 5.91  | 0.32 | 0.1  | 1.29  | 0.282496 | 0.508273 | 0.573222 | 0.703492 |
| MmugDNA.8260.1.S1_at    | MmugDNA.8260.1  | 9.95  | 9.7   | 0.47 | 0.14 | 1.19  | 0.452551 | 0.269436 | 0.702975 | 0.534742 |
| MmugDNA.8262.1.S1_at    | MmugDNA.8262.1  | 6.09  | 6.11  | 0.08 | 0.02 | -1.01 | 0.450096 | 0.06532  | 0.701214 | 0.301295 |
| MmugDNA.8264.1.S1_at    | MmugDNA.8264.1  | 5.71  | 5.74  | 0.21 | 0.25 | -1.02 | 0.788115 | 0.910082 | 0.90365  | 0.949319 |
| MmugDNA.8266.1.S1_at    | MmugDNA.8266.1  | 4.01  | 4.04  | 0.06 | 0.07 | -1.02 | 0.687898 | 0.753553 | 0.85092  | 0.856527 |
| MmugDNA.8267.1.S1_at    | MmugDNA.8267.1  | 6.3   | 5.67  | 0.2  | 0.23 | 1.54  | 0.044774 | 0.063896 | 0.268915 | 0.29906  |
| MmugDNA.8269.1.S1_at    | MmugDNA.8269.1  | 6.6   | 6.67  | 0.18 | 0.02 | -1.05 | 0.725374 | 0.078924 | 0.871154 | 0.325912 |
| MmugDNA.827.1.S1_at     | MmugDNA.827.1   | 5.49  | 5.49  | 0.09 | 0.05 | 1     | 0.688458 | 0.342217 | 0.851235 | 0.588375 |
| MmugDNA.8270.1.S1_at    | MmugDNA.8270.1  | 4.59  | 4.69  | 0.08 | 0.1  | -1.08 | 0.188747 | 0.16271  | 0.485343 | 0.43882  |
| MmugDNA.8271.1.S1_at    | MmugDNA.8271.1  | 5.7   | 5.7   | 0.01 | 0.01 | 1     | 0.230538 | 0.394142 | 0.529462 | 0.62675  |
| MmugDNA.8272.1.S1_at    | MmugDNA.8272.1  | 9.4   | 9.87  | 0.07 | 0.14 | -1.39 | 0.010071 | 0.010496 | 0.149988 | 0.133872 |
| MmugDNA.8273.1.S1_at    | MmugDNA.8273.1  | 5.14  | 4.62  | 0.53 | 0.08 | 1.43  | 0.135705 | 0.101838 | 0.419734 | 0.361805 |
| MmugDNA.8274.1.S1_at    | MmugDNA.8274.1  | 8.67  | 8.58  | 0.11 | 0.13 | 1.06  | 0.80791  | 0.018176 | 0.914039 | 0.169673 |
| MmugDNA.8276.1.S1_at    | MmugDNA.8276.1  | 7.03  | 6.42  | 0.6  | 0.23 | 1.52  | 0.13803  | 0.657877 | 0.423185 | 0.800051 |
| MmugDNA.8277.1.S1_s_at  | MmugDNA.8277.1  | 8.3   | 7.95  | 0.29 | 0.03 | 1.27  | 0.08241  | 0.075871 | 0.344143 | 0.320523 |
| MmugDNA.8278.1.S1_at    | MmugDNA.8278.1  | 9.99  | 9.96  | 0.17 | 0.11 | 1.02  | 0.706161 | 0.10902  | 0.86084  | 0.372792 |
| MmugDNA.828.1.S1_at     | MmugDNA.828.1   | 6.53  | 6.51  | 0.91 | 0.54 | 1.02  | 0.803155 | 0.448248 | 0.911681 | 0.664162 |
| MmugDNA.8280.1.S1_at    | MmugDNA.8280.1  | 11.16 | 10.68 | 0.22 | 0.1  | 1.39  | 0.02417  | 0.110719 | 0.20868  | 0.374854 |
| MmugDNA.8281.1.S1_at    | MmugDNA.8281.1  | 5.83  | 5.69  | 0.08 | 0.17 | 1.1   | 0.678705 | 0.418972 | 0.846793 | 0.643191 |
| MmugDNA.8282.1.S1_at    | MmugDNA.8282.1  | 5.26  | 5.46  | 0.1  | 0.12 | -1.15 | 0.404205 | 0.159447 | 0.66805  | 0.435568 |
| MmugDNA.8284.1.S1_at    | MmugDNA.8284.1  | 5.03  | 5.15  | 0.1  | 0.19 | -1.09 | 0.462092 | 0.032751 | 0.709348 | 0.224042 |
| MmugDNA.8286.1.S1_at    | MmugDNA.8286.1  | 4.33  | 4.03  | 0.36 | 0.36 | 1.23  | 0.367397 | 0.118381 | 0.641394 | 0.3864   |
| MmugDNA.8288.1.S1_at    | MmugDNA.8288.1  | 5.15  | 4.59  | 0.12 | 0.1  | 1.47  | 0.005235 | 0.009775 | 0.117387 | 0.130028 |
| MmugDNA.8289.1.S1_at    | MmugDNA.8289.1  | 6.53  | 6.45  | 0.11 | 0.02 | 1.06  | 0.073903 | 0.129702 | 0.329917 | 0.401344 |
| MmugDNA.829.1.S1_at     | MmugDNA.829.1   | 3.45  | 3.43  | 0.12 | 0.07 | 1.02  | 0.930967 | 0.446212 | 0.970984 | 0.662743 |
| MmugDNA.8290.1.S1_at    | MmugDNA.8290.1  | 6.33  | 6.54  | 0.8  | 0.11 | -1.16 | 0.509931 | 0.746998 | 0.741324 | 0.853119 |
| MmugDNA.8291.1.S1_at    | MmugDNA.8291.1  | 5.69  | 5.73  | 0.18 | 0.09 | -1.02 | 0.278504 | 0.459416 | 0.569868 | 0.671741 |
| MmugDNA.8292.1.S1_at    | MmugDNA.8292.1  | 3.2   | 3.28  | 0.12 | 0.07 | -1.05 | 0.420274 | 0.422465 | 0.679364 | 0.645729 |
| MmugDNA.8293.1.S1_s_at  | MmugDNA.8293.1  | 3.86  | 3.67  | 0.17 | 0.08 | 1.14  | 0.603646 | 0.333231 | 0.801159 | 0.581498 |
| MmugDNA.8294.1.S1_at    | MmugDNA.8294.1  | 5.3   | 5.22  | 0.12 | 0.09 | 1.06  | 0.195215 | 0.258791 | 0.491805 | 0.525949 |
| MmugDNA.8295.1.S1_at    | MmugDNA.8295.1  | 9.15  | 9.38  | 0.04 | 0.12 | -1.17 | 0.040296 | 0.000078 | 0.257247 | 0.027016 |
| MmugDNA.8297.1.S1_at    | MmugDNA.8297.1  | 6.48  | 6.6   | 0.2  | 0.05 | -1.09 | 0.503743 | 0.63602  | 0.73721  | 0.78583  |
| MmugDNA.8298.1.S1_at    | MmugDNA.8298.1  | 8.08  | 6.79  | 0.78 | 0.26 | 2.45  | 0.092127 | 0.099832 | 0.360155 | 0.358464 |
| MmugDNA.830.1.S1_at     | MmugDNA.830.1   | 7.8   | 7.34  | 0.39 | 0.19 | 1.37  | 0.063923 | 0.256046 | 0.309333 | 0.524016 |
| MmugDNA.8301.1.S1_at    | MmugDNA.8301.1  | 11.82 | 11.74 | 0.05 | 0.11 | 1.06  | 0.254252 | 0.00199  | 0.548737 | 0.066247 |

|                        |                |       |       |      |      |       |          |          |          |          |
|------------------------|----------------|-------|-------|------|------|-------|----------|----------|----------|----------|
| MmugDNA.8302.1.S1_at   | MmugDNA.8302.1 | 7.21  | 7.07  | 0.06 | 0.05 | 1.1   | 0.030957 | 0.038208 | 0.229015 | 0.240171 |
| MmugDNA.8302.1.S1_s_at | MmugDNA.8302.1 | 5.57  | 5.66  | 0.17 | 0.01 | -1.06 | 0.568228 | 0.063393 | 0.778223 | 0.298441 |
| MmugDNA.8304.1.S1_at   | MmugDNA.8304.1 | 10.25 | 10.13 | 0.18 | 0.01 | 1.09  | 0.243228 | 0.014446 | 0.539969 | 0.153383 |
| MmugDNA.8306.1.S1_at   | MmugDNA.8306.1 | 7.2   | 6.92  | 1.32 | 0.54 | 1.21  | 0.35237  | 0.222129 | 0.629964 | 0.495124 |
| MmugDNA.8307.1.S1_at   | MmugDNA.8307.1 | 5.86  | 5.92  | 0.13 | 0.08 | -1.04 | 0.226179 | 0.284374 | 0.523944 | 0.54661  |
| MmugDNA.8309.1.S1_at   | MmugDNA.8309.1 | 7.32  | 6.94  | 0.22 | 0.35 | 1.3   | 0.820276 | 0.853903 | 0.919875 | 0.91686  |
| MmugDNA.831.1.S1_at    | MmugDNA.831.1  | 3.01  | 3.39  | 0.02 | 0.2  | -1.3  | 0.078681 | 0.061198 | 0.338535 | 0.294033 |
| MmugDNA.8310.1.S1_at   | MmugDNA.8310.1 | 6.19  | 5.97  | 0.14 | 0.13 | 1.16  | 0.24615  | 0.296292 | 0.541923 | 0.555423 |
| MmugDNA.8311.1.S1_x_at | MmugDNA.8311.1 | 8.43  | 8.36  | 0.38 | 0.05 | 1.05  | 0.859736 | 0.357505 | 0.939203 | 0.599157 |
| MmugDNA.8312.1.S1_at   | MmugDNA.8312.1 | 10.95 | 10.6  | 0.2  | 0.28 | 1.27  | 0.177616 | 0.052144 | 0.472289 | 0.273955 |
| MmugDNA.8313.1.S1_at   | MmugDNA.8313.1 | 6.93  | 6.73  | 0.06 | 0.1  | 1.14  | 0.03248  | 0.026032 | 0.234482 | 0.202231 |
| MmugDNA.8314.1.S1_at   | MmugDNA.8314.1 | 3.01  | 3.3   | 0.64 | 0.16 | -1.22 | 0.686146 | 0.908975 | 0.850502 | 0.948482 |
| MmugDNA.8315.1.S1_at   | MmugDNA.8315.1 | 4.85  | 4.9   | 0.19 | 0.18 | -1.03 | 0.629135 | 0.179311 | 0.817703 | 0.455755 |
| MmugDNA.8317.1.S1_s_at | MmugDNA.8317.1 | 10.23 | 9.76  | 0.49 | 0.16 | 1.38  | 0.59614  | 0.161134 | 0.795651 | 0.437288 |
| MmugDNA.8319.1.S1_at   | MmugDNA.8319.1 | 3.62  | 3.99  | 0.21 | 0.12 | -1.3  | 0.149817 | 0.277059 | 0.438771 | 0.541087 |
| MmugDNA.832.1.S1_at    | MmugDNA.832.1  | 8.21  | 8.34  | 0.31 | 0.12 | -1.09 | 0.576956 | 0.026738 | 0.783459 | 0.204493 |
| MmugDNA.8320.1.S1_at   | MmugDNA.8320.1 | 3.93  | 4.09  | 0.24 | 0.08 | -1.12 | 0.567594 | 0.136015 | 0.777821 | 0.40834  |
| MmugDNA.8322.1.S1_at   | MmugDNA.8322.1 | 8.38  | 8.48  | 0.21 | 0.16 | -1.07 | 0.359378 | 0.243311 | 0.634935 | 0.513356 |
| MmugDNA.8323.1.S1_at   | MmugDNA.8323.1 | 5.99  | 5.98  | 0.2  | 0.13 | 1.01  | 0.912515 | 0.894332 | 0.963068 | 0.939697 |
| MmugDNA.8325.1.S1_at   | MmugDNA.8325.1 | 6.19  | 5.77  | 0.44 | 0.21 | 1.34  | 0.14358  | 0.025652 | 0.430073 | 0.200834 |
| MmugDNA.8328.1.S1_at   | MmugDNA.8328.1 | 7.2   | 7.45  | 0.32 | 0.14 | -1.19 | 0.398727 | 0.461034 | 0.664253 | 0.672829 |
| MmugDNA.8329.1.S1_at   | MmugDNA.8329.1 | 9.25  | 9.29  | 0.27 | 0.2  | -1.03 | 0.690022 | 0.170161 | 0.851894 | 0.446906 |
| MmugDNA.833.1.S1_at    | MmugDNA.833.1  | 4.38  | 4.48  | 0.1  | 0.25 | -1.07 | 0.597918 | 0.333447 | 0.797048 | 0.581683 |
| MmugDNA.8330.1.S1_at   | MmugDNA.8330.1 | 4.51  | 4.54  | 0.01 | 0.08 | -1.02 | 0.56891  | 0.179159 | 0.778633 | 0.455496 |
| MmugDNA.8331.1.S1_at   | MmugDNA.8331.1 | 5.12  | 4.95  | 0.61 | 0.14 | 1.12  | 0.913172 | 0.108493 | 0.96332  | 0.372066 |
| MmugDNA.8332.1.S1_at   | MmugDNA.8332.1 | 3.49  | 3.31  | 0.25 | 0.71 | 1.14  | 0.612441 | 0.80134  | 0.806855 | 0.885696 |
| MmugDNA.8333.1.S1_at   | MmugDNA.8333.1 | 3.62  | 3.23  | 0.3  | 0.25 | 1.31  | 0.135239 | 0.290208 | 0.419109 | 0.551169 |
| MmugDNA.8334.1.S1_at   | MmugDNA.8334.1 | 5.45  | 5.82  | 0.62 | 0.55 | -1.3  | 0.433472 | 0.757501 | 0.688966 | 0.858849 |
| MmugDNA.8335.1.S1_at   | MmugDNA.8335.1 | 4.3   | 4.03  | 0.17 | 0.19 | 1.2   | 0.125092 | 0.240292 | 0.405516 | 0.510871 |
| MmugDNA.8336.1.S1_at   | MmugDNA.8336.1 | 7.68  | 6.3   | 0.87 | 0.15 | 2.61  | 0.155637 | 0.242517 | 0.445973 | 0.512846 |
| MmugDNA.8337.1.S1_at   | MmugDNA.8337.1 | 4.55  | 4.61  | 0.14 | 0.11 | -1.04 | 0.689724 | 0.261353 | 0.851884 | 0.527858 |
| MmugDNA.8338.1.S1_at   | MmugDNA.8338.1 | 6.45  | 6.45  | 0.15 | 0.08 | 1     | 0.245373 | 0.515799 | 0.541446 | 0.708492 |
| MmugDNA.8339.1.S1_at   | MmugDNA.8339.1 | 6.59  | 6.6   | 0.35 | 0.14 | -1.01 | 0.675387 | 0.862247 | 0.845075 | 0.921663 |
| MmugDNA.834.1.S1_at    | MmugDNA.834.1  | 8.11  | 8.1   | 0.27 | 0.17 | 1.01  | 0.659713 | 0.018307 | 0.835787 | 0.170154 |
| MmugDNA.8340.1.S1_at   | MmugDNA.8340.1 | 13.27 | 12.84 | 0.16 | 0.27 | 1.35  | 0.137066 | 0.170761 | 0.421892 | 0.447316 |
| MmugDNA.8341.1.S1_at   | MmugDNA.8341.1 | 4.05  | 4.04  | 0.14 | 0.02 | 1.01  | 0.743936 | 0.243311 | 0.881384 | 0.513356 |
| MmugDNA.8342.1.S1_at   | MmugDNA.8342.1 | 6.38  | 7.07  | 0.33 | 0.1  | -1.61 | 0.038152 | 0.029351 | 0.2513   | 0.213228 |
| MmugDNA.8343.1.S1_at   | MmugDNA.8343.1 | 5.35  | 5.38  | 0.14 | 0.1  | -1.02 | 0.896857 | 0.220633 | 0.956194 | 0.494069 |
| MmugDNA.8344.1.S1_at   | MmugDNA.8344.1 | 9.57  | 9.02  | 0.3  | 0.13 | 1.47  | 0.135005 | 0.065273 | 0.418965 | 0.301239 |
| MmugDNA.8345.1.S1_at   | MmugDNA.8345.1 | 8.79  | 8.44  | 0.21 | 0.22 | 1.28  | 0.19237  | 0.339959 | 0.488949 | 0.586474 |
| MmugDNA.8346.1.S1_at   | MmugDNA.8346.1 | 7.33  | 7.49  | 0.06 | 0.25 | -1.12 | 0.884891 | 0.992042 | 0.951005 | 0.995515 |
| MmugDNA.835.1.S1_at    | MmugDNA.835.1  | 8.08  | 8.05  | 0.2  | 0.19 | 1.02  | 0.826972 | 0.702612 | 0.92338  | 0.827641 |
| MmugDNA.8350.1.S1_at   | MmugDNA.8350.1 | 10.78 | 10.82 | 0.04 | 0.08 | -1.03 | 0.501786 | 0.801259 | 0.735531 | 0.88568  |



|                        |                |       |       |      |      |       |          |          |          |          |
|------------------------|----------------|-------|-------|------|------|-------|----------|----------|----------|----------|
| MmugDNA.8351.1.S1_at   | MmugDNA.8351.1 | 5.51  | 5.1   | 0.48 | 0.24 | 1.33  | 0.686982 | 0.891393 | 0.850763 | 0.938135 |
| MmugDNA.8352.1.S1_at   | MmugDNA.8352.1 | 5.5   | 5.43  | 0.18 | 0.12 | 1.05  | 0.990699 | 0.170096 | 0.996638 | 0.446868 |
| MmugDNA.8353.1.S1_at   | MmugDNA.8353.1 | 7.89  | 7.37  | 0.86 | 0.33 | 1.43  | 0.523216 | 0.837529 | 0.750262 | 0.907127 |
| MmugDNA.8355.1.S1_at   | MmugDNA.8355.1 | 10.55 | 9.86  | 0.12 | 0.05 | 1.61  | 0.000794 | 0.035977 | 0.073056 | 0.234155 |
| MmugDNA.8356.1.S1_at   | MmugDNA.8356.1 | 5.21  | 5.18  | 0.4  | 0.18 | 1.03  | 0.635713 | 0.617105 | 0.821626 | 0.77321  |
| MmugDNA.8359.1.S1_at   | MmugDNA.8359.1 | 8.04  | 8     | 0.14 | 0.12 | 1.03  | 0.3058   | 0.363914 | 0.592817 | 0.604293 |
| MmugDNA.8359.1.S1_x_at | MmugDNA.8359.1 | 7.03  | 7     | 0.18 | 0.11 | 1.02  | 0.912693 | 0.629896 | 0.963141 | 0.782009 |
| MmugDNA.836.1.S1_at    | MmugDNA.836.1  | 6.41  | 6.22  | 0.03 | 0.03 | 1.14  | 0.001217 | 0.014321 | 0.078338 | 0.152764 |
| MmugDNA.8360.1.S1_at   | MmugDNA.8360.1 | 3.66  | 3.59  | 0.14 | 0.05 | 1.05  | 0.557772 | 0.471962 | 0.772387 | 0.679799 |
| MmugDNA.8360.1.S1_x_at | MmugDNA.8360.1 | 3.79  | 3.75  | 0.34 | 0.11 | 1.03  | 0.468292 | 0.713114 | 0.713445 | 0.833638 |
| MmugDNA.8361.1.S1_at   | MmugDNA.8361.1 | 11.18 | 10.62 | 0.12 | 0.18 | 1.48  | 0.014088 | 0.387441 | 0.170085 | 0.62212  |
| MmugDNA.8362.1.S1_at   | MmugDNA.8362.1 | 4.6   | 4.49  | 0.39 | 0.19 | 1.08  | 0.255281 | 0.468938 | 0.549716 | 0.67794  |
| MmugDNA.8363.1.S1_at   | MmugDNA.8363.1 | 10.43 | 10.34 | 0.21 | 0.04 | 1.06  | 0.216233 | 0.016058 | 0.513992 | 0.160565 |
| MmugDNA.8365.1.S1_at   | MmugDNA.8365.1 | 8.74  | 8.23  | 0.25 | 0.18 | 1.43  | 0.039692 | 0.031924 | 0.255923 | 0.221104 |
| MmugDNA.8366.1.S1_at   | MmugDNA.8366.1 | 2.83  | 2.7   | 0.07 | 0.04 | 1.09  | 0.091637 | 0.055742 | 0.3594   | 0.282006 |
| MmugDNA.8367.1.S1_at   | MmugDNA.8367.1 | 4.26  | 4.06  | 0.58 | 0.46 | 1.15  | 0.631052 | 0.737239 | 0.818772 | 0.847869 |
| MmugDNA.8368.1.S1_at   | MmugDNA.8368.1 | 4.08  | 4.18  | 0.09 | 0.27 | -1.07 | 0.74582  | 0.54708  | 0.882129 | 0.728283 |
| MmugDNA.8369.1.S1_at   | MmugDNA.8369.1 | 6.48  | 6.47  | 0.42 | 0.12 | 1.01  | 0.3568   | 0.342752 | 0.633046 | 0.588712 |
| MmugDNA.837.1.S1_at    | MmugDNA.837.1  | 4.29  | 4.41  | 0.81 | 0.3  | -1.09 | 0.362055 | 0.406403 | 0.637175 | 0.634305 |
| MmugDNA.8370.1.S1_at   | MmugDNA.8370.1 | 5.61  | 5.55  | 0.05 | 0.15 | 1.04  | 0.359986 | 0.582612 | 0.63552  | 0.751269 |
| MmugDNA.8371.1.S1_at   | MmugDNA.8371.1 | 5.63  | 5.68  | 0.04 | 0.07 | -1.03 | 0.851628 | 0.081873 | 0.935423 | 0.330339 |
| MmugDNA.8373.1.S1_at   | MmugDNA.8373.1 | 3.82  | 3.67  | 0.16 | 0.15 | 1.11  | 0.372501 | 0.626316 | 0.64495  | 0.779698 |
| MmugDNA.8374.1.S1_at   | MmugDNA.8374.1 | 6.99  | 7.24  | 0.23 | 0.06 | -1.18 | 0.145247 | 0.47746  | 0.432542 | 0.683498 |
| MmugDNA.8375.1.S1_at   | MmugDNA.8375.1 | 4.91  | 4.69  | 0.24 | 0.12 | 1.16  | 0.127858 | 0.204712 | 0.409723 | 0.479067 |
| MmugDNA.8376.1.S1_at   | MmugDNA.8376.1 | 5.19  | 5.16  | 0.23 | 0.1  | 1.02  | 0.500237 | 0.438462 | 0.734585 | 0.65742  |
| MmugDNA.8377.1.S1_at   | MmugDNA.8377.1 | 5.59  | 5.45  | 0.19 | 0.11 | 1.1   | 0.175621 | 0.222312 | 0.470125 | 0.495346 |
| MmugDNA.8378.1.S1_at   | MmugDNA.8378.1 | 10.76 | 10.35 | 0.22 | 0.03 | 1.33  | 0.082484 | 0.069047 | 0.344209 | 0.309017 |
| MmugDNA.8379.1.S1_at   | MmugDNA.8379.1 | 5.28  | 6.62  | 0.4  | 0.62 | -2.54 | 0.081085 | 0.110171 | 0.342048 | 0.374314 |
| MmugDNA.8381.1.S1_at   | MmugDNA.8381.1 | 3.03  | 3.06  | 0.11 | 0.03 | -1.02 | 0.453969 | 0.120632 | 0.703991 | 0.389476 |
| MmugDNA.8382.1.S1_s_at | MmugDNA.8382.1 | 4.76  | 4.75  | 0.2  | 0.08 | 1.01  | 0.555885 | 0.825192 | 0.771458 | 0.899552 |
| MmugDNA.8383.1.S1_at   | MmugDNA.8383.1 | 7.04  | 6.8   | 0.08 | 0.1  | 1.18  | 0.016272 | 0.159918 | 0.180344 | 0.435987 |
| MmugDNA.8385.1.S1_at   | MmugDNA.8385.1 | 4.63  | 4.45  | 0.08 | 0.08 | 1.13  | 0.042515 | 0.035298 | 0.263254 | 0.23215  |
| MmugDNA.8386.1.S1_at   | MmugDNA.8386.1 | 4.4   | 4.37  | 0.12 | 0.14 | 1.03  | 0.780033 | 0.900543 | 0.899614 | 0.943464 |
| MmugDNA.8388.1.S1_at   | MmugDNA.8388.1 | 3.98  | 3.97  | 0.08 | 0.07 | 1     | 0.589064 | 0.211994 | 0.791382 | 0.485975 |
| MmugDNA.839.1.S1_at    | MmugDNA.839.1  | 13.18 | 13.37 | 0.14 | 0.11 | -1.14 | 0.264582 | 0.258748 | 0.557815 | 0.525949 |
| MmugDNA.8390.1.S1_at   | MmugDNA.8390.1 | 4.14  | 4.04  | 0.35 | 0.19 | 1.07  | 0.354054 | 0.409776 | 0.631226 | 0.636816 |
| MmugDNA.8394.1.S1_at   | MmugDNA.8394.1 | 8.82  | 8.49  | 0.1  | 0.14 | 1.26  | 0.030939 | 0.015592 | 0.229015 | 0.158262 |
| MmugDNA.8395.1.S1_at   | MmugDNA.8395.1 | 5.92  | 5.97  | 0.63 | 0.56 | -1.04 | 0.947602 | 0.624261 | 0.977941 | 0.778523 |
| MmugDNA.8396.1.S1_at   | MmugDNA.8396.1 | 5.29  | 5.3   | 0.15 | 0.26 | -1    | 0.477641 | 0.360074 | 0.719533 | 0.601204 |
| MmugDNA.8398.1.S1_at   | MmugDNA.8398.1 | 4.28  | 4.25  | 0.23 | 0.09 | 1.02  | 0.458103 | 0.541114 | 0.706795 | 0.72475  |
| MmugDNA.8399.1.S1_at   | MmugDNA.8399.1 | 6.18  | 5.5   | 1.03 | 0.7  | 1.6   | 0.152532 | 0.19416  | 0.442239 | 0.469266 |
| MmugDNA.84.1.S1_at     | MmugDNA.84.1   | 5.99  | 6.18  | 0.3  | 0.04 | -1.14 | 0.776378 | 0.82137  | 0.89774  | 0.897125 |
| MmugDNA.8400.1.S1_at   | MmugDNA.8400.1 | 8.99  | 9.03  | 0.11 | 0.06 | -1.03 | 0.172805 | 0.616311 | 0.466842 | 0.772571 |

|                        |                |       |       |      |      |       |          |          |          |          |
|------------------------|----------------|-------|-------|------|------|-------|----------|----------|----------|----------|
| MmugDNA.8401.1.S1_at   | MmugDNA.8401.1 | 5.45  | 5.54  | 0.15 | 0.16 | -1.06 | 0.888508 | 0.551085 | 0.952483 | 0.730776 |
| MmugDNA.8402.1.S1_at   | MmugDNA.8402.1 | 6.67  | 6.35  | 0.31 | 0.13 | 1.25  | 0.299527 | 0.184513 | 0.587812 | 0.460559 |
| MmugDNA.8404.1.S1_at   | MmugDNA.8404.1 | 3.04  | 3     | 0.01 | 0.12 | 1.03  | 0.626985 | 0.583263 | 0.816544 | 0.751682 |
| MmugDNA.8409.1.S1_at   | MmugDNA.8409.1 | 6.45  | 6.37  | 0.02 | 0.12 | 1.06  | 0.079624 | 0.01025  | 0.33985  | 0.132655 |
| MmugDNA.841.1.S1_at    | MmugDNA.841.1  | 5.92  | 6.78  | 0.31 | 0.21 | -1.82 | 0.021005 | 0.006657 | 0.198347 | 0.110505 |
| MmugDNA.8410.1.S1_at   | MmugDNA.8410.1 | 5.09  | 4.86  | 0.13 | 0.23 | 1.17  | 0.197894 | 0.110018 | 0.49515  | 0.374145 |
| MmugDNA.8411.1.S1_at   | MmugDNA.8411.1 | 7.47  | 7.48  | 0.21 | 0.24 | -1.01 | 0.461711 | 0.528852 | 0.709048 | 0.71692  |
| MmugDNA.8412.1.S1_at   | MmugDNA.8412.1 | 7.98  | 8.17  | 0.41 | 0.08 | -1.14 | 0.420618 | 0.325422 | 0.679563 | 0.575807 |
| MmugDNA.8415.1.S1_at   | MmugDNA.8415.1 | 6.6   | 6.39  | 0.24 | 0.06 | 1.15  | 0.230056 | 0.313767 | 0.528979 | 0.568083 |
| MmugDNA.8416.1.S1_at   | MmugDNA.8416.1 | 3.45  | 3.45  | 0.12 | 0.12 | -1    | 0.961234 | 0.257055 | 0.984145 | 0.524781 |
| MmugDNA.8417.1.S1_at   | MmugDNA.8417.1 | 4.32  | 4.08  | 0.14 | 0.12 | 1.18  | 0.370538 | 0.107834 | 0.643448 | 0.370945 |
| MmugDNA.8419.1.S1_at   | MmugDNA.8419.1 | 5.39  | 4.76  | 0.45 | 0.07 | 1.54  | 0.088225 | 0.120769 | 0.354244 | 0.389579 |
| MmugDNA.842.1.S1_at    | MmugDNA.842.1  | 5.32  | 4.93  | 0.14 | 0.11 | 1.31  | 0.037072 | 0.258618 | 0.247826 | 0.52584  |
| MmugDNA.8424.1.S1_at   | MmugDNA.8424.1 | 4.26  | 4.17  | 0.91 | 0.16 | 1.06  | 0.302458 | 0.400242 | 0.590305 | 0.630158 |
| MmugDNA.8425.1.S1_at   | MmugDNA.8425.1 | 8.86  | 8.56  | 0.16 | 0.17 | 1.24  | 0.160652 | 0.596466 | 0.452231 | 0.759592 |
| MmugDNA.8426.1.S1_at   | MmugDNA.8426.1 | 7.9   | 8.16  | 0.28 | 0.22 | -1.19 | 0.345082 | 0.416703 | 0.624133 | 0.64167  |
| MmugDNA.8427.1.S1_at   | MmugDNA.8427.1 | 5.71  | 5.84  | 0.1  | 0.07 | -1.09 | 0.30496  | 0.011373 | 0.591949 | 0.138214 |
| MmugDNA.843.1.S1_at    | MmugDNA.843.1  | 7.33  | 7.69  | 0.05 | 0.21 | -1.28 | 0.119126 | 0.164277 | 0.396724 | 0.440539 |
| MmugDNA.8430.1.S1_at   | MmugDNA.8430.1 | 4.9   | 4.47  | 0.49 | 0.35 | 1.35  | 0.466749 | 0.111807 | 0.712397 | 0.376856 |
| MmugDNA.8432.1.S1_at   | MmugDNA.8432.1 | 11.24 | 11.34 | 0.22 | 0.09 | -1.07 | 0.8056   | 0.044625 | 0.912789 | 0.255589 |
| MmugDNA.8433.1.S1_at   | MmugDNA.8433.1 | 4.61  | 4.35  | 0.73 | 0.22 | 1.19  | 0.525329 | 0.24736  | 0.751919 | 0.516579 |
| MmugDNA.8434.1.S1_at   | MmugDNA.8434.1 | 3.9   | 3.99  | 0.14 | 0.1  | -1.07 | 0.318196 | 0.508709 | 0.602917 | 0.703792 |
| MmugDNA.8436.1.S1_at   | MmugDNA.8436.1 | 4.08  | 4.06  | 0.27 | 0.03 | 1.01  | 0.379042 | 0.426677 | 0.649065 | 0.648796 |
| MmugDNA.8437.1.S1_at   | MmugDNA.8437.1 | 4.24  | 3.87  | 0.57 | 0.23 | 1.29  | 0.312872 | 0.198272 | 0.598797 | 0.473234 |
| MmugDNA.8438.1.S1_at   | MmugDNA.8438.1 | 5.58  | 5.3   | 0.16 | 0.08 | 1.22  | 0.058854 | 0.180694 | 0.299686 | 0.457249 |
| MmugDNA.8439.1.S1_at   | MmugDNA.8439.1 | 8.94  | 8.9   | 0.11 | 0.12 | 1.02  | 0.811416 | 0.937395 | 0.915561 | 0.964687 |
| MmugDNA.8440.1.S1_at   | MmugDNA.8440.1 | 3.68  | 3.69  | 0.16 | 0.06 | -1.01 | 0.495759 | 0.147678 | 0.73183  | 0.421999 |
| MmugDNA.8442.1.S1_at   | MmugDNA.8442.1 | 5.17  | 4.94  | 0.26 | 0.11 | 1.18  | 0.135178 | 0.173118 | 0.419109 | 0.449765 |
| MmugDNA.8443.1.S1_at   | MmugDNA.8443.1 | 5.75  | 5.9   | 0.69 | 0.04 | -1.11 | 0.570926 | 0.891847 | 0.779514 | 0.938333 |
| MmugDNA.8444.1.S1_at   | MmugDNA.8444.1 | 3.32  | 3.15  | 0.21 | 0.08 | 1.13  | 0.147002 | 0.139209 | 0.434942 | 0.412358 |
| MmugDNA.8445.1.S1_at   | MmugDNA.8445.1 | 3.69  | 3.47  | 0.66 | 0.11 | 1.17  | 0.474128 | 0.590553 | 0.717305 | 0.756311 |
| MmugDNA.8446.1.S1_at   | MmugDNA.8446.1 | 6.49  | 6.34  | 0.2  | 0.25 | 1.11  | 0.847998 | 0.945394 | 0.933829 | 0.968942 |
| MmugDNA.8448.1.S1_at   | MmugDNA.8448.1 | 2.54  | 2.61  | 0.02 | 0.09 | -1.05 | 0.235717 | 0.399357 | 0.533475 | 0.629776 |
| MmugDNA.845.1.S1_at    | MmugDNA.845.1  | 10.87 | 11.23 | 0.2  | 0.12 | -1.29 | 0.077937 | 0.149623 | 0.337174 | 0.424172 |
| MmugDNA.8451.1.S1_at   | MmugDNA.8451.1 | 5.8   | 5.77  | 0.1  | 0.04 | 1.02  | 0.285374 | 0.28999  | 0.575167 | 0.550995 |
| MmugDNA.8452.1.S1_at   | MmugDNA.8452.1 | 5.99  | 5.88  | 0.09 | 0.05 | 1.07  | 0.662036 | 0.074442 | 0.836881 | 0.318062 |
| MmugDNA.8453.1.S1_at   | MmugDNA.8453.1 | 8.1   | 8.1   | 0.05 | 0.02 | 1     | 0.625535 | 0.101134 | 0.815449 | 0.360785 |
| MmugDNA.8454.1.S1_at   | MmugDNA.8454.1 | 8.79  | 8.13  | 0.12 | 0.05 | 1.58  | 0.001109 | 0.000351 | 0.077306 | 0.037121 |
| MmugDNA.8457.1.S1_at   | MmugDNA.8457.1 | 10.94 | 10.25 | 0.31 | 0.15 | 1.61  | 0.016765 | 0.019851 | 0.182686 | 0.177189 |
| MmugDNA.8459.1.S1_s_at | MmugDNA.8459.1 | 8.77  | 8.25  | 0.19 | 0.06 | 1.43  | 0.021323 | 0.362961 | 0.199623 | 0.603471 |
| MmugDNA.846.1.S1_at    | MmugDNA.846.1  | 8.13  | 7.88  | 0.28 | 0.1  | 1.19  | 0.585649 | 0.731331 | 0.789285 | 0.844291 |
| MmugDNA.8464.1.S1_at   | MmugDNA.8464.1 | 5.02  | 4.89  | 0.58 | 0.25 | 1.1   | 0.648859 | 0.358102 | 0.829432 | 0.599654 |
| MmugDNA.8464.1.S1_x_at | MmugDNA.8464.1 | 5.59  | 5.6   | 0.52 | 0.22 | -1.01 | 0.3892   | 0.258723 | 0.657141 | 0.525949 |

|                        |                |       |       |      |      |       |          |          |          |          |
|------------------------|----------------|-------|-------|------|------|-------|----------|----------|----------|----------|
| MmugDNA.8465.1.S1_at   | MmugDNA.8465.1 | 3.61  | 3.39  | 0.25 | 0.16 | 1.16  | 0.411392 | 0.535365 | 0.67332  | 0.720907 |
| MmugDNA.8466.1.S1_at   | MmugDNA.8466.1 | 3.95  | 3.68  | 0.14 | 0.12 | 1.2   | 0.092795 | 0.092854 | 0.361263 | 0.349024 |
| MmugDNA.8467.1.S1_at   | MmugDNA.8467.1 | 6.03  | 5.98  | 0.18 | 0.14 | 1.03  | 0.390459 | 0.529815 | 0.658105 | 0.717498 |
| MmugDNA.8469.1.S1_at   | MmugDNA.8469.1 | 5.29  | 5.3   | 0.18 | 0.28 | -1.01 | 0.783272 | 0.748291 | 0.901127 | 0.853508 |
| MmugDNA.847.1.S1_at    | MmugDNA.847.1  | 11.91 | 11.74 | 0.19 | 0.02 | 1.13  | 0.140502 | 0.087948 | 0.426215 | 0.341363 |
| MmugDNA.8470.1.S1_at   | MmugDNA.8470.1 | 3.45  | 3.51  | 0.05 | 0.09 | -1.05 | 0.151312 | 0.458543 | 0.440914 | 0.671232 |
| MmugDNA.8471.1.S1_at   | MmugDNA.8471.1 | 6.21  | 6.13  | 0.16 | 0.08 | 1.06  | 0.720325 | 0.174932 | 0.868039 | 0.451595 |
| MmugDNA.8472.1.S1_at   | MmugDNA.8472.1 | 6.28  | 6.12  | 0.14 | 0.12 | 1.11  | 0.209244 | 0.065478 | 0.506743 | 0.301415 |
| MmugDNA.8473.1.S1_at   | MmugDNA.8473.1 | 5.92  | 5.84  | 0.11 | 0.1  | 1.06  | 0.386994 | 0.187681 | 0.655324 | 0.46368  |
| MmugDNA.8474.1.S1_s_at | MmugDNA.8474.1 | 3.98  | 4.09  | 0.2  | 0.14 | -1.08 | 0.222998 | 0.285415 | 0.520935 | 0.547278 |
| MmugDNA.8476.1.S1_at   | MmugDNA.8476.1 | 5.89  | 6.06  | 0.14 | 0.08 | -1.12 | 0.237939 | 0.030367 | 0.535375 | 0.216116 |
| MmugDNA.8477.1.S1_at   | MmugDNA.8477.1 | 6.32  | 6.39  | 0.04 | 0.07 | -1.05 | 0.340739 | 0.006339 | 0.620859 | 0.108136 |
| MmugDNA.8478.1.S1_at   | MmugDNA.8478.1 | 9.14  | 8.87  | 0.19 | 0.11 | 1.21  | 0.309128 | 0.18801  | 0.59558  | 0.4641   |
| MmugDNA.8479.1.S1_at   | MmugDNA.8479.1 | 6     | 5.74  | 0.14 | 0.06 | 1.19  | 0.13159  | 0.565008 | 0.414472 | 0.739639 |
| MmugDNA.848.1.S1_at    | MmugDNA.848.1  | 9.47  | 9.48  | 0.14 | 0.07 | -1.01 | 0.98655  | 0.076847 | 0.995228 | 0.322345 |
| MmugDNA.8480.1.S1_at   | MmugDNA.8480.1 | 11.4  | 11.5  | 0.24 | 0.06 | -1.07 | 0.244859 | 0.361073 | 0.541091 | 0.602069 |
| MmugDNA.8482.1.S1_at   | MmugDNA.8482.1 | 3.93  | 3.78  | 0.1  | 0.15 | 1.11  | 0.134254 | 0.136654 | 0.417818 | 0.409207 |
| MmugDNA.8483.1.S1_at   | MmugDNA.8483.1 | 5.34  | 5.51  | 0.08 | 0.11 | -1.13 | 0.079797 | 0.756902 | 0.33994  | 0.858495 |
| MmugDNA.8484.1.S1_at   | MmugDNA.8484.1 | 9.55  | 9.86  | 0.06 | 0.19 | -1.24 | 0.04348  | 0.012399 | 0.265671 | 0.144058 |
| MmugDNA.8485.1.S1_at   | MmugDNA.8485.1 | 4.02  | 3.71  | 0.45 | 0.05 | 1.24  | 0.881097 | 0.630257 | 0.949433 | 0.782195 |
| MmugDNA.8486.1.S1_at   | MmugDNA.8486.1 | 7.25  | 7.95  | 0.51 | 0.27 | -1.63 | 0.064816 | 0.65335  | 0.311316 | 0.7974   |
| MmugDNA.8487.1.S1_at   | MmugDNA.8487.1 | 7.55  | 7.91  | 0.39 | 0.24 | -1.28 | 0.168184 | 0.108084 | 0.461465 | 0.371281 |
| MmugDNA.8489.1.S1_at   | MmugDNA.8489.1 | 11.33 | 11.49 | 0.05 | 0.04 | -1.12 | 0.015931 | 0.003492 | 0.17868  | 0.084984 |
| MmugDNA.849.1.S1_at    | MmugDNA.849.1  | 10.36 | 10.08 | 0.11 | 0.08 | 1.22  | 0.040646 | 0.148754 | 0.258198 | 0.423201 |
| MmugDNA.8490.1.S1_at   | MmugDNA.8490.1 | 5.45  | 5.67  | 0.76 | 0.1  | -1.17 | 0.862773 | 0.863437 | 0.940274 | 0.92245  |
| MmugDNA.8491.1.S1_at   | MmugDNA.8491.1 | 5.1   | 4.95  | 0.09 | 0.07 | 1.11  | 0.061534 | 0.021496 | 0.304646 | 0.183673 |
| MmugDNA.8492.1.S1_at   | MmugDNA.8492.1 | 9.08  | 9.02  | 0.4  | 0.1  | 1.04  | 0.938795 | 0.280192 | 0.974191 | 0.543487 |
| MmugDNA.8493.1.S1_x_at | MmugDNA.8493.1 | 7.23  | 7.16  | 0.57 | 0.04 | 1.05  | 0.316506 | 0.33006  | 0.601203 | 0.578938 |
| MmugDNA.8494.1.S1_at   | MmugDNA.8494.1 | 4.3   | 3.78  | 0.27 | 0.18 | 1.43  | 0.133255 | 0.271911 | 0.416749 | 0.536655 |
| MmugDNA.8495.1.S1_at   | MmugDNA.8495.1 | 4.21  | 4.26  | 0.06 | 0.07 | -1.04 | 0.37212  | 0.1519   | 0.644755 | 0.426547 |
| MmugDNA.85.1.S1_at     | MmugDNA.85.1   | 7.43  | 6.91  | 0.32 | 0.27 | 1.44  | 0.330616 | 0.292904 | 0.612597 | 0.552857 |
| MmugDNA.850.1.S1_at    | MmugDNA.850.1  | 5.35  | 5.18  | 0.12 | 0.09 | 1.12  | 0.099851 | 0.37999  | 0.370801 | 0.616674 |
| MmugDNA.8500.1.S1_at   | MmugDNA.8500.1 | 5.07  | 5.05  | 0.01 | 0.14 | 1.01  | 0.285926 | 0.116983 | 0.575761 | 0.384379 |
| MmugDNA.8501.1.S1_at   | MmugDNA.8501.1 | 3.54  | 3.35  | 0.44 | 0.08 | 1.14  | 0.25835  | 0.399154 | 0.552539 | 0.62969  |
| MmugDNA.8504.1.S1_at   | MmugDNA.8504.1 | 3.25  | 3.17  | 0.12 | 0.07 | 1.05  | 0.707618 | 0.328205 | 0.861511 | 0.577947 |
| MmugDNA.8505.1.S1_at   | MmugDNA.8505.1 | 4.35  | 3.9   | 0.45 | 0.11 | 1.37  | 0.132549 | 0.165655 | 0.415892 | 0.441925 |
| MmugDNA.8507.1.S1_at   | MmugDNA.8507.1 | 3.93  | 3.28  | 1.08 | 0.79 | 1.57  | 0.35202  | 0.397992 | 0.629611 | 0.629138 |
| MmugDNA.8508.1.S1_at   | MmugDNA.8508.1 | 5.79  | 5.88  | 0.29 | 0.13 | -1.07 | 0.533958 | 0.38489  | 0.757384 | 0.620513 |
| MmugDNA.8512.1.S1_at   | MmugDNA.8512.1 | 11.29 | 11.31 | 0.05 | 0.03 | -1.01 | 0.689065 | 0.941162 | 0.851509 | 0.966652 |
| MmugDNA.8513.1.S1_at   | MmugDNA.8513.1 | 3.93  | 3.57  | 0.3  | 0.27 | 1.29  | 0.329422 | 0.020294 | 0.61165  | 0.178808 |
| MmugDNA.8514.1.S1_at   | MmugDNA.8514.1 | 2.96  | 2.79  | 0.08 | 0.17 | 1.12  | 0.775862 | 0.919375 | 0.897461 | 0.954737 |
| MmugDNA.8516.1.S1_at   | MmugDNA.8516.1 | 6.21  | 6.27  | 0.07 | 0.05 | -1.04 | 0.120092 | 0.279894 | 0.398476 | 0.543342 |
| MmugDNA.8517.1.S1_at   | MmugDNA.8517.1 | 3.18  | 3.1   | 0.12 | 0.04 | 1.05  | 0.396466 | 0.695142 | 0.662531 | 0.822797 |

|                        |                |       |       |      |      |       |          |          |          |          |
|------------------------|----------------|-------|-------|------|------|-------|----------|----------|----------|----------|
| MmugDNA.8518.1.S1_at   | MmugDNA.8518.1 | 3.35  | 3.36  | 0.13 | 0.05 | -1.01 | 0.464919 | 0.154428 | 0.711025 | 0.429313 |
| MmugDNA.8519.1.S1_at   | MmugDNA.8519.1 | 5.29  | 5.23  | 0.09 | 0.09 | 1.04  | 0.294462 | 0.313205 | 0.583448 | 0.567753 |
| MmugDNA.852.1.S1_at    | MmugDNA.852.1  | 4.7   | 4.82  | 0.09 | 0.11 | -1.09 | 0.269742 | 0.507114 | 0.562025 | 0.70277  |
| MmugDNA.8520.1.S1_at   | MmugDNA.8520.1 | 4.81  | 4.75  | 0.1  | 0.49 | 1.04  | 0.872247 | 0.109981 | 0.945234 | 0.374067 |
| MmugDNA.8521.1.S1_at   | MmugDNA.8521.1 | 6.87  | 7.66  | 0.56 | 0.46 | -1.74 | 0.292782 | 0.649893 | 0.581833 | 0.795273 |
| MmugDNA.8522.1.S1_at   | MmugDNA.8522.1 | 5.08  | 4.87  | 0.21 | 0.06 | 1.15  | 0.125746 | 0.050142 | 0.406505 | 0.269087 |
| MmugDNA.8523.1.S1_at   | MmugDNA.8523.1 | 6.05  | 6.04  | 0.17 | 0.15 | 1.01  | 0.218233 | 0.286759 | 0.515982 | 0.548125 |
| MmugDNA.8525.1.S1_at   | MmugDNA.8525.1 | 12.97 | 13.11 | 0.19 | 0.05 | -1.1  | 0.315837 | 0.494545 | 0.600607 | 0.694909 |
| MmugDNA.8526.1.S1_at   | MmugDNA.8526.1 | 5.89  | 5.96  | 0.05 | 0.12 | -1.05 | 0.500705 | 0.215793 | 0.734918 | 0.489536 |
| MmugDNA.8528.1.S1_at   | MmugDNA.8528.1 | 4.46  | 4.41  | 0.56 | 0.06 | 1.04  | 0.310498 | 0.349904 | 0.596824 | 0.593668 |
| MmugDNA.8529.1.S1_at   | MmugDNA.8529.1 | 10.98 | 13.2  | 1.09 | 0.16 | -4.66 | 0.050385 | 0.239917 | 0.282317 | 0.510627 |
| MmugDNA.853.1.S1_at    | MmugDNA.853.1  | 6.54  | 6.6   | 0.16 | 0.12 | -1.05 | 0.729077 | 0.136873 | 0.873447 | 0.409568 |
| MmugDNA.8531.1.S1_at   | MmugDNA.8531.1 | 3.69  | 3.64  | 0.06 | 0.04 | 1.04  | 0.129029 | 0.173155 | 0.411326 | 0.449765 |
| MmugDNA.8532.1.S1_at   | MmugDNA.8532.1 | 3.25  | 3.16  | 0.32 | 0.15 | 1.07  | 0.342774 | 0.309216 | 0.622513 | 0.564807 |
| MmugDNA.8533.1.S1_at   | MmugDNA.8533.1 | 2.81  | 2.71  | 0.1  | 0.05 | 1.07  | 0.120733 | 0.170477 | 0.399109 | 0.447103 |
| MmugDNA.8535.1.S1_at   | MmugDNA.8535.1 | 4.52  | 4.65  | 0.12 | 0.03 | -1.09 | 0.418215 | 0.582385 | 0.678167 | 0.751018 |
| MmugDNA.8536.1.S1_s_at | MmugDNA.8536.1 | 12.33 | 12.15 | 0.25 | 0.03 | 1.13  | 0.310743 | 0.02205  | 0.596993 | 0.185911 |
| MmugDNA.8537.1.S1_at   | MmugDNA.8537.1 | 13.18 | 13.15 | 0.08 | 0.06 | 1.02  | 0.187865 | 0.166403 | 0.484145 | 0.442884 |
| MmugDNA.8539.1.S1_at   | MmugDNA.8539.1 | 3.85  | 3.85  | 0.41 | 0.1  | -1    | 0.293536 | 0.342874 | 0.582499 | 0.588712 |
| MmugDNA.854.1.S1_at    | MmugDNA.854.1  | 8.21  | 8.22  | 0.06 | 0.04 | -1    | 0.282421 | 0.019251 | 0.573155 | 0.174522 |
| MmugDNA.8541.1.S1_at   | MmugDNA.8541.1 | 5.59  | 5.14  | 0.27 | 0.24 | 1.37  | 0.221133 | 0.326723 | 0.519102 | 0.576725 |
| MmugDNA.8542.1.S1_at   | MmugDNA.8542.1 | 6.66  | 6.51  | 0.1  | 0.1  | 1.11  | 0.116743 | 0.089585 | 0.39382  | 0.343811 |
| MmugDNA.8544.1.S1_at   | MmugDNA.8544.1 | 5.12  | 6.69  | 0.43 | 0.28 | -2.97 | 0.007006 | 0.008878 | 0.131062 | 0.124662 |
| MmugDNA.8546.1.S1_at   | MmugDNA.8546.1 | 5.14  | 5.13  | 0.23 | 0.25 | 1     | 0.910128 | 0.360219 | 0.961887 | 0.601275 |
| MmugDNA.8547.1.S1_at   | MmugDNA.8547.1 | 5.97  | 5.97  | 0.04 | 0.05 | -1    | 0.52766  | 0.318075 | 0.753222 | 0.571046 |
| MmugDNA.8549.1.S1_s_at | MmugDNA.8549.1 | 7.33  | 7.72  | 0.18 | 0.04 | -1.3  | 0.019012 | 0.090064 | 0.191367 | 0.344402 |
| MmugDNA.855.1.S1_at    | MmugDNA.855.1  | 5.26  | 5.2   | 0.09 | 0.11 | 1.05  | 0.681192 | 0.271149 | 0.847983 | 0.536259 |
| MmugDNA.8551.1.S1_at   | MmugDNA.8551.1 | 8.81  | 8.71  | 0.25 | 0.14 | 1.07  | 0.401212 | 0.546696 | 0.665958 | 0.728135 |
| MmugDNA.8553.1.S1_at   | MmugDNA.8553.1 | 9.36  | 8.51  | 0.23 | 0.11 | 1.81  | 0.004944 | 0.058972 | 0.115244 | 0.289669 |
| MmugDNA.8554.1.S1_at   | MmugDNA.8554.1 | 4.97  | 5.04  | 0.22 | 0.11 | -1.05 | 0.458623 | 0.551419 | 0.707163 | 0.730925 |
| MmugDNA.8555.1.S1_at   | MmugDNA.8555.1 | 5.27  | 5.19  | 0.19 | 0.13 | 1.06  | 0.66971  | 0.03526  | 0.841513 | 0.231988 |
| MmugDNA.8556.1.S1_at   | MmugDNA.8556.1 | 8.08  | 10.65 | 0.98 | 0.17 | -5.91 | 0.011568 | 0.159587 | 0.157417 | 0.435785 |
| MmugDNA.8557.1.S1_at   | MmugDNA.8557.1 | 4.98  | 5.03  | 0.11 | 0.04 | -1.04 | 0.361632 | 0.183892 | 0.637014 | 0.460033 |
| MmugDNA.8558.1.S1_at   | MmugDNA.8558.1 | 4.68  | 4.7   | 0.13 | 0.16 | -1.01 | 0.832005 | 0.500338 | 0.926042 | 0.699009 |
| MmugDNA.8559.1.S1_at   | MmugDNA.8559.1 | 8.76  | 9.22  | 0.3  | 0.23 | -1.38 | 0.16818  | 0.018248 | 0.461465 | 0.1699   |
| MmugDNA.856.1.S1_at    | MmugDNA.856.1  | 4.03  | 4.02  | 0.08 | 0.03 | 1.01  | 0.37328  | 0.652554 | 0.645118 | 0.796833 |
| MmugDNA.8560.1.S1_at   | MmugDNA.8560.1 | 3.6   | 3.39  | 0.1  | 0.09 | 1.16  | 0.064639 | 0.072905 | 0.310933 | 0.315942 |
| MmugDNA.8561.1.S1_at   | MmugDNA.8561.1 | 3.84  | 4.09  | 0.06 | 0.16 | -1.19 | 0.082672 | 0.071776 | 0.344485 | 0.314031 |
| MmugDNA.8562.1.S1_at   | MmugDNA.8562.1 | 8.81  | 8.51  | 0.24 | 0.04 | 1.23  | 0.146553 | 0.004015 | 0.434472 | 0.089976 |
| MmugDNA.8563.1.S1_at   | MmugDNA.8563.1 | 7.44  | 8.2   | 0.44 | 0.19 | -1.7  | 0.041594 | 0.296827 | 0.260345 | 0.5558   |
| MmugDNA.8564.1.S1_at   | MmugDNA.8564.1 | 6.98  | 6.07  | 0.97 | 0.36 | 1.88  | 0.071118 | 0.046066 | 0.324551 | 0.258977 |
| MmugDNA.8565.1.S1_at   | MmugDNA.8565.1 | 4.24  | 4.06  | 0.05 | 0.07 | 1.13  | 0.029661 | 0.039364 | 0.225392 | 0.243406 |
| MmugDNA.8566.1.S1_at   | MmugDNA.8566.1 | 3.46  | 3.45  | 0.16 | 0.05 | 1.01  | 0.662288 | 0.83805  | 0.837063 | 0.907543 |

|                      |                |       |       |      |      |       |          |          |          |          |
|----------------------|----------------|-------|-------|------|------|-------|----------|----------|----------|----------|
| MmugDNA.8567.1.S1_at | MmugDNA.8567.1 | 11.83 | 11.46 | 0.06 | 0.02 | 1.29  | 0.00064  | 0.339727 | 0.070727 | 0.586323 |
| MmugDNA.8568.1.S1_at | MmugDNA.8568.1 | 3.85  | 3.84  | 0.06 | 0.09 | 1     | 0.893588 | 0.91019  | 0.954565 | 0.949342 |
| MmugDNA.8569.1.S1_at | MmugDNA.8569.1 | 6.68  | 6.85  | 0.73 | 0.59 | -1.13 | 0.683281 | 0.646832 | 0.848962 | 0.793143 |
| MmugDNA.857.1.S1_at  | MmugDNA.857.1  | 2.94  | 2.94  | 0    | 0.02 | 1.01  | 0.255495 | 0.206111 | 0.549926 | 0.480319 |
| MmugDNA.8570.1.S1_at | MmugDNA.8570.1 | 4.91  | 4.77  | 0.33 | 0.08 | 1.11  | 0.625795 | 0.654396 | 0.815566 | 0.798021 |
| MmugDNA.8571.1.S1_at | MmugDNA.8571.1 | 10.97 | 10.79 | 0.02 | 0.14 | 1.13  | 0.033161 | 0.126131 | 0.236296 | 0.396734 |
| MmugDNA.8573.1.S1_at | MmugDNA.8573.1 | 9.81  | 9.3   | 0.25 | 0.14 | 1.43  | 0.072487 | 0.292905 | 0.327132 | 0.552857 |
| MmugDNA.8575.1.S1_at | MmugDNA.8575.1 | 4.73  | 4.9   | 0.19 | 0.05 | -1.12 | 0.253115 | 0.137365 | 0.547579 | 0.41029  |
| MmugDNA.8576.1.S1_at | MmugDNA.8576.1 | 3.84  | 3.82  | 0.05 | 0.06 | 1.02  | 0.33115  | 0.446448 | 0.61305  | 0.662842 |
| MmugDNA.8577.1.S1_at | MmugDNA.8577.1 | 6.25  | 6.36  | 0.21 | 0.35 | -1.09 | 0.881844 | 0.946778 | 0.949737 | 0.96978  |
| MmugDNA.8579.1.S1_at | MmugDNA.8579.1 | 3.73  | 3.43  | 0.18 | 0.12 | 1.23  | 0.065573 | 0.071753 | 0.313465 | 0.31401  |
| MmugDNA.858.1.S1_at  | MmugDNA.858.1  | 6.21  | 6.29  | 0.13 | 0.13 | -1.05 | 0.866758 | 0.222182 | 0.942468 | 0.495178 |
| MmugDNA.8581.1.S1_at | MmugDNA.8581.1 | 9.67  | 10.66 | 0.09 | 0.15 | -1.98 | 0.00085  | 0.187162 | 0.073467 | 0.46313  |
| MmugDNA.8582.1.S1_at | MmugDNA.8582.1 | 3.4   | 3     | 0.28 | 0.08 | 1.32  | 0.085279 | 0.070661 | 0.34932  | 0.312011 |
| MmugDNA.8583.1.S1_at | MmugDNA.8583.1 | 5.36  | 4.84  | 0.37 | 0.7  | 1.44  | 0.723155 | 0.747755 | 0.869925 | 0.853252 |
| MmugDNA.8584.1.S1_at | MmugDNA.8584.1 | 3.06  | 3.11  | 0.37 | 0.02 | -1.04 | 0.478806 | 0.522407 | 0.7203   | 0.713139 |
| MmugDNA.8585.1.S1_at | MmugDNA.8585.1 | 6.69  | 8.74  | 1.14 | 0.26 | -4.12 | 0.035316 | 0.093435 | 0.242626 | 0.349695 |
| MmugDNA.8586.1.S1_at | MmugDNA.8586.1 | 4.44  | 3.88  | 0.34 | 0.16 | 1.47  | 0.109428 | 0.138102 | 0.384489 | 0.410985 |
| MmugDNA.8587.1.S1_at | MmugDNA.8587.1 | 4.45  | 4.38  | 0.16 | 0.11 | 1.05  | 0.459325 | 0.526537 | 0.707471 | 0.715583 |
| MmugDNA.8588.1.S1_at | MmugDNA.8588.1 | 3.35  | 3.15  | 0.14 | 0.29 | 1.14  | 0.735458 | 0.307842 | 0.87686  | 0.56397  |
| MmugDNA.859.1.S1_at  | MmugDNA.859.1  | 4.42  | 4.38  | 0.43 | 0.2  | 1.03  | 0.356455 | 0.583029 | 0.632731 | 0.751513 |
| MmugDNA.8590.1.S1_at | MmugDNA.8590.1 | 8.33  | 8.53  | 0.13 | 0.03 | -1.14 | 0.031526 | 0.302682 | 0.230993 | 0.560269 |
| MmugDNA.8594.1.S1_at | MmugDNA.8594.1 | 8.57  | 9.16  | 0.08 | 0.13 | -1.5  | 0.004256 | 0.149129 | 0.111107 | 0.423572 |
| MmugDNA.8596.1.S1_at | MmugDNA.8596.1 | 7.02  | 6.59  | 0.1  | 0.22 | 1.35  | 0.142659 | 0.210357 | 0.4287   | 0.484237 |
| MmugDNA.860.1.S1_at  | MmugDNA.860.1  | 5.19  | 5.2   | 0.61 | 0.33 | -1.01 | 0.424662 | 0.604357 | 0.682288 | 0.764576 |
| MmugDNA.8600.1.S1_at | MmugDNA.8600.1 | 4.99  | 4.66  | 0.28 | 0.1  | 1.26  | 0.362247 | 0.48186  | 0.637219 | 0.686812 |
| MmugDNA.8601.1.S1_at | MmugDNA.8601.1 | 12.83 | 12.87 | 0.05 | 0.02 | -1.03 | 0.324142 | 0.093174 | 0.607824 | 0.34931  |
| MmugDNA.8606.1.S1_at | MmugDNA.8606.1 | 3.67  | 4.18  | 0.36 | 0.21 | -1.43 | 0.276548 | 0.448277 | 0.568108 | 0.664167 |
| MmugDNA.8607.1.S1_at | MmugDNA.8607.1 | 4.08  | 4.1   | 0.27 | 0.22 | -1.01 | 0.660521 | 0.529735 | 0.83613  | 0.717498 |
| MmugDNA.8608.1.S1_at | MmugDNA.8608.1 | 3.33  | 3.35  | 0.01 | 0.15 | -1.01 | 0.71813  | 0.895291 | 0.866934 | 0.940185 |
| MmugDNA.8609.1.S1_at | MmugDNA.8609.1 | 3.13  | 3.3   | 0.09 | 0.03 | -1.13 | 0.056645 | 0.277969 | 0.295477 | 0.541664 |
| MmugDNA.861.1.S1_at  | MmugDNA.861.1  | 2.92  | 3.1   | 0.31 | 0.23 | -1.13 | 0.789963 | 0.571112 | 0.90449  | 0.74355  |
| MmugDNA.8610.1.S1_at | MmugDNA.8610.1 | 4.78  | 4.73  | 0.04 | 0.03 | 1.03  | 0.102919 | 0.14734  | 0.37552  | 0.421554 |
| MmugDNA.8611.1.S1_at | MmugDNA.8611.1 | 5.06  | 5.07  | 0.18 | 0.04 | -1    | 0.453159 | 0.416122 | 0.703473 | 0.64135  |
| MmugDNA.8613.1.S1_at | MmugDNA.8613.1 | 8.95  | 8.86  | 0.1  | 0.12 | 1.07  | 0.411896 | 0.063657 | 0.673728 | 0.298815 |
| MmugDNA.8614.1.S1_at | MmugDNA.8614.1 | 6.2   | 6.22  | 0.22 | 0.16 | -1.01 | 0.908444 | 0.540208 | 0.961215 | 0.724218 |
| MmugDNA.8615.1.S1_at | MmugDNA.8615.1 | 10.28 | 8.94  | 0.38 | 0.21 | 2.54  | 0.004532 | 0.00898  | 0.113436 | 0.125353 |
| MmugDNA.8616.1.S1_at | MmugDNA.8616.1 | 10.81 | 9.44  | 0.16 | 0.04 | 2.58  | 0.000135 | 0.005889 | 0.051196 | 0.104899 |
| MmugDNA.862.1.S1_at  | MmugDNA.862.1  | 8     | 8.05  | 0.23 | 0.07 | -1.04 | 0.506015 | 0.1294   | 0.738797 | 0.4008   |
| MmugDNA.8620.1.S1_at | MmugDNA.8620.1 | 6.23  | 5.78  | 0.49 | 0.24 | 1.37  | 0.403792 | 0.414312 | 0.667849 | 0.640189 |
| MmugDNA.8623.1.S1_at | MmugDNA.8623.1 | 12.6  | 12.64 | 0.04 | 0.05 | -1.03 | 0.283829 | 0.069016 | 0.574077 | 0.309017 |
| MmugDNA.8624.1.S1_at | MmugDNA.8624.1 | 8.1   | 9.3   | 0.89 | 0.65 | -2.3  | 0.170395 | 0.297747 | 0.46404  | 0.556395 |
| MmugDNA.8627.1.S1_at | MmugDNA.8627.1 | 6.26  | 6.26  | 0.07 | 0.03 | -1    | 0.546646 | 0.525447 | 0.765406 | 0.715025 |

|                        |                |       |       |      |      |       |          |          |          |          |
|------------------------|----------------|-------|-------|------|------|-------|----------|----------|----------|----------|
| MmugDNA.8628.1.S1_at   | MmugDNA.8628.1 | 5.54  | 5.47  | 0.18 | 0.07 | 1.05  | 0.55932  | 0.813141 | 0.773275 | 0.891951 |
| MmugDNA.8629.1.S1_at   | MmugDNA.8629.1 | 7.65  | 7.75  | 0.1  | 0.41 | -1.08 | 0.484125 | 0.729708 | 0.724078 | 0.843652 |
| MmugDNA.8631.1.S1_at   | MmugDNA.8631.1 | 5.18  | 5.26  | 0.07 | 0.16 | -1.06 | 0.45922  | 0.009786 | 0.707418 | 0.130114 |
| MmugDNA.8632.1.S1_at   | MmugDNA.8632.1 | 8.32  | 8.35  | 0.44 | 0.12 | -1.02 | 0.335411 | 0.300993 | 0.616384 | 0.559198 |
| MmugDNA.8633.1.S1_at   | MmugDNA.8633.1 | 5.13  | 4.97  | 0.06 | 0.03 | 1.12  | 0.057445 | 0.14083  | 0.296977 | 0.414207 |
| MmugDNA.8635.1.S1_s_at | MmugDNA.8635.1 | 10.48 | 10.23 | 0.12 | 0.07 | 1.19  | 0.058943 | 0.209834 | 0.299935 | 0.483581 |
| MmugDNA.8636.1.S1_at   | MmugDNA.8636.1 | 4.44  | 4.47  | 0.06 | 0.12 | -1.02 | 0.292837 | 0.237757 | 0.58186  | 0.50826  |
| MmugDNA.8637.1.S1_at   | MmugDNA.8637.1 | 4.49  | 4.16  | 0.19 | 0.09 | 1.25  | 0.053137 | 0.18085  | 0.28778  | 0.457381 |
| MmugDNA.8638.1.S1_at   | MmugDNA.8638.1 | 3.23  | 3.16  | 0.1  | 0.25 | 1.05  | 0.873561 | 0.982583 | 0.945669 | 0.990376 |
| MmugDNA.864.1.S1_at    | MmugDNA.864.1  | 9.66  | 9.67  | 0.4  | 0.19 | -1.01 | 0.448738 | 0.454805 | 0.700162 | 0.668859 |
| MmugDNA.8641.1.S1_at   | MmugDNA.8641.1 | 5.47  | 5.42  | 0.44 | 0.05 | 1.04  | 0.624581 | 0.798868 | 0.81488  | 0.884147 |
| MmugDNA.8642.1.S1_at   | MmugDNA.8642.1 | 6.63  | 6.56  | 0.36 | 0.06 | 1.05  | 0.883548 | 0.772489 | 0.950515 | 0.867741 |
| MmugDNA.8643.1.S1_at   | MmugDNA.8643.1 | 3.69  | 3.3   | 0.14 | 0.39 | 1.31  | 0.358716 | 0.454231 | 0.634486 | 0.668474 |
| MmugDNA.8644.1.S1_at   | MmugDNA.8644.1 | 4.71  | 4.03  | 0.79 | 0.21 | 1.61  | 0.277244 | 0.595862 | 0.568765 | 0.759258 |
| MmugDNA.8647.1.S1_at   | MmugDNA.8647.1 | 4.42  | 4.38  | 0.07 | 0.03 | 1.03  | 0.89283  | 0.175086 | 0.954354 | 0.45175  |
| MmugDNA.8647.1.S1_x_at | MmugDNA.8647.1 | 3.66  | 3.62  | 0.09 | 0.04 | 1.03  | 0.764152 | 0.068908 | 0.891902 | 0.308844 |
| MmugDNA.8651.1.S1_at   | MmugDNA.8651.1 | 8.01  | 7.92  | 0.15 | 0.11 | 1.07  | 0.773504 | 0.01216  | 0.896169 | 0.142648 |
| MmugDNA.8654.1.S1_at   | MmugDNA.8654.1 | 3.75  | 3.65  | 0.17 | 0.02 | 1.07  | 0.106296 | 0.145412 | 0.380284 | 0.419421 |
| MmugDNA.8655.1.S1_at   | MmugDNA.8655.1 | 6.13  | 6.13  | 0.11 | 0.08 | 1     | 0.241482 | 0.641826 | 0.538602 | 0.789771 |
| MmugDNA.8657.1.S1_at   | MmugDNA.8657.1 | 4.79  | 4.8   | 0.06 | 0.06 | -1    | 0.6492   | 0.690021 | 0.829606 | 0.819235 |
| MmugDNA.8659.1.S1_at   | MmugDNA.8659.1 | 3.26  | 3.52  | 0.5  | 0.05 | -1.19 | 0.842148 | 0.618027 | 0.930761 | 0.773852 |
| MmugDNA.866.1.S1_at    | MmugDNA.866.1  | 5.85  | 6.1   | 0.67 | 0.05 | -1.19 | 0.754105 | 0.738765 | 0.886714 | 0.848575 |
| MmugDNA.8661.1.S1_at   | MmugDNA.8661.1 | 2.89  | 2.96  | 0.09 | 0.06 | -1.05 | 0.438235 | 0.542292 | 0.692864 | 0.725385 |
| MmugDNA.8662.1.S1_at   | MmugDNA.8662.1 | 7.07  | 7.05  | 0.38 | 0.27 | 1.01  | 0.944488 | 0.760375 | 0.976597 | 0.860754 |
| MmugDNA.8664.1.S1_at   | MmugDNA.8664.1 | 8.85  | 8.3   | 0.03 | 0    | 1.47  | 0.00001  | 0.000004 | 0.045594 | 0.014484 |
| MmugDNA.8665.1.S1_at   | MmugDNA.8665.1 | 5.75  | 5.68  | 0.15 | 0.04 | 1.05  | 0.839601 | 0.854205 | 0.92965  | 0.916964 |
| MmugDNA.8666.1.S1_at   | MmugDNA.8666.1 | 3.91  | 3.85  | 0.11 | 0.07 | 1.04  | 0.297062 | 0.502234 | 0.585548 | 0.70006  |
| MmugDNA.8669.1.S1_at   | MmugDNA.8669.1 | 4.9   | 4.9   | 0.12 | 0.21 | -1    | 0.612724 | 0.871926 | 0.807067 | 0.927098 |
| MmugDNA.867.1.S1_at    | MmugDNA.867.1  | 3.98  | 3.79  | 0.22 | 0.32 | 1.14  | 0.500948 | 0.720719 | 0.735133 | 0.838368 |
| MmugDNA.8672.1.S1_at   | MmugDNA.8672.1 | 11.02 | 10.71 | 0.36 | 0.21 | 1.25  | 0.208602 | 0.416985 | 0.506194 | 0.641875 |
| MmugDNA.8673.1.S1_at   | MmugDNA.8673.1 | 4.55  | 4.54  | 0.07 | 0.03 | 1     | 0.406253 | 0.453888 | 0.669594 | 0.668329 |
| MmugDNA.8674.1.S1_at   | MmugDNA.8674.1 | 4.72  | 4.67  | 0    | 0.05 | 1.03  | 0.143796 | 0.05239  | 0.430437 | 0.274351 |
| MmugDNA.8675.1.S1_at   | MmugDNA.8675.1 | 5.23  | 7.94  | 1.37 | 0.11 | -6.55 | 0.038493 | 0.186572 | 0.2521   | 0.462364 |
| MmugDNA.8678.1.S1_x_at | MmugDNA.8678.1 | 3.9   | 3.74  | 0.22 | 0.11 | 1.11  | 0.509883 | 0.072395 | 0.741316 | 0.315251 |
| MmugDNA.8679.1.S1_at   | MmugDNA.8679.1 | 10.96 | 11.43 | 0.63 | 0.16 | -1.39 | 0.345883 | 0.059185 | 0.624702 | 0.290208 |
| MmugDNA.868.1.S1_at    | MmugDNA.868.1  | 5.79  | 5.63  | 0.07 | 0.02 | 1.12  | 0.009958 | 0.105942 | 0.14901  | 0.36826  |
| MmugDNA.8680.1.S1_at   | MmugDNA.8680.1 | 7.41  | 7.48  | 0.24 | 0.39 | -1.05 | 0.576043 | 0.009015 | 0.783034 | 0.125499 |
| MmugDNA.8681.1.S1_at   | MmugDNA.8681.1 | 9.18  | 9.2   | 0.2  | 0.08 | -1.01 | 0.789604 | 0.947139 | 0.904456 | 0.97002  |
| MmugDNA.8681.1.S1_s_at | MmugDNA.8681.1 | 9.28  | 9.27  | 0.16 | 0.07 | 1     | 0.456793 | 0.631254 | 0.705979 | 0.782738 |
| MmugDNA.8682.1.S1_at   | MmugDNA.8682.1 | 6.15  | 6.11  | 0.05 | 0.09 | 1.03  | 0.250096 | 0.030048 | 0.544879 | 0.215155 |
| MmugDNA.8683.1.S1_at   | MmugDNA.8683.1 | 6.43  | 6.45  | 0.16 | 0.17 | -1.02 | 0.335041 | 0.461542 | 0.616064 | 0.673162 |
| MmugDNA.8684.1.S1_at   | MmugDNA.8684.1 | 8.79  | 9.13  | 0.25 | 0.15 | -1.27 | 0.077268 | 0.249228 | 0.335964 | 0.518313 |
| MmugDNA.8685.1.S1_at   | MmugDNA.8685.1 | 4.81  | 4.82  | 0.05 | 0.1  | -1.01 | 0.34376  | 0.401454 | 0.623063 | 0.631018 |

|                         |                 |       |       |      |      |       |          |          |          |          |
|-------------------------|-----------------|-------|-------|------|------|-------|----------|----------|----------|----------|
| MmugDNA.8686.1.S1_at    | MmugDNA.8686.1  | 3.78  | 3.78  | 0.18 | 0.09 | -1    | 0.545132 | 0.300098 | 0.764467 | 0.558262 |
| MmugDNA.8687.1.S1_at    | MmugDNA.8687.1  | 3.84  | 3.86  | 0.11 | 0.17 | -1.02 | 0.465379 | 0.664652 | 0.711439 | 0.803476 |
| MmugDNA.8688.1.S1_s_at  | MmugDNA.8688.1  | 9.76  | 9.04  | 0.26 | 0.1  | 1.66  | 0.012348 | 0.008125 | 0.161511 | 0.11972  |
| MmugDNA.8689.1.S1_at    | MmugDNA.8689.1  | 6.07  | 6.64  | 0.26 | 0.22 | -1.48 | 0.035094 | 0.02787  | 0.241992 | 0.208453 |
| MmugDNA.869.1.S1_at     | MmugDNA.869.1   | 5.42  | 5.42  | 0.06 | 0.04 | 1     | 0.468935 | 0.415509 | 0.713885 | 0.64091  |
| MmugDNA.8690.1.S1_at    | MmugDNA.8690.1  | 2.98  | 3.04  | 0.46 | 0.06 | -1.04 | 0.432319 | 0.561913 | 0.688182 | 0.737659 |
| MmugDNA.8692.1.S1_at    | MmugDNA.8692.1  | 3.71  | 3.51  | 0.33 | 0.05 | 1.15  | 0.561588 | 0.788155 | 0.774505 | 0.877471 |
| MmugDNA.8693.1.S1_at    | MmugDNA.8693.1  | 2.85  | 2.84  | 0.14 | 0.12 | 1     | 0.521497 | 0.479793 | 0.749377 | 0.68541  |
| MmugDNA.8694.1.S1_at    | MmugDNA.8694.1  | 5.89  | 5.87  | 0.14 | 0.06 | 1.01  | 0.735963 | 0.077881 | 0.877129 | 0.324135 |
| MmugDNA.8696.1.S1_at    | MmugDNA.8696.1  | 10.02 | 11.15 | 0.41 | 0.02 | -2.2  | 0.010845 | 0.037414 | 0.15391  | 0.237777 |
| MmugDNA.8698.1.S1_at    | MmugDNA.8698.1  | 6.73  | 6.75  | 0.24 | 0.12 | -1.02 | 0.649344 | 0.814289 | 0.829674 | 0.892914 |
| MmugDNA.8699.1.S1_at    | MmugDNA.8699.1  | 5.2   | 6.02  | 0.13 | 0.45 | -1.77 | 0.034373 | 0.020718 | 0.240032 | 0.180645 |
| MmugDNA.870.1.S1_at     | MmugDNA.870.1   | 4.6   | 4.56  | 0.25 | 0.18 | 1.03  | 0.494576 | 0.365481 | 0.731275 | 0.605587 |
| MmugDNA.8701.1.S1_at    | MmugDNA.8701.1  | 8.87  | 7.23  | 0.03 | 0.44 | 3.13  | 0.004044 | 0.00696  | 0.108999 | 0.112719 |
| MmugDNA.34107.1.S1_s_at | MmugDNA.34107.1 | 12.5  | 12.47 | 0.12 | 0.17 | 1.02  | 0.904524 | 0.988238 | 0.959489 | 0.993443 |
| MmugDNA.8705.1.S1_at    | MmugDNA.8705.1  | 3.25  | 3.39  | 1.01 | 0.18 | -1.1  | 0.593656 | 0.815434 | 0.794119 | 0.893558 |
| MmugDNA.8706.1.S1_at    | MmugDNA.8706.1  | 6.51  | 7.16  | 0.13 | 0.21 | -1.57 | 0.014394 | 0.065301 | 0.171686 | 0.301249 |
| MmugDNA.8707.1.S1_at    | MmugDNA.8707.1  | 7.05  | 7.28  | 0.18 | 0.07 | -1.17 | 0.21868  | 0.259447 | 0.516351 | 0.526418 |
| MmugDNA.8708.1.S1_at    | MmugDNA.8708.1  | 9.28  | 9     | 0.16 | 0.18 | 1.22  | 0.051938 | 0.308724 | 0.285355 | 0.564619 |
| MmugDNA.8709.1.S1_s_at  | MmugDNA.8709.1  | 11.26 | 11.34 | 0.02 | 0.06 | -1.06 | 0.283808 | 0.016792 | 0.574077 | 0.164118 |
| MmugDNA.8710.1.S1_at    | MmugDNA.8710.1  | 6.47  | 6.01  | 0.03 | 0.03 | 1.38  | 0.000054 | 0.000362 | 0.045594 | 0.037273 |
| MmugDNA.14508.1.S1_s_at | MmugDNA.14508.1 | 12.75 | 12.77 | 0.17 | 0.06 | -1.01 | 0.505929 | 0.686745 | 0.738757 | 0.817214 |
| MmugDNA.8713.1.S1_at    | MmugDNA.8713.1  | 5.06  | 4.71  | 0.07 | 0.19 | 1.27  | 0.10446  | 0.0898   | 0.377773 | 0.34404  |
| MmugDNA.8715.1.S1_at    | MmugDNA.8715.1  | 12.65 | 12.54 | 0.06 | 0.09 | 1.08  | 0.365328 | 0.006974 | 0.639887 | 0.112743 |
| MmugDNA.8716.1.S1_at    | MmugDNA.8716.1  | 6.6   | 6.7   | 0.06 | 0.06 | -1.07 | 0.478851 | 0.168483 | 0.720315 | 0.445108 |
| MmugDNA.8717.1.S1_at    | MmugDNA.8717.1  | 4.52  | 4.52  | 0.12 | 0.16 | -1    | 0.734352 | 0.652476 | 0.87617  | 0.796793 |
| MmugDNA.8718.1.S1_at    | MmugDNA.8718.1  | 4.16  | 3.84  | 0.18 | 0.13 | 1.25  | 0.03878  | 0.06899  | 0.253262 | 0.309017 |
| MmugDNA.872.1.S1_at     | MmugDNA.872.1   | 4.36  | 4.24  | 0.46 | 0.17 | 1.09  | 0.554975 | 0.213654 | 0.770957 | 0.487441 |
| MmugDNA.8720.1.S1_at    | MmugDNA.8720.1  | 9.99  | 9.97  | 0.4  | 0.11 | 1.02  | 0.474257 | 0.004009 | 0.717417 | 0.089969 |
| MmugDNA.8724.1.S1_at    | MmugDNA.8724.1  | 12.7  | 12.72 | 0.09 | 0.03 | -1.01 | 0.892778 | 0.006727 | 0.954336 | 0.110963 |
| MmugDNA.8726.1.S1_at    | MmugDNA.8726.1  | 6.95  | 6.23  | 0.78 | 0.05 | 1.64  | 0.54847  | 0.094576 | 0.766574 | 0.351353 |
| MmugDNA.8727.1.S1_at    | MmugDNA.8727.1  | 12.03 | 12.11 | 0.13 | 0.09 | -1.06 | 0.816027 | 0.9446   | 0.917916 | 0.968621 |
| MmugDNA.8728.1.S1_at    | MmugDNA.8728.1  | 3.67  | 4.17  | 1.27 | 0.2  | -1.41 | 0.775438 | 0.58533  | 0.897425 | 0.752844 |
| MmugDNA.8729.1.S1_at    | MmugDNA.8729.1  | 4.91  | 5.35  | 0.16 | 0.13 | -1.36 | 0.022038 | 0.120819 | 0.201692 | 0.389657 |
| MmugDNA.873.1.S1_at     | MmugDNA.873.1   | 8.94  | 8.38  | 0.08 | 0.04 | 1.48  | 0.000566 | 0.010359 | 0.070727 | 0.133236 |
| MmugDNA.8730.1.S1_at    | MmugDNA.8730.1  | 4.44  | 4.4   | 0.15 | 0.04 | 1.03  | 0.273981 | 0.52266  | 0.566002 | 0.713295 |
| MmugDNA.8731.1.S1_at    | MmugDNA.8731.1  | 7.06  | 8.86  | 0.89 | 0.26 | -3.47 | 0.03476  | 0.028989 | 0.241036 | 0.212154 |
| MmugDNA.8733.1.S1_at    | MmugDNA.8733.1  | 3.04  | 3.02  | 0.07 | 0.07 | 1.01  | 0.674045 | 0.479739 | 0.844333 | 0.685409 |
| MmugDNA.8736.1.S1_at    | MmugDNA.8736.1  | 3.27  | 3.07  | 0.18 | 0.06 | 1.15  | 0.195445 | 0.337484 | 0.492151 | 0.584686 |
| MmugDNA.8737.1.S1_s_at  | MmugDNA.8737.1  | 5.39  | 6.06  | 0.81 | 0.2  | -1.59 | 0.677742 | 0.705902 | 0.846305 | 0.829555 |
| MmugDNA.8738.1.S1_at    | MmugDNA.8738.1  | 2.96  | 2.95  | 0.11 | 0.03 | 1.01  | 0.618707 | 0.810128 | 0.810755 | 0.890539 |
| MmugDNA.8739.1.S1_at    | MmugDNA.8739.1  | 6.74  | 6.4   | 0.27 | 0.51 | 1.26  | 0.334368 | 0.292461 | 0.615487 | 0.552545 |
| MmugDNA.874.1.S1_at     | MmugDNA.874.1   | 5.18  | 5.1   | 0.32 | 0.18 | 1.05  | 0.709018 | 0.914583 | 0.862234 | 0.951966 |

|                        |                |       |       |      |      |       |          |          |          |          |
|------------------------|----------------|-------|-------|------|------|-------|----------|----------|----------|----------|
| MmugDNA.8740.1.S1_at   | MmugDNA.8740.1 | 4.28  | 4     | 0.37 | 0.41 | 1.21  | 0.333947 | 0.242999 | 0.615174 | 0.513356 |
| MmugDNA.8742.1.S1_at   | MmugDNA.8742.1 | 3.87  | 3.79  | 0.11 | 0.03 | 1.06  | 0.082897 | 0.139525 | 0.345009 | 0.412743 |
| MmugDNA.8744.1.S1_at   | MmugDNA.8744.1 | 4.31  | 4.38  | 0.08 | 0.05 | -1.05 | 0.058507 | 0.01475  | 0.298985 | 0.154493 |
| MmugDNA.8745.1.S1_at   | MmugDNA.8745.1 | 3.17  | 2.96  | 0.19 | 0.15 | 1.16  | 0.819175 | 0.298657 | 0.919481 | 0.557252 |
| MmugDNA.8746.1.S1_at   | MmugDNA.8746.1 | 8.63  | 8.84  | 0.16 | 0.06 | -1.15 | 0.081134 | 0.050308 | 0.342143 | 0.269573 |
| MmugDNA.8747.1.S1_at   | MmugDNA.8747.1 | 4.18  | 4.15  | 0.37 | 0.28 | 1.02  | 0.492798 | 0.746676 | 0.72996  | 0.852899 |
| MmugDNA.8748.1.S1_at   | MmugDNA.8748.1 | 9.86  | 9.79  | 0.27 | 0.17 | 1.05  | 0.706226 | 0.691633 | 0.86088  | 0.820648 |
| MmugDNA.8749.1.S1_at   | MmugDNA.8749.1 | 6.24  | 6.35  | 1.35 | 0.06 | -1.08 | 0.940176 | 0.98336  | 0.97477  | 0.990744 |
| MmugDNA.8750.1.S1_at   | MmugDNA.8750.1 | 7.81  | 7.54  | 0.04 | 0.25 | 1.21  | 0.078167 | 0.310026 | 0.337735 | 0.565253 |
| MmugDNA.8751.1.S1_at   | MmugDNA.8751.1 | 7.22  | 6.81  | 0.23 | 0.16 | 1.33  | 0.076119 | 0.183403 | 0.33422  | 0.459553 |
| MmugDNA.8752.1.S1_at   | MmugDNA.8752.1 | 10.89 | 10.73 | 0.45 | 0.06 | 1.11  | 0.728439 | 0.239778 | 0.873043 | 0.510505 |
| MmugDNA.8753.1.S1_x_at | MmugDNA.8753.1 | 8.5   | 8.44  | 0.8  | 0.13 | 1.04  | 0.273549 | 0.268195 | 0.565699 | 0.533915 |
| MmugDNA.8754.1.S1_at   | MmugDNA.8754.1 | 4.54  | 4.5   | 0.05 | 0.05 | 1.03  | 0.326527 | 0.484593 | 0.609577 | 0.688576 |
| MmugDNA.8755.1.S1_at   | MmugDNA.8755.1 | 11.55 | 10.83 | 0.05 | 0.06 | 1.65  | 0.00011  | 0.000028 | 0.051196 | 0.02122  |
| MmugDNA.8757.1.S1_at   | MmugDNA.8757.1 | 6.15  | 6.22  | 0.33 | 0.15 | -1.05 | 0.407271 | 0.420231 | 0.67039  | 0.644059 |
| MmugDNA.8759.1.S1_at   | MmugDNA.8759.1 | 7.27  | 7.26  | 0.78 | 0.44 | 1.01  | 0.532767 | 0.466678 | 0.756693 | 0.676425 |
| MmugDNA.8760.1.S1_at   | MmugDNA.8760.1 | 5.45  | 5.26  | 0.08 | 0.09 | 1.14  | 0.085565 | 0.041522 | 0.349971 | 0.24862  |
| MmugDNA.8762.1.S1_at   | MmugDNA.8762.1 | 3.21  | 3.05  | 0.05 | 0.14 | 1.12  | 0.097643 | 0.295883 | 0.368021 | 0.555241 |
| MmugDNA.8763.1.S1_at   | MmugDNA.8763.1 | 5.39  | 5.2   | 0.2  | 0.19 | 1.14  | 0.292752 | 0.47298  | 0.581832 | 0.680272 |
| MmugDNA.8763.1.S1_s_at | MmugDNA.8763.1 | 5.44  | 5.35  | 0.23 | 0.15 | 1.06  | 0.814396 | 0.739247 | 0.917056 | 0.848883 |
| MmugDNA.8764.1.S1_at   | MmugDNA.8764.1 | 3.47  | 3.39  | 0.13 | 0.15 | 1.06  | 0.55636  | 0.651099 | 0.771647 | 0.796031 |
| MmugDNA.8766.1.S1_at   | MmugDNA.8766.1 | 5.78  | 5.47  | 0.77 | 0.03 | 1.24  | 0.163029 | 0.224902 | 0.455189 | 0.497657 |
| MmugDNA.8768.1.S1_at   | MmugDNA.8768.1 | 11.25 | 11.28 | 0.04 | 0.08 | -1.02 | 0.996363 | 0.818656 | 0.998649 | 0.895512 |
| MmugDNA.8769.1.S1_at   | MmugDNA.8769.1 | 9.12  | 8.94  | 0.22 | 0.37 | 1.14  | 0.719691 | 0.932389 | 0.867731 | 0.961695 |
| MmugDNA.8770.1.S1_at   | MmugDNA.8770.1 | 10.48 | 10.64 | 0.12 | 0.09 | -1.12 | 0.653391 | 0.711473 | 0.832145 | 0.832695 |
| MmugDNA.8771.1.S1_at   | MmugDNA.8771.1 | 8.65  | 8.52  | 0.27 | 0.1  | 1.1   | 0.346198 | 0.026442 | 0.624868 | 0.203765 |
| MmugDNA.8773.1.S1_at   | MmugDNA.8773.1 | 7.65  | 7.16  | 1.17 | 0.28 | 1.41  | 0.259634 | 0.595466 | 0.554008 | 0.759091 |
| MmugDNA.8774.1.S1_at   | MmugDNA.8774.1 | 3.7   | 3.38  | 0.38 | 0.09 | 1.25  | 0.742737 | 0.418832 | 0.880969 | 0.643118 |
| MmugDNA.8775.1.S1_at   | MmugDNA.8775.1 | 7.42  | 7.8   | 0.32 | 0.31 | -1.31 | 0.093479 | 0.363956 | 0.362078 | 0.604326 |
| MmugDNA.8776.1.S1_at   | MmugDNA.8776.1 | 10.48 | 10.45 | 0.46 | 0.07 | 1.02  | 0.61912  | 0.553312 | 0.811006 | 0.73248  |
| MmugDNA.8777.1.S1_at   | MmugDNA.8777.1 | 7.37  | 8.04  | 0.33 | 0.15 | -1.58 | 0.090894 | 0.050883 | 0.358094 | 0.270882 |
| MmugDNA.8779.1.S1_at   | MmugDNA.8779.1 | 7.56  | 8.01  | 0.59 | 0.13 | -1.37 | 0.312766 | 0.350296 | 0.598778 | 0.594034 |
| MmugDNA.878.1.S1_x_at  | MmugDNA.878.1  | 4.06  | 3.9   | 0.27 | 0.06 | 1.12  | 0.155131 | 0.253288 | 0.445286 | 0.521662 |
| MmugDNA.8780.1.S1_at   | MmugDNA.8780.1 | 10.71 | 10.72 | 0.21 | 0.04 | -1    | 0.995146 | 0.774629 | 0.998014 | 0.868797 |
| MmugDNA.8782.1.S1_at   | MmugDNA.8782.1 | 4.99  | 4.77  | 0.21 | 0.03 | 1.17  | 0.385375 | 0.680835 | 0.654158 | 0.813597 |
| MmugDNA.8783.1.S1_at   | MmugDNA.8783.1 | 6.04  | 5.96  | 1.12 | 0.34 | 1.06  | 0.78438  | 0.738876 | 0.901638 | 0.848647 |
| MmugDNA.8784.1.S1_at   | MmugDNA.8784.1 | 3.97  | 3.97  | 0.04 | 0.09 | 1     | 0.798627 | 0.750529 | 0.909247 | 0.854881 |
| MmugDNA.8785.1.S1_at   | MmugDNA.8785.1 | 4.29  | 4.62  | 0.26 | 0.23 | -1.26 | 0.527815 | 0.032154 | 0.753319 | 0.222021 |
| MmugDNA.8786.1.S1_at   | MmugDNA.8786.1 | 7.24  | 6.82  | 0.47 | 0.43 | 1.34  | 0.379476 | 0.521735 | 0.649328 | 0.712623 |
| MmugDNA.8787.1.S1_at   | MmugDNA.8787.1 | 10.21 | 9.99  | 0.04 | 0.37 | 1.17  | 0.124307 | 0.013687 | 0.404399 | 0.149772 |
| MmugDNA.8788.1.S1_at   | MmugDNA.8788.1 | 5.45  | 5.47  | 1.29 | 0.26 | -1.01 | 0.394539 | 0.458192 | 0.661066 | 0.671077 |
| MmugDNA.8792.1.S1_at   | MmugDNA.8792.1 | 8.38  | 8.06  | 0.44 | 0.01 | 1.25  | 0.27855  | 0.029328 | 0.569919 | 0.213228 |
| MmugDNA.8795.1.S1_at   | MmugDNA.8795.1 | 6.03  | 9.08  | 0.99 | 0.28 | -8.27 | 0.008675 | 0.018267 | 0.142597 | 0.169975 |



|                      |                |       |       |      |      |       |          |          |          |          |
|----------------------|----------------|-------|-------|------|------|-------|----------|----------|----------|----------|
| MmugDNA.8796.1.S1_at | MmugDNA.8796.1 | 6.68  | 6.3   | 0.21 | 0.07 | 1.31  | 0.031249 | 0.018496 | 0.229951 | 0.171093 |
| MmugDNA.8798.1.S1_at | MmugDNA.8798.1 | 3.06  | 3.13  | 0.1  | 0.12 | -1.05 | 0.598034 | 0.170416 | 0.797092 | 0.447103 |
| MmugDNA.8799.1.S1_at | MmugDNA.8799.1 | 5.54  | 5.46  | 0.33 | 0.04 | 1.06  | 0.55058  | 0.216337 | 0.767898 | 0.489898 |
| MmugDNA.88.1.S1_at   | MmugDNA.88.1   | 6.47  | 6.66  | 0.85 | 0.35 | -1.14 | 0.722927 | 0.909864 | 0.869766 | 0.949148 |
| MmugDNA.880.1.S1_at  | MmugDNA.880.1  | 7.61  | 7.91  | 0.89 | 0.27 | -1.23 | 0.806448 | 0.853485 | 0.913279 | 0.916634 |
| MmugDNA.8800.1.S1_at | MmugDNA.8800.1 | 4.1   | 4.04  | 0.14 | 0.11 | 1.04  | 0.168235 | 0.21641  | 0.461466 | 0.489999 |
| MmugDNA.8801.1.S1_at | MmugDNA.8801.1 | 4     | 3.76  | 0.5  | 0.26 | 1.18  | 0.280475 | 0.392865 | 0.571599 | 0.625868 |
| MmugDNA.8802.1.S1_at | MmugDNA.8802.1 | 7.19  | 7.2   | 0.23 | 0.31 | -1.01 | 0.662356 | 0.742779 | 0.837065 | 0.851023 |
| MmugDNA.8803.1.S1_at | MmugDNA.8803.1 | 5.17  | 5.18  | 0.03 | 0.1  | -1.01 | 0.935734 | 0.422095 | 0.973043 | 0.645462 |
| MmugDNA.8805.1.S1_at | MmugDNA.8805.1 | 5.99  | 6.39  | 0.06 | 0.1  | -1.32 | 0.002538 | 0.006357 | 0.094413 | 0.108372 |
| MmugDNA.8806.1.S1_at | MmugDNA.8806.1 | 11.9  | 11.95 | 0.03 | 0.09 | -1.04 | 0.275701 | 0.000675 | 0.567274 | 0.04413  |
| MmugDNA.8807.1.S1_at | MmugDNA.8807.1 | 7.03  | 6.8   | 0.23 | 0.09 | 1.18  | 0.490805 | 0.54812  | 0.728854 | 0.728892 |
| MmugDNA.8808.1.S1_at | MmugDNA.8808.1 | 5.38  | 5.4   | 0.15 | 0.04 | -1.01 | 0.710868 | 0.395688 | 0.863433 | 0.627623 |
| MmugDNA.8809.1.S1_at | MmugDNA.8809.1 | 10.22 | 10.49 | 0.16 | 0.25 | -1.2  | 0.137579 | 0.134334 | 0.422683 | 0.406603 |
| MmugDNA.881.1.S1_at  | MmugDNA.881.1  | 10.96 | 10.69 | 0.41 | 0.21 | 1.21  | 0.551224 | 0.024942 | 0.76831  | 0.197799 |
| MmugDNA.8810.1.S1_at | MmugDNA.8810.1 | 6.57  | 6.7   | 0.22 | 0.2  | -1.1  | 0.190596 | 0.711881 | 0.48678  | 0.832951 |
| MmugDNA.8813.1.S1_at | MmugDNA.8813.1 | 3.64  | 3.43  | 0.09 | 0.16 | 1.15  | 0.288949 | 0.095108 | 0.578669 | 0.352151 |
| MmugDNA.8814.1.S1_at | MmugDNA.8814.1 | 11.24 | 11.19 | 0.17 | 0.23 | 1.03  | 0.986422 | 0.104601 | 0.995228 | 0.365891 |
| MmugDNA.8815.1.S1_at | MmugDNA.8815.1 | 6     | 5.96  | 0.03 | 0.05 | 1.03  | 0.324243 | 0.05947  | 0.607948 | 0.290548 |
| MmugDNA.8816.1.S1_at | MmugDNA.8816.1 | 3.52  | 3.41  | 0.06 | 0.11 | 1.08  | 0.526603 | 0.131075 | 0.75269  | 0.403084 |
| MmugDNA.8818.1.S1_at | MmugDNA.8818.1 | 5.2   | 5.15  | 0.25 | 0.06 | 1.04  | 0.818955 | 0.312367 | 0.919338 | 0.567115 |
| MmugDNA.882.1.S1_at  | MmugDNA.882.1  | 5.24  | 5     | 0.3  | 0.24 | 1.18  | 0.171949 | 0.359978 | 0.465968 | 0.601195 |
| MmugDNA.8821.1.S1_at | MmugDNA.8821.1 | 5.49  | 5.4   | 0.17 | 0.14 | 1.06  | 0.412188 | 0.366315 | 0.673975 | 0.606072 |
| MmugDNA.8822.1.S1_at | MmugDNA.8822.1 | 6.01  | 7.03  | 0.38 | 0.23 | -2.04 | 0.015737 | 0.095463 | 0.177874 | 0.352482 |
| MmugDNA.8825.1.S1_at | MmugDNA.8825.1 | 9.24  | 9.78  | 0.13 | 0.19 | -1.46 | 0.012555 | 0.013074 | 0.162479 | 0.147079 |
| MmugDNA.8828.1.S1_at | MmugDNA.8828.1 | 6.52  | 5.53  | 1.12 | 0.23 | 1.99  | 0.759404 | 0.41553  | 0.889659 | 0.640923 |
| MmugDNA.8829.1.S1_at | MmugDNA.8829.1 | 11.02 | 10.9  | 0.2  | 0.2  | 1.09  | 0.155411 | 0.35923  | 0.445785 | 0.600537 |
| MmugDNA.883.1.S1_at  | MmugDNA.883.1  | 3.59  | 3.6   | 0.25 | 0.09 | -1    | 0.630638 | 0.699091 | 0.818647 | 0.825164 |
| MmugDNA.8830.1.S1_at | MmugDNA.8830.1 | 5.1   | 4.85  | 0.14 | 0.12 | 1.19  | 0.075276 | 0.174926 | 0.332516 | 0.451595 |
| MmugDNA.8831.1.S1_at | MmugDNA.8831.1 | 6.24  | 5.78  | 0.87 | 0.27 | 1.38  | 0.409388 | 0.561434 | 0.671738 | 0.737397 |
| MmugDNA.8833.1.S1_at | MmugDNA.8833.1 | 12.38 | 12.4  | 0.07 | 0.01 | -1.01 | 0.221851 | 0.571311 | 0.519887 | 0.743642 |
| MmugDNA.8834.1.S1_at | MmugDNA.8834.1 | 7.09  | 8.12  | 0.75 | 0.26 | -2.04 | 0.355424 | 0.152982 | 0.632237 | 0.427792 |
| MmugDNA.8835.1.S1_at | MmugDNA.8835.1 | 2.98  | 2.97  | 0.1  | 0.06 | 1.01  | 0.460571 | 0.829822 | 0.708278 | 0.902225 |
| MmugDNA.8836.1.S1_at | MmugDNA.8836.1 | 9.67  | 8.81  | 0.4  | 0.14 | 1.82  | 0.019683 | 0.001169 | 0.193195 | 0.053679 |
| MmugDNA.8837.1.S1_at | MmugDNA.8837.1 | 7.87  | 8.24  | 0.15 | 0.27 | -1.3  | 0.278901 | 0.301884 | 0.570239 | 0.559811 |
| MmugDNA.8838.1.S1_at | MmugDNA.8838.1 | 4.61  | 4.79  | 0.18 | 0.08 | -1.13 | 0.267817 | 0.354744 | 0.560554 | 0.597422 |
| MmugDNA.8839.1.S1_at | MmugDNA.8839.1 | 4.87  | 4.86  | 0.1  | 0.09 | 1     | 0.917567 | 0.530744 | 0.964862 | 0.718104 |
| MmugDNA.884.1.S1_at  | MmugDNA.884.1  | 3.53  | 3.54  | 0.04 | 0.16 | -1.01 | 0.681948 | 0.227357 | 0.848286 | 0.499659 |
| MmugDNA.8840.1.S1_at | MmugDNA.8840.1 | 2.95  | 2.96  | 0.03 | 0.01 | -1.01 | 0.862605 | 0.899297 | 0.940259 | 0.942757 |
| MmugDNA.8841.1.S1_at | MmugDNA.8841.1 | 3.46  | 3.44  | 0.06 | 0.15 | 1.01  | 0.995008 | 0.529774 | 0.997971 | 0.717498 |
| MmugDNA.8842.1.S1_at | MmugDNA.8842.1 | 4.23  | 3.96  | 0.18 | 0.1  | 1.2   | 0.058923 | 0.048824 | 0.299904 | 0.265858 |
| MmugDNA.8843.1.S1_at | MmugDNA.8843.1 | 3.32  | 3.29  | 0.28 | 0.09 | 1.02  | 0.538011 | 0.872077 | 0.760013 | 0.927221 |
| MmugDNA.8844.1.S1_at | MmugDNA.8844.1 | 10.46 | 9.5   | 0.25 | 0.35 | 1.95  | 0.026045 | 0.058616 | 0.214399 | 0.288819 |

|                        |                |       |       |      |      |       |          |          |          |          |
|------------------------|----------------|-------|-------|------|------|-------|----------|----------|----------|----------|
| MmugDNA.8846.1.S1_at   | MmugDNA.8846.1 | 4.47  | 3.99  | 0.14 | 0.17 | 1.4   | 0.027728 | 0.018925 | 0.218946 | 0.173058 |
| MmugDNA.8847.1.S1_at   | MmugDNA.8847.1 | 5.85  | 6.89  | 0.37 | 0.19 | -2.05 | 0.026015 | 0.103808 | 0.214209 | 0.364519 |
| MmugDNA.8848.1.S1_at   | MmugDNA.8848.1 | 6.48  | 9.25  | 1.05 | 0.25 | -6.83 | 0.031002 | 0.20797  | 0.229092 | 0.482049 |
| MmugDNA.8849.1.S1_at   | MmugDNA.8849.1 | 8.24  | 8.24  | 0.07 | 0.15 | 1     | 0.938236 | 0.816024 | 0.973863 | 0.893871 |
| MmugDNA.885.1.S1_at    | MmugDNA.885.1  | 3.65  | 3.72  | 0.01 | 0.27 | -1.05 | 0.713086 | 0.84353  | 0.864548 | 0.910896 |
| MmugDNA.8852.1.S1_at   | MmugDNA.8852.1 | 9.57  | 9.04  | 0.06 | 0.37 | 1.45  | 0.201505 | 0.006254 | 0.49907  | 0.10728  |
| MmugDNA.8853.1.S1_at   | MmugDNA.8853.1 | 5.37  | 5.18  | 0.05 | 0.06 | 1.14  | 0.00472  | 0.001889 | 0.115008 | 0.065004 |
| MmugDNA.8854.1.S1_at   | MmugDNA.8854.1 | 7.27  | 7.04  | 0.24 | 0.26 | 1.17  | 0.065933 | 0.023542 | 0.314244 | 0.192231 |
| MmugDNA.8856.1.S1_at   | MmugDNA.8856.1 | 4.67  | 4.95  | 0.2  | 0.13 | -1.21 | 0.109538 | 0.011093 | 0.384571 | 0.137051 |
| MmugDNA.8857.1.S1_at   | MmugDNA.8857.1 | 3.92  | 4.01  | 0.08 | 0.15 | -1.07 | 0.41705  | 0.393797 | 0.677297 | 0.626565 |
| MmugDNA.8858.1.S1_at   | MmugDNA.8858.1 | 9.13  | 8.2   | 0.15 | 0.23 | 1.9   | 0.004    | 0.188596 | 0.108676 | 0.464557 |
| MmugDNA.8859.1.S1_at   | MmugDNA.8859.1 | 3.33  | 3.27  | 0.16 | 0.13 | 1.05  | 0.507985 | 0.219335 | 0.740166 | 0.493095 |
| MmugDNA.886.1.S1_at    | MmugDNA.886.1  | 7.92  | 6.38  | 1    | 0.75 | 2.9   | 0.175698 | 0.11037  | 0.470151 | 0.374541 |
| MmugDNA.8860.1.S1_at   | MmugDNA.8860.1 | 6.86  | 6.72  | 0.19 | 0.11 | 1.1   | 0.125982 | 0.223838 | 0.406918 | 0.496802 |
| MmugDNA.8861.1.S1_at   | MmugDNA.8861.1 | 13.15 | 13.48 | 0.16 | 0.06 | -1.26 | 0.039643 | 0.077712 | 0.255709 | 0.323851 |
| MmugDNA.8862.1.S1_at   | MmugDNA.8862.1 | 6.43  | 6.68  | 0.69 | 0.07 | -1.19 | 0.700493 | 0.636221 | 0.857773 | 0.785986 |
| MmugDNA.8864.1.S1_at   | MmugDNA.8864.1 | 6.26  | 6.09  | 0.14 | 0.12 | 1.13  | 0.197038 | 0.053068 | 0.494219 | 0.27607  |
| MmugDNA.8865.1.S1_at   | MmugDNA.8865.1 | 7.39  | 7.74  | 0.74 | 0.41 | -1.28 | 0.741996 | 0.70266  | 0.880498 | 0.827658 |
| MmugDNA.8867.1.S1_at   | MmugDNA.8867.1 | 5.13  | 6.85  | 0.41 | 0.46 | -3.29 | 0.012934 | 0.009128 | 0.164364 | 0.125994 |
| MmugDNA.8869.1.S1_at   | MmugDNA.8869.1 | 6.68  | 6.77  | 0.06 | 0.05 | -1.06 | 0.342273 | 0.060105 | 0.622096 | 0.291829 |
| MmugDNA.887.1.S1_at    | MmugDNA.887.1  | 11.87 | 11.65 | 0.11 | 0.15 | 1.16  | 0.199196 | 0.069153 | 0.49658  | 0.30917  |
| MmugDNA.8871.1.S1_at   | MmugDNA.8871.1 | 6.6   | 6.6   | 0.2  | 0.11 | -1    | 0.685665 | 0.720207 | 0.850226 | 0.838202 |
| MmugDNA.8873.1.S1_s_at | MmugDNA.8873.1 | 14.42 | 14.43 | 0.04 | 0    | -1.01 | 0.64009  | 0.290408 | 0.824018 | 0.551169 |
| MmugDNA.8874.1.S1_at   | MmugDNA.8874.1 | 6.61  | 6.71  | 0.18 | 0.06 | -1.07 | 0.197927 | 0.035551 | 0.49515  | 0.232812 |
| MmugDNA.8875.1.S1_at   | MmugDNA.8875.1 | 6.12  | 6.17  | 0.13 | 0.11 | -1.03 | 0.94013  | 0.249724 | 0.97477  | 0.518832 |
| MmugDNA.8876.1.S1_at   | MmugDNA.8876.1 | 5.91  | 5.98  | 0.14 | 0.12 | -1.05 | 0.225433 | 0.095076 | 0.523271 | 0.352124 |
| MmugDNA.8877.1.S1_at   | MmugDNA.8877.1 | 11.72 | 10.88 | 0.17 | 0.18 | 1.78  | 0.00567  | 0.132606 | 0.120889 | 0.404544 |
| MmugDNA.8878.1.S1_at   | MmugDNA.8878.1 | 5.58  | 5.64  | 0.02 | 0.07 | -1.04 | 0.054028 | 0.315309 | 0.289556 | 0.568939 |
| MmugDNA.888.1.S1_at    | MmugDNA.888.1  | 8.02  | 7.55  | 0.57 | 0.23 | 1.39  | 0.24028  | 0.072999 | 0.537838 | 0.31601  |
| MmugDNA.8880.1.S1_at   | MmugDNA.8880.1 | 5.64  | 5.45  | 0.43 | 0.13 | 1.14  | 0.182374 | 0.357612 | 0.478109 | 0.599228 |
| MmugDNA.8881.1.S1_at   | MmugDNA.8881.1 | 3.37  | 3.31  | 0.03 | 0.07 | 1.04  | 0.073013 | 0.413709 | 0.327873 | 0.639742 |
| MmugDNA.8884.1.S1_at   | MmugDNA.8884.1 | 3.15  | 3.22  | 0    | 0.12 | -1.05 | 0.953283 | 0.939904 | 0.980807 | 0.96581  |
| MmugDNA.8885.1.S1_at   | MmugDNA.8885.1 | 12.53 | 12.31 | 0.14 | 0.01 | 1.16  | 0.114849 | 0.367558 | 0.391836 | 0.607217 |
| MmugDNA.8889.1.S1_at   | MmugDNA.8889.1 | 3.92  | 3.79  | 0.31 | 0.08 | 1.1   | 0.398144 | 0.558283 | 0.663636 | 0.735506 |
| MmugDNA.889.1.S1_at    | MmugDNA.889.1  | 4.57  | 5.04  | 0.18 | 0.14 | -1.38 | 0.022775 | 0.057257 | 0.204093 | 0.285098 |
| MmugDNA.8890.1.S1_at   | MmugDNA.8890.1 | 7.01  | 7.2   | 0.03 | 0.16 | -1.14 | 0.166588 | 0.189217 | 0.459786 | 0.464997 |
| MmugDNA.8891.1.S1_at   | MmugDNA.8891.1 | 3.71  | 3.53  | 0.32 | 0.02 | 1.13  | 0.870804 | 0.893596 | 0.944458 | 0.939277 |
| MmugDNA.8892.1.S1_at   | MmugDNA.8892.1 | 4.46  | 4.31  | 0.48 | 0.07 | 1.11  | 0.689267 | 0.85876  | 0.851616 | 0.919572 |
| MmugDNA.8893.1.S1_at   | MmugDNA.8893.1 | 9.47  | 7.92  | 0.59 | 0.03 | 2.91  | 0.014996 | 0.00366  | 0.174543 | 0.086526 |
| MmugDNA.8894.1.S1_at   | MmugDNA.8894.1 | 8.26  | 8.18  | 0.13 | 0.05 | 1.05  | 0.953002 | 0.673412 | 0.980622 | 0.809182 |
| MmugDNA.8897.1.S1_at   | MmugDNA.8897.1 | 4.59  | 4.93  | 0.62 | 0.1  | -1.26 | 0.979771 | 0.96671  | 0.992265 | 0.981489 |
| MmugDNA.8898.1.S1_at   | MmugDNA.8898.1 | 8.62  | 8.25  | 0.08 | 0.33 | 1.29  | 0.11974  | 0.040979 | 0.397715 | 0.247202 |
| MmugDNA.8899.1.S1_at   | MmugDNA.8899.1 | 6.75  | 6.74  | 0.1  | 0.07 | 1.01  | 0.916254 | 0.341938 | 0.964383 | 0.588008 |

|                        |                |       |       |      |      |       |          |          |          |          |
|------------------------|----------------|-------|-------|------|------|-------|----------|----------|----------|----------|
| MmugDNA.89.1.S1_at     | MmugDNA.89.1   | 9.84  | 9.7   | 0.17 | 0.07 | 1.1   | 0.524769 | 0.264265 | 0.751548 | 0.530329 |
| MmugDNA.890.1.S1_at    | MmugDNA.890.1  | 9.42  | 9.45  | 0.1  | 0.18 | -1.02 | 0.720518 | 0.31148  | 0.868055 | 0.566468 |
| MmugDNA.8900.1.S1_at   | MmugDNA.8900.1 | 5.95  | 6.42  | 1.25 | 0.23 | -1.38 | 0.73527  | 0.868891 | 0.876788 | 0.925527 |
| MmugDNA.8901.1.S1_at   | MmugDNA.8901.1 | 6.11  | 6.22  | 0.21 | 0.11 | -1.08 | 0.630991 | 0.872627 | 0.818745 | 0.927581 |
| MmugDNA.8901.1.S1_x_at | MmugDNA.8901.1 | 6.76  | 6.74  | 0.11 | 0.05 | 1.02  | 0.329529 | 0.208288 | 0.611784 | 0.48217  |
| MmugDNA.8902.1.S1_at   | MmugDNA.8902.1 | 9.81  | 10.33 | 0.2  | 0.26 | -1.44 | 0.051015 | 0.198104 | 0.283499 | 0.473108 |
| MmugDNA.8902.1.S1_s_at | MmugDNA.8902.1 | 9.37  | 9.89  | 0.04 | 0.14 | -1.43 | 0.006082 | 0.201199 | 0.124422 | 0.475646 |
| MmugDNA.8904.1.S1_at   | MmugDNA.8904.1 | 5.02  | 5.02  | 0.01 | 0.03 | 1     | 0.670838 | 0.2761   | 0.842083 | 0.540133 |
| MmugDNA.8905.1.S1_at   | MmugDNA.8905.1 | 8.2   | 7.92  | 0.42 | 0.13 | 1.21  | 0.123691 | 0.597998 | 0.403307 | 0.760536 |
| MmugDNA.8907.1.S1_at   | MmugDNA.8907.1 | 5.11  | 5.13  | 0.23 | 0.2  | -1.01 | 0.342045 | 0.587499 | 0.621859 | 0.754278 |
| MmugDNA.8908.1.S1_at   | MmugDNA.8908.1 | 4.28  | 4.29  | 0.34 | 0.13 | -1.01 | 0.708875 | 0.808274 | 0.862101 | 0.889645 |
| MmugDNA.8909.1.S1_at   | MmugDNA.8909.1 | 11.77 | 11.76 | 0.1  | 0.08 | 1     | 0.583097 | 0.002984 | 0.78781  | 0.079958 |
| MmugDNA.8910.1.S1_at   | MmugDNA.8910.1 | 5.08  | 5.31  | 0.15 | 0.08 | -1.17 | 0.079232 | 0.090249 | 0.339129 | 0.344664 |
| MmugDNA.8911.1.S1_at   | MmugDNA.8911.1 | 5.68  | 5.41  | 0.51 | 0.08 | 1.2   | 0.212441 | 0.332075 | 0.510496 | 0.580584 |
| MmugDNA.8912.1.S1_at   | MmugDNA.8912.1 | 3.6   | 3.52  | 0.04 | 0.03 | 1.06  | 0.073555 | 0.245999 | 0.328967 | 0.515713 |
| MmugDNA.8914.1.S1_at   | MmugDNA.8914.1 | 10.8  | 9.99  | 0.11 | 0.14 | 1.76  | 0.001314 | 0.002796 | 0.078631 | 0.077966 |
| MmugDNA.8915.1.S1_at   | MmugDNA.8915.1 | 7.46  | 6.54  | 0.6  | 0.11 | 1.9   | 0.045995 | 0.037272 | 0.272121 | 0.237508 |
| MmugDNA.8916.1.S1_at   | MmugDNA.8916.1 | 11.52 | 10.9  | 0.09 | 0.15 | 1.54  | 0.008943 | 0.049681 | 0.144294 | 0.267892 |
| MmugDNA.8917.1.S1_at   | MmugDNA.8917.1 | 4.69  | 4.11  | 0.03 | 0.15 | 1.49  | 0.002412 | 0.005843 | 0.093606 | 0.10467  |
| MmugDNA.8919.1.S1_at   | MmugDNA.8919.1 | 7.8   | 8.39  | 0.68 | 0.16 | -1.5  | 0.22731  | 0.085873 | 0.525321 | 0.338025 |
| MmugDNA.892.1.S1_at    | MmugDNA.892.1  | 7.93  | 7.44  | 0.45 | 0.3  | 1.4   | 0.240531 | 0.002444 | 0.53802  | 0.073201 |
| MmugDNA.8920.1.S1_at   | MmugDNA.8920.1 | 3.97  | 3.92  | 0.34 | 0.04 | 1.04  | 0.270888 | 0.397968 | 0.562868 | 0.629138 |
| MmugDNA.8922.1.S1_at   | MmugDNA.8922.1 | 6.69  | 7.95  | 1.18 | 0.36 | -2.4  | 0.60562  | 0.783514 | 0.802615 | 0.874643 |
| MmugDNA.8923.1.S1_at   | MmugDNA.8923.1 | 4.14  | 3.98  | 0.2  | 0.06 | 1.12  | 0.521117 | 0.707501 | 0.749221 | 0.830363 |
| MmugDNA.8924.1.S1_at   | MmugDNA.8924.1 | 4.52  | 4.49  | 0.07 | 0.24 | 1.02  | 0.578189 | 0.696042 | 0.784023 | 0.823404 |
| MmugDNA.8925.1.S1_at   | MmugDNA.8925.1 | 9.44  | 9.42  | 1.24 | 0.39 | 1.01  | 0.563626 | 0.4983   | 0.775596 | 0.697411 |
| MmugDNA.8928.1.S1_at   | MmugDNA.8928.1 | 4.88  | 5     | 0.38 | 0.03 | -1.09 | 0.239038 | 0.461895 | 0.536338 | 0.673417 |
| MmugDNA.8929.1.S1_at   | MmugDNA.8929.1 | 6.95  | 6.87  | 0.21 | 0.05 | 1.06  | 0.398289 | 0.786194 | 0.663814 | 0.876192 |
| MmugDNA.893.1.S1_at    | MmugDNA.893.1  | 5.77  | 5.57  | 0.1  | 0.13 | 1.15  | 0.134625 | 0.246916 | 0.418463 | 0.516238 |
| MmugDNA.8930.1.S1_at   | MmugDNA.8930.1 | 7.42  | 7.25  | 0.22 | 0.02 | 1.13  | 0.1772   | 0.28733  | 0.471808 | 0.548603 |
| MmugDNA.8931.1.S1_at   | MmugDNA.8931.1 | 4.75  | 4.14  | 0.26 | 0.24 | 1.53  | 0.038014 | 0.030729 | 0.250711 | 0.217179 |
| MmugDNA.8932.1.S1_at   | MmugDNA.8932.1 | 3.19  | 3.09  | 0.1  | 0.11 | 1.07  | 0.061288 | 0.043066 | 0.304318 | 0.252157 |
| MmugDNA.8934.1.S1_at   | MmugDNA.8934.1 | 4.63  | 3.74  | 0.36 | 0.38 | 1.85  | 0.060302 | 0.03674  | 0.302684 | 0.236285 |
| MmugDNA.8937.1.S1_at   | MmugDNA.8937.1 | 5.68  | 5.68  | 0.1  | 0.07 | 1     | 0.238693 | 0.615637 | 0.53598  | 0.772121 |
| MmugDNA.8938.1.S1_at   | MmugDNA.8938.1 | 3.72  | 3.67  | 0.06 | 0.4  | 1.03  | 0.571664 | 0.348588 | 0.780018 | 0.59263  |
| MmugDNA.8939.1.S1_at   | MmugDNA.8939.1 | 7.54  | 7.41  | 0.27 | 0.16 | 1.1   | 0.214958 | 0.30473  | 0.512596 | 0.561921 |
| MmugDNA.894.1.S1_at    | MmugDNA.894.1  | 4.79  | 4.37  | 0.63 | 0.09 | 1.33  | 0.43115  | 0.014008 | 0.687274 | 0.151595 |
| MmugDNA.8940.1.S1_at   | MmugDNA.8940.1 | 6.57  | 8.17  | 0.63 | 0.16 | -3.04 | 0.018797 | 0.176097 | 0.190563 | 0.452581 |
| MmugDNA.8941.1.S1_at   | MmugDNA.8941.1 | 5.31  | 4.35  | 0.41 | 0.08 | 1.94  | 0.051534 | 0.061098 | 0.284421 | 0.293958 |
| MmugDNA.8942.1.S1_at   | MmugDNA.8942.1 | 3.56  | 3.56  | 0.12 | 0.05 | 1     | 0.414676 | 0.391916 | 0.675681 | 0.625419 |
| MmugDNA.8943.1.S1_at   | MmugDNA.8943.1 | 10.16 | 10.48 | 0.06 | 0.03 | -1.25 | 0.001109 | 0.014568 | 0.077306 | 0.153907 |
| MmugDNA.8944.1.S1_at   | MmugDNA.8944.1 | 5.5   | 5.38  | 0.27 | 0.15 | 1.08  | 0.719172 | 0.425938 | 0.867519 | 0.648127 |
| MmugDNA.8945.1.S1_at   | MmugDNA.8945.1 | 4.2   | 4.04  | 0.24 | 0.01 | 1.12  | 0.300983 | 0.474385 | 0.589056 | 0.681421 |

|                        |                |       |       |      |      |       |          |          |          |          |
|------------------------|----------------|-------|-------|------|------|-------|----------|----------|----------|----------|
| MmugDNA.8946.1.S1_at   | MmugDNA.8946.1 | 10.93 | 10.73 | 0.05 | 0.13 | 1.15  | 0.037367 | 0.000229 | 0.248698 | 0.032385 |
| MmugDNA.8947.1.S1_at   | MmugDNA.8947.1 | 5.77  | 6.97  | 0.36 | 0.31 | -2.3  | 0.011406 | 0.160769 | 0.157067 | 0.436897 |
| MmugDNA.8948.1.S1_at   | MmugDNA.8948.1 | 3.24  | 3.06  | 0.48 | 0.06 | 1.13  | 0.330535 | 0.425198 | 0.61256  | 0.647647 |
| MmugDNA.8949.1.S1_at   | MmugDNA.8949.1 | 6.89  | 6.93  | 0.11 | 0.05 | -1.03 | 0.575991 | 0.024051 | 0.783032 | 0.194384 |
| MmugDNA.8949.1.S1_s_at | MmugDNA.8949.1 | 6.4   | 6.1   | 0.49 | 0.19 | 1.23  | 0.462801 | 0.639758 | 0.709796 | 0.788438 |
| MmugDNA.895.1.S1_s_at  | MmugDNA.895.1  | 12.38 | 12.34 | 0.15 | 0.02 | 1.03  | 0.273    | 0.114639 | 0.565169 | 0.381156 |
| MmugDNA.8951.1.S1_at   | MmugDNA.8951.1 | 8.33  | 7.64  | 0.34 | 0.08 | 1.61  | 0.010492 | 0.038241 | 0.152373 | 0.240265 |
| MmugDNA.8952.1.S1_at   | MmugDNA.8952.1 | 8.52  | 10.44 | 0.26 | 0.35 | -3.77 | 0.002343 | 0.025084 | 0.092897 | 0.19842  |
| MmugDNA.8953.1.S1_at   | MmugDNA.8953.1 | 4.12  | 3.96  | 0.13 | 0.23 | 1.12  | 0.896492 | 0.82693  | 0.955936 | 0.900611 |
| MmugDNA.8955.1.S1_at   | MmugDNA.8955.1 | 3.27  | 3.2   | 0.12 | 0.1  | 1.05  | 0.410078 | 0.446885 | 0.672272 | 0.663072 |
| MmugDNA.8956.1.S1_at   | MmugDNA.8956.1 | 4.23  | 4.32  | 0.1  | 0.48 | -1.07 | 0.264063 | 0.486236 | 0.557422 | 0.689657 |
| MmugDNA.8957.1.S1_at   | MmugDNA.8957.1 | 11.8  | 11.86 | 0.17 | 0.02 | -1.04 | 0.707624 | 0.606686 | 0.861511 | 0.765928 |
| MmugDNA.8959.1.S1_at   | MmugDNA.8959.1 | 9.26  | 9.43  | 0.22 | 0.26 | -1.13 | 0.510142 | 0.177433 | 0.741549 | 0.453773 |
| MmugDNA.8960.1.S1_at   | MmugDNA.8960.1 | 9.48  | 8.77  | 0.43 | 0.46 | 1.64  | 0.083489 | 0.172709 | 0.345905 | 0.449206 |
| MmugDNA.8961.1.S1_at   | MmugDNA.8961.1 | 11    | 11.16 | 0.07 | 0.06 | -1.12 | 0.176041 | 0.894977 | 0.470426 | 0.940055 |
| MmugDNA.8962.1.S1_at   | MmugDNA.8962.1 | 6.46  | 6.47  | 0.09 | 0.04 | -1.01 | 0.524496 | 0.862329 | 0.751321 | 0.921714 |
| MmugDNA.8965.1.S1_at   | MmugDNA.8965.1 | 5.63  | 5.93  | 0.76 | 0.34 | -1.23 | 0.881982 | 0.562007 | 0.949748 | 0.737679 |
| MmugDNA.8967.1.S1_at   | MmugDNA.8967.1 | 4.6   | 4.56  | 0.03 | 0.14 | 1.03  | 0.999507 | 0.111179 | 0.999849 | 0.375798 |
| MmugDNA.8968.1.S1_at   | MmugDNA.8968.1 | 8.32  | 8.32  | 0.14 | 0.07 | -1    | 0.392486 | 0.450396 | 0.659423 | 0.665643 |
| MmugDNA.897.1.S1_at    | MmugDNA.897.1  | 4.51  | 4.58  | 0.15 | 0.34 | -1.05 | 0.292137 | 0.428877 | 0.581449 | 0.650408 |
| MmugDNA.8971.1.S1_at   | MmugDNA.8971.1 | 5.01  | 4.57  | 0.26 | 0.47 | 1.35  | 0.949759 | 0.799043 | 0.979093 | 0.884285 |
| MmugDNA.8972.1.S1_at   | MmugDNA.8972.1 | 6.63  | 6.51  | 0.23 | 0.1  | 1.08  | 0.266897 | 0.318029 | 0.559479 | 0.571046 |
| MmugDNA.8973.1.S1_at   | MmugDNA.8973.1 | 3.51  | 3.56  | 0.11 | 0.12 | -1.03 | 0.303534 | 0.765159 | 0.591015 | 0.86347  |
| MmugDNA.8976.1.S1_at   | MmugDNA.8976.1 | 3.85  | 4.03  | 0.11 | 0.14 | -1.13 | 0.397256 | 0.193245 | 0.662987 | 0.468578 |
| MmugDNA.8977.1.S1_at   | MmugDNA.8977.1 | 8.27  | 8.87  | 0.27 | 0.32 | -1.52 | 0.153257 | 0.543651 | 0.442946 | 0.726239 |
| MmugDNA.8978.1.S1_at   | MmugDNA.8978.1 | 6.9   | 6.93  | 0.15 | 0.13 | -1.02 | 0.781502 | 0.715271 | 0.900207 | 0.834959 |
| MmugDNA.8979.1.S1_at   | MmugDNA.8979.1 | 5.93  | 4.88  | 0.51 | 0.28 | 2.08  | 0.146329 | 0.171359 | 0.434192 | 0.447817 |
| MmugDNA.898.1.S1_at    | MmugDNA.898.1  | 6.09  | 6.09  | 0.27 | 0.02 | 1     | 0.998784 | 0.780122 | 0.999597 | 0.872514 |
| MmugDNA.8981.1.S1_at   | MmugDNA.8981.1 | 3.73  | 3.6   | 0.24 | 0.08 | 1.09  | 0.098991 | 0.048588 | 0.36986  | 0.265572 |
| MmugDNA.8982.1.S1_at   | MmugDNA.8982.1 | 8.98  | 8.8   | 0.09 | 0.17 | 1.13  | 0.08915  | 0.084846 | 0.355884 | 0.336385 |
| MmugDNA.8983.1.S1_at   | MmugDNA.8983.1 | 6.73  | 7.24  | 0.64 | 0.07 | -1.42 | 0.654115 | 0.848205 | 0.832526 | 0.913822 |
| MmugDNA.8984.1.S1_at   | MmugDNA.8984.1 | 3.24  | 3.33  | 0.11 | 0.09 | -1.06 | 0.640505 | 0.168284 | 0.824317 | 0.444935 |
| MmugDNA.8985.1.S1_at   | MmugDNA.8985.1 | 4.22  | 3.95  | 0.33 | 0.03 | 1.21  | 0.294116 | 0.270451 | 0.583157 | 0.535785 |
| MmugDNA.8986.1.S1_at   | MmugDNA.8986.1 | 3.42  | 3.47  | 0.16 | 0.15 | -1.03 | 0.787678 | 0.192852 | 0.90334  | 0.468376 |
| MmugDNA.8987.1.S1_at   | MmugDNA.8987.1 | 9.78  | 9.57  | 0.08 | 0.03 | 1.15  | 0.018003 | 0.793695 | 0.187205 | 0.881022 |
| MmugDNA.8988.1.S1_at   | MmugDNA.8988.1 | 12.12 | 12.08 | 0.27 | 0.12 | 1.03  | 0.276106 | 0.213822 | 0.567711 | 0.48758  |
| MmugDNA.8989.1.S1_at   | MmugDNA.8989.1 | 9.02  | 9.2   | 0.41 | 0.27 | -1.14 | 0.938522 | 0.194983 | 0.974084 | 0.470138 |
| MmugDNA.8990.1.S1_at   | MmugDNA.8990.1 | 7.54  | 7.33  | 0.22 | 0.16 | 1.16  | 0.129281 | 0.024405 | 0.411613 | 0.19551  |
| MmugDNA.8991.1.S1_at   | MmugDNA.8991.1 | 7.17  | 8.73  | 1.56 | 0.34 | -2.95 | 0.470612 | 0.48043  | 0.715038 | 0.685781 |
| MmugDNA.8992.1.S1_at   | MmugDNA.8992.1 | 6.36  | 6.1   | 0.06 | 0.15 | 1.2   | 0.172093 | 0.098526 | 0.466142 | 0.356636 |
| MmugDNA.8993.1.S1_at   | MmugDNA.8993.1 | 7.41  | 7.68  | 0.28 | 0.19 | -1.2  | 0.435375 | 0.681511 | 0.690435 | 0.814092 |
| MmugDNA.8994.1.S1_at   | MmugDNA.8994.1 | 3.56  | 3.58  | 0.21 | 0.1  | -1.02 | 0.946017 | 0.728516 | 0.977211 | 0.843068 |
| MmugDNA.8995.1.S1_at   | MmugDNA.8995.1 | 5.88  | 5.72  | 0.26 | 0.21 | 1.11  | 0.543284 | 0.62948  | 0.763361 | 0.781895 |

|                      |                |       |       |      |      |       |          |          |          |          |
|----------------------|----------------|-------|-------|------|------|-------|----------|----------|----------|----------|
| MmugDNA.8997.1.S1_at | MmugDNA.8997.1 | 13.2  | 13.06 | 0.1  | 0.05 | 1.1   | 0.087871 | 0.001457 | 0.353994 | 0.058186 |
| MmugDNA.8998.1.S1_at | MmugDNA.8998.1 | 3.64  | 3.66  | 0.09 | 0.22 | -1.01 | 0.857005 | 0.921024 | 0.937926 | 0.955491 |
| MmugDNA.8999.1.S1_at | MmugDNA.8999.1 | 5.99  | 5.68  | 0.19 | 0.29 | 1.24  | 0.26756  | 0.382923 | 0.56038  | 0.61902  |
| MmugDNA.9.1.S1_at    | MmugDNA.9.1    | 4.52  | 4.51  | 0.14 | 0.06 | 1.01  | 0.92539  | 0.760255 | 0.968364 | 0.86071  |
| MmugDNA.90.1.S1_at   | MmugDNA.90.1   | 4.02  | 4.04  | 0.24 | 0.09 | -1.01 | 0.556107 | 0.746055 | 0.771459 | 0.852688 |
| MmugDNA.9003.1.S1_at | MmugDNA.9003.1 | 3.43  | 3.45  | 0.17 | 0.12 | -1.02 | 0.302549 | 0.196249 | 0.590347 | 0.471236 |
| MmugDNA.9005.1.S1_at | MmugDNA.9005.1 | 4.78  | 4.79  | 0.03 | 0.17 | -1.01 | 0.522393 | 0.694144 | 0.749806 | 0.822134 |
| MmugDNA.9007.1.S1_at | MmugDNA.9007.1 | 3.47  | 3.38  | 0.13 | 0.1  | 1.06  | 0.143612 | 0.209239 | 0.430076 | 0.48303  |
| MmugDNA.9008.1.S1_at | MmugDNA.9008.1 | 6.35  | 6.36  | 0.03 | 0.09 | -1.01 | 0.395808 | 0.813943 | 0.662054 | 0.892664 |
| MmugDNA.9009.1.S1_at | MmugDNA.9009.1 | 4.27  | 4.08  | 0.84 | 0.55 | 1.15  | 0.804316 | 0.950977 | 0.912045 | 0.972219 |
| MmugDNA.901.1.S1_at  | MmugDNA.901.1  | 6.66  | 7.09  | 0.09 | 0.04 | -1.34 | 0.001906 | 0.678603 | 0.087869 | 0.81228  |
| MmugDNA.9010.1.S1_at | MmugDNA.9010.1 | 4.15  | 4.07  | 0.12 | 0.09 | 1.06  | 0.192392 | 0.51529  | 0.488957 | 0.70823  |
| MmugDNA.9011.1.S1_at | MmugDNA.9011.1 | 9.58  | 9.35  | 0.14 | 0.04 | 1.17  | 0.180155 | 0.1946   | 0.475243 | 0.469707 |
| MmugDNA.9012.1.S1_at | MmugDNA.9012.1 | 4.51  | 4.43  | 0.73 | 0.21 | 1.06  | 0.755588 | 0.955365 | 0.887352 | 0.974645 |
| MmugDNA.9013.1.S1_at | MmugDNA.9013.1 | 5.22  | 5.23  | 0.07 | 0.01 | -1.01 | 0.238698 | 0.446201 | 0.53598  | 0.662743 |
| MmugDNA.9014.1.S1_at | MmugDNA.9014.1 | 6.94  | 7.11  | 0.15 | 0.24 | -1.12 | 0.659097 | 0.317862 | 0.835451 | 0.571042 |
| MmugDNA.9015.1.S1_at | MmugDNA.9015.1 | 3.86  | 3.7   | 0.09 | 0.34 | 1.12  | 0.953733 | 0.8586   | 0.981032 | 0.919494 |
| MmugDNA.9016.1.S1_at | MmugDNA.9016.1 | 6.34  | 6.63  | 0.5  | 0.1  | -1.22 | 0.373424 | 0.237558 | 0.645118 | 0.508196 |
| MmugDNA.9017.1.S1_at | MmugDNA.9017.1 | 7.09  | 5.88  | 0.73 | 0.11 | 2.32  | 0.054632 | 0.006583 | 0.290604 | 0.109998 |
| MmugDNA.9018.1.S1_at | MmugDNA.9018.1 | 4.39  | 4.35  | 0.5  | 0.2  | 1.03  | 0.522053 | 0.39869  | 0.749514 | 0.629458 |
| MmugDNA.9019.1.S1_at | MmugDNA.9019.1 | 6.13  | 6.9   | 0.43 | 0.42 | -1.7  | 0.157157 | 0.450719 | 0.447994 | 0.665844 |
| MmugDNA.9021.1.S1_at | MmugDNA.9021.1 | 5     | 4.09  | 0.47 | 0.27 | 1.88  | 0.074161 | 0.028381 | 0.330427 | 0.210319 |
| MmugDNA.9023.1.S1_at | MmugDNA.9023.1 | 5.62  | 5.56  | 0.13 | 0.11 | 1.05  | 0.280877 | 0.4308   | 0.571843 | 0.651811 |
| MmugDNA.9024.1.S1_at | MmugDNA.9024.1 | 8.2   | 8.98  | 0.44 | 0.19 | -1.72 | 0.038628 | 0.043802 | 0.252573 | 0.25387  |
| MmugDNA.9026.1.S1_at | MmugDNA.9026.1 | 6.07  | 5.85  | 0.17 | 0.12 | 1.17  | 0.057213 | 0.043787 | 0.296556 | 0.25387  |
| MmugDNA.9027.1.S1_at | MmugDNA.9027.1 | 10.74 | 10.85 | 0.1  | 0.02 | -1.08 | 0.125499 | 0.3669   | 0.405993 | 0.606566 |
| MmugDNA.9028.1.S1_at | MmugDNA.9028.1 | 9.63  | 9.78  | 0.06 | 0.02 | -1.11 | 0.013222 | 0.003233 | 0.165553 | 0.08214  |
| MmugDNA.9029.1.S1_at | MmugDNA.9029.1 | 10.98 | 11.15 | 0.05 | 0.11 | -1.13 | 0.156539 | 0.011989 | 0.447079 | 0.141658 |
| MmugDNA.9034.1.S1_at | MmugDNA.9034.1 | 3.74  | 3.68  | 0.1  | 0.06 | 1.04  | 0.401602 | 0.637731 | 0.666149 | 0.787114 |
| MmugDNA.9036.1.S1_at | MmugDNA.9036.1 | 7.1   | 7.2   | 0.11 | 0.19 | -1.07 | 0.920677 | 0.607424 | 0.96609  | 0.766402 |
| MmugDNA.9037.1.S1_at | MmugDNA.9037.1 | 4.11  | 4.33  | 0.12 | 0.25 | -1.16 | 0.424791 | 0.50817  | 0.682288 | 0.703405 |
| MmugDNA.9038.1.S1_at | MmugDNA.9038.1 | 3.81  | 3.86  | 0.34 | 0.07 | -1.04 | 0.897702 | 0.751532 | 0.956564 | 0.855508 |
| MmugDNA.9039.1.S1_at | MmugDNA.9039.1 | 7.57  | 8.46  | 0.36 | 0.44 | -1.86 | 0.257894 | 0.389211 | 0.552089 | 0.623403 |
| MmugDNA.904.1.S1_at  | MmugDNA.904.1  | 7.86  | 8.33  | 0.61 | 0.24 | -1.38 | 0.629456 | 0.84983  | 0.817959 | 0.914673 |
| MmugDNA.9041.1.S1_at | MmugDNA.9041.1 | 9.1   | 9.14  | 0.22 | 0.26 | -1.03 | 0.632202 | 0.511771 | 0.819633 | 0.705797 |
| MmugDNA.9042.1.S1_at | MmugDNA.9042.1 | 3.54  | 3.21  | 0.1  | 0.03 | 1.26  | 0.005309 | 0.161284 | 0.117801 | 0.437434 |
| MmugDNA.9043.1.S1_at | MmugDNA.9043.1 | 6.85  | 5.49  | 0.22 | 0.31 | 2.56  | 0.005073 | 0.024094 | 0.116398 | 0.194493 |
| MmugDNA.9045.1.S1_at | MmugDNA.9045.1 | 10.35 | 10.21 | 0.21 | 0.02 | 1.11  | 0.522663 | 0.355767 | 0.749873 | 0.597864 |
| MmugDNA.9046.1.S1_at | MmugDNA.9046.1 | 3.06  | 2.99  | 0.19 | 0.09 | 1.05  | 0.357669 | 0.372839 | 0.633636 | 0.611735 |
| MmugDNA.905.1.S1_at  | MmugDNA.905.1  | 5.16  | 5.41  | 0.34 | 0.48 | -1.19 | 0.803888 | 0.063424 | 0.911913 | 0.298441 |
| MmugDNA.9050.1.S1_at | MmugDNA.9050.1 | 3.84  | 3.8   | 0    | 0.07 | 1.03  | 0.217279 | 0.666666 | 0.515088 | 0.804716 |
| MmugDNA.9053.1.S1_at | MmugDNA.9053.1 | 6.84  | 6.8   | 0.24 | 0.2  | 1.02  | 0.62764  | 0.395859 | 0.816925 | 0.627743 |
| MmugDNA.9054.1.S1_at | MmugDNA.9054.1 | 4.04  | 4.04  | 0.19 | 0.1  | -1    | 0.444017 | 0.650559 | 0.696961 | 0.795663 |

|                        |                |       |       |      |      |       |          |          |          |          |
|------------------------|----------------|-------|-------|------|------|-------|----------|----------|----------|----------|
| MmugDNA.9057.1.S1_at   | MmugDNA.9057.1 | 8.49  | 9.34  | 0.77 | 0.05 | -1.8  | 0.113459 | 0.323422 | 0.390238 | 0.574466 |
| MmugDNA.9058.1.S1_at   | MmugDNA.9058.1 | 4.34  | 4.27  | 0.08 | 0.07 | 1.05  | 0.121722 | 0.455229 | 0.400504 | 0.669198 |
| MmugDNA.9059.1.S1_at   | MmugDNA.9059.1 | 6.17  | 5.7   | 0.84 | 0.45 | 1.38  | 0.422975 | 0.389256 | 0.681093 | 0.623403 |
| MmugDNA.9060.1.S1_at   | MmugDNA.9060.1 | 6.78  | 6.96  | 0.15 | 0.05 | -1.13 | 0.438895 | 0.031598 | 0.693369 | 0.219905 |
| MmugDNA.9063.1.S1_at   | MmugDNA.9063.1 | 5.76  | 6.59  | 1.18 | 0.24 | -1.77 | 0.975964 | 0.807156 | 0.990409 | 0.888965 |
| MmugDNA.9064.1.S1_at   | MmugDNA.9064.1 | 11.02 | 10.17 | 0.53 | 0.23 | 1.81  | 0.06133  | 0.066541 | 0.304434 | 0.303711 |
| MmugDNA.9065.1.S1_at   | MmugDNA.9065.1 | 6.79  | 6.18  | 0.33 | 0.37 | 1.52  | 0.050485 | 0.397035 | 0.282507 | 0.62859  |
| MmugDNA.9067.1.S1_at   | MmugDNA.9067.1 | 3.84  | 3.66  | 0.09 | 0.12 | 1.13  | 0.097208 | 0.116494 | 0.367275 | 0.383671 |
| MmugDNA.9068.1.S1_at   | MmugDNA.9068.1 | 8.67  | 7.44  | 0.28 | 0.44 | 2.35  | 0.01164  | 0.094294 | 0.157734 | 0.350889 |
| MmugDNA.907.1.S1_at    | MmugDNA.907.1  | 6.99  | 7.06  | 0.2  | 0.09 | -1.05 | 0.365369 | 0.387829 | 0.639887 | 0.622486 |
| MmugDNA.9070.1.S1_at   | MmugDNA.9070.1 | 11.61 | 12.05 | 0.14 | 0.05 | -1.36 | 0.008406 | 0.601657 | 0.140949 | 0.763001 |
| MmugDNA.9071.1.S1_at   | MmugDNA.9071.1 | 5.22  | 5.11  | 0.77 | 0.75 | 1.07  | 0.590744 | 0.153792 | 0.792009 | 0.428488 |
| MmugDNA.9072.1.S1_at   | MmugDNA.9072.1 | 10.67 | 10.67 | 0.2  | 0.06 | 1     | 0.412795 | 0.368433 | 0.674343 | 0.60796  |
| MmugDNA.9073.1.S1_at   | MmugDNA.9073.1 | 4.01  | 4.84  | 0.24 | 0.4  | -1.78 | 0.085739 | 0.119894 | 0.350079 | 0.388593 |
| MmugDNA.9074.1.S1_at   | MmugDNA.9074.1 | 11.96 | 12.15 | 0.11 | 0.07 | -1.14 | 0.048545 | 0.434235 | 0.277767 | 0.654422 |
| MmugDNA.9074.1.S1_x_at | MmugDNA.9074.1 | 11.08 | 11.28 | 0.09 | 0.01 | -1.15 | 0.026373 | 0.439871 | 0.215478 | 0.658468 |
| MmugDNA.9075.1.S1_at   | MmugDNA.9075.1 | 10.62 | 9.34  | 0.11 | 0.13 | 2.43  | 0.000266 | 0.013468 | 0.056093 | 0.148626 |
| MmugDNA.9076.1.S1_at   | MmugDNA.9076.1 | 4.7   | 4.68  | 0.11 | 0.08 | 1.02  | 0.329124 | 0.367121 | 0.611461 | 0.606799 |
| MmugDNA.9077.1.S1_at   | MmugDNA.9077.1 | 5.46  | 5.08  | 0.11 | 0.25 | 1.3   | 0.217515 | 0.182685 | 0.515377 | 0.459186 |
| MmugDNA.9080.1.S1_at   | MmugDNA.9080.1 | 4.78  | 4.51  | 0.19 | 0.04 | 1.21  | 0.225664 | 0.490008 | 0.523395 | 0.692076 |
| MmugDNA.9081.1.S1_at   | MmugDNA.9081.1 | 7.13  | 7.08  | 0.07 | 0.03 | 1.03  | 0.464898 | 0.002533 | 0.711025 | 0.074302 |
| MmugDNA.9082.1.S1_s_at | MmugDNA.9082.1 | 4.72  | 4.7   | 0.02 | 0.18 | 1.01  | 0.284891 | 0.447313 | 0.574839 | 0.663434 |
| MmugDNA.9084.1.S1_at   | MmugDNA.9084.1 | 6.93  | 7.02  | 0.08 | 0.04 | -1.07 | 0.293953 | 0.004811 | 0.582954 | 0.096859 |
| MmugDNA.9085.1.S1_at   | MmugDNA.9085.1 | 8.37  | 8.81  | 0.46 | 0.16 | -1.36 | 0.528896 | 0.011032 | 0.753909 | 0.136793 |
| MmugDNA.9086.1.S1_at   | MmugDNA.9086.1 | 5.21  | 4.63  | 0.73 | 0.73 | 1.49  | 0.686822 | 0.202025 | 0.850752 | 0.476448 |
| MmugDNA.9087.1.S1_at   | MmugDNA.9087.1 | 5.46  | 5.43  | 0.32 | 0.14 | 1.02  | 0.97976  | 0.519263 | 0.992265 | 0.710923 |
| MmugDNA.9089.1.S1_at   | MmugDNA.9089.1 | 7.16  | 7.51  | 1.01 | 0.13 | -1.28 | 0.213324 | 0.235977 | 0.511122 | 0.507056 |
| MmugDNA.909.1.S1_at    | MmugDNA.909.1  | 9.39  | 9.07  | 0.72 | 0.24 | 1.24  | 0.69093  | 0.904186 | 0.852272 | 0.94565  |
| MmugDNA.9090.1.S1_at   | MmugDNA.9090.1 | 3.05  | 3.27  | 0.07 | 0.04 | -1.16 | 0.009911 | 0.032476 | 0.148933 | 0.223254 |
| MmugDNA.9091.1.S1_at   | MmugDNA.9091.1 | 11.5  | 11.64 | 0.22 | 0.05 | -1.11 | 0.246731 | 0.330867 | 0.54248  | 0.57958  |
| MmugDNA.9092.1.S1_at   | MmugDNA.9092.1 | 5.43  | 3.86  | 0.98 | 0.14 | 2.97  | 0.152956 | 0.183601 | 0.442701 | 0.459681 |
| MmugDNA.9093.1.S1_at   | MmugDNA.9093.1 | 5.37  | 5.25  | 0.39 | 0.26 | 1.08  | 0.529456 | 0.208879 | 0.754256 | 0.482717 |
| MmugDNA.9094.1.S1_at   | MmugDNA.9094.1 | 7.67  | 8.89  | 0.27 | 0.18 | -2.33 | 0.006516 | 0.026401 | 0.127373 | 0.203571 |
| MmugDNA.9096.1.S1_at   | MmugDNA.9096.1 | 7.67  | 7.54  | 0.12 | 0.04 | 1.09  | 0.361799 | 0.446556 | 0.637105 | 0.662862 |
| MmugDNA.9097.1.S1_at   | MmugDNA.9097.1 | 9.33  | 8.97  | 0.85 | 0.09 | 1.28  | 0.531577 | 0.604022 | 0.755832 | 0.764427 |
| MmugDNA.9098.1.S1_at   | MmugDNA.9098.1 | 10.75 | 10.62 | 0.03 | 0.19 | 1.1   | 0.237665 | 0.067356 | 0.5351   | 0.305525 |
| MmugDNA.9099.1.S1_at   | MmugDNA.9099.1 | 6.1   | 6.03  | 0.1  | 0.22 | 1.05  | 0.384481 | 0.496679 | 0.65355  | 0.696119 |
| MmugDNA.9102.1.S1_at   | MmugDNA.9102.1 | 2.94  | 3.01  | 0.08 | 0.07 | -1.04 | 0.71579  | 0.903725 | 0.86589  | 0.945356 |
| MmugDNA.9103.1.S1_at   | MmugDNA.9103.1 | 5.31  | 5.18  | 0.18 | 0.29 | 1.09  | 0.214516 | 0.096997 | 0.512167 | 0.354502 |
| MmugDNA.9104.1.S1_at   | MmugDNA.9104.1 | 10.52 | 10.19 | 0.14 | 0.18 | 1.25  | 0.090389 | 0.005885 | 0.357131 | 0.104899 |
| MmugDNA.9105.1.S1_at   | MmugDNA.9105.1 | 3.17  | 3.15  | 0.13 | 0.06 | 1.01  | 0.386526 | 0.649259 | 0.654936 | 0.794724 |
| MmugDNA.9107.1.S1_at   | MmugDNA.9107.1 | 8.56  | 8.93  | 0.32 | 0.24 | -1.29 | 0.223857 | 0.578207 | 0.521882 | 0.748364 |
| MmugDNA.9108.1.S1_at   | MmugDNA.9108.1 | 3.23  | 3.28  | 0.05 | 0.18 | -1.04 | 0.242076 | 0.415184 | 0.539116 | 0.640745 |

|                        |                |       |       |      |      |       |          |          |          |          |
|------------------------|----------------|-------|-------|------|------|-------|----------|----------|----------|----------|
| MmugDNA.9109.1.S1_at   | MmugDNA.9109.1 | 10.71 | 10.71 | 0.49 | 0.07 | -1    | 0.970432 | 0.237662 | 0.98833  | 0.50826  |
| MmugDNA.9111.1.S1_at   | MmugDNA.9111.1 | 8.26  | 7.93  | 0.25 | 0.22 | 1.26  | 0.146638 | 0.005176 | 0.43458  | 0.099727 |
| MmugDNA.9110.1.S1_at   | MmugDNA.9110.1 | 5.19  | 5.48  | 0.35 | 0.13 | -1.22 | 0.466214 | 0.769399 | 0.712097 | 0.866055 |
| MmugDNA.9111.1.S1_at   | MmugDNA.9111.1 | 3.71  | 3.5   | 0.73 | 0.07 | 1.15  | 0.462553 | 0.542675 | 0.709725 | 0.725667 |
| MmugDNA.9112.1.S1_at   | MmugDNA.9112.1 | 6.71  | 6.81  | 0.15 | 0.03 | -1.08 | 0.452279 | 0.468931 | 0.702807 | 0.67794  |
| MmugDNA.9114.1.S1_at   | MmugDNA.9114.1 | 4.36  | 4.91  | 0.96 | 0.16 | -1.47 | 0.878497 | 0.968451 | 0.948158 | 0.982645 |
| MmugDNA.9115.1.S1_at   | MmugDNA.9115.1 | 5.9   | 5.55  | 0.47 | 0.31 | 1.28  | 0.315202 | 0.262261 | 0.600287 | 0.528586 |
| MmugDNA.9116.1.S1_at   | MmugDNA.9116.1 | 6.17  | 6.2   | 0.08 | 0.03 | -1.02 | 0.807592 | 0.519046 | 0.913872 | 0.710813 |
| MmugDNA.9117.1.S1_at   | MmugDNA.9117.1 | 6.63  | 6.52  | 0.23 | 0.08 | 1.08  | 0.936787 | 0.092392 | 0.973607 | 0.348294 |
| MmugDNA.9118.1.S1_at   | MmugDNA.9118.1 | 6.24  | 6.44  | 0.42 | 0.13 | -1.15 | 0.414059 | 0.070462 | 0.675365 | 0.311777 |
| MmugDNA.9119.1.S1_at   | MmugDNA.9119.1 | 7.26  | 7.54  | 0.12 | 0.07 | -1.22 | 0.107258 | 0.437249 | 0.381755 | 0.656613 |
| MmugDNA.9120.1.S1_at   | MmugDNA.9120.1 | 4.3   | 4.09  | 0.19 | 0.17 | 1.16  | 0.0661   | 0.18178  | 0.314442 | 0.458373 |
| MmugDNA.9121.1.S1_at   | MmugDNA.9121.1 | 4.4   | 4.29  | 0.18 | 0.14 | 1.08  | 0.354589 | 0.542587 | 0.631745 | 0.725615 |
| MmugDNA.9122.1.S1_at   | MmugDNA.9122.1 | 7.52  | 7.26  | 0.25 | 0.2  | 1.2   | 0.145715 | 0.100036 | 0.433202 | 0.358901 |
| MmugDNA.9123.1.S1_at   | MmugDNA.9123.1 | 5.84  | 5.94  | 0.16 | 0.24 | -1.07 | 0.902218 | 0.79837  | 0.958593 | 0.883979 |
| MmugDNA.9124.1.S1_at   | MmugDNA.9124.1 | 7.04  | 7.13  | 0.47 | 0.06 | -1.06 | 0.54965  | 0.248684 | 0.76733  | 0.517917 |
| MmugDNA.9125.1.S1_at   | MmugDNA.9125.1 | 4.88  | 4.78  | 0.34 | 0.08 | 1.08  | 0.268358 | 0.498361 | 0.561061 | 0.697442 |
| MmugDNA.9126.1.S1_at   | MmugDNA.9126.1 | 9     | 9.11  | 0.12 | 0.03 | -1.08 | 0.137818 | 0.285886 | 0.422877 | 0.547484 |
| MmugDNA.913.1.S1_at    | MmugDNA.913.1  | 6.28  | 5.95  | 0.3  | 0.16 | 1.26  | 0.101996 | 0.027159 | 0.373772 | 0.205893 |
| MmugDNA.913.1.S1_x_at  | MmugDNA.913.1  | 6.87  | 6.54  | 0.09 | 0.19 | 1.26  | 0.057881 | 0.004509 | 0.297769 | 0.093778 |
| MmugDNA.9146.1.S1_x_at | MmugDNA.9146.1 | 6.9   | 8.41  | 0.67 | 0.1  | -2.83 | 0.039952 | 0.386984 | 0.25663  | 0.621935 |
| MmugDNA.9132.1.S1_at   | MmugDNA.9132.1 | 6.28  | 6.33  | 0    | 0.08 | -1.04 | 0.227641 | 0.75178  | 0.525741 | 0.855696 |
| MmugDNA.9134.1.S1_at   | MmugDNA.9134.1 | 5.57  | 5.01  | 1.3  | 0.65 | 1.47  | 0.528579 | 0.548993 | 0.753758 | 0.729509 |
| MmugDNA.9135.1.S1_at   | MmugDNA.9135.1 | 4.06  | 3.89  | 0.23 | 0.1  | 1.13  | 0.096575 | 0.106188 | 0.366453 | 0.36856  |
| MmugDNA.9136.1.S1_at   | MmugDNA.9136.1 | 4.83  | 4.37  | 0.16 | 0.18 | 1.38  | 0.075034 | 0.066032 | 0.332107 | 0.302361 |
| MmugDNA.9138.1.S1_at   | MmugDNA.9138.1 | 5.53  | 5.21  | 0.26 | 0.09 | 1.25  | 0.108255 | 0.034951 | 0.382964 | 0.231062 |
| MmugDNA.9139.1.S1_at   | MmugDNA.9139.1 | 6.15  | 5.99  | 0.59 | 0.06 | 1.12  | 0.633278 | 0.791679 | 0.820348 | 0.879671 |
| MmugDNA.9140.1.S1_at   | MmugDNA.9140.1 | 3.78  | 3.78  | 0.12 | 0.09 | 1     | 0.88487  | 0.690197 | 0.951005 | 0.819386 |
| MmugDNA.9142.1.S1_at   | MmugDNA.9142.1 | 3.47  | 3.39  | 0.12 | 0.06 | 1.06  | 0.136369 | 0.155768 | 0.420898 | 0.431134 |
| MmugDNA.9143.1.S1_at   | MmugDNA.9143.1 | 3.72  | 3.56  | 0.1  | 0.09 | 1.12  | 0.091466 | 0.421766 | 0.359134 | 0.645271 |
| MmugDNA.9144.1.S1_at   | MmugDNA.9144.1 | 5.18  | 5.84  | 0.23 | 0.09 | -1.58 | 0.019366 | 0.265076 | 0.192264 | 0.531    |
| MmugDNA.9145.1.S1_at   | MmugDNA.9145.1 | 7.34  | 7.32  | 0.24 | 0.09 | 1.02  | 0.745208 | 0.64069  | 0.881818 | 0.789053 |
| MmugDNA.9149.1.S1_at   | MmugDNA.9149.1 | 3.28  | 3.38  | 0.09 | 0.09 | -1.07 | 0.316227 | 0.10022  | 0.600997 | 0.359205 |
| MmugDNA.915.1.S1_at    | MmugDNA.915.1  | 2.85  | 2.82  | 0.02 | 0.06 | 1.02  | 0.398572 | 0.093238 | 0.664098 | 0.349352 |
| MmugDNA.9150.1.S1_at   | MmugDNA.9150.1 | 9.23  | 9.15  | 0.13 | 0.22 | 1.06  | 0.942039 | 0.524963 | 0.975589 | 0.714673 |
| MmugDNA.9152.1.S1_at   | MmugDNA.9152.1 | 9.5   | 9.49  | 0.06 | 0.22 | 1     | 0.343624 | 0.397269 | 0.622989 | 0.628773 |
| MmugDNA.9153.1.S1_at   | MmugDNA.9153.1 | 7.36  | 7.65  | 0.62 | 0.25 | -1.23 | 0.695873 | 0.302584 | 0.855122 | 0.560201 |
| MmugDNA.9153.1.S1_s_at | MmugDNA.9153.1 | 7.62  | 7.94  | 0.75 | 0.4  | -1.25 | 0.848571 | 0.62654  | 0.934034 | 0.779856 |
| MmugDNA.9154.1.S1_at   | MmugDNA.9154.1 | 9.8   | 9.91  | 0.04 | 0.13 | -1.08 | 0.827716 | 0.93041  | 0.923713 | 0.960461 |
| MmugDNA.9155.1.S1_s_at | MmugDNA.9155.1 | 7.75  | 9.45  | 0.94 | 0.39 | -3.25 | 0.076025 | 0.028409 | 0.334035 | 0.210385 |
| MmugDNA.9156.1.S1_at   | MmugDNA.9156.1 | 10.08 | 10.22 | 0.19 | 0.11 | -1.11 | 0.692208 | 0.951135 | 0.852917 | 0.972323 |
| MmugDNA.9157.1.S1_at   | MmugDNA.9157.1 | 7.77  | 8.28  | 0.03 | 0.1  | -1.42 | 0.001208 | 0.280525 | 0.078133 | 0.54372  |
| MmugDNA.9159.1.S1_at   | MmugDNA.9159.1 | 3.62  | 3.62  | 0.03 | 0.07 | -1    | 0.275238 | 0.062666 | 0.566916 | 0.297037 |

|                        |                |       |       |      |      |       |          |          |          |          |
|------------------------|----------------|-------|-------|------|------|-------|----------|----------|----------|----------|
| MmugDNA.9160.1.S1_at   | MmugDNA.9160.1 | 2.96  | 2.96  | 0.43 | 0.08 | 1     | 0.302947 | 0.531415 | 0.590447 | 0.718636 |
| MmugDNA.9161.1.S1_at   | MmugDNA.9161.1 | 3.65  | 3.8   | 0.26 | 0.08 | -1.11 | 0.920156 | 0.987373 | 0.965869 | 0.992932 |
| MmugDNA.9162.1.S1_at   | MmugDNA.9162.1 | 2.96  | 2.96  | 0.1  | 0.02 | 1     | 0.687131 | 0.06164  | 0.850763 | 0.295095 |
| MmugDNA.9163.1.S1_at   | MmugDNA.9163.1 | 4.36  | 4.37  | 0.29 | 0.04 | -1    | 0.981762 | 0.975973 | 0.993299 | 0.986856 |
| MmugDNA.9165.1.S1_at   | MmugDNA.9165.1 | 9.5   | 9.49  | 0.32 | 0    | 1.01  | 0.420317 | 0.321167 | 0.679364 | 0.573111 |
| MmugDNA.9166.1.S1_at   | MmugDNA.9166.1 | 5.29  | 5.25  | 0.15 | 0.04 | 1.03  | 0.811102 | 0.118921 | 0.915384 | 0.38714  |
| MmugDNA.9167.1.S1_at   | MmugDNA.9167.1 | 7     | 7.02  | 0.08 | 0.21 | -1.01 | 0.973653 | 0.999637 | 0.989412 | 0.999864 |
| MmugDNA.9168.1.S1_at   | MmugDNA.9168.1 | 5.72  | 5.69  | 0.08 | 0.16 | 1.02  | 0.18856  | 0.355066 | 0.485094 | 0.59749  |
| MmugDNA.9169.1.S1_at   | MmugDNA.9169.1 | 6.15  | 6.02  | 0.11 | 0.1  | 1.1   | 0.132722 | 0.12664  | 0.416078 | 0.397295 |
| MmugDNA.917.1.S1_at    | MmugDNA.917.1  | 4.59  | 4.5   | 0.1  | 0.09 | 1.07  | 0.226188 | 0.20903  | 0.523944 | 0.482823 |
| MmugDNA.9170.1.S1_at   | MmugDNA.9170.1 | 8.16  | 8.84  | 0.07 | 0.21 | -1.6  | 0.007604 | 0.131086 | 0.135715 | 0.403084 |
| MmugDNA.9171.1.S1_s_at | MmugDNA.9171.1 | 13.13 | 13.17 | 0.07 | 0.07 | -1.02 | 0.577179 | 0.597548 | 0.783459 | 0.760237 |
| MmugDNA.9173.1.S1_at   | MmugDNA.9173.1 | 9.17  | 9.03  | 0.09 | 0.06 | 1.1   | 0.106094 | 0.16776  | 0.380154 | 0.444297 |
| MmugDNA.9174.1.S1_at   | MmugDNA.9174.1 | 4.41  | 3.88  | 0.53 | 0.12 | 1.44  | 0.144601 | 0.090726 | 0.431598 | 0.345205 |
| MmugDNA.9175.1.S1_s_at | MmugDNA.9175.1 | 9.83  | 9.38  | 0.2  | 0.06 | 1.36  | 0.017865 | 0.026354 | 0.187044 | 0.203321 |
| MmugDNA.9176.1.S1_at   | MmugDNA.9176.1 | 12.47 | 12.57 | 0.08 | 0.09 | -1.07 | 0.27878  | 0.383162 | 0.57008  | 0.619153 |
| MmugDNA.9178.1.S1_at   | MmugDNA.9178.1 | 7.21  | 7.36  | 0.32 | 0.25 | -1.11 | 0.527945 | 0.676503 | 0.753403 | 0.81095  |
| MmugDNA.918.1.S1_at    | MmugDNA.918.1  | 7.3   | 7.44  | 0.25 | 0.11 | -1.1  | 0.895939 | 0.103199 | 0.955628 | 0.364123 |
| MmugDNA.9180.1.S1_at   | MmugDNA.9180.1 | 8.12  | 7.27  | 0.67 | 0.07 | 1.79  | 0.068427 | 0.088312 | 0.319391 | 0.341721 |
| MmugDNA.9181.1.S1_at   | MmugDNA.9181.1 | 10.5  | 10.26 | 0.17 | 0.1  | 1.19  | 0.073009 | 0.397829 | 0.327873 | 0.629126 |
| MmugDNA.9182.1.S1_at   | MmugDNA.9182.1 | 5.25  | 4.34  | 0.6  | 0.17 | 1.87  | 0.08041  | 0.098411 | 0.341026 | 0.356531 |
| MmugDNA.9183.1.S1_at   | MmugDNA.9183.1 | 7.42  | 7.01  | 0.68 | 0.19 | 1.33  | 0.254244 | 0.542883 | 0.548737 | 0.725834 |
| MmugDNA.9184.1.S1_at   | MmugDNA.9184.1 | 5.58  | 5.58  | 0.46 | 0.27 | -1    | 0.743831 | 0.397293 | 0.881384 | 0.628775 |
| MmugDNA.9185.1.S1_at   | MmugDNA.9185.1 | 10.59 | 11.07 | 0.13 | 0.19 | -1.4  | 0.013889 | 0.017909 | 0.168896 | 0.168944 |
| MmugDNA.9186.1.S1_at   | MmugDNA.9186.1 | 11.15 | 10.96 | 0.35 | 0.15 | 1.14  | 0.61962  | 0.754714 | 0.811329 | 0.85732  |
| MmugDNA.9187.1.S1_at   | MmugDNA.9187.1 | 4.32  | 4.59  | 0.24 | 0.05 | -1.2  | 0.185425 | 0.144172 | 0.48166  | 0.418037 |
| MmugDNA.9188.1.S1_at   | MmugDNA.9188.1 | 6.63  | 6.75  | 0.14 | 0.08 | -1.09 | 0.171045 | 0.506964 | 0.464851 | 0.702692 |
| MmugDNA.9189.1.S1_at   | MmugDNA.9189.1 | 3.3   | 3.35  | 0.24 | 0.34 | -1.03 | 0.536587 | 0.768174 | 0.759061 | 0.865413 |
| MmugDNA.919.1.S1_at    | MmugDNA.919.1  | 2.86  | 2.76  | 0.08 | 0.06 | 1.07  | 0.391275 | 0.233891 | 0.658623 | 0.505169 |
| MmugDNA.9190.1.S1_at   | MmugDNA.9190.1 | 3.67  | 3.92  | 0.07 | 0.09 | -1.18 | 0.018757 | 0.112811 | 0.190313 | 0.37844  |
| MmugDNA.9191.1.S1_at   | MmugDNA.9191.1 | 3.77  | 3.75  | 0.32 | 0.3  | 1.01  | 0.436031 | 0.719254 | 0.690991 | 0.837537 |
| MmugDNA.9193.1.S1_at   | MmugDNA.9193.1 | 13.31 | 13.1  | 0.06 | 0.01 | 1.15  | 0.001925 | 0.033417 | 0.088159 | 0.22646  |
| MmugDNA.9194.1.S1_at   | MmugDNA.9194.1 | 11.77 | 11.74 | 0.19 | 0.03 | 1.02  | 0.800153 | 0.659178 | 0.909973 | 0.800594 |
| MmugDNA.9196.1.S1_at   | MmugDNA.9196.1 | 9.73  | 9.85  | 0.1  | 0.06 | -1.09 | 0.141239 | 0.066716 | 0.427147 | 0.304114 |
| MmugDNA.9196.1.S1_s_at | MmugDNA.9196.1 | 11.67 | 11.68 | 0.1  | 0.01 | -1.01 | 0.501009 | 0.738996 | 0.735146 | 0.848711 |
| MmugDNA.9197.1.S1_at   | MmugDNA.9197.1 | 8.89  | 8.44  | 0.38 | 0.26 | 1.36  | 0.16083  | 0.200127 | 0.452392 | 0.474603 |
| MmugDNA.9198.1.S1_at   | MmugDNA.9198.1 | 4.87  | 4.92  | 0.03 | 0.1  | -1.04 | 0.148504 | 0.401665 | 0.437096 | 0.631068 |
| MmugDNA.92.1.S1_at     | MmugDNA.92.1   | 6.72  | 7.11  | 0.51 | 0.48 | -1.31 | 0.392883 | 0.605006 | 0.659767 | 0.764917 |
| MmugDNA.920.1.S1_at    | MmugDNA.920.1  | 7.28  | 6.29  | 0.6  | 0.27 | 1.98  | 0.086804 | 0.092827 | 0.351991 | 0.349024 |
| MmugDNA.9200.1.S1_at   | MmugDNA.9200.1 | 4.72  | 4.77  | 0.07 | 0.07 | -1.04 | 0.081369 | 0.089792 | 0.342325 | 0.34404  |
| MmugDNA.9201.1.S1_at   | MmugDNA.9201.1 | 9.82  | 10.32 | 0.07 | 0.11 | -1.41 | 0.004068 | 0.005345 | 0.108999 | 0.101089 |
| MmugDNA.9202.1.S1_at   | MmugDNA.9202.1 | 8.84  | 9.07  | 0.04 | 0.09 | -1.17 | 0.018356 | 0.656921 | 0.188509 | 0.799401 |
| MmugDNA.9203.1.S1_at   | MmugDNA.9203.1 | 12.47 | 12.81 | 0.08 | 0.03 | -1.26 | 0.002431 | 0.001652 | 0.093606 | 0.061436 |



|                        |                |       |       |      |      |       |          |          |          |          |
|------------------------|----------------|-------|-------|------|------|-------|----------|----------|----------|----------|
| MmugDNA.9204.1.S1_at   | MmugDNA.9204.1 | 4.42  | 4.38  | 0.11 | 0.19 | 1.03  | 0.745287 | 0.696932 | 0.881818 | 0.824002 |
| MmugDNA.9205.1.S1_at   | MmugDNA.9205.1 | 3.72  | 3.4   | 0.16 | 0.03 | 1.25  | 0.030419 | 0.021525 | 0.227279 | 0.183771 |
| MmugDNA.9207.1.S1_at   | MmugDNA.9207.1 | 3.93  | 4.79  | 1.03 | 0.25 | -1.81 | 0.846387 | 0.913646 | 0.93295  | 0.951422 |
| MmugDNA.9208.1.S1_at   | MmugDNA.9208.1 | 5.78  | 5.87  | 0.11 | 0.01 | -1.07 | 0.62169  | 0.632625 | 0.812872 | 0.783666 |
| MmugDNA.921.1.S1_at    | MmugDNA.921.1  | 4.06  | 3.94  | 0.26 | 0.49 | 1.09  | 0.84757  | 0.70719  | 0.933572 | 0.830201 |
| MmugDNA.9211.1.S1_at   | MmugDNA.9211.1 | 9.65  | 9.68  | 0.46 | 0.13 | -1.02 | 0.915792 | 0.916974 | 0.964189 | 0.95361  |
| MmugDNA.9212.1.S1_at   | MmugDNA.9212.1 | 6.56  | 7.25  | 0.29 | 0.06 | -1.62 | 0.021586 | 0.447806 | 0.200598 | 0.66388  |
| MmugDNA.9213.1.S1_at   | MmugDNA.9213.1 | 8.37  | 8.48  | 0.23 | 0.03 | -1.08 | 0.351621 | 0.105334 | 0.629259 | 0.367168 |
| MmugDNA.9214.1.S1_at   | MmugDNA.9214.1 | 6.79  | 6.81  | 0.15 | 0.18 | -1.01 | 0.964239 | 0.123486 | 0.985543 | 0.393518 |
| MmugDNA.9215.1.S1_s_at | MmugDNA.9215.1 | 10.06 | 10.14 | 0.46 | 0.49 | -1.06 | 0.685411 | 0.110668 | 0.85005  | 0.374854 |
| MmugDNA.9216.1.S1_s_at | MmugDNA.9216.1 | 11.02 | 10.91 | 0.45 | 0.14 | 1.08  | 0.867178 | 0.762186 | 0.942572 | 0.861664 |
| MmugDNA.9217.1.S1_at   | MmugDNA.9217.1 | 5.85  | 5.75  | 0.14 | 0.14 | 1.07  | 0.458611 | 0.229515 | 0.707163 | 0.501534 |
| MmugDNA.922.1.S1_at    | MmugDNA.922.1  | 4.46  | 4.38  | 0.01 | 0.06 | 1.06  | 0.103447 | 0.074475 | 0.376571 | 0.318151 |
| MmugDNA.9220.1.S1_at   | MmugDNA.9220.1 | 4.26  | 4.33  | 0.01 | 0.22 | -1.05 | 0.497974 | 0.505327 | 0.733379 | 0.702073 |
| MmugDNA.9221.1.S1_at   | MmugDNA.9221.1 | 10.49 | 10.08 | 0.36 | 0.15 | 1.33  | 0.116133 | 0.120914 | 0.393198 | 0.38981  |
| MmugDNA.9223.1.S1_at   | MmugDNA.9223.1 | 3.82  | 3.84  | 0.17 | 0    | -1.01 | 0.850089 | 0.917197 | 0.934831 | 0.953758 |
| MmugDNA.9224.1.S1_at   | MmugDNA.9224.1 | 5.86  | 5.97  | 0.03 | 0.14 | -1.08 | 0.078466 | 0.154506 | 0.338154 | 0.429396 |
| MmugDNA.9226.1.S1_at   | MmugDNA.9226.1 | 3.16  | 3.06  | 0.15 | 0.02 | 1.07  | 0.396958 | 0.586011 | 0.662787 | 0.753172 |
| MmugDNA.9228.1.S1_at   | MmugDNA.9228.1 | 4.15  | 3.74  | 0.4  | 0.15 | 1.33  | 0.248887 | 0.130938 | 0.544234 | 0.403037 |
| MmugDNA.9229.1.S1_at   | MmugDNA.9229.1 | 6.4   | 5.71  | 0.9  | 0.28 | 1.62  | 0.248588 | 0.327482 | 0.544007 | 0.577308 |
| MmugDNA.923.1.S1_at    | MmugDNA.923.1  | 11.43 | 11.86 | 0.18 | 0.03 | -1.34 | 0.008236 | 0.003394 | 0.139904 | 0.083959 |
| MmugDNA.9230.1.S1_at   | MmugDNA.9230.1 | 8.16  | 7.46  | 0.35 | 0.11 | 1.63  | 0.078689 | 0.15233  | 0.338535 | 0.427072 |
| MmugDNA.9231.1.S1_at   | MmugDNA.9231.1 | 7.09  | 6.9   | 0.67 | 0.47 | 1.14  | 0.85772  | 0.116301 | 0.938164 | 0.383671 |
| MmugDNA.9232.1.S1_at   | MmugDNA.9232.1 | 6.93  | 7.53  | 0.29 | 0.16 | -1.52 | 0.151511 | 0.319602 | 0.440961 | 0.571885 |
| MmugDNA.9233.1.S1_at   | MmugDNA.9233.1 | 10.19 | 10.05 | 0.14 | 0.14 | 1.1   | 0.178063 | 0.541236 | 0.472824 | 0.724781 |
| MmugDNA.9236.1.S1_at   | MmugDNA.9236.1 | 2.86  | 2.95  | 0.09 | 0.07 | -1.06 | 0.205916 | 0.32542  | 0.503741 | 0.575807 |
| MmugDNA.9237.1.S1_at   | MmugDNA.9237.1 | 5.83  | 5.93  | 0.08 | 0.08 | -1.07 | 0.268525 | 0.005177 | 0.561073 | 0.099727 |
| MmugDNA.9239.1.S1_at   | MmugDNA.9239.1 | 5.22  | 4.39  | 0.42 | 0.25 | 1.78  | 0.057743 | 0.054566 | 0.297465 | 0.279115 |
| MmugDNA.924.1.S1_at    | MmugDNA.924.1  | 10.59 | 10.64 | 0.04 | 0.08 | -1.04 | 0.144192 | 0.04686  | 0.430953 | 0.261272 |
| MmugDNA.9240.1.S1_at   | MmugDNA.9240.1 | 7.21  | 7.33  | 0.06 | 0.37 | -1.08 | 0.748588 | 0.536216 | 0.883646 | 0.721574 |
| MmugDNA.9242.1.S1_at   | MmugDNA.9242.1 | 9.9   | 9.31  | 0.46 | 0.08 | 1.5   | 0.239995 | 0.315609 | 0.537553 | 0.569053 |
| MmugDNA.9243.1.S1_at   | MmugDNA.9243.1 | 5.63  | 6.2   | 1.03 | 0.28 | -1.49 | 0.340979 | 0.05753  | 0.620956 | 0.285919 |
| MmugDNA.9244.1.S1_at   | MmugDNA.9244.1 | 2.97  | 2.96  | 0.04 | 0.11 | 1.01  | 0.931332 | 0.771759 | 0.971084 | 0.867344 |
| MmugDNA.9245.1.S1_at   | MmugDNA.9245.1 | 7.54  | 8.16  | 0.1  | 0.12 | -1.54 | 0.003793 | 0.144075 | 0.106813 | 0.417963 |
| MmugDNA.9247.1.S1_at   | MmugDNA.9247.1 | 6.05  | 6.38  | 0.79 | 0.4  | -1.25 | 0.923784 | 0.990484 | 0.967605 | 0.994623 |
| MmugDNA.9249.1.S1_at   | MmugDNA.9249.1 | 12.21 | 12.25 | 0.15 | 0.04 | -1.03 | 0.731267 | 0.063917 | 0.874456 | 0.29906  |
| MmugDNA.925.1.S1_at    | MmugDNA.925.1  | 11.47 | 11.43 | 0.13 | 0.09 | 1.03  | 0.489499 | 0.132219 | 0.727823 | 0.404274 |
| MmugDNA.9250.1.S1_at   | MmugDNA.9250.1 | 8.96  | 8.89  | 0.52 | 0.33 | 1.05  | 0.713318 | 0.917911 | 0.864604 | 0.954027 |
| MmugDNA.9252.1.S1_at   | MmugDNA.9252.1 | 4.74  | 3.45  | 0.28 | 0.26 | 2.44  | 0.005789 | 0.009434 | 0.121984 | 0.127948 |
| MmugDNA.9254.1.S1_at   | MmugDNA.9254.1 | 7.4   | 7.49  | 0.23 | 0.15 | -1.06 | 0.579317 | 0.727138 | 0.785017 | 0.842187 |
| MmugDNA.9255.1.S1_at   | MmugDNA.9255.1 | 4.3   | 4.29  | 0.11 | 0.06 | 1.01  | 0.732503 | 0.918065 | 0.875074 | 0.954068 |
| MmugDNA.9256.1.S1_at   | MmugDNA.9256.1 | 5.57  | 5.82  | 0.19 | 0.17 | -1.19 | 0.170904 | 0.326779 | 0.464646 | 0.576782 |
| MmugDNA.9258.1.S1_at   | MmugDNA.9258.1 | 3.51  | 3.47  | 0.08 | 0.07 | 1.03  | 0.203889 | 0.247954 | 0.501449 | 0.517431 |

|                        |                |       |       |      |      |       |          |          |          |          |
|------------------------|----------------|-------|-------|------|------|-------|----------|----------|----------|----------|
| MmugDNA.9259.1.S1_at   | MmugDNA.9259.1 | 6.82  | 6.7   | 0.21 | 0.16 | 1.09  | 0.892825 | 0.639483 | 0.954354 | 0.788314 |
| MmugDNA.926.1.S1_at    | MmugDNA.926.1  | 7.21  | 7.93  | 0.06 | 0.07 | -1.64 | 0.000252 | 0.021271 | 0.054642 | 0.182573 |
| MmugDNA.9260.1.S1_at   | MmugDNA.9260.1 | 5.93  | 5.84  | 0.23 | 0.18 | 1.07  | 0.690581 | 0.850922 | 0.852093 | 0.91522  |
| MmugDNA.9261.1.S1_at   | MmugDNA.9261.1 | 5.34  | 4.47  | 0.75 | 0.3  | 1.84  | 0.075157 | 0.052373 | 0.332294 | 0.274345 |
| MmugDNA.9263.1.S1_at   | MmugDNA.9263.1 | 8.9   | 8.93  | 0.18 | 0.37 | -1.02 | 0.57153  | 0.037444 | 0.779996 | 0.237777 |
| MmugDNA.9264.1.S1_at   | MmugDNA.9264.1 | 7.22  | 7.29  | 0.27 | 0.02 | -1.05 | 0.390481 | 0.181407 | 0.658105 | 0.457923 |
| MmugDNA.9267.1.S1_at   | MmugDNA.9267.1 | 3.49  | 3.34  | 0.47 | 0.39 | 1.11  | 0.731419 | 0.73238  | 0.874476 | 0.844986 |
| MmugDNA.9268.1.S1_at   | MmugDNA.9268.1 | 9.19  | 8.89  | 0.14 | 0.09 | 1.23  | 0.043555 | 0.037319 | 0.265762 | 0.237622 |
| MmugDNA.927.1.S1_at    | MmugDNA.927.1  | 3.72  | 3.39  | 0.48 | 0.07 | 1.26  | 0.325517 | 0.340928 | 0.608744 | 0.587035 |
| MmugDNA.9270.1.S1_at   | MmugDNA.9270.1 | 11.22 | 10.9  | 0.19 | 0.14 | 1.26  | 0.058619 | 0.033081 | 0.299229 | 0.225106 |
| MmugDNA.9271.1.S1_at   | MmugDNA.9271.1 | 6.22  | 5.85  | 0.31 | 0.12 | 1.29  | 0.165712 | 0.467697 | 0.458753 | 0.677207 |
| MmugDNA.9272.1.S1_at   | MmugDNA.9272.1 | 3.31  | 3.68  | 0.29 | 0.13 | -1.29 | 0.137476 | 0.079642 | 0.422465 | 0.326981 |
| MmugDNA.9273.1.S1_at   | MmugDNA.9273.1 | 5.74  | 5.55  | 0.32 | 0.14 | 1.14  | 0.979138 | 0.914221 | 0.992066 | 0.951773 |
| MmugDNA.9274.1.S1_at   | MmugDNA.9274.1 | 7.48  | 9.32  | 1.04 | 0.06 | -3.58 | 0.044823 | 0.151748 | 0.269024 | 0.426392 |
| MmugDNA.9275.1.S1_at   | MmugDNA.9275.1 | 5.49  | 4.79  | 0.26 | 0.28 | 1.62  | 0.036539 | 0.004826 | 0.246142 | 0.096904 |
| MmugDNA.9276.1.S1_at   | MmugDNA.9276.1 | 6.64  | 6.65  | 0.57 | 0.06 | -1.01 | 0.533486 | 0.869773 | 0.757039 | 0.926118 |
| MmugDNA.9277.1.S1_at   | MmugDNA.9277.1 | 4.89  | 4.8   | 0.81 | 0.11 | 1.07  | 0.946978 | 0.869412 | 0.977699 | 0.92597  |
| MmugDNA.9278.1.S1_at   | MmugDNA.9278.1 | 4.76  | 4.71  | 0.13 | 0.05 | 1.03  | 0.759524 | 0.225208 | 0.889781 | 0.497865 |
| MmugDNA.9279.1.S1_at   | MmugDNA.9279.1 | 5.06  | 4.42  | 0.27 | 0.27 | 1.55  | 0.065828 | 0.096848 | 0.314024 | 0.354254 |
| MmugDNA.9280.1.S1_at   | MmugDNA.9280.1 | 4.55  | 4.73  | 0.14 | 0.03 | -1.13 | 0.100617 | 0.147157 | 0.371612 | 0.421376 |
| MmugDNA.9281.1.S1_at   | MmugDNA.9281.1 | 6.92  | 6.9   | 0.13 | 0.06 | 1.01  | 0.971247 | 0.888258 | 0.988525 | 0.93629  |
| MmugDNA.9283.1.S1_at   | MmugDNA.9283.1 | 6.18  | 6.19  | 0.09 | 0.16 | -1.01 | 0.795363 | 0.885635 | 0.907532 | 0.934982 |
| MmugDNA.9286.1.S1_at   | MmugDNA.9286.1 | 4.91  | 5.4   | 0.28 | 0.35 | -1.41 | 0.300874 | 0.46032  | 0.58899  | 0.672177 |
| MmugDNA.9288.1.S1_at   | MmugDNA.9288.1 | 8     | 7.63  | 0.22 | 0.44 | 1.29  | 0.538644 | 0.411901 | 0.760315 | 0.638434 |
| MmugDNA.9289.1.S1_at   | MmugDNA.9289.1 | 4.59  | 4.39  | 0.01 | 0.2  | 1.15  | 0.054465 | 0.045236 | 0.290603 | 0.257005 |
| MmugDNA.929.1.S1_at    | MmugDNA.929.1  | 4.81  | 4.72  | 0.36 | 0.16 | 1.07  | 0.452355 | 0.656078 | 0.702807 | 0.798847 |
| MmugDNA.9290.1.S1_s_at | MmugDNA.9290.1 | 3.35  | 3.38  | 0.04 | 0.03 | -1.02 | 0.127046 | 0.425266 | 0.408591 | 0.647679 |
| MmugDNA.9292.1.S1_at   | MmugDNA.9292.1 | 8.04  | 8.21  | 0.07 | 0.15 | -1.12 | 0.480559 | 0.413714 | 0.721416 | 0.639742 |
| MmugDNA.9296.1.S1_at   | MmugDNA.9296.1 | 6.58  | 6.54  | 0.12 | 0.26 | 1.02  | 0.883813 | 0.873538 | 0.950628 | 0.928102 |
| MmugDNA.9298.1.S1_at   | MmugDNA.9298.1 | 10.64 | 10.19 | 0.31 | 0.09 | 1.37  | 0.071101 | 0.276201 | 0.324551 | 0.540183 |
| MmugDNA.9299.1.S1_at   | MmugDNA.9299.1 | 2.8   | 2.67  | 0.06 | 0.23 | 1.09  | 0.960682 | 0.831958 | 0.983922 | 0.90356  |
| MmugDNA.93.1.S1_at     | MmugDNA.93.1   | 6.78  | 6.77  | 0.17 | 0.05 | 1.01  | 0.979148 | 0.358849 | 0.992066 | 0.600291 |
| MmugDNA.930.1.S1_at    | MmugDNA.930.1  | 3.73  | 3.72  | 0.04 | 0.04 | 1     | 0.86523  | 0.937463 | 0.94147  | 0.964687 |
| MmugDNA.9300.1.S1_at   | MmugDNA.9300.1 | 5.84  | 5.32  | 0.31 | 0.37 | 1.44  | 0.672907 | 0.061785 | 0.843427 | 0.295327 |
| MmugDNA.9303.1.S1_at   | MmugDNA.9303.1 | 5.9   | 5.41  | 0.28 | 0.3  | 1.4   | 0.044253 | 0.074619 | 0.267399 | 0.318303 |
| MmugDNA.9305.1.S1_at   | MmugDNA.9305.1 | 5.82  | 6.08  | 0.35 | 0.29 | -1.2  | 0.681074 | 0.896344 | 0.847915 | 0.940817 |
| MmugDNA.9306.1.S1_at   | MmugDNA.9306.1 | 4.93  | 4.77  | 0.07 | 0.09 | 1.12  | 0.153998 | 0.172149 | 0.444262 | 0.448529 |
| MmugDNA.9307.1.S1_x_at | MmugDNA.9307.1 | 11.9  | 12.11 | 0.18 | 0.12 | -1.16 | 0.729087 | 0.942157 | 0.873447 | 0.967154 |
| MmugDNA.9308.1.S1_at   | MmugDNA.9308.1 | 6.24  | 6.16  | 0.52 | 0.25 | 1.06  | 0.850093 | 0.136926 | 0.934831 | 0.409677 |
| MmugDNA.9309.1.S1_at   | MmugDNA.9309.1 | 5.18  | 4.95  | 0.31 | 0.08 | 1.18  | 0.696208 | 0.693476 | 0.855314 | 0.821713 |
| MmugDNA.931.1.S1_at    | MmugDNA.931.1  | 4.42  | 4.43  | 0    | 0.14 | -1    | 0.406787 | 0.869525 | 0.670079 | 0.925994 |
| MmugDNA.9310.1.S1_s_at | MmugDNA.9310.1 | 6.44  | 6.29  | 0.11 | 0.11 | 1.11  | 0.407454 | 0.202804 | 0.670508 | 0.477284 |
| MmugDNA.9312.1.S1_at   | MmugDNA.9312.1 | 4.6   | 4.68  | 0.1  | 0.14 | -1.06 | 0.245544 | 0.20027  | 0.541618 | 0.474689 |

|                        |                |       |       |      |      |       |          |          |          |          |
|------------------------|----------------|-------|-------|------|------|-------|----------|----------|----------|----------|
| MmugDNA.9314.1.S1_at   | MmugDNA.9314.1 | 4.15  | 4.23  | 0.14 | 0.1  | -1.06 | 0.7562   | 0.730688 | 0.887677 | 0.844055 |
| MmugDNA.9316.1.S1_at   | MmugDNA.9316.1 | 6.84  | 6.92  | 0.09 | 0.07 | -1.06 | 0.128969 | 0.220461 | 0.41119  | 0.493818 |
| MmugDNA.9317.1.S1_at   | MmugDNA.9317.1 | 7.79  | 7.67  | 0.51 | 0.16 | 1.09  | 0.825318 | 0.855087 | 0.922422 | 0.91741  |
| MmugDNA.9318.1.S1_at   | MmugDNA.9318.1 | 9.9   | 9.63  | 0.08 | 0.12 | 1.21  | 0.044659 | 0.003603 | 0.268588 | 0.085876 |
| MmugDNA.9319.1.S1_at   | MmugDNA.9319.1 | 4.73  | 4.74  | 0.44 | 0.13 | -1.01 | 0.671542 | 0.796938 | 0.842415 | 0.882822 |
| MmugDNA.932.1.S1_at    | MmugDNA.932.1  | 4.58  | 4.32  | 0.33 | 0.21 | 1.19  | 0.244644 | 0.347814 | 0.540961 | 0.592161 |
| MmugDNA.9321.1.S1_at   | MmugDNA.9321.1 | 4.33  | 4.4   | 0.15 | 0.19 | -1.05 | 0.407816 | 0.377694 | 0.670804 | 0.615086 |
| MmugDNA.9323.1.S1_at   | MmugDNA.9323.1 | 10.61 | 10.84 | 0.06 | 0.01 | -1.17 | 0.004966 | 0.001138 | 0.115545 | 0.053148 |
| MmugDNA.9324.1.S1_at   | MmugDNA.9324.1 | 4.9   | 4.87  | 0.26 | 0.08 | 1.03  | 0.687631 | 0.496713 | 0.850807 | 0.696148 |
| MmugDNA.9327.1.S1_at   | MmugDNA.9327.1 | 3.46  | 3.4   | 0.15 | 0.11 | 1.04  | 0.406909 | 0.564741 | 0.670175 | 0.739425 |
| MmugDNA.9328.1.S1_at   | MmugDNA.9328.1 | 6.09  | 6.06  | 0.27 | 0.02 | 1.02  | 0.851348 | 0.973337 | 0.935336 | 0.985515 |
| MmugDNA.9331.1.S1_at   | MmugDNA.9331.1 | 7.13  | 7.17  | 0.15 | 0.31 | -1.03 | 0.843783 | 0.219576 | 0.931554 | 0.493192 |
| MmugDNA.9332.1.S1_at   | MmugDNA.9332.1 | 11    | 11.66 | 0.07 | 0.11 | -1.57 | 0.000902 | 0.027654 | 0.075282 | 0.207659 |
| MmugDNA.9334.1.S1_at   | MmugDNA.9334.1 | 7.65  | 8.11  | 0.29 | 0.43 | -1.37 | 0.268809 | 0.206793 | 0.561284 | 0.480945 |
| MmugDNA.9337.1.S1_at   | MmugDNA.9337.1 | 11.4  | 11.3  | 0    | 0.05 | 1.07  | 0.018826 | 0.000152 | 0.190771 | 0.029832 |
| MmugDNA.9340.1.S1_at   | MmugDNA.9340.1 | 6.34  | 6.26  | 0.08 | 0.05 | 1.06  | 0.206696 | 0.371412 | 0.504346 | 0.610191 |
| MmugDNA.9341.1.S1_at   | MmugDNA.9341.1 | 3.44  | 3.56  | 0.19 | 0.38 | -1.09 | 0.382106 | 0.680101 | 0.651635 | 0.813208 |
| MmugDNA.9343.1.S1_at   | MmugDNA.9343.1 | 5.8   | 5.83  | 0.02 | 0.03 | -1.02 | 0.11604  | 0.138203 | 0.393069 | 0.411149 |
| MmugDNA.9344.1.S1_at   | MmugDNA.9344.1 | 3.24  | 3.26  | 0.05 | 0.05 | -1.01 | 0.404319 | 0.427509 | 0.668114 | 0.649302 |
| MmugDNA.9345.1.S1_at   | MmugDNA.9345.1 | 11.29 | 11.04 | 0.02 | 0.15 | 1.19  | 0.041559 | 0.051875 | 0.260279 | 0.273151 |
| MmugDNA.9346.1.S1_at   | MmugDNA.9346.1 | 6.9   | 6.67  | 0.1  | 0.13 | 1.17  | 0.090446 | 0.275686 | 0.35723  | 0.539923 |
| MmugDNA.9348.1.S1_at   | MmugDNA.9348.1 | 3.46  | 3.38  | 0.03 | 0.1  | 1.05  | 0.161427 | 0.345834 | 0.453006 | 0.590997 |
| MmugDNA.935.1.S1_x_at  | MmugDNA.935.1  | 11.08 | 11.11 | 0.79 | 0.17 | -1.02 | 0.413832 | 0.346675 | 0.67514  | 0.591516 |
| MmugDNA.9350.1.S1_at   | MmugDNA.9350.1 | 5.12  | 5.26  | 0.15 | 0.05 | -1.1  | 0.096966 | 0.111799 | 0.367181 | 0.376856 |
| MmugDNA.9353.1.S1_at   | MmugDNA.9353.1 | 9.98  | 10.59 | 0.21 | 0.1  | -1.52 | 0.017861 | 0.085934 | 0.187044 | 0.338115 |
| MmugDNA.9354.1.S1_at   | MmugDNA.9354.1 | 13.05 | 12.88 | 0.07 | 0.13 | 1.12  | 0.195474 | 0.079123 | 0.4922   | 0.32625  |
| MmugDNA.9354.1.S1_x_at | MmugDNA.9354.1 | 13.13 | 12.95 | 0.08 | 0.08 | 1.13  | 0.068571 | 0.028655 | 0.319718 | 0.210956 |
| MmugDNA.9355.1.S1_at   | MmugDNA.9355.1 | 5.68  | 5.5   | 0.09 | 0.44 | 1.13  | 0.342842 | 0.626346 | 0.622552 | 0.779698 |
| MmugDNA.9357.1.S1_at   | MmugDNA.9357.1 | 6.72  | 6.68  | 0.78 | 0.43 | 1.02  | 0.645015 | 0.370977 | 0.827097 | 0.609964 |
| MmugDNA.9358.1.S1_at   | MmugDNA.9358.1 | 4.35  | 4.41  | 0.13 | 0.24 | -1.04 | 0.792971 | 0.043622 | 0.906368 | 0.253501 |
| MmugDNA.9359.1.S1_at   | MmugDNA.9359.1 | 7.41  | 6.4   | 0.71 | 0.1  | 2.02  | 0.054672 | 0.054464 | 0.290604 | 0.278959 |
| MmugDNA.936.1.S1_at    | MmugDNA.936.1  | 6.34  | 6.11  | 0.18 | 0.14 | 1.17  | 0.103579 | 0.347631 | 0.376749 | 0.592039 |
| MmugDNA.9360.1.S1_at   | MmugDNA.9360.1 | 3.84  | 3.77  | 0.13 | 0.04 | 1.05  | 0.19287  | 0.236363 | 0.48942  | 0.507308 |
| MmugDNA.9361.1.S1_at   | MmugDNA.9361.1 | 6.64  | 6.58  | 0.06 | 0.08 | 1.04  | 0.232489 | 0.434076 | 0.530886 | 0.654223 |
| MmugDNA.9362.1.S1_at   | MmugDNA.9362.1 | 7.77  | 7.73  | 0.36 | 0.21 | 1.03  | 0.424475 | 0.845635 | 0.682218 | 0.912169 |
| MmugDNA.9365.1.S1_at   | MmugDNA.9365.1 | 8.86  | 9.23  | 0.36 | 0.12 | -1.29 | 0.256018 | 0.028401 | 0.550543 | 0.210374 |
| MmugDNA.9366.1.S1_at   | MmugDNA.9366.1 | 6.5   | 6.55  | 0.13 | 0.07 | -1.04 | 0.520908 | 0.66872  | 0.749023 | 0.806133 |
| MmugDNA.9367.1.S1_at   | MmugDNA.9367.1 | 4.92  | 4.71  | 0.18 | 0.51 | 1.16  | 0.596965 | 0.729253 | 0.79623  | 0.843541 |
| MmugDNA.937.1.S1_at    | MmugDNA.937.1  | 7.04  | 4.67  | 0.88 | 0.15 | 5.17  | 0.022411 | 0.007465 | 0.202983 | 0.115888 |
| MmugDNA.9370.1.S1_at   | MmugDNA.9370.1 | 4.06  | 3.96  | 0.22 | 0.05 | 1.07  | 0.586256 | 0.726432 | 0.789737 | 0.841687 |
| MmugDNA.9371.1.S1_at   | MmugDNA.9371.1 | 8.73  | 9.11  | 0.17 | 0.03 | -1.3  | 0.018944 | 0.122921 | 0.19119  | 0.392923 |
| MmugDNA.9372.1.S1_at   | MmugDNA.9372.1 | 5.65  | 5.65  | 0.07 | 0.3  | 1     | 0.960195 | 0.13475  | 0.983678 | 0.40678  |
| MmugDNA.9373.1.S1_at   | MmugDNA.9373.1 | 7.96  | 8.64  | 0.09 | 0.26 | -1.6  | 0.033353 | 0.011725 | 0.236556 | 0.140206 |

|                        |                |       |       |      |      |       |          |          |          |          |
|------------------------|----------------|-------|-------|------|------|-------|----------|----------|----------|----------|
| MmugDNA.9374.1.S1_s_at | MmugDNA.9374.1 | 8.62  | 8.59  | 0.64 | 0.56 | 1.02  | 0.912021 | 0.144185 | 0.962758 | 0.41805  |
| MmugDNA.9375.1.S1_at   | MmugDNA.9375.1 | 8.4   | 7.96  | 0.59 | 0.24 | 1.36  | 0.098006 | 0.073747 | 0.368578 | 0.317093 |
| MmugDNA.9376.1.S1_at   | MmugDNA.9376.1 | 5.53  | 5.41  | 0.13 | 0.06 | 1.08  | 0.244454 | 0.215002 | 0.540909 | 0.488898 |
| MmugDNA.9377.1.S1_at   | MmugDNA.9377.1 | 5.68  | 5.62  | 0.03 | 0.13 | 1.04  | 0.651657 | 0.235599 | 0.830755 | 0.507056 |
| MmugDNA.9378.1.S1_at   | MmugDNA.9378.1 | 6.5   | 6.33  | 0.01 | 0.2  | 1.12  | 0.252651 | 0.308586 | 0.547282 | 0.564575 |
| MmugDNA.9379.1.S1_at   | MmugDNA.9379.1 | 4.72  | 4.38  | 0.15 | 0.08 | 1.27  | 0.057353 | 0.107005 | 0.296814 | 0.36958  |
| MmugDNA.938.1.S1_at    | MmugDNA.938.1  | 7.98  | 7.99  | 0.17 | 0.09 | -1    | 0.235524 | 0.639429 | 0.533339 | 0.788289 |
| MmugDNA.9380.1.S1_at   | MmugDNA.9380.1 | 4.84  | 4.67  | 0.14 | 0.07 | 1.12  | 0.64905  | 0.132793 | 0.829514 | 0.404544 |
| MmugDNA.9381.1.S1_at   | MmugDNA.9381.1 | 3.39  | 3.32  | 0.04 | 0.03 | 1.05  | 0.076618 | 0.089588 | 0.334909 | 0.343811 |
| MmugDNA.9382.1.S1_at   | MmugDNA.9382.1 | 3.61  | 3.48  | 0.15 | 0.26 | 1.09  | 0.935905 | 0.817622 | 0.973145 | 0.894787 |
| MmugDNA.9383.1.S1_at   | MmugDNA.9383.1 | 5.18  | 4.92  | 0.42 | 0.08 | 1.19  | 0.807546 | 0.329746 | 0.913856 | 0.578874 |
| MmugDNA.9384.1.S1_at   | MmugDNA.9384.1 | 12.36 | 12.37 | 0.17 | 0.09 | -1.01 | 0.690316 | 0.852522 | 0.851986 | 0.916196 |
| MmugDNA.9385.1.S1_at   | MmugDNA.9385.1 | 6.05  | 5.97  | 0.08 | 0.05 | 1.06  | 0.173114 | 0.305927 | 0.467303 | 0.562732 |
| MmugDNA.9386.1.S1_at   | MmugDNA.9386.1 | 5.32  | 5.5   | 0.51 | 0.14 | -1.13 | 0.720508 | 0.737966 | 0.868055 | 0.848158 |
| MmugDNA.9387.1.S1_at   | MmugDNA.9387.1 | 5.01  | 4.86  | 0.19 | 0.05 | 1.11  | 0.197109 | 0.301251 | 0.494235 | 0.559356 |
| MmugDNA.9389.1.S1_at   | MmugDNA.9389.1 | 2.89  | 2.84  | 0.11 | 0.13 | 1.04  | 0.745222 | 0.434382 | 0.881818 | 0.654536 |
| MmugDNA.939.1.S1_at    | MmugDNA.939.1  | 9.11  | 10.15 | 0.37 | 0.24 | -2.06 | 0.026    | 0.001467 | 0.214199 | 0.058401 |
| MmugDNA.9390.1.S1_at   | MmugDNA.9390.1 | 3.87  | 3.72  | 0.25 | 0.41 | 1.11  | 0.716286 | 0.648148 | 0.866094 | 0.794002 |
| MmugDNA.9391.1.S1_at   | MmugDNA.9391.1 | 6.52  | 6.2   | 0.43 | 0.07 | 1.25  | 0.263316 | 0.398538 | 0.556921 | 0.629458 |
| MmugDNA.9392.1.S1_at   | MmugDNA.9392.1 | 12.12 | 12.23 | 0.63 | 0.04 | -1.08 | 0.263292 | 0.678872 | 0.556921 | 0.812474 |
| MmugDNA.9393.1.S1_at   | MmugDNA.9393.1 | 5.28  | 5.25  | 0.24 | 0.05 | 1.02  | 0.772799 | 0.927938 | 0.895994 | 0.959116 |
| MmugDNA.9396.1.S1_at   | MmugDNA.9396.1 | 9.73  | 9.72  | 0.21 | 0.11 | 1.01  | 0.722446 | 0.015243 | 0.869499 | 0.156859 |
| MmugDNA.9397.1.S1_at   | MmugDNA.9397.1 | 3.73  | 3.78  | 0.14 | 0.05 | -1.03 | 0.232863 | 0.004746 | 0.531142 | 0.096064 |
| MmugDNA.9398.1.S1_at   | MmugDNA.9398.1 | 11.33 | 12.14 | 0.24 | 0.17 | -1.76 | 0.011646 | 0.012346 | 0.157734 | 0.143697 |
| MmugDNA.9399.1.S1_at   | MmugDNA.9399.1 | 6.55  | 6.5   | 0.14 | 0.03 | 1.04  | 0.339041 | 0.663911 | 0.619372 | 0.803242 |
| MmugDNA.940.1.S1_at    | MmugDNA.940.1  | 3.01  | 3.38  | 0.14 | 0.1  | -1.29 | 0.00741  | 0.202888 | 0.134211 | 0.477312 |
| MmugDNA.9402.1.S1_at   | MmugDNA.9402.1 | 11.75 | 11.8  | 0.14 | 0.03 | -1.04 | 0.14982  | 0.27716  | 0.438771 | 0.541154 |
| MmugDNA.9402.1.S1_s_at | MmugDNA.9402.1 | 10.14 | 10.18 | 0.25 | 0.03 | -1.03 | 0.293419 | 0.228143 | 0.582378 | 0.500327 |
| MmugDNA.9405.1.S1_at   | MmugDNA.9405.1 | 8.14  | 8.83  | 0.14 | 0.32 | -1.61 | 0.034076 | 0.159915 | 0.239358 | 0.435987 |
| MmugDNA.9406.1.S1_at   | MmugDNA.9406.1 | 6.57  | 7.87  | 1.17 | 0.22 | -2.47 | 0.4444   | 0.535173 | 0.697293 | 0.720821 |
| MmugDNA.9407.1.S1_at   | MmugDNA.9407.1 | 3.99  | 3.73  | 0.18 | 0.14 | 1.2   | 0.098098 | 0.071315 | 0.368627 | 0.313345 |
| MmugDNA.9408.1.S1_at   | MmugDNA.9408.1 | 2.96  | 2.95  | 0.01 | 0.12 | 1     | 0.480303 | 0.499752 | 0.721279 | 0.698494 |
| MmugDNA.9409.1.S1_at   | MmugDNA.9409.1 | 4.47  | 4.44  | 0.23 | 0.04 | 1.02  | 0.86354  | 0.958443 | 0.940697 | 0.976452 |
| MmugDNA.9410.1.S1_at   | MmugDNA.9410.1 | 5.81  | 5.87  | 0.25 | 0.01 | -1.04 | 0.889197 | 0.933086 | 0.95279  | 0.962002 |
| MmugDNA.9411.1.S1_at   | MmugDNA.9411.1 | 4.78  | 4.77  | 0.08 | 0.17 | 1.01  | 0.744895 | 0.884839 | 0.881728 | 0.934382 |
| MmugDNA.9412.1.S1_at   | MmugDNA.9412.1 | 3.36  | 3.31  | 0.11 | 0.1  | 1.04  | 0.59002  | 0.96382  | 0.791771 | 0.979909 |
| MmugDNA.9414.1.S1_at   | MmugDNA.9414.1 | 3.66  | 3.55  | 0.72 | 0.13 | 1.07  | 0.271989 | 0.423108 | 0.563903 | 0.646145 |
| MmugDNA.9416.1.S1_at   | MmugDNA.9416.1 | 2.98  | 2.9   | 0.07 | 0.1  | 1.06  | 0.133745 | 0.094674 | 0.417183 | 0.351481 |
| MmugDNA.9418.1.S1_at   | MmugDNA.9418.1 | 13.45 | 13.33 | 0.11 | 0.05 | 1.08  | 0.159937 | 0.130096 | 0.451279 | 0.401724 |
| MmugDNA.9419.1.S1_at   | MmugDNA.9419.1 | 3.09  | 3.08  | 0.05 | 0.15 | 1.01  | 0.806688 | 0.830591 | 0.913434 | 0.902794 |
| MmugDNA.942.1.S1_at    | MmugDNA.942.1  | 6.24  | 6.21  | 0.04 | 0.19 | 1.02  | 0.634937 | 0.537035 | 0.821078 | 0.722236 |
| MmugDNA.9421.1.S1_at   | MmugDNA.9421.1 | 10.49 | 11    | 0.13 | 0.14 | -1.42 | 0.034007 | 0.37601  | 0.239003 | 0.613815 |
| MmugDNA.9423.1.S1_at   | MmugDNA.9423.1 | 6.4   | 6.54  | 0.31 | 0.23 | -1.1  | 0.974623 | 0.197265 | 0.989826 | 0.472213 |

|                         |                 |       |       |      |      |        |          |          |          |          |
|-------------------------|-----------------|-------|-------|------|------|--------|----------|----------|----------|----------|
| MmugDNA.9425.1.S1_at    | MmugDNA.9425.1  | 3.9   | 3.9   | 0.07 | 0.05 | 1      | 0.774622 | 0.87873  | 0.896973 | 0.930817 |
| MmugDNA.9426.1.S1_at    | MmugDNA.9426.1  | 3.04  | 2.87  | 0.35 | 0.14 | 1.13   | 0.509958 | 0.523005 | 0.741342 | 0.713429 |
| MmugDNA.9427.1.S1_at    | MmugDNA.9427.1  | 11.9  | 10.57 | 0.13 | 0.21 | 2.52   | 0.001092 | 0.139761 | 0.077278 | 0.413109 |
| MmugDNA.9428.1.S1_at    | MmugDNA.9428.1  | 4.2   | 4.1   | 0.01 | 0.09 | 1.08   | 0.119765 | 0.181124 | 0.397751 | 0.457582 |
| MmugDNA.9429.1.S1_at    | MmugDNA.9429.1  | 13.06 | 12.61 | 0.08 | 0.16 | 1.36   | 0.021192 | 0.008204 | 0.199235 | 0.120272 |
| MmugDNA.943.1.S1_at     | MmugDNA.943.1   | 4.47  | 4.52  | 0.38 | 0.12 | -1.03  | 0.991484 | 0.235783 | 0.996896 | 0.506949 |
| MmugDNA.9430.1.S1_at    | MmugDNA.9430.1  | 4.97  | 4.87  | 0.11 | 0.1  | 1.07   | 0.62419  | 0.45969  | 0.814736 | 0.671948 |
| MmugDNA.9431.1.S1_at    | MmugDNA.9431.1  | 3.54  | 3.26  | 0.08 | 0.21 | 1.22   | 0.197474 | 0.219703 | 0.494677 | 0.493336 |
| MmugDNA.9432.1.S1_at    | MmugDNA.9432.1  | 5.23  | 5.23  | 0.38 | 0.15 | 1      | 0.254422 | 0.315506 | 0.548842 | 0.569004 |
| MmugDNA.9436.1.S1_at    | MmugDNA.9436.1  | 7.7   | 7.07  | 0.69 | 0.23 | 1.55   | 0.134736 | 0.014004 | 0.418618 | 0.151595 |
| MmugDNA.9437.1.S1_at    | MmugDNA.9437.1  | 10.41 | 10.88 | 0.13 | 0.05 | -1.39  | 0.008092 | 0.001067 | 0.138956 | 0.051835 |
| MmugDNA.9439.1.S1_at    | MmugDNA.9439.1  | 4.63  | 4.53  | 0.03 | 0.12 | 1.07   | 0.322371 | 0.420656 | 0.606352 | 0.644323 |
| MmugDNA.944.1.S1_at     | MmugDNA.944.1   | 12.67 | 12.36 | 0.18 | 0.14 | 1.24   | 0.178173 | 0.243115 | 0.472847 | 0.513356 |
| MmugDNA.9441.1.S1_at    | MmugDNA.9441.1  | 11.36 | 10.44 | 0.06 | 0.31 | 1.89   | 0.016008 | 0.022188 | 0.179129 | 0.186424 |
| MmugDNA.9443.1.S1_at    | MmugDNA.9443.1  | 3.22  | 3.1   | 0.17 | 0.06 | 1.09   | 0.325344 | 0.514846 | 0.608697 | 0.707919 |
| MmugDNA.9444.1.S1_at    | MmugDNA.9444.1  | 7.21  | 6.49  | 0.65 | 1.13 | 1.65   | 0.206039 | 0.292243 | 0.50382  | 0.552363 |
| MmugDNA.9445.1.S1_at    | MmugDNA.9445.1  | 10.17 | 10.17 | 0.02 | 0.11 | 1      | 0.634162 | 0.008269 | 0.820636 | 0.12078  |
| MmugDNA.9445.1.S1_s_at  | MmugDNA.9445.1  | 8.82  | 8.68  | 0.06 | 0.12 | 1.11   | 0.183808 | 0.386503 | 0.479745 | 0.621626 |
| MmugDNA.9446.1.S1_at    | MmugDNA.9446.1  | 4.69  | 4.55  | 0.14 | 0.04 | 1.11   | 0.448784 | 0.746556 | 0.700182 | 0.852872 |
| MmugDNA.9447.1.S1_at    | MmugDNA.9447.1  | 5.99  | 7.4   | 0.16 | 0.13 | -2.67  | 0.000291 | 0.003228 | 0.057043 | 0.082124 |
| MmugDNA.9448.1.S1_at    | MmugDNA.9448.1  | 4.88  | 4.69  | 0.4  | 0.06 | 1.15   | 0.243949 | 0.443434 | 0.540712 | 0.661218 |
| MmugDNA.9449.1.S1_at    | MmugDNA.9449.1  | 8.6   | 7.23  | 0.19 | 0.19 | 2.58   | 0.001274 | 0.000034 | 0.078631 | 0.023031 |
| MmugDNA.945.1.S1_s_at   | MmugDNA.945.1   | 3.34  | 3.25  | 0.17 | 0.15 | 1.06   | 0.42485  | 0.368614 | 0.682288 | 0.608107 |
| MmugDNA.9450.1.S1_at    | MmugDNA.9450.1  | 5.4   | 5.08  | 0.23 | 0.07 | 1.24   | 0.213718 | 0.000383 | 0.511664 | 0.037273 |
| MmugDNA.9451.1.S1_at    | MmugDNA.9451.1  | 4.53  | 4.51  | 0.14 | 0.04 | 1.02   | 0.913947 | 0.653253 | 0.963451 | 0.797335 |
| MmugDNA.9453.1.S1_at    | MmugDNA.9453.1  | 8.28  | 8.97  | 0.35 | 0.04 | -1.61  | 0.071852 | 0.185608 | 0.325953 | 0.461574 |
| MmugDNA.9454.1.S1_at    | MmugDNA.9454.1  | 10.15 | 9.95  | 0.33 | 0.14 | 1.15   | 0.564106 | 0.239729 | 0.775892 | 0.510443 |
| MmugDNA.9455.1.S1_at    | MmugDNA.9455.1  | 5.47  | 6.57  | 0.28 | 0.27 | -2.14  | 0.014139 | 0.027625 | 0.170464 | 0.207522 |
| MmugDNA.9457.1.S1_at    | MmugDNA.9457.1  | 8.81  | 9.01  | 0.29 | 0.03 | -1.14  | 0.633402 | 0.729589 | 0.820383 | 0.843613 |
| MmugDNA.9458.1.S1_at    | MmugDNA.9458.1  | 7.49  | 7.14  | 0.17 | 0.06 | 1.27   | 0.034486 | 0.370517 | 0.240323 | 0.609573 |
| MmugDNA.9459.1.S1_x_at  | MmugDNA.9459.1  | 4.26  | 4     | 0.33 | 0.11 | 1.2    | 0.148769 | 0.233094 | 0.437317 | 0.504456 |
| MmugDNA.946.1.S1_at     | MmugDNA.946.1   | 6.78  | 6.89  | 0.33 | 0.21 | -1.08  | 0.25659  | 0.323453 | 0.551138 | 0.574466 |
| MmugDNA.9460.1.S1_at    | MmugDNA.9460.1  | 4.17  | 4.13  | 0.12 | 0.2  | 1.03   | 0.631273 | 0.65292  | 0.8189   | 0.797125 |
| MmugDNA.9461.1.S1_at    | MmugDNA.9461.1  | 3.89  | 3.94  | 0.08 | 0.11 | -1.03  | 0.767431 | 0.052747 | 0.893274 | 0.275315 |
| MmugDNA.9463.1.S1_at    | MmugDNA.9463.1  | 3.41  | 3.35  | 0.29 | 0.08 | 1.04   | 0.197252 | 0.265628 | 0.494369 | 0.531468 |
| MmugDNA.9464.1.S1_at    | MmugDNA.9464.1  | 8.99  | 8.67  | 0.08 | 0.23 | 1.25   | 0.16791  | 0.229234 | 0.461188 | 0.501527 |
| MmugDNA.9467.1.S1_at    | MmugDNA.9467.1  | 7     | 6.45  | 0.4  | 0.02 | 1.46   | 0.242728 | 0.722824 | 0.539526 | 0.839457 |
| MmugDNA.9468.1.S1_at    | MmugDNA.9468.1  | 3.34  | 3.32  | 0.09 | 0.26 | 1.01   | 0.244202 | 0.194448 | 0.540864 | 0.469533 |
| MmugDNA.18446.1.S1_s_at | MmugDNA.18446.1 | 9.8   | 10.87 | 0.77 | 0.44 | -2.1   | 0.127063 | 0.286802 | 0.408591 | 0.548149 |
| MmugDNA.9472.1.S1_at    | MmugDNA.9472.1  | 9.81  | 9.25  | 0.27 | 0.23 | 1.47   | 0.057076 | 0.203301 | 0.296224 | 0.477517 |
| MmugDNA.9473.1.S1_at    | MmugDNA.9473.1  | 7.18  | 10.55 | 0.57 | 0.23 | -10.39 | 0.000843 | 0.11571  | 0.07338  | 0.382814 |
| MmugDNA.9474.1.S1_at    | MmugDNA.9474.1  | 3.32  | 3.22  | 0.12 | 0.4  | 1.08   | 0.850669 | 0.842513 | 0.935192 | 0.910315 |
| MmugDNA.9475.1.S1_at    | MmugDNA.9475.1  | 6.32  | 8.6   | 0.16 | 0.42 | -4.85  | 0.001042 | 0.050156 | 0.076321 | 0.269105 |

|                      |                |       |       |      |      |       |          |          |          |          |
|----------------------|----------------|-------|-------|------|------|-------|----------|----------|----------|----------|
| MmugDNA.9476.1.S1_at | MmugDNA.9476.1 | 5.59  | 5.4   | 0.12 | 0.24 | 1.14  | 0.140677 | 0.116818 | 0.426401 | 0.384133 |
| MmugDNA.9477.1.S1_at | MmugDNA.9477.1 | 5.26  | 3.98  | 0.98 | 0.63 | 2.44  | 0.211797 | 0.348526 | 0.509683 | 0.592609 |
| MmugDNA.9478.1.S1_at | MmugDNA.9478.1 | 3.63  | 4.91  | 0.36 | 0.99 | -2.43 | 0.054572 | 0.126102 | 0.290604 | 0.39672  |
| MmugDNA.9480.1.S1_at | MmugDNA.9480.1 | 3.58  | 3.75  | 0.11 | 0.31 | -1.13 | 0.960616 | 0.99039  | 0.983913 | 0.994548 |
| MmugDNA.9482.1.S1_at | MmugDNA.9482.1 | 5.25  | 5.27  | 0.13 | 0.29 | -1.01 | 0.645011 | 0.424581 | 0.827097 | 0.647146 |
| MmugDNA.9483.1.S1_at | MmugDNA.9483.1 | 5.89  | 6.61  | 0.38 | 0.19 | -1.65 | 0.023647 | 0.004044 | 0.207074 | 0.090281 |
| MmugDNA.9484.1.S1_at | MmugDNA.9484.1 | 6.04  | 6.08  | 0.2  | 0.08 | -1.03 | 0.739492 | 0.880272 | 0.879245 | 0.931571 |
| MmugDNA.9485.1.S1_at | MmugDNA.9485.1 | 5.17  | 5.12  | 0.13 | 0.1  | 1.04  | 0.576646 | 0.151417 | 0.783318 | 0.426121 |
| MmugDNA.9486.1.S1_at | MmugDNA.9486.1 | 8.64  | 6.83  | 0.17 | 0.18 | 3.5   | 0.000313 | 0.029448 | 0.058857 | 0.213368 |
| MmugDNA.9487.1.S1_at | MmugDNA.9487.1 | 9.81  | 9.78  | 0.03 | 0.02 | 1.02  | 0.11741  | 0.780018 | 0.394715 | 0.872435 |
| MmugDNA.9489.1.S1_at | MmugDNA.9489.1 | 3.42  | 3.18  | 0.12 | 0.22 | 1.18  | 0.791743 | 0.233159 | 0.905419 | 0.504458 |
| MmugDNA.949.1.S1_at  | MmugDNA.949.1  | 7.89  | 7.71  | 0.5  | 0.05 | 1.13  | 0.661956 | 0.508909 | 0.836881 | 0.703911 |
| MmugDNA.9490.1.S1_at | MmugDNA.9490.1 | 4.53  | 4.55  | 0.08 | 0.21 | -1.02 | 0.983471 | 0.999369 | 0.99383  | 0.999769 |
| MmugDNA.9492.1.S1_at | MmugDNA.9492.1 | 7.69  | 7.66  | 0.4  | 0.09 | 1.02  | 0.269983 | 0.263748 | 0.562262 | 0.530052 |
| MmugDNA.9493.1.S1_at | MmugDNA.9493.1 | 7.41  | 7.81  | 0.82 | 0.24 | -1.32 | 0.165703 | 0.122523 | 0.458753 | 0.392427 |
| MmugDNA.9494.1.S1_at | MmugDNA.9494.1 | 6.73  | 7.11  | 0.15 | 0.17 | -1.3  | 0.095938 | 0.366732 | 0.365529 | 0.606498 |
| MmugDNA.9498.1.S1_at | MmugDNA.9498.1 | 9.28  | 9.34  | 0.48 | 0.06 | -1.04 | 0.49148  | 0.069994 | 0.72924  | 0.310761 |
| MmugDNA.9499.1.S1_at | MmugDNA.9499.1 | 7.92  | 7.79  | 0.4  | 0.26 | 1.1   | 0.132925 | 0.082245 | 0.416351 | 0.331091 |
| MmugDNA.95.1.S1_at   | MmugDNA.95.1   | 7.06  | 7.01  | 0.03 | 0.06 | 1.04  | 0.077086 | 0.638844 | 0.335647 | 0.787894 |
| MmugDNA.9501.1.S1_at | MmugDNA.9501.1 | 4.08  | 3.22  | 0.44 | 0.14 | 1.82  | 0.11599  | 0.141937 | 0.393014 | 0.415477 |
| MmugDNA.9502.1.S1_at | MmugDNA.9502.1 | 6.54  | 6.44  | 0.07 | 0.1  | 1.07  | 0.090536 | 0.190499 | 0.357339 | 0.465906 |
| MmugDNA.9503.1.S1_at | MmugDNA.9503.1 | 5.11  | 5.64  | 0.17 | 0.21 | -1.44 | 0.011275 | 0.092675 | 0.156196 | 0.348751 |
| MmugDNA.9504.1.S1_at | MmugDNA.9504.1 | 6.31  | 6.07  | 1.03 | 0.24 | 1.18  | 0.665921 | 0.865684 | 0.839467 | 0.923638 |
| MmugDNA.9505.1.S1_at | MmugDNA.9505.1 | 4.74  | 4.76  | 0.28 | 0.1  | -1.01 | 0.848321 | 0.933751 | 0.933974 | 0.9623   |
| MmugDNA.9506.1.S1_at | MmugDNA.9506.1 | 8.47  | 9.17  | 0.32 | 0.34 | -1.63 | 0.289559 | 0.210376 | 0.579093 | 0.48426  |
| MmugDNA.9507.1.S1_at | MmugDNA.9507.1 | 10.06 | 9.57  | 0.09 | 0.17 | 1.4   | 0.011184 | 0.129363 | 0.15543  | 0.400748 |
| MmugDNA.9508.1.S1_at | MmugDNA.9508.1 | 6.78  | 6.51  | 0.74 | 0.5  | 1.21  | 0.815059 | 0.264149 | 0.917431 | 0.530214 |
| MmugDNA.9509.1.S1_at | MmugDNA.9509.1 | 5.77  | 5.22  | 0.23 | 0.09 | 1.47  | 0.010505 | 0.002115 | 0.152429 | 0.068023 |
| MmugDNA.951.1.S1_at  | MmugDNA.951.1  | 9.89  | 9.71  | 0.46 | 0.23 | 1.13  | 0.815385 | 0.041623 | 0.917549 | 0.24887  |
| MmugDNA.9510.1.S1_at | MmugDNA.9510.1 | 6.11  | 5.5   | 0.3  | 0.14 | 1.52  | 0.074574 | 0.065342 | 0.331249 | 0.30137  |
| MmugDNA.9511.1.S1_at | MmugDNA.9511.1 | 5.21  | 4.26  | 0.13 | 0.11 | 1.92  | 0.000744 | 0.065824 | 0.072567 | 0.301933 |
| MmugDNA.9512.1.S1_at | MmugDNA.9512.1 | 3.04  | 3.14  | 0.07 | 0.15 | -1.07 | 0.669389 | 0.497617 | 0.841414 | 0.696935 |
| MmugDNA.9514.1.S1_at | MmugDNA.9514.1 | 10.88 | 10.68 | 0.12 | 0.14 | 1.15  | 0.32675  | 0.037208 | 0.609643 | 0.237285 |
| MmugDNA.9516.1.S1_at | MmugDNA.9516.1 | 9.89  | 9.76  | 0.48 | 0.13 | 1.09  | 0.945369 | 0.218442 | 0.977063 | 0.492009 |
| MmugDNA.9518.1.S1_at | MmugDNA.9518.1 | 4.42  | 4.77  | 0.35 | 0.02 | -1.27 | 0.164901 | 0.285557 | 0.457897 | 0.547395 |
| MmugDNA.9519.1.S1_at | MmugDNA.9519.1 | 4.5   | 3.53  | 0.33 | 0.25 | 1.95  | 0.031665 | 0.081556 | 0.231419 | 0.329764 |
| MmugDNA.952.1.S1_at  | MmugDNA.952.1  | 10.17 | 10.3  | 0.27 | 0.21 | -1.09 | 0.713364 | 0.521166 | 0.864604 | 0.712273 |
| MmugDNA.9520.1.S1_at | MmugDNA.9520.1 | 6.1   | 6.36  | 0.13 | 0.16 | -1.19 | 0.23091  | 0.302758 | 0.529752 | 0.560307 |
| MmugDNA.9525.1.S1_at | MmugDNA.9525.1 | 12.04 | 11.56 | 0.2  | 0.12 | 1.39  | 0.040003 | 0.060616 | 0.256645 | 0.292801 |
| MmugDNA.9527.1.S1_at | MmugDNA.9527.1 | 7.39  | 5.9   | 0.41 | 0.3  | 2.82  | 0.005042 | 0.005072 | 0.116282 | 0.09907  |
| MmugDNA.9530.1.S1_at | MmugDNA.9530.1 | 3.41  | 3.4   | 0.27 | 0.01 | 1     | 0.975165 | 0.914766 | 0.99011  | 0.9521   |
| MmugDNA.9531.1.S1_at | MmugDNA.9531.1 | 3.89  | 3.8   | 0.05 | 0.06 | 1.07  | 0.545322 | 0.113123 | 0.764553 | 0.379122 |
| MmugDNA.9532.1.S1_at | MmugDNA.9532.1 | 3.87  | 3.83  | 0.16 | 0    | 1.03  | 0.818108 | 0.889819 | 0.918751 | 0.937225 |

|                        |                |       |       |      |      |       |          |          |          |          |
|------------------------|----------------|-------|-------|------|------|-------|----------|----------|----------|----------|
| MmugDNA.9533.1.S1_at   | MmugDNA.9533.1 | 5.58  | 5.58  | 0    | 0.11 | 1     | 0.373901 | 0.52727  | 0.645118 | 0.715915 |
| MmugDNA.9534.1.S1_at   | MmugDNA.9534.1 | 7.97  | 8.27  | 0.19 | 0.58 | -1.23 | 0.491969 | 0.737092 | 0.729433 | 0.847795 |
| MmugDNA.9535.1.S1_at   | MmugDNA.9535.1 | 3.33  | 3.33  | 0.05 | 0.06 | -1    | 0.214117 | 0.69715  | 0.511862 | 0.824045 |
| MmugDNA.9538.1.S1_at   | MmugDNA.9538.1 | 4.31  | 4.27  | 0.28 | 0.03 | 1.03  | 0.582521 | 0.261269 | 0.787305 | 0.527739 |
| MmugDNA.9539.1.S1_at   | MmugDNA.9539.1 | 7.94  | 8.8   | 0.26 | 0.12 | -1.82 | 0.014052 | 0.000009 | 0.169936 | 0.016421 |
| MmugDNA.9540.1.S1_at   | MmugDNA.9540.1 | 4.26  | 4.23  | 0.44 | 0.15 | 1.02  | 0.651475 | 0.534737 | 0.83072  | 0.720524 |
| MmugDNA.9541.1.S1_at   | MmugDNA.9541.1 | 4.41  | 4.51  | 0.16 | 0.3  | -1.07 | 0.809209 | 0.364156 | 0.914507 | 0.604488 |
| MmugDNA.9542.1.S1_at   | MmugDNA.9542.1 | 6.1   | 5.83  | 0.06 | 0.17 | 1.2   | 0.023822 | 0.177381 | 0.20744  | 0.453742 |
| MmugDNA.9543.1.S1_at   | MmugDNA.9543.1 | 3.97  | 4     | 0.12 | 0.23 | -1.02 | 0.303829 | 0.183645 | 0.591195 | 0.459681 |
| MmugDNA.9544.1.S1_at   | MmugDNA.9544.1 | 3.71  | 3.81  | 0.09 | 0.11 | -1.07 | 0.488377 | 0.744829 | 0.726901 | 0.852198 |
| MmugDNA.9547.1.S1_at   | MmugDNA.9547.1 | 3.42  | 3.44  | 0.03 | 0.19 | -1.02 | 0.860868 | 0.513385 | 0.939561 | 0.706881 |
| MmugDNA.9549.1.S1_at   | MmugDNA.9549.1 | 7.95  | 7.76  | 0.12 | 0.11 | 1.14  | 0.050436 | 0.042661 | 0.282391 | 0.251037 |
| MmugDNA.955.1.S1_at    | MmugDNA.955.1  | 6.78  | 6.84  | 0.13 | 0.05 | -1.04 | 0.162369 | 0.147833 | 0.45441  | 0.42217  |
| MmugDNA.9550.1.S1_at   | MmugDNA.9550.1 | 8.69  | 8.71  | 0.19 | 0.09 | -1.01 | 0.706903 | 0.316615 | 0.861306 | 0.569963 |
| MmugDNA.9551.1.S1_at   | MmugDNA.9551.1 | 12.64 | 12.33 | 0.03 | 0.12 | 1.24  | 0.011503 | 0.003679 | 0.15722  | 0.086591 |
| MmugDNA.9552.1.S1_at   | MmugDNA.9552.1 | 5.78  | 5.33  | 0.31 | 0.36 | 1.37  | 0.422226 | 0.559708 | 0.680473 | 0.736365 |
| MmugDNA.9554.1.S1_at   | MmugDNA.9554.1 | 2.86  | 2.84  | 0.15 | 0.08 | 1.02  | 0.340706 | 0.633476 | 0.620859 | 0.784173 |
| MmugDNA.956.1.S1_s_at  | MmugDNA.956.1  | 9.71  | 9.58  | 0.05 | 0.07 | 1.09  | 0.047347 | 0.446407 | 0.274971 | 0.662842 |
| MmugDNA.9561.1.S1_at   | MmugDNA.9561.1 | 8.62  | 8.84  | 0.08 | 0.11 | -1.17 | 0.028755 | 0.27932  | 0.222261 | 0.542962 |
| MmugDNA.9562.1.S1_at   | MmugDNA.9562.1 | 3.61  | 3.66  | 0.15 | 0.04 | -1.03 | 0.564896 | 0.67798  | 0.776435 | 0.811865 |
| MmugDNA.9563.1.S1_at   | MmugDNA.9563.1 | 5.3   | 5.69  | 0.07 | 0.43 | -1.31 | 0.194597 | 0.165652 | 0.491247 | 0.441925 |
| MmugDNA.9564.1.S1_at   | MmugDNA.9564.1 | 4.97  | 5.53  | 0.27 | 0.46 | -1.47 | 0.392447 | 0.750829 | 0.6594   | 0.855074 |
| MmugDNA.9565.1.S1_at   | MmugDNA.9565.1 | 6.97  | 6.94  | 0.04 | 0.08 | 1.02  | 0.460382 | 0.108328 | 0.708167 | 0.371601 |
| MmugDNA.9566.1.S1_at   | MmugDNA.9566.1 | 5.86  | 5.76  | 0.07 | 0.08 | 1.07  | 0.098943 | 0.733727 | 0.369803 | 0.845822 |
| MmugDNA.9567.1.S1_at   | MmugDNA.9567.1 | 6.59  | 6.5   | 0.41 | 0.11 | 1.06  | 0.288764 | 0.187865 | 0.578502 | 0.463959 |
| MmugDNA.9568.1.S1_at   | MmugDNA.9568.1 | 3.06  | 3.06  | 0.29 | 0.04 | 1     | 0.325178 | 0.713161 | 0.608601 | 0.833655 |
| MmugDNA.9569.1.S1_at   | MmugDNA.9569.1 | 3.81  | 3.38  | 0.35 | 0.12 | 1.34  | 0.065823 | 0.068124 | 0.314024 | 0.307181 |
| MmugDNA.957.1.S1_x_at  | MmugDNA.957.1  | 12.76 | 12.83 | 0.16 | 0.21 | -1.04 | 0.369593 | 0.645001 | 0.642956 | 0.791993 |
| MmugDNA.9570.1.S1_at   | MmugDNA.9570.1 | 3.43  | 3.42  | 0.11 | 0.06 | 1     | 0.814978 | 0.167271 | 0.917379 | 0.443684 |
| MmugDNA.9571.1.S1_at   | MmugDNA.9571.1 | 10.25 | 9.64  | 0.12 | 0.17 | 1.53  | 0.020115 | 0.000057 | 0.195301 | 0.025666 |
| MmugDNA.9573.1.S1_at   | MmugDNA.9573.1 | 4.74  | 4.93  | 0.77 | 0.22 | -1.14 | 0.94992  | 0.244755 | 0.979147 | 0.514615 |
| MmugDNA.9574.1.S1_at   | MmugDNA.9574.1 | 3.37  | 3.13  | 0.14 | 0.07 | 1.18  | 0.104325 | 0.234076 | 0.377773 | 0.505319 |
| MmugDNA.9576.1.S1_at   | MmugDNA.9576.1 | 3.02  | 3.01  | 0.03 | 0.07 | 1     | 0.566851 | 0.95076  | 0.777544 | 0.972034 |
| MmugDNA.9577.1.S1_s_at | MmugDNA.9577.1 | 9.43  | 9.56  | 0.13 | 0.18 | -1.09 | 0.387732 | 0.019318 | 0.65583  | 0.174723 |
| MmugDNA.9579.1.S1_at   | MmugDNA.9579.1 | 3.45  | 2.99  | 0.27 | 0.26 | 1.37  | 0.52616  | 0.123056 | 0.75242  | 0.393015 |
| MmugDNA.9579.1.S1_x_at | MmugDNA.9579.1 | 2.99  | 3.01  | 0.26 | 0.24 | -1.01 | 0.459612 | 0.314348 | 0.707719 | 0.568273 |
| MmugDNA.958.1.S1_at    | MmugDNA.958.1  | 5.91  | 5.98  | 0.1  | 0.08 | -1.05 | 0.786024 | 0.526483 | 0.902343 | 0.715574 |
| MmugDNA.9583.1.S1_at   | MmugDNA.9583.1 | 5.72  | 5.91  | 0.64 | 0.2  | -1.14 | 0.689915 | 0.607536 | 0.851884 | 0.766417 |
| MmugDNA.9584.1.S1_at   | MmugDNA.9584.1 | 3.35  | 3.35  | 0.07 | 0.05 | -1    | 0.200432 | 0.412039 | 0.497869 | 0.638463 |
| MmugDNA.9585.1.S1_at   | MmugDNA.9585.1 | 6.67  | 7.72  | 0.54 | 0.23 | -2.07 | 0.089981 | 0.312301 | 0.356863 | 0.567015 |
| MmugDNA.9586.1.S1_at   | MmugDNA.9586.1 | 3.85  | 4.05  | 0.04 | 0.05 | -1.14 | 0.00487  | 0.100585 | 0.115123 | 0.359845 |
| MmugDNA.9587.1.S1_at   | MmugDNA.9587.1 | 8.42  | 8.37  | 0.28 | 0.05 | 1.03  | 0.23808  | 0.37517  | 0.535495 | 0.613238 |
| MmugDNA.9589.1.S1_at   | MmugDNA.9589.1 | 4.72  | 4.29  | 0.29 | 0.07 | 1.34  | 0.084764 | 0.088901 | 0.348712 | 0.34275  |

|                      |                |       |       |      |      |       |          |          |          |          |
|----------------------|----------------|-------|-------|------|------|-------|----------|----------|----------|----------|
| MmugDNA.959.1.S1_at  | MmugDNA.959.1  | 8.8   | 8.64  | 0.17 | 0.06 | 1.11  | 0.179999 | 0.178304 | 0.475116 | 0.45464  |
| MmugDNA.9590.1.S1_at | MmugDNA.9590.1 | 11.7  | 10.69 | 0.32 | 0.41 | 2.01  | 0.057273 | 0.08982  | 0.296671 | 0.34404  |
| MmugDNA.9593.1.S1_at | MmugDNA.9593.1 | 4.95  | 3.85  | 0.72 | 0.51 | 2.15  | 0.219907 | 0.183081 | 0.517641 | 0.459493 |
| MmugDNA.9594.1.S1_at | MmugDNA.9594.1 | 4.24  | 3.42  | 0.42 | 0.17 | 1.76  | 0.083446 | 0.049653 | 0.345905 | 0.267876 |
| MmugDNA.9596.1.S1_at | MmugDNA.9596.1 | 3.77  | 3.78  | 0.28 | 0.17 | -1.01 | 0.562439 | 0.785138 | 0.774894 | 0.875623 |
| MmugDNA.9598.1.S1_at | MmugDNA.9598.1 | 8.47  | 8.29  | 0.21 | 0.16 | 1.13  | 0.147887 | 0.162175 | 0.436081 | 0.438335 |
| MmugDNA.9599.1.S1_at | MmugDNA.9599.1 | 4.3   | 4.29  | 0.1  | 0.08 | 1     | 0.647049 | 0.789451 | 0.828492 | 0.878377 |
| MmugDNA.96.1.S1_at   | MmugDNA.96.1   | 8.94  | 9.01  | 0.51 | 0.02 | -1.05 | 0.275396 | 0.132647 | 0.567073 | 0.404544 |
| MmugDNA.960.1.S1_at  | MmugDNA.960.1  | 8.15  | 8.23  | 0.67 | 0.14 | -1.06 | 0.832674 | 0.974903 | 0.926317 | 0.986264 |
| MmugDNA.9602.1.S1_at | MmugDNA.9602.1 | 9.16  | 8.72  | 0.23 | 0.23 | 1.35  | 0.06605  | 0.305982 | 0.314431 | 0.562732 |
| MmugDNA.9606.1.S1_at | MmugDNA.9606.1 | 10.28 | 9.98  | 0.07 | 0.16 | 1.23  | 0.021016 | 0.189642 | 0.198347 | 0.465297 |
| MmugDNA.9608.1.S1_at | MmugDNA.9608.1 | 9.27  | 9.38  | 0.17 | 0.05 | -1.07 | 0.245099 | 0.469275 | 0.541279 | 0.678191 |
| MmugDNA.9609.1.S1_at | MmugDNA.9609.1 | 8.75  | 7.85  | 1.01 | 0.23 | 1.87  | 0.057941 | 0.102778 | 0.297852 | 0.363305 |
| MmugDNA.961.1.S1_at  | MmugDNA.961.1  | 6.67  | 6.51  | 0.15 | 0.1  | 1.12  | 0.190059 | 0.357115 | 0.486394 | 0.598798 |
| MmugDNA.9611.1.S1_at | MmugDNA.9611.1 | 8.48  | 8.35  | 0.14 | 0    | 1.09  | 0.170917 | 0.611794 | 0.464646 | 0.769583 |
| MmugDNA.9613.1.S1_at | MmugDNA.9613.1 | 8.2   | 7.94  | 0.14 | 0.13 | 1.2   | 0.114682 | 0.001724 | 0.391699 | 0.062886 |
| MmugDNA.9616.1.S1_at | MmugDNA.9616.1 | 12.83 | 12.86 | 0.12 | 0.05 | -1.02 | 0.462236 | 0.001393 | 0.709505 | 0.057005 |
| MmugDNA.9617.1.S1_at | MmugDNA.9617.1 | 4.05  | 3.94  | 0.08 | 0.08 | 1.08  | 0.108116 | 0.407103 | 0.38286  | 0.634734 |
| MmugDNA.9618.1.S1_at | MmugDNA.9618.1 | 5.67  | 5.45  | 0.38 | 0.03 | 1.16  | 0.388063 | 0.36169  | 0.656101 | 0.602419 |
| MmugDNA.9619.1.S1_at | MmugDNA.9619.1 | 10.88 | 11.07 | 0.1  | 0.09 | -1.14 | 0.072838 | 0.151315 | 0.327658 | 0.426073 |
| MmugDNA.962.1.S1_at  | MmugDNA.962.1  | 10.91 | 11.26 | 0.48 | 0.01 | -1.28 | 0.258799 | 0.49659  | 0.552973 | 0.696119 |
| MmugDNA.9620.1.S1_at | MmugDNA.9620.1 | 8.17  | 7.95  | 0.27 | 0.22 | 1.16  | 0.187092 | 0.49611  | 0.483199 | 0.695877 |
| MmugDNA.9621.1.S1_at | MmugDNA.9621.1 | 5.52  | 5.47  | 0.21 | 0.11 | 1.04  | 0.84685  | 0.840793 | 0.933148 | 0.909237 |
| MmugDNA.9622.1.S1_at | MmugDNA.9622.1 | 7     | 8.43  | 0.87 | 0.22 | -2.69 | 0.063756 | 0.015155 | 0.308957 | 0.156391 |
| MmugDNA.9624.1.S1_at | MmugDNA.9624.1 | 5.71  | 4.94  | 0.56 | 0.27 | 1.7   | 0.094827 | 0.041383 | 0.363741 | 0.248067 |
| MmugDNA.9625.1.S1_at | MmugDNA.9625.1 | 10.24 | 10.01 | 0.13 | 0.15 | 1.17  | 0.064251 | 0.569525 | 0.309883 | 0.742452 |
| MmugDNA.9626.1.S1_at | MmugDNA.9626.1 | 8.25  | 9.2   | 0.08 | 0.12 | -1.93 | 0.000286 | 0.000133 | 0.057043 | 0.029087 |
| MmugDNA.9627.1.S1_at | MmugDNA.9627.1 | 6.53  | 8.31  | 0.78 | 0.12 | -3.43 | 0.021889 | 0.122939 | 0.201211 | 0.392923 |
| MmugDNA.9628.1.S1_at | MmugDNA.9628.1 | 3.59  | 3.63  | 0.16 | 0.06 | -1.03 | 0.374789 | 0.593023 | 0.645697 | 0.758    |
| MmugDNA.963.1.S1_at  | MmugDNA.963.1  | 6.67  | 6.53  | 0.12 | 0.29 | 1.1   | 0.362279 | 0.064021 | 0.637219 | 0.299166 |
| MmugDNA.9630.1.S1_at | MmugDNA.9630.1 | 5.15  | 5.1   | 0.05 | 0.18 | 1.03  | 0.232639 | 0.351547 | 0.531067 | 0.595094 |
| MmugDNA.9633.1.S1_at | MmugDNA.9633.1 | 6.81  | 6.69  | 0.11 | 0.15 | 1.09  | 0.372794 | 0.581991 | 0.645067 | 0.750784 |
| MmugDNA.9635.1.S1_at | MmugDNA.9635.1 | 8.78  | 8.27  | 0.3  | 0.23 | 1.42  | 0.081887 | 0.038779 | 0.343159 | 0.241916 |
| MmugDNA.9636.1.S1_at | MmugDNA.9636.1 | 5.04  | 5.05  | 0.1  | 0.04 | -1    | 0.559141 | 0.391643 | 0.773148 | 0.625282 |
| MmugDNA.9637.1.S1_at | MmugDNA.9637.1 | 3.8   | 3.69  | 0.11 | 0.14 | 1.08  | 0.187917 | 0.193815 | 0.484195 | 0.468847 |
| MmugDNA.9638.1.S1_at | MmugDNA.9638.1 | 5.42  | 5.29  | 0.08 | 0.07 | 1.09  | 0.121571 | 0.403648 | 0.400376 | 0.632266 |
| MmugDNA.9640.1.S1_at | MmugDNA.9640.1 | 5.34  | 5.2   | 0.03 | 0.08 | 1.1   | 0.112538 | 0.271695 | 0.388857 | 0.536577 |
| MmugDNA.9641.1.S1_at | MmugDNA.9641.1 | 11.22 | 10.62 | 0.34 | 0.09 | 1.52  | 0.051205 | 0.061648 | 0.283674 | 0.295095 |
| MmugDNA.9643.1.S1_at | MmugDNA.9643.1 | 5.07  | 5.05  | 0.09 | 0    | 1.01  | 0.968497 | 0.994157 | 0.987529 | 0.996438 |
| MmugDNA.9644.1.S1_at | MmugDNA.9644.1 | 3.88  | 4.05  | 0.15 | 0.08 | -1.12 | 0.144879 | 0.156838 | 0.431907 | 0.432372 |
| MmugDNA.9645.1.S1_at | MmugDNA.9645.1 | 5.01  | 4.9   | 0.08 | 0.15 | 1.08  | 0.779208 | 0.437123 | 0.89921  | 0.656547 |
| MmugDNA.9647.1.S1_at | MmugDNA.9647.1 | 2.88  | 2.85  | 0.21 | 0.06 | 1.02  | 0.847372 | 0.178954 | 0.933432 | 0.455243 |
| MmugDNA.965.1.S1_at  | MmugDNA.965.1  | 11.95 | 11.82 | 0.15 | 0.02 | 1.09  | 0.21115  | 0.015699 | 0.50898  | 0.158742 |



|                        |                |       |       |      |      |        |          |          |          |          |
|------------------------|----------------|-------|-------|------|------|--------|----------|----------|----------|----------|
| MmugDNA.9651.1.S1_at   | MmugDNA.9651.1 | 3.75  | 3.92  | 0.39 | 0.16 | -1.12  | 0.606442 | 0.700351 | 0.803128 | 0.826079 |
| MmugDNA.9653.1.S1_at   | MmugDNA.9653.1 | 9.48  | 9.55  | 0.27 | 0.13 | -1.05  | 0.6804   | 0.378146 | 0.847548 | 0.615438 |
| MmugDNA.9654.1.S1_at   | MmugDNA.9654.1 | 9.4   | 9.12  | 1    | 0.35 | 1.22   | 0.755653 | 0.794181 | 0.887352 | 0.881296 |
| MmugDNA.9655.1.S1_at   | MmugDNA.9655.1 | 10.01 | 9.06  | 0.32 | 0.21 | 1.93   | 0.02235  | 0.006599 | 0.2028   | 0.110088 |
| MmugDNA.9656.1.S1_at   | MmugDNA.9656.1 | 7.9   | 7.81  | 0.2  | 0.09 | 1.06   | 0.44699  | 0.140576 | 0.699055 | 0.413822 |
| MmugDNA.9657.1.S1_at   | MmugDNA.9657.1 | 5.18  | 4.92  | 0.26 | 0.18 | 1.19   | 0.456192 | 0.203772 | 0.705665 | 0.478031 |
| MmugDNA.9658.1.S1_at   | MmugDNA.9658.1 | 4.66  | 4.93  | 0.14 | 0.15 | -1.21  | 0.037988 | 0.024357 | 0.250683 | 0.195335 |
| MmugDNA.966.1.S1_at    | MmugDNA.966.1  | 6.36  | 6.37  | 0.07 | 0.08 | -1     | 0.240716 | 0.254208 | 0.538168 | 0.52252  |
| MmugDNA.9660.1.S1_at   | MmugDNA.9660.1 | 3.82  | 4.29  | 0.51 | 0.27 | -1.39  | 0.740677 | 0.650786 | 0.879789 | 0.795801 |
| MmugDNA.9661.1.S1_s_at | MmugDNA.9661.1 | 6.41  | 9.93  | 0.89 | 0.25 | -11.52 | 0.005719 | 0.065064 | 0.121186 | 0.301009 |
| MmugDNA.9663.1.S1_at   | MmugDNA.9663.1 | 6.18  | 6.2   | 0.1  | 0.13 | -1.01  | 0.305013 | 0.211991 | 0.592008 | 0.485975 |
| MmugDNA.9664.1.S1_s_at | MmugDNA.9664.1 | 8.63  | 8.43  | 0.17 | 0.22 | 1.16   | 0.311168 | 0.077406 | 0.597352 | 0.323204 |
| MmugDNA.9665.1.S1_at   | MmugDNA.9665.1 | 5.52  | 5.39  | 0.11 | 0.06 | 1.1    | 0.464143 | 0.435429 | 0.710515 | 0.655194 |
| MmugDNA.9666.1.S1_at   | MmugDNA.9666.1 | 6.4   | 5.58  | 0.22 | 1.04 | 1.77   | 0.202541 | 0.239079 | 0.500226 | 0.509827 |
| MmugDNA.9667.1.S1_at   | MmugDNA.9667.1 | 9.24  | 8.78  | 0.4  | 0.14 | 1.38   | 0.073463 | 0.116409 | 0.328846 | 0.383671 |
| MmugDNA.9669.1.S1_at   | MmugDNA.9669.1 | 6.04  | 6.02  | 0.28 | 0.1  | 1.02   | 0.933485 | 0.660469 | 0.972111 | 0.801351 |
| MmugDNA.967.1.S1_at    | MmugDNA.967.1  | 4.45  | 4.46  | 0.23 | 0.05 | -1.01  | 0.735423 | 0.854518 | 0.876858 | 0.917099 |
| MmugDNA.9670.1.S1_at   | MmugDNA.9670.1 | 4.99  | 4.34  | 0.63 | 0.17 | 1.57   | 0.12272  | 0.140423 | 0.401609 | 0.413589 |
| MmugDNA.9671.1.S1_at   | MmugDNA.9671.1 | 3.5   | 3.62  | 0.1  | 0.09 | -1.08  | 0.210169 | 0.258598 | 0.507703 | 0.52584  |
| MmugDNA.9672.1.S1_s_at | MmugDNA.9672.1 | 8.32  | 8     | 0.16 | 0.08 | 1.25   | 0.035173 | 0.024344 | 0.242214 | 0.195284 |
| MmugDNA.9673.1.S1_at   | MmugDNA.9673.1 | 6.64  | 6.36  | 0.24 | 0.15 | 1.22   | 0.221014 | 0.165392 | 0.519009 | 0.441544 |
| MmugDNA.9674.1.S1_at   | MmugDNA.9674.1 | 3.45  | 3.56  | 0.18 | 0.16 | -1.08  | 0.973865 | 0.988321 | 0.989501 | 0.993461 |
| MmugDNA.9675.1.S1_at   | MmugDNA.9675.1 | 4.45  | 4.3   | 0.07 | 0.08 | 1.11   | 0.030041 | 0.07754  | 0.226564 | 0.323421 |
| MmugDNA.9676.1.S1_at   | MmugDNA.9676.1 | 4.71  | 4.7   | 0.02 | 0.12 | 1.01   | 0.816929 | 0.587071 | 0.918148 | 0.753998 |
| MmugDNA.9676.1.S1_s_at | MmugDNA.9676.1 | 6.33  | 5.9   | 0.93 | 0.23 | 1.35   | 0.431444 | 0.599846 | 0.687507 | 0.761621 |
| MmugDNA.9677.1.S1_at   | MmugDNA.9677.1 | 10.31 | 9.65  | 0.17 | 0.22 | 1.58   | 0.018572 | 0.127699 | 0.189513 | 0.398581 |
| MmugDNA.9678.1.S1_at   | MmugDNA.9678.1 | 7.37  | 6.81  | 0.43 | 0.14 | 1.47   | 0.103661 | 0.212197 | 0.376952 | 0.486081 |
| MmugDNA.968.1.S1_at    | MmugDNA.968.1  | 4.97  | 3.96  | 1.14 | 0.43 | 2.02   | 0.31953  | 0.362726 | 0.604169 | 0.603245 |
| MmugDNA.9680.1.S1_at   | MmugDNA.9680.1 | 4     | 3.93  | 0.18 | 0.06 | 1.05   | 0.353318 | 0.585723 | 0.630444 | 0.753003 |
| MmugDNA.9681.1.S1_at   | MmugDNA.9681.1 | 5.82  | 5.68  | 0.14 | 0.07 | 1.1    | 0.194978 | 0.31539  | 0.491489 | 0.568939 |
| MmugDNA.9684.1.S1_at   | MmugDNA.9684.1 | 5.7   | 5.58  | 0.08 | 0.13 | 1.09   | 0.12831  | 0.228272 | 0.410227 | 0.50046  |
| MmugDNA.9685.1.S1_at   | MmugDNA.9685.1 | 5.54  | 5.58  | 0.24 | 0.26 | -1.03  | 0.895506 | 0.093211 | 0.9554   | 0.34931  |
| MmugDNA.9687.1.S1_at   | MmugDNA.9687.1 | 3.1   | 3.24  | 0.09 | 0.4  | -1.1   | 0.603353 | 0.858719 | 0.80093  | 0.919548 |
| MmugDNA.9688.1.S1_at   | MmugDNA.9688.1 | 12.34 | 12.25 | 0.04 | 0.06 | 1.07   | 0.047205 | 0.029862 | 0.274594 | 0.214491 |
| MmugDNA.969.1.S1_at    | MmugDNA.969.1  | 3.76  | 3.47  | 0.22 | 0.1  | 1.22   | 0.130193 | 0.149849 | 0.412471 | 0.424463 |
| MmugDNA.9690.1.S1_at   | MmugDNA.9690.1 | 3.91  | 3.82  | 0.14 | 0.07 | 1.07   | 0.146337 | 0.170411 | 0.434192 | 0.447103 |
| MmugDNA.9691.1.S1_at   | MmugDNA.9691.1 | 8.56  | 8.6   | 0.38 | 0.07 | -1.03  | 0.633686 | 0.837744 | 0.82045  | 0.907286 |
| MmugDNA.9692.1.S1_at   | MmugDNA.9692.1 | 4.78  | 3.72  | 0.62 | 0.16 | 2.08   | 0.17364  | 0.309331 | 0.468029 | 0.564912 |
| MmugDNA.9693.1.S1_at   | MmugDNA.9693.1 | 2.72  | 2.73  | 0.13 | 0.1  | -1.01  | 0.78369  | 0.69169  | 0.901314 | 0.820652 |
| MmugDNA.9694.1.S1_at   | MmugDNA.9694.1 | 5.26  | 5.48  | 0.1  | 0.08 | -1.16  | 0.071785 | 0.481351 | 0.325792 | 0.686374 |
| MmugDNA.9695.1.S1_at   | MmugDNA.9695.1 | 7.45  | 7.58  | 1.4  | 0.05 | -1.09  | 0.966975 | 0.984534 | 0.986723 | 0.991307 |
| MmugDNA.9696.1.S1_at   | MmugDNA.9696.1 | 8.94  | 8.59  | 0.28 | 0.03 | 1.28   | 0.34945  | 0.012731 | 0.62731  | 0.145429 |
| MmugDNA.9698.1.S1_at   | MmugDNA.9698.1 | 2.81  | 2.8   | 0    | 0.05 | 1.01   | 0.282773 | 0.612124 | 0.573345 | 0.769787 |

|                         |                 |       |       |      |      |       |          |          |          |          |
|-------------------------|-----------------|-------|-------|------|------|-------|----------|----------|----------|----------|
| MmugDNA.9699.1.S1_at    | MmugDNA.9699.1  | 3.28  | 3.12  | 0.18 | 0.19 | 1.11  | 0.656547 | 0.809095 | 0.833835 | 0.889995 |
| MmugDNA.97.1.S1_at      | MmugDNA.97.1    | 7.79  | 7.7   | 0.17 | 0.09 | 1.06  | 0.297048 | 0.155541 | 0.585548 | 0.430888 |
| MmugDNA.970.1.S1_at     | MmugDNA.970.1   | 5.67  | 5.79  | 0.18 | 0.08 | -1.09 | 0.44387  | 0.330196 | 0.696897 | 0.579016 |
| MmugDNA.9700.1.S1_s_at  | MmugDNA.9700.1  | 14.59 | 14.57 | 0.04 | 0.03 | 1.01  | 0.890037 | 0.833182 | 0.95318  | 0.904313 |
| MmugDNA.9702.1.S1_at    | MmugDNA.9702.1  | 6.63  | 6.59  | 0.11 | 0.13 | 1.03  | 0.70211  | 0.946733 | 0.858655 | 0.96978  |
| MmugDNA.9704.1.S1_at    | MmugDNA.9704.1  | 6.82  | 6.22  | 0.12 | 0.11 | 1.52  | 0.005091 | 0.005004 | 0.11661  | 0.098557 |
| MmugDNA.9706.1.S1_at    | MmugDNA.9706.1  | 6.21  | 6.17  | 0.1  | 0.03 | 1.03  | 0.937345 | 0.305287 | 0.973704 | 0.562255 |
| MmugDNA.9707.1.S1_at    | MmugDNA.9707.1  | 11.76 | 12.38 | 0.16 | 0.06 | -1.53 | 0.003703 | 0.180583 | 0.106124 | 0.457191 |
| MmugDNA.9708.1.S1_at    | MmugDNA.9708.1  | 4.17  | 4.09  | 0.12 | 0.05 | 1.06  | 0.133372 | 0.193695 | 0.41693  | 0.468785 |
| MmugDNA.9709.1.S1_at    | MmugDNA.9709.1  | 6.4   | 6.23  | 0.17 | 0.06 | 1.12  | 0.135706 | 0.507334 | 0.419734 | 0.702917 |
| MmugDNA.9710.1.S1_at    | MmugDNA.9710.1  | 10.92 | 11.07 | 0.24 | 0.11 | -1.11 | 0.497917 | 0.663408 | 0.733373 | 0.803    |
| MmugDNA.9711.1.S1_s_at  | MmugDNA.9711.1  | 7.39  | 7.51  | 0.17 | 0.15 | -1.08 | 0.427006 | 0.00136  | 0.684319 | 0.056687 |
| MmugDNA.9712.1.S1_at    | MmugDNA.9712.1  | 4.98  | 4.97  | 0.19 | 0.06 | 1     | 0.355988 | 0.525767 | 0.632435 | 0.715217 |
| MmugDNA.9714.1.S1_at    | MmugDNA.9714.1  | 6.91  | 6.86  | 0.09 | 0.12 | 1.04  | 0.849537 | 0.729293 | 0.934492 | 0.843541 |
| MmugDNA.9715.1.S1_at    | MmugDNA.9715.1  | 3.7   | 3.62  | 0.23 | 0.04 | 1.05  | 0.751329 | 0.676001 | 0.885256 | 0.810632 |
| MmugDNA.9716.1.S1_at    | MmugDNA.9716.1  | 5.62  | 7.12  | 0.19 | 0.26 | -2.84 | 0.001278 | 0.010796 | 0.078631 | 0.135584 |
| MmugDNA.9717.1.S1_at    | MmugDNA.9717.1  | 5.14  | 4.99  | 0.12 | 0.06 | 1.11  | 0.099828 | 0.601244 | 0.370801 | 0.762609 |
| MmugDNA.9718.1.S1_at    | MmugDNA.9718.1  | 7.93  | 8.88  | 0.9  | 0.26 | -1.94 | 0.310796 | 0.210543 | 0.597072 | 0.484477 |
| MmugDNA.9719.1.S1_at    | MmugDNA.9719.1  | 3.74  | 3.9   | 0.13 | 0.1  | -1.12 | 0.817439 | 0.056505 | 0.918429 | 0.28368  |
| MmugDNA.972.1.S1_at     | MmugDNA.972.1   | 7.15  | 7.57  | 0.97 | 0.03 | -1.34 | 0.817115 | 0.785793 | 0.91826  | 0.875967 |
| MmugDNA.9721.1.S1_at    | MmugDNA.9721.1  | 8.58  | 7.77  | 0.81 | 0.08 | 1.76  | 0.179049 | 0.054077 | 0.474016 | 0.277914 |
| MmugDNA.9722.1.S1_at    | MmugDNA.9722.1  | 4.75  | 4.74  | 0    | 0.29 | 1.01  | 0.337378 | 0.251006 | 0.617851 | 0.519638 |
| MmugDNA.9724.1.S1_at    | MmugDNA.9724.1  | 4.82  | 4.83  | 0.11 | 0.08 | -1.01 | 0.456285 | 0.200215 | 0.705721 | 0.474678 |
| MmugDNA.9726.1.S1_at    | MmugDNA.9726.1  | 5.62  | 5.82  | 0.08 | 0.15 | -1.14 | 0.112714 | 0.117594 | 0.389148 | 0.38531  |
| MmugDNA.9727.1.S1_at    | MmugDNA.9727.1  | 3.69  | 3.47  | 0.3  | 0.18 | 1.16  | 0.413149 | 0.41786  | 0.674504 | 0.642449 |
| MmugDNA.9729.1.S1_at    | MmugDNA.9729.1  | 6.41  | 6.44  | 0.81 | 0.07 | -1.03 | 0.655799 | 0.750027 | 0.833545 | 0.854659 |
| MmugDNA.973.1.S1_at     | MmugDNA.973.1   | 5.55  | 5.54  | 0.02 | 0.03 | 1     | 0.199305 | 0.842096 | 0.496618 | 0.910036 |
| MmugDNA.9732.1.S1_at    | MmugDNA.9732.1  | 6.94  | 8.06  | 0.55 | 1.04 | -2.18 | 0.1141   | 0.003483 | 0.390869 | 0.084834 |
| MmugDNA.9733.1.S1_at    | MmugDNA.9733.1  | 7.03  | 7.86  | 1.13 | 0.08 | -1.78 | 0.75039  | 0.911335 | 0.884668 | 0.950008 |
| MmugDNA.9734.1.S1_at    | MmugDNA.9734.1  | 6.52  | 6.26  | 0.92 | 0.32 | 1.2   | 0.577695 | 0.780293 | 0.783728 | 0.872577 |
| MmugDNA.9735.1.S1_at    | MmugDNA.9735.1  | 4.73  | 3.54  | 0.7  | 0.6  | 2.28  | 0.405784 | 0.320889 | 0.669176 | 0.572869 |
| MmugDNA.9736.1.S1_at    | MmugDNA.9736.1  | 7.49  | 7.67  | 0.18 | 0.15 | -1.13 | 0.111037 | 0.031589 | 0.386768 | 0.219905 |
| MmugDNA.9738.1.S1_at    | MmugDNA.9738.1  | 5.12  | 5.33  | 0.17 | 0.16 | -1.15 | 0.200761 | 0.029608 | 0.498111 | 0.213742 |
| MmugDNA.9739.1.S1_at    | MmugDNA.9739.1  | 3.51  | 3.61  | 0.17 | 0.09 | -1.07 | 0.964507 | 0.400237 | 0.985688 | 0.630158 |
| MmugDNA.974.1.S1_at     | MmugDNA.974.1   | 7.69  | 7.61  | 0.17 | 0.03 | 1.06  | 0.913579 | 0.607875 | 0.963382 | 0.766631 |
| MmugDNA.20440.1.S1_s_at | MmugDNA.20440.1 | 8.32  | 8.28  | 0.5  | 0    | 1.03  | 0.95193  | 0.749734 | 0.980054 | 0.854564 |
| MmugDNA.9743.1.S1_at    | MmugDNA.9743.1  | 3.83  | 3.8   | 0.38 | 0.34 | 1.02  | 0.672959 | 0.256379 | 0.843462 | 0.524114 |
| MmugDNA.9746.1.S1_at    | MmugDNA.9746.1  | 3.19  | 3.19  | 0.06 | 0.12 | 1     | 0.384191 | 0.541226 | 0.653283 | 0.724781 |
| MmugDNA.9747.1.S1_at    | MmugDNA.9747.1  | 6.1   | 6.09  | 1.34 | 0.1  | 1.01  | 0.389824 | 0.477409 | 0.657536 | 0.683463 |
| MmugDNA.9748.1.S1_at    | MmugDNA.9748.1  | 5.04  | 4.68  | 0.22 | 0.12 | 1.29  | 0.094399 | 0.063135 | 0.363345 | 0.29795  |
| MmugDNA.9749.1.S1_at    | MmugDNA.9749.1  | 10.49 | 10.27 | 0.19 | 0.05 | 1.16  | 0.104562 | 0.012945 | 0.377911 | 0.146418 |
| MmugDNA.9751.1.S1_at    | MmugDNA.9751.1  | 5.3   | 5.14  | 0.19 | 0.15 | 1.11  | 0.069355 | 0.279883 | 0.321649 | 0.543342 |
| MmugDNA.9752.1.S1_at    | MmugDNA.9752.1  | 5.47  | 6.02  | 0.57 | 0.08 | -1.46 | 0.324584 | 0.539209 | 0.60824  | 0.723613 |

|                        |                |       |       |      |      |       |          |          |          |          |
|------------------------|----------------|-------|-------|------|------|-------|----------|----------|----------|----------|
| MmugDNA.9753.1.S1_at   | MmugDNA.9753.1 | 5.76  | 5.87  | 0.8  | 0.32 | -1.08 | 0.53423  | 0.458407 | 0.757483 | 0.671165 |
| MmugDNA.9754.1.S1_at   | MmugDNA.9754.1 | 6.95  | 6.3   | 0.3  | 0.15 | 1.57  | 0.110283 | 0.374456 | 0.385603 | 0.6129   |
| MmugDNA.9756.1.S1_at   | MmugDNA.9756.1 | 3.31  | 2.9   | 0.77 | 0.16 | 1.33  | 0.516714 | 0.258564 | 0.74601  | 0.525819 |
| MmugDNA.9757.1.S1_at   | MmugDNA.9757.1 | 12    | 12.02 | 0.1  | 0.05 | -1.01 | 0.813853 | 0.83732  | 0.916771 | 0.90705  |
| MmugDNA.9758.1.S1_at   | MmugDNA.9758.1 | 7.07  | 6.39  | 0.23 | 0.08 | 1.6   | 0.004334 | 0.007519 | 0.111896 | 0.116291 |
| MmugDNA.9759.1.S1_at   | MmugDNA.9759.1 | 3.89  | 3.72  | 0.44 | 0.14 | 1.12  | 0.500884 | 0.646025 | 0.735064 | 0.792676 |
| MmugDNA.976.1.S1_at    | MmugDNA.976.1  | 9.89  | 9.5   | 0.1  | 0.43 | 1.31  | 0.227713 | 0.145531 | 0.525826 | 0.419442 |
| MmugDNA.9761.1.S1_at   | MmugDNA.9761.1 | 4.32  | 4.36  | 0.07 | 0.08 | -1.03 | 0.437576 | 0.586365 | 0.692421 | 0.753444 |
| MmugDNA.9762.1.S1_at   | MmugDNA.9762.1 | 5.23  | 5.22  | 0.16 | 0.11 | 1.01  | 0.387642 | 0.701382 | 0.655725 | 0.826814 |
| MmugDNA.9763.1.S1_at   | MmugDNA.9763.1 | 4.25  | 3.92  | 0.14 | 0.12 | 1.25  | 0.078116 | 0.070082 | 0.337608 | 0.31098  |
| MmugDNA.9764.1.S1_at   | MmugDNA.9764.1 | 3.8   | 3.96  | 0.22 | 0.06 | -1.12 | 0.73007  | 0.601013 | 0.873891 | 0.762462 |
| MmugDNA.9765.1.S1_at   | MmugDNA.9765.1 | 3.57  | 3.53  | 0.03 | 0.19 | 1.02  | 0.23271  | 0.415126 | 0.531068 | 0.640713 |
| MmugDNA.9767.1.S1_at   | MmugDNA.9767.1 | 7.9   | 7.43  | 0.43 | 0.12 | 1.38  | 0.430958 | 0.100931 | 0.687195 | 0.360509 |
| MmugDNA.9769.1.S1_at   | MmugDNA.9769.1 | 6.81  | 6.74  | 0.27 | 0.15 | 1.04  | 0.279511 | 0.379969 | 0.570786 | 0.616659 |
| MmugDNA.9770.1.S1_at   | MmugDNA.9770.1 | 10.63 | 8.8   | 0.26 | 0.29 | 3.55  | 0.001727 | 0.001289 | 0.085035 | 0.055585 |
| MmugDNA.9771.1.S1_at   | MmugDNA.9771.1 | 9.79  | 9.08  | 0.28 | 0.32 | 1.64  | 0.016797 | 0.017323 | 0.182859 | 0.166509 |
| MmugDNA.9772.1.S1_at   | MmugDNA.9772.1 | 3.2   | 3.2   | 0.07 | 0.01 | 1     | 0.432585 | 0.376475 | 0.688358 | 0.614293 |
| MmugDNA.9773.1.S1_at   | MmugDNA.9773.1 | 3.06  | 3     | 0.15 | 0.03 | 1.04  | 0.694089 | 0.400229 | 0.853922 | 0.630158 |
| MmugDNA.9775.1.S1_at   | MmugDNA.9775.1 | 3.71  | 3.57  | 0.07 | 0.04 | 1.1   | 0.154623 | 0.335047 | 0.444927 | 0.582851 |
| MmugDNA.9776.1.S1_at   | MmugDNA.9776.1 | 5.78  | 5.52  | 0.24 | 0.31 | 1.2   | 0.396157 | 0.021072 | 0.662245 | 0.181869 |
| MmugDNA.9777.1.S1_at   | MmugDNA.9777.1 | 3.45  | 3.45  | 0.12 | 0.03 | 1.01  | 0.932061 | 0.996645 | 0.971437 | 0.99808  |
| MmugDNA.978.1.S1_at    | MmugDNA.978.1  | 5.34  | 5.47  | 0.08 | 0.11 | -1.1  | 0.073163 | 0.21264  | 0.328251 | 0.48659  |
| MmugDNA.9781.1.S1_at   | MmugDNA.9781.1 | 3.74  | 3.37  | 0.23 | 0.03 | 1.29  | 0.073223 | 0.067504 | 0.328341 | 0.305843 |
| MmugDNA.9784.1.S1_at   | MmugDNA.9784.1 | 3.89  | 3.92  | 0.12 | 0.04 | -1.03 | 0.246625 | 0.385784 | 0.542477 | 0.621079 |
| MmugDNA.9785.1.S1_at   | MmugDNA.9785.1 | 8.14  | 7.92  | 0.26 | 0.17 | 1.17  | 0.157733 | 0.217679 | 0.448548 | 0.491274 |
| MmugDNA.9786.1.S1_at   | MmugDNA.9786.1 | 3.59  | 3.58  | 0.1  | 0.05 | 1     | 0.23382  | 0.688458 | 0.532018 | 0.818166 |
| MmugDNA.9788.1.S1_at   | MmugDNA.9788.1 | 4.46  | 4.25  | 0.33 | 0.15 | 1.16  | 0.369598 | 0.482865 | 0.642956 | 0.68765  |
| MmugDNA.9789.1.S1_at   | MmugDNA.9789.1 | 6.86  | 7.64  | 1.17 | 0.37 | -1.71 | 0.969975 | 0.887064 | 0.988053 | 0.935666 |
| MmugDNA.9790.1.S1_at   | MmugDNA.9790.1 | 5.63  | 5.5   | 0.07 | 0.1  | 1.09  | 0.297949 | 0.069867 | 0.586436 | 0.31043  |
| MmugDNA.9791.1.S1_at   | MmugDNA.9791.1 | 6.72  | 6.79  | 0.09 | 0.1  | -1.05 | 0.771428 | 0.865444 | 0.895235 | 0.923596 |
| MmugDNA.9792.1.S1_at   | MmugDNA.9792.1 | 3.81  | 3.81  | 0.19 | 0    | -1    | 0.399253 | 0.541961 | 0.664729 | 0.725169 |
| MmugDNA.9794.1.S1_at   | MmugDNA.9794.1 | 4.18  | 3.9   | 0.18 | 0.04 | 1.21  | 0.070171 | 0.018796 | 0.323191 | 0.172349 |
| MmugDNA.9795.1.S1_at   | MmugDNA.9795.1 | 5.2   | 5.07  | 0.24 | 0.05 | 1.09  | 0.170829 | 0.254438 | 0.464646 | 0.522732 |
| MmugDNA.9796.1.S1_at   | MmugDNA.9796.1 | 5.05  | 5.09  | 0.03 | 0.05 | -1.03 | 0.919026 | 0.398017 | 0.965387 | 0.629138 |
| MmugDNA.9797.1.S1_at   | MmugDNA.9797.1 | 3.72  | 3.44  | 0.01 | 0.04 | 1.21  | 0.000251 | 0.014688 | 0.054642 | 0.154371 |
| MmugDNA.9798.1.S1_at   | MmugDNA.9798.1 | 4.64  | 4.78  | 0.37 | 0.15 | -1.1  | 0.197095 | 0.462341 | 0.494233 | 0.673695 |
| MmugDNA.98.1.S1_at     | MmugDNA.98.1   | 4.92  | 4.94  | 0.52 | 0.16 | -1.02 | 0.507428 | 0.412758 | 0.739639 | 0.63909  |
| MmugDNA.980.1.S1_at    | MmugDNA.980.1  | 5.04  | 4.88  | 0.05 | 0.11 | 1.12  | 0.11428  | 0.392209 | 0.39113  | 0.625652 |
| MmugDNA.9800.1.S1_at   | MmugDNA.9800.1 | 6.91  | 7.9   | 0.65 | 0.31 | -1.98 | 0.215222 | 0.045288 | 0.512891 | 0.25714  |
| MmugDNA.9803.1.S1_at   | MmugDNA.9803.1 | 8.37  | 8.24  | 0.36 | 0.23 | 1.1   | 0.479201 | 0.085233 | 0.720456 | 0.337096 |
| MmugDNA.9804.1.S1_s_at | MmugDNA.9804.1 | 3.45  | 3.39  | 0.02 | 0.18 | 1.04  | 0.339982 | 0.454104 | 0.620171 | 0.668398 |
| MmugDNA.9805.1.S1_at   | MmugDNA.9805.1 | 6.42  | 6.43  | 0.4  | 0.1  | -1.01 | 0.997108 | 0.972338 | 0.999078 | 0.985083 |
| MmugDNA.9806.1.S1_at   | MmugDNA.9806.1 | 10.99 | 11.26 | 0.19 | 0.08 | -1.2  | 0.077369 | 0.235357 | 0.336082 | 0.506412 |

|                        |                |       |       |      |      |       |          |          |          |          |
|------------------------|----------------|-------|-------|------|------|-------|----------|----------|----------|----------|
| MmugDNA.9808.1.S1_at   | MmugDNA.9808.1 | 6.22  | 6.27  | 0.03 | 0.12 | -1.03 | 0.839344 | 0.287806 | 0.929546 | 0.549064 |
| MmugDNA.981.1.S1_at    | MmugDNA.981.1  | 2.89  | 2.96  | 0.09 | 0.19 | -1.05 | 0.891779 | 0.837025 | 0.953838 | 0.906826 |
| MmugDNA.9810.1.S1_s_at | MmugDNA.9810.1 | 12.12 | 12.23 | 0.16 | 0.11 | -1.08 | 0.877239 | 0.358555 | 0.947478 | 0.60007  |
| MmugDNA.9811.1.S1_s_at | MmugDNA.9811.1 | 9.77  | 10.8  | 0.25 | 0.24 | -2.04 | 0.012699 | 0.002473 | 0.162702 | 0.073576 |
| MmugDNA.9812.1.S1_at   | MmugDNA.9812.1 | 4.34  | 4.41  | 0.21 | 0.22 | -1.05 | 0.336887 | 0.579662 | 0.617422 | 0.749254 |
| MmugDNA.9813.1.S1_at   | MmugDNA.9813.1 | 11.74 | 12.62 | 0.21 | 0.12 | -1.84 | 0.003286 | 0.000463 | 0.102069 | 0.038572 |
| MmugDNA.9814.1.S1_at   | MmugDNA.9814.1 | 7.43  | 6.91  | 0.19 | 0.26 | 1.44  | 0.136606 | 0.316284 | 0.421269 | 0.569785 |
| MmugDNA.9815.1.S1_at   | MmugDNA.9815.1 | 4.31  | 4.92  | 1    | 0.22 | -1.53 | 0.257612 | 0.585194 | 0.551845 | 0.752781 |
| MmugDNA.9816.1.S1_at   | MmugDNA.9816.1 | 6.38  | 6.58  | 0.21 | 0.06 | -1.15 | 0.59302  | 0.67431  | 0.793805 | 0.809716 |
| MmugDNA.9817.1.S1_at   | MmugDNA.9817.1 | 6.81  | 7.1   | 0.45 | 0.49 | -1.22 | 0.528898 | 0.712619 | 0.753909 | 0.833428 |
| MmugDNA.9818.1.S1_at   | MmugDNA.9818.1 | 4.97  | 4.99  | 0.18 | 0.03 | -1.02 | 0.542706 | 0.333743 | 0.762954 | 0.581904 |
| MmugDNA.9819.1.S1_at   | MmugDNA.9819.1 | 3.92  | 3.52  | 0.78 | 0.14 | 1.32  | 0.221144 | 0.218233 | 0.519102 | 0.491764 |
| MmugDNA.982.1.S1_at    | MmugDNA.982.1  | 6.09  | 6.09  | 0.24 | 0.32 | -1    | 0.895214 | 0.476506 | 0.955284 | 0.682743 |
| MmugDNA.9820.1.S1_at   | MmugDNA.9820.1 | 4.67  | 4.47  | 0.09 | 0.1  | 1.14  | 0.115062 | 0.000299 | 0.392115 | 0.034892 |
| MmugDNA.9821.1.S1_at   | MmugDNA.9821.1 | 3.04  | 3.07  | 0.22 | 0.18 | -1.02 | 0.60256  | 0.646727 | 0.800303 | 0.793089 |
| MmugDNA.9825.1.S1_at   | MmugDNA.9825.1 | 3.73  | 3.65  | 0.02 | 0.09 | 1.06  | 0.721972 | 0.162631 | 0.869092 | 0.438724 |
| MmugDNA.9826.1.S1_at   | MmugDNA.9826.1 | 6.15  | 6.48  | 0.12 | 0.36 | -1.26 | 0.244517 | 0.347627 | 0.540909 | 0.592039 |
| MmugDNA.9828.1.S1_at   | MmugDNA.9828.1 | 10.63 | 10.71 | 0.05 | 0.03 | -1.06 | 0.112939 | 0.026787 | 0.389499 | 0.204724 |
| MmugDNA.9828.1.S1_s_at | MmugDNA.9828.1 | 8.59  | 8.49  | 0.06 | 0.11 | 1.07  | 0.146845 | 0.21914  | 0.434827 | 0.492868 |
| MmugDNA.983.1.S1_at    | MmugDNA.983.1  | 4.16  | 4.06  | 0.07 | 0.07 | 1.07  | 0.090262 | 0.562469 | 0.356872 | 0.738025 |
| MmugDNA.9830.1.S1_at   | MmugDNA.9830.1 | 6.1   | 6.63  | 0.22 | 0.38 | -1.45 | 0.084319 | 0.365604 | 0.347695 | 0.605617 |
| MmugDNA.9831.1.S1_at   | MmugDNA.9831.1 | 7.92  | 7.25  | 0.22 | 0.07 | 1.59  | 0.006633 | 0.001921 | 0.127936 | 0.06556  |
| MmugDNA.9832.1.S1_at   | MmugDNA.9832.1 | 9.29  | 10.76 | 1.07 | 0.12 | -2.76 | 0.275118 | 0.503349 | 0.566774 | 0.700823 |
| MmugDNA.9833.1.S1_at   | MmugDNA.9833.1 | 12.6  | 13.23 | 0.02 | 0.11 | -1.55 | 0.000609 | 0.001665 | 0.070727 | 0.061711 |
| MmugDNA.9834.1.S1_at   | MmugDNA.9834.1 | 6.34  | 6.39  | 0.12 | 0    | -1.04 | 0.859877 | 0.846349 | 0.939228 | 0.912548 |
| MmugDNA.9835.1.S1_at   | MmugDNA.9835.1 | 3.92  | 4.15  | 0.67 | 0.05 | -1.17 | 0.672892 | 0.830697 | 0.843427 | 0.902872 |
| MmugDNA.9836.1.S1_at   | MmugDNA.9836.1 | 4.03  | 4.23  | 0.19 | 0.11 | -1.15 | 0.290289 | 0.44627  | 0.579777 | 0.662743 |
| MmugDNA.9837.1.S1_at   | MmugDNA.9837.1 | 2.6   | 2.6   | 0.09 | 0.06 | -1    | 0.912565 | 0.340266 | 0.963089 | 0.586661 |
| MmugDNA.9838.1.S1_at   | MmugDNA.9838.1 | 11.39 | 11.42 | 0.2  | 0.22 | -1.03 | 0.486904 | 0.166174 | 0.725872 | 0.442738 |
| MmugDNA.9838.1.S1_x_at | MmugDNA.9838.1 | 11.37 | 11.37 | 0.2  | 0.2  | -1    | 0.46321  | 0.120428 | 0.709949 | 0.38925  |
| MmugDNA.9839.1.S1_at   | MmugDNA.9839.1 | 4.76  | 4.78  | 0.48 | 0.41 | -1.02 | 0.617595 | 0.815195 | 0.810076 | 0.893385 |
| MmugDNA.984.1.S1_at    | MmugDNA.984.1  | 4.21  | 3.72  | 0.24 | 0.3  | 1.41  | 0.440291 | 0.605459 | 0.694391 | 0.765238 |
| MmugDNA.9840.1.S1_at   | MmugDNA.9840.1 | 4.51  | 5.06  | 0.27 | 0.21 | -1.46 | 0.055198 | 0.045801 | 0.291977 | 0.258337 |
| MmugDNA.9841.1.S1_at   | MmugDNA.9841.1 | 2.8   | 2.85  | 0.06 | 0.02 | -1.03 | 0.904867 | 0.091322 | 0.95971  | 0.346281 |
| MmugDNA.9842.1.S1_at   | MmugDNA.9842.1 | 5.14  | 4.71  | 0.48 | 0.17 | 1.34  | 0.109072 | 0.079647 | 0.384173 | 0.326981 |
| MmugDNA.9843.1.S1_at   | MmugDNA.9843.1 | 4.81  | 4.77  | 0.04 | 0.08 | 1.03  | 0.309446 | 0.778663 | 0.59582  | 0.871528 |
| MmugDNA.9844.1.S1_at   | MmugDNA.9844.1 | 6.03  | 6     | 0.05 | 0.15 | 1.03  | 0.245255 | 0.337553 | 0.541307 | 0.584728 |
| MmugDNA.9846.1.S1_at   | MmugDNA.9846.1 | 3.56  | 3.74  | 0.18 | 0.04 | -1.14 | 0.275529 | 0.126797 | 0.567205 | 0.397446 |
| MmugDNA.9847.1.S1_at   | MmugDNA.9847.1 | 6.29  | 6.33  | 0.22 | 0.15 | -1.03 | 0.269244 | 0.168557 | 0.561615 | 0.445172 |
| MmugDNA.9848.1.S1_at   | MmugDNA.9848.1 | 4.3   | 4.14  | 0.07 | 0.09 | 1.12  | 0.038258 | 0.074825 | 0.251651 | 0.318614 |
| MmugDNA.985.1.S1_at    | MmugDNA.985.1  | 6.96  | 8.64  | 1.67 | 0.15 | -3.19 | 0.177528 | 0.325716 | 0.472191 | 0.57602  |
| MmugDNA.9850.1.S1_at   | MmugDNA.9850.1 | 3.78  | 3.78  | 0.2  | 0.07 | -1    | 0.274411 | 0.523883 | 0.566281 | 0.714052 |
| MmugDNA.9852.1.S1_at   | MmugDNA.9852.1 | 2.93  | 3.08  | 0.05 | 0.12 | -1.11 | 0.311917 | 0.387103 | 0.598095 | 0.621935 |

|                        |                |       |       |      |      |       |          |          |          |          |
|------------------------|----------------|-------|-------|------|------|-------|----------|----------|----------|----------|
| MmugDNA.9855.1.S1_at   | MmugDNA.9855.1 | 11.99 | 11.88 | 0.11 | 0.06 | 1.08  | 0.327804 | 0.305456 | 0.610488 | 0.562418 |
| MmugDNA.9857.1.S1_at   | MmugDNA.9857.1 | 10.84 | 10.65 | 0.16 | 0.08 | 1.14  | 0.099095 | 0.067736 | 0.36996  | 0.306344 |
| MmugDNA.9857.1.S1_s_at | MmugDNA.9857.1 | 12.07 | 11.88 | 0.13 | 0.04 | 1.14  | 0.202967 | 0.028058 | 0.500692 | 0.20903  |
| MmugDNA.9858.1.S1_at   | MmugDNA.9858.1 | 10.91 | 10.94 | 0.02 | 0.05 | -1.02 | 0.256066 | 0.789662 | 0.550543 | 0.87847  |
| MmugDNA.9859.1.S1_at   | MmugDNA.9859.1 | 5.66  | 6.07  | 0.23 | 0.28 | -1.32 | 0.126336 | 0.002702 | 0.407563 | 0.076461 |
| MmugDNA.986.1.S1_at    | MmugDNA.986.1  | 4.22  | 3.89  | 0.36 | 0.13 | 1.25  | 0.151788 | 0.139352 | 0.441256 | 0.412568 |
| MmugDNA.9861.1.S1_at   | MmugDNA.9861.1 | 5.35  | 6.21  | 0.53 | 0.3  | -1.81 | 0.029975 | 0.010203 | 0.226411 | 0.132451 |
| MmugDNA.9862.1.S1_at   | MmugDNA.9862.1 | 5.97  | 5.98  | 0.13 | 0.01 | -1.01 | 0.365325 | 0.204183 | 0.639887 | 0.478507 |
| MmugDNA.9864.1.S1_at   | MmugDNA.9864.1 | 3.76  | 3.9   | 0.28 | 0.19 | -1.1  | 0.507408 | 0.623265 | 0.739639 | 0.777666 |
| MmugDNA.9865.1.S1_at   | MmugDNA.9865.1 | 4.57  | 4.55  | 0.14 | 0.11 | 1.01  | 0.394306 | 0.720384 | 0.660956 | 0.838261 |
| MmugDNA.9866.1.S1_at   | MmugDNA.9866.1 | 4.12  | 4.54  | 0.12 | 0.09 | -1.35 | 0.005446 | 0.001418 | 0.119202 | 0.057458 |
| MmugDNA.9867.1.S1_at   | MmugDNA.9867.1 | 8.33  | 9.22  | 0.23 | 0.14 | -1.86 | 0.00526  | 0.01029  | 0.117461 | 0.132841 |
| MmugDNA.9868.1.S1_at   | MmugDNA.9868.1 | 6.49  | 6.24  | 0.16 | 0.14 | 1.19  | 0.085211 | 0.569283 | 0.34932  | 0.742375 |
| MmugDNA.9869.1.S1_at   | MmugDNA.9869.1 | 7.66  | 6.8   | 0.63 | 0.45 | 1.81  | 0.051706 | 0.052224 | 0.284675 | 0.274065 |
| MmugDNA.987.1.S1_at    | MmugDNA.987.1  | 5.56  | 5.67  | 1.14 | 0.24 | -1.08 | 0.836597 | 0.960015 | 0.928302 | 0.977394 |
| MmugDNA.9870.1.S1_at   | MmugDNA.9870.1 | 6.78  | 6.76  | 0.08 | 0.04 | 1.01  | 0.540013 | 0.123326 | 0.761201 | 0.393386 |
| MmugDNA.9871.1.S1_at   | MmugDNA.9871.1 | 10.37 | 9.64  | 0.21 | 0.15 | 1.65  | 0.008071 | 0.007064 | 0.138956 | 0.113284 |
| MmugDNA.9875.1.S1_at   | MmugDNA.9875.1 | 10.11 | 10.27 | 0.36 | 0.21 | -1.12 | 0.292814 | 0.540828 | 0.58186  | 0.724572 |
| MmugDNA.9876.1.S1_s_at | MmugDNA.9876.1 | 4.58  | 4.55  | 0.1  | 0.58 | 1.03  | 0.91434  | 0.81214  | 0.963616 | 0.89155  |
| MmugDNA.9879.1.S1_at   | MmugDNA.9879.1 | 3.81  | 4.01  | 0.21 | 0.08 | -1.15 | 0.699828 | 0.870259 | 0.857467 | 0.926387 |
| MmugDNA.988.1.S1_at    | MmugDNA.988.1  | 9.5   | 9.74  | 0.12 | 0.15 | -1.18 | 0.251891 | 0.047335 | 0.546576 | 0.2623   |
| MmugDNA.9880.1.S1_at   | MmugDNA.9880.1 | 3.61  | 3.53  | 0.65 | 0.17 | 1.06  | 0.412986 | 0.677229 | 0.674478 | 0.811535 |
| MmugDNA.9881.1.S1_s_at | MmugDNA.9881.1 | 10.52 | 10.31 | 0.01 | 0.04 | 1.16  | 0.00189  | 0.109588 | 0.087741 | 0.373525 |
| MmugDNA.9882.1.S1_at   | MmugDNA.9882.1 | 5.7   | 5.71  | 0.02 | 0.08 | -1    | 0.416499 | 0.448766 | 0.676964 | 0.664601 |
| MmugDNA.9882.1.S1_s_at | MmugDNA.9882.1 | 3.81  | 3.73  | 0.43 | 0.09 | 1.05  | 0.28537  | 0.37551  | 0.575167 | 0.613453 |
| MmugDNA.9884.1.S1_at   | MmugDNA.9884.1 | 5.46  | 5.43  | 0.08 | 0.05 | 1.02  | 0.854686 | 0.158242 | 0.936785 | 0.43403  |
| MmugDNA.9885.1.S1_at   | MmugDNA.9885.1 | 5.89  | 5.51  | 0.34 | 0.11 | 1.3   | 0.40745  | 0.271483 | 0.670508 | 0.536512 |
| MmugDNA.9886.1.S1_at   | MmugDNA.9886.1 | 8.12  | 8.12  | 0.11 | 0.08 | 1     | 0.474455 | 0.347099 | 0.717455 | 0.591815 |
| MmugDNA.9888.1.S1_at   | MmugDNA.9888.1 | 6.82  | 6.79  | 0.36 | 0.04 | 1.02  | 0.81449  | 0.958119 | 0.917133 | 0.976277 |
| MmugDNA.989.1.S1_at    | MmugDNA.989.1  | 5.52  | 5.37  | 0.2  | 0.14 | 1.11  | 0.698192 | 0.722724 | 0.856385 | 0.839378 |
| MmugDNA.9890.1.S1_at   | MmugDNA.9890.1 | 2.99  | 3.45  | 0.23 | 0.87 | -1.38 | 0.295933 | 0.261602 | 0.584666 | 0.528068 |
| MmugDNA.9891.1.S1_at   | MmugDNA.9891.1 | 4.28  | 4.51  | 0.18 | 0.06 | -1.18 | 0.078194 | 0.395186 | 0.337763 | 0.627379 |
| MmugDNA.9893.1.S1_at   | MmugDNA.9893.1 | 10.93 | 11.03 | 0.2  | 0.07 | -1.07 | 0.291997 | 0.026428 | 0.581449 | 0.203748 |
| MmugDNA.9894.1.S1_at   | MmugDNA.9894.1 | 5.15  | 5.37  | 0.1  | 0.14 | -1.16 | 0.095276 | 0.125677 | 0.364719 | 0.396249 |
| MmugDNA.9895.1.S1_at   | MmugDNA.9895.1 | 4.89  | 4.82  | 0.11 | 0.03 | 1.05  | 0.307947 | 0.177121 | 0.59471  | 0.453611 |
| MmugDNA.9896.1.S1_at   | MmugDNA.9896.1 | 8.94  | 8.98  | 0.18 | 0.01 | -1.03 | 0.906354 | 0.707704 | 0.960316 | 0.830472 |
| MmugDNA.9897.1.S1_at   | MmugDNA.9897.1 | 4.48  | 4.5   | 0.17 | 0    | -1.01 | 0.931121 | 0.547558 | 0.971037 | 0.728511 |
| MmugDNA.9900.1.S1_at   | MmugDNA.9900.1 | 8.01  | 8.93  | 0.58 | 0.8  | -1.89 | 0.163413 | 0.000267 | 0.455676 | 0.033786 |
| MmugDNA.9901.1.S1_at   | MmugDNA.9901.1 | 7.95  | 6.99  | 0.4  | 0.17 | 1.93  | 0.009404 | 0.008849 | 0.146817 | 0.124493 |
| MmugDNA.9902.1.S1_s_at | MmugDNA.9902.1 | 4.75  | 4.36  | 0.3  | 0.31 | 1.31  | 0.679801 | 0.056749 | 0.847268 | 0.284362 |
| MmugDNA.9903.1.S1_at   | MmugDNA.9903.1 | 3.69  | 3.38  | 0.63 | 0.14 | 1.24  | 0.283529 | 0.361182 | 0.573932 | 0.60207  |
| MmugDNA.9903.1.S1_x_at | MmugDNA.9903.1 | 3.59  | 3.28  | 0.47 | 0.17 | 1.24  | 0.309548 | 0.342247 | 0.595886 | 0.588375 |
| MmugDNA.9904.1.S1_at   | MmugDNA.9904.1 | 6.62  | 6.49  | 0.28 | 0.04 | 1.1   | 0.531076 | 0.84329  | 0.755559 | 0.910767 |

|                        |                |       |       |      |      |       |          |          |          |          |
|------------------------|----------------|-------|-------|------|------|-------|----------|----------|----------|----------|
| MmugDNA.9905.1.S1_at   | MmugDNA.9905.1 | 11.11 | 11.21 | 0.12 | 0.13 | -1.07 | 0.690171 | 0.92002  | 0.851936 | 0.954993 |
| MmugDNA.9907.1.S1_at   | MmugDNA.9907.1 | 4.95  | 4.66  | 0.32 | 0.15 | 1.22  | 0.203732 | 0.262388 | 0.501439 | 0.528655 |
| MmugDNA.9908.1.S1_at   | MmugDNA.9908.1 | 8.32  | 8.08  | 0.06 | 0.16 | 1.19  | 0.205299 | 0.490262 | 0.503171 | 0.692302 |
| MmugDNA.991.1.S1_at    | MmugDNA.991.1  | 4.44  | 4.45  | 0.09 | 0.07 | -1.01 | 0.370758 | 0.542642 | 0.643582 | 0.725641 |
| MmugDNA.9911.1.S1_at   | MmugDNA.9911.1 | 7.78  | 7.38  | 0.06 | 0.51 | 1.31  | 0.084628 | 0.03566  | 0.348519 | 0.233228 |
| MmugDNA.9912.1.S1_at   | MmugDNA.9912.1 | 9.11  | 9.48  | 0.18 | 0.43 | -1.29 | 0.13506  | 0.001722 | 0.419042 | 0.062866 |
| MmugDNA.9913.1.S1_at   | MmugDNA.9913.1 | 4.5   | 4.14  | 0.32 | 0.16 | 1.28  | 0.289493 | 0.325945 | 0.579042 | 0.576213 |
| MmugDNA.9914.1.S1_at   | MmugDNA.9914.1 | 5.44  | 5.1   | 0.63 | 0.57 | 1.27  | 0.564353 | 0.421567 | 0.776031 | 0.645171 |
| MmugDNA.9915.1.S1_at   | MmugDNA.9915.1 | 10.63 | 10.54 | 0.31 | 0.14 | 1.06  | 0.460447 | 0.553758 | 0.708179 | 0.732795 |
| MmugDNA.9916.1.S1_at   | MmugDNA.9916.1 | 4.44  | 4.48  | 0.23 | 0.35 | -1.03 | 0.241227 | 0.312596 | 0.538538 | 0.567268 |
| MmugDNA.9918.1.S1_at   | MmugDNA.9918.1 | 6.13  | 7.74  | 0.36 | 0.08 | -3.05 | 0.001037 | 0.000057 | 0.076321 | 0.025666 |
| MmugDNA.9919.1.S1_at   | MmugDNA.9919.1 | 9.15  | 8.77  | 0.14 | 0.04 | 1.31  | 0.020386 | 0.003675 | 0.196305 | 0.086568 |
| MmugDNA.992.1.S1_at    | MmugDNA.992.1  | 4.25  | 4.44  | 0.34 | 0.48 | -1.14 | 0.988195 | 0.762226 | 0.995748 | 0.861687 |
| MmugDNA.9921.1.S1_at   | MmugDNA.9921.1 | 12.19 | 12.01 | 0.12 | 0.04 | 1.14  | 0.11062  | 0.141552 | 0.385979 | 0.415063 |
| MmugDNA.9923.1.S1_at   | MmugDNA.9923.1 | 7.22  | 7.16  | 0.2  | 0.3  | 1.05  | 0.659559 | 0.760004 | 0.83568  | 0.860519 |
| MmugDNA.9924.1.S1_at   | MmugDNA.9924.1 | 3.24  | 3.25  | 0.15 | 0.19 | -1.01 | 0.516824 | 0.539574 | 0.746092 | 0.723833 |
| MmugDNA.9926.1.S1_x_at | MmugDNA.9926.1 | 5.89  | 4.96  | 0.68 | 0.43 | 1.9   | 0.074962 | 0.104295 | 0.331989 | 0.365501 |
| MmugDNA.9927.1.S1_at   | MmugDNA.9927.1 | 4.58  | 4.6   | 0.07 | 0.22 | -1.01 | 0.330806 | 0.323903 | 0.612778 | 0.574658 |
| MmugDNA.9928.1.S1_at   | MmugDNA.9928.1 | 5.71  | 5.82  | 0.83 | 0.32 | -1.08 | 0.81795  | 0.658926 | 0.918705 | 0.800473 |
| MmugDNA.9929.1.S1_at   | MmugDNA.9929.1 | 3.85  | 4.13  | 0.03 | 0.17 | -1.22 | 0.109156 | 0.125377 | 0.384284 | 0.396008 |
| MmugDNA.993.1.S1_at    | MmugDNA.993.1  | 10.22 | 10.71 | 0.31 | 0.22 | -1.4  | 0.175569 | 0.573261 | 0.470066 | 0.744991 |
| MmugDNA.9931.1.S1_at   | MmugDNA.9931.1 | 3.19  | 2.84  | 0.25 | 0.1  | 1.27  | 0.104889 | 0.156636 | 0.378521 | 0.432134 |
| MmugDNA.9932.1.S1_at   | MmugDNA.9932.1 | 4.13  | 3.94  | 1.38 | 0.09 | 1.14  | 0.267496 | 0.357069 | 0.560299 | 0.59875  |
| MmugDNA.9934.1.S1_at   | MmugDNA.9934.1 | 5.19  | 5.17  | 0.35 | 0.02 | 1.02  | 0.840129 | 0.433692 | 0.929875 | 0.65392  |
| MmugDNA.9935.1.S1_at   | MmugDNA.9935.1 | 9.38  | 9.59  | 0.17 | 0.11 | -1.16 | 0.626946 | 0.893917 | 0.816524 | 0.939452 |
| MmugDNA.9936.1.S1_s_at | MmugDNA.9936.1 | 12.51 | 12.51 | 0.2  | 0.1  | 1     | 0.250636 | 0.347582 | 0.545228 | 0.592019 |
| MmugDNA.9937.1.S1_at   | MmugDNA.9937.1 | 3.39  | 3.39  | 0.04 | 0    | 1     | 0.499824 | 0.662057 | 0.734372 | 0.802105 |
| MmugDNA.9938.1.S1_at   | MmugDNA.9938.1 | 5.03  | 5.04  | 0.36 | 0.06 | -1.01 | 0.617101 | 0.689692 | 0.809826 | 0.819038 |
| MmugDNA.994.1.S1_at    | MmugDNA.994.1  | 5.26  | 5.25  | 0.35 | 0.04 | 1.01  | 0.346813 | 0.414593 | 0.625079 | 0.640431 |
| MmugDNA.9941.1.S1_at   | MmugDNA.9941.1 | 6.41  | 6.8   | 0.31 | 0.4  | -1.31 | 0.196498 | 0.399271 | 0.493578 | 0.629735 |
| MmugDNA.9945.1.S1_at   | MmugDNA.9945.1 | 4.07  | 3.92  | 0.29 | 0.21 | 1.11  | 0.106026 | 0.172491 | 0.380031 | 0.448864 |
| MmugDNA.9946.1.S1_at   | MmugDNA.9946.1 | 9.42  | 9.8   | 0.14 | 0.08 | -1.3  | 0.0091   | 0.043792 | 0.145157 | 0.25387  |
| MmugDNA.9947.1.S1_at   | MmugDNA.9947.1 | 5.75  | 5.39  | 0.51 | 0.26 | 1.28  | 0.409607 | 0.507153 | 0.671953 | 0.702788 |
| MmugDNA.9948.1.S1_at   | MmugDNA.9948.1 | 4.23  | 4.19  | 0.14 | 0.04 | 1.03  | 0.310574 | 0.38277  | 0.596884 | 0.618887 |
| MmugDNA.9949.1.S1_at   | MmugDNA.9949.1 | 4.59  | 4.86  | 0.3  | 0.07 | -1.2  | 0.797495 | 0.445635 | 0.908527 | 0.662468 |
| MmugDNA.995.1.S1_at    | MmugDNA.995.1  | 5.08  | 5.14  | 0.25 | 0.07 | -1.04 | 0.935311 | 0.943672 | 0.972947 | 0.96797  |
| MmugDNA.9950.1.S1_at   | MmugDNA.9950.1 | 5.19  | 4.96  | 0.13 | 0.41 | 1.18  | 0.331976 | 0.463764 | 0.613805 | 0.674656 |
| MmugDNA.9952.1.S1_at   | MmugDNA.9952.1 | 9.79  | 9.81  | 0.47 | 0.07 | -1.01 | 0.757754 | 0.661127 | 0.888869 | 0.801687 |
| MmugDNA.9953.1.S1_at   | MmugDNA.9953.1 | 5.58  | 6.12  | 1.25 | 0.15 | -1.45 | 0.836536 | 0.808278 | 0.928302 | 0.889645 |
| MmugDNA.9954.1.S1_at   | MmugDNA.9954.1 | 4.23  | 4.15  | 0.17 | 0.09 | 1.06  | 0.566221 | 0.407455 | 0.777206 | 0.635032 |
| MmugDNA.9955.1.S1_at   | MmugDNA.9955.1 | 6.93  | 6.63  | 0.36 | 0.12 | 1.23  | 0.148458 | 0.14725  | 0.436985 | 0.421464 |
| MmugDNA.9956.1.S1_at   | MmugDNA.9956.1 | 6.96  | 7.11  | 0.1  | 0    | -1.11 | 0.060011 | 0.052171 | 0.302259 | 0.274023 |
| MmugDNA.9957.1.S1_at   | MmugDNA.9957.1 | 4.84  | 4.61  | 0.34 | 0.14 | 1.17  | 0.093705 | 0.139528 | 0.362354 | 0.412743 |

|                          |                  |       |       |      |      |          |          |          |          |          |
|--------------------------|------------------|-------|-------|------|------|----------|----------|----------|----------|----------|
| MmugDNA.9959.1.S1_at     | MmugDNA.9959.1   | 6.49  | 6.19  | 0.71 | 0.23 | 1.23     | 0.208044 | 0.334988 | 0.505907 | 0.582768 |
| MmugDNA.996.1.S1_at      | MmugDNA.996.1    | 4.23  | 4.54  | 0.14 | 0.65 | -1.24    | 0.347685 | 0.562628 | 0.625846 | 0.7381   |
| MmugDNA.9960.1.S1_at     | MmugDNA.9960.1   | 3.52  | 3.26  | 0.08 | 0.11 | 1.2      | 0.063248 | 0.173128 | 0.308139 | 0.449765 |
| MmugDNA.9961.1.S1_at     | MmugDNA.9961.1   | 5.59  | 5.56  | 0.02 | 0.07 | 1.02     | 0.402646 | 0.247621 | 0.666951 | 0.517002 |
| MmugDNA.9962.1.S1_at     | MmugDNA.9962.1   | 3.85  | 3.76  | 0.17 | 0.04 | 1.07     | 0.236955 | 0.220206 | 0.534591 | 0.493655 |
| MmugDNA.9963.1.S1_at     | MmugDNA.9963.1   | 10.2  | 9.26  | 0.79 | 0.31 | 1.93     | 0.169069 | 0.313607 | 0.462287 | 0.567977 |
| MmugDNA.9964.1.S1_at     | MmugDNA.9964.1   | 9.64  | 9.82  | 0.23 | 0.08 | -1.13    | 0.311633 | 0.870398 | 0.597746 | 0.926446 |
| MmugDNA.9965.1.S1_at     | MmugDNA.9965.1   | 3.96  | 3.95  | 0.04 | 0.17 | 1.01     | 0.75814  | 0.919363 | 0.889026 | 0.954737 |
| MmugDNA.9966.1.S1_at     | MmugDNA.9966.1   | 10.54 | 10.76 | 0.17 | 0.04 | -1.16    | 0.091695 | 0.199252 | 0.359438 | 0.473946 |
| MmugDNA.9971.1.S1_at     | MmugDNA.9971.1   | 7.57  | 7.47  | 0.14 | 0.04 | 1.07     | 0.239162 | 0.602454 | 0.536505 | 0.763411 |
| MmugDNA.9972.1.S1_at     | MmugDNA.9972.1   | 6.06  | 6.09  | 0.22 | 0.09 | -1.03    | 0.953547 | 0.647516 | 0.980976 | 0.793521 |
| MmugDNA.9975.1.S1_at     | MmugDNA.9975.1   | 7.65  | 7.49  | 0.04 | 0.1  | 1.11     | 0.032914 | 0.020458 | 0.235677 | 0.179597 |
| MmugDNA.9976.1.S1_s_at   | MmugDNA.9976.1   | 6.15  | 6.09  | 0.04 | 0.05 | 1.04     | 0.119422 | 0.392844 | 0.397285 | 0.625854 |
| MmugDNA.9979.1.S1_at     | MmugDNA.9979.1   | 6.57  | 6.36  | 0.18 | 0.03 | 1.16     | 0.323668 | 0.470119 | 0.607431 | 0.678572 |
| MmugDNA.9980.1.S1_at     | MmugDNA.9980.1   | 5.01  | 6.14  | 0.75 | 0.17 | -2.19    | 0.179912 | 0.16506  | 0.475023 | 0.441242 |
| MmugDNA.9981.1.S1_at     | MmugDNA.9981.1   | 3.79  | 4.66  | 0.6  | 0.35 | -1.83    | 0.475029 | 0.066733 | 0.717773 | 0.304149 |
| MmugDNA.9982.1.S1_at     | MmugDNA.9982.1   | 5.15  | 5.01  | 0.23 | 0.17 | 1.1      | 0.809161 | 0.738305 | 0.914492 | 0.848258 |
| MmugDNA.9983.1.S1_at     | MmugDNA.9983.1   | 11.59 | 10.66 | 0.31 | 0.15 | 1.91     | 0.009362 | 0.003243 | 0.14664  | 0.082187 |
| MmugDNA.9984.1.S1_at     | MmugDNA.9984.1   | 3.57  | 3.53  | 0.15 | 0.03 | 1.03     | 0.559407 | 0.187486 | 0.773306 | 0.463586 |
| MmugDNA.9985.1.S1_at     | MmugDNA.9985.1   | 3.06  | 2.93  | 0.23 | 0.06 | 1.09     | 0.175847 | 0.15511  | 0.470167 | 0.430237 |
| MmugDNA.9986.1.S1_at     | MmugDNA.9986.1   | 11.61 | 11.38 | 0.13 | 0.08 | 1.17     | 0.113759 | 0.281226 | 0.390438 | 0.544374 |
| MmugDNA.34805.1.S1_s_at  | MmugDNA.34805.1  | 12.09 | 12.07 | 0.12 | 0.01 | 1.01     | 0.260147 | 0.202135 | 0.554308 | 0.476557 |
| MmugDNA.9987.1.S1_at     | MmugDNA.9987.1   | 5.1   | 5.11  | 0.1  | 0.16 | -1.01    | 0.860993 | 0.263084 | 0.939567 | 0.529402 |
| MmugDNA.9988.1.S1_at     | MmugDNA.9988.1   | 6.2   | 6.14  | 0.12 | 0.12 | 1.04     | 0.232406 | 0.184462 | 0.530886 | 0.460481 |
| MmugDNA.9989.1.S1_at     | MmugDNA.9989.1   | 6.63  | 6.97  | 0.08 | 0.04 | -1.27    | 0.004407 | 0.245337 | 0.1125   | 0.515132 |
| MmugDNA.999.1.S1_at      | MmugDNA.999.1    | 6.64  | 6.51  | 0.14 | 0.22 | 1.09     | 0.673119 | 0.043646 | 0.843573 | 0.253581 |
| MmugDNA.9990.1.S1_at     | MmugDNA.9990.1   | 6.84  | 5.62  | 1.36 | 1.18 | 2.33     | 0.269785 | 0.382966 | 0.562034 | 0.61903  |
| MmugDNA.9991.1.S1_at     | MmugDNA.9991.1   | 4.72  | 4.53  | 0.04 | 0.17 | 1.14     | 0.432632 | 0.614563 | 0.688365 | 0.771322 |
| MmugDNA.9993.1.S1_at     | MmugDNA.9993.1   | 3.81  | 4.01  | 0.27 | 0.33 | -1.15    | 0.565023 | 0.162796 | 0.776489 | 0.438915 |
| MmugDNA.9995.1.S1_at     | MmugDNA.9995.1   | 3.2   | 3.34  | 0.71 | 0.06 | -1.1     | 0.548136 | 0.591661 | 0.766369 | 0.757176 |
| MmugDNA.9996.1.S1_x_at   | MmugDNA.9996.1   | 8.51  | 8.43  | 0.31 | 0.23 | 1.06     | 0.95043  | 0.004381 | 0.97944  | 0.092641 |
| MmugDNA.9998.1.S1_at     | MmugDNA.9998.1   | 4.76  | 4.89  | 0.12 | 0.23 | -1.09    | 0.160316 | 0.255438 | 0.451651 | 0.523461 |
| MmugDNA.9999.1.S1_at     | MmugDNA.9999.1   | 9.42  | 9     | 0.37 | 0.12 | 1.34     | 0.208337 | 0.281554 | 0.506068 | 0.54464  |
| MmuMitochon.3.1.S1_s_at  | MmuMitochon.3.1  | 9.43  | 14.22 | 3.3  | 0.03 | -27.56   | 0.122169 | 0.087365 | 0.400941 | 0.340477 |
| MmuMitochon.4.1.S1_at    | MmuMitochon.4.1  | 9.11  | 14.01 | 2.99 | 0.07 | -29.78   | 0.137896 | 0.105253 | 0.423019 | 0.366999 |
| MmuMitochon.6.1.S1_s_at  | MmuMitochon.6.1  | 11.82 | 14.42 | 2.59 | 0.04 | -6.08    | 0.155539 | 0.122982 | 0.445885 | 0.392923 |
| MmuMitochon.10.1.S1_s_at | MmuMitochon.10.1 | 3.7   | 14.36 | 6.21 | 0.07 | -1620.92 | 0.117547 | 0.08164  | 0.394872 | 0.329836 |
| MmuMitochon.13.1.S1_at   | MmuMitochon.13.1 | 13.89 | 13.77 | 0.17 | 0.07 | 1.09     | 0.506376 | 0.365752 | 0.739124 | 0.605685 |
| AY588945.CDS1.S1_s_at    | AY588945.CDS1    | 5.82  | 5.75  | 0.01 | 0.01 | 1.05     | 0.000469 | 0.118104 | 0.066672 | 0.385979 |
| AY588945.CDS2.S1_s_at    | AY588945.CDS2    | 4.25  | 4.3   | 0.1  | 0.15 | -1.04    | 0.982931 | 0.064723 | 0.993693 | 0.300314 |
| AY588945.CDS3.S1_s_at    | AY588945.CDS3    | 4     | 4.04  | 0.03 | 0.08 | -1.03    | 0.936498 | 0.120573 | 0.973489 | 0.389378 |
| AY588945.CDS4.S1_s_at    | AY588945.CDS4    | 3.09  | 3.19  | 0.06 | 0.05 | -1.07    | 0.081286 | 0.353361 | 0.342222 | 0.596477 |
| AY588945.CDS6.S1_at      | AY588945.CDS6    | 3.9   | 3.89  | 0.09 | 0.04 | 1        | 0.467556 | 0.828669 | 0.713007 | 0.901558 |

|                        |                 |      |      |      |      |       |          |          |          |          |
|------------------------|-----------------|------|------|------|------|-------|----------|----------|----------|----------|
| AY588945.CDS6.S1_s_at  | AY588945.CDS6   | 3.46 | 3.34 | 0.15 | 0.17 | 1.08  | 0.808636 | 0.129417 | 0.914357 | 0.400822 |
| AY588945.CDS7.S1_s_at  | AY588945.CDS7   | 3.08 | 3.19 | 0.11 | 0.09 | -1.08 | 0.114848 | 0.251814 | 0.391836 | 0.520478 |
| AY588945.CDS8.S1_at    | AY588945.CDS8   | 3.51 | 3.52 | 0.01 | 0.08 | -1.01 | 0.812565 | 0.975356 | 0.916193 | 0.986553 |
| AY588945.CDS9.S1_s_at  | AY588945.CDS9   | 4.39 | 4.37 | 0.31 | 0.19 | 1.01  | 0.879585 | 0.68258  | 0.948771 | 0.814624 |
| NC-004455.CDS1.S1_at   | NC-004455.CDS1  | 5.04 | 4.97 | 0.04 | 0.06 | 1.05  | 0.476482 | 0.192948 | 0.71885  | 0.468455 |
| NC-004455.CDS2.S1_at   | NC-004455.CDS2  | 4.12 | 3.88 | 0.11 | 0.12 | 1.18  | 0.303845 | 0.501334 | 0.591195 | 0.69951  |
| NC-004455.CDS3.S1_at   | NC-004455.CDS3  | 2.9  | 2.91 | 0.09 | 0.09 | -1.01 | 0.688684 | 0.734301 | 0.851333 | 0.846058 |
| NC-004455.CDS4.S1_at   | NC-004455.CDS4  | 4.35 | 4.31 | 0.06 | 0.07 | 1.03  | 0.335051 | 0.301706 | 0.616064 | 0.559643 |
| NC-004455.CDS5.S1_at   | NC-004455.CDS5  | 3.1  | 3.15 | 0.03 | 0.1  | -1.04 | 0.550338 | 0.176491 | 0.767803 | 0.452836 |
| NC-004455.CDS6.S1_at   | NC-004455.CDS6  | 3.77 | 3.64 | 0.1  | 0.21 | 1.09  | 0.372855 | 0.674278 | 0.645098 | 0.809716 |
| NC-004455.CDS7.S1_at   | NC-004455.CDS7  | 4.39 | 4.42 | 0.13 | 0.12 | -1.03 | 0.831925 | 0.193332 | 0.926006 | 0.468657 |
| NC-004455.CDS8.S1_at   | NC-004455.CDS8  | 3.91 | 3.9  | 0.11 | 0.05 | 1.01  | 0.726221 | 0.323986 | 0.871526 | 0.574672 |
| NC-001870.CDS5.S1_at   | NC-001870.CDS5  | 4.02 | 4.25 | 0.32 | 0.04 | -1.17 | 0.295284 | 0.265259 | 0.584116 | 0.531232 |
| NC-001870.CDS6.S1_at   | NC-001870.CDS6  | 3.51 | 3.38 | 0    | 0.02 | 1.1   | 0.000135 | 0.002421 | 0.051196 | 0.073056 |
| NC-001870.CDS7.S1_s_at | NC-001870.CDS7  | 3.57 | 3.57 | 0.04 | 0.12 | 1     | 0.69054  | 0.887695 | 0.852093 | 0.93601  |
| NC-001870.CDS8.S1_at   | NC-001870.CDS8  | 3.13 | 3.13 | 0.07 | 0.05 | -1    | 0.636188 | 0.389789 | 0.822072 | 0.623851 |
| NC-001870.CDS8.S1_x_at | NC-001870.CDS8  | 3.33 | 3.22 | 0.03 | 0.09 | 1.08  | 0.075346 | 0.075169 | 0.332679 | 0.319373 |
| NC-001870.CDS9.S1_at   | NC-001870.CDS9  | 4.09 | 4.1  | 0.01 | 0.03 | -1.01 | 0.298699 | 0.636451 | 0.586964 | 0.786176 |
| NC-001798.CDS1.S1_s_at | NC-001798.CDS1  | 7.55 | 7.61 | 0.05 | 0.05 | -1.05 | 0.195274 | 0.029814 | 0.491906 | 0.214326 |
| NC-001798.CDS2.S1_s_at | NC-001798.CDS2  | 5.89 | 5.67 | 0.11 | 0.13 | 1.16  | 0.099868 | 0.199879 | 0.370801 | 0.474559 |
| NC-001798.CDS3.S1_at   | NC-001798.CDS3  | 4.75 | 4.79 | 0.14 | 0.18 | -1.03 | 0.91238  | 0.110526 | 0.963003 | 0.374742 |
| NC-001798.CDS4.S1_at   | NC-001798.CDS4  | 5.01 | 5.06 | 0.08 | 0.03 | -1.04 | 0.813747 | 0.430015 | 0.916696 | 0.65111  |
| NC-001798.CDS5.S1_at   | NC-001798.CDS5  | 3.84 | 3.85 | 0.12 | 0.11 | -1    | 0.441132 | 0.296505 | 0.694766 | 0.555528 |
| NC-001798.CDS6.S1_at   | NC-001798.CDS6  | 5.73 | 5.82 | 0.07 | 0.03 | -1.06 | 0.160823 | 0.060599 | 0.452392 | 0.292776 |
| NC-001798.CDS7.S1_at   | NC-001798.CDS7  | 3.64 | 3.7  | 0.08 | 0.21 | -1.04 | 0.92505  | 0.152191 | 0.968161 | 0.426978 |
| NC-001798.CDS8.S1_at   | NC-001798.CDS8  | 4.43 | 4.52 | 0.08 | 0.04 | -1.06 | 0.11709  | 0.233055 | 0.394266 | 0.50445  |
| NC-001798.CDS9.S1_at   | NC-001798.CDS9  | 5.25 | 5.31 | 0.06 | 0.13 | -1.04 | 0.543719 | 0.29642  | 0.763572 | 0.555525 |
| NC-001798.CDS10.S1_at  | NC-001798.CDS10 | 5.91 | 5.84 | 0.07 | 0.09 | 1.05  | 0.509856 | 0.576367 | 0.741297 | 0.747202 |
| NC-001798.CDS11.S1_at  | NC-001798.CDS11 | 6    | 6.05 | 0.07 | 0.02 | -1.04 | 0.24189  | 0.021524 | 0.538882 | 0.183771 |
| NC-001798.CDS12.S1_at  | NC-001798.CDS12 | 4.68 | 4.69 | 0.18 | 0.06 | -1.01 | 0.242958 | 0.467072 | 0.539686 | 0.676825 |
| NC-001798.CDS13.S1_at  | NC-001798.CDS13 | 4.6  | 4.82 | 0.13 | 0.11 | -1.16 | 0.11799  | 0.350286 | 0.395593 | 0.594034 |
| NC-001798.CDS14.S1_at  | NC-001798.CDS14 | 5.48 | 5.58 | 0.09 | 0.02 | -1.07 | 0.11009  | 0.051542 | 0.385346 | 0.272451 |
| NC-001798.CDS15.S1_at  | NC-001798.CDS15 | 5.45 | 5.53 | 0.17 | 0.23 | -1.06 | 0.30263  | 0.195314 | 0.590379 | 0.470253 |
| NC-001798.CDS16.S1_at  | NC-001798.CDS16 | 4.72 | 4.84 | 0.26 | 0.18 | -1.09 | 0.366079 | 0.423361 | 0.640586 | 0.646277 |
| NC-001798.CDS17.S1_at  | NC-001798.CDS17 | 5.94 | 6.01 | 0.13 | 0.08 | -1.05 | 0.784109 | 0.947768 | 0.901553 | 0.970346 |
| NC-001798.CDS18.S1_at  | NC-001798.CDS18 | 5.81 | 5.95 | 0.21 | 0.09 | -1.1  | 0.433489 | 0.224777 | 0.688966 | 0.497617 |
| NC-001798.CDS19.S1_at  | NC-001798.CDS19 | 4.78 | 4.8  | 0.06 | 0.13 | -1.01 | 0.860973 | 0.247123 | 0.939567 | 0.516289 |
| NC-001798.CDS20.S1_at  | NC-001798.CDS20 | 6.03 | 6.15 | 0.08 | 0.13 | -1.09 | 0.259469 | 0.199699 | 0.553789 | 0.474335 |
| NC-001798.CDS21.S1_at  | NC-001798.CDS21 | 6.16 | 6.27 | 0.11 | 0.11 | -1.08 | 0.510287 | 0.122647 | 0.741698 | 0.392596 |
| NC-001798.CDS22.S1_at  | NC-001798.CDS22 | 5.56 | 5.58 | 0.11 | 0    | -1.01 | 0.487236 | 0.713892 | 0.726032 | 0.833976 |
| NC-001798.CDS23.S1_at  | NC-001798.CDS23 | 5.81 | 6.04 | 0.21 | 0.17 | -1.17 | 0.617342 | 0.631451 | 0.810009 | 0.782839 |
| NC-001798.CDS24.S1_at  | NC-001798.CDS24 | 5.75 | 5.75 | 0.18 | 0.02 | -1    | 0.319879 | 0.36381  | 0.604461 | 0.604189 |
| NC-001798.CDS25.S1_at  | NC-001798.CDS25 | 6.2  | 6.28 | 0.01 | 0.08 | -1.05 | 0.234125 | 0.005777 | 0.532201 | 0.104378 |



|                         |                 |      |      |      |      |       |          |          |          |          |
|-------------------------|-----------------|------|------|------|------|-------|----------|----------|----------|----------|
| NC-001798.CDS26.S1_at   | NC-001798.CDS26 | 3.77 | 3.93 | 0.07 | 0.07 | -1.12 | 0.052404 | 0.046202 | 0.286191 | 0.259359 |
| NC-001798.CDS27.S1_at   | NC-001798.CDS27 | 4.3  | 4.49 | 0.08 | 0.06 | -1.14 | 0.029762 | 0.196002 | 0.225738 | 0.471005 |
| NC-001798.CDS28.S1_s_at | NC-001798.CDS28 | 5.3  | 5.25 | 0.03 | 0.05 | 1.03  | 0.891296 | 0.62049  | 0.953665 | 0.775449 |
| NC-001798.CDS30.S1_at   | NC-001798.CDS30 | 6.11 | 6.07 | 0.04 | 0.12 | 1.03  | 0.770747 | 0.522181 | 0.894865 | 0.712941 |
| NC-001798.CDS31.S1_at   | NC-001798.CDS31 | 3.54 | 3.55 | 0.1  | 0.14 | -1.01 | 0.979471 | 0.742406 | 0.992184 | 0.850798 |
| NC-001798.CDS32.S1_at   | NC-001798.CDS32 | 7.09 | 7.17 | 0.11 | 0.02 | -1.05 | 0.264748 | 0.029695 | 0.55795  | 0.214029 |
| NC-001798.CDS33.S1_at   | NC-001798.CDS33 | 4.36 | 4.37 | 0.14 | 0.13 | -1.01 | 0.280324 | 0.329786 | 0.571447 | 0.578874 |
| NC-001798.CDS34.S1_at   | NC-001798.CDS34 | 4.87 | 4.76 | 0.11 | 0.05 | 1.08  | 0.160228 | 0.006981 | 0.451588 | 0.112771 |
| NC-001798.CDS35.S1_at   | NC-001798.CDS35 | 4.56 | 4.49 | 0.12 | 0.18 | 1.05  | 0.428511 | 0.139756 | 0.685384 | 0.413109 |
| NC-001798.CDS36.S1_at   | NC-001798.CDS36 | 4.27 | 4.31 | 0.05 | 0    | -1.03 | 0.160466 | 0.347356 | 0.451994 | 0.591967 |
| NC-001798.CDS37.S1_at   | NC-001798.CDS37 | 6.56 | 6.67 | 0.13 | 0.1  | -1.08 | 0.826837 | 0.546005 | 0.923258 | 0.727708 |
| NC-001798.CDS38.S1_at   | NC-001798.CDS38 | 4.64 | 4.72 | 0.17 | 0.06 | -1.06 | 0.514088 | 0.484186 | 0.744131 | 0.688399 |
| NC-001798.CDS39.S1_at   | NC-001798.CDS39 | 4.64 | 4.64 | 0.04 | 0.03 | -1    | 0.911244 | 0.565838 | 0.962285 | 0.740112 |
| NC-001798.CDS40.S1_at   | NC-001798.CDS40 | 6.39 | 6.47 | 0.09 | 0.14 | -1.06 | 0.469097 | 0.673225 | 0.71396  | 0.809084 |
| NC-001798.CDS41.S1_at   | NC-001798.CDS41 | 5.97 | 6.05 | 0.1  | 0.11 | -1.06 | 0.708155 | 0.146895 | 0.861763 | 0.420934 |
| NC-001798.CDS42.S1_at   | NC-001798.CDS42 | 4.39 | 4.17 | 0    | 0.19 | 1.17  | 0.130166 | 0.105239 | 0.412419 | 0.366999 |
| NC-001798.CDS43.S1_at   | NC-001798.CDS43 | 5.56 | 5.54 | 0.12 | 0.05 | 1.01  | 0.569044 | 0.757685 | 0.778679 | 0.858941 |
| NC-001798.CDS44.S1_at   | NC-001798.CDS44 | 5.1  | 5.21 | 0.09 | 0.1  | -1.08 | 0.418528 | 0.040689 | 0.678425 | 0.24665  |
| NC-001798.CDS45.S1_at   | NC-001798.CDS45 | 6.55 | 6.58 | 0.11 | 0.06 | -1.02 | 0.986204 | 0.237742 | 0.995165 | 0.50826  |
| NC-001798.CDS46.S1_at   | NC-001798.CDS46 | 6.18 | 6.13 | 0.11 | 0.05 | 1.04  | 0.886533 | 0.364844 | 0.951683 | 0.605139 |
| NC-001798.CDS47.S1_at   | NC-001798.CDS47 | 5.32 | 5.34 | 0.18 | 0    | -1.01 | 0.555677 | 0.321874 | 0.771425 | 0.573523 |
| NC-001798.CDS48.S1_at   | NC-001798.CDS48 | 4.13 | 4.08 | 0.06 | 0.05 | 1.03  | 0.865921 | 0.496145 | 0.941953 | 0.695877 |
| NC-001798.CDS49.S1_at   | NC-001798.CDS49 | 4.78 | 4.96 | 0.21 | 0.05 | -1.13 | 0.682006 | 0.85666  | 0.848315 | 0.918123 |
| NC-001798.CDS50.S1_at   | NC-001798.CDS50 | 5.32 | 5.37 | 0.1  | 0.16 | -1.03 | 0.911607 | 0.243975 | 0.962571 | 0.514069 |
| NC-001798.CDS52.S1_at   | NC-001798.CDS52 | 5.92 | 6.01 | 0.1  | 0.01 | -1.07 | 0.161681 | 0.035342 | 0.453411 | 0.232294 |
| NC-001798.CDS53.S1_at   | NC-001798.CDS53 | 4.7  | 4.77 | 0.06 | 0    | -1.05 | 0.137592 | 0.088566 | 0.422699 | 0.342004 |
| NC-001798.CDS54.S1_at   | NC-001798.CDS54 | 6.94 | 6.94 | 0.25 | 0.08 | 1     | 0.997566 | 0.717234 | 0.999115 | 0.836332 |
| NC-001798.CDS55.S1_at   | NC-001798.CDS55 | 6.94 | 6.95 | 0.19 | 0.02 | -1.01 | 0.440863 | 0.180242 | 0.694673 | 0.456804 |
| NC-001798.CDS56.S1_at   | NC-001798.CDS56 | 5.39 | 5.42 | 0.19 | 0    | -1.02 | 0.275694 | 0.054907 | 0.567274 | 0.279775 |
| NC-001798.CDS57.S1_at   | NC-001798.CDS57 | 3.5  | 3.49 | 0.09 | 0.16 | 1.01  | 0.378625 | 0.322301 | 0.648732 | 0.573907 |
| NC-001798.CDS58.S1_at   | NC-001798.CDS58 | 4.22 | 4.32 | 0.02 | 0.04 | -1.07 | 0.021737 | 0.031775 | 0.200743 | 0.220698 |
| NC-001798.CDS59.S1_at   | NC-001798.CDS59 | 5.22 | 5.36 | 0.07 | 0.11 | -1.1  | 0.041189 | 0.151613 | 0.259407 | 0.426354 |
| NC-001798.CDS60.S1_at   | NC-001798.CDS60 | 5.38 | 5.6  | 0.19 | 0.04 | -1.17 | 0.389508 | 0.242449 | 0.657329 | 0.512835 |
| NC-001798.CDS63.S1_s_at | NC-001798.CDS63 | 7.39 | 7.42 | 0.06 | 0.07 | -1.02 | 0.844451 | 0.031085 | 0.931888 | 0.218117 |
| NC-001798.CDS64.S1_at   | NC-001798.CDS64 | 6.46 | 6.34 | 0.18 | 0.09 | 1.09  | 0.358953 | 0.564703 | 0.634581 | 0.739425 |
| NC-001798.CDS65.S1_at   | NC-001798.CDS65 | 5.44 | 5.43 | 0.03 | 0.12 | 1.01  | 0.380235 | 0.60049  | 0.649975 | 0.762128 |
| NC-001798.CDS66.S1_at   | NC-001798.CDS66 | 6.6  | 6.54 | 0.14 | 0.1  | 1.04  | 0.744394 | 0.581746 | 0.881461 | 0.750738 |
| NC-001798.CDS67.S1_at   | NC-001798.CDS67 | 6.69 | 6.76 | 0.09 | 0.08 | -1.05 | 0.162033 | 0.224103 | 0.453899 | 0.497092 |
| NC-001798.CDS68.S1_at   | NC-001798.CDS68 | 5.89 | 5.88 | 0.07 | 0.1  | 1.01  | 0.724392 | 0.201785 | 0.870565 | 0.476367 |
| NC-001798.CDS69.S1_at   | NC-001798.CDS69 | 5.31 | 5.51 | 0.08 | 0.11 | -1.15 | 0.061436 | 0.028187 | 0.304446 | 0.2095   |
| NC-001798.CDS70.S1_at   | NC-001798.CDS70 | 5.4  | 5.38 | 0.14 | 0.12 | 1.02  | 0.430162 | 0.117965 | 0.686507 | 0.385858 |
| NC-001798.CDS71.S1_at   | NC-001798.CDS71 | 6.91 | 6.97 | 0.24 | 0.09 | -1.04 | 0.662785 | 0.462923 | 0.83726  | 0.674149 |
| NC-001798.CDS72.S1_at   | NC-001798.CDS72 | 5.13 | 5.17 | 0.1  | 0.17 | -1.03 | 0.55789  | 0.28531  | 0.772457 | 0.547196 |

|                         |                 |      |      |      |      |       |          |          |          |          |
|-------------------------|-----------------|------|------|------|------|-------|----------|----------|----------|----------|
| NC-001798.CDS73.S1_at   | NC-001798.CDS73 | 6.09 | 6.09 | 0    | 0.12 | 1     | 0.418302 | 0.68036  | 0.678208 | 0.813388 |
| NC-001798.CDS74.S1_at   | NC-001798.CDS74 | 6.15 | 6.16 | 0.13 | 0.03 | -1.01 | 0.501742 | 0.594668 | 0.735507 | 0.758623 |
| NC-001798.CDS75.S1_at   | NC-001798.CDS75 | 7.52 | 7.54 | 0.27 | 0.04 | -1.01 | 0.96594  | 0.663943 | 0.986221 | 0.803246 |
| NC-001798.CDS75.S1_s_at | NC-001798.CDS75 | 5.46 | 5.44 | 0.17 | 0.02 | 1.02  | 0.446633 | 0.67027  | 0.698786 | 0.807201 |
| NC-001798.CDS76.S1_at   | NC-001798.CDS76 | 6.14 | 6.23 | 0.11 | 0.06 | -1.07 | 0.281326 | 0.045124 | 0.572166 | 0.256974 |
| NC-001862.CDS1.S1_at    | NC-001862.CDS1  | 4.51 | 4.64 | 0.15 | 0.1  | -1.09 | 0.849691 | 0.744365 | 0.934565 | 0.85199  |
| NC-001862.CDS2.S1_at    | NC-001862.CDS2  | 3.93 | 3.89 | 0.07 | 0.18 | 1.02  | 0.779138 | 0.835044 | 0.89919  | 0.905549 |
| NC-001401.CDS1.S1_s_at  | NC-001401.CDS1  | 4.59 | 4.7  | 0.07 | 0.16 | -1.08 | 0.533989 | 0.227668 | 0.757384 | 0.499923 |
| NC-001401.CDS5.S1_at    | NC-001401.CDS5  | 4.79 | 4.53 | 0.11 | 0.1  | 1.2   | 0.180915 | 0.155534 | 0.476157 | 0.430888 |
| NC-001542.CDS1.S1_at    | NC-001542.CDS1  | 3.1  | 3.1  | 0.01 | 0.04 | 1     | 0.317597 | 0.659054 | 0.602344 | 0.800504 |
| NC-001542.CDS2.S1_at    | NC-001542.CDS2  | 3.55 | 3.62 | 0.08 | 0.12 | -1.05 | 0.256016 | 0.709893 | 0.550543 | 0.831863 |
| NC-001542.CDS3.S1_at    | NC-001542.CDS3  | 3.74 | 3.74 | 0.31 | 0.02 | 1     | 0.858639 | 0.531046 | 0.938762 | 0.718384 |
| NC-001542.CDS4.S1_at    | NC-001542.CDS4  | 3.8  | 3.61 | 0.13 | 0.05 | 1.14  | 0.220044 | 0.29128  | 0.517673 | 0.551803 |
| NC-001542.CDS5.S1_at    | NC-001542.CDS5  | 3.94 | 3.83 | 0.18 | 0.18 | 1.07  | 0.544713 | 0.712939 | 0.764211 | 0.833562 |
| NC-001710.CDS1.S1_at    | NC-001710.CDS1  | 3.95 | 3.89 | 0.08 | 0.04 | 1.04  | 0.161021 | 0.184152 | 0.452489 | 0.460379 |
| NC-001669.CDS1.S1_at    | NC-001669.CDS1  | 3.69 | 3.65 | 0.05 | 0.07 | 1.03  | 0.264074 | 0.013729 | 0.557422 | 0.150093 |
| NC-001669.CDS2.S1_at    | NC-001669.CDS2  | 3.6  | 3.62 | 0.15 | 0.11 | -1.02 | 0.705477 | 0.734088 | 0.860404 | 0.845896 |
| NC-001669.CDS3.S1_s_at  | NC-001669.CDS3  | 3.99 | 3.94 | 0.12 | 0.13 | 1.04  | 0.41385  | 0.598938 | 0.675148 | 0.761244 |
| NC-001669.CDS5.S1_at    | NC-001669.CDS5  | 4.75 | 4.46 | 0.09 | 0.18 | 1.22  | 0.112705 | 0.195654 | 0.389141 | 0.470491 |
| NC-003401.CDS1.S1_at    | NC-003401.CDS1  | 2.99 | 3.28 | 0.13 | 0.07 | -1.23 | 0.058689 | 0.055318 | 0.299418 | 0.281024 |
| NC-003401.CDS2.S1_at    | NC-003401.CDS2  | 3.74 | 3.72 | 0.18 | 0.07 | 1.02  | 0.209069 | 0.318675 | 0.506551 | 0.571315 |
| NC-003401.CDS3.S1_at    | NC-003401.CDS3  | 3.15 | 3.05 | 0.2  | 0.07 | 1.07  | 0.986529 | 0.888321 | 0.995228 | 0.93632  |
| NC-003401.CDS4.S1_at    | NC-003401.CDS4  | 5.16 | 5.18 | 0.06 | 0.15 | -1.02 | 0.710424 | 0.10137  | 0.863079 | 0.36112  |
| NC-003401.CDS5.S1_at    | NC-003401.CDS5  | 3.74 | 3.82 | 0.07 | 0.11 | -1.06 | 0.13139  | 0.404897 | 0.414229 | 0.633393 |
| NC-003401.CDS6.S1_at    | NC-003401.CDS6  | 5.15 | 5    | 0.32 | 0.1  | 1.11  | 0.461038 | 0.495036 | 0.708593 | 0.695291 |
| NC-003401.CDS7.S1_at    | NC-003401.CDS7  | 4.4  | 4.62 | 0.19 | 0.16 | -1.16 | 0.335911 | 0.345472 | 0.616626 | 0.590746 |
| NC-003401.CDS8.S1_at    | NC-003401.CDS8  | 4.33 | 4.28 | 0.07 | 0.25 | 1.03  | 0.618446 | 0.354958 | 0.810674 | 0.597466 |
| NC-003401.CDS9.S1_at    | NC-003401.CDS9  | 4.53 | 4.5  | 0.25 | 0.02 | 1.02  | 0.302858 | 0.420343 | 0.590429 | 0.644099 |
| NC-003401.CDS10.S1_at   | NC-003401.CDS10 | 4.03 | 3.91 | 0.16 | 0.1  | 1.09  | 0.343169 | 0.145483 | 0.622848 | 0.419424 |
| NC-003401.CDS11.S1_at   | NC-003401.CDS11 | 4.63 | 4.63 | 0.25 | 0.09 | 1     | 0.745251 | 0.6042   | 0.881818 | 0.764542 |
| NC-003401.CDS12.S1_at   | NC-003401.CDS12 | 3.18 | 3.28 | 0.27 | 0.16 | -1.07 | 0.624374 | 0.694741 | 0.8148   | 0.822545 |
| NC-003401.CDS13.S1_at   | NC-003401.CDS13 | 5.44 | 5.35 | 0.03 | 0.07 | 1.07  | 0.0746   | 0.043144 | 0.331249 | 0.252421 |
| NC-003401.CDS14.S1_at   | NC-003401.CDS14 | 6.6  | 6.63 | 0.24 | 0.08 | -1.02 | 0.744673 | 0.537548 | 0.881599 | 0.722606 |
| NC-003401.CDS15.S1_at   | NC-003401.CDS15 | 4.54 | 4.46 | 0.09 | 0.12 | 1.06  | 0.195549 | 0.442446 | 0.492319 | 0.660417 |
| NC-003401.CDS16.S1_at   | NC-003401.CDS16 | 4.8  | 4.81 | 0.11 | 0.18 | -1.01 | 0.593044 | 0.362964 | 0.793805 | 0.603471 |
| NC-003401.CDS17.S1_at   | NC-003401.CDS17 | 4.28 | 4.32 | 0.18 | 0.16 | -1.02 | 0.879465 | 0.20548  | 0.948738 | 0.479764 |
| NC-003401.CDS18.S1_at   | NC-003401.CDS18 | 3.27 | 3.4  | 0.16 | 0.33 | -1.1  | 0.585667 | 0.671857 | 0.789285 | 0.808158 |
| NC-003401.CDS19.S1_at   | NC-003401.CDS19 | 4.45 | 4.29 | 0.03 | 0.06 | 1.11  | 0.008752 | 0.032236 | 0.14333  | 0.222213 |
| NC-003401.CDS19.S1_s_at | NC-003401.CDS19 | 3.84 | 3.9  | 0.17 | 0.06 | -1.04 | 0.406788 | 0.385385 | 0.670079 | 0.620818 |
| NC-003401.CDS20.S1_at   | NC-003401.CDS20 | 3.59 | 3.44 | 0.01 | 0.14 | 1.12  | 0.305274 | 0.208001 | 0.592297 | 0.482049 |
| NC-003401.CDS21.S1_at   | NC-003401.CDS21 | 2.99 | 3.05 | 0.09 | 0.08 | -1.04 | 0.260697 | 0.582256 | 0.554798 | 0.750921 |
| NC-003401.CDS22.S1_at   | NC-003401.CDS22 | 3.88 | 3.91 | 0.04 | 0.01 | -1.02 | 0.869465 | 0.110695 | 0.943727 | 0.374854 |
| NC-003401.CDS23.S1_at   | NC-003401.CDS23 | 3.25 | 3.12 | 0.02 | 0.09 | 1.1   | 0.212857 | 0.213861 | 0.510857 | 0.48758  |

|                         |                 |      |      |      |      |       |          |          |          |          |
|-------------------------|-----------------|------|------|------|------|-------|----------|----------|----------|----------|
| NC-003401.CDS24.S1_at   | NC-003401.CDS24 | 4.43 | 4.42 | 0.02 | 0.11 | 1.01  | 0.725165 | 0.511377 | 0.871012 | 0.705534 |
| NC-003401.CDS25.S1_at   | NC-003401.CDS25 | 4.83 | 4.99 | 0.15 | 0.04 | -1.12 | 0.209752 | 0.041964 | 0.507182 | 0.24943  |
| NC-003401.CDS26.S1_at   | NC-003401.CDS26 | 5.54 | 5.44 | 0.27 | 0.11 | 1.08  | 0.548694 | 0.812303 | 0.766623 | 0.891561 |
| NC-003401.CDS27.S1_at   | NC-003401.CDS27 | 3.72 | 3.79 | 0.09 | 0.11 | -1.05 | 0.365628 | 0.539963 | 0.640052 | 0.723995 |
| NC-003401.CDS28.S1_at   | NC-003401.CDS28 | 3.72 | 3.72 | 0.17 | 0.03 | -1    | 0.403686 | 0.777137 | 0.667761 | 0.870521 |
| NC-003401.CDS29.S1_at   | NC-003401.CDS29 | 3.33 | 3.18 | 0.11 | 0.1  | 1.11  | 0.109644 | 0.096614 | 0.384755 | 0.354145 |
| NC-003401.CDS30.S1_at   | NC-003401.CDS30 | 3.39 | 3.39 | 0.09 | 0.06 | 1     | 0.239297 | 0.53763  | 0.536536 | 0.722616 |
| NC-003401.CDS31.S1_at   | NC-003401.CDS31 | 5.03 | 5.05 | 0.1  | 0.09 | -1.02 | 0.298948 | 0.065417 | 0.5872   | 0.301415 |
| NC-003401.CDS32.S1_at   | NC-003401.CDS32 | 3.63 | 3.66 | 0.23 | 0.01 | -1.03 | 0.492998 | 0.670611 | 0.73014  | 0.807444 |
| NC-003401.CDS33.S1_at   | NC-003401.CDS33 | 4.06 | 4.37 | 0.16 | 0.2  | -1.24 | 0.222389 | 0.287483 | 0.520349 | 0.548718 |
| NC-003401.CDS34.S1_at   | NC-003401.CDS34 | 3.84 | 3.92 | 0.08 | 0.01 | -1.05 | 0.180079 | 0.05934  | 0.475163 | 0.29054  |
| NC-003401.CDS35.S1_at   | NC-003401.CDS35 | 3.48 | 3.83 | 0.03 | 0.07 | -1.27 | 0.001267 | 0.021438 | 0.078631 | 0.183342 |
| NC-003401.CDS36.S1_at   | NC-003401.CDS36 | 4.43 | 4.55 | 0.09 | 0.11 | -1.09 | 0.72622  | 0.850611 | 0.871526 | 0.915016 |
| NC-003401.CDS37.S1_at   | NC-003401.CDS37 | 3.36 | 3.35 | 0.02 | 0.08 | 1.01  | 0.342954 | 0.015464 | 0.622647 | 0.157878 |
| NC-003401.CDS38.S1_at   | NC-003401.CDS38 | 3.66 | 3.65 | 0.06 | 0.12 | 1.01  | 0.398324 | 0.729338 | 0.663851 | 0.843541 |
| NC-003401.CDS38.S1_x_at | NC-003401.CDS38 | 3    | 3.01 | 0.02 | 0.11 | -1.01 | 0.765421 | 0.937835 | 0.892409 | 0.964734 |
| NC-003401.CDS39.S1_at   | NC-003401.CDS39 | 3.48 | 3.47 | 0.07 | 0.05 | 1.01  | 0.760297 | 0.844323 | 0.890148 | 0.911376 |
| NC-003401.CDS40.S1_at   | NC-003401.CDS40 | 4.89 | 4.87 | 0.16 | 0.07 | 1.01  | 0.735974 | 0.523886 | 0.877129 | 0.714052 |
| NC-003401.CDS41.S1_at   | NC-003401.CDS41 | 5.4  | 5.48 | 0.12 | 0.11 | -1.06 | 0.401381 | 0.21109  | 0.666016 | 0.4851   |
| NC-003401.CDS42.S1_at   | NC-003401.CDS42 | 4.92 | 5.04 | 0.01 | 0.18 | -1.09 | 0.863126 | 0.431294 | 0.940491 | 0.652249 |
| NC-003401.CDS43.S1_at   | NC-003401.CDS43 | 3.09 | 3.14 | 0.1  | 0.1  | -1.04 | 0.230803 | 0.078228 | 0.529545 | 0.324765 |
| NC-003401.CDS44.S1_at   | NC-003401.CDS44 | 4.11 | 4.28 | 0.13 | 0.28 | -1.13 | 0.155033 | 0.226756 | 0.445174 | 0.499176 |
| NC-003401.CDS45.S1_at   | NC-003401.CDS45 | 4.58 | 4.52 | 0.1  | 0.1  | 1.04  | 0.866642 | 0.260035 | 0.94244  | 0.52675  |
| NC-003401.CDS46.S1_at   | NC-003401.CDS46 | 4.14 | 4.22 | 0.12 | 0.2  | -1.06 | 0.535305 | 0.289851 | 0.758257 | 0.550831 |
| NC-003401.CDS47.S1_at   | NC-003401.CDS47 | 3.58 | 3.43 | 0.18 | 0.04 | 1.11  | 0.17274  | 0.346219 | 0.46677  | 0.591201 |
| NC-003401.CDS48.S1_at   | NC-003401.CDS48 | 4.59 | 4.65 | 0.11 | 0.07 | -1.04 | 0.257507 | 0.124797 | 0.551704 | 0.395219 |
| NC-003401.CDS49.S1_at   | NC-003401.CDS49 | 4.09 | 4.1  | 0.09 | 0.1  | -1.01 | 0.477161 | 0.646076 | 0.71929  | 0.792676 |
| NC-003401.CDS50.S1_at   | NC-003401.CDS50 | 4.99 | 4.99 | 0.13 | 0    | 1     | 0.373901 | 0.522835 | 0.645118 | 0.713416 |
| NC-003401.CDS51.S1_at   | NC-003401.CDS51 | 5.03 | 5.03 | 0.13 | 0.06 | 1     | 0.265739 | 0.253431 | 0.558335 | 0.521736 |
| NC-003401.CDS52.S1_at   | NC-003401.CDS52 | 5.49 | 5.46 | 0.14 | 0.06 | 1.03  | 0.724046 | 0.094602 | 0.870379 | 0.351371 |
| NC-003401.CDS53.S1_at   | NC-003401.CDS53 | 5.27 | 5.39 | 0.28 | 0    | -1.08 | 0.91106  | 0.919652 | 0.962223 | 0.954874 |
| NC-003401.CDS54.S1_at   | NC-003401.CDS54 | 4.56 | 4.56 | 0.06 | 0.11 | 1     | 0.434611 | 0.386693 | 0.689795 | 0.621864 |
| NC-003401.CDS55.S1_at   | NC-003401.CDS55 | 3.12 | 3.2  | 0.2  | 0.02 | -1.05 | 0.640335 | 0.087022 | 0.824254 | 0.339889 |
| NC-003401.CDS56.S1_at   | NC-003401.CDS56 | 3.73 | 3.84 | 0.19 | 0    | -1.08 | 0.860974 | 0.849975 | 0.939567 | 0.914673 |
| NC-003401.CDS57.S1_at   | NC-003401.CDS57 | 4.68 | 4.69 | 0.05 | 0.15 | -1.01 | 0.721806 | 0.707615 | 0.868992 | 0.830424 |
| NC-003401.CDS58.S1_at   | NC-003401.CDS58 | 4.08 | 4.05 | 0.11 | 0.09 | 1.02  | 0.608151 | 0.546982 | 0.804287 | 0.728283 |
| NC-003401.CDS59.S1_at   | NC-003401.CDS59 | 4.01 | 3.9  | 0.12 | 0.09 | 1.08  | 0.743431 | 0.206516 | 0.881377 | 0.480571 |
| NC-003401.CDS60.S1_at   | NC-003401.CDS60 | 3.84 | 3.98 | 0.06 | 0.25 | -1.1  | 0.355331 | 0.39402  | 0.632127 | 0.626734 |
| NC-003401.CDS61.S1_at   | NC-003401.CDS61 | 4.22 | 4.37 | 0.23 | 0.01 | -1.1  | 0.877797 | 0.468445 | 0.947831 | 0.677714 |
| NC-003401.CDS62.S1_at   | NC-003401.CDS62 | 5.51 | 5.44 | 0.18 | 0.18 | 1.05  | 0.659493 | 0.876359 | 0.83568  | 0.929679 |
| NC-003401.CDS63.S1_at   | NC-003401.CDS63 | 2.87 | 2.86 | 0.09 | 0.05 | 1.01  | 0.929697 | 0.737601 | 0.970278 | 0.847993 |
| NC-003401.CDS64.S1_at   | NC-003401.CDS64 | 5.42 | 5.42 | 0.21 | 0.09 | -1    | 0.84338  | 0.461297 | 0.931427 | 0.672971 |
| NC-003401.CDS65.S1_at   | NC-003401.CDS65 | 5.21 | 5.24 | 0.06 | 0.12 | -1.02 | 0.717185 | 0.862214 | 0.866467 | 0.921663 |

|                       |                 |      |      |      |      |       |          |          |          |          |
|-----------------------|-----------------|------|------|------|------|-------|----------|----------|----------|----------|
| NC-003401.CDS66.S1_at | NC-003401.CDS66 | 5.4  | 5.42 | 0.14 | 0    | -1.01 | 0.49215  | 0.549215 | 0.72956  | 0.729705 |
| NC-003401.CDS67.S1_at | NC-003401.CDS67 | 5.23 | 5.09 | 0.29 | 0.15 | 1.1   | 0.36164  | 0.511842 | 0.637014 | 0.705797 |
| NC-003401.CDS68.S1_at | NC-003401.CDS68 | 4.7  | 4.56 | 0.15 | 0.17 | 1.1   | 0.524941 | 0.297247 | 0.751591 | 0.556067 |
| NC-003401.CDS69.S1_at | NC-003401.CDS69 | 6.87 | 6.88 | 0.11 | 0.1  | -1.01 | 0.208606 | 0.141078 | 0.506194 | 0.414592 |
| NC-003401.CDS70.S1_at | NC-003401.CDS70 | 4.57 | 4.59 | 0.12 | 0.04 | -1.01 | 0.843741 | 0.436415 | 0.931554 | 0.655988 |
| NC-003401.CDS71.S1_at | NC-003401.CDS71 | 5.46 | 5.46 | 0.04 | 0.07 | 1     | 0.36425  | 0.408745 | 0.638845 | 0.6359   |
| NC-003401.CDS72.S1_at | NC-003401.CDS72 | 4.59 | 4.63 | 0.18 | 0.05 | -1.02 | 0.817758 | 0.168897 | 0.918631 | 0.445458 |
| NC-003401.CDS73.S1_at | NC-003401.CDS73 | 3.7  | 3.69 | 0.16 | 0.2  | 1.01  | 0.532473 | 0.364783 | 0.756535 | 0.605072 |
| NC-003401.CDS74.S1_at | NC-003401.CDS74 | 3.39 | 3.45 | 0.04 | 0.12 | -1.05 | 0.941126 | 0.221809 | 0.975266 | 0.494948 |
| NC-003401.CDS75.S1_at | NC-003401.CDS75 | 3.95 | 4.1  | 0.04 | 0.13 | -1.11 | 0.103079 | 0.210737 | 0.375732 | 0.48478  |
| NC-003401.CDS76.S1_at | NC-003401.CDS76 | 4.96 | 4.96 | 0    | 0.05 | 1     | 0.40126  | 0.319244 | 0.665992 | 0.571722 |
| NC-003401.CDS77.S1_at | NC-003401.CDS77 | 3.89 | 3.89 | 0.03 | 0.08 | 1     | 0.773809 | 0.970721 | 0.896356 | 0.98405  |
| NC-003401.CDS78.S1_at | NC-003401.CDS78 | 4.48 | 4.33 | 0.06 | 0.12 | 1.12  | 0.099632 | 0.206134 | 0.370527 | 0.480348 |
| NC-003401.CDS79.S1_at | NC-003401.CDS79 | 3.12 | 3.11 | 0.07 | 0.01 | 1     | 0.376102 | 0.593567 | 0.646788 | 0.758329 |
| NC-003401.CDS80.S1_at | NC-003401.CDS80 | 5.49 | 5.43 | 0.04 | 0.07 | 1.04  | 0.146862 | 0.138167 | 0.434827 | 0.411086 |
| NC-003401.CDS81.S1_at | NC-003401.CDS81 | 4.2  | 4.14 | 0.05 | 0.1  | 1.04  | 0.521874 | 0.79874  | 0.749453 | 0.884072 |
| NC-003401.CDS82.S1_at | NC-003401.CDS82 | 5.78 | 5.78 | 0.02 | 0.08 | 1     | 0.817104 | 0.625623 | 0.91826  | 0.779265 |
| NC-003401.CDS83.S1_at | NC-003401.CDS83 | 6.89 | 7.04 | 0.11 | 0.1  | -1.11 | 0.389364 | 0.14658  | 0.657321 | 0.420591 |
| NC-003401.CDS84.S1_at | NC-003401.CDS84 | 5.9  | 5.87 | 0.12 | 0.12 | 1.02  | 0.822585 | 0.84255  | 0.921047 | 0.910315 |
| NC-003401.CDS85.S1_at | NC-003401.CDS85 | 4.21 | 4.21 | 0.06 | 0.11 | 1     | 0.67283  | 0.886243 | 0.843391 | 0.935248 |
| NC-003401.CDS86.S1_at | NC-003401.CDS86 | 3.83 | 3.69 | 0.2  | 0.1  | 1.1   | 0.269297 | 0.306199 | 0.561615 | 0.562901 |
| NC-003401.CDS87.S1_at | NC-003401.CDS87 | 4    | 3.94 | 0.06 | 0.06 | 1.04  | 0.598602 | 0.039715 | 0.797518 | 0.244271 |
| NC-003401.CDS88.S1_at | NC-003401.CDS88 | 5.09 | 5.17 | 0.08 | 0.05 | -1.05 | 0.270923 | 0.81926  | 0.562875 | 0.895838 |
| NC-003401.CDS89.S1_at | NC-003401.CDS89 | 4.54 | 4.54 | 0.07 | 0.14 | -1    | 0.610704 | 0.031896 | 0.805939 | 0.220981 |
| NC-004367.CDS1.S1_at  | NC-004367.CDS1  | 4.38 | 4.52 | 0.12 | 0.14 | -1.1  | 0.203878 | 0.261017 | 0.501449 | 0.527371 |
| NC-004367.CDS2.S1_at  | NC-004367.CDS2  | 4.59 | 4.65 | 0.13 | 0.1  | -1.04 | 0.26323  | 0.487537 | 0.556921 | 0.690559 |
| NC-004367.CDS3.S1_at  | NC-004367.CDS3  | 3.57 | 3.42 | 0.05 | 0.17 | 1.11  | 0.151424 | 0.196849 | 0.440961 | 0.471968 |
| NC-004367.CDS4.S1_at  | NC-004367.CDS4  | 5.53 | 5.64 | 0.15 | 0.06 | -1.08 | 0.441904 | 0.337375 | 0.695358 | 0.584592 |
| NC-004367.CDS5.S1_at  | NC-004367.CDS5  | 3.93 | 3.87 | 0.07 | 0.02 | 1.04  | 0.84364  | 0.529869 | 0.931553 | 0.717526 |
| NC-004367.CDS6.S1_at  | NC-004367.CDS6  | 4.2  | 4.28 | 0.13 | 0.16 | -1.06 | 0.926029 | 0.796109 | 0.968745 | 0.882495 |
| NC-004367.CDS7.S1_at  | NC-004367.CDS7  | 3.31 | 3.47 | 0.13 | 0.14 | -1.12 | 0.469731 | 0.468947 | 0.714415 | 0.67794  |
| NC-004367.CDS8.S1_at  | NC-004367.CDS8  | 3.59 | 3.59 | 0.01 | 0.1  | 1     | 0.992097 | 0.748121 | 0.997076 | 0.853384 |
| NC-004367.CDS9.S1_at  | NC-004367.CDS9  | 3.81 | 4.01 | 0.11 | 0.09 | -1.15 | 0.36832  | 0.062795 | 0.642064 | 0.297193 |
| NC-004367.CDS10.S1_at | NC-004367.CDS10 | 3.95 | 3.95 | 0.02 | 0.1  | 1     | 0.954475 | 0.989587 | 0.981317 | 0.994062 |
| NC-004367.CDS11.S1_at | NC-004367.CDS11 | 3.67 | 3.61 | 0.03 | 0.14 | 1.04  | 0.407281 | 0.190266 | 0.67039  | 0.465904 |
| NC-004367.CDS12.S1_at | NC-004367.CDS12 | 4.34 | 4.37 | 0.07 | 0.07 | -1.03 | 0.908395 | 0.565922 | 0.961215 | 0.740165 |
| NC-004367.CDS13.S1_at | NC-004367.CDS13 | 3.8  | 3.85 | 0.07 | 0.16 | -1.04 | 0.975101 | 0.742336 | 0.990084 | 0.850754 |
| NC-004367.CDS14.S1_at | NC-004367.CDS14 | 4.23 | 4.3  | 0.1  | 0.1  | -1.05 | 0.665307 | 0.646796 | 0.839114 | 0.793117 |
| NC-004367.CDS15.S1_at | NC-004367.CDS15 | 4.25 | 4.31 | 0.11 | 0.02 | -1.04 | 0.334484 | 0.110605 | 0.6156   | 0.374854 |
| NC-004367.CDS16.S1_at | NC-004367.CDS16 | 3.05 | 3.18 | 0.19 | 0.07 | -1.09 | 0.68479  | 0.876835 | 0.849802 | 0.92983  |
| NC-004367.CDS17.S1_at | NC-004367.CDS17 | 3.66 | 3.49 | 0.15 | 0.05 | 1.13  | 0.581245 | 0.396649 | 0.786433 | 0.628434 |
| NC-004367.CDS18.S1_at | NC-004367.CDS18 | 4.32 | 4.31 | 0.16 | 0.09 | 1     | 0.92305  | 0.995967 | 0.967159 | 0.997533 |
| NC-004367.CDS19.S1_at | NC-004367.CDS19 | 3.89 | 3.93 | 0.08 | 0.21 | -1.03 | 0.686515 | 0.784917 | 0.850618 | 0.875471 |

|                       |                 |      |      |      |      |       |          |          |          |          |
|-----------------------|-----------------|------|------|------|------|-------|----------|----------|----------|----------|
| NC-004367.CDS20.S1_at | NC-004367.CDS20 | 4.6  | 4.45 | 0.09 | 0.27 | 1.11  | 0.639368 | 0.314205 | 0.823492 | 0.568185 |
| NC-004367.CDS21.S1_at | NC-004367.CDS21 | 4.21 | 4.19 | 0.08 | 0.12 | 1.02  | 0.820555 | 0.965833 | 0.919941 | 0.980843 |
| NC-004367.CDS22.S1_at | NC-004367.CDS22 | 4.63 | 4.61 | 0.15 | 0.04 | 1.01  | 0.832312 | 0.810562 | 0.926066 | 0.890812 |
| NC-004367.CDS23.S1_at | NC-004367.CDS23 | 2.86 | 2.86 | 0.05 | 0.06 | -1    | 0.546309 | 0.195387 | 0.765166 | 0.470253 |
| NC-004367.CDS24.S1_at | NC-004367.CDS24 | 3.47 | 3.51 | 0.29 | 0.23 | -1.03 | 0.690388 | 0.286019 | 0.851986 | 0.547512 |
| NC-004367.CDS25.S1_at | NC-004367.CDS25 | 4.06 | 4.15 | 0.08 | 0.14 | -1.07 | 0.402138 | 0.371913 | 0.666552 | 0.610729 |
| NC-004367.CDS26.S1_at | NC-004367.CDS26 | 3.77 | 3.78 | 0.04 | 0.07 | -1.01 | 0.475101 | 0.805341 | 0.717852 | 0.888113 |
| NC-004367.CDS27.S1_at | NC-004367.CDS27 | 3.62 | 3.62 | 0.1  | 0.08 | 1     | 0.232099 | 0.248618 | 0.530631 | 0.517917 |
| NC-004367.CDS28.S1_at | NC-004367.CDS28 | 3.84 | 3.84 | 0.07 | 0.03 | 1.01  | 0.827566 | 0.979962 | 0.923667 | 0.989229 |
| NC-004367.CDS29.S1_at | NC-004367.CDS29 | 4.4  | 4.27 | 0.02 | 0.16 | 1.1   | 0.229821 | 0.148016 | 0.528728 | 0.422416 |
| NC-004367.CDS30.S1_at | NC-004367.CDS30 | 4.64 | 4.47 | 0.24 | 0.14 | 1.13  | 0.228476 | 0.41278  | 0.52682  | 0.639105 |
| NC-004367.CDS31.S1_at | NC-004367.CDS31 | 4.53 | 4.41 | 0.06 | 0.06 | 1.09  | 0.053493 | 0.474528 | 0.28856  | 0.681511 |
| NC-004367.CDS32.S1_at | NC-004367.CDS32 | 2.82 | 2.83 | 0.1  | 0.13 | -1.01 | 0.910326 | 0.656422 | 0.961971 | 0.799082 |
| NC-004367.CDS33.S1_at | NC-004367.CDS33 | 3.42 | 3.42 | 0.05 | 0.24 | -1    | 0.637772 | 0.814494 | 0.822594 | 0.892948 |
| NC-004367.CDS34.S1_at | NC-004367.CDS34 | 3.83 | 3.96 | 0.15 | 0.05 | -1.09 | 0.315554 | 0.030813 | 0.600423 | 0.217376 |
| NC-004367.CDS35.S1_at | NC-004367.CDS35 | 3.68 | 3.7  | 0.07 | 0.07 | -1.01 | 0.718464 | 0.699249 | 0.867219 | 0.825277 |
| NC-004367.CDS36.S1_at | NC-004367.CDS36 | 3.08 | 3.08 | 0.19 | 0.07 | 1     | 0.981511 | 0.931439 | 0.993103 | 0.961034 |
| NC-004367.CDS37.S1_at | NC-004367.CDS37 | 5.01 | 5.05 | 0.05 | 0.05 | -1.03 | 0.158524 | 0.451954 | 0.44964  | 0.666717 |
| NC-004367.CDS38.S1_at | NC-004367.CDS38 | 3.32 | 3.28 | 0.15 | 0.15 | 1.03  | 0.974349 | 0.802301 | 0.989745 | 0.886115 |
| NC-004367.CDS39.S1_at | NC-004367.CDS39 | 3.51 | 3.3  | 0.04 | 0.18 | 1.16  | 0.258031 | 0.451818 | 0.552259 | 0.66662  |
| NC-004367.CDS40.S1_at | NC-004367.CDS40 | 3.35 | 3.46 | 0.07 | 0.02 | -1.08 | 0.045629 | 0.088424 | 0.271064 | 0.341877 |
| NC-004367.CDS41.S1_at | NC-004367.CDS41 | 3.25 | 3.25 | 0.03 | 0.06 | -1    | 0.280531 | 0.044126 | 0.571609 | 0.254441 |
| NC-004367.CDS42.S1_at | NC-004367.CDS42 | 3.6  | 3.65 | 0.05 | 0.05 | -1.04 | 0.701366 | 0.057088 | 0.858181 | 0.284945 |
| NC-004367.CDS43.S1_at | NC-004367.CDS43 | 3.26 | 3.24 | 0.16 | 0.09 | 1.02  | 0.190551 | 0.290927 | 0.486767 | 0.551499 |
| NC-004367.CDS44.S1_at | NC-004367.CDS44 | 3.41 | 3.23 | 0.15 | 0.13 | 1.13  | 0.242258 | 0.154138 | 0.539285 | 0.42887  |
| NC-004367.CDS45.S1_at | NC-004367.CDS45 | 4.78 | 4.95 | 0.13 | 0.12 | -1.12 | 0.624366 | 0.675033 | 0.8148   | 0.810141 |
| NC-004367.CDS46.S1_at | NC-004367.CDS46 | 4.17 | 4.15 | 0.19 | 0.02 | 1.01  | 0.526719 | 0.559275 | 0.752751 | 0.736207 |
| NC-004367.CDS47.S1_at | NC-004367.CDS47 | 4.26 | 4.1  | 0.23 | 0.09 | 1.12  | 0.554193 | 0.103549 | 0.770567 | 0.364346 |
| NC-004367.CDS48.S1_at | NC-004367.CDS48 | 3.39 | 3.39 | 0.15 | 0.07 | 1     | 0.3597   | 0.224588 | 0.635313 | 0.497613 |
| NC-004367.CDS49.S1_at | NC-004367.CDS49 | 3.65 | 3.49 | 0.05 | 0.09 | 1.11  | 0.091761 | 0.008584 | 0.359517 | 0.122976 |
| NC-004367.CDS50.S1_at | NC-004367.CDS50 | 5.2  | 5.22 | 0.2  | 0.01 | -1.02 | 0.801515 | 0.337972 | 0.91087  | 0.585166 |
| NC-004367.CDS51.S1_at | NC-004367.CDS51 | 3.38 | 3.38 | 0.05 | 0.06 | -1    | 0.323464 | 0.648731 | 0.60726  | 0.794433 |
| NC-004367.CDS52.S1_at | NC-004367.CDS52 | 4.53 | 4.57 | 0.05 | 0.03 | -1.02 | 0.15489  | 0.015831 | 0.445083 | 0.159537 |
| NC-004367.CDS53.S1_at | NC-004367.CDS53 | 3.46 | 3.4  | 0.1  | 0.1  | 1.04  | 0.83967  | 0.756829 | 0.92965  | 0.858443 |
| NC-004367.CDS54.S1_at | NC-004367.CDS54 | 4.58 | 4.47 | 0.24 | 0.08 | 1.08  | 0.330361 | 0.430027 | 0.612383 | 0.65111  |
| NC-004367.CDS55.S1_at | NC-004367.CDS55 | 3.54 | 3.57 | 0.21 | 0    | -1.02 | 0.708817 | 0.87021  | 0.862097 | 0.926372 |
| NC-004367.CDS56.S1_at | NC-004367.CDS56 | 2.88 | 2.87 | 0.12 | 0.09 | 1.01  | 0.763161 | 0.912319 | 0.891497 | 0.950583 |
| NC-004367.CDS57.S1_at | NC-004367.CDS57 | 3.72 | 3.72 | 0.18 | 0.06 | -1    | 0.266415 | 0.532938 | 0.558813 | 0.719308 |
| NC-004367.CDS58.S1_at | NC-004367.CDS58 | 5.66 | 5.45 | 0.46 | 0.06 | 1.16  | 0.763793 | 0.465058 | 0.891841 | 0.675549 |
| NC-004367.CDS59.S1_at | NC-004367.CDS59 | 3.33 | 3.32 | 0    | 0.06 | 1.01  | 0.268804 | 0.23254  | 0.561284 | 0.504337 |
| NC-004367.CDS60.S1_at | NC-004367.CDS60 | 3.43 | 3.37 | 0.03 | 0.11 | 1.04  | 0.550628 | 0.093181 | 0.767944 | 0.34931  |
| NC-004367.CDS61.S1_at | NC-004367.CDS61 | 3.35 | 3.2  | 0.1  | 0.04 | 1.11  | 0.168908 | 0.199886 | 0.462098 | 0.474559 |
| NC-004367.CDS62.S1_at | NC-004367.CDS62 | 4.84 | 4.87 | 0.22 | 0.08 | -1.02 | 0.351896 | 0.574028 | 0.62954  | 0.745547 |

|                         |                 |      |      |      |      |       |          |          |          |          |
|-------------------------|-----------------|------|------|------|------|-------|----------|----------|----------|----------|
| NC-004367.CDS63.S1_at   | NC-004367.CDS63 | 5.48 | 5.43 | 0.13 | 0.05 | 1.03  | 0.583414 | 0.620979 | 0.788056 | 0.775745 |
| NC-004367.CDS64.S1_at   | NC-004367.CDS64 | 3.32 | 3.28 | 0.07 | 0.1  | 1.03  | 0.796507 | 0.900641 | 0.908112 | 0.943473 |
| NC-004367.CDS65.S1_at   | NC-004367.CDS65 | 3.51 | 3.77 | 0.08 | 0.16 | -1.2  | 0.045473 | 0.037707 | 0.270804 | 0.23859  |
| NC-004367.CDS66.S1_at   | NC-004367.CDS66 | 4.02 | 4.01 | 0.11 | 0.32 | 1.01  | 0.438054 | 0.252752 | 0.692782 | 0.521174 |
| NC-004367.CDS67.S1_at   | NC-004367.CDS67 | 2.81 | 2.81 | 0.03 | 0.04 | -1    | 0.621943 | 0.156899 | 0.812912 | 0.432372 |
| NC-004367.CDS68.S1_at   | NC-004367.CDS68 | 4.44 | 4.36 | 0.08 | 0.08 | 1.06  | 0.225066 | 0.209251 | 0.522982 | 0.48303  |
| NC-004367.CDS69.S1_at   | NC-004367.CDS69 | 5.04 | 4.95 | 0.2  | 0.29 | 1.07  | 0.497213 | 0.713531 | 0.732907 | 0.833812 |
| NC-004367.CDS70.S1_at   | NC-004367.CDS70 | 3.97 | 3.86 | 0.06 | 0.12 | 1.08  | 0.205298 | 0.176114 | 0.503171 | 0.452581 |
| NC-004367.CDS71.S1_at   | NC-004367.CDS71 | 4.98 | 5.05 | 0.03 | 0.01 | -1.05 | 0.021429 | 0.78584  | 0.199988 | 0.875982 |
| NC-004367.CDS72.S1_at   | NC-004367.CDS72 | 5.05 | 5.05 | 0.12 | 0.16 | 1     | 0.232794 | 0.203016 | 0.531077 | 0.477343 |
| NC-006146.CDS1.S1_s_at  | NC-006146.CDS1  | 3.38 | 3.3  | 0.03 | 0.05 | 1.06  | 0.02982  | 0.020111 | 0.22588  | 0.178118 |
| NC-006146.CDS3.S1_at    | NC-006146.CDS3  | 4.17 | 4.16 | 0.08 | 0.05 | 1     | 0.82077  | 0.115754 | 0.92006  | 0.382814 |
| NC-006146.CDS4.S1_at    | NC-006146.CDS4  | 4.55 | 4.49 | 0.08 | 0.05 | 1.04  | 0.813253 | 0.561629 | 0.916498 | 0.73751  |
| NC-006146.CDS5.S1_at    | NC-006146.CDS5  | 5.53 | 5.44 | 0.06 | 0.16 | 1.06  | 0.313073 | 0.446712 | 0.598916 | 0.662889 |
| NC-006146.CDS6.S1_at    | NC-006146.CDS6  | 4.47 | 4.51 | 0.21 | 0.05 | -1.03 | 0.851489 | 0.504011 | 0.935336 | 0.701269 |
| NC-006146.CDS7.S1_at    | NC-006146.CDS7  | 3.83 | 3.76 | 0.27 | 0.07 | 1.05  | 0.822573 | 0.728907 | 0.921047 | 0.8433   |
| NC-006146.CDS8.S1_at    | NC-006146.CDS8  | 5.24 | 5.08 | 0.08 | 0.13 | 1.12  | 0.268051 | 0.380327 | 0.560779 | 0.616984 |
| NC-006146.CDS9.S1_at    | NC-006146.CDS9  | 3.86 | 3.73 | 0.09 | 0.05 | 1.09  | 0.087065 | 0.079903 | 0.352616 | 0.327207 |
| NC-006146.CDS10.S1_at   | NC-006146.CDS10 | 6.08 | 6.1  | 0.02 | 0.07 | -1.01 | 0.263835 | 0.457439 | 0.557349 | 0.670842 |
| NC-006146.CDS11.S1_at   | NC-006146.CDS11 | 4.17 | 4.26 | 0.03 | 0.14 | -1.06 | 0.219046 | 0.536368 | 0.516709 | 0.721688 |
| NC-006146.CDS12.S1_at   | NC-006146.CDS12 | 6.09 | 6.03 | 0.26 | 0.05 | 1.04  | 0.483924 | 0.588962 | 0.723901 | 0.755275 |
| NC-006146.CDS13.S1_at   | NC-006146.CDS13 | 4.09 | 4.01 | 0.08 | 0.08 | 1.06  | 0.185786 | 0.599527 | 0.481947 | 0.761473 |
| NC-006146.CDS14.S1_at   | NC-006146.CDS14 | 7.12 | 6.93 | 0.05 | 0.12 | 1.14  | 0.0442   | 0.025499 | 0.267305 | 0.200333 |
| NC-006146.CDS14.S1_x_at | NC-006146.CDS14 | 7.08 | 7.12 | 0.07 | 0.07 | -1.02 | 0.337352 | 0.236692 | 0.617824 | 0.507459 |
| NC-006146.CDS15.S1_at   | NC-006146.CDS15 | 4.97 | 5.07 | 0.09 | 0.14 | -1.07 | 0.337099 | 0.651414 | 0.617686 | 0.796212 |
| NC-006146.CDS16.S1_at   | NC-006146.CDS16 | 5.22 | 5.18 | 0    | 0.08 | 1.02  | 0.461007 | 0.347036 | 0.708587 | 0.59181  |
| NC-006146.CDS17.S1_at   | NC-006146.CDS17 | 5.03 | 4.99 | 0.13 | 0.03 | 1.03  | 0.733471 | 0.11939  | 0.875708 | 0.387887 |
| NC-006146.CDS18.S1_at   | NC-006146.CDS18 | 5.8  | 5.89 | 0.27 | 0.08 | -1.06 | 0.813614 | 0.917984 | 0.916664 | 0.954061 |
| NC-006146.CDS19.S1_at   | NC-006146.CDS19 | 4.89 | 4.87 | 0.2  | 0.13 | 1.01  | 0.874858 | 0.246675 | 0.94633  | 0.516025 |
| NC-006146.CDS20.S1_at   | NC-006146.CDS20 | 6.37 | 6.25 | 0.26 | 0.03 | 1.08  | 0.450705 | 0.607712 | 0.701646 | 0.766491 |
| NC-006146.CDS21.S1_at   | NC-006146.CDS21 | 5.64 | 5.65 | 0.09 | 0.05 | -1.01 | 0.347373 | 0.379143 | 0.625483 | 0.616132 |
| NC-006146.CDS22.S1_at   | NC-006146.CDS22 | 6.85 | 6.88 | 0.08 | 0.16 | -1.02 | 0.566113 | 0.339116 | 0.777118 | 0.585891 |
| NC-006146.CDS23.S1_at   | NC-006146.CDS23 | 5.93 | 5.89 | 0.28 | 0.08 | 1.03  | 0.305895 | 0.147208 | 0.592893 | 0.421455 |
| NC-006146.CDS24.S1_at   | NC-006146.CDS24 | 4.58 | 4.58 | 0.05 | 0.07 | -1    | 0.595604 | 0.149353 | 0.795338 | 0.423811 |
| NC-006146.CDS25.S1_at   | NC-006146.CDS25 | 6.19 | 6.2  | 0.13 | 0.03 | -1    | 0.638783 | 0.944929 | 0.823276 | 0.968827 |
| NC-006146.CDS26.S1_at   | NC-006146.CDS26 | 4.67 | 4.67 | 0.11 | 0.08 | 1     | 0.819296 | 0.108602 | 0.919512 | 0.372171 |
| NC-006146.CDS27.S1_s_at | NC-006146.CDS27 | 6.72 | 6.73 | 0.12 | 0    | -1.01 | 0.893036 | 0.460416 | 0.954376 | 0.672279 |
| NC-006146.CDS28.S1_at   | NC-006146.CDS28 | 5.63 | 5.65 | 0.14 | 0    | -1.01 | 0.455598 | 0.833361 | 0.705224 | 0.904429 |
| NC-006146.CDS29.S1_at   | NC-006146.CDS29 | 4.86 | 4.85 | 0.12 | 0.02 | 1.01  | 0.580662 | 0.680525 | 0.786011 | 0.813481 |
| NC-006146.CDS30.S1_at   | NC-006146.CDS30 | 4.28 | 4.18 | 0.07 | 0.22 | 1.07  | 0.257882 | 0.344351 | 0.552089 | 0.589762 |
| NC-006146.CDS31.S1_at   | NC-006146.CDS31 | 3.08 | 3.03 | 0.17 | 0.26 | 1.03  | 0.995834 | 0.360529 | 0.99844  | 0.601613 |
| NC-006146.CDS32.S1_at   | NC-006146.CDS32 | 5.56 | 5.54 | 0.17 | 0.05 | 1.01  | 0.872875 | 0.974108 | 0.945492 | 0.98586  |
| NC-006146.CDS33.S1_at   | NC-006146.CDS33 | 5.87 | 6.15 | 0.16 | 0.11 | -1.21 | 0.346127 | 0.050361 | 0.624868 | 0.269658 |

|                       |                 |      |      |      |      |       |          |          |          |          |
|-----------------------|-----------------|------|------|------|------|-------|----------|----------|----------|----------|
| NC-006146.CDS34.S1_at | NC-006146.CDS34 | 6.39 | 6.34 | 0.04 | 0.04 | 1.03  | 0.575223 | 0.203868 | 0.782692 | 0.478102 |
| NC-006146.CDS35.S1_at | NC-006146.CDS35 | 5.46 | 5.74 | 0.14 | 0.08 | -1.21 | 0.098975 | 0.315876 | 0.369854 | 0.569327 |
| NC-006146.CDS36.S1_at | NC-006146.CDS36 | 3.27 | 3.19 | 0.04 | 0.08 | 1.06  | 0.112314 | 0.065912 | 0.388478 | 0.302129 |
| NC-006146.CDS37.S1_at | NC-006146.CDS37 | 4.55 | 4.63 | 0.06 | 0.12 | -1.06 | 0.184193 | 0.217463 | 0.480146 | 0.491035 |
| NC-006146.CDS38.S1_at | NC-006146.CDS38 | 4.76 | 4.81 | 0.27 | 0.02 | -1.03 | 0.806988 | 0.570306 | 0.913559 | 0.743056 |
| NC-006146.CDS39.S1_at | NC-006146.CDS39 | 5.78 | 5.78 | 0.13 | 0    | -1    | 0.344418 | 0.273927 | 0.6237   | 0.538452 |
| NC-006146.CDS40.S1_at | NC-006146.CDS40 | 5.5  | 5.32 | 0.15 | 0.19 | 1.13  | 0.138344 | 0.136573 | 0.423598 | 0.409084 |
| NC-006146.CDS41.S1_at | NC-006146.CDS41 | 4.81 | 5.02 | 0.07 | 0.09 | -1.15 | 0.072786 | 0.094291 | 0.327658 | 0.350889 |
| NC-006146.CDS42.S1_at | NC-006146.CDS42 | 5.13 | 5.13 | 0.06 | 0    | -1    | 0.448441 | 0.85504  | 0.700064 | 0.917395 |
| NC-006146.CDS43.S1_at | NC-006146.CDS43 | 5.71 | 5.47 | 0.11 | 0.08 | 1.18  | 0.107899 | 0.178248 | 0.382524 | 0.45458  |
| NC-006146.CDS44.S1_at | NC-006146.CDS44 | 6.85 | 6.76 | 0.1  | 0.11 | 1.06  | 0.738791 | 0.254289 | 0.878951 | 0.522606 |
| NC-006146.CDS45.S1_at | NC-006146.CDS45 | 3.78 | 3.89 | 0.05 | 0.06 | -1.07 | 0.114976 | 0.351271 | 0.392008 | 0.594937 |
| NC-006146.CDS46.S1_at | NC-006146.CDS46 | 3.51 | 3.47 | 0.03 | 0.14 | 1.03  | 0.241255 | 0.456469 | 0.538538 | 0.670188 |
| NC-006146.CDS47.S1_at | NC-006146.CDS47 | 4.67 | 4.54 | 0.17 | 0.1  | 1.1   | 0.321212 | 0.127959 | 0.605501 | 0.398901 |
| NC-006146.CDS48.S1_at | NC-006146.CDS48 | 4.72 | 4.76 | 0.1  | 0.03 | -1.03 | 0.20556  | 0.129165 | 0.503307 | 0.400611 |
| NC-006146.CDS49.S1_at | NC-006146.CDS49 | 5.14 | 5.04 | 0.15 | 0.13 | 1.07  | 0.781129 | 0.537904 | 0.900025 | 0.722779 |
| NC-006146.CDS50.S1_at | NC-006146.CDS50 | 5.51 | 5.47 | 0.21 | 0.07 | 1.03  | 0.650556 | 0.633139 | 0.830274 | 0.783969 |
| NC-006146.CDS51.S1_at | NC-006146.CDS51 | 3.75 | 3.93 | 0.1  | 0.2  | -1.13 | 0.228683 | 0.291608 | 0.527113 | 0.551985 |
| NC-006146.CDS52.S1_at | NC-006146.CDS52 | 5.58 | 5.53 | 0.03 | 0.01 | 1.03  | 0.036558 | 0.108277 | 0.246142 | 0.371557 |
| NC-006146.CDS53.S1_at | NC-006146.CDS53 | 4.58 | 4.67 | 0.09 | 0.11 | -1.06 | 0.386164 | 0.620755 | 0.654632 | 0.775593 |
| NC-006146.CDS54.S1_at | NC-006146.CDS54 | 6.01 | 5.92 | 0.15 | 0.13 | 1.06  | 0.635578 | 0.385115 | 0.821512 | 0.620662 |
| NC-006146.CDS55.S1_at | NC-006146.CDS55 | 5.71 | 5.72 | 0.05 | 0.06 | -1.01 | 0.933203 | 0.256338 | 0.971999 | 0.524114 |
| NC-006146.CDS56.S1_at | NC-006146.CDS56 | 6.38 | 6.26 | 0.03 | 0.05 | 1.08  | 0.023134 | 0.009437 | 0.205228 | 0.127948 |
| NC-006146.CDS57.S1_at | NC-006146.CDS57 | 5.77 | 5.83 | 0.08 | 0.04 | -1.04 | 0.278642 | 0.073574 | 0.569962 | 0.316905 |
| NC-006146.CDS58.S1_at | NC-006146.CDS58 | 5.67 | 5.83 | 0.15 | 0.07 | -1.12 | 0.693382 | 0.131152 | 0.85343  | 0.403153 |
| NC-006146.CDS59.S1_at | NC-006146.CDS59 | 5.08 | 5.21 | 0.1  | 0.05 | -1.09 | 0.127009 | 0.095682 | 0.408591 | 0.3527   |
| NC-006146.CDS60.S1_at | NC-006146.CDS60 | 5.01 | 4.99 | 0.12 | 0.07 | 1.01  | 0.730329 | 0.817168 | 0.873938 | 0.894545 |
| NC-006146.CDS61.S1_at | NC-006146.CDS61 | 4.35 | 4.43 | 0.2  | 0.01 | -1.05 | 0.254051 | 0.184453 | 0.548382 | 0.46048  |
| NC-006146.CDS62.S1_at | NC-006146.CDS62 | 3.79 | 3.96 | 0.12 | 0.09 | -1.13 | 0.062156 | 0.103781 | 0.305949 | 0.364519 |
| NC-006146.CDS63.S1_at | NC-006146.CDS63 | 7.58 | 7.58 | 0.19 | 0.01 | -1    | 0.968928 | 0.502255 | 0.987691 | 0.70006  |
| NC-006146.CDS64.S1_at | NC-006146.CDS64 | 6.55 | 6.68 | 0.23 | 0.09 | -1.1  | 0.589384 | 0.470027 | 0.791592 | 0.678572 |
| NC-006146.CDS65.S1_at | NC-006146.CDS65 | 3.95 | 3.81 | 0.15 | 0.05 | 1.1   | 0.658147 | 0.204694 | 0.834894 | 0.479056 |
| NC-006146.CDS66.S1_at | NC-006146.CDS66 | 4.43 | 4.53 | 0.08 | 0.01 | -1.07 | 0.108866 | 0.0674   | 0.383806 | 0.305662 |
| NC-006146.CDS67.S1_at | NC-006146.CDS67 | 6.1  | 6.15 | 0.1  | 0.07 | -1.03 | 0.577468 | 0.244019 | 0.783629 | 0.514069 |
| NC-006146.CDS68.S1_at | NC-006146.CDS68 | 5.45 | 5.47 | 0.15 | 0.03 | -1.02 | 0.409206 | 0.689643 | 0.67166  | 0.819004 |
| NC-006146.CDS69.S1_at | NC-006146.CDS69 | 4.55 | 4.54 | 0.12 | 0.01 | 1.01  | 0.523905 | 0.672612 | 0.750738 | 0.808661 |
| NC-006146.CDS70.S1_at | NC-006146.CDS70 | 5.74 | 5.71 | 0.15 | 0.04 | 1.02  | 0.665417 | 0.312427 | 0.839233 | 0.567185 |
| NC-006146.CDS71.S1_at | NC-006146.CDS71 | 6.32 | 6.41 | 0.05 | 0.05 | -1.07 | 0.452121 | 0.040488 | 0.702737 | 0.246264 |
| NC-006146.CDS72.S1_at | NC-006146.CDS72 | 5.38 | 5.29 | 0.12 | 0.12 | 1.06  | 0.82561  | 0.893551 | 0.922496 | 0.939277 |
| NC-006146.CDS73.S1_at | NC-006146.CDS73 | 5.46 | 5.47 | 0.13 | 0.11 | -1    | 0.986326 | 0.757606 | 0.995212 | 0.858926 |
| NC-006146.CDS74.S1_at | NC-006146.CDS74 | 5.03 | 5.05 | 0.1  | 0.28 | -1.02 | 0.559547 | 0.76339  | 0.773349 | 0.862471 |
| NC-006146.CDS75.S1_at | NC-006146.CDS75 | 6.2  | 6.38 | 0.14 | 0.02 | -1.13 | 0.14279  | 0.145573 | 0.428908 | 0.419456 |
| NC-006146.CDS76.S1_at | NC-006146.CDS76 | 6.11 | 6.12 | 0.24 | 0.05 | -1    | 0.681544 | 0.595646 | 0.848112 | 0.759132 |

|                         |                 |      |      |      |      |       |          |          |          |          |
|-------------------------|-----------------|------|------|------|------|-------|----------|----------|----------|----------|
| NC-006146.CDS77.S1_at   | NC-006146.CDS77 | 5.37 | 5.17 | 0.15 | 0.06 | 1.15  | 0.056256 | 0.070407 | 0.294422 | 0.311676 |
| NC-006146.CDS78.S1_at   | NC-006146.CDS78 | 5.25 | 5.34 | 0.1  | 0.22 | -1.06 | 0.330538 | 0.537707 | 0.61256  | 0.722661 |
| NC-006146.CDS79.S1_at   | NC-006146.CDS79 | 7.06 | 7    | 0.34 | 0.22 | 1.04  | 0.614094 | 0.816911 | 0.807886 | 0.894398 |
| NC-006146.CDS80.S1_at   | NC-006146.CDS80 | 5.14 | 5.15 | 0.08 | 0.08 | -1.01 | 0.363715 | 0.821293 | 0.638309 | 0.897125 |
| NC-001345.CDS1.S1_at    | NC-001345.CDS1  | 5.94 | 5.79 | 0.08 | 0.09 | 1.11  | 0.135245 | 0.033661 | 0.419109 | 0.227052 |
| NC-001345.CDS2.S1_at    | NC-001345.CDS2  | 5.07 | 5.13 | 0.04 | 0.05 | -1.04 | 0.270425 | 0.089673 | 0.562614 | 0.343848 |
| NC-001345.CDS3.S1_at    | NC-001345.CDS3  | 5.5  | 5.44 | 0.07 | 0.07 | 1.04  | 0.741059 | 0.225511 | 0.880006 | 0.498147 |
| NC-001345.CDS4.S1_at    | NC-001345.CDS4  | 5.71 | 5.7  | 0.11 | 0.05 | 1.01  | 0.756822 | 0.507574 | 0.88823  | 0.703118 |
| NC-001345.CDS5.S1_at    | NC-001345.CDS5  | 3.55 | 3.57 | 0.17 | 0.1  | -1.01 | 0.866809 | 0.262747 | 0.942479 | 0.529086 |
| NC-001345.CDS6.S1_s_at  | NC-001345.CDS6  | 5.88 | 5.85 | 0.16 | 0.09 | 1.03  | 0.396875 | 0.624193 | 0.662712 | 0.778475 |
| NC-001345.CDS18.S1_at   | NC-001345.CDS18 | 5.49 | 5.58 | 0.28 | 0.11 | -1.06 | 0.531863 | 0.483065 | 0.756015 | 0.687687 |
| NC-001345.CDS19.S1_at   | NC-001345.CDS19 | 3.49 | 3.66 | 0.15 | 0.07 | -1.12 | 0.172712 | 0.265152 | 0.46677  | 0.531078 |
| NC-001345.CDS20.S1_at   | NC-001345.CDS20 | 4.36 | 4.25 | 0.11 | 0.09 | 1.07  | 0.502315 | 0.721023 | 0.735998 | 0.838471 |
| NC-001345.CDS21.S1_at   | NC-001345.CDS21 | 5.8  | 5.77 | 0.06 | 0.15 | 1.02  | 0.993571 | 0.925263 | 0.997413 | 0.957727 |
| NC-001345.CDS22.S1_at   | NC-001345.CDS22 | 4.59 | 4.66 | 0.24 | 0.14 | -1.05 | 0.461601 | 0.445781 | 0.709005 | 0.662505 |
| NC-001345.CDS23.S1_at   | NC-001345.CDS23 | 6.26 | 6.15 | 0.26 | 0.09 | 1.08  | 0.811694 | 0.119405 | 0.915692 | 0.387903 |
| NC-001345.CDS24.S1_at   | NC-001345.CDS24 | 3.79 | 3.68 | 0.19 | 0.13 | 1.08  | 0.970121 | 0.606986 | 0.988151 | 0.766178 |
| NC-001345.CDS25.S1_at   | NC-001345.CDS25 | 2.92 | 3.1  | 0.1  | 0.22 | -1.13 | 0.43881  | 0.515781 | 0.693335 | 0.708485 |
| NC-001345.CDS26.S1_at   | NC-001345.CDS26 | 6.66 | 6.65 | 0.06 | 0.08 | 1.01  | 0.720041 | 0.159731 | 0.867914 | 0.43585  |
| NC-001345.CDS27.S1_at   | NC-001345.CDS27 | 3.92 | 3.91 | 0.18 | 0.11 | 1.01  | 0.457036 | 0.551551 | 0.706061 | 0.731027 |
| NC-001345.CDS28.S1_at   | NC-001345.CDS28 | 4.75 | 4.64 | 0.2  | 0.02 | 1.08  | 0.448293 | 0.124414 | 0.699953 | 0.394857 |
| NC-001345.CDS29.S1_at   | NC-001345.CDS29 | 6.09 | 6.09 | 0.12 | 0.04 | -1    | 0.89235  | 0.175003 | 0.954155 | 0.451647 |
| NC-001345.CDS30.S1_at   | NC-001345.CDS30 | 6.43 | 6.48 | 0.05 | 0.14 | -1.04 | 0.476062 | 0.288381 | 0.718647 | 0.549656 |
| NC-001345.CDS31.S1_at   | NC-001345.CDS31 | 4.69 | 4.94 | 0.16 | 0.08 | -1.19 | 0.131168 | 0.271488 | 0.413871 | 0.536512 |
| NC-001345.CDS32.S1_at   | NC-001345.CDS32 | 5.59 | 5.6  | 0.24 | 0.04 | -1.01 | 0.336561 | 0.408834 | 0.617124 | 0.6359   |
| NC-001345.CDS33.S1_at   | NC-001345.CDS33 | 5.87 | 5.93 | 0.06 | 0.1  | -1.04 | 0.447953 | 0.910538 | 0.699731 | 0.949476 |
| NC-001345.CDS34.S1_at   | NC-001345.CDS34 | 5    | 4.76 | 0.08 | 0.26 | 1.18  | 0.213647 | 0.320096 | 0.511594 | 0.572459 |
| NC-001345.CDS35.S1_at   | NC-001345.CDS35 | 5.57 | 5.54 | 0.16 | 0.08 | 1.02  | 0.971209 | 0.141313 | 0.988525 | 0.414874 |
| NC-001345.CDS36.S1_at   | NC-001345.CDS36 | 4.13 | 4.37 | 0.28 | 0.07 | -1.18 | 0.527461 | 0.524701 | 0.753078 | 0.714514 |
| NC-001345.CDS37.S1_at   | NC-001345.CDS37 | 5.17 | 5.17 | 0.01 | 0.02 | 1     | 0.271509 | 0.353344 | 0.563425 | 0.596477 |
| NC-001345.CDS38.S1_at   | NC-001345.CDS38 | 4.54 | 4.63 | 0.17 | 0.05 | -1.07 | 0.261628 | 0.220867 | 0.555806 | 0.494262 |
| NC-001345.CDS39.S1_at   | NC-001345.CDS39 | 5.67 | 5.54 | 0.22 | 0.1  | 1.09  | 0.45181  | 0.248635 | 0.702516 | 0.517917 |
| NC-001345.CDS40.S1_s_at | NC-001345.CDS40 | 4.71 | 4.71 | 0.18 | 0.13 | 1     | 0.823692 | 0.401522 | 0.921674 | 0.631068 |
| NC-001345.CDS41.S1_at   | NC-001345.CDS41 | 4.81 | 4.84 | 0.04 | 0.05 | -1.02 | 0.880354 | 0.747679 | 0.949116 | 0.853234 |
| NC-001345.CDS42.S1_at   | NC-001345.CDS42 | 2.98 | 3.16 | 0.07 | 0.11 | -1.14 | 0.371087 | 0.177989 | 0.643831 | 0.454339 |
| NC-001345.CDS43.S1_at   | NC-001345.CDS43 | 5.17 | 5.15 | 0.16 | 0.03 | 1.01  | 0.48434  | 0.240365 | 0.724218 | 0.510952 |
| NC-001345.CDS44.S1_at   | NC-001345.CDS44 | 4.67 | 4.59 | 0.11 | 0.08 | 1.06  | 0.222639 | 0.266255 | 0.520511 | 0.532078 |
| NC-001345.CDS45.S1_at   | NC-001345.CDS45 | 4.29 | 4.3  | 0.09 | 0.08 | -1    | 0.622627 | 0.127724 | 0.813423 | 0.398581 |
| NC-001345.CDS46.S1_at   | NC-001345.CDS46 | 3.74 | 3.91 | 0.24 | 0.12 | -1.12 | 0.34864  | 0.527146 | 0.626581 | 0.715861 |
| NC-001345.CDS47.S1_at   | NC-001345.CDS47 | 5.52 | 5.44 | 0.15 | 0.08 | 1.06  | 0.253178 | 0.243917 | 0.547579 | 0.514069 |
| NC-001345.CDS48.S1_at   | NC-001345.CDS48 | 4.58 | 4.58 | 0.08 | 0.03 | 1     | 0.266463 | 0.76244  | 0.558813 | 0.861818 |
| NC-001345.CDS49.S1_at   | NC-001345.CDS49 | 5.43 | 5.56 | 0.12 | 0.08 | -1.09 | 0.107852 | 0.073594 | 0.382472 | 0.316945 |
| NC-001345.CDS51.S1_at   | NC-001345.CDS51 | 4.28 | 4.45 | 0.14 | 0.18 | -1.13 | 0.283022 | 0.509504 | 0.573538 | 0.704233 |



|                         |                 |      |      |      |      |       |          |          |          |          |
|-------------------------|-----------------|------|------|------|------|-------|----------|----------|----------|----------|
| NC-001345.CDS52.S1_at   | NC-001345.CDS52 | 3.25 | 3.24 | 0.09 | 0.1  | 1.01  | 0.914305 | 0.411754 | 0.963616 | 0.638434 |
| NC-001345.CDS53.S1_at   | NC-001345.CDS53 | 4.82 | 4.75 | 0.11 | 0.1  | 1.05  | 0.423913 | 0.090377 | 0.681782 | 0.344827 |
| NC-001345.CDS54.S1_at   | NC-001345.CDS54 | 3.71 | 3.58 | 0.14 | 0.11 | 1.09  | 0.237154 | 0.103293 | 0.534591 | 0.364143 |
| NC-001345.CDS55.S1_at   | NC-001345.CDS55 | 4.03 | 3.98 | 0.03 | 0.04 | 1.04  | 0.11625  | 0.593763 | 0.393341 | 0.758418 |
| NC-001345.CDS56.S1_at   | NC-001345.CDS56 | 5.63 | 5.63 | 0.05 | 0.07 | -1    | 0.966591 | 0.972845 | 0.986533 | 0.985352 |
| NC-001345.CDS57.S1_at   | NC-001345.CDS57 | 6.1  | 6.1  | 0.09 | 0.02 | 1     | 0.823129 | 0.275878 | 0.921375 | 0.540035 |
| NC-001345.CDS58.S1_at   | NC-001345.CDS58 | 5.71 | 5.7  | 0.08 | 0.16 | 1     | 0.583739 | 0.165669 | 0.788335 | 0.441925 |
| NC-001345.CDS59.S1_at   | NC-001345.CDS59 | 4.45 | 4.44 | 0.21 | 0.13 | 1     | 0.427457 | 0.585385 | 0.684773 | 0.752844 |
| NC-001345.CDS60.S1_at   | NC-001345.CDS60 | 3.27 | 3.38 | 0.21 | 0.02 | -1.08 | 0.366213 | 0.431497 | 0.640626 | 0.652415 |
| NC-001345.CDS61.S1_at   | NC-001345.CDS61 | 5.32 | 5.52 | 0.34 | 0.05 | -1.15 | 0.953933 | 0.268501 | 0.981106 | 0.534123 |
| NC-001345.CDS62.S1_at   | NC-001345.CDS62 | 4.14 | 4.11 | 0.25 | 0.17 | 1.02  | 0.515738 | 0.192179 | 0.745426 | 0.467651 |
| NC-001345.CDS63.S1_at   | NC-001345.CDS63 | 4.81 | 4.65 | 0.17 | 0.23 | 1.12  | 0.285349 | 0.287057 | 0.575167 | 0.548359 |
| NC-001345.CDS64.S1_at   | NC-001345.CDS64 | 3.86 | 3.89 | 0.09 | 0.05 | -1.03 | 0.848425 | 0.310357 | 0.933992 | 0.565552 |
| NC-001345.CDS65.S1_at   | NC-001345.CDS65 | 2.71 | 2.71 | 0.05 | 0    | 1     | 0.373901 | 0.421875 | 0.645118 | 0.645369 |
| NC-001345.CDS65.S1_s_at | NC-001345.CDS65 | 4.08 | 4.09 | 0.09 | 0.03 | -1    | 0.718838 | 0.278076 | 0.867276 | 0.541754 |
| NC-001345.CDS66.S1_at   | NC-001345.CDS66 | 5.85 | 5.73 | 0.09 | 0.11 | 1.09  | 0.614874 | 0.303741 | 0.808549 | 0.561148 |
| NC-001345.CDS67.S1_at   | NC-001345.CDS67 | 4.58 | 4.65 | 0.11 | 0.07 | -1.05 | 0.685093 | 0.403959 | 0.849935 | 0.63254  |
| NC-001345.CDS68.S1_at   | NC-001345.CDS68 | 5.6  | 5.6  | 0.14 | 0.03 | -1    | 0.695508 | 0.873521 | 0.854867 | 0.928102 |
| NC-001345.CDS69.S1_at   | NC-001345.CDS69 | 4.74 | 4.84 | 0.14 | 0.24 | -1.07 | 0.729417 | 0.088057 | 0.873618 | 0.341547 |
| NC-001345.CDS70.S1_at   | NC-001345.CDS70 | 4.07 | 4.05 | 0.06 | 0.18 | 1.01  | 0.714295 | 0.415252 | 0.865055 | 0.640769 |
| NC-001345.CDS71.S1_at   | NC-001345.CDS71 | 4.51 | 4.5  | 0.24 | 0.09 | 1.01  | 0.429898 | 0.217878 | 0.686234 | 0.491408 |
| NC-001345.CDS72.S1_at   | NC-001345.CDS72 | 5.92 | 5.89 | 0.25 | 0.06 | 1.02  | 0.921018 | 0.259892 | 0.966268 | 0.526748 |
| NC-001345.CDS73.S1_at   | NC-001345.CDS73 | 3.79 | 3.85 | 0.04 | 0.1  | -1.04 | 0.99613  | 0.020063 | 0.99851  | 0.177928 |
| NC-001345.CDS74.S1_at   | NC-001345.CDS74 | 4.95 | 4.81 | 0.07 | 0.06 | 1.1   | 0.066954 | 0.388455 | 0.316426 | 0.622858 |
| NC-001345.CDS75.S1_at   | NC-001345.CDS75 | 4.01 | 4.02 | 0.03 | 0.11 | -1.01 | 0.381305 | 0.488281 | 0.650899 | 0.691036 |
| NC-001345.CDS76.S1_at   | NC-001345.CDS76 | 3.75 | 3.68 | 0.15 | 0.06 | 1.05  | 0.630446 | 0.667483 | 0.818647 | 0.805333 |
| NC-001345.CDS77.S1_at   | NC-001345.CDS77 | 4.21 | 4.17 | 0.25 | 0.02 | 1.03  | 0.27787  | 0.43175  | 0.569319 | 0.652537 |
| NC-001345.CDS78.S1_at   | NC-001345.CDS78 | 5.19 | 5.18 | 0.04 | 0.03 | 1     | 0.765514 | 0.175265 | 0.892486 | 0.452059 |
| NC-001345.CDS79.S1_at   | NC-001345.CDS79 | 6.63 | 6.69 | 0.17 | 0.05 | -1.04 | 0.785196 | 0.162634 | 0.902006 | 0.438724 |
| NC-001345.CDS80.S1_at   | NC-001345.CDS80 | 5.77 | 5.76 | 0.2  | 0    | 1.01  | 0.451955 | 0.539177 | 0.702661 | 0.723588 |
| NC-001345.CDS81.S1_s_at | NC-001345.CDS81 | 6.26 | 6.21 | 0.34 | 0.06 | 1.03  | 0.532418 | 0.653892 | 0.756478 | 0.797692 |
| NC-001345.CDS83.S1_at   | NC-001345.CDS83 | 4.34 | 4.28 | 0.06 | 0.09 | 1.04  | 0.812764 | 0.257888 | 0.916222 | 0.525467 |
| NC-001345.CDS84.S1_at   | NC-001345.CDS84 | 3.75 | 3.79 | 0.27 | 0.15 | -1.03 | 0.551006 | 0.734008 | 0.768225 | 0.845896 |
| NC-001345.CDS85.S1_at   | NC-001345.CDS85 | 5.06 | 5.11 | 0.04 | 0.17 | -1.04 | 0.225776 | 0.477771 | 0.523482 | 0.683777 |
| NC-001345.CDS86.S1_at   | NC-001345.CDS86 | 6.1  | 6.1  | 0.16 | 0.02 | -1    | 0.322124 | 0.327728 | 0.606295 | 0.577549 |
| NC-001345.CDS87.S1_at   | NC-001345.CDS87 | 4.04 | 4.08 | 0.12 | 0.03 | -1.02 | 0.245582 | 0.266931 | 0.541637 | 0.532473 |
| NC-001345.CDS88.S1_at   | NC-001345.CDS88 | 5.52 | 5.53 | 0.1  | 0.08 | -1.01 | 0.609081 | 0.372716 | 0.804954 | 0.611661 |
| NC-001345.CDS89.S1_at   | NC-001345.CDS89 | 5.66 | 5.54 | 0.06 | 0.11 | 1.09  | 0.313829 | 0.129022 | 0.599699 | 0.400513 |
| NC-001345.CDS90.S1_at   | NC-001345.CDS90 | 4.6  | 4.28 | 0.08 | 0.16 | 1.25  | 0.061309 | 0.080659 | 0.304356 | 0.328444 |
| NC-001345.CDS91.S1_at   | NC-001345.CDS91 | 4.8  | 4.74 | 0.08 | 0.09 | 1.04  | 0.438137 | 0.081988 | 0.692786 | 0.330661 |
| NC-001345.CDS92.S1_at   | NC-001345.CDS92 | 6.39 | 6.3  | 0.12 | 0.05 | 1.06  | 0.620535 | 0.650748 | 0.811995 | 0.795801 |
| NC-001345.CDS93.S1_at   | NC-001345.CDS93 | 4.99 | 4.87 | 0    | 0.14 | 1.08  | 0.198825 | 0.069242 | 0.49596  | 0.309436 |
| NC-001345.CDS94.S1_at   | NC-001345.CDS94 | 4.01 | 3.97 | 0.17 | 0.02 | 1.03  | 0.90987  | 0.406513 | 0.961801 | 0.634382 |

|                        |                 |      |      |      |      |       |          |          |          |          |
|------------------------|-----------------|------|------|------|------|-------|----------|----------|----------|----------|
| NC-006150.CDS1.S1_at   | NC-006150.CDS1  | 4.75 | 4.84 | 0.18 | 0.04 | -1.07 | 0.972969 | 0.243058 | 0.9892   | 0.513356 |
| NC-006150.CDS2.S1_s_at | NC-006150.CDS2  | 5.6  | 5.53 | 0.11 | 0.09 | 1.05  | 0.637816 | 0.215927 | 0.822597 | 0.489556 |
| NC-006150.CDS3.S1_at   | NC-006150.CDS3  | 3.91 | 3.98 | 0.11 | 0    | -1.05 | 0.223738 | 0.023998 | 0.521766 | 0.194183 |
| NC-006150.CDS4.S1_at   | NC-006150.CDS4  | 4.7  | 4.86 | 0.14 | 0.11 | -1.11 | 0.149599 | 0.213794 | 0.43857  | 0.487564 |
| NC-006150.CDS5.S1_at   | NC-006150.CDS5  | 6.01 | 5.96 | 0.06 | 0.15 | 1.04  | 0.990506 | 0.295139 | 0.996572 | 0.554551 |
| NC-006150.CDS6.S1_at   | NC-006150.CDS6  | 2.68 | 2.72 | 0.03 | 0.1  | -1.03 | 0.774786 | 0.261978 | 0.897036 | 0.52836  |
| NC-006150.CDS7.S1_at   | NC-006150.CDS7  | 3.45 | 3.26 | 0.12 | 0.03 | 1.14  | 0.193895 | 0.393197 | 0.490511 | 0.626132 |
| NC-006150.CDS8.S1_at   | NC-006150.CDS8  | 3.74 | 3.78 | 0.1  | 0.11 | -1.03 | 0.685532 | 0.306267 | 0.850141 | 0.562907 |
| NC-006150.CDS9.S1_at   | NC-006150.CDS9  | 2.95 | 2.96 | 0.05 | 0.1  | -1.01 | 0.311453 | 0.475309 | 0.597553 | 0.682031 |
| NC-006150.CDS10.S1_at  | NC-006150.CDS10 | 3.36 | 3.49 | 0.12 | 0.07 | -1.09 | 0.134675 | 0.26955  | 0.418553 | 0.534821 |
| NC-006150.CDS11.S1_at  | NC-006150.CDS11 | 5.14 | 4.97 | 0.25 | 0.12 | 1.13  | 0.332199 | 0.339977 | 0.613975 | 0.586486 |
| NC-006150.CDS12.S1_at  | NC-006150.CDS12 | 3.47 | 3.46 | 0.04 | 0.12 | 1     | 0.846497 | 0.973665 | 0.933013 | 0.985648 |
| NC-006150.CDS13.S1_at  | NC-006150.CDS13 | 3.62 | 3.58 | 0.04 | 0.04 | 1.03  | 0.084844 | 0.103848 | 0.34881  | 0.364519 |
| NC-006150.CDS14.S1_at  | NC-006150.CDS14 | 3.77 | 3.83 | 0.09 | 0.1  | -1.05 | 0.77156  | 0.088172 | 0.895305 | 0.341721 |
| NC-006150.CDS15.S1_at  | NC-006150.CDS15 | 5.11 | 4.8  | 0.1  | 0.13 | 1.24  | 0.061991 | 0.128007 | 0.305504 | 0.39898  |
| NC-006150.CDS16.S1_at  | NC-006150.CDS16 | 3.81 | 3.88 | 0.14 | 0.08 | -1.05 | 0.164584 | 0.33226  | 0.457706 | 0.580717 |
| NC-006150.CDS17.S1_at  | NC-006150.CDS17 | 4.06 | 3.99 | 0.1  | 0.06 | 1.05  | 0.769351 | 0.413296 | 0.894198 | 0.639586 |
| NC-006150.CDS18.S1_at  | NC-006150.CDS18 | 4.28 | 4.59 | 0.29 | 0.12 | -1.24 | 0.648284 | 0.809153 | 0.829161 | 0.889995 |
| NC-006150.CDS19.S1_at  | NC-006150.CDS19 | 3.04 | 2.91 | 0.06 | 0.13 | 1.1   | 0.454211 | 0.407921 | 0.704125 | 0.635304 |
| NC-006150.CDS20.S1_at  | NC-006150.CDS20 | 3.67 | 3.69 | 0.03 | 0.19 | -1.02 | 0.599182 | 0.727244 | 0.7979   | 0.84224  |
| NC-006150.CDS21.S1_at  | NC-006150.CDS21 | 2.77 | 2.76 | 0.08 | 0    | 1.01  | 0.53354  | 0.351354 | 0.757063 | 0.595026 |
| NC-006150.CDS22.S1_at  | NC-006150.CDS22 | 3.13 | 3.03 | 0.16 | 0.07 | 1.07  | 0.543553 | 0.134176 | 0.763476 | 0.406421 |
| NC-006150.CDS23.S1_at  | NC-006150.CDS23 | 3.34 | 3.33 | 0.05 | 0.06 | 1.01  | 0.387105 | 0.584675 | 0.655424 | 0.752482 |
| NC-006150.CDS24.S1_at  | NC-006150.CDS24 | 3.46 | 3.5  | 0.02 | 0.03 | -1.03 | 0.093231 | 0.097088 | 0.361736 | 0.354605 |
| NC-006150.CDS25.S1_at  | NC-006150.CDS25 | 3.56 | 3.4  | 0.16 | 0.08 | 1.12  | 0.632393 | 0.342884 | 0.819792 | 0.588712 |
| NC-006150.CDS26.S1_at  | NC-006150.CDS26 | 3.78 | 3.84 | 0.05 | 0    | -1.04 | 0.129672 | 0.120158 | 0.412005 | 0.388915 |
| NC-006150.CDS27.S1_at  | NC-006150.CDS27 | 3.2  | 3.11 | 0    | 0.09 | 1.06  | 0.168893 | 0.169852 | 0.462098 | 0.446544 |
| NC-006150.CDS28.S1_at  | NC-006150.CDS28 | 2.98 | 2.99 | 0.06 | 0.01 | -1    | 0.428539 | 0.136035 | 0.685384 | 0.408363 |
| NC-006150.CDS29.S1_at  | NC-006150.CDS29 | 2.98 | 2.93 | 0.1  | 0    | 1.04  | 0.978404 | 0.998392 | 0.991666 | 0.999091 |
| NC-006150.CDS30.S1_at  | NC-006150.CDS30 | 5.33 | 5.32 | 0.09 | 0    | 1.01  | 0.473472 | 0.249579 | 0.716763 | 0.518645 |
| NC-006150.CDS31.S1_at  | NC-006150.CDS31 | 3.46 | 3.55 | 0.1  | 0.15 | -1.06 | 0.484045 | 0.206708 | 0.723999 | 0.480799 |
| NC-006150.CDS32.S1_at  | NC-006150.CDS32 | 4.17 | 4.35 | 0.08 | 0.06 | -1.13 | 0.033061 | 0.077236 | 0.236091 | 0.322852 |
| NC-006150.CDS33.S1_at  | NC-006150.CDS33 | 3.89 | 3.9  | 0.14 | 0.19 | -1    | 0.512897 | 0.372674 | 0.743326 | 0.611617 |
| NC-006150.CDS34.S1_at  | NC-006150.CDS34 | 5.57 | 5.74 | 0.19 | 0.11 | -1.13 | 0.662001 | 0.131438 | 0.836881 | 0.403584 |
| NC-006150.CDS35.S1_at  | NC-006150.CDS35 | 3.98 | 3.93 | 0.16 | 0.04 | 1.04  | 0.516523 | 0.11175  | 0.745902 | 0.376787 |
| NC-006150.CDS36.S1_at  | NC-006150.CDS36 | 4.37 | 4.37 | 0    | 0.2  | 1     | 0.365764 | 0.621387 | 0.640226 | 0.775982 |
| NC-006150.CDS37.S1_at  | NC-006150.CDS37 | 3.86 | 3.87 | 0.06 | 0.09 | -1    | 0.536522 | 0.605726 | 0.759061 | 0.765429 |
| NC-006150.CDS38.S1_at  | NC-006150.CDS38 | 4.42 | 4.39 | 0.06 | 0.22 | 1.02  | 0.399034 | 0.720404 | 0.664555 | 0.838261 |
| NC-006150.CDS39.S1_at  | NC-006150.CDS39 | 2.87 | 2.97 | 0.06 | 0.11 | -1.07 | 0.406191 | 0.052237 | 0.669555 | 0.274065 |
| NC-006150.CDS40.S1_at  | NC-006150.CDS40 | 3.23 | 3.28 | 0.02 | 0.07 | -1.04 | 0.774482 | 0.03281  | 0.896869 | 0.22427  |
| NC-006150.CDS41.S1_at  | NC-006150.CDS41 | 3.87 | 3.94 | 0.16 | 0.07 | -1.05 | 0.735059 | 0.397507 | 0.876681 | 0.628923 |
| NC-006150.CDS42.S1_at  | NC-006150.CDS42 | 4.84 | 4.75 | 0.14 | 0.13 | 1.06  | 0.328632 | 0.723797 | 0.610955 | 0.840126 |
| NC-006150.CDS43.S1_at  | NC-006150.CDS43 | 3.62 | 3.63 | 0.13 | 0.12 | -1.01 | 0.42373  | 0.259466 | 0.681694 | 0.526418 |

|                         |                 |      |      |      |      |       |          |          |          |          |
|-------------------------|-----------------|------|------|------|------|-------|----------|----------|----------|----------|
| NC-006150.CDS44.S1_at   | NC-006150.CDS44 | 4.3  | 4.22 | 0.01 | 0.05 | 1.05  | 0.17039  | 0.016278 | 0.46404  | 0.161661 |
| NC-006150.CDS45.S1_at   | NC-006150.CDS45 | 3.59 | 3.5  | 0.07 | 0.1  | 1.06  | 0.391415 | 0.039964 | 0.658671 | 0.245076 |
| NC-006150.CDS46.S1_at   | NC-006150.CDS46 | 3.41 | 3.29 | 0.09 | 0.17 | 1.08  | 0.56967  | 0.663721 | 0.779023 | 0.803122 |
| NC-006150.CDS47.S1_at   | NC-006150.CDS47 | 5.26 | 5.42 | 0.09 | 0.01 | -1.12 | 0.139296 | 0.089871 | 0.424942 | 0.344073 |
| NC-006150.CDS48.S1_at   | NC-006150.CDS48 | 3.87 | 3.88 | 0.06 | 0.09 | -1.01 | 0.810602 | 0.953186 | 0.915155 | 0.973457 |
| NC-006150.CDS49.S1_at   | NC-006150.CDS49 | 3.82 | 3.95 | 0.08 | 0.01 | -1.09 | 0.098759 | 0.195127 | 0.369673 | 0.470241 |
| NC-006150.CDS50.S1_at   | NC-006150.CDS50 | 4.37 | 4.39 | 0.15 | 0.15 | -1.01 | 0.587839 | 0.092501 | 0.790683 | 0.348445 |
| NC-006150.CDS51.S1_s_at | NC-006150.CDS51 | 4.46 | 4.51 | 0.08 | 0.08 | -1.04 | 0.169191 | 0.312167 | 0.462429 | 0.566915 |
| NC-006150.CDS52.S1_at   | NC-006150.CDS52 | 3.35 | 3.26 | 0.14 | 0.12 | 1.06  | 0.84907  | 0.18684  | 0.934271 | 0.462703 |
| NC-006150.CDS53.S1_at   | NC-006150.CDS53 | 4.74 | 4.71 | 0.05 | 0.03 | 1.02  | 0.390273 | 0.655684 | 0.657953 | 0.7987   |
| NC-006150.CDS54.S1_at   | NC-006150.CDS54 | 2.75 | 2.74 | 0.04 | 0.1  | 1.01  | 0.42354  | 0.160974 | 0.681488 | 0.437116 |
| NC-006150.CDS55.S1_at   | NC-006150.CDS55 | 4.29 | 4.32 | 0.04 | 0.14 | -1.02 | 0.844904 | 0.727633 | 0.932176 | 0.842488 |
| NC-006150.CDS56.S1_at   | NC-006150.CDS56 | 2.93 | 2.99 | 0.02 | 0.13 | -1.04 | 0.96234  | 0.483306 | 0.984644 | 0.687887 |
| NC-006150.CDS57.S1_at   | NC-006150.CDS57 | 4.69 | 4.86 | 0.05 | 0.02 | -1.13 | 0.006022 | 0.018551 | 0.124151 | 0.171365 |
| NC-006150.CDS58.S1_s_at | NC-006150.CDS58 | 4.9  | 4.89 | 0.06 | 0.12 | 1     | 0.606921 | 0.627899 | 0.803387 | 0.780849 |
| NC-006150.CDS59.S1_at   | NC-006150.CDS59 | 4.37 | 4.32 | 0    | 0.06 | 1.03  | 0.24412  | 0.052322 | 0.540834 | 0.274201 |
| NC-006150.CDS60.S1_at   | NC-006150.CDS60 | 4.29 | 4.36 | 0.26 | 0.09 | -1.05 | 0.71584  | 0.654418 | 0.86593  | 0.798021 |
| NC-006150.CDS61.S1_at   | NC-006150.CDS61 | 3.53 | 3.52 | 0.09 | 0.03 | 1     | 0.334299 | 0.257081 | 0.615458 | 0.524783 |
| NC-006150.CDS62.S1_at   | NC-006150.CDS62 | 3.68 | 3.78 | 0.08 | 0.07 | -1.08 | 0.100985 | 0.140661 | 0.372286 | 0.413964 |
| NC-006150.CDS63.S1_at   | NC-006150.CDS63 | 3.9  | 4    | 0.05 | 0    | -1.07 | 0.116854 | 0.278931 | 0.393878 | 0.542661 |
| NC-006150.CDS64.S1_at   | NC-006150.CDS64 | 4.64 | 4.71 | 0.04 | 0.13 | -1.05 | 0.308504 | 0.48724  | 0.595071 | 0.690358 |
| NC-006150.CDS65.S1_at   | NC-006150.CDS65 | 4.69 | 4.75 | 0.04 | 0.01 | -1.04 | 0.05781  | 0.042607 | 0.297576 | 0.251035 |
| NC-006150.CDS66.S1_at   | NC-006150.CDS66 | 5.34 | 5.5  | 0.18 | 0.09 | -1.12 | 0.346639 | 0.122978 | 0.625    | 0.392923 |
| NC-006150.CDS67.S1_at   | NC-006150.CDS67 | 4.08 | 4.21 | 0.04 | 0.14 | -1.1  | 0.170699 | 0.248    | 0.464413 | 0.517487 |
| NC-006150.CDS68.S1_at   | NC-006150.CDS68 | 3.81 | 3.86 | 0.27 | 0.11 | -1.03 | 0.674375 | 0.715509 | 0.844507 | 0.83509  |
| NC-006150.CDS69.S1_at   | NC-006150.CDS69 | 3.84 | 3.86 | 0.03 | 0.07 | -1.01 | 0.782385 | 0.021984 | 0.900675 | 0.185566 |
| NC-006150.CDS70.S1_at   | NC-006150.CDS70 | 3.64 | 3.68 | 0.09 | 0.05 | -1.02 | 0.216473 | 0.157204 | 0.51426  | 0.432684 |
| NC-006150.CDS71.S1_at   | NC-006150.CDS71 | 3.68 | 3.67 | 0.22 | 0.07 | 1.01  | 0.6117   | 0.255016 | 0.806482 | 0.52317  |
| NC-006150.CDS72.S1_at   | NC-006150.CDS72 | 3.89 | 3.78 | 0.1  | 0.08 | 1.08  | 0.309376 | 0.080952 | 0.595819 | 0.328993 |
| NC-006150.CDS73.S1_at   | NC-006150.CDS73 | 3.66 | 3.67 | 0.18 | 0.15 | -1.01 | 0.486075 | 0.784619 | 0.725497 | 0.875303 |
| NC-006150.CDS74.S1_at   | NC-006150.CDS74 | 4.76 | 4.56 | 0.07 | 0.14 | 1.15  | 0.4108   | 0.12216  | 0.672767 | 0.391819 |
| NC-006150.CDS75.S1_at   | NC-006150.CDS75 | 4.2  | 4.2  | 0.1  | 0.01 | 1     | 0.314    | 0.529747 | 0.59974  | 0.717498 |
| NC-006150.CDS76.S1_at   | NC-006150.CDS76 | 5.17 | 5.08 | 0.07 | 0.1  | 1.07  | 0.199481 | 0.517019 | 0.496847 | 0.709375 |
| NC-006150.CDS77.S1_at   | NC-006150.CDS77 | 5.48 | 5.55 | 0.16 | 0.09 | -1.04 | 0.285865 | 0.178944 | 0.575682 | 0.455243 |
| NC-006150.CDS78.S1_at   | NC-006150.CDS78 | 3.03 | 2.88 | 0.03 | 0.18 | 1.11  | 0.794545 | 0.216295 | 0.907212 | 0.489844 |
| NC-006150.CDS79.S1_at   | NC-006150.CDS79 | 5.33 | 5.35 | 0.11 | 0.15 | -1.01 | 0.745274 | 0.010192 | 0.881818 | 0.132348 |
| NC-006150.CDS80.S1_at   | NC-006150.CDS80 | 4.5  | 4.54 | 0.05 | 0.12 | -1.03 | 0.780539 | 0.415996 | 0.899882 | 0.641323 |
| NC-006150.CDS81.S1_at   | NC-006150.CDS81 | 4.26 | 4.26 | 0.15 | 0    | -1    | 0.979549 | 0.56663  | 0.992184 | 0.740707 |
| NC-006150.CDS82.S1_at   | NC-006150.CDS82 | 3.79 | 3.8  | 0.14 | 0.05 | -1.01 | 0.31175  | 0.132741 | 0.597884 | 0.404544 |
| NC-006150.CDS83.S1_at   | NC-006150.CDS83 | 4.75 | 4.75 | 0.01 | 0.07 | 1     | 0.697641 | 0.712445 | 0.856021 | 0.833371 |
| NC-006150.CDS84.S1_at   | NC-006150.CDS84 | 3.66 | 3.79 | 0.11 | 0.12 | -1.09 | 0.573577 | 0.717521 | 0.781176 | 0.836463 |
| NC-006150.CDS85.S1_at   | NC-006150.CDS85 | 3.81 | 3.79 | 0.06 | 0.09 | 1.01  | 0.355885 | 0.539498 | 0.632435 | 0.723763 |
| NC-006150.CDS86.S1_at   | NC-006150.CDS86 | 3.17 | 3.15 | 0.09 | 0    | 1.01  | 0.950454 | 0.66616  | 0.97944  | 0.804415 |

|                          |                  |      |      |      |      |       |          |          |          |          |
|--------------------------|------------------|------|------|------|------|-------|----------|----------|----------|----------|
| NC-006150.CDS87.S1_at    | NC-006150.CDS87  | 3.9  | 3.84 | 0.1  | 0.22 | 1.04  | 0.987215 | 0.700587 | 0.995376 | 0.826284 |
| NC-006150.CDS88.S1_at    | NC-006150.CDS88  | 3.31 | 3.51 | 0.11 | 0.07 | -1.15 | 0.072761 | 0.239769 | 0.327658 | 0.510505 |
| NC-006150.CDS89.S1_at    | NC-006150.CDS89  | 3.52 | 3.53 | 0.06 | 0.03 | -1    | 0.482494 | 0.87904  | 0.722845 | 0.930992 |
| NC-006150.CDS90.S1_at    | NC-006150.CDS90  | 3.51 | 3.46 | 0.07 | 0.04 | 1.04  | 0.421665 | 0.004898 | 0.680117 | 0.097632 |
| NC-006150.CDS91.S1_at    | NC-006150.CDS91  | 5.23 | 5.06 | 0.04 | 0.16 | 1.12  | 0.567173 | 0.254977 | 0.777704 | 0.52317  |
| NC-006150.CDS92.S1_at    | NC-006150.CDS92  | 4.77 | 4.87 | 0.09 | 0    | -1.08 | 0.129137 | 0.048257 | 0.411506 | 0.264727 |
| NC-006150.CDS93.S1_at    | NC-006150.CDS93  | 3.66 | 3.71 | 0.05 | 0.06 | -1.04 | 0.267204 | 0.864733 | 0.559954 | 0.923286 |
| NC-006150.CDS94.S1_at    | NC-006150.CDS94  | 6.75 | 6.97 | 0.24 | 0.02 | -1.17 | 0.531575 | 0.454227 | 0.755832 | 0.668474 |
| NC-006150.CDS95.S1_at    | NC-006150.CDS95  | 6.14 | 6.18 | 0.22 | 0.02 | -1.02 | 0.952084 | 0.556935 | 0.980193 | 0.734847 |
| NC-006150.CDS96.S1_at    | NC-006150.CDS96  | 5.41 | 5.46 | 0.25 | 0.2  | -1.03 | 0.530235 | 0.648971 | 0.754826 | 0.794525 |
| NC-006150.CDS97.S1_at    | NC-006150.CDS97  | 5.3  | 5.28 | 0.1  | 0.12 | 1.01  | 0.265168 | 0.338196 | 0.557962 | 0.58536  |
| NC-006150.CDS98.S1_at    | NC-006150.CDS98  | 5.81 | 5.65 | 0.01 | 0.11 | 1.11  | 0.12466  | 0.096697 | 0.404951 | 0.35417  |
| NC-006150.CDS99.S1_at    | NC-006150.CDS99  | 4.77 | 4.91 | 0.18 | 0.09 | -1.1  | 0.915066 | 0.171518 | 0.963913 | 0.447895 |
| NC-006150.CDS100.S1_at   | NC-006150.CDS100 | 3.35 | 3.13 | 0.13 | 0.13 | 1.17  | 0.528705 | 0.515944 | 0.753764 | 0.708598 |
| NC-006150.CDS101.S1_at   | NC-006150.CDS101 | 3.26 | 3.3  | 0.12 | 0.11 | -1.03 | 0.660349 | 0.450406 | 0.83613  | 0.665643 |
| NC-006150.CDS102.S1_at   | NC-006150.CDS102 | 3.23 | 3.18 | 0.02 | 0.01 | 1.03  | 0.007433 | 0.38665  | 0.134429 | 0.621814 |
| NC-006150.CDS103.S1_at   | NC-006150.CDS103 | 3.44 | 3.37 | 0.06 | 0.02 | 1.05  | 0.121239 | 0.83488  | 0.399906 | 0.905483 |
| NC-006150.CDS104.S1_at   | NC-006150.CDS104 | 6.16 | 6.13 | 0.02 | 0.07 | 1.02  | 0.848607 | 0.215222 | 0.934034 | 0.488977 |
| NC-006150.CDS105.S1_at   | NC-006150.CDS105 | 3.37 | 3.3  | 0.07 | 0.07 | 1.05  | 0.707225 | 0.402212 | 0.861311 | 0.631247 |
| NC-006150.CDS106.S1_at   | NC-006150.CDS106 | 4.9  | 4.94 | 0.17 | 0.17 | -1.02 | 0.348192 | 0.537822 | 0.626326 | 0.722758 |
| NC-006150.CDS107.S1_at   | NC-006150.CDS107 | 4.27 | 4.37 | 0.13 | 0.03 | -1.08 | 0.517681 | 0.588796 | 0.74688  | 0.755149 |
| NC-006150.CDS108.S1_at   | NC-006150.CDS108 | 5.34 | 5.34 | 0.13 | 0.08 | -1    | 0.902582 | 0.892736 | 0.958703 | 0.938818 |
| NC-006150.CDS109.S1_at   | NC-006150.CDS109 | 3.8  | 3.88 | 0.1  | 0.12 | -1.06 | 0.471441 | 0.796394 | 0.715544 | 0.882647 |
| NC-006150.CDS110.S1_at   | NC-006150.CDS110 | 3.93 | 3.89 | 0    | 0.14 | 1.02  | 0.589309 | 0.842999 | 0.79159  | 0.91057  |
| NC-006150.CDS111.S1_at   | NC-006150.CDS111 | 3.41 | 3.65 | 0.19 | 0.23 | -1.18 | 0.116054 | 0.127242 | 0.393069 | 0.397935 |
| NC-006150.CDS112.S1_at   | NC-006150.CDS112 | 4.03 | 3.98 | 0.06 | 0.01 | 1.03  | 0.330801 | 0.657985 | 0.612778 | 0.80013  |
| NC-006150.CDS113.S1_at   | NC-006150.CDS113 | 5.36 | 5.33 | 0.13 | 0.16 | 1.02  | 0.793967 | 0.260463 | 0.906937 | 0.527006 |
| NC-006150.CDS114.S1_at   | NC-006150.CDS114 | 5.76 | 5.75 | 0.16 | 0.16 | 1     | 0.523056 | 0.764452 | 0.750171 | 0.863114 |
| NC-006150.CDS115.S1_at   | NC-006150.CDS115 | 4.48 | 4.63 | 0.06 | 0.09 | -1.11 | 0.067704 | 0.076402 | 0.318062 | 0.321372 |
| NC-006150.CDS116.S1_at   | NC-006150.CDS116 | 3.59 | 3.62 | 0.03 | 0.09 | -1.02 | 0.220474 | 0.565432 | 0.518178 | 0.739886 |
| NC-006150.CDS117.S1_at   | NC-006150.CDS117 | 4.79 | 4.71 | 0.1  | 0.19 | 1.05  | 0.452246 | 0.691713 | 0.702807 | 0.820652 |
| NC-006150.CDS118.S1_at   | NC-006150.CDS118 | 4.29 | 4.34 | 0.18 | 0.16 | -1.04 | 0.342717 | 0.375094 | 0.622453 | 0.613186 |
| NC-006150.CDS119.S1_s_at | NC-006150.CDS119 | 3.82 | 3.95 | 0.27 | 0.01 | -1.1  | 0.885319 | 0.341249 | 0.951028 | 0.587344 |
| NC-006150.CDS120.S1_at   | NC-006150.CDS120 | 5.42 | 5.38 | 0.16 | 0.04 | 1.03  | 0.650696 | 0.423898 | 0.830313 | 0.646571 |
| NC-006150.CDS121.S1_at   | NC-006150.CDS121 | 4.81 | 4.81 | 0.09 | 0.03 | -1    | 0.568053 | 0.020803 | 0.778103 | 0.180908 |
| NC-006150.CDS122.S1_at   | NC-006150.CDS122 | 4.81 | 4.75 | 0.11 | 0.12 | 1.04  | 0.86773  | 0.890831 | 0.942992 | 0.937722 |
| NC-006150.CDS123.S1_at   | NC-006150.CDS123 | 3.7  | 3.81 | 0.09 | 0.1  | -1.08 | 0.107508 | 0.198724 | 0.382242 | 0.473391 |
| NC-006150.CDS124.S1_at   | NC-006150.CDS124 | 3.96 | 4.04 | 0.15 | 0.21 | -1.06 | 0.738289 | 0.909124 | 0.87869  | 0.948563 |
| NC-006150.CDS125.S1_at   | NC-006150.CDS125 | 4.7  | 4.54 | 0.13 | 0.16 | 1.12  | 0.711131 | 0.6036   | 0.863578 | 0.764204 |
| NC-006150.CDS126.S1_at   | NC-006150.CDS126 | 3.66 | 3.5  | 0.13 | 0.24 | 1.11  | 0.416142 | 0.625468 | 0.676628 | 0.779182 |
| NC-006150.CDS127.S1_at   | NC-006150.CDS127 | 3.46 | 3.52 | 0.01 | 0.13 | -1.05 | 0.825382 | 0.982463 | 0.922432 | 0.99036  |
| NC-006150.CDS128.S1_at   | NC-006150.CDS128 | 4.63 | 4.68 | 0.06 | 0.06 | -1.03 | 0.910361 | 0.011851 | 0.961986 | 0.140973 |
| NC-006150.CDS129.S1_at   | NC-006150.CDS129 | 3.85 | 3.85 | 0.08 | 0.07 | -1    | 0.458968 | 0.788927 | 0.707304 | 0.878011 |

|                          |                  |      |      |      |      |       |          |          |          |          |
|--------------------------|------------------|------|------|------|------|-------|----------|----------|----------|----------|
| NC-006150.CDS130.S1_at   | NC-006150.CDS130 | 5.29 | 5.25 | 0.1  | 0.02 | 1.03  | 0.851473 | 0.355163 | 0.935336 | 0.597552 |
| NC-006150.CDS131.S1_at   | NC-006150.CDS131 | 5.04 | 4.96 | 0.16 | 0.39 | 1.06  | 0.786749 | 0.91586  | 0.902743 | 0.952836 |
| NC-006150.CDS132.S1_at   | NC-006150.CDS132 | 5.51 | 5.57 | 0.06 | 0.07 | -1.04 | 0.790021 | 0.298661 | 0.90449  | 0.557252 |
| NC-006150.CDS133.S1_at   | NC-006150.CDS133 | 3.84 | 3.83 | 0.14 | 0.03 | 1     | 0.363646 | 0.307357 | 0.638272 | 0.563634 |
| NC-006150.CDS134.S1_at   | NC-006150.CDS134 | 4.3  | 4.33 | 0.21 | 0.08 | -1.02 | 0.70968  | 0.332795 | 0.86264  | 0.58121  |
| NC-006150.CDS135.S1_at   | NC-006150.CDS135 | 3.22 | 3.28 | 0.04 | 0.01 | -1.04 | 0.090549 | 0.114061 | 0.357339 | 0.380421 |
| NC-006150.CDS136.S1_at   | NC-006150.CDS136 | 4.78 | 4.85 | 0.04 | 0.15 | -1.05 | 0.172851 | 0.17841  | 0.466926 | 0.454778 |
| NC-006150.CDS137.S1_at   | NC-006150.CDS137 | 3.38 | 3.4  | 0.1  | 0    | -1.01 | 0.688929 | 0.106241 | 0.851438 | 0.368652 |
| NC-006150.CDS138.S1_at   | NC-006150.CDS138 | 3.9  | 3.9  | 0.06 | 0.02 | 1     | 0.622179 | 0.951476 | 0.813079 | 0.972503 |
| NC-006150.CDS139.S1_at   | NC-006150.CDS139 | 4.73 | 4.68 | 0.11 | 0.13 | 1.03  | 0.654753 | 0.554265 | 0.832889 | 0.733111 |
| NC-006150.CDS140.S1_at   | NC-006150.CDS140 | 4.86 | 4.84 | 0.07 | 0.11 | 1.01  | 0.186846 | 0.123332 | 0.48299  | 0.393386 |
| NC-006150.CDS141.S1_at   | NC-006150.CDS141 | 4.23 | 4.23 | 0.08 | 0.09 | 1     | 0.230264 | 0.621932 | 0.529095 | 0.776497 |
| NC-006150.CDS142.S1_at   | NC-006150.CDS142 | 5.16 | 5.19 | 0.03 | 0.1  | -1.02 | 0.410318 | 0.390141 | 0.672397 | 0.624002 |
| NC-006150.CDS143.S1_at   | NC-006150.CDS143 | 3.4  | 3.55 | 0.17 | 0.05 | -1.11 | 0.192881 | 0.094142 | 0.489424 | 0.350851 |
| NC-006150.CDS144.S1_at   | NC-006150.CDS144 | 3.2  | 3.08 | 0.1  | 0.13 | 1.08  | 0.419811 | 0.620643 | 0.679047 | 0.775525 |
| NC-006150.CDS145.S1_s_at | NC-006150.CDS145 | 7.25 | 7.31 | 0.11 | 0.05 | -1.04 | 0.363046 | 0.698472 | 0.637748 | 0.82482  |
| NC-006150.CDS146.S1_at   | NC-006150.CDS146 | 4.96 | 5    | 0.05 | 0.02 | -1.03 | 0.428507 | 0.139844 | 0.685384 | 0.413131 |
| NC-006150.CDS147.S1_at   | NC-006150.CDS147 | 4    | 4.02 | 0.04 | 0.08 | -1.02 | 0.960214 | 0.798937 | 0.983678 | 0.884205 |
| NC-006150.CDS148.S1_at   | NC-006150.CDS148 | 3.36 | 3.32 | 0.1  | 0.06 | 1.03  | 0.581632 | 0.450388 | 0.786737 | 0.665643 |
| NC-006150.CDS149.S1_s_at | NC-006150.CDS149 | 3.9  | 3.78 | 0.16 | 0.13 | 1.08  | 0.441193 | 0.281345 | 0.694766 | 0.544391 |
| NC-006150.CDS150.S1_at   | NC-006150.CDS150 | 2.78 | 2.87 | 0.09 | 0.05 | -1.06 | 0.124341 | 0.149355 | 0.404459 | 0.423811 |
| NC-006150.CDS151.S1_at   | NC-006150.CDS151 | 4.69 | 4.88 | 0.06 | 0.28 | -1.14 | 0.735246 | 0.231284 | 0.876788 | 0.502954 |
| NC-006150.CDS152.S1_at   | NC-006150.CDS152 | 3.96 | 3.86 | 0.18 | 0.05 | 1.07  | 0.43093  | 0.162135 | 0.687194 | 0.438282 |
| NC-006150.CDS153.S1_at   | NC-006150.CDS153 | 3.91 | 3.82 | 0.18 | 0.25 | 1.06  | 0.812295 | 0.765534 | 0.916037 | 0.863726 |
| NC-006150.CDS154.S1_at   | NC-006150.CDS154 | 4.2  | 3.93 | 0.02 | 0.13 | 1.21  | 0.060996 | 0.143142 | 0.303917 | 0.417029 |
| NC-006150.CDS155.S1_at   | NC-006150.CDS155 | 3.02 | 2.99 | 0.08 | 0.14 | 1.02  | 0.780247 | 0.60041  | 0.89973  | 0.762128 |
| NC-006150.CDS156.S1_at   | NC-006150.CDS156 | 3.29 | 3.29 | 0    | 0.07 | 1.01  | 0.506812 | 0.907378 | 0.739351 | 0.947602 |
| NC-006150.CDS157.S1_at   | NC-006150.CDS157 | 5.44 | 5.46 | 0.2  | 0.14 | -1.02 | 0.292273 | 0.293324 | 0.581586 | 0.553239 |
| NC-006150.CDS158.S1_at   | NC-006150.CDS158 | 4.94 | 4.72 | 0.07 | 0.1  | 1.17  | 0.064386 | 0.063321 | 0.310328 | 0.298315 |
| NC-006150.CDS159.S1_at   | NC-006150.CDS159 | 4.14 | 4.21 | 0.03 | 0.05 | -1.05 | 0.111681 | 0.005821 | 0.38771  | 0.104661 |
| NC-006150.CDS160.S1_at   | NC-006150.CDS160 | 3.99 | 4.14 | 0.11 | 0.11 | -1.12 | 0.172303 | 0.160184 | 0.466519 | 0.436308 |
| NC-006150.CDS161.S1_at   | NC-006150.CDS161 | 4.15 | 4.17 | 0.07 | 0.13 | -1.02 | 0.68382  | 0.798565 | 0.84925  | 0.884032 |
| NC-006150.CDS162.S1_at   | NC-006150.CDS162 | 6.17 | 6.37 | 0.07 | 0.08 | -1.14 | 0.078935 | 0.079996 | 0.338745 | 0.327352 |
| NC-006150.CDS163.S1_at   | NC-006150.CDS163 | 3.34 | 3.42 | 0.07 | 0.16 | -1.06 | 0.929161 | 0.986829 | 0.969943 | 0.992556 |
| NC-006150.CDS164.S1_at   | NC-006150.CDS164 | 4.48 | 4.48 | 0.01 | 0.03 | 1     | 0.546297 | 0.70806  | 0.765166 | 0.83065  |
| NC-006150.CDS165.S1_at   | NC-006150.CDS165 | 5.39 | 5.36 | 0.16 | 0.3  | 1.02  | 0.890421 | 0.977698 | 0.953316 | 0.987864 |
| NC-006150.CDS166.S1_at   | NC-006150.CDS166 | 3.99 | 4.21 | 0.28 | 0    | -1.17 | 0.266059 | 0.054832 | 0.558596 | 0.279675 |
| NC-006150.CDS167.S1_at   | NC-006150.CDS167 | 4.03 | 4    | 0.12 | 0.22 | 1.02  | 0.563925 | 0.602309 | 0.77575  | 0.763318 |
| NC-006150.CDS168.S1_at   | NC-006150.CDS168 | 3.44 | 3.49 | 0.06 | 0.1  | -1.04 | 0.450039 | 0.175748 | 0.701214 | 0.452344 |
| NC-006150.CDS169.S1_at   | NC-006150.CDS169 | 3.24 | 3.31 | 0.11 | 0.09 | -1.05 | 0.172078 | 0.356585 | 0.466127 | 0.598459 |
| NC-006150.CDS170.S1_at   | NC-006150.CDS170 | 4.98 | 4.87 | 0.09 | 0.02 | 1.08  | 0.036426 | 0.246311 | 0.2459   | 0.515889 |
| NC-006150.CDS171.S1_at   | NC-006150.CDS171 | 5.49 | 5.62 | 0.08 | 0.05 | -1.09 | 0.070944 | 0.235888 | 0.324377 | 0.507056 |
| NC-006150.CDS172.S1_at   | NC-006150.CDS172 | 5.22 | 5.26 | 0.21 | 0.02 | -1.02 | 0.892862 | 0.672558 | 0.954368 | 0.808633 |

|                          |                  |      |      |      |      |       |          |          |          |          |
|--------------------------|------------------|------|------|------|------|-------|----------|----------|----------|----------|
| NC-006150.CDS172.S1_s_at | NC-006150.CDS172 | 4.55 | 4.44 | 0.17 | 0.11 | 1.08  | 0.44471  | 0.499609 | 0.697551 | 0.698424 |
| NC-006150.CDS173.S1_at   | NC-006150.CDS173 | 3.39 | 3.4  | 0.12 | 0.13 | -1    | 0.987099 | 0.752751 | 0.995307 | 0.855968 |
| NC-006150.CDS174.S1_at   | NC-006150.CDS174 | 4.72 | 4.7  | 0.07 | 0.18 | 1.01  | 0.472608 | 0.698757 | 0.716214 | 0.824973 |
| NC-006150.CDS175.S1_at   | NC-006150.CDS175 | 5.6  | 5.66 | 0.08 | 0.1  | -1.04 | 0.424771 | 0.334962 | 0.682288 | 0.58275  |
| NC-006150.CDS176.S1_at   | NC-006150.CDS176 | 5.61 | 5.68 | 0.13 | 0.05 | -1.05 | 0.717865 | 0.167251 | 0.866734 | 0.443684 |
| NC-006150.CDS177.S1_at   | NC-006150.CDS177 | 4.6  | 4.57 | 0.1  | 0.22 | 1.02  | 0.759326 | 0.277627 | 0.889659 | 0.541628 |
| NC-006150.CDS178.S1_at   | NC-006150.CDS178 | 4.11 | 4.18 | 0.04 | 0.04 | -1.05 | 0.29506  | 0.74923  | 0.584039 | 0.854266 |
| NC-006150.CDS179.S1_at   | NC-006150.CDS179 | 3.4  | 3.3  | 0.06 | 0.06 | 1.07  | 0.093355 | 0.400216 | 0.361907 | 0.630158 |
| NC-006150.CDS180.S1_at   | NC-006150.CDS180 | 4.99 | 5.07 | 0.07 | 0.03 | -1.05 | 0.270522 | 0.661199 | 0.562706 | 0.801687 |
| NC-006150.CDS181.S1_at   | NC-006150.CDS181 | 2.84 | 2.78 | 0.07 | 0.07 | 1.05  | 0.43274  | 0.072206 | 0.688405 | 0.31474  |
| NC-006150.CDS182.S1_at   | NC-006150.CDS182 | 3.87 | 3.94 | 0.16 | 0.15 | -1.05 | 0.871055 | 0.979977 | 0.944503 | 0.989229 |
| NC-006150.CDS183.S1_at   | NC-006150.CDS183 | 5.22 | 5.21 | 0    | 0.05 | 1.01  | 0.301093 | 0.822608 | 0.589084 | 0.89799  |
| NC-006150.CDS184.S1_at   | NC-006150.CDS184 | 3.57 | 3.57 | 0    | 0    | 1     | 0.909076 | 0.085596 | 0.961465 | 0.337588 |
| NC-006150.CDS185.S1_at   | NC-006150.CDS185 | 4.76 | 4.72 | 0.12 | 0.03 | 1.03  | 0.787345 | 0.156259 | 0.903077 | 0.43161  |
| NC-006150.CDS186.S1_s_at | NC-006150.CDS186 | 4.42 | 4.54 | 0.08 | 0.02 | -1.09 | 0.09937  | 0.04267  | 0.370308 | 0.251037 |
| NC-006150.CDS187.S1_at   | NC-006150.CDS187 | 3.42 | 3.53 | 0.09 | 0.12 | -1.08 | 0.396238 | 0.574974 | 0.662345 | 0.746216 |
| NC-006150.CDS188.S1_at   | NC-006150.CDS188 | 3.01 | 3.01 | 0.08 | 0.04 | 1     | 0.249551 | 0.367654 | 0.544627 | 0.607357 |
| NC-006150.CDS188.S1_s_at | NC-006150.CDS188 | 3.79 | 3.71 | 0.08 | 0.04 | 1.06  | 0.179761 | 0.137513 | 0.474837 | 0.410482 |
| NC-006150.CDS189.S1_at   | NC-006150.CDS189 | 4.28 | 4.32 | 0.4  | 0.08 | -1.03 | 0.551416 | 0.679414 | 0.768449 | 0.812809 |
| NC-006150.CDS190.S1_at   | NC-006150.CDS190 | 2.7  | 2.78 | 0.07 | 0.11 | -1.06 | 0.22815  | 0.169526 | 0.526367 | 0.446167 |
| NC-006150.CDS191.S1_at   | NC-006150.CDS191 | 4.06 | 3.96 | 0.03 | 0    | 1.07  | 0.014597 | 0.128148 | 0.172727 | 0.399148 |
| NC-006150.CDS192.S1_at   | NC-006150.CDS192 | 2.98 | 3.23 | 0.12 | 0.02 | -1.18 | 0.08441  | 0.018115 | 0.347914 | 0.169609 |
| NC-006150.CDS193.S1_at   | NC-006150.CDS193 | 3.79 | 3.65 | 0.12 | 0.14 | 1.1   | 0.563251 | 0.02971  | 0.775375 | 0.214029 |
| NC-006150.CDS194.S1_at   | NC-006150.CDS194 | 3.6  | 3.53 | 0.34 | 0.12 | 1.05  | 0.795979 | 0.565427 | 0.907823 | 0.739886 |
| NC-006150.CDS195.S1_at   | NC-006150.CDS195 | 3.62 | 3.72 | 0.06 | 0.1  | -1.07 | 0.11791  | 0.755286 | 0.395465 | 0.857546 |
| NC-006150.CDS196.S1_at   | NC-006150.CDS196 | 2.91 | 2.91 | 0.07 | 0.05 | 1     | 0.802577 | 0.339913 | 0.911359 | 0.586449 |
| NC-006150.CDS197.S1_at   | NC-006150.CDS197 | 4.59 | 4.6  | 0.05 | 0.18 | -1    | 0.27632  | 0.4632   | 0.567926 | 0.674269 |
| NC-006150.CDS198.S1_at   | NC-006150.CDS198 | 4.74 | 4.74 | 0.08 | 0.11 | -1    | 0.90255  | 0.889056 | 0.958703 | 0.936779 |
| NC-006150.CDS199.S1_at   | NC-006150.CDS199 | 3.03 | 2.92 | 0.13 | 0.1  | 1.07  | 0.85223  | 0.845798 | 0.93578  | 0.912246 |
| NC-006150.CDS200.S1_s_at | NC-006150.CDS200 | 4.69 | 4.6  | 0.02 | 0.1  | 1.06  | 0.213806 | 0.189021 | 0.511664 | 0.464897 |
| NC-006150.CDS201.S1_s_at | NC-006150.CDS201 | 4.45 | 4.46 | 0.11 | 0.06 | -1.01 | 0.614908 | 0.032488 | 0.808554 | 0.223254 |
| NC-006150.CDS202.S1_at   | NC-006150.CDS202 | 3.51 | 3.42 | 0.04 | 0.07 | 1.07  | 0.206605 | 0.424544 | 0.504256 | 0.647141 |
| NC-006150.CDS203.S1_at   | NC-006150.CDS203 | 3.14 | 3.2  | 0.08 | 0.04 | -1.05 | 0.132531 | 0.416399 | 0.415892 | 0.641587 |
| NC-006150.CDS204.S1_at   | NC-006150.CDS204 | 5.74 | 5.32 | 0.17 | 0.15 | 1.34  | 0.094007 | 0.222113 | 0.363011 | 0.495113 |
| NC-006150.CDS205.S1_at   | NC-006150.CDS205 | 5.3  | 5.32 | 0.14 | 0.13 | -1.02 | 0.366906 | 0.434692 | 0.641083 | 0.654756 |
| NC-006150.CDS206.S1_s_at | NC-006150.CDS206 | 5.14 | 5.17 | 0.05 | 0.07 | -1.03 | 0.516507 | 0.052407 | 0.7459   | 0.274414 |
| NC-006150.CDS207.S1_at   | NC-006150.CDS207 | 4.04 | 4.12 | 0.11 | 0.15 | -1.06 | 0.461348 | 0.819546 | 0.708826 | 0.896039 |
| NC-006150.CDS208.S1_at   | NC-006150.CDS208 | 3.82 | 3.85 | 0.14 | 0.12 | -1.02 | 0.369244 | 0.521546 | 0.642795 | 0.712483 |
| NC-006150.CDS209.S1_at   | NC-006150.CDS209 | 4.15 | 4.15 | 0.05 | 0.1  | -1    | 0.934585 | 0.612384 | 0.972575 | 0.770014 |
| NC-006150.CDS210.S1_at   | NC-006150.CDS210 | 3.51 | 3.48 | 0.14 | 0.1  | 1.01  | 0.658882 | 0.602221 | 0.835255 | 0.763226 |
| NC-006150.CDS211.S1_at   | NC-006150.CDS211 | 3.76 | 3.77 | 0.2  | 0.1  | -1.01 | 0.451565 | 0.661712 | 0.702385 | 0.801903 |
| NC-006150.CDS212.S1_at   | NC-006150.CDS212 | 3.69 | 3.68 | 0.15 | 0.13 | 1     | 0.968979 | 0.429302 | 0.987691 | 0.650754 |
| NC-006150.CDS213.S1_at   | NC-006150.CDS213 | 4.24 | 4.24 | 0.22 | 0.15 | 1     | 0.236198 | 0.304933 | 0.533822 | 0.562064 |

|                          |                  |       |       |      |      |       |          |          |          |          |
|--------------------------|------------------|-------|-------|------|------|-------|----------|----------|----------|----------|
| NC-006150.CDS214.S1_at   | NC-006150.CDS214 | 4.43  | 4.19  | 0.13 | 0.04 | 1.18  | 0.044573 | 0.0896   | 0.268287 | 0.343811 |
| NC-006150.CDS215.S1_s_at | NC-006150.CDS215 | 4.52  | 4.58  | 0.06 | 0.02 | -1.04 | 0.379512 | 0.759248 | 0.649328 | 0.860036 |
| NC-006150.CDS216.S1_at   | NC-006150.CDS216 | 3.75  | 3.73  | 0.03 | 0.01 | 1.02  | 0.703812 | 0.097371 | 0.859383 | 0.355074 |
| NC-006150.CDS217.S1_at   | NC-006150.CDS217 | 4.53  | 4.55  | 0.16 | 0.04 | -1.02 | 0.979016 | 0.1164   | 0.992043 | 0.383671 |
| NC-006150.CDS218.S1_at   | NC-006150.CDS218 | 4.7   | 4.63  | 0.01 | 0.01 | 1.05  | 0.002392 | 0.086115 | 0.093383 | 0.338448 |
| NC-006150.CDS219.S1_at   | NC-006150.CDS219 | 3.97  | 4.33  | 0.1  | 0.16 | -1.28 | 0.118325 | 0.154598 | 0.39584  | 0.429489 |
| NC-006150.CDS220.S1_at   | NC-006150.CDS220 | 4.66  | 4.73  | 0.1  | 0.09 | -1.05 | 0.822022 | 0.112174 | 0.920741 | 0.37752  |
| NC-006150.CDS221.S1_at   | NC-006150.CDS221 | 4.94  | 4.85  | 0.01 | 0.1  | 1.06  | 0.258473 | 0.509487 | 0.552539 | 0.704232 |
| NC-006150.CDS222.S1_at   | NC-006150.CDS222 | 4.02  | 3.94  | 0.08 | 0.13 | 1.06  | 0.159067 | 0.392588 | 0.450439 | 0.625813 |
| NC-006150.CDS222.S1_s_at | NC-006150.CDS222 | 3.41  | 3.23  | 0.07 | 0.22 | 1.14  | 0.740254 | 0.902658 | 0.879531 | 0.944707 |
| NC-006150.CDS223.S1_at   | NC-006150.CDS223 | 4.31  | 4.37  | 0.21 | 0.14 | -1.04 | 0.863414 | 0.630665 | 0.940655 | 0.782345 |
| NC-001781.CDS1.S1_at     | NC-001781.CDS1   | 3.52  | 3.39  | 0.16 | 0.06 | 1.09  | 0.130748 | 0.182272 | 0.413299 | 0.458766 |
| NC-001781.CDS2.S1_at     | NC-001781.CDS2   | 3.16  | 3.2   | 0.07 | 0.16 | -1.03 | 0.950117 | 0.766563 | 0.979278 | 0.864391 |
| NC-001781.CDS3.S1_at     | NC-001781.CDS3   | 3.4   | 3.34  | 0.02 | 0.06 | 1.04  | 0.138576 | 0.019901 | 0.424096 | 0.177357 |
| NC-001781.CDS4.S1_at     | NC-001781.CDS4   | 4.69  | 4.52  | 0.07 | 0.07 | 1.13  | 0.184842 | 0.100223 | 0.480961 | 0.359205 |
| NC-001781.CDS5.S1_at     | NC-001781.CDS5   | 3.09  | 3.15  | 0.11 | 0.1  | -1.04 | 0.54479  | 0.600488 | 0.764258 | 0.762128 |
| NC-001781.CDS6.S1_at     | NC-001781.CDS6   | 2.53  | 2.62  | 0.07 | 0.08 | -1.07 | 0.397623 | 0.596727 | 0.663187 | 0.759776 |
| NC-001781.CDS7.S1_at     | NC-001781.CDS7   | 4.13  | 4.19  | 0.41 | 0.11 | -1.04 | 0.943701 | 0.929503 | 0.976335 | 0.959749 |
| NC-001781.CDS8.S1_at     | NC-001781.CDS8   | 3.56  | 3.57  | 0.13 | 0    | -1.01 | 0.335948 | 0.53312  | 0.616626 | 0.719436 |
| NC-001781.CDS9.S1_at     | NC-001781.CDS9   | 3.64  | 3.63  | 0.18 | 0.12 | 1.01  | 0.217796 | 0.366897 | 0.515619 | 0.606566 |
| NC-001781.CDS10.S1_at    | NC-001781.CDS10  | 2.64  | 2.66  | 0.02 | 0.05 | -1.01 | 0.180425 | 0.655444 | 0.475556 | 0.798546 |
| NC-001781.CDS11.S1_at    | NC-001781.CDS11  | 2.58  | 2.69  | 0.04 | 0.12 | -1.08 | 0.15743  | 0.229353 | 0.448074 | 0.501527 |
| NC-004148.CDS1.S1_at     | NC-004148.CDS1   | 4.51  | 4.52  | 0.19 | 0.12 | -1.01 | 0.75848  | 0.116688 | 0.889227 | 0.383864 |
| NC-004148.CDS2.S1_at     | NC-004148.CDS2   | 2.85  | 2.84  | 0.01 | 0.03 | 1.01  | 0.546857 | 0.408342 | 0.765598 | 0.635622 |
| NC-004148.CDS3.S1_at     | NC-004148.CDS3   | 3.38  | 3.45  | 0.08 | 0.04 | -1.05 | 0.718739 | 0.334539 | 0.867276 | 0.582504 |
| NC-004148.CDS4.S1_at     | NC-004148.CDS4   | 4.59  | 4.61  | 0.01 | 0.18 | -1.01 | 0.443497 | 0.420582 | 0.696579 | 0.644279 |
| NC-004148.CDS5.S1_at     | NC-004148.CDS5   | 4.12  | 4.12  | 0.15 | 0.09 | -1.01 | 0.353498 | 0.300932 | 0.630667 | 0.559178 |
| NC-004148.CDS6.S1_at     | NC-004148.CDS6   | 3.38  | 3.45  | 0.05 | 0.15 | -1.05 | 0.597956 | 0.492712 | 0.797048 | 0.693724 |
| NC-004148.CDS7.S1_at     | NC-004148.CDS7   | 2.95  | 2.9   | 0.01 | 0.15 | 1.03  | 0.767351 | 0.061455 | 0.893274 | 0.294706 |
| NC-004148.CDS8.S1_at     | NC-004148.CDS8   | 6.23  | 6.22  | 0.13 | 0.05 | 1.01  | 0.793348 | 0.353172 | 0.906582 | 0.596432 |
| NC-004148.CDS9.S1_at     | NC-004148.CDS9   | 3.31  | 3.29  | 0.44 | 0.19 | 1.01  | 0.932286 | 0.983323 | 0.971546 | 0.990726 |
| Mmu.10692.1.A1_at        | Mmu.10692.1      | 12.67 | 12.49 | 0.11 | 0.04 | 1.13  | 0.088104 | 0.552318 | 0.354244 | 0.731658 |
| Mmu.10692.1.S1_at        | Mmu.10692.1      | 12.34 | 12.09 | 0.08 | 0.04 | 1.19  | 0.022508 | 0.40846  | 0.203286 | 0.635694 |
| MmuSTS.1.1.S1_at         | MmuSTS.1.1       | 3.98  | 3.94  | 0.68 | 0.02 | 1.02  | 0.328204 | 0.222446 | 0.61059  | 0.495516 |
| MmuSTS.10.1.S1_at        | MmuSTS.10.1      | 10    | 9.62  | 0.17 | 0.04 | 1.3   | 0.019532 | 0.067307 | 0.192506 | 0.305414 |
| MmuSTS.100.1.S1_at       | MmuSTS.100.1     | 4.25  | 4.23  | 0.07 | 0.05 | 1.01  | 0.949582 | 0.437316 | 0.978971 | 0.656613 |
| MmuSTS.1000.1.S1_at      | MmuSTS.1000.1    | 10.86 | 10.97 | 0.14 | 0.09 | -1.08 | 0.513844 | 0.877062 | 0.743984 | 0.92994  |
| MmuSTS.1001.1.S1_at      | MmuSTS.1001.1    | 11.8  | 11.86 | 0.18 | 0.04 | -1.04 | 0.844652 | 0.86637  | 0.932048 | 0.923996 |
| MmuSTS.1002.1.S1_at      | MmuSTS.1002.1    | 13.14 | 12.87 | 0.11 | 0.03 | 1.2   | 0.029603 | 0.042488 | 0.225143 | 0.25075  |
| MmuSTS.1003.1.S1_at      | MmuSTS.1003.1    | 9.57  | 9.95  | 0.23 | 0.11 | -1.3  | 0.115792 | 0.309236 | 0.392935 | 0.564807 |
| MmuSTS.1004.1.S1_at      | MmuSTS.1004.1    | 4.02  | 3.86  | 0.3  | 0.05 | 1.11  | 0.350199 | 0.165169 | 0.628033 | 0.441389 |
| MmuSTS.1005.1.S1_at      | MmuSTS.1005.1    | 4.79  | 5.01  | 0.31 | 0.08 | -1.16 | 0.428388 | 0.689041 | 0.685363 | 0.81851  |
| MmuSTS.1006.1.S1_at      | MmuSTS.1006.1    | 11.53 | 11.37 | 0.12 | 0.11 | 1.12  | 0.324564 | 0.272562 | 0.608233 | 0.537323 |

|                       |               |       |       |      |      |       |          |          |          |          |
|-----------------------|---------------|-------|-------|------|------|-------|----------|----------|----------|----------|
| MmuSTS.1007.1.S1_at   | MmuSTS.1007.1 | 10.2  | 9.49  | 0.16 | 0.26 | 1.64  | 0.010727 | 0.041645 | 0.153388 | 0.24887  |
| MmuSTS.1008.1.S1_at   | MmuSTS.1008.1 | 5.76  | 5.94  | 0.74 | 0.04 | -1.13 | 0.67689  | 0.920222 | 0.84582  | 0.95511  |
| MmuSTS.1009.1.S1_at   | MmuSTS.1009.1 | 9.4   | 9.16  | 0.14 | 0.03 | 1.18  | 0.034529 | 0.014141 | 0.24039  | 0.15208  |
| MmuSTS.101.1.S1_at    | MmuSTS.101.1  | 7.71  | 7.86  | 0.79 | 0.01 | -1.11 | 0.758298 | 0.968752 | 0.88913  | 0.982788 |
| MmuSTS.1010.1.S1_at   | MmuSTS.1010.1 | 5.58  | 5.53  | 0.05 | 0.07 | 1.03  | 0.300598 | 0.004223 | 0.588799 | 0.091422 |
| MmuSTS.1011.1.S1_at   | MmuSTS.1011.1 | 5.49  | 5.32  | 0.2  | 0.16 | 1.12  | 0.882191 | 0.086558 | 0.949895 | 0.33911  |
| MmuSTS.1012.1.S1_at   | MmuSTS.1012.1 | 9.96  | 9.92  | 0.1  | 0.12 | 1.03  | 0.768395 | 0.088035 | 0.893594 | 0.341547 |
| MmuSTS.1013.1.S1_at   | MmuSTS.1013.1 | 6.01  | 6.25  | 0.4  | 0.27 | -1.18 | 0.664481 | 0.787531 | 0.838493 | 0.877072 |
| MmuSTS.1014.1.S1_at   | MmuSTS.1014.1 | 4.55  | 4.54  | 0.1  | 0.17 | 1.01  | 0.611134 | 0.791298 | 0.806132 | 0.879433 |
| MmuSTS.1015.1.S1_s_at | MmuSTS.1015.1 | 3.04  | 3.1   | 0.03 | 0.07 | -1.04 | 0.165402 | 0.292855 | 0.458328 | 0.552837 |
| MmuSTS.1016.1.S1_at   | MmuSTS.1016.1 | 10.56 | 10.78 | 0.02 | 0.09 | -1.17 | 0.027435 | 0.69784  | 0.21846  | 0.824445 |
| MmuSTS.1017.1.S1_at   | MmuSTS.1017.1 | 12.83 | 12.78 | 0.03 | 0.17 | 1.04  | 0.59675  | 0.905624 | 0.796023 | 0.946574 |
| MmuSTS.1018.1.S1_at   | MmuSTS.1018.1 | 7.34  | 7.8   | 0.13 | 0.16 | -1.37 | 0.017213 | 0.007462 | 0.184359 | 0.115888 |
| MmuSTS.1019.1.S1_s_at | MmuSTS.1019.1 | 3.92  | 3.96  | 0.07 | 0.28 | -1.03 | 0.882576 | 0.135021 | 0.950089 | 0.406995 |
| MmuSTS.102.1.S1_at    | MmuSTS.102.1  | 10.23 | 10.08 | 0.08 | 0.04 | 1.11  | 0.023909 | 0.028551 | 0.20768  | 0.210768 |
| MmuSTS.1020.1.S1_s_at | MmuSTS.1020.1 | 5.8   | 5.6   | 0.09 | 0.14 | 1.15  | 0.025649 | 0.018422 | 0.212966 | 0.170755 |
| MmuSTS.1021.1.S1_at   | MmuSTS.1021.1 | 8.59  | 8.1   | 0.57 | 0.2  | 1.41  | 0.180461 | 0.273031 | 0.475578 | 0.537644 |
| MmuSTS.1022.1.S1_at   | MmuSTS.1022.1 | 6.32  | 6.11  | 0.16 | 0.1  | 1.16  | 0.066611 | 0.060593 | 0.315622 | 0.292774 |
| MmuSTS.1023.1.S1_at   | MmuSTS.1023.1 | 7.33  | 7.62  | 0.38 | 0.35 | -1.23 | 0.819791 | 0.78846  | 0.919644 | 0.877644 |
| MmuSTS.1024.1.S1_at   | MmuSTS.1024.1 | 7.81  | 7.98  | 0.42 | 0.14 | -1.12 | 0.554418 | 0.019839 | 0.770669 | 0.177164 |
| MmuSTS.1025.1.S1_at   | MmuSTS.1025.1 | 9.02  | 9.19  | 0.14 | 0.29 | -1.12 | 0.249939 | 0.132731 | 0.544845 | 0.404544 |
| MmuSTS.1026.1.S1_at   | MmuSTS.1026.1 | 9.41  | 9.21  | 0.23 | 0.15 | 1.15  | 0.687544 | 0.927421 | 0.850804 | 0.958778 |
| MmuSTS.1027.1.S1_at   | MmuSTS.1027.1 | 10.01 | 9.75  | 0.32 | 0.09 | 1.2   | 0.205014 | 0.317006 | 0.502852 | 0.570298 |
| MmuSTS.1028.1.S1_at   | MmuSTS.1028.1 | 9.96  | 7.92  | 0.41 | 0.28 | 4.12  | 0.001328 | 0.013383 | 0.079065 | 0.14827  |
| MmuSTS.1029.1.S1_at   | MmuSTS.1029.1 | 10.15 | 9.76  | 0.18 | 0.12 | 1.32  | 0.031677 | 0.031051 | 0.231419 | 0.218115 |
| MmuSTS.103.1.S1_at    | MmuSTS.103.1  | 9.13  | 8.19  | 0.46 | 0.03 | 1.92  | 0.066225 | 0.034141 | 0.314835 | 0.228692 |
| MmuSTS.1030.1.S1_at   | MmuSTS.1030.1 | 8.97  | 9.55  | 0.52 | 0.14 | -1.5  | 0.091519 | 0.14934  | 0.359218 | 0.423811 |
| MmuSTS.1031.1.S1_at   | MmuSTS.1031.1 | 5.2   | 5.26  | 0.08 | 0.12 | -1.04 | 0.82532  | 0.144849 | 0.922422 | 0.418736 |
| MmuSTS.1032.1.S1_at   | MmuSTS.1032.1 | 8.69  | 8.24  | 0.61 | 0.23 | 1.37  | 0.80648  | 0.140409 | 0.913279 | 0.413589 |
| MmuSTS.1033.1.S1_at   | MmuSTS.1033.1 | 10.82 | 10.77 | 0.14 | 0.08 | 1.04  | 0.419083 | 0.198706 | 0.678626 | 0.473391 |
| MmuSTS.1034.1.S1_at   | MmuSTS.1034.1 | 8.78  | 8.95  | 0.24 | 0.1  | -1.13 | 0.488099 | 0.065241 | 0.726687 | 0.301239 |
| MmuSTS.1035.1.S1_s_at | MmuSTS.1035.1 | 5.51  | 5.22  | 0.45 | 0.18 | 1.22  | 0.551154 | 0.421395 | 0.768269 | 0.644994 |
| MmuSTS.1036.1.S1_at   | MmuSTS.1036.1 | 4.9   | 5.09  | 0.89 | 0.21 | -1.14 | 0.567104 | 0.780565 | 0.77767  | 0.872678 |
| MmuSTS.1037.1.S1_at   | MmuSTS.1037.1 | 9.94  | 9.2   | 0.75 | 0.2  | 1.67  | 0.257555 | 0.473433 | 0.551777 | 0.680697 |
| MmuSTS.1038.1.S1_at   | MmuSTS.1038.1 | 7.49  | 7.83  | 0.16 | 0.06 | -1.27 | 0.011278 | 0.009374 | 0.156196 | 0.127634 |
| MmuSTS.1039.1.S1_at   | MmuSTS.1039.1 | 8.93  | 9.5   | 0.11 | 0.09 | -1.49 | 0.004286 | 0.008664 | 0.111606 | 0.123486 |
| MmuSTS.104.1.S1_at    | MmuSTS.104.1  | 10.33 | 9.8   | 0.04 | 0.07 | 1.44  | 0.00042  | 0.006201 | 0.063209 | 0.106821 |
| MmuSTS.1040.1.S1_at   | MmuSTS.1040.1 | 6.33  | 7.21  | 0.25 | 0.04 | -1.83 | 0.003948 | 0.147711 | 0.108453 | 0.422007 |
| MmuSTS.1041.1.S1_at   | MmuSTS.1041.1 | 7.68  | 9.05  | 0.55 | 0.34 | -2.6  | 0.021801 | 0.013057 | 0.200878 | 0.146997 |
| MmuSTS.1042.1.S1_at   | MmuSTS.1042.1 | 10.33 | 10.19 | 0.19 | 0.1  | 1.1   | 0.510572 | 0.073278 | 0.741957 | 0.316233 |
| MmuSTS.1043.1.S1_at   | MmuSTS.1043.1 | 3.74  | 3.37  | 0.24 | 0.11 | 1.29  | 0.221619 | 0.28711  | 0.519622 | 0.5484   |
| MmuSTS.1044.1.S1_at   | MmuSTS.1044.1 | 6.57  | 6.53  | 0.14 | 0.04 | 1.03  | 0.576478 | 0.697563 | 0.783247 | 0.824244 |
| MmuSTS.1045.1.S1_at   | MmuSTS.1045.1 | 5.66  | 5.55  | 0.13 | 0.07 | 1.08  | 0.095443 | 0.102433 | 0.364958 | 0.362627 |



|                       |               |       |       |      |      |       |          |          |          |          |
|-----------------------|---------------|-------|-------|------|------|-------|----------|----------|----------|----------|
| MmuSTS.1046.1.S1_at   | MmuSTS.1046.1 | 4.52  | 4.55  | 0.09 | 0.08 | -1.02 | 0.75743  | 0.252964 | 0.888727 | 0.521261 |
| MmuSTS.1047.1.S1_at   | MmuSTS.1047.1 | 5.38  | 5.58  | 0.15 | 0.05 | -1.15 | 0.035012 | 0.030833 | 0.241777 | 0.21742  |
| MmuSTS.1048.1.S1_at   | MmuSTS.1048.1 | 11.99 | 12.26 | 0.32 | 0.24 | -1.21 | 0.163336 | 0.156398 | 0.45566  | 0.431702 |
| MmuSTS.1049.1.S1_at   | MmuSTS.1049.1 | 6.26  | 6.21  | 0.1  | 0.06 | 1.03  | 0.410501 | 0.341621 | 0.672527 | 0.587796 |
| MmuSTS.105.1.S1_s_at  | MmuSTS.105.1  | 3.15  | 3.15  | 0.08 | 0.04 | -1    | 0.282724 | 0.747384 | 0.573338 | 0.853149 |
| MmuSTS.1050.1.S1_at   | MmuSTS.1050.1 | 8.39  | 7.44  | 0.39 | 0.19 | 1.92  | 0.047389 | 0.03136  | 0.275072 | 0.219062 |
| MmuSTS.1051.1.S1_at   | MmuSTS.1051.1 | 2.87  | 2.92  | 0.19 | 0.12 | -1.04 | 0.407934 | 0.301295 | 0.670893 | 0.559356 |
| MmuSTS.1052.1.S1_s_at | MmuSTS.1052.1 | 6.4   | 6.33  | 0.18 | 0.01 | 1.04  | 0.602018 | 0.396691 | 0.799962 | 0.628434 |
| MmuSTS.1053.1.S1_at   | MmuSTS.1053.1 | 13.02 | 12.98 | 0.06 | 0    | 1.03  | 0.240515 | 0.011732 | 0.53802  | 0.140259 |
| MmuSTS.1054.1.S1_at   | MmuSTS.1054.1 | 5.26  | 5.78  | 0.09 | 0.13 | -1.43 | 0.014816 | 0.201442 | 0.173867 | 0.475963 |
| MmuSTS.1055.1.S1_at   | MmuSTS.1055.1 | 8.47  | 8.64  | 0.18 | 0.2  | -1.12 | 0.547452 | 0.021412 | 0.765963 | 0.183283 |
| MmuSTS.1056.1.S1_at   | MmuSTS.1056.1 | 11.19 | 10.69 | 0.35 | 0.15 | 1.42  | 0.230186 | 0.450238 | 0.529077 | 0.66558  |
| MmuSTS.1057.1.S1_at   | MmuSTS.1057.1 | 6.78  | 6.79  | 0.05 | 0.18 | -1.01 | 0.554559 | 0.347943 | 0.770723 | 0.592209 |
| MmuSTS.1058.1.S1_at   | MmuSTS.1058.1 | 4.01  | 4.13  | 0.11 | 0.12 | -1.08 | 0.241733 | 0.44647  | 0.538882 | 0.662842 |
| MmuSTS.1059.1.S1_at   | MmuSTS.1059.1 | 10.03 | 9.63  | 0.16 | 0.13 | 1.32  | 0.030064 | 0.084637 | 0.226565 | 0.33618  |
| MmuSTS.106.1.S1_at    | MmuSTS.106.1  | 11.58 | 12.06 | 0.3  | 0.06 | -1.39 | 0.062042 | 0.008927 | 0.305631 | 0.124951 |
| MmuSTS.1060.1.S1_at   | MmuSTS.1060.1 | 7.66  | 7.79  | 0.22 | 0.18 | -1.09 | 0.969758 | 0.587018 | 0.987995 | 0.753952 |
| MmuSTS.1061.1.S1_at   | MmuSTS.1061.1 | 11.53 | 11.31 | 0.13 | 0.06 | 1.17  | 0.092348 | 0.169535 | 0.360374 | 0.446167 |
| MmuSTS.1062.1.S1_at   | MmuSTS.1062.1 | 10.93 | 11.07 | 0.04 | 0.04 | -1.1  | 0.022169 | 0.000136 | 0.201977 | 0.029179 |
| MmuSTS.1063.1.S1_at   | MmuSTS.1063.1 | 13.62 | 13.73 | 0.06 | 0.04 | -1.08 | 0.077331 | 0.045471 | 0.335992 | 0.2575   |
| MmuSTS.1064.1.S1_at   | MmuSTS.1064.1 | 8.97  | 9.12  | 0.08 | 0.08 | -1.11 | 0.120473 | 0.780986 | 0.398818 | 0.872934 |
| MmuSTS.1065.1.S1_at   | MmuSTS.1065.1 | 6.28  | 6.4   | 0.03 | 0.06 | -1.09 | 0.032283 | 0.263511 | 0.233693 | 0.529826 |
| MmuSTS.1066.1.S1_at   | MmuSTS.1066.1 | 4.56  | 4.55  | 0.06 | 0.04 | 1.01  | 0.684521 | 0.696604 | 0.84962  | 0.823774 |
| MmuSTS.1067.1.S1_at   | MmuSTS.1067.1 | 8.34  | 7.64  | 0.57 | 0.01 | 1.63  | 0.090781 | 0.205259 | 0.357821 | 0.479599 |
| MmuSTS.1068.1.S1_at   | MmuSTS.1068.1 | 9.19  | 9.36  | 0.17 | 0.12 | -1.13 | 0.482823 | 0.671188 | 0.723113 | 0.807707 |
| MmuSTS.1069.1.S1_at   | MmuSTS.1069.1 | 10.39 | 9.61  | 0.51 | 0.04 | 1.71  | 0.194274 | 0.038229 | 0.490878 | 0.240249 |
| MmuSTS.107.1.S1_at    | MmuSTS.107.1  | 10.09 | 9.37  | 0.26 | 0.58 | 1.65  | 0.13778  | 0.489689 | 0.422858 | 0.691862 |
| MmuSTS.1070.1.S1_at   | MmuSTS.1070.1 | 3.35  | 3.35  | 0.08 | 0.03 | 1.01  | 0.583225 | 0.604163 | 0.78787  | 0.764542 |
| MmuSTS.1071.1.S1_at   | MmuSTS.1071.1 | 10.09 | 9.94  | 0.19 | 0.14 | 1.11  | 0.76796  | 0.633055 | 0.893427 | 0.783905 |
| MmuSTS.1072.1.S1_at   | MmuSTS.1072.1 | 6.51  | 5.88  | 0.24 | 0.23 | 1.55  | 0.125353 | 0.227161 | 0.405812 | 0.499517 |
| MmuSTS.1073.1.S1_at   | MmuSTS.1073.1 | 7.88  | 7.57  | 0.18 | 0.15 | 1.24  | 0.172074 | 0.593921 | 0.466127 | 0.758442 |
| MmuSTS.1074.1.S1_at   | MmuSTS.1074.1 | 6.32  | 6.35  | 0.15 | 0.06 | -1.02 | 0.979076 | 0.41685  | 0.992043 | 0.641776 |
| MmuSTS.1075.1.S1_at   | MmuSTS.1075.1 | 11.44 | 11.47 | 0.09 | 0.19 | -1.02 | 0.594482 | 0.703738 | 0.794803 | 0.828214 |
| MmuSTS.1076.1.S1_at   | MmuSTS.1076.1 | 6.05  | 7.03  | 0.31 | 0.33 | -1.97 | 0.035981 | 0.071351 | 0.244728 | 0.313391 |
| MmuSTS.1077.1.S1_at   | MmuSTS.1077.1 | 6.26  | 6.12  | 0.29 | 0.52 | 1.11  | 0.393092 | 0.168104 | 0.659938 | 0.444698 |
| MmuSTS.1078.1.S1_at   | MmuSTS.1078.1 | 5.84  | 6.33  | 0.22 | 0.16 | -1.41 | 0.059955 | 0.068645 | 0.302234 | 0.308548 |
| MmuSTS.1079.1.S1_at   | MmuSTS.1079.1 | 10.54 | 10.61 | 0.12 | 0.06 | -1.05 | 0.56152  | 0.390085 | 0.774452 | 0.624002 |
| MmuSTS.108.1.S1_at    | MmuSTS.108.1  | 8.93  | 8.72  | 0.15 | 0.03 | 1.15  | 0.282416 | 0.736579 | 0.573155 | 0.847627 |
| MmuSTS.1080.1.S1_at   | MmuSTS.1080.1 | 6.8   | 6.67  | 0.17 | 0.11 | 1.1   | 0.422626 | 0.568162 | 0.68072  | 0.741859 |
| MmuSTS.1081.1.S1_at   | MmuSTS.1081.1 | 5.25  | 6.96  | 1.04 | 0.4  | -3.28 | 0.162938 | 0.140125 | 0.45504  | 0.413394 |
| MmuSTS.1082.1.S1_at   | MmuSTS.1082.1 | 5.28  | 5.13  | 0.25 | 0.11 | 1.11  | 0.488421 | 0.484082 | 0.726924 | 0.688318 |
| MmuSTS.1083.1.S1_at   | MmuSTS.1083.1 | 3.79  | 3.76  | 0.15 | 0.1  | 1.02  | 0.692133 | 0.493724 | 0.852885 | 0.694316 |
| MmuSTS.1084.1.S1_at   | MmuSTS.1084.1 | 5.11  | 5.08  | 0.23 | 0.26 | 1.02  | 0.678264 | 0.470277 | 0.846549 | 0.678582 |

|                       |               |       |       |      |      |       |          |          |          |          |
|-----------------------|---------------|-------|-------|------|------|-------|----------|----------|----------|----------|
| MmuSTS.1085.1.S1_at   | MmuSTS.1085.1 | 6.55  | 6.65  | 0.19 | 0.08 | -1.07 | 0.319588 | 0.427288 | 0.604201 | 0.649175 |
| MmuSTS.1086.1.S1_at   | MmuSTS.1086.1 | 9.96  | 10.32 | 0.21 | 0.1  | -1.28 | 0.104611 | 0.045547 | 0.377932 | 0.257596 |
| MmuSTS.1087.1.S1_at   | MmuSTS.1087.1 | 10.09 | 9.67  | 0.17 | 0.1  | 1.34  | 0.019187 | 0.005385 | 0.191978 | 0.101199 |
| MmuSTS.1088.1.S1_at   | MmuSTS.1088.1 | 7.34  | 8.37  | 0.09 | 0.1  | -2.04 | 0.00016  | 0.00382  | 0.053215 | 0.08794  |
| MmuSTS.1089.1.S1_at   | MmuSTS.1089.1 | 12.48 | 12.31 | 0.17 | 0.08 | 1.13  | 0.150443 | 0.081515 | 0.439474 | 0.329764 |
| MmuSTS.109.1.S1_at    | MmuSTS.109.1  | 9.26  | 10.37 | 0.21 | 0.43 | -2.16 | 0.015314 | 0.027043 | 0.176072 | 0.205639 |
| MmuSTS.1090.1.S1_at   | MmuSTS.1090.1 | 5.07  | 4.97  | 0.7  | 0.63 | 1.07  | 0.677593 | 0.574895 | 0.846252 | 0.746177 |
| MmuSTS.1091.1.S1_at   | MmuSTS.1091.1 | 7.6   | 7.61  | 0.15 | 0.07 | -1.01 | 0.859709 | 0.054713 | 0.939203 | 0.279379 |
| MmuSTS.1092.1.S1_at   | MmuSTS.1092.1 | 5.78  | 5.55  | 0.19 | 0.21 | 1.17  | 0.09734  | 0.112463 | 0.367528 | 0.377793 |
| MmuSTS.1093.1.S1_at   | MmuSTS.1093.1 | 12.51 | 12.46 | 0.26 | 0.15 | 1.03  | 0.788857 | 0.042665 | 0.904019 | 0.251037 |
| MmuSTS.1094.1.S1_at   | MmuSTS.1094.1 | 10.35 | 10.14 | 0.16 | 0.12 | 1.16  | 0.316282 | 0.049175 | 0.601059 | 0.266577 |
| MmuSTS.1095.1.S1_at   | MmuSTS.1095.1 | 8.69  | 10.27 | 0.69 | 0.1  | -3    | 0.019592 | 0.081132 | 0.19287  | 0.32931  |
| MmuSTS.1096.1.S1_at   | MmuSTS.1096.1 | 7.08  | 6.82  | 0.24 | 0.17 | 1.2   | 0.100204 | 0.036721 | 0.370985 | 0.236221 |
| MmuSTS.1097.1.S1_at   | MmuSTS.1097.1 | 4.32  | 4.24  | 0.23 | 0.57 | 1.05  | 0.563684 | 0.078022 | 0.775636 | 0.324416 |
| MmuSTS.1098.1.S1_at   | MmuSTS.1098.1 | 10.91 | 10.4  | 0.1  | 0.22 | 1.42  | 0.014857 | 0.029238 | 0.174061 | 0.212898 |
| MmuSTS.1099.1.S1_at   | MmuSTS.1099.1 | 10.09 | 9.01  | 0.43 | 0.13 | 2.11  | 0.013351 | 0.001635 | 0.166311 | 0.061167 |
| MmuSTS.11.1.S1_at     | MmuSTS.11.1   | 6.25  | 6.13  | 0.11 | 0.06 | 1.08  | 0.111109 | 0.117052 | 0.386891 | 0.384489 |
| MmuSTS.110.1.S1_at    | MmuSTS.110.1  | 9.73  | 9.26  | 0.15 | 0.19 | 1.38  | 0.014871 | 0.004981 | 0.174075 | 0.098393 |
| MmuSTS.1100.1.S1_at   | MmuSTS.1100.1 | 9.5   | 9     | 0.33 | 0.06 | 1.42  | 0.050845 | 0.014144 | 0.283144 | 0.15208  |
| MmuSTS.1101.1.S1_at   | MmuSTS.1101.1 | 7.79  | 7.67  | 0.08 | 0.07 | 1.09  | 0.063076 | 0.078411 | 0.307923 | 0.325189 |
| MmuSTS.1102.1.S1_at   | MmuSTS.1102.1 | 8.21  | 8.61  | 0.04 | 0.23 | -1.32 | 0.037764 | 0.029304 | 0.250051 | 0.21321  |
| MmuSTS.1103.1.S1_at   | MmuSTS.1103.1 | 10.36 | 10.31 | 0.12 | 0.1  | 1.04  | 0.514062 | 0.747121 | 0.744131 | 0.853124 |
| MmuSTS.1104.1.S1_at   | MmuSTS.1104.1 | 6.99  | 6.71  | 0.18 | 0.1  | 1.22  | 0.106767 | 0.60354  | 0.380982 | 0.764201 |
| MmuSTS.1105.1.S1_at   | MmuSTS.1105.1 | 4.21  | 3.87  | 0.06 | 0.17 | 1.27  | 0.051063 | 0.080715 | 0.283595 | 0.328583 |
| MmuSTS.1106.1.S1_at   | MmuSTS.1106.1 | 9.93  | 10.74 | 0.52 | 0.14 | -1.75 | 0.082793 | 0.613969 | 0.344741 | 0.77098  |
| MmuSTS.1107.1.S1_at   | MmuSTS.1107.1 | 10.71 | 10.66 | 0.14 | 0.01 | 1.04  | 0.771713 | 0.584387 | 0.895391 | 0.75242  |
| MmuSTS.1108.1.S1_at   | MmuSTS.1108.1 | 3.61  | 3.6   | 0.19 | 0.05 | 1.01  | 0.276334 | 0.374357 | 0.567928 | 0.61282  |
| MmuSTS.1109.1.S1_at   | MmuSTS.1109.1 | 9.59  | 9.37  | 0.27 | 0.31 | 1.16  | 0.177109 | 0.0299   | 0.471728 | 0.214615 |
| MmuSTS.111.1.S1_at    | MmuSTS.111.1  | 4.21  | 4.15  | 0.05 | 0.23 | 1.04  | 0.932968 | 0.90245  | 0.971907 | 0.944564 |
| MmuSTS.1110.1.S1_at   | MmuSTS.1110.1 | 3.99  | 3.98  | 0.01 | 0.03 | 1.01  | 0.695792 | 0.096442 | 0.855062 | 0.35409  |
| MmuSTS.1111.1.S1_at   | MmuSTS.1111.1 | 4.02  | 3.96  | 0.25 | 0.07 | 1.04  | 0.603379 | 0.518601 | 0.800944 | 0.710549 |
| MmuSTS.1112.1.S1_at   | MmuSTS.1112.1 | 7.37  | 7.01  | 0.28 | 0.38 | 1.29  | 0.109246 | 0.093855 | 0.384375 | 0.350298 |
| MmuSTS.1113.1.S1_at   | MmuSTS.1113.1 | 9.22  | 9.69  | 0.13 | 0.19 | -1.39 | 0.041288 | 0.543531 | 0.259651 | 0.726187 |
| MmuSTS.1114.1.S1_at   | MmuSTS.1114.1 | 6.48  | 6.44  | 0.33 | 0.21 | 1.03  | 0.734053 | 0.220968 | 0.876041 | 0.494389 |
| MmuSTS.1115.1.S1_at   | MmuSTS.1115.1 | 3.07  | 3.18  | 0.04 | 0.13 | -1.08 | 0.280225 | 0.06104  | 0.571426 | 0.29389  |
| MmuSTS.1116.1.S1_at   | MmuSTS.1116.1 | 9.54  | 9.11  | 0.29 | 0.22 | 1.34  | 0.104564 | 0.625226 | 0.377911 | 0.779064 |
| MmuSTS.1117.1.S1_at   | MmuSTS.1117.1 | 9.16  | 9.43  | 0.09 | 0.16 | -1.21 | 0.069404 | 0.381332 | 0.32176  | 0.617657 |
| MmuSTS.1118.1.S1_at   | MmuSTS.1118.1 | 7.28  | 7.08  | 0.15 | 0.02 | 1.14  | 0.091928 | 0.258242 | 0.359903 | 0.52558  |
| MmuSTS.1119.1.S1_at   | MmuSTS.1119.1 | 11.17 | 11.35 | 0.13 | 0.08 | -1.13 | 0.110114 | 0.579296 | 0.385355 | 0.74904  |
| MmuSTS.112.1.S1_at    | MmuSTS.112.1  | 5.63  | 7.11  | 0.36 | 0.22 | -2.79 | 0.0018   | 0.001844 | 0.086149 | 0.064452 |
| MmuSTS.1120.1.S1_s_at | MmuSTS.1120.1 | 7.36  | 7.59  | 0.66 | 0.08 | -1.17 | 0.181007 | 0.544276 | 0.476233 | 0.726717 |
| MmuSTS.1121.1.S1_at   | MmuSTS.1121.1 | 8.1   | 7.86  | 0.16 | 0.2  | 1.17  | 0.17874  | 0.000185 | 0.47356  | 0.030511 |
| MmuSTS.1122.1.S1_at   | MmuSTS.1122.1 | 3.99  | 3.99  | 0.13 | 0.05 | -1    | 0.780461 | 0.687142 | 0.899851 | 0.817466 |

|                       |               |       |       |      |      |        |          |          |          |          |
|-----------------------|---------------|-------|-------|------|------|--------|----------|----------|----------|----------|
| MmuSTS.1123.1.S1_at   | MmuSTS.1123.1 | 11.63 | 11.65 | 0.07 | 0.04 | -1.02  | 0.441134 | 0.906073 | 0.694766 | 0.946856 |
| MmuSTS.1124.1.S1_at   | MmuSTS.1124.1 | 8.62  | 9.17  | 0.14 | 0.08 | -1.46  | 0.003414 | 0.001585 | 0.103083 | 0.060358 |
| MmuSTS.1125.1.S1_at   | MmuSTS.1125.1 | 10.85 | 12    | 0.44 | 0.05 | -2.21  | 0.028495 | 0.0963   | 0.22113  | 0.353755 |
| MmuSTS.1126.1.S1_at   | MmuSTS.1126.1 | 3.22  | 2.88  | 0.81 | 0.1  | 1.26   | 0.294114 | 0.38392  | 0.583157 | 0.61978  |
| MmuSTS.1127.1.S1_at   | MmuSTS.1127.1 | 5.26  | 7.89  | 0.63 | 0.49 | -6.21  | 0.007408 | 0.105676 | 0.134211 | 0.367779 |
| MmuSTS.1128.1.S1_at   | MmuSTS.1128.1 | 5.18  | 4.74  | 0.43 | 0.11 | 1.35   | 0.232391 | 0.372985 | 0.530886 | 0.611823 |
| MmuSTS.1129.1.S1_at   | MmuSTS.1129.1 | 5.86  | 5.9   | 0.12 | 0.03 | -1.02  | 0.495624 | 0.71806  | 0.73183  | 0.836848 |
| MmuSTS.113.1.S1_at    | MmuSTS.113.1  | 7.5   | 7.47  | 0.61 | 0.02 | 1.02   | 0.889674 | 0.685435 | 0.953061 | 0.81652  |
| MmuSTS.1130.1.S1_at   | MmuSTS.1130.1 | 7.36  | 6.59  | 0.95 | 0.06 | 1.7    | 0.269096 | 0.375887 | 0.561488 | 0.613746 |
| MmuSTS.1131.1.S1_at   | MmuSTS.1131.1 | 6.32  | 5.84  | 0.53 | 0.43 | 1.4    | 0.175058 | 0.338851 | 0.469373 | 0.585891 |
| MmuSTS.1132.1.S1_s_at | MmuSTS.1132.1 | 3.49  | 3.46  | 0.05 | 0.03 | 1.02   | 0.182712 | 0.348449 | 0.478507 | 0.592593 |
| MmuSTS.1133.1.S1_at   | MmuSTS.1133.1 | 7.26  | 7.88  | 0.21 | 0.33 | -1.55  | 0.030862 | 0.010583 | 0.228673 | 0.134213 |
| MmuSTS.1134.1.S1_at   | MmuSTS.1134.1 | 10.83 | 10.82 | 0.07 | 0.08 | 1      | 0.981864 | 0.265705 | 0.993299 | 0.531561 |
| MmuSTS.1135.1.S1_at   | MmuSTS.1135.1 | 9.46  | 9.66  | 0.39 | 0.1  | -1.15  | 0.219964 | 0.110662 | 0.517641 | 0.374854 |
| MmuSTS.1136.1.S1_at   | MmuSTS.1136.1 | 5.5   | 9.53  | 1.82 | 0.4  | -16.37 | 0.041723 | 0.244896 | 0.260779 | 0.514728 |
| MmuSTS.1137.1.S1_at   | MmuSTS.1137.1 | 11.12 | 10.82 | 0.21 | 0.06 | 1.23   | 0.029688 | 0.037198 | 0.225494 | 0.237285 |
| MmuSTS.1138.1.S1_at   | MmuSTS.1138.1 | 5.58  | 5.59  | 0.06 | 0.03 | -1     | 0.380758 | 0.380717 | 0.650323 | 0.61738  |
| MmuSTS.1139.1.S1_at   | MmuSTS.1139.1 | 7.05  | 7.29  | 0.48 | 0.08 | -1.18  | 0.143513 | 0.118401 | 0.429994 | 0.3864   |
| MmuSTS.114.1.S1_at    | MmuSTS.114.1  | 11.95 | 11.02 | 0.41 | 0.16 | 1.9    | 0.024506 | 0.048386 | 0.209655 | 0.265126 |
| MmuSTS.1140.1.S1_at   | MmuSTS.1140.1 | 4.51  | 4.58  | 0.14 | 0.08 | -1.05  | 0.693498 | 0.250258 | 0.853516 | 0.519282 |
| MmuSTS.1141.1.S1_at   | MmuSTS.1141.1 | 4.18  | 4.33  | 0.21 | 0.09 | -1.11  | 0.535486 | 0.647539 | 0.758374 | 0.793531 |
| MmuSTS.1142.1.S1_at   | MmuSTS.1142.1 | 10.17 | 10.35 | 0.33 | 0.06 | -1.14  | 0.12022  | 0.081282 | 0.398635 | 0.329351 |
| MmuSTS.1143.1.S1_at   | MmuSTS.1143.1 | 5.46  | 5.26  | 0.37 | 0.09 | 1.15   | 0.28782  | 0.049528 | 0.577508 | 0.267481 |
| MmuSTS.1144.1.S1_at   | MmuSTS.1144.1 | 6.96  | 7.63  | 0.3  | 0.06 | -1.6   | 0.008307 | 0.015072 | 0.140083 | 0.1559   |
| MmuSTS.1145.1.S1_at   | MmuSTS.1145.1 | 11.92 | 11.37 | 0.18 | 0.04 | 1.47   | 0.006338 | 0.042685 | 0.125909 | 0.251049 |
| MmuSTS.1146.1.S1_at   | MmuSTS.1146.1 | 7.41  | 7.15  | 0.12 | 0.03 | 1.2    | 0.054596 | 0.726761 | 0.290604 | 0.841963 |
| MmuSTS.1147.1.S1_at   | MmuSTS.1147.1 | 5.78  | 5.39  | 0.12 | 0.18 | 1.31   | 0.164127 | 0.169323 | 0.457048 | 0.445925 |
| MmuSTS.1148.1.S1_at   | MmuSTS.1148.1 | 9.42  | 8.68  | 0.1  | 0.1  | 1.67   | 0.000508 | 0.000137 | 0.068843 | 0.029184 |
| MmuSTS.1149.1.S1_at   | MmuSTS.1149.1 | 9.91  | 9.48  | 0.34 | 0.1  | 1.34   | 0.190882 | 0.25177  | 0.487086 | 0.520444 |
| MmuSTS.115.1.S1_s_at  | MmuSTS.115.1  | 11.07 | 10.2  | 0.2  | 0.35 | 1.82   | 0.033186 | 0.053251 | 0.236343 | 0.276449 |
| MmuSTS.1150.1.S1_at   | MmuSTS.1150.1 | 8.66  | 7.9   | 0.25 | 0.12 | 1.7    | 0.010735 | 0.014095 | 0.153406 | 0.15195  |
| MmuSTS.1151.1.S1_at   | MmuSTS.1151.1 | 7.4   | 7.25  | 0.1  | 0.13 | 1.11   | 0.221798 | 0.008902 | 0.519797 | 0.124825 |
| MmuSTS.1152.1.S1_at   | MmuSTS.1152.1 | 11.6  | 11.5  | 0.36 | 0.13 | 1.07   | 0.895362 | 0.366768 | 0.95534  | 0.6065   |
| MmuSTS.1153.1.S1_at   | MmuSTS.1153.1 | 5.85  | 4.42  | 0.6  | 0.15 | 2.71   | 0.035956 | 0.006011 | 0.244614 | 0.106068 |
| MmuSTS.1154.1.S1_at   | MmuSTS.1154.1 | 5.05  | 5.11  | 0.12 | 0.16 | -1.04  | 0.974753 | 0.97591  | 0.98992  | 0.986856 |
| MmuSTS.1155.1.S1_at   | MmuSTS.1155.1 | 3.88  | 3.89  | 0.41 | 0.32 | -1.01  | 0.931101 | 0.286079 | 0.971037 | 0.547578 |
| MmuSTS.1156.1.S1_at   | MmuSTS.1156.1 | 5.19  | 5.41  | 0.29 | 0.16 | -1.16  | 0.310967 | 0.606246 | 0.597234 | 0.765727 |
| MmuSTS.1157.1.S1_at   | MmuSTS.1157.1 | 4.95  | 4.68  | 0.31 | 0.16 | 1.21   | 0.288835 | 0.207581 | 0.578557 | 0.481898 |
| MmuSTS.1158.1.S1_at   | MmuSTS.1158.1 | 10.64 | 10.68 | 0.24 | 0.08 | -1.03  | 0.315278 | 0.328972 | 0.600287 | 0.578482 |
| MmuSTS.1159.1.S1_at   | MmuSTS.1159.1 | 5.84  | 5.76  | 0.06 | 0.06 | 1.05   | 0.211457 | 0.232063 | 0.509249 | 0.503781 |
| MmuSTS.116.1.S1_at    | MmuSTS.116.1  | 10.86 | 10.58 | 0.24 | 0.08 | 1.22   | 0.04371  | 0.001792 | 0.266107 | 0.063581 |
| MmuSTS.1160.1.S1_at   | MmuSTS.1160.1 | 8.91  | 9.27  | 0.08 | 0.05 | -1.28  | 0.00125  | 0.004951 | 0.078631 | 0.098015 |
| MmuSTS.1161.1.S1_at   | MmuSTS.1161.1 | 11.24 | 10.93 | 0.03 | 0.05 | 1.24   | 0.000903 | 0.221732 | 0.075282 | 0.494901 |

|                       |               |       |       |      |      |       |          |          |          |          |
|-----------------------|---------------|-------|-------|------|------|-------|----------|----------|----------|----------|
| MmuSTS.1162.1.S1_at   | MmuSTS.1162.1 | 12.18 | 12.19 | 0.05 | 0.11 | -1.01 | 0.51137  | 0.034691 | 0.742401 | 0.230454 |
| MmuSTS.1163.1.S1_at   | MmuSTS.1163.1 | 4.9   | 5.02  | 0.2  | 0.01 | -1.09 | 0.110816 | 0.248698 | 0.386305 | 0.517917 |
| MmuSTS.1164.1.S1_at   | MmuSTS.1164.1 | 8.34  | 9.46  | 0.16 | 0.41 | -2.17 | 0.023539 | 0.004991 | 0.206602 | 0.098466 |
| MmuSTS.1165.1.S1_at   | MmuSTS.1165.1 | 8.81  | 8.64  | 0.17 | 0.18 | 1.12  | 0.469861 | 0.323178 | 0.71453  | 0.574396 |
| MmuSTS.1166.1.S1_at   | MmuSTS.1166.1 | 4.16  | 4.45  | 0.2  | 0.14 | -1.22 | 0.076013 | 0.095716 | 0.334035 | 0.352735 |
| MmuSTS.1167.1.S1_at   | MmuSTS.1167.1 | 6.44  | 6.18  | 0.07 | 0.37 | 1.2   | 0.454832 | 0.699898 | 0.704641 | 0.825803 |
| MmuSTS.1168.1.S1_at   | MmuSTS.1168.1 | 7.05  | 8.46  | 0.37 | 0.15 | -2.66 | 0.003592 | 0.127251 | 0.105306 | 0.397935 |
| MmuSTS.1169.1.S1_at   | MmuSTS.1169.1 | 7.7   | 7.71  | 0.09 | 0.01 | -1    | 0.652376 | 0.980124 | 0.831273 | 0.989236 |
| MmuSTS.117.1.S1_at    | MmuSTS.117.1  | 8.95  | 9.13  | 0.1  | 0.03 | -1.13 | 0.020626 | 0.125834 | 0.197109 | 0.396315 |
| MmuSTS.1170.1.S1_at   | MmuSTS.1170.1 | 6.47  | 6.62  | 0.05 | 0.12 | -1.11 | 0.153028 | 0.176426 | 0.442719 | 0.45282  |
| MmuSTS.1171.1.S1_at   | MmuSTS.1171.1 | 4.64  | 4.69  | 0.18 | 0.05 | -1.04 | 0.22134  | 0.717952 | 0.519357 | 0.836759 |
| MmuSTS.1172.1.S1_at   | MmuSTS.1172.1 | 12.64 | 12.45 | 0.07 | 0.03 | 1.14  | 0.01092  | 0.247031 | 0.154271 | 0.516238 |
| MmuSTS.1173.1.S1_at   | MmuSTS.1173.1 | 8.75  | 8.76  | 0.07 | 0.14 | -1    | 0.935093 | 0.029109 | 0.972855 | 0.212733 |
| MmuSTS.1174.1.S1_at   | MmuSTS.1174.1 | 11.87 | 12.07 | 0.1  | 0.16 | -1.15 | 0.273719 | 0.021881 | 0.565814 | 0.185137 |
| MmuSTS.1175.1.S1_at   | MmuSTS.1175.1 | 3.37  | 3.39  | 0.03 | 0.11 | -1.01 | 0.613191 | 0.826821 | 0.807283 | 0.900529 |
| MmuSTS.1176.1.S1_at   | MmuSTS.1176.1 | 5.29  | 5.28  | 0.07 | 0.07 | 1.01  | 0.566454 | 0.530191 | 0.777346 | 0.717779 |
| MmuSTS.1177.1.S1_at   | MmuSTS.1177.1 | 3.7   | 3.7   | 0.21 | 0.14 | -1    | 0.441605 | 0.58357  | 0.695103 | 0.751826 |
| MmuSTS.1178.1.S1_at   | MmuSTS.1178.1 | 4.46  | 4.37  | 0.22 | 0.01 | 1.06  | 0.555238 | 0.690415 | 0.771148 | 0.81956  |
| MmuSTS.1179.1.S1_s_at | MmuSTS.1179.1 | 2.91  | 2.91  | 0.04 | 0.05 | 1     | 0.511395 | 0.782524 | 0.742401 | 0.874147 |
| MmuSTS.118.1.S1_at    | MmuSTS.118.1  | 11.26 | 10.6  | 0.38 | 0.3  | 1.58  | 0.097802 | 0.187495 | 0.368256 | 0.463586 |
| MmuSTS.1180.1.S1_at   | MmuSTS.1180.1 | 10.91 | 11.05 | 0.23 | 0.06 | -1.1  | 0.112243 | 0.167375 | 0.388393 | 0.443785 |
| MmuSTS.1181.1.S1_at   | MmuSTS.1181.1 | 8.24  | 8.58  | 0.09 | 0.09 | -1.27 | 0.00659  | 0.003616 | 0.127762 | 0.086033 |
| MmuSTS.1182.1.S1_at   | MmuSTS.1182.1 | 10.56 | 10.42 | 0.33 | 0.04 | 1.1   | 0.886082 | 0.861946 | 0.95143  | 0.921546 |
| MmuSTS.1183.1.S1_at   | MmuSTS.1183.1 | 12.36 | 10.19 | 0.09 | 0.4  | 4.5   | 0.001284 | 0.05258  | 0.078631 | 0.274848 |
| MmuSTS.1184.1.S1_at   | MmuSTS.1184.1 | 9.03  | 9.64  | 0.12 | 0.07 | -1.53 | 0.002212 | 0.314703 | 0.090954 | 0.568449 |
| MmuSTS.1185.1.S1_at   | MmuSTS.1185.1 | 7.63  | 8.69  | 0.66 | 0.22 | -2.09 | 0.057471 | 0.297264 | 0.297046 | 0.556067 |
| MmuSTS.1186.1.S1_at   | MmuSTS.1186.1 | 10.96 | 10.51 | 0.17 | 0.08 | 1.37  | 0.015418 | 0.390074 | 0.176266 | 0.624002 |
| MmuSTS.1187.1.S1_at   | MmuSTS.1187.1 | 7.12  | 7.32  | 0.86 | 0.45 | -1.15 | 0.720032 | 0.491481 | 0.867914 | 0.693004 |
| MmuSTS.1188.1.S1_at   | MmuSTS.1188.1 | 7.76  | 9.61  | 0.75 | 0.22 | -3.61 | 0.019883 | 0.001368 | 0.194289 | 0.056902 |
| MmuSTS.1189.1.S1_at   | MmuSTS.1189.1 | 6.25  | 6.75  | 1.08 | 0.16 | -1.41 | 0.533239 | 0.176466 | 0.756887 | 0.452836 |
| MmuSTS.119.1.S1_at    | MmuSTS.119.1  | 10.57 | 10.42 | 0.16 | 0.04 | 1.11  | 0.082045 | 0.03027  | 0.343331 | 0.215828 |
| MmuSTS.1190.1.S1_at   | MmuSTS.1190.1 | 8.46  | 8.5   | 0.12 | 0.03 | -1.03 | 0.193036 | 0.79729  | 0.489582 | 0.883122 |
| MmuSTS.1191.1.S1_at   | MmuSTS.1191.1 | 8.37  | 7.78  | 0.3  | 0.26 | 1.5   | 0.094334 | 0.059837 | 0.363345 | 0.291286 |
| MmuSTS.1192.1.S1_at   | MmuSTS.1192.1 | 10.42 | 10.61 | 0.19 | 0.05 | -1.14 | 0.237604 | 0.891699 | 0.535034 | 0.938272 |
| MmuSTS.1193.1.S1_at   | MmuSTS.1193.1 | 12.17 | 12.23 | 0.6  | 0.21 | -1.04 | 0.386562 | 0.076876 | 0.654936 | 0.322368 |
| MmuSTS.1194.1.S1_at   | MmuSTS.1194.1 | 8.92  | 9.02  | 0.14 | 0.04 | -1.07 | 0.352474 | 0.000132 | 0.630029 | 0.029087 |
| MmuSTS.1195.1.S1_at   | MmuSTS.1195.1 | 5.1   | 5.11  | 0.14 | 0.21 | -1.01 | 0.763958 | 0.407551 | 0.891852 | 0.63505  |
| MmuSTS.1196.1.S1_at   | MmuSTS.1196.1 | 4.17  | 4.15  | 0.15 | 0.05 | 1.02  | 0.510721 | 0.127203 | 0.742065 | 0.397935 |
| MmuSTS.1197.1.S1_s_at | MmuSTS.1197.1 | 4.45  | 4.42  | 0.02 | 0.04 | 1.02  | 0.187646 | 0.353454 | 0.483874 | 0.596547 |
| MmuSTS.1198.1.S1_at   | MmuSTS.1198.1 | 6.24  | 6.05  | 0.19 | 0.13 | 1.14  | 0.538258 | 0.701435 | 0.760199 | 0.826841 |
| MmuSTS.1199.1.S1_at   | MmuSTS.1199.1 | 3.25  | 3.22  | 0.06 | 0.06 | 1.02  | 0.947088 | 0.127125 | 0.977715 | 0.397922 |
| MmuSTS.12.1.S1_at     | MmuSTS.12.1   | 7.41  | 7.15  | 0.29 | 0.17 | 1.19  | 0.366245 | 0.545343 | 0.640628 | 0.727505 |
| MmuSTS.120.1.S1_at    | MmuSTS.120.1  | 7.06  | 7.53  | 0.5  | 0.05 | -1.38 | 0.193107 | 0.428062 | 0.489667 | 0.649619 |

|                     |               |       |       |      |      |       |          |          |          |          |
|---------------------|---------------|-------|-------|------|------|-------|----------|----------|----------|----------|
| MmuSTS.1200.1.S1_at | MmuSTS.1200.1 | 6.95  | 8.75  | 0.42 | 0.25 | -3.48 | 0.003807 | 0.096812 | 0.106937 | 0.354207 |
| MmuSTS.1201.1.S1_at | MmuSTS.1201.1 | 9.77  | 9.21  | 0.1  | 0.03 | 1.48  | 0.000925 | 0.002974 | 0.075607 | 0.079958 |
| MmuSTS.1202.1.S1_at | MmuSTS.1202.1 | 8.05  | 7.98  | 0.19 | 0.12 | 1.05  | 0.974381 | 0.034914 | 0.989745 | 0.231062 |
| MmuSTS.1203.1.S1_at | MmuSTS.1203.1 | 12.86 | 12.79 | 0.25 | 0.04 | 1.05  | 0.659297 | 0.674769 | 0.835571 | 0.810023 |
| MmuSTS.1204.1.S1_at | MmuSTS.1204.1 | 5.95  | 8.01  | 0.87 | 0.3  | -4.18 | 0.058561 | 0.049829 | 0.299164 | 0.268305 |
| MmuSTS.1205.1.S1_at | MmuSTS.1205.1 | 3.46  | 3.44  | 0.04 | 0.03 | 1.01  | 0.962548 | 0.062677 | 0.984734 | 0.29706  |
| MmuSTS.1206.1.S1_at | MmuSTS.1206.1 | 4.29  | 4.16  | 0.32 | 0.08 | 1.09  | 0.500176 | 0.640082 | 0.734575 | 0.78869  |
| MmuSTS.1207.1.S1_at | MmuSTS.1207.1 | 4.83  | 4.62  | 0.25 | 0.08 | 1.15  | 0.376967 | 0.342836 | 0.64755  | 0.588712 |
| MmuSTS.1208.1.S1_at | MmuSTS.1208.1 | 7.32  | 7.69  | 0.19 | 0.2  | -1.29 | 0.190607 | 0.014068 | 0.486785 | 0.151858 |
| MmuSTS.1209.1.S1_at | MmuSTS.1209.1 | 9.91  | 10.34 | 0.14 | 0.16 | -1.35 | 0.054259 | 0.119248 | 0.289971 | 0.387751 |
| MmuSTS.121.1.S1_at  | MmuSTS.121.1  | 10.59 | 10.93 | 0.09 | 0.12 | -1.26 | 0.04282  | 0.375024 | 0.264078 | 0.613186 |
| MmuSTS.1210.1.S1_at | MmuSTS.1210.1 | 7.25  | 7.19  | 0.1  | 0.05 | 1.05  | 0.154159 | 0.079392 | 0.444483 | 0.32676  |
| MmuSTS.1211.1.S1_at | MmuSTS.1211.1 | 7.44  | 8.27  | 1.04 | 0.46 | -1.77 | 0.151127 | 0.195594 | 0.440668 | 0.470441 |
| MmuSTS.1212.1.S1_at | MmuSTS.1212.1 | 4.57  | 4.57  | 0.08 | 0.11 | 1     | 0.279936 | 0.562078 | 0.571191 | 0.737747 |
| MmuSTS.1213.1.S1_at | MmuSTS.1213.1 | 5.83  | 5.7   | 0.15 | 0.11 | 1.09  | 0.562279 | 0.867781 | 0.774871 | 0.924867 |
| MmuSTS.1214.1.S1_at | MmuSTS.1214.1 | 4.49  | 4.3   | 0.2  | 0.11 | 1.15  | 0.589987 | 0.325073 | 0.791771 | 0.575545 |
| MmuSTS.1215.1.S1_at | MmuSTS.1215.1 | 9.96  | 9.53  | 0.13 | 0.05 | 1.35  | 0.004364 | 0.003824 | 0.112174 | 0.08794  |
| MmuSTS.1216.1.S1_at | MmuSTS.1216.1 | 5.47  | 5.5   | 0.1  | 0.19 | -1.02 | 0.790562 | 0.926755 | 0.904905 | 0.958404 |
| MmuSTS.1217.1.S1_at | MmuSTS.1217.1 | 11.25 | 11.34 | 0.07 | 0.05 | -1.06 | 0.124458 | 0.673194 | 0.404646 | 0.809066 |
| MmuSTS.1218.1.S1_at | MmuSTS.1218.1 | 4.91  | 5.23  | 0.11 | 0.32 | -1.25 | 0.103787 | 0.193222 | 0.377045 | 0.468578 |
| MmuSTS.1219.1.S1_at | MmuSTS.1219.1 | 4.12  | 4.05  | 0.07 | 0.07 | 1.05  | 0.12768  | 0.239059 | 0.409575 | 0.509827 |
| MmuSTS.122.1.S1_at  | MmuSTS.122.1  | 7.43  | 7.87  | 0.31 | 0.11 | -1.35 | 0.059961 | 0.242463 | 0.302234 | 0.512835 |
| MmuSTS.1220.1.S1_at | MmuSTS.1220.1 | 12.85 | 12.54 | 0.1  | 0.02 | 1.25  | 0.006193 | 0.03936  | 0.124922 | 0.243406 |
| MmuSTS.1221.1.S1_at | MmuSTS.1221.1 | 3.14  | 3.21  | 0.17 | 0.04 | -1.05 | 0.808929 | 0.778809 | 0.914357 | 0.871617 |
| MmuSTS.1222.1.S1_at | MmuSTS.1222.1 | 7.99  | 7.81  | 2.14 | 0.3  | 1.13  | 0.804921 | 0.939736 | 0.912432 | 0.965752 |
| MmuSTS.1223.1.S1_at | MmuSTS.1223.1 | 10.83 | 13.16 | 0.51 | 0.13 | -5.05 | 0.00259  | 0.001641 | 0.094992 | 0.06124  |
| MmuSTS.1224.1.S1_at | MmuSTS.1224.1 | 5.08  | 5.04  | 0.6  | 0.08 | 1.03  | 0.333227 | 0.468411 | 0.614682 | 0.677714 |
| MmuSTS.1225.1.S1_at | MmuSTS.1225.1 | 6.54  | 4.23  | 0.45 | 0.59 | 4.95  | 0.008941 | 0.028364 | 0.144294 | 0.21025  |
| MmuSTS.1226.1.S1_at | MmuSTS.1226.1 | 7.17  | 10.42 | 1.93 | 0.34 | -9.48 | 0.162372 | 0.422501 | 0.45441  | 0.645729 |
| MmuSTS.1227.1.S1_at | MmuSTS.1227.1 | 10.4  | 10.41 | 0.17 | 0.11 | -1.01 | 0.955443 | 0.320136 | 0.981758 | 0.572472 |
| MmuSTS.1228.1.S1_at | MmuSTS.1228.1 | 10.54 | 10.36 | 0.34 | 0.03 | 1.14  | 0.427556 | 0.406934 | 0.684843 | 0.634629 |
| MmuSTS.1229.1.S1_at | MmuSTS.1229.1 | 4.14  | 4.1   | 0.3  | 0.38 | 1.03  | 0.975816 | 0.420471 | 0.990391 | 0.644171 |
| MmuSTS.123.1.S1_at  | MmuSTS.123.1  | 11.01 | 10.55 | 0.13 | 0.08 | 1.37  | 0.006166 | 0.275863 | 0.124695 | 0.540035 |
| MmuSTS.1230.1.S1_at | MmuSTS.1230.1 | 3.94  | 4.05  | 0.23 | 0.12 | -1.08 | 0.993465 | 0.584498 | 0.997388 | 0.752435 |
| MmuSTS.1231.1.S1_at | MmuSTS.1231.1 | 11.09 | 10.9  | 0.06 | 0.05 | 1.14  | 0.010453 | 0.023399 | 0.152221 | 0.191765 |
| MmuSTS.1232.1.S1_at | MmuSTS.1232.1 | 8.73  | 7.5   | 0.71 | 0.83 | 2.36  | 0.592182 | 0.748724 | 0.793273 | 0.853837 |
| MmuSTS.1233.1.S1_at | MmuSTS.1233.1 | 9.52  | 8.77  | 0.19 | 0.26 | 1.68  | 0.01887  | 0.036629 | 0.190961 | 0.235943 |
| MmuSTS.1234.1.S1_at | MmuSTS.1234.1 | 8.88  | 8.89  | 0.12 | 0.07 | -1    | 0.471509 | 0.139016 | 0.715544 | 0.412153 |
| MmuSTS.1235.1.S1_at | MmuSTS.1235.1 | 8.63  | 8.34  | 0.27 | 0.1  | 1.22  | 0.167747 | 0.317768 | 0.461006 | 0.570922 |
| MmuSTS.1236.1.S1_at | MmuSTS.1236.1 | 7.38  | 8.32  | 0.21 | 0.07 | -1.92 | 0.001781 | 0.056296 | 0.085481 | 0.283274 |
| MmuSTS.1237.1.S1_at | MmuSTS.1237.1 | 9.94  | 8.86  | 1.13 | 0.11 | 2.12  | 0.528822 | 0.239583 | 0.753881 | 0.510247 |
| MmuSTS.1238.1.S1_at | MmuSTS.1238.1 | 7.08  | 8.25  | 0.58 | 0.19 | -2.25 | 0.027268 | 0.069464 | 0.218055 | 0.309778 |
| MmuSTS.1239.1.S1_at | MmuSTS.1239.1 | 4.82  | 6.37  | 0.93 | 0.54 | -2.92 | 0.084669 | 0.248699 | 0.348571 | 0.517917 |

|                       |               |       |       |      |      |       |          |          |          |          |
|-----------------------|---------------|-------|-------|------|------|-------|----------|----------|----------|----------|
| MmuSTS.124.1.S1_at    | MmuSTS.124.1  | 6.64  | 6.88  | 0.46 | 0.19 | -1.18 | 0.93098  | 0.484625 | 0.970984 | 0.68858  |
| MmuSTS.1240.1.S1_at   | MmuSTS.1240.1 | 12.37 | 12.65 | 0.05 | 0.16 | -1.21 | 0.12936  | 0.124556 | 0.411701 | 0.394987 |
| MmuSTS.1241.1.S1_at   | MmuSTS.1241.1 | 9.33  | 9.11  | 0.11 | 0.06 | 1.16  | 0.058703 | 0.006501 | 0.299451 | 0.109521 |
| MmuSTS.1242.1.S1_s_at | MmuSTS.1242.1 | 5.14  | 5.11  | 0.06 | 0.07 | 1.02  | 0.815958 | 0.301023 | 0.917896 | 0.559198 |
| MmuSTS.1243.1.S1_at   | MmuSTS.1243.1 | 3.46  | 3.58  | 0.1  | 0.16 | -1.09 | 0.358154 | 0.706425 | 0.633959 | 0.829634 |
| MmuSTS.1244.1.S1_at   | MmuSTS.1244.1 | 10.46 | 10.33 | 0.54 | 0.08 | 1.09  | 0.595701 | 0.820337 | 0.795406 | 0.89648  |
| MmuSTS.1245.1.S1_at   | MmuSTS.1245.1 | 7.01  | 8.2   | 0.22 | 0.33 | -2.28 | 0.007789 | 0.002047 | 0.137073 | 0.066887 |
| MmuSTS.1246.1.S1_at   | MmuSTS.1246.1 | 7.77  | 8.52  | 0.32 | 0.16 | -1.69 | 0.056976 | 0.415139 | 0.295936 | 0.640713 |
| MmuSTS.1247.1.S1_at   | MmuSTS.1247.1 | 6.51  | 6.87  | 0.17 | 0.55 | -1.28 | 0.204723 | 0.321426 | 0.502496 | 0.573207 |
| MmuSTS.1248.1.S1_at   | MmuSTS.1248.1 | 9.07  | 9.08  | 0.45 | 0.08 | -1.01 | 0.88373  | 0.316033 | 0.950585 | 0.569488 |
| MmuSTS.1249.1.S1_at   | MmuSTS.1249.1 | 11.09 | 10.8  | 0.16 | 0.04 | 1.22  | 0.062775 | 0.147618 | 0.307182 | 0.421901 |
| MmuSTS.125.1.S1_at    | MmuSTS.125.1  | 4.59  | 4.51  | 0.65 | 0.4  | 1.06  | 0.549058 | 0.185776 | 0.766949 | 0.461631 |
| MmuSTS.1250.1.S1_at   | MmuSTS.1250.1 | 8.18  | 8.86  | 0.13 | 0.06 | -1.6  | 0.001258 | 0.2218   | 0.078631 | 0.494948 |
| MmuSTS.1251.1.S1_at   | MmuSTS.1251.1 | 4.84  | 5.47  | 0.25 | 0.19 | -1.55 | 0.013641 | 0.00587  | 0.167583 | 0.104856 |
| MmuSTS.1252.1.S1_at   | MmuSTS.1252.1 | 6.24  | 6.36  | 0.13 | 0.08 | -1.09 | 0.377449 | 0.545506 | 0.647959 | 0.727564 |
| MmuSTS.1253.1.S1_at   | MmuSTS.1253.1 | 11.2  | 9.94  | 0.15 | 0.3  | 2.39  | 0.00491  | 0.001279 | 0.115126 | 0.055351 |
| MmuSTS.1254.1.S1_at   | MmuSTS.1254.1 | 6.56  | 6.67  | 0.03 | 0.1  | -1.08 | 0.148189 | 0.553432 | 0.436678 | 0.732583 |
| MmuSTS.1255.1.S1_at   | MmuSTS.1255.1 | 6.24  | 6.54  | 0.34 | 0.09 | -1.23 | 0.615868 | 0.307349 | 0.809213 | 0.563634 |
| MmuSTS.1256.1.S1_at   | MmuSTS.1256.1 | 3.39  | 3.4   | 0.17 | 0.17 | -1.01 | 0.507836 | 0.726324 | 0.740111 | 0.841617 |
| MmuSTS.1257.1.S1_at   | MmuSTS.1257.1 | 10.27 | 10.05 | 0.18 | 0.08 | 1.16  | 0.205415 | 0.369201 | 0.503171 | 0.608669 |
| MmuSTS.1258.1.S1_at   | MmuSTS.1258.1 | 6.6   | 8.42  | 0.62 | 0.25 | -3.53 | 0.018613 | 0.177686 | 0.189667 | 0.454073 |
| MmuSTS.1259.1.S1_at   | MmuSTS.1259.1 | 6.95  | 7.11  | 0.44 | 0.28 | -1.12 | 0.178658 | 0.294682 | 0.47343  | 0.554326 |
| MmuSTS.126.1.S1_at    | MmuSTS.126.1  | 5.4   | 5.59  | 0.15 | 0.08 | -1.14 | 0.59595  | 0.384791 | 0.795524 | 0.620428 |
| MmuSTS.1260.1.S1_at   | MmuSTS.1260.1 | 4.66  | 5.07  | 0.13 | 0.09 | -1.32 | 0.010737 | 0.130381 | 0.153406 | 0.402234 |
| MmuSTS.1261.1.S1_at   | MmuSTS.1261.1 | 7.75  | 9.56  | 0.85 | 0.2  | -3.5  | 0.035741 | 0.060606 | 0.243972 | 0.292783 |
| MmuSTS.1262.1.S1_at   | MmuSTS.1262.1 | 8.19  | 8.43  | 0.17 | 0.19 | -1.18 | 0.17242  | 0.227253 | 0.466621 | 0.499574 |
| MmuSTS.1263.1.S1_at   | MmuSTS.1263.1 | 6.09  | 6.02  | 0.2  | 0.12 | 1.05  | 0.364091 | 0.50996  | 0.638714 | 0.704535 |
| MmuSTS.1264.1.S1_at   | MmuSTS.1264.1 | 8.49  | 7.85  | 0.06 | 0.21 | 1.56  | 0.007985 | 0.029852 | 0.138394 | 0.214481 |
| MmuSTS.1265.1.S1_at   | MmuSTS.1265.1 | 5.73  | 5.72  | 0.08 | 0.13 | 1.01  | 0.837319 | 0.003981 | 0.928666 | 0.089711 |
| MmuSTS.1266.1.S1_s_at | MmuSTS.1266.1 | 8.39  | 9.1   | 0.51 | 0.14 | -1.63 | 0.133078 | 0.44721  | 0.416571 | 0.663391 |
| MmuSTS.1267.1.S1_at   | MmuSTS.1267.1 | 4.46  | 4.47  | 0.12 | 0.25 | -1    | 0.612216 | 0.365708 | 0.80674  | 0.605684 |
| MmuSTS.1268.1.S1_at   | MmuSTS.1268.1 | 9.94  | 11.09 | 0.14 | 0.1  | -2.22 | 0.000364 | 0.143617 | 0.06234  | 0.417526 |
| MmuSTS.1269.1.S1_at   | MmuSTS.1269.1 | 6.85  | 6.91  | 0.09 | 0.05 | -1.04 | 0.733307 | 0.384286 | 0.875659 | 0.619994 |
| MmuSTS.127.1.S1_at    | MmuSTS.127.1  | 6.62  | 6.68  | 0.2  | 0.06 | -1.04 | 0.735731 | 0.904283 | 0.877005 | 0.945683 |
| MmuSTS.1270.1.S1_at   | MmuSTS.1270.1 | 4.72  | 4.78  | 0.13 | 0.06 | -1.04 | 0.192201 | 0.110973 | 0.488778 | 0.375405 |
| MmuSTS.1271.1.S1_at   | MmuSTS.1271.1 | 10.97 | 10.93 | 0.31 | 0.2  | 1.03  | 0.321082 | 0.627085 | 0.605394 | 0.780185 |
| MmuSTS.1272.1.S1_at   | MmuSTS.1272.1 | 8.76  | 8.75  | 0.28 | 0.44 | 1.01  | 0.673868 | 0.823904 | 0.844191 | 0.898817 |
| MmuSTS.1273.1.S1_at   | MmuSTS.1273.1 | 11.58 | 10.34 | 0.37 | 0.11 | 2.37  | 0.003048 | 0.045054 | 0.100201 | 0.256789 |
| MmuSTS.1274.1.S1_at   | MmuSTS.1274.1 | 8.35  | 8.68  | 0.37 | 0.17 | -1.25 | 0.802288 | 0.538719 | 0.911225 | 0.723323 |
| MmuSTS.1275.1.S1_at   | MmuSTS.1275.1 | 9.89  | 9.71  | 0.15 | 0.09 | 1.13  | 0.304411 | 0.562594 | 0.591617 | 0.738076 |
| MmuSTS.1276.1.S1_at   | MmuSTS.1276.1 | 3.54  | 3.63  | 0.13 | 0.18 | -1.06 | 0.177637 | 0.326386 | 0.472289 | 0.57656  |
| MmuSTS.1277.1.S1_at   | MmuSTS.1277.1 | 6.07  | 6.64  | 0.25 | 0.06 | -1.49 | 0.053474 | 0.147716 | 0.28856  | 0.422007 |
| MmuSTS.1278.1.S1_at   | MmuSTS.1278.1 | 11.47 | 11.34 | 0.1  | 0.07 | 1.09  | 0.314389 | 0.808065 | 0.599959 | 0.889504 |

|                     |               |       |       |      |      |       |          |          |          |          |
|---------------------|---------------|-------|-------|------|------|-------|----------|----------|----------|----------|
| MmuSTS.1279.1.S1_at | MmuSTS.1279.1 | 6.47  | 7.45  | 0.1  | 0.08 | -1.96 | 0.000125 | 0.000141 | 0.051196 | 0.029307 |
| MmuSTS.128.1.S1_at  | MmuSTS.128.1  | 3.96  | 3.86  | 0.06 | 0.06 | 1.07  | 0.064237 | 0.450034 | 0.309883 | 0.665446 |
| MmuSTS.1280.1.S1_at | MmuSTS.1280.1 | 11.69 | 11.56 | 0.13 | 0.14 | 1.1   | 0.398403 | 0.853061 | 0.663859 | 0.916487 |
| MmuSTS.1281.1.S1_at | MmuSTS.1281.1 | 8.11  | 9.24  | 0.16 | 0.29 | -2.19 | 0.010367 | 0.037178 | 0.151735 | 0.237285 |
| MmuSTS.1282.1.S1_at | MmuSTS.1282.1 | 9.36  | 8.37  | 0.36 | 0.37 | 1.99  | 0.034431 | 0.36358  | 0.240132 | 0.603986 |
| MmuSTS.1283.1.S1_at | MmuSTS.1283.1 | 11.87 | 10.73 | 0.07 | 0.07 | 2.2   | 0.000052 | 0.001119 | 0.045594 | 0.052924 |
| MmuSTS.1284.1.S1_at | MmuSTS.1284.1 | 10.65 | 10.35 | 0.27 | 0.06 | 1.24  | 0.458353 | 0.308669 | 0.706975 | 0.56461  |
| MmuSTS.1285.1.S1_at | MmuSTS.1285.1 | 4.69  | 4.81  | 0.12 | 0.08 | -1.09 | 0.12005  | 0.007755 | 0.398372 | 0.117622 |
| MmuSTS.1286.1.S1_at | MmuSTS.1286.1 | 8.41  | 8.26  | 0.25 | 0.13 | 1.11  | 0.251219 | 0.257838 | 0.546013 | 0.525467 |
| MmuSTS.1287.1.S1_at | MmuSTS.1287.1 | 8.1   | 7.86  | 0.2  | 0.19 | 1.18  | 0.118867 | 0.159617 | 0.396589 | 0.435785 |
| MmuSTS.1288.1.S1_at | MmuSTS.1288.1 | 8.7   | 8.64  | 0.25 | 0.08 | 1.04  | 0.63029  | 0.450346 | 0.818539 | 0.665643 |
| MmuSTS.1289.1.S1_at | MmuSTS.1289.1 | 10.12 | 10.2  | 0.07 | 0.03 | -1.06 | 0.036594 | 0.22003  | 0.246284 | 0.49344  |
| MmuSTS.129.1.S1_at  | MmuSTS.129.1  | 3.76  | 3.67  | 0.25 | 0.17 | 1.06  | 0.831924 | 0.519102 | 0.926006 | 0.710813 |
| MmuSTS.1290.1.S1_at | MmuSTS.1290.1 | 3.56  | 3.5   | 0.17 | 0.3  | 1.04  | 0.868765 | 0.406363 | 0.943567 | 0.634297 |
| MmuSTS.1291.1.S1_at | MmuSTS.1291.1 | 9.68  | 9.61  | 0.15 | 0.06 | 1.05  | 0.359224 | 0.017292 | 0.634811 | 0.166482 |
| MmuSTS.1292.1.S1_at | MmuSTS.1292.1 | 7.23  | 7.59  | 0.22 | 0.19 | -1.28 | 0.12251  | 0.209508 | 0.401245 | 0.48315  |
| MmuSTS.1293.1.S1_at | MmuSTS.1293.1 | 6.02  | 5.86  | 0.21 | 0.13 | 1.12  | 0.109861 | 0.271396 | 0.385105 | 0.536507 |
| MmuSTS.1294.1.S1_at | MmuSTS.1294.1 | 7.9   | 7.57  | 0.25 | 0.21 | 1.25  | 0.055157 | 0.298233 | 0.291849 | 0.556931 |
| MmuSTS.1295.1.S1_at | MmuSTS.1295.1 | 7.78  | 7.75  | 0.07 | 0.32 | 1.03  | 0.620912 | 0.045971 | 0.812296 | 0.258818 |
| MmuSTS.1296.1.S1_at | MmuSTS.1296.1 | 6.54  | 6.51  | 0.16 | 0.07 | 1.02  | 0.28918  | 0.578275 | 0.578786 | 0.748372 |
| MmuSTS.1297.1.S1_at | MmuSTS.1297.1 | 4.79  | 4.94  | 0.15 | 0.28 | -1.12 | 0.141174 | 0.300055 | 0.427044 | 0.558262 |
| MmuSTS.1298.1.S1_at | MmuSTS.1298.1 | 8.32  | 8.84  | 0.29 | 0.17 | -1.43 | 0.050195 | 0.246987 | 0.281792 | 0.516238 |
| MmuSTS.1299.1.S1_at | MmuSTS.1299.1 | 8.07  | 9.15  | 0.9  | 0.18 | -2.11 | 0.095091 | 0.009327 | 0.364251 | 0.12747  |
| MmuSTS.13.1.S1_at   | MmuSTS.13.1   | 8.98  | 6.99  | 0.84 | 0.21 | 3.97  | 0.014078 | 0.010094 | 0.170073 | 0.131794 |
| MmuSTS.130.1.S1_at  | MmuSTS.130.1  | 12.36 | 12.39 | 0.12 | 0.04 | -1.02 | 0.950633 | 0.696286 | 0.979576 | 0.823545 |
| MmuSTS.1300.1.S1_at | MmuSTS.1300.1 | 5.97  | 5.88  | 0.26 | 0.02 | 1.06  | 0.588564 | 0.777758 | 0.791173 | 0.87086  |
| MmuSTS.1301.1.S1_at | MmuSTS.1301.1 | 5.35  | 5.18  | 0.25 | 0.1  | 1.12  | 0.354823 | 0.908494 | 0.631821 | 0.948205 |
| MmuSTS.1302.1.S1_at | MmuSTS.1302.1 | 10.8  | 10.82 | 0.05 | 0.08 | -1.01 | 0.5692   | 0.13981  | 0.778726 | 0.413131 |
| MmuSTS.1303.1.S1_at | MmuSTS.1303.1 | 7.81  | 7.33  | 0.1  | 0.25 | 1.4   | 0.086117 | 0.134902 | 0.350603 | 0.406878 |
| MmuSTS.1304.1.S1_at | MmuSTS.1304.1 | 10.1  | 10.47 | 0.26 | 0.18 | -1.29 | 0.200862 | 0.345508 | 0.498259 | 0.590747 |
| MmuSTS.1305.1.S1_at | MmuSTS.1305.1 | 11.08 | 11.45 | 0.24 | 0.21 | -1.29 | 0.14234  | 0.020504 | 0.428351 | 0.179742 |
| MmuSTS.1306.1.S1_at | MmuSTS.1306.1 | 10.26 | 10.12 | 0.31 | 0.02 | 1.1   | 0.813655 | 0.925949 | 0.916671 | 0.958059 |
| MmuSTS.1307.1.S1_at | MmuSTS.1307.1 | 9.79  | 10.8  | 0.48 | 0.32 | -2.01 | 0.074497 | 0.14076  | 0.331227 | 0.414117 |
| MmuSTS.1308.1.S1_at | MmuSTS.1308.1 | 12.64 | 12.47 | 0.03 | 0.06 | 1.13  | 0.012932 | 0.59073  | 0.164364 | 0.756437 |
| MmuSTS.1309.1.S1_at | MmuSTS.1309.1 | 4.07  | 5.31  | 0.28 | 0.3  | -2.35 | 0.019885 | 0.014327 | 0.194289 | 0.152764 |
| MmuSTS.131.1.S1_at  | MmuSTS.131.1  | 3.76  | 3.97  | 0.18 | 0.07 | -1.16 | 0.470673 | 0.495361 | 0.715067 | 0.695433 |
| MmuSTS.1310.1.S1_at | MmuSTS.1310.1 | 3.68  | 3.78  | 0.11 | 0.04 | -1.07 | 0.649787 | 0.236099 | 0.829934 | 0.507179 |
| MmuSTS.1311.1.S1_at | MmuSTS.1311.1 | 4.9   | 5.16  | 0.13 | 0.08 | -1.2  | 0.045596 | 0.40001  | 0.271011 | 0.630158 |
| MmuSTS.1312.1.S1_at | MmuSTS.1312.1 | 8.81  | 8.97  | 0.2  | 0.14 | -1.12 | 0.173038 | 0.712723 | 0.46717  | 0.8335   |
| MmuSTS.1313.1.S1_at | MmuSTS.1313.1 | 7.19  | 7.63  | 0.4  | 0.05 | -1.36 | 0.079657 | 0.134383 | 0.33985  | 0.406603 |
| MmuSTS.1314.1.S1_at | MmuSTS.1314.1 | 10.03 | 9.75  | 0.37 | 0.11 | 1.22  | 0.299329 | 0.735577 | 0.587663 | 0.846993 |
| MmuSTS.1315.1.S1_at | MmuSTS.1315.1 | 6.06  | 6.28  | 0.08 | 0.28 | -1.17 | 0.293077 | 0.313654 | 0.582105 | 0.568009 |
| MmuSTS.1316.1.S1_at | MmuSTS.1316.1 | 6.82  | 5.85  | 0.61 | 0.29 | 1.96  | 0.18509  | 0.485098 | 0.481225 | 0.688913 |

|                       |               |       |       |      |      |       |          |          |          |          |
|-----------------------|---------------|-------|-------|------|------|-------|----------|----------|----------|----------|
| MmuSTS.1317.1.S1_at   | MmuSTS.1317.1 | 12.2  | 11.95 | 0.07 | 0.01 | 1.19  | 0.002454 | 0.032087 | 0.093923 | 0.221733 |
| MmuSTS.1318.1.S1_at   | MmuSTS.1318.1 | 8.3   | 8.33  | 0.16 | 0.09 | -1.02 | 0.602095 | 0.441639 | 0.800013 | 0.659769 |
| MmuSTS.1319.1.S1_at   | MmuSTS.1319.1 | 3.63  | 3.68  | 0.02 | 0.08 | -1.04 | 0.214733 | 0.257707 | 0.512314 | 0.525343 |
| MmuSTS.132.1.S1_s_at  | MmuSTS.132.1  | 5.09  | 5.21  | 0.06 | 0.16 | -1.08 | 0.30323  | 0.250465 | 0.590656 | 0.519391 |
| MmuSTS.1320.1.S1_at   | MmuSTS.1320.1 | 8.75  | 10.18 | 0.25 | 0.26 | -2.71 | 0.001632 | 0.018665 | 0.084217 | 0.171716 |
| MmuSTS.1321.1.S1_at   | MmuSTS.1321.1 | 3.99  | 3.92  | 0.15 | 0.17 | 1.05  | 0.934214 | 0.583419 | 0.972408 | 0.751772 |
| MmuSTS.1322.1.S1_at   | MmuSTS.1322.1 | 4.18  | 4     | 0.06 | 0.05 | 1.14  | 0.051644 | 0.439814 | 0.284589 | 0.658439 |
| MmuSTS.1323.1.S1_at   | MmuSTS.1323.1 | 12.44 | 11.84 | 0.09 | 0.11 | 1.51  | 0.001782 | 0.303615 | 0.085481 | 0.561073 |
| MmuSTS.1324.1.S1_at   | MmuSTS.1324.1 | 9.46  | 9.38  | 0.03 | 0.11 | 1.05  | 0.462831 | 0.669175 | 0.709801 | 0.806492 |
| MmuSTS.1325.1.S1_at   | MmuSTS.1325.1 | 8.83  | 8.34  | 0.06 | 0.11 | 1.4   | 0.005871 | 0.04537  | 0.12277  | 0.257378 |
| MmuSTS.1326.1.S1_at   | MmuSTS.1326.1 | 8.99  | 8.9   | 0.27 | 0.02 | 1.06  | 0.215235 | 0.355009 | 0.512891 | 0.597466 |
| MmuSTS.1327.1.S1_at   | MmuSTS.1327.1 | 6.47  | 6.69  | 0.22 | 0.1  | -1.16 | 0.759101 | 0.915852 | 0.889606 | 0.952836 |
| MmuSTS.1328.1.S1_at   | MmuSTS.1328.1 | 9.17  | 9.16  | 0.19 | 0.05 | 1.01  | 0.861826 | 0.192211 | 0.94005  | 0.467665 |
| MmuSTS.1329.1.S1_at   | MmuSTS.1329.1 | 12.66 | 12.59 | 0.07 | 0.03 | 1.05  | 0.352825 | 0.646009 | 0.630102 | 0.792676 |
| MmuSTS.133.1.S1_at    | MmuSTS.133.1  | 14.02 | 14.03 | 0.05 | 0.05 | -1.01 | 0.692685 | 0.028569 | 0.853127 | 0.210791 |
| MmuSTS.1330.1.S1_at   | MmuSTS.1330.1 | 8.99  | 9.35  | 0.2  | 0.17 | -1.29 | 0.038462 | 0.005726 | 0.2521   | 0.104271 |
| MmuSTS.1331.1.S1_at   | MmuSTS.1331.1 | 3.89  | 3.98  | 0.03 | 0.13 | -1.07 | 0.671404 | 0.868783 | 0.842413 | 0.925437 |
| MmuSTS.1332.1.S1_at   | MmuSTS.1332.1 | 8.66  | 8.27  | 0.26 | 0.18 | 1.32  | 0.176727 | 0.038645 | 0.471201 | 0.241683 |
| MmuSTS.1333.1.S1_at   | MmuSTS.1333.1 | 5.1   | 6.79  | 0.71 | 0.18 | -3.24 | 0.042534 | 0.040413 | 0.263299 | 0.246134 |
| MmuSTS.1334.1.S1_at   | MmuSTS.1334.1 | 5.63  | 7.15  | 0.56 | 0.28 | -2.87 | 0.019965 | 0.011562 | 0.194588 | 0.139171 |
| MmuSTS.1335.1.S1_at   | MmuSTS.1335.1 | 7.45  | 8.31  | 0.33 | 0.24 | -1.82 | 0.022633 | 0.010205 | 0.203548 | 0.132451 |
| MmuSTS.1336.1.S1_at   | MmuSTS.1336.1 | 12.99 | 12.73 | 0.03 | 0.06 | 1.2   | 0.003301 | 0.001496 | 0.102162 | 0.058967 |
| MmuSTS.1336.1.S1_s_at | MmuSTS.1336.1 | 12.92 | 12.75 | 0.03 | 0.06 | 1.12  | 0.007864 | 0.042598 | 0.137523 | 0.251035 |
| MmuSTS.1337.1.S1_at   | MmuSTS.1337.1 | 4.86  | 4.82  | 0.13 | 0.06 | 1.03  | 0.61986  | 0.149589 | 0.811502 | 0.424115 |
| MmuSTS.1338.1.S1_at   | MmuSTS.1338.1 | 4.6   | 4.94  | 0.64 | 0.15 | -1.26 | 0.912734 | 0.960403 | 0.963144 | 0.977488 |
| MmuSTS.1339.1.S1_at   | MmuSTS.1339.1 | 10.82 | 10.45 | 0.22 | 0.17 | 1.29  | 0.105259 | 0.004355 | 0.379136 | 0.092417 |
| MmuSTS.134.1.S1_at    | MmuSTS.134.1  | 5.92  | 6.25  | 0.25 | 0.29 | -1.25 | 0.04476  | 0.128251 | 0.268899 | 0.399362 |
| MmuSTS.1340.1.S1_at   | MmuSTS.1340.1 | 11.98 | 11.82 | 0.11 | 0    | 1.12  | 0.20172  | 0.091264 | 0.499224 | 0.346275 |
| MmuSTS.1341.1.S1_at   | MmuSTS.1341.1 | 8.96  | 9.66  | 0.6  | 0.05 | -1.62 | 0.117167 | 0.237958 | 0.394399 | 0.508495 |
| MmuSTS.1342.1.S1_at   | MmuSTS.1342.1 | 6.45  | 6.45  | 0.07 | 0.09 | -1    | 0.497516 | 0.428836 | 0.733194 | 0.650408 |
| MmuSTS.1343.1.S1_at   | MmuSTS.1343.1 | 10.96 | 11.57 | 1.74 | 0.27 | -1.52 | 0.480871 | 0.111285 | 0.721641 | 0.375963 |
| MmuSTS.1344.1.S1_at   | MmuSTS.1344.1 | 6.43  | 7.22  | 0.38 | 0.29 | -1.72 | 0.043927 | 0.171415 | 0.266567 | 0.447874 |
| MmuSTS.1345.1.S1_at   | MmuSTS.1345.1 | 11.21 | 12.69 | 0.71 | 0.09 | -2.79 | 0.02376  | 0.165203 | 0.207137 | 0.441389 |
| MmuSTS.1346.1.S1_at   | MmuSTS.1346.1 | 11.03 | 11.15 | 0.04 | 0.06 | -1.09 | 0.082467 | 0.050605 | 0.344209 | 0.270317 |
| MmuSTS.1347.1.S1_at   | MmuSTS.1347.1 | 12.68 | 11.13 | 0.22 | 0.28 | 2.93  | 0.002434 | 0.001683 | 0.093645 | 0.062108 |
| MmuSTS.1348.1.S1_at   | MmuSTS.1348.1 | 5.1   | 7.4   | 0.35 | 0.21 | -4.94 | 0.000827 | 0.098835 | 0.07338  | 0.357002 |
| MmuSTS.1349.1.S1_at   | MmuSTS.1349.1 | 8.81  | 9.33  | 0.37 | 0.07 | -1.43 | 0.11865  | 0.115099 | 0.396337 | 0.381985 |
| MmuSTS.135.1.S1_s_at  | MmuSTS.135.1  | 3.9   | 3.89  | 0.08 | 0.01 | 1.01  | 0.551667 | 0.442263 | 0.768597 | 0.660309 |
| MmuSTS.1350.1.S1_at   | MmuSTS.1350.1 | 7.63  | 8.25  | 0.39 | 0.07 | -1.53 | 0.048251 | 0.352896 | 0.276959 | 0.596217 |
| MmuSTS.1351.1.S1_at   | MmuSTS.1351.1 | 6.65  | 6.33  | 0.53 | 0.35 | 1.24  | 0.434718 | 0.064771 | 0.689913 | 0.300439 |
| MmuSTS.1352.1.S1_at   | MmuSTS.1352.1 | 4.79  | 4.71  | 0.13 | 0.11 | 1.05  | 0.863448 | 0.064248 | 0.940655 | 0.299692 |
| MmuSTS.1353.1.S1_at   | MmuSTS.1353.1 | 4.76  | 4.75  | 0.24 | 0.06 | 1.01  | 0.353233 | 0.498204 | 0.630388 | 0.697351 |
| MmuSTS.1354.1.S1_at   | MmuSTS.1354.1 | 7.78  | 7.06  | 0.24 | 0.47 | 1.65  | 0.201809 | 0.344877 | 0.49928  | 0.590208 |



|                       |               |       |       |      |      |        |          |          |          |          |
|-----------------------|---------------|-------|-------|------|------|--------|----------|----------|----------|----------|
| MmuSTS.1355.1.S1_at   | MmuSTS.1355.1 | 12.08 | 12.07 | 0.22 | 0.03 | 1.01   | 0.328107 | 0.54273  | 0.61059  | 0.725703 |
| MmuSTS.1356.1.S1_at   | MmuSTS.1356.1 | 5.58  | 6.26  | 0.54 | 0.3  | -1.6   | 0.195886 | 0.354986 | 0.492745 | 0.597466 |
| MmuSTS.1357.1.S1_s_at | MmuSTS.1357.1 | 6.08  | 7.53  | 0.49 | 0.11 | -2.74  | 0.006477 | 0.00509  | 0.127306 | 0.099108 |
| MmuSTS.1358.1.S1_at   | MmuSTS.1358.1 | 2.94  | 3.11  | 0.05 | 0.25 | -1.12  | 0.3448   | 0.474746 | 0.624027 | 0.681695 |
| MmuSTS.1358.1.S1_x_at | MmuSTS.1358.1 | 2.98  | 2.98  | 0.05 | 0.08 | 1      | 0.512152 | 0.084601 | 0.742874 | 0.336098 |
| MmuSTS.1359.1.S1_at   | MmuSTS.1359.1 | 9.64  | 9.45  | 0.7  | 0.07 | 1.14   | 0.641218 | 0.314675 | 0.824717 | 0.568437 |
| MmuSTS.136.1.S1_at    | MmuSTS.136.1  | 9.35  | 9.68  | 0.2  | 0.05 | -1.26  | 0.174177 | 0.524183 | 0.468365 | 0.714207 |
| MmuSTS.1360.1.S1_at   | MmuSTS.1360.1 | 12.11 | 12.77 | 0.26 | 0.06 | -1.58  | 0.035387 | 0.043213 | 0.242919 | 0.252647 |
| MmuSTS.1361.1.S1_at   | MmuSTS.1361.1 | 9.68  | 8.87  | 0.5  | 0.2  | 1.75   | 0.024042 | 0.122056 | 0.208189 | 0.391558 |
| MmuSTS.1362.1.S1_at   | MmuSTS.1362.1 | 11.01 | 10.94 | 0.04 | 0.01 | 1.05   | 0.050516 | 0.026686 | 0.282549 | 0.204241 |
| MmuSTS.1363.1.S1_at   | MmuSTS.1363.1 | 5.2   | 5.58  | 0.1  | 0.13 | -1.31  | 0.016532 | 0.437388 | 0.181539 | 0.656684 |
| MmuSTS.1364.1.S1_at   | MmuSTS.1364.1 | 13.1  | 12.99 | 0.14 | 0.03 | 1.08   | 0.89047  | 0.946644 | 0.953316 | 0.969766 |
| MmuSTS.1365.1.S1_s_at | MmuSTS.1365.1 | 9.46  | 9.28  | 0.29 | 0.5  | 1.13   | 0.69394  | 0.000314 | 0.853798 | 0.035198 |
| MmuSTS.1366.1.S1_at   | MmuSTS.1366.1 | 12.1  | 12.33 | 0.11 | 0.2  | -1.18  | 0.363097 | 0.091594 | 0.637776 | 0.346713 |
| MmuSTS.1367.1.S1_at   | MmuSTS.1367.1 | 11.01 | 11.29 | 0.47 | 0.22 | -1.21  | 0.56783  | 0.093102 | 0.777977 | 0.349292 |
| MmuSTS.1368.1.S1_at   | MmuSTS.1368.1 | 10.13 | 10.35 | 0.43 | 0.13 | -1.17  | 0.17496  | 0.587232 | 0.469267 | 0.7541   |
| MmuSTS.1369.1.S1_at   | MmuSTS.1369.1 | 10.43 | 10.37 | 0.06 | 0.04 | 1.05   | 0.145375 | 0.180862 | 0.432667 | 0.457391 |
| MmuSTS.137.1.S1_at    | MmuSTS.137.1  | 7.25  | 7.57  | 0.08 | 0.06 | -1.25  | 0.0036   | 0.059913 | 0.105385 | 0.291408 |
| MmuSTS.1370.1.S1_at   | MmuSTS.1370.1 | 11.66 | 10.19 | 0.18 | 0.22 | 2.77   | 0.001114 | 0.001248 | 0.077306 | 0.054879 |
| MmuSTS.1371.1.S1_at   | MmuSTS.1371.1 | 5.81  | 5.59  | 0.04 | 0.08 | 1.17   | 0.011365 | 0.018292 | 0.156786 | 0.170097 |
| MmuSTS.1372.1.S1_at   | MmuSTS.1372.1 | 4.81  | 4.43  | 0.7  | 0.16 | 1.3    | 0.327682 | 0.402311 | 0.610332 | 0.631347 |
| MmuSTS.1373.1.S1_at   | MmuSTS.1373.1 | 7.24  | 7.94  | 0.36 | 0.27 | -1.63  | 0.081525 | 0.170918 | 0.342512 | 0.447561 |
| MmuSTS.1374.1.S1_at   | MmuSTS.1374.1 | 12.24 | 12.26 | 0.13 | 0.07 | -1.01  | 0.375494 | 0.758974 | 0.646352 | 0.859942 |
| MmuSTS.1375.1.S1_at   | MmuSTS.1375.1 | 12.47 | 12.53 | 0.06 | 0.01 | -1.04  | 0.190639 | 0.069736 | 0.486842 | 0.310191 |
| MmuSTS.1376.1.S1_at   | MmuSTS.1376.1 | 6.11  | 6.4   | 0.12 | 0.08 | -1.22  | 0.01173  | 0.029987 | 0.15815  | 0.214956 |
| MmuSTS.1377.1.S1_at   | MmuSTS.1377.1 | 5.11  | 5.47  | 0.22 | 0.25 | -1.28  | 0.127787 | 0.212504 | 0.409656 | 0.486502 |
| MmuSTS.1378.1.S1_at   | MmuSTS.1378.1 | 4.55  | 6.17  | 0.47 | 0.22 | -3.08  | 0.008588 | 0.006593 | 0.142192 | 0.110053 |
| MmuSTS.1379.1.S1_at   | MmuSTS.1379.1 | 7.15  | 7.3   | 0.63 | 0.17 | -1.11  | 0.342644 | 0.674883 | 0.622342 | 0.810065 |
| MmuSTS.138.1.S1_at    | MmuSTS.138.1  | 10.48 | 9.49  | 0.47 | 0.17 | 1.98   | 0.037394 | 0.233045 | 0.248739 | 0.50445  |
| MmuSTS.1380.1.S1_at   | MmuSTS.1380.1 | 5.62  | 7.57  | 1.56 | 0.13 | -3.86  | 0.119364 | 0.069235 | 0.397207 | 0.309436 |
| MmuSTS.1381.1.S1_at   | MmuSTS.1381.1 | 3.78  | 3.7   | 0.39 | 0.07 | 1.06   | 0.568461 | 0.573435 | 0.77836  | 0.745125 |
| MmuSTS.1382.1.S1_at   | MmuSTS.1382.1 | 3.1   | 3.41  | 0.19 | 0.41 | -1.24  | 0.11803  | 0.348594 | 0.395593 | 0.59263  |
| MmuSTS.1383.1.S1_at   | MmuSTS.1383.1 | 6.31  | 6.56  | 0.36 | 0.28 | -1.19  | 0.415938 | 0.434612 | 0.676502 | 0.654747 |
| MmuSTS.1384.1.S1_at   | MmuSTS.1384.1 | 7.57  | 7.78  | 0.45 | 0.24 | -1.16  | 0.733798 | 0.197726 | 0.875909 | 0.472633 |
| MmuSTS.1385.1.S1_at   | MmuSTS.1385.1 | 7.43  | 8.83  | 0.43 | 0.33 | -2.65  | 0.017749 | 0.175483 | 0.18688  | 0.452157 |
| MmuSTS.1386.1.S1_at   | MmuSTS.1386.1 | 6.28  | 6.22  | 0.1  | 0.22 | 1.04   | 0.699993 | 0.709677 | 0.857509 | 0.831736 |
| MmuSTS.1387.1.S1_at   | MmuSTS.1387.1 | 5.75  | 6.11  | 0.11 | 0.08 | -1.28  | 0.014999 | 0.03089  | 0.174543 | 0.217584 |
| MmuSTS.1388.1.S1_at   | MmuSTS.1388.1 | 5.55  | 5.51  | 0.24 | 0.02 | 1.03   | 0.284482 | 0.394077 | 0.574425 | 0.626734 |
| MmuSTS.1389.1.S1_at   | MmuSTS.1389.1 | 6.62  | 6.44  | 0.1  | 0.02 | 1.14   | 0.041636 | 0.120573 | 0.260483 | 0.389378 |
| MmuSTS.139.1.S1_at    | MmuSTS.139.1  | 6.07  | 9.8   | 1.6  | 0.22 | -13.23 | 0.045173 | 0.325162 | 0.270005 | 0.575591 |
| MmuSTS.1390.1.S1_at   | MmuSTS.1390.1 | 5.94  | 5.84  | 0.32 | 0.18 | 1.07   | 0.739501 | 0.61276  | 0.879245 | 0.770189 |
| MmuSTS.1391.1.S1_at   | MmuSTS.1391.1 | 3.61  | 3.84  | 0.15 | 0.19 | -1.18  | 0.347917 | 0.463777 | 0.626069 | 0.674656 |
| MmuSTS.1392.1.S1_at   | MmuSTS.1392.1 | 8.45  | 7.8   | 0.35 | 0.48 | 1.57   | 0.147674 | 0.013994 | 0.435646 | 0.151593 |

|                       |               |       |       |      |      |       |          |          |          |          |
|-----------------------|---------------|-------|-------|------|------|-------|----------|----------|----------|----------|
| MmuSTS.1393.1.S1_at   | MmuSTS.1393.1 | 5.4   | 5.13  | 0.09 | 0.07 | 1.2   | 0.022574 | 0.031184 | 0.203331 | 0.21838  |
| MmuSTS.1394.1.S1_at   | MmuSTS.1394.1 | 5.28  | 5.2   | 0.02 | 0.05 | 1.06  | 0.089512 | 0.086181 | 0.356406 | 0.338568 |
| MmuSTS.1395.1.S1_at   | MmuSTS.1395.1 | 12.23 | 12.47 | 0.14 | 0.02 | -1.18 | 0.049261 | 0.090727 | 0.279456 | 0.345205 |
| MmuSTS.1396.1.S1_s_at | MmuSTS.1396.1 | 9.18  | 9.25  | 0.09 | 0.11 | -1.05 | 0.396925 | 0.4391   | 0.662771 | 0.657854 |
| MmuSTS.1397.1.S1_at   | MmuSTS.1397.1 | 9.06  | 10.72 | 0.29 | 0.22 | -3.16 | 0.001304 | 0.176435 | 0.078631 | 0.45282  |
| MmuSTS.1398.1.S1_at   | MmuSTS.1398.1 | 9.66  | 10.91 | 0.66 | 0.07 | -2.38 | 0.030988 | 0.178585 | 0.229092 | 0.454817 |
| MmuSTS.1399.1.S1_at   | MmuSTS.1399.1 | 9.67  | 10.53 | 0.78 | 0.21 | -1.81 | 0.057321 | 0.185933 | 0.296809 | 0.461772 |
| MmuSTS.14.1.S1_at     | MmuSTS.14.1   | 9.6   | 10.16 | 0.1  | 0.06 | -1.48 | 0.001314 | 0.015343 | 0.078631 | 0.157315 |
| MmuSTS.140.1.S1_at    | MmuSTS.140.1  | 5.18  | 5.23  | 0.11 | 0.16 | -1.04 | 0.89444  | 0.002843 | 0.954958 | 0.078566 |
| MmuSTS.1400.1.S1_at   | MmuSTS.1400.1 | 5.29  | 5.02  | 0.19 | 0.11 | 1.21  | 0.063347 | 0.043753 | 0.308295 | 0.25387  |
| MmuSTS.1401.1.S1_at   | MmuSTS.1401.1 | 6.14  | 6.16  | 0.06 | 0.09 | -1.02 | 0.50642  | 0.16737  | 0.739167 | 0.443785 |
| MmuSTS.1402.1.S1_at   | MmuSTS.1402.1 | 2.86  | 2.9   | 0.08 | 0.12 | -1.03 | 0.585093 | 0.820985 | 0.789015 | 0.896977 |
| MmuSTS.1403.1.S1_s_at | MmuSTS.1403.1 | 5.65  | 5.61  | 0.07 | 0.1  | 1.03  | 0.625324 | 0.275363 | 0.815334 | 0.539663 |
| MmuSTS.1404.1.S1_at   | MmuSTS.1404.1 | 4.54  | 4.39  | 0.11 | 0.16 | 1.11  | 0.631402 | 0.737713 | 0.819025 | 0.848062 |
| MmuSTS.1405.1.S1_at   | MmuSTS.1405.1 | 5.76  | 6.22  | 0.28 | 0.03 | -1.38 | 0.134025 | 0.123313 | 0.417489 | 0.393386 |
| MmuSTS.1406.1.S1_at   | MmuSTS.1406.1 | 9.78  | 9.76  | 0.34 | 0.33 | 1.02  | 0.733068 | 0.026749 | 0.875472 | 0.204493 |
| MmuSTS.1407.1.S1_at   | MmuSTS.1407.1 | 6.98  | 8.7   | 0.3  | 0.13 | -3.31 | 0.001138 | 0.000235 | 0.077306 | 0.03241  |
| MmuSTS.1408.1.S1_at   | MmuSTS.1408.1 | 6.87  | 6.89  | 0.16 | 0.09 | -1.02 | 0.666851 | 0.8883   | 0.840039 | 0.936315 |
| MmuSTS.1409.1.S1_at   | MmuSTS.1409.1 | 5.34  | 5.54  | 0.4  | 0.21 | -1.15 | 0.183337 | 0.197869 | 0.479273 | 0.472805 |
| MmuSTS.141.1.S1_at    | MmuSTS.141.1  | 10.18 | 9.86  | 0.34 | 0.16 | 1.25  | 0.22468  | 0.147603 | 0.522708 | 0.421901 |
| MmuSTS.1410.1.S1_at   | MmuSTS.1410.1 | 11.58 | 11.4  | 0.12 | 0.05 | 1.13  | 0.079055 | 0.638403 | 0.338758 | 0.787631 |
| MmuSTS.1411.1.S1_at   | MmuSTS.1411.1 | 8.24  | 8.13  | 0.27 | 0.26 | 1.07  | 0.839005 | 0.259689 | 0.929366 | 0.526583 |
| MmuSTS.1412.1.S1_at   | MmuSTS.1412.1 | 5.25  | 5.6   | 0.24 | 0.14 | -1.27 | 0.059171 | 0.246491 | 0.30037  | 0.515917 |
| MmuSTS.1413.1.S1_at   | MmuSTS.1413.1 | 6.26  | 6.26  | 0.01 | 0.11 | 1     | 0.632518 | 0.943642 | 0.819841 | 0.967966 |
| MmuSTS.1414.1.S1_at   | MmuSTS.1414.1 | 10.24 | 11.13 | 0.24 | 0.09 | -1.84 | 0.002382 | 0.004967 | 0.093326 | 0.098202 |
| MmuSTS.1415.1.S1_at   | MmuSTS.1415.1 | 11.77 | 11.07 | 0.29 | 0.17 | 1.62  | 0.057967 | 0.015059 | 0.297866 | 0.155852 |
| MmuSTS.1416.1.S1_at   | MmuSTS.1416.1 | 3.85  | 3.55  | 0.3  | 0.25 | 1.23  | 0.234742 | 0.017787 | 0.532848 | 0.168549 |
| MmuSTS.1417.1.S1_at   | MmuSTS.1417.1 | 12.41 | 12.37 | 0.07 | 0.07 | 1.03  | 0.587795 | 0.887931 | 0.790681 | 0.936115 |
| MmuSTS.1418.1.S1_at   | MmuSTS.1418.1 | 8.62  | 8.67  | 0.11 | 0.25 | -1.03 | 0.873748 | 0.698612 | 0.945733 | 0.824912 |
| MmuSTS.1419.1.S1_at   | MmuSTS.1419.1 | 4.63  | 5.78  | 0.31 | 0.45 | -2.22 | 0.041425 | 0.148668 | 0.259966 | 0.423201 |
| MmuSTS.142.1.S1_at    | MmuSTS.142.1  | 10.98 | 10.83 | 0.11 | 0.06 | 1.11  | 0.126607 | 0.20332  | 0.408002 | 0.477521 |
| MmuSTS.1420.1.S1_at   | MmuSTS.1420.1 | 6.71  | 7.09  | 0.81 | 0.34 | -1.3  | 0.284282 | 0.455922 | 0.574388 | 0.669712 |
| MmuSTS.1421.1.S1_at   | MmuSTS.1421.1 | 6.43  | 6.45  | 0.18 | 0.1  | -1.01 | 0.462544 | 0.089146 | 0.709725 | 0.343188 |
| MmuSTS.1422.1.S1_at   | MmuSTS.1422.1 | 8.96  | 8.46  | 0.19 | 0.12 | 1.42  | 0.01656  | 0.069352 | 0.181779 | 0.309558 |
| MmuSTS.1423.1.S1_at   | MmuSTS.1423.1 | 5     | 5.04  | 0.14 | 0.04 | -1.03 | 0.880811 | 0.040072 | 0.949338 | 0.245388 |
| MmuSTS.1424.1.S1_at   | MmuSTS.1424.1 | 4.82  | 7.48  | 1.35 | 0.51 | -6.33 | 0.092725 | 0.316561 | 0.361184 | 0.569938 |
| MmuSTS.1425.1.S1_at   | MmuSTS.1425.1 | 5.15  | 6.06  | 0.57 | 0.04 | -1.88 | 0.046935 | 0.030483 | 0.27447  | 0.216624 |
| MmuSTS.1426.1.S1_at   | MmuSTS.1426.1 | 13.63 | 13.37 | 0.14 | 0.03 | 1.2   | 0.081333 | 0.158305 | 0.342222 | 0.434043 |
| MmuSTS.1427.1.S1_at   | MmuSTS.1427.1 | 12.75 | 12.67 | 0.03 | 0.01 | 1.06  | 0.00506  | 0.185453 | 0.116301 | 0.461494 |
| MmuSTS.1428.1.S1_at   | MmuSTS.1428.1 | 11.81 | 12.21 | 0.18 | 0.04 | -1.32 | 0.018422 | 0.084776 | 0.188772 | 0.336285 |
| MmuSTS.1429.1.S1_at   | MmuSTS.1429.1 | 10.73 | 9.77  | 0.18 | 0.48 | 1.94  | 0.122352 | 0.070814 | 0.40112  | 0.31231  |
| MmuSTS.143.1.S1_at    | MmuSTS.143.1  | 8.06  | 8.78  | 0.64 | 0.15 | -1.65 | 0.456239 | 0.160683 | 0.705691 | 0.436758 |
| MmuSTS.1430.1.S1_at   | MmuSTS.1430.1 | 10.14 | 10.45 | 1.31 | 0.12 | -1.24 | 0.779373 | 0.773127 | 0.899222 | 0.868084 |

|                       |               |       |       |      |      |        |          |          |          |          |
|-----------------------|---------------|-------|-------|------|------|--------|----------|----------|----------|----------|
| MmuSTS.1431.1.S1_at   | MmuSTS.1431.1 | 12.43 | 12.06 | 0.08 | 0.04 | 1.3    | 0.002381 | 0.178803 | 0.093326 | 0.455099 |
| MmuSTS.1432.1.S1_at   | MmuSTS.1432.1 | 12.38 | 12.57 | 0.11 | 0.03 | -1.14  | 0.045809 | 0.050452 | 0.271515 | 0.269897 |
| MmuSTS.1433.1.S1_at   | MmuSTS.1433.1 | 5.96  | 4.29  | 0.27 | 0.1  | 3.18   | 0.000597 | 0.017166 | 0.070727 | 0.165989 |
| MmuSTS.1434.1.S1_at   | MmuSTS.1434.1 | 12.93 | 13.02 | 0.09 | 0.08 | -1.07  | 0.25214  | 0.446485 | 0.546792 | 0.662842 |
| MmuSTS.1434.1.S1_s_at | MmuSTS.1434.1 | 14.35 | 14.29 | 0.04 | 0.01 | 1.04   | 0.182771 | 0.265728 | 0.478544 | 0.531586 |
| MmuSTS.1434.1.S1_x_at | MmuSTS.1434.1 | 13.59 | 13.67 | 0.09 | 0.06 | -1.06  | 0.383864 | 0.534792 | 0.65303  | 0.720557 |
| MmuSTS.1435.1.S1_at   | MmuSTS.1435.1 | 13.68 | 13.71 | 0.02 | 0.02 | -1.02  | 0.025325 | 0.067669 | 0.212168 | 0.306199 |
| MmuSTS.1436.1.S1_at   | MmuSTS.1436.1 | 4.96  | 5.65  | 0.15 | 0.19 | -1.61  | 0.023681 | 0.044942 | 0.207081 | 0.256489 |
| MmuSTS.1437.1.S1_at   | MmuSTS.1437.1 | 8.74  | 12.73 | 2    | 0.17 | -15.84 | 0.075653 | 0.346909 | 0.333337 | 0.591725 |
| MmuSTS.1438.1.S1_at   | MmuSTS.1438.1 | 8.67  | 9.09  | 0.13 | 0.06 | -1.33  | 0.006268 | 0.014665 | 0.125436 | 0.154231 |
| MmuSTS.1439.1.S1_at   | MmuSTS.1439.1 | 11.37 | 10    | 0.03 | 0.09 | 2.6    | 0.000017 | 0.000015 | 0.045594 | 0.018351 |
| MmuSTS.144.1.S1_at    | MmuSTS.144.1  | 11.07 | 9.98  | 0.03 | 0.07 | 2.13   | 0.000012 | 0.000048 | 0.045594 | 0.025273 |
| MmuSTS.1440.1.S1_at   | MmuSTS.1440.1 | 7.65  | 7.15  | 0.11 | 0.06 | 1.41   | 0.001682 | 0.001645 | 0.084735 | 0.061345 |
| MmuSTS.1441.1.S1_at   | MmuSTS.1441.1 | 5.07  | 5.9   | 0.6  | 0.35 | -1.78  | 0.171796 | 0.207975 | 0.465719 | 0.482049 |
| MmuSTS.1442.1.S1_at   | MmuSTS.1442.1 | 4.98  | 5.34  | 0.21 | 0.41 | -1.28  | 0.282651 | 0.377228 | 0.573338 | 0.61485  |
| MmuSTS.1443.1.S1_at   | MmuSTS.1443.1 | 9.86  | 10.38 | 0.13 | 0.05 | -1.43  | 0.003314 | 0.000009 | 0.102389 | 0.016421 |
| MmuSTS.1444.1.S1_at   | MmuSTS.1444.1 | 8.68  | 10.81 | 0.77 | 0.25 | -4.39  | 0.029946 | 0.282676 | 0.226315 | 0.54543  |
| MmuSTS.1445.1.S1_at   | MmuSTS.1445.1 | 9.42  | 10.65 | 0.58 | 0.26 | -2.36  | 0.045469 | 0.035023 | 0.270804 | 0.231264 |
| MmuSTS.1446.1.S1_at   | MmuSTS.1446.1 | 5.53  | 5.57  | 0.09 | 0.13 | -1.03  | 0.905463 | 0.926483 | 0.960065 | 0.958312 |
| MmuSTS.1447.1.S1_at   | MmuSTS.1447.1 | 5.82  | 8     | 2.33 | 0.44 | -4.51  | 0.186982 | 0.377353 | 0.483077 | 0.6149   |
| MmuSTS.1448.1.S1_at   | MmuSTS.1448.1 | 6.61  | 9.01  | 1.16 | 0.38 | -5.28  | 0.076852 | 0.35009  | 0.335302 | 0.593862 |
| MmuSTS.1449.1.S1_at   | MmuSTS.1449.1 | 11.65 | 11.25 | 0.15 | 0.06 | 1.31   | 0.038514 | 0.078774 | 0.252142 | 0.325725 |
| MmuSTS.145.1.S1_at    | MmuSTS.145.1  | 7.04  | 6.61  | 0.54 | 0.08 | 1.35   | 0.816881 | 0.866052 | 0.918133 | 0.923791 |
| MmuSTS.1450.1.S1_at   | MmuSTS.1450.1 | 11.24 | 10.77 | 0.09 | 0.05 | 1.39   | 0.001216 | 0.000242 | 0.078338 | 0.032681 |
| MmuSTS.1451.1.S1_at   | MmuSTS.1451.1 | 10.87 | 10.67 | 0.06 | 0.06 | 1.15   | 0.021313 | 0.002278 | 0.199623 | 0.07037  |
| MmuSTS.1452.1.S1_at   | MmuSTS.1452.1 | 3.54  | 3.49  | 0.15 | 0.03 | 1.03   | 0.404096 | 0.590173 | 0.667997 | 0.756117 |
| MmuSTS.1453.1.S1_at   | MmuSTS.1453.1 | 9.83  | 9.6   | 0.29 | 0.02 | 1.17   | 0.082546 | 0.001662 | 0.344304 | 0.061704 |
| MmuSTS.1454.1.S1_at   | MmuSTS.1454.1 | 7.69  | 8.12  | 0.78 | 0.19 | -1.35  | 0.44045  | 0.07751  | 0.694477 | 0.323421 |
| MmuSTS.1455.1.S1_at   | MmuSTS.1455.1 | 10.3  | 10.91 | 0.39 | 0.07 | -1.53  | 0.037618 | 0.025004 | 0.249459 | 0.198121 |
| MmuSTS.1456.1.S1_at   | MmuSTS.1456.1 | 9.09  | 9.44  | 0.13 | 0.16 | -1.27  | 0.047143 | 0.007521 | 0.274594 | 0.116291 |
| MmuSTS.1457.1.S1_at   | MmuSTS.1457.1 | 7.89  | 8.07  | 0.11 | 0.06 | -1.13  | 0.042518 | 0.008611 | 0.263254 | 0.123102 |
| MmuSTS.1458.1.S1_at   | MmuSTS.1458.1 | 8.13  | 8.23  | 0.09 | 0.03 | -1.07  | 0.13915  | 0.767978 | 0.424893 | 0.865284 |
| MmuSTS.1459.1.S1_at   | MmuSTS.1459.1 | 6.19  | 6.66  | 0.22 | 0.19 | -1.39  | 0.024265 | 0.019353 | 0.208861 | 0.1748   |
| MmuSTS.146.1.S1_at    | MmuSTS.146.1  | 11.95 | 11.79 | 0.08 | 0.06 | 1.12   | 0.139295 | 0.239946 | 0.424942 | 0.510627 |
| MmuSTS.1460.1.S1_at   | MmuSTS.1460.1 | 11.11 | 11.02 | 0.12 | 0.07 | 1.07   | 0.477847 | 0.178255 | 0.719648 | 0.45458  |
| MmuSTS.1461.1.S1_at   | MmuSTS.1461.1 | 10.66 | 10.75 | 0.15 | 0.01 | -1.07  | 0.274803 | 0.849443 | 0.566556 | 0.914533 |
| MmuSTS.1462.1.S1_at   | MmuSTS.1462.1 | 5.9   | 7.32  | 0.84 | 0.66 | -2.67  | 0.080581 | 0.1538   | 0.341201 | 0.428488 |
| MmuSTS.1463.1.S1_at   | MmuSTS.1463.1 | 10.84 | 10.96 | 0.18 | 0.09 | -1.09  | 0.292546 | 0.812147 | 0.581743 | 0.89155  |
| MmuSTS.1464.1.S1_at   | MmuSTS.1464.1 | 5.16  | 5.34  | 0.34 | 0.12 | -1.14  | 0.291974 | 0.255065 | 0.581449 | 0.52317  |
| MmuSTS.1465.1.S1_at   | MmuSTS.1465.1 | 11.56 | 11.75 | 0.19 | 0.1  | -1.14  | 0.315681 | 0.415905 | 0.600483 | 0.641239 |
| MmuSTS.1466.1.S1_s_at | MmuSTS.1466.1 | 3.95  | 4.02  | 0.15 | 0.11 | -1.05  | 0.581151 | 0.814898 | 0.786393 | 0.893213 |
| MmuSTS.1467.1.S1_at   | MmuSTS.1467.1 | 5.84  | 5.79  | 0.11 | 0.04 | 1.03   | 0.799276 | 0.127786 | 0.909484 | 0.398644 |
| MmuSTS.1468.1.S1_at   | MmuSTS.1468.1 | 10.78 | 9.38  | 0.21 | 0.05 | 2.64   | 0.000354 | 0.000244 | 0.062105 | 0.032798 |

|                     |               |       |       |      |      |       |          |          |          |          |
|---------------------|---------------|-------|-------|------|------|-------|----------|----------|----------|----------|
| MmuSTS.1469.1.S1_at | MmuSTS.1469.1 | 9.8   | 11    | 0.29 | 0.16 | -2.31 | 0.0045   | 0.01763  | 0.113436 | 0.167839 |
| MmuSTS.147.1.S1_at  | MmuSTS.147.1  | 6.74  | 6.55  | 0.16 | 0.12 | 1.14  | 0.683706 | 0.437453 | 0.849222 | 0.656745 |
| MmuSTS.1470.1.S1_at | MmuSTS.1470.1 | 3.84  | 3.52  | 0.18 | 0.08 | 1.25  | 0.037972 | 0.036642 | 0.25063  | 0.235943 |
| MmuSTS.1471.1.S1_at | MmuSTS.1471.1 | 5.28  | 5.31  | 0.05 | 0.07 | -1.02 | 0.312067 | 0.784652 | 0.598188 | 0.875304 |
| MmuSTS.1472.1.S1_at | MmuSTS.1472.1 | 4.96  | 5.5   | 0.82 | 0.49 | -1.45 | 0.361466 | 0.391851 | 0.636937 | 0.625384 |
| MmuSTS.1473.1.S1_at | MmuSTS.1473.1 | 3.78  | 4.19  | 0.35 | 0.21 | -1.33 | 0.45212  | 0.603626 | 0.702737 | 0.764215 |
| MmuSTS.1474.1.S1_at | MmuSTS.1474.1 | 11.33 | 10.06 | 0.22 | 0.35 | 2.42  | 0.00978  | 0.036901 | 0.148542 | 0.236575 |
| MmuSTS.1475.1.S1_at | MmuSTS.1475.1 | 11.85 | 11.9  | 0.11 | 0.08 | -1.03 | 0.456777 | 0.101704 | 0.705979 | 0.361562 |
| MmuSTS.1476.1.S1_at | MmuSTS.1476.1 | 10.09 | 10.01 | 0.05 | 0.07 | 1.05  | 0.296464 | 0.505689 | 0.58519  | 0.702218 |
| MmuSTS.1477.1.S1_at | MmuSTS.1477.1 | 10.49 | 11    | 0.11 | 0.14 | -1.43 | 0.013616 | 0.181083 | 0.167477 | 0.457577 |
| MmuSTS.1478.1.S1_at | MmuSTS.1478.1 | 4.89  | 4.5   | 0.72 | 0.13 | 1.31  | 0.220024 | 0.178514 | 0.517666 | 0.454778 |
| MmuSTS.1479.1.S1_at | MmuSTS.1479.1 | 6.8   | 7.93  | 0.22 | 0.25 | -2.19 | 0.004479 | 0.08619  | 0.113436 | 0.338568 |
| MmuSTS.148.1.S1_at  | MmuSTS.148.1  | 11.85 | 11.78 | 0.21 | 0.06 | 1.05  | 0.532732 | 0.941458 | 0.756693 | 0.966805 |
| MmuSTS.1480.1.S1_at | MmuSTS.1480.1 | 4.75  | 4.74  | 0.16 | 0.22 | 1.01  | 0.96235  | 0.804743 | 0.984644 | 0.887712 |
| MmuSTS.1481.1.S1_at | MmuSTS.1481.1 | 4.52  | 4.61  | 0.02 | 0.12 | -1.07 | 0.29476  | 0.08958  | 0.583722 | 0.343811 |
| MmuSTS.1482.1.S1_at | MmuSTS.1482.1 | 10.97 | 10.91 | 0.05 | 0.13 | 1.05  | 0.917211 | 0.278164 | 0.964746 | 0.541805 |
| MmuSTS.1483.1.S1_at | MmuSTS.1483.1 | 8.27  | 7.62  | 0.2  | 0.2  | 1.58  | 0.01779  | 0.015698 | 0.187001 | 0.158742 |
| MmuSTS.1484.1.S1_at | MmuSTS.1484.1 | 7.27  | 6.8   | 0.32 | 0.28 | 1.38  | 0.133846 | 0.341677 | 0.417214 | 0.587796 |
| MmuSTS.1485.1.S1_at | MmuSTS.1485.1 | 9.04  | 8.5   | 0.25 | 0.1  | 1.45  | 0.027563 | 0.000212 | 0.218525 | 0.032262 |
| MmuSTS.1486.1.S1_at | MmuSTS.1486.1 | 10.93 | 11.02 | 0.22 | 0.13 | -1.06 | 0.747477 | 0.930328 | 0.883065 | 0.960394 |
| MmuSTS.1487.1.S1_at | MmuSTS.1487.1 | 9.48  | 9.21  | 0.17 | 0.1  | 1.21  | 0.147209 | 0.056059 | 0.43531  | 0.282647 |
| MmuSTS.1488.1.S1_at | MmuSTS.1488.1 | 8.66  | 8.6   | 0.07 | 0.14 | 1.04  | 0.754501 | 0.029171 | 0.886805 | 0.212798 |
| MmuSTS.1489.1.S1_at | MmuSTS.1489.1 | 11.82 | 11.63 | 0.06 | 0.04 | 1.14  | 0.01865  | 0.009341 | 0.189742 | 0.127598 |
| MmuSTS.149.1.S1_at  | MmuSTS.149.1  | 7.26  | 6.08  | 0.55 | 0.11 | 2.27  | 0.023673 | 0.033552 | 0.207081 | 0.226764 |
| MmuSTS.1490.1.S1_at | MmuSTS.1490.1 | 11.62 | 11.32 | 0.12 | 0.04 | 1.23  | 0.025387 | 0.432194 | 0.21227  | 0.652775 |
| MmuSTS.1491.1.S1_at | MmuSTS.1491.1 | 9.54  | 9.78  | 0.12 | 0.07 | -1.18 | 0.032823 | 0.011028 | 0.235248 | 0.136793 |
| MmuSTS.1492.1.S1_at | MmuSTS.1492.1 | 8.7   | 8.54  | 0.51 | 0.14 | 1.12  | 0.681743 | 0.026746 | 0.848213 | 0.204493 |
| MmuSTS.1493.1.S1_at | MmuSTS.1493.1 | 8.51  | 8.39  | 0.08 | 0.02 | 1.09  | 0.300277 | 0.006091 | 0.588475 | 0.106327 |
| MmuSTS.1494.1.S1_at | MmuSTS.1494.1 | 11.71 | 11.81 | 0.17 | 0.09 | -1.07 | 0.693595 | 0.36569  | 0.853579 | 0.605684 |
| MmuSTS.1495.1.S1_at | MmuSTS.1495.1 | 7.43  | 7.76  | 0.15 | 0.15 | -1.25 | 0.154434 | 0.692963 | 0.444671 | 0.821324 |
| MmuSTS.1496.1.S1_at | MmuSTS.1496.1 | 11.97 | 11.96 | 0.09 | 0.16 | 1.01  | 0.695226 | 0.016949 | 0.854703 | 0.165073 |
| MmuSTS.1497.1.S1_at | MmuSTS.1497.1 | 7.46  | 7.74  | 0.87 | 0.29 | -1.21 | 0.827515 | 0.955164 | 0.923667 | 0.9746   |
| MmuSTS.1498.1.S1_at | MmuSTS.1498.1 | 11.05 | 10.99 | 0.25 | 0.11 | 1.04  | 0.403322 | 0.051235 | 0.667479 | 0.271799 |
| MmuSTS.1499.1.S1_at | MmuSTS.1499.1 | 11.49 | 11.18 | 0.11 | 0.02 | 1.24  | 0.010212 | 0.040739 | 0.150739 | 0.246735 |
| MmuSTS.15.1.S1_at   | MmuSTS.15.1   | 7.97  | 9.4   | 0.29 | 0.35 | -2.69 | 0.009411 | 0.000329 | 0.146817 | 0.035806 |
| MmuSTS.150.1.S1_at  | MmuSTS.150.1  | 9.2   | 8.91  | 0.22 | 0.17 | 1.23  | 0.033245 | 0.007637 | 0.236446 | 0.116928 |
| MmuSTS.1500.1.S1_at | MmuSTS.1500.1 | 12.32 | 12.67 | 0.38 | 0.12 | -1.28 | 0.780607 | 0.237763 | 0.899901 | 0.50826  |
| MmuSTS.1501.1.S1_at | MmuSTS.1501.1 | 10.49 | 11.31 | 0.47 | 0.07 | -1.77 | 0.027871 | 0.001743 | 0.219533 | 0.062895 |
| MmuSTS.1502.1.S1_at | MmuSTS.1502.1 | 9.35  | 8.62  | 0.37 | 0.25 | 1.67  | 0.037815 | 0.017355 | 0.250169 | 0.166751 |
| MmuSTS.1503.1.S1_at | MmuSTS.1503.1 | 7.27  | 7.56  | 0.32 | 0.25 | -1.22 | 0.632941 | 0.249623 | 0.820074 | 0.518682 |
| MmuSTS.1504.1.S1_at | MmuSTS.1504.1 | 12.75 | 12.31 | 0.16 | 0.03 | 1.35  | 0.009015 | 0.460063 | 0.144777 | 0.671989 |
| MmuSTS.1505.1.S1_at | MmuSTS.1505.1 | 4.69  | 6.67  | 0.39 | 0.41 | -3.95 | 0.007177 | 0.014221 | 0.132296 | 0.152283 |
| MmuSTS.1506.1.S1_at | MmuSTS.1506.1 | 7.41  | 8.43  | 0.02 | 0.11 | -2.03 | 0.000099 | 0.018068 | 0.051196 | 0.169379 |

|                       |               |       |       |      |      |        |          |          |          |          |
|-----------------------|---------------|-------|-------|------|------|--------|----------|----------|----------|----------|
| MmuSTS.1507.1.S1_at   | MmuSTS.1507.1 | 8.24  | 8.65  | 0.13 | 0.25 | -1.33  | 0.182805 | 0.118424 | 0.478557 | 0.386431 |
| MmuSTS.1508.1.S1_at   | MmuSTS.1508.1 | 7.78  | 8.2   | 0.5  | 0.29 | -1.33  | 0.182345 | 0.291949 | 0.478087 | 0.552156 |
| MmuSTS.1509.1.S1_at   | MmuSTS.1509.1 | 6.5   | 6.47  | 0.06 | 0.05 | 1.02   | 0.635056 | 0.018119 | 0.821123 | 0.169609 |
| MmuSTS.151.1.S1_at    | MmuSTS.151.1  | 9.16  | 9.41  | 0.05 | 0.17 | -1.19  | 0.107592 | 0.003603 | 0.382272 | 0.085876 |
| MmuSTS.1510.1.S1_at   | MmuSTS.1510.1 | 11.99 | 11.97 | 0.22 | 0.23 | 1.01   | 0.825162 | 0.040819 | 0.922341 | 0.246981 |
| MmuSTS.1511.1.S1_at   | MmuSTS.1511.1 | 8.67  | 8.53  | 0.18 | 0.16 | 1.1    | 0.462442 | 0.007009 | 0.709665 | 0.113    |
| MmuSTS.1512.1.S1_at   | MmuSTS.1512.1 | 11.31 | 11.12 | 0.16 | 0.06 | 1.14   | 0.345888 | 0.002203 | 0.624702 | 0.069315 |
| MmuSTS.1513.1.S1_at   | MmuSTS.1513.1 | 10.38 | 10.8  | 0.33 | 0.03 | -1.34  | 0.115039 | 0.10645  | 0.392078 | 0.368999 |
| MmuSTS.1514.1.S1_at   | MmuSTS.1514.1 | 9.41  | 10.11 | 0.16 | 0.23 | -1.63  | 0.042555 | 0.568054 | 0.263364 | 0.741761 |
| MmuSTS.1515.1.S1_at   | MmuSTS.1515.1 | 5.09  | 5.32  | 0.54 | 0.59 | -1.17  | 0.391312 | 0.508107 | 0.658623 | 0.70337  |
| MmuSTS.1516.1.S1_at   | MmuSTS.1516.1 | 9.21  | 9.24  | 0.21 | 0.04 | -1.02  | 0.298453 | 0.354076 | 0.586735 | 0.597048 |
| MmuSTS.1517.1.S1_at   | MmuSTS.1517.1 | 8.62  | 8.72  | 0.31 | 0.18 | -1.07  | 0.373695 | 0.00736  | 0.645118 | 0.115215 |
| MmuSTS.1518.1.S1_at   | MmuSTS.1518.1 | 6.24  | 7.48  | 1.19 | 0.22 | -2.36  | 0.099427 | 0.120987 | 0.370342 | 0.389975 |
| MmuSTS.1519.1.S1_at   | MmuSTS.1519.1 | 8.77  | 8.68  | 0.37 | 0.06 | 1.06   | 0.598976 | 0.888019 | 0.797745 | 0.936169 |
| MmuSTS.152.1.S1_at    | MmuSTS.152.1  | 10.5  | 10.9  | 0.05 | 0.16 | -1.32  | 0.042335 | 0.22632  | 0.262804 | 0.498781 |
| MmuSTS.1520.1.S1_at   | MmuSTS.1520.1 | 11.09 | 11.44 | 0.17 | 0.07 | -1.27  | 0.022481 | 0.383034 | 0.203193 | 0.619068 |
| MmuSTS.1521.1.S1_at   | MmuSTS.1521.1 | 3.75  | 3.81  | 0.07 | 0.28 | -1.05  | 0.848041 | 0.436756 | 0.933832 | 0.656276 |
| MmuSTS.1522.1.S1_at   | MmuSTS.1522.1 | 7.35  | 7.5   | 0.41 | 0.45 | -1.11  | 0.347441 | 0.473386 | 0.625532 | 0.68068  |
| MmuSTS.1523.1.S1_at   | MmuSTS.1523.1 | 9.59  | 13.51 | 1.88 | 0.12 | -15.16 | 0.062292 | 0.329946 | 0.306277 | 0.578874 |
| MmuSTS.1524.1.S1_at   | MmuSTS.1524.1 | 11.11 | 11.01 | 0.15 | 0.08 | 1.07   | 0.20967  | 0.020509 | 0.507147 | 0.179742 |
| MmuSTS.1525.1.S1_at   | MmuSTS.1525.1 | 7.33  | 6.36  | 0.22 | 0.27 | 1.95   | 0.008629 | 0.238817 | 0.142375 | 0.509485 |
| MmuSTS.1526.1.S1_at   | MmuSTS.1526.1 | 12.53 | 12.48 | 0.11 | 0.03 | 1.03   | 0.328895 | 0.461827 | 0.611174 | 0.673361 |
| MmuSTS.1527.1.S1_at   | MmuSTS.1527.1 | 12.7  | 12.46 | 0.06 | 0.06 | 1.18   | 0.009621 | 0.003228 | 0.14832  | 0.082124 |
| MmuSTS.1528.1.S1_at   | MmuSTS.1528.1 | 11.13 | 11.04 | 0.04 | 0.04 | 1.06   | 0.107608 | 0.1356   | 0.382296 | 0.407742 |
| MmuSTS.1529.1.S1_at   | MmuSTS.1529.1 | 12.87 | 12.76 | 0.05 | 0.02 | 1.08   | 0.018642 | 0.366761 | 0.189736 | 0.6065   |
| MmuSTS.153.1.S1_at    | MmuSTS.153.1  | 10.28 | 10.3  | 0.15 | 0.09 | -1.01  | 0.921079 | 0.01286  | 0.966268 | 0.14601  |
| MmuSTS.1530.1.S1_at   | MmuSTS.1530.1 | 5.76  | 5.76  | 0.43 | 0.22 | 1      | 0.752049 | 0.900243 | 0.885518 | 0.943337 |
| MmuSTS.1531.1.S1_at   | MmuSTS.1531.1 | 7.84  | 6.05  | 0.87 | 0.2  | 3.46   | 0.021643 | 0.00659  | 0.20067  | 0.110037 |
| MmuSTS.1532.1.S1_at   | MmuSTS.1532.1 | 8.43  | 8.57  | 0.28 | 0.2  | -1.11  | 0.760596 | 0.430538 | 0.890267 | 0.651544 |
| MmuSTS.1533.1.S1_at   | MmuSTS.1533.1 | 8.02  | 8.17  | 0.01 | 0.04 | -1.11  | 0.002853 | 0.316396 | 0.098362 | 0.569809 |
| MmuSTS.1533.1.S1_s_at | MmuSTS.1533.1 | 11.95 | 12.09 | 0.1  | 0.02 | -1.11  | 0.028257 | 0.184369 | 0.220719 | 0.460458 |
| MmuSTS.1534.1.S1_at   | MmuSTS.1534.1 | 10.42 | 8.86  | 0.41 | 0.18 | 2.94   | 0.003276 | 0.000656 | 0.102069 | 0.043559 |
| MmuSTS.1535.1.S1_at   | MmuSTS.1535.1 | 10.34 | 9.07  | 0.19 | 0.19 | 2.41   | 0.00107  | 0.007316 | 0.076737 | 0.114875 |
| MmuSTS.1536.1.S1_at   | MmuSTS.1536.1 | 5.15  | 5.11  | 0.23 | 0.12 | 1.02   | 0.327833 | 0.531362 | 0.610501 | 0.718591 |
| MmuSTS.1537.1.S1_at   | MmuSTS.1537.1 | 12.19 | 12.6  | 0.29 | 0.14 | -1.33  | 0.123801 | 0.07423  | 0.403548 | 0.318046 |
| MmuSTS.1538.1.S1_at   | MmuSTS.1538.1 | 6.41  | 7.79  | 0.3  | 0.2  | -2.59  | 0.004679 | 0.009582 | 0.115008 | 0.129001 |
| MmuSTS.1539.1.S1_at   | MmuSTS.1539.1 | 13.03 | 12.49 | 0.11 | 0.04 | 1.46   | 0.001251 | 0.002684 | 0.078631 | 0.076408 |
| MmuSTS.154.1.S1_x_at  | MmuSTS.154.1  | 3.95  | 4.1   | 0.67 | 0.08 | -1.1   | 0.571124 | 0.455816 | 0.779724 | 0.669659 |
| MmuSTS.1540.1.S1_at   | MmuSTS.1540.1 | 9.79  | 9.49  | 0.21 | 0.05 | 1.23   | 0.045933 | 0.134003 | 0.271942 | 0.406197 |
| MmuSTS.1541.1.S1_at   | MmuSTS.1541.1 | 11.11 | 11.03 | 0.35 | 0.14 | 1.06   | 0.769418 | 0.071943 | 0.894237 | 0.314293 |
| MmuSTS.1542.1.S1_at   | MmuSTS.1542.1 | 11.91 | 11.4  | 0.07 | 0.12 | 1.42   | 0.002543 | 0.01243  | 0.094413 | 0.144098 |
| MmuSTS.1543.1.S1_at   | MmuSTS.1543.1 | 3.39  | 3.28  | 0.18 | 0.03 | 1.08   | 0.941098 | 0.955964 | 0.975266 | 0.975016 |
| MmuSTS.1544.1.S1_at   | MmuSTS.1544.1 | 4.4   | 4.72  | 0.39 | 0.37 | -1.25  | 0.357653 | 0.577481 | 0.633636 | 0.747923 |

|                       |               |       |       |      |      |        |          |          |          |          |
|-----------------------|---------------|-------|-------|------|------|--------|----------|----------|----------|----------|
| MmuSTS.1545.1.S1_at   | MmuSTS.1545.1 | 7.55  | 7.92  | 0.54 | 0.07 | -1.29  | 0.658521 | 0.671012 | 0.835018 | 0.807635 |
| MmuSTS.1546.1.S1_at   | MmuSTS.1546.1 | 10.02 | 9.56  | 0.3  | 0.16 | 1.37   | 0.125118 | 0.274011 | 0.405516 | 0.538517 |
| MmuSTS.1547.1.S1_at   | MmuSTS.1547.1 | 3.51  | 3.59  | 0.03 | 0.05 | -1.06  | 0.073991 | 0.228179 | 0.330014 | 0.500351 |
| MmuSTS.1547.1.S1_s_at | MmuSTS.1547.1 | 5.34  | 5.34  | 0.51 | 0.07 | 1      | 0.372934 | 0.635584 | 0.645118 | 0.785437 |
| MmuSTS.1547.1.S1_x_at | MmuSTS.1547.1 | 4.26  | 4.22  | 0.09 | 0.11 | 1.03   | 0.214458 | 0.308803 | 0.512121 | 0.56463  |
| MmuSTS.1548.1.S1_at   | MmuSTS.1548.1 | 5.72  | 5.77  | 0.08 | 0.26 | -1.04  | 0.38048  | 0.671495 | 0.650225 | 0.807948 |
| MmuSTS.1549.1.S1_at   | MmuSTS.1549.1 | 10.57 | 10.83 | 0.17 | 0.11 | -1.2   | 0.159844 | 0.643782 | 0.451208 | 0.791128 |
| MmuSTS.155.1.S1_at    | MmuSTS.155.1  | 4.62  | 4.73  | 0.13 | 0.2  | -1.08  | 0.633719 | 0.268627 | 0.820473 | 0.534138 |
| MmuSTS.1550.1.S1_at   | MmuSTS.1550.1 | 10.8  | 10.87 | 0.1  | 0.06 | -1.05  | 0.757864 | 0.756472 | 0.888951 | 0.858223 |
| MmuSTS.1551.1.S1_at   | MmuSTS.1551.1 | 10.4  | 10.68 | 0.15 | 0.22 | -1.21  | 0.118595 | 0.00121  | 0.396265 | 0.054455 |
| MmuSTS.1552.1.S1_x_at | MmuSTS.1552.1 | 7.76  | 7.71  | 0.04 | 0.07 | 1.03   | 0.46683  | 0.053152 | 0.712461 | 0.276345 |
| MmuSTS.1553.1.S1_at   | MmuSTS.1553.1 | 8.85  | 8.54  | 0.18 | 0.03 | 1.23   | 0.060128 | 0.001863 | 0.302405 | 0.064697 |
| MmuSTS.1554.1.S1_at   | MmuSTS.1554.1 | 8.5   | 9.01  | 0.32 | 0.04 | -1.43  | 0.12776  | 0.274046 | 0.40963  | 0.538527 |
| MmuSTS.1555.1.S1_at   | MmuSTS.1555.1 | 10.75 | 10.93 | 0.21 | 0.13 | -1.13  | 0.168409 | 0.669964 | 0.46165  | 0.806982 |
| MmuSTS.1556.1.S1_at   | MmuSTS.1556.1 | 8.71  | 7.39  | 0.4  | 0.26 | 2.51   | 0.013649 | 0.012807 | 0.167609 | 0.145832 |
| MmuSTS.1557.1.S1_at   | MmuSTS.1557.1 | 11.05 | 10.88 | 0.03 | 0.1  | 1.12   | 0.121251 | 0.549252 | 0.399906 | 0.729737 |
| MmuSTS.1558.1.S1_at   | MmuSTS.1558.1 | 10.33 | 8.79  | 0.6  | 0.36 | 2.9    | 0.020683 | 0.008142 | 0.197469 | 0.119736 |
| MmuSTS.1559.1.S1_at   | MmuSTS.1559.1 | 10.97 | 11.29 | 0.62 | 0.09 | -1.24  | 0.876412 | 0.116709 | 0.947077 | 0.383888 |
| MmuSTS.156.1.S1_at    | MmuSTS.156.1  | 11.07 | 10.97 | 0.07 | 0.05 | 1.07   | 0.276732 | 0.021079 | 0.568265 | 0.181869 |
| MmuSTS.1560.1.S1_at   | MmuSTS.1560.1 | 7.41  | 7.75  | 1.79 | 0.1  | -1.26  | 0.96003  | 0.96014  | 0.983565 | 0.977408 |
| MmuSTS.1561.1.S1_s_at | MmuSTS.1561.1 | 12.43 | 12.39 | 0.05 | 0.05 | 1.03   | 0.770271 | 0.016977 | 0.894561 | 0.165195 |
| MmuSTS.1562.1.S1_at   | MmuSTS.1562.1 | 3.16  | 3.5   | 0.04 | 0.15 | -1.27  | 0.048431 | 0.072879 | 0.277485 | 0.315928 |
| MmuSTS.1563.1.S1_at   | MmuSTS.1563.1 | 10.55 | 9.29  | 0.16 | 0.26 | 2.41   | 0.004008 | 0.024642 | 0.108676 | 0.196442 |
| MmuSTS.1564.1.S1_at   | MmuSTS.1564.1 | 5.33  | 9.29  | 1.2  | 0.34 | -15.57 | 0.013001 | 0.155379 | 0.164775 | 0.430771 |
| MmuSTS.1565.1.S1_at   | MmuSTS.1565.1 | 8.2   | 7.03  | 0.3  | 0.22 | 2.24   | 0.003639 | 0.018885 | 0.105715 | 0.172872 |
| MmuSTS.1566.1.S1_at   | MmuSTS.1566.1 | 8.61  | 6.92  | 0.94 | 0.27 | 3.22   | 0.081941 | 0.13915  | 0.343216 | 0.412266 |
| MmuSTS.1567.1.S1_at   | MmuSTS.1567.1 | 8.88  | 8.6   | 0.32 | 0.17 | 1.22   | 0.401816 | 0.665348 | 0.666322 | 0.803901 |
| MmuSTS.1568.1.S1_at   | MmuSTS.1568.1 | 4.62  | 4.58  | 0.01 | 0.1  | 1.02   | 0.522966 | 0.404997 | 0.750166 | 0.633428 |
| MmuSTS.1569.1.S1_at   | MmuSTS.1569.1 | 3.56  | 3.62  | 0.28 | 0.22 | -1.04  | 0.302292 | 0.548451 | 0.590132 | 0.729185 |
| MmuSTS.157.1.S1_at    | MmuSTS.157.1  | 7     | 6.35  | 0.16 | 0.27 | 1.56   | 0.034781 | 0.010909 | 0.241036 | 0.136002 |
| MmuSTS.1570.1.S1_at   | MmuSTS.1570.1 | 10.23 | 10.13 | 0.21 | 0    | 1.07   | 0.457652 | 0.285107 | 0.706449 | 0.547098 |
| MmuSTS.1571.1.S1_at   | MmuSTS.1571.1 | 9.39  | 9.99  | 0.11 | 0.14 | -1.51  | 0.004876 | 0.002703 | 0.115123 | 0.076461 |
| MmuSTS.1572.1.S1_at   | MmuSTS.1572.1 | 9.18  | 9.52  | 0.28 | 0.07 | -1.27  | 0.390569 | 0.709791 | 0.658148 | 0.831832 |
| MmuSTS.1573.1.S1_at   | MmuSTS.1573.1 | 11    | 10.46 | 0.23 | 0.11 | 1.46   | 0.043266 | 0.038143 | 0.265331 | 0.239936 |
| MmuSTS.1574.1.S1_at   | MmuSTS.1574.1 | 7.67  | 7.36  | 0.09 | 0.09 | 1.24   | 0.02159  | 0.032213 | 0.200598 | 0.222139 |
| MmuSTS.1575.1.S1_at   | MmuSTS.1575.1 | 3.26  | 3.36  | 0.03 | 0.11 | -1.07  | 0.70321  | 0.830992 | 0.859182 | 0.903044 |
| MmuSTS.1576.1.S1_at   | MmuSTS.1576.1 | 4.54  | 4.82  | 0.07 | 0.18 | -1.22  | 0.07102  | 0.1846   | 0.324424 | 0.460628 |
| MmuSTS.1577.1.S1_at   | MmuSTS.1577.1 | 9.39  | 9.97  | 0.34 | 0.07 | -1.5   | 0.054948 | 0.068934 | 0.291357 | 0.308909 |
| MmuSTS.1578.1.S1_at   | MmuSTS.1578.1 | 10.31 | 11.22 | 0.7  | 0.09 | -1.88  | 0.074694 | 0.083673 | 0.331379 | 0.334346 |
| MmuSTS.1579.1.S1_at   | MmuSTS.1579.1 | 8.71  | 9.55  | 0.37 | 0.21 | -1.8   | 0.105694 | 0.281564 | 0.379811 | 0.54464  |
| MmuSTS.158.1.S1_at    | MmuSTS.158.1  | 6.27  | 6.62  | 0.53 | 0.07 | -1.27  | 0.191026 | 0.648168 | 0.487243 | 0.794002 |
| MmuSTS.1580.1.S1_at   | MmuSTS.1580.1 | 9.85  | 10.38 | 0.31 | 0.23 | -1.44  | 0.147635 | 0.385653 | 0.435556 | 0.621079 |
| MmuSTS.1581.1.S1_at   | MmuSTS.1581.1 | 8.99  | 12.41 | 1.37 | 0.23 | -10.73 | 0.033076 | 0.170182 | 0.236101 | 0.446906 |

|                       |               |       |       |      |      |       |          |          |          |          |
|-----------------------|---------------|-------|-------|------|------|-------|----------|----------|----------|----------|
| MmuSTS.1582.1.S1_s_at | MmuSTS.1582.1 | 8.22  | 7.82  | 0.2  | 0.54 | 1.32  | 0.155241 | 0.1358   | 0.445435 | 0.407979 |
| MmuSTS.1583.1.S1_at   | MmuSTS.1583.1 | 8.33  | 7.7   | 0.17 | 0.21 | 1.56  | 0.040113 | 0.000259 | 0.256783 | 0.033501 |
| MmuSTS.1584.1.S1_at   | MmuSTS.1584.1 | 10.88 | 10.89 | 0.05 | 0.05 | -1.01 | 0.739383 | 0.002246 | 0.879245 | 0.069739 |
| MmuSTS.1585.1.S1_at   | MmuSTS.1585.1 | 5.75  | 6.28  | 0.28 | 0.13 | -1.45 | 0.151598 | 0.220673 | 0.441094 | 0.494087 |
| MmuSTS.1586.1.S1_at   | MmuSTS.1586.1 | 4.69  | 4.7   | 0.16 | 0.08 | -1.01 | 0.985458 | 0.491882 | 0.99479  | 0.693275 |
| MmuSTS.1587.1.S1_at   | MmuSTS.1587.1 | 5.01  | 5.06  | 0.17 | 0.12 | -1.03 | 0.399721 | 0.563892 | 0.664902 | 0.738913 |
| MmuSTS.1588.1.S1_at   | MmuSTS.1588.1 | 10.28 | 10.59 | 0.04 | 0.12 | -1.24 | 0.012406 | 0.004159 | 0.161664 | 0.091036 |
| MmuSTS.1589.1.S1_at   | MmuSTS.1589.1 | 10.76 | 10.91 | 0.48 | 0.07 | -1.11 | 0.424626 | 0.634381 | 0.682288 | 0.784774 |
| MmuSTS.159.1.S1_at    | MmuSTS.159.1  | 9.31  | 10.7  | 0.29 | 0.06 | -2.62 | 0.001141 | 0.052559 | 0.077306 | 0.274848 |
| MmuSTS.1590.1.S1_at   | MmuSTS.1590.1 | 9.66  | 9.5   | 0.31 | 0.15 | 1.12  | 0.410019 | 0.018796 | 0.672223 | 0.172349 |
| MmuSTS.1591.1.S1_at   | MmuSTS.1591.1 | 12.94 | 12.77 | 0.24 | 0.12 | 1.13  | 0.477419 | 0.713279 | 0.719417 | 0.833666 |
| MmuSTS.1592.1.S1_at   | MmuSTS.1592.1 | 6.9   | 5.87  | 1.41 | 0.22 | 2.04  | 0.327626 | 0.224061 | 0.610314 | 0.497048 |
| MmuSTS.1593.1.S1_at   | MmuSTS.1593.1 | 11.48 | 11.56 | 0.05 | 0.08 | -1.06 | 0.137727 | 0.561177 | 0.422803 | 0.737224 |
| MmuSTS.1594.1.S1_at   | MmuSTS.1594.1 | 10.76 | 10.92 | 0.14 | 0.07 | -1.11 | 0.057006 | 0.182038 | 0.296065 | 0.45857  |
| MmuSTS.1595.1.S1_at   | MmuSTS.1595.1 | 11.34 | 11.56 | 0.04 | 0.06 | -1.17 | 0.009602 | 0.002467 | 0.148199 | 0.073576 |
| MmuSTS.1596.1.S1_at   | MmuSTS.1596.1 | 7.71  | 7.5   | 0.14 | 0.13 | 1.16  | 0.061011 | 0.323809 | 0.303936 | 0.574609 |
| MmuSTS.1597.1.S1_at   | MmuSTS.1597.1 | 11.75 | 11.81 | 0.17 | 0.01 | -1.04 | 0.596624 | 0.17245  | 0.795916 | 0.448864 |
| MmuSTS.1598.1.S1_at   | MmuSTS.1598.1 | 5.06  | 5.06  | 0.11 | 0.07 | 1.01  | 0.601694 | 0.32621  | 0.799788 | 0.576411 |
| MmuSTS.1599.1.S1_at   | MmuSTS.1599.1 | 3.24  | 3.61  | 0.46 | 0.37 | -1.3  | 0.686198 | 0.677705 | 0.850502 | 0.811777 |
| MmuSTS.16.1.S1_s_at   | MmuSTS.16.1   | 14.37 | 14.16 | 0.07 | 0.02 | 1.16  | 0.010057 | 0.14063  | 0.149887 | 0.413897 |
| MmuSTS.16.1.S1_x_at   | MmuSTS.16.1   | 9.75  | 9.49  | 0.09 | 0.08 | 1.19  | 0.028014 | 0.099293 | 0.219887 | 0.357562 |
| MmuSTS.160.1.S1_at    | MmuSTS.160.1  | 5.81  | 5.11  | 0.62 | 0.01 | 1.63  | 0.308367 | 0.413566 | 0.595031 | 0.639648 |
| MmuSTS.1600.1.S1_at   | MmuSTS.1600.1 | 7.42  | 6.62  | 0.28 | 0.45 | 1.75  | 0.080791 | 0.062002 | 0.341497 | 0.295878 |
| MmuSTS.1601.1.S1_at   | MmuSTS.1601.1 | 7.6   | 7.61  | 0.19 | 0.1  | -1    | 0.466307 | 0.093326 | 0.712157 | 0.349412 |
| MmuSTS.1602.1.S1_at   | MmuSTS.1602.1 | 6.08  | 6.14  | 0.24 | 0.02 | -1.04 | 0.660696 | 0.455017 | 0.836228 | 0.66903  |
| MmuSTS.1603.1.S1_at   | MmuSTS.1603.1 | 4.32  | 4.86  | 0.28 | 0.46 | -1.46 | 0.189167 | 0.129751 | 0.485784 | 0.401362 |
| MmuSTS.1604.1.S1_at   | MmuSTS.1604.1 | 3.41  | 3.35  | 0.11 | 0.17 | 1.04  | 0.303652 | 0.170343 | 0.591084 | 0.447103 |
| MmuSTS.1605.1.S1_at   | MmuSTS.1605.1 | 5.72  | 5.6   | 0.33 | 0.15 | 1.09  | 0.392738 | 0.475252 | 0.659638 | 0.682031 |
| MmuSTS.1606.1.S1_at   | MmuSTS.1606.1 | 4.34  | 5.84  | 1.05 | 0.32 | -2.81 | 0.23187  | 0.58586  | 0.530482 | 0.753074 |
| MmuSTS.1607.1.S1_at   | MmuSTS.1607.1 | 9.85  | 9.34  | 0.91 | 0.47 | 1.43  | 0.181885 | 0.01369  | 0.477403 | 0.14978  |
| MmuSTS.1608.1.S1_at   | MmuSTS.1608.1 | 11.43 | 11.56 | 0.23 | 0.06 | -1.09 | 0.383469 | 0.005129 | 0.652801 | 0.099421 |
| MmuSTS.1609.1.S1_at   | MmuSTS.1609.1 | 6.68  | 6.77  | 0.11 | 0.2  | -1.07 | 0.978821 | 0.999081 | 0.991936 | 0.999573 |
| MmuSTS.161.1.S1_at    | MmuSTS.161.1  | 8.42  | 8.2   | 0.21 | 0.17 | 1.17  | 0.303386 | 0.000326 | 0.590824 | 0.035633 |
| MmuSTS.1610.1.S1_at   | MmuSTS.1610.1 | 10.61 | 10.25 | 0.14 | 0.17 | 1.29  | 0.024004 | 0.154623 | 0.208141 | 0.429518 |
| MmuSTS.1611.1.S1_at   | MmuSTS.1611.1 | 11.42 | 11.41 | 0.18 | 0.07 | 1.01  | 0.468726 | 0.5648   | 0.713707 | 0.739427 |
| MmuSTS.1612.1.S1_at   | MmuSTS.1612.1 | 5.31  | 6.82  | 0.67 | 0.3  | -2.86 | 0.01641  | 0.194696 | 0.180995 | 0.469765 |
| MmuSTS.1613.1.S1_at   | MmuSTS.1613.1 | 9.2   | 9.72  | 0.32 | 0.17 | -1.44 | 0.105764 | 0.001591 | 0.379853 | 0.06044  |
| MmuSTS.1614.1.S1_at   | MmuSTS.1614.1 | 11.82 | 11.87 | 0.14 | 0.08 | -1.04 | 0.959081 | 0.03391  | 0.983307 | 0.227771 |
| MmuSTS.1615.1.S1_at   | MmuSTS.1615.1 | 6.05  | 6.11  | 0.22 | 0.03 | -1.04 | 0.591461 | 0.52821  | 0.792608 | 0.716662 |
| MmuSTS.1616.1.S1_at   | MmuSTS.1616.1 | 4.23  | 4.25  | 0.14 | 0.01 | -1.01 | 0.796179 | 0.936485 | 0.907954 | 0.964171 |
| MmuSTS.1617.1.S1_at   | MmuSTS.1617.1 | 8.28  | 8.63  | 0.24 | 0    | -1.28 | 0.062164 | 0.048096 | 0.305959 | 0.26436  |
| MmuSTS.1618.1.S1_at   | MmuSTS.1618.1 | 11.6  | 10.95 | 0.06 | 0.05 | 1.57  | 0.000137 | 0.000306 | 0.051196 | 0.034918 |
| MmuSTS.1619.1.S1_at   | MmuSTS.1619.1 | 10.28 | 9.34  | 0.15 | 0.35 | 1.92  | 0.027992 | 0.004917 | 0.219887 | 0.097749 |

|                       |               |       |       |      |      |       |          |          |          |          |
|-----------------------|---------------|-------|-------|------|------|-------|----------|----------|----------|----------|
| MmuSTS.162.1.S1_at    | MmuSTS.162.1  | 7.16  | 8.12  | 0.39 | 0.34 | -1.95 | 0.033129 | 0.172008 | 0.236253 | 0.448404 |
| MmuSTS.1620.1.S1_at   | MmuSTS.1620.1 | 10.72 | 10.59 | 0.44 | 0.18 | 1.1   | 0.230793 | 0.109477 | 0.529545 | 0.373337 |
| MmuSTS.1621.1.S1_at   | MmuSTS.1621.1 | 4.42  | 4.24  | 0.11 | 0.11 | 1.13  | 0.112956 | 0.078096 | 0.389499 | 0.324578 |
| MmuSTS.1622.1.S1_at   | MmuSTS.1622.1 | 3.82  | 3.77  | 0.31 | 0.21 | 1.03  | 0.636448 | 0.857141 | 0.822111 | 0.918378 |
| MmuSTS.1623.1.S1_at   | MmuSTS.1623.1 | 5.03  | 4.74  | 0.27 | 0.05 | 1.22  | 0.127483 | 0.031978 | 0.409437 | 0.221216 |
| MmuSTS.1624.1.S1_at   | MmuSTS.1624.1 | 4.23  | 4.19  | 0.06 | 0.06 | 1.03  | 0.189329 | 0.415289 | 0.485819 | 0.640769 |
| MmuSTS.1625.1.S1_at   | MmuSTS.1625.1 | 3.24  | 3.01  | 0.15 | 0.09 | 1.18  | 0.047111 | 0.074721 | 0.274594 | 0.318465 |
| MmuSTS.1626.1.S1_at   | MmuSTS.1626.1 | 9.14  | 9.09  | 0.22 | 0.03 | 1.03  | 0.640602 | 0.898777 | 0.824377 | 0.942417 |
| MmuSTS.1627.1.S1_at   | MmuSTS.1627.1 | 11.69 | 11.82 | 0.21 | 0.05 | -1.09 | 0.426508 | 0.638254 | 0.683874 | 0.787493 |
| MmuSTS.1628.1.S1_at   | MmuSTS.1628.1 | 3.24  | 3.24  | 0.05 | 0.07 | 1     | 0.992647 | 0.957859 | 0.99725  | 0.976177 |
| MmuSTS.1629.1.S1_at   | MmuSTS.1629.1 | 4.1   | 4.1   | 0.15 | 0.01 | -1.01 | 0.54703  | 0.024227 | 0.765708 | 0.194908 |
| MmuSTS.163.1.S1_at    | MmuSTS.163.1  | 3.38  | 3.39  | 0.07 | 0.01 | -1    | 0.779155 | 0.824624 | 0.89919  | 0.899309 |
| MmuSTS.1630.1.S1_s_at | MmuSTS.1630.1 | 6.72  | 6.57  | 0.18 | 0.05 | 1.11  | 0.220184 | 0.34076  | 0.517758 | 0.586956 |
| MmuSTS.1631.1.S1_s_at | MmuSTS.1631.1 | 7.54  | 7.43  | 0.17 | 0.08 | 1.08  | 0.426868 | 0.131305 | 0.684257 | 0.403407 |
| MmuSTS.1632.1.S1_s_at | MmuSTS.1632.1 | 4.07  | 4.06  | 0.12 | 0.07 | 1.01  | 0.492766 | 0.774721 | 0.72996  | 0.868833 |
| MmuSTS.1633.1.S1_at   | MmuSTS.1633.1 | 5.61  | 5.52  | 0.18 | 0.06 | 1.06  | 0.170878 | 0.504308 | 0.464646 | 0.701474 |
| MmuSTS.1634.1.S1_at   | MmuSTS.1634.1 | 3.56  | 3.56  | 0.02 | 0.01 | -1    | 0.124228 | 0.34967  | 0.404242 | 0.593563 |
| MmuSTS.1635.1.S1_at   | MmuSTS.1635.1 | 6.31  | 6.29  | 0.07 | 0.09 | 1.02  | 0.392175 | 0.301337 | 0.659194 | 0.559366 |
| MmuSTS.1636.1.S1_at   | MmuSTS.1636.1 | 4.27  | 4.16  | 0.09 | 0.05 | 1.08  | 0.598252 | 0.241533 | 0.797283 | 0.512152 |
| MmuSTS.1637.1.S1_at   | MmuSTS.1637.1 | 3.17  | 3.18  | 0.2  | 0.1  | -1    | 0.848632 | 0.95733  | 0.934034 | 0.975845 |
| MmuSTS.1638.1.S1_at   | MmuSTS.1638.1 | 3.85  | 3.74  | 0.41 | 0.57 | 1.08  | 0.968064 | 0.798384 | 0.987338 | 0.883979 |
| MmuSTS.1639.1.S1_at   | MmuSTS.1639.1 | 6.06  | 5.99  | 0.2  | 0.06 | 1.05  | 0.579826 | 0.704615 | 0.785371 | 0.828649 |
| MmuSTS.164.1.S1_at    | MmuSTS.164.1  | 6.47  | 8.2   | 0.77 | 0.43 | -3.32 | 0.081525 | 0.186631 | 0.342512 | 0.462425 |
| MmuSTS.1640.1.S1_at   | MmuSTS.1640.1 | 12.12 | 11.97 | 0.16 | 0.03 | 1.11  | 0.157406 | 0.078707 | 0.448037 | 0.325673 |
| MmuSTS.1641.1.S1_at   | MmuSTS.1641.1 | 6.26  | 6.16  | 0.11 | 0.23 | 1.07  | 0.572232 | 0.191658 | 0.780448 | 0.466936 |
| MmuSTS.1642.1.S1_at   | MmuSTS.1642.1 | 5.97  | 5.96  | 0.18 | 0.04 | 1     | 0.926301 | 0.073292 | 0.968841 | 0.316241 |
| MmuSTS.1643.1.S1_at   | MmuSTS.1643.1 | 6.43  | 6.4   | 0.18 | 0.1  | 1.03  | 0.780683 | 0.930115 | 0.899918 | 0.96025  |
| MmuSTS.1644.1.S1_at   | MmuSTS.1644.1 | 10.79 | 10.7  | 0.23 | 0.09 | 1.07  | 0.202242 | 0.002696 | 0.499812 | 0.076455 |
| MmuSTS.1645.1.S1_at   | MmuSTS.1645.1 | 5.1   | 5.27  | 0.19 | 0.06 | -1.13 | 0.615726 | 0.808786 | 0.809106 | 0.889895 |
| MmuSTS.1646.1.S1_at   | MmuSTS.1646.1 | 11.02 | 11.08 | 0.13 | 0.05 | -1.04 | 0.320204 | 0.304239 | 0.604773 | 0.561558 |
| MmuSTS.1647.1.S1_at   | MmuSTS.1647.1 | 4.36  | 4.2   | 0.02 | 0.09 | 1.12  | 0.141596 | 0.133569 | 0.42755  | 0.405542 |
| MmuSTS.1648.1.S1_at   | MmuSTS.1648.1 | 9.84  | 9.55  | 0.18 | 0.06 | 1.22  | 0.14996  | 0.001062 | 0.438962 | 0.051766 |
| MmuSTS.1649.1.S1_at   | MmuSTS.1649.1 | 7.11  | 7.17  | 2.07 | 1.76 | -1.04 | 0.940381 | 0.939446 | 0.974856 | 0.965611 |
| MmuSTS.165.1.S1_at    | MmuSTS.165.1  | 11.04 | 11.09 | 0.28 | 0.12 | -1.04 | 0.725642 | 0.009124 | 0.871228 | 0.125994 |
| MmuSTS.1650.1.S1_at   | MmuSTS.1650.1 | 8.9   | 9.34  | 0.23 | 0.08 | -1.36 | 0.0384   | 0.021699 | 0.251895 | 0.184333 |
| MmuSTS.1651.1.S1_at   | MmuSTS.1651.1 | 10.21 | 9.76  | 0.02 | 0.07 | 1.36  | 0.000444 | 0.000305 | 0.065442 | 0.034907 |
| MmuSTS.1652.1.S1_at   | MmuSTS.1652.1 | 9.58  | 9.57  | 0.15 | 0.21 | 1     | 0.322651 | 0.168741 | 0.606572 | 0.445379 |
| MmuSTS.1653.1.S1_at   | MmuSTS.1653.1 | 10.6  | 8.73  | 0.21 | 0.61 | 3.64  | 0.014983 | 0.009047 | 0.174543 | 0.1257   |
| MmuSTS.1654.1.S1_at   | MmuSTS.1654.1 | 2.52  | 2.61  | 0.02 | 0.07 | -1.06 | 0.110621 | 0.071879 | 0.385979 | 0.314181 |
| MmuSTS.1654.1.S1_s_at | MmuSTS.1654.1 | 5.18  | 5.02  | 0.24 | 0.01 | 1.11  | 0.51241  | 0.678934 | 0.742962 | 0.81252  |
| MmuSTS.1655.1.S1_at   | MmuSTS.1655.1 | 12.68 | 12.43 | 0.04 | 0.02 | 1.19  | 0.000411 | 0.000402 | 0.06311  | 0.037471 |
| MmuSTS.1656.1.S1_at   | MmuSTS.1656.1 | 5.57  | 5.66  | 0.12 | 0.03 | -1.07 | 0.779607 | 0.821313 | 0.899345 | 0.897125 |
| MmuSTS.1657.1.S1_at   | MmuSTS.1657.1 | 5.36  | 5.36  | 0.19 | 0.09 | -1    | 0.610784 | 0.125096 | 0.805939 | 0.395506 |



|                       |               |       |       |      |      |       |          |          |          |          |
|-----------------------|---------------|-------|-------|------|------|-------|----------|----------|----------|----------|
| MmuSTS.1658.1.S1_at   | MmuSTS.1658.1 | 9.26  | 8.36  | 0.38 | 0.07 | 1.87  | 0.030772 | 0.021195 | 0.228288 | 0.182325 |
| MmuSTS.1659.1.S1_at   | MmuSTS.1659.1 | 11.33 | 12.03 | 0.26 | 0.13 | -1.62 | 0.021016 | 0.176846 | 0.198347 | 0.453284 |
| MmuSTS.166.1.S1_at    | MmuSTS.166.1  | 13.59 | 13.1  | 0.14 | 0.17 | 1.4   | 0.048694 | 0.032352 | 0.278083 | 0.222667 |
| MmuSTS.1660.1.S1_at   | MmuSTS.1660.1 | 9.48  | 8.95  | 0.02 | 0.06 | 1.44  | 0.00013  | 0.000574 | 0.051196 | 0.041171 |
| MmuSTS.1661.1.S1_at   | MmuSTS.1661.1 | 6.01  | 6.22  | 0.1  | 0.04 | -1.16 | 0.056565 | 0.258568 | 0.295381 | 0.525819 |
| MmuSTS.1662.1.S1_at   | MmuSTS.1662.1 | 7.18  | 6.81  | 0.28 | 0.18 | 1.29  | 0.26112  | 0.100432 | 0.555257 | 0.359541 |
| MmuSTS.1663.1.S1_at   | MmuSTS.1663.1 | 9.53  | 8.88  | 0.14 | 0.14 | 1.57  | 0.003555 | 0.004923 | 0.104814 | 0.097801 |
| MmuSTS.1664.1.S1_at   | MmuSTS.1664.1 | 6.63  | 6.56  | 0.47 | 0.4  | 1.05  | 0.859971 | 0.549955 | 0.939228 | 0.730193 |
| MmuSTS.1665.1.S1_at   | MmuSTS.1665.1 | 9.17  | 9.25  | 0.07 | 0.1  | -1.06 | 0.192788 | 0.547997 | 0.489396 | 0.72884  |
| MmuSTS.1666.1.S1_at   | MmuSTS.1666.1 | 6.08  | 6.05  | 0.11 | 0.06 | 1.02  | 0.674257 | 0.528755 | 0.844438 | 0.716808 |
| MmuSTS.1667.1.S1_at   | MmuSTS.1667.1 | 4.91  | 4.91  | 0.17 | 0.04 | 1     | 0.882147 | 0.75282  | 0.949874 | 0.855977 |
| MmuSTS.1668.1.S1_at   | MmuSTS.1668.1 | 10.75 | 10.45 | 0.23 | 0.14 | 1.23  | 0.118838 | 0.010753 | 0.396589 | 0.135417 |
| MmuSTS.1669.1.S1_at   | MmuSTS.1669.1 | 6.81  | 6.85  | 0.1  | 0.14 | -1.03 | 0.88551  | 0.081186 | 0.951126 | 0.329351 |
| MmuSTS.167.1.S1_at    | MmuSTS.167.1  | 11.67 | 11.92 | 0.2  | 0.05 | -1.19 | 0.173284 | 0.181816 | 0.467477 | 0.458382 |
| MmuSTS.1670.1.S1_at   | MmuSTS.1670.1 | 8.48  | 9.16  | 0.66 | 0.09 | -1.61 | 0.079261 | 0.029451 | 0.339198 | 0.213368 |
| MmuSTS.1671.1.S1_at   | MmuSTS.1671.1 | 12.4  | 12.28 | 0.04 | 0.02 | 1.08  | 0.004109 | 0.550756 | 0.109608 | 0.730611 |
| MmuSTS.1672.1.S1_at   | MmuSTS.1672.1 | 6.03  | 6.06  | 0.22 | 0.16 | -1.02 | 0.437892 | 0.786368 | 0.692673 | 0.876293 |
| MmuSTS.1673.1.S1_at   | MmuSTS.1673.1 | 12.62 | 12.34 | 0.08 | 0.01 | 1.22  | 0.002471 | 0.002477 | 0.094063 | 0.073576 |
| MmuSTS.1674.1.S1_at   | MmuSTS.1674.1 | 11.02 | 11.08 | 0.14 | 0.2  | -1.05 | 0.882153 | 0.981758 | 0.949874 | 0.989984 |
| MmuSTS.1675.1.S1_at   | MmuSTS.1675.1 | 12.03 | 12.12 | 0.11 | 0.05 | -1.07 | 0.333119 | 0.743888 | 0.61465  | 0.85159  |
| MmuSTS.1676.1.S1_at   | MmuSTS.1676.1 | 9.74  | 9.64  | 0.21 | 0.16 | 1.07  | 0.813541 | 0.050383 | 0.916621 | 0.269722 |
| MmuSTS.1677.1.S1_at   | MmuSTS.1677.1 | 3.25  | 3.31  | 0.07 | 0.09 | -1.04 | 0.463681 | 0.011774 | 0.710191 | 0.140572 |
| MmuSTS.1678.1.S1_at   | MmuSTS.1678.1 | 7.11  | 7.19  | 0.24 | 0.15 | -1.06 | 0.680882 | 0.763194 | 0.847795 | 0.862339 |
| MmuSTS.1679.1.S1_at   | MmuSTS.1679.1 | 7.9   | 7.4   | 0.42 | 0.18 | 1.41  | 0.120265 | 0.283518 | 0.39866  | 0.545959 |
| MmuSTS.168.1.S1_s_at  | MmuSTS.168.1  | 11.18 | 10.27 | 0.14 | 0.08 | 1.87  | 0.000418 | 0.014206 | 0.063209 | 0.152207 |
| MmuSTS.168.1.S1_x_at  | MmuSTS.168.1  | 10.76 | 9.5   | 0.14 | 0.04 | 2.4   | 0.00013  | 0.002137 | 0.051196 | 0.06842  |
| MmuSTS.1680.1.S1_s_at | MmuSTS.1680.1 | 4.94  | 4.69  | 0.09 | 0.04 | 1.19  | 0.010019 | 0.009076 | 0.149521 | 0.125944 |
| MmuSTS.1681.1.S1_at   | MmuSTS.1681.1 | 7.82  | 7.55  | 0.31 | 0.1  | 1.2   | 0.193489 | 0.430325 | 0.490073 | 0.651371 |
| MmuSTS.1682.1.S1_at   | MmuSTS.1682.1 | 12.06 | 11.99 | 0.2  | 0.03 | 1.05  | 0.511156 | 0.773603 | 0.742366 | 0.868402 |
| MmuSTS.1683.1.S1_at   | MmuSTS.1683.1 | 9.01  | 8.61  | 0.19 | 0.03 | 1.32  | 0.017991 | 0.006155 | 0.187151 | 0.106774 |
| MmuSTS.1684.1.S1_at   | MmuSTS.1684.1 | 8.84  | 8.68  | 0.11 | 0.2  | 1.11  | 0.321302 | 0.178138 | 0.605548 | 0.454508 |
| MmuSTS.1685.1.S1_at   | MmuSTS.1685.1 | 8.46  | 8.23  | 0.12 | 0.22 | 1.18  | 0.165664 | 0.003762 | 0.458716 | 0.087395 |
| MmuSTS.1686.1.S1_at   | MmuSTS.1686.1 | 6.02  | 5.91  | 0.09 | 0.07 | 1.08  | 0.070522 | 0.145485 | 0.323989 | 0.419424 |
| MmuSTS.1687.1.S1_at   | MmuSTS.1687.1 | 11.48 | 11.98 | 0.1  | 0.08 | -1.42 | 0.005525 | 0.051215 | 0.119795 | 0.271799 |
| MmuSTS.1688.1.S1_at   | MmuSTS.1688.1 | 4.09  | 3.66  | 0.3  | 0.04 | 1.34  | 0.158267 | 0.095467 | 0.449228 | 0.352482 |
| MmuSTS.1689.1.S1_at   | MmuSTS.1689.1 | 6.87  | 9.33  | 0.9  | 0.25 | -5.5  | 0.017121 | 0.011344 | 0.184186 | 0.13815  |
| MmuSTS.169.1.S1_at    | MmuSTS.169.1  | 7.73  | 7.55  | 0.14 | 0.05 | 1.13  | 0.038157 | 0.263962 | 0.2513   | 0.530153 |
| MmuSTS.1690.1.S1_at   | MmuSTS.1690.1 | 5.74  | 5.8   | 0.32 | 0.02 | -1.04 | 0.781241 | 0.899627 | 0.900071 | 0.942903 |
| MmuSTS.1691.1.S1_at   | MmuSTS.1691.1 | 4.43  | 4.43  | 0.36 | 0.11 | 1     | 0.848343 | 0.986498 | 0.933976 | 0.992355 |
| MmuSTS.1692.1.S1_at   | MmuSTS.1692.1 | 9.2   | 8.99  | 0.26 | 0.04 | 1.16  | 0.27488  | 0.382609 | 0.566556 | 0.618778 |
| MmuSTS.1693.1.S1_at   | MmuSTS.1693.1 | 6.27  | 7.49  | 1.08 | 0.13 | -2.33 | 0.341207 | 0.171338 | 0.621119 | 0.447813 |
| MmuSTS.1694.1.S1_at   | MmuSTS.1694.1 | 9.27  | 9.13  | 0.61 | 0.06 | 1.1   | 0.692122 | 0.806882 | 0.852885 | 0.888872 |
| MmuSTS.1695.1.S1_at   | MmuSTS.1695.1 | 9.99  | 10.74 | 0.35 | 0.06 | -1.69 | 0.027877 | 0.024419 | 0.219533 | 0.195563 |

|                       |               |       |       |      |      |       |          |          |          |          |
|-----------------------|---------------|-------|-------|------|------|-------|----------|----------|----------|----------|
| MmuSTS.1696.1.S1_at   | MmuSTS.1696.1 | 2.83  | 2.89  | 0.05 | 0.14 | -1.04 | 0.440411 | 0.271792 | 0.694455 | 0.536577 |
| MmuSTS.1697.1.S1_at   | MmuSTS.1697.1 | 12.2  | 12.22 | 0.19 | 0.03 | -1.02 | 0.937129 | 0.249111 | 0.973667 | 0.51821  |
| MmuSTS.1698.1.S1_s_at | MmuSTS.1698.1 | 5.85  | 6.16  | 0.44 | 0.32 | -1.24 | 0.23782  | 0.422393 | 0.535199 | 0.645722 |
| MmuSTS.1699.1.S1_at   | MmuSTS.1699.1 | 6.72  | 6.7   | 0.11 | 0.06 | 1.02  | 0.172724 | 0.281071 | 0.46677  | 0.54422  |
| MmuSTS.17.1.S1_at     | MmuSTS.17.1   | 9.69  | 9.52  | 0.24 | 0.03 | 1.13  | 0.247208 | 0.053844 | 0.542786 | 0.277598 |
| MmuSTS.170.1.S1_at    | MmuSTS.170.1  | 7.94  | 8.16  | 0.14 | 0.12 | -1.16 | 0.233958 | 0.481406 | 0.532172 | 0.686434 |
| MmuSTS.1700.1.S1_at   | MmuSTS.1700.1 | 10.55 | 10.29 | 0.28 | 0.05 | 1.2   | 0.460715 | 0.443871 | 0.708364 | 0.661533 |
| MmuSTS.1701.1.S1_at   | MmuSTS.1701.1 | 7.64  | 8.39  | 0.42 | 0.35 | -1.68 | 0.137616 | 0.330462 | 0.422708 | 0.579193 |
| MmuSTS.1702.1.S1_at   | MmuSTS.1702.1 | 10.47 | 10.17 | 0.1  | 0.05 | 1.23  | 0.014773 | 0.369206 | 0.173554 | 0.608669 |
| MmuSTS.1703.1.S1_at   | MmuSTS.1703.1 | 4.91  | 4.92  | 0.13 | 0.08 | -1.01 | 0.872012 | 0.610792 | 0.945018 | 0.768889 |
| MmuSTS.1704.1.S1_at   | MmuSTS.1704.1 | 5.48  | 5.51  | 0.05 | 0.05 | -1.02 | 0.101088 | 0.494216 | 0.372328 | 0.69475  |
| MmuSTS.1705.1.S1_at   | MmuSTS.1705.1 | 9.48  | 9.75  | 0.14 | 0.13 | -1.2  | 0.160369 | 0.168895 | 0.45177  | 0.445458 |
| MmuSTS.1706.1.S1_at   | MmuSTS.1706.1 | 2.96  | 2.92  | 0.06 | 0.15 | 1.03  | 0.868807 | 0.980707 | 0.943567 | 0.989447 |
| MmuSTS.1707.1.S1_at   | MmuSTS.1707.1 | 9.7   | 9.33  | 0.25 | 0.11 | 1.29  | 0.102027 | 0.201649 | 0.373848 | 0.476208 |
| MmuSTS.1708.1.S1_at   | MmuSTS.1708.1 | 11.01 | 10.14 | 0.18 | 0.06 | 1.83  | 0.001419 | 0.015106 | 0.07964  | 0.156008 |
| MmuSTS.1709.1.S1_at   | MmuSTS.1709.1 | 9.24  | 11.61 | 1.02 | 0.17 | -5.18 | 0.046449 | 0.305907 | 0.273325 | 0.562732 |
| MmuSTS.171.1.S1_at    | MmuSTS.171.1  | 6.7   | 7.03  | 0.56 | 0.11 | -1.26 | 0.954054 | 0.230559 | 0.981138 | 0.50226  |
| MmuSTS.1710.1.S1_at   | MmuSTS.1710.1 | 5.51  | 5.68  | 0.02 | 0.07 | -1.12 | 0.021856 | 0.000711 | 0.201103 | 0.044419 |
| MmuSTS.1711.1.S1_at   | MmuSTS.1711.1 | 3.58  | 3.61  | 0.11 | 0.02 | -1.02 | 0.513464 | 0.445728 | 0.743659 | 0.662489 |
| MmuSTS.1712.1.S1_at   | MmuSTS.1712.1 | 11.97 | 11.45 | 0.12 | 0.11 | 1.44  | 0.004746 | 0.005682 | 0.115098 | 0.103959 |
| MmuSTS.1713.1.S1_at   | MmuSTS.1713.1 | 2.7   | 3.19  | 0.17 | 0.17 | -1.4  | 0.050855 | 0.039084 | 0.283144 | 0.242995 |
| MmuSTS.1714.1.S1_s_at | MmuSTS.1714.1 | 8.54  | 8.89  | 0.37 | 0.05 | -1.27 | 0.199314 | 0.202412 | 0.496618 | 0.476765 |
| MmuSTS.1715.1.S1_at   | MmuSTS.1715.1 | 4.11  | 4.21  | 0.11 | 0.24 | -1.07 | 0.464917 | 0.406201 | 0.711025 | 0.634213 |
| MmuSTS.1716.1.S1_at   | MmuSTS.1716.1 | 6.25  | 6.55  | 0.47 | 0.23 | -1.23 | 0.21838  | 0.772488 | 0.516054 | 0.867741 |
| MmuSTS.1717.1.S1_at   | MmuSTS.1717.1 | 5.65  | 7.49  | 0.65 | 0.31 | -3.59 | 0.026916 | 0.038733 | 0.21704  | 0.241835 |
| MmuSTS.1718.1.S1_at   | MmuSTS.1718.1 | 3.13  | 3.06  | 0.13 | 0.06 | 1.05  | 0.994101 | 0.547004 | 0.997585 | 0.728283 |
| MmuSTS.1719.1.S1_at   | MmuSTS.1719.1 | 9.68  | 9.5   | 0.14 | 0.11 | 1.14  | 0.357379 | 0.267848 | 0.633494 | 0.533607 |
| MmuSTS.172.1.S1_at    | MmuSTS.172.1  | 13.1  | 13.18 | 0.1  | 0.01 | -1.06 | 0.189035 | 0.70408  | 0.485678 | 0.828326 |
| MmuSTS.1720.1.S1_at   | MmuSTS.1720.1 | 6.78  | 7.54  | 0.49 | 0.26 | -1.7  | 0.209631 | 0.161938 | 0.507107 | 0.438029 |
| MmuSTS.1721.1.S1_at   | MmuSTS.1721.1 | 9.86  | 9     | 0.06 | 0.16 | 1.81  | 0.001193 | 0.182741 | 0.077857 | 0.459215 |
| MmuSTS.1722.1.S1_at   | MmuSTS.1722.1 | 13.99 | 13.75 | 0.04 | 0.03 | 1.18  | 0.001249 | 0.000228 | 0.078631 | 0.032385 |
| MmuSTS.1723.1.S1_at   | MmuSTS.1723.1 | 9.48  | 9.26  | 0.38 | 0.15 | 1.16  | 0.610247 | 0.255138 | 0.805752 | 0.52317  |
| MmuSTS.1724.1.S1_at   | MmuSTS.1724.1 | 8.31  | 8.1   | 0.14 | 0.1  | 1.16  | 0.302524 | 0.002378 | 0.590329 | 0.072042 |
| MmuSTS.1725.1.S1_at   | MmuSTS.1725.1 | 10.79 | 10.6  | 0.15 | 0.01 | 1.14  | 0.310981 | 0.010999 | 0.597234 | 0.136623 |
| MmuSTS.1726.1.S1_at   | MmuSTS.1726.1 | 10.14 | 10.22 | 0.02 | 0.2  | -1.06 | 0.794064 | 0.97086  | 0.906989 | 0.984115 |
| MmuSTS.1727.1.S1_at   | MmuSTS.1727.1 | 7.83  | 7.83  | 0.08 | 0.12 | 1     | 0.964906 | 0.126448 | 0.98581  | 0.396995 |
| MmuSTS.1728.1.S1_s_at | MmuSTS.1728.1 | 3.78  | 3.75  | 0.07 | 0.04 | 1.02  | 0.957653 | 0.209224 | 0.982604 | 0.48303  |
| MmuSTS.1729.1.S1_at   | MmuSTS.1729.1 | 5.1   | 4.75  | 0.1  | 0.05 | 1.27  | 0.006646 | 0.004422 | 0.127957 | 0.092904 |
| MmuSTS.173.1.S1_at    | MmuSTS.173.1  | 3.9   | 3.61  | 0.46 | 0.08 | 1.22  | 0.167393 | 0.244447 | 0.460585 | 0.514295 |
| MmuSTS.1730.1.S1_at   | MmuSTS.1730.1 | 5.11  | 7.25  | 0.54 | 0.45 | -4.41 | 0.00628  | 0.092564 | 0.125521 | 0.348519 |
| MmuSTS.1731.1.S1_at   | MmuSTS.1731.1 | 5.26  | 5.18  | 0.22 | 0.04 | 1.06  | 0.59625  | 0.199474 | 0.795717 | 0.474069 |
| MmuSTS.1732.1.S1_at   | MmuSTS.1732.1 | 5.12  | 4.28  | 0.61 | 0.1  | 1.79  | 0.093401 | 0.136684 | 0.361945 | 0.409226 |
| MmuSTS.1733.1.S1_at   | MmuSTS.1733.1 | 12.11 | 11.39 | 0.33 | 0.15 | 1.65  | 0.02552  | 0.443115 | 0.212834 | 0.661002 |

|                       |               |       |       |      |      |        |          |          |          |          |
|-----------------------|---------------|-------|-------|------|------|--------|----------|----------|----------|----------|
| MmuSTS.1734.1.S1_at   | MmuSTS.1734.1 | 7.36  | 8.38  | 0.15 | 0.23 | -2.03  | 0.002359 | 0.066382 | 0.092906 | 0.30331  |
| MmuSTS.1735.1.S1_at   | MmuSTS.1735.1 | 9.69  | 9.76  | 0.1  | 0.04 | -1.05  | 0.465906 | 0.089517 | 0.711854 | 0.343811 |
| MmuSTS.1736.1.S1_at   | MmuSTS.1736.1 | 6.31  | 10.54 | 1.16 | 0.24 | -18.76 | 0.004314 | 0.079433 | 0.111813 | 0.326766 |
| MmuSTS.1737.1.S1_s_at | MmuSTS.1737.1 | 4.47  | 4.4   | 0.05 | 0.13 | 1.05   | 0.503914 | 0.272668 | 0.73721  | 0.537433 |
| MmuSTS.1738.1.S1_s_at | MmuSTS.1738.1 | 8.47  | 9.15  | 0.66 | 0.47 | -1.6   | 0.167571 | 0.170636 | 0.46081  | 0.447219 |
| MmuSTS.1739.1.S1_at   | MmuSTS.1739.1 | 11.72 | 11.92 | 0.13 | 0.06 | -1.15  | 0.034259 | 0.184692 | 0.239765 | 0.460645 |
| MmuSTS.174.1.S1_at    | MmuSTS.174.1  | 9.54  | 9.85  | 0.12 | 0.03 | -1.24  | 0.015425 | 0.040004 | 0.176272 | 0.245193 |
| MmuSTS.1740.1.S1_at   | MmuSTS.1740.1 | 4.45  | 4.56  | 0.17 | 0.03 | -1.08  | 0.44094  | 0.161374 | 0.694673 | 0.437556 |
| MmuSTS.1741.1.S1_at   | MmuSTS.1741.1 | 5.57  | 6.29  | 0.3  | 0.15 | -1.65  | 0.014054 | 0.129058 | 0.169936 | 0.400548 |
| MmuSTS.1742.1.S1_at   | MmuSTS.1742.1 | 6.24  | 6.2   | 0.21 | 0.05 | 1.03   | 0.34621  | 0.497581 | 0.624868 | 0.696935 |
| MmuSTS.1743.1.S1_at   | MmuSTS.1743.1 | 10.82 | 11.36 | 0.36 | 0.02 | -1.46  | 0.189501 | 0.261815 | 0.485955 | 0.528265 |
| MmuSTS.1744.1.S1_at   | MmuSTS.1744.1 | 12.78 | 12.33 | 0.13 | 0.06 | 1.36   | 0.002959 | 0.11966  | 0.099517 | 0.388324 |
| MmuSTS.1745.1.S1_at   | MmuSTS.1745.1 | 5.16  | 7.54  | 0.51 | 0.23 | -5.2   | 0.003734 | 0.002324 | 0.106332 | 0.071237 |
| MmuSTS.1746.1.S1_at   | MmuSTS.1746.1 | 11.54 | 11.6  | 0.1  | 0.08 | -1.04  | 0.573995 | 0.615409 | 0.781504 | 0.771963 |
| MmuSTS.1747.1.S1_at   | MmuSTS.1747.1 | 8.3   | 7.98  | 0.3  | 0.12 | 1.25   | 0.129632 | 0.285242 | 0.412005 | 0.547165 |
| MmuSTS.1748.1.S1_at   | MmuSTS.1748.1 | 3.49  | 3.01  | 0.28 | 0.1  | 1.39   | 0.053621 | 0.132605 | 0.288753 | 0.404544 |
| MmuSTS.1749.1.S1_at   | MmuSTS.1749.1 | 9.97  | 10.06 | 0.15 | 0.04 | -1.06  | 0.588603 | 0.043071 | 0.791201 | 0.252157 |
| MmuSTS.175.1.S1_s_at  | MmuSTS.175.1  | 6.16  | 6.15  | 0.16 | 0.32 | 1.01   | 0.981913 | 0.992623 | 0.993299 | 0.995715 |
| MmuSTS.1750.1.S1_at   | MmuSTS.1750.1 | 8.75  | 9.49  | 0.69 | 0.16 | -1.67  | 0.052258 | 0.107708 | 0.285979 | 0.370776 |
| MmuSTS.1751.1.S1_at   | MmuSTS.1751.1 | 4.05  | 4.14  | 0.03 | 0.32 | -1.07  | 0.570699 | 0.828691 | 0.779385 | 0.901558 |
| MmuSTS.1752.1.S1_at   | MmuSTS.1752.1 | 2.76  | 3.39  | 0.05 | 0.19 | -1.55  | 0.012589 | 0.011255 | 0.162521 | 0.138053 |
| MmuSTS.1753.1.S1_at   | MmuSTS.1753.1 | 3.3   | 3.98  | 0.1  | 0.32 | -1.6   | 0.046512 | 0.050875 | 0.273563 | 0.270873 |
| MmuSTS.1754.1.S1_at   | MmuSTS.1754.1 | 11.8  | 11.38 | 0.17 | 0.14 | 1.33   | 0.063022 | 0.073117 | 0.307802 | 0.316064 |
| MmuSTS.1755.1.S1_at   | MmuSTS.1755.1 | 7.1   | 7.07  | 0.14 | 0.16 | 1.02   | 0.814347 | 0.515477 | 0.91702  | 0.708325 |
| MmuSTS.1756.1.S1_at   | MmuSTS.1756.1 | 8.42  | 8.83  | 0.06 | 0.11 | -1.33  | 0.006876 | 0.85797  | 0.129792 | 0.919035 |
| MmuSTS.1757.1.S1_at   | MmuSTS.1757.1 | 5.2   | 5.58  | 0.12 | 0.94 | -1.3   | 0.873205 | 0.523102 | 0.945613 | 0.713481 |
| MmuSTS.1758.1.S1_at   | MmuSTS.1758.1 | 6.8   | 6.62  | 0.72 | 0.08 | 1.13   | 0.674445 | 0.898758 | 0.844514 | 0.942416 |
| MmuSTS.1759.1.S1_at   | MmuSTS.1759.1 | 3.8   | 3.73  | 0.03 | 0.07 | 1.05   | 0.06431  | 0.112359 | 0.309999 | 0.377686 |
| MmuSTS.176.1.S1_at    | MmuSTS.176.1  | 4.36  | 4.34  | 0.1  | 0.05 | 1.01   | 0.895865 | 0.165222 | 0.955609 | 0.441399 |
| MmuSTS.1760.1.S1_at   | MmuSTS.1760.1 | 8.96  | 9.72  | 0.09 | 0.26 | -1.7   | 0.011512 | 0.578928 | 0.15722  | 0.748776 |
| MmuSTS.1761.1.S1_at   | MmuSTS.1761.1 | 7.99  | 9.55  | 0.67 | 0.2  | -2.94  | 0.016469 | 0.02457  | 0.181307 | 0.196149 |
| MmuSTS.1762.1.S1_at   | MmuSTS.1762.1 | 8.1   | 8.88  | 1.14 | 0.19 | -1.73  | 0.118255 | 0.156864 | 0.395722 | 0.432372 |
| MmuSTS.1763.1.S1_at   | MmuSTS.1763.1 | 5.04  | 4.89  | 0.15 | 0.2  | 1.11   | 0.192612 | 0.23028  | 0.489253 | 0.502102 |
| MmuSTS.1764.1.S1_at   | MmuSTS.1764.1 | 5.17  | 5.16  | 0.1  | 0.03 | 1      | 0.675633 | 0.757656 | 0.845101 | 0.858927 |
| MmuSTS.1765.1.S1_at   | MmuSTS.1765.1 | 7.66  | 7.85  | 0.2  | 0.15 | -1.14  | 0.101687 | 0.316653 | 0.373129 | 0.569984 |
| MmuSTS.1766.1.S1_at   | MmuSTS.1766.1 | 7.09  | 6.91  | 0.02 | 0.1  | 1.13   | 0.011749 | 0.052863 | 0.158219 | 0.275521 |
| MmuSTS.1767.1.S1_at   | MmuSTS.1767.1 | 7.98  | 6.97  | 0.19 | 0.07 | 2.02   | 0.00167  | 0.000165 | 0.084462 | 0.030511 |
| MmuSTS.1768.1.S1_at   | MmuSTS.1768.1 | 6.76  | 6.53  | 0.38 | 0.15 | 1.17   | 0.086793 | 0.101889 | 0.351991 | 0.36188  |
| MmuSTS.1769.1.S1_at   | MmuSTS.1769.1 | 9.43  | 8.25  | 0.62 | 0.2  | 2.28   | 0.051699 | 0.440481 | 0.284675 | 0.658967 |
| MmuSTS.177.1.S1_at    | MmuSTS.177.1  | 7.37  | 7.76  | 0.32 | 0.3  | -1.31  | 0.717155 | 0.856832 | 0.866451 | 0.918214 |
| MmuSTS.1770.1.S1_at   | MmuSTS.1770.1 | 12.89 | 13.32 | 0.34 | 0.09 | -1.35  | 0.047237 | 0.053648 | 0.274594 | 0.277225 |
| MmuSTS.1771.1.S1_at   | MmuSTS.1771.1 | 5.14  | 5.16  | 0.07 | 0.02 | -1.01  | 0.671495 | 0.725345 | 0.842415 | 0.840981 |
| MmuSTS.1772.1.S1_at   | MmuSTS.1772.1 | 3.9   | 3.69  | 0.23 | 0.05 | 1.16   | 0.144438 | 0.121662 | 0.431343 | 0.39084  |

|                       |               |       |       |      |      |       |          |          |          |          |
|-----------------------|---------------|-------|-------|------|------|-------|----------|----------|----------|----------|
| MmuSTS.1772.1.S1_s_at | MmuSTS.1772.1 | 4.4   | 4.52  | 0.45 | 0.1  | -1.09 | 0.664698 | 0.802029 | 0.838694 | 0.885995 |
| MmuSTS.1773.1.S1_at   | MmuSTS.1773.1 | 3.94  | 3.96  | 0.05 | 0.07 | -1.01 | 0.506558 | 0.612954 | 0.739179 | 0.770327 |
| MmuSTS.1774.1.S1_at   | MmuSTS.1774.1 | 6.89  | 6.94  | 0.14 | 0.09 | -1.03 | 0.913644 | 0.683532 | 0.963382 | 0.815375 |
| MmuSTS.1775.1.S1_at   | MmuSTS.1775.1 | 8.53  | 9.93  | 0.18 | 0.17 | -2.65 | 0.001049 | 0.022376 | 0.076524 | 0.187176 |
| MmuSTS.1776.1.S1_at   | MmuSTS.1776.1 | 10.05 | 10.69 | 0.55 | 0.19 | -1.56 | 0.130681 | 0.002671 | 0.413161 | 0.076408 |
| MmuSTS.1777.1.S1_s_at | MmuSTS.1777.1 | 5.33  | 4.58  | 0.72 | 0.36 | 1.69  | 0.295561 | 0.68766  | 0.584306 | 0.81766  |
| MmuSTS.1778.1.S1_at   | MmuSTS.1778.1 | 5.91  | 8.32  | 1.81 | 0.38 | -5.31 | 0.148418 | 0.530739 | 0.436978 | 0.718104 |
| MmuSTS.1779.1.S1_at   | MmuSTS.1779.1 | 9.89  | 8.65  | 0.19 | 0.15 | 2.35  | 0.001127 | 0.00149  | 0.077306 | 0.058951 |
| MmuSTS.178.1.S1_at    | MmuSTS.178.1  | 3.15  | 3.19  | 0.07 | 0.14 | -1.03 | 0.894154 | 0.936919 | 0.954822 | 0.964449 |
| MmuSTS.1780.1.S1_at   | MmuSTS.1780.1 | 9.3   | 9.32  | 0.49 | 0.05 | -1.02 | 0.396697 | 0.244115 | 0.662694 | 0.514121 |
| MmuSTS.1781.1.S1_at   | MmuSTS.1781.1 | 6.2   | 6.32  | 0.33 | 0.17 | -1.09 | 0.216418 | 0.42379  | 0.514199 | 0.646542 |
| MmuSTS.1782.1.S1_at   | MmuSTS.1782.1 | 7.32  | 7.54  | 0.32 | 0.29 | -1.16 | 0.397841 | 0.05198  | 0.66332  | 0.273453 |
| MmuSTS.1783.1.S1_at   | MmuSTS.1783.1 | 9.68  | 9.98  | 0.13 | 0.03 | -1.23 | 0.027946 | 0.283051 | 0.219781 | 0.545692 |
| MmuSTS.1784.1.S1_at   | MmuSTS.1784.1 | 9.46  | 9.24  | 0.23 | 0.06 | 1.17  | 0.470084 | 0.053232 | 0.714683 | 0.276445 |
| MmuSTS.1785.1.S1_s_at | MmuSTS.1785.1 | 3.68  | 3.54  | 0.05 | 0.1  | 1.11  | 0.073244 | 0.080463 | 0.328341 | 0.328159 |
| MmuSTS.1786.1.S1_s_at | MmuSTS.1786.1 | 3.3   | 3.32  | 0.17 | 0.01 | -1.01 | 0.440879 | 0.602073 | 0.694673 | 0.763172 |
| MmuSTS.1787.1.S1_at   | MmuSTS.1787.1 | 10.67 | 11.73 | 0.28 | 0.07 | -2.08 | 0.006174 | 0.003507 | 0.124714 | 0.08503  |
| MmuSTS.1788.1.S1_s_at | MmuSTS.1788.1 | 3.95  | 4.2   | 0.13 | 0.16 | -1.18 | 0.521951 | 0.399668 | 0.749488 | 0.629933 |
| MmuSTS.1789.1.S1_at   | MmuSTS.1789.1 | 8.73  | 8.8   | 0.17 | 0.07 | -1.05 | 0.550828 | 0.166652 | 0.768143 | 0.443133 |
| MmuSTS.179.1.S1_at    | MmuSTS.179.1  | 4.02  | 4.03  | 0.16 | 0.07 | -1.01 | 0.901183 | 0.915303 | 0.958206 | 0.952467 |
| MmuSTS.1790.1.S1_at   | MmuSTS.1790.1 | 9.9   | 10.83 | 0.31 | 0.23 | -1.91 | 0.014615 | 0.085975 | 0.172728 | 0.338116 |
| MmuSTS.1791.1.S1_s_at | MmuSTS.1791.1 | 11.64 | 11.82 | 0.16 | 0.05 | -1.13 | 0.120639 | 0.242181 | 0.399021 | 0.512669 |
| MmuSTS.1792.1.S1_at   | MmuSTS.1792.1 | 12.14 | 12.13 | 0.12 | 0.04 | 1.01  | 0.35602  | 0.788085 | 0.632435 | 0.87743  |
| MmuSTS.1793.1.S1_at   | MmuSTS.1793.1 | 7.13  | 7.93  | 0.21 | 0.38 | -1.74 | 0.030215 | 0.100962 | 0.226956 | 0.360525 |
| MmuSTS.1794.1.S1_at   | MmuSTS.1794.1 | 10.48 | 10.3  | 0.26 | 0.3  | 1.13  | 0.643597 | 0.002898 | 0.826261 | 0.079107 |
| MmuSTS.1795.1.S1_at   | MmuSTS.1795.1 | 7.4   | 7.18  | 0.08 | 0.2  | 1.17  | 0.296896 | 0.095652 | 0.585528 | 0.35269  |
| MmuSTS.1796.1.S1_at   | MmuSTS.1796.1 | 6.78  | 7.9   | 0.69 | 0.06 | -2.18 | 0.01864  | 0.03106  | 0.189736 | 0.218115 |
| MmuSTS.1797.1.S1_at   | MmuSTS.1797.1 | 5.8   | 6.05  | 0.44 | 0.23 | -1.18 | 0.480751 | 0.605018 | 0.721501 | 0.764917 |
| MmuSTS.1798.1.S1_at   | MmuSTS.1798.1 | 9.96  | 10.15 | 0.34 | 0.09 | -1.14 | 0.385598 | 0.424257 | 0.65436  | 0.646853 |
| MmuSTS.1799.1.S1_at   | MmuSTS.1799.1 | 10.86 | 10.44 | 0.04 | 0.12 | 1.34  | 0.005102 | 0.00085  | 0.116736 | 0.047089 |
| MmuSTS.18.1.S1_at     | MmuSTS.18.1   | 3.87  | 3.9   | 0.13 | 0.04 | -1.03 | 0.274102 | 0.372366 | 0.566098 | 0.611263 |
| MmuSTS.180.1.S1_at    | MmuSTS.180.1  | 8.9   | 9.19  | 0.11 | 0.11 | -1.22 | 0.040829 | 0.003703 | 0.258464 | 0.086769 |
| MmuSTS.1800.1.S1_at   | MmuSTS.1800.1 | 3.09  | 3.27  | 0.33 | 0.28 | -1.14 | 0.580844 | 0.402499 | 0.786132 | 0.631481 |
| MmuSTS.1800.1.S1_s_at | MmuSTS.1800.1 | 3.72  | 3.52  | 0.35 | 0.28 | 1.15  | 0.942032 | 0.544568 | 0.975589 | 0.726948 |
| MmuSTS.1800.1.S1_x_at | MmuSTS.1800.1 | 4.93  | 4.77  | 0.51 | 0.6  | 1.12  | 0.912737 | 0.817144 | 0.963144 | 0.894545 |
| MmuSTS.1801.1.S1_at   | MmuSTS.1801.1 | 13.09 | 12.96 | 0.13 | 0.05 | 1.1   | 0.225234 | 0.018169 | 0.52312  | 0.169673 |
| MmuSTS.1802.1.S1_at   | MmuSTS.1802.1 | 10.28 | 11.08 | 0.31 | 0.1  | -1.75 | 0.039713 | 0.036252 | 0.255965 | 0.235    |
| MmuSTS.1803.1.S1_at   | MmuSTS.1803.1 | 7.12  | 5.78  | 0.54 | 0.31 | 2.54  | 0.05724  | 0.076226 | 0.296612 | 0.321127 |
| MmuSTS.1804.1.S1_at   | MmuSTS.1804.1 | 6.22  | 6.24  | 0.04 | 0.05 | -1.02 | 0.742658 | 0.020484 | 0.880915 | 0.179669 |
| MmuSTS.1805.1.S1_at   | MmuSTS.1805.1 | 8.96  | 8.73  | 0.2  | 0.06 | 1.17  | 0.12456  | 0.010797 | 0.404741 | 0.135584 |
| MmuSTS.1806.1.S1_at   | MmuSTS.1806.1 | 10.27 | 10.58 | 0.24 | 0.05 | -1.25 | 0.265563 | 0.235858 | 0.55821  | 0.50704  |
| MmuSTS.1807.1.S1_at   | MmuSTS.1807.1 | 8.98  | 8.9   | 0.25 | 0.04 | 1.06  | 0.607968 | 0.774999 | 0.804139 | 0.869027 |
| MmuSTS.1808.1.S1_at   | MmuSTS.1808.1 | 7.56  | 7.87  | 0.13 | 0.06 | -1.24 | 0.044597 | 0.141387 | 0.268363 | 0.414874 |

|                       |               |       |       |      |      |       |          |          |          |          |
|-----------------------|---------------|-------|-------|------|------|-------|----------|----------|----------|----------|
| MmuSTS.1809.1.S1_at   | MmuSTS.1809.1 | 4.04  | 3.93  | 0.45 | 0.23 | 1.08  | 0.464707 | 0.587852 | 0.710874 | 0.754542 |
| MmuSTS.181.1.S1_at    | MmuSTS.181.1  | 11.9  | 11.73 | 0.17 | 0.04 | 1.12  | 0.180298 | 0.00348  | 0.475456 | 0.084834 |
| MmuSTS.1810.1.S1_at   | MmuSTS.1810.1 | 10.07 | 10.57 | 0.46 | 0.25 | -1.41 | 0.166409 | 0.010087 | 0.45963  | 0.131765 |
| MmuSTS.1811.1.S1_at   | MmuSTS.1811.1 | 11.32 | 11.6  | 0.22 | 0.13 | -1.21 | 0.61516  | 0.191476 | 0.808746 | 0.466821 |
| MmuSTS.1812.1.S1_at   | MmuSTS.1812.1 | 10.81 | 10.32 | 0.34 | 0.12 | 1.41  | 0.195678 | 0.254217 | 0.492502 | 0.52252  |
| MmuSTS.1813.1.S1_at   | MmuSTS.1813.1 | 4.47  | 8.26  | 1.12 | 0.34 | -13.8 | 0.008871 | 0.085476 | 0.143995 | 0.337473 |
| MmuSTS.1814.1.S1_at   | MmuSTS.1814.1 | 5.63  | 5.45  | 0.24 | 0.13 | 1.13  | 0.433354 | 0.290339 | 0.68886  | 0.551169 |
| MmuSTS.1815.1.S1_at   | MmuSTS.1815.1 | 3.34  | 3.08  | 0.05 | 0.04 | 1.2   | 0.006333 | 0.128489 | 0.125881 | 0.399822 |
| MmuSTS.1816.1.S1_at   | MmuSTS.1816.1 | 8.14  | 9.23  | 0.74 | 0.23 | -2.13 | 0.071677 | 0.012643 | 0.325611 | 0.14505  |
| MmuSTS.1817.1.S1_at   | MmuSTS.1817.1 | 11.8  | 12.47 | 0.25 | 0.1  | -1.59 | 0.015345 | 0.009909 | 0.176072 | 0.130731 |
| MmuSTS.1818.1.S1_s_at | MmuSTS.1818.1 | 5.91  | 5.84  | 0.05 | 0.06 | 1.05  | 0.110969 | 0.181704 | 0.386642 | 0.458313 |
| MmuSTS.1819.1.S1_a_at | MmuSTS.1819.1 | 6.96  | 7.14  | 0.09 | 0.01 | -1.14 | 0.030108 | 0.024144 | 0.226703 | 0.194543 |
| MmuSTS.1819.1.S1_at   | MmuSTS.1819.1 | 3.39  | 3.41  | 0.11 | 0.05 | -1.02 | 0.602577 | 0.752093 | 0.800303 | 0.855744 |
| MmuSTS.182.1.S1_at    | MmuSTS.182.1  | 6.49  | 7.58  | 1.08 | 0.23 | -2.13 | 0.351349 | 0.371693 | 0.628948 | 0.610481 |
| MmuSTS.1820.1.S1_at   | MmuSTS.1820.1 | 5.92  | 5.79  | 0.25 | 0.03 | 1.09  | 0.445771 | 0.603583 | 0.698211 | 0.764204 |
| MmuSTS.1821.1.S1_at   | MmuSTS.1821.1 | 4.58  | 4.48  | 0.05 | 0.11 | 1.07  | 0.121254 | 0.094532 | 0.399906 | 0.351296 |
| MmuSTS.1822.1.S1_at   | MmuSTS.1822.1 | 11.53 | 11.34 | 0.08 | 0.08 | 1.14  | 0.012797 | 0.003811 | 0.163405 | 0.08794  |
| MmuSTS.1823.1.S1_at   | MmuSTS.1823.1 | 6.31  | 9.58  | 0.93 | 0.24 | -9.64 | 0.00876  | 0.100029 | 0.14333  | 0.3589   |
| MmuSTS.1824.1.S1_at   | MmuSTS.1824.1 | 6.18  | 6.04  | 0.12 | 0.04 | 1.11  | 0.475478 | 0.001973 | 0.718112 | 0.065871 |
| MmuSTS.1825.1.S1_at   | MmuSTS.1825.1 | 9.24  | 9.15  | 0.04 | 0.13 | 1.07  | 0.072477 | 0.115261 | 0.327132 | 0.382262 |
| MmuSTS.1826.1.S1_at   | MmuSTS.1826.1 | 10.58 | 10.97 | 0.39 | 0.34 | -1.31 | 0.389139 | 0.044441 | 0.657101 | 0.25521  |
| MmuSTS.1827.1.S1_at   | MmuSTS.1827.1 | 9.93  | 10.11 | 0.15 | 0.12 | -1.13 | 0.747275 | 0.001781 | 0.882955 | 0.063434 |
| MmuSTS.1828.1.S1_at   | MmuSTS.1828.1 | 6.37  | 6.34  | 0.24 | 0.22 | 1.01  | 0.582338 | 0.638508 | 0.78718  | 0.78765  |
| MmuSTS.1829.1.S1_at   | MmuSTS.1829.1 | 7.83  | 8.36  | 0.38 | 0.13 | -1.45 | 0.293298 | 0.523421 | 0.582201 | 0.713713 |
| MmuSTS.183.1.S1_at    | MmuSTS.183.1  | 6.64  | 7.14  | 1.38 | 0.14 | -1.41 | 0.633012 | 0.639061 | 0.82012  | 0.788038 |
| MmuSTS.1830.1.S1_at   | MmuSTS.1830.1 | 11.41 | 11.28 | 0.17 | 0.07 | 1.1   | 0.296195 | 0.572802 | 0.584922 | 0.74476  |
| MmuSTS.1831.1.S1_at   | MmuSTS.1831.1 | 10.95 | 10.68 | 0.03 | 0.03 | 1.2   | 0.000512 | 0.215228 | 0.069024 | 0.488977 |
| MmuSTS.1832.1.S1_at   | MmuSTS.1832.1 | 10.38 | 10.13 | 0.34 | 0.19 | 1.19  | 0.152515 | 0.025743 | 0.442229 | 0.201029 |
| MmuSTS.1833.1.S1_at   | MmuSTS.1833.1 | 4.16  | 4.21  | 0.17 | 0.1  | -1.03 | 0.506132 | 0.24571  | 0.738814 | 0.515496 |
| MmuSTS.1834.1.S1_at   | MmuSTS.1834.1 | 3.59  | 3.59  | 0.07 | 0.07 | 1.01  | 0.190385 | 0.604973 | 0.486711 | 0.764917 |
| MmuSTS.1835.1.S1_at   | MmuSTS.1835.1 | 3.82  | 3.81  | 0.19 | 0.05 | 1.01  | 0.797839 | 0.828094 | 0.90876  | 0.901214 |
| MmuSTS.1836.1.S1_at   | MmuSTS.1836.1 | 3.23  | 3.23  | 0.06 | 0.11 | -1    | 0.573703 | 0.480269 | 0.781268 | 0.68574  |
| MmuSTS.1837.1.S1_at   | MmuSTS.1837.1 | 10.37 | 10.19 | 0.3  | 0.11 | 1.13  | 0.422983 | 0.833805 | 0.681093 | 0.904744 |
| MmuSTS.1838.1.S1_at   | MmuSTS.1838.1 | 9.37  | 9.32  | 0.09 | 0.09 | 1.04  | 0.28295  | 0.685469 | 0.573505 | 0.816523 |
| MmuSTS.1839.1.S1_at   | MmuSTS.1839.1 | 2.88  | 2.88  | 0.17 | 0.13 | -1    | 0.245809 | 0.326423 | 0.541732 | 0.576576 |
| MmuSTS.184.1.S1_at    | MmuSTS.184.1  | 9.05  | 8.7   | 0.1  | 0.05 | 1.27  | 0.004829 | 0.055502 | 0.115098 | 0.281404 |
| MmuSTS.1840.1.S1_at   | MmuSTS.1840.1 | 10.75 | 10.66 | 0.19 | 0.11 | 1.06  | 0.945779 | 0.900596 | 0.977159 | 0.943473 |
| MmuSTS.1841.1.S1_at   | MmuSTS.1841.1 | 12.12 | 12.26 | 0.05 | 0.12 | -1.1  | 0.219548 | 0.00231  | 0.517335 | 0.070884 |
| MmuSTS.1842.1.S1_at   | MmuSTS.1842.1 | 10.25 | 9.28  | 0.33 | 0.17 | 1.96  | 0.011736 | 0.037945 | 0.158171 | 0.239302 |
| MmuSTS.1843.1.S1_at   | MmuSTS.1843.1 | 5.78  | 5.37  | 0.33 | 0.17 | 1.33  | 0.093486 | 0.026613 | 0.362078 | 0.204008 |
| MmuSTS.1844.1.S1_at   | MmuSTS.1844.1 | 5.5   | 5.46  | 0.21 | 0.18 | 1.03  | 0.171628 | 0.20926  | 0.465636 | 0.48303  |
| MmuSTS.1845.1.S1_at   | MmuSTS.1845.1 | 7.86  | 7.46  | 0.16 | 0.24 | 1.32  | 0.056717 | 0.000883 | 0.295666 | 0.047602 |
| MmuSTS.1846.1.S1_s_at | MmuSTS.1846.1 | 4.63  | 4.52  | 0.16 | 0.11 | 1.07  | 0.938163 | 0.991457 | 0.973844 | 0.995223 |

|                       |               |       |       |      |      |       |          |          |          |          |
|-----------------------|---------------|-------|-------|------|------|-------|----------|----------|----------|----------|
| MmuSTS.1847.1.S1_at   | MmuSTS.1847.1 | 8.92  | 8.85  | 0.19 | 0.1  | 1.05  | 0.628608 | 0.300769 | 0.817487 | 0.558978 |
| MmuSTS.1848.1.S1_at   | MmuSTS.1848.1 | 9.1   | 8.77  | 0.03 | 0.14 | 1.25  | 0.014905 | 0.00443  | 0.174233 | 0.092937 |
| MmuSTS.1849.1.S1_at   | MmuSTS.1849.1 | 4.54  | 5.36  | 0.55 | 0.42 | -1.76 | 0.109091 | 0.315725 | 0.384192 | 0.569148 |
| MmuSTS.185.1.S1_at    | MmuSTS.185.1  | 9.3   | 7.58  | 0.21 | 0.33 | 3.29  | 0.002915 | 0.001575 | 0.099212 | 0.060185 |
| MmuSTS.1850.1.S1_at   | MmuSTS.1850.1 | 8.2   | 7.67  | 0.22 | 0.07 | 1.45  | 0.016027 | 0.557412 | 0.179208 | 0.735031 |
| MmuSTS.1851.1.S1_at   | MmuSTS.1851.1 | 13.16 | 13.32 | 0.05 | 0.05 | -1.12 | 0.008104 | 0.016488 | 0.138956 | 0.162562 |
| MmuSTS.1852.1.S1_at   | MmuSTS.1852.1 | 9.44  | 8.13  | 0.42 | 0.14 | 2.48  | 0.010481 | 0.014507 | 0.152291 | 0.153682 |
| MmuSTS.1853.1.S1_at   | MmuSTS.1853.1 | 9.79  | 9.61  | 0.2  | 0.05 | 1.14  | 0.11369  | 0.219818 | 0.390392 | 0.493388 |
| MmuSTS.1854.1.S1_at   | MmuSTS.1854.1 | 10.68 | 10.84 | 0.11 | 0.11 | -1.11 | 0.421696 | 0.780147 | 0.680117 | 0.872524 |
| MmuSTS.1855.1.S1_at   | MmuSTS.1855.1 | 13.16 | 13.13 | 0.07 | 0.03 | 1.02  | 0.232721 | 0.260567 | 0.531068 | 0.527084 |
| MmuSTS.1856.1.S1_at   | MmuSTS.1856.1 | 4.64  | 3.93  | 0.49 | 0.29 | 1.64  | 0.239939 | 0.339876 | 0.537473 | 0.586417 |
| MmuSTS.1857.1.S1_at   | MmuSTS.1857.1 | 5.82  | 5.87  | 0.02 | 0.12 | -1.03 | 0.411829 | 0.313941 | 0.673681 | 0.568121 |
| MmuSTS.1858.1.S1_at   | MmuSTS.1858.1 | 9.5   | 9.13  | 0.24 | 0.11 | 1.29  | 0.089827 | 0.562794 | 0.356705 | 0.738167 |
| MmuSTS.1859.1.S1_at   | MmuSTS.1859.1 | 10.14 | 9.84  | 0.07 | 0.15 | 1.23  | 0.013805 | 0.404959 | 0.168434 | 0.633415 |
| MmuSTS.186.1.S1_at    | MmuSTS.186.1  | 5.83  | 5.75  | 0.17 | 0.07 | 1.06  | 0.838674 | 0.347795 | 0.929155 | 0.592154 |
| MmuSTS.1860.1.S1_at   | MmuSTS.1860.1 | 6.23  | 6.36  | 0.1  | 0.35 | -1.09 | 0.492249 | 0.183657 | 0.729603 | 0.459681 |
| MmuSTS.1861.1.S1_at   | MmuSTS.1861.1 | 6.12  | 6     | 0.28 | 0.05 | 1.08  | 0.160667 | 0.243595 | 0.452247 | 0.513729 |
| MmuSTS.1862.1.S1_at   | MmuSTS.1862.1 | 5.45  | 5.36  | 0.15 | 0.04 | 1.07  | 0.402721 | 0.291712 | 0.666996 | 0.552054 |
| MmuSTS.1863.1.S1_at   | MmuSTS.1863.1 | 6.71  | 6.47  | 0.34 | 0.06 | 1.18  | 0.265188 | 0.355124 | 0.557962 | 0.597508 |
| MmuSTS.1864.1.S1_at   | MmuSTS.1864.1 | 7.46  | 6.93  | 0.06 | 0.14 | 1.44  | 0.004073 | 0.00005  | 0.108999 | 0.025273 |
| MmuSTS.1865.1.S1_at   | MmuSTS.1865.1 | 3.7   | 3.69  | 0.96 | 0.12 | 1.01  | 0.359039 | 0.408128 | 0.634653 | 0.635476 |
| MmuSTS.1866.1.S1_at   | MmuSTS.1866.1 | 3.96  | 3.59  | 0.23 | 0.4  | 1.29  | 0.478306 | 0.663949 | 0.719904 | 0.803246 |
| MmuSTS.1866.1.S1_s_at | MmuSTS.1866.1 | 3.56  | 3.6   | 0.13 | 0.05 | -1.03 | 0.67705  | 0.855577 | 0.845952 | 0.917669 |
| MmuSTS.1867.1.S1_at   | MmuSTS.1867.1 | 11.37 | 11.37 | 0.17 | 0.13 | 1     | 0.528007 | 0.095426 | 0.753456 | 0.352453 |
| MmuSTS.1868.1.S1_at   | MmuSTS.1868.1 | 12.4  | 12.93 | 0.18 | 0.08 | -1.44 | 0.005006 | 0.001178 | 0.115961 | 0.05381  |
| MmuSTS.1869.1.S1_at   | MmuSTS.1869.1 | 3.12  | 3.1   | 0.03 | 0.07 | 1.01  | 0.939476 | 0.998689 | 0.974443 | 0.999294 |
| MmuSTS.187.1.S1_at    | MmuSTS.187.1  | 9.62  | 9.38  | 0.06 | 0.08 | 1.18  | 0.030067 | 0.008407 | 0.226565 | 0.121726 |
| MmuSTS.1870.1.S1_at   | MmuSTS.1870.1 | 4.99  | 5.08  | 0.17 | 0.17 | -1.06 | 0.572747 | 0.146174 | 0.78079  | 0.420124 |
| MmuSTS.1871.1.S1_at   | MmuSTS.1871.1 | 8.07  | 8.53  | 0.27 | 0.08 | -1.38 | 0.052618 | 0.168869 | 0.286356 | 0.445458 |
| MmuSTS.1872.1.S1_at   | MmuSTS.1872.1 | 5.34  | 7.81  | 1.06 | 0.26 | -5.57 | 0.052265 | 0.230848 | 0.285979 | 0.502545 |
| MmuSTS.1873.1.S1_at   | MmuSTS.1873.1 | 11.74 | 11.95 | 0.07 | 0.04 | -1.15 | 0.01303  | 0.007332 | 0.164922 | 0.115015 |
| MmuSTS.1874.1.S1_at   | MmuSTS.1874.1 | 5.23  | 6.11  | 0.2  | 0.5  | -1.84 | 0.125955 | 0.279496 | 0.406905 | 0.543055 |
| MmuSTS.1875.1.S1_s_at | MmuSTS.1875.1 | 8.07  | 5.99  | 0.56 | 0.25 | 4.23  | 0.004312 | 0.004135 | 0.111813 | 0.090937 |
| MmuSTS.1876.1.S1_at   | MmuSTS.1876.1 | 8.21  | 8.88  | 0.32 | 0.19 | -1.59 | 0.026861 | 0.21908  | 0.216926 | 0.49285  |
| MmuSTS.1877.1.S1_at   | MmuSTS.1877.1 | 9.97  | 10.15 | 0.26 | 0.08 | -1.13 | 0.891358 | 0.350671 | 0.953686 | 0.594403 |
| MmuSTS.1878.1.S1_at   | MmuSTS.1878.1 | 3.7   | 3.72  | 0.55 | 0.03 | -1.01 | 0.428668 | 0.464445 | 0.685446 | 0.675068 |
| MmuSTS.1879.1.S1_at   | MmuSTS.1879.1 | 5.74  | 4.86  | 0.23 | 0.2  | 1.85  | 0.010637 | 0.002034 | 0.152845 | 0.066885 |
| MmuSTS.188.1.S1_at    | MmuSTS.188.1  | 4.55  | 4.65  | 0.12 | 0.07 | -1.07 | 0.632857 | 0.193539 | 0.82004  | 0.468785 |
| MmuSTS.1880.1.S1_at   | MmuSTS.1880.1 | 12.18 | 12.18 | 0.06 | 0.05 | 1     | 0.701648 | 0.575256 | 0.858329 | 0.746427 |
| MmuSTS.1881.1.S1_at   | MmuSTS.1881.1 | 12.86 | 12.61 | 0.18 | 0.07 | 1.2   | 0.13065  | 0.709941 | 0.413113 | 0.831879 |
| MmuSTS.1882.1.S1_s_at | MmuSTS.1882.1 | 6.47  | 6.87  | 0.45 | 0.18 | -1.32 | 0.089863 | 0.204861 | 0.356788 | 0.479224 |
| MmuSTS.1883.1.S1_at   | MmuSTS.1883.1 | 12.15 | 11.99 | 0.2  | 0.04 | 1.12  | 0.441367 | 0.442528 | 0.694906 | 0.660487 |
| MmuSTS.1884.1.S1_at   | MmuSTS.1884.1 | 5.89  | 6.59  | 0.35 | 0.43 | -1.63 | 0.370283 | 0.019237 | 0.643268 | 0.174494 |

|                        |                |       |       |      |      |        |          |          |          |          |
|------------------------|----------------|-------|-------|------|------|--------|----------|----------|----------|----------|
| MmuSTS.1885.1.S1_at    | MmuSTS.1885.1  | 6.43  | 6.45  | 0.1  | 0.05 | -1.01  | 0.691086 | 0.929238 | 0.852289 | 0.959644 |
| MmuSTS.1886.1.S1_at    | MmuSTS.1886.1  | 5.97  | 5.98  | 0.24 | 0.06 | -1.01  | 0.882443 | 0.314198 | 0.949992 | 0.568185 |
| MmugDNA.2662.1.S1_s_at | MmugDNA.2662.1 | 3.8   | 3.81  | 0.13 | 0.06 | -1.01  | 0.499729 | 0.164911 | 0.734372 | 0.441219 |
| MmuSTS.1889.1.S1_at    | MmuSTS.1889.1  | 8.07  | 8.73  | 0.13 | 0.09 | -1.58  | 0.002188 | 0.217808 | 0.090693 | 0.491376 |
| MmuSTS.189.1.S1_at     | MmuSTS.189.1   | 3.56  | 3.73  | 0.07 | 0.18 | -1.12  | 0.382198 | 0.392458 | 0.651645 | 0.625813 |
| MmuSTS.1890.1.S1_at    | MmuSTS.1890.1  | 11.92 | 12.84 | 0.56 | 0.1  | -1.9   | 0.022066 | 0.296359 | 0.201819 | 0.555492 |
| MmuSTS.1891.1.S1_at    | MmuSTS.1891.1  | 11.74 | 11.42 | 0.29 | 0.09 | 1.24   | 0.331918 | 0.140848 | 0.613772 | 0.414237 |
| MmuSTS.1892.1.S1_at    | MmuSTS.1892.1  | 10.92 | 11.02 | 0.06 | 0.05 | -1.07  | 0.074606 | 0.414793 | 0.331249 | 0.640456 |
| MmuSTS.1893.1.S1_s_at  | MmuSTS.1893.1  | 5.11  | 7.1   | 2.01 | 0.76 | -3.97  | 0.34081  | 0.318943 | 0.620908 | 0.571532 |
| MmuSTS.1894.1.S1_at    | MmuSTS.1894.1  | 6.39  | 9.42  | 1.64 | 0.18 | -8.16  | 0.040098 | 0.00815  | 0.256783 | 0.119754 |
| MmuSTS.1895.1.S1_at    | MmuSTS.1895.1  | 8.71  | 10.9  | 2.27 | 0.5  | -4.55  | 0.235876 | 0.241188 | 0.533528 | 0.511821 |
| MmuSTS.1896.1.S1_at    | MmuSTS.1896.1  | 6.59  | 6.59  | 0.04 | 0.01 | -1     | 0.868699 | 0.340921 | 0.943559 | 0.587035 |
| MmuSTS.1897.1.S1_at    | MmuSTS.1897.1  | 7.8   | 8.39  | 0.3  | 0.15 | -1.51  | 0.047378 | 0.147301 | 0.275072 | 0.421493 |
| MmuSTS.1898.1.S1_at    | MmuSTS.1898.1  | 3.22  | 3.16  | 0.04 | 0.23 | 1.04   | 0.89893  | 0.944109 | 0.957024 | 0.968306 |
| MmuSTS.1899.1.S1_at    | MmuSTS.1899.1  | 2.85  | 2.86  | 0.06 | 0.07 | -1.01  | 0.333886 | 0.659747 | 0.615174 | 0.800854 |
| MmuSTS.19.1.S1_at      | MmuSTS.19.1    | 6.91  | 10.27 | 1.5  | 0.24 | -10.22 | 0.054547 | 0.361933 | 0.290603 | 0.602709 |
| MmuSTS.190.1.S1_at     | MmuSTS.190.1   | 8.91  | 9.55  | 0.24 | 0.2  | -1.56  | 0.023216 | 0.008137 | 0.205385 | 0.119736 |
| MmuSTS.1900.1.S1_at    | MmuSTS.1900.1  | 3.34  | 3.38  | 0.33 | 0.08 | -1.03  | 0.371738 | 0.523908 | 0.644368 | 0.714064 |
| MmuSTS.1901.1.S1_at    | MmuSTS.1901.1  | 4.11  | 4.33  | 0.05 | 0.09 | -1.16  | 0.036124 | 0.075772 | 0.245053 | 0.320348 |
| MmuSTS.1902.1.S1_s_at  | MmuSTS.1902.1  | 4.36  | 4.14  | 0.1  | 0.11 | 1.17   | 0.060912 | 0.060168 | 0.303761 | 0.291882 |
| MmuSTS.1903.1.S1_at    | MmuSTS.1903.1  | 6.36  | 6.11  | 0.53 | 0.16 | 1.19   | 0.878631 | 0.351722 | 0.948226 | 0.595164 |
| MmuSTS.1904.1.S1_at    | MmuSTS.1904.1  | 6.64  | 7.14  | 0.08 | 0.08 | -1.41  | 0.001818 | 0.173504 | 0.08633  | 0.449938 |
| MmuSTS.1905.1.S1_at    | MmuSTS.1905.1  | 4.77  | 5.04  | 0.12 | 0.07 | -1.2   | 0.056736 | 0.18316  | 0.295704 | 0.459531 |
| MmuSTS.1906.1.S1_at    | MmuSTS.1906.1  | 4.07  | 4.04  | 0.18 | 0.14 | 1.02   | 0.901378 | 0.987537 | 0.95827  | 0.993022 |
| MmuSTS.1907.1.S1_at    | MmuSTS.1907.1  | 5.49  | 5.71  | 0.23 | 0.14 | -1.16  | 0.981031 | 0.939088 | 0.992909 | 0.965412 |
| MmuSTS.1908.1.S1_at    | MmuSTS.1908.1  | 4.9   | 5.24  | 0.59 | 0.41 | -1.27  | 0.797249 | 0.926618 | 0.908429 | 0.958372 |
| MmuSTS.1909.1.S1_at    | MmuSTS.1909.1  | 8.28  | 7.6   | 0.29 | 0.11 | 1.6    | 0.052124 | 0.22791  | 0.28583  | 0.500211 |
| MmuSTS.191.1.S1_at     | MmuSTS.191.1   | 6.44  | 8.79  | 1.06 | 0.17 | -5.11  | 0.044147 | 0.221816 | 0.267197 | 0.494948 |
| MmuSTS.1910.1.S1_at    | MmuSTS.1910.1  | 4.45  | 4.45  | 0.12 | 0.01 | 1      | 0.408369 | 0.449193 | 0.671177 | 0.664892 |
| MmuSTS.1911.1.S1_at    | MmuSTS.1911.1  | 9.85  | 9.82  | 0.09 | 0.06 | 1.03   | 0.256152 | 0.974614 | 0.550644 | 0.986197 |
| MmuSTS.1912.1.S1_at    | MmuSTS.1912.1  | 11.36 | 11.12 | 0.08 | 0.12 | 1.18   | 0.064565 | 0.009483 | 0.310686 | 0.12821  |
| MmuSTS.1913.1.S1_at    | MmuSTS.1913.1  | 10.8  | 10.75 | 0.01 | 0.08 | 1.03   | 0.123458 | 0.23172  | 0.402832 | 0.503551 |
| MmuSTS.1914.1.S1_at    | MmuSTS.1914.1  | 10.15 | 10.14 | 0.23 | 0.1  | 1.01   | 0.630884 | 0.108614 | 0.818647 | 0.372171 |
| MmuSTS.1915.1.S1_at    | MmuSTS.1915.1  | 4.17  | 4.69  | 0.29 | 0.55 | -1.43  | 0.243101 | 0.442306 | 0.539753 | 0.660336 |
| MmuSTS.1916.1.S1_at    | MmuSTS.1916.1  | 3.25  | 3.33  | 0.06 | 0.18 | -1.06  | 0.342965 | 0.469576 | 0.622647 | 0.67829  |
| MmuSTS.1917.1.S1_at    | MmuSTS.1917.1  | 5.26  | 5.85  | 0.41 | 0.16 | -1.5   | 0.225644 | 0.166687 | 0.523395 | 0.443163 |
| MmuSTS.1918.1.S1_at    | MmuSTS.1918.1  | 7.25  | 6.39  | 0.68 | 0.13 | 1.82   | 0.090956 | 0.045942 | 0.358168 | 0.258786 |
| MmuSTS.1919.1.S1_at    | MmuSTS.1919.1  | 7.08  | 6.93  | 0.14 | 0.07 | 1.11   | 0.094777 | 0.559655 | 0.36369  | 0.736365 |
| MmuSTS.192.1.S1_at     | MmuSTS.192.1   | 8.28  | 8.02  | 0.08 | 0.11 | 1.2    | 0.047182 | 0.040409 | 0.274594 | 0.246134 |
| MmuSTS.1920.1.S1_at    | MmuSTS.1920.1  | 8.49  | 7.65  | 0.28 | 0.03 | 1.79   | 0.005155 | 0.032618 | 0.116998 | 0.223644 |
| MmuSTS.1921.1.S1_at    | MmuSTS.1921.1  | 4.79  | 4.75  | 0.28 | 0.13 | 1.03   | 0.325716 | 0.364458 | 0.608885 | 0.604837 |
| MmuSTS.1923.1.S1_at    | MmuSTS.1923.1  | 11.23 | 11.07 | 0.29 | 0.21 | 1.12   | 0.292505 | 0.575909 | 0.581743 | 0.746847 |
| MmuSTS.1924.1.S1_at    | MmuSTS.1924.1  | 8.61  | 8.71  | 0.18 | 0.28 | -1.07  | 0.303737 | 0.026555 | 0.591195 | 0.203915 |

|                      |               |       |       |      |      |       |          |          |          |          |
|----------------------|---------------|-------|-------|------|------|-------|----------|----------|----------|----------|
| MmuSTS.1925.1.S1_at  | MmuSTS.1925.1 | 12.68 | 13.67 | 0.29 | 0.14 | -1.99 | 0.013529 | 0.00409  | 0.167163 | 0.09055  |
| MmuSTS.1926.1.S1_at  | MmuSTS.1926.1 | 7.71  | 7.44  | 0.15 | 0.07 | 1.21  | 0.028926 | 0.093109 | 0.22298  | 0.349292 |
| MmuSTS.1927.1.S1_at  | MmuSTS.1927.1 | 4.9   | 6.8   | 1.53 | 0.13 | -3.74 | 0.116216 | 0.186665 | 0.393335 | 0.462459 |
| MmuSTS.1928.1.S1_at  | MmuSTS.1928.1 | 10.49 | 10.74 | 0.49 | 0.22 | -1.19 | 0.531961 | 0.850696 | 0.756114 | 0.915051 |
| MmuSTS.1929.1.S1_at  | MmuSTS.1929.1 | 12.26 | 12.24 | 0.25 | 0.15 | 1.01  | 0.425127 | 0.852911 | 0.682591 | 0.916372 |
| MmuSTS.193.1.S1_s_at | MmuSTS.193.1  | 10.97 | 10.88 | 0.03 | 0.1  | 1.06  | 0.071995 | 0.044048 | 0.326208 | 0.254195 |
| MmuSTS.1930.1.S1_at  | MmuSTS.1930.1 | 11.87 | 11.47 | 0.28 | 0.03 | 1.31  | 0.045503 | 0.370465 | 0.270864 | 0.609543 |
| MmuSTS.1931.1.S1_at  | MmuSTS.1931.1 | 12.32 | 12.44 | 0.26 | 0.07 | -1.09 | 0.618349 | 0.759285 | 0.810659 | 0.860036 |
| MmuSTS.1932.1.S1_at  | MmuSTS.1932.1 | 9.11  | 9.41  | 0.58 | 0.14 | -1.24 | 0.134372 | 0.362369 | 0.41803  | 0.602965 |
| MmuSTS.1933.1.S1_at  | MmuSTS.1933.1 | 3.01  | 3.71  | 0.08 | 0.25 | -1.63 | 0.025611 | 0.02413  | 0.212928 | 0.1945   |
| MmuSTS.1934.1.S1_at  | MmuSTS.1934.1 | 10.07 | 10.39 | 0.13 | 0.24 | -1.24 | 0.16739  | 0.061774 | 0.460585 | 0.295327 |
| MmuSTS.1935.1.S1_at  | MmuSTS.1935.1 | 10.51 | 10.59 | 0.11 | 0.24 | -1.06 | 0.9649   | 0.194712 | 0.98581  | 0.469765 |
| MmuSTS.1936.1.S1_at  | MmuSTS.1936.1 | 10.17 | 9.99  | 0.18 | 0.07 | 1.13  | 0.089345 | 0.036869 | 0.356307 | 0.23648  |
| MmuSTS.1937.1.S1_at  | MmuSTS.1937.1 | 7.22  | 7.41  | 0.17 | 0.09 | -1.14 | 0.426489 | 0.734437 | 0.683874 | 0.846141 |
| MmuSTS.1938.1.S1_at  | MmuSTS.1938.1 | 4.32  | 4.35  | 0.09 | 0.05 | -1.02 | 0.679409 | 0.957439 | 0.847058 | 0.975899 |
| MmuSTS.1939.1.S1_at  | MmuSTS.1939.1 | 4.35  | 4.27  | 0.32 | 0.17 | 1.06  | 0.46611  | 0.666131 | 0.712021 | 0.804415 |
| MmuSTS.194.1.S1_at   | MmuSTS.194.1  | 4.59  | 4.7   | 0.53 | 0.24 | -1.08 | 0.672244 | 0.738504 | 0.843056 | 0.848349 |
| MmuSTS.1940.1.S1_at  | MmuSTS.1940.1 | 9.63  | 10.49 | 0.18 | 0.05 | -1.81 | 0.001336 | 0.036633 | 0.079218 | 0.235943 |
| MmuSTS.1941.1.S1_at  | MmuSTS.1941.1 | 5.21  | 5.65  | 0.66 | 0.32 | -1.35 | 0.082058 | 0.389035 | 0.343361 | 0.623288 |
| MmuSTS.1942.1.S1_at  | MmuSTS.1942.1 | 4.56  | 4.57  | 0.11 | 0.06 | -1.01 | 0.525584 | 0.601083 | 0.752003 | 0.762496 |
| MmuSTS.1943.1.S1_at  | MmuSTS.1943.1 | 13.04 | 13.17 | 0.07 | 0.01 | -1.1  | 0.058188 | 0.767425 | 0.298273 | 0.864956 |
| MmuSTS.1944.1.S1_at  | MmuSTS.1944.1 | 6.03  | 8.04  | 1.76 | 0.26 | -4.02 | 0.270908 | 0.413194 | 0.562872 | 0.639484 |
| MmuSTS.1945.1.S1_at  | MmuSTS.1945.1 | 8.18  | 8.14  | 0.16 | 0.21 | 1.03  | 0.918547 | 0.24728  | 0.965302 | 0.516473 |
| MmuSTS.1946.1.S1_at  | MmuSTS.1946.1 | 12.37 | 12.37 | 0.05 | 0    | -1    | 0.386664 | 0.02366  | 0.655041 | 0.192574 |
| MmuSTS.1947.1.S1_at  | MmuSTS.1947.1 | 3.63  | 3.5   | 0.32 | 0.07 | 1.1   | 0.17638  | 0.203407 | 0.470765 | 0.477634 |
| MmuSTS.1948.1.S1_at  | MmuSTS.1948.1 | 7.19  | 7.16  | 0.12 | 0.2  | 1.03  | 0.998186 | 0.911739 | 0.999328 | 0.950257 |
| MmuSTS.1949.1.S1_at  | MmuSTS.1949.1 | 2.89  | 2.87  | 0.05 | 0.07 | 1.01  | 0.236363 | 0.086633 | 0.533999 | 0.339176 |
| MmuSTS.195.1.S1_at   | MmuSTS.195.1  | 5.43  | 5.49  | 0.19 | 0.03 | -1.04 | 0.693842 | 0.438838 | 0.853757 | 0.657715 |
| MmuSTS.1950.1.S1_at  | MmuSTS.1950.1 | 5.33  | 5.49  | 0.29 | 0.05 | -1.12 | 0.844843 | 0.795064 | 0.932176 | 0.881926 |
| MmuSTS.1951.1.S1_at  | MmuSTS.1951.1 | 4.55  | 4.8   | 0.14 | 0.07 | -1.19 | 0.135836 | 0.062258 | 0.41994  | 0.296325 |
| MmuSTS.1952.1.S1_at  | MmuSTS.1952.1 | 7.04  | 7.57  | 0.56 | 0.37 | -1.44 | 0.196559 | 0.009765 | 0.493604 | 0.129971 |
| MmuSTS.1953.1.S1_at  | MmuSTS.1953.1 | 9.98  | 8.49  | 0.32 | 0.39 | 2.82  | 0.00649  | 0.067765 | 0.127362 | 0.306425 |
| MmuSTS.1954.1.S1_at  | MmuSTS.1954.1 | 3.95  | 4.82  | 0.06 | 0.18 | -1.84 | 0.001385 | 0.135    | 0.079595 | 0.40698  |
| MmuSTS.1955.1.S1_at  | MmuSTS.1955.1 | 12.24 | 10.95 | 0.12 | 0.28 | 2.46  | 0.003117 | 0.000685 | 0.100877 | 0.044166 |
| MmuSTS.1956.1.S1_at  | MmuSTS.1956.1 | 12.92 | 13.18 | 0.25 | 0.07 | -1.2  | 0.192162 | 0.158524 | 0.488749 | 0.434442 |
| MmuSTS.1957.1.S1_at  | MmuSTS.1957.1 | 8.14  | 9.99  | 0.31 | 0.23 | -3.62 | 0.001491 | 0.163957 | 0.081104 | 0.440107 |
| MmuSTS.1958.1.S1_at  | MmuSTS.1958.1 | 7.34  | 8.57  | 0.36 | 0.21 | -2.35 | 0.007746 | 0.264764 | 0.136735 | 0.530791 |
| MmuSTS.1959.1.S1_at  | MmuSTS.1959.1 | 4.4   | 4.41  | 0.06 | 0.05 | -1.01 | 0.511912 | 0.427226 | 0.74282  | 0.649175 |
| MmuSTS.196.1.S1_at   | MmuSTS.196.1  | 11.49 | 11.53 | 0.3  | 0.04 | -1.03 | 0.754007 | 0.286734 | 0.886677 | 0.548112 |
| MmuSTS.1960.1.S1_at  | MmuSTS.1960.1 | 5.08  | 5.52  | 0.79 | 0.1  | -1.36 | 0.893935 | 0.876045 | 0.954747 | 0.929533 |
| MmuSTS.1961.1.S1_at  | MmuSTS.1961.1 | 4.33  | 4.23  | 0.07 | 0.05 | 1.07  | 0.087424 | 0.077189 | 0.353207 | 0.322773 |
| MmuSTS.1962.1.S1_at  | MmuSTS.1962.1 | 10.18 | 9.87  | 0.15 | 0.09 | 1.24  | 0.14073  | 0.004122 | 0.426473 | 0.090887 |
| MmuSTS.1963.1.S1_at  | MmuSTS.1963.1 | 12.18 | 11.48 | 0.25 | 0.13 | 1.62  | 0.029875 | 0.018865 | 0.226143 | 0.172781 |



|                     |               |       |       |      |      |        |          |          |          |          |
|---------------------|---------------|-------|-------|------|------|--------|----------|----------|----------|----------|
| MmuSTS.1964.1.S1_at | MmuSTS.1964.1 | 11.02 | 10.88 | 0.2  | 0.09 | 1.1    | 0.121027 | 0.005248 | 0.399514 | 0.100352 |
| MmuSTS.1965.1.S1_at | MmuSTS.1965.1 | 8.88  | 9.11  | 0.31 | 0.04 | -1.18  | 0.860403 | 0.384433 | 0.939467 | 0.620107 |
| MmuSTS.1966.1.S1_at | MmuSTS.1966.1 | 10.2  | 9.73  | 0.09 | 0.16 | 1.38   | 0.016146 | 0.001375 | 0.179587 | 0.05691  |
| MmuSTS.1967.1.S1_at | MmuSTS.1967.1 | 5.89  | 9.82  | 1.49 | 0.28 | -15.24 | 0.020116 | 0.257086 | 0.195301 | 0.524783 |
| MmuSTS.1968.1.S1_at | MmuSTS.1968.1 | 8.93  | 9.19  | 0.64 | 0.18 | -1.2   | 0.338346 | 0.752215 | 0.61869  | 0.855787 |
| MmuSTS.1969.1.S1_at | MmuSTS.1969.1 | 11.36 | 11.26 | 0.37 | 0.13 | 1.07   | 0.615674 | 0.895011 | 0.809106 | 0.940055 |
| MmuSTS.197.1.S1_at  | MmuSTS.197.1  | 10.97 | 9.58  | 0.22 | 0.17 | 2.62   | 0.000995 | 0.000107 | 0.076321 | 0.028099 |
| MmuSTS.1970.1.S1_at | MmuSTS.1970.1 | 7.92  | 8.04  | 0.29 | 0.26 | -1.09  | 0.393813 | 0.069337 | 0.66051  | 0.309558 |
| MmuSTS.1971.1.S1_at | MmuSTS.1971.1 | 11.45 | 12.16 | 0.46 | 0.04 | -1.63  | 0.137329 | 0.015323 | 0.422285 | 0.157164 |
| MmuSTS.1972.1.S1_at | MmuSTS.1972.1 | 7.14  | 7.1   | 0.21 | 0.05 | 1.02   | 0.744062 | 0.544917 | 0.881384 | 0.727184 |
| MmuSTS.1973.1.S1_at | MmuSTS.1973.1 | 5.33  | 7.75  | 1.88 | 0.3  | -5.33  | 0.119494 | 0.073132 | 0.397399 | 0.316064 |
| MmuSTS.1974.1.S1_at | MmuSTS.1974.1 | 5.52  | 5.67  | 0.1  | 0.1  | -1.11  | 0.651245 | 0.150923 | 0.830636 | 0.425523 |
| MmuSTS.1975.1.S1_at | MmuSTS.1975.1 | 6.96  | 7.77  | 0.45 | 0.27 | -1.75  | 0.094421 | 0.488742 | 0.363345 | 0.691338 |
| MmuSTS.1976.1.S1_at | MmuSTS.1976.1 | 5.84  | 5.64  | 0.08 | 0.03 | 1.14   | 0.018107 | 0.076991 | 0.18753  | 0.322421 |
| MmuSTS.1977.1.S1_at | MmuSTS.1977.1 | 9.12  | 8.5   | 0.28 | 0.18 | 1.55   | 0.009392 | 0.163087 | 0.146803 | 0.439249 |
| MmuSTS.1978.1.S1_at | MmuSTS.1978.1 | 6.15  | 7.62  | 0.82 | 0.35 | -2.78  | 0.067309 | 0.286221 | 0.317061 | 0.547725 |
| MmuSTS.1979.1.S1_at | MmuSTS.1979.1 | 11    | 10.7  | 0.19 | 0.04 | 1.23   | 0.055259 | 0.343155 | 0.292066 | 0.588905 |
| MmuSTS.198.1.S1_at  | MmuSTS.198.1  | 2.82  | 2.89  | 0.1  | 0.08 | -1.05  | 0.738726 | 0.025444 | 0.878914 | 0.200043 |
| MmuSTS.1980.1.S1_at | MmuSTS.1980.1 | 4.08  | 4.06  | 0.09 | 0.32 | 1.01   | 0.971499 | 0.83449  | 0.98857  | 0.905226 |
| MmuSTS.1981.1.S1_at | MmuSTS.1981.1 | 5.06  | 8.35  | 1.53 | 0.27 | -9.81  | 0.044961 | 0.307544 | 0.26933  | 0.563781 |
| MmuSTS.1982.1.S1_at | MmuSTS.1982.1 | 8.44  | 10.83 | 1.24 | 0.24 | -5.27  | 0.091553 | 0.46105  | 0.359232 | 0.672831 |
| MmuSTS.1983.1.S1_at | MmuSTS.1983.1 | 3     | 3.07  | 0.1  | 0.12 | -1.05  | 0.696172 | 0.735465 | 0.855291 | 0.846919 |
| MmuSTS.1984.1.S1_at | MmuSTS.1984.1 | 5.76  | 6.57  | 0.53 | 0.12 | -1.75  | 0.161776 | 0.003509 | 0.45355  | 0.08503  |
| MmuSTS.1985.1.S1_at | MmuSTS.1985.1 | 10.17 | 9.67  | 0.24 | 0.27 | 1.41   | 0.320534 | 0.006241 | 0.605112 | 0.107169 |
| MmuSTS.1986.1.S1_at | MmuSTS.1986.1 | 6.41  | 6.26  | 0.1  | 0.09 | 1.11   | 0.057634 | 0.078207 | 0.297348 | 0.324752 |
| MmuSTS.1987.1.S1_at | MmuSTS.1987.1 | 11.58 | 11.25 | 0.13 | 0    | 1.26   | 0.009651 | 0.003823 | 0.14832  | 0.08794  |
| MmuSTS.1988.1.S1_at | MmuSTS.1988.1 | 6.62  | 6.24  | 0.46 | 0.38 | 1.3    | 0.426904 | 0.64456  | 0.684257 | 0.791661 |
| MmuSTS.1989.1.S1_at | MmuSTS.1989.1 | 5.59  | 5.61  | 0.06 | 0.07 | -1.01  | 0.815546 | 0.975465 | 0.917658 | 0.986626 |
| MmuSTS.199.1.S1_at  | MmuSTS.199.1  | 9.4   | 9.21  | 1.23 | 0.22 | 1.14   | 0.624792 | 0.69628  | 0.815063 | 0.823545 |
| MmuSTS.1990.1.S1_at | MmuSTS.1990.1 | 6.19  | 6.23  | 0.07 | 0.09 | -1.03  | 0.230686 | 0.458219 | 0.529522 | 0.671077 |
| MmuSTS.1991.1.S1_at | MmuSTS.1991.1 | 7.23  | 7.94  | 0.21 | 0.37 | -1.64  | 0.054606 | 0.063872 | 0.290604 | 0.29906  |
| MmuSTS.1992.1.S1_at | MmuSTS.1992.1 | 7.08  | 8.96  | 0.96 | 0.15 | -3.67  | 0.023913 | 0.063588 | 0.207681 | 0.298703 |
| MmuSTS.1993.1.S1_at | MmuSTS.1993.1 | 5.22  | 6.22  | 0.24 | 0.67 | -2.01  | 0.215857 | 0.355125 | 0.513611 | 0.597508 |
| MmuSTS.1994.1.S1_at | MmuSTS.1994.1 | 4.58  | 4.49  | 0.2  | 0.17 | 1.06   | 0.200602 | 0.190398 | 0.497869 | 0.465906 |
| MmuSTS.1995.1.S1_at | MmuSTS.1995.1 | 11.9  | 11.54 | 0.07 | 0.13 | 1.29   | 0.022285 | 0.034353 | 0.202621 | 0.229283 |
| MmuSTS.1996.1.S1_at | MmuSTS.1996.1 | 10.96 | 10.9  | 0.06 | 0.13 | 1.04   | 0.393414 | 0.58135  | 0.660249 | 0.750417 |
| MmuSTS.1997.1.S1_at | MmuSTS.1997.1 | 9.48  | 9.52  | 0.58 | 0.3  | -1.03  | 0.763804 | 0.028482 | 0.891841 | 0.21056  |
| MmuSTS.1998.1.S1_at | MmuSTS.1998.1 | 11.49 | 9.37  | 0.17 | 0.49 | 4.33   | 0.003795 | 0.03691  | 0.106813 | 0.236593 |
| MmuSTS.1999.1.S1_at | MmuSTS.1999.1 | 9.55  | 8.75  | 0.15 | 0.07 | 1.74   | 0.001428 | 0.01556  | 0.07964  | 0.158132 |
| MmuSTS.2.1.S1_at    | MmuSTS.2.1    | 3.99  | 4.01  | 0.05 | 0.03 | -1.02  | 0.281892 | 0.679888 | 0.572744 | 0.8131   |
| MmuSTS.20.1.S1_at   | MmuSTS.20.1   | 7.46  | 9.82  | 1.15 | 0.16 | -5.15  | 0.073384 | 0.488422 | 0.328797 | 0.691144 |
| MmuSTS.200.1.S1_at  | MmuSTS.200.1  | 9.2   | 9.94  | 0.53 | 0.06 | -1.67  | 0.063314 | 0.037957 | 0.308261 | 0.239302 |
| MmuSTS.2000.1.S1_at | MmuSTS.2000.1 | 6.2   | 5.42  | 0.25 | 0.41 | 1.73   | 0.025725 | 0.013983 | 0.212979 | 0.151585 |

|                       |               |       |       |      |      |       |          |          |          |          |
|-----------------------|---------------|-------|-------|------|------|-------|----------|----------|----------|----------|
| MmuSTS.2001.1.S1_at   | MmuSTS.2001.1 | 11.86 | 11.84 | 0.14 | 0.04 | 1.01  | 0.608465 | 0.349403 | 0.804524 | 0.593406 |
| MmuSTS.2002.1.S1_at   | MmuSTS.2002.1 | 4.02  | 3.01  | 0.52 | 0.08 | 2.01  | 0.040526 | 0.010945 | 0.257685 | 0.13621  |
| MmuSTS.2003.1.S1_at   | MmuSTS.2003.1 | 3.05  | 3.05  | 0.06 | 0.04 | -1    | 0.774255 | 0.756718 | 0.896704 | 0.858361 |
| MmuSTS.2004.1.S1_at   | MmuSTS.2004.1 | 4.73  | 4.62  | 0.26 | 0.13 | 1.08  | 0.812666 | 0.954854 | 0.916193 | 0.974414 |
| MmuSTS.2005.1.S1_at   | MmuSTS.2005.1 | 5.74  | 5.96  | 0.18 | 0.09 | -1.16 | 0.633643 | 0.058223 | 0.820437 | 0.287988 |
| MmuSTS.2006.1.S1_at   | MmuSTS.2006.1 | 12.61 | 12.79 | 0.12 | 0.05 | -1.13 | 0.199856 | 0.259162 | 0.497351 | 0.526264 |
| MmuSTS.2007.1.S1_at   | MmuSTS.2007.1 | 7.44  | 7.5   | 0.5  | 0.03 | -1.05 | 0.592619 | 0.089343 | 0.793595 | 0.343595 |
| MmuSTS.2008.1.S1_at   | MmuSTS.2008.1 | 6.81  | 7.45  | 0.43 | 0.12 | -1.56 | 0.057798 | 0.063826 | 0.297543 | 0.29906  |
| MmuSTS.2009.1.S1_at   | MmuSTS.2009.1 | 7.13  | 7.05  | 0.45 | 0.07 | 1.05  | 0.699395 | 0.208598 | 0.857265 | 0.48252  |
| MmuSTS.201.1.S1_at    | MmuSTS.201.1  | 3.59  | 3.54  | 0.19 | 0.25 | 1.03  | 0.734164 | 0.000799 | 0.876102 | 0.04607  |
| MmuSTS.2010.1.S1_at   | MmuSTS.2010.1 | 4.81  | 4.72  | 0.34 | 0.11 | 1.06  | 0.450608 | 0.676113 | 0.701557 | 0.810713 |
| MmuSTS.2012.1.S1_at   | MmuSTS.2012.1 | 3.82  | 3.69  | 0.18 | 0.05 | 1.09  | 0.59227  | 0.929032 | 0.793329 | 0.959562 |
| MmuSTS.2013.1.S1_at   | MmuSTS.2013.1 | 7.61  | 8.54  | 0.8  | 0.19 | -1.9  | 0.160128 | 0.267539 | 0.451475 | 0.533272 |
| MmuSTS.2014.1.S1_at   | MmuSTS.2014.1 | 2.63  | 2.78  | 0.09 | 0.17 | -1.12 | 0.207879 | 0.332986 | 0.505752 | 0.581326 |
| MmuSTS.2014.1.S1_x_at | MmuSTS.2014.1 | 2.64  | 2.8   | 0.06 | 0.14 | -1.11 | 0.089649 | 0.364318 | 0.356593 | 0.604662 |
| MmuSTS.2015.1.S1_at   | MmuSTS.2015.1 | 5.31  | 5.48  | 0.18 | 0.04 | -1.13 | 0.344942 | 0.200291 | 0.624093 | 0.474689 |
| MmuSTS.2016.1.S1_at   | MmuSTS.2016.1 | 4.98  | 5.03  | 0.06 | 0.09 | -1.04 | 0.459583 | 0.022555 | 0.707702 | 0.187981 |
| MmuSTS.2017.1.S1_at   | MmuSTS.2017.1 | 4.68  | 4.65  | 0.06 | 0.03 | 1.02  | 0.159217 | 0.777202 | 0.450505 | 0.870556 |
| MmuSTS.2018.1.S1_at   | MmuSTS.2018.1 | 6.31  | 6.2   | 0.24 | 0.07 | 1.08  | 0.926803 | 0.845318 | 0.969047 | 0.911994 |
| MmuSTS.2019.1.S1_at   | MmuSTS.2019.1 | 5.37  | 5.38  | 0.17 | 0.11 | -1.01 | 0.427498 | 0.095219 | 0.684792 | 0.35218  |
| MmuSTS.202.1.S1_s_at  | MmuSTS.202.1  | 5.77  | 3.86  | 1.69 | 0.6  | 3.76  | 0.201507 | 0.318613 | 0.49907  | 0.571258 |
| MmuSTS.2020.1.S1_at   | MmuSTS.2020.1 | 11.87 | 12.11 | 0.15 | 0.09 | -1.18 | 0.075942 | 0.27912  | 0.333917 | 0.542807 |
| MmuSTS.2021.1.S1_at   | MmuSTS.2021.1 | 4.5   | 4.38  | 0.1  | 0.11 | 1.09  | 0.347545 | 0.092437 | 0.625672 | 0.348329 |
| MmuSTS.2022.1.S1_at   | MmuSTS.2022.1 | 6.06  | 6.97  | 1.18 | 0.21 | -1.88 | 0.286793 | 0.673133 | 0.576587 | 0.809011 |
| MmuSTS.2024.1.S1_at   | MmuSTS.2024.1 | 8.47  | 8.01  | 0.05 | 0.13 | 1.38  | 0.00343  | 0.072986 | 0.103309 | 0.315986 |
| MmuSTS.2025.1.S1_at   | MmuSTS.2025.1 | 11.53 | 10.31 | 0.27 | 0.41 | 2.32  | 0.013954 | 0.079803 | 0.169189 | 0.327113 |
| MmuSTS.2026.1.S1_at   | MmuSTS.2026.1 | 10.47 | 10.59 | 0.05 | 0.05 | -1.09 | 0.095302 | 0.628009 | 0.364763 | 0.780911 |
| MmuSTS.2027.1.S1_at   | MmuSTS.2027.1 | 7.85  | 6.97  | 0.38 | 0.14 | 1.84  | 0.012289 | 0.008143 | 0.161126 | 0.119736 |
| MmuSTS.2028.1.S1_at   | MmuSTS.2028.1 | 4.02  | 4.06  | 0.24 | 0.17 | -1.02 | 0.782793 | 0.382531 | 0.90089  | 0.618735 |
| MmuSTS.2029.1.S1_at   | MmuSTS.2029.1 | 10    | 8.68  | 0.14 | 0.1  | 2.51  | 0.000155 | 0.00007  | 0.052525 | 0.025812 |
| MmuSTS.203.1.S1_at    | MmuSTS.203.1  | 3.75  | 3.59  | 0.08 | 0.03 | 1.12  | 0.020444 | 0.180942 | 0.19653  | 0.457418 |
| MmuSTS.2030.1.S1_at   | MmuSTS.2030.1 | 9.55  | 9.65  | 0.04 | 0.12 | -1.07 | 0.270196 | 0.887458 | 0.562365 | 0.935867 |
| MmuSTS.2031.1.S1_at   | MmuSTS.2031.1 | 10.11 | 8.99  | 0.07 | 0.06 | 2.16  | 0.000037 | 0.000364 | 0.045594 | 0.037273 |
| MmuSTS.2032.1.S1_at   | MmuSTS.2032.1 | 3.92  | 3.83  | 0.31 | 0.31 | 1.06  | 0.742197 | 0.737581 | 0.880585 | 0.847993 |
| MmuSTS.2033.1.S1_at   | MmuSTS.2033.1 | 5.19  | 5.21  | 0.21 | 0.17 | -1.01 | 0.882307 | 0.964613 | 0.949962 | 0.980347 |
| MmuSTS.2034.1.S1_at   | MmuSTS.2034.1 | 8.72  | 8.57  | 0.1  | 0.04 | 1.11  | 0.041089 | 0.152579 | 0.259179 | 0.427435 |
| MmuSTS.2035.1.S1_at   | MmuSTS.2035.1 | 11.68 | 12.51 | 0.83 | 0.13 | -1.78 | 0.180913 | 0.435407 | 0.476157 | 0.655194 |
| MmuSTS.2036.1.S1_at   | MmuSTS.2036.1 | 9.37  | 9.54  | 0.43 | 0.01 | -1.13 | 0.687149 | 0.925236 | 0.850763 | 0.957718 |
| MmuSTS.2037.1.S1_at   | MmuSTS.2037.1 | 11.42 | 10.88 | 0.28 | 0.05 | 1.45  | 0.014949 | 0.165665 | 0.174344 | 0.441925 |
| MmuSTS.2038.1.S1_at   | MmuSTS.2038.1 | 5.45  | 5.29  | 0.2  | 0.05 | 1.12  | 0.128637 | 0.636317 | 0.410774 | 0.786047 |
| MmuSTS.2039.1.S1_at   | MmuSTS.2039.1 | 10.51 | 10.46 | 0.06 | 0.04 | 1.03  | 0.796224 | 0.0883   | 0.907966 | 0.341721 |
| MmuSTS.204.1.S1_at    | MmuSTS.204.1  | 11.29 | 11.01 | 0.17 | 0.16 | 1.22  | 0.049329 | 0.136382 | 0.279484 | 0.408839 |
| MmuSTS.2040.1.S1_at   | MmuSTS.2040.1 | 9.07  | 9     | 0.07 | 0.05 | 1.05  | 0.591744 | 0.001316 | 0.79283  | 0.055939 |

|                       |               |       |       |      |      |        |          |          |          |          |
|-----------------------|---------------|-------|-------|------|------|--------|----------|----------|----------|----------|
| MmuSTS.2041.1.S1_at   | MmuSTS.2041.1 | 8.75  | 8.41  | 0.45 | 0.12 | 1.27   | 0.345791 | 0.307611 | 0.624644 | 0.563785 |
| MmuSTS.2042.1.S1_at   | MmuSTS.2042.1 | 8.11  | 8.51  | 0.16 | 0.06 | -1.32  | 0.042032 | 0.215693 | 0.261972 | 0.489487 |
| MmuSTS.2043.1.S1_at   | MmuSTS.2043.1 | 7.21  | 6.24  | 0.09 | 0.22 | 1.95   | 0.001969 | 0.000062 | 0.089049 | 0.025666 |
| MmuSTS.2044.1.S1_at   | MmuSTS.2044.1 | 7.65  | 8.01  | 0.15 | 0.33 | -1.29  | 0.19451  | 0.146831 | 0.491166 | 0.42088  |
| MmuSTS.2045.1.S1_at   | MmuSTS.2045.1 | 7.86  | 7.33  | 0.19 | 0.12 | 1.45   | 0.033775 | 0.077431 | 0.237957 | 0.323236 |
| MmuSTS.2046.1.S1_at   | MmuSTS.2046.1 | 9.86  | 9.97  | 0.13 | 0.04 | -1.08  | 0.437301 | 0.073897 | 0.692112 | 0.31727  |
| MmuSTS.2047.1.S1_at   | MmuSTS.2047.1 | 5.03  | 4.76  | 0.96 | 0.41 | 1.21   | 0.630932 | 0.759399 | 0.81869  | 0.860081 |
| MmuSTS.2048.1.S1_at   | MmuSTS.2048.1 | 5.12  | 5.18  | 0.15 | 0.11 | -1.04  | 0.383668 | 0.190909 | 0.652919 | 0.466269 |
| MmuSTS.2049.1.S1_at   | MmuSTS.2049.1 | 12.81 | 12.6  | 0.35 | 0.02 | 1.16   | 0.453825 | 0.475457 | 0.703872 | 0.682155 |
| MmuSTS.205.1.S1_at    | MmuSTS.205.1  | 7.25  | 7.27  | 0.16 | 0.2  | -1.01  | 0.908778 | 0.354897 | 0.961332 | 0.597466 |
| MmuSTS.2050.1.S1_at   | MmuSTS.2050.1 | 3.18  | 3.15  | 0.06 | 0.02 | 1.02   | 0.197269 | 0.406537 | 0.494372 | 0.634382 |
| MmuSTS.2051.1.S1_at   | MmuSTS.2051.1 | 10.52 | 10.5  | 0.05 | 0.06 | 1.01   | 0.29826  | 0.963992 | 0.586612 | 0.980028 |
| MmuSTS.2052.1.S1_at   | MmuSTS.2052.1 | 10.09 | 9.81  | 0.07 | 0.08 | 1.21   | 0.0104   | 0.350923 | 0.151942 | 0.594639 |
| MmuSTS.2053.1.S1_at   | MmuSTS.2053.1 | 6     | 5.15  | 0.41 | 0.26 | 1.81   | 0.058475 | 0.05519  | 0.298936 | 0.280555 |
| MmuSTS.2054.1.S1_at   | MmuSTS.2054.1 | 6.77  | 6.69  | 0.61 | 0.15 | 1.06   | 0.925946 | 0.510318 | 0.968696 | 0.704827 |
| MmuSTS.2055.1.S1_at   | MmuSTS.2055.1 | 4.47  | 4.11  | 0.93 | 0.5  | 1.29   | 0.880182 | 0.919819 | 0.949028 | 0.954916 |
| MmuSTS.2056.1.S1_at   | MmuSTS.2056.1 | 7.25  | 7.13  | 0.2  | 0.07 | 1.09   | 0.158831 | 0.121713 | 0.450098 | 0.390956 |
| MmuSTS.2057.1.S1_at   | MmuSTS.2057.1 | 9.72  | 9.61  | 0.36 | 0.28 | 1.08   | 0.472769 | 0.791775 | 0.716319 | 0.879741 |
| MmuSTS.2058.1.S1_at   | MmuSTS.2058.1 | 6.46  | 7.61  | 0.35 | 0.29 | -2.22  | 0.01342  | 0.062057 | 0.166584 | 0.29597  |
| MmuSTS.2059.1.S1_at   | MmuSTS.2059.1 | 6.77  | 6.27  | 0.44 | 0.17 | 1.42   | 0.243061 | 0.648013 | 0.539753 | 0.793947 |
| MmuSTS.206.1.S1_at    | MmuSTS.206.1  | 12.34 | 12.42 | 0.07 | 0.14 | -1.05  | 0.961613 | 0.03367  | 0.984367 | 0.227066 |
| MmuSTS.2060.1.S1_at   | MmuSTS.2060.1 | 7.51  | 7.3   | 0.51 | 0.11 | 1.16   | 0.870978 | 0.742669 | 0.944458 | 0.851023 |
| MmuSTS.2061.1.S1_at   | MmuSTS.2061.1 | 11.21 | 11.03 | 0.18 | 0.01 | 1.14   | 0.139295 | 0.065676 | 0.424942 | 0.301631 |
| MmuSTS.2062.1.S1_at   | MmuSTS.2062.1 | 5.21  | 4.69  | 0.56 | 0.22 | 1.43   | 0.066263 | 0.048366 | 0.314905 | 0.265081 |
| MmuSTS.2063.1.S1_at   | MmuSTS.2063.1 | 11.6  | 11.85 | 0.09 | 0.06 | -1.19  | 0.027002 | 0.100791 | 0.217168 | 0.360239 |
| MmuSTS.2064.1.S1_at   | MmuSTS.2064.1 | 13.18 | 12.74 | 0.1  | 0.06 | 1.35   | 0.002105 | 0.086591 | 0.090208 | 0.33911  |
| MmuSTS.2065.1.S1_at   | MmuSTS.2065.1 | 6.67  | 10.47 | 1.99 | 0.15 | -13.9  | 0.02723  | 0.029109 | 0.217941 | 0.212733 |
| MmuSTS.2065.1.S1_s_at | MmuSTS.2065.1 | 6.76  | 10.35 | 1.89 | 0.23 | -12.03 | 0.030194 | 0.035151 | 0.226892 | 0.231645 |
| MmuSTS.2065.1.S1_x_at | MmuSTS.2065.1 | 7.15  | 10.77 | 1.91 | 0.17 | -12.31 | 0.02805  | 0.029236 | 0.219909 | 0.212898 |
| MmuSTS.2066.1.S1_at   | MmuSTS.2066.1 | 11.55 | 10.73 | 0.12 | 0.14 | 1.76   | 0.002273 | 0.004317 | 0.091735 | 0.092178 |
| MmuSTS.2067.1.S1_at   | MmuSTS.2067.1 | 6.87  | 7.33  | 0.11 | 0.11 | -1.37  | 0.006151 | 0.047468 | 0.12462  | 0.262486 |
| MmuSTS.2068.1.S1_at   | MmuSTS.2068.1 | 8.24  | 8.39  | 0.43 | 0.38 | -1.11  | 0.711639 | 0.187059 | 0.863964 | 0.462983 |
| MmuSTS.2069.1.S1_at   | MmuSTS.2069.1 | 11.11 | 9.76  | 0.28 | 0.09 | 2.54   | 0.001292 | 0.000324 | 0.078631 | 0.035587 |
| MmuSTS.207.1.S1_at    | MmuSTS.207.1  | 7.06  | 7.79  | 0.55 | 0.12 | -1.66  | 0.270819 | 0.660705 | 0.56285  | 0.80151  |
| MmuSTS.2070.1.S1_s_at | MmuSTS.2070.1 | 9.22  | 8.26  | 0.72 | 0.02 | 1.94   | 0.073108 | 0.014965 | 0.328113 | 0.155453 |
| MmuSTS.2071.1.S1_at   | MmuSTS.2071.1 | 9.18  | 7.89  | 0.22 | 0.24 | 2.44   | 0.002529 | 0.00347  | 0.094413 | 0.084806 |
| MmuSTS.2073.1.S1_at   | MmuSTS.2073.1 | 10.98 | 12.05 | 0.07 | 0.06 | -2.11  | 0.000046 | 0.14819  | 0.045594 | 0.422745 |
| MmuSTS.2074.1.S1_at   | MmuSTS.2074.1 | 11.64 | 11.39 | 0.12 | 0.02 | 1.19   | 0.045568 | 0.005861 | 0.270962 | 0.104856 |
| MmuSTS.2075.1.S1_at   | MmuSTS.2075.1 | 5.01  | 5.18  | 0.21 | 0.42 | -1.13  | 0.752143 | 0.920551 | 0.885542 | 0.955234 |
| MmuSTS.2076.1.S1_at   | MmuSTS.2076.1 | 4.98  | 5.07  | 0.44 | 0.11 | -1.06  | 0.715632 | 0.802709 | 0.865837 | 0.886441 |
| MmuSTS.2077.1.S1_at   | MmuSTS.2077.1 | 5.98  | 6.01  | 0.15 | 0.03 | -1.02  | 0.328783 | 0.025518 | 0.611086 | 0.200389 |
| MmuSTS.2078.1.S1_at   | MmuSTS.2078.1 | 5.44  | 4.85  | 0.4  | 0.5  | 1.5    | 0.477491 | 0.519633 | 0.719447 | 0.711208 |
| MmuSTS.2079.1.S1_at   | MmuSTS.2079.1 | 7.52  | 7.59  | 0.16 | 0.19 | -1.05  | 0.316809 | 0.028264 | 0.60152  | 0.209854 |

|                       |               |       |       |      |      |       |          |          |          |          |
|-----------------------|---------------|-------|-------|------|------|-------|----------|----------|----------|----------|
| MmuSTS.208.1.S1_at    | MmuSTS.208.1  | 6.56  | 6.36  | 0.36 | 0.12 | 1.15  | 0.400124 | 0.018054 | 0.665274 | 0.169372 |
| MmuSTS.2080.1.S1_at   | MmuSTS.2080.1 | 3.5   | 3.4   | 0.09 | 0.12 | 1.07  | 0.131955 | 0.524135 | 0.415087 | 0.714207 |
| MmuSTS.2081.1.S1_at   | MmuSTS.2081.1 | 10.42 | 8.34  | 0.62 | 0.07 | 4.22  | 0.008034 | 0.01129  | 0.138661 | 0.138076 |
| MmuSTS.2082.1.S1_at   | MmuSTS.2082.1 | 9.47  | 9.13  | 0.14 | 0.12 | 1.27  | 0.03731  | 0.022956 | 0.248625 | 0.189548 |
| MmuSTS.2083.1.S1_at   | MmuSTS.2083.1 | 11.77 | 12.02 | 0.07 | 0.13 | -1.19 | 0.144217 | 0.403204 | 0.430978 | 0.631996 |
| MmuSTS.2084.1.S1_at   | MmuSTS.2084.1 | 12.93 | 12.76 | 0.09 | 0.02 | 1.13  | 0.035822 | 0.160379 | 0.244259 | 0.436528 |
| MmuSTS.2085.1.S1_at   | MmuSTS.2085.1 | 4.82  | 4.7   | 0.65 | 0.6  | 1.08  | 0.699401 | 0.761749 | 0.857265 | 0.861459 |
| MmuSTS.2086.1.S1_at   | MmuSTS.2086.1 | 7.29  | 7.71  | 0.14 | 0.11 | -1.34 | 0.016033 | 0.042753 | 0.179208 | 0.251238 |
| MmuSTS.2087.1.S1_at   | MmuSTS.2087.1 | 3.26  | 3.78  | 0.21 | 0.53 | -1.43 | 0.232928 | 0.369408 | 0.531154 | 0.608809 |
| MmuSTS.2088.1.S1_at   | MmuSTS.2088.1 | 8.38  | 8.74  | 0.34 | 0.12 | -1.28 | 0.610092 | 0.454546 | 0.805668 | 0.668668 |
| MmuSTS.2089.1.S1_at   | MmuSTS.2089.1 | 7.76  | 8.36  | 0.53 | 0.27 | -1.51 | 0.112175 | 0.388566 | 0.388288 | 0.622897 |
| MmuSTS.209.1.S1_at    | MmuSTS.209.1  | 6.56  | 7.37  | 1.7  | 0.08 | -1.75 | 0.89786  | 0.980392 | 0.956621 | 0.989333 |
| MmuSTS.2090.1.S1_at   | MmuSTS.2090.1 | 6.38  | 6.31  | 0.52 | 0.17 | 1.05  | 0.842449 | 0.834422 | 0.930859 | 0.905171 |
| MmuSTS.2091.1.S1_at   | MmuSTS.2091.1 | 11.51 | 11.58 | 0.19 | 0.01 | -1.05 | 0.299283 | 0.633242 | 0.58764  | 0.784025 |
| MmuSTS.2092.1.S1_at   | MmuSTS.2092.1 | 7.17  | 7.22  | 0.27 | 0.14 | -1.04 | 0.893029 | 0.101858 | 0.954376 | 0.361836 |
| MmuSTS.2093.1.S1_at   | MmuSTS.2093.1 | 11.03 | 11.23 | 0.09 | 0.02 | -1.15 | 0.015414 | 0.00145  | 0.176257 | 0.057999 |
| MmuSTS.2094.1.S1_at   | MmuSTS.2094.1 | 11.15 | 11.26 | 0.11 | 0.02 | -1.08 | 0.085726 | 0.509194 | 0.350079 | 0.704028 |
| MmuSTS.2095.1.S1_at   | MmuSTS.2095.1 | 3.04  | 3.15  | 0.05 | 0.07 | -1.08 | 0.266363 | 0.182633 | 0.558804 | 0.459167 |
| MmuSTS.2096.1.S1_at   | MmuSTS.2096.1 | 7.49  | 7.64  | 0.41 | 0.12 | -1.11 | 0.187302 | 0.769383 | 0.483405 | 0.866055 |
| MmuSTS.2097.1.S1_s_at | MmuSTS.2097.1 | 4.94  | 4.81  | 0.06 | 0.15 | 1.1   | 0.117493 | 0.176266 | 0.394772 | 0.452718 |
| MmuSTS.2098.1.S1_at   | MmuSTS.2098.1 | 10.6  | 10.45 | 0.15 | 0.13 | 1.1   | 0.404602 | 0.523322 | 0.668308 | 0.713653 |
| MmuSTS.2099.1.S1_at   | MmuSTS.2099.1 | 9.99  | 9.83  | 0.26 | 0.21 | 1.11  | 0.869176 | 0.040979 | 0.943687 | 0.247202 |
| MmuSTS.21.1.S1_at     | MmuSTS.21.1   | 9.89  | 9.65  | 0.19 | 0.11 | 1.18  | 0.400945 | 0.553549 | 0.665692 | 0.732701 |
| MmuSTS.210.1.S1_at    | MmuSTS.210.1  | 3.48  | 3.48  | 0.02 | 0.13 | 1     | 0.32075  | 0.089888 | 0.605271 | 0.344073 |
| MmuSTS.2100.1.S1_at   | MmuSTS.2100.1 | 5.25  | 5.78  | 0.36 | 0.68 | -1.44 | 0.308321 | 0.392292 | 0.594978 | 0.625694 |
| MmuSTS.2100.1.S1_x_at | MmuSTS.2100.1 | 5.08  | 5.38  | 0.21 | 0.52 | -1.23 | 0.464497 | 0.417409 | 0.710664 | 0.642209 |
| MmuSTS.2101.1.S1_at   | MmuSTS.2101.1 | 13.08 | 13.1  | 0.12 | 0.05 | -1.01 | 0.423399 | 0.005035 | 0.681371 | 0.098963 |
| MmuSTS.2102.1.S1_at   | MmuSTS.2102.1 | 7.57  | 7.67  | 0.27 | 0.11 | -1.07 | 0.569084 | 0.970149 | 0.778679 | 0.983714 |
| MmuSTS.2103.1.S1_at   | MmuSTS.2103.1 | 12.43 | 12.96 | 0.24 | 0.08 | -1.45 | 0.078821 | 0.33578  | 0.338706 | 0.583515 |
| MmuSTS.2104.1.S1_at   | MmuSTS.2104.1 | 4.82  | 4.89  | 0.84 | 0.18 | -1.05 | 0.92914  | 0.640528 | 0.969943 | 0.78899  |
| MmuSTS.2105.1.S1_s_at | MmuSTS.2105.1 | 7.98  | 7.34  | 1.2  | 0.1  | 1.56  | 0.267823 | 0.280739 | 0.560554 | 0.543935 |
| MmuSTS.2106.1.S1_at   | MmuSTS.2106.1 | 9.58  | 9.3   | 0.23 | 0.29 | 1.22  | 0.170273 | 0.025808 | 0.463911 | 0.201375 |
| MmuSTS.2107.1.S1_at   | MmuSTS.2107.1 | 9.29  | 9.39  | 0.07 | 0.1  | -1.07 | 0.186272 | 0.626218 | 0.482508 | 0.779684 |
| MmuSTS.2108.1.S1_s_at | MmuSTS.2108.1 | 11.49 | 11.42 | 0.07 | 0.02 | 1.05  | 0.091606 | 0.083926 | 0.359363 | 0.334824 |
| MmuSTS.2109.1.S1_at   | MmuSTS.2109.1 | 9.97  | 9.61  | 0.14 | 0.27 | 1.28  | 0.153862 | 0.493508 | 0.444014 | 0.694195 |
| MmuSTS.211.1.S1_s_at  | MmuSTS.211.1  | 4.17  | 4.01  | 0.28 | 0.08 | 1.12  | 0.308796 | 0.338047 | 0.595283 | 0.585223 |
| MmuSTS.2110.1.S1_at   | MmuSTS.2110.1 | 11.11 | 10.91 | 0.12 | 0.13 | 1.15  | 0.270024 | 0.011569 | 0.562292 | 0.139219 |
| MmuSTS.2111.1.S1_at   | MmuSTS.2111.1 | 12.23 | 12.36 | 0.12 | 0.02 | -1.1  | 0.11376  | 0.005238 | 0.390438 | 0.100294 |
| MmuSTS.2112.1.S1_at   | MmuSTS.2112.1 | 12.16 | 12.06 | 0.06 | 0.04 | 1.07  | 0.105657 | 0.00111  | 0.379794 | 0.052745 |
| MmuSTS.2113.1.S1_at   | MmuSTS.2113.1 | 8.52  | 7.77  | 0.35 | 0.14 | 1.68  | 0.059184 | 0.063482 | 0.30037  | 0.298441 |
| MmuSTS.2114.1.S1_at   | MmuSTS.2114.1 | 10.52 | 10.41 | 0.02 | 0.08 | 1.08  | 0.158229 | 0.003763 | 0.44918  | 0.087395 |
| MmuSTS.2115.1.S1_at   | MmuSTS.2115.1 | 12.89 | 12.82 | 0.04 | 0.08 | 1.05  | 0.167141 | 0.403696 | 0.460327 | 0.632319 |
| MmuSTS.2116.1.S1_at   | MmuSTS.2116.1 | 7.84  | 7.71  | 0.24 | 0.03 | 1.09  | 0.18336  | 0.407558 | 0.479273 | 0.63505  |

|                       |               |       |       |      |      |       |          |          |          |          |
|-----------------------|---------------|-------|-------|------|------|-------|----------|----------|----------|----------|
| MmuSTS.2117.1.S1_at   | MmuSTS.2117.1 | 12.67 | 12.49 | 0.05 | 0.06 | 1.13  | 0.005679 | 0.056454 | 0.120964 | 0.283516 |
| MmuSTS.2118.1.S1_at   | MmuSTS.2118.1 | 6.66  | 7.1   | 0.37 | 0.12 | -1.35 | 0.113448 | 0.075182 | 0.390238 | 0.319384 |
| MmuSTS.2119.1.S1_at   | MmuSTS.2119.1 | 10.22 | 10.63 | 0.28 | 0.08 | -1.33 | 0.292058 | 0.750382 | 0.581449 | 0.854787 |
| MmuSTS.212.1.S1_at    | MmuSTS.212.1  | 8.1   | 8.6   | 0.19 | 0.09 | -1.42 | 0.013531 | 0.04686  | 0.167163 | 0.261272 |
| MmuSTS.2120.1.S1_at   | MmuSTS.2120.1 | 10.31 | 10.02 | 0.01 | 0.04 | 1.22  | 0.000326 | 0.008305 | 0.05945  | 0.120929 |
| MmuSTS.2121.1.S1_at   | MmuSTS.2121.1 | 5.68  | 5.63  | 0.23 | 0.15 | 1.04  | 0.288698 | 0.333491 | 0.578453 | 0.581694 |
| MmuSTS.2122.1.S1_at   | MmuSTS.2122.1 | 7.63  | 7.97  | 0.12 | 0.15 | -1.27 | 0.017814 | 0.473673 | 0.187035 | 0.680935 |
| MmuSTS.2123.1.S1_at   | MmuSTS.2123.1 | 7.07  | 7.16  | 0.33 | 0.52 | -1.07 | 0.216826 | 0.360251 | 0.514637 | 0.60129  |
| MmuSTS.2124.1.S1_at   | MmuSTS.2124.1 | 10.78 | 10.79 | 0.3  | 0.02 | -1.01 | 0.986835 | 0.535989 | 0.995228 | 0.721454 |
| MmuSTS.2125.1.S1_at   | MmuSTS.2125.1 | 10.36 | 10.49 | 0.15 | 0.08 | -1.09 | 0.324711 | 0.566255 | 0.608332 | 0.740362 |
| MmuSTS.2126.1.S1_s_at | MmuSTS.2126.1 | 7.81  | 8.8   | 0.44 | 0.22 | -2    | 0.059588 | 0.371453 | 0.301206 | 0.610204 |
| MmuSTS.2127.1.S1_at   | MmuSTS.2127.1 | 4.87  | 5.05  | 0.06 | 0.08 | -1.13 | 0.059688 | 0.053505 | 0.301505 | 0.276963 |
| MmuSTS.2128.1.S1_at   | MmuSTS.2128.1 | 4.33  | 4.5   | 0.04 | 0.09 | -1.12 | 0.035361 | 0.027524 | 0.242867 | 0.207161 |
| MmuSTS.2129.1.S1_at   | MmuSTS.2129.1 | 10.9  | 10.63 | 0.21 | 0.14 | 1.21  | 0.339791 | 0.506982 | 0.620001 | 0.702698 |
| MmuSTS.213.1.S1_at    | MmuSTS.213.1  | 11.29 | 11.64 | 0.13 | 0.02 | -1.28 | 0.024609 | 0.349575 | 0.209931 | 0.593539 |
| MmuSTS.2130.1.S1_s_at | MmuSTS.2130.1 | 6.01  | 7.23  | 0.81 | 0.22 | -2.34 | 0.09233  | 0.274802 | 0.360374 | 0.53925  |
| MmuSTS.2131.1.S1_s_at | MmuSTS.2131.1 | 5.32  | 5.31  | 0.46 | 0.15 | 1.01  | 0.905399 | 0.93552  | 0.960065 | 0.96359  |
| MmuSTS.2131.1.S1_x_at | MmuSTS.2131.1 | 7.72  | 7.68  | 0.13 | 0.06 | 1.03  | 0.217437 | 0.303558 | 0.515324 | 0.561022 |
| MmuSTS.2132.1.S1_s_at | MmuSTS.2132.1 | 11.81 | 12.34 | 0.2  | 0.19 | -1.45 | 0.04669  | 0.383881 | 0.273611 | 0.61978  |
| MmuSTS.2133.1.S1_at   | MmuSTS.2133.1 | 8.82  | 8.51  | 0.12 | 0.05 | 1.24  | 0.017094 | 0.00435  | 0.184186 | 0.092371 |
| MmuSTS.2134.1.S1_at   | MmuSTS.2134.1 | 11.22 | 11.53 | 0.08 | 0.11 | -1.24 | 0.033168 | 0.032616 | 0.236296 | 0.223644 |
| MmuSTS.2135.1.S1_at   | MmuSTS.2135.1 | 8.99  | 9.3   | 0.25 | 0.18 | -1.24 | 0.221898 | 0.017277 | 0.519951 | 0.166459 |
| MmuSTS.2136.1.S1_at   | MmuSTS.2136.1 | 8.87  | 8.93  | 0.78 | 0.34 | -1.05 | 0.881097 | 0.141778 | 0.949433 | 0.415331 |
| MmuSTS.2137.1.S1_at   | MmuSTS.2137.1 | 8.75  | 8.29  | 0.14 | 0.02 | 1.38  | 0.007926 | 0.028836 | 0.13826  | 0.211661 |
| MmuSTS.2138.1.S1_at   | MmuSTS.2138.1 | 12.26 | 11.55 | 0.16 | 0.01 | 1.64  | 0.002202 | 0.067085 | 0.090729 | 0.304939 |
| MmuSTS.2139.1.S1_at   | MmuSTS.2139.1 | 8.18  | 8.05  | 0.28 | 0.17 | 1.09  | 0.383123 | 0.34235  | 0.652484 | 0.588413 |
| MmuSTS.214.1.S1_at    | MmuSTS.214.1  | 3.14  | 3.06  | 0.08 | 0.08 | 1.05  | 0.152152 | 0.294725 | 0.441677 | 0.554345 |
| MmuSTS.2140.1.S1_at   | MmuSTS.2140.1 | 3.77  | 3.88  | 0.17 | 0.1  | -1.08 | 0.92597  | 0.969556 | 0.968701 | 0.98334  |
| MmuSTS.2141.1.S1_at   | MmuSTS.2141.1 | 7.55  | 7.74  | 0.38 | 0.07 | -1.14 | 0.125133 | 0.243517 | 0.405539 | 0.513585 |
| MmuSTS.2142.1.S1_at   | MmuSTS.2142.1 | 9.83  | 9.72  | 0.07 | 0.03 | 1.08  | 0.042888 | 0.801688 | 0.264218 | 0.885902 |
| MmuSTS.2143.1.S1_at   | MmuSTS.2143.1 | 4.59  | 4.39  | 0.3  | 0.38 | 1.15  | 0.324277 | 0.277905 | 0.607951 | 0.541664 |
| MmuSTS.2144.1.S1_at   | MmuSTS.2144.1 | 9.97  | 10.23 | 0.72 | 0.16 | -1.2  | 0.604112 | 0.477353 | 0.801436 | 0.683422 |
| MmuSTS.2145.1.S1_at   | MmuSTS.2145.1 | 6.51  | 6.34  | 0.04 | 0.13 | 1.12  | 0.105976 | 0.434608 | 0.379981 | 0.654747 |
| MmuSTS.2146.1.S1_at   | MmuSTS.2146.1 | 8.74  | 9     | 0.02 | 0.02 | -1.2  | 0.000158 | 0.057522 | 0.052915 | 0.285907 |
| MmuSTS.2147.1.S1_at   | MmuSTS.2147.1 | 12.39 | 12.24 | 0.1  | 0.02 | 1.11  | 0.061423 | 0.025981 | 0.304438 | 0.202105 |
| MmuSTS.2148.1.S1_at   | MmuSTS.2148.1 | 3.87  | 3.9   | 0.1  | 0.03 | -1.02 | 0.854904 | 0.661537 | 0.93686  | 0.801856 |
| MmuSTS.2149.1.S1_at   | MmuSTS.2149.1 | 10.58 | 10.58 | 0.27 | 0.18 | 1     | 0.794341 | 0.56258  | 0.90713  | 0.738076 |
| MmuSTS.215.1.S1_at    | MmuSTS.215.1  | 6.54  | 7.9   | 0.55 | 0.23 | -2.55 | 0.029619 | 0.220374 | 0.225201 | 0.493783 |
| MmuSTS.2150.1.S1_at   | MmuSTS.2150.1 | 7.27  | 8.01  | 2.11 | 0.37 | -1.67 | 0.751829 | 0.233317 | 0.885488 | 0.50468  |
| MmuSTS.2151.1.S1_at   | MmuSTS.2151.1 | 11.85 | 10.79 | 0.08 | 0.14 | 2.08  | 0.00049  | 0.009142 | 0.068271 | 0.126119 |
| MmuSTS.2152.1.S1_at   | MmuSTS.2152.1 | 9.52  | 8.48  | 0.2  | 0.3  | 2.06  | 0.009604 | 0.005329 | 0.148199 | 0.100928 |
| MmuSTS.2153.1.S1_at   | MmuSTS.2153.1 | 9.33  | 9.11  | 0.06 | 0.23 | 1.17  | 0.515641 | 0.35438  | 0.745423 | 0.597166 |
| MmuSTS.2154.1.S1_at   | MmuSTS.2154.1 | 8.04  | 8.44  | 1.2  | 0.21 | -1.32 | 0.24438  | 0.569082 | 0.540909 | 0.742239 |

|                       |               |       |       |      |      |       |          |          |          |          |
|-----------------------|---------------|-------|-------|------|------|-------|----------|----------|----------|----------|
| MmuSTS.2155.1.S1_at   | MmuSTS.2155.1 | 8.18  | 8.32  | 0.23 | 0.34 | -1.1  | 0.989593 | 0.880908 | 0.996378 | 0.932018 |
| MmuSTS.2156.1.S1_at   | MmuSTS.2156.1 | 11.57 | 11.73 | 0.16 | 0.09 | -1.12 | 0.11391  | 0.435425 | 0.390674 | 0.655194 |
| MmuSTS.2156.1.S1_x_at | MmuSTS.2156.1 | 11.47 | 11.66 | 0.22 | 0.11 | -1.14 | 0.11848  | 0.363783 | 0.396144 | 0.604189 |
| MmuSTS.2157.1.S1_at   | MmuSTS.2157.1 | 8.54  | 8.3   | 0.71 | 0.27 | 1.18  | 0.455103 | 0.605939 | 0.704964 | 0.765547 |
| MmuSTS.2158.1.S1_at   | MmuSTS.2158.1 | 11.31 | 11.29 | 0.18 | 0.09 | 1.01  | 0.527541 | 0.658948 | 0.753112 | 0.800473 |
| MmuSTS.2159.1.S1_at   | MmuSTS.2159.1 | 4.27  | 4.02  | 0.22 | 0.18 | 1.19  | 0.457271 | 0.375076 | 0.706253 | 0.613186 |
| MmuSTS.216.1.S1_s_at  | MmuSTS.216.1  | 3.65  | 3.42  | 0.13 | 0.01 | 1.17  | 0.021961 | 0.002696 | 0.201313 | 0.076455 |
| MmuSTS.2160.1.S1_at   | MmuSTS.2160.1 | 5.49  | 5.51  | 0.16 | 0.03 | -1.01 | 0.852643 | 0.984947 | 0.935897 | 0.991478 |
| MmuSTS.2161.1.S1_at   | MmuSTS.2161.1 | 5.57  | 5.4   | 0.06 | 0.06 | 1.12  | 0.059242 | 0.276228 | 0.30044  | 0.540183 |
| MmuSTS.2162.1.S1_at   | MmuSTS.2162.1 | 6.98  | 7.28  | 0.15 | 0.08 | -1.24 | 0.022868 | 0.036323 | 0.204235 | 0.235105 |
| MmuSTS.2163.1.S1_at   | MmuSTS.2163.1 | 10.44 | 10.34 | 0.31 | 0.32 | 1.07  | 0.965403 | 0.556301 | 0.985967 | 0.734487 |
| MmuSTS.2164.1.S1_at   | MmuSTS.2164.1 | 11.84 | 10.31 | 0.21 | 0.35 | 2.88  | 0.004715 | 0.001735 | 0.115008 | 0.062895 |
| MmuSTS.2164.1.S1_s_at | MmuSTS.2164.1 | 10.86 | 9.34  | 0.2  | 0.37 | 2.87  | 0.004334 | 0.002072 | 0.111896 | 0.067389 |
| MmuSTS.2165.1.S1_at   | MmuSTS.2165.1 | 11.79 | 11.89 | 0.02 | 0.06 | -1.07 | 0.223476 | 0.442792 | 0.521292 | 0.660759 |
| MmuSTS.2166.1.S1_at   | MmuSTS.2166.1 | 7.67  | 7.32  | 0.54 | 0.31 | 1.27  | 0.862408 | 0.793377 | 0.9402   | 0.880744 |
| MmuSTS.2167.1.S1_s_at | MmuSTS.2167.1 | 8.4   | 9.15  | 0.2  | 0.04 | -1.68 | 0.0065   | 0.119598 | 0.127373 | 0.388247 |
| MmuSTS.2168.1.S1_at   | MmuSTS.2168.1 | 8.17  | 8.25  | 0.19 | 0.07 | -1.06 | 0.483758 | 0.016528 | 0.723753 | 0.162745 |
| MmuSTS.2169.1.S1_at   | MmuSTS.2169.1 | 10.63 | 11.05 | 0.12 | 0.1  | -1.34 | 0.012686 | 0.000626 | 0.162687 | 0.042692 |
| MmuSTS.217.1.S1_at    | MmuSTS.217.1  | 3.45  | 3.3   | 0.51 | 0.13 | 1.11  | 0.215512 | 0.287793 | 0.513219 | 0.549064 |
| MmuSTS.2170.1.S1_at   | MmuSTS.2170.1 | 10.73 | 10.56 | 0.1  | 0.04 | 1.13  | 0.071029 | 0.126255 | 0.324424 | 0.39678  |
| MmuSTS.2171.1.S1_at   | MmuSTS.2171.1 | 11.6  | 11.66 | 0.16 | 0.06 | -1.04 | 0.140464 | 0.430238 | 0.426202 | 0.651295 |
| MmuSTS.2172.1.S1_at   | MmuSTS.2172.1 | 9.24  | 9.25  | 0.15 | 0.01 | -1.01 | 0.321163 | 0.729467 | 0.605458 | 0.843541 |
| MmuSTS.2173.1.S1_at   | MmuSTS.2173.1 | 8.34  | 8.34  | 0.04 | 0.23 | 1     | 0.379897 | 0.195246 | 0.649662 | 0.470253 |
| MmuSTS.2174.1.S1_at   | MmuSTS.2174.1 | 10.04 | 10.43 | 0.16 | 0.1  | -1.31 | 0.022993 | 0.399043 | 0.204563 | 0.62969  |
| MmuSTS.2175.1.S1_at   | MmuSTS.2175.1 | 9.14  | 8.73  | 0.05 | 0.26 | 1.32  | 0.135106 | 0.325194 | 0.419103 | 0.575598 |
| MmuSTS.2176.1.S1_at   | MmuSTS.2176.1 | 4.25  | 4.41  | 0.35 | 0.02 | -1.12 | 0.658865 | 0.697196 | 0.835253 | 0.824045 |
| MmuSTS.2177.1.S1_at   | MmuSTS.2177.1 | 3.79  | 3.99  | 0.05 | 0.22 | -1.15 | 0.179296 | 0.030213 | 0.47435  | 0.21576  |
| MmuSTS.2178.1.S1_at   | MmuSTS.2178.1 | 5.55  | 5.43  | 0.25 | 0.19 | 1.09  | 0.558068 | 0.387348 | 0.772593 | 0.622027 |
| MmuSTS.2179.1.S1_at   | MmuSTS.2179.1 | 8.45  | 8     | 0.09 | 0.34 | 1.37  | 0.190529 | 0.167009 | 0.486767 | 0.443466 |
| MmuSTS.218.1.S1_at    | MmuSTS.218.1  | 12.04 | 11.76 | 0.08 | 0.08 | 1.21  | 0.006798 | 0.00409  | 0.129178 | 0.09055  |
| MmuSTS.2180.1.S1_at   | MmuSTS.2180.1 | 5.69  | 8.29  | 0.16 | 0.62 | -6.08 | 0.002219 | 0.028681 | 0.090954 | 0.211057 |
| MmuSTS.2181.1.S1_at   | MmuSTS.2181.1 | 5.73  | 5.85  | 0.23 | 0.09 | -1.09 | 0.690892 | 0.805028 | 0.85225  | 0.887934 |
| MmuSTS.2182.1.S1_at   | MmuSTS.2182.1 | 8.33  | 8.42  | 0.37 | 0.12 | -1.06 | 0.494514 | 0.008027 | 0.731238 | 0.119047 |
| MmuSTS.2183.1.S1_at   | MmuSTS.2183.1 | 9.54  | 9.04  | 0.27 | 0.15 | 1.41  | 0.132212 | 0.008702 | 0.415465 | 0.123697 |
| MmuSTS.2184.1.S1_at   | MmuSTS.2184.1 | 4.28  | 4.97  | 0.39 | 0.09 | -1.62 | 0.109411 | 0.29869  | 0.384489 | 0.55727  |
| MmuSTS.2185.1.S1_at   | MmuSTS.2185.1 | 10.18 | 11.4  | 0.58 | 0.12 | -2.32 | 0.012185 | 0.00903  | 0.160718 | 0.125559 |
| MmuSTS.2186.1.S1_at   | MmuSTS.2186.1 | 9.56  | 9.13  | 0.21 | 0.11 | 1.34  | 0.141757 | 0.383126 | 0.427738 | 0.619153 |
| MmuSTS.2187.1.S1_at   | MmuSTS.2187.1 | 9.76  | 9.78  | 0.09 | 0.04 | -1.02 | 0.243821 | 0.315588 | 0.540592 | 0.569053 |
| MmuSTS.2188.1.S1_at   | MmuSTS.2188.1 | 3.09  | 3.2   | 0.04 | 0.02 | -1.08 | 0.012428 | 0.00381  | 0.161818 | 0.08794  |
| MmuSTS.2189.1.S1_at   | MmuSTS.2189.1 | 13.08 | 13.12 | 0.03 | 0.01 | -1.03 | 0.16935  | 0.748309 | 0.462597 | 0.85351  |
| MmuSTS.219.1.S1_at    | MmuSTS.219.1  | 3.84  | 3.77  | 0.13 | 0.1  | 1.05  | 0.473739 | 0.777376 | 0.717024 | 0.87064  |
| MmuSTS.2190.1.S1_at   | MmuSTS.2190.1 | 2.91  | 2.91  | 0.12 | 0.12 | -1    | 0.548189 | 0.575549 | 0.766412 | 0.746587 |
| MmuSTS.2191.1.S1_at   | MmuSTS.2191.1 | 8.46  | 8.58  | 0.15 | 0.14 | -1.09 | 0.89077  | 0.001955 | 0.95342  | 0.065813 |

|                     |               |       |       |      |      |       |          |          |          |          |
|---------------------|---------------|-------|-------|------|------|-------|----------|----------|----------|----------|
| MmuSTS.2192.1.S1_at | MmuSTS.2192.1 | 11.52 | 11.3  | 0.26 | 0.06 | 1.16  | 0.628819 | 0.106612 | 0.817507 | 0.36916  |
| MmuSTS.2193.1.S1_at | MmuSTS.2193.1 | 9.99  | 11.35 | 0.49 | 0.32 | -2.58 | 0.034516 | 0.071291 | 0.24039  | 0.313335 |
| MmuSTS.2194.1.S1_at | MmuSTS.2194.1 | 4.68  | 4.69  | 0.11 | 0.14 | -1.01 | 0.419199 | 0.60094  | 0.678702 | 0.762424 |
| MmuSTS.2195.1.S1_at | MmuSTS.2195.1 | 9.95  | 9.84  | 0.35 | 0.18 | 1.08  | 0.861668 | 0.069552 | 0.939915 | 0.309848 |
| MmuSTS.2196.1.S1_at | MmuSTS.2196.1 | 4.53  | 4.7   | 0.16 | 0.2  | -1.13 | 0.314581 | 0.428117 | 0.599987 | 0.649676 |
| MmuSTS.2197.1.S1_at | MmuSTS.2197.1 | 8.3   | 8.09  | 0.22 | 0.03 | 1.16  | 0.243686 | 0.278532 | 0.540371 | 0.542311 |
| MmuSTS.2198.1.S1_at | MmuSTS.2198.1 | 8.44  | 8.68  | 0.34 | 0.31 | -1.17 | 0.780926 | 0.945083 | 0.900006 | 0.968834 |
| MmuSTS.2199.1.S1_at | MmuSTS.2199.1 | 4.18  | 4.32  | 0.12 | 0.18 | -1.1  | 0.287754 | 0.287654 | 0.577473 | 0.548886 |
| MmuSTS.22.1.S1_at   | MmuSTS.22.1   | 9.64  | 9.35  | 0.13 | 0.09 | 1.23  | 0.030659 | 0.137967 | 0.228027 | 0.410912 |
| MmuSTS.220.1.S1_at  | MmuSTS.220.1  | 11.78 | 10.95 | 0.31 | 0.12 | 1.78  | 0.006507 | 0.000911 | 0.127373 | 0.048322 |
| MmuSTS.2200.1.S1_at | MmuSTS.2200.1 | 10.5  | 10.08 | 0.24 | 0.12 | 1.34  | 0.149169 | 0.593144 | 0.437947 | 0.758096 |
| MmuSTS.2201.1.S1_at | MmuSTS.2201.1 | 3.41  | 3.52  | 0.11 | 0.03 | -1.08 | 0.219795 | 0.361906 | 0.517548 | 0.602682 |
| MmuSTS.2202.1.S1_at | MmuSTS.2202.1 | 8.33  | 8.07  | 0.15 | 0.23 | 1.2   | 0.240808 | 0.073611 | 0.538187 | 0.316945 |
| MmuSTS.2203.1.S1_at | MmuSTS.2203.1 | 6.16  | 5.91  | 0.28 | 0.11 | 1.19  | 0.090787 | 0.281598 | 0.357821 | 0.544655 |
| MmuSTS.2205.1.S1_at | MmuSTS.2205.1 | 3.19  | 3.35  | 0.08 | 0.07 | -1.12 | 0.141394 | 0.180812 | 0.427329 | 0.457306 |
| MmuSTS.2206.1.S1_at | MmuSTS.2206.1 | 9.9   | 9.87  | 0.11 | 0.07 | 1.02  | 0.497735 | 0.586332 | 0.73333  | 0.753438 |
| MmuSTS.2207.1.S1_at | MmuSTS.2207.1 | 11.12 | 10.63 | 0.11 | 0.08 | 1.4   | 0.003986 | 0.453861 | 0.108676 | 0.668321 |
| MmuSTS.2208.1.S1_at | MmuSTS.2208.1 | 7.96  | 7.84  | 0.08 | 0.13 | 1.09  | 0.091301 | 0.000084 | 0.358855 | 0.027016 |
| MmuSTS.2209.1.S1_at | MmuSTS.2209.1 | 9.93  | 9.84  | 0.35 | 0.07 | 1.07  | 0.269682 | 0.226484 | 0.562001 | 0.498961 |
| MmuSTS.221.1.S1_at  | MmuSTS.221.1  | 5.7   | 5.5   | 0.12 | 0.21 | 1.15  | 0.188345 | 0.394117 | 0.484637 | 0.62675  |
| MmuSTS.2210.1.S1_at | MmuSTS.2210.1 | 8.81  | 8.89  | 0.11 | 0.03 | -1.06 | 0.075481 | 0.334078 | 0.332995 | 0.582104 |
| MmuSTS.2211.1.S1_at | MmuSTS.2211.1 | 5.91  | 5.99  | 0.1  | 0.05 | -1.06 | 0.191084 | 0.283798 | 0.487272 | 0.546209 |
| MmuSTS.2212.1.S1_at | MmuSTS.2212.1 | 9.5   | 9.34  | 0.25 | 0.03 | 1.12  | 0.379461 | 0.104468 | 0.649328 | 0.365719 |
| MmuSTS.2213.1.S1_at | MmuSTS.2213.1 | 8.71  | 9.03  | 0.11 | 0.16 | -1.25 | 0.015438 | 0.16458  | 0.176349 | 0.440829 |
| MmuSTS.2214.1.S1_at | MmuSTS.2214.1 | 7.4   | 8.81  | 0.82 | 0.24 | -2.65 | 0.019014 | 0.009838 | 0.191367 | 0.130274 |
| MmuSTS.2215.1.S1_at | MmuSTS.2215.1 | 9.86  | 9.82  | 0.19 | 0.07 | 1.03  | 0.643485 | 0.718941 | 0.826158 | 0.83732  |
| MmuSTS.2216.1.S1_at | MmuSTS.2216.1 | 8.97  | 8.7   | 0.21 | 0.06 | 1.2   | 0.133323 | 0.045744 | 0.416876 | 0.258221 |
| MmuSTS.2217.1.S1_at | MmuSTS.2217.1 | 3.56  | 3.41  | 0.14 | 0.13 | 1.11  | 0.54638  | 0.740645 | 0.765211 | 0.84983  |
| MmuSTS.2218.1.S1_at | MmuSTS.2218.1 | 10.81 | 11.59 | 0.24 | 0.16 | -1.72 | 0.01293  | 0.001839 | 0.164364 | 0.064374 |
| MmuSTS.2219.1.S1_at | MmuSTS.2219.1 | 10.28 | 10.11 | 0.3  | 0.08 | 1.12  | 0.449731 | 0.006853 | 0.701057 | 0.11185  |
| MmuSTS.222.1.S1_at  | MmuSTS.222.1  | 4.87  | 4.89  | 0.03 | 0.08 | -1.01 | 0.58399  | 0.881394 | 0.788472 | 0.932335 |
| MmuSTS.2220.1.S1_at | MmuSTS.2220.1 | 8.63  | 8.33  | 0.15 | 0.08 | 1.23  | 0.034262 | 0.009928 | 0.239765 | 0.130813 |
| MmuSTS.2221.1.S1_at | MmuSTS.2221.1 | 11.06 | 11.18 | 0.05 | 0.08 | -1.08 | 0.448067 | 0.065259 | 0.699768 | 0.301239 |
| MmuSTS.2222.1.S1_at | MmuSTS.2222.1 | 3.38  | 3.45  | 0.45 | 0.19 | -1.05 | 0.563439 | 0.545751 | 0.77546  | 0.727653 |
| MmuSTS.2223.1.S1_at | MmuSTS.2223.1 | 7.65  | 7.27  | 0.28 | 0.18 | 1.3   | 0.208789 | 0.363163 | 0.506291 | 0.60356  |
| MmuSTS.2224.1.S1_at | MmuSTS.2224.1 | 5.62  | 5.72  | 0.04 | 0.04 | -1.08 | 0.016403 | 0.105248 | 0.180952 | 0.366999 |
| MmuSTS.2225.1.S1_at | MmuSTS.2225.1 | 7.03  | 7.5   | 0.51 | 0.06 | -1.39 | 0.267636 | 0.094283 | 0.560407 | 0.350889 |
| MmuSTS.2226.1.S1_at | MmuSTS.2226.1 | 11.85 | 12.49 | 0.18 | 0.07 | -1.55 | 0.003284 | 0.00171  | 0.102069 | 0.062657 |
| MmuSTS.2227.1.S1_at | MmuSTS.2227.1 | 7.87  | 9.62  | 0.82 | 0.06 | -3.36 | 0.026677 | 0.039685 | 0.216498 | 0.244271 |
| MmuSTS.2228.1.S1_at | MmuSTS.2228.1 | 9.05  | 9.19  | 0.14 | 0.05 | -1.1  | 0.123467 | 0.760662 | 0.402832 | 0.860963 |
| MmuSTS.2229.1.S1_at | MmuSTS.2229.1 | 8.31  | 9.22  | 0.79 | 0.19 | -1.88 | 0.054214 | 0.275627 | 0.289903 | 0.539867 |
| MmuSTS.223.1.S1_at  | MmuSTS.223.1  | 3.56  | 3.56  | 0.05 | 0.08 | -1    | 0.540989 | 0.466235 | 0.761865 | 0.676201 |
| MmuSTS.2230.1.S1_at | MmuSTS.2230.1 | 5.14  | 4.83  | 0.66 | 0.38 | 1.23  | 0.133882 | 0.339683 | 0.417214 | 0.586266 |

|                       |               |       |       |      |      |       |          |          |          |          |
|-----------------------|---------------|-------|-------|------|------|-------|----------|----------|----------|----------|
| MmuSTS.2231.1.S1_at   | MmuSTS.2231.1 | 3.05  | 3.14  | 0.05 | 0.18 | -1.07 | 0.120131 | 0.116223 | 0.398476 | 0.38353  |
| MmuSTS.2232.1.S1_at   | MmuSTS.2232.1 | 11.67 | 11.58 | 0.06 | 0.05 | 1.07  | 0.053236 | 0.000134 | 0.287986 | 0.029087 |
| MmuSTS.2233.1.S1_at   | MmuSTS.2233.1 | 10.81 | 10.5  | 0.64 | 0.22 | 1.24  | 0.663667 | 0.855468 | 0.837945 | 0.9176   |
| MmuSTS.2234.1.S1_at   | MmuSTS.2234.1 | 8.54  | 8.4   | 0.25 | 0.02 | 1.1   | 0.762774 | 0.39992  | 0.891334 | 0.63009  |
| MmuSTS.2235.1.S1_at   | MmuSTS.2235.1 | 4.44  | 4.48  | 0.15 | 0.07 | -1.03 | 0.534738 | 0.717254 | 0.757913 | 0.836332 |
| MmuSTS.2236.1.S1_at   | MmuSTS.2236.1 | 6.96  | 6.77  | 0.12 | 0.18 | 1.14  | 0.099282 | 0.033452 | 0.370274 | 0.226517 |
| MmuSTS.2237.1.S1_at   | MmuSTS.2237.1 | 3.36  | 3.28  | 0.11 | 0.08 | 1.06  | 0.423809 | 0.657016 | 0.681747 | 0.799401 |
| MmuSTS.2238.1.S1_at   | MmuSTS.2238.1 | 6.81  | 7.55  | 0.07 | 0.17 | -1.67 | 0.001869 | 0.040278 | 0.087447 | 0.245902 |
| MmuSTS.2239.1.S1_at   | MmuSTS.2239.1 | 9.24  | 9.11  | 0.35 | 0.02 | 1.09  | 0.869053 | 0.657957 | 0.943649 | 0.800122 |
| MmuSTS.224.1.S1_at    | MmuSTS.224.1  | 7.07  | 7.27  | 0.5  | 0.38 | -1.15 | 0.586843 | 0.864994 | 0.790145 | 0.923442 |
| MmuSTS.2240.1.S1_at   | MmuSTS.2240.1 | 8.29  | 8.38  | 1    | 0.05 | -1.07 | 0.293676 | 0.235058 | 0.582689 | 0.506267 |
| MmuSTS.2241.1.S1_at   | MmuSTS.2241.1 | 8.49  | 9.2   | 0.28 | 0.09 | -1.64 | 0.044377 | 0.090056 | 0.26791  | 0.344402 |
| MmuSTS.2242.1.S1_at   | MmuSTS.2242.1 | 11.74 | 11.16 | 0.08 | 0.13 | 1.5   | 0.004329 | 0.001296 | 0.111896 | 0.055585 |
| MmuSTS.2243.1.S1_at   | MmuSTS.2243.1 | 9.17  | 9.25  | 0.09 | 0.08 | -1.05 | 0.307266 | 0.137896 | 0.594004 | 0.410846 |
| MmuSTS.2244.1.S1_at   | MmuSTS.2244.1 | 8.3   | 10.03 | 0.84 | 0.27 | -3.32 | 0.036555 | 0.017551 | 0.246142 | 0.167634 |
| MmuSTS.2245.1.S1_at   | MmuSTS.2245.1 | 6.45  | 6.68  | 0.11 | 0.06 | -1.18 | 0.02469  | 0.003824 | 0.210221 | 0.08794  |
| MmuSTS.2246.1.S1_at   | MmuSTS.2246.1 | 5.79  | 8.42  | 1.04 | 0.26 | -6.2  | 0.029214 | 0.128827 | 0.223732 | 0.400277 |
| MmuSTS.2247.1.S1_at   | MmuSTS.2247.1 | 5.54  | 5.71  | 0.09 | 0.18 | -1.13 | 0.100528 | 0.23576  | 0.371552 | 0.506934 |
| MmuSTS.2248.1.S1_at   | MmuSTS.2248.1 | 9.8   | 8.77  | 0.03 | 0.16 | 2.05  | 0.000442 | 0.000249 | 0.065442 | 0.03313  |
| MmuSTS.2249.1.S1_at   | MmuSTS.2249.1 | 11    | 10.52 | 0.22 | 0.02 | 1.39  | 0.020895 | 0.054312 | 0.198207 | 0.27854  |
| MmuSTS.225.1.S1_at    | MmuSTS.225.1  | 12.45 | 12.35 | 0.09 | 0.12 | 1.08  | 0.241691 | 0.063412 | 0.538882 | 0.298441 |
| MmuSTS.2250.1.S1_at   | MmuSTS.2250.1 | 9.81  | 9.94  | 0.4  | 0.13 | -1.09 | 0.152828 | 0.228749 | 0.442529 | 0.501005 |
| MmuSTS.2251.1.S1_at   | MmuSTS.2251.1 | 12.12 | 11.72 | 0.06 | 0.01 | 1.32  | 0.000389 | 0.003402 | 0.062519 | 0.084004 |
| MmuSTS.2252.1.S1_at   | MmuSTS.2252.1 | 11.37 | 11.43 | 0.14 | 0.12 | -1.04 | 0.210138 | 0.015756 | 0.507675 | 0.159048 |
| MmuSTS.2253.1.S1_at   | MmuSTS.2253.1 | 9.43  | 9.57  | 0.38 | 0.25 | -1.1  | 0.646519 | 0.018582 | 0.828201 | 0.171539 |
| MmuSTS.2254.1.S1_at   | MmuSTS.2254.1 | 5.43  | 5.4   | 0.13 | 0.11 | 1.02  | 0.701291 | 0.364509 | 0.858142 | 0.604846 |
| MmuSTS.2255.1.S1_at   | MmuSTS.2255.1 | 6.23  | 6.42  | 0.18 | 0.18 | -1.13 | 0.089471 | 0.377185 | 0.356406 | 0.614825 |
| MmuSTS.2256.1.S1_at   | MmuSTS.2256.1 | 3.92  | 3.82  | 0.55 | 0.19 | 1.07  | 0.351769 | 0.422909 | 0.629379 | 0.646083 |
| MmuSTS.2257.1.S1_at   | MmuSTS.2257.1 | 6.65  | 5.93  | 0.94 | 0.14 | 1.65  | 0.20824  | 0.234685 | 0.505958 | 0.505897 |
| MmuSTS.2258.1.S1_s_at | MmuSTS.2258.1 | 12.01 | 11.98 | 0.03 | 0.06 | 1.02  | 0.875802 | 0.004709 | 0.946757 | 0.095492 |
| MmuSTS.2258.1.S1_x_at | MmuSTS.2258.1 | 12.25 | 12.21 | 0.08 | 0.05 | 1.03  | 0.88031  | 0.993875 | 0.949107 | 0.996306 |
| MmuSTS.2259.1.S1_at   | MmuSTS.2259.1 | 7.51  | 7.46  | 0.08 | 0.03 | 1.03  | 0.639679 | 0.259855 | 0.823651 | 0.526735 |
| MmuSTS.226.1.S1_at    | MmuSTS.226.1  | 8.4   | 6.44  | 0.52 | 0.51 | 3.89  | 0.017801 | 0.293856 | 0.187001 | 0.553861 |
| MmuSTS.2260.1.S1_at   | MmuSTS.2260.1 | 4.31  | 4.34  | 0.19 | 0.26 | -1.02 | 0.767389 | 0.792053 | 0.893274 | 0.879814 |
| MmuSTS.2261.1.S1_at   | MmuSTS.2261.1 | 3.45  | 3.87  | 0.04 | 0.09 | -1.34 | 0.002014 | 0.008467 | 0.089873 | 0.122057 |
| MmuSTS.2262.1.S1_at   | MmuSTS.2262.1 | 4.64  | 4.66  | 0.16 | 0.25 | -1.01 | 0.798427 | 0.783359 | 0.909066 | 0.874571 |
| MmuSTS.2263.1.S1_at   | MmuSTS.2263.1 | 5.21  | 6.74  | 0.55 | 0.35 | -2.89 | 0.026484 | 0.255013 | 0.215841 | 0.52317  |
| MmuSTS.2264.1.S1_at   | MmuSTS.2264.1 | 9.97  | 9.9   | 0.3  | 0.29 | 1.05  | 0.795123 | 0.131319 | 0.907466 | 0.403407 |
| MmuSTS.2265.1.S1_at   | MmuSTS.2265.1 | 6.21  | 6.24  | 0.13 | 0.29 | -1.02 | 0.577913 | 0.774891 | 0.783846 | 0.868962 |
| MmuSTS.2266.1.S1_at   | MmuSTS.2266.1 | 11.03 | 10.96 | 0.2  | 0.02 | 1.05  | 0.38018  | 0.354549 | 0.649909 | 0.59726  |
| MmuSTS.2267.1.S1_s_at | MmuSTS.2267.1 | 13.07 | 13.25 | 0.28 | 0.04 | -1.13 | 0.262948 | 0.150882 | 0.556723 | 0.425476 |
| MmuSTS.2268.1.S1_at   | MmuSTS.2268.1 | 9.82  | 9.71  | 0.11 | 0.12 | 1.08  | 0.115637 | 0.334886 | 0.392723 | 0.58275  |
| MmuSTS.2269.1.S1_at   | MmuSTS.2269.1 | 9.61  | 9.32  | 0.17 | 0.19 | 1.22  | 0.128659 | 0.11466  | 0.410774 | 0.381202 |



|                       |               |       |       |      |      |       |          |          |          |          |
|-----------------------|---------------|-------|-------|------|------|-------|----------|----------|----------|----------|
| MmuSTS.227.1.S1_at    | MmuSTS.227.1  | 10.61 | 10.96 | 0.36 | 0.19 | -1.27 | 0.365376 | 0.561644 | 0.639887 | 0.73751  |
| MmuSTS.2270.1.S1_at   | MmuSTS.2270.1 | 9.65  | 9.56  | 0.12 | 0.15 | 1.07  | 0.261255 | 0.047416 | 0.555306 | 0.262476 |
| MmuSTS.2271.1.S1_at   | MmuSTS.2271.1 | 9.71  | 9.64  | 0.16 | 0.08 | 1.05  | 0.374485 | 0.854033 | 0.645594 | 0.91692  |
| MmuSTS.2272.1.S1_at   | MmuSTS.2272.1 | 12.39 | 12.16 | 0.27 | 0.1  | 1.17  | 0.319042 | 0.44373  | 0.603736 | 0.661427 |
| MmuSTS.2273.1.S1_at   | MmuSTS.2273.1 | 6.89  | 6.72  | 0.25 | 0.1  | 1.13  | 0.484784 | 0.446311 | 0.724478 | 0.66276  |
| MmuSTS.2274.1.S1_at   | MmuSTS.2274.1 | 8.59  | 8.5   | 0.08 | 0.1  | 1.07  | 0.304249 | 0.000266 | 0.591459 | 0.033786 |
| MmuSTS.2275.1.S1_s_at | MmuSTS.2275.1 | 7.54  | 7.47  | 0.43 | 0.22 | 1.06  | 0.859721 | 0.486328 | 0.939203 | 0.689731 |
| MmuSTS.2276.1.S1_at   | MmuSTS.2276.1 | 13.21 | 12.84 | 0.06 | 0.02 | 1.29  | 0.000636 | 0.053533 | 0.070727 | 0.277016 |
| MmuSTS.2276.1.S1_x_at | MmuSTS.2276.1 | 13.06 | 12.71 | 0.11 | 0.02 | 1.28  | 0.004654 | 0.062289 | 0.114693 | 0.296416 |
| MmuSTS.2277.1.S1_at   | MmuSTS.2277.1 | 10.82 | 10.33 | 0.24 | 0.14 | 1.41  | 0.032051 | 0.175617 | 0.232887 | 0.45218  |
| MmuSTS.2278.1.S1_at   | MmuSTS.2278.1 | 11.67 | 11.59 | 0.58 | 0.07 | 1.06  | 0.500815 | 0.753716 | 0.734984 | 0.856634 |
| MmuSTS.2279.1.S1_at   | MmuSTS.2279.1 | 7.74  | 9.28  | 0.53 | 0.24 | -2.9  | 0.010635 | 0.014664 | 0.152845 | 0.154231 |
| MmuSTS.228.1.S1_at    | MmuSTS.228.1  | 5.93  | 6.36  | 0.27 | 0.17 | -1.34 | 0.105422 | 0.636154 | 0.379376 | 0.785938 |
| MmuSTS.2280.1.S1_at   | MmuSTS.2280.1 | 12.11 | 12.62 | 0.16 | 0.09 | -1.43 | 0.006193 | 0.007245 | 0.124922 | 0.114309 |
| MmuSTS.2281.1.S1_at   | MmuSTS.2281.1 | 9.54  | 9.51  | 0.06 | 0.03 | 1.02  | 0.586379 | 0.726641 | 0.789769 | 0.841892 |
| MmuSTS.2282.1.S1_at   | MmuSTS.2282.1 | 6.91  | 6.85  | 0.3  | 0.03 | 1.04  | 0.947042 | 0.98584  | 0.977707 | 0.991957 |
| MmuSTS.2283.1.S1_at   | MmuSTS.2283.1 | 10    | 9.97  | 0.18 | 0.13 | 1.02  | 0.552969 | 0.856445 | 0.769566 | 0.917996 |
| MmuSTS.2284.1.S1_s_at | MmuSTS.2284.1 | 3.24  | 3.4   | 0.07 | 0.08 | -1.11 | 0.061751 | 0.402476 | 0.304962 | 0.631481 |
| MmuSTS.2285.1.S1_at   | MmuSTS.2285.1 | 5.9   | 6.64  | 0.21 | 0.21 | -1.66 | 0.00955  | 0.013833 | 0.147873 | 0.150838 |
| MmuSTS.2286.1.S1_at   | MmuSTS.2286.1 | 7.68  | 7.48  | 0.11 | 0.23 | 1.14  | 0.12983  | 0.632051 | 0.41207  | 0.78312  |
| MmuSTS.2287.1.S1_at   | MmuSTS.2287.1 | 12.64 | 11.75 | 0.32 | 0.24 | 1.85  | 0.03807  | 0.147607 | 0.251007 | 0.421901 |
| MmuSTS.2288.1.S1_at   | MmuSTS.2288.1 | 13.46 | 13.45 | 0.07 | 0.01 | 1     | 0.793845 | 0.258026 | 0.906818 | 0.52557  |
| MmuSTS.2289.1.S1_at   | MmuSTS.2289.1 | 9.63  | 9.55  | 0.12 | 0.06 | 1.05  | 0.507996 | 0.12441  | 0.740166 | 0.394857 |
| MmuSTS.229.1.S1_at    | MmuSTS.229.1  | 4.28  | 5.22  | 0.37 | 0.45 | -1.91 | 0.237782 | 0.745277 | 0.53518  | 0.852332 |
| MmuSTS.2290.1.S1_at   | MmuSTS.2290.1 | 4.99  | 5     | 0.15 | 0.1  | -1.01 | 0.767728 | 0.261696 | 0.893373 | 0.528137 |
| MmuSTS.2291.1.S1_at   | MmuSTS.2291.1 | 9.19  | 9.37  | 0.47 | 0.11 | -1.13 | 0.977586 | 0.198515 | 0.991189 | 0.473391 |
| MmuSTS.2292.1.S1_at   | MmuSTS.2292.1 | 7.8   | 7.48  | 0.06 | 0.03 | 1.25  | 0.00108  | 0.001007 | 0.077048 | 0.050657 |
| MmuSTS.2293.1.S1_at   | MmuSTS.2293.1 | 8.29  | 8.29  | 0.44 | 0.08 | 1     | 0.650547 | 0.459173 | 0.830274 | 0.671633 |
| MmuSTS.2294.1.S1_at   | MmuSTS.2294.1 | 8.06  | 7.04  | 0.29 | 0.12 | 2.03  | 0.003288 | 0.000584 | 0.102069 | 0.041486 |
| MmuSTS.2295.1.S1_at   | MmuSTS.2295.1 | 10.35 | 10.45 | 0.2  | 0.15 | -1.07 | 0.904532 | 0.421066 | 0.959489 | 0.644721 |
| MmuSTS.2295.1.S1_x_at | MmuSTS.2295.1 | 10.26 | 10.44 | 0.17 | 0.17 | -1.13 | 0.809789 | 0.504629 | 0.914789 | 0.701754 |
| MmuSTS.2296.1.S1_at   | MmuSTS.2296.1 | 11.87 | 11.75 | 0.04 | 0.03 | 1.09  | 0.009093 | 0.079252 | 0.145093 | 0.326444 |
| MmuSTS.2297.1.S1_at   | MmuSTS.2297.1 | 4.24  | 4.45  | 0.09 | 0.11 | -1.16 | 0.171571 | 0.349707 | 0.465564 | 0.593566 |
| MmuSTS.2298.1.S1_at   | MmuSTS.2298.1 | 7.61  | 8.96  | 0.71 | 0.19 | -2.54 | 0.027307 | 0.054665 | 0.218069 | 0.279311 |
| MmuSTS.2299.1.S1_at   | MmuSTS.2299.1 | 8.24  | 8.17  | 0.29 | 0.03 | 1.05  | 0.639179 | 0.898626 | 0.823346 | 0.942296 |
| MmuSTS.23.1.S1_at     | MmuSTS.23.1   | 3.52  | 3.33  | 0.19 | 0.6  | 1.14  | 0.84677  | 0.848355 | 0.933119 | 0.913909 |
| MmuSTS.230.1.S1_at    | MmuSTS.230.1  | 5.53  | 4.54  | 0.92 | 0.51 | 1.99  | 0.115465 | 0.136096 | 0.392644 | 0.408396 |
| MmuSTS.2300.1.S1_at   | MmuSTS.2300.1 | 9.5   | 8.46  | 0.21 | 0.07 | 2.06  | 0.00085  | 0.002883 | 0.073467 | 0.078985 |
| MmuSTS.2301.1.S1_at   | MmuSTS.2301.1 | 8.94  | 8.87  | 0.14 | 0.18 | 1.05  | 0.315251 | 0.192003 | 0.600287 | 0.467382 |
| MmuSTS.2302.1.S1_at   | MmuSTS.2302.1 | 11.02 | 10.73 | 0.15 | 0.06 | 1.22  | 0.011201 | 0.013115 | 0.155478 | 0.147286 |
| MmuSTS.2303.1.S1_s_at | MmuSTS.2303.1 | 10.35 | 9.58  | 0.26 | 0.18 | 1.7   | 0.007569 | 0.000443 | 0.135292 | 0.038359 |
| MmuSTS.2304.1.S1_at   | MmuSTS.2304.1 | 12.61 | 12.58 | 0.05 | 0.04 | 1.03  | 0.204418 | 0.535128 | 0.502127 | 0.720807 |
| MmuSTS.2305.1.S1_at   | MmuSTS.2305.1 | 12.72 | 12.59 | 0.04 | 0.06 | 1.1   | 0.07727  | 0.517927 | 0.335964 | 0.710031 |

|                      |               |       |       |      |      |       |          |          |          |          |
|----------------------|---------------|-------|-------|------|------|-------|----------|----------|----------|----------|
| MmuSTS.2306.1.S1_at  | MmuSTS.2306.1 | 11.34 | 11.24 | 0.07 | 0.05 | 1.07  | 0.252766 | 0.11929  | 0.547383 | 0.387799 |
| MmuSTS.2307.1.S1_at  | MmuSTS.2307.1 | 5.14  | 5.75  | 0.31 | 0.27 | -1.52 | 0.071476 | 0.423596 | 0.325377 | 0.646459 |
| MmuSTS.2308.1.S1_at  | MmuSTS.2308.1 | 5.96  | 5.71  | 0.15 | 0.25 | 1.19  | 0.406176 | 0.182211 | 0.669555 | 0.458739 |
| MmuSTS.2309.1.S1_at  | MmuSTS.2309.1 | 3.23  | 3.25  | 0.15 | 0.06 | -1.02 | 0.710242 | 0.85946  | 0.86293  | 0.919962 |
| MmuSTS.231.1.S1_at   | MmuSTS.231.1  | 4.32  | 4.8   | 0.55 | 0.19 | -1.4  | 0.377304 | 0.508888 | 0.647835 | 0.7039   |
| MmuSTS.231.1.S1_x_at | MmuSTS.231.1  | 4.9   | 5.01  | 0.12 | 0.19 | -1.08 | 0.341497 | 0.467997 | 0.621345 | 0.677474 |
| MmuSTS.2310.1.S1_at  | MmuSTS.2310.1 | 4.95  | 4.93  | 0.3  | 0.1  | 1.01  | 0.452035 | 0.614339 | 0.702703 | 0.771206 |
| MmuSTS.2311.1.S1_at  | MmuSTS.2311.1 | 5.89  | 5.92  | 0.13 | 0    | -1.02 | 0.924784 | 0.940693 | 0.968005 | 0.966415 |
| MmuSTS.2312.1.S1_at  | MmuSTS.2312.1 | 8.69  | 9.41  | 0.37 | 0.05 | -1.65 | 0.083078 | 0.007463 | 0.345372 | 0.115888 |
| MmuSTS.2313.1.S1_at  | MmuSTS.2313.1 | 3.39  | 3.32  | 0.21 | 0.07 | 1.05  | 0.141865 | 0.149861 | 0.427804 | 0.424468 |
| MmuSTS.2314.1.S1_at  | MmuSTS.2314.1 | 4.42  | 4.6   | 0.25 | 0.21 | -1.13 | 0.214045 | 0.053007 | 0.511862 | 0.275891 |
| MmuSTS.2315.1.S1_at  | MmuSTS.2315.1 | 12.75 | 12.73 | 0.05 | 0.04 | 1.01  | 0.473784 | 0.084277 | 0.717056 | 0.335465 |
| MmuSTS.2316.1.S1_at  | MmuSTS.2316.1 | 11.31 | 11.2  | 0.17 | 0.07 | 1.08  | 0.46436  | 0.021425 | 0.710598 | 0.183331 |
| MmuSTS.2317.1.S1_at  | MmuSTS.2317.1 | 3.92  | 3.97  | 0.04 | 0    | -1.03 | 0.127226 | 0.079554 | 0.408887 | 0.326897 |
| MmuSTS.2318.1.S1_at  | MmuSTS.2318.1 | 7.76  | 8.85  | 0.32 | 0.14 | -2.14 | 0.01153  | 0.00278  | 0.15722  | 0.077966 |
| MmuSTS.2319.1.S1_at  | MmuSTS.2319.1 | 4.33  | 4.85  | 0.31 | 0.58 | -1.43 | 0.208765 | 0.052852 | 0.506255 | 0.275521 |
| MmuSTS.232.1.S1_at   | MmuSTS.232.1  | 6.72  | 6.85  | 0.17 | 0.19 | -1.09 | 0.341633 | 0.792213 | 0.621444 | 0.879931 |
| MmuSTS.2320.1.S1_at  | MmuSTS.2320.1 | 4.3   | 4.31  | 0.06 | 0.09 | -1.01 | 0.885887 | 0.946194 | 0.951309 | 0.969447 |
| MmuSTS.2321.1.S1_at  | MmuSTS.2321.1 | 13.93 | 14.09 | 0.01 | 0.04 | -1.12 | 0.001625 | 0.387839 | 0.08405  | 0.622486 |
| MmuSTS.2322.1.S1_at  | MmuSTS.2322.1 | 3.42  | 3.21  | 0.38 | 0.27 | 1.15  | 0.735699 | 0.896475 | 0.877005 | 0.940899 |
| MmuSTS.2323.1.S1_at  | MmuSTS.2323.1 | 12.44 | 11.91 | 0.08 | 0.13 | 1.44  | 0.006211 | 0.096694 | 0.125037 | 0.35417  |
| MmuSTS.2324.1.S1_at  | MmuSTS.2324.1 | 13.39 | 13.16 | 0.08 | 0.02 | 1.18  | 0.00904  | 0.009463 | 0.144777 | 0.128094 |
| MmuSTS.2325.1.S1_at  | MmuSTS.2325.1 | 13.06 | 13.1  | 0.1  | 0.05 | -1.03 | 0.964595 | 0.194041 | 0.985701 | 0.469151 |
| MmuSTS.2326.1.S1_at  | MmuSTS.2326.1 | 12.32 | 12.14 | 0.05 | 0.07 | 1.14  | 0.04025  | 0.031552 | 0.257139 | 0.219708 |
| MmuSTS.2327.1.S1_at  | MmuSTS.2327.1 | 7.78  | 7.54  | 0.1  | 0.12 | 1.17  | 0.071725 | 0.156278 | 0.325666 | 0.43161  |
| MmuSTS.2328.1.S1_at  | MmuSTS.2328.1 | 4.39  | 4.51  | 0.11 | 0.19 | -1.09 | 0.973437 | 0.729343 | 0.989335 | 0.843541 |
| MmuSTS.2329.1.S1_at  | MmuSTS.2329.1 | 7.51  | 6.62  | 0.58 | 0.27 | 1.84  | 0.187209 | 0.319275 | 0.483367 | 0.571722 |
| MmuSTS.233.1.S1_at   | MmuSTS.233.1  | 4.71  | 4.34  | 0.23 | 0.12 | 1.29  | 0.172962 | 0.212363 | 0.467041 | 0.486315 |
| MmuSTS.2330.1.S1_at  | MmuSTS.2330.1 | 10    | 9.48  | 0.25 | 0.24 | 1.43  | 0.083349 | 0.346184 | 0.345719 | 0.591195 |
| MmuSTS.2331.1.S1_at  | MmuSTS.2331.1 | 5.94  | 7.63  | 0.9  | 0.24 | -3.24 | 0.033492 | 0.103707 | 0.237024 | 0.364519 |
| MmuSTS.2332.1.S1_at  | MmuSTS.2332.1 | 6.2   | 5.98  | 0.2  | 0.22 | 1.17  | 0.119162 | 0.167808 | 0.396724 | 0.44438  |
| MmuSTS.2333.1.S1_at  | MmuSTS.2333.1 | 10.23 | 10.17 | 0.05 | 0.12 | 1.04  | 0.107    | 0.656354 | 0.38138  | 0.799062 |
| MmuSTS.2334.1.S1_at  | MmuSTS.2334.1 | 6.85  | 7.37  | 0.32 | 0.18 | -1.44 | 0.0407   | 0.267736 | 0.258356 | 0.533525 |
| MmuSTS.2335.1.S1_at  | MmuSTS.2335.1 | 11.78 | 12.04 | 0.02 | 0.09 | -1.2  | 0.008256 | 0.046389 | 0.139927 | 0.259896 |
| MmuSTS.2336.1.S1_at  | MmuSTS.2336.1 | 11.17 | 11.11 | 0.07 | 0.05 | 1.05  | 0.986497 | 0.002036 | 0.995228 | 0.066885 |
| MmuSTS.2337.1.S1_at  | MmuSTS.2337.1 | 8.41  | 8.53  | 0.09 | 0.15 | -1.09 | 0.295383 | 0.423913 | 0.584168 | 0.646571 |
| MmuSTS.2338.1.S1_at  | MmuSTS.2338.1 | 2.9   | 2.75  | 0.1  | 0.04 | 1.11  | 0.061941 | 0.014076 | 0.305402 | 0.151885 |
| MmuSTS.2339.1.S1_at  | MmuSTS.2339.1 | 12.51 | 12.75 | 0.17 | 0.02 | -1.18 | 0.031177 | 0.201836 | 0.229656 | 0.476367 |
| MmuSTS.234.1.S1_at   | MmuSTS.234.1  | 9.98  | 10.07 | 0.07 | 0.12 | -1.06 | 0.917533 | 0.568012 | 0.964859 | 0.74176  |
| MmuSTS.2340.1.S1_at  | MmuSTS.2340.1 | 9.62  | 8.75  | 0.22 | 0.3  | 1.83  | 0.019814 | 0.171381 | 0.193865 | 0.447852 |
| MmuSTS.2341.1.S1_at  | MmuSTS.2341.1 | 8.81  | 8.12  | 0.16 | 0.08 | 1.61  | 0.0034   | 0.001135 | 0.103074 | 0.053082 |
| MmuSTS.2342.1.S1_at  | MmuSTS.2342.1 | 9.37  | 9.87  | 0.4  | 0.02 | -1.41 | 0.104634 | 0.467561 | 0.377962 | 0.67714  |
| MmuSTS.2343.1.S1_at  | MmuSTS.2343.1 | 8.38  | 8.23  | 0.23 | 0.16 | 1.11  | 0.753597 | 0.805885 | 0.886373 | 0.888395 |

|                       |               |       |       |      |      |        |          |          |          |          |
|-----------------------|---------------|-------|-------|------|------|--------|----------|----------|----------|----------|
| MmuSTS.2344.1.S1_at   | MmuSTS.2344.1 | 12.88 | 12.83 | 0.05 | 0.03 | 1.03   | 0.280085 | 0.016606 | 0.571289 | 0.163117 |
| MmuSTS.2345.1.S1_at   | MmuSTS.2345.1 | 7.64  | 7     | 0.24 | 0.41 | 1.56   | 0.02408  | 0.004552 | 0.208287 | 0.094327 |
| MmuSTS.2346.1.S1_at   | MmuSTS.2346.1 | 11.51 | 11.55 | 0.05 | 0.07 | -1.03  | 0.616277 | 0.980445 | 0.809428 | 0.989333 |
| MmuSTS.2346.1.S1_s_at | MmuSTS.2346.1 | 11.9  | 11.85 | 0.11 | 0.06 | 1.04   | 0.469114 | 0.747459 | 0.71396  | 0.853149 |
| MmuSTS.2347.1.S1_at   | MmuSTS.2347.1 | 6.94  | 7.01  | 0.13 | 0.03 | -1.05  | 0.564554 | 0.320716 | 0.776201 | 0.572811 |
| MmuSTS.2348.1.S1_at   | MmuSTS.2348.1 | 5.96  | 6.35  | 0.22 | 0.2  | -1.31  | 0.40184  | 0.564716 | 0.66633  | 0.739425 |
| MmuSTS.2349.1.S1_at   | MmuSTS.2349.1 | 9.4   | 9.44  | 0.09 | 0.02 | -1.03  | 0.808938 | 0.484891 | 0.914357 | 0.688838 |
| MmuSTS.235.1.S1_at    | MmuSTS.235.1  | 12.01 | 12.03 | 0.05 | 0.18 | -1.01  | 0.349403 | 0.096266 | 0.62731  | 0.353654 |
| MmuSTS.2350.1.S1_at   | MmuSTS.2350.1 | 4.34  | 4.56  | 0.42 | 0.27 | -1.17  | 0.374214 | 0.085497 | 0.645421 | 0.337495 |
| MmuSTS.2351.1.S1_s_at | MmuSTS.2351.1 | 5.85  | 7.26  | 0.55 | 0.45 | -2.64  | 0.029782 | 0.149723 | 0.225824 | 0.424334 |
| MmuSTS.2352.1.S1_at   | MmuSTS.2352.1 | 5.38  | 5.51  | 0.2  | 0.32 | -1.09  | 0.496301 | 0.666476 | 0.732262 | 0.804596 |
| MmuSTS.2353.1.S1_at   | MmuSTS.2353.1 | 5.71  | 5.64  | 0.17 | 0.06 | 1.05   | 0.309665 | 0.527543 | 0.595927 | 0.716154 |
| MmuSTS.2354.1.S1_at   | MmuSTS.2354.1 | 9.42  | 9.02  | 0.52 | 0.01 | 1.33   | 0.701007 | 0.031708 | 0.857901 | 0.220493 |
| MmuSTS.2355.1.S1_at   | MmuSTS.2355.1 | 10.91 | 10.83 | 0.19 | 0.1  | 1.05   | 0.360269 | 0.496056 | 0.63583  | 0.695877 |
| MmuSTS.2356.1.S1_at   | MmuSTS.2356.1 | 3.98  | 4.05  | 0.32 | 0.06 | -1.05  | 0.961607 | 0.998071 | 0.984367 | 0.999009 |
| MmuSTS.2357.1.S1_s_at | MmuSTS.2357.1 | 14.4  | 14.35 | 0.13 | 0.05 | 1.04   | 0.778455 | 0.782218 | 0.898788 | 0.873842 |
| MmuSTS.2357.1.S1_x_at | MmuSTS.2357.1 | 14.49 | 14.43 | 0.08 | 0.04 | 1.04   | 0.875082 | 0.845247 | 0.946398 | 0.911955 |
| MmuSTS.2358.1.S1_at   | MmuSTS.2358.1 | 8.1   | 7.83  | 0.61 | 0.16 | 1.21   | 0.421991 | 0.594083 | 0.680233 | 0.758517 |
| MmuSTS.2359.1.S1_at   | MmuSTS.2359.1 | 12.04 | 13.75 | 0.73 | 0.1  | -3.26  | 0.043859 | 0.292528 | 0.266439 | 0.55258  |
| MmuSTS.236.1.S1_at    | MmuSTS.236.1  | 12.38 | 11.76 | 0.09 | 0.06 | 1.53   | 0.000764 | 0.037359 | 0.072766 | 0.237723 |
| MmuSTS.2360.1.S1_at   | MmuSTS.2360.1 | 9.54  | 9.85  | 0.14 | 0.39 | -1.25  | 0.254377 | 0.862925 | 0.54882  | 0.922071 |
| MmuSTS.2361.1.S1_at   | MmuSTS.2361.1 | 8.6   | 12.19 | 0.93 | 0.16 | -12.02 | 0.004813 | 0.008306 | 0.115098 | 0.120929 |
| MmuSTS.2362.1.S1_at   | MmuSTS.2362.1 | 5.43  | 5.35  | 0.47 | 0.22 | 1.06   | 0.747455 | 0.733615 | 0.883065 | 0.845775 |
| MmuSTS.2363.1.S1_at   | MmuSTS.2363.1 | 12.88 | 12.56 | 0.04 | 0.02 | 1.24   | 0.000219 | 0.202252 | 0.054357 | 0.476665 |
| MmuSTS.2364.1.S1_at   | MmuSTS.2364.1 | 10.79 | 10.54 | 0.08 | 0.17 | 1.19   | 0.045365 | 0.030482 | 0.270535 | 0.216624 |
| MmuSTS.2365.1.S1_at   | MmuSTS.2365.1 | 10.17 | 10.2  | 0.18 | 0.05 | -1.02  | 0.895567 | 0.169605 | 0.955442 | 0.446204 |
| MmuSTS.2366.1.S1_at   | MmuSTS.2366.1 | 3.76  | 3.85  | 0.12 | 0.04 | -1.07  | 0.839101 | 0.182244 | 0.929434 | 0.458762 |
| MmuSTS.2367.1.S1_at   | MmuSTS.2367.1 | 6.42  | 6.43  | 0.09 | 0    | -1.01  | 0.320915 | 0.06856  | 0.605315 | 0.308382 |
| MmuSTS.2368.1.S1_at   | MmuSTS.2368.1 | 3.96  | 3.98  | 0.43 | 0.51 | -1.02  | 0.470799 | 0.170116 | 0.715134 | 0.446868 |
| MmuSTS.2369.1.S1_at   | MmuSTS.2369.1 | 4.31  | 3.89  | 0.12 | 0.44 | 1.33   | 0.283325 | 0.523844 | 0.573777 | 0.71405  |
| MmuSTS.237.1.S1_s_at  | MmuSTS.237.1  | 5.41  | 5.37  | 0.11 | 0.07 | 1.03   | 0.710468 | 0.769315 | 0.863105 | 0.866034 |
| MmuSTS.2370.1.S1_at   | MmuSTS.2370.1 | 6.5   | 6.47  | 0.17 | 0.02 | 1.02   | 0.338745 | 0.560434 | 0.619173 | 0.736669 |
| MmuSTS.2371.1.S1_at   | MmuSTS.2371.1 | 12.45 | 12.22 | 0.07 | 0.02 | 1.17   | 0.008075 | 0.074561 | 0.138956 | 0.318185 |
| MmuSTS.2372.1.S1_at   | MmuSTS.2372.1 | 10.62 | 10.25 | 0.17 | 0.05 | 1.29   | 0.025513 | 0.006793 | 0.212834 | 0.111388 |
| MmuSTS.2373.1.S1_at   | MmuSTS.2373.1 | 5.58  | 8.44  | 1.21 | 0.33 | -7.27  | 0.047181 | 0.292863 | 0.274594 | 0.552837 |
| MmuSTS.2374.1.S1_at   | MmuSTS.2374.1 | 8.68  | 8.87  | 0.11 | 0.1  | -1.14  | 0.106679 | 0.004775 | 0.380862 | 0.09642  |
| MmuSTS.2375.1.S1_at   | MmuSTS.2375.1 | 8.71  | 8.52  | 0.15 | 0.03 | 1.14   | 0.111412 | 0.100074 | 0.387378 | 0.358965 |
| MmuSTS.2376.1.S1_at   | MmuSTS.2376.1 | 12.71 | 12.79 | 0.1  | 0.02 | -1.05  | 0.472405 | 0.156727 | 0.716189 | 0.432216 |
| MmuSTS.2377.1.S1_at   | MmuSTS.2377.1 | 4.29  | 4.35  | 0.11 | 0.09 | -1.04  | 0.362802 | 0.509308 | 0.637448 | 0.704094 |
| MmuSTS.2377.1.S1_s_at | MmuSTS.2377.1 | 11.63 | 11.67 | 0.21 | 0.07 | -1.02  | 0.60873  | 0.680419 | 0.804644 | 0.813441 |
| MmuSTS.2378.1.S1_at   | MmuSTS.2378.1 | 6.96  | 7.18  | 0.22 | 0.02 | -1.16  | 0.458125 | 0.474884 | 0.706807 | 0.681784 |
| MmuSTS.2379.1.S1_at   | MmuSTS.2379.1 | 10.09 | 10.37 | 0.28 | 0.17 | -1.22  | 0.874534 | 0.85872  | 0.94618  | 0.919548 |
| MmuSTS.238.1.S1_at    | MmuSTS.238.1  | 10.03 | 9.81  | 0.27 | 0.05 | 1.16   | 0.295004 | 0.001639 | 0.583988 | 0.061228 |

|                       |               |       |       |      |      |       |          |          |          |          |
|-----------------------|---------------|-------|-------|------|------|-------|----------|----------|----------|----------|
| MmuSTS.2380.1.S1_at   | MmuSTS.2380.1 | 5.02  | 4.38  | 0.73 | 0.12 | 1.57  | 0.235    | 0.294288 | 0.533056 | 0.55407  |
| MmuSTS.2381.1.S1_at   | MmuSTS.2381.1 | 10.68 | 9.19  | 0.23 | 0.02 | 2.8   | 0.000382 | 0.002161 | 0.062479 | 0.068763 |
| MmuSTS.2382.1.S1_at   | MmuSTS.2382.1 | 6.49  | 6.79  | 0.17 | 0.15 | -1.24 | 0.045194 | 0.30935  | 0.270005 | 0.564912 |
| MmuSTS.2383.1.S1_at   | MmuSTS.2383.1 | 11.75 | 11.15 | 0.42 | 0.14 | 1.51  | 0.297284 | 0.217754 | 0.585759 | 0.491309 |
| MmuSTS.2384.1.S1_at   | MmuSTS.2384.1 | 5.87  | 8.59  | 0.94 | 0.4  | -6.57 | 0.017629 | 0.160448 | 0.186416 | 0.436569 |
| MmuSTS.2385.1.S1_at   | MmuSTS.2385.1 | 3.37  | 3.34  | 0.05 | 0.19 | 1.03  | 0.630867 | 0.779429 | 0.818647 | 0.87211  |
| MmuSTS.2386.1.S1_at   | MmuSTS.2386.1 | 8.49  | 8.45  | 0.41 | 0.32 | 1.03  | 0.292284 | 0.538038 | 0.581586 | 0.722826 |
| MmuSTS.2387.1.S1_at   | MmuSTS.2387.1 | 5.27  | 4.88  | 0.17 | 0.16 | 1.31  | 0.033339 | 0.048416 | 0.236556 | 0.265262 |
| MmuSTS.2388.1.S1_at   | MmuSTS.2388.1 | 2.96  | 2.96  | 0.13 | 0.02 | -1    | 0.375558 | 0.677824 | 0.646358 | 0.811825 |
| MmuSTS.2389.1.S1_at   | MmuSTS.2389.1 | 4.31  | 4.31  | 0.28 | 0.04 | 1     | 0.481984 | 0.596918 | 0.722245 | 0.75993  |
| MmuSTS.239.1.S1_at    | MmuSTS.239.1  | 11.13 | 10.23 | 0.21 | 0.02 | 1.87  | 0.001457 | 0.001224 | 0.079991 | 0.054593 |
| MmuSTS.2390.1.S1_at   | MmuSTS.2390.1 | 10.44 | 10.05 | 0.05 | 0.01 | 1.31  | 0.000136 | 0.001121 | 0.051196 | 0.052924 |
| MmuSTS.2391.1.S1_at   | MmuSTS.2391.1 | 4.37  | 4.45  | 0.09 | 0.08 | -1.05 | 0.311258 | 0.101696 | 0.597396 | 0.361562 |
| MmuSTS.2392.1.S1_at   | MmuSTS.2392.1 | 5.49  | 7.48  | 0.14 | 0.3  | -3.98 | 0.000343 | 0.012409 | 0.061415 | 0.144066 |
| MmuSTS.2393.1.S1_at   | MmuSTS.2393.1 | 8.85  | 9.84  | 0.21 | 0.22 | -1.98 | 0.008182 | 0.172664 | 0.139396 | 0.449141 |
| MmuSTS.2394.1.S1_at   | MmuSTS.2394.1 | 9.71  | 10.26 | 0.04 | 0.05 | -1.46 | 0.000181 | 0.20481  | 0.053494 | 0.479209 |
| MmuSTS.2395.1.S1_at   | MmuSTS.2395.1 | 5.46  | 5.6   | 0.2  | 0.12 | -1.1  | 0.244387 | 0.143511 | 0.540909 | 0.417449 |
| MmuSTS.2396.1.S1_at   | MmuSTS.2396.1 | 10.8  | 10.87 | 0.27 | 0.17 | -1.05 | 0.528711 | 0.726756 | 0.753764 | 0.841963 |
| MmuSTS.2397.1.S1_s_at | MmuSTS.2397.1 | 6.34  | 7.34  | 0.68 | 0.15 | -2.01 | 0.090464 | 0.236359 | 0.35723  | 0.507308 |
| MmuSTS.2398.1.S1_at   | MmuSTS.2398.1 | 2.75  | 2.89  | 0.05 | 0.07 | -1.1  | 0.051174 | 0.08635  | 0.283595 | 0.338791 |
| MmuSTS.2399.1.S1_at   | MmuSTS.2399.1 | 11.35 | 11.2  | 0.18 | 0.13 | 1.1   | 0.298686 | 0.021832 | 0.586964 | 0.184811 |
| MmuSTS.24.1.S1_at     | MmuSTS.24.1   | 4.95  | 5.22  | 0.05 | 0.28 | -1.21 | 0.201244 | 0.522029 | 0.498747 | 0.712827 |
| MmuSTS.240.1.S1_at    | MmuSTS.240.1  | 2.88  | 2.93  | 0.04 | 0    | -1.04 | 0.12528  | 0.347539 | 0.405737 | 0.592019 |
| MmuSTS.2400.1.S1_at   | MmuSTS.2400.1 | 8.3   | 8.75  | 0.16 | 0.13 | -1.37 | 0.032717 | 0.004213 | 0.234993 | 0.091368 |
| MmuSTS.2401.1.S1_at   | MmuSTS.2401.1 | 12.02 | 12.12 | 1.07 | 0.04 | -1.07 | 0.406163 | 0.53383  | 0.669555 | 0.719904 |
| MmuSTS.2401.1.S1_s_at | MmuSTS.2401.1 | 10.85 | 10.51 | 0.16 | 0.04 | 1.27  | 0.01786  | 0.014395 | 0.187044 | 0.153146 |
| MmuSTS.2402.1.S1_at   | MmuSTS.2402.1 | 11.87 | 12.9  | 0.13 | 0.19 | -2.04 | 0.002954 | 0.003618 | 0.099482 | 0.086035 |
| MmuSTS.2403.1.S1_at   | MmuSTS.2403.1 | 7.44  | 7.52  | 0.22 | 0.07 | -1.06 | 0.415041 | 0.033391 | 0.675916 | 0.226396 |
| MmuSTS.2404.1.S1_at   | MmuSTS.2404.1 | 3.96  | 3.89  | 0.07 | 0.24 | 1.05  | 0.502468 | 0.250543 | 0.736123 | 0.519391 |
| MmuSTS.2405.1.S1_at   | MmuSTS.2405.1 | 8.54  | 9.02  | 0.32 | 0.22 | -1.4  | 0.177495 | 0.00336  | 0.472186 | 0.083405 |
| MmuSTS.2406.1.S1_at   | MmuSTS.2406.1 | 5.94  | 5.89  | 0.1  | 0.13 | 1.04  | 0.784608 | 0.497301 | 0.901768 | 0.696622 |
| MmuSTS.2407.1.S1_at   | MmuSTS.2407.1 | 6.14  | 5.89  | 0.29 | 0.15 | 1.19  | 0.33925  | 0.070632 | 0.619561 | 0.311944 |
| MmuSTS.2408.1.S1_at   | MmuSTS.2408.1 | 9.39  | 8.93  | 0.3  | 0.22 | 1.37  | 0.135173 | 0.06121  | 0.419109 | 0.294035 |
| MmuSTS.2408.1.S1_s_at | MmuSTS.2408.1 | 9.57  | 9.13  | 0.27 | 0.11 | 1.36  | 0.182827 | 0.114464 | 0.47859  | 0.381021 |
| MmuSTS.2409.1.S1_at   | MmuSTS.2409.1 | 4.76  | 4.55  | 0.11 | 0.09 | 1.16  | 0.022198 | 0.028958 | 0.202183 | 0.212059 |
| MmuSTS.2409.1.S1_s_at | MmuSTS.2409.1 | 5.19  | 5.11  | 0.13 | 0.06 | 1.06  | 0.697593 | 0.384183 | 0.856021 | 0.619939 |
| MmuSTS.241.1.S1_at    | MmuSTS.241.1  | 5.77  | 5.59  | 0.14 | 0.15 | 1.13  | 0.477461 | 0.039714 | 0.719439 | 0.244271 |
| MmuSTS.2410.1.S1_at   | MmuSTS.2410.1 | 3.61  | 3.52  | 0.27 | 0.07 | 1.06  | 0.222687 | 0.551415 | 0.520555 | 0.730925 |
| MmuSTS.2411.1.S1_at   | MmuSTS.2411.1 | 5.03  | 5.35  | 0.08 | 0.22 | -1.25 | 0.118119 | 0.059892 | 0.395593 | 0.291386 |
| MmuSTS.2412.1.S1_at   | MmuSTS.2412.1 | 7.65  | 7.86  | 0.25 | 0.02 | -1.16 | 0.201554 | 0.633462 | 0.499133 | 0.784173 |
| MmuSTS.2413.1.S1_at   | MmuSTS.2413.1 | 6.42  | 6.44  | 0.23 | 0.07 | -1.01 | 0.471638 | 0.484499 | 0.715688 | 0.688522 |
| MmuSTS.2414.1.S1_at   | MmuSTS.2414.1 | 12.27 | 12.1  | 0.05 | 0.1  | 1.13  | 0.064026 | 0.326727 | 0.309505 | 0.576725 |
| MmuSTS.2415.1.S1_at   | MmuSTS.2415.1 | 5.95  | 5.94  | 0.19 | 0.03 | 1.01  | 0.911131 | 0.896466 | 0.962223 | 0.940899 |

|                       |               |       |       |      |      |       |          |          |          |          |
|-----------------------|---------------|-------|-------|------|------|-------|----------|----------|----------|----------|
| MmuSTS.2416.1.S1_at   | MmuSTS.2416.1 | 4.29  | 4.19  | 0.05 | 0.06 | 1.07  | 0.092357 | 0.305458 | 0.360383 | 0.562418 |
| MmuSTS.2417.1.S1_at   | MmuSTS.2417.1 | 4.88  | 4.91  | 0.1  | 0.09 | -1.02 | 0.837002 | 0.970712 | 0.928546 | 0.98405  |
| MmuSTS.2418.1.S1_at   | MmuSTS.2418.1 | 8.07  | 8.45  | 0.27 | 0.15 | -1.3  | 0.170287 | 0.203081 | 0.463911 | 0.477343 |
| MmuSTS.2419.1.S1_at   | MmuSTS.2419.1 | 5.18  | 5.08  | 0.75 | 0.15 | 1.08  | 0.828389 | 0.803579 | 0.924113 | 0.886984 |
| MmuSTS.242.1.S1_at    | MmuSTS.242.1  | 7.06  | 6.92  | 0.17 | 0.03 | 1.1   | 0.295163 | 0.373182 | 0.584058 | 0.612033 |
| MmuSTS.242.1.S1_x_at  | MmuSTS.242.1  | 6.68  | 6.64  | 0.23 | 0.03 | 1.03  | 0.544698 | 0.735112 | 0.76421  | 0.846715 |
| MmuSTS.2420.1.S1_at   | MmuSTS.2420.1 | 11.8  | 11.1  | 0.13 | 0.07 | 1.63  | 0.001252 | 0.006184 | 0.078631 | 0.106774 |
| MmuSTS.2421.1.S1_at   | MmuSTS.2421.1 | 4.26  | 4.24  | 0.21 | 0.06 | 1.01  | 0.976193 | 0.634353 | 0.990507 | 0.784758 |
| MmuSTS.2422.1.S1_at   | MmuSTS.2422.1 | 12.34 | 12.42 | 0.05 | 0.04 | -1.06 | 0.142538 | 0.843324 | 0.428631 | 0.910772 |
| MmuSTS.2423.1.S1_at   | MmuSTS.2423.1 | 7.25  | 7.1   | 0.05 | 0    | 1.11  | 0.007617 | 0.145458 | 0.135757 | 0.419421 |
| MmuSTS.2424.1.S1_at   | MmuSTS.2424.1 | 5.94  | 6.03  | 0.15 | 0.07 | -1.07 | 0.253674 | 0.32744  | 0.547927 | 0.577284 |
| MmuSTS.2425.1.S1_at   | MmuSTS.2425.1 | 5.23  | 5.2   | 0.13 | 0.07 | 1.02  | 0.971561 | 0.432906 | 0.98857  | 0.65324  |
| MmuSTS.2426.1.S1_at   | MmuSTS.2426.1 | 8.67  | 8.73  | 0.63 | 0.12 | -1.04 | 0.402683 | 0.245437 | 0.666975 | 0.515213 |
| MmuSTS.2427.1.S1_at   | MmuSTS.2427.1 | 9.7   | 9.8   | 0.22 | 0.13 | -1.07 | 0.474608 | 0.206464 | 0.717558 | 0.480571 |
| MmuSTS.2428.1.S1_at   | MmuSTS.2428.1 | 4.46  | 4.22  | 0.15 | 0.06 | 1.18  | 0.114878 | 0.169227 | 0.391855 | 0.445815 |
| MmuSTS.2429.1.S1_at   | MmuSTS.2429.1 | 5.4   | 5.38  | 0.76 | 0.1  | 1.01  | 0.362111 | 0.526671 | 0.637183 | 0.715627 |
| MmuSTS.243.1.S1_at    | MmuSTS.243.1  | 8.11  | 7.05  | 0.26 | 0.16 | 2.08  | 0.006728 | 0.000536 | 0.128806 | 0.040439 |
| MmuSTS.2430.1.S1_at   | MmuSTS.2430.1 | 7.56  | 7.98  | 0.02 | 0.06 | -1.33 | 0.000554 | 0.190889 | 0.070113 | 0.466264 |
| MmuSTS.2431.1.S1_at   | MmuSTS.2431.1 | 3.91  | 4.02  | 0.05 | 0.13 | -1.08 | 0.405724 | 0.612591 | 0.669103 | 0.770091 |
| MmuSTS.2432.1.S1_s_at | MmuSTS.2432.1 | 5.96  | 5.98  | 0.15 | 0.22 | -1.02 | 0.996852 | 0.851433 | 0.998972 | 0.915468 |
| MmuSTS.2433.1.S1_at   | MmuSTS.2433.1 | 9.29  | 9.83  | 0.14 | 0.07 | -1.46 | 0.002214 | 0.000088 | 0.090954 | 0.027016 |
| MmuSTS.2434.1.S1_at   | MmuSTS.2434.1 | 7.42  | 8.43  | 0.2  | 0.21 | -2.02 | 0.002362 | 0.030113 | 0.092906 | 0.215388 |
| MmuSTS.2435.1.S1_at   | MmuSTS.2435.1 | 3.82  | 3.98  | 0.24 | 0.05 | -1.12 | 0.268372 | 0.436855 | 0.561061 | 0.656331 |
| MmuSTS.2436.1.S1_at   | MmuSTS.2436.1 | 5.42  | 4.7   | 0.72 | 0.24 | 1.65  | 0.062826 | 0.051078 | 0.307336 | 0.271296 |
| MmuSTS.2437.1.S1_at   | MmuSTS.2437.1 | 4.27  | 4.25  | 0.14 | 0.12 | 1.02  | 0.450533 | 0.452547 | 0.70154  | 0.667147 |
| MmuSTS.2438.1.S1_at   | MmuSTS.2438.1 | 3.22  | 3.18  | 0.11 | 0.12 | 1.03  | 0.667934 | 0.867344 | 0.840528 | 0.924663 |
| MmuSTS.2439.1.S1_at   | MmuSTS.2439.1 | 5.41  | 5.59  | 0.48 | 0.16 | -1.13 | 0.184689 | 0.35589  | 0.480751 | 0.597869 |
| MmuSTS.244.1.S1_at    | MmuSTS.244.1  | 8.85  | 9.86  | 0.21 | 0.27 | -2.02 | 0.014559 | 0.280098 | 0.172573 | 0.543369 |
| MmuSTS.2440.1.S1_at   | MmuSTS.2440.1 | 11.09 | 9.44  | 0.58 | 0.28 | 3.12  | 0.024571 | 0.016581 | 0.209748 | 0.163023 |
| MmuSTS.2441.1.S1_at   | MmuSTS.2441.1 | 10.99 | 11.15 | 0.24 | 0.06 | -1.11 | 0.516215 | 0.733221 | 0.745621 | 0.845568 |
| MmuSTS.2442.1.S1_at   | MmuSTS.2442.1 | 4.38  | 4.42  | 0.08 | 0.01 | -1.03 | 0.43779  | 0.532103 | 0.69255  | 0.718995 |
| MmuSTS.2443.1.S1_at   | MmuSTS.2443.1 | 5.93  | 6.04  | 0.07 | 0.06 | -1.08 | 0.495717 | 0.156206 | 0.73183  | 0.43161  |
| MmuSTS.2444.1.S1_at   | MmuSTS.2444.1 | 5.14  | 4.87  | 0.04 | 0.06 | 1.21  | 0.003513 | 0.001329 | 0.104228 | 0.056205 |
| MmuSTS.2445.1.S1_at   | MmuSTS.2445.1 | 7.33  | 7.42  | 0.07 | 0.09 | -1.06 | 0.481046 | 0.123768 | 0.72178  | 0.393908 |
| MmuSTS.2446.1.S1_at   | MmuSTS.2446.1 | 4.83  | 5.99  | 0.3  | 0.25 | -2.23 | 0.005249 | 0.140339 | 0.117387 | 0.413522 |
| MmuSTS.2447.1.S1_at   | MmuSTS.2447.1 | 11.02 | 10.4  | 0.26 | 0.12 | 1.54  | 0.009975 | 0.515609 | 0.14918  | 0.708449 |
| MmuSTS.2448.1.S1_at   | MmuSTS.2448.1 | 4.63  | 4.67  | 0.08 | 0.19 | -1.03 | 0.286988 | 0.256256 | 0.576707 | 0.524079 |
| MmuSTS.2449.1.S1_at   | MmuSTS.2449.1 | 3.85  | 3.79  | 0.1  | 0.1  | 1.04  | 0.197923 | 0.185273 | 0.49515  | 0.461194 |
| MmuSTS.245.1.S1_at    | MmuSTS.245.1  | 10.22 | 10.22 | 0.2  | 0.1  | 1     | 0.733476 | 0.748454 | 0.875708 | 0.853639 |
| MmuSTS.2450.1.S1_at   | MmuSTS.2450.1 | 8.79  | 8.17  | 0.39 | 0.07 | 1.54  | 0.022948 | 0.106099 | 0.204353 | 0.368498 |
| MmuSTS.2451.1.S1_at   | MmuSTS.2451.1 | 5.18  | 5.31  | 0.64 | 0.19 | -1.09 | 0.416402 | 0.681218 | 0.676909 | 0.813862 |
| MmuSTS.2452.1.S1_at   | MmuSTS.2452.1 | 9.43  | 8.91  | 0.16 | 0.09 | 1.44  | 0.005244 | 0.519486 | 0.117387 | 0.711062 |
| MmuSTS.2453.1.S1_at   | MmuSTS.2453.1 | 5.99  | 4.88  | 0.76 | 0.42 | 2.17  | 0.138667 | 0.144435 | 0.42426  | 0.418323 |

|                     |               |       |       |      |      |        |          |          |          |          |
|---------------------|---------------|-------|-------|------|------|--------|----------|----------|----------|----------|
| MmuSTS.2454.1.S1_at | MmuSTS.2454.1 | 5.35  | 5.21  | 0.06 | 0.09 | 1.1    | 0.056048 | 0.049881 | 0.293789 | 0.268445 |
| MmuSTS.2455.1.S1_at | MmuSTS.2455.1 | 11.81 | 10.94 | 0.19 | 0.06 | 1.84   | 0.003281 | 0.001775 | 0.102069 | 0.0634   |
| MmuSTS.2456.1.S1_at | MmuSTS.2456.1 | 12.95 | 12.79 | 0.03 | 0.03 | 1.12   | 0.006561 | 0.003777 | 0.127421 | 0.087503 |
| MmuSTS.2457.1.S1_at | MmuSTS.2457.1 | 6.68  | 10.29 | 1.62 | 0.31 | -12.18 | 0.04623  | 0.223843 | 0.272763 | 0.496802 |
| MmuSTS.2458.1.S1_at | MmuSTS.2458.1 | 5.77  | 5.62  | 0.77 | 0.25 | 1.11   | 0.706438 | 0.356021 | 0.861019 | 0.598012 |
| MmuSTS.2459.1.S1_at | MmuSTS.2459.1 | 10.58 | 10.45 | 0.22 | 0.08 | 1.09   | 0.604092 | 0.222975 | 0.801436 | 0.495821 |
| MmuSTS.246.1.S1_at  | MmuSTS.246.1  | 11.09 | 11    | 0.08 | 0.17 | 1.07   | 0.548494 | 0.16006  | 0.766578 | 0.436231 |
| MmuSTS.2460.1.S1_at | MmuSTS.2460.1 | 8.79  | 8.12  | 0.17 | 0.04 | 1.59   | 0.003945 | 0.000108 | 0.108453 | 0.028099 |
| MmuSTS.2461.1.S1_at | MmuSTS.2461.1 | 9.28  | 9.16  | 0.26 | 0.14 | 1.08   | 0.879695 | 0.62974  | 0.948777 | 0.781989 |
| MmuSTS.2462.1.S1_at | MmuSTS.2462.1 | 10.77 | 10.44 | 0.31 | 0.06 | 1.26   | 0.053752 | 0.076835 | 0.289013 | 0.322319 |
| MmuSTS.2463.1.S1_at | MmuSTS.2463.1 | 4.66  | 4.53  | 0.16 | 0.07 | 1.09   | 0.086349 | 0.139067 | 0.351168 | 0.412165 |
| MmuSTS.2464.1.S1_at | MmuSTS.2464.1 | 6.6   | 7.23  | 0.53 | 0.78 | -1.54  | 0.308426 | 0.003373 | 0.595066 | 0.083569 |
| MmuSTS.2465.1.S1_at | MmuSTS.2465.1 | 4.96  | 4.94  | 0.15 | 0.09 | 1.01   | 0.756962 | 0.344515 | 0.888373 | 0.589905 |
| MmuSTS.2466.1.S1_at | MmuSTS.2466.1 | 5.03  | 5.03  | 0.04 | 0.05 | -1     | 0.948829 | 0.414304 | 0.978648 | 0.640189 |
| MmuSTS.2467.1.S1_at | MmuSTS.2467.1 | 11.36 | 11.24 | 0.3  | 0.11 | 1.09   | 0.54638  | 0.593994 | 0.765211 | 0.758509 |
| MmuSTS.2468.1.S1_at | MmuSTS.2468.1 | 11.48 | 11.38 | 0.06 | 0.03 | 1.08   | 0.016792 | 0.155892 | 0.182845 | 0.431279 |
| MmuSTS.2469.1.S1_at | MmuSTS.2469.1 | 4.68  | 4.73  | 0.12 | 0.09 | -1.04  | 0.648303 | 0.01451  | 0.829161 | 0.153682 |
| MmuSTS.247.1.S1_at  | MmuSTS.247.1  | 9.04  | 9.72  | 0.21 | 0.13 | -1.6   | 0.006694 | 0.012838 | 0.128447 | 0.145955 |
| MmuSTS.2470.1.S1_at | MmuSTS.2470.1 | 10.47 | 10.33 | 0.03 | 0.16 | 1.1    | 0.090247 | 0.095387 | 0.356864 | 0.352428 |
| MmuSTS.2471.1.S1_at | MmuSTS.2471.1 | 5.07  | 4.58  | 1.99 | 0.6  | 1.41   | 0.356289 | 0.527699 | 0.632563 | 0.716221 |
| MmuSTS.2472.1.S1_at | MmuSTS.2472.1 | 5.96  | 5.95  | 0.18 | 0.14 | 1.01   | 0.883965 | 0.957143 | 0.950642 | 0.975767 |
| MmuSTS.2473.1.S1_at | MmuSTS.2473.1 | 9.35  | 8.04  | 0.23 | 0.16 | 2.47   | 0.001819 | 0.102881 | 0.08633  | 0.363508 |
| MmuSTS.2474.1.S1_at | MmuSTS.2474.1 | 9.28  | 8.75  | 0.25 | 0.06 | 1.45   | 0.054021 | 0.023716 | 0.289549 | 0.192852 |
| MmuSTS.2475.1.S1_at | MmuSTS.2475.1 | 4.78  | 4.76  | 0.11 | 0.08 | 1.01   | 0.407152 | 0.842242 | 0.670282 | 0.910143 |
| MmuSTS.2476.1.S1_at | MmuSTS.2476.1 | 8.74  | 8.87  | 0.26 | 0.21 | -1.1   | 0.530621 | 0.124468 | 0.755142 | 0.394865 |
| MmuSTS.2477.1.S1_at | MmuSTS.2477.1 | 10.67 | 9.67  | 0.2  | 0.21 | 2      | 0.003954 | 0.004327 | 0.108453 | 0.092251 |
| MmuSTS.2478.1.S1_at | MmuSTS.2478.1 | 12.34 | 12.51 | 0.02 | 0.08 | -1.13  | 0.021147 | 0.055903 | 0.198926 | 0.282209 |
| MmuSTS.2479.1.S1_at | MmuSTS.2479.1 | 6.47  | 6.6   | 0.16 | 0.1  | -1.09  | 0.947923 | 0.456287 | 0.978054 | 0.670064 |
| MmuSTS.248.1.S1_at  | MmuSTS.248.1  | 5.95  | 5.83  | 0.49 | 0.3  | 1.09   | 0.599167 | 0.100931 | 0.7979   | 0.360509 |
| MmuSTS.2480.1.S1_at | MmuSTS.2480.1 | 7.54  | 7.28  | 0.46 | 0.24 | 1.2    | 0.538646 | 0.022271 | 0.760315 | 0.1867   |
| MmuSTS.2481.1.S1_at | MmuSTS.2481.1 | 10.9  | 10.54 | 0.27 | 0.02 | 1.28   | 0.261622 | 0.087252 | 0.555806 | 0.340237 |
| MmuSTS.2482.1.S1_at | MmuSTS.2482.1 | 10.05 | 10.18 | 0.08 | 0.06 | -1.09  | 0.074131 | 0.870392 | 0.330349 | 0.926446 |
| MmuSTS.2483.1.S1_at | MmuSTS.2483.1 | 5.85  | 5.59  | 0.26 | 0.09 | 1.2    | 0.066094 | 0.001893 | 0.314442 | 0.065004 |
| MmuSTS.2484.1.S1_at | MmuSTS.2484.1 | 5.91  | 6.03  | 0.08 | 0    | -1.09  | 0.054316 | 0.015825 | 0.290104 | 0.159503 |
| MmuSTS.2485.1.S1_at | MmuSTS.2485.1 | 6.76  | 6.71  | 0.24 | 0.1  | 1.04   | 0.451697 | 0.626385 | 0.702488 | 0.779719 |
| MmuSTS.2486.1.S1_at | MmuSTS.2486.1 | 9.26  | 8.59  | 1.35 | 0.59 | 1.59   | 0.855692 | 0.859556 | 0.937133 | 0.919999 |
| MmuSTS.2487.1.S1_at | MmuSTS.2487.1 | 5.59  | 5.43  | 0.06 | 0.08 | 1.12   | 0.069371 | 0.273605 | 0.321691 | 0.538053 |
| MmuSTS.2488.1.S1_at | MmuSTS.2488.1 | 10.72 | 10.46 | 0.12 | 0.08 | 1.19   | 0.060866 | 0.425892 | 0.303716 | 0.6481   |
| MmuSTS.2489.1.S1_at | MmuSTS.2489.1 | 4.2   | 4.18  | 0.06 | 0.07 | 1.01   | 0.287688 | 0.310567 | 0.577473 | 0.565771 |
| MmuSTS.249.1.S1_at  | MmuSTS.249.1  | 7.77  | 11.21 | 1.53 | 0.18 | -10.91 | 0.03085  | 0.275906 | 0.228669 | 0.540035 |
| MmuSTS.2490.1.S1_at | MmuSTS.2490.1 | 3.5   | 3.42  | 0.09 | 0.23 | 1.06   | 0.976965 | 0.957548 | 0.990948 | 0.975954 |
| MmuSTS.2491.1.S1_at | MmuSTS.2491.1 | 6.05  | 5.94  | 0.06 | 0.1  | 1.08   | 0.133687 | 0.198765 | 0.417096 | 0.473391 |
| MmuSTS.2492.1.S1_at | MmuSTS.2492.1 | 7.71  | 7.58  | 0.2  | 0.14 | 1.1    | 0.685609 | 0.128137 | 0.850196 | 0.399148 |

|                       |               |       |       |      |      |       |          |          |          |          |
|-----------------------|---------------|-------|-------|------|------|-------|----------|----------|----------|----------|
| MmuSTS.2493.1.S1_at   | MmuSTS.2493.1 | 4.36  | 4.51  | 0.13 | 0.08 | -1.11 | 0.042521 | 0.005601 | 0.263254 | 0.10339  |
| MmuSTS.2494.1.S1_at   | MmuSTS.2494.1 | 5.75  | 5.73  | 0.09 | 0.31 | 1.02  | 0.489641 | 0.669853 | 0.727859 | 0.806933 |
| MmuSTS.2495.1.S1_at   | MmuSTS.2495.1 | 6.2   | 5.57  | 0.17 | 0.1  | 1.55  | 0.00635  | 0.127889 | 0.126096 | 0.398825 |
| MmuSTS.2496.1.S1_at   | MmuSTS.2496.1 | 8.98  | 8.75  | 0.02 | 0.08 | 1.17  | 0.00365  | 0.092236 | 0.105789 | 0.347992 |
| MmuSTS.2497.1.S1_at   | MmuSTS.2497.1 | 4.78  | 5.1   | 0.22 | 0.02 | -1.25 | 0.186762 | 0.061116 | 0.482843 | 0.293975 |
| MmuSTS.2498.1.S1_at   | MmuSTS.2498.1 | 8.51  | 8.2   | 0.11 | 0.16 | 1.24  | 0.061263 | 0.126042 | 0.304306 | 0.396714 |
| MmuSTS.2499.1.S1_at   | MmuSTS.2499.1 | 2.88  | 2.95  | 0.04 | 0.14 | -1.05 | 0.333166 | 0.456191 | 0.61466  | 0.66996  |
| MmuSTS.25.1.S1_at     | MmuSTS.25.1   | 5.15  | 5.12  | 0.16 | 0.09 | 1.02  | 0.901375 | 0.898499 | 0.95827  | 0.94222  |
| MmuSTS.250.1.S1_at    | MmuSTS.250.1  | 7.36  | 7.52  | 0.2  | 0.15 | -1.12 | 0.392962 | 0.644049 | 0.659811 | 0.791291 |
| MmuSTS.2500.1.S1_at   | MmuSTS.2500.1 | 7.86  | 7.48  | 0.24 | 0.12 | 1.3   | 0.041141 | 0.27501  | 0.259372 | 0.539419 |
| MmuSTS.2501.1.S1_at   | MmuSTS.2501.1 | 10.84 | 10.94 | 0.08 | 0.07 | -1.08 | 0.161516 | 0.187599 | 0.453118 | 0.463628 |
| MmuSTS.2502.1.S1_at   | MmuSTS.2502.1 | 6.04  | 6.29  | 0.26 | 0.17 | -1.19 | 0.999595 | 0.965657 | 0.999849 | 0.980751 |
| MmuSTS.2503.1.S1_at   | MmuSTS.2503.1 | 10.69 | 10.03 | 0.44 | 0.42 | 1.58  | 0.0651   | 0.169684 | 0.311972 | 0.446263 |
| MmuSTS.2504.1.S1_at   | MmuSTS.2504.1 | 6.21  | 8.96  | 1.24 | 0.17 | -6.7  | 0.054479 | 0.11605  | 0.290603 | 0.383268 |
| MmuSTS.2505.1.S1_at   | MmuSTS.2505.1 | 8.19  | 6.1   | 0.65 | 0.27 | 4.26  | 0.018165 | 0.027413 | 0.187736 | 0.206759 |
| MmuSTS.2506.1.S1_s_at | MmuSTS.2506.1 | 8.11  | 7.63  | 0.24 | 0.21 | 1.4   | 0.088966 | 0.735626 | 0.355552 | 0.847031 |
| MmuSTS.2507.1.S1_at   | MmuSTS.2507.1 | 8.36  | 8.28  | 0.07 | 0.1  | 1.06  | 0.138198 | 0.030073 | 0.423422 | 0.215243 |
| MmuSTS.2508.1.S1_at   | MmuSTS.2508.1 | 6.95  | 7.5   | 0.31 | 0.2  | -1.47 | 0.126758 | 0.02655  | 0.408228 | 0.203915 |
| MmuSTS.2509.1.S1_at   | MmuSTS.2509.1 | 12.36 | 12.22 | 0.32 | 0.13 | 1.1   | 0.63553  | 0.333154 | 0.82149  | 0.581452 |
| MmuSTS.251.1.S1_at    | MmuSTS.251.1  | 10.64 | 11    | 0.11 | 0.12 | -1.28 | 0.009799 | 0.260789 | 0.148542 | 0.52721  |
| MmuSTS.2510.1.S1_at   | MmuSTS.2510.1 | 11.96 | 11.07 | 0.19 | 0.12 | 1.85  | 0.002558 | 0.193981 | 0.094709 | 0.469113 |
| MmuSTS.2511.1.S1_at   | MmuSTS.2511.1 | 10.27 | 9.84  | 0.1  | 0.01 | 1.35  | 0.001666 | 0.052379 | 0.084462 | 0.274345 |
| MmuSTS.2512.1.S1_at   | MmuSTS.2512.1 | 8.93  | 10.13 | 0.47 | 0.15 | -2.3  | 0.025224 | 0.148803 | 0.211843 | 0.423201 |
| MmuSTS.2513.1.S1_at   | MmuSTS.2513.1 | 11.5  | 10.33 | 0.16 | 0.36 | 2.26  | 0.007915 | 0.0907   | 0.138212 | 0.345151 |
| MmuSTS.2514.1.S1_at   | MmuSTS.2514.1 | 8.9   | 10.65 | 0.79 | 0.13 | -3.38 | 0.021658 | 0.233452 | 0.20067  | 0.504809 |
| MmuSTS.2515.1.S1_at   | MmuSTS.2515.1 | 3.58  | 3.67  | 0.04 | 0.18 | -1.07 | 0.384964 | 0.536907 | 0.653852 | 0.722119 |
| MmuSTS.2516.1.S1_at   | MmuSTS.2516.1 | 7     | 7.44  | 0.32 | 0.16 | -1.36 | 0.248929 | 0.655498 | 0.544234 | 0.798583 |
| MmuSTS.2517.1.S1_at   | MmuSTS.2517.1 | 13.07 | 13.02 | 0.08 | 0.02 | 1.04  | 0.221969 | 0.253547 | 0.520064 | 0.521873 |
| MmuSTS.2518.1.S1_s_at | MmuSTS.2518.1 | 11.17 | 11.01 | 0.09 | 0.17 | 1.12  | 0.150697 | 0.013556 | 0.439791 | 0.149001 |
| MmuSTS.2519.1.S1_at   | MmuSTS.2519.1 | 13.58 | 13.57 | 0.07 | 0.03 | 1     | 0.379214 | 0.548998 | 0.649212 | 0.729509 |
| MmuSTS.252.1.S1_at    | MmuSTS.252.1  | 3.45  | 3.37  | 0.02 | 0.13 | 1.05  | 0.285155 | 0.299102 | 0.57512  | 0.557663 |
| MmuSTS.2520.1.S1_at   | MmuSTS.2520.1 | 10.85 | 11.19 | 0.24 | 0.11 | -1.27 | 0.217818 | 0.015581 | 0.515633 | 0.158192 |
| MmuSTS.2521.1.S1_at   | MmuSTS.2521.1 | 6.12  | 6.08  | 0.49 | 0.03 | 1.03  | 0.72513  | 0.84958  | 0.871012 | 0.914595 |
| MmuSTS.2522.1.S1_at   | MmuSTS.2522.1 | 6.7   | 6.63  | 0.19 | 0.21 | 1.05  | 0.427335 | 0.183824 | 0.684657 | 0.459909 |
| MmuSTS.2523.1.S1_at   | MmuSTS.2523.1 | 6.96  | 6.54  | 0.44 | 0.31 | 1.34  | 0.503917 | 0.496644 | 0.73721  | 0.696119 |
| MmuSTS.2524.1.S1_at   | MmuSTS.2524.1 | 4.68  | 5.23  | 0.63 | 0.22 | -1.47 | 0.245724 | 0.155513 | 0.54172  | 0.430888 |
| MmuSTS.2525.1.S1_at   | MmuSTS.2525.1 | 3.24  | 3.36  | 0.04 | 0.03 | -1.09 | 0.012153 | 0.116423 | 0.160493 | 0.383671 |
| MmuSTS.2526.1.S1_at   | MmuSTS.2526.1 | 11.36 | 11.45 | 0.11 | 0.07 | -1.07 | 0.244934 | 0.798415 | 0.541118 | 0.883979 |
| MmuSTS.2527.1.S1_at   | MmuSTS.2527.1 | 11.37 | 11.64 | 0.03 | 0.06 | -1.2  | 0.003001 | 0.466684 | 0.099837 | 0.676425 |
| MmuSTS.2528.1.S1_at   | MmuSTS.2528.1 | 3.94  | 3.73  | 0.13 | 0.15 | 1.15  | 0.1081   | 0.322448 | 0.38286  | 0.573985 |
| MmuSTS.2529.1.S1_at   | MmuSTS.2529.1 | 12.81 | 12.7  | 0.09 | 0.12 | 1.07  | 0.167553 | 0.241538 | 0.46081  | 0.512152 |
| MmuSTS.253.1.S1_at    | MmuSTS.253.1  | 10.35 | 10.32 | 0.34 | 0.21 | 1.02  | 0.509927 | 0.246079 | 0.741324 | 0.515827 |
| MmuSTS.2530.1.S1_at   | MmuSTS.2530.1 | 5.61  | 5.56  | 0.26 | 0.03 | 1.04  | 0.509599 | 0.699871 | 0.741167 | 0.82579  |

|                       |               |       |       |      |      |       |          |          |          |          |
|-----------------------|---------------|-------|-------|------|------|-------|----------|----------|----------|----------|
| MmuSTS.2531.1.S1_at   | MmuSTS.2531.1 | 5.48  | 5.88  | 0.4  | 0.11 | -1.31 | 0.536482 | 0.584607 | 0.759061 | 0.752482 |
| MmuSTS.2532.1.S1_at   | MmuSTS.2532.1 | 11.32 | 11.92 | 0.77 | 0.08 | -1.51 | 0.209634 | 0.556368 | 0.507107 | 0.734507 |
| MmuSTS.2533.1.S1_at   | MmuSTS.2533.1 | 12.86 | 12.71 | 0.17 | 0.01 | 1.11  | 0.070329 | 0.022243 | 0.323556 | 0.18659  |
| MmuSTS.622.1.S1_s_at  | MmuSTS.622.1  | 3.32  | 3.27  | 0.04 | 0.07 | 1.04  | 0.12015  | 0.05752  | 0.398476 | 0.285907 |
| MmuSTS.622.1.S1_x_at  | MmuSTS.622.1  | 5.08  | 4.86  | 0.1  | 0.07 | 1.16  | 0.045066 | 0.043481 | 0.269602 | 0.253152 |
| MmuSTS.623.1.S1_at    | MmuSTS.623.1  | 4.35  | 3.99  | 0.16 | 0.02 | 1.28  | 0.045595 | 0.059602 | 0.271011 | 0.290696 |
| MmuSTS.623.1.S1_s_at  | MmuSTS.623.1  | 3.18  | 3.23  | 0.04 | 0.11 | -1.04 | 0.528955 | 0.123272 | 0.753919 | 0.393358 |
| MmuSTS.623.1.S1_x_at  | MmuSTS.623.1  | 3.41  | 3.46  | 0.16 | 0.11 | -1.03 | 0.964683 | 0.835557 | 0.985735 | 0.905864 |
| MmuSTS.2536.1.S1_at   | MmuSTS.2536.1 | 3.49  | 3.6   | 0.18 | 0.09 | -1.08 | 0.718222 | 0.51109  | 0.866986 | 0.705383 |
| MmuSTS.2537.1.S1_at   | MmuSTS.2537.1 | 10.68 | 11.63 | 0.75 | 0.23 | -1.93 | 0.052645 | 0.033499 | 0.286412 | 0.226577 |
| MmuSTS.2538.1.S1_at   | MmuSTS.2538.1 | 9.98  | 11.31 | 0.34 | 0.27 | -2.52 | 0.017558 | 0.011552 | 0.186091 | 0.139091 |
| MmuSTS.2539.1.S1_at   | MmuSTS.2539.1 | 7.01  | 7.13  | 0.19 | 0.01 | -1.09 | 0.889975 | 0.345999 | 0.953151 | 0.59115  |
| MmuSTS.254.1.S1_at    | MmuSTS.254.1  | 6.05  | 5.08  | 0.69 | 0.73 | 1.95  | 0.492061 | 0.202327 | 0.729508 | 0.476691 |
| MmuSTS.2540.1.S1_at   | MmuSTS.2540.1 | 8.59  | 9.38  | 0.73 | 0.22 | -1.73 | 0.161854 | 0.414898 | 0.453651 | 0.640509 |
| MmuSTS.2541.1.S1_at   | MmuSTS.2541.1 | 7.84  | 9.16  | 0.38 | 0.18 | -2.5  | 0.010839 | 0.093148 | 0.153877 | 0.349303 |
| MmuSTS.2542.1.S1_at   | MmuSTS.2542.1 | 3.65  | 3.67  | 0.09 | 0.09 | -1.01 | 0.747952 | 0.283994 | 0.883193 | 0.546237 |
| MmuSTS.2543.1.S1_at   | MmuSTS.2543.1 | 3.38  | 3.28  | 0.19 | 0.14 | 1.07  | 0.680286 | 0.413218 | 0.847493 | 0.639484 |
| MmuSTS.2544.1.S1_at   | MmuSTS.2544.1 | 11.55 | 11.36 | 0.07 | 0.06 | 1.14  | 0.028972 | 0.040806 | 0.222981 | 0.246935 |
| MmuSTS.2545.1.S1_at   | MmuSTS.2545.1 | 8.85  | 8.72  | 0.1  | 0.05 | 1.09  | 0.183827 | 0.409711 | 0.479745 | 0.636759 |
| MmuSTS.2546.1.S1_at   | MmuSTS.2546.1 | 4.25  | 4.37  | 0.1  | 0.05 | -1.08 | 0.137347 | 0.768758 | 0.42229  | 0.865653 |
| MmuSTS.2547.1.S1_at   | MmuSTS.2547.1 | 10.2  | 10.26 | 0.04 | 0.03 | -1.04 | 0.068214 | 0.756548 | 0.318984 | 0.858235 |
| MmuSTS.2548.1.S1_at   | MmuSTS.2548.1 | 9.67  | 9.26  | 0.1  | 0.11 | 1.33  | 0.011428 | 0.103289 | 0.157067 | 0.364143 |
| MmuSTS.2549.1.S1_at   | MmuSTS.2549.1 | 9.61  | 10.34 | 0.36 | 0.09 | -1.66 | 0.033533 | 0.030474 | 0.237037 | 0.216624 |
| MmuSTS.255.1.S1_at    | MmuSTS.255.1  | 11.25 | 11.12 | 0.18 | 0.12 | 1.1   | 0.226426 | 0.022817 | 0.524218 | 0.189214 |
| MmuSTS.2550.1.S1_at   | MmuSTS.2550.1 | 5.9   | 5.85  | 0.11 | 0.25 | 1.03  | 0.874602 | 0.348591 | 0.946214 | 0.59263  |
| MmuSTS.2551.1.S1_at   | MmuSTS.2551.1 | 10.75 | 10.44 | 0.18 | 0.08 | 1.24  | 0.083502 | 0.314486 | 0.345905 | 0.568367 |
| MmuSTS.2552.1.S1_x_at | MmuSTS.2552.1 | 12.44 | 12.55 | 0.19 | 0.1  | -1.08 | 0.223348 | 0.259954 | 0.521156 | 0.52675  |
| MmuSTS.2553.1.S1_at   | MmuSTS.2553.1 | 5.64  | 6.08  | 0.46 | 0.15 | -1.36 | 0.433177 | 0.547175 | 0.68877  | 0.728314 |
| MmuSTS.2554.1.S1_at   | MmuSTS.2554.1 | 9.41  | 10.25 | 0.2  | 0.34 | -1.79 | 0.054733 | 0.282366 | 0.290771 | 0.545076 |
| MmuSTS.2555.1.S1_at   | MmuSTS.2555.1 | 10.48 | 10.48 | 0.3  | 0.13 | 1     | 0.791847 | 0.292036 | 0.905494 | 0.552201 |
| MmuSTS.2556.1.S1_at   | MmuSTS.2556.1 | 10.66 | 10.58 | 0.26 | 0.15 | 1.06  | 0.928137 | 0.998229 | 0.969664 | 0.999079 |
| MmuSTS.2557.1.S1_at   | MmuSTS.2557.1 | 7.82  | 9.04  | 0.14 | 0.25 | -2.33 | 0.002109 | 0.006011 | 0.090208 | 0.106068 |
| MmuSTS.2558.1.S1_at   | MmuSTS.2558.1 | 12.46 | 12.38 | 0.17 | 0.04 | 1.05  | 0.121477 | 0.080645 | 0.400293 | 0.328444 |
| MmuSTS.2559.1.S1_at   | MmuSTS.2559.1 | 8.25  | 8.38  | 0.26 | 0.03 | -1.09 | 0.395485 | 0.544202 | 0.661903 | 0.726643 |
| MmuSTS.256.1.S1_at    | MmuSTS.256.1  | 8.12  | 7.91  | 0.03 | 0.04 | 1.15  | 0.00134  | 0.350704 | 0.079218 | 0.59442  |
| MmuSTS.2560.1.S1_at   | MmuSTS.2560.1 | 8.18  | 8.7   | 0.31 | 0.11 | -1.44 | 0.146017 | 0.375301 | 0.433778 | 0.613336 |
| MmuSTS.2561.1.S1_at   | MmuSTS.2561.1 | 6.95  | 7.14  | 0.17 | 0.05 | -1.14 | 0.165622 | 0.299884 | 0.458665 | 0.558158 |
| MmuSTS.2562.1.S1_s_at | MmuSTS.2562.1 | 9.74  | 9.77  | 0.21 | 0.04 | -1.02 | 0.553691 | 0.179518 | 0.770167 | 0.455998 |
| MmuSTS.2563.1.S1_at   | MmuSTS.2563.1 | 9.35  | 9.22  | 0.1  | 0.08 | 1.09  | 0.72515  | 0.032964 | 0.871012 | 0.224771 |
| MmuSTS.2564.1.S1_at   | MmuSTS.2564.1 | 11.78 | 11.52 | 0.15 | 0.11 | 1.2   | 0.089445 | 0.048425 | 0.356406 | 0.265282 |
| MmuSTS.2565.1.S1_at   | MmuSTS.2565.1 | 10.65 | 10.36 | 0.14 | 0.17 | 1.22  | 0.166978 | 0.000872 | 0.460211 | 0.047471 |
| MmuSTS.2566.1.S1_at   | MmuSTS.2566.1 | 12.43 | 12.41 | 0.09 | 0.13 | 1.01  | 0.790177 | 0.010245 | 0.904554 | 0.132655 |
| MmuSTS.2567.1.S1_s_at | MmuSTS.2567.1 | 9.81  | 9.5   | 0.09 | 0.07 | 1.24  | 0.011786 | 0.007991 | 0.158421 | 0.118791 |



|                       |               |       |       |      |      |       |          |          |          |          |
|-----------------------|---------------|-------|-------|------|------|-------|----------|----------|----------|----------|
| MmuSTS.2568.1.S1_at   | MmuSTS.2568.1 | 11.97 | 11.98 | 0.09 | 0.07 | -1    | 0.523217 | 0.231325 | 0.750262 | 0.503024 |
| MmuSTS.2569.1.S1_at   | MmuSTS.2569.1 | 9.62  | 9.19  | 0.08 | 0.06 | 1.35  | 0.002169 | 0.016936 | 0.090506 | 0.165006 |
| MmuSTS.257.1.S1_at    | MmuSTS.257.1  | 11.8  | 11.87 | 0.06 | 0.04 | -1.05 | 0.692376 | 0.003202 | 0.852986 | 0.082015 |
| MmuSTS.2570.1.S1_at   | MmuSTS.2570.1 | 5.75  | 5.73  | 0.09 | 0.08 | 1.01  | 0.432602 | 0.178836 | 0.688358 | 0.455141 |
| MmuSTS.2570.1.S1_x_at | MmuSTS.2570.1 | 5.54  | 5.48  | 0.07 | 0.07 | 1.04  | 0.110491 | 0.017657 | 0.38583  | 0.168002 |
| MmuSTS.2571.1.S1_at   | MmuSTS.2571.1 | 7.92  | 7.87  | 0.06 | 0.03 | 1.04  | 0.232125 | 0.444272 | 0.530631 | 0.661926 |
| MmuSTS.2572.1.S1_at   | MmuSTS.2572.1 | 4.47  | 4.39  | 0.11 | 0.19 | 1.06  | 0.813725 | 0.479597 | 0.916696 | 0.685315 |
| MmuSTS.2573.1.S1_at   | MmuSTS.2573.1 | 10.11 | 9.91  | 0.21 | 0.02 | 1.15  | 0.063266 | 0.076948 | 0.30817  | 0.322421 |
| MmuSTS.2574.1.S1_at   | MmuSTS.2574.1 | 3.68  | 4.08  | 0.25 | 0.2  | -1.32 | 0.502459 | 0.212546 | 0.736123 | 0.486502 |
| MmuSTS.2575.1.S1_at   | MmuSTS.2575.1 | 11.22 | 11.42 | 0.12 | 0.07 | -1.15 | 0.04957  | 0.516334 | 0.280028 | 0.708858 |
| MmuSTS.2576.1.S1_at   | MmuSTS.2576.1 | 7.71  | 7.66  | 0.05 | 0.06 | 1.03  | 0.541452 | 0.543828 | 0.762186 | 0.726382 |
| MmuSTS.2577.1.S1_at   | MmuSTS.2577.1 | 11.72 | 11.42 | 0.03 | 0.04 | 1.23  | 0.000534 | 0.000184 | 0.069726 | 0.030511 |
| MmuSTS.2578.1.S1_at   | MmuSTS.2578.1 | 5.18  | 5.02  | 0.51 | 0.15 | 1.12  | 0.19712  | 0.098409 | 0.494235 | 0.356531 |
| MmuSTS.2579.1.S1_at   | MmuSTS.2579.1 | 8.42  | 9.13  | 0.35 | 0.04 | -1.64 | 0.0221   | 0.056954 | 0.201888 | 0.284751 |
| MmuSTS.258.1.S1_at    | MmuSTS.258.1  | 10.75 | 10.62 | 0.21 | 0.11 | 1.1   | 0.631955 | 0.679355 | 0.819413 | 0.812775 |
| MmuSTS.2580.1.S1_at   | MmuSTS.2580.1 | 11.29 | 11.38 | 0.06 | 0.05 | -1.07 | 0.078171 | 0.597437 | 0.337735 | 0.760197 |
| MmuSTS.2581.1.S1_s_at | MmuSTS.2581.1 | 10.29 | 9.98  | 0.04 | 0    | 1.24  | 0.000116 | 0.016448 | 0.051196 | 0.162439 |
| MmuSTS.2582.1.S1_at   | MmuSTS.2582.1 | 4.72  | 5.95  | 0.47 | 0.42 | -2.35 | 0.024249 | 0.139943 | 0.20883  | 0.413295 |
| MmuSTS.2583.1.S1_at   | MmuSTS.2583.1 | 3.23  | 3.37  | 0.12 | 0.12 | -1.1  | 0.475388 | 0.541619 | 0.718106 | 0.725033 |
| MmuSTS.2584.1.S1_at   | MmuSTS.2584.1 | 10.24 | 10.49 | 0.09 | 0.03 | -1.19 | 0.00537  | 0.187407 | 0.118423 | 0.46345  |
| MmuSTS.2585.1.S1_at   | MmuSTS.2585.1 | 6.74  | 9.16  | 1.08 | 0.21 | -5.37 | 0.054689 | 0.248666 | 0.290604 | 0.517917 |
| MmuSTS.2586.1.S1_at   | MmuSTS.2586.1 | 10.31 | 10.19 | 0.09 | 0.06 | 1.08  | 0.211389 | 0.292005 | 0.509163 | 0.552163 |
| MmuSTS.2587.1.S1_at   | MmuSTS.2587.1 | 10.84 | 10.86 | 0.06 | 0.19 | -1.01 | 0.319477 | 0.586916 | 0.604137 | 0.753896 |
| MmuSTS.2588.1.S1_at   | MmuSTS.2588.1 | 11.98 | 11.94 | 0.07 | 0.07 | 1.03  | 0.332961 | 0.029685 | 0.614488 | 0.214029 |
| MmuSTS.2589.1.S1_at   | MmuSTS.2589.1 | 11.17 | 11.38 | 0.1  | 0.04 | -1.16 | 0.037103 | 0.072775 | 0.24788  | 0.315651 |
| MmuSTS.259.1.S1_at    | MmuSTS.259.1  | 10.28 | 10.55 | 0.26 | 0.06 | -1.21 | 0.431617 | 0.747167 | 0.687582 | 0.853124 |
| MmuSTS.2590.1.S1_at   | MmuSTS.2590.1 | 12.58 | 12.62 | 0.08 | 0.02 | -1.03 | 0.366292 | 0.167906 | 0.640628 | 0.444485 |
| MmuSTS.2591.1.S1_at   | MmuSTS.2591.1 | 10.66 | 10.71 | 0.16 | 0.18 | -1.03 | 0.782989 | 0.548014 | 0.900958 | 0.728843 |
| MmuSTS.2592.1.S1_at   | MmuSTS.2592.1 | 11.35 | 11.35 | 0.17 | 0    | 1     | 0.984895 | 0.991019 | 0.994489 | 0.994952 |
| MmuSTS.2593.1.S1_at   | MmuSTS.2593.1 | 11.65 | 12.07 | 0.34 | 0.06 | -1.34 | 0.034439 | 0.005359 | 0.240156 | 0.101092 |
| MmuSTS.2594.1.S1_at   | MmuSTS.2594.1 | 4.55  | 4.45  | 0.11 | 0.12 | 1.07  | 0.27704  | 0.093325 | 0.568522 | 0.349412 |
| MmuSTS.2595.1.S1_at   | MmuSTS.2595.1 | 4.98  | 5.16  | 0.09 | 0.1  | -1.14 | 0.129309 | 0.617793 | 0.411629 | 0.773705 |
| MmuSTS.2596.1.S1_at   | MmuSTS.2596.1 | 10.45 | 10.27 | 0.17 | 0.15 | 1.13  | 0.3786   | 0.501156 | 0.648732 | 0.699449 |
| MmuSTS.2597.1.S1_at   | MmuSTS.2597.1 | 10.66 | 10.64 | 0.07 | 0.13 | 1.01  | 0.290546 | 0.887451 | 0.579962 | 0.935867 |
| MmuSTS.2598.1.S1_at   | MmuSTS.2598.1 | 10.04 | 10.3  | 0.04 | 0.11 | -1.2  | 0.02268  | 0.695411 | 0.203642 | 0.822978 |
| MmuSTS.2599.1.S1_at   | MmuSTS.2599.1 | 9.1   | 9     | 0.65 | 0.07 | 1.07  | 0.91437  | 0.836967 | 0.963616 | 0.906826 |
| MmuSTS.26.1.S1_at     | MmuSTS.26.1   | 11.44 | 11.47 | 0.11 | 0.03 | -1.03 | 0.186387 | 0.690459 | 0.482583 | 0.819587 |
| MmuSTS.260.1.S1_at    | MmuSTS.260.1  | 4.87  | 5.03  | 0.06 | 0.12 | -1.12 | 0.070296 | 0.738933 | 0.323543 | 0.848676 |
| MmuSTS.2600.1.S1_at   | MmuSTS.2600.1 | 7.95  | 8.53  | 0.11 | 0.14 | -1.49 | 0.00448  | 0.013089 | 0.113436 | 0.14718  |
| MmuSTS.2601.1.S1_at   | MmuSTS.2601.1 | 7.63  | 7.17  | 0.21 | 0.24 | 1.37  | 0.35668  | 0.032206 | 0.632981 | 0.222139 |
| MmuSTS.2602.1.S1_at   | MmuSTS.2602.1 | 8.73  | 8.87  | 0.26 | 0.04 | -1.1  | 0.348456 | 0.454668 | 0.626378 | 0.668763 |
| MmuSTS.2603.1.S1_at   | MmuSTS.2603.1 | 11.33 | 12.07 | 0.52 | 0.35 | -1.67 | 0.408451 | 0.255949 | 0.671229 | 0.523879 |
| MmuSTS.2604.1.S1_at   | MmuSTS.2604.1 | 12.44 | 12.64 | 0.06 | 0.06 | -1.15 | 0.010222 | 0.054099 | 0.150783 | 0.277914 |

|                       |               |       |       |      |      |       |          |          |          |          |
|-----------------------|---------------|-------|-------|------|------|-------|----------|----------|----------|----------|
| MmuSTS.2605.1.S1_at   | MmuSTS.2605.1 | 7.61  | 7.63  | 0.15 | 0.14 | -1.01 | 0.711706 | 0.281566 | 0.863994 | 0.54464  |
| MmuSTS.2606.1.S1_at   | MmuSTS.2606.1 | 12.52 | 11.97 | 0.34 | 0.18 | 1.46  | 0.060391 | 0.01605  | 0.302958 | 0.160532 |
| MmuSTS.2607.1.S1_at   | MmuSTS.2607.1 | 7.04  | 7.14  | 0.1  | 0.2  | -1.07 | 0.557449 | 0.004733 | 0.77215  | 0.095831 |
| MmuSTS.2608.1.S1_at   | MmuSTS.2608.1 | 5.74  | 6.02  | 0.1  | 0.12 | -1.22 | 0.063937 | 0.047892 | 0.309333 | 0.263751 |
| MmuSTS.2609.1.S1_at   | MmuSTS.2609.1 | 10.24 | 9.98  | 0.19 | 0.18 | 1.19  | 0.419408 | 0.061004 | 0.678752 | 0.293811 |
| MmuSTS.261.1.S1_at    | MmuSTS.261.1  | 4.92  | 4.41  | 0.36 | 0.14 | 1.42  | 0.04166  | 0.057764 | 0.2606   | 0.286677 |
| MmuSTS.2610.1.S1_at   | MmuSTS.2610.1 | 7.49  | 7.56  | 0.3  | 0.14 | -1.05 | 0.632573 | 0.166169 | 0.819853 | 0.442738 |
| MmuSTS.2611.1.S1_at   | MmuSTS.2611.1 | 11.24 | 10.9  | 0.04 | 0.18 | 1.26  | 0.096075 | 0.008313 | 0.365529 | 0.120929 |
| MmuSTS.2612.1.S1_at   | MmuSTS.2612.1 | 6.59  | 6.32  | 0.62 | 0.09 | 1.21  | 0.35455  | 0.489794 | 0.631745 | 0.691918 |
| MmuSTS.2613.1.S1_at   | MmuSTS.2613.1 | 8.96  | 8.79  | 0.26 | 0.2  | 1.12  | 0.814636 | 0.173794 | 0.917175 | 0.450128 |
| MmuSTS.2614.1.S1_at   | MmuSTS.2614.1 | 12.57 | 12.64 | 0.06 | 0.04 | -1.05 | 0.111076 | 0.097742 | 0.386863 | 0.355598 |
| MmuSTS.2614.1.S1_s_at | MmuSTS.2614.1 | 11.56 | 11.8  | 0.1  | 0.03 | -1.19 | 0.045516 | 0.093126 | 0.270878 | 0.349303 |
| MmuSTS.2614.1.S1_x_at | MmuSTS.2614.1 | 12.25 | 12.36 | 0.06 | 0.03 | -1.08 | 0.046391 | 0.118372 | 0.273163 | 0.386398 |
| MmuSTS.2615.1.S1_at   | MmuSTS.2615.1 | 12.43 | 12.59 | 0.06 | 0.04 | -1.11 | 0.037283 | 0.332994 | 0.248575 | 0.581326 |
| MmuSTS.2616.1.S1_at   | MmuSTS.2616.1 | 3.75  | 3.75  | 0.09 | 0.03 | 1     | 0.444552 | 0.050308 | 0.697428 | 0.269573 |
| MmuSTS.2617.1.S1_at   | MmuSTS.2617.1 | 5.38  | 7.56  | 2.4  | 0.3  | -4.55 | 0.669833 | 0.826712 | 0.841529 | 0.900485 |
| MmuSTS.2618.1.S1_at   | MmuSTS.2618.1 | 6.42  | 6.74  | 0.81 | 0.2  | -1.25 | 0.577003 | 0.733295 | 0.783459 | 0.84558  |
| MmuSTS.2619.1.S1_at   | MmuSTS.2619.1 | 7.85  | 8     | 0.49 | 0.36 | -1.11 | 0.27081  | 0.40955  | 0.56285  | 0.636566 |
| MmuSTS.262.1.S1_at    | MmuSTS.262.1  | 10.45 | 10.28 | 0.19 | 0.07 | 1.12  | 0.126848 | 0.539262 | 0.408342 | 0.723665 |
| MmuSTS.2620.1.S1_at   | MmuSTS.2620.1 | 10.21 | 10.4  | 0.07 | 0.07 | -1.14 | 0.071007 | 0.403793 | 0.324424 | 0.632386 |
| MmuSTS.2621.1.S1_at   | MmuSTS.2621.1 | 10.83 | 11.08 | 0.14 | 0.1  | -1.19 | 0.052312 | 0.410451 | 0.285984 | 0.637311 |
| MmuSTS.2622.1.S1_at   | MmuSTS.2622.1 | 8.59  | 8.33  | 0.09 | 0.24 | 1.2   | 0.063203 | 0.034712 | 0.308086 | 0.230506 |
| MmuSTS.2623.1.S1_at   | MmuSTS.2623.1 | 5.96  | 6.23  | 0.19 | 0.14 | -1.2  | 0.081236 | 0.083967 | 0.342222 | 0.334885 |
| MmuSTS.2624.1.S1_at   | MmuSTS.2624.1 | 9.51  | 9.83  | 0.15 | 0.03 | -1.25 | 0.017728 | 0.092455 | 0.186878 | 0.348346 |
| MmuSTS.2625.1.S1_at   | MmuSTS.2625.1 | 9.27  | 9.26  | 0.23 | 0.25 | 1.01  | 0.797883 | 0.756476 | 0.90876  | 0.858223 |
| MmuSTS.2626.1.S1_at   | MmuSTS.2626.1 | 9.17  | 9     | 0.24 | 0.15 | 1.13  | 0.243753 | 0.416774 | 0.540498 | 0.64171  |
| MmuSTS.2627.1.S1_at   | MmuSTS.2627.1 | 5.37  | 6.13  | 0.12 | 0.25 | -1.69 | 0.009257 | 0.003483 | 0.145977 | 0.084834 |
| MmuSTS.2628.1.S1_at   | MmuSTS.2628.1 | 10.28 | 9.84  | 0.08 | 0.06 | 1.36  | 0.002129 | 0.225284 | 0.090208 | 0.497892 |
| MmuSTS.2629.1.S1_at   | MmuSTS.2629.1 | 6.62  | 6.65  | 0.31 | 0.38 | -1.02 | 0.210366 | 0.81314  | 0.507935 | 0.891951 |
| MmuSTS.263.1.S1_at    | MmuSTS.263.1  | 11.27 | 12.28 | 0.31 | 0.23 | -2.01 | 0.022042 | 0.011281 | 0.201692 | 0.138076 |
| MmuSTS.2630.1.S1_at   | MmuSTS.2630.1 | 9.08  | 9.62  | 0.19 | 0.13 | -1.45 | 0.042902 | 0.206528 | 0.264232 | 0.480571 |
| MmuSTS.2631.1.S1_at   | MmuSTS.2631.1 | 3.45  | 3.4   | 0.15 | 0.05 | 1.04  | 0.951585 | 0.157156 | 0.979984 | 0.432616 |
| MmuSTS.2632.1.S1_at   | MmuSTS.2632.1 | 6.3   | 5     | 0.49 | 0.23 | 2.46  | 0.017203 | 0.002907 | 0.184359 | 0.079157 |
| MmuSTS.2633.1.S1_at   | MmuSTS.2633.1 | 8.99  | 8.18  | 0.58 | 0.24 | 1.75  | 0.051404 | 0.036946 | 0.284155 | 0.236659 |
| MmuSTS.2634.1.S1_at   | MmuSTS.2634.1 | 9.76  | 9.7   | 0.1  | 0.08 | 1.04  | 0.840183 | 0.003499 | 0.929894 | 0.08503  |
| MmuSTS.2635.1.S1_at   | MmuSTS.2635.1 | 7.31  | 7.17  | 0.4  | 0.2  | 1.1   | 0.707681 | 0.431736 | 0.861541 | 0.652535 |
| MmuSTS.2636.1.S1_at   | MmuSTS.2636.1 | 9.47  | 9.05  | 0.19 | 0.05 | 1.34  | 0.018634 | 0.006057 | 0.189736 | 0.106152 |
| MmuSTS.2637.1.S1_at   | MmuSTS.2637.1 | 7.05  | 8.15  | 1.06 | 0.15 | -2.14 | 0.15997  | 0.352042 | 0.451279 | 0.595426 |
| MmuSTS.2638.1.S1_at   | MmuSTS.2638.1 | 5.92  | 5.33  | 0.27 | 0.6  | 1.51  | 0.192229 | 0.300227 | 0.488787 | 0.558443 |
| MmuSTS.2639.1.S1_at   | MmuSTS.2639.1 | 3.74  | 3.89  | 0.05 | 0.09 | -1.11 | 0.058964 | 0.168044 | 0.299985 | 0.444641 |
| MmuSTS.264.1.S1_at    | MmuSTS.264.1  | 4.39  | 4.66  | 0.16 | 0.17 | -1.21 | 0.24778  | 0.394774 | 0.543138 | 0.627208 |
| MmuSTS.2640.1.S1_at   | MmuSTS.2640.1 | 10.69 | 10.47 | 0.52 | 0.19 | 1.16  | 0.589537 | 0.789565 | 0.791613 | 0.878449 |
| MmuSTS.2641.1.S1_at   | MmuSTS.2641.1 | 8.35  | 9.79  | 0.19 | 0.24 | -2.71 | 0.001875 | 0.1169   | 0.087584 | 0.384277 |

|                       |               |       |       |      |      |       |          |          |          |          |
|-----------------------|---------------|-------|-------|------|------|-------|----------|----------|----------|----------|
| MmuSTS.2642.1.S1_at   | MmuSTS.2642.1 | 7.65  | 7.68  | 0.37 | 0.09 | -1.02 | 0.341424 | 0.102405 | 0.621327 | 0.36259  |
| MmuSTS.2643.1.S1_at   | MmuSTS.2643.1 | 10.94 | 10.98 | 0.25 | 0.13 | -1.03 | 0.553628 | 0.007126 | 0.770118 | 0.113654 |
| MmuSTS.2643.1.S1_x_at | MmuSTS.2643.1 | 10.84 | 10.94 | 0.25 | 0.13 | -1.07 | 0.610602 | 0.011959 | 0.805939 | 0.141475 |
| MmuSTS.2644.1.S1_s_at | MmuSTS.2644.1 | 3.88  | 3.77  | 0.09 | 0.05 | 1.08  | 0.092981 | 0.168935 | 0.361523 | 0.44549  |
| MmuSTS.2645.1.S1_at   | MmuSTS.2645.1 | 11.81 | 10.66 | 0.15 | 0.13 | 2.22  | 0.00043  | 0.001697 | 0.064179 | 0.062399 |
| MmuSTS.2646.1.S1_at   | MmuSTS.2646.1 | 8.36  | 8.16  | 0.23 | 0.1  | 1.15  | 0.205107 | 0.490665 | 0.50292  | 0.692649 |
| MmuSTS.2647.1.S1_at   | MmuSTS.2647.1 | 8.93  | 9.03  | 0.13 | 0.22 | -1.07 | 0.225579 | 0.006037 | 0.523395 | 0.106089 |
| MmuSTS.2648.1.S1_at   | MmuSTS.2648.1 | 10.38 | 9.83  | 0.33 | 0.12 | 1.46  | 0.050082 | 0.051619 | 0.281479 | 0.272664 |
| MmuSTS.2649.1.S1_at   | MmuSTS.2649.1 | 9.57  | 8.92  | 0.41 | 0.43 | 1.56  | 0.152074 | 0.030662 | 0.441589 | 0.217142 |
| MmuSTS.265.1.S1_at    | MmuSTS.265.1  | 9.55  | 10.12 | 0.06 | 0.07 | -1.48 | 0.000393 | 0.029436 | 0.062519 | 0.213368 |
| MmuSTS.2650.1.S1_at   | MmuSTS.2650.1 | 4.46  | 5.89  | 0.1  | 0.41 | -2.69 | 0.006247 | 0.012217 | 0.125292 | 0.142932 |
| MmuSTS.2651.1.S1_at   | MmuSTS.2651.1 | 10.33 | 10.43 | 0.16 | 0.09 | -1.07 | 0.238095 | 0.456448 | 0.535498 | 0.670188 |
| MmuSTS.2652.1.S1_at   | MmuSTS.2652.1 | 7.02  | 7.11  | 0.15 | 0.08 | -1.06 | 0.361305 | 0.025062 | 0.636743 | 0.198332 |
| MmuSTS.2653.1.S1_at   | MmuSTS.2653.1 | 9.53  | 9.66  | 0.19 | 0.03 | -1.09 | 0.358044 | 0.792411 | 0.633833 | 0.880041 |
| MmuSTS.2654.1.S1_at   | MmuSTS.2654.1 | 7.65  | 7.87  | 0.37 | 0.1  | -1.16 | 0.552501 | 0.49659  | 0.769177 | 0.696119 |
| MmuSTS.2655.1.S1_at   | MmuSTS.2655.1 | 11.55 | 11.22 | 0.64 | 0.06 | 1.25  | 0.924846 | 0.263849 | 0.968031 | 0.5301   |
| MmuSTS.2656.1.S1_at   | MmuSTS.2656.1 | 10.39 | 10.02 | 0.23 | 0.1  | 1.29  | 0.219273 | 0.00427  | 0.517032 | 0.091847 |
| MmuSTS.2657.1.S1_at   | MmuSTS.2657.1 | 12.33 | 13.01 | 0.14 | 0.05 | -1.61 | 0.001399 | 0.010018 | 0.07964  | 0.131262 |
| MmuSTS.2658.1.S1_at   | MmuSTS.2658.1 | 11.12 | 10.35 | 0.61 | 0.04 | 1.71  | 0.2441   | 0.141187 | 0.540834 | 0.414709 |
| MmuSTS.2659.1.S1_at   | MmuSTS.2659.1 | 9.42  | 9.26  | 0.2  | 0.2  | 1.12  | 0.38987  | 0.102009 | 0.657536 | 0.362076 |
| MmuSTS.266.1.S1_at    | MmuSTS.266.1  | 3.33  | 3.43  | 0.07 | 0.23 | -1.07 | 0.556955 | 0.38426  | 0.771975 | 0.619994 |
| MmuSTS.2660.1.S1_at   | MmuSTS.2660.1 | 10.89 | 10.67 | 0.38 | 0.05 | 1.16  | 0.905357 | 0.992524 | 0.960065 | 0.995715 |
| MmuSTS.2661.1.S1_at   | MmuSTS.2661.1 | 9.32  | 12.21 | 1.24 | 0.21 | -7.39 | 0.047433 | 0.34901  | 0.275072 | 0.593033 |
| MmuSTS.2662.1.S1_at   | MmuSTS.2662.1 | 4.24  | 4.13  | 0.21 | 0.1  | 1.08  | 0.143245 | 0.32911  | 0.429519 | 0.578482 |
| MmuSTS.2663.1.S1_at   | MmuSTS.2663.1 | 2.88  | 3.06  | 0.17 | 0.22 | -1.13 | 0.731291 | 0.872325 | 0.874456 | 0.927429 |
| MmuSTS.2664.1.S1_at   | MmuSTS.2664.1 | 6.46  | 6.49  | 0.2  | 0.07 | -1.02 | 0.227571 | 0.533596 | 0.525671 | 0.719808 |
| MmuSTS.2665.1.S1_at   | MmuSTS.2665.1 | 4.15  | 4.1   | 0.2  | 0.16 | 1.03  | 0.947869 | 0.554556 | 0.978044 | 0.733264 |
| MmuSTS.2666.1.S1_at   | MmuSTS.2666.1 | 3.55  | 3.7   | 0.11 | 0.16 | -1.11 | 0.128276 | 0.277295 | 0.410227 | 0.54125  |
| MmuSTS.2667.1.S1_at   | MmuSTS.2667.1 | 10.74 | 10.96 | 0.21 | 0.19 | -1.16 | 0.284341 | 0.268526 | 0.574388 | 0.534123 |
| MmuSTS.2668.1.S1_s_at | MmuSTS.2668.1 | 9.94  | 9.49  | 0.2  | 0.1  | 1.37  | 0.090102 | 0.003223 | 0.356863 | 0.082115 |
| MmuSTS.2669.1.S1_at   | MmuSTS.2669.1 | 6.2   | 7.11  | 0.86 | 0.09 | -1.88 | 0.140733 | 0.270998 | 0.426473 | 0.536124 |
| MmuSTS.267.1.S1_at    | MmuSTS.267.1  | 10.42 | 10.79 | 0.08 | 0.21 | -1.29 | 0.088957 | 0.024329 | 0.355552 | 0.195238 |
| MmuSTS.2670.1.S1_at   | MmuSTS.2670.1 | 8.02  | 7.48  | 0.6  | 0.23 | 1.45  | 0.277918 | 0.817158 | 0.569352 | 0.894545 |
| MmuSTS.2671.1.S1_at   | MmuSTS.2671.1 | 5.95  | 6.17  | 0.49 | 0.28 | -1.16 | 0.44787  | 0.303088 | 0.699731 | 0.56055  |
| MmuSTS.2672.1.S1_at   | MmuSTS.2672.1 | 12.08 | 10.82 | 0.19 | 0.22 | 2.4   | 0.002535 | 0.01761  | 0.094413 | 0.167797 |
| MmuSTS.2673.1.S1_at   | MmuSTS.2673.1 | 5.28  | 4.28  | 0.16 | 0.42 | 2     | 0.022003 | 0.171282 | 0.201558 | 0.447809 |
| MmuSTS.2674.1.S1_at   | MmuSTS.2674.1 | 3.22  | 4.04  | 0.23 | 0.78 | -1.76 | 0.132192 | 0.105104 | 0.415434 | 0.366755 |
| MmuSTS.2675.1.S1_s_at | MmuSTS.2675.1 | 11.12 | 11.17 | 0.29 | 0.09 | -1.04 | 0.747943 | 0.667449 | 0.883193 | 0.805333 |
| MmuSTS.2676.1.S1_at   | MmuSTS.2676.1 | 3.78  | 3.73  | 0.11 | 0.08 | 1.03  | 0.300756 | 0.438348 | 0.588909 | 0.657341 |
| MmuSTS.2677.1.S1_at   | MmuSTS.2677.1 | 6.57  | 6.5   | 0.07 | 0.16 | 1.05  | 0.273869 | 0.121831 | 0.565917 | 0.391122 |
| MmuSTS.2678.1.S1_at   | MmuSTS.2678.1 | 3.43  | 3.37  | 0.11 | 0.09 | 1.04  | 0.571618 | 0.720587 | 0.780017 | 0.838346 |
| MmuSTS.2679.1.S1_at   | MmuSTS.2679.1 | 8.75  | 8.37  | 0.15 | 0.06 | 1.31  | 0.024092 | 0.013849 | 0.208351 | 0.150924 |
| MmuSTS.268.1.S1_at    | MmuSTS.268.1  | 9.74  | 9.94  | 0.07 | 0.06 | -1.15 | 0.06005  | 0.916654 | 0.302267 | 0.953352 |

|                       |               |       |       |      |      |       |          |          |          |          |
|-----------------------|---------------|-------|-------|------|------|-------|----------|----------|----------|----------|
| MmuSTS.2680.1.S1_at   | MmuSTS.2680.1 | 7.02  | 8.86  | 0.72 | 0.37 | -3.58 | 0.023519 | 0.244449 | 0.20653  | 0.514295 |
| MmuSTS.2681.1.S1_at   | MmuSTS.2681.1 | 3.13  | 3.01  | 0.02 | 0.26 | 1.09  | 0.888596 | 0.862152 | 0.952485 | 0.921655 |
| MmuSTS.2682.1.S1_at   | MmuSTS.2682.1 | 11.09 | 10.75 | 0.11 | 0.05 | 1.27  | 0.004037 | 0.20183  | 0.108999 | 0.476367 |
| MmuSTS.2683.1.S1_at   | MmuSTS.2683.1 | 5.32  | 5.43  | 0.06 | 0.05 | -1.09 | 0.028672 | 0.009446 | 0.221856 | 0.128022 |
| MmuSTS.2684.1.S1_at   | MmuSTS.2684.1 | 5.55  | 5.66  | 0.17 | 0.1  | -1.08 | 0.986833 | 0.164988 | 0.995228 | 0.44123  |
| MmuSTS.2685.1.S1_s_at | MmuSTS.2685.1 | 5.89  | 5.49  | 1.52 | 0.23 | 1.33  | 0.654449 | 0.645891 | 0.832755 | 0.792632 |
| MmuSTS.2686.1.S1_at   | MmuSTS.2686.1 | 5.95  | 5.84  | 0.17 | 0.08 | 1.08  | 0.517758 | 0.416406 | 0.746932 | 0.641587 |
| MmuSTS.2687.1.S1_at   | MmuSTS.2687.1 | 6.51  | 6.31  | 0.1  | 0.15 | 1.14  | 0.08549  | 0.142627 | 0.349904 | 0.416343 |
| MmuSTS.2688.1.S1_at   | MmuSTS.2688.1 | 4.38  | 4.61  | 0.13 | 0.2  | -1.17 | 0.139876 | 0.096999 | 0.425463 | 0.354502 |
| MmuSTS.2689.1.S1_at   | MmuSTS.2689.1 | 8.95  | 9.11  | 0.29 | 0.04 | -1.12 | 0.629633 | 0.432604 | 0.818048 | 0.653025 |
| MmuSTS.269.1.S1_at    | MmuSTS.269.1  | 11.59 | 11.76 | 0.03 | 0.03 | -1.12 | 0.003345 | 0.002872 | 0.10258  | 0.078904 |
| MmuSTS.2690.1.S1_at   | MmuSTS.2690.1 | 8.06  | 7.92  | 0.41 | 0.08 | 1.1   | 0.685269 | 0.77447  | 0.849991 | 0.868766 |
| MmuSTS.2691.1.S1_at   | MmuSTS.2691.1 | 4.17  | 4.19  | 0.09 | 0.04 | -1.01 | 0.296579 | 0.784669 | 0.585308 | 0.875304 |
| MmuSTS.2692.1.S1_at   | MmuSTS.2692.1 | 10.51 | 10.28 | 0.16 | 0.14 | 1.17  | 0.536748 | 0.126744 | 0.75909  | 0.397433 |
| MmuSTS.2693.1.S1_at   | MmuSTS.2693.1 | 6.84  | 5.28  | 0.45 | 0.35 | 2.95  | 0.009039 | 0.015053 | 0.144777 | 0.155825 |
| MmuSTS.2694.1.S1_at   | MmuSTS.2694.1 | 10.39 | 10.33 | 0.1  | 0.06 | 1.04  | 0.365281 | 0.710207 | 0.639887 | 0.831904 |
| MmuSTS.2695.1.S1_at   | MmuSTS.2695.1 | 3.69  | 3.68  | 0.02 | 0.15 | 1     | 0.408908 | 0.1823   | 0.671457 | 0.458768 |
| MmuSTS.2696.1.S1_at   | MmuSTS.2696.1 | 6.4   | 6.44  | 0.2  | 0.31 | -1.02 | 0.462506 | 0.607317 | 0.709694 | 0.766358 |
| MmuSTS.2697.1.S1_at   | MmuSTS.2697.1 | 10.5  | 10.35 | 0.19 | 0.07 | 1.11  | 0.272361 | 0.01168  | 0.564376 | 0.140078 |
| MmuSTS.2698.1.S1_at   | MmuSTS.2698.1 | 7.73  | 7.62  | 0.48 | 0.15 | 1.09  | 0.763151 | 0.962606 | 0.891497 | 0.979014 |
| MmuSTS.2698.1.S1_x_at | MmuSTS.2698.1 | 7.91  | 7.83  | 0.42 | 0.22 | 1.05  | 0.950305 | 0.965324 | 0.97936  | 0.980657 |
| MmuSTS.2699.1.S1_at   | MmuSTS.2699.1 | 10.54 | 9.64  | 0.21 | 0.21 | 1.86  | 0.007407 | 0.001857 | 0.134211 | 0.064677 |
| MmuSTS.27.1.S1_at     | MmuSTS.27.1   | 3.65  | 3.68  | 0.39 | 0.13 | -1.02 | 0.349439 | 0.520126 | 0.62731  | 0.711472 |
| MmuSTS.270.1.S1_at    | MmuSTS.270.1  | 6.51  | 6.57  | 0.32 | 0.15 | -1.04 | 0.573141 | 0.724415 | 0.781077 | 0.840474 |
| MmuSTS.2700.1.S1_at   | MmuSTS.2700.1 | 10.47 | 9.36  | 0.13 | 0.05 | 2.15  | 0.000227 | 0.000886 | 0.054608 | 0.047602 |
| MmuSTS.2701.1.S1_at   | MmuSTS.2701.1 | 4.17  | 4.87  | 0.22 | 0.29 | -1.63 | 0.059313 | 0.267934 | 0.300736 | 0.533658 |
| MmuSTS.2702.1.S1_at   | MmuSTS.2702.1 | 12.75 | 12.74 | 0.05 | 0.02 | 1.01  | 0.309354 | 0.78561  | 0.595817 | 0.875891 |
| MmuSTS.2703.1.S1_s_at | MmuSTS.2703.1 | 10.08 | 9.47  | 0.13 | 0.04 | 1.53  | 0.001122 | 0.000054 | 0.077306 | 0.025666 |
| MmuSTS.2704.1.S1_at   | MmuSTS.2704.1 | 6.94  | 6.64  | 0.25 | 0.2  | 1.23  | 0.359756 | 0.027095 | 0.635363 | 0.205797 |
| MmuSTS.2705.1.S1_at   | MmuSTS.2705.1 | 4.19  | 4.08  | 0.26 | 0.22 | 1.08  | 0.225102 | 0.730755 | 0.523009 | 0.844055 |
| MmuSTS.2706.1.S1_at   | MmuSTS.2706.1 | 11.72 | 11.86 | 0.02 | 0.06 | -1.1  | 0.015657 | 0.302624 | 0.177578 | 0.560201 |
| MmuSTS.2707.1.S1_at   | MmuSTS.2707.1 | 9.77  | 9.92  | 0.02 | 0.05 | -1.11 | 0.007799 | 0.000286 | 0.137195 | 0.034857 |
| MmuSTS.2708.1.S1_at   | MmuSTS.2708.1 | 9.81  | 10.21 | 0.17 | 0.22 | -1.32 | 0.160829 | 0.301783 | 0.452392 | 0.559722 |
| MmuSTS.2709.1.S1_at   | MmuSTS.2709.1 | 5.66  | 5.6   | 0.12 | 0.1  | 1.04  | 0.245729 | 0.205221 | 0.54172  | 0.479596 |
| MmuSTS.271.1.S1_at    | MmuSTS.271.1  | 7.87  | 8.18  | 0.28 | 0.08 | -1.24 | 0.421083 | 0.904923 | 0.679846 | 0.946143 |
| MmuSTS.2710.1.S1_at   | MmuSTS.2710.1 | 11.2  | 10.54 | 0.33 | 0.06 | 1.57  | 0.027964 | 0.369658 | 0.219824 | 0.608957 |
| MmuSTS.2711.1.S1_at   | MmuSTS.2711.1 | 10.65 | 10.88 | 0.25 | 0.13 | -1.17 | 0.223383 | 0.011792 | 0.521191 | 0.140625 |
| MmuSTS.2712.1.S1_at   | MmuSTS.2712.1 | 10.03 | 10.07 | 0.28 | 0.04 | -1.03 | 0.275047 | 0.283416 | 0.566763 | 0.54594  |
| MmuSTS.2713.1.S1_at   | MmuSTS.2713.1 | 5.48  | 5.25  | 0.38 | 0.13 | 1.17  | 0.912854 | 0.314096 | 0.963186 | 0.568185 |
| MmuSTS.2714.1.S1_at   | MmuSTS.2714.1 | 8.12  | 7.13  | 0.31 | 0.24 | 1.99  | 0.022374 | 0.065363 | 0.202823 | 0.301409 |
| MmuSTS.2715.1.S1_at   | MmuSTS.2715.1 | 5.99  | 5.41  | 0.16 | 0.17 | 1.49  | 0.042518 | 0.175863 | 0.263254 | 0.452475 |
| MmuSTS.2716.1.S1_at   | MmuSTS.2716.1 | 4.63  | 4.55  | 0.52 | 0.05 | 1.06  | 0.271144 | 0.5742   | 0.563072 | 0.745679 |
| MmuSTS.2717.1.S1_at   | MmuSTS.2717.1 | 9.86  | 9.6   | 0.34 | 0.07 | 1.2   | 0.237245 | 0.207017 | 0.534656 | 0.481115 |

|                       |               |       |       |      |      |       |          |          |          |          |
|-----------------------|---------------|-------|-------|------|------|-------|----------|----------|----------|----------|
| MmuSTS.2718.1.S1_at   | MmuSTS.2718.1 | 7.84  | 8.88  | 0.18 | 0.13 | -2.06 | 0.001615 | 0.229186 | 0.08404  | 0.501487 |
| MmuSTS.2719.1.S1_at   | MmuSTS.2719.1 | 12.8  | 12.53 | 0.14 | 0.12 | 1.2   | 0.33093  | 0.099872 | 0.6129   | 0.358557 |
| MmuSTS.272.1.S1_at    | MmuSTS.272.1  | 4.59  | 4.57  | 0.16 | 0.16 | 1.01  | 0.939143 | 0.591679 | 0.974332 | 0.75718  |
| MmuSTS.2720.1.S1_at   | MmuSTS.2720.1 | 9.29  | 9.8   | 0.1  | 0.09 | -1.42 | 0.003232 | 0.059763 | 0.101775 | 0.291114 |
| MmuSTS.2721.1.S1_at   | MmuSTS.2721.1 | 4.31  | 4.22  | 0.1  | 0.06 | 1.06  | 0.140278 | 0.559342 | 0.426028 | 0.736241 |
| MmuSTS.2722.1.S1_at   | MmuSTS.2722.1 | 7.31  | 7.34  | 0.21 | 0.07 | -1.02 | 0.948562 | 0.200412 | 0.978472 | 0.474782 |
| MmuSTS.2723.1.S1_at   | MmuSTS.2723.1 | 11.87 | 11.55 | 0.24 | 0.03 | 1.24  | 0.208226 | 0.042587 | 0.505958 | 0.251035 |
| MmuSTS.2724.1.S1_at   | MmuSTS.2724.1 | 7.77  | 8.28  | 0.65 | 0.11 | -1.42 | 0.099294 | 0.195144 | 0.370274 | 0.470241 |
| MmuSTS.2725.1.S1_at   | MmuSTS.2725.1 | 8.6   | 8.57  | 0.15 | 0.09 | 1.03  | 0.30356  | 0.041785 | 0.591015 | 0.248981 |
| MmuSTS.2726.1.S1_at   | MmuSTS.2726.1 | 9.97  | 9.95  | 0.16 | 0.11 | 1.01  | 0.924791 | 0.494402 | 0.968005 | 0.694859 |
| MmuSTS.2727.1.S1_at   | MmuSTS.2727.1 | 5.41  | 5.49  | 0.09 | 0.19 | -1.06 | 0.841097 | 0.196521 | 0.930114 | 0.471577 |
| MmuSTS.2728.1.S1_at   | MmuSTS.2728.1 | 8.38  | 8.44  | 0.34 | 0.11 | -1.05 | 0.561216 | 0.199325 | 0.774316 | 0.474002 |
| MmuSTS.2729.1.S1_at   | MmuSTS.2729.1 | 7.47  | 6.9   | 0.26 | 0.14 | 1.48  | 0.056837 | 0.375418 | 0.295812 | 0.613405 |
| MmuSTS.2729.1.S1_s_at | MmuSTS.2729.1 | 9.53  | 9.22  | 0.09 | 0.02 | 1.24  | 0.003712 | 0.363159 | 0.106194 | 0.60356  |
| MmuSTS.273.1.S1_at    | MmuSTS.273.1  | 7.15  | 7.13  | 0.31 | 0.03 | 1.01  | 0.99425  | 0.280028 | 0.997647 | 0.543369 |
| MmuSTS.2730.1.S1_at   | MmuSTS.2730.1 | 6.22  | 7.02  | 0.66 | 0.49 | -1.74 | 0.088776 | 0.089404 | 0.355162 | 0.343637 |
| MmuSTS.2731.1.S1_at   | MmuSTS.2731.1 | 5.84  | 6.53  | 1.47 | 0.23 | -1.61 | 0.925105 | 0.940944 | 0.96818  | 0.966553 |
| MmuSTS.2731.1.S1_x_at | MmuSTS.2731.1 | 8.4   | 8.25  | 0.62 | 0.15 | 1.1   | 0.840354 | 0.964089 | 0.929916 | 0.980052 |
| MmuSTS.2732.1.S1_s_at | MmuSTS.2732.1 | 4.7   | 4.69  | 0.23 | 0.08 | 1.01  | 0.468452 | 0.760356 | 0.713557 | 0.860754 |
| MmuSTS.2733.1.S1_at   | MmuSTS.2733.1 | 4.47  | 4.4   | 0.06 | 0.01 | 1.05  | 0.318684 | 0.181726 | 0.603411 | 0.458324 |
| MmuSTS.2734.1.S1_at   | MmuSTS.2734.1 | 4.32  | 3.89  | 0.1  | 0.24 | 1.35  | 0.085636 | 0.10667  | 0.350073 | 0.369222 |
| MmuSTS.2735.1.S1_at   | MmuSTS.2735.1 | 5.1   | 4.97  | 0.12 | 0.08 | 1.09  | 0.134986 | 0.221904 | 0.418928 | 0.495019 |
| MmuSTS.2736.1.S1_at   | MmuSTS.2736.1 | 10.69 | 11.47 | 0.69 | 0.1  | -1.72 | 0.124989 | 0.108858 | 0.405516 | 0.372477 |
| MmuSTS.2737.1.S1_at   | MmuSTS.2737.1 | 6.35  | 9.37  | 2.73 | 0.27 | -8.14 | 0.137996 | 0.486676 | 0.423144 | 0.690002 |
| MmuSTS.2738.1.S1_at   | MmuSTS.2738.1 | 9.28  | 10.02 | 0.89 | 0.04 | -1.67 | 0.661461 | 0.17852  | 0.836571 | 0.454778 |
| MmuSTS.2739.1.S1_at   | MmuSTS.2739.1 | 10.23 | 10.2  | 1    | 0.32 | 1.02  | 0.991377 | 0.225578 | 0.996826 | 0.498155 |
| MmuSTS.274.1.S1_at    | MmuSTS.274.1  | 10.98 | 10.96 | 0.46 | 0.05 | 1.02  | 0.924519 | 0.93924  | 0.967892 | 0.965522 |
| MmuSTS.2740.1.S1_at   | MmuSTS.2740.1 | 10.89 | 9.53  | 0.23 | 0.21 | 2.57  | 0.002469 | 0.009452 | 0.094063 | 0.128022 |
| MmuSTS.2741.1.S1_at   | MmuSTS.2741.1 | 11.24 | 11.74 | 0.23 | 0.08 | -1.42 | 0.009948 | 0.070733 | 0.149006 | 0.31213  |
| MmuSTS.2742.1.S1_at   | MmuSTS.2742.1 | 10.08 | 10.02 | 0.6  | 0.05 | 1.04  | 0.32218  | 0.554274 | 0.606295 | 0.733111 |
| MmuSTS.2743.1.S1_at   | MmuSTS.2743.1 | 9.57  | 9.46  | 0.34 | 0.22 | 1.08  | 0.864634 | 0.988656 | 0.941384 | 0.993595 |
| MmuSTS.2744.1.S1_at   | MmuSTS.2744.1 | 8.48  | 8.15  | 0.57 | 0.08 | 1.26  | 0.430342 | 0.863897 | 0.686627 | 0.922755 |
| MmuSTS.2745.1.S1_at   | MmuSTS.2745.1 | 5.79  | 5.81  | 0.03 | 0.08 | -1.01 | 0.782056 | 0.613824 | 0.900441 | 0.77088  |
| MmuSTS.2746.1.S1_at   | MmuSTS.2746.1 | 4.74  | 4.74  | 0.22 | 0.07 | -1    | 0.940113 | 0.800075 | 0.97477  | 0.885075 |
| MmuSTS.2747.1.S1_s_at | MmuSTS.2747.1 | 12.68 | 12.43 | 0.17 | 0.1  | 1.19  | 0.203091 | 0.139034 | 0.500893 | 0.412159 |
| MmuSTS.2748.1.S1_at   | MmuSTS.2748.1 | 11.72 | 11.5  | 0.24 | 0.05 | 1.17  | 0.091875 | 0.030363 | 0.359802 | 0.216116 |
| MmuSTS.2749.1.S1_at   | MmuSTS.2749.1 | 9.98  | 10.53 | 0.27 | 0.27 | -1.46 | 0.121691 | 0.3186   | 0.400504 | 0.571258 |
| MmuSTS.275.1.S1_at    | MmuSTS.275.1  | 11.26 | 11.31 | 0.09 | 0.03 | -1.03 | 0.659186 | 0.877694 | 0.83552  | 0.930219 |
| MmuSTS.2750.1.S1_at   | MmuSTS.2750.1 | 8.74  | 8.81  | 0.04 | 0.11 | -1.05 | 0.965904 | 0.078513 | 0.986219 | 0.325285 |
| MmuSTS.2751.1.S1_at   | MmuSTS.2751.1 | 5.48  | 5.4   | 0.09 | 0.21 | 1.06  | 0.320051 | 0.213297 | 0.604635 | 0.487187 |
| MmuSTS.2752.1.S1_at   | MmuSTS.2752.1 | 13.42 | 13.24 | 0.06 | 0.03 | 1.13  | 0.007835 | 0.515772 | 0.137244 | 0.708485 |
| MmuSTS.2753.1.S1_at   | MmuSTS.2753.1 | 6.34  | 6.54  | 0.08 | 0.1  | -1.15 | 0.147845 | 0.354966 | 0.43603  | 0.597466 |
| MmuSTS.2754.1.S1_at   | MmuSTS.2754.1 | 8.79  | 8.97  | 0.25 | 0.03 | -1.13 | 0.895867 | 0.899737 | 0.955609 | 0.942937 |

|                       |               |       |       |      |      |        |          |          |          |          |
|-----------------------|---------------|-------|-------|------|------|--------|----------|----------|----------|----------|
| MmuSTS.2755.1.S1_s_at | MmuSTS.2755.1 | 11.63 | 11.6  | 0.06 | 0.03 | 1.02   | 0.526696 | 0.053507 | 0.752738 | 0.276963 |
| MmuSTS.2756.1.S1_s_at | MmuSTS.2756.1 | 12.14 | 12.1  | 0.08 | 0.03 | 1.03   | 0.382124 | 0.76861  | 0.651635 | 0.865637 |
| MmuSTS.2757.1.S1_at   | MmuSTS.2757.1 | 10.21 | 10.01 | 0.09 | 0.1  | 1.16   | 0.034178 | 0.095362 | 0.239537 | 0.35239  |
| MmuSTS.2758.1.S1_at   | MmuSTS.2758.1 | 5.97  | 5.86  | 0.3  | 0.22 | 1.08   | 0.340842 | 0.312998 | 0.620908 | 0.567594 |
| MmuSTS.2759.1.S1_at   | MmuSTS.2759.1 | 11.28 | 10.8  | 0.09 | 0.2  | 1.39   | 0.036101 | 0.019008 | 0.244978 | 0.173576 |
| MmuSTS.276.1.S1_at    | MmuSTS.276.1  | 7.47  | 6.39  | 0.95 | 0.32 | 2.11   | 0.049536 | 0.037483 | 0.27999  | 0.237853 |
| MmuSTS.2760.1.S1_at   | MmuSTS.2760.1 | 4.97  | 5.25  | 0.52 | 0.48 | -1.22  | 0.180636 | 0.339058 | 0.475777 | 0.585891 |
| MmuSTS.2761.1.S1_s_at | MmuSTS.2761.1 | 5.83  | 5.6   | 0.17 | 0.04 | 1.17   | 0.264918 | 0.501361 | 0.557962 | 0.699529 |
| MmuSTS.2762.1.S1_s_at | MmuSTS.2762.1 | 11.69 | 11.28 | 0.25 | 0.05 | 1.33   | 0.108279 | 0.140166 | 0.382964 | 0.413405 |
| MmuSTS.2763.1.S1_at   | MmuSTS.2763.1 | 11.96 | 12.32 | 0.1  | 0.13 | -1.28  | 0.08241  | 0.36113  | 0.344143 | 0.60207  |
| MmuSTS.2764.1.S1_at   | MmuSTS.2764.1 | 7.3   | 7.45  | 0.3  | 0.32 | -1.11  | 0.459923 | 0.635978 | 0.707972 | 0.785812 |
| MmuSTS.2765.1.S1_at   | MmuSTS.2765.1 | 9.68  | 9.27  | 0.29 | 0.02 | 1.33   | 0.210667 | 0.390118 | 0.5083   | 0.624002 |
| MmuSTS.2766.1.S1_at   | MmuSTS.2766.1 | 6.52  | 10.05 | 1.38 | 0.27 | -11.54 | 0.014563 | 0.199107 | 0.172573 | 0.473707 |
| MmuSTS.2767.1.S1_at   | MmuSTS.2767.1 | 4.23  | 4.08  | 0.1  | 0.13 | 1.11   | 0.835658 | 0.965687 | 0.927786 | 0.980751 |
| MmuSTS.2768.1.S1_at   | MmuSTS.2768.1 | 6.9   | 8.49  | 0.56 | 0.71 | -3.01  | 0.081946 | 0.377803 | 0.343216 | 0.615203 |
| MmuSTS.2769.1.S1_s_at | MmuSTS.2769.1 | 3.29  | 3.33  | 0.06 | 0.06 | -1.03  | 0.724736 | 0.837452 | 0.870833 | 0.907122 |
| MmuSTS.277.1.S1_at    | MmuSTS.277.1  | 10.19 | 9.98  | 0.1  | 0.06 | 1.15   | 0.032088 | 0.004609 | 0.232919 | 0.094873 |
| MmuSTS.2770.1.S1_at   | MmuSTS.2770.1 | 4.45  | 4.56  | 0.27 | 0.22 | -1.08  | 0.369377 | 0.531163 | 0.642818 | 0.718451 |
| MmuSTS.2771.1.S1_at   | MmuSTS.2771.1 | 3.61  | 3.67  | 0.07 | 0.04 | -1.04  | 0.409276 | 0.206335 | 0.671686 | 0.480524 |
| MmuSTS.2772.1.S1_at   | MmuSTS.2772.1 | 7.84  | 8.44  | 0.3  | 0.25 | -1.52  | 0.077452 | 0.642767 | 0.336173 | 0.790476 |
| MmuSTS.2773.1.S1_at   | MmuSTS.2773.1 | 8.47  | 8.26  | 0.32 | 0.18 | 1.16   | 0.676298 | 0.003194 | 0.84542  | 0.08199  |
| MmuSTS.2774.1.S1_at   | MmuSTS.2774.1 | 3.37  | 3.34  | 0.17 | 0.13 | 1.02   | 0.575397 | 0.73322  | 0.782823 | 0.845568 |
| MmuSTS.2775.1.S1_at   | MmuSTS.2775.1 | 12.65 | 12.72 | 0.14 | 0.08 | -1.05  | 0.174938 | 0.047882 | 0.469252 | 0.263751 |
| MmuSTS.2776.1.S1_at   | MmuSTS.2776.1 | 4.06  | 4.73  | 0.11 | 0.06 | -1.6   | 0.001401 | 0.091345 | 0.07964  | 0.346281 |
| MmuSTS.2777.1.S1_at   | MmuSTS.2777.1 | 9.71  | 9.24  | 0.31 | 0.1  | 1.38   | 0.062002 | 0.018173 | 0.305532 | 0.169673 |
| MmuSTS.2778.1.S1_at   | MmuSTS.2778.1 | 10.83 | 10.81 | 0.02 | 0.1  | 1.01   | 0.639461 | 0.378302 | 0.82357  | 0.615438 |
| MmuSTS.2779.1.S1_at   | MmuSTS.2779.1 | 7.75  | 7.71  | 0.15 | 0.1  | 1.03   | 0.697694 | 0.526735 | 0.856045 | 0.715627 |
| MmuSTS.278.1.S1_at    | MmuSTS.278.1  | 10.92 | 10.91 | 0.15 | 0.05 | 1.01   | 0.955606 | 0.492129 | 0.981771 | 0.693457 |
| MmuSTS.2780.1.S1_at   | MmuSTS.2780.1 | 4.51  | 4.92  | 0.51 | 0.55 | -1.33  | 0.25005  | 0.410642 | 0.544879 | 0.637463 |
| MmuSTS.2781.1.S1_at   | MmuSTS.2781.1 | 10.33 | 10.9  | 0.33 | 0.06 | -1.48  | 0.041336 | 0.133303 | 0.259688 | 0.405049 |
| MmuSTS.2782.1.S1_at   | MmuSTS.2782.1 | 7.93  | 8.04  | 0.07 | 0.04 | -1.08  | 0.054664 | 0.636917 | 0.290604 | 0.786458 |
| MmuSTS.2783.1.S1_at   | MmuSTS.2783.1 | 3.34  | 3.34  | 0.1  | 0.05 | -1     | 0.599915 | 0.112801 | 0.798469 | 0.37844  |
| MmuSTS.2784.1.S1_at   | MmuSTS.2784.1 | 5.91  | 6.1   | 0.67 | 0.32 | -1.14  | 0.818525 | 0.136449 | 0.918984 | 0.408866 |
| MmuSTS.2785.1.S1_at   | MmuSTS.2785.1 | 4.9   | 5.03  | 0.03 | 0.05 | -1.09  | 0.022446 | 0.022842 | 0.203155 | 0.189246 |
| MmuSTS.2786.1.S1_at   | MmuSTS.2786.1 | 3.55  | 3.92  | 0.89 | 0.11 | -1.29  | 0.787981 | 0.945744 | 0.903595 | 0.969149 |
| MmuSTS.2787.1.S1_at   | MmuSTS.2787.1 | 5.17  | 5.25  | 0.19 | 0.05 | -1.06  | 0.97374  | 0.393592 | 0.989462 | 0.626497 |
| MmuSTS.2788.1.S1_at   | MmuSTS.2788.1 | 7.99  | 8.15  | 0.38 | 0.2  | -1.11  | 0.64554  | 0.744277 | 0.827474 | 0.851927 |
| MmuSTS.2789.1.S1_at   | MmuSTS.2789.1 | 11.35 | 11.25 | 0.14 | 0.02 | 1.07   | 0.298348 | 0.048248 | 0.586678 | 0.264724 |
| MmuSTS.279.1.S1_at    | MmuSTS.279.1  | 12.01 | 11.83 | 0.07 | 0.14 | 1.13   | 0.055913 | 0.248092 | 0.293437 | 0.517567 |
| MmuSTS.2790.1.S1_at   | MmuSTS.2790.1 | 9.8   | 9.78  | 0.21 | 0.21 | 1.01   | 0.59087  | 0.355857 | 0.792097 | 0.597864 |
| MmuSTS.2791.1.S1_at   | MmuSTS.2791.1 | 7.29  | 7.73  | 0.14 | 0.08 | -1.35  | 0.021285 | 0.015228 | 0.199623 | 0.156798 |
| MmuSTS.2793.1.S1_at   | MmuSTS.2793.1 | 4.44  | 4.8   | 0.36 | 0.09 | -1.29  | 0.460227 | 0.606365 | 0.70815  | 0.765747 |
| MmuSTS.2794.1.S1_at   | MmuSTS.2794.1 | 7.84  | 8.58  | 0.28 | 0.53 | -1.68  | 0.256334 | 0.178047 | 0.550836 | 0.454422 |

|                       |               |       |       |      |      |        |          |          |          |          |
|-----------------------|---------------|-------|-------|------|------|--------|----------|----------|----------|----------|
| MmuSTS.2795.1.S1_at   | MmuSTS.2795.1 | 9.19  | 11.82 | 0.65 | 0.24 | -6.19  | 0.002989 | 0.07549  | 0.099744 | 0.319875 |
| MmuSTS.2796.1.S1_at   | MmuSTS.2796.1 | 8.57  | 7.99  | 0.39 | 0.12 | 1.5    | 0.06084  | 0.048282 | 0.303684 | 0.2648   |
| MmuSTS.2797.1.S1_at   | MmuSTS.2797.1 | 8.18  | 8.23  | 0.26 | 0.38 | -1.03  | 0.951425 | 0.036204 | 0.979915 | 0.234837 |
| MmuSTS.2798.1.S1_at   | MmuSTS.2798.1 | 8.38  | 9.05  | 0.54 | 0.18 | -1.6   | 0.388277 | 0.090101 | 0.656363 | 0.344402 |
| MmuSTS.2799.1.S1_at   | MmuSTS.2799.1 | 5.28  | 5.32  | 0.19 | 0.08 | -1.03  | 0.208432 | 0.240022 | 0.506128 | 0.510717 |
| MmuSTS.28.1.S1_at     | MmuSTS.28.1   | 6.45  | 6.2   | 0.39 | 0.1  | 1.19   | 0.245701 | 0.473205 | 0.54172  | 0.68054  |
| MmuSTS.280.1.S1_at    | MmuSTS.280.1  | 5.9   | 6.33  | 0.08 | 0.24 | -1.34  | 0.032197 | 0.006552 | 0.233359 | 0.109707 |
| MmuSTS.2800.1.S1_at   | MmuSTS.2800.1 | 8.76  | 10.59 | 0.59 | 0.2  | -3.57  | 0.012283 | 0.331555 | 0.161126 | 0.580182 |
| MmuSTS.2801.1.S1_at   | MmuSTS.2801.1 | 9.6   | 9.65  | 0.11 | 0.09 | -1.04  | 0.248632 | 0.285014 | 0.544034 | 0.547095 |
| MmuSTS.2802.1.S1_at   | MmuSTS.2802.1 | 6.36  | 5.99  | 0.2  | 0.07 | 1.29   | 0.024206 | 0.037717 | 0.208762 | 0.238593 |
| MmuSTS.2803.1.S1_at   | MmuSTS.2803.1 | 9.95  | 10.19 | 0.06 | 0.05 | -1.18  | 0.005883 | 0.000049 | 0.122924 | 0.025273 |
| MmuSTS.2804.1.S1_at   | MmuSTS.2804.1 | 4.11  | 4.23  | 0.51 | 0.76 | -1.09  | 0.830802 | 0.969456 | 0.925496 | 0.983275 |
| MmuSTS.2805.1.S1_at   | MmuSTS.2805.1 | 3.48  | 3.71  | 0.12 | 0.15 | -1.17  | 0.093846 | 0.488127 | 0.362657 | 0.690902 |
| MmuSTS.2806.1.S1_at   | MmuSTS.2806.1 | 4.29  | 4.28  | 0.2  | 0.07 | 1      | 0.331911 | 0.554529 | 0.613772 | 0.733264 |
| MmuSTS.2807.1.S1_at   | MmuSTS.2807.1 | 11.01 | 10.63 | 0.15 | 0.16 | 1.3    | 0.115808 | 0.321055 | 0.392951 | 0.573046 |
| MmuSTS.2808.1.S1_s_at | MmuSTS.2808.1 | 12.75 | 12.42 | 0.16 | 0.06 | 1.25   | 0.020419 | 0.066875 | 0.196403 | 0.304533 |
| MmuSTS.2809.1.S1_at   | MmuSTS.2809.1 | 9.64  | 9.98  | 0.21 | 0.04 | -1.27  | 0.107703 | 0.140494 | 0.382296 | 0.413704 |
| MmuSTS.281.1.S1_s_at  | MmuSTS.281.1  | 7.39  | 7.29  | 0.09 | 0.09 | 1.07   | 0.362061 | 0.315317 | 0.637175 | 0.568939 |
| MmuSTS.2810.1.S1_at   | MmuSTS.2810.1 | 11.35 | 11.26 | 0.25 | 0.04 | 1.06   | 0.964406 | 0.94708  | 0.985636 | 0.969997 |
| MmuSTS.2811.1.S1_s_at | MmuSTS.2811.1 | 8.94  | 8.01  | 0.18 | 0.19 | 1.9    | 0.003074 | 0.000438 | 0.10056  | 0.038359 |
| MmuSTS.2812.1.S1_at   | MmuSTS.2812.1 | 4.46  | 3.96  | 0.43 | 0.2  | 1.41   | 0.219911 | 0.21702  | 0.517641 | 0.490646 |
| MmuSTS.2813.1.S1_at   | MmuSTS.2813.1 | 5.55  | 5.57  | 0.16 | 0.15 | -1.01  | 0.728328 | 0.735874 | 0.873011 | 0.847202 |
| MmuSTS.2814.1.S1_at   | MmuSTS.2814.1 | 5.21  | 5.29  | 0.07 | 0.13 | -1.05  | 0.672795 | 0.877308 | 0.843387 | 0.930089 |
| MmuSTS.2815.1.S1_at   | MmuSTS.2815.1 | 3.37  | 3.14  | 0.25 | 0.05 | 1.17   | 0.308732 | 0.493678 | 0.595248 | 0.694288 |
| MmuSTS.2816.1.S1_at   | MmuSTS.2816.1 | 6.47  | 9.88  | 1.31 | 0.16 | -10.64 | 0.027915 | 0.229154 | 0.219684 | 0.501438 |
| MmuSTS.2817.1.S1_at   | MmuSTS.2817.1 | 9.58  | 10.16 | 0.24 | 0.22 | -1.5   | 0.033232 | 0.096582 | 0.236446 | 0.354126 |
| MmuSTS.2818.1.S1_at   | MmuSTS.2818.1 | 10.39 | 11.18 | 0.12 | 0.06 | -1.73  | 0.000745 | 0.001045 | 0.072567 | 0.051426 |
| MmuSTS.2819.1.S1_at   | MmuSTS.2819.1 | 5     | 5.34  | 0.86 | 0.21 | -1.27  | 0.494459 | 0.342703 | 0.731233 | 0.588666 |
| MmuSTS.282.1.S1_s_at  | MmuSTS.282.1  | 5.84  | 5.97  | 0.23 | 0.02 | -1.09  | 0.888539 | 0.739111 | 0.952483 | 0.848806 |
| MmuSTS.2820.1.S1_at   | MmuSTS.2820.1 | 9.79  | 10.14 | 0.05 | 0.1  | -1.27  | 0.006466 | 0.146104 | 0.127289 | 0.420092 |
| MmuSTS.2821.1.S1_at   | MmuSTS.2821.1 | 7.12  | 11.57 | 2.09 | 0.23 | -21.81 | 0.060449 | 0.31155  | 0.30301  | 0.566532 |
| MmuSTS.2822.1.S1_at   | MmuSTS.2822.1 | 7.99  | 5.78  | 1.17 | 0.15 | 4.64   | 0.034177 | 0.026983 | 0.239537 | 0.205465 |
| MmuSTS.2823.1.S1_at   | MmuSTS.2823.1 | 9.51  | 7.96  | 0.56 | 0.1  | 2.94   | 0.019284 | 0.0098   | 0.192035 | 0.130166 |
| MmuSTS.2824.1.S1_at   | MmuSTS.2824.1 | 8.31  | 8.25  | 0.79 | 0.06 | 1.05   | 0.685661 | 0.471049 | 0.850226 | 0.679172 |
| MmuSTS.2825.1.S1_at   | MmuSTS.2825.1 | 4.13  | 4.16  | 0.08 | 0.06 | -1.02  | 0.826417 | 0.201111 | 0.922984 | 0.475519 |
| MmuSTS.2826.1.S1_at   | MmuSTS.2826.1 | 8.9   | 8.48  | 0.09 | 0.05 | 1.33   | 0.002115 | 0.003434 | 0.090208 | 0.084252 |
| MmuSTS.2827.1.S1_at   | MmuSTS.2827.1 | 3.8   | 3.76  | 0.07 | 0.08 | 1.03   | 0.448612 | 0.045763 | 0.7001   | 0.258277 |
| MmuSTS.2828.1.S1_at   | MmuSTS.2828.1 | 3.21  | 3.29  | 0.11 | 0.19 | -1.05  | 0.535321 | 0.450416 | 0.75826  | 0.665643 |
| MmuSTS.2829.1.S1_at   | MmuSTS.2829.1 | 8.58  | 8.43  | 0.21 | 0.23 | 1.11   | 0.286901 | 0.152544 | 0.576648 | 0.427426 |
| MmuSTS.283.1.S1_at    | MmuSTS.283.1  | 4.71  | 4.63  | 0.08 | 0.06 | 1.05   | 0.451017 | 0.501492 | 0.701926 | 0.699675 |
| MmuSTS.2830.1.S1_at   | MmuSTS.2830.1 | 9.51  | 10.26 | 0.15 | 0.18 | -1.67  | 0.003938 | 0.237039 | 0.108453 | 0.507722 |
| MmuSTS.2831.1.S1_at   | MmuSTS.2831.1 | 8.86  | 11.38 | 0.84 | 0.21 | -5.72  | 0.018406 | 0.215168 | 0.18871  | 0.488943 |
| MmuSTS.2832.1.S1_at   | MmuSTS.2832.1 | 5.22  | 5.28  | 0.3  | 0.05 | -1.05  | 0.962345 | 0.522136 | 0.984644 | 0.712899 |

|                     |               |       |       |      |      |       |          |          |          |          |
|---------------------|---------------|-------|-------|------|------|-------|----------|----------|----------|----------|
| MmuSTS.2833.1.S1_at | MmuSTS.2833.1 | 9.92  | 10.23 | 0.54 | 0.07 | -1.24 | 0.423824 | 0.404504 | 0.681747 | 0.633004 |
| MmuSTS.2834.1.S1_at | MmuSTS.2834.1 | 3.64  | 3.59  | 0.48 | 0.19 | 1.04  | 0.431987 | 0.621474 | 0.687882 | 0.776054 |
| MmuSTS.2835.1.S1_at | MmuSTS.2835.1 | 3.45  | 3.33  | 0.07 | 0.1  | 1.09  | 0.100346 | 0.171696 | 0.371121 | 0.448078 |
| MmuSTS.2836.1.S1_at | MmuSTS.2836.1 | 13.42 | 13.42 | 0.02 | 0.02 | 1     | 0.804241 | 0.007631 | 0.912041 | 0.116869 |
| MmuSTS.2837.1.S1_at | MmuSTS.2837.1 | 9.55  | 9.55  | 0.38 | 0.03 | 1     | 0.734382 | 0.794918 | 0.87617  | 0.881843 |
| MmuSTS.2838.1.S1_at | MmuSTS.2838.1 | 10.55 | 10.5  | 0.2  | 0.09 | 1.03  | 0.417426 | 0.080896 | 0.677553 | 0.328864 |
| MmuSTS.2839.1.S1_at | MmuSTS.2839.1 | 2.79  | 2.79  | 0.02 | 0.03 | -1    | 0.325479 | 0.82799  | 0.608731 | 0.901214 |
| MmuSTS.284.1.S1_at  | MmuSTS.284.1  | 6.34  | 6.19  | 0.18 | 0.03 | 1.11  | 0.225546 | 0.244679 | 0.523395 | 0.514512 |
| MmuSTS.2840.1.S1_at | MmuSTS.2840.1 | 4.13  | 4.17  | 0.13 | 0.05 | -1.03 | 0.7663   | 0.020775 | 0.892813 | 0.180849 |
| MmuSTS.2841.1.S1_at | MmuSTS.2841.1 | 6.09  | 6.11  | 0.13 | 0.2  | -1.02 | 0.27489  | 0.436206 | 0.566556 | 0.655879 |
| MmuSTS.2842.1.S1_at | MmuSTS.2842.1 | 7.14  | 6.89  | 0.17 | 0.32 | 1.19  | 0.977211 | 0.002028 | 0.991084 | 0.066885 |
| MmuSTS.2843.1.S1_at | MmuSTS.2843.1 | 13.34 | 13.3  | 0.04 | 0.06 | 1.03  | 0.247726 | 0.250534 | 0.543078 | 0.519391 |
| MmuSTS.2844.1.S1_at | MmuSTS.2844.1 | 11.9  | 11.99 | 0.11 | 0.06 | -1.07 | 0.157685 | 0.67377  | 0.44851  | 0.809446 |
| MmuSTS.2845.1.S1_at | MmuSTS.2845.1 | 10.38 | 10.13 | 0.1  | 0.14 | 1.19  | 0.047946 | 0.001881 | 0.276361 | 0.064979 |
| MmuSTS.2846.1.S1_at | MmuSTS.2846.1 | 13.2  | 13.2  | 0.05 | 0.04 | -1    | 0.823311 | 0.030911 | 0.921475 | 0.217651 |
| MmuSTS.2847.1.S1_at | MmuSTS.2847.1 | 9.82  | 9.89  | 0.49 | 0.14 | -1.05 | 0.877051 | 0.334456 | 0.947453 | 0.582455 |
| MmuSTS.2848.1.S1_at | MmuSTS.2848.1 | 8.75  | 8.96  | 0.11 | 0.07 | -1.16 | 0.028007 | 0.100956 | 0.219887 | 0.360525 |
| MmuSTS.2849.1.S1_at | MmuSTS.2849.1 | 10.66 | 12.56 | 1.04 | 0.17 | -3.73 | 0.053282 | 0.363718 | 0.287986 | 0.604138 |
| MmuSTS.285.1.S1_at  | MmuSTS.285.1  | 11.32 | 11.33 | 0.21 | 0.1  | -1.01 | 0.560226 | 0.641436 | 0.773717 | 0.78954  |
| MmuSTS.2850.1.S1_at | MmuSTS.2850.1 | 4.09  | 4.08  | 0.04 | 0.07 | 1     | 0.415453 | 0.031778 | 0.676162 | 0.220698 |
| MmuSTS.2851.1.S1_at | MmuSTS.2851.1 | 11.93 | 11.81 | 0.12 | 0.06 | 1.09  | 0.075576 | 0.417292 | 0.333167 | 0.642141 |
| MmuSTS.2852.1.S1_at | MmuSTS.2852.1 | 10.32 | 10.06 | 0.16 | 0.06 | 1.2   | 0.050476 | 0.673702 | 0.282507 | 0.809382 |
| MmuSTS.2853.1.S1_at | MmuSTS.2853.1 | 5.56  | 7.49  | 0.84 | 0.17 | -3.8  | 0.019292 | 0.118065 | 0.192035 | 0.385921 |
| MmuSTS.2854.1.S1_at | MmuSTS.2854.1 | 12.66 | 12.61 | 0.13 | 0.02 | 1.03  | 0.64314  | 0.924501 | 0.826035 | 0.957386 |
| MmuSTS.2855.1.S1_at | MmuSTS.2855.1 | 7.3   | 7.27  | 0.27 | 0.31 | 1.02  | 0.414653 | 0.153713 | 0.675681 | 0.428413 |
| MmuSTS.2856.1.S1_at | MmuSTS.2856.1 | 8.15  | 8.31  | 0.9  | 0.13 | -1.12 | 0.428321 | 0.680703 | 0.685338 | 0.81356  |
| MmuSTS.2857.1.S1_at | MmuSTS.2857.1 | 8.95  | 8.99  | 0.19 | 0.13 | -1.03 | 0.301051 | 0.042314 | 0.589075 | 0.250297 |
| MmuSTS.2858.1.S1_at | MmuSTS.2858.1 | 7.13  | 7.76  | 0.14 | 0.1  | -1.55 | 0.002149 | 0.006827 | 0.090216 | 0.111597 |
| MmuSTS.2859.1.S1_at | MmuSTS.2859.1 | 5.81  | 5.61  | 0.12 | 0.31 | 1.15  | 0.519321 | 0.710807 | 0.747997 | 0.832265 |
| MmuSTS.286.1.S1_at  | MmuSTS.286.1  | 3.47  | 3.45  | 0.04 | 0.06 | 1.01  | 0.811559 | 0.230338 | 0.915617 | 0.502112 |
| MmuSTS.2860.1.S1_at | MmuSTS.2860.1 | 13.96 | 13.87 | 0.02 | 0.03 | 1.06  | 0.008865 | 0.030319 | 0.143995 | 0.216032 |
| MmuSTS.2861.1.S1_at | MmuSTS.2861.1 | 4.89  | 5.3   | 0.17 | 0.23 | -1.33 | 0.084619 | 0.29293  | 0.348519 | 0.552885 |
| MmuSTS.2862.1.S1_at | MmuSTS.2862.1 | 10.2  | 10.29 | 2.37 | 0.27 | -1.07 | 0.895602 | 0.976258 | 0.955443 | 0.987069 |
| MmuSTS.2863.1.S1_at | MmuSTS.2863.1 | 5.4   | 5.39  | 0.1  | 0.11 | 1.01  | 0.566194 | 0.827911 | 0.777188 | 0.901197 |
| MmuSTS.2864.1.S1_at | MmuSTS.2864.1 | 6.62  | 7.22  | 0.21 | 0.28 | -1.52 | 0.181942 | 0.410338 | 0.477456 | 0.637216 |
| MmuSTS.2865.1.S1_at | MmuSTS.2865.1 | 4.8   | 4.68  | 0.12 | 0.15 | 1.09  | 0.893121 | 0.26689  | 0.954395 | 0.53244  |
| MmuSTS.2866.1.S1_at | MmuSTS.2866.1 | 12.39 | 11.88 | 0.24 | 0.01 | 1.43  | 0.040365 | 0.444647 | 0.257247 | 0.662072 |
| MmuSTS.2867.1.S1_at | MmuSTS.2867.1 | 9.15  | 8.95  | 0.57 | 0.07 | 1.14  | 0.700179 | 0.035151 | 0.857602 | 0.231645 |
| MmuSTS.2868.1.S1_at | MmuSTS.2868.1 | 12.42 | 12.23 | 0.16 | 0.09 | 1.14  | 0.095624 | 0.151879 | 0.365116 | 0.426512 |
| MmuSTS.2869.1.S1_at | MmuSTS.2869.1 | 3.07  | 3.45  | 0.25 | 0.37 | -1.3  | 0.395446 | 0.078111 | 0.661894 | 0.324578 |
| MmuSTS.287.1.S1_at  | MmuSTS.287.1  | 10.33 | 10.02 | 0.1  | 0.19 | 1.24  | 0.07765  | 0.239702 | 0.336558 | 0.510405 |
| MmuSTS.2870.1.S1_at | MmuSTS.2870.1 | 8.9   | 8.63  | 1.03 | 0.23 | 1.21  | 0.570552 | 0.950347 | 0.779362 | 0.971738 |
| MmuSTS.2871.1.S1_at | MmuSTS.2871.1 | 3.41  | 3.4   | 0.01 | 0.05 | 1.01  | 0.729937 | 0.74031  | 0.873865 | 0.849596 |



|                       |               |       |       |      |      |       |          |          |          |          |
|-----------------------|---------------|-------|-------|------|------|-------|----------|----------|----------|----------|
| MmuSTS.2872.1.S1_at   | MmuSTS.2872.1 | 9.88  | 9.96  | 0.18 | 0.03 | -1.06 | 0.280953 | 0.220518 | 0.571858 | 0.493885 |
| MmuSTS.2873.1.S1_at   | MmuSTS.2873.1 | 7.15  | 6.32  | 0.47 | 0.32 | 1.77  | 0.048558 | 0.194386 | 0.277767 | 0.46947  |
| MmuSTS.2874.1.S1_at   | MmuSTS.2874.1 | 5.25  | 7.61  | 1.56 | 0.19 | -5.13 | 0.183729 | 0.197117 | 0.47973  | 0.472213 |
| MmuSTS.2875.1.S1_at   | MmuSTS.2875.1 | 4.16  | 4.18  | 0.09 | 0.03 | -1.01 | 0.81808  | 0.455867 | 0.918751 | 0.669664 |
| MmuSTS.2876.1.S1_at   | MmuSTS.2876.1 | 8.61  | 8.45  | 0.37 | 0.26 | 1.12  | 0.526756 | 0.566767 | 0.752776 | 0.74076  |
| MmuSTS.2877.1.S1_at   | MmuSTS.2877.1 | 6     | 6.03  | 0.14 | 0.04 | -1.02 | 0.887884 | 0.507773 | 0.952087 | 0.703325 |
| MmuSTS.2878.1.S1_at   | MmuSTS.2878.1 | 7.05  | 7.46  | 0.36 | 0.33 | -1.33 | 0.454912 | 0.151104 | 0.704731 | 0.425782 |
| MmuSTS.2879.1.S1_at   | MmuSTS.2879.1 | 10.22 | 11.03 | 0.31 | 0.11 | -1.76 | 0.029448 | 0.107873 | 0.224611 | 0.370945 |
| MmuSTS.288.1.S1_at    | MmuSTS.288.1  | 13.23 | 13.23 | 0.05 | 0.02 | -1    | 0.746389 | 0.457475 | 0.882528 | 0.670862 |
| MmuSTS.2880.1.S1_at   | MmuSTS.2880.1 | 6.15  | 6.17  | 0.23 | 0.14 | -1.01 | 0.976719 | 0.48561  | 0.990824 | 0.68924  |
| MmuSTS.2881.1.S1_at   | MmuSTS.2881.1 | 12.44 | 12.32 | 0.17 | 0.1  | 1.09  | 0.563979 | 0.017147 | 0.775779 | 0.165888 |
| MmuSTS.2882.1.S1_at   | MmuSTS.2882.1 | 10.33 | 10.32 | 0.39 | 0.1  | 1.01  | 0.721823 | 0.014698 | 0.868992 | 0.154371 |
| MmuSTS.2883.1.S1_s_at | MmuSTS.2883.1 | 7.52  | 6.89  | 0.22 | 0.11 | 1.54  | 0.010349 | 0.040401 | 0.151676 | 0.246134 |
| MmuSTS.2884.1.S1_at   | MmuSTS.2884.1 | 6.13  | 6.45  | 0.02 | 0.07 | -1.25 | 0.001548 | 0.053091 | 0.081983 | 0.276139 |
| MmuSTS.2885.1.S1_at   | MmuSTS.2885.1 | 3.86  | 4.01  | 0.54 | 0.04 | -1.11 | 0.632127 | 0.859208 | 0.819596 | 0.919754 |
| MmuSTS.2886.1.S1_at   | MmuSTS.2886.1 | 4.14  | 4.1   | 0.04 | 0.01 | 1.03  | 0.052447 | 0.04251  | 0.286213 | 0.250786 |
| MmuSTS.2887.1.S1_at   | MmuSTS.2887.1 | 12.71 | 12.65 | 0.04 | 0.02 | 1.04  | 0.093637 | 0.085732 | 0.362277 | 0.337761 |
| MmuSTS.2888.1.S1_at   | MmuSTS.2888.1 | 8.9   | 8.69  | 0.09 | 0.1  | 1.16  | 0.035727 | 0.011128 | 0.243972 | 0.137286 |
| MmuSTS.2889.1.S1_at   | MmuSTS.2889.1 | 3.93  | 3.84  | 0.09 | 0.15 | 1.06  | 0.152101 | 0.448634 | 0.441609 | 0.664474 |
| MmuSTS.289.1.S1_at    | MmuSTS.289.1  | 7.03  | 7.06  | 0.07 | 0.05 | -1.02 | 0.786777 | 0.093933 | 0.902743 | 0.350445 |
| MmuSTS.2890.1.S1_at   | MmuSTS.2890.1 | 8.05  | 7.66  | 0.28 | 0.13 | 1.31  | 0.439369 | 0.361308 | 0.693654 | 0.602104 |
| MmuSTS.2891.1.S1_at   | MmuSTS.2891.1 | 5.33  | 5.26  | 0.05 | 0.09 | 1.05  | 0.170088 | 0.127658 | 0.463657 | 0.398581 |
| MmuSTS.2892.1.S1_at   | MmuSTS.2892.1 | 7.78  | 7.73  | 0.19 | 0.04 | 1.04  | 0.347781 | 0.070272 | 0.625951 | 0.311342 |
| MmuSTS.2893.1.S1_at   | MmuSTS.2893.1 | 9.27  | 9.38  | 0.48 | 0.15 | -1.08 | 0.764458 | 0.717256 | 0.891963 | 0.836332 |
| MmuSTS.2894.1.S1_at   | MmuSTS.2894.1 | 12.22 | 12.2  | 0.07 | 0.13 | 1.02  | 0.943799 | 0.993214 | 0.976378 | 0.995946 |
| MmuSTS.2895.1.S1_at   | MmuSTS.2895.1 | 8.57  | 8.58  | 0.14 | 0.27 | -1.01 | 0.414652 | 0.725526 | 0.675681 | 0.841043 |
| MmuSTS.2896.1.S1_s_at | MmuSTS.2896.1 | 7.65  | 6.1   | 0.6  | 0.41 | 2.94  | 0.037182 | 0.015731 | 0.248107 | 0.158922 |
| MmuSTS.2897.1.S1_at   | MmuSTS.2897.1 | 5.68  | 7.5   | 0.5  | 0.52 | -3.53 | 0.021747 | 0.115541 | 0.200743 | 0.38267  |
| MmuSTS.2898.1.S1_at   | MmuSTS.2898.1 | 8.59  | 7.88  | 0.13 | 0.21 | 1.65  | 0.013114 | 0.269939 | 0.165173 | 0.53521  |
| MmuSTS.2899.1.S1_at   | MmuSTS.2899.1 | 3.66  | 3.65  | 0.06 | 0.04 | 1.01  | 0.510882 | 0.581942 | 0.742178 | 0.750784 |
| MmuSTS.29.1.S1_at     | MmuSTS.29.1   | 4.05  | 3.88  | 0.16 | 0.25 | 1.13  | 0.297802 | 0.593863 | 0.586265 | 0.758418 |
| MmuSTS.290.1.S1_at    | MmuSTS.290.1  | 6.54  | 6.45  | 0.13 | 0.09 | 1.07  | 0.212854 | 0.255002 | 0.510857 | 0.52317  |
| MmuSTS.2900.1.S1_at   | MmuSTS.2900.1 | 5.71  | 5.75  | 0.07 | 0.24 | -1.02 | 0.859588 | 0.552532 | 0.939196 | 0.731829 |
| MmuSTS.2901.1.S1_at   | MmuSTS.2901.1 | 12.42 | 12.43 | 0.08 | 0.03 | -1    | 0.493062 | 0.51258  | 0.730194 | 0.706419 |
| MmuSTS.2902.1.S1_s_at | MmuSTS.2902.1 | 11.54 | 11.52 | 0.18 | 0.06 | 1.01  | 0.834947 | 0.977066 | 0.927417 | 0.987527 |
| MmuSTS.2903.1.S1_at   | MmuSTS.2903.1 | 8.82  | 9.71  | 0.3  | 0.24 | -1.86 | 0.02797  | 0.264145 | 0.219838 | 0.530214 |
| MmuSTS.2904.1.S1_at   | MmuSTS.2904.1 | 3.38  | 3.18  | 0.17 | 0.05 | 1.16  | 0.332497 | 0.241644 | 0.614123 | 0.512225 |
| MmuSTS.2905.1.S1_at   | MmuSTS.2905.1 | 5.3   | 5.23  | 0.16 | 0.07 | 1.05  | 0.208696 | 0.102204 | 0.506255 | 0.362326 |
| MmuSTS.2906.1.S1_at   | MmuSTS.2906.1 | 8.49  | 9.98  | 0.45 | 0.08 | -2.81 | 0.00957  | 0.21507  | 0.147978 | 0.488912 |
| MmuSTS.2907.1.S1_at   | MmuSTS.2907.1 | 10.59 | 10.6  | 0.16 | 0.03 | -1    | 0.671445 | 0.797735 | 0.842413 | 0.883466 |
| MmuSTS.2908.1.S1_at   | MmuSTS.2908.1 | 6.41  | 6.39  | 0.09 | 0.08 | 1.01  | 0.706482 | 0.11565  | 0.861053 | 0.382714 |
| MmuSTS.2909.1.S1_at   | MmuSTS.2909.1 | 7.34  | 7.16  | 0.6  | 0.14 | 1.13  | 0.851098 | 0.493633 | 0.935277 | 0.694288 |
| MmuSTS.291.1.S1_s_at  | MmuSTS.291.1  | 4.28  | 4.2   | 0.15 | 0.04 | 1.06  | 0.323814 | 0.438961 | 0.607547 | 0.657787 |

|                       |               |       |       |      |      |        |          |          |          |          |
|-----------------------|---------------|-------|-------|------|------|--------|----------|----------|----------|----------|
| MmuSTS.2910.1.S1_at   | MmuSTS.2910.1 | 5.61  | 5.69  | 0.18 | 0.1  | -1.05  | 0.894596 | 0.83075  | 0.955061 | 0.902874 |
| MmuSTS.2911.1.S1_at   | MmuSTS.2911.1 | 4.3   | 4.16  | 0.09 | 0.09 | 1.1    | 0.27021  | 0.771734 | 0.562365 | 0.867344 |
| MmuSTS.2912.1.S1_at   | MmuSTS.2912.1 | 8.14  | 10.04 | 0.78 | 0.11 | -3.73  | 0.02938  | 0.054319 | 0.224381 | 0.278551 |
| MmuSTS.2913.1.S1_at   | MmuSTS.2913.1 | 4.27  | 4.28  | 0.15 | 0.03 | -1     | 0.343367 | 0.531219 | 0.622974 | 0.718508 |
| MmuSTS.2914.1.S1_at   | MmuSTS.2914.1 | 10.56 | 11.08 | 0.28 | 0.29 | -1.44  | 0.135438 | 0.014729 | 0.419372 | 0.154415 |
| MmuSTS.2915.1.S1_at   | MmuSTS.2915.1 | 6.19  | 6.68  | 0.36 | 0.14 | -1.4   | 0.099142 | 0.479377 | 0.370086 | 0.685126 |
| MmuSTS.2916.1.S1_at   | MmuSTS.2916.1 | 5.26  | 6.82  | 1.94 | 0.53 | -2.95  | 0.221698 | 0.138552 | 0.519652 | 0.411557 |
| MmuSTS.2917.1.S1_s_at | MmuSTS.2917.1 | 6.81  | 6.14  | 1.35 | 0.41 | 1.6    | 0.980492 | 0.977846 | 0.992755 | 0.9879   |
| MmuSTS.2918.1.S1_at   | MmuSTS.2918.1 | 11.93 | 12.46 | 0.15 | 0.11 | -1.45  | 0.005844 | 0.000506 | 0.12242  | 0.039185 |
| MmuSTS.2919.1.S1_s_at | MmuSTS.2919.1 | 6.59  | 9.55  | 2.08 | 0.34 | -7.8   | 0.107923 | 0.296769 | 0.382524 | 0.555779 |
| MmuSTS.292.1.S1_at    | MmuSTS.292.1  | 4.69  | 4.69  | 0.11 | 0.18 | 1      | 0.607238 | 0.078851 | 0.803617 | 0.325837 |
| MmuSTS.2920.1.S1_at   | MmuSTS.2920.1 | 12.06 | 11.78 | 0.2  | 0.02 | 1.21   | 0.051339 | 0.283366 | 0.283923 | 0.545922 |
| MmuSTS.2921.1.S1_at   | MmuSTS.2921.1 | 3.85  | 4.2   | 0.09 | 0.16 | -1.28  | 0.032566 | 0.030713 | 0.234816 | 0.217148 |
| MmuSTS.2922.1.S1_at   | MmuSTS.2922.1 | 9.7   | 9.68  | 0.05 | 0.22 | 1.01   | 0.69132  | 0.90414  | 0.852399 | 0.945621 |
| MmuSTS.2923.1.S1_at   | MmuSTS.2923.1 | 4.25  | 4.23  | 0.04 | 0.13 | 1.02   | 0.737728 | 0.557387 | 0.87837  | 0.735031 |
| MmuSTS.2924.1.S1_at   | MmuSTS.2924.1 | 6.82  | 6.82  | 0.16 | 0.03 | -1     | 0.389721 | 0.189263 | 0.657497 | 0.465043 |
| MmuSTS.2925.1.S1_at   | MmuSTS.2925.1 | 3.39  | 3.29  | 0.22 | 0.11 | 1.07   | 0.803873 | 0.10604  | 0.911913 | 0.368427 |
| MmuSTS.2926.1.S1_at   | MmuSTS.2926.1 | 5.05  | 5.01  | 0.06 | 0.13 | 1.03   | 0.489754 | 0.301842 | 0.727966 | 0.559788 |
| MmuSTS.2927.1.S1_at   | MmuSTS.2927.1 | 6.6   | 6.6   | 0.16 | 0.07 | 1      | 0.670381 | 0.325981 | 0.841837 | 0.576235 |
| MmuSTS.2928.1.S1_at   | MmuSTS.2928.1 | 3.1   | 3.11  | 0.06 | 0.14 | -1.01  | 0.472046 | 0.125653 | 0.71594  | 0.396249 |
| MmuSTS.2929.1.S1_at   | MmuSTS.2929.1 | 4.42  | 4.97  | 0.18 | 0.3  | -1.46  | 0.100603 | 0.344286 | 0.371612 | 0.589762 |
| MmuSTS.293.1.S1_s_at  | MmuSTS.293.1  | 2.98  | 3.04  | 0.18 | 0.05 | -1.04  | 0.698766 | 0.561678 | 0.856806 | 0.73751  |
| MmuSTS.2930.1.S1_at   | MmuSTS.2930.1 | 3.52  | 3.49  | 0    | 0.02 | 1.02   | 0.228503 | 0.073628 | 0.526859 | 0.316952 |
| MmuSTS.2931.1.S1_at   | MmuSTS.2931.1 | 5.07  | 5.34  | 0.14 | 0.15 | -1.21  | 0.090016 | 0.073151 | 0.356863 | 0.316064 |
| MmuSTS.2932.1.S1_at   | MmuSTS.2932.1 | 5.69  | 5.76  | 0.17 | 0.04 | -1.05  | 0.28081  | 0.348609 | 0.571842 | 0.592637 |
| MmuSTS.2933.1.S1_at   | MmuSTS.2933.1 | 5.61  | 5.6   | 0.17 | 0.2  | 1.01   | 0.921389 | 0.900889 | 0.966381 | 0.943591 |
| MmuSTS.2934.1.S1_at   | MmuSTS.2934.1 | 8.87  | 10.16 | 0.21 | 0.13 | -2.44  | 0.001693 | 0.003908 | 0.084735 | 0.088806 |
| MmuSTS.2935.1.S1_at   | MmuSTS.2935.1 | 5.93  | 6.14  | 0.28 | 0.22 | -1.16  | 0.189646 | 0.398507 | 0.486064 | 0.629458 |
| MmuSTS.2936.1.S1_at   | MmuSTS.2936.1 | 4.79  | 4.81  | 0.08 | 0.04 | -1.01  | 0.646357 | 0.10412  | 0.828104 | 0.365152 |
| MmuSTS.2937.1.S1_at   | MmuSTS.2937.1 | 5.95  | 6.25  | 0.21 | 0.42 | -1.23  | 0.122759 | 0.132888 | 0.401667 | 0.404544 |
| MmuSTS.2938.1.S1_at   | MmuSTS.2938.1 | 9.88  | 10.52 | 1.03 | 0.39 | -1.56  | 0.127815 | 0.010486 | 0.40966  | 0.133872 |
| MmuSTS.2939.1.S1_at   | MmuSTS.2939.1 | 5.93  | 5.91  | 0.1  | 0.05 | 1.01   | 0.564031 | 0.070611 | 0.77581  | 0.311913 |
| MmuSTS.294.1.S1_s_at  | MmuSTS.294.1  | 4.79  | 4.77  | 0.07 | 0.11 | 1.01   | 0.337406 | 0.311945 | 0.617875 | 0.566833 |
| MmuSTS.2940.1.S1_at   | MmuSTS.2940.1 | 5.51  | 9.34  | 1.54 | 0.41 | -14.24 | 0.038012 | 0.166932 | 0.250711 | 0.443415 |
| MmuSTS.2941.1.S1_at   | MmuSTS.2941.1 | 7.78  | 8.33  | 0.33 | 0.06 | -1.47  | 0.134118 | 0.755186 | 0.417578 | 0.857488 |
| MmuSTS.2942.1.S1_at   | MmuSTS.2942.1 | 11.05 | 10.79 | 0.08 | 0.05 | 1.2    | 0.013092 | 0.039381 | 0.165061 | 0.243406 |
| MmuSTS.2943.1.S1_at   | MmuSTS.2943.1 | 9.88  | 10.19 | 0.04 | 0.04 | -1.24  | 0.000409 | 0.086318 | 0.06311  | 0.338771 |
| MmuSTS.2944.1.S1_at   | MmuSTS.2944.1 | 9.24  | 9.37  | 0.16 | 0.08 | -1.1   | 0.518802 | 0.787798 | 0.747723 | 0.877294 |
| MmuSTS.2945.1.S1_s_at | MmuSTS.2945.1 | 3.65  | 4.51  | 0.14 | 0.57 | -1.81  | 0.173571 | 0.1585   | 0.467917 | 0.434442 |
| MmuSTS.2946.1.S1_at   | MmuSTS.2946.1 | 8.42  | 8.79  | 0.37 | 0.31 | -1.29  | 0.508974 | 0.73617  | 0.740783 | 0.847335 |
| MmuSTS.2947.1.S1_at   | MmuSTS.2947.1 | 9.92  | 10.8  | 0.4  | 0.12 | -1.85  | 0.015959 | 0.029623 | 0.178824 | 0.213783 |
| MmuSTS.2948.1.S1_at   | MmuSTS.2948.1 | 5.77  | 5.74  | 0.36 | 0.18 | 1.02   | 0.909345 | 0.859164 | 0.961565 | 0.919754 |
| MmuSTS.2949.1.S1_at   | MmuSTS.2949.1 | 11.25 | 11.19 | 0.16 | 0.18 | 1.05   | 0.561823 | 0.304073 | 0.774627 | 0.561408 |

|                      |               |       |       |      |      |        |          |          |          |          |
|----------------------|---------------|-------|-------|------|------|--------|----------|----------|----------|----------|
| MmuSTS.295.1.S1_s_at | MmuSTS.295.1  | 4.22  | 4.27  | 0.17 | 0.02 | -1.04  | 0.700581 | 0.495028 | 0.857793 | 0.695291 |
| MmuSTS.2950.1.S1_at  | MmuSTS.2950.1 | 11.15 | 11    | 0.24 | 0.05 | 1.11   | 0.190664 | 0.271515 | 0.486844 | 0.536545 |
| MmuSTS.2951.1.S1_at  | MmuSTS.2951.1 | 12.63 | 12.56 | 0.03 | 0.02 | 1.05   | 0.030421 | 0.000449 | 0.227279 | 0.038539 |
| MmuSTS.2952.1.S1_at  | MmuSTS.2952.1 | 8.78  | 10.21 | 0.65 | 0.3  | -2.69  | 0.101577 | 0.089835 | 0.372935 | 0.344058 |
| MmuSTS.2953.1.S1_at  | MmuSTS.2953.1 | 9.67  | 11.01 | 0.29 | 0.23 | -2.53  | 0.008443 | 0.085019 | 0.141068 | 0.336744 |
| MmuSTS.2954.1.S1_at  | MmuSTS.2954.1 | 3.5   | 3.36  | 0.04 | 0.1  | 1.1    | 0.180789 | 0.326553 | 0.47597  | 0.576612 |
| MmuSTS.2955.1.S1_at  | MmuSTS.2955.1 | 7.54  | 7.28  | 0.32 | 0.4  | 1.2    | 0.296886 | 0.589298 | 0.585528 | 0.755536 |
| MmuSTS.2956.1.S1_at  | MmuSTS.2956.1 | 9.41  | 12.78 | 1.71 | 0.14 | -10.39 | 0.075607 | 0.339506 | 0.333234 | 0.586095 |
| MmuSTS.2957.1.S1_at  | MmuSTS.2957.1 | 8.79  | 8.77  | 0.2  | 0.03 | 1.01   | 0.819995 | 0.022071 | 0.919687 | 0.185927 |
| MmuSTS.2958.1.S1_at  | MmuSTS.2958.1 | 10.75 | 11.2  | 0.28 | 0.04 | -1.36  | 0.054896 | 0.577391 | 0.291213 | 0.747893 |
| MmuSTS.2959.1.S1_at  | MmuSTS.2959.1 | 4.14  | 4.13  | 0.47 | 0.46 | 1.01   | 0.791213 | 0.099681 | 0.9052   | 0.358211 |
| MmuSTS.296.1.S1_s_at | MmuSTS.296.1  | 5.56  | 5.64  | 0.13 | 0.03 | -1.06  | 0.357553 | 0.136668 | 0.633615 | 0.409207 |
| MmuSTS.2960.1.S1_at  | MmuSTS.2960.1 | 3.36  | 3.2   | 0.07 | 0.24 | 1.12   | 0.262512 | 0.449165 | 0.556605 | 0.664892 |
| MmuSTS.2961.1.S1_at  | MmuSTS.2961.1 | 7.5   | 7.66  | 0.21 | 0.09 | -1.12  | 0.273137 | 0.408233 | 0.565251 | 0.635527 |
| MmuSTS.2962.1.S1_at  | MmuSTS.2962.1 | 7.09  | 6.75  | 0.39 | 0.28 | 1.27   | 0.109271 | 0.022823 | 0.384379 | 0.189227 |
| MmuSTS.2963.1.S1_at  | MmuSTS.2963.1 | 4.89  | 4.6   | 0.14 | 0.16 | 1.23   | 0.084999 | 0.121158 | 0.348996 | 0.390217 |
| MmuSTS.2964.1.S1_at  | MmuSTS.2964.1 | 5.4   | 4.41  | 0.33 | 0.32 | 1.99   | 0.07214  | 0.051462 | 0.326542 | 0.272242 |
| MmuSTS.2965.1.S1_at  | MmuSTS.2965.1 | 4.01  | 3.95  | 0.09 | 0.16 | 1.04   | 0.761208 | 0.250597 | 0.890581 | 0.51941  |
| MmuSTS.2966.1.S1_at  | MmuSTS.2966.1 | 5.65  | 5.53  | 0.01 | 0.03 | 1.08   | 0.007398 | 0.049359 | 0.134211 | 0.267081 |
| MmuSTS.2967.1.S1_at  | MmuSTS.2967.1 | 7.87  | 7.86  | 0.46 | 0.13 | 1.01   | 0.435172 | 0.842665 | 0.690293 | 0.910333 |
| MmuSTS.2968.1.S1_at  | MmuSTS.2968.1 | 6.64  | 7.37  | 0.49 | 0.13 | -1.66  | 0.199734 | 0.214756 | 0.497195 | 0.48862  |
| MmuSTS.2969.1.S1_at  | MmuSTS.2969.1 | 3.39  | 3.29  | 0.01 | 0.49 | 1.07   | 0.557249 | 0.482311 | 0.772057 | 0.687186 |
| MmuSTS.297.1.S1_at   | MmuSTS.297.1  | 4.94  | 4.84  | 0.05 | 0.09 | 1.07   | 0.170587 | 0.078427 | 0.464298 | 0.325193 |
| MmuSTS.2970.1.S1_at  | MmuSTS.2970.1 | 11.9  | 11.73 | 0.11 | 0.09 | 1.12   | 0.050544 | 0.040331 | 0.282549 | 0.245973 |
| MmuSTS.2971.1.S1_at  | MmuSTS.2971.1 | 8.43  | 8.5   | 0.25 | 0.09 | -1.05  | 0.82301  | 0.584354 | 0.921328 | 0.752414 |
| MmuSTS.2972.1.S1_at  | MmuSTS.2972.1 | 13.57 | 13.63 | 0.43 | 0.07 | -1.04  | 0.28099  | 0.33404  | 0.571878 | 0.582104 |
| MmuSTS.2973.1.S1_at  | MmuSTS.2973.1 | 10.69 | 10.88 | 0.34 | 0.09 | -1.14  | 0.584371 | 0.822304 | 0.788586 | 0.89777  |
| MmuSTS.2974.1.S1_at  | MmuSTS.2974.1 | 8.86  | 9.01  | 0.23 | 0.09 | -1.11  | 0.655113 | 0.923968 | 0.833095 | 0.957162 |
| MmuSTS.2975.1.S1_at  | MmuSTS.2975.1 | 5.72  | 5.76  | 0.18 | 0.42 | -1.03  | 0.901613 | 0.509607 | 0.958288 | 0.704267 |
| MmuSTS.2976.1.S1_at  | MmuSTS.2976.1 | 10.2  | 10.83 | 0.28 | 0.08 | -1.54  | 0.023381 | 0.040017 | 0.205907 | 0.245241 |
| MmuSTS.2977.1.S1_at  | MmuSTS.2977.1 | 9.6   | 9.42  | 0.21 | 0.38 | 1.13   | 0.437983 | 0.005941 | 0.692763 | 0.105436 |
| MmuSTS.2978.1.S1_at  | MmuSTS.2978.1 | 11.76 | 11.82 | 0.25 | 0.1  | -1.04  | 0.965202 | 0.75219  | 0.985924 | 0.855787 |
| MmuSTS.2979.1.S1_at  | MmuSTS.2979.1 | 7.31  | 7.32  | 0.1  | 0.03 | -1.01  | 0.975053 | 0.728668 | 0.990073 | 0.843151 |
| MmuSTS.298.1.S1_at   | MmuSTS.298.1  | 8.06  | 8.82  | 0.67 | 0.05 | -1.7   | 0.044909 | 0.128079 | 0.269298 | 0.399072 |
| MmuSTS.2980.1.S1_at  | MmuSTS.2980.1 | 11.59 | 11.68 | 0.03 | 0.1  | -1.06  | 0.321926 | 0.355021 | 0.606135 | 0.597466 |
| MmuSTS.2981.1.S1_at  | MmuSTS.2981.1 | 11.29 | 11.5  | 0.16 | 0.08 | -1.16  | 0.097143 | 0.139949 | 0.367275 | 0.413295 |
| MmuSTS.2982.1.S1_at  | MmuSTS.2982.1 | 9.77  | 9.83  | 0.19 | 0.05 | -1.05  | 0.257671 | 0.041893 | 0.551912 | 0.249206 |
| MmuSTS.2983.1.S1_at  | MmuSTS.2983.1 | 9.8   | 9.72  | 0.23 | 0.23 | 1.06   | 0.350432 | 0.358706 | 0.628242 | 0.600178 |
| MmuSTS.2984.1.S1_at  | MmuSTS.2984.1 | 4.42  | 4.43  | 0.12 | 0.03 | -1.01  | 0.437532 | 0.410329 | 0.692395 | 0.637216 |
| MmuSTS.2985.1.S1_at  | MmuSTS.2985.1 | 5.08  | 4.86  | 0.22 | 0.1  | 1.16   | 0.363273 | 0.006013 | 0.637958 | 0.106069 |
| MmuSTS.2986.1.S1_at  | MmuSTS.2986.1 | 8.68  | 8.63  | 0.09 | 0.11 | 1.04   | 0.410311 | 0.173511 | 0.672397 | 0.449938 |
| MmuSTS.2987.1.S1_at  | MmuSTS.2987.1 | 12.23 | 12.15 | 0.11 | 0.04 | 1.06   | 0.351481 | 0.347398 | 0.629056 | 0.591987 |
| MmuSTS.2988.1.S1_at  | MmuSTS.2988.1 | 8.56  | 8.49  | 0.22 | 0.03 | 1.05   | 0.580525 | 0.158222 | 0.785928 | 0.43403  |

|                       |               |       |       |      |      |       |          |          |          |          |
|-----------------------|---------------|-------|-------|------|------|-------|----------|----------|----------|----------|
| MmuSTS.2989.1.S1_at   | MmuSTS.2989.1 | 11.36 | 10.56 | 0.67 | 0.17 | 1.74  | 0.053304 | 0.041066 | 0.287986 | 0.247375 |
| MmuSTS.299.1.S1_at    | MmuSTS.299.1  | 6.49  | 7.04  | 0.36 | 0.29 | -1.46 | 0.249857 | 0.144704 | 0.544824 | 0.418546 |
| MmuSTS.2990.1.S1_at   | MmuSTS.2990.1 | 7.3   | 7.05  | 0.44 | 0.05 | 1.19  | 0.989391 | 0.630737 | 0.996327 | 0.78239  |
| MmuSTS.2991.1.S1_at   | MmuSTS.2991.1 | 7.42  | 7.84  | 0.26 | 0.23 | -1.33 | 0.106823 | 0.00008  | 0.381108 | 0.027016 |
| MmuSTS.2992.1.S1_at   | MmuSTS.2992.1 | 5.16  | 5.69  | 0.41 | 0.23 | -1.44 | 0.588207 | 0.840801 | 0.790932 | 0.909237 |
| MmuSTS.2993.1.S1_at   | MmuSTS.2993.1 | 11.7  | 11.63 | 0.13 | 0.05 | 1.05  | 0.575851 | 0.052464 | 0.78296  | 0.274577 |
| MmuSTS.2994.1.S1_at   | MmuSTS.2994.1 | 11.34 | 10.97 | 0.28 | 0.1  | 1.29  | 0.295626 | 0.495885 | 0.584357 | 0.695781 |
| MmuSTS.2995.1.S1_at   | MmuSTS.2995.1 | 12.94 | 12.8  | 0.12 | 0.02 | 1.1   | 0.108889 | 0.044064 | 0.383812 | 0.254195 |
| MmuSTS.2996.1.S1_at   | MmuSTS.2996.1 | 6.65  | 6.73  | 0.47 | 0.05 | -1.05 | 0.573983 | 0.816996 | 0.781504 | 0.894454 |
| MmuSTS.2997.1.S1_at   | MmuSTS.2997.1 | 6.35  | 6.42  | 0.11 | 0.15 | -1.05 | 0.120448 | 0.194836 | 0.398818 | 0.46989  |
| MmuSTS.2998.1.S1_at   | MmuSTS.2998.1 | 3.91  | 4.19  | 0.19 | 0.11 | -1.21 | 0.309933 | 0.175229 | 0.596237 | 0.452011 |
| MmuSTS.2999.1.S1_at   | MmuSTS.2999.1 | 11.5  | 11.26 | 0.19 | 0.07 | 1.18  | 0.234132 | 0.142398 | 0.532201 | 0.415965 |
| MmuSTS.3.1.S1_at      | MmuSTS.3.1    | 4.04  | 4.07  | 0.34 | 0.13 | -1.02 | 0.839701 | 0.374178 | 0.92965  | 0.612678 |
| MmuSTS.30.1.S1_s_at   | MmuSTS.30.1   | 9.71  | 9.37  | 0.18 | 0.14 | 1.27  | 0.098917 | 0.001041 | 0.369794 | 0.051426 |
| MmuSTS.3000.1.S1_at   | MmuSTS.3000.1 | 8.47  | 6.22  | 0.18 | 0.78 | 4.76  | 0.006644 | 0.017054 | 0.127957 | 0.165465 |
| MmuSTS.3001.1.S1_at   | MmuSTS.3001.1 | 9.11  | 9.15  | 0.15 | 0.05 | -1.03 | 0.761735 | 0.849115 | 0.890644 | 0.914337 |
| MmuSTS.3002.1.S1_at   | MmuSTS.3002.1 | 9.78  | 9.67  | 0.37 | 0.05 | 1.07  | 0.260032 | 0.260224 | 0.554208 | 0.526807 |
| MmuSTS.3003.1.S1_at   | MmuSTS.3003.1 | 10.23 | 10.31 | 0.43 | 0.12 | -1.06 | 0.73809  | 0.6758   | 0.878569 | 0.810503 |
| MmuSTS.3004.1.S1_at   | MmuSTS.3004.1 | 9.45  | 8.87  | 0.08 | 0.09 | 1.5   | 0.002178 | 0.062776 | 0.090576 | 0.297193 |
| MmuSTS.3005.1.S1_at   | MmuSTS.3005.1 | 5.84  | 5.09  | 0.6  | 0.12 | 1.68  | 0.197821 | 0.156027 | 0.49515  | 0.431444 |
| MmuSTS.3006.1.S1_at   | MmuSTS.3006.1 | 8.27  | 9.5   | 0.42 | 0.28 | -2.33 | 0.049303 | 0.063946 | 0.279476 | 0.29906  |
| MmuSTS.3007.1.S1_at   | MmuSTS.3007.1 | 11.46 | 11.65 | 0.22 | 0.04 | -1.15 | 0.265686 | 0.661699 | 0.558314 | 0.801903 |
| MmuSTS.3008.1.S1_s_at | MmuSTS.3008.1 | 4.09  | 4.06  | 0.07 | 0.07 | 1.02  | 0.352452 | 0.442405 | 0.630029 | 0.660391 |
| MmuSTS.3009.1.S1_at   | MmuSTS.3009.1 | 9.26  | 10.11 | 0.06 | 0.11 | -1.81 | 0.00045  | 0.039016 | 0.065806 | 0.242715 |
| MmuSTS.301.1.S1_s_at  | MmuSTS.301.1  | 3.93  | 3.9   | 0.06 | 0.1  | 1.02  | 0.784736 | 0.390377 | 0.901788 | 0.624156 |
| MmuSTS.3010.1.S1_at   | MmuSTS.3010.1 | 7.33  | 7.21  | 0.31 | 0.16 | 1.08  | 0.837061 | 0.53474  | 0.928546 | 0.720524 |
| MmuSTS.3011.1.S1_at   | MmuSTS.3011.1 | 9.87  | 9.94  | 0.29 | 0.03 | -1.05 | 0.563586 | 0.161842 | 0.775582 | 0.437937 |
| MmuSTS.3012.1.S1_at   | MmuSTS.3012.1 | 6.73  | 6.8   | 0.12 | 0.01 | -1.06 | 0.303079 | 0.093523 | 0.590531 | 0.349846 |
| MmuSTS.3013.1.S1_at   | MmuSTS.3013.1 | 6.92  | 7.52  | 1.04 | 0.33 | -1.52 | 0.184483 | 0.253321 | 0.480429 | 0.521662 |
| MmuSTS.3014.1.S1_at   | MmuSTS.3014.1 | 3.9   | 3.91  | 0.08 | 0.12 | -1.01 | 0.881545 | 0.078317 | 0.949624 | 0.324955 |
| MmuSTS.3015.1.S1_at   | MmuSTS.3015.1 | 8.51  | 8.82  | 0.73 | 0.3  | -1.24 | 0.87059  | 0.522967 | 0.944318 | 0.713429 |
| MmuSTS.3016.1.S1_at   | MmuSTS.3016.1 | 4.68  | 5.13  | 0.19 | 0.3  | -1.37 | 0.439784 | 0.695463 | 0.693902 | 0.822995 |
| MmuSTS.3017.1.S1_at   | MmuSTS.3017.1 | 8.69  | 8.75  | 0.08 | 0.18 | -1.04 | 0.280232 | 0.141862 | 0.571426 | 0.415372 |
| MmuSTS.3018.1.S1_at   | MmuSTS.3018.1 | 6.46  | 6.79  | 0.83 | 0.19 | -1.25 | 0.480367 | 0.441285 | 0.721302 | 0.659483 |
| MmuSTS.3019.1.S1_at   | MmuSTS.3019.1 | 4.93  | 5.16  | 0.73 | 0.3  | -1.17 | 0.99438  | 0.414201 | 0.997657 | 0.640124 |
| MmuSTS.3020.1.S1_at   | MmuSTS.3020.1 | 3.71  | 3.68  | 0.14 | 0.03 | 1.02  | 0.802759 | 0.503854 | 0.911426 | 0.701193 |
| MmuSTS.3020.1.S1_s_at | MmuSTS.3020.1 | 5.61  | 5.51  | 0.02 | 0.15 | 1.07  | 0.293675 | 0.566026 | 0.582689 | 0.740192 |
| MmuSTS.3021.1.S1_at   | MmuSTS.3021.1 | 11.13 | 10.83 | 0.17 | 0.1  | 1.23  | 0.052571 | 0.013528 | 0.286306 | 0.148875 |
| MmuSTS.3022.1.S1_at   | MmuSTS.3022.1 | 3.54  | 3.51  | 0.39 | 0.28 | 1.02  | 0.724447 | 0.86717  | 0.870565 | 0.924514 |
| MmuSTS.3023.1.S1_at   | MmuSTS.3023.1 | 5.58  | 5.43  | 0.06 | 0.06 | 1.11  | 0.065063 | 0.010898 | 0.311895 | 0.135939 |
| MmuSTS.3024.1.S1_at   | MmuSTS.3024.1 | 12.8  | 12.98 | 0.1  | 0.07 | -1.14 | 0.055456 | 0.002202 | 0.292419 | 0.069315 |
| MmuSTS.3025.1.S1_at   | MmuSTS.3025.1 | 9.21  | 10.03 | 0.15 | 0.1  | -1.77 | 0.001494 | 0.170532 | 0.08111  | 0.447177 |
| MmuSTS.3026.1.S1_at   | MmuSTS.3026.1 | 4.55  | 4.73  | 1.08 | 0.3  | -1.13 | 0.926714 | 0.334226 | 0.969008 | 0.582266 |

|                       |               |       |       |      |      |       |          |          |          |          |
|-----------------------|---------------|-------|-------|------|------|-------|----------|----------|----------|----------|
| MmuSTS.3027.1.S1_at   | MmuSTS.3027.1 | 6.82  | 6.59  | 0.2  | 0.06 | 1.18  | 0.13001  | 0.370332 | 0.412127 | 0.609407 |
| MmuSTS.3028.1.S1_at   | MmuSTS.3028.1 | 9.62  | 10.44 | 0.22 | 0.14 | -1.76 | 0.006771 | 0.039508 | 0.129086 | 0.243706 |
| MmuSTS.3029.1.S1_at   | MmuSTS.3029.1 | 12.25 | 12.17 | 0.22 | 0.07 | 1.05  | 0.694632 | 0.87925  | 0.854272 | 0.9311   |
| MmuSTS.3030.1.S1_at   | MmuSTS.3030.1 | 9.84  | 10.93 | 0.2  | 0.34 | -2.13 | 0.016245 | 0.012144 | 0.180266 | 0.142633 |
| MmuSTS.3031.1.S1_at   | MmuSTS.3031.1 | 7     | 7.65  | 0.11 | 0.18 | -1.57 | 0.005555 | 0.027937 | 0.120017 | 0.208628 |
| MmuSTS.3032.1.S1_at   | MmuSTS.3032.1 | 11.34 | 11.86 | 0.05 | 0.06 | -1.43 | 0.000291 | 0.175929 | 0.057043 | 0.452486 |
| MmuSTS.3033.1.S1_at   | MmuSTS.3033.1 | 8.07  | 8.02  | 0.08 | 0.12 | 1.04  | 0.45808  | 0.911965 | 0.706779 | 0.950333 |
| MmuSTS.3034.1.S1_at   | MmuSTS.3034.1 | 10.92 | 11.13 | 0.04 | 0.17 | -1.16 | 0.397576 | 0.856088 | 0.66317  | 0.917842 |
| MmuSTS.3035.1.S1_at   | MmuSTS.3035.1 | 11.52 | 11.14 | 0.05 | 0.09 | 1.3   | 0.00453  | 0.003319 | 0.113436 | 0.082861 |
| MmuSTS.3036.1.S1_at   | MmuSTS.3036.1 | 9.56  | 8.31  | 0.35 | 0.34 | 2.38  | 0.007246 | 0.004579 | 0.132695 | 0.094474 |
| MmuSTS.3037.1.S1_at   | MmuSTS.3037.1 | 4.95  | 5.28  | 0.26 | 0.11 | -1.26 | 0.246684 | 0.462432 | 0.54248  | 0.673754 |
| MmuSTS.3038.1.S1_at   | MmuSTS.3038.1 | 11.84 | 11.82 | 0.14 | 0.04 | 1.01  | 0.642262 | 0.30123  | 0.825507 | 0.559356 |
| MmuSTS.3039.1.S1_at   | MmuSTS.3039.1 | 8.52  | 8.68  | 0.12 | 0.15 | -1.12 | 0.166739 | 0.464251 | 0.460006 | 0.674983 |
| MmuSTS.304.1.S1_at    | MmuSTS.304.1  | 11.42 | 11.2  | 0.02 | 0.14 | 1.16  | 0.121521 | 0.122079 | 0.400293 | 0.39161  |
| MmuSTS.3040.1.S1_at   | MmuSTS.3040.1 | 9.09  | 9.18  | 0.15 | 0.1  | -1.06 | 0.376649 | 0.607693 | 0.647297 | 0.766491 |
| MmuSTS.3041.1.S1_at   | MmuSTS.3041.1 | 11.79 | 11.7  | 0.19 | 0.07 | 1.06  | 0.902787 | 0.978468 | 0.958754 | 0.988282 |
| MmuSTS.3042.1.S1_at   | MmuSTS.3042.1 | 11.69 | 11.5  | 0.08 | 0.02 | 1.14  | 0.011802 | 0.012278 | 0.158436 | 0.143352 |
| MmuSTS.3043.1.S1_at   | MmuSTS.3043.1 | 6.04  | 6.05  | 0.14 | 0.06 | -1.01 | 0.492043 | 0.195422 | 0.729508 | 0.470253 |
| MmuSTS.3044.1.S1_at   | MmuSTS.3044.1 | 6.11  | 6.24  | 0.19 | 0.1  | -1.1  | 0.946098 | 0.347449 | 0.977211 | 0.592019 |
| MmuSTS.3045.1.S1_at   | MmuSTS.3045.1 | 6.81  | 8.01  | 0.62 | 0.06 | -2.29 | 0.080063 | 0.214236 | 0.340402 | 0.487856 |
| MmuSTS.3046.1.S1_at   | MmuSTS.3046.1 | 11.29 | 11.33 | 0.1  | 0.03 | -1.03 | 0.778519 | 0.593875 | 0.898791 | 0.758418 |
| MmuSTS.3047.1.S1_at   | MmuSTS.3047.1 | 12.72 | 12.76 | 0.06 | 0.04 | -1.03 | 0.782439 | 0.035237 | 0.900717 | 0.231952 |
| MmuSTS.3048.1.S1_at   | MmuSTS.3048.1 | 12.52 | 12.29 | 0.06 | 0.04 | 1.17  | 0.007227 | 0.251182 | 0.132536 | 0.519899 |
| MmuSTS.3049.1.S1_at   | MmuSTS.3049.1 | 2.78  | 2.92  | 0.07 | 0.03 | -1.1  | 0.079721 | 0.194736 | 0.339935 | 0.469774 |
| MmuSTS.305.1.S1_at    | MmuSTS.305.1  | 6.97  | 6.96  | 0.14 | 0.01 | 1.01  | 0.374966 | 0.457398 | 0.645792 | 0.670819 |
| MmuSTS.3050.1.S1_at   | MmuSTS.3050.1 | 10.69 | 10.65 | 1.02 | 0.06 | 1.03  | 0.329187 | 0.225758 | 0.611514 | 0.498159 |
| MmuSTS.3051.1.S1_at   | MmuSTS.3051.1 | 10.43 | 10.46 | 0.29 | 0.11 | -1.02 | 0.982577 | 0.231529 | 0.993625 | 0.503325 |
| MmuSTS.3052.1.S1_at   | MmuSTS.3052.1 | 8.11  | 7.92  | 0.07 | 0.08 | 1.14  | 0.021858 | 0.089902 | 0.201103 | 0.344073 |
| MmuSTS.3053.1.S1_at   | MmuSTS.3053.1 | 8.74  | 8.8   | 0.1  | 0.2  | -1.04 | 0.714435 | 0.578732 | 0.86508  | 0.748611 |
| MmuSTS.3054.1.S1_at   | MmuSTS.3054.1 | 10.64 | 10.62 | 0.26 | 0.14 | 1.01  | 0.615995 | 0.269027 | 0.809258 | 0.534425 |
| MmuSTS.3055.1.S1_at   | MmuSTS.3055.1 | 11.39 | 11.18 | 0.09 | 0.03 | 1.16  | 0.029844 | 0.131926 | 0.22603  | 0.403977 |
| MmuSTS.3056.1.S1_at   | MmuSTS.3056.1 | 4.04  | 4.18  | 0.13 | 0.24 | -1.1  | 0.330007 | 0.471003 | 0.612081 | 0.679162 |
| MmuSTS.3057.1.S1_at   | MmuSTS.3057.1 | 9.11  | 8.8   | 0.15 | 0.17 | 1.25  | 0.079606 | 0.005357 | 0.33985  | 0.101092 |
| MmuSTS.3058.1.S1_at   | MmuSTS.3058.1 | 7.71  | 7.58  | 0.15 | 0.11 | 1.09  | 0.119012 | 0.064255 | 0.396713 | 0.299692 |
| MmuSTS.3059.1.S1_s_at | MmuSTS.3059.1 | 13.15 | 13.28 | 0.02 | 0.06 | -1.1  | 0.039294 | 0.215329 | 0.254695 | 0.489062 |
| MmuSTS.306.1.S1_at    | MmuSTS.306.1  | 6.79  | 6.71  | 0.13 | 0.14 | 1.06  | 0.691921 | 0.418264 | 0.852783 | 0.642702 |
| MmuSTS.3060.1.S1_at   | MmuSTS.3060.1 | 10.14 | 11.13 | 0.42 | 0.14 | -1.99 | 0.018864 | 0.054516 | 0.190935 | 0.278993 |
| MmuSTS.3061.1.S1_at   | MmuSTS.3061.1 | 10.36 | 10.58 | 0.14 | 0.13 | -1.16 | 0.264212 | 0.00127  | 0.557453 | 0.055241 |
| MmuSTS.3062.1.S1_at   | MmuSTS.3062.1 | 10.09 | 10.43 | 0.19 | 0.02 | -1.27 | 0.04118  | 0.024536 | 0.259407 | 0.196025 |
| MmuSTS.3063.1.S1_at   | MmuSTS.3063.1 | 8.15  | 7.34  | 0.22 | 0.05 | 1.76  | 0.004582 | 0.000058 | 0.113728 | 0.025666 |
| MmuSTS.3064.1.S1_at   | MmuSTS.3064.1 | 8.58  | 9.57  | 0.34 | 0.31 | -1.99 | 0.035293 | 0.011983 | 0.24256  | 0.141658 |
| MmuSTS.3065.1.S1_at   | MmuSTS.3065.1 | 11.67 | 11.75 | 0.06 | 0.07 | -1.06 | 0.05541  | 0.014799 | 0.292343 | 0.154768 |
| MmuSTS.3066.1.S1_at   | MmuSTS.3066.1 | 7.22  | 7.33  | 0.22 | 0.12 | -1.08 | 0.577135 | 0.246954 | 0.783459 | 0.516238 |

|                      |               |       |       |      |      |       |          |          |          |          |
|----------------------|---------------|-------|-------|------|------|-------|----------|----------|----------|----------|
| MmuSTS.3067.1.S1_at  | MmuSTS.3067.1 | 9.02  | 8.99  | 0.1  | 0.01 | 1.02  | 0.368745 | 0.016013 | 0.642367 | 0.160458 |
| MmuSTS.3068.1.S1_at  | MmuSTS.3068.1 | 10.67 | 10.71 | 0.13 | 0.19 | -1.03 | 0.585127 | 0.567985 | 0.78904  | 0.74176  |
| MmuSTS.3069.1.S1_at  | MmuSTS.3069.1 | 6.17  | 5.95  | 0.09 | 0.13 | 1.16  | 0.10261  | 0.029124 | 0.374931 | 0.212733 |
| MmuSTS.307.1.S1_at   | MmuSTS.307.1  | 10.67 | 11.45 | 0.18 | 0.22 | -1.72 | 0.015064 | 0.07162  | 0.174736 | 0.313735 |
| MmuSTS.3070.1.S1_at  | MmuSTS.3070.1 | 12.37 | 11.97 | 0.14 | 0.05 | 1.32  | 0.005153 | 0.000125 | 0.116998 | 0.029087 |
| MmuSTS.3071.1.S1_at  | MmuSTS.3071.1 | 4.43  | 4.39  | 0.19 | 0.21 | 1.02  | 0.465557 | 0.597814 | 0.711552 | 0.760411 |
| MmuSTS.3072.1.S1_at  | MmuSTS.3072.1 | 3.66  | 3.71  | 0.14 | 0.02 | -1.03 | 0.54715  | 0.74599  | 0.765801 | 0.852688 |
| MmuSTS.3073.1.S1_at  | MmuSTS.3073.1 | 5.2   | 5.16  | 0.21 | 0.1  | 1.03  | 0.633802 | 0.624324 | 0.8205   | 0.778564 |
| MmuSTS.3074.1.S1_at  | MmuSTS.3074.1 | 9.56  | 9.75  | 0.11 | 0.05 | -1.14 | 0.054538 | 0.001091 | 0.290603 | 0.052283 |
| MmuSTS.3075.1.S1_at  | MmuSTS.3075.1 | 6.9   | 6.85  | 0.02 | 0.03 | 1.04  | 0.040108 | 0.841352 | 0.256783 | 0.909628 |
| MmuSTS.3076.1.S1_at  | MmuSTS.3076.1 | 3.75  | 3.65  | 0.12 | 0.06 | 1.07  | 0.445114 | 0.365582 | 0.697715 | 0.605617 |
| MmuSTS.3077.1.S1_at  | MmuSTS.3077.1 | 12.47 | 12.61 | 0.08 | 0    | -1.1  | 0.113531 | 0.760173 | 0.390238 | 0.860657 |
| MmuSTS.3078.1.S1_at  | MmuSTS.3078.1 | 5.8   | 5.81  | 0.17 | 0.09 | -1.01 | 0.398985 | 0.045194 | 0.664535 | 0.256979 |
| MmuSTS.3079.1.S1_at  | MmuSTS.3079.1 | 8.82  | 9.59  | 0.16 | 0.16 | -1.71 | 0.003145 | 0.003474 | 0.101284 | 0.084834 |
| MmuSTS.308.1.S1_at   | MmuSTS.308.1  | 6.98  | 7.5   | 0.26 | 0.44 | -1.43 | 0.2003   | 0.028884 | 0.497792 | 0.211763 |
| MmuSTS.3080.1.S1_at  | MmuSTS.3080.1 | 8.11  | 8.01  | 0.07 | 0.03 | 1.07  | 0.08801  | 0.000174 | 0.354244 | 0.030511 |
| MmuSTS.3081.1.S1_at  | MmuSTS.3081.1 | 11.89 | 11.85 | 0.09 | 0.05 | 1.03  | 0.325643 | 0.531045 | 0.608846 | 0.718384 |
| MmuSTS.3082.1.S1_at  | MmuSTS.3082.1 | 12.81 | 12.81 | 0.05 | 0.09 | 1     | 0.728272 | 0.132416 | 0.873011 | 0.404409 |
| MmuSTS.3083.1.S1_at  | MmuSTS.3083.1 | 13.02 | 13.04 | 0.08 | 0.03 | -1.02 | 0.91487  | 0.063947 | 0.963876 | 0.29906  |
| MmuSTS.3084.1.S1_at  | MmuSTS.3084.1 | 11.6  | 11.93 | 0.15 | 0.18 | -1.26 | 0.353025 | 0.011987 | 0.630277 | 0.141658 |
| MmuSTS.3085.1.S1_at  | MmuSTS.3085.1 | 10.37 | 10.8  | 0.17 | 0.03 | -1.34 | 0.005503 | 0.000935 | 0.119627 | 0.048962 |
| MmuSTS.3086.1.S1_at  | MmuSTS.3086.1 | 10.42 | 10.35 | 0.16 | 0.08 | 1.05  | 0.467606 | 0.005488 | 0.713028 | 0.102081 |
| MmuSTS.3087.1.S1_at  | MmuSTS.3087.1 | 11.71 | 11.1  | 0.17 | 0.13 | 1.54  | 0.009225 | 0.000267 | 0.145865 | 0.033786 |
| MmuSTS.3088.1.S1_at  | MmuSTS.3088.1 | 8.89  | 10.47 | 0.09 | 0.04 | -3    | 0.000013 | 0.026528 | 0.045594 | 0.203899 |
| MmuSTS.3089.1.S1_at  | MmuSTS.3089.1 | 7.21  | 7.27  | 0.17 | 0.06 | -1.04 | 0.59197  | 0.279727 | 0.793093 | 0.543228 |
| MmuSTS.309.1.S1_s_at | MmuSTS.309.1  | 2.77  | 2.68  | 0.09 | 0.21 | 1.06  | 0.82541  | 0.950758 | 0.922444 | 0.972034 |
| MmuSTS.3090.1.S1_at  | MmuSTS.3090.1 | 8.64  | 9.05  | 0.84 | 0.08 | -1.33 | 0.402086 | 0.845057 | 0.666552 | 0.911824 |
| MmuSTS.3091.1.S1_at  | MmuSTS.3091.1 | 12.36 | 12.92 | 0.08 | 0.07 | -1.48 | 0.001081 | 0.000101 | 0.077048 | 0.027996 |
| MmuSTS.3092.1.S1_at  | MmuSTS.3092.1 | 6.83  | 6.83  | 0.22 | 0.07 | -1    | 0.713337 | 0.602831 | 0.864604 | 0.763752 |
| MmuSTS.3093.1.S1_at  | MmuSTS.3093.1 | 8.99  | 8.74  | 0.1  | 0.02 | 1.19  | 0.012669 | 0.021667 | 0.16264  | 0.184333 |
| MmuSTS.3094.1.S1_at  | MmuSTS.3094.1 | 3.83  | 3.82  | 0.21 | 0.11 | 1.01  | 0.489531 | 0.673637 | 0.727823 | 0.809337 |
| MmuSTS.3095.1.S1_at  | MmuSTS.3095.1 | 3.73  | 5.54  | 0.7  | 0.24 | -3.5  | 0.038665 | 0.240941 | 0.252703 | 0.51164  |
| MmuSTS.3096.1.S1_at  | MmuSTS.3096.1 | 6.36  | 6.03  | 0.26 | 0.04 | 1.26  | 0.255149 | 0.741306 | 0.549651 | 0.850237 |
| MmuSTS.3097.1.S1_at  | MmuSTS.3097.1 | 9.49  | 9.37  | 0.18 | 0.09 | 1.09  | 0.250062 | 0.812596 | 0.544879 | 0.89176  |
| MmuSTS.3098.1.S1_at  | MmuSTS.3098.1 | 11.23 | 9.92  | 0.25 | 0.12 | 2.48  | 0.000842 | 0.000381 | 0.07338  | 0.037273 |
| MmuSTS.3099.1.S1_at  | MmuSTS.3099.1 | 9.86  | 9.64  | 0.34 | 0.12 | 1.16  | 0.184949 | 0.004068 | 0.481073 | 0.090288 |
| MmuSTS.31.1.S1_at    | MmuSTS.31.1   | 7.23  | 7.17  | 0.08 | 0.04 | 1.04  | 0.431291 | 0.885979 | 0.687415 | 0.935119 |
| MmuSTS.310.1.S1_at   | MmuSTS.310.1  | 7.36  | 6.84  | 0.42 | 0.08 | 1.43  | 0.174227 | 0.178676 | 0.468371 | 0.454929 |
| MmuSTS.3100.1.S1_at  | MmuSTS.3100.1 | 12.03 | 11.59 | 0.08 | 0.05 | 1.36  | 0.001569 | 0.005566 | 0.082388 | 0.103068 |
| MmuSTS.3101.1.S1_at  | MmuSTS.3101.1 | 6.31  | 5.04  | 0.52 | 0.2  | 2.4   | 0.010958 | 0.079558 | 0.154561 | 0.326897 |
| MmuSTS.3102.1.S1_at  | MmuSTS.3102.1 | 3.25  | 3.11  | 0.24 | 0.06 | 1.1   | 0.754732 | 0.790066 | 0.88688  | 0.878655 |
| MmuSTS.3103.1.S1_at  | MmuSTS.3103.1 | 10.76 | 10.32 | 0.09 | 0.04 | 1.36  | 0.001313 | 0.113808 | 0.078631 | 0.380052 |
| MmuSTS.3104.1.S1_at  | MmuSTS.3104.1 | 9.15  | 9.91  | 0.1  | 0.14 | -1.69 | 0.001204 | 0.008219 | 0.078073 | 0.12044  |

|                       |               |       |       |      |      |        |          |          |          |          |
|-----------------------|---------------|-------|-------|------|------|--------|----------|----------|----------|----------|
| MmuSTS.3105.1.S1_at   | MmuSTS.3105.1 | 8.43  | 8.81  | 0.61 | 0.15 | -1.3   | 0.319461 | 0.112279 | 0.604137 | 0.377561 |
| MmuSTS.3106.1.S1_at   | MmuSTS.3106.1 | 12.32 | 12.42 | 0.07 | 0.05 | -1.07  | 0.115922 | 0.654611 | 0.392991 | 0.79809  |
| MmuSTS.3107.1.S1_at   | MmuSTS.3107.1 | 10.14 | 10.37 | 0.05 | 0.15 | -1.17  | 0.15632  | 0.019319 | 0.446913 | 0.174723 |
| MmuSTS.3108.1.S1_at   | MmuSTS.3108.1 | 3.32  | 3.21  | 0.09 | 0.13 | 1.08   | 0.284625 | 0.38708  | 0.574565 | 0.621935 |
| MmuSTS.3109.1.S1_at   | MmuSTS.3109.1 | 10.56 | 10.25 | 0.15 | 0.11 | 1.24   | 0.065475 | 0.486403 | 0.313214 | 0.689764 |
| MmuSTS.311.1.S1_at    | MmuSTS.311.1  | 10.79 | 10.48 | 0.17 | 0.03 | 1.24   | 0.029921 | 0.070668 | 0.226288 | 0.312011 |
| MmuSTS.3110.1.S1_at   | MmuSTS.3110.1 | 12.12 | 12.17 | 0.04 | 0.05 | -1.03  | 0.33956  | 0.060361 | 0.619828 | 0.292291 |
| MmuSTS.3111.1.S1_at   | MmuSTS.3111.1 | 10.62 | 10.56 | 0.29 | 0.07 | 1.04   | 0.712537 | 0.882599 | 0.864309 | 0.933083 |
| MmuSTS.3112.1.S1_at   | MmuSTS.3112.1 | 9.39  | 9.34  | 0.11 | 0.08 | 1.04   | 0.203491 | 0.004348 | 0.501192 | 0.092371 |
| MmuSTS.3113.1.S1_at   | MmuSTS.3113.1 | 3.34  | 3.98  | 0.53 | 0.24 | -1.55  | 0.599506 | 0.318136 | 0.798168 | 0.571046 |
| MmuSTS.3114.1.S1_at   | MmuSTS.3114.1 | 10.91 | 9.82  | 0.13 | 0.24 | 2.12   | 0.003608 | 0.000833 | 0.105447 | 0.046851 |
| MmuSTS.3115.1.S1_at   | MmuSTS.3115.1 | 5.93  | 6.2   | 0.31 | 0.07 | -1.21  | 0.263614 | 0.245144 | 0.557104 | 0.514901 |
| MmuSTS.3116.1.S1_at   | MmuSTS.3116.1 | 9.88  | 10.46 | 0.82 | 0.31 | -1.49  | 0.099947 | 0.012752 | 0.370858 | 0.145496 |
| MmuSTS.3117.1.S1_at   | MmuSTS.3117.1 | 13.41 | 13.26 | 0.14 | 0.03 | 1.11   | 0.472972 | 0.82492  | 0.716416 | 0.899441 |
| MmuSTS.3118.1.S1_at   | MmuSTS.3118.1 | 9.02  | 9.05  | 0.26 | 0.09 | -1.03  | 0.589326 | 0.882603 | 0.791592 | 0.933083 |
| MmuSTS.3119.1.S1_at   | MmuSTS.3119.1 | 9.16  | 9.81  | 0.19 | 0.08 | -1.56  | 0.011173 | 0.021366 | 0.15539  | 0.183015 |
| MmuSTS.312.1.S1_at    | MmuSTS.312.1  | 11.83 | 11.94 | 0.03 | 0.04 | -1.08  | 0.052041 | 0.000012 | 0.285668 | 0.016526 |
| MmuSTS.3120.1.S1_at   | MmuSTS.3120.1 | 9.57  | 9.28  | 0.2  | 0.03 | 1.22   | 0.147833 | 0.623805 | 0.436019 | 0.778193 |
| MmuSTS.3121.1.S1_at   | MmuSTS.3121.1 | 3.78  | 3.64  | 0.12 | 0.06 | 1.1    | 0.057048 | 0.148313 | 0.296166 | 0.422869 |
| MmuSTS.3122.1.S1_at   | MmuSTS.3122.1 | 9.35  | 8.68  | 0.53 | 0.22 | 1.58   | 0.358655 | 0.756481 | 0.6344   | 0.858223 |
| MmuSTS.3123.1.S1_at   | MmuSTS.3123.1 | 3.17  | 3.16  | 0.04 | 0.06 | 1.01   | 0.738111 | 0.551045 | 0.878569 | 0.730772 |
| MmuSTS.3124.1.S1_at   | MmuSTS.3124.1 | 8.72  | 8.56  | 0.18 | 0.15 | 1.12   | 0.124676 | 0.074317 | 0.404976 | 0.318046 |
| MmuSTS.3125.1.S1_s_at | MmuSTS.3125.1 | 11.99 | 11.95 | 0.17 | 0.07 | 1.03   | 0.659515 | 0.727429 | 0.83568  | 0.842336 |
| MmuSTS.3126.1.S1_at   | MmuSTS.3126.1 | 5.37  | 5.4   | 0.11 | 0.03 | -1.02  | 0.896454 | 0.349831 | 0.955936 | 0.593595 |
| MmuSTS.3127.1.S1_at   | MmuSTS.3127.1 | 9.9   | 9.76  | 0.21 | 0.06 | 1.1    | 0.901472 | 0.381772 | 0.95827  | 0.617972 |
| MmuSTS.3128.1.S1_at   | MmuSTS.3128.1 | 8.38  | 9.17  | 0.5  | 0.23 | -1.73  | 0.311601 | 0.176254 | 0.597735 | 0.452718 |
| MmuSTS.3129.1.S1_at   | MmuSTS.3129.1 | 10.76 | 11.1  | 0.95 | 0.3  | -1.26  | 0.710528 | 0.031931 | 0.863158 | 0.221119 |
| MmuSTS.313.1.S1_at    | MmuSTS.313.1  | 11.44 | 11.96 | 0.36 | 0.03 | -1.44  | 0.060332 | 0.159207 | 0.302777 | 0.435217 |
| MmuSTS.3130.1.S1_at   | MmuSTS.3130.1 | 5.25  | 8.7   | 1.37 | 0.62 | -10.95 | 0.024978 | 0.168953 | 0.211192 | 0.445515 |
| MmuSTS.3131.1.S1_at   | MmuSTS.3131.1 | 7.77  | 10.15 | 1.19 | 0.12 | -5.21  | 0.050287 | 0.008752 | 0.282088 | 0.124009 |
| MmuSTS.3132.1.S1_at   | MmuSTS.3132.1 | 3.66  | 3.8   | 0.22 | 0.05 | -1.1   | 0.200597 | 0.082509 | 0.497869 | 0.331625 |
| MmuSTS.3133.1.S1_at   | MmuSTS.3133.1 | 10.79 | 12.31 | 0.91 | 0.15 | -2.87  | 0.114847 | 0.231883 | 0.391836 | 0.503594 |
| MmuSTS.3134.1.S1_at   | MmuSTS.3134.1 | 9.8   | 9.83  | 0.16 | 0.11 | -1.02  | 0.614506 | 0.160078 | 0.808206 | 0.436234 |
| MmuSTS.3135.1.S1_at   | MmuSTS.3135.1 | 12.58 | 11.51 | 0.38 | 0.21 | 2.09   | 0.015278 | 0.059114 | 0.175968 | 0.290056 |
| MmuSTS.3136.1.S1_at   | MmuSTS.3136.1 | 8.12  | 8.66  | 0.77 | 0.13 | -1.45  | 0.856077 | 0.095178 | 0.937367 | 0.35218  |
| MmuSTS.3137.1.S1_at   | MmuSTS.3137.1 | 5.25  | 5.22  | 0.09 | 0.07 | 1.02   | 0.294557 | 0.241117 | 0.583547 | 0.511749 |
| MmuSTS.3138.1.S1_at   | MmuSTS.3138.1 | 6.61  | 6.73  | 0.12 | 0.07 | -1.08  | 0.249776 | 0.073278 | 0.544804 | 0.316233 |
| MmuSTS.3139.1.S1_at   | MmuSTS.3139.1 | 8.96  | 8.94  | 0.38 | 0.06 | 1.02   | 0.606082 | 0.806696 | 0.802904 | 0.888775 |
| MmuSTS.314.1.S1_at    | MmuSTS.314.1  | 5.43  | 5.24  | 0.6  | 0.32 | 1.15   | 0.621236 | 0.762545 | 0.81255  | 0.861881 |
| MmuSTS.3140.1.S1_at   | MmuSTS.3140.1 | 10.47 | 10.16 | 0.18 | 0.06 | 1.24   | 0.087072 | 0.379596 | 0.352616 | 0.616523 |
| MmuSTS.3141.1.S1_at   | MmuSTS.3141.1 | 5.41  | 5.56  | 0.17 | 0.11 | -1.11  | 0.335766 | 0.417471 | 0.616597 | 0.64224  |
| MmuSTS.3142.1.S1_at   | MmuSTS.3142.1 | 7.55  | 7.59  | 0.36 | 0.08 | -1.03  | 0.330186 | 0.472695 | 0.61223  | 0.68007  |
| MmuSTS.3143.1.S1_at   | MmuSTS.3143.1 | 6.63  | 6.96  | 0.86 | 0.47 | -1.26  | 0.860187 | 0.832835 | 0.939327 | 0.90408  |

|                       |               |       |       |      |      |       |          |          |          |          |
|-----------------------|---------------|-------|-------|------|------|-------|----------|----------|----------|----------|
| MmuSTS.3144.1.S1_at   | MmuSTS.3144.1 | 11.54 | 11.3  | 0.05 | 0.08 | 1.18  | 0.013859 | 0.040045 | 0.168781 | 0.245307 |
| MmuSTS.3145.1.S1_at   | MmuSTS.3145.1 | 11.7  | 11.36 | 0.05 | 0.01 | 1.27  | 0.000233 | 0.095352 | 0.054608 | 0.35239  |
| MmuSTS.3146.1.S1_s_at | MmuSTS.3146.1 | 11.17 | 10.12 | 0.11 | 0.2  | 2.07  | 0.001445 | 0.021945 | 0.079991 | 0.185351 |
| MmuSTS.3147.1.S1_at   | MmuSTS.3147.1 | 4.46  | 6.81  | 1.25 | 0.09 | -5.12 | 0.087146 | 0.034722 | 0.352835 | 0.230506 |
| MmuSTS.3148.1.S1_at   | MmuSTS.3148.1 | 9.2   | 8     | 0.24 | 0.33 | 2.3   | 0.008455 | 0.005766 | 0.141184 | 0.104378 |
| MmuSTS.3149.1.S1_at   | MmuSTS.3149.1 | 7.2   | 7.16  | 0.09 | 0.01 | 1.03  | 0.447332 | 0.386451 | 0.699354 | 0.621593 |
| MmuSTS.315.1.S1_at    | MmuSTS.315.1  | 4.93  | 5.14  | 0.47 | 0.11 | -1.15 | 0.98863  | 0.83698  | 0.995977 | 0.906826 |
| MmuSTS.3150.1.S1_at   | MmuSTS.3150.1 | 6.93  | 6.81  | 0.04 | 0.53 | 1.09  | 0.216551 | 0.325908 | 0.51433  | 0.576181 |
| MmuSTS.3151.1.S1_at   | MmuSTS.3151.1 | 3.16  | 3.1   | 0.04 | 0.13 | 1.04  | 0.91142  | 0.600398 | 0.962432 | 0.762128 |
| MmuSTS.3152.1.S1_at   | MmuSTS.3152.1 | 4.23  | 4.22  | 0.45 | 0.14 | 1.01  | 0.271881 | 0.408928 | 0.563778 | 0.63601  |
| MmuSTS.3153.1.S1_s_at | MmuSTS.3153.1 | 3.89  | 3.78  | 0.13 | 0.06 | 1.08  | 0.245527 | 0.32389  | 0.541613 | 0.574656 |
| MmuSTS.3154.1.S1_s_at | MmuSTS.3154.1 | 3.29  | 3.28  | 0.06 | 0.03 | 1     | 0.511219 | 0.484746 | 0.74238  | 0.68867  |
| MmuSTS.3155.1.S1_at   | MmuSTS.3155.1 | 5.18  | 5.18  | 0.18 | 0.19 | -1    | 0.845695 | 0.975148 | 0.932611 | 0.986437 |
| MmuSTS.3156.1.S1_at   | MmuSTS.3156.1 | 5.71  | 5.87  | 0.12 | 0.14 | -1.11 | 0.8756   | 0.189304 | 0.946675 | 0.465078 |
| MmuSTS.3157.1.S1_at   | MmuSTS.3157.1 | 4.91  | 5.45  | 0.25 | 0.36 | -1.46 | 0.234484 | 0.325251 | 0.532612 | 0.575648 |
| MmuSTS.3158.1.S1_at   | MmuSTS.3158.1 | 10.37 | 10.53 | 0.5  | 0.27 | -1.11 | 0.427252 | 0.741832 | 0.684611 | 0.850509 |
| MmuSTS.3159.1.S1_at   | MmuSTS.3159.1 | 3.12  | 3.19  | 0.02 | 0.1  | -1.05 | 0.638358 | 0.68915  | 0.822992 | 0.818618 |
| MmuSTS.316.1.S1_at    | MmuSTS.316.1  | 11.13 | 10.58 | 0.06 | 0.1  | 1.46  | 0.001928 | 0.076724 | 0.088186 | 0.322136 |
| MmuSTS.316.1.S1_s_at  | MmuSTS.316.1  | 11.01 | 10.51 | 0.07 | 0.11 | 1.41  | 0.003438 | 0.065266 | 0.103385 | 0.301239 |
| MmuSTS.3160.1.S1_at   | MmuSTS.3160.1 | 4.56  | 4.6   | 0.02 | 0.19 | -1.02 | 0.513754 | 0.302892 | 0.743895 | 0.560356 |
| MmuSTS.3161.1.S1_at   | MmuSTS.3161.1 | 9.17  | 9.54  | 0.24 | 0.07 | -1.29 | 0.073958 | 0.362513 | 0.330014 | 0.603067 |
| MmuSTS.3162.1.S1_at   | MmuSTS.3162.1 | 10.54 | 10.49 | 0.15 | 0.06 | 1.03  | 0.513917 | 0.237411 | 0.744054 | 0.508117 |
| MmuSTS.3163.1.S1_at   | MmuSTS.3163.1 | 10.23 | 10.25 | 0.2  | 0.08 | -1.01 | 0.329654 | 0.58204  | 0.611807 | 0.750784 |
| MmuSTS.3164.1.S1_at   | MmuSTS.3164.1 | 10.65 | 12.71 | 0.66 | 0.22 | -4.18 | 0.008646 | 0.13172  | 0.142384 | 0.403854 |
| MmuSTS.3165.1.S1_at   | MmuSTS.3165.1 | 10.21 | 10.73 | 0.24 | 0.03 | -1.44 | 0.02111  | 0.057001 | 0.198834 | 0.284868 |
| MmuSTS.3166.1.S1_s_at | MmuSTS.3166.1 | 3.98  | 3.77  | 1.34 | 0.29 | 1.16  | 0.324891 | 0.439464 | 0.608408 | 0.6582   |
| MmuSTS.3167.1.S1_at   | MmuSTS.3167.1 | 8.05  | 7.77  | 0.16 | 0.11 | 1.22  | 0.114403 | 0.257464 | 0.391351 | 0.52521  |
| MmuSTS.3168.1.S1_at   | MmuSTS.3168.1 | 8.05  | 8.25  | 0.19 | 0.04 | -1.15 | 0.168198 | 0.007509 | 0.461465 | 0.116291 |
| MmuSTS.3169.1.S1_at   | MmuSTS.3169.1 | 2.96  | 3.07  | 0.14 | 0.07 | -1.08 | 0.601689 | 0.465304 | 0.799788 | 0.675704 |
| MmuSTS.317.1.S1_at    | MmuSTS.317.1  | 9.97  | 9.95  | 0.09 | 0.08 | 1.02  | 0.354674 | 0.087552 | 0.631754 | 0.340753 |
| MmuSTS.3170.1.S1_at   | MmuSTS.3170.1 | 10.46 | 10.6  | 0.09 | 0.07 | -1.1  | 0.041626 | 0.012191 | 0.260455 | 0.14287  |
| MmuSTS.3171.1.S1_at   | MmuSTS.3171.1 | 8.11  | 7.94  | 0.21 | 0.12 | 1.12  | 0.770168 | 0.08903  | 0.894561 | 0.342893 |
| MmuSTS.3172.1.S1_at   | MmuSTS.3172.1 | 4.08  | 3.81  | 0.29 | 0.12 | 1.21  | 0.218046 | 0.277727 | 0.515866 | 0.541648 |
| MmuSTS.3173.1.S1_at   | MmuSTS.3173.1 | 9.89  | 9.37  | 0.35 | 0.07 | 1.43  | 0.214493 | 0.458902 | 0.512159 | 0.671498 |
| MmuSTS.3174.1.S1_at   | MmuSTS.3174.1 | 9.87  | 10.28 | 0.34 | 0.21 | -1.32 | 0.224199 | 0.198585 | 0.522333 | 0.473391 |
| MmuSTS.3175.1.S1_at   | MmuSTS.3175.1 | 10.4  | 10.38 | 0.17 | 0.03 | 1.02  | 0.743323 | 0.131211 | 0.881285 | 0.403252 |
| MmuSTS.3176.1.S1_at   | MmuSTS.3176.1 | 10.34 | 11.49 | 0.37 | 0.15 | -2.23 | 0.015901 | 0.313611 | 0.178508 | 0.567977 |
| MmuSTS.3177.1.S1_at   | MmuSTS.3177.1 | 11    | 11.24 | 0.06 | 0.07 | -1.18 | 0.012723 | 0.023598 | 0.162978 | 0.192397 |
| MmuSTS.3178.1.S1_at   | MmuSTS.3178.1 | 12.65 | 12.39 | 0.13 | 0.01 | 1.2   | 0.025287 | 0.370257 | 0.212087 | 0.609406 |
| MmuSTS.3179.1.S1_at   | MmuSTS.3179.1 | 7.5   | 9.21  | 0.64 | 0.13 | -3.27 | 0.01175  | 0.307597 | 0.158219 | 0.563785 |
| MmuSTS.318.1.S1_at    | MmuSTS.318.1  | 7.28  | 7.71  | 0.13 | 0.09 | -1.34 | 0.012691 | 0.121475 | 0.162687 | 0.39062  |
| MmuSTS.3180.1.S1_at   | MmuSTS.3180.1 | 10.89 | 11.38 | 0.21 | 0.12 | -1.41 | 0.03138  | 0.018098 | 0.23018  | 0.169516 |
| MmuSTS.3181.1.S1_at   | MmuSTS.3181.1 | 6.65  | 8.03  | 0.39 | 0.08 | -2.6  | 0.006828 | 0.036991 | 0.129276 | 0.236733 |



|                       |               |       |       |      |      |       |          |          |          |          |
|-----------------------|---------------|-------|-------|------|------|-------|----------|----------|----------|----------|
| MmuSTS.3182.1.S1_s_at | MmuSTS.3182.1 | 11.59 | 11.22 | 0.29 | 0.12 | 1.29  | 0.504018 | 0.247238 | 0.737289 | 0.516446 |
| MmuSTS.3183.1.S1_at   | MmuSTS.3183.1 | 11.22 | 11.08 | 0.18 | 0.04 | 1.1   | 0.245466 | 0.090344 | 0.541518 | 0.34479  |
| MmuSTS.3184.1.S1_at   | MmuSTS.3184.1 | 11.46 | 11.79 | 0.17 | 0.16 | -1.26 | 0.064828 | 0.70846  | 0.311331 | 0.830919 |
| MmuSTS.3185.1.S1_at   | MmuSTS.3185.1 | 7.77  | 8.2   | 0.2  | 0.17 | -1.34 | 0.112803 | 0.225868 | 0.389296 | 0.498248 |
| MmuSTS.3186.1.S1_at   | MmuSTS.3186.1 | 11.39 | 11.24 | 0.01 | 0.1  | 1.11  | 0.149117 | 0.126227 | 0.437923 | 0.396754 |
| MmuSTS.3187.1.S1_at   | MmuSTS.3187.1 | 8.68  | 8.86  | 0.22 | 0.33 | -1.13 | 0.843287 | 0.124845 | 0.931396 | 0.395219 |
| MmuSTS.3188.1.S1_at   | MmuSTS.3188.1 | 9.46  | 9.28  | 0.06 | 0.12 | 1.13  | 0.048323 | 0.226769 | 0.277205 | 0.499176 |
| MmuSTS.3189.1.S1_at   | MmuSTS.3189.1 | 11.41 | 11.09 | 0.11 | 0.04 | 1.25  | 0.00801  | 0.000065 | 0.138479 | 0.025805 |
| MmuSTS.319.1.S1_at    | MmuSTS.319.1  | 4.98  | 5.22  | 0.18 | 0.12 | -1.19 | 0.253433 | 0.001338 | 0.547829 | 0.056366 |
| MmuSTS.3190.1.S1_at   | MmuSTS.3190.1 | 4.62  | 4.85  | 0.05 | 0.1  | -1.17 | 0.020059 | 0.016286 | 0.195141 | 0.161712 |
| MmuSTS.3191.1.S1_at   | MmuSTS.3191.1 | 9.33  | 8.55  | 0.23 | 0.1  | 1.73  | 0.009729 | 0.033237 | 0.148542 | 0.225803 |
| MmuSTS.3192.1.S1_at   | MmuSTS.3192.1 | 10.3  | 10.25 | 0.14 | 0.13 | 1.04  | 0.292464 | 0.617273 | 0.581743 | 0.773326 |
| MmuSTS.3193.1.S1_at   | MmuSTS.3193.1 | 12    | 12.1  | 0.21 | 0.04 | -1.07 | 0.9858   | 0.079614 | 0.994947 | 0.326981 |
| MmuSTS.3194.1.S1_at   | MmuSTS.3194.1 | 8.15  | 7.96  | 0.1  | 0.18 | 1.14  | 0.484026 | 0.00154  | 0.723999 | 0.05949  |
| MmuSTS.3195.1.S1_at   | MmuSTS.3195.1 | 5.76  | 5.7   | 0.2  | 0.06 | 1.04  | 0.251782 | 0.343814 | 0.546475 | 0.589508 |
| MmuSTS.3196.1.S1_at   | MmuSTS.3196.1 | 8.64  | 8.46  | 0.25 | 0.15 | 1.14  | 0.37429  | 0.388511 | 0.645448 | 0.622897 |
| MmuSTS.3197.1.S1_at   | MmuSTS.3197.1 | 7.41  | 10.27 | 0.94 | 0.18 | -7.26 | 0.007038 | 0.018182 | 0.131294 | 0.169673 |
| MmuSTS.3198.1.S1_at   | MmuSTS.3198.1 | 9.37  | 9.47  | 0.03 | 0.25 | -1.07 | 0.385197 | 0.722138 | 0.65405  | 0.839044 |
| MmuSTS.3199.1.S1_at   | MmuSTS.3199.1 | 8.6   | 8.79  | 0.23 | 0.09 | -1.14 | 0.087783 | 0.309846 | 0.353927 | 0.565046 |
| MmuSTS.32.1.S1_at     | MmuSTS.32.1   | 9.52  | 9.05  | 0.15 | 0.4  | 1.38  | 0.383615 | 0.806176 | 0.652919 | 0.88857  |
| MmuSTS.320.1.S1_at    | MmuSTS.320.1  | 5.73  | 5.84  | 0.25 | 0.06 | -1.07 | 0.863207 | 0.797385 | 0.940527 | 0.883171 |
| MmuSTS.3200.1.S1_at   | MmuSTS.3200.1 | 9.76  | 9.63  | 0.25 | 0.1  | 1.09  | 0.960773 | 0.126549 | 0.983983 | 0.397149 |
| MmuSTS.3201.1.S1_at   | MmuSTS.3201.1 | 10.67 | 10.82 | 0.2  | 0.14 | -1.11 | 0.887545 | 0.310113 | 0.951977 | 0.565333 |
| MmuSTS.3202.1.S1_at   | MmuSTS.3202.1 | 8.38  | 9.1   | 0.22 | 0.24 | -1.65 | 0.017713 | 0.54485  | 0.186756 | 0.727178 |
| MmuSTS.3203.1.S1_at   | MmuSTS.3203.1 | 13.01 | 12.65 | 0.1  | 0.02 | 1.28  | 0.003768 | 0.269101 | 0.106813 | 0.534447 |
| MmuSTS.3204.1.S1_at   | MmuSTS.3204.1 | 10.86 | 10.49 | 0.21 | 0.06 | 1.29  | 0.019773 | 0.55779  | 0.193572 | 0.73524  |
| MmuSTS.3205.1.S1_at   | MmuSTS.3205.1 | 8.91  | 8.88  | 0.23 | 0.07 | 1.02  | 0.293134 | 0.138888 | 0.58211  | 0.412037 |
| MmuSTS.3206.1.S1_at   | MmuSTS.3206.1 | 10.88 | 10.55 | 0.05 | 0.12 | 1.26  | 0.011014 | 0.000155 | 0.154661 | 0.030072 |
| MmuSTS.3207.1.S1_at   | MmuSTS.3207.1 | 10.86 | 10.83 | 0.22 | 0.19 | 1.02  | 0.494074 | 0.098108 | 0.730933 | 0.356202 |
| MmuSTS.3208.1.S1_at   | MmuSTS.3208.1 | 11.17 | 10.93 | 0.07 | 0.08 | 1.18  | 0.010359 | 0.011303 | 0.151697 | 0.138076 |
| MmuSTS.3209.1.S1_at   | MmuSTS.3209.1 | 12.18 | 12.28 | 0.12 | 0.02 | -1.07 | 0.17875  | 0.152617 | 0.47356  | 0.427435 |
| MmuSTS.321.1.S1_s_at  | MmuSTS.321.1  | 10.42 | 10.52 | 0.1  | 0.12 | -1.07 | 0.836609 | 0.040528 | 0.928302 | 0.246264 |
| MmuSTS.3210.1.S1_at   | MmuSTS.3210.1 | 4.57  | 4.57  | 0.08 | 0.01 | -1    | 0.666903 | 0.775099 | 0.84008  | 0.869048 |
| MmuSTS.3211.1.S1_at   | MmuSTS.3211.1 | 9.4   | 9.25  | 0.34 | 0.13 | 1.11  | 0.457394 | 0.565165 | 0.706363 | 0.739748 |
| MmuSTS.3212.1.S1_at   | MmuSTS.3212.1 | 5.79  | 6.43  | 0.91 | 0.11 | -1.56 | 0.349098 | 0.64259  | 0.62702  | 0.790343 |
| MmuSTS.3213.1.S1_at   | MmuSTS.3213.1 | 10.14 | 10.09 | 0.15 | 0.08 | 1.04  | 0.762684 | 0.529476 | 0.891323 | 0.717289 |
| MmuSTS.3214.1.S1_at   | MmuSTS.3214.1 | 8.51  | 9.19  | 0.76 | 0.3  | -1.61 | 0.198669 | 0.044013 | 0.495836 | 0.254195 |
| MmuSTS.3215.1.S1_at   | MmuSTS.3215.1 | 9.17  | 9.28  | 0.04 | 0.02 | -1.08 | 0.012183 | 0.449113 | 0.160718 | 0.664892 |
| MmuSTS.3216.1.S1_at   | MmuSTS.3216.1 | 4.4   | 4.12  | 0.25 | 0.05 | 1.21  | 0.390231 | 0.612606 | 0.657935 | 0.770091 |
| MmuSTS.3217.1.S1_at   | MmuSTS.3217.1 | 12.76 | 12.4  | 0.37 | 0.14 | 1.28  | 0.719592 | 0.010543 | 0.867731 | 0.134072 |
| MmuSTS.3218.1.S1_at   | MmuSTS.3218.1 | 9.75  | 10.39 | 0.23 | 0.07 | -1.56 | 0.013741 | 0.00309  | 0.167976 | 0.081194 |
| MmuSTS.3219.1.S1_at   | MmuSTS.3219.1 | 9.82  | 9.36  | 0.27 | 0.03 | 1.37  | 0.050983 | 0.011779 | 0.283499 | 0.140575 |
| MmuSTS.322.1.S1_at    | MmuSTS.322.1  | 5.21  | 5.27  | 0.2  | 0.06 | -1.05 | 0.781631 | 0.674359 | 0.900258 | 0.809748 |

|                       |               |       |       |      |      |        |          |          |          |          |
|-----------------------|---------------|-------|-------|------|------|--------|----------|----------|----------|----------|
| MmuSTS.3220.1.S1_at   | MmuSTS.3220.1 | 9.66  | 8.59  | 0.52 | 0.12 | 2.1    | 0.025106 | 0.020723 | 0.211413 | 0.180645 |
| MmuSTS.3221.1.S1_at   | MmuSTS.3221.1 | 4.87  | 4.99  | 0.15 | 0.14 | -1.09  | 0.749912 | 0.134247 | 0.884241 | 0.406457 |
| MmuSTS.3222.1.S1_at   | MmuSTS.3222.1 | 8.67  | 8.93  | 0.26 | 0.08 | -1.19  | 0.060098 | 0.204447 | 0.302405 | 0.478821 |
| MmuSTS.3223.1.S1_at   | MmuSTS.3223.1 | 9.32  | 9.57  | 0.14 | 0.07 | -1.19  | 0.041794 | 0.152654 | 0.261162 | 0.427483 |
| MmuSTS.3224.1.S1_at   | MmuSTS.3224.1 | 6.66  | 9.54  | 0.65 | 0.14 | -7.37  | 0.001922 | 0.130666 | 0.088159 | 0.402666 |
| MmuSTS.3225.1.S1_at   | MmuSTS.3225.1 | 10.24 | 9.76  | 0.09 | 0.09 | 1.4    | 0.001728 | 0.015715 | 0.085035 | 0.158858 |
| MmuSTS.3226.1.S1_at   | MmuSTS.3226.1 | 5.91  | 5.96  | 0.2  | 0.14 | -1.03  | 0.977928 | 0.600289 | 0.991374 | 0.762019 |
| MmuSTS.3227.1.S1_at   | MmuSTS.3227.1 | 10.1  | 9.66  | 0.1  | 0.14 | 1.35   | 0.021563 | 0.017412 | 0.200582 | 0.166995 |
| MmuSTS.3228.1.S1_at   | MmuSTS.3228.1 | 7.24  | 7.33  | 0.23 | 0.06 | -1.07  | 0.230987 | 0.079549 | 0.529768 | 0.326897 |
| MmuSTS.3229.1.S1_at   | MmuSTS.3229.1 | 5.93  | 5.79  | 0.3  | 0.31 | 1.1    | 0.990172 | 0.979875 | 0.996449 | 0.989228 |
| MmuSTS.323.1.S1_at    | MmuSTS.323.1  | 6.63  | 6.48  | 0.19 | 0.16 | 1.11   | 0.396403 | 0.509129 | 0.662468 | 0.704012 |
| MmuSTS.3230.1.S1_at   | MmuSTS.3230.1 | 4.42  | 4.85  | 0.35 | 0.27 | -1.34  | 0.408178 | 0.319425 | 0.671025 | 0.571762 |
| MmuSTS.3231.1.S1_at   | MmuSTS.3231.1 | 7.6   | 7.35  | 0.09 | 0.12 | 1.19   | 0.124942 | 0.116685 | 0.405468 | 0.383864 |
| MmuSTS.3232.1.S1_at   | MmuSTS.3232.1 | 5.1   | 4.94  | 0.15 | 0.04 | 1.12   | 0.157919 | 0.013046 | 0.448708 | 0.14696  |
| MmuSTS.3233.1.S1_at   | MmuSTS.3233.1 | 5.42  | 5.61  | 0.18 | 0.02 | -1.15  | 0.290348 | 0.211608 | 0.579851 | 0.485681 |
| MmuSTS.3234.1.S1_at   | MmuSTS.3234.1 | 7.92  | 9.39  | 0.31 | 0.1  | -2.78  | 0.0009   | 0.009474 | 0.075282 | 0.128164 |
| MmuSTS.3235.1.S1_at   | MmuSTS.3235.1 | 3.29  | 3.36  | 0.07 | 0.05 | -1.05  | 0.150415 | 0.291987 | 0.439474 | 0.552163 |
| MmuSTS.3236.1.S1_at   | MmuSTS.3236.1 | 12.13 | 11.89 | 0.13 | 0.06 | 1.18   | 0.013468 | 0.004064 | 0.166746 | 0.090288 |
| MmuSTS.3237.1.S1_at   | MmuSTS.3237.1 | 10.12 | 9.41  | 0.24 | 0.11 | 1.64   | 0.009005 | 0.00018  | 0.144777 | 0.030511 |
| MmuSTS.3238.1.S1_at   | MmuSTS.3238.1 | 9.27  | 10.14 | 0.37 | 0.04 | -1.82  | 0.01836  | 0.144682 | 0.188509 | 0.418546 |
| MmuSTS.3239.1.S1_at   | MmuSTS.3239.1 | 8.97  | 9.33  | 0.47 | 0.4  | -1.28  | 0.131974 | 0.091344 | 0.415087 | 0.346281 |
| MmuSTS.324.1.S1_at    | MmuSTS.324.1  | 12.61 | 12.81 | 0.17 | 0.04 | -1.15  | 0.109638 | 0.160962 | 0.384755 | 0.437116 |
| MmuSTS.3240.1.S1_at   | MmuSTS.3240.1 | 10.76 | 10.36 | 0.2  | 0.09 | 1.32   | 0.041143 | 0.445252 | 0.259372 | 0.662338 |
| MmuSTS.3241.1.S1_at   | MmuSTS.3241.1 | 9.31  | 8.95  | 0.26 | 0.06 | 1.28   | 0.06444  | 0.05441  | 0.31037  | 0.278799 |
| MmuSTS.3242.1.S1_at   | MmuSTS.3242.1 | 12.76 | 12.64 | 0.13 | 0.04 | 1.09   | 0.124551 | 0.728343 | 0.404741 | 0.84296  |
| MmuSTS.3243.1.S1_at   | MmuSTS.3243.1 | 12.86 | 12.49 | 0.18 | 0.04 | 1.29   | 0.081213 | 0.335517 | 0.342222 | 0.583326 |
| MmuSTS.3244.1.S1_at   | MmuSTS.3244.1 | 12.36 | 12.19 | 0.53 | 0.12 | 1.12   | 0.194852 | 0.126376 | 0.49141  | 0.396902 |
| MmuSTS.3245.1.S1_at   | MmuSTS.3245.1 | 10.88 | 10.99 | 0.26 | 0.03 | -1.08  | 0.418125 | 0.156466 | 0.678105 | 0.431846 |
| MmuSTS.3246.1.S1_at   | MmuSTS.3246.1 | 10.84 | 11.24 | 0.13 | 0.07 | -1.32  | 0.012384 | 0.006955 | 0.161664 | 0.112678 |
| MmuSTS.3247.1.S1_at   | MmuSTS.3247.1 | 9.28  | 8.71  | 0.33 | 0.08 | 1.48   | 0.156911 | 0.327605 | 0.447658 | 0.577448 |
| MmuSTS.3248.1.S1_at   | MmuSTS.3248.1 | 10.56 | 10.37 | 0.05 | 0.19 | 1.14   | 0.132687 | 0.197819 | 0.416039 | 0.472721 |
| MmuSTS.3249.1.S1_at   | MmuSTS.3249.1 | 7.23  | 8.61  | 0.73 | 0.25 | -2.61  | 0.123073 | 0.539167 | 0.402192 | 0.723588 |
| MmuSTS.325.1.S1_at    | MmuSTS.325.1  | 3.79  | 3.77  | 0.18 | 0.12 | 1.01   | 0.902039 | 0.707797 | 0.958518 | 0.830472 |
| MmuSTS.325.1.S1_s_at  | MmuSTS.325.1  | 5.13  | 5.19  | 0.05 | 0.2  | -1.04  | 0.544922 | 0.75695  | 0.764363 | 0.858495 |
| MmuSTS.3250.1.S1_at   | MmuSTS.3250.1 | 10.64 | 10.97 | 0.09 | 0.01 | -1.26  | 0.002713 | 0.080655 | 0.09684  | 0.328444 |
| MmuSTS.3251.1.S1_at   | MmuSTS.3251.1 | 7.51  | 11.28 | 1.4  | 0.26 | -13.67 | 0.026385 | 0.190371 | 0.21549  | 0.465906 |
| MmuSTS.3252.1.S1_at   | MmuSTS.3252.1 | 6.52  | 8.38  | 0.52 | 0.17 | -3.63  | 0.004826 | 0.190219 | 0.115098 | 0.465854 |
| MmuSTS.3253.1.S1_s_at | MmuSTS.3253.1 | 12.75 | 12.05 | 0.53 | 0.13 | 1.62   | 0.08757  | 0.033803 | 0.353496 | 0.227489 |
| MmuSTS.3254.1.S1_at   | MmuSTS.3254.1 | 6.92  | 7.22  | 0.95 | 0.3  | -1.23  | 0.503277 | 0.72393  | 0.736858 | 0.840188 |
| MmuSTS.3255.1.S1_at   | MmuSTS.3255.1 | 6.27  | 6.3   | 0.24 | 0.36 | -1.02  | 0.636071 | 0.917809 | 0.821984 | 0.954011 |
| MmuSTS.3256.1.S1_at   | MmuSTS.3256.1 | 11.85 | 11.68 | 0.12 | 0.05 | 1.13   | 0.215911 | 0.805093 | 0.513611 | 0.887962 |
| MmuSTS.3257.1.S1_at   | MmuSTS.3257.1 | 7.09  | 6.04  | 0.26 | 0.16 | 2.07   | 0.00627  | 0.011048 | 0.125436 | 0.136843 |
| MmuSTS.3258.1.S1_at   | MmuSTS.3258.1 | 6.63  | 6.59  | 0.11 | 0.11 | 1.03   | 0.651423 | 0.310693 | 0.830699 | 0.565787 |

|                       |               |       |       |      |      |       |          |          |          |          |
|-----------------------|---------------|-------|-------|------|------|-------|----------|----------|----------|----------|
| MmuSTS.3259.1.S1_at   | MmuSTS.3259.1 | 8     | 7.34  | 0.58 | 0.25 | 1.57  | 0.274662 | 0.299705 | 0.566523 | 0.558037 |
| MmuSTS.326.1.S1_at    | MmuSTS.326.1  | 12.61 | 12.51 | 0.07 | 0.04 | 1.07  | 0.421692 | 0.213884 | 0.680117 | 0.48758  |
| MmuSTS.3260.1.S1_at   | MmuSTS.3260.1 | 4.47  | 4.49  | 0.1  | 0.06 | -1.02 | 0.269473 | 0.594672 | 0.561805 | 0.758623 |
| MmuSTS.3261.1.S1_at   | MmuSTS.3261.1 | 11.25 | 10.68 | 0.16 | 0.11 | 1.49  | 0.006728 | 0.082219 | 0.128806 | 0.331091 |
| MmuSTS.3262.1.S1_at   | MmuSTS.3262.1 | 9.97  | 10.3  | 0.23 | 0.14 | -1.26 | 0.334876 | 0.017871 | 0.615935 | 0.168774 |
| MmuSTS.3263.1.S1_at   | MmuSTS.3263.1 | 10.22 | 10.7  | 0.47 | 0.32 | -1.39 | 0.3097   | 0.400916 | 0.595962 | 0.630658 |
| MmuSTS.3264.1.S1_at   | MmuSTS.3264.1 | 13.91 | 13.44 | 0.05 | 0.1  | 1.38  | 0.00276  | 0.028536 | 0.097385 | 0.210754 |
| MmuSTS.3265.1.S1_at   | MmuSTS.3265.1 | 7.56  | 7.95  | 0.05 | 0.09 | -1.32 | 0.00422  | 0.228151 | 0.110761 | 0.500327 |
| MmuSTS.3266.1.S1_at   | MmuSTS.3266.1 | 12.67 | 12.77 | 0.24 | 0.06 | -1.07 | 0.714058 | 0.040097 | 0.864923 | 0.245388 |
| MmuSTS.3267.1.S1_at   | MmuSTS.3267.1 | 3.87  | 3.96  | 0.29 | 0.24 | -1.06 | 0.754172 | 0.385125 | 0.886723 | 0.620662 |
| MmuSTS.3268.1.S1_at   | MmuSTS.3268.1 | 10.99 | 10.79 | 0.21 | 0.06 | 1.15  | 0.157401 | 0.047431 | 0.448037 | 0.262486 |
| MmuSTS.3269.1.S1_at   | MmuSTS.3269.1 | 8.11  | 10.12 | 0.61 | 0.25 | -4.03 | 0.015841 | 0.114562 | 0.178312 | 0.38111  |
| MmuSTS.3270.1.S1_at   | MmuSTS.3270.1 | 8.82  | 8.69  | 0.25 | 0.32 | 1.09  | 0.323648 | 0.057652 | 0.607414 | 0.286366 |
| MmuSTS.3270.1.S1_s_at | MmuSTS.3270.1 | 8.35  | 8.18  | 0.21 | 0.22 | 1.13  | 0.300264 | 0.027502 | 0.588473 | 0.207161 |
| MmuSTS.3271.1.S1_at   | MmuSTS.3271.1 | 9.65  | 9.6   | 0.13 | 0.07 | 1.03  | 0.128777 | 0.41351  | 0.410975 | 0.639648 |
| MmuSTS.3272.1.S1_at   | MmuSTS.3272.1 | 8.92  | 8.42  | 0.26 | 0.15 | 1.41  | 0.03066  | 0.257304 | 0.228027 | 0.525108 |
| MmuSTS.3273.1.S1_at   | MmuSTS.3273.1 | 8.39  | 8.48  | 0.22 | 0.2  | -1.06 | 0.728135 | 0.973533 | 0.872894 | 0.985633 |
| MmuSTS.3274.1.S1_at   | MmuSTS.3274.1 | 10.24 | 10.62 | 0.27 | 0.17 | -1.3  | 0.070598 | 0.23435  | 0.324085 | 0.505629 |
| MmuSTS.3275.1.S1_at   | MmuSTS.3275.1 | 12.58 | 11.46 | 0.2  | 0.04 | 2.17  | 0.000564 | 0.001944 | 0.070714 | 0.065813 |
| MmuSTS.3276.1.S1_at   | MmuSTS.3276.1 | 10.8  | 10.85 | 0.12 | 0.05 | -1.04 | 0.549935 | 0.301014 | 0.767502 | 0.559198 |
| MmuSTS.3277.1.S1_at   | MmuSTS.3277.1 | 9.36  | 8.98  | 0.56 | 0.13 | 1.3   | 0.287873 | 0.148951 | 0.577527 | 0.423294 |
| MmuSTS.3278.1.S1_at   | MmuSTS.3278.1 | 9.39  | 9.31  | 0.09 | 0.09 | 1.06  | 0.13773  | 0.311397 | 0.422803 | 0.566451 |
| MmuSTS.3279.1.S1_at   | MmuSTS.3279.1 | 7.2   | 7.46  | 0.15 | 0.19 | -1.2  | 0.06176  | 0.160903 | 0.304962 | 0.437116 |
| MmuSTS.328.1.S1_at    | MmuSTS.328.1  | 6.77  | 6.78  | 0.08 | 0.16 | -1    | 0.905573 | 0.692042 | 0.960065 | 0.82091  |
| MmuSTS.328.1.S1_s_at  | MmuSTS.328.1  | 5.22  | 5.33  | 0.27 | 0.02 | -1.08 | 0.971585 | 0.505058 | 0.98857  | 0.70197  |
| MmuSTS.3280.1.S1_at   | MmuSTS.3280.1 | 7.08  | 5.74  | 0.68 | 0.05 | 2.54  | 0.071584 | 0.032275 | 0.325595 | 0.222396 |
| MmuSTS.3281.1.S1_at   | MmuSTS.3281.1 | 9.89  | 10.09 | 0.25 | 0.3  | -1.15 | 0.183894 | 0.116682 | 0.479745 | 0.383864 |
| MmuSTS.3282.1.S1_at   | MmuSTS.3282.1 | 6.41  | 5.73  | 0.44 | 0.13 | 1.6   | 0.042985 | 0.051845 | 0.264508 | 0.273151 |
| MmuSTS.3283.1.S1_at   | MmuSTS.3283.1 | 7.84  | 7.57  | 0.25 | 0.38 | 1.21  | 0.76173  | 0.494517 | 0.890644 | 0.694909 |
| MmuSTS.3284.1.S1_at   | MmuSTS.3284.1 | 7.94  | 7.43  | 0.27 | 0.05 | 1.42  | 0.017109 | 0.545925 | 0.184186 | 0.727697 |
| MmuSTS.3285.1.S1_at   | MmuSTS.3285.1 | 8.57  | 9.78  | 0.34 | 0.19 | -2.32 | 0.015629 | 0.368648 | 0.177553 | 0.608143 |
| MmuSTS.3286.1.S1_at   | MmuSTS.3286.1 | 6.78  | 6.69  | 0.2  | 0.08 | 1.07  | 0.331102 | 0.081229 | 0.613047 | 0.329351 |
| MmuSTS.3287.1.S1_at   | MmuSTS.3287.1 | 8.83  | 8.91  | 0.29 | 0.08 | -1.06 | 0.582016 | 0.385245 | 0.786912 | 0.620709 |
| MmuSTS.3288.1.S1_at   | MmuSTS.3288.1 | 8.7   | 10.05 | 0.65 | 0.23 | -2.56 | 0.043077 | 0.044611 | 0.264735 | 0.255589 |
| MmuSTS.3289.1.S1_at   | MmuSTS.3289.1 | 9.37  | 9.3   | 0.13 | 0.02 | 1.05  | 0.359584 | 0.812761 | 0.635235 | 0.891794 |
| MmuSTS.329.1.S1_at    | MmuSTS.329.1  | 5.01  | 4.91  | 0.21 | 0.05 | 1.07  | 0.443294 | 0.599041 | 0.696549 | 0.761257 |
| MmuSTS.3290.1.S1_at   | MmuSTS.3290.1 | 4.45  | 5.6   | 0.07 | 0.27 | -2.22 | 0.002158 | 0.002194 | 0.090391 | 0.069206 |
| MmuSTS.3291.1.S1_at   | MmuSTS.3291.1 | 11.42 | 11.77 | 0.22 | 0.1  | -1.27 | 0.051591 | 0.218664 | 0.284576 | 0.492361 |
| MmuSTS.3292.1.S1_at   | MmuSTS.3292.1 | 11.86 | 12.62 | 0.32 | 0.07 | -1.7  | 0.014032 | 0.101323 | 0.169859 | 0.361094 |
| MmuSTS.3293.1.S1_at   | MmuSTS.3293.1 | 3.19  | 3.07  | 0.21 | 0.11 | 1.09  | 0.644663 | 0.639675 | 0.827017 | 0.788389 |
| MmuSTS.3294.1.S1_at   | MmuSTS.3294.1 | 6.1   | 5.25  | 0.9  | 1.15 | 1.8   | 0.389718 | 0.521605 | 0.657497 | 0.712505 |
| MmuSTS.3295.1.S1_at   | MmuSTS.3295.1 | 3.18  | 3.14  | 0.11 | 0.07 | 1.03  | 0.370919 | 0.638746 | 0.643729 | 0.787827 |
| MmuSTS.3296.1.S1_at   | MmuSTS.3296.1 | 6.55  | 6.97  | 0.39 | 0.2  | -1.34 | 0.319076 | 0.123589 | 0.603736 | 0.393637 |

|                       |               |       |       |      |      |       |          |          |          |          |
|-----------------------|---------------|-------|-------|------|------|-------|----------|----------|----------|----------|
| MmuSTS.3297.1.S1_at   | MmuSTS.3297.1 | 11.42 | 11.29 | 0.12 | 0.07 | 1.09  | 0.608203 | 0.341225 | 0.804298 | 0.587336 |
| MmuSTS.3298.1.S1_at   | MmuSTS.3298.1 | 7.64  | 7.48  | 0.15 | 0.19 | 1.12  | 0.699533 | 0.402036 | 0.857319 | 0.631153 |
| MmuSTS.3299.1.S1_at   | MmuSTS.3299.1 | 10.36 | 9.72  | 0.69 | 0.18 | 1.56  | 0.743993 | 0.933513 | 0.881384 | 0.962216 |
| MmuSTS.33.1.S1_at     | MmuSTS.33.1   | 9.78  | 9.35  | 0.74 | 0.37 | 1.35  | 0.696998 | 0.646578 | 0.855728 | 0.792965 |
| MmuSTS.330.1.S1_s_at  | MmuSTS.330.1  | 3.02  | 2.94  | 0.07 | 0.15 | 1.06  | 0.862496 | 0.489562 | 0.940245 | 0.691824 |
| MmuSTS.3300.1.S1_at   | MmuSTS.3300.1 | 12.73 | 12.55 | 0.2  | 0.04 | 1.13  | 0.067453 | 0.025566 | 0.317391 | 0.200612 |
| MmuSTS.3301.1.S1_s_at | MmuSTS.3301.1 | 13.53 | 13.5  | 0.05 | 0.06 | 1.02  | 0.290274 | 0.162389 | 0.57977  | 0.438575 |
| MmuSTS.3302.1.S1_at   | MmuSTS.3302.1 | 11.35 | 11.42 | 0.36 | 0.09 | -1.05 | 0.558097 | 0.339091 | 0.772606 | 0.585891 |
| MmuSTS.3303.1.S1_at   | MmuSTS.3303.1 | 6.04  | 6.45  | 0.92 | 0.13 | -1.33 | 0.937936 | 0.902383 | 0.973844 | 0.94454  |
| MmuSTS.3304.1.S1_at   | MmuSTS.3304.1 | 11.63 | 11.29 | 0.17 | 0.09 | 1.27  | 0.036004 | 0.112478 | 0.244806 | 0.377815 |
| MmuSTS.3305.1.S1_at   | MmuSTS.3305.1 | 8.81  | 10.02 | 0.43 | 0.15 | -2.31 | 0.009039 | 0.418202 | 0.144777 | 0.642663 |
| MmuSTS.3306.1.S1_at   | MmuSTS.3306.1 | 6.56  | 6.48  | 0.26 | 0.08 | 1.06  | 0.471438 | 0.60637  | 0.715544 | 0.765747 |
| MmuSTS.3306.1.S1_s_at | MmuSTS.3306.1 | 6.17  | 6.46  | 0.26 | 0.09 | -1.22 | 0.219907 | 0.280599 | 0.517641 | 0.543772 |
| MmuSTS.3307.1.S1_at   | MmuSTS.3307.1 | 9.17  | 10.45 | 0.26 | 0.21 | -2.43 | 0.004476 | 0.325277 | 0.113436 | 0.575648 |
| MmuSTS.3308.1.S1_at   | MmuSTS.3308.1 | 7.25  | 8.16  | 0.49 | 0.16 | -1.88 | 0.041358 | 0.021907 | 0.259793 | 0.185235 |
| MmuSTS.3309.1.S1_at   | MmuSTS.3309.1 | 8.42  | 8.58  | 0.27 | 0.18 | -1.11 | 0.214544 | 0.295449 | 0.512196 | 0.554885 |
| MmuSTS.331.1.S1_s_at  | MmuSTS.331.1  | 3.77  | 3.83  | 0.1  | 0.13 | -1.04 | 0.528709 | 0.173849 | 0.753764 | 0.450133 |
| MmuSTS.3310.1.S1_at   | MmuSTS.3310.1 | 9.55  | 9.25  | 0.18 | 0.06 | 1.23  | 0.039166 | 0.016011 | 0.25435  | 0.160458 |
| MmuSTS.3311.1.S1_at   | MmuSTS.3311.1 | 10.56 | 10.16 | 0.26 | 0.09 | 1.31  | 0.108403 | 0.000517 | 0.383016 | 0.039588 |
| MmuSTS.3312.1.S1_at   | MmuSTS.3312.1 | 10.1  | 10.72 | 0.07 | 0.23 | -1.54 | 0.005411 | 0.069089 | 0.118701 | 0.309061 |
| MmuSTS.3313.1.S1_at   | MmuSTS.3313.1 | 11.91 | 11.65 | 0.12 | 0.04 | 1.2   | 0.080987 | 0.001383 | 0.341848 | 0.056947 |
| MmuSTS.3314.1.S1_at   | MmuSTS.3314.1 | 8.65  | 8.68  | 0.76 | 0.47 | -1.02 | 0.788871 | 0.479637 | 0.904019 | 0.685331 |
| MmuSTS.3315.1.S1_at   | MmuSTS.3315.1 | 7.78  | 7.62  | 0.12 | 0.04 | 1.12  | 0.04953  | 0.151716 | 0.279984 | 0.426383 |
| MmuSTS.3316.1.S1_at   | MmuSTS.3316.1 | 8.81  | 8.65  | 0.27 | 0.06 | 1.12  | 0.36537  | 0.706577 | 0.639887 | 0.829757 |
| MmuSTS.3317.1.S1_at   | MmuSTS.3317.1 | 11.08 | 12.96 | 1.6  | 0.15 | -3.69 | 0.127309 | 0.204618 | 0.409027 | 0.478993 |
| MmuSTS.3318.1.S1_at   | MmuSTS.3318.1 | 10.98 | 9.56  | 0.29 | 0.19 | 2.67  | 0.001892 | 0.000702 | 0.087741 | 0.04424  |
| MmuSTS.3319.1.S1_at   | MmuSTS.3319.1 | 9.38  | 10.45 | 0.35 | 0.14 | -2.11 | 0.00982  | 0.137271 | 0.148542 | 0.410165 |
| MmuSTS.332.1.S1_s_at  | MmuSTS.332.1  | 3.31  | 3.45  | 0.1  | 0.14 | -1.1  | 0.36718  | 0.375882 | 0.641304 | 0.613746 |
| MmuSTS.3320.1.S1_at   | MmuSTS.3320.1 | 10.89 | 9.68  | 0.43 | 0.44 | 2.3   | 0.039824 | 0.010835 | 0.256213 | 0.135705 |
| MmuSTS.3321.1.S1_at   | MmuSTS.3321.1 | 12.82 | 12.96 | 0.06 | 0.04 | -1.1  | 0.018074 | 0.073273 | 0.187529 | 0.316233 |
| MmuSTS.3322.1.S1_at   | MmuSTS.3322.1 | 11.09 | 10.87 | 0.44 | 0.15 | 1.17  | 0.160115 | 0.454565 | 0.451463 | 0.668668 |
| MmuSTS.3323.1.S1_at   | MmuSTS.3323.1 | 10.28 | 10.42 | 0.54 | 0.11 | -1.1  | 0.644953 | 0.543282 | 0.827097 | 0.726012 |
| MmuSTS.3324.1.S1_at   | MmuSTS.3324.1 | 5.89  | 8.96  | 1.35 | 0.3  | -8.38 | 0.046436 | 0.307408 | 0.273274 | 0.563649 |
| MmuSTS.3325.1.S1_at   | MmuSTS.3325.1 | 3.66  | 3.69  | 0.13 | 0.09 | -1.02 | 0.559337 | 0.690277 | 0.773275 | 0.819463 |
| MmuSTS.3326.1.S1_at   | MmuSTS.3326.1 | 5.75  | 7.18  | 0.25 | 0.59 | -2.7  | 0.028293 | 0.310361 | 0.22074  | 0.565552 |
| MmuSTS.3327.1.S1_at   | MmuSTS.3327.1 | 10.25 | 8.5   | 0.12 | 0.54 | 3.35  | 0.010863 | 0.001522 | 0.153933 | 0.059307 |
| MmuSTS.3328.1.S1_at   | MmuSTS.3328.1 | 9.84  | 8.93  | 0.17 | 0.04 | 1.88  | 0.000813 | 0.002899 | 0.073351 | 0.079107 |
| MmuSTS.3329.1.S1_at   | MmuSTS.3329.1 | 11.02 | 10.62 | 0.26 | 0.18 | 1.32  | 0.174584 | 0.411869 | 0.468862 | 0.638434 |
| MmuSTS.333.1.S1_at    | MmuSTS.333.1  | 3.92  | 3.98  | 0.04 | 0.03 | -1.04 | 0.198403 | 0.267771 | 0.495518 | 0.533553 |
| MmuSTS.3330.1.S1_at   | MmuSTS.3330.1 | 6.05  | 6.38  | 0.04 | 0.24 | -1.26 | 0.242648 | 0.193046 | 0.539495 | 0.468554 |
| MmuSTS.3331.1.S1_at   | MmuSTS.3331.1 | 6.64  | 6.45  | 0.12 | 0.09 | 1.15  | 0.091498 | 0.248278 | 0.359218 | 0.517596 |
| MmuSTS.3332.1.S1_at   | MmuSTS.3332.1 | 9.73  | 9.25  | 0.33 | 0.02 | 1.4   | 0.024519 | 0.062363 | 0.209655 | 0.296504 |
| MmuSTS.3333.1.S1_at   | MmuSTS.3333.1 | 9.81  | 10.01 | 0.25 | 0.08 | -1.16 | 0.67492  | 0.042968 | 0.844854 | 0.251849 |

|                       |               |       |       |      |      |       |          |          |          |          |
|-----------------------|---------------|-------|-------|------|------|-------|----------|----------|----------|----------|
| MmuSTS.3334.1.S1_at   | MmuSTS.3334.1 | 7.67  | 6.88  | 2.33 | 0.23 | 1.74  | 0.708012 | 0.926627 | 0.861706 | 0.958372 |
| MmuSTS.3335.1.S1_at   | MmuSTS.3335.1 | 10.01 | 10.44 | 0.06 | 0.13 | -1.34 | 0.006654 | 0.202934 | 0.127957 | 0.477343 |
| MmuSTS.3336.1.S1_at   | MmuSTS.3336.1 | 7.95  | 8.41  | 0.22 | 0.18 | -1.37 | 0.048805 | 0.463838 | 0.278475 | 0.674663 |
| MmuSTS.3337.1.S1_at   | MmuSTS.3337.1 | 11.43 | 11.46 | 0.2  | 0.03 | -1.02 | 0.832772 | 0.610573 | 0.92634  | 0.76874  |
| MmuSTS.3338.1.S1_at   | MmuSTS.3338.1 | 7.22  | 7.43  | 0.17 | 0.02 | -1.16 | 0.370699 | 0.671256 | 0.643559 | 0.807748 |
| MmuSTS.3339.1.S1_at   | MmuSTS.3339.1 | 6.86  | 7.74  | 1.13 | 0.18 | -1.84 | 0.271818 | 0.333973 | 0.563738 | 0.582063 |
| MmuSTS.334.1.S1_s_at  | MmuSTS.334.1  | 3.74  | 3.68  | 0.12 | 0.06 | 1.04  | 0.399305 | 0.720246 | 0.664753 | 0.838202 |
| MmuSTS.3340.1.S1_at   | MmuSTS.3340.1 | 8.49  | 8.15  | 0.32 | 0.3  | 1.26  | 0.253896 | 0.028889 | 0.548203 | 0.211763 |
| MmuSTS.3341.1.S1_at   | MmuSTS.3341.1 | 3.13  | 3.05  | 0.23 | 0.05 | 1.05  | 0.656015 | 0.848988 | 0.83356  | 0.914252 |
| MmuSTS.3342.1.S1_at   | MmuSTS.3342.1 | 10.41 | 10.23 | 0.24 | 0.01 | 1.13  | 0.53487  | 0.781413 | 0.757966 | 0.873256 |
| MmuSTS.3342.1.S1_s_at | MmuSTS.3342.1 | 11.28 | 11.16 | 0.24 | 0.03 | 1.09  | 0.872474 | 0.593822 | 0.945324 | 0.758418 |
| MmuSTS.3343.1.S1_at   | MmuSTS.3343.1 | 5.89  | 6.88  | 0.51 | 0.14 | -1.98 | 0.118918 | 0.155621 | 0.396589 | 0.430977 |
| MmuSTS.3344.1.S1_at   | MmuSTS.3344.1 | 2.86  | 2.75  | 0.08 | 0.3  | 1.08  | 0.72121  | 0.824773 | 0.86861  | 0.89939  |
| MmuSTS.3345.1.S1_at   | MmuSTS.3345.1 | 8.05  | 7.67  | 0.28 | 0.1  | 1.31  | 0.090281 | 0.185253 | 0.356872 | 0.461194 |
| MmuSTS.3346.1.S1_at   | MmuSTS.3346.1 | 3.61  | 3.64  | 0.1  | 0.12 | -1.02 | 0.440362 | 0.162562 | 0.694448 | 0.438708 |
| MmuSTS.3347.1.S1_at   | MmuSTS.3347.1 | 5.38  | 5.36  | 0.03 | 0.02 | 1.01  | 0.703495 | 0.975937 | 0.859275 | 0.986856 |
| MmuSTS.3348.1.S1_at   | MmuSTS.3348.1 | 5.66  | 5.42  | 0.27 | 0.24 | 1.18  | 0.377865 | 0.082639 | 0.648273 | 0.331917 |
| MmuSTS.3349.1.S1_at   | MmuSTS.3349.1 | 6.27  | 8.22  | 0.83 | 0.49 | -3.85 | 0.03267  | 0.254947 | 0.234993 | 0.52317  |
| MmuSTS.335.1.S1_at    | MmuSTS.335.1  | 4.95  | 4.69  | 0.12 | 0.1  | 1.2   | 0.043857 | 0.00723  | 0.266439 | 0.114199 |
| MmuSTS.3350.1.S1_at   | MmuSTS.3350.1 | 3.64  | 3.69  | 0.06 | 0.14 | -1.04 | 0.574758 | 0.770343 | 0.782184 | 0.866591 |
| MmuSTS.3351.1.S1_at   | MmuSTS.3351.1 | 13.1  | 13.2  | 0.03 | 0.02 | -1.08 | 0.006296 | 0.000677 | 0.125749 | 0.04413  |
| MmuSTS.3352.1.S1_at   | MmuSTS.3352.1 | 6.29  | 6.3   | 0.1  | 0.15 | -1    | 0.498882 | 0.333807 | 0.733962 | 0.581974 |
| MmuSTS.3353.1.S1_at   | MmuSTS.3353.1 | 5.31  | 7.25  | 0.29 | 0.52 | -3.83 | 0.004689 | 0.116964 | 0.115008 | 0.384343 |
| MmuSTS.3354.1.S1_at   | MmuSTS.3354.1 | 10.77 | 12.43 | 0.59 | 0.15 | -3.16 | 0.023504 | 0.152766 | 0.206519 | 0.427571 |
| MmuSTS.3355.1.S1_at   | MmuSTS.3355.1 | 5.03  | 5.09  | 0.27 | 0.15 | -1.05 | 0.675408 | 0.834955 | 0.845075 | 0.90553  |
| MmuSTS.3356.1.S1_at   | MmuSTS.3356.1 | 5.5   | 7.19  | 0.53 | 0.36 | -3.22 | 0.019102 | 0.163061 | 0.191749 | 0.439224 |
| MmuSTS.3357.1.S1_at   | MmuSTS.3357.1 | 4.06  | 4.22  | 0.08 | 0.04 | -1.12 | 0.082626 | 0.115658 | 0.344435 | 0.382714 |
| MmuSTS.3358.1.S1_at   | MmuSTS.3358.1 | 9.38  | 10.45 | 0.18 | 0.18 | -2.09 | 0.002654 | 0.077852 | 0.095754 | 0.324093 |
| MmuSTS.3359.1.S1_at   | MmuSTS.3359.1 | 6.13  | 6.06  | 0.09 | 0.07 | 1.04  | 0.370153 | 0.049741 | 0.643242 | 0.268104 |
| MmuSTS.336.1.S1_at    | MmuSTS.336.1  | 4.86  | 4.82  | 0.28 | 0.06 | 1.03  | 0.511345 | 0.706401 | 0.742401 | 0.829634 |
| MmuSTS.3360.1.S1_at   | MmuSTS.3360.1 | 5.49  | 5.85  | 0.26 | 0.25 | -1.28 | 0.094127 | 0.351712 | 0.363134 | 0.595164 |
| MmuSTS.3361.1.S1_at   | MmuSTS.3361.1 | 10.63 | 13.15 | 1.21 | 0.13 | -5.71 | 0.069016 | 0.063199 | 0.320813 | 0.298119 |
| MmuSTS.3362.1.S1_at   | MmuSTS.3362.1 | 9.38  | 9.7   | 0.32 | 0.16 | -1.25 | 0.207361 | 0.872672 | 0.505092 | 0.927592 |
| MmuSTS.3363.1.S1_at   | MmuSTS.3363.1 | 7.39  | 7.47  | 0.21 | 0.1  | -1.05 | 0.844941 | 0.06196  | 0.932176 | 0.295759 |
| MmuSTS.3364.1.S1_at   | MmuSTS.3364.1 | 7.39  | 7.66  | 0.89 | 0.15 | -1.21 | 0.222189 | 0.223125 | 0.520231 | 0.49588  |
| MmuSTS.3365.1.S1_at   | MmuSTS.3365.1 | 11.84 | 11.63 | 0.08 | 0.07 | 1.16  | 0.041089 | 0.000511 | 0.259179 | 0.039357 |
| MmuSTS.3366.1.S1_at   | MmuSTS.3366.1 | 8.78  | 8.49  | 0.12 | 0.02 | 1.22  | 0.034626 | 0.007797 | 0.240605 | 0.117765 |
| MmuSTS.3367.1.S1_at   | MmuSTS.3367.1 | 3.73  | 3.83  | 0.27 | 0.14 | -1.07 | 0.941838 | 0.99452  | 0.975589 | 0.996631 |
| MmuSTS.3368.1.S1_at   | MmuSTS.3368.1 | 11.14 | 10.95 | 0.17 | 0.15 | 1.14  | 0.379052 | 0.113671 | 0.649065 | 0.379818 |
| MmuSTS.3369.1.S1_at   | MmuSTS.3369.1 | 11.72 | 11.05 | 0.25 | 0.04 | 1.59  | 0.011248 | 0.019062 | 0.155943 | 0.173688 |
| MmuSTS.337.1.S1_at    | MmuSTS.337.1  | 4.96  | 4.92  | 0.15 | 0.07 | 1.03  | 0.400297 | 0.668819 | 0.665392 | 0.806227 |
| MmuSTS.3370.1.S1_at   | MmuSTS.3370.1 | 9.52  | 9.5   | 0.41 | 0.17 | 1.02  | 0.764593 | 0.175492 | 0.892005 | 0.452157 |
| MmuSTS.3371.1.S1_at   | MmuSTS.3371.1 | 11.85 | 11.92 | 0.23 | 0.06 | -1.05 | 0.827085 | 0.103858 | 0.923438 | 0.364519 |

|                       |               |       |       |      |      |        |          |          |          |          |
|-----------------------|---------------|-------|-------|------|------|--------|----------|----------|----------|----------|
| MmuSTS.3372.1.S1_at   | MmuSTS.3372.1 | 6.09  | 6.11  | 0.19 | 0.14 | -1.01  | 0.652231 | 0.248842 | 0.831164 | 0.517951 |
| MmuSTS.3373.1.S1_at   | MmuSTS.3373.1 | 8.36  | 11.28 | 1.61 | 0.25 | -7.6   | 0.043412 | 0.217656 | 0.265644 | 0.491255 |
| MmuSTS.3373.1.S1_s_at | MmuSTS.3373.1 | 6.8   | 10.24 | 1.28 | 0.25 | -10.83 | 0.026344 | 0.188848 | 0.215438 | 0.464789 |
| MmuSTS.3374.1.S1_at   | MmuSTS.3374.1 | 6.94  | 8.73  | 2.24 | 0.45 | -3.45  | 0.332718 | 0.632842 | 0.614336 | 0.783788 |
| MmuSTS.3375.1.S1_at   | MmuSTS.3375.1 | 6.19  | 10.36 | 2.04 | 0.36 | -17.97 | 0.068203 | 0.232879 | 0.318984 | 0.50445  |
| MmuSTS.3376.1.S1_at   | MmuSTS.3376.1 | 12.85 | 12.91 | 0.07 | 0.04 | -1.04  | 0.201675 | 0.37209  | 0.499203 | 0.610943 |
| MmuSTS.3377.1.S1_at   | MmuSTS.3377.1 | 12.02 | 12.38 | 0.09 | 0.04 | -1.28  | 0.005825 | 0.002341 | 0.122207 | 0.071588 |
| MmuSTS.3378.1.S1_at   | MmuSTS.3378.1 | 8.19  | 8.46  | 0.15 | 0.36 | -1.21  | 0.409796 | 0.851757 | 0.672061 | 0.915746 |
| MmuSTS.3379.1.S1_at   | MmuSTS.3379.1 | 13.18 | 13.18 | 0.09 | 0.02 | 1      | 0.332405 | 0.43753  | 0.614085 | 0.656769 |
| MmuSTS.338.1.S1_at    | MmuSTS.338.1  | 5.58  | 5.58  | 0.13 | 0.08 | -1     | 0.986973 | 0.850687 | 0.995256 | 0.915051 |
| MmuSTS.3380.1.S1_at   | MmuSTS.3380.1 | 10.81 | 9.63  | 0.21 | 0.05 | 2.27   | 0.000585 | 0.000036 | 0.070727 | 0.023031 |
| MmuSTS.3381.1.S1_at   | MmuSTS.3381.1 | 5.06  | 5.36  | 0.18 | 0.21 | -1.22  | 0.159084 | 0.011804 | 0.450454 | 0.140698 |
| MmuSTS.3382.1.S1_at   | MmuSTS.3382.1 | 4.59  | 4.91  | 0.54 | 0.31 | -1.25  | 0.66491  | 0.27274  | 0.838857 | 0.537479 |
| MmuSTS.3383.1.S1_at   | MmuSTS.3383.1 | 6.18  | 7.25  | 0.14 | 0.28 | -2.1   | 0.004004 | 0.004146 | 0.108676 | 0.09103  |
| MmuSTS.3384.1.S1_at   | MmuSTS.3384.1 | 11.01 | 10.93 | 0.11 | 0.09 | 1.06   | 0.29386  | 0.259142 | 0.58288  | 0.526264 |
| MmuSTS.3385.1.S1_at   | MmuSTS.3385.1 | 9.21  | 8.91  | 0.14 | 0.04 | 1.23   | 0.052475 | 0.062987 | 0.286213 | 0.297633 |
| MmuSTS.3386.1.S1_at   | MmuSTS.3386.1 | 10.5  | 9.74  | 0.18 | 0.28 | 1.7    | 0.01021  | 0.162845 | 0.150739 | 0.438966 |
| MmuSTS.3387.1.S1_at   | MmuSTS.3387.1 | 8.82  | 10.61 | 1.01 | 0.29 | -3.46  | 0.120924 | 0.501255 | 0.399442 | 0.699458 |
| MmuSTS.3388.1.S1_at   | MmuSTS.3388.1 | 2.87  | 2.9   | 0.05 | 0.11 | -1.02  | 0.612682 | 0.433406 | 0.807033 | 0.653676 |
| MmuSTS.3389.1.S1_at   | MmuSTS.3389.1 | 3.84  | 3.84  | 0.54 | 0.09 | -1     | 0.334765 | 0.324241 | 0.615803 | 0.57488  |
| MmuSTS.3390.1.S1_at   | MmuSTS.3390.1 | 9.11  | 9.01  | 0.15 | 0.1  | 1.07   | 0.357927 | 0.036514 | 0.633748 | 0.235526 |
| MmuSTS.3391.1.S1_at   | MmuSTS.3391.1 | 9.6   | 9.5   | 0.21 | 0.21 | 1.07   | 0.957747 | 0.745793 | 0.982604 | 0.852572 |
| MmuSTS.3392.1.S1_at   | MmuSTS.3392.1 | 12.62 | 12.58 | 0.08 | 0.03 | 1.02   | 0.537227 | 0.683868 | 0.759433 | 0.815591 |
| MmuSTS.3393.1.S1_at   | MmuSTS.3393.1 | 9.38  | 9.37  | 0.13 | 0.08 | 1.01   | 0.801942 | 0.007962 | 0.911061 | 0.118702 |
| MmuSTS.3394.1.S1_at   | MmuSTS.3394.1 | 5.56  | 6.3   | 1.23 | 0.28 | -1.67  | 0.994948 | 0.670509 | 0.997969 | 0.807399 |
| MmuSTS.3395.1.S1_at   | MmuSTS.3395.1 | 5.79  | 7.13  | 1.21 | 0.24 | -2.54  | 0.124999 | 0.070204 | 0.405516 | 0.311194 |
| MmuSTS.3396.1.S1_at   | MmuSTS.3396.1 | 6.31  | 6.41  | 0.1  | 0.08 | -1.07  | 0.459786 | 0.297825 | 0.707841 | 0.5565   |
| MmuSTS.3397.1.S1_at   | MmuSTS.3397.1 | 3.54  | 4.86  | 0.42 | 0.1  | -2.49  | 0.007031 | 0.018019 | 0.131294 | 0.169255 |
| MmuSTS.3398.1.S1_at   | MmuSTS.3398.1 | 3.03  | 2.97  | 0.12 | 0.11 | 1.04   | 0.189444 | 0.532071 | 0.485933 | 0.718995 |
| MmuSTS.3399.1.S1_at   | MmuSTS.3399.1 | 7.16  | 6.94  | 0.28 | 0.08 | 1.16   | 0.954508 | 0.802621 | 0.98132  | 0.886389 |
| MmuSTS.34.1.S1_at     | MmuSTS.34.1   | 11.25 | 11.19 | 0.14 | 0.23 | 1.04   | 0.26692  | 0.217743 | 0.559504 | 0.491309 |
| MmuSTS.340.1.S1_at    | MmuSTS.340.1  | 12.8  | 12.29 | 0.11 | 0.05 | 1.42   | 0.001108 | 0.000099 | 0.077306 | 0.027996 |
| MmuSTS.3400.1.S1_at   | MmuSTS.3400.1 | 10.83 | 11.52 | 0.54 | 0.39 | -1.61  | 0.147446 | 0.00796  | 0.435407 | 0.118702 |
| MmuSTS.3401.1.S1_at   | MmuSTS.3401.1 | 5.82  | 8.6   | 1.59 | 0.14 | -6.86  | 0.054932 | 0.10419  | 0.291332 | 0.365326 |
| MmuSTS.3401.1.S1_s_at | MmuSTS.3401.1 | 6.06  | 10.1  | 1.82 | 0.26 | -16.44 | 0.054193 | 0.112687 | 0.289903 | 0.378284 |
| MmuSTS.3402.1.S1_at   | MmuSTS.3402.1 | 9     | 8.98  | 0.14 | 0.16 | 1.01   | 0.958458 | 0.001343 | 0.983098 | 0.056396 |
| MmuSTS.3403.1.S1_at   | MmuSTS.3403.1 | 8.74  | 8.41  | 0.48 | 0.28 | 1.25   | 0.142333 | 0.446243 | 0.428351 | 0.662743 |
| MmuSTS.3404.1.S1_at   | MmuSTS.3404.1 | 9.36  | 9.79  | 0.32 | 0.37 | -1.35  | 0.262811 | 0.285052 | 0.556683 | 0.547095 |
| MmuSTS.3405.1.S1_at   | MmuSTS.3405.1 | 10.84 | 10.87 | 0.31 | 0.05 | -1.02  | 0.976076 | 0.254312 | 0.990427 | 0.522613 |
| MmuSTS.3406.1.S1_at   | MmuSTS.3406.1 | 9.67  | 9.58  | 0.06 | 0.03 | 1.07   | 0.067924 | 0.013126 | 0.318429 | 0.147338 |
| MmuSTS.3407.1.S1_at   | MmuSTS.3407.1 | 10.17 | 9.73  | 0.33 | 0.19 | 1.36   | 0.219467 | 0.393246 | 0.5172   | 0.626174 |
| MmuSTS.3408.1.S1_at   | MmuSTS.3408.1 | 8.47  | 9.8   | 0.2  | 0.24 | -2.51  | 0.00119  | 0.00301  | 0.077857 | 0.080074 |
| MmuSTS.3409.1.S1_at   | MmuSTS.3409.1 | 7.29  | 7.71  | 0.24 | 0.06 | -1.33  | 0.030622 | 0.425113 | 0.227933 | 0.647579 |

|                       |               |       |       |      |      |       |          |          |          |          |
|-----------------------|---------------|-------|-------|------|------|-------|----------|----------|----------|----------|
| MmuSTS.341.1.S1_at    | MmuSTS.341.1  | 10.87 | 10.6  | 0.12 | 0.15 | 1.21  | 0.326743 | 0.000064 | 0.609643 | 0.025805 |
| MmuSTS.3410.1.S1_at   | MmuSTS.3410.1 | 10.61 | 10.55 | 0.12 | 0.13 | 1.04  | 0.234954 | 0.031024 | 0.532993 | 0.218074 |
| MmuSTS.3411.1.S1_at   | MmuSTS.3411.1 | 10.37 | 9.97  | 0.18 | 0.08 | 1.32  | 0.012545 | 0.037681 | 0.162479 | 0.23859  |
| MmuSTS.3412.1.S1_s_at | MmuSTS.3412.1 | 10.53 | 10.39 | 0.27 | 0.09 | 1.1   | 0.178132 | 0.200946 | 0.472847 | 0.475426 |
| MmuSTS.3413.1.S1_at   | MmuSTS.3413.1 | 4.68  | 4.73  | 0.31 | 0.06 | -1.04 | 0.645751 | 0.399925 | 0.82755  | 0.63009  |
| MmuSTS.3414.1.S1_at   | MmuSTS.3414.1 | 10.93 | 10.97 | 0.25 | 0.01 | -1.03 | 0.507259 | 0.271473 | 0.739609 | 0.536512 |
| MmuSTS.3415.1.S1_at   | MmuSTS.3415.1 | 9.75  | 8.59  | 0.59 | 0.09 | 2.24  | 0.063618 | 0.006739 | 0.308797 | 0.110984 |
| MmuSTS.3416.1.S1_at   | MmuSTS.3416.1 | 4.49  | 4.45  | 0.25 | 0.15 | 1.03  | 0.942139 | 0.960591 | 0.975589 | 0.977548 |
| MmuSTS.3417.1.S1_at   | MmuSTS.3417.1 | 7.36  | 7.86  | 0.2  | 0.13 | -1.42 | 0.02592  | 0.013891 | 0.213833 | 0.151189 |
| MmuSTS.3418.1.S1_at   | MmuSTS.3418.1 | 6.71  | 7.56  | 0.34 | 0.19 | -1.8  | 0.050816 | 0.00148  | 0.283144 | 0.058699 |
| MmuSTS.3419.1.S1_at   | MmuSTS.3419.1 | 4.7   | 4.73  | 0.11 | 0.21 | -1.02 | 0.544143 | 0.795967 | 0.763878 | 0.882469 |
| MmuSTS.342.1.S1_s_at  | MmuSTS.342.1  | 10.59 | 10.54 | 0.21 | 0.04 | 1.03  | 0.666022 | 0.74653  | 0.839495 | 0.852872 |
| MmuSTS.3420.1.S1_at   | MmuSTS.3420.1 | 10.94 | 8.88  | 1.26 | 0.26 | 4.16  | 0.049612 | 0.053298 | 0.28018  | 0.276463 |
| MmuSTS.3421.1.S1_at   | MmuSTS.3421.1 | 7.43  | 7.17  | 0.38 | 0.05 | 1.2   | 0.306485 | 0.365679 | 0.593297 | 0.605684 |
| MmuSTS.3422.1.S1_at   | MmuSTS.3422.1 | 6.26  | 6.44  | 0.26 | 0.04 | -1.13 | 0.968515 | 0.658989 | 0.987529 | 0.800475 |
| MmuSTS.3423.1.S1_at   | MmuSTS.3423.1 | 8.02  | 9.08  | 0.38 | 0.03 | -2.08 | 0.004559 | 0.02079  | 0.113722 | 0.1809   |
| MmuSTS.3424.1.S1_at   | MmuSTS.3424.1 | 5.73  | 5.72  | 0.04 | 0.03 | 1     | 0.996728 | 0.268713 | 0.99893  | 0.534138 |
| MmuSTS.3425.1.S1_at   | MmuSTS.3425.1 | 4.26  | 3.78  | 0.97 | 0.32 | 1.4   | 0.284389 | 0.235787 | 0.574396 | 0.506949 |
| MmuSTS.3426.1.S1_at   | MmuSTS.3426.1 | 4.42  | 4.36  | 0.9  | 0.15 | 1.04  | 0.299758 | 0.303008 | 0.588092 | 0.560461 |
| MmuSTS.3427.1.S1_at   | MmuSTS.3427.1 | 13.04 | 13.01 | 0.08 | 0.03 | 1.02  | 0.682773 | 0.286978 | 0.84871  | 0.548246 |
| MmuSTS.3428.1.S1_at   | MmuSTS.3428.1 | 4.62  | 4.46  | 0.25 | 0.07 | 1.12  | 0.100481 | 0.223843 | 0.371463 | 0.496802 |
| MmuSTS.3429.1.S1_at   | MmuSTS.3429.1 | 10.96 | 11.49 | 0.22 | 0.08 | -1.45 | 0.007483 | 0.164869 | 0.134856 | 0.441191 |
| MmuSTS.343.1.S1_at    | MmuSTS.343.1  | 11.96 | 12.07 | 0.1  | 0.03 | -1.08 | 0.377686 | 0.639229 | 0.64816  | 0.788125 |
| MmuSTS.3430.1.S1_at   | MmuSTS.3430.1 | 10.25 | 10.09 | 0.07 | 0.05 | 1.12  | 0.058826 | 0.462363 | 0.299626 | 0.673709 |
| MmuSTS.3431.1.S1_at   | MmuSTS.3431.1 | 12.73 | 12.95 | 0.17 | 0.02 | -1.16 | 0.345532 | 0.435272 | 0.624476 | 0.655127 |
| MmuSTS.3432.1.S1_at   | MmuSTS.3432.1 | 12.46 | 12.61 | 0.25 | 0.02 | -1.11 | 0.980822 | 0.619724 | 0.992889 | 0.774893 |
| MmuSTS.3433.1.S1_at   | MmuSTS.3433.1 | 13.69 | 13.55 | 0.05 | 0.02 | 1.1   | 0.019231 | 0.229496 | 0.192035 | 0.501527 |
| MmuSTS.3434.1.S1_at   | MmuSTS.3434.1 | 8.28  | 8.49  | 2.11 | 0.14 | -1.16 | 0.895143 | 0.784972 | 0.955278 | 0.875511 |
| MmuSTS.3435.1.S1_at   | MmuSTS.3435.1 | 13.33 | 13.41 | 0.08 | 0.04 | -1.05 | 0.172184 | 0.658623 | 0.466269 | 0.800453 |
| MmuSTS.3436.1.S1_at   | MmuSTS.3436.1 | 8.8   | 9.5   | 0.19 | 0.08 | -1.63 | 0.006171 | 0.22352  | 0.124714 | 0.496363 |
| MmuSTS.3437.1.S1_at   | MmuSTS.3437.1 | 7.75  | 7.39  | 0.2  | 0.05 | 1.28  | 0.106097 | 0.686516 | 0.380154 | 0.817053 |
| MmuSTS.3438.1.S1_at   | MmuSTS.3438.1 | 8.89  | 8.69  | 0.23 | 0.09 | 1.15  | 0.664522 | 0.831421 | 0.838524 | 0.903343 |
| MmuSTS.3439.1.S1_at   | MmuSTS.3439.1 | 13.43 | 13.67 | 0.18 | 0.05 | -1.18 | 0.040068 | 0.031408 | 0.256783 | 0.219107 |
| MmuSTS.344.1.S1_at    | MmuSTS.344.1  | 11.72 | 11.7  | 0.13 | 0.08 | 1.01  | 0.306333 | 0.193636 | 0.593269 | 0.468785 |
| MmuSTS.3440.1.S1_at   | MmuSTS.3440.1 | 13.53 | 12.96 | 0.09 | 0.11 | 1.49  | 0.004753 | 0.000089 | 0.115098 | 0.027016 |
| MmuSTS.3441.1.S1_at   | MmuSTS.3441.1 | 4.27  | 5.12  | 0.35 | 0.36 | -1.81 | 0.110311 | 0.164127 | 0.385611 | 0.440346 |
| MmuSTS.3442.1.S1_at   | MmuSTS.3442.1 | 6.86  | 9.5   | 0.92 | 0.33 | -6.24 | 0.024377 | 0.14703  | 0.209245 | 0.421149 |
| MmuSTS.3443.1.S1_at   | MmuSTS.3443.1 | 8.13  | 8.86  | 0.47 | 0.23 | -1.65 | 0.173991 | 0.575303 | 0.468351 | 0.74643  |
| MmuSTS.3444.1.S1_at   | MmuSTS.3444.1 | 5.65  | 6.46  | 0.21 | 0.52 | -1.75 | 0.068665 | 0.284107 | 0.319908 | 0.546319 |
| MmuSTS.3445.1.S1_at   | MmuSTS.3445.1 | 9.98  | 10.54 | 0.13 | 0.16 | -1.47 | 0.032746 | 0.190955 | 0.234993 | 0.46629  |
| MmuSTS.3446.1.S1_at   | MmuSTS.3446.1 | 9.93  | 10.73 | 0.5  | 0.09 | -1.74 | 0.162044 | 0.143147 | 0.453899 | 0.417029 |
| MmuSTS.3447.1.S1_at   | MmuSTS.3447.1 | 7.19  | 7.25  | 0.14 | 0.31 | -1.04 | 0.770017 | 0.32192  | 0.894469 | 0.573567 |
| MmuSTS.3448.1.S1_at   | MmuSTS.3448.1 | 11.05 | 10.87 | 0.08 | 0.08 | 1.14  | 0.248833 | 0.000521 | 0.544206 | 0.039743 |

|                       |               |       |       |      |      |       |          |          |          |          |
|-----------------------|---------------|-------|-------|------|------|-------|----------|----------|----------|----------|
| MmuSTS.3449.1.S1_at   | MmuSTS.3449.1 | 12.46 | 12.36 | 0.11 | 0.02 | 1.07  | 0.237096 | 0.000252 | 0.534591 | 0.033325 |
| MmuSTS.345.1.S1_at    | MmuSTS.345.1  | 10    | 10.97 | 0.14 | 0.07 | -1.96 | 0.000421 | 0.002504 | 0.063209 | 0.074108 |
| MmuSTS.3450.1.S1_at   | MmuSTS.3450.1 | 10.47 | 10.63 | 0.11 | 0.03 | -1.12 | 0.080823 | 0.013513 | 0.341569 | 0.148824 |
| MmuSTS.3451.1.S1_at   | MmuSTS.3451.1 | 11.23 | 11.07 | 0.08 | 0.07 | 1.12  | 0.056805 | 0.00196  | 0.295745 | 0.065832 |
| MmuSTS.3452.1.S1_at   | MmuSTS.3452.1 | 8.33  | 9.13  | 0.19 | 0.11 | -1.75 | 0.002519 | 0.003413 | 0.094382 | 0.084071 |
| MmuSTS.3453.1.S1_at   | MmuSTS.3453.1 | 9.03  | 11.1  | 1.26 | 0.06 | -4.2  | 0.047734 | 0.109092 | 0.275898 | 0.372869 |
| MmuSTS.3454.1.S1_at   | MmuSTS.3454.1 | 12.78 | 12.66 | 0.03 | 0.03 | 1.09  | 0.003412 | 0.013255 | 0.103083 | 0.147707 |
| MmuSTS.3455.1.S1_at   | MmuSTS.3455.1 | 6.38  | 6.36  | 0.08 | 0    | 1.02  | 0.681499 | 0.794987 | 0.848103 | 0.881864 |
| MmuSTS.3456.1.S1_at   | MmuSTS.3456.1 | 10.16 | 9.96  | 0.35 | 0.05 | 1.15  | 0.450884 | 0.010132 | 0.701843 | 0.131974 |
| MmuSTS.3457.1.S1_at   | MmuSTS.3457.1 | 8.04  | 8.03  | 0.06 | 0.08 | 1.01  | 0.564163 | 0.002604 | 0.775892 | 0.075487 |
| MmuSTS.3458.1.S1_at   | MmuSTS.3458.1 | 12.26 | 12.28 | 0.11 | 0.07 | -1.01 | 0.77829  | 0.570795 | 0.898724 | 0.74337  |
| MmuSTS.3459.1.S1_at   | MmuSTS.3459.1 | 6.14  | 6.36  | 0.14 | 0.12 | -1.17 | 0.050401 | 0.042846 | 0.282342 | 0.251589 |
| MmuSTS.346.1.S1_at    | MmuSTS.346.1  | 3.4   | 3.15  | 0.14 | 0.06 | 1.2   | 0.168528 | 0.501072 | 0.461856 | 0.699435 |
| MmuSTS.3460.1.S1_s_at | MmuSTS.3460.1 | 12.57 | 12.64 | 0.2  | 0.05 | -1.05 | 0.934919 | 0.659771 | 0.972776 | 0.800854 |
| MmuSTS.3460.1.S1_x_at | MmuSTS.3460.1 | 12.87 | 13.01 | 0.19 | 0.07 | -1.1  | 0.268373 | 0.645795 | 0.561061 | 0.792588 |
| MmuSTS.3461.1.S1_at   | MmuSTS.3461.1 | 5.29  | 5.08  | 0.15 | 0.19 | 1.16  | 0.097222 | 0.465479 | 0.367275 | 0.675774 |
| MmuSTS.3462.1.S1_at   | MmuSTS.3462.1 | 8.22  | 8.42  | 0.29 | 0.1  | -1.15 | 0.446535 | 0.478042 | 0.698756 | 0.684055 |
| MmuSTS.3463.1.S1_at   | MmuSTS.3463.1 | 9.57  | 9.72  | 0.22 | 0.04 | -1.11 | 0.848481 | 0.270743 | 0.934016 | 0.53602  |
| MmuSTS.3464.1.S1_at   | MmuSTS.3464.1 | 7.74  | 7.96  | 0.35 | 0.18 | -1.16 | 0.140824 | 0.354348 | 0.426579 | 0.597166 |
| MmuSTS.3465.1.S1_at   | MmuSTS.3465.1 | 9.8   | 9.93  | 0.18 | 0.25 | -1.09 | 0.522629 | 0.078556 | 0.749853 | 0.325285 |
| MmuSTS.3466.1.S1_at   | MmuSTS.3466.1 | 8.58  | 9     | 0.22 | 0.16 | -1.34 | 0.028462 | 0.044617 | 0.22113  | 0.255589 |
| MmuSTS.3467.1.S1_at   | MmuSTS.3467.1 | 8.75  | 8.41  | 0.09 | 0.09 | 1.26  | 0.009042 | 0.062712 | 0.144777 | 0.297117 |
| MmuSTS.3468.1.S1_at   | MmuSTS.3468.1 | 7.64  | 7.32  | 0.03 | 0.31 | 1.24  | 0.157119 | 0.006254 | 0.447994 | 0.10728  |
| MmuSTS.3469.1.S1_at   | MmuSTS.3469.1 | 9.69  | 9.72  | 0.09 | 0.02 | -1.03 | 0.511441 | 0.854706 | 0.742401 | 0.91719  |
| MmuSTS.347.1.S1_at    | MmuSTS.347.1  | 5.56  | 3.68  | 1.07 | 0.54 | 3.67  | 0.226888 | 0.34496  | 0.524811 | 0.590239 |
| MmuSTS.3470.1.S1_at   | MmuSTS.3470.1 | 11.86 | 11.34 | 0.09 | 0.09 | 1.44  | 0.002832 | 0.015042 | 0.098185 | 0.155766 |
| MmuSTS.3471.1.S1_at   | MmuSTS.3471.1 | 10.12 | 10.65 | 0.26 | 0.25 | -1.44 | 0.268471 | 0.005879 | 0.561069 | 0.104899 |
| MmuSTS.3471.1.S1_s_at | MmuSTS.3471.1 | 10.81 | 11.09 | 0.29 | 0.17 | -1.22 | 0.386215 | 0.006563 | 0.65465  | 0.109857 |
| MmuSTS.3472.1.S1_at   | MmuSTS.3472.1 | 10.49 | 10.15 | 0.1  | 0.1  | 1.27  | 0.012925 | 0.00017  | 0.164364 | 0.030511 |
| MmuSTS.3473.1.S1_at   | MmuSTS.3473.1 | 6.4   | 5.9   | 0.19 | 0.38 | 1.42  | 0.158635 | 0.217851 | 0.449786 | 0.491406 |
| MmuSTS.3474.1.S1_at   | MmuSTS.3474.1 | 8.21  | 7.73  | 0.31 | 0.05 | 1.4   | 0.020903 | 0.03903  | 0.198215 | 0.242772 |
| MmuSTS.3475.1.S1_at   | MmuSTS.3475.1 | 7.3   | 7.93  | 0.72 | 0.12 | -1.55 | 0.205388 | 0.106887 | 0.503171 | 0.369499 |
| MmuSTS.3476.1.S1_at   | MmuSTS.3476.1 | 12.76 | 12.53 | 0.09 | 0.04 | 1.17  | 0.015521 | 0.007259 | 0.176837 | 0.114309 |
| MmuSTS.3477.1.S1_at   | MmuSTS.3477.1 | 11.39 | 11.3  | 0.18 | 0.08 | 1.07  | 0.416666 | 0.387348 | 0.67708  | 0.622027 |
| MmuSTS.3478.1.S1_at   | MmuSTS.3478.1 | 9.37  | 10.53 | 0.87 | 0.21 | -2.23 | 0.029318 | 0.090748 | 0.224074 | 0.345227 |
| MmuSTS.3479.1.S1_at   | MmuSTS.3479.1 | 6.45  | 6.51  | 0.22 | 0.08 | -1.04 | 0.625395 | 0.254717 | 0.815359 | 0.522987 |
| MmuSTS.348.1.S1_at    | MmuSTS.348.1  | 4.19  | 4.12  | 0.19 | 0.04 | 1.05  | 0.210491 | 0.326889 | 0.5081   | 0.576848 |
| MmuSTS.3480.1.S1_at   | MmuSTS.3480.1 | 11.77 | 11.7  | 0.07 | 0.06 | 1.05  | 0.053648 | 0.004967 | 0.288836 | 0.098202 |
| MmuSTS.3481.1.S1_at   | MmuSTS.3481.1 | 3.68  | 4.4   | 0.27 | 0.13 | -1.64 | 0.023098 | 0.111948 | 0.205038 | 0.377063 |
| MmuSTS.3481.1.S1_x_at | MmuSTS.3481.1 | 4.53  | 5.15  | 0.16 | 0.07 | -1.53 | 0.003678 | 0.060161 | 0.105948 | 0.291882 |
| MmuSTS.3482.1.S1_at   | MmuSTS.3482.1 | 4.07  | 4.05  | 0.08 | 0.16 | 1.02  | 0.623014 | 0.174421 | 0.813768 | 0.450894 |
| MmuSTS.3483.1.S1_at   | MmuSTS.3483.1 | 10.94 | 10.92 | 0.07 | 0.02 | 1.01  | 0.816407 | 0.179673 | 0.917994 | 0.456149 |
| MmuSTS.3484.1.S1_at   | MmuSTS.3484.1 | 7.23  | 7.05  | 0.28 | 0.39 | 1.13  | 0.572327 | 0.796624 | 0.78054  | 0.882754 |



|                       |               |       |       |      |      |        |          |          |          |          |
|-----------------------|---------------|-------|-------|------|------|--------|----------|----------|----------|----------|
| MmuSTS.3485.1.S1_at   | MmuSTS.3485.1 | 12.96 | 12.92 | 0.07 | 0.03 | 1.02   | 0.200921 | 0.892372 | 0.498297 | 0.938624 |
| MmuSTS.3486.1.S1_s_at | MmuSTS.3486.1 | 8.49  | 8.59  | 0.1  | 0.05 | -1.08  | 0.098213 | 0.036861 | 0.36881  | 0.23648  |
| MmuSTS.3487.1.S1_at   | MmuSTS.3487.1 | 6.72  | 7.4   | 0.37 | 0.25 | -1.61  | 0.060046 | 0.136588 | 0.302267 | 0.409084 |
| MmuSTS.3488.1.S1_at   | MmuSTS.3488.1 | 9.01  | 11.46 | 1.04 | 0.22 | -5.48  | 0.015251 | 0.279083 | 0.175767 | 0.542782 |
| MmuSTS.3488.1.S1_s_at | MmuSTS.3488.1 | 8.93  | 11.39 | 1.33 | 0.16 | -5.5   | 0.034245 | 0.279159 | 0.239765 | 0.542814 |
| MmuSTS.3488.1.S1_x_at | MmuSTS.3488.1 | 8.93  | 11.29 | 1.17 | 0.16 | -5.13  | 0.025716 | 0.330274 | 0.212979 | 0.579044 |
| MmuSTS.3489.1.S1_at   | MmuSTS.3489.1 | 9.55  | 13.04 | 2.17 | 0.1  | -11.27 | 0.06567  | 0.241755 | 0.313663 | 0.512327 |
| MmuSTS.349.1.S1_at    | MmuSTS.349.1  | 9.42  | 9.32  | 0.24 | 0.07 | 1.07   | 0.17276  | 0.156025 | 0.466801 | 0.431444 |
| MmuSTS.3490.1.S1_at   | MmuSTS.3490.1 | 7.04  | 8.19  | 0.88 | 0.24 | -2.22  | 0.103067 | 0.362352 | 0.375715 | 0.602965 |
| MmuSTS.3491.1.S1_at   | MmuSTS.3491.1 | 7.58  | 9.07  | 0.84 | 0.21 | -2.8   | 0.120111 | 0.311309 | 0.398476 | 0.566361 |
| MmuSTS.3492.1.S1_at   | MmuSTS.3492.1 | 12.11 | 11.59 | 0.1  | 0.03 | 1.43   | 0.000938 | 0.000198 | 0.075939 | 0.031116 |
| MmuSTS.3493.1.S1_at   | MmuSTS.3493.1 | 10.23 | 10.64 | 0.22 | 0.03 | -1.32  | 0.065113 | 0.549482 | 0.311972 | 0.729879 |
| MmuSTS.3494.1.S1_at   | MmuSTS.3494.1 | 6.29  | 6.26  | 0.1  | 0.06 | 1.02   | 0.164617 | 0.192974 | 0.457712 | 0.468455 |
| MmuSTS.3495.1.S1_at   | MmuSTS.3495.1 | 6.42  | 6.79  | 0.21 | 0.07 | -1.29  | 0.157858 | 0.000464 | 0.448652 | 0.038572 |
| MmuSTS.3496.1.S1_at   | MmuSTS.3496.1 | 8.27  | 8.06  | 0.01 | 0.14 | 1.15   | 0.175187 | 0.485459 | 0.469543 | 0.68914  |
| MmuSTS.3497.1.S1_at   | MmuSTS.3497.1 | 6.7   | 6.7   | 0.27 | 0.07 | 1      | 0.443137 | 0.80628  | 0.69649  | 0.888642 |
| MmuSTS.3498.1.S1_at   | MmuSTS.3498.1 | 9.08  | 8.96  | 0.14 | 0.12 | 1.09   | 0.635634 | 0.089879 | 0.821565 | 0.344073 |
| MmuSTS.3499.1.S1_at   | MmuSTS.3499.1 | 7.96  | 9.02  | 0.43 | 0.22 | -2.08  | 0.067282 | 0.009656 | 0.317039 | 0.129267 |
| MmuSTS.35.1.S1_at     | MmuSTS.35.1   | 10.94 | 10.93 | 0.08 | 0.02 | 1      | 0.919078 | 0.572977 | 0.965387 | 0.744895 |
| MmuSTS.350.1.S1_at    | MmuSTS.350.1  | 8.4   | 8.57  | 0.21 | 0.1  | -1.13  | 0.394577 | 0.248703 | 0.661066 | 0.517917 |
| MmuSTS.3500.1.S1_at   | MmuSTS.3500.1 | 11.72 | 11.83 | 0.26 | 0.15 | -1.07  | 0.815353 | 0.287811 | 0.917549 | 0.549064 |
| MmuSTS.3501.1.S1_at   | MmuSTS.3501.1 | 10.67 | 9.77  | 0.21 | 0.12 | 1.87   | 0.004582 | 0.244326 | 0.113728 | 0.514184 |
| MmuSTS.3502.1.S1_at   | MmuSTS.3502.1 | 7.35  | 7.37  | 0.29 | 0.14 | -1.01  | 0.626345 | 0.325744 | 0.815943 | 0.57602  |
| MmuSTS.3503.1.S1_at   | MmuSTS.3503.1 | 4.25  | 4.31  | 0.37 | 0.32 | -1.04  | 0.483711 | 0.530736 | 0.723753 | 0.718104 |
| MmuSTS.3504.1.S1_at   | MmuSTS.3504.1 | 10.59 | 10.24 | 0.12 | 0.24 | 1.27   | 0.175605 | 0.056763 | 0.470114 | 0.284379 |
| MmuSTS.3505.1.S1_at   | MmuSTS.3505.1 | 7.11  | 6.28  | 0.29 | 0.08 | 1.78   | 0.00782  | 0.014859 | 0.137244 | 0.155055 |
| MmuSTS.3506.1.S1_at   | MmuSTS.3506.1 | 13.01 | 12.82 | 0.12 | 0.03 | 1.14   | 0.02166  | 0.141008 | 0.20067  | 0.414507 |
| MmuSTS.3507.1.S1_at   | MmuSTS.3507.1 | 5.89  | 5.88  | 0.1  | 0.09 | 1      | 0.748685 | 0.458273 | 0.883741 | 0.671096 |
| MmuSTS.3508.1.S1_at   | MmuSTS.3508.1 | 6.34  | 6.25  | 0.71 | 0.43 | 1.06   | 0.312182 | 0.389041 | 0.598235 | 0.623288 |
| MmuSTS.3509.1.S1_at   | MmuSTS.3509.1 | 5.57  | 6.78  | 0.42 | 0.3  | -2.32  | 0.024801 | 0.066974 | 0.210464 | 0.304829 |
| MmuSTS.351.1.S1_at    | MmuSTS.351.1  | 6.03  | 6     | 0.17 | 0.19 | 1.02   | 0.18301  | 0.486199 | 0.478856 | 0.689643 |
| MmuSTS.3510.1.S1_at   | MmuSTS.3510.1 | 3.18  | 3.22  | 0.05 | 0.09 | -1.02  | 0.339443 | 0.186531 | 0.619743 | 0.462364 |
| MmuSTS.3511.1.S1_at   | MmuSTS.3511.1 | 8.27  | 8.15  | 0.09 | 0.13 | 1.09   | 0.926491 | 0.435336 | 0.968882 | 0.65516  |
| MmuSTS.3512.1.S1_at   | MmuSTS.3512.1 | 9.14  | 10.21 | 0.29 | 0.07 | -2.1   | 0.002915 | 0.000552 | 0.099212 | 0.040948 |
| MmuSTS.3513.1.S1_at   | MmuSTS.3513.1 | 8.74  | 8.26  | 0.13 | 0.36 | 1.4    | 0.14418  | 0.080593 | 0.430944 | 0.328367 |
| MmuSTS.3514.1.S1_at   | MmuSTS.3514.1 | 6.42  | 6.33  | 0.09 | 0.14 | 1.07   | 0.205813 | 0.20071  | 0.503593 | 0.47524  |
| MmuSTS.3515.1.S1_at   | MmuSTS.3515.1 | 9.32  | 9.1   | 0.32 | 0.13 | 1.17   | 0.302498 | 0.077357 | 0.590329 | 0.323153 |
| MmuSTS.3516.1.S1_at   | MmuSTS.3516.1 | 6.69  | 6.18  | 0.52 | 0.16 | 1.42   | 0.280894 | 0.44936  | 0.571843 | 0.665021 |
| MmuSTS.3517.1.S1_at   | MmuSTS.3517.1 | 6.28  | 6.21  | 0.05 | 0.01 | 1.05   | 0.158941 | 0.470257 | 0.450217 | 0.678575 |
| MmuSTS.3518.1.S1_at   | MmuSTS.3518.1 | 3.91  | 3.87  | 0.1  | 0.07 | 1.03   | 0.256506 | 0.373452 | 0.551012 | 0.612267 |
| MmuSTS.3519.1.S1_at   | MmuSTS.3519.1 | 7.4   | 8.76  | 0.96 | 0.28 | -2.58  | 0.108126 | 0.197358 | 0.38286  | 0.472304 |
| MmuSTS.352.1.S1_s_at  | MmuSTS.352.1  | 7.98  | 5.66  | 1.48 | 0.73 | 5      | 0.114975 | 0.049783 | 0.392008 | 0.268194 |
| MmuSTS.3520.1.S1_at   | MmuSTS.3520.1 | 8.07  | 7.86  | 0.1  | 0.19 | 1.16   | 0.157646 | 0.771979 | 0.448448 | 0.867436 |

|                       |               |       |       |      |      |        |          |          |          |          |
|-----------------------|---------------|-------|-------|------|------|--------|----------|----------|----------|----------|
| MmuSTS.3521.1.S1_at   | MmuSTS.3521.1 | 9.75  | 8.93  | 0.15 | 0.1  | 1.76   | 0.001948 | 0.000885 | 0.08845  | 0.047602 |
| MmuSTS.3522.1.S1_at   | MmuSTS.3522.1 | 7.06  | 7.21  | 0.43 | 0.4  | -1.11  | 0.915688 | 0.057369 | 0.964127 | 0.285522 |
| MmuSTS.3523.1.S1_at   | MmuSTS.3523.1 | 8.21  | 7.45  | 0.6  | 0.14 | 1.69   | 0.121079 | 0.141406 | 0.399627 | 0.414874 |
| MmuSTS.3524.1.S1_at   | MmuSTS.3524.1 | 7.29  | 8.17  | 0.82 | 0.2  | -1.84  | 0.117098 | 0.043387 | 0.394267 | 0.25294  |
| MmuSTS.3525.1.S1_at   | MmuSTS.3525.1 | 4.19  | 4.26  | 0.12 | 0.09 | -1.05  | 0.175812 | 0.231569 | 0.470151 | 0.503367 |
| MmuSTS.3526.1.S1_at   | MmuSTS.3526.1 | 9.35  | 8.85  | 0.16 | 0.19 | 1.42   | 0.014656 | 0.009376 | 0.172984 | 0.127634 |
| MmuSTS.3527.1.S1_at   | MmuSTS.3527.1 | 5.51  | 6.91  | 0.43 | 0.28 | -2.65  | 0.027324 | 0.38853  | 0.218069 | 0.622897 |
| MmuSTS.3528.1.S1_at   | MmuSTS.3528.1 | 9.19  | 9.79  | 0.71 | 0.16 | -1.52  | 0.243311 | 0.247414 | 0.539969 | 0.516672 |
| MmuSTS.3529.1.S1_at   | MmuSTS.3529.1 | 4.97  | 4.44  | 0.48 | 0.12 | 1.45   | 0.099967 | 0.171322 | 0.370861 | 0.447809 |
| MmuSTS.353.1.S1_s_at  | MmuSTS.353.1  | 9.74  | 8.27  | 0.64 | 0.3  | 2.75   | 0.050743 | 0.075193 | 0.283078 | 0.319384 |
| MmuSTS.3530.1.S1_at   | MmuSTS.3530.1 | 5.33  | 5.34  | 0.2  | 0.03 | -1.01  | 0.76457  | 0.369851 | 0.892005 | 0.609138 |
| MmuSTS.3531.1.S1_at   | MmuSTS.3531.1 | 8.6   | 8.92  | 0.7  | 0.11 | -1.25  | 0.582474 | 0.77999  | 0.787305 | 0.872428 |
| MmuSTS.3531.1.S1_s_at | MmuSTS.3531.1 | 9.82  | 10.11 | 0.61 | 0.06 | -1.22  | 0.490836 | 0.815844 | 0.728857 | 0.893781 |
| MmuSTS.3532.1.S1_at   | MmuSTS.3532.1 | 8.58  | 12.52 | 1.87 | 0.22 | -15.29 | 0.064923 | 0.273902 | 0.311504 | 0.538452 |
| MmuSTS.3533.1.S1_at   | MmuSTS.3533.1 | 12.62 | 12.4  | 0.05 | 0.12 | 1.16   | 0.044379 | 0.051069 | 0.26791  | 0.271281 |
| MmuSTS.3534.1.S1_at   | MmuSTS.3534.1 | 5.52  | 5.76  | 0.13 | 0.04 | -1.18  | 0.043459 | 0.109935 | 0.265644 | 0.374008 |
| MmuSTS.3535.1.S1_at   | MmuSTS.3535.1 | 6.15  | 6.04  | 0.15 | 0.07 | 1.08   | 0.811072 | 0.973756 | 0.915384 | 0.985656 |
| MmuSTS.3536.1.S1_at   | MmuSTS.3536.1 | 10.67 | 10.46 | 0.32 | 0.05 | 1.16   | 0.407146 | 0.63244  | 0.670282 | 0.783528 |
| MmuSTS.3537.1.S1_at   | MmuSTS.3537.1 | 8.39  | 8.87  | 0.46 | 0.18 | -1.39  | 0.47677  | 0.709535 | 0.7191   | 0.831686 |
| MmuSTS.3538.1.S1_at   | MmuSTS.3538.1 | 11.48 | 11.3  | 0.12 | 0.05 | 1.13   | 0.136057 | 0.379491 | 0.420353 | 0.616413 |
| MmuSTS.3539.1.S1_at   | MmuSTS.3539.1 | 7.64  | 7.62  | 0.18 | 0.04 | 1.01   | 0.515688 | 0.776662 | 0.745426 | 0.870173 |
| MmuSTS.354.1.S1_at    | MmuSTS.354.1  | 5.85  | 6.43  | 0.07 | 0.19 | -1.5   | 0.010731 | 0.022583 | 0.153406 | 0.188092 |
| MmuSTS.3540.1.S1_at   | MmuSTS.3540.1 | 8.8   | 8.6   | 0.41 | 0.51 | 1.15   | 0.784572 | 0.849986 | 0.901768 | 0.914673 |
| MmuSTS.3541.1.S1_at   | MmuSTS.3541.1 | 4.59  | 7.27  | 1.43 | 0.25 | -6.4   | 0.073237 | 0.161517 | 0.328341 | 0.437651 |
| MmuSTS.3542.1.S1_at   | MmuSTS.3542.1 | 3.31  | 3.3   | 0.29 | 0.16 | 1      | 0.24135  | 0.13761  | 0.538538 | 0.410562 |
| MmuSTS.3543.1.S1_at   | MmuSTS.3543.1 | 8.75  | 9.31  | 0.21 | 0.27 | -1.47  | 0.120404 | 0.004338 | 0.398818 | 0.092354 |
| MmuSTS.3544.1.S1_at   | MmuSTS.3544.1 | 10.35 | 9.94  | 0.18 | 0.15 | 1.33   | 0.07514  | 0.390857 | 0.332294 | 0.624588 |
| MmuSTS.3545.1.S1_at   | MmuSTS.3545.1 | 5.13  | 7.21  | 0.48 | 0.3  | -4.23  | 0.007127 | 0.028884 | 0.131745 | 0.211763 |
| MmuSTS.3546.1.S1_at   | MmuSTS.3546.1 | 10.46 | 10.44 | 0.15 | 0.08 | 1.02   | 0.898082 | 0.609831 | 0.956732 | 0.768137 |
| MmuSTS.3547.1.S1_at   | MmuSTS.3547.1 | 2.86  | 2.85  | 0.04 | 0.08 | 1.01   | 0.761331 | 0.701    | 0.890581 | 0.826611 |
| MmuSTS.3548.1.S1_at   | MmuSTS.3548.1 | 7.39  | 7.71  | 0.2  | 0.03 | -1.25  | 0.048026 | 0.168273 | 0.276508 | 0.444935 |
| MmuSTS.3549.1.S1_at   | MmuSTS.3549.1 | 3.38  | 3.42  | 0.05 | 0.02 | -1.02  | 0.362415 | 0.431136 | 0.637276 | 0.652151 |
| MmuSTS.355.1.S1_at    | MmuSTS.355.1  | 12.66 | 12.53 | 0.09 | 0.06 | 1.09   | 0.146924 | 0.115102 | 0.434902 | 0.381985 |
| MmuSTS.3550.1.S1_s_at | MmuSTS.3550.1 | 13.47 | 13.36 | 0.02 | 0.05 | 1.08   | 0.025391 | 0.183805 | 0.21227  | 0.459882 |
| MmuSTS.3551.1.S1_at   | MmuSTS.3551.1 | 7.91  | 7.97  | 0.18 | 0.11 | -1.04  | 0.995131 | 0.965197 | 0.998014 | 0.98061  |
| MmuSTS.3552.1.S1_at   | MmuSTS.3552.1 | 5.97  | 5.68  | 0.37 | 0.02 | 1.22   | 0.44463  | 0.539945 | 0.697467 | 0.723995 |
| MmuSTS.3552.1.S1_x_at | MmuSTS.3552.1 | 6.43  | 5.9   | 0.51 | 0.05 | 1.45   | 0.458061 | 0.553134 | 0.706772 | 0.73239  |
| MmuSTS.3553.1.S1_at   | MmuSTS.3553.1 | 3.68  | 3.78  | 0.14 | 0.15 | -1.07  | 0.255134 | 0.568992 | 0.549651 | 0.742216 |
| MmuSTS.3554.1.S1_at   | MmuSTS.3554.1 | 4.9   | 9.17  | 2.27 | 0.25 | -19.29 | 0.090112 | 0.223422 | 0.356863 | 0.496227 |
| MmuSTS.3555.1.S1_at   | MmuSTS.3555.1 | 9.43  | 9.33  | 0.07 | 0.02 | 1.07   | 0.092201 | 0.103594 | 0.360155 | 0.364346 |
| MmuSTS.3556.1.S1_at   | MmuSTS.3556.1 | 5.25  | 6.5   | 0.83 | 0.32 | -2.38  | 0.074812 | 0.167099 | 0.33165  | 0.4436   |
| MmuSTS.3557.1.S1_at   | MmuSTS.3557.1 | 10.59 | 9.66  | 0.3  | 0.14 | 1.91   | 0.01518  | 0.151384 | 0.175242 | 0.426104 |
| MmuSTS.3558.1.S1_at   | MmuSTS.3558.1 | 6.3   | 6.4   | 0.21 | 0.05 | -1.07  | 0.89979  | 0.479211 | 0.95742  | 0.685022 |

|                       |               |       |       |      |      |        |          |          |          |          |
|-----------------------|---------------|-------|-------|------|------|--------|----------|----------|----------|----------|
| MmuSTS.3559.1.S1_at   | MmuSTS.3559.1 | 10.16 | 11.19 | 0.47 | 0.29 | -2.05  | 0.100773 | 0.009185 | 0.371886 | 0.126554 |
| MmuSTS.356.1.S1_s_at  | MmuSTS.356.1  | 11.71 | 12.04 | 0.71 | 0.05 | -1.25  | 0.478145 | 0.658988 | 0.719818 | 0.800475 |
| MmuSTS.3560.1.S1_x_at | MmuSTS.3560.1 | 8.25  | 8.43  | 0.09 | 0.16 | -1.13  | 0.11208  | 0.103498 | 0.388221 | 0.364346 |
| MmuSTS.3561.1.S1_at   | MmuSTS.3561.1 | 11.37 | 11.88 | 0.16 | 0.13 | -1.43  | 0.027896 | 0.256164 | 0.219644 | 0.524069 |
| MmuSTS.3562.1.S1_at   | MmuSTS.3562.1 | 11.74 | 11.41 | 0.05 | 0.03 | 1.26   | 0.000693 | 0.000051 | 0.071248 | 0.025333 |
| MmuSTS.3563.1.S1_at   | MmuSTS.3563.1 | 7.06  | 6.98  | 0.32 | 0.18 | 1.05   | 0.234176 | 0.184685 | 0.532279 | 0.460645 |
| MmuSTS.3564.1.S1_at   | MmuSTS.3564.1 | 7.15  | 7.17  | 0.07 | 0.04 | -1.01  | 0.857998 | 0.125344 | 0.938213 | 0.395994 |
| MmuSTS.3564.1.S1_x_at | MmuSTS.3564.1 | 7.09  | 7.11  | 0.08 | 0.16 | -1.01  | 0.748978 | 0.559679 | 0.883781 | 0.736365 |
| MmuSTS.3565.1.S1_at   | MmuSTS.3565.1 | 5.89  | 7.72  | 0.74 | 0.28 | -3.56  | 0.022108 | 0.016025 | 0.201889 | 0.160532 |
| MmuSTS.3566.1.S1_at   | MmuSTS.3566.1 | 7.15  | 7.41  | 0.18 | 0.06 | -1.2   | 0.025694 | 0.134406 | 0.212966 | 0.406603 |
| MmuSTS.3567.1.S1_at   | MmuSTS.3567.1 | 11.56 | 11.9  | 0.84 | 0.14 | -1.27  | 0.540795 | 0.124997 | 0.761732 | 0.395386 |
| MmuSTS.3568.1.S1_at   | MmuSTS.3568.1 | 7.06  | 7.57  | 0.66 | 0.17 | -1.43  | 0.265014 | 0.492748 | 0.557962 | 0.693756 |
| MmuSTS.3569.1.S1_at   | MmuSTS.3569.1 | 6.46  | 11.14 | 2.29 | 0.32 | -25.79 | 0.036035 | 0.123207 | 0.244857 | 0.393273 |
| MmuSTS.357.1.S1_s_at  | MmuSTS.357.1  | 8.75  | 9.03  | 0.07 | 0.28 | -1.21  | 0.225118 | 0.048507 | 0.523023 | 0.265472 |
| MmuSTS.3570.1.S1_at   | MmuSTS.3570.1 | 10.5  | 11.01 | 0.19 | 0.11 | -1.43  | 0.022247 | 0.51946  | 0.202353 | 0.711062 |
| MmuSTS.3571.1.S1_s_at | MmuSTS.3571.1 | 10.17 | 11.19 | 1.47 | 0.1  | -2.03  | 0.302307 | 0.409051 | 0.590132 | 0.636113 |
| MmuSTS.3572.1.S1_at   | MmuSTS.3572.1 | 7.49  | 8.63  | 0.16 | 0.05 | -2.21  | 0.00021  | 0.027703 | 0.053494 | 0.20785  |
| MmuSTS.3573.1.S1_at   | MmuSTS.3573.1 | 3.39  | 3.46  | 0.96 | 0.35 | -1.05  | 0.317353 | 0.517617 | 0.602098 | 0.709722 |
| MmuSTS.3574.1.S1_at   | MmuSTS.3574.1 | 9.91  | 9.12  | 0.12 | 0.13 | 1.73   | 0.002364 | 0.017128 | 0.092906 | 0.165775 |
| MmuSTS.3575.1.S1_at   | MmuSTS.3575.1 | 3.5   | 5.9   | 1.88 | 0.27 | -5.26  | 0.258148 | 0.07653  | 0.552421 | 0.321612 |
| MmuSTS.3576.1.S1_at   | MmuSTS.3576.1 | 10.63 | 9.55  | 0.28 | 0.15 | 2.11   | 0.003269 | 0.001211 | 0.102069 | 0.054455 |
| MmuSTS.3577.1.S1_at   | MmuSTS.3577.1 | 4.32  | 4.65  | 0.29 | 0.2  | -1.26  | 0.228373 | 0.420993 | 0.526674 | 0.644662 |
| MmuSTS.3578.1.S1_at   | MmuSTS.3578.1 | 5.64  | 5.79  | 0.24 | 0.09 | -1.11  | 0.183373 | 0.176005 | 0.479285 | 0.452526 |
| MmuSTS.3579.1.S1_at   | MmuSTS.3579.1 | 5.83  | 7.74  | 0.89 | 0.09 | -3.76  | 0.053293 | 0.10571  | 0.287986 | 0.3678   |
| MmuSTS.358.1.S1_at    | MmuSTS.358.1  | 5.83  | 5.74  | 0.11 | 0.08 | 1.07   | 0.275859 | 0.216103 | 0.567443 | 0.489686 |
| MmuSTS.3580.1.S1_at   | MmuSTS.3580.1 | 7.36  | 7.51  | 0.1  | 0.03 | -1.11  | 0.068391 | 0.068792 | 0.319362 | 0.308711 |
| MmuSTS.3581.1.S1_at   | MmuSTS.3581.1 | 3.29  | 3.16  | 0.14 | 0.09 | 1.1    | 0.227264 | 0.294178 | 0.525273 | 0.553974 |
| MmuSTS.3582.1.S1_at   | MmuSTS.3582.1 | 14.31 | 13.86 | 0.09 | 0.02 | 1.37   | 0.000918 | 0.032767 | 0.075607 | 0.224122 |
| MmuSTS.3583.1.S1_at   | MmuSTS.3583.1 | 12.09 | 12.7  | 0.23 | 0.14 | -1.52  | 0.010504 | 0.053897 | 0.152429 | 0.277685 |
| MmuSTS.3584.1.S1_at   | MmuSTS.3584.1 | 3.41  | 3.41  | 0.04 | 0.04 | 1      | 0.517787 | 0.039131 | 0.746932 | 0.243056 |
| MmuSTS.3585.1.S1_at   | MmuSTS.3585.1 | 4.64  | 4.87  | 0.2  | 0.11 | -1.18  | 0.121691 | 0.170539 | 0.400504 | 0.447177 |
| MmuSTS.3586.1.S1_at   | MmuSTS.3586.1 | 3.8   | 3.77  | 0.04 | 0.02 | 1.02   | 0.343406 | 0.841749 | 0.622974 | 0.909796 |
| MmuSTS.3587.1.S1_at   | MmuSTS.3587.1 | 5.39  | 7.42  | 0.54 | 0.24 | -4.09  | 0.004168 | 0.131533 | 0.110227 | 0.403658 |
| MmuSTS.3588.1.S1_at   | MmuSTS.3588.1 | 6.07  | 6.17  | 0.09 | 0.2  | -1.08  | 0.281997 | 0.184873 | 0.572752 | 0.460776 |
| MmuSTS.3589.1.S1_at   | MmuSTS.3589.1 | 11.14 | 11.09 | 0.16 | 0.07 | 1.03   | 0.742504 | 0.567146 | 0.880829 | 0.741068 |
| MmuSTS.359.1.S1_at    | MmuSTS.359.1  | 9.67  | 10.67 | 0.17 | 0.16 | -2.01  | 0.002295 | 0.000442 | 0.092325 | 0.038359 |
| MmuSTS.3590.1.S1_at   | MmuSTS.3590.1 | 3.72  | 3.68  | 0.13 | 0.02 | 1.03   | 0.225057 | 0.309226 | 0.522982 | 0.564807 |
| MmuSTS.3591.1.S1_s_at | MmuSTS.3591.1 | 13.4  | 13.36 | 0.08 | 0.07 | 1.03   | 0.797181 | 0.062463 | 0.908371 | 0.296717 |
| MmuSTS.3592.1.S1_at   | MmuSTS.3592.1 | 10.37 | 10.36 | 0.28 | 0.05 | 1.01   | 0.994926 | 0.028558 | 0.997965 | 0.210768 |
| MmuSTS.3593.1.S1_at   | MmuSTS.3593.1 | 8.03  | 7.57  | 0.22 | 0.08 | 1.37   | 0.028065 | 0.019795 | 0.219909 | 0.176951 |
| MmuSTS.3594.1.S1_at   | MmuSTS.3594.1 | 6.23  | 5.56  | 0.35 | 0.18 | 1.6    | 0.041257 | 0.010842 | 0.259648 | 0.135758 |
| MmuSTS.3595.1.S1_at   | MmuSTS.3595.1 | 5.73  | 5.71  | 0.24 | 0.07 | 1.02   | 0.380377 | 0.573402 | 0.650146 | 0.745119 |
| MmuSTS.3596.1.S1_at   | MmuSTS.3596.1 | 5.21  | 5     | 0.4  | 0.08 | 1.15   | 0.489996 | 0.126162 | 0.728203 | 0.396742 |

|                       |               |       |       |      |      |       |          |          |          |          |
|-----------------------|---------------|-------|-------|------|------|-------|----------|----------|----------|----------|
| MmuSTS.3597.1.S1_at   | MmuSTS.3597.1 | 3.49  | 3.37  | 0.09 | 0.1  | 1.09  | 0.150353 | 0.228294 | 0.43942  | 0.500467 |
| MmuSTS.3598.1.S1_s_at | MmuSTS.3598.1 | 10.94 | 9.76  | 0.42 | 0.42 | 2.26  | 0.016257 | 0.013301 | 0.180322 | 0.14803  |
| MmuSTS.3599.1.S1_at   | MmuSTS.3599.1 | 7.56  | 7.59  | 0.13 | 0.06 | -1.02 | 0.812444 | 0.995963 | 0.916127 | 0.997533 |
| MmuSTS.36.1.S1_at     | MmuSTS.36.1   | 11.94 | 12.11 | 0.06 | 0.08 | -1.13 | 0.063408 | 0.230673 | 0.308517 | 0.502381 |
| MmuSTS.360.1.S1_at    | MmuSTS.360.1  | 7.06  | 7.24  | 0.03 | 0.1  | -1.13 | 0.040905 | 0.657032 | 0.258688 | 0.799401 |
| MmuSTS.3600.1.S1_at   | MmuSTS.3600.1 | 10.81 | 11.79 | 0.87 | 0.2  | -1.97 | 0.090794 | 0.132114 | 0.357824 | 0.404131 |
| MmuSTS.3601.1.S1_at   | MmuSTS.3601.1 | 12.41 | 12.28 | 0.2  | 0.03 | 1.09  | 0.329369 | 0.396866 | 0.61165  | 0.62846  |
| MmuSTS.3602.1.S1_at   | MmuSTS.3602.1 | 9.8   | 9.75  | 0.12 | 0.06 | 1.04  | 0.631637 | 0.801543 | 0.819161 | 0.885828 |
| MmuSTS.3603.1.S1_at   | MmuSTS.3603.1 | 9.59  | 8.33  | 0.11 | 0.2  | 2.4   | 0.000633 | 0.003549 | 0.070727 | 0.085371 |
| MmuSTS.3604.1.S1_at   | MmuSTS.3604.1 | 8.77  | 7.29  | 0.57 | 0.42 | 2.78  | 0.00878  | 0.019348 | 0.143445 | 0.174785 |
| MmuSTS.3605.1.S1_at   | MmuSTS.3605.1 | 6.52  | 6.5   | 0.94 | 0.26 | 1.01  | 0.662383 | 0.573479 | 0.837065 | 0.745164 |
| MmuSTS.3606.1.S1_at   | MmuSTS.3606.1 | 10.53 | 10.61 | 0.25 | 0.01 | -1.06 | 0.624876 | 0.232117 | 0.815077 | 0.503844 |
| MmuSTS.3607.1.S1_at   | MmuSTS.3607.1 | 10.87 | 10.9  | 0.42 | 0.11 | -1.02 | 0.268962 | 0.629713 | 0.561347 | 0.781989 |
| MmuSTS.3608.1.S1_at   | MmuSTS.3608.1 | 8.71  | 10.19 | 0.54 | 0.1  | -2.79 | 0.01032  | 0.319339 | 0.151371 | 0.571724 |
| MmuSTS.3609.1.S1_at   | MmuSTS.3609.1 | 8.14  | 9.7   | 0.58 | 0.26 | -2.96 | 0.022412 | 0.150421 | 0.202983 | 0.424955 |
| MmuSTS.361.1.A1_at    | MmuSTS.361.1  | 10.58 | 9.71  | 0.14 | 0.25 | 1.83  | 0.00505  | 0.005977 | 0.116282 | 0.105736 |
| MmuSTS.361.1.S1_at    | MmuSTS.361.1  | 9.42  | 8.43  | 0.19 | 0.2  | 1.99  | 0.003518 | 0.003961 | 0.104235 | 0.089522 |
| MmuSTS.3610.1.S1_at   | MmuSTS.3610.1 | 13.39 | 13.54 | 0.11 | 0.02 | -1.11 | 0.088349 | 0.540267 | 0.35445  | 0.724221 |
| MmuSTS.3610.1.S1_x_at | MmuSTS.3610.1 | 13.31 | 13.33 | 0.14 | 0.02 | -1.01 | 0.289402 | 0.700262 | 0.578963 | 0.826029 |
| MmuSTS.3611.1.S1_at   | MmuSTS.3611.1 | 9.64  | 9.87  | 0.12 | 0.03 | -1.17 | 0.080173 | 0.655287 | 0.340566 | 0.798399 |
| MmuSTS.3612.1.S1_at   | MmuSTS.3612.1 | 8.21  | 7.93  | 0.09 | 0.22 | 1.21  | 0.07083  | 0.450851 | 0.324317 | 0.665869 |
| MmuSTS.3613.1.S1_at   | MmuSTS.3613.1 | 4.45  | 4.12  | 0.83 | 0.16 | 1.26  | 0.439424 | 0.681907 | 0.693686 | 0.814226 |
| MmuSTS.3614.1.S1_at   | MmuSTS.3614.1 | 3.92  | 3.66  | 0.15 | 0.06 | 1.2   | 0.058199 | 0.086634 | 0.298273 | 0.339176 |
| MmuSTS.3615.1.S1_at   | MmuSTS.3615.1 | 12.88 | 11.3  | 1.54 | 0.98 | 2.99  | 0.68945  | 0.596196 | 0.851703 | 0.759376 |
| MmuSTS.3616.1.S1_at   | MmuSTS.3616.1 | 6.02  | 5.78  | 0.22 | 0.43 | 1.18  | 0.401509 | 0.108491 | 0.666053 | 0.372066 |
| MmuSTS.3617.1.S1_at   | MmuSTS.3617.1 | 10.57 | 11.31 | 0.25 | 0.27 | -1.67 | 0.029416 | 0.159268 | 0.224498 | 0.435283 |
| MmuSTS.3618.1.S1_at   | MmuSTS.3618.1 | 11.13 | 12.52 | 1.21 | 0.22 | -2.62 | 0.153652 | 0.155617 | 0.443725 | 0.430977 |
| MmuSTS.3619.1.S1_at   | MmuSTS.3619.1 | 10.2  | 10.2  | 0.18 | 0.03 | 1     | 0.734404 | 0.613967 | 0.876177 | 0.77098  |
| MmuSTS.362.1.S1_at    | MmuSTS.362.1  | 6.64  | 6.66  | 0.13 | 0.07 | -1.01 | 0.513347 | 0.747773 | 0.743653 | 0.853252 |
| MmuSTS.362.1.S1_s_at  | MmuSTS.362.1  | 4.33  | 4.23  | 0.02 | 0.05 | 1.08  | 0.02511  | 0.011413 | 0.211413 | 0.138384 |
| MmuSTS.3620.1.S1_at   | MmuSTS.3620.1 | 11.35 | 10.73 | 0.5  | 0.19 | 1.54  | 0.514707 | 0.767117 | 0.744643 | 0.864712 |
| MmuSTS.3621.1.S1_at   | MmuSTS.3621.1 | 10.91 | 11.16 | 1.05 | 0.15 | -1.19 | 0.64794  | 0.77496  | 0.829095 | 0.869002 |
| MmuSTS.3622.1.S1_at   | MmuSTS.3622.1 | 9.3   | 9.27  | 0.17 | 0.09 | 1.02  | 0.806473 | 0.82724  | 0.913279 | 0.9008   |
| MmuSTS.3623.1.S1_at   | MmuSTS.3623.1 | 4.73  | 4.69  | 0.13 | 0.16 | 1.03  | 0.777807 | 0.944842 | 0.898434 | 0.968794 |
| MmuSTS.3624.1.S1_at   | MmuSTS.3624.1 | 8.55  | 8.32  | 0.07 | 0.22 | 1.17  | 0.052028 | 0.042854 | 0.285663 | 0.251591 |
| MmuSTS.3625.1.S1_at   | MmuSTS.3625.1 | 11.08 | 11.09 | 0.22 | 0.07 | -1.01 | 0.515604 | 0.673261 | 0.74541  | 0.809084 |
| MmuSTS.3626.1.S1_at   | MmuSTS.3626.1 | 9.14  | 9.14  | 0.29 | 0.13 | 1     | 0.737318 | 0.027545 | 0.878088 | 0.207227 |
| MmuSTS.3627.1.S1_at   | MmuSTS.3627.1 | 7.93  | 7.45  | 0.31 | 0.44 | 1.4   | 0.283807 | 0.431711 | 0.574077 | 0.652516 |
| MmuSTS.3628.1.S1_at   | MmuSTS.3628.1 | 9.64  | 7.97  | 0.33 | 0.26 | 3.18  | 0.002968 | 0.00038  | 0.099551 | 0.037273 |
| MmuSTS.3629.1.S1_at   | MmuSTS.3629.1 | 6.76  | 6.42  | 0.16 | 0.1  | 1.27  | 0.055927 | 0.267959 | 0.293437 | 0.533687 |
| MmuSTS.363.1.S1_s_at  | MmuSTS.363.1  | 2.66  | 2.71  | 0.12 | 0.03 | -1.04 | 0.498024 | 0.464707 | 0.733394 | 0.675374 |
| MmuSTS.3630.1.S1_at   | MmuSTS.3630.1 | 3.14  | 3.15  | 0.05 | 0.05 | -1    | 0.339218 | 0.389721 | 0.619525 | 0.623783 |
| MmuSTS.3631.1.S1_at   | MmuSTS.3631.1 | 11.36 | 10.89 | 0.26 | 0.26 | 1.38  | 0.150546 | 0.079906 | 0.439612 | 0.327207 |

|                       |               |       |       |      |      |       |          |          |          |          |
|-----------------------|---------------|-------|-------|------|------|-------|----------|----------|----------|----------|
| MmuSTS.3632.1.S1_at   | MmuSTS.3632.1 | 4.94  | 5.04  | 0.57 | 0.16 | -1.07 | 0.800746 | 0.566398 | 0.910354 | 0.740513 |
| MmuSTS.3633.1.S1_at   | MmuSTS.3633.1 | 12.32 | 12.05 | 0.03 | 0.08 | 1.21  | 0.010979 | 0.307744 | 0.154584 | 0.563932 |
| MmuSTS.3634.1.S1_s_at | MmuSTS.3634.1 | 6.53  | 6.53  | 0.2  | 0.13 | -1    | 0.475208 | 0.419448 | 0.717973 | 0.643474 |
| MmuSTS.3635.1.S1_at   | MmuSTS.3635.1 | 10.81 | 11.31 | 0.32 | 0.11 | -1.41 | 0.203126 | 0.461683 | 0.500939 | 0.673237 |
| MmuSTS.3636.1.S1_at   | MmuSTS.3636.1 | 9.95  | 10.22 | 0.25 | 0.02 | -1.21 | 0.042    | 0.092643 | 0.261908 | 0.34868  |
| MmuSTS.3637.1.S1_at   | MmuSTS.3637.1 | 6.07  | 6.81  | 0.55 | 0.15 | -1.67 | 0.199481 | 0.257579 | 0.496847 | 0.525302 |
| MmuSTS.3638.1.S1_at   | MmuSTS.3638.1 | 7.91  | 8.07  | 0.16 | 0.51 | -1.12 | 0.564342 | 0.000371 | 0.776031 | 0.037273 |
| MmuSTS.3639.1.S1_at   | MmuSTS.3639.1 | 12.27 | 11.89 | 0.09 | 0.1  | 1.3   | 0.006838 | 0.371447 | 0.129382 | 0.610204 |
| MmuSTS.364.1.S1_at    | MmuSTS.364.1  | 6.41  | 7.17  | 0.74 | 0.21 | -1.69 | 0.128864 | 0.381111 | 0.411079 | 0.617478 |
| MmuSTS.3640.1.S1_at   | MmuSTS.3640.1 | 4.84  | 4.97  | 0.36 | 0.39 | -1.1  | 0.506552 | 0.601683 | 0.739179 | 0.763001 |
| MmuSTS.3641.1.S1_at   | MmuSTS.3641.1 | 5.28  | 4.89  | 0.01 | 0.15 | 1.31  | 0.013595 | 0.208291 | 0.167375 | 0.48217  |
| MmuSTS.3642.1.S1_at   | MmuSTS.3642.1 | 6.76  | 7.92  | 0.84 | 0.11 | -2.23 | 0.243553 | 0.32011  | 0.54025  | 0.572464 |
| MmuSTS.3643.1.S1_at   | MmuSTS.3643.1 | 7.16  | 10.13 | 1.26 | 0.26 | -7.87 | 0.040596 | 0.301474 | 0.25803  | 0.559522 |
| MmuSTS.3644.1.S1_at   | MmuSTS.3644.1 | 5.32  | 5.67  | 0.3  | 0.55 | -1.27 | 0.384399 | 0.134631 | 0.653458 | 0.406629 |
| MmuSTS.3645.1.S1_at   | MmuSTS.3645.1 | 6.26  | 6.81  | 0.44 | 0.46 | -1.46 | 0.219201 | 0.472033 | 0.516927 | 0.679835 |
| MmuSTS.3646.1.S1_at   | MmuSTS.3646.1 | 8.68  | 8.16  | 0.36 | 0.66 | 1.44  | 0.220217 | 0.097798 | 0.517758 | 0.355639 |
| MmuSTS.3647.1.S1_at   | MmuSTS.3647.1 | 8.1   | 6.91  | 0.29 | 0.38 | 2.28  | 0.010999 | 0.055507 | 0.154648 | 0.281404 |
| MmuSTS.3648.1.S1_at   | MmuSTS.3648.1 | 13.11 | 13.01 | 0.18 | 0.06 | 1.07  | 0.283617 | 0.364598 | 0.573936 | 0.604917 |
| MmuSTS.3649.1.S1_at   | MmuSTS.3649.1 | 7.01  | 7.14  | 0.06 | 0.43 | -1.09 | 0.631692 | 0.945368 | 0.819193 | 0.968942 |
| MmuSTS.365.1.S1_s_at  | MmuSTS.365.1  | 3.01  | 3.04  | 0.02 | 0.1  | -1.02 | 0.701999 | 0.134664 | 0.858637 | 0.406638 |
| MmuSTS.3650.1.S1_at   | MmuSTS.3650.1 | 9.88  | 9.37  | 0.43 | 0.04 | 1.43  | 0.034812 | 0.244231 | 0.241109 | 0.514167 |
| MmuSTS.3651.1.S1_at   | MmuSTS.3651.1 | 8.3   | 8.27  | 0.17 | 0.2  | 1.02  | 0.776137 | 0.859255 | 0.897623 | 0.919785 |
| MmuSTS.3652.1.S1_at   | MmuSTS.3652.1 | 6.4   | 6.74  | 0.15 | 0.21 | -1.26 | 0.063654 | 0.018918 | 0.308797 | 0.173025 |
| MmuSTS.3653.1.S1_at   | MmuSTS.3653.1 | 4.06  | 4.23  | 0.13 | 0.15 | -1.12 | 0.24911  | 0.257295 | 0.544437 | 0.525108 |
| MmuSTS.3654.1.S1_at   | MmuSTS.3654.1 | 5.77  | 6.69  | 0.65 | 0.41 | -1.89 | 0.04714  | 0.039654 | 0.274594 | 0.244239 |
| MmuSTS.3655.1.S1_at   | MmuSTS.3655.1 | 9.89  | 10.34 | 0.58 | 0.16 | -1.37 | 0.117232 | 0.357022 | 0.39452  | 0.598737 |
| MmuSTS.3656.1.S1_at   | MmuSTS.3656.1 | 9.9   | 10.02 | 0.33 | 0.13 | -1.09 | 0.935546 | 0.172191 | 0.972982 | 0.448608 |
| MmuSTS.3657.1.S1_at   | MmuSTS.3657.1 | 4.86  | 4.89  | 0.09 | 0.08 | -1.02 | 0.785101 | 0.379734 | 0.901955 | 0.616543 |
| MmuSTS.3658.1.S1_at   | MmuSTS.3658.1 | 10.03 | 10.33 | 0.11 | 0.13 | -1.23 | 0.071342 | 0.256279 | 0.324993 | 0.524079 |
| MmuSTS.3659.1.S1_at   | MmuSTS.3659.1 | 4.87  | 4.93  | 0.07 | 0.02 | -1.04 | 0.860323 | 0.4236   | 0.93941  | 0.646459 |
| MmuSTS.366.1.S1_at    | MmuSTS.366.1  | 6.13  | 6.19  | 0.09 | 0.04 | -1.04 | 0.453182 | 0.303637 | 0.703473 | 0.561088 |
| MmuSTS.3660.1.S1_at   | MmuSTS.3660.1 | 9.59  | 8.49  | 0.3  | 0.13 | 2.14  | 0.004053 | 0.038551 | 0.108999 | 0.241325 |
| MmuSTS.3661.1.S1_at   | MmuSTS.3661.1 | 11.42 | 11.45 | 0.08 | 0.02 | -1.02 | 0.576526 | 0.000743 | 0.783247 | 0.044964 |
| MmuSTS.3662.1.S1_at   | MmuSTS.3662.1 | 11.6  | 11.47 | 0.07 | 0.04 | 1.09  | 0.022356 | 0.346764 | 0.2028   | 0.591536 |
| MmuSTS.3663.1.S1_at   | MmuSTS.3663.1 | 6.96  | 6.89  | 0.23 | 0.1  | 1.06  | 0.510577 | 0.774234 | 0.741957 | 0.868735 |
| MmuSTS.3664.1.S1_at   | MmuSTS.3664.1 | 10.25 | 10.24 | 0.17 | 0.15 | 1.01  | 0.542132 | 0.706089 | 0.762635 | 0.829633 |
| MmuSTS.3665.1.S1_at   | MmuSTS.3665.1 | 13.01 | 12.9  | 0.06 | 0    | 1.08  | 0.052337 | 0.013337 | 0.286005 | 0.148042 |
| MmuSTS.3666.1.S1_at   | MmuSTS.3666.1 | 10.5  | 10.09 | 0.13 | 0.14 | 1.33  | 0.029176 | 0.107355 | 0.223658 | 0.370219 |
| MmuSTS.3667.1.S1_at   | MmuSTS.3667.1 | 7.98  | 8.04  | 0.19 | 0.05 | -1.04 | 0.719326 | 0.248706 | 0.867628 | 0.517917 |
| MmuSTS.3668.1.S1_at   | MmuSTS.3668.1 | 8.49  | 8.46  | 0.19 | 0.15 | 1.02  | 0.186936 | 0.269048 | 0.483009 | 0.534425 |
| MmuSTS.3669.1.S1_at   | MmuSTS.3669.1 | 4.21  | 5.49  | 0.04 | 0.13 | -2.43 | 0.000068 | 0.000211 | 0.051142 | 0.032262 |
| MmuSTS.367.1.S1_s_at  | MmuSTS.367.1  | 3.27  | 3.27  | 0.03 | 0.06 | -1    | 0.216884 | 0.170946 | 0.514681 | 0.447561 |
| MmuSTS.3670.1.S1_at   | MmuSTS.3670.1 | 5.31  | 5.35  | 0.1  | 0.12 | -1.03 | 0.893683 | 0.082995 | 0.954628 | 0.332692 |

|                       |               |       |       |      |      |       |          |          |          |          |
|-----------------------|---------------|-------|-------|------|------|-------|----------|----------|----------|----------|
| MmuSTS.3671.1.S1_at   | MmuSTS.3671.1 | 3.37  | 3.54  | 0.21 | 0.27 | -1.13 | 0.28706  | 0.18784  | 0.57677  | 0.46394  |
| MmuSTS.3672.1.S1_at   | MmuSTS.3672.1 | 9.06  | 8.44  | 0.11 | 0.1  | 1.54  | 0.001199 | 0.009358 | 0.077857 | 0.127602 |
| MmuSTS.3673.1.S1_at   | MmuSTS.3673.1 | 11.81 | 11.82 | 0.34 | 0.06 | -1.01 | 0.872356 | 0.961829 | 0.945259 | 0.978471 |
| MmuSTS.3674.1.S1_at   | MmuSTS.3674.1 | 3.71  | 3.68  | 0.05 | 0.09 | 1.02  | 0.90403  | 0.540441 | 0.959361 | 0.724383 |
| MmuSTS.3675.1.S1_at   | MmuSTS.3675.1 | 8.68  | 7.68  | 0.37 | 0.16 | 1.99  | 0.01071  | 0.009008 | 0.153282 | 0.125499 |
| MmuSTS.3676.1.S1_at   | MmuSTS.3676.1 | 10.08 | 9.36  | 0.07 | 0.45 | 1.65  | 0.090058 | 0.009547 | 0.356863 | 0.128745 |
| MmuSTS.3677.1.S1_at   | MmuSTS.3677.1 | 8.02  | 7.8   | 0.12 | 0.14 | 1.17  | 0.046217 | 0.345322 | 0.272717 | 0.59062  |
| MmuSTS.3678.1.S1_at   | MmuSTS.3678.1 | 5.59  | 5.06  | 0.62 | 0.06 | 1.45  | 0.159768 | 0.128957 | 0.451158 | 0.400429 |
| MmuSTS.3679.1.S1_at   | MmuSTS.3679.1 | 8.17  | 7.66  | 0.08 | 0.12 | 1.42  | 0.005003 | 0.03557  | 0.115961 | 0.232813 |
| MmuSTS.368.1.S1_at    | MmuSTS.368.1  | 3.82  | 3.84  | 0.1  | 0.03 | -1.01 | 0.827318 | 0.924527 | 0.923542 | 0.957386 |
| MmuSTS.3680.1.S1_at   | MmuSTS.3680.1 | 5.31  | 5.49  | 0.36 | 0.13 | -1.13 | 0.831729 | 0.297449 | 0.925994 | 0.556105 |
| MmuSTS.3681.1.S1_at   | MmuSTS.3681.1 | 11.92 | 11.84 | 0.11 | 0.17 | 1.06  | 0.105472 | 0.118915 | 0.37939  | 0.38714  |
| MmuSTS.3682.1.S1_x_at | MmuSTS.3682.1 | 9.75  | 9.92  | 0.42 | 0.15 | -1.13 | 0.589215 | 0.257535 | 0.791544 | 0.525294 |
| MmuSTS.3683.1.S1_at   | MmuSTS.3683.1 | 7.78  | 6.51  | 0.32 | 0.28 | 2.4   | 0.00572  | 0.000957 | 0.121186 | 0.049342 |
| MmuSTS.3684.1.S1_at   | MmuSTS.3684.1 | 5.88  | 5.72  | 0.15 | 0.11 | 1.12  | 0.760172 | 0.940553 | 0.890106 | 0.966314 |
| MmuSTS.3685.1.S1_at   | MmuSTS.3685.1 | 6.23  | 6.22  | 0.15 | 0.03 | 1.01  | 0.345599 | 0.643102 | 0.624534 | 0.790678 |
| MmuSTS.3686.1.S1_at   | MmuSTS.3686.1 | 9.47  | 9.51  | 0.48 | 0.16 | -1.02 | 0.687399 | 0.408964 | 0.850804 | 0.636048 |
| MmuSTS.3687.1.S1_at   | MmuSTS.3687.1 | 4.76  | 4.76  | 0.12 | 0.08 | 1     | 0.914754 | 0.838856 | 0.963792 | 0.908118 |
| MmuSTS.3688.1.S1_at   | MmuSTS.3688.1 | 8.3   | 6.98  | 0.15 | 0.38 | 2.5   | 0.00511  | 0.338394 | 0.116747 | 0.585432 |
| MmuSTS.3689.1.S1_at   | MmuSTS.3689.1 | 6.92  | 7.31  | 0.12 | 0.13 | -1.31 | 0.018759 | 0.176439 | 0.190313 | 0.45282  |
| MmuSTS.369.1.S1_s_at  | MmuSTS.369.1  | 4.42  | 4.47  | 0.1  | 0.03 | -1.04 | 0.529132 | 0.152801 | 0.754058 | 0.427601 |
| MmuSTS.3690.1.S1_at   | MmuSTS.3690.1 | 13.13 | 13.24 | 0.19 | 0.06 | -1.08 | 0.129865 | 0.349912 | 0.412108 | 0.593668 |
| MmuSTS.3691.1.S1_at   | MmuSTS.3691.1 | 11.26 | 10.78 | 0.16 | 0.21 | 1.4   | 0.039272 | 0.010451 | 0.254642 | 0.133645 |
| MmuSTS.3692.1.S1_at   | MmuSTS.3692.1 | 11.51 | 11.98 | 0.47 | 0.09 | -1.38 | 0.238344 | 0.26094  | 0.53577  | 0.527351 |
| MmuSTS.3693.1.S1_at   | MmuSTS.3693.1 | 6.3   | 7.11  | 0.17 | 0.26 | -1.75 | 0.009918 | 0.245558 | 0.148989 | 0.515348 |
| MmuSTS.3694.1.S1_at   | MmuSTS.3694.1 | 7.97  | 7.51  | 0.25 | 0.14 | 1.38  | 0.162634 | 0.457265 | 0.454661 | 0.670746 |
| MmuSTS.3695.1.S1_at   | MmuSTS.3695.1 | 11.04 | 10.81 | 0.04 | 0.06 | 1.17  | 0.00531  | 0.017857 | 0.117801 | 0.168774 |
| MmuSTS.3695.1.S1_s_at | MmuSTS.3695.1 | 12.04 | 11.84 | 0.04 | 0.06 | 1.15  | 0.014324 | 0.037226 | 0.171529 | 0.237329 |
| MmuSTS.3696.1.S1_at   | MmuSTS.3696.1 | 11.11 | 11.29 | 0.05 | 0.11 | -1.13 | 0.116227 | 0.733776 | 0.393335 | 0.845859 |
| MmuSTS.3697.1.S1_at   | MmuSTS.3697.1 | 12.29 | 12.23 | 0.02 | 0.02 | 1.04  | 0.018837 | 0.065883 | 0.190809 | 0.302126 |
| MmuSTS.3698.1.S1_at   | MmuSTS.3698.1 | 13.25 | 13.28 | 0.07 | 0.02 | -1.02 | 0.455958 | 0.235258 | 0.705586 | 0.506307 |
| MmuSTS.3699.1.S1_at   | MmuSTS.3699.1 | 7.31  | 6.39  | 0.51 | 0.29 | 1.89  | 0.055786 | 0.04581  | 0.293357 | 0.258337 |
| MmuSTS.37.1.S1_at     | MmuSTS.37.1   | 10.44 | 10.12 | 0.06 | 0.05 | 1.25  | 0.001775 | 0.109696 | 0.085481 | 0.373675 |
| MmuSTS.370.1.S1_at    | MmuSTS.370.1  | 5.77  | 5.68  | 0.2  | 0.16 | 1.07  | 0.180946 | 0.449648 | 0.476193 | 0.665155 |
| MmuSTS.3700.1.S1_at   | MmuSTS.3700.1 | 12.94 | 12.66 | 0.19 | 0.03 | 1.22  | 0.053263 | 0.009239 | 0.287986 | 0.126946 |
| MmuSTS.3701.1.S1_at   | MmuSTS.3701.1 | 3.94  | 3.95  | 0.26 | 0.16 | -1.01 | 0.597436 | 0.617103 | 0.796676 | 0.77321  |
| MmuSTS.3702.1.S1_at   | MmuSTS.3702.1 | 11.15 | 11.04 | 0.2  | 0.09 | 1.08  | 0.971412 | 0.077406 | 0.98857  | 0.323204 |
| MmuSTS.3703.1.S1_at   | MmuSTS.3703.1 | 3.12  | 3.21  | 0.1  | 0.04 | -1.06 | 0.320087 | 0.436555 | 0.604682 | 0.656048 |
| MmuSTS.3704.1.S1_at   | MmuSTS.3704.1 | 9.59  | 10.08 | 0.13 | 0.13 | -1.4  | 0.016609 | 0.080697 | 0.18217  | 0.328537 |
| MmuSTS.3705.1.S1_at   | MmuSTS.3705.1 | 5.8   | 7.01  | 0.2  | 0.37 | -2.32 | 0.007045 | 0.001065 | 0.131294 | 0.051835 |
| MmuSTS.3706.1.S1_at   | MmuSTS.3706.1 | 11.63 | 11.5  | 0.15 | 0.04 | 1.09  | 0.174751 | 0.3159   | 0.468992 | 0.569327 |
| MmuSTS.3707.1.S1_at   | MmuSTS.3707.1 | 10.33 | 10.05 | 0.87 | 0.38 | 1.21  | 0.724078 | 0.052438 | 0.870379 | 0.274524 |
| MmuSTS.3708.1.S1_at   | MmuSTS.3708.1 | 5.73  | 5.95  | 0.04 | 0.06 | -1.17 | 0.007616 | 0.001965 | 0.135757 | 0.065838 |

|                        |                |       |       |      |      |        |          |          |          |          |
|------------------------|----------------|-------|-------|------|------|--------|----------|----------|----------|----------|
| MmuSTS.3709.1.S1_at    | MmuSTS.3709.1  | 5.08  | 5.02  | 0.04 | 0.08 | 1.04   | 0.177896 | 0.022732 | 0.47265  | 0.188776 |
| MmuSTS.371.1.S1_at     | MmuSTS.371.1   | 3.69  | 3.57  | 0.17 | 0.07 | 1.09   | 0.287893 | 0.525881 | 0.577544 | 0.715223 |
| MmuSTS.3710.1.S1_at    | MmuSTS.3710.1  | 11.61 | 11.67 | 0.11 | 0.02 | -1.04  | 0.201051 | 0.39959  | 0.498526 | 0.629912 |
| MmuSTS.3711.1.S1_s_at  | MmuSTS.3711.1  | 10.5  | 10.6  | 0.12 | 0.09 | -1.07  | 0.218283 | 0.329552 | 0.515982 | 0.578781 |
| MmuSTS.3712.1.S1_at    | MmuSTS.3712.1  | 11.97 | 12.17 | 0.09 | 0.06 | -1.15  | 0.039772 | 0.0207   | 0.25613  | 0.180639 |
| MmuSTS.3713.1.S1_at    | MmuSTS.3713.1  | 11.36 | 10.82 | 0.38 | 0.1  | 1.45   | 0.074876 | 0.138422 | 0.331829 | 0.411336 |
| MmuSTS.3714.1.S1_at    | MmuSTS.3714.1  | 12.23 | 12.32 | 0.29 | 0.06 | -1.06  | 0.537707 | 0.821282 | 0.759887 | 0.897125 |
| MmuSTS.3715.1.S1_at    | MmuSTS.3715.1  | 6.04  | 5.63  | 0.1  | 0.07 | 1.33   | 0.004342 | 0.019914 | 0.111908 | 0.17744  |
| MmuSTS.3716.1.S1_at    | MmuSTS.3716.1  | 4.21  | 4.06  | 0.18 | 0.07 | 1.11   | 0.709845 | 0.326617 | 0.862704 | 0.576649 |
| MmuSTS.3717.1.S1_at    | MmuSTS.3717.1  | 12.59 | 12.72 | 0.05 | 0    | -1.09  | 0.026601 | 0.393812 | 0.216314 | 0.626565 |
| MmuSTS.3718.1.S1_at    | MmuSTS.3718.1  | 7.48  | 8.66  | 0.71 | 0.4  | -2.27  | 0.066038 | 0.005315 | 0.314399 | 0.100896 |
| MmuSTS.3719.1.S1_at    | MmuSTS.3719.1  | 7.57  | 6.69  | 0.2  | 0.11 | 1.85   | 0.00318  | 0.087295 | 0.101444 | 0.340327 |
| MmuSTS.372.1.S1_at     | MmuSTS.372.1   | 3.01  | 3.05  | 0.13 | 0.16 | -1.03  | 0.787146 | 0.312633 | 0.902963 | 0.567268 |
| MmunewRS.336.1.S1_at   | MmunewRS.336.1 | 3.58  | 3.6   | 0.05 | 0.27 | -1.01  | 0.969905 | 0.295905 | 0.98803  | 0.555241 |
| MmunewRS.336.1.S1_s_at | MmunewRS.336.1 | 5.55  | 5.54  | 0.15 | 0.07 | 1.01   | 0.433072 | 0.539334 | 0.688696 | 0.723689 |
| MmuSTS.3720.1.S1_at    | MmuSTS.3720.1  | 5.41  | 9.35  | 0.91 | 0.33 | -15.27 | 0.002149 | 0.027869 | 0.090216 | 0.208453 |
| MmuSTS.3721.1.S1_at    | MmuSTS.3721.1  | 7.16  | 8.08  | 1.66 | 0.41 | -1.88  | 0.954534 | 0.266324 | 0.98132  | 0.532099 |
| MmuSTS.3722.1.S1_at    | MmuSTS.3722.1  | 7.86  | 9.45  | 0.52 | 0.49 | -3.02  | 0.035792 | 0.005404 | 0.244149 | 0.101457 |
| MmuSTS.3723.1.S1_at    | MmuSTS.3723.1  | 13.86 | 13.83 | 0.01 | 0.01 | 1.02   | 0.010451 | 0.28506  | 0.152221 | 0.547095 |
| MmuSTS.3724.1.S1_at    | MmuSTS.3724.1  | 10.36 | 10.78 | 0.1  | 0.08 | -1.33  | 0.00262  | 0.001594 | 0.095181 | 0.06044  |
| MmuSTS.3725.1.S1_at    | MmuSTS.3725.1  | 8.85  | 9.34  | 0.05 | 0.25 | -1.4   | 0.041079 | 0.001388 | 0.259179 | 0.057005 |
| MmuSTS.3726.1.S1_at    | MmuSTS.3726.1  | 6.5   | 6.77  | 0.9  | 0.17 | -1.21  | 0.218489 | 0.465    | 0.516127 | 0.675534 |
| MmuSTS.3727.1.S1_at    | MmuSTS.3727.1  | 7.45  | 10.58 | 1.33 | 0.19 | -8.77  | 0.037457 | 0.127017 | 0.249007 | 0.397816 |
| MmuSTS.3728.1.S1_at    | MmuSTS.3728.1  | 5.32  | 5.39  | 0.26 | 0.07 | -1.05  | 0.233293 | 0.196317 | 0.531554 | 0.47127  |
| MmuSTS.3729.1.S1_at    | MmuSTS.3729.1  | 10.47 | 10.61 | 0.23 | 0.41 | -1.11  | 0.424491 | 0.488768 | 0.682218 | 0.691355 |
| MmuSTS.3730.1.S1_at    | MmuSTS.3730.1  | 10.11 | 10.15 | 0.21 | 0.06 | -1.03  | 0.565897 | 0.008103 | 0.776954 | 0.119551 |
| MmuSTS.3731.1.S1_at    | MmuSTS.3731.1  | 9.07  | 9.31  | 0.41 | 0.15 | -1.18  | 0.553907 | 0.036934 | 0.770323 | 0.236659 |
| MmuSTS.3732.1.S1_s_at  | MmuSTS.3732.1  | 12.59 | 12.53 | 0.05 | 0.03 | 1.04   | 0.055928 | 0.217361 | 0.293437 | 0.490978 |
| MmuSTS.3733.1.S1_at    | MmuSTS.3733.1  | 4.7   | 4.75  | 0.1  | 0.05 | -1.03  | 0.607571 | 0.102508 | 0.803785 | 0.362796 |
| MmuSTS.3733.1.S1_s_at  | MmuSTS.3733.1  | 6.12  | 6.09  | 0    | 0.07 | 1.02   | 0.285387 | 0.322306 | 0.575167 | 0.573907 |
| MmuSTS.3734.1.S1_at    | MmuSTS.3734.1  | 3.08  | 2.95  | 0.12 | 0.1  | 1.09   | 0.524402 | 0.669715 | 0.751227 | 0.806829 |
| MmuSTS.3735.1.S1_at    | MmuSTS.3735.1  | 6.89  | 6.95  | 0.04 | 0.09 | -1.04  | 0.269369 | 0.485081 | 0.561706 | 0.688913 |
| MmuSTS.3736.1.S1_at    | MmuSTS.3736.1  | 11.87 | 11.84 | 0.18 | 0.04 | 1.03   | 0.780317 | 0.712859 | 0.899764 | 0.833557 |
| MmuSTS.3737.1.S1_at    | MmuSTS.3737.1  | 7.11  | 11.33 | 1.94 | 0.24 | -18.68 | 0.051657 | 0.247003 | 0.284589 | 0.516238 |
| MmuSTS.3738.1.S1_at    | MmuSTS.3738.1  | 11.84 | 11.09 | 0.16 | 0.04 | 1.68   | 0.000972 | 0.087859 | 0.076222 | 0.341218 |
| MmuSTS.3739.1.S1_at    | MmuSTS.3739.1  | 6.41  | 8.97  | 1.28 | 0.46 | -5.93  | 0.050999 | 0.120468 | 0.283499 | 0.38925  |
| MmuSTS.374.1.S1_at     | MmuSTS.374.1   | 5.71  | 6.23  | 0.09 | 0.26 | -1.43  | 0.026358 | 0.107324 | 0.215464 | 0.370219 |
| MmuSTS.3740.1.S1_s_at  | MmuSTS.3740.1  | 5.89  | 6.16  | 0.12 | 0.04 | -1.21  | 0.054585 | 0.112345 | 0.290604 | 0.377686 |
| MmuSTS.3741.1.S1_at    | MmuSTS.3741.1  | 8.37  | 10.38 | 1.12 | 0.31 | -4.01  | 0.151998 | 0.017015 | 0.441547 | 0.165348 |
| MmuSTS.3742.1.S1_at    | MmuSTS.3742.1  | 8.52  | 10.48 | 1.94 | 0.41 | -3.91  | 0.2132   | 0.076394 | 0.511046 | 0.321372 |
| MmuSTS.3743.1.S1_at    | MmuSTS.3743.1  | 6.41  | 6.36  | 0.1  | 0.05 | 1.03   | 0.21598  | 0.763456 | 0.513655 | 0.862471 |
| MmuSTS.3744.1.S1_at    | MmuSTS.3744.1  | 9.68  | 9.8   | 0.11 | 0.04 | -1.09  | 0.228093 | 0.003619 | 0.526281 | 0.086035 |
| MmuSTS.3745.1.S1_at    | MmuSTS.3745.1  | 5.13  | 6.73  | 0.49 | 0.39 | -3.02  | 0.016762 | 0.111126 | 0.182686 | 0.375714 |

|                     |               |       |       |      |      |       |          |          |          |          |
|---------------------|---------------|-------|-------|------|------|-------|----------|----------|----------|----------|
| MmuSTS.3746.1.S1_at | MmuSTS.3746.1 | 8.1   | 6.84  | 0.69 | 0.49 | 2.4   | 0.048403 | 0.081478 | 0.277466 | 0.329735 |
| MmuSTS.3747.1.S1_at | MmuSTS.3747.1 | 9.62  | 9.95  | 0.1  | 0.11 | -1.26 | 0.030918 | 0.011513 | 0.228986 | 0.138773 |
| MmuSTS.3748.1.S1_at | MmuSTS.3748.1 | 5.84  | 5.64  | 0.2  | 0.17 | 1.15  | 0.138768 | 0.173824 | 0.424364 | 0.450128 |
| MmuSTS.3749.1.S1_at | MmuSTS.3749.1 | 7.43  | 6.91  | 0.28 | 0.26 | 1.43  | 0.131382 | 0.112792 | 0.414229 | 0.37844  |
| MmuSTS.375.1.S1_at  | MmuSTS.375.1  | 4.57  | 6.37  | 0.53 | 0.19 | -3.47 | 0.005276 | 0.174437 | 0.117642 | 0.450911 |
| MmuSTS.3750.1.S1_at | MmuSTS.3750.1 | 13.31 | 13.34 | 0.06 | 0.04 | -1.02 | 0.527097 | 0.410834 | 0.752918 | 0.637644 |
| MmuSTS.3751.1.S1_at | MmuSTS.3751.1 | 10.7  | 8.96  | 0.23 | 0.34 | 3.33  | 0.002709 | 0.071609 | 0.096803 | 0.313717 |
| MmuSTS.3752.1.S1_at | MmuSTS.3752.1 | 8.29  | 8.63  | 0.39 | 0.11 | -1.27 | 0.826051 | 0.014197 | 0.922773 | 0.152173 |
| MmuSTS.3753.1.S1_at | MmuSTS.3753.1 | 3.8   | 5.19  | 0.49 | 0.51 | -2.62 | 0.08174  | 0.107075 | 0.342963 | 0.369728 |
| MmuSTS.3754.1.S1_at | MmuSTS.3754.1 | 9.33  | 9.31  | 0.31 | 0.08 | 1.02  | 0.621913 | 0.12795  | 0.812905 | 0.398894 |
| MmuSTS.3755.1.S1_at | MmuSTS.3755.1 | 8.93  | 9.07  | 0.14 | 0.08 | -1.1  | 0.647104 | 0.271979 | 0.828492 | 0.53674  |
| MmuSTS.3756.1.S1_at | MmuSTS.3756.1 | 5.97  | 5.91  | 0.13 | 0.04 | 1.04  | 0.505745 | 0.555239 | 0.738658 | 0.733763 |
| MmuSTS.3757.1.S1_at | MmuSTS.3757.1 | 7.76  | 8.44  | 0.38 | 0.14 | -1.6  | 0.054228 | 0.20867  | 0.289903 | 0.482544 |
| MmuSTS.3758.1.S1_at | MmuSTS.3758.1 | 13.27 | 13.21 | 0.02 | 0.03 | 1.04  | 0.058801 | 0.07224  | 0.299609 | 0.314836 |
| MmuSTS.3759.1.S1_at | MmuSTS.3759.1 | 12.38 | 12.33 | 0.05 | 0.12 | 1.04  | 0.205632 | 0.252113 | 0.503384 | 0.520787 |
| MmuSTS.376.1.S1_at  | MmuSTS.376.1  | 11.98 | 12.32 | 0.14 | 0.03 | -1.26 | 0.009414 | 0.013615 | 0.146817 | 0.149362 |
| MmuSTS.3760.1.S1_at | MmuSTS.3760.1 | 8.3   | 8.2   | 0.07 | 0.05 | 1.07  | 0.151189 | 0.170452 | 0.440703 | 0.447103 |
| MmuSTS.3761.1.S1_at | MmuSTS.3761.1 | 3.66  | 3.68  | 0.29 | 0.22 | -1.01 | 0.798177 | 0.353066 | 0.908871 | 0.596363 |
| MmuSTS.3762.1.S1_at | MmuSTS.3762.1 | 3.85  | 3.64  | 0.2  | 0.21 | 1.16  | 0.165217 | 0.103676 | 0.458247 | 0.364465 |
| MmuSTS.3763.1.S1_at | MmuSTS.3763.1 | 12.44 | 12.47 | 0.14 | 0.04 | -1.03 | 0.669173 | 0.058215 | 0.841308 | 0.287988 |
| MmuSTS.3764.1.S1_at | MmuSTS.3764.1 | 2.8   | 3.1   | 0.03 | 0.08 | -1.23 | 0.005179 | 0.001397 | 0.116998 | 0.057005 |
| MmuSTS.3765.1.S1_at | MmuSTS.3765.1 | 8.81  | 9.26  | 0.29 | 0.06 | -1.37 | 0.023393 | 0.454227 | 0.205936 | 0.668474 |
| MmuSTS.3766.1.S1_at | MmuSTS.3766.1 | 7.04  | 8.38  | 1.53 | 0.34 | -2.53 | 0.534226 | 0.496979 | 0.757483 | 0.696338 |
| MmuSTS.3767.1.S1_at | MmuSTS.3767.1 | 4.78  | 5.96  | 1.08 | 0.43 | -2.26 | 0.103129 | 0.016478 | 0.375814 | 0.162551 |
| MmuSTS.3768.1.S1_at | MmuSTS.3768.1 | 7.71  | 7.66  | 0.24 | 0.06 | 1.03  | 0.551652 | 0.640966 | 0.768597 | 0.789319 |
| MmuSTS.3769.1.S1_at | MmuSTS.3769.1 | 6.06  | 6.3   | 0.47 | 0.36 | -1.18 | 0.387742 | 0.136522 | 0.65583  | 0.409003 |
| MmuSTS.377.1.S1_at  | MmuSTS.377.1  | 5.2   | 5.11  | 0.18 | 0.06 | 1.07  | 0.968608 | 0.967516 | 0.987551 | 0.98208  |
| MmuSTS.3770.1.S1_at | MmuSTS.3770.1 | 7.19  | 7.24  | 0.03 | 0.05 | -1.03 | 0.239622 | 0.287237 | 0.537081 | 0.548526 |
| MmuSTS.3771.1.S1_at | MmuSTS.3771.1 | 9.8   | 9.96  | 0.15 | 0.06 | -1.12 | 0.67998  | 0.08439  | 0.847291 | 0.335713 |
| MmuSTS.3772.1.S1_at | MmuSTS.3772.1 | 9.75  | 9.7   | 0.38 | 0.07 | 1.03  | 0.300393 | 0.533862 | 0.588556 | 0.71991  |
| MmuSTS.3773.1.S1_at | MmuSTS.3773.1 | 12.03 | 12.34 | 0.12 | 0.03 | -1.24 | 0.011266 | 0.023712 | 0.15611  | 0.192852 |
| MmuSTS.3774.1.S1_at | MmuSTS.3774.1 | 8.12  | 8.23  | 0.09 | 0.11 | -1.08 | 0.265171 | 0.557068 | 0.557962 | 0.73493  |
| MmuSTS.3775.1.S1_at | MmuSTS.3775.1 | 8.49  | 8.47  | 0.08 | 0.13 | 1.01  | 0.840666 | 0.005669 | 0.930057 | 0.103959 |
| MmuSTS.3776.1.S1_at | MmuSTS.3776.1 | 5.61  | 6.29  | 0.59 | 0.26 | -1.61 | 0.066595 | 0.077036 | 0.315605 | 0.322481 |
| MmuSTS.3777.1.S1_at | MmuSTS.3777.1 | 8.69  | 8.81  | 0.18 | 0.19 | -1.08 | 0.209487 | 0.086573 | 0.507029 | 0.33911  |
| MmuSTS.3778.1.S1_at | MmuSTS.3778.1 | 12.27 | 12.21 | 0.03 | 0.09 | 1.04  | 0.346188 | 0.00032  | 0.624868 | 0.035423 |
| MmuSTS.3779.1.S1_at | MmuSTS.3779.1 | 3.39  | 3.14  | 0.25 | 0.12 | 1.18  | 0.349933 | 0.492239 | 0.627709 | 0.693477 |
| MmuSTS.378.1.S1_at  | MmuSTS.378.1  | 3.87  | 3.74  | 0.77 | 0.5  | 1.09  | 0.747247 | 0.518263 | 0.882955 | 0.710344 |
| MmuSTS.3780.1.S1_at | MmuSTS.3780.1 | 11.32 | 11.55 | 0.41 | 0.09 | -1.17 | 0.969578 | 0.027277 | 0.987929 | 0.206458 |
| MmuSTS.3781.1.S1_at | MmuSTS.3781.1 | 9.33  | 9.65  | 0.04 | 0.02 | -1.25 | 0.000152 | 0.275134 | 0.051907 | 0.539542 |
| MmuSTS.3782.1.S1_at | MmuSTS.3782.1 | 7.04  | 7.23  | 0.25 | 0.22 | -1.14 | 0.267983 | 0.088265 | 0.560733 | 0.341721 |
| MmuSTS.3783.1.S1_at | MmuSTS.3783.1 | 3.05  | 3.17  | 0.01 | 0.11 | -1.09 | 0.407537 | 0.24095  | 0.67054  | 0.51164  |
| MmuSTS.3784.1.S1_at | MmuSTS.3784.1 | 4.71  | 5.13  | 0.34 | 0.14 | -1.34 | 0.294623 | 0.339929 | 0.583582 | 0.586449 |



|                       |               |       |       |      |      |       |          |          |          |          |
|-----------------------|---------------|-------|-------|------|------|-------|----------|----------|----------|----------|
| MmuSTS.3785.1.S1_at   | MmuSTS.3785.1 | 5.75  | 6.48  | 0.65 | 0.26 | -1.67 | 0.302167 | 0.638875 | 0.590132 | 0.787897 |
| MmuSTS.3786.1.S1_at   | MmuSTS.3786.1 | 5.93  | 5.46  | 0.25 | 0.11 | 1.38  | 0.178994 | 0.433528 | 0.47398  | 0.653805 |
| MmuSTS.3787.1.S1_at   | MmuSTS.3787.1 | 7.28  | 6.4   | 0.12 | 0.18 | 1.85  | 0.002661 | 0.000531 | 0.095754 | 0.040186 |
| MmuSTS.3788.1.S1_at   | MmuSTS.3788.1 | 10.4  | 10.46 | 0.21 | 0.05 | -1.04 | 0.328821 | 0.583288 | 0.611114 | 0.751682 |
| MmuSTS.3789.1.S1_at   | MmuSTS.3789.1 | 7.66  | 8.42  | 0.75 | 0.34 | -1.69 | 0.22238  | 0.196525 | 0.520349 | 0.471577 |
| MmuSTS.379.1.S1_at    | MmuSTS.379.1  | 7.99  | 9.09  | 0.31 | 0.13 | -2.15 | 0.006177 | 0.132299 | 0.124738 | 0.404294 |
| MmuSTS.3790.1.S1_at   | MmuSTS.3790.1 | 5.11  | 5.23  | 0.29 | 0.05 | -1.08 | 0.901676 | 0.991376 | 0.958306 | 0.995189 |
| MmuSTS.3791.1.S1_at   | MmuSTS.3791.1 | 9.53  | 9.25  | 0.16 | 0.13 | 1.22  | 0.073151 | 0.209603 | 0.328251 | 0.483271 |
| MmuSTS.3792.1.S1_at   | MmuSTS.3792.1 | 5.94  | 5.98  | 0.11 | 0.05 | -1.03 | 0.699627 | 0.853749 | 0.857343 | 0.916773 |
| MmuSTS.3793.1.S1_at   | MmuSTS.3793.1 | 4.21  | 4.2   | 0.02 | 0.04 | 1     | 0.950781 | 0.385708 | 0.979595 | 0.621079 |
| MmuSTS.3794.1.S1_at   | MmuSTS.3794.1 | 11.31 | 11.27 | 0.05 | 0.05 | 1.03  | 0.404404 | 0.474134 | 0.668151 | 0.681302 |
| MmuSTS.3795.1.S1_at   | MmuSTS.3795.1 | 10.77 | 11.47 | 0.23 | 0.09 | -1.62 | 0.00888  | 0.014737 | 0.143995 | 0.154455 |
| MmuSTS.3796.1.S1_at   | MmuSTS.3796.1 | 9.46  | 9.19  | 0.09 | 0.08 | 1.2   | 0.016428 | 0.00179  | 0.181069 | 0.063581 |
| MmuSTS.3797.1.S1_at   | MmuSTS.3797.1 | 11.66 | 11.9  | 0.09 | 0.05 | -1.18 | 0.018262 | 0.080483 | 0.188157 | 0.328159 |
| MmuSTS.3798.1.S1_at   | MmuSTS.3798.1 | 9.07  | 9.45  | 0.42 | 0.01 | -1.31 | 0.323604 | 0.444853 | 0.607387 | 0.662072 |
| MmuSTS.3799.1.S1_at   | MmuSTS.3799.1 | 10.34 | 9.43  | 0.48 | 0.14 | 1.87  | 0.012619 | 0.00776  | 0.162521 | 0.117626 |
| MmuSTS.38.1.S1_at     | MmuSTS.38.1   | 8.64  | 8.52  | 0.31 | 0.02 | 1.08  | 0.563755 | 0.675157 | 0.775658 | 0.810205 |
| MmuSTS.380.1.S1_at    | MmuSTS.380.1  | 4.71  | 5.06  | 0.24 | 0.1  | -1.28 | 0.127975 | 0.721725 | 0.409866 | 0.838808 |
| MmuSTS.3800.1.S1_at   | MmuSTS.3800.1 | 12.66 | 12.83 | 0.16 | 0.05 | -1.13 | 0.121227 | 0.222955 | 0.399891 | 0.495821 |
| MmuSTS.3801.1.S1_at   | MmuSTS.3801.1 | 13.36 | 12.97 | 0.1  | 0.04 | 1.31  | 0.004027 | 0.022278 | 0.108999 | 0.186724 |
| MmuSTS.3802.1.S1_at   | MmuSTS.3802.1 | 3.83  | 3.53  | 0.08 | 0.22 | 1.23  | 0.324775 | 0.368073 | 0.608363 | 0.607669 |
| MmuSTS.3803.1.S1_at   | MmuSTS.3803.1 | 9.26  | 9.07  | 0.51 | 0.12 | 1.13  | 0.293992 | 0.223565 | 0.582994 | 0.49642  |
| MmuSTS.3804.1.S1_at   | MmuSTS.3804.1 | 7.68  | 7.93  | 0.2  | 0.15 | -1.19 | 0.083    | 0.190845 | 0.345251 | 0.466228 |
| MmuSTS.3805.1.S1_at   | MmuSTS.3805.1 | 8.7   | 8.79  | 0.18 | 0.06 | -1.06 | 0.928254 | 0.98542  | 0.969727 | 0.991761 |
| MmuSTS.3806.1.S1_at   | MmuSTS.3806.1 | 11.71 | 11.72 | 0.11 | 0.13 | -1.01 | 0.970072 | 0.016993 | 0.988128 | 0.165285 |
| MmuSTS.3807.1.S1_at   | MmuSTS.3807.1 | 8.14  | 7.33  | 0.22 | 0.2  | 1.75  | 0.003867 | 0.006827 | 0.107698 | 0.111597 |
| MmuSTS.3808.1.S1_at   | MmuSTS.3808.1 | 8.38  | 8.88  | 0.2  | 0.13 | -1.41 | 0.018029 | 0.046125 | 0.187289 | 0.259154 |
| MmuSTS.3809.1.S1_at   | MmuSTS.3809.1 | 6.05  | 6.07  | 0.19 | 0.27 | -1.02 | 0.527931 | 0.587488 | 0.753403 | 0.754278 |
| MmuSTS.381.1.S1_at    | MmuSTS.381.1  | 8.91  | 8.44  | 0.12 | 0.12 | 1.38  | 0.006701 | 0.005824 | 0.12845  | 0.104661 |
| MmuSTS.3810.1.S1_s_at | MmuSTS.3810.1 | 3.52  | 3.54  | 0.03 | 0.01 | -1.01 | 0.28334  | 0.654966 | 0.573777 | 0.7982   |
| MmuSTS.3811.1.S1_at   | MmuSTS.3811.1 | 9.4   | 8.96  | 0.14 | 0.1  | 1.36  | 0.021928 | 0.070782 | 0.201275 | 0.312275 |
| MmuSTS.3812.1.S1_at   | MmuSTS.3812.1 | 10.76 | 11.06 | 0.2  | 0.14 | -1.22 | 0.201083 | 0.594508 | 0.498557 | 0.758623 |
| MmuSTS.3813.1.S1_at   | MmuSTS.3813.1 | 7.37  | 7.57  | 0.09 | 0.07 | -1.15 | 0.045968 | 0.330258 | 0.272039 | 0.579044 |
| MmuSTS.3814.1.S1_at   | MmuSTS.3814.1 | 7.83  | 8.04  | 0.83 | 0.32 | -1.16 | 0.484266 | 0.087571 | 0.724151 | 0.3408   |
| MmuSTS.3815.1.S1_at   | MmuSTS.3815.1 | 11.41 | 11.83 | 0.17 | 0.03 | -1.34 | 0.015129 | 0.346765 | 0.175084 | 0.591536 |
| MmuSTS.3816.1.S1_at   | MmuSTS.3816.1 | 10.08 | 10.75 | 0.28 | 0.01 | -1.59 | 0.015074 | 0.367894 | 0.174736 | 0.607469 |
| MmuSTS.3817.1.S1_at   | MmuSTS.3817.1 | 4.98  | 6.3   | 0.31 | 0.04 | -2.51 | 0.001417 | 0.000178 | 0.07964  | 0.030511 |
| MmuSTS.3818.1.S1_at   | MmuSTS.3818.1 | 5.47  | 5.29  | 0.02 | 0.14 | 1.13  | 0.086474 | 0.445283 | 0.351333 | 0.662338 |
| MmuSTS.3819.1.S1_at   | MmuSTS.3819.1 | 12.56 | 12.34 | 0.4  | 0.05 | 1.16  | 0.471163 | 0.107655 | 0.715413 | 0.370618 |
| MmuSTS.382.1.S1_at    | MmuSTS.382.1  | 3.17  | 3.38  | 0.43 | 0.29 | -1.16 | 0.760332 | 0.419307 | 0.890152 | 0.643445 |
| MmuSTS.3820.1.S1_at   | MmuSTS.3820.1 | 9.93  | 10.4  | 0.19 | 0.1  | -1.38 | 0.016195 | 0.029111 | 0.179908 | 0.212733 |
| MmuSTS.3821.1.S1_at   | MmuSTS.3821.1 | 7.39  | 7.57  | 0.17 | 0.17 | -1.14 | 0.374287 | 0.729862 | 0.645448 | 0.84372  |
| MmuSTS.3822.1.S1_at   | MmuSTS.3822.1 | 9.1   | 9.2   | 0.17 | 0.03 | -1.07 | 0.106891 | 0.392185 | 0.38127  | 0.625652 |

|                       |               |       |       |      |      |       |          |          |          |          |
|-----------------------|---------------|-------|-------|------|------|-------|----------|----------|----------|----------|
| MmuSTS.3823.1.S1_at   | MmuSTS.3823.1 | 3.74  | 3.73  | 0.02 | 0.03 | 1     | 0.711264 | 0.988046 | 0.863695 | 0.993307 |
| MmuSTS.3824.1.S1_at   | MmuSTS.3824.1 | 7.87  | 8.27  | 0.35 | 0.18 | -1.32 | 0.45077  | 0.01122  | 0.701727 | 0.137971 |
| MmuSTS.3825.1.S1_at   | MmuSTS.3825.1 | 4.73  | 4.02  | 0.82 | 0.72 | 1.65  | 0.247711 | 0.350461 | 0.543078 | 0.594161 |
| MmuSTS.3826.1.S1_at   | MmuSTS.3826.1 | 6.88  | 7.21  | 0.28 | 0.35 | -1.26 | 0.243245 | 0.75462  | 0.539969 | 0.85725  |
| MmuSTS.3827.1.S1_at   | MmuSTS.3827.1 | 7.12  | 9.21  | 1.19 | 0.32 | -4.23 | 0.056547 | 0.112237 | 0.295332 | 0.37754  |
| MmuSTS.3828.1.S1_at   | MmuSTS.3828.1 | 11.93 | 11.64 | 0.18 | 0.02 | 1.22  | 0.018144 | 0.425881 | 0.187667 | 0.6481   |
| MmuSTS.3829.1.S1_at   | MmuSTS.3829.1 | 8.41  | 8.72  | 0.2  | 0.15 | -1.24 | 0.111731 | 0.031344 | 0.387803 | 0.219013 |
| MmuSTS.383.1.S1_at    | MmuSTS.383.1  | 3.36  | 3.47  | 0.06 | 0.11 | -1.08 | 0.124974 | 0.090914 | 0.405516 | 0.345543 |
| MmuSTS.3830.1.S1_at   | MmuSTS.3830.1 | 6.26  | 8.17  | 1.46 | 0.29 | -3.76 | 0.351239 | 0.316533 | 0.628877 | 0.569938 |
| MmuSTS.3831.1.S1_at   | MmuSTS.3831.1 | 7.27  | 7.32  | 0.26 | 0.57 | -1.03 | 0.824814 | 0.893283 | 0.922207 | 0.939163 |
| MmuSTS.3832.1.S1_at   | MmuSTS.3832.1 | 3.07  | 3.28  | 0.15 | 0.31 | -1.16 | 0.337975 | 0.429704 | 0.618376 | 0.65099  |
| MmuSTS.3833.1.S1_at   | MmuSTS.3833.1 | 4.3   | 3.95  | 0.22 | 0.03 | 1.28  | 0.049752 | 0.046929 | 0.28052  | 0.261301 |
| MmuSTS.3834.1.S1_at   | MmuSTS.3834.1 | 11.7  | 11.54 | 0.27 | 0.09 | 1.12  | 0.13443  | 0.159921 | 0.418098 | 0.435987 |
| MmuSTS.3835.1.S1_at   | MmuSTS.3835.1 | 7.44  | 8.61  | 0.94 | 0.3  | -2.24 | 0.318009 | 0.426579 | 0.60278  | 0.648739 |
| MmuSTS.3836.1.S1_at   | MmuSTS.3836.1 | 8.41  | 8.38  | 0.06 | 0.26 | 1.02  | 0.976425 | 0.001741 | 0.990648 | 0.062895 |
| MmuSTS.3837.1.S1_at   | MmuSTS.3837.1 | 6.8   | 7.38  | 1.07 | 0.39 | -1.5  | 0.720427 | 0.19715  | 0.868039 | 0.472213 |
| MmuSTS.3838.1.S1_at   | MmuSTS.3838.1 | 3.68  | 3.88  | 0.43 | 0.66 | -1.15 | 0.340098 | 0.789947 | 0.620296 | 0.878631 |
| MmuSTS.3839.1.S1_s_at | MmuSTS.3839.1 | 3.18  | 2.97  | 0.62 | 0.11 | 1.16  | 0.238731 | 0.341978 | 0.536007 | 0.588058 |
| MmuSTS.384.1.S1_at    | MmuSTS.384.1  | 6.89  | 6.81  | 0.09 | 0.01 | 1.06  | 0.214117 | 0.065473 | 0.511862 | 0.301415 |
| MmuSTS.3840.1.S1_at   | MmuSTS.3840.1 | 5.02  | 5.36  | 0.07 | 0.03 | -1.26 | 0.001313 | 0.063683 | 0.078631 | 0.298842 |
| MmuSTS.3841.1.S1_at   | MmuSTS.3841.1 | 2.83  | 2.86  | 0.09 | 0.09 | -1.02 | 0.796781 | 0.87802  | 0.908259 | 0.930359 |
| MmuSTS.3842.1.S1_at   | MmuSTS.3842.1 | 12.7  | 13.21 | 0.14 | 0.09 | -1.43 | 0.008106 | 0.019123 | 0.138956 | 0.174027 |
| MmuSTS.3843.1.S1_at   | MmuSTS.3843.1 | 5.5   | 5.47  | 0.02 | 0.11 | 1.02  | 0.276404 | 0.175    | 0.567973 | 0.451647 |
| MmuSTS.3844.1.S1_at   | MmuSTS.3844.1 | 5.73  | 5.82  | 0.12 | 0.15 | -1.06 | 0.212029 | 0.288977 | 0.509913 | 0.550098 |
| MmuSTS.3845.1.S1_at   | MmuSTS.3845.1 | 11.29 | 11.27 | 0.1  | 0.16 | 1.01  | 0.871729 | 0.86751  | 0.944808 | 0.924699 |
| MmuSTS.3846.1.S1_at   | MmuSTS.3846.1 | 6.25  | 5.59  | 0.67 | 0.12 | 1.57  | 0.142337 | 0.149555 | 0.428351 | 0.424095 |
| MmuSTS.3847.1.S1_s_at | MmuSTS.3847.1 | 8.7   | 8.43  | 0.19 | 0.07 | 1.2   | 0.086299 | 0.309372 | 0.351033 | 0.564912 |
| MmuSTS.3848.1.S1_at   | MmuSTS.3848.1 | 8.8   | 8.92  | 0.13 | 0.19 | -1.09 | 0.725971 | 0.008396 | 0.871415 | 0.121673 |
| MmuSTS.3849.1.S1_at   | MmuSTS.3849.1 | 12.06 | 11.8  | 0.25 | 0.16 | 1.2   | 0.087742 | 0.043111 | 0.353864 | 0.252277 |
| MmuSTS.385.1.S1_at    | MmuSTS.385.1  | 3.57  | 4.05  | 0.15 | 0.11 | -1.4  | 0.022014 | 0.01818  | 0.201587 | 0.169673 |
| MmuSTS.3850.1.S1_at   | MmuSTS.3850.1 | 9.03  | 9.39  | 0.59 | 0.31 | -1.29 | 0.738459 | 0.802296 | 0.878801 | 0.886115 |
| MmuSTS.3851.1.S1_at   | MmuSTS.3851.1 | 10.54 | 10.64 | 0.18 | 0.04 | -1.07 | 0.369861 | 0.0607   | 0.643133 | 0.292943 |
| MmuSTS.3852.1.S1_at   | MmuSTS.3852.1 | 5.09  | 5.17  | 0.31 | 0.1  | -1.06 | 0.863134 | 0.842705 | 0.940491 | 0.910346 |
| MmuSTS.3853.1.S1_at   | MmuSTS.3853.1 | 10.86 | 10.52 | 0.01 | 0.04 | 1.27  | 0.000103 | 0.077116 | 0.051196 | 0.322673 |
| MmuSTS.3854.1.S1_at   | MmuSTS.3854.1 | 13.55 | 13.54 | 0.14 | 0.04 | 1.01  | 0.448459 | 0.541652 | 0.700064 | 0.725033 |
| MmuSTS.3855.1.S1_at   | MmuSTS.3855.1 | 5.79  | 5.72  | 0.18 | 0.08 | 1.05  | 0.491114 | 0.424764 | 0.729045 | 0.64727  |
| MmuSTS.3856.1.S1_at   | MmuSTS.3856.1 | 8.7   | 8.88  | 2.48 | 0.44 | -1.13 | 0.755033 | 0.842602 | 0.887035 | 0.910315 |
| MmuSTS.3857.1.S1_at   | MmuSTS.3857.1 | 4.02  | 4.23  | 0.15 | 0.2  | -1.16 | 0.114859 | 0.050026 | 0.391844 | 0.2689   |
| MmuSTS.3858.1.S1_at   | MmuSTS.3858.1 | 3.79  | 3.77  | 0.01 | 0.04 | 1.01  | 0.277679 | 0.63668  | 0.569172 | 0.78633  |
| MmuSTS.3859.1.S1_at   | MmuSTS.3859.1 | 4.87  | 4.94  | 0.04 | 0.08 | -1.04 | 0.068588 | 0.3415   | 0.319718 | 0.587676 |
| MmuSTS.386.1.S1_at    | MmuSTS.386.1  | 8.83  | 11.15 | 1.93 | 0.29 | -5.01 | 0.204625 | 0.291896 | 0.502362 | 0.552116 |
| MmuSTS.3860.1.S1_at   | MmuSTS.3860.1 | 7.93  | 7.78  | 0.23 | 0.15 | 1.1   | 0.317503 | 0.4686   | 0.602275 | 0.677755 |
| MmuSTS.3861.1.S1_at   | MmuSTS.3861.1 | 11.69 | 11.61 | 0.32 | 0.1  | 1.06  | 0.565144 | 0.880464 | 0.776513 | 0.931694 |

|                       |               |       |       |      |      |        |          |          |          |          |
|-----------------------|---------------|-------|-------|------|------|--------|----------|----------|----------|----------|
| MmuSTS.3862.1.S1_at   | MmuSTS.3862.1 | 5.85  | 9.27  | 1.19 | 0.4  | -10.74 | 0.01901  | 0.012755 | 0.191367 | 0.145496 |
| MmuSTS.3863.1.S1_at   | MmuSTS.3863.1 | 6.37  | 6.27  | 0.18 | 0.05 | 1.07   | 0.280765 | 0.378427 | 0.571782 | 0.615443 |
| MmuSTS.3864.1.S1_at   | MmuSTS.3864.1 | 8.08  | 8.03  | 0.29 | 0.18 | 1.04   | 0.357348 | 0.009903 | 0.633494 | 0.130717 |
| MmuSTS.3865.1.S1_at   | MmuSTS.3865.1 | 11.98 | 11.95 | 0.1  | 0.03 | 1.02   | 0.902641 | 0.997579 | 0.958703 | 0.99875  |
| MmuSTS.3866.1.S1_at   | MmuSTS.3866.1 | 7.4   | 8.71  | 0.4  | 0.36 | -2.48  | 0.023067 | 0.054481 | 0.204882 | 0.278959 |
| MmuSTS.3867.1.S1_at   | MmuSTS.3867.1 | 5.54  | 5.48  | 0.13 | 0.07 | 1.04   | 0.203534 | 0.405116 | 0.501202 | 0.633482 |
| MmuSTS.3868.1.S1_at   | MmuSTS.3868.1 | 4.33  | 4.38  | 0.27 | 0.08 | -1.03  | 0.917693 | 0.785568 | 0.96488  | 0.875882 |
| MmuSTS.3869.1.S1_at   | MmuSTS.3869.1 | 6.81  | 6.05  | 0.55 | 0.39 | 1.69   | 0.449265 | 0.285238 | 0.700621 | 0.547165 |
| MmuSTS.387.1.S1_at    | MmuSTS.387.1  | 12.46 | 12.75 | 0.1  | 0.05 | -1.23  | 0.006887 | 0.500159 | 0.129886 | 0.698908 |
| MmuSTS.3870.1.S1_at   | MmuSTS.3870.1 | 9.39  | 8.32  | 0.5  | 0.12 | 2.1    | 0.032982 | 0.054385 | 0.235988 | 0.278784 |
| MmuSTS.3871.1.S1_at   | MmuSTS.3871.1 | 8.75  | 8.25  | 0.58 | 0.19 | 1.41   | 0.251041 | 0.506166 | 0.545717 | 0.702359 |
| MmuSTS.3872.1.S1_at   | MmuSTS.3872.1 | 8.79  | 8.71  | 0.67 | 0.15 | 1.06   | 0.88106  | 0.197499 | 0.949432 | 0.472476 |
| MmuSTS.3873.1.S1_at   | MmuSTS.3873.1 | 3.36  | 3.31  | 0.02 | 0.08 | 1.03   | 0.274088 | 0.52545  | 0.56609  | 0.715025 |
| MmuSTS.3874.1.S1_at   | MmuSTS.3874.1 | 10.66 | 11.46 | 1.07 | 0.19 | -1.74  | 0.265164 | 0.529358 | 0.557962 | 0.717257 |
| MmuSTS.3875.1.S1_at   | MmuSTS.3875.1 | 4.04  | 4.02  | 0    | 0.03 | 1.02   | 0.210894 | 0.852569 | 0.508549 | 0.916218 |
| MmuSTS.3876.1.S1_at   | MmuSTS.3876.1 | 3.05  | 3.01  | 0.44 | 0.1  | 1.03   | 0.25705  | 0.321293 | 0.551586 | 0.573184 |
| MmuSTS.3877.1.S1_at   | MmuSTS.3877.1 | 3.15  | 3.39  | 0.02 | 0.29 | -1.18  | 0.187635 | 0.12008  | 0.483874 | 0.388792 |
| MmuSTS.3878.1.S1_at   | MmuSTS.3878.1 | 8.82  | 9.17  | 0.17 | 0.05 | -1.27  | 0.021761 | 0.016693 | 0.200838 | 0.163599 |
| MmuSTS.3879.1.S1_at   | MmuSTS.3879.1 | 10.68 | 11.22 | 0.32 | 0.3  | -1.45  | 0.11662  | 0.000947 | 0.393693 | 0.049071 |
| MmuSTS.388.1.S1_at    | MmuSTS.388.1  | 6.07  | 6.16  | 0.13 | 0.07 | -1.06  | 0.819931 | 0.107561 | 0.919687 | 0.37046  |
| MmuSTS.3880.1.S1_at   | MmuSTS.3880.1 | 11.04 | 11.08 | 0.1  | 0.05 | -1.03  | 0.824971 | 0.040099 | 0.922259 | 0.245388 |
| MmuSTS.3881.1.S1_at   | MmuSTS.3881.1 | 7.62  | 7.63  | 0.2  | 0.09 | -1.01  | 0.836524 | 0.848949 | 0.928302 | 0.914251 |
| MmuSTS.3882.1.S1_at   | MmuSTS.3882.1 | 7.35  | 6.85  | 0.06 | 0.03 | 1.41   | 0.000169 | 0.000027 | 0.053494 | 0.02079  |
| MmuSTS.3883.1.S1_s_at | MmuSTS.3883.1 | 7.31  | 7.17  | 0.17 | 0.06 | 1.1    | 0.284837 | 0.600987 | 0.574818 | 0.762462 |
| MmuSTS.3884.1.S1_at   | MmuSTS.3884.1 | 10.86 | 10.57 | 0.18 | 0.06 | 1.22   | 0.085656 | 0.090095 | 0.350073 | 0.344402 |
| MmuSTS.3885.1.S1_at   | MmuSTS.3885.1 | 11.59 | 11.64 | 0.1  | 0.16 | -1.03  | 0.745154 | 0.011134 | 0.881818 | 0.137297 |
| MmuSTS.3886.1.S1_at   | MmuSTS.3886.1 | 5.11  | 5.97  | 0.18 | 0.12 | -1.81  | 0.00524  | 0.043063 | 0.117387 | 0.252157 |
| MmuSTS.3887.1.S1_at   | MmuSTS.3887.1 | 9.25  | 10.09 | 0.33 | 0.33 | -1.78  | 0.043272 | 0.393694 | 0.265331 | 0.626522 |
| MmuSTS.3888.1.S1_at   | MmuSTS.3888.1 | 7.9   | 7.42  | 0.28 | 0.06 | 1.39   | 0.035457 | 0.04873  | 0.243084 | 0.265744 |
| MmuSTS.3889.1.S1_at   | MmuSTS.3889.1 | 9.74  | 9.88  | 0.06 | 0.11 | -1.1   | 0.263651 | 0.042572 | 0.557138 | 0.251009 |
| MmuSTS.389.1.S1_at    | MmuSTS.389.1  | 3.29  | 3.29  | 0.09 | 0.07 | -1     | 0.346158 | 0.760628 | 0.624868 | 0.860949 |
| MmuSTS.389.1.S1_s_at  | MmuSTS.389.1  | 3.72  | 3.61  | 0.06 | 0.15 | 1.08   | 0.98402  | 0.958517 | 0.994033 | 0.976506 |
| MmuSTS.3890.1.S1_at   | MmuSTS.3890.1 | 8.62  | 8.3   | 0.25 | 0.17 | 1.25   | 0.169746 | 0.020904 | 0.463121 | 0.181404 |
| MmuSTS.3891.1.S1_at   | MmuSTS.3891.1 | 11.93 | 11.88 | 0.04 | 0.03 | 1.04   | 0.087337 | 0.355374 | 0.353109 | 0.597738 |
| MmuSTS.3892.1.S1_at   | MmuSTS.3892.1 | 9.21  | 9.36  | 0.11 | 0.08 | -1.11  | 0.086731 | 0.774375 | 0.351857 | 0.868766 |
| MmuSTS.3893.1.S1_at   | MmuSTS.3893.1 | 5.82  | 5.86  | 0.25 | 0.09 | -1.03  | 0.548371 | 0.768105 | 0.766533 | 0.865354 |
| MmuSTS.3894.1.S1_at   | MmuSTS.3894.1 | 10.58 | 10.54 | 0.19 | 0.15 | 1.03   | 0.332789 | 0.558182 | 0.61438  | 0.735446 |
| MmuSTS.3895.1.S1_at   | MmuSTS.3895.1 | 5.84  | 5.87  | 0.22 | 0.01 | -1.02  | 0.799139 | 0.332504 | 0.909452 | 0.580932 |
| MmuSTS.3896.1.S1_at   | MmuSTS.3896.1 | 7.36  | 7.06  | 0.13 | 0.13 | 1.23   | 0.035138 | 0.005451 | 0.242186 | 0.101934 |
| MmuSTS.3897.1.S1_at   | MmuSTS.3897.1 | 7.95  | 8.48  | 0.47 | 0.11 | -1.45  | 0.149904 | 0.019434 | 0.43882  | 0.175133 |
| MmuSTS.3898.1.S1_at   | MmuSTS.3898.1 | 5.32  | 5.85  | 0.35 | 0.26 | -1.45  | 0.510161 | 0.916478 | 0.741557 | 0.953262 |
| MmuSTS.3899.1.S1_at   | MmuSTS.3899.1 | 9.12  | 9.34  | 0.3  | 0.07 | -1.17  | 0.817486 | 0.931755 | 0.918462 | 0.961247 |
| MmuSTS.39.1.S1_at     | MmuSTS.39.1   | 4.97  | 5.01  | 0.2  | 0.13 | -1.03  | 0.983482 | 0.481315 | 0.99383  | 0.686365 |

|                       |               |       |       |      |      |       |          |          |          |          |
|-----------------------|---------------|-------|-------|------|------|-------|----------|----------|----------|----------|
| MmuSTS.390.1.S1_at    | MmuSTS.390.1  | 4.88  | 4.78  | 0.17 | 0.14 | 1.07  | 0.654463 | 0.507852 | 0.832755 | 0.703358 |
| MmuSTS.3900.1.S1_at   | MmuSTS.3900.1 | 9.62  | 9.33  | 0.09 | 0.09 | 1.22  | 0.039944 | 0.3893   | 0.25663  | 0.623403 |
| MmuSTS.3901.1.S1_at   | MmuSTS.3901.1 | 7.1   | 7.48  | 1.01 | 0.19 | -1.3  | 0.519686 | 0.726892 | 0.748221 | 0.842011 |
| MmuSTS.3902.1.S1_at   | MmuSTS.3902.1 | 11.42 | 11.5  | 0.03 | 0.09 | -1.05 | 0.256334 | 0.044891 | 0.550836 | 0.256424 |
| MmuSTS.3903.1.S1_at   | MmuSTS.3903.1 | 11.18 | 11.06 | 0.24 | 0.02 | 1.09  | 0.331612 | 0.698345 | 0.613532 | 0.82478  |
| MmuSTS.3904.1.S1_at   | MmuSTS.3904.1 | 4.85  | 4.85  | 0.05 | 0.06 | -1    | 0.523478 | 0.168998 | 0.750424 | 0.445567 |
| MmuSTS.3905.1.S1_at   | MmuSTS.3905.1 | 5.7   | 6.09  | 0.22 | 0.2  | -1.32 | 0.090779 | 0.288594 | 0.357821 | 0.549827 |
| MmuSTS.3906.1.S1_at   | MmuSTS.3906.1 | 10.16 | 9.94  | 0.15 | 0.15 | 1.16  | 0.145347 | 0.180755 | 0.432645 | 0.547294 |
| MmuSTS.3907.1.S1_at   | MmuSTS.3907.1 | 10.47 | 10.68 | 0.13 | 0.04 | -1.16 | 0.040638 | 0.018608 | 0.258183 | 0.171539 |
| MmuSTS.3908.1.S1_at   | MmuSTS.3908.1 | 13.45 | 13.64 | 0.09 | 0.04 | -1.14 | 0.018102 | 0.42315  | 0.18753  | 0.646172 |
| MmuSTS.3909.1.S1_at   | MmuSTS.3909.1 | 4.7   | 4.54  | 0.21 | 0.06 | 1.12  | 0.472079 | 0.692935 | 0.71594  | 0.821308 |
| MmuSTS.391.1.S1_at    | MmuSTS.391.1  | 5.08  | 5.03  | 0.07 | 0.05 | 1.03  | 0.844058 | 0.734938 | 0.931703 | 0.846588 |
| MmuSTS.3910.1.S1_at   | MmuSTS.3910.1 | 7.32  | 7.6   | 0.4  | 0.11 | -1.21 | 0.886191 | 0.894423 | 0.95147  | 0.939731 |
| MmuSTS.3911.1.S1_at   | MmuSTS.3911.1 | 8.49  | 8.62  | 0.14 | 0.14 | -1.09 | 0.436543 | 0.001032 | 0.69147  | 0.051297 |
| MmuSTS.3912.1.S1_at   | MmuSTS.3912.1 | 6.74  | 9.01  | 0.93 | 0.16 | -4.8  | 0.022095 | 0.165009 | 0.201888 | 0.44123  |
| MmuSTS.3913.1.S1_at   | MmuSTS.3913.1 | 7.48  | 7.43  | 0.48 | 0.17 | 1.04  | 0.921372 | 0.239353 | 0.966381 | 0.510039 |
| MmuSTS.3914.1.S1_at   | MmuSTS.3914.1 | 5.46  | 5.4   | 0.17 | 0.05 | 1.04  | 0.574917 | 0.584851 | 0.782347 | 0.75256  |
| MmuSTS.3915.1.S1_at   | MmuSTS.3915.1 | 11.27 | 11.09 | 0.04 | 0.05 | 1.13  | 0.011099 | 0.000563 | 0.155073 | 0.041049 |
| MmuSTS.3916.1.S1_at   | MmuSTS.3916.1 | 10.07 | 10.16 | 0.11 | 0.1  | -1.06 | 0.803642 | 0.721222 | 0.911852 | 0.838628 |
| MmuSTS.3917.1.S1_at   | MmuSTS.3917.1 | 12.73 | 12.92 | 0.01 | 0.1  | -1.15 | 0.060506 | 0.315092 | 0.303045 | 0.568838 |
| MmuSTS.3918.1.S1_at   | MmuSTS.3918.1 | 11.91 | 9.57  | 0.23 | 0.68 | 5.06  | 0.010606 | 0.079331 | 0.152782 | 0.326621 |
| MmuSTS.3919.1.S1_s_at | MmuSTS.3919.1 | 10.16 | 11.1  | 0.4  | 0.11 | -1.92 | 0.019046 | 0.289253 | 0.191521 | 0.550293 |
| MmuSTS.392.1.S1_s_at  | MmuSTS.392.1  | 4.38  | 4.53  | 0.19 | 0.04 | -1.11 | 0.558386 | 0.378308 | 0.772852 | 0.615438 |
| MmuSTS.3920.1.S1_at   | MmuSTS.3920.1 | 7.6   | 7.8   | 0.23 | 0.14 | -1.15 | 0.373609 | 0.416042 | 0.645118 | 0.641342 |
| MmuSTS.3921.1.S1_at   | MmuSTS.3921.1 | 11.03 | 10.98 | 0    | 0.1  | 1.04  | 0.296242 | 0.973266 | 0.584971 | 0.985495 |
| MmuSTS.3922.1.S1_at   | MmuSTS.3922.1 | 9.13  | 8.94  | 0.21 | 0.08 | 1.14  | 0.056242 | 0.175372 | 0.294377 | 0.452114 |
| MmuSTS.3923.1.S1_at   | MmuSTS.3923.1 | 10.92 | 10.35 | 0.17 | 0.05 | 1.49  | 0.004063 | 0.001862 | 0.108999 | 0.064697 |
| MmuSTS.3924.1.S1_at   | MmuSTS.3924.1 | 11.87 | 12.02 | 0.21 | 0.03 | -1.11 | 0.257282 | 0.020157 | 0.551586 | 0.178414 |
| MmuSTS.3925.1.S1_at   | MmuSTS.3925.1 | 10.4  | 9.91  | 0.06 | 0.16 | 1.4   | 0.003699 | 0.0504   | 0.106124 | 0.269732 |
| MmuSTS.3926.1.S1_at   | MmuSTS.3926.1 | 10.76 | 11.04 | 0.17 | 0.13 | -1.21 | 0.036709 | 0.004277 | 0.246698 | 0.091847 |
| MmuSTS.3926.1.S1_s_at | MmuSTS.3926.1 | 12.23 | 12.6  | 0.04 | 0.03 | -1.29 | 0.000196 | 0.025804 | 0.053494 | 0.201375 |
| MmuSTS.3927.1.S1_s_at | MmuSTS.3927.1 | 8.94  | 9.03  | 0.11 | 0.11 | -1.06 | 0.364183 | 0.42218  | 0.638791 | 0.645549 |
| MmuSTS.3928.1.S1_at   | MmuSTS.3928.1 | 13.41 | 13.54 | 0.12 | 0.04 | -1.1  | 0.186895 | 0.179478 | 0.482992 | 0.455939 |
| MmuSTS.3929.1.S1_at   | MmuSTS.3929.1 | 10.71 | 10.29 | 0.34 | 0.29 | 1.34  | 0.359091 | 0.428755 | 0.634671 | 0.650316 |
| MmuSTS.393.1.S1_s_at  | MmuSTS.393.1  | 4.87  | 4.87  | 0.12 | 0.03 | -1    | 0.378284 | 0.681747 | 0.648513 | 0.814127 |
| MmuSTS.3930.1.S1_at   | MmuSTS.3930.1 | 7.79  | 7.64  | 0.26 | 0.46 | 1.11  | 0.137145 | 0.314509 | 0.422016 | 0.568372 |
| MmuSTS.3931.1.S1_at   | MmuSTS.3931.1 | 12.1  | 12.25 | 0.24 | 0.08 | -1.11 | 0.151234 | 0.741514 | 0.440787 | 0.850328 |
| MmuSTS.3932.1.S1_at   | MmuSTS.3932.1 | 6.61  | 8.59  | 0.92 | 0.29 | -3.94 | 0.082718 | 0.191021 | 0.344584 | 0.46629  |
| MmuSTS.3933.1.S1_at   | MmuSTS.3933.1 | 10.41 | 10.98 | 0.21 | 0.23 | -1.48 | 0.036332 | 0.000183 | 0.245737 | 0.030511 |
| MmuSTS.3934.1.S1_at   | MmuSTS.3934.1 | 5.52  | 4.24  | 1.31 | 0.14 | 2.43  | 0.161362 | 0.165192 | 0.452953 | 0.441389 |
| MmuSTS.3935.1.S1_at   | MmuSTS.3935.1 | 6.74  | 7.45  | 0.47 | 0.06 | -1.64 | 0.090974 | 0.272619 | 0.358186 | 0.537379 |
| MmuSTS.3935.1.S1_s_at | MmuSTS.3935.1 | 7.89  | 8.66  | 0.45 | 0.1  | -1.7  | 0.040323 | 0.180538 | 0.257247 | 0.457138 |
| MmuSTS.3936.1.S1_at   | MmuSTS.3936.1 | 5.66  | 7.89  | 0.34 | 0.61 | -4.71 | 0.005386 | 0.061945 | 0.118569 | 0.295734 |

|                       |               |       |       |      |      |       |          |          |          |          |
|-----------------------|---------------|-------|-------|------|------|-------|----------|----------|----------|----------|
| MmuSTS.3937.1.S1_at   | MmuSTS.3937.1 | 9.88  | 10.97 | 0.22 | 0.05 | -2.14 | 0.001188 | 0.153195 | 0.077857 | 0.428023 |
| MmuSTS.3938.1.S1_at   | MmuSTS.3938.1 | 10.29 | 9.95  | 0.11 | 0.06 | 1.26  | 0.005188 | 0.149983 | 0.116998 | 0.424617 |
| MmuSTS.3939.1.S1_at   | MmuSTS.3939.1 | 7.56  | 7.37  | 0.11 | 0.1  | 1.14  | 0.09464  | 0.222186 | 0.363574 | 0.495178 |
| MmuSTS.394.1.S1_s_at  | MmuSTS.394.1  | 4.46  | 4.59  | 0.12 | 0.07 | -1.1  | 0.148874 | 0.434787 | 0.437372 | 0.654826 |
| MmuSTS.3940.1.S1_at   | MmuSTS.3940.1 | 10.3  | 10.75 | 0.32 | 0.14 | -1.37 | 0.041716 | 0.030977 | 0.260766 | 0.217853 |
| MmuSTS.3941.1.S1_at   | MmuSTS.3941.1 | 10.75 | 10.71 | 0.17 | 0.05 | 1.03  | 0.834172 | 0.200238 | 0.927018 | 0.474689 |
| MmuSTS.3942.1.S1_at   | MmuSTS.3942.1 | 4.16  | 4.84  | 0.14 | 0.52 | -1.61 | 0.13048  | 0.121826 | 0.412895 | 0.391122 |
| MmuSTS.3943.1.S1_at   | MmuSTS.3943.1 | 7.62  | 8.09  | 0.7  | 0.29 | -1.38 | 0.514165 | 0.844698 | 0.744143 | 0.911602 |
| MmuSTS.3944.1.S1_at   | MmuSTS.3944.1 | 11.36 | 10.93 | 0.14 | 0.08 | 1.35  | 0.013717 | 0.051052 | 0.16797  | 0.271214 |
| MmuSTS.3945.1.S1_at   | MmuSTS.3945.1 | 4.8   | 5.38  | 0.3  | 0.22 | -1.49 | 0.043792 | 0.209387 | 0.266372 | 0.483069 |
| MmuSTS.3946.1.S1_at   | MmuSTS.3946.1 | 7.77  | 9.85  | 1.28 | 0.32 | -4.22 | 0.083506 | 0.22566  | 0.345905 | 0.498155 |
| MmuSTS.3947.1.S1_at   | MmuSTS.3947.1 | 10.73 | 10.81 | 0.07 | 0.04 | -1.05 | 0.118727 | 0.269847 | 0.396513 | 0.535135 |
| MmuSTS.3948.1.S1_at   | MmuSTS.3948.1 | 9.65  | 9.35  | 0.69 | 0.39 | 1.23  | 0.482257 | 0.658828 | 0.722552 | 0.800473 |
| MmuSTS.3949.1.S1_at   | MmuSTS.3949.1 | 11.16 | 11.24 | 0.07 | 0.02 | -1.06 | 0.442596 | 0.269046 | 0.696032 | 0.534425 |
| MmuSTS.395.1.S1_s_at  | MmuSTS.395.1  | 5.19  | 5.48  | 0.13 | 0.15 | -1.22 | 0.03943  | 0.126454 | 0.255072 | 0.396995 |
| MmuSTS.3950.1.S1_at   | MmuSTS.3950.1 | 10.94 | 10.85 | 0.26 | 0.03 | 1.07  | 0.172539 | 0.033559 | 0.466621 | 0.226764 |
| MmuSTS.3951.1.S1_at   | MmuSTS.3951.1 | 6.79  | 6.93  | 0.21 | 0.73 | -1.1  | 0.627501 | 0.880479 | 0.816884 | 0.931694 |
| MmuSTS.3952.1.S1_at   | MmuSTS.3952.1 | 8.68  | 8.59  | 0.14 | 0.09 | 1.07  | 0.263319 | 0.07483  | 0.556921 | 0.318614 |
| MmuSTS.3953.1.S1_s_at | MmuSTS.3953.1 | 9.09  | 9.04  | 0.41 | 0.1  | 1.03  | 0.873119 | 0.949673 | 0.945586 | 0.97122  |
| MmuSTS.3954.1.S1_at   | MmuSTS.3954.1 | 8.4   | 8.49  | 0.15 | 0.16 | -1.06 | 0.946489 | 0.002005 | 0.977402 | 0.066428 |
| MmuSTS.3955.1.S1_at   | MmuSTS.3955.1 | 9.92  | 9.66  | 0.05 | 0.02 | 1.19  | 0.002008 | 0.278702 | 0.089852 | 0.542416 |
| MmuSTS.3956.1.S1_at   | MmuSTS.3956.1 | 9.41  | 9.18  | 0.05 | 0.02 | 1.17  | 0.001327 | 0.073246 | 0.079065 | 0.316225 |
| MmuSTS.3957.1.S1_at   | MmuSTS.3957.1 | 12.22 | 11.98 | 0.17 | 0.02 | 1.18  | 0.240287 | 0.556951 | 0.537838 | 0.73485  |
| MmuSTS.3958.1.S1_at   | MmuSTS.3958.1 | 9.94  | 9.67  | 0.08 | 0.11 | 1.21  | 0.107658 | 0.252564 | 0.382296 | 0.521128 |
| MmuSTS.3959.1.S1_at   | MmuSTS.3959.1 | 7     | 7.04  | 0.12 | 0.09 | -1.02 | 0.980599 | 0.39802  | 0.992776 | 0.629138 |
| MmuSTS.396.1.S1_at    | MmuSTS.396.1  | 3.58  | 3.63  | 0.06 | 0.09 | -1.03 | 0.284665 | 0.205077 | 0.574573 | 0.479391 |
| MmuSTS.3960.1.S1_at   | MmuSTS.3960.1 | 11.08 | 11.5  | 0.12 | 0.21 | -1.35 | 0.069517 | 0.415699 | 0.322002 | 0.641033 |
| MmuSTS.3961.1.S1_at   | MmuSTS.3961.1 | 5.12  | 5.06  | 0.11 | 0.11 | 1.04  | 0.229542 | 0.312925 | 0.528425 | 0.567524 |
| MmuSTS.3962.1.S1_at   | MmuSTS.3962.1 | 10.52 | 10.47 | 0.09 | 0.17 | 1.04  | 0.493668 | 0.000391 | 0.730599 | 0.03746  |
| MmuSTS.3963.1.S1_at   | MmuSTS.3963.1 | 2.75  | 2.69  | 0.07 | 0.04 | 1.04  | 0.157862 | 0.739747 | 0.448652 | 0.849223 |
| MmuSTS.3964.1.S1_at   | MmuSTS.3964.1 | 8.68  | 8.39  | 0.23 | 0.09 | 1.22  | 0.061571 | 0.257542 | 0.30471  | 0.525294 |
| MmuSTS.3965.1.S1_at   | MmuSTS.3965.1 | 10.85 | 11.13 | 0.32 | 0.2  | -1.21 | 0.304822 | 0.9382   | 0.591821 | 0.964949 |
| MmuSTS.3966.1.S1_at   | MmuSTS.3966.1 | 7     | 7.46  | 0.34 | 0.1  | -1.37 | 0.025596 | 0.014452 | 0.212928 | 0.153403 |
| MmuSTS.3967.1.S1_at   | MmuSTS.3967.1 | 5.81  | 6.48  | 0.06 | 0.03 | -1.59 | 0.000054 | 0.229395 | 0.045594 | 0.501527 |
| MmuSTS.3968.1.S1_at   | MmuSTS.3968.1 | 8.79  | 9.61  | 0.55 | 0.1  | -1.76 | 0.053007 | 0.10363  | 0.287349 | 0.364426 |
| MmuSTS.3969.1.S1_at   | MmuSTS.3969.1 | 6.38  | 7.14  | 0.44 | 0.21 | -1.69 | 0.035271 | 0.026017 | 0.242544 | 0.202179 |
| MmuSTS.397.1.S1_s_at  | MmuSTS.397.1  | 5.44  | 5.57  | 0.19 | 0.03 | -1.09 | 0.315425 | 0.266229 | 0.600357 | 0.532045 |
| MmuSTS.3970.1.S1_at   | MmuSTS.3970.1 | 5.43  | 5.45  | 0.08 | 0.04 | -1.01 | 0.218282 | 0.281334 | 0.515982 | 0.544391 |
| MmuSTS.3971.1.S1_at   | MmuSTS.3971.1 | 13.08 | 13.93 | 0.45 | 0.09 | -1.8  | 0.040843 | 0.20487  | 0.258518 | 0.479224 |
| MmuSTS.3972.1.S1_at   | MmuSTS.3972.1 | 9.5   | 9.87  | 0.09 | 0.22 | -1.29 | 0.102826 | 0.742735 | 0.375328 | 0.851023 |
| MmuSTS.3973.1.S1_at   | MmuSTS.3973.1 | 10.62 | 11.5  | 0.19 | 0.02 | -1.83 | 0.001744 | 0.0011   | 0.085035 | 0.052486 |
| MmuSTS.3974.1.S1_at   | MmuSTS.3974.1 | 10.25 | 10.46 | 0.39 | 0.1  | -1.16 | 0.241256 | 0.392723 | 0.538538 | 0.62583  |
| MmuSTS.3975.1.S1_at   | MmuSTS.3975.1 | 3.07  | 2.97  | 0.06 | 0.04 | 1.07  | 0.143351 | 0.590174 | 0.429654 | 0.756117 |

|                       |               |       |       |      |      |        |          |          |          |          |
|-----------------------|---------------|-------|-------|------|------|--------|----------|----------|----------|----------|
| MmuSTS.3975.1.S1_x_at | MmuSTS.3975.1 | 3.89  | 3.83  | 0.07 | 0.06 | 1.05   | 0.15302  | 0.127635 | 0.442719 | 0.398571 |
| MmuSTS.3976.1.S1_at   | MmuSTS.3976.1 | 11.37 | 11.15 | 0.04 | 0.03 | 1.16   | 0.001603 | 0.418125 | 0.08363  | 0.642619 |
| MmuSTS.3977.1.S1_at   | MmuSTS.3977.1 | 10.76 | 10.68 | 0.11 | 0.06 | 1.06   | 0.209803 | 0.140198 | 0.507187 | 0.413405 |
| MmuSTS.3978.1.S1_at   | MmuSTS.3978.1 | 13.62 | 13.53 | 0.05 | 0.01 | 1.07   | 0.037008 | 0.086947 | 0.247648 | 0.339802 |
| MmuSTS.3979.1.S1_at   | MmuSTS.3979.1 | 7.49  | 10.2  | 1.22 | 0.28 | -6.56  | 0.040343 | 0.101144 | 0.257247 | 0.360794 |
| MmuSTS.398.1.S1_s_at  | MmuSTS.398.1  | 3.32  | 3.49  | 0.11 | 0.05 | -1.13  | 0.118986 | 0.144046 | 0.396683 | 0.417912 |
| MmuSTS.3980.1.S1_at   | MmuSTS.3980.1 | 9.79  | 10.15 | 0.78 | 0.18 | -1.28  | 0.575714 | 0.400994 | 0.78295  | 0.630658 |
| MmuSTS.3981.1.S1_at   | MmuSTS.3981.1 | 5.92  | 6.07  | 1.05 | 0.2  | -1.11  | 0.300942 | 0.450149 | 0.58902  | 0.665505 |
| MmuSTS.3982.1.S1_at   | MmuSTS.3982.1 | 7.48  | 7.25  | 0.18 | 0.07 | 1.17   | 0.134741 | 0.057244 | 0.418618 | 0.285059 |
| MmuSTS.3983.1.S1_at   | MmuSTS.3983.1 | 6     | 6.41  | 0.07 | 0.11 | -1.33  | 0.004237 | 0.138372 | 0.110986 | 0.411244 |
| MmuSTS.3984.1.S1_at   | MmuSTS.3984.1 | 10.74 | 10.14 | 0.21 | 0.21 | 1.51   | 0.013377 | 0.035243 | 0.16632  | 0.23196  |
| MmuSTS.3985.1.S1_at   | MmuSTS.3985.1 | 4.76  | 5.62  | 0.32 | 0.37 | -1.81  | 0.034568 | 0.264481 | 0.240515 | 0.530437 |
| MmuSTS.3986.1.S1_at   | MmuSTS.3986.1 | 2.75  | 2.73  | 0.03 | 0    | 1.02   | 0.135514 | 0.636669 | 0.419375 | 0.78633  |
| MmuSTS.3987.1.S1_at   | MmuSTS.3987.1 | 7.14  | 7.26  | 0.11 | 0.08 | -1.09  | 0.158988 | 0.75726  | 0.450279 | 0.858672 |
| MmuSTS.3988.1.S1_at   | MmuSTS.3988.1 | 7.39  | 11.19 | 1.54 | 0.31 | -13.91 | 0.029058 | 0.156149 | 0.223234 | 0.43161  |
| MmuSTS.3989.1.S1_at   | MmuSTS.3989.1 | 11.39 | 11.98 | 0.3  | 0.06 | -1.5   | 0.023604 | 0.134122 | 0.206972 | 0.406393 |
| MmuSTS.399.1.S1_s_at  | MmuSTS.399.1  | 3.51  | 3.59  | 0.08 | 0.03 | -1.06  | 0.172662 | 0.03971  | 0.46677  | 0.244271 |
| MmuSTS.3990.1.S1_at   | MmuSTS.3990.1 | 10.27 | 10.08 | 0.18 | 0.09 | 1.14   | 0.299296 | 0.89132  | 0.587643 | 0.938078 |
| MmuSTS.3991.1.S1_at   | MmuSTS.3991.1 | 11.17 | 11.13 | 0.1  | 0.04 | 1.03   | 0.421827 | 0.746248 | 0.680158 | 0.85272  |
| MmuSTS.3992.1.S1_at   | MmuSTS.3992.1 | 12.27 | 12.33 | 0.06 | 0.03 | -1.04  | 0.626546 | 0.021095 | 0.816102 | 0.181869 |
| MmuSTS.3993.1.S1_at   | MmuSTS.3993.1 | 6.37  | 6.78  | 0.18 | 0.12 | -1.33  | 0.083263 | 0.031033 | 0.345528 | 0.218074 |
| MmuSTS.3994.1.S1_at   | MmuSTS.3994.1 | 5.34  | 6.92  | 0.28 | 0.35 | -3     | 0.006423 | 0.012103 | 0.126742 | 0.142307 |
| MmuSTS.3995.1.S1_at   | MmuSTS.3995.1 | 5.74  | 5.67  | 0.18 | 0.15 | 1.05   | 0.50788  | 0.73813  | 0.740133 | 0.848203 |
| MmuSTS.3996.1.S1_s_at | MmuSTS.3996.1 | 10.75 | 10.9  | 0.4  | 0.11 | -1.11  | 0.137064 | 0.253226 | 0.421892 | 0.521614 |
| MmuSTS.3997.1.S1_at   | MmuSTS.3997.1 | 7.41  | 8.54  | 0.65 | 0.16 | -2.19  | 0.015783 | 0.003994 | 0.178054 | 0.089884 |
| MmuSTS.3998.1.S1_at   | MmuSTS.3998.1 | 6.7   | 7.41  | 0.45 | 0.12 | -1.64  | 0.060642 | 0.109686 | 0.303267 | 0.373675 |
| MmuSTS.3999.1.S1_at   | MmuSTS.3999.1 | 3.31  | 3.18  | 0.11 | 0.11 | 1.1    | 0.160302 | 0.070877 | 0.451651 | 0.312373 |
| MmuSTS.4.1.S1_at      | MmuSTS.4.1    | 6.19  | 5.99  | 0.34 | 0.06 | 1.14   | 0.369419 | 0.427037 | 0.642818 | 0.649087 |
| MmuSTS.40.1.S1_at     | MmuSTS.40.1   | 10.4  | 10.42 | 0.12 | 0.07 | -1.01  | 0.35258  | 0.454287 | 0.630029 | 0.66849  |
| MmuSTS.400.1.S1_s_at  | MmuSTS.400.1  | 4.61  | 4.64  | 0.12 | 0.02 | -1.02  | 0.222736 | 0.355597 | 0.520646 | 0.597844 |
| MmuSTS.4000.1.S1_at   | MmuSTS.4000.1 | 6.56  | 7.48  | 2.5  | 0.26 | -1.89  | 0.699843 | 0.85076  | 0.857467 | 0.915085 |
| MmuSTS.4001.1.S1_at   | MmuSTS.4001.1 | 5.25  | 5.33  | 0.12 | 0.12 | -1.06  | 0.924383 | 0.980076 | 0.967845 | 0.989236 |
| MmuSTS.4002.1.S1_at   | MmuSTS.4002.1 | 10.88 | 10.8  | 0.33 | 0.34 | 1.05   | 0.361812 | 0.650967 | 0.637105 | 0.795942 |
| MmuSTS.4003.1.S1_at   | MmuSTS.4003.1 | 4.68  | 6.5   | 0.1  | 0.3  | -3.55  | 0.00062  | 0.000714 | 0.070727 | 0.044419 |
| MmuSTS.4004.1.S1_at   | MmuSTS.4004.1 | 12.92 | 13.41 | 0.1  | 0.09 | -1.4   | 0.004389 | 0.007919 | 0.112454 | 0.11857  |
| MmuSTS.4005.1.S1_at   | MmuSTS.4005.1 | 12.2  | 12.39 | 0.35 | 0.02 | -1.14  | 0.44359  | 0.780669 | 0.696642 | 0.872739 |
| MmuSTS.4006.1.S1_at   | MmuSTS.4006.1 | 4.77  | 4.69  | 0.22 | 0.08 | 1.05   | 0.667118 | 0.247293 | 0.8402   | 0.516479 |
| MmuSTS.4007.1.S1_at   | MmuSTS.4007.1 | 10.07 | 9.48  | 0.09 | 0.06 | 1.5    | 0.0007   | 0.017916 | 0.071709 | 0.168983 |
| MmuSTS.4008.1.S1_at   | MmuSTS.4008.1 | 6.12  | 5.92  | 0.09 | 0.1  | 1.15   | 0.142185 | 0.051399 | 0.428176 | 0.272185 |
| MmuSTS.4009.1.S1_s_at | MmuSTS.4009.1 | 5.91  | 5.62  | 0.14 | 0.02 | 1.23   | 0.058605 | 0.164855 | 0.299229 | 0.44118  |
| MmuSTS.401.1.S1_at    | MmuSTS.401.1  | 5.83  | 5.42  | 0.23 | 0.3  | 1.34   | 0.210505 | 0.115535 | 0.5081   | 0.38267  |
| MmuSTS.401.1.S1_s_at  | MmuSTS.401.1  | 4.93  | 4.84  | 0.33 | 0.02 | 1.07   | 0.486045 | 0.646156 | 0.725473 | 0.792676 |
| MmuSTS.4010.1.S1_at   | MmuSTS.4010.1 | 10.2  | 9.83  | 0.1  | 0.07 | 1.29   | 0.008615 | 0.085281 | 0.142375 | 0.337119 |

|                       |               |       |       |      |      |        |          |          |          |          |
|-----------------------|---------------|-------|-------|------|------|--------|----------|----------|----------|----------|
| MmuSTS.4011.1.S1_at   | MmuSTS.4011.1 | 11.12 | 10.97 | 0.11 | 0.08 | 1.1    | 0.20021  | 0.001398 | 0.497733 | 0.057005 |
| MmuSTS.4012.1.S1_at   | MmuSTS.4012.1 | 9.54  | 10.27 | 0.21 | 0.05 | -1.65  | 0.004905 | 0.001818 | 0.115126 | 0.063958 |
| MmuSTS.4013.1.S1_at   | MmuSTS.4013.1 | 10.61 | 10.78 | 0.29 | 0.03 | -1.12  | 0.612332 | 0.344711 | 0.806812 | 0.59007  |
| MmuSTS.4014.1.S1_at   | MmuSTS.4014.1 | 4.48  | 4.64  | 0.07 | 0.18 | -1.12  | 0.609479 | 0.075003 | 0.805285 | 0.319064 |
| MmuSTS.4015.1.S1_s_at | MmuSTS.4015.1 | 4.32  | 4.4   | 0.25 | 0.04 | -1.05  | 0.886435 | 0.21611  | 0.951597 | 0.489686 |
| MmuSTS.4016.1.S1_at   | MmuSTS.4016.1 | 12.42 | 11.64 | 0.3  | 0.08 | 1.71   | 0.013329 | 0.004351 | 0.166232 | 0.092371 |
| MmuSTS.4017.1.S1_at   | MmuSTS.4017.1 | 9.43  | 9.47  | 0.6  | 0.24 | -1.03  | 0.831857 | 0.539918 | 0.925994 | 0.723995 |
| MmuSTS.4018.1.S1_at   | MmuSTS.4018.1 | 4.48  | 4.42  | 0.11 | 0.16 | 1.05   | 0.794207 | 0.218379 | 0.907055 | 0.491929 |
| MmuSTS.4019.1.S1_at   | MmuSTS.4019.1 | 4.17  | 4.28  | 0.06 | 0.26 | -1.07  | 0.495551 | 0.004324 | 0.731829 | 0.092241 |
| MmuSTS.402.1.S1_s_at  | MmuSTS.402.1  | 4.63  | 4.78  | 0.17 | 0.11 | -1.11  | 0.58753  | 0.138012 | 0.790485 | 0.410919 |
| MmuSTS.4020.1.S1_at   | MmuSTS.4020.1 | 10.48 | 10.48 | 0.3  | 0.05 | -1     | 0.443552 | 0.00076  | 0.696624 | 0.04544  |
| MmuSTS.4021.1.S1_at   | MmuSTS.4021.1 | 3.33  | 3.32  | 0.07 | 0.08 | 1.01   | 0.989889 | 0.060782 | 0.996442 | 0.29326  |
| MmuSTS.4022.1.S1_at   | MmuSTS.4022.1 | 8.11  | 7.07  | 0.47 | 0.2  | 2.06   | 0.093372 | 0.001399 | 0.361928 | 0.057005 |
| MmuSTS.4023.1.S1_at   | MmuSTS.4023.1 | 11.21 | 12.06 | 0.12 | 0.11 | -1.8   | 0.001307 | 0.000247 | 0.078631 | 0.032979 |
| MmuSTS.4024.1.S1_at   | MmuSTS.4024.1 | 3.1   | 2.87  | 0.28 | 0.06 | 1.17   | 0.718602 | 0.653245 | 0.867276 | 0.797335 |
| MmuSTS.4025.1.S1_at   | MmuSTS.4025.1 | 11.89 | 11.56 | 0.23 | 0.13 | 1.26   | 0.112796 | 0.244947 | 0.389296 | 0.514752 |
| MmuSTS.4026.1.S1_at   | MmuSTS.4026.1 | 7.31  | 6.12  | 0.9  | 0.54 | 2.27   | 0.373198 | 0.190335 | 0.645118 | 0.465906 |
| MmuSTS.4027.1.S1_at   | MmuSTS.4027.1 | 5.33  | 5.21  | 0.59 | 0.04 | 1.08   | 0.609155 | 0.255889 | 0.804998 | 0.523862 |
| MmuSTS.4028.1.S1_at   | MmuSTS.4028.1 | 8.7   | 9.1   | 0.26 | 0.02 | -1.32  | 0.058292 | 0.286958 | 0.298574 | 0.548246 |
| MmuSTS.4029.1.S1_at   | MmuSTS.4029.1 | 11.15 | 11.77 | 0.2  | 0.2  | -1.54  | 0.035886 | 0.003412 | 0.244522 | 0.084071 |
| MmuSTS.403.1.S1_at    | MmuSTS.403.1  | 2.83  | 2.76  | 0    | 0.05 | 1.06   | 0.128275 | 0.326189 | 0.410227 | 0.576393 |
| MmuSTS.403.1.S1_s_at  | MmuSTS.403.1  | 4.3   | 4.3   | 0.05 | 0.06 | 1      | 0.456091 | 0.044364 | 0.705665 | 0.255119 |
| MmuSTS.4030.1.S1_at   | MmuSTS.4030.1 | 12.97 | 12.98 | 0.06 | 0.04 | -1.01  | 0.628254 | 0.076501 | 0.817362 | 0.321584 |
| MmuSTS.4031.1.S1_s_at | MmuSTS.4031.1 | 2.96  | 2.89  | 0.07 | 0.08 | 1.05   | 0.743664 | 0.663153 | 0.881384 | 0.80284  |
| MmuSTS.4032.1.S1_at   | MmuSTS.4032.1 | 6.04  | 10.7  | 1.73 | 0.34 | -25.28 | 0.02717  | 0.199989 | 0.217696 | 0.474603 |
| MmuSTS.4033.1.S1_at   | MmuSTS.4033.1 | 6.31  | 8.25  | 1.11 | 0.16 | -3.84  | 0.056772 | 0.18737  | 0.295745 | 0.463386 |
| MmuSTS.4034.1.S1_at   | MmuSTS.4034.1 | 5.46  | 8.93  | 1.09 | 0.72 | -11.1  | 0.017181 | 0.236244 | 0.184344 | 0.507252 |
| MmuSTS.4035.1.S1_at   | MmuSTS.4035.1 | 7.16  | 7.21  | 0.19 | 0.02 | -1.03  | 0.659489 | 0.308667 | 0.83568  | 0.56461  |
| MmuSTS.4036.1.S1_at   | MmuSTS.4036.1 | 13.33 | 12.34 | 0.08 | 0.15 | 1.99   | 0.000575 | 0.066367 | 0.070727 | 0.303265 |
| MmuSTS.4037.1.S1_at   | MmuSTS.4037.1 | 8.32  | 7.41  | 0.18 | 0.33 | 1.89   | 0.011932 | 0.022804 | 0.159288 | 0.189194 |
| MmuSTS.4038.1.S1_at   | MmuSTS.4038.1 | 4.19  | 4.27  | 0.17 | 0.31 | -1.06  | 0.751985 | 0.908141 | 0.885488 | 0.947949 |
| MmuSTS.4039.1.S1_at   | MmuSTS.4039.1 | 3.67  | 3.88  | 0.21 | 0.06 | -1.16  | 0.312005 | 0.302259 | 0.598156 | 0.560092 |
| MmuSTS.404.1.S1_at    | MmuSTS.404.1  | 4.24  | 4.31  | 0.03 | 0.13 | -1.05  | 0.925004 | 0.664468 | 0.968143 | 0.803396 |
| MmuSTS.4040.1.S1_at   | MmuSTS.4040.1 | 7.3   | 7.06  | 0.1  | 0.22 | 1.18   | 0.577102 | 0.102621 | 0.783459 | 0.362991 |
| MmuSTS.4041.1.S1_at   | MmuSTS.4041.1 | 10.9  | 11.41 | 0.32 | 0.12 | -1.42  | 0.181871 | 0.005366 | 0.477403 | 0.101135 |
| MmuSTS.4042.1.S1_at   | MmuSTS.4042.1 | 7.11  | 7.47  | 0.76 | 0.27 | -1.28  | 0.434822 | 0.429637 | 0.689966 | 0.650973 |
| MmuSTS.4043.1.S1_at   | MmuSTS.4043.1 | 9.66  | 10.09 | 0.42 | 0.13 | -1.34  | 0.088329 | 0.509322 | 0.354438 | 0.704095 |
| MmuSTS.4044.1.S1_at   | MmuSTS.4044.1 | 9.77  | 9.92  | 0.12 | 0.05 | -1.11  | 0.134706 | 0.312963 | 0.418599 | 0.567554 |
| MmuSTS.4045.1.S1_at   | MmuSTS.4045.1 | 6.17  | 4.8   | 1.11 | 0.29 | 2.59   | 0.067886 | 0.119852 | 0.318295 | 0.388577 |
| MmuSTS.4046.1.S1_at   | MmuSTS.4046.1 | 8.08  | 7.81  | 0.39 | 0.32 | 1.21   | 0.209598 | 0.008614 | 0.507107 | 0.123108 |
| MmuSTS.4047.1.S1_at   | MmuSTS.4047.1 | 5.9   | 7.26  | 1.25 | 0.22 | -2.55  | 0.131193 | 0.406716 | 0.413871 | 0.634487 |
| MmuSTS.4049.1.S1_at   | MmuSTS.4049.1 | 6.46  | 6.54  | 0.08 | 0.07 | -1.06  | 0.094869 | 0.326851 | 0.363793 | 0.576848 |
| MmuSTS.405.1.S1_at    | MmuSTS.405.1  | 5.84  | 5.98  | 0.22 | 0.07 | -1.11  | 0.975436 | 0.359034 | 0.990215 | 0.600414 |

|                       |               |       |       |      |      |        |          |          |          |          |
|-----------------------|---------------|-------|-------|------|------|--------|----------|----------|----------|----------|
| MmuSTS.405.1.S1_s_at  | MmuSTS.405.1  | 5.63  | 5.57  | 0.14 | 0.15 | 1.05   | 0.53413  | 0.251787 | 0.75744  | 0.520459 |
| MmuSTS.4050.1.S1_at   | MmuSTS.4050.1 | 3.27  | 3.29  | 0.06 | 0.17 | -1.01  | 0.884281 | 0.266937 | 0.95079  | 0.532473 |
| MmuSTS.4051.1.S1_at   | MmuSTS.4051.1 | 8.94  | 8.94  | 0.47 | 0.04 | -1     | 0.976713 | 0.999542 | 0.990824 | 0.999859 |
| MmuSTS.4052.1.S1_at   | MmuSTS.4052.1 | 5.02  | 5.42  | 0.13 | 0.19 | -1.32  | 0.037705 | 0.291935 | 0.249816 | 0.552156 |
| MmuSTS.4053.1.S1_at   | MmuSTS.4053.1 | 8.56  | 7.22  | 0.32 | 0.55 | 2.53   | 0.014227 | 0.085304 | 0.17101  | 0.337139 |
| MmuSTS.4054.1.S1_at   | MmuSTS.4054.1 | 8.24  | 8.24  | 0.1  | 0.21 | -1     | 0.734314 | 0.567864 | 0.87617  | 0.741693 |
| MmuSTS.4055.1.S1_at   | MmuSTS.4055.1 | 10.17 | 10.84 | 0.23 | 0.24 | -1.59  | 0.05693  | 0.28619  | 0.295858 | 0.547713 |
| MmuSTS.4056.1.S1_at   | MmuSTS.4056.1 | 3.46  | 3.45  | 0.17 | 0.02 | 1.01   | 0.497019 | 0.564367 | 0.732851 | 0.739211 |
| MmuSTS.4057.1.S1_at   | MmuSTS.4057.1 | 7.98  | 7.67  | 0.05 | 0.04 | 1.24   | 0.000796 | 0.001471 | 0.073056 | 0.058457 |
| MmuSTS.4058.1.S1_at   | MmuSTS.4058.1 | 10.38 | 9.65  | 0.2  | 0.02 | 1.66   | 0.006141 | 0.043997 | 0.12462  | 0.254195 |
| MmuSTS.4059.1.S1_at   | MmuSTS.4059.1 | 7.56  | 7.95  | 0.14 | 0.06 | -1.31  | 0.004534 | 0.001525 | 0.113436 | 0.059307 |
| MmuSTS.406.1.S1_at    | MmuSTS.406.1  | 3.26  | 3.35  | 0.05 | 0.05 | -1.06  | 0.126938 | 0.327128 | 0.40851  | 0.577136 |
| MmuSTS.4060.1.S1_at   | MmuSTS.4060.1 | 5.86  | 5.9   | 0.06 | 0.02 | -1.03  | 0.885196 | 0.111314 | 0.951028 | 0.375989 |
| MmuSTS.4061.1.S1_s_at | MmuSTS.4061.1 | 3.58  | 3.52  | 0.07 | 0.07 | 1.04   | 0.15046  | 0.229953 | 0.439501 | 0.501802 |
| MmuSTS.4063.1.S1_at   | MmuSTS.4063.1 | 10.19 | 10.04 | 0.01 | 0.06 | 1.11   | 0.018019 | 0.265434 | 0.187281 | 0.531363 |
| MmuSTS.4064.1.S1_at   | MmuSTS.4064.1 | 6.14  | 6.06  | 0.79 | 0.33 | 1.05   | 0.499442 | 0.70413  | 0.734175 | 0.828337 |
| MmuSTS.4065.1.S1_at   | MmuSTS.4065.1 | 6.67  | 6.71  | 0.14 | 0.16 | -1.02  | 0.439    | 0.000216 | 0.693409 | 0.032385 |
| MmuSTS.4066.1.S1_at   | MmuSTS.4066.1 | 7.33  | 7.37  | 0.06 | 0.13 | -1.03  | 0.546014 | 0.587254 | 0.7651   | 0.754106 |
| MmuSTS.4067.1.S1_at   | MmuSTS.4067.1 | 4.55  | 4.6   | 0.11 | 0.21 | -1.04  | 0.582171 | 0.718424 | 0.787062 | 0.837032 |
| MmuSTS.4068.1.S1_at   | MmuSTS.4068.1 | 7.25  | 7     | 0.11 | 0.25 | 1.19   | 0.051677 | 0.155167 | 0.284634 | 0.430328 |
| MmuSTS.4069.1.S1_at   | MmuSTS.4069.1 | 3.22  | 3.41  | 0.16 | 0.14 | -1.14  | 0.416609 | 0.770084 | 0.677057 | 0.866476 |
| MmuSTS.407.1.S1_s_at  | MmuSTS.407.1  | 4.09  | 4.05  | 0.09 | 0.05 | 1.03   | 0.93805  | 0.957519 | 0.973844 | 0.975944 |
| MmuSTS.4070.1.S1_at   | MmuSTS.4070.1 | 3.5   | 3.53  | 0.41 | 0.21 | -1.02  | 0.765618 | 0.542455 | 0.892487 | 0.725516 |
| MmuSTS.4071.1.S1_at   | MmuSTS.4071.1 | 6.02  | 7.38  | 1.68 | 0.31 | -2.56  | 0.589824 | 0.783549 | 0.791747 | 0.874664 |
| MmuSTS.4072.1.S1_at   | MmuSTS.4072.1 | 10    | 10.46 | 1.3  | 0.32 | -1.38  | 0.218249 | 0.233413 | 0.515982 | 0.504761 |
| MmuSTS.4073.1.S1_at   | MmuSTS.4073.1 | 10.3  | 10.82 | 0.18 | 0.16 | -1.44  | 0.034692 | 0.000372 | 0.240901 | 0.037273 |
| MmuSTS.4074.1.S1_at   | MmuSTS.4074.1 | 7.79  | 7.94  | 0.11 | 0.14 | -1.11  | 0.188064 | 0.785971 | 0.484319 | 0.876026 |
| MmuSTS.4075.1.S1_at   | MmuSTS.4075.1 | 7.61  | 7.45  | 0.34 | 0.03 | 1.12   | 0.883973 | 0.069729 | 0.950642 | 0.310191 |
| MmuSTS.4076.1.S1_at   | MmuSTS.4076.1 | 6.49  | 6.57  | 0.18 | 0.2  | -1.06  | 0.268251 | 0.747819 | 0.561004 | 0.853252 |
| MmuSTS.4077.1.S1_at   | MmuSTS.4077.1 | 11.12 | 10.88 | 0.13 | 0.02 | 1.18   | 0.043542 | 0.029983 | 0.265724 | 0.214956 |
| MmuSTS.4078.1.S1_at   | MmuSTS.4078.1 | 7.05  | 6.89  | 0.22 | 0.17 | 1.12   | 0.619586 | 0.301571 | 0.811315 | 0.55955  |
| MmuSTS.4079.1.S1_at   | MmuSTS.4079.1 | 10.21 | 10.27 | 0.07 | 0.02 | -1.04  | 0.083727 | 0.295943 | 0.346423 | 0.555241 |
| MmuSTS.408.1.S1_at    | MmuSTS.408.1  | 5.6   | 9.24  | 1.23 | 0.25 | -12.43 | 0.013414 | 0.132494 | 0.166578 | 0.404544 |
| MmuSTS.4080.1.S1_at   | MmuSTS.4080.1 | 10.13 | 9.38  | 0.27 | 0.25 | 1.68   | 0.024643 | 0.232291 | 0.210032 | 0.504024 |
| MmuSTS.4081.1.S1_at   | MmuSTS.4081.1 | 4.85  | 4.41  | 0.51 | 0.14 | 1.36   | 0.211844 | 0.613473 | 0.509723 | 0.770558 |
| MmuSTS.4082.1.S1_at   | MmuSTS.4082.1 | 7.62  | 7.97  | 0.24 | 0.04 | -1.27  | 0.056647 | 0.161113 | 0.295477 | 0.437279 |
| MmuSTS.4083.1.S1_at   | MmuSTS.4083.1 | 8.28  | 7.59  | 0.21 | 0.13 | 1.62   | 0.009805 | 0.338927 | 0.148542 | 0.585891 |
| MmuSTS.4084.1.S1_at   | MmuSTS.4084.1 | 8.65  | 7.16  | 0.11 | 0.25 | 2.8    | 0.001038 | 0.004867 | 0.076321 | 0.097453 |
| MmuSTS.4085.1.S1_at   | MmuSTS.4085.1 | 12.86 | 12.75 | 0.35 | 0.05 | 1.08   | 0.918884 | 0.374465 | 0.965374 | 0.6129   |
| MmuSTS.4086.1.S1_at   | MmuSTS.4086.1 | 9.41  | 9.61  | 0.18 | 0.2  | -1.15  | 0.120333 | 0.010867 | 0.398774 | 0.135879 |
| MmuSTS.4087.1.S1_at   | MmuSTS.4087.1 | 7.98  | 8.55  | 0.38 | 0.38 | -1.49  | 0.073263 | 0.002876 | 0.328392 | 0.078929 |
| MmuSTS.4088.1.S1_at   | MmuSTS.4088.1 | 10.53 | 10.33 | 0.27 | 0.11 | 1.15   | 0.565656 | 0.042632 | 0.776758 | 0.251037 |
| MmuSTS.4089.1.S1_at   | MmuSTS.4089.1 | 10.51 | 10.5  | 0.04 | 0.01 | 1      | 0.432051 | 0.784987 | 0.687889 | 0.875511 |



|                       |               |       |       |      |      |        |          |          |          |          |
|-----------------------|---------------|-------|-------|------|------|--------|----------|----------|----------|----------|
| MmuSTS.409.1.S1_at    | MmuSTS.409.1  | 4.17  | 4.19  | 0.12 | 0.03 | -1.01  | 0.487539 | 0.634245 | 0.726349 | 0.784729 |
| MmuSTS.4090.1.S1_at   | MmuSTS.4090.1 | 5.42  | 4.56  | 0.6  | 0.1  | 1.82   | 0.070074 | 0.043178 | 0.323085 | 0.252554 |
| MmuSTS.4091.1.S1_at   | MmuSTS.4091.1 | 6.4   | 10.39 | 2.5  | 0.31 | -15.87 | 0.161027 | 0.396341 | 0.452489 | 0.628112 |
| MmuSTS.4092.1.S1_at   | MmuSTS.4092.1 | 6.59  | 7.23  | 0.2  | 0.19 | -1.56  | 0.026449 | 0.008959 | 0.21571  | 0.125097 |
| MmuSTS.4093.1.S1_at   | MmuSTS.4093.1 | 8.44  | 7.2   | 0.88 | 1.04 | 2.36   | 0.33928  | 0.147353 | 0.619574 | 0.421554 |
| MmuSTS.4094.1.S1_at   | MmuSTS.4094.1 | 8.03  | 8.14  | 0.61 | 0.27 | -1.08  | 0.588743 | 0.823109 | 0.791231 | 0.898356 |
| MmuSTS.4095.1.S1_at   | MmuSTS.4095.1 | 6.87  | 6.4   | 0.3  | 0.2  | 1.38   | 0.176074 | 0.015727 | 0.470426 | 0.158912 |
| MmuSTS.4096.1.S1_at   | MmuSTS.4096.1 | 10.69 | 11.23 | 0.35 | 0.11 | -1.45  | 0.043249 | 0.242053 | 0.26533  | 0.512624 |
| MmuSTS.4097.1.S1_at   | MmuSTS.4097.1 | 10.59 | 10.51 | 0.02 | 0.03 | 1.06   | 0.028952 | 0.026381 | 0.22298  | 0.203474 |
| MmuSTS.4098.1.S1_at   | MmuSTS.4098.1 | 9.59  | 9.29  | 0.15 | 0.11 | 1.23   | 0.051552 | 0.005073 | 0.284449 | 0.09907  |
| MmuSTS.4099.1.S1_at   | MmuSTS.4099.1 | 8.78  | 9.61  | 0.6  | 0.16 | -1.78  | 0.071198 | 0.007123 | 0.324758 | 0.113654 |
| MmuSTS.41.1.S1_at     | MmuSTS.41.1   | 6.5   | 6.4   | 0.13 | 0.11 | 1.07   | 0.148771 | 0.185415 | 0.437317 | 0.461443 |
| MmuSTS.410.1.S1_at    | MmuSTS.410.1  | 8.98  | 9.49  | 0.18 | 0.14 | -1.42  | 0.017252 | 0.000132 | 0.184546 | 0.029087 |
| MmuSTS.4100.1.S1_at   | MmuSTS.4100.1 | 4.83  | 5     | 0.18 | 0.05 | -1.13  | 0.132876 | 0.15334  | 0.416311 | 0.428139 |
| MmuSTS.4101.1.S1_at   | MmuSTS.4101.1 | 7.4   | 7.26  | 0.25 | 0.04 | 1.1    | 0.368795 | 0.271138 | 0.642367 | 0.536259 |
| MmuSTS.4102.1.S1_at   | MmuSTS.4102.1 | 12.12 | 12.12 | 0.3  | 0.03 | -1     | 0.968843 | 0.918016 | 0.987676 | 0.954068 |
| MmuSTS.4103.1.S1_at   | MmuSTS.4103.1 | 11.75 | 11.76 | 0.11 | 0.01 | -1.01  | 0.934618 | 0.99318  | 0.972591 | 0.995946 |
| MmuSTS.4104.1.S1_at   | MmuSTS.4104.1 | 10.34 | 10.08 | 0.1  | 0.1  | 1.2    | 0.036045 | 0.229757 | 0.244865 | 0.501761 |
| MmuSTS.4105.1.S1_at   | MmuSTS.4105.1 | 6.77  | 6.72  | 0.33 | 0.14 | 1.04   | 0.931333 | 0.725219 | 0.971084 | 0.840945 |
| MmuSTS.4106.1.S1_s_at | MmuSTS.4106.1 | 7.83  | 9.13  | 0.5  | 0.1  | -2.46  | 0.009141 | 0.018225 | 0.145552 | 0.169777 |
| MmuSTS.4107.1.S1_at   | MmuSTS.4107.1 | 6.83  | 6.18  | 0.44 | 0.16 | 1.57   | 0.091657 | 0.094541 | 0.359407 | 0.351296 |
| MmuSTS.4108.1.S1_at   | MmuSTS.4108.1 | 5.32  | 5.18  | 0.16 | 0.07 | 1.11   | 0.089174 | 0.090388 | 0.3559   | 0.344834 |
| MmuSTS.4109.1.S1_at   | MmuSTS.4109.1 | 11.56 | 9.7   | 0.41 | 0.3  | 3.63   | 0.004169 | 0.000959 | 0.110227 | 0.049342 |
| MmuSTS.411.1.S1_at    | MmuSTS.411.1  | 6.75  | 7.56  | 0.35 | 0.22 | -1.75  | 0.110027 | 0.475047 | 0.385253 | 0.681872 |
| MmuSTS.4110.1.S1_at   | MmuSTS.4110.1 | 6.75  | 7.32  | 0.29 | 0.11 | -1.48  | 0.086297 | 0.066639 | 0.351033 | 0.303959 |
| MmuSTS.4111.1.S1_at   | MmuSTS.4111.1 | 4.95  | 5.02  | 0.27 | 0.33 | -1.05  | 0.950428 | 0.944984 | 0.97944  | 0.968834 |
| MmuSTS.4112.1.S1_at   | MmuSTS.4112.1 | 14.21 | 14.01 | 0.18 | 0.05 | 1.14   | 0.130446 | 0.022209 | 0.412859 | 0.186513 |
| MmuSTS.4113.1.S1_at   | MmuSTS.4113.1 | 8.58  | 8.18  | 0.55 | 0.32 | 1.32   | 0.147222 | 0.206505 | 0.43531  | 0.480571 |
| MmuSTS.4114.1.S1_at   | MmuSTS.4114.1 | 5.19  | 5.39  | 0.26 | 0.37 | -1.15  | 0.318776 | 0.427672 | 0.603489 | 0.649406 |
| MmuSTS.4115.1.S1_s_at | MmuSTS.4115.1 | 11.51 | 10.71 | 0.28 | 0.35 | 1.74   | 0.059338 | 0.111025 | 0.300758 | 0.37554  |
| MmuSTS.4116.1.S1_at   | MmuSTS.4116.1 | 9.44  | 10.08 | 0.62 | 0.08 | -1.56  | 0.281977 | 0.684511 | 0.572752 | 0.81598  |
| MmuSTS.4117.1.S1_at   | MmuSTS.4117.1 | 9.83  | 9.54  | 0.23 | 0.12 | 1.22   | 0.150435 | 0.349331 | 0.439474 | 0.593355 |
| MmuSTS.4118.1.S1_s_at | MmuSTS.4118.1 | 3.54  | 3.25  | 0.88 | 0.21 | 1.22   | 0.26571  | 0.353264 | 0.558335 | 0.596477 |
| MmuSTS.4119.1.S1_at   | MmuSTS.4119.1 | 4.56  | 4.49  | 0.08 | 0.04 | 1.05   | 0.990195 | 0.449082 | 0.996453 | 0.664892 |
| MmuSTS.412.1.S1_at    | MmuSTS.412.1  | 5.24  | 5.96  | 0.16 | 0.11 | -1.65  | 0.00346  | 0.230139 | 0.103385 | 0.502007 |
| MmuSTS.4120.1.S1_s_at | MmuSTS.4120.1 | 7.85  | 8.07  | 0.07 | 0.26 | -1.16  | 0.090172 | 0.005631 | 0.356864 | 0.103694 |
| MmuSTS.4121.1.S1_at   | MmuSTS.4121.1 | 7.47  | 7.36  | 0.22 | 0.16 | 1.08   | 0.890278 | 0.009841 | 0.953253 | 0.130274 |
| MmuSTS.4122.1.S1_at   | MmuSTS.4122.1 | 11.34 | 11.17 | 0.17 | 0.04 | 1.13   | 0.071548 | 0.017932 | 0.325561 | 0.168998 |
| MmuSTS.4123.1.S1_at   | MmuSTS.4123.1 | 9.23  | 9.52  | 0.2  | 0.09 | -1.23  | 0.103732 | 0.125195 | 0.377036 | 0.395674 |
| MmuSTS.4124.1.S1_at   | MmuSTS.4124.1 | 9.92  | 10.8  | 1.3  | 0.39 | -1.84  | 0.359911 | 0.194542 | 0.635494 | 0.469632 |
| MmuSTS.4125.1.S1_at   | MmuSTS.4125.1 | 4.91  | 4.49  | 0.69 | 0.31 | 1.34   | 0.21542  | 0.306611 | 0.513072 | 0.563185 |
| MmuSTS.4126.1.S1_at   | MmuSTS.4126.1 | 13.33 | 13.36 | 0.07 | 0.02 | -1.02  | 0.417288 | 0.795501 | 0.677496 | 0.882189 |
| MmuSTS.4127.1.S1_at   | MmuSTS.4127.1 | 11.56 | 11.56 | 0.12 | 0.08 | -1     | 0.84646  | 0.17829  | 0.932991 | 0.454627 |

|                      |               |       |       |      |      |       |          |          |          |          |
|----------------------|---------------|-------|-------|------|------|-------|----------|----------|----------|----------|
| MmuSTS.4128.1.S1_at  | MmuSTS.4128.1 | 5.34  | 5.57  | 0.12 | 0.04 | -1.17 | 0.03702  | 0.125515 | 0.247665 | 0.396226 |
| MmuSTS.4129.1.S1_at  | MmuSTS.4129.1 | 12.42 | 12.38 | 0.12 | 0.04 | 1.03  | 0.79188  | 0.372753 | 0.905512 | 0.611661 |
| MmuSTS.413.1.S1_at   | MmuSTS.413.1  | 4.43  | 4.12  | 0.23 | 0.1  | 1.25  | 0.279994 | 0.580257 | 0.571213 | 0.749616 |
| MmuSTS.4130.1.S1_at  | MmuSTS.4130.1 | 13.53 | 13.53 | 0.05 | 0    | 1     | 0.963586 | 0.657394 | 0.985244 | 0.799695 |
| MmuSTS.4131.1.S1_at  | MmuSTS.4131.1 | 12.23 | 12.04 | 0.07 | 0.1  | 1.14  | 0.054511 | 0.000976 | 0.290603 | 0.049854 |
| MmuSTS.4132.1.S1_at  | MmuSTS.4132.1 | 9.34  | 9.2   | 0.08 | 0.19 | 1.1   | 0.20121  | 0.081553 | 0.498709 | 0.329764 |
| MmuSTS.4133.1.S1_at  | MmuSTS.4133.1 | 13.47 | 13.26 | 0.04 | 0.04 | 1.16  | 0.004441 | 0.215669 | 0.112979 | 0.489477 |
| MmuSTS.4134.1.S1_at  | MmuSTS.4134.1 | 3.45  | 3.44  | 0.18 | 0.04 | 1.01  | 0.928316 | 0.432306 | 0.969727 | 0.652778 |
| MmuSTS.4135.1.S1_at  | MmuSTS.4135.1 | 9.77  | 10.17 | 0.03 | 0.02 | -1.32 | 0.000039 | 0.142069 | 0.045594 | 0.415655 |
| MmuSTS.4136.1.S1_at  | MmuSTS.4136.1 | 8.23  | 9.18  | 0.28 | 0.1  | -1.93 | 0.003017 | 0.000841 | 0.100006 | 0.047013 |
| MmuSTS.4137.1.S1_at  | MmuSTS.4137.1 | 10.21 | 10.26 | 0.44 | 0.03 | -1.03 | 0.806424 | 0.710316 | 0.913273 | 0.831912 |
| MmuSTS.4138.1.S1_at  | MmuSTS.4138.1 | 8.26  | 9.56  | 0.62 | 0.44 | -2.46 | 0.03822  | 0.015174 | 0.251526 | 0.15652  |
| MmuSTS.4139.1.S1_at  | MmuSTS.4139.1 | 3.49  | 4.86  | 0.17 | 0.24 | -2.58 | 0.001145 | 0.002289 | 0.077487 | 0.07045  |
| MmuSTS.414.1.S1_s_at | MmuSTS.414.1  | 7.97  | 7.86  | 0.31 | 0.1  | 1.08  | 0.681364 | 0.925682 | 0.848035 | 0.957937 |
| MmuSTS.4140.1.S1_at  | MmuSTS.4140.1 | 4.93  | 5.12  | 0.22 | 0.06 | -1.14 | 0.670458 | 0.520987 | 0.841859 | 0.712102 |
| MmuSTS.4141.1.S1_at  | MmuSTS.4141.1 | 6.45  | 5.48  | 0.2  | 0.21 | 1.95  | 0.00302  | 0.008132 | 0.100006 | 0.11972  |
| MmuSTS.4142.1.S1_at  | MmuSTS.4142.1 | 7.38  | 7.4   | 0.12 | 0.11 | -1.02 | 0.375536 | 0.096755 | 0.646358 | 0.354171 |
| MmuSTS.4143.1.S1_at  | MmuSTS.4143.1 | 7.76  | 6.24  | 0.49 | 0.01 | 2.86  | 0.007106 | 0.000848 | 0.131735 | 0.047089 |
| MmuSTS.4144.1.S1_at  | MmuSTS.4144.1 | 11.81 | 12.01 | 0.27 | 0.04 | -1.15 | 0.08061  | 0.200727 | 0.341245 | 0.47524  |
| MmuSTS.4145.1.S1_at  | MmuSTS.4145.1 | 9.32  | 9.18  | 0.13 | 0.15 | 1.1   | 0.191827 | 0.000232 | 0.488321 | 0.03241  |
| MmuSTS.4146.1.S1_at  | MmuSTS.4146.1 | 6.03  | 8.98  | 1.66 | 0.5  | -7.72 | 0.064989 | 0.115012 | 0.311682 | 0.38182  |
| MmuSTS.4147.1.S1_at  | MmuSTS.4147.1 | 4.47  | 4.37  | 0.02 | 0.03 | 1.07  | 0.00748  | 0.142194 | 0.134856 | 0.415754 |
| MmuSTS.4148.1.S1_at  | MmuSTS.4148.1 | 9.77  | 9.38  | 0.12 | 0.07 | 1.3   | 0.003341 | 0.002969 | 0.102526 | 0.079958 |
| MmuSTS.4149.1.S1_at  | MmuSTS.4149.1 | 7.9   | 7.93  | 0.11 | 0.22 | -1.02 | 0.754877 | 0.181828 | 0.886949 | 0.458385 |
| MmuSTS.415.1.S1_at   | MmuSTS.415.1  | 6.72  | 5.83  | 0.77 | 0.45 | 1.86  | 0.157265 | 0.200874 | 0.448014 | 0.475369 |
| MmuSTS.4150.1.S1_at  | MmuSTS.4150.1 | 11.48 | 11.54 | 0.22 | 0.1  | -1.05 | 0.642851 | 0.019677 | 0.825755 | 0.176276 |
| MmuSTS.4151.1.S1_at  | MmuSTS.4151.1 | 11.56 | 11.44 | 0.25 | 0.11 | 1.09  | 0.159779 | 0.273252 | 0.451167 | 0.537788 |
| MmuSTS.4152.1.S1_at  | MmuSTS.4152.1 | 5.53  | 5.51  | 0.12 | 0.13 | 1.01  | 0.636148 | 0.44225  | 0.822047 | 0.660308 |
| MmuSTS.4153.1.S1_at  | MmuSTS.4153.1 | 3.4   | 3.35  | 0.28 | 0.1  | 1.04  | 0.440517 | 0.616088 | 0.69454  | 0.772461 |
| MmuSTS.4154.1.S1_at  | MmuSTS.4154.1 | 10.12 | 10.2  | 0.21 | 0.17 | -1.06 | 0.706309 | 0.130941 | 0.860948 | 0.403037 |
| MmuSTS.4155.1.S1_at  | MmuSTS.4155.1 | 8.54  | 8.23  | 0.45 | 0.22 | 1.23  | 0.572837 | 0.625057 | 0.780873 | 0.778973 |
| MmuSTS.4156.1.S1_at  | MmuSTS.4156.1 | 4.13  | 4.18  | 0.15 | 0.12 | -1.04 | 0.478709 | 0.746634 | 0.720221 | 0.852888 |
| MmuSTS.4157.1.S1_at  | MmuSTS.4157.1 | 12.55 | 11.71 | 0.06 | 0.23 | 1.78  | 0.008636 | 0.013093 | 0.142384 | 0.14718  |
| MmuSTS.4158.1.S1_at  | MmuSTS.4158.1 | 10.24 | 10.01 | 0.04 | 0.02 | 1.17  | 0.000837 | 0.029523 | 0.07338  | 0.213506 |
| MmuSTS.4159.1.S1_at  | MmuSTS.4159.1 | 11.95 | 12.16 | 0.04 | 0.14 | -1.15 | 0.080617 | 0.243251 | 0.341245 | 0.513356 |
| MmuSTS.416.1.S1_at   | MmuSTS.416.1  | 12.04 | 12.03 | 0.12 | 0.04 | 1.01  | 0.385129 | 0.37757  | 0.654006 | 0.615012 |
| MmuSTS.4160.1.S1_at  | MmuSTS.4160.1 | 5.73  | 5.81  | 0.17 | 0.13 | -1.06 | 0.600113 | 0.803862 | 0.798627 | 0.887148 |
| MmuSTS.4161.1.S1_at  | MmuSTS.4161.1 | 10.8  | 10.57 | 0.11 | 0    | 1.17  | 0.025579 | 0.001206 | 0.212928 | 0.054389 |
| MmuSTS.4162.1.S1_at  | MmuSTS.4162.1 | 11.29 | 11.27 | 0.17 | 0.08 | 1.01  | 0.322979 | 0.055256 | 0.606849 | 0.280809 |
| MmuSTS.4163.1.S1_at  | MmuSTS.4163.1 | 10.73 | 10.78 | 0.06 | 0.01 | -1.04 | 0.167233 | 0.006892 | 0.460436 | 0.112203 |
| MmuSTS.4164.1.S1_at  | MmuSTS.4164.1 | 7.39  | 8.38  | 0.49 | 0.1  | -1.99 | 0.026929 | 0.226893 | 0.217059 | 0.499276 |
| MmuSTS.4165.1.S1_at  | MmuSTS.4165.1 | 4.24  | 3.95  | 0.12 | 0.12 | 1.22  | 0.07894  | 0.244121 | 0.338745 | 0.514121 |
| MmuSTS.4166.1.S1_at  | MmuSTS.4166.1 | 5.98  | 6.86  | 0.68 | 0.22 | -1.84 | 0.282929 | 0.290022 | 0.573503 | 0.551016 |

|                       |               |       |       |      |      |       |          |          |          |          |
|-----------------------|---------------|-------|-------|------|------|-------|----------|----------|----------|----------|
| MmuSTS.4167.1.S1_at   | MmuSTS.4167.1 | 10.84 | 10.67 | 0.13 | 0.03 | 1.12  | 0.137981 | 0.01201  | 0.423144 | 0.141846 |
| MmuSTS.4168.1.S1_at   | MmuSTS.4168.1 | 7.37  | 6.92  | 0.28 | 0.37 | 1.36  | 0.071004 | 0.028013 | 0.324424 | 0.208903 |
| MmuSTS.4169.1.S1_at   | MmuSTS.4169.1 | 12.81 | 12.54 | 0.06 | 0.07 | 1.21  | 0.012739 | 0.00023  | 0.163022 | 0.032385 |
| MmuSTS.417.1.S1_at    | MmuSTS.417.1  | 10.79 | 8.93  | 0.61 | 0.54 | 3.65  | 0.016501 | 0.104811 | 0.181437 | 0.366313 |
| MmuSTS.4170.1.S1_at   | MmuSTS.4170.1 | 11.58 | 11.95 | 0.08 | 0.21 | -1.29 | 0.082264 | 0.399148 | 0.343869 | 0.62969  |
| MmuSTS.4171.1.S1_at   | MmuSTS.4171.1 | 10.05 | 10.27 | 0.14 | 0.03 | -1.16 | 0.05954  | 0.013468 | 0.301148 | 0.148626 |
| MmuSTS.4172.1.S1_at   | MmuSTS.4172.1 | 7.22  | 7.51  | 0.19 | 0.12 | -1.23 | 0.052049 | 0.084409 | 0.285668 | 0.335713 |
| MmuSTS.4173.1.S1_at   | MmuSTS.4173.1 | 7.19  | 7.08  | 0.19 | 0.15 | 1.08  | 0.628706 | 0.071331 | 0.817507 | 0.313366 |
| MmuSTS.4174.1.S1_at   | MmuSTS.4174.1 | 10.09 | 10.02 | 0.23 | 0.35 | 1.05  | 0.788933 | 0.181532 | 0.904019 | 0.458087 |
| MmuSTS.4175.1.S1_at   | MmuSTS.4175.1 | 3.6   | 3.49  | 0.37 | 0.02 | 1.08  | 0.525928 | 0.761592 | 0.752178 | 0.861459 |
| MmuSTS.4176.1.S1_at   | MmuSTS.4176.1 | 9.28  | 11.12 | 0.53 | 0.14 | -3.6  | 0.004683 | 0.172987 | 0.115008 | 0.449625 |
| MmuSTS.4177.1.S1_at   | MmuSTS.4177.1 | 3.33  | 3.36  | 0.04 | 0.05 | -1.02 | 0.890113 | 0.601842 | 0.953208 | 0.763113 |
| MmuSTS.4178.1.S1_at   | MmuSTS.4178.1 | 8.72  | 5.72  | 1.72 | 0.49 | 8.01  | 0.034667 | 0.032936 | 0.240791 | 0.224663 |
| MmuSTS.4179.1.S1_at   | MmuSTS.4179.1 | 10.5  | 10.57 | 0.09 | 0.16 | -1.05 | 0.729756 | 0.120107 | 0.873782 | 0.38882  |
| MmuSTS.418.1.S1_s_at  | MmuSTS.418.1  | 3.53  | 3.59  | 0.06 | 0.04 | -1.04 | 0.051219 | 0.710474 | 0.283678 | 0.832042 |
| MmuSTS.4180.1.S1_at   | MmuSTS.4180.1 | 11.71 | 11.5  | 0.17 | 0.04 | 1.16  | 0.288037 | 0.124872 | 0.577791 | 0.395219 |
| MmuSTS.4181.1.S1_at   | MmuSTS.4181.1 | 8.84  | 9.56  | 0.48 | 0.14 | -1.64 | 0.137185 | 0.180804 | 0.422016 | 0.457306 |
| MmuSTS.4182.1.S1_at   | MmuSTS.4182.1 | 8.16  | 6.91  | 0.13 | 0.14 | 2.37  | 0.000283 | 0.00177  | 0.056985 | 0.063359 |
| MmuSTS.4183.1.S1_at   | MmuSTS.4183.1 | 6.89  | 6.97  | 0.04 | 0.08 | -1.05 | 0.654312 | 0.453303 | 0.832676 | 0.667688 |
| MmuSTS.4184.1.S1_at   | MmuSTS.4184.1 | 9     | 8.19  | 0.17 | 0.03 | 1.76  | 0.000862 | 0.000067 | 0.073779 | 0.025805 |
| MmuSTS.4185.1.S1_at   | MmuSTS.4185.1 | 10.49 | 10.49 | 0.72 | 0.06 | 1     | 0.91294  | 0.92722  | 0.963228 | 0.958627 |
| MmuSTS.4186.1.S1_at   | MmuSTS.4186.1 | 10.54 | 10.34 | 0.22 | 0.05 | 1.15  | 0.197678 | 0.014017 | 0.494972 | 0.151595 |
| MmuSTS.4187.1.S1_at   | MmuSTS.4187.1 | 8.73  | 9.45  | 0.07 | 0.19 | -1.64 | 0.004821 | 0.203195 | 0.115098 | 0.477415 |
| MmuSTS.4188.1.S1_at   | MmuSTS.4188.1 | 4.73  | 4.64  | 0.11 | 0.08 | 1.07  | 0.119546 | 0.322609 | 0.397422 | 0.574023 |
| MmuSTS.4189.1.S1_at   | MmuSTS.4189.1 | 6.78  | 7.59  | 0.58 | 0.7  | -1.76 | 0.837033 | 0.970782 | 0.928546 | 0.984072 |
| MmuSTS.4189.1.S1_s_at | MmuSTS.4189.1 | 6.74  | 7.99  | 0.77 | 0.36 | -2.37 | 0.270839 | 0.358317 | 0.562856 | 0.599823 |
| MmuSTS.419.1.S1_s_at  | MmuSTS.419.1  | 3.1   | 2.94  | 0.08 | 0.19 | 1.11  | 0.604564 | 0.814448 | 0.801793 | 0.892923 |
| MmuSTS.4190.1.S1_at   | MmuSTS.4190.1 | 12.45 | 12.45 | 0.02 | 0.06 | -1    | 0.998279 | 0.993997 | 0.999376 | 0.996372 |
| MmuSTS.4191.1.S1_at   | MmuSTS.4191.1 | 5.44  | 5.45  | 0.11 | 0.11 | -1    | 0.631925 | 0.164893 | 0.819395 | 0.441213 |
| MmuSTS.4192.1.S1_at   | MmuSTS.4192.1 | 11.08 | 10.67 | 0.43 | 0.17 | 1.33  | 0.13913  | 0.040325 | 0.42488  | 0.245973 |
| MmuSTS.4193.1.S1_at   | MmuSTS.4193.1 | 11.17 | 10.43 | 0.29 | 0.2  | 1.67  | 0.010467 | 0.003045 | 0.152221 | 0.080462 |
| MmuSTS.4194.1.S1_at   | MmuSTS.4194.1 | 3.6   | 3.72  | 0.07 | 0.06 | -1.09 | 0.342543 | 0.246133 | 0.622243 | 0.51585  |
| MmuSTS.4194.1.S1_s_at | MmuSTS.4194.1 | 3.31  | 3.42  | 0.01 | 0.17 | -1.08 | 0.217705 | 0.339205 | 0.515507 | 0.585918 |
| MmuSTS.4195.1.S1_at   | MmuSTS.4195.1 | 9     | 11.39 | 0.89 | 0.13 | -5.24 | 0.016316 | 0.133347 | 0.18057  | 0.405139 |
| MmuSTS.4196.1.S1_at   | MmuSTS.4196.1 | 4.36  | 4.42  | 0.16 | 0.08 | -1.04 | 0.207044 | 0.183024 | 0.504797 | 0.459493 |
| MmuSTS.4197.1.S1_at   | MmuSTS.4197.1 | 3.71  | 3.74  | 0.3  | 0.19 | -1.02 | 0.766368 | 0.239177 | 0.892818 | 0.509902 |
| MmuSTS.4198.1.S1_at   | MmuSTS.4198.1 | 5.1   | 4.82  | 0.46 | 0.12 | 1.22  | 0.260573 | 0.242752 | 0.554645 | 0.5131   |
| MmuSTS.4199.1.S1_at   | MmuSTS.4199.1 | 6.38  | 6.34  | 0.21 | 0.12 | 1.03  | 0.854596 | 0.874932 | 0.936782 | 0.929042 |
| MmuSTS.42.1.S1_at     | MmuSTS.42.1   | 2.94  | 2.91  | 0.02 | 0.06 | 1.02  | 0.493166 | 0.474261 | 0.730245 | 0.68135  |
| MmuSTS.42.1.S1_s_at   | MmuSTS.42.1   | 4.54  | 3.83  | 0.49 | 0.06 | 1.64  | 0.088458 | 0.101087 | 0.354589 | 0.360724 |
| MmuSTS.420.1.S1_s_at  | MmuSTS.420.1  | 3.28  | 3.19  | 0.09 | 0.01 | 1.06  | 0.135478 | 0.220795 | 0.419375 | 0.494262 |
| MmuSTS.4200.1.S1_at   | MmuSTS.4200.1 | 3.58  | 4.43  | 0.28 | 0.2  | -1.8  | 0.014404 | 0.016423 | 0.171691 | 0.162253 |
| MmuSTS.4200.1.S1_x_at | MmuSTS.4200.1 | 3.55  | 4.74  | 0.46 | 0.16 | -2.28 | 0.014332 | 0.023735 | 0.171529 | 0.192893 |

|                       |               |       |       |      |      |        |          |          |          |          |
|-----------------------|---------------|-------|-------|------|------|--------|----------|----------|----------|----------|
| MmuSTS.4201.1.S1_at   | MmuSTS.4201.1 | 9.85  | 10.96 | 0.6  | 0.17 | -2.16  | 0.046879 | 0.062249 | 0.274237 | 0.296325 |
| MmuSTS.4202.1.S1_at   | MmuSTS.4202.1 | 5.16  | 5.07  | 0.3  | 0.09 | 1.06   | 0.196104 | 0.279025 | 0.493082 | 0.542782 |
| MmuSTS.4203.1.S1_at   | MmuSTS.4203.1 | 6.42  | 6.28  | 0.17 | 0.04 | 1.1    | 0.645722 | 0.749564 | 0.82755  | 0.854499 |
| MmuSTS.4204.1.S1_at   | MmuSTS.4204.1 | 7.22  | 7.31  | 0.06 | 0.04 | -1.06  | 0.190004 | 0.124843 | 0.486315 | 0.395219 |
| MmuSTS.4205.1.S1_at   | MmuSTS.4205.1 | 9.22  | 9.66  | 0.11 | 0.04 | -1.36  | 0.00195  | 0.686686 | 0.088479 | 0.817182 |
| MmuSTS.4206.1.S1_at   | MmuSTS.4206.1 | 8.07  | 7.93  | 0.12 | 0.06 | 1.11   | 0.074952 | 0.039527 | 0.331989 | 0.243753 |
| MmuSTS.4207.1.S1_at   | MmuSTS.4207.1 | 6.32  | 6.06  | 0.25 | 0.47 | 1.19   | 0.7138   | 0.760175 | 0.864758 | 0.860657 |
| MmuSTS.4208.1.S1_at   | MmuSTS.4208.1 | 4.62  | 4.94  | 0.21 | 0.33 | -1.25  | 0.11905  | 0.20501  | 0.396713 | 0.479296 |
| MmuSTS.4209.1.S1_at   | MmuSTS.4209.1 | 10.21 | 10.27 | 0.07 | 0.04 | -1.05  | 0.23209  | 0.216872 | 0.530631 | 0.490478 |
| MmuSTS.421.1.S1_at    | MmuSTS.421.1  | 10.09 | 9.74  | 0.15 | 0.12 | 1.27   | 0.054056 | 0.012102 | 0.289645 | 0.142307 |
| MmuSTS.4210.1.S1_at   | MmuSTS.4210.1 | 7.09  | 6.83  | 0.11 | 0.14 | 1.2    | 0.308934 | 0.573657 | 0.595422 | 0.745229 |
| MmuSTS.4211.1.S1_at   | MmuSTS.4211.1 | 5.07  | 5.05  | 0.38 | 0.02 | 1.02   | 0.368835 | 0.531037 | 0.64239  | 0.718384 |
| MmuSTS.4212.1.S1_at   | MmuSTS.4212.1 | 12.22 | 11.92 | 0.24 | 0.15 | 1.23   | 0.206997 | 0.061642 | 0.504793 | 0.295095 |
| MmuSTS.4213.1.S1_at   | MmuSTS.4213.1 | 6.72  | 7.33  | 0.12 | 0.09 | -1.53  | 0.002135 | 0.000066 | 0.090208 | 0.025805 |
| MmuSTS.4214.1.S1_at   | MmuSTS.4214.1 | 6.99  | 6.47  | 0.76 | 0.18 | 1.43   | 0.264999 | 0.503258 | 0.557962 | 0.700751 |
| MmuSTS.4215.1.S1_at   | MmuSTS.4215.1 | 7.44  | 7.14  | 0.25 | 0.13 | 1.22   | 0.256191 | 0.023643 | 0.550684 | 0.192558 |
| MmuSTS.4216.1.S1_at   | MmuSTS.4216.1 | 10.94 | 10.87 | 0.59 | 0.18 | 1.05   | 0.361855 | 0.009762 | 0.637126 | 0.129961 |
| MmuSTS.4217.1.S1_at   | MmuSTS.4217.1 | 11.97 | 11.54 | 0.06 | 0.05 | 1.35   | 0.000677 | 0.026463 | 0.071248 | 0.203812 |
| MmuSTS.4218.1.S1_at   | MmuSTS.4218.1 | 2.82  | 2.81  | 0.03 | 0.08 | 1.01   | 0.481107 | 0.665072 | 0.721831 | 0.803733 |
| MmuSTS.4219.1.S1_at   | MmuSTS.4219.1 | 9.81  | 9.61  | 0.07 | 0.05 | 1.15   | 0.010306 | 0.357234 | 0.151336 | 0.598864 |
| MmuSTS.422.1.S1_at    | MmuSTS.422.1  | 9.53  | 9.8   | 0.34 | 0.06 | -1.21  | 0.126109 | 0.299418 | 0.407155 | 0.55788  |
| MmuSTS.4220.1.S1_at   | MmuSTS.4220.1 | 3.02  | 3.11  | 0.17 | 0.04 | -1.06  | 0.362398 | 0.675079 | 0.637275 | 0.810146 |
| MmuSTS.4221.1.S1_at   | MmuSTS.4221.1 | 7.98  | 8.16  | 0.67 | 0.2  | -1.13  | 0.456163 | 0.53055  | 0.705665 | 0.718042 |
| MmuSTS.4222.1.S1_at   | MmuSTS.4222.1 | 6.19  | 9.79  | 1.81 | 0.39 | -12.13 | 0.093292 | 0.163518 | 0.361736 | 0.439751 |
| MmuSTS.4223.1.S1_at   | MmuSTS.4223.1 | 8.25  | 8.34  | 0.59 | 0.12 | -1.07  | 0.502672 | 0.847377 | 0.736318 | 0.913303 |
| MmuSTS.4224.1.S1_at   | MmuSTS.4224.1 | 9.33  | 8.84  | 0.2  | 0.12 | 1.4    | 0.022147 | 0.12267  | 0.20197  | 0.392645 |
| MmuSTS.4225.1.S1_at   | MmuSTS.4225.1 | 10.55 | 10.25 | 0.15 | 0.33 | 1.23   | 0.611806 | 0.43629  | 0.806542 | 0.655923 |
| MmuSTS.4226.1.S1_at   | MmuSTS.4226.1 | 8.61  | 8.84  | 0.22 | 0.18 | -1.17  | 0.175796 | 0.140181 | 0.470151 | 0.413405 |
| MmuSTS.4227.1.S1_at   | MmuSTS.4227.1 | 10.45 | 10.15 | 0.31 | 0.39 | 1.23   | 0.42205  | 0.522975 | 0.680296 | 0.713429 |
| MmuSTS.4228.1.S1_at   | MmuSTS.4228.1 | 12.11 | 12.54 | 0.23 | 0.04 | -1.34  | 0.03895  | 0.050146 | 0.253692 | 0.269087 |
| MmuSTS.4229.1.S1_at   | MmuSTS.4229.1 | 9.49  | 8.16  | 0.13 | 0.13 | 2.52   | 0.000193 | 0.000021 | 0.053494 | 0.019635 |
| MmuSTS.423.1.S1_at    | MmuSTS.423.1  | 5.72  | 6.33  | 1.07 | 0.16 | -1.53  | 0.998508 | 0.399455 | 0.999471 | 0.629799 |
| MmuSTS.4230.1.S1_at   | MmuSTS.4230.1 | 8.5   | 8.64  | 0.05 | 0.07 | -1.1   | 0.049487 | 0.151908 | 0.279939 | 0.426547 |
| MmuSTS.4231.1.S1_at   | MmuSTS.4231.1 | 4.84  | 4.71  | 0.73 | 0.29 | 1.09   | 0.840878 | 0.858522 | 0.930077 | 0.919428 |
| MmuSTS.4232.1.S1_at   | MmuSTS.4232.1 | 6.01  | 6.1   | 0.04 | 0.08 | -1.07  | 0.62435  | 0.052193 | 0.8148   | 0.274036 |
| MmuSTS.4233.1.S1_at   | MmuSTS.4233.1 | 9.66  | 9.51  | 0.13 | 0.1  | 1.11   | 0.134903 | 0.41447  | 0.418868 | 0.640342 |
| MmuSTS.4234.1.S1_at   | MmuSTS.4234.1 | 5.28  | 5.24  | 0.1  | 0.06 | 1.02   | 0.476109 | 0.381523 | 0.718656 | 0.617702 |
| MmuSTS.4235.1.S1_s_at | MmuSTS.4235.1 | 3.61  | 3.67  | 0.05 | 0.16 | -1.04  | 0.916933 | 0.062859 | 0.964649 | 0.297418 |
| MmuSTS.4236.1.S1_at   | MmuSTS.4236.1 | 7.01  | 6.96  | 0.17 | 0.05 | 1.03   | 0.885628 | 0.568402 | 0.951213 | 0.741962 |
| MmuSTS.4237.1.S1_at   | MmuSTS.4237.1 | 6.46  | 5.5   | 0.24 | 0.22 | 1.95   | 0.011015 | 0.428915 | 0.154661 | 0.650409 |
| MmuSTS.4238.1.S1_at   | MmuSTS.4238.1 | 4.33  | 3.87  | 0.33 | 0.11 | 1.37   | 0.085509 | 0.081021 | 0.349904 | 0.329172 |
| MmuSTS.4239.1.S1_at   | MmuSTS.4239.1 | 6.2   | 7.7   | 0.64 | 0.19 | -2.82  | 0.032173 | 0.273873 | 0.233272 | 0.538438 |
| MmuSTS.424.1.S1_s_at  | MmuSTS.424.1  | 3.81  | 3.87  | 0.01 | 0.03 | -1.04  | 0.109351 | 0.039687 | 0.384426 | 0.244271 |

|                       |               |       |       |      |      |       |          |          |          |          |
|-----------------------|---------------|-------|-------|------|------|-------|----------|----------|----------|----------|
| MmuSTS.4240.1.S1_at   | MmuSTS.4240.1 | 4.3   | 4.25  | 0.16 | 0.05 | 1.04  | 0.616901 | 0.385133 | 0.809705 | 0.620662 |
| MmuSTS.4241.1.S1_at   | MmuSTS.4241.1 | 5.15  | 5.14  | 0.13 | 0.11 | 1     | 0.919912 | 0.072198 | 0.96576  | 0.31474  |
| MmuSTS.4242.1.S1_at   | MmuSTS.4242.1 | 9.94  | 9.91  | 0.36 | 0.02 | 1.02  | 0.318366 | 0.313501 | 0.603024 | 0.567926 |
| MmuSTS.4243.1.S1_at   | MmuSTS.4243.1 | 9.17  | 9.26  | 0.1  | 0.08 | -1.06 | 0.157963 | 0.26558  | 0.448708 | 0.531432 |
| MmuSTS.4243.1.S1_s_at | MmuSTS.4243.1 | 9.99  | 10.23 | 0.18 | 0.09 | -1.18 | 0.120655 | 0.12131  | 0.399026 | 0.390351 |
| MmuSTS.4244.1.S1_at   | MmuSTS.4244.1 | 11.39 | 11.56 | 0.16 | 0.13 | -1.13 | 0.119097 | 0.480839 | 0.396716 | 0.686    |
| MmuSTS.4245.1.S1_at   | MmuSTS.4245.1 | 8.16  | 8.61  | 0.23 | 0.12 | -1.36 | 0.033164 | 0.48099  | 0.236296 | 0.686044 |
| MmuSTS.4246.1.S1_at   | MmuSTS.4246.1 | 11.72 | 11.73 | 0.14 | 0.03 | -1    | 0.801971 | 0.062606 | 0.911061 | 0.297022 |
| MmuSTS.4247.1.S1_at   | MmuSTS.4247.1 | 5.59  | 6.38  | 0.4  | 0.23 | -1.73 | 0.18184  | 0.391729 | 0.47739  | 0.625301 |
| MmuSTS.4248.1.S1_at   | MmuSTS.4248.1 | 9.36  | 9.53  | 0.49 | 0.26 | -1.12 | 0.632341 | 0.795529 | 0.819774 | 0.882189 |
| MmuSTS.4249.1.S1_at   | MmuSTS.4249.1 | 13.07 | 13.03 | 0.14 | 0.08 | 1.03  | 0.672695 | 0.195363 | 0.843342 | 0.470253 |
| MmuSTS.425.1.S1_at    | MmuSTS.425.1  | 4.18  | 4.07  | 0.18 | 0.01 | 1.08  | 0.423066 | 0.36525  | 0.681133 | 0.605412 |
| MmuSTS.4250.1.S1_at   | MmuSTS.4250.1 | 11.11 | 9.32  | 0.24 | 0.36 | 3.47  | 0.003728 | 0.00664  | 0.106286 | 0.110449 |
| MmuSTS.4251.1.S1_at   | MmuSTS.4251.1 | 10.56 | 10.19 | 0.4  | 0.1  | 1.29  | 0.459141 | 0.131529 | 0.707406 | 0.403658 |
| MmuSTS.4252.1.S1_at   | MmuSTS.4252.1 | 7.67  | 7.57  | 0.29 | 0.02 | 1.07  | 0.556533 | 0.944929 | 0.771681 | 0.968827 |
| MmuSTS.4253.1.S1_at   | MmuSTS.4253.1 | 6.74  | 6.98  | 0.12 | 0.2  | -1.18 | 0.056445 | 0.068725 | 0.295004 | 0.308711 |
| MmuSTS.4254.1.S1_at   | MmuSTS.4254.1 | 11.99 | 12.24 | 0.17 | 0.12 | -1.19 | 0.112059 | 0.331457 | 0.388221 | 0.580121 |
| MmuSTS.4255.1.S1_at   | MmuSTS.4255.1 | 8.97  | 9.97  | 0.76 | 0.18 | -1.99 | 0.119917 | 0.170451 | 0.398154 | 0.447103 |
| MmuSTS.4256.1.S1_at   | MmuSTS.4256.1 | 8.09  | 8.6   | 0.41 | 0.1  | -1.43 | 0.080999 | 0.143956 | 0.341848 | 0.41787  |
| MmuSTS.4257.1.S1_at   | MmuSTS.4257.1 | 11.26 | 11.1  | 0.09 | 0.08 | 1.12  | 0.046658 | 0.165383 | 0.27358  | 0.441544 |
| MmuSTS.4258.1.S1_at   | MmuSTS.4258.1 | 11.52 | 11.72 | 0.13 | 0.02 | -1.15 | 0.039548 | 0.597389 | 0.255411 | 0.760182 |
| MmuSTS.4259.1.S1_at   | MmuSTS.4259.1 | 5.63  | 5.6   | 0.19 | 0.11 | 1.02  | 0.697462 | 0.825646 | 0.855999 | 0.899784 |
| MmuSTS.426.1.S1_at    | MmuSTS.426.1  | 4.87  | 5.72  | 0.21 | 0.22 | -1.8  | 0.027809 | 0.022974 | 0.219195 | 0.189592 |
| MmuSTS.4260.1.S1_at   | MmuSTS.4260.1 | 9.63  | 10.33 | 0.57 | 0.18 | -1.63 | 0.438288 | 0.031073 | 0.692907 | 0.218117 |
| MmuSTS.4261.1.S1_at   | MmuSTS.4261.1 | 6.1   | 6.15  | 0.69 | 0.05 | -1.03 | 0.89794  | 0.255858 | 0.956663 | 0.523854 |
| MmuSTS.4262.1.S1_at   | MmuSTS.4262.1 | 7.42  | 7.56  | 0.2  | 0.09 | -1.1  | 0.865682 | 0.944175 | 0.941845 | 0.968355 |
| MmuSTS.4263.1.S1_at   | MmuSTS.4263.1 | 3.97  | 3.96  | 0.06 | 0.05 | 1.01  | 0.379206 | 0.498777 | 0.649212 | 0.697765 |
| MmuSTS.4264.1.S1_at   | MmuSTS.4264.1 | 8.82  | 8.04  | 0.24 | 0.33 | 1.72  | 0.019717 | 0.024201 | 0.193384 | 0.194795 |
| MmuSTS.4265.1.S1_at   | MmuSTS.4265.1 | 10.54 | 10.34 | 0.15 | 0.12 | 1.14  | 0.396854 | 0.711072 | 0.662712 | 0.8324   |
| MmuSTS.4266.1.S1_at   | MmuSTS.4266.1 | 4.11  | 4.13  | 0.17 | 0.08 | -1.01 | 0.749126 | 0.734114 | 0.883847 | 0.845896 |
| MmuSTS.4267.1.S1_at   | MmuSTS.4267.1 | 7.22  | 7.23  | 0.01 | 0.1  | -1.01 | 0.919179 | 0.942729 | 0.965424 | 0.967499 |
| MmuSTS.4268.1.S1_at   | MmuSTS.4268.1 | 7.87  | 8.17  | 0.15 | 0.13 | -1.23 | 0.031273 | 0.525959 | 0.230061 | 0.715291 |
| MmuSTS.4269.1.S1_at   | MmuSTS.4269.1 | 8.34  | 7.89  | 0.82 | 0.27 | 1.37  | 0.570609 | 0.827912 | 0.779362 | 0.901197 |
| MmuSTS.427.1.S1_s_at  | MmuSTS.427.1  | 4     | 3.89  | 0.17 | 0.03 | 1.08  | 0.783731 | 0.866823 | 0.901321 | 0.924317 |
| MmuSTS.4270.1.S1_at   | MmuSTS.4270.1 | 4.03  | 4.17  | 0.07 | 0.08 | -1.1  | 0.167597 | 0.028307 | 0.46081  | 0.21008  |
| MmuSTS.4271.1.S1_at   | MmuSTS.4271.1 | 10.22 | 10.24 | 0.3  | 0.09 | -1.02 | 0.68752  | 0.904331 | 0.850804 | 0.945708 |
| MmuSTS.4272.1.S1_at   | MmuSTS.4272.1 | 7.76  | 7.55  | 0.3  | 0.27 | 1.15  | 0.885741 | 0.459882 | 0.951257 | 0.671989 |
| MmuSTS.4273.1.S1_at   | MmuSTS.4273.1 | 12.31 | 12.2  | 0.08 | 0.03 | 1.08  | 0.081243 | 0.169559 | 0.342222 | 0.446179 |
| MmuSTS.4274.1.S1_at   | MmuSTS.4274.1 | 6.57  | 6.3   | 0.55 | 0.23 | 1.21  | 0.182014 | 0.228887 | 0.477584 | 0.501124 |
| MmuSTS.4275.1.S1_at   | MmuSTS.4275.1 | 11.53 | 10.87 | 0.23 | 0.15 | 1.57  | 0.036171 | 0.000986 | 0.245271 | 0.050145 |
| MmuSTS.4276.1.S1_at   | MmuSTS.4276.1 | 10.48 | 10.34 | 0.11 | 0.13 | 1.1   | 0.265292 | 0.137826 | 0.557962 | 0.41079  |
| MmuSTS.4277.1.S1_at   | MmuSTS.4277.1 | 3.45  | 3.54  | 0.09 | 0.09 | -1.06 | 0.551018 | 0.539114 | 0.768225 | 0.723558 |
| MmuSTS.4278.1.S1_at   | MmuSTS.4278.1 | 5.12  | 5.2   | 0.3  | 0.03 | -1.06 | 0.7003   | 0.896154 | 0.85768  | 0.940656 |

|                       |               |       |       |      |      |        |          |          |          |          |
|-----------------------|---------------|-------|-------|------|------|--------|----------|----------|----------|----------|
| MmuSTS.4279.1.S1_at   | MmuSTS.4279.1 | 7.72  | 7.82  | 0.12 | 0.1  | -1.07  | 0.47265  | 0.16785  | 0.716236 | 0.444426 |
| MmuSTS.428.1.S1_s_at  | MmuSTS.428.1  | 3.57  | 3.63  | 0.1  | 0.03 | -1.05  | 0.249799 | 0.082241 | 0.544804 | 0.331091 |
| MmuSTS.4280.1.S1_s_at | MmuSTS.4280.1 | 11.93 | 11.88 | 0.06 | 0.06 | 1.03   | 0.174444 | 0.676524 | 0.468676 | 0.81095  |
| MmuSTS.4281.1.S1_at   | MmuSTS.4281.1 | 8.32  | 8.89  | 0.31 | 0.16 | -1.49  | 0.062261 | 0.459437 | 0.306207 | 0.671741 |
| MmuSTS.4282.1.S1_at   | MmuSTS.4282.1 | 7.85  | 8.29  | 0.26 | 0.1  | -1.36  | 0.028841 | 0.246516 | 0.22259  | 0.515917 |
| MmuSTS.4283.1.S1_at   | MmuSTS.4283.1 | 9.71  | 8.61  | 0.42 | 0.11 | 2.15   | 0.010506 | 0.014957 | 0.152429 | 0.155453 |
| MmuSTS.4284.1.S1_at   | MmuSTS.4284.1 | 11.1  | 11.24 | 0.05 | 0.04 | -1.1   | 0.016323 | 0.354342 | 0.180607 | 0.597166 |
| MmuSTS.4285.1.S1_at   | MmuSTS.4285.1 | 11.04 | 10.84 | 0.12 | 0.04 | 1.15   | 0.033342 | 0.007817 | 0.236556 | 0.117908 |
| MmuSTS.4286.1.S1_at   | MmuSTS.4286.1 | 5.97  | 6.11  | 0.14 | 0.05 | -1.1   | 0.538834 | 0.944585 | 0.76041  | 0.968621 |
| MmuSTS.4287.1.S1_at   | MmuSTS.4287.1 | 9.38  | 8.56  | 0.19 | 0.02 | 1.77   | 0.001756 | 0.000083 | 0.085202 | 0.027016 |
| MmuSTS.4288.1.S1_at   | MmuSTS.4288.1 | 9.98  | 9.95  | 0.08 | 0.05 | 1.02   | 0.626473 | 0.075551 | 0.816048 | 0.319982 |
| MmuSTS.4289.1.S1_at   | MmuSTS.4289.1 | 7.31  | 6.89  | 0.02 | 0.01 | 1.34   | 0.000003 | 0.005165 | 0.037385 | 0.09972  |
| MmuSTS.429.1.S1_at    | MmuSTS.429.1  | 3.69  | 3.81  | 0.13 | 0.07 | -1.08  | 0.167116 | 0.142349 | 0.460327 | 0.415923 |
| MmuSTS.4290.1.S1_at   | MmuSTS.4290.1 | 8.52  | 8.68  | 0.18 | 0.07 | -1.11  | 0.271866 | 0.854172 | 0.56377  | 0.916964 |
| MmuSTS.4291.1.S1_at   | MmuSTS.4291.1 | 8.06  | 7.99  | 0.37 | 0.05 | 1.05   | 0.629399 | 0.784003 | 0.817945 | 0.874963 |
| MmuSTS.4292.1.S1_at   | MmuSTS.4292.1 | 12.61 | 12.58 | 0.03 | 0.01 | 1.02   | 0.20001  | 0.294006 | 0.497566 | 0.553909 |
| MmuSTS.4293.1.S1_at   | MmuSTS.4293.1 | 6.04  | 6.15  | 0.07 | 0.04 | -1.08  | 0.076068 | 0.144648 | 0.33408  | 0.418477 |
| MmuSTS.4294.1.S1_at   | MmuSTS.4294.1 | 11.42 | 11.68 | 0.06 | 0.04 | -1.19  | 0.004911 | 0.000852 | 0.115126 | 0.047136 |
| MmuSTS.4295.1.S1_at   | MmuSTS.4295.1 | 9     | 8.79  | 0.22 | 0.16 | 1.15   | 0.063207 | 0.000338 | 0.308086 | 0.036485 |
| MmuSTS.4296.1.S1_at   | MmuSTS.4296.1 | 11.04 | 11.29 | 0.09 | 0.15 | -1.19  | 0.194156 | 0.342535 | 0.490738 | 0.588543 |
| MmuSTS.4297.1.S1_at   | MmuSTS.4297.1 | 11.44 | 11.46 | 0.12 | 0.06 | -1.02  | 0.924203 | 0.018191 | 0.967791 | 0.169695 |
| MmuSTS.4298.1.S1_at   | MmuSTS.4298.1 | 7.21  | 7.31  | 0.22 | 0.1  | -1.07  | 0.280084 | 0.432287 | 0.571289 | 0.652778 |
| MmuSTS.4299.1.S1_at   | MmuSTS.4299.1 | 7.61  | 8.05  | 0.13 | 0.05 | -1.36  | 0.007469 | 0.090889 | 0.134755 | 0.345525 |
| MmuSTS.43.1.S1_at     | MmuSTS.43.1   | 10.53 | 10.76 | 0.11 | 0.05 | -1.17  | 0.022099 | 0.021046 | 0.201888 | 0.181869 |
| MmuSTS.430.1.S1_at    | MmuSTS.430.1  | 3.39  | 3.25  | 0.18 | 0.13 | 1.1    | 0.895219 | 0.87019  | 0.955284 | 0.926372 |
| MmuSTS.4300.1.S1_at   | MmuSTS.4300.1 | 9.72  | 9.73  | 0.13 | 0.16 | -1.01  | 0.909287 | 0.125097 | 0.961553 | 0.395506 |
| MmuSTS.4301.1.S1_at   | MmuSTS.4301.1 | 10.17 | 10.28 | 0.15 | 0.05 | -1.08  | 0.234553 | 0.963891 | 0.532688 | 0.979963 |
| MmuSTS.4302.1.S1_at   | MmuSTS.4302.1 | 5.06  | 4.98  | 0.3  | 0.11 | 1.06   | 0.628646 | 0.096221 | 0.817502 | 0.353541 |
| MmuSTS.4303.1.S1_at   | MmuSTS.4303.1 | 8.94  | 8.71  | 0.04 | 0.12 | 1.17   | 0.090735 | 0.219941 | 0.357722 | 0.49344  |
| MmuSTS.4304.1.S1_at   | MmuSTS.4304.1 | 5.77  | 6.02  | 0.16 | 0.39 | -1.19  | 0.245282 | 0.322071 | 0.541345 | 0.573662 |
| MmuSTS.4305.1.S1_at   | MmuSTS.4305.1 | 11.11 | 11.41 | 0.07 | 0.15 | -1.23  | 0.01853  | 0.017323 | 0.189367 | 0.166509 |
| MmuSTS.4306.1.S1_at   | MmuSTS.4306.1 | 6.92  | 6.96  | 0.09 | 0.18 | -1.03  | 0.367629 | 0.516567 | 0.641471 | 0.709034 |
| MmuSTS.4307.1.S1_at   | MmuSTS.4307.1 | 9.01  | 9.16  | 0.13 | 0.14 | -1.11  | 0.338706 | 0.063194 | 0.619173 | 0.298119 |
| MmuSTS.4308.1.S1_s_at | MmuSTS.4308.1 | 6.98  | 10.6  | 1.79 | 0.28 | -12.27 | 0.080747 | 0.351069 | 0.341441 | 0.594752 |
| MmuSTS.4309.1.S1_at   | MmuSTS.4309.1 | 6.82  | 5.89  | 0.13 | 0.29 | 1.91   | 0.008005 | 0.002841 | 0.138479 | 0.078566 |
| MmuSTS.431.1.S1_at    | MmuSTS.431.1  | 4.81  | 4.84  | 0.27 | 0.01 | -1.02  | 0.6799   | 0.297985 | 0.847268 | 0.556695 |
| MmuSTS.431.1.S1_s_at  | MmuSTS.431.1  | 3.44  | 3.34  | 0.03 | 0.09 | 1.07   | 0.113396 | 0.409496 | 0.390203 | 0.636528 |
| MmuSTS.4310.1.S1_at   | MmuSTS.4310.1 | 9.16  | 7.38  | 0.11 | 0.46 | 3.43   | 0.004884 | 0.014248 | 0.115123 | 0.152403 |
| MmuSTS.4311.1.S1_at   | MmuSTS.4311.1 | 7.05  | 5.26  | 0.63 | 0.62 | 3.45   | 0.015508 | 0.008714 | 0.176763 | 0.123746 |
| MmuSTS.4311.1.S1_x_at | MmuSTS.4311.1 | 7.09  | 5.53  | 0.6  | 0.53 | 2.93   | 0.019696 | 0.011861 | 0.193252 | 0.140973 |
| MmuSTS.4312.1.S1_at   | MmuSTS.4312.1 | 8.9   | 9.08  | 0.61 | 0.11 | -1.13  | 0.788982 | 0.620155 | 0.904036 | 0.775248 |
| MmuSTS.4313.1.S1_at   | MmuSTS.4313.1 | 8.63  | 11.89 | 1.47 | 0.3  | -9.63  | 0.029658 | 0.195767 | 0.225392 | 0.470637 |
| MmuSTS.4314.1.S1_at   | MmuSTS.4314.1 | 3.28  | 3.26  | 0.08 | 0.03 | 1.02   | 0.608983 | 0.620568 | 0.804888 | 0.77549  |

|                       |               |       |       |      |      |       |          |          |          |          |
|-----------------------|---------------|-------|-------|------|------|-------|----------|----------|----------|----------|
| MmuSTS.4315.1.S1_at   | MmuSTS.4315.1 | 10.58 | 10.05 | 0.18 | 0.15 | 1.44  | 0.04054  | 0.002349 | 0.257745 | 0.07161  |
| MmuSTS.4316.1.S1_at   | MmuSTS.4316.1 | 11.77 | 12    | 0.19 | 0.05 | -1.17 | 0.057864 | 0.053792 | 0.297738 | 0.277457 |
| MmuSTS.4316.1.S1_s_at | MmuSTS.4316.1 | 11.02 | 11.28 | 0.16 | 0.05 | -1.2  | 0.017843 | 0.009435 | 0.187044 | 0.127948 |
| MmuSTS.4317.1.S1_at   | MmuSTS.4317.1 | 9.65  | 11.29 | 0.48 | 0.33 | -3.11 | 0.01895  | 0.002222 | 0.191192 | 0.069434 |
| MmuSTS.4318.1.S1_at   | MmuSTS.4318.1 | 9.92  | 10.02 | 0.15 | 0.05 | -1.07 | 0.141397 | 0.570524 | 0.427329 | 0.743151 |
| MmuSTS.4319.1.S1_s_at | MmuSTS.4319.1 | 7.37  | 7.25  | 0.11 | 0.17 | 1.09  | 0.348199 | 0.271405 | 0.626326 | 0.536507 |
| MmuSTS.432.1.S1_at    | MmuSTS.432.1  | 3.22  | 3.23  | 0.06 | 0.13 | -1.01 | 0.892973 | 0.658312 | 0.954376 | 0.800259 |
| MmuSTS.432.1.S1_s_at  | MmuSTS.432.1  | 3.05  | 3.07  | 0.13 | 0.13 | -1.01 | 0.740001 | 0.907372 | 0.8795   | 0.947602 |
| MmuSTS.4320.1.S1_at   | MmuSTS.4320.1 | 6.22  | 6.14  | 0.97 | 0.2  | 1.06  | 0.261566 | 0.420381 | 0.555775 | 0.644099 |
| MmuSTS.4321.1.S1_at   | MmuSTS.4321.1 | 11.91 | 12.71 | 0.21 | 0.08 | -1.73 | 0.004777 | 0.105216 | 0.115098 | 0.366982 |
| MmuSTS.4322.1.S1_at   | MmuSTS.4322.1 | 7.11  | 7.45  | 0.79 | 0.17 | -1.27 | 0.4994   | 0.750258 | 0.734175 | 0.854766 |
| MmuSTS.4323.1.S1_at   | MmuSTS.4323.1 | 9.08  | 9.28  | 0.29 | 0.11 | -1.15 | 0.348606 | 0.008368 | 0.62654  | 0.121371 |
| MmuSTS.4324.1.S1_at   | MmuSTS.4324.1 | 4.63  | 4.31  | 0.09 | 0.21 | 1.25  | 0.043817 | 0.375594 | 0.266406 | 0.613533 |
| MmuSTS.4325.1.S1_at   | MmuSTS.4325.1 | 3.92  | 3.43  | 0.24 | 0.1  | 1.4   | 0.10834  | 0.128293 | 0.382975 | 0.399469 |
| MmuSTS.4326.1.S1_at   | MmuSTS.4326.1 | 11.23 | 11.02 | 0.23 | 0.02 | 1.15  | 0.191211 | 0.008224 | 0.487409 | 0.120459 |
| MmuSTS.4327.1.S1_at   | MmuSTS.4327.1 | 5.87  | 5.63  | 0.11 | 0.2  | 1.18  | 0.092969 | 0.2411   | 0.361523 | 0.511749 |
| MmuSTS.4328.1.S1_at   | MmuSTS.4328.1 | 13.59 | 13.31 | 0.09 | 0.03 | 1.21  | 0.006543 | 0.198481 | 0.127373 | 0.473391 |
| MmuSTS.4328.1.S1_x_at | MmuSTS.4328.1 | 13.69 | 13.47 | 0.07 | 0.03 | 1.16  | 0.00367  | 0.203022 | 0.105789 | 0.477343 |
| MmuSTS.4329.1.S1_at   | MmuSTS.4329.1 | 11.1  | 12.36 | 0.54 | 0.21 | -2.41 | 0.066837 | 0.032883 | 0.316219 | 0.224478 |
| MmuSTS.433.1.S1_s_at  | MmuSTS.433.1  | 3.99  | 4.2   | 0.08 | 0.11 | -1.16 | 0.091393 | 0.09275  | 0.359005 | 0.34896  |
| MmuSTS.4330.1.S1_at   | MmuSTS.4330.1 | 11.93 | 11.13 | 0.27 | 0.37 | 1.75  | 0.174069 | 0.27215  | 0.468351 | 0.536939 |
| MmuSTS.4331.1.S1_at   | MmuSTS.4331.1 | 9.02  | 8.45  | 0.22 | 0.09 | 1.49  | 0.006769 | 0.003096 | 0.129086 | 0.081194 |
| MmuSTS.4332.1.S1_at   | MmuSTS.4332.1 | 12.53 | 12.51 | 0.14 | 0.02 | 1.02  | 0.306853 | 0.114336 | 0.593617 | 0.380835 |
| MmuSTS.4333.1.S1_at   | MmuSTS.4333.1 | 7.17  | 6.49  | 0.65 | 0.14 | 1.6   | 0.160806 | 0.051862 | 0.452392 | 0.273151 |
| MmuSTS.4334.1.S1_at   | MmuSTS.4334.1 | 7.87  | 7.9   | 0.06 | 0.34 | -1.02 | 0.623256 | 0.334671 | 0.814023 | 0.582581 |
| MmuSTS.4335.1.S1_at   | MmuSTS.4335.1 | 8.7   | 8.7   | 0.15 | 0.02 | 1     | 0.679263 | 0.240259 | 0.84701  | 0.510851 |
| MmuSTS.4336.1.S1_at   | MmuSTS.4336.1 | 11.3  | 10.32 | 0.2  | 0.12 | 1.97  | 0.002094 | 0.025165 | 0.090208 | 0.198794 |
| MmuSTS.4337.1.S1_at   | MmuSTS.4337.1 | 7.96  | 8.22  | 0.1  | 0.22 | -1.2  | 0.33523  | 0.907867 | 0.616202 | 0.947871 |
| MmuSTS.4338.1.S1_at   | MmuSTS.4338.1 | 6.03  | 6.1   | 0.15 | 0.07 | -1.05 | 0.577341 | 0.648542 | 0.783538 | 0.794319 |
| MmuSTS.4339.1.S1_at   | MmuSTS.4339.1 | 5.46  | 7.26  | 0.55 | 0.24 | -3.48 | 0.006589 | 0.132801 | 0.127762 | 0.404544 |
| MmuSTS.434.1.S1_at    | MmuSTS.434.1  | 3.48  | 3.42  | 0.1  | 0.07 | 1.04  | 0.584837 | 0.079799 | 0.78881  | 0.327113 |
| MmuSTS.4340.1.S1_at   | MmuSTS.4340.1 | 4.55  | 4.26  | 0.42 | 0.53 | 1.22  | 0.479768 | 0.645633 | 0.7209   | 0.792444 |
| MmuSTS.4341.1.S1_at   | MmuSTS.4341.1 | 11.01 | 10.73 | 0.27 | 0.06 | 1.22  | 0.052151 | 0.063672 | 0.285921 | 0.298832 |
| MmuSTS.4342.1.S1_at   | MmuSTS.4342.1 | 4.04  | 4.01  | 0.24 | 0.24 | 1.02  | 0.83006  | 0.101517 | 0.92519  | 0.361343 |
| MmuSTS.4343.1.S1_at   | MmuSTS.4343.1 | 6.39  | 6.32  | 0.13 | 0.1  | 1.05  | 0.412552 | 0.371076 | 0.674192 | 0.609998 |
| MmuSTS.4344.1.S1_at   | MmuSTS.4344.1 | 12.76 | 12.44 | 0.16 | 0.12 | 1.25  | 0.131467 | 0.659546 | 0.41434  | 0.800801 |
| MmuSTS.4345.1.S1_at   | MmuSTS.4345.1 | 8.1   | 8.01  | 0.12 | 0.04 | 1.07  | 0.162043 | 0.916312 | 0.453899 | 0.953126 |
| MmuSTS.4346.1.S1_at   | MmuSTS.4346.1 | 9.14  | 8.96  | 0.15 | 0.03 | 1.13  | 0.16574  | 0.007252 | 0.458756 | 0.114309 |
| MmuSTS.4347.1.S1_at   | MmuSTS.4347.1 | 5.45  | 5.39  | 0.22 | 0.07 | 1.04  | 0.770891 | 0.652049 | 0.894926 | 0.796529 |
| MmuSTS.4348.1.S1_at   | MmuSTS.4348.1 | 6.78  | 7.09  | 0.11 | 0.03 | -1.25 | 0.025032 | 0.022007 | 0.211194 | 0.18564  |
| MmuSTS.4349.1.S1_at   | MmuSTS.4349.1 | 11.88 | 11.58 | 0.05 | 0.09 | 1.23  | 0.005023 | 0.027117 | 0.116192 | 0.205797 |
| MmuSTS.435.1.S1_at    | MmuSTS.435.1  | 3.04  | 2.95  | 0.13 | 0.13 | 1.07  | 0.087883 | 0.113017 | 0.354003 | 0.378885 |
| MmuSTS.4350.1.S1_at   | MmuSTS.4350.1 | 6.3   | 6.91  | 0.14 | 0.16 | -1.52 | 0.010616 | 0.05616  | 0.152801 | 0.282888 |

|                       |               |       |       |      |      |        |          |          |          |          |
|-----------------------|---------------|-------|-------|------|------|--------|----------|----------|----------|----------|
| MmuSTS.4351.1.S1_at   | MmuSTS.4351.1 | 12.62 | 12.76 | 0.06 | 0.01 | -1.1   | 0.017217 | 0.252521 | 0.184359 | 0.521079 |
| MmuSTS.4352.1.S1_at   | MmuSTS.4352.1 | 2.97  | 3.42  | 0.34 | 0.15 | -1.36  | 0.13183  | 0.204492 | 0.414857 | 0.478845 |
| MmuSTS.4353.1.S1_at   | MmuSTS.4353.1 | 4.09  | 4.92  | 0.72 | 0.58 | -1.78  | 0.427811 | 0.694988 | 0.684946 | 0.822709 |
| MmuSTS.4354.1.S1_at   | MmuSTS.4354.1 | 6.41  | 7.31  | 1.68 | 0.42 | -1.87  | 0.428892 | 0.629257 | 0.685557 | 0.781747 |
| MmuSTS.4355.1.S1_at   | MmuSTS.4355.1 | 10.97 | 11.27 | 0.52 | 0.06 | -1.23  | 0.204876 | 0.302777 | 0.502658 | 0.560307 |
| MmuSTS.4356.1.S1_at   | MmuSTS.4356.1 | 4.39  | 4.39  | 0.01 | 0.07 | 1      | 0.385767 | 0.588763 | 0.654416 | 0.755137 |
| MmuSTS.4357.1.S1_at   | MmuSTS.4357.1 | 11.45 | 11.42 | 0.21 | 0.14 | 1.02   | 0.983316 | 0.386256 | 0.99383  | 0.621469 |
| MmuSTS.4358.1.S1_at   | MmuSTS.4358.1 | 6.21  | 6.18  | 0.18 | 0.04 | 1.02   | 0.574543 | 0.778891 | 0.781988 | 0.871673 |
| MmuSTS.4359.1.S1_at   | MmuSTS.4359.1 | 4.93  | 4.64  | 0.08 | 0.12 | 1.22   | 0.036726 | 0.040752 | 0.246729 | 0.246735 |
| MmuSTS.436.1.S1_s_at  | MmuSTS.436.1  | 4.71  | 4.77  | 0.14 | 0.06 | -1.04  | 0.331017 | 0.153407 | 0.612975 | 0.42827  |
| MmuSTS.4360.1.S1_at   | MmuSTS.4360.1 | 5.47  | 5.34  | 0.56 | 0.22 | 1.1    | 0.271146 | 0.151585 | 0.563072 | 0.426333 |
| MmuSTS.4361.1.S1_at   | MmuSTS.4361.1 | 11.75 | 11.61 | 0.07 | 0.05 | 1.1    | 0.064444 | 0.021673 | 0.31037  | 0.184333 |
| MmuSTS.4362.1.S1_at   | MmuSTS.4362.1 | 5.66  | 5.56  | 0.53 | 0.29 | 1.07   | 0.468224 | 0.687693 | 0.713381 | 0.817662 |
| MmuSTS.4363.1.S1_at   | MmuSTS.4363.1 | 12.55 | 12.59 | 0.02 | 0.06 | -1.03  | 0.565591 | 0.496622 | 0.776758 | 0.696119 |
| MmuSTS.4364.1.S1_at   | MmuSTS.4364.1 | 10.04 | 10.74 | 0.32 | 0.24 | -1.63  | 0.132311 | 0.248553 | 0.415604 | 0.517842 |
| MmuSTS.4365.1.S1_at   | MmuSTS.4365.1 | 6.13  | 6.02  | 0.06 | 0.09 | 1.08   | 0.117944 | 0.464149 | 0.395518 | 0.674916 |
| MmuSTS.4366.1.S1_at   | MmuSTS.4366.1 | 7.62  | 7.65  | 0.18 | 0.27 | -1.02  | 0.925821 | 0.004169 | 0.968604 | 0.091036 |
| MmuSTS.4367.1.S1_at   | MmuSTS.4367.1 | 9.38  | 9.62  | 0.25 | 0.13 | -1.19  | 0.087514 | 0.208904 | 0.353349 | 0.482721 |
| MmuSTS.4368.1.S1_at   | MmuSTS.4368.1 | 8.06  | 9.25  | 0.14 | 0.16 | -2.28  | 0.000685 | 0.003704 | 0.071248 | 0.086769 |
| MmuSTS.4369.1.S1_at   | MmuSTS.4369.1 | 10.35 | 10.12 | 0.29 | 0.11 | 1.18   | 0.261855 | 0.275901 | 0.555987 | 0.540035 |
| MmuSTS.437.1.S1_at    | MmuSTS.437.1  | 6.05  | 6.09  | 0.3  | 0.08 | -1.03  | 0.621922 | 0.770615 | 0.812905 | 0.866798 |
| MmuSTS.4370.1.S1_at   | MmuSTS.4370.1 | 4.7   | 8.53  | 2.08 | 0.36 | -14.25 | 0.103311 | 0.317461 | 0.376296 | 0.570681 |
| MmuSTS.4371.1.S1_at   | MmuSTS.4371.1 | 2.96  | 2.79  | 0.12 | 0.09 | 1.12   | 0.027553 | 0.10236  | 0.218525 | 0.362527 |
| MmuSTS.4372.1.S1_at   | MmuSTS.4372.1 | 11.1  | 11.61 | 0.19 | 0.04 | -1.42  | 0.004988 | 0.2505   | 0.115785 | 0.519391 |
| MmuSTS.4373.1.S1_at   | MmuSTS.4373.1 | 3.68  | 3.65  | 0.3  | 0.04 | 1.02   | 0.25741  | 0.211284 | 0.551695 | 0.485418 |
| MmuSTS.4374.1.S1_at   | MmuSTS.4374.1 | 6.42  | 7.35  | 0.16 | 0.22 | -1.91  | 0.003008 | 0.090562 | 0.099942 | 0.345026 |
| MmuSTS.4375.1.S1_at   | MmuSTS.4375.1 | 7.96  | 8.69  | 0.76 | 0.14 | -1.66  | 0.189386 | 0.188949 | 0.485873 | 0.464854 |
| MmuSTS.4376.1.S1_at   | MmuSTS.4376.1 | 9.5   | 9.78  | 0.15 | 0.03 | -1.22  | 0.031994 | 0.063034 | 0.23265  | 0.297739 |
| MmuSTS.4377.1.S1_at   | MmuSTS.4377.1 | 3.36  | 3.14  | 0.04 | 0.2  | 1.16   | 0.44346  | 0.427984 | 0.696562 | 0.649602 |
| MmuSTS.4377.1.S1_s_at | MmuSTS.4377.1 | 3     | 2.93  | 0.06 | 0.1  | 1.05   | 0.400468 | 0.480302 | 0.665444 | 0.68574  |
| MmuSTS.4378.1.S1_at   | MmuSTS.4378.1 | 7.57  | 8.16  | 0.51 | 0.07 | -1.5   | 0.046208 | 0.052588 | 0.272717 | 0.274848 |
| MmuSTS.4379.1.S1_at   | MmuSTS.4379.1 | 5.94  | 6.8   | 0.33 | 0.33 | -1.81  | 0.023406 | 0.096807 | 0.20598  | 0.354207 |
| MmuSTS.438.1.S1_at    | MmuSTS.438.1  | 6.08  | 6.14  | 0.12 | 0.21 | -1.04  | 0.9273   | 0.21013  | 0.969249 | 0.483968 |
| MmuSTS.4380.1.S1_at   | MmuSTS.4380.1 | 3.6   | 3.59  | 0.07 | 0.03 | 1.01   | 0.37576  | 0.245863 | 0.646508 | 0.51552  |
| MmuSTS.4381.1.S1_at   | MmuSTS.4381.1 | 4.46  | 4.44  | 0.04 | 0.09 | 1.01   | 0.810195 | 0.051423 | 0.914977 | 0.272204 |
| MmuSTS.4382.1.S1_at   | MmuSTS.4382.1 | 4.64  | 5.91  | 0.08 | 0.4  | -2.42  | 0.009784 | 0.05434  | 0.148542 | 0.278605 |
| MmuSTS.4383.1.S1_at   | MmuSTS.4383.1 | 7.35  | 8.89  | 0.06 | 0.43 | -2.92  | 0.006303 | 0.058396 | 0.12583  | 0.288407 |
| MmuSTS.4384.1.S1_at   | MmuSTS.4384.1 | 3.37  | 3.9   | 0.36 | 0.43 | -1.43  | 0.175395 | 0.137998 | 0.469836 | 0.410919 |
| MmuSTS.4385.1.S1_at   | MmuSTS.4385.1 | 5.75  | 5.76  | 0.14 | 0.06 | -1     | 0.712575 | 0.782692 | 0.864314 | 0.874202 |
| MmuSTS.4386.1.S1_at   | MmuSTS.4386.1 | 5.61  | 5.7   | 0.23 | 0.01 | -1.06  | 0.536197 | 0.738422 | 0.75885  | 0.848292 |
| MmuSTS.4387.1.S1_at   | MmuSTS.4387.1 | 7.01  | 6.95  | 0.15 | 0.04 | 1.04   | 0.354746 | 0.53554  | 0.631771 | 0.721087 |
| MmuSTS.4388.1.S1_at   | MmuSTS.4388.1 | 10.35 | 9.73  | 0.24 | 0.11 | 1.53   | 0.010988 | 0.010943 | 0.154584 | 0.13621  |
| MmuSTS.4389.1.S1_at   | MmuSTS.4389.1 | 5.72  | 5.17  | 0.1  | 0.32 | 1.46   | 0.113386 | 0.226863 | 0.390192 | 0.499276 |



|                     |               |       |       |      |      |       |          |          |          |          |
|---------------------|---------------|-------|-------|------|------|-------|----------|----------|----------|----------|
| MmuSTS.439.1.S1_at  | MmuSTS.439.1  | 8.69  | 8.89  | 0.39 | 0.11 | -1.15 | 0.518286 | 0.201374 | 0.747407 | 0.47589  |
| MmuSTS.4390.1.S1_at | MmuSTS.4390.1 | 4.52  | 4.18  | 0.95 | 0.15 | 1.27  | 0.153537 | 0.193641 | 0.443464 | 0.468785 |
| MmuSTS.4391.1.S1_at | MmuSTS.4391.1 | 4.31  | 4.57  | 0.26 | 0.35 | -1.2  | 0.61453  | 0.69897  | 0.808218 | 0.825058 |
| MmuSTS.4392.1.S1_at | MmuSTS.4392.1 | 10.24 | 10.19 | 0.33 | 0.05 | 1.04  | 0.710676 | 0.937697 | 0.863239 | 0.964687 |
| MmuSTS.4393.1.S1_at | MmuSTS.4393.1 | 4.63  | 4.28  | 0.18 | 0.25 | 1.28  | 0.221366 | 0.131406 | 0.519374 | 0.403577 |
| MmuSTS.4394.1.S1_at | MmuSTS.4394.1 | 7.18  | 7.63  | 0.27 | 0.15 | -1.37 | 0.107312 | 0.00982  | 0.381866 | 0.130205 |
| MmuSTS.4395.1.S1_at | MmuSTS.4395.1 | 6.22  | 6.75  | 0.37 | 0.3  | -1.44 | 0.325032 | 0.253608 | 0.608499 | 0.521956 |
| MmuSTS.4396.1.S1_at | MmuSTS.4396.1 | 5.18  | 5.12  | 0.16 | 0.04 | 1.04  | 0.89753  | 0.885691 | 0.956515 | 0.934982 |
| MmuSTS.4397.1.S1_at | MmuSTS.4397.1 | 8.47  | 8.46  | 0.16 | 0.13 | 1.01  | 0.90636  | 0.987512 | 0.960316 | 0.993022 |
| MmuSTS.4398.1.S1_at | MmuSTS.4398.1 | 3.75  | 3.69  | 0.14 | 0.21 | 1.04  | 0.906697 | 0.913912 | 0.960553 | 0.951568 |
| MmuSTS.4399.1.S1_at | MmuSTS.4399.1 | 10.68 | 8.72  | 0.26 | 0.31 | 3.89  | 0.001672 | 0.000895 | 0.084462 | 0.047825 |
| MmuSTS.44.1.S1_at   | MmuSTS.44.1   | 11.44 | 11.12 | 0.3  | 0.27 | 1.25  | 0.213759 | 0.11899  | 0.511664 | 0.387269 |
| MmuSTS.440.1.S1_at  | MmuSTS.440.1  | 4.38  | 5.54  | 0.5  | 0.21 | -2.24 | 0.044164 | 0.01123  | 0.267226 | 0.138014 |
| MmuSTS.4400.1.S1_at | MmuSTS.4400.1 | 3.32  | 3.34  | 0.01 | 0.11 | -1.02 | 0.576789 | 0.34005  | 0.783405 | 0.586516 |
| MmuSTS.4401.1.S1_at | MmuSTS.4401.1 | 3.85  | 3.64  | 0.14 | 0.08 | 1.15  | 0.090187 | 0.039165 | 0.356864 | 0.243072 |
| MmuSTS.4402.1.S1_at | MmuSTS.4402.1 | 4.5   | 4.02  | 0.36 | 0.16 | 1.4   | 0.349642 | 0.423473 | 0.627381 | 0.646367 |
| MmuSTS.4403.1.S1_at | MmuSTS.4403.1 | 9.69  | 9.69  | 0.12 | 0.07 | 1     | 0.674946 | 0.832666 | 0.844854 | 0.904017 |
| MmuSTS.4404.1.S1_at | MmuSTS.4404.1 | 3.12  | 3.14  | 0.1  | 0.04 | -1.01 | 0.798906 | 0.268904 | 0.909361 | 0.534356 |
| MmuSTS.4405.1.S1_at | MmuSTS.4405.1 | 4.79  | 4.63  | 0.17 | 0.04 | 1.11  | 0.173212 | 0.171658 | 0.467402 | 0.448044 |
| MmuSTS.4406.1.S1_at | MmuSTS.4406.1 | 10.84 | 10.61 | 0.18 | 0.02 | 1.17  | 0.117848 | 0.403595 | 0.395308 | 0.632235 |
| MmuSTS.4407.1.S1_at | MmuSTS.4407.1 | 7.75  | 8.6   | 0.54 | 0.11 | -1.8  | 0.062383 | 0.121571 | 0.306492 | 0.390688 |
| MmuSTS.4408.1.S1_at | MmuSTS.4408.1 | 12.15 | 11.77 | 0.31 | 0.16 | 1.3   | 0.206188 | 0.471522 | 0.503843 | 0.6795   |
| MmuSTS.4409.1.S1_at | MmuSTS.4409.1 | 12.6  | 12.4  | 0.08 | 0.02 | 1.15  | 0.01023  | 0.002883 | 0.15081  | 0.078985 |
| MmuSTS.441.1.S1_at  | MmuSTS.441.1  | 4.8   | 4.84  | 0.3  | 0.01 | -1.03 | 0.331969 | 0.159895 | 0.613805 | 0.435987 |
| MmuSTS.4410.1.S1_at | MmuSTS.4410.1 | 7.28  | 8.17  | 0.34 | 0.15 | -1.85 | 0.015687 | 0.120635 | 0.177718 | 0.389476 |
| MmuSTS.4411.1.S1_at | MmuSTS.4411.1 | 13.21 | 12.91 | 0.05 | 0.05 | 1.23  | 0.001888 | 0.005595 | 0.087741 | 0.10339  |
| MmuSTS.4412.1.S1_at | MmuSTS.4412.1 | 8.33  | 8.2   | 0.22 | 0.16 | 1.09  | 0.171213 | 0.334944 | 0.465116 | 0.58275  |
| MmuSTS.4413.1.S1_at | MmuSTS.4413.1 | 3.31  | 3.22  | 0.02 | 0.07 | 1.07  | 0.134965 | 0.153714 | 0.418904 | 0.428413 |
| MmuSTS.4414.1.S1_at | MmuSTS.4414.1 | 11.98 | 11.42 | 0.19 | 0.21 | 1.47  | 0.019298 | 0.002999 | 0.192036 | 0.079958 |
| MmuSTS.4415.1.S1_at | MmuSTS.4415.1 | 10.91 | 10.63 | 0.26 | 0.13 | 1.21  | 0.214634 | 0.284234 | 0.512282 | 0.546461 |
| MmuSTS.4416.1.S1_at | MmuSTS.4416.1 | 4.79  | 4.73  | 0.25 | 0.06 | 1.04  | 0.545054 | 0.760812 | 0.764388 | 0.861028 |
| MmuSTS.4417.1.S1_at | MmuSTS.4417.1 | 11.35 | 12    | 0.35 | 0.08 | -1.57 | 0.052219 | 0.039067 | 0.285979 | 0.242914 |
| MmuSTS.4418.1.S1_at | MmuSTS.4418.1 | 5.73  | 5.63  | 0.1  | 0.08 | 1.07  | 0.321897 | 0.346123 | 0.60613  | 0.591186 |
| MmuSTS.4419.1.S1_at | MmuSTS.4419.1 | 9.75  | 9.28  | 0.89 | 0.51 | 1.39  | 0.524089 | 0.654981 | 0.750921 | 0.7982   |
| MmuSTS.442.1.S1_at  | MmuSTS.442.1  | 8.02  | 8.79  | 0.32 | 0.18 | -1.7  | 0.036578 | 0.081264 | 0.246207 | 0.329351 |
| MmuSTS.4420.1.S1_at | MmuSTS.4420.1 | 10.99 | 9.35  | 0.18 | 0.08 | 3.1   | 0.000127 | 0.000073 | 0.051196 | 0.026477 |
| MmuSTS.4421.1.S1_at | MmuSTS.4421.1 | 11.14 | 11.6  | 0.17 | 0.21 | -1.38 | 0.094077 | 0.014638 | 0.363072 | 0.154176 |
| MmuSTS.4422.1.S1_at | MmuSTS.4422.1 | 7.63  | 8.89  | 0.64 | 0.28 | -2.39 | 0.026202 | 0.438718 | 0.214892 | 0.657639 |
| MmuSTS.4423.1.S1_at | MmuSTS.4423.1 | 6.87  | 6.92  | 0.13 | 0.03 | -1.04 | 0.975369 | 0.023239 | 0.99019  | 0.191096 |
| MmuSTS.4424.1.S1_at | MmuSTS.4424.1 | 9.47  | 10    | 0.29 | 0.07 | -1.44 | 0.050624 | 0.004299 | 0.282692 | 0.092019 |
| MmuSTS.4425.1.S1_at | MmuSTS.4425.1 | 8.86  | 9.84  | 0.64 | 0.05 | -1.97 | 0.031131 | 0.109605 | 0.229433 | 0.373559 |
| MmuSTS.4426.1.S1_at | MmuSTS.4426.1 | 8.35  | 8.9   | 0.26 | 0.17 | -1.46 | 0.067987 | 0.097753 | 0.318434 | 0.355611 |
| MmuSTS.4427.1.S1_at | MmuSTS.4427.1 | 4.05  | 4.01  | 0.23 | 0.3  | 1.03  | 0.558612 | 0.451354 | 0.772947 | 0.666168 |

|                       |               |       |       |      |      |       |          |          |          |          |
|-----------------------|---------------|-------|-------|------|------|-------|----------|----------|----------|----------|
| MmuSTS.4428.1.S1_at   | MmuSTS.4428.1 | 10.22 | 10.6  | 0.22 | 0.07 | -1.3  | 0.046992 | 0.024593 | 0.27447  | 0.196239 |
| MmuSTS.4429.1.S1_at   | MmuSTS.4429.1 | 6.48  | 6.47  | 0.18 | 0.11 | 1     | 0.482018 | 0.109156 | 0.722255 | 0.373015 |
| MmuSTS.443.1.S1_at    | MmuSTS.443.1  | 11.32 | 11.15 | 0.14 | 0.05 | 1.12  | 0.176326 | 0.001784 | 0.470709 | 0.063434 |
| MmuSTS.4430.1.S1_at   | MmuSTS.4430.1 | 6.75  | 7.18  | 0.64 | 0.1  | -1.34 | 0.672817 | 0.027527 | 0.843391 | 0.207161 |
| MmuSTS.4431.1.S1_at   | MmuSTS.4431.1 | 4.53  | 4.32  | 0.28 | 0.13 | 1.16  | 0.140662 | 0.15411  | 0.426401 | 0.42887  |
| MmuSTS.4432.1.S1_at   | MmuSTS.4432.1 | 9.74  | 8.96  | 0.07 | 0.06 | 1.71  | 0.000123 | 0.001584 | 0.051196 | 0.060358 |
| MmuSTS.4433.1.S1_at   | MmuSTS.4433.1 | 7.92  | 7.33  | 0.16 | 0.25 | 1.51  | 0.025828 | 0.221369 | 0.213447 | 0.494644 |
| MmuSTS.4434.1.S1_at   | MmuSTS.4434.1 | 3.21  | 3.26  | 0.16 | 0.15 | -1.04 | 0.370948 | 0.475715 | 0.643759 | 0.682332 |
| MmuSTS.4435.1.S1_at   | MmuSTS.4435.1 | 8.34  | 8.02  | 0.11 | 0.05 | 1.25  | 0.020637 | 0.236083 | 0.197178 | 0.507179 |
| MmuSTS.4436.1.S1_at   | MmuSTS.4436.1 | 3.82  | 3.71  | 0.1  | 0.16 | 1.08  | 0.156643 | 0.048931 | 0.44712  | 0.265988 |
| MmuSTS.4437.1.S1_at   | MmuSTS.4437.1 | 10.16 | 9.99  | 0.37 | 0.09 | 1.12  | 0.483754 | 0.497026 | 0.723753 | 0.696385 |
| MmuSTS.4438.1.S1_at   | MmuSTS.4438.1 | 4.76  | 4.64  | 0.11 | 0.16 | 1.09  | 0.485219 | 0.426952 | 0.724739 | 0.649072 |
| MmuSTS.4439.1.S1_at   | MmuSTS.4439.1 | 4.1   | 4.14  | 0.01 | 0.04 | -1.03 | 0.108158 | 0.49944  | 0.382895 | 0.698289 |
| MmuSTS.444.1.S1_at    | MmuSTS.444.1  | 6.05  | 6.21  | 0.23 | 0.04 | -1.12 | 0.146492 | 0.006201 | 0.434403 | 0.106821 |
| MmuSTS.4440.1.S1_at   | MmuSTS.4440.1 | 7.46  | 7.38  | 0.08 | 0.05 | 1.06  | 0.148262 | 0.03207  | 0.436844 | 0.22165  |
| MmuSTS.4441.1.S1_at   | MmuSTS.4441.1 | 12.43 | 12.2  | 0.11 | 0.05 | 1.17  | 0.144264 | 0.002637 | 0.431072 | 0.075979 |
| MmuSTS.4442.1.S1_at   | MmuSTS.4442.1 | 4.19  | 4.13  | 0.19 | 0.06 | 1.04  | 0.512482 | 0.348963 | 0.742975 | 0.59297  |
| MmuSTS.4443.1.S1_s_at | MmuSTS.4443.1 | 5.13  | 6.1   | 0.63 | 0.45 | -1.96 | 0.053661 | 0.247524 | 0.288851 | 0.516859 |
| MmuSTS.4444.1.S1_at   | MmuSTS.4444.1 | 5.11  | 4.55  | 1.04 | 0.82 | 1.47  | 0.502787 | 0.644703 | 0.736405 | 0.7918   |
| MmuSTS.4445.1.S1_at   | MmuSTS.4445.1 | 11.62 | 11.57 | 0.34 | 0.09 | 1.03  | 0.919202 | 0.043495 | 0.965424 | 0.25316  |
| MmuSTS.4446.1.S1_at   | MmuSTS.4446.1 | 3.36  | 3.28  | 0.12 | 0.07 | 1.05  | 0.784016 | 0.479307 | 0.901492 | 0.685088 |
| MmuSTS.4447.1.S1_at   | MmuSTS.4447.1 | 3.98  | 4.32  | 0.36 | 0.29 | -1.26 | 0.774036 | 0.458221 | 0.896534 | 0.671077 |
| MmuSTS.4448.1.S1_at   | MmuSTS.4448.1 | 3.23  | 3.2   | 0.09 | 0.13 | 1.02  | 0.997466 | 0.667325 | 0.999096 | 0.805297 |
| MmuSTS.4449.1.S1_at   | MmuSTS.4449.1 | 7.55  | 7.61  | 0.19 | 0.06 | -1.04 | 0.638423 | 0.255489 | 0.823011 | 0.523505 |
| MmuSTS.445.1.S1_at    | MmuSTS.445.1  | 4.65  | 4.97  | 0.27 | 0.04 | -1.25 | 0.383229 | 0.380502 | 0.652519 | 0.617165 |
| MmuSTS.4450.1.S1_at   | MmuSTS.4450.1 | 4.06  | 3.96  | 0.15 | 0.08 | 1.07  | 0.227717 | 0.141812 | 0.525826 | 0.415331 |
| MmuSTS.4451.1.S1_at   | MmuSTS.4451.1 | 4.36  | 4.43  | 0.12 | 0.05 | -1.05 | 0.426616 | 0.242159 | 0.684012 | 0.512652 |
| MmuSTS.4452.1.S1_at   | MmuSTS.4452.1 | 9.96  | 10.24 | 0.3  | 0.28 | -1.22 | 0.436061 | 0.560384 | 0.691018 | 0.736645 |
| MmuSTS.4453.1.S1_at   | MmuSTS.4453.1 | 9     | 9.04  | 0.06 | 0.05 | -1.02 | 0.305785 | 0.202739 | 0.59281  | 0.477174 |
| MmuSTS.4454.1.S1_at   | MmuSTS.4454.1 | 10.39 | 10.37 | 0.31 | 0.09 | 1.01  | 0.357382 | 0.084324 | 0.633494 | 0.335578 |
| MmuSTS.4455.1.S1_at   | MmuSTS.4455.1 | 8.49  | 8.12  | 0.46 | 0.11 | 1.29  | 0.263377 | 0.09766  | 0.556958 | 0.355554 |
| MmuSTS.4456.1.S1_at   | MmuSTS.4456.1 | 3.65  | 3.18  | 0.35 | 0.2  | 1.39  | 0.326065 | 0.576656 | 0.609284 | 0.747307 |
| MmuSTS.4457.1.S1_at   | MmuSTS.4457.1 | 3.77  | 3.66  | 0.05 | 0.1  | 1.08  | 0.204351 | 0.338267 | 0.502069 | 0.585417 |
| MmuSTS.4458.1.S1_at   | MmuSTS.4458.1 | 6.38  | 9.28  | 1.87 | 0.14 | -7.49 | 0.102674 | 0.253104 | 0.374983 | 0.521426 |
| MmuSTS.4459.1.S1_at   | MmuSTS.4459.1 | 10.39 | 10.09 | 0.09 | 0.02 | 1.23  | 0.00898  | 0.005293 | 0.144563 | 0.100738 |
| MmuSTS.446.1.S1_at    | MmuSTS.446.1  | 6.16  | 6.04  | 0.14 | 0.13 | 1.09  | 0.465788 | 0.626293 | 0.711735 | 0.779698 |
| MmuSTS.4460.1.S1_at   | MmuSTS.4460.1 | 11.95 | 11.75 | 0.03 | 0.11 | 1.16  | 0.017133 | 0.079051 | 0.184186 | 0.326117 |
| MmuSTS.4461.1.S1_at   | MmuSTS.4461.1 | 8.58  | 8.69  | 0.06 | 0.04 | -1.08 | 0.063465 | 0.05618  | 0.308631 | 0.282948 |
| MmuSTS.4462.1.S1_at   | MmuSTS.4462.1 | 5.8   | 5.85  | 0.04 | 0.09 | -1.03 | 0.91896  | 0.046062 | 0.965374 | 0.258977 |
| MmuSTS.4463.1.S1_at   | MmuSTS.4463.1 | 11.78 | 11.97 | 0.03 | 0.02 | -1.14 | 0.000952 | 0.395575 | 0.076054 | 0.627566 |
| MmuSTS.4464.1.S1_at   | MmuSTS.4464.1 | 3.32  | 3.31  | 0.11 | 0.09 | 1     | 0.429712 | 0.422723 | 0.686099 | 0.645895 |
| MmuSTS.4465.1.S1_at   | MmuSTS.4465.1 | 8.68  | 9.31  | 0.48 | 0.3  | -1.55 | 0.149315 | 0.288501 | 0.438215 | 0.549786 |
| MmuSTS.4466.1.S1_at   | MmuSTS.4466.1 | 4.84  | 4.82  | 0.07 | 0.04 | 1.01  | 0.649447 | 0.129677 | 0.829674 | 0.401322 |

|                       |               |       |       |      |      |       |          |          |          |          |
|-----------------------|---------------|-------|-------|------|------|-------|----------|----------|----------|----------|
| MmuSTS.4467.1.S1_at   | MmuSTS.4467.1 | 11.37 | 11.29 | 0    | 0.07 | 1.06  | 0.131553 | 0.244781 | 0.414397 | 0.514629 |
| MmuSTS.4468.1.S1_at   | MmuSTS.4468.1 | 7.68  | 8.86  | 0.39 | 0.17 | -2.27 | 0.00993  | 0.004305 | 0.149006 | 0.092019 |
| MmuSTS.4469.1.S1_at   | MmuSTS.4469.1 | 12.74 | 13.05 | 0.05 | 0.04 | -1.25 | 0.000945 | 0.013137 | 0.076054 | 0.147338 |
| MmuSTS.4469.1.S1_s_at | MmuSTS.4469.1 | 8.16  | 9.15  | 0.27 | 0.23 | -1.98 | 0.014735 | 0.015536 | 0.173341 | 0.158053 |
| MmuSTS.447.1.S1_at    | MmuSTS.447.1  | 8.81  | 8.06  | 0.35 | 0.36 | 1.68  | 0.028944 | 0.022415 | 0.22298  | 0.187375 |
| MmuSTS.4470.1.S1_at   | MmuSTS.4470.1 | 11.29 | 12.24 | 0.3  | 0.08 | -1.93 | 0.006409 | 0.188046 | 0.126645 | 0.464144 |
| MmuSTS.4471.1.S1_at   | MmuSTS.4471.1 | 4.24  | 4.26  | 0.06 | 0.11 | -1.02 | 0.711993 | 0.861579 | 0.864162 | 0.921322 |
| MmuSTS.4472.1.S1_at   | MmuSTS.4472.1 | 7.85  | 7.79  | 0.09 | 0.08 | 1.04  | 0.330387 | 0.001879 | 0.612408 | 0.064979 |
| MmuSTS.4473.1.S1_at   | MmuSTS.4473.1 | 7.02  | 6.9   | 0.15 | 0.09 | 1.09  | 0.957035 | 0.070254 | 0.982369 | 0.311287 |
| MmuSTS.4474.1.S1_at   | MmuSTS.4474.1 | 10.37 | 10.38 | 0.06 | 0.1  | -1.01 | 0.499209 | 0.152797 | 0.734073 | 0.427601 |
| MmuSTS.4475.1.S1_at   | MmuSTS.4475.1 | 10.06 | 10.2  | 0.09 | 0.11 | -1.1  | 0.40936  | 0.895614 | 0.671738 | 0.940329 |
| MmuSTS.4476.1.S1_at   | MmuSTS.4476.1 | 3.41  | 3.34  | 0.06 | 0.1  | 1.04  | 0.266333 | 0.05358  | 0.558799 | 0.277127 |
| MmuSTS.4477.1.S1_at   | MmuSTS.4477.1 | 11.83 | 11.54 | 0.09 | 0.02 | 1.22  | 0.004732 | 0.006467 | 0.115008 | 0.109304 |
| MmuSTS.4478.1.S1_at   | MmuSTS.4478.1 | 13.77 | 13.75 | 0.02 | 0.02 | 1.02  | 0.116268 | 0.460193 | 0.393352 | 0.672102 |
| MmuSTS.4479.1.S1_s_at | MmuSTS.4479.1 | 5.94  | 6.03  | 0.1  | 0.05 | -1.06 | 0.693563 | 0.17086  | 0.853573 | 0.447509 |
| MmuSTS.448.1.S1_at    | MmuSTS.448.1  | 8.3   | 8.44  | 0.22 | 0.34 | -1.1  | 0.755957 | 0.70273  | 0.88758  | 0.827685 |
| MmuSTS.4480.1.S1_at   | MmuSTS.4480.1 | 12.49 | 12.43 | 0.08 | 0.03 | 1.04  | 0.338355 | 0.576014 | 0.61869  | 0.746933 |
| MmuSTS.4481.1.S1_at   | MmuSTS.4481.1 | 12.11 | 12.01 | 0.06 | 0.07 | 1.08  | 0.075174 | 0.153442 | 0.332294 | 0.42827  |
| MmuSTS.4482.1.S1_at   | MmuSTS.4482.1 | 6.76  | 7.07  | 0.4  | 0.21 | -1.25 | 0.523827 | 0.791418 | 0.750688 | 0.879492 |
| MmuSTS.4483.1.S1_s_at | MmuSTS.4483.1 | 4.46  | 4.29  | 0.03 | 0.14 | 1.13  | 0.161099 | 0.057    | 0.452596 | 0.284868 |
| MmuSTS.4484.1.S1_at   | MmuSTS.4484.1 | 8.59  | 9.16  | 0.12 | 0.19 | -1.48 | 0.042416 | 0.001545 | 0.26312  | 0.05949  |
| MmuSTS.4485.1.S1_at   | MmuSTS.4485.1 | 3.79  | 3.88  | 0.09 | 0.15 | -1.06 | 0.291814 | 0.247276 | 0.581243 | 0.516473 |
| MmuSTS.4486.1.S1_at   | MmuSTS.4486.1 | 4.7   | 4.95  | 0.06 | 0.17 | -1.19 | 0.103057 | 0.276309 | 0.375707 | 0.540303 |
| MmuSTS.4487.1.S1_at   | MmuSTS.4487.1 | 10.2  | 10.74 | 0.32 | 0.25 | -1.45 | 0.417829 | 0.5622   | 0.677832 | 0.737871 |
| MmuSTS.4488.1.S1_at   | MmuSTS.4488.1 | 5.98  | 5.81  | 0.15 | 0.2  | 1.13  | 0.506494 | 0.746533 | 0.739179 | 0.852872 |
| MmuSTS.4489.1.S1_at   | MmuSTS.4489.1 | 5.99  | 5.7   | 0.17 | 0.08 | 1.22  | 0.047832 | 0.024644 | 0.276115 | 0.196442 |
| MmuSTS.449.1.S1_at    | MmuSTS.449.1  | 7.25  | 7.49  | 0.09 | 0.09 | -1.18 | 0.064971 | 0.256504 | 0.311652 | 0.524275 |
| MmuSTS.4490.1.S1_at   | MmuSTS.4490.1 | 5.21  | 5.27  | 0.16 | 0.15 | -1.04 | 0.617137 | 0.601923 | 0.809853 | 0.763122 |
| MmuSTS.4491.1.S1_at   | MmuSTS.4491.1 | 4.07  | 4.11  | 0.63 | 0.23 | -1.03 | 0.776474 | 0.668384 | 0.89778  | 0.805938 |
| MmuSTS.4492.1.S1_at   | MmuSTS.4492.1 | 6.09  | 5.68  | 0.28 | 0.26 | 1.33  | 0.651312 | 0.074295 | 0.830638 | 0.318046 |
| MmuSTS.4493.1.S1_at   | MmuSTS.4493.1 | 12.06 | 12.14 | 0.04 | 0.05 | -1.05 | 0.125361 | 0.425657 | 0.405812 | 0.648    |
| MmuSTS.4494.1.S1_at   | MmuSTS.4494.1 | 6.14  | 6.08  | 0.05 | 0.08 | 1.05  | 0.751895 | 0.0635   | 0.885488 | 0.298444 |
| MmuSTS.4495.1.S1_at   | MmuSTS.4495.1 | 5.42  | 4.97  | 0.96 | 0.43 | 1.37  | 0.399493 | 0.109227 | 0.664823 | 0.37308  |
| MmuSTS.4496.1.S1_at   | MmuSTS.4496.1 | 7.13  | 6.67  | 0.3  | 0.75 | 1.38  | 0.30788  | 0.234679 | 0.594672 | 0.505897 |
| MmuSTS.4497.1.S1_at   | MmuSTS.4497.1 | 3.15  | 3.13  | 0.17 | 0.06 | 1.02  | 0.547998 | 0.766118 | 0.766338 | 0.86411  |
| MmuSTS.4498.1.S1_at   | MmuSTS.4498.1 | 7.49  | 7.83  | 0.15 | 0.09 | -1.27 | 0.02577  | 0.097347 | 0.213153 | 0.355066 |
| MmuSTS.4499.1.S1_at   | MmuSTS.4499.1 | 9.38  | 9.53  | 0.19 | 0.19 | -1.11 | 0.17203  | 0.011894 | 0.466112 | 0.141204 |
| MmuSTS.45.1.S1_at     | MmuSTS.45.1   | 8.59  | 8.7   | 0.08 | 0.08 | -1.08 | 0.17432  | 0.156205 | 0.468499 | 0.43161  |
| MmuSTS.450.1.S1_at    | MmuSTS.450.1  | 10.05 | 9.52  | 0.11 | 0.12 | 1.44  | 0.0053   | 0.127171 | 0.11776  | 0.397922 |
| MmuSTS.4500.1.S1_at   | MmuSTS.4500.1 | 9.52  | 9.23  | 0.45 | 0.11 | 1.22  | 0.351478 | 0.290139 | 0.629056 | 0.551134 |
| MmuSTS.4501.1.S1_at   | MmuSTS.4501.1 | 8.24  | 8.82  | 0.11 | 0.22 | -1.49 | 0.052411 | 0.062416 | 0.2862   | 0.296669 |
| MmuSTS.4502.1.S1_at   | MmuSTS.4502.1 | 9.18  | 9.33  | 0.31 | 0.07 | -1.11 | 0.867401 | 0.223465 | 0.942688 | 0.49626  |
| MmuSTS.4503.1.S1_at   | MmuSTS.4503.1 | 9.46  | 9.48  | 0.17 | 0.19 | -1.02 | 0.53894  | 0.351591 | 0.76048  | 0.595109 |

|                       |               |       |       |      |      |        |          |          |          |          |
|-----------------------|---------------|-------|-------|------|------|--------|----------|----------|----------|----------|
| MmuSTS.4504.1.S1_at   | MmuSTS.4504.1 | 9.32  | 9.16  | 0.13 | 0.16 | 1.12   | 0.421388 | 0.318807 | 0.679933 | 0.571379 |
| MmuSTS.4505.1.S1_at   | MmuSTS.4505.1 | 10.36 | 10.18 | 0.08 | 0.06 | 1.13   | 0.089078 | 0.060895 | 0.355757 | 0.293504 |
| MmuSTS.4506.1.S1_at   | MmuSTS.4506.1 | 10.92 | 10.95 | 0.37 | 0.1  | -1.02  | 0.774997 | 0.113823 | 0.897172 | 0.380062 |
| MmuSTS.4507.1.S1_at   | MmuSTS.4507.1 | 8.99  | 10.49 | 0.1  | 0.14 | -2.83  | 0.000138 | 0.000118 | 0.051196 | 0.028664 |
| MmuSTS.4508.1.S1_at   | MmuSTS.4508.1 | 12.55 | 12.28 | 0.41 | 0.05 | 1.21   | 0.895107 | 0.040777 | 0.955278 | 0.246842 |
| MmuSTS.4509.1.S1_at   | MmuSTS.4509.1 | 4.19  | 4.13  | 0.13 | 0.03 | 1.05   | 0.867081 | 0.459268 | 0.942519 | 0.671678 |
| MmuSTS.451.1.S1_at    | MmuSTS.451.1  | 9.02  | 9.34  | 0.09 | 0.13 | -1.25  | 0.055204 | 0.002214 | 0.291983 | 0.069424 |
| MmuSTS.4510.1.S1_at   | MmuSTS.4510.1 | 5.76  | 5.64  | 0.09 | 0.08 | 1.08   | 0.195576 | 0.066343 | 0.49234  | 0.303207 |
| MmuSTS.4511.1.S1_at   | MmuSTS.4511.1 | 7.86  | 8.24  | 0.35 | 0.17 | -1.3   | 0.059767 | 0.156941 | 0.301699 | 0.432372 |
| MmuSTS.4512.1.S1_at   | MmuSTS.4512.1 | 4.68  | 4.8   | 0    | 0.17 | -1.09  | 0.25613  | 0.192567 | 0.550621 | 0.46807  |
| MmuSTS.4513.1.S1_at   | MmuSTS.4513.1 | 11.31 | 10.62 | 0.32 | 0.05 | 1.61   | 0.053783 | 0.02148  | 0.289059 | 0.183627 |
| MmuSTS.4514.1.S1_at   | MmuSTS.4514.1 | 7.8   | 8.51  | 0.14 | 0.3  | -1.64  | 0.032378 | 0.252301 | 0.234176 | 0.52096  |
| MmuSTS.4515.1.S1_at   | MmuSTS.4515.1 | 12.15 | 12.64 | 0.32 | 0.03 | -1.41  | 0.081756 | 0.15827  | 0.342963 | 0.43403  |
| MmuSTS.4516.1.S1_at   | MmuSTS.4516.1 | 10.01 | 9.74  | 0.07 | 0.08 | 1.21   | 0.01743  | 0.006403 | 0.185667 | 0.108767 |
| MmuSTS.4517.1.S1_at   | MmuSTS.4517.1 | 8.66  | 8.67  | 0.21 | 0.16 | -1.01  | 0.901282 | 0.025332 | 0.958253 | 0.199522 |
| MmuSTS.4518.1.S1_at   | MmuSTS.4518.1 | 6.76  | 6.88  | 0.28 | 0.15 | -1.08  | 0.354606 | 0.534631 | 0.631745 | 0.720477 |
| MmuSTS.4519.1.S1_at   | MmuSTS.4519.1 | 13.11 | 12.96 | 0.18 | 0.15 | 1.11   | 0.37808  | 0.378809 | 0.648422 | 0.615795 |
| MmuSTS.452.1.S1_at    | MmuSTS.452.1  | 4.2   | 4.29  | 0.16 | 0.06 | -1.06  | 0.776134 | 0.265956 | 0.897623 | 0.531796 |
| MmuSTS.4520.1.S1_at   | MmuSTS.4520.1 | 8.88  | 7.14  | 0.43 | 0.09 | 3.35   | 0.00283  | 0.00477  | 0.098158 | 0.096363 |
| MmuSTS.4521.1.S1_at   | MmuSTS.4521.1 | 4.54  | 4.83  | 0.09 | 0.17 | -1.22  | 0.166722 | 0.324825 | 0.459983 | 0.575369 |
| MmuSTS.4522.1.S1_at   | MmuSTS.4522.1 | 7.86  | 8.14  | 0.13 | 0.18 | -1.22  | 0.177424 | 0.194489 | 0.472172 | 0.46959  |
| MmuSTS.4523.1.S1_at   | MmuSTS.4523.1 | 6.71  | 6.31  | 0.53 | 0.02 | 1.32   | 0.256718 | 0.268624 | 0.551257 | 0.534138 |
| MmuSTS.4524.1.S1_at   | MmuSTS.4524.1 | 7.06  | 7.44  | 1.05 | 0.22 | -1.3   | 0.521537 | 0.56933  | 0.749377 | 0.742375 |
| MmuSTS.4525.1.S1_at   | MmuSTS.4525.1 | 5.76  | 5.8   | 0.1  | 0.2  | -1.03  | 0.601158 | 0.797947 | 0.799362 | 0.883664 |
| MmuSTS.4526.1.S1_at   | MmuSTS.4526.1 | 6.58  | 9.76  | 1.17 | 0.36 | -9.05  | 0.031281 | 0.247005 | 0.230063 | 0.516238 |
| MmuSTS.4527.1.S1_at   | MmuSTS.4527.1 | 7.75  | 7.62  | 0.18 | 0.06 | 1.1    | 0.631104 | 0.898869 | 0.818772 | 0.942457 |
| MmuSTS.4528.1.S1_at   | MmuSTS.4528.1 | 6.73  | 6.99  | 0.47 | 0.21 | -1.19  | 0.097214 | 0.066195 | 0.367275 | 0.302797 |
| MmuSTS.4529.1.S1_at   | MmuSTS.4529.1 | 3.25  | 3.06  | 0.28 | 0.16 | 1.14   | 0.838809 | 0.456699 | 0.929227 | 0.670408 |
| MmuSTS.453.1.S1_at    | MmuSTS.453.1  | 9.94  | 10.58 | 0.17 | 0.07 | -1.55  | 0.004481 | 0.098635 | 0.113436 | 0.356743 |
| MmuSTS.4530.1.S1_at   | MmuSTS.4530.1 | 11.98 | 11.96 | 0.06 | 0.04 | 1.01   | 0.684891 | 0.441853 | 0.849863 | 0.659939 |
| MmuSTS.4531.1.S1_at   | MmuSTS.4531.1 | 10.01 | 10.02 | 0.08 | 0.16 | -1.01  | 0.80639  | 0.048861 | 0.913273 | 0.265858 |
| MmuSTS.4532.1.S1_at   | MmuSTS.4532.1 | 10.51 | 10.61 | 0.15 | 0.09 | -1.07  | 0.610221 | 0.052853 | 0.805737 | 0.275521 |
| MmuSTS.4533.1.S1_at   | MmuSTS.4533.1 | 10.34 | 9.24  | 0.24 | 0.13 | 2.14   | 0.00192  | 0.000091 | 0.088159 | 0.027225 |
| MmuSTS.4534.1.S1_at   | MmuSTS.4534.1 | 5.81  | 9.46  | 1.74 | 0.36 | -12.56 | 0.038936 | 0.245582 | 0.253692 | 0.515348 |
| MmuSTS.4535.1.S1_at   | MmuSTS.4535.1 | 7.56  | 8.07  | 0.08 | 0.21 | -1.42  | 0.023657 | 0.017903 | 0.207074 | 0.168922 |
| MmuSTS.4536.1.S1_at   | MmuSTS.4536.1 | 7.78  | 7.83  | 0.25 | 0.11 | -1.03  | 0.774742 | 0.806609 | 0.897014 | 0.888732 |
| MmuSTS.4537.1.S1_at   | MmuSTS.4537.1 | 6.58  | 8.8   | 0.95 | 0.22 | -4.67  | 0.021337 | 0.138835 | 0.199674 | 0.412015 |
| MmuSTS.4538.1.S1_at   | MmuSTS.4538.1 | 12.45 | 12.03 | 0.67 | 0.06 | 1.34   | 0.960114 | 0.998055 | 0.983632 | 0.999009 |
| MmuSTS.4539.1.S1_s_at | MmuSTS.4539.1 | 3.3   | 3.36  | 0.18 | 0.08 | -1.05  | 0.837248 | 0.918431 | 0.92862  | 0.95425  |
| MmuSTS.454.1.S1_at    | MmuSTS.454.1  | 8.72  | 9.09  | 0.28 | 0.11 | -1.29  | 0.214357 | 0.039614 | 0.511995 | 0.244052 |
| MmuSTS.4540.1.S1_at   | MmuSTS.4540.1 | 8.29  | 9.04  | 0.54 | 0.07 | -1.68  | 0.142962 | 0.259299 | 0.429137 | 0.526418 |
| MmuSTS.4541.1.S1_at   | MmuSTS.4541.1 | 3.03  | 3.07  | 0.09 | 0.02 | -1.03  | 0.682557 | 0.049523 | 0.848621 | 0.267481 |
| MmuSTS.4542.1.S1_at   | MmuSTS.4542.1 | 9.98  | 9.98  | 0.78 | 0.12 | 1      | 0.602575 | 0.658841 | 0.800303 | 0.800473 |

|                       |               |       |       |      |      |        |          |          |          |          |
|-----------------------|---------------|-------|-------|------|------|--------|----------|----------|----------|----------|
| MmuSTS.4543.1.S1_at   | MmuSTS.4543.1 | 6.19  | 6.68  | 0.73 | 0.43 | -1.41  | 0.131079 | 0.276664 | 0.413841 | 0.540596 |
| MmuSTS.4544.1.S1_at   | MmuSTS.4544.1 | 5.84  | 5.62  | 0.15 | 0.12 | 1.16   | 0.088435 | 0.167222 | 0.354567 | 0.443684 |
| MmuSTS.4545.1.S1_at   | MmuSTS.4545.1 | 4.24  | 4.23  | 0.09 | 0.16 | 1.01   | 0.904443 | 0.931823 | 0.959453 | 0.961265 |
| MmuSTS.4546.1.S1_at   | MmuSTS.4546.1 | 11.4  | 11.39 | 0.17 | 0.03 | 1.01   | 0.562394 | 0.002167 | 0.774894 | 0.068824 |
| MmuSTS.4547.1.S1_at   | MmuSTS.4547.1 | 3.46  | 3.7   | 0.05 | 0.12 | -1.18  | 0.03246  | 0.124693 | 0.234426 | 0.39513  |
| MmuSTS.4548.1.S1_at   | MmuSTS.4548.1 | 5.69  | 5.82  | 0.06 | 0.14 | -1.09  | 0.098342 | 0.112643 | 0.368957 | 0.378183 |
| MmuSTS.4549.1.S1_at   | MmuSTS.4549.1 | 6.09  | 6.17  | 0.53 | 0.08 | -1.06  | 0.997898 | 0.963186 | 0.999236 | 0.979435 |
| MmuSTS.455.1.S1_s_at  | MmuSTS.455.1  | 3.77  | 3.83  | 0.07 | 0.02 | -1.04  | 0.244528 | 0.15825  | 0.540909 | 0.43403  |
| MmuSTS.4550.1.S1_at   | MmuSTS.4550.1 | 4.02  | 4.11  | 0.06 | 0    | -1.06  | 0.047712 | 0.095168 | 0.275878 | 0.35218  |
| MmuSTS.4551.1.S1_at   | MmuSTS.4551.1 | 6.42  | 6.09  | 1    | 0.9  | 1.26   | 0.806382 | 0.030619 | 0.913273 | 0.216919 |
| MmuSTS.4552.1.S1_at   | MmuSTS.4552.1 | 6.2   | 6.32  | 0.11 | 0.07 | -1.09  | 0.838318 | 0.090816 | 0.929053 | 0.345355 |
| MmuSTS.4553.1.S1_at   | MmuSTS.4553.1 | 10.81 | 11.68 | 0.38 | 0.06 | -1.83  | 0.011445 | 0.228032 | 0.157145 | 0.500228 |
| MmuSTS.4554.1.S1_at   | MmuSTS.4554.1 | 10.7  | 10.76 | 0.06 | 0.15 | -1.05  | 0.535927 | 0.002443 | 0.75869  | 0.073201 |
| MmuSTS.4555.1.S1_at   | MmuSTS.4555.1 | 4.2   | 3.17  | 1.14 | 1.9  | 2.04   | 0.910862 | 0.757174 | 0.962223 | 0.858648 |
| MmuSTS.4556.1.S1_at   | MmuSTS.4556.1 | 6.09  | 6.08  | 0.09 | 0.12 | 1.01   | 0.748376 | 0.041995 | 0.883455 | 0.249463 |
| MmuSTS.4557.1.S1_at   | MmuSTS.4557.1 | 5.24  | 5.52  | 0.23 | 0.07 | -1.21  | 0.363596 | 0.284967 | 0.638251 | 0.547071 |
| MmuSTS.4558.1.S1_at   | MmuSTS.4558.1 | 7.05  | 6.89  | 0.3  | 0.07 | 1.12   | 0.800482 | 0.164998 | 0.91021  | 0.44123  |
| MmuSTS.4559.1.S1_at   | MmuSTS.4559.1 | 8.52  | 8.62  | 0.32 | 0.16 | -1.07  | 0.650589 | 0.042212 | 0.830276 | 0.24989  |
| MmuSTS.456.1.S1_at    | MmuSTS.456.1  | 8.82  | 8.55  | 0.23 | 0.12 | 1.21   | 0.106919 | 0.044246 | 0.381299 | 0.25493  |
| MmuSTS.4560.1.S1_at   | MmuSTS.4560.1 | 5.6   | 5.55  | 0.07 | 0.12 | 1.03   | 0.210513 | 0.584103 | 0.5081   | 0.752201 |
| MmuSTS.4561.1.S1_at   | MmuSTS.4561.1 | 5.51  | 5.34  | 0.05 | 0.08 | 1.12   | 0.023165 | 0.126489 | 0.205331 | 0.397038 |
| MmuSTS.4562.1.S1_at   | MmuSTS.4562.1 | 11.07 | 10.21 | 0.04 | 0.29 | 1.82   | 0.012683 | 0.130939 | 0.162687 | 0.403037 |
| MmuSTS.4563.1.S1_at   | MmuSTS.4563.1 | 3.73  | 3.73  | 0.08 | 0.15 | 1      | 0.803815 | 0.476344 | 0.911913 | 0.682695 |
| MmuSTS.4564.1.S1_at   | MmuSTS.4564.1 | 9.33  | 9.22  | 0.33 | 0.2  | 1.08   | 0.985266 | 0.369744 | 0.994723 | 0.609048 |
| MmuSTS.4565.1.S1_at   | MmuSTS.4565.1 | 7.93  | 8.43  | 0.97 | 0.25 | -1.42  | 0.991781 | 0.659852 | 0.997004 | 0.800897 |
| MmuSTS.4566.1.S1_at   | MmuSTS.4566.1 | 4.5   | 4.34  | 0.14 | 0.17 | 1.12   | 0.48543  | 0.770617 | 0.724942 | 0.866798 |
| MmuSTS.4567.1.S1_at   | MmuSTS.4567.1 | 7.98  | 12.44 | 2.11 | 0.22 | -21.89 | 0.064241 | 0.26025  | 0.309883 | 0.526807 |
| MmuSTS.4568.1.S1_at   | MmuSTS.4568.1 | 12.21 | 12.21 | 0.05 | 0.04 | -1     | 0.970812 | 0.965538 | 0.988411 | 0.980739 |
| MmuSTS.4569.1.S1_at   | MmuSTS.4569.1 | 11.04 | 11.25 | 0.31 | 0.07 | -1.16  | 0.2888   | 0.457699 | 0.578509 | 0.670897 |
| MmuSTS.457.1.S1_at    | MmuSTS.457.1  | 6.09  | 5.63  | 0.49 | 0    | 1.38   | 0.139927 | 0.179613 | 0.42552  | 0.456042 |
| MmuSTS.457.1.S1_s_at  | MmuSTS.457.1  | 5.41  | 5.34  | 0.23 | 0.13 | 1.05   | 0.590337 | 0.851475 | 0.791804 | 0.91548  |
| MmuSTS.4570.1.S1_at   | MmuSTS.4570.1 | 5.32  | 5.31  | 0.03 | 0.07 | 1.01   | 0.267965 | 0.686503 | 0.560719 | 0.817053 |
| MmuSTS.4571.1.S1_s_at | MmuSTS.4571.1 | 3.81  | 3.91  | 0.12 | 0.08 | -1.07  | 0.273862 | 0.547268 | 0.565917 | 0.728346 |
| MmuSTS.4572.1.S1_at   | MmuSTS.4572.1 | 9.61  | 8.72  | 0.16 | 0.08 | 1.85   | 0.000721 | 0.006904 | 0.072175 | 0.11226  |
| MmuSTS.4573.1.S1_at   | MmuSTS.4573.1 | 6.3   | 6.96  | 0.27 | 0.24 | -1.58  | 0.012217 | 0.042379 | 0.160818 | 0.250533 |
| MmuSTS.4574.1.S1_at   | MmuSTS.4574.1 | 9.14  | 9.24  | 0.24 | 0.05 | -1.07  | 0.571443 | 0.314437 | 0.779958 | 0.568319 |
| MmuSTS.4575.1.S1_at   | MmuSTS.4575.1 | 11.25 | 11.5  | 0.24 | 0.04 | -1.18  | 0.051214 | 0.002731 | 0.283678 | 0.077041 |
| MmuSTS.4576.1.S1_at   | MmuSTS.4576.1 | 6.33  | 6.36  | 0.26 | 0.02 | -1.02  | 0.616216 | 0.311174 | 0.809428 | 0.566215 |
| MmuSTS.4577.1.S1_at   | MmuSTS.4577.1 | 11.87 | 11.79 | 0.17 | 0.02 | 1.06   | 0.64932  | 0.249857 | 0.829674 | 0.518876 |
| MmuSTS.4578.1.S1_at   | MmuSTS.4578.1 | 12.15 | 12.12 | 0.05 | 0.05 | 1.02   | 0.275101 | 0.476899 | 0.566774 | 0.683011 |
| MmuSTS.4579.1.S1_at   | MmuSTS.4579.1 | 10.47 | 11.31 | 0.28 | 0.14 | -1.78  | 0.023523 | 0.007354 | 0.206533 | 0.115197 |
| MmuSTS.458.1.S1_s_at  | MmuSTS.458.1  | 3.01  | 3.16  | 0.15 | 0.12 | -1.11  | 0.481141 | 0.663553 | 0.72184  | 0.803017 |
| MmuSTS.4580.1.S1_at   | MmuSTS.4580.1 | 4.27  | 4.04  | 1.83 | 0.27 | 1.17   | 0.278918 | 0.345705 | 0.570252 | 0.590854 |

|                       |               |       |       |      |      |       |          |          |          |          |
|-----------------------|---------------|-------|-------|------|------|-------|----------|----------|----------|----------|
| MmuSTS.4581.1.S1_at   | MmuSTS.4581.1 | 11.68 | 10.86 | 0.44 | 0.19 | 1.77  | 0.068012 | 0.205004 | 0.318434 | 0.479296 |
| MmuSTS.4582.1.S1_at   | MmuSTS.4582.1 | 5.53  | 5.5   | 0.06 | 0.12 | 1.02  | 0.418304 | 0.454292 | 0.678208 | 0.66849  |
| MmuSTS.4583.1.S1_at   | MmuSTS.4583.1 | 11.26 | 10.71 | 0.44 | 0.38 | 1.46  | 0.404626 | 0.081368 | 0.668308 | 0.329516 |
| MmuSTS.4584.1.S1_at   | MmuSTS.4584.1 | 6.74  | 6.69  | 0.03 | 0.26 | 1.04  | 0.780235 | 0.18915  | 0.89973  | 0.464997 |
| MmuSTS.4585.1.S1_at   | MmuSTS.4585.1 | 5.2   | 4.6   | 0.44 | 0.11 | 1.51  | 0.097616 | 0.200297 | 0.367976 | 0.474689 |
| MmuSTS.4586.1.S1_at   | MmuSTS.4586.1 | 6.24  | 5.75  | 0.26 | 0.09 | 1.4   | 0.022089 | 0.176431 | 0.201888 | 0.45282  |
| MmuSTS.4587.1.S1_at   | MmuSTS.4587.1 | 6.71  | 6.82  | 0.39 | 0.08 | -1.08 | 0.532635 | 0.201062 | 0.756684 | 0.475509 |
| MmuSTS.4588.1.S1_at   | MmuSTS.4588.1 | 3.94  | 3.69  | 0.08 | 0.13 | 1.18  | 0.112023 | 0.03605  | 0.388221 | 0.234272 |
| MmuSTS.4589.1.S1_at   | MmuSTS.4589.1 | 9.82  | 9.33  | 0.66 | 0.15 | 1.4   | 0.317001 | 0.144799 | 0.601691 | 0.418661 |
| MmuSTS.459.1.S1_at    | MmuSTS.459.1  | 7.58  | 7.32  | 0.29 | 0.17 | 1.2   | 0.467675 | 0.130337 | 0.713093 | 0.402172 |
| MmuSTS.4590.1.S1_at   | MmuSTS.4590.1 | 8.06  | 10.2  | 0.89 | 0.29 | -4.4  | 0.036329 | 0.194699 | 0.245737 | 0.469765 |
| MmuSTS.4591.1.S1_at   | MmuSTS.4591.1 | 9.4   | 9.37  | 0.13 | 0.15 | 1.02  | 0.918419 | 0.095375 | 0.965272 | 0.352414 |
| MmuSTS.4592.1.S1_at   | MmuSTS.4592.1 | 4.33  | 4.28  | 0.38 | 0.07 | 1.04  | 0.359686 | 0.517489 | 0.635313 | 0.709615 |
| MmuSTS.4593.1.S1_at   | MmuSTS.4593.1 | 9.55  | 9.52  | 0.38 | 0.14 | 1.02  | 0.669489 | 0.418984 | 0.841477 | 0.643191 |
| MmuSTS.4594.1.S1_at   | MmuSTS.4594.1 | 11.69 | 11.86 | 0.17 | 0.06 | -1.13 | 0.084791 | 0.055508 | 0.348748 | 0.281404 |
| MmuSTS.4595.1.S1_at   | MmuSTS.4595.1 | 8.03  | 10.25 | 0.65 | 0.23 | -4.66 | 0.006494 | 0.032043 | 0.127373 | 0.221577 |
| MmuSTS.4596.1.S1_at   | MmuSTS.4596.1 | 6.02  | 5.76  | 0.33 | 0.14 | 1.2   | 0.177976 | 0.117167 | 0.472775 | 0.384627 |
| MmuSTS.4597.1.S1_at   | MmuSTS.4597.1 | 7.1   | 7.11  | 0.14 | 0.28 | -1.01 | 0.694588 | 0.525153 | 0.854266 | 0.714766 |
| MmuSTS.4598.1.S1_at   | MmuSTS.4598.1 | 11.61 | 11.13 | 0.36 | 0.25 | 1.4   | 0.105405 | 0.220791 | 0.379375 | 0.494262 |
| MmuSTS.4599.1.S1_at   | MmuSTS.4599.1 | 10.24 | 10.16 | 0.14 | 0.04 | 1.06  | 0.615046 | 0.080935 | 0.808675 | 0.328973 |
| MmuSTS.46.1.S1_at     | MmuSTS.46.1   | 10.37 | 9.92  | 0.08 | 0.11 | 1.36  | 0.007576 | 0.001574 | 0.135306 | 0.060185 |
| MmuSTS.460.1.S1_s_at  | MmuSTS.460.1  | 3.32  | 3.44  | 0.07 | 0.04 | -1.09 | 0.122846 | 0.00112  | 0.401841 | 0.052924 |
| MmuSTS.4600.1.S1_at   | MmuSTS.4600.1 | 9.31  | 9.54  | 0.28 | 0.04 | -1.17 | 0.713769 | 0.849471 | 0.864758 | 0.914534 |
| MmuSTS.4601.1.S1_at   | MmuSTS.4601.1 | 3.72  | 3.84  | 0.07 | 0.09 | -1.09 | 0.680696 | 0.448099 | 0.847721 | 0.664016 |
| MmuSTS.4602.1.S1_at   | MmuSTS.4602.1 | 5.52  | 5.89  | 0.46 | 0.22 | -1.29 | 0.406459 | 0.641306 | 0.669756 | 0.789506 |
| MmuSTS.4603.1.S1_x_at | MmuSTS.4603.1 | 5.83  | 6.82  | 1.15 | 0.29 | -1.99 | 0.224568 | 0.366529 | 0.522686 | 0.606274 |
| MmuSTS.4604.1.S1_at   | MmuSTS.4604.1 | 5.24  | 6.53  | 0.57 | 0.2  | -2.44 | 0.016719 | 0.110665 | 0.182634 | 0.374854 |
| MmuSTS.4605.1.S1_at   | MmuSTS.4605.1 | 7.32  | 7.23  | 0.23 | 0.04 | 1.06  | 0.532689 | 0.189545 | 0.756693 | 0.465281 |
| MmuSTS.4606.1.S1_at   | MmuSTS.4606.1 | 7.06  | 8.69  | 0.49 | 0.31 | -3.09 | 0.011795 | 0.003579 | 0.158436 | 0.085582 |
| MmuSTS.4607.1.S1_at   | MmuSTS.4607.1 | 6.01  | 6     | 0.23 | 0.07 | 1.01  | 0.922606 | 0.816526 | 0.966932 | 0.894202 |
| MmuSTS.4608.1.S1_at   | MmuSTS.4608.1 | 5.1   | 5.05  | 0.01 | 0.17 | 1.04  | 0.695094 | 0.074394 | 0.854582 | 0.318058 |
| MmuSTS.4609.1.S1_at   | MmuSTS.4609.1 | 3.95  | 4.03  | 0.43 | 0.2  | -1.05 | 0.37974  | 0.592295 | 0.649486 | 0.757674 |
| MmuSTS.461.1.S1_s_at  | MmuSTS.461.1  | 4.26  | 4.27  | 0.15 | 0.08 | -1    | 0.271593 | 0.457612 | 0.563425 | 0.670889 |
| MmuSTS.4610.1.S1_at   | MmuSTS.4610.1 | 9.8   | 9.95  | 0.12 | 0.03 | -1.12 | 0.12061  | 0.27117  | 0.398976 | 0.536263 |
| MmuSTS.4611.1.S1_at   | MmuSTS.4611.1 | 7.25  | 7.44  | 0.17 | 0.02 | -1.14 | 0.416712 | 0.351534 | 0.67708  | 0.595094 |
| MmuSTS.4612.1.S1_at   | MmuSTS.4612.1 | 8.73  | 8.01  | 0.38 | 0.1  | 1.64  | 0.052333 | 0.137388 | 0.286005 | 0.410318 |
| MmuSTS.4613.1.S1_at   | MmuSTS.4613.1 | 10.92 | 10.58 | 0.23 | 0.03 | 1.27  | 0.067471 | 0.180941 | 0.317394 | 0.457418 |
| MmuSTS.4614.1.S1_at   | MmuSTS.4614.1 | 10.03 | 10.04 | 0.07 | 0.07 | -1.01 | 0.680902 | 0.073375 | 0.847795 | 0.316469 |
| MmuSTS.4615.1.S1_at   | MmuSTS.4615.1 | 13.2  | 12.72 | 0.17 | 0.05 | 1.4   | 0.017224 | 0.010682 | 0.184393 | 0.134971 |
| MmuSTS.4616.1.S1_at   | MmuSTS.4616.1 | 11.59 | 11.25 | 0.19 | 0.08 | 1.27  | 0.042431 | 0.078378 | 0.26312  | 0.325077 |
| MmuSTS.4617.1.S1_at   | MmuSTS.4617.1 | 11.37 | 11.38 | 0.37 | 0.21 | -1    | 0.751034 | 0.265518 | 0.885057 | 0.531409 |
| MmuSTS.4618.1.S1_at   | MmuSTS.4618.1 | 3.19  | 3.2   | 0.01 | 0.02 | -1.01 | 0.212838 | 0.695493 | 0.510857 | 0.823012 |
| MmuSTS.4619.1.S1_at   | MmuSTS.4619.1 | 6.62  | 5.76  | 0.72 | 0.11 | 1.82  | 0.122755 | 0.543404 | 0.401667 | 0.726105 |

|                       |               |       |       |      |      |       |          |          |          |          |
|-----------------------|---------------|-------|-------|------|------|-------|----------|----------|----------|----------|
| MmuSTS.462.1.S1_at    | MmuSTS.462.1  | 3.47  | 3.35  | 0.07 | 0.04 | 1.09  | 0.027302 | 0.068051 | 0.218069 | 0.307142 |
| MmuSTS.4620.1.S1_at   | MmuSTS.4620.1 | 9.96  | 9.8   | 0.18 | 0.03 | 1.12  | 0.356769 | 0.072601 | 0.633028 | 0.315526 |
| MmuSTS.4621.1.S1_at   | MmuSTS.4621.1 | 11.89 | 11.82 | 0.07 | 0.14 | 1.05  | 0.177429 | 0.220186 | 0.472172 | 0.493655 |
| MmuSTS.4622.1.S1_at   | MmuSTS.4622.1 | 9.47  | 9.33  | 0.31 | 0.02 | 1.1   | 0.458623 | 0.008275 | 0.707163 | 0.12078  |
| MmuSTS.4623.1.S1_at   | MmuSTS.4623.1 | 6.91  | 5.85  | 0.34 | 0.13 | 2.08  | 0.011252 | 0.248315 | 0.155959 | 0.5176   |
| MmuSTS.4624.1.S1_at   | MmuSTS.4624.1 | 9.35  | 9.02  | 0.15 | 0.13 | 1.26  | 0.043866 | 0.38091  | 0.266439 | 0.617426 |
| MmuSTS.4625.1.S1_at   | MmuSTS.4625.1 | 3.67  | 3.78  | 0.06 | 0.1  | -1.08 | 0.618431 | 0.940589 | 0.810674 | 0.966326 |
| MmuSTS.4626.1.S1_at   | MmuSTS.4626.1 | 7.63  | 7.84  | 0.27 | 0.26 | -1.16 | 0.702694 | 0.101629 | 0.858892 | 0.361529 |
| MmuSTS.4627.1.S1_at   | MmuSTS.4627.1 | 9.74  | 9.81  | 0.09 | 0.13 | -1.05 | 0.464897 | 0.818134 | 0.711025 | 0.895106 |
| MmuSTS.4628.1.S1_at   | MmuSTS.4628.1 | 11.49 | 11.62 | 0.07 | 0.01 | -1.09 | 0.038157 | 0.686366 | 0.2513   | 0.816948 |
| MmuSTS.4629.1.S1_at   | MmuSTS.4629.1 | 5.71  | 5.72  | 0.09 | 0.11 | -1.01 | 0.993119 | 0.977649 | 0.997345 | 0.987833 |
| MmuSTS.463.1.S1_s_at  | MmuSTS.463.1  | 3.74  | 3.83  | 0.16 | 0.15 | -1.07 | 0.474597 | 0.476245 | 0.717558 | 0.682616 |
| MmuSTS.4630.1.S1_at   | MmuSTS.4630.1 | 8.55  | 9.9   | 0.28 | 0.14 | -2.55 | 0.003103 | 0.004127 | 0.100877 | 0.090887 |
| MmuSTS.4631.1.S1_at   | MmuSTS.4631.1 | 11.17 | 10.82 | 0.18 | 0.19 | 1.28  | 0.084124 | 0.145457 | 0.34741  | 0.419421 |
| MmuSTS.4632.1.S1_at   | MmuSTS.4632.1 | 5.48  | 5.44  | 0.06 | 0.08 | 1.02  | 0.860001 | 0.962085 | 0.939228 | 0.978692 |
| MmuSTS.4633.1.S1_at   | MmuSTS.4633.1 | 7.64  | 7.93  | 0.54 | 0.14 | -1.22 | 0.72697  | 0.290266 | 0.87203  | 0.551169 |
| MmuSTS.4634.1.S1_x_at | MmuSTS.4634.1 | 13.86 | 13.79 | 0.19 | 0.04 | 1.05  | 0.918622 | 0.983234 | 0.965313 | 0.990726 |
| MmuSTS.4635.1.S1_at   | MmuSTS.4635.1 | 8.72  | 9.03  | 0.08 | 0.08 | -1.24 | 0.010311 | 0.141785 | 0.151336 | 0.415331 |
| MmuSTS.4636.1.S1_at   | MmuSTS.4636.1 | 6.09  | 6.16  | 0.16 | 0.03 | -1.05 | 0.846249 | 0.346729 | 0.932856 | 0.591536 |
| MmuSTS.4637.1.S1_at   | MmuSTS.4637.1 | 11.05 | 10.49 | 0.26 | 0.22 | 1.47  | 0.151455 | 0.142149 | 0.440961 | 0.41575  |
| MmuSTS.4638.1.S1_at   | MmuSTS.4638.1 | 6.3   | 7.09  | 0.33 | 0.03 | -1.73 | 0.032157 | 0.026916 | 0.23326  | 0.205227 |
| MmuSTS.4639.1.S1_at   | MmuSTS.4639.1 | 7.99  | 6.27  | 0.51 | 0.26 | 3.3   | 0.015098 | 0.01751  | 0.174809 | 0.167516 |
| MmuSTS.464.1.S1_at    | MmuSTS.464.1  | 3.34  | 3.36  | 0.06 | 0.12 | -1.01 | 0.203973 | 0.305268 | 0.50149  | 0.562255 |
| MmuSTS.4640.1.S1_at   | MmuSTS.4640.1 | 3.37  | 3.23  | 0.34 | 0.04 | 1.1   | 0.149385 | 0.180058 | 0.438257 | 0.456601 |
| MmuSTS.4640.1.S1_s_at | MmuSTS.4640.1 | 4.31  | 4.14  | 0.29 | 0.1  | 1.13  | 0.285365 | 0.276634 | 0.575167 | 0.540596 |
| MmuSTS.4641.1.S1_at   | MmuSTS.4641.1 | 5.29  | 5.17  | 0.08 | 0.1  | 1.09  | 0.142569 | 0.280095 | 0.428642 | 0.543369 |
| MmuSTS.4642.1.S1_at   | MmuSTS.4642.1 | 4.78  | 5.57  | 0.04 | 0.2  | -1.72 | 0.002816 | 0.102944 | 0.097939 | 0.363634 |
| MmuSTS.4643.1.S1_at   | MmuSTS.4643.1 | 5.48  | 5.5   | 0.05 | 0.08 | -1.01 | 0.787434 | 0.564773 | 0.903124 | 0.739427 |
| MmuSTS.4644.1.S1_at   | MmuSTS.4644.1 | 6.69  | 6.36  | 0.18 | 0.27 | 1.25  | 0.13629  | 0.088165 | 0.420705 | 0.341721 |
| MmuSTS.4645.1.S1_at   | MmuSTS.4645.1 | 10.25 | 10.07 | 0.11 | 0.08 | 1.14  | 0.09293  | 0.437567 | 0.361523 | 0.656785 |
| MmuSTS.4646.1.S1_at   | MmuSTS.4646.1 | 10.2  | 11.1  | 0.27 | 0.19 | -1.86 | 0.00652  | 0.076992 | 0.127373 | 0.322421 |
| MmuSTS.4647.1.S1_at   | MmuSTS.4647.1 | 3.35  | 3.2   | 0.09 | 0.02 | 1.11  | 0.090093 | 0.072594 | 0.356863 | 0.315519 |
| MmuSTS.4648.1.S1_at   | MmuSTS.4648.1 | 6.13  | 6.1   | 0.14 | 0.18 | 1.02  | 0.933572 | 0.996923 | 0.972111 | 0.99822  |
| MmuSTS.4649.1.S1_at   | MmuSTS.4649.1 | 4.9   | 4.81  | 0.25 | 0.07 | 1.06  | 0.196909 | 0.38576  | 0.494071 | 0.621079 |
| MmuSTS.465.1.S1_s_at  | MmuSTS.465.1  | 4.39  | 4.39  | 0.04 | 0.04 | -1    | 0.990408 | 0.285946 | 0.996555 | 0.547505 |
| MmuSTS.4650.1.S1_at   | MmuSTS.4650.1 | 11.72 | 11.6  | 0.2  | 0.12 | 1.09  | 0.432809 | 0.167911 | 0.688464 | 0.444485 |
| MmuSTS.4651.1.S1_at   | MmuSTS.4651.1 | 4.44  | 4.56  | 0.38 | 0.41 | -1.09 | 0.385725 | 0.692143 | 0.654416 | 0.82091  |
| MmuSTS.4652.1.S1_at   | MmuSTS.4652.1 | 5.32  | 5.37  | 0.14 | 0.16 | -1.03 | 0.762703 | 0.513927 | 0.891323 | 0.707322 |
| MmuSTS.4653.1.S1_at   | MmuSTS.4653.1 | 4.11  | 4.09  | 0.06 | 0.09 | 1.01  | 0.865588 | 0.808992 | 0.941782 | 0.889981 |
| MmuSTS.4654.1.S1_at   | MmuSTS.4654.1 | 3.6   | 3.68  | 0.15 | 0.07 | -1.06 | 0.876535 | 0.945627 | 0.947123 | 0.969098 |
| MmuSTS.4655.1.S1_at   | MmuSTS.4655.1 | 6.68  | 6.87  | 0.35 | 0.41 | -1.14 | 0.365943 | 0.68401  | 0.640412 | 0.81565  |
| MmuSTS.4656.1.S1_at   | MmuSTS.4656.1 | 8.03  | 7.8   | 0.04 | 0.13 | 1.17  | 0.035069 | 0.000127 | 0.241969 | 0.029087 |
| MmuSTS.4657.1.S1_at   | MmuSTS.4657.1 | 5.23  | 5.42  | 0.26 | 0.21 | -1.14 | 0.40581  | 0.5757   | 0.669198 | 0.746728 |

|                       |               |       |       |      |      |       |          |          |          |          |
|-----------------------|---------------|-------|-------|------|------|-------|----------|----------|----------|----------|
| MmuSTS.4658.1.S1_at   | MmuSTS.4658.1 | 12.99 | 12.74 | 0.03 | 0.09 | 1.19  | 0.008944 | 0.07717  | 0.144294 | 0.322751 |
| MmuSTS.4659.1.S1_at   | MmuSTS.4659.1 | 10.2  | 10.31 | 0.8  | 0.11 | -1.08 | 0.704654 | 0.799642 | 0.859786 | 0.884762 |
| MmuSTS.466.1.S1_at    | MmuSTS.466.1  | 6.67  | 9.83  | 1.31 | 0.32 | -8.9  | 0.027255 | 0.195516 | 0.218012 | 0.470351 |
| MmuSTS.4660.1.S1_at   | MmuSTS.4660.1 | 7.48  | 8.99  | 1.48 | 0.41 | -2.85 | 0.239213 | 0.013019 | 0.53651  | 0.146821 |
| MmuSTS.4661.1.S1_at   | MmuSTS.4661.1 | 6.78  | 9.87  | 1.82 | 0.31 | -8.49 | 0.026664 | 0.041705 | 0.216444 | 0.24887  |
| MmuSTS.4662.1.S1_at   | MmuSTS.4662.1 | 10.44 | 10.23 | 0.84 | 0.2  | 1.16  | 0.558494 | 0.640162 | 0.772919 | 0.788733 |
| MmuSTS.4663.1.S1_at   | MmuSTS.4663.1 | 8.88  | 9.98  | 0.4  | 0.11 | -2.15 | 0.010461 | 0.058197 | 0.152221 | 0.287988 |
| MmuSTS.4664.1.S1_at   | MmuSTS.4664.1 | 12.07 | 13.05 | 0.32 | 0.14 | -1.98 | 0.021364 | 0.022142 | 0.199771 | 0.186249 |
| MmuSTS.4666.1.S1_at   | MmuSTS.4666.1 | 9.6   | 10.64 | 0.6  | 0.08 | -2.04 | 0.017933 | 0.156199 | 0.187151 | 0.43161  |
| MmuSTS.4667.1.S1_at   | MmuSTS.4667.1 | 8.43  | 9.54  | 0.31 | 0.11 | -2.15 | 0.004711 | 0.214025 | 0.115008 | 0.487633 |
| MmuSTS.4668.1.S1_at   | MmuSTS.4668.1 | 7.02  | 6.94  | 0.2  | 0.03 | 1.06  | 0.233615 | 0.227936 | 0.531728 | 0.500211 |
| MmuSTS.4669.1.S1_at   | MmuSTS.4669.1 | 3.84  | 4.03  | 0.14 | 0.29 | -1.14 | 0.389747 | 0.290157 | 0.657497 | 0.551134 |
| MmuSTS.467.1.S1_at    | MmuSTS.467.1  | 12.22 | 11.19 | 0.19 | 0.24 | 2.04  | 0.008265 | 0.158285 | 0.139927 | 0.43403  |
| MmuSTS.4670.1.S1_s_at | MmuSTS.4670.1 | 5.09  | 5.08  | 0.13 | 0.05 | 1     | 0.656526 | 0.82     | 0.833833 | 0.896303 |
| MmuSTS.4671.1.S1_at   | MmuSTS.4671.1 | 4.98  | 5.61  | 0.3  | 0.14 | -1.54 | 0.094353 | 0.442501 | 0.363345 | 0.660478 |
| MmuSTS.4672.1.S1_at   | MmuSTS.4672.1 | 5.46  | 5.53  | 0.99 | 0.12 | -1.04 | 0.912415 | 0.332325 | 0.963021 | 0.580754 |
| MmuSTS.4673.1.S1_at   | MmuSTS.4673.1 | 6.97  | 7.18  | 0.09 | 0.07 | -1.15 | 0.036834 | 0.168139 | 0.247082 | 0.444724 |
| MmuSTS.4674.1.S1_at   | MmuSTS.4674.1 | 11.82 | 11.58 | 0.27 | 0.03 | 1.18  | 0.637994 | 0.434653 | 0.822679 | 0.654756 |
| MmuSTS.4675.1.S1_at   | MmuSTS.4675.1 | 13.47 | 13.56 | 0.09 | 0.06 | -1.07 | 0.376616 | 0.580801 | 0.647284 | 0.749953 |
| MmuSTS.4676.1.S1_at   | MmuSTS.4676.1 | 7.85  | 8.33  | 0.42 | 0.1  | -1.39 | 0.417735 | 0.016316 | 0.677741 | 0.161818 |
| MmuSTS.4677.1.S1_at   | MmuSTS.4677.1 | 7.75  | 8.03  | 0.31 | 0.08 | -1.21 | 0.069888 | 0.220427 | 0.322845 | 0.493818 |
| MmuSTS.4678.1.S1_at   | MmuSTS.4678.1 | 8.42  | 8.68  | 0.05 | 0.05 | -1.2  | 0.002704 | 0.750825 | 0.096803 | 0.855074 |
| MmuSTS.4679.1.S1_s_at | MmuSTS.4679.1 | 3.59  | 3.63  | 0.12 | 0.11 | -1.03 | 0.440777 | 0.703743 | 0.694673 | 0.828214 |
| MmuSTS.468.1.S1_at    | MmuSTS.468.1  | 9.6   | 9.44  | 0.08 | 0.02 | 1.12  | 0.010212 | 0.113327 | 0.150739 | 0.379419 |
| MmuSTS.4680.1.S1_at   | MmuSTS.4680.1 | 4.22  | 5.11  | 0.27 | 0.68 | -1.85 | 0.047078 | 0.000602 | 0.274594 | 0.041985 |
| MmuSTS.4681.1.S1_at   | MmuSTS.4681.1 | 9.3   | 10.05 | 0.21 | 0.07 | -1.69 | 0.004523 | 0.234041 | 0.113436 | 0.505312 |
| MmuSTS.4682.1.S1_s_at | MmuSTS.4682.1 | 10.87 | 10.69 | 0.26 | 0.06 | 1.14  | 0.212109 | 0.411887 | 0.510014 | 0.638434 |
| MmuSTS.4683.1.S1_at   | MmuSTS.4683.1 | 12.45 | 12.65 | 0.09 | 0.07 | -1.15 | 0.144513 | 0.032664 | 0.431498 | 0.223791 |
| MmuSTS.4684.1.S1_at   | MmuSTS.4684.1 | 9.09  | 8.61  | 0.05 | 0.13 | 1.39  | 0.007835 | 0.000905 | 0.137244 | 0.048084 |
| MmuSTS.4685.1.S1_at   | MmuSTS.4685.1 | 11.99 | 11.13 | 0.11 | 0.08 | 1.82  | 0.000496 | 0.000039 | 0.068271 | 0.023828 |
| MmuSTS.4686.1.S1_at   | MmuSTS.4686.1 | 4.34  | 4.38  | 0.11 | 0.08 | -1.03 | 0.844286 | 0.610629 | 0.931819 | 0.76874  |
| MmuSTS.4687.1.S1_at   | MmuSTS.4687.1 | 11.71 | 11.61 | 0.13 | 0.02 | 1.07  | 0.14751  | 0.503986 | 0.435443 | 0.701267 |
| MmuSTS.4688.1.S1_at   | MmuSTS.4688.1 | 9.41  | 9.6   | 0.09 | 0.16 | -1.14 | 0.132103 | 0.456925 | 0.415302 | 0.67059  |
| MmuSTS.4689.1.S1_at   | MmuSTS.4689.1 | 7.66  | 6.78  | 0.31 | 0.06 | 1.84  | 0.015082 | 0.000885 | 0.174736 | 0.047602 |
| MmuSTS.469.1.S1_s_at  | MmuSTS.469.1  | 3.54  | 4.03  | 0.3  | 0.36 | -1.4  | 0.35224  | 0.090521 | 0.629817 | 0.345015 |
| MmuSTS.4690.1.S1_at   | MmuSTS.4690.1 | 10.09 | 9.34  | 0.46 | 0.15 | 1.69  | 0.017119 | 0.314273 | 0.184186 | 0.568254 |
| MmuSTS.4691.1.S1_at   | MmuSTS.4691.1 | 12.72 | 11.91 | 0.08 | 0.2  | 1.76  | 0.004691 | 0.026095 | 0.115008 | 0.20248  |
| MmuSTS.4692.1.S1_at   | MmuSTS.4692.1 | 3.95  | 3.88  | 0.11 | 0    | 1.05  | 0.692195 | 0.672499 | 0.852917 | 0.808599 |
| MmuSTS.4693.1.S1_at   | MmuSTS.4693.1 | 10.53 | 10.1  | 0.19 | 0.02 | 1.34  | 0.019542 | 0.103539 | 0.192522 | 0.364346 |
| MmuSTS.4694.1.S1_at   | MmuSTS.4694.1 | 12.44 | 12.39 | 0.18 | 0.06 | 1.03  | 0.561143 | 0.040537 | 0.774256 | 0.246264 |
| MmuSTS.4695.1.S1_at   | MmuSTS.4695.1 | 10.39 | 10.33 | 0.09 | 0.09 | 1.04  | 0.88051  | 0.005362 | 0.949207 | 0.101092 |
| MmuSTS.4696.1.S1_at   | MmuSTS.4696.1 | 10.56 | 10.38 | 0.22 | 0.05 | 1.14  | 0.078405 | 0.141326 | 0.338082 | 0.414874 |
| MmuSTS.4697.1.S1_at   | MmuSTS.4697.1 | 12.38 | 11.7  | 0.23 | 0.08 | 1.6   | 0.010114 | 0.047069 | 0.150273 | 0.261469 |



|                       |               |       |       |      |      |       |          |          |          |          |
|-----------------------|---------------|-------|-------|------|------|-------|----------|----------|----------|----------|
| MmuSTS.4698.1.S1_at   | MmuSTS.4698.1 | 6.1   | 6.73  | 0.16 | 0.18 | -1.54 | 0.012901 | 0.014848 | 0.164345 | 0.154971 |
| MmuSTS.4699.1.S1_at   | MmuSTS.4699.1 | 10.3  | 9.46  | 0.45 | 0.21 | 1.78  | 0.062138 | 0.093766 | 0.305916 | 0.350241 |
| MmuSTS.47.1.S1_at     | MmuSTS.47.1   | 5.77  | 5.72  | 0.12 | 0.12 | 1.03  | 0.901361 | 0.621173 | 0.95827  | 0.775813 |
| MmuSTS.470.1.S1_at    | MmuSTS.470.1  | 12.74 | 12.49 | 0.09 | 0.06 | 1.19  | 0.03055  | 0.078596 | 0.227713 | 0.325343 |
| MmuSTS.4700.1.S1_at   | MmuSTS.4700.1 | 8.8   | 7.58  | 0.97 | 0.06 | 2.34  | 0.073808 | 0.075407 | 0.329577 | 0.319705 |
| MmuSTS.4701.1.S1_at   | MmuSTS.4701.1 | 5.26  | 5.32  | 0.15 | 0.09 | -1.04 | 0.508673 | 0.169611 | 0.740531 | 0.446204 |
| MmuSTS.4702.1.S1_at   | MmuSTS.4702.1 | 3.95  | 4.1   | 0.19 | 0.08 | -1.11 | 0.94402  | 0.228113 | 0.976429 | 0.500298 |
| MmuSTS.4703.1.S1_at   | MmuSTS.4703.1 | 6.35  | 7.2   | 0.17 | 0.17 | -1.81 | 0.003222 | 0.008696 | 0.101738 | 0.123683 |
| MmuSTS.4704.1.S1_at   | MmuSTS.4704.1 | 11.36 | 11.69 | 0.73 | 0.05 | -1.25 | 0.445223 | 0.38622  | 0.697742 | 0.621444 |
| MmuSTS.4705.1.S1_at   | MmuSTS.4705.1 | 3.24  | 3.26  | 0.17 | 0.1  | -1.02 | 0.73368  | 0.861368 | 0.875847 | 0.921151 |
| MmuSTS.4706.1.S1_at   | MmuSTS.4706.1 | 9.73  | 9.24  | 0.15 | 0.11 | 1.4   | 0.009828 | 0.005805 | 0.148542 | 0.104597 |
| MmuSTS.4707.1.S1_at   | MmuSTS.4707.1 | 8.68  | 8.7   | 0.03 | 0.07 | -1.02 | 0.939411 | 0.10739  | 0.974436 | 0.370219 |
| MmuSTS.4708.1.S1_at   | MmuSTS.4708.1 | 6.73  | 6.22  | 0.14 | 0.19 | 1.42  | 0.01989  | 0.008696 | 0.194289 | 0.123683 |
| MmuSTS.4709.1.S1_s_at | MmuSTS.4709.1 | 12.65 | 12.76 | 0.1  | 0.04 | -1.08 | 0.392504 | 0.705876 | 0.659433 | 0.829555 |
| MmuSTS.471.1.S1_at    | MmuSTS.471.1  | 9.25  | 9.81  | 0.15 | 0.03 | -1.47 | 0.006371 | 0.293603 | 0.126181 | 0.5536   |
| MmuSTS.4710.1.S1_at   | MmuSTS.4710.1 | 13.66 | 13.61 | 0.05 | 0.04 | 1.03  | 0.245211 | 0.072958 | 0.541279 | 0.315986 |
| MmuSTS.4711.1.S1_at   | MmuSTS.4711.1 | 11.19 | 11.05 | 0.2  | 0.14 | 1.1   | 0.868871 | 0.135468 | 0.943567 | 0.407554 |
| MmuSTS.4712.1.S1_at   | MmuSTS.4712.1 | 13.41 | 13.37 | 0.02 | 0.02 | 1.03  | 0.012654 | 0.016618 | 0.162529 | 0.163117 |
| MmuSTS.4713.1.S1_at   | MmuSTS.4713.1 | 11.11 | 11.51 | 0.17 | 0.15 | -1.32 | 0.110813 | 0.018635 | 0.386305 | 0.171648 |
| MmuSTS.4714.1.S1_at   | MmuSTS.4714.1 | 11.34 | 11.72 | 0.1  | 0.09 | -1.3  | 0.007814 | 0.329944 | 0.137244 | 0.578874 |
| MmuSTS.4715.1.S1_at   | MmuSTS.4715.1 | 9.68  | 9.75  | 0.15 | 0.15 | -1.05 | 0.595871 | 0.000711 | 0.795488 | 0.044419 |
| MmuSTS.4716.1.S1_at   | MmuSTS.4716.1 | 10.15 | 9.88  | 0.08 | 0.05 | 1.21  | 0.012949 | 0.001307 | 0.164442 | 0.055656 |
| MmuSTS.4717.1.S1_at   | MmuSTS.4717.1 | 5.61  | 5.32  | 0.5  | 0.13 | 1.22  | 0.183234 | 0.413061 | 0.479221 | 0.63939  |
| MmuSTS.4718.1.S1_at   | MmuSTS.4718.1 | 4.46  | 4.58  | 0.28 | 0.16 | -1.09 | 0.871522 | 0.821648 | 0.9447   | 0.897303 |
| MmuSTS.4719.1.S1_at   | MmuSTS.4719.1 | 9.12  | 7.91  | 0.57 | 0.2  | 2.31  | 0.033907 | 0.010564 | 0.238679 | 0.134181 |
| MmuSTS.472.1.S1_at    | MmuSTS.472.1  | 11.48 | 12.8  | 0.45 | 0.11 | -2.48 | 0.004697 | 0.009268 | 0.115008 | 0.127089 |
| MmuSTS.4720.1.S1_at   | MmuSTS.4720.1 | 4.61  | 4.72  | 0.25 | 0.5  | -1.08 | 0.259434 | 0.510536 | 0.553789 | 0.704999 |
| MmuSTS.4721.1.S1_at   | MmuSTS.4721.1 | 9.37  | 9.18  | 0.19 | 0.15 | 1.14  | 0.424358 | 0.027332 | 0.682102 | 0.206625 |
| MmuSTS.4722.1.S1_at   | MmuSTS.4722.1 | 11.6  | 10.64 | 0.25 | 0.04 | 1.94  | 0.003095 | 0.000562 | 0.100824 | 0.041049 |
| MmuSTS.4723.1.S1_at   | MmuSTS.4723.1 | 5.09  | 5.01  | 0.48 | 0.38 | 1.06  | 0.409714 | 0.492347 | 0.672003 | 0.693485 |
| MmuSTS.4724.1.S1_at   | MmuSTS.4724.1 | 9.74  | 9.72  | 0.13 | 0.05 | 1.01  | 0.734382 | 0.94568  | 0.87617  | 0.969126 |
| MmuSTS.4725.1.S1_at   | MmuSTS.4725.1 | 12.01 | 11.91 | 0.42 | 0.16 | 1.07  | 0.850288 | 0.448065 | 0.934949 | 0.663986 |
| MmuSTS.4726.1.S1_at   | MmuSTS.4726.1 | 9.72  | 9.87  | 0.25 | 0.16 | -1.11 | 0.642753 | 0.925513 | 0.825715 | 0.957833 |
| MmuSTS.4727.1.S1_s_at | MmuSTS.4727.1 | 7.53  | 8.72  | 0.61 | 0.2  | -2.29 | 0.01355  | 0.006125 | 0.167242 | 0.106581 |
| MmuSTS.4728.1.S1_at   | MmuSTS.4728.1 | 9.56  | 8.94  | 0.2  | 0.01 | 1.54  | 0.005203 | 0.002087 | 0.117146 | 0.067506 |
| MmuSTS.4729.1.S1_at   | MmuSTS.4729.1 | 9.44  | 9.17  | 0.28 | 0.05 | 1.2   | 0.173211 | 0.021801 | 0.467402 | 0.184765 |
| MmuSTS.473.1.S1_at    | MmuSTS.473.1  | 6.36  | 6.15  | 0.01 | 0.12 | 1.15  | 0.115334 | 0.035908 | 0.392403 | 0.234002 |
| MmuSTS.4730.1.S1_at   | MmuSTS.4730.1 | 9.58  | 9.61  | 0.09 | 0.15 | -1.03 | 0.290838 | 0.284435 | 0.580217 | 0.546637 |
| MmuSTS.4731.1.S1_at   | MmuSTS.4731.1 | 10.2  | 9.85  | 0.17 | 0.05 | 1.28  | 0.019681 | 0.14875  | 0.193195 | 0.423201 |
| MmuSTS.4732.1.S1_at   | MmuSTS.4732.1 | 5.91  | 5.93  | 0.04 | 0.13 | -1.01 | 0.362402 | 0.370289 | 0.637275 | 0.609406 |
| MmuSTS.4733.1.S1_at   | MmuSTS.4733.1 | 11.84 | 11.81 | 0.08 | 0.04 | 1.02  | 0.704461 | 0.246095 | 0.85972  | 0.515832 |
| MmuSTS.4734.1.S1_at   | MmuSTS.4734.1 | 10.52 | 10.2  | 0.27 | 0.07 | 1.25  | 0.092117 | 0.153285 | 0.360155 | 0.428139 |
| MmuSTS.4735.1.S1_at   | MmuSTS.4735.1 | 8.63  | 8.77  | 0.05 | 0.12 | -1.11 | 0.579798 | 0.554017 | 0.785371 | 0.73293  |

|                       |               |       |       |      |      |        |          |          |          |          |
|-----------------------|---------------|-------|-------|------|------|--------|----------|----------|----------|----------|
| MmuSTS.4736.1.S1_at   | MmuSTS.4736.1 | 5.74  | 5.94  | 0.33 | 0.17 | -1.15  | 0.151383 | 0.291028 | 0.440961 | 0.551574 |
| MmuSTS.4737.1.S1_at   | MmuSTS.4737.1 | 10.4  | 10.81 | 0.33 | 0.04 | -1.33  | 0.304952 | 0.016217 | 0.591949 | 0.161389 |
| MmuSTS.4738.1.S1_at   | MmuSTS.4738.1 | 5.22  | 8.32  | 1.86 | 0.54 | -8.55  | 0.070241 | 0.303536 | 0.323429 | 0.561005 |
| MmuSTS.4739.1.S1_at   | MmuSTS.4739.1 | 6.51  | 7.29  | 0.24 | 0.06 | -1.72  | 0.006939 | 0.293677 | 0.130411 | 0.553665 |
| MmuSTS.474.1.S1_at    | MmuSTS.474.1  | 8.69  | 8.59  | 0.11 | 0.05 | 1.07   | 0.08457  | 0.045985 | 0.348357 | 0.258838 |
| MmuSTS.4740.1.S1_at   | MmuSTS.4740.1 | 8.38  | 12.19 | 1.9  | 0.26 | -13.99 | 0.053303 | 0.253803 | 0.287986 | 0.52217  |
| MmuSTS.4741.1.S1_at   | MmuSTS.4741.1 | 7.75  | 8.91  | 0.41 | 0.64 | -2.23  | 0.120455 | 0.010347 | 0.398818 | 0.133184 |
| MmuSTS.4742.1.S1_at   | MmuSTS.4742.1 | 7.41  | 7.53  | 0.51 | 0.37 | -1.09  | 0.866594 | 0.213136 | 0.942426 | 0.487054 |
| MmuSTS.4743.1.S1_at   | MmuSTS.4743.1 | 5.95  | 6.03  | 0.09 | 0.15 | -1.05  | 0.906968 | 0.145403 | 0.960627 | 0.419421 |
| MmuSTS.4744.1.S1_at   | MmuSTS.4744.1 | 9.55  | 9.85  | 0.25 | 0.11 | -1.23  | 0.245874 | 0.221348 | 0.541732 | 0.494644 |
| MmuSTS.4745.1.S1_at   | MmuSTS.4745.1 | 9.24  | 9.34  | 0.13 | 0.12 | -1.07  | 0.140194 | 0.22579  | 0.425843 | 0.498159 |
| MmuSTS.4745.1.S1_s_at | MmuSTS.4745.1 | 10.58 | 10.69 | 0.12 | 0.04 | -1.08  | 0.154684 | 0.119737 | 0.444927 | 0.388481 |
| MmuSTS.4746.1.S1_at   | MmuSTS.4746.1 | 9.69  | 9.45  | 0.24 | 0.12 | 1.19   | 0.597737 | 0.839454 | 0.796926 | 0.908523 |
| MmuSTS.4747.1.S1_at   | MmuSTS.4747.1 | 9.89  | 9.68  | 0.12 | 0.04 | 1.16   | 0.049097 | 0.042917 | 0.279154 | 0.251759 |
| MmuSTS.4747.1.S1_s_at | MmuSTS.4747.1 | 10.49 | 10.31 | 0.12 | 0.02 | 1.14   | 0.067578 | 0.022848 | 0.3177   | 0.189246 |
| MmuSTS.4748.1.S1_at   | MmuSTS.4748.1 | 7.62  | 7.25  | 0.69 | 0.16 | 1.29   | 0.514979 | 0.148665 | 0.744832 | 0.423201 |
| MmuSTS.4749.1.S1_at   | MmuSTS.4749.1 | 9.29  | 9.27  | 0.08 | 0.1  | 1.02   | 0.797023 | 0.709481 | 0.908289 | 0.831671 |
| MmuSTS.475.1.S1_at    | MmuSTS.475.1  | 12.08 | 12.13 | 0.14 | 0.09 | -1.04  | 0.309238 | 0.505513 | 0.595682 | 0.702189 |
| MmuSTS.4750.1.S1_at   | MmuSTS.4750.1 | 10.36 | 10.72 | 0.12 | 0.03 | -1.29  | 0.016072 | 0.010182 | 0.179246 | 0.132317 |
| MmuSTS.4751.1.S1_at   | MmuSTS.4751.1 | 8.48  | 8.7   | 0.09 | 0.2  | -1.17  | 0.286776 | 0.761187 | 0.576587 | 0.86123  |
| MmuSTS.4752.1.S1_at   | MmuSTS.4752.1 | 10.18 | 9.65  | 0.2  | 0.08 | 1.44   | 0.014126 | 0.024901 | 0.17039  | 0.197685 |
| MmuSTS.4753.1.S1_at   | MmuSTS.4753.1 | 5.76  | 7.16  | 0.79 | 0.16 | -2.66  | 0.112124 | 0.393604 | 0.388227 | 0.626497 |
| MmuSTS.4754.1.S1_at   | MmuSTS.4754.1 | 10.72 | 10.61 | 0.13 | 0.03 | 1.07   | 0.747205 | 0.256562 | 0.882955 | 0.524321 |
| MmuSTS.4755.1.S1_at   | MmuSTS.4755.1 | 3.61  | 3.48  | 0.16 | 0.14 | 1.09   | 0.333623 | 0.323322 | 0.614974 | 0.57443  |
| MmuSTS.4756.1.S1_at   | MmuSTS.4756.1 | 7.56  | 7.52  | 0.2  | 0.02 | 1.02   | 0.740155 | 0.316082 | 0.879525 | 0.569541 |
| MmuSTS.4757.1.S1_at   | MmuSTS.4757.1 | 12.97 | 12.42 | 0.15 | 0.17 | 1.46   | 0.043818 | 0.129272 | 0.266406 | 0.400682 |
| MmuSTS.4758.1.S1_at   | MmuSTS.4758.1 | 12.04 | 12.16 | 0.04 | 0.04 | -1.09  | 0.009    | 0.105494 | 0.144777 | 0.367413 |
| MmuSTS.4759.1.S1_at   | MmuSTS.4759.1 | 11.82 | 11.92 | 0.17 | 0.04 | -1.07  | 0.54353  | 0.218933 | 0.763463 | 0.492716 |
| MmuSTS.476.1.S1_s_at  | MmuSTS.476.1  | 4.21  | 4.25  | 0.3  | 0.02 | -1.03  | 0.463498 | 0.579964 | 0.710084 | 0.749354 |
| MmuSTS.4760.1.S1_at   | MmuSTS.4760.1 | 10.16 | 10.09 | 0.12 | 0.16 | 1.05   | 0.232402 | 0.346299 | 0.530886 | 0.59124  |
| MmuSTS.4761.1.S1_at   | MmuSTS.4761.1 | 3.15  | 3.2   | 0.18 | 0.17 | -1.03  | 0.761404 | 0.206551 | 0.890581 | 0.480584 |
| MmuSTS.4762.1.S1_at   | MmuSTS.4762.1 | 10.62 | 9.62  | 0.08 | 0.31 | 2      | 0.011113 | 0.025952 | 0.155073 | 0.20198  |
| MmuSTS.4763.1.S1_at   | MmuSTS.4763.1 | 8.57  | 9.4   | 0.44 | 0.21 | -1.77  | 0.0331   | 0.057834 | 0.236157 | 0.286866 |
| MmuSTS.4764.1.S1_at   | MmuSTS.4764.1 | 12.09 | 12.07 | 0.03 | 0.08 | 1.01   | 0.912287 | 0.49466  | 0.962924 | 0.69497  |
| MmuSTS.4765.1.S1_at   | MmuSTS.4765.1 | 8.85  | 8.13  | 0.16 | 0.21 | 1.64   | 0.009672 | 0.013951 | 0.14832  | 0.151468 |
| MmuSTS.4766.1.S1_at   | MmuSTS.4766.1 | 7.7   | 8.31  | 0.36 | 0.15 | -1.52  | 0.091062 | 0.405886 | 0.358316 | 0.634037 |
| MmuSTS.4767.1.S1_at   | MmuSTS.4767.1 | 8.04  | 7.94  | 0.19 | 0.05 | 1.07   | 0.74646  | 0.839453 | 0.88254  | 0.908523 |
| MmuSTS.4768.1.S1_at   | MmuSTS.4768.1 | 11.7  | 11.89 | 0.02 | 0.06 | -1.14  | 0.006074 | 0.064427 | 0.124422 | 0.300001 |
| MmuSTS.4769.1.S1_at   | MmuSTS.4769.1 | 8.16  | 7.84  | 0.2  | 0.17 | 1.25   | 0.265513 | 0.060489 | 0.558187 | 0.292569 |
| MmuSTS.477.1.S1_s_at  | MmuSTS.477.1  | 4.52  | 4.45  | 0.18 | 0.09 | 1.05   | 0.839975 | 0.885178 | 0.929862 | 0.934628 |
| MmuSTS.4770.1.S1_at   | MmuSTS.4770.1 | 8.54  | 8.38  | 0.12 | 0.06 | 1.12   | 0.076155 | 0.612517 | 0.334238 | 0.770071 |
| MmuSTS.4771.1.S1_at   | MmuSTS.4771.1 | 6.75  | 6.76  | 0.18 | 0.2  | -1.01  | 0.523453 | 0.691706 | 0.750424 | 0.820652 |
| MmuSTS.4772.1.S1_at   | MmuSTS.4772.1 | 7.98  | 7.41  | 0.47 | 0.11 | 1.49   | 0.059657 | 0.320431 | 0.301392 | 0.572648 |

|                      |               |       |       |      |      |       |          |          |          |          |
|----------------------|---------------|-------|-------|------|------|-------|----------|----------|----------|----------|
| MmuSTS.4773.1.S1_at  | MmuSTS.4773.1 | 12.09 | 12.01 | 0.07 | 0.01 | 1.06  | 0.096188 | 0.021442 | 0.365761 | 0.183342 |
| MmuSTS.4774.1.S1_at  | MmuSTS.4774.1 | 8.2   | 7.75  | 0.14 | 0.12 | 1.36  | 0.01395  | 0.011337 | 0.169182 | 0.138125 |
| MmuSTS.4775.1.S1_at  | MmuSTS.4775.1 | 8.78  | 9.23  | 0.07 | 0.11 | -1.37 | 0.003159 | 0.066354 | 0.101284 | 0.303235 |
| MmuSTS.4776.1.S1_at  | MmuSTS.4776.1 | 11.39 | 11.28 | 0.12 | 0.17 | 1.08  | 0.417564 | 0.035368 | 0.677694 | 0.232348 |
| MmuSTS.4777.1.S1_at  | MmuSTS.4777.1 | 4.36  | 4.28  | 0.06 | 0.06 | 1.05  | 0.157501 | 0.425871 | 0.448181 | 0.6481   |
| MmuSTS.4778.1.S1_at  | MmuSTS.4778.1 | 6.87  | 7.63  | 1    | 0.59 | -1.69 | 0.541235 | 0.762031 | 0.762022 | 0.861597 |
| MmuSTS.4779.1.S1_at  | MmuSTS.4779.1 | 6.98  | 7.41  | 0.14 | 0.18 | -1.34 | 0.031683 | 0.009091 | 0.231419 | 0.125944 |
| MmuSTS.478.1.S1_s_at | MmuSTS.478.1  | 4.76  | 4.76  | 0.21 | 0.1  | 1     | 0.659585 | 0.828721 | 0.835686 | 0.901558 |
| MmuSTS.4780.1.S1_at  | MmuSTS.4780.1 | 4.86  | 4.85  | 0.24 | 0.03 | 1.01  | 0.927068 | 0.81098  | 0.969143 | 0.890949 |
| MmuSTS.4781.1.S1_at  | MmuSTS.4781.1 | 10.47 | 10.34 | 0.25 | 0.08 | 1.09  | 0.327047 | 0.031859 | 0.609778 | 0.220909 |
| MmuSTS.4782.1.S1_at  | MmuSTS.4782.1 | 11.45 | 11.65 | 0.47 | 0.17 | -1.15 | 0.665948 | 0.067953 | 0.839482 | 0.306905 |
| MmuSTS.4783.1.S1_at  | MmuSTS.4783.1 | 8.63  | 8.44  | 0.23 | 0.12 | 1.14  | 0.744852 | 0.104346 | 0.881702 | 0.36558  |
| MmuSTS.4784.1.S1_at  | MmuSTS.4784.1 | 13.28 | 13.14 | 0.14 | 0.02 | 1.1   | 0.129699 | 0.106935 | 0.412027 | 0.369499 |
| MmuSTS.4785.1.S1_at  | MmuSTS.4785.1 | 9.86  | 9.97  | 0.17 | 0.08 | -1.08 | 0.358389 | 0.931409 | 0.634198 | 0.961034 |
| MmuSTS.4786.1.S1_at  | MmuSTS.4786.1 | 7.69  | 7.48  | 0.1  | 0.12 | 1.15  | 0.313652 | 0.01392  | 0.599524 | 0.151344 |
| MmuSTS.4787.1.S1_at  | MmuSTS.4787.1 | 11.52 | 11.05 | 0.23 | 0.14 | 1.39  | 0.052466 | 0.003546 | 0.286213 | 0.085371 |
| MmuSTS.4788.1.S1_at  | MmuSTS.4788.1 | 7.02  | 7.09  | 0.07 | 0.21 | -1.05 | 0.692253 | 0.01968  | 0.852937 | 0.176276 |
| MmuSTS.4789.1.S1_at  | MmuSTS.4789.1 | 7.67  | 8.19  | 0.12 | 0.06 | -1.43 | 0.003235 | 0.027763 | 0.101775 | 0.208034 |
| MmuSTS.479.1.S1_s_at | MmuSTS.479.1  | 4.73  | 4.82  | 0.12 | 0.06 | -1.07 | 0.500762 | 0.470232 | 0.734926 | 0.678572 |
| MmuSTS.4790.1.S1_at  | MmuSTS.4790.1 | 8.52  | 8.43  | 0.08 | 0.22 | 1.07  | 0.27658  | 0.46947  | 0.568108 | 0.678248 |
| MmuSTS.4791.1.S1_at  | MmuSTS.4791.1 | 7.05  | 7.12  | 0.17 | 0.15 | -1.05 | 0.907715 | 0.003739 | 0.960977 | 0.08718  |
| MmuSTS.4792.1.S1_at  | MmuSTS.4792.1 | 7.58  | 7.77  | 0.3  | 0.12 | -1.14 | 0.945595 | 0.129236 | 0.977128 | 0.400635 |
| MmuSTS.4793.1.S1_at  | MmuSTS.4793.1 | 8.24  | 7.98  | 0.08 | 0.19 | 1.19  | 0.080699 | 0.370288 | 0.341441 | 0.609406 |
| MmuSTS.4794.1.S1_at  | MmuSTS.4794.1 | 10.95 | 10.68 | 0.13 | 0.02 | 1.21  | 0.019235 | 0.002046 | 0.192035 | 0.066887 |
| MmuSTS.4795.1.S1_at  | MmuSTS.4795.1 | 3.46  | 3.36  | 0.2  | 0.05 | 1.07  | 0.645409 | 0.862708 | 0.827341 | 0.921951 |
| MmuSTS.4796.1.S1_at  | MmuSTS.4796.1 | 6.74  | 8.55  | 0.61 | 0.28 | -3.5  | 0.009077 | 0.351264 | 0.144991 | 0.594937 |
| MmuSTS.4797.1.S1_at  | MmuSTS.4797.1 | 11.07 | 10.96 | 0.15 | 0.08 | 1.08  | 0.430944 | 0.382976 | 0.687194 | 0.61903  |
| MmuSTS.4798.1.S1_at  | MmuSTS.4798.1 | 5.49  | 5.53  | 0.21 | 0.26 | -1.03 | 0.848382 | 0.869306 | 0.93398  | 0.925876 |
| MmuSTS.4799.1.S1_at  | MmuSTS.4799.1 | 5.43  | 5.42  | 0.26 | 0.08 | 1     | 0.765413 | 0.343276 | 0.892409 | 0.589026 |
| MmuSTS.48.1.S1_at    | MmuSTS.48.1   | 11.59 | 11.46 | 0.11 | 0.07 | 1.09  | 0.179829 | 0.710547 | 0.474882 | 0.832109 |
| MmuSTS.480.1.S1_s_at | MmuSTS.480.1  | 4.45  | 4.48  | 0.11 | 0.03 | -1.02 | 0.516727 | 0.241137 | 0.74601  | 0.511749 |
| MmuSTS.4800.1.S1_at  | MmuSTS.4800.1 | 3.45  | 3.33  | 0.41 | 0.1  | 1.09  | 0.531407 | 0.726902 | 0.75568  | 0.842011 |
| MmuSTS.4801.1.S1_at  | MmuSTS.4801.1 | 4.21  | 4.01  | 0.33 | 0.26 | 1.15  | 0.242126 | 0.71101  | 0.539152 | 0.832375 |
| MmuSTS.4802.1.S1_at  | MmuSTS.4802.1 | 5.87  | 5.68  | 0.24 | 0.08 | 1.14  | 0.148724 | 0.166384 | 0.437305 | 0.442884 |
| MmuSTS.4803.1.S1_at  | MmuSTS.4803.1 | 12.8  | 13.12 | 0.14 | 0.05 | -1.25 | 0.021315 | 0.464294 | 0.199623 | 0.674993 |
| MmuSTS.4804.1.S1_at  | MmuSTS.4804.1 | 5.12  | 5.31  | 0.08 | 0.16 | -1.14 | 0.055721 | 0.048443 | 0.293205 | 0.26532  |
| MmuSTS.4805.1.S1_at  | MmuSTS.4805.1 | 8.42  | 7.11  | 0.38 | 0.35 | 2.49  | 0.008296 | 0.003041 | 0.139992 | 0.080419 |
| MmuSTS.4806.1.S1_at  | MmuSTS.4806.1 | 8.38  | 8.65  | 0.2  | 0.21 | -1.21 | 0.41306  | 0.023269 | 0.674478 | 0.191218 |
| MmuSTS.4807.1.S1_at  | MmuSTS.4807.1 | 6.47  | 6.47  | 0.13 | 0.01 | 1     | 0.76176  | 0.299458 | 0.890644 | 0.557907 |
| MmuSTS.4808.1.S1_at  | MmuSTS.4808.1 | 6.77  | 6.79  | 0.13 | 0.04 | -1.02 | 0.559687 | 0.385783 | 0.773457 | 0.621079 |
| MmuSTS.4809.1.S1_at  | MmuSTS.4809.1 | 9.79  | 10.21 | 0.23 | 0.04 | -1.34 | 0.015047 | 0.010266 | 0.174736 | 0.132661 |
| MmuSTS.481.1.S1_s_at | MmuSTS.481.1  | 4.32  | 4.26  | 0.14 | 0.27 | 1.04  | 0.455869 | 0.360155 | 0.705469 | 0.601268 |
| MmuSTS.4810.1.S1_at  | MmuSTS.4810.1 | 10.19 | 10.68 | 0.16 | 0.13 | -1.41 | 0.010261 | 0.00533  | 0.15106  | 0.100928 |

|                        |                |       |       |      |      |       |          |          |          |          |
|------------------------|----------------|-------|-------|------|------|-------|----------|----------|----------|----------|
| MmuSTS.4811.1.S1_at    | MmuSTS.4811.1  | 9.47  | 10.04 | 0.29 | 0.1  | -1.49 | 0.030077 | 0.001156 | 0.22657  | 0.053615 |
| MmuSTS.4812.1.S1_at    | MmuSTS.4812.1  | 2.96  | 2.91  | 0.5  | 0.04 | 1.04  | 0.303651 | 0.394528 | 0.591084 | 0.627068 |
| MmuSTS.4813.1.S1_at    | MmuSTS.4813.1  | 4.01  | 4.12  | 0.46 | 0.11 | -1.08 | 0.729551 | 0.345981 | 0.87368  | 0.59115  |
| MmuSTS.4814.1.S1_at    | MmuSTS.4814.1  | 4.1   | 3.95  | 0.34 | 0.15 | 1.11  | 0.669004 | 0.439859 | 0.841208 | 0.658468 |
| MmuSTS.4815.1.S1_at    | MmuSTS.4815.1  | 9.84  | 5.08  | 0.85 | 0.5  | 26.96 | 0.001735 | 0.05039  | 0.085035 | 0.269732 |
| MmuSTS.4816.1.S1_at    | MmuSTS.4816.1  | 11.62 | 11.95 | 0.32 | 0.34 | -1.26 | 0.134751 | 0.003544 | 0.418618 | 0.085371 |
| MmuSTS.4817.1.S1_at    | MmuSTS.4817.1  | 2.86  | 2.94  | 0.03 | 0.13 | -1.05 | 0.197272 | 0.278006 | 0.494372 | 0.541696 |
| MmuSTS.4818.1.S1_at    | MmuSTS.4818.1  | 4.4   | 4.38  | 0.46 | 0.5  | 1.01  | 0.840093 | 0.454957 | 0.929875 | 0.669021 |
| MmuSTS.4819.1.S1_at    | MmuSTS.4819.1  | 7.93  | 9.11  | 0.24 | 0.25 | -2.27 | 0.005375 | 0.007153 | 0.118439 | 0.113788 |
| MmuSTS.482.1.S1_at     | MmuSTS.482.1   | 6.01  | 5.81  | 0.09 | 0.16 | 1.15  | 0.12323  | 0.135751 | 0.402454 | 0.407925 |
| MmuSTS.482.1.S1_s_at   | MmuSTS.482.1   | 4.68  | 4.83  | 0.28 | 0.08 | -1.11 | 0.798095 | 0.76936  | 0.908865 | 0.866048 |
| MmuSTS.4820.1.S1_at    | MmuSTS.4820.1  | 5.12  | 5.11  | 0.4  | 0.24 | 1     | 0.693377 | 0.283058 | 0.85343  | 0.545692 |
| MmuSTS.4821.1.S1_at    | MmuSTS.4821.1  | 10.28 | 9.26  | 0.24 | 0.04 | 2.03  | 0.002299 | 0.067836 | 0.092335 | 0.306639 |
| MmuSTS.4822.1.S1_at    | MmuSTS.4822.1  | 13    | 12.47 | 0.17 | 0.08 | 1.44  | 0.022927 | 0.077438 | 0.204351 | 0.323236 |
| MmuSTS.4823.1.S1_at    | MmuSTS.4823.1  | 5.39  | 6.76  | 0.33 | 0.17 | -2.59 | 0.005549 | 0.289748 | 0.119965 | 0.550776 |
| MmuSTS.4824.1.S1_at    | MmuSTS.4824.1  | 4.14  | 5.11  | 0.02 | 0.13 | -1.95 | 0.000233 | 0.001893 | 0.054608 | 0.065004 |
| MmuSTS.4825.1.S1_at    | MmuSTS.4825.1  | 6.28  | 6.4   | 0.13 | 0.2  | -1.08 | 0.446575 | 0.449416 | 0.698757 | 0.665054 |
| MmuSTS.4826.1.S1_at    | MmuSTS.4826.1  | 9.88  | 9.84  | 0.83 | 0.48 | 1.03  | 0.300634 | 0.010168 | 0.588826 | 0.13217  |
| MmuSTS.4827.1.S1_at    | MmuSTS.4827.1  | 7.41  | 7     | 0.41 | 0.32 | 1.33  | 0.329611 | 0.13085  | 0.611807 | 0.403037 |
| MmuSTS.4828.1.S1_at    | MmuSTS.4828.1  | 4.44  | 6.64  | 1.12 | 0.61 | -4.59 | 0.101126 | 0.093195 | 0.372334 | 0.34931  |
| MmuSTS.4829.1.S1_at    | MmuSTS.4829.1  | 9.33  | 9.39  | 0.68 | 0.15 | -1.04 | 0.838484 | 0.695967 | 0.929139 | 0.823362 |
| MmuSTS.483.1.S1_s_at   | MmuSTS.483.1   | 3.41  | 3.43  | 0.01 | 0.21 | -1.01 | 0.331962 | 0.436488 | 0.613805 | 0.656022 |
| MmuSTS.4830.1.S1_at    | MmuSTS.4830.1  | 3.93  | 4.01  | 0.06 | 0.36 | -1.06 | 0.723299 | 0.431828 | 0.869971 | 0.6526   |
| MmuSTS.4831.1.S1_at    | MmuSTS.4831.1  | 6.57  | 6.73  | 0.11 | 0.06 | -1.12 | 0.077639 | 0.039999 | 0.336558 | 0.245193 |
| MmuSTS.4832.1.S1_at    | MmuSTS.4832.1  | 6.26  | 6.22  | 0.24 | 0.15 | 1.02  | 0.489548 | 0.405476 | 0.727823 | 0.633774 |
| MmuSTS.4833.1.S1_at    | MmuSTS.4833.1  | 5.98  | 5.97  | 0.13 | 0.02 | 1.01  | 0.944533 | 0.489479 | 0.976613 | 0.691824 |
| MmuSTS.4834.1.S1_at    | MmuSTS.4834.1  | 8.3   | 6.68  | 0.5  | 0.86 | 3.06  | 0.070759 | 0.046645 | 0.324313 | 0.260499 |
| MmuSTS.4835.1.S1_at    | MmuSTS.4835.1  | 8.93  | 8.95  | 0.09 | 0.08 | -1.01 | 0.413043 | 0.034276 | 0.674478 | 0.229049 |
| MmuSTS.4836.1.S1_at    | MmuSTS.4836.1  | 10.84 | 9.29  | 0.67 | 0.17 | 2.94  | 0.02524  | 0.023668 | 0.211843 | 0.192612 |
| MmuSTS.4837.1.S1_at    | MmuSTS.4837.1  | 11.41 | 12.03 | 0.38 | 0.19 | -1.54 | 0.040943 | 0.108196 | 0.258807 | 0.371557 |
| MmuSTS.4838.1.S1_at    | MmuSTS.4838.1  | 10.45 | 10.74 | 0.26 | 0.13 | -1.22 | 0.097393 | 0.205759 | 0.367528 | 0.48007  |
| MmuSTS.4839.1.S1_at    | MmuSTS.4839.1  | 12.75 | 12.73 | 0.12 | 0.04 | 1.01  | 0.204535 | 0.746185 | 0.502251 | 0.852688 |
| MmuSTS.484.1.S1_s_at   | MmuSTS.484.1   | 4.21  | 4.13  | 0.18 | 0.16 | 1.06  | 0.560598 | 0.387606 | 0.773964 | 0.622234 |
| MmuSTS.4840.1.S1_at    | MmuSTS.4840.1  | 3.91  | 3.73  | 0.14 | 0.03 | 1.13  | 0.165035 | 0.075511 | 0.457982 | 0.319939 |
| MmuSTS.4841.1.S1_at    | MmuSTS.4841.1  | 5.1   | 5.19  | 0.16 | 0.05 | -1.07 | 0.975776 | 0.679888 | 0.990389 | 0.8131   |
| MmuSTS.4842.1.S1_at    | MmuSTS.4842.1  | 5.5   | 8.33  | 1.64 | 0.37 | -7.13 | 0.089738 | 0.322916 | 0.356703 | 0.574257 |
| MmuSTS.4843.1.S1_at    | MmuSTS.4843.1  | 11.13 | 11.03 | 0.08 | 0.03 | 1.07  | 0.203309 | 0.138274 | 0.501192 | 0.411198 |
| MmuSTS.4844.1.S1_at    | MmuSTS.4844.1  | 13.12 | 13.04 | 0.29 | 0.01 | 1.06  | 0.636429 | 0.650071 | 0.822111 | 0.795399 |
| MmuSTS.4845.1.S1_at    | MmuSTS.4845.1  | 4.6   | 4.34  | 0.11 | 0.09 | 1.2   | 0.035891 | 0.033643 | 0.244522 | 0.227006 |
| MmuSTS.485.1.S1_at     | MmuSTS.485.1   | 5.35  | 5     | 0.45 | 0.05 | 1.28  | 0.240918 | 0.189895 | 0.538275 | 0.465424 |
| MmunewRS.696.1.S1_at   | MmunewRS.696.1 | 3.2   | 3.19  | 0.02 | 0.01 | 1     | 0.313942 | 0.491324 | 0.599734 | 0.692931 |
| MmunewRS.696.1.S1_s_at | MmunewRS.696.1 | 3.28  | 3.32  | 0.2  | 0.08 | -1.02 | 0.681742 | 0.809533 | 0.848213 | 0.890191 |
| MmuSTS.486.1.S1_at     | MmuSTS.486.1   | 10.64 | 10.78 | 0.1  | 0.28 | -1.1  | 0.595102 | 0.289136 | 0.795091 | 0.550283 |

|                      |              |       |       |      |      |       |          |          |          |          |
|----------------------|--------------|-------|-------|------|------|-------|----------|----------|----------|----------|
| MmuSTS.487.1.S1_at   | MmuSTS.487.1 | 11    | 10.87 | 0.14 | 0.05 | 1.09  | 0.135265 | 0.134871 | 0.419126 | 0.406878 |
| MmuSTS.488.1.S1_at   | MmuSTS.488.1 | 9.16  | 9.08  | 0.07 | 0.03 | 1.06  | 0.113471 | 0.605671 | 0.390238 | 0.765377 |
| MmuSTS.489.1.S1_s_at | MmuSTS.489.1 | 10.83 | 10.83 | 0.14 | 0.08 | -1    | 0.954367 | 0.925752 | 0.981263 | 0.95799  |
| MmuSTS.49.1.S1_at    | MmuSTS.49.1  | 10.24 | 9.88  | 0.25 | 0.11 | 1.28  | 0.145909 | 0.05049  | 0.433608 | 0.270049 |
| MmuSTS.490.1.S1_at   | MmuSTS.490.1 | 11.2  | 10.96 | 0.09 | 0.08 | 1.18  | 0.027619 | 0.417535 | 0.21866  | 0.642252 |
| MmuSTS.491.1.S1_at   | MmuSTS.491.1 | 11.33 | 12.13 | 0.14 | 0.16 | -1.74 | 0.00299  | 0.008672 | 0.099744 | 0.123535 |
| MmuSTS.492.1.S1_at   | MmuSTS.492.1 | 8.06  | 9.96  | 0.75 | 0.12 | -3.73 | 0.019941 | 0.043843 | 0.194498 | 0.254002 |
| MmuSTS.493.1.S1_at   | MmuSTS.493.1 | 7.43  | 7.6   | 0.16 | 0.03 | -1.12 | 0.159428 | 0.548714 | 0.450703 | 0.729333 |
| MmuSTS.494.1.S1_at   | MmuSTS.494.1 | 5.52  | 5.3   | 0.09 | 0.11 | 1.17  | 0.072748 | 0.129213 | 0.327658 | 0.400635 |
| MmuSTS.495.1.S1_at   | MmuSTS.495.1 | 9.49  | 9.77  | 0.09 | 0.03 | -1.22 | 0.00559  | 0.002061 | 0.120456 | 0.0672   |
| MmuSTS.496.1.S1_s_at | MmuSTS.496.1 | 3.27  | 3.14  | 0    | 0.15 | 1.09  | 0.610769 | 0.667664 | 0.805939 | 0.805472 |
| MmuSTS.497.1.S1_s_at | MmuSTS.497.1 | 4.13  | 4.01  | 0.14 | 0.05 | 1.09  | 0.679801 | 0.719229 | 0.847268 | 0.837526 |
| MmuSTS.498.1.S1_at   | MmuSTS.498.1 | 4.34  | 4.17  | 0.13 | 0.15 | 1.12  | 0.113861 | 0.271635 | 0.390581 | 0.536577 |
| MmuSTS.499.1.S1_at   | MmuSTS.499.1 | 3.29  | 3.18  | 0.08 | 0.05 | 1.08  | 0.112285 | 0.011074 | 0.388426 | 0.137002 |
| MmuSTS.5.1.S1_at     | MmuSTS.5.1   | 6.71  | 7.26  | 0.15 | 0.28 | -1.46 | 0.046366 | 0.101775 | 0.273076 | 0.361653 |
| MmuSTS.50.1.S1_at    | MmuSTS.50.1  | 9.95  | 9.86  | 0.18 | 0.19 | 1.06  | 0.845038 | 0.958197 | 0.932259 | 0.976332 |
| MmuSTS.500.1.S1_s_at | MmuSTS.500.1 | 3.54  | 3.63  | 0.27 | 0.01 | -1.07 | 0.746228 | 0.921186 | 0.882377 | 0.955622 |
| MmuSTS.501.1.S1_at   | MmuSTS.501.1 | 3.48  | 3.24  | 0.21 | 0.09 | 1.18  | 0.138376 | 0.172494 | 0.423629 | 0.448864 |
| MmuSTS.502.1.S1_s_at | MmuSTS.502.1 | 3.32  | 3.37  | 0.01 | 0.04 | -1.04 | 0.113303 | 0.097043 | 0.390065 | 0.354531 |
| MmuSTS.503.1.S1_s_at | MmuSTS.503.1 | 4.77  | 4.71  | 0.2  | 0.02 | 1.04  | 0.649469 | 0.954245 | 0.829674 | 0.973995 |
| MmuSTS.504.1.S1_s_at | MmuSTS.504.1 | 3.76  | 3.6   | 0.22 | 0.14 | 1.12  | 0.806761 | 0.788553 | 0.913444 | 0.877729 |
| MmuSTS.505.1.S1_s_at | MmuSTS.505.1 | 4.27  | 4.2   | 0.15 | 0.13 | 1.05  | 0.915044 | 0.976475 | 0.963913 | 0.987202 |
| MmuSTS.506.1.S1_at   | MmuSTS.506.1 | 4.73  | 5.42  | 0.37 | 0.25 | -1.6  | 0.04949  | 0.02861  | 0.279939 | 0.210901 |
| MmuSTS.507.1.S1_s_at | MmuSTS.507.1 | 6.87  | 6.79  | 0.27 | 0.15 | 1.06  | 0.526996 | 0.705201 | 0.752848 | 0.829062 |
| MmuSTS.508.1.S1_at   | MmuSTS.508.1 | 8.84  | 8.85  | 0.18 | 0.09 | -1.01 | 0.577722 | 0.000061 | 0.783728 | 0.025666 |
| MmuSTS.509.1.S1_at   | MmuSTS.509.1 | 4.48  | 4.36  | 0.03 | 0.06 | 1.09  | 0.030447 | 0.019419 | 0.227311 | 0.175117 |
| MmuSTS.51.1.S1_at    | MmuSTS.51.1  | 10.22 | 10.06 | 0.08 | 0.06 | 1.11  | 0.046992 | 0.522076 | 0.27447  | 0.712853 |
| MmuSTS.510.1.S1_at   | MmuSTS.510.1 | 11.92 | 11.61 | 0.16 | 0.06 | 1.24  | 0.031552 | 0.173177 | 0.231028 | 0.44977  |
| MmuSTS.511.1.S1_s_at | MmuSTS.511.1 | 7.09  | 6.98  | 0.07 | 0.18 | 1.07  | 0.265344 | 0.174665 | 0.558032 | 0.451216 |
| MmuSTS.512.1.S1_at   | MmuSTS.512.1 | 13.8  | 13.83 | 0.23 | 0.07 | -1.02 | 0.486728 | 0.030296 | 0.725795 | 0.215937 |
| MmuSTS.513.1.S1_at   | MmuSTS.513.1 | 11.21 | 11.27 | 0.17 | 0.21 | -1.04 | 0.874774 | 0.841513 | 0.946265 | 0.909663 |
| MmuSTS.514.1.S1_at   | MmuSTS.514.1 | 10.96 | 10.98 | 0.25 | 0.06 | -1.01 | 0.33763  | 0.373533 | 0.618005 | 0.612327 |
| MmuSTS.515.1.S1_at   | MmuSTS.515.1 | 11.15 | 11.61 | 0.24 | 0.06 | -1.37 | 0.102495 | 0.162299 | 0.374663 | 0.438447 |
| MmuSTS.516.1.S1_s_at | MmuSTS.516.1 | 4.22  | 4.01  | 0.07 | 0.13 | 1.16  | 0.072233 | 0.196916 | 0.326716 | 0.472072 |
| MmuSTS.517.1.S1_at   | MmuSTS.517.1 | 2.89  | 3.01  | 0.07 | 0.06 | -1.09 | 0.19827  | 0.419568 | 0.495463 | 0.643528 |
| MmuSTS.517.1.S1_s_at | MmuSTS.517.1 | 4.23  | 4.23  | 0.1  | 0.04 | -1    | 0.939583 | 0.492039 | 0.974477 | 0.693403 |
| MmuSTS.518.1.S1_s_at | MmuSTS.518.1 | 4.6   | 4.47  | 0.1  | 0.04 | 1.09  | 0.36784  | 0.620766 | 0.641596 | 0.775593 |
| MmuSTS.519.1.S1_s_at | MmuSTS.519.1 | 4.77  | 4.78  | 0.15 | 0.12 | -1    | 0.892901 | 0.188643 | 0.954372 | 0.464569 |
| MmuSTS.52.1.S1_at    | MmuSTS.52.1  | 3.07  | 3.04  | 0.11 | 0.07 | 1.02  | 0.607523 | 0.77574  | 0.803781 | 0.869526 |
| MmuSTS.520.1.S1_s_at | MmuSTS.520.1 | 3.56  | 3.58  | 0.09 | 0.08 | -1.02 | 0.928992 | 0.623962 | 0.969935 | 0.778285 |
| MmuSTS.521.1.S1_s_at | MmuSTS.521.1 | 4.55  | 4.49  | 0.07 | 0.11 | 1.04  | 0.505068 | 0.272039 | 0.738131 | 0.536838 |
| MmuSTS.522.1.S1_at   | MmuSTS.522.1 | 3.77  | 3.8   | 0.05 | 0.01 | -1.02 | 0.427741 | 0.238213 | 0.684938 | 0.508825 |
| MmuSTS.523.1.S1_at   | MmuSTS.523.1 | 4.95  | 5     | 0.29 | 0.2  | -1.04 | 0.95595  | 0.585696 | 0.981973 | 0.752987 |

|                      |              |       |       |      |      |        |          |          |          |          |
|----------------------|--------------|-------|-------|------|------|--------|----------|----------|----------|----------|
| MmuSTS.523.1.S1_s_at | MmuSTS.523.1 | 3     | 2.93  | 0.07 | 0.16 | 1.04   | 0.629742 | 0.389178 | 0.81813  | 0.623403 |
| MmuSTS.525.1.S1_s_at | MmuSTS.525.1 | 2.89  | 2.87  | 0.12 | 0.03 | 1.01   | 0.464337 | 0.737114 | 0.710598 | 0.847802 |
| MmuSTS.526.1.S1_at   | MmuSTS.526.1 | 11.95 | 12.15 | 0.09 | 0.02 | -1.15  | 0.015691 | 0.158071 | 0.177718 | 0.433851 |
| MmuSTS.527.1.S1_at   | MmuSTS.527.1 | 4.99  | 5.27  | 0.64 | 0.02 | -1.22  | 0.169875 | 0.087691 | 0.463325 | 0.340941 |
| MmuSTS.528.1.S1_at   | MmuSTS.528.1 | 8.9   | 8.13  | 0.19 | 0.12 | 1.69   | 0.004005 | 0.040543 | 0.108676 | 0.246264 |
| MmuSTS.529.1.S1_at   | MmuSTS.529.1 | 11.82 | 11.86 | 0.07 | 0.03 | -1.03  | 0.521723 | 0.506277 | 0.749403 | 0.702368 |
| MmuSTS.53.1.S1_at    | MmuSTS.53.1  | 6.09  | 6.09  | 0.11 | 0.1  | 1      | 0.571236 | 0.084932 | 0.779828 | 0.336552 |
| MmuSTS.530.1.S1_at   | MmuSTS.530.1 | 4.85  | 5.49  | 0.11 | 0.25 | -1.56  | 0.023297 | 0.008604 | 0.205593 | 0.123072 |
| MmuSTS.531.1.S1_at   | MmuSTS.531.1 | 6.16  | 7.76  | 0.44 | 0.32 | -3.02  | 0.021016 | 0.012784 | 0.198347 | 0.145715 |
| MmuSTS.532.1.S1_at   | MmuSTS.532.1 | 5.53  | 5.53  | 0.09 | 0.12 | 1.01   | 0.578747 | 0.416598 | 0.78454  | 0.641647 |
| MmuSTS.533.1.S1_at   | MmuSTS.533.1 | 13.68 | 13.03 | 0.38 | 0.03 | 1.57   | 0.115204 | 0.240242 | 0.392238 | 0.510851 |
| MmuSTS.534.1.S1_at   | MmuSTS.534.1 | 8.47  | 8.21  | 0.12 | 0.25 | 1.19   | 0.314206 | 0.822403 | 0.599901 | 0.897826 |
| MmuSTS.535.1.S1_at   | MmuSTS.535.1 | 7.24  | 8.88  | 0.43 | 0.26 | -3.12  | 0.004815 | 0.068194 | 0.115098 | 0.307336 |
| MmuSTS.536.1.S1_s_at | MmuSTS.536.1 | 3.67  | 3.53  | 0.1  | 0.13 | 1.1    | 0.245549 | 0.469587 | 0.541618 | 0.67829  |
| MmuSTS.537.1.S1_s_at | MmuSTS.537.1 | 3.24  | 3.21  | 0.07 | 0.11 | 1.02   | 0.937716 | 0.906748 | 0.973782 | 0.947216 |
| MmuSTS.538.1.S1_at   | MmuSTS.538.1 | 3.66  | 3.88  | 0.21 | 0.01 | -1.16  | 0.516018 | 0.127233 | 0.745613 | 0.397935 |
| MmuSTS.538.1.S1_s_at | MmuSTS.538.1 | 3.46  | 3.43  | 0.19 | 0.39 | 1.02   | 0.287864 | 0.305865 | 0.577527 | 0.562731 |
| MmuSTS.539.1.S1_at   | MmuSTS.539.1 | 7.12  | 7.07  | 0.27 | 0.26 | 1.03   | 0.752939 | 0.313432 | 0.885895 | 0.567879 |
| MmuSTS.54.1.S1_at    | MmuSTS.54.1  | 13.2  | 12.72 | 0.11 | 0.11 | 1.39   | 0.009292 | 0.043956 | 0.146233 | 0.254126 |
| MmuSTS.54.1.S1_s_at  | MmuSTS.54.1  | 13.6  | 13.05 | 0.06 | 0.05 | 1.47   | 0.000147 | 0.02165  | 0.051402 | 0.184333 |
| MmuSTS.540.1.S1_at   | MmuSTS.540.1 | 8.7   | 8.67  | 0.08 | 0.15 | 1.02   | 0.319512 | 0.234363 | 0.604166 | 0.505636 |
| MmuSTS.541.1.S1_at   | MmuSTS.541.1 | 9.75  | 9.84  | 0.11 | 0.14 | -1.06  | 0.338217 | 0.671502 | 0.618658 | 0.807948 |
| MmuSTS.542.1.S1_at   | MmuSTS.542.1 | 11.55 | 12.1  | 0.09 | 0.17 | -1.47  | 0.019418 | 0.225645 | 0.192344 | 0.498155 |
| MmuSTS.543.1.S1_at   | MmuSTS.543.1 | 4.1   | 7.57  | 0.6  | 0.46 | -11.14 | 0.00234  | 0.117587 | 0.092897 | 0.38531  |
| MmuSTS.544.1.S1_at   | MmuSTS.544.1 | 4.64  | 4.55  | 0.05 | 0.08 | 1.06   | 0.304454 | 0.045489 | 0.59162  | 0.2575   |
| MmuSTS.545.1.S1_at   | MmuSTS.545.1 | 11.54 | 10    | 0.96 | 0.14 | 2.91   | 0.062622 | 0.096106 | 0.306893 | 0.353322 |
| MmuSTS.546.1.S1_at   | MmuSTS.546.1 | 6.22  | 5.61  | 0.8  | 0.39 | 1.53   | 0.197706 | 0.356767 | 0.495015 | 0.598574 |
| MmuSTS.547.1.S1_at   | MmuSTS.547.1 | 5     | 5.81  | 0.44 | 0.33 | -1.76  | 0.027217 | 0.066043 | 0.217937 | 0.302387 |
| MmuSTS.548.1.S1_at   | MmuSTS.548.1 | 3.92  | 4.22  | 0.23 | 0.11 | -1.22  | 0.327629 | 0.427473 | 0.610314 | 0.649302 |
| MmuSTS.549.1.S1_at   | MmuSTS.549.1 | 9.55  | 8.55  | 0.16 | 0.13 | 1.99   | 0.001068 | 0.000389 | 0.076699 | 0.037374 |
| MmuSTS.55.1.S1_at    | MmuSTS.55.1  | 11.89 | 11.79 | 0.1  | 0.06 | 1.07   | 0.095299 | 0.047597 | 0.364763 | 0.262953 |
| MmuSTS.550.1.S1_s_at | MmuSTS.550.1 | 6.62  | 6.69  | 0.14 | 0.06 | -1.05  | 0.690627 | 0.077182 | 0.852093 | 0.322773 |
| MmuSTS.551.1.S1_at   | MmuSTS.551.1 | 6.86  | 6.8   | 0.19 | 0.08 | 1.04   | 0.694454 | 0.554969 | 0.854152 | 0.733559 |
| MmuSTS.552.1.S1_at   | MmuSTS.552.1 | 11.1  | 10.33 | 0.17 | 0.2  | 1.7    | 0.012071 | 0.188428 | 0.15989  | 0.464416 |
| MmuSTS.553.1.S1_at   | MmuSTS.553.1 | 4.78  | 4.94  | 0.38 | 0.22 | -1.12  | 0.968871 | 0.54227  | 0.987676 | 0.725385 |
| MmuSTS.554.1.S1_at   | MmuSTS.554.1 | 5.52  | 5.46  | 0.12 | 0.01 | 1.04   | 0.327053 | 0.486956 | 0.609778 | 0.690122 |
| MmuSTS.555.1.S1_at   | MmuSTS.555.1 | 3.9   | 4.01  | 0.1  | 0.13 | -1.08  | 0.330089 | 0.259345 | 0.612143 | 0.526418 |
| MmuSTS.556.1.S1_at   | MmuSTS.556.1 | 9.26  | 9.48  | 0.47 | 0.07 | -1.16  | 0.549203 | 0.425448 | 0.76701  | 0.647848 |
| MmuSTS.557.1.S1_at   | MmuSTS.557.1 | 6.38  | 6.33  | 0.08 | 0.03 | 1.04   | 0.142689 | 0.109205 | 0.428717 | 0.37308  |
| MmuSTS.558.1.S1_at   | MmuSTS.558.1 | 5.54  | 6.94  | 1.02 | 0.37 | -2.63  | 0.094584 | 0.397838 | 0.363543 | 0.629126 |
| MmuSTS.559.1.S1_at   | MmuSTS.559.1 | 10.63 | 10.68 | 0.17 | 0.09 | -1.04  | 0.59475  | 0.492671 | 0.794991 | 0.693708 |
| MmuSTS.56.1.S1_at    | MmuSTS.56.1  | 6.15  | 9.86  | 1.76 | 0.26 | -13.1  | 0.058071 | 0.284444 | 0.298107 | 0.546637 |
| MmuSTS.560.1.S1_at   | MmuSTS.560.1 | 8.14  | 7.4   | 0.16 | 0.31 | 1.67   | 0.029079 | 0.013582 | 0.223234 | 0.14912  |

|                      |              |       |       |      |      |       |          |          |          |          |
|----------------------|--------------|-------|-------|------|------|-------|----------|----------|----------|----------|
| MmuSTS.561.1.S1_at   | MmuSTS.561.1 | 4.26  | 3.6   | 0.34 | 0.04 | 1.58  | 0.078986 | 0.078547 | 0.338745 | 0.325285 |
| MmuSTS.562.1.S1_at   | MmuSTS.562.1 | 10.98 | 10.71 | 0.07 | 0.09 | 1.21  | 0.01484  | 0.10876  | 0.173991 | 0.372285 |
| MmuSTS.563.1.S1_at   | MmuSTS.563.1 | 5.81  | 5.97  | 0.38 | 0.27 | -1.11 | 0.200476 | 0.154605 | 0.497869 | 0.429489 |
| MmuSTS.564.1.S1_at   | MmuSTS.564.1 | 5.14  | 5.41  | 0.22 | 0.06 | -1.2  | 0.132232 | 0.102285 | 0.41548  | 0.362395 |
| MmuSTS.565.1.S1_s_at | MmuSTS.565.1 | 6.78  | 6.43  | 0.28 | 0.08 | 1.27  | 0.096827 | 0.116844 | 0.366885 | 0.384188 |
| MmuSTS.566.1.S1_at   | MmuSTS.566.1 | 8.36  | 8.14  | 0.1  | 0.1  | 1.16  | 0.046519 | 0.044957 | 0.273563 | 0.256489 |
| MmuSTS.567.1.S1_at   | MmuSTS.567.1 | 6.54  | 4.93  | 1.75 | 0.48 | 3.05  | 0.290184 | 0.578558 | 0.57966  | 0.748589 |
| MmuSTS.568.1.S1_at   | MmuSTS.568.1 | 12.08 | 12.2  | 0.03 | 0.05 | -1.09 | 0.039768 | 0.005486 | 0.25613  | 0.102081 |
| MmuSTS.569.1.S1_at   | MmuSTS.569.1 | 3.45  | 3.16  | 0.16 | 0.04 | 1.22  | 0.074059 | 0.192509 | 0.330086 | 0.467958 |
| MmuSTS.57.1.S1_at    | MmuSTS.57.1  | 4.12  | 4.05  | 0.15 | 0.17 | 1.05  | 0.276049 | 0.683856 | 0.5677   | 0.815591 |
| MmuSTS.570.1.S1_at   | MmuSTS.570.1 | 8.56  | 8.05  | 0.09 | 0.03 | 1.42  | 0.000712 | 0.003256 | 0.071988 | 0.082277 |
| MmuSTS.571.1.S1_at   | MmuSTS.571.1 | 4.76  | 4.84  | 0.15 | 0.12 | -1.06 | 0.556022 | 0.698111 | 0.771459 | 0.824615 |
| MmuSTS.572.1.S1_at   | MmuSTS.572.1 | 5.77  | 8.27  | 0.82 | 0.31 | -5.62 | 0.004363 | 0.044013 | 0.112174 | 0.254195 |
| MmuSTS.573.1.S1_at   | MmuSTS.573.1 | 4.05  | 4.1   | 0.04 | 0.22 | -1.03 | 0.70658  | 0.741853 | 0.861073 | 0.850515 |
| MmuSTS.574.1.S1_at   | MmuSTS.574.1 | 13.32 | 13.28 | 0.22 | 0.03 | 1.03  | 0.822075 | 0.048808 | 0.920741 | 0.265858 |
| MmuSTS.575.1.S1_at   | MmuSTS.575.1 | 4.58  | 4.64  | 0.07 | 0.15 | -1.04 | 0.682908 | 0.04765  | 0.848772 | 0.263138 |
| MmuSTS.576.1.S1_at   | MmuSTS.576.1 | 3.91  | 3.81  | 0.08 | 0.06 | 1.07  | 0.742006 | 0.424985 | 0.880498 | 0.647458 |
| MmuSTS.577.1.S1_at   | MmuSTS.577.1 | 10.09 | 10.4  | 0.07 | 0.01 | -1.24 | 0.001716 | 0.003686 | 0.085035 | 0.086591 |
| MmuSTS.578.1.S1_at   | MmuSTS.578.1 | 3.2   | 3.11  | 0.14 | 0.06 | 1.06  | 0.7403   | 0.47268  | 0.879531 | 0.68007  |
| MmuSTS.579.1.S1_at   | MmuSTS.579.1 | 5.88  | 5.96  | 0.03 | 0.21 | -1.06 | 0.542497 | 0.792688 | 0.762844 | 0.880287 |
| MmuSTS.58.1.S1_s_at  | MmuSTS.58.1  | 11.14 | 11.3  | 0.14 | 0.02 | -1.12 | 0.040921 | 0.249488 | 0.258702 | 0.518532 |
| MmuSTS.580.1.S1_at   | MmuSTS.580.1 | 4.73  | 4.67  | 0.12 | 0.16 | 1.05  | 0.493257 | 0.617734 | 0.730304 | 0.773649 |
| MmuSTS.581.1.S1_at   | MmuSTS.581.1 | 10.91 | 10.07 | 0.38 | 0.13 | 1.8   | 0.02511  | 0.017633 | 0.211413 | 0.167841 |
| MmuSTS.582.1.S1_at   | MmuSTS.582.1 | 5.96  | 5.89  | 0.03 | 0.19 | 1.05  | 0.425762 | 0.724827 | 0.683025 | 0.840693 |
| MmuSTS.583.1.S1_at   | MmuSTS.583.1 | 3.5   | 3.44  | 0.02 | 0.09 | 1.04  | 0.325473 | 0.435909 | 0.608731 | 0.655618 |
| MmuSTS.584.1.S1_at   | MmuSTS.584.1 | 6.55  | 6.66  | 0.31 | 0.22 | -1.08 | 0.534215 | 0.746872 | 0.757483 | 0.853023 |
| MmuSTS.585.1.S1_at   | MmuSTS.585.1 | 11.11 | 10.93 | 0.17 | 0.03 | 1.13  | 0.122388 | 0.35935  | 0.40112  | 0.600641 |
| MmuSTS.586.1.S1_at   | MmuSTS.586.1 | 13.42 | 13.39 | 0.03 | 0.02 | 1.02  | 0.143147 | 0.717797 | 0.429392 | 0.836614 |
| MmuSTS.587.1.S1_at   | MmuSTS.587.1 | 13.27 | 12.94 | 0.08 | 0.01 | 1.25  | 0.003159 | 0.065581 | 0.101284 | 0.301476 |
| MmuSTS.588.1.S1_at   | MmuSTS.588.1 | 13.38 | 13.35 | 0.06 | 0.03 | 1.02  | 0.178621 | 0.014345 | 0.473394 | 0.152894 |
| MmuSTS.589.1.S1_at   | MmuSTS.589.1 | 5.78  | 5.39  | 0.36 | 0.88 | 1.3   | 0.816432 | 0.02811  | 0.918    | 0.209286 |
| MmuSTS.59.1.S1_at    | MmuSTS.59.1  | 6.31  | 6.44  | 0.1  | 0.11 | -1.09 | 0.110294 | 0.739068 | 0.385603 | 0.848775 |
| MmuSTS.590.1.S1_at   | MmuSTS.590.1 | 5.48  | 4.67  | 0.84 | 0.84 | 1.75  | 0.653417 | 0.068096 | 0.832146 | 0.307142 |
| MmuSTS.591.1.S1_at   | MmuSTS.591.1 | 5.23  | 5.26  | 0.05 | 0.12 | -1.03 | 0.202946 | 0.468639 | 0.500692 | 0.677755 |
| MmuSTS.592.1.S1_at   | MmuSTS.592.1 | 5.71  | 5.62  | 0.18 | 0.07 | 1.06  | 0.257412 | 0.282083 | 0.551695 | 0.544937 |
| MmuSTS.593.1.S1_at   | MmuSTS.593.1 | 3.74  | 3.76  | 0.05 | 0.05 | -1.01 | 0.884751 | 0.026821 | 0.950986 | 0.204901 |
| MmuSTS.594.1.S1_at   | MmuSTS.594.1 | 3.97  | 3.94  | 0.01 | 0.1  | 1.03  | 0.51346  | 0.422371 | 0.743659 | 0.645709 |
| MmuSTS.595.1.S1_at   | MmuSTS.595.1 | 5.47  | 5.03  | 0.37 | 0.55 | 1.36  | 0.30621  | 0.445239 | 0.593212 | 0.662338 |
| MmuSTS.596.1.S1_at   | MmuSTS.596.1 | 9.62  | 9.8   | 0.14 | 0.14 | -1.13 | 0.362909 | 0.024578 | 0.637594 | 0.196149 |
| MmuSTS.597.1.S1_at   | MmuSTS.597.1 | 3.87  | 3.94  | 0.17 | 0.07 | -1.05 | 0.629682 | 0.840181 | 0.818071 | 0.908919 |
| MmuSTS.597.1.S1_s_at | MmuSTS.597.1 | 11.45 | 11.05 | 0.01 | 0.08 | 1.33  | 0.000797 | 0.001349 | 0.073056 | 0.056546 |
| MmuSTS.598.1.S1_at   | MmuSTS.598.1 | 6.01  | 6.03  | 0.34 | 0.18 | -1.01 | 0.724365 | 0.840225 | 0.870565 | 0.908948 |
| MmuSTS.599.1.S1_at   | MmuSTS.599.1 | 8.05  | 8.29  | 0.82 | 0.26 | -1.18 | 0.457537 | 0.454257 | 0.706421 | 0.66849  |

|                      |              |       |       |      |      |        |          |          |          |          |
|----------------------|--------------|-------|-------|------|------|--------|----------|----------|----------|----------|
| MmuSTS.6.1.S1_at     | MmuSTS.6.1   | 12.29 | 11.64 | 0.15 | 0.22 | 1.57   | 0.022135 | 0.153681 | 0.20197  | 0.428413 |
| MmuSTS.60.1.S1_at    | MmuSTS.60.1  | 10.38 | 10.16 | 0.15 | 0.18 | 1.17   | 0.073603 | 0.166748 | 0.329077 | 0.443215 |
| MmuSTS.600.1.S1_at   | MmuSTS.600.1 | 5.32  | 5.57  | 0.13 | 0.05 | -1.19  | 0.021248 | 0.295445 | 0.199565 | 0.554885 |
| MmuSTS.601.1.S1_at   | MmuSTS.601.1 | 4.58  | 4.4   | 0.08 | 0.11 | 1.13   | 0.206448 | 0.209555 | 0.504097 | 0.483234 |
| MmuSTS.602.1.S1_at   | MmuSTS.602.1 | 12.32 | 11    | 0.67 | 0.07 | 2.5    | 0.010871 | 0.000571 | 0.153933 | 0.041171 |
| MmuSTS.603.1.S1_at   | MmuSTS.603.1 | 12.82 | 11.3  | 0.36 | 0.01 | 2.87   | 0.001198 | 0.000051 | 0.077857 | 0.025273 |
| MmuSTS.604.1.S1_at   | MmuSTS.604.1 | 6.22  | 6.35  | 0.3  | 0.17 | -1.09  | 0.354956 | 0.01052  | 0.631874 | 0.13398  |
| MmuSTS.605.1.S1_at   | MmuSTS.605.1 | 9.15  | 8.83  | 0.32 | 0.31 | 1.25   | 0.212139 | 0.373088 | 0.510039 | 0.611955 |
| MmuSTS.606.1.S1_at   | MmuSTS.606.1 | 13.09 | 12.86 | 0.05 | 0.11 | 1.17   | 0.027934 | 0.050241 | 0.219721 | 0.269432 |
| MmuSTS.607.1.S1_at   | MmuSTS.607.1 | 6.21  | 6.25  | 0.2  | 0.13 | -1.03  | 0.452484 | 0.622357 | 0.702926 | 0.776862 |
| MmuSTS.608.1.S1_at   | MmuSTS.608.1 | 12.44 | 12.54 | 0.05 | 0.04 | -1.07  | 0.112469 | 0.000321 | 0.388733 | 0.035462 |
| MmuSTS.609.1.S1_at   | MmuSTS.609.1 | 4.7   | 4.78  | 0.09 | 0.11 | -1.06  | 0.237179 | 0.111236 | 0.534591 | 0.375882 |
| MmuSTS.61.1.S1_at    | MmuSTS.61.1  | 10.48 | 9.26  | 0.26 | 0.09 | 2.32   | 0.001457 | 0.002999 | 0.079991 | 0.079958 |
| MmuSTS.610.1.S1_at   | MmuSTS.610.1 | 4.99  | 5.74  | 0.53 | 0.29 | -1.68  | 0.079524 | 0.12915  | 0.339662 | 0.400611 |
| MmuSTS.611.1.S1_at   | MmuSTS.611.1 | 3.04  | 3.14  | 0.11 | 0.11 | -1.07  | 0.700964 | 0.394968 | 0.857901 | 0.627216 |
| MmuSTS.612.1.S1_at   | MmuSTS.612.1 | 7.3   | 7.69  | 1.26 | 0.12 | -1.3   | 0.658317 | 0.864589 | 0.834939 | 0.923249 |
| MmuSTS.613.1.S1_at   | MmuSTS.613.1 | 2.96  | 2.87  | 0.05 | 0.07 | 1.06   | 0.081036 | 0.347037 | 0.341977 | 0.59181  |
| MmuSTS.614.1.S1_at   | MmuSTS.614.1 | 5.15  | 8.54  | 1.28 | 0.42 | -10.51 | 0.018885 | 0.008926 | 0.190967 | 0.124951 |
| MmuSTS.615.1.S1_at   | MmuSTS.615.1 | 10.07 | 12.54 | 0.69 | 0.15 | -5.54  | 0.007972 | 0.062609 | 0.138364 | 0.297022 |
| MmuSTS.616.1.S1_at   | MmuSTS.616.1 | 5.77  | 6.06  | 0.08 | 0.08 | -1.22  | 0.011336 | 0.310684 | 0.156654 | 0.565787 |
| MmuSTS.617.1.S1_at   | MmuSTS.617.1 | 11.81 | 12.21 | 0.72 | 0.11 | -1.32  | 0.453238 | 0.624976 | 0.703496 | 0.778972 |
| MmuSTS.619.1.S1_at   | MmuSTS.619.1 | 5.17  | 5.14  | 0.07 | 0.04 | 1.02   | 0.495948 | 0.160976 | 0.731966 | 0.437116 |
| MmuSTS.62.1.S1_at    | MmuSTS.62.1  | 11.37 | 11.72 | 0.23 | 0.09 | -1.27  | 0.213256 | 0.265996 | 0.511046 | 0.531815 |
| MmuSTS.620.1.S1_at   | MmuSTS.620.1 | 2.7   | 2.73  | 0.04 | 0.02 | -1.02  | 0.438883 | 0.52919  | 0.693369 | 0.717207 |
| MmuSTS.621.1.S1_x_at | MmuSTS.621.1 | 2.59  | 2.62  | 0.08 | 0.08 | -1.02  | 0.257978 | 0.370631 | 0.55217  | 0.609664 |
| MmuSTS.624.1.S1_at   | MmuSTS.624.1 | 3.36  | 3.31  | 0.13 | 0.05 | 1.04   | 0.626386 | 0.820323 | 0.815975 | 0.89648  |
| MmuSTS.624.1.S1_s_at | MmuSTS.624.1 | 3.19  | 3.28  | 0.1  | 0.07 | -1.06  | 0.843957 | 0.41355  | 0.931631 | 0.639648 |
| MmuSTS.625.1.S1_at   | MmuSTS.625.1 | 4.67  | 4.59  | 0.07 | 0.06 | 1.06   | 0.435406 | 0.884875 | 0.690435 | 0.934401 |
| MmuSTS.626.1.S1_at   | MmuSTS.626.1 | 11.28 | 11.25 | 0.23 | 0.01 | 1.02   | 0.913031 | 0.405709 | 0.963229 | 0.633894 |
| MmuSTS.627.1.S1_at   | MmuSTS.627.1 | 4.63  | 4.6   | 0.15 | 0.04 | 1.02   | 0.874002 | 0.378167 | 0.945895 | 0.615438 |
| MmuSTS.628.1.S1_at   | MmuSTS.628.1 | 10.21 | 11.03 | 0.93 | 0.11 | -1.76  | 0.114709 | 0.274297 | 0.39171  | 0.538751 |
| MmuSTS.629.1.S1_at   | MmuSTS.629.1 | 7.94  | 8.56  | 0.47 | 0.13 | -1.54  | 0.051544 | 0.07257  | 0.284436 | 0.315511 |
| MmuSTS.63.1.S1_at    | MmuSTS.63.1  | 6.87  | 6.61  | 0.54 | 0.18 | 1.2    | 0.883231 | 0.473916 | 0.950338 | 0.681111 |
| MmuSTS.630.1.S1_at   | MmuSTS.630.1 | 6.34  | 6.34  | 0.19 | 0.1  | 1      | 0.983017 | 0.874989 | 0.993693 | 0.929084 |
| MmuSTS.631.1.S1_at   | MmuSTS.631.1 | 11.94 | 12.05 | 0.17 | 0.07 | -1.08  | 0.209805 | 0.878558 | 0.507187 | 0.930686 |
| MmuSTS.632.1.S1_at   | MmuSTS.632.1 | 9.3   | 10.79 | 0.3  | 0.09 | -2.81  | 0.001304 | 0.009378 | 0.078631 | 0.127634 |
| MmuSTS.633.1.S1_at   | MmuSTS.633.1 | 10.26 | 10.16 | 0.29 | 0.09 | 1.07   | 0.578641 | 0.820823 | 0.784516 | 0.896833 |
| MmuSTS.634.1.S1_at   | MmuSTS.634.1 | 6.83  | 8.18  | 0.07 | 0.39 | -2.57  | 0.007169 | 0.023905 | 0.132203 | 0.193679 |
| MmuSTS.635.1.S1_at   | MmuSTS.635.1 | 4.7   | 4.78  | 0.13 | 0.1  | -1.06  | 0.447404 | 0.180654 | 0.699412 | 0.457245 |
| MmuSTS.636.1.S1_at   | MmuSTS.636.1 | 6.75  | 6.96  | 0.61 | 0.3  | -1.16  | 0.663537 | 0.234245 | 0.837827 | 0.505485 |
| MmuSTS.636.1.S1_s_at | MmuSTS.636.1 | 6.18  | 6.16  | 0.81 | 0.63 | 1.02   | 0.761298 | 0.574227 | 0.890581 | 0.745688 |
| MmuSTS.637.1.S1_at   | MmuSTS.637.1 | 4.26  | 4.28  | 0.4  | 0.13 | -1.01  | 0.746155 | 0.921932 | 0.882363 | 0.955975 |
| MmuSTS.638.1.S1_at   | MmuSTS.638.1 | 3.95  | 4.76  | 0.21 | 0.26 | -1.75  | 0.014555 | 0.017758 | 0.172573 | 0.168392 |



|                      |              |       |       |      |      |       |          |          |          |          |
|----------------------|--------------|-------|-------|------|------|-------|----------|----------|----------|----------|
| MmuSTS.639.1.S1_at   | MmuSTS.639.1 | 7.42  | 7.87  | 0.1  | 0.41 | -1.36 | 0.574056 | 0.395158 | 0.781567 | 0.627379 |
| MmuSTS.64.1.S1_at    | MmuSTS.64.1  | 12.5  | 12.16 | 0.08 | 0.23 | 1.27  | 0.295605 | 0.35449  | 0.584345 | 0.597257 |
| MmuSTS.640.1.S1_at   | MmuSTS.640.1 | 6.25  | 6.24  | 0.12 | 0.12 | 1     | 0.750459 | 0.400044 | 0.88467  | 0.630158 |
| MmuSTS.641.1.S1_at   | MmuSTS.641.1 | 7.57  | 6.26  | 0.61 | 0.62 | 2.47  | 0.060186 | 0.407606 | 0.302487 | 0.635057 |
| MmuSTS.642.1.S1_at   | MmuSTS.642.1 | 3.4   | 3.39  | 0.1  | 0.1  | 1.01  | 0.738681 | 0.211647 | 0.878914 | 0.485681 |
| MmuSTS.643.1.S1_at   | MmuSTS.643.1 | 8.54  | 9.54  | 0.34 | 0.21 | -2    | 0.013145 | 0.033136 | 0.165277 | 0.225324 |
| MmuSTS.644.1.S1_at   | MmuSTS.644.1 | 10.05 | 8.77  | 0.43 | 0.14 | 2.44  | 0.006173 | 0.001148 | 0.124714 | 0.05344  |
| MmuSTS.645.1.S1_at   | MmuSTS.645.1 | 10.64 | 10.85 | 0.1  | 0.06 | -1.16 | 0.015405 | 0.007685 | 0.176257 | 0.117153 |
| MmuSTS.646.1.S1_at   | MmuSTS.646.1 | 6.31  | 6.92  | 0.23 | 0.15 | -1.53 | 0.017984 | 0.006297 | 0.187151 | 0.107763 |
| MmuSTS.647.1.S1_at   | MmuSTS.647.1 | 4     | 4.33  | 0.26 | 0.14 | -1.26 | 0.183407 | 0.647059 | 0.47934  | 0.793279 |
| MmuSTS.648.1.S1_at   | MmuSTS.648.1 | 10.84 | 10.86 | 0.39 | 0.01 | -1.02 | 0.335348 | 0.498354 | 0.616311 | 0.697442 |
| MmuSTS.649.1.S1_at   | MmuSTS.649.1 | 6.98  | 7.03  | 0.11 | 0.11 | -1.03 | 0.938025 | 0.685771 | 0.973844 | 0.816612 |
| MmuSTS.65.1.S1_at    | MmuSTS.65.1  | 8.88  | 8.66  | 0.28 | 0.12 | 1.16  | 0.705276 | 0.801248 | 0.860238 | 0.88568  |
| MmuSTS.650.1.S1_at   | MmuSTS.650.1 | 6     | 7.88  | 0.67 | 0.38 | -3.69 | 0.013611 | 0.012819 | 0.167455 | 0.145864 |
| MmuSTS.651.1.S1_at   | MmuSTS.651.1 | 10.62 | 11.37 | 0.17 | 0.22 | -1.68 | 0.014166 | 0.345845 | 0.170662 | 0.590998 |
| MmuSTS.652.1.S1_at   | MmuSTS.652.1 | 8     | 9.3   | 1.88 | 0.1  | -2.47 | 0.1561   | 0.429702 | 0.446597 | 0.65099  |
| MmuSTS.652.1.S1_s_at | MmuSTS.652.1 | 6.27  | 7.69  | 1.24 | 0.17 | -2.67 | 0.113304 | 0.391418 | 0.390065 | 0.625086 |
| MmuSTS.653.1.S1_at   | MmuSTS.653.1 | 6.56  | 6.51  | 0.13 | 0.01 | 1.03  | 0.565656 | 0.388775 | 0.776758 | 0.62307  |
| MmuSTS.654.1.S1_at   | MmuSTS.654.1 | 5.26  | 5.17  | 0.19 | 0.06 | 1.06  | 0.389157 | 0.299219 | 0.657109 | 0.557769 |
| MmuSTS.655.1.S1_at   | MmuSTS.655.1 | 7.49  | 6.62  | 0.03 | 0.08 | 1.84  | 0.000048 | 0.000011 | 0.045594 | 0.016526 |
| MmuSTS.656.1.S1_at   | MmuSTS.656.1 | 3.94  | 3.98  | 0.06 | 0.06 | -1.03 | 0.855202 | 0.653841 | 0.93691  | 0.797692 |
| MmuSTS.657.1.S1_at   | MmuSTS.657.1 | 10.07 | 10.8  | 0.56 | 0.21 | -1.66 | 0.06681  | 0.040032 | 0.316219 | 0.245254 |
| MmuSTS.658.1.S1_at   | MmuSTS.658.1 | 10.33 | 10.1  | 0.2  | 0.12 | 1.17  | 0.064201 | 0.12543  | 0.309807 | 0.396079 |
| MmuSTS.659.1.S1_at   | MmuSTS.659.1 | 6.81  | 7.02  | 0.19 | 0.04 | -1.16 | 0.345002 | 0.442448 | 0.624093 | 0.660417 |
| MmuSTS.66.1.S1_at    | MmuSTS.66.1  | 4.14  | 7.27  | 0.93 | 0.19 | -8.75 | 0.008629 | 0.093039 | 0.142375 | 0.3492   |
| MmuSTS.660.1.S1_at   | MmuSTS.660.1 | 3.84  | 3.7   | 0.11 | 0.07 | 1.1   | 0.164865 | 0.5114   | 0.457897 | 0.705547 |
| MmuSTS.661.1.S1_at   | MmuSTS.661.1 | 8.58  | 8.72  | 0.15 | 0.09 | -1.1  | 0.058778 | 0.124089 | 0.299555 | 0.394389 |
| MmuSTS.662.1.S1_at   | MmuSTS.662.1 | 6.99  | 6.9   | 0.16 | 0.11 | 1.07  | 0.231544 | 0.103796 | 0.530238 | 0.364519 |
| MmuSTS.663.1.S1_at   | MmuSTS.663.1 | 6.22  | 6.05  | 0.18 | 0.22 | 1.13  | 0.806418 | 0.190735 | 0.913273 | 0.466168 |
| MmuSTS.663.1.S1_x_at | MmuSTS.663.1 | 6.08  | 6.03  | 0.23 | 0.14 | 1.04  | 0.351903 | 0.333805 | 0.62954  | 0.581974 |
| MmuSTS.664.1.S1_at   | MmuSTS.664.1 | 10.13 | 11.05 | 0.34 | 0.3  | -1.89 | 0.102993 | 0.029343 | 0.375642 | 0.213228 |
| MmuSTS.665.1.S1_at   | MmuSTS.665.1 | 12.77 | 12.55 | 0.11 | 0.02 | 1.17  | 0.031321 | 0.14956  | 0.230161 | 0.424095 |
| MmuSTS.666.1.S1_at   | MmuSTS.666.1 | 8.68  | 8.36  | 0.17 | 0.05 | 1.25  | 0.026147 | 0.001816 | 0.214757 | 0.063958 |
| MmuSTS.667.1.S1_at   | MmuSTS.667.1 | 7.4   | 7.55  | 0.03 | 0.2  | -1.11 | 0.323618 | 0.038382 | 0.607387 | 0.240813 |
| MmuSTS.668.1.S1_at   | MmuSTS.668.1 | 6.41  | 6.8   | 0.48 | 0.23 | -1.31 | 0.183558 | 0.211809 | 0.479459 | 0.485784 |
| MmuSTS.669.1.S1_at   | MmuSTS.669.1 | 7.5   | 7.34  | 0.2  | 0.02 | 1.12  | 0.076628 | 0.098111 | 0.334926 | 0.356202 |
| MmuSTS.67.1.S1_at    | MmuSTS.67.1  | 5.89  | 5.92  | 0.32 | 0.1  | -1.02 | 0.995975 | 0.547024 | 0.998468 | 0.728283 |
| MmuSTS.670.1.S1_at   | MmuSTS.670.1 | 12.18 | 11.87 | 0.04 | 0.05 | 1.24  | 0.000671 | 0.000643 | 0.071248 | 0.042928 |
| MmuSTS.671.1.S1_at   | MmuSTS.671.1 | 6.43  | 6.51  | 0.52 | 0.27 | -1.05 | 0.439134 | 0.53185  | 0.693456 | 0.718957 |
| MmuSTS.672.1.S1_at   | MmuSTS.672.1 | 8.43  | 8.23  | 0.2  | 0.07 | 1.15  | 0.092641 | 0.014096 | 0.360982 | 0.15195  |
| MmuSTS.673.1.S1_at   | MmuSTS.673.1 | 10.97 | 10.24 | 0.06 | 0.05 | 1.66  | 0.0001   | 0.000194 | 0.051196 | 0.030888 |
| MmuSTS.673.1.S1_s_at | MmuSTS.673.1 | 10.51 | 9.53  | 0.11 | 0.05 | 1.97  | 0.000219 | 0.000236 | 0.054357 | 0.03241  |
| MmuSTS.674.1.S1_at   | MmuSTS.674.1 | 10.58 | 10.48 | 0.27 | 0.16 | 1.07  | 0.914303 | 0.037093 | 0.963616 | 0.237141 |

|                      |              |       |       |      |      |        |          |          |          |          |
|----------------------|--------------|-------|-------|------|------|--------|----------|----------|----------|----------|
| MmuSTS.675.1.S1_at   | MmuSTS.675.1 | 12.72 | 12.62 | 0.08 | 0.06 | 1.07   | 0.11055  | 0.249228 | 0.38596  | 0.518313 |
| MmuSTS.676.1.S1_at   | MmuSTS.676.1 | 5.32  | 5.48  | 0.2  | 0.27 | -1.12  | 0.320175 | 0.201855 | 0.604769 | 0.476373 |
| MmuSTS.677.1.S1_at   | MmuSTS.677.1 | 6.32  | 6.34  | 0.17 | 0.21 | -1.01  | 0.854126 | 0.853437 | 0.9366   | 0.916601 |
| MmuSTS.678.1.S1_at   | MmuSTS.678.1 | 3.01  | 3.03  | 0.06 | 0.01 | -1.02  | 0.497505 | 0.003094 | 0.733194 | 0.081194 |
| MmuSTS.679.1.S1_at   | MmuSTS.679.1 | 6.3   | 6.44  | 0.85 | 0.4  | -1.11  | 0.341022 | 0.576405 | 0.620979 | 0.747202 |
| MmuSTS.68.1.S1_at    | MmuSTS.68.1  | 7.48  | 11.57 | 2.26 | 0.33 | -17.08 | 0.01697  | 0.108442 | 0.183747 | 0.371943 |
| MmuSTS.680.1.S1_at   | MmuSTS.680.1 | 3.29  | 3.41  | 0.05 | 0.19 | -1.08  | 0.279297 | 0.139729 | 0.570678 | 0.413083 |
| MmuSTS.681.1.S1_at   | MmuSTS.681.1 | 6.83  | 7.59  | 1.31 | 0.13 | -1.7   | 0.341799 | 0.542446 | 0.621589 | 0.725516 |
| MmuSTS.682.1.S1_at   | MmuSTS.682.1 | 5.96  | 6.62  | 0.45 | 0.15 | -1.58  | 0.069836 | 0.06523  | 0.322728 | 0.301239 |
| MmuSTS.683.1.S1_at   | MmuSTS.683.1 | 6.56  | 5.66  | 0.29 | 0.08 | 1.87   | 0.013724 | 0.002681 | 0.16797  | 0.076408 |
| MmuSTS.684.1.S1_at   | MmuSTS.684.1 | 4.94  | 5.68  | 0.36 | 0.23 | -1.66  | 0.094031 | 0.455731 | 0.363011 | 0.669659 |
| MmuSTS.685.1.S1_at   | MmuSTS.685.1 | 8.22  | 8.48  | 0.01 | 0.13 | -1.2   | 0.05355  | 0.061645 | 0.288636 | 0.295095 |
| MmuSTS.686.1.S1_at   | MmuSTS.686.1 | 3.74  | 4.75  | 0.48 | 0.24 | -2.01  | 0.122664 | 0.416633 | 0.401475 | 0.64165  |
| MmuSTS.687.1.S1_at   | MmuSTS.687.1 | 3.57  | 3.63  | 0.3  | 0.02 | -1.04  | 0.781394 | 0.260729 | 0.900161 | 0.52721  |
| MmuSTS.688.1.S1_at   | MmuSTS.688.1 | 7.66  | 8     | 0.34 | 0.14 | -1.26  | 0.076436 | 0.376045 | 0.334699 | 0.613853 |
| MmuSTS.689.1.S1_at   | MmuSTS.689.1 | 8.76  | 8.29  | 0.16 | 0.24 | 1.38   | 0.099989 | 0.06883  | 0.37088  | 0.308714 |
| MmuSTS.690.1.S1_at   | MmuSTS.690.1 | 8.04  | 9.12  | 1.91 | 0.54 | -2.11  | 0.995915 | 0.660122 | 0.998465 | 0.801083 |
| MmuSTS.691.1.S1_at   | MmuSTS.691.1 | 11.02 | 11    | 0.13 | 0.01 | 1.02   | 0.945428 | 0.18257  | 0.977066 | 0.459065 |
| MmuSTS.692.1.S1_at   | MmuSTS.692.1 | 4.12  | 3.98  | 0.09 | 0.32 | 1.1    | 0.928771 | 0.516821 | 0.969855 | 0.70925  |
| MmuSTS.693.1.S1_at   | MmuSTS.693.1 | 11.78 | 11.97 | 0.07 | 0.13 | -1.14  | 0.258975 | 0.024125 | 0.55325  | 0.1945   |
| MmuSTS.694.1.S1_at   | MmuSTS.694.1 | 6.68  | 6.42  | 0.43 | 0.4  | 1.19   | 0.970396 | 0.440389 | 0.988325 | 0.658939 |
| MmuSTS.695.1.S1_at   | MmuSTS.695.1 | 8.2   | 6.84  | 0.37 | 0.2  | 2.56   | 0.00275  | 0.072908 | 0.097105 | 0.315942 |
| MmuSTS.696.1.S1_at   | MmuSTS.696.1 | 10.9  | 10.8  | 0.32 | 0.06 | 1.07   | 0.184866 | 0.263454 | 0.480995 | 0.529764 |
| MmuSTS.697.1.S1_at   | MmuSTS.697.1 | 10.71 | 10.69 | 0.07 | 0.15 | 1.01   | 0.704672 | 0.025512 | 0.859786 | 0.200366 |
| MmuSTS.698.1.S1_at   | MmuSTS.698.1 | 7.32  | 7.21  | 0.05 | 0.15 | 1.07   | 0.411269 | 0.007197 | 0.67323  | 0.114062 |
| MmuSTS.699.1.S1_at   | MmuSTS.699.1 | 3.67  | 5.79  | 0.42 | 0.35 | -4.37  | 0.002429 | 0.139548 | 0.093606 | 0.412779 |
| MmuSTS.7.1.S1_at     | MmuSTS.7.1   | 8.05  | 8.14  | 0.25 | 0.29 | -1.07  | 0.240904 | 0.094292 | 0.538268 | 0.350889 |
| MmuSTS.70.1.S1_at    | MmuSTS.70.1  | 6.23  | 6.37  | 0.14 | 0.04 | -1.1   | 0.155136 | 0.177852 | 0.445286 | 0.454167 |
| MmuSTS.700.1.S1_at   | MmuSTS.700.1 | 5.47  | 8.21  | 1.53 | 0.24 | -6.66  | 0.125363 | 0.282248 | 0.405812 | 0.544991 |
| MmuSTS.701.1.S1_at   | MmuSTS.701.1 | 8.27  | 8.59  | 0.28 | 0.19 | -1.25  | 0.475294 | 0.011283 | 0.71804  | 0.138076 |
| MmuSTS.702.1.S1_at   | MmuSTS.702.1 | 13.92 | 12.01 | 0.13 | 0.2  | 3.78   | 0.000152 | 0.017089 | 0.051907 | 0.165617 |
| MmuSTS.703.1.S1_at   | MmuSTS.703.1 | 6.4   | 8.15  | 0.72 | 0.11 | -3.37  | 0.037295 | 0.33365  | 0.248596 | 0.581819 |
| MmuSTS.704.1.S1_at   | MmuSTS.704.1 | 9.08  | 9.49  | 1.12 | 0.35 | -1.33  | 0.767926 | 0.247852 | 0.893427 | 0.51728  |
| MmuSTS.705.1.S1_at   | MmuSTS.705.1 | 11.24 | 11.36 | 0.05 | 0.05 | -1.09  | 0.034207 | 0.007158 | 0.239647 | 0.113788 |
| MmuSTS.706.1.S1_at   | MmuSTS.706.1 | 6.39  | 6.57  | 0.07 | 0.07 | -1.13  | 0.018622 | 0.720847 | 0.189686 | 0.838368 |
| MmuSTS.707.1.S1_at   | MmuSTS.707.1 | 7.48  | 7.48  | 0.36 | 0.04 | -1     | 0.378572 | 0.251393 | 0.648732 | 0.520132 |
| MmuSTS.708.1.S1_at   | MmuSTS.708.1 | 6.67  | 8.04  | 0.57 | 0.16 | -2.58  | 0.021088 | 0.148213 | 0.19883  | 0.422745 |
| MmuSTS.709.1.S1_s_at | MmuSTS.709.1 | 3.92  | 3.86  | 0.1  | 0.05 | 1.04   | 0.16093  | 0.166618 | 0.452431 | 0.443115 |
| MmuSTS.71.1.S1_at    | MmuSTS.71.1  | 12.29 | 12.18 | 0.13 | 0.03 | 1.08   | 0.194608 | 0.070138 | 0.491247 | 0.311033 |
| MmuSTS.710.1.S1_at   | MmuSTS.710.1 | 11.43 | 11.31 | 0.27 | 0.03 | 1.09   | 0.610963 | 0.45405  | 0.806033 | 0.668394 |
| MmuSTS.711.1.S1_at   | MmuSTS.711.1 | 5.27  | 5.11  | 0.05 | 0.13 | 1.11   | 0.190951 | 0.398682 | 0.487168 | 0.629458 |
| MmuSTS.712.1.S1_at   | MmuSTS.712.1 | 3.87  | 3.89  | 0.08 | 0.08 | -1.01  | 0.718124 | 0.537556 | 0.866934 | 0.722606 |
| MmuSTS.713.1.S1_at   | MmuSTS.713.1 | 7.58  | 8.06  | 0.57 | 0.07 | -1.39  | 0.072674 | 0.174593 | 0.327605 | 0.451097 |

|                      |              |       |       |      |      |        |          |          |          |          |
|----------------------|--------------|-------|-------|------|------|--------|----------|----------|----------|----------|
| MmuSTS.713.1.S1_x_at | MmuSTS.713.1 | 7.5   | 8.05  | 0.17 | 0.09 | -1.47  | 0.007494 | 0.102038 | 0.134856 | 0.362102 |
| MmuSTS.714.1.S1_at   | MmuSTS.714.1 | 6.75  | 8.94  | 0.33 | 0.24 | -4.56  | 0.000969 | 0.009057 | 0.076222 | 0.125799 |
| MmuSTS.715.1.S1_at   | MmuSTS.715.1 | 12.76 | 12.75 | 0.07 | 0.01 | 1.01   | 0.959934 | 0.285779 | 0.983565 | 0.547484 |
| MmuSTS.716.1.S1_at   | MmuSTS.716.1 | 5.89  | 5.81  | 0.1  | 0.01 | 1.06   | 0.63774  | 0.919241 | 0.822594 | 0.954653 |
| MmuSTS.717.1.S1_at   | MmuSTS.717.1 | 3.3   | 5.5   | 1.02 | 0.37 | -4.59  | 0.070973 | 0.24988  | 0.324424 | 0.518876 |
| MmuSTS.718.1.S1_at   | MmuSTS.718.1 | 8.22  | 11.32 | 1.62 | 0.26 | -8.57  | 0.036404 | 0.240893 | 0.24584  | 0.511584 |
| MmuSTS.719.1.S1_at   | MmuSTS.719.1 | 9.36  | 9.18  | 0.46 | 0.04 | 1.14   | 0.214766 | 0.747247 | 0.51237  | 0.853149 |
| MmuSTS.72.1.S1_at    | MmuSTS.72.1  | 11.2  | 11.54 | 0.22 | 0.02 | -1.26  | 0.194625 | 0.756371 | 0.491247 | 0.858223 |
| MmuSTS.720.1.S1_at   | MmuSTS.720.1 | 4.46  | 4.68  | 0.3  | 0.13 | -1.17  | 0.919384 | 0.064944 | 0.965499 | 0.300855 |
| MmuSTS.721.1.S1_at   | MmuSTS.721.1 | 6.14  | 10.24 | 1.2  | 0.26 | -17.14 | 0.010133 | 0.283221 | 0.150406 | 0.545783 |
| MmuSTS.722.1.S1_at   | MmuSTS.722.1 | 6.98  | 8.85  | 0.25 | 0.04 | -3.66  | 0.000231 | 0.002483 | 0.054608 | 0.073652 |
| MmuSTS.723.1.S1_at   | MmuSTS.723.1 | 10.87 | 10.88 | 0.17 | 0.14 | -1.01  | 0.510595 | 0.775981 | 0.741963 | 0.869682 |
| MmuSTS.725.1.S1_at   | MmuSTS.725.1 | 11.63 | 11.68 | 0.05 | 0.03 | -1.04  | 0.467483 | 0.024621 | 0.712945 | 0.19635  |
| MmuSTS.726.1.S1_at   | MmuSTS.726.1 | 5.8   | 5.81  | 0.1  | 0.03 | -1     | 0.949961 | 0.871263 | 0.97917  | 0.92684  |
| MmuSTS.727.1.S1_at   | MmuSTS.727.1 | 8.07  | 8.48  | 0.31 | 0.18 | -1.33  | 0.074053 | 0.024111 | 0.330086 | 0.1945   |
| MmuSTS.728.1.S1_at   | MmuSTS.728.1 | 10.31 | 9.86  | 0.22 | 0.17 | 1.36   | 0.111537 | 0.125206 | 0.387565 | 0.395684 |
| MmuSTS.729.1.S1_at   | MmuSTS.729.1 | 10.39 | 10.51 | 0.16 | 0.13 | -1.09  | 0.20273  | 0.195251 | 0.500426 | 0.470253 |
| MmuSTS.73.1.S1_s_at  | MmuSTS.73.1  | 10.75 | 10.91 | 0.05 | 0.02 | -1.11  | 0.007937 | 0.487159 | 0.138287 | 0.690281 |
| MmuSTS.730.1.S1_at   | MmuSTS.730.1 | 11.22 | 11.39 | 0.07 | 0.06 | -1.12  | 0.033582 | 0.06321  | 0.237136 | 0.298119 |
| MmuSTS.731.1.S1_at   | MmuSTS.731.1 | 11.4  | 11.41 | 0.2  | 0.03 | -1.01  | 0.913501 | 0.420496 | 0.963382 | 0.644185 |
| MmuSTS.732.1.S1_at   | MmuSTS.732.1 | 5.56  | 5.48  | 0.22 | 0.11 | 1.06   | 0.216822 | 0.263008 | 0.514637 | 0.529397 |
| MmuSTS.733.1.S1_at   | MmuSTS.733.1 | 9.14  | 9.27  | 0.09 | 0.07 | -1.1   | 0.036949 | 0.245879 | 0.24745  | 0.51552  |
| MmuSTS.734.1.S1_at   | MmuSTS.734.1 | 13.42 | 13.46 | 0.04 | 0.05 | -1.03  | 0.463495 | 0.757184 | 0.710084 | 0.858648 |
| MmuSTS.735.1.S1_at   | MmuSTS.735.1 | 7.24  | 7.62  | 0.5  | 0.05 | -1.31  | 0.156458 | 0.424151 | 0.446993 | 0.646747 |
| MmuSTS.736.1.S1_at   | MmuSTS.736.1 | 11.3  | 11.54 | 0.19 | 0.06 | -1.18  | 0.096141 | 0.064692 | 0.365673 | 0.300314 |
| MmuSTS.737.1.S1_at   | MmuSTS.737.1 | 10.64 | 10.79 | 0.02 | 0.08 | -1.11  | 0.128849 | 0.564045 | 0.411072 | 0.738956 |
| MmuSTS.738.1.S1_at   | MmuSTS.738.1 | 3.6   | 3.57  | 0.08 | 0.01 | 1.02   | 0.535503 | 0.047359 | 0.758374 | 0.262353 |
| MmuSTS.739.1.S1_at   | MmuSTS.739.1 | 5.63  | 5.76  | 0.05 | 0.07 | -1.09  | 0.065807 | 0.30896  | 0.314024 | 0.564656 |
| MmuSTS.74.1.S1_at    | MmuSTS.74.1  | 10.14 | 10.39 | 0.15 | 0.09 | -1.19  | 0.109002 | 0.71107  | 0.383979 | 0.8324   |
| MmuSTS.740.1.S1_at   | MmuSTS.740.1 | 12.45 | 12.54 | 0.09 | 0.05 | -1.07  | 0.182214 | 0.18233  | 0.477958 | 0.458787 |
| MmuSTS.741.1.S1_at   | MmuSTS.741.1 | 3.81  | 3.84  | 0.32 | 0.03 | -1.02  | 0.465546 | 0.595741 | 0.711552 | 0.759208 |
| MmuSTS.742.1.S1_at   | MmuSTS.742.1 | 4.87  | 4.91  | 0.19 | 0.06 | -1.02  | 0.466765 | 0.692531 | 0.712397 | 0.821061 |
| MmuSTS.743.1.S1_at   | MmuSTS.743.1 | 12.46 | 11.66 | 0.82 | 0.08 | 1.73   | 0.18702  | 0.091553 | 0.483107 | 0.346652 |
| MmuSTS.744.1.S1_at   | MmuSTS.744.1 | 11.32 | 11.39 | 0.08 | 0.09 | -1.05  | 0.824384 | 0.198491 | 0.921961 | 0.473391 |
| MmuSTS.745.1.S1_at   | MmuSTS.745.1 | 7.08  | 4.27  | 0.69 | 0.27 | 7      | 0.00296  | 0.00442  | 0.099517 | 0.092904 |
| MmuSTS.746.1.S1_at   | MmuSTS.746.1 | 9.35  | 9.17  | 0.35 | 0.1  | 1.13   | 0.173569 | 0.670347 | 0.467917 | 0.807242 |
| MmuSTS.747.1.S1_at   | MmuSTS.747.1 | 9.13  | 9.38  | 0.16 | 0.14 | -1.19  | 0.104334 | 0.416093 | 0.377773 | 0.64135  |
| MmuSTS.748.1.S1_at   | MmuSTS.748.1 | 4.97  | 4.94  | 0.09 | 0.03 | 1.02   | 0.664944 | 0.042674 | 0.838877 | 0.251037 |
| MmuSTS.749.1.S1_at   | MmuSTS.749.1 | 11.26 | 11.3  | 0.06 | 0.16 | -1.03  | 0.894719 | 0.000287 | 0.955118 | 0.034857 |
| MmuSTS.75.1.S1_at    | MmuSTS.75.1  | 5.26  | 5.23  | 0.06 | 0.06 | 1.02   | 0.572718 | 0.652938 | 0.780771 | 0.797125 |
| MmuSTS.750.1.S1_at   | MmuSTS.750.1 | 4.46  | 4.27  | 0.24 | 0.15 | 1.14   | 0.121503 | 0.100762 | 0.400293 | 0.360174 |
| MmuSTS.751.1.S1_at   | MmuSTS.751.1 | 7.06  | 7.49  | 0.31 | 0.2  | -1.34  | 0.052983 | 0.275533 | 0.287278 | 0.539743 |
| MmuSTS.752.1.S1_at   | MmuSTS.752.1 | 13.44 | 13.46 | 0.03 | 0    | -1.02  | 0.463486 | 0.934374 | 0.710084 | 0.962766 |

|                      |              |       |       |      |      |       |          |          |          |          |
|----------------------|--------------|-------|-------|------|------|-------|----------|----------|----------|----------|
| MmuSTS.753.1.S1_at   | MmuSTS.753.1 | 6.84  | 6.88  | 0.2  | 0.1  | -1.03 | 0.651723 | 0.848572 | 0.830782 | 0.91405  |
| MmuSTS.754.1.S1_at   | MmuSTS.754.1 | 7.43  | 6.35  | 0.35 | 0.15 | 2.11  | 0.005517 | 0.126089 | 0.119675 | 0.39672  |
| MmuSTS.755.1.S1_at   | MmuSTS.755.1 | 6.4   | 5.82  | 0.25 | 0.19 | 1.49  | 0.150383 | 0.13706  | 0.439446 | 0.409836 |
| MmuSTS.756.1.S1_at   | MmuSTS.756.1 | 5.21  | 5.22  | 0.17 | 0.04 | -1    | 0.809864 | 0.153093 | 0.914798 | 0.428011 |
| MmuSTS.757.1.S1_at   | MmuSTS.757.1 | 9.04  | 9.87  | 0.29 | 0.07 | -1.78 | 0.018978 | 0.028503 | 0.19121  | 0.210658 |
| MmuSTS.758.1.S1_at   | MmuSTS.758.1 | 6.82  | 7.09  | 0.29 | 0.05 | -1.21 | 0.52741  | 0.274607 | 0.753064 | 0.539059 |
| MmuSTS.759.1.S1_at   | MmuSTS.759.1 | 4.56  | 4.47  | 0.31 | 0.27 | 1.07  | 0.926813 | 0.982216 | 0.969047 | 0.990289 |
| MmuSTS.76.1.S1_at    | MmuSTS.76.1  | 6.05  | 6.17  | 0.02 | 0.06 | -1.09 | 0.0798   | 0.06904  | 0.33994  | 0.309017 |
| MmuSTS.76.1.S1_x_at  | MmuSTS.76.1  | 6.22  | 6.22  | 0.07 | 0.03 | -1    | 0.380561 | 0.695823 | 0.65023  | 0.823223 |
| MmuSTS.760.1.S1_at   | MmuSTS.760.1 | 10.23 | 10.11 | 0.12 | 0.05 | 1.08  | 0.225652 | 0.031379 | 0.523395 | 0.219065 |
| MmuSTS.761.1.S1_at   | MmuSTS.761.1 | 2.91  | 2.88  | 0.12 | 0.09 | 1.02  | 0.173802 | 0.202    | 0.468263 | 0.476444 |
| MmuSTS.762.1.S1_at   | MmuSTS.762.1 | 4.07  | 4.01  | 0.24 | 0.31 | 1.04  | 0.775893 | 0.942887 | 0.897461 | 0.967564 |
| MmuSTS.763.1.S1_at   | MmuSTS.763.1 | 12.24 | 12.14 | 0.13 | 0.06 | 1.07  | 0.743117 | 0.024044 | 0.881225 | 0.194371 |
| MmuSTS.764.1.S1_at   | MmuSTS.764.1 | 10.9  | 10.85 | 0.08 | 0.14 | 1.04  | 0.274    | 0.723638 | 0.566013 | 0.840028 |
| MmuSTS.765.1.S1_at   | MmuSTS.765.1 | 7.44  | 7.04  | 0.4  | 0.08 | 1.31  | 0.146168 | 0.087846 | 0.43399  | 0.341218 |
| MmuSTS.766.1.S1_at   | MmuSTS.766.1 | 6.15  | 6.01  | 0.27 | 0.02 | 1.11  | 0.381009 | 0.248498 | 0.65054  | 0.517769 |
| MmuSTS.767.1.S1_at   | MmuSTS.767.1 | 6.9   | 6.92  | 0.13 | 0.03 | -1.01 | 0.883675 | 0.256614 | 0.950562 | 0.524408 |
| MmuSTS.768.1.S1_at   | MmuSTS.768.1 | 4.24  | 4.28  | 0.09 | 0.11 | -1.03 | 0.663728 | 0.087589 | 0.837982 | 0.340846 |
| MmuSTS.769.1.S1_at   | MmuSTS.769.1 | 13.49 | 10.58 | 0.24 | 1    | 7.53  | 0.017498 | 0.119494 | 0.185974 | 0.388143 |
| MmuSTS.77.1.S1_at    | MmuSTS.77.1  | 10.96 | 10.81 | 0.12 | 0.12 | 1.11  | 0.115897 | 0.059357 | 0.392991 | 0.29054  |
| MmuSTS.770.1.S1_at   | MmuSTS.770.1 | 7.19  | 7.45  | 0.06 | 0.13 | -1.19 | 0.037953 | 0.050599 | 0.250613 | 0.270317 |
| MmuSTS.771.1.S1_at   | MmuSTS.771.1 | 11.28 | 11.28 | 0.02 | 0.04 | 1     | 0.505668 | 0.482268 | 0.738641 | 0.687144 |
| MmuSTS.772.1.S1_at   | MmuSTS.772.1 | 10.52 | 9.54  | 0.16 | 0.33 | 1.97  | 0.015013 | 0.157003 | 0.17462  | 0.432467 |
| MmuSTS.773.1.S1_at   | MmuSTS.773.1 | 11.45 | 11.13 | 0.11 | 0.12 | 1.25  | 0.102079 | 0.043546 | 0.373939 | 0.253261 |
| MmuSTS.774.1.S1_at   | MmuSTS.774.1 | 3.57  | 3.57  | 0.17 | 0.01 | 1.01  | 0.986805 | 0.998819 | 0.995228 | 0.999367 |
| MmuSTS.775.1.S1_at   | MmuSTS.775.1 | 3.42  | 3.42  | 0.05 | 0.01 | -1    | 0.408627 | 0.72077  | 0.671385 | 0.838368 |
| MmuSTS.776.1.S1_at   | MmuSTS.776.1 | 5.6   | 5.75  | 0.17 | 0.08 | -1.11 | 0.696303 | 0.621194 | 0.855348 | 0.775813 |
| MmuSTS.777.1.S1_at   | MmuSTS.777.1 | 4.58  | 4.7   | 0.16 | 0.21 | -1.08 | 0.98189  | 0.410012 | 0.993299 | 0.63704  |
| MmuSTS.778.1.S1_at   | MmuSTS.778.1 | 3.18  | 2.85  | 0.2  | 0.05 | 1.25  | 0.08999  | 0.343936 | 0.356863 | 0.589617 |
| MmuSTS.779.1.S1_at   | MmuSTS.779.1 | 5.59  | 5.68  | 0.62 | 0.19 | -1.07 | 0.266232 | 0.285378 | 0.558722 | 0.547227 |
| MmuSTS.78.1.S1_at    | MmuSTS.78.1  | 5.46  | 5.75  | 0.25 | 0.42 | -1.22 | 0.411769 | 0.112783 | 0.673666 | 0.37844  |
| MmuSTS.780.1.S1_s_at | MmuSTS.780.1 | 4.06  | 4.04  | 0.09 | 0.22 | 1.02  | 0.54938  | 0.46929  | 0.767114 | 0.678193 |
| MmuSTS.781.1.S1_at   | MmuSTS.781.1 | 4.43  | 4.49  | 0.05 | 0.18 | -1.04 | 0.337136 | 0.489076 | 0.617686 | 0.691588 |
| MmuSTS.782.1.S1_at   | MmuSTS.782.1 | 4.94  | 4.85  | 0.16 | 0.1  | 1.07  | 0.280748 | 0.415152 | 0.571782 | 0.640713 |
| MmuSTS.783.1.S1_at   | MmuSTS.783.1 | 3.5   | 3.63  | 0.1  | 0.26 | -1.09 | 0.325105 | 0.430352 | 0.608531 | 0.651374 |
| MmuSTS.784.1.S1_at   | MmuSTS.784.1 | 3.49  | 3.62  | 0.17 | 0.23 | -1.09 | 0.991867 | 0.802024 | 0.997004 | 0.885995 |
| MmuSTS.785.1.S1_at   | MmuSTS.785.1 | 9.83  | 9.69  | 0.09 | 0.02 | 1.1   | 0.122329 | 0.203478 | 0.40112  | 0.477701 |
| MmuSTS.786.1.S1_at   | MmuSTS.786.1 | 3.85  | 3.93  | 0.09 | 0.09 | -1.06 | 0.429561 | 0.094897 | 0.685945 | 0.352    |
| MmuSTS.787.1.S1_at   | MmuSTS.787.1 | 7.9   | 7.65  | 0.04 | 0.03 | 1.19  | 0.000831 | 0.006366 | 0.07338  | 0.108489 |
| MmuSTS.788.1.S1_at   | MmuSTS.788.1 | 6.3   | 6.21  | 0.16 | 0.06 | 1.07  | 0.978227 | 0.340488 | 0.991561 | 0.586776 |
| MmuSTS.789.1.S1_at   | MmuSTS.789.1 | 8.69  | 9.14  | 0.91 | 0.29 | -1.37 | 0.542395 | 0.220379 | 0.762761 | 0.493783 |
| MmuSTS.79.1.S1_at    | MmuSTS.79.1  | 11.13 | 11.03 | 0.2  | 0.1  | 1.07  | 0.779865 | 0.759063 | 0.899497 | 0.859979 |
| MmuSTS.790.1.S1_at   | MmuSTS.790.1 | 7.28  | 7.28  | 0.12 | 0.03 | 1     | 0.430136 | 0.571851 | 0.686505 | 0.744056 |

|                      |              |       |       |      |      |       |          |          |          |          |
|----------------------|--------------|-------|-------|------|------|-------|----------|----------|----------|----------|
| MmuSTS.791.1.S1_at   | MmuSTS.791.1 | 8.2   | 7.38  | 0.89 | 0.49 | 1.76  | 0.139612 | 0.037777 | 0.425212 | 0.238746 |
| MmuSTS.792.1.S1_at   | MmuSTS.792.1 | 10.56 | 10.43 | 0.19 | 0.18 | 1.09  | 0.412204 | 0.730663 | 0.673981 | 0.844055 |
| MmuSTS.793.1.S1_at   | MmuSTS.793.1 | 11.67 | 12.6  | 0.38 | 0.06 | -1.9  | 0.016194 | 0.09818  | 0.179908 | 0.356253 |
| MmuSTS.794.1.S1_at   | MmuSTS.794.1 | 5.41  | 5.38  | 0.04 | 0.07 | 1.02  | 0.678115 | 0.784451 | 0.846434 | 0.875181 |
| MmuSTS.795.1.S1_at   | MmuSTS.795.1 | 9.03  | 9.59  | 0.26 | 0.28 | -1.47 | 0.069509 | 0.264491 | 0.322002 | 0.530437 |
| MmuSTS.796.1.S1_at   | MmuSTS.796.1 | 7.56  | 7.86  | 0.29 | 0.02 | -1.23 | 0.512004 | 0.074507 | 0.742848 | 0.318173 |
| MmuSTS.797.1.S1_at   | MmuSTS.797.1 | 4.03  | 3.92  | 0.15 | 0.15 | 1.08  | 0.331461 | 0.240716 | 0.61341  | 0.511447 |
| MmuSTS.798.1.S1_at   | MmuSTS.798.1 | 10.15 | 9.81  | 0.25 | 0.08 | 1.27  | 0.250222 | 0.132518 | 0.544972 | 0.404544 |
| MmuSTS.799.1.S1_at   | MmuSTS.799.1 | 2.78  | 2.9   | 0.18 | 0.04 | -1.09 | 0.838288 | 0.147655 | 0.929053 | 0.421957 |
| MmuSTS.8.1.S1_at     | MmuSTS.8.1   | 12.39 | 11.49 | 0.24 | 0.21 | 1.87  | 0.007511 | 0.020311 | 0.134925 | 0.178899 |
| MmuSTS.80.1.S1_at    | MmuSTS.80.1  | 10.05 | 10.11 | 0.07 | 0.06 | -1.05 | 0.364045 | 0.925797 | 0.638677 | 0.958018 |
| MmuSTS.800.1.S1_at   | MmuSTS.800.1 | 7.6   | 7.93  | 0.26 | 0.12 | -1.26 | 0.059057 | 0.150129 | 0.30011  | 0.424714 |
| MmuSTS.801.1.S1_s_at | MmuSTS.801.1 | 10.41 | 8.84  | 0.53 | 0.15 | 2.97  | 0.017013 | 0.202219 | 0.183848 | 0.476628 |
| MmuSTS.802.1.S1_at   | MmuSTS.802.1 | 3.89  | 3.83  | 0.28 | 0.09 | 1.04  | 0.249514 | 0.449184 | 0.544627 | 0.664892 |
| MmuSTS.803.1.S1_at   | MmuSTS.803.1 | 5.03  | 6.91  | 0.34 | 0.35 | -3.7  | 0.003405 | 0.131459 | 0.103083 | 0.403584 |
| MmuSTS.804.1.S1_at   | MmuSTS.804.1 | 4.83  | 4.97  | 0.16 | 0.03 | -1.11 | 0.379405 | 0.275833 | 0.649328 | 0.540035 |
| MmuSTS.805.1.S1_at   | MmuSTS.805.1 | 11.88 | 11.9  | 0.08 | 0.15 | -1.02 | 0.963184 | 0.888769 | 0.985129 | 0.936623 |
| MmuSTS.806.1.S1_at   | MmuSTS.806.1 | 10.51 | 9.94  | 0.66 | 0.32 | 1.49  | 0.414099 | 0.179087 | 0.675408 | 0.455436 |
| MmuSTS.807.1.S1_at   | MmuSTS.807.1 | 4.25  | 4.19  | 0.26 | 0.4  | 1.04  | 0.863889 | 0.278081 | 0.940941 | 0.541754 |
| MmuSTS.808.1.S1_at   | MmuSTS.808.1 | 10.76 | 11.69 | 0.12 | 0.12 | -1.91 | 0.0005   | 0.000752 | 0.068271 | 0.045271 |
| MmuSTS.809.1.S1_at   | MmuSTS.809.1 | 11.56 | 11.76 | 0.15 | 0.1  | -1.16 | 0.133991 | 0.064707 | 0.417435 | 0.300314 |
| MmuSTS.81.1.S1_at    | MmuSTS.81.1  | 3.01  | 2.78  | 0.18 | 0.04 | 1.18  | 0.108291 | 0.065601 | 0.382964 | 0.301514 |
| MmuSTS.810.1.S1_at   | MmuSTS.810.1 | 7.45  | 7.45  | 0.06 | 0.05 | -1    | 0.237691 | 0.46209  | 0.535124 | 0.673537 |
| MmuSTS.811.1.S1_at   | MmuSTS.811.1 | 5.9   | 5.84  | 0.05 | 0.06 | 1.04  | 0.301267 | 0.498116 | 0.589242 | 0.697266 |
| MmuSTS.812.1.S1_at   | MmuSTS.812.1 | 5.69  | 5.6   | 0.14 | 0.04 | 1.07  | 0.423998 | 0.534372 | 0.681839 | 0.720341 |
| MmuSTS.813.1.S1_at   | MmuSTS.813.1 | 11.51 | 11.83 | 0.06 | 0.23 | -1.25 | 0.078834 | 0.003893 | 0.338706 | 0.088806 |
| MmuSTS.814.1.S1_s_at | MmuSTS.814.1 | 5.23  | 5.16  | 0.48 | 0.38 | 1.05  | 0.64395  | 0.431457 | 0.826523 | 0.652374 |
| MmuSTS.815.1.S1_at   | MmuSTS.815.1 | 8.54  | 9.03  | 0.17 | 0.01 | -1.41 | 0.003626 | 0.040909 | 0.10567  | 0.247161 |
| MmuSTS.816.1.S1_at   | MmuSTS.816.1 | 9     | 8.98  | 0.1  | 0.07 | 1.01  | 0.557896 | 0.049627 | 0.772457 | 0.267843 |
| MmuSTS.817.1.S1_at   | MmuSTS.817.1 | 7.05  | 6.92  | 0.72 | 0.08 | 1.09  | 0.959944 | 0.660816 | 0.983565 | 0.801589 |
| MmuSTS.818.1.S1_at   | MmuSTS.818.1 | 6.83  | 6.47  | 0.05 | 0.31 | 1.28  | 0.124221 | 0.019168 | 0.404242 | 0.1742   |
| MmuSTS.819.1.S1_at   | MmuSTS.819.1 | 6.65  | 7.2   | 0.3  | 0.22 | -1.46 | 0.094898 | 0.31312  | 0.363852 | 0.567684 |
| MmuSTS.82.1.S1_at    | MmuSTS.82.1  | 10.32 | 10.01 | 0.23 | 0.06 | 1.24  | 0.315142 | 0.013863 | 0.600287 | 0.150985 |
| MmuSTS.820.1.S1_at   | MmuSTS.820.1 | 9.06  | 9.07  | 0.2  | 0.08 | -1.01 | 0.584012 | 0.280342 | 0.788478 | 0.543556 |
| MmuSTS.821.1.S1_at   | MmuSTS.821.1 | 10.43 | 9.96  | 0.13 | 0.03 | 1.38  | 0.003116 | 0.00088  | 0.100877 | 0.047602 |
| MmuSTS.822.1.S1_at   | MmuSTS.822.1 | 12.23 | 12.31 | 0.04 | 0.08 | -1.06 | 0.481373 | 0.613239 | 0.721905 | 0.770484 |
| MmuSTS.823.1.S1_at   | MmuSTS.823.1 | 9.62  | 9.64  | 0.16 | 0.16 | -1.02 | 0.643456 | 0.100651 | 0.826158 | 0.360009 |
| MmuSTS.824.1.S1_at   | MmuSTS.824.1 | 9.96  | 9.67  | 0.08 | 0.05 | 1.23  | 0.003282 | 0.075033 | 0.102069 | 0.31917  |
| MmuSTS.825.1.S1_at   | MmuSTS.825.1 | 9.99  | 10.18 | 0.24 | 0.16 | -1.14 | 0.485395 | 0.006333 | 0.724931 | 0.108074 |
| MmuSTS.825.1.S1_x_at | MmuSTS.825.1 | 9.9   | 10.13 | 0.26 | 0.17 | -1.18 | 0.402191 | 0.006625 | 0.666556 | 0.110304 |
| MmuSTS.826.1.S1_at   | MmuSTS.826.1 | 5.24  | 5.73  | 0.37 | 0.13 | -1.4  | 0.09368  | 0.087665 | 0.362354 | 0.340941 |
| MmuSTS.827.1.S1_at   | MmuSTS.827.1 | 2.99  | 2.94  | 0.09 | 0.03 | 1.04  | 0.648353 | 0.840642 | 0.829161 | 0.909176 |
| MmuSTS.827.1.S1_s_at | MmuSTS.827.1 | 3.76  | 3.75  | 0.03 | 0.04 | 1     | 0.194482 | 0.240233 | 0.491143 | 0.510851 |

|                      |              |       |       |      |      |       |          |          |          |          |
|----------------------|--------------|-------|-------|------|------|-------|----------|----------|----------|----------|
| MmuSTS.828.1.S1_at   | MmuSTS.828.1 | 7.77  | 7.65  | 0.09 | 0.27 | 1.09  | 0.133802 | 0.104482 | 0.417214 | 0.36573  |
| MmuSTS.829.1.S1_at   | MmuSTS.829.1 | 7.3   | 6.91  | 0.14 | 0.3  | 1.32  | 0.063187 | 0.020083 | 0.308086 | 0.178007 |
| MmuSTS.83.1.S1_at    | MmuSTS.83.1  | 10.67 | 10.49 | 0.19 | 0.11 | 1.13  | 0.225071 | 0.262616 | 0.522982 | 0.528973 |
| MmuSTS.830.1.S1_at   | MmuSTS.830.1 | 6.43  | 10.49 | 1.62 | 0.21 | -16.7 | 0.028162 | 0.166083 | 0.220266 | 0.442666 |
| MmuSTS.831.1.S1_at   | MmuSTS.831.1 | 12.05 | 12.46 | 0.05 | 0.15 | -1.33 | 0.016972 | 0.000505 | 0.183747 | 0.039158 |
| MmuSTS.832.1.S1_at   | MmuSTS.832.1 | 7.55  | 7.74  | 0.33 | 0.13 | -1.14 | 0.251335 | 0.191489 | 0.546147 | 0.466823 |
| MmuSTS.833.1.S1_s_at | MmuSTS.833.1 | 10.67 | 10.69 | 0.25 | 0.07 | -1.01 | 0.451354 | 0.128472 | 0.702207 | 0.399814 |
| MmuSTS.834.1.S1_at   | MmuSTS.834.1 | 12.46 | 12.27 | 0.08 | 0.05 | 1.14  | 0.021624 | 0.245186 | 0.20067  | 0.514949 |
| MmuSTS.835.1.S1_at   | MmuSTS.835.1 | 9.38  | 11.04 | 0.97 | 0.19 | -3.16 | 0.062301 | 0.160623 | 0.306291 | 0.436745 |
| MmuSTS.836.1.S1_at   | MmuSTS.836.1 | 3.83  | 3.36  | 0.22 | 0.14 | 1.39  | 0.02523  | 0.019013 | 0.211843 | 0.173596 |
| MmuSTS.837.1.S1_at   | MmuSTS.837.1 | 10.75 | 10.66 | 0.19 | 0.06 | 1.07  | 0.496129 | 0.5093   | 0.732084 | 0.704094 |
| MmuSTS.838.1.S1_at   | MmuSTS.838.1 | 9.31  | 9.34  | 0.14 | 0.33 | -1.02 | 0.540207 | 0.010774 | 0.761304 | 0.135471 |
| MmuSTS.839.1.S1_at   | MmuSTS.839.1 | 6.97  | 7.26  | 0.38 | 0.25 | -1.22 | 0.243869 | 0.139249 | 0.540641 | 0.412427 |
| MmuSTS.84.1.S1_at    | MmuSTS.84.1  | 4.5   | 5.02  | 0.53 | 0.41 | -1.44 | 0.302312 | 0.334618 | 0.590132 | 0.582581 |
| MmuSTS.840.1.S1_at   | MmuSTS.840.1 | 12.38 | 12.11 | 0.03 | 0.02 | 1.2   | 0.000201 | 0.056956 | 0.053494 | 0.284751 |
| MmuSTS.841.1.S1_at   | MmuSTS.841.1 | 9.87  | 10.18 | 0.09 | 0.03 | -1.24 | 0.007754 | 0.000451 | 0.136735 | 0.038539 |
| MmuSTS.842.1.S1_at   | MmuSTS.842.1 | 8.21  | 7.78  | 0.2  | 0.03 | 1.34  | 0.061587 | 0.051294 | 0.30471  | 0.271872 |
| MmuSTS.843.1.S1_at   | MmuSTS.843.1 | 6.54  | 6.46  | 0.67 | 0.14 | 1.06  | 0.684087 | 0.34974  | 0.849404 | 0.593566 |
| MmuSTS.844.1.S1_at   | MmuSTS.844.1 | 9.19  | 10.95 | 0.75 | 0.23 | -3.39 | 0.043577 | 0.491491 | 0.265765 | 0.693004 |
| MmuSTS.845.1.S1_at   | MmuSTS.845.1 | 5.1   | 5.46  | 0.25 | 0.25 | -1.28 | 0.157047 | 0.392565 | 0.4479   | 0.625813 |
| MmuSTS.846.1.S1_at   | MmuSTS.846.1 | 5.77  | 5.73  | 0.21 | 0.12 | 1.03  | 0.775865 | 0.81005  | 0.897461 | 0.890518 |
| MmuSTS.847.1.S1_at   | MmuSTS.847.1 | 9.49  | 9.36  | 0.16 | 0.08 | 1.1   | 0.300833 | 0.29051  | 0.588975 | 0.55123  |
| MmuSTS.848.1.S1_s_at | MmuSTS.848.1 | 8.3   | 8.09  | 0.22 | 0.07 | 1.16  | 0.473681 | 0.936002 | 0.716998 | 0.963932 |
| MmuSTS.849.1.S1_at   | MmuSTS.849.1 | 4.64  | 5.36  | 0.3  | 0.6  | -1.66 | 0.404707 | 0.604014 | 0.668358 | 0.764427 |
| MmuSTS.85.1.S1_s_at  | MmuSTS.85.1  | 3.84  | 7.35  | 1.22 | 0.24 | -11.4 | 0.018047 | 0.069962 | 0.187335 | 0.31072  |
| MmuSTS.850.1.S1_at   | MmuSTS.850.1 | 6.74  | 6.91  | 0.34 | 0.09 | -1.12 | 0.113526 | 0.164836 | 0.390238 | 0.441152 |
| MmuSTS.851.1.S1_at   | MmuSTS.851.1 | 11.47 | 11.45 | 0.1  | 0.12 | 1.01  | 0.708811 | 0.214125 | 0.862097 | 0.487729 |
| MmuSTS.852.1.S1_at   | MmuSTS.852.1 | 4.99  | 5.03  | 0.11 | 0.1  | -1.03 | 0.295118 | 0.359134 | 0.584039 | 0.600506 |
| MmuSTS.853.1.S1_at   | MmuSTS.853.1 | 12.2  | 12.33 | 0.05 | 0.09 | -1.1  | 0.243074 | 0.505322 | 0.539753 | 0.702073 |
| MmuSTS.854.1.S1_at   | MmuSTS.854.1 | 6.32  | 6.17  | 0.28 | 0.2  | 1.11  | 0.812335 | 0.526147 | 0.916052 | 0.715401 |
| MmuSTS.854.1.S1_s_at | MmuSTS.854.1 | 7.65  | 7.12  | 0.3  | 0.36 | 1.45  | 0.414722 | 0.271304 | 0.675681 | 0.53644  |
| MmuSTS.855.1.S1_at   | MmuSTS.855.1 | 7.48  | 7.3   | 0.18 | 0.02 | 1.13  | 0.543137 | 0.744657 | 0.763277 | 0.852121 |
| MmuSTS.856.1.S1_at   | MmuSTS.856.1 | 6.23  | 5     | 0.5  | 0.2  | 2.35  | 0.053879 | 0.130547 | 0.289261 | 0.402412 |
| MmuSTS.857.1.S1_at   | MmuSTS.857.1 | 9.09  | 9.22  | 0.11 | 0.07 | -1.1  | 0.055543 | 0.335939 | 0.292664 | 0.583577 |
| MmuSTS.858.1.S1_at   | MmuSTS.858.1 | 6.62  | 6     | 0.27 | 0.48 | 1.54  | 0.086116 | 0.010536 | 0.350603 | 0.134072 |
| MmuSTS.859.1.S1_at   | MmuSTS.859.1 | 2.88  | 2.9   | 0.01 | 0.1  | -1.01 | 0.636742 | 0.70831  | 0.822252 | 0.830869 |
| MmuSTS.86.1.S1_at    | MmuSTS.86.1  | 7.2   | 6.66  | 1.28 | 0.25 | 1.45  | 0.718817 | 0.54961  | 0.867276 | 0.729956 |
| MmuSTS.86.1.S1_x_at  | MmuSTS.86.1  | 7.31  | 6.76  | 1.09 | 0.36 | 1.47  | 0.66856  | 0.608486 | 0.84096  | 0.767082 |
| MmuSTS.860.1.S1_s_at | MmuSTS.860.1 | 7.84  | 8.56  | 0.32 | 0.19 | -1.64 | 0.056783 | 0.259604 | 0.295745 | 0.526525 |
| MmuSTS.861.1.S1_at   | MmuSTS.861.1 | 9.07  | 9.29  | 0.37 | 0.18 | -1.16 | 0.982307 | 0.71473  | 0.993483 | 0.8345   |
| MmuSTS.861.1.S1_s_at | MmuSTS.861.1 | 8.45  | 8.5   | 0.38 | 0.14 | -1.04 | 0.449798 | 0.643013 | 0.701102 | 0.790587 |
| MmuSTS.862.1.S1_at   | MmuSTS.862.1 | 4.94  | 4.93  | 0.47 | 0.32 | 1.01  | 0.884151 | 0.771849 | 0.95069  | 0.867372 |
| MmuSTS.863.1.S1_at   | MmuSTS.863.1 | 6.9   | 7.32  | 0.16 | 0.06 | -1.34 | 0.016066 | 0.142747 | 0.179246 | 0.416625 |

|                      |              |       |       |      |      |       |          |          |          |          |
|----------------------|--------------|-------|-------|------|------|-------|----------|----------|----------|----------|
| MmuSTS.864.1.S1_at   | MmuSTS.864.1 | 10.84 | 10.76 | 0.08 | 0.09 | 1.05  | 0.152073 | 0.080199 | 0.441589 | 0.327801 |
| MmuSTS.865.1.S1_at   | MmuSTS.865.1 | 5.96  | 6.03  | 0.12 | 0.07 | -1.05 | 0.129763 | 0.556718 | 0.412052 | 0.734725 |
| MmuSTS.866.1.S1_at   | MmuSTS.866.1 | 4.32  | 4.37  | 0.12 | 0.08 | -1.03 | 0.99607  | 0.53602  | 0.998488 | 0.721454 |
| MmuSTS.867.1.S1_at   | MmuSTS.867.1 | 5.89  | 5.93  | 0.14 | 0.09 | -1.03 | 0.746888 | 0.489674 | 0.882818 | 0.691862 |
| MmuSTS.868.1.S1_at   | MmuSTS.868.1 | 9.49  | 9.69  | 0.24 | 0.12 | -1.15 | 0.689563 | 0.215372 | 0.851803 | 0.489067 |
| MmuSTS.869.1.S1_at   | MmuSTS.869.1 | 7.95  | 7.73  | 0.22 | 0.14 | 1.17  | 0.382103 | 0.012354 | 0.651635 | 0.14376  |
| MmuSTS.87.1.S1_at    | MmuSTS.87.1  | 11.11 | 13.26 | 0.96 | 0.09 | -4.45 | 0.043807 | 0.163168 | 0.266406 | 0.439303 |
| MmuSTS.870.1.S1_at   | MmuSTS.870.1 | 8.27  | 8.71  | 0.17 | 0.1  | -1.36 | 0.025912 | 0.123922 | 0.213801 | 0.394201 |
| MmuSTS.871.1.S1_at   | MmuSTS.871.1 | 10.48 | 10.38 | 0.3  | 0.01 | 1.07  | 0.197583 | 0.098928 | 0.494846 | 0.357049 |
| MmuSTS.872.1.S1_at   | MmuSTS.872.1 | 4.21  | 4.26  | 0.13 | 0.09 | -1.04 | 0.237438 | 0.304857 | 0.534931 | 0.561994 |
| MmuSTS.873.1.S1_at   | MmuSTS.873.1 | 10.2  | 10.06 | 0.14 | 0.08 | 1.1   | 0.141349 | 0.007659 | 0.427324 | 0.117089 |
| MmuSTS.874.1.S1_at   | MmuSTS.874.1 | 4.46  | 4.49  | 0.05 | 0.06 | -1.02 | 0.718063 | 0.130896 | 0.866933 | 0.403037 |
| MmuSTS.875.1.S1_at   | MmuSTS.875.1 | 4.6   | 4.66  | 0.12 | 0.06 | -1.04 | 0.629118 | 0.184454 | 0.8177   | 0.46048  |
| MmuSTS.876.1.S1_at   | MmuSTS.876.1 | 9.17  | 9.35  | 0.07 | 0.3  | -1.14 | 0.133877 | 0.041005 | 0.417214 | 0.247202 |
| MmuSTS.877.1.S1_at   | MmuSTS.877.1 | 11.63 | 12.08 | 0.23 | 0.08 | -1.37 | 0.082562 | 0.547072 | 0.344324 | 0.728283 |
| MmuSTS.878.1.S1_s_at | MmuSTS.878.1 | 12.44 | 12.08 | 0.22 | 0.1  | 1.28  | 0.058311 | 0.222503 | 0.298616 | 0.495581 |
| MmuSTS.879.1.S1_at   | MmuSTS.879.1 | 11.04 | 11.03 | 0.11 | 0.1  | 1     | 0.458228 | 0.710262 | 0.706883 | 0.831904 |
| MmuSTS.88.1.S1_at    | MmuSTS.88.1  | 9.73  | 9.73  | 0.04 | 0.15 | 1     | 0.734571 | 0.3181   | 0.876326 | 0.571046 |
| MmuSTS.880.1.S1_at   | MmuSTS.880.1 | 9.76  | 8.65  | 0.27 | 0.08 | 2.15  | 0.003623 | 0.009377 | 0.105654 | 0.127634 |
| MmuSTS.881.1.S1_at   | MmuSTS.881.1 | 11.96 | 12.34 | 0.17 | 0.09 | -1.3  | 0.035059 | 0.128667 | 0.241969 | 0.400083 |
| MmuSTS.882.1.S1_at   | MmuSTS.882.1 | 10.09 | 9.53  | 0.15 | 0.05 | 1.47  | 0.007729 | 0.003246 | 0.13671  | 0.082187 |
| MmuSTS.883.1.S1_at   | MmuSTS.883.1 | 7.72  | 7.68  | 0.17 | 0.3  | 1.03  | 0.572054 | 0.025393 | 0.78032  | 0.199747 |
| MmuSTS.884.1.S1_at   | MmuSTS.884.1 | 5.29  | 5.38  | 0.14 | 0.05 | -1.07 | 0.142411 | 0.276579 | 0.42843  | 0.540591 |
| MmuSTS.885.1.S1_at   | MmuSTS.885.1 | 10.03 | 9.92  | 0.06 | 0.05 | 1.08  | 0.047849 | 0.005634 | 0.276149 | 0.103705 |
| MmuSTS.886.1.S1_at   | MmuSTS.886.1 | 9.78  | 9.54  | 0.17 | 0.06 | 1.18  | 0.024555 | 0.038368 | 0.209655 | 0.240795 |
| MmuSTS.887.1.S1_at   | MmuSTS.887.1 | 4.82  | 4.73  | 0.48 | 0.08 | 1.06  | 0.869525 | 0.958409 | 0.943768 | 0.976452 |
| MmuSTS.888.1.S1_at   | MmuSTS.888.1 | 10.94 | 11.08 | 0.11 | 0.05 | -1.1  | 0.374046 | 0.044024 | 0.645258 | 0.254195 |
| MmuSTS.889.1.S1_at   | MmuSTS.889.1 | 8.68  | 8.67  | 1.34 | 0.61 | 1.01  | 0.382634 | 0.088907 | 0.652037 | 0.34275  |
| MmuSTS.89.1.S1_at    | MmuSTS.89.1  | 3.45  | 3.55  | 0.07 | 0.07 | -1.08 | 0.343452 | 0.016743 | 0.622974 | 0.163889 |
| MmuSTS.890.1.S1_at   | MmuSTS.890.1 | 7.48  | 7.55  | 0.07 | 0.35 | -1.05 | 0.339807 | 0.001887 | 0.620001 | 0.065004 |
| MmuSTS.891.1.S1_at   | MmuSTS.891.1 | 10.84 | 10.63 | 0.1  | 0.09 | 1.16  | 0.105111 | 0.777571 | 0.378837 | 0.870732 |
| MmuSTS.892.1.S1_at   | MmuSTS.892.1 | 6.3   | 6.2   | 0.18 | 0.07 | 1.07  | 0.279526 | 0.497859 | 0.570786 | 0.697071 |
| MmuSTS.893.1.S1_s_at | MmuSTS.893.1 | 7.12  | 6.96  | 0.07 | 0.16 | 1.12  | 0.211207 | 0.024351 | 0.509003 | 0.195315 |
| MmuSTS.894.1.S1_at   | MmuSTS.894.1 | 6.15  | 5.72  | 0.22 | 0.23 | 1.35  | 0.037642 | 0.004216 | 0.249552 | 0.091375 |
| MmuSTS.895.1.S1_at   | MmuSTS.895.1 | 7.42  | 5.43  | 1.19 | 0.27 | 3.99  | 0.077905 | 0.062892 | 0.337108 | 0.297494 |
| MmuSTS.896.1.S1_at   | MmuSTS.896.1 | 8.29  | 8.24  | 0.23 | 0.05 | 1.03  | 0.662061 | 0.948322 | 0.836881 | 0.970536 |
| MmuSTS.897.1.S1_at   | MmuSTS.897.1 | 8.22  | 8.7   | 0.16 | 0.23 | -1.39 | 0.020417 | 0.28921  | 0.196403 | 0.550293 |
| MmuSTS.898.1.S1_at   | MmuSTS.898.1 | 6.96  | 7.95  | 0.39 | 0.33 | -1.98 | 0.049916 | 0.061069 | 0.281052 | 0.293952 |
| MmuSTS.899.1.S1_at   | MmuSTS.899.1 | 6.6   | 7.23  | 0.42 | 0.04 | -1.55 | 0.075724 | 0.218538 | 0.333511 | 0.492142 |
| MmuSTS.9.1.S1_at     | MmuSTS.9.1   | 13.07 | 13.07 | 0.03 | 0.01 | -1    | 0.534385 | 0.752621 | 0.757644 | 0.855965 |
| MmuSTS.90.1.S1_at    | MmuSTS.90.1  | 10.15 | 10.44 | 0.51 | 0.1  | -1.22 | 0.119266 | 0.046172 | 0.396989 | 0.259313 |
| MmuSTS.900.1.S1_at   | MmuSTS.900.1 | 7.38  | 7.45  | 0.15 | 0.11 | -1.05 | 0.28422  | 0.225469 | 0.574388 | 0.498129 |
| MmuSTS.901.1.S1_at   | MmuSTS.901.1 | 8.65  | 11.02 | 1.41 | 0.14 | -5.18 | 0.05942  | 0.044313 | 0.300867 | 0.255021 |

|                      |              |       |       |      |      |       |          |          |          |          |
|----------------------|--------------|-------|-------|------|------|-------|----------|----------|----------|----------|
| MmuSTS.902.1.S1_at   | MmuSTS.902.1 | 6.43  | 6.47  | 0.14 | 0.08 | -1.02 | 0.744856 | 0.804918 | 0.881702 | 0.88785  |
| MmuSTS.903.1.S1_at   | MmuSTS.903.1 | 8.01  | 6.91  | 0.27 | 0.35 | 2.15  | 0.027252 | 0.04253  | 0.218012 | 0.250848 |
| MmuSTS.904.1.S1_at   | MmuSTS.904.1 | 6.76  | 7.59  | 0.28 | 0.4  | -1.78 | 0.060549 | 0.110482 | 0.303145 | 0.374684 |
| MmuSTS.905.1.S1_at   | MmuSTS.905.1 | 11.43 | 10.97 | 0.16 | 0.14 | 1.37  | 0.019246 | 0.082929 | 0.192035 | 0.332465 |
| MmuSTS.906.1.S1_at   | MmuSTS.906.1 | 4.22  | 4.2   | 0.21 | 0.08 | 1.01  | 0.614272 | 0.692364 | 0.80804  | 0.820984 |
| MmuSTS.907.1.S1_at   | MmuSTS.907.1 | 4.09  | 4.13  | 0.02 | 0.02 | -1.03 | 0.190564 | 0.277966 | 0.486767 | 0.541664 |
| MmuSTS.908.1.S1_at   | MmuSTS.908.1 | 5.97  | 5.96  | 0.21 | 0.06 | 1.01  | 0.904095 | 0.429115 | 0.959379 | 0.65062  |
| MmuSTS.909.1.S1_at   | MmuSTS.909.1 | 4.3   | 3.53  | 0.34 | 0.21 | 1.71  | 0.031039 | 0.028349 | 0.229143 | 0.210223 |
| MmuSTS.91.1.S1_at    | MmuSTS.91.1  | 6.52  | 7.96  | 0.96 | 0.13 | -2.71 | 0.073536 | 0.393684 | 0.328967 | 0.626522 |
| MmuSTS.910.1.S1_at   | MmuSTS.910.1 | 8.64  | 8.66  | 0.04 | 0.23 | -1.01 | 0.898852 | 0.960331 | 0.957017 | 0.977459 |
| MmuSTS.911.1.S1_at   | MmuSTS.911.1 | 11.68 | 10.74 | 0.19 | 0.23 | 1.91  | 0.004715 | 0.058485 | 0.115008 | 0.288549 |
| MmuSTS.912.1.S1_at   | MmuSTS.912.1 | 5.63  | 5.75  | 0.25 | 0.33 | -1.09 | 0.972368 | 0.98674  | 0.988877 | 0.992539 |
| MmuSTS.913.1.S1_at   | MmuSTS.913.1 | 12.37 | 12.66 | 0.15 | 0.07 | -1.23 | 0.0456   | 0.013661 | 0.271011 | 0.149641 |
| MmuSTS.914.1.S1_at   | MmuSTS.914.1 | 4.71  | 4.81  | 0.11 | 0.18 | -1.07 | 0.936388 | 0.581781 | 0.973455 | 0.750765 |
| MmuSTS.915.1.S1_at   | MmuSTS.915.1 | 11.63 | 11.83 | 0.1  | 0.09 | -1.15 | 0.306328 | 0.006253 | 0.593269 | 0.10728  |
| MmuSTS.916.1.S1_at   | MmuSTS.916.1 | 11.89 | 12.13 | 0.08 | 0.04 | -1.17 | 0.021659 | 0.000225 | 0.20067  | 0.032385 |
| MmuSTS.917.1.S1_at   | MmuSTS.917.1 | 7.27  | 7.23  | 0.18 | 0.08 | 1.03  | 0.271577 | 0.203071 | 0.563425 | 0.477343 |
| MmuSTS.918.1.S1_at   | MmuSTS.918.1 | 6.09  | 7.94  | 0.82 | 0.12 | -3.6  | 0.013316 | 0.027469 | 0.166232 | 0.207063 |
| MmuSTS.918.1.S1_s_at | MmuSTS.918.1 | 8.59  | 8.66  | 0.37 | 0.32 | -1.05 | 0.868026 | 0.183397 | 0.943135 | 0.459553 |
| MmuSTS.919.1.S1_at   | MmuSTS.919.1 | 7.18  | 9.01  | 1.2  | 0.52 | -3.57 | 0.324913 | 0.075777 | 0.608412 | 0.320348 |
| MmuSTS.92.1.S1_at    | MmuSTS.92.1  | 9.61  | 10.5  | 0.58 | 0.13 | -1.85 | 0.134066 | 0.00194  | 0.417577 | 0.065813 |
| MmuSTS.920.1.S1_at   | MmuSTS.920.1 | 3.42  | 5.19  | 0.42 | 0.57 | -3.43 | 0.022906 | 0.025578 | 0.204235 | 0.20065  |
| MmuSTS.921.1.S1_at   | MmuSTS.921.1 | 7.21  | 10.25 | 2.13 | 0.63 | -8.23 | 0.233582 | 0.061133 | 0.531705 | 0.293981 |
| MmuSTS.922.1.S1_at   | MmuSTS.922.1 | 2.86  | 2.83  | 0.06 | 0.03 | 1.02  | 0.816337 | 0.637015 | 0.917994 | 0.786561 |
| MmuSTS.923.1.S1_at   | MmuSTS.923.1 | 4.44  | 6.58  | 0.97 | 1    | -4.4  | 0.056163 | 0.007965 | 0.294169 | 0.118702 |
| MmuSTS.924.1.S1_at   | MmuSTS.924.1 | 9.92  | 10.19 | 0.39 | 0.11 | -1.2  | 0.292599 | 0.0142   | 0.581743 | 0.152173 |
| MmuSTS.925.1.S1_at   | MmuSTS.925.1 | 10.03 | 9.38  | 0.26 | 0.31 | 1.57  | 0.046973 | 0.199962 | 0.27447  | 0.474603 |
| MmuSTS.926.1.S1_at   | MmuSTS.926.1 | 9.82  | 9.77  | 0.11 | 0.03 | 1.04  | 0.112445 | 0.024167 | 0.388702 | 0.194633 |
| MmuSTS.927.1.S1_at   | MmuSTS.927.1 | 8.46  | 8.64  | 0.34 | 0.11 | -1.13 | 0.942819 | 0.002902 | 0.975902 | 0.079116 |
| MmuSTS.928.1.S1_at   | MmuSTS.928.1 | 7.98  | 8.33  | 0.07 | 0.16 | -1.28 | 0.023489 | 0.132931 | 0.206437 | 0.404616 |
| MmuSTS.929.1.S1_at   | MmuSTS.929.1 | 9.39  | 11.36 | 0.65 | 0.23 | -3.93 | 0.017016 | 0.063844 | 0.183848 | 0.29906  |
| MmuSTS.93.1.S1_at    | MmuSTS.93.1  | 8.22  | 8.9   | 0.64 | 0.16 | -1.6  | 0.105711 | 0.237644 | 0.379811 | 0.50826  |
| MmuSTS.930.1.S1_at   | MmuSTS.930.1 | 7.8   | 8.14  | 0.43 | 0.16 | -1.26 | 0.10066  | 0.503912 | 0.371708 | 0.701193 |
| MmuSTS.931.1.S1_at   | MmuSTS.931.1 | 4.85  | 4.83  | 0.04 | 0.04 | 1.01  | 0.291652 | 0.603268 | 0.581072 | 0.764037 |
| MmuSTS.932.1.S1_s_at | MmuSTS.932.1 | 3.33  | 3.22  | 0.06 | 1.08 | 1.08  | 0.463049 | 0.708674 | 0.709925 | 0.831025 |
| MmuSTS.933.1.S1_at   | MmuSTS.933.1 | 6.01  | 6.29  | 0.64 | 0.17 | -1.21 | 0.867343 | 0.548855 | 0.942651 | 0.729463 |
| MmuSTS.934.1.S1_at   | MmuSTS.934.1 | 10.27 | 11.09 | 0.42 | 0.18 | -1.77 | 0.046462 | 0.213107 | 0.273367 | 0.487054 |
| MmuSTS.935.1.S1_at   | MmuSTS.935.1 | 9.36  | 8.94  | 0.22 | 0.02 | 1.34  | 0.02708  | 0.046529 | 0.217303 | 0.260221 |
| MmuSTS.936.1.S1_at   | MmuSTS.936.1 | 7.22  | 6.68  | 0.66 | 0.14 | 1.46  | 0.273343 | 0.285979 | 0.565481 | 0.547506 |
| MmuSTS.937.1.S1_at   | MmuSTS.937.1 | 12.68 | 12.23 | 0.17 | 0.05 | 1.37  | 0.005845 | 0.511846 | 0.12242  | 0.705797 |
| MmuSTS.938.1.S1_at   | MmuSTS.938.1 | 3.3   | 3.3   | 0.09 | 0.09 | 1     | 0.977451 | 0.952466 | 0.991176 | 0.973066 |
| MmuSTS.939.1.S1_at   | MmuSTS.939.1 | 3.59  | 3.64  | 0.12 | 0.07 | -1.03 | 0.636886 | 0.15174  | 0.822282 | 0.426392 |
| MmuSTS.94.1.S1_at    | MmuSTS.94.1  | 12.66 | 12.47 | 0.04 | 0.06 | 1.14  | 0.024247 | 0.638234 | 0.20883  | 0.787493 |



|                      |              |       |       |      |      |       |          |          |          |          |
|----------------------|--------------|-------|-------|------|------|-------|----------|----------|----------|----------|
| MmuSTS.940.1.S1_at   | MmuSTS.940.1 | 12.16 | 12.76 | 0.41 | 0.14 | -1.51 | 0.100061 | 0.249245 | 0.37088  | 0.518324 |
| MmuSTS.941.1.S1_at   | MmuSTS.941.1 | 6.64  | 7.33  | 0.19 | 0.24 | -1.61 | 0.010914 | 0.017738 | 0.15427  | 0.168367 |
| MmuSTS.942.1.S1_at   | MmuSTS.942.1 | 6.38  | 7.56  | 0.54 | 0.14 | -2.25 | 0.045541 | 0.246862 | 0.270946 | 0.516233 |
| MmuSTS.943.1.S1_at   | MmuSTS.943.1 | 10.82 | 11.29 | 0.22 | 0.1  | -1.38 | 0.051133 | 0.280516 | 0.283595 | 0.54372  |
| MmuSTS.944.1.S1_at   | MmuSTS.944.1 | 8.24  | 8.41  | 0.11 | 0.1  | -1.12 | 0.099992 | 0.065469 | 0.37088  | 0.301415 |
| MmuSTS.945.1.S1_at   | MmuSTS.945.1 | 5.05  | 5.33  | 0.07 | 0.26 | -1.21 | 0.146857 | 0.304329 | 0.434827 | 0.561645 |
| MmuSTS.946.1.S1_at   | MmuSTS.946.1 | 8.42  | 8.99  | 0.36 | 0.07 | -1.49 | 0.038098 | 0.036022 | 0.251129 | 0.234255 |
| MmuSTS.947.1.S1_at   | MmuSTS.947.1 | 8.46  | 8.51  | 0.41 | 0.36 | -1.04 | 0.559112 | 0.733332 | 0.773148 | 0.845598 |
| MmuSTS.948.1.S1_at   | MmuSTS.948.1 | 9.7   | 9.61  | 0.2  | 0.03 | 1.06  | 0.142252 | 0.109503 | 0.428304 | 0.373339 |
| MmuSTS.949.1.S1_at   | MmuSTS.949.1 | 4.76  | 5.11  | 0.59 | 0.22 | -1.28 | 0.219645 | 0.496571 | 0.51742  | 0.696119 |
| MmuSTS.95.1.S1_at    | MmuSTS.95.1  | 13.06 | 9.84  | 0.88 | 0.24 | 9.36  | 0.00639  | 0.004617 | 0.126512 | 0.094942 |
| MmuSTS.950.1.S1_at   | MmuSTS.950.1 | 10.47 | 10.57 | 0.39 | 0.06 | -1.07 | 0.616605 | 0.681519 | 0.809561 | 0.814092 |
| MmuSTS.951.1.S1_at   | MmuSTS.951.1 | 7.99  | 7.75  | 0.2  | 0.05 | 1.18  | 0.07426  | 0.041844 | 0.330673 | 0.249172 |
| MmuSTS.952.1.S1_at   | MmuSTS.952.1 | 10.27 | 9.87  | 0.13 | 0.09 | 1.31  | 0.024769 | 0.201486 | 0.210464 | 0.476026 |
| MmuSTS.953.1.S1_at   | MmuSTS.953.1 | 7.44  | 7.23  | 0.09 | 0.05 | 1.15  | 0.048062 | 0.303433 | 0.276594 | 0.560914 |
| MmuSTS.954.1.S1_at   | MmuSTS.954.1 | 11.81 | 11.99 | 0.29 | 0.09 | -1.13 | 0.951901 | 0.462129 | 0.980049 | 0.673568 |
| MmuSTS.955.1.S1_at   | MmuSTS.955.1 | 12.11 | 11.94 | 0.07 | 0.04 | 1.12  | 0.01613  | 0.044069 | 0.179543 | 0.254198 |
| MmuSTS.956.1.S1_at   | MmuSTS.956.1 | 12.41 | 12.01 | 0.14 | 0.04 | 1.32  | 0.013871 | 0.003332 | 0.168813 | 0.083001 |
| MmuSTS.957.1.S1_at   | MmuSTS.957.1 | 12.38 | 12.38 | 0.17 | 0.13 | 1     | 0.985764 | 0.976464 | 0.99493  | 0.987202 |
| MmuSTS.958.1.S1_at   | MmuSTS.958.1 | 10.29 | 10.45 | 0.25 | 0.09 | -1.12 | 0.874511 | 0.808365 | 0.94618  | 0.889697 |
| MmuSTS.959.1.S1_at   | MmuSTS.959.1 | 11.09 | 11.09 | 0.28 | 0.01 | 1     | 0.376789 | 0.342381 | 0.647386 | 0.588445 |
| MmuSTS.96.1.S1_at    | MmuSTS.96.1  | 3.57  | 3.72  | 0.13 | 0.02 | -1.11 | 0.161014 | 0.055013 | 0.452489 | 0.280018 |
| MmuSTS.960.1.S1_at   | MmuSTS.960.1 | 12.19 | 11.98 | 0.17 | 0.06 | 1.16  | 0.056629 | 0.054599 | 0.295477 | 0.279201 |
| MmuSTS.961.1.S1_at   | MmuSTS.961.1 | 12.7  | 12.56 | 0.15 | 0.09 | 1.1   | 0.089539 | 0.025623 | 0.356406 | 0.200834 |
| MmuSTS.962.1.S1_at   | MmuSTS.962.1 | 10.6  | 10.34 | 0.17 | 0.06 | 1.2   | 0.10206  | 0.078109 | 0.3739   | 0.324578 |
| MmuSTS.963.1.S1_at   | MmuSTS.963.1 | 2.72  | 2.68  | 0.14 | 0.13 | 1.03  | 0.34688  | 0.480875 | 0.625079 | 0.686    |
| MmuSTS.963.1.S1_x_at | MmuSTS.963.1 | 2.92  | 2.72  | 0.21 | 0.03 | 1.15  | 0.211952 | 0.301613 | 0.509822 | 0.55955  |
| MmuSTS.964.1.S1_at   | MmuSTS.964.1 | 6.69  | 6.7   | 0.08 | 0.1  | -1.01 | 0.193614 | 0.190993 | 0.49027  | 0.46629  |
| MmuSTS.965.1.S1_at   | MmuSTS.965.1 | 12.08 | 12.17 | 0.19 | 0.06 | -1.07 | 0.450984 | 0.462184 | 0.701915 | 0.673601 |
| MmuSTS.966.1.S1_at   | MmuSTS.966.1 | 11.02 | 10.81 | 0.08 | 0.07 | 1.16  | 0.079027 | 0.52578  | 0.338745 | 0.715217 |
| MmuSTS.967.1.S1_at   | MmuSTS.967.1 | 4.72  | 4.78  | 0.24 | 0.07 | -1.04 | 0.469273 | 0.616532 | 0.714096 | 0.772748 |
| MmuSTS.968.1.S1_at   | MmuSTS.968.1 | 3.47  | 3.33  | 0.36 | 0.23 | 1.1   | 0.9743   | 0.993803 | 0.989741 | 0.996274 |
| MmuSTS.969.1.S1_at   | MmuSTS.969.1 | 8.31  | 7.64  | 0.14 | 0.05 | 1.59  | 0.001813 | 0.027835 | 0.08633  | 0.208365 |
| MmuSTS.97.1.S1_at    | MmuSTS.97.1  | 6.09  | 5.99  | 0.26 | 0.23 | 1.07  | 0.931665 | 0.886851 | 0.971294 | 0.935553 |
| MmuSTS.970.1.S1_at   | MmuSTS.970.1 | 11.95 | 11.39 | 0.04 | 0.13 | 1.47  | 0.003272 | 0.36264  | 0.102069 | 0.603188 |
| MmuSTS.971.1.S1_at   | MmuSTS.971.1 | 5.55  | 5.64  | 0.11 | 0.08 | -1.06 | 0.528662 | 0.877933 | 0.753764 | 0.930322 |
| MmuSTS.972.1.S1_at   | MmuSTS.972.1 | 7.16  | 6.49  | 0.55 | 0.08 | 1.59  | 0.037645 | 0.008522 | 0.249552 | 0.122518 |
| MmuSTS.973.1.S1_s_at | MmuSTS.973.1 | 7.95  | 5.97  | 0.26 | 0.5  | 3.95  | 0.00396  | 0.004068 | 0.108453 | 0.090288 |
| MmuSTS.974.1.S1_at   | MmuSTS.974.1 | 11.13 | 10.89 | 0.1  | 0.04 | 1.18  | 0.039124 | 0.003775 | 0.254238 | 0.08749  |
| MmuSTS.975.1.S1_at   | MmuSTS.975.1 | 7.87  | 7.21  | 0.22 | 0.03 | 1.59  | 0.011973 | 0.00675  | 0.159466 | 0.11113  |
| MmuSTS.976.1.S1_at   | MmuSTS.976.1 | 9.16  | 8.5   | 0.22 | 0.12 | 1.58  | 0.022234 | 0.010257 | 0.202307 | 0.132655 |
| MmuSTS.977.1.S1_at   | MmuSTS.977.1 | 5.93  | 5.98  | 0.05 | 0.09 | -1.03 | 0.196355 | 0.385939 | 0.493451 | 0.621161 |
| MmuSTS.978.1.S1_at   | MmuSTS.978.1 | 8.32  | 8.27  | 0.22 | 0.14 | 1.04  | 0.391296 | 0.52748  | 0.658623 | 0.716154 |

|                         |                 |       |       |      |      |        |          |          |          |          |
|-------------------------|-----------------|-------|-------|------|------|--------|----------|----------|----------|----------|
| MmuSTS.979.1.S1_at      | MmuSTS.979.1    | 12.86 | 12.86 | 0.09 | 0.03 | -1     | 0.813276 | 0.687574 | 0.916498 | 0.81762  |
| MmuSTS.98.1.S1_at       | MmuSTS.98.1     | 10.05 | 10.26 | 0.13 | 0.07 | -1.16  | 0.097551 | 0.03627  | 0.367778 | 0.235    |
| MmuSTS.980.1.S1_s_at    | MmuSTS.980.1    | 7.24  | 7.25  | 0.05 | 0.08 | -1.01  | 0.725165 | 0.830812 | 0.871012 | 0.902905 |
| MmuSTS.981.1.S1_s_at    | MmuSTS.981.1    | 4.54  | 4.61  | 0.11 | 0.06 | -1.05  | 0.275068 | 0.560069 | 0.566763 | 0.736464 |
| MmuSTS.982.1.S1_at      | MmuSTS.982.1    | 10.98 | 11.38 | 0.74 | 0.26 | -1.31  | 0.21319  | 0.44962  | 0.511046 | 0.665151 |
| MmuSTS.983.1.S1_at      | MmuSTS.983.1    | 8.37  | 9.08  | 1.24 | 0.16 | -1.64  | 0.565117 | 0.514056 | 0.776513 | 0.707422 |
| MmuSTS.984.1.S1_at      | MmuSTS.984.1    | 6.56  | 6.48  | 0.01 | 0.02 | 1.05   | 0.005249 | 0.32744  | 0.117387 | 0.577284 |
| MmuSTS.985.1.S1_at      | MmuSTS.985.1    | 3.77  | 5.09  | 0.22 | 0.42 | -2.5   | 0.008778 | 0.129176 | 0.143445 | 0.400611 |
| MmuSTS.986.1.S1_at      | MmuSTS.986.1    | 5.91  | 5.7   | 0.13 | 0.19 | 1.16   | 0.814816 | 0.971365 | 0.917295 | 0.984419 |
| MmuSTS.987.1.S1_at      | MmuSTS.987.1    | 4.26  | 4.27  | 0.21 | 0.02 | -1.01  | 0.979956 | 0.801711 | 0.992376 | 0.885902 |
| MmuSTS.988.1.S1_at      | MmuSTS.988.1    | 5.14  | 5.48  | 0.52 | 0.16 | -1.26  | 0.081076 | 0.093052 | 0.342039 | 0.3492   |
| MmuSTS.989.1.S1_at      | MmuSTS.989.1    | 10.41 | 10.37 | 0.05 | 0.11 | 1.03   | 0.842945 | 0.121794 | 0.931186 | 0.391074 |
| MmuSTS.99.1.S1_at       | MmuSTS.99.1     | 3.21  | 3.03  | 0.22 | 0.05 | 1.13   | 0.077836 | 0.088185 | 0.336934 | 0.341721 |
| MmuSTS.990.1.S1_at      | MmuSTS.990.1    | 11.84 | 11.43 | 0.43 | 0.09 | 1.33   | 0.546265 | 0.482231 | 0.765159 | 0.687128 |
| MmuSTS.991.1.S1_at      | MmuSTS.991.1    | 6.93  | 10.71 | 1.63 | 0.23 | -13.73 | 0.046565 | 0.31438  | 0.273564 | 0.56831  |
| MmuSTS.992.1.S1_at      | MmuSTS.992.1    | 11.58 | 11.46 | 0.07 | 0.05 | 1.09   | 0.121726 | 0.004967 | 0.400504 | 0.098202 |
| MmuSTS.993.1.S1_at      | MmuSTS.993.1    | 3.37  | 3.39  | 0.89 | 0.04 | -1.02  | 0.400407 | 0.452695 | 0.665436 | 0.667253 |
| MmuSTS.994.1.S1_at      | MmuSTS.994.1    | 7.93  | 7.91  | 0.17 | 0.06 | 1.01   | 0.837693 | 0.624302 | 0.928861 | 0.778555 |
| MmuSTS.995.1.S1_at      | MmuSTS.995.1    | 7.38  | 7.55  | 0.06 | 0.03 | -1.12  | 0.047917 | 0.000139 | 0.276338 | 0.029296 |
| MmuSTS.996.1.S1_at      | MmuSTS.996.1    | 12.4  | 11.81 | 0.11 | 0.12 | 1.5    | 0.006036 | 0.003176 | 0.124151 | 0.081873 |
| MmuSTS.997.1.S1_at      | MmuSTS.997.1    | 5     | 4.85  | 0.03 | 0.09 | 1.11   | 0.036304 | 0.048816 | 0.245677 | 0.265858 |
| MmuSTS.998.1.S1_at      | MmuSTS.998.1    | 5.71  | 6.07  | 0.28 | 0.15 | -1.28  | 0.271704 | 0.326094 | 0.563589 | 0.576315 |
| MmuSTS.999.1.S1_at      | MmuSTS.999.1    | 10.77 | 10.26 | 0.25 | 0.08 | 1.42   | 0.043529 | 0.182021 | 0.265724 | 0.458566 |
| MmugDNA.10.1.S1_s_at    | MmugDNA.10.1    | 6.13  | 6.3   | 0.17 | 0.13 | -1.12  | 0.507489 | 0.653578 | 0.739706 | 0.797512 |
| MmugDNA.100.1.S1_at     | MmugDNA.100.1   | 5.31  | 5.69  | 1.06 | 0.26 | -1.3   | 0.501384 | 0.644034 | 0.735287 | 0.791291 |
| MmugDNA.10000.1.S1_at   | MmugDNA.10000.1 | 12.53 | 12.74 | 0.08 | 0.13 | -1.16  | 0.110216 | 0.675682 | 0.38556  | 0.810429 |
| MmugDNA.10001.1.S1_at   | MmugDNA.10001.1 | 10.53 | 10.55 | 0    | 0.1  | -1.01  | 0.85145  | 0.128609 | 0.935336 | 0.400031 |
| MmugDNA.10004.1.S1_at   | MmugDNA.10004.1 | 3.46  | 3.42  | 0.14 | 0.02 | 1.03   | 0.52045  | 0.706114 | 0.748788 | 0.829634 |
| MmugDNA.10006.1.S1_at   | MmugDNA.10006.1 | 12.26 | 12.14 | 0.07 | 0.04 | 1.09   | 0.075849 | 0.059769 | 0.333731 | 0.291114 |
| MmugDNA.10008.1.S1_at   | MmugDNA.10008.1 | 9.51  | 10.39 | 0.28 | 0.06 | -1.84  | 0.00658  | 0.010024 | 0.127727 | 0.131279 |
| MmugDNA.10011.1.S1_at   | MmugDNA.10011.1 | 10.04 | 8.85  | 0.27 | 0.19 | 2.27   | 0.002937 | 0.003661 | 0.099331 | 0.086526 |
| MmugDNA.10012.1.S1_at   | MmugDNA.10012.1 | 6.32  | 5.3   | 0.53 | 0.85 | 2.03   | 0.319079 | 0.376157 | 0.603736 | 0.613978 |
| MmugDNA.10014.1.S1_s_at | MmugDNA.10014.1 | 9.37  | 9.22  | 0.31 | 0.23 | 1.11   | 0.445528 | 0.002129 | 0.697986 | 0.068239 |
| MmugDNA.10018.1.S1_at   | MmugDNA.10018.1 | 10.93 | 9.71  | 0.16 | 0.19 | 2.34   | 0.001493 | 0.034171 | 0.08111  | 0.228728 |
| MmugDNA.10025.1.S1_at   | MmugDNA.10025.1 | 12.44 | 12.72 | 0.06 | 0.05 | -1.21  | 0.004072 | 0.2595   | 0.108999 | 0.526418 |
| MmugDNA.10031.1.S1_at   | MmugDNA.10031.1 | 12.25 | 12.25 | 0.04 | 0.05 | -1     | 0.971673 | 0.999127 | 0.988578 | 0.999599 |
| MmugDNA.10032.1.S1_at   | MmugDNA.10032.1 | 3.68  | 3.57  | 0.12 | 0.08 | 1.08   | 0.126961 | 0.194757 | 0.408535 | 0.469774 |
| MmugDNA.10033.1.S1_at   | MmugDNA.10033.1 | 10.13 | 10.39 | 0.22 | 0.16 | -1.19  | 0.490432 | 0.544098 | 0.728506 | 0.726614 |
| MmugDNA.10040.1.S1_at   | MmugDNA.10040.1 | 10.18 | 8.84  | 0.12 | 0.31 | 2.53   | 0.002815 | 0.001166 | 0.097939 | 0.053615 |
| MmugDNA.10044.1.S1_at   | MmugDNA.10044.1 | 8.03  | 7.45  | 0.11 | 0.06 | 1.5    | 0.00068  | 0.000022 | 0.071248 | 0.019635 |
| MmugDNA.10059.1.S1_at   | MmugDNA.10059.1 | 10.23 | 9.43  | 0.25 | 0.04 | 1.75   | 0.010547 | 0.012815 | 0.152509 | 0.145843 |
| MmugDNA.10064.1.S1_at   | MmugDNA.10064.1 | 3.34  | 3.28  | 0.06 | 0.1  | 1.04   | 0.740138 | 0.057814 | 0.879525 | 0.286845 |
| MmugDNA.10069.1.S1_at   | MmugDNA.10069.1 | 9.2   | 8.78  | 0.26 | 0.2  | 1.33   | 0.124161 | 0.080782 | 0.404149 | 0.328657 |

|                         |                 |       |       |      |      |        |          |          |          |          |
|-------------------------|-----------------|-------|-------|------|------|--------|----------|----------|----------|----------|
| MmugDNA.10073.1.S1_s_at | MmugDNA.10073.1 | 11.14 | 11.84 | 0.29 | 0.1  | -1.63  | 0.020224 | 0.034232 | 0.195882 | 0.228869 |
| MmugDNA.10078.1.S1_at   | MmugDNA.10078.1 | 5.91  | 5.8   | 0.06 | 0.08 | 1.08   | 0.128736 | 0.245813 | 0.410916 | 0.515519 |
| MmugDNA.10084.1.S1_at   | MmugDNA.10084.1 | 10.3  | 10.05 | 0.36 | 0.1  | 1.19   | 0.809758 | 0.36889  | 0.914781 | 0.608429 |
| MmugDNA.10096.1.S1_at   | MmugDNA.10096.1 | 10.19 | 10.26 | 0.29 | 0.03 | -1.05  | 0.6311   | 0.1313   | 0.818772 | 0.403407 |
| MmugDNA.10101.1.S1_at   | MmugDNA.10101.1 | 4.62  | 4.56  | 0.09 | 0.09 | 1.04   | 0.672667 | 0.867436 | 0.843341 | 0.924699 |
| MmugDNA.10110.1.S1_at   | MmugDNA.10110.1 | 9.13  | 12.91 | 1.29 | 0.14 | -13.76 | 0.016101 | 0.195243 | 0.179436 | 0.470253 |
| MmugDNA.10114.1.S1_at   | MmugDNA.10114.1 | 10.22 | 9.96  | 0.59 | 0.17 | 1.2    | 0.783366 | 0.310552 | 0.901128 | 0.565771 |
| MmugDNA.10116.1.S1_at   | MmugDNA.10116.1 | 10.09 | 8.99  | 0.58 | 0.46 | 2.15   | 0.15538  | 0.13086  | 0.445719 | 0.403037 |
| MmugDNA.10119.1.S1_at   | MmugDNA.10119.1 | 4.33  | 4.31  | 0.13 | 0.11 | 1.01   | 0.900928 | 0.800318 | 0.958069 | 0.885129 |
| MmugDNA.1012.1.S1_at    | MmugDNA.1012.1  | 12.82 | 12.7  | 0.05 | 0.09 | 1.08   | 0.03281  | 0.112538 | 0.235221 | 0.377928 |
| MmugDNA.10122.1.S1_at   | MmugDNA.10122.1 | 10.44 | 10.18 | 0.05 | 0.03 | 1.2    | 0.002314 | 0.288712 | 0.092542 | 0.549856 |
| MmugDNA.10130.1.S1_at   | MmugDNA.10130.1 | 10.5  | 11.23 | 0.63 | 0.37 | -1.66  | 0.094228 | 0.006649 | 0.363285 | 0.110505 |
| MmugDNA.10134.1.S1_at   | MmugDNA.10134.1 | 10.24 | 10.3  | 0.16 | 0.2  | -1.04  | 0.611282 | 0.079207 | 0.806213 | 0.32639  |
| MmugDNA.10137.1.S1_at   | MmugDNA.10137.1 | 5.19  | 5.13  | 0.13 | 0.17 | 1.04   | 0.547694 | 0.848458 | 0.766197 | 0.913984 |
| MmugDNA.10138.1.S1_at   | MmugDNA.10138.1 | 9.38  | 9.29  | 0.19 | 0.2  | 1.07   | 0.312949 | 0.292636 | 0.598837 | 0.552705 |
| MmugDNA.10150.1.S1_s_at | MmugDNA.10150.1 | 5.39  | 5.27  | 0.1  | 0.09 | 1.08   | 0.25489  | 0.295369 | 0.549392 | 0.554814 |
| MmugDNA.10153.1.S1_at   | MmugDNA.10153.1 | 3.45  | 3.42  | 0.01 | 0.06 | 1.03   | 0.383054 | 0.355808 | 0.652427 | 0.597864 |
| MmugDNA.10156.1.S1_at   | MmugDNA.10156.1 | 11    | 10.04 | 0.3  | 0.07 | 1.95   | 0.005702 | 0.404674 | 0.121173 | 0.633175 |
| MmugDNA.10158.1.S1_at   | MmugDNA.10158.1 | 11.54 | 11.41 | 0.34 | 0.17 | 1.1    | 0.686798 | 0.038034 | 0.850752 | 0.239596 |
| MmugDNA.10162.1.S1_at   | MmugDNA.10162.1 | 5.48  | 6.12  | 0.4  | 0.1  | -1.56  | 0.166388 | 0.044436 | 0.45963  | 0.25521  |
| MmugDNA.10177.1.S1_at   | MmugDNA.10177.1 | 9.02  | 9.26  | 0.36 | 0.04 | -1.18  | 0.298734 | 0.309558 | 0.586965 | 0.564987 |
| MmugDNA.10182.1.S1_at   | MmugDNA.10182.1 | 10.88 | 11.6  | 0.14 | 0.24 | -1.65  | 0.025682 | 0.012003 | 0.212966 | 0.141798 |
| MmugDNA.10186.1.S1_at   | MmugDNA.10186.1 | 11.51 | 10.31 | 0.22 | 0.16 | 2.31   | 0.001056 | 0.000257 | 0.076562 | 0.033501 |
| MmugDNA.10195.1.S1_at   | MmugDNA.10195.1 | 11.16 | 10.46 | 0.08 | 0.06 | 1.62   | 0.00018  | 0.000203 | 0.053494 | 0.03171  |
| MmugDNA.10196.1.S1_at   | MmugDNA.10196.1 | 11.41 | 11.59 | 0.15 | 0.04 | -1.14  | 0.254317 | 0.114316 | 0.548754 | 0.380835 |
| MmugDNA.10197.1.S1_at   | MmugDNA.10197.1 | 6.59  | 8.2   | 0.37 | 0.12 | -3.05  | 0.004129 | 0.183317 | 0.109689 | 0.459553 |
| MmugDNA.10200.1.S1_at   | MmugDNA.10200.1 | 6.48  | 7.35  | 0.13 | 0.45 | -1.83  | 0.029806 | 0.381979 | 0.225856 | 0.618252 |
| MmugDNA.10209.1.S1_at   | MmugDNA.10209.1 | 7.45  | 7.47  | 0.79 | 0.5  | -1.02  | 0.928613 | 0.052863 | 0.969796 | 0.275521 |
| MmugDNA.10212.1.S1_at   | MmugDNA.10212.1 | 5.45  | 5.63  | 0.16 | 0.06 | -1.13  | 0.087391 | 0.103418 | 0.353204 | 0.364309 |
| MmugDNA.10214.1.S1_at   | MmugDNA.10214.1 | 6.55  | 6.56  | 0.13 | 0.01 | -1     | 0.408805 | 0.766671 | 0.671414 | 0.864438 |
| MmugDNA.10216.1.S1_at   | MmugDNA.10216.1 | 7.04  | 7.07  | 0.33 | 0.07 | -1.02  | 0.563383 | 0.728324 | 0.775443 | 0.842956 |
| MmugDNA.10218.1.S1_at   | MmugDNA.10218.1 | 7.38  | 7.38  | 0.03 | 0.17 | 1      | 0.462988 | 0.310737 | 0.709909 | 0.565809 |
| MmugDNA.10220.1.S1_at   | MmugDNA.10220.1 | 8.37  | 9.07  | 0.24 | 0.08 | -1.63  | 0.004694 | 0.040354 | 0.115008 | 0.245984 |
| MmugDNA.10222.1.S1_at   | MmugDNA.10222.1 | 12.27 | 12.2  | 0.18 | 0.13 | 1.05   | 0.32962  | 0.501559 | 0.611807 | 0.699719 |
| MmugDNA.10223.1.S1_at   | MmugDNA.10223.1 | 10.11 | 9.72  | 0.06 | 0.38 | 1.3    | 0.271583 | 0.01347  | 0.563425 | 0.148626 |
| MmugDNA.10227.1.S1_at   | MmugDNA.10227.1 | 3.93  | 5.01  | 0.22 | 0.35 | -2.12  | 0.017338 | 0.073018 | 0.184946 | 0.316017 |
| MmugDNA.10236.1.S1_at   | MmugDNA.10236.1 | 9.38  | 9.69  | 0.18 | 0.05 | -1.24  | 0.130772 | 0.317604 | 0.413324 | 0.570787 |
| MmugDNA.10240.1.S1_at   | MmugDNA.10240.1 | 5.66  | 5.57  | 0.05 | 0.02 | 1.07   | 0.089486 | 0.687856 | 0.356406 | 0.817746 |
| MmugDNA.10243.1.S1_at   | MmugDNA.10243.1 | 10.09 | 9.86  | 0.06 | 0.1  | 1.18   | 0.03639  | 0.007905 | 0.24584  | 0.118524 |
| MmugDNA.10249.1.S1_at   | MmugDNA.10249.1 | 11.47 | 10.8  | 0.23 | 0.21 | 1.59   | 0.024548 | 0.116377 | 0.209655 | 0.383671 |
| MmugDNA.10253.1.S1_at   | MmugDNA.10253.1 | 8.39  | 8.25  | 0.22 | 0.07 | 1.1    | 0.40213  | 0.582389 | 0.666552 | 0.751018 |
| MmugDNA.10257.1.S1_at   | MmugDNA.10257.1 | 5.99  | 6.65  | 0.31 | 0.29 | -1.58  | 0.085267 | 0.238093 | 0.34932  | 0.50868  |
| MmugDNA.10259.1.S1_at   | MmugDNA.10259.1 | 10.6  | 10.65 | 0.05 | 0.07 | -1.04  | 0.172769 | 0.526286 | 0.466801 | 0.715497 |

|                       |                 |       |       |      |      |       |          |          |          |          |
|-----------------------|-----------------|-------|-------|------|------|-------|----------|----------|----------|----------|
| MmugDNA.10260.1.S1_at | MmugDNA.10260.1 | 11.35 | 11.4  | 0.05 | 0.1  | -1.04 | 0.804856 | 0.159033 | 0.91238  | 0.435217 |
| MmugDNA.10261.1.S1_at | MmugDNA.10261.1 | 8.62  | 8.37  | 0.14 | 0.11 | 1.18  | 0.026298 | 0.055767 | 0.215228 | 0.282044 |
| MmugDNA.10267.1.S1_at | MmugDNA.10267.1 | 4.56  | 4.14  | 0.21 | 0.17 | 1.33  | 0.074038 | 0.102134 | 0.330086 | 0.362199 |
| MmugDNA.10269.1.S1_at | MmugDNA.10269.1 | 9.86  | 9.94  | 0.14 | 0.04 | -1.05 | 0.872638 | 0.241038 | 0.945425 | 0.511657 |
| MmugDNA.1027.1.S1_at  | MmugDNA.1027.1  | 10.45 | 8.68  | 0.27 | 0.42 | 3.42  | 0.008569 | 0.052156 | 0.141954 | 0.273967 |
| MmugDNA.10271.1.S1_at | MmugDNA.10271.1 | 5.92  | 5.9   | 0.09 | 0.08 | 1.01  | 0.170331 | 0.048376 | 0.463985 | 0.265095 |
| MmugDNA.10272.1.S1_at | MmugDNA.10272.1 | 7.33  | 7.63  | 0.12 | 0.13 | -1.23 | 0.012835 | 0.257454 | 0.163726 | 0.52521  |
| MmugDNA.10274.1.S1_at | MmugDNA.10274.1 | 3.79  | 3.93  | 0.16 | 0.12 | -1.1  | 0.381968 | 0.579735 | 0.651504 | 0.74927  |
| MmugDNA.10278.1.S1_at | MmugDNA.10278.1 | 4.03  | 4.08  | 0.4  | 0.03 | -1.03 | 0.726708 | 0.426672 | 0.871852 | 0.648796 |
| MmugDNA.1028.1.S1_at  | MmugDNA.1028.1  | 11.45 | 14.01 | 1.07 | 0.11 | -5.9  | 0.038859 | 0.144046 | 0.253396 | 0.417912 |
| MmugDNA.10283.1.S1_at | MmugDNA.10283.1 | 5.39  | 5.4   | 0.07 | 0.09 | -1.01 | 0.345823 | 0.238531 | 0.62466  | 0.509122 |
| MmugDNA.10284.1.S1_at | MmugDNA.10284.1 | 8.47  | 8.17  | 0.34 | 0.08 | 1.23  | 0.188706 | 0.001542 | 0.485343 | 0.05949  |
| MmugDNA.10286.1.S1_at | MmugDNA.10286.1 | 11.53 | 11.54 | 0.16 | 0.06 | -1.01 | 0.503898 | 0.364196 | 0.73721  | 0.604513 |
| MmugDNA.10287.1.S1_at | MmugDNA.10287.1 | 7.32  | 7.29  | 0.19 | 0.02 | 1.02  | 0.627534 | 0.778807 | 0.816887 | 0.871617 |
| MmugDNA.10288.1.S1_at | MmugDNA.10288.1 | 8.12  | 8     | 0.07 | 0.08 | 1.09  | 0.128013 | 0.104524 | 0.409921 | 0.365803 |
| MmugDNA.10302.1.S1_at | MmugDNA.10302.1 | 10.32 | 10.72 | 0.06 | 0.04 | -1.32 | 0.000399 | 0.044031 | 0.062817 | 0.254195 |
| MmugDNA.10306.1.S1_at | MmugDNA.10306.1 | 7.24  | 7.58  | 0.29 | 0.18 | -1.27 | 0.235171 | 0.051427 | 0.533056 | 0.272204 |
| MmugDNA.10307.1.S1_at | MmugDNA.10307.1 | 8.07  | 7.94  | 0.2  | 0.12 | 1.09  | 0.705075 | 0.969199 | 0.860091 | 0.98309  |
| MmugDNA.10311.1.S1_at | MmugDNA.10311.1 | 4.63  | 4.91  | 0.36 | 0.17 | -1.21 | 0.274889 | 0.511842 | 0.566556 | 0.705797 |
| MmugDNA.10320.1.S1_at | MmugDNA.10320.1 | 9.15  | 9.88  | 0.21 | 0.21 | -1.66 | 0.026223 | 0.011524 | 0.214951 | 0.138822 |
| MmugDNA.10322.1.S1_at | MmugDNA.10322.1 | 4.35  | 4.09  | 1.07 | 0.15 | 1.19  | 0.360511 | 0.352488 | 0.636043 | 0.595743 |
| MmugDNA.10327.1.S1_at | MmugDNA.10327.1 | 7.84  | 7.8   | 0.26 | 0.22 | 1.03  | 0.702376 | 0.097007 | 0.858741 | 0.354507 |
| MmugDNA.10328.1.S1_at | MmugDNA.10328.1 | 11.74 | 11.6  | 0.13 | 0.03 | 1.1   | 0.065102 | 0.116187 | 0.311972 | 0.383524 |
| MmugDNA.10331.1.S1_at | MmugDNA.10331.1 | 11.23 | 11.69 | 0.23 | 0.14 | -1.38 | 0.086396 | 0.077837 | 0.351225 | 0.324079 |
| MmugDNA.10333.1.S1_at | MmugDNA.10333.1 | 9.61  | 9.3   | 0.12 | 0.1  | 1.25  | 0.015694 | 0.164454 | 0.177718 | 0.440678 |
| MmugDNA.10334.1.S1_at | MmugDNA.10334.1 | 8.12  | 8.81  | 0.05 | 0.22 | -1.62 | 0.008484 | 0.011717 | 0.141304 | 0.140206 |
| MmugDNA.10335.1.S1_at | MmugDNA.10335.1 | 9.5   | 9.52  | 0.39 | 0.07 | -1.01 | 0.935623 | 0.102648 | 0.973033 | 0.363001 |
| MmugDNA.10338.1.S1_at | MmugDNA.10338.1 | 8.97  | 9.13  | 0.07 | 0.05 | -1.12 | 0.026298 | 0.578556 | 0.215228 | 0.748589 |
| MmugDNA.10345.1.S1_at | MmugDNA.10345.1 | 8.67  | 8.76  | 0.24 | 0.05 | -1.07 | 0.778415 | 0.278935 | 0.898788 | 0.542661 |
| MmugDNA.10347.1.S1_at | MmugDNA.10347.1 | 4.57  | 5.17  | 0.27 | 0.3  | -1.52 | 0.116577 | 0.050247 | 0.393692 | 0.269432 |
| MmugDNA.10349.1.S1_at | MmugDNA.10349.1 | 9.51  | 9.58  | 0.15 | 0.18 | -1.05 | 0.313046 | 0.666111 | 0.598916 | 0.804415 |
| MmugDNA.10350.1.S1_at | MmugDNA.10350.1 | 9.63  | 9.7   | 0.14 | 0.03 | -1.05 | 0.769901 | 0.000365 | 0.894412 | 0.037273 |
| MmugDNA.10356.1.S1_at | MmugDNA.10356.1 | 10.34 | 10.68 | 0.17 | 0.01 | -1.27 | 0.017316 | 0.293018 | 0.184859 | 0.552978 |
| MmugDNA.10357.1.S1_at | MmugDNA.10357.1 | 6.99  | 6.88  | 0.09 | 0.07 | 1.08  | 0.217113 | 0.456159 | 0.514925 | 0.669949 |
| MmugDNA.10363.1.S1_at | MmugDNA.10363.1 | 10.18 | 10.29 | 0.18 | 0.17 | -1.08 | 0.198046 | 0.291502 | 0.495303 | 0.551864 |
| MmugDNA.10369.1.S1_at | MmugDNA.10369.1 | 7.28  | 7.68  | 0.44 | 0.34 | -1.32 | 0.140361 | 0.023545 | 0.426075 | 0.192231 |
| MmugDNA.1037.1.S1_at  | MmugDNA.1037.1  | 5.15  | 5.06  | 0.19 | 0.07 | 1.07  | 0.269272 | 0.260362 | 0.561615 | 0.526915 |
| MmugDNA.10370.1.S1_at | MmugDNA.10370.1 | 11.09 | 10.64 | 0.15 | 0.08 | 1.37  | 0.011175 | 0.000291 | 0.15539  | 0.034892 |
| MmugDNA.10371.1.S1_at | MmugDNA.10371.1 | 8.92  | 8.16  | 0.38 | 0.17 | 1.69  | 0.023152 | 0.035774 | 0.205291 | 0.233489 |
| MmugDNA.10383.1.S1_at | MmugDNA.10383.1 | 5.99  | 5.98  | 0.16 | 0.06 | 1.01  | 0.4836   | 0.401274 | 0.723664 | 0.630898 |
| MmugDNA.10385.1.S1_at | MmugDNA.10385.1 | 3.66  | 3.82  | 0.08 | 0.08 | -1.12 | 0.057629 | 0.553151 | 0.297348 | 0.73239  |
| MmugDNA.10386.1.S1_at | MmugDNA.10386.1 | 9.01  | 8.81  | 0.06 | 0.01 | 1.15  | 0.00442  | 0.006463 | 0.112723 | 0.109304 |
| MmugDNA.10387.1.S1_at | MmugDNA.10387.1 | 7.04  | 6.93  | 0.13 | 0.08 | 1.08  | 0.157946 | 0.146742 | 0.448708 | 0.42078  |

|                         |                 |       |       |      |      |       |          |          |          |          |
|-------------------------|-----------------|-------|-------|------|------|-------|----------|----------|----------|----------|
| MmugDNA.10389.1.S1_at   | MmugDNA.10389.1 | 10.95 | 10.98 | 0.27 | 0.03 | -1.03 | 0.495604 | 0.287373 | 0.73183  | 0.548636 |
| MmugDNA.10390.1.S1_at   | MmugDNA.10390.1 | 11.99 | 11.94 | 0.17 | 0.01 | 1.03  | 0.231158 | 0.284896 | 0.529962 | 0.54701  |
| MmugDNA.10394.1.S1_at   | MmugDNA.10394.1 | 9.14  | 9.52  | 0.16 | 0.1  | -1.3  | 0.064395 | 0.395495 | 0.310328 | 0.627504 |
| MmugDNA.10395.1.S1_at   | MmugDNA.10395.1 | 8.53  | 8.78  | 0.27 | 0.16 | -1.19 | 0.132113 | 0.090105 | 0.415302 | 0.344402 |
| MmugDNA.10397.1.S1_at   | MmugDNA.10397.1 | 7.47  | 7.55  | 0.14 | 0.16 | -1.06 | 0.214833 | 0.83816  | 0.512418 | 0.907587 |
| MmugDNA.10398.1.S1_at   | MmugDNA.10398.1 | 9.91  | 10.12 | 0.17 | 0.16 | -1.16 | 0.262851 | 0.01393  | 0.556683 | 0.151382 |
| MmugDNA.10398.1.S1_s_at | MmugDNA.10398.1 | 8.63  | 8.67  | 0.07 | 0.02 | -1.03 | 0.538135 | 0.00151  | 0.760127 | 0.059146 |
| MmugDNA.10399.1.S1_at   | MmugDNA.10399.1 | 9.78  | 10.51 | 0.79 | 0.53 | -1.66 | 0.346694 | 0.253477 | 0.625    | 0.521768 |
| MmugDNA.1040.1.S1_at    | MmugDNA.1040.1  | 8.33  | 8.13  | 0.14 | 0.35 | 1.15  | 0.391716 | 0.353181 | 0.658752 | 0.596432 |
| MmugDNA.10403.1.S1_at   | MmugDNA.10403.1 | 10.23 | 10.86 | 0.4  | 0.05 | -1.55 | 0.050775 | 0.104052 | 0.283078 | 0.364988 |
| MmugDNA.10405.1.S1_at   | MmugDNA.10405.1 | 11.12 | 11.43 | 0.06 | 0.14 | -1.23 | 0.087361 | 0.007745 | 0.353109 | 0.117619 |
| MmugDNA.10410.1.S1_at   | MmugDNA.10410.1 | 7.16  | 7.88  | 0.41 | 0.07 | -1.65 | 0.043389 | 0.072531 | 0.265644 | 0.31548  |
| MmugDNA.10411.1.S1_at   | MmugDNA.10411.1 | 8.5   | 8.58  | 0.24 | 0.23 | -1.06 | 0.894435 | 0.029816 | 0.954958 | 0.214326 |
| MmugDNA.10415.1.S1_at   | MmugDNA.10415.1 | 6.01  | 6.03  | 0.08 | 0.17 | -1.01 | 0.211469 | 0.44843  | 0.509249 | 0.664264 |
| MmugDNA.10417.1.S1_at   | MmugDNA.10417.1 | 7.42  | 5.74  | 0.11 | 0.59 | 3.19  | 0.009925 | 0.00822  | 0.149006 | 0.12044  |
| MmugDNA.10421.1.S1_at   | MmugDNA.10421.1 | 10.53 | 11.65 | 0.46 | 0.11 | -2.17 | 0.019431 | 0.066911 | 0.192344 | 0.304608 |
| MmugDNA.10422.1.S1_s_at | MmugDNA.10422.1 | 5.7   | 5.98  | 0.16 | 0.17 | -1.22 | 0.189679 | 0.306452 | 0.486064 | 0.563029 |
| MmugDNA.10423.1.S1_at   | MmugDNA.10423.1 | 11.03 | 11.21 | 0.17 | 0.02 | -1.13 | 0.049155 | 0.28254  | 0.279211 | 0.545266 |
| MmugDNA.10424.1.S1_at   | MmugDNA.10424.1 | 6.07  | 5.47  | 0.22 | 0.07 | 1.51  | 0.009387 | 0.362018 | 0.146803 | 0.602727 |
| MmugDNA.10425.1.S1_at   | MmugDNA.10425.1 | 7.67  | 7.72  | 0.15 | 0.05 | -1.04 | 0.523232 | 0.796123 | 0.750262 | 0.882495 |
| MmugDNA.10426.1.S1_at   | MmugDNA.10426.1 | 9.07  | 10.52 | 0.46 | 0.33 | -2.73 | 0.018848 | 0.174369 | 0.190845 | 0.450824 |
| MmugDNA.10429.1.S1_at   | MmugDNA.10429.1 | 8.1   | 8.09  | 0.29 | 0.07 | 1.01  | 0.936631 | 0.26872  | 0.97357  | 0.534138 |
| MmugDNA.10432.1.S1_at   | MmugDNA.10432.1 | 12.71 | 12.49 | 0.18 | 0.1  | 1.16  | 0.170384 | 0.127179 | 0.46404  | 0.397923 |
| MmugDNA.10435.1.S1_at   | MmugDNA.10435.1 | 10.01 | 10.52 | 0.28 | 0.29 | -1.42 | 0.053291 | 0.016095 | 0.287986 | 0.160775 |
| MmugDNA.10443.1.S1_s_at | MmugDNA.10443.1 | 8.19  | 8.92  | 0.43 | 0.16 | -1.65 | 0.042319 | 0.092933 | 0.262765 | 0.349029 |
| MmugDNA.10444.1.S1_at   | MmugDNA.10444.1 | 13.87 | 13.76 | 0.07 | 0.01 | 1.08  | 0.034355 | 0.023022 | 0.240004 | 0.189836 |
| MmugDNA.10445.1.S1_at   | MmugDNA.10445.1 | 11.07 | 10.95 | 0.1  | 0.04 | 1.09  | 0.35515  | 0.902206 | 0.632007 | 0.944402 |
| MmugDNA.10446.1.S1_at   | MmugDNA.10446.1 | 11.27 | 10.85 | 0.46 | 0.04 | 1.33  | 0.064885 | 0.065227 | 0.311382 | 0.301239 |
| MmugDNA.10448.1.S1_at   | MmugDNA.10448.1 | 9.78  | 10.18 | 0.3  | 0.22 | -1.32 | 0.283987 | 0.533694 | 0.574307 | 0.719848 |
| MmugDNA.10450.1.S1_at   | MmugDNA.10450.1 | 7.36  | 7.67  | 0.21 | 0.11 | -1.24 | 0.112353 | 0.154776 | 0.388511 | 0.42979  |
| MmugDNA.10452.1.S1_at   | MmugDNA.10452.1 | 6.85  | 7.13  | 0.26 | 0.23 | -1.22 | 0.581484 | 0.00416  | 0.786616 | 0.091036 |
| MmugDNA.10453.1.S1_at   | MmugDNA.10453.1 | 4.69  | 3.92  | 0.43 | 0.03 | 1.71  | 0.036124 | 0.030186 | 0.245053 | 0.215679 |
| MmugDNA.10458.1.S1_at   | MmugDNA.10458.1 | 9.38  | 9.96  | 0.61 | 0.05 | -1.5  | 0.210439 | 0.497085 | 0.508054 | 0.696431 |
| MmugDNA.10459.1.S1_at   | MmugDNA.10459.1 | 11.42 | 11.21 | 0.12 | 0.19 | 1.15  | 0.142162 | 0.435285 | 0.428166 | 0.655127 |
| MmugDNA.10463.1.S1_at   | MmugDNA.10463.1 | 7.53  | 7.35  | 0.18 | 0.08 | 1.13  | 0.81408  | 0.374097 | 0.916916 | 0.612678 |
| MmugDNA.10464.1.S1_at   | MmugDNA.10464.1 | 6.03  | 5.92  | 0.14 | 0.1  | 1.08  | 0.42551  | 0.293214 | 0.682937 | 0.553144 |
| MmugDNA.10467.1.S1_x_at | MmugDNA.10467.1 | 3.25  | 3.45  | 0.09 | 0.03 | -1.15 | 0.021769 | 0.320849 | 0.200876 | 0.572849 |
| MmugDNA.10468.1.S1_at   | MmugDNA.10468.1 | 3.87  | 3.34  | 0.37 | 0.22 | 1.45  | 0.147425 | 0.166876 | 0.435407 | 0.443334 |
| MmugDNA.10474.1.S1_at   | MmugDNA.10474.1 | 6.09  | 6.24  | 0.15 | 0.08 | -1.1  | 0.323733 | 0.213131 | 0.607479 | 0.487054 |
| MmugDNA.10477.1.S1_at   | MmugDNA.10477.1 | 7.68  | 7.62  | 0.18 | 0.21 | 1.04  | 0.785889 | 0.022283 | 0.902291 | 0.186724 |
| MmugDNA.10481.1.S1_at   | MmugDNA.10481.1 | 5.41  | 8.03  | 1.12 | 0.36 | -6.15 | 0.033352 | 0.192449 | 0.236556 | 0.467952 |
| MmugDNA.10482.1.S1_at   | MmugDNA.10482.1 | 5.16  | 4.91  | 0.19 | 0.09 | 1.2   | 0.113564 | 0.316482 | 0.390238 | 0.569889 |
| MmugDNA.10491.1.S1_at   | MmugDNA.10491.1 | 7.73  | 7.91  | 0.21 | 0.15 | -1.14 | 0.269824 | 0.320396 | 0.562082 | 0.572648 |

|                         |                 |       |       |      |      |       |          |          |          |          |
|-------------------------|-----------------|-------|-------|------|------|-------|----------|----------|----------|----------|
| MmugDNA.10494.1.S1_at   | MmugDNA.10494.1 | 12.27 | 12.09 | 0.14 | 0.01 | 1.13  | 0.095619 | 0.018042 | 0.365116 | 0.169372 |
| MmugDNA.1050.1.S1_s_at  | MmugDNA.1050.1  | 4.11  | 4.09  | 0.08 | 0.08 | 1.01  | 0.984481 | 0.974134 | 0.994242 | 0.985864 |
| MmugDNA.10506.1.S1_at   | MmugDNA.10506.1 | 10.72 | 10.94 | 0.11 | 0.14 | -1.17 | 0.181677 | 0.00018  | 0.477223 | 0.030511 |
| MmugDNA.1051.1.S1_at    | MmugDNA.1051.1  | 5.11  | 6.03  | 0.14 | 0.29 | -1.9  | 0.011131 | 0.004694 | 0.155142 | 0.095363 |
| MmugDNA.10512.1.S1_at   | MmugDNA.10512.1 | 3.36  | 3.43  | 0.09 | 0.06 | -1.05 | 0.171487 | 0.120646 | 0.465479 | 0.389476 |
| MmugDNA.10525.1.S1_at   | MmugDNA.10525.1 | 6.92  | 6.89  | 0.18 | 0.07 | 1.02  | 0.637018 | 0.745952 | 0.822336 | 0.852688 |
| MmugDNA.10526.1.S1_at   | MmugDNA.10526.1 | 9.17  | 11.48 | 1.17 | 0.22 | -4.95 | 0.040947 | 0.037749 | 0.258807 | 0.238716 |
| MmugDNA.10528.1.S1_at   | MmugDNA.10528.1 | 7.12  | 7.14  | 0.05 | 0.12 | -1.01 | 0.208379 | 0.012507 | 0.506108 | 0.144302 |
| MmugDNA.10530.1.S1_at   | MmugDNA.10530.1 | 5.51  | 5.45  | 0.13 | 0.1  | 1.04  | 0.906444 | 0.907962 | 0.960343 | 0.947889 |
| MmugDNA.10531.1.S1_at   | MmugDNA.10531.1 | 5.24  | 5.1   | 0.24 | 0.19 | 1.1   | 0.456557 | 0.246468 | 0.70584  | 0.515899 |
| MmugDNA.10542.1.S1_at   | MmugDNA.10542.1 | 8.57  | 8.75  | 0.37 | 0.32 | -1.13 | 0.318343 | 0.53605  | 0.603003 | 0.721454 |
| MmugDNA.10548.1.S1_at   | MmugDNA.10548.1 | 8.29  | 8.25  | 0.17 | 0.13 | 1.03  | 0.354067 | 0.368727 | 0.631226 | 0.608236 |
| MmugDNA.10549.1.S1_at   | MmugDNA.10549.1 | 6.24  | 6.21  | 0.18 | 0.01 | 1.02  | 0.951639 | 0.94998  | 0.980002 | 0.971462 |
| MmugDNA.1056.1.S1_at    | MmugDNA.1056.1  | 9.99  | 9.82  | 0.22 | 0.1  | 1.13  | 0.229442 | 0.041893 | 0.528241 | 0.249206 |
| MmugDNA.10563.1.S1_at   | MmugDNA.10563.1 | 8.21  | 9.08  | 0.4  | 0.19 | -1.83 | 0.068237 | 0.458894 | 0.319026 | 0.671498 |
| MmugDNA.10570.1.S1_at   | MmugDNA.10570.1 | 9.01  | 9.36  | 0.53 | 0.11 | -1.27 | 0.805019 | 0.903142 | 0.912503 | 0.94497  |
| MmugDNA.10574.1.S1_at   | MmugDNA.10574.1 | 7.55  | 7.76  | 0.13 | 0.1  | -1.16 | 0.166931 | 0.543633 | 0.460143 | 0.726239 |
| MmugDNA.10575.1.S1_at   | MmugDNA.10575.1 | 9.53  | 8.77  | 0.04 | 0.37 | 1.7   | 0.016729 | 0.029534 | 0.182634 | 0.213525 |
| MmugDNA.10578.1.S1_at   | MmugDNA.10578.1 | 12.73 | 13.01 | 0.04 | 0.09 | -1.21 | 0.011918 | 0.024736 | 0.159266 | 0.196967 |
| MmugDNA.10587.1.S1_at   | MmugDNA.10587.1 | 6.83  | 6.96  | 0.19 | 0.13 | -1.09 | 0.265788 | 0.120004 | 0.558375 | 0.388672 |
| MmugDNA.10588.1.S1_at   | MmugDNA.10588.1 | 12.07 | 11.94 | 0.08 | 0.01 | 1.1   | 0.088672 | 0.34713  | 0.355022 | 0.591815 |
| MmugDNA.10589.1.S1_at   | MmugDNA.10589.1 | 6.87  | 6.43  | 0.1  | 0.07 | 1.36  | 0.001736 | 0.000289 | 0.085035 | 0.034892 |
| MmugDNA.10594.1.S1_at   | MmugDNA.10594.1 | 8.18  | 8.1   | 0.15 | 0.1  | 1.06  | 0.708533 | 0.363668 | 0.861951 | 0.604075 |
| MmugDNA.10599.1.S1_at   | MmugDNA.10599.1 | 4.21  | 4.22  | 0.39 | 0.03 | -1.01 | 0.694866 | 0.905805 | 0.854441 | 0.946726 |
| MmugDNA.10610.1.S1_s_at | MmugDNA.10610.1 | 11.8  | 11.41 | 0.09 | 0.05 | 1.31  | 0.005608 | 0.006658 | 0.120616 | 0.110505 |
| MmugDNA.10611.1.S1_at   | MmugDNA.10611.1 | 7.94  | 6.05  | 0.94 | 0.16 | 3.69  | 0.070425 | 0.133551 | 0.323757 | 0.405525 |
| MmugDNA.10614.1.S1_at   | MmugDNA.10614.1 | 3.02  | 3.19  | 0.09 | 0.14 | -1.12 | 0.342433 | 0.465695 | 0.622192 | 0.675863 |
| MmugDNA.10628.1.S1_at   | MmugDNA.10628.1 | 12.29 | 11.49 | 0.2  | 0.06 | 1.75  | 0.004782 | 0.003018 | 0.115098 | 0.080204 |
| MmugDNA.10637.1.S1_at   | MmugDNA.10637.1 | 7.95  | 7.95  | 0.15 | 0.03 | 1     | 0.553693 | 0.523975 | 0.770167 | 0.714099 |
| MmugDNA.10638.1.S1_at   | MmugDNA.10638.1 | 12.76 | 12.99 | 0.41 | 0.06 | -1.17 | 0.459747 | 0.200797 | 0.707815 | 0.47529  |
| MmugDNA.1064.1.S1_at    | MmugDNA.1064.1  | 4.25  | 4.08  | 0.04 | 0.4  | 1.12  | 0.800747 | 0.817436 | 0.910354 | 0.894694 |
| MmugDNA.10640.1.S1_s_at | MmugDNA.10640.1 | 9.72  | 10.05 | 0.82 | 0.14 | -1.26 | 0.176669 | 0.393734 | 0.471175 | 0.626534 |
| MmugDNA.10643.1.S1_s_at | MmugDNA.10643.1 | 11.65 | 12.85 | 0.48 | 0.05 | -2.29 | 0.011075 | 0.006213 | 0.154928 | 0.106916 |
| MmugDNA.10647.1.S1_at   | MmugDNA.10647.1 | 3.43  | 3.47  | 0.13 | 0.08 | -1.02 | 0.956544 | 0.705454 | 0.982145 | 0.829222 |
| MmugDNA.10649.1.S1_at   | MmugDNA.10649.1 | 12.57 | 12.14 | 0.15 | 0.09 | 1.35  | 0.010362 | 0.13989  | 0.151697 | 0.413192 |
| MmugDNA.10663.1.S1_at   | MmugDNA.10663.1 | 5.29  | 5.47  | 0.27 | 0.12 | -1.13 | 0.261994 | 0.046563 | 0.556237 | 0.260267 |
| MmugDNA.10666.1.S1_at   | MmugDNA.10666.1 | 11.6  | 11.47 | 0.25 | 0.1  | 1.1   | 0.29249  | 0.173188 | 0.581743 | 0.449773 |
| MmugDNA.10668.1.S1_at   | MmugDNA.10668.1 | 4.96  | 4.82  | 0.09 | 0.02 | 1.1   | 0.116762 | 0.057849 | 0.39382  | 0.286898 |
| MmugDNA.1067.1.S1_s_at  | MmugDNA.1067.1  | 11.41 | 11.42 | 0.07 | 0.04 | -1.01 | 0.898912 | 0.324592 | 0.957024 | 0.575149 |
| MmugDNA.10675.1.S1_at   | MmugDNA.10675.1 | 11.77 | 11.79 | 0.15 | 0.1  | -1.01 | 0.477088 | 0.523814 | 0.719271 | 0.714044 |
| MmugDNA.10676.1.S1_s_at | MmugDNA.10676.1 | 9.93  | 9.82  | 0.31 | 0.14 | 1.08  | 0.713345 | 0.280073 | 0.864604 | 0.543369 |
| MmugDNA.10679.1.S1_at   | MmugDNA.10679.1 | 12.57 | 12.83 | 0.23 | 0.03 | -1.2  | 0.051208 | 0.022669 | 0.283674 | 0.188607 |
| MmugDNA.1068.1.S1_at    | MmugDNA.1068.1  | 11.63 | 12.33 | 0.63 | 0.17 | -1.63 | 0.429236 | 0.324263 | 0.685711 | 0.574893 |

|                         |                 |       |       |      |      |       |          |          |          |          |
|-------------------------|-----------------|-------|-------|------|------|-------|----------|----------|----------|----------|
| MmugDNA.10680.1.S1_at   | MmugDNA.10680.1 | 9.23  | 9.94  | 0.26 | 0.25 | -1.64 | 0.076485 | 0.095196 | 0.334798 | 0.35218  |
| MmugDNA.10682.1.S1_at   | MmugDNA.10682.1 | 6.31  | 6.04  | 0.16 | 0.08 | 1.21  | 0.095946 | 0.245779 | 0.365529 | 0.515519 |
| MmugDNA.10684.1.S1_at   | MmugDNA.10684.1 | 6.21  | 6.02  | 0.2  | 0.12 | 1.14  | 0.29007  | 0.238612 | 0.579597 | 0.509233 |
| MmugDNA.10685.1.S1_at   | MmugDNA.10685.1 | 6.74  | 7.46  | 0.3  | 0.28 | -1.65 | 0.090204 | 0.062949 | 0.356864 | 0.297579 |
| MmugDNA.10688.1.S1_at   | MmugDNA.10688.1 | 7.8   | 7.58  | 1.09 | 0.07 | 1.16  | 0.248969 | 0.225667 | 0.544234 | 0.498155 |
| MmugDNA.10692.1.S1_at   | MmugDNA.10692.1 | 11.19 | 11.54 | 0.15 | 0.06 | -1.28 | 0.011872 | 0.053745 | 0.159011 | 0.277384 |
| MmugDNA.10695.1.S1_at   | MmugDNA.10695.1 | 6.88  | 6.97  | 0.05 | 0.16 | -1.07 | 0.411369 | 0.394954 | 0.673306 | 0.627216 |
| MmugDNA.10698.1.S1_at   | MmugDNA.10698.1 | 6.93  | 6.83  | 0.07 | 0.14 | 1.07  | 0.777735 | 0.421973 | 0.898434 | 0.645406 |
| MmugDNA.10699.1.S1_at   | MmugDNA.10699.1 | 3.19  | 2.99  | 0.15 | 0.09 | 1.15  | 0.543325 | 0.731071 | 0.763378 | 0.844197 |
| MmugDNA.107.1.S1_at     | MmugDNA.107.1   | 4.18  | 4.2   | 0.19 | 0.14 | -1.01 | 0.891833 | 0.901614 | 0.953838 | 0.944007 |
| MmugDNA.10707.1.S1_at   | MmugDNA.10707.1 | 7.6   | 8     | 0.42 | 0.1  | -1.32 | 0.205973 | 0.283744 | 0.50382  | 0.546185 |
| MmugDNA.10708.1.S1_at   | MmugDNA.10708.1 | 12.4  | 12.28 | 0.03 | 0.07 | 1.08  | 0.143347 | 0.33346  | 0.429654 | 0.581683 |
| MmugDNA.10710.1.S1_at   | MmugDNA.10710.1 | 4.83  | 4.8   | 0.16 | 0.03 | 1.02  | 0.584287 | 0.236147 | 0.788555 | 0.507188 |
| MmugDNA.10712.1.S1_at   | MmugDNA.10712.1 | 5.49  | 7.45  | 0.77 | 0.49 | -3.89 | 0.041333 | 0.001298 | 0.259688 | 0.055585 |
| MmugDNA.10727.1.S1_at   | MmugDNA.10727.1 | 9.55  | 10.15 | 0.26 | 0.02 | -1.51 | 0.007044 | 0.121484 | 0.131294 | 0.390624 |
| MmugDNA.10728.1.S1_at   | MmugDNA.10728.1 | 12.35 | 12.44 | 0.06 | 0.04 | -1.06 | 0.134006 | 0.040677 | 0.417457 | 0.246631 |
| MmugDNA.10734.1.S1_at   | MmugDNA.10734.1 | 7.37  | 8.17  | 0.4  | 0.08 | -1.74 | 0.03136  | 0.022864 | 0.23018  | 0.189271 |
| MmugDNA.10736.1.S1_at   | MmugDNA.10736.1 | 6.22  | 6     | 0.15 | 0.09 | 1.16  | 0.08768  | 0.043242 | 0.353723 | 0.252677 |
| MmugDNA.10741.1.S1_s_at | MmugDNA.10741.1 | 12.17 | 11.95 | 0.16 | 0.07 | 1.16  | 0.105233 | 0.19321  | 0.379089 | 0.468578 |
| MmugDNA.10743.1.S1_at   | MmugDNA.10743.1 | 12.09 | 12.3  | 0.15 | 0.03 | -1.15 | 0.179076 | 0.000865 | 0.474018 | 0.047425 |
| MmugDNA.10745.1.S1_at   | MmugDNA.10745.1 | 3.68  | 3.64  | 0.06 | 0.06 | 1.03  | 0.833536 | 0.923678 | 0.926706 | 0.95708  |
| MmugDNA.10754.1.S1_at   | MmugDNA.10754.1 | 7.17  | 7.35  | 0.12 | 0.02 | -1.13 | 0.103118 | 0.030843 | 0.375797 | 0.217427 |
| MmugDNA.1076.1.S1_at    | MmugDNA.1076.1  | 11.66 | 11.32 | 0.1  | 0.03 | 1.26  | 0.005087 | 0.003241 | 0.116578 | 0.082187 |
| MmugDNA.10763.1.S1_at   | MmugDNA.10763.1 | 3.6   | 3.55  | 0.21 | 0.04 | 1.03  | 0.541031 | 0.709073 | 0.761875 | 0.831303 |
| MmugDNA.10764.1.S1_at   | MmugDNA.10764.1 | 3.63  | 3.68  | 0.26 | 0.09 | -1.04 | 0.818205 | 0.795766 | 0.918821 | 0.882339 |
| MmugDNA.10769.1.S1_at   | MmugDNA.10769.1 | 5.81  | 5.91  | 0.09 | 0.05 | -1.07 | 0.5283   | 0.176037 | 0.753563 | 0.452526 |
| MmugDNA.1077.1.S1_at    | MmugDNA.1077.1  | 5.92  | 5.79  | 0.17 | 0.14 | 1.1   | 0.179183 | 0.194526 | 0.474118 | 0.469632 |
| MmugDNA.10771.1.S1_at   | MmugDNA.10771.1 | 8.19  | 9.13  | 0.43 | 0.23 | -1.93 | 0.101415 | 0.095999 | 0.372883 | 0.353302 |
| MmugDNA.10773.1.S1_at   | MmugDNA.10773.1 | 7.35  | 7.24  | 0.01 | 0.07 | 1.08  | 0.190785 | 0.21748  | 0.486956 | 0.491035 |
| MmugDNA.10776.1.S1_at   | MmugDNA.10776.1 | 4.9   | 4.9   | 0.12 | 0.04 | -1    | 0.264179 | 0.258299 | 0.557422 | 0.525596 |
| MmugDNA.10777.1.S1_at   | MmugDNA.10777.1 | 4.01  | 3.92  | 0.12 | 0.09 | 1.07  | 0.780706 | 0.936582 | 0.899918 | 0.964214 |
| MmugDNA.10778.1.S1_at   | MmugDNA.10778.1 | 11.53 | 9.84  | 0.11 | 0.5  | 3.22  | 0.007988 | 0.004778 | 0.138394 | 0.09644  |
| MmugDNA.10783.1.S1_at   | MmugDNA.10783.1 | 10.02 | 10.16 | 0.05 | 0.03 | -1.1  | 0.02407  | 0.010554 | 0.208287 | 0.134149 |
| MmugDNA.10790.1.S1_at   | MmugDNA.10790.1 | 11.67 | 11.66 | 0.26 | 0.2  | 1.01  | 0.653832 | 0.437328 | 0.832423 | 0.656613 |
| MmugDNA.10791.1.S1_at   | MmugDNA.10791.1 | 5.02  | 4.63  | 0.57 | 0.22 | 1.31  | 0.262077 | 0.248919 | 0.556302 | 0.517972 |
| MmugDNA.10796.1.S1_at   | MmugDNA.10796.1 | 5.8   | 5.89  | 0.03 | 0.08 | -1.07 | 0.112063 | 0.628319 | 0.388221 | 0.781112 |
| MmugDNA.10807.1.S1_at   | MmugDNA.10807.1 | 5.43  | 5.34  | 0.01 | 0.09 | 1.07  | 0.304104 | 0.441359 | 0.59132  | 0.659552 |
| MmugDNA.1081.1.S1_at    | MmugDNA.1081.1  | 8.88  | 9.52  | 0.18 | 0.16 | -1.56 | 0.015153 | 0.046057 | 0.175172 | 0.258977 |
| MmugDNA.10811.1.S1_at   | MmugDNA.10811.1 | 3.61  | 3.38  | 0.52 | 0.06 | 1.17  | 0.380291 | 0.554486 | 0.65005  | 0.733245 |
| MmugDNA.10812.1.S1_at   | MmugDNA.10812.1 | 9.87  | 9.75  | 0.07 | 0.06 | 1.08  | 0.326145 | 0.011034 | 0.60931  | 0.136793 |
| MmugDNA.10819.1.S1_at   | MmugDNA.10819.1 | 3.66  | 3.31  | 0.41 | 0.05 | 1.27  | 0.218412 | 0.253902 | 0.516059 | 0.522257 |
| MmugDNA.10823.1.S1_at   | MmugDNA.10823.1 | 6.05  | 4.75  | 0.7  | 0.19 | 2.47  | 0.096704 | 0.084196 | 0.366706 | 0.33527  |
| MmugDNA.10829.1.S1_at   | MmugDNA.10829.1 | 6.56  | 5.49  | 0.12 | 0.17 | 2.1   | 0.001158 | 0.012323 | 0.077718 | 0.143659 |

|                         |                 |       |       |      |      |       |          |          |          |          |
|-------------------------|-----------------|-------|-------|------|------|-------|----------|----------|----------|----------|
| MmugDNA.10840.1.S1_at   | MmugDNA.10840.1 | 5.15  | 5.15  | 0.43 | 0.56 | 1     | 0.874123 | 0.856743 | 0.945969 | 0.918137 |
| MmugDNA.10844.1.S1_at   | MmugDNA.10844.1 | 11.58 | 11.57 | 0.04 | 0.02 | 1.01  | 0.261552 | 0.005691 | 0.555768 | 0.104029 |
| MmugDNA.10850.1.S1_at   | MmugDNA.10850.1 | 5.18  | 5.14  | 0.27 | 0.11 | 1.03  | 0.757592 | 0.532713 | 0.888802 | 0.719203 |
| MmugDNA.10855.1.S1_at   | MmugDNA.10855.1 | 11.23 | 10.32 | 0.04 | 0.05 | 1.88  | 0.00002  | 0.047539 | 0.045594 | 0.262717 |
| MmugDNA.10863.1.S1_at   | MmugDNA.10863.1 | 7.14  | 7.4   | 0.18 | 0.02 | -1.2  | 0.205787 | 0.348001 | 0.503584 | 0.592215 |
| MmugDNA.10869.1.S1_at   | MmugDNA.10869.1 | 11.25 | 11.35 | 0.07 | 0.11 | -1.08 | 0.150295 | 0.414815 | 0.439408 | 0.640456 |
| MmugDNA.10872.1.S1_at   | MmugDNA.10872.1 | 10.66 | 11    | 0.08 | 0.1  | -1.26 | 0.006528 | 0.000438 | 0.127373 | 0.038359 |
| MmugDNA.10874.1.S1_s_at | MmugDNA.10874.1 | 5.34  | 5.31  | 0.13 | 0.07 | 1.02  | 0.437277 | 0.44664  | 0.692095 | 0.66287  |
| MmugDNA.10875.1.S1_at   | MmugDNA.10875.1 | 8.58  | 8.89  | 0.21 | 0.18 | -1.24 | 0.30801  | 0.725085 | 0.594714 | 0.840867 |
| MmugDNA.10876.1.S1_at   | MmugDNA.10876.1 | 10.52 | 10.48 | 0.1  | 0.04 | 1.03  | 0.468909 | 0.000843 | 0.713885 | 0.047013 |
| MmugDNA.10878.1.S1_at   | MmugDNA.10878.1 | 8.96  | 9.78  | 0.17 | 0.24 | -1.77 | 0.01838  | 0.035467 | 0.188632 | 0.232564 |
| MmugDNA.10883.1.S1_at   | MmugDNA.10883.1 | 9.9   | 9.65  | 0.21 | 0.03 | 1.19  | 0.071784 | 0.038689 | 0.325792 | 0.24169  |
| MmugDNA.10884.1.S1_at   | MmugDNA.10884.1 | 12.19 | 11.74 | 0.17 | 0.04 | 1.37  | 0.016992 | 0.100858 | 0.183806 | 0.360398 |
| MmugDNA.10889.1.S1_at   | MmugDNA.10889.1 | 2.84  | 2.82  | 0.07 | 0.15 | 1.01  | 0.872882 | 0.87124  | 0.945492 | 0.926834 |
| MmugDNA.10893.1.S1_at   | MmugDNA.10893.1 | 4.15  | 4.3   | 0.24 | 0.32 | -1.11 | 0.450525 | 0.37963  | 0.70154  | 0.616523 |
| MmugDNA.10896.1.S1_at   | MmugDNA.10896.1 | 4.83  | 4.8   | 0.85 | 0.21 | 1.02  | 0.368617 | 0.392019 | 0.642282 | 0.625519 |
| MmugDNA.10899.1.S1_at   | MmugDNA.10899.1 | 8.69  | 8.26  | 0.17 | 0.08 | 1.34  | 0.015331 | 0.000398 | 0.176072 | 0.037471 |
| MmugDNA.10899.1.S1_s_at | MmugDNA.10899.1 | 8.04  | 7.95  | 0.14 | 0.11 | 1.07  | 0.30724  | 0.018638 | 0.593975 | 0.171648 |
| MmugDNA.10900.1.S1_at   | MmugDNA.10900.1 | 10.09 | 9.42  | 0.54 | 0.22 | 1.59  | 0.435105 | 0.274954 | 0.690268 | 0.539402 |
| MmugDNA.10904.1.S1_at   | MmugDNA.10904.1 | 5.82  | 5.91  | 0.28 | 0.11 | -1.06 | 0.881954 | 0.874326 | 0.949737 | 0.928622 |
| MmugDNA.10906.1.S1_at   | MmugDNA.10906.1 | 8.05  | 8.63  | 0.28 | 0.22 | -1.5  | 0.104023 | 0.048785 | 0.377324 | 0.26581  |
| MmugDNA.10907.1.S1_at   | MmugDNA.10907.1 | 11.04 | 11.01 | 0.09 | 0.11 | 1.02  | 0.350902 | 0.005577 | 0.628649 | 0.103193 |
| MmugDNA.10908.1.S1_at   | MmugDNA.10908.1 | 11.62 | 11.34 | 0.24 | 0.1  | 1.21  | 0.085906 | 0.050504 | 0.350257 | 0.270066 |
| MmugDNA.1091.1.S1_at    | MmugDNA.1091.1  | 7.5   | 7.96  | 0.13 | 0.31 | -1.37 | 0.026878 | 0.071317 | 0.217016 | 0.313345 |
| MmugDNA.10911.1.S1_at   | MmugDNA.10911.1 | 9.56  | 8.52  | 0.45 | 0.42 | 2.05  | 0.087803 | 0.236634 | 0.353927 | 0.50743  |
| MmugDNA.10912.1.S1_at   | MmugDNA.10912.1 | 6.51  | 6.7   | 0.49 | 0.41 | -1.14 | 0.725838 | 0.135454 | 0.871346 | 0.407535 |
| MmugDNA.1092.1.S1_at    | MmugDNA.1092.1  | 8.08  | 7.53  | 0.33 | 0.16 | 1.46  | 0.017523 | 0.01913  | 0.185974 | 0.174059 |
| MmugDNA.10921.1.S1_at   | MmugDNA.10921.1 | 11.06 | 11.44 | 0.07 | 0.01 | -1.3  | 0.000495 | 0.004633 | 0.068271 | 0.094988 |
| MmugDNA.10922.1.S1_at   | MmugDNA.10922.1 | 12.12 | 12.35 | 0.36 | 0.14 | -1.17 | 0.190126 | 0.234103 | 0.486473 | 0.505319 |
| MmugDNA.10923.1.S1_at   | MmugDNA.10923.1 | 7.36  | 7.97  | 0.33 | 0.5  | -1.54 | 0.162814 | 0.05517  | 0.4549   | 0.280519 |
| MmugDNA.10925.1.S1_at   | MmugDNA.10925.1 | 5.82  | 6.35  | 0.44 | 0.24 | -1.45 | 0.139396 | 0.382309 | 0.424957 | 0.618482 |
| MmugDNA.10926.1.S1_at   | MmugDNA.10926.1 | 11.05 | 11.25 | 0.07 | 0.04 | -1.15 | 0.010525 | 0.281919 | 0.15243  | 0.544864 |
| MmugDNA.10928.1.S1_at   | MmugDNA.10928.1 | 10.19 | 9.94  | 0.12 | 0.17 | 1.2   | 0.242942 | 0.111039 | 0.539672 | 0.375566 |
| MmugDNA.1093.1.S1_at    | MmugDNA.1093.1  | 10.51 | 10.94 | 0.14 | 0.1  | -1.35 | 0.01139  | 0.0065   | 0.157008 | 0.109521 |
| MmugDNA.10931.1.S1_at   | MmugDNA.10931.1 | 10.54 | 10.25 | 0.22 | 0.04 | 1.22  | 0.086708 | 0.167276 | 0.351806 | 0.443684 |
| MmugDNA.10937.1.S1_at   | MmugDNA.10937.1 | 4.14  | 4.09  | 0.14 | 0.09 | 1.04  | 0.612505 | 0.446072 | 0.806905 | 0.662684 |
| MmugDNA.1094.1.S1_at    | MmugDNA.1094.1  | 5.52  | 5.36  | 0.17 | 0.02 | 1.12  | 0.487151 | 0.258316 | 0.726032 | 0.5256   |
| MmugDNA.10940.1.S1_at   | MmugDNA.10940.1 | 3.96  | 4     | 0.38 | 0.13 | -1.03 | 0.909876 | 0.940559 | 0.961801 | 0.966314 |
| MmugDNA.10942.1.S1_at   | MmugDNA.10942.1 | 7.77  | 7.65  | 0.53 | 0.53 | 1.08  | 0.407083 | 0.871975 | 0.670235 | 0.927131 |
| MmugDNA.10943.1.S1_at   | MmugDNA.10943.1 | 6.8   | 6.77  | 0.15 | 0.08 | 1.02  | 0.969527 | 0.027502 | 0.987896 | 0.207161 |
| MmugDNA.10946.1.S1_at   | MmugDNA.10946.1 | 4.81  | 5.56  | 0.03 | 0.18 | -1.68 | 0.002027 | 0.000945 | 0.089887 | 0.049054 |
| MmugDNA.1096.1.S1_at    | MmugDNA.1096.1  | 8.99  | 9.82  | 0.06 | 0.07 | -1.77 | 0.000088 | 0.004896 | 0.051196 | 0.097632 |
| MmugDNA.10975.1.S1_at   | MmugDNA.10975.1 | 4.45  | 4.8   | 0.11 | 0.2  | -1.28 | 0.141554 | 0.272974 | 0.42754  | 0.53761  |



|                         |                 |       |       |      |      |       |          |          |          |          |
|-------------------------|-----------------|-------|-------|------|------|-------|----------|----------|----------|----------|
| MmugDNA.10976.1.S1_at   | MmugDNA.10976.1 | 13.09 | 13.04 | 0.08 | 0.02 | 1.04  | 0.268706 | 0.033904 | 0.561271 | 0.227771 |
| MmugDNA.10977.1.S1_at   | MmugDNA.10977.1 | 10.3  | 10.45 | 0.19 | 0.02 | -1.1  | 0.567133 | 0.880981 | 0.777689 | 0.932039 |
| MmugDNA.10979.1.S1_at   | MmugDNA.10979.1 | 8.69  | 9.03  | 0.28 | 0.17 | -1.26 | 0.12823  | 0.22106  | 0.410227 | 0.494471 |
| MmugDNA.10981.1.S1_at   | MmugDNA.10981.1 | 11.71 | 11.59 | 0.08 | 0.01 | 1.08  | 0.049527 | 0.0051   | 0.279984 | 0.099108 |
| MmugDNA.10986.1.S1_s_at | MmugDNA.10986.1 | 10.53 | 10.9  | 0.21 | 0.17 | -1.28 | 0.415497 | 0.490665 | 0.676187 | 0.692649 |
| MmugDNA.1099.1.S1_at    | MmugDNA.1099.1  | 4     | 3.92  | 0.43 | 0.33 | 1.05  | 0.678371 | 0.710763 | 0.846605 | 0.832259 |
| MmugDNA.10990.1.S1_at   | MmugDNA.10990.1 | 7.24  | 7.34  | 0.24 | 0.1  | -1.07 | 0.579412 | 0.009819 | 0.785078 | 0.130205 |
| MmugDNA.10995.1.S1_at   | MmugDNA.10995.1 | 12.58 | 12.48 | 0.09 | 0.01 | 1.07  | 0.143601 | 0.255121 | 0.430076 | 0.52317  |
| MmugDNA.10998.1.S1_at   | MmugDNA.10998.1 | 10    | 10.03 | 0.26 | 0.06 | -1.02 | 0.525718 | 0.042657 | 0.752031 | 0.251037 |
| MmugDNA.11001.1.S1_at   | MmugDNA.11001.1 | 10.47 | 10.68 | 0.1  | 0.1  | -1.16 | 0.037575 | 0.101445 | 0.249272 | 0.36121  |
| MmugDNA.11002.1.S1_at   | MmugDNA.11002.1 | 7.44  | 7.94  | 0.64 | 0.18 | -1.42 | 0.084641 | 0.039472 | 0.348521 | 0.243642 |
| MmugDNA.11003.1.S1_at   | MmugDNA.11003.1 | 8.3   | 7.01  | 0.19 | 0.41 | 2.45  | 0.01644  | 0.081076 | 0.181069 | 0.329249 |
| MmugDNA.11004.1.S1_at   | MmugDNA.11004.1 | 4.46  | 4.31  | 0.11 | 0.11 | 1.11  | 0.126846 | 0.181533 | 0.408342 | 0.458087 |
| MmugDNA.11009.1.S1_at   | MmugDNA.11009.1 | 11.4  | 11.32 | 0.21 | 0.08 | 1.06  | 0.619173 | 0.876941 | 0.811036 | 0.929868 |
| MmugDNA.11020.1.S1_at   | MmugDNA.11020.1 | 10.18 | 10.31 | 0.18 | 0.11 | -1.1  | 0.165501 | 0.058045 | 0.458483 | 0.287507 |
| MmugDNA.11026.1.S1_at   | MmugDNA.11026.1 | 11.97 | 12.16 | 0.21 | 0.03 | -1.14 | 0.268278 | 0.064864 | 0.561018 | 0.300719 |
| MmugDNA.11027.1.S1_at   | MmugDNA.11027.1 | 8.9   | 9.62  | 0.33 | 0.19 | -1.64 | 0.02289  | 0.003167 | 0.204235 | 0.081793 |
| MmugDNA.11032.1.S1_at   | MmugDNA.11032.1 | 7.33  | 6.84  | 0.26 | 0.16 | 1.4   | 0.073185 | 0.013155 | 0.328293 | 0.147338 |
| MmugDNA.11035.1.S1_at   | MmugDNA.11035.1 | 7.49  | 7.7   | 0.33 | 0.05 | -1.16 | 0.487614 | 0.041616 | 0.726419 | 0.24887  |
| MmugDNA.11036.1.S1_at   | MmugDNA.11036.1 | 11.99 | 12.05 | 0.05 | 0.13 | -1.04 | 0.466593 | 0.315744 | 0.712286 | 0.569157 |
| MmugDNA.11040.1.S1_at   | MmugDNA.11040.1 | 10.64 | 10.7  | 0.1  | 0.09 | -1.04 | 0.289665 | 0.408412 | 0.57918  | 0.635685 |
| MmugDNA.11044.1.S1_at   | MmugDNA.11044.1 | 4.21  | 4.03  | 0.12 | 0.12 | 1.13  | 0.152158 | 0.113102 | 0.441677 | 0.379073 |
| MmugDNA.11045.1.S1_at   | MmugDNA.11045.1 | 3.07  | 2.95  | 0.13 | 0.06 | 1.09  | 0.886109 | 0.736032 | 0.95144  | 0.847309 |
| MmugDNA.11045.1.S1_s_at | MmugDNA.11045.1 | 6.73  | 6.76  | 0.23 | 0.04 | -1.03 | 0.763786 | 0.781117 | 0.891841 | 0.873036 |
| MmugDNA.11046.1.S1_at   | MmugDNA.11046.1 | 10.56 | 10.1  | 0.19 | 0.27 | 1.37  | 0.093195 | 0.031005 | 0.361736 | 0.217993 |
| MmugDNA.11047.1.S1_at   | MmugDNA.11047.1 | 9.83  | 9.69  | 0.4  | 0.23 | 1.1   | 0.820885 | 0.715679 | 0.920074 | 0.835159 |
| MmugDNA.11048.1.S1_at   | MmugDNA.11048.1 | 5.51  | 5.07  | 0.26 | 0.11 | 1.36  | 0.076736 | 0.133294 | 0.335123 | 0.405049 |
| MmugDNA.11049.1.S1_at   | MmugDNA.11049.1 | 4.06  | 4.08  | 0.08 | 0.15 | -1.01 | 0.821854 | 0.952487 | 0.92065  | 0.973066 |
| MmugDNA.11051.1.S1_at   | MmugDNA.11051.1 | 8.42  | 8.95  | 0.14 | 0.1  | -1.45 | 0.006535 | 0.308082 | 0.127373 | 0.564219 |
| MmugDNA.11052.1.S1_at   | MmugDNA.11052.1 | 11.59 | 11.46 | 0.07 | 0.02 | 1.09  | 0.03101  | 0.224847 | 0.229092 | 0.497653 |
| MmugDNA.11058.1.S1_at   | MmugDNA.11058.1 | 12.21 | 12.14 | 0.08 | 0.01 | 1.05  | 0.144634 | 0.005889 | 0.431639 | 0.104899 |
| MmugDNA.1106.1.S1_at    | MmugDNA.1106.1  | 8.58  | 8.59  | 0.29 | 0.2  | -1    | 0.668136 | 0.947276 | 0.840616 | 0.970103 |
| MmugDNA.11064.1.S1_at   | MmugDNA.11064.1 | 9.52  | 9.6   | 0.33 | 0.05 | -1.06 | 0.550966 | 0.175616 | 0.768202 | 0.45218  |
| MmugDNA.11066.1.S1_at   | MmugDNA.11066.1 | 12    | 12.34 | 0.24 | 0.18 | -1.27 | 0.228831 | 0.369291 | 0.52733  | 0.6087   |
| MmugDNA.11072.1.S1_at   | MmugDNA.11072.1 | 11.05 | 10.99 | 0.11 | 0.04 | 1.04  | 0.39452  | 0.004447 | 0.661066 | 0.092958 |
| MmugDNA.11073.1.S1_at   | MmugDNA.11073.1 | 3.77  | 3.59  | 0.24 | 0.04 | 1.13  | 0.217593 | 0.300717 | 0.515458 | 0.558959 |
| MmugDNA.11075.1.S1_at   | MmugDNA.11075.1 | 3.83  | 3.36  | 0.56 | 0.11 | 1.39  | 0.269522 | 0.269279 | 0.561872 | 0.534534 |
| MmugDNA.11078.1.S1_at   | MmugDNA.11078.1 | 5.69  | 5.59  | 0.11 | 0.09 | 1.07  | 0.186318 | 0.338118 | 0.482544 | 0.585286 |
| MmugDNA.11078.1.S1_s_at | MmugDNA.11078.1 | 5.97  | 5.75  | 0.04 | 0.08 | 1.17  | 0.013534 | 0.059353 | 0.167163 | 0.29054  |
| MmugDNA.11079.1.S1_at   | MmugDNA.11079.1 | 8.32  | 8.4   | 0.3  | 0.27 | -1.05 | 0.363557 | 0.272855 | 0.638251 | 0.537586 |
| MmugDNA.11084.1.S1_at   | MmugDNA.11084.1 | 2.97  | 3.04  | 0.25 | 0.16 | -1.05 | 0.676325 | 0.665457 | 0.845426 | 0.80399  |
| MmugDNA.11088.1.S1_at   | MmugDNA.11088.1 | 6.06  | 6.18  | 0.38 | 0.27 | -1.08 | 0.747694 | 0.055893 | 0.883139 | 0.282185 |
| MmugDNA.11092.1.S1_at   | MmugDNA.11092.1 | 7.99  | 7.66  | 0.8  | 0.55 | 1.26  | 0.448075 | 0.688274 | 0.699768 | 0.818009 |

|                         |                 |       |       |      |      |       |          |          |          |          |
|-------------------------|-----------------|-------|-------|------|------|-------|----------|----------|----------|----------|
| MmugDNA.11095.1.S1_at   | MmugDNA.11095.1 | 5.18  | 5.23  | 0.25 | 0.05 | -1.03 | 0.906743 | 0.62342  | 0.960562 | 0.777776 |
| MmugDNA.111.1.S1_at     | MmugDNA.111.1   | 8.94  | 8.41  | 0.23 | 0.39 | 1.45  | 0.389496 | 0.088287 | 0.657329 | 0.341721 |
| MmugDNA.11101.1.S1_at   | MmugDNA.11101.1 | 8.18  | 8.48  | 0.18 | 0.19 | -1.23 | 0.276415 | 0.32689  | 0.567973 | 0.576848 |
| MmugDNA.11105.1.S1_at   | MmugDNA.11105.1 | 9     | 8.62  | 0.24 | 0.17 | 1.3   | 0.188302 | 0.668669 | 0.484627 | 0.806111 |
| MmugDNA.11108.1.S1_at   | MmugDNA.11108.1 | 8.86  | 9.16  | 0.24 | 0.06 | -1.23 | 0.117974 | 0.425876 | 0.39558  | 0.6481   |
| MmugDNA.11112.1.S1_at   | MmugDNA.11112.1 | 5.3   | 5.29  | 0.02 | 0.03 | 1.01  | 0.771376 | 0.82224  | 0.895234 | 0.897741 |
| MmugDNA.11115.1.S1_at   | MmugDNA.11115.1 | 7.14  | 7.25  | 0.51 | 0.21 | -1.08 | 0.344675 | 0.695339 | 0.623972 | 0.82295  |
| MmugDNA.11115.1.S1_s_at | MmugDNA.11115.1 | 8.63  | 9.23  | 0.7  | 0.17 | -1.51 | 0.067587 | 0.297321 | 0.31771  | 0.556071 |
| MmugDNA.11117.1.S1_at   | MmugDNA.11117.1 | 8.27  | 7.86  | 0.05 | 0.1  | 1.33  | 0.003224 | 0.006177 | 0.101738 | 0.106774 |
| MmugDNA.11132.1.S1_at   | MmugDNA.11132.1 | 6.62  | 6.62  | 0.13 | 0.05 | 1     | 0.684226 | 0.832713 | 0.849538 | 0.904023 |
| MmugDNA.11134.1.S1_at   | MmugDNA.11134.1 | 8.65  | 9.46  | 0.62 | 0.15 | -1.75 | 0.31959  | 0.670283 | 0.604201 | 0.807201 |
| MmugDNA.1114.1.S1_at    | MmugDNA.1114.1  | 3.59  | 3.59  | 0.07 | 0.03 | 1     | 0.541721 | 0.021006 | 0.762382 | 0.181715 |
| MmugDNA.11143.1.S1_at   | MmugDNA.11143.1 | 11.64 | 12.05 | 0.11 | 0.09 | -1.33 | 0.008291 | 0.054701 | 0.13996  | 0.279343 |
| MmugDNA.11163.1.S1_at   | MmugDNA.11163.1 | 10.76 | 10.58 | 0.12 | 0.16 | 1.13  | 0.366527 | 0.528471 | 0.640793 | 0.716643 |
| MmugDNA.11165.1.S1_at   | MmugDNA.11165.1 | 5.13  | 5.17  | 0.07 | 0.05 | -1.03 | 0.970613 | 0.184578 | 0.988374 | 0.460617 |
| MmugDNA.11168.1.S1_at   | MmugDNA.11168.1 | 12.51 | 12.58 | 0.09 | 0.03 | -1.05 | 0.785076 | 0.019391 | 0.901955 | 0.175022 |
| MmugDNA.11171.1.S1_at   | MmugDNA.11171.1 | 11.73 | 11.1  | 0.03 | 0.03 | 1.54  | 0.000022 | 0.053611 | 0.045594 | 0.277182 |
| MmugDNA.11176.1.S1_at   | MmugDNA.11176.1 | 6.82  | 7.33  | 0.16 | 0.24 | -1.43 | 0.09404  | 0.08353  | 0.363011 | 0.334076 |
| MmugDNA.11192.1.S1_at   | MmugDNA.11192.1 | 6.9   | 6.84  | 0.15 | 0.13 | 1.04  | 0.650335 | 0.248345 | 0.830259 | 0.5176   |
| MmugDNA.11197.1.S1_at   | MmugDNA.11197.1 | 10.87 | 11.07 | 0.34 | 0.12 | -1.15 | 0.988522 | 0.693692 | 0.995934 | 0.821874 |
| MmugDNA.1120.1.S1_at    | MmugDNA.1120.1  | 6.36  | 9.55  | 1.19 | 0.36 | -9.12 | 0.028484 | 0.221928 | 0.22113  | 0.495019 |
| MmugDNA.11204.1.S1_at   | MmugDNA.11204.1 | 8.99  | 8.14  | 0.18 | 0.07 | 1.81  | 0.001316 | 0.001684 | 0.078631 | 0.062108 |
| MmugDNA.11206.1.S1_at   | MmugDNA.11206.1 | 12.01 | 12.1  | 0.11 | 0.12 | -1.06 | 0.77932  | 0.890751 | 0.899222 | 0.937717 |
| MmugDNA.11207.1.S1_at   | MmugDNA.11207.1 | 8.89  | 8.54  | 0.52 | 0.07 | 1.27  | 0.100243 | 0.213572 | 0.371058 | 0.48741  |
| MmugDNA.11216.1.S1_at   | MmugDNA.11216.1 | 12.7  | 12.53 | 0.1  | 0.04 | 1.13  | 0.128897 | 0.039664 | 0.411159 | 0.244271 |
| MmugDNA.11219.1.S1_at   | MmugDNA.11219.1 | 11.74 | 11.98 | 0.12 | 0.06 | -1.18 | 0.041495 | 0.141479 | 0.260097 | 0.415019 |
| MmugDNA.11223.1.S1_at   | MmugDNA.11223.1 | 5.16  | 4.91  | 0.17 | 0.04 | 1.19  | 0.056295 | 0.131451 | 0.294481 | 0.403584 |
| MmugDNA.11235.1.S1_at   | MmugDNA.11235.1 | 3.63  | 3.46  | 0.3  | 0.07 | 1.12  | 0.289344 | 0.05485  | 0.578961 | 0.279693 |
| MmugDNA.11237.1.S1_at   | MmugDNA.11237.1 | 9.41  | 9.31  | 0.32 | 0.18 | 1.07  | 0.990262 | 0.093535 | 0.996502 | 0.349846 |
| MmugDNA.11238.1.S1_at   | MmugDNA.11238.1 | 8.96  | 8.47  | 0.63 | 0.1  | 1.4   | 0.254579 | 0.132869 | 0.549102 | 0.404544 |
| MmugDNA.11243.1.S1_at   | MmugDNA.11243.1 | 9.17  | 8.74  | 0.14 | 0.13 | 1.35  | 0.032156 | 0.034796 | 0.23326  | 0.230686 |
| MmugDNA.11251.1.S1_at   | MmugDNA.11251.1 | 11.44 | 12.92 | 0.64 | 0.13 | -2.78 | 0.043654 | 0.046877 | 0.26593  | 0.261272 |
| MmugDNA.11254.1.S1_at   | MmugDNA.11254.1 | 7.6   | 7.49  | 0.17 | 0.05 | 1.08  | 0.595907 | 0.496142 | 0.795501 | 0.695877 |
| MmugDNA.11257.1.S1_s_at | MmugDNA.11257.1 | 11.01 | 10.88 | 0.26 | 0.19 | 1.1   | 0.611863 | 0.706624 | 0.806572 | 0.829794 |
| MmugDNA.11259.1.S1_at   | MmugDNA.11259.1 | 3.47  | 3.39  | 0.2  | 0.06 | 1.05  | 0.189848 | 0.183318 | 0.486238 | 0.459553 |
| MmugDNA.11263.1.S1_at   | MmugDNA.11263.1 | 3.07  | 4.57  | 0.68 | 0.64 | -2.82 | 0.11167  | 0.052569 | 0.38771  | 0.274848 |
| MmugDNA.11273.1.S1_at   | MmugDNA.11273.1 | 11.43 | 11.22 | 0.02 | 0.04 | 1.15  | 0.001196 | 0.001963 | 0.077857 | 0.065832 |
| MmugDNA.11279.1.S1_at   | MmugDNA.11279.1 | 6.73  | 6.69  | 0.2  | 0.05 | 1.03  | 0.273648 | 0.185054 | 0.565755 | 0.460891 |
| MmugDNA.11281.1.S1_at   | MmugDNA.11281.1 | 10.03 | 9.86  | 0.07 | 0.1  | 1.13  | 0.0685   | 0.442319 | 0.319531 | 0.660336 |
| MmugDNA.11286.1.S1_at   | MmugDNA.11286.1 | 6.71  | 6.79  | 0.05 | 0.16 | -1.06 | 0.815609 | 0.17341  | 0.917679 | 0.449918 |
| MmugDNA.11287.1.S1_s_at | MmugDNA.11287.1 | 13.15 | 13.41 | 0.08 | 0.03 | -1.2  | 0.012461 | 0.587313 | 0.161927 | 0.754131 |
| MmugDNA.11294.1.S1_at   | MmugDNA.11294.1 | 8.63  | 9.22  | 0.2  | 0.19 | -1.51 | 0.041026 | 0.025095 | 0.259025 | 0.19845  |
| MmugDNA.11298.1.S1_at   | MmugDNA.11298.1 | 7.3   | 7.41  | 0.32 | 0.18 | -1.08 | 0.583539 | 0.142238 | 0.788185 | 0.415754 |

|                         |                 |       |       |      |      |       |          |          |          |          |
|-------------------------|-----------------|-------|-------|------|------|-------|----------|----------|----------|----------|
| MmugDNA.113.1.S1_at     | MmugDNA.113.1   | 7.72  | 8.54  | 0.11 | 0.1  | -1.76 | 0.000836 | 0.000461 | 0.07338  | 0.038572 |
| MmugDNA.11300.1.S1_at   | MmugDNA.11300.1 | 6.89  | 7.29  | 0.53 | 0.12 | -1.32 | 0.111405 | 0.001711 | 0.387378 | 0.062657 |
| MmugDNA.11301.1.S1_at   | MmugDNA.11301.1 | 7.72  | 9.48  | 1.13 | 0.28 | -3.38 | 0.040821 | 0.027115 | 0.258464 | 0.205797 |
| MmugDNA.11309.1.S1_at   | MmugDNA.11309.1 | 2.9   | 2.88  | 0.03 | 0.03 | 1.01  | 0.355657 | 0.190415 | 0.632269 | 0.465906 |
| MmugDNA.11310.1.S1_at   | MmugDNA.11310.1 | 7.83  | 7.81  | 0.87 | 0.28 | 1.02  | 0.704209 | 0.914292 | 0.859667 | 0.951813 |
| MmugDNA.11311.1.S1_at   | MmugDNA.11311.1 | 9.34  | 9.24  | 0.14 | 0.1  | 1.07  | 0.300692 | 0.409471 | 0.588854 | 0.636521 |
| MmugDNA.11314.1.S1_at   | MmugDNA.11314.1 | 4.05  | 3.97  | 0.14 | 0.09 | 1.06  | 0.258989 | 0.283164 | 0.553257 | 0.545694 |
| MmugDNA.11315.1.S1_at   | MmugDNA.11315.1 | 8.04  | 8.11  | 0.98 | 0.31 | -1.05 | 0.816862 | 0.773743 | 0.918133 | 0.868448 |
| MmugDNA.11316.1.S1_at   | MmugDNA.11316.1 | 10.88 | 11.2  | 0.16 | 0.14 | -1.25 | 0.039971 | 0.739166 | 0.256645 | 0.848851 |
| MmugDNA.11320.1.S1_at   | MmugDNA.11320.1 | 9.38  | 9.41  | 0.13 | 0.18 | -1.02 | 0.367346 | 0.000372 | 0.641394 | 0.037273 |
| MmugDNA.11321.1.S1_at   | MmugDNA.11321.1 | 11.17 | 10.73 | 0.06 | 0.11 | 1.36  | 0.006964 | 0.085662 | 0.13065  | 0.337744 |
| MmugDNA.11327.1.S1_s_at | MmugDNA.11327.1 | 6.22  | 6.23  | 0.04 | 0.06 | -1.01 | 0.797345 | 0.790005 | 0.908463 | 0.878631 |
| MmugDNA.11328.1.S1_at   | MmugDNA.11328.1 | 11.03 | 10.06 | 1.17 | 0.37 | 1.96  | 0.219456 | 0.272794 | 0.5172   | 0.537505 |
| MmugDNA.11332.1.S1_at   | MmugDNA.11332.1 | 9.41  | 8.84  | 0.43 | 0.06 | 1.49  | 0.117661 | 0.182732 | 0.39507  | 0.459215 |
| MmugDNA.11336.1.S1_at   | MmugDNA.11336.1 | 6.66  | 6.47  | 0.23 | 0.1  | 1.14  | 0.732556 | 0.20489  | 0.875097 | 0.479227 |
| MmugDNA.11338.1.S1_at   | MmugDNA.11338.1 | 6.71  | 6.51  | 0.06 | 0.06 | 1.15  | 0.013328 | 0.032888 | 0.166232 | 0.224486 |
| MmugDNA.11341.1.S1_s_at | MmugDNA.11341.1 | 7.61  | 6.9   | 0.5  | 0.34 | 1.63  | 0.531156 | 0.714139 | 0.755624 | 0.834155 |
| MmugDNA.11342.1.S1_at   | MmugDNA.11342.1 | 8.63  | 9.21  | 0.43 | 0.53 | -1.5  | 0.099401 | 0.13034  | 0.370342 | 0.402172 |
| MmugDNA.11346.1.S1_at   | MmugDNA.11346.1 | 10.05 | 10.02 | 0.15 | 0.07 | 1.02  | 0.937259 | 0.138236 | 0.973671 | 0.411198 |
| MmugDNA.11347.1.S1_at   | MmugDNA.11347.1 | 3.73  | 3.65  | 0.26 | 0.22 | 1.06  | 0.568569 | 0.724083 | 0.778467 | 0.840308 |
| MmugDNA.11349.1.S1_at   | MmugDNA.11349.1 | 13.1  | 13.13 | 0.21 | 0.08 | -1.03 | 0.307948 | 0.549715 | 0.59471  | 0.730002 |
| MmugDNA.11350.1.S1_at   | MmugDNA.11350.1 | 8.79  | 9.06  | 0.55 | 0.09 | -1.2  | 0.460273 | 0.169456 | 0.708163 | 0.446075 |
| MmugDNA.11351.1.S1_at   | MmugDNA.11351.1 | 8.4   | 6.46  | 0.68 | 0.37 | 3.85  | 0.014286 | 0.12508  | 0.171355 | 0.395506 |
| MmugDNA.11352.1.S1_at   | MmugDNA.11352.1 | 6.73  | 7.18  | 0.66 | 0.25 | -1.37 | 0.361514 | 0.058885 | 0.636962 | 0.289418 |
| MmugDNA.11353.1.S1_at   | MmugDNA.11353.1 | 5.33  | 8.43  | 2.18 | 0.27 | -8.59 | 0.100612 | 0.306541 | 0.371612 | 0.563095 |
| MmugDNA.11355.1.S1_at   | MmugDNA.11355.1 | 8     | 7.73  | 0.23 | 0.17 | 1.21  | 0.058127 | 0.034792 | 0.298185 | 0.230686 |
| MmugDNA.11358.1.S1_at   | MmugDNA.11358.1 | 9.48  | 9.59  | 0.03 | 0.21 | -1.08 | 0.153572 | 0.007948 | 0.443541 | 0.118702 |
| MmugDNA.1136.1.S1_at    | MmugDNA.1136.1  | 12.92 | 12.94 | 0.02 | 0.03 | -1.01 | 0.14304  | 0.29998  | 0.429258 | 0.558262 |
| MmugDNA.11360.1.S1_at   | MmugDNA.11360.1 | 6.85  | 7.11  | 0.21 | 0.15 | -1.2  | 0.120819 | 0.000813 | 0.399267 | 0.046271 |
| MmugDNA.11362.1.S1_at   | MmugDNA.11362.1 | 6.17  | 6.21  | 0.42 | 0.07 | -1.03 | 0.816521 | 0.129029 | 0.918041 | 0.400513 |
| MmugDNA.11364.1.S1_at   | MmugDNA.11364.1 | 10.82 | 9.04  | 0.18 | 0.32 | 3.44  | 0.001626 | 0.000574 | 0.08405  | 0.041171 |
| MmugDNA.11365.1.S1_at   | MmugDNA.11365.1 | 13.43 | 13.79 | 0.16 | 0.07 | -1.29 | 0.03554  | 0.329815 | 0.243391 | 0.578874 |
| MmugDNA.11366.1.S1_at   | MmugDNA.11366.1 | 3.44  | 3.52  | 0.12 | 0.17 | -1.06 | 0.22305  | 0.345656 | 0.52097  | 0.590854 |
| MmugDNA.11368.1.S1_at   | MmugDNA.11368.1 | 3.18  | 3.23  | 0.12 | 0.06 | -1.04 | 0.830181 | 0.922292 | 0.925253 | 0.956244 |
| MmugDNA.11369.1.S1_at   | MmugDNA.11369.1 | 3.21  | 3.07  | 0.1  | 0.1  | 1.1   | 0.251649 | 0.249466 | 0.546364 | 0.518532 |
| MmugDNA.11375.1.S1_at   | MmugDNA.11375.1 | 9.45  | 8.56  | 0.25 | 0.43 | 1.86  | 0.085527 | 0.275317 | 0.349921 | 0.539663 |
| MmugDNA.11378.1.S1_at   | MmugDNA.11378.1 | 11.16 | 11    | 0.17 | 0.1  | 1.12  | 0.399806 | 0.114772 | 0.665002 | 0.381311 |
| MmugDNA.11379.1.S1_at   | MmugDNA.11379.1 | 12.76 | 12.82 | 0.12 | 0.08 | -1.05 | 0.23026  | 0.537123 | 0.529095 | 0.722298 |
| MmugDNA.11380.1.S1_at   | MmugDNA.11380.1 | 4.03  | 3.98  | 0.07 | 0.02 | 1.03  | 0.396542 | 0.184949 | 0.662576 | 0.460776 |
| MmugDNA.11386.1.S1_at   | MmugDNA.11386.1 | 10.89 | 10.94 | 0.22 | 0.12 | -1.04 | 0.445164 | 0.008282 | 0.697732 | 0.12078  |
| MmugDNA.11387.1.S1_at   | MmugDNA.11387.1 | 6.92  | 7.01  | 0.22 | 0.07 | -1.07 | 0.749532 | 0.916179 | 0.884066 | 0.953065 |
| MmugDNA.11389.1.S1_at   | MmugDNA.11389.1 | 8.29  | 9.92  | 0.64 | 0.12 | -3.09 | 0.033244 | 0.425762 | 0.236446 | 0.648082 |
| MmugDNA.11398.1.S1_s_at | MmugDNA.11398.1 | 9.87  | 9.23  | 0.32 | 0.11 | 1.55  | 0.027026 | 0.037709 | 0.217188 | 0.23859  |

|                         |                 |       |       |      |      |       |          |          |          |          |
|-------------------------|-----------------|-------|-------|------|------|-------|----------|----------|----------|----------|
| MmugDNA.11406.1.S1_at   | MmugDNA.11406.1 | 10.5  | 10.36 | 0.24 | 0.06 | 1.1   | 0.506549 | 0.849843 | 0.739179 | 0.914673 |
| MmugDNA.11419.1.S1_at   | MmugDNA.11419.1 | 9.16  | 8.98  | 0.18 | 0.13 | 1.13  | 0.125107 | 0.022624 | 0.405516 | 0.188352 |
| MmugDNA.11424.1.S1_at   | MmugDNA.11424.1 | 6.94  | 7.8   | 0.95 | 0.52 | -1.82 | 0.679512 | 0.858906 | 0.847107 | 0.919654 |
| MmugDNA.11426.1.S1_at   | MmugDNA.11426.1 | 3.06  | 3.13  | 0.15 | 0.08 | -1.05 | 0.758995 | 0.874052 | 0.889555 | 0.928462 |
| MmugDNA.11427.1.S1_at   | MmugDNA.11427.1 | 4.03  | 3.84  | 0.35 | 0.09 | 1.15  | 0.387414 | 0.317965 | 0.655563 | 0.571046 |
| MmugDNA.11430.1.S1_at   | MmugDNA.11430.1 | 7.46  | 10.19 | 1.1  | 0.29 | -6.65 | 0.038337 | 0.299317 | 0.251853 | 0.557811 |
| MmugDNA.11438.1.S1_at   | MmugDNA.11438.1 | 7.32  | 7.2   | 0.07 | 0.02 | 1.08  | 0.255418 | 0.440898 | 0.549873 | 0.659138 |
| MmugDNA.11456.1.S1_at   | MmugDNA.11456.1 | 11.35 | 11.15 | 0.14 | 0.13 | 1.15  | 0.306119 | 0.547296 | 0.593065 | 0.728364 |
| MmugDNA.1146.1.S1_at    | MmugDNA.1146.1  | 12.05 | 11.92 | 0.14 | 0.02 | 1.09  | 0.067403 | 0.00202  | 0.317287 | 0.06682  |
| MmugDNA.11461.1.S1_at   | MmugDNA.11461.1 | 7.71  | 7.67  | 0.05 | 0.14 | 1.03  | 0.382537 | 0.103729 | 0.652013 | 0.364519 |
| MmugDNA.11462.1.S1_at   | MmugDNA.11462.1 | 10.49 | 10.15 | 0.1  | 0.04 | 1.26  | 0.002493 | 0.000049 | 0.094326 | 0.025273 |
| MmugDNA.11463.1.S1_at   | MmugDNA.11463.1 | 4.74  | 4.68  | 0.06 | 0.06 | 1.05  | 0.500746 | 0.09858  | 0.734926 | 0.356709 |
| MmugDNA.11465.1.S1_at   | MmugDNA.11465.1 | 6.57  | 6.52  | 0.17 | 0.14 | 1.04  | 0.651985 | 0.071594 | 0.831042 | 0.313714 |
| MmugDNA.11466.1.S1_at   | MmugDNA.11466.1 | 4.09  | 5.53  | 0.83 | 0.16 | -2.71 | 0.045196 | 0.018687 | 0.270005 | 0.171717 |
| MmugDNA.11468.1.S1_at   | MmugDNA.11468.1 | 8.53  | 8.62  | 0.09 | 0.03 | -1.06 | 0.046054 | 0.350615 | 0.272269 | 0.594364 |
| MmugDNA.11486.1.S1_at   | MmugDNA.11486.1 | 5.79  | 5.74  | 0.14 | 0.06 | 1.03  | 0.545528 | 0.610868 | 0.764745 | 0.768948 |
| MmugDNA.11494.1.S1_at   | MmugDNA.11494.1 | 5.45  | 5.48  | 0.09 | 0.01 | -1.02 | 0.252245 | 0.222598 | 0.546828 | 0.495617 |
| MmugDNA.11508.1.S1_at   | MmugDNA.11508.1 | 4.92  | 4.15  | 0.78 | 0.02 | 1.7   | 0.141163 | 0.16868  | 0.427043 | 0.445352 |
| MmugDNA.11509.1.S1_at   | MmugDNA.11509.1 | 7.85  | 7.8   | 0.11 | 0.05 | 1.03  | 0.978798 | 0.152161 | 0.991932 | 0.426919 |
| MmugDNA.11516.1.S1_at   | MmugDNA.11516.1 | 9.88  | 9.69  | 0.22 | 0.2  | 1.14  | 0.25016  | 0.724577 | 0.544879 | 0.840552 |
| MmugDNA.11519.1.S1_at   | MmugDNA.11519.1 | 9.53  | 9.33  | 0.25 | 0.03 | 1.14  | 0.779637 | 0.973121 | 0.899345 | 0.985424 |
| MmugDNA.11527.1.S1_at   | MmugDNA.11527.1 | 4.41  | 4.41  | 1.01 | 0.13 | 1     | 0.324869 | 0.430898 | 0.608388 | 0.651894 |
| MmugDNA.11532.1.S1_at   | MmugDNA.11532.1 | 10.36 | 10.53 | 0.45 | 0.15 | -1.13 | 0.257511 | 0.46609  | 0.551704 | 0.676117 |
| MmugDNA.11533.1.S1_at   | MmugDNA.11533.1 | 3.41  | 3.4   | 0.01 | 0.17 | 1     | 0.791677 | 0.156238 | 0.905386 | 0.43161  |
| MmugDNA.11535.1.S1_at   | MmugDNA.11535.1 | 10.99 | 11.12 | 0.31 | 0.1  | -1.1  | 0.737386 | 0.074819 | 0.878112 | 0.318614 |
| MmugDNA.11539.1.S1_at   | MmugDNA.11539.1 | 7.38  | 7.01  | 0.13 | 0.1  | 1.3   | 0.032542 | 0.015976 | 0.234816 | 0.160458 |
| MmugDNA.1154.1.S1_at    | MmugDNA.1154.1  | 9.11  | 10    | 0.83 | 0.18 | -1.86 | 0.370425 | 0.748678 | 0.643441 | 0.853802 |
| MmugDNA.11541.1.S1_at   | MmugDNA.11541.1 | 4.78  | 4.55  | 0.81 | 0.27 | 1.17  | 0.261021 | 0.380434 | 0.555198 | 0.617091 |
| MmugDNA.11549.1.S1_at   | MmugDNA.11549.1 | 8.91  | 8.74  | 0.27 | 0.07 | 1.13  | 0.219441 | 0.076515 | 0.5172   | 0.321589 |
| MmugDNA.11555.1.S1_at   | MmugDNA.11555.1 | 10.27 | 10.52 | 0.02 | 0.2  | -1.18 | 0.298457 | 0.247772 | 0.586735 | 0.517199 |
| MmugDNA.11557.1.S1_at   | MmugDNA.11557.1 | 11.94 | 10.9  | 0.18 | 0.26 | 2.05  | 0.003831 | 0.000642 | 0.107129 | 0.042928 |
| MmugDNA.1156.1.S1_at    | MmugDNA.1156.1  | 4.86  | 4.7   | 0.1  | 0.13 | 1.12  | 0.170169 | 0.166694 | 0.463807 | 0.443163 |
| MmugDNA.11564.1.S1_at   | MmugDNA.11564.1 | 7.45  | 7.55  | 0.13 | 0.01 | -1.07 | 0.359125 | 0.085578 | 0.634699 | 0.337567 |
| MmugDNA.11570.1.S1_at   | MmugDNA.11570.1 | 7.54  | 7.71  | 0.28 | 0.36 | -1.13 | 0.645189 | 0.112855 | 0.82722  | 0.378487 |
| MmugDNA.11575.1.S1_at   | MmugDNA.11575.1 | 8.05  | 8.21  | 0.18 | 0.08 | -1.11 | 0.15193  | 0.297987 | 0.441477 | 0.556695 |
| MmugDNA.11580.1.S1_at   | MmugDNA.11580.1 | 7.74  | 8.3   | 0.19 | 0.18 | -1.47 | 0.021572 | 0.022863 | 0.200582 | 0.189271 |
| MmugDNA.11582.1.S1_at   | MmugDNA.11582.1 | 6.39  | 7.69  | 0.42 | 0.1  | -2.45 | 0.013506 | 0.120449 | 0.167058 | 0.38925  |
| MmugDNA.11583.1.S1_at   | MmugDNA.11583.1 | 11.49 | 10.82 | 0.05 | 0.11 | 1.58  | 0.000978 | 0.182682 | 0.076222 | 0.459186 |
| MmugDNA.11585.1.S1_at   | MmugDNA.11585.1 | 7.32  | 6.96  | 0.1  | 0.24 | 1.28  | 0.029796 | 0.017505 | 0.225856 | 0.167516 |
| MmugDNA.11589.1.S1_at   | MmugDNA.11589.1 | 6.86  | 6.8   | 0.58 | 0.19 | 1.04  | 0.654942 | 0.293231 | 0.832997 | 0.553156 |
| MmugDNA.11591.1.S1_s_at | MmugDNA.11591.1 | 5.93  | 6.28  | 0.55 | 0.27 | -1.27 | 0.151697 | 0.244687 | 0.441235 | 0.514512 |
| MmugDNA.11594.1.S1_at   | MmugDNA.11594.1 | 5.3   | 5.27  | 0.17 | 0.15 | 1.02  | 0.323348 | 0.318151 | 0.607153 | 0.571046 |
| MmugDNA.11595.1.S1_at   | MmugDNA.11595.1 | 9.64  | 9.66  | 0.04 | 0.07 | -1.01 | 0.682279 | 0.816596 | 0.848516 | 0.894202 |

|                         |                 |       |       |      |      |       |          |          |          |          |
|-------------------------|-----------------|-------|-------|------|------|-------|----------|----------|----------|----------|
| MmugDNA.1160.1.S1_at    | MmugDNA.1160.1  | 5.97  | 5.96  | 0.28 | 0.09 | 1.01  | 0.584111 | 0.104565 | 0.788484 | 0.365816 |
| MmugDNA.11601.1.S1_at   | MmugDNA.11601.1 | 8.73  | 8.94  | 0.18 | 0.14 | -1.16 | 0.089973 | 0.151771 | 0.356863 | 0.426413 |
| MmugDNA.11605.1.S1_at   | MmugDNA.11605.1 | 4.51  | 4.51  | 0.09 | 0.07 | -1    | 0.913028 | 0.772659 | 0.963229 | 0.867785 |
| MmugDNA.11610.1.S1_at   | MmugDNA.11610.1 | 12.26 | 12.29 | 0.11 | 0.03 | -1.03 | 0.574925 | 0.187336 | 0.782347 | 0.463366 |
| MmugDNA.11614.1.S1_at   | MmugDNA.11614.1 | 9.73  | 11.79 | 0.69 | 0.18 | -4.17 | 0.009763 | 0.060182 | 0.148542 | 0.291882 |
| MmugDNA.11618.1.S1_at   | MmugDNA.11618.1 | 12.8  | 12.66 | 0.11 | 0.1  | 1.1   | 0.219048 | 0.074729 | 0.516709 | 0.318465 |
| MmugDNA.11618.1.S1_s_at | MmugDNA.11618.1 | 13.18 | 13.06 | 0.07 | 0.07 | 1.09  | 0.135879 | 0.055704 | 0.419983 | 0.281853 |
| MmugDNA.1162.1.S1_at    | MmugDNA.1162.1  | 12.24 | 12.4  | 0.24 | 0    | -1.12 | 0.306364 | 0.881174 | 0.593269 | 0.932188 |
| MmugDNA.11622.1.S1_at   | MmugDNA.11622.1 | 8.91  | 9.51  | 0.58 | 0.1  | -1.52 | 0.171781 | 0.069455 | 0.465702 | 0.309778 |
| MmugDNA.11623.1.S1_at   | MmugDNA.11623.1 | 6.95  | 7.69  | 0.47 | 0.21 | -1.68 | 0.207445 | 0.03366  | 0.505141 | 0.227052 |
| MmugDNA.11624.1.S1_at   | MmugDNA.11624.1 | 6.07  | 6.19  | 0.16 | 0.16 | -1.09 | 0.807799 | 0.912206 | 0.914009 | 0.950522 |
| MmugDNA.11625.1.S1_at   | MmugDNA.11625.1 | 9.08  | 8.53  | 0.35 | 0.25 | 1.46  | 0.15139  | 0.061514 | 0.440961 | 0.294835 |
| MmugDNA.11626.1.S1_at   | MmugDNA.11626.1 | 9.85  | 9.67  | 0.29 | 0.13 | 1.13  | 0.469067 | 0.066524 | 0.71396  | 0.303705 |
| MmugDNA.11627.1.S1_at   | MmugDNA.11627.1 | 5.19  | 5.17  | 0.15 | 0.11 | 1.01  | 0.883663 | 0.497472 | 0.950562 | 0.696806 |
| MmugDNA.11630.1.S1_at   | MmugDNA.11630.1 | 9.36  | 9.64  | 0.1  | 0.11 | -1.21 | 0.061765 | 0.081651 | 0.304962 | 0.329836 |
| MmugDNA.11631.1.S1_s_at | MmugDNA.11631.1 | 3.88  | 5.02  | 2.21 | 0.26 | -2.21 | 0.935512 | 0.817371 | 0.972982 | 0.89468  |
| MmugDNA.11635.1.S1_at   | MmugDNA.11635.1 | 3.36  | 3.53  | 0.05 | 0.01 | -1.12 | 0.00203  | 0.012054 | 0.089887 | 0.142044 |
| MmugDNA.11637.1.S1_at   | MmugDNA.11637.1 | 7.67  | 7.63  | 0.24 | 0.05 | 1.03  | 0.977713 | 0.515385 | 0.991259 | 0.708274 |
| MmugDNA.11637.1.S1_s_at | MmugDNA.11637.1 | 8.08  | 7.81  | 0.48 | 0.01 | 1.2   | 0.972262 | 0.492583 | 0.988877 | 0.693633 |
| MmugDNA.11639.1.S1_at   | MmugDNA.11639.1 | 10.23 | 9.89  | 0.13 | 0.23 | 1.27  | 0.104896 | 0.001133 | 0.378521 | 0.053052 |
| MmugDNA.11647.1.S1_at   | MmugDNA.11647.1 | 4.89  | 5.74  | 0.35 | 0.22 | -1.81 | 0.053485 | 0.136169 | 0.28856  | 0.408498 |
| MmugDNA.11648.1.S1_at   | MmugDNA.11648.1 | 6.48  | 6.41  | 0.07 | 0.1  | 1.05  | 0.314798 | 0.039932 | 0.600158 | 0.244926 |
| MmugDNA.11649.1.S1_at   | MmugDNA.11649.1 | 11.38 | 11.45 | 0.22 | 0.02 | -1.05 | 0.580479 | 0.877027 | 0.785919 | 0.92994  |
| MmugDNA.11650.1.S1_at   | MmugDNA.11650.1 | 6.01  | 6.54  | 1.06 | 0.2  | -1.44 | 0.966748 | 0.906865 | 0.986564 | 0.947253 |
| MmugDNA.11652.1.S1_at   | MmugDNA.11652.1 | 11.91 | 11.05 | 0.09 | 0.08 | 1.81  | 0.000253 | 0.000044 | 0.054642 | 0.025273 |
| MmugDNA.11653.1.S1_at   | MmugDNA.11653.1 | 9.02  | 9.12  | 0.01 | 0.07 | -1.08 | 0.148561 | 0.010776 | 0.437111 | 0.135471 |
| MmugDNA.11654.1.S1_at   | MmugDNA.11654.1 | 5.85  | 5.84  | 0.22 | 0.1  | 1.01  | 0.643771 | 0.729451 | 0.826406 | 0.843541 |
| MmugDNA.11655.1.S1_at   | MmugDNA.11655.1 | 5.75  | 5.84  | 0.3  | 0.08 | -1.06 | 0.623921 | 0.445591 | 0.81455  | 0.662468 |
| MmugDNA.11660.1.S1_at   | MmugDNA.11660.1 | 8.1   | 8.39  | 0.14 | 0.05 | -1.22 | 0.067495 | 0.039709 | 0.317446 | 0.244271 |
| MmugDNA.11661.1.S1_at   | MmugDNA.11661.1 | 10.02 | 10.58 | 0.29 | 0.03 | -1.48 | 0.036746 | 0.009481 | 0.246752 | 0.12821  |
| MmugDNA.11662.1.S1_at   | MmugDNA.11662.1 | 4.96  | 4.67  | 0.18 | 0.01 | 1.21  | 0.149482 | 0.087715 | 0.438403 | 0.340964 |
| MmugDNA.1167.1.S1_at    | MmugDNA.1167.1  | 10.66 | 10.19 | 0.06 | 0.11 | 1.39  | 0.002353 | 0.003819 | 0.092906 | 0.08794  |
| MmugDNA.11672.1.S1_at   | MmugDNA.11672.1 | 9.8   | 9.29  | 0.64 | 0.48 | 1.42  | 0.327147 | 0.214422 | 0.609783 | 0.488132 |
| MmugDNA.11673.1.S1_at   | MmugDNA.11673.1 | 5.18  | 5.5   | 0.33 | 0.13 | -1.25 | 0.12153  | 0.448632 | 0.400293 | 0.664474 |
| MmugDNA.11680.1.S1_at   | MmugDNA.11680.1 | 6.29  | 8.64  | 1.22 | 0.18 | -5.12 | 0.082536 | 0.276215 | 0.344304 | 0.540183 |
| MmugDNA.11681.1.S1_at   | MmugDNA.11681.1 | 5.38  | 5.37  | 0.04 | 0.12 | 1.01  | 0.573367 | 0.538445 | 0.781098 | 0.723141 |
| MmugDNA.11684.1.S1_at   | MmugDNA.11684.1 | 10.36 | 9.54  | 0.32 | 0.06 | 1.76  | 0.014517 | 0.04969  | 0.172383 | 0.267908 |
| MmugDNA.11685.1.S1_at   | MmugDNA.11685.1 | 9.06  | 9.95  | 0.26 | 0.14 | -1.86 | 0.01165  | 0.006895 | 0.157734 | 0.11222  |
| MmugDNA.11691.1.S1_at   | MmugDNA.11691.1 | 7.61  | 7.79  | 0.17 | 0.02 | -1.13 | 0.151758 | 0.166839 | 0.441235 | 0.443311 |
| MmugDNA.11692.1.S1_at   | MmugDNA.11692.1 | 10.66 | 11.4  | 0.22 | 0.22 | -1.67 | 0.024922 | 0.340242 | 0.211038 | 0.586637 |
| MmugDNA.11693.1.S1_at   | MmugDNA.11693.1 | 12.67 | 12.6  | 0.02 | 0.11 | 1.05  | 0.355185 | 0.16711  | 0.63202  | 0.4436   |
| MmugDNA.11694.1.S1_at   | MmugDNA.11694.1 | 8.69  | 8.39  | 0.2  | 0.05 | 1.23  | 0.09407  | 0.229154 | 0.363072 | 0.501438 |
| MmugDNA.11699.1.S1_at   | MmugDNA.11699.1 | 9.92  | 9.53  | 0.17 | 0.03 | 1.31  | 0.020944 | 0.008495 | 0.198299 | 0.122289 |

|                       |                 |       |       |      |      |       |          |          |          |          |
|-----------------------|-----------------|-------|-------|------|------|-------|----------|----------|----------|----------|
| MmugDNA.1170.1.S1_at  | MmugDNA.1170.1  | 7.69  | 7.34  | 0.32 | 0.22 | 1.27  | 0.073718 | 0.095962 | 0.329321 | 0.353252 |
| MmugDNA.11701.1.S1_at | MmugDNA.11701.1 | 5.91  | 6.34  | 0.4  | 0.23 | -1.35 | 0.151587 | 0.255545 | 0.441094 | 0.523538 |
| MmugDNA.11702.1.S1_at | MmugDNA.11702.1 | 5.31  | 4.97  | 0.12 | 0.15 | 1.27  | 0.047497 | 0.040901 | 0.275228 | 0.247161 |
| MmugDNA.11708.1.S1_at | MmugDNA.11708.1 | 8.85  | 8.06  | 0.52 | 0.23 | 1.73  | 0.061451 | 0.068065 | 0.304484 | 0.307142 |
| MmugDNA.11712.1.S1_at | MmugDNA.11712.1 | 9.72  | 9.91  | 0.1  | 0.2  | -1.13 | 0.132871 | 0.289204 | 0.416311 | 0.550293 |
| MmugDNA.11720.1.S1_at | MmugDNA.11720.1 | 8.5   | 8.19  | 0.25 | 0.07 | 1.23  | 0.036672 | 0.006502 | 0.246619 | 0.109521 |
| MmugDNA.11728.1.S1_at | MmugDNA.11728.1 | 5.16  | 5.27  | 0.08 | 0.29 | -1.08 | 0.773397 | 0.160917 | 0.896112 | 0.437116 |
| MmugDNA.11729.1.S1_at | MmugDNA.11729.1 | 6.31  | 7.12  | 0.55 | 0.26 | -1.75 | 0.049944 | 0.021491 | 0.281092 | 0.183661 |
| MmugDNA.11735.1.S1_at | MmugDNA.11735.1 | 8.85  | 9     | 0.21 | 0.15 | -1.11 | 0.505128 | 0.09322  | 0.738175 | 0.34931  |
| MmugDNA.11741.1.S1_at | MmugDNA.11741.1 | 7.84  | 7.91  | 0.17 | 0.09 | -1.05 | 0.562902 | 0.658285 | 0.775205 | 0.800244 |
| MmugDNA.11746.1.S1_at | MmugDNA.11746.1 | 6.81  | 8.08  | 0.75 | 0.43 | -2.42 | 0.051466 | 0.099181 | 0.284331 | 0.357379 |
| MmugDNA.11748.1.S1_at | MmugDNA.11748.1 | 8.41  | 8.89  | 0.14 | 0.03 | -1.4  | 0.005335 | 0.485191 | 0.118146 | 0.688969 |
| MmugDNA.11754.1.S1_at | MmugDNA.11754.1 | 9.17  | 8.82  | 0.15 | 0.09 | 1.27  | 0.030121 | 0.003167 | 0.226716 | 0.081793 |
| MmugDNA.11756.1.S1_at | MmugDNA.11756.1 | 4.3   | 4.05  | 0.17 | 0.1  | 1.19  | 0.259553 | 0.395037 | 0.55388  | 0.627268 |
| MmugDNA.11758.1.S1_at | MmugDNA.11758.1 | 9.72  | 10.38 | 0.15 | 0.08 | -1.58 | 0.003218 | 0.01554  | 0.101682 | 0.158053 |
| MmugDNA.11759.1.S1_at | MmugDNA.11759.1 | 12.9  | 12.88 | 0.12 | 0.09 | 1.01  | 0.783413 | 0.735773 | 0.901128 | 0.847144 |
| MmugDNA.11763.1.S1_at | MmugDNA.11763.1 | 7.97  | 7.93  | 0.38 | 0.15 | 1.03  | 0.56012  | 0.013931 | 0.773651 | 0.151382 |
| MmugDNA.11765.1.S1_at | MmugDNA.11765.1 | 4.76  | 7.15  | 0.37 | 0.34 | -5.27 | 0.001472 | 0.07576  | 0.080516 | 0.320348 |
| MmugDNA.11770.1.S1_at | MmugDNA.11770.1 | 7.23  | 6.94  | 0.35 | 0.08 | 1.23  | 0.209187 | 0.002365 | 0.50665  | 0.0718   |
| MmugDNA.11773.1.S1_at | MmugDNA.11773.1 | 11.1  | 10.77 | 0.16 | 0.15 | 1.25  | 0.065553 | 0.005178 | 0.313444 | 0.099727 |
| MmugDNA.11779.1.S1_at | MmugDNA.11779.1 | 8.79  | 8.69  | 0.05 | 0.4  | 1.07  | 0.601016 | 0.053626 | 0.799309 | 0.277224 |
| MmugDNA.11781.1.S1_at | MmugDNA.11781.1 | 7.35  | 8.76  | 0.76 | 0.38 | -2.66 | 0.063048 | 0.456895 | 0.307843 | 0.670565 |
| MmugDNA.11783.1.S1_at | MmugDNA.11783.1 | 10.58 | 10.35 | 0.22 | 0.1  | 1.17  | 0.110306 | 0.416069 | 0.385611 | 0.641342 |
| MmugDNA.11787.1.S1_at | MmugDNA.11787.1 | 5.07  | 5.05  | 0.1  | 0.08 | 1.02  | 0.531361 | 0.881499 | 0.75568  | 0.932382 |
| MmugDNA.11788.1.S1_at | MmugDNA.11788.1 | 9.5   | 9.52  | 0.1  | 0.08 | -1.01 | 0.328498 | 0.736267 | 0.610835 | 0.8474   |
| MmugDNA.1179.1.S1_at  | MmugDNA.1179.1  | 7.17  | 7.59  | 0.26 | 0.36 | -1.34 | 0.176955 | 0.339039 | 0.471556 | 0.585891 |
| MmugDNA.11791.1.S1_at | MmugDNA.11791.1 | 7.59  | 7.25  | 0.06 | 0.17 | 1.26  | 0.016369 | 0.078305 | 0.180807 | 0.324949 |
| MmugDNA.11793.1.S1_at | MmugDNA.11793.1 | 7.55  | 7.51  | 0.17 | 0.15 | 1.03  | 0.751022 | 0.489115 | 0.885057 | 0.691616 |
| MmugDNA.11795.1.S1_at | MmugDNA.11795.1 | 6.78  | 6.04  | 0.23 | 0.3  | 1.67  | 0.014751 | 0.014433 | 0.173373 | 0.153335 |
| MmugDNA.11797.1.S1_at | MmugDNA.11797.1 | 6.4   | 6.04  | 0.15 | 0.17 | 1.28  | 0.027771 | 0.105088 | 0.2191   | 0.366755 |
| MmugDNA.11799.1.S1_at | MmugDNA.11799.1 | 10.59 | 10.53 | 0.33 | 0.21 | 1.04  | 0.988801 | 0.150812 | 0.996059 | 0.425335 |
| MmugDNA.11801.1.S1_at | MmugDNA.11801.1 | 3.72  | 3.77  | 0.33 | 0.03 | -1.03 | 0.969168 | 0.993024 | 0.98776  | 0.995888 |
| MmugDNA.11809.1.S1_at | MmugDNA.11809.1 | 12.34 | 12.47 | 0.06 | 0.07 | -1.1  | 0.02992  | 0.066914 | 0.226288 | 0.304608 |
| MmugDNA.11811.1.S1_at | MmugDNA.11811.1 | 11.03 | 10.5  | 0.12 | 0.05 | 1.44  | 0.001174 | 0.004303 | 0.077718 | 0.092019 |
| MmugDNA.11814.1.S1_at | MmugDNA.11814.1 | 10.51 | 10.33 | 0.07 | 0.05 | 1.13  | 0.027295 | 0.007211 | 0.218069 | 0.11412  |
| MmugDNA.11817.1.S1_at | MmugDNA.11817.1 | 11.76 | 12.06 | 0.29 | 0.1  | -1.23 | 0.085957 | 0.028603 | 0.350327 | 0.210901 |
| MmugDNA.11818.1.S1_at | MmugDNA.11818.1 | 7.27  | 6.28  | 0.1  | 0.1  | 2     | 0.000267 | 0.000295 | 0.056093 | 0.034892 |
| MmugDNA.11820.1.S1_at | MmugDNA.11820.1 | 4.56  | 4.65  | 0.29 | 0.34 | -1.07 | 0.741693 | 0.564292 | 0.880324 | 0.739149 |
| MmugDNA.11824.1.S1_at | MmugDNA.11824.1 | 2.68  | 2.68  | 0.06 | 0.01 | 1     | 0.795266 | 0.407704 | 0.907499 | 0.635135 |
| MmugDNA.11825.1.S1_at | MmugDNA.11825.1 | 4.24  | 4.23  | 0.05 | 0.02 | 1.01  | 0.517447 | 0.839063 | 0.746666 | 0.908268 |
| MmugDNA.1183.1.S1_at  | MmugDNA.1183.1  | 7.51  | 7.45  | 0.11 | 0.04 | 1.04  | 0.522565 | 0.729447 | 0.749813 | 0.843541 |
| MmugDNA.11837.1.S1_at | MmugDNA.11837.1 | 5.6   | 5.97  | 0.13 | 0.26 | -1.3  | 0.036557 | 0.051738 | 0.246142 | 0.272993 |
| MmugDNA.1184.1.S1_at  | MmugDNA.1184.1  | 6.4   | 6.3   | 0.02 | 0.08 | 1.08  | 0.117611 | 0.198562 | 0.394964 | 0.473391 |

|                         |                 |       |       |      |      |       |          |          |          |          |
|-------------------------|-----------------|-------|-------|------|------|-------|----------|----------|----------|----------|
| MmugDNA.11843.1.S1_at   | MmugDNA.11843.1 | 9.76  | 9.68  | 0.34 | 0.08 | 1.06  | 0.251548 | 0.387869 | 0.546344 | 0.622486 |
| MmugDNA.11846.1.S1_at   | MmugDNA.11846.1 | 6     | 6.29  | 0.85 | 0.17 | -1.22 | 0.49776  | 0.439392 | 0.73333  | 0.658142 |
| MmugDNA.11848.1.S1_at   | MmugDNA.11848.1 | 12.29 | 12.5  | 0.06 | 0.02 | -1.16 | 0.003904 | 0.246687 | 0.108214 | 0.51603  |
| MmugDNA.11853.1.S1_at   | MmugDNA.11853.1 | 3.4   | 3.41  | 0.11 | 0.09 | -1.01 | 0.991725 | 0.607465 | 0.997004 | 0.766417 |
| MmugDNA.11858.1.S1_at   | MmugDNA.11858.1 | 5.94  | 6.01  | 0.06 | 0.06 | -1.05 | 0.421781 | 0.213131 | 0.680127 | 0.487054 |
| MmugDNA.11863.1.S1_at   | MmugDNA.11863.1 | 8.74  | 8.75  | 0.24 | 0.12 | -1.01 | 0.660286 | 0.953355 | 0.83613  | 0.97351  |
| MmugDNA.11864.1.S1_at   | MmugDNA.11864.1 | 8.86  | 8.85  | 0.12 | 0.14 | 1     | 0.218701 | 0.360005 | 0.516351 | 0.601198 |
| MmugDNA.11868.1.S1_at   | MmugDNA.11868.1 | 10.5  | 10.64 | 0.17 | 0.09 | -1.1  | 0.474836 | 0.815859 | 0.717692 | 0.893781 |
| MmugDNA.11873.1.S1_s_at | MmugDNA.11873.1 | 9.97  | 10.07 | 0.16 | 0.17 | -1.08 | 0.360259 | 0.83327  | 0.63583  | 0.904386 |
| MmugDNA.11879.1.S1_at   | MmugDNA.11879.1 | 10.37 | 10.09 | 0.26 | 0.2  | 1.21  | 0.147391 | 0.198535 | 0.435407 | 0.473391 |
| MmugDNA.11884.1.S1_at   | MmugDNA.11884.1 | 5.91  | 5.81  | 0.19 | 0.06 | 1.07  | 0.566904 | 0.146058 | 0.777544 | 0.420073 |
| MmugDNA.11886.1.S1_at   | MmugDNA.11886.1 | 9.38  | 8.89  | 0.06 | 0.07 | 1.4   | 0.001174 | 0.128726 | 0.077718 | 0.400135 |
| MmugDNA.11889.1.S1_at   | MmugDNA.11889.1 | 9.21  | 8.98  | 0.15 | 0.05 | 1.18  | 0.019759 | 0.012161 | 0.193508 | 0.142648 |
| MmugDNA.11890.1.S1_at   | MmugDNA.11890.1 | 10.46 | 10.1  | 0.12 | 0.22 | 1.29  | 0.042878 | 0.248346 | 0.26421  | 0.5176   |
| MmugDNA.11891.1.S1_at   | MmugDNA.11891.1 | 10.34 | 9.59  | 0.27 | 0.22 | 1.68  | 0.017971 | 0.135087 | 0.187151 | 0.407128 |
| MmugDNA.11893.1.S1_at   | MmugDNA.11893.1 | 10.56 | 10.44 | 0.05 | 0.11 | 1.09  | 0.061908 | 0.244275 | 0.305351 | 0.514184 |
| MmugDNA.11895.1.S1_at   | MmugDNA.11895.1 | 13.06 | 13.03 | 0.12 | 0.03 | 1.02  | 0.849626 | 0.828428 | 0.934532 | 0.901406 |
| MmugDNA.11896.1.S1_at   | MmugDNA.11896.1 | 5.03  | 5     | 0.13 | 0.06 | 1.02  | 0.855435 | 0.47472  | 0.937004 | 0.681695 |
| MmugDNA.11898.1.S1_at   | MmugDNA.11898.1 | 7.58  | 8.77  | 1.2  | 0.1  | -2.29 | 0.057627 | 0.106866 | 0.297348 | 0.369489 |
| MmugDNA.119.1.S1_at     | MmugDNA.119.1   | 7.53  | 7.18  | 0.31 | 0.16 | 1.27  | 0.156482 | 0.054536 | 0.446993 | 0.279042 |
| MmugDNA.11911.1.S1_at   | MmugDNA.11911.1 | 3.85  | 3.85  | 0.36 | 0.01 | 1     | 0.379545 | 0.618148 | 0.649328 | 0.773929 |
| MmugDNA.11913.1.S1_at   | MmugDNA.11913.1 | 5.4   | 5.24  | 0.18 | 0.04 | 1.12  | 0.196967 | 0.105658 | 0.494101 | 0.367776 |
| MmugDNA.11915.1.S1_at   | MmugDNA.11915.1 | 7.86  | 7.71  | 0.49 | 0.19 | 1.11  | 0.561923 | 0.071749 | 0.774705 | 0.31401  |
| MmugDNA.11918.1.S1_s_at | MmugDNA.11918.1 | 10.9  | 10.89 | 0.32 | 0.18 | 1.01  | 0.474764 | 0.130074 | 0.717662 | 0.401724 |
| MmugDNA.11934.1.S1_at   | MmugDNA.11934.1 | 11.42 | 11.14 | 0.02 | 0.02 | 1.22  | 0.00007  | 0.01801  | 0.051196 | 0.169233 |
| MmugDNA.11937.1.S1_at   | MmugDNA.11937.1 | 5.22  | 4.24  | 0.8  | 0.08 | 1.97  | 0.12876  | 0.1266   | 0.410944 | 0.397214 |
| MmugDNA.11945.1.S1_at   | MmugDNA.11945.1 | 11.4  | 11.63 | 0.12 | 0.18 | -1.17 | 0.279458 | 0.001946 | 0.570786 | 0.065813 |
| MmugDNA.11966.1.S1_at   | MmugDNA.11966.1 | 7.39  | 7.69  | 0.12 | 0.02 | -1.23 | 0.010134 | 0.025539 | 0.150406 | 0.200461 |
| MmugDNA.11970.1.S1_at   | MmugDNA.11970.1 | 9.49  | 9.73  | 0.14 | 0.05 | -1.18 | 0.070104 | 0.000564 | 0.323085 | 0.041049 |
| MmugDNA.11974.1.S1_at   | MmugDNA.11974.1 | 10.24 | 9.84  | 0.14 | 0.13 | 1.32  | 0.013723 | 0.371805 | 0.16797  | 0.610589 |
| MmugDNA.11978.1.S1_at   | MmugDNA.11978.1 | 13.75 | 13.77 | 0    | 0.04 | -1.01 | 0.747741 | 0.277556 | 0.883144 | 0.54152  |
| MmugDNA.11979.1.S1_at   | MmugDNA.11979.1 | 13.45 | 13.4  | 0.14 | 0.08 | 1.04  | 0.632721 | 0.801202 | 0.819945 | 0.885679 |
| MmugDNA.1198.1.S1_at    | MmugDNA.1198.1  | 9.01  | 9.84  | 0.42 | 0.23 | -1.77 | 0.046952 | 0.161418 | 0.27447  | 0.437604 |
| MmugDNA.11985.1.S1_at   | MmugDNA.11985.1 | 11.28 | 11.12 | 0.11 | 0.03 | 1.11  | 0.090198 | 0.329313 | 0.356864 | 0.578703 |
| MmugDNA.11989.1.S1_at   | MmugDNA.11989.1 | 4.79  | 5.09  | 0.35 | 0.3  | -1.23 | 0.397589 | 0.216158 | 0.66317  | 0.489701 |
| MmugDNA.11993.1.S1_at   | MmugDNA.11993.1 | 10.47 | 10.22 | 0.19 | 0.11 | 1.19  | 0.328718 | 0.001423 | 0.611072 | 0.057604 |
| MmugDNA.11998.1.S1_at   | MmugDNA.11998.1 | 9.8   | 10.21 | 0.17 | 0.21 | -1.32 | 0.119338 | 0.001752 | 0.397153 | 0.063106 |
| MmugDNA.12003.1.S1_s_at | MmugDNA.12003.1 | 5.15  | 4.93  | 0.14 | 0.11 | 1.17  | 0.446452 | 0.699396 | 0.698687 | 0.825344 |
| MmugDNA.12007.1.S1_at   | MmugDNA.12007.1 | 9.1   | 8.11  | 0.21 | 0.24 | 1.98  | 0.010827 | 0.022987 | 0.153877 | 0.189624 |
| MmugDNA.12008.1.S1_at   | MmugDNA.12008.1 | 5.99  | 5.97  | 0.19 | 0.1  | 1.02  | 0.728441 | 0.338198 | 0.873043 | 0.58536  |
| MmugDNA.1201.1.S1_at    | MmugDNA.1201.1  | 8.23  | 7.58  | 0.12 | 0.38 | 1.57  | 0.094372 | 0.660932 | 0.363345 | 0.801637 |
| MmugDNA.12013.1.S1_at   | MmugDNA.12013.1 | 4.1   | 3.93  | 0.17 | 0.11 | 1.12  | 0.182787 | 0.438501 | 0.478557 | 0.657459 |
| MmugDNA.12016.1.S1_at   | MmugDNA.12016.1 | 10.89 | 10.93 | 0.05 | 0.11 | -1.03 | 0.269611 | 0.000088 | 0.561959 | 0.027016 |

|                       |                 |       |       |      |      |        |          |          |          |          |
|-----------------------|-----------------|-------|-------|------|------|--------|----------|----------|----------|----------|
| MmugDNA.12019.1.S1_at | MmugDNA.12019.1 | 9.82  | 8.89  | 0.21 | 0.09 | 1.91   | 0.00344  | 0.000609 | 0.103385 | 0.042176 |
| MmugDNA.12026.1.S1_at | MmugDNA.12026.1 | 6.32  | 6.09  | 0.2  | 0.03 | 1.18   | 0.095337 | 0.123707 | 0.364765 | 0.393843 |
| MmugDNA.12033.1.S1_at | MmugDNA.12033.1 | 10.73 | 10.4  | 0.2  | 0.1  | 1.25   | 0.194879 | 0.597118 | 0.49141  | 0.760092 |
| MmugDNA.12046.1.S1_at | MmugDNA.12046.1 | 3.75  | 3.79  | 0.16 | 0.08 | -1.02  | 0.905546 | 0.089804 | 0.960065 | 0.34404  |
| MmugDNA.1206.1.S1_at  | MmugDNA.1206.1  | 7.88  | 7.9   | 0.11 | 0.11 | -1.01  | 0.745568 | 0.835891 | 0.881965 | 0.906115 |
| MmugDNA.12060.1.S1_at | MmugDNA.12060.1 | 9.65  | 9.68  | 0.5  | 0.13 | -1.02  | 0.942151 | 0.405352 | 0.975589 | 0.633693 |
| MmugDNA.12065.1.S1_at | MmugDNA.12065.1 | 7.92  | 10.19 | 0.86 | 0.3  | -4.81  | 0.010613 | 0.134901 | 0.152801 | 0.406878 |
| MmugDNA.12067.1.S1_at | MmugDNA.12067.1 | 7.08  | 7.19  | 0.26 | 0.26 | -1.08  | 0.411657 | 0.519102 | 0.673582 | 0.710813 |
| MmugDNA.12069.1.S1_at | MmugDNA.12069.1 | 11.36 | 11.17 | 0.15 | 0.05 | 1.15   | 0.266223 | 0.036034 | 0.558722 | 0.234255 |
| MmugDNA.12070.1.S1_at | MmugDNA.12070.1 | 5.31  | 4.78  | 0.43 | 0.05 | 1.44   | 0.110701 | 0.135679 | 0.386079 | 0.407841 |
| MmugDNA.12071.1.S1_at | MmugDNA.12071.1 | 11.37 | 12.38 | 0.25 | 0.1  | -2.02  | 0.003039 | 0.000766 | 0.100201 | 0.04544  |
| MmugDNA.12073.1.S1_at | MmugDNA.12073.1 | 7.7   | 7.63  | 0.22 | 0.07 | 1.05   | 0.502078 | 0.443835 | 0.735775 | 0.661517 |
| MmugDNA.12075.1.S1_at | MmugDNA.12075.1 | 11.25 | 10.2  | 0.11 | 0.09 | 2.08   | 0.000323 | 0.000032 | 0.0594   | 0.022097 |
| MmugDNA.12082.1.S1_at | MmugDNA.12082.1 | 8.19  | 7.6   | 0.51 | 0.13 | 1.5    | 0.112652 | 0.048641 | 0.389008 | 0.265613 |
| MmugDNA.12087.1.S1_at | MmugDNA.12087.1 | 9.16  | 9.62  | 0.42 | 0.09 | -1.37  | 0.328284 | 0.285839 | 0.610662 | 0.547484 |
| MmugDNA.12090.1.S1_at | MmugDNA.12090.1 | 7.05  | 6.04  | 0.3  | 0.09 | 2.02   | 0.009528 | 0.006431 | 0.147842 | 0.108902 |
| MmugDNA.12091.1.S1_at | MmugDNA.12091.1 | 8.68  | 9.12  | 0.29 | 0.12 | -1.36  | 0.301266 | 0.007513 | 0.589242 | 0.116291 |
| MmugDNA.12094.1.S1_at | MmugDNA.12094.1 | 3.83  | 5.58  | 0.65 | 0.4  | -3.35  | 0.033998 | 0.16287  | 0.238985 | 0.438966 |
| MmugDNA.12109.1.S1_at | MmugDNA.12109.1 | 10.63 | 9.45  | 0.22 | 0.42 | 2.27   | 0.022689 | 0.005229 | 0.203642 | 0.100184 |
| MmugDNA.12110.1.S1_at | MmugDNA.12110.1 | 3.47  | 3.48  | 0.15 | 0.11 | -1.01  | 0.436982 | 0.478239 | 0.691834 | 0.684243 |
| MmugDNA.12114.1.S1_at | MmugDNA.12114.1 | 10.93 | 10.62 | 0.28 | 0.11 | 1.24   | 0.217123 | 0.004542 | 0.514925 | 0.094165 |
| MmugDNA.12128.1.S1_at | MmugDNA.12128.1 | 8.86  | 8.88  | 0.13 | 0.02 | -1.01  | 0.595035 | 0.161172 | 0.795076 | 0.437346 |
| MmugDNA.12134.1.S1_at | MmugDNA.12134.1 | 11.11 | 11.6  | 0.37 | 0.15 | -1.41  | 0.055104 | 0.00911  | 0.291755 | 0.125983 |
| MmugDNA.12136.1.S1_at | MmugDNA.12136.1 | 7.03  | 7.17  | 0.2  | 0.21 | -1.1   | 0.159986 | 0.322723 | 0.451279 | 0.574043 |
| MmugDNA.12139.1.S1_at | MmugDNA.12139.1 | 5.94  | 5.96  | 0.12 | 0.08 | -1.02  | 0.708817 | 0.012454 | 0.862097 | 0.14417  |
| MmugDNA.12140.1.S1_at | MmugDNA.12140.1 | 9.06  | 8.95  | 0.14 | 0.08 | 1.08   | 0.412413 | 0.13238  | 0.674115 | 0.404344 |
| MmugDNA.12141.1.S1_at | MmugDNA.12141.1 | 5.95  | 5.75  | 0.71 | 0.28 | 1.14   | 0.986804 | 0.748985 | 0.995228 | 0.85406  |
| MmugDNA.12148.1.S1_at | MmugDNA.12148.1 | 5.32  | 5.29  | 0.11 | 0.16 | 1.02   | 0.879503 | 0.280333 | 0.948758 | 0.543556 |
| MmugDNA.12150.1.S1_at | MmugDNA.12150.1 | 5.08  | 5.32  | 0.4  | 0.06 | -1.18  | 0.904213 | 0.61804  | 0.959379 | 0.773852 |
| MmugDNA.12151.1.S1_at | MmugDNA.12151.1 | 10.28 | 8.9   | 0.34 | 0.2  | 2.61   | 0.005054 | 0.00118  | 0.116282 | 0.053826 |
| MmugDNA.12153.1.S1_at | MmugDNA.12153.1 | 6.45  | 6.81  | 0.41 | 0.15 | -1.28  | 0.899313 | 0.479789 | 0.957134 | 0.68541  |
| MmugDNA.12156.1.S1_at | MmugDNA.12156.1 | 8.8   | 8.75  | 0.18 | 0.09 | 1.03   | 0.152647 | 0.078569 | 0.442345 | 0.325285 |
| MmugDNA.12161.1.S1_at | MmugDNA.12161.1 | 12.92 | 12.78 | 0.06 | 0.02 | 1.1    | 0.022823 | 0.057065 | 0.204235 | 0.284945 |
| MmugDNA.12165.1.S1_at | MmugDNA.12165.1 | 11.43 | 11.54 | 0.21 | 0.1  | -1.08  | 0.093559 | 0.089017 | 0.362157 | 0.342876 |
| MmugDNA.12166.1.S1_at | MmugDNA.12166.1 | 10.92 | 11.1  | 0.42 | 0.11 | -1.13  | 0.44693  | 0.475404 | 0.699002 | 0.682125 |
| MmugDNA.1217.1.S1_at  | MmugDNA.1217.1  | 4.53  | 8.45  | 0.37 | 0.29 | -15.17 | 0.000195 | 0.000068 | 0.053494 | 0.025805 |
| MmugDNA.12175.1.S1_at | MmugDNA.12175.1 | 9.85  | 8.65  | 0.18 | 0.19 | 2.3    | 0.000954 | 0.000093 | 0.076054 | 0.027285 |
| MmugDNA.12184.1.S1_at | MmugDNA.12184.1 | 3.6   | 3.65  | 0.04 | 0.02 | -1.03  | 0.262121 | 0.230435 | 0.556351 | 0.502204 |
| MmugDNA.12190.1.S1_at | MmugDNA.12190.1 | 6.37  | 6.37  | 0.14 | 0.05 | 1      | 0.625614 | 0.373535 | 0.815474 | 0.612327 |
| MmugDNA.12193.1.S1_at | MmugDNA.12193.1 | 10.03 | 10.86 | 0.17 | 0.16 | -1.77  | 0.002575 | 0.00116  | 0.094992 | 0.053615 |
| MmugDNA.12200.1.S1_at | MmugDNA.12200.1 | 5.81  | 6.1   | 0.19 | 0.39 | -1.23  | 0.881561 | 0.576463 | 0.949624 | 0.747241 |
| MmugDNA.12202.1.S1_at | MmugDNA.12202.1 | 8.46  | 8.67  | 0.13 | 0.15 | -1.16  | 0.15279  | 0.041033 | 0.442495 | 0.247319 |
| MmugDNA.12206.1.S1_at | MmugDNA.12206.1 | 9.77  | 9.13  | 0.1  | 0.14 | 1.55   | 0.007239 | 0.02336  | 0.132655 | 0.191577 |



|                         |                 |       |       |      |      |       |          |          |          |          |
|-------------------------|-----------------|-------|-------|------|------|-------|----------|----------|----------|----------|
| MmugDNA.12215.1.S1_at   | MmugDNA.12215.1 | 6.26  | 5.25  | 0.73 | 0.29 | 2.02  | 0.39587  | 0.556394 | 0.662079 | 0.734507 |
| MmugDNA.12218.1.S1_at   | MmugDNA.12218.1 | 10.5  | 10.35 | 0.1  | 0.08 | 1.11  | 0.378125 | 0.000768 | 0.648422 | 0.04544  |
| MmugDNA.12219.1.S1_at   | MmugDNA.12219.1 | 2.54  | 2.6   | 0.05 | 0.05 | -1.04 | 0.186961 | 0.094959 | 0.483051 | 0.352054 |
| MmugDNA.1222.1.S1_at    | MmugDNA.1222.1  | 4.87  | 4.87  | 0.07 | 0.08 | -1.01 | 0.754312 | 0.347749 | 0.886774 | 0.592107 |
| MmugDNA.12222.1.S1_at   | MmugDNA.12222.1 | 3.99  | 3.76  | 0.26 | 0.17 | 1.18  | 0.149648 | 0.186408 | 0.438613 | 0.46226  |
| MmugDNA.12226.1.S1_at   | MmugDNA.12226.1 | 10.99 | 10.8  | 0.4  | 0.07 | 1.14  | 0.855713 | 0.457852 | 0.937133 | 0.670983 |
| MmugDNA.12228.1.S1_at   | MmugDNA.12228.1 | 7.98  | 7.79  | 0.16 | 0.09 | 1.14  | 0.227388 | 0.018421 | 0.525446 | 0.170755 |
| MmugDNA.12229.1.S1_at   | MmugDNA.12229.1 | 9.32  | 9.45  | 0.16 | 0.14 | -1.1  | 0.948307 | 0.636888 | 0.978362 | 0.786441 |
| MmugDNA.1223.1.S1_at    | MmugDNA.1223.1  | 10.36 | 10.58 | 0.15 | 0.1  | -1.17 | 0.138821 | 0.00136  | 0.424403 | 0.056687 |
| MmugDNA.12234.1.S1_at   | MmugDNA.12234.1 | 10.3  | 10.24 | 0.15 | 0.06 | 1.04  | 0.920076 | 0.221799 | 0.965854 | 0.494948 |
| MmugDNA.12239.1.S1_at   | MmugDNA.12239.1 | 8.29  | 9.4   | 0.45 | 0.35 | -2.16 | 0.116492 | 0.039814 | 0.393631 | 0.244569 |
| MmugDNA.1225.1.S1_x_at  | MmugDNA.1225.1  | 11.99 | 12.03 | 0.42 | 0.15 | -1.03 | 0.484354 | 0.240297 | 0.724218 | 0.510871 |
| MmugDNA.12251.1.S1_at   | MmugDNA.12251.1 | 12.39 | 12.29 | 0.17 | 0.03 | 1.08  | 0.327067 | 0.496442 | 0.609782 | 0.69607  |
| MmugDNA.12262.1.S1_at   | MmugDNA.12262.1 | 11.66 | 11.64 | 0.16 | 0.02 | 1.01  | 0.459979 | 0.032944 | 0.707988 | 0.224663 |
| MmugDNA.12264.1.S1_at   | MmugDNA.12264.1 | 3.74  | 3.88  | 0.17 | 0.04 | -1.11 | 0.410453 | 0.411509 | 0.672479 | 0.638215 |
| MmugDNA.1227.1.S1_s_at  | MmugDNA.1227.1  | 8.75  | 9.29  | 0.24 | 0.21 | -1.45 | 0.051407 | 0.119265 | 0.284155 | 0.387769 |
| MmugDNA.12277.1.S1_at   | MmugDNA.12277.1 | 12.63 | 11.25 | 0.11 | 0.28 | 2.59  | 0.001896 | 0.00183  | 0.087757 | 0.064224 |
| MmugDNA.12290.1.S1_at   | MmugDNA.12290.1 | 4.97  | 4.86  | 0.02 | 0.07 | 1.08  | 0.199271 | 0.130094 | 0.496613 | 0.401724 |
| MmugDNA.12293.1.S1_at   | MmugDNA.12293.1 | 7.73  | 7.76  | 0.2  | 0.17 | -1.02 | 0.967051 | 0.238688 | 0.986743 | 0.509376 |
| MmugDNA.12296.1.S1_at   | MmugDNA.12296.1 | 7.7   | 7.58  | 0.04 | 0.05 | 1.09  | 0.022647 | 0.012928 | 0.203573 | 0.146343 |
| MmugDNA.12302.1.S1_at   | MmugDNA.12302.1 | 11.93 | 12    | 0.14 | 0.03 | -1.05 | 0.443398 | 0.102552 | 0.696549 | 0.362904 |
| MmugDNA.12305.1.S1_at   | MmugDNA.12305.1 | 13.3  | 13.12 | 0.03 | 0.01 | 1.13  | 0.001033 | 0.001733 | 0.076321 | 0.062895 |
| MmugDNA.12314.1.S1_at   | MmugDNA.12314.1 | 12.19 | 11.97 | 0.23 | 0.07 | 1.16  | 0.047065 | 0.05429  | 0.274593 | 0.278485 |
| MmugDNA.12315.1.S1_at   | MmugDNA.12315.1 | 6.91  | 6.95  | 0.11 | 0.03 | -1.02 | 0.849178 | 0.204571 | 0.934328 | 0.478946 |
| MmugDNA.12321.1.S1_at   | MmugDNA.12321.1 | 12.3  | 12.64 | 0.21 | 0.03 | -1.27 | 0.036499 | 0.061798 | 0.246105 | 0.295352 |
| MmugDNA.12328.1.S1_at   | MmugDNA.12328.1 | 11.35 | 11.17 | 0.26 | 0.04 | 1.13  | 0.122647 | 0.130519 | 0.401468 | 0.402373 |
| MmugDNA.12334.1.S1_at   | MmugDNA.12334.1 | 9.97  | 9.99  | 0.13 | 0.16 | -1.01 | 0.284181 | 0.480335 | 0.574388 | 0.68574  |
| MmugDNA.12342.1.S1_at   | MmugDNA.12342.1 | 6.49  | 6.42  | 0.81 | 0.29 | 1.05  | 0.819024 | 0.699433 | 0.91937  | 0.825365 |
| MmugDNA.12349.1.S1_at   | MmugDNA.12349.1 | 4.12  | 4.22  | 0.08 | 0.41 | -1.07 | 0.239049 | 0.33306  | 0.536338 | 0.581374 |
| MmugDNA.12350.1.S1_at   | MmugDNA.12350.1 | 6.41  | 6.41  | 0.19 | 0.05 | -1    | 0.983432 | 0.400805 | 0.99383  | 0.630649 |
| MmugDNA.12352.1.S1_at   | MmugDNA.12352.1 | 3.39  | 3.3   | 0.2  | 0.14 | 1.06  | 0.806197 | 0.946999 | 0.913173 | 0.969952 |
| MmugDNA.12353.1.S1_at   | MmugDNA.12353.1 | 6.59  | 6.24  | 0.16 | 0.26 | 1.28  | 0.098279 | 0.00347  | 0.368888 | 0.084806 |
| MmugDNA.12354.1.S1_at   | MmugDNA.12354.1 | 5.63  | 5.65  | 0.05 | 0.15 | -1.02 | 0.894171 | 0.277762 | 0.954822 | 0.541664 |
| MmugDNA.12361.1.S1_at   | MmugDNA.12361.1 | 5.67  | 5.79  | 0.05 | 0.09 | -1.09 | 0.094299 | 0.071398 | 0.363294 | 0.313518 |
| MmugDNA.12365.1.S1_at   | MmugDNA.12365.1 | 8.96  | 9.35  | 0.21 | 0.06 | -1.31 | 0.052174 | 0.103584 | 0.285936 | 0.364346 |
| MmugDNA.12371.1.S1_at   | MmugDNA.12371.1 | 6.09  | 6.62  | 0.38 | 0.41 | -1.45 | 0.527343 | 0.610903 | 0.753064 | 0.768948 |
| MmugDNA.12373.1.S1_at   | MmugDNA.12373.1 | 6.16  | 6.32  | 0.3  | 0.16 | -1.12 | 0.99802  | 0.569954 | 0.999236 | 0.742751 |
| MmugDNA.12374.1.S1_at   | MmugDNA.12374.1 | 9.2   | 9.36  | 0.17 | 0.09 | -1.11 | 0.245176 | 0.001755 | 0.541279 | 0.063111 |
| MmugDNA.12376.1.S1_at   | MmugDNA.12376.1 | 11.75 | 11.4  | 0.33 | 0.12 | 1.28  | 0.486284 | 0.590166 | 0.725583 | 0.756117 |
| MmugDNA.12382.1.S1_at   | MmugDNA.12382.1 | 11.44 | 11.23 | 0.07 | 0.1  | 1.16  | 0.05388  | 0.509094 | 0.289261 | 0.703993 |
| MmugDNA.12383.1.S1_at   | MmugDNA.12383.1 | 10.16 | 10.37 | 0.1  | 0.05 | -1.15 | 0.080237 | 0.534833 | 0.340727 | 0.720557 |
| MmugDNA.12386.1.S1_at   | MmugDNA.12386.1 | 9.89  | 9.57  | 0.13 | 0.19 | 1.25  | 0.070595 | 0.195417 | 0.324085 | 0.470253 |
| MmugDNA.12390.1.S1_s_at | MmugDNA.12390.1 | 12.78 | 12.86 | 0.11 | 0.03 | -1.06 | 0.196661 | 0.012196 | 0.493731 | 0.142872 |

|                         |                 |       |       |      |      |       |          |          |          |          |
|-------------------------|-----------------|-------|-------|------|------|-------|----------|----------|----------|----------|
| MmugDNA.12391.1.S1_at   | MmugDNA.12391.1 | 4.61  | 4.61  | 0.06 | 0.08 | -1    | 0.547252 | 0.468566 | 0.765823 | 0.677755 |
| MmugDNA.12393.1.S1_at   | MmugDNA.12393.1 | 10.24 | 9.65  | 0.06 | 0.16 | 1.51  | 0.005133 | 0.036473 | 0.116966 | 0.235458 |
| MmugDNA.12399.1.S1_at   | MmugDNA.12399.1 | 12.1  | 12.21 | 0.08 | 0.02 | -1.08 | 0.232999 | 0.015577 | 0.531271 | 0.158192 |
| MmugDNA.12408.1.S1_at   | MmugDNA.12408.1 | 6.78  | 6.92  | 0.16 | 0.09 | -1.11 | 0.743623 | 0.623357 | 0.881384 | 0.777726 |
| MmugDNA.12426.1.S1_at   | MmugDNA.12426.1 | 8.07  | 8.06  | 0.12 | 0.1  | 1.01  | 0.625481 | 0.1777   | 0.815436 | 0.454073 |
| MmugDNA.12436.1.S1_at   | MmugDNA.12436.1 | 7.35  | 7.99  | 0.32 | 0.26 | -1.56 | 0.067214 | 0.055053 | 0.31689  | 0.280138 |
| MmugDNA.1244.1.S1_at    | MmugDNA.1244.1  | 8.93  | 8.99  | 0.08 | 0.16 | -1.04 | 0.32339  | 0.943265 | 0.607168 | 0.967814 |
| MmugDNA.12443.1.S1_at   | MmugDNA.12443.1 | 9.86  | 8.86  | 0.25 | 0.15 | 1.99  | 0.007116 | 0.217449 | 0.131745 | 0.491035 |
| MmugDNA.12446.1.S1_at   | MmugDNA.12446.1 | 13.76 | 13.55 | 0.05 | 0.1  | 1.16  | 0.060581 | 0.009525 | 0.303194 | 0.128521 |
| MmugDNA.12450.1.S1_s_at | MmugDNA.12450.1 | 7.93  | 8.02  | 0.27 | 0.06 | -1.06 | 0.678414 | 0.862838 | 0.846605 | 0.922029 |
| MmugDNA.12450.1.S1_x_at | MmugDNA.12450.1 | 5.62  | 5.59  | 0.21 | 0.03 | 1.01  | 0.607836 | 0.794756 | 0.804015 | 0.881719 |
| MmugDNA.12459.1.S1_at   | MmugDNA.12459.1 | 6.98  | 6.82  | 0.3  | 0.19 | 1.11  | 0.463007 | 0.457529 | 0.709909 | 0.670864 |
| MmugDNA.12461.1.S1_at   | MmugDNA.12461.1 | 8.51  | 8.53  | 0.07 | 0.17 | -1.01 | 0.787583 | 0.805127 | 0.903275 | 0.887962 |
| MmugDNA.12465.1.S1_at   | MmugDNA.12465.1 | 4.48  | 4.39  | 0.48 | 0.19 | 1.06  | 0.442076 | 0.581363 | 0.695464 | 0.750417 |
| MmugDNA.12469.1.S1_at   | MmugDNA.12469.1 | 4.88  | 5.11  | 0.05 | 0.18 | -1.17 | 0.077324 | 0.056186 | 0.335992 | 0.282948 |
| MmugDNA.12478.1.S1_at   | MmugDNA.12478.1 | 12.53 | 12.71 | 0.15 | 0.1  | -1.14 | 0.05933  | 0.009402 | 0.300756 | 0.127832 |
| MmugDNA.1248.1.S1_at    | MmugDNA.1248.1  | 7.84  | 8.53  | 0.37 | 0.12 | -1.61 | 0.067106 | 0.121352 | 0.316802 | 0.390389 |
| MmugDNA.12480.1.S1_at   | MmugDNA.12480.1 | 12.19 | 12.07 | 0.09 | 0.12 | 1.09  | 0.186891 | 0.581872 | 0.482992 | 0.750784 |
| MmugDNA.12483.1.S1_at   | MmugDNA.12483.1 | 4.66  | 4.5   | 0.39 | 0.12 | 1.11  | 0.992344 | 0.724573 | 0.997172 | 0.840552 |
| MmugDNA.12484.1.S1_at   | MmugDNA.12484.1 | 10.23 | 10.03 | 0.19 | 0.05 | 1.15  | 0.164161 | 0.405319 | 0.45709  | 0.633679 |
| MmugDNA.12487.1.S1_at   | MmugDNA.12487.1 | 6.99  | 7.36  | 0.46 | 0.04 | -1.29 | 0.72659  | 0.798738 | 0.871808 | 0.884072 |
| MmugDNA.12490.1.S1_at   | MmugDNA.12490.1 | 8.62  | 7.31  | 0.24 | 0.02 | 2.48  | 0.0007   | 0.003668 | 0.071709 | 0.086563 |
| MmugDNA.125.1.S1_at     | MmugDNA.125.1   | 5.74  | 5.83  | 0.15 | 0.1  | -1.06 | 0.721565 | 0.081393 | 0.868879 | 0.329571 |
| MmugDNA.12501.1.S1_at   | MmugDNA.12501.1 | 9.02  | 8.99  | 0.22 | 0.12 | 1.02  | 0.550492 | 0.150996 | 0.76784  | 0.425628 |
| MmugDNA.12503.1.S1_at   | MmugDNA.12503.1 | 4.36  | 4.23  | 0.06 | 0.08 | 1.09  | 0.188043 | 0.092961 | 0.484319 | 0.349059 |
| MmugDNA.12505.1.S1_at   | MmugDNA.12505.1 | 11.81 | 12.29 | 0.19 | 0.08 | -1.4  | 0.014239 | 0.000276 | 0.171042 | 0.034199 |
| MmugDNA.1251.1.S1_at    | MmugDNA.1251.1  | 11.65 | 11.42 | 0.56 | 0.14 | 1.17  | 0.234645 | 0.281537 | 0.532768 | 0.54464  |
| MmugDNA.12511.1.S1_at   | MmugDNA.12511.1 | 3.82  | 4.45  | 0.32 | 0.27 | -1.55 | 0.02032  | 0.02035  | 0.196136 | 0.179112 |
| MmugDNA.12515.1.S1_at   | MmugDNA.12515.1 | 3.82  | 3.83  | 0.09 | 0.14 | -1.01 | 0.898668 | 0.937685 | 0.956937 | 0.964687 |
| MmugDNA.12524.1.S1_at   | MmugDNA.12524.1 | 8.82  | 8.19  | 1.24 | 0.13 | 1.55  | 0.447238 | 0.134967 | 0.699298 | 0.406951 |
| MmugDNA.12529.1.S1_at   | MmugDNA.12529.1 | 4.77  | 4.77  | 0.13 | 0.08 | 1     | 0.78146  | 0.048483 | 0.900178 | 0.265407 |
| MmugDNA.12530.1.S1_at   | MmugDNA.12530.1 | 11.23 | 11.4  | 0.26 | 0.07 | -1.13 | 0.905674 | 0.240572 | 0.960065 | 0.511229 |
| MmugDNA.12533.1.S1_at   | MmugDNA.12533.1 | 4.97  | 5.03  | 0.3  | 0.14 | -1.04 | 0.643425 | 0.803276 | 0.826158 | 0.88676  |
| MmugDNA.12535.1.S1_at   | MmugDNA.12535.1 | 8.96  | 8.83  | 0.15 | 0.08 | 1.1   | 0.314901 | 0.668017 | 0.600177 | 0.805702 |
| MmugDNA.12539.1.S1_s_at | MmugDNA.12539.1 | 6.19  | 6.47  | 0.07 | 0.21 | -1.21 | 0.087929 | 0.310671 | 0.35408  | 0.565787 |
| MmugDNA.12540.1.S1_at   | MmugDNA.12540.1 | 9.86  | 10.24 | 0.38 | 0.13 | -1.29 | 0.178284 | 0.016496 | 0.473024 | 0.162577 |
| MmugDNA.12543.1.S1_at   | MmugDNA.12543.1 | 10.99 | 10.83 | 0.41 | 0.31 | 1.12  | 0.904087 | 0.012798 | 0.959379 | 0.145832 |
| MmugDNA.12544.1.S1_at   | MmugDNA.12544.1 | 9.18  | 8.51  | 0.4  | 0.37 | 1.59  | 0.047004 | 0.139851 | 0.274509 | 0.413131 |
| MmugDNA.12546.1.S1_at   | MmugDNA.12546.1 | 12.73 | 12.92 | 0.2  | 0.09 | -1.15 | 0.243026 | 0.034725 | 0.539753 | 0.230506 |
| MmugDNA.12548.1.S1_at   | MmugDNA.12548.1 | 12.37 | 12.46 | 0.06 | 0.03 | -1.06 | 0.029071 | 0.016503 | 0.223234 | 0.162611 |
| MmugDNA.12549.1.S1_at   | MmugDNA.12549.1 | 10.12 | 10.02 | 0.12 | 0.19 | 1.08  | 0.135071 | 0.262363 | 0.419042 | 0.528655 |
| MmugDNA.12550.1.S1_at   | MmugDNA.12550.1 | 3.74  | 3.95  | 0.12 | 0.09 | -1.15 | 0.159167 | 0.23052  | 0.450505 | 0.502251 |
| MmugDNA.12551.1.S1_at   | MmugDNA.12551.1 | 6.42  | 8.63  | 1.04 | 0.23 | -4.65 | 0.056363 | 0.514608 | 0.29472  | 0.707767 |

|                         |                 |       |       |      |      |       |          |          |          |          |
|-------------------------|-----------------|-------|-------|------|------|-------|----------|----------|----------|----------|
| MmugDNA.12551.1.S1_s_at | MmugDNA.12551.1 | 3.86  | 4.03  | 0.26 | 0.05 | -1.12 | 0.421315 | 0.285665 | 0.679878 | 0.547395 |
| MmugDNA.12555.1.S1_at   | MmugDNA.12555.1 | 5.82  | 5.77  | 0.09 | 0.02 | 1.04  | 0.144682 | 0.220864 | 0.431647 | 0.494262 |
| MmugDNA.12556.1.S1_at   | MmugDNA.12556.1 | 3.52  | 3.59  | 0.05 | 0.06 | -1.05 | 0.293077 | 0.833343 | 0.582105 | 0.904427 |
| MmugDNA.12557.1.S1_at   | MmugDNA.12557.1 | 6.28  | 6.38  | 0.03 | 0.32 | -1.08 | 0.193369 | 0.38259  | 0.489956 | 0.618766 |
| MmugDNA.12559.1.S1_at   | MmugDNA.12559.1 | 9.66  | 9.74  | 0.14 | 0.07 | -1.06 | 0.746815 | 0.08776  | 0.882809 | 0.341027 |
| MmugDNA.12560.1.S1_at   | MmugDNA.12560.1 | 9.33  | 8.21  | 0.37 | 0.7  | 2.17  | 0.126092 | 0.134647 | 0.40715  | 0.406629 |
| MmugDNA.12563.1.S1_at   | MmugDNA.12563.1 | 4.86  | 4.8   | 0.13 | 0.04 | 1.04  | 0.205744 | 0.318517 | 0.503526 | 0.571239 |
| MmugDNA.12564.1.S1_at   | MmugDNA.12564.1 | 8.27  | 8.57  | 0.34 | 0.09 | -1.23 | 0.203613 | 0.611384 | 0.501321 | 0.769286 |
| MmugDNA.12567.1.S1_at   | MmugDNA.12567.1 | 11.82 | 12.38 | 0.2  | 0.09 | -1.48 | 0.019016 | 0.012497 | 0.191367 | 0.144302 |
| MmugDNA.12568.1.S1_at   | MmugDNA.12568.1 | 8.24  | 7.88  | 0.11 | 0.05 | 1.28  | 0.003396 | 0.00008  | 0.102989 | 0.027016 |
| MmugDNA.1257.1.S1_at    | MmugDNA.1257.1  | 12.05 | 11.56 | 0.22 | 0.06 | 1.4   | 0.03492  | 0.027823 | 0.241405 | 0.208337 |
| MmugDNA.12570.1.S1_at   | MmugDNA.12570.1 | 9.75  | 8.68  | 0.11 | 0.23 | 2.09  | 0.003249 | 0.011652 | 0.101782 | 0.139826 |
| MmugDNA.12571.1.S1_at   | MmugDNA.12571.1 | 8.04  | 8.11  | 0.33 | 0.03 | -1.05 | 0.987557 | 0.907674 | 0.995514 | 0.947753 |
| MmugDNA.12573.1.S1_at   | MmugDNA.12573.1 | 11.72 | 11.76 | 0.27 | 0.12 | -1.03 | 0.479036 | 0.039764 | 0.72042  | 0.244402 |
| MmugDNA.12577.1.S1_at   | MmugDNA.12577.1 | 7.94  | 8.03  | 0.18 | 0.15 | -1.06 | 0.758313 | 0.072078 | 0.88913  | 0.314519 |
| MmugDNA.12587.1.S1_at   | MmugDNA.12587.1 | 3.47  | 3.42  | 0.11 | 0.14 | 1.03  | 0.802916 | 0.331411 | 0.911566 | 0.580076 |
| MmugDNA.12592.1.S1_at   | MmugDNA.12592.1 | 12.54 | 12.5  | 0.01 | 0.03 | 1.03  | 0.382164 | 0.579569 | 0.651645 | 0.749192 |
| MmugDNA.12593.1.S1_at   | MmugDNA.12593.1 | 12.23 | 12.09 | 0.11 | 0.09 | 1.1   | 0.104956 | 0.282821 | 0.378609 | 0.545524 |
| MmugDNA.12595.1.S1_at   | MmugDNA.12595.1 | 12.39 | 12.57 | 0.11 | 0.07 | -1.13 | 0.127138 | 0.329467 | 0.408728 | 0.578781 |
| MmugDNA.12596.1.S1_at   | MmugDNA.12596.1 | 6.54  | 6.79  | 0.02 | 0.22 | -1.19 | 0.132398 | 0.146883 | 0.415753 | 0.420934 |
| MmugDNA.12598.1.S1_at   | MmugDNA.12598.1 | 9.67  | 9.49  | 0.03 | 0.14 | 1.13  | 0.084898 | 0.353299 | 0.348845 | 0.596477 |
| MmugDNA.12599.1.S1_at   | MmugDNA.12599.1 | 11.72 | 11.58 | 0.09 | 0.09 | 1.1   | 0.053818 | 0.045348 | 0.289104 | 0.257279 |
| MmugDNA.126.1.S1_at     | MmugDNA.126.1   | 8.29  | 8.14  | 0.26 | 0.06 | 1.11  | 0.496405 | 0.796846 | 0.732272 | 0.882814 |
| MmugDNA.1260.1.S1_at    | MmugDNA.1260.1  | 9.42  | 9.31  | 0.16 | 0.12 | 1.08  | 0.174118 | 0.167053 | 0.468351 | 0.443535 |
| MmugDNA.12602.1.S1_at   | MmugDNA.12602.1 | 8.79  | 8.41  | 0.22 | 0.14 | 1.3   | 0.047911 | 0.017586 | 0.276338 | 0.167721 |
| MmugDNA.12604.1.S1_at   | MmugDNA.12604.1 | 10.5  | 9.99  | 0.55 | 0.11 | 1.42  | 0.658176 | 0.04676  | 0.834894 | 0.260948 |
| MmugDNA.12610.1.S1_at   | MmugDNA.12610.1 | 10.81 | 10.5  | 0.04 | 0.26 | 1.24  | 0.35281  | 0.506849 | 0.630102 | 0.702624 |
| MmugDNA.12611.1.S1_at   | MmugDNA.12611.1 | 10.3  | 10.5  | 0.07 | 0.03 | -1.14 | 0.011572 | 0.424342 | 0.157425 | 0.646926 |
| MmugDNA.12617.1.S1_at   | MmugDNA.12617.1 | 10.74 | 10.97 | 0.17 | 0.07 | -1.17 | 0.084836 | 0.072779 | 0.34881  | 0.315651 |
| MmugDNA.1262.1.S1_at    | MmugDNA.1262.1  | 4.69  | 4.64  | 0.25 | 0.14 | 1.04  | 0.357741 | 0.6125   | 0.633636 | 0.770071 |
| MmugDNA.12622.1.S1_at   | MmugDNA.12622.1 | 6.39  | 7.01  | 0.84 | 0.07 | -1.54 | 0.262215 | 0.305951 | 0.556354 | 0.562732 |
| MmugDNA.12623.1.S1_at   | MmugDNA.12623.1 | 10.11 | 9.81  | 0.15 | 0.02 | 1.24  | 0.021844 | 0.011785 | 0.20108  | 0.140575 |
| MmugDNA.12624.1.S1_at   | MmugDNA.12624.1 | 9.53  | 10.56 | 0.24 | 0.22 | -2.05 | 0.010465 | 0.210249 | 0.152221 | 0.484073 |
| MmugDNA.12625.1.S1_at   | MmugDNA.12625.1 | 6.25  | 7.24  | 0.26 | 0.48 | -2    | 0.027449 | 0.31792  | 0.218469 | 0.571046 |
| MmugDNA.12627.1.S1_at   | MmugDNA.12627.1 | 5.06  | 5.34  | 0.1  | 0.06 | -1.22 | 0.008541 | 0.026985 | 0.141761 | 0.205465 |
| MmugDNA.12628.1.S1_at   | MmugDNA.12628.1 | 6.21  | 5.47  | 0.59 | 0.9  | 1.68  | 0.238453 | 0.130273 | 0.535825 | 0.402037 |
| MmugDNA.12634.1.S1_at   | MmugDNA.12634.1 | 5.56  | 5.56  | 0.09 | 0.03 | 1     | 0.263228 | 0.736968 | 0.556921 | 0.847779 |
| MmugDNA.12640.1.S1_at   | MmugDNA.12640.1 | 6.99  | 6.37  | 0.33 | 0.24 | 1.55  | 0.074538 | 0.037417 | 0.331249 | 0.237777 |
| MmugDNA.12648.1.S1_at   | MmugDNA.12648.1 | 10.11 | 11.47 | 0.4  | 0.17 | -2.57 | 0.005339 | 0.022549 | 0.11815  | 0.187981 |
| MmugDNA.1265.1.S1_at    | MmugDNA.1265.1  | 7.93  | 7.94  | 0.11 | 0.06 | -1    | 0.260258 | 0.191095 | 0.554444 | 0.466364 |
| MmugDNA.12657.1.S1_at   | MmugDNA.12657.1 | 4.52  | 4.68  | 0.13 | 0.16 | -1.12 | 0.585385 | 0.798589 | 0.789198 | 0.884032 |
| MmugDNA.12666.1.S1_at   | MmugDNA.12666.1 | 10.56 | 10.75 | 0.3  | 0.12 | -1.13 | 0.930437 | 0.026584 | 0.970762 | 0.203998 |
| MmugDNA.12666.1.S1_s_at | MmugDNA.12666.1 | 10.84 | 10.97 | 0.22 | 0.1  | -1.1  | 0.988775 | 0.017316 | 0.996059 | 0.166509 |

|                         |                 |       |       |      |      |       |          |          |          |          |
|-------------------------|-----------------|-------|-------|------|------|-------|----------|----------|----------|----------|
| MmugDNA.12688.1.S1_at   | MmugDNA.12688.1 | 9.47  | 9.53  | 0.15 | 0.03 | -1.04 | 0.726718 | 0.542944 | 0.871852 | 0.725861 |
| MmugDNA.1269.1.S1_at    | MmugDNA.1269.1  | 8.06  | 8.19  | 0.1  | 0.03 | -1.09 | 0.168656 | 0.054561 | 0.461921 | 0.279114 |
| MmugDNA.12691.1.S1_at   | MmugDNA.12691.1 | 10.27 | 10.33 | 0.05 | 0.07 | -1.04 | 0.460418 | 0.000028 | 0.708167 | 0.021152 |
| MmugDNA.1270.1.S1_at    | MmugDNA.1270.1  | 3.34  | 3.08  | 0.25 | 0.06 | 1.2   | 0.130268 | 0.084733 | 0.412564 | 0.336218 |
| MmugDNA.12703.1.S1_at   | MmugDNA.12703.1 | 8.47  | 7.97  | 0.29 | 0.12 | 1.42  | 0.070761 | 0.098519 | 0.324313 | 0.356636 |
| MmugDNA.12711.1.S1_at   | MmugDNA.12711.1 | 8.81  | 7.75  | 0.15 | 0.16 | 2.08  | 0.00102  | 0.000266 | 0.076321 | 0.033786 |
| MmugDNA.12725.1.S1_at   | MmugDNA.12725.1 | 4.49  | 7.08  | 0.78 | 0.05 | -6.04 | 0.008735 | 0.001415 | 0.14316  | 0.057432 |
| MmugDNA.12728.1.S1_at   | MmugDNA.12728.1 | 6.11  | 5.99  | 0.06 | 0.09 | 1.08  | 0.108796 | 0.5013   | 0.383665 | 0.699499 |
| MmugDNA.12736.1.S1_at   | MmugDNA.12736.1 | 6.83  | 6.79  | 0.21 | 0.05 | 1.03  | 0.825631 | 0.354948 | 0.922496 | 0.597466 |
| MmugDNA.12737.1.S1_at   | MmugDNA.12737.1 | 10.99 | 10.83 | 0.1  | 0.06 | 1.12  | 0.082548 | 0.102399 | 0.344304 | 0.36259  |
| MmugDNA.12738.1.S1_at   | MmugDNA.12738.1 | 2.97  | 3.11  | 0.23 | 0.01 | -1.11 | 0.92363  | 0.938489 | 0.967518 | 0.965059 |
| MmugDNA.12740.1.S1_at   | MmugDNA.12740.1 | 6.01  | 6.04  | 0.04 | 0.03 | -1.02 | 0.771794 | 0.108796 | 0.895444 | 0.37236  |
| MmugDNA.12743.1.S1_at   | MmugDNA.12743.1 | 10.04 | 10.66 | 0.27 | 0.08 | -1.55 | 0.016379 | 0.525628 | 0.180807 | 0.715154 |
| MmugDNA.12745.1.S1_at   | MmugDNA.12745.1 | 6.4   | 6.21  | 0.94 | 0.12 | 1.14  | 0.885348 | 0.375673 | 0.951028 | 0.613577 |
| MmugDNA.12748.1.S1_at   | MmugDNA.12748.1 | 3.75  | 3.99  | 0.16 | 0.09 | -1.18 | 0.23538  | 0.507984 | 0.533273 | 0.703358 |
| MmugDNA.12749.1.S1_s_at | MmugDNA.12749.1 | 12.7  | 11.81 | 0.18 | 0.05 | 1.85  | 0.001152 | 0.009324 | 0.077569 | 0.127466 |
| MmugDNA.12751.1.S1_at   | MmugDNA.12751.1 | 4.9   | 4.74  | 0.08 | 0.1  | 1.11  | 0.131691 | 0.068874 | 0.414568 | 0.308799 |
| MmugDNA.12757.1.S1_s_at | MmugDNA.12757.1 | 7.49  | 7.25  | 0.12 | 0.09 | 1.17  | 0.057774 | 0.278565 | 0.297537 | 0.542327 |
| MmugDNA.12759.1.S1_at   | MmugDNA.12759.1 | 6.62  | 6.66  | 0.1  | 0.03 | -1.03 | 0.868713 | 0.626834 | 0.943559 | 0.780001 |
| MmugDNA.12780.1.S1_at   | MmugDNA.12780.1 | 5.49  | 5.58  | 0.3  | 0.12 | -1.06 | 0.463596 | 0.772044 | 0.710141 | 0.867462 |
| MmugDNA.12786.1.S1_at   | MmugDNA.12786.1 | 6.07  | 7.02  | 1.07 | 0.31 | -1.93 | 0.097171 | 0.185178 | 0.367275 | 0.461071 |
| MmugDNA.12791.1.S1_at   | MmugDNA.12791.1 | 10.11 | 10.57 | 0.31 | 0.14 | -1.37 | 0.052825 | 0.149252 | 0.286839 | 0.42373  |
| MmugDNA.12792.1.S1_at   | MmugDNA.12792.1 | 4.3   | 4.15  | 0.14 | 0.07 | 1.11  | 0.208099 | 0.101684 | 0.505909 | 0.361562 |
| MmugDNA.12795.1.S1_at   | MmugDNA.12795.1 | 12.25 | 12.11 | 0.1  | 0.03 | 1.1   | 0.095654 | 0.096061 | 0.365159 | 0.353319 |
| MmugDNA.12797.1.S1_at   | MmugDNA.12797.1 | 5.5   | 5.19  | 0.03 | 0.26 | 1.24  | 0.118105 | 0.152146 | 0.395593 | 0.426919 |
| MmugDNA.128.1.S1_at     | MmugDNA.128.1   | 5.97  | 5.99  | 0.16 | 0.1  | -1.02 | 0.399951 | 0.678942 | 0.665139 | 0.81252  |
| MmugDNA.12801.1.S1_at   | MmugDNA.12801.1 | 7.73  | 7.74  | 0.23 | 0.03 | -1.01 | 0.888203 | 0.414133 | 0.952297 | 0.640063 |
| MmugDNA.12803.1.S1_s_at | MmugDNA.12803.1 | 12.02 | 11.44 | 0.31 | 0.09 | 1.49  | 0.103597 | 0.082932 | 0.37679  | 0.332465 |
| MmugDNA.12810.1.S1_at   | MmugDNA.12810.1 | 4.88  | 3.45  | 0.57 | 0.06 | 2.7   | 0.019678 | 0.005178 | 0.193195 | 0.099727 |
| MmugDNA.12811.1.S1_at   | MmugDNA.12811.1 | 4.08  | 4.41  | 0.34 | 0.01 | -1.25 | 0.565064 | 0.538051 | 0.776513 | 0.722826 |
| MmugDNA.12823.1.S1_at   | MmugDNA.12823.1 | 10.17 | 9.53  | 0.14 | 0.06 | 1.56  | 0.001356 | 0.004877 | 0.079562 | 0.097507 |
| MmugDNA.12828.1.S1_at   | MmugDNA.12828.1 | 7.04  | 6.75  | 0.48 | 0.14 | 1.22  | 0.515455 | 0.302213 | 0.745337 | 0.560092 |
| MmugDNA.12835.1.S1_at   | MmugDNA.12835.1 | 7.22  | 7.39  | 0.17 | 0.11 | -1.12 | 0.139808 | 0.242501 | 0.425392 | 0.51284  |
| MmugDNA.12836.1.S1_at   | MmugDNA.12836.1 | 6.03  | 5.67  | 0.2  | 0.42 | 1.28  | 0.503583 | 0.528235 | 0.737082 | 0.716462 |
| MmugDNA.12841.1.S1_at   | MmugDNA.12841.1 | 7.8   | 8.72  | 0.69 | 0.43 | -1.9  | 0.068839 | 0.189419 | 0.320453 | 0.465117 |
| MmugDNA.12851.1.S1_at   | MmugDNA.12851.1 | 10.72 | 10.92 | 0.4  | 0.19 | -1.15 | 0.776956 | 0.049879 | 0.898112 | 0.268445 |
| MmugDNA.12854.1.S1_at   | MmugDNA.12854.1 | 8.23  | 8.33  | 0.12 | 0.16 | -1.07 | 0.955774 | 0.000498 | 0.981831 | 0.038955 |
| MmugDNA.12855.1.S1_at   | MmugDNA.12855.1 | 7.55  | 7.56  | 0.4  | 0.02 | -1    | 0.516955 | 0.334223 | 0.74618  | 0.582266 |
| MmugDNA.12857.1.S1_at   | MmugDNA.12857.1 | 11.89 | 10.98 | 0.12 | 0.28 | 1.88  | 0.007223 | 0.168668 | 0.132536 | 0.445352 |
| MmugDNA.1286.1.S1_at    | MmugDNA.1286.1  | 11.07 | 11.38 | 0.15 | 0.08 | -1.24 | 0.053934 | 0.04239  | 0.28932  | 0.250533 |
| MmugDNA.12863.1.S1_at   | MmugDNA.12863.1 | 9.55  | 10.13 | 0.28 | 0.13 | -1.5  | 0.077129 | 0.152255 | 0.335758 | 0.427045 |
| MmugDNA.12865.1.S1_at   | MmugDNA.12865.1 | 9.26  | 9.72  | 0.16 | 0.01 | -1.38 | 0.008237 | 0.024894 | 0.139904 | 0.197685 |
| MmugDNA.12866.1.S1_at   | MmugDNA.12866.1 | 5.29  | 5.29  | 0.06 | 0.01 | 1     | 0.899934 | 0.598605 | 0.957478 | 0.760996 |

|                         |                 |       |       |      |      |       |          |          |          |          |
|-------------------------|-----------------|-------|-------|------|------|-------|----------|----------|----------|----------|
| MmugDNA.12873.1.S1_at   | MmugDNA.12873.1 | 7.25  | 7.35  | 0.15 | 0.08 | -1.07 | 0.576179 | 0.917593 | 0.783141 | 0.953897 |
| MmugDNA.12875.1.S1_at   | MmugDNA.12875.1 | 5.69  | 5.9   | 0.25 | 0.01 | -1.16 | 0.720287 | 0.448819 | 0.868039 | 0.664636 |
| MmugDNA.12878.1.S1_at   | MmugDNA.12878.1 | 8.93  | 9.18  | 0.34 | 0.03 | -1.19 | 0.303999 | 0.012681 | 0.59132  | 0.145201 |
| MmugDNA.12880.1.S1_at   | MmugDNA.12880.1 | 5.41  | 5.35  | 0.06 | 0.06 | 1.04  | 0.795483 | 0.424516 | 0.907558 | 0.647118 |
| MmugDNA.12881.1.S1_at   | MmugDNA.12881.1 | 7.25  | 8.64  | 0.85 | 0.32 | -2.62 | 0.080715 | 0.114336 | 0.341441 | 0.380835 |
| MmugDNA.12885.1.S1_at   | MmugDNA.12885.1 | 5.37  | 5.31  | 0.13 | 0.08 | 1.04  | 0.218397 | 0.340042 | 0.516059 | 0.586516 |
| MmugDNA.12889.1.S1_at   | MmugDNA.12889.1 | 8.29  | 8.47  | 0.15 | 0.06 | -1.13 | 0.040526 | 0.193246 | 0.257685 | 0.468578 |
| MmugDNA.12896.1.S1_at   | MmugDNA.12896.1 | 5.78  | 6.01  | 0.14 | 0.06 | -1.17 | 0.049331 | 0.01795  | 0.279484 | 0.168998 |
| MmugDNA.1290.1.S1_at    | MmugDNA.1290.1  | 13.65 | 13.68 | 0.06 | 0.04 | -1.02 | 0.954977 | 0.229613 | 0.98151  | 0.501574 |
| MmugDNA.12900.1.S1_at   | MmugDNA.12900.1 | 10.58 | 10.86 | 0.12 | 0.11 | -1.22 | 0.039505 | 0.085236 | 0.255248 | 0.337096 |
| MmugDNA.12904.1.S1_at   | MmugDNA.12904.1 | 4.87  | 4.87  | 0.02 | 0.03 | -1    | 0.405971 | 0.739796 | 0.6694   | 0.849224 |
| MmugDNA.12904.1.S1_x_at | MmugDNA.12904.1 | 4.69  | 4.77  | 0.14 | 0.09 | -1.06 | 0.938796 | 0.831418 | 0.974191 | 0.903343 |
| MmugDNA.12908.1.S1_at   | MmugDNA.12908.1 | 6.84  | 7.21  | 0.41 | 0.21 | -1.29 | 0.515131 | 0.159092 | 0.745011 | 0.435217 |
| MmugDNA.12914.1.S1_at   | MmugDNA.12914.1 | 9.36  | 8.56  | 0.09 | 0.29 | 1.74  | 0.009203 | 0.339363 | 0.145865 | 0.586    |
| MmugDNA.12923.1.S1_at   | MmugDNA.12923.1 | 11.15 | 10.2  | 0.17 | 0.06 | 1.93  | 0.000678 | 0.000174 | 0.071248 | 0.030511 |
| MmugDNA.12924.1.S1_at   | MmugDNA.12924.1 | 6.71  | 6.71  | 0.11 | 0.12 | -1    | 0.497757 | 0.243098 | 0.73333  | 0.513356 |
| MmugDNA.1294.1.S1_s_at  | MmugDNA.1294.1  | 4.38  | 4.3   | 0.37 | 0.3  | 1.06  | 0.811205 | 0.779961 | 0.915452 | 0.872426 |
| MmugDNA.12943.1.S1_at   | MmugDNA.12943.1 | 8.87  | 8.82  | 0.03 | 0.07 | 1.03  | 0.255784 | 0.000136 | 0.550344 | 0.029179 |
| MmugDNA.12944.1.S1_at   | MmugDNA.12944.1 | 10.19 | 9.56  | 0.47 | 0.17 | 1.54  | 0.412877 | 0.826986 | 0.674373 | 0.900654 |
| MmugDNA.1295.1.S1_at    | MmugDNA.1295.1  | 11.06 | 11.08 | 0.2  | 0.2  | -1.02 | 0.301503 | 0.62853  | 0.589355 | 0.781248 |
| MmugDNA.12951.1.S1_at   | MmugDNA.12951.1 | 8.6   | 8.85  | 0.32 | 0.12 | -1.19 | 0.085244 | 0.227396 | 0.34932  | 0.499659 |
| MmugDNA.12952.1.S1_at   | MmugDNA.12952.1 | 6.35  | 6.14  | 0.25 | 0.17 | 1.16  | 0.660612 | 0.599481 | 0.836185 | 0.761468 |
| MmugDNA.12954.1.S1_at   | MmugDNA.12954.1 | 7.17  | 7.72  | 0.46 | 0.49 | -1.46 | 0.532243 | 0.096639 | 0.756311 | 0.354145 |
| MmugDNA.12958.1.S1_at   | MmugDNA.12958.1 | 8     | 8.05  | 0.22 | 0.03 | -1.03 | 0.749265 | 0.240848 | 0.883904 | 0.511547 |
| MmugDNA.1296.1.S1_at    | MmugDNA.1296.1  | 4.45  | 6.3   | 0.96 | 0.32 | -3.6  | 0.031829 | 0.141101 | 0.231961 | 0.414602 |
| MmugDNA.12968.1.S1_at   | MmugDNA.12968.1 | 12.16 | 12.09 | 0.17 | 0.17 | 1.05  | 0.814676 | 0.452689 | 0.917175 | 0.667253 |
| MmugDNA.12969.1.S1_at   | MmugDNA.12969.1 | 7.44  | 7.09  | 0.28 | 0.06 | 1.27  | 0.030856 | 0.033384 | 0.228673 | 0.226396 |
| MmugDNA.1297.1.S1_at    | MmugDNA.1297.1  | 9.4   | 9.2   | 0.12 | 0.08 | 1.15  | 0.072335 | 0.547244 | 0.326891 | 0.728342 |
| MmugDNA.12971.1.S1_at   | MmugDNA.12971.1 | 8.95  | 8.97  | 0.03 | 0.05 | -1.02 | 0.700627 | 0.958866 | 0.857793 | 0.976695 |
| MmugDNA.12973.1.S1_at   | MmugDNA.12973.1 | 5.69  | 5.71  | 0.72 | 0.12 | -1.01 | 0.95511  | 0.937628 | 0.981588 | 0.964687 |
| MmugDNA.12975.1.S1_at   | MmugDNA.12975.1 | 4.2   | 4.15  | 0.1  | 0.4  | 1.04  | 0.949216 | 0.921804 | 0.978837 | 0.955925 |
| MmugDNA.12977.1.S1_at   | MmugDNA.12977.1 | 4.58  | 4.71  | 0.43 | 0.17 | -1.1  | 0.902015 | 0.388605 | 0.958512 | 0.622917 |
| MmugDNA.12989.1.A1_at   | MmugDNA.12989.1 | 3.96  | 4.06  | 0.21 | 0.06 | -1.07 | 0.467405 | 0.378819 | 0.712919 | 0.615795 |
| MmugDNA.12989.1.S1_at   | MmugDNA.12989.1 | 4.35  | 4.73  | 0.22 | 0.04 | -1.3  | 0.101758 | 0.163199 | 0.373209 | 0.439324 |
| MmugDNA.12994.1.S1_at   | MmugDNA.12994.1 | 10.54 | 9.93  | 0.27 | 0.07 | 1.52  | 0.045691 | 0.226957 | 0.271188 | 0.499276 |
| MmugDNA.12996.1.S1_at   | MmugDNA.12996.1 | 7.95  | 8.14  | 0.2  | 0.12 | -1.14 | 0.777804 | 0.915869 | 0.898434 | 0.952836 |
| MmugDNA.12997.1.S1_at   | MmugDNA.12997.1 | 13.03 | 12.7  | 0.14 | 0.09 | 1.25  | 0.051087 | 0.538856 | 0.283595 | 0.723368 |
| MmugDNA.12999.1.S1_at   | MmugDNA.12999.1 | 6.97  | 7.05  | 0.09 | 0.16 | -1.06 | 0.271028 | 0.355397 | 0.562988 | 0.597738 |
| MmugDNA.13001.1.S1_at   | MmugDNA.13001.1 | 5.55  | 5.71  | 0.21 | 0.02 | -1.12 | 0.740397 | 0.928801 | 0.879595 | 0.959449 |
| MmugDNA.1301.1.S1_at    | MmugDNA.1301.1  | 6.79  | 6.48  | 0.18 | 0.04 | 1.24  | 0.020611 | 0.114065 | 0.197032 | 0.380421 |
| MmugDNA.13010.1.S1_at   | MmugDNA.13010.1 | 11.3  | 11.46 | 0.03 | 0.05 | -1.12 | 0.006191 | 0.565785 | 0.124922 | 0.740112 |
| MmugDNA.13011.1.S1_at   | MmugDNA.13011.1 | 7.45  | 6.95  | 0.33 | 0.14 | 1.41  | 0.163409 | 0.538356 | 0.455676 | 0.723074 |
| MmugDNA.13019.1.S1_at   | MmugDNA.13019.1 | 3.1   | 2.9   | 0.02 | 0.95 | 1.15  | 0.55904  | 0.61426  | 0.77314  | 0.77118  |

|                         |                 |       |       |      |      |       |          |          |          |          |
|-------------------------|-----------------|-------|-------|------|------|-------|----------|----------|----------|----------|
| MmugDNA.13023.1.S1_at   | MmugDNA.13023.1 | 4.59  | 4.51  | 0.18 | 0.05 | 1.06  | 0.125478 | 0.043237 | 0.405984 | 0.252677 |
| MmugDNA.13025.1.S1_at   | MmugDNA.13025.1 | 3.12  | 3.14  | 0.06 | 0.09 | -1.02 | 0.815983 | 0.866828 | 0.917896 | 0.924317 |
| MmugDNA.1303.1.S1_at    | MmugDNA.1303.1  | 3.61  | 3.54  | 0.13 | 0.05 | 1.05  | 0.725615 | 0.128351 | 0.871228 | 0.399618 |
| MmugDNA.1303.1.S1_s_at  | MmugDNA.1303.1  | 3.94  | 3.88  | 0.05 | 0.08 | 1.04  | 0.698959 | 0.053358 | 0.856942 | 0.27654  |
| MmugDNA.13030.1.S1_at   | MmugDNA.13030.1 | 5.07  | 5.03  | 0.14 | 0.06 | 1.03  | 0.445804 | 0.783611 | 0.698211 | 0.874696 |
| MmugDNA.13032.1.S1_at   | MmugDNA.13032.1 | 5.9   | 5.93  | 0.29 | 0.29 | -1.02 | 0.569639 | 0.593418 | 0.779023 | 0.758267 |
| MmugDNA.13034.1.S1_at   | MmugDNA.13034.1 | 13.78 | 13.86 | 0.07 | 0.06 | -1.06 | 0.611362 | 0.724357 | 0.806237 | 0.840457 |
| MmugDNA.13037.1.S1_at   | MmugDNA.13037.1 | 6.43  | 6.88  | 0.34 | 0.22 | -1.36 | 0.122006 | 0.155969 | 0.400661 | 0.431376 |
| MmugDNA.13039.1.S1_at   | MmugDNA.13039.1 | 12.81 | 12.75 | 0.09 | 0.06 | 1.05  | 0.798788 | 0.891806 | 0.909337 | 0.938309 |
| MmugDNA.13040.1.S1_at   | MmugDNA.13040.1 | 2.86  | 2.9   | 0.06 | 0.03 | -1.03 | 0.335457 | 0.587304 | 0.616404 | 0.754131 |
| MmugDNA.13044.1.S1_at   | MmugDNA.13044.1 | 8.62  | 8.1   | 0.12 | 0.12 | 1.43  | 0.013627 | 0.100577 | 0.16753  | 0.359845 |
| MmugDNA.13046.1.S1_at   | MmugDNA.13046.1 | 7.68  | 7.86  | 0.51 | 0.34 | -1.14 | 0.484694 | 0.216074 | 0.724437 | 0.489679 |
| MmugDNA.13052.1.S1_at   | MmugDNA.13052.1 | 11.94 | 11.59 | 0.19 | 0.1  | 1.27  | 0.042848 | 0.418462 | 0.264158 | 0.642876 |
| MmugDNA.13053.1.S1_at   | MmugDNA.13053.1 | 8.5   | 8.29  | 0.31 | 0.12 | 1.16  | 0.501199 | 0.041589 | 0.735287 | 0.248831 |
| MmugDNA.13057.1.S1_at   | MmugDNA.13057.1 | 6.99  | 6.96  | 0.05 | 0.02 | 1.02  | 0.717367 | 0.098623 | 0.866489 | 0.356743 |
| MmugDNA.13058.1.S1_at   | MmugDNA.13058.1 | 4.89  | 4.49  | 0.56 | 0.13 | 1.32  | 0.112076 | 0.123978 | 0.388221 | 0.394262 |
| MmugDNA.13061.1.S1_at   | MmugDNA.13061.1 | 6.99  | 7.06  | 0.1  | 0.05 | -1.05 | 0.16604  | 0.215616 | 0.459086 | 0.489397 |
| MmugDNA.13064.1.S1_at   | MmugDNA.13064.1 | 5.11  | 5.03  | 0.27 | 0.1  | 1.05  | 0.801907 | 0.745005 | 0.911061 | 0.852261 |
| MmugDNA.13074.1.S1_at   | MmugDNA.13074.1 | 11.16 | 10.8  | 0.62 | 0.05 | 1.29  | 0.440892 | 0.600552 | 0.694673 | 0.76217  |
| MmugDNA.13076.1.S1_at   | MmugDNA.13076.1 | 5.31  | 5.18  | 0.04 | 0.37 | 1.09  | 0.634371 | 0.901214 | 0.820718 | 0.943829 |
| MmugDNA.13077.1.S1_at   | MmugDNA.13077.1 | 5.39  | 5.28  | 0.3  | 0.11 | 1.08  | 0.800187 | 0.184121 | 0.909986 | 0.460323 |
| MmugDNA.13085.1.S1_at   | MmugDNA.13085.1 | 6.78  | 6.83  | 0.02 | 0.08 | -1.04 | 0.337602 | 0.281531 | 0.618005 | 0.54464  |
| MmugDNA.13096.1.S1_x_at | MmugDNA.13096.1 | 11.38 | 12.25 | 0.16 | 0.15 | -1.83 | 0.003124 | 0.143671 | 0.100879 | 0.417555 |
| MmugDNA.13097.1.S1_at   | MmugDNA.13097.1 | 10.17 | 9.71  | 0.1  | 0.04 | 1.37  | 0.001287 | 0.000131 | 0.078631 | 0.029087 |
| MmugDNA.13099.1.S1_at   | MmugDNA.13099.1 | 4.15  | 5.29  | 0.56 | 0.76 | -2.21 | 0.243837 | 0.613434 | 0.540592 | 0.770528 |
| MmugDNA.131.1.S1_at     | MmugDNA.131.1   | 9.27  | 9.5   | 0.27 | 0.09 | -1.18 | 0.223064 | 0.241893 | 0.52097  | 0.512489 |
| MmugDNA.1310.1.S1_at    | MmugDNA.1310.1  | 6.74  | 7.9   | 0.48 | 0.03 | -2.25 | 0.02374  | 0.122021 | 0.207099 | 0.391468 |
| MmugDNA.13102.1.S1_at   | MmugDNA.13102.1 | 11.61 | 11.56 | 0.09 | 0.1  | 1.03  | 0.110689 | 0.137923 | 0.386068 | 0.410892 |
| MmugDNA.13104.1.S1_at   | MmugDNA.13104.1 | 7.86  | 8.03  | 0.12 | 0.13 | -1.13 | 0.591158 | 0.857558 | 0.792302 | 0.918694 |
| MmugDNA.13120.1.S1_at   | MmugDNA.13120.1 | 9.93  | 9.74  | 0.08 | 0.11 | 1.15  | 0.037838 | 0.112717 | 0.250187 | 0.378336 |
| MmugDNA.13121.1.S1_at   | MmugDNA.13121.1 | 5     | 4.78  | 0.35 | 0.69 | 1.16  | 0.201842 | 0.268822 | 0.499297 | 0.534258 |
| MmugDNA.13127.1.S1_at   | MmugDNA.13127.1 | 9.43  | 9.16  | 0.36 | 0.04 | 1.2   | 0.846523 | 0.838074 | 0.933021 | 0.90755  |
| MmugDNA.13140.1.S1_at   | MmugDNA.13140.1 | 6.07  | 6.38  | 0.81 | 0.06 | -1.24 | 0.846449 | 0.854311 | 0.932991 | 0.917018 |
| MmugDNA.13151.1.S1_at   | MmugDNA.13151.1 | 6.7   | 7.35  | 0.37 | 0.38 | -1.57 | 0.102249 | 0.372308 | 0.374232 | 0.611225 |
| MmugDNA.13156.1.S1_at   | MmugDNA.13156.1 | 12.08 | 12.83 | 0.09 | 0.04 | -1.69 | 0.000191 | 0.001207 | 0.053494 | 0.054389 |
| MmugDNA.13162.1.S1_at   | MmugDNA.13162.1 | 6.78  | 6.71  | 0.2  | 0.33 | 1.05  | 0.870924 | 0.945066 | 0.944458 | 0.968834 |
| MmugDNA.13165.1.S1_at   | MmugDNA.13165.1 | 5.12  | 5.3   | 0.2  | 0.02 | -1.13 | 0.225694 | 0.020527 | 0.523419 | 0.179788 |
| MmugDNA.13172.1.S1_at   | MmugDNA.13172.1 | 10.65 | 10.79 | 0.07 | 0.01 | -1.1  | 0.089957 | 0.685808 | 0.356863 | 0.816612 |
| MmugDNA.13173.1.S1_at   | MmugDNA.13173.1 | 11.69 | 10.84 | 0.2  | 0.02 | 1.79  | 0.002019 | 0.033139 | 0.089873 | 0.225324 |
| MmugDNA.13177.1.S1_at   | MmugDNA.13177.1 | 11.58 | 11.53 | 0.12 | 0.13 | 1.03  | 0.782559 | 0.171205 | 0.900788 | 0.447792 |
| MmugDNA.13178.1.S1_at   | MmugDNA.13178.1 | 8.2   | 8.44  | 0.23 | 0.09 | -1.18 | 0.107351 | 0.165548 | 0.381931 | 0.441872 |
| MmugDNA.13179.1.S1_at   | MmugDNA.13179.1 | 3.79  | 5.66  | 0.48 | 0.41 | -3.66 | 0.010802 | 0.00801  | 0.153792 | 0.118982 |
| MmugDNA.13185.1.S1_at   | MmugDNA.13185.1 | 5.56  | 5.52  | 0.19 | 0.03 | 1.03  | 0.871334 | 0.983167 | 0.944612 | 0.990726 |

|                         |                 |       |       |      |      |       |          |          |          |          |
|-------------------------|-----------------|-------|-------|------|------|-------|----------|----------|----------|----------|
| MmugDNA.13186.1.S1_at   | MmugDNA.13186.1 | 3.06  | 3.01  | 0.03 | 0.03 | 1.04  | 0.0425   | 0.05728  | 0.263254 | 0.285187 |
| MmugDNA.13188.1.S1_at   | MmugDNA.13188.1 | 6.1   | 5.98  | 0.07 | 0.01 | 1.09  | 0.110604 | 0.37125  | 0.385979 | 0.610135 |
| MmugDNA.13189.1.S1_at   | MmugDNA.13189.1 | 10.11 | 9.73  | 0.16 | 0.1  | 1.31  | 0.060417 | 0.357685 | 0.302968 | 0.599297 |
| MmugDNA.13197.1.S1_at   | MmugDNA.13197.1 | 2.95  | 2.95  | 0.01 | 0.05 | -1    | 0.400617 | 0.372415 | 0.665527 | 0.611306 |
| MmugDNA.132.1.S1_at     | MmugDNA.132.1   | 3.38  | 3.66  | 0.19 | 0.56 | -1.22 | 0.134608 | 0.09788  | 0.418463 | 0.355678 |
| MmugDNA.13201.1.S1_at   | MmugDNA.13201.1 | 11.36 | 11.27 | 0.11 | 0.15 | 1.06  | 0.82648  | 0.715173 | 0.923035 | 0.834894 |
| MmugDNA.13218.1.S1_at   | MmugDNA.13218.1 | 5.89  | 5.79  | 0.48 | 0.46 | 1.07  | 0.876077 | 0.858093 | 0.946958 | 0.919063 |
| MmugDNA.13224.1.S1_at   | MmugDNA.13224.1 | 5.96  | 6.01  | 0.1  | 0.14 | -1.03 | 0.660402 | 0.962035 | 0.83613  | 0.978659 |
| MmugDNA.13227.1.S1_at   | MmugDNA.13227.1 | 11.53 | 10.88 | 0.23 | 0.09 | 1.57  | 0.013435 | 0.00868  | 0.166683 | 0.123557 |
| MmugDNA.13230.1.S1_at   | MmugDNA.13230.1 | 5.25  | 5.22  | 0.17 | 0.07 | 1.03  | 0.324029 | 0.440701 | 0.607761 | 0.659076 |
| MmugDNA.13231.1.S1_at   | MmugDNA.13231.1 | 4.68  | 4.73  | 0.12 | 0.1  | -1.03 | 0.790923 | 0.918081 | 0.90499  | 0.954068 |
| MmugDNA.13233.1.S1_at   | MmugDNA.13233.1 | 10.12 | 10.28 | 0.38 | 0.1  | -1.11 | 0.608043 | 0.835149 | 0.804208 | 0.905607 |
| MmugDNA.13242.1.S1_at   | MmugDNA.13242.1 | 9.83  | 9.69  | 0.11 | 0.09 | 1.1   | 0.240888 | 0.444596 | 0.538254 | 0.662072 |
| MmugDNA.13252.1.S1_at   | MmugDNA.13252.1 | 3.63  | 3.55  | 0.16 | 0.07 | 1.06  | 0.874988 | 0.51565  | 0.946361 | 0.708451 |
| MmugDNA.13266.1.S1_at   | MmugDNA.13266.1 | 5.83  | 6.06  | 0.14 | 0.04 | -1.17 | 0.042522 | 0.028517 | 0.263254 | 0.210725 |
| MmugDNA.13269.1.S1_at   | MmugDNA.13269.1 | 10.85 | 9.89  | 0.1  | 0.37 | 1.95  | 0.023044 | 0.024263 | 0.204777 | 0.194952 |
| MmugDNA.1327.1.S1_at    | MmugDNA.1327.1  | 6.28  | 6.34  | 0.19 | 0.08 | -1.04 | 0.723327 | 0.506054 | 0.869971 | 0.702351 |
| MmugDNA.13270.1.S1_at   | MmugDNA.13270.1 | 11.22 | 11.3  | 0.06 | 0.17 | -1.06 | 0.770826 | 0.041284 | 0.894871 | 0.247995 |
| MmugDNA.13273.1.S1_at   | MmugDNA.13273.1 | 5.99  | 6.19  | 0.05 | 0.21 | -1.15 | 0.194932 | 0.22493  | 0.491444 | 0.497696 |
| MmugDNA.13277.1.S1_at   | MmugDNA.13277.1 | 6.29  | 6.99  | 0.27 | 0.3  | -1.63 | 0.053218 | 0.104456 | 0.287986 | 0.365719 |
| MmugDNA.13284.1.S1_at   | MmugDNA.13284.1 | 8.56  | 8.75  | 0.2  | 0.04 | -1.14 | 0.172656 | 0.180583 | 0.46677  | 0.457191 |
| MmugDNA.13285.1.S1_at   | MmugDNA.13285.1 | 12.14 | 12.08 | 0.37 | 0.18 | 1.04  | 0.560259 | 0.031202 | 0.773742 | 0.218421 |
| MmugDNA.13290.1.S1_at   | MmugDNA.13290.1 | 8.61  | 8.69  | 0.15 | 0.04 | -1.05 | 0.132368 | 0.680878 | 0.415735 | 0.813622 |
| MmugDNA.13293.1.S1_at   | MmugDNA.13293.1 | 9.17  | 9.36  | 0.3  | 0.08 | -1.14 | 0.379736 | 0.616043 | 0.649486 | 0.772446 |
| MmugDNA.13299.1.S1_at   | MmugDNA.13299.1 | 4.66  | 4.59  | 0.23 | 0.12 | 1.05  | 0.82727  | 0.368806 | 0.923507 | 0.608313 |
| MmugDNA.133.1.S1_at     | MmugDNA.133.1   | 6.83  | 6.78  | 0.08 | 0.13 | 1.03  | 0.902189 | 0.039593 | 0.958582 | 0.244002 |
| MmugDNA.13300.1.S1_s_at | MmugDNA.13300.1 | 6.51  | 9.34  | 0.94 | 0.19 | -7.13 | 0.014367 | 0.173794 | 0.171567 | 0.450128 |
| MmugDNA.13302.1.S1_at   | MmugDNA.13302.1 | 5.14  | 4.66  | 0.72 | 0.23 | 1.4   | 0.449145 | 0.157076 | 0.700477 | 0.432547 |
| MmugDNA.13303.1.S1_s_at | MmugDNA.13303.1 | 12.11 | 11.93 | 0.06 | 0.13 | 1.13  | 0.13497  | 0.014175 | 0.418904 | 0.152173 |
| MmugDNA.13304.1.S1_at   | MmugDNA.13304.1 | 7.77  | 7.77  | 0.25 | 0.23 | 1     | 0.228001 | 0.76656  | 0.526114 | 0.864391 |
| MmugDNA.13306.1.S1_at   | MmugDNA.13306.1 | 11.16 | 9.25  | 1.35 | 0.29 | 3.77  | 0.077687 | 0.15418  | 0.336576 | 0.428941 |
| MmugDNA.13308.1.S1_at   | MmugDNA.13308.1 | 6.71  | 5.64  | 0.1  | 0.18 | 2.09  | 0.000877 | 0.001111 | 0.074796 | 0.052745 |
| MmugDNA.13312.1.S1_at   | MmugDNA.13312.1 | 10.85 | 10.88 | 0.07 | 0.07 | -1.02 | 0.812343 | 0.386261 | 0.916052 | 0.621469 |
| MmugDNA.13320.1.S1_at   | MmugDNA.13320.1 | 10.74 | 10.91 | 0.25 | 0.01 | -1.12 | 0.871132 | 0.724734 | 0.944548 | 0.840659 |
| MmugDNA.13325.1.S1_at   | MmugDNA.13325.1 | 9.29  | 9.43  | 0.08 | 0.28 | -1.1  | 0.869236 | 0.008363 | 0.943687 | 0.121327 |
| MmugDNA.13327.1.S1_at   | MmugDNA.13327.1 | 5.37  | 5.23  | 0.1  | 0.07 | 1.1   | 0.312098 | 0.162918 | 0.598203 | 0.439062 |
| MmugDNA.13329.1.S1_at   | MmugDNA.13329.1 | 10.19 | 10.41 | 0.18 | 0.01 | -1.17 | 0.037461 | 0.047745 | 0.249007 | 0.263394 |
| MmugDNA.13332.1.S1_at   | MmugDNA.13332.1 | 3.75  | 3.74  | 0.1  | 0.04 | 1.01  | 0.328189 | 0.430696 | 0.61059  | 0.651691 |
| MmugDNA.13338.1.S1_at   | MmugDNA.13338.1 | 9.21  | 8.54  | 0.13 | 0.08 | 1.58  | 0.000826 | 0.002075 | 0.07338  | 0.067389 |
| MmugDNA.13339.1.S1_at   | MmugDNA.13339.1 | 10.96 | 10.93 | 0.07 | 0.16 | 1.02  | 0.80884  | 0.865128 | 0.914357 | 0.923484 |
| MmugDNA.13346.1.S1_at   | MmugDNA.13346.1 | 11.37 | 10.98 | 0.09 | 0.02 | 1.31  | 0.00177  | 0.035198 | 0.085481 | 0.231787 |
| MmugDNA.13349.1.S1_at   | MmugDNA.13349.1 | 5.31  | 5.18  | 0.24 | 0.13 | 1.1   | 0.74701  | 0.868266 | 0.882818 | 0.925234 |
| MmugDNA.1335.1.S1_at    | MmugDNA.1335.1  | 4.61  | 5     | 0.11 | 0.19 | -1.3  | 0.160298 | 0.110139 | 0.451651 | 0.374244 |

|                         |                 |       |       |      |      |        |          |          |          |          |
|-------------------------|-----------------|-------|-------|------|------|--------|----------|----------|----------|----------|
| MmugDNA.13352.1.S1_at   | MmugDNA.13352.1 | 10.39 | 10.38 | 0.2  | 0.11 | 1.01   | 0.689084 | 0.150108 | 0.85151  | 0.42471  |
| MmugDNA.13352.1.S1_s_at | MmugDNA.13352.1 | 10.14 | 10.17 | 0.2  | 0.19 | -1.02  | 0.592505 | 0.348425 | 0.793487 | 0.592591 |
| MmugDNA.13355.1.S1_at   | MmugDNA.13355.1 | 4.5   | 4.44  | 0.08 | 0.1  | 1.04   | 0.477778 | 0.635421 | 0.719594 | 0.785405 |
| MmugDNA.13356.1.S1_at   | MmugDNA.13356.1 | 12.12 | 12.08 | 0.16 | 0.04 | 1.03   | 0.618296 | 0.378267 | 0.81065  | 0.615438 |
| MmugDNA.13366.1.S1_at   | MmugDNA.13366.1 | 7.82  | 11.17 | 1.76 | 0.18 | -10.25 | 0.032546 | 0.196216 | 0.234816 | 0.471236 |
| MmugDNA.13380.1.S1_at   | MmugDNA.13380.1 | 7.64  | 7.68  | 0.44 | 0.18 | -1.02  | 0.807664 | 0.814992 | 0.913902 | 0.893221 |
| MmugDNA.13381.1.S1_at   | MmugDNA.13381.1 | 8.6   | 7.88  | 0.37 | 0.11 | 1.65   | 0.029378 | 0.015219 | 0.224381 | 0.156741 |
| MmugDNA.13382.1.S1_at   | MmugDNA.13382.1 | 9.94  | 10.28 | 0.34 | 0.19 | -1.27  | 0.07562  | 0.048923 | 0.333234 | 0.26597  |
| MmugDNA.13386.1.S1_at   | MmugDNA.13386.1 | 10.09 | 9.53  | 0.24 | 0.06 | 1.47   | 0.016124 | 0.006429 | 0.17953  | 0.108902 |
| MmugDNA.13391.1.S1_at   | MmugDNA.13391.1 | 7.16  | 7.68  | 0.14 | 0.16 | -1.44  | 0.005898 | 0.036086 | 0.123151 | 0.234414 |
| MmugDNA.13394.1.S1_at   | MmugDNA.13394.1 | 4.72  | 5.47  | 0.54 | 0.19 | -1.69  | 0.16893  | 0.172107 | 0.46212  | 0.448529 |
| MmugDNA.13397.1.S1_x_at | MmugDNA.13397.1 | 7.34  | 9.64  | 0.83 | 0.08 | -4.91  | 0.016487 | 0.209447 | 0.181374 | 0.483069 |
| MmugDNA.13398.1.S1_at   | MmugDNA.13398.1 | 5.22  | 4.99  | 0.19 | 0.13 | 1.17   | 0.218929 | 0.090535 | 0.516629 | 0.345015 |
| MmugDNA.134.1.S1_at     | MmugDNA.134.1   | 11.71 | 11.91 | 0.19 | 0.05 | -1.15  | 0.473858 | 0.789066 | 0.717121 | 0.878078 |
| MmugDNA.13400.1.S1_at   | MmugDNA.13400.1 | 12.01 | 12.03 | 0.21 | 0.24 | -1.02  | 0.698402 | 0.054084 | 0.856557 | 0.277914 |
| MmugDNA.13400.1.S1_s_at | MmugDNA.13400.1 | 11.16 | 11.15 | 0.37 | 0.01 | 1      | 0.430209 | 0.183707 | 0.68654  | 0.459766 |
| MmugDNA.13402.1.S1_at   | MmugDNA.13402.1 | 8.5   | 8.65  | 0.66 | 0.1  | -1.11  | 0.689757 | 0.242403 | 0.851884 | 0.51282  |
| MmugDNA.13403.1.S1_at   | MmugDNA.13403.1 | 9.15  | 12.49 | 1.63 | 0.12 | -10.14 | 0.069035 | 0.351942 | 0.320837 | 0.595335 |
| MmugDNA.13406.1.S1_at   | MmugDNA.13406.1 | 6.38  | 6.15  | 0.38 | 0.12 | 1.17   | 0.53279  | 0.245789 | 0.756693 | 0.515519 |
| MmugDNA.13407.1.S1_at   | MmugDNA.13407.1 | 6.35  | 5.82  | 0.09 | 0.08 | 1.45   | 0.002886 | 0.010873 | 0.098683 | 0.135892 |
| MmugDNA.13408.1.S1_at   | MmugDNA.13408.1 | 10.13 | 9.85  | 0.08 | 0.12 | 1.21   | 0.021663 | 0.70305  | 0.20067  | 0.827866 |
| MmugDNA.1341.1.S1_at    | MmugDNA.1341.1  | 8.94  | 8.8   | 0.25 | 0.13 | 1.11   | 0.207359 | 0.42847  | 0.505092 | 0.650015 |
| MmugDNA.13417.1.S1_at   | MmugDNA.13417.1 | 6.58  | 6.57  | 0.17 | 0.19 | 1.01   | 0.685911 | 0.293103 | 0.850412 | 0.553014 |
| MmugDNA.13418.1.S1_at   | MmugDNA.13418.1 | 9.54  | 9.59  | 0.17 | 0.09 | -1.03  | 0.267669 | 0.161688 | 0.56043  | 0.437771 |
| MmugDNA.13422.1.S1_at   | MmugDNA.13422.1 | 6.39  | 8.91  | 1.23 | 0.23 | -5.73  | 0.055833 | 0.255034 | 0.293385 | 0.52317  |
| MmugDNA.13424.1.S1_a_at | MmugDNA.13424.1 | 12.65 | 11.01 | 0.24 | 0.13 | 3.13   | 0.000547 | 0.077461 | 0.070087 | 0.323279 |
| MmugDNA.13424.1.S1_at   | MmugDNA.13424.1 | 11.82 | 9.54  | 0.32 | 0.12 | 4.86   | 0.000353 | 0.039126 | 0.062105 | 0.243056 |
| MmugDNA.13426.1.S1_at   | MmugDNA.13426.1 | 7.9   | 8.63  | 0.5  | 0.25 | -1.66  | 0.076688 | 0.186568 | 0.335022 | 0.462364 |
| MmugDNA.13428.1.S1_at   | MmugDNA.13428.1 | 7.68  | 4.37  | 0.02 | 0.21 | 9.9    | 0.000012 | 1.98E-07 | 0.045594 | 0.005999 |
| MmugDNA.13432.1.S1_at   | MmugDNA.13432.1 | 5.42  | 5.83  | 0.23 | 0.15 | -1.33  | 0.063839 | 0.413741 | 0.309192 | 0.639751 |
| MmugDNA.13436.1.S1_s_at | MmugDNA.13436.1 | 8.2   | 8.46  | 0.2  | 0.03 | -1.2   | 0.11151  | 0.122964 | 0.387496 | 0.392923 |
| MmugDNA.13439.1.S1_at   | MmugDNA.13439.1 | 5.65  | 5.77  | 0.23 | 0.09 | -1.09  | 0.693601 | 0.305975 | 0.853579 | 0.562732 |
| MmugDNA.1344.1.S1_at    | MmugDNA.1344.1  | 4.38  | 4.34  | 0.26 | 0.04 | 1.03   | 0.85753  | 0.980877 | 0.938079 | 0.989478 |
| MmugDNA.13444.1.S1_at   | MmugDNA.13444.1 | 6.38  | 6.59  | 0.05 | 0.1  | -1.16  | 0.02596  | 0.296024 | 0.214003 | 0.555295 |
| MmugDNA.13445.1.S1_at   | MmugDNA.13445.1 | 5.5   | 5.05  | 0.65 | 0.13 | 1.36   | 0.299643 | 0.303975 | 0.587953 | 0.561344 |
| MmugDNA.13455.1.S1_at   | MmugDNA.13455.1 | 10.96 | 11    | 0.26 | 0.05 | -1.03  | 0.681235 | 0.266746 | 0.847983 | 0.53241  |
| MmugDNA.13467.1.S1_at   | MmugDNA.13467.1 | 11.56 | 11.48 | 0.11 | 0.11 | 1.06   | 0.455075 | 0.024491 | 0.704942 | 0.19587  |
| MmugDNA.13472.1.S1_at   | MmugDNA.13472.1 | 6.18  | 6.05  | 0.21 | 0.03 | 1.09   | 0.440827 | 0.72208  | 0.694673 | 0.838998 |
| MmugDNA.13481.1.S1_at   | MmugDNA.13481.1 | 12.47 | 12.51 | 0.07 | 0.03 | -1.02  | 0.483798 | 0.005927 | 0.723753 | 0.105331 |
| MmugDNA.13482.1.S1_at   | MmugDNA.13482.1 | 9.67  | 9.67  | 0.07 | 0.06 | 1.01   | 0.652804 | 0.923927 | 0.831632 | 0.957162 |
| MmugDNA.13486.1.S1_at   | MmugDNA.13486.1 | 8.18  | 8.3   | 1.21 | 0.03 | -1.09  | 0.317001 | 0.552412 | 0.601691 | 0.731728 |
| MmugDNA.13488.1.S1_at   | MmugDNA.13488.1 | 11.11 | 10.21 | 0.27 | 0.14 | 1.87   | 0.004861 | 0.008915 | 0.115123 | 0.12491  |
| MmugDNA.13490.1.S1_at   | MmugDNA.13490.1 | 2.96  | 2.93  | 0.09 | 0.1  | 1.02   | 0.562483 | 0.751836 | 0.774894 | 0.855698 |



|                         |                 |       |       |      |      |       |          |          |          |          |
|-------------------------|-----------------|-------|-------|------|------|-------|----------|----------|----------|----------|
| MmugDNA.13493.1.S1_at   | MmugDNA.13493.1 | 5.18  | 5.28  | 0.5  | 0.09 | -1.07 | 0.563994 | 0.701332 | 0.77578  | 0.826814 |
| MmugDNA.13498.1.S1_at   | MmugDNA.13498.1 | 12.61 | 12.81 | 0.13 | 0.03 | -1.15 | 0.073001 | 0.249864 | 0.327873 | 0.518876 |
| MmugDNA.13510.1.S1_at   | MmugDNA.13510.1 | 11.88 | 11.82 | 0.13 | 0.03 | 1.04  | 0.703688 | 0.891623 | 0.859331 | 0.938242 |
| MmugDNA.13513.1.S1_at   | MmugDNA.13513.1 | 11.1  | 11.2  | 0.21 | 0.08 | -1.07 | 0.927983 | 0.183447 | 0.969567 | 0.459574 |
| MmugDNA.1352.1.S1_at    | MmugDNA.1352.1  | 11.21 | 11.04 | 0.22 | 0.05 | 1.12  | 0.222487 | 0.001173 | 0.52041  | 0.053791 |
| MmugDNA.13520.1.S1_at   | MmugDNA.13520.1 | 5.57  | 6.46  | 0.6  | 0.16 | -1.85 | 0.076187 | 0.016372 | 0.334238 | 0.16199  |
| MmugDNA.13524.1.S1_at   | MmugDNA.13524.1 | 7.55  | 7.58  | 0.24 | 0.11 | -1.02 | 0.841488 | 0.800121 | 0.930364 | 0.885076 |
| MmugDNA.13528.1.S1_at   | MmugDNA.13528.1 | 5.4   | 5.41  | 0.07 | 0.03 | -1    | 0.492681 | 0.11564  | 0.729895 | 0.382714 |
| MmugDNA.1353.1.S1_at    | MmugDNA.1353.1  | 5.76  | 6.55  | 0.55 | 0.21 | -1.73 | 0.043715 | 0.268886 | 0.266107 | 0.534345 |
| MmugDNA.13531.1.S1_at   | MmugDNA.13531.1 | 10.59 | 12.55 | 0.85 | 0.16 | -3.88 | 0.032911 | 0.22841  | 0.235677 | 0.500587 |
| MmugDNA.13532.1.S1_at   | MmugDNA.13532.1 | 8.24  | 7.69  | 0.28 | 0.05 | 1.46  | 0.062691 | 0.079184 | 0.307025 | 0.32639  |
| MmugDNA.13536.1.S1_at   | MmugDNA.13536.1 | 12.89 | 12.96 | 0.11 | 0.05 | -1.05 | 0.240411 | 0.693531 | 0.53796  | 0.82172  |
| MmugDNA.13538.1.S1_at   | MmugDNA.13538.1 | 6.78  | 6.82  | 0.06 | 0    | -1.03 | 0.256892 | 0.130076 | 0.55141  | 0.401724 |
| MmugDNA.13544.1.S1_at   | MmugDNA.13544.1 | 11.27 | 11.1  | 0.21 | 0.04 | 1.12  | 0.204296 | 0.737814 | 0.502003 | 0.848096 |
| MmugDNA.13559.1.S1_at   | MmugDNA.13559.1 | 12.88 | 13.05 | 0.2  | 0.11 | -1.12 | 0.391236 | 0.331848 | 0.658623 | 0.580411 |
| MmugDNA.13561.1.S1_at   | MmugDNA.13561.1 | 11.29 | 11.25 | 0.28 | 0.12 | 1.03  | 0.573066 | 0.392177 | 0.781064 | 0.625652 |
| MmugDNA.13565.1.S1_at   | MmugDNA.13565.1 | 11.86 | 10.33 | 0.24 | 0.26 | 2.89  | 0.002341 | 0.000422 | 0.092897 | 0.038266 |
| MmugDNA.13568.1.S1_at   | MmugDNA.13568.1 | 7.28  | 7.08  | 0.19 | 0.06 | 1.15  | 0.141972 | 0.079868 | 0.427943 | 0.327203 |
| MmugDNA.13568.1.S1_s_at | MmugDNA.13568.1 | 5.82  | 6     | 0.12 | 0.07 | -1.14 | 0.126554 | 0.271101 | 0.407968 | 0.536259 |
| MmugDNA.13569.1.S1_at   | MmugDNA.13569.1 | 12.57 | 12.48 | 0.07 | 0.07 | 1.06  | 0.084697 | 0.011084 | 0.348607 | 0.137039 |
| MmugDNA.13571.1.S1_at   | MmugDNA.13571.1 | 6.54  | 6.56  | 0.21 | 0.11 | -1.02 | 0.92868  | 0.814055 | 0.96981  | 0.892736 |
| MmugDNA.13584.1.S1_at   | MmugDNA.13584.1 | 10.87 | 9.57  | 0.34 | 0.19 | 2.48  | 0.005473 | 0.001593 | 0.119519 | 0.06044  |
| MmugDNA.13590.1.S1_at   | MmugDNA.13590.1 | 5.75  | 8.03  | 0.84 | 0.24 | -4.84 | 0.030789 | 0.277396 | 0.22835  | 0.541326 |
| MmugDNA.13593.1.S1_at   | MmugDNA.13593.1 | 7.89  | 8.09  | 0.1  | 0.05 | -1.14 | 0.087046 | 0.224594 | 0.352594 | 0.497613 |
| MmugDNA.13596.1.S1_at   | MmugDNA.13596.1 | 10.57 | 10.44 | 0.27 | 0.06 | 1.1   | 0.115286 | 0.090464 | 0.392357 | 0.344952 |
| MmugDNA.13605.1.S1_at   | MmugDNA.13605.1 | 5.24  | 5.31  | 0.06 | 0.15 | -1.05 | 0.620308 | 0.242239 | 0.811798 | 0.51267  |
| MmugDNA.13612.1.S1_at   | MmugDNA.13612.1 | 7.27  | 7.23  | 0.01 | 0.08 | 1.03  | 0.51618  | 0.299255 | 0.745613 | 0.557769 |
| MmugDNA.13613.1.S1_at   | MmugDNA.13613.1 | 5.07  | 5.1   | 0.15 | 0.06 | -1.02 | 0.688616 | 0.828707 | 0.851289 | 0.901558 |
| MmugDNA.13617.1.S1_at   | MmugDNA.13617.1 | 7.79  | 7.81  | 0.14 | 0.17 | -1.02 | 0.999026 | 0.985584 | 0.999637 | 0.991812 |
| MmugDNA.13619.1.S1_at   | MmugDNA.13619.1 | 4.4   | 4.33  | 0.05 | 0.01 | 1.05  | 0.1116   | 0.038063 | 0.387683 | 0.239717 |
| MmugDNA.13620.1.S1_at   | MmugDNA.13620.1 | 5.82  | 5.98  | 0.12 | 0.21 | -1.11 | 0.329002 | 0.747725 | 0.611301 | 0.853252 |
| MmugDNA.13622.1.S1_at   | MmugDNA.13622.1 | 4.59  | 4.54  | 0.19 | 0.1  | 1.04  | 0.712492 | 0.601956 | 0.864309 | 0.763127 |
| MmugDNA.13625.1.S1_at   | MmugDNA.13625.1 | 12.16 | 12.08 | 0.08 | 0.02 | 1.06  | 0.205053 | 0.035466 | 0.50286  | 0.232564 |
| MmugDNA.13625.1.S1_s_at | MmugDNA.13625.1 | 11.44 | 11.36 | 0.06 | 0.02 | 1.06  | 0.032217 | 0.019836 | 0.233436 | 0.177162 |
| MmugDNA.13626.1.S1_at   | MmugDNA.13626.1 | 9.65  | 9.95  | 0.56 | 0.26 | -1.24 | 0.205022 | 0.345976 | 0.502852 | 0.59115  |
| MmugDNA.13627.1.S1_at   | MmugDNA.13627.1 | 4.19  | 4.09  | 0.31 | 0.08 | 1.07  | 0.708157 | 0.889122 | 0.861763 | 0.936796 |
| MmugDNA.13628.1.S1_at   | MmugDNA.13628.1 | 6.79  | 7.89  | 0.4  | 0.55 | -2.15 | 0.066417 | 0.032604 | 0.31527  | 0.223643 |
| MmugDNA.13630.1.S1_at   | MmugDNA.13630.1 | 3.64  | 3.66  | 0.17 | 0.16 | -1.01 | 0.874694 | 0.623076 | 0.946237 | 0.777502 |
| MmugDNA.13631.1.S1_at   | MmugDNA.13631.1 | 8.68  | 8.96  | 0.47 | 0.13 | -1.21 | 0.273835 | 0.318441 | 0.565917 | 0.571239 |
| MmugDNA.13631.1.S1_s_at | MmugDNA.13631.1 | 10.39 | 10.27 | 0.36 | 0.13 | 1.08  | 0.961453 | 0.182468 | 0.98428  | 0.459057 |
| MmugDNA.13634.1.S1_at   | MmugDNA.13634.1 | 10.19 | 10.06 | 0.36 | 0.18 | 1.09  | 0.371508 | 0.518023 | 0.64419  | 0.710089 |
| MmugDNA.13638.1.S1_at   | MmugDNA.13638.1 | 9.37  | 10.86 | 0.58 | 0.18 | -2.82 | 0.01691  | 0.099217 | 0.183348 | 0.357394 |
| MmugDNA.13640.1.S1_at   | MmugDNA.13640.1 | 5.92  | 5.91  | 0.16 | 0.03 | 1.01  | 0.961896 | 0.664568 | 0.984466 | 0.803448 |

|                         |                 |       |       |      |      |       |          |          |          |          |
|-------------------------|-----------------|-------|-------|------|------|-------|----------|----------|----------|----------|
| MmugDNA.13644.1.S1_at   | MmugDNA.13644.1 | 5.06  | 5.03  | 0.21 | 0.1  | 1.02  | 0.922235 | 0.651948 | 0.966724 | 0.796529 |
| MmugDNA.13648.1.S1_at   | MmugDNA.13648.1 | 6     | 6.42  | 0.17 | 0.14 | -1.33 | 0.04824  | 0.064691 | 0.276957 | 0.300314 |
| MmugDNA.13654.1.S1_at   | MmugDNA.13654.1 | 11.87 | 11.39 | 0.15 | 0.1  | 1.4   | 0.007478 | 0.005648 | 0.134856 | 0.103804 |
| MmugDNA.13655.1.S1_s_at | MmugDNA.13655.1 | 8.21  | 8.21  | 0.15 | 0.03 | 1     | 0.725164 | 0.950146 | 0.871012 | 0.971594 |
| MmugDNA.13662.1.S1_at   | MmugDNA.13662.1 | 4.67  | 4.89  | 0.21 | 0.1  | -1.16 | 0.130533 | 0.115775 | 0.41294  | 0.382814 |
| MmugDNA.13663.1.S1_at   | MmugDNA.13663.1 | 11.63 | 11.69 | 0.07 | 0.03 | -1.04 | 0.266114 | 0.813168 | 0.558636 | 0.891963 |
| MmugDNA.13664.1.S1_at   | MmugDNA.13664.1 | 10.31 | 10.55 | 0.33 | 0.04 | -1.18 | 0.334132 | 0.441721 | 0.615231 | 0.659854 |
| MmugDNA.13666.1.S1_at   | MmugDNA.13666.1 | 3.59  | 3.55  | 0.1  | 0.05 | 1.03  | 0.549011 | 0.444585 | 0.766905 | 0.662072 |
| MmugDNA.13667.1.S1_at   | MmugDNA.13667.1 | 7.9   | 8.14  | 0.13 | 0.37 | -1.18 | 0.850816 | 0.125847 | 0.935218 | 0.396315 |
| MmugDNA.13667.1.S1_x_at | MmugDNA.13667.1 | 7.9   | 8.05  | 0.21 | 0.28 | -1.1  | 0.83518  | 0.053602 | 0.9275   | 0.277182 |
| MmugDNA.13670.1.S1_at   | MmugDNA.13670.1 | 10.39 | 10.38 | 0.29 | 0.05 | 1.01  | 0.76525  | 0.60688  | 0.892336 | 0.766118 |
| MmugDNA.13674.1.S1_at   | MmugDNA.13674.1 | 5.47  | 5.87  | 0.2  | 0.24 | -1.32 | 0.096357 | 0.208646 | 0.36602  | 0.482544 |
| MmugDNA.13679.1.S1_at   | MmugDNA.13679.1 | 6.41  | 6.45  | 0.19 | 0.04 | -1.03 | 0.744986 | 0.580383 | 0.881771 | 0.749646 |
| MmugDNA.13690.1.S1_at   | MmugDNA.13690.1 | 10.84 | 11.1  | 0.3  | 0.13 | -1.2  | 0.385647 | 0.633996 | 0.65438  | 0.784594 |
| MmugDNA.13693.1.S1_at   | MmugDNA.13693.1 | 9.73  | 9.66  | 0.36 | 0.03 | 1.05  | 0.56219  | 0.008358 | 0.774838 | 0.121281 |
| MmugDNA.13694.1.S1_at   | MmugDNA.13694.1 | 11.49 | 11.34 | 0.15 | 0.03 | 1.11  | 0.460911 | 0.848651 | 0.708501 | 0.914061 |
| MmugDNA.13696.1.S1_at   | MmugDNA.13696.1 | 11.04 | 11.1  | 0.15 | 0.16 | -1.04 | 0.132794 | 0.112187 | 0.416223 | 0.377537 |
| MmugDNA.13699.1.S1_at   | MmugDNA.13699.1 | 12.48 | 12.69 | 0.04 | 0.02 | -1.16 | 0.00102  | 0.134581 | 0.076321 | 0.406629 |
| MmugDNA.13699.1.S1_s_at | MmugDNA.13699.1 | 11.79 | 12.01 | 0.07 | 0.03 | -1.16 | 0.009668 | 0.074555 | 0.14832  | 0.318185 |
| MmugDNA.137.1.S1_at     | MmugDNA.137.1   | 7.91  | 8.05  | 0.27 | 0.05 | -1.1  | 0.332429 | 0.748536 | 0.614085 | 0.853696 |
| MmugDNA.13701.1.S1_at   | MmugDNA.13701.1 | 5.05  | 5.09  | 0.1  | 0.1  | -1.03 | 0.437162 | 0.557345 | 0.691996 | 0.735031 |
| MmugDNA.13702.1.S1_at   | MmugDNA.13702.1 | 12.47 | 12.67 | 0.05 | 0.06 | -1.15 | 0.017685 | 0.144157 | 0.186535 | 0.418037 |
| MmugDNA.13708.1.S1_at   | MmugDNA.13708.1 | 10.01 | 9.78  | 0.23 | 0.08 | 1.18  | 0.189249 | 0.019541 | 0.485811 | 0.175536 |
| MmugDNA.1371.1.S1_at    | MmugDNA.1371.1  | 6.61  | 7.04  | 0.07 | 0.11 | -1.35 | 0.007642 | 0.001232 | 0.135934 | 0.05478  |
| MmugDNA.13713.1.S1_at   | MmugDNA.13713.1 | 7.51  | 7.19  | 0.14 | 0.04 | 1.25  | 0.008764 | 0.055839 | 0.143352 | 0.282161 |
| MmugDNA.13716.1.S1_s_at | MmugDNA.13716.1 | 10.98 | 11.45 | 0.23 | 0.09 | -1.38 | 0.040142 | 0.023833 | 0.256842 | 0.193372 |
| MmugDNA.13718.1.S1_at   | MmugDNA.13718.1 | 7.03  | 7.04  | 0.18 | 0.02 | -1.01 | 0.903754 | 0.761049 | 0.959241 | 0.861185 |
| MmugDNA.13719.1.S1_at   | MmugDNA.13719.1 | 11.97 | 11.73 | 0.15 | 0.07 | 1.18  | 0.186808 | 0.506266 | 0.482938 | 0.702368 |
| MmugDNA.13723.1.S1_at   | MmugDNA.13723.1 | 11.48 | 11.74 | 0.18 | 0.12 | -1.2  | 0.277761 | 0.324434 | 0.569272 | 0.575042 |
| MmugDNA.13723.1.S1_s_at | MmugDNA.13723.1 | 12.08 | 12.19 | 0.09 | 0.12 | -1.08 | 0.150701 | 0.224241 | 0.439791 | 0.497164 |
| MmugDNA.13727.1.S1_at   | MmugDNA.13727.1 | 10.63 | 10.89 | 0.03 | 0.21 | -1.2  | 0.280757 | 0.544882 | 0.571782 | 0.727183 |
| MmugDNA.13729.1.S1_at   | MmugDNA.13729.1 | 6.4   | 6.49  | 0.05 | 0.05 | -1.07 | 0.161877 | 0.082141 | 0.453672 | 0.330937 |
| MmugDNA.13734.1.S1_at   | MmugDNA.13734.1 | 8.46  | 8.44  | 0.18 | 0.03 | 1.02  | 0.694387 | 0.958425 | 0.85409  | 0.976452 |
| MmugDNA.13739.1.S1_at   | MmugDNA.13739.1 | 11.24 | 11.29 | 0.2  | 0.12 | -1.03 | 0.559334 | 0.817532 | 0.773275 | 0.894746 |
| MmugDNA.13740.1.S1_at   | MmugDNA.13740.1 | 3.07  | 3.06  | 0.03 | 0.08 | 1.01  | 0.562609 | 0.825555 | 0.775024 | 0.899762 |
| MmugDNA.13742.1.S1_at   | MmugDNA.13742.1 | 10.79 | 10.96 | 0.19 | 0.11 | -1.13 | 0.159198 | 0.134872 | 0.450505 | 0.406878 |
| MmugDNA.13742.1.S1_s_at | MmugDNA.13742.1 | 10.98 | 11.15 | 0.28 | 0.12 | -1.13 | 0.175503 | 0.185919 | 0.46998  | 0.461772 |
| MmugDNA.13744.1.S1_at   | MmugDNA.13744.1 | 3.1   | 3.15  | 0.14 | 0.16 | -1.04 | 0.383641 | 0.228748 | 0.652919 | 0.501005 |
| MmugDNA.13750.1.S1_at   | MmugDNA.13750.1 | 10.37 | 10.32 | 0.04 | 0.18 | 1.04  | 0.628511 | 0.119813 | 0.81747  | 0.388577 |
| MmugDNA.13752.1.S1_at   | MmugDNA.13752.1 | 10.12 | 9.68  | 0.12 | 0.22 | 1.35  | 0.094448 | 0.005048 | 0.363371 | 0.099019 |
| MmugDNA.13753.1.S1_at   | MmugDNA.13753.1 | 4.15  | 4.08  | 0.06 | 0.14 | 1.05  | 0.68847  | 0.234878 | 0.851235 | 0.506125 |
| MmugDNA.13754.1.S1_at   | MmugDNA.13754.1 | 5.7   | 5.65  | 0.08 | 0.09 | 1.03  | 0.335126 | 0.085818 | 0.616117 | 0.337901 |
| MmugDNA.13757.1.S1_at   | MmugDNA.13757.1 | 7.29  | 11.73 | 1.74 | 0.24 | -21.8 | 0.01881  | 0.193752 | 0.190647 | 0.468828 |

|                         |                 |       |       |      |      |       |          |          |          |          |
|-------------------------|-----------------|-------|-------|------|------|-------|----------|----------|----------|----------|
| MmugDNA.13758.1.S1_at   | MmugDNA.13758.1 | 11.46 | 11.63 | 0.18 | 0.01 | -1.13 | 0.183286 | 0.048866 | 0.479247 | 0.265858 |
| MmugDNA.13760.1.S1_at   | MmugDNA.13760.1 | 11.92 | 12.19 | 0.16 | 0.1  | -1.2  | 0.205001 | 0.004046 | 0.502847 | 0.090281 |
| MmugDNA.13767.1.S1_at   | MmugDNA.13767.1 | 5.16  | 6.57  | 0.27 | 1.07 | -2.66 | 0.227522 | 0.002626 | 0.525651 | 0.075772 |
| MmugDNA.13774.1.S1_at   | MmugDNA.13774.1 | 12.46 | 12.61 | 0.27 | 0.2  | -1.11 | 0.512376 | 0.241607 | 0.742962 | 0.512212 |
| MmugDNA.13776.1.S1_s_at | MmugDNA.13776.1 | 12.45 | 12.16 | 0.11 | 0.14 | 1.23  | 0.144206 | 0.289251 | 0.430972 | 0.550293 |
| MmugDNA.13777.1.S1_at   | MmugDNA.13777.1 | 7.59  | 8.14  | 0.26 | 0.12 | -1.46 | 0.030239 | 0.467427 | 0.226977 | 0.677085 |
| MmugDNA.1378.1.S1_at    | MmugDNA.1378.1  | 4.42  | 4.55  | 0.05 | 0.17 | -1.09 | 0.271854 | 0.29175  | 0.56377  | 0.552054 |
| MmugDNA.13783.1.S1_at   | MmugDNA.13783.1 | 6.43  | 6.52  | 0.05 | 0.1  | -1.06 | 0.122417 | 0.253375 | 0.401138 | 0.521701 |
| MmugDNA.13790.1.S1_at   | MmugDNA.13790.1 | 12.05 | 12.12 | 0.03 | 0.09 | -1.05 | 0.533325 | 0.389347 | 0.756932 | 0.62342  |
| MmugDNA.13792.1.S1_at   | MmugDNA.13792.1 | 6.52  | 6.64  | 0.05 | 0.06 | -1.09 | 0.078396 | 0.072799 | 0.338082 | 0.315651 |
| MmugDNA.13802.1.S1_at   | MmugDNA.13802.1 | 12.8  | 12.95 | 0.09 | 0.12 | -1.11 | 0.031985 | 0.056564 | 0.23262  | 0.283838 |
| MmugDNA.13806.1.S1_at   | MmugDNA.13806.1 | 5.13  | 5.41  | 0.11 | 0.45 | -1.21 | 0.183738 | 0.395432 | 0.47973  | 0.627474 |
| MmugDNA.13810.1.S1_at   | MmugDNA.13810.1 | 13.52 | 13.25 | 0.05 | 0.1  | 1.21  | 0.013339 | 0.221485 | 0.166232 | 0.494795 |
| MmugDNA.13815.1.S1_at   | MmugDNA.13815.1 | 10.34 | 10.21 | 0.44 | 0.15 | 1.09  | 0.831349 | 0.248148 | 0.925813 | 0.517567 |
| MmugDNA.13828.1.S1_at   | MmugDNA.13828.1 | 4.3   | 6.18  | 0.87 | 0.07 | -3.68 | 0.046729 | 0.008715 | 0.273749 | 0.123746 |
| MmugDNA.13832.1.S1_s_at | MmugDNA.13832.1 | 10.8  | 10.7  | 0.28 | 0.01 | 1.07  | 0.467989 | 0.599497 | 0.713344 | 0.76147  |
| MmugDNA.13833.1.S1_at   | MmugDNA.13833.1 | 8.84  | 9.09  | 0.24 | 0.15 | -1.19 | 0.480909 | 0.002414 | 0.721673 | 0.072905 |
| MmugDNA.13836.1.S1_at   | MmugDNA.13836.1 | 7.22  | 7.45  | 0.07 | 0.1  | -1.17 | 0.019451 | 0.059011 | 0.192344 | 0.289764 |
| MmugDNA.13838.1.S1_at   | MmugDNA.13838.1 | 9.24  | 8.89  | 0.09 | 0.27 | 1.27  | 0.279162 | 0.725263 | 0.570597 | 0.840954 |
| MmugDNA.13842.1.S1_at   | MmugDNA.13842.1 | 10.07 | 9.81  | 0.01 | 0.14 | 1.19  | 0.0144   | 0.005593 | 0.171686 | 0.10339  |
| MmugDNA.13848.1.S1_at   | MmugDNA.13848.1 | 6.78  | 6.8   | 0.1  | 0.07 | -1.01 | 0.816908 | 0.972968 | 0.918144 | 0.985389 |
| MmugDNA.13852.1.S1_at   | MmugDNA.13852.1 | 8.02  | 7.89  | 0.1  | 0.08 | 1.1   | 0.400834 | 0.236078 | 0.665577 | 0.507179 |
| MmugDNA.13861.1.S1_at   | MmugDNA.13861.1 | 4.59  | 4.47  | 0.08 | 0.07 | 1.09  | 0.36755  | 0.290521 | 0.641471 | 0.551231 |
| MmugDNA.13869.1.S1_x_at | MmugDNA.13869.1 | 3.87  | 3.71  | 0.15 | 0.06 | 1.12  | 0.120345 | 0.129426 | 0.398774 | 0.400827 |
| MmugDNA.13872.1.S1_at   | MmugDNA.13872.1 | 6.55  | 7     | 0.18 | 0.24 | -1.37 | 0.076127 | 0.356229 | 0.334229 | 0.598166 |
| MmugDNA.13873.1.S1_at   | MmugDNA.13873.1 | 9.15  | 8.99  | 0.26 | 0.14 | 1.11  | 0.133679 | 0.001906 | 0.417096 | 0.065148 |
| MmugDNA.13874.1.S1_at   | MmugDNA.13874.1 | 3.96  | 3.76  | 0.09 | 0.09 | 1.15  | 0.108167 | 0.077929 | 0.382902 | 0.324277 |
| MmugDNA.13875.1.S1_at   | MmugDNA.13875.1 | 12.86 | 12.62 | 0.1  | 0.05 | 1.18  | 0.084185 | 0.133024 | 0.347528 | 0.40469  |
| MmugDNA.13881.1.S1_at   | MmugDNA.13881.1 | 7.4   | 7.16  | 0.34 | 0.16 | 1.18  | 0.078855 | 0.039907 | 0.338722 | 0.244852 |
| MmugDNA.13882.1.S1_at   | MmugDNA.13882.1 | 8.66  | 8.1   | 0.02 | 0.07 | 1.47  | 0.000182 | 0.171305 | 0.053494 | 0.447809 |
| MmugDNA.13883.1.S1_at   | MmugDNA.13883.1 | 4.11  | 4.06  | 0.12 | 0.08 | 1.03  | 0.349378 | 0.616347 | 0.627309 | 0.772571 |
| MmugDNA.13886.1.S1_at   | MmugDNA.13886.1 | 6.59  | 7.2   | 0.11 | 0.01 | -1.52 | 0.000674 | 0.080882 | 0.071248 | 0.328858 |
| MmugDNA.13893.1.S1_at   | MmugDNA.13893.1 | 12.13 | 12.12 | 0.02 | 0.15 | 1.01  | 0.354858 | 0.506572 | 0.631826 | 0.702503 |
| MmugDNA.139.1.S1_at     | MmugDNA.139.1   | 11.6  | 11.64 | 0.03 | 0.16 | -1.03 | 0.834603 | 0.457175 | 0.927293 | 0.670746 |
| MmugDNA.13900.1.S1_at   | MmugDNA.13900.1 | 3.91  | 3.76  | 0.02 | 0.12 | 1.1   | 0.13188  | 0.505832 | 0.414966 | 0.702218 |
| MmugDNA.1391.1.S1_at    | MmugDNA.1391.1  | 8.16  | 7.37  | 1.09 | 0.49 | 1.73  | 0.175336 | 0.170393 | 0.469734 | 0.447103 |
| MmugDNA.13911.1.S1_s_at | MmugDNA.13911.1 | 10.24 | 10.32 | 0.19 | 0.08 | -1.06 | 0.951364 | 0.056838 | 0.979913 | 0.284531 |
| MmugDNA.13913.1.S1_at   | MmugDNA.13913.1 | 9.27  | 9.23  | 0.18 | 0.15 | 1.03  | 0.367026 | 0.497847 | 0.641205 | 0.697071 |
| MmugDNA.13914.1.S1_at   | MmugDNA.13914.1 | 6.38  | 6.86  | 0.27 | 0.13 | -1.4  | 0.014666 | 0.00309  | 0.172984 | 0.081194 |
| MmugDNA.13916.1.S1_at   | MmugDNA.13916.1 | 11.46 | 11.42 | 0.09 | 0.08 | 1.03  | 0.575483 | 0.008309 | 0.782845 | 0.120929 |
| MmugDNA.13917.1.S1_at   | MmugDNA.13917.1 | 9.25  | 8     | 0.71 | 0.23 | 2.38  | 0.03935  | 0.01355  | 0.254835 | 0.149001 |
| MmugDNA.13932.1.S1_at   | MmugDNA.13932.1 | 7.05  | 6.8   | 0.41 | 0.11 | 1.19  | 0.48457  | 0.215152 | 0.72436  | 0.488943 |
| MmugDNA.13933.1.S1_at   | MmugDNA.13933.1 | 12.86 | 12.69 | 0.37 | 0.1  | 1.13  | 0.301021 | 0.391231 | 0.589063 | 0.624922 |

|                         |                 |       |       |      |      |       |          |          |          |          |
|-------------------------|-----------------|-------|-------|------|------|-------|----------|----------|----------|----------|
| MmugDNA.1394.1.S1_at    | MmugDNA.1394.1  | 11.19 | 10.39 | 0.09 | 0.22 | 1.75  | 0.004494 | 0.005408 | 0.113436 | 0.10146  |
| MmugDNA.13945.1.S1_at   | MmugDNA.13945.1 | 6.25  | 6.24  | 0.07 | 0.08 | 1.01  | 0.803231 | 0.085337 | 0.911741 | 0.337219 |
| MmugDNA.13946.1.S1_at   | MmugDNA.13946.1 | 5.44  | 5.36  | 0.05 | 0.18 | 1.06  | 0.295543 | 0.328684 | 0.584306 | 0.578213 |
| MmugDNA.1395.1.S1_at    | MmugDNA.1395.1  | 6.39  | 6.36  | 0.11 | 0.13 | 1.02  | 0.711299 | 0.910901 | 0.863698 | 0.949723 |
| MmugDNA.13953.1.S1_at   | MmugDNA.13953.1 | 11.16 | 11.07 | 0.18 | 0.08 | 1.06  | 0.441934 | 0.791801 | 0.695365 | 0.879751 |
| MmugDNA.13954.1.S1_at   | MmugDNA.13954.1 | 7.57  | 7.71  | 0.29 | 0.12 | -1.1  | 0.853639 | 0.77068  | 0.936335 | 0.866801 |
| MmugDNA.13955.1.S1_at   | MmugDNA.13955.1 | 12.17 | 12.03 | 0.07 | 0.05 | 1.1   | 0.051506 | 0.09153  | 0.284376 | 0.346614 |
| MmugDNA.13957.1.S1_at   | MmugDNA.13957.1 | 9.32  | 9.84  | 0.22 | 0.11 | -1.43 | 0.078651 | 0.741071 | 0.338508 | 0.850126 |
| MmugDNA.13958.1.S1_at   | MmugDNA.13958.1 | 6.36  | 6.53  | 0.9  | 0.23 | -1.13 | 0.891039 | 0.991686 | 0.953461 | 0.995392 |
| MmugDNA.13973.1.S1_at   | MmugDNA.13973.1 | 7.26  | 7.39  | 0.14 | 0.04 | -1.1  | 0.751932 | 0.056198 | 0.885488 | 0.282972 |
| MmugDNA.13976.1.S1_at   | MmugDNA.13976.1 | 4.02  | 4.24  | 1.24 | 0.06 | -1.17 | 0.534243 | 0.578937 | 0.757483 | 0.748776 |
| MmugDNA.13979.1.S1_at   | MmugDNA.13979.1 | 7.33  | 7.36  | 0.17 | 0.22 | -1.02 | 0.372798 | 0.000694 | 0.645067 | 0.044179 |
| MmugDNA.13983.1.S1_at   | MmugDNA.13983.1 | 6.8   | 6.77  | 0.03 | 0.07 | 1.03  | 0.439832 | 0.173335 | 0.693926 | 0.449791 |
| MmugDNA.13984.1.S1_at   | MmugDNA.13984.1 | 7.62  | 7.75  | 0.13 | 0.07 | -1.1  | 0.810187 | 0.664458 | 0.914977 | 0.803396 |
| MmugDNA.13992.1.S1_at   | MmugDNA.13992.1 | 10.65 | 10.1  | 0.22 | 0.09 | 1.46  | 0.016297 | 0.029191 | 0.180457 | 0.212884 |
| MmugDNA.13999.1.S1_at   | MmugDNA.13999.1 | 5.62  | 6.32  | 0.44 | 0.17 | -1.62 | 0.021816 | 0.09634  | 0.200923 | 0.353827 |
| MmugDNA.14006.1.S1_at   | MmugDNA.14006.1 | 7.69  | 7.36  | 0.38 | 0.12 | 1.26  | 0.207344 | 0.000282 | 0.505092 | 0.034568 |
| MmugDNA.14009.1.S1_s_at | MmugDNA.14009.1 | 8.2   | 10.04 | 0.55 | 0.09 | -3.59 | 0.005003 | 0.00268  | 0.115961 | 0.076408 |
| MmugDNA.14011.1.S1_s_at | MmugDNA.14011.1 | 3.76  | 3.49  | 0.14 | 0.14 | 1.21  | 0.182022 | 0.281878 | 0.477584 | 0.544844 |
| MmugDNA.14020.1.S1_at   | MmugDNA.14020.1 | 8.74  | 8.45  | 0.43 | 0.07 | 1.23  | 0.961537 | 0.274496 | 0.984328 | 0.538987 |
| MmugDNA.14022.1.S1_at   | MmugDNA.14022.1 | 6.03  | 6.04  | 0.16 | 0.13 | -1.01 | 0.440981 | 0.453262 | 0.694685 | 0.667661 |
| MmugDNA.14031.1.S1_at   | MmugDNA.14031.1 | 12.87 | 12.86 | 0.06 | 0.08 | 1.01  | 0.308181 | 0.280992 | 0.594856 | 0.544166 |
| MmugDNA.14033.1.S1_at   | MmugDNA.14033.1 | 3.08  | 2.99  | 0.42 | 0.07 | 1.06  | 0.301624 | 0.311577 | 0.589477 | 0.566537 |
| MmugDNA.14037.1.S1_at   | MmugDNA.14037.1 | 5.85  | 5.86  | 0.04 | 0.03 | -1    | 0.483118 | 0.244335 | 0.72337  | 0.514184 |
| MmugDNA.14045.1.S1_at   | MmugDNA.14045.1 | 4.52  | 4.77  | 0.28 | 0.06 | -1.19 | 0.622249 | 0.40769  | 0.81313  | 0.635135 |
| MmugDNA.14046.1.A1_at   | MmugDNA.14046.1 | 6.01  | 5.91  | 0.09 | 0.07 | 1.07  | 0.151745 | 0.344069 | 0.441235 | 0.58962  |
| MmugDNA.14046.1.S1_at   | MmugDNA.14046.1 | 5.76  | 5.87  | 0.25 | 0.03 | -1.08 | 0.84712  | 0.658547 | 0.933311 | 0.800401 |
| MmugDNA.14048.1.S1_at   | MmugDNA.14048.1 | 13.06 | 13.1  | 0.05 | 0.08 | -1.03 | 0.932739 | 0.854633 | 0.971802 | 0.917159 |
| MmugDNA.14052.1.S1_at   | MmugDNA.14052.1 | 7.04  | 7     | 0.04 | 0.03 | 1.03  | 0.114635 | 0.697973 | 0.391643 | 0.824551 |
| MmugDNA.14052.1.S1_s_at | MmugDNA.14052.1 | 5.66  | 6.52  | 0.2  | 0.54 | -1.81 | 0.033575 | 0.015423 | 0.237136 | 0.157699 |
| MmugDNA.14054.1.S1_at   | MmugDNA.14054.1 | 12.6  | 12.31 | 0.1  | 0.06 | 1.23  | 0.037331 | 0.028112 | 0.248625 | 0.209286 |
| MmugDNA.14061.1.S1_at   | MmugDNA.14061.1 | 4.23  | 4.03  | 0.09 | 0.18 | 1.15  | 0.205508 | 0.115544 | 0.503275 | 0.38267  |
| MmugDNA.14067.1.S1_at   | MmugDNA.14067.1 | 4.46  | 4.32  | 0.19 | 0.12 | 1.11  | 0.809344 | 0.738315 | 0.914582 | 0.848258 |
| MmugDNA.14068.1.S1_at   | MmugDNA.14068.1 | 12.25 | 12.45 | 0.12 | 0.07 | -1.15 | 0.080864 | 0.416703 | 0.341635 | 0.64167  |
| MmugDNA.14075.1.S1_at   | MmugDNA.14075.1 | 11.17 | 9.85  | 0.34 | 0.12 | 2.48  | 0.002989 | 0.00019  | 0.099744 | 0.030754 |
| MmugDNA.14076.1.S1_at   | MmugDNA.14076.1 | 8.65  | 7.02  | 0.09 | 0.33 | 3.1   | 0.001032 | 0.001995 | 0.076321 | 0.066264 |
| MmugDNA.14076.1.S1_s_at | MmugDNA.14076.1 | 9.18  | 7.27  | 0.24 | 0.34 | 3.75  | 0.002623 | 0.002643 | 0.095221 | 0.076012 |
| MmugDNA.14078.1.S1_at   | MmugDNA.14078.1 | 11.09 | 11.09 | 0.22 | 0.05 | 1     | 0.375704 | 0.525789 | 0.646473 | 0.715217 |
| MmugDNA.14080.1.S1_at   | MmugDNA.14080.1 | 7.13  | 7.21  | 0.16 | 0.08 | -1.06 | 0.346916 | 0.417553 | 0.625096 | 0.642252 |
| MmugDNA.14081.1.S1_at   | MmugDNA.14081.1 | 11.78 | 11.54 | 0.04 | 0.03 | 1.18  | 0.001683 | 0.004159 | 0.084735 | 0.091036 |
| MmugDNA.14088.1.S1_at   | MmugDNA.14088.1 | 10.79 | 10.59 | 0.18 | 0.06 | 1.15  | 0.13949  | 0.357375 | 0.425004 | 0.598986 |
| MmugDNA.14089.1.S1_at   | MmugDNA.14089.1 | 6.95  | 7.61  | 0.33 | 0.26 | -1.58 | 0.094017 | 0.620933 | 0.363011 | 0.775708 |
| MmugDNA.14090.1.S1_at   | MmugDNA.14090.1 | 8.03  | 8.03  | 0.04 | 0.06 | 1     | 0.585546 | 0.809833 | 0.789262 | 0.890412 |

|                         |                 |       |       |      |      |        |          |          |          |          |
|-------------------------|-----------------|-------|-------|------|------|--------|----------|----------|----------|----------|
| MmugDNA.14093.1.S1_at   | MmugDNA.14093.1 | 11.08 | 10.93 | 0.26 | 0.11 | 1.11   | 0.184385 | 0.386972 | 0.480429 | 0.621935 |
| MmugDNA.14096.1.S1_at   | MmugDNA.14096.1 | 3.54  | 3.45  | 0.09 | 0.07 | 1.06   | 0.767599 | 0.54764  | 0.893341 | 0.728583 |
| MmugDNA.14099.1.S1_at   | MmugDNA.14099.1 | 9.98  | 9.53  | 0.24 | 0.07 | 1.37   | 0.027013 | 0.05912  | 0.217188 | 0.290056 |
| MmugDNA.14109.1.S1_at   | MmugDNA.14109.1 | 7.29  | 6.73  | 0.49 | 0.3  | 1.47   | 0.157193 | 0.183377 | 0.447994 | 0.459553 |
| MmugDNA.14110.1.S1_at   | MmugDNA.14110.1 | 11.93 | 11.86 | 0.22 | 0.04 | 1.04   | 0.213941 | 0.615041 | 0.511174 | 0.771703 |
| MmugDNA.14118.1.S1_at   | MmugDNA.14118.1 | 8.83  | 8.6   | 0.43 | 0.06 | 1.17   | 0.135743 | 0.119674 | 0.419782 | 0.388324 |
| MmugDNA.1412.1.S1_at    | MmugDNA.1412.1  | 4.82  | 4.87  | 0.24 | 0.07 | -1.04  | 0.442021 | 0.247644 | 0.695419 | 0.517028 |
| MmugDNA.14121.1.S1_at   | MmugDNA.14121.1 | 5.84  | 5.48  | 0.42 | 0.42 | 1.29   | 0.392112 | 0.222721 | 0.659131 | 0.495669 |
| MmugDNA.14123.1.S1_at   | MmugDNA.14123.1 | 10.26 | 10.06 | 0.12 | 0.13 | 1.15   | 0.275517 | 0.017068 | 0.567202 | 0.165561 |
| MmugDNA.14124.1.S1_at   | MmugDNA.14124.1 | 10.26 | 10.36 | 0.28 | 0.39 | -1.07  | 0.399637 | 0.511918 | 0.664842 | 0.705856 |
| MmugDNA.14128.1.S1_at   | MmugDNA.14128.1 | 3.53  | 3.77  | 0.18 | 0.42 | -1.18  | 0.233108 | 0.332882 | 0.531336 | 0.581266 |
| MmugDNA.14132.1.S1_at   | MmugDNA.14132.1 | 10.25 | 11    | 0.46 | 0.08 | -1.68  | 0.046028 | 0.390127 | 0.272172 | 0.624002 |
| MmugDNA.14137.1.S1_at   | MmugDNA.14137.1 | 13.4  | 13.42 | 0.15 | 0.09 | -1.01  | 0.656778 | 0.078769 | 0.834007 | 0.325725 |
| MmugDNA.14139.1.S1_at   | MmugDNA.14139.1 | 7.9   | 7.76  | 0.17 | 0.06 | 1.1    | 0.251315 | 0.011949 | 0.546147 | 0.141415 |
| MmugDNA.1414.1.S1_at    | MmugDNA.1414.1  | 7.05  | 6.28  | 0.24 | 0.19 | 1.71   | 0.024964 | 0.022562 | 0.211179 | 0.187982 |
| MmugDNA.14145.1.S1_s_at | MmugDNA.14145.1 | 7.76  | 7.21  | 0.11 | 0.34 | 1.46   | 0.155554 | 0.212378 | 0.445904 | 0.486325 |
| MmugDNA.14147.1.S1_at   | MmugDNA.14147.1 | 6.36  | 6.33  | 0.13 | 0.05 | 1.02   | 0.741138 | 0.189533 | 0.880016 | 0.465277 |
| MmugDNA.14151.1.S1_at   | MmugDNA.14151.1 | 11.46 | 11.31 | 0.16 | 0.15 | 1.11   | 0.328542 | 0.285972 | 0.610875 | 0.547506 |
| MmugDNA.14154.1.S1_at   | MmugDNA.14154.1 | 10.66 | 10.67 | 0.22 | 0.08 | -1.01  | 0.843566 | 0.945197 | 0.931516 | 0.968914 |
| MmugDNA.14155.1.S1_at   | MmugDNA.14155.1 | 6.89  | 7.8   | 0.34 | 0.21 | -1.87  | 0.020592 | 0.232167 | 0.196956 | 0.503874 |
| MmugDNA.1416.1.S1_at    | MmugDNA.1416.1  | 7.9   | 8.06  | 0.11 | 0.12 | -1.11  | 0.076992 | 0.323731 | 0.33549  | 0.574587 |
| MmugDNA.14168.1.S1_at   | MmugDNA.14168.1 | 8.64  | 8.87  | 0.35 | 0.09 | -1.17  | 0.262322 | 0.091095 | 0.556437 | 0.345932 |
| MmugDNA.14171.1.S1_s_at | MmugDNA.14171.1 | 10.11 | 10.23 | 0.09 | 0.16 | -1.09  | 0.262067 | 0.324327 | 0.556302 | 0.574924 |
| MmugDNA.14172.1.S1_at   | MmugDNA.14172.1 | 6.47  | 6.39  | 0.59 | 0.08 | 1.06   | 0.436925 | 0.683169 | 0.691807 | 0.815172 |
| MmugDNA.14174.1.S1_at   | MmugDNA.14174.1 | 2.9   | 3.05  | 0.01 | 0.09 | -1.11  | 0.152643 | 0.167415 | 0.442345 | 0.443785 |
| MmugDNA.14178.1.S1_at   | MmugDNA.14178.1 | 3.89  | 3.87  | 0.11 | 0.12 | 1.02   | 0.326196 | 0.477447 | 0.609341 | 0.683498 |
| MmugDNA.14185.1.S1_at   | MmugDNA.14185.1 | 4.25  | 3.65  | 0.58 | 0.1  | 1.52   | 0.106919 | 0.106207 | 0.381299 | 0.368585 |
| MmugDNA.14188.1.S1_at   | MmugDNA.14188.1 | 4.89  | 4.89  | 0.08 | 0.15 | 1      | 0.658041 | 0.289869 | 0.834849 | 0.550831 |
| MmugDNA.14192.1.S1_at   | MmugDNA.14192.1 | 6.87  | 7.36  | 0.98 | 0.15 | -1.41  | 0.139144 | 0.212114 | 0.424893 | 0.486036 |
| MmugDNA.14193.1.S1_at   | MmugDNA.14193.1 | 11.6  | 11.33 | 0.11 | 0.1  | 1.2    | 0.025702 | 0.481332 | 0.212966 | 0.686365 |
| MmugDNA.14194.1.S1_at   | MmugDNA.14194.1 | 12.03 | 11.98 | 0.09 | 0.02 | 1.04   | 0.130831 | 0.055359 | 0.41337  | 0.281125 |
| MmugDNA.14203.1.S1_at   | MmugDNA.14203.1 | 6.49  | 6.52  | 0.08 | 0.08 | -1.02  | 0.583191 | 0.917278 | 0.787869 | 0.953776 |
| MmugDNA.14204.1.S1_at   | MmugDNA.14204.1 | 7.17  | 10.25 | 1.76 | 0.23 | -8.44  | 0.041305 | 0.101387 | 0.259651 | 0.36112  |
| MmugDNA.14206.1.S1_at   | MmugDNA.14206.1 | 5.09  | 5.16  | 0.19 | 0.15 | -1.05  | 0.531246 | 0.727245 | 0.755666 | 0.84224  |
| MmugDNA.14209.1.S1_at   | MmugDNA.14209.1 | 6.44  | 6.49  | 0.08 | 0.02 | -1.04  | 0.923961 | 0.437904 | 0.967672 | 0.657026 |
| MmugDNA.1421.1.S1_at    | MmugDNA.1421.1  | 10.3  | 10.78 | 0.48 | 0.1  | -1.39  | 0.045268 | 0.127932 | 0.270246 | 0.398887 |
| MmugDNA.14210.1.S1_at   | MmugDNA.14210.1 | 12.6  | 12.66 | 0.22 | 0.04 | -1.04  | 0.587999 | 0.203638 | 0.790755 | 0.47789  |
| MmugDNA.14211.1.S1_at   | MmugDNA.14211.1 | 6.44  | 6.49  | 0.17 | 0.02 | -1.04  | 0.696833 | 0.365336 | 0.855674 | 0.605468 |
| MmugDNA.14213.1.S1_at   | MmugDNA.14213.1 | 11.64 | 11.45 | 0.18 | 0.12 | 1.14   | 0.2689   | 0.233828 | 0.561347 | 0.505169 |
| MmugDNA.14218.1.S1_at   | MmugDNA.14218.1 | 6.12  | 5.99  | 0.61 | 0.3  | 1.09   | 0.898455 | 0.851811 | 0.956806 | 0.915767 |
| MmugDNA.14227.1.S1_at   | MmugDNA.14227.1 | 8.13  | 11.69 | 1.78 | 0.3  | -11.81 | 0.084925 | 0.312708 | 0.348867 | 0.567299 |
| MmugDNA.14230.1.S1_at   | MmugDNA.14230.1 | 9.75  | 9.97  | 0.13 | 0.18 | -1.17  | 0.15485  | 0.236386 | 0.44505  | 0.507308 |
| MmugDNA.14231.1.S1_at   | MmugDNA.14231.1 | 8.16  | 5.98  | 0.22 | 0.45 | 4.53   | 0.001732 | 0.010569 | 0.085035 | 0.134182 |

|                         |                 |       |       |      |      |       |          |          |          |          |
|-------------------------|-----------------|-------|-------|------|------|-------|----------|----------|----------|----------|
| MmugDNA.14233.1.S1_at   | MmugDNA.14233.1 | 10.95 | 11.43 | 0.11 | 0.05 | -1.39 | 0.001914 | 0.000877 | 0.088048 | 0.047586 |
| MmugDNA.14234.1.S1_at   | MmugDNA.14234.1 | 13.77 | 13.62 | 0.14 | 0.09 | 1.11  | 0.209123 | 0.3752   | 0.506636 | 0.613249 |
| MmugDNA.1424.1.S1_at    | MmugDNA.1424.1  | 5.88  | 5.89  | 0.17 | 0.03 | -1    | 0.855471 | 0.884682 | 0.937004 | 0.934321 |
| MmugDNA.14243.1.S1_at   | MmugDNA.14243.1 | 5.81  | 5.92  | 0.02 | 0.16 | -1.08 | 0.908252 | 0.814968 | 0.961179 | 0.893221 |
| MmugDNA.14245.1.S1_at   | MmugDNA.14245.1 | 5.75  | 5.65  | 0.1  | 0.04 | 1.07  | 0.304477 | 0.623243 | 0.59162  | 0.777656 |
| MmugDNA.14253.1.S1_at   | MmugDNA.14253.1 | 4.6   | 4.25  | 0.27 | 0.09 | 1.27  | 0.080672 | 0.102909 | 0.341398 | 0.363558 |
| MmugDNA.14255.1.S1_at   | MmugDNA.14255.1 | 9.51  | 9.54  | 0.16 | 0.1  | -1.02 | 0.981212 | 0.00228  | 0.992918 | 0.07037  |
| MmugDNA.14256.1.S1_at   | MmugDNA.14256.1 | 12.32 | 12.28 | 0.05 | 0.04 | 1.03  | 0.07551  | 0.104035 | 0.33307  | 0.36495  |
| MmugDNA.14257.1.S1_at   | MmugDNA.14257.1 | 11.15 | 10.6  | 0.44 | 0.05 | 1.47  | 0.035476 | 0.066175 | 0.243183 | 0.302783 |
| MmugDNA.14258.1.S1_s_at | MmugDNA.14258.1 | 13.51 | 13.44 | 0.1  | 0.01 | 1.05  | 0.820113 | 0.866858 | 0.919784 | 0.92433  |
| MmugDNA.14260.1.S1_at   | MmugDNA.14260.1 | 4.14  | 4.25  | 0.06 | 0.02 | -1.08 | 0.025099 | 0.003906 | 0.211413 | 0.088806 |
| MmugDNA.14261.1.S1_at   | MmugDNA.14261.1 | 5.72  | 5.68  | 0.19 | 0.03 | 1.02  | 0.78981  | 0.947887 | 0.904456 | 0.970378 |
| MmugDNA.14268.1.S1_at   | MmugDNA.14268.1 | 10.27 | 10.2  | 0.37 | 0.07 | 1.05  | 0.918889 | 0.606325 | 0.965374 | 0.765746 |
| MmugDNA.14272.1.S1_at   | MmugDNA.14272.1 | 3.46  | 3.41  | 0.03 | 0.08 | 1.04  | 0.308667 | 0.223324 | 0.595227 | 0.49612  |
| MmugDNA.14282.1.S1_at   | MmugDNA.14282.1 | 5     | 4.81  | 0.2  | 0.1  | 1.14  | 0.676515 | 0.203441 | 0.84554  | 0.477634 |
| MmugDNA.14285.1.S1_at   | MmugDNA.14285.1 | 10.23 | 10.03 | 0.17 | 0.01 | 1.15  | 0.115151 | 0.143296 | 0.392172 | 0.417283 |
| MmugDNA.14287.1.S1_at   | MmugDNA.14287.1 | 5.35  | 5.24  | 0.16 | 0.04 | 1.08  | 0.326862 | 0.096873 | 0.609778 | 0.354286 |
| MmugDNA.14289.1.S1_at   | MmugDNA.14289.1 | 10.86 | 10.03 | 0.21 | 0.15 | 1.79  | 0.003916 | 0.002783 | 0.108352 | 0.077966 |
| MmugDNA.14290.1.S1_at   | MmugDNA.14290.1 | 10.15 | 10.89 | 0.12 | 0.19 | -1.67 | 0.006653 | 0.273782 | 0.127957 | 0.538287 |
| MmugDNA.14297.1.S1_at   | MmugDNA.14297.1 | 4.17  | 4.21  | 0.12 | 0.11 | -1.03 | 0.810554 | 0.7125   | 0.915142 | 0.833383 |
| MmugDNA.14298.1.S1_at   | MmugDNA.14298.1 | 6.6   | 7.33  | 0.02 | 0.14 | -1.66 | 0.001148 | 0.042467 | 0.077533 | 0.250702 |
| MmugDNA.14300.1.S1_at   | MmugDNA.14300.1 | 9.78  | 10.03 | 0.31 | 0.07 | -1.19 | 0.735859 | 0.18477  | 0.877062 | 0.460661 |
| MmugDNA.14303.1.S1_at   | MmugDNA.14303.1 | 5.52  | 10.13 | 3.06 | 0.3  | -24.5 | 0.10914  | 0.260503 | 0.384284 | 0.527026 |
| MmugDNA.14306.1.S1_at   | MmugDNA.14306.1 | 6.56  | 8.66  | 0.54 | 0.4  | -4.28 | 0.015464 | 0.147744 | 0.176449 | 0.42203  |
| MmugDNA.14307.1.S1_at   | MmugDNA.14307.1 | 9.38  | 9.5   | 0.34 | 0.13 | -1.09 | 0.252757 | 0.170576 | 0.547383 | 0.447204 |
| MmugDNA.14308.1.S1_at   | MmugDNA.14308.1 | 7.21  | 7.62  | 0.99 | 0.16 | -1.33 | 0.403889 | 0.649077 | 0.667864 | 0.794569 |
| MmugDNA.14310.1.S1_at   | MmugDNA.14310.1 | 11.49 | 11.95 | 0.24 | 0.06 | -1.37 | 0.028058 | 0.09603  | 0.219909 | 0.353302 |
| MmugDNA.14314.1.S1_at   | MmugDNA.14314.1 | 4.28  | 4.92  | 0.4  | 0.67 | -1.56 | 0.577684 | 0.761763 | 0.783728 | 0.861459 |
| MmugDNA.14318.1.S1_at   | MmugDNA.14318.1 | 5.03  | 5.14  | 0.11 | 0.04 | -1.08 | 0.474361 | 0.330156 | 0.717451 | 0.578987 |
| MmugDNA.14326.1.S1_at   | MmugDNA.14326.1 | 5.08  | 5.04  | 0.03 | 0.16 | 1.03  | 0.572107 | 0.141825 | 0.78032  | 0.415331 |
| MmugDNA.14327.1.S1_at   | MmugDNA.14327.1 | 9.59  | 9.97  | 0.21 | 0.06 | -1.31 | 0.035279 | 0.055075 | 0.242544 | 0.280198 |
| MmugDNA.14329.1.S1_at   | MmugDNA.14329.1 | 9.72  | 9.57  | 0.27 | 0.15 | 1.11  | 0.297311 | 0.375399 | 0.585786 | 0.613405 |
| MmugDNA.14333.1.S1_at   | MmugDNA.14333.1 | 7.02  | 6.59  | 0.25 | 0.12 | 1.35  | 0.144524 | 0.171484 | 0.431507 | 0.447895 |
| MmugDNA.14338.1.S1_at   | MmugDNA.14338.1 | 7.04  | 6.99  | 0.07 | 0.05 | 1.03  | 0.345317 | 0.150188 | 0.624363 | 0.424841 |
| MmugDNA.14341.1.S1_at   | MmugDNA.14341.1 | 3.43  | 3.45  | 0.09 | 0.09 | -1.02 | 0.671893 | 0.022155 | 0.842775 | 0.186325 |
| MmugDNA.14342.1.S1_at   | MmugDNA.14342.1 | 7.17  | 9.95  | 1.16 | 0.33 | -6.85 | 0.023516 | 0.248772 | 0.20653  | 0.517931 |
| MmugDNA.14347.1.S1_s_at | MmugDNA.14347.1 | 7.61  | 9.91  | 1.22 | 0.37 | -4.95 | 0.0408   | 0.000497 | 0.258464 | 0.038955 |
| MmugDNA.14350.1.S1_at   | MmugDNA.14350.1 | 8.41  | 9.16  | 0.68 | 0.2  | -1.68 | 0.199328 | 0.19876  | 0.496628 | 0.473391 |
| MmugDNA.14352.1.S1_at   | MmugDNA.14352.1 | 10.24 | 9.47  | 0.22 | 0.19 | 1.71  | 0.009901 | 0.019989 | 0.148933 | 0.177571 |
| MmugDNA.14355.1.S1_at   | MmugDNA.14355.1 | 9.22  | 8.62  | 0.38 | 0.03 | 1.51  | 0.06495  | 0.024612 | 0.311598 | 0.196308 |
| MmugDNA.14356.1.S1_at   | MmugDNA.14356.1 | 9.09  | 8.77  | 0.16 | 0.03 | 1.25  | 0.020988 | 0.118874 | 0.198347 | 0.387068 |
| MmugDNA.14359.1.S1_at   | MmugDNA.14359.1 | 6.97  | 7.24  | 0.15 | 0.05 | -1.21 | 0.050942 | 0.049053 | 0.283415 | 0.266406 |
| MmugDNA.14361.1.S1_at   | MmugDNA.14361.1 | 7.87  | 8.35  | 0.17 | 0.13 | -1.39 | 0.0081   | 0.132734 | 0.138956 | 0.404544 |

|                         |                 |       |       |      |      |       |          |          |          |          |
|-------------------------|-----------------|-------|-------|------|------|-------|----------|----------|----------|----------|
| MmugDNA.14370.1.S1_at   | MmugDNA.14370.1 | 3.16  | 3.03  | 0.09 | 0.12 | 1.1   | 0.885308 | 0.403276 | 0.951028 | 0.631998 |
| MmugDNA.14372.1.S1_at   | MmugDNA.14372.1 | 5.45  | 5.43  | 0.07 | 0.05 | 1.02  | 0.402611 | 0.077232 | 0.666923 | 0.322852 |
| MmugDNA.14373.1.S1_at   | MmugDNA.14373.1 | 3.57  | 3.46  | 0.08 | 0.11 | 1.08  | 0.75238  | 0.186111 | 0.885576 | 0.461934 |
| MmugDNA.14375.1.S1_at   | MmugDNA.14375.1 | 9.06  | 11.35 | 1.19 | 0.13 | -4.91 | 0.029636 | 0.290642 | 0.225261 | 0.551363 |
| MmugDNA.1438.1.S1_at    | MmugDNA.1438.1  | 5.77  | 5.57  | 0.06 | 0.17 | 1.14  | 0.185383 | 0.694987 | 0.481586 | 0.822709 |
| MmugDNA.14380.1.S1_at   | MmugDNA.14380.1 | 13.26 | 13.55 | 0.12 | 0.14 | -1.22 | 0.132806 | 0.061763 | 0.416223 | 0.295327 |
| MmugDNA.14382.1.S1_at   | MmugDNA.14382.1 | 4.76  | 4.61  | 0.15 | 0.01 | 1.11  | 0.152006 | 0.336417 | 0.441547 | 0.583831 |
| MmugDNA.14385.1.S1_at   | MmugDNA.14385.1 | 3.5   | 3.61  | 0.07 | 0.07 | -1.07 | 0.340055 | 0.426791 | 0.620242 | 0.648883 |
| MmugDNA.14387.1.S1_at   | MmugDNA.14387.1 | 12.76 | 12.68 | 0.13 | 0.02 | 1.05  | 0.367835 | 0.073553 | 0.641596 | 0.316874 |
| MmugDNA.14388.1.S1_at   | MmugDNA.14388.1 | 9.18  | 9.14  | 0.17 | 0.03 | 1.03  | 0.825487 | 0.783216 | 0.922472 | 0.874547 |
| MmugDNA.14394.1.S1_at   | MmugDNA.14394.1 | 11.86 | 11.91 | 0.19 | 0.06 | -1.03 | 0.249363 | 0.001493 | 0.544534 | 0.058967 |
| MmugDNA.14396.1.S1_at   | MmugDNA.14396.1 | 9.05  | 8.41  | 0.14 | 0.18 | 1.55  | 0.015756 | 0.002542 | 0.177898 | 0.074521 |
| MmugDNA.144.1.S1_at     | MmugDNA.144.1   | 10.55 | 10.74 | 0.15 | 0.09 | -1.14 | 0.134184 | 0.276828 | 0.417715 | 0.540757 |
| MmugDNA.14400.1.S1_at   | MmugDNA.14400.1 | 10.85 | 10.85 | 0.1  | 0.04 | -1    | 0.952771 | 0.938097 | 0.980564 | 0.964929 |
| MmugDNA.14401.1.S1_at   | MmugDNA.14401.1 | 7.29  | 7.13  | 0.18 | 0.32 | 1.12  | 0.3232   | 0.648171 | 0.607056 | 0.794002 |
| MmugDNA.14404.1.S1_at   | MmugDNA.14404.1 | 5.83  | 9.05  | 1.79 | 0.27 | -9.3  | 0.04724  | 0.260457 | 0.274594 | 0.527006 |
| MmugDNA.14407.1.S1_at   | MmugDNA.14407.1 | 7.93  | 7.99  | 0.08 | 0.05 | -1.05 | 0.310949 | 0.229905 | 0.597234 | 0.501802 |
| MmugDNA.14408.1.S1_at   | MmugDNA.14408.1 | 9.94  | 9.2   | 0.28 | 0.25 | 1.68  | 0.036626 | 0.028043 | 0.246402 | 0.208977 |
| MmugDNA.14410.1.S1_at   | MmugDNA.14410.1 | 7.84  | 7.79  | 0.15 | 0    | 1.04  | 0.908905 | 0.880223 | 0.96137  | 0.931571 |
| MmugDNA.14412.1.S1_at   | MmugDNA.14412.1 | 5.95  | 6.56  | 0.33 | 0.15 | -1.53 | 0.037807 | 0.062537 | 0.250145 | 0.296906 |
| MmugDNA.14416.1.S1_at   | MmugDNA.14416.1 | 9.69  | 9.32  | 0.36 | 0.21 | 1.3   | 0.614433 | 0.666146 | 0.808151 | 0.804415 |
| MmugDNA.14438.1.S1_at   | MmugDNA.14438.1 | 9     | 10.51 | 0.23 | 0.02 | -2.85 | 0.000369 | 0.062904 | 0.062479 | 0.297495 |
| MmugDNA.14440.1.S1_at   | MmugDNA.14440.1 | 10.82 | 11.07 | 0.11 | 0.05 | -1.18 | 0.04339  | 0.011388 | 0.265644 | 0.13824  |
| MmugDNA.14443.1.S1_at   | MmugDNA.14443.1 | 3.53  | 3.65  | 0.14 | 0.39 | -1.09 | 0.971174 | 0.925917 | 0.988523 | 0.958059 |
| MmugDNA.14453.1.S1_at   | MmugDNA.14453.1 | 9.88  | 6.9   | 0.13 | 0.66 | 7.88  | 0.002587 | 0.004447 | 0.094992 | 0.092958 |
| MmugDNA.14455.1.S1_at   | MmugDNA.14455.1 | 4.75  | 4.98  | 0.07 | 0.18 | -1.18 | 0.107835 | 0.177203 | 0.382472 | 0.453647 |
| MmugDNA.14456.1.S1_at   | MmugDNA.14456.1 | 5.09  | 5.21  | 0.1  | 0.23 | -1.09 | 0.248636 | 0.74182  | 0.544034 | 0.850509 |
| MmugDNA.14458.1.S1_at   | MmugDNA.14458.1 | 9.19  | 8.9   | 0.15 | 0.15 | 1.22  | 0.041531 | 0.106627 | 0.260186 | 0.36916  |
| MmugDNA.14459.1.S1_at   | MmugDNA.14459.1 | 8.82  | 8.12  | 0.3  | 0.15 | 1.63  | 0.05912  | 0.048769 | 0.300315 | 0.265793 |
| MmugDNA.14461.1.S1_at   | MmugDNA.14461.1 | 5.05  | 4.89  | 0.11 | 0.05 | 1.12  | 0.259044 | 0.35147  | 0.553321 | 0.595084 |
| MmugDNA.14463.1.S1_at   | MmugDNA.14463.1 | 5.57  | 5.69  | 0.14 | 0.11 | -1.08 | 0.235916 | 0.097023 | 0.533552 | 0.354531 |
| MmugDNA.14464.1.S1_at   | MmugDNA.14464.1 | 11.11 | 10.88 | 0.05 | 0.1  | 1.17  | 0.061088 | 0.032093 | 0.304005 | 0.221745 |
| MmugDNA.14465.1.S1_at   | MmugDNA.14465.1 | 6.76  | 6.42  | 0.27 | 0.13 | 1.26  | 0.213857 | 0.672902 | 0.511674 | 0.80887  |
| MmugDNA.14480.1.S1_at   | MmugDNA.14480.1 | 10.08 | 10.2  | 0.07 | 0.17 | -1.08 | 0.219981 | 0.585611 | 0.517641 | 0.752934 |
| MmugDNA.14483.1.S1_at   | MmugDNA.14483.1 | 10.89 | 11.15 | 0.17 | 0.02 | -1.2  | 0.12967  | 0.027161 | 0.412005 | 0.205893 |
| MmugDNA.14484.1.S1_at   | MmugDNA.14484.1 | 11.25 | 11.07 | 0.16 | 0.08 | 1.13  | 0.19837  | 0.30414  | 0.495518 | 0.561492 |
| MmugDNA.14499.1.S1_at   | MmugDNA.14499.1 | 8.57  | 8.27  | 0.28 | 0.38 | 1.23  | 0.691889 | 0.50807  | 0.852782 | 0.703358 |
| MmugDNA.1450.1.S1_at    | MmugDNA.1450.1  | 7.92  | 8.95  | 0.48 | 0.15 | -2.04 | 0.023779 | 0.160373 | 0.207169 | 0.436528 |
| MmugDNA.14501.1.S1_at   | MmugDNA.14501.1 | 10.94 | 10.85 | 0.18 | 0.1  | 1.07  | 0.534698 | 0.077761 | 0.757913 | 0.323917 |
| MmugDNA.14502.1.S1_s_at | MmugDNA.14502.1 | 9.64  | 9.6   | 0.07 | 0.15 | 1.02  | 0.463314 | 0.210731 | 0.710026 | 0.48478  |
| MmugDNA.14505.1.S1_at   | MmugDNA.14505.1 | 8.4   | 8.72  | 0.07 | 0.12 | -1.25 | 0.030688 | 0.614304 | 0.228035 | 0.771206 |
| MmugDNA.14506.1.S1_at   | MmugDNA.14506.1 | 11.64 | 11.43 | 0.11 | 0.03 | 1.16  | 0.094422 | 0.0153   | 0.363345 | 0.157071 |
| MmugDNA.14507.1.S1_at   | MmugDNA.14507.1 | 9.56  | 9.46  | 0.16 | 0.07 | 1.08  | 0.079734 | 0.009802 | 0.339935 | 0.130166 |

|                         |                 |       |       |      |      |        |          |          |          |          |
|-------------------------|-----------------|-------|-------|------|------|--------|----------|----------|----------|----------|
| MmugDNA.14520.1.S1_at   | MmugDNA.14520.1 | 4.28  | 4.22  | 0.29 | 0.11 | 1.04   | 0.189825 | 0.21319  | 0.486238 | 0.487069 |
| MmugDNA.14527.1.S1_at   | MmugDNA.14527.1 | 4.61  | 4.58  | 0.06 | 0.04 | 1.02   | 0.164655 | 0.139319 | 0.457714 | 0.412518 |
| MmugDNA.1453.1.S1_at    | MmugDNA.1453.1  | 9.3   | 9.17  | 0.13 | 0.19 | 1.09   | 0.745834 | 0.008145 | 0.882129 | 0.119736 |
| MmugDNA.14530.1.S1_at   | MmugDNA.14530.1 | 10.88 | 10.82 | 0.25 | 0.08 | 1.04   | 0.77128  | 0.376248 | 0.895207 | 0.614089 |
| MmugDNA.14531.1.S1_at   | MmugDNA.14531.1 | 6.78  | 6.57  | 0.16 | 0.09 | 1.16   | 0.107962 | 0.184087 | 0.382542 | 0.460306 |
| MmugDNA.14532.1.S1_at   | MmugDNA.14532.1 | 5.17  | 5.17  | 0.12 | 0.06 | -1     | 0.990964 | 0.105258 | 0.996677 | 0.366999 |
| MmugDNA.1454.1.S1_at    | MmugDNA.1454.1  | 9.39  | 9.24  | 0.18 | 0.07 | 1.12   | 0.143737 | 0.142308 | 0.430322 | 0.415848 |
| MmugDNA.14543.1.S1_at   | MmugDNA.14543.1 | 11.4  | 11.58 | 0.32 | 0.11 | -1.13  | 0.502448 | 0.449719 | 0.736123 | 0.665204 |
| MmugDNA.14544.1.S1_at   | MmugDNA.14544.1 | 10.03 | 12.76 | 1.32 | 0.19 | -6.63  | 0.063722 | 0.278128 | 0.308957 | 0.541783 |
| MmugDNA.14546.1.S1_at   | MmugDNA.14546.1 | 6.83  | 6.83  | 0.09 | 0.04 | 1      | 0.802708 | 0.105055 | 0.911408 | 0.366736 |
| MmugDNA.14551.1.S1_at   | MmugDNA.14551.1 | 7.58  | 12.11 | 1.61 | 0.27 | -23.09 | 0.013752 | 0.214035 | 0.168016 | 0.487633 |
| MmugDNA.14555.1.S1_at   | MmugDNA.14555.1 | 4.79  | 4.71  | 0.16 | 0.17 | 1.06   | 0.859557 | 0.74768  | 0.93919  | 0.853234 |
| MmugDNA.1456.1.S1_at    | MmugDNA.1456.1  | 9.65  | 9.15  | 0.06 | 0.06 | 1.41   | 0.000784 | 0.019967 | 0.072818 | 0.17752  |
| MmugDNA.14562.1.S1_at   | MmugDNA.14562.1 | 10.2  | 10.25 | 0.04 | 0.04 | -1.03  | 0.580217 | 0.000195 | 0.785706 | 0.030949 |
| MmugDNA.14563.1.S1_at   | MmugDNA.14563.1 | 5.6   | 5.55  | 0.07 | 0.14 | 1.03   | 0.341336 | 0.078801 | 0.621267 | 0.325757 |
| MmugDNA.14571.1.S1_s_at | MmugDNA.14571.1 | 10.23 | 9.34  | 0.15 | 0    | 1.86   | 0.000737 | 0.000146 | 0.072567 | 0.029509 |
| MmugDNA.14572.1.S1_at   | MmugDNA.14572.1 | 11.65 | 11.51 | 0.13 | 0.03 | 1.1    | 0.047039 | 0.000182 | 0.274555 | 0.030511 |
| MmugDNA.14573.1.S1_at   | MmugDNA.14573.1 | 7.82  | 7.8   | 0.22 | 0.18 | 1.01   | 0.957403 | 0.206513 | 0.982581 | 0.480571 |
| MmugDNA.14577.1.S1_at   | MmugDNA.14577.1 | 12.99 | 13.16 | 0.03 | 0.02 | -1.12  | 0.001992 | 0.22125  | 0.089614 | 0.49459  |
| MmugDNA.14583.1.S1_at   | MmugDNA.14583.1 | 7.79  | 7.8   | 0.09 | 0.06 | -1.01  | 0.942922 | 0.655123 | 0.97595  | 0.798309 |
| MmugDNA.14588.1.S1_at   | MmugDNA.14588.1 | 11.82 | 11.8  | 0.03 | 0.05 | 1.02   | 0.374929 | 0.884659 | 0.645792 | 0.934321 |
| MmugDNA.14592.1.S1_at   | MmugDNA.14592.1 | 11.8  | 11.66 | 0.29 | 0.24 | 1.1    | 0.905771 | 0.855915 | 0.960077 | 0.917744 |
| MmugDNA.14593.1.S1_at   | MmugDNA.14593.1 | 11.58 | 10.51 | 0.5  | 0.14 | 2.1    | 0.021619 | 0.001205 | 0.20067  | 0.054389 |
| MmugDNA.146.1.S1_at     | MmugDNA.146.1   | 5.9   | 5.89  | 0.16 | 0.02 | 1.01   | 0.427848 | 0.437224 | 0.684984 | 0.656606 |
| MmugDNA.1460.1.S1_at    | MmugDNA.1460.1  | 10.34 | 9.54  | 0.68 | 0.14 | 1.74   | 0.118379 | 0.385745 | 0.395956 | 0.621079 |
| MmugDNA.14601.1.S1_at   | MmugDNA.14601.1 | 12.13 | 11.98 | 0.21 | 0.02 | 1.11   | 0.23919  | 0.287945 | 0.53651  | 0.549227 |
| MmugDNA.14609.1.S1_at   | MmugDNA.14609.1 | 7.21  | 8.06  | 1.19 | 0.42 | -1.8   | 0.980956 | 0.733488 | 0.992903 | 0.845679 |
| MmugDNA.14617.1.S1_at   | MmugDNA.14617.1 | 8.57  | 9.26  | 0.37 | 0.25 | -1.61  | 0.082343 | 0.577842 | 0.34399  | 0.748148 |
| MmugDNA.14617.1.S1_s_at | MmugDNA.14617.1 | 8.2   | 9.18  | 0.49 | 0.24 | -1.97  | 0.057731 | 0.374903 | 0.297463 | 0.613144 |
| MmugDNA.14620.1.S1_at   | MmugDNA.14620.1 | 12.12 | 12.5  | 0.09 | 0.05 | -1.3   | 0.003137 | 0.043789 | 0.101196 | 0.25387  |
| MmugDNA.14623.1.S1_at   | MmugDNA.14623.1 | 9.85  | 9.76  | 0.28 | 0.03 | 1.06   | 0.751802 | 0.955407 | 0.885488 | 0.974655 |
| MmugDNA.14626.1.S1_at   | MmugDNA.14626.1 | 10.31 | 10.25 | 0.07 | 0.13 | 1.04   | 0.42878  | 0.881934 | 0.685509 | 0.932674 |
| MmugDNA.14631.1.S1_at   | MmugDNA.14631.1 | 11.42 | 11.05 | 0.04 | 0.06 | 1.3    | 0.0008   | 0.000686 | 0.073056 | 0.044166 |
| MmugDNA.14637.1.S1_at   | MmugDNA.14637.1 | 6.74  | 7.34  | 0.72 | 0.37 | -1.52  | 0.097461 | 0.065357 | 0.367624 | 0.301409 |
| MmugDNA.14644.1.S1_at   | MmugDNA.14644.1 | 4.91  | 4.65  | 0.18 | 0.2  | 1.2    | 0.207134 | 0.294758 | 0.504847 | 0.554345 |
| MmugDNA.1465.1.S1_at    | MmugDNA.1465.1  | 3.88  | 3.87  | 0.09 | 0.1  | 1.01   | 0.884718 | 0.09664  | 0.95097  | 0.354145 |
| MmugDNA.14651.1.S1_at   | MmugDNA.14651.1 | 6.17  | 7.77  | 0.75 | 0.48 | -3.03  | 0.154792 | 0.036913 | 0.445047 | 0.236593 |
| MmugDNA.14656.1.S1_at   | MmugDNA.14656.1 | 8.04  | 9.18  | 0.21 | 0.12 | -2.2   | 0.001667 | 0.069046 | 0.084462 | 0.309017 |
| MmugDNA.14658.1.S1_at   | MmugDNA.14658.1 | 10.44 | 10.58 | 0.04 | 0.26 | -1.1   | 0.126124 | 0.25388  | 0.407179 | 0.522233 |
| MmugDNA.14659.1.S1_at   | MmugDNA.14659.1 | 10.29 | 7.99  | 0.26 | 0.07 | 4.94   | 0.000124 | 0.000005 | 0.051196 | 0.015647 |
| MmugDNA.14660.1.S1_at   | MmugDNA.14660.1 | 11.9  | 11.84 | 0.18 | 0.09 | 1.04   | 0.710968 | 0.754564 | 0.863523 | 0.857242 |
| MmugDNA.14670.1.S1_at   | MmugDNA.14670.1 | 6.6   | 6.8   | 0.19 | 0.08 | -1.15  | 0.203438 | 0.146772 | 0.501192 | 0.420799 |
| MmugDNA.14671.1.S1_at   | MmugDNA.14671.1 | 10.27 | 9.99  | 0.02 | 0.08 | 1.22   | 0.002659 | 0.036669 | 0.095754 | 0.235973 |



|                         |                 |       |       |      |      |       |          |          |          |          |
|-------------------------|-----------------|-------|-------|------|------|-------|----------|----------|----------|----------|
| MmugDNA.14673.1.S1_at   | MmugDNA.14673.1 | 8.65  | 8.7   | 0.25 | 0.23 | -1.03 | 0.366907 | 0.608661 | 0.641083 | 0.767185 |
| MmugDNA.14675.1.S1_at   | MmugDNA.14675.1 | 12.71 | 12.32 | 0.05 | 0.16 | 1.31  | 0.031152 | 0.168447 | 0.229536 | 0.445092 |
| MmugDNA.14678.1.S1_at   | MmugDNA.14678.1 | 6.29  | 6.11  | 0.02 | 0.02 | 1.13  | 0.000898 | 0.027726 | 0.075282 | 0.207965 |
| MmugDNA.14684.1.S1_at   | MmugDNA.14684.1 | 11.09 | 11.04 | 0.09 | 0.13 | 1.03  | 0.370429 | 0.025848 | 0.643441 | 0.201605 |
| MmugDNA.14686.1.S1_s_at | MmugDNA.14686.1 | 12.09 | 11.65 | 0.1  | 0.05 | 1.35  | 0.001992 | 0.003766 | 0.089614 | 0.087404 |
| MmugDNA.14691.1.S1_at   | MmugDNA.14691.1 | 8.19  | 10.07 | 0.77 | 0.17 | -3.68 | 0.02628  | 0.117068 | 0.215228 | 0.384494 |
| MmugDNA.147.1.S1_at     | MmugDNA.147.1   | 3.37  | 3.27  | 0.08 | 0.08 | 1.07  | 0.242158 | 0.074247 | 0.539178 | 0.318046 |
| MmugDNA.14700.1.S1_at   | MmugDNA.14700.1 | 8.01  | 7.68  | 0.21 | 0.29 | 1.25  | 0.179669 | 0.183542 | 0.474837 | 0.459681 |
| MmugDNA.14702.1.S1_at   | MmugDNA.14702.1 | 8.86  | 9.31  | 0.14 | 0.13 | -1.37 | 0.019959 | 0.024941 | 0.194588 | 0.197799 |
| MmugDNA.14704.1.S1_at   | MmugDNA.14704.1 | 10.74 | 10.78 | 0.14 | 0.06 | -1.03 | 0.699943 | 0.021697 | 0.857508 | 0.184333 |
| MmugDNA.14711.1.S1_at   | MmugDNA.14711.1 | 7.86  | 8.15  | 0.38 | 0.25 | -1.22 | 0.593464 | 0.190926 | 0.79401  | 0.466269 |
| MmugDNA.14712.1.S1_at   | MmugDNA.14712.1 | 7.01  | 8.59  | 0.6  | 0.21 | -2.99 | 0.015347 | 0.029805 | 0.176072 | 0.214318 |
| MmugDNA.1472.1.S1_at    | MmugDNA.1472.1  | 9.56  | 9.61  | 1    | 0.16 | -1.04 | 0.328335 | 0.604106 | 0.610675 | 0.764496 |
| MmugDNA.1472.1.S1_s_at  | MmugDNA.1472.1  | 9.03  | 9.15  | 1.15 | 0.16 | -1.08 | 0.360712 | 0.650517 | 0.636187 | 0.795663 |
| MmugDNA.14720.1.S1_at   | MmugDNA.14720.1 | 3.4   | 3.19  | 0.26 | 0.21 | 1.16  | 0.687291 | 0.866927 | 0.850804 | 0.924385 |
| MmugDNA.14721.1.S1_at   | MmugDNA.14721.1 | 6.65  | 7.96  | 0.42 | 0.2  | -2.48 | 0.016607 | 0.127163 | 0.18217  | 0.397922 |
| MmugDNA.14722.1.S1_at   | MmugDNA.14722.1 | 5.47  | 5.38  | 0.47 | 0.1  | 1.07  | 0.520719 | 0.159804 | 0.748945 | 0.435871 |
| MmugDNA.14725.1.S1_at   | MmugDNA.14725.1 | 6.07  | 5.6   | 0.65 | 0.21 | 1.39  | 0.564544 | 0.335627 | 0.776201 | 0.583403 |
| MmugDNA.14726.1.S1_at   | MmugDNA.14726.1 | 7.02  | 6.99  | 0.17 | 0.04 | 1.02  | 0.729405 | 0.656408 | 0.873618 | 0.799082 |
| MmugDNA.14729.1.S1_at   | MmugDNA.14729.1 | 6.3   | 6.27  | 0.28 | 0.03 | 1.02  | 0.556006 | 0.201368 | 0.771459 | 0.47589  |
| MmugDNA.14730.1.S1_at   | MmugDNA.14730.1 | 4.56  | 4.49  | 0.42 | 0.19 | 1.04  | 0.508318 | 0.498987 | 0.740303 | 0.69793  |
| MmugDNA.14733.1.S1_at   | MmugDNA.14733.1 | 9.45  | 10.24 | 0.24 | 0.11 | -1.74 | 0.008498 | 0.334942 | 0.141348 | 0.58275  |
| MmugDNA.14737.1.S1_at   | MmugDNA.14737.1 | 7.57  | 8.22  | 0.57 | 0.3  | -1.57 | 0.278198 | 0.384576 | 0.56955  | 0.62023  |
| MmugDNA.14743.1.S1_at   | MmugDNA.14743.1 | 5.17  | 5.06  | 0.14 | 0.1  | 1.08  | 0.902698 | 0.391449 | 0.958703 | 0.625086 |
| MmugDNA.1475.1.S1_at    | MmugDNA.1475.1  | 6.57  | 6.66  | 0.19 | 0.13 | -1.07 | 0.340783 | 0.074395 | 0.620903 | 0.318058 |
| MmugDNA.14753.1.S1_at   | MmugDNA.14753.1 | 10.88 | 10.89 | 0.04 | 0.05 | -1.01 | 0.282803 | 0.966667 | 0.573377 | 0.98148  |
| MmugDNA.14762.1.S1_at   | MmugDNA.14762.1 | 5.32  | 6.75  | 0.22 | 0.52 | -2.68 | 0.037555 | 0.027561 | 0.249261 | 0.207319 |
| MmugDNA.14765.1.S1_at   | MmugDNA.14765.1 | 12.3  | 12.52 | 0.13 | 0.08 | -1.17 | 0.043417 | 0.301987 | 0.265644 | 0.559929 |
| MmugDNA.14767.1.S1_at   | MmugDNA.14767.1 | 7.7   | 6.04  | 0.62 | 0.68 | 3.15  | 0.057412 | 0.015667 | 0.296977 | 0.158598 |
| MmugDNA.14769.1.S1_at   | MmugDNA.14769.1 | 9.32  | 9.79  | 0.34 | 0.15 | -1.38 | 0.152668 | 0.306958 | 0.442371 | 0.563427 |
| MmugDNA.14770.1.S1_at   | MmugDNA.14770.1 | 6.32  | 8.6   | 0.36 | 0.34 | -4.83 | 0.001434 | 0.012038 | 0.079801 | 0.142019 |
| MmugDNA.14772.1.S1_at   | MmugDNA.14772.1 | 10.52 | 10.73 | 0.22 | 0.08 | -1.15 | 0.285667 | 0.013803 | 0.575393 | 0.150578 |
| MmugDNA.14773.1.S1_at   | MmugDNA.14773.1 | 10.24 | 9.98  | 0.06 | 0.08 | 1.2   | 0.007655 | 0.103354 | 0.136071 | 0.36423  |
| MmugDNA.14778.1.S1_at   | MmugDNA.14778.1 | 11.3  | 11.06 | 0.19 | 0.05 | 1.18  | 0.036407 | 0.06261  | 0.24584  | 0.297022 |
| MmugDNA.14791.1.S1_at   | MmugDNA.14791.1 | 6.5   | 6.41  | 0.09 | 0.01 | 1.07  | 0.195305 | 0.177171 | 0.491959 | 0.453631 |
| MmugDNA.14803.1.S1_s_at | MmugDNA.14803.1 | 10.56 | 10.63 | 0.13 | 0.07 | -1.05 | 0.092195 | 0.010102 | 0.360155 | 0.131859 |
| MmugDNA.1481.1.S1_at    | MmugDNA.1481.1  | 4.83  | 4.85  | 0.14 | 0.08 | -1.01 | 0.661819 | 0.081722 | 0.836822 | 0.330011 |
| MmugDNA.14810.1.S1_at   | MmugDNA.14810.1 | 11.55 | 11.54 | 0.13 | 0.18 | 1.01  | 0.804249 | 0.384739 | 0.912041 | 0.620363 |
| MmugDNA.14815.1.S1_at   | MmugDNA.14815.1 | 3.56  | 3.63  | 0.02 | 0.11 | -1.05 | 0.25073  | 0.740402 | 0.545287 | 0.849642 |
| MmugDNA.14817.1.S1_at   | MmugDNA.14817.1 | 12.93 | 12.97 | 0.04 | 0.02 | -1.03 | 0.09433  | 0.098652 | 0.363345 | 0.356743 |
| MmugDNA.14819.1.S1_at   | MmugDNA.14819.1 | 12.18 | 12    | 0.27 | 0.08 | 1.13  | 0.082029 | 0.003673 | 0.343291 | 0.086568 |
| MmugDNA.14821.1.S1_at   | MmugDNA.14821.1 | 2.86  | 2.91  | 0.12 | 0.13 | -1.03 | 0.459405 | 0.223735 | 0.707564 | 0.496672 |
| MmugDNA.14822.1.S1_at   | MmugDNA.14822.1 | 9.45  | 9.22  | 0.07 | 0.08 | 1.17  | 0.049526 | 0.009667 | 0.279984 | 0.129379 |

|                         |                 |       |       |      |      |       |          |          |          |          |
|-------------------------|-----------------|-------|-------|------|------|-------|----------|----------|----------|----------|
| MmugDNA.14824.1.S1_at   | MmugDNA.14824.1 | 6.47  | 5.29  | 0.83 | 0.13 | 2.26  | 0.186085 | 0.248296 | 0.482202 | 0.5176   |
| MmugDNA.14825.1.S1_at   | MmugDNA.14825.1 | 5.81  | 5.71  | 0.16 | 0.1  | 1.07  | 0.142368 | 0.136709 | 0.428359 | 0.409259 |
| MmugDNA.14826.1.S1_at   | MmugDNA.14826.1 | 9.24  | 9.06  | 0.1  | 0.1  | 1.13  | 0.040313 | 0.028143 | 0.257247 | 0.209306 |
| MmugDNA.1483.1.S1_at    | MmugDNA.1483.1  | 8.2   | 8.15  | 0.17 | 0.06 | 1.04  | 0.613441 | 0.965657 | 0.807428 | 0.980751 |
| MmugDNA.14830.1.S1_at   | MmugDNA.14830.1 | 4.96  | 5.07  | 0.19 | 0.03 | -1.08 | 0.1341   | 0.143151 | 0.417577 | 0.417029 |
| MmugDNA.14831.1.S1_at   | MmugDNA.14831.1 | 6.75  | 6.75  | 0.13 | 0.04 | 1     | 0.918574 | 0.201953 | 0.965302 | 0.476412 |
| MmugDNA.14832.1.S1_at   | MmugDNA.14832.1 | 12.97 | 12.74 | 0.08 | 0.11 | 1.17  | 0.023872 | 0.074525 | 0.207529 | 0.318173 |
| MmugDNA.14835.1.S1_at   | MmugDNA.14835.1 | 11.29 | 11.94 | 0.06 | 0.16 | -1.56 | 0.003459 | 0.228528 | 0.103385 | 0.500752 |
| MmugDNA.14838.1.S1_at   | MmugDNA.14838.1 | 5.21  | 4.91  | 0.28 | 0.12 | 1.23  | 0.210795 | 0.289392 | 0.50843  | 0.550431 |
| MmugDNA.14839.1.S1_at   | MmugDNA.14839.1 | 7.32  | 7.01  | 0.54 | 0.18 | 1.24  | 0.957968 | 0.294462 | 0.982752 | 0.554212 |
| MmugDNA.14842.1.S1_at   | MmugDNA.14842.1 | 6.67  | 5.74  | 0.75 | 0.38 | 1.9   | 0.110019 | 0.127888 | 0.385253 | 0.398825 |
| MmugDNA.14844.1.S1_at   | MmugDNA.14844.1 | 12.62 | 12.46 | 0.08 | 0.07 | 1.12  | 0.038952 | 0.252593 | 0.253692 | 0.521145 |
| MmugDNA.14849.1.S1_at   | MmugDNA.14849.1 | 10.02 | 10.15 | 0.13 | 0.16 | -1.09 | 0.633773 | 0.315432 | 0.8205   | 0.568949 |
| MmugDNA.1485.1.S1_at    | MmugDNA.1485.1  | 10.6  | 12.2  | 0.22 | 0.2  | -3.04 | 0.000857 | 0.226931 | 0.073702 | 0.499276 |
| MmugDNA.14852.1.S1_at   | MmugDNA.14852.1 | 4.6   | 4.57  | 0.19 | 0.03 | 1.02  | 0.511462 | 0.696593 | 0.742407 | 0.823774 |
| MmugDNA.14853.1.S1_at   | MmugDNA.14853.1 | 5.76  | 5.81  | 0.06 | 0.01 | -1.04 | 0.228769 | 0.341757 | 0.527266 | 0.587862 |
| MmugDNA.14857.1.S1_at   | MmugDNA.14857.1 | 4.6   | 4.55  | 0.13 | 0.08 | 1.03  | 0.351918 | 0.462864 | 0.62954  | 0.674149 |
| MmugDNA.14858.1.S1_at   | MmugDNA.14858.1 | 4.01  | 4.04  | 0.15 | 0.08 | -1.02 | 0.590102 | 0.768953 | 0.791771 | 0.865764 |
| MmugDNA.14860.1.S1_at   | MmugDNA.14860.1 | 11.66 | 11.33 | 0.04 | 0.1  | 1.26  | 0.004856 | 0.090761 | 0.115123 | 0.345227 |
| MmugDNA.14861.1.S1_at   | MmugDNA.14861.1 | 12.2  | 12.31 | 0.07 | 0.02 | -1.08 | 0.044442 | 0.002476 | 0.267911 | 0.073576 |
| MmugDNA.14862.1.S1_at   | MmugDNA.14862.1 | 5.85  | 7.16  | 0.95 | 0.22 | -2.48 | 0.074707 | 0.166783 | 0.33141  | 0.443274 |
| MmugDNA.14866.1.S1_at   | MmugDNA.14866.1 | 11.44 | 11.44 | 0.14 | 0.06 | 1     | 0.768572 | 0.108661 | 0.893686 | 0.372171 |
| MmugDNA.14866.1.S1_s_at | MmugDNA.14866.1 | 11.75 | 11.74 | 0.15 | 0.08 | 1.01  | 0.8514   | 0.131039 | 0.935336 | 0.40306  |
| MmugDNA.14872.1.S1_at   | MmugDNA.14872.1 | 7.11  | 7.39  | 0.41 | 0.36 | -1.22 | 0.464214 | 0.591617 | 0.710562 | 0.757155 |
| MmugDNA.14876.1.S1_at   | MmugDNA.14876.1 | 5.32  | 5.92  | 0.26 | 0.4  | -1.52 | 0.102652 | 0.254745 | 0.37496  | 0.523015 |
| MmugDNA.14886.1.S1_at   | MmugDNA.14886.1 | 9.93  | 9.88  | 0.15 | 0.2  | 1.03  | 0.762636 | 0.20424  | 0.891323 | 0.478541 |
| MmugDNA.14893.1.S1_at   | MmugDNA.14893.1 | 11.92 | 11.77 | 0.04 | 0.03 | 1.11  | 0.002495 | 0.00002  | 0.094326 | 0.019635 |
| MmugDNA.14897.1.S1_at   | MmugDNA.14897.1 | 12.48 | 13.18 | 0.02 | 0.15 | -1.62 | 0.002115 | 0.0003   | 0.090208 | 0.034892 |
| MmugDNA.14899.1.S1_at   | MmugDNA.14899.1 | 4.76  | 4.77  | 0.3  | 0.18 | -1.01 | 0.428751 | 0.579868 | 0.685503 | 0.749321 |
| MmugDNA.14908.1.S1_at   | MmugDNA.14908.1 | 6.26  | 6.19  | 0.11 | 0.06 | 1.05  | 0.429634 | 0.241925 | 0.686015 | 0.512489 |
| MmugDNA.14909.1.S1_at   | MmugDNA.14909.1 | 8.71  | 8.53  | 0.52 | 0.07 | 1.13  | 0.631709 | 0.099736 | 0.819194 | 0.358288 |
| MmugDNA.14912.1.S1_at   | MmugDNA.14912.1 | 5.4   | 6.18  | 0.77 | 0.33 | -1.72 | 0.339626 | 0.395423 | 0.619844 | 0.627474 |
| MmugDNA.14912.1.S1_s_at | MmugDNA.14912.1 | 5.01  | 5.02  | 0.17 | 0.22 | -1.01 | 0.651449 | 0.784464 | 0.830712 | 0.875181 |
| MmugDNA.14913.1.S1_at   | MmugDNA.14913.1 | 13.23 | 13.18 | 0.21 | 0.03 | 1.04  | 0.686907 | 0.000403 | 0.850752 | 0.037471 |
| MmugDNA.14920.1.S1_at   | MmugDNA.14920.1 | 7.33  | 7.41  | 0.03 | 0.06 | -1.06 | 0.130301 | 0.517281 | 0.412601 | 0.709435 |
| MmugDNA.14925.1.S1_at   | MmugDNA.14925.1 | 5.77  | 6.37  | 0.3  | 0.33 | -1.52 | 0.024527 | 0.021076 | 0.209655 | 0.181869 |
| MmugDNA.14929.1.S1_at   | MmugDNA.14929.1 | 10.51 | 10.73 | 0.12 | 0.05 | -1.17 | 0.017525 | 0.02992  | 0.185974 | 0.214643 |
| MmugDNA.1493.1.S1_at    | MmugDNA.1493.1  | 6.6   | 6.73  | 0.3  | 0.31 | -1.1  | 0.366215 | 0.535354 | 0.640626 | 0.720907 |
| MmugDNA.1494.1.S1_at    | MmugDNA.1494.1  | 11.74 | 11.88 | 0.21 | 0.07 | -1.11 | 0.077698 | 0.033103 | 0.336598 | 0.225221 |
| MmugDNA.14944.1.S1_at   | MmugDNA.14944.1 | 9.75  | 10.17 | 0.11 | 0.09 | -1.34 | 0.01173  | 0.040835 | 0.15815  | 0.246981 |
| MmugDNA.14944.1.S1_s_at | MmugDNA.14944.1 | 7.72  | 8     | 0.24 | 0.16 | -1.22 | 0.176742 | 0.087855 | 0.471201 | 0.341218 |
| MmugDNA.14945.1.S1_at   | MmugDNA.14945.1 | 12.85 | 12.86 | 0.05 | 0.07 | -1.01 | 0.431112 | 0.813576 | 0.687263 | 0.892313 |
| MmugDNA.14946.1.S1_at   | MmugDNA.14946.1 | 8.1   | 8.13  | 0.23 | 0.13 | -1.03 | 0.415258 | 0.130458 | 0.676055 | 0.4023   |

|                         |                 |       |       |      |      |       |          |          |          |          |
|-------------------------|-----------------|-------|-------|------|------|-------|----------|----------|----------|----------|
| MmugDNA.14947.1.S1_at   | MmugDNA.14947.1 | 10.81 | 10.8  | 0.34 | 0.16 | 1.01  | 0.640472 | 0.016602 | 0.824311 | 0.163117 |
| MmugDNA.14949.1.S1_at   | MmugDNA.14949.1 | 3.3   | 3.12  | 0.2  | 0.19 | 1.13  | 0.733361 | 0.173136 | 0.875693 | 0.449765 |
| MmugDNA.14950.1.S1_at   | MmugDNA.14950.1 | 12.63 | 12.7  | 0.04 | 0.02 | -1.05 | 0.10443  | 0.817771 | 0.377773 | 0.894834 |
| MmugDNA.14951.1.S1_s_at | MmugDNA.14951.1 | 11.76 | 11.8  | 0.11 | 0.05 | -1.02 | 0.591602 | 0.008952 | 0.792697 | 0.125082 |
| MmugDNA.14954.1.S1_at   | MmugDNA.14954.1 | 10.49 | 10.57 | 0.15 | 0.09 | -1.05 | 0.816869 | 0.691824 | 0.918133 | 0.82074  |
| MmugDNA.14955.1.S1_at   | MmugDNA.14955.1 | 9.17  | 10.03 | 0.41 | 0.05 | -1.81 | 0.023093 | 0.00311  | 0.205038 | 0.081305 |
| MmugDNA.14959.1.S1_at   | MmugDNA.14959.1 | 11.49 | 10.59 | 0.1  | 0.12 | 1.86  | 0.000581 | 0.014922 | 0.070727 | 0.155285 |
| MmugDNA.14962.1.S1_at   | MmugDNA.14962.1 | 10.85 | 10.72 | 0.17 | 0.18 | 1.09  | 0.793785 | 0.035136 | 0.906789 | 0.231645 |
| MmugDNA.14964.1.S1_at   | MmugDNA.14964.1 | 11.3  | 10.2  | 0.33 | 0.06 | 2.14  | 0.009124 | 0.377952 | 0.145411 | 0.615264 |
| MmugDNA.14967.1.S1_at   | MmugDNA.14967.1 | 9.01  | 9.06  | 0.39 | 0.13 | -1.04 | 0.465655 | 0.587113 | 0.711634 | 0.75402  |
| MmugDNA.14970.1.S1_at   | MmugDNA.14970.1 | 4.81  | 4.76  | 0.11 | 0.08 | 1.03  | 0.609964 | 0.667674 | 0.80558  | 0.805472 |
| MmugDNA.14973.1.S1_at   | MmugDNA.14973.1 | 10.53 | 9.25  | 0.11 | 0.15 | 2.43  | 0.00023  | 0.000009 | 0.054608 | 0.016421 |
| MmugDNA.14978.1.S1_at   | MmugDNA.14978.1 | 5.96  | 6.18  | 0.26 | 0.45 | -1.16 | 0.857765 | 0.500413 | 0.938173 | 0.699036 |
| MmugDNA.1498.1.S1_at    | MmugDNA.1498.1  | 10.8  | 10.74 | 0.05 | 0.03 | 1.05  | 0.070866 | 0.009039 | 0.324317 | 0.125644 |
| MmugDNA.14982.1.S1_at   | MmugDNA.14982.1 | 10.48 | 10.2  | 0.09 | 0.07 | 1.21  | 0.016884 | 0.000313 | 0.18332  | 0.035198 |
| MmugDNA.14985.1.S1_at   | MmugDNA.14985.1 | 6.02  | 6.87  | 0.68 | 0.33 | -1.8  | 0.363597 | 0.617862 | 0.638251 | 0.773736 |
| MmugDNA.14989.1.S1_at   | MmugDNA.14989.1 | 5.14  | 5.21  | 0.1  | 0.06 | -1.05 | 0.808862 | 0.400333 | 0.914357 | 0.630169 |
| MmugDNA.1499.1.S1_at    | MmugDNA.1499.1  | 10.69 | 11.63 | 0.48 | 0.1  | -1.92 | 0.061652 | 0.477324 | 0.304886 | 0.683422 |
| MmugDNA.14992.1.S1_at   | MmugDNA.14992.1 | 5.12  | 5.09  | 0.17 | 0.11 | 1.02  | 0.806392 | 0.183626 | 0.913273 | 0.459681 |
| MmugDNA.14995.1.S1_at   | MmugDNA.14995.1 | 9.25  | 9.57  | 0.24 | 0.13 | -1.25 | 0.186568 | 0.827801 | 0.482695 | 0.901152 |
| MmugDNA.14999.1.S1_at   | MmugDNA.14999.1 | 6     | 5.83  | 0.18 | 0.03 | 1.13  | 0.313474 | 0.484517 | 0.599319 | 0.688529 |
| MmugDNA.150.1.S1_at     | MmugDNA.150.1   | 12.39 | 12.38 | 0.02 | 0.03 | 1.01  | 0.104065 | 0.717648 | 0.377336 | 0.836515 |
| MmugDNA.15002.1.S1_at   | MmugDNA.15002.1 | 10.11 | 9.67  | 0.17 | 0.03 | 1.36  | 0.017947 | 0.613288 | 0.187151 | 0.770491 |
| MmugDNA.15004.1.S1_at   | MmugDNA.15004.1 | 11.52 | 12.47 | 0.47 | 0.02 | -1.92 | 0.021153 | 0.061119 | 0.19894  | 0.293975 |
| MmugDNA.1501.1.S1_at    | MmugDNA.1501.1  | 12.67 | 12.28 | 0.13 | 0.04 | 1.31  | 0.011711 | 0.475025 | 0.158018 | 0.681859 |
| MmugDNA.15010.1.S1_at   | MmugDNA.15010.1 | 9.96  | 9.56  | 0.1  | 0.07 | 1.32  | 0.006023 | 0.084663 | 0.124151 | 0.33618  |
| MmugDNA.15014.1.S1_at   | MmugDNA.15014.1 | 8.92  | 8.76  | 0.18 | 0.22 | 1.12  | 0.609325 | 0.004403 | 0.805158 | 0.092846 |
| MmugDNA.15020.1.S1_at   | MmugDNA.15020.1 | 12.61 | 12.42 | 0.09 | 0.05 | 1.14  | 0.038828 | 0.081158 | 0.253345 | 0.329346 |
| MmugDNA.15022.1.S1_at   | MmugDNA.15022.1 | 8.26  | 8.48  | 0.09 | 0.12 | -1.17 | 0.139187 | 0.001961 | 0.424933 | 0.065832 |
| MmugDNA.15037.1.S1_at   | MmugDNA.15037.1 | 12.36 | 12.87 | 0.17 | 0.05 | -1.42 | 0.018042 | 0.001212 | 0.187335 | 0.054455 |
| MmugDNA.15045.1.S1_at   | MmugDNA.15045.1 | 5.09  | 4.76  | 0.23 | 0.08 | 1.26  | 0.085168 | 0.114679 | 0.349307 | 0.381227 |
| MmugDNA.15046.1.S1_at   | MmugDNA.15046.1 | 9.77  | 11.68 | 0.82 | 0.18 | -3.75 | 0.042727 | 0.054054 | 0.263882 | 0.277914 |
| MmugDNA.1505.1.S1_at    | MmugDNA.1505.1  | 11.59 | 11.39 | 0.15 | 0.08 | 1.15  | 0.151726 | 0.097206 | 0.441235 | 0.354886 |
| MmugDNA.15052.1.S1_at   | MmugDNA.15052.1 | 7.61  | 8.11  | 0.16 | 0.15 | -1.41 | 0.016847 | 0.004978 | 0.183141 | 0.098369 |
| MmugDNA.15054.1.S1_x_at | MmugDNA.15054.1 | 7.7   | 7.18  | 0.31 | 0.09 | 1.44  | 0.082226 | 0.06348  | 0.343817 | 0.298441 |
| MmugDNA.15055.1.S1_at   | MmugDNA.15055.1 | 5.26  | 5.18  | 0.22 | 0.06 | 1.06  | 0.533004 | 0.369935 | 0.756781 | 0.609164 |
| MmugDNA.15058.1.S1_at   | MmugDNA.15058.1 | 7.99  | 8.09  | 0.15 | 0.31 | -1.07 | 0.455801 | 0.923968 | 0.705414 | 0.957162 |
| MmugDNA.15062.1.S1_at   | MmugDNA.15062.1 | 10.4  | 10.46 | 0.4  | 0.15 | -1.04 | 0.599746 | 0.232159 | 0.798347 | 0.503874 |
| MmugDNA.15063.1.S1_s_at | MmugDNA.15063.1 | 6.36  | 6.88  | 0.45 | 0.14 | -1.43 | 0.126146 | 0.009086 | 0.407197 | 0.125944 |
| MmugDNA.15064.1.S1_at   | MmugDNA.15064.1 | 5.1   | 5.1   | 0.07 | 0.02 | 1     | 0.993638 | 0.994969 | 0.997413 | 0.996893 |
| MmugDNA.15075.1.S1_at   | MmugDNA.15075.1 | 7.38  | 7.95  | 0.47 | 0.49 | -1.48 | 0.356868 | 0.894334 | 0.633124 | 0.939697 |
| MmugDNA.15076.1.S1_at   | MmugDNA.15076.1 | 13.51 | 13.47 | 0.05 | 0.02 | 1.03  | 0.118759 | 0.111279 | 0.396551 | 0.375963 |
| MmugDNA.15079.1.S1_at   | MmugDNA.15079.1 | 3.93  | 3.85  | 0.15 | 0.33 | 1.06  | 0.727726 | 0.725726 | 0.872524 | 0.841146 |

|                         |                 |       |       |      |      |        |          |          |          |          |
|-------------------------|-----------------|-------|-------|------|------|--------|----------|----------|----------|----------|
| MmugDNA.15079.1.S1_s_at | MmugDNA.15079.1 | 4.43  | 3.97  | 0.76 | 0.32 | 1.37   | 0.416395 | 0.582059 | 0.676909 | 0.750784 |
| MmugDNA.15084.1.S1_s_at | MmugDNA.15084.1 | 9.93  | 13.26 | 1.38 | 0.13 | -10.06 | 0.032354 | 0.260967 | 0.234044 | 0.527351 |
| MmugDNA.15086.1.S1_at   | MmugDNA.15086.1 | 9.5   | 9.48  | 0.16 | 0.24 | 1.01   | 0.603689 | 0.264351 | 0.801175 | 0.530385 |
| MmugDNA.15089.1.S1_at   | MmugDNA.15089.1 | 6.43  | 5.9   | 0.79 | 0.39 | 1.44   | 0.550862 | 0.378293 | 0.76815  | 0.615438 |
| MmugDNA.1509.1.S1_s_at  | MmugDNA.1509.1  | 10.24 | 10.42 | 0.34 | 0.08 | -1.14  | 0.736388 | 0.476632 | 0.877494 | 0.682812 |
| MmugDNA.15092.1.S1_at   | MmugDNA.15092.1 | 8.62  | 8.72  | 0.24 | 0.13 | -1.07  | 0.752284 | 0.190528 | 0.885542 | 0.465906 |
| MmugDNA.15101.1.S1_at   | MmugDNA.15101.1 | 6     | 5.88  | 0.17 | 0.02 | 1.09   | 0.251577 | 0.355234 | 0.546344 | 0.597576 |
| MmugDNA.15113.1.S1_at   | MmugDNA.15113.1 | 7.45  | 7.42  | 0.14 | 0.2  | 1.02   | 0.825135 | 0.633714 | 0.922332 | 0.784372 |
| MmugDNA.15114.1.S1_at   | MmugDNA.15114.1 | 9.86  | 9.28  | 0.19 | 0.13 | 1.5    | 0.01413  | 0.003573 | 0.17039  | 0.085556 |
| MmugDNA.15120.1.A1_at   | MmugDNA.15120.1 | 7.63  | 7.79  | 0.36 | 0.07 | -1.11  | 0.798018 | 0.443384 | 0.908854 | 0.66118  |
| MmugDNA.15120.1.S1_at   | MmugDNA.15120.1 | 7.06  | 6.97  | 0.54 | 0.18 | 1.07   | 0.985074 | 0.679231 | 0.994613 | 0.81275  |
| MmugDNA.15126.1.S1_at   | MmugDNA.15126.1 | 7.88  | 7.62  | 0.21 | 0.11 | 1.2    | 0.079628 | 0.240079 | 0.33985  | 0.510776 |
| MmugDNA.15127.1.S1_at   | MmugDNA.15127.1 | 9.61  | 9.34  | 0.27 | 0.28 | 1.21   | 0.335084 | 0.661279 | 0.616104 | 0.801687 |
| MmugDNA.15132.1.S1_at   | MmugDNA.15132.1 | 4.5   | 5.45  | 0.12 | 0.34 | -1.93  | 0.017748 | 0.099868 | 0.18688  | 0.358557 |
| MmugDNA.15135.1.S1_at   | MmugDNA.15135.1 | 3.47  | 3.46  | 0.23 | 0.05 | 1.01   | 0.702223 | 0.722886 | 0.858658 | 0.839474 |
| MmugDNA.15141.1.S1_at   | MmugDNA.15141.1 | 3.16  | 3.14  | 0.11 | 0.08 | 1.02   | 0.864764 | 0.929199 | 0.94142  | 0.959644 |
| MmugDNA.15141.1.S1_s_at | MmugDNA.15141.1 | 3.36  | 3.34  | 0.08 | 0.12 | 1.01   | 0.816188 | 0.839125 | 0.917981 | 0.908316 |
| MmugDNA.15148.1.S1_at   | MmugDNA.15148.1 | 5.04  | 5.11  | 0.16 | 0.03 | -1.05  | 0.754418 | 0.933502 | 0.886786 | 0.962216 |
| MmugDNA.1515.1.S1_at    | MmugDNA.1515.1  | 4.83  | 6.77  | 0.84 | 0.42 | -3.83  | 0.027048 | 0.155694 | 0.217254 | 0.431054 |
| MmugDNA.15150.1.S1_at   | MmugDNA.15150.1 | 10.49 | 9.94  | 0.12 | 0.14 | 1.47   | 0.005486 | 0.013354 | 0.119547 | 0.148152 |
| MmugDNA.15152.1.S1_at   | MmugDNA.15152.1 | 10.89 | 10.75 | 0.3  | 0.02 | 1.1    | 0.475012 | 0.263812 | 0.717773 | 0.530086 |
| MmugDNA.15153.1.S1_at   | MmugDNA.15153.1 | 12.52 | 11.57 | 0.08 | 0.33 | 1.93   | 0.017841 | 0.157422 | 0.187044 | 0.432911 |
| MmugDNA.15155.1.S1_at   | MmugDNA.15155.1 | 6.69  | 5.78  | 1.1  | 0.47 | 1.88   | 0.2681   | 0.279749 | 0.560779 | 0.543232 |
| MmugDNA.15162.1.S1_at   | MmugDNA.15162.1 | 6.14  | 6.29  | 0.07 | 0.02 | -1.11  | 0.049109 | 0.089499 | 0.279154 | 0.343811 |
| MmugDNA.15162.1.S1_s_at | MmugDNA.15162.1 | 6     | 5.97  | 0.08 | 0.1  | 1.02   | 0.405364 | 0.184997 | 0.668832 | 0.460814 |
| MmugDNA.15167.1.S1_at   | MmugDNA.15167.1 | 4.8   | 4.76  | 0.11 | 0.07 | 1.02   | 0.725125 | 0.629746 | 0.871012 | 0.781989 |
| MmugDNA.15170.1.S1_s_at | MmugDNA.15170.1 | 5.16  | 5.29  | 0.59 | 0.05 | -1.1   | 0.629591 | 0.256161 | 0.818047 | 0.524069 |
| MmugDNA.15175.1.S1_at   | MmugDNA.15175.1 | 12.91 | 12.89 | 0.08 | 0.05 | 1.01   | 0.497071 | 0.584724 | 0.732887 | 0.752515 |
| MmugDNA.15176.1.S1_at   | MmugDNA.15176.1 | 8.79  | 8.83  | 0.18 | 0.01 | -1.03  | 0.570578 | 0.49873  | 0.779362 | 0.697733 |
| MmugDNA.15178.1.S1_at   | MmugDNA.15178.1 | 10.92 | 11.27 | 0.3  | 0.03 | -1.27  | 0.395932 | 0.154857 | 0.662105 | 0.429849 |
| MmugDNA.15193.1.S1_at   | MmugDNA.15193.1 | 5.53  | 5.12  | 0.39 | 0.23 | 1.33   | 0.212636 | 0.263852 | 0.510654 | 0.5301   |
| MmugDNA.15194.1.S1_at   | MmugDNA.15194.1 | 9.55  | 9.22  | 0.14 | 0.37 | 1.26   | 0.355049 | 0.900995 | 0.631891 | 0.943658 |
| MmugDNA.15195.1.S1_at   | MmugDNA.15195.1 | 4.83  | 6.43  | 0.45 | 0.56 | -3.03  | 0.035284 | 0.063859 | 0.242544 | 0.29906  |
| MmugDNA.15195.1.S1_s_at | MmugDNA.15195.1 | 5.75  | 5.82  | 0.51 | 0.36 | -1.05  | 0.509986 | 0.739623 | 0.741352 | 0.849117 |
| MmugDNA.15205.1.S1_at   | MmugDNA.15205.1 | 11    | 10.34 | 0.29 | 0.04 | 1.58   | 0.032945 | 0.015669 | 0.235804 | 0.158598 |
| MmugDNA.15208.1.S1_at   | MmugDNA.15208.1 | 4.65  | 4.62  | 0.31 | 0.17 | 1.02   | 0.612094 | 0.833108 | 0.80668  | 0.90427  |
| MmugDNA.15209.1.S1_at   | MmugDNA.15209.1 | 11.01 | 11.09 | 0.14 | 0.06 | -1.06  | 0.232458 | 0.399807 | 0.530886 | 0.630016 |
| MmugDNA.15212.1.S1_at   | MmugDNA.15212.1 | 6.68  | 8.32  | 0.5  | 0.48 | -3.12  | 0.035114 | 0.026392 | 0.242052 | 0.203529 |
| MmugDNA.15218.1.S1_at   | MmugDNA.15218.1 | 11.56 | 11.46 | 0.17 | 0.17 | 1.07   | 0.21878  | 0.069545 | 0.516445 | 0.309848 |
| MmugDNA.15222.1.S1_at   | MmugDNA.15222.1 | 13.21 | 13.2  | 0.04 | 0.01 | 1      | 0.292133 | 0.918758 | 0.581449 | 0.954387 |
| MmugDNA.15225.1.S1_at   | MmugDNA.15225.1 | 5.99  | 5.96  | 0.17 | 0.05 | 1.02   | 0.717754 | 0.837146 | 0.866693 | 0.906917 |
| MmugDNA.15227.1.S1_at   | MmugDNA.15227.1 | 13.34 | 13.29 | 0.04 | 0.01 | 1.04   | 0.235354 | 0.369237 | 0.533272 | 0.608691 |
| MmugDNA.15229.1.S1_at   | MmugDNA.15229.1 | 9.63  | 9.68  | 0.2  | 0.16 | -1.04  | 0.414223 | 0.106938 | 0.675506 | 0.369499 |

|                         |                 |       |       |      |      |        |          |          |          |          |
|-------------------------|-----------------|-------|-------|------|------|--------|----------|----------|----------|----------|
| MmugDNA.15233.1.S1_at   | MmugDNA.15233.1 | 9.63  | 9.56  | 0.25 | 0.2  | 1.05   | 0.357338 | 0.049468 | 0.633494 | 0.267334 |
| MmugDNA.15234.1.S1_at   | MmugDNA.15234.1 | 12.75 | 12.13 | 0.12 | 0.06 | 1.53   | 0.001755 | 0.073132 | 0.085202 | 0.316064 |
| MmugDNA.15236.1.S1_at   | MmugDNA.15236.1 | 6.17  | 6.72  | 0.61 | 0.65 | -1.47  | 0.303812 | 0.13892  | 0.591195 | 0.412037 |
| MmugDNA.15238.1.S1_at   | MmugDNA.15238.1 | 5.12  | 4.32  | 0.37 | 0.2  | 1.73   | 0.075959 | 0.086796 | 0.333917 | 0.339559 |
| MmugDNA.15239.1.S1_at   | MmugDNA.15239.1 | 8.37  | 7.91  | 0.12 | 0.02 | 1.38   | 0.003731 | 0.000077 | 0.10632  | 0.027016 |
| MmugDNA.15240.1.S1_at   | MmugDNA.15240.1 | 6.29  | 6.23  | 0.17 | 0.09 | 1.04   | 0.935861 | 0.877782 | 0.973118 | 0.930256 |
| MmugDNA.15241.1.S1_at   | MmugDNA.15241.1 | 5.93  | 6.32  | 0.36 | 0.2  | -1.31  | 0.132862 | 0.040228 | 0.416311 | 0.245805 |
| MmugDNA.15244.1.S1_at   | MmugDNA.15244.1 | 7.57  | 8.24  | 0.43 | 0.11 | -1.58  | 0.165334 | 0.652175 | 0.458328 | 0.796592 |
| MmugDNA.15245.1.S1_at   | MmugDNA.15245.1 | 10.32 | 10.33 | 0.05 | 0.07 | -1.01  | 0.971845 | 0.000097 | 0.988676 | 0.027841 |
| MmugDNA.15250.1.S1_at   | MmugDNA.15250.1 | 12.2  | 10.74 | 0.17 | 0.27 | 2.75   | 0.002171 | 0.005039 | 0.090513 | 0.098963 |
| MmugDNA.15251.1.S1_at   | MmugDNA.15251.1 | 9.63  | 9.58  | 0.11 | 0.11 | 1.03   | 0.483025 | 0.68324  | 0.723292 | 0.81521  |
| MmugDNA.15258.1.S1_at   | MmugDNA.15258.1 | 5.29  | 5.17  | 0.1  | 0.13 | 1.09   | 0.171844 | 0.207252 | 0.465779 | 0.481388 |
| MmugDNA.15259.1.S1_at   | MmugDNA.15259.1 | 10.28 | 10.09 | 0.16 | 0.03 | 1.14   | 0.12092  | 0.039109 | 0.399442 | 0.24303  |
| MmugDNA.1526.1.S1_at    | MmugDNA.1526.1  | 7.18  | 7.55  | 0.43 | 0.14 | -1.3   | 0.186336 | 0.260763 | 0.482544 | 0.52721  |
| MmugDNA.15260.1.S1_at   | MmugDNA.15260.1 | 8.29  | 7.2   | 0.43 | 0.11 | 2.14   | 0.010362 | 0.001123 | 0.151697 | 0.052924 |
| MmugDNA.15261.1.S1_at   | MmugDNA.15261.1 | 9.11  | 9.78  | 0.39 | 0.19 | -1.59  | 0.120829 | 0.108777 | 0.399277 | 0.372322 |
| MmugDNA.15263.1.S1_at   | MmugDNA.15263.1 | 10.16 | 11.09 | 0.25 | 0.04 | -1.9   | 0.005594 | 0.014098 | 0.120456 | 0.15195  |
| MmugDNA.15267.1.S1_at   | MmugDNA.15267.1 | 10.31 | 10.62 | 0.16 | 0.08 | -1.23  | 0.055957 | 0.249775 | 0.293472 | 0.518876 |
| MmugDNA.15271.1.S1_at   | MmugDNA.15271.1 | 6.63  | 6.48  | 0.2  | 0.13 | 1.11   | 0.26624  | 0.1074   | 0.558722 | 0.370219 |
| MmugDNA.15279.1.S1_at   | MmugDNA.15279.1 | 11.91 | 11.64 | 0.27 | 0.15 | 1.21   | 0.130201 | 0.020245 | 0.412471 | 0.178671 |
| MmugDNA.1528.1.S1_at    | MmugDNA.1528.1  | 5.79  | 6.95  | 0.64 | 0.32 | -2.23  | 0.051294 | 0.126312 | 0.283882 | 0.396786 |
| MmugDNA.15281.1.S1_at   | MmugDNA.15281.1 | 6.23  | 6.24  | 0.13 | 0.17 | -1     | 0.824253 | 0.20171  | 0.921872 | 0.476237 |
| MmugDNA.15285.1.S1_at   | MmugDNA.15285.1 | 9.59  | 9.69  | 0.11 | 0.09 | -1.07  | 0.208662 | 0.758789 | 0.506215 | 0.859824 |
| MmugDNA.15286.1.S1_at   | MmugDNA.15286.1 | 10.55 | 11.06 | 0.11 | 0.18 | -1.42  | 0.023235 | 0.000472 | 0.205506 | 0.038572 |
| MmugDNA.15288.1.S1_at   | MmugDNA.15288.1 | 3.73  | 3.68  | 0.1  | 0.04 | 1.03   | 0.738953 | 0.438174 | 0.879058 | 0.657196 |
| MmugDNA.15292.1.S1_at   | MmugDNA.15292.1 | 12.57 | 12.92 | 0.22 | 0.07 | -1.27  | 0.129377 | 0.039443 | 0.411701 | 0.243592 |
| MmugDNA.15293.1.S1_at   | MmugDNA.15293.1 | 4.93  | 4.56  | 0.42 | 0.21 | 1.29   | 0.968881 | 0.994516 | 0.987676 | 0.996631 |
| MmugDNA.15296.1.S1_at   | MmugDNA.15296.1 | 13.43 | 13.27 | 0.03 | 0.02 | 1.11   | 0.001991 | 0.224598 | 0.089614 | 0.497613 |
| MmugDNA.15298.1.S1_at   | MmugDNA.15298.1 | 11.3  | 10.36 | 0.1  | 0.13 | 1.92   | 0.000453 | 0.041674 | 0.065829 | 0.24887  |
| MmugDNA.15298.1.S1_x_at | MmugDNA.15298.1 | 11.13 | 10.17 | 0.08 | 0.12 | 1.94   | 0.000293 | 0.03514  | 0.057223 | 0.231645 |
| MmugDNA.15299.1.S1_at   | MmugDNA.15299.1 | 12.62 | 12.52 | 0.08 | 0.05 | 1.07   | 0.33453  | 0.040206 | 0.615621 | 0.24575  |
| MmugDNA.15305.1.S1_at   | MmugDNA.15305.1 | 11.03 | 10.48 | 0.13 | 0.25 | 1.47   | 0.028019 | 0.025337 | 0.219887 | 0.199522 |
| MmugDNA.15307.1.S1_at   | MmugDNA.15307.1 | 3.32  | 3.79  | 0.15 | 0.34 | -1.38  | 0.151473 | 0.197648 | 0.440961 | 0.47262  |
| MmugDNA.15309.1.S1_at   | MmugDNA.15309.1 | 12.09 | 11.82 | 0.09 | 0.07 | 1.2    | 0.023361 | 0.051594 | 0.20583  | 0.272614 |
| MmugDNA.15310.1.S1_at   | MmugDNA.15310.1 | 12.75 | 13.25 | 0.08 | 0.06 | -1.42  | 0.001701 | 0.016964 | 0.084891 | 0.165103 |
| MmugDNA.15314.1.S1_at   | MmugDNA.15314.1 | 11.45 | 11.29 | 0.1  | 0.06 | 1.12   | 0.135384 | 0.284936 | 0.419311 | 0.547047 |
| MmugDNA.15315.1.S1_at   | MmugDNA.15315.1 | 7.9   | 7.66  | 0.23 | 0.35 | 1.17   | 0.529841 | 0.340823 | 0.7545   | 0.586978 |
| MmugDNA.15317.1.S1_at   | MmugDNA.15317.1 | 10.89 | 10.78 | 0.11 | 0.07 | 1.08   | 0.202055 | 0.406669 | 0.499672 | 0.634475 |
| MmugDNA.15319.1.S1_at   | MmugDNA.15319.1 | 6.99  | 7.63  | 0.53 | 0.24 | -1.55  | 0.259177 | 0.443607 | 0.553502 | 0.661336 |
| MmugDNA.15328.1.S1_at   | MmugDNA.15328.1 | 9.72  | 9.65  | 0.5  | 0.11 | 1.05   | 0.277818 | 0.499501 | 0.569311 | 0.69832  |
| MmugDNA.15329.1.S1_at   | MmugDNA.15329.1 | 11.61 | 11.46 | 0.18 | 0.03 | 1.11   | 0.185046 | 0.291849 | 0.481174 | 0.552086 |
| MmugDNA.1533.1.S1_at    | MmugDNA.1533.1  | 7.09  | 11.03 | 1.52 | 0.27 | -15.35 | 0.028973 | 0.159652 | 0.222981 | 0.435785 |
| MmugDNA.15331.1.S1_s_at | MmugDNA.15331.1 | 8.38  | 8.54  | 0.22 | 0.06 | -1.12  | 0.121512 | 0.117879 | 0.400293 | 0.38579  |

|                         |                 |       |       |      |      |       |          |          |          |          |
|-------------------------|-----------------|-------|-------|------|------|-------|----------|----------|----------|----------|
| MmugDNA.15333.1.S1_at   | MmugDNA.15333.1 | 4.97  | 4.87  | 0.05 | 0.13 | 1.07  | 0.114537 | 0.435115 | 0.391605 | 0.655021 |
| MmugDNA.15334.1.S1_s_at | MmugDNA.15334.1 | 11.96 | 12.43 | 0.12 | 0.11 | -1.38 | 0.00871  | 0.028614 | 0.143064 | 0.210901 |
| MmugDNA.15336.1.S1_at   | MmugDNA.15336.1 | 13.14 | 12.62 | 0.03 | 0.06 | 1.44  | 0.000248 | 0.001075 | 0.054642 | 0.051908 |
| MmugDNA.15337.1.S1_s_at | MmugDNA.15337.1 | 7.92  | 7.73  | 0.19 | 0.04 | 1.14  | 0.504493 | 0.012711 | 0.737712 | 0.145355 |
| MmugDNA.15343.1.S1_at   | MmugDNA.15343.1 | 9.61  | 10.44 | 0.11 | 0.2  | -1.77 | 0.005804 | 0.009122 | 0.122165 | 0.125994 |
| MmugDNA.15345.1.S1_at   | MmugDNA.15345.1 | 6.69  | 6.2   | 0.12 | 0.21 | 1.4   | 0.033859 | 0.452022 | 0.238403 | 0.666754 |
| MmugDNA.15348.1.S1_at   | MmugDNA.15348.1 | 9.07  | 9.28  | 0.34 | 0.2  | -1.16 | 0.351301 | 0.165099 | 0.628948 | 0.441318 |
| MmugDNA.15352.1.S1_at   | MmugDNA.15352.1 | 10.99 | 11    | 0.15 | 0.14 | -1.01 | 0.715922 | 0.103344 | 0.86597  | 0.36422  |
| MmugDNA.15352.1.S1_s_at | MmugDNA.15352.1 | 11.69 | 11.64 | 0.09 | 0.09 | 1.03  | 0.280908 | 0.144422 | 0.571843 | 0.418323 |
| MmugDNA.15354.1.S1_at   | MmugDNA.15354.1 | 4.01  | 3.61  | 0.4  | 0.07 | 1.32  | 0.399411 | 0.472099 | 0.664771 | 0.679861 |
| MmugDNA.15357.1.S1_at   | MmugDNA.15357.1 | 6.18  | 6.24  | 0.43 | 0.08 | -1.04 | 0.784861 | 0.897664 | 0.901855 | 0.941624 |
| MmugDNA.15358.1.S1_at   | MmugDNA.15358.1 | 12.55 | 12.6  | 0.09 | 0.01 | -1.03 | 0.78068  | 0.381101 | 0.899918 | 0.617478 |
| MmugDNA.15359.1.S1_at   | MmugDNA.15359.1 | 12.85 | 12.56 | 0.09 | 0.1  | 1.22  | 0.016981 | 0.032141 | 0.18377  | 0.221991 |
| MmugDNA.15359.1.S1_s_at | MmugDNA.15359.1 | 12.87 | 12.69 | 0.11 | 0.17 | 1.14  | 0.079945 | 0.05477  | 0.340163 | 0.279535 |
| MmugDNA.15361.1.S1_at   | MmugDNA.15361.1 | 7.87  | 7.42  | 0.07 | 0.1  | 1.36  | 0.006484 | 0.088187 | 0.127306 | 0.341721 |
| MmugDNA.15364.1.S1_at   | MmugDNA.15364.1 | 10.59 | 10.03 | 0.46 | 0.02 | 1.47  | 0.109781 | 0.042244 | 0.384954 | 0.249997 |
| MmugDNA.15370.1.S1_at   | MmugDNA.15370.1 | 5.81  | 5.78  | 0.15 | 0.18 | 1.02  | 0.499069 | 0.808314 | 0.734029 | 0.889665 |
| MmugDNA.15374.1.S1_at   | MmugDNA.15374.1 | 10.37 | 9.88  | 0.22 | 0.06 | 1.4   | 0.023358 | 0.076948 | 0.20583  | 0.322421 |
| MmugDNA.15379.1.S1_at   | MmugDNA.15379.1 | 4.31  | 4.37  | 1.81 | 0.13 | -1.04 | 0.399952 | 0.520305 | 0.665139 | 0.711612 |
| MmugDNA.15380.1.S1_at   | MmugDNA.15380.1 | 3.29  | 3.24  | 0.05 | 0.09 | 1.03  | 0.181228 | 0.648995 | 0.476576 | 0.794525 |
| MmugDNA.15397.1.S1_at   | MmugDNA.15397.1 | 11.33 | 11.07 | 0.17 | 0.05 | 1.2   | 0.037385 | 0.024029 | 0.248725 | 0.194351 |
| MmugDNA.15398.1.S1_at   | MmugDNA.15398.1 | 8.94  | 9.14  | 0.12 | 0.31 | -1.14 | 0.944047 | 0.369561 | 0.976429 | 0.608927 |
| MmugDNA.15399.1.S1_at   | MmugDNA.15399.1 | 12.62 | 12.68 | 0.16 | 0.11 | -1.04 | 0.482529 | 0.660927 | 0.722857 | 0.801637 |
| MmugDNA.154.1.S1_at     | MmugDNA.154.1   | 8.15  | 7.84  | 0.26 | 0.25 | 1.24  | 0.1794   | 0.224266 | 0.474484 | 0.497164 |
| MmugDNA.1540.1.S1_at    | MmugDNA.1540.1  | 9.62  | 9.92  | 0.34 | 0.05 | -1.23 | 0.075556 | 0.150571 | 0.333134 | 0.425106 |
| MmugDNA.15405.1.S1_at   | MmugDNA.15405.1 | 3.97  | 3.88  | 0.12 | 0.05 | 1.07  | 0.060732 | 0.171873 | 0.303419 | 0.448295 |
| MmugDNA.15409.1.S1_at   | MmugDNA.15409.1 | 9.38  | 7.48  | 0.35 | 0.19 | 3.73  | 0.000815 | 0.00035  | 0.07338  | 0.037097 |
| MmugDNA.15418.1.S1_at   | MmugDNA.15418.1 | 5.31  | 5.32  | 0.03 | 0.1  | -1    | 0.487735 | 0.089359 | 0.726421 | 0.343611 |
| MmugDNA.15419.1.S1_at   | MmugDNA.15419.1 | 5.05  | 4.64  | 0.35 | 0.06 | 1.33  | 0.085918 | 0.123435 | 0.350263 | 0.393452 |
| MmugDNA.15422.1.S1_at   | MmugDNA.15422.1 | 6.8   | 9.75  | 1.07 | 0.24 | -7.7  | 0.021676 | 0.143755 | 0.20067  | 0.417583 |
| MmugDNA.15424.1.S1_at   | MmugDNA.15424.1 | 10.21 | 9.65  | 0.57 | 0.13 | 1.48  | 0.403087 | 0.417714 | 0.667226 | 0.642382 |
| MmugDNA.15428.1.S1_at   | MmugDNA.15428.1 | 10.03 | 9.72  | 0.04 | 0.11 | 1.24  | 0.017493 | 0.020253 | 0.185974 | 0.178702 |
| MmugDNA.15428.1.S1_s_at | MmugDNA.15428.1 | 11    | 10.73 | 0.07 | 0.08 | 1.2   | 0.014564 | 0.012232 | 0.172573 | 0.142996 |
| MmugDNA.1543.1.S1_at    | MmugDNA.1543.1  | 6.36  | 4.66  | 1.66 | 0.2  | 3.25  | 0.480007 | 0.669434 | 0.72104  | 0.806626 |
| MmugDNA.1544.1.S1_at    | MmugDNA.1544.1  | 9.75  | 10.13 | 0.31 | 0.2  | -1.31 | 0.238539 | 0.207499 | 0.535904 | 0.481813 |
| MmugDNA.15444.1.S1_at   | MmugDNA.15444.1 | 7.22  | 7.33  | 0.16 | 0.06 | -1.08 | 0.480619 | 0.61688  | 0.721447 | 0.773019 |
| MmugDNA.15445.1.S1_at   | MmugDNA.15445.1 | 7.27  | 8.17  | 0.39 | 0.1  | -1.86 | 0.043428 | 0.257463 | 0.265644 | 0.52521  |
| MmugDNA.15446.1.S1_at   | MmugDNA.15446.1 | 7.33  | 7.85  | 0.16 | 0.17 | -1.43 | 0.021512 | 0.133707 | 0.200467 | 0.405647 |
| MmugDNA.15453.1.S1_s_at | MmugDNA.15453.1 | 5.52  | 5.59  | 0.23 | 0.15 | -1.05 | 0.617094 | 0.578741 | 0.809826 | 0.748611 |
| MmugDNA.15455.1.S1_at   | MmugDNA.15455.1 | 9.48  | 9.91  | 0.26 | 0.01 | -1.35 | 0.044537 | 0.035078 | 0.268214 | 0.231478 |
| MmugDNA.1546.1.S1_at    | MmugDNA.1546.1  | 8.64  | 8.43  | 0.07 | 0.26 | 1.15  | 0.707125 | 0.763547 | 0.861311 | 0.86248  |
| MmugDNA.15469.1.S1_at   | MmugDNA.15469.1 | 4.99  | 4.94  | 0.07 | 0.1  | 1.04  | 0.700447 | 0.161846 | 0.857753 | 0.437937 |
| MmugDNA.15472.1.S1_at   | MmugDNA.15472.1 | 8.58  | 8.59  | 0.21 | 0.06 | -1.01 | 0.27009  | 0.006143 | 0.562292 | 0.10676  |

|                         |                 |       |       |      |      |       |          |          |          |          |
|-------------------------|-----------------|-------|-------|------|------|-------|----------|----------|----------|----------|
| MmugDNA.15476.1.S1_at   | MmugDNA.15476.1 | 6.14  | 7.16  | 0.09 | 0.26 | -2.02 | 0.005652 | 0.2874   | 0.120889 | 0.548657 |
| MmugDNA.15481.1.S1_at   | MmugDNA.15481.1 | 4.58  | 4.19  | 0.22 | 0.09 | 1.31  | 0.071382 | 0.042947 | 0.325114 | 0.251793 |
| MmugDNA.15482.1.S1_at   | MmugDNA.15482.1 | 5.07  | 5.1   | 0.17 | 0.08 | -1.02 | 0.839894 | 0.300015 | 0.929825 | 0.558262 |
| MmugDNA.15485.1.S1_at   | MmugDNA.15485.1 | 9.03  | 8.55  | 0.3  | 0.13 | 1.4   | 0.024988 | 0.002275 | 0.211192 | 0.070332 |
| MmugDNA.15490.1.S1_at   | MmugDNA.15490.1 | 10.5  | 10.32 | 0.25 | 0.22 | 1.13  | 0.594677 | 0.5777   | 0.794982 | 0.748038 |
| MmugDNA.15500.1.S1_at   | MmugDNA.15500.1 | 5.57  | 5.59  | 0.11 | 0.12 | -1.01 | 0.836973 | 0.928583 | 0.928546 | 0.959399 |
| MmugDNA.15501.1.S1_at   | MmugDNA.15501.1 | 10.08 | 10.82 | 0.08 | 0.18 | -1.67 | 0.00367  | 0.008562 | 0.105789 | 0.122771 |
| MmugDNA.15504.1.S1_at   | MmugDNA.15504.1 | 6.98  | 7.17  | 0.11 | 0.09 | -1.15 | 0.060259 | 0.02209  | 0.30263  | 0.185972 |
| MmugDNA.15505.1.S1_at   | MmugDNA.15505.1 | 5.04  | 5.15  | 0.14 | 0.08 | -1.08 | 0.322037 | 0.169517 | 0.606199 | 0.446167 |
| MmugDNA.15506.1.S1_at   | MmugDNA.15506.1 | 5.39  | 5.38  | 0.29 | 0.12 | 1.01  | 0.907863 | 0.97253  | 0.961007 | 0.985221 |
| MmugDNA.15509.1.S1_at   | MmugDNA.15509.1 | 4.9   | 4.61  | 0.22 | 0.11 | 1.22  | 0.104709 | 0.515904 | 0.37819  | 0.708562 |
| MmugDNA.15512.1.S1_at   | MmugDNA.15512.1 | 8.21  | 7.19  | 0.6  | 0.26 | 2.03  | 0.04906  | 0.031305 | 0.279099 | 0.21885  |
| MmugDNA.15512.1.S1_s_at | MmugDNA.15512.1 | 7.46  | 6.53  | 0.61 | 0.41 | 1.9   | 0.096683 | 0.07539  | 0.366681 | 0.319693 |
| MmugDNA.15515.1.S1_at   | MmugDNA.15515.1 | 10.3  | 11.46 | 0.43 | 0.24 | -2.23 | 0.025367 | 0.220569 | 0.21227  | 0.49398  |
| MmugDNA.15518.1.S1_at   | MmugDNA.15518.1 | 5.27  | 5.12  | 0.08 | 0.07 | 1.11  | 0.14566  | 0.077733 | 0.433153 | 0.323851 |
| MmugDNA.15523.1.S1_at   | MmugDNA.15523.1 | 5.2   | 5.18  | 0.15 | 0.04 | 1.01  | 0.672667 | 0.094064 | 0.843341 | 0.350707 |
| MmugDNA.15525.1.S1_at   | MmugDNA.15525.1 | 5.11  | 5.11  | 0.05 | 0.07 | 1.01  | 0.495411 | 0.64726  | 0.731814 | 0.793355 |
| MmugDNA.15528.1.S1_at   | MmugDNA.15528.1 | 5.77  | 5.9   | 0.31 | 0.14 | -1.09 | 0.55317  | 0.412936 | 0.769696 | 0.639254 |
| MmugDNA.15530.1.S1_at   | MmugDNA.15530.1 | 9.1   | 9.14  | 0.18 | 0.21 | -1.02 | 0.756019 | 0.045321 | 0.887592 | 0.257202 |
| MmugDNA.15536.1.S1_at   | MmugDNA.15536.1 | 11.2  | 11.14 | 0.2  | 0.17 | 1.04  | 0.589297 | 0.133303 | 0.79159  | 0.405049 |
| MmugDNA.15537.1.S1_at   | MmugDNA.15537.1 | 12.25 | 12.25 | 0.18 | 0.14 | -1    | 0.964603 | 0.024605 | 0.985701 | 0.196276 |
| MmugDNA.1554.1.S1_at    | MmugDNA.1554.1  | 11.33 | 11.53 | 0.06 | 0.09 | -1.15 | 0.018984 | 0.002291 | 0.191231 | 0.07045  |
| MmugDNA.15540.1.S1_at   | MmugDNA.15540.1 | 8.37  | 9.42  | 0.49 | 0.23 | -2.07 | 0.032259 | 0.291993 | 0.233644 | 0.552163 |
| MmugDNA.15544.1.S1_at   | MmugDNA.15544.1 | 8.23  | 7.4   | 0.21 | 0.17 | 1.78  | 0.010386 | 0.003368 | 0.151842 | 0.083517 |
| MmugDNA.15548.1.S1_at   | MmugDNA.15548.1 | 11.12 | 10.99 | 0.02 | 0.08 | 1.1   | 0.036559 | 0.015889 | 0.246142 | 0.159934 |
| MmugDNA.1555.1.S1_at    | MmugDNA.1555.1  | 6.08  | 6.03  | 0.31 | 0.21 | 1.04  | 0.603295 | 0.886817 | 0.800913 | 0.935553 |
| MmugDNA.15554.1.S1_at   | MmugDNA.15554.1 | 6.18  | 5.77  | 0.1  | 0.06 | 1.33  | 0.006002 | 0.181428 | 0.124151 | 0.457923 |
| MmugDNA.15556.1.S1_at   | MmugDNA.15556.1 | 12.31 | 12.25 | 0.12 | 0.09 | 1.04  | 0.675839 | 0.746028 | 0.845248 | 0.852688 |
| MmugDNA.15556.1.S1_s_at | MmugDNA.15556.1 | 11.9  | 11.82 | 0.1  | 0.09 | 1.06  | 0.318007 | 0.466279 | 0.60278  | 0.676227 |
| MmugDNA.15559.1.S1_at   | MmugDNA.15559.1 | 4.35  | 4.25  | 0.16 | 0.12 | 1.07  | 0.637785 | 0.085221 | 0.822594 | 0.337096 |
| MmugDNA.15560.1.S1_at   | MmugDNA.15560.1 | 11.43 | 10.76 | 0.28 | 0.13 | 1.6   | 0.011696 | 0.246536 | 0.157975 | 0.515917 |
| MmugDNA.15563.1.S1_at   | MmugDNA.15563.1 | 13.29 | 13.3  | 0.08 | 0.05 | -1.01 | 0.521351 | 0.033526 | 0.749308 | 0.226727 |
| MmugDNA.15565.1.S1_at   | MmugDNA.15565.1 | 8.52  | 8.69  | 0.22 | 0.24 | -1.12 | 0.585711 | 0.024035 | 0.789324 | 0.194358 |
| MmugDNA.15566.1.S1_at   | MmugDNA.15566.1 | 11.98 | 12.24 | 0.17 | 0.09 | -1.2  | 0.076554 | 0.232955 | 0.334818 | 0.50445  |
| MmugDNA.15567.1.S1_at   | MmugDNA.15567.1 | 11.36 | 11.78 | 0.25 | 0.06 | -1.34 | 0.038478 | 0.032225 | 0.2521   | 0.222167 |
| MmugDNA.15568.1.S1_at   | MmugDNA.15568.1 | 7.77  | 7.62  | 0.16 | 0.06 | 1.11  | 0.16869  | 0.702561 | 0.461991 | 0.827615 |
| MmugDNA.15573.1.S1_s_at | MmugDNA.15573.1 | 12.73 | 12.67 | 0    | 0.04 | 1.05  | 0.10155  | 0.799391 | 0.372929 | 0.884559 |
| MmugDNA.15573.1.S1_x_at | MmugDNA.15573.1 | 9.25  | 9.19  | 0.04 | 0.03 | 1.04  | 0.105781 | 0.939826 | 0.379853 | 0.965805 |
| MmugDNA.15574.1.S1_at   | MmugDNA.15574.1 | 5.75  | 5.64  | 0.11 | 0.09 | 1.08  | 0.987306 | 0.370435 | 0.995376 | 0.609512 |
| MmugDNA.15575.1.S1_at   | MmugDNA.15575.1 | 7.26  | 7.39  | 0.08 | 0.06 | -1.09 | 0.070641 | 0.242455 | 0.324085 | 0.512835 |
| MmugDNA.15576.1.S1_at   | MmugDNA.15576.1 | 6.6   | 6.94  | 0.2  | 0.12 | -1.26 | 0.129992 | 0.235132 | 0.412127 | 0.50629  |
| MmugDNA.15583.1.S1_at   | MmugDNA.15583.1 | 7.42  | 6.95  | 0.37 | 0.11 | 1.38  | 0.101619 | 0.117872 | 0.37296  | 0.38579  |
| MmugDNA.15585.1.S1_at   | MmugDNA.15585.1 | 10.35 | 8.16  | 0.12 | 0.27 | 4.56  | 0.00019  | 0.000437 | 0.053494 | 0.038359 |

|                        |                 |       |       |      |      |       |          |          |          |          |
|------------------------|-----------------|-------|-------|------|------|-------|----------|----------|----------|----------|
| MmugDNA.15586.1.S1_at  | MmugDNA.15586.1 | 11.53 | 10.72 | 0.21 | 0.15 | 1.76  | 0.015292 | 0.162066 | 0.175986 | 0.438173 |
| MmugDNA.15587.1.S1_at  | MmugDNA.15587.1 | 6.99  | 6.42  | 0.96 | 0.18 | 1.48  | 0.18626  | 0.236242 | 0.482508 | 0.507252 |
| MmugDNA.15589.1.S1_at  | MmugDNA.15589.1 | 11.29 | 11.36 | 0.29 | 0.05 | -1.05 | 0.856861 | 0.804487 | 0.937807 | 0.887566 |
| MmugDNA.15592.1.S1_at  | MmugDNA.15592.1 | 7.91  | 9.13  | 0.27 | 0.23 | -2.32 | 0.002572 | 0.000842 | 0.094992 | 0.047013 |
| MmugDNA.15593.1.S1_at  | MmugDNA.15593.1 | 10.39 | 10.62 | 0.15 | 0.06 | -1.18 | 0.046332 | 0.687088 | 0.272999 | 0.817434 |
| MmugDNA.15594.1.S1_at  | MmugDNA.15594.1 | 7.46  | 7.22  | 0.24 | 0.12 | 1.18  | 0.284501 | 0.384111 | 0.574425 | 0.619926 |
| MmugDNA.15596.1.S1_at  | MmugDNA.15596.1 | 7.17  | 7.43  | 0.18 | 0.07 | -1.2  | 0.030572 | 0.073068 | 0.227751 | 0.316017 |
| MmugDNA.156.1.S1_at    | MmugDNA.156.1   | 6.44  | 6.33  | 0.15 | 0.06 | 1.08  | 0.98986  | 0.132811 | 0.996439 | 0.404544 |
| MmugDNA.15603.1.S1_at  | MmugDNA.15603.1 | 11.64 | 11.6  | 0.04 | 0.03 | 1.02  | 0.141511 | 0.858806 | 0.427484 | 0.919602 |
| MmugDNA.15604.1.S1_at  | MmugDNA.15604.1 | 10.76 | 10.53 | 0.09 | 0.1  | 1.17  | 0.043326 | 0.05397  | 0.265479 | 0.27777  |
| MmugDNA.15605.1.S1_at  | MmugDNA.15605.1 | 11.77 | 11.32 | 0.09 | 0.09 | 1.36  | 0.003786 | 0.103124 | 0.106813 | 0.364026 |
| MmugDNA.15608.1.S1_at  | MmugDNA.15608.1 | 3.06  | 2.92  | 0.07 | 0.12 | 1.1   | 0.202876 | 0.307835 | 0.500608 | 0.56397  |
| MmugDNA.15610.1.S1_at  | MmugDNA.15610.1 | 4.95  | 4.86  | 0.17 | 0.12 | 1.07  | 0.103973 | 0.076513 | 0.377277 | 0.321589 |
| MmugDNA.15611.1.S1_at  | MmugDNA.15611.1 | 5.97  | 7.21  | 0.53 | 0.27 | -2.36 | 0.031767 | 0.264804 | 0.231669 | 0.530803 |
| MmugDNA.15615.1.S1_at  | MmugDNA.15615.1 | 11.44 | 11.41 | 0.12 | 0.03 | 1.02  | 0.570795 | 0.748494 | 0.779435 | 0.853666 |
| MmugDNA.15616.1.S1_at  | MmugDNA.15616.1 | 9.18  | 8.96  | 0.2  | 0.05 | 1.17  | 0.137042 | 0.00604  | 0.421892 | 0.106089 |
| MmugDNA.15617.1.S1_at  | MmugDNA.15617.1 | 8.24  | 8.5   | 0.64 | 0.34 | -1.2  | 0.626245 | 0.923495 | 0.815861 | 0.956997 |
| MmugDNA.15620.1.S1_at  | MmugDNA.15620.1 | 12.75 | 12.24 | 0.08 | 0.04 | 1.42  | 0.00063  | 0.000489 | 0.070727 | 0.038921 |
| MmugDNA.15621.1.S1_at  | MmugDNA.15621.1 | 5.46  | 6.24  | 0.34 | 0.23 | -1.71 | 0.021018 | 0.001576 | 0.198347 | 0.060185 |
| MmugDNA.15625.1.S1_at  | MmugDNA.15625.1 | 8.55  | 8.17  | 0.23 | 0.17 | 1.3   | 0.137248 | 0.012776 | 0.422107 | 0.145663 |
| MmugDNA.15626.1.S1_at  | MmugDNA.15626.1 | 3.7   | 3.6   | 0.07 | 0.11 | 1.07  | 0.336545 | 0.743679 | 0.617124 | 0.851456 |
| MmugDNA.1563.1.S1_at   | MmugDNA.1563.1  | 7.51  | 7.53  | 0.18 | 0.17 | -1.01 | 0.478905 | 0.049152 | 0.720361 | 0.266534 |
| MmugDNA.1563.1.S1_s_at | MmugDNA.1563.1  | 6.27  | 6.63  | 0.46 | 0.39 | -1.29 | 0.646374 | 0.072978 | 0.828104 | 0.315986 |
| MmugDNA.15631.1.S1_at  | MmugDNA.15631.1 | 5.82  | 5.8   | 0.16 | 0.06 | 1.02  | 0.416486 | 0.101799 | 0.676962 | 0.361714 |
| MmugDNA.15633.1.S1_at  | MmugDNA.15633.1 | 10.33 | 10.55 | 0.23 | 0.15 | -1.16 | 0.454608 | 0.100966 | 0.704426 | 0.360525 |
| MmugDNA.15634.1.S1_at  | MmugDNA.15634.1 | 4.88  | 5.03  | 0.15 | 0.14 | -1.11 | 0.411897 | 0.198848 | 0.673728 | 0.473475 |
| MmugDNA.15637.1.S1_at  | MmugDNA.15637.1 | 4.55  | 4.55  | 0.03 | 0.04 | 1     | 0.806903 | 0.580303 | 0.913554 | 0.749618 |
| MmugDNA.15638.1.S1_at  | MmugDNA.15638.1 | 9.35  | 9.69  | 0.15 | 0.07 | -1.26 | 0.030292 | 0.538308 | 0.227112 | 0.723028 |
| MmugDNA.1564.1.S1_at   | MmugDNA.1564.1  | 3.7   | 3.25  | 0.29 | 0.07 | 1.37  | 0.108125 | 0.026172 | 0.38286  | 0.202785 |
| MmugDNA.15641.1.S1_at  | MmugDNA.15641.1 | 11.04 | 10.86 | 0.19 | 0.06 | 1.14  | 0.125223 | 0.019309 | 0.405657 | 0.174723 |
| MmugDNA.15646.1.S1_at  | MmugDNA.15646.1 | 3.3   | 3.28  | 0.07 | 0.05 | 1.01  | 0.296682 | 0.208661 | 0.585414 | 0.482544 |
| MmugDNA.15647.1.S1_at  | MmugDNA.15647.1 | 5.29  | 5.06  | 0.35 | 0.23 | 1.17  | 0.210544 | 0.375312 | 0.5081   | 0.613336 |
| MmugDNA.15656.1.S1_at  | MmugDNA.15656.1 | 12.41 | 12.62 | 0.13 | 0.05 | -1.16 | 0.048676 | 0.302308 | 0.278061 | 0.560092 |
| MmugDNA.1566.1.S1_at   | MmugDNA.1566.1  | 6.51  | 6.3   | 0.23 | 0.21 | 1.16  | 0.449033 | 0.297374 | 0.700385 | 0.556072 |
| MmugDNA.15660.1.S1_at  | MmugDNA.15660.1 | 6.92  | 6.9   | 0.09 | 0.07 | 1.01  | 0.848149 | 0.469931 | 0.933898 | 0.678572 |
| MmugDNA.15661.1.S1_at  | MmugDNA.15661.1 | 5.78  | 5.98  | 0.55 | 0.31 | -1.15 | 0.463499 | 0.526755 | 0.710084 | 0.715627 |
| MmugDNA.15662.1.S1_at  | MmugDNA.15662.1 | 5.3   | 5.24  | 0.07 | 0.05 | 1.04  | 0.640791 | 0.025379 | 0.824509 | 0.199678 |
| MmugDNA.15664.1.S1_at  | MmugDNA.15664.1 | 7.22  | 7.01  | 0.04 | 0.12 | 1.16  | 0.121617 | 0.04086  | 0.400461 | 0.247004 |
| MmugDNA.15665.1.S1_at  | MmugDNA.15665.1 | 5.84  | 6.06  | 0.08 | 0.22 | -1.17 | 0.342469 | 0.527651 | 0.622192 | 0.716174 |
| MmugDNA.15666.1.S1_at  | MmugDNA.15666.1 | 3.33  | 3.49  | 0.06 | 0.11 | -1.11 | 0.145463 | 0.154795 | 0.432776 | 0.429813 |
| MmugDNA.15667.1.S1_at  | MmugDNA.15667.1 | 11.88 | 11.91 | 0.05 | 0.02 | -1.02 | 0.638813 | 0.604761 | 0.823276 | 0.764797 |
| MmugDNA.1567.1.S1_at   | MmugDNA.1567.1  | 6.55  | 9.23  | 0.95 | 0.3  | -6.37 | 0.01409  | 0.194784 | 0.170085 | 0.469807 |
| MmugDNA.15671.1.S1_at  | MmugDNA.15671.1 | 3.69  | 3.68  | 0.15 | 0.02 | 1     | 0.84056  | 0.992159 | 0.930008 | 0.99553  |



|                         |                 |       |       |      |      |       |          |          |          |          |
|-------------------------|-----------------|-------|-------|------|------|-------|----------|----------|----------|----------|
| MmugDNA.15679.1.S1_at   | MmugDNA.15679.1 | 5.16  | 5.15  | 0.09 | 0.09 | 1.01  | 0.760057 | 0.31068  | 0.890079 | 0.565787 |
| MmugDNA.1568.1.S1_at    | MmugDNA.1568.1  | 11.3  | 11.5  | 0.15 | 0.03 | -1.14 | 0.184094 | 0.09684  | 0.480042 | 0.354254 |
| MmugDNA.15682.1.S1_at   | MmugDNA.15682.1 | 4.14  | 4.12  | 0.2  | 0.09 | 1.02  | 0.542315 | 0.498087 | 0.762689 | 0.697261 |
| MmugDNA.15691.1.S1_s_at | MmugDNA.15691.1 | 8.16  | 8.64  | 0.48 | 0.14 | -1.39 | 0.003755 | 0.213469 | 0.106678 | 0.487369 |
| MmugDNA.15693.1.S1_at   | MmugDNA.15693.1 | 10.99 | 11.4  | 0.22 | 0.18 | -1.33 | 0.050249 | 0.03455  | 0.281999 | 0.229979 |
| MmugDNA.15696.1.S1_at   | MmugDNA.15696.1 | 5.26  | 5.45  | 0.12 | 0.06 | -1.14 | 0.043392 | 0.307817 | 0.265644 | 0.56397  |
| MmugDNA.15700.1.S1_s_at | MmugDNA.15700.1 | 9.99  | 8.79  | 0.06 | 0.19 | 2.3   | 0.000449 | 0.072645 | 0.065806 | 0.315579 |
| MmugDNA.15703.1.S1_at   | MmugDNA.15703.1 | 10.16 | 9.8   | 0.05 | 0.17 | 1.28  | 0.011102 | 0.08631  | 0.155073 | 0.338771 |
| MmugDNA.15706.1.S1_at   | MmugDNA.15706.1 | 10.43 | 10.54 | 0.17 | 0.21 | -1.08 | 0.560432 | 0.523446 | 0.773879 | 0.713714 |
| MmugDNA.15708.1.S1_s_at | MmugDNA.15708.1 | 12.19 | 12.09 | 0.09 | 0.07 | 1.08  | 0.330672 | 0.275243 | 0.612631 | 0.53963  |
| MmugDNA.15709.1.S1_at   | MmugDNA.15709.1 | 4.94  | 4.79  | 0.09 | 0.13 | 1.11  | 0.117379 | 0.106384 | 0.394686 | 0.36895  |
| MmugDNA.15710.1.S1_at   | MmugDNA.15710.1 | 8.5   | 8.45  | 0.16 | 0.12 | 1.04  | 0.271407 | 0.5369   | 0.563348 | 0.722119 |
| MmugDNA.15715.1.S1_at   | MmugDNA.15715.1 | 12.03 | 11.73 | 0.18 | 0.03 | 1.23  | 0.047978 | 0.066321 | 0.276383 | 0.303189 |
| MmugDNA.15719.1.S1_at   | MmugDNA.15719.1 | 10.63 | 10.83 | 0.24 | 0.07 | -1.15 | 0.694993 | 0.005471 | 0.854537 | 0.102081 |
| MmugDNA.15721.1.S1_at   | MmugDNA.15721.1 | 9.17  | 8.13  | 0.66 | 0.05 | 2.05  | 0.0194   | 0.006161 | 0.192344 | 0.106774 |
| MmugDNA.15723.1.S1_at   | MmugDNA.15723.1 | 10.75 | 10.8  | 0.34 | 0.19 | -1.03 | 0.663455 | 0.715635 | 0.837777 | 0.835159 |
| MmugDNA.15726.1.S1_at   | MmugDNA.15726.1 | 4.35  | 4.34  | 0.34 | 0.31 | 1     | 0.505628 | 0.604451 | 0.738603 | 0.76464  |
| MmugDNA.15732.1.S1_at   | MmugDNA.15732.1 | 3     | 2.96  | 0.26 | 0.1  | 1.03  | 0.200729 | 0.24321  | 0.498074 | 0.513356 |
| MmugDNA.15733.1.S1_at   | MmugDNA.15733.1 | 5.4   | 5.19  | 0.28 | 0.03 | 1.16  | 0.757448 | 0.337319 | 0.888727 | 0.584533 |
| MmugDNA.15740.1.S1_at   | MmugDNA.15740.1 | 11.01 | 11.01 | 0.13 | 0.1  | 1     | 0.224715 | 0.250521 | 0.522708 | 0.519391 |
| MmugDNA.15744.1.S1_at   | MmugDNA.15744.1 | 4.31  | 4.35  | 0.54 | 0.15 | -1.03 | 0.786752 | 0.831922 | 0.902743 | 0.90356  |
| MmugDNA.15746.1.S1_at   | MmugDNA.15746.1 | 6.76  | 6.2   | 0.19 | 0.18 | 1.47  | 0.011615 | 0.033298 | 0.157638 | 0.226087 |
| MmugDNA.15747.1.S1_at   | MmugDNA.15747.1 | 11.65 | 11.6  | 0.11 | 0.05 | 1.04  | 0.193456 | 0.070516 | 0.490072 | 0.311777 |
| MmugDNA.15751.1.S1_at   | MmugDNA.15751.1 | 9.6   | 8.51  | 0.22 | 0.09 | 2.13  | 0.001683 | 0.000346 | 0.084735 | 0.037    |
| MmugDNA.15752.1.S1_at   | MmugDNA.15752.1 | 8.82  | 9.04  | 0.45 | 0.26 | -1.17 | 0.712759 | 0.092533 | 0.864413 | 0.348504 |
| MmugDNA.15754.1.S1_at   | MmugDNA.15754.1 | 10.54 | 9.22  | 0.12 | 0.07 | 2.51  | 0.000086 | 0.000001 | 0.051196 | 0.007307 |
| MmugDNA.15759.1.S1_at   | MmugDNA.15759.1 | 11.75 | 12.25 | 0.01 | 0.08 | -1.41 | 0.000725 | 0.000023 | 0.072183 | 0.019635 |
| MmugDNA.15760.1.S1_at   | MmugDNA.15760.1 | 11.74 | 11.69 | 0.35 | 0.39 | 1.03  | 0.934363 | 0.063413 | 0.972478 | 0.298441 |
| MmugDNA.15762.1.S1_at   | MmugDNA.15762.1 | 6.98  | 10.27 | 1.33 | 0.19 | -9.77 | 0.031378 | 0.228305 | 0.23018  | 0.500471 |
| MmugDNA.15770.1.S1_at   | MmugDNA.15770.1 | 6.81  | 6.89  | 0.15 | 0.02 | -1.06 | 0.456813 | 0.24878  | 0.705979 | 0.517931 |
| MmugDNA.15775.1.S1_at   | MmugDNA.15775.1 | 9.56  | 9.6   | 0.07 | 0.09 | -1.03 | 0.93716  | 0.214366 | 0.973667 | 0.488047 |
| MmugDNA.15780.1.S1_at   | MmugDNA.15780.1 | 11.96 | 12.04 | 0.21 | 0.1  | -1.06 | 0.325067 | 0.440114 | 0.608523 | 0.658719 |
| MmugDNA.15782.1.S1_at   | MmugDNA.15782.1 | 8.82  | 10.57 | 0.6  | 0.23 | -3.38 | 0.015886 | 0.111685 | 0.17843  | 0.37664  |
| MmugDNA.15793.1.S1_at   | MmugDNA.15793.1 | 6.32  | 6.23  | 0.2  | 0.11 | 1.06  | 0.434664 | 0.664083 | 0.689859 | 0.803247 |
| MmugDNA.15802.1.S1_at   | MmugDNA.15802.1 | 12.18 | 12.03 | 0.11 | 0.03 | 1.11  | 0.096345 | 0.285883 | 0.366014 | 0.547484 |
| MmugDNA.15804.1.S1_at   | MmugDNA.15804.1 | 11.31 | 11.17 | 0.16 | 0.11 | 1.11  | 0.28943  | 0.193094 | 0.578968 | 0.468554 |
| MmugDNA.15809.1.S1_at   | MmugDNA.15809.1 | 7     | 7.05  | 0.05 | 0.02 | -1.04 | 0.060173 | 0.034345 | 0.302467 | 0.229283 |
| MmugDNA.15811.1.S1_at   | MmugDNA.15811.1 | 9.83  | 9.16  | 0.05 | 0.04 | 1.59  | 0.000061 | 0.000261 | 0.048521 | 0.033678 |
| MmugDNA.15817.1.S1_at   | MmugDNA.15817.1 | 3.58  | 3.69  | 0.13 | 0.08 | -1.08 | 0.703585 | 0.900404 | 0.859276 | 0.94344  |
| MmugDNA.15818.1.S1_at   | MmugDNA.15818.1 | 7     | 6.46  | 0.61 | 0.09 | 1.44  | 0.187212 | 0.133107 | 0.483367 | 0.404734 |
| MmugDNA.15820.1.S1_at   | MmugDNA.15820.1 | 8.25  | 8.83  | 1.21 | 0.37 | -1.5  | 0.361724 | 0.546663 | 0.63707  | 0.728135 |
| MmugDNA.15821.1.S1_at   | MmugDNA.15821.1 | 9.8   | 9.94  | 0.52 | 0.14 | -1.1  | 0.232454 | 0.005804 | 0.530886 | 0.104597 |
| MmugDNA.1583.1.S1_at    | MmugDNA.1583.1  | 3.55  | 3.75  | 0.21 | 0.09 | -1.15 | 0.64339  | 0.250197 | 0.826158 | 0.519222 |

|                         |                 |       |       |      |      |        |          |          |          |          |
|-------------------------|-----------------|-------|-------|------|------|--------|----------|----------|----------|----------|
| MmugDNA.15835.1.S1_at   | MmugDNA.15835.1 | 10.85 | 9.36  | 0.36 | 0.32 | 2.8    | 0.009774 | 0.069758 | 0.148542 | 0.31026  |
| MmugDNA.15837.1.S1_at   | MmugDNA.15837.1 | 6.15  | 6.57  | 0.13 | 0.09 | -1.34  | 0.031978 | 0.603943 | 0.23262  | 0.764419 |
| MmugDNA.15841.1.S1_at   | MmugDNA.15841.1 | 13.65 | 13.58 | 0.02 | 0.05 | 1.05   | 0.078642 | 0.01208  | 0.338496 | 0.14216  |
| MmugDNA.15847.1.S1_at   | MmugDNA.15847.1 | 10.32 | 10.3  | 0.11 | 0.03 | 1.01   | 0.243944 | 0.870549 | 0.540712 | 0.926446 |
| MmugDNA.15851.1.S1_at   | MmugDNA.15851.1 | 11.23 | 10.39 | 0.14 | 0.04 | 1.79   | 0.00057  | 0.051693 | 0.070727 | 0.272892 |
| MmugDNA.15857.1.S1_s_at | MmugDNA.15857.1 | 9.37  | 9.95  | 0.6  | 0.21 | -1.5   | 0.072866 | 0.062335 | 0.327658 | 0.296503 |
| MmugDNA.15859.1.S1_at   | MmugDNA.15859.1 | 10.28 | 10.32 | 0.06 | 0.15 | -1.02  | 0.587077 | 0.657056 | 0.790341 | 0.799413 |
| MmugDNA.15859.1.S1_s_at | MmugDNA.15859.1 | 11.08 | 11.07 | 0.05 | 0.07 | 1.01   | 0.443396 | 0.822318 | 0.696549 | 0.89777  |
| MmugDNA.15860.1.S1_at   | MmugDNA.15860.1 | 5.23  | 5.8   | 0.82 | 0.47 | -1.48  | 0.391347 | 0.439014 | 0.658628 | 0.657802 |
| MmugDNA.15861.1.S1_s_at | MmugDNA.15861.1 | 12.74 | 12.42 | 0.12 | 0.11 | 1.25   | 0.020833 | 0.00205  | 0.197943 | 0.066887 |
| MmugDNA.15865.1.S1_at   | MmugDNA.15865.1 | 7.94  | 9.84  | 0.94 | 0.2  | -3.75  | 0.028267 | 0.236622 | 0.220719 | 0.50743  |
| MmugDNA.15867.1.S1_at   | MmugDNA.15867.1 | 5.83  | 6.56  | 0.27 | 0.27 | -1.65  | 0.024795 | 0.040985 | 0.210464 | 0.247202 |
| MmugDNA.15869.1.S1_at   | MmugDNA.15869.1 | 6.2   | 6.05  | 0.06 | 0.02 | 1.11   | 0.048549 | 0.029364 | 0.277767 | 0.213234 |
| MmugDNA.15878.1.S1_at   | MmugDNA.15878.1 | 12.84 | 12.8  | 0.03 | 0.04 | 1.03   | 0.58726  | 0.445885 | 0.790419 | 0.662593 |
| MmugDNA.15881.1.S1_at   | MmugDNA.15881.1 | 12.85 | 12.84 | 0.06 | 0.03 | 1.01   | 0.498014 | 0.925964 | 0.733394 | 0.958059 |
| MmugDNA.15884.1.S1_at   | MmugDNA.15884.1 | 2.98  | 3.11  | 0.14 | 0.05 | -1.09  | 0.155844 | 0.18103  | 0.446227 | 0.457529 |
| MmugDNA.15887.1.S1_at   | MmugDNA.15887.1 | 8.74  | 9.25  | 0.19 | 0.18 | -1.42  | 0.055997 | 0.063271 | 0.29362  | 0.298244 |
| MmugDNA.15888.1.S1_at   | MmugDNA.15888.1 | 4.17  | 4.85  | 0.49 | 0.44 | -1.61  | 0.295803 | 0.45845  | 0.584581 | 0.671168 |
| MmugDNA.1589.1.S1_at    | MmugDNA.1589.1  | 9.34  | 10.13 | 0.53 | 0.12 | -1.72  | 0.113618 | 0.336924 | 0.390328 | 0.584156 |
| MmugDNA.15890.1.S1_at   | MmugDNA.15890.1 | 5.58  | 4.52  | 1.02 | 0.33 | 2.08   | 0.168202 | 0.49231  | 0.461465 | 0.693485 |
| MmugDNA.15898.1.S1_at   | MmugDNA.15898.1 | 9.88  | 10.18 | 0.11 | 0.14 | -1.23  | 0.047019 | 0.505419 | 0.274544 | 0.702133 |
| MmugDNA.15898.1.S1_s_at | MmugDNA.15898.1 | 12.1  | 12.67 | 0.2  | 0.14 | -1.48  | 0.032821 | 0.341837 | 0.235248 | 0.587929 |
| MmugDNA.159.1.S1_at     | MmugDNA.159.1   | 6.31  | 6.25  | 0.27 | 0.11 | 1.04   | 0.370171 | 0.508109 | 0.643242 | 0.70337  |
| MmugDNA.15904.1.S1_at   | MmugDNA.15904.1 | 7.48  | 8.14  | 0.52 | 0.18 | -1.58  | 0.05588  | 0.301321 | 0.293434 | 0.559356 |
| MmugDNA.15906.1.S1_at   | MmugDNA.15906.1 | 11.51 | 11.51 | 0.05 | 0.02 | 1      | 0.825935 | 0.286942 | 0.92268  | 0.548246 |
| MmugDNA.15911.1.S1_at   | MmugDNA.15911.1 | 6.39  | 6.42  | 0.15 | 0.03 | -1.02  | 0.884777 | 0.655807 | 0.950995 | 0.798709 |
| MmugDNA.15912.1.S1_at   | MmugDNA.15912.1 | 9.05  | 10.11 | 0.59 | 0.21 | -2.09  | 0.0571   | 0.255665 | 0.296291 | 0.523619 |
| MmugDNA.15913.1.S1_at   | MmugDNA.15913.1 | 11.93 | 11.66 | 0.17 | 0.26 | 1.21   | 0.437997 | 0.124706 | 0.692763 | 0.39513  |
| MmugDNA.15916.1.S1_at   | MmugDNA.15916.1 | 7.65  | 8.75  | 0.51 | 0.3  | -2.15  | 0.043445 | 0.257054 | 0.265644 | 0.524781 |
| MmugDNA.15917.1.S1_at   | MmugDNA.15917.1 | 5.09  | 5.18  | 0.06 | 0.03 | -1.06  | 0.080709 | 0.00887  | 0.341441 | 0.12465  |
| MmugDNA.15918.1.S1_at   | MmugDNA.15918.1 | 12.83 | 13.19 | 0.11 | 0.09 | -1.28  | 0.032094 | 0.056392 | 0.232925 | 0.283382 |
| MmugDNA.15921.1.S1_at   | MmugDNA.15921.1 | 5.06  | 5.08  | 0.23 | 0.05 | -1.02  | 0.442055 | 0.309544 | 0.695451 | 0.564987 |
| MmugDNA.15923.1.S1_at   | MmugDNA.15923.1 | 9.33  | 9.5   | 0.25 | 0.18 | -1.12  | 0.667241 | 0.446613 | 0.84027  | 0.66287  |
| MmugDNA.15927.1.S1_at   | MmugDNA.15927.1 | 8.4   | 8.5   | 0.03 | 0.3  | -1.07  | 0.600483 | 0.009802 | 0.798905 | 0.130166 |
| MmugDNA.15932.1.S1_at   | MmugDNA.15932.1 | 8.76  | 8.2   | 0.09 | 0.07 | 1.47   | 0.001537 | 0.011239 | 0.081678 | 0.138014 |
| MmugDNA.15938.1.S1_at   | MmugDNA.15938.1 | 10.75 | 10.69 | 0.22 | 0.12 | 1.04   | 0.928485 | 0.90979  | 0.969772 | 0.949108 |
| MmugDNA.15940.1.S1_at   | MmugDNA.15940.1 | 5.75  | 11.36 | 1.42 | 0.42 | -48.91 | 0.002564 | 0.052913 | 0.094863 | 0.275647 |
| MmugDNA.15943.1.S1_at   | MmugDNA.15943.1 | 9.14  | 9.14  | 0.1  | 0.05 | 1      | 0.840255 | 0.090696 | 0.929894 | 0.345151 |
| MmugDNA.15943.1.S1_s_at | MmugDNA.15943.1 | 9.43  | 9.44  | 0.18 | 0.07 | -1.01  | 0.788971 | 0.360025 | 0.904036 | 0.601198 |
| MmugDNA.15943.1.S1_x_at | MmugDNA.15943.1 | 9.15  | 9.19  | 0.11 | 0.03 | -1.02  | 0.97787  | 0.106706 | 0.991334 | 0.369298 |
| MmugDNA.15944.1.S1_at   | MmugDNA.15944.1 | 4.72  | 4.89  | 0.05 | 0.1  | -1.13  | 0.07691  | 0.16526  | 0.33537  | 0.441459 |
| MmugDNA.15948.1.S1_at   | MmugDNA.15948.1 | 4.88  | 4.85  | 0.21 | 0.04 | 1.01   | 0.797748 | 0.476476 | 0.908721 | 0.682725 |
| MmugDNA.15949.1.S1_at   | MmugDNA.15949.1 | 4.32  | 4.09  | 0.27 | 0.24 | 1.17   | 0.165621 | 0.205978 | 0.458665 | 0.480222 |

|                         |                 |       |       |      |      |        |          |          |          |          |
|-------------------------|-----------------|-------|-------|------|------|--------|----------|----------|----------|----------|
| MmugDNA.15954.1.S1_at   | MmugDNA.15954.1 | 11.03 | 11.22 | 0.27 | 0.09 | -1.15  | 0.237605 | 0.195233 | 0.535034 | 0.470253 |
| MmugDNA.15955.1.S1_at   | MmugDNA.15955.1 | 8.75  | 8.72  | 0.24 | 0.09 | 1.02   | 0.482008 | 0.000407 | 0.722255 | 0.037601 |
| MmugDNA.15957.1.S1_at   | MmugDNA.15957.1 | 8.55  | 8.75  | 0.43 | 0.08 | -1.15  | 0.146656 | 0.264999 | 0.434585 | 0.530973 |
| MmugDNA.15959.1.S1_at   | MmugDNA.15959.1 | 7.95  | 7.16  | 0.51 | 0.3  | 1.73   | 0.082996 | 0.175722 | 0.345251 | 0.452344 |
| MmugDNA.1596.1.S1_at    | MmugDNA.1596.1  | 13.39 | 13.28 | 0.04 | 0.02 | 1.08   | 0.022036 | 0.482494 | 0.201692 | 0.687323 |
| MmugDNA.15960.1.S1_at   | MmugDNA.15960.1 | 10.96 | 11.07 | 0.19 | 0.05 | -1.08  | 0.123284 | 0.036198 | 0.402508 | 0.234829 |
| MmugDNA.15961.1.S1_at   | MmugDNA.15961.1 | 9.59  | 9.59  | 0.12 | 0.08 | 1      | 0.372464 | 0.007575 | 0.64495  | 0.116509 |
| MmugDNA.15962.1.S1_at   | MmugDNA.15962.1 | 6.26  | 6.54  | 0.28 | 0.25 | -1.22  | 0.053577 | 0.023557 | 0.288683 | 0.192238 |
| MmugDNA.15978.1.S1_at   | MmugDNA.15978.1 | 3.55  | 3.55  | 0.39 | 0.21 | -1     | 0.699942 | 0.892402 | 0.857508 | 0.938637 |
| MmugDNA.15983.1.S1_at   | MmugDNA.15983.1 | 10.29 | 9.81  | 0.13 | 0.18 | 1.39   | 0.033342 | 0.00427  | 0.236556 | 0.091847 |
| MmugDNA.15984.1.S1_at   | MmugDNA.15984.1 | 11.62 | 11.54 | 0.08 | 0.05 | 1.06   | 0.19036  | 0.727291 | 0.486685 | 0.84224  |
| MmugDNA.1599.1.S1_at    | MmugDNA.1599.1  | 12.97 | 12.89 | 0.07 | 0.08 | 1.06   | 0.112179 | 0.43519  | 0.388288 | 0.655058 |
| MmugDNA.15993.1.S1_at   | MmugDNA.15993.1 | 10.57 | 10.46 | 0.1  | 0.14 | 1.08   | 0.405347 | 0.010951 | 0.668831 | 0.136223 |
| MmugDNA.15994.1.S1_at   | MmugDNA.15994.1 | 11.08 | 11.18 | 0.1  | 0.14 | -1.07  | 0.402793 | 0.35652  | 0.667011 | 0.598459 |
| MmugDNA.15997.1.S1_s_at | MmugDNA.15997.1 | 3.23  | 7.83  | 1.65 | 0.41 | -24.11 | 0.025579 | 0.181639 | 0.212928 | 0.458236 |
| MmugDNA.16.1.S1_at      | MmugDNA.16.1    | 7.35  | 7.15  | 0.18 | 0.17 | 1.15   | 0.201612 | 0.401769 | 0.499174 | 0.631068 |
| MmugDNA.16002.1.S1_at   | MmugDNA.16002.1 | 7.6   | 7.78  | 0.06 | 0.03 | -1.13  | 0.020805 | 0.000841 | 0.197815 | 0.047013 |
| MmugDNA.1601.1.S1_at    | MmugDNA.1601.1  | 7.08  | 7.06  | 0.18 | 0.1  | 1.01   | 0.811088 | 0.91872  | 0.915384 | 0.954387 |
| MmugDNA.16010.1.S1_at   | MmugDNA.16010.1 | 4.8   | 4.49  | 0.18 | 0.13 | 1.24   | 0.253514 | 0.415222 | 0.547829 | 0.640766 |
| MmugDNA.16011.1.S1_at   | MmugDNA.16011.1 | 10.09 | 10.89 | 0.45 | 0.1  | -1.74  | 0.098512 | 0.11801  | 0.369192 | 0.385881 |
| MmugDNA.16012.1.S1_at   | MmugDNA.16012.1 | 7.85  | 7.19  | 0.02 | 0.13 | 1.58   | 0.000971 | 0.00491  | 0.076222 | 0.097662 |
| MmugDNA.16013.1.S1_at   | MmugDNA.16013.1 | 5.62  | 5.55  | 0.03 | 0.08 | 1.05   | 0.489209 | 0.002208 | 0.727603 | 0.069408 |
| MmugDNA.16021.1.S1_at   | MmugDNA.16021.1 | 4.71  | 4.64  | 0.22 | 0.02 | 1.05   | 0.238083 | 0.630668 | 0.535495 | 0.782345 |
| MmugDNA.16022.1.S1_at   | MmugDNA.16022.1 | 4.72  | 4.89  | 0.07 | 0.15 | -1.13  | 0.142641 | 0.552304 | 0.428696 | 0.731658 |
| MmugDNA.16024.1.S1_at   | MmugDNA.16024.1 | 10.72 | 10.08 | 0.11 | 0.29 | 1.56   | 0.060619 | 0.149134 | 0.303237 | 0.423572 |
| MmugDNA.16025.1.S1_at   | MmugDNA.16025.1 | 8.62  | 8.56  | 0.01 | 0.14 | 1.04   | 0.569507 | 0.97463  | 0.778885 | 0.986197 |
| MmugDNA.16028.1.S1_at   | MmugDNA.16028.1 | 12.42 | 12.27 | 0.16 | 0.3  | 1.11   | 0.404515 | 0.511791 | 0.668229 | 0.705797 |
| MmugDNA.1603.1.S1_at    | MmugDNA.1603.1  | 5.61  | 5.37  | 0.25 | 0.04 | 1.18   | 0.192804 | 0.300727 | 0.489396 | 0.558959 |
| MmugDNA.16031.1.S1_at   | MmugDNA.16031.1 | 10.26 | 10.83 | 0.11 | 0.06 | -1.48  | 0.001169 | 0.076367 | 0.077718 | 0.321368 |
| MmugDNA.16040.1.S1_at   | MmugDNA.16040.1 | 7.64  | 9.49  | 0.79 | 0.16 | -3.62  | 0.038217 | 0.371832 | 0.251526 | 0.610615 |
| MmugDNA.16041.1.S1_at   | MmugDNA.16041.1 | 6.26  | 6.03  | 0.58 | 0.33 | 1.17   | 0.358645 | 0.061174 | 0.6344   | 0.293981 |
| MmugDNA.16045.1.S1_at   | MmugDNA.16045.1 | 13.59 | 13.8  | 0.15 | 0.03 | -1.15  | 0.081177 | 0.406404 | 0.342218 | 0.634305 |
| MmugDNA.16048.1.S1_at   | MmugDNA.16048.1 | 10.72 | 10.84 | 0.33 | 0.09 | -1.08  | 0.146729 | 0.100807 | 0.434751 | 0.360275 |
| MmugDNA.16049.1.S1_at   | MmugDNA.16049.1 | 10.02 | 10.06 | 0.05 | 0.11 | -1.03  | 0.729641 | 0.063973 | 0.873728 | 0.299066 |
| MmugDNA.16050.1.S1_at   | MmugDNA.16050.1 | 3.19  | 3.12  | 0.06 | 0.06 | 1.05   | 0.171729 | 0.45312  | 0.465674 | 0.667551 |
| MmugDNA.16051.1.S1_at   | MmugDNA.16051.1 | 3.72  | 3.64  | 0.33 | 0.03 | 1.06   | 0.202521 | 0.257754 | 0.500223 | 0.525376 |
| MmugDNA.16052.1.S1_at   | MmugDNA.16052.1 | 8.64  | 8.69  | 0.07 | 0.08 | -1.04  | 0.754389 | 0.661211 | 0.886774 | 0.801687 |
| MmugDNA.16053.1.S1_at   | MmugDNA.16053.1 | 11.96 | 11.98 | 0.08 | 0.03 | -1.02  | 0.759245 | 0.299278 | 0.889659 | 0.557769 |
| MmugDNA.16054.1.S1_at   | MmugDNA.16054.1 | 11.13 | 10.83 | 0.09 | 0.03 | 1.24   | 0.014469 | 0.067053 | 0.171923 | 0.304872 |
| MmugDNA.16057.1.S1_at   | MmugDNA.16057.1 | 5.5   | 5.61  | 0.04 | 0.11 | -1.08  | 0.412871 | 0.583785 | 0.674373 | 0.751989 |
| MmugDNA.16058.1.S1_at   | MmugDNA.16058.1 | 9.5   | 9.33  | 0.16 | 0.11 | 1.13   | 0.356082 | 0.067331 | 0.632435 | 0.305482 |
| MmugDNA.16059.1.S1_at   | MmugDNA.16059.1 | 3.56  | 3.55  | 0.17 | 0.01 | 1.01   | 0.947594 | 0.750309 | 0.977941 | 0.854766 |
| MmugDNA.1606.1.S1_at    | MmugDNA.1606.1  | 5.43  | 5.41  | 0.26 | 0.07 | 1.01   | 0.922624 | 0.358769 | 0.966932 | 0.600237 |

|                         |                 |       |       |      |      |       |          |          |          |          |
|-------------------------|-----------------|-------|-------|------|------|-------|----------|----------|----------|----------|
| MmugDNA.16060.1.S1_at   | MmugDNA.16060.1 | 3.97  | 4.14  | 0.24 | 0.07 | -1.12 | 0.480744 | 0.667672 | 0.721501 | 0.805472 |
| MmugDNA.16062.1.S1_at   | MmugDNA.16062.1 | 11.96 | 11.81 | 0.03 | 0.09 | 1.11  | 0.060889 | 0.048661 | 0.303728 | 0.265613 |
| MmugDNA.16063.1.S1_at   | MmugDNA.16063.1 | 11.47 | 11.5  | 0.04 | 0.09 | -1.02 | 0.243316 | 0.950713 | 0.539969 | 0.972024 |
| MmugDNA.16069.1.S1_at   | MmugDNA.16069.1 | 9.4   | 10.47 | 0.34 | 0.04 | -2.1  | 0.01185  | 0.029705 | 0.158913 | 0.214029 |
| MmugDNA.16075.1.S1_at   | MmugDNA.16075.1 | 6.07  | 5.79  | 0.09 | 0.08 | 1.22  | 0.055649 | 0.548689 | 0.293043 | 0.729318 |
| MmugDNA.16079.1.S1_at   | MmugDNA.16079.1 | 10.04 | 10.81 | 0.27 | 0.08 | -1.71 | 0.015597 | 0.040998 | 0.177369 | 0.247202 |
| MmugDNA.1608.1.S1_at    | MmugDNA.1608.1  | 7.26  | 7.11  | 0.21 | 0.09 | 1.1   | 0.379003 | 0.332442 | 0.649062 | 0.58087  |
| MmugDNA.16086.1.S1_at   | MmugDNA.16086.1 | 3.64  | 3.63  | 0.06 | 0.21 | 1.01  | 0.702436 | 0.896998 | 0.858775 | 0.941205 |
| MmugDNA.16089.1.S1_at   | MmugDNA.16089.1 | 6.94  | 6.98  | 0.06 | 0.08 | -1.03 | 0.492916 | 0.190449 | 0.730079 | 0.465906 |
| MmugDNA.1609.1.S1_at    | MmugDNA.1609.1  | 10.44 | 10.68 | 0.17 | 0.21 | -1.19 | 0.873809 | 0.276712 | 0.945744 | 0.540618 |
| MmugDNA.16092.1.S1_at   | MmugDNA.16092.1 | 10.11 | 9.68  | 0.13 | 0.15 | 1.35  | 0.015633 | 0.000067 | 0.177553 | 0.025805 |
| MmugDNA.16097.1.S1_at   | MmugDNA.16097.1 | 9.28  | 9.1   | 0.14 | 0.15 | 1.13  | 0.157112 | 0.061099 | 0.447994 | 0.293958 |
| MmugDNA.16098.1.S1_at   | MmugDNA.16098.1 | 3.28  | 3.34  | 0.14 | 0.05 | -1.04 | 0.481478 | 0.165359 | 0.721957 | 0.441544 |
| MmugDNA.16101.1.S1_at   | MmugDNA.16101.1 | 10.69 | 10.52 | 0.04 | 0.06 | 1.13  | 0.013702 | 0.104767 | 0.167949 | 0.366208 |
| MmugDNA.16104.1.S1_at   | MmugDNA.16104.1 | 5.29  | 7.11  | 0.65 | 0.24 | -3.53 | 0.011685 | 0.01594  | 0.157908 | 0.160254 |
| MmugDNA.16105.1.S1_at   | MmugDNA.16105.1 | 9.76  | 11.45 | 0.95 | 0.18 | -3.22 | 0.048211 | 0.050612 | 0.276915 | 0.270317 |
| MmugDNA.16113.1.S1_at   | MmugDNA.16113.1 | 12.18 | 12.44 | 0.14 | 0.04 | -1.2  | 0.115634 | 0.02013  | 0.392723 | 0.17825  |
| MmugDNA.16116.1.S1_at   | MmugDNA.16116.1 | 5.31  | 5.35  | 0.15 | 0.02 | -1.02 | 0.491494 | 0.641335 | 0.72924  | 0.789506 |
| MmugDNA.16118.1.S1_at   | MmugDNA.16118.1 | 8.12  | 9.14  | 0.15 | 0.3  | -2.02 | 0.006843 | 0.085979 | 0.129439 | 0.338116 |
| MmugDNA.16122.1.S1_at   | MmugDNA.16122.1 | 4.43  | 4.41  | 0.12 | 0.08 | 1.02  | 0.843177 | 0.39544  | 0.931314 | 0.627474 |
| MmugDNA.16127.1.S1_at   | MmugDNA.16127.1 | 6.49  | 6.91  | 0.21 | 0.1  | -1.33 | 0.058732 | 0.109973 | 0.299483 | 0.374065 |
| MmugDNA.16131.1.S1_at   | MmugDNA.16131.1 | 11.25 | 11.1  | 0.14 | 0.08 | 1.11  | 0.072953 | 0.130621 | 0.32778  | 0.402594 |
| MmugDNA.16132.1.S1_at   | MmugDNA.16132.1 | 5.53  | 5.66  | 0.18 | 0.02 | -1.09 | 0.778539 | 0.14595  | 0.898791 | 0.419967 |
| MmugDNA.16137.1.S1_at   | MmugDNA.16137.1 | 10.8  | 11.54 | 0.35 | 0.04 | -1.67 | 0.048867 | 0.139789 | 0.278677 | 0.413122 |
| MmugDNA.1614.1.S1_at    | MmugDNA.1614.1  | 9.4   | 10.51 | 0.82 | 0.21 | -2.16 | 0.254639 | 0.593721 | 0.54918  | 0.758417 |
| MmugDNA.16140.1.S1_at   | MmugDNA.16140.1 | 10    | 10.13 | 0.2  | 0.04 | -1.09 | 0.45512  | 0.094112 | 0.70497  | 0.35079  |
| MmugDNA.16142.1.S1_at   | MmugDNA.16142.1 | 7.14  | 6.99  | 0.74 | 0.09 | 1.11  | 0.716706 | 0.164955 | 0.866324 | 0.44123  |
| MmugDNA.16143.1.S1_at   | MmugDNA.16143.1 | 8.22  | 7.89  | 0.09 | 0.14 | 1.25  | 0.012983 | 0.156278 | 0.164715 | 0.43161  |
| MmugDNA.16144.1.S1_at   | MmugDNA.16144.1 | 7.76  | 7.59  | 0.07 | 0.2  | 1.13  | 0.107583 | 0.48778  | 0.382272 | 0.690669 |
| MmugDNA.16148.1.S1_at   | MmugDNA.16148.1 | 9.8   | 9.65  | 0.23 | 0.19 | 1.11  | 0.507664 | 0.828996 | 0.7399   | 0.901691 |
| MmugDNA.16150.1.S1_at   | MmugDNA.16150.1 | 4.93  | 4.89  | 0.19 | 0.31 | 1.02  | 0.54056  | 0.742121 | 0.761559 | 0.850618 |
| MmugDNA.16156.1.S1_at   | MmugDNA.16156.1 | 5.54  | 5.18  | 0.15 | 0.4  | 1.28  | 0.431712 | 0.593849 | 0.687592 | 0.758418 |
| MmugDNA.16158.1.S1_at   | MmugDNA.16158.1 | 5.7   | 7.04  | 0.85 | 0.18 | -2.53 | 0.113329 | 0.261399 | 0.390124 | 0.527887 |
| MmugDNA.16159.1.S1_at   | MmugDNA.16159.1 | 9.29  | 7.83  | 0.35 | 0.26 | 2.76  | 0.004553 | 0.020154 | 0.113686 | 0.178414 |
| MmugDNA.16160.1.S1_at   | MmugDNA.16160.1 | 10.11 | 10.88 | 0.41 | 0.16 | -1.71 | 0.017327 | 0.051163 | 0.184932 | 0.27167  |
| MmugDNA.16162.1.S1_at   | MmugDNA.16162.1 | 3.71  | 3.75  | 0.1  | 0.03 | -1.03 | 0.249326 | 0.500163 | 0.544528 | 0.698908 |
| MmugDNA.16165.1.S1_at   | MmugDNA.16165.1 | 6.21  | 6.03  | 0.67 | 0.27 | 1.13  | 0.383016 | 0.386784 | 0.652427 | 0.621895 |
| MmugDNA.16166.1.S1_at   | MmugDNA.16166.1 | 4.78  | 5.18  | 0.16 | 0.49 | -1.32 | 0.402942 | 0.71499  | 0.667108 | 0.834761 |
| MmugDNA.16168.1.S1_at   | MmugDNA.16168.1 | 11.38 | 11.15 | 0.12 | 0.1  | 1.18  | 0.271534 | 0.02699  | 0.563425 | 0.205476 |
| MmugDNA.16168.1.S1_s_at | MmugDNA.16168.1 | 11.19 | 10.79 | 0.08 | 0.04 | 1.32  | 0.003092 | 0.07522  | 0.100824 | 0.319399 |
| MmugDNA.16169.1.S1_at   | MmugDNA.16169.1 | 5.31  | 8.25  | 0.79 | 0.63 | -7.66 | 0.009577 | 0.083812 | 0.148034 | 0.334648 |
| MmugDNA.1617.1.S1_at    | MmugDNA.1617.1  | 5.55  | 6.26  | 0.92 | 0.13 | -1.63 | 0.30999  | 0.629468 | 0.596326 | 0.781895 |
| MmugDNA.16170.1.S1_s_at | MmugDNA.16170.1 | 12.61 | 12.79 | 0.18 | 0.07 | -1.13 | 0.209394 | 0.027629 | 0.506897 | 0.207522 |

|                         |                 |       |       |      |      |       |          |          |          |          |
|-------------------------|-----------------|-------|-------|------|------|-------|----------|----------|----------|----------|
| MmugDNA.16173.1.S1_at   | MmugDNA.16173.1 | 9.76  | 9.95  | 0.3  | 0.01 | -1.15 | 0.162598 | 0.163492 | 0.454585 | 0.439731 |
| MmugDNA.16179.1.S1_at   | MmugDNA.16179.1 | 4.82  | 4.79  | 0.1  | 0.34 | 1.02  | 0.700022 | 0.928815 | 0.857509 | 0.959449 |
| MmugDNA.1618.1.S1_at    | MmugDNA.1618.1  | 5.93  | 5.88  | 0.19 | 0.03 | 1.03  | 0.777506 | 0.676953 | 0.898365 | 0.81126  |
| MmugDNA.16181.1.S1_at   | MmugDNA.16181.1 | 7.18  | 7.19  | 0.11 | 0.11 | -1.01 | 0.670919 | 0.401606 | 0.842154 | 0.631068 |
| MmugDNA.16183.1.S1_at   | MmugDNA.16183.1 | 8.87  | 9.23  | 0.07 | 0.11 | -1.28 | 0.006405 | 0.092416 | 0.126645 | 0.348296 |
| MmugDNA.16185.1.S1_at   | MmugDNA.16185.1 | 12.82 | 12.98 | 0.09 | 0.1  | -1.12 | 0.121919 | 0.102073 | 0.400622 | 0.362122 |
| MmugDNA.16186.1.S1_at   | MmugDNA.16186.1 | 10.58 | 10.09 | 0.15 | 0.21 | 1.4   | 0.0569   | 0.458373 | 0.295858 | 0.671165 |
| MmugDNA.16187.1.S1_at   | MmugDNA.16187.1 | 9.81  | 9.2   | 0.23 | 0.06 | 1.52  | 0.006607 | 0.018127 | 0.127762 | 0.169609 |
| MmugDNA.16188.1.S1_at   | MmugDNA.16188.1 | 8.54  | 8.25  | 0.23 | 0.11 | 1.22  | 0.336558 | 0.231049 | 0.617124 | 0.502774 |
| MmugDNA.16189.1.S1_at   | MmugDNA.16189.1 | 4.25  | 4.24  | 0.15 | 0.13 | 1.01  | 0.540026 | 0.127728 | 0.761201 | 0.398581 |
| MmugDNA.16193.1.S1_at   | MmugDNA.16193.1 | 12.5  | 12.53 | 0.09 | 0.05 | -1.02 | 0.681555 | 0.819716 | 0.848112 | 0.896133 |
| MmugDNA.1620.1.S1_s_at  | MmugDNA.1620.1  | 7.14  | 6.73  | 0.31 | 0.07 | 1.33  | 0.085508 | 0.085749 | 0.349904 | 0.337761 |
| MmugDNA.16200.1.S1_at   | MmugDNA.16200.1 | 10.26 | 10.02 | 0.41 | 0.08 | 1.18  | 0.41596  | 0.040399 | 0.676502 | 0.246134 |
| MmugDNA.16202.1.S1_at   | MmugDNA.16202.1 | 6.86  | 7.94  | 0.15 | 0.16 | -2.11 | 0.001426 | 0.006646 | 0.07964  | 0.110505 |
| MmugDNA.1621.1.S1_at    | MmugDNA.1621.1  | 3.34  | 3.1   | 0.03 | 0.03 | 1.18  | 0.000939 | 0.001203 | 0.075939 | 0.054389 |
| MmugDNA.16210.1.S1_at   | MmugDNA.16210.1 | 10.36 | 9.9   | 0.19 | 0.05 | 1.38  | 0.015896 | 0.462654 | 0.178495 | 0.673983 |
| MmugDNA.16211.1.S1_at   | MmugDNA.16211.1 | 4.61  | 4.13  | 0.39 | 0.11 | 1.39  | 0.081251 | 0.121221 | 0.342222 | 0.390348 |
| MmugDNA.16213.1.S1_at   | MmugDNA.16213.1 | 4.87  | 5.49  | 0.07 | 0.38 | -1.54 | 0.045571 | 0.049168 | 0.270962 | 0.266566 |
| MmugDNA.16214.1.S1_at   | MmugDNA.16214.1 | 12.48 | 12.65 | 0.14 | 0.02 | -1.12 | 0.105151 | 0.14137  | 0.3789   | 0.414874 |
| MmugDNA.16217.1.S1_at   | MmugDNA.16217.1 | 4.53  | 4.43  | 0.2  | 0.28 | 1.07  | 0.589936 | 0.483975 | 0.791769 | 0.688262 |
| MmugDNA.16234.1.S1_at   | MmugDNA.16234.1 | 8.54  | 8.7   | 0.12 | 0.09 | -1.12 | 0.030047 | 0.080563 | 0.226564 | 0.328319 |
| MmugDNA.16240.1.S1_at   | MmugDNA.16240.1 | 12.13 | 12.05 | 0.21 | 0.05 | 1.06  | 0.987842 | 0.000676 | 0.995601 | 0.04413  |
| MmugDNA.16245.1.S1_at   | MmugDNA.16245.1 | 6.91  | 6.68  | 0.36 | 0.19 | 1.17  | 0.085075 | 0.108072 | 0.349156 | 0.371281 |
| MmugDNA.16253.1.S1_at   | MmugDNA.16253.1 | 10.14 | 9.02  | 0.55 | 0.06 | 2.17  | 0.034883 | 0.217468 | 0.241271 | 0.491035 |
| MmugDNA.16253.1.S1_s_at | MmugDNA.16253.1 | 9.7   | 8.53  | 0.59 | 0.06 | 2.25  | 0.035593 | 0.16729  | 0.243518 | 0.443697 |
| MmugDNA.16255.1.S1_at   | MmugDNA.16255.1 | 7.47  | 10.42 | 1.5  | 0.11 | -7.73 | 0.07377  | 0.340637 | 0.329461 | 0.586801 |
| MmugDNA.16262.1.S1_at   | MmugDNA.16262.1 | 3.43  | 3.42  | 0.02 | 0.27 | 1.01  | 0.374632 | 0.464438 | 0.645606 | 0.675068 |
| MmugDNA.16266.1.S1_at   | MmugDNA.16266.1 | 2.73  | 2.81  | 0.08 | 0.06 | -1.05 | 0.24512  | 0.451192 | 0.541279 | 0.666085 |
| MmugDNA.16266.1.S1_s_at | MmugDNA.16266.1 | 3.56  | 3.49  | 0.01 | 0.08 | 1.05  | 0.131361 | 0.035553 | 0.414229 | 0.232812 |
| MmugDNA.16268.1.S1_at   | MmugDNA.16268.1 | 12.61 | 12.58 | 0.38 | 0.07 | 1.02  | 0.472772 | 0.399141 | 0.716319 | 0.62969  |
| MmugDNA.16268.1.S1_s_at | MmugDNA.16268.1 | 12.56 | 12.5  | 0.41 | 0.07 | 1.04  | 0.590839 | 0.411996 | 0.792097 | 0.638434 |
| MmugDNA.1627.1.S1_at    | MmugDNA.1627.1  | 4.49  | 4.54  | 0.08 | 0.08 | -1.03 | 0.104448 | 0.140818 | 0.377773 | 0.414202 |
| MmugDNA.16274.1.S1_at   | MmugDNA.16274.1 | 6.59  | 6.61  | 0.23 | 0.12 | -1.02 | 0.519137 | 0.952872 | 0.747956 | 0.973271 |
| MmugDNA.16279.1.S1_at   | MmugDNA.16279.1 | 7.68  | 7.06  | 0.43 | 0.08 | 1.54  | 0.097656 | 0.055423 | 0.368021 | 0.281318 |
| MmugDNA.16280.1.S1_at   | MmugDNA.16280.1 | 10.32 | 10.62 | 0.22 | 0.09 | -1.23 | 0.1197   | 0.217961 | 0.397651 | 0.491553 |
| MmugDNA.16282.1.S1_x_at | MmugDNA.16282.1 | 4.46  | 4.45  | 0.55 | 0.13 | 1.01  | 0.416166 | 0.329007 | 0.676628 | 0.578482 |
| MmugDNA.16297.1.S1_at   | MmugDNA.16297.1 | 7.86  | 7.65  | 0.21 | 0.12 | 1.16  | 0.277545 | 0.104104 | 0.569083 | 0.365122 |
| MmugDNA.1631.1.S1_at    | MmugDNA.1631.1  | 6.07  | 6.05  | 0.21 | 0.11 | 1.01  | 0.737738 | 0.594585 | 0.87837  | 0.758623 |
| MmugDNA.16314.1.S1_at   | MmugDNA.16314.1 | 8.66  | 8.48  | 0.23 | 0.12 | 1.14  | 0.316089 | 0.16145  | 0.600905 | 0.437604 |
| MmugDNA.16318.1.S1_at   | MmugDNA.16318.1 | 6.81  | 6.3   | 0.26 | 0.03 | 1.43  | 0.031471 | 0.08118  | 0.23072  | 0.329351 |
| MmugDNA.1632.1.S1_at    | MmugDNA.1632.1  | 7.03  | 6.68  | 0.13 | 0.46 | 1.27  | 0.30543  | 0.130972 | 0.592468 | 0.403037 |
| MmugDNA.16321.1.S1_at   | MmugDNA.16321.1 | 6.76  | 6.95  | 0.06 | 0.09 | -1.14 | 0.02491  | 0.346042 | 0.211036 | 0.59115  |
| MmugDNA.16323.1.S1_at   | MmugDNA.16323.1 | 10.45 | 10.41 | 0.26 | 0.06 | 1.03  | 0.22006  | 0.16674  | 0.517678 | 0.443215 |

|                         |                 |       |       |      |      |       |          |          |          |          |
|-------------------------|-----------------|-------|-------|------|------|-------|----------|----------|----------|----------|
| MmugDNA.16327.1.S1_at   | MmugDNA.16327.1 | 9.66  | 9.88  | 0.21 | 0.22 | -1.16 | 0.856474 | 0.231186 | 0.937578 | 0.5029   |
| MmugDNA.16332.1.S1_at   | MmugDNA.16332.1 | 5.3   | 5.44  | 0.14 | 0.02 | -1.11 | 0.425631 | 0.215855 | 0.682976 | 0.489536 |
| MmugDNA.16335.1.S1_at   | MmugDNA.16335.1 | 7.82  | 8.04  | 0.03 | 0.01 | -1.17 | 0.000169 | 0.38276  | 0.053494 | 0.618887 |
| MmugDNA.16337.1.S1_at   | MmugDNA.16337.1 | 7.32  | 7.08  | 0.36 | 0.09 | 1.17  | 0.331627 | 0.236972 | 0.613532 | 0.507675 |
| MmugDNA.16340.1.S1_s_at | MmugDNA.16340.1 | 8.19  | 9.52  | 0.56 | 0.36 | -2.51 | 0.066545 | 0.208417 | 0.315478 | 0.482316 |
| MmugDNA.16343.1.S1_at   | MmugDNA.16343.1 | 8.15  | 8.03  | 0.22 | 0.2  | 1.08  | 0.66266  | 0.033852 | 0.837251 | 0.227639 |
| MmugDNA.16349.1.S1_at   | MmugDNA.16349.1 | 5.8   | 6.51  | 0.79 | 0.28 | -1.63 | 0.315087 | 0.836744 | 0.600277 | 0.906703 |
| MmugDNA.16356.1.S1_at   | MmugDNA.16356.1 | 13.07 | 13.21 | 0.02 | 0.05 | -1.11 | 0.020788 | 0.018895 | 0.197815 | 0.172935 |
| MmugDNA.16362.1.S1_at   | MmugDNA.16362.1 | 5.5   | 5.26  | 0.16 | 0.09 | 1.18  | 0.14407  | 0.188532 | 0.430916 | 0.464458 |
| MmugDNA.16364.1.S1_at   | MmugDNA.16364.1 | 10.56 | 10.39 | 0.12 | 0.08 | 1.13  | 0.185064 | 0.040189 | 0.481184 | 0.245709 |
| MmugDNA.16366.1.S1_at   | MmugDNA.16366.1 | 9.3   | 9.26  | 0.29 | 0.14 | 1.02  | 0.697943 | 0.034992 | 0.856252 | 0.231175 |
| MmugDNA.16367.1.S1_at   | MmugDNA.16367.1 | 5.4   | 6.32  | 0.03 | 0.08 | -1.9  | 0.000044 | 0.096525 | 0.045594 | 0.354096 |
| MmugDNA.16368.1.S1_at   | MmugDNA.16368.1 | 6.6   | 6.87  | 0.09 | 0.01 | -1.2  | 0.013147 | 0.000572 | 0.165277 | 0.041171 |
| MmugDNA.16370.1.S1_at   | MmugDNA.16370.1 | 7.6   | 6.95  | 0.22 | 0.05 | 1.56  | 0.010451 | 0.089395 | 0.152221 | 0.343637 |
| MmugDNA.16372.1.S1_at   | MmugDNA.16372.1 | 8.87  | 8.36  | 0.2  | 0.03 | 1.42  | 0.012793 | 0.003661 | 0.163393 | 0.086526 |
| MmugDNA.16382.1.S1_at   | MmugDNA.16382.1 | 5.41  | 5.36  | 0.01 | 0.03 | 1.03  | 0.096778 | 0.401868 | 0.366759 | 0.63109  |
| MmugDNA.16387.1.S1_at   | MmugDNA.16387.1 | 6.72  | 7.66  | 0.24 | 0.3  | -1.92 | 0.024584 | 0.218421 | 0.209791 | 0.491983 |
| MmugDNA.1639.1.S1_at    | MmugDNA.1639.1  | 11.96 | 12.35 | 0.12 | 0.02 | -1.31 | 0.01017  | 0.036402 | 0.150739 | 0.235284 |
| MmugDNA.16390.1.S1_at   | MmugDNA.16390.1 | 8.63  | 8.63  | 0.29 | 0.06 | 1     | 0.728719 | 0.10175  | 0.873237 | 0.361627 |
| MmugDNA.16400.1.S1_at   | MmugDNA.16400.1 | 9.28  | 9.76  | 0.82 | 0.19 | -1.39 | 0.360617 | 0.645605 | 0.63616  | 0.792428 |
| MmugDNA.16404.1.S1_at   | MmugDNA.16404.1 | 4.43  | 4.54  | 0.08 | 0.09 | -1.08 | 0.10961  | 0.186025 | 0.38471  | 0.461878 |
| MmugDNA.16407.1.S1_at   | MmugDNA.16407.1 | 4.37  | 4.18  | 0.27 | 0.03 | 1.14  | 0.220183 | 0.282088 | 0.517758 | 0.544937 |
| MmugDNA.16412.1.S1_at   | MmugDNA.16412.1 | 2.87  | 2.88  | 0.04 | 0.1  | -1.01 | 0.898811 | 0.974699 | 0.957012 | 0.986238 |
| MmugDNA.16420.1.S1_at   | MmugDNA.16420.1 | 12.03 | 11.84 | 0.12 | 0.03 | 1.14  | 0.070712 | 0.355454 | 0.324268 | 0.597738 |
| MmugDNA.16421.1.S1_s_at | MmugDNA.16421.1 | 8.5   | 9.25  | 0.17 | 0.06 | -1.68 | 0.002273 | 0.117012 | 0.091735 | 0.384405 |
| MmugDNA.16424.1.S1_at   | MmugDNA.16424.1 | 8.51  | 9.62  | 0.45 | 0.14 | -2.15 | 0.048324 | 0.247764 | 0.277205 | 0.517199 |
| MmugDNA.16426.1.S1_at   | MmugDNA.16426.1 | 12.08 | 10.74 | 0.65 | 0.36 | 2.53  | 0.024161 | 0.006709 | 0.20867  | 0.110872 |
| MmugDNA.16427.1.S1_at   | MmugDNA.16427.1 | 3.39  | 3.4   | 0.07 | 0.04 | -1.01 | 0.604841 | 0.04276  | 0.802039 | 0.251253 |
| MmugDNA.16431.1.S1_at   | MmugDNA.16431.1 | 12.38 | 12.19 | 0.17 | 0.01 | 1.15  | 0.363342 | 0.492803 | 0.638036 | 0.6938   |
| MmugDNA.16432.1.S1_at   | MmugDNA.16432.1 | 6.11  | 6.13  | 0.12 | 0.02 | -1.02 | 0.730166 | 0.969805 | 0.873891 | 0.983498 |
| MmugDNA.16433.1.S1_at   | MmugDNA.16433.1 | 4.6   | 4.33  | 0.05 | 0.08 | 1.2   | 0.028535 | 0.040954 | 0.22128  | 0.247202 |
| MmugDNA.16447.1.S1_at   | MmugDNA.16447.1 | 8.64  | 8.53  | 0.05 | 0.04 | 1.08  | 0.060986 | 0.630551 | 0.303895 | 0.782306 |
| MmugDNA.16448.1.S1_at   | MmugDNA.16448.1 | 7.07  | 7     | 0.68 | 0.43 | 1.05  | 0.895653 | 0.977324 | 0.955478 | 0.987656 |
| MmugDNA.16449.1.S1_at   | MmugDNA.16449.1 | 10.46 | 10.25 | 0.3  | 0.01 | 1.15  | 0.207177 | 0.050982 | 0.504881 | 0.27106  |
| MmugDNA.16450.1.S1_at   | MmugDNA.16450.1 | 7.86  | 7.84  | 0.09 | 0.11 | 1.01  | 0.703346 | 0.945468 | 0.859252 | 0.968984 |
| MmugDNA.16451.1.S1_s_at | MmugDNA.16451.1 | 13.68 | 13.74 | 0.03 | 0.02 | -1.04 | 0.062052 | 0.0002   | 0.305631 | 0.031344 |
| MmugDNA.16454.1.S1_s_at | MmugDNA.16454.1 | 10.95 | 11.59 | 0.17 | 0.22 | -1.57 | 0.006476 | 0.019549 | 0.127306 | 0.175563 |
| MmugDNA.16458.1.S1_at   | MmugDNA.16458.1 | 7.36  | 7.31  | 0.57 | 0.18 | 1.03  | 0.831837 | 0.843665 | 0.925994 | 0.910936 |
| MmugDNA.16459.1.S1_at   | MmugDNA.16459.1 | 12.61 | 12.43 | 0.06 | 0.06 | 1.14  | 0.01166  | 0.018982 | 0.157772 | 0.173405 |
| MmugDNA.16464.1.S1_at   | MmugDNA.16464.1 | 8.88  | 8.59  | 0.1  | 0.11 | 1.22  | 0.01395  | 0.000061 | 0.169182 | 0.025666 |
| MmugDNA.16466.1.S1_at   | MmugDNA.16466.1 | 5     | 5.43  | 0.48 | 0.36 | -1.35 | 0.388101 | 0.000537 | 0.656144 | 0.040439 |
| MmugDNA.16469.1.S1_at   | MmugDNA.16469.1 | 9.9   | 9.75  | 0.42 | 0.07 | 1.11  | 0.535096 | 0.097735 | 0.758193 | 0.355598 |
| MmugDNA.16474.1.S1_at   | MmugDNA.16474.1 | 10.84 | 11.83 | 0.51 | 0.13 | -1.98 | 0.031621 | 0.202507 | 0.231243 | 0.476819 |

|                         |                 |       |       |      |      |       |          |          |          |          |
|-------------------------|-----------------|-------|-------|------|------|-------|----------|----------|----------|----------|
| MmugDNA.16474.1.S1_s_at | MmugDNA.16474.1 | 11.18 | 12.17 | 0.56 | 0.12 | -1.99 | 0.046638 | 0.208017 | 0.273564 | 0.482049 |
| MmugDNA.16476.1.S1_at   | MmugDNA.16476.1 | 8.46  | 8.56  | 0.16 | 0.18 | -1.07 | 0.68385  | 0.207522 | 0.84925  | 0.481824 |
| MmugDNA.16477.1.S1_at   | MmugDNA.16477.1 | 13.3  | 13.56 | 0.07 | 0.03 | -1.2  | 0.002113 | 0.02549  | 0.090208 | 0.200313 |
| MmugDNA.16478.1.S1_at   | MmugDNA.16478.1 | 13.35 | 13.37 | 0.09 | 0.09 | -1.01 | 0.294582 | 0.32551  | 0.583567 | 0.575827 |
| MmugDNA.16480.1.S1_at   | MmugDNA.16480.1 | 4.65  | 3.9   | 0.16 | 0.09 | 1.68  | 0.002992 | 0.000457 | 0.099744 | 0.038572 |
| MmugDNA.16484.1.S1_at   | MmugDNA.16484.1 | 6.49  | 6.64  | 0.14 | 0.05 | -1.11 | 0.221488 | 0.104228 | 0.519474 | 0.365373 |
| MmugDNA.16490.1.S1_at   | MmugDNA.16490.1 | 13.22 | 12.72 | 0.05 | 0.05 | 1.42  | 0.000271 | 0.029082 | 0.056567 | 0.212721 |
| MmugDNA.16493.1.S1_at   | MmugDNA.16493.1 | 4.69  | 4.62  | 0.06 | 0.08 | 1.05  | 0.200005 | 0.115238 | 0.497566 | 0.38221  |
| MmugDNA.16495.1.S1_at   | MmugDNA.16495.1 | 11.87 | 11.68 | 0.1  | 0.04 | 1.14  | 0.033755 | 0.033383 | 0.237928 | 0.226396 |
| MmugDNA.16497.1.S1_at   | MmugDNA.16497.1 | 4.2   | 4.22  | 0.11 | 0.09 | -1.01 | 0.208353 | 0.275204 | 0.506068 | 0.53962  |
| MmugDNA.1650.1.S1_at    | MmugDNA.1650.1  | 8.77  | 8.41  | 0.2  | 0.1  | 1.28  | 0.056031 | 0.231842 | 0.29377  | 0.503592 |
| MmugDNA.16500.1.S1_at   | MmugDNA.16500.1 | 4.77  | 4.72  | 0.13 | 0.06 | 1.04  | 0.564134 | 0.435832 | 0.775892 | 0.65554  |
| MmugDNA.16520.1.S1_at   | MmugDNA.16520.1 | 2.78  | 2.89  | 0.07 | 0.03 | -1.08 | 0.047923 | 0.067064 | 0.276338 | 0.304872 |
| MmugDNA.16529.1.S1_at   | MmugDNA.16529.1 | 11.58 | 11.64 | 0.06 | 0.02 | -1.04 | 0.533886 | 0.732898 | 0.757384 | 0.845436 |
| MmugDNA.1653.1.S1_at    | MmugDNA.1653.1  | 5.42  | 5.46  | 0.12 | 0.15 | -1.03 | 0.876526 | 0.979053 | 0.947123 | 0.988666 |
| MmugDNA.16530.1.S1_at   | MmugDNA.16530.1 | 6.13  | 5.89  | 0.2  | 0.13 | 1.18  | 0.07279  | 0.147628 | 0.327658 | 0.421901 |
| MmugDNA.16541.1.S1_at   | MmugDNA.16541.1 | 7.46  | 7.48  | 0.15 | 0.06 | -1.01 | 0.534761 | 0.124766 | 0.757913 | 0.395215 |
| MmugDNA.16554.1.S1_at   | MmugDNA.16554.1 | 6.39  | 5.13  | 0.28 | 0.88 | 2.39  | 0.211163 | 0.197232 | 0.508989 | 0.472213 |
| MmugDNA.16556.1.S1_at   | MmugDNA.16556.1 | 9.57  | 11.05 | 0.78 | 0.12 | -2.8  | 0.033774 | 0.144559 | 0.237957 | 0.418424 |
| MmugDNA.16558.1.S1_at   | MmugDNA.16558.1 | 7.39  | 8.03  | 0.19 | 0.07 | -1.56 | 0.006783 | 0.473924 | 0.129089 | 0.681111 |
| MmugDNA.1656.1.S1_at    | MmugDNA.1656.1  | 7.57  | 7.57  | 0.3  | 0.29 | 1     | 0.37745  | 0.457692 | 0.647959 | 0.670897 |
| MmugDNA.16560.1.S1_at   | MmugDNA.16560.1 | 4.66  | 4.62  | 0.04 | 0.09 | 1.03  | 0.268261 | 0.00505  | 0.561004 | 0.099019 |
| MmugDNA.16563.1.S1_at   | MmugDNA.16563.1 | 3.73  | 3.38  | 0.15 | 0.05 | 1.28  | 0.015828 | 0.008278 | 0.178308 | 0.12078  |
| MmugDNA.16575.1.S1_at   | MmugDNA.16575.1 | 4.38  | 4.58  | 0.27 | 0.32 | -1.15 | 0.225159 | 0.119666 | 0.523094 | 0.388324 |
| MmugDNA.16579.1.S1_at   | MmugDNA.16579.1 | 8.04  | 8.45  | 0.3  | 0.22 | -1.33 | 0.118096 | 0.05823  | 0.395593 | 0.287988 |
| MmugDNA.16579.1.S1_s_at | MmugDNA.16579.1 | 7.61  | 8.26  | 0.73 | 0.13 | -1.57 | 0.103924 | 0.025503 | 0.377213 | 0.200333 |
| MmugDNA.16582.1.S1_at   | MmugDNA.16582.1 | 10.46 | 10.26 | 0.13 | 0.05 | 1.15  | 0.173834 | 0.071822 | 0.468263 | 0.314082 |
| MmugDNA.16586.1.S1_at   | MmugDNA.16586.1 | 4.4   | 4.35  | 0.1  | 0.03 | 1.03  | 0.348859 | 0.092859 | 0.626845 | 0.349024 |
| MmugDNA.16593.1.S1_at   | MmugDNA.16593.1 | 11.5  | 11.16 | 0.06 | 0.03 | 1.27  | 0.001544 | 0.010873 | 0.081956 | 0.135892 |
| MmugDNA.16597.1.S1_at   | MmugDNA.16597.1 | 6.45  | 6.5   | 0.06 | 0.03 | -1.03 | 0.484226 | 0.324781 | 0.724148 | 0.575311 |
| MmugDNA.16603.1.S1_at   | MmugDNA.16603.1 | 11.26 | 11.52 | 0.42 | 0.21 | -1.2  | 0.342202 | 0.044267 | 0.622046 | 0.254932 |
| MmugDNA.16608.1.S1_at   | MmugDNA.16608.1 | 7.42  | 8.22  | 0.52 | 0.34 | -1.73 | 0.167971 | 0.000636 | 0.461204 | 0.042882 |
| MmugDNA.1661.1.S1_s_at  | MmugDNA.1661.1  | 11.14 | 11.51 | 0.15 | 0.02 | -1.3  | 0.009304 | 0.276374 | 0.146273 | 0.540334 |
| MmugDNA.16610.1.S1_at   | MmugDNA.16610.1 | 8.95  | 8.86  | 0.42 | 0.08 | 1.07  | 0.857306 | 0.986203 | 0.938003 | 0.992172 |
| MmugDNA.16614.1.S1_at   | MmugDNA.16614.1 | 5     | 4.91  | 0.15 | 0.16 | 1.06  | 0.517175 | 0.56253  | 0.746416 | 0.738055 |
| MmugDNA.16617.1.S1_at   | MmugDNA.16617.1 | 6.14  | 5.57  | 0.15 | 0.07 | 1.48  | 0.005265 | 0.060936 | 0.117499 | 0.293629 |
| MmugDNA.16620.1.S1_at   | MmugDNA.16620.1 | 5.67  | 5.63  | 0.01 | 0.15 | 1.03  | 0.211298 | 0.322119 | 0.509081 | 0.573728 |
| MmugDNA.16625.1.S1_at   | MmugDNA.16625.1 | 10.05 | 9.91  | 0.04 | 0.1  | 1.11  | 0.245229 | 0.419421 | 0.541279 | 0.643471 |
| MmugDNA.16626.1.S1_at   | MmugDNA.16626.1 | 7.13  | 7.8   | 0.3  | 0.09 | -1.58 | 0.017986 | 0.000431 | 0.187151 | 0.038359 |
| MmugDNA.16643.1.S1_at   | MmugDNA.16643.1 | 8.89  | 8.79  | 0.15 | 0.17 | 1.07  | 0.679208 | 0.011088 | 0.84701  | 0.137048 |
| MmugDNA.16645.1.S1_at   | MmugDNA.16645.1 | 7.25  | 7.15  | 0.05 | 0.13 | 1.07  | 0.175256 | 0.159101 | 0.469608 | 0.435217 |
| MmugDNA.16649.1.S1_at   | MmugDNA.16649.1 | 3.45  | 3.46  | 0.08 | 0.01 | -1    | 0.42811  | 0.134644 | 0.685092 | 0.406629 |
| MmugDNA.16657.1.S1_at   | MmugDNA.16657.1 | 11.43 | 11.73 | 0.16 | 0.03 | -1.23 | 0.098486 | 0.165636 | 0.369125 | 0.441925 |

|                         |                 |       |       |      |      |       |          |          |          |          |
|-------------------------|-----------------|-------|-------|------|------|-------|----------|----------|----------|----------|
| MmugDNA.16663.1.S1_at   | MmugDNA.16663.1 | 7.59  | 7.27  | 0.35 | 0.1  | 1.25  | 0.087352 | 0.025906 | 0.353109 | 0.201728 |
| MmugDNA.16668.1.S1_at   | MmugDNA.16668.1 | 12.23 | 12.73 | 0.25 | 0.07 | -1.41 | 0.029538 | 0.237203 | 0.224943 | 0.507928 |
| MmugDNA.1667.1.S1_at    | MmugDNA.1667.1  | 5.85  | 5.85  | 0.43 | 0.15 | -1    | 0.394355 | 0.836292 | 0.660989 | 0.90636  |
| MmugDNA.16672.1.S1_at   | MmugDNA.16672.1 | 3.48  | 3.56  | 0.2  | 0.06 | -1.06 | 0.698785 | 0.812409 | 0.856808 | 0.891629 |
| MmugDNA.16676.1.S1_at   | MmugDNA.16676.1 | 10.27 | 10.05 | 0.1  | 0.16 | 1.17  | 0.227542 | 0.005495 | 0.525651 | 0.102081 |
| MmugDNA.16677.1.S1_at   | MmugDNA.16677.1 | 8.04  | 7.93  | 0.33 | 0.3  | 1.08  | 0.396819 | 0.06903  | 0.662712 | 0.309017 |
| MmugDNA.1668.1.S1_at    | MmugDNA.1668.1  | 4.91  | 4.72  | 0.12 | 0.11 | 1.15  | 0.201362 | 0.191939 | 0.4989   | 0.467295 |
| MmugDNA.16680.1.S1_at   | MmugDNA.16680.1 | 11.62 | 10.69 | 0.12 | 0.19 | 1.9   | 0.002997 | 0.093889 | 0.099837 | 0.350402 |
| MmugDNA.16683.1.S1_at   | MmugDNA.16683.1 | 7.84  | 9.29  | 0.55 | 0.28 | -2.72 | 0.019361 | 0.153714 | 0.192255 | 0.428413 |
| MmugDNA.16694.1.S1_at   | MmugDNA.16694.1 | 9.62  | 9.13  | 0.1  | 0.04 | 1.4   | 0.001421 | 0.024109 | 0.07964  | 0.1945   |
| MmugDNA.16696.1.S1_s_at | MmugDNA.16696.1 | 10.62 | 9.72  | 0.05 | 0.17 | 1.87  | 0.001356 | 0.000291 | 0.079562 | 0.034892 |
| MmugDNA.16698.1.S1_at   | MmugDNA.16698.1 | 12.92 | 12.82 | 0.14 | 0.09 | 1.07  | 0.394001 | 0.231903 | 0.660709 | 0.503597 |
| MmugDNA.167.1.S1_at     | MmugDNA.167.1   | 11.83 | 12.43 | 0.5  | 0.17 | -1.52 | 0.126568 | 0.634751 | 0.407989 | 0.785012 |
| MmugDNA.1670.1.S1_at    | MmugDNA.1670.1  | 9.75  | 10.69 | 0.31 | 0.08 | -1.93 | 0.00901  | 0.053323 | 0.144777 | 0.276481 |
| MmugDNA.16701.1.S1_at   | MmugDNA.16701.1 | 10.01 | 9.71  | 0.15 | 0.19 | 1.23  | 0.041447 | 0.097047 | 0.259966 | 0.354531 |
| MmugDNA.16709.1.S1_s_at | MmugDNA.16709.1 | 11.2  | 11.51 | 0.29 | 0.17 | -1.24 | 0.203392 | 0.16532  | 0.501192 | 0.441514 |
| MmugDNA.16710.1.S1_at   | MmugDNA.16710.1 | 12.9  | 12.85 | 0.16 | 0.14 | 1.04  | 0.751429 | 0.919528 | 0.885319 | 0.954822 |
| MmugDNA.16722.1.S1_at   | MmugDNA.16722.1 | 12.1  | 11.38 | 0.15 | 0.16 | 1.64  | 0.006955 | 0.002513 | 0.130571 | 0.074158 |
| MmugDNA.16729.1.S1_at   | MmugDNA.16729.1 | 3.37  | 3.34  | 0.09 | 0.17 | 1.02  | 0.752637 | 0.457297 | 0.885782 | 0.670746 |
| MmugDNA.1673.1.S1_at    | MmugDNA.1673.1  | 5.79  | 5.53  | 0.51 | 0.35 | 1.2   | 0.440754 | 0.737002 | 0.694666 | 0.847784 |
| MmugDNA.16732.1.S1_at   | MmugDNA.16732.1 | 5.76  | 5.68  | 0.15 | 0.08 | 1.06  | 0.186911 | 0.311166 | 0.482992 | 0.566215 |
| MmugDNA.16733.1.S1_at   | MmugDNA.16733.1 | 5.3   | 5.73  | 0.07 | 0.27 | -1.35 | 0.051069 | 0.11214  | 0.283595 | 0.377431 |
| MmugDNA.16736.1.S1_at   | MmugDNA.16736.1 | 6.62  | 5.98  | 0.44 | 0.23 | 1.56  | 0.074881 | 0.06391  | 0.331829 | 0.29906  |
| MmugDNA.16738.1.S1_at   | MmugDNA.16738.1 | 4.87  | 4.79  | 0.16 | 0.15 | 1.06  | 0.483601 | 0.400881 | 0.723664 | 0.630658 |
| MmugDNA.16747.1.S1_at   | MmugDNA.16747.1 | 10.93 | 10.78 | 0.09 | 0.09 | 1.11  | 0.104906 | 0.05713  | 0.37853  | 0.284945 |
| MmugDNA.16748.1.S1_at   | MmugDNA.16748.1 | 8.55  | 7.52  | 0.64 | 0.25 | 2.05  | 0.160553 | 0.246898 | 0.452057 | 0.516238 |
| MmugDNA.1675.1.S1_at    | MmugDNA.1675.1  | 10.04 | 10.04 | 0.23 | 0.08 | 1     | 0.888923 | 0.487728 | 0.952689 | 0.690658 |
| MmugDNA.16750.1.S1_at   | MmugDNA.16750.1 | 6.3   | 7.11  | 0.12 | 0.12 | -1.75 | 0.002095 | 0.032597 | 0.090208 | 0.223643 |
| MmugDNA.16751.1.S1_at   | MmugDNA.16751.1 | 5.86  | 5.93  | 0.05 | 0.01 | -1.05 | 0.09289  | 0.106846 | 0.361448 | 0.369467 |
| MmugDNA.16753.1.S1_at   | MmugDNA.16753.1 | 9.61  | 10.3  | 0.17 | 0.16 | -1.61 | 0.011541 | 0.010556 | 0.15728  | 0.134149 |
| MmugDNA.16755.1.S1_at   | MmugDNA.16755.1 | 7.75  | 8.17  | 0.89 | 0.2  | -1.34 | 0.161758 | 0.220777 | 0.453531 | 0.494262 |
| MmugDNA.16756.1.S1_at   | MmugDNA.16756.1 | 9.57  | 9.7   | 0.15 | 0.33 | -1.1  | 0.310289 | 0.423448 | 0.596553 | 0.646347 |
| MmugDNA.16758.1.S1_at   | MmugDNA.16758.1 | 5.21  | 5.37  | 0.12 | 0.05 | -1.11 | 0.186329 | 0.713743 | 0.482544 | 0.833937 |
| MmugDNA.16763.1.S1_at   | MmugDNA.16763.1 | 11.5  | 11.67 | 0.22 | 0.2  | -1.13 | 0.850967 | 0.007565 | 0.935277 | 0.116437 |
| MmugDNA.16765.1.S1_at   | MmugDNA.16765.1 | 12.34 | 11.33 | 0.04 | 0.51 | 2.02  | 0.075333 | 0.270031 | 0.33265  | 0.535332 |
| MmugDNA.16766.1.S1_at   | MmugDNA.16766.1 | 9.98  | 10.33 | 0.25 | 0.08 | -1.27 | 0.274632 | 0.670944 | 0.566523 | 0.807629 |
| MmugDNA.1677.1.S1_at    | MmugDNA.1677.1  | 9.98  | 9.77  | 0.15 | 0.12 | 1.15  | 0.140954 | 0.032435 | 0.426802 | 0.223088 |
| MmugDNA.16773.1.S1_at   | MmugDNA.16773.1 | 9.77  | 9.32  | 0.18 | 0.07 | 1.36  | 0.01859  | 0.010497 | 0.189572 | 0.133872 |
| MmugDNA.16776.1.S1_at   | MmugDNA.16776.1 | 5.94  | 5.62  | 0.65 | 0.3  | 1.25  | 0.77     | 0.328074 | 0.894469 | 0.577851 |
| MmugDNA.16779.1.S1_at   | MmugDNA.16779.1 | 5.97  | 6.59  | 0.28 | 0.08 | -1.54 | 0.018917 | 0.02619  | 0.191115 | 0.202804 |
| MmugDNA.16785.1.S1_s_at | MmugDNA.16785.1 | 4.78  | 4.79  | 0.03 | 0.07 | -1.01 | 0.384111 | 0.462539 | 0.653221 | 0.673854 |
| MmugDNA.16788.1.S1_at   | MmugDNA.16788.1 | 5.96  | 5.88  | 0.06 | 0.05 | 1.05  | 0.057447 | 0.135128 | 0.296977 | 0.407131 |
| MmugDNA.1679.1.S1_at    | MmugDNA.1679.1  | 7.36  | 9.06  | 1.77 | 0.22 | -3.24 | 0.207423 | 0.561227 | 0.505141 | 0.737235 |



|                         |                 |       |       |      |      |       |          |          |          |          |
|-------------------------|-----------------|-------|-------|------|------|-------|----------|----------|----------|----------|
| MmugDNA.16791.1.S1_at   | MmugDNA.16791.1 | 9.6   | 9.56  | 0.07 | 0.09 | 1.02  | 0.505717 | 0.001739 | 0.738658 | 0.062895 |
| MmugDNA.16796.1.S1_at   | MmugDNA.16796.1 | 10.22 | 10.88 | 0.2  | 0.06 | -1.58 | 0.010691 | 0.20577  | 0.153204 | 0.48007  |
| MmugDNA.16801.1.S1_at   | MmugDNA.16801.1 | 6.49  | 7.91  | 0.36 | 0.31 | -2.67 | 0.006271 | 0.282201 | 0.125436 | 0.544949 |
| MmugDNA.16802.1.S1_at   | MmugDNA.16802.1 | 9.84  | 9.94  | 0.13 | 0.11 | -1.07 | 0.987772 | 0.562675 | 0.995569 | 0.7381   |
| MmugDNA.16807.1.S1_at   | MmugDNA.16807.1 | 5.84  | 5.82  | 0.13 | 0.02 | 1.01  | 0.67928  | 0.184242 | 0.84701  | 0.460382 |
| MmugDNA.16810.1.S1_at   | MmugDNA.16810.1 | 11.78 | 11.56 | 0.34 | 0.12 | 1.17  | 0.477703 | 0.159161 | 0.719543 | 0.435217 |
| MmugDNA.16812.1.S1_at   | MmugDNA.16812.1 | 7.07  | 7.29  | 0.34 | 0.13 | -1.16 | 0.278573 | 0.296573 | 0.569942 | 0.555566 |
| MmugDNA.16814.1.S1_at   | MmugDNA.16814.1 | 13.26 | 13.19 | 0.12 | 0.03 | 1.05  | 0.160012 | 0.01741  | 0.451279 | 0.166995 |
| MmugDNA.16816.1.S1_at   | MmugDNA.16816.1 | 6.46  | 6.96  | 0.05 | 0.13 | -1.42 | 0.003503 | 0.024771 | 0.104036 | 0.197156 |
| MmugDNA.1682.1.S1_at    | MmugDNA.1682.1  | 6.23  | 8.38  | 0.76 | 0.28 | -4.44 | 0.024761 | 0.23273  | 0.210464 | 0.504378 |
| MmugDNA.16820.1.S1_at   | MmugDNA.16820.1 | 6.83  | 7.73  | 0.47 | 0.1  | -1.87 | 0.035922 | 0.101314 | 0.244561 | 0.361094 |
| MmugDNA.16823.1.S1_at   | MmugDNA.16823.1 | 9.33  | 6.12  | 0.48 | 1.01 | 9.25  | 0.021532 | 0.035937 | 0.200513 | 0.234032 |
| MmugDNA.16833.1.S1_at   | MmugDNA.16833.1 | 10.06 | 9.06  | 0.08 | 0.1  | 2     | 0.000133 | 0.000232 | 0.051196 | 0.03241  |
| MmugDNA.16840.1.S1_at   | MmugDNA.16840.1 | 9.78  | 10.04 | 0.16 | 0.24 | -1.2  | 0.86062  | 0.690946 | 0.939526 | 0.820018 |
| MmugDNA.16842.1.S1_at   | MmugDNA.16842.1 | 12.8  | 12.79 | 0.18 | 0.08 | 1.01  | 0.852365 | 0.841919 | 0.93587  | 0.909939 |
| MmugDNA.16849.1.S1_at   | MmugDNA.16849.1 | 9.04  | 8.68  | 0.13 | 0.1  | 1.28  | 0.024143 | 0.006062 | 0.208549 | 0.106159 |
| MmugDNA.16850.1.S1_at   | MmugDNA.16850.1 | 7.17  | 7.19  | 0.25 | 0.03 | -1.01 | 0.499675 | 0.873803 | 0.734372 | 0.928235 |
| MmugDNA.16852.1.S1_at   | MmugDNA.16852.1 | 3.88  | 4.28  | 0.1  | 0.32 | -1.31 | 0.069285 | 0.246945 | 0.321418 | 0.516238 |
| MmugDNA.16855.1.S1_at   | MmugDNA.16855.1 | 10.32 | 9.34  | 0.57 | 0.44 | 1.97  | 0.098249 | 0.468689 | 0.36886  | 0.677808 |
| MmugDNA.16857.1.S1_at   | MmugDNA.16857.1 | 10.65 | 10.7  | 0.18 | 0.08 | -1.03 | 0.423399 | 0.041937 | 0.681371 | 0.249397 |
| MmugDNA.16863.1.S1_at   | MmugDNA.16863.1 | 6.91  | 7.54  | 0.56 | 0.15 | -1.55 | 0.190072 | 0.351838 | 0.486405 | 0.595274 |
| MmugDNA.16869.1.S1_at   | MmugDNA.16869.1 | 12.26 | 12.45 | 0.07 | 0.05 | -1.13 | 0.051237 | 0.316401 | 0.283686 | 0.569809 |
| MmugDNA.16873.1.S1_at   | MmugDNA.16873.1 | 9.53  | 9.6   | 0.5  | 0.1  | -1.05 | 0.525669 | 0.042    | 0.75203  | 0.249463 |
| MmugDNA.16874.1.S1_s_at | MmugDNA.16874.1 | 10.3  | 9.47  | 0.32 | 0.27 | 1.78  | 0.027271 | 0.135609 | 0.218055 | 0.407744 |
| MmugDNA.16876.1.S1_at   | MmugDNA.16876.1 | 3.43  | 3.44  | 0.15 | 0.06 | -1.01 | 0.669924 | 0.749725 | 0.841623 | 0.854564 |
| MmugDNA.16878.1.S1_at   | MmugDNA.16878.1 | 7.18  | 7.69  | 0.32 | 0.2  | -1.42 | 0.021204 | 0.317567 | 0.199286 | 0.570774 |
| MmugDNA.16883.1.S1_at   | MmugDNA.16883.1 | 12.97 | 12.91 | 0.05 | 0.04 | 1.05  | 0.079768 | 0.250403 | 0.339935 | 0.519391 |
| MmugDNA.16884.1.S1_s_at | MmugDNA.16884.1 | 10.5  | 10.83 | 0.35 | 0.19 | -1.26 | 0.115195 | 0.074458 | 0.392238 | 0.318106 |
| MmugDNA.16885.1.S1_at   | MmugDNA.16885.1 | 4.3   | 4.19  | 0.16 | 0.12 | 1.08  | 0.498249 | 0.163545 | 0.733567 | 0.439765 |
| MmugDNA.16895.1.S1_at   | MmugDNA.16895.1 | 8.9   | 9.58  | 0.52 | 0.1  | -1.6  | 0.248514 | 0.281911 | 0.543914 | 0.544864 |
| MmugDNA.16896.1.S1_at   | MmugDNA.16896.1 | 7.14  | 7.39  | 0.35 | 0.39 | -1.19 | 0.318841 | 0.506551 | 0.603528 | 0.702503 |
| MmugDNA.16897.1.S1_x_at | MmugDNA.16897.1 | 5.11  | 5.11  | 0.11 | 0.07 | -1    | 0.727559 | 0.183656 | 0.872385 | 0.459681 |
| MmugDNA.16902.1.S1_at   | MmugDNA.16902.1 | 9.71  | 10.4  | 0.35 | 0.27 | -1.62 | 0.043442 | 0.007424 | 0.265644 | 0.115848 |
| MmugDNA.16904.1.S1_at   | MmugDNA.16904.1 | 6.36  | 6.59  | 0.19 | 0.34 | -1.17 | 0.453998 | 0.197196 | 0.704015 | 0.472213 |
| MmugDNA.16905.1.S1_at   | MmugDNA.16905.1 | 3.87  | 4     | 0.09 | 0.14 | -1.09 | 0.705953 | 0.616334 | 0.860745 | 0.772571 |
| MmugDNA.16906.1.S1_at   | MmugDNA.16906.1 | 12.66 | 12.64 | 0.19 | 0.06 | 1.02  | 0.845989 | 0.095099 | 0.932725 | 0.352151 |
| MmugDNA.16908.1.S1_at   | MmugDNA.16908.1 | 2.73  | 2.7   | 0.05 | 0.07 | 1.02  | 0.607111 | 0.075152 | 0.803551 | 0.319339 |
| MmugDNA.16908.1.S1_x_at | MmugDNA.16908.1 | 4.42  | 4.3   | 0.03 | 0.04 | 1.08  | 0.043107 | 0.079763 | 0.264779 | 0.327052 |
| MmugDNA.16909.1.S1_at   | MmugDNA.16909.1 | 11.11 | 10.51 | 0.19 | 0.05 | 1.52  | 0.004629 | 0.052463 | 0.114415 | 0.274577 |
| MmugDNA.16910.1.S1_at   | MmugDNA.16910.1 | 11.04 | 11.03 | 0.25 | 0.12 | 1.01  | 0.83339  | 0.972248 | 0.926598 | 0.985011 |
| MmugDNA.16912.1.S1_s_at | MmugDNA.16912.1 | 10.85 | 10.45 | 0.17 | 0.2  | 1.32  | 0.166006 | 0.168487 | 0.459032 | 0.445108 |
| MmugDNA.16913.1.S1_at   | MmugDNA.16913.1 | 12.78 | 12.8  | 0.04 | 0.03 | -1.01 | 0.401507 | 0.234118 | 0.666053 | 0.505319 |
| MmugDNA.16920.1.S1_at   | MmugDNA.16920.1 | 6.6   | 6.52  | 0.14 | 0.27 | 1.05  | 0.155334 | 0.225822 | 0.445636 | 0.498187 |

|                         |                 |       |       |      |      |       |          |          |          |          |
|-------------------------|-----------------|-------|-------|------|------|-------|----------|----------|----------|----------|
| MmugDNA.16923.1.S1_at   | MmugDNA.16923.1 | 6.54  | 6.45  | 0.3  | 0.13 | 1.07  | 0.658186 | 0.371169 | 0.834894 | 0.610113 |
| MmugDNA.16950.1.S1_at   | MmugDNA.16950.1 | 2.85  | 2.81  | 0.08 | 0.06 | 1.02  | 0.807732 | 0.974791 | 0.913952 | 0.986245 |
| MmugDNA.16958.1.S1_at   | MmugDNA.16958.1 | 9.64  | 9.3   | 0.23 | 0.04 | 1.27  | 0.06699  | 0.225591 | 0.316461 | 0.498155 |
| MmugDNA.16965.1.S1_at   | MmugDNA.16965.1 | 4.64  | 4.54  | 0.04 | 0.06 | 1.07  | 0.089605 | 0.100187 | 0.356523 | 0.359195 |
| MmugDNA.16971.1.S1_at   | MmugDNA.16971.1 | 3.61  | 3.53  | 0.06 | 0.03 | 1.06  | 0.09743  | 0.387011 | 0.367577 | 0.621935 |
| MmugDNA.16972.1.S1_at   | MmugDNA.16972.1 | 4.37  | 4.39  | 0.03 | 0.02 | -1.01 | 0.598866 | 0.24128  | 0.79767  | 0.511911 |
| MmugDNA.16980.1.S1_at   | MmugDNA.16980.1 | 6.7   | 6.48  | 0.04 | 0.12 | 1.16  | 0.040414 | 0.149692 | 0.257326 | 0.424291 |
| MmugDNA.16982.1.S1_at   | MmugDNA.16982.1 | 9.78  | 9.29  | 0.12 | 0.14 | 1.41  | 0.009511 | 0.129905 | 0.147625 | 0.401511 |
| MmugDNA.16983.1.S1_at   | MmugDNA.16983.1 | 3.83  | 3.63  | 0.03 | 0.13 | 1.15  | 0.039818 | 0.03248  | 0.256213 | 0.223254 |
| MmugDNA.1699.1.S1_at    | MmugDNA.1699.1  | 5.31  | 5.52  | 0.17 | 0.24 | -1.16 | 0.465314 | 0.409378 | 0.711399 | 0.636452 |
| MmugDNA.170.1.S1_at     | MmugDNA.170.1   | 4.04  | 4.01  | 0.15 | 0.02 | 1.03  | 0.346015 | 0.343134 | 0.624806 | 0.588897 |
| MmugDNA.17002.1.S1_at   | MmugDNA.17002.1 | 11.68 | 11.14 | 0.08 | 0.05 | 1.45  | 0.000791 | 0.002862 | 0.073056 | 0.078756 |
| MmugDNA.17004.1.S1_at   | MmugDNA.17004.1 | 8.26  | 8.19  | 0.02 | 0.06 | 1.05  | 0.092504 | 0.924043 | 0.360707 | 0.957178 |
| MmugDNA.17005.1.S1_at   | MmugDNA.17005.1 | 9.49  | 9.83  | 0.34 | 0.09 | -1.27 | 0.054154 | 0.090906 | 0.289903 | 0.345537 |
| MmugDNA.17006.1.S1_at   | MmugDNA.17006.1 | 9.27  | 8.77  | 0.12 | 0.05 | 1.42  | 0.002282 | 0.000679 | 0.091965 | 0.04413  |
| MmugDNA.1701.1.S1_at    | MmugDNA.1701.1  | 5.9   | 6.25  | 0.46 | 0.22 | -1.28 | 0.31203  | 0.506784 | 0.59816  | 0.702575 |
| MmugDNA.17013.1.S1_at   | MmugDNA.17013.1 | 5.32  | 5.26  | 0.16 | 0.08 | 1.04  | 0.450817 | 0.768652 | 0.701759 | 0.865638 |
| MmugDNA.17016.1.S1_at   | MmugDNA.17016.1 | 7.7   | 8.56  | 0.75 | 0.18 | -1.82 | 0.365158 | 0.071276 | 0.639822 | 0.313318 |
| MmugDNA.17017.1.S1_at   | MmugDNA.17017.1 | 9     | 11.01 | 0.87 | 0.1  | -4.03 | 0.017334 | 0.048942 | 0.184946 | 0.266021 |
| MmugDNA.1702.1.S1_at    | MmugDNA.1702.1  | 8.09  | 9.12  | 0.7  | 0.34 | -2.04 | 0.096236 | 0.041871 | 0.365825 | 0.249187 |
| MmugDNA.17021.1.S1_at   | MmugDNA.17021.1 | 11.5  | 11.54 | 0.09 | 0.1  | -1.03 | 0.343227 | 0.13421  | 0.622887 | 0.406453 |
| MmugDNA.17025.1.S1_at   | MmugDNA.17025.1 | 11.54 | 11.3  | 0.1  | 0.07 | 1.18  | 0.048418 | 0.110299 | 0.277466 | 0.374403 |
| MmugDNA.17029.1.S1_at   | MmugDNA.17029.1 | 12.57 | 11.85 | 0.22 | 0.02 | 1.65  | 0.009299 | 0.032677 | 0.146273 | 0.223827 |
| MmugDNA.17029.1.S1_s_at | MmugDNA.17029.1 | 13.54 | 13.07 | 0.16 | 0.02 | 1.38  | 0.016285 | 0.055964 | 0.180411 | 0.28236  |
| MmugDNA.17031.1.S1_at   | MmugDNA.17031.1 | 9.95  | 9.83  | 0.08 | 0.24 | 1.09  | 0.703637 | 0.029851 | 0.859309 | 0.214481 |
| MmugDNA.17034.1.S1_at   | MmugDNA.17034.1 | 9.2   | 8.99  | 0.28 | 0.19 | 1.15  | 0.179932 | 0.46557  | 0.475023 | 0.675811 |
| MmugDNA.17036.1.S1_at   | MmugDNA.17036.1 | 7.38  | 6.97  | 0.18 | 0.21 | 1.33  | 0.156631 | 0.507991 | 0.44712  | 0.703358 |
| MmugDNA.17038.1.S1_at   | MmugDNA.17038.1 | 7.47  | 7.51  | 0.04 | 0.04 | -1.03 | 0.136196 | 0.225121 | 0.420589 | 0.497779 |
| MmugDNA.17039.1.S1_at   | MmugDNA.17039.1 | 5.52  | 5.36  | 0.23 | 0.04 | 1.12  | 0.185659 | 0.124458 | 0.481899 | 0.394865 |
| MmugDNA.17044.1.S1_at   | MmugDNA.17044.1 | 11.38 | 11.12 | 0.23 | 0.09 | 1.19  | 0.315851 | 0.272167 | 0.600607 | 0.536939 |
| MmugDNA.17048.1.S1_at   | MmugDNA.17048.1 | 11.07 | 11.02 | 0.2  | 0.11 | 1.03  | 0.820141 | 0.920548 | 0.919784 | 0.955234 |
| MmugDNA.17049.1.S1_at   | MmugDNA.17049.1 | 4.14  | 3.95  | 0.19 | 0.04 | 1.14  | 0.503323 | 0.514913 | 0.736884 | 0.707937 |
| MmugDNA.17051.1.S1_at   | MmugDNA.17051.1 | 6.49  | 6.56  | 0.2  | 0.02 | -1.05 | 0.665195 | 0.224756 | 0.839032 | 0.497617 |
| MmugDNA.17052.1.S1_at   | MmugDNA.17052.1 | 7.08  | 6.83  | 0.18 | 0.14 | 1.19  | 0.54272  | 0.002075 | 0.762954 | 0.067389 |
| MmugDNA.17053.1.S1_at   | MmugDNA.17053.1 | 8.83  | 8.83  | 0.12 | 0.05 | -1    | 0.683671 | 0.014108 | 0.849222 | 0.15195  |
| MmugDNA.17056.1.S1_at   | MmugDNA.17056.1 | 8.26  | 8.24  | 0.17 | 0.01 | 1.01  | 0.602102 | 0.689802 | 0.800013 | 0.819112 |
| MmugDNA.17056.1.S1_s_at | MmugDNA.17056.1 | 5.38  | 5.18  | 0.17 | 0.16 | 1.15  | 0.261502 | 0.384075 | 0.555684 | 0.619926 |
| MmugDNA.17065.1.S1_at   | MmugDNA.17065.1 | 9.11  | 9.77  | 0.26 | 0.02 | -1.59 | 0.017615 | 0.266737 | 0.186416 | 0.53241  |
| MmugDNA.17068.1.S1_at   | MmugDNA.17068.1 | 6.2   | 6.33  | 0.08 | 0.04 | -1.1  | 0.04203  | 0.014154 | 0.261972 | 0.152107 |
| MmugDNA.17069.1.S1_at   | MmugDNA.17069.1 | 9.08  | 9.27  | 0.13 | 0.09 | -1.14 | 0.1219   | 0.042693 | 0.400622 | 0.251049 |
| MmugDNA.17072.1.S1_at   | MmugDNA.17072.1 | 11.14 | 11    | 0.23 | 0.15 | 1.1   | 0.507404 | 0.003616 | 0.739639 | 0.086033 |
| MmugDNA.17072.1.S1_x_at | MmugDNA.17072.1 | 10.9  | 10.76 | 0.18 | 0.12 | 1.1   | 0.257634 | 0.001616 | 0.551856 | 0.06074  |
| MmugDNA.17073.1.S1_at   | MmugDNA.17073.1 | 5.58  | 5.63  | 0.03 | 0.09 | -1.04 | 0.318316 | 0.539755 | 0.603003 | 0.723926 |

|                         |                 |       |       |      |      |       |          |          |          |          |
|-------------------------|-----------------|-------|-------|------|------|-------|----------|----------|----------|----------|
| MmugDNA.17075.1.S1_at   | MmugDNA.17075.1 | 4.76  | 4.83  | 0.28 | 0.14 | -1.05 | 0.79477  | 0.766081 | 0.907365 | 0.864102 |
| MmugDNA.17083.1.S1_at   | MmugDNA.17083.1 | 12.8  | 12.68 | 0.06 | 0.04 | 1.09  | 0.030696 | 0.000373 | 0.228035 | 0.037273 |
| MmugDNA.17084.1.S1_at   | MmugDNA.17084.1 | 4.55  | 7.49  | 1.95 | 0.2  | -7.65 | 0.184069 | 0.261859 | 0.480042 | 0.528265 |
| MmugDNA.17093.1.S1_at   | MmugDNA.17093.1 | 7.52  | 6.89  | 0.36 | 0.15 | 1.55  | 0.050302 | 0.098181 | 0.282147 | 0.356253 |
| MmugDNA.17097.1.S1_at   | MmugDNA.17097.1 | 5.57  | 4.97  | 0.1  | 0.15 | 1.52  | 0.004855 | 0.065767 | 0.115123 | 0.301767 |
| MmugDNA.17099.1.S1_at   | MmugDNA.17099.1 | 7.8   | 7.79  | 0.25 | 0.04 | 1     | 0.31559  | 0.401816 | 0.600423 | 0.631075 |
| MmugDNA.17100.1.S1_at   | MmugDNA.17100.1 | 10.08 | 9.37  | 0.33 | 0.03 | 1.63  | 0.010227 | 0.010833 | 0.15081  | 0.135705 |
| MmugDNA.17105.1.S1_at   | MmugDNA.17105.1 | 12.26 | 12.25 | 0.04 | 0.07 | 1     | 0.469787 | 0.621185 | 0.714445 | 0.775813 |
| MmugDNA.17109.1.S1_at   | MmugDNA.17109.1 | 7.57  | 7.45  | 0.15 | 0.43 | 1.08  | 0.875077 | 0.307142 | 0.946398 | 0.563487 |
| MmugDNA.1711.1.S1_at    | MmugDNA.1711.1  | 9.01  | 7.79  | 0.07 | 0.12 | 2.33  | 0.000132 | 0.000025 | 0.051196 | 0.020254 |
| MmugDNA.17111.1.S1_at   | MmugDNA.17111.1 | 6.42  | 5.36  | 0.64 | 0.15 | 2.08  | 0.176303 | 0.195004 | 0.470697 | 0.470146 |
| MmugDNA.17113.1.S1_at   | MmugDNA.17113.1 | 5.54  | 5.73  | 0.55 | 0.37 | -1.14 | 0.468559 | 0.765549 | 0.713637 | 0.863726 |
| MmugDNA.17118.1.S1_at   | MmugDNA.17118.1 | 8.48  | 8.08  | 0.47 | 0.16 | 1.32  | 0.217499 | 0.173619 | 0.515377 | 0.449965 |
| MmugDNA.17122.1.S1_at   | MmugDNA.17122.1 | 4.36  | 4.26  | 0.24 | 0.05 | 1.08  | 0.169265 | 0.202131 | 0.462574 | 0.476557 |
| MmugDNA.17125.1.S1_at   | MmugDNA.17125.1 | 6.75  | 6.83  | 0.2  | 0.04 | -1.06 | 0.495286 | 0.76037  | 0.731766 | 0.860754 |
| MmugDNA.17135.1.S1_at   | MmugDNA.17135.1 | 9.88  | 10.23 | 0.17 | 0.07 | -1.28 | 0.023703 | 0.06557  | 0.207081 | 0.301476 |
| MmugDNA.1714.1.S1_at    | MmugDNA.1714.1  | 6.83  | 6.84  | 0.23 | 0.08 | -1    | 0.783094 | 0.559827 | 0.901029 | 0.736394 |
| MmugDNA.17140.1.S1_at   | MmugDNA.17140.1 | 6.52  | 6.38  | 0.12 | 0.04 | 1.1   | 0.276657 | 0.206422 | 0.5682   | 0.480571 |
| MmugDNA.17142.1.S1_at   | MmugDNA.17142.1 | 6.91  | 6.82  | 0.14 | 0.06 | 1.06  | 0.726987 | 0.258069 | 0.872031 | 0.525574 |
| MmugDNA.17143.1.S1_x_at | MmugDNA.17143.1 | 6.7   | 6.09  | 0.34 | 0.14 | 1.52  | 0.051002 | 0.088442 | 0.283499 | 0.341877 |
| MmugDNA.1715.1.S1_at    | MmugDNA.1715.1  | 7.85  | 7.51  | 0.32 | 0.26 | 1.26  | 0.498502 | 0.01615  | 0.733686 | 0.161087 |
| MmugDNA.17158.1.S1_at   | MmugDNA.17158.1 | 3.64  | 3.6   | 0.05 | 0.09 | 1.03  | 0.302825 | 0.304603 | 0.590429 | 0.561838 |
| MmugDNA.17159.1.S1_at   | MmugDNA.17159.1 | 9.48  | 9.47  | 0.49 | 0.05 | 1     | 0.963761 | 0.999621 | 0.985326 | 0.999864 |
| MmugDNA.17159.1.S1_s_at | MmugDNA.17159.1 | 10.46 | 10.2  | 0.33 | 0.13 | 1.21  | 0.254312 | 0.855318 | 0.548754 | 0.917526 |
| MmugDNA.17164.1.S1_s_at | MmugDNA.17164.1 | 6.32  | 6.16  | 0.24 | 0.19 | 1.11  | 0.45332  | 0.56454  | 0.7035   | 0.739363 |
| MmugDNA.17182.1.S1_at   | MmugDNA.17182.1 | 3.21  | 2.97  | 0.02 | 0.13 | 1.18  | 0.096262 | 0.346303 | 0.365846 | 0.59124  |
| MmugDNA.17188.1.S1_at   | MmugDNA.17188.1 | 7.69  | 7.43  | 0.29 | 0.08 | 1.2   | 0.10841  | 0.034382 | 0.383016 | 0.229382 |
| MmugDNA.17189.1.S1_at   | MmugDNA.17189.1 | 4.75  | 4.83  | 0.27 | 0.43 | -1.06 | 0.31991  | 0.203627 | 0.604498 | 0.47789  |
| MmugDNA.17193.1.S1_at   | MmugDNA.17193.1 | 6.47  | 6.58  | 0.2  | 0.06 | -1.08 | 0.281619 | 0.114011 | 0.572497 | 0.38036  |
| MmugDNA.17196.1.S1_at   | MmugDNA.17196.1 | 12.52 | 11.94 | 0.12 | 0.21 | 1.5   | 0.043841 | 0.122901 | 0.266411 | 0.392923 |
| MmugDNA.17198.1.S1_at   | MmugDNA.17198.1 | 3.42  | 3.14  | 0.43 | 0.07 | 1.21  | 0.261224 | 0.403488 | 0.555294 | 0.632164 |
| MmugDNA.17201.1.S1_at   | MmugDNA.17201.1 | 6.67  | 6.31  | 0.25 | 0.06 | 1.28  | 0.072313 | 0.002237 | 0.32685  | 0.069642 |
| MmugDNA.17203.1.S1_at   | MmugDNA.17203.1 | 12.66 | 12.51 | 0.11 | 0.01 | 1.1   | 0.270092 | 0.120662 | 0.562292 | 0.389476 |
| MmugDNA.17205.1.S1_at   | MmugDNA.17205.1 | 5.83  | 5.8   | 0.14 | 0.01 | 1.02  | 0.314993 | 0.56457  | 0.600177 | 0.739366 |
| MmugDNA.17209.1.S1_at   | MmugDNA.17209.1 | 5.92  | 5.96  | 0.07 | 0.05 | -1.03 | 0.413102 | 0.297424 | 0.67449  | 0.556086 |
| MmugDNA.1721.1.S1_at    | MmugDNA.1721.1  | 8.24  | 7.45  | 0.6  | 0.19 | 1.74  | 0.098428 | 0.093051 | 0.369086 | 0.3492   |
| MmugDNA.17212.1.S1_at   | MmugDNA.17212.1 | 3.24  | 3.25  | 0.27 | 0.16 | -1.01 | 0.600377 | 0.802722 | 0.798845 | 0.886441 |
| MmugDNA.17213.1.S1_at   | MmugDNA.17213.1 | 5.21  | 5.2   | 0.14 | 0.06 | 1     | 0.815389 | 0.078721 | 0.917549 | 0.325673 |
| MmugDNA.17216.1.S1_at   | MmugDNA.17216.1 | 5.41  | 5.29  | 0.04 | 0.04 | 1.08  | 0.006526 | 0.282172 | 0.127373 | 0.544937 |
| MmugDNA.17218.1.S1_at   | MmugDNA.17218.1 | 8.79  | 8.7   | 0.54 | 0.08 | 1.06  | 0.648667 | 0.501207 | 0.829342 | 0.699449 |
| MmugDNA.17219.1.S1_at   | MmugDNA.17219.1 | 8.35  | 7.5   | 0.26 | 0.28 | 1.81  | 0.01486  | 0.004145 | 0.174061 | 0.091027 |
| MmugDNA.17220.1.S1_at   | MmugDNA.17220.1 | 6.85  | 6.79  | 0.19 | 0.06 | 1.04  | 0.82431  | 0.551794 | 0.921916 | 0.731221 |
| MmugDNA.17221.1.S1_at   | MmugDNA.17221.1 | 7.08  | 7.54  | 0.04 | 0.14 | -1.37 | 0.008738 | 0.0542   | 0.14316  | 0.278211 |

|                         |                 |       |       |      |      |       |          |          |          |          |
|-------------------------|-----------------|-------|-------|------|------|-------|----------|----------|----------|----------|
| MmugDNA.17224.1.A1_at   | MmugDNA.17224.1 | 6.32  | 6.51  | 0.41 | 0.04 | -1.14 | 0.525393 | 0.518366 | 0.751933 | 0.71038  |
| MmugDNA.17224.1.S1_at   | MmugDNA.17224.1 | 6.75  | 6.74  | 0.33 | 0.02 | 1     | 0.969706 | 0.680783 | 0.987995 | 0.813594 |
| MmugDNA.17225.1.S1_at   | MmugDNA.17225.1 | 10.94 | 11.08 | 0.11 | 0.05 | -1.1  | 0.07702  | 0.091354 | 0.335515 | 0.346281 |
| MmugDNA.17229.1.S1_at   | MmugDNA.17229.1 | 5.89  | 5.86  | 0.19 | 0.08 | 1.02  | 0.94189  | 0.880455 | 0.975589 | 0.931694 |
| MmugDNA.17238.1.S1_at   | MmugDNA.17238.1 | 9.62  | 11.21 | 0.57 | 0.26 | -3.01 | 0.020308 | 0.061182 | 0.196136 | 0.293981 |
| MmugDNA.17241.1.S1_at   | MmugDNA.17241.1 | 5.79  | 5.92  | 0.19 | 0.06 | -1.09 | 0.93229  | 0.823161 | 0.971546 | 0.898361 |
| MmugDNA.17242.1.S1_at   | MmugDNA.17242.1 | 9.96  | 10.4  | 0.31 | 0.1  | -1.36 | 0.080484 | 0.079438 | 0.341026 | 0.326766 |
| MmugDNA.17250.1.S1_at   | MmugDNA.17250.1 | 3.49  | 3.32  | 0.1  | 0.04 | 1.12  | 0.085202 | 0.144712 | 0.34932  | 0.418546 |
| MmugDNA.17253.1.S1_at   | MmugDNA.17253.1 | 10.13 | 9.87  | 0.67 | 0.21 | 1.2   | 0.188137 | 0.308322 | 0.48443  | 0.564425 |
| MmugDNA.17254.1.S1_at   | MmugDNA.17254.1 | 5.87  | 5.91  | 0.3  | 0.07 | -1.03 | 0.955718 | 0.803796 | 0.981818 | 0.887124 |
| MmugDNA.17256.1.S1_at   | MmugDNA.17256.1 | 4.4   | 4.36  | 0.07 | 0.15 | 1.03  | 0.348389 | 0.144376 | 0.626353 | 0.418323 |
| MmugDNA.17259.1.S1_at   | MmugDNA.17259.1 | 8.96  | 8.99  | 0.16 | 0.27 | -1.02 | 0.532848 | 0.889799 | 0.7567   | 0.937223 |
| MmugDNA.17269.1.S1_at   | MmugDNA.17269.1 | 8.3   | 7.77  | 0.19 | 0.02 | 1.44  | 0.009413 | 0.000689 | 0.146817 | 0.044166 |
| MmugDNA.17277.1.S1_at   | MmugDNA.17277.1 | 9.18  | 8.89  | 0.16 | 0.24 | 1.22  | 0.078955 | 0.188591 | 0.338745 | 0.464557 |
| MmugDNA.17286.1.S1_at   | MmugDNA.17286.1 | 12.15 | 12.27 | 0.25 | 0.06 | -1.09 | 0.408876 | 0.394421 | 0.671451 | 0.626982 |
| MmugDNA.17292.1.S1_at   | MmugDNA.17292.1 | 7.33  | 7.35  | 0.25 | 0.05 | -1.02 | 0.675394 | 0.131083 | 0.845075 | 0.403084 |
| MmugDNA.17294.1.S1_at   | MmugDNA.17294.1 | 7.21  | 7.63  | 0.28 | 0.03 | -1.33 | 0.025019 | 0.166231 | 0.211194 | 0.442777 |
| MmugDNA.17295.1.S1_at   | MmugDNA.17295.1 | 10.2  | 10.3  | 0.3  | 0.03 | -1.08 | 0.919436 | 0.951681 | 0.965499 | 0.972543 |
| MmugDNA.17299.1.S1_at   | MmugDNA.17299.1 | 3.14  | 3.23  | 0    | 0.08 | -1.06 | 0.139907 | 0.141414 | 0.425484 | 0.414874 |
| MmugDNA.173.1.S1_at     | MmugDNA.173.1   | 6.89  | 6.86  | 0.05 | 0.04 | 1.02  | 0.414469 | 0.14789  | 0.675678 | 0.422263 |
| MmugDNA.17300.1.S1_s_at | MmugDNA.17300.1 | 6.61  | 6.69  | 1.04 | 0.23 | -1.06 | 0.898152 | 0.973696 | 0.956732 | 0.985648 |
| MmugDNA.17319.1.S1_at   | MmugDNA.17319.1 | 12.26 | 12.37 | 0.11 | 0.1  | -1.08 | 0.685989 | 0.899877 | 0.850432 | 0.943047 |
| MmugDNA.17322.1.S1_at   | MmugDNA.17322.1 | 6.54  | 6.57  | 0.14 | 0.05 | -1.02 | 0.956879 | 0.377494 | 0.982318 | 0.614984 |
| MmugDNA.17329.1.S1_at   | MmugDNA.17329.1 | 12    | 10.01 | 0.06 | 0.33 | 3.99  | 0.000644 | 0.006916 | 0.070888 | 0.112399 |
| MmugDNA.1734.1.S1_at    | MmugDNA.1734.1  | 5.57  | 5.29  | 0.31 | 0.16 | 1.21  | 0.159922 | 0.256891 | 0.451279 | 0.52471  |
| MmugDNA.17344.1.S1_at   | MmugDNA.17344.1 | 5.94  | 5.82  | 0.28 | 0.23 | 1.09  | 0.253036 | 0.028579 | 0.547557 | 0.210834 |
| MmugDNA.17348.1.S1_at   | MmugDNA.17348.1 | 12.27 | 12.46 | 0.1  | 0.02 | -1.14 | 0.028506 | 0.001887 | 0.22113  | 0.065004 |
| MmugDNA.17350.1.S1_at   | MmugDNA.17350.1 | 11.98 | 11.89 | 0.06 | 0.01 | 1.07  | 0.054166 | 0.088614 | 0.289903 | 0.342165 |
| MmugDNA.17360.1.S1_at   | MmugDNA.17360.1 | 6.56  | 6.63  | 0.16 | 0.03 | -1.05 | 0.860803 | 0.678419 | 0.939561 | 0.812189 |
| MmugDNA.17362.1.S1_at   | MmugDNA.17362.1 | 11.23 | 11.52 | 0.35 | 0.04 | -1.22 | 0.219184 | 0.065689 | 0.516915 | 0.301631 |
| MmugDNA.17365.1.S1_at   | MmugDNA.17365.1 | 10.2  | 12.52 | 1.65 | 0.15 | -5.01 | 0.123365 | 0.508384 | 0.402711 | 0.70359  |
| MmugDNA.17366.1.S1_s_at | MmugDNA.17366.1 | 10.11 | 9.94  | 0.16 | 0.23 | 1.12  | 0.880698 | 0.027632 | 0.949283 | 0.207522 |
| MmugDNA.17369.1.S1_at   | MmugDNA.17369.1 | 3.84  | 3.75  | 0.04 | 0.04 | 1.06  | 0.056268 | 0.11158  | 0.294454 | 0.376407 |
| MmugDNA.17373.1.S1_at   | MmugDNA.17373.1 | 6.26  | 4.46  | 2.15 | 0.12 | 3.48  | 0.199352 | 0.20279  | 0.496665 | 0.477273 |
| MmugDNA.17384.1.S1_at   | MmugDNA.17384.1 | 9.19  | 8.94  | 0.3  | 0.18 | 1.19  | 0.329418 | 0.171065 | 0.61165  | 0.447601 |
| MmugDNA.17390.1.S1_at   | MmugDNA.17390.1 | 4.03  | 4.08  | 0.06 | 0.13 | -1.04 | 0.730374 | 0.457261 | 0.873954 | 0.670746 |
| MmugDNA.17393.1.S1_at   | MmugDNA.17393.1 | 11.35 | 10.88 | 0.08 | 0.09 | 1.38  | 0.002934 | 0.016396 | 0.099331 | 0.162135 |
| MmugDNA.17395.1.S1_at   | MmugDNA.17395.1 | 12.39 | 13.02 | 0.14 | 0.12 | -1.55 | 0.006761 | 0.030193 | 0.128994 | 0.215693 |
| MmugDNA.17397.1.S1_at   | MmugDNA.17397.1 | 5.83  | 5.37  | 0.59 | 0.14 | 1.38  | 0.148399 | 0.327657 | 0.436978 | 0.577464 |
| MmugDNA.17400.1.S1_at   | MmugDNA.17400.1 | 10.45 | 10.75 | 0.15 | 0.06 | -1.24 | 0.056071 | 0.004204 | 0.293864 | 0.091368 |
| MmugDNA.17406.1.S1_at   | MmugDNA.17406.1 | 4.81  | 4.9   | 0.12 | 0.08 | -1.06 | 0.463358 | 0.034178 | 0.710048 | 0.228728 |
| MmugDNA.17407.1.S1_at   | MmugDNA.17407.1 | 6.63  | 6.56  | 0.12 | 0.15 | 1.05  | 0.92863  | 0.806722 | 0.969796 | 0.888783 |
| MmugDNA.17409.1.S1_s_at | MmugDNA.17409.1 | 10.6  | 10.65 | 0.1  | 0.11 | -1.04 | 0.975341 | 0.227625 | 0.99019  | 0.499898 |

|                         |                 |       |       |      |      |       |          |          |          |          |
|-------------------------|-----------------|-------|-------|------|------|-------|----------|----------|----------|----------|
| MmugDNA.17413.1.S1_at   | MmugDNA.17413.1 | 9.62  | 9.96  | 0.27 | 0.13 | -1.27 | 0.19169  | 0.467447 | 0.488159 | 0.677085 |
| MmugDNA.17419.1.S1_at   | MmugDNA.17419.1 | 5.22  | 4.98  | 0.16 | 0.05 | 1.18  | 0.183351 | 0.211513 | 0.479273 | 0.48563  |
| MmugDNA.1742.1.S1_at    | MmugDNA.1742.1  | 11.08 | 11.2  | 0.16 | 0.05 | -1.09 | 0.422648 | 0.101708 | 0.68072  | 0.361562 |
| MmugDNA.17422.1.S1_at   | MmugDNA.17422.1 | 4.5   | 4.64  | 0.16 | 0.06 | -1.1  | 0.209288 | 0.602105 | 0.506775 | 0.763172 |
| MmugDNA.17426.1.S1_at   | MmugDNA.17426.1 | 11.49 | 10.65 | 0.73 | 0.11 | 1.79  | 0.165829 | 0.159366 | 0.45879  | 0.435417 |
| MmugDNA.17430.1.S1_at   | MmugDNA.17430.1 | 10.94 | 10.97 | 0.06 | 0.15 | -1.02 | 0.607107 | 0.014876 | 0.803551 | 0.155055 |
| MmugDNA.17430.1.S1_s_at | MmugDNA.17430.1 | 10.25 | 10.29 | 0.12 | 0.19 | -1.03 | 0.957584 | 0.041334 | 0.982588 | 0.247995 |
| MmugDNA.17433.1.S1_at   | MmugDNA.17433.1 | 11.07 | 10.75 | 0.06 | 0.04 | 1.25  | 0.001564 | 0.004643 | 0.082331 | 0.095    |
| MmugDNA.17444.1.S1_at   | MmugDNA.17444.1 | 8.56  | 9.16  | 0.32 | 0.13 | -1.52 | 0.017533 | 0.028634 | 0.186007 | 0.210901 |
| MmugDNA.17448.1.S1_at   | MmugDNA.17448.1 | 12.28 | 12.26 | 0.11 | 0.06 | 1.02  | 0.904415 | 0.069254 | 0.959442 | 0.309453 |
| MmugDNA.17450.1.S1_at   | MmugDNA.17450.1 | 10    | 9.9   | 0.12 | 0.04 | 1.07  | 0.575873 | 0.000768 | 0.78296  | 0.04544  |
| MmugDNA.17451.1.S1_at   | MmugDNA.17451.1 | 6.6   | 6.79  | 0.28 | 0.26 | -1.14 | 0.454547 | 0.886875 | 0.704412 | 0.93556  |
| MmugDNA.17453.1.S1_at   | MmugDNA.17453.1 | 5.84  | 5.87  | 0.11 | 0.17 | -1.02 | 0.606835 | 0.273294 | 0.803333 | 0.537788 |
| MmugDNA.17463.1.S1_at   | MmugDNA.17463.1 | 7.73  | 7.94  | 0.36 | 0.11 | -1.16 | 0.823551 | 0.54145  | 0.921555 | 0.724928 |
| MmugDNA.17467.1.S1_at   | MmugDNA.17467.1 | 11.8  | 11.65 | 0.06 | 0.16 | 1.11  | 0.080843 | 0.363308 | 0.341628 | 0.60371  |
| MmugDNA.17468.1.S1_at   | MmugDNA.17468.1 | 4.73  | 4.95  | 0.63 | 0.56 | -1.17 | 0.735107 | 0.676636 | 0.876697 | 0.811009 |
| MmugDNA.17469.1.S1_at   | MmugDNA.17469.1 | 9.77  | 9.82  | 0.32 | 0.45 | -1.04 | 0.700871 | 0.325787 | 0.857901 | 0.576049 |
| MmugDNA.17470.1.S1_at   | MmugDNA.17470.1 | 11.81 | 11.69 | 0.14 | 0.14 | 1.09  | 0.733853 | 0.941959 | 0.875955 | 0.96711  |
| MmugDNA.1748.1.S1_at    | MmugDNA.1748.1  | 6.41  | 7.3   | 0.63 | 0.26 | -1.85 | 0.049172 | 0.12005  | 0.279211 | 0.388733 |
| MmugDNA.17485.1.S1_at   | MmugDNA.17485.1 | 3.55  | 3.41  | 0.14 | 0.16 | 1.1   | 0.750729 | 0.511207 | 0.884876 | 0.705447 |
| MmugDNA.17492.1.S1_at   | MmugDNA.17492.1 | 6.04  | 5.81  | 0.14 | 0.13 | 1.17  | 0.109902 | 0.112842 | 0.385149 | 0.378467 |
| MmugDNA.17497.1.S1_at   | MmugDNA.17497.1 | 7.47  | 6.93  | 0.19 | 0.4  | 1.46  | 0.383663 | 0.083822 | 0.652919 | 0.334662 |
| MmugDNA.17499.1.S1_at   | MmugDNA.17499.1 | 4.05  | 4.11  | 0.12 | 0.18 | -1.04 | 0.782255 | 0.752277 | 0.900606 | 0.855787 |
| MmugDNA.17503.1.S1_at   | MmugDNA.17503.1 | 11.02 | 11.09 | 0.13 | 0.01 | -1.05 | 0.126811 | 0.15005  | 0.408298 | 0.424693 |
| MmugDNA.17505.1.S1_at   | MmugDNA.17505.1 | 6.78  | 7.11  | 0.16 | 0.03 | -1.26 | 0.031114 | 0.099483 | 0.229371 | 0.357862 |
| MmugDNA.17506.1.S1_at   | MmugDNA.17506.1 | 12.61 | 12.6  | 0.07 | 0.07 | 1     | 0.826684 | 0.480221 | 0.923165 | 0.68574  |
| MmugDNA.17511.1.S1_at   | MmugDNA.17511.1 | 5.48  | 5.49  | 0.03 | 0.11 | -1.01 | 0.566456 | 0.391094 | 0.777346 | 0.624833 |
| MmugDNA.17513.1.S1_at   | MmugDNA.17513.1 | 12.15 | 12.28 | 0.3  | 0.11 | -1.1  | 0.653849 | 0.182334 | 0.832423 | 0.458787 |
| MmugDNA.17518.1.S1_at   | MmugDNA.17518.1 | 9.75  | 9.29  | 0.26 | 0.12 | 1.37  | 0.0661   | 0.036866 | 0.314442 | 0.23648  |
| MmugDNA.17519.1.S1_at   | MmugDNA.17519.1 | 5.57  | 5.38  | 0.36 | 0.14 | 1.14  | 0.25686  | 0.535063 | 0.551407 | 0.720775 |
| MmugDNA.1752.1.S1_s_at  | MmugDNA.1752.1  | 5.88  | 5.89  | 0.1  | 0.13 | -1.01 | 0.941957 | 0.287435 | 0.975589 | 0.548683 |
| MmugDNA.17523.1.S1_at   | MmugDNA.17523.1 | 5.86  | 5.87  | 0.09 | 0.03 | -1.01 | 0.491959 | 0.351884 | 0.729433 | 0.595331 |
| MmugDNA.17526.1.S1_at   | MmugDNA.17526.1 | 8.02  | 7.97  | 0.05 | 0.01 | 1.04  | 0.257372 | 0.442364 | 0.551692 | 0.660366 |
| MmugDNA.17527.1.S1_at   | MmugDNA.17527.1 | 11.44 | 11.38 | 0.05 | 0.02 | 1.04  | 0.154341 | 0.483296 | 0.444624 | 0.687887 |
| MmugDNA.17530.1.S1_at   | MmugDNA.17530.1 | 12.43 | 12.05 | 0.13 | 0.01 | 1.3   | 0.006241 | 0.005724 | 0.125292 | 0.104271 |
| MmugDNA.17531.1.S1_at   | MmugDNA.17531.1 | 11.45 | 11.6  | 0.05 | 0.05 | -1.11 | 0.013561 | 0.009502 | 0.167258 | 0.128379 |
| MmugDNA.17533.1.S1_at   | MmugDNA.17533.1 | 13.07 | 12.86 | 0.07 | 0.12 | 1.15  | 0.07685  | 0.113533 | 0.335302 | 0.379632 |
| MmugDNA.17537.1.S1_at   | MmugDNA.17537.1 | 4.94  | 4.94  | 0.2  | 0.07 | -1    | 0.433602 | 0.551703 | 0.688989 | 0.731155 |
| MmugDNA.17538.1.S1_at   | MmugDNA.17538.1 | 6.67  | 6.75  | 0.08 | 0.03 | -1.05 | 0.184732 | 0.180427 | 0.480792 | 0.457077 |
| MmugDNA.17539.1.S1_at   | MmugDNA.17539.1 | 8.03  | 8.65  | 0.13 | 0.1  | -1.53 | 0.002938 | 0.338422 | 0.099331 | 0.585432 |
| MmugDNA.17542.1.S1_at   | MmugDNA.17542.1 | 3.69  | 3.75  | 0.12 | 0.06 | -1.05 | 0.521027 | 0.001835 | 0.749121 | 0.064337 |
| MmugDNA.17547.1.S1_at   | MmugDNA.17547.1 | 8.59  | 9     | 0.86 | 0.12 | -1.33 | 0.635224 | 0.540725 | 0.821235 | 0.724514 |
| MmugDNA.17554.1.S1_at   | MmugDNA.17554.1 | 4.19  | 4.32  | 0.24 | 0.11 | -1.09 | 0.90249  | 0.110644 | 0.958703 | 0.374854 |

|                         |                 |       |       |      |      |       |          |          |          |          |
|-------------------------|-----------------|-------|-------|------|------|-------|----------|----------|----------|----------|
| MmugDNA.17555.1.S1_at   | MmugDNA.17555.1 | 4.39  | 4.43  | 0.24 | 0.25 | -1.03 | 0.425593 | 0.428894 | 0.682976 | 0.650409 |
| MmugDNA.17562.1.S1_at   | MmugDNA.17562.1 | 7.3   | 7.1   | 0.34 | 0.03 | 1.15  | 0.78394  | 0.738819 | 0.901444 | 0.848618 |
| MmugDNA.17562.1.S1_s_at | MmugDNA.17562.1 | 7.75  | 7.67  | 0.38 | 0.02 | 1.05  | 0.824197 | 0.830344 | 0.921849 | 0.902644 |
| MmugDNA.17567.1.S1_at   | MmugDNA.17567.1 | 8.37  | 8.56  | 0.07 | 0.15 | -1.14 | 0.112351 | 0.401414 | 0.388511 | 0.631018 |
| MmugDNA.17568.1.S1_at   | MmugDNA.17568.1 | 11.14 | 11.24 | 0.29 | 0.05 | -1.07 | 0.716175 | 0.000499 | 0.866043 | 0.038955 |
| MmugDNA.17571.1.S1_at   | MmugDNA.17571.1 | 3.47  | 3.47  | 0.05 | 0.06 | -1    | 0.54017  | 0.218973 | 0.761298 | 0.492722 |
| MmugDNA.17573.1.S1_at   | MmugDNA.17573.1 | 12.62 | 12.66 | 0.04 | 0.04 | -1.03 | 0.722343 | 0.185631 | 0.8694   | 0.461588 |
| MmugDNA.17574.1.S1_at   | MmugDNA.17574.1 | 5.98  | 5.96  | 0.07 | 0.03 | 1.01  | 0.784381 | 0.090118 | 0.901638 | 0.344424 |
| MmugDNA.17575.1.S1_at   | MmugDNA.17575.1 | 10.33 | 10.49 | 0.08 | 0.04 | -1.12 | 0.039402 | 0.001718 | 0.254967 | 0.062797 |
| MmugDNA.17579.1.S1_at   | MmugDNA.17579.1 | 5.95  | 6.91  | 0.14 | 0.11 | -1.95 | 0.000755 | 0.000083 | 0.072567 | 0.027016 |
| MmugDNA.17583.1.S1_at   | MmugDNA.17583.1 | 11.69 | 11.7  | 0.15 | 0.04 | -1.01 | 0.496138 | 0.006685 | 0.732084 | 0.110612 |
| MmugDNA.17585.1.S1_at   | MmugDNA.17585.1 | 8.85  | 8.73  | 0.12 | 0.23 | 1.08  | 0.46369  | 0.010039 | 0.710191 | 0.131334 |
| MmugDNA.17587.1.S1_at   | MmugDNA.17587.1 | 7.49  | 7.45  | 0.14 | 0.15 | 1.03  | 0.375159 | 0.220469 | 0.646002 | 0.493818 |
| MmugDNA.17599.1.S1_at   | MmugDNA.17599.1 | 7.06  | 7.16  | 0.13 | 0.06 | -1.07 | 0.133422 | 0.018239 | 0.416977 | 0.169844 |
| MmugDNA.176.1.S1_at     | MmugDNA.176.1   | 3.59  | 3.51  | 0.04 | 0.02 | 1.06  | 0.019481 | 0.008866 | 0.192357 | 0.12465  |
| MmugDNA.1760.1.S1_s_at  | MmugDNA.1760.1  | 10.48 | 10.83 | 0.13 | 0.12 | -1.27 | 0.042111 | 0.033748 | 0.262198 | 0.227391 |
| MmugDNA.17601.1.S1_at   | MmugDNA.17601.1 | 4.74  | 4.88  | 0.08 | 0.44 | -1.11 | 0.617347 | 0.067044 | 0.810009 | 0.304872 |
| MmugDNA.17603.1.S1_at   | MmugDNA.17603.1 | 10.48 | 10.51 | 0.12 | 0.08 | -1.02 | 0.82459  | 0.134366 | 0.922055 | 0.406603 |
| MmugDNA.17604.1.S1_at   | MmugDNA.17604.1 | 8.89  | 8.59  | 0.13 | 0.34 | 1.23  | 0.64936  | 0.292284 | 0.829674 | 0.552389 |
| MmugDNA.17606.1.S1_at   | MmugDNA.17606.1 | 5.19  | 5.53  | 0.26 | 0.2  | -1.26 | 0.045177 | 0.174956 | 0.270005 | 0.451599 |
| MmugDNA.1761.1.S1_at    | MmugDNA.1761.1  | 11.25 | 11.36 | 0.06 | 0.08 | -1.07 | 0.182766 | 0.247228 | 0.478544 | 0.516446 |
| MmugDNA.17612.1.S1_at   | MmugDNA.17612.1 | 2.97  | 3.09  | 0.4  | 0.14 | -1.08 | 0.306534 | 0.318966 | 0.593328 | 0.57154  |
| MmugDNA.17614.1.S1_at   | MmugDNA.17614.1 | 5.98  | 4.39  | 0.84 | 0.47 | 3.01  | 0.08607  | 0.057067 | 0.350601 | 0.284945 |
| MmugDNA.17617.1.S1_s_at | MmugDNA.17617.1 | 9.43  | 8.72  | 0.05 | 0.1  | 1.63  | 0.000554 | 0.002347 | 0.070113 | 0.07161  |
| MmugDNA.17624.1.S1_at   | MmugDNA.17624.1 | 9.42  | 9.05  | 0.24 | 0.04 | 1.29  | 0.115369 | 0.672942 | 0.392461 | 0.808874 |
| MmugDNA.17625.1.S1_at   | MmugDNA.17625.1 | 8.56  | 8.31  | 0.15 | 0.18 | 1.18  | 0.437243 | 0.006899 | 0.692062 | 0.112257 |
| MmugDNA.1763.1.S1_at    | MmugDNA.1763.1  | 8.73  | 9.4   | 0.1  | 0.04 | -1.59 | 0.000329 | 0.001522 | 0.059763 | 0.059307 |
| MmugDNA.17632.1.S1_at   | MmugDNA.17632.1 | 10.24 | 9.98  | 0.24 | 0.07 | 1.2   | 0.369993 | 0.550711 | 0.643241 | 0.730611 |
| MmugDNA.17636.1.S1_at   | MmugDNA.17636.1 | 11.4  | 11.12 | 0.2  | 0.06 | 1.21  | 0.334734 | 0.06904  | 0.615803 | 0.309017 |
| MmugDNA.17640.1.S1_at   | MmugDNA.17640.1 | 7.48  | 7.08  | 0.26 | 0.11 | 1.32  | 0.19618  | 0.511372 | 0.493248 | 0.705534 |
| MmugDNA.17642.1.S1_at   | MmugDNA.17642.1 | 5.13  | 5.16  | 0.12 | 0.08 | -1.02 | 0.559399 | 0.003362 | 0.773306 | 0.083405 |
| MmugDNA.17643.1.S1_at   | MmugDNA.17643.1 | 4.9   | 4.85  | 0.2  | 0.15 | 1.03  | 0.167556 | 0.54798  | 0.46081  | 0.72884  |
| MmugDNA.17644.1.S1_s_at | MmugDNA.17644.1 | 9     | 11.77 | 1.33 | 0.16 | -6.81 | 0.059733 | 0.043063 | 0.301631 | 0.252157 |
| MmugDNA.17655.1.S1_at   | MmugDNA.17655.1 | 12.72 | 12.65 | 0.22 | 0.05 | 1.05  | 0.656773 | 0.455991 | 0.834007 | 0.669758 |
| MmugDNA.17657.1.S1_at   | MmugDNA.17657.1 | 12.89 | 12.83 | 0.19 | 0.04 | 1.04  | 0.661641 | 0.299012 | 0.836666 | 0.557628 |
| MmugDNA.17658.1.S1_at   | MmugDNA.17658.1 | 12.25 | 12.09 | 0.13 | 0.02 | 1.11  | 0.322017 | 0.087839 | 0.606199 | 0.341218 |
| MmugDNA.17659.1.S1_at   | MmugDNA.17659.1 | 11.11 | 11.34 | 0.19 | 0.19 | -1.18 | 0.55447  | 0.774926 | 0.770701 | 0.868983 |
| MmugDNA.17662.1.S1_s_at | MmugDNA.17662.1 | 10.42 | 10.21 | 0.25 | 0.02 | 1.16  | 0.20127  | 0.028622 | 0.498787 | 0.210901 |
| MmugDNA.17663.1.S1_at   | MmugDNA.17663.1 | 4.77  | 4.59  | 0.24 | 0.06 | 1.13  | 0.983131 | 0.993164 | 0.993771 | 0.995946 |
| MmugDNA.17664.1.S1_at   | MmugDNA.17664.1 | 6.3   | 6.23  | 0.13 | 0.01 | 1.05  | 0.937564 | 0.660369 | 0.973767 | 0.801285 |
| MmugDNA.17671.1.S1_at   | MmugDNA.17671.1 | 7.22  | 7.56  | 0.08 | 0.11 | -1.27 | 0.021732 | 0.010587 | 0.200743 | 0.134213 |
| MmugDNA.17676.1.S1_at   | MmugDNA.17676.1 | 3.22  | 3.02  | 0.22 | 0.05 | 1.15  | 0.224891 | 0.032583 | 0.522818 | 0.223585 |
| MmugDNA.17681.1.S1_at   | MmugDNA.17681.1 | 7.77  | 7.21  | 0.28 | 0.13 | 1.47  | 0.02532  | 0.038219 | 0.212168 | 0.240217 |

|                         |                 |       |       |      |      |       |          |          |          |          |
|-------------------------|-----------------|-------|-------|------|------|-------|----------|----------|----------|----------|
| MmugDNA.17682.1.S1_at   | MmugDNA.17682.1 | 5.13  | 5.26  | 0.05 | 0.07 | -1.09 | 0.040867 | 0.029371 | 0.25855  | 0.213239 |
| MmugDNA.17684.1.S1_at   | MmugDNA.17684.1 | 10.13 | 9.36  | 1.38 | 0.24 | 1.69  | 0.896517 | 0.278142 | 0.955936 | 0.541783 |
| MmugDNA.17686.1.S1_at   | MmugDNA.17686.1 | 12.63 | 13.31 | 0.55 | 0.04 | -1.61 | 0.068993 | 0.055986 | 0.320754 | 0.282442 |
| MmugDNA.17689.1.S1_at   | MmugDNA.17689.1 | 7.36  | 7.39  | 0.06 | 0.02 | -1.02 | 0.480288 | 0.622993 | 0.721278 | 0.777444 |
| MmugDNA.17690.1.S1_at   | MmugDNA.17690.1 | 4.94  | 5.05  | 0.18 | 0.05 | -1.08 | 0.471532 | 0.671957 | 0.715547 | 0.808177 |
| MmugDNA.17693.1.S1_at   | MmugDNA.17693.1 | 8.95  | 10.06 | 0.33 | 0.15 | -2.15 | 0.006547 | 0.008282 | 0.127377 | 0.12078  |
| MmugDNA.17696.1.S1_at   | MmugDNA.17696.1 | 6.63  | 7.93  | 0.78 | 0.05 | -2.47 | 0.126754 | 0.145408 | 0.408228 | 0.419421 |
| MmugDNA.17696.1.S1_s_at | MmugDNA.17696.1 | 7.5   | 8.36  | 0.5  | 0.12 | -1.82 | 0.131232 | 0.144948 | 0.413962 | 0.418862 |
| MmugDNA.17699.1.S1_at   | MmugDNA.17699.1 | 5.94  | 5.91  | 0.17 | 0.03 | 1.02  | 0.651661 | 0.253124 | 0.830755 | 0.521447 |
| MmugDNA.17704.1.S1_at   | MmugDNA.17704.1 | 13.56 | 13.28 | 0.19 | 0.09 | 1.22  | 0.153056 | 0.659664 | 0.442744 | 0.800835 |
| MmugDNA.17705.1.S1_s_at | MmugDNA.17705.1 | 6.04  | 6.16  | 0.17 | 0.04 | -1.09 | 0.241515 | 0.286742 | 0.538648 | 0.548112 |
| MmugDNA.17709.1.S1_at   | MmugDNA.17709.1 | 12.35 | 11.99 | 0.05 | 0.09 | 1.28  | 0.00417  | 0.000802 | 0.110227 | 0.04607  |
| MmugDNA.17715.1.S1_at   | MmugDNA.17715.1 | 12.22 | 11.79 | 0.13 | 0.2  | 1.35  | 0.07989  | 0.036846 | 0.340107 | 0.236451 |
| MmugDNA.17727.1.S1_at   | MmugDNA.17727.1 | 7.23  | 7.21  | 0.12 | 0.15 | 1.02  | 0.516294 | 0.928977 | 0.745706 | 0.959524 |
| MmugDNA.17728.1.S1_at   | MmugDNA.17728.1 | 7.08  | 7.11  | 0.19 | 0.25 | -1.02 | 0.667803 | 0.801915 | 0.840528 | 0.885989 |
| MmugDNA.17730.1.S1_at   | MmugDNA.17730.1 | 10.8  | 10.38 | 0.15 | 0.23 | 1.34  | 0.08617  | 0.053961 | 0.350682 | 0.27777  |
| MmugDNA.17734.1.S1_at   | MmugDNA.17734.1 | 2.72  | 2.71  | 0    | 0.04 | 1.01  | 0.618253 | 0.059477 | 0.810647 | 0.290548 |
| MmugDNA.17735.1.S1_at   | MmugDNA.17735.1 | 8.3   | 7.79  | 0.19 | 0.1  | 1.43  | 0.021815 | 0.113251 | 0.200923 | 0.379287 |
| MmugDNA.17736.1.S1_at   | MmugDNA.17736.1 | 12.29 | 12.22 | 0.12 | 0.06 | 1.05  | 0.662954 | 0.061418 | 0.837385 | 0.294688 |
| MmugDNA.17737.1.S1_at   | MmugDNA.17737.1 | 4.55  | 4.75  | 0.1  | 0.07 | -1.15 | 0.080937 | 0.510508 | 0.341723 | 0.704979 |
| MmugDNA.17738.1.S1_at   | MmugDNA.17738.1 | 7.4   | 7.09  | 0.13 | 0.08 | 1.24  | 0.021647 | 0.021116 | 0.20067  | 0.181927 |
| MmugDNA.17750.1.S1_at   | MmugDNA.17750.1 | 10.4  | 10.56 | 0.33 | 0.1  | -1.12 | 0.341671 | 0.476858 | 0.621474 | 0.683007 |
| MmugDNA.17758.1.S1_at   | MmugDNA.17758.1 | 7.94  | 7.18  | 0.63 | 0.55 | 1.7   | 0.206805 | 0.044406 | 0.504487 | 0.255192 |
| MmugDNA.1776.1.S1_at    | MmugDNA.1776.1  | 9.86  | 8.21  | 0.31 | 0.54 | 3.13  | 0.015644 | 0.028147 | 0.177553 | 0.209306 |
| MmugDNA.17760.1.S1_at   | MmugDNA.17760.1 | 6.36  | 5.98  | 0.41 | 0.17 | 1.3   | 0.241454 | 0.440614 | 0.538602 | 0.659029 |
| MmugDNA.17762.1.S1_at   | MmugDNA.17762.1 | 6.35  | 7.05  | 0.24 | 0.13 | -1.62 | 0.027476 | 0.038862 | 0.218484 | 0.242062 |
| MmugDNA.17762.1.S1_s_at | MmugDNA.17762.1 | 6.6   | 7.32  | 0.17 | 0.1  | -1.66 | 0.005068 | 0.020276 | 0.116376 | 0.178742 |
| MmugDNA.17764.1.S1_at   | MmugDNA.17764.1 | 7.66  | 7.98  | 0.14 | 0.15 | -1.25 | 0.107698 | 0.001467 | 0.382296 | 0.058401 |
| MmugDNA.17769.1.S1_at   | MmugDNA.17769.1 | 5.09  | 4.86  | 0.16 | 0.11 | 1.17  | 0.302166 | 0.4995   | 0.590132 | 0.69832  |
| MmugDNA.17773.1.S1_at   | MmugDNA.17773.1 | 9.3   | 9.27  | 0.32 | 0.04 | 1.03  | 0.299785 | 0.002075 | 0.5881   | 0.067389 |
| MmugDNA.17779.1.S1_at   | MmugDNA.17779.1 | 11.8  | 11.48 | 0.55 | 0.07 | 1.25  | 0.418998 | 0.820998 | 0.678626 | 0.896977 |
| MmugDNA.17781.1.S1_at   | MmugDNA.17781.1 | 12.44 | 12.87 | 0.08 | 0.04 | -1.35 | 0.001193 | 0.080232 | 0.077857 | 0.32783  |
| MmugDNA.17782.1.S1_at   | MmugDNA.17782.1 | 11.02 | 11.24 | 0.1  | 0.11 | -1.16 | 0.142124 | 0.100743 | 0.428166 | 0.360154 |
| MmugDNA.1779.1.S1_at    | MmugDNA.1779.1  | 5.83  | 6.07  | 0.26 | 0.1  | -1.18 | 0.574461 | 0.492249 | 0.781968 | 0.693477 |
| MmugDNA.17791.1.S1_at   | MmugDNA.17791.1 | 7.79  | 7.81  | 0.58 | 0.13 | -1.02 | 0.453176 | 0.677452 | 0.703473 | 0.81167  |
| MmugDNA.17793.1.S1_at   | MmugDNA.17793.1 | 3.7   | 3.73  | 0.1  | 0.01 | -1.02 | 0.60114  | 0.477543 | 0.799362 | 0.683599 |
| MmugDNA.17798.1.S1_at   | MmugDNA.17798.1 | 3.65  | 3.68  | 0.12 | 0.1  | -1.02 | 0.424367 | 0.396745 | 0.682102 | 0.628438 |
| MmugDNA.17805.1.S1_at   | MmugDNA.17805.1 | 4.86  | 4.56  | 0.29 | 0.12 | 1.23  | 0.231318 | 0.333196 | 0.530046 | 0.581467 |
| MmugDNA.17819.1.S1_at   | MmugDNA.17819.1 | 6.61  | 7.66  | 0.78 | 0.05 | -2.07 | 0.092727 | 0.348804 | 0.361184 | 0.592834 |
| MmugDNA.17826.1.S1_at   | MmugDNA.17826.1 | 6.65  | 6.84  | 0.16 | 0.13 | -1.14 | 0.143024 | 0.133664 | 0.429235 | 0.405612 |
| MmugDNA.17828.1.S1_at   | MmugDNA.17828.1 | 9.39  | 8.69  | 0.69 | 0.25 | 1.62  | 0.172477 | 0.181126 | 0.466621 | 0.457582 |
| MmugDNA.17829.1.S1_at   | MmugDNA.17829.1 | 6.12  | 5.96  | 0.19 | 0.04 | 1.12  | 0.222617 | 0.278736 | 0.520511 | 0.542441 |
| MmugDNA.17832.1.S1_at   | MmugDNA.17832.1 | 11.39 | 11.35 | 0.16 | 0.05 | 1.03  | 0.510356 | 0.848973 | 0.74172  | 0.914252 |

|                         |                 |       |       |      |      |        |          |          |          |          |
|-------------------------|-----------------|-------|-------|------|------|--------|----------|----------|----------|----------|
| MmugDNA.17834.1.S1_at   | MmugDNA.17834.1 | 5.21  | 5.26  | 0.15 | 0.04 | -1.04  | 0.235127 | 0.035658 | 0.533056 | 0.233228 |
| MmugDNA.17835.1.S1_at   | MmugDNA.17835.1 | 6.52  | 6.48  | 0.15 | 0.18 | 1.02   | 0.772876 | 0.729169 | 0.895994 | 0.843509 |
| MmugDNA.17837.1.S1_at   | MmugDNA.17837.1 | 8.55  | 8.63  | 0.22 | 0.17 | -1.06  | 0.660678 | 0.885943 | 0.836228 | 0.935118 |
| MmugDNA.17838.1.S1_at   | MmugDNA.17838.1 | 10.92 | 11.12 | 0.23 | 0.05 | -1.15  | 0.306744 | 0.503614 | 0.59358  | 0.700988 |
| MmugDNA.17840.1.S1_at   | MmugDNA.17840.1 | 5.93  | 7.52  | 0.55 | 0.21 | -3.02  | 0.026625 | 0.003939 | 0.216408 | 0.089266 |
| MmugDNA.17842.1.S1_at   | MmugDNA.17842.1 | 11.75 | 10.54 | 0.24 | 0.12 | 2.32   | 0.001131 | 0.000176 | 0.077306 | 0.030511 |
| MmugDNA.17843.1.S1_at   | MmugDNA.17843.1 | 6.53  | 6.64  | 0.15 | 0.06 | -1.08  | 0.390481 | 0.120933 | 0.658105 | 0.389847 |
| MmugDNA.17848.1.S1_at   | MmugDNA.17848.1 | 12.64 | 12.6  | 0.05 | 0.04 | 1.03   | 0.078601 | 0.00048  | 0.338458 | 0.038665 |
| MmugDNA.17851.1.S1_at   | MmugDNA.17851.1 | 12.31 | 12.02 | 0.03 | 0.09 | 1.22   | 0.00903  | 0.132899 | 0.144777 | 0.404544 |
| MmugDNA.17855.1.S1_at   | MmugDNA.17855.1 | 12.37 | 12.38 | 0.13 | 0.06 | -1.01  | 0.941832 | 0.995412 | 0.975589 | 0.997147 |
| MmugDNA.17858.1.S1_at   | MmugDNA.17858.1 | 7.4   | 7.56  | 0.06 | 0.11 | -1.12  | 0.054948 | 0.658536 | 0.291357 | 0.800401 |
| MmugDNA.17859.1.S1_at   | MmugDNA.17859.1 | 10.09 | 9.7   | 0.11 | 0.12 | 1.31   | 0.010519 | 0.062308 | 0.15243  | 0.296445 |
| MmugDNA.17860.1.S1_at   | MmugDNA.17860.1 | 12.96 | 12.79 | 0.05 | 0.04 | 1.12   | 0.025515 | 0.231614 | 0.212834 | 0.503403 |
| MmugDNA.17862.1.A1_at   | MmugDNA.17862.1 | 4.66  | 4.53  | 0.15 | 0.09 | 1.09   | 0.136712 | 0.125695 | 0.421401 | 0.396249 |
| MmugDNA.17862.1.S1_at   | MmugDNA.17862.1 | 4.64  | 4.64  | 0.21 | 0.03 | 1      | 0.770718 | 0.8904   | 0.894865 | 0.937539 |
| MmugDNA.17865.1.S1_at   | MmugDNA.17865.1 | 5.37  | 5.33  | 0.1  | 0.08 | 1.03   | 0.452354 | 0.00024  | 0.702807 | 0.032579 |
| MmugDNA.17867.1.S1_at   | MmugDNA.17867.1 | 10.02 | 9.69  | 0.13 | 0.08 | 1.25   | 0.061462 | 0.10864  | 0.304484 | 0.372171 |
| MmugDNA.17879.1.S1_at   | MmugDNA.17879.1 | 8.56  | 8.18  | 0.18 | 0.13 | 1.3    | 0.116241 | 0.594462 | 0.393335 | 0.758623 |
| MmugDNA.17881.1.S1_at   | MmugDNA.17881.1 | 7.47  | 7.51  | 0.02 | 0.12 | -1.03  | 0.743568 | 0.469582 | 0.881381 | 0.67829  |
| MmugDNA.17884.1.S1_at   | MmugDNA.17884.1 | 9.78  | 9.33  | 0.15 | 0.09 | 1.36   | 0.008827 | 0.02439  | 0.143804 | 0.195507 |
| MmugDNA.17885.1.S1_at   | MmugDNA.17885.1 | 6.91  | 8     | 0.17 | 0.08 | -2.13  | 0.000641 | 0.014325 | 0.070727 | 0.152764 |
| MmugDNA.17887.1.S1_s_at | MmugDNA.17887.1 | 11.83 | 11.69 | 0.29 | 0.02 | 1.1    | 0.521825 | 0.642291 | 0.749403 | 0.790122 |
| MmugDNA.17893.1.S1_at   | MmugDNA.17893.1 | 14.72 | 14.73 | 0.03 | 0.01 | -1.01  | 0.979394 | 0.354513 | 0.992175 | 0.59726  |
| MmugDNA.179.1.S1_at     | MmugDNA.179.1   | 13.01 | 13.07 | 0.12 | 0.03 | -1.04  | 0.426029 | 0.504931 | 0.68331  | 0.701953 |
| MmugDNA.1790.1.S1_at    | MmugDNA.1790.1  | 4.59  | 3.48  | 0.5  | 0.28 | 2.15   | 0.043291 | 0.062085 | 0.265362 | 0.29606  |
| MmugDNA.17906.1.S1_at   | MmugDNA.17906.1 | 11.71 | 11.53 | 0.09 | 0.05 | 1.13   | 0.046988 | 0.153107 | 0.27447  | 0.428011 |
| MmugDNA.17907.1.S1_at   | MmugDNA.17907.1 | 9.52  | 9.73  | 0.22 | 0.09 | -1.15  | 0.421721 | 0.878881 | 0.680117 | 0.930872 |
| MmugDNA.17907.1.S1_s_at | MmugDNA.17907.1 | 10.67 | 10.93 | 0.31 | 0.13 | -1.2   | 0.402604 | 0.674376 | 0.666923 | 0.809751 |
| MmugDNA.17909.1.S1_at   | MmugDNA.17909.1 | 7.78  | 9.46  | 0.35 | 0.12 | -3.21  | 0.001299 | 0.012445 | 0.078631 | 0.14417  |
| MmugDNA.17910.1.S1_at   | MmugDNA.17910.1 | 10.73 | 11.01 | 0.24 | 0.1  | -1.21  | 0.078947 | 0.241208 | 0.338745 | 0.511821 |
| MmugDNA.17919.1.S1_at   | MmugDNA.17919.1 | 4.79  | 4.71  | 0.52 | 0.14 | 1.06   | 0.528239 | 0.674577 | 0.753543 | 0.809882 |
| MmugDNA.17925.1.S1_at   | MmugDNA.17925.1 | 12.23 | 12.12 | 0.15 | 0.11 | 1.08   | 0.727661 | 0.039191 | 0.872484 | 0.243089 |
| MmugDNA.17931.1.S1_at   | MmugDNA.17931.1 | 8.93  | 9.1   | 0.14 | 0.06 | -1.12  | 0.203414 | 0.002955 | 0.501192 | 0.079945 |
| MmugDNA.17938.1.S1_at   | MmugDNA.17938.1 | 6.94  | 12.38 | 1.58 | 0.25 | -43.59 | 0.008883 | 0.063809 | 0.143995 | 0.29906  |
| MmugDNA.17939.1.S1_at   | MmugDNA.17939.1 | 5.52  | 5.13  | 0.28 | 0.02 | 1.31   | 0.07034  | 0.064152 | 0.323556 | 0.29954  |
| MmugDNA.17940.1.S1_at   | MmugDNA.17940.1 | 11.56 | 11.52 | 0.47 | 0.11 | 1.02   | 0.558866 | 0.731399 | 0.773051 | 0.84431  |
| MmugDNA.17941.1.S1_at   | MmugDNA.17941.1 | 12.96 | 10.54 | 1.17 | 0.2  | 5.34   | 0.04968  | 0.103234 | 0.28036  | 0.364143 |
| MmugDNA.17943.1.S1_at   | MmugDNA.17943.1 | 10.25 | 11.44 | 0.49 | 0.26 | -2.29  | 0.053324 | 0.024813 | 0.288059 | 0.197371 |
| MmugDNA.17947.1.S1_at   | MmugDNA.17947.1 | 7.4   | 7.44  | 0.35 | 0.08 | -1.03  | 0.762683 | 0.007924 | 0.891323 | 0.11857  |
| MmugDNA.17950.1.S1_s_at | MmugDNA.17950.1 | 10.12 | 8.23  | 0.26 | 0.14 | 3.7    | 0.000316 | 0.014783 | 0.058857 | 0.154635 |
| MmugDNA.17951.1.S1_at   | MmugDNA.17951.1 | 7.33  | 7.53  | 0.47 | 0.28 | -1.15  | 0.889223 | 0.625494 | 0.95279  | 0.779196 |
| MmugDNA.17952.1.S1_at   | MmugDNA.17952.1 | 4.12  | 4.1   | 0.08 | 0.04 | 1.01   | 0.235154 | 0.282268 | 0.533056 | 0.544999 |
| MmugDNA.17963.1.S1_at   | MmugDNA.17963.1 | 4.74  | 4.85  | 0.32 | 0.15 | -1.08  | 0.931812 | 0.980141 | 0.971362 | 0.989236 |



|                         |                 |       |       |      |      |       |          |          |          |          |
|-------------------------|-----------------|-------|-------|------|------|-------|----------|----------|----------|----------|
| MmugDNA.17965.1.S1_at   | MmugDNA.17965.1 | 12.33 | 12.92 | 0.37 | 0.09 | -1.51 | 0.159236 | 0.315618 | 0.450505 | 0.569053 |
| MmugDNA.17967.1.S1_at   | MmugDNA.17967.1 | 3.56  | 3.67  | 0.13 | 0.06 | -1.08 | 0.391238 | 0.19598  | 0.658623 | 0.470976 |
| MmugDNA.17968.1.S1_at   | MmugDNA.17968.1 | 7.53  | 7.26  | 0.16 | 0.25 | 1.2   | 0.371819 | 0.03272  | 0.644424 | 0.223956 |
| MmugDNA.17969.1.S1_at   | MmugDNA.17969.1 | 3.81  | 4.02  | 0.1  | 0.03 | -1.15 | 0.039198 | 0.282357 | 0.254458 | 0.545076 |
| MmugDNA.17969.1.S1_s_at | MmugDNA.17969.1 | 3.64  | 3.68  | 0.16 | 0.08 | -1.03 | 0.620609 | 0.921463 | 0.812011 | 0.955761 |
| MmugDNA.17977.1.S1_at   | MmugDNA.17977.1 | 11.95 | 12.09 | 0.27 | 0.02 | -1.1  | 0.129913 | 0.650849 | 0.412108 | 0.795849 |
| MmugDNA.1798.1.S1_at    | MmugDNA.1798.1  | 3.53  | 2.97  | 0.24 | 0.09 | 1.48  | 0.062331 | 0.153118 | 0.306409 | 0.428011 |
| MmugDNA.17986.1.S1_at   | MmugDNA.17986.1 | 9.75  | 10.55 | 0.35 | 0.2  | -1.74 | 0.035606 | 0.404078 | 0.243539 | 0.632599 |
| MmugDNA.17986.1.S1_s_at | MmugDNA.17986.1 | 10.08 | 10.67 | 0.39 | 0.17 | -1.5  | 0.063629 | 0.375329 | 0.308797 | 0.613336 |
| MmugDNA.17991.1.S1_at   | MmugDNA.17991.1 | 12.24 | 11.74 | 0.04 | 0.14 | 1.41  | 0.003602 | 0.082417 | 0.105392 | 0.331381 |
| MmugDNA.17992.1.S1_at   | MmugDNA.17992.1 | 5.87  | 5.89  | 0.47 | 0.55 | -1.02 | 0.442388 | 0.590422 | 0.695806 | 0.756223 |
| MmugDNA.17994.1.S1_at   | MmugDNA.17994.1 | 6.22  | 5.83  | 0.47 | 0.14 | 1.31  | 0.605171 | 0.613112 | 0.802276 | 0.770416 |
| MmugDNA.17995.1.S1_at   | MmugDNA.17995.1 | 7.1   | 6.91  | 0.12 | 0.17 | 1.14  | 0.496423 | 0.710253 | 0.732279 | 0.831904 |
| MmugDNA.17996.1.S1_at   | MmugDNA.17996.1 | 5.68  | 5.66  | 0.11 | 0.03 | 1.02  | 0.912603 | 0.180462 | 0.963089 | 0.457115 |
| MmugDNA.17997.1.S1_at   | MmugDNA.17997.1 | 6.41  | 6.87  | 0.71 | 0.12 | -1.37 | 0.815993 | 0.232364 | 0.917896 | 0.504088 |
| MmugDNA.17998.1.S1_at   | MmugDNA.17998.1 | 13.68 | 13.38 | 0.14 | 0.03 | 1.24  | 0.054235 | 0.062769 | 0.289903 | 0.297193 |
| MmugDNA.180.1.S1_at     | MmugDNA.180.1   | 4.12  | 4.14  | 0.04 | 0.12 | -1.01 | 0.412931 | 0.335533 | 0.674419 | 0.583326 |
| MmugDNA.1800.1.S1_at    | MmugDNA.1800.1  | 9.07  | 9.8   | 0.56 | 0.23 | -1.66 | 0.087186 | 0.168326 | 0.352835 | 0.444973 |
| MmugDNA.18001.1.S1_at   | MmugDNA.18001.1 | 7.76  | 8.16  | 0.11 | 0.09 | -1.33 | 0.008077 | 0.027925 | 0.138956 | 0.208597 |
| MmugDNA.18006.1.S1_at   | MmugDNA.18006.1 | 10.36 | 10.52 | 0.16 | 0.08 | -1.12 | 0.346155 | 0.615127 | 0.624868 | 0.771756 |
| MmugDNA.18010.1.S1_at   | MmugDNA.18010.1 | 6.32  | 6.3   | 0.27 | 0.13 | 1.01  | 0.530818 | 0.689889 | 0.755314 | 0.819167 |
| MmugDNA.18011.1.S1_at   | MmugDNA.18011.1 | 10.79 | 11.07 | 0.1  | 0.01 | -1.21 | 0.007037 | 0.138954 | 0.131294 | 0.412048 |
| MmugDNA.18013.1.S1_at   | MmugDNA.18013.1 | 6.71  | 8.63  | 0.68 | 0.24 | -3.77 | 0.021002 | 0.22422  | 0.198347 | 0.497164 |
| MmugDNA.18015.1.S1_at   | MmugDNA.18015.1 | 8.74  | 11.52 | 1    | 0.21 | -6.87 | 0.021003 | 0.229749 | 0.198347 | 0.501761 |
| MmugDNA.1802.1.S1_at    | MmugDNA.1802.1  | 5.12  | 5.09  | 0.25 | 0.05 | 1.02  | 0.803095 | 0.932182 | 0.911652 | 0.961538 |
| MmugDNA.18026.1.S1_at   | MmugDNA.18026.1 | 3.76  | 3.49  | 0.23 | 0.08 | 1.21  | 0.116685 | 0.117605 | 0.393796 | 0.38531  |
| MmugDNA.18028.1.S1_at   | MmugDNA.18028.1 | 5.23  | 5.19  | 0.11 | 0.16 | 1.03  | 0.801096 | 0.631391 | 0.910582 | 0.782816 |
| MmugDNA.18031.1.S1_at   | MmugDNA.18031.1 | 5.24  | 5.04  | 0.21 | 0.25 | 1.15  | 0.075616 | 0.06279  | 0.333234 | 0.297193 |
| MmugDNA.18032.1.S1_at   | MmugDNA.18032.1 | 3.7   | 3.82  | 0.23 | 0.09 | -1.09 | 0.502269 | 0.732935 | 0.735994 | 0.84546  |
| MmugDNA.18039.1.S1_at   | MmugDNA.18039.1 | 12.97 | 12.93 | 0.16 | 0.03 | 1.03  | 0.674759 | 0.184196 | 0.844767 | 0.460382 |
| MmugDNA.18046.1.S1_at   | MmugDNA.18046.1 | 10.42 | 10.22 | 0.2  | 0.02 | 1.15  | 0.153203 | 0.280604 | 0.442887 | 0.543772 |
| MmugDNA.18055.1.S1_at   | MmugDNA.18055.1 | 10.97 | 10.83 | 0.32 | 0.11 | 1.1   | 0.603397 | 0.79075  | 0.800949 | 0.878973 |
| MmugDNA.18060.1.S1_at   | MmugDNA.18060.1 | 7.25  | 7.25  | 0.12 | 0.01 | 1     | 0.378281 | 0.3891   | 0.648513 | 0.623345 |
| MmugDNA.18065.1.S1_at   | MmugDNA.18065.1 | 6.35  | 5.4   | 0.64 | 0.07 | 1.94  | 0.161284 | 0.436555 | 0.452827 | 0.656048 |
| MmugDNA.18069.1.S1_at   | MmugDNA.18069.1 | 10.09 | 9.91  | 0.13 | 0.06 | 1.14  | 0.039245 | 0.165385 | 0.254562 | 0.441544 |
| MmugDNA.18070.1.S1_at   | MmugDNA.18070.1 | 7.83  | 9.3   | 0.53 | 0.08 | -2.77 | 0.010718 | 0.009923 | 0.153317 | 0.130787 |
| MmugDNA.18070.1.S1_s_at | MmugDNA.18070.1 | 9.76  | 10.84 | 0.44 | 0.04 | -2.11 | 0.012997 | 0.01133  | 0.16477  | 0.138076 |
| MmugDNA.18083.1.S1_at   | MmugDNA.18083.1 | 11.29 | 10.91 | 0.13 | 0.04 | 1.3   | 0.007838 | 0.001797 | 0.137244 | 0.063638 |
| MmugDNA.18087.1.S1_at   | MmugDNA.18087.1 | 10.79 | 10.96 | 0.29 | 0.02 | -1.13 | 0.29967  | 0.682324 | 0.587984 | 0.814506 |
| MmugDNA.18095.1.S1_at   | MmugDNA.18095.1 | 10.72 | 11.51 | 0.29 | 0.17 | -1.73 | 0.019377 | 0.002443 | 0.192293 | 0.073201 |
| MmugDNA.18096.1.S1_at   | MmugDNA.18096.1 | 11.11 | 11.1  | 0.25 | 0.19 | 1.01  | 0.521701 | 0.163153 | 0.749403 | 0.439303 |
| MmugDNA.18099.1.S1_at   | MmugDNA.18099.1 | 8.26  | 9.7   | 0.51 | 0.14 | -2.72 | 0.011079 | 0.292963 | 0.154948 | 0.552926 |
| MmugDNA.18100.1.S1_at   | MmugDNA.18100.1 | 13.21 | 13.68 | 0.26 | 0.06 | -1.38 | 0.078448 | 0.316416 | 0.338154 | 0.569809 |

|                         |                 |       |       |      |      |        |          |          |          |          |
|-------------------------|-----------------|-------|-------|------|------|--------|----------|----------|----------|----------|
| MmugDNA.18105.1.S1_at   | MmugDNA.18105.1 | 6.14  | 4.79  | 0.85 | 0.04 | 2.55   | 0.04792  | 0.21428  | 0.276338 | 0.487894 |
| MmugDNA.18111.1.S1_s_at | MmugDNA.18111.1 | 5.32  | 5.1   | 0.2  | 0.39 | 1.16   | 0.974898 | 0.979306 | 0.989954 | 0.988845 |
| MmugDNA.18112.1.S1_at   | MmugDNA.18112.1 | 7.9   | 7.98  | 0.23 | 0.12 | -1.06  | 0.765631 | 0.694867 | 0.892487 | 0.822638 |
| MmugDNA.18113.1.S1_s_at | MmugDNA.18113.1 | 6.06  | 6.02  | 0.13 | 0.02 | 1.03   | 0.762257 | 0.873092 | 0.890988 | 0.927823 |
| MmugDNA.18114.1.S1_at   | MmugDNA.18114.1 | 7.43  | 5.06  | 0.31 | 0.23 | 5.15   | 0.000548 | 0.007738 | 0.070087 | 0.11758  |
| MmugDNA.1812.1.S1_at    | MmugDNA.1812.1  | 5.17  | 5.22  | 0.18 | 0.05 | -1.04  | 0.471224 | 0.417539 | 0.71543  | 0.642252 |
| MmugDNA.18122.1.S1_at   | MmugDNA.18122.1 | 10.46 | 10.49 | 0.22 | 0.21 | -1.02  | 0.71444  | 0.913236 | 0.86508  | 0.951146 |
| MmugDNA.18123.1.S1_at   | MmugDNA.18123.1 | 12.04 | 11.27 | 0.05 | 0.13 | 1.71   | 0.000705 | 0.001505 | 0.071903 | 0.0591   |
| MmugDNA.18124.1.S1_at   | MmugDNA.18124.1 | 3.11  | 3.1   | 0.15 | 0.02 | 1      | 0.931263 | 0.823094 | 0.971084 | 0.898356 |
| MmugDNA.18127.1.S1_at   | MmugDNA.18127.1 | 5.23  | 6.13  | 1.06 | 0.18 | -1.87  | 0.6481   | 0.864867 | 0.829161 | 0.923362 |
| MmugDNA.18128.1.S1_at   | MmugDNA.18128.1 | 5.25  | 5.59  | 0.35 | 0.14 | -1.27  | 0.533738 | 0.223845 | 0.757217 | 0.496802 |
| MmugDNA.18130.1.S1_at   | MmugDNA.18130.1 | 7.19  | 7.08  | 0.26 | 0.07 | 1.08   | 0.757323 | 0.949817 | 0.888659 | 0.971332 |
| MmugDNA.18134.1.S1_at   | MmugDNA.18134.1 | 6.17  | 7.51  | 0.29 | 0.32 | -2.54  | 0.016053 | 0.188413 | 0.179208 | 0.464416 |
| MmugDNA.18136.1.S1_at   | MmugDNA.18136.1 | 3.38  | 3.37  | 0.06 | 0.03 | 1.01   | 0.980846 | 0.675986 | 0.992889 | 0.810632 |
| MmugDNA.18138.1.S1_at   | MmugDNA.18138.1 | 5.78  | 6.03  | 0.12 | 0.05 | -1.19  | 0.026837 | 0.34322  | 0.216925 | 0.588968 |
| MmugDNA.18141.1.S1_at   | MmugDNA.18141.1 | 12.28 | 12.39 | 0.05 | 0.04 | -1.07  | 0.049724 | 0.012525 | 0.280409 | 0.144385 |
| MmugDNA.18150.1.S1_at   | MmugDNA.18150.1 | 6.02  | 6.25  | 0.02 | 0.03 | -1.18  | 0.000377 | 0.000111 | 0.062479 | 0.028099 |
| MmugDNA.18158.1.S1_at   | MmugDNA.18158.1 | 7.77  | 8.86  | 0.25 | 0.13 | -2.13  | 0.002926 | 0.049011 | 0.099331 | 0.266257 |
| MmugDNA.18163.1.S1_at   | MmugDNA.18163.1 | 8.82  | 8.18  | 0.63 | 0.1  | 1.56   | 0.487152 | 0.165576 | 0.726032 | 0.44189  |
| MmugDNA.18169.1.S1_at   | MmugDNA.18169.1 | 9.71  | 10.26 | 0.33 | 0.14 | -1.46  | 0.07321  | 0.032329 | 0.328341 | 0.222602 |
| MmugDNA.18179.1.S1_at   | MmugDNA.18179.1 | 6.79  | 6.71  | 0.14 | 0.07 | 1.05   | 0.168023 | 0.077037 | 0.461204 | 0.322481 |
| MmugDNA.18181.1.S1_at   | MmugDNA.18181.1 | 10.78 | 10.9  | 0.08 | 0.1  | -1.09  | 0.433918 | 0.075938 | 0.689233 | 0.320634 |
| MmugDNA.18185.1.S1_at   | MmugDNA.18185.1 | 12.2  | 12.11 | 0.06 | 0.11 | 1.06   | 0.205094 | 0.188751 | 0.502914 | 0.464735 |
| MmugDNA.18186.1.S1_at   | MmugDNA.18186.1 | 5.03  | 4.94  | 0.07 | 0.06 | 1.06   | 0.112761 | 0.115809 | 0.389286 | 0.382854 |
| MmugDNA.18187.1.S1_s_at | MmugDNA.18187.1 | 7.99  | 8.42  | 0.25 | 0.01 | -1.35  | 0.115975 | 0.114356 | 0.393014 | 0.380861 |
| MmugDNA.18189.1.S1_at   | MmugDNA.18189.1 | 12.21 | 12.08 | 0.25 | 0.1  | 1.09   | 0.326138 | 0.784601 | 0.60931  | 0.875301 |
| MmugDNA.18191.1.S1_at   | MmugDNA.18191.1 | 11.52 | 11.79 | 0.2  | 0.08 | -1.2   | 0.190123 | 0.047297 | 0.486473 | 0.262176 |
| MmugDNA.18192.1.S1_at   | MmugDNA.18192.1 | 12.15 | 12.14 | 0.1  | 0.06 | 1.01   | 0.876225 | 0.532351 | 0.94701  | 0.719017 |
| MmugDNA.18193.1.S1_at   | MmugDNA.18193.1 | 10.19 | 11.67 | 0.05 | 0.1  | -2.79  | 0.000021 | 0.43124  | 0.045594 | 0.652233 |
| MmugDNA.18195.1.S1_at   | MmugDNA.18195.1 | 6.02  | 6.03  | 0.1  | 0.04 | -1.01  | 0.361225 | 0.537872 | 0.636739 | 0.722773 |
| MmugDNA.18199.1.S1_at   | MmugDNA.18199.1 | 7.34  | 7.39  | 0.24 | 0.14 | -1.04  | 0.158513 | 0.325188 | 0.44964  | 0.575598 |
| MmugDNA.182.1.S1_at     | MmugDNA.182.1   | 3.44  | 3.61  | 0.09 | 0.02 | -1.13  | 0.103697 | 0.204723 | 0.376999 | 0.479071 |
| MmugDNA.1820.1.S1_at    | MmugDNA.1820.1  | 10.39 | 10.34 | 0.12 | 0.18 | 1.04   | 0.253548 | 0.052926 | 0.547854 | 0.275685 |
| MmugDNA.18216.1.S1_at   | MmugDNA.18216.1 | 9.8   | 9.82  | 0.14 | 0.03 | -1.02  | 0.946114 | 0.880437 | 0.977211 | 0.931694 |
| MmugDNA.18224.1.S1_at   | MmugDNA.18224.1 | 5.78  | 10.09 | 2.03 | 0.33 | -19.95 | 0.050552 | 0.199023 | 0.282559 | 0.473614 |
| MmugDNA.18227.1.S1_at   | MmugDNA.18227.1 | 12.09 | 10.84 | 0.13 | 0.27 | 2.38   | 0.0025   | 0.010734 | 0.094326 | 0.135307 |
| MmugDNA.18228.1.S1_at   | MmugDNA.18228.1 | 4.64  | 4.59  | 0.14 | 0.03 | 1.03   | 0.263966 | 0.395412 | 0.557422 | 0.627474 |
| MmugDNA.18233.1.S1_at   | MmugDNA.18233.1 | 7.93  | 8.56  | 0.76 | 0.48 | -1.55  | 0.111738 | 0.129223 | 0.387803 | 0.400635 |
| MmugDNA.18235.1.S1_at   | MmugDNA.18235.1 | 13.54 | 13.43 | 0.1  | 0.03 | 1.08   | 0.053969 | 0.245434 | 0.289412 | 0.515213 |
| MmugDNA.18236.1.S1_at   | MmugDNA.18236.1 | 5.73  | 5.71  | 0.05 | 0.07 | 1.01   | 0.372758 | 0.580847 | 0.645067 | 0.749953 |
| MmugDNA.1824.1.S1_at    | MmugDNA.1824.1  | 7.56  | 7.4   | 0.17 | 0.09 | 1.12   | 0.378721 | 0.468256 | 0.648814 | 0.6777   |
| MmugDNA.18241.1.S1_at   | MmugDNA.18241.1 | 11.76 | 11.75 | 0.14 | 0.08 | 1.01   | 0.389006 | 0.060772 | 0.65696  | 0.29326  |
| MmugDNA.18254.1.S1_at   | MmugDNA.18254.1 | 5.76  | 5.82  | 0.05 | 0.07 | -1.04  | 0.209144 | 0.364562 | 0.50665  | 0.604915 |

|                         |                 |       |       |      |      |        |          |          |          |          |
|-------------------------|-----------------|-------|-------|------|------|--------|----------|----------|----------|----------|
| MmugDNA.18259.1.S1_at   | MmugDNA.18259.1 | 11.54 | 11.63 | 0.23 | 0.1  | -1.07  | 0.644342 | 0.850507 | 0.826816 | 0.914979 |
| MmugDNA.18263.1.S1_at   | MmugDNA.18263.1 | 10.48 | 10.71 | 0.17 | 0.16 | -1.17  | 0.497128 | 0.058544 | 0.73289  | 0.288669 |
| MmugDNA.18270.1.S1_at   | MmugDNA.18270.1 | 8.1   | 7.58  | 0.3  | 0.06 | 1.43   | 0.018569 | 0.029805 | 0.189513 | 0.214318 |
| MmugDNA.18278.1.S1_at   | MmugDNA.18278.1 | 13.08 | 13.08 | 0.04 | 0.02 | -1     | 0.446519 | 0.371024 | 0.698755 | 0.609964 |
| MmugDNA.18279.1.S1_at   | MmugDNA.18279.1 | 11.86 | 12.64 | 0.17 | 0.03 | -1.72  | 0.001958 | 0.007037 | 0.088702 | 0.113112 |
| MmugDNA.1828.1.S1_at    | MmugDNA.1828.1  | 7.01  | 11.46 | 1.81 | 0.11 | -21.92 | 0.0299   | 0.191139 | 0.226288 | 0.4664   |
| MmugDNA.18280.1.S1_at   | MmugDNA.18280.1 | 4.05  | 4.08  | 0.08 | 0.07 | -1.02  | 0.568759 | 0.030528 | 0.778586 | 0.216711 |
| MmugDNA.18281.1.S1_s_at | MmugDNA.18281.1 | 11.33 | 11.24 | 0.07 | 0.01 | 1.07   | 0.103005 | 0.014817 | 0.375645 | 0.154879 |
| MmugDNA.18290.1.S1_at   | MmugDNA.18290.1 | 10.58 | 11.19 | 0.39 | 0.15 | -1.52  | 0.171121 | 0.156429 | 0.464985 | 0.431767 |
| MmugDNA.18294.1.S1_at   | MmugDNA.18294.1 | 6.5   | 6.63  | 0.21 | 0.09 | -1.1   | 0.938632 | 0.762032 | 0.974178 | 0.861597 |
| MmugDNA.18297.1.S1_at   | MmugDNA.18297.1 | 10.86 | 10.81 | 0.04 | 0.09 | 1.03   | 0.686016 | 0.653866 | 0.850441 | 0.797692 |
| MmugDNA.1830.1.S1_at    | MmugDNA.1830.1  | 10.84 | 10.92 | 0.22 | 0.1  | -1.05  | 0.56137  | 0.073096 | 0.774384 | 0.316064 |
| MmugDNA.18301.1.S1_at   | MmugDNA.18301.1 | 10.26 | 9.78  | 0.05 | 0.1  | 1.39   | 0.002343 | 0.306434 | 0.092897 | 0.563029 |
| MmugDNA.18309.1.S1_at   | MmugDNA.18309.1 | 4.5   | 5.96  | 0.68 | 1.75 | -2.75  | 0.362327 | 0.402552 | 0.637219 | 0.631481 |
| MmugDNA.1832.1.S1_at    | MmugDNA.1832.1  | 6.28  | 10.88 | 2.32 | 0.2  | -24.26 | 0.054223 | 0.234989 | 0.289903 | 0.506162 |
| MmugDNA.18323.1.S1_at   | MmugDNA.18323.1 | 4.14  | 3.88  | 0.27 | 0.16 | 1.2    | 0.155294 | 0.259649 | 0.445545 | 0.526538 |
| MmugDNA.18326.1.S1_at   | MmugDNA.18326.1 | 11.34 | 11.32 | 0.2  | 0.04 | 1.02   | 0.82312  | 0.058688 | 0.921375 | 0.288956 |
| MmugDNA.1833.1.S1_at    | MmugDNA.1833.1  | 9.96  | 9.75  | 0.16 | 0.09 | 1.16   | 0.127979 | 0.054085 | 0.409866 | 0.277914 |
| MmugDNA.18332.1.S1_at   | MmugDNA.18332.1 | 5.55  | 5.68  | 0.31 | 0.07 | -1.09  | 0.788293 | 0.445171 | 0.903737 | 0.662331 |
| MmugDNA.18333.1.S1_at   | MmugDNA.18333.1 | 4.65  | 5.72  | 0.46 | 0.11 | -2.1   | 0.035015 | 0.226223 | 0.241777 | 0.498692 |
| MmugDNA.18333.1.S1_x_at | MmugDNA.18333.1 | 4.78  | 5.89  | 0.2  | 0.21 | -2.15  | 0.004473 | 0.258117 | 0.113436 | 0.525574 |
| MmugDNA.18335.1.S1_at   | MmugDNA.18335.1 | 12.27 | 12.64 | 0.24 | 0.08 | -1.29  | 0.222778 | 0.065898 | 0.520677 | 0.302129 |
| MmugDNA.18337.1.S1_at   | MmugDNA.18337.1 | 8.82  | 8.6   | 0.55 | 0.21 | 1.16   | 0.650917 | 0.150407 | 0.830474 | 0.424951 |
| MmugDNA.18346.1.S1_at   | MmugDNA.18346.1 | 4.51  | 4.42  | 0.18 | 0.01 | 1.07   | 0.717671 | 0.705099 | 0.866659 | 0.828994 |
| MmugDNA.18347.1.S1_at   | MmugDNA.18347.1 | 10.2  | 10.03 | 0.16 | 0.22 | 1.13   | 0.22568  | 0.163436 | 0.523409 | 0.439629 |
| MmugDNA.18348.1.S1_at   | MmugDNA.18348.1 | 6.93  | 7.21  | 0.39 | 0.06 | -1.22  | 0.097907 | 0.034783 | 0.368361 | 0.230686 |
| MmugDNA.18349.1.S1_at   | MmugDNA.18349.1 | 3.35  | 3.53  | 0.01 | 0.18 | -1.13  | 0.153196 | 0.152502 | 0.442887 | 0.427329 |
| MmugDNA.18350.1.S1_at   | MmugDNA.18350.1 | 7.78  | 7.37  | 0.16 | 0.19 | 1.33   | 0.034754 | 0.017515 | 0.241036 | 0.167516 |
| MmugDNA.18351.1.S1_at   | MmugDNA.18351.1 | 7.07  | 7.56  | 0.64 | 0.24 | -1.41  | 0.397655 | 0.663514 | 0.663192 | 0.803016 |
| MmugDNA.18353.1.S1_at   | MmugDNA.18353.1 | 10.33 | 10.18 | 0.04 | 0.09 | 1.11   | 0.142415 | 0.451209 | 0.42843  | 0.666085 |
| MmugDNA.18354.1.S1_at   | MmugDNA.18354.1 | 6.59  | 6.66  | 1.35 | 0.05 | -1.05  | 0.914532 | 0.44424  | 0.963657 | 0.661897 |
| MmugDNA.18355.1.S1_at   | MmugDNA.18355.1 | 2.76  | 2.69  | 0.09 | 0.01 | 1.05   | 0.881372 | 0.252459 | 0.949601 | 0.521073 |
| MmugDNA.18357.1.S1_at   | MmugDNA.18357.1 | 11.44 | 10.54 | 0.13 | 0.37 | 1.87   | 0.042177 | 0.017292 | 0.262255 | 0.166482 |
| MmugDNA.18358.1.S1_at   | MmugDNA.18358.1 | 8.72  | 8.74  | 0.14 | 0.1  | -1.02  | 0.513948 | 0.883037 | 0.744054 | 0.93328  |
| MmugDNA.18359.1.S1_at   | MmugDNA.18359.1 | 6.17  | 6.01  | 0.13 | 0.01 | 1.12   | 0.065616 | 0.134369 | 0.313575 | 0.406603 |
| MmugDNA.18361.1.S1_s_at | MmugDNA.18361.1 | 8.04  | 8.92  | 0.16 | 0.23 | -1.84  | 0.005686 | 0.225484 | 0.121066 | 0.498129 |
| MmugDNA.18363.1.S1_at   | MmugDNA.18363.1 | 8.28  | 9.44  | 0.62 | 0.23 | -2.24  | 0.035201 | 0.053692 | 0.242242 | 0.277304 |
| MmugDNA.18366.1.S1_at   | MmugDNA.18366.1 | 9.1   | 8.96  | 0.2  | 0.13 | 1.1    | 0.41936  | 0.045252 | 0.67873  | 0.257066 |
| MmugDNA.1837.1.S1_at    | MmugDNA.1837.1  | 5.89  | 5.99  | 0.15 | 0.12 | -1.07  | 0.804742 | 0.400218 | 0.912379 | 0.630158 |
| MmugDNA.18373.1.S1_at   | MmugDNA.18373.1 | 7.07  | 6.85  | 0.18 | 0.05 | 1.17   | 0.125496 | 0.134984 | 0.405993 | 0.406955 |
| MmugDNA.18374.1.S1_at   | MmugDNA.18374.1 | 9.19  | 9.11  | 0.24 | 0.13 | 1.05   | 0.383454 | 0.030081 | 0.652801 | 0.215243 |
| MmugDNA.18376.1.S1_at   | MmugDNA.18376.1 | 3.89  | 3.91  | 0.25 | 0.05 | -1.01  | 0.763571 | 0.926038 | 0.891841 | 0.958117 |
| MmugDNA.18378.1.S1_at   | MmugDNA.18378.1 | 10.09 | 10.67 | 0.26 | 0.06 | -1.49  | 0.016763 | 0.020715 | 0.182686 | 0.180645 |

|                         |                 |       |       |      |      |        |          |          |          |          |
|-------------------------|-----------------|-------|-------|------|------|--------|----------|----------|----------|----------|
| MmugDNA.18382.1.S1_at   | MmugDNA.18382.1 | 9.62  | 9.46  | 0.13 | 0.07 | 1.12   | 0.160938 | 0.090657 | 0.452431 | 0.345151 |
| MmugDNA.18385.1.S1_at   | MmugDNA.18385.1 | 10.34 | 10.28 | 0.21 | 0.07 | 1.04   | 0.934834 | 0.108729 | 0.972738 | 0.372257 |
| MmugDNA.18391.1.S1_at   | MmugDNA.18391.1 | 9.74  | 10.75 | 0.1  | 0.05 | -2.01  | 0.000143 | 0.19309  | 0.051196 | 0.468554 |
| MmugDNA.18398.1.S1_at   | MmugDNA.18398.1 | 4.85  | 5.12  | 0.33 | 0.21 | -1.21  | 0.592668 | 0.221911 | 0.793595 | 0.495019 |
| MmugDNA.18399.1.S1_at   | MmugDNA.18399.1 | 3.26  | 7.63  | 2.22 | 0.44 | -20.63 | 0.094785 | 0.279369 | 0.36369  | 0.543012 |
| MmugDNA.18401.1.S1_s_at | MmugDNA.18401.1 | 9.85  | 9.97  | 0.37 | 0.09 | -1.09  | 0.900531 | 0.439486 | 0.957773 | 0.6582   |
| MmugDNA.18407.1.S1_at   | MmugDNA.18407.1 | 5.44  | 5.29  | 0.15 | 0.06 | 1.11   | 0.648769 | 0.760613 | 0.829361 | 0.860949 |
| MmugDNA.1841.1.S1_at    | MmugDNA.1841.1  | 12.76 | 12.66 | 0.1  | 0.05 | 1.07   | 0.187228 | 0.425312 | 0.483367 | 0.647696 |
| MmugDNA.18412.1.S1_at   | MmugDNA.18412.1 | 6.95  | 7.04  | 0.09 | 0.21 | -1.06  | 0.648054 | 0.876003 | 0.829123 | 0.929526 |
| MmugDNA.18413.1.S1_at   | MmugDNA.18413.1 | 11.23 | 11.29 | 0.08 | 0.07 | -1.04  | 0.748923 | 0.000082 | 0.883751 | 0.027016 |
| MmugDNA.18414.1.S1_at   | MmugDNA.18414.1 | 10.22 | 10.21 | 0.05 | 0.07 | 1.01   | 0.565502 | 0.066334 | 0.776724 | 0.303194 |
| MmugDNA.18415.1.S1_at   | MmugDNA.18415.1 | 9.57  | 10.5  | 1.01 | 0.11 | -1.9   | 0.226491 | 0.295652 | 0.524301 | 0.555108 |
| MmugDNA.18423.1.S1_at   | MmugDNA.18423.1 | 3.22  | 3.1   | 0.09 | 0.16 | 1.09   | 0.757926 | 0.536182 | 0.888972 | 0.721547 |
| MmugDNA.18425.1.S1_at   | MmugDNA.18425.1 | 5.54  | 5.2   | 0.21 | 0.05 | 1.27   | 0.114117 | 0.084619 | 0.390876 | 0.336144 |
| MmugDNA.18426.1.S1_at   | MmugDNA.18426.1 | 9.12  | 9.06  | 0.15 | 0.11 | 1.04   | 0.887693 | 0.072353 | 0.952052 | 0.315146 |
| MmugDNA.18431.1.S1_at   | MmugDNA.18431.1 | 7.55  | 7.55  | 0.23 | 0.27 | 1      | 0.523487 | 0.563256 | 0.750424 | 0.738506 |
| MmugDNA.18432.1.S1_at   | MmugDNA.18432.1 | 6.15  | 7.99  | 1.01 | 0.33 | -3.58  | 0.062008 | 0.193099 | 0.305534 | 0.468554 |
| MmugDNA.18434.1.S1_at   | MmugDNA.18434.1 | 9.06  | 9.16  | 0.18 | 0.1  | -1.08  | 0.808528 | 0.309645 | 0.914304 | 0.564991 |
| MmugDNA.18435.1.S1_x_at | MmugDNA.18435.1 | 11.98 | 11.88 | 0.44 | 0.1  | 1.07   | 0.499433 | 0.237673 | 0.734175 | 0.50826  |
| MmugDNA.18441.1.S1_at   | MmugDNA.18441.1 | 3.66  | 3.64  | 0.16 | 0.08 | 1.02   | 0.324916 | 0.35498  | 0.608412 | 0.597466 |
| MmugDNA.18445.1.S1_at   | MmugDNA.18445.1 | 7.05  | 9.47  | 0.91 | 0.23 | -5.34  | 0.021374 | 0.17469  | 0.199771 | 0.451231 |
| MmugDNA.18451.1.S1_at   | MmugDNA.18451.1 | 13.17 | 13.06 | 0.06 | 0.01 | 1.08   | 0.014145 | 0.170608 | 0.170496 | 0.447204 |
| MmugDNA.18453.1.S1_at   | MmugDNA.18453.1 | 5.86  | 5.92  | 0.31 | 0.11 | -1.05  | 0.898195 | 0.835664 | 0.956732 | 0.905942 |
| MmugDNA.18455.1.S1_at   | MmugDNA.18455.1 | 7.34  | 7.33  | 0.22 | 0.07 | 1      | 0.947979 | 0.538878 | 0.978071 | 0.723368 |
| MmugDNA.18457.1.S1_at   | MmugDNA.18457.1 | 6.4   | 7.2   | 0.33 | 0.25 | -1.75  | 0.062502 | 0.047416 | 0.306597 | 0.262476 |
| MmugDNA.18458.1.S1_at   | MmugDNA.18458.1 | 8.38  | 8.5   | 0.18 | 0.07 | -1.09  | 0.119638 | 0.407111 | 0.397592 | 0.634734 |
| MmugDNA.18461.1.S1_at   | MmugDNA.18461.1 | 9.47  | 9.67  | 0.16 | 0.05 | -1.15  | 0.324012 | 0.001383 | 0.607761 | 0.056947 |
| MmugDNA.18463.1.S1_at   | MmugDNA.18463.1 | 8.94  | 8.32  | 1.25 | 0.19 | 1.53   | 0.899342 | 0.976576 | 0.957134 | 0.987237 |
| MmugDNA.18465.1.S1_at   | MmugDNA.18465.1 | 5.89  | 5.69  | 0.2  | 1.03 | 1.14   | 0.563675 | 0.405061 | 0.775636 | 0.63348  |
| MmugDNA.1847.1.S1_at    | MmugDNA.1847.1  | 13.8  | 13.95 | 0.05 | 0.03 | -1.11  | 0.009823 | 0.049589 | 0.148542 | 0.267692 |
| MmugDNA.18473.1.S1_at   | MmugDNA.18473.1 | 5.14  | 5.28  | 0.14 | 0.32 | -1.1   | 0.873425 | 0.073741 | 0.945619 | 0.317089 |
| MmugDNA.18474.1.S1_s_at | MmugDNA.18474.1 | 9.44  | 9.19  | 0.18 | 0.12 | 1.18   | 0.180902 | 0.026561 | 0.476157 | 0.203915 |
| MmugDNA.18477.1.S1_at   | MmugDNA.18477.1 | 8.31  | 8.81  | 0.72 | 0.1  | -1.42  | 0.251489 | 0.33766  | 0.546309 | 0.584856 |
| MmugDNA.18481.1.S1_at   | MmugDNA.18481.1 | 5.81  | 6.03  | 0.32 | 0.08 | -1.16  | 0.848429 | 0.12936  | 0.933992 | 0.400748 |
| MmugDNA.18483.1.S1_at   | MmugDNA.18483.1 | 6.24  | 6.79  | 0.44 | 0.37 | -1.47  | 0.149887 | 0.177599 | 0.438796 | 0.453962 |
| MmugDNA.18486.1.S1_s_at | MmugDNA.18486.1 | 12.88 | 12.09 | 0.82 | 0.14 | 1.73   | 0.127624 | 0.224439 | 0.409544 | 0.497441 |
| MmugDNA.18488.1.S1_at   | MmugDNA.18488.1 | 5.42  | 5.23  | 0.25 | 0.02 | 1.14   | 0.184442 | 0.248156 | 0.480429 | 0.517567 |
| MmugDNA.18490.1.S1_at   | MmugDNA.18490.1 | 9.68  | 10.02 | 0.06 | 0.12 | -1.27  | 0.045681 | 0.492884 | 0.271157 | 0.693817 |
| MmugDNA.18495.1.S1_at   | MmugDNA.18495.1 | 11.28 | 11.55 | 0.01 | 0.03 | -1.2   | 0.000164 | 0.000011 | 0.053494 | 0.016526 |
| MmugDNA.18498.1.S1_at   | MmugDNA.18498.1 | 5.92  | 8.01  | 0.87 | 0.2  | -4.24  | 0.045566 | 0.203082 | 0.270962 | 0.477343 |
| MmugDNA.18499.1.S1_at   | MmugDNA.18499.1 | 7.3   | 7.29  | 0.11 | 0.03 | 1      | 0.389809 | 0.736389 | 0.657536 | 0.847485 |
| MmugDNA.18500.1.S1_at   | MmugDNA.18500.1 | 3.7   | 3.83  | 0.21 | 0.23 | -1.1   | 0.922733 | 0.918418 | 0.966967 | 0.95425  |
| MmugDNA.18502.1.S1_at   | MmugDNA.18502.1 | 12.79 | 12.35 | 0.03 | 0.05 | 1.36   | 0.00025  | 0.001739 | 0.054642 | 0.062895 |

|                         |                 |       |       |      |      |       |          |          |          |          |
|-------------------------|-----------------|-------|-------|------|------|-------|----------|----------|----------|----------|
| MmugDNA.18508.1.S1_at   | MmugDNA.18508.1 | 9.04  | 10.11 | 0.65 | 0    | -2.09 | 0.05785  | 0.016202 | 0.297699 | 0.16133  |
| MmugDNA.18510.1.S1_at   | MmugDNA.18510.1 | 9.93  | 9.52  | 0.3  | 0.08 | 1.33  | 0.185615 | 0.183404 | 0.481858 | 0.459553 |
| MmugDNA.18511.1.S1_at   | MmugDNA.18511.1 | 11.91 | 12.23 | 0.26 | 0.05 | -1.24 | 0.040168 | 0.256517 | 0.256871 | 0.524275 |
| MmugDNA.18513.1.S1_s_at | MmugDNA.18513.1 | 12.94 | 13.04 | 0.19 | 0.11 | -1.07 | 0.725494 | 0.403375 | 0.871194 | 0.632083 |
| MmugDNA.18515.1.S1_at   | MmugDNA.18515.1 | 7.92  | 8.48  | 0.21 | 0.09 | -1.47 | 0.013015 | 0.03196  | 0.164853 | 0.221191 |
| MmugDNA.18516.1.S1_at   | MmugDNA.18516.1 | 9.85  | 9.98  | 0.21 | 0.09 | -1.09 | 0.891997 | 0.051927 | 0.95392  | 0.273337 |
| MmugDNA.18519.1.S1_at   | MmugDNA.18519.1 | 3.29  | 3.74  | 0.07 | 0.17 | -1.37 | 0.018412 | 0.237732 | 0.18871  | 0.50826  |
| MmugDNA.18520.1.S1_at   | MmugDNA.18520.1 | 11.68 | 11.6  | 0.16 | 0.09 | 1.06  | 0.174122 | 0.655279 | 0.468351 | 0.798399 |
| MmugDNA.18528.1.S1_at   | MmugDNA.18528.1 | 10.58 | 10.73 | 0.1  | 0.07 | -1.11 | 0.07929  | 0.811071 | 0.339252 | 0.890975 |
| MmugDNA.18538.1.S1_at   | MmugDNA.18538.1 | 8.52  | 9.7   | 1.09 | 0.21 | -2.28 | 0.169381 | 0.199357 | 0.462613 | 0.474002 |
| MmugDNA.18538.1.S1_s_at | MmugDNA.18538.1 | 8.72  | 9.87  | 1.15 | 0.22 | -2.22 | 0.213773 | 0.205275 | 0.511664 | 0.479599 |
| MmugDNA.18539.1.S1_at   | MmugDNA.18539.1 | 7.62  | 7.66  | 0.45 | 0.08 | -1.03 | 0.288325 | 0.404517 | 0.57804  | 0.633004 |
| MmugDNA.18541.1.S1_at   | MmugDNA.18541.1 | 9.67  | 10.02 | 0.1  | 0.05 | -1.28 | 0.005466 | 0.035424 | 0.119451 | 0.232539 |
| MmugDNA.18544.1.S1_at   | MmugDNA.18544.1 | 7.34  | 7.23  | 0.14 | 0.13 | 1.08  | 0.313375 | 0.186027 | 0.599174 | 0.461878 |
| MmugDNA.18548.1.S1_at   | MmugDNA.18548.1 | 11.51 | 10.03 | 0.43 | 0.17 | 2.79  | 0.011583 | 0.04607  | 0.15753  | 0.258977 |
| MmugDNA.18551.1.S1_at   | MmugDNA.18551.1 | 8.74  | 8.41  | 0.06 | 0.2  | 1.25  | 0.022868 | 0.24498  | 0.204235 | 0.514782 |
| MmugDNA.18552.1.S1_at   | MmugDNA.18552.1 | 10.91 | 10.93 | 0.05 | 0.05 | -1.01 | 0.385638 | 0.665107 | 0.65438  | 0.803733 |
| MmugDNA.18555.1.S1_at   | MmugDNA.18555.1 | 7.84  | 7.7   | 0.12 | 0.06 | 1.1   | 0.400792 | 0.009676 | 0.665577 | 0.129405 |
| MmugDNA.18556.1.S1_at   | MmugDNA.18556.1 | 12    | 10.44 | 0.31 | 0.41 | 2.93  | 0.009902 | 0.143412 | 0.148933 | 0.41743  |
| MmugDNA.18557.1.S1_at   | MmugDNA.18557.1 | 5.2   | 5.13  | 0.01 | 0.18 | 1.05  | 0.519818 | 0.174238 | 0.748277 | 0.450573 |
| MmugDNA.18559.1.S1_at   | MmugDNA.18559.1 | 11.62 | 11.75 | 0.06 | 0.14 | -1.09 | 0.077336 | 0.114496 | 0.335992 | 0.381041 |
| MmugDNA.18563.1.S1_at   | MmugDNA.18563.1 | 5.09  | 5.07  | 0.04 | 0.01 | 1.01  | 0.200662 | 0.308849 | 0.497934 | 0.564656 |
| MmugDNA.18566.1.S1_at   | MmugDNA.18566.1 | 5.73  | 5.72  | 0.13 | 0.05 | 1.01  | 0.511381 | 0.772967 | 0.742401 | 0.867983 |
| MmugDNA.18569.1.S1_at   | MmugDNA.18569.1 | 7.96  | 7.38  | 0.64 | 0.35 | 1.49  | 0.165753 | 0.152719 | 0.458756 | 0.427571 |
| MmugDNA.1857.1.S1_at    | MmugDNA.1857.1  | 3.35  | 3.29  | 0.18 | 0.09 | 1.04  | 0.410169 | 0.480774 | 0.6723   | 0.686    |
| MmugDNA.18573.1.S1_at   | MmugDNA.18573.1 | 5.95  | 5.95  | 0.18 | 0.19 | 1     | 0.571299 | 0.143395 | 0.779864 | 0.417409 |
| MmugDNA.18574.1.S1_at   | MmugDNA.18574.1 | 3.36  | 3.19  | 0.32 | 0.01 | 1.12  | 0.129896 | 0.145415 | 0.412108 | 0.419421 |
| MmugDNA.18578.1.S1_at   | MmugDNA.18578.1 | 10.08 | 10.04 | 0.29 | 0.17 | 1.02  | 0.607661 | 0.332043 | 0.803844 | 0.580568 |
| MmugDNA.18584.1.S1_at   | MmugDNA.18584.1 | 10.34 | 10.29 | 0.11 | 0.14 | 1.04  | 0.700795 | 0.517911 | 0.857891 | 0.710027 |
| MmugDNA.18585.1.S1_at   | MmugDNA.18585.1 | 5.37  | 5.34  | 0.08 | 0.03 | 1.02  | 0.766188 | 0.191879 | 0.89274  | 0.467257 |
| MmugDNA.18586.1.S1_at   | MmugDNA.18586.1 | 10.41 | 9.21  | 0.18 | 0.09 | 2.3   | 0.000377 | 0.000025 | 0.062479 | 0.020254 |
| MmugDNA.18588.1.S1_at   | MmugDNA.18588.1 | 8.14  | 8.39  | 0.35 | 0.11 | -1.19 | 0.953673 | 0.411077 | 0.981026 | 0.637877 |
| MmugDNA.18590.1.S1_at   | MmugDNA.18590.1 | 13.39 | 13.47 | 0.03 | 0.02 | -1.06 | 0.013891 | 0.254138 | 0.168896 | 0.522439 |
| MmugDNA.18592.1.S1_at   | MmugDNA.18592.1 | 6.53  | 6.23  | 0.2  | 0.22 | 1.23  | 0.677881 | 0.977578 | 0.846342 | 0.987812 |
| MmugDNA.18593.1.S1_at   | MmugDNA.18593.1 | 11.88 | 11.87 | 0.08 | 0.07 | 1.01  | 0.992758 | 0.173017 | 0.997263 | 0.449661 |
| MmugDNA.18595.1.S1_at   | MmugDNA.18595.1 | 9.37  | 8.86  | 0.07 | 0.09 | 1.42  | 0.002333 | 0.276604 | 0.092789 | 0.540596 |
| MmugDNA.18597.1.S1_at   | MmugDNA.18597.1 | 5.29  | 5.6   | 0.08 | 0.07 | -1.24 | 0.013589 | 0.026315 | 0.167335 | 0.203232 |
| MmugDNA.1860.1.S1_at    | MmugDNA.1860.1  | 5.03  | 6.52  | 1.03 | 0.14 | -2.81 | 0.075747 | 0.043296 | 0.33353  | 0.252847 |
| MmugDNA.18600.1.S1_at   | MmugDNA.18600.1 | 4.49  | 4.17  | 0.16 | 0.13 | 1.25  | 0.052385 | 0.077789 | 0.28616  | 0.323933 |
| MmugDNA.18606.1.S1_at   | MmugDNA.18606.1 | 4.18  | 4.16  | 0.09 | 0.05 | 1.02  | 0.257102 | 0.66989  | 0.551586 | 0.806933 |
| MmugDNA.18607.1.S1_at   | MmugDNA.18607.1 | 8.49  | 7.94  | 0.57 | 0.04 | 1.46  | 0.189604 | 0.227737 | 0.486064 | 0.499979 |
| MmugDNA.18611.1.S1_at   | MmugDNA.18611.1 | 12.75 | 12.64 | 0.09 | 0.1  | 1.08  | 0.456256 | 0.031262 | 0.705695 | 0.218668 |
| MmugDNA.18611.1.S1_x_at | MmugDNA.18611.1 | 12.46 | 12.41 | 0.1  | 0.08 | 1.03  | 0.69628  | 0.01133  | 0.855348 | 0.138076 |

|                         |                 |       |       |      |      |       |          |          |          |          |
|-------------------------|-----------------|-------|-------|------|------|-------|----------|----------|----------|----------|
| MmugDNA.18612.1.S1_at   | MmugDNA.18612.1 | 11.09 | 11.07 | 0.26 | 0.16 | 1.01  | 0.838273 | 0.467669 | 0.929053 | 0.677207 |
| MmugDNA.18614.1.S1_at   | MmugDNA.18614.1 | 10.56 | 10.72 | 0.1  | 0.04 | -1.12 | 0.031959 | 0.004151 | 0.232562 | 0.091036 |
| MmugDNA.18615.1.S1_at   | MmugDNA.18615.1 | 10.3  | 9.98  | 0.19 | 0.07 | 1.25  | 0.022481 | 0.000108 | 0.203193 | 0.028099 |
| MmugDNA.18621.1.S1_at   | MmugDNA.18621.1 | 4.03  | 4.04  | 0.08 | 0.14 | -1.01 | 0.784142 | 0.790768 | 0.901553 | 0.878973 |
| MmugDNA.18630.1.S1_at   | MmugDNA.18630.1 | 8.18  | 8.52  | 0.32 | 0.04 | -1.27 | 0.093697 | 0.127827 | 0.362354 | 0.398723 |
| MmugDNA.18631.1.S1_at   | MmugDNA.18631.1 | 4.69  | 4.86  | 0.09 | 0.21 | -1.13 | 0.642095 | 0.381046 | 0.825434 | 0.617478 |
| MmugDNA.18633.1.S1_at   | MmugDNA.18633.1 | 5     | 4.96  | 0.72 | 0.19 | 1.03  | 0.579642 | 0.557565 | 0.785269 | 0.73509  |
| MmugDNA.18635.1.S1_at   | MmugDNA.18635.1 | 12.96 | 12.98 | 0.07 | 0.02 | -1.02 | 0.995762 | 0.763525 | 0.998387 | 0.862473 |
| MmugDNA.18638.1.S1_s_at | MmugDNA.18638.1 | 7.88  | 6.97  | 0.56 | 0.1  | 1.88  | 0.111422 | 0.110891 | 0.387378 | 0.375256 |
| MmugDNA.18643.1.S1_s_at | MmugDNA.18643.1 | 11.68 | 11.65 | 0.31 | 0.07 | 1.02  | 0.929039 | 0.795758 | 0.969935 | 0.882339 |
| MmugDNA.18645.1.S1_at   | MmugDNA.18645.1 | 8.37  | 8.58  | 0.49 | 0.07 | -1.16 | 0.818981 | 0.578535 | 0.919341 | 0.748589 |
| MmugDNA.18647.1.S1_s_at | MmugDNA.18647.1 | 7.1   | 6.94  | 0.12 | 0.11 | 1.12  | 0.185245 | 0.098504 | 0.481392 | 0.356636 |
| MmugDNA.18648.1.S1_at   | MmugDNA.18648.1 | 8.53  | 8.04  | 0.38 | 0.23 | 1.4   | 0.192404 | 0.050315 | 0.488958 | 0.269573 |
| MmugDNA.1865.1.S1_at    | MmugDNA.1865.1  | 7.5   | 7.49  | 0.16 | 0.11 | 1.01  | 0.722713 | 0.589038 | 0.869653 | 0.755336 |
| MmugDNA.18650.1.S1_at   | MmugDNA.18650.1 | 4.6   | 4.54  | 0.16 | 0.07 | 1.04  | 0.335772 | 0.357169 | 0.616597 | 0.598831 |
| MmugDNA.18652.1.S1_at   | MmugDNA.18652.1 | 9.01  | 8.36  | 0.23 | 0.24 | 1.57  | 0.019384 | 0.000074 | 0.192293 | 0.0265   |
| MmugDNA.18653.1.S1_at   | MmugDNA.18653.1 | 8.18  | 6.41  | 0.93 | 0.15 | 3.41  | 0.090811 | 0.183358 | 0.357863 | 0.459553 |
| MmugDNA.18655.1.S1_at   | MmugDNA.18655.1 | 11.54 | 11.12 | 0.17 | 0.1  | 1.34  | 0.015073 | 0.014728 | 0.174736 | 0.154415 |
| MmugDNA.18657.1.S1_s_at | MmugDNA.18657.1 | 5.27  | 5.24  | 0.12 | 0.12 | 1.02  | 0.161715 | 0.248218 | 0.453459 | 0.517574 |
| MmugDNA.18659.1.S1_at   | MmugDNA.18659.1 | 8.86  | 9     | 0.33 | 0.38 | -1.1  | 0.444586 | 0.294917 | 0.69744  | 0.554462 |
| MmugDNA.1866.1.S1_at    | MmugDNA.1866.1  | 10.8  | 10.61 | 0.04 | 0.12 | 1.14  | 0.043958 | 0.291938 | 0.266638 | 0.552156 |
| MmugDNA.18662.1.S1_at   | MmugDNA.18662.1 | 5.36  | 4.25  | 1.1  | 0.6  | 2.15  | 0.216193 | 0.095613 | 0.513942 | 0.352645 |
| MmugDNA.18664.1.S1_at   | MmugDNA.18664.1 | 3.92  | 4.08  | 0.2  | 0.06 | -1.12 | 0.832748 | 0.551436 | 0.926336 | 0.73093  |
| MmugDNA.18665.1.S1_at   | MmugDNA.18665.1 | 12.14 | 12.11 | 0.16 | 0.01 | 1.02  | 0.534314 | 0.542915 | 0.757564 | 0.725841 |
| MmugDNA.18667.1.S1_at   | MmugDNA.18667.1 | 10.87 | 11.32 | 0.64 | 0.22 | -1.37 | 0.103927 | 0.003462 | 0.377213 | 0.084734 |
| MmugDNA.18668.1.S1_at   | MmugDNA.18668.1 | 5.56  | 5.46  | 0.1  | 0.02 | 1.07  | 0.146609 | 0.187566 | 0.434564 | 0.463628 |
| MmugDNA.18670.1.S1_s_at | MmugDNA.18670.1 | 10.33 | 10.93 | 0.13 | 0.08 | -1.52 | 0.003116 | 0.132663 | 0.100877 | 0.404544 |
| MmugDNA.18673.1.S1_at   | MmugDNA.18673.1 | 12.38 | 12.35 | 0.03 | 0.03 | 1.02  | 0.146145 | 0.140124 | 0.433971 | 0.413394 |
| MmugDNA.18674.1.S1_at   | MmugDNA.18674.1 | 8.62  | 7.24  | 0.72 | 0.9  | 2.6   | 0.392796 | 0.246164 | 0.659693 | 0.515874 |
| MmugDNA.18681.1.S1_at   | MmugDNA.18681.1 | 8.1   | 7.82  | 0.4  | 0.16 | 1.21  | 0.492808 | 0.871918 | 0.72996  | 0.927098 |
| MmugDNA.18682.1.S1_at   | MmugDNA.18682.1 | 10.5  | 10.54 | 0.05 | 0.05 | -1.03 | 0.311333 | 0.038147 | 0.597475 | 0.239936 |
| MmugDNA.18684.1.S1_at   | MmugDNA.18684.1 | 7.21  | 6.78  | 0.35 | 0.09 | 1.34  | 0.17463  | 0.216574 | 0.468862 | 0.490224 |
| MmugDNA.18687.1.S1_at   | MmugDNA.18687.1 | 11.59 | 11.57 | 0.19 | 0.09 | 1.01  | 0.298179 | 0.000384 | 0.586571 | 0.037273 |
| MmugDNA.18688.1.S1_at   | MmugDNA.18688.1 | 9.96  | 9.88  | 0.19 | 0.24 | 1.06  | 0.349049 | 0.029766 | 0.62702  | 0.214185 |
| MmugDNA.18690.1.S1_at   | MmugDNA.18690.1 | 5.87  | 6.37  | 0.06 | 0.03 | -1.42 | 0.000185 | 0.002684 | 0.053494 | 0.076408 |
| MmugDNA.18698.1.S1_at   | MmugDNA.18698.1 | 11.44 | 11.18 | 0.04 | 0.04 | 1.2   | 0.001359 | 0.06265  | 0.079595 | 0.297022 |
| MmugDNA.18699.1.S1_at   | MmugDNA.18699.1 | 6.83  | 6.55  | 0.2  | 0.45 | 1.21  | 0.993812 | 0.90513  | 0.997473 | 0.94617  |
| MmugDNA.18701.1.S1_at   | MmugDNA.18701.1 | 4.05  | 4.01  | 0.1  | 0.04 | 1.03  | 0.552493 | 0.696163 | 0.769177 | 0.823455 |
| MmugDNA.18704.1.S1_at   | MmugDNA.18704.1 | 6.62  | 8.84  | 1.12 | 0.33 | -4.67 | 0.108973 | 0.234954 | 0.38393  | 0.506146 |
| MmugDNA.18707.1.S1_at   | MmugDNA.18707.1 | 2.97  | 3.11  | 0.03 | 0.12 | -1.1  | 0.042379 | 0.071333 | 0.262982 | 0.313366 |
| MmugDNA.18715.1.S1_at   | MmugDNA.18715.1 | 8.2   | 8.19  | 0.17 | 0.04 | 1.01  | 0.979436 | 0.371163 | 0.992179 | 0.610113 |
| MmugDNA.18717.1.S1_at   | MmugDNA.18717.1 | 2.92  | 2.95  | 0.13 | 0.04 | -1.02 | 0.803662 | 0.559743 | 0.911852 | 0.736365 |
| MmugDNA.18722.1.S1_at   | MmugDNA.18722.1 | 5.4   | 4.39  | 0.71 | 0.37 | 2.02  | 0.133764 | 0.292233 | 0.417199 | 0.552363 |

|                         |                 |       |       |      |      |       |          |          |          |          |
|-------------------------|-----------------|-------|-------|------|------|-------|----------|----------|----------|----------|
| MmugDNA.18724.1.S1_at   | MmugDNA.18724.1 | 3.61  | 3.65  | 0.02 | 0.09 | -1.03 | 0.778161 | 0.218209 | 0.898649 | 0.491764 |
| MmugDNA.18724.1.S1_s_at | MmugDNA.18724.1 | 6.67  | 7.15  | 0.4  | 0.19 | -1.39 | 0.489321 | 0.343721 | 0.727626 | 0.589444 |
| MmugDNA.18724.1.S1_x_at | MmugDNA.18724.1 | 4.09  | 4.18  | 0.04 | 0.16 | -1.06 | 0.833448 | 0.310205 | 0.926627 | 0.565386 |
| MmugDNA.1873.1.S1_at    | MmugDNA.1873.1  | 6.75  | 7.35  | 0.25 | 0.22 | -1.52 | 0.051488 | 0.075084 | 0.284376 | 0.319283 |
| MmugDNA.18730.1.S1_at   | MmugDNA.18730.1 | 11.32 | 11.09 | 0.02 | 0.02 | 1.18  | 0.000215 | 0.141197 | 0.054064 | 0.414709 |
| MmugDNA.18734.1.S1_at   | MmugDNA.18734.1 | 6.01  | 6.36  | 0.26 | 0.14 | -1.28 | 0.062502 | 0.08083  | 0.306597 | 0.32875  |
| MmugDNA.18735.1.S1_at   | MmugDNA.18735.1 | 10.93 | 10.88 | 0.22 | 0.06 | 1.03  | 0.677789 | 0.815798 | 0.846315 | 0.893771 |
| MmugDNA.18741.1.S1_at   | MmugDNA.18741.1 | 5.52  | 5.31  | 0.26 | 0.02 | 1.15  | 0.221482 | 0.17562  | 0.519474 | 0.45218  |
| MmugDNA.18744.1.S1_at   | MmugDNA.18744.1 | 5.88  | 6.02  | 0.02 | 0.24 | -1.1  | 0.942168 | 0.204631 | 0.975589 | 0.478995 |
| MmugDNA.18748.1.S1_at   | MmugDNA.18748.1 | 4.6   | 4.53  | 0.37 | 0.07 | 1.05  | 0.256174 | 0.225747 | 0.55067  | 0.498159 |
| MmugDNA.1875.1.S1_at    | MmugDNA.1875.1  | 11.64 | 11.5  | 0.2  | 0.01 | 1.1   | 0.090225 | 0.012841 | 0.356864 | 0.145955 |
| MmugDNA.18751.1.S1_at   | MmugDNA.18751.1 | 3.75  | 3.62  | 0.06 | 0.04 | 1.09  | 0.032847 | 0.277706 | 0.235321 | 0.541648 |
| MmugDNA.18752.1.S1_at   | MmugDNA.18752.1 | 8.87  | 8.51  | 0.35 | 0.13 | 1.28  | 0.15778  | 0.329575 | 0.448587 | 0.578781 |
| MmugDNA.18755.1.S1_at   | MmugDNA.18755.1 | 4.02  | 4.28  | 0.17 | 0.13 | -1.2  | 0.086387 | 0.083994 | 0.351225 | 0.3349   |
| MmugDNA.18756.1.S1_at   | MmugDNA.18756.1 | 10.09 | 9.68  | 0.25 | 0.02 | 1.33  | 0.037084 | 0.001666 | 0.247876 | 0.061711 |
| MmugDNA.18757.1.S1_at   | MmugDNA.18757.1 | 10.03 | 9.46  | 0.17 | 0.25 | 1.49  | 0.130274 | 0.519706 | 0.412564 | 0.711271 |
| MmugDNA.18759.1.S1_at   | MmugDNA.18759.1 | 5.96  | 6.24  | 0.12 | 0.3  | -1.21 | 0.133862 | 0.036534 | 0.417214 | 0.235621 |
| MmugDNA.1876.1.S1_at    | MmugDNA.1876.1  | 7.25  | 7.22  | 0.42 | 0.15 | 1.02  | 0.857872 | 0.159182 | 0.938213 | 0.435217 |
| MmugDNA.18760.1.S1_at   | MmugDNA.18760.1 | 8.89  | 8.66  | 0.06 | 0.03 | 1.17  | 0.004515 | 0.06017  | 0.113436 | 0.291882 |
| MmugDNA.18770.1.S1_at   | MmugDNA.18770.1 | 13.42 | 13.42 | 0.08 | 0.04 | -1    | 0.879345 | 0.349225 | 0.948686 | 0.593263 |
| MmugDNA.18774.1.S1_at   | MmugDNA.18774.1 | 5.59  | 5.5   | 0.24 | 0.08 | 1.06  | 0.304827 | 0.312578 | 0.591821 | 0.567268 |
| MmugDNA.18776.1.S1_at   | MmugDNA.18776.1 | 7.16  | 7.63  | 0.09 | 0.07 | -1.38 | 0.002458 | 0.222569 | 0.093953 | 0.495615 |
| MmugDNA.18777.1.S1_at   | MmugDNA.18777.1 | 12.38 | 12.63 | 0.06 | 0.07 | -1.19 | 0.011679 | 0.021126 | 0.157906 | 0.181957 |
| MmugDNA.18793.1.S1_at   | MmugDNA.18793.1 | 6.53  | 6.66  | 0.14 | 0.01 | -1.09 | 0.182675 | 0.162604 | 0.478477 | 0.43872  |
| MmugDNA.18794.1.S1_at   | MmugDNA.18794.1 | 12.08 | 10.73 | 0.02 | 0.23 | 2.54  | 0.000539 | 0.049775 | 0.069927 | 0.26818  |
| MmugDNA.18796.1.S1_at   | MmugDNA.18796.1 | 4.53  | 4.54  | 0.11 | 0.08 | -1.01 | 0.621902 | 0.178196 | 0.812905 | 0.454531 |
| MmugDNA.18799.1.S1_at   | MmugDNA.18799.1 | 6.03  | 6.58  | 0.14 | 0.13 | -1.47 | 0.011484 | 0.159667 | 0.15722  | 0.435785 |
| MmugDNA.1880.1.S1_at    | MmugDNA.1880.1  | 9.55  | 9.59  | 0.33 | 0.18 | -1.03 | 0.353126 | 0.097391 | 0.630353 | 0.355097 |
| MmugDNA.18802.1.S1_at   | MmugDNA.18802.1 | 6.17  | 6.16  | 0.1  | 0.04 | 1.01  | 0.627491 | 0.017747 | 0.816884 | 0.168367 |
| MmugDNA.18804.1.S1_at   | MmugDNA.18804.1 | 8.37  | 7.15  | 0.56 | 0.33 | 2.33  | 0.122988 | 0.478445 | 0.402136 | 0.684481 |
| MmugDNA.18807.1.S1_at   | MmugDNA.18807.1 | 8.48  | 7.43  | 0.48 | 0.42 | 2.08  | 0.081729 | 0.161115 | 0.342963 | 0.437279 |
| MmugDNA.18817.1.S1_at   | MmugDNA.18817.1 | 4.8   | 4.99  | 0.18 | 0.31 | -1.14 | 0.466643 | 0.366788 | 0.71232  | 0.606502 |
| MmugDNA.1882.1.S1_s_at  | MmugDNA.1882.1  | 10.95 | 10.57 | 0.2  | 0.17 | 1.3   | 0.329753 | 0.434404 | 0.611875 | 0.654546 |
| MmugDNA.18823.1.S1_at   | MmugDNA.18823.1 | 6.7   | 6.7   | 0.06 | 0.04 | -1.01 | 0.865634 | 0.221277 | 0.941813 | 0.4946   |
| MmugDNA.18826.1.S1_at   | MmugDNA.18826.1 | 4.38  | 4.39  | 0.1  | 0.17 | -1.01 | 0.340273 | 0.432532 | 0.620508 | 0.65297  |
| MmugDNA.18827.1.S1_at   | MmugDNA.18827.1 | 10.41 | 9.98  | 0.11 | 0.1  | 1.35  | 0.015378 | 0.041033 | 0.176257 | 0.247319 |
| MmugDNA.18828.1.S1_at   | MmugDNA.18828.1 | 12.16 | 12.16 | 0.24 | 0.1  | 1     | 0.99861  | 0.999634 | 0.999508 | 0.999864 |
| MmugDNA.18830.1.S1_at   | MmugDNA.18830.1 | 12.5  | 10.75 | 0.44 | 0.06 | 3.37  | 0.002508 | 0.154485 | 0.094326 | 0.429395 |
| MmugDNA.18834.1.S1_at   | MmugDNA.18834.1 | 4.47  | 6.83  | 0.88 | 0.46 | -5.11 | 0.025027 | 0.207937 | 0.211194 | 0.482049 |
| MmugDNA.18840.1.S1_at   | MmugDNA.18840.1 | 7.84  | 7.65  | 0.39 | 0.03 | 1.14  | 0.966905 | 0.617979 | 0.986678 | 0.773846 |
| MmugDNA.18843.1.S1_at   | MmugDNA.18843.1 | 9.3   | 10.2  | 0.47 | 0.04 | -1.87 | 0.02958  | 0.007667 | 0.22511  | 0.117109 |
| MmugDNA.18844.1.S1_at   | MmugDNA.18844.1 | 4.58  | 4.73  | 0.17 | 0.16 | -1.11 | 0.173715 | 0.404071 | 0.468158 | 0.632599 |
| MmugDNA.18845.1.S1_at   | MmugDNA.18845.1 | 4.88  | 4.7   | 0.16 | 0.19 | 1.14  | 0.13971  | 0.154647 | 0.42522  | 0.429562 |

|                         |                 |       |       |      |      |       |          |          |          |          |
|-------------------------|-----------------|-------|-------|------|------|-------|----------|----------|----------|----------|
| MmugDNA.18846.1.S1_at   | MmugDNA.18846.1 | 8.69  | 8.65  | 0.3  | 0.09 | 1.03  | 0.617412 | 0.929685 | 0.810046 | 0.9599   |
| MmugDNA.18857.1.S1_at   | MmugDNA.18857.1 | 7.37  | 7.44  | 0.22 | 0.14 | -1.05 | 0.754743 | 0.025646 | 0.88688  | 0.200834 |
| MmugDNA.18860.1.S1_at   | MmugDNA.18860.1 | 5.07  | 4.93  | 0.27 | 0.13 | 1.1   | 0.730174 | 0.933351 | 0.873891 | 0.962162 |
| MmugDNA.18863.1.S1_at   | MmugDNA.18863.1 | 3.17  | 2.98  | 0.05 | 0.16 | 1.14  | 0.474555 | 0.751909 | 0.717519 | 0.855714 |
| MmugDNA.18864.1.S1_at   | MmugDNA.18864.1 | 6.52  | 6.38  | 0.22 | 0.1  | 1.1   | 0.186827 | 0.265681 | 0.482963 | 0.531553 |
| MmugDNA.18866.1.S1_at   | MmugDNA.18866.1 | 5.19  | 5.33  | 0.17 | 0.05 | -1.11 | 0.524356 | 0.790415 | 0.751182 | 0.878858 |
| MmugDNA.18867.1.S1_at   | MmugDNA.18867.1 | 8.6   | 8.51  | 0.09 | 0.11 | 1.07  | 0.186738 | 0.342339 | 0.482843 | 0.588413 |
| MmugDNA.18869.1.S1_at   | MmugDNA.18869.1 | 5.08  | 5.09  | 0.07 | 0.02 | -1    | 0.582597 | 0.713324 | 0.787356 | 0.833681 |
| MmugDNA.1887.1.S1_at    | MmugDNA.1887.1  | 9.45  | 9.77  | 0.13 | 0.14 | -1.25 | 0.239067 | 0.456616 | 0.536338 | 0.670304 |
| MmugDNA.18872.1.S1_at   | MmugDNA.18872.1 | 11.4  | 11.58 | 0.12 | 0.02 | -1.13 | 0.024128 | 0.026154 | 0.208473 | 0.202721 |
| MmugDNA.18873.1.S1_at   | MmugDNA.18873.1 | 10.48 | 10.74 | 0.21 | 0.15 | -1.19 | 0.466871 | 0.52807  | 0.712483 | 0.71643  |
| MmugDNA.18878.1.S1_at   | MmugDNA.18878.1 | 8.71  | 8.23  | 0.26 | 0.08 | 1.4   | 0.075845 | 0.010391 | 0.333731 | 0.133359 |
| MmugDNA.18880.1.S1_at   | MmugDNA.18880.1 | 9.32  | 7.75  | 0.65 | 0.16 | 2.97  | 0.031906 | 0.021814 | 0.232348 | 0.184771 |
| MmugDNA.18890.1.S1_at   | MmugDNA.18890.1 | 6.86  | 8.04  | 0.48 | 0.24 | -2.26 | 0.03134  | 0.205538 | 0.23018  | 0.47981  |
| MmugDNA.18892.1.S1_s_at | MmugDNA.18892.1 | 6.41  | 6.03  | 0.35 | 0.07 | 1.3   | 0.508601 | 0.733833 | 0.74051  | 0.845891 |
| MmugDNA.18897.1.S1_at   | MmugDNA.18897.1 | 4.79  | 4.77  | 0.19 | 0.05 | 1.01  | 0.693283 | 0.924549 | 0.853387 | 0.957386 |
| MmugDNA.18903.1.S1_at   | MmugDNA.18903.1 | 6.92  | 7     | 0.43 | 0.09 | -1.05 | 0.758016 | 0.959338 | 0.889015 | 0.976949 |
| MmugDNA.18905.1.S1_at   | MmugDNA.18905.1 | 7.45  | 7.62  | 0.15 | 0.09 | -1.13 | 0.185558 | 0.351421 | 0.481757 | 0.595054 |
| MmugDNA.18907.1.S1_at   | MmugDNA.18907.1 | 5.48  | 5.53  | 0.14 | 0.01 | -1.04 | 0.587829 | 0.670735 | 0.790683 | 0.807469 |
| MmugDNA.18909.1.S1_at   | MmugDNA.18909.1 | 5.33  | 5.37  | 0.04 | 0.18 | -1.03 | 0.886364 | 0.757506 | 0.951556 | 0.858849 |
| MmugDNA.18913.1.S1_at   | MmugDNA.18913.1 | 9.92  | 9.85  | 0.04 | 0.03 | 1.05  | 0.16098  | 0.001319 | 0.452489 | 0.055996 |
| MmugDNA.18917.1.S1_at   | MmugDNA.18917.1 | 9.79  | 9.89  | 0.14 | 0.1  | -1.07 | 0.434502 | 0.551674 | 0.68971  | 0.731153 |
| MmugDNA.18923.1.S1_at   | MmugDNA.18923.1 | 7.11  | 7.44  | 0.15 | 0.06 | -1.25 | 0.039428 | 0.169643 | 0.255072 | 0.446221 |
| MmugDNA.18925.1.S1_at   | MmugDNA.18925.1 | 4.22  | 4.3   | 0.36 | 0.32 | -1.06 | 0.865129 | 0.905072 | 0.941423 | 0.946165 |
| MmugDNA.18928.1.S1_at   | MmugDNA.18928.1 | 4.92  | 7.93  | 1.35 | 0.38 | -8.09 | 0.04422  | 0.204509 | 0.267305 | 0.478845 |
| MmugDNA.18937.1.S1_at   | MmugDNA.18937.1 | 5.81  | 5.58  | 0.53 | 0.2  | 1.17  | 0.141656 | 0.173494 | 0.427605 | 0.449938 |
| MmugDNA.18940.1.S1_at   | MmugDNA.18940.1 | 3.8   | 3.67  | 0.12 | 0.07 | 1.1   | 0.066152 | 0.294058 | 0.314574 | 0.553912 |
| MmugDNA.18942.1.S1_at   | MmugDNA.18942.1 | 8.55  | 8.28  | 0.12 | 0.04 | 1.2   | 0.010151 | 0.021013 | 0.150574 | 0.18172  |
| MmugDNA.18948.1.S1_at   | MmugDNA.18948.1 | 11.4  | 11.19 | 0.2  | 0.16 | 1.16  | 0.051517 | 0.0492   | 0.284376 | 0.266627 |
| MmugDNA.18953.1.S1_at   | MmugDNA.18953.1 | 9.83  | 9.36  | 0.14 | 0.19 | 1.39  | 0.035909 | 0.031944 | 0.244561 | 0.221125 |
| MmugDNA.18955.1.S1_at   | MmugDNA.18955.1 | 11.1  | 10.63 | 0.16 | 0.06 | 1.38  | 0.005407 | 0.001125 | 0.118701 | 0.052924 |
| MmugDNA.18956.1.S1_s_at | MmugDNA.18956.1 | 10.5  | 10.23 | 0.07 | 0.11 | 1.21  | 0.02293  | 0.028043 | 0.204351 | 0.208977 |
| MmugDNA.18958.1.S1_at   | MmugDNA.18958.1 | 8.92  | 8.57  | 0.11 | 0.13 | 1.28  | 0.049069 | 0.01945  | 0.279111 | 0.175136 |
| MmugDNA.18969.1.S1_at   | MmugDNA.18969.1 | 11.96 | 11.94 | 0.02 | 0.04 | 1.01  | 0.212584 | 0.036946 | 0.510654 | 0.236659 |
| MmugDNA.18970.1.S1_at   | MmugDNA.18970.1 | 7.19  | 6.84  | 0.38 | 0.11 | 1.27  | 0.160553 | 0.111393 | 0.452057 | 0.376126 |
| MmugDNA.18973.1.S1_at   | MmugDNA.18973.1 | 10.48 | 10.65 | 0.15 | 0.03 | -1.12 | 0.122388 | 0.452044 | 0.40112  | 0.666759 |
| MmugDNA.18980.1.S1_at   | MmugDNA.18980.1 | 6.61  | 6.01  | 0.19 | 0.21 | 1.52  | 0.072198 | 0.053939 | 0.326665 | 0.277766 |
| MmugDNA.18990.1.S1_at   | MmugDNA.18990.1 | 5.98  | 5.98  | 0.22 | 0.61 | -1    | 0.70462  | 0.917916 | 0.859786 | 0.954027 |
| MmugDNA.18991.1.S1_at   | MmugDNA.18991.1 | 9.52  | 9.67  | 0.23 | 0.19 | -1.11 | 0.203788 | 0.604303 | 0.501441 | 0.764558 |
| MmugDNA.18992.1.S1_at   | MmugDNA.18992.1 | 6.77  | 6.79  | 0.02 | 0.1  | -1.01 | 0.547468 | 0.662594 | 0.765963 | 0.802443 |
| MmugDNA.18993.1.S1_at   | MmugDNA.18993.1 | 5.33  | 5.02  | 0.14 | 0.09 | 1.24  | 0.01493  | 0.141954 | 0.174272 | 0.415503 |
| MmugDNA.18996.1.S1_at   | MmugDNA.18996.1 | 10.73 | 10.44 | 0.15 | 0.07 | 1.23  | 0.058812 | 0.093478 | 0.299616 | 0.34983  |
| MmugDNA.18998.1.S1_at   | MmugDNA.18998.1 | 8.75  | 8.62  | 0.17 | 0.01 | 1.1   | 0.20097  | 0.607346 | 0.498371 | 0.766359 |



|                         |                 |       |       |      |      |        |          |          |          |          |
|-------------------------|-----------------|-------|-------|------|------|--------|----------|----------|----------|----------|
| MmugDNA.18999.1.S1_at   | MmugDNA.18999.1 | 8.82  | 8.27  | 0.92 | 0.5  | 1.46   | 0.562169 | 0.142905 | 0.774838 | 0.416854 |
| MmugDNA.19000.1.S1_at   | MmugDNA.19000.1 | 4.66  | 4.57  | 0.19 | 0.02 | 1.06   | 0.890236 | 0.953039 | 0.953253 | 0.973379 |
| MmugDNA.19005.1.S1_at   | MmugDNA.19005.1 | 8.38  | 8.39  | 0.36 | 0.24 | -1.01  | 0.68989  | 0.063187 | 0.851884 | 0.298115 |
| MmugDNA.19008.1.S1_at   | MmugDNA.19008.1 | 12.72 | 12.23 | 0.11 | 0.21 | 1.41   | 0.030403 | 0.561023 | 0.227249 | 0.737076 |
| MmugDNA.19013.1.S1_s_at | MmugDNA.19013.1 | 3.59  | 3.63  | 0.17 | 0.1  | -1.03  | 0.460989 | 0.047017 | 0.70858  | 0.261469 |
| MmugDNA.19017.1.S1_at   | MmugDNA.19017.1 | 4.1   | 4.26  | 0.04 | 0.12 | -1.12  | 0.12758  | 0.40007  | 0.409503 | 0.630158 |
| MmugDNA.19022.1.S1_at   | MmugDNA.19022.1 | 4.18  | 4.25  | 0.18 | 0.33 | -1.05  | 0.461195 | 0.735172 | 0.708726 | 0.846748 |
| MmugDNA.19026.1.S1_at   | MmugDNA.19026.1 | 5.53  | 5.28  | 0.24 | 0.11 | 1.18   | 0.662416 | 0.464858 | 0.837065 | 0.675463 |
| MmugDNA.19033.1.S1_at   | MmugDNA.19033.1 | 3.52  | 3.56  | 0.26 | 0.09 | -1.03  | 0.503935 | 0.610264 | 0.73721  | 0.7685   |
| MmugDNA.19039.1.S1_at   | MmugDNA.19039.1 | 4.23  | 4.31  | 0.01 | 0.13 | -1.06  | 0.859187 | 0.901776 | 0.938992 | 0.944082 |
| MmugDNA.19040.1.S1_at   | MmugDNA.19040.1 | 9.27  | 9.45  | 0.2  | 0.09 | -1.13  | 0.345623 | 0.007806 | 0.624534 | 0.117858 |
| MmugDNA.19043.1.S1_at   | MmugDNA.19043.1 | 11.5  | 10.34 | 0.52 | 0.53 | 2.24   | 0.257225 | 0.249448 | 0.551586 | 0.518532 |
| MmugDNA.19047.1.S1_at   | MmugDNA.19047.1 | 11.85 | 11.8  | 0.06 | 0.04 | 1.04   | 0.282343 | 0.820008 | 0.573125 | 0.896303 |
| MmugDNA.19049.1.S1_at   | MmugDNA.19049.1 | 9.95  | 9.92  | 0.19 | 0.04 | 1.02   | 0.785086 | 0.10992  | 0.901955 | 0.37398  |
| MmugDNA.19050.1.S1_at   | MmugDNA.19050.1 | 11.52 | 12.35 | 0.35 | 0.14 | -1.78  | 0.024662 | 0.225639 | 0.210126 | 0.498155 |
| MmugDNA.19051.1.S1_at   | MmugDNA.19051.1 | 12.13 | 12    | 0.29 | 0.16 | 1.1    | 0.856543 | 0.764562 | 0.937634 | 0.863128 |
| MmugDNA.19056.1.S1_at   | MmugDNA.19056.1 | 11.9  | 9.94  | 0.72 | 0.19 | 3.89   | 0.023317 | 0.153725 | 0.205612 | 0.428413 |
| MmugDNA.19066.1.S1_at   | MmugDNA.19066.1 | 6.89  | 10.38 | 1.51 | 0.52 | -11.28 | 0.033943 | 0.341391 | 0.238811 | 0.587526 |
| MmugDNA.19068.1.S1_x_at | MmugDNA.19068.1 | 3.86  | 3.89  | 0.04 | 0.05 | -1.02  | 0.168407 | 0.321351 | 0.46165  | 0.57319  |
| MmugDNA.19069.1.S1_at   | MmugDNA.19069.1 | 9.8   | 10.06 | 0.21 | 0.15 | -1.2   | 0.394501 | 0.044906 | 0.661066 | 0.256424 |
| MmugDNA.19070.1.S1_at   | MmugDNA.19070.1 | 7.42  | 7.91  | 0.42 | 0.23 | -1.4   | 0.106285 | 0.288347 | 0.380284 | 0.549631 |
| MmugDNA.19074.1.S1_at   | MmugDNA.19074.1 | 7.97  | 8.04  | 0.31 | 0.14 | -1.05  | 0.584732 | 0.618181 | 0.788749 | 0.77393  |
| MmugDNA.19075.1.S1_at   | MmugDNA.19075.1 | 7.08  | 7.24  | 0.18 | 0.04 | -1.11  | 0.413726 | 0.532873 | 0.675051 | 0.719273 |
| MmugDNA.19086.1.S1_at   | MmugDNA.19086.1 | 4.75  | 7.25  | 0.9  | 0.24 | -5.66  | 0.02165  | 0.24347  | 0.20067  | 0.513527 |
| MmugDNA.19092.1.S1_at   | MmugDNA.19092.1 | 11.58 | 11.57 | 0.04 | 0.04 | 1      | 0.983329 | 0.155521 | 0.99383  | 0.430888 |
| MmugDNA.19096.1.S1_at   | MmugDNA.19096.1 | 3.26  | 3.42  | 0.05 | 0.09 | -1.12  | 0.054844 | 0.054859 | 0.291031 | 0.279693 |
| MmugDNA.19097.1.S1_at   | MmugDNA.19097.1 | 7.64  | 7.63  | 0.23 | 0.26 | 1      | 0.929038 | 0.99375  | 0.969935 | 0.996274 |
| MmugDNA.1910.1.S1_at    | MmugDNA.1910.1  | 8.38  | 8.7   | 0.11 | 0.03 | -1.25  | 0.011117 | 0.22192  | 0.155073 | 0.495019 |
| MmugDNA.19107.1.S1_at   | MmugDNA.19107.1 | 9.4   | 9.77  | 0.18 | 0.07 | -1.29  | 0.104989 | 0.09674  | 0.378702 | 0.354171 |
| MmugDNA.19109.1.S1_at   | MmugDNA.19109.1 | 5.93  | 7.28  | 0.5  | 0.22 | -2.55  | 0.013128 | 0.032621 | 0.16524  | 0.223644 |
| MmugDNA.1911.1.S1_at    | MmugDNA.1911.1  | 9.15  | 9.33  | 0.36 | 0.15 | -1.13  | 0.419252 | 0.160117 | 0.67873  | 0.436296 |
| MmugDNA.19111.1.S1_at   | MmugDNA.19111.1 | 11.47 | 12.18 | 0.35 | 0.16 | -1.64  | 0.050694 | 0.37688  | 0.282967 | 0.614628 |
| MmugDNA.19112.1.S1_at   | MmugDNA.19112.1 | 3.31  | 3.25  | 0.27 | 0.11 | 1.04   | 0.230745 | 0.303655 | 0.529522 | 0.561088 |
| MmugDNA.19113.1.S1_at   | MmugDNA.19113.1 | 10.75 | 12.49 | 1.14 | 0.4  | -3.35  | 0.078929 | 0.014647 | 0.338745 | 0.154213 |
| MmugDNA.19120.1.S1_at   | MmugDNA.19120.1 | 5.33  | 4.9   | 0.7  | 0.31 | 1.35   | 0.938716 | 0.195379 | 0.97419  | 0.470253 |
| MmugDNA.19123.1.S1_at   | MmugDNA.19123.1 | 6.58  | 6.53  | 0.32 | 0.28 | 1.04   | 0.614411 | 0.101601 | 0.808151 | 0.361498 |
| MmugDNA.19125.1.S1_at   | MmugDNA.19125.1 | 3.54  | 3.65  | 0.23 | 0.2  | -1.07  | 0.478469 | 0.486563 | 0.71999  | 0.689898 |
| MmugDNA.19126.1.S1_at   | MmugDNA.19126.1 | 2.94  | 3.82  | 0.2  | 0.71 | -1.85  | 0.094672 | 0.048674 | 0.363621 | 0.265629 |
| MmugDNA.19127.1.S1_s_at | MmugDNA.19127.1 | 11.56 | 11.42 | 0.21 | 0.06 | 1.1    | 0.521803 | 0.069689 | 0.749403 | 0.310164 |
| MmugDNA.19132.1.S1_at   | MmugDNA.19132.1 | 10.15 | 10.61 | 0.31 | 0.07 | -1.37  | 0.072484 | 0.057732 | 0.327132 | 0.2866   |
| MmugDNA.19138.1.S1_at   | MmugDNA.19138.1 | 7.42  | 7.34  | 0.23 | 0.1  | 1.06   | 0.335966 | 0.34245  | 0.616626 | 0.588507 |
| MmugDNA.19145.1.S1_at   | MmugDNA.19145.1 | 12.8  | 12.83 | 0.18 | 0.1  | -1.02  | 0.749796 | 0.144906 | 0.884144 | 0.418811 |
| MmugDNA.19153.1.S1_at   | MmugDNA.19153.1 | 7.29  | 7.18  | 0.13 | 0.04 | 1.08   | 0.215918 | 0.377396 | 0.513611 | 0.6149   |

|                         |                 |       |       |      |      |        |          |          |          |          |
|-------------------------|-----------------|-------|-------|------|------|--------|----------|----------|----------|----------|
| MmugDNA.1916.1.S1_at    | MmugDNA.1916.1  | 5.68  | 5.58  | 1.27 | 0.31 | 1.07   | 0.738091 | 0.768063 | 0.878569 | 0.865344 |
| MmugDNA.19161.1.S1_at   | MmugDNA.19161.1 | 8.95  | 9.32  | 0.47 | 0.14 | -1.3   | 0.222576 | 0.7146   | 0.520511 | 0.834435 |
| MmugDNA.19162.1.S1_at   | MmugDNA.19162.1 | 4.56  | 4.58  | 0.02 | 0.17 | -1.02  | 0.942286 | 0.993337 | 0.975644 | 0.99605  |
| MmugDNA.19166.1.S1_at   | MmugDNA.19166.1 | 11.47 | 11.38 | 0.14 | 0.05 | 1.06   | 0.301259 | 0.296283 | 0.589242 | 0.555423 |
| MmugDNA.19167.1.S1_at   | MmugDNA.19167.1 | 4.05  | 4.7   | 0.1  | 0.69 | -1.57  | 0.143838 | 0.119244 | 0.430505 | 0.387751 |
| MmugDNA.19168.1.S1_at   | MmugDNA.19168.1 | 8.74  | 8.56  | 0.07 | 0.01 | 1.13   | 0.017825 | 0.030241 | 0.187044 | 0.215784 |
| MmugDNA.19170.1.S1_at   | MmugDNA.19170.1 | 11.65 | 10.88 | 0.12 | 0.13 | 1.71   | 0.001766 | 0.03014  | 0.085481 | 0.215467 |
| MmugDNA.19183.1.S1_at   | MmugDNA.19183.1 | 5.59  | 5.54  | 0.15 | 0.08 | 1.03   | 0.838212 | 0.271724 | 0.929053 | 0.536577 |
| MmugDNA.1920.1.S1_at    | MmugDNA.1920.1  | 10.33 | 10.2  | 0.35 | 0.09 | 1.1    | 0.184071 | 0.191246 | 0.480042 | 0.466553 |
| MmugDNA.19203.1.S1_at   | MmugDNA.19203.1 | 13.18 | 13.18 | 0.03 | 0.06 | -1.01  | 0.692585 | 0.854509 | 0.853103 | 0.917099 |
| MmugDNA.19204.1.S1_at   | MmugDNA.19204.1 | 11.66 | 12.33 | 0.18 | 0.05 | -1.6   | 0.002383 | 0.012344 | 0.093326 | 0.143697 |
| MmugDNA.19207.1.S1_at   | MmugDNA.19207.1 | 13.06 | 13.04 | 0.04 | 0.02 | 1.01   | 0.229827 | 0.285352 | 0.528728 | 0.547198 |
| MmugDNA.19208.1.S1_at   | MmugDNA.19208.1 | 11.35 | 11.23 | 0.07 | 0.07 | 1.09   | 0.198549 | 0.125759 | 0.495738 | 0.396313 |
| MmugDNA.19209.1.S1_s_at | MmugDNA.19209.1 | 5.05  | 8.4   | 0.91 | 0.33 | -10.17 | 0.005076 | 0.023249 | 0.116409 | 0.191114 |
| MmugDNA.19214.1.S1_at   | MmugDNA.19214.1 | 6.56  | 6.53  | 0.16 | 0.04 | 1.02   | 0.196565 | 0.227729 | 0.493604 | 0.499979 |
| MmugDNA.19217.1.S1_at   | MmugDNA.19217.1 | 7.63  | 7.74  | 1.05 | 0.34 | -1.08  | 0.456521 | 0.746442 | 0.705816 | 0.852816 |
| MmugDNA.19219.1.S1_at   | MmugDNA.19219.1 | 7.41  | 7.67  | 0.49 | 0.39 | -1.19  | 0.525689 | 0.775652 | 0.75203  | 0.869465 |
| MmugDNA.19220.1.S1_at   | MmugDNA.19220.1 | 5.68  | 5.65  | 0.14 | 0.1  | 1.02   | 0.942808 | 0.576092 | 0.975902 | 0.74698  |
| MmugDNA.19222.1.S1_at   | MmugDNA.19222.1 | 7.1   | 5.05  | 0.33 | 0.03 | 4.13   | 0.000545 | 0.000012 | 0.070087 | 0.016526 |
| MmugDNA.19224.1.S1_at   | MmugDNA.19224.1 | 12.47 | 12.34 | 0.04 | 0.03 | 1.1    | 0.01105  | 0.000804 | 0.154788 | 0.04607  |
| MmugDNA.19225.1.S1_at   | MmugDNA.19225.1 | 5.52  | 6.43  | 0.31 | 0.3  | -1.88  | 0.01187  | 0.242586 | 0.159011 | 0.51293  |
| MmugDNA.19229.1.S1_at   | MmugDNA.19229.1 | 10.22 | 9.98  | 0.33 | 0.1  | 1.18   | 0.391629 | 0.464375 | 0.658751 | 0.67504  |
| MmugDNA.19230.1.S1_at   | MmugDNA.19230.1 | 11.54 | 11.44 | 0.34 | 0.05 | 1.08   | 0.658767 | 0.680545 | 0.83523  | 0.813481 |
| MmugDNA.19230.1.S1_s_at | MmugDNA.19230.1 | 10.81 | 10.53 | 0.39 | 0.07 | 1.21   | 0.537968 | 0.177354 | 0.759999 | 0.453742 |
| MmugDNA.19231.1.S1_at   | MmugDNA.19231.1 | 4.98  | 5.25  | 0.98 | 0.25 | -1.21  | 0.904396 | 0.888382 | 0.959442 | 0.936346 |
| MmugDNA.19233.1.S1_at   | MmugDNA.19233.1 | 9.24  | 9.1   | 0.27 | 0.02 | 1.1    | 0.399162 | 0.648068 | 0.664662 | 0.793977 |
| MmugDNA.19236.1.S1_at   | MmugDNA.19236.1 | 11.79 | 11.75 | 0.25 | 0.02 | 1.03   | 0.723163 | 0.724241 | 0.869925 | 0.840433 |
| MmugDNA.19238.1.S1_at   | MmugDNA.19238.1 | 11.43 | 11.58 | 0.08 | 0.07 | -1.11  | 0.0253   | 0.279911 | 0.212134 | 0.543342 |
| MmugDNA.19242.1.S1_at   | MmugDNA.19242.1 | 11.7  | 11.7  | 0.2  | 0.1  | 1      | 0.712346 | 0.11009  | 0.864309 | 0.374221 |
| MmugDNA.19246.1.S1_s_at | MmugDNA.19246.1 | 7.55  | 8.53  | 0.51 | 0.24 | -1.97  | 0.025083 | 0.003091 | 0.211313 | 0.081194 |
| MmugDNA.19250.1.S1_at   | MmugDNA.19250.1 | 5.02  | 5.13  | 0.51 | 0.18 | -1.08  | 0.706006 | 0.884961 | 0.860759 | 0.934455 |
| MmugDNA.19252.1.S1_at   | MmugDNA.19252.1 | 10.65 | 10.66 | 0.05 | 0.18 | -1.01  | 0.415278 | 0.006665 | 0.676055 | 0.11055  |
| MmugDNA.19254.1.S1_at   | MmugDNA.19254.1 | 4.59  | 4.64  | 0.32 | 0.34 | -1.04  | 0.78916  | 0.768964 | 0.904142 | 0.865764 |
| MmugDNA.19255.1.S1_at   | MmugDNA.19255.1 | 3.38  | 3.41  | 0.11 | 0.13 | -1.02  | 0.369271 | 0.458018 | 0.64281  | 0.671022 |
| MmugDNA.19258.1.S1_at   | MmugDNA.19258.1 | 3.7   | 3.56  | 0.06 | 0.07 | 1.11   | 0.088184 | 0.09492  | 0.354244 | 0.352044 |
| MmugDNA.19264.1.S1_at   | MmugDNA.19264.1 | 12.68 | 12.9  | 0.17 | 0.03 | -1.17  | 0.288104 | 0.039284 | 0.577838 | 0.243338 |
| MmugDNA.19265.1.S1_at   | MmugDNA.19265.1 | 12.03 | 11.89 | 0.24 | 0.06 | 1.1    | 0.224822 | 0.266306 | 0.522793 | 0.532099 |
| MmugDNA.19266.1.S1_at   | MmugDNA.19266.1 | 3.77  | 6.3   | 0.26 | 0.26 | -5.76  | 0.000288 | 0.043683 | 0.057043 | 0.253711 |
| MmugDNA.1927.1.S1_at    | MmugDNA.1927.1  | 11.25 | 10.95 | 0.17 | 0.08 | 1.23   | 0.083202 | 0.000141 | 0.345461 | 0.029307 |
| MmugDNA.19272.1.S1_s_at | MmugDNA.19272.1 | 11.16 | 10.04 | 0.34 | 0.24 | 2.17   | 0.006741 | 0.002248 | 0.128875 | 0.069739 |
| MmugDNA.19276.1.S1_at   | MmugDNA.19276.1 | 10.42 | 10.79 | 0.42 | 0.21 | -1.29  | 0.65652  | 0.508972 | 0.833833 | 0.703967 |
| MmugDNA.19282.1.S1_at   | MmugDNA.19282.1 | 13.48 | 13.41 | 0.12 | 0.07 | 1.05   | 0.691714 | 0.293447 | 0.852609 | 0.553405 |
| MmugDNA.19284.1.S1_at   | MmugDNA.19284.1 | 5.11  | 5.88  | 0.63 | 0.09 | -1.7   | 0.330595 | 0.310748 | 0.612597 | 0.565809 |

|                         |                 |       |       |      |      |       |          |          |          |          |
|-------------------------|-----------------|-------|-------|------|------|-------|----------|----------|----------|----------|
| MmugDNA.19286.1.S1_at   | MmugDNA.19286.1 | 7.91  | 7.86  | 0.57 | 0.24 | 1.03  | 0.313778 | 0.578225 | 0.599642 | 0.748369 |
| MmugDNA.1929.1.S1_at    | MmugDNA.1929.1  | 7.75  | 7.92  | 0.07 | 0.24 | -1.12 | 0.262145 | 0.571689 | 0.556354 | 0.743916 |
| MmugDNA.19295.1.S1_at   | MmugDNA.19295.1 | 8.93  | 8.88  | 0.12 | 0.05 | 1.03  | 0.716949 | 0.200828 | 0.866434 | 0.475342 |
| MmugDNA.19298.1.S1_at   | MmugDNA.19298.1 | 8.23  | 8.5   | 0.16 | 0.32 | -1.2  | 0.252019 | 0.027122 | 0.546695 | 0.205797 |
| MmugDNA.19300.1.S1_at   | MmugDNA.19300.1 | 9.31  | 9.32  | 0.14 | 0.13 | -1.01 | 0.515752 | 0.72729  | 0.745426 | 0.84224  |
| MmugDNA.19301.1.S1_at   | MmugDNA.19301.1 | 10.31 | 11.26 | 0.92 | 0.02 | -1.92 | 0.151002 | 0.077266 | 0.440376 | 0.322945 |
| MmugDNA.19302.1.S1_at   | MmugDNA.19302.1 | 8.48  | 8.31  | 0.05 | 0.1  | 1.12  | 0.05277  | 0.027948 | 0.286707 | 0.208684 |
| MmugDNA.19311.1.S1_at   | MmugDNA.19311.1 | 10.59 | 10.52 | 0.19 | 0.11 | 1.05  | 0.772609 | 0.026675 | 0.895838 | 0.204238 |
| MmugDNA.19315.1.S1_at   | MmugDNA.19315.1 | 8.01  | 7.07  | 0.24 | 0.28 | 1.92  | 0.011497 | 0.003926 | 0.15722  | 0.089123 |
| MmugDNA.19316.1.S1_at   | MmugDNA.19316.1 | 6.49  | 6.28  | 0.34 | 0.06 | 1.16  | 0.542354 | 0.098379 | 0.762723 | 0.356513 |
| MmugDNA.19318.1.S1_at   | MmugDNA.19318.1 | 11.72 | 11.69 | 0.09 | 0.06 | 1.02  | 0.523562 | 0.121742 | 0.750433 | 0.391024 |
| MmugDNA.19320.1.S1_at   | MmugDNA.19320.1 | 3.56  | 3.65  | 0.22 | 0    | -1.07 | 0.837704 | 0.952514 | 0.928861 | 0.973066 |
| MmugDNA.19320.1.S1_x_at | MmugDNA.19320.1 | 3.48  | 3.49  | 0.29 | 0.01 | -1.01 | 0.403063 | 0.523826 | 0.667206 | 0.714044 |
| MmugDNA.19324.1.S1_at   | MmugDNA.19324.1 | 8.46  | 10.09 | 0.37 | 0.26 | -3.1  | 0.004402 | 0.00658  | 0.1125   | 0.109973 |
| MmugDNA.19331.1.S1_at   | MmugDNA.19331.1 | 9.21  | 8.91  | 0.27 | 0.05 | 1.23  | 0.11496  | 0.1809   | 0.392008 | 0.457397 |
| MmugDNA.19332.1.S1_at   | MmugDNA.19332.1 | 4.26  | 3.4   | 0.94 | 0.44 | 1.81  | 0.097211 | 0.181383 | 0.367275 | 0.457918 |
| MmugDNA.1934.1.S1_at    | MmugDNA.1934.1  | 4.7   | 4.78  | 0.23 | 0.09 | -1.05 | 0.910625 | 0.590868 | 0.96217  | 0.75649  |
| MmugDNA.19341.1.S1_at   | MmugDNA.19341.1 | 4.65  | 4.69  | 0.12 | 0.05 | -1.03 | 0.74904  | 0.896656 | 0.883781 | 0.94094  |
| MmugDNA.19342.1.S1_at   | MmugDNA.19342.1 | 4.51  | 3.33  | 0.7  | 0.06 | 2.27  | 0.113846 | 0.097423 | 0.390555 | 0.355097 |
| MmugDNA.19347.1.S1_at   | MmugDNA.19347.1 | 6.85  | 7     | 0.42 | 0.12 | -1.11 | 0.201339 | 0.63364  | 0.498866 | 0.784317 |
| MmugDNA.19348.1.S1_at   | MmugDNA.19348.1 | 6.97  | 7.02  | 0.24 | 0.04 | -1.03 | 0.967167 | 0.362782 | 0.986785 | 0.603287 |
| MmugDNA.19349.1.S1_at   | MmugDNA.19349.1 | 7.82  | 7.61  | 0.39 | 0.1  | 1.16  | 0.20628  | 0.082338 | 0.503927 | 0.331312 |
| MmugDNA.19352.1.S1_at   | MmugDNA.19352.1 | 3.42  | 3.26  | 0.1  | 0.12 | 1.12  | 0.169466 | 0.477349 | 0.462676 | 0.683422 |
| MmugDNA.19353.1.S1_at   | MmugDNA.19353.1 | 10.33 | 10.15 | 0.2  | 0.05 | 1.13  | 0.167836 | 0.230859 | 0.461157 | 0.502546 |
| MmugDNA.19358.1.S1_at   | MmugDNA.19358.1 | 5.69  | 5.64  | 0.14 | 0.11 | 1.03  | 0.642608 | 0.436342 | 0.825647 | 0.655923 |
| MmugDNA.19361.1.S1_at   | MmugDNA.19361.1 | 5.81  | 5.83  | 0.11 | 0.09 | -1.01 | 0.395585 | 0.3295   | 0.661945 | 0.578781 |
| MmugDNA.19362.1.S1_s_at | MmugDNA.19362.1 | 4.45  | 5.04  | 0.41 | 0.36 | -1.51 | 0.24982  | 0.342796 | 0.544804 | 0.588712 |
| MmugDNA.19370.1.S1_at   | MmugDNA.19370.1 | 7.53  | 7.15  | 0.18 | 0.15 | 1.3   | 0.217006 | 0.00038  | 0.514863 | 0.037273 |
| MmugDNA.19377.1.S1_at   | MmugDNA.19377.1 | 13.43 | 13.93 | 0.19 | 0.08 | -1.42 | 0.018608 | 0.174594 | 0.189654 | 0.451097 |
| MmugDNA.19380.1.S1_at   | MmugDNA.19380.1 | 11.6  | 10.88 | 0.06 | 0.09 | 1.65  | 0.000315 | 0.060069 | 0.058857 | 0.291761 |
| MmugDNA.19382.1.S1_at   | MmugDNA.19382.1 | 7.03  | 6.66  | 0.76 | 0.33 | 1.29  | 0.463632 | 0.052585 | 0.710143 | 0.274848 |
| MmugDNA.19383.1.S1_at   | MmugDNA.19383.1 | 10.48 | 10.07 | 0.12 | 0.02 | 1.32  | 0.009267 | 0.002037 | 0.146049 | 0.066885 |
| MmugDNA.19385.1.S1_at   | MmugDNA.19385.1 | 11.82 | 11.77 | 0.08 | 0.1  | 1.04  | 0.462701 | 0.336852 | 0.70975  | 0.584113 |
| MmugDNA.19388.1.S1_at   | MmugDNA.19388.1 | 7.28  | 7.19  | 0.17 | 0.07 | 1.06  | 0.456803 | 0.211769 | 0.705979 | 0.485757 |
| MmugDNA.1939.1.S1_at    | MmugDNA.1939.1  | 8.01  | 9.76  | 0.9  | 0.27 | -3.38 | 0.03482  | 0.212294 | 0.241113 | 0.486197 |
| MmugDNA.19390.1.S1_at   | MmugDNA.19390.1 | 5.37  | 5.08  | 1.04 | 0.1  | 1.22  | 0.220969 | 0.259477 | 0.51897  | 0.526418 |
| MmugDNA.19394.1.S1_at   | MmugDNA.19394.1 | 10.52 | 10.73 | 0.37 | 0.11 | -1.16 | 0.135312 | 0.135206 | 0.419222 | 0.407275 |
| MmugDNA.19402.1.S1_at   | MmugDNA.19402.1 | 13.53 | 12.45 | 0.33 | 0.03 | 2.12  | 0.003469 | 0.002281 | 0.103443 | 0.07037  |
| MmugDNA.1941.1.S1_at    | MmugDNA.1941.1  | 4.1   | 4.1   | 0.24 | 0.12 | -1    | 0.849711 | 0.982419 | 0.934567 | 0.99036  |
| MmugDNA.19411.1.S1_at   | MmugDNA.19411.1 | 5.09  | 6.44  | 0.49 | 0.48 | -2.56 | 0.025954 | 0.013631 | 0.213981 | 0.149433 |
| MmugDNA.19417.1.S1_at   | MmugDNA.19417.1 | 12.06 | 10.16 | 0.4  | 0.15 | 3.73  | 0.001697 | 0.091465 | 0.084859 | 0.346492 |
| MmugDNA.19418.1.S1_at   | MmugDNA.19418.1 | 4.33  | 4.33  | 0.3  | 0.08 | 1     | 0.926439 | 0.823182 | 0.968882 | 0.898361 |
| MmugDNA.1942.1.S1_at    | MmugDNA.1942.1  | 11.45 | 12.2  | 0.25 | 0.12 | -1.68 | 0.031849 | 0.02131  | 0.232076 | 0.182738 |

|                         |                 |       |       |      |      |       |          |          |          |          |
|-------------------------|-----------------|-------|-------|------|------|-------|----------|----------|----------|----------|
| MmugDNA.19420.1.S1_at   | MmugDNA.19420.1 | 11.3  | 8.88  | 0.26 | 0.11 | 5.35  | 0.000134 | 0.000018 | 0.051196 | 0.019635 |
| MmugDNA.19428.1.S1_at   | MmugDNA.19428.1 | 8.68  | 7.9   | 1.14 | 0.41 | 1.72  | 0.619149 | 0.513835 | 0.811024 | 0.707281 |
| MmugDNA.19430.1.S1_at   | MmugDNA.19430.1 | 10.82 | 10.86 | 0.02 | 0.05 | -1.03 | 0.785441 | 0.964288 | 0.90204  | 0.98014  |
| MmugDNA.19435.1.S1_at   | MmugDNA.19435.1 | 5.98  | 5.87  | 0.08 | 0.05 | 1.08  | 0.079897 | 0.018465 | 0.340107 | 0.170923 |
| MmugDNA.19435.1.S1_s_at | MmugDNA.19435.1 | 12.67 | 12.64 | 0.27 | 0.12 | 1.02  | 0.689684 | 0.117601 | 0.851884 | 0.38531  |
| MmugDNA.19438.1.S1_at   | MmugDNA.19438.1 | 11.16 | 10.47 | 0.17 | 0.04 | 1.61  | 0.003538 | 0.016179 | 0.104477 | 0.161214 |
| MmugDNA.19443.1.S1_at   | MmugDNA.19443.1 | 8.78  | 7.64  | 0.36 | 0.1  | 2.2   | 0.004007 | 0.276745 | 0.108676 | 0.540655 |
| MmugDNA.19449.1.S1_at   | MmugDNA.19449.1 | 12.45 | 11.48 | 0.53 | 0.06 | 1.96  | 0.097539 | 0.098635 | 0.367761 | 0.356743 |
| MmugDNA.19449.1.S1_s_at | MmugDNA.19449.1 | 12.18 | 11.24 | 0.47 | 0.04 | 1.92  | 0.071274 | 0.08592  | 0.324861 | 0.338084 |
| MmugDNA.19455.1.S1_at   | MmugDNA.19455.1 | 10.81 | 10.82 | 0.02 | 0.06 | -1    | 0.531863 | 0.418893 | 0.756015 | 0.643141 |
| MmugDNA.19456.1.S1_at   | MmugDNA.19456.1 | 13.53 | 13    | 0.02 | 0.13 | 1.44  | 0.002132 | 0.010692 | 0.090208 | 0.135065 |
| MmugDNA.19457.1.S1_at   | MmugDNA.19457.1 | 13.68 | 13.61 | 0.1  | 0.06 | 1.05  | 0.499829 | 0.055625 | 0.734372 | 0.281649 |
| MmugDNA.19457.1.S1_s_at | MmugDNA.19457.1 | 13.91 | 13.74 | 0.11 | 0.03 | 1.13  | 0.222815 | 0.056715 | 0.520692 | 0.284246 |
| MmugDNA.19463.1.S1_s_at | MmugDNA.19463.1 | 3.57  | 3.25  | 0.2  | 0.87 | 1.25  | 0.747707 | 0.70532  | 0.883139 | 0.829145 |
| MmugDNA.19464.1.S1_at   | MmugDNA.19464.1 | 12.31 | 12.06 | 0.11 | 0.03 | 1.19  | 0.019106 | 0.000036 | 0.191749 | 0.023031 |
| MmugDNA.19475.1.S1_at   | MmugDNA.19475.1 | 10.87 | 10.73 | 0.16 | 0.07 | 1.11  | 0.101488 | 0.05554  | 0.372929 | 0.281454 |
| MmugDNA.19481.1.S1_at   | MmugDNA.19481.1 | 5.83  | 5.84  | 0.04 | 0.06 | -1.01 | 0.990916 | 0.662422 | 0.996666 | 0.802321 |
| MmugDNA.19484.1.S1_at   | MmugDNA.19484.1 | 7.85  | 6.69  | 1.49 | 0.65 | 2.23  | 0.51563  | 0.771084 | 0.745423 | 0.866936 |
| MmugDNA.19486.1.S1_at   | MmugDNA.19486.1 | 4.6   | 4.92  | 0.29 | 0.34 | -1.25 | 0.474902 | 0.785611 | 0.7177   | 0.875891 |
| MmugDNA.19488.1.S1_at   | MmugDNA.19488.1 | 6.14  | 7.57  | 0.32 | 0.14 | -2.7  | 0.002021 | 0.003414 | 0.089873 | 0.084071 |
| MmugDNA.19492.1.S1_at   | MmugDNA.19492.1 | 3.53  | 3.6   | 0.09 | 0.48 | -1.05 | 0.351711 | 0.292139 | 0.62935  | 0.552299 |
| MmugDNA.195.1.S1_at     | MmugDNA.195.1   | 11.15 | 10.99 | 0.04 | 0.18 | 1.12  | 0.063691 | 0.018351 | 0.308901 | 0.170347 |
| MmugDNA.19506.1.S1_at   | MmugDNA.19506.1 | 4.32  | 4.3   | 0.31 | 0.05 | 1.02  | 0.748483 | 0.94809  | 0.883542 | 0.970446 |
| MmugDNA.19512.1.S1_at   | MmugDNA.19512.1 | 7.05  | 10.34 | 0.87 | 0.32 | -9.78 | 0.008257 | 0.003296 | 0.139927 | 0.082571 |
| MmugDNA.19513.1.S1_at   | MmugDNA.19513.1 | 3.64  | 3.6   | 0.3  | 0.09 | 1.03  | 0.737809 | 0.473505 | 0.878415 | 0.680769 |
| MmugDNA.19515.1.S1_at   | MmugDNA.19515.1 | 3.82  | 3.83  | 0.13 | 0.09 | -1.01 | 0.558771 | 0.408558 | 0.773051 | 0.635752 |
| MmugDNA.19520.1.S1_at   | MmugDNA.19520.1 | 10.31 | 11.61 | 0.46 | 0.26 | -2.46 | 0.009927 | 0.01014  | 0.149006 | 0.131979 |
| MmugDNA.19530.1.S1_at   | MmugDNA.19530.1 | 3.88  | 4.36  | 0.21 | 0.39 | -1.4  | 0.087626 | 0.085807 | 0.353641 | 0.337901 |
| MmugDNA.19533.1.S1_at   | MmugDNA.19533.1 | 10.59 | 11.14 | 0.52 | 0.1  | -1.46 | 0.043522 | 0.23305  | 0.265724 | 0.50445  |
| MmugDNA.19534.1.S1_at   | MmugDNA.19534.1 | 4.05  | 3.88  | 0.55 | 0.09 | 1.13  | 0.448758 | 0.625747 | 0.700162 | 0.779309 |
| MmugDNA.19538.1.S1_at   | MmugDNA.19538.1 | 3.59  | 3.52  | 0.2  | 0.16 | 1.05  | 0.644115 | 0.826028 | 0.826625 | 0.900052 |
| MmugDNA.19540.1.S1_at   | MmugDNA.19540.1 | 9.85  | 10.55 | 0.36 | 0.24 | -1.62 | 0.026828 | 0.017535 | 0.216925 | 0.167632 |
| MmugDNA.19543.1.S1_at   | MmugDNA.19543.1 | 8.68  | 8.8   | 0.12 | 0.07 | -1.08 | 0.172931 | 0.114193 | 0.467041 | 0.380758 |
| MmugDNA.19546.1.S1_at   | MmugDNA.19546.1 | 4.29  | 4.97  | 0.26 | 0.12 | -1.6  | 0.012907 | 0.014292 | 0.164364 | 0.152639 |
| MmugDNA.19551.1.S1_at   | MmugDNA.19551.1 | 7.93  | 8.32  | 0.22 | 0.03 | -1.31 | 0.051834 | 0.037404 | 0.285036 | 0.237776 |
| MmugDNA.19552.1.S1_s_at | MmugDNA.19552.1 | 11.17 | 10.96 | 0.1  | 0.03 | 1.15  | 0.04234  | 0.044589 | 0.262804 | 0.255578 |
| MmugDNA.19553.1.S1_at   | MmugDNA.19553.1 | 8.85  | 8.19  | 0.16 | 0.18 | 1.58  | 0.008885 | 0.057783 | 0.143995 | 0.286744 |
| MmugDNA.19556.1.S1_at   | MmugDNA.19556.1 | 9.33  | 9.42  | 0.08 | 0.03 | -1.07 | 0.218019 | 0.046227 | 0.515851 | 0.259397 |
| MmugDNA.19561.1.S1_at   | MmugDNA.19561.1 | 3.35  | 3.34  | 0.16 | 0.1  | 1.01  | 0.8844   | 0.090695 | 0.950846 | 0.345151 |
| MmugDNA.19562.1.S1_at   | MmugDNA.19562.1 | 8.41  | 8.32  | 0.09 | 0.22 | 1.07  | 0.224994 | 0.266636 | 0.522965 | 0.532396 |
| MmugDNA.19566.1.S1_at   | MmugDNA.19566.1 | 4.08  | 4.7   | 0.15 | 0.18 | -1.53 | 0.009823 | 0.065168 | 0.148542 | 0.301239 |
| MmugDNA.19567.1.S1_at   | MmugDNA.19567.1 | 9.8   | 10.63 | 0.93 | 0.11 | -1.78 | 0.194859 | 0.529104 | 0.49141  | 0.717134 |
| MmugDNA.19567.1.S1_s_at | MmugDNA.19567.1 | 9.56  | 10.05 | 1.07 | 0.05 | -1.41 | 0.448465 | 0.792989 | 0.700064 | 0.880435 |

|                         |                 |       |       |      |      |        |          |          |          |          |
|-------------------------|-----------------|-------|-------|------|------|--------|----------|----------|----------|----------|
| MmugDNA.19574.1.S1_at   | MmugDNA.19574.1 | 5.12  | 6.17  | 0.65 | 0.38 | -2.07  | 0.055142 | 0.146852 | 0.291849 | 0.42088  |
| MmugDNA.19575.1.S1_at   | MmugDNA.19575.1 | 3.79  | 3.74  | 0.15 | 0.06 | 1.03   | 0.548097 | 0.766653 | 0.766347 | 0.864438 |
| MmugDNA.19576.1.S1_at   | MmugDNA.19576.1 | 7.36  | 6.94  | 0.62 | 0.26 | 1.34   | 0.253601 | 0.132828 | 0.547903 | 0.404544 |
| MmugDNA.19577.1.S1_at   | MmugDNA.19577.1 | 6.05  | 7     | 0.3  | 0.74 | -1.94  | 0.171411 | 0.319425 | 0.465343 | 0.571762 |
| MmugDNA.19579.1.S1_at   | MmugDNA.19579.1 | 3.69  | 3.68  | 0.15 | 0.11 | 1.01   | 0.384839 | 0.384128 | 0.653766 | 0.619926 |
| MmugDNA.19580.1.S1_at   | MmugDNA.19580.1 | 10.68 | 11.02 | 0.11 | 0.09 | -1.27  | 0.015081 | 0.186595 | 0.174736 | 0.462398 |
| MmugDNA.19581.1.S1_at   | MmugDNA.19581.1 | 8.42  | 8.21  | 0.26 | 0.03 | 1.15   | 0.198767 | 0.532162 | 0.495887 | 0.718995 |
| MmugDNA.19586.1.S1_at   | MmugDNA.19586.1 | 3.38  | 3.25  | 0.13 | 0.11 | 1.09   | 0.23618  | 0.403244 | 0.533803 | 0.631996 |
| MmugDNA.19588.1.S1_at   | MmugDNA.19588.1 | 11.06 | 10.99 | 0.16 | 0.13 | 1.05   | 0.499135 | 0.135357 | 0.734029 | 0.40745  |
| MmugDNA.19594.1.S1_at   | MmugDNA.19594.1 | 9.42  | 10.15 | 0.21 | 0.12 | -1.66  | 0.016269 | 0.023461 | 0.180344 | 0.191956 |
| MmugDNA.19598.1.S1_at   | MmugDNA.19598.1 | 8.95  | 9     | 0.18 | 0.09 | -1.03  | 0.248114 | 0.113929 | 0.543465 | 0.380184 |
| MmugDNA.19599.1.S1_at   | MmugDNA.19599.1 | 8.29  | 8.45  | 0.24 | 0.03 | -1.12  | 0.884414 | 0.988989 | 0.950846 | 0.993708 |
| MmugDNA.19601.1.S1_at   | MmugDNA.19601.1 | 6.47  | 6.1   | 0.29 | 0.12 | 1.3    | 0.307426 | 0.208052 | 0.594183 | 0.482049 |
| MmugDNA.19604.1.S1_at   | MmugDNA.19604.1 | 5.49  | 5.83  | 0.85 | 0.37 | -1.27  | 0.197927 | 0.375169 | 0.49515  | 0.613238 |
| MmugDNA.19605.1.S1_at   | MmugDNA.19605.1 | 6.1   | 6.39  | 0.34 | 0.2  | -1.22  | 0.485868 | 0.504689 | 0.725331 | 0.701774 |
| MmugDNA.1961.1.S1_at    | MmugDNA.1961.1  | 4.47  | 4.52  | 0.08 | 0.04 | -1.04  | 0.408799 | 0.402529 | 0.671414 | 0.631481 |
| MmugDNA.19613.1.S1_at   | MmugDNA.19613.1 | 11.28 | 11.15 | 0.15 | 0.09 | 1.1    | 0.390937 | 0.237421 | 0.658432 | 0.508117 |
| MmugDNA.19614.1.S1_at   | MmugDNA.19614.1 | 7.72  | 9.45  | 0.27 | 0.13 | -3.3   | 0.00076  | 0.001889 | 0.072567 | 0.065004 |
| MmugDNA.19615.1.S1_at   | MmugDNA.19615.1 | 3.81  | 3.88  | 0.13 | 0.05 | -1.05  | 0.88534  | 0.048651 | 0.951028 | 0.265613 |
| MmugDNA.19622.1.S1_at   | MmugDNA.19622.1 | 5.64  | 5.79  | 0.52 | 0.14 | -1.11  | 0.634864 | 0.566176 | 0.82101  | 0.740296 |
| MmugDNA.19644.1.S1_at   | MmugDNA.19644.1 | 9.41  | 10.02 | 0.13 | 0.15 | -1.52  | 0.006797 | 0.55793  | 0.129178 | 0.735297 |
| MmugDNA.19651.1.S1_at   | MmugDNA.19651.1 | 6.42  | 7.16  | 1.08 | 0.4  | -1.68  | 0.224342 | 0.121541 | 0.522575 | 0.390665 |
| MmugDNA.19653.1.S1_at   | MmugDNA.19653.1 | 8.14  | 8.24  | 0.07 | 0.17 | -1.07  | 0.256287 | 0.651652 | 0.550823 | 0.796301 |
| MmugDNA.19660.1.S1_s_at | MmugDNA.19660.1 | 9.64  | 10.55 | 0.04 | 0.09 | -1.87  | 0.000086 | 0.01647  | 0.051196 | 0.162534 |
| MmugDNA.19663.1.S1_at   | MmugDNA.19663.1 | 10.13 | 10.05 | 0.2  | 0.03 | 1.06   | 0.566931 | 0.016744 | 0.777544 | 0.163889 |
| MmugDNA.19666.1.S1_at   | MmugDNA.19666.1 | 5.65  | 5.57  | 0.05 | 0.08 | 1.06   | 0.113807 | 0.017599 | 0.390524 | 0.167721 |
| MmugDNA.1967.1.S1_at    | MmugDNA.1967.1  | 8.02  | 8.26  | 0.09 | 0.1  | -1.18  | 0.010289 | 0.004003 | 0.151218 | 0.089969 |
| MmugDNA.19671.1.S1_at   | MmugDNA.19671.1 | 4.68  | 4.59  | 0.1  | 0.04 | 1.06   | 0.532151 | 0.015615 | 0.756226 | 0.158353 |
| MmugDNA.19674.1.S1_at   | MmugDNA.19674.1 | 9.91  | 10.04 | 0.1  | 0.08 | -1.09  | 0.106004 | 0.160074 | 0.380025 | 0.436234 |
| MmugDNA.19677.1.S1_at   | MmugDNA.19677.1 | 5.28  | 5.23  | 0.05 | 0.02 | 1.04   | 0.300794 | 0.290493 | 0.588943 | 0.55123  |
| MmugDNA.19679.1.S1_at   | MmugDNA.19679.1 | 13.22 | 13.24 | 0.13 | 0.08 | -1.01  | 0.618714 | 0.017893 | 0.810755 | 0.16888  |
| MmugDNA.19682.1.S1_at   | MmugDNA.19682.1 | 10.33 | 10.31 | 0.03 | 0.09 | 1.01   | 0.448066 | 0.036097 | 0.699768 | 0.234417 |
| MmugDNA.19685.1.S1_at   | MmugDNA.19685.1 | 8.69  | 8.84  | 0.2  | 0.07 | -1.11  | 0.500609 | 0.031119 | 0.734825 | 0.218175 |
| MmugDNA.19685.1.S1_s_at | MmugDNA.19685.1 | 10.09 | 9.86  | 0.44 | 0.12 | 1.17   | 0.243368 | 0.048727 | 0.540029 | 0.265744 |
| MmugDNA.19686.1.S1_at   | MmugDNA.19686.1 | 7.99  | 8     | 0.1  | 0.05 | -1     | 0.656224 | 0.033294 | 0.833605 | 0.226086 |
| MmugDNA.19691.1.S1_at   | MmugDNA.19691.1 | 6.96  | 11.44 | 2.92 | 0.23 | -22.41 | 0.06798  | 0.213221 | 0.318434 | 0.487098 |
| MmugDNA.197.1.S1_at     | MmugDNA.197.1   | 10.76 | 10.44 | 0.23 | 0.09 | 1.25   | 0.301861 | 0.345761 | 0.589831 | 0.590931 |
| MmugDNA.19701.1.S1_at   | MmugDNA.19701.1 | 5.69  | 5.58  | 0.14 | 0.03 | 1.08   | 0.155494 | 0.377238 | 0.445869 | 0.61485  |
| MmugDNA.19704.1.S1_at   | MmugDNA.19704.1 | 12.27 | 12.33 | 0.1  | 0.09 | -1.04  | 0.689951 | 0.838733 | 0.851884 | 0.908041 |
| MmugDNA.19706.1.S1_s_at | MmugDNA.19706.1 | 12.89 | 12.83 | 0.14 | 0.08 | 1.04   | 0.679188 | 0.893315 | 0.84701  | 0.939163 |
| MmugDNA.19712.1.S1_at   | MmugDNA.19712.1 | 4.74  | 3.92  | 0.34 | 0.11 | 1.76   | 0.017214 | 0.011848 | 0.184359 | 0.140973 |
| MmugDNA.19714.1.S1_at   | MmugDNA.19714.1 | 10.96 | 10.93 | 0.25 | 0.05 | 1.02   | 0.820823 | 0.194814 | 0.920074 | 0.46986  |
| MmugDNA.19718.1.S1_at   | MmugDNA.19718.1 | 10.76 | 10.22 | 0.28 | 0.38 | 1.46   | 0.138745 | 0.065742 | 0.424319 | 0.301766 |

|                         |                 |       |       |      |      |       |          |          |          |          |
|-------------------------|-----------------|-------|-------|------|------|-------|----------|----------|----------|----------|
| MmugDNA.19725.1.S1_at   | MmugDNA.19725.1 | 12.14 | 12.29 | 0.1  | 0.08 | -1.11 | 0.390688 | 0.291051 | 0.658264 | 0.551574 |
| MmugDNA.19727.1.S1_at   | MmugDNA.19727.1 | 10.99 | 10.93 | 0.26 | 0.07 | 1.05  | 0.855158 | 0.809976 | 0.93691  | 0.890518 |
| MmugDNA.19729.1.S1_at   | MmugDNA.19729.1 | 11.14 | 11.63 | 0.14 | 0.03 | -1.4  | 0.002244 | 0.02433  | 0.091175 | 0.195238 |
| MmugDNA.19736.1.S1_at   | MmugDNA.19736.1 | 7.43  | 6.86  | 0.46 | 0.25 | 1.48  | 0.119106 | 0.162819 | 0.396716 | 0.438932 |
| MmugDNA.19738.1.S1_at   | MmugDNA.19738.1 | 10.55 | 10.63 | 0.16 | 0.05 | -1.06 | 0.838298 | 0.026902 | 0.929053 | 0.205158 |
| MmugDNA.19748.1.S1_at   | MmugDNA.19748.1 | 11.82 | 11.66 | 0.53 | 0.01 | 1.12  | 0.684976 | 0.96527  | 0.849869 | 0.980629 |
| MmugDNA.1975.1.S1_at    | MmugDNA.1975.1  | 6.67  | 6.74  | 0.15 | 0.05 | -1.05 | 0.451724 | 0.172402 | 0.702488 | 0.448837 |
| MmugDNA.19751.1.S1_at   | MmugDNA.19751.1 | 5.28  | 5.23  | 0.03 | 0.03 | 1.03  | 0.108953 | 0.744565 | 0.383909 | 0.852091 |
| MmugDNA.19752.1.S1_at   | MmugDNA.19752.1 | 3.83  | 3.62  | 0.09 | 0.17 | 1.16  | 0.215116 | 0.098446 | 0.512856 | 0.356564 |
| MmugDNA.19754.1.S1_at   | MmugDNA.19754.1 | 9.24  | 9.22  | 0.31 | 0.17 | 1.02  | 0.91414  | 0.742764 | 0.963571 | 0.851023 |
| MmugDNA.19755.1.S1_at   | MmugDNA.19755.1 | 8.55  | 9.09  | 0.24 | 0.08 | -1.45 | 0.017971 | 0.000789 | 0.187151 | 0.045969 |
| MmugDNA.19756.1.S1_at   | MmugDNA.19756.1 | 5.97  | 5.63  | 0.12 | 0.05 | 1.27  | 0.028062 | 0.014159 | 0.219909 | 0.152107 |
| MmugDNA.19760.1.S1_at   | MmugDNA.19760.1 | 3.33  | 3.25  | 0.18 | 0.12 | 1.06  | 0.481983 | 0.42136  | 0.722245 | 0.644994 |
| MmugDNA.19765.1.S1_at   | MmugDNA.19765.1 | 12.12 | 11.93 | 0.02 | 0.1  | 1.14  | 0.031232 | 0.000254 | 0.229891 | 0.033475 |
| MmugDNA.19768.1.S1_at   | MmugDNA.19768.1 | 10.27 | 9.09  | 0.12 | 0.22 | 2.27  | 0.001254 | 0.000144 | 0.078631 | 0.029509 |
| MmugDNA.19769.1.S1_at   | MmugDNA.19769.1 | 5.35  | 5.28  | 0.64 | 0.41 | 1.04  | 0.761372 | 0.545163 | 0.890581 | 0.727411 |
| MmugDNA.19770.1.S1_at   | MmugDNA.19770.1 | 6.69  | 6.4   | 0.45 | 0.06 | 1.22  | 0.887563 | 0.960319 | 0.951977 | 0.977459 |
| MmugDNA.19770.1.S1_s_at | MmugDNA.19770.1 | 7.12  | 6.78  | 0.81 | 0.09 | 1.26  | 0.690308 | 0.785359 | 0.851986 | 0.875741 |
| MmugDNA.19774.1.S1_at   | MmugDNA.19774.1 | 10.69 | 10.32 | 0.15 | 0.06 | 1.3   | 0.014191 | 0.003437 | 0.170827 | 0.084282 |
| MmugDNA.19777.1.S1_s_at | MmugDNA.19777.1 | 13.52 | 13.46 | 0.05 | 0.12 | 1.04  | 0.170622 | 0.058802 | 0.464363 | 0.289228 |
| MmugDNA.19784.1.S1_at   | MmugDNA.19784.1 | 11.9  | 11.9  | 0.12 | 0.07 | -1    | 0.814549 | 0.759152 | 0.917151 | 0.859995 |
| MmugDNA.19786.1.S1_at   | MmugDNA.19786.1 | 8.1   | 8.49  | 0.05 | 0.18 | -1.31 | 0.061987 | 0.196576 | 0.305504 | 0.471608 |
| MmugDNA.19791.1.S1_at   | MmugDNA.19791.1 | 6.43  | 6.46  | 0.1  | 0.36 | -1.02 | 0.468697 | 0.472395 | 0.713704 | 0.679986 |
| MmugDNA.19799.1.S1_at   | MmugDNA.19799.1 | 6.2   | 6.14  | 0.05 | 0.06 | 1.04  | 0.285405 | 0.559213 | 0.575167 | 0.736143 |
| MmugDNA.198.1.S1_at     | MmugDNA.198.1   | 10.7  | 10.23 | 0.1  | 0.12 | 1.38  | 0.008528 | 0.000157 | 0.141678 | 0.030199 |
| MmugDNA.19801.1.S1_at   | MmugDNA.19801.1 | 3.12  | 3.06  | 0.05 | 0.07 | 1.04  | 0.121962 | 0.346877 | 0.400622 | 0.591709 |
| MmugDNA.19809.1.S1_at   | MmugDNA.19809.1 | 5.3   | 5.3   | 0.13 | 0.06 | -1    | 0.360253 | 0.639843 | 0.63583  | 0.788487 |
| MmugDNA.19810.1.S1_at   | MmugDNA.19810.1 | 10.06 | 10.02 | 0.16 | 0.09 | 1.03  | 0.262708 | 0.014057 | 0.556683 | 0.151841 |
| MmugDNA.19811.1.S1_at   | MmugDNA.19811.1 | 4.71  | 4.02  | 0.22 | 0.06 | 1.61  | 0.006103 | 0.000881 | 0.124422 | 0.047602 |
| MmugDNA.19823.1.S1_at   | MmugDNA.19823.1 | 7.97  | 9.3   | 0.36 | 0.31 | -2.51 | 0.014976 | 0.004403 | 0.174543 | 0.092846 |
| MmugDNA.19824.1.S1_at   | MmugDNA.19824.1 | 6.29  | 6.68  | 0.34 | 0.24 | -1.31 | 0.069925 | 0.308051 | 0.322931 | 0.56421  |
| MmugDNA.19827.1.S1_at   | MmugDNA.19827.1 | 8.96  | 8.97  | 0.15 | 0.06 | -1.01 | 0.454211 | 0.721951 | 0.704125 | 0.838904 |
| MmugDNA.19830.1.S1_at   | MmugDNA.19830.1 | 5.6   | 5.71  | 0.1  | 0.16 | -1.07 | 0.152971 | 0.181332 | 0.442701 | 0.457834 |
| MmugDNA.19835.1.S1_s_at | MmugDNA.19835.1 | 11.16 | 11.33 | 0.11 | 0.08 | -1.12 | 0.124873 | 0.274547 | 0.405294 | 0.53901  |
| MmugDNA.19836.1.S1_at   | MmugDNA.19836.1 | 8.31  | 7.56  | 0.26 | 0.06 | 1.68  | 0.020914 | 0.058987 | 0.198215 | 0.289676 |
| MmugDNA.19837.1.S1_at   | MmugDNA.19837.1 | 9.04  | 9.24  | 0.02 | 0.11 | -1.15 | 0.030978 | 0.000139 | 0.229092 | 0.029307 |
| MmugDNA.19838.1.S1_at   | MmugDNA.19838.1 | 5.03  | 5.05  | 0.27 | 0.21 | -1.02 | 0.551972 | 0.530053 | 0.768805 | 0.717721 |
| MmugDNA.19839.1.S1_at   | MmugDNA.19839.1 | 7.55  | 7.59  | 0.11 | 0.03 | -1.03 | 0.152052 | 0.002221 | 0.441589 | 0.069434 |
| MmugDNA.19840.1.S1_at   | MmugDNA.19840.1 | 5.38  | 5.87  | 0.7  | 0.08 | -1.41 | 0.477308 | 0.049016 | 0.719345 | 0.266257 |
| MmugDNA.19841.1.S1_at   | MmugDNA.19841.1 | 8.85  | 9.09  | 0.08 | 0.1  | -1.18 | 0.121788 | 0.011397 | 0.400504 | 0.138253 |
| MmugDNA.19842.1.S1_at   | MmugDNA.19842.1 | 5.65  | 6.26  | 1.01 | 1.18 | -1.54 | 0.652799 | 0.004556 | 0.831632 | 0.094355 |
| MmugDNA.19857.1.S1_at   | MmugDNA.19857.1 | 11.84 | 12.02 | 0.11 | 0.05 | -1.13 | 0.058278 | 0.019886 | 0.298559 | 0.177357 |
| MmugDNA.19858.1.S1_at   | MmugDNA.19858.1 | 11.21 | 11.11 | 0.21 | 0.04 | 1.07  | 0.525036 | 0.414748 | 0.751666 | 0.640456 |

|                         |                 |       |       |      |      |       |          |          |          |          |
|-------------------------|-----------------|-------|-------|------|------|-------|----------|----------|----------|----------|
| MmugDNA.19864.1.S1_at   | MmugDNA.19864.1 | 9.32  | 9.84  | 0.22 | 0.06 | -1.43 | 0.022092 | 0.12916  | 0.201888 | 0.400611 |
| MmugDNA.19867.1.S1_at   | MmugDNA.19867.1 | 10.59 | 10.46 | 0.16 | 0.08 | 1.1   | 0.714395 | 0.002988 | 0.86508  | 0.079958 |
| MmugDNA.1987.1.S1_at    | MmugDNA.1987.1  | 7.35  | 10.2  | 1.9  | 0.16 | -7.25 | 0.185159 | 0.479116 | 0.481333 | 0.684942 |
| MmugDNA.19871.1.S1_at   | MmugDNA.19871.1 | 10.93 | 10.79 | 0.15 | 0.03 | 1.1   | 0.180676 | 0.020859 | 0.475809 | 0.181218 |
| MmugDNA.19875.1.S1_at   | MmugDNA.19875.1 | 9.56  | 9.47  | 0.18 | 0.06 | 1.07  | 0.416069 | 0.220991 | 0.676556 | 0.494389 |
| MmugDNA.19881.1.S1_at   | MmugDNA.19881.1 | 10.53 | 10.39 | 0.23 | 0.18 | 1.1   | 0.699693 | 0.52944  | 0.857382 | 0.717276 |
| MmugDNA.19883.1.S1_at   | MmugDNA.19883.1 | 9.95  | 9.88  | 0.03 | 0.16 | 1.05  | 0.163748 | 0.146368 | 0.456321 | 0.420368 |
| MmugDNA.19884.1.S1_at   | MmugDNA.19884.1 | 4.51  | 4.66  | 0.29 | 0.13 | -1.12 | 0.597411 | 0.779575 | 0.796664 | 0.872217 |
| MmugDNA.19888.1.S1_at   | MmugDNA.19888.1 | 10.93 | 10.22 | 0.17 | 0.06 | 1.63  | 0.002347 | 0.0508   | 0.092906 | 0.270583 |
| MmugDNA.19899.1.S1_at   | MmugDNA.19899.1 | 4.29  | 4.29  | 0.07 | 0.14 | -1    | 0.376119 | 0.483118 | 0.646788 | 0.687725 |
| MmugDNA.19902.1.S1_at   | MmugDNA.19902.1 | 3.34  | 3.43  | 0.08 | 0.01 | -1.07 | 0.114207 | 0.358657 | 0.391009 | 0.600164 |
| MmugDNA.19908.1.S1_at   | MmugDNA.19908.1 | 4.19  | 4.87  | 1.22 | 0.51 | -1.59 | 0.573242 | 0.749882 | 0.781077 | 0.854631 |
| MmugDNA.19909.1.S1_at   | MmugDNA.19909.1 | 6.63  | 6.54  | 0.1  | 0.21 | 1.07  | 0.841599 | 0.005329 | 0.930364 | 0.100928 |
| MmugDNA.19910.1.S1_s_at | MmugDNA.19910.1 | 10.02 | 10.07 | 0.26 | 0.11 | -1.04 | 0.17551  | 0.172429 | 0.46998  | 0.448837 |
| MmugDNA.19915.1.S1_at   | MmugDNA.19915.1 | 9.71  | 9.74  | 0.09 | 0.09 | -1.02 | 0.780485 | 0.019415 | 0.899859 | 0.175117 |
| MmugDNA.19921.1.S1_at   | MmugDNA.19921.1 | 5.92  | 6.9   | 0.73 | 0.18 | -1.97 | 0.109548 | 0.187741 | 0.384571 | 0.463739 |
| MmugDNA.19923.1.S1_at   | MmugDNA.19923.1 | 9.73  | 9.81  | 0.83 | 0.24 | -1.06 | 0.446078 | 0.468407 | 0.698352 | 0.677714 |
| MmugDNA.19924.1.S1_at   | MmugDNA.19924.1 | 8.99  | 8.68  | 0.08 | 0.02 | 1.24  | 0.004318 | 0.101544 | 0.111813 | 0.361393 |
| MmugDNA.1993.1.S1_at    | MmugDNA.1993.1  | 7.16  | 7.38  | 0.22 | 0.14 | -1.17 | 0.612238 | 0.005797 | 0.806748 | 0.104597 |
| MmugDNA.19937.1.S1_at   | MmugDNA.19937.1 | 5.94  | 6.5   | 0.51 | 0.33 | -1.47 | 0.107153 | 0.189072 | 0.381659 | 0.464897 |
| MmugDNA.19938.1.S1_at   | MmugDNA.19938.1 | 7.62  | 7.74  | 0.32 | 0.13 | -1.08 | 0.885202 | 0.747932 | 0.951028 | 0.853333 |
| MmugDNA.1994.1.S1_at    | MmugDNA.1994.1  | 9.52  | 9.01  | 0.14 | 0.08 | 1.42  | 0.002866 | 0.042918 | 0.098485 | 0.251759 |
| MmugDNA.19940.1.S1_at   | MmugDNA.19940.1 | 4.73  | 4.63  | 0.24 | 0.17 | 1.07  | 0.735587 | 0.745734 | 0.876915 | 0.85256  |
| MmugDNA.19941.1.S1_at   | MmugDNA.19941.1 | 4.65  | 4.55  | 0.28 | 0.09 | 1.07  | 0.756361 | 0.925822 | 0.887826 | 0.958025 |
| MmugDNA.19948.1.S1_at   | MmugDNA.19948.1 | 8.35  | 8.44  | 0.05 | 0.03 | -1.07 | 0.152644 | 0.664051 | 0.442345 | 0.803247 |
| MmugDNA.19950.1.S1_at   | MmugDNA.19950.1 | 7.14  | 7.68  | 0.79 | 0.14 | -1.45 | 0.290435 | 0.485481 | 0.57991  | 0.68914  |
| MmugDNA.19953.1.S1_at   | MmugDNA.19953.1 | 5.49  | 5.34  | 0.14 | 0.07 | 1.11  | 0.099048 | 0.258189 | 0.36989  | 0.525574 |
| MmugDNA.19954.1.S1_at   | MmugDNA.19954.1 | 6.77  | 6.59  | 0.09 | 0.17 | 1.14  | 0.302673 | 0.234482 | 0.590379 | 0.505674 |
| MmugDNA.19955.1.S1_at   | MmugDNA.19955.1 | 4.25  | 4.9   | 0.34 | 0.43 | -1.57 | 0.076559 | 0.066603 | 0.334818 | 0.303842 |
| MmugDNA.19956.1.S1_at   | MmugDNA.19956.1 | 9.92  | 10.25 | 0.4  | 0.06 | -1.25 | 0.76393  | 0.09825  | 0.891841 | 0.356289 |
| MmugDNA.19961.1.S1_at   | MmugDNA.19961.1 | 7.78  | 7.84  | 0.24 | 0.05 | -1.04 | 0.639511 | 0.377148 | 0.823589 | 0.614819 |
| MmugDNA.19965.1.S1_at   | MmugDNA.19965.1 | 8.9   | 8.62  | 0.59 | 0.07 | 1.22  | 0.512656 | 0.135102 | 0.743099 | 0.407128 |
| MmugDNA.19966.1.S1_at   | MmugDNA.19966.1 | 4.92  | 4.79  | 1.12 | 0.11 | 1.09  | 0.566398 | 0.759318 | 0.777306 | 0.860036 |
| MmugDNA.1997.1.S1_at    | MmugDNA.1997.1  | 8.43  | 8.15  | 0.84 | 0.2  | 1.21  | 0.249238 | 0.283251 | 0.544486 | 0.545822 |
| MmugDNA.19972.1.S1_at   | MmugDNA.19972.1 | 11.74 | 12.28 | 0.13 | 0.06 | -1.45 | 0.002634 | 0.215042 | 0.095417 | 0.488898 |
| MmugDNA.19974.1.S1_at   | MmugDNA.19974.1 | 3.17  | 3.02  | 0.27 | 0.08 | 1.11  | 0.386167 | 0.382254 | 0.654632 | 0.618438 |
| MmugDNA.19979.1.S1_at   | MmugDNA.19979.1 | 7.66  | 8.94  | 0.33 | 0.19 | -2.43 | 0.006363 | 0.21945  | 0.126133 | 0.493156 |
| MmugDNA.19988.1.S1_at   | MmugDNA.19988.1 | 7.85  | 7.16  | 0.29 | 0.16 | 1.61  | 0.018662 | 0.428904 | 0.189795 | 0.650409 |
| MmugDNA.19992.1.S1_at   | MmugDNA.19992.1 | 11.01 | 11.48 | 0.06 | 0.06 | -1.38 | 0.000666 | 0.247073 | 0.071248 | 0.516259 |
| MmugDNA.19997.1.S1_s_at | MmugDNA.19997.1 | 12.89 | 12.34 | 0.08 | 0.2  | 1.46  | 0.017103 | 0.009583 | 0.184186 | 0.129001 |
| MmugDNA.19998.1.S1_at   | MmugDNA.19998.1 | 3.19  | 3.19  | 0.01 | 0.13 | -1    | 0.569926 | 0.60655  | 0.779215 | 0.765811 |
| MmugDNA.19999.1.S1_at   | MmugDNA.19999.1 | 10.74 | 10.96 | 0.46 | 0.06 | -1.16 | 0.486325 | 0.670993 | 0.725583 | 0.807635 |
| MmugDNA.20000.1.S1_s_at | MmugDNA.20000.1 | 6.45  | 6.85  | 0.4  | 0.27 | -1.32 | 0.49193  | 0.098743 | 0.729433 | 0.356828 |

|                         |                 |       |       |      |      |       |          |          |          |          |
|-------------------------|-----------------|-------|-------|------|------|-------|----------|----------|----------|----------|
| MmugDNA.20003.1.S1_at   | MmugDNA.20003.1 | 10.68 | 9.96  | 0.1  | 0.08 | 1.65  | 0.000641 | 0.000886 | 0.070727 | 0.047602 |
| MmugDNA.20004.1.S1_at   | MmugDNA.20004.1 | 12.89 | 12.93 | 0.03 | 0.1  | -1.02 | 0.555674 | 0.830536 | 0.771425 | 0.902753 |
| MmugDNA.20005.1.S1_at   | MmugDNA.20005.1 | 11.37 | 11.66 | 0.03 | 0.11 | -1.22 | 0.011939 | 0.069613 | 0.159288 | 0.309956 |
| MmugDNA.20012.1.S1_at   | MmugDNA.20012.1 | 8.77  | 9.59  | 0.1  | 0.11 | -1.76 | 0.001229 | 0.070988 | 0.078617 | 0.312602 |
| MmugDNA.20022.1.S1_at   | MmugDNA.20022.1 | 11.8  | 11.87 | 0.12 | 0.08 | -1.05 | 0.660709 | 0.096501 | 0.836228 | 0.35409  |
| MmugDNA.20022.1.S1_s_at | MmugDNA.20022.1 | 12.36 | 12.35 | 0.11 | 0.05 | 1.01  | 0.871258 | 0.066803 | 0.944612 | 0.304363 |
| MmugDNA.20031.1.S1_at   | MmugDNA.20031.1 | 11.8  | 12.22 | 0.27 | 0.17 | -1.34 | 0.321145 | 0.262341 | 0.60545  | 0.528633 |
| MmugDNA.20037.1.S1_at   | MmugDNA.20037.1 | 9.22  | 9.3   | 0.48 | 0.16 | -1.06 | 0.928798 | 0.818684 | 0.969856 | 0.895523 |
| MmugDNA.20046.1.S1_at   | MmugDNA.20046.1 | 8.57  | 7.91  | 0.62 | 0.1  | 1.58  | 0.116801 | 0.133066 | 0.39382  | 0.404726 |
| MmugDNA.20047.1.S1_at   | MmugDNA.20047.1 | 12.1  | 12.41 | 0.11 | 0.02 | -1.24 | 0.008902 | 0.022757 | 0.144048 | 0.188918 |
| MmugDNA.20050.1.S1_at   | MmugDNA.20050.1 | 12.8  | 12.71 | 0.2  | 0.12 | 1.07  | 0.35457  | 0.478658 | 0.631745 | 0.684657 |
| MmugDNA.20051.1.S1_at   | MmugDNA.20051.1 | 3.2   | 3.19  | 0.09 | 0.03 | 1.01  | 0.813221 | 0.965545 | 0.916498 | 0.980739 |
| MmugDNA.20054.1.S1_at   | MmugDNA.20054.1 | 4.33  | 4.27  | 0.1  | 0.06 | 1.05  | 0.714145 | 0.240318 | 0.864977 | 0.510874 |
| MmugDNA.20055.1.S1_at   | MmugDNA.20055.1 | 9.87  | 8.45  | 0.2  | 0.21 | 2.66  | 0.000685 | 0.000286 | 0.071248 | 0.034857 |
| MmugDNA.20066.1.S1_at   | MmugDNA.20066.1 | 10.75 | 11.09 | 0.1  | 0.15 | -1.27 | 0.10896  | 0.012422 | 0.383909 | 0.144095 |
| MmugDNA.20067.1.S1_at   | MmugDNA.20067.1 | 6.28  | 6.39  | 0.15 | 0.19 | -1.08 | 0.781433 | 0.004471 | 0.900178 | 0.09331  |
| MmugDNA.20073.1.S1_at   | MmugDNA.20073.1 | 9.4   | 9.24  | 0.34 | 0.1  | 1.11  | 0.43083  | 0.166132 | 0.687095 | 0.442694 |
| MmugDNA.20079.1.S1_at   | MmugDNA.20079.1 | 12.74 | 12.52 | 0.08 | 0.07 | 1.16  | 0.028533 | 0.177012 | 0.22128  | 0.453444 |
| MmugDNA.20085.1.S1_at   | MmugDNA.20085.1 | 3.86  | 3.93  | 0.23 | 0.23 | -1.05 | 0.711284 | 0.792859 | 0.863698 | 0.880387 |
| MmugDNA.20090.1.S1_at   | MmugDNA.20090.1 | 9.19  | 9.11  | 0.26 | 0.08 | 1.06  | 0.845719 | 0.15522  | 0.932611 | 0.430451 |
| MmugDNA.20095.1.S1_at   | MmugDNA.20095.1 | 3.9   | 4.2   | 0.23 | 0.2  | -1.23 | 0.362556 | 0.126295 | 0.63739  | 0.396786 |
| MmugDNA.201.1.S1_s_at   | MmugDNA.201.1   | 7.58  | 7.74  | 0.16 | 0.14 | -1.11 | 0.625369 | 0.454122 | 0.815353 | 0.668407 |
| MmugDNA.2010.1.S1_at    | MmugDNA.2010.1  | 10.31 | 10.12 | 0.03 | 0.05 | 1.14  | 0.006539 | 0.013582 | 0.127373 | 0.14912  |
| MmugDNA.20106.1.S1_at   | MmugDNA.20106.1 | 9.36  | 10.42 | 0.39 | 0.01 | -2.1  | 0.017961 | 0.000716 | 0.187151 | 0.044419 |
| MmugDNA.20110.1.S1_at   | MmugDNA.20110.1 | 9.24  | 10.25 | 0.2  | 0.18 | -2.02 | 0.005176 | 0.007725 | 0.116998 | 0.117463 |
| MmugDNA.20111.1.S1_at   | MmugDNA.20111.1 | 12.86 | 13.12 | 0.15 | 0.08 | -1.19 | 0.099744 | 0.045852 | 0.370728 | 0.258389 |
| MmugDNA.20117.1.S1_at   | MmugDNA.20117.1 | 8.14  | 9.28  | 0.63 | 0.15 | -2.21 | 0.035309 | 0.217583 | 0.242607 | 0.491183 |
| MmugDNA.20126.1.S1_at   | MmugDNA.20126.1 | 11.66 | 10.91 | 0.4  | 0.24 | 1.68  | 0.090945 | 0.02845  | 0.358159 | 0.210466 |
| MmugDNA.20127.1.S1_at   | MmugDNA.20127.1 | 8.68  | 9.57  | 0.63 | 0.12 | -1.85 | 0.070808 | 0.385371 | 0.324317 | 0.620818 |
| MmugDNA.20128.1.S1_s_at | MmugDNA.20128.1 | 12.74 | 12.65 | 0.05 | 0.07 | 1.07  | 0.193185 | 0.490437 | 0.489748 | 0.692457 |
| MmugDNA.20129.1.S1_at   | MmugDNA.20129.1 | 13.07 | 13.18 | 0.11 | 0.07 | -1.08 | 0.213958 | 0.093753 | 0.51174  | 0.350241 |
| MmugDNA.2013.1.S1_at    | MmugDNA.2013.1  | 3.71  | 3.39  | 0.52 | 0.38 | 1.25  | 0.661443 | 0.85425  | 0.836571 | 0.916971 |
| MmugDNA.20131.1.S1_at   | MmugDNA.20131.1 | 10.08 | 10.26 | 0.21 | 0.08 | -1.14 | 0.052924 | 0.044196 | 0.287075 | 0.254709 |
| MmugDNA.20134.1.S1_at   | MmugDNA.20134.1 | 13.01 | 12.99 | 0.09 | 0.03 | 1.01  | 0.54395  | 0.000979 | 0.763748 | 0.049927 |
| MmugDNA.2014.1.S1_at    | MmugDNA.2014.1  | 7.32  | 8.47  | 0.73 | 0.16 | -2.23 | 0.170278 | 0.05126  | 0.463911 | 0.271825 |
| MmugDNA.20144.1.S1_at   | MmugDNA.20144.1 | 11.26 | 11.41 | 0.26 | 0.08 | -1.11 | 0.326476 | 0.510881 | 0.609577 | 0.70525  |
| MmugDNA.20145.1.S1_at   | MmugDNA.20145.1 | 5.77  | 6.03  | 1.2  | 0.48 | -1.19 | 0.649834 | 0.488242 | 0.829934 | 0.691    |
| MmugDNA.20146.1.S1_at   | MmugDNA.20146.1 | 5.36  | 5.17  | 0.17 | 0.16 | 1.14  | 0.229874 | 0.167377 | 0.528728 | 0.443785 |
| MmugDNA.20150.1.S1_at   | MmugDNA.20150.1 | 11.45 | 10.91 | 0.26 | 0.07 | 1.46  | 0.026371 | 0.022473 | 0.215478 | 0.187564 |
| MmugDNA.20157.1.S1_at   | MmugDNA.20157.1 | 9.74  | 9.41  | 0.63 | 0.27 | 1.25  | 0.247597 | 0.606583 | 0.543025 | 0.765834 |
| MmugDNA.20158.1.S1_at   | MmugDNA.20158.1 | 3.19  | 4.76  | 0.6  | 0.2  | -2.98 | 0.015714 | 0.154474 | 0.177791 | 0.429395 |
| MmugDNA.20158.1.S1_s_at | MmugDNA.20158.1 | 4.57  | 5.7   | 0.27 | 0.13 | -2.18 | 0.00493  | 0.232174 | 0.115175 | 0.503874 |
| MmugDNA.20159.1.S1_at   | MmugDNA.20159.1 | 8.4   | 8.06  | 0.64 | 0.09 | 1.27  | 0.628391 | 0.100082 | 0.817431 | 0.358968 |



|                       |                 |       |       |      |      |        |          |          |          |          |
|-----------------------|-----------------|-------|-------|------|------|--------|----------|----------|----------|----------|
| MmugDNA.20164.1.S1_at | MmugDNA.20164.1 | 6.09  | 6.21  | 0.31 | 0.02 | -1.09  | 0.56165  | 0.305588 | 0.774547 | 0.562504 |
| MmugDNA.20165.1.S1_at | MmugDNA.20165.1 | 5.13  | 5.14  | 0.06 | 0.16 | -1.01  | 0.884919 | 0.025008 | 0.951005 | 0.198121 |
| MmugDNA.20170.1.S1_at | MmugDNA.20170.1 | 4.62  | 4.31  | 0.25 | 0.2  | 1.24   | 0.427728 | 0.000621 | 0.684938 | 0.042498 |
| MmugDNA.20174.1.S1_at | MmugDNA.20174.1 | 3.41  | 3.25  | 0.18 | 0.06 | 1.11   | 0.224034 | 0.297008 | 0.522129 | 0.555957 |
| MmugDNA.20175.1.S1_at | MmugDNA.20175.1 | 10.84 | 10.43 | 0.32 | 0.05 | 1.33   | 0.190936 | 0.093777 | 0.487168 | 0.350256 |
| MmugDNA.20177.1.S1_at | MmugDNA.20177.1 | 9.69  | 9.97  | 0.27 | 0.08 | -1.22  | 0.383875 | 0.229379 | 0.65303  | 0.501527 |
| MmugDNA.20179.1.S1_at | MmugDNA.20179.1 | 10.57 | 10.33 | 0.25 | 0.07 | 1.18   | 0.114615 | 0.550447 | 0.391643 | 0.730443 |
| MmugDNA.20182.1.S1_at | MmugDNA.20182.1 | 8.53  | 7.73  | 0.18 | 0.26 | 1.74   | 0.012224 | 0.254049 | 0.160865 | 0.522387 |
| MmugDNA.20184.1.S1_at | MmugDNA.20184.1 | 5.59  | 5.59  | 0.11 | 0.02 | -1     | 0.409209 | 0.208977 | 0.67166  | 0.482763 |
| MmugDNA.20192.1.S1_at | MmugDNA.20192.1 | 6.4   | 6.2   | 0.13 | 0.12 | 1.15   | 0.167302 | 0.208122 | 0.460507 | 0.482082 |
| MmugDNA.20193.1.S1_at | MmugDNA.20193.1 | 11.8  | 12.15 | 0.07 | 0.02 | -1.27  | 0.001034 | 0.003937 | 0.076321 | 0.089257 |
| MmugDNA.20195.1.S1_at | MmugDNA.20195.1 | 7.19  | 7.11  | 0.03 | 0.05 | 1.06   | 0.063346 | 0.087326 | 0.308295 | 0.3404   |
| MmugDNA.20197.1.S1_at | MmugDNA.20197.1 | 10.38 | 10.69 | 0.29 | 0.03 | -1.24  | 0.093239 | 0.388245 | 0.361736 | 0.622692 |
| MmugDNA.20198.1.S1_at | MmugDNA.20198.1 | 10.66 | 11.15 | 0.08 | 0.01 | -1.4   | 0.000751 | 0.000213 | 0.072567 | 0.032361 |
| MmugDNA.202.1.S1_at   | MmugDNA.202.1   | 3.72  | 3.62  | 0.21 | 0.04 | 1.07   | 0.432373 | 0.579896 | 0.688228 | 0.749335 |
| MmugDNA.20201.1.S1_at | MmugDNA.20201.1 | 7     | 7.06  | 0.31 | 0.04 | -1.05  | 0.708123 | 0.94329  | 0.861762 | 0.967814 |
| MmugDNA.20203.1.S1_at | MmugDNA.20203.1 | 7.52  | 7.39  | 0.21 | 0.1  | 1.1    | 0.927551 | 0.553851 | 0.969315 | 0.732845 |
| MmugDNA.20206.1.S1_at | MmugDNA.20206.1 | 4.15  | 3.93  | 0.38 | 0.02 | 1.17   | 0.216644 | 0.302282 | 0.514443 | 0.560092 |
| MmugDNA.2021.1.S1_at  | MmugDNA.2021.1  | 8.81  | 9.04  | 0.27 | 0.14 | -1.17  | 0.160912 | 0.039774 | 0.452408 | 0.24444  |
| MmugDNA.20219.1.S1_at | MmugDNA.20219.1 | 9.34  | 9.85  | 0.21 | 0.1  | -1.43  | 0.012628 | 0.169336 | 0.162521 | 0.445925 |
| MmugDNA.20220.1.S1_at | MmugDNA.20220.1 | 4.7   | 5.17  | 0.52 | 0.17 | -1.39  | 0.247058 | 0.12581  | 0.542659 | 0.396313 |
| MmugDNA.20221.1.S1_at | MmugDNA.20221.1 | 6.28  | 6.15  | 0.03 | 0.08 | 1.09   | 0.114169 | 0.281825 | 0.390933 | 0.544844 |
| MmugDNA.20227.1.S1_at | MmugDNA.20227.1 | 7.4   | 7.51  | 0.16 | 0.32 | -1.08  | 0.514842 | 0.047495 | 0.744737 | 0.262554 |
| MmugDNA.20234.1.S1_at | MmugDNA.20234.1 | 4.39  | 4.18  | 0.01 | 0.05 | 1.15   | 0.004056 | 0.57907  | 0.108999 | 0.748857 |
| MmugDNA.20241.1.S1_at | MmugDNA.20241.1 | 12.42 | 12.42 | 0.05 | 0.02 | -1     | 0.913835 | 0.163648 | 0.96343  | 0.439841 |
| MmugDNA.2026.1.S1_at  | MmugDNA.2026.1  | 9.22  | 9.78  | 0.42 | 0.14 | -1.47  | 0.092515 | 0.612048 | 0.360707 | 0.76972  |
| MmugDNA.2027.1.S1_at  | MmugDNA.2027.1  | 7.41  | 7.05  | 0.08 | 0.14 | 1.28   | 0.020454 | 0.076579 | 0.19653  | 0.32173  |
| MmugDNA.20271.1.S1_at | MmugDNA.20271.1 | 10.06 | 10.94 | 0.26 | 0.23 | -1.85  | 0.032608 | 0.12555  | 0.234922 | 0.396226 |
| MmugDNA.20272.1.S1_at | MmugDNA.20272.1 | 12.8  | 12.78 | 0.27 | 0.11 | 1.01   | 0.766301 | 0.711005 | 0.892813 | 0.832375 |
| MmugDNA.20275.1.S1_at | MmugDNA.20275.1 | 11.83 | 11.64 | 1.11 | 0.12 | 1.14   | 0.726861 | 0.849833 | 0.871959 | 0.914673 |
| MmugDNA.20278.1.S1_at | MmugDNA.20278.1 | 13.59 | 13.62 | 0.34 | 0.03 | -1.02  | 0.712349 | 0.86522  | 0.864309 | 0.923533 |
| MmugDNA.20287.1.S1_at | MmugDNA.20287.1 | 3.57  | 3.49  | 0.18 | 0.07 | 1.05   | 0.539826 | 0.922335 | 0.761072 | 0.95627  |
| MmugDNA.2029.1.S1_at  | MmugDNA.2029.1  | 4.57  | 3.7   | 0.86 | 0.19 | 1.83   | 0.185313 | 0.147783 | 0.481498 | 0.422072 |
| MmugDNA.20291.1.S1_at | MmugDNA.20291.1 | 7.51  | 5.07  | 0.6  | 0.53 | 5.42   | 0.017029 | 0.014121 | 0.183882 | 0.152004 |
| MmugDNA.20292.1.S1_at | MmugDNA.20292.1 | 8.75  | 8.82  | 0.02 | 0.1  | -1.05  | 0.726271 | 0.814353 | 0.871526 | 0.892923 |
| MmugDNA.20299.1.S1_at | MmugDNA.20299.1 | 6.41  | 6.29  | 0.07 | 0.06 | 1.09   | 0.061038 | 0.448269 | 0.303985 | 0.664167 |
| MmugDNA.20302.1.S1_at | MmugDNA.20302.1 | 8.75  | 8.98  | 0.19 | 0.23 | -1.17  | 0.104224 | 0.729352 | 0.377566 | 0.843541 |
| MmugDNA.20303.1.S1_at | MmugDNA.20303.1 | 3.83  | 3.64  | 0.38 | 0.11 | 1.14   | 0.383797 | 0.514333 | 0.653002 | 0.707645 |
| MmugDNA.20304.1.S1_at | MmugDNA.20304.1 | 10.98 | 10.74 | 0.11 | 0.02 | 1.18   | 0.045446 | 0.190307 | 0.270804 | 0.465906 |
| MmugDNA.20306.1.S1_at | MmugDNA.20306.1 | 11.84 | 11.65 | 0.15 | 0.18 | 1.14   | 0.130894 | 0.117608 | 0.413461 | 0.38531  |
| MmugDNA.20308.1.S1_at | MmugDNA.20308.1 | 11.98 | 12.1  | 0.25 | 0.03 | -1.09  | 0.499599 | 0.001188 | 0.73432  | 0.054071 |
| MmugDNA.20313.1.S1_at | MmugDNA.20313.1 | 7.01  | 10.62 | 1.35 | 0.3  | -12.21 | 0.025952 | 0.245275 | 0.213981 | 0.515052 |
| MmugDNA.20319.1.S1_at | MmugDNA.20319.1 | 4.13  | 4.06  | 0.16 | 0.18 | 1.05   | 0.245654 | 0.079254 | 0.541668 | 0.326444 |

|                         |                 |       |       |      |      |       |          |          |          |          |
|-------------------------|-----------------|-------|-------|------|------|-------|----------|----------|----------|----------|
| MmugDNA.20321.1.S1_at   | MmugDNA.20321.1 | 8.7   | 8.78  | 0.06 | 0.1  | -1.05 | 0.176366 | 0.247116 | 0.470765 | 0.516289 |
| MmugDNA.20325.1.S1_s_at | MmugDNA.20325.1 | 7.83  | 8.42  | 0.29 | 0.29 | -1.5  | 0.093932 | 0.014296 | 0.362806 | 0.152643 |
| MmugDNA.20327.1.S1_at   | MmugDNA.20327.1 | 13.42 | 13.16 | 0.13 | 0.05 | 1.2   | 0.016858 | 0.003815 | 0.183191 | 0.08794  |
| MmugDNA.20327.1.S1_s_at | MmugDNA.20327.1 | 11.68 | 11.16 | 0.23 | 0.04 | 1.43  | 0.008129 | 0.002217 | 0.138956 | 0.069424 |
| MmugDNA.20328.1.S1_at   | MmugDNA.20328.1 | 10.13 | 10.23 | 0.24 | 0.03 | -1.07 | 0.530024 | 0.530555 | 0.754645 | 0.718042 |
| MmugDNA.20328.1.S1_s_at | MmugDNA.20328.1 | 10.42 | 10.77 | 0.31 | 0.13 | -1.27 | 0.213566 | 0.303566 | 0.511445 | 0.561022 |
| MmugDNA.20333.1.S1_at   | MmugDNA.20333.1 | 3.98  | 4.21  | 0.11 | 0.21 | -1.17 | 0.111788 | 0.147016 | 0.387899 | 0.421133 |
| MmugDNA.20342.1.S1_at   | MmugDNA.20342.1 | 10.36 | 10    | 0.09 | 0.12 | 1.29  | 0.015521 | 0.000117 | 0.176837 | 0.028664 |
| MmugDNA.20348.1.S1_at   | MmugDNA.20348.1 | 3.12  | 3.11  | 0.07 | 0.06 | 1.01  | 0.829425 | 0.985108 | 0.924859 | 0.991531 |
| MmugDNA.20349.1.S1_at   | MmugDNA.20349.1 | 3.12  | 3.19  | 0.03 | 0.07 | -1.05 | 0.438821 | 0.703507 | 0.693335 | 0.828103 |
| MmugDNA.20350.1.S1_at   | MmugDNA.20350.1 | 9.29  | 9.89  | 0.34 | 0.13 | -1.51 | 0.054386 | 0.001952 | 0.290385 | 0.065813 |
| MmugDNA.20354.1.S1_at   | MmugDNA.20354.1 | 4.14  | 4.59  | 0.14 | 0.14 | -1.36 | 0.01585  | 0.200957 | 0.178315 | 0.475426 |
| MmugDNA.20357.1.S1_at   | MmugDNA.20357.1 | 9.09  | 11.08 | 1.07 | 0.25 | -3.97 | 0.097722 | 0.023775 | 0.36811  | 0.193037 |
| MmugDNA.20359.1.S1_at   | MmugDNA.20359.1 | 9.1   | 8.51  | 0.14 | 0.21 | 1.51  | 0.03877  | 0.005683 | 0.253262 | 0.103959 |
| MmugDNA.20364.1.S1_at   | MmugDNA.20364.1 | 5.22  | 5.35  | 0.6  | 0.13 | -1.1  | 0.528693 | 0.729328 | 0.753764 | 0.843541 |
| MmugDNA.20373.1.S1_at   | MmugDNA.20373.1 | 9.84  | 9.65  | 0.36 | 0.07 | 1.14  | 0.352854 | 0.129958 | 0.630127 | 0.401533 |
| MmugDNA.20377.1.S1_at   | MmugDNA.20377.1 | 9.91  | 9.89  | 0.33 | 0.16 | 1.01  | 0.655207 | 0.900939 | 0.833154 | 0.943618 |
| MmugDNA.20378.1.S1_at   | MmugDNA.20378.1 | 5.72  | 5.62  | 0.18 | 0.08 | 1.07  | 0.458779 | 0.412571 | 0.707207 | 0.638941 |
| MmugDNA.20379.1.S1_at   | MmugDNA.20379.1 | 9.57  | 9.29  | 0.21 | 0.11 | 1.22  | 0.105103 | 0.137802 | 0.378837 | 0.410769 |
| MmugDNA.2038.1.S1_at    | MmugDNA.2038.1  | 4.8   | 4.79  | 0.29 | 0.16 | 1.01  | 0.510991 | 0.635437 | 0.742253 | 0.785405 |
| MmugDNA.20380.1.S1_at   | MmugDNA.20380.1 | 10.96 | 10.88 | 0.16 | 0.12 | 1.06  | 0.534058 | 0.871072 | 0.757384 | 0.926785 |
| MmugDNA.20381.1.S1_at   | MmugDNA.20381.1 | 5.18  | 5.45  | 0.07 | 0    | -1.21 | 0.004047 | 0.095427 | 0.108999 | 0.352453 |
| MmugDNA.20386.1.S1_at   | MmugDNA.20386.1 | 5     | 5.12  | 0.04 | 0.12 | -1.09 | 0.092916 | 0.107749 | 0.361494 | 0.370816 |
| MmugDNA.20397.1.S1_at   | MmugDNA.20397.1 | 10.81 | 9.16  | 0.11 | 0.28 | 3.14  | 0.000847 | 0.000599 | 0.073467 | 0.041969 |
| MmugDNA.20399.1.S1_at   | MmugDNA.20399.1 | 5.17  | 5.12  | 0.16 | 0.09 | 1.03  | 0.798637 | 0.597775 | 0.909247 | 0.760398 |
| MmugDNA.204.1.S1_at     | MmugDNA.204.1   | 4.82  | 6.02  | 0.3  | 0.12 | -2.29 | 0.002322 | 0.00203  | 0.092632 | 0.066885 |
| MmugDNA.20405.1.S1_at   | MmugDNA.20405.1 | 7.77  | 7.3   | 0.69 | 0.08 | 1.38  | 0.090332 | 0.001077 | 0.35696  | 0.051912 |
| MmugDNA.20415.1.S1_at   | MmugDNA.20415.1 | 5.12  | 4.98  | 0.22 | 0.07 | 1.1   | 0.304025 | 0.438964 | 0.59132  | 0.657787 |
| MmugDNA.20416.1.S1_s_at | MmugDNA.20416.1 | 11.17 | 10.97 | 0.17 | 0.05 | 1.14  | 0.086925 | 0.115369 | 0.352318 | 0.382394 |
| MmugDNA.20418.1.S1_at   | MmugDNA.20418.1 | 5.23  | 5.23  | 0.03 | 0.1  | 1     | 0.372161 | 0.453592 | 0.644798 | 0.668035 |
| MmugDNA.20420.1.S1_at   | MmugDNA.20420.1 | 5.84  | 5.93  | 0.1  | 0.06 | -1.06 | 0.334004 | 0.281024 | 0.615174 | 0.544179 |
| MmugDNA.20421.1.S1_at   | MmugDNA.20421.1 | 4.39  | 4.43  | 0.12 | 0.04 | -1.03 | 0.657872 | 0.844823 | 0.834785 | 0.911684 |
| MmugDNA.20423.1.S1_at   | MmugDNA.20423.1 | 5.96  | 5.87  | 0.08 | 0.12 | 1.06  | 0.216292 | 0.107778 | 0.514062 | 0.370847 |
| MmugDNA.20425.1.S1_at   | MmugDNA.20425.1 | 5.46  | 5.42  | 0.17 | 0.03 | 1.03  | 0.464176 | 0.742063 | 0.710524 | 0.850608 |
| MmugDNA.20427.1.S1_at   | MmugDNA.20427.1 | 7.48  | 7.05  | 0.12 | 0.03 | 1.34  | 0.009347 | 0.023212 | 0.146531 | 0.190932 |
| MmugDNA.20427.1.S1_x_at | MmugDNA.20427.1 | 7.98  | 7.47  | 0.05 | 0.06 | 1.42  | 0.000524 | 0.001271 | 0.069567 | 0.055241 |
| MmugDNA.20430.1.S1_at   | MmugDNA.20430.1 | 13.1  | 12.73 | 0.3  | 0.04 | 1.29  | 0.286167 | 0.373759 | 0.576051 | 0.61241  |
| MmugDNA.2044.1.S1_at    | MmugDNA.2044.1  | 10.37 | 10.43 | 0.18 | 0.13 | -1.04 | 0.288365 | 0.181765 | 0.578081 | 0.458373 |
| MmugDNA.20442.1.S1_at   | MmugDNA.20442.1 | 9.15  | 10.29 | 0.38 | 0.05 | -2.21 | 0.005046 | 0.088237 | 0.116282 | 0.341721 |
| MmugDNA.20447.1.S1_at   | MmugDNA.20447.1 | 13.11 | 12.97 | 0.06 | 0.06 | 1.11  | 0.034297 | 0.595386 | 0.239767 | 0.759091 |
| MmugDNA.20449.1.S1_at   | MmugDNA.20449.1 | 4.27  | 4.27  | 0.07 | 0.12 | 1     | 0.943454 | 0.829111 | 0.976209 | 0.90176  |
| MmugDNA.20453.1.S1_at   | MmugDNA.20453.1 | 12.89 | 12.6  | 0.11 | 0.01 | 1.23  | 0.009343 | 0.086451 | 0.146531 | 0.338938 |
| MmugDNA.20454.1.S1_at   | MmugDNA.20454.1 | 4.61  | 5.48  | 0.36 | 0.17 | -1.83 | 0.032609 | 0.087095 | 0.234922 | 0.340073 |

|                         |                 |       |       |      |      |       |          |          |          |          |
|-------------------------|-----------------|-------|-------|------|------|-------|----------|----------|----------|----------|
| MmugDNA.20455.1.S1_at   | MmugDNA.20455.1 | 6.93  | 8.66  | 0.71 | 0.02 | -3.31 | 0.017512 | 0.002613 | 0.185974 | 0.075662 |
| MmugDNA.20457.1.S1_at   | MmugDNA.20457.1 | 5.17  | 5.3   | 0.14 | 0.19 | -1.1  | 0.237589 | 0.073724 | 0.535034 | 0.317071 |
| MmugDNA.20459.1.S1_at   | MmugDNA.20459.1 | 12.3  | 12.19 | 0.14 | 0.05 | 1.08  | 0.231671 | 0.003518 | 0.530333 | 0.085137 |
| MmugDNA.20465.1.S1_at   | MmugDNA.20465.1 | 9.05  | 9.01  | 0.09 | 0.27 | 1.03  | 0.291147 | 0.723731 | 0.580504 | 0.840105 |
| MmugDNA.20467.1.S1_at   | MmugDNA.20467.1 | 5.77  | 8.42  | 0.45 | 0.35 | -6.27 | 0.001517 | 0.148528 | 0.081668 | 0.423074 |
| MmugDNA.20470.1.S1_at   | MmugDNA.20470.1 | 10.35 | 9.67  | 0.09 | 0.12 | 1.6   | 0.001934 | 0.123188 | 0.088284 | 0.393257 |
| MmugDNA.20473.1.S1_at   | MmugDNA.20473.1 | 3.47  | 3.37  | 0.45 | 0.11 | 1.07  | 0.661237 | 0.879381 | 0.836453 | 0.931144 |
| MmugDNA.20482.1.S1_at   | MmugDNA.20482.1 | 9.5   | 10.99 | 0.15 | 0.04 | -2.82 | 0.000098 | 0.183932 | 0.051196 | 0.46007  |
| MmugDNA.20487.1.S1_at   | MmugDNA.20487.1 | 4.89  | 5.97  | 0.19 | 0.55 | -2.1  | 0.035402 | 0.003868 | 0.24293  | 0.088475 |
| MmugDNA.20489.1.S1_at   | MmugDNA.20489.1 | 3.34  | 3.4   | 0.08 | 0.07 | -1.04 | 0.324511 | 0.594416 | 0.60819  | 0.758623 |
| MmugDNA.20492.1.S1_at   | MmugDNA.20492.1 | 13.08 | 13.05 | 0.25 | 0.05 | 1.02  | 0.489509 | 0.745133 | 0.727823 | 0.852267 |
| MmugDNA.20494.1.S1_at   | MmugDNA.20494.1 | 11.5  | 11.07 | 0.08 | 0.08 | 1.35  | 0.002139 | 0.0072   | 0.090208 | 0.114071 |
| MmugDNA.20496.1.S1_at   | MmugDNA.20496.1 | 6.51  | 6.5   | 0.33 | 0.16 | 1.01  | 0.400676 | 0.594151 | 0.665527 | 0.758517 |
| MmugDNA.20496.1.S1_s_at | MmugDNA.20496.1 | 3.42  | 3.4   | 0.07 | 0.24 | 1.01  | 0.324128 | 0.55656  | 0.60782  | 0.734609 |
| MmugDNA.2050.1.S1_at    | MmugDNA.2050.1  | 5.82  | 5.85  | 0.17 | 0.55 | -1.02 | 0.343926 | 0.480987 | 0.623214 | 0.686044 |
| MmugDNA.20505.1.S1_at   | MmugDNA.20505.1 | 9.06  | 8.58  | 0.17 | 0.1  | 1.39  | 0.01507  | 0.040372 | 0.174736 | 0.246054 |
| MmugDNA.20512.1.S1_at   | MmugDNA.20512.1 | 5.16  | 5.18  | 0.31 | 0.07 | -1.02 | 0.451562 | 0.306441 | 0.702385 | 0.563029 |
| MmugDNA.20516.1.S1_at   | MmugDNA.20516.1 | 4.4   | 4.41  | 0.01 | 0.04 | -1.01 | 0.232628 | 0.64492  | 0.531064 | 0.791938 |
| MmugDNA.20518.1.S1_at   | MmugDNA.20518.1 | 9.4   | 10.16 | 0.42 | 0.24 | -1.69 | 0.105485 | 0.146529 | 0.37939  | 0.420581 |
| MmugDNA.20520.1.S1_at   | MmugDNA.20520.1 | 11.56 | 11.82 | 0.15 | 0.12 | -1.2  | 0.105474 | 0.007039 | 0.37939  | 0.113112 |
| MmugDNA.20521.1.S1_at   | MmugDNA.20521.1 | 11.87 | 12.45 | 0.23 | 0.12 | -1.5  | 0.039632 | 0.03344  | 0.255709 | 0.226517 |
| MmugDNA.20535.1.S1_at   | MmugDNA.20535.1 | 10.61 | 10.4  | 0.41 | 0.11 | 1.16  | 0.528025 | 0.01196  | 0.753456 | 0.141475 |
| MmugDNA.2054.1.S1_at    | MmugDNA.2054.1  | 5.12  | 7.25  | 0.61 | 0.55 | -4.38 | 0.036213 | 0.032639 | 0.245344 | 0.223694 |
| MmugDNA.20540.1.S1_at   | MmugDNA.20540.1 | 9.11  | 8.15  | 0.45 | 0.15 | 1.95  | 0.03039  | 0.048368 | 0.227249 | 0.265081 |
| MmugDNA.20542.1.S1_at   | MmugDNA.20542.1 | 11.85 | 11.78 | 0.11 | 0.14 | 1.05  | 0.426627 | 0.42339  | 0.684012 | 0.646277 |
| MmugDNA.20549.1.S1_at   | MmugDNA.20549.1 | 6.47  | 6.68  | 0.08 | 0.03 | -1.16 | 0.011599 | 0.010812 | 0.157631 | 0.135636 |
| MmugDNA.2055.1.S1_at    | MmugDNA.2055.1  | 14    | 13.89 | 0.06 | 0.04 | 1.08  | 0.030255 | 0.471531 | 0.227031 | 0.6795   |
| MmugDNA.20560.1.S1_at   | MmugDNA.20560.1 | 6.77  | 7.57  | 0.02 | 0.19 | -1.74 | 0.002031 | 0.042676 | 0.089887 | 0.251037 |
| MmugDNA.20561.1.S1_at   | MmugDNA.20561.1 | 5.45  | 5.25  | 0.08 | 0.2  | 1.15  | 0.744627 | 0.892218 | 0.881589 | 0.938574 |
| MmugDNA.20570.1.S1_at   | MmugDNA.20570.1 | 9.89  | 9.84  | 0.21 | 0.19 | 1.04  | 0.708178 | 0.62978  | 0.861769 | 0.781989 |
| MmugDNA.20573.1.S1_at   | MmugDNA.20573.1 | 6.32  | 6.3   | 0.22 | 0.13 | 1.02  | 0.228288 | 0.168138 | 0.526524 | 0.444724 |
| MmugDNA.20574.1.S1_at   | MmugDNA.20574.1 | 7.72  | 8.62  | 0.85 | 0.21 | -1.87 | 0.06549  | 0.097983 | 0.313257 | 0.355882 |
| MmugDNA.20577.1.S1_at   | MmugDNA.20577.1 | 5.68  | 5.63  | 0.17 | 0.06 | 1.03  | 0.873552 | 0.988078 | 0.945669 | 0.99332  |
| MmugDNA.20581.1.S1_at   | MmugDNA.20581.1 | 3.92  | 3.75  | 0.1  | 0.07 | 1.12  | 0.203483 | 0.200119 | 0.501192 | 0.474603 |
| MmugDNA.20586.1.S1_at   | MmugDNA.20586.1 | 8.5   | 8.24  | 0.26 | 0.36 | 1.2   | 0.280128 | 0.481113 | 0.571311 | 0.686152 |
| MmugDNA.20588.1.S1_at   | MmugDNA.20588.1 | 10.78 | 10.43 | 0.15 | 0.05 | 1.27  | 0.024393 | 0.040356 | 0.209245 | 0.245984 |
| MmugDNA.20598.1.S1_at   | MmugDNA.20598.1 | 11.28 | 11.13 | 0.2  | 0.04 | 1.1   | 0.255837 | 0.003867 | 0.550415 | 0.088475 |
| MmugDNA.20601.1.S1_at   | MmugDNA.20601.1 | 9.89  | 9.52  | 0.33 | 0.09 | 1.29  | 0.45321  | 0.354762 | 0.703475 | 0.597429 |
| MmugDNA.20601.1.S1_s_at | MmugDNA.20601.1 | 10.04 | 9.73  | 0.29 | 0.03 | 1.24  | 0.235146 | 0.298062 | 0.533056 | 0.556707 |
| MmugDNA.20602.1.S1_at   | MmugDNA.20602.1 | 12.51 | 12.39 | 0.16 | 0.08 | 1.09  | 0.660598 | 0.17357  | 0.836185 | 0.449956 |
| MmugDNA.20604.1.S1_at   | MmugDNA.20604.1 | 12.91 | 13.47 | 0.69 | 0.08 | -1.48 | 0.085751 | 0.064344 | 0.350079 | 0.29983  |
| MmugDNA.20610.1.S1_at   | MmugDNA.20610.1 | 8.16  | 8.11  | 0.11 | 0.21 | 1.04  | 0.447053 | 0.274886 | 0.69909  | 0.53934  |
| MmugDNA.20611.1.S1_at   | MmugDNA.20611.1 | 8.96  | 9.18  | 0.24 | 0.14 | -1.17 | 0.076549 | 0.003095 | 0.334818 | 0.081194 |

|                         |                 |       |       |      |      |        |          |          |          |          |
|-------------------------|-----------------|-------|-------|------|------|--------|----------|----------|----------|----------|
| MmugDNA.20612.1.S1_at   | MmugDNA.20612.1 | 10.52 | 10.94 | 0.26 | 0.11 | -1.34  | 0.035212 | 0.026498 | 0.242285 | 0.203897 |
| MmugDNA.20616.1.S1_at   | MmugDNA.20616.1 | 4.11  | 4.63  | 0.42 | 0.18 | -1.44  | 0.294188 | 0.405448 | 0.583201 | 0.633767 |
| MmugDNA.20636.1.S1_at   | MmugDNA.20636.1 | 4.58  | 4.61  | 1.1  | 0.28 | -1.02  | 0.541814 | 0.510497 | 0.762451 | 0.704979 |
| MmugDNA.20650.1.S1_at   | MmugDNA.20650.1 | 5.92  | 6.02  | 0.1  | 0.09 | -1.07  | 0.511779 | 0.287585 | 0.742744 | 0.548871 |
| MmugDNA.2066.1.S1_at    | MmugDNA.2066.1  | 6.46  | 8.12  | 0.21 | 0.08 | -3.16  | 0.000288 | 0.174275 | 0.057043 | 0.450648 |
| MmugDNA.2066.1.S1_s_at  | MmugDNA.2066.1  | 6.96  | 8.51  | 0.36 | 0.1  | -2.93  | 0.003588 | 0.213644 | 0.10529  | 0.487441 |
| MmugDNA.20660.1.S1_at   | MmugDNA.20660.1 | 9.02  | 8.65  | 0.24 | 0.04 | 1.29   | 0.049875 | 0.082905 | 0.280974 | 0.332446 |
| MmugDNA.20669.1.S1_at   | MmugDNA.20669.1 | 7.61  | 7.6   | 0.29 | 0.05 | 1.01   | 0.873058 | 0.886834 | 0.94557  | 0.935553 |
| MmugDNA.20670.1.S1_at   | MmugDNA.20670.1 | 10.74 | 11.2  | 0.11 | 0.12 | -1.38  | 0.006051 | 0.006378 | 0.124182 | 0.108551 |
| MmugDNA.20670.1.S1_s_at | MmugDNA.20670.1 | 9.98  | 10.21 | 0.06 | 0.09 | -1.17  | 0.012612 | 0.062962 | 0.162521 | 0.297586 |
| MmugDNA.20671.1.S1_at   | MmugDNA.20671.1 | 12.18 | 10.7  | 0.31 | 0.3  | 2.79   | 0.006095 | 0.007677 | 0.124422 | 0.117153 |
| MmugDNA.20672.1.S1_at   | MmugDNA.20672.1 | 10.86 | 10.82 | 0.14 | 0.04 | 1.03   | 0.783247 | 0.185848 | 0.901127 | 0.461695 |
| MmugDNA.20675.1.S1_at   | MmugDNA.20675.1 | 9.32  | 9.7   | 0.08 | 0.19 | -1.3   | 0.053866 | 0.164445 | 0.289248 | 0.440678 |
| MmugDNA.20683.1.S1_at   | MmugDNA.20683.1 | 8.82  | 8.14  | 0.11 | 0.02 | 1.6    | 0.000373 | 0.001507 | 0.062479 | 0.0591   |
| MmugDNA.20685.1.S1_at   | MmugDNA.20685.1 | 9.2   | 9.17  | 0.1  | 0.09 | 1.02   | 0.339261 | 0.507458 | 0.619561 | 0.703026 |
| MmugDNA.20686.1.S1_at   | MmugDNA.20686.1 | 4.32  | 4     | 0.22 | 0.13 | 1.25   | 0.295509 | 0.396611 | 0.584279 | 0.628434 |
| MmugDNA.20687.1.S1_at   | MmugDNA.20687.1 | 5.43  | 5.47  | 0.22 | 0.35 | -1.03  | 0.92143  | 0.450691 | 0.966381 | 0.665844 |
| MmugDNA.20693.1.S1_at   | MmugDNA.20693.1 | 8.25  | 11.25 | 2.18 | 0.15 | -7.98  | 0.088989 | 0.180787 | 0.355587 | 0.457306 |
| MmugDNA.20694.1.S1_at   | MmugDNA.20694.1 | 9.1   | 9.26  | 0.29 | 0.09 | -1.11  | 0.39228  | 0.383394 | 0.659275 | 0.619384 |
| MmugDNA.20698.1.S1_at   | MmugDNA.20698.1 | 7.76  | 8.33  | 0.64 | 0.04 | -1.48  | 0.49427  | 0.013708 | 0.731105 | 0.149947 |
| MmugDNA.20702.1.S1_at   | MmugDNA.20702.1 | 7.12  | 7.08  | 0.05 | 0.07 | 1.02   | 0.508223 | 0.059288 | 0.740295 | 0.290528 |
| MmugDNA.20706.1.S1_at   | MmugDNA.20706.1 | 6.34  | 5.91  | 0.32 | 0.29 | 1.35   | 0.172723 | 0.025212 | 0.46677  | 0.19911  |
| MmugDNA.2071.1.S1_at    | MmugDNA.2071.1  | 7.3   | 7.88  | 0.33 | 0.14 | -1.49  | 0.02685  | 0.012337 | 0.216925 | 0.143659 |
| MmugDNA.20711.1.A1_at   | MmugDNA.20711.1 | 6.42  | 6.59  | 0.16 | 0.06 | -1.13  | 0.242449 | 0.480013 | 0.539382 | 0.685613 |
| MmugDNA.20711.1.S1_at   | MmugDNA.20711.1 | 6.27  | 6.28  | 0.15 | 0.07 | -1     | 0.746372 | 0.703791 | 0.882528 | 0.828234 |
| MmugDNA.20719.1.S1_s_at | MmugDNA.20719.1 | 13.04 | 12.94 | 0.05 | 0.03 | 1.07   | 0.084025 | 0.002846 | 0.347198 | 0.078601 |
| MmugDNA.2072.1.S1_at    | MmugDNA.2072.1  | 5.8   | 5.92  | 0.06 | 0.09 | -1.09  | 0.094598 | 0.358441 | 0.363543 | 0.599994 |
| MmugDNA.20725.1.S1_at   | MmugDNA.20725.1 | 6.76  | 7.01  | 0.09 | 0.07 | -1.19  | 0.022335 | 0.122629 | 0.202741 | 0.392564 |
| MmugDNA.20726.1.S1_at   | MmugDNA.20726.1 | 6.75  | 6.81  | 0.13 | 0.11 | -1.05  | 0.91072  | 0.106176 | 0.962201 | 0.36856  |
| MmugDNA.20728.1.S1_at   | MmugDNA.20728.1 | 11.4  | 11.53 | 0.13 | 0.05 | -1.09  | 0.148778 | 0.061096 | 0.437317 | 0.293958 |
| MmugDNA.20730.1.S1_at   | MmugDNA.20730.1 | 8.83  | 8.83  | 0.32 | 0.1  | 1.01   | 0.583127 | 0.810006 | 0.78783  | 0.890518 |
| MmugDNA.20731.1.S1_at   | MmugDNA.20731.1 | 9.95  | 10.33 | 0.23 | 0.07 | -1.3   | 0.022475 | 0.027592 | 0.203193 | 0.207431 |
| MmugDNA.20732.1.S1_at   | MmugDNA.20732.1 | 10.68 | 10.2  | 0.15 | 0.11 | 1.4    | 0.013533 | 0.009922 | 0.167163 | 0.130787 |
| MmugDNA.20734.1.S1_at   | MmugDNA.20734.1 | 10.41 | 10.25 | 0.13 | 0.02 | 1.11   | 0.116854 | 0.123263 | 0.393878 | 0.393358 |
| MmugDNA.20738.1.S1_at   | MmugDNA.20738.1 | 7.49  | 7.52  | 0.85 | 0.3  | -1.02  | 0.687166 | 0.260467 | 0.850763 | 0.527006 |
| MmugDNA.20764.1.S1_at   | MmugDNA.20764.1 | 8.3   | 7.95  | 0.19 | 0.25 | 1.27   | 0.063486 | 0.133017 | 0.308631 | 0.40469  |
| MmugDNA.20768.1.S1_at   | MmugDNA.20768.1 | 5.2   | 9.1   | 0.65 | 0.32 | -14.95 | 0.000755 | 0.068104 | 0.072567 | 0.307142 |
| MmugDNA.20770.1.S1_s_at | MmugDNA.20770.1 | 12.17 | 12.19 | 0.07 | 0.02 | -1.01  | 0.613278 | 0.042506 | 0.807314 | 0.250786 |
| MmugDNA.20776.1.S1_at   | MmugDNA.20776.1 | 8.93  | 9.06  | 0.18 | 0.04 | -1.09  | 0.473315 | 0.201797 | 0.716576 | 0.476367 |
| MmugDNA.20780.1.S1_at   | MmugDNA.20780.1 | 6.16  | 5.89  | 0.07 | 0.11 | 1.21   | 0.029363 | 0.031418 | 0.224348 | 0.219107 |
| MmugDNA.20784.1.S1_at   | MmugDNA.20784.1 | 11.13 | 12.07 | 0.41 | 0.1  | -1.92  | 0.023466 | 0.110448 | 0.206304 | 0.374684 |
| MmugDNA.20790.1.S1_at   | MmugDNA.20790.1 | 6.57  | 6.59  | 0.13 | 0.11 | -1.01  | 0.593472 | 0.29826  | 0.79401  | 0.556931 |
| MmugDNA.20794.1.S1_at   | MmugDNA.20794.1 | 6.91  | 6.72  | 0.21 | 0.12 | 1.14   | 0.248133 | 0.607509 | 0.543485 | 0.766417 |

|                         |                 |       |       |      |      |        |          |          |          |          |
|-------------------------|-----------------|-------|-------|------|------|--------|----------|----------|----------|----------|
| MmugDNA.208.1.S1_at     | MmugDNA.208.1   | 6.66  | 7.28  | 0.16 | 0.23 | -1.54  | 0.029079 | 0.001176 | 0.223234 | 0.05381  |
| MmugDNA.20800.1.S1_at   | MmugDNA.20800.1 | 12.14 | 11.93 | 0.06 | 0.02 | 1.16   | 0.003639 | 0.466047 | 0.105715 | 0.676096 |
| MmugDNA.20802.1.S1_at   | MmugDNA.20802.1 | 10.25 | 10.57 | 0.02 | 0.06 | -1.24  | 0.001272 | 0.000007 | 0.078631 | 0.016421 |
| MmugDNA.20810.1.S1_s_at | MmugDNA.20810.1 | 7.18  | 7.25  | 0.08 | 0.05 | -1.04  | 0.677354 | 0.04431  | 0.846153 | 0.255021 |
| MmugDNA.20819.1.S1_at   | MmugDNA.20819.1 | 8.8   | 9.3   | 0.27 | 0.21 | -1.41  | 0.056783 | 0.330164 | 0.295745 | 0.578987 |
| MmugDNA.20819.1.S1_s_at | MmugDNA.20819.1 | 8.31  | 8.66  | 0.28 | 0.18 | -1.28  | 0.109548 | 0.350686 | 0.384571 | 0.594409 |
| MmugDNA.20825.1.S1_at   | MmugDNA.20825.1 | 4.97  | 4.91  | 0.19 | 0.03 | 1.04   | 0.462705 | 0.514895 | 0.70975  | 0.707931 |
| MmugDNA.2083.1.S1_at    | MmugDNA.2083.1  | 10.24 | 10.2  | 0.19 | 0.13 | 1.03   | 0.329633 | 0.555842 | 0.611807 | 0.734119 |
| MmugDNA.20834.1.S1_at   | MmugDNA.20834.1 | 10.22 | 10.2  | 0.03 | 0.08 | 1.01   | 0.456963 | 0.014837 | 0.706061 | 0.154918 |
| MmugDNA.20835.1.S1_at   | MmugDNA.20835.1 | 5.77  | 5.37  | 0.38 | 0.13 | 1.33   | 0.099451 | 0.139695 | 0.370342 | 0.413029 |
| MmugDNA.20839.1.S1_at   | MmugDNA.20839.1 | 12.12 | 12.31 | 0.03 | 0.04 | -1.14  | 0.001454 | 0.0036   | 0.079991 | 0.085874 |
| MmugDNA.20840.1.S1_at   | MmugDNA.20840.1 | 6.73  | 6.65  | 0.18 | 0.02 | 1.06   | 0.224847 | 0.191158 | 0.522793 | 0.466426 |
| MmugDNA.20842.1.S1_at   | MmugDNA.20842.1 | 9.12  | 9.21  | 0.17 | 0.03 | -1.06  | 0.919368 | 0.584941 | 0.965499 | 0.752584 |
| MmugDNA.20843.1.S1_at   | MmugDNA.20843.1 | 8.64  | 8.69  | 0.17 | 0.06 | -1.04  | 0.639932 | 0.149439 | 0.823917 | 0.423893 |
| MmugDNA.20848.1.S1_at   | MmugDNA.20848.1 | 12.77 | 12.61 | 0.07 | 0.01 | 1.12   | 0.017505 | 0.005351 | 0.185974 | 0.101092 |
| MmugDNA.20855.1.S1_at   | MmugDNA.20855.1 | 3.13  | 3.12  | 0.01 | 0.03 | 1.01   | 0.340988 | 0.348003 | 0.620956 | 0.592215 |
| MmugDNA.2086.1.S1_at    | MmugDNA.2086.1  | 6.22  | 6.73  | 0.94 | 0.05 | -1.43  | 0.223134 | 0.177745 | 0.520981 | 0.454107 |
| MmugDNA.20861.1.S1_at   | MmugDNA.20861.1 | 9.51  | 10.91 | 0.74 | 0.03 | -2.64  | 0.026149 | 0.007365 | 0.214757 | 0.115268 |
| MmugDNA.20865.1.S1_at   | MmugDNA.20865.1 | 12.8  | 12.72 | 0.07 | 0.05 | 1.05   | 0.083217 | 0.145857 | 0.345461 | 0.419888 |
| MmugDNA.20871.1.S1_at   | MmugDNA.20871.1 | 12.4  | 12.68 | 0.06 | 0.04 | -1.21  | 0.00352  | 0.083995 | 0.104251 | 0.3349   |
| MmugDNA.20880.1.S1_at   | MmugDNA.20880.1 | 6.03  | 6.13  | 0.19 | 0.03 | -1.07  | 0.114178 | 0.289727 | 0.390933 | 0.550776 |
| MmugDNA.20885.1.S1_at   | MmugDNA.20885.1 | 11.5  | 11.31 | 0.2  | 0.12 | 1.14   | 0.15914  | 0.068347 | 0.450505 | 0.307894 |
| MmugDNA.20899.1.S1_at   | MmugDNA.20899.1 | 5.89  | 6.45  | 0.44 | 0.35 | -1.48  | 0.347802 | 0.724405 | 0.625959 | 0.840474 |
| MmugDNA.209.1.S1_at     | MmugDNA.209.1   | 7.12  | 6.92  | 0.15 | 0.04 | 1.16   | 0.201768 | 0.003748 | 0.49925  | 0.087236 |
| MmugDNA.20906.1.S1_at   | MmugDNA.20906.1 | 7.09  | 7.83  | 0.77 | 0.34 | -1.68  | 0.070494 | 0.169332 | 0.323891 | 0.445925 |
| MmugDNA.20907.1.S1_at   | MmugDNA.20907.1 | 9.12  | 10.63 | 0.21 | 0.07 | -2.85  | 0.00041  | 0.093827 | 0.06311  | 0.350281 |
| MmugDNA.20916.1.S1_at   | MmugDNA.20916.1 | 8.78  | 9.04  | 0.15 | 0.11 | -1.2   | 0.05018  | 0.007782 | 0.281792 | 0.117732 |
| MmugDNA.20928.1.S1_at   | MmugDNA.20928.1 | 11.47 | 11.52 | 0.12 | 0.08 | -1.04  | 0.492359 | 0.007562 | 0.729684 | 0.116437 |
| MmugDNA.2093.1.S1_at    | MmugDNA.2093.1  | 3.83  | 3.7   | 0.47 | 0.01 | 1.09   | 0.351597 | 0.35058  | 0.629242 | 0.594324 |
| MmugDNA.20932.1.S1_at   | MmugDNA.20932.1 | 9.26  | 9.35  | 0.24 | 0.15 | -1.06  | 0.926141 | 0.855207 | 0.968794 | 0.917457 |
| MmugDNA.20957.1.S1_at   | MmugDNA.20957.1 | 10.94 | 10.94 | 0.08 | 0.05 | 1      | 0.540412 | 0.011045 | 0.761465 | 0.136837 |
| MmugDNA.20958.1.S1_at   | MmugDNA.20958.1 | 11.52 | 11.36 | 0.16 | 0.2  | 1.12   | 0.752695 | 0.666257 | 0.885782 | 0.804419 |
| MmugDNA.20963.1.S1_at   | MmugDNA.20963.1 | 4.8   | 4.58  | 0.19 | 0.21 | 1.16   | 0.170298 | 0.148912 | 0.46392  | 0.423284 |
| MmugDNA.20979.1.S1_at   | MmugDNA.20979.1 | 13.81 | 13.79 | 0.02 | 0.01 | 1.02   | 0.12834  | 0.889139 | 0.410299 | 0.936796 |
| MmugDNA.20983.1.S1_at   | MmugDNA.20983.1 | 5.6   | 7.46  | 0.88 | 0.09 | -3.62  | 0.038785 | 0.047157 | 0.253262 | 0.261755 |
| MmugDNA.20986.1.S1_s_at | MmugDNA.20986.1 | 9.27  | 10.04 | 0.3  | 0.14 | -1.7   | 0.01941  | 0.172082 | 0.192344 | 0.448508 |
| MmugDNA.20995.1.S1_at   | MmugDNA.20995.1 | 7.3   | 10.67 | 2.06 | 0.28 | -10.34 | 0.081602 | 0.2998   | 0.342727 | 0.558081 |
| MmugDNA.21.1.S1_at      | MmugDNA.21.1    | 10.73 | 10.67 | 0.04 | 0.06 | 1.04   | 0.295347 | 0.916517 | 0.58412  | 0.953266 |
| MmugDNA.210.1.S1_at     | MmugDNA.210.1   | 4.56  | 5.73  | 2.2  | 0.26 | -2.25  | 0.886765 | 0.533747 | 0.951782 | 0.719857 |
| MmugDNA.21002.1.S1_at   | MmugDNA.21002.1 | 10.28 | 10.66 | 0.12 | 0.07 | -1.3   | 0.013606 | 0.019101 | 0.167433 | 0.173887 |
| MmugDNA.21004.1.S1_at   | MmugDNA.21004.1 | 4.67  | 4.6   | 0.13 | 0.04 | 1.05   | 0.30127  | 0.510045 | 0.589242 | 0.704549 |
| MmugDNA.21005.1.S1_at   | MmugDNA.21005.1 | 7.72  | 7.48  | 0.2  | 0.09 | 1.19   | 0.083511 | 0.082171 | 0.345905 | 0.331021 |
| MmugDNA.21007.1.S1_s_at | MmugDNA.21007.1 | 13.69 | 13.68 | 0.16 | 0.03 | 1.01   | 0.546257 | 0.472328 | 0.765159 | 0.679963 |

|                         |                 |       |       |      |      |       |          |          |          |          |
|-------------------------|-----------------|-------|-------|------|------|-------|----------|----------|----------|----------|
| MmugDNA.21009.1.S1_at   | MmugDNA.21009.1 | 5.44  | 5.49  | 0.15 | 0.29 | -1.04 | 0.712499 | 0.603592 | 0.864309 | 0.764204 |
| MmugDNA.2101.1.S1_at    | MmugDNA.2101.1  | 13.42 | 13.19 | 0.1  | 0.01 | 1.18  | 0.017884 | 0.545525 | 0.187102 | 0.727564 |
| MmugDNA.21013.1.S1_at   | MmugDNA.21013.1 | 6.75  | 6.85  | 0.2  | 0.07 | -1.07 | 0.906432 | 0.369319 | 0.960343 | 0.6087   |
| MmugDNA.21023.1.S1_at   | MmugDNA.21023.1 | 10.73 | 10.79 | 0.22 | 0.1  | -1.04 | 0.686209 | 0.868585 | 0.850502 | 0.925383 |
| MmugDNA.21026.1.S1_at   | MmugDNA.21026.1 | 5.87  | 5.86  | 0.43 | 0.03 | 1.01  | 0.947738 | 0.960331 | 0.978023 | 0.977459 |
| MmugDNA.21032.1.S1_at   | MmugDNA.21032.1 | 12.95 | 13.14 | 0.02 | 0.05 | -1.14 | 0.004391 | 0.53994  | 0.112454 | 0.723995 |
| MmugDNA.21038.1.S1_at   | MmugDNA.21038.1 | 4.12  | 4.18  | 0.1  | 0.04 | -1.04 | 0.684149 | 0.683922 | 0.849462 | 0.815618 |
| MmugDNA.21041.1.S1_at   | MmugDNA.21041.1 | 10.06 | 10.15 | 0.18 | 0.06 | -1.06 | 0.422242 | 0.837525 | 0.680473 | 0.907127 |
| MmugDNA.21042.1.S1_at   | MmugDNA.21042.1 | 5.97  | 6.08  | 0.12 | 0.09 | -1.08 | 0.321778 | 0.155833 | 0.606128 | 0.431211 |
| MmugDNA.21047.1.S1_at   | MmugDNA.21047.1 | 10.54 | 10.27 | 0.24 | 0.16 | 1.21  | 0.079869 | 0.069793 | 0.340107 | 0.310331 |
| MmugDNA.21051.1.S1_at   | MmugDNA.21051.1 | 3.5   | 3.53  | 0.14 | 0.47 | -1.02 | 0.555074 | 0.558855 | 0.771033 | 0.73591  |
| MmugDNA.21058.1.S1_at   | MmugDNA.21058.1 | 9.42  | 9.21  | 0.25 | 0.16 | 1.16  | 0.523357 | 0.574057 | 0.750359 | 0.745566 |
| MmugDNA.21059.1.S1_at   | MmugDNA.21059.1 | 11.79 | 10.67 | 0.27 | 0.06 | 2.18  | 0.001721 | 0.022872 | 0.085035 | 0.189285 |
| MmugDNA.21065.1.S1_at   | MmugDNA.21065.1 | 7.13  | 6.9   | 0.19 | 0.17 | 1.17  | 0.12989  | 0.038668 | 0.412108 | 0.24169  |
| MmugDNA.21067.1.S1_at   | MmugDNA.21067.1 | 12.44 | 12.17 | 0.06 | 0.02 | 1.21  | 0.001497 | 0.443613 | 0.081111 | 0.661336 |
| MmugDNA.21071.1.S1_at   | MmugDNA.21071.1 | 13.21 | 13.26 | 0.08 | 0.03 | -1.04 | 0.327815 | 0.324235 | 0.610488 | 0.57488  |
| MmugDNA.21074.1.S1_at   | MmugDNA.21074.1 | 12.22 | 12.69 | 0.12 | 0.05 | -1.39 | 0.003691 | 0.053278 | 0.106124 | 0.276463 |
| MmugDNA.21077.1.S1_at   | MmugDNA.21077.1 | 9.57  | 9.92  | 0.42 | 0.08 | -1.28 | 0.260911 | 0.744837 | 0.555052 | 0.852198 |
| MmugDNA.2108.1.S1_s_at  | MmugDNA.2108.1  | 6.99  | 8.47  | 0.85 | 0.24 | -2.78 | 0.12585  | 0.382009 | 0.406766 | 0.618258 |
| MmugDNA.21080.1.S1_at   | MmugDNA.21080.1 | 5.84  | 5.98  | 1.44 | 0.48 | -1.1  | 0.533999 | 0.400266 | 0.757384 | 0.630158 |
| MmugDNA.21082.1.S1_at   | MmugDNA.21082.1 | 3.21  | 3.2   | 0.1  | 0.15 | 1.01  | 0.683731 | 0.869079 | 0.849222 | 0.925671 |
| MmugDNA.21084.1.S1_at   | MmugDNA.21084.1 | 4.22  | 4.15  | 0.12 | 0.09 | 1.05  | 0.16644  | 0.199401 | 0.45963  | 0.474002 |
| MmugDNA.21085.1.S1_at   | MmugDNA.21085.1 | 4.46  | 4.39  | 0.12 | 0.07 | 1.05  | 0.207368 | 0.500683 | 0.505092 | 0.699229 |
| MmugDNA.21086.1.S1_at   | MmugDNA.21086.1 | 5.62  | 5.56  | 0.13 | 0.03 | 1.04  | 0.546207 | 0.432713 | 0.765159 | 0.653094 |
| MmugDNA.21088.1.S1_at   | MmugDNA.21088.1 | 5.53  | 5.49  | 0.14 | 0.09 | 1.03  | 0.293139 | 0.303301 | 0.58211  | 0.560748 |
| MmugDNA.2109.1.S1_at    | MmugDNA.2109.1  | 6.64  | 6.65  | 0.06 | 0.06 | -1.01 | 0.149651 | 0.775044 | 0.438613 | 0.869035 |
| MmugDNA.21090.1.S1_at   | MmugDNA.21090.1 | 4.97  | 4.97  | 0.09 | 0.16 | -1    | 0.672574 | 0.708678 | 0.84327  | 0.831025 |
| MmugDNA.21095.1.S1_at   | MmugDNA.21095.1 | 10.82 | 9.89  | 0.43 | 0.18 | 1.91  | 0.062736 | 0.27292  | 0.307182 | 0.53761  |
| MmugDNA.21098.1.S1_at   | MmugDNA.21098.1 | 6.24  | 5.87  | 0.87 | 0.11 | 1.3   | 0.401925 | 0.373967 | 0.666434 | 0.612588 |
| MmugDNA.211.1.S1_at     | MmugDNA.211.1   | 6.77  | 6.69  | 0.12 | 0.28 | 1.06  | 0.96045  | 0.811031 | 0.983786 | 0.890966 |
| MmugDNA.21100.1.S1_at   | MmugDNA.21100.1 | 7.59  | 6.77  | 0.19 | 0.12 | 1.76  | 0.002707 | 0.012447 | 0.096803 | 0.14417  |
| MmugDNA.21104.1.S1_at   | MmugDNA.21104.1 | 9.07  | 9.26  | 0.52 | 0.28 | -1.15 | 0.792303 | 0.001975 | 0.905814 | 0.065871 |
| MmugDNA.21105.1.S1_at   | MmugDNA.21105.1 | 10.51 | 10.12 | 0.37 | 0.14 | 1.31  | 0.116553 | 0.003989 | 0.393692 | 0.089804 |
| MmugDNA.21108.1.S1_at   | MmugDNA.21108.1 | 6.87  | 6.62  | 0.29 | 0.14 | 1.18  | 0.814931 | 0.134472 | 0.917365 | 0.406626 |
| MmugDNA.21109.1.S1_at   | MmugDNA.21109.1 | 11.53 | 12.07 | 0.25 | 0.14 | -1.45 | 0.04894  | 0.172107 | 0.278842 | 0.448529 |
| MmugDNA.21118.1.S1_at   | MmugDNA.21118.1 | 6.08  | 6.02  | 0.1  | 0.04 | 1.04  | 0.986815 | 0.039153 | 0.995228 | 0.243072 |
| MmugDNA.2112.1.S1_at    | MmugDNA.2112.1  | 7.46  | 7.85  | 0.35 | 0.22 | -1.31 | 0.288462 | 0.60192  | 0.578182 | 0.763122 |
| MmugDNA.21120.1.S1_at   | MmugDNA.21120.1 | 6.43  | 6.32  | 1.07 | 0.26 | 1.08  | 0.897004 | 0.885103 | 0.956282 | 0.934567 |
| MmugDNA.21122.1.S1_at   | MmugDNA.21122.1 | 4.88  | 4.77  | 0.17 | 0.04 | 1.08  | 0.322161 | 0.46582  | 0.606295 | 0.675969 |
| MmugDNA.21125.1.S1_at   | MmugDNA.21125.1 | 8.43  | 7.97  | 0.43 | 0.09 | 1.37  | 0.456192 | 0.415143 | 0.705665 | 0.640713 |
| MmugDNA.21125.1.S1_s_at | MmugDNA.21125.1 | 7.76  | 7.69  | 0.18 | 0.07 | 1.05  | 0.20602  | 0.341671 | 0.50382  | 0.587796 |
| MmugDNA.21126.1.S1_at   | MmugDNA.21126.1 | 5.42  | 5.21  | 0.1  | 0.03 | 1.15  | 0.027827 | 0.026495 | 0.219267 | 0.203897 |
| MmugDNA.21127.1.S1_at   | MmugDNA.21127.1 | 6.3   | 7.79  | 0.28 | 0.38 | -2.81 | 0.005057 | 0.029309 | 0.116282 | 0.21321  |

|                         |                 |       |       |      |      |       |          |          |          |          |
|-------------------------|-----------------|-------|-------|------|------|-------|----------|----------|----------|----------|
| MmugDNA.21128.1.S1_at   | MmugDNA.21128.1 | 12.96 | 12.91 | 0.05 | 0.04 | 1.04  | 0.222058 | 0.864636 | 0.520165 | 0.923264 |
| MmugDNA.21136.1.S1_at   | MmugDNA.21136.1 | 13.96 | 13.51 | 0.15 | 0.03 | 1.37  | 0.007202 | 0.023457 | 0.132536 | 0.191956 |
| MmugDNA.21138.1.S1_at   | MmugDNA.21138.1 | 11.55 | 11.49 | 0.09 | 0.04 | 1.04  | 0.45605  | 0.907606 | 0.705636 | 0.947753 |
| MmugDNA.21144.1.S1_at   | MmugDNA.21144.1 | 3.98  | 3.97  | 0.25 | 0.26 | 1     | 0.983511 | 0.997791 | 0.99383  | 0.998906 |
| MmugDNA.21145.1.S1_s_at | MmugDNA.21145.1 | 6.76  | 6.75  | 0.18 | 0.07 | 1.01  | 0.353172 | 0.557242 | 0.630353 | 0.735031 |
| MmugDNA.21146.1.S1_at   | MmugDNA.21146.1 | 12.63 | 12.32 | 0.1  | 0.11 | 1.24  | 0.007044 | 0.00923  | 0.131294 | 0.126903 |
| MmugDNA.21148.1.S1_at   | MmugDNA.21148.1 | 9.75  | 10.51 | 0.11 | 0.41 | -1.69 | 0.047728 | 0.002883 | 0.275898 | 0.078985 |
| MmugDNA.2115.1.S1_at    | MmugDNA.2115.1  | 13.23 | 13.04 | 0.04 | 0.07 | 1.14  | 0.020305 | 0.150764 | 0.196136 | 0.425322 |
| MmugDNA.21150.1.S1_at   | MmugDNA.21150.1 | 6.57  | 6.44  | 0.22 | 0.11 | 1.1   | 0.805217 | 0.593504 | 0.912649 | 0.758322 |
| MmugDNA.21158.1.S1_at   | MmugDNA.21158.1 | 4.03  | 4.13  | 0.12 | 0.05 | -1.07 | 0.178126 | 0.37581  | 0.472847 | 0.613697 |
| MmugDNA.21162.1.S1_at   | MmugDNA.21162.1 | 11.47 | 11.03 | 0.2  | 0.1  | 1.35  | 0.110026 | 0.001035 | 0.385253 | 0.051314 |
| MmugDNA.21164.1.S1_at   | MmugDNA.21164.1 | 6.95  | 7.81  | 0.61 | 0.05 | -1.82 | 0.084084 | 0.207249 | 0.347329 | 0.481388 |
| MmugDNA.21166.1.S1_at   | MmugDNA.21166.1 | 6.05  | 6     | 0.11 | 0.03 | 1.03  | 0.881481 | 0.486403 | 0.949612 | 0.689764 |
| MmugDNA.21171.1.S1_at   | MmugDNA.21171.1 | 5.51  | 5.63  | 0.22 | 0.3  | -1.09 | 0.572939 | 0.936153 | 0.780942 | 0.963987 |
| MmugDNA.21188.1.S1_at   | MmugDNA.21188.1 | 6.31  | 6.56  | 0.04 | 0.09 | -1.19 | 0.008463 | 0.144567 | 0.141218 | 0.418425 |
| MmugDNA.21189.1.S1_at   | MmugDNA.21189.1 | 5.53  | 6.1   | 0.2  | 0.09 | -1.49 | 0.011208 | 0.236241 | 0.155478 | 0.507252 |
| MmugDNA.21195.1.S1_at   | MmugDNA.21195.1 | 9.91  | 8.98  | 0.18 | 0.1  | 1.9   | 0.00182  | 0.00959  | 0.08633  | 0.129058 |
| MmugDNA.21199.1.S1_at   | MmugDNA.21199.1 | 5.34  | 5.76  | 0.18 | 0.11 | -1.34 | 0.038564 | 0.272054 | 0.252331 | 0.536847 |
| MmugDNA.21211.1.S1_at   | MmugDNA.21211.1 | 7.57  | 7.95  | 0.7  | 0.09 | -1.3  | 0.463254 | 0.244314 | 0.709976 | 0.514184 |
| MmugDNA.21214.1.S1_at   | MmugDNA.21214.1 | 8.69  | 7.94  | 0.41 | 0.18 | 1.68  | 0.034333 | 0.042596 | 0.23992  | 0.251035 |
| MmugDNA.21216.1.S1_at   | MmugDNA.21216.1 | 11.01 | 10.94 | 0.18 | 0.06 | 1.05  | 0.772538 | 0.058373 | 0.895806 | 0.288369 |
| MmugDNA.21230.1.S1_at   | MmugDNA.21230.1 | 12.88 | 12.75 | 0.05 | 0.04 | 1.09  | 0.029453 | 0.072646 | 0.224618 | 0.315579 |
| MmugDNA.21234.1.S1_at   | MmugDNA.21234.1 | 5.38  | 5.44  | 0.06 | 0.09 | -1.04 | 0.602822 | 0.390979 | 0.800507 | 0.62469  |
| MmugDNA.21236.1.S1_at   | MmugDNA.21236.1 | 9.98  | 9.43  | 0.16 | 0.08 | 1.46  | 0.008793 | 0.004531 | 0.143564 | 0.094006 |
| MmugDNA.2124.1.S1_at    | MmugDNA.2124.1  | 13.87 | 13.67 | 0.06 | 0.09 | 1.15  | 0.027532 | 0.030806 | 0.218489 | 0.217376 |
| MmugDNA.21240.1.S1_at   | MmugDNA.21240.1 | 7.01  | 7.07  | 0.31 | 0.01 | -1.04 | 0.467482 | 0.356802 | 0.712945 | 0.598603 |
| MmugDNA.21242.1.S1_at   | MmugDNA.21242.1 | 5.98  | 8.56  | 0.98 | 0.2  | -5.97 | 0.022884 | 0.120693 | 0.204235 | 0.389548 |
| MmugDNA.21246.1.S1_at   | MmugDNA.21246.1 | 12.66 | 12.67 | 0.09 | 0.04 | -1.01 | 0.816344 | 0.351037 | 0.917994 | 0.594737 |
| MmugDNA.21250.1.S1_at   | MmugDNA.21250.1 | 7.93  | 8.67  | 0.26 | 0.17 | -1.67 | 0.023184 | 0.49074  | 0.205385 | 0.692666 |
| MmugDNA.21252.1.S1_at   | MmugDNA.21252.1 | 4.83  | 4.8   | 0.38 | 0.06 | 1.01  | 0.324495 | 0.390753 | 0.60819  | 0.624518 |
| MmugDNA.21266.1.S1_at   | MmugDNA.21266.1 | 9.23  | 9.56  | 0.79 | 0.17 | -1.26 | 0.456121 | 0.524292 | 0.705665 | 0.714254 |
| MmugDNA.21266.1.S1_s_at | MmugDNA.21266.1 | 9.71  | 9.49  | 0.83 | 0.18 | 1.16  | 0.734089 | 0.915835 | 0.876058 | 0.952836 |
| MmugDNA.21269.1.S1_at   | MmugDNA.21269.1 | 5.94  | 5.84  | 0.19 | 0.11 | 1.08  | 0.450127 | 0.216557 | 0.701214 | 0.490207 |
| MmugDNA.21270.1.S1_at   | MmugDNA.21270.1 | 5.2   | 5.03  | 0.11 | 0.06 | 1.13  | 0.199042 | 0.631222 | 0.496267 | 0.782734 |
| MmugDNA.21273.1.S1_at   | MmugDNA.21273.1 | 6.61  | 6.14  | 0.74 | 0.64 | 1.39  | 0.352742 | 0.01659  | 0.630033 | 0.163051 |
| MmugDNA.21274.1.S1_at   | MmugDNA.21274.1 | 11.41 | 11.37 | 0.09 | 0.1  | 1.03  | 0.261853 | 0.525823 | 0.555987 | 0.715217 |
| MmugDNA.21275.1.S1_at   | MmugDNA.21275.1 | 8.04  | 7.77  | 0.16 | 0.07 | 1.2   | 0.062694 | 0.016862 | 0.307025 | 0.164584 |
| MmugDNA.21276.1.S1_at   | MmugDNA.21276.1 | 6.71  | 8.25  | 0.17 | 0.22 | -2.91 | 0.001024 | 0.015406 | 0.076321 | 0.157628 |
| MmugDNA.21283.1.S1_at   | MmugDNA.21283.1 | 9.2   | 9.17  | 0.35 | 0.34 | 1.02  | 0.86313  | 0.101074 | 0.940491 | 0.360724 |
| MmugDNA.21287.1.S1_at   | MmugDNA.21287.1 | 5.76  | 5.71  | 0.03 | 0.03 | 1.04  | 0.14107  | 0.005456 | 0.426907 | 0.101952 |
| MmugDNA.21289.1.S1_at   | MmugDNA.21289.1 | 12.67 | 12.63 | 0.19 | 0.06 | 1.03  | 0.540877 | 0.713107 | 0.761782 | 0.833638 |
| MmugDNA.213.1.S1_at     | MmugDNA.213.1   | 6.59  | 7.23  | 0.67 | 0.22 | -1.56 | 0.754887 | 0.109512 | 0.886949 | 0.373339 |
| MmugDNA.2130.1.S1_at    | MmugDNA.2130.1  | 10.09 | 10.31 | 0.27 | 0.06 | -1.17 | 0.082738 | 0.202516 | 0.34462  | 0.476819 |

|                         |                 |       |       |      |      |       |          |          |          |          |
|-------------------------|-----------------|-------|-------|------|------|-------|----------|----------|----------|----------|
| MmugDNA.21300.1.S1_at   | MmugDNA.21300.1 | 4.41  | 3.91  | 0.15 | 0.13 | 1.41  | 0.020231 | 0.012633 | 0.195882 | 0.145027 |
| MmugDNA.21315.1.S1_at   | MmugDNA.21315.1 | 11.11 | 11.02 | 0.29 | 0.05 | 1.06  | 0.768463 | 0.664277 | 0.893625 | 0.803298 |
| MmugDNA.21317.1.S1_at   | MmugDNA.21317.1 | 10.34 | 10.01 | 0.13 | 0.02 | 1.26  | 0.024955 | 0.377893 | 0.211179 | 0.615264 |
| MmugDNA.21338.1.S1_at   | MmugDNA.21338.1 | 8.55  | 8.97  | 0.28 | 0.32 | -1.35 | 0.175604 | 0.004721 | 0.470114 | 0.095706 |
| MmugDNA.21339.1.S1_at   | MmugDNA.21339.1 | 11.89 | 12    | 0.11 | 0.18 | -1.08 | 0.698213 | 0.867039 | 0.856385 | 0.924449 |
| MmugDNA.2134.1.S1_at    | MmugDNA.2134.1  | 8.22  | 8.12  | 0.13 | 0.03 | 1.08  | 0.692363 | 0.674869 | 0.852986 | 0.810065 |
| MmugDNA.21346.1.S1_at   | MmugDNA.21346.1 | 12    | 11.73 | 0.17 | 0.28 | 1.2   | 0.63314  | 0.010984 | 0.820205 | 0.136546 |
| MmugDNA.21347.1.S1_s_at | MmugDNA.21347.1 | 12.48 | 12.23 | 0.11 | 0.11 | 1.19  | 0.079089 | 0.096221 | 0.33882  | 0.353541 |
| MmugDNA.21353.1.S1_at   | MmugDNA.21353.1 | 3.76  | 3.76  | 0.08 | 0.41 | 1     | 0.306703 | 0.594208 | 0.593535 | 0.758517 |
| MmugDNA.21353.1.S1_s_at | MmugDNA.21353.1 | 5.01  | 5.35  | 0.38 | 0.19 | -1.27 | 0.323204 | 0.608395 | 0.607056 | 0.767074 |
| MmugDNA.21371.1.S1_at   | MmugDNA.21371.1 | 4.75  | 6.32  | 0.51 | 0.74 | -2.96 | 0.057423 | 0.213733 | 0.296977 | 0.487551 |
| MmugDNA.21376.1.S1_s_at | MmugDNA.21376.1 | 10.84 | 10.84 | 0.19 | 0.07 | -1    | 0.656129 | 0.741821 | 0.833605 | 0.850509 |
| MmugDNA.21377.1.S1_at   | MmugDNA.21377.1 | 10.42 | 9.56  | 0.1  | 0.35 | 1.81  | 0.035873 | 0.027254 | 0.244488 | 0.206326 |
| MmugDNA.21380.1.S1_at   | MmugDNA.21380.1 | 13.14 | 13.18 | 0.12 | 0.05 | -1.03 | 0.31737  | 0.182895 | 0.602108 | 0.459365 |
| MmugDNA.21382.1.S1_at   | MmugDNA.21382.1 | 11.77 | 11.52 | 0.18 | 0.07 | 1.19  | 0.036242 | 0.033479 | 0.245445 | 0.226577 |
| MmugDNA.21386.1.S1_at   | MmugDNA.21386.1 | 7.58  | 7.14  | 0.13 | 0.25 | 1.35  | 0.041382 | 0.031728 | 0.259912 | 0.22055  |
| MmugDNA.21387.1.S1_at   | MmugDNA.21387.1 | 6.33  | 6.25  | 0.5  | 0.02 | 1.06  | 0.257584 | 0.451399 | 0.551817 | 0.666186 |
| MmugDNA.21391.1.S1_at   | MmugDNA.21391.1 | 5.58  | 5.54  | 0.15 | 0.04 | 1.02  | 0.470698 | 0.446581 | 0.715067 | 0.662862 |
| MmugDNA.2140.1.S1_at    | MmugDNA.2140.1  | 10.46 | 10.42 | 0.15 | 0.05 | 1.03  | 0.657143 | 0.847515 | 0.834252 | 0.913321 |
| MmugDNA.21403.1.S1_at   | MmugDNA.21403.1 | 10.82 | 9.23  | 0.22 | 0.21 | 3     | 0.000809 | 0.000119 | 0.073277 | 0.028664 |
| MmugDNA.21404.1.S1_at   | MmugDNA.21404.1 | 8.69  | 8.67  | 0.12 | 0.07 | 1.01  | 0.470264 | 0.632957 | 0.71485  | 0.783881 |
| MmugDNA.21407.1.S1_at   | MmugDNA.21407.1 | 10.73 | 10.68 | 0.16 | 0.1  | 1.03  | 0.410553 | 0.418076 | 0.672532 | 0.642582 |
| MmugDNA.21410.1.S1_at   | MmugDNA.21410.1 | 6.35  | 6.59  | 0.04 | 0.14 | -1.18 | 0.019443 | 0.007831 | 0.192344 | 0.117929 |
| MmugDNA.21414.1.S1_at   | MmugDNA.21414.1 | 9.64  | 9.42  | 0.03 | 0.24 | 1.16  | 0.647102 | 0.707468 | 0.828492 | 0.830361 |
| MmugDNA.2142.1.S1_at    | MmugDNA.2142.1  | 8.38  | 8.11  | 0.03 | 0.08 | 1.21  | 0.005065 | 0.00654  | 0.116357 | 0.109652 |
| MmugDNA.21423.1.S1_at   | MmugDNA.21423.1 | 7.31  | 6.91  | 0.25 | 0.17 | 1.32  | 0.168819 | 0.140274 | 0.462083 | 0.413448 |
| MmugDNA.21431.1.S1_at   | MmugDNA.21431.1 | 6.45  | 5.94  | 0.26 | 0.26 | 1.42  | 0.150096 | 0.111976 | 0.439066 | 0.37707  |
| MmugDNA.21435.1.S1_at   | MmugDNA.21435.1 | 12.84 | 12.84 | 0.04 | 0.03 | -1    | 0.560545 | 0.236565 | 0.773956 | 0.507364 |
| MmugDNA.21436.1.S1_at   | MmugDNA.21436.1 | 9.76  | 9.92  | 0.29 | 0.02 | -1.12 | 0.981415 | 0.178439 | 0.993043 | 0.454778 |
| MmugDNA.21439.1.S1_at   | MmugDNA.21439.1 | 10.3  | 13.14 | 1.81 | 0.13 | -7.17 | 0.107001 | 0.355711 | 0.38138  | 0.597864 |
| MmugDNA.21441.1.S1_at   | MmugDNA.21441.1 | 13.29 | 13.12 | 0.01 | 0.03 | 1.13  | 0.000852 | 0.009402 | 0.073472 | 0.127832 |
| MmugDNA.21446.1.S1_at   | MmugDNA.21446.1 | 6.89  | 6.7   | 0.31 | 0.17 | 1.14  | 0.956575 | 0.88272  | 0.982157 | 0.93317  |
| MmugDNA.2145.1.S1_at    | MmugDNA.2145.1  | 12.11 | 11.67 | 0.07 | 0.13 | 1.36  | 0.005364 | 0.171511 | 0.118402 | 0.447895 |
| MmugDNA.21462.1.S1_at   | MmugDNA.21462.1 | 10.59 | 8.89  | 0.24 | 0.05 | 3.26  | 0.000211 | 0.000344 | 0.053494 | 0.036921 |
| MmugDNA.21467.1.S1_at   | MmugDNA.21467.1 | 8.77  | 8.89  | 0.27 | 0.11 | -1.09 | 0.659565 | 0.730878 | 0.83568  | 0.844119 |
| MmugDNA.21472.1.S1_at   | MmugDNA.21472.1 | 10.93 | 10.76 | 0.15 | 0.06 | 1.12  | 0.054537 | 0.104639 | 0.290603 | 0.365941 |
| MmugDNA.21476.1.S1_at   | MmugDNA.21476.1 | 11.53 | 11.52 | 0.08 | 0.05 | 1.01  | 0.88502  | 0.043676 | 0.951005 | 0.253711 |
| MmugDNA.21483.1.S1_at   | MmugDNA.21483.1 | 9.13  | 9.26  | 0.07 | 0.14 | -1.1  | 0.224608 | 0.017544 | 0.522693 | 0.167632 |
| MmugDNA.21487.1.S1_at   | MmugDNA.21487.1 | 8.97  | 8.94  | 0.12 | 0.19 | 1.02  | 0.754758 | 0.32147  | 0.88688  | 0.573226 |
| MmugDNA.21489.1.S1_at   | MmugDNA.21489.1 | 12.11 | 11.84 | 0.02 | 0.05 | 1.21  | 0.001033 | 0.015048 | 0.076321 | 0.155803 |
| MmugDNA.21492.1.S1_at   | MmugDNA.21492.1 | 11.4  | 11.34 | 0.19 | 0.06 | 1.04  | 0.740045 | 0.115987 | 0.879501 | 0.383164 |
| MmugDNA.2150.1.S1_at    | MmugDNA.2150.1  | 7.9   | 7.81  | 0.24 | 0.11 | 1.07  | 0.36837  | 0.408844 | 0.6421   | 0.6359   |
| MmugDNA.21502.1.S1_at   | MmugDNA.21502.1 | 10.67 | 10.57 | 0.21 | 0.16 | 1.07  | 0.959411 | 0.011451 | 0.983466 | 0.13846  |



|                         |                 |       |       |      |      |       |          |          |          |          |
|-------------------------|-----------------|-------|-------|------|------|-------|----------|----------|----------|----------|
| MmugDNA.21510.1.S1_at   | MmugDNA.21510.1 | 12.57 | 12.97 | 0.23 | 0.04 | -1.32 | 0.119962 | 0.46658  | 0.398202 | 0.676398 |
| MmugDNA.21515.1.S1_at   | MmugDNA.21515.1 | 11.36 | 10.13 | 0.26 | 0.07 | 2.35  | 0.000925 | 0.00117  | 0.075607 | 0.053714 |
| MmugDNA.21516.1.S1_at   | MmugDNA.21516.1 | 11.04 | 11.37 | 0.09 | 0.08 | -1.25 | 0.00964  | 0.49323  | 0.14832  | 0.694009 |
| MmugDNA.21518.1.S1_at   | MmugDNA.21518.1 | 11.65 | 11.44 | 0.45 | 0.06 | 1.16  | 0.806715 | 0.902392 | 0.913434 | 0.94454  |
| MmugDNA.21523.1.S1_at   | MmugDNA.21523.1 | 5.72  | 5.61  | 0.17 | 0.04 | 1.08  | 0.739912 | 0.13281  | 0.87947  | 0.404544 |
| MmugDNA.21524.1.S1_at   | MmugDNA.21524.1 | 8.43  | 7.6   | 0.5  | 0.11 | 1.78  | 0.106346 | 0.208024 | 0.380319 | 0.482049 |
| MmugDNA.21524.1.S1_s_at | MmugDNA.21524.1 | 8.39  | 8.01  | 0.26 | 0.09 | 1.29  | 0.099684 | 0.458545 | 0.370642 | 0.671232 |
| MmugDNA.21525.1.S1_at   | MmugDNA.21525.1 | 6.39  | 7.41  | 0.91 | 0.17 | -2.03 | 0.097079 | 0.069526 | 0.367275 | 0.309848 |
| MmugDNA.21525.1.S1_s_at | MmugDNA.21525.1 | 7.39  | 7.75  | 0.22 | 0.27 | -1.29 | 0.079755 | 0.060669 | 0.339935 | 0.292876 |
| MmugDNA.21526.1.S1_at   | MmugDNA.21526.1 | 4.54  | 4.48  | 0.05 | 0.05 | 1.04  | 0.10671  | 0.662859 | 0.380906 | 0.802631 |
| MmugDNA.21528.1.S1_at   | MmugDNA.21528.1 | 6.8   | 6.88  | 0.15 | 0.03 | -1.05 | 0.93049  | 0.987255 | 0.970779 | 0.992852 |
| MmugDNA.21529.1.S1_at   | MmugDNA.21529.1 | 9.51  | 9.65  | 0.24 | 0.15 | -1.11 | 0.374059 | 0.137984 | 0.645259 | 0.410912 |
| MmugDNA.21530.1.S1_at   | MmugDNA.21530.1 | 3.19  | 3.29  | 0.02 | 0.04 | -1.07 | 0.016069 | 0.012725 | 0.179246 | 0.145429 |
| MmugDNA.21534.1.S1_at   | MmugDNA.21534.1 | 11.66 | 11.58 | 0.05 | 0.03 | 1.05  | 0.156644 | 0.687193 | 0.44712  | 0.817509 |
| MmugDNA.21539.1.S1_at   | MmugDNA.21539.1 | 3.9   | 3.85  | 0.02 | 0.15 | 1.03  | 0.617844 | 0.646542 | 0.810238 | 0.792953 |
| MmugDNA.21540.1.S1_at   | MmugDNA.21540.1 | 12.02 | 13.39 | 0.68 | 0.08 | -2.59 | 0.063134 | 0.305396 | 0.307954 | 0.562397 |
| MmugDNA.21543.1.S1_at   | MmugDNA.21543.1 | 12.04 | 11.4  | 0.06 | 0.08 | 1.56  | 0.000495 | 0.007864 | 0.068271 | 0.118072 |
| MmugDNA.21546.1.S1_at   | MmugDNA.21546.1 | 12.25 | 12.15 | 0.08 | 0.08 | 1.06  | 0.218134 | 0.175245 | 0.51594  | 0.452027 |
| MmugDNA.21551.1.S1_at   | MmugDNA.21551.1 | 3.91  | 4     | 0.18 | 0.07 | -1.07 | 0.671271 | 0.769774 | 0.842316 | 0.866333 |
| MmugDNA.21552.1.S1_at   | MmugDNA.21552.1 | 11.1  | 10.14 | 0.24 | 0.06 | 1.94  | 0.004325 | 0.000961 | 0.111896 | 0.049342 |
| MmugDNA.21555.1.S1_at   | MmugDNA.21555.1 | 6.14  | 5.53  | 0.24 | 0.14 | 1.53  | 0.011049 | 0.007235 | 0.154788 | 0.11424  |
| MmugDNA.21556.1.S1_at   | MmugDNA.21556.1 | 10.65 | 10.19 | 0.1  | 0.07 | 1.38  | 0.001925 | 0.012559 | 0.088159 | 0.144501 |
| MmugDNA.21561.1.S1_at   | MmugDNA.21561.1 | 5.31  | 5.38  | 0.19 | 0.06 | -1.05 | 0.774969 | 0.747372 | 0.897172 | 0.853149 |
| MmugDNA.21562.1.S1_at   | MmugDNA.21562.1 | 5.96  | 5.95  | 1.22 | 0.24 | 1.01  | 0.445012 | 0.314301 | 0.697652 | 0.568263 |
| MmugDNA.21566.1.S1_at   | MmugDNA.21566.1 | 7.56  | 7.58  | 0.09 | 0.05 | -1.02 | 0.735111 | 0.344187 | 0.876697 | 0.589762 |
| MmugDNA.21567.1.S1_at   | MmugDNA.21567.1 | 8.27  | 8.64  | 0.11 | 0.02 | -1.3  | 0.004464 | 0.001024 | 0.113281 | 0.051079 |
| MmugDNA.21575.1.S1_at   | MmugDNA.21575.1 | 9.01  | 9.51  | 0.82 | 0.31 | -1.41 | 0.403889 | 0.441269 | 0.667864 | 0.659477 |
| MmugDNA.21586.1.S1_at   | MmugDNA.21586.1 | 13.41 | 12.99 | 0.05 | 0.06 | 1.34  | 0.000834 | 0.073358 | 0.07338  | 0.316469 |
| MmugDNA.21589.1.S1_at   | MmugDNA.21589.1 | 6.31  | 7.1   | 0.52 | 0.1  | -1.72 | 0.063466 | 0.188231 | 0.308631 | 0.464251 |
| MmugDNA.2159.1.S1_at    | MmugDNA.2159.1  | 6.69  | 6.8   | 0.12 | 0.05 | -1.08 | 0.448597 | 0.556243 | 0.700097 | 0.734449 |
| MmugDNA.21590.1.S1_at   | MmugDNA.21590.1 | 2.95  | 3.06  | 0.73 | 0.2  | -1.08 | 0.481654 | 0.477608 | 0.722105 | 0.683636 |
| MmugDNA.21590.1.S1_x_at | MmugDNA.21590.1 | 3.34  | 3.4   | 0.82 | 0.27 | -1.04 | 0.495897 | 0.451054 | 0.731931 | 0.666004 |
| MmugDNA.21593.1.S1_at   | MmugDNA.21593.1 | 3.93  | 3.85  | 0.06 | 0.03 | 1.06  | 0.147334 | 0.296139 | 0.435407 | 0.555339 |
| MmugDNA.21599.1.S1_at   | MmugDNA.21599.1 | 11.46 | 11.32 | 0.24 | 0.08 | 1.1   | 0.302694 | 0.309973 | 0.590379 | 0.565227 |
| MmugDNA.21602.1.S1_at   | MmugDNA.21602.1 | 12.29 | 11.69 | 0.08 | 0.08 | 1.52  | 0.000894 | 0.012122 | 0.075114 | 0.142442 |
| MmugDNA.21603.1.S1_at   | MmugDNA.21603.1 | 6.22  | 6.11  | 0.13 | 0.02 | 1.08  | 0.205035 | 0.299551 | 0.50286  | 0.557945 |
| MmugDNA.21607.1.S1_at   | MmugDNA.21607.1 | 5.79  | 5.77  | 0.04 | 0.03 | 1.01  | 0.97691  | 0.356191 | 0.990931 | 0.598158 |
| MmugDNA.21608.1.S1_at   | MmugDNA.21608.1 | 9.97  | 10.01 | 0.18 | 0.02 | -1.02 | 0.845715 | 0.317854 | 0.932611 | 0.571042 |
| MmugDNA.2161.1.S1_at    | MmugDNA.2161.1  | 4.84  | 4.87  | 0    | 0.15 | -1.02 | 0.720774 | 0.469922 | 0.868263 | 0.678572 |
| MmugDNA.21612.1.S1_at   | MmugDNA.21612.1 | 7.38  | 7.94  | 0.1  | 0.05 | -1.47 | 0.001551 | 0.007585 | 0.081983 | 0.11658  |
| MmugDNA.2162.1.S1_at    | MmugDNA.2162.1  | 9.86  | 9.81  | 0.28 | 0.01 | 1.04  | 0.641148 | 0.520774 | 0.824661 | 0.711942 |
| MmugDNA.21620.1.S1_at   | MmugDNA.21620.1 | 7.87  | 7.87  | 0.07 | 0.04 | 1     | 0.236293 | 0.705462 | 0.533943 | 0.829222 |
| MmugDNA.21621.1.S1_s_at | MmugDNA.21621.1 | 10.96 | 10.76 | 0.32 | 0.12 | 1.15  | 0.184332 | 0.326001 | 0.480413 | 0.576235 |

|                       |                 |       |       |      |      |       |          |          |          |          |
|-----------------------|-----------------|-------|-------|------|------|-------|----------|----------|----------|----------|
| MmugDNA.21622.1.S1_at | MmugDNA.21622.1 | 6.37  | 6.75  | 0.19 | 0.04 | -1.3  | 0.011822 | 0.035877 | 0.158666 | 0.233893 |
| MmugDNA.21629.1.S1_at | MmugDNA.21629.1 | 4.19  | 4.16  | 0.07 | 0.12 | 1.02  | 0.321858 | 0.361085 | 0.606128 | 0.602069 |
| MmugDNA.21630.1.S1_at | MmugDNA.21630.1 | 10.37 | 10.18 | 0.15 | 0.06 | 1.14  | 0.080378 | 0.002005 | 0.341026 | 0.066428 |
| MmugDNA.21633.1.S1_at | MmugDNA.21633.1 | 9.11  | 9.15  | 0.18 | 0.03 | -1.03 | 0.298811 | 0.886648 | 0.587033 | 0.935519 |
| MmugDNA.21634.1.S1_at | MmugDNA.21634.1 | 11.64 | 11.61 | 0.22 | 0.02 | 1.02  | 0.873949 | 0.100746 | 0.945857 | 0.360154 |
| MmugDNA.21636.1.S1_at | MmugDNA.21636.1 | 6.26  | 6.32  | 0.15 | 0.09 | -1.04 | 0.979042 | 0.587205 | 0.992043 | 0.754083 |
| MmugDNA.21651.1.S1_at | MmugDNA.21651.1 | 13.01 | 12.85 | 0.09 | 0.04 | 1.11  | 0.08819  | 0.010274 | 0.354244 | 0.132734 |
| MmugDNA.21655.1.S1_at | MmugDNA.21655.1 | 4.42  | 5.31  | 0.35 | 0.15 | -1.86 | 0.052478 | 0.27182  | 0.286213 | 0.536584 |
| MmugDNA.21661.1.S1_at | MmugDNA.21661.1 | 12.28 | 12.34 | 0.1  | 0.07 | -1.04 | 0.677479 | 0.543652 | 0.846248 | 0.726239 |
| MmugDNA.21665.1.S1_at | MmugDNA.21665.1 | 12.31 | 12.43 | 0.11 | 0.12 | -1.09 | 0.542475 | 0.009107 | 0.762838 | 0.125983 |
| MmugDNA.2167.1.S1_at  | MmugDNA.2167.1  | 6.35  | 6.65  | 0.19 | 0.1  | -1.23 | 0.114708 | 0.548981 | 0.39171  | 0.729509 |
| MmugDNA.21671.1.S1_at | MmugDNA.21671.1 | 9.78  | 10.39 | 0.08 | 0.16 | -1.53 | 0.003265 | 0.040096 | 0.102069 | 0.245388 |
| MmugDNA.2168.1.S1_at  | MmugDNA.2168.1  | 6.48  | 6.23  | 1.24 | 0.19 | 1.2   | 0.615786 | 0.828652 | 0.809127 | 0.901558 |
| MmugDNA.21682.1.S1_at | MmugDNA.21682.1 | 9.37  | 9.52  | 0.15 | 0.02 | -1.11 | 0.195393 | 0.803402 | 0.492108 | 0.886844 |
| MmugDNA.21684.1.S1_at | MmugDNA.21684.1 | 10.84 | 11    | 0.44 | 0.04 | -1.11 | 0.386535 | 0.690345 | 0.654936 | 0.819507 |
| MmugDNA.21691.1.S1_at | MmugDNA.21691.1 | 11.4  | 11.43 | 0.1  | 0.08 | -1.02 | 0.314193 | 0.46994  | 0.599901 | 0.678572 |
| MmugDNA.21692.1.S1_at | MmugDNA.21692.1 | 9.57  | 9.37  | 0.12 | 0.06 | 1.15  | 0.056149 | 0.070439 | 0.294152 | 0.311737 |
| MmugDNA.21695.1.S1_at | MmugDNA.21695.1 | 13.09 | 12.88 | 0.19 | 0.04 | 1.16  | 0.132583 | 0.133994 | 0.415892 | 0.406194 |
| MmugDNA.21697.1.S1_at | MmugDNA.21697.1 | 12.46 | 12.37 | 0.05 | 0.04 | 1.07  | 0.107535 | 0.272174 | 0.382272 | 0.536939 |
| MmugDNA.21699.1.S1_at | MmugDNA.21699.1 | 6.55  | 7.56  | 0.29 | 0.11 | -2.01 | 0.008189 | 0.004204 | 0.139463 | 0.091368 |
| MmugDNA.2170.1.S1_at  | MmugDNA.2170.1  | 4.81  | 5.44  | 0.23 | 0.36 | -1.55 | 0.079378 | 0.322847 | 0.339398 | 0.574192 |
| MmugDNA.21701.1.S1_at | MmugDNA.21701.1 | 13.05 | 12.88 | 0.1  | 0.04 | 1.12  | 0.07307  | 0.482454 | 0.327998 | 0.687298 |
| MmugDNA.21702.1.S1_at | MmugDNA.21702.1 | 9.26  | 9.57  | 0.17 | 0.03 | -1.24 | 0.03138  | 0.088243 | 0.23018  | 0.341721 |
| MmugDNA.21705.1.A1_at | MmugDNA.21705.1 | 5.82  | 5.65  | 0.09 | 0.1  | 1.12  | 0.180509 | 0.638887 | 0.475655 | 0.787897 |
| MmugDNA.21705.1.S1_at | MmugDNA.21705.1 | 5.56  | 5.59  | 0.15 | 0.05 | -1.02 | 0.70713  | 0.932618 | 0.861311 | 0.961739 |
| MmugDNA.21706.1.S1_at | MmugDNA.21706.1 | 7.45  | 7.66  | 0.26 | 0.02 | -1.15 | 0.208501 | 0.058509 | 0.506156 | 0.288585 |
| MmugDNA.21708.1.S1_at | MmugDNA.21708.1 | 3.88  | 6.56  | 1.3  | 0.64 | -6.44 | 0.077181 | 0.060526 | 0.335786 | 0.292664 |
| MmugDNA.21714.1.S1_at | MmugDNA.21714.1 | 12.8  | 12.42 | 0.01 | 0.06 | 1.31  | 0.000395 | 0.000468 | 0.062519 | 0.038572 |
| MmugDNA.21719.1.S1_at | MmugDNA.21719.1 | 9.27  | 9.12  | 0.1  | 0.07 | 1.11  | 0.409318 | 0.276539 | 0.671735 | 0.540552 |
| MmugDNA.2172.1.S1_at  | MmugDNA.2172.1  | 13.14 | 13.16 | 0.05 | 0.01 | -1.01 | 0.714317 | 0.023903 | 0.865058 | 0.193679 |
| MmugDNA.21722.1.S1_at | MmugDNA.21722.1 | 7.94  | 7.78  | 0.22 | 0.46 | 1.12  | 0.438647 | 0.025681 | 0.693162 | 0.200834 |
| MmugDNA.21723.1.S1_at | MmugDNA.21723.1 | 11.51 | 11.48 | 0.37 | 0.05 | 1.02  | 0.941853 | 0.138907 | 0.975589 | 0.412037 |
| MmugDNA.21725.1.S1_at | MmugDNA.21725.1 | 11.44 | 11.27 | 0.11 | 0.09 | 1.12  | 0.107157 | 0.317082 | 0.381659 | 0.570347 |
| MmugDNA.21726.1.S1_at | MmugDNA.21726.1 | 4.95  | 5.17  | 0.17 | 0.08 | -1.17 | 0.281906 | 0.029348 | 0.57275  | 0.213228 |
| MmugDNA.2173.1.S1_at  | MmugDNA.2173.1  | 9.96  | 9.47  | 0.31 | 0.07 | 1.4   | 0.130553 | 0.270446 | 0.412977 | 0.535785 |
| MmugDNA.21737.1.S1_at | MmugDNA.21737.1 | 5.48  | 7.2   | 1.49 | 0.36 | -3.28 | 0.406138 | 0.267995 | 0.669555 | 0.533738 |
| MmugDNA.21738.1.S1_at | MmugDNA.21738.1 | 5.39  | 5.2   | 0.05 | 0.24 | 1.13  | 0.233484 | 0.106298 | 0.53162  | 0.368766 |
| MmugDNA.21740.1.S1_at | MmugDNA.21740.1 | 7.97  | 7.06  | 0.95 | 0.08 | 1.88  | 0.537438 | 0.385144 | 0.759637 | 0.620662 |
| MmugDNA.21745.1.S1_at | MmugDNA.21745.1 | 11.67 | 12.01 | 0.2  | 0.2  | -1.26 | 0.053787 | 0.064424 | 0.289059 | 0.300001 |
| MmugDNA.21748.1.S1_at | MmugDNA.21748.1 | 5.24  | 5.19  | 0.16 | 0.03 | 1.04  | 0.232217 | 0.572555 | 0.530724 | 0.744566 |
| MmugDNA.21749.1.S1_at | MmugDNA.21749.1 | 5.27  | 5.23  | 0.1  | 0.05 | 1.03  | 0.207403 | 0.218816 | 0.50513  | 0.492537 |
| MmugDNA.2175.1.S1_at  | MmugDNA.2175.1  | 12.72 | 12.54 | 0.13 | 0.08 | 1.13  | 0.074774 | 0.118577 | 0.331577 | 0.38654  |
| MmugDNA.21756.1.S1_at | MmugDNA.21756.1 | 11.66 | 11.24 | 0.15 | 0.17 | 1.33  | 0.116406 | 0.150227 | 0.393578 | 0.42486  |

|                         |                 |       |       |      |      |       |          |          |          |          |
|-------------------------|-----------------|-------|-------|------|------|-------|----------|----------|----------|----------|
| MmugDNA.2176.1.S1_at    | MmugDNA.2176.1  | 7.11  | 8.32  | 0.6  | 0.19 | -2.31 | 0.03619  | 0.00282  | 0.245335 | 0.078275 |
| MmugDNA.21762.1.S1_at   | MmugDNA.21762.1 | 12.03 | 11.89 | 0.12 | 0.05 | 1.1   | 0.036023 | 0.111343 | 0.244836 | 0.376045 |
| MmugDNA.21768.1.S1_at   | MmugDNA.21768.1 | 6.71  | 6.45  | 0.19 | 0.18 | 1.2   | 0.151696 | 0.478232 | 0.441235 | 0.684243 |
| MmugDNA.21787.1.S1_at   | MmugDNA.21787.1 | 4.4   | 4.32  | 0.1  | 0.05 | 1.06  | 0.14532  | 0.209439 | 0.432623 | 0.483069 |
| MmugDNA.21795.1.S1_at   | MmugDNA.21795.1 | 5.96  | 5.7   | 0.17 | 0.22 | 1.2   | 0.820511 | 0.165205 | 0.919941 | 0.441389 |
| MmugDNA.21803.1.S1_at   | MmugDNA.21803.1 | 10.29 | 10.77 | 0.22 | 0.11 | -1.39 | 0.01928  | 0.654374 | 0.192035 | 0.798021 |
| MmugDNA.21806.1.S1_at   | MmugDNA.21806.1 | 3.73  | 3.67  | 0.2  | 0.14 | 1.04  | 0.731341 | 0.361428 | 0.874456 | 0.602201 |
| MmugDNA.21807.1.S1_at   | MmugDNA.21807.1 | 11.46 | 11.51 | 0.19 | 0.05 | -1.04 | 0.290347 | 0.594446 | 0.579851 | 0.758623 |
| MmugDNA.21809.1.S1_at   | MmugDNA.21809.1 | 12.04 | 12.03 | 0.06 | 0.02 | 1.01  | 0.783229 | 0.988849 | 0.901127 | 0.993642 |
| MmugDNA.21811.1.S1_at   | MmugDNA.21811.1 | 6.66  | 7.24  | 0.18 | 0.33 | -1.49 | 0.15558  | 0.368185 | 0.445915 | 0.607793 |
| MmugDNA.21814.1.S1_at   | MmugDNA.21814.1 | 5.9   | 6.5   | 0.18 | 0.33 | -1.52 | 0.117495 | 0.355746 | 0.394772 | 0.597864 |
| MmugDNA.21818.1.S1_at   | MmugDNA.21818.1 | 4.3   | 4.47  | 0.17 | 0.06 | -1.12 | 0.53896  | 0.768087 | 0.76048  | 0.865352 |
| MmugDNA.21826.1.S1_at   | MmugDNA.21826.1 | 5.59  | 6.63  | 0.32 | 0.21 | -2.05 | 0.02884  | 0.011619 | 0.22259  | 0.139603 |
| MmugDNA.21829.1.S1_at   | MmugDNA.21829.1 | 7.8   | 7.91  | 0.11 | 0.08 | -1.07 | 0.699972 | 0.942246 | 0.857508 | 0.967221 |
| MmugDNA.21835.1.S1_s_at | MmugDNA.21835.1 | 8.02  | 8.52  | 0.6  | 0.36 | -1.42 | 0.235147 | 0.222859 | 0.533056 | 0.495769 |
| MmugDNA.21839.1.S1_at   | MmugDNA.21839.1 | 8.27  | 8.06  | 1.14 | 0.44 | 1.16  | 0.622062 | 0.834302 | 0.812986 | 0.905078 |
| MmugDNA.2184.1.S1_at    | MmugDNA.2184.1  | 4.46  | 4.26  | 0.31 | 0.34 | 1.15  | 0.1178   | 0.159658 | 0.395196 | 0.435785 |
| MmugDNA.21840.1.S1_at   | MmugDNA.21840.1 | 10.25 | 10.28 | 0.13 | 0.1  | -1.02 | 0.332904 | 0.045156 | 0.614424 | 0.256979 |
| MmugDNA.21844.1.S1_at   | MmugDNA.21844.1 | 6.91  | 8.04  | 0.49 | 0.22 | -2.19 | 0.010618 | 0.056552 | 0.152801 | 0.283835 |
| MmugDNA.21847.1.S1_at   | MmugDNA.21847.1 | 6.05  | 5.99  | 0.06 | 0.14 | 1.04  | 0.957751 | 0.941975 | 0.982604 | 0.96711  |
| MmugDNA.2185.1.S1_at    | MmugDNA.2185.1  | 10.1  | 10.29 | 0.12 | 0.02 | -1.14 | 0.056704 | 0.737192 | 0.295663 | 0.847855 |
| MmugDNA.21852.1.S1_at   | MmugDNA.21852.1 | 6.48  | 7.31  | 0.47 | 0.06 | -1.78 | 0.036859 | 0.230757 | 0.247118 | 0.502451 |
| MmugDNA.2186.1.S1_at    | MmugDNA.2186.1  | 11.49 | 11    | 0.2  | 0.04 | 1.4   | 0.012273 | 0.011623 | 0.161109 | 0.13962  |
| MmugDNA.21865.1.S1_at   | MmugDNA.21865.1 | 9.86  | 9.86  | 0.27 | 0.05 | 1     | 0.634141 | 0.90085  | 0.820636 | 0.943581 |
| MmugDNA.21866.1.S1_at   | MmugDNA.21866.1 | 6.2   | 7.59  | 0.23 | 0.15 | -2.63 | 0.001301 | 0.115568 | 0.078631 | 0.382674 |
| MmugDNA.21867.1.S1_at   | MmugDNA.21867.1 | 11.65 | 11.92 | 0.42 | 0.16 | -1.21 | 0.575894 | 0.171061 | 0.78296  | 0.447601 |
| MmugDNA.21867.1.S1_s_at | MmugDNA.21867.1 | 10.52 | 9.93  | 0.23 | 0.13 | 1.51  | 0.061377 | 0.015601 | 0.304438 | 0.158262 |
| MmugDNA.21868.1.S1_at   | MmugDNA.21868.1 | 6.22  | 6.13  | 0.58 | 0.36 | 1.06  | 0.37233  | 0.321694 | 0.64489  | 0.573346 |
| MmugDNA.2187.1.S1_at    | MmugDNA.2187.1  | 12.79 | 12.75 | 0.16 | 0.02 | 1.03  | 0.561092 | 0.43037  | 0.774205 | 0.651383 |
| MmugDNA.21870.1.S1_at   | MmugDNA.21870.1 | 9.33  | 9.27  | 0.09 | 0.07 | 1.04  | 0.740305 | 0.303005 | 0.879531 | 0.560461 |
| MmugDNA.21873.1.S1_at   | MmugDNA.21873.1 | 2.64  | 2.82  | 0.14 | 0.1  | -1.13 | 0.398682 | 0.476189 | 0.664218 | 0.682566 |
| MmugDNA.21875.1.S1_at   | MmugDNA.21875.1 | 4.86  | 4.57  | 0.61 | 0.15 | 1.22  | 0.461658 | 0.599212 | 0.709034 | 0.761365 |
| MmugDNA.21876.1.S1_at   | MmugDNA.21876.1 | 4.02  | 4.03  | 0.12 | 0.1  | -1.01 | 0.935638 | 0.98179  | 0.973033 | 0.989993 |
| MmugDNA.21878.1.S1_at   | MmugDNA.21878.1 | 11.58 | 11.66 | 0.08 | 0.08 | -1.06 | 0.108422 | 0.432364 | 0.383021 | 0.652794 |
| MmugDNA.21887.1.S1_at   | MmugDNA.21887.1 | 11.43 | 11.21 | 0.21 | 0.18 | 1.17  | 0.17975  | 0.033288 | 0.474837 | 0.226074 |
| MmugDNA.21889.1.S1_at   | MmugDNA.21889.1 | 3.77  | 3.74  | 0.12 | 0.06 | 1.02  | 0.885298 | 0.983427 | 0.951028 | 0.99078  |
| MmugDNA.21894.1.S1_at   | MmugDNA.21894.1 | 4.29  | 4.28  | 0.21 | 0.05 | 1.01  | 0.786964 | 0.715589 | 0.90284  | 0.835127 |
| MmugDNA.21895.1.S1_at   | MmugDNA.21895.1 | 5.98  | 5.28  | 0.74 | 0.11 | 1.63  | 0.146972 | 0.509102 | 0.434942 | 0.703993 |
| MmugDNA.21899.1.S1_at   | MmugDNA.21899.1 | 10.42 | 10.6  | 0.11 | 0.01 | -1.14 | 0.148806 | 0.043379 | 0.437337 | 0.25294  |
| MmugDNA.219.1.S1_at     | MmugDNA.219.1   | 4.23  | 4.41  | 0.14 | 0.09 | -1.14 | 0.03015  | 0.158783 | 0.226724 | 0.43488  |
| MmugDNA.21904.1.S1_at   | MmugDNA.21904.1 | 10.54 | 10.87 | 0.1  | 0.09 | -1.25 | 0.014946 | 0.135595 | 0.174339 | 0.407742 |
| MmugDNA.21912.1.S1_at   | MmugDNA.21912.1 | 7.79  | 8.76  | 0.99 | 0.43 | -1.96 | 0.769013 | 0.049123 | 0.893947 | 0.266534 |
| MmugDNA.21920.1.S1_at   | MmugDNA.21920.1 | 4.8   | 4.87  | 0.04 | 0.05 | -1.05 | 0.182996 | 0.023067 | 0.478845 | 0.190066 |

|                         |                 |       |       |      |      |       |          |          |          |          |
|-------------------------|-----------------|-------|-------|------|------|-------|----------|----------|----------|----------|
| MmugDNA.21924.1.S1_at   | MmugDNA.21924.1 | 12.1  | 12.01 | 0.07 | 0.06 | 1.06  | 0.274029 | 0.108042 | 0.566013 | 0.37127  |
| MmugDNA.21928.1.S1_at   | MmugDNA.21928.1 | 6.73  | 7.02  | 0.33 | 0.07 | -1.22 | 0.557943 | 0.748045 | 0.772485 | 0.853351 |
| MmugDNA.21934.1.S1_at   | MmugDNA.21934.1 | 5.93  | 5.86  | 0.15 | 0.14 | 1.05  | 0.125007 | 0.119158 | 0.405516 | 0.387553 |
| MmugDNA.21945.1.S1_at   | MmugDNA.21945.1 | 13.36 | 13.26 | 0.04 | 0.06 | 1.07  | 0.044084 | 0.012218 | 0.267012 | 0.142932 |
| MmugDNA.21947.1.S1_at   | MmugDNA.21947.1 | 10.12 | 10.36 | 0.23 | 0.06 | -1.18 | 0.495322 | 0.017867 | 0.731799 | 0.168774 |
| MmugDNA.21948.1.S1_at   | MmugDNA.21948.1 | 6     | 6.93  | 0.19 | 0.5  | -1.91 | 0.039277 | 0.429248 | 0.254643 | 0.650729 |
| MmugDNA.21953.1.S1_at   | MmugDNA.21953.1 | 7.29  | 10.05 | 1.69 | 0.37 | -6.8  | 0.050823 | 0.080997 | 0.283144 | 0.329124 |
| MmugDNA.21954.1.S1_at   | MmugDNA.21954.1 | 6.15  | 5.99  | 0.18 | 0.15 | 1.11  | 0.063301 | 0.11222  | 0.308234 | 0.377537 |
| MmugDNA.21955.1.S1_at   | MmugDNA.21955.1 | 7.1   | 9.4   | 1.36 | 0.57 | -4.94 | 0.148654 | 0.047451 | 0.437221 | 0.262486 |
| MmugDNA.21974.1.S1_at   | MmugDNA.21974.1 | 3.96  | 3.91  | 0.12 | 0.08 | 1.03  | 0.945748 | 0.207674 | 0.977159 | 0.481906 |
| MmugDNA.21987.1.S1_at   | MmugDNA.21987.1 | 10.79 | 11.35 | 0.21 | 0.05 | -1.47 | 0.009431 | 0.004839 | 0.146902 | 0.097041 |
| MmugDNA.21989.1.S1_at   | MmugDNA.21989.1 | 10.91 | 10.84 | 0.15 | 0.08 | 1.05  | 0.480722 | 0.001582 | 0.721501 | 0.060356 |
| MmugDNA.21994.1.S1_at   | MmugDNA.21994.1 | 12.69 | 12.82 | 0.07 | 0.09 | -1.09 | 0.060582 | 0.000773 | 0.303194 | 0.045568 |
| MmugDNA.21995.1.S1_at   | MmugDNA.21995.1 | 9.73  | 10.28 | 0.23 | 0.15 | -1.46 | 0.013706 | 0.047853 | 0.167959 | 0.263679 |
| MmugDNA.21995.1.S1_s_at | MmugDNA.21995.1 | 9.61  | 10.12 | 0.15 | 0.11 | -1.42 | 0.006792 | 0.056777 | 0.129178 | 0.284379 |
| MmugDNA.21998.1.S1_at   | MmugDNA.21998.1 | 8.99  | 8.64  | 0.18 | 0.01 | 1.27  | 0.06353  | 0.069275 | 0.308742 | 0.309468 |
| MmugDNA.2200.1.S1_s_at  | MmugDNA.2200.1  | 4.53  | 4.15  | 0.28 | 0.23 | 1.3   | 0.166198 | 0.30761  | 0.45933  | 0.563785 |
| MmugDNA.22001.1.S1_at   | MmugDNA.22001.1 | 3.25  | 3.4   | 0.07 | 0.06 | -1.11 | 0.079486 | 0.1044   | 0.339662 | 0.365697 |
| MmugDNA.2201.1.S1_at    | MmugDNA.2201.1  | 10.56 | 10.4  | 0.16 | 0.09 | 1.12  | 0.078219 | 0.136783 | 0.337769 | 0.40939  |
| MmugDNA.22018.1.S1_at   | MmugDNA.22018.1 | 5.42  | 5.42  | 0.06 | 0.01 | 1.01  | 0.243588 | 0.225218 | 0.54025  | 0.497865 |
| MmugDNA.22020.1.S1_at   | MmugDNA.22020.1 | 4.92  | 4.73  | 0.43 | 0.12 | 1.14  | 0.530251 | 0.19781  | 0.754826 | 0.472721 |
| MmugDNA.22021.1.S1_at   | MmugDNA.22021.1 | 10.98 | 11.12 | 0.15 | 0.03 | -1.11 | 0.102091 | 0.13619  | 0.373939 | 0.408517 |
| MmugDNA.22026.1.S1_at   | MmugDNA.22026.1 | 5.28  | 5.62  | 0.16 | 0.16 | -1.26 | 0.124116 | 0.426705 | 0.40411  | 0.648808 |
| MmugDNA.22052.1.S1_at   | MmugDNA.22052.1 | 8.26  | 9.46  | 0.18 | 0.26 | -2.3  | 0.003    | 0.000528 | 0.099837 | 0.040039 |
| MmugDNA.22055.1.S1_at   | MmugDNA.22055.1 | 4.08  | 4.56  | 0.38 | 0.32 | -1.4  | 0.165974 | 0.051031 | 0.459032 | 0.271214 |
| MmugDNA.22057.1.S1_at   | MmugDNA.22057.1 | 5.62  | 4.54  | 0.64 | 0.47 | 2.11  | 0.138253 | 0.328436 | 0.423499 | 0.578066 |
| MmugDNA.22059.1.S1_at   | MmugDNA.22059.1 | 7.2   | 7.24  | 0.25 | 0.06 | -1.03 | 0.679537 | 0.785906 | 0.847107 | 0.87599  |
| MmugDNA.22060.1.S1_at   | MmugDNA.22060.1 | 6.5   | 6.4   | 0.08 | 0.09 | 1.07  | 0.230509 | 0.051285 | 0.529451 | 0.271872 |
| MmugDNA.22063.1.S1_at   | MmugDNA.22063.1 | 11.48 | 12    | 0.18 | 0.16 | -1.43 | 0.01876  | 0.435502 | 0.190313 | 0.655256 |
| MmugDNA.22066.1.S1_at   | MmugDNA.22066.1 | 10.55 | 10.19 | 0.18 | 0.12 | 1.29  | 0.079962 | 0.175444 | 0.340188 | 0.452157 |
| MmugDNA.22068.1.S1_at   | MmugDNA.22068.1 | 10.16 | 9.9   | 0.13 | 0.06 | 1.2   | 0.018978 | 0.1146   | 0.19121  | 0.381156 |
| MmugDNA.22069.1.S1_at   | MmugDNA.22069.1 | 5.72  | 5.67  | 0.08 | 0.07 | 1.04  | 0.983813 | 0.119867 | 0.993967 | 0.388577 |
| MmugDNA.2207.1.S1_at    | MmugDNA.2207.1  | 7.6   | 8.02  | 0.19 | 0.1  | -1.34 | 0.037169 | 0.255674 | 0.248068 | 0.523619 |
| MmugDNA.22074.1.S1_at   | MmugDNA.22074.1 | 3.97  | 4.02  | 0.08 | 0.02 | -1.03 | 0.321253 | 0.329766 | 0.605501 | 0.578874 |
| MmugDNA.22075.1.S1_at   | MmugDNA.22075.1 | 9.72  | 10.38 | 0.19 | 0.33 | -1.59 | 0.09285  | 0.042342 | 0.361387 | 0.250382 |
| MmugDNA.22077.1.S1_at   | MmugDNA.22077.1 | 4.01  | 6.88  | 0.77 | 0.25 | -7.3  | 0.006467 | 0.148243 | 0.127289 | 0.422745 |
| MmugDNA.22079.1.S1_at   | MmugDNA.22079.1 | 6.08  | 6.44  | 0.25 | 0.13 | -1.28 | 0.158871 | 0.176286 | 0.450154 | 0.452726 |
| MmugDNA.22083.1.S1_at   | MmugDNA.22083.1 | 3.93  | 3.83  | 0.42 | 0.17 | 1.07  | 0.751875 | 0.926752 | 0.885488 | 0.958404 |
| MmugDNA.22091.1.S1_at   | MmugDNA.22091.1 | 6.07  | 10.22 | 1.85 | 0.23 | -17.8 | 0.046699 | 0.289187 | 0.273636 | 0.550293 |
| MmugDNA.22094.1.S1_at   | MmugDNA.22094.1 | 5.75  | 6.45  | 0.45 | 0.31 | -1.63 | 0.129765 | 0.636733 | 0.412052 | 0.78635  |
| MmugDNA.22095.1.S1_at   | MmugDNA.22095.1 | 6.37  | 8.12  | 0.59 | 0.15 | -3.37 | 0.011588 | 0.097034 | 0.15753  | 0.354531 |
| MmugDNA.22096.1.S1_at   | MmugDNA.22096.1 | 12.3  | 12.98 | 0.22 | 0.01 | -1.6  | 0.006454 | 0.14685  | 0.127119 | 0.42088  |
| MmugDNA.22097.1.S1_at   | MmugDNA.22097.1 | 5.47  | 6.11  | 0.56 | 0.31 | -1.55 | 0.150354 | 0.175705 | 0.43942  | 0.452333 |

|                         |                 |       |       |      |      |       |          |          |          |          |
|-------------------------|-----------------|-------|-------|------|------|-------|----------|----------|----------|----------|
| MmugDNA.22098.1.S1_at   | MmugDNA.22098.1 | 7.22  | 8.17  | 1.22 | 0.59 | -1.94 | 0.098199 | 0.033451 | 0.36881  | 0.226517 |
| MmugDNA.22099.1.S1_at   | MmugDNA.22099.1 | 12.62 | 12.75 | 0.13 | 0.06 | -1.09 | 0.177011 | 0.255912 | 0.471609 | 0.523862 |
| MmugDNA.2210.1.S1_at    | MmugDNA.2210.1  | 12.14 | 11.64 | 0.13 | 0.04 | 1.41  | 0.00487  | 0.029882 | 0.115123 | 0.21455  |
| MmugDNA.22110.1.S1_at   | MmugDNA.22110.1 | 11.68 | 11.46 | 0.25 | 0.09 | 1.16  | 0.505961 | 0.513107 | 0.738783 | 0.706759 |
| MmugDNA.22111.1.S1_at   | MmugDNA.22111.1 | 9.09  | 9.38  | 0.22 | 0.08 | -1.23 | 0.111483 | 0.271541 | 0.387457 | 0.536547 |
| MmugDNA.22112.1.S1_at   | MmugDNA.22112.1 | 4.32  | 4.41  | 0.35 | 0.22 | -1.07 | 0.694018 | 0.896555 | 0.853854 | 0.940905 |
| MmugDNA.22115.1.S1_at   | MmugDNA.22115.1 | 9.51  | 9.44  | 0.13 | 0.09 | 1.05  | 0.309756 | 0.000173 | 0.596026 | 0.030511 |
| MmugDNA.22116.1.S1_at   | MmugDNA.22116.1 | 7.03  | 8.87  | 2.07 | 0.3  | -3.58 | 0.087457 | 0.187348 | 0.353257 | 0.463373 |
| MmugDNA.22118.1.S1_at   | MmugDNA.22118.1 | 8.03  | 8.75  | 0.27 | 0.09 | -1.64 | 0.01923  | 0.457143 | 0.192035 | 0.670743 |
| MmugDNA.22119.1.S1_at   | MmugDNA.22119.1 | 10.71 | 10.51 | 0.17 | 0.07 | 1.15  | 0.196768 | 0.167521 | 0.493882 | 0.443968 |
| MmugDNA.22121.1.S1_at   | MmugDNA.22121.1 | 8.84  | 10.21 | 0.53 | 0.23 | -2.6  | 0.034258 | 0.057998 | 0.239765 | 0.287327 |
| MmugDNA.22125.1.S1_at   | MmugDNA.22125.1 | 10.52 | 10    | 0.33 | 0.1  | 1.43  | 0.089895 | 0.085383 | 0.356863 | 0.337278 |
| MmugDNA.22131.1.S1_at   | MmugDNA.22131.1 | 7.69  | 7.64  | 0.16 | 0.15 | 1.04  | 0.831527 | 0.163561 | 0.925933 | 0.439765 |
| MmugDNA.22132.1.S1_at   | MmugDNA.22132.1 | 9.54  | 9.56  | 0.31 | 0.04 | -1.02 | 0.317932 | 0.639457 | 0.602764 | 0.788306 |
| MmugDNA.22134.1.S1_at   | MmugDNA.22134.1 | 10.65 | 10.36 | 0.17 | 0.1  | 1.22  | 0.198452 | 0.225377 | 0.495613 | 0.498017 |
| MmugDNA.2214.1.S1_at    | MmugDNA.2214.1  | 8.86  | 9.06  | 0.23 | 0.17 | -1.15 | 0.1063   | 0.554126 | 0.380284 | 0.732988 |
| MmugDNA.22140.1.S1_at   | MmugDNA.22140.1 | 5.26  | 5.3   | 0.06 | 0.02 | -1.03 | 0.845203 | 0.103499 | 0.932344 | 0.364346 |
| MmugDNA.22143.1.S1_at   | MmugDNA.22143.1 | 7.04  | 6.99  | 0.05 | 0.03 | 1.03  | 0.189968 | 0.039181 | 0.486315 | 0.243081 |
| MmugDNA.22148.1.S1_at   | MmugDNA.22148.1 | 3.21  | 3.3   | 0.12 | 0.01 | -1.07 | 0.24981  | 0.036665 | 0.544804 | 0.235973 |
| MmugDNA.2215.1.S1_at    | MmugDNA.2215.1  | 6.64  | 7.3   | 0.21 | 0.16 | -1.58 | 0.013146 | 0.098247 | 0.165277 | 0.356289 |
| MmugDNA.2215.1.S1_x_at  | MmugDNA.2215.1  | 6.2   | 6.94  | 0.19 | 0.12 | -1.66 | 0.007831 | 0.073766 | 0.137244 | 0.317123 |
| MmugDNA.22154.1.S1_at   | MmugDNA.22154.1 | 12.44 | 12.4  | 0.27 | 0.22 | 1.03  | 0.681137 | 0.798359 | 0.847952 | 0.883979 |
| MmugDNA.22156.1.S1_at   | MmugDNA.22156.1 | 3.56  | 3.79  | 0.26 | 0.36 | -1.17 | 0.338741 | 0.135725 | 0.619173 | 0.407917 |
| MmugDNA.22160.1.S1_at   | MmugDNA.22160.1 | 5.92  | 8.29  | 1.01 | 0.38 | -5.15 | 0.026283 | 0.332858 | 0.215228 | 0.581266 |
| MmugDNA.22165.1.S1_at   | MmugDNA.22165.1 | 7.92  | 7.77  | 0.61 | 0.13 | 1.11  | 0.483438 | 0.742905 | 0.723563 | 0.851074 |
| MmugDNA.22167.1.S1_at   | MmugDNA.22167.1 | 8.62  | 8.69  | 0.26 | 0.06 | -1.05 | 0.225781 | 0.085055 | 0.523482 | 0.336812 |
| MmugDNA.22170.1.S1_at   | MmugDNA.22170.1 | 7.52  | 8.78  | 0.58 | 0.14 | -2.4  | 0.054288 | 0.035427 | 0.290066 | 0.232539 |
| MmugDNA.22172.1.S1_at   | MmugDNA.22172.1 | 8.91  | 9.03  | 0.32 | 0.11 | -1.09 | 0.771341 | 0.082139 | 0.895232 | 0.330937 |
| MmugDNA.22174.1.S1_at   | MmugDNA.22174.1 | 2.85  | 2.98  | 0.12 | 0.09 | -1.09 | 0.265103 | 0.302753 | 0.557962 | 0.560307 |
| MmugDNA.22175.1.S1_s_at | MmugDNA.22175.1 | 5.87  | 5.9   | 0.14 | 0.04 | -1.02 | 0.438786 | 0.595269 | 0.69332  | 0.759074 |
| MmugDNA.22176.1.S1_at   | MmugDNA.22176.1 | 12.02 | 11.98 | 0.06 | 0.08 | 1.03  | 0.254804 | 0.003037 | 0.549356 | 0.080386 |
| MmugDNA.22178.1.S1_at   | MmugDNA.22178.1 | 5.49  | 4.77  | 0.27 | 0.32 | 1.65  | 0.044217 | 0.105218 | 0.267305 | 0.366982 |
| MmugDNA.2218.1.S1_at    | MmugDNA.2218.1  | 5.88  | 5.78  | 0.12 | 0.31 | 1.07  | 0.884441 | 0.419633 | 0.950846 | 0.643571 |
| MmugDNA.22186.1.S1_at   | MmugDNA.22186.1 | 4.41  | 4.55  | 0.1  | 0.19 | -1.1  | 0.169311 | 0.314109 | 0.462589 | 0.568185 |
| MmugDNA.22190.1.S1_at   | MmugDNA.22190.1 | 11.97 | 12.43 | 0.25 | 0.08 | -1.38 | 0.024988 | 0.002627 | 0.211192 | 0.075772 |
| MmugDNA.22191.1.S1_at   | MmugDNA.22191.1 | 4.31  | 4.14  | 0.18 | 0.1  | 1.12  | 0.065694 | 0.054999 | 0.313721 | 0.279974 |
| MmugDNA.22192.1.S1_at   | MmugDNA.22192.1 | 12.33 | 12.67 | 0.47 | 0.12 | -1.27 | 0.31202  | 0.659724 | 0.59816  | 0.800854 |
| MmugDNA.22195.1.S1_at   | MmugDNA.22195.1 | 5.33  | 5.77  | 0.17 | 0.23 | -1.36 | 0.042241 | 0.408781 | 0.262497 | 0.6359   |
| MmugDNA.22197.1.S1_at   | MmugDNA.22197.1 | 4.34  | 4.54  | 0.1  | 0.13 | -1.15 | 0.055857 | 0.478706 | 0.293434 | 0.684691 |
| MmugDNA.22199.1.S1_at   | MmugDNA.22199.1 | 11.61 | 11.55 | 0.08 | 0.18 | 1.05  | 0.333392 | 0.936557 | 0.614833 | 0.964214 |
| MmugDNA.2220.1.S1_at    | MmugDNA.2220.1  | 10.79 | 10.87 | 0.04 | 0.06 | -1.05 | 0.445934 | 0.003354 | 0.698308 | 0.083359 |
| MmugDNA.22200.1.S1_at   | MmugDNA.22200.1 | 11.22 | 11.13 | 0.08 | 0.09 | 1.06  | 0.095326 | 0.524879 | 0.364763 | 0.714635 |
| MmugDNA.22200.1.S1_s_at | MmugDNA.22200.1 | 12.02 | 11.97 | 0.08 | 0.07 | 1.03  | 0.345246 | 0.593237 | 0.624343 | 0.758138 |

|                         |                 |       |       |      |      |       |          |          |          |          |
|-------------------------|-----------------|-------|-------|------|------|-------|----------|----------|----------|----------|
| MmugDNA.22218.1.S1_at   | MmugDNA.22218.1 | 7.88  | 7.9   | 0.15 | 0.06 | -1.02 | 0.380543 | 0.577103 | 0.65023  | 0.74764  |
| MmugDNA.22218.1.S1_s_at | MmugDNA.22218.1 | 6.34  | 6.12  | 0.48 | 0.16 | 1.16  | 0.39431  | 0.539608 | 0.660956 | 0.723854 |
| MmugDNA.22221.1.S1_at   | MmugDNA.22221.1 | 12.01 | 12.4  | 0.12 | 0.12 | -1.31 | 0.015456 | 0.002142 | 0.176435 | 0.06849  |
| MmugDNA.22224.1.S1_at   | MmugDNA.22224.1 | 12.3  | 12.23 | 0.06 | 0.06 | 1.05  | 0.203952 | 0.097699 | 0.501484 | 0.355581 |
| MmugDNA.22229.1.S1_at   | MmugDNA.22229.1 | 6.4   | 6.09  | 0.9  | 0.12 | 1.24  | 0.575368 | 0.767326 | 0.782823 | 0.864882 |
| MmugDNA.2223.1.S1_at    | MmugDNA.2223.1  | 4.99  | 4.67  | 0.26 | 0.09 | 1.25  | 0.154299 | 0.05543  | 0.44462  | 0.281328 |
| MmugDNA.22231.1.S1_at   | MmugDNA.22231.1 | 5.21  | 5.11  | 0.27 | 0.04 | 1.08  | 0.52741  | 0.709926 | 0.753064 | 0.831879 |
| MmugDNA.22233.1.S1_at   | MmugDNA.22233.1 | 3.57  | 3.5   | 0.24 | 0.04 | 1.04  | 0.670523 | 0.841863 | 0.841859 | 0.909901 |
| MmugDNA.22235.1.S1_at   | MmugDNA.22235.1 | 10.67 | 10.46 | 0.63 | 0.21 | 1.15  | 0.419952 | 0.664219 | 0.679193 | 0.803247 |
| MmugDNA.22240.1.S1_at   | MmugDNA.22240.1 | 7.2   | 7.07  | 0.28 | 0.03 | 1.09  | 0.465921 | 0.676406 | 0.711856 | 0.810935 |
| MmugDNA.22241.1.S1_at   | MmugDNA.22241.1 | 11.4  | 11.22 | 0.06 | 0.1  | 1.13  | 0.093092 | 0.001223 | 0.361736 | 0.054593 |
| MmugDNA.22244.1.S1_at   | MmugDNA.22244.1 | 10.28 | 10.49 | 0.12 | 0.06 | -1.15 | 0.045619 | 0.348721 | 0.271064 | 0.592732 |
| MmugDNA.22246.1.S1_at   | MmugDNA.22246.1 | 12.08 | 11.98 | 0.17 | 0.05 | 1.07  | 0.831241 | 0.393714 | 0.92581  | 0.626522 |
| MmugDNA.22248.1.S1_at   | MmugDNA.22248.1 | 7.42  | 7.57  | 0.11 | 0.02 | -1.1  | 0.356075 | 0.037942 | 0.632435 | 0.239302 |
| MmugDNA.2225.1.S1_at    | MmugDNA.2225.1  | 10.36 | 10.4  | 0.15 | 0.08 | -1.03 | 0.681324 | 0.990023 | 0.848025 | 0.994311 |
| MmugDNA.22251.1.S1_at   | MmugDNA.22251.1 | 10.36 | 10.48 | 0.2  | 0.04 | -1.09 | 0.191211 | 0.626753 | 0.487409 | 0.779979 |
| MmugDNA.22252.1.S1_at   | MmugDNA.22252.1 | 12.14 | 12.51 | 0.11 | 0.08 | -1.29 | 0.007717 | 0.067895 | 0.136707 | 0.306745 |
| MmugDNA.22262.1.S1_at   | MmugDNA.22262.1 | 3.17  | 3.19  | 0.07 | 0.17 | -1.02 | 0.823834 | 0.846114 | 0.921686 | 0.912389 |
| MmugDNA.22263.1.S1_x_at | MmugDNA.22263.1 | 5.34  | 5.92  | 0.91 | 0.66 | -1.49 | 0.234231 | 0.302103 | 0.532289 | 0.560071 |
| MmugDNA.22266.1.S1_at   | MmugDNA.22266.1 | 4.96  | 4.89  | 0.19 | 0.09 | 1.05  | 0.517808 | 0.695827 | 0.746932 | 0.823223 |
| MmugDNA.22266.1.S1_x_at | MmugDNA.22266.1 | 4.91  | 4.95  | 0.05 | 0.05 | -1.03 | 0.449001 | 0.703236 | 0.700354 | 0.827928 |
| MmugDNA.22279.1.S1_at   | MmugDNA.22279.1 | 6.38  | 6.38  | 0.17 | 0.01 | -1    | 0.683518 | 0.473839 | 0.849117 | 0.681082 |
| MmugDNA.22282.1.S1_at   | MmugDNA.22282.1 | 11.21 | 11.32 | 0.16 | 0.04 | -1.08 | 0.116213 | 0.320443 | 0.393335 | 0.572648 |
| MmugDNA.22284.1.S1_at   | MmugDNA.22284.1 | 5.03  | 5.18  | 0.04 | 0.15 | -1.11 | 0.151456 | 0.127993 | 0.440961 | 0.398959 |
| MmugDNA.22285.1.S1_at   | MmugDNA.22285.1 | 6.05  | 5.96  | 0.19 | 0.15 | 1.06  | 0.790908 | 0.670687 | 0.90499  | 0.807467 |
| MmugDNA.22287.1.S1_at   | MmugDNA.22287.1 | 6.04  | 6.81  | 0.25 | 0.28 | -1.71 | 0.014598 | 0.014594 | 0.172727 | 0.154067 |
| MmugDNA.22295.1.S1_at   | MmugDNA.22295.1 | 5.83  | 5.17  | 0.58 | 0.9  | 1.58  | 0.374002 | 0.47931  | 0.645224 | 0.685088 |
| MmugDNA.22298.1.S1_at   | MmugDNA.22298.1 | 7.24  | 7.7   | 0.51 | 0.07 | -1.37 | 0.192644 | 0.298646 | 0.489253 | 0.557252 |
| MmugDNA.223.1.S1_at     | MmugDNA.223.1   | 6.03  | 6.34  | 0.86 | 0.66 | -1.24 | 0.967571 | 0.771358 | 0.987066 | 0.867153 |
| MmugDNA.2230.1.S1_at    | MmugDNA.2230.1  | 8.18  | 8.43  | 0.16 | 0.1  | -1.18 | 0.371341 | 0.745726 | 0.64406  | 0.85256  |
| MmugDNA.22301.1.S1_at   | MmugDNA.22301.1 | 4.26  | 3.95  | 0.25 | 0.02 | 1.24  | 0.344975 | 0.441802 | 0.624093 | 0.659938 |
| MmugDNA.22309.1.S1_at   | MmugDNA.22309.1 | 7.94  | 6.53  | 0.18 | 0.2  | 2.66  | 0.000627 | 0.055788 | 0.070727 | 0.282044 |
| MmugDNA.22312.1.S1_at   | MmugDNA.22312.1 | 8.67  | 8.62  | 0.05 | 0.05 | 1.03  | 0.281316 | 0.933826 | 0.572166 | 0.962332 |
| MmugDNA.22314.1.S1_at   | MmugDNA.22314.1 | 10.99 | 11.1  | 0.13 | 0.07 | -1.08 | 0.158853 | 0.106991 | 0.450138 | 0.369557 |
| MmugDNA.22319.1.S1_at   | MmugDNA.22319.1 | 7.01  | 6.99  | 0.34 | 0.12 | 1.01  | 0.913933 | 0.936472 | 0.963451 | 0.964171 |
| MmugDNA.22328.1.S1_at   | MmugDNA.22328.1 | 5.72  | 5.71  | 0.17 | 0.03 | 1.01  | 0.567956 | 0.260082 | 0.778072 | 0.52675  |
| MmugDNA.22332.1.S1_at   | MmugDNA.22332.1 | 12.05 | 12.14 | 0.15 | 0.03 | -1.06 | 0.343214 | 0.001304 | 0.622887 | 0.055628 |
| MmugDNA.22343.1.S1_at   | MmugDNA.22343.1 | 13.17 | 13.19 | 0.03 | 0.03 | -1.01 | 0.92637  | 0.171246 | 0.968882 | 0.447792 |
| MmugDNA.22343.1.S1_s_at | MmugDNA.22343.1 | 12.28 | 12.3  | 0.01 | 0.05 | -1.01 | 0.632502 | 0.835547 | 0.819841 | 0.905864 |
| MmugDNA.22344.1.S1_at   | MmugDNA.22344.1 | 13.18 | 13.03 | 0.02 | 0.07 | 1.11  | 0.008582 | 0.017585 | 0.142133 | 0.167721 |
| MmugDNA.22345.1.S1_at   | MmugDNA.22345.1 | 5.35  | 5.27  | 0.22 | 0.05 | 1.06  | 0.440291 | 0.565366 | 0.694391 | 0.739877 |
| MmugDNA.22346.1.S1_at   | MmugDNA.22346.1 | 12.47 | 12.5  | 0.06 | 0.07 | -1.02 | 0.76742  | 0.976969 | 0.893274 | 0.987472 |
| MmugDNA.22354.1.S1_at   | MmugDNA.22354.1 | 9.21  | 8.96  | 0.2  | 0.07 | 1.19  | 0.474415 | 0.10237  | 0.717451 | 0.362527 |

|                         |                 |       |       |      |      |        |          |          |          |          |
|-------------------------|-----------------|-------|-------|------|------|--------|----------|----------|----------|----------|
| MmugDNA.22359.1.S1_at   | MmugDNA.22359.1 | 10.49 | 9.63  | 1.42 | 0.24 | 1.82   | 0.196021 | 0.224244 | 0.492967 | 0.497164 |
| MmugDNA.22360.1.S1_at   | MmugDNA.22360.1 | 8.11  | 8.86  | 0.38 | 0.2  | -1.68  | 0.057334 | 0.356994 | 0.296814 | 0.598736 |
| MmugDNA.22360.1.S1_s_at | MmugDNA.22360.1 | 10.14 | 10.82 | 0.57 | 0.08 | -1.6   | 0.234737 | 0.62888  | 0.532848 | 0.781499 |
| MmugDNA.22362.1.S1_at   | MmugDNA.22362.1 | 13.21 | 13.09 | 0.06 | 0.02 | 1.09   | 0.008108 | 0.014373 | 0.138956 | 0.15304  |
| MmugDNA.22364.1.S1_at   | MmugDNA.22364.1 | 12.69 | 12.54 | 0.06 | 0.07 | 1.11   | 0.03181  | 0.027    | 0.231861 | 0.2055   |
| MmugDNA.22366.1.S1_at   | MmugDNA.22366.1 | 7.74  | 7.42  | 0.16 | 0.02 | 1.24   | 0.017832 | 0.004759 | 0.187044 | 0.096243 |
| MmugDNA.22371.1.S1_at   | MmugDNA.22371.1 | 13.49 | 13.49 | 0.13 | 0.01 | 1      | 0.986866 | 0.801466 | 0.995228 | 0.885779 |
| MmugDNA.22373.1.S1_at   | MmugDNA.22373.1 | 6.89  | 7.72  | 0.46 | 0.06 | -1.77  | 0.021677 | 0.043789 | 0.20067  | 0.25387  |
| MmugDNA.22376.1.S1_at   | MmugDNA.22376.1 | 5.7   | 7.7   | 1.38 | 0.28 | -4     | 0.108287 | 0.442902 | 0.382964 | 0.660816 |
| MmugDNA.22380.1.S1_at   | MmugDNA.22380.1 | 5.66  | 4.97  | 0.91 | 0.18 | 1.61   | 0.275486 | 0.390564 | 0.567161 | 0.624329 |
| MmugDNA.22383.1.S1_at   | MmugDNA.22383.1 | 5.79  | 5.85  | 0.04 | 0.02 | -1.04  | 0.063593 | 0.462139 | 0.308797 | 0.673568 |
| MmugDNA.22387.1.S1_at   | MmugDNA.22387.1 | 5.19  | 5.15  | 0.12 | 0.03 | 1.03   | 0.309866 | 0.245887 | 0.596131 | 0.51552  |
| MmugDNA.22388.1.S1_at   | MmugDNA.22388.1 | 7.47  | 7.35  | 0.19 | 0.06 | 1.09   | 0.114382 | 0.248864 | 0.391329 | 0.517951 |
| MmugDNA.22389.1.S1_at   | MmugDNA.22389.1 | 3.67  | 3.72  | 0.19 | 0.28 | -1.04  | 0.833398 | 0.968926 | 0.926598 | 0.982889 |
| MmugDNA.22392.1.S1_at   | MmugDNA.22392.1 | 5.86  | 5.64  | 0.16 | 0.05 | 1.17   | 0.362596 | 0.314862 | 0.63739  | 0.568619 |
| MmugDNA.2240.1.S1_at    | MmugDNA.2240.1  | 8.69  | 9     | 0.25 | 0.05 | -1.24  | 0.123574 | 0.11552  | 0.403056 | 0.38267  |
| MmugDNA.22401.1.S1_at   | MmugDNA.22401.1 | 4.75  | 4.66  | 0.11 | 0.06 | 1.06   | 0.53313  | 0.3969   | 0.756823 | 0.628464 |
| MmugDNA.22407.1.S1_at   | MmugDNA.22407.1 | 7.31  | 8.45  | 0.21 | 0.12 | -2.2   | 0.00101  | 0.004166 | 0.076321 | 0.091036 |
| MmugDNA.22418.1.S1_at   | MmugDNA.22418.1 | 9.27  | 8.96  | 0.08 | 0.01 | 1.24   | 0.003701 | 0.260667 | 0.106124 | 0.527199 |
| MmugDNA.22421.1.S1_at   | MmugDNA.22421.1 | 3.43  | 3.3   | 0.2  | 0.04 | 1.09   | 0.157257 | 0.230105 | 0.448014 | 0.501982 |
| MmugDNA.22422.1.S1_at   | MmugDNA.22422.1 | 7.91  | 8.43  | 0.32 | 0.18 | -1.44  | 0.045016 | 0.31195  | 0.269448 | 0.566833 |
| MmugDNA.22426.1.S1_at   | MmugDNA.22426.1 | 5.43  | 8.94  | 1.78 | 0.2  | -11.39 | 0.034607 | 0.162458 | 0.240603 | 0.438575 |
| MmugDNA.22429.1.S1_at   | MmugDNA.22429.1 | 10.46 | 10.55 | 0.02 | 0.06 | -1.06  | 0.224912 | 0.026733 | 0.522843 | 0.204492 |
| MmugDNA.22431.1.S1_s_at | MmugDNA.22431.1 | 4.97  | 4.79  | 0.35 | 0.08 | 1.13   | 0.515174 | 0.860314 | 0.745032 | 0.920379 |
| MmugDNA.22446.1.S1_at   | MmugDNA.22446.1 | 8.15  | 8.4   | 0.51 | 0.11 | -1.19  | 0.611579 | 0.013155 | 0.806363 | 0.147338 |
| MmugDNA.2245.1.S1_at    | MmugDNA.2245.1  | 11.46 | 11.42 | 0.35 | 0.08 | 1.03   | 0.827994 | 0.133861 | 0.923804 | 0.405882 |
| MmugDNA.22453.1.S1_at   | MmugDNA.22453.1 | 4.88  | 4.61  | 0.24 | 0.16 | 1.21   | 0.067317 | 0.06399  | 0.317061 | 0.299074 |
| MmugDNA.22455.1.S1_at   | MmugDNA.22455.1 | 9.36  | 9.35  | 0.11 | 0.03 | 1.01   | 0.486994 | 0.298029 | 0.725966 | 0.556695 |
| MmugDNA.22456.1.S1_at   | MmugDNA.22456.1 | 9.52  | 8.85  | 0.47 | 0.32 | 1.6    | 0.188049 | 0.394156 | 0.484319 | 0.62675  |
| MmugDNA.22456.1.S1_s_at | MmugDNA.22456.1 | 9.98  | 9.33  | 0.55 | 0.47 | 1.58   | 0.214835 | 0.492195 | 0.512418 | 0.693477 |
| MmugDNA.22464.1.S1_at   | MmugDNA.22464.1 | 7.43  | 7.06  | 0.43 | 0.07 | 1.29   | 0.679914 | 0.122326 | 0.847268 | 0.392032 |
| MmugDNA.22467.1.S1_at   | MmugDNA.22467.1 | 9.65  | 9.97  | 0.14 | 0.24 | -1.25  | 0.099428 | 0.431547 | 0.370342 | 0.652437 |
| MmugDNA.2247.1.S1_at    | MmugDNA.2247.1  | 7.54  | 7.54  | 0.2  | 0.23 | -1     | 0.48259  | 0.740865 | 0.722916 | 0.849975 |
| MmugDNA.22474.1.S1_at   | MmugDNA.22474.1 | 6.43  | 6.36  | 0.38 | 0.05 | 1.05   | 0.772928 | 0.177752 | 0.896007 | 0.454107 |
| MmugDNA.22479.1.S1_at   | MmugDNA.22479.1 | 9.02  | 9.91  | 0.44 | 0.11 | -1.85  | 0.034126 | 0.48672  | 0.239433 | 0.690047 |
| MmugDNA.22481.1.S1_at   | MmugDNA.22481.1 | 8.68  | 8.21  | 0.15 | 0.08 | 1.38   | 0.010719 | 0.076378 | 0.153317 | 0.321368 |
| MmugDNA.22485.1.S1_at   | MmugDNA.22485.1 | 10.26 | 10.65 | 0.17 | 0.26 | -1.31  | 0.170248 | 0.371393 | 0.46391  | 0.610177 |
| MmugDNA.22487.1.S1_at   | MmugDNA.22487.1 | 10.16 | 10.18 | 0.03 | 0.06 | -1.01  | 0.562082 | 0.074137 | 0.774823 | 0.31781  |
| MmugDNA.22495.1.S1_at   | MmugDNA.22495.1 | 10.9  | 10.43 | 0.07 | 0.13 | 1.38   | 0.003175 | 0.001742 | 0.101357 | 0.062895 |
| MmugDNA.22500.1.S1_at   | MmugDNA.22500.1 | 6.3   | 6.3   | 0.14 | 0.06 | -1     | 0.447264 | 0.308242 | 0.699312 | 0.564378 |
| MmugDNA.22502.1.S1_at   | MmugDNA.22502.1 | 4.39  | 4.37  | 0.03 | 0.08 | 1.01   | 0.268508 | 0.315607 | 0.561073 | 0.569053 |
| MmugDNA.22505.1.S1_at   | MmugDNA.22505.1 | 6.95  | 6.72  | 0.22 | 0.02 | 1.17   | 0.450548 | 0.155019 | 0.70154  | 0.430053 |
| MmugDNA.22509.1.S1_at   | MmugDNA.22509.1 | 6.95  | 6.82  | 0.09 | 0.11 | 1.09   | 0.117735 | 0.040164 | 0.395125 | 0.245709 |

|                         |                 |       |       |      |      |       |          |          |          |          |
|-------------------------|-----------------|-------|-------|------|------|-------|----------|----------|----------|----------|
| MmugDNA.22512.1.S1_at   | MmugDNA.22512.1 | 7.97  | 7.86  | 0.32 | 0.13 | 1.08  | 0.686905 | 0.629064 | 0.850752 | 0.781597 |
| MmugDNA.22518.1.S1_at   | MmugDNA.22518.1 | 9.83  | 8.8   | 0.3  | 0.17 | 2.04  | 0.013462 | 0.005136 | 0.166746 | 0.099462 |
| MmugDNA.2252.1.S1_at    | MmugDNA.2252.1  | 13.73 | 13.56 | 0.04 | 0.05 | 1.12  | 0.017439 | 0.003178 | 0.185714 | 0.081873 |
| MmugDNA.22520.1.S1_at   | MmugDNA.22520.1 | 12.81 | 12.48 | 0.15 | 0.04 | 1.26  | 0.017142 | 0.01449  | 0.184186 | 0.153669 |
| MmugDNA.22526.1.S1_at   | MmugDNA.22526.1 | 4.7   | 4.59  | 0.3  | 0.1  | 1.08  | 0.597732 | 0.557912 | 0.796926 | 0.735292 |
| MmugDNA.22532.1.S1_at   | MmugDNA.22532.1 | 3.98  | 4.26  | 0.04 | 0.14 | -1.21 | 0.07346  | 0.097215 | 0.328846 | 0.354886 |
| MmugDNA.22537.1.S1_s_at | MmugDNA.22537.1 | 12.35 | 12.17 | 0.35 | 0.11 | 1.13  | 0.718524 | 0.433621 | 0.867253 | 0.65387  |
| MmugDNA.22543.1.S1_at   | MmugDNA.22543.1 | 7     | 6.38  | 0.05 | 0.1  | 1.54  | 0.000774 | 0.005756 | 0.072818 | 0.104378 |
| MmugDNA.22545.1.S1_at   | MmugDNA.22545.1 | 12.21 | 12.71 | 0.15 | 0.02 | -1.41 | 0.00515  | 0.003859 | 0.116998 | 0.088378 |
| MmugDNA.22546.1.S1_at   | MmugDNA.22546.1 | 6.82  | 6.9   | 0.1  | 0.15 | -1.06 | 0.439516 | 0.539135 | 0.693727 | 0.723569 |
| MmugDNA.22549.1.S1_at   | MmugDNA.22549.1 | 9.14  | 9.05  | 0.21 | 0.11 | 1.06  | 0.558353 | 0.326286 | 0.772827 | 0.576452 |
| MmugDNA.2255.1.S1_at    | MmugDNA.2255.1  | 9.76  | 7.31  | 0.21 | 0.06 | 5.45  | 0.000046 | 0.034788 | 0.045594 | 0.230686 |
| MmugDNA.22554.1.S1_at   | MmugDNA.22554.1 | 11.82 | 11.7  | 0.11 | 0.07 | 1.08  | 0.098438 | 0.268593 | 0.369095 | 0.534138 |
| MmugDNA.22554.1.S1_s_at | MmugDNA.22554.1 | 8.76  | 8.56  | 0.07 | 0.05 | 1.15  | 0.020908 | 0.214748 | 0.198215 | 0.48862  |
| MmugDNA.22560.1.S1_at   | MmugDNA.22560.1 | 9.68  | 9.76  | 0.05 | 0.09 | -1.06 | 0.718639 | 0.302879 | 0.867276 | 0.560356 |
| MmugDNA.22568.1.S1_at   | MmugDNA.22568.1 | 12.64 | 12.43 | 0.18 | 0.04 | 1.16  | 0.113066 | 0.129284 | 0.389626 | 0.400692 |
| MmugDNA.22569.1.S1_at   | MmugDNA.22569.1 | 5.79  | 5.71  | 0.24 | 0.09 | 1.06  | 0.491787 | 0.701269 | 0.729388 | 0.826775 |
| MmugDNA.22573.1.S1_at   | MmugDNA.22573.1 | 5.77  | 5.61  | 0.18 | 0.03 | 1.12  | 0.499998 | 0.064531 | 0.734497 | 0.300255 |
| MmugDNA.22579.1.S1_at   | MmugDNA.22579.1 | 8.24  | 10.25 | 1.16 | 0.14 | -4.03 | 0.052916 | 0.229108 | 0.287075 | 0.501438 |
| MmugDNA.2258.1.S1_at    | MmugDNA.2258.1  | 12.13 | 12.07 | 0.27 | 0.11 | 1.04  | 0.753748 | 0.000685 | 0.886491 | 0.044166 |
| MmugDNA.22582.1.S1_at   | MmugDNA.22582.1 | 8.13  | 6.85  | 1.29 | 0.73 | 2.43  | 0.309108 | 0.50449  | 0.59558  | 0.701617 |
| MmugDNA.2259.1.S1_at    | MmugDNA.2259.1  | 11.27 | 11.16 | 0.03 | 0.09 | 1.08  | 0.087174 | 0.681629 | 0.352835 | 0.814092 |
| MmugDNA.22594.1.S1_at   | MmugDNA.22594.1 | 6.78  | 6.77  | 0.08 | 0.05 | 1     | 0.872897 | 0.970533 | 0.945492 | 0.983953 |
| MmugDNA.22595.1.S1_at   | MmugDNA.22595.1 | 10.29 | 10.96 | 0.13 | 0.05 | -1.59 | 0.002034 | 0.000717 | 0.089887 | 0.044419 |
| MmugDNA.22596.1.S1_at   | MmugDNA.22596.1 | 6.66  | 6.75  | 0.21 | 0.08 | -1.06 | 0.494936 | 0.571653 | 0.731451 | 0.743888 |
| MmugDNA.22596.1.S1_s_at | MmugDNA.22596.1 | 6.88  | 6.9   | 0.19 | 0.03 | -1.01 | 0.847121 | 0.608777 | 0.933311 | 0.767285 |
| MmugDNA.22597.1.S1_at   | MmugDNA.22597.1 | 6.63  | 6.69  | 0.13 | 0.05 | -1.04 | 0.940972 | 0.992608 | 0.975229 | 0.995715 |
| MmugDNA.226.1.S1_at     | MmugDNA.226.1   | 8.02  | 8.21  | 0.09 | 0.13 | -1.15 | 0.118005 | 0.825065 | 0.395593 | 0.899488 |
| MmugDNA.22607.1.S1_at   | MmugDNA.22607.1 | 10.4  | 11.09 | 0.53 | 0.23 | -1.61 | 0.136179 | 0.219474 | 0.420583 | 0.493156 |
| MmugDNA.22609.1.S1_at   | MmugDNA.22609.1 | 9.2   | 9.55  | 0.09 | 0.3  | -1.27 | 0.106112 | 0.494896 | 0.380184 | 0.695168 |
| MmugDNA.22610.1.S1_at   | MmugDNA.22610.1 | 4.02  | 4.01  | 0.18 | 0.18 | 1.01  | 0.241479 | 0.255694 | 0.538602 | 0.52364  |
| MmugDNA.22617.1.S1_at   | MmugDNA.22617.1 | 3.58  | 3.48  | 0.04 | 0.06 | 1.07  | 0.075302 | 0.065843 | 0.332568 | 0.301996 |
| MmugDNA.22619.1.S1_at   | MmugDNA.22619.1 | 7.24  | 8.16  | 0.53 | 0.19 | -1.9  | 0.050004 | 0.434679 | 0.281277 | 0.654756 |
| MmugDNA.22619.1.S1_x_at | MmugDNA.22619.1 | 6.3   | 7.48  | 0.5  | 0.25 | -2.28 | 0.054531 | 0.279879 | 0.290603 | 0.543342 |
| MmugDNA.22620.1.S1_at   | MmugDNA.22620.1 | 5.88  | 6.09  | 0.11 | 0.05 | -1.16 | 0.16526  | 0.048634 | 0.458293 | 0.265602 |
| MmugDNA.22622.1.S1_at   | MmugDNA.22622.1 | 6.64  | 6.57  | 0.17 | 0.01 | 1.05  | 0.236496 | 0.34805  | 0.534154 | 0.59222  |
| MmugDNA.22627.1.S1_at   | MmugDNA.22627.1 | 4.85  | 4.52  | 0.19 | 0.26 | 1.26  | 0.555802 | 0.681719 | 0.771458 | 0.814123 |
| MmugDNA.22629.1.S1_at   | MmugDNA.22629.1 | 6.92  | 6.63  | 0.1  | 0.54 | 1.23  | 0.141609 | 0.622124 | 0.427561 | 0.77667  |
| MmugDNA.22631.1.S1_at   | MmugDNA.22631.1 | 10.24 | 9.98  | 0.14 | 0    | 1.19  | 0.031899 | 0.000037 | 0.232341 | 0.023168 |
| MmugDNA.22632.1.S1_at   | MmugDNA.22632.1 | 5.35  | 5.46  | 0.49 | 0.1  | -1.08 | 0.754285 | 0.559525 | 0.886774 | 0.736353 |
| MmugDNA.22634.1.S1_at   | MmugDNA.22634.1 | 8.84  | 8.55  | 0.28 | 0.04 | 1.22  | 0.253022 | 0.281957 | 0.547557 | 0.544868 |
| MmugDNA.22640.1.S1_at   | MmugDNA.22640.1 | 11.39 | 10.92 | 0.3  | 0.15 | 1.38  | 0.064091 | 0.095647 | 0.309716 | 0.35269  |
| MmugDNA.22642.1.S1_at   | MmugDNA.22642.1 | 7.79  | 7.72  | 0.18 | 0.1  | 1.04  | 0.678824 | 0.027279 | 0.846794 | 0.206458 |



|                         |                 |       |       |      |      |        |          |          |          |          |
|-------------------------|-----------------|-------|-------|------|------|--------|----------|----------|----------|----------|
| MmugDNA.2265.1.S1_at    | MmugDNA.2265.1  | 11.55 | 11.5  | 0.15 | 0.07 | 1.03   | 0.9306   | 0.042437 | 0.970818 | 0.250663 |
| MmugDNA.22655.1.S1_at   | MmugDNA.22655.1 | 6.46  | 6.44  | 0.03 | 0.15 | 1.02   | 0.618016 | 0.373669 | 0.810424 | 0.612403 |
| MmugDNA.22659.1.S1_at   | MmugDNA.22659.1 | 11.65 | 12.18 | 0.03 | 0.15 | -1.44  | 0.007757 | 0.536002 | 0.136735 | 0.721454 |
| MmugDNA.2266.1.S1_at    | MmugDNA.2266.1  | 2.9   | 2.92  | 0.07 | 0.02 | -1.01  | 0.567004 | 0.939036 | 0.777573 | 0.9654   |
| MmugDNA.22660.1.S1_at   | MmugDNA.22660.1 | 6.38  | 6.33  | 0.12 | 0.11 | 1.04   | 0.903556 | 0.857993 | 0.959148 | 0.919035 |
| MmugDNA.22663.1.S1_at   | MmugDNA.22663.1 | 4.54  | 4.41  | 0.16 | 0.13 | 1.09   | 0.259657 | 0.260071 | 0.554019 | 0.52675  |
| MmugDNA.22665.1.S1_at   | MmugDNA.22665.1 | 9.32  | 8.89  | 0.2  | 0.11 | 1.35   | 0.068071 | 0.02651  | 0.318571 | 0.203899 |
| MmugDNA.22679.1.S1_at   | MmugDNA.22679.1 | 8.89  | 9.41  | 0.24 | 0.09 | -1.43  | 0.066861 | 0.189903 | 0.316267 | 0.465424 |
| MmugDNA.22688.1.S1_at   | MmugDNA.22688.1 | 4.28  | 4.22  | 0.06 | 0.35 | 1.04   | 0.454022 | 0.460718 | 0.704032 | 0.672646 |
| MmugDNA.2269.1.S1_at    | MmugDNA.2269.1  | 13.35 | 13.41 | 0.08 | 0.02 | -1.04  | 0.083104 | 0.388324 | 0.345372 | 0.62274  |
| MmugDNA.22692.1.S1_at   | MmugDNA.22692.1 | 10.46 | 11.11 | 0.19 | 0.21 | -1.57  | 0.034157 | 0.072586 | 0.239537 | 0.315511 |
| MmugDNA.22693.1.S1_at   | MmugDNA.22693.1 | 7.56  | 6.9   | 0.3  | 0.09 | 1.58   | 0.026807 | 0.039731 | 0.216925 | 0.244323 |
| MmugDNA.22711.1.S1_at   | MmugDNA.22711.1 | 9.81  | 9.61  | 0.04 | 0.13 | 1.15   | 0.077225 | 0.026047 | 0.335896 | 0.202256 |
| MmugDNA.22712.1.S1_at   | MmugDNA.22712.1 | 9.06  | 8.78  | 0.31 | 0.16 | 1.21   | 0.195941 | 0.026113 | 0.492835 | 0.202544 |
| MmugDNA.22722.1.S1_at   | MmugDNA.22722.1 | 7.49  | 7.5   | 0.22 | 0.15 | -1.01  | 0.655935 | 0.369041 | 0.83356  | 0.608583 |
| MmugDNA.22726.1.S1_at   | MmugDNA.22726.1 | 9.61  | 9.64  | 0.13 | 0.02 | -1.02  | 0.23406  | 0.850567 | 0.532201 | 0.914988 |
| MmugDNA.22731.1.S1_at   | MmugDNA.22731.1 | 6.07  | 6.04  | 0.14 | 0.1  | 1.03   | 0.84775  | 0.521759 | 0.933674 | 0.712623 |
| MmugDNA.22735.1.S1_at   | MmugDNA.22735.1 | 11.41 | 11.35 | 0.08 | 0.02 | 1.04   | 0.25348  | 0.710207 | 0.547829 | 0.831904 |
| MmugDNA.22736.1.S1_at   | MmugDNA.22736.1 | 4.93  | 4.75  | 0.08 | 0.09 | 1.14   | 0.066279 | 0.420979 | 0.314934 | 0.644662 |
| MmugDNA.22748.1.S1_at   | MmugDNA.22748.1 | 7.83  | 9.34  | 0.51 | 0.2  | -2.84  | 0.01264  | 0.17301  | 0.162521 | 0.449661 |
| MmugDNA.22756.1.S1_at   | MmugDNA.22756.1 | 10.94 | 11.1  | 0.12 | 0.09 | -1.12  | 0.120416 | 0.004001 | 0.398818 | 0.089969 |
| MmugDNA.22762.1.S1_at   | MmugDNA.22762.1 | 12.75 | 12.83 | 0.05 | 0.05 | -1.05  | 0.22937  | 0.444346 | 0.528143 | 0.66198  |
| MmugDNA.22769.1.S1_at   | MmugDNA.22769.1 | 10.4  | 10.18 | 0.16 | 0.14 | 1.16   | 0.093424 | 0.560738 | 0.361985 | 0.736921 |
| MmugDNA.22782.1.S1_at   | MmugDNA.22782.1 | 7.15  | 7.34  | 0.11 | 0.14 | -1.14  | 0.197011 | 0.216688 | 0.494186 | 0.490311 |
| MmugDNA.22783.1.S1_at   | MmugDNA.22783.1 | 11.49 | 11.31 | 0.16 | 0.15 | 1.14   | 0.565758 | 0.044318 | 0.776831 | 0.255021 |
| MmugDNA.22786.1.S1_at   | MmugDNA.22786.1 | 13.12 | 13.47 | 0.06 | 0.08 | -1.28  | 0.005659 | 0.000676 | 0.120889 | 0.04413  |
| MmugDNA.22787.1.S1_at   | MmugDNA.22787.1 | 11.69 | 10.4  | 0.1  | 0.37 | 2.43   | 0.009951 | 0.000693 | 0.149006 | 0.044166 |
| MmugDNA.22788.1.S1_s_at | MmugDNA.22788.1 | 8.09  | 11.75 | 1.07 | 0.17 | -12.68 | 0.007891 | 0.081503 | 0.137864 | 0.329764 |
| MmugDNA.2279.1.S1_at    | MmugDNA.2279.1  | 7.66  | 7.99  | 0.16 | 0    | -1.26  | 0.058344 | 0.080906 | 0.298712 | 0.328883 |
| MmugDNA.22792.1.S1_at   | MmugDNA.22792.1 | 4.42  | 4.47  | 0.06 | 0.08 | -1.04  | 0.235759 | 0.607537 | 0.533475 | 0.766417 |
| MmugDNA.22798.1.S1_at   | MmugDNA.22798.1 | 3.7   | 3.85  | 0.05 | 0.18 | -1.1   | 0.288227 | 0.642053 | 0.577949 | 0.789995 |
| MmugDNA.228.1.S1_at     | MmugDNA.228.1   | 10.94 | 10.49 | 0.07 | 0.13 | 1.37   | 0.003633 | 0.031058 | 0.10567  | 0.218115 |
| MmugDNA.2280.1.S1_at    | MmugDNA.2280.1  | 4.65  | 4.75  | 0.16 | 0.12 | -1.08  | 0.734982 | 0.917801 | 0.876629 | 0.954011 |
| MmugDNA.22804.1.S1_at   | MmugDNA.22804.1 | 12.18 | 12.15 | 0.07 | 0.02 | 1.02   | 0.782026 | 0.040064 | 0.900438 | 0.245388 |
| MmugDNA.22805.1.S1_at   | MmugDNA.22805.1 | 11.27 | 11.31 | 0.19 | 0.07 | -1.03  | 0.779165 | 0.642752 | 0.89919  | 0.790476 |
| MmugDNA.22807.1.S1_at   | MmugDNA.22807.1 | 3.41  | 3.47  | 0.07 | 0.14 | -1.04  | 0.203922 | 0.329071 | 0.501449 | 0.578482 |
| MmugDNA.2281.1.S1_at    | MmugDNA.2281.1  | 7.02  | 7.12  | 0.15 | 0.19 | -1.07  | 0.992416 | 0.913189 | 0.997182 | 0.951134 |
| MmugDNA.22810.1.S1_at   | MmugDNA.22810.1 | 5.83  | 6.09  | 0.29 | 0.27 | -1.2   | 0.201648 | 0.219095 | 0.499203 | 0.49285  |
| MmugDNA.22811.1.S1_at   | MmugDNA.22811.1 | 4.19  | 4.12  | 0.07 | 0.24 | 1.05   | 0.722717 | 0.749378 | 0.869653 | 0.85438  |
| MmugDNA.2282.1.S1_at    | MmugDNA.2282.1  | 10.32 | 11.58 | 0.37 | 0.11 | -2.39  | 0.002724 | 0.00506  | 0.096899 | 0.09907  |
| MmugDNA.22821.1.S1_at   | MmugDNA.22821.1 | 5.15  | 5.16  | 0.06 | 0.04 | -1     | 0.858779 | 0.145532 | 0.938801 | 0.419442 |
| MmugDNA.22822.1.S1_at   | MmugDNA.22822.1 | 8.63  | 8.4   | 0.09 | 0.16 | 1.17   | 0.067767 | 0.257369 | 0.318135 | 0.525179 |
| MmugDNA.22836.1.S1_s_at | MmugDNA.22836.1 | 10.25 | 9.89  | 0.33 | 0.11 | 1.28   | 0.145452 | 0.074945 | 0.432776 | 0.318924 |

|                         |                 |       |       |      |      |       |          |          |          |          |
|-------------------------|-----------------|-------|-------|------|------|-------|----------|----------|----------|----------|
| MmugDNA.22850.1.S1_at   | MmugDNA.22850.1 | 10.1  | 9.83  | 0.2  | 0.06 | 1.21  | 0.047404 | 0.001533 | 0.275072 | 0.059437 |
| MmugDNA.22851.1.S1_at   | MmugDNA.22851.1 | 8.31  | 8.39  | 0.16 | 0.1  | -1.06 | 0.777858 | 0.118248 | 0.898457 | 0.386244 |
| MmugDNA.22853.1.S1_at   | MmugDNA.22853.1 | 7.84  | 7.97  | 0.24 | 0.04 | -1.1  | 0.103862 | 0.245542 | 0.377157 | 0.515347 |
| MmugDNA.22856.1.S1_at   | MmugDNA.22856.1 | 10.84 | 11.51 | 0.36 | 0.17 | -1.6  | 0.01784  | 0.001145 | 0.187044 | 0.053384 |
| MmugDNA.2286.1.S1_s_at  | MmugDNA.2286.1  | 6.01  | 5.99  | 0.14 | 0.06 | 1.02  | 0.427782 | 0.238516 | 0.68494  | 0.509112 |
| MmugDNA.22860.1.S1_at   | MmugDNA.22860.1 | 10.43 | 10.19 | 0.14 | 0.04 | 1.18  | 0.194718 | 0.343747 | 0.491311 | 0.589457 |
| MmugDNA.22863.1.S1_s_at | MmugDNA.22863.1 | 13.04 | 12.83 | 0.08 | 0.1  | 1.15  | 0.101055 | 0.021074 | 0.372328 | 0.181869 |
| MmugDNA.22866.1.S1_at   | MmugDNA.22866.1 | 11.29 | 11.25 | 0.05 | 0.13 | 1.03  | 0.553831 | 0.260697 | 0.770278 | 0.527199 |
| MmugDNA.22867.1.S1_at   | MmugDNA.22867.1 | 11.03 | 10.99 | 0.2  | 0.13 | 1.03  | 0.613368 | 0.018651 | 0.807369 | 0.171653 |
| MmugDNA.22871.1.S1_at   | MmugDNA.22871.1 | 3.67  | 3.73  | 0.04 | 0.08 | -1.04 | 0.937828 | 0.319177 | 0.973841 | 0.571688 |
| MmugDNA.22875.1.S1_at   | MmugDNA.22875.1 | 10.89 | 10.68 | 0.15 | 0.11 | 1.16  | 0.574385 | 0.161539 | 0.781914 | 0.43767  |
| MmugDNA.22876.1.S1_at   | MmugDNA.22876.1 | 3.15  | 3.03  | 0.03 | 0.07 | 1.09  | 0.189646 | 0.68532  | 0.486064 | 0.816457 |
| MmugDNA.22878.1.S1_at   | MmugDNA.22878.1 | 10.16 | 10.74 | 1.5  | 0.2  | -1.49 | 0.250226 | 0.305759 | 0.544972 | 0.562731 |
| MmugDNA.2288.1.S1_at    | MmugDNA.2288.1  | 5.97  | 4.75  | 0.79 | 0.2  | 2.33  | 0.181672 | 0.229449 | 0.477223 | 0.501527 |
| MmugDNA.22888.1.S1_at   | MmugDNA.22888.1 | 11.68 | 11.34 | 0.56 | 0.05 | 1.26  | 0.96895  | 0.472423 | 0.987691 | 0.67999  |
| MmugDNA.2289.1.S1_at    | MmugDNA.2289.1  | 3.38  | 3.65  | 0.07 | 0.16 | -1.21 | 0.063884 | 0.320631 | 0.309277 | 0.572718 |
| MmugDNA.2290.1.S1_at    | MmugDNA.2290.1  | 6.56  | 6.85  | 0.21 | 0.09 | -1.22 | 0.287816 | 0.008033 | 0.577508 | 0.119091 |
| MmugDNA.22901.1.S1_at   | MmugDNA.22901.1 | 7.57  | 8.23  | 0.46 | 0.07 | -1.59 | 0.055372 | 0.196718 | 0.292283 | 0.471783 |
| MmugDNA.2291.1.S1_at    | MmugDNA.2291.1  | 5.99  | 5.19  | 1.02 | 0.75 | 1.74  | 0.475883 | 0.666803 | 0.718459 | 0.804789 |
| MmugDNA.2292.1.S1_at    | MmugDNA.2292.1  | 8.11  | 6.98  | 0.54 | 0.06 | 2.18  | 0.025597 | 0.033485 | 0.212928 | 0.226577 |
| MmugDNA.22923.1.S1_at   | MmugDNA.22923.1 | 12.27 | 12.43 | 0.19 | 0.03 | -1.12 | 0.11269  | 0.06516  | 0.389114 | 0.301238 |
| MmugDNA.22929.1.S1_at   | MmugDNA.22929.1 | 14    | 13.91 | 0.1  | 0.05 | 1.07  | 0.666219 | 0.521023 | 0.839583 | 0.712115 |
| MmugDNA.22932.1.S1_at   | MmugDNA.22932.1 | 9.05  | 10.35 | 0.19 | 0.18 | -2.47 | 0.001689 | 0.053495 | 0.084735 | 0.276963 |
| MmugDNA.22934.1.S1_at   | MmugDNA.22934.1 | 11.51 | 11.39 | 0.05 | 0.14 | 1.09  | 0.080443 | 0.016923 | 0.341026 | 0.164991 |
| MmugDNA.22936.1.S1_at   | MmugDNA.22936.1 | 12.63 | 12.63 | 0.01 | 0.02 | -1    | 0.930879 | 0.398648 | 0.970917 | 0.629458 |
| MmugDNA.2294.1.S1_at    | MmugDNA.2294.1  | 7.4   | 7.38  | 0.16 | 0.05 | 1.01  | 0.369931 | 0.162006 | 0.643182 | 0.438108 |
| MmugDNA.22941.1.S1_at   | MmugDNA.22941.1 | 6.13  | 6.09  | 0.12 | 0.06 | 1.03  | 0.769784 | 0.948934 | 0.894407 | 0.97078  |
| MmugDNA.22947.1.S1_s_at | MmugDNA.22947.1 | 12.44 | 12.36 | 0.09 | 0.05 | 1.05  | 0.264434 | 0.694319 | 0.5577   | 0.822254 |
| MmugDNA.22950.1.S1_at   | MmugDNA.22950.1 | 6.29  | 6.45  | 0.08 | 0.1  | -1.12 | 0.072351 | 0.144203 | 0.326908 | 0.418082 |
| MmugDNA.22955.1.S1_at   | MmugDNA.22955.1 | 12.46 | 12.4  | 0.09 | 0.03 | 1.04  | 0.42535  | 0.060675 | 0.682784 | 0.292876 |
| MmugDNA.22958.1.S1_at   | MmugDNA.22958.1 | 12.38 | 12.36 | 0.13 | 0.06 | 1.01  | 0.852573 | 0.002701 | 0.935884 | 0.076461 |
| MmugDNA.22965.1.S1_at   | MmugDNA.22965.1 | 10.24 | 9.78  | 0.15 | 0.07 | 1.38  | 0.018156 | 0.448211 | 0.187719 | 0.664144 |
| MmugDNA.22967.1.S1_at   | MmugDNA.22967.1 | 12.36 | 12.2  | 0.11 | 0.03 | 1.12  | 0.073155 | 0.255067 | 0.328251 | 0.52317  |
| MmugDNA.22972.1.S1_at   | MmugDNA.22972.1 | 9.21  | 9.21  | 0.11 | 0.04 | -1    | 0.27685  | 0.464259 | 0.568332 | 0.674983 |
| MmugDNA.22975.1.S1_at   | MmugDNA.22975.1 | 12.6  | 11.99 | 0.14 | 0.07 | 1.52  | 0.003284 | 0.045705 | 0.102069 | 0.258049 |
| MmugDNA.22985.1.S1_at   | MmugDNA.22985.1 | 11.04 | 10.68 | 0.11 | 0.14 | 1.28  | 0.038115 | 0.01732  | 0.251175 | 0.166509 |
| MmugDNA.22986.1.S1_at   | MmugDNA.22986.1 | 5.79  | 5.58  | 0.15 | 0.03 | 1.16  | 0.120917 | 0.093326 | 0.399442 | 0.349412 |
| MmugDNA.2299.1.S1_at    | MmugDNA.2299.1  | 9.99  | 9.33  | 0.23 | 0.17 | 1.58  | 0.010003 | 0.017074 | 0.149381 | 0.165589 |
| MmugDNA.22991.1.S1_at   | MmugDNA.22991.1 | 12.54 | 12.64 | 0.09 | 0.07 | -1.07 | 0.273109 | 0.438648 | 0.565251 | 0.657605 |
| MmugDNA.2300.1.S1_at    | MmugDNA.2300.1  | 12.97 | 12.66 | 0.1  | 0.13 | 1.24  | 0.028809 | 0.327657 | 0.222494 | 0.577464 |
| MmugDNA.23003.1.S1_s_at | MmugDNA.23003.1 | 13.16 | 13.03 | 0.06 | 0.01 | 1.09  | 0.010941 | 0.046575 | 0.154399 | 0.260267 |
| MmugDNA.23007.1.S1_at   | MmugDNA.23007.1 | 8.23  | 7.35  | 0.3  | 0.29 | 1.84  | 0.020805 | 0.00452  | 0.197815 | 0.093971 |
| MmugDNA.23015.1.S1_at   | MmugDNA.23015.1 | 10.69 | 10.83 | 0.24 | 0.1  | -1.1  | 0.156535 | 0.14871  | 0.447079 | 0.423201 |

|                         |                 |       |       |      |      |       |          |          |          |          |
|-------------------------|-----------------|-------|-------|------|------|-------|----------|----------|----------|----------|
| MmugDNA.23021.1.S1_at   | MmugDNA.23021.1 | 7.04  | 6.95  | 0.14 | 0.05 | 1.06  | 0.348694 | 0.183716 | 0.626632 | 0.459769 |
| MmugDNA.23023.1.S1_at   | MmugDNA.23023.1 | 9.03  | 7.87  | 0.36 | 0.16 | 2.23  | 0.004632 | 0.000973 | 0.114433 | 0.049791 |
| MmugDNA.23027.1.S1_at   | MmugDNA.23027.1 | 10.88 | 11.15 | 0.3  | 0.04 | -1.21 | 0.557259 | 0.569337 | 0.772057 | 0.742375 |
| MmugDNA.23028.1.S1_at   | MmugDNA.23028.1 | 12.01 | 11.93 | 0.16 | 0.03 | 1.06  | 0.554417 | 0.249451 | 0.770669 | 0.518532 |
| MmugDNA.2304.1.S1_at    | MmugDNA.2304.1  | 7.6   | 7.62  | 0.25 | 0.05 | -1.01 | 0.474771 | 0.571754 | 0.717662 | 0.743982 |
| MmugDNA.23040.1.S1_at   | MmugDNA.23040.1 | 3.98  | 3.8   | 0.07 | 0.26 | 1.14  | 0.861794 | 0.00492  | 0.940034 | 0.097771 |
| MmugDNA.23041.1.S1_at   | MmugDNA.23041.1 | 9.97  | 9.09  | 0.58 | 0.14 | 1.84  | 0.094709 | 0.111628 | 0.363689 | 0.376546 |
| MmugDNA.23042.1.S1_at   | MmugDNA.23042.1 | 6.93  | 7.15  | 0.19 | 0.07 | -1.16 | 0.100803 | 0.498856 | 0.371905 | 0.697821 |
| MmugDNA.23045.1.S1_at   | MmugDNA.23045.1 | 5.8   | 5.56  | 0.46 | 0.72 | 1.18  | 0.887399 | 0.87675  | 0.951936 | 0.92982  |
| MmugDNA.23046.1.S1_at   | MmugDNA.23046.1 | 3.91  | 3.92  | 0.1  | 0.02 | -1.01 | 0.830288 | 0.461567 | 0.925353 | 0.673162 |
| MmugDNA.23047.1.S1_at   | MmugDNA.23047.1 | 5.43  | 5.21  | 0.14 | 0.12 | 1.17  | 0.261245 | 0.386043 | 0.555306 | 0.621296 |
| MmugDNA.23049.1.S1_at   | MmugDNA.23049.1 | 7.38  | 7.35  | 0.09 | 0.08 | 1.02  | 0.746798 | 0.209314 | 0.882809 | 0.483038 |
| MmugDNA.23053.1.S1_at   | MmugDNA.23053.1 | 7.55  | 7.55  | 0.07 | 0.04 | -1    | 0.233086 | 0.409947 | 0.531318 | 0.636977 |
| MmugDNA.23058.1.S1_at   | MmugDNA.23058.1 | 8.15  | 8.2   | 0.16 | 0.02 | -1.04 | 0.234417 | 0.820139 | 0.532527 | 0.896336 |
| MmugDNA.2306.1.S1_s_at  | MmugDNA.2306.1  | 8.17  | 8.31  | 0.33 | 0.13 | -1.1  | 0.379198 | 0.192357 | 0.649212 | 0.467834 |
| MmugDNA.23060.1.S1_s_at | MmugDNA.23060.1 | 6.49  | 6.48  | 0.24 | 0.06 | 1.01  | 0.479374 | 0.031262 | 0.720601 | 0.218668 |
| MmugDNA.23064.1.S1_at   | MmugDNA.23064.1 | 8.54  | 8.29  | 0.14 | 0.15 | 1.19  | 0.104936 | 0.143526 | 0.378561 | 0.417469 |
| MmugDNA.23068.1.S1_s_at | MmugDNA.23068.1 | 12.07 | 11.88 | 0.04 | 0.01 | 1.14  | 0.002407 | 0.188523 | 0.093606 | 0.464458 |
| MmugDNA.23070.1.S1_at   | MmugDNA.23070.1 | 5.18  | 5.22  | 0.07 | 0.13 | -1.03 | 0.813644 | 0.629654 | 0.916671 | 0.781989 |
| MmugDNA.23075.1.S1_at   | MmugDNA.23075.1 | 4.53  | 4.69  | 0.35 | 0.05 | -1.12 | 0.156547 | 0.412111 | 0.447079 | 0.638537 |
| MmugDNA.23080.1.S1_at   | MmugDNA.23080.1 | 9.28  | 9.42  | 0.25 | 0.06 | -1.1  | 0.252114 | 0.916328 | 0.546788 | 0.953126 |
| MmugDNA.23082.1.S1_at   | MmugDNA.23082.1 | 9.02  | 9.89  | 0.74 | 0.07 | -1.84 | 0.107591 | 0.28844  | 0.382272 | 0.549749 |
| MmugDNA.23088.1.S1_at   | MmugDNA.23088.1 | 12    | 12.5  | 0.06 | 0.15 | -1.41 | 0.014867 | 0.046721 | 0.174074 | 0.260831 |
| MmugDNA.2309.1.S1_at    | MmugDNA.2309.1  | 10.37 | 10.55 | 0.3  | 0.19 | -1.13 | 0.61647  | 0.44806  | 0.809516 | 0.663986 |
| MmugDNA.23095.1.S1_at   | MmugDNA.23095.1 | 7.21  | 7.23  | 0.37 | 0.03 | -1.01 | 0.368652 | 0.162413 | 0.642282 | 0.438575 |
| MmugDNA.23098.1.S1_at   | MmugDNA.23098.1 | 9     | 8.44  | 0.17 | 0.14 | 1.47  | 0.009698 | 0.081446 | 0.148419 | 0.329632 |
| MmugDNA.23108.1.S1_at   | MmugDNA.23108.1 | 9.74  | 11.01 | 0.72 | 0.1  | -2.41 | 0.033168 | 0.215025 | 0.236296 | 0.488898 |
| MmugDNA.23115.1.S1_at   | MmugDNA.23115.1 | 6.71  | 6.54  | 0.13 | 0.04 | 1.13  | 0.306217 | 0.150816 | 0.593212 | 0.425335 |
| MmugDNA.23120.1.S1_at   | MmugDNA.23120.1 | 8.4   | 8.46  | 0.06 | 0.29 | -1.05 | 0.589188 | 0.449476 | 0.791528 | 0.665087 |
| MmugDNA.23121.1.S1_at   | MmugDNA.23121.1 | 6.37  | 6.56  | 0.14 | 0.02 | -1.14 | 0.299959 | 0.110537 | 0.588233 | 0.374755 |
| MmugDNA.23128.1.S1_s_at | MmugDNA.23128.1 | 8.25  | 8.65  | 0.15 | 0.04 | -1.31 | 0.01208  | 0.002611 | 0.15991  | 0.075645 |
| MmugDNA.23129.1.S1_at   | MmugDNA.23129.1 | 3.72  | 3.56  | 0.03 | 0.23 | 1.12  | 0.400526 | 0.646034 | 0.66549  | 0.792676 |
| MmugDNA.23133.1.S1_at   | MmugDNA.23133.1 | 4.55  | 4.6   | 0.08 | 0.11 | -1.04 | 0.243553 | 0.081689 | 0.54025  | 0.329928 |
| MmugDNA.23136.1.S1_at   | MmugDNA.23136.1 | 3.36  | 3.21  | 0.18 | 0.07 | 1.11  | 0.16963  | 0.306006 | 0.462919 | 0.562757 |
| MmugDNA.23137.1.S1_at   | MmugDNA.23137.1 | 8.12  | 7.47  | 0.59 | 0.25 | 1.58  | 0.275118 | 0.477678 | 0.566774 | 0.6837   |
| MmugDNA.2314.1.S1_at    | MmugDNA.2314.1  | 5.45  | 5.45  | 0.07 | 0.09 | 1     | 0.859112 | 0.347437 | 0.938949 | 0.592019 |
| MmugDNA.23143.1.S1_at   | MmugDNA.23143.1 | 11.6  | 10.74 | 0.29 | 0.04 | 1.82  | 0.006318 | 0.145212 | 0.125881 | 0.419214 |
| MmugDNA.23149.1.S1_at   | MmugDNA.23149.1 | 4.61  | 3.82  | 0.18 | 0.1  | 1.72  | 0.002591 | 0.003408 | 0.094992 | 0.084071 |
| MmugDNA.2315.1.S1_at    | MmugDNA.2315.1  | 9.35  | 8.74  | 0.42 | 0.06 | 1.53  | 0.21234  | 0.350261 | 0.510367 | 0.594012 |
| MmugDNA.23158.1.S1_at   | MmugDNA.23158.1 | 8.16  | 7.82  | 0.44 | 0.22 | 1.27  | 0.177541 | 0.254718 | 0.472191 | 0.522987 |
| MmugDNA.2316.1.S1_s_at  | MmugDNA.2316.1  | 13.75 | 13.53 | 0.27 | 0.09 | 1.16  | 0.342838 | 0.721988 | 0.622552 | 0.838928 |
| MmugDNA.23160.1.S1_at   | MmugDNA.23160.1 | 4.7   | 4.43  | 0.34 | 0.37 | 1.2   | 0.509197 | 0.709897 | 0.740889 | 0.831863 |
| MmugDNA.23162.1.S1_at   | MmugDNA.23162.1 | 3.22  | 3.77  | 0.58 | 0.52 | -1.47 | 0.870311 | 0.687292 | 0.944208 | 0.817535 |

|                         |                 |       |       |      |      |       |          |          |          |          |
|-------------------------|-----------------|-------|-------|------|------|-------|----------|----------|----------|----------|
| MmugDNA.2317.1.S1_at    | MmugDNA.2317.1  | 11.63 | 11.53 | 0.19 | 0.03 | 1.08  | 0.77763  | 0.395482 | 0.898409 | 0.627503 |
| MmugDNA.23173.1.S1_at   | MmugDNA.23173.1 | 6.58  | 8.58  | 0.38 | 0.08 | -4    | 0.000844 | 0.000283 | 0.07338  | 0.034683 |
| MmugDNA.23174.1.S1_at   | MmugDNA.23174.1 | 10.92 | 10.4  | 0.42 | 0.09 | 1.44  | 0.233444 | 0.334492 | 0.53162  | 0.582498 |
| MmugDNA.23177.1.S1_at   | MmugDNA.23177.1 | 9.55  | 11.11 | 0.11 | 0.19 | -2.96 | 0.000385 | 0.008743 | 0.062479 | 0.123975 |
| MmugDNA.23179.1.S1_at   | MmugDNA.23179.1 | 3.59  | 3.58  | 0.05 | 0.2  | 1.01  | 0.481345 | 0.192512 | 0.721905 | 0.467958 |
| MmugDNA.23181.1.S1_at   | MmugDNA.23181.1 | 7.82  | 7.79  | 0.36 | 0.16 | 1.02  | 0.732388 | 0.467015 | 0.874977 | 0.676774 |
| MmugDNA.23182.1.S1_at   | MmugDNA.23182.1 | 5.59  | 5.7   | 0.19 | 0.05 | -1.08 | 0.751515 | 0.455733 | 0.885332 | 0.669659 |
| MmugDNA.23183.1.S1_at   | MmugDNA.23183.1 | 12.03 | 11.43 | 0.14 | 0.06 | 1.52  | 0.002857 | 0.193637 | 0.098402 | 0.468785 |
| MmugDNA.23187.1.S1_at   | MmugDNA.23187.1 | 2.86  | 2.86  | 0.08 | 0.04 | 1     | 0.264699 | 0.599083 | 0.55795  | 0.761287 |
| MmugDNA.23195.1.S1_at   | MmugDNA.23195.1 | 4.26  | 4.12  | 0.99 | 0.42 | 1.1   | 0.643387 | 0.805648 | 0.826158 | 0.888316 |
| MmugDNA.23197.1.S1_at   | MmugDNA.23197.1 | 3.15  | 3.37  | 0.1  | 0.05 | -1.16 | 0.051112 | 0.028386 | 0.283595 | 0.210319 |
| MmugDNA.232.1.S1_at     | MmugDNA.232.1   | 12.79 | 12.54 | 0.19 | 0.05 | 1.18  | 0.268448 | 0.55642  | 0.561069 | 0.734507 |
| MmugDNA.2320.1.S1_at    | MmugDNA.2320.1  | 8.25  | 7.1   | 0.3  | 0.28 | 2.22  | 0.010283 | 0.020785 | 0.151176 | 0.180899 |
| MmugDNA.23200.1.S1_at   | MmugDNA.23200.1 | 10.03 | 10.14 | 0.58 | 0.19 | -1.08 | 0.282509 | 0.642232 | 0.573225 | 0.790086 |
| MmugDNA.23202.1.S1_at   | MmugDNA.23202.1 | 8.97  | 8.92  | 0.28 | 0.23 | 1.03  | 0.920996 | 0.482498 | 0.966268 | 0.687323 |
| MmugDNA.23207.1.S1_at   | MmugDNA.23207.1 | 6.75  | 9.6   | 1.16 | 0.33 | -7.17 | 0.015715 | 0.245832 | 0.177791 | 0.515519 |
| MmugDNA.2321.1.S1_at    | MmugDNA.2321.1  | 9.48  | 11.18 | 0.64 | 0.26 | -3.25 | 0.034991 | 0.038328 | 0.241699 | 0.240641 |
| MmugDNA.23211.1.S1_at   | MmugDNA.23211.1 | 11    | 10.02 | 0.1  | 0.3  | 1.98  | 0.013377 | 0.00243  | 0.16632  | 0.073093 |
| MmugDNA.23216.1.S1_at   | MmugDNA.23216.1 | 4.47  | 4.51  | 0.03 | 0.09 | -1.03 | 0.350858 | 0.482878 | 0.628649 | 0.68765  |
| MmugDNA.23217.1.S1_at   | MmugDNA.23217.1 | 9.91  | 10.49 | 0.41 | 0.11 | -1.49 | 0.11126  | 0.011312 | 0.387263 | 0.138076 |
| MmugDNA.23222.1.S1_at   | MmugDNA.23222.1 | 9.83  | 9.79  | 0.13 | 0.03 | 1.03  | 0.730119 | 0.89657  | 0.873891 | 0.940905 |
| MmugDNA.23234.1.S1_at   | MmugDNA.23234.1 | 6.03  | 6.06  | 0.04 | 0.01 | -1.02 | 0.118329 | 0.120471 | 0.39584  | 0.38925  |
| MmugDNA.23236.1.S1_at   | MmugDNA.23236.1 | 6.8   | 6.88  | 0.2  | 0.14 | -1.06 | 0.610316 | 0.433384 | 0.805823 | 0.653662 |
| MmugDNA.2324.1.S1_at    | MmugDNA.2324.1  | 8.55  | 8.53  | 0.07 | 0.02 | 1.02  | 0.771959 | 0.790532 | 0.895533 | 0.878895 |
| MmugDNA.23243.1.S1_at   | MmugDNA.23243.1 | 5.11  | 5.24  | 0.06 | 0.5  | -1.1  | 0.981512 | 0.992255 | 0.993103 | 0.995588 |
| MmugDNA.23245.1.S1_at   | MmugDNA.23245.1 | 3.22  | 3.25  | 0.07 | 0.09 | -1.02 | 0.265423 | 0.403818 | 0.558032 | 0.632393 |
| MmugDNA.23247.1.S1_at   | MmugDNA.23247.1 | 10.67 | 10.47 | 0.03 | 0.06 | 1.15  | 0.011045 | 0.004219 | 0.154788 | 0.091392 |
| MmugDNA.23250.1.S1_at   | MmugDNA.23250.1 | 10.77 | 11.19 | 0.52 | 0.21 | -1.33 | 0.142236 | 0.173342 | 0.42828  | 0.449791 |
| MmugDNA.23251.1.S1_at   | MmugDNA.23251.1 | 10.32 | 10.82 | 0.19 | 0.07 | -1.41 | 0.017283 | 0.127716 | 0.184654 | 0.398581 |
| MmugDNA.23254.1.A1_at   | MmugDNA.23254.1 | 3.28  | 2.91  | 0.24 | 0.06 | 1.29  | 0.028182 | 0.015081 | 0.220356 | 0.155923 |
| MmugDNA.23254.1.S1_at   | MmugDNA.23254.1 | 3.37  | 3.3   | 0.28 | 0.05 | 1.05  | 0.26247  | 0.325756 | 0.556605 | 0.57602  |
| MmugDNA.23256.1.S1_at   | MmugDNA.23256.1 | 9.87  | 9.21  | 0.21 | 0.11 | 1.57  | 0.017336 | 0.048904 | 0.184946 | 0.265919 |
| MmugDNA.23262.1.S1_at   | MmugDNA.23262.1 | 9.07  | 9.01  | 0.24 | 0.04 | 1.04  | 0.551646 | 0.308961 | 0.768597 | 0.564656 |
| MmugDNA.23267.1.S1_at   | MmugDNA.23267.1 | 10.01 | 10.65 | 0.13 | 0.04 | -1.56 | 0.000899 | 0.003136 | 0.075282 | 0.081639 |
| MmugDNA.23271.1.S1_at   | MmugDNA.23271.1 | 8.9   | 8.98  | 0.17 | 0.02 | -1.06 | 0.819873 | 0.595585 | 0.919678 | 0.759091 |
| MmugDNA.23271.1.S1_s_at | MmugDNA.23271.1 | 10.85 | 10.83 | 0.07 | 0.04 | 1.01  | 0.744041 | 0.836166 | 0.881384 | 0.9063   |
| MmugDNA.23289.1.S1_at   | MmugDNA.23289.1 | 5.66  | 5.77  | 0.12 | 0.19 | -1.08 | 0.357787 | 0.222191 | 0.633648 | 0.495178 |
| MmugDNA.23290.1.S1_at   | MmugDNA.23290.1 | 5.79  | 7.66  | 0.47 | 0.16 | -3.67 | 0.002797 | 0.054667 | 0.097799 | 0.279311 |
| MmugDNA.23292.1.S1_at   | MmugDNA.23292.1 | 8.38  | 8.92  | 0.51 | 0.34 | -1.45 | 0.396754 | 0.049267 | 0.662694 | 0.266828 |
| MmugDNA.2330.1.S1_at    | MmugDNA.2330.1  | 10    | 9.94  | 0.15 | 0.06 | 1.04  | 0.196217 | 0.410502 | 0.49329  | 0.637352 |
| MmugDNA.23303.1.S1_at   | MmugDNA.23303.1 | 13.58 | 13.63 | 0.04 | 0    | -1.03 | 0.038271 | 0.031972 | 0.251675 | 0.2212   |
| MmugDNA.23304.1.S1_at   | MmugDNA.23304.1 | 8.9   | 10.37 | 0.59 | 0.23 | -2.77 | 0.021803 | 0.038339 | 0.200878 | 0.240682 |
| MmugDNA.23307.1.S1_at   | MmugDNA.23307.1 | 9.34  | 8.84  | 0.12 | 0.04 | 1.42  | 0.002431 | 0.054893 | 0.093606 | 0.279748 |

|                         |                 |       |       |      |      |       |          |          |          |          |
|-------------------------|-----------------|-------|-------|------|------|-------|----------|----------|----------|----------|
| MmugDNA.2331.1.S1_at    | MmugDNA.2331.1  | 6.44  | 6.21  | 0.11 | 0.22 | 1.18  | 0.104343 | 0.117242 | 0.377773 | 0.384777 |
| MmugDNA.23322.1.S1_at   | MmugDNA.23322.1 | 12.32 | 12.45 | 0.01 | 0.01 | -1.1  | 0.000072 | 0.403716 | 0.051196 | 0.632331 |
| MmugDNA.23326.1.S1_at   | MmugDNA.23326.1 | 6.18  | 5.83  | 0.12 | 0.15 | 1.27  | 0.048467 | 0.105054 | 0.277562 | 0.366736 |
| MmugDNA.23326.1.S1_x_at | MmugDNA.23326.1 | 8.05  | 7.86  | 0.08 | 0.1  | 1.14  | 0.058507 | 0.099466 | 0.298985 | 0.357827 |
| MmugDNA.23328.1.S1_at   | MmugDNA.23328.1 | 6.69  | 6.71  | 0.12 | 0.09 | -1.01 | 0.319104 | 0.489869 | 0.603736 | 0.691972 |
| MmugDNA.2333.1.S1_at    | MmugDNA.2333.1  | 11.76 | 11.97 | 0.4  | 0.06 | -1.16 | 0.30817  | 0.041253 | 0.594856 | 0.247995 |
| MmugDNA.2333.1.S1_s_at  | MmugDNA.2333.1  | 11.78 | 11.95 | 0.2  | 0.06 | -1.13 | 0.206164 | 0.036374 | 0.503843 | 0.235146 |
| MmugDNA.23334.1.S1_at   | MmugDNA.23334.1 | 11.09 | 10.87 | 0.18 | 0.05 | 1.16  | 0.112827 | 0.215237 | 0.389309 | 0.488977 |
| MmugDNA.23337.1.S1_at   | MmugDNA.23337.1 | 10.94 | 12.13 | 0.64 | 0.08 | -2.29 | 0.031959 | 0.026455 | 0.232562 | 0.203779 |
| MmugDNA.2334.1.S1_at    | MmugDNA.2334.1  | 6.75  | 7.42  | 0.34 | 0.19 | -1.6  | 0.067195 | 0.390805 | 0.316853 | 0.624547 |
| MmugDNA.23346.1.S1_at   | MmugDNA.23346.1 | 11.89 | 11.9  | 0.1  | 0.01 | -1.01 | 0.826773 | 0.482964 | 0.923245 | 0.687687 |
| MmugDNA.23352.1.S1_at   | MmugDNA.23352.1 | 8.97  | 8.79  | 0.17 | 0.18 | 1.13  | 0.510539 | 0.876649 | 0.741943 | 0.929744 |
| MmugDNA.23356.1.S1_at   | MmugDNA.23356.1 | 7.15  | 7.23  | 0.41 | 0.09 | -1.06 | 0.381808 | 0.300159 | 0.651337 | 0.558356 |
| MmugDNA.23358.1.S1_at   | MmugDNA.23358.1 | 13.16 | 13.41 | 0.07 | 0.05 | -1.19 | 0.008431 | 0.045116 | 0.140955 | 0.256956 |
| MmugDNA.2337.1.S1_at    | MmugDNA.2337.1  | 5.23  | 5.01  | 0.65 | 0.07 | 1.17  | 0.453866 | 0.612044 | 0.703883 | 0.76972  |
| MmugDNA.23373.1.S1_at   | MmugDNA.23373.1 | 5.69  | 5.84  | 0.15 | 0.02 | -1.11 | 0.554447 | 0.099342 | 0.770689 | 0.35761  |
| MmugDNA.23378.1.S1_at   | MmugDNA.23378.1 | 6.94  | 7.25  | 0.98 | 0.35 | -1.24 | 0.213781 | 0.182698 | 0.511664 | 0.459186 |
| MmugDNA.23379.1.S1_at   | MmugDNA.23379.1 | 11.56 | 11.44 | 0.1  | 0.09 | 1.09  | 0.233372 | 0.061687 | 0.53162  | 0.295135 |
| MmugDNA.2338.1.S1_at    | MmugDNA.2338.1  | 6.01  | 6.2   | 0.1  | 0.24 | -1.14 | 0.073585 | 0.29571  | 0.329026 | 0.555138 |
| MmugDNA.23387.1.S1_at   | MmugDNA.23387.1 | 6.12  | 8.06  | 0.58 | 0.44 | -3.84 | 0.022542 | 0.013481 | 0.203331 | 0.148688 |
| MmugDNA.23388.1.S1_at   | MmugDNA.23388.1 | 2.59  | 2.72  | 0.02 | 0.07 | -1.1  | 0.029485 | 0.045202 | 0.224759 | 0.256979 |
| MmugDNA.23392.1.S1_at   | MmugDNA.23392.1 | 10    | 9.51  | 0.45 | 0.1  | 1.4   | 0.394164 | 0.202433 | 0.660857 | 0.476772 |
| MmugDNA.23403.1.A1_at   | MmugDNA.23403.1 | 6.03  | 6.05  | 0.25 | 0.1  | -1.02 | 0.547025 | 0.479025 | 0.765708 | 0.684885 |
| MmugDNA.23403.1.S1_at   | MmugDNA.23403.1 | 5.62  | 5.53  | 0.05 | 0.17 | 1.06  | 0.848177 | 0.929425 | 0.933904 | 0.959707 |
| MmugDNA.23405.1.S1_s_at | MmugDNA.23405.1 | 11.85 | 11.91 | 0.07 | 0.07 | -1.05 | 0.167877 | 0.719604 | 0.461188 | 0.837761 |
| MmugDNA.23407.1.S1_at   | MmugDNA.23407.1 | 11.15 | 10.97 | 0.28 | 0.08 | 1.13  | 0.12071  | 0.11322  | 0.399081 | 0.379229 |
| MmugDNA.23414.1.S1_at   | MmugDNA.23414.1 | 6.54  | 6.49  | 0.04 | 0.04 | 1.03  | 0.305462 | 0.421666 | 0.592509 | 0.645222 |
| MmugDNA.23423.1.S1_at   | MmugDNA.23423.1 | 9.8   | 9.72  | 0.18 | 0.1  | 1.06  | 0.333553 | 0.201128 | 0.614935 | 0.475519 |
| MmugDNA.23424.1.S1_at   | MmugDNA.23424.1 | 9.26  | 9.5   | 0.78 | 0.06 | -1.18 | 0.595548 | 0.781656 | 0.795312 | 0.87342  |
| MmugDNA.23425.1.S1_at   | MmugDNA.23425.1 | 9.59  | 10.59 | 1.79 | 0.28 | -2.01 | 0.3852   | 0.568597 | 0.65405  | 0.742052 |
| MmugDNA.23428.1.S1_at   | MmugDNA.23428.1 | 12.05 | 11.98 | 0.09 | 0.05 | 1.05  | 0.222316 | 0.135514 | 0.520287 | 0.407621 |
| MmugDNA.23431.1.S1_at   | MmugDNA.23431.1 | 6.35  | 6.47  | 0.48 | 0.17 | -1.08 | 0.556878 | 0.75263  | 0.771968 | 0.855965 |
| MmugDNA.23434.1.S1_at   | MmugDNA.23434.1 | 13.6  | 13.51 | 0.04 | 0.02 | 1.07  | 0.01276  | 0.002866 | 0.163162 | 0.078799 |
| MmugDNA.23436.1.S1_at   | MmugDNA.23436.1 | 3.23  | 3.19  | 0.06 | 0.06 | 1.03  | 0.412432 | 0.782665 | 0.674115 | 0.874202 |
| MmugDNA.23445.1.S1_at   | MmugDNA.23445.1 | 8.68  | 7.83  | 0.21 | 0.04 | 1.8   | 0.002813 | 0.001392 | 0.097939 | 0.057005 |
| MmugDNA.23448.1.S1_at   | MmugDNA.23448.1 | 6.33  | 6.45  | 0.1  | 0.01 | -1.08 | 0.129793 | 0.239589 | 0.412052 | 0.510247 |
| MmugDNA.23451.1.S1_at   | MmugDNA.23451.1 | 4.41  | 4.38  | 1.16 | 0.1  | 1.02  | 0.470599 | 0.566988 | 0.715038 | 0.740935 |
| MmugDNA.2347.1.S1_s_at  | MmugDNA.2347.1  | 11.8  | 11.18 | 0.08 | 0.07 | 1.53  | 0.000607 | 0.010422 | 0.070727 | 0.133525 |
| MmugDNA.23473.1.S1_at   | MmugDNA.23473.1 | 5.57  | 5.73  | 0.04 | 0.03 | -1.12 | 0.006875 | 0.208889 | 0.129792 | 0.482717 |
| MmugDNA.23474.1.S1_at   | MmugDNA.23474.1 | 4.88  | 4.99  | 0.01 | 0.01 | -1.08 | 0.000281 | 0.006266 | 0.056985 | 0.107376 |
| MmugDNA.23486.1.S1_at   | MmugDNA.23486.1 | 6.64  | 6.63  | 0.02 | 0.06 | 1.01  | 0.303547 | 0.129966 | 0.591015 | 0.401533 |
| MmugDNA.23489.1.S1_at   | MmugDNA.23489.1 | 4.56  | 4.59  | 0.12 | 0.17 | -1.02 | 0.943923 | 0.50578  | 0.976384 | 0.702218 |
| MmugDNA.23492.1.S1_at   | MmugDNA.23492.1 | 4.98  | 5.02  | 0.09 | 0.13 | -1.03 | 0.700804 | 0.609659 | 0.857891 | 0.767957 |

|                         |                 |       |       |      |      |       |          |          |          |          |
|-------------------------|-----------------|-------|-------|------|------|-------|----------|----------|----------|----------|
| MmugDNA.23498.1.S1_at   | MmugDNA.23498.1 | 10.48 | 10.35 | 0.15 | 0.05 | 1.09  | 0.294479 | 0.092784 | 0.583448 | 0.348989 |
| MmugDNA.235.1.S1_at     | MmugDNA.235.1   | 6.65  | 6.54  | 0.1  | 0.04 | 1.08  | 0.080738 | 0.144171 | 0.341441 | 0.418037 |
| MmugDNA.23500.1.S1_at   | MmugDNA.23500.1 | 12.61 | 12.17 | 0.12 | 0.03 | 1.35  | 0.008717 | 0.402204 | 0.143064 | 0.631247 |
| MmugDNA.23501.1.S1_at   | MmugDNA.23501.1 | 12.67 | 12.64 | 0.04 | 0    | 1.02  | 0.33     | 0.509022 | 0.612081 | 0.703967 |
| MmugDNA.23510.1.S1_at   | MmugDNA.23510.1 | 4.58  | 4.09  | 0.27 | 0.15 | 1.4   | 0.077266 | 0.090867 | 0.335964 | 0.345474 |
| MmugDNA.23511.1.S1_at   | MmugDNA.23511.1 | 7.46  | 6.8   | 0.59 | 0.19 | 1.58  | 0.290422 | 0.501896 | 0.57991  | 0.699953 |
| MmugDNA.23513.1.S1_at   | MmugDNA.23513.1 | 5.94  | 5.98  | 0.44 | 0.25 | -1.03 | 0.297976 | 0.421187 | 0.586445 | 0.644807 |
| MmugDNA.23514.1.S1_at   | MmugDNA.23514.1 | 5.76  | 5.75  | 0.1  | 0.06 | 1.01  | 0.551813 | 0.871016 | 0.768719 | 0.926745 |
| MmugDNA.23515.1.S1_at   | MmugDNA.23515.1 | 11.91 | 12.13 | 0.09 | 0.03 | -1.16 | 0.031685 | 0.003709 | 0.231419 | 0.0868   |
| MmugDNA.23523.1.S1_at   | MmugDNA.23523.1 | 11.5  | 11.79 | 0.21 | 0.03 | -1.22 | 0.284498 | 0.254698 | 0.574425 | 0.522987 |
| MmugDNA.23523.1.S1_s_at | MmugDNA.23523.1 | 10.89 | 11.1  | 0.16 | 0.11 | -1.16 | 0.469785 | 0.078154 | 0.714445 | 0.324634 |
| MmugDNA.23535.1.S1_at   | MmugDNA.23535.1 | 5.53  | 5.52  | 0.17 | 0.05 | 1.01  | 0.809659 | 0.928669 | 0.914761 | 0.959449 |
| MmugDNA.23538.1.S1_at   | MmugDNA.23538.1 | 6.49  | 6.62  | 0.2  | 0.07 | -1.09 | 0.209704 | 0.226748 | 0.507182 | 0.499176 |
| MmugDNA.23542.1.S1_at   | MmugDNA.23542.1 | 9.76  | 9.5   | 0.08 | 0.05 | 1.2   | 0.008906 | 0.189203 | 0.144074 | 0.464997 |
| MmugDNA.23556.1.S1_at   | MmugDNA.23556.1 | 8.3   | 8.67  | 0.58 | 0.22 | -1.3  | 0.399593 | 0.400025 | 0.664835 | 0.630158 |
| MmugDNA.23559.1.S1_at   | MmugDNA.23559.1 | 7.86  | 8.57  | 1.01 | 0.2  | -1.63 | 0.625727 | 0.614332 | 0.815539 | 0.771206 |
| MmugDNA.23560.1.S1_at   | MmugDNA.23560.1 | 7.22  | 7.69  | 0.16 | 0.26 | -1.38 | 0.030312 | 0.077054 | 0.227117 | 0.322498 |
| MmugDNA.23564.1.S1_at   | MmugDNA.23564.1 | 11.04 | 11.49 | 0.22 | 0.03 | -1.37 | 0.01082  | 0.38952  | 0.153877 | 0.623635 |
| MmugDNA.23564.1.S1_s_at | MmugDNA.23564.1 | 8.38  | 9.37  | 0.3  | 0.02 | -1.98 | 0.004978 | 0.236769 | 0.115723 | 0.507513 |
| MmugDNA.23567.1.S1_at   | MmugDNA.23567.1 | 8.46  | 8.66  | 0.25 | 0.07 | -1.15 | 0.184742 | 0.487308 | 0.480792 | 0.690398 |
| MmugDNA.23572.1.S1_s_at | MmugDNA.23572.1 | 9.2   | 8.94  | 0.13 | 0.14 | 1.19  | 0.156532 | 0.468165 | 0.447079 | 0.677624 |
| MmugDNA.23575.1.S1_at   | MmugDNA.23575.1 | 10.5  | 10.7  | 0.58 | 0.04 | -1.15 | 0.654777 | 0.246914 | 0.832889 | 0.516238 |
| MmugDNA.23577.1.S1_at   | MmugDNA.23577.1 | 10.1  | 10.15 | 0.22 | 0.07 | -1.04 | 0.247605 | 0.108632 | 0.543025 | 0.372171 |
| MmugDNA.23582.1.S1_at   | MmugDNA.23582.1 | 8.26  | 7.57  | 0.17 | 0.22 | 1.61  | 0.014325 | 0.270965 | 0.171529 | 0.536099 |
| MmugDNA.23582.1.S1_s_at | MmugDNA.23582.1 | 9.17  | 8.45  | 0.24 | 0.33 | 1.65  | 0.085637 | 0.350794 | 0.350073 | 0.594515 |
| MmugDNA.23583.1.S1_at   | MmugDNA.23583.1 | 6.43  | 6.51  | 0.18 | 0.08 | -1.05 | 0.195873 | 0.890542 | 0.492745 | 0.937632 |
| MmugDNA.23584.1.S1_at   | MmugDNA.23584.1 | 9.3   | 9.66  | 0.23 | 0.17 | -1.29 | 0.082713 | 0.104956 | 0.344584 | 0.366527 |
| MmugDNA.23586.1.S1_at   | MmugDNA.23586.1 | 11.93 | 11.9  | 0.32 | 0.05 | 1.02  | 0.959832 | 0.93857  | 0.983565 | 0.965059 |
| MmugDNA.23588.1.S1_at   | MmugDNA.23588.1 | 6.35  | 6.41  | 0.45 | 0.21 | -1.04 | 0.538839 | 0.735465 | 0.76041  | 0.846919 |
| MmugDNA.23592.1.S1_at   | MmugDNA.23592.1 | 4.79  | 4.67  | 0.11 | 0.23 | 1.09  | 0.79554  | 0.437544 | 0.907596 | 0.656769 |
| MmugDNA.23593.1.S1_at   | MmugDNA.23593.1 | 8.08  | 7.99  | 0.22 | 0.14 | 1.06  | 0.637235 | 0.211924 | 0.822365 | 0.48594  |
| MmugDNA.23596.1.S1_at   | MmugDNA.23596.1 | 8.91  | 9.09  | 0.21 | 0.14 | -1.13 | 0.088727 | 0.146005 | 0.355102 | 0.420006 |
| MmugDNA.23596.1.S1_s_at | MmugDNA.23596.1 | 10.39 | 10.47 | 0.09 | 0.1  | -1.06 | 0.322656 | 0.642941 | 0.606572 | 0.79055  |
| MmugDNA.23603.1.S1_at   | MmugDNA.23603.1 | 12.2  | 12.53 | 0.25 | 0.06 | -1.26 | 0.238701 | 0.317276 | 0.53598  | 0.570504 |
| MmugDNA.23607.1.S1_at   | MmugDNA.23607.1 | 2.99  | 2.99  | 0.04 | 0.11 | -1    | 0.278992 | 0.339133 | 0.570315 | 0.585891 |
| MmugDNA.23609.1.S1_at   | MmugDNA.23609.1 | 7.28  | 6.85  | 0.18 | 0.18 | 1.35  | 0.043366 | 0.577097 | 0.265602 | 0.74764  |
| MmugDNA.23615.1.S1_at   | MmugDNA.23615.1 | 11.1  | 11.2  | 0.19 | 0.08 | -1.07 | 0.322358 | 0.388739 | 0.606349 | 0.623031 |
| MmugDNA.23619.1.S1_at   | MmugDNA.23619.1 | 10.49 | 11.06 | 0.2  | 0.16 | -1.49 | 0.037486 | 0.001083 | 0.249007 | 0.05215  |
| MmugDNA.23628.1.S1_at   | MmugDNA.23628.1 | 12.15 | 11.91 | 0.04 | 0.08 | 1.18  | 0.005293 | 0.027886 | 0.117714 | 0.208455 |
| MmugDNA.23630.1.S1_at   | MmugDNA.23630.1 | 5.05  | 5.57  | 0.18 | 0.09 | -1.44 | 0.033554 | 0.027696 | 0.237111 | 0.207837 |
| MmugDNA.23634.1.S1_at   | MmugDNA.23634.1 | 5.26  | 5.3   | 0.1  | 0.01 | -1.03 | 0.22391  | 0.144047 | 0.521914 | 0.417912 |
| MmugDNA.23639.1.S1_at   | MmugDNA.23639.1 | 9.1   | 9.92  | 0.27 | 0.5  | -1.76 | 0.026767 | 0.019178 | 0.21683  | 0.1742   |
| MmugDNA.2364.1.S1_at    | MmugDNA.2364.1  | 9.18  | 9.16  | 0.36 | 0.07 | 1.01  | 0.848195 | 0.650491 | 0.933904 | 0.795663 |

|                         |                 |       |       |      |      |        |          |          |          |          |
|-------------------------|-----------------|-------|-------|------|------|--------|----------|----------|----------|----------|
| MmugDNA.23641.1.S1_at   | MmugDNA.23641.1 | 5.87  | 9.05  | 0.31 | 0.24 | -9.01  | 0.000145 | 0.004568 | 0.051196 | 0.094375 |
| MmugDNA.23642.1.S1_at   | MmugDNA.23642.1 | 3.07  | 3.03  | 0.2  | 0.01 | 1.03   | 0.77457  | 0.773697 | 0.896932 | 0.868433 |
| MmugDNA.23645.1.S1_at   | MmugDNA.23645.1 | 8.49  | 8.1   | 0.39 | 0.16 | 1.31   | 0.488169 | 0.585999 | 0.726709 | 0.753172 |
| MmugDNA.23646.1.S1_at   | MmugDNA.23646.1 | 11.55 | 11.48 | 0.26 | 0.1  | 1.05   | 0.690344 | 0.792012 | 0.851986 | 0.879813 |
| MmugDNA.23660.1.S1_at   | MmugDNA.23660.1 | 4.74  | 5.3   | 0.48 | 0.19 | -1.48  | 0.194085 | 0.131429 | 0.490693 | 0.403584 |
| MmugDNA.23662.1.S1_at   | MmugDNA.23662.1 | 4.61  | 5.46  | 0.59 | 0.24 | -1.81  | 0.077299 | 0.280053 | 0.335969 | 0.543369 |
| MmugDNA.23662.1.S1_s_at | MmugDNA.23662.1 | 6.75  | 7.58  | 0.1  | 0.26 | -1.78  | 0.008403 | 0.187189 | 0.140949 | 0.463153 |
| MmugDNA.23665.1.S1_at   | MmugDNA.23665.1 | 12.17 | 12.25 | 0.05 | 0.04 | -1.05  | 0.355759 | 0.811583 | 0.632408 | 0.891244 |
| MmugDNA.23668.1.S1_s_at | MmugDNA.23668.1 | 10.02 | 11.1  | 0.28 | 0.22 | -2.12  | 0.016685 | 0.002507 | 0.182519 | 0.074142 |
| MmugDNA.23670.1.S1_at   | MmugDNA.23670.1 | 12.2  | 11.84 | 0.09 | 0.06 | 1.28   | 0.003057 | 0.027242 | 0.10031  | 0.206279 |
| MmugDNA.23676.1.S1_at   | MmugDNA.23676.1 | 4.98  | 4.86  | 0.12 | 0.09 | 1.09   | 0.223811 | 0.062946 | 0.521844 | 0.297579 |
| MmugDNA.23678.1.S1_at   | MmugDNA.23678.1 | 3.99  | 3.95  | 0.35 | 0.08 | 1.02   | 0.996782 | 0.569609 | 0.998936 | 0.742525 |
| MmugDNA.23689.1.S1_at   | MmugDNA.23689.1 | 9.87  | 9.98  | 0.14 | 0.15 | -1.07  | 0.779414 | 0.984409 | 0.899222 | 0.991287 |
| MmugDNA.23693.1.S1_at   | MmugDNA.23693.1 | 6.91  | 10.29 | 1.4  | 0.31 | -10.45 | 0.018672 | 0.024252 | 0.189833 | 0.194952 |
| MmugDNA.23694.1.S1_at   | MmugDNA.23694.1 | 4.16  | 4.35  | 0.37 | 0.37 | -1.14  | 0.528428 | 0.680678 | 0.753659 | 0.813548 |
| MmugDNA.23695.1.S1_s_at | MmugDNA.23695.1 | 9.51  | 8.68  | 0.7  | 0.34 | 1.78   | 0.10712  | 0.122289 | 0.381648 | 0.391973 |
| MmugDNA.23702.1.S1_at   | MmugDNA.23702.1 | 5.71  | 5.81  | 0.17 | 0.06 | -1.07  | 0.619106 | 0.323876 | 0.811006 | 0.574656 |
| MmugDNA.23704.1.S1_at   | MmugDNA.23704.1 | 7.47  | 7.45  | 0.65 | 0.08 | 1.02   | 0.366726 | 0.737222 | 0.640955 | 0.847869 |
| MmugDNA.23709.1.S1_at   | MmugDNA.23709.1 | 12.63 | 12.66 | 0.14 | 0.05 | -1.02  | 0.181016 | 0.703591 | 0.476233 | 0.828139 |
| MmugDNA.23718.1.S1_at   | MmugDNA.23718.1 | 6.78  | 7.29  | 0.22 | 0.15 | -1.42  | 0.018114 | 0.038263 | 0.18754  | 0.240378 |
| MmugDNA.23719.1.S1_at   | MmugDNA.23719.1 | 11.39 | 10.24 | 0.18 | 0.03 | 2.23   | 0.000543 | 0.000079 | 0.070087 | 0.027016 |
| MmugDNA.23722.1.S1_at   | MmugDNA.23722.1 | 5.39  | 5.67  | 0.48 | 0.28 | -1.22  | 0.157698 | 0.19718  | 0.448524 | 0.472213 |
| MmugDNA.23725.1.S1_at   | MmugDNA.23725.1 | 11.65 | 11.43 | 0.14 | 0.05 | 1.17   | 0.058165 | 0.069693 | 0.298244 | 0.310164 |
| MmugDNA.23734.1.S1_at   | MmugDNA.23734.1 | 7.94  | 7.52  | 0.2  | 0.14 | 1.34   | 0.168711 | 0.387991 | 0.462025 | 0.62253  |
| MmugDNA.23740.1.S1_at   | MmugDNA.23740.1 | 4.83  | 5.05  | 0.12 | 0.29 | -1.16  | 0.152673 | 0.203057 | 0.442371 | 0.477343 |
| MmugDNA.23741.1.S1_at   | MmugDNA.23741.1 | 10.34 | 9.87  | 0.17 | 0.11 | 1.38   | 0.022674 | 0.010019 | 0.203642 | 0.131262 |
| MmugDNA.2375.1.S1_at    | MmugDNA.2375.1  | 7.06  | 7.59  | 0.36 | 0.08 | -1.45  | 0.072841 | 0.273203 | 0.327658 | 0.537788 |
| MmugDNA.23757.1.S1_at   | MmugDNA.23757.1 | 9.89  | 9.62  | 0.09 | 0.03 | 1.21   | 0.005315 | 0.595216 | 0.117854 | 0.759023 |
| MmugDNA.23758.1.S1_at   | MmugDNA.23758.1 | 7.96  | 7.34  | 0.08 | 0.19 | 1.53   | 0.006361 | 0.007443 | 0.126133 | 0.115858 |
| MmugDNA.23758.1.S1_x_at | MmugDNA.23758.1 | 7.93  | 7.33  | 0.14 | 0.16 | 1.51   | 0.004711 | 0.004343 | 0.115008 | 0.092354 |
| MmugDNA.2376.1.S1_at    | MmugDNA.2376.1  | 5.78  | 8.64  | 1.91 | 0.41 | -7.27  | 0.097016 | 0.237542 | 0.367217 | 0.508196 |
| MmugDNA.23765.1.S1_at   | MmugDNA.23765.1 | 5.32  | 5.31  | 0.21 | 0.09 | 1      | 0.96643  | 0.956045 | 0.98642  | 0.975043 |
| MmugDNA.23771.1.S1_at   | MmugDNA.23771.1 | 10.78 | 10.46 | 0.14 | 0.14 | 1.25   | 0.244415 | 0.174018 | 0.540909 | 0.450269 |
| MmugDNA.23772.1.S1_at   | MmugDNA.23772.1 | 3.92  | 3.91  | 0.01 | 0.06 | 1      | 0.561639 | 0.32527  | 0.774547 | 0.575648 |
| MmugDNA.23781.1.S1_s_at | MmugDNA.23781.1 | 10.99 | 10.93 | 0.11 | 0.04 | 1.05   | 0.413622 | 0.067306 | 0.674922 | 0.305414 |
| MmugDNA.23788.1.S1_at   | MmugDNA.23788.1 | 6.33  | 6.38  | 0.22 | 0.07 | -1.03  | 0.875093 | 0.737296 | 0.946398 | 0.847869 |
| MmugDNA.23790.1.S1_at   | MmugDNA.23790.1 | 8.73  | 8.33  | 0.11 | 0.05 | 1.32   | 0.004173 | 0.086218 | 0.110227 | 0.33863  |
| MmugDNA.23792.1.S1_at   | MmugDNA.23792.1 | 4.13  | 4.12  | 0.06 | 0.06 | 1      | 0.4879   | 0.927735 | 0.726538 | 0.958972 |
| MmugDNA.23793.1.S1_at   | MmugDNA.23793.1 | 8.7   | 8.64  | 0.07 | 0.13 | 1.04   | 0.489545 | 0.586008 | 0.727823 | 0.753172 |
| MmugDNA.23793.1.S1_s_at | MmugDNA.23793.1 | 9.09  | 9.08  | 0.1  | 0.2  | 1.01   | 0.653745 | 0.856014 | 0.832376 | 0.917803 |
| MmugDNA.238.1.S1_at     | MmugDNA.238.1   | 9.3   | 9.49  | 0.38 | 0.1  | -1.14  | 0.387572 | 0.286297 | 0.655669 | 0.547784 |
| MmugDNA.23812.1.S1_at   | MmugDNA.23812.1 | 9.3   | 9.59  | 0.14 | 0.23 | -1.23  | 0.226921 | 0.00929  | 0.524851 | 0.127128 |
| MmugDNA.23817.1.S1_at   | MmugDNA.23817.1 | 6.04  | 6.03  | 0.08 | 0.06 | 1      | 0.854686 | 0.360061 | 0.936785 | 0.601204 |

|                         |                 |       |       |      |      |       |          |          |          |          |
|-------------------------|-----------------|-------|-------|------|------|-------|----------|----------|----------|----------|
| MmugDNA.23824.1.S1_at   | MmugDNA.23824.1 | 10.36 | 10.49 | 0.58 | 0.23 | -1.09 | 0.432611 | 0.754529 | 0.688358 | 0.857221 |
| MmugDNA.23833.1.S1_at   | MmugDNA.23833.1 | 5.13  | 4.96  | 0.17 | 0.07 | 1.12  | 0.153004 | 0.437962 | 0.442719 | 0.657057 |
| MmugDNA.23854.1.S1_at   | MmugDNA.23854.1 | 7.51  | 7.53  | 0.13 | 0.13 | -1.01 | 0.617473 | 0.82758  | 0.810046 | 0.901078 |
| MmugDNA.23862.1.S1_at   | MmugDNA.23862.1 | 5.94  | 7.99  | 0.83 | 0.23 | -4.13 | 0.044129 | 0.296953 | 0.267189 | 0.555895 |
| MmugDNA.23879.1.S1_at   | MmugDNA.23879.1 | 3.03  | 3.05  | 0.12 | 0.04 | -1.02 | 0.687058 | 0.129739 | 0.850763 | 0.401362 |
| MmugDNA.23887.1.S1_at   | MmugDNA.23887.1 | 3.06  | 3.14  | 0.09 | 0.18 | -1.06 | 0.79897  | 0.582878 | 0.909384 | 0.751428 |
| MmugDNA.23889.1.S1_s_at | MmugDNA.23889.1 | 9.74  | 10.13 | 0.3  | 0.07 | -1.32 | 0.045271 | 0.032069 | 0.270246 | 0.22165  |
| MmugDNA.23894.1.S1_at   | MmugDNA.23894.1 | 4.94  | 5.24  | 0.27 | 0.08 | -1.23 | 0.460423 | 0.128811 | 0.708167 | 0.400277 |
| MmugDNA.23896.1.S1_at   | MmugDNA.23896.1 | 12.48 | 12.54 | 0.06 | 0.06 | -1.04 | 0.577306 | 0.005737 | 0.78353  | 0.104271 |
| MmugDNA.23905.1.S1_at   | MmugDNA.23905.1 | 5.34  | 5.29  | 0.1  | 0.17 | 1.04  | 0.453454 | 0.795992 | 0.703626 | 0.882479 |
| MmugDNA.23909.1.S1_at   | MmugDNA.23909.1 | 7.5   | 7.39  | 0.3  | 0.35 | 1.08  | 0.848503 | 0.015473 | 0.934016 | 0.157908 |
| MmugDNA.23925.1.S1_at   | MmugDNA.23925.1 | 8.36  | 9.26  | 0.2  | 0.12 | -1.86 | 0.003022 | 0.412814 | 0.100006 | 0.639121 |
| MmugDNA.23928.1.S1_at   | MmugDNA.23928.1 | 11.26 | 11.23 | 0.02 | 0.12 | 1.02  | 0.829685 | 0.039261 | 0.925023 | 0.243333 |
| MmugDNA.23928.1.S1_x_at | MmugDNA.23928.1 | 11.21 | 11.21 | 0.01 | 0.12 | -1    | 0.914087 | 0.04874  | 0.963554 | 0.265744 |
| MmugDNA.2393.1.S1_at    | MmugDNA.2393.1  | 7.49  | 7.38  | 0.23 | 0.35 | 1.08  | 0.770346 | 0.754747 | 0.894589 | 0.857323 |
| MmugDNA.23932.1.S1_at   | MmugDNA.23932.1 | 6.03  | 5.99  | 0.13 | 0.09 | 1.03  | 0.740223 | 0.127534 | 0.879526 | 0.398407 |
| MmugDNA.23933.1.S1_at   | MmugDNA.23933.1 | 12.13 | 11.7  | 0.12 | 0.16 | 1.35  | 0.040909 | 0.013058 | 0.258688 | 0.146997 |
| MmugDNA.23938.1.S1_at   | MmugDNA.23938.1 | 11.03 | 11.13 | 0.03 | 0.09 | -1.07 | 0.318734 | 0.841384 | 0.603462 | 0.909644 |
| MmugDNA.23938.1.S1_s_at | MmugDNA.23938.1 | 11.65 | 11.71 | 0.06 | 0.03 | -1.04 | 0.244668 | 0.811543 | 0.540961 | 0.891234 |
| MmugDNA.2394.1.S1_at    | MmugDNA.2394.1  | 6.36  | 7.75  | 1.11 | 0.05 | -2.61 | 0.097917 | 0.153518 | 0.368373 | 0.42827  |
| MmugDNA.23942.1.S1_at   | MmugDNA.23942.1 | 6.72  | 7.38  | 0.46 | 0.28 | -1.57 | 0.043444 | 0.28585  | 0.265644 | 0.547484 |
| MmugDNA.23945.1.S1_at   | MmugDNA.23945.1 | 6.27  | 6.06  | 0.04 | 0.09 | 1.16  | 0.025393 | 0.459839 | 0.21227  | 0.671989 |
| MmugDNA.2395.1.S1_at    | MmugDNA.2395.1  | 10.3  | 10.43 | 0.05 | 0.08 | -1.1  | 0.051156 | 0.810583 | 0.283595 | 0.890812 |
| MmugDNA.23952.1.S1_at   | MmugDNA.23952.1 | 3.9   | 4.12  | 0.17 | 0.05 | -1.17 | 0.243444 | 0.174388 | 0.540139 | 0.450842 |
| MmugDNA.23954.1.S1_at   | MmugDNA.23954.1 | 7.24  | 8.61  | 0.89 | 0.19 | -2.58 | 0.121502 | 0.194373 | 0.400293 | 0.469464 |
| MmugDNA.23979.1.S1_at   | MmugDNA.23979.1 | 9.48  | 9.36  | 0.08 | 0.34 | 1.09  | 0.679609 | 0.001758 | 0.847147 | 0.063146 |
| MmugDNA.23982.1.S1_at   | MmugDNA.23982.1 | 11.52 | 11.09 | 0.35 | 0.05 | 1.34  | 0.180972 | 0.009617 | 0.476233 | 0.12918  |
| MmugDNA.23983.1.S1_at   | MmugDNA.23983.1 | 12.25 | 12.15 | 0.1  | 0.05 | 1.07  | 0.238372 | 0.225646 | 0.535771 | 0.498155 |
| MmugDNA.23986.1.S1_at   | MmugDNA.23986.1 | 5.77  | 5.7   | 0.39 | 0.24 | 1.05  | 0.762301 | 0.917236 | 0.89102  | 0.953758 |
| MmugDNA.2399.1.S1_at    | MmugDNA.2399.1  | 11.66 | 11.17 | 0.12 | 0.17 | 1.41  | 0.027625 | 0.039124 | 0.21866  | 0.243056 |
| MmugDNA.23995.1.S1_at   | MmugDNA.23995.1 | 8.54  | 8     | 0.13 | 0.29 | 1.45  | 0.139369 | 0.219237 | 0.424947 | 0.493013 |
| MmugDNA.23998.1.S1_at   | MmugDNA.23998.1 | 7     | 7.01  | 0.11 | 0.18 | -1.01 | 0.549361 | 0.500723 | 0.767114 | 0.699242 |
| MmugDNA.24001.1.S1_at   | MmugDNA.24001.1 | 6.14  | 6.03  | 0.15 | 0.04 | 1.08  | 0.261075 | 0.366377 | 0.555232 | 0.606087 |
| MmugDNA.24003.1.S1_at   | MmugDNA.24003.1 | 4.95  | 4.97  | 0.13 | 0.03 | -1.02 | 0.536731 | 0.33488  | 0.75909  | 0.58275  |
| MmugDNA.24004.1.S1_at   | MmugDNA.24004.1 | 9.35  | 9.25  | 0.17 | 0.08 | 1.07  | 0.147985 | 0.136409 | 0.436226 | 0.408839 |
| MmugDNA.24005.1.S1_at   | MmugDNA.24005.1 | 8.13  | 5.96  | 1.62 | 0.29 | 4.5   | 0.115326 | 0.158149 | 0.392403 | 0.433976 |
| MmugDNA.24006.1.S1_s_at | MmugDNA.24006.1 | 3.22  | 3.18  | 0.07 | 0.15 | 1.03  | 0.849414 | 0.956531 | 0.934435 | 0.975294 |
| MmugDNA.24007.1.S1_at   | MmugDNA.24007.1 | 9.84  | 9.75  | 0.2  | 0.06 | 1.06  | 0.854562 | 0.002449 | 0.936768 | 0.073236 |
| MmugDNA.2401.1.S1_s_at  | MmugDNA.2401.1  | 8.2   | 8.28  | 0.26 | 0.19 | -1.06 | 0.546246 | 0.147965 | 0.765159 | 0.422364 |
| MmugDNA.24017.1.S1_at   | MmugDNA.24017.1 | 9.49  | 9.16  | 0.21 | 0.04 | 1.25  | 0.077973 | 0.087672 | 0.337208 | 0.340941 |
| MmugDNA.24023.1.S1_at   | MmugDNA.24023.1 | 10    | 9.5   | 0.35 | 0.15 | 1.41  | 0.030175 | 0.398957 | 0.226852 | 0.629665 |
| MmugDNA.24026.1.S1_s_at | MmugDNA.24026.1 | 12.01 | 11.99 | 0.08 | 0.06 | 1.01  | 0.570118 | 0.36695  | 0.779298 | 0.606583 |
| MmugDNA.24027.1.S1_at   | MmugDNA.24027.1 | 10.04 | 9.66  | 0.05 | 0.16 | 1.3   | 0.024168 | 0.268663 | 0.20868  | 0.534138 |



|                         |                 |       |       |      |      |        |          |          |          |          |
|-------------------------|-----------------|-------|-------|------|------|--------|----------|----------|----------|----------|
| MmugDNA.24028.1.S1_at   | MmugDNA.24028.1 | 8.99  | 7.96  | 0.36 | 0.1  | 2.04   | 0.008693 | 0.003115 | 0.142858 | 0.081314 |
| MmugDNA.2403.1.S1_at    | MmugDNA.2403.1  | 5.56  | 7.13  | 0.47 | 0.32 | -2.98  | 0.010962 | 0.065057 | 0.154565 | 0.301009 |
| MmugDNA.24036.1.S1_s_at | MmugDNA.24036.1 | 9.74  | 10.19 | 0.42 | 0.12 | -1.36  | 0.088524 | 0.002531 | 0.354709 | 0.074292 |
| MmugDNA.24039.1.S1_at   | MmugDNA.24039.1 | 9.12  | 8.48  | 0.02 | 0.07 | 1.55   | 0.000127 | 0.09196  | 0.051196 | 0.347297 |
| MmugDNA.24044.1.S1_at   | MmugDNA.24044.1 | 3.67  | 3.64  | 0.05 | 0.08 | 1.02   | 0.827585 | 0.219848 | 0.923667 | 0.493388 |
| MmugDNA.24047.1.S1_s_at | MmugDNA.24047.1 | 12.22 | 12.21 | 0.07 | 0.03 | 1.01   | 0.839137 | 0.006853 | 0.929453 | 0.11185  |
| MmugDNA.24048.1.S1_at   | MmugDNA.24048.1 | 5.65  | 8.98  | 1.2  | 0.47 | -10.02 | 0.029371 | 0.049424 | 0.224381 | 0.267237 |
| MmugDNA.24069.1.S1_at   | MmugDNA.24069.1 | 6.59  | 6.42  | 0.07 | 0.14 | 1.13   | 0.095506 | 0.214719 | 0.364961 | 0.488578 |
| MmugDNA.24071.1.S1_at   | MmugDNA.24071.1 | 13.26 | 13.42 | 0.08 | 0.04 | -1.11  | 0.096565 | 0.373063 | 0.366453 | 0.611933 |
| MmugDNA.24076.1.S1_at   | MmugDNA.24076.1 | 9.73  | 8.26  | 0.19 | 0.15 | 2.77   | 0.000515 | 0.095257 | 0.069024 | 0.352251 |
| MmugDNA.24078.1.S1_at   | MmugDNA.24078.1 | 4.93  | 5.04  | 0.18 | 0.07 | -1.08  | 0.268937 | 0.03249  | 0.561347 | 0.223254 |
| MmugDNA.24081.1.S1_at   | MmugDNA.24081.1 | 8.4   | 8.34  | 0.08 | 0.08 | 1.04   | 0.189975 | 0.678757 | 0.486315 | 0.812378 |
| MmugDNA.24091.1.S1_at   | MmugDNA.24091.1 | 5.22  | 4.72  | 1.09 | 0.4  | 1.42   | 0.708079 | 0.920348 | 0.86174  | 0.95511  |
| MmugDNA.241.1.S1_at     | MmugDNA.241.1   | 7.51  | 7.98  | 0.16 | 0.19 | -1.39  | 0.040807 | 0.078873 | 0.258464 | 0.325852 |
| MmugDNA.24100.1.S1_at   | MmugDNA.24100.1 | 10.05 | 10.13 | 0.38 | 0.12 | -1.05  | 0.736032 | 0.669198 | 0.877149 | 0.806492 |
| MmugDNA.24112.1.S1_at   | MmugDNA.24112.1 | 9.97  | 9.84  | 0.17 | 0.08 | 1.09   | 0.762251 | 0.400905 | 0.890988 | 0.630658 |
| MmugDNA.24115.1.S1_at   | MmugDNA.24115.1 | 9.4   | 10.01 | 0.05 | 0.18 | -1.53  | 0.005989 | 0.012934 | 0.124151 | 0.146387 |
| MmugDNA.24119.1.S1_at   | MmugDNA.24119.1 | 4.34  | 4.41  | 0.06 | 0.08 | -1.05  | 0.355538 | 0.070695 | 0.632237 | 0.312066 |
| MmugDNA.24127.1.S1_at   | MmugDNA.24127.1 | 11.99 | 11.99 | 0.18 | 0.12 | -1     | 0.253131 | 0.755672 | 0.547579 | 0.85776  |
| MmugDNA.2413.1.S1_at    | MmugDNA.2413.1  | 9.94  | 11    | 0.47 | 0.03 | -2.09  | 0.047035 | 0.032691 | 0.274555 | 0.223883 |
| MmugDNA.24135.1.S1_at   | MmugDNA.24135.1 | 11.47 | 11.59 | 0.09 | 0.05 | -1.09  | 0.150697 | 0.013273 | 0.439791 | 0.147875 |
| MmugDNA.2414.1.S1_at    | MmugDNA.2414.1  | 8.65  | 9.33  | 0.49 | 0.19 | -1.6   | 0.089079 | 0.214852 | 0.355757 | 0.488734 |
| MmugDNA.24144.1.S1_at   | MmugDNA.24144.1 | 11.98 | 12.08 | 0.13 | 0.01 | -1.08  | 0.198461 | 0.48419  | 0.495613 | 0.688399 |
| MmugDNA.24146.1.S1_at   | MmugDNA.24146.1 | 11.04 | 11.77 | 0.32 | 0.14 | -1.66  | 0.025606 | 0.252709 | 0.212928 | 0.521174 |
| MmugDNA.24147.1.S1_at   | MmugDNA.24147.1 | 11.49 | 11.25 | 0.36 | 0.09 | 1.19   | 0.309712 | 0.579799 | 0.595965 | 0.749289 |
| MmugDNA.24148.1.S1_at   | MmugDNA.24148.1 | 12.19 | 12.33 | 0.08 | 0.02 | -1.1   | 0.044346 | 0.000302 | 0.267789 | 0.034907 |
| MmugDNA.24151.1.S1_at   | MmugDNA.24151.1 | 11.78 | 11.77 | 0.23 | 0.05 | 1      | 0.314374 | 0.143294 | 0.599959 | 0.417283 |
| MmugDNA.24157.1.S1_at   | MmugDNA.24157.1 | 5.37  | 5.35  | 0.21 | 0.03 | 1.01   | 0.402752 | 0.579494 | 0.667006 | 0.74918  |
| MmugDNA.24158.1.S1_at   | MmugDNA.24158.1 | 9.49  | 9.33  | 0.29 | 0.06 | 1.12   | 0.349232 | 0.095595 | 0.627133 | 0.352645 |
| MmugDNA.2416.1.S1_at    | MmugDNA.2416.1  | 4.65  | 4.16  | 0.14 | 0.19 | 1.4    | 0.093528 | 0.154199 | 0.362134 | 0.428949 |
| MmugDNA.24160.1.S1_at   | MmugDNA.24160.1 | 3.36  | 3.33  | 0.16 | 0.04 | 1.02   | 0.262844 | 0.638588 | 0.556683 | 0.787711 |
| MmugDNA.24161.1.S1_at   | MmugDNA.24161.1 | 7.53  | 7.51  | 0.2  | 0.05 | 1.01   | 0.598316 | 0.005545 | 0.797347 | 0.10275  |
| MmugDNA.24169.1.S1_at   | MmugDNA.24169.1 | 8.19  | 7.85  | 0.12 | 0.16 | 1.27   | 0.115365 | 0.330775 | 0.392461 | 0.579558 |
| MmugDNA.24172.1.S1_at   | MmugDNA.24172.1 | 11.44 | 10.09 | 0.36 | 0.34 | 2.54   | 0.011024 | 0.003032 | 0.154661 | 0.080386 |
| MmugDNA.24174.1.S1_at   | MmugDNA.24174.1 | 9.64  | 9.3   | 0.25 | 0.07 | 1.27   | 0.061366 | 0.409976 | 0.304438 | 0.637002 |
| MmugDNA.24181.1.S1_s_at | MmugDNA.24181.1 | 7.6   | 8.74  | 0.44 | 0.05 | -2.2   | 0.026766 | 0.199973 | 0.21683  | 0.474603 |
| MmugDNA.24185.1.S1_at   | MmugDNA.24185.1 | 8.48  | 8.5   | 0.09 | 0.09 | -1.01  | 0.602358 | 0.85465  | 0.800189 | 0.917159 |
| MmugDNA.24187.1.S1_at   | MmugDNA.24187.1 | 3.53  | 3.77  | 0.08 | 0.11 | -1.18  | 0.064117 | 0.058548 | 0.309726 | 0.288669 |
| MmugDNA.2419.1.S1_at    | MmugDNA.2419.1  | 4.86  | 5.05  | 0.43 | 0.05 | -1.14  | 0.857554 | 0.862624 | 0.938079 | 0.92189  |
| MmugDNA.24191.1.S1_at   | MmugDNA.24191.1 | 6.3   | 6.3   | 0.12 | 0.12 | 1      | 0.745388 | 0.824782 | 0.881878 | 0.89939  |
| MmugDNA.24192.1.S1_at   | MmugDNA.24192.1 | 4.45  | 4.54  | 0.21 | 0.23 | -1.06  | 0.819782 | 0.531961 | 0.919644 | 0.718995 |
| MmugDNA.24198.1.S1_at   | MmugDNA.24198.1 | 3.75  | 3.5   | 0.25 | 0.15 | 1.19   | 0.422263 | 0.324313 | 0.680473 | 0.574924 |
| MmugDNA.24203.1.S1_s_at | MmugDNA.24203.1 | 10.16 | 10.26 | 0.35 | 0.02 | -1.07  | 0.914634 | 0.986203 | 0.963708 | 0.992172 |

|                         |                 |       |       |      |      |       |          |          |          |          |
|-------------------------|-----------------|-------|-------|------|------|-------|----------|----------|----------|----------|
| MmugDNA.24205.1.S1_at   | MmugDNA.24205.1 | 6.53  | 6.64  | 0.22 | 0    | -1.08 | 0.549365 | 0.391782 | 0.767114 | 0.625301 |
| MmugDNA.24206.1.S1_at   | MmugDNA.24206.1 | 7.91  | 8.06  | 0.17 | 0.01 | -1.11 | 0.242675 | 0.142933 | 0.539526 | 0.416854 |
| MmugDNA.24210.1.S1_at   | MmugDNA.24210.1 | 10.33 | 10.51 | 0.14 | 0.19 | -1.14 | 0.305578 | 0.085159 | 0.592647 | 0.336997 |
| MmugDNA.24212.1.S1_at   | MmugDNA.24212.1 | 6.94  | 7.66  | 0.84 | 0.23 | -1.65 | 0.057035 | 0.221741 | 0.296156 | 0.494901 |
| MmugDNA.24215.1.S1_at   | MmugDNA.24215.1 | 12.08 | 11.19 | 0.09 | 0.34 | 1.86  | 0.025728 | 0.005954 | 0.212979 | 0.105513 |
| MmugDNA.24224.1.S1_at   | MmugDNA.24224.1 | 11.89 | 11.91 | 0.1  | 0.07 | -1.01 | 0.341484 | 0.264424 | 0.621345 | 0.530385 |
| MmugDNA.24228.1.S1_at   | MmugDNA.24228.1 | 11.67 | 11.47 | 0.21 | 0.06 | 1.15  | 0.446806 | 0.788212 | 0.698851 | 0.877514 |
| MmugDNA.24230.1.S1_s_at | MmugDNA.24230.1 | 11.14 | 11.54 | 0.06 | 0.01 | -1.32 | 0.000242 | 0.000319 | 0.054642 | 0.035423 |
| MmugDNA.24231.1.S1_at   | MmugDNA.24231.1 | 12.07 | 12    | 0.19 | 0.07 | 1.05  | 0.748105 | 0.971613 | 0.883273 | 0.984594 |
| MmugDNA.24238.1.S1_at   | MmugDNA.24238.1 | 5.09  | 4.55  | 0.16 | 0.21 | 1.45  | 0.053671 | 0.042739 | 0.288873 | 0.251216 |
| MmugDNA.24243.1.S1_at   | MmugDNA.24243.1 | 7.04  | 7.08  | 0.23 | 0.05 | -1.03 | 0.97593  | 0.672078 | 0.990409 | 0.808295 |
| MmugDNA.2425.1.S1_at    | MmugDNA.2425.1  | 10.47 | 10.86 | 0.09 | 0.13 | -1.31 | 0.015938 | 0.105544 | 0.178697 | 0.367526 |
| MmugDNA.24251.1.S1_at   | MmugDNA.24251.1 | 5.65  | 5.82  | 0.42 | 0.09 | -1.12 | 0.474634 | 0.680647 | 0.717577 | 0.813542 |
| MmugDNA.24263.1.S1_at   | MmugDNA.24263.1 | 11.84 | 11.88 | 0.16 | 0.03 | -1.03 | 0.712008 | 0.011361 | 0.864162 | 0.138214 |
| MmugDNA.24266.1.S1_at   | MmugDNA.24266.1 | 8.29  | 7.85  | 0.13 | 0.28 | 1.36  | 0.122852 | 0.022433 | 0.401841 | 0.187441 |
| MmugDNA.24267.1.S1_at   | MmugDNA.24267.1 | 12.9  | 12.92 | 0.07 | 0.05 | -1.01 | 0.661172 | 0.519179 | 0.836453 | 0.710878 |
| MmugDNA.2427.1.S1_at    | MmugDNA.2427.1  | 13.15 | 12.66 | 0.12 | 0.04 | 1.4   | 0.002948 | 0.003586 | 0.099448 | 0.085687 |
| MmugDNA.24275.1.S1_at   | MmugDNA.24275.1 | 7.61  | 7.84  | 0.16 | 0.09 | -1.17 | 0.100922 | 0.101692 | 0.372157 | 0.361562 |
| MmugDNA.24278.1.S1_at   | MmugDNA.24278.1 | 11.81 | 11.73 | 0.13 | 0.09 | 1.06  | 0.534887 | 0.392232 | 0.757969 | 0.625652 |
| MmugDNA.24286.1.S1_at   | MmugDNA.24286.1 | 10.96 | 11.93 | 0.39 | 0.38 | -1.96 | 0.049718 | 0.007897 | 0.280409 | 0.118462 |
| MmugDNA.24287.1.S1_at   | MmugDNA.24287.1 | 8.52  | 7.3   | 0.24 | 0.87 | 2.33  | 0.107165 | 0.031336 | 0.381659 | 0.219011 |
| MmugDNA.24291.1.S1_s_at | MmugDNA.24291.1 | 7.97  | 10.82 | 1.69 | 0.2  | -7.22 | 0.144756 | 0.541785 | 0.431711 | 0.725064 |
| MmugDNA.24305.1.S1_at   | MmugDNA.24305.1 | 11.21 | 11.05 | 0.08 | 0.05 | 1.12  | 0.039751 | 0.091047 | 0.256052 | 0.345842 |
| MmugDNA.24306.1.S1_at   | MmugDNA.24306.1 | 4.2   | 3.89  | 0.32 | 0.14 | 1.24  | 0.138212 | 0.200718 | 0.423422 | 0.47524  |
| MmugDNA.24308.1.S1_at   | MmugDNA.24308.1 | 9.5   | 11.18 | 0.64 | 0.16 | -3.21 | 0.014092 | 0.02733  | 0.170085 | 0.206625 |
| MmugDNA.2431.1.S1_at    | MmugDNA.2431.1  | 9.15  | 9.29  | 0.11 | 0.07 | -1.1  | 0.32666  | 0.429372 | 0.609643 | 0.650823 |
| MmugDNA.24325.1.S1_at   | MmugDNA.24325.1 | 11.84 | 12.21 | 0.16 | 0.06 | -1.29 | 0.013237 | 0.0146   | 0.165657 | 0.15408  |
| MmugDNA.24330.1.S1_at   | MmugDNA.24330.1 | 9.85  | 9.6   | 0.25 | 0.02 | 1.19  | 0.056205 | 0.158834 | 0.294294 | 0.434952 |
| MmugDNA.24333.1.S1_at   | MmugDNA.24333.1 | 10.27 | 10.05 | 0.07 | 0.06 | 1.16  | 0.042625 | 0.016926 | 0.263614 | 0.164991 |
| MmugDNA.24341.1.S1_at   | MmugDNA.24341.1 | 8.71  | 8.39  | 0.24 | 0.14 | 1.25  | 0.050386 | 0.003054 | 0.282317 | 0.080596 |
| MmugDNA.24342.1.S1_at   | MmugDNA.24342.1 | 3.54  | 3.57  | 0.11 | 0.04 | -1.02 | 0.275386 | 0.403544 | 0.567073 | 0.632211 |
| MmugDNA.24343.1.S1_at   | MmugDNA.24343.1 | 6.09  | 6.8   | 0.16 | 0.25 | -1.64 | 0.037235 | 0.083408 | 0.248291 | 0.333699 |
| MmugDNA.24350.1.S1_at   | MmugDNA.24350.1 | 12.64 | 12.95 | 0.19 | 0.09 | -1.24 | 0.074782 | 0.093628 | 0.331577 | 0.349995 |
| MmugDNA.2436.1.S1_at    | MmugDNA.2436.1  | 6.34  | 7.18  | 0.96 | 0.45 | -1.79 | 0.244729 | 0.173675 | 0.54105  | 0.450021 |
| MmugDNA.24363.1.S1_at   | MmugDNA.24363.1 | 6.84  | 7.93  | 0.55 | 0.36 | -2.12 | 0.115282 | 0.041844 | 0.392357 | 0.249172 |
| MmugDNA.24364.1.S1_at   | MmugDNA.24364.1 | 7.31  | 8.43  | 0.45 | 0.13 | -2.17 | 0.0171   | 0.130859 | 0.184186 | 0.403037 |
| MmugDNA.24379.1.S1_at   | MmugDNA.24379.1 | 10.62 | 10.16 | 0.73 | 0.19 | 1.38  | 0.59964  | 0.271144 | 0.798286 | 0.536259 |
| MmugDNA.2438.1.S1_at    | MmugDNA.2438.1  | 11.31 | 11.43 | 0.25 | 0.04 | -1.09 | 0.96583  | 0.062625 | 0.986163 | 0.297022 |
| MmugDNA.24380.1.S1_at   | MmugDNA.24380.1 | 13.59 | 13.32 | 0.06 | 0.03 | 1.21  | 0.001068 | 0.008126 | 0.076699 | 0.11972  |
| MmugDNA.2439.1.S1_at    | MmugDNA.2439.1  | 11.58 | 11.16 | 0.11 | 0.01 | 1.33  | 0.005007 | 0.029235 | 0.115961 | 0.212898 |
| MmugDNA.24390.1.S1_at   | MmugDNA.24390.1 | 11.36 | 11.37 | 0.03 | 0.01 | -1    | 0.695225 | 0.993814 | 0.854703 | 0.996274 |
| MmugDNA.24395.1.S1_at   | MmugDNA.24395.1 | 8.46  | 8.69  | 0.09 | 0.08 | -1.17 | 0.016196 | 0.12872  | 0.179908 | 0.400135 |
| MmugDNA.24397.1.S1_at   | MmugDNA.24397.1 | 10.83 | 10.92 | 0.34 | 0.11 | -1.06 | 0.377487 | 0.004306 | 0.648001 | 0.092019 |

|                         |                 |       |       |      |      |        |          |          |          |          |
|-------------------------|-----------------|-------|-------|------|------|--------|----------|----------|----------|----------|
| MmugDNA.24397.1.S1_x_at | MmugDNA.24397.1 | 10.77 | 10.93 | 0.31 | 0.09 | -1.12  | 0.362275 | 0.003214 | 0.637219 | 0.082043 |
| MmugDNA.24403.1.S1_at   | MmugDNA.24403.1 | 4.81  | 5.12  | 0.64 | 0.27 | -1.23  | 0.384151 | 0.085742 | 0.653268 | 0.337761 |
| MmugDNA.24413.1.S1_at   | MmugDNA.24413.1 | 12.53 | 12.33 | 0.08 | 0.13 | 1.15   | 0.208916 | 0.65308  | 0.506372 | 0.79718  |
| MmugDNA.24421.1.S1_at   | MmugDNA.24421.1 | 9.86  | 8.69  | 0.03 | 0.21 | 2.25   | 0.00067  | 0.015982 | 0.071248 | 0.160458 |
| MmugDNA.24422.1.S1_at   | MmugDNA.24422.1 | 3.07  | 3.13  | 0.1  | 0.13 | -1.04  | 0.471394 | 0.76857  | 0.715544 | 0.865637 |
| MmugDNA.24426.1.S1_at   | MmugDNA.24426.1 | 10.61 | 10.07 | 0.25 | 0.02 | 1.46   | 0.026796 | 0.110226 | 0.216925 | 0.374349 |
| MmugDNA.24431.1.S1_at   | MmugDNA.24431.1 | 4.6   | 4.53  | 0.04 | 0.04 | 1.05   | 0.100519 | 0.001859 | 0.371552 | 0.064693 |
| MmugDNA.24432.1.S1_at   | MmugDNA.24432.1 | 6.39  | 5.73  | 0.07 | 0.09 | 1.58   | 0.000549 | 0.00299  | 0.070087 | 0.079958 |
| MmugDNA.24437.1.S1_at   | MmugDNA.24437.1 | 6.44  | 6.6   | 0.39 | 0.11 | -1.12  | 0.126249 | 0.568247 | 0.407483 | 0.741866 |
| MmugDNA.24448.1.S1_at   | MmugDNA.24448.1 | 6.25  | 6.15  | 0.29 | 0.11 | 1.07   | 0.32428  | 0.013979 | 0.607951 | 0.151585 |
| MmugDNA.24450.1.S1_at   | MmugDNA.24450.1 | 8.49  | 8.13  | 0.36 | 0.11 | 1.28   | 0.186062 | 0.451162 | 0.482202 | 0.666085 |
| MmugDNA.24451.1.S1_at   | MmugDNA.24451.1 | 4.38  | 6.71  | 1.07 | 0.48 | -5.03  | 0.090289 | 0.075741 | 0.356872 | 0.32034  |
| MmugDNA.24454.1.S1_at   | MmugDNA.24454.1 | 5.29  | 5.72  | 0.03 | 0.09 | -1.34  | 0.001133 | 0.09533  | 0.077306 | 0.35236  |
| MmugDNA.24456.1.S1_at   | MmugDNA.24456.1 | 6.64  | 6.64  | 0.07 | 0.04 | 1      | 0.815594 | 0.612515 | 0.917679 | 0.770071 |
| MmugDNA.24456.1.S1_s_at | MmugDNA.24456.1 | 6.4   | 6.39  | 0.07 | 0.01 | 1.01   | 0.25276  | 0.846524 | 0.547383 | 0.912676 |
| MmugDNA.24456.1.S1_x_at | MmugDNA.24456.1 | 5.35  | 5.44  | 0.24 | 0.08 | -1.06  | 0.500398 | 0.582924 | 0.73465  | 0.75147  |
| MmugDNA.2446.1.S1_at    | MmugDNA.2446.1  | 10.8  | 10.08 | 0.17 | 0.29 | 1.64   | 0.077021 | 0.105057 | 0.335515 | 0.366736 |
| MmugDNA.24462.1.S1_at   | MmugDNA.24462.1 | 10.65 | 10.24 | 0.15 | 0.04 | 1.33   | 0.012558 | 0.035834 | 0.162479 | 0.233759 |
| MmugDNA.24463.1.S1_at   | MmugDNA.24463.1 | 4.15  | 4.1   | 0.24 | 0.03 | 1.04   | 0.826998 | 0.204854 | 0.92338  | 0.479224 |
| MmugDNA.24471.1.S1_at   | MmugDNA.24471.1 | 3.73  | 3.51  | 0.12 | 0.08 | 1.16   | 0.017638 | 0.103439 | 0.186416 | 0.364346 |
| MmugDNA.24474.1.S1_at   | MmugDNA.24474.1 | 8.83  | 8.53  | 0.2  | 0.05 | 1.23   | 0.081932 | 0.103762 | 0.343216 | 0.364519 |
| MmugDNA.24476.1.S1_at   | MmugDNA.24476.1 | 9.43  | 9.44  | 0.51 | 0.12 | -1.01  | 0.970818 | 0.703733 | 0.988411 | 0.828214 |
| MmugDNA.24477.1.S1_at   | MmugDNA.24477.1 | 10.38 | 10.66 | 0.13 | 0.19 | -1.21  | 0.528398 | 0.230758 | 0.753652 | 0.502451 |
| MmugDNA.24478.1.S1_at   | MmugDNA.24478.1 | 12.09 | 11.81 | 0.19 | 0.01 | 1.21   | 0.060471 | 0.283481 | 0.30301  | 0.545959 |
| MmugDNA.2449.1.S1_at    | MmugDNA.2449.1  | 4.89  | 4.82  | 0.05 | 0.09 | 1.06   | 0.181097 | 0.186418 | 0.476388 | 0.462263 |
| MmugDNA.24498.1.S1_at   | MmugDNA.24498.1 | 12.15 | 11.15 | 0.1  | 0.11 | 2.01   | 0.000452 | 0.000389 | 0.065806 | 0.037374 |
| MmugDNA.2450.1.S1_at    | MmugDNA.2450.1  | 9.07  | 8.41  | 0.42 | 0.1  | 1.58   | 0.061063 | 0.028296 | 0.303985 | 0.210038 |
| MmugDNA.24500.1.S1_at   | MmugDNA.24500.1 | 10.61 | 10.04 | 0.16 | 0.16 | 1.49   | 0.01261  | 0.23155  | 0.162521 | 0.503348 |
| MmugDNA.24509.1.S1_at   | MmugDNA.24509.1 | 6.39  | 6.56  | 0.18 | 0.24 | -1.13  | 0.702798 | 0.883472 | 0.85894  | 0.933594 |
| MmugDNA.24510.1.S1_at   | MmugDNA.24510.1 | 8.05  | 7.88  | 0.12 | 0.4  | 1.13   | 0.655542 | 0.819048 | 0.833421 | 0.895738 |
| MmugDNA.24512.1.S1_at   | MmugDNA.24512.1 | 4.93  | 5.78  | 0.65 | 0.58 | -1.8   | 0.310835 | 0.618019 | 0.597104 | 0.773852 |
| MmugDNA.24523.1.S1_at   | MmugDNA.24523.1 | 9.78  | 8.13  | 0.42 | 0.2  | 3.14   | 0.004733 | 0.005606 | 0.115008 | 0.103449 |
| MmugDNA.24533.1.S1_at   | MmugDNA.24533.1 | 6.61  | 10.97 | 1.72 | 0.38 | -20.47 | 0.032756 | 0.180308 | 0.234993 | 0.456927 |
| MmugDNA.24538.1.S1_at   | MmugDNA.24538.1 | 5.88  | 5.85  | 0.09 | 0.14 | 1.02   | 0.425621 | 0.59257  | 0.682976 | 0.757844 |
| MmugDNA.24551.1.S1_at   | MmugDNA.24551.1 | 9.51  | 9.51  | 0.23 | 0.3  | -1     | 0.47686  | 0.004442 | 0.719132 | 0.092958 |
| MmugDNA.24555.1.S1_at   | MmugDNA.24555.1 | 6.29  | 6.93  | 0.16 | 0.27 | -1.56  | 0.021935 | 0.051418 | 0.201286 | 0.272204 |
| MmugDNA.24563.1.S1_at   | MmugDNA.24563.1 | 10.49 | 10.19 | 0.16 | 0.06 | 1.23   | 0.065388 | 0.001224 | 0.312883 | 0.054593 |
| MmugDNA.24566.1.S1_at   | MmugDNA.24566.1 | 5.91  | 6.41  | 0.4  | 0.08 | -1.41  | 0.180351 | 0.437882 | 0.475506 | 0.657015 |
| MmugDNA.24567.1.S1_at   | MmugDNA.24567.1 | 5.16  | 5.14  | 0.17 | 0.06 | 1.01   | 0.690631 | 0.819677 | 0.852093 | 0.896127 |
| MmugDNA.24570.1.S1_at   | MmugDNA.24570.1 | 8.55  | 8.06  | 0.24 | 0.17 | 1.4    | 0.041397 | 0.036081 | 0.259966 | 0.234413 |
| MmugDNA.24582.1.S1_at   | MmugDNA.24582.1 | 3.37  | 3.11  | 0.02 | 0.15 | 1.19   | 0.154838 | 0.043417 | 0.44505  | 0.253032 |
| MmugDNA.24586.1.S1_at   | MmugDNA.24586.1 | 6.15  | 6.09  | 0.15 | 0.07 | 1.04   | 0.72831  | 0.368924 | 0.873011 | 0.608449 |
| MmugDNA.24595.1.S1_at   | MmugDNA.24595.1 | 4.64  | 5.94  | 0.43 | 0.59 | -2.48  | 0.045301 | 0.307156 | 0.270318 | 0.563487 |

|                         |                 |       |       |      |      |       |          |          |          |          |
|-------------------------|-----------------|-------|-------|------|------|-------|----------|----------|----------|----------|
| MmugDNA.24598.1.S1_at   | MmugDNA.24598.1 | 5.88  | 5.45  | 0.23 | 0.42 | 1.34  | 0.209503 | 0.65855  | 0.50704  | 0.800401 |
| MmugDNA.24600.1.S1_at   | MmugDNA.24600.1 | 4.98  | 4.83  | 0.18 | 0.09 | 1.11  | 0.290897 | 0.122436 | 0.580247 | 0.392278 |
| MmugDNA.24602.1.S1_at   | MmugDNA.24602.1 | 5.11  | 5.11  | 0.21 | 0.06 | -1    | 0.29509  | 0.397872 | 0.584039 | 0.629138 |
| MmugDNA.24614.1.S1_at   | MmugDNA.24614.1 | 10.84 | 10.51 | 0.23 | 0.08 | 1.26  | 0.068583 | 0.04381  | 0.319718 | 0.25387  |
| MmugDNA.2462.1.S1_at    | MmugDNA.2462.1  | 5.06  | 4.75  | 0.11 | 0.28 | 1.24  | 0.061241 | 0.093596 | 0.304296 | 0.349952 |
| MmugDNA.24624.1.S1_at   | MmugDNA.24624.1 | 5.18  | 5.2   | 0.04 | 0.09 | -1.02 | 0.603443 | 0.780357 | 0.80097  | 0.872597 |
| MmugDNA.24625.1.S1_at   | MmugDNA.24625.1 | 7     | 7.16  | 0.31 | 0.22 | -1.12 | 0.637872 | 0.701936 | 0.822597 | 0.827192 |
| MmugDNA.24630.1.S1_s_at | MmugDNA.24630.1 | 6.16  | 6.99  | 0.76 | 0.16 | -1.78 | 0.471474 | 0.446567 | 0.715544 | 0.662862 |
| MmugDNA.24631.1.S1_at   | MmugDNA.24631.1 | 7.93  | 7.36  | 0.11 | 0.22 | 1.49  | 0.027874 | 0.198852 | 0.219533 | 0.473475 |
| MmugDNA.24633.1.S1_at   | MmugDNA.24633.1 | 6.83  | 7.05  | 0.19 | 0.02 | -1.17 | 0.33186  | 0.304293 | 0.613772 | 0.5616   |
| MmugDNA.24635.1.S1_s_at | MmugDNA.24635.1 | 4.84  | 5.04  | 0.04 | 0.09 | -1.15 | 0.018142 | 0.238439 | 0.187667 | 0.50907  |
| MmugDNA.24636.1.S1_at   | MmugDNA.24636.1 | 3.14  | 3.11  | 0.1  | 0.03 | 1.03  | 0.738258 | 0.466602 | 0.878673 | 0.676398 |
| MmugDNA.24645.1.S1_at   | MmugDNA.24645.1 | 5.36  | 5.74  | 0.77 | 0.19 | -1.31 | 0.91185  | 0.703199 | 0.962655 | 0.827928 |
| MmugDNA.24646.1.S1_at   | MmugDNA.24646.1 | 5.83  | 5.86  | 0.19 | 0.09 | -1.02 | 0.654362 | 0.821292 | 0.83271  | 0.897125 |
| MmugDNA.24651.1.S1_at   | MmugDNA.24651.1 | 5.17  | 5.77  | 0.18 | 0.54 | -1.52 | 0.092853 | 0.097415 | 0.361387 | 0.355097 |
| MmugDNA.24652.1.S1_at   | MmugDNA.24652.1 | 3.95  | 4.44  | 0.44 | 0.29 | -1.4  | 0.469122 | 0.60934  | 0.71396  | 0.767726 |
| MmugDNA.24653.1.S1_at   | MmugDNA.24653.1 | 10.91 | 8.85  | 2.57 | 0.65 | 4.17  | 0.896867 | 0.469641 | 0.956194 | 0.678318 |
| MmugDNA.24659.1.S1_at   | MmugDNA.24659.1 | 5.67  | 5.63  | 0.13 | 0.09 | 1.03  | 0.266962 | 0.102027 | 0.559549 | 0.362086 |
| MmugDNA.24667.1.S1_at   | MmugDNA.24667.1 | 4.71  | 4.78  | 0.22 | 0.02 | -1.05 | 0.562961 | 0.56746  | 0.775246 | 0.741351 |
| MmugDNA.24668.1.S1_at   | MmugDNA.24668.1 | 13.14 | 13.17 | 0.06 | 0.05 | -1.02 | 0.585367 | 0.268246 | 0.789198 | 0.533977 |
| MmugDNA.2467.1.S1_at    | MmugDNA.2467.1  | 7.4   | 7.51  | 0.4  | 0.31 | -1.07 | 0.724397 | 0.033057 | 0.870565 | 0.225068 |
| MmugDNA.24671.1.S1_at   | MmugDNA.24671.1 | 5.09  | 6.83  | 0.46 | 0.42 | -3.36 | 0.025539 | 0.105305 | 0.212881 | 0.367141 |
| MmugDNA.24674.1.S1_at   | MmugDNA.24674.1 | 7.96  | 7.78  | 0.29 | 0.15 | 1.13  | 0.409268 | 0.729689 | 0.671686 | 0.843649 |
| MmugDNA.24679.1.S1_at   | MmugDNA.24679.1 | 3.76  | 4.62  | 0.27 | 0.73 | -1.82 | 0.091935 | 0.091806 | 0.359905 | 0.346977 |
| MmugDNA.24681.1.S1_at   | MmugDNA.24681.1 | 5.41  | 7.69  | 0.95 | 0.17 | -4.83 | 0.035984 | 0.2611   | 0.244728 | 0.527481 |
| MmugDNA.24682.1.S1_at   | MmugDNA.24682.1 | 4.54  | 4.41  | 0.06 | 0.06 | 1.1   | 0.09678  | 0.617553 | 0.366759 | 0.773477 |
| MmugDNA.24685.1.S1_at   | MmugDNA.24685.1 | 8.37  | 9.36  | 0.32 | 0.25 | -1.98 | 0.033307 | 0.243149 | 0.236556 | 0.513356 |
| MmugDNA.24690.1.S1_at   | MmugDNA.24690.1 | 10.91 | 10.69 | 0.15 | 0.1  | 1.16  | 0.106077 | 0.163604 | 0.380136 | 0.439768 |
| MmugDNA.24691.1.S1_at   | MmugDNA.24691.1 | 10.55 | 10.43 | 0.17 | 0.19 | 1.08  | 0.204558 | 0.358227 | 0.502251 | 0.599754 |
| MmugDNA.24692.1.S1_at   | MmugDNA.24692.1 | 4.24  | 4.29  | 0.26 | 0.14 | -1.04 | 0.577729 | 0.483321 | 0.783728 | 0.687887 |
| MmugDNA.247.1.S1_at     | MmugDNA.247.1   | 5.2   | 5.05  | 0.25 | 0.11 | 1.11  | 0.310426 | 0.376936 | 0.596708 | 0.614678 |
| MmugDNA.2470.1.S1_at    | MmugDNA.2470.1  | 6.5   | 6.89  | 0.19 | 0.19 | -1.31 | 0.043454 | 0.120283 | 0.265644 | 0.389248 |
| MmugDNA.24703.1.S1_at   | MmugDNA.24703.1 | 4.47  | 4.38  | 0.05 | 0.07 | 1.06  | 0.153815 | 0.196952 | 0.443953 | 0.472072 |
| MmugDNA.24705.1.S1_at   | MmugDNA.24705.1 | 5.93  | 6.16  | 0.07 | 0.12 | -1.18 | 0.043429 | 0.268679 | 0.265644 | 0.534138 |
| MmugDNA.24707.1.S1_at   | MmugDNA.24707.1 | 4.92  | 5.04  | 0.06 | 0.06 | -1.09 | 0.181286 | 0.00962  | 0.476634 | 0.12918  |
| MmugDNA.24708.1.S1_at   | MmugDNA.24708.1 | 7.93  | 7.85  | 1.32 | 0.8  | 1.06  | 0.683259 | 0.25278  | 0.848962 | 0.521174 |
| MmugDNA.24711.1.S1_at   | MmugDNA.24711.1 | 7.64  | 7.68  | 0.1  | 0.09 | -1.03 | 0.473695 | 0.038431 | 0.716998 | 0.240918 |
| MmugDNA.24712.1.S1_at   | MmugDNA.24712.1 | 3.16  | 3.04  | 0.05 | 0.04 | 1.09  | 0.127263 | 0.17937  | 0.408955 | 0.455841 |
| MmugDNA.24713.1.S1_at   | MmugDNA.24713.1 | 11.57 | 11.63 | 0.16 | 0.03 | -1.05 | 0.522043 | 0.947363 | 0.749514 | 0.970137 |
| MmugDNA.24715.1.S1_at   | MmugDNA.24715.1 | 8.9   | 9.07  | 0.06 | 0.03 | -1.13 | 0.01436  | 0.138636 | 0.171567 | 0.411695 |
| MmugDNA.24718.1.S1_at   | MmugDNA.24718.1 | 8.01  | 7.28  | 0.41 | 0.16 | 1.66  | 0.033327 | 0.026516 | 0.236556 | 0.203899 |
| MmugDNA.24721.1.S1_at   | MmugDNA.24721.1 | 8.62  | 8.88  | 0.14 | 0.1  | -1.2  | 0.121792 | 0.030677 | 0.400504 | 0.217148 |
| MmugDNA.24722.1.S1_s_at | MmugDNA.24722.1 | 12.07 | 11.94 | 0.11 | 0.02 | 1.09  | 0.144225 | 0.631762 | 0.430978 | 0.782957 |

|                         |                 |       |       |      |      |        |          |          |          |          |
|-------------------------|-----------------|-------|-------|------|------|--------|----------|----------|----------|----------|
| MmugDNA.24724.1.S1_at   | MmugDNA.24724.1 | 12.83 | 13.06 | 0.15 | 0.04 | -1.17  | 0.199216 | 0.382855 | 0.496607 | 0.61893  |
| MmugDNA.24727.1.S1_at   | MmugDNA.24727.1 | 9.39  | 9.18  | 0.15 | 0.13 | 1.16   | 0.133598 | 0.268698 | 0.41701  | 0.534138 |
| MmugDNA.24728.1.S1_at   | MmugDNA.24728.1 | 10.49 | 10.34 | 0.17 | 0.04 | 1.11   | 0.106707 | 0.000244 | 0.380906 | 0.032798 |
| MmugDNA.2473.1.S1_at    | MmugDNA.2473.1  | 9.66  | 10.27 | 0.02 | 0.05 | -1.52  | 0.000034 | 0.095742 | 0.045594 | 0.352753 |
| MmugDNA.24731.1.S1_at   | MmugDNA.24731.1 | 13.58 | 13.63 | 0.06 | 0.1  | -1.03  | 0.335211 | 0.142133 | 0.616202 | 0.415728 |
| MmugDNA.24736.1.S1_s_at | MmugDNA.24736.1 | 11.21 | 11.12 | 0.33 | 0.18 | 1.07   | 0.883981 | 0.00423  | 0.950642 | 0.091435 |
| MmugDNA.24737.1.S1_at   | MmugDNA.24737.1 | 11.37 | 11.23 | 0.13 | 0.05 | 1.1    | 0.154735 | 0.011722 | 0.444943 | 0.140206 |
| MmugDNA.24739.1.S1_at   | MmugDNA.24739.1 | 11.01 | 11.39 | 0.07 | 0.17 | -1.3   | 0.069992 | 0.011508 | 0.323042 | 0.138744 |
| MmugDNA.24740.1.S1_at   | MmugDNA.24740.1 | 6.91  | 7.61  | 0.39 | 0.26 | -1.63  | 0.033093 | 0.001603 | 0.236157 | 0.060491 |
| MmugDNA.24742.1.S1_at   | MmugDNA.24742.1 | 10.03 | 9.84  | 0.23 | 0.09 | 1.14   | 0.2892   | 0.037563 | 0.578805 | 0.238211 |
| MmugDNA.24742.1.S1_s_at | MmugDNA.24742.1 | 9.54  | 9.25  | 0.34 | 0.11 | 1.22   | 0.174859 | 0.186542 | 0.46914  | 0.462364 |
| MmugDNA.24743.1.S1_at   | MmugDNA.24743.1 | 3.12  | 3.08  | 0.05 | 0.05 | 1.03   | 0.838607 | 0.171463 | 0.929155 | 0.447895 |
| MmugDNA.24744.1.S1_at   | MmugDNA.24744.1 | 6.64  | 6.97  | 0.44 | 0.03 | -1.27  | 0.158576 | 0.519371 | 0.44969  | 0.710998 |
| MmugDNA.24746.1.S1_at   | MmugDNA.24746.1 | 11.3  | 11.4  | 0.14 | 0.02 | -1.07  | 0.234209 | 0.079275 | 0.532289 | 0.326444 |
| MmugDNA.24747.1.S1_at   | MmugDNA.24747.1 | 5.64  | 9     | 1.47 | 0.46 | -10.26 | 0.063745 | 0.285895 | 0.308957 | 0.547484 |
| MmugDNA.24749.1.S1_at   | MmugDNA.24749.1 | 12.09 | 12.08 | 0.01 | 0.06 | 1.01   | 0.559141 | 0.723523 | 0.773148 | 0.839934 |
| MmugDNA.24753.1.S1_at   | MmugDNA.24753.1 | 8.98  | 8.92  | 0.03 | 0.01 | 1.04   | 0.205547 | 0.357881 | 0.503307 | 0.599493 |
| MmugDNA.2476.1.S1_at    | MmugDNA.2476.1  | 6.5   | 5.72  | 0.29 | 0.16 | 1.72   | 0.020314 | 0.082838 | 0.196136 | 0.332362 |
| MmugDNA.24761.1.S1_at   | MmugDNA.24761.1 | 9.65  | 9.69  | 0.2  | 0.05 | -1.03  | 0.864819 | 0.744716 | 0.94142  | 0.852165 |
| MmugDNA.24771.1.S1_at   | MmugDNA.24771.1 | 7.34  | 9.07  | 0.54 | 0.15 | -3.32  | 0.014379 | 0.155541 | 0.171633 | 0.430888 |
| MmugDNA.24773.1.S1_at   | MmugDNA.24773.1 | 4.43  | 4.29  | 0.08 | 0.07 | 1.1    | 0.168297 | 0.489702 | 0.461553 | 0.691862 |
| MmugDNA.24778.1.S1_at   | MmugDNA.24778.1 | 6.52  | 6.54  | 0.29 | 0.35 | -1.01  | 0.267966 | 0.429369 | 0.560719 | 0.650823 |
| MmugDNA.2478.1.S1_at    | MmugDNA.2478.1  | 11.77 | 14.03 | 1.06 | 0.08 | -4.77  | 0.059802 | 0.212564 | 0.301777 | 0.486502 |
| MmugDNA.24780.1.S1_at   | MmugDNA.24780.1 | 12.32 | 11.52 | 0.27 | 0.14 | 1.74   | 0.00888  | 0.001128 | 0.143995 | 0.05299  |
| MmugDNA.24783.1.S1_at   | MmugDNA.24783.1 | 6.02  | 8.88  | 1.07 | 0.36 | -7.27  | 0.015228 | 0.034209 | 0.175536 | 0.228779 |
| MmugDNA.24784.1.S1_at   | MmugDNA.24784.1 | 12.27 | 12.24 | 0.07 | 0.05 | 1.02   | 0.637982 | 0.011703 | 0.822679 | 0.140174 |
| MmugDNA.24789.1.S1_at   | MmugDNA.24789.1 | 5.35  | 5.51  | 0.17 | 0.07 | -1.12  | 0.483989 | 0.060412 | 0.723978 | 0.292435 |
| MmugDNA.24791.1.S1_at   | MmugDNA.24791.1 | 11.81 | 11.52 | 0.07 | 0.11 | 1.23   | 0.025006 | 0.051636 | 0.211194 | 0.272698 |
| MmugDNA.24793.1.S1_at   | MmugDNA.24793.1 | 9.04  | 8.74  | 0.24 | 0.2  | 1.23   | 0.260429 | 0.243739 | 0.554556 | 0.513899 |
| MmugDNA.24794.1.S1_at   | MmugDNA.24794.1 | 7.18  | 7.17  | 0.01 | 0.07 | 1.01   | 0.69388  | 0.939899 | 0.853757 | 0.96581  |
| MmugDNA.24794.1.S1_s_at | MmugDNA.24794.1 | 7.49  | 7.29  | 0.17 | 0.02 | 1.14   | 0.312411 | 0.364419 | 0.598392 | 0.604791 |
| MmugDNA.24797.1.S1_at   | MmugDNA.24797.1 | 5.14  | 4.94  | 0.4  | 0.49 | 1.15   | 0.903474 | 0.804599 | 0.959099 | 0.88762  |
| MmugDNA.24798.1.S1_at   | MmugDNA.24798.1 | 6.02  | 5.92  | 0.19 | 0.09 | 1.07   | 0.798204 | 0.857727 | 0.908871 | 0.918838 |
| MmugDNA.24803.1.S1_at   | MmugDNA.24803.1 | 8.88  | 8.21  | 0.24 | 0.04 | 1.59   | 0.015386 | 0.035255 | 0.176257 | 0.231987 |
| MmugDNA.24804.1.S1_at   | MmugDNA.24804.1 | 3.73  | 3.74  | 0.06 | 0.05 | -1.01  | 0.663077 | 0.028243 | 0.837461 | 0.209816 |
| MmugDNA.24809.1.S1_at   | MmugDNA.24809.1 | 11.34 | 11.1  | 0.2  | 0.09 | 1.18   | 0.399331 | 0.020758 | 0.664758 | 0.180781 |
| MmugDNA.2481.1.S1_at    | MmugDNA.2481.1  | 3.18  | 3.06  | 0.05 | 0.04 | 1.09   | 0.039998 | 0.172783 | 0.256645 | 0.449341 |
| MmugDNA.24810.1.S1_at   | MmugDNA.24810.1 | 4.2   | 4.56  | 0.2  | 0.15 | -1.28  | 0.071646 | 0.202878 | 0.325611 | 0.477312 |
| MmugDNA.24816.1.S1_at   | MmugDNA.24816.1 | 2.62  | 2.63  | 0.02 | 0.01 | -1.01  | 0.388166 | 0.412549 | 0.656212 | 0.638941 |
| MmugDNA.24819.1.S1_at   | MmugDNA.24819.1 | 9.5   | 9.38  | 0.12 | 0.05 | 1.09   | 0.115333 | 0.04242  | 0.392403 | 0.250616 |
| MmugDNA.24820.1.S1_at   | MmugDNA.24820.1 | 11.64 | 11.7  | 0.11 | 0.1  | -1.04  | 0.517205 | 0.167125 | 0.746439 | 0.443617 |
| MmugDNA.24823.1.S1_at   | MmugDNA.24823.1 | 5.87  | 5.82  | 0.11 | 0.17 | 1.04   | 0.322687 | 0.491729 | 0.606575 | 0.693243 |
| MmugDNA.24828.1.S1_at   | MmugDNA.24828.1 | 10.21 | 9.61  | 0.26 | 0.17 | 1.51   | 0.068916 | 0.094345 | 0.320539 | 0.350889 |

|                         |                 |       |       |      |      |       |          |          |          |          |
|-------------------------|-----------------|-------|-------|------|------|-------|----------|----------|----------|----------|
| MmugDNA.24838.1.S1_at   | MmugDNA.24838.1 | 11.23 | 11.54 | 0.16 | 0.04 | -1.24 | 0.026304 | 0.034134 | 0.215228 | 0.228692 |
| MmugDNA.24839.1.S1_at   | MmugDNA.24839.1 | 5.94  | 6.17  | 0.07 | 0.08 | -1.17 | 0.037922 | 0.065768 | 0.250541 | 0.301767 |
| MmugDNA.24841.1.S1_at   | MmugDNA.24841.1 | 13.33 | 13.06 | 0.05 | 0.03 | 1.21  | 0.001994 | 0.119855 | 0.089614 | 0.388577 |
| MmugDNA.24861.1.S1_s_at | MmugDNA.24861.1 | 11.68 | 11.39 | 0.13 | 0.07 | 1.22  | 0.042497 | 0.062545 | 0.263254 | 0.296914 |
| MmugDNA.24862.1.S1_at   | MmugDNA.24862.1 | 7.66  | 7.74  | 0.15 | 0.13 | -1.06 | 0.146917 | 0.299383 | 0.434902 | 0.557857 |
| MmugDNA.24865.1.S1_at   | MmugDNA.24865.1 | 5.12  | 5.23  | 0.22 | 0.22 | -1.08 | 0.932761 | 0.794156 | 0.971806 | 0.881296 |
| MmugDNA.24878.1.S1_at   | MmugDNA.24878.1 | 11.13 | 10.6  | 0.11 | 0.23 | 1.44  | 0.084499 | 0.005073 | 0.348139 | 0.09907  |
| MmugDNA.24879.1.S1_at   | MmugDNA.24879.1 | 5.93  | 5.95  | 0.19 | 0.24 | -1.01 | 0.80834  | 0.725197 | 0.914202 | 0.840939 |
| MmugDNA.24880.1.S1_s_at | MmugDNA.24880.1 | 12.97 | 12.98 | 0.06 | 0.01 | -1.01 | 0.508653 | 0.011917 | 0.740531 | 0.141283 |
| MmugDNA.24887.1.S1_at   | MmugDNA.24887.1 | 11.49 | 11    | 0.32 | 0.07 | 1.4   | 0.15056  | 0.321694 | 0.439616 | 0.573346 |
| MmugDNA.24888.1.S1_s_at | MmugDNA.24888.1 | 8.84  | 8.93  | 0.06 | 0.03 | -1.06 | 0.095536 | 0.365936 | 0.365002 | 0.605798 |
| MmugDNA.2490.1.S1_at    | MmugDNA.2490.1  | 10.14 | 11.19 | 0.9  | 0.18 | -2.06 | 0.0516   | 0.211463 | 0.284578 | 0.485578 |
| MmugDNA.24907.1.S1_at   | MmugDNA.24907.1 | 11.87 | 11.83 | 0.17 | 0.06 | 1.03  | 0.893112 | 0.07365  | 0.954395 | 0.316984 |
| MmugDNA.24911.1.S1_at   | MmugDNA.24911.1 | 8.42  | 7.82  | 0.58 | 0.11 | 1.52  | 0.184472 | 0.45856  | 0.480429 | 0.671232 |
| MmugDNA.24918.1.S1_at   | MmugDNA.24918.1 | 9.61  | 9.49  | 0.27 | 0.13 | 1.09  | 0.659822 | 0.852041 | 0.835807 | 0.915853 |
| MmugDNA.24927.1.S1_at   | MmugDNA.24927.1 | 11.42 | 11.18 | 0.24 | 0.15 | 1.18  | 0.075402 | 0.11894  | 0.332772 | 0.387176 |
| MmugDNA.24936.1.S1_at   | MmugDNA.24936.1 | 12.05 | 11.74 | 0.21 | 0.07 | 1.24  | 0.056969 | 0.04051  | 0.295936 | 0.246264 |
| MmugDNA.24945.1.S1_at   | MmugDNA.24945.1 | 5.29  | 5.16  | 0.03 | 0.09 | 1.1   | 0.289547 | 0.15275  | 0.579093 | 0.427571 |
| MmugDNA.24946.1.S1_at   | MmugDNA.24946.1 | 4.69  | 4.98  | 0.22 | 0.13 | -1.22 | 0.134488 | 0.026334 | 0.418244 | 0.203321 |
| MmugDNA.24950.1.S1_at   | MmugDNA.24950.1 | 3.13  | 3.14  | 0.14 | 0.15 | -1.01 | 0.647375 | 0.58807  | 0.828696 | 0.754719 |
| MmugDNA.24950.1.S1_s_at | MmugDNA.24950.1 | 11.25 | 9.43  | 0.58 | 0.24 | 3.55  | 0.016746 | 0.016415 | 0.182678 | 0.162201 |
| MmugDNA.24951.1.S1_at   | MmugDNA.24951.1 | 12.32 | 12.92 | 0.08 | 0.12 | -1.51 | 0.003153 | 0.018676 | 0.101284 | 0.171717 |
| MmugDNA.24957.1.S1_at   | MmugDNA.24957.1 | 6.35  | 6.3   | 0.12 | 0.05 | 1.03  | 0.620016 | 0.716503 | 0.81161  | 0.835751 |
| MmugDNA.24959.1.S1_at   | MmugDNA.24959.1 | 8.73  | 8.59  | 0.34 | 0.11 | 1.11  | 0.308034 | 0.513407 | 0.594726 | 0.706881 |
| MmugDNA.24960.1.S1_at   | MmugDNA.24960.1 | 6.46  | 6.33  | 0.24 | 0.09 | 1.09  | 0.390334 | 0.537252 | 0.657982 | 0.722344 |
| MmugDNA.24964.1.S1_at   | MmugDNA.24964.1 | 6.33  | 6.3   | 0.2  | 0.02 | 1.02  | 0.260173 | 0.694591 | 0.554308 | 0.822424 |
| MmugDNA.2497.1.S1_at    | MmugDNA.2497.1  | 4.55  | 4.62  | 0.36 | 0.08 | -1.05 | 0.445433 | 0.6206   | 0.69792  | 0.775511 |
| MmugDNA.24970.1.S1_at   | MmugDNA.24970.1 | 10.2  | 10.49 | 0.21 | 0.12 | -1.22 | 0.047433 | 0.292663 | 0.275072 | 0.552736 |
| MmugDNA.24972.1.S1_at   | MmugDNA.24972.1 | 8.05  | 9.11  | 0.66 | 0.24 | -2.08 | 0.081495 | 0.420458 | 0.342512 | 0.644171 |
| MmugDNA.24979.1.S1_at   | MmugDNA.24979.1 | 3.26  | 3.15  | 0.12 | 0.13 | 1.08  | 0.347707 | 0.410835 | 0.625846 | 0.637644 |
| MmugDNA.24984.1.S1_at   | MmugDNA.24984.1 | 13.3  | 13.23 | 0.06 | 0.01 | 1.05  | 0.09461  | 0.095724 | 0.363543 | 0.352735 |
| MmugDNA.24998.1.S1_at   | MmugDNA.24998.1 | 6.2   | 6.43  | 0.1  | 0.11 | -1.18 | 0.040881 | 0.050749 | 0.258607 | 0.270423 |
| MmugDNA.25.1.S1_at      | MmugDNA.25.1    | 6.29  | 6.55  | 0.29 | 0.15 | -1.19 | 0.371035 | 0.021065 | 0.6438   | 0.181869 |
| MmugDNA.25002.1.S1_at   | MmugDNA.25002.1 | 9.09  | 9.7   | 0.17 | 0.1  | -1.53 | 0.004247 | 0.009748 | 0.111028 | 0.129897 |
| MmugDNA.25003.1.S1_at   | MmugDNA.25003.1 | 12.67 | 12.71 | 0.06 | 0.1  | -1.03 | 0.797436 | 0.148203 | 0.908517 | 0.422745 |
| MmugDNA.25007.1.S1_at   | MmugDNA.25007.1 | 6.93  | 6.84  | 0.25 | 0.3  | 1.06  | 0.685197 | 0.850761 | 0.849991 | 0.915085 |
| MmugDNA.25007.1.S1_s_at | MmugDNA.25007.1 | 11.18 | 10.8  | 0.37 | 0.03 | 1.3   | 0.525854 | 0.413042 | 0.752144 | 0.63938  |
| MmugDNA.25012.1.S1_at   | MmugDNA.25012.1 | 10.96 | 11.04 | 0.36 | 0.23 | -1.06 | 0.194264 | 0.425    | 0.490878 | 0.647464 |
| MmugDNA.25013.1.S1_at   | MmugDNA.25013.1 | 4.24  | 3.94  | 0.03 | 0.02 | 1.23  | 0.000183 | 0.000102 | 0.053494 | 0.028099 |
| MmugDNA.25018.1.S1_at   | MmugDNA.25018.1 | 6.14  | 6.62  | 0.31 | 0.16 | -1.39 | 0.226119 | 0.31078  | 0.52392  | 0.565832 |
| MmugDNA.25024.1.S1_at   | MmugDNA.25024.1 | 7.05  | 7.14  | 0.14 | 0.18 | -1.06 | 0.466371 | 0.654584 | 0.712193 | 0.798087 |
| MmugDNA.25028.1.S1_at   | MmugDNA.25028.1 | 4.29  | 4.22  | 0.16 | 0.07 | 1.05  | 0.156658 | 0.112451 | 0.447128 | 0.377784 |
| MmugDNA.25033.1.S1_at   | MmugDNA.25033.1 | 4.83  | 4.64  | 0.15 | 0.02 | 1.15  | 0.136939 | 0.221253 | 0.421747 | 0.49459  |

|                         |                 |       |       |      |      |       |          |          |          |          |
|-------------------------|-----------------|-------|-------|------|------|-------|----------|----------|----------|----------|
| MmugDNA.25034.1.S1_at   | MmugDNA.25034.1 | 6.54  | 6.77  | 0.02 | 0.35 | -1.17 | 0.102198 | 0.0675   | 0.374174 | 0.305843 |
| MmugDNA.25035.1.S1_s_at | MmugDNA.25035.1 | 8.66  | 9.19  | 0.19 | 0.12 | -1.44 | 0.02295  | 0.122993 | 0.204353 | 0.392923 |
| MmugDNA.25044.1.S1_at   | MmugDNA.25044.1 | 2.8   | 2.75  | 0.07 | 0.02 | 1.03  | 0.26999  | 0.420911 | 0.562262 | 0.644578 |
| MmugDNA.25045.1.S1_at   | MmugDNA.25045.1 | 11.21 | 11.14 | 0.48 | 0.09 | 1.05  | 0.511444 | 0.723918 | 0.742401 | 0.840188 |
| MmugDNA.25045.1.S1_s_at | MmugDNA.25045.1 | 12.39 | 12.38 | 0.34 | 0.04 | 1     | 0.429414 | 0.649113 | 0.68583  | 0.794594 |
| MmugDNA.2505.1.S1_at    | MmugDNA.2505.1  | 5.01  | 5.84  | 0.14 | 0.05 | -1.77 | 0.000836 | 0.000777 | 0.07338  | 0.045626 |
| MmugDNA.25053.1.S1_at   | MmugDNA.25053.1 | 4.25  | 3.94  | 0.34 | 0.12 | 1.24  | 0.198206 | 0.306968 | 0.495463 | 0.563427 |
| MmugDNA.25058.1.S1_at   | MmugDNA.25058.1 | 9.37  | 9.9   | 0.29 | 0.14 | -1.45 | 0.041331 | 0.062194 | 0.259688 | 0.296296 |
| MmugDNA.25060.1.S1_at   | MmugDNA.25060.1 | 7.18  | 7.58  | 0.24 | 0.14 | -1.32 | 0.201615 | 0.023966 | 0.499174 | 0.194025 |
| MmugDNA.25061.1.S1_at   | MmugDNA.25061.1 | 6.4   | 6.35  | 0.15 | 0.02 | 1.04  | 0.728566 | 0.875805 | 0.873093 | 0.929464 |
| MmugDNA.25068.1.S1_at   | MmugDNA.25068.1 | 7.05  | 7.28  | 0.08 | 0.07 | -1.17 | 0.045113 | 0.099676 | 0.269752 | 0.358211 |
| MmugDNA.25071.1.S1_at   | MmugDNA.25071.1 | 7.63  | 7.76  | 0.14 | 0.1  | -1.09 | 0.976905 | 0.890567 | 0.990931 | 0.93764  |
| MmugDNA.25072.1.S1_at   | MmugDNA.25072.1 | 9.2   | 9.57  | 0.82 | 0.18 | -1.29 | 0.881023 | 0.086621 | 0.949411 | 0.339176 |
| MmugDNA.25076.1.S1_at   | MmugDNA.25076.1 | 6.31  | 6.21  | 0.14 | 0.07 | 1.07  | 0.209422 | 0.036041 | 0.506919 | 0.234269 |
| MmugDNA.25079.1.S1_at   | MmugDNA.25079.1 | 11.03 | 10.84 | 0.1  | 0.06 | 1.14  | 0.027759 | 0.074612 | 0.219092 | 0.318299 |
| MmugDNA.25081.1.S1_at   | MmugDNA.25081.1 | 5.84  | 6.93  | 1.44 | 0.07 | -2.12 | 0.7562   | 0.87182  | 0.887677 | 0.927078 |
| MmugDNA.25088.1.S1_at   | MmugDNA.25088.1 | 6.03  | 6.37  | 0.91 | 0.27 | -1.26 | 0.550047 | 0.450913 | 0.7676   | 0.66589  |
| MmugDNA.25090.1.S1_at   | MmugDNA.25090.1 | 8.17  | 8.46  | 0.09 | 0.09 | -1.22 | 0.005881 | 0.467848 | 0.122924 | 0.677386 |
| MmugDNA.25103.1.S1_at   | MmugDNA.25103.1 | 5.66  | 5.4   | 0.38 | 0.11 | 1.19  | 0.212931 | 0.290443 | 0.510909 | 0.551169 |
| MmugDNA.25111.1.S1_at   | MmugDNA.25111.1 | 4.61  | 4.33  | 0.23 | 0.16 | 1.21  | 0.412468 | 0.559003 | 0.674115 | 0.735977 |
| MmugDNA.25114.1.S1_at   | MmugDNA.25114.1 | 7.74  | 8.5   | 0.15 | 0.02 | -1.7  | 0.00152  | 0.000663 | 0.081668 | 0.0439   |
| MmugDNA.25115.1.S1_at   | MmugDNA.25115.1 | 13.24 | 12.16 | 0.57 | 0.07 | 2.12  | 0.026546 | 0.027243 | 0.216097 | 0.206279 |
| MmugDNA.2512.1.S1_at    | MmugDNA.2512.1  | 9.21  | 7.69  | 0.13 | 0.22 | 2.86  | 0.000648 | 0.000052 | 0.0711   | 0.025333 |
| MmugDNA.25121.1.S1_at   | MmugDNA.25121.1 | 11.65 | 11.86 | 0.21 | 0.08 | -1.16 | 0.235975 | 0.505292 | 0.533591 | 0.702073 |
| MmugDNA.25137.1.S1_at   | MmugDNA.25137.1 | 7.58  | 7.81  | 0.22 | 0.01 | -1.17 | 0.465309 | 0.543121 | 0.711399 | 0.725952 |
| MmugDNA.25140.1.S1_at   | MmugDNA.25140.1 | 5.09  | 5.68  | 0.5  | 0.48 | -1.5  | 0.422636 | 0.222272 | 0.68072  | 0.495318 |
| MmugDNA.25146.1.S1_at   | MmugDNA.25146.1 | 11.67 | 11.67 | 0.05 | 0.05 | 1     | 0.511409 | 0.00195  | 0.742401 | 0.065813 |
| MmugDNA.25147.1.S1_at   | MmugDNA.25147.1 | 10.1  | 9.44  | 0.05 | 0.11 | 1.57  | 0.00123  | 0.030472 | 0.078617 | 0.216624 |
| MmugDNA.25153.1.S1_at   | MmugDNA.25153.1 | 11.49 | 11.64 | 0.05 | 0.1  | -1.11 | 0.076772 | 0.406466 | 0.335141 | 0.634352 |
| MmugDNA.25159.1.S1_at   | MmugDNA.25159.1 | 12.1  | 12.11 | 0.15 | 0.11 | -1.01 | 0.937889 | 0.471616 | 0.973844 | 0.679537 |
| MmugDNA.25164.1.S1_at   | MmugDNA.25164.1 | 11.04 | 10.76 | 0.03 | 0    | 1.22  | 0.000035 | 0.000457 | 0.045594 | 0.038572 |
| MmugDNA.25165.1.S1_at   | MmugDNA.25165.1 | 10.01 | 10.41 | 0.06 | 0.1  | -1.32 | 0.00535  | 0.064186 | 0.118207 | 0.299592 |
| MmugDNA.25169.1.S1_at   | MmugDNA.25169.1 | 3.82  | 3.82  | 0.2  | 0.27 | -1.01 | 0.740919 | 0.909013 | 0.879899 | 0.948484 |
| MmugDNA.25173.1.S1_at   | MmugDNA.25173.1 | 5.21  | 5.23  | 0.06 | 0.06 | -1.02 | 0.590677 | 0.26866  | 0.792009 | 0.534138 |
| MmugDNA.25176.1.S1_at   | MmugDNA.25176.1 | 3.85  | 4.01  | 0.17 | 0.05 | -1.12 | 0.562409 | 0.674883 | 0.774894 | 0.810065 |
| MmugDNA.25181.1.S1_at   | MmugDNA.25181.1 | 8.95  | 10.16 | 0.74 | 0.04 | -2.32 | 0.063965 | 0.122337 | 0.309348 | 0.392032 |
| MmugDNA.25184.1.S1_at   | MmugDNA.25184.1 | 7.41  | 7.44  | 0.09 | 0.04 | -1.01 | 0.517844 | 0.105953 | 0.746954 | 0.36826  |
| MmugDNA.2519.1.S1_at    | MmugDNA.2519.1  | 9.29  | 9.36  | 0.2  | 0.06 | -1.05 | 0.254695 | 0.158628 | 0.549255 | 0.434612 |
| MmugDNA.25198.1.S1_at   | MmugDNA.25198.1 | 9.99  | 8.05  | 0.24 | 0.11 | 3.85  | 0.000228 | 0.000032 | 0.054608 | 0.022097 |
| MmugDNA.252.1.S1_at     | MmugDNA.252.1   | 6.93  | 7.5   | 0.52 | 0.09 | -1.48 | 0.115997 | 0.247039 | 0.393014 | 0.516238 |
| MmugDNA.25203.1.S1_at   | MmugDNA.25203.1 | 12.51 | 12.21 | 0.03 | 0.06 | 1.23  | 0.001282 | 0.000903 | 0.078631 | 0.048084 |
| MmugDNA.25204.1.S1_at   | MmugDNA.25204.1 | 7.82  | 7.97  | 0.47 | 0.24 | -1.11 | 0.881938 | 0.073372 | 0.949737 | 0.316469 |
| MmugDNA.25205.1.S1_s_at | MmugDNA.25205.1 | 6.11  | 5.49  | 0.35 | 0.27 | 1.53  | 0.36782  | 0.002107 | 0.641596 | 0.067887 |

|                         |                 |       |       |      |      |        |          |          |          |          |
|-------------------------|-----------------|-------|-------|------|------|--------|----------|----------|----------|----------|
| MmugDNA.25208.1.S1_at   | MmugDNA.25208.1 | 10.64 | 11.52 | 1.36 | 0.19 | -1.85  | 0.315749 | 0.34557  | 0.600522 | 0.590813 |
| MmugDNA.2521.1.S1_at    | MmugDNA.2521.1  | 4.89  | 4.89  | 0.02 | 0.01 | 1      | 0.5045   | 0.137275 | 0.737712 | 0.410165 |
| MmugDNA.25211.1.S1_at   | MmugDNA.25211.1 | 6.67  | 7.18  | 0.13 | 0.24 | -1.42  | 0.032267 | 0.003606 | 0.233644 | 0.085909 |
| MmugDNA.25213.1.S1_at   | MmugDNA.25213.1 | 4.45  | 4.65  | 0.09 | 0.13 | -1.15  | 0.081816 | 0.284943 | 0.343105 | 0.547047 |
| MmugDNA.25218.1.S1_at   | MmugDNA.25218.1 | 4.25  | 3.32  | 0.84 | 0.12 | 1.91   | 0.041805 | 0.032747 | 0.261201 | 0.224042 |
| MmugDNA.2522.1.S1_at    | MmugDNA.2522.1  | 3.67  | 3.39  | 0.16 | 0.06 | 1.22   | 0.105065 | 0.123366 | 0.378776 | 0.393391 |
| MmugDNA.25220.1.S1_at   | MmugDNA.25220.1 | 6.74  | 7.25  | 0.23 | 0.12 | -1.42  | 0.042138 | 0.016846 | 0.262198 | 0.164528 |
| MmugDNA.25221.1.S1_at   | MmugDNA.25221.1 | 5.77  | 5.74  | 0.04 | 0.02 | 1.02   | 0.116671 | 0.162759 | 0.393781 | 0.438913 |
| MmugDNA.25223.1.S1_at   | MmugDNA.25223.1 | 9.62  | 9.03  | 0.12 | 0.02 | 1.5    | 0.000616 | 0.003522 | 0.070727 | 0.085137 |
| MmugDNA.25225.1.S1_at   | MmugDNA.25225.1 | 5.89  | 5.81  | 0.56 | 0.19 | 1.06   | 0.819952 | 0.960904 | 0.919687 | 0.977791 |
| MmugDNA.25229.1.S1_at   | MmugDNA.25229.1 | 4.55  | 5.29  | 0.23 | 0.12 | -1.67  | 0.009428 | 0.051734 | 0.146898 | 0.272993 |
| MmugDNA.25235.1.S1_at   | MmugDNA.25235.1 | 2.95  | 3.02  | 0.06 | 0.05 | -1.05  | 0.321879 | 0.601032 | 0.60613  | 0.762468 |
| MmugDNA.25243.1.S1_at   | MmugDNA.25243.1 | 6.93  | 9.43  | 1.21 | 0.31 | -5.65  | 0.030005 | 0.097628 | 0.226473 | 0.355473 |
| MmugDNA.25250.1.S1_at   | MmugDNA.25250.1 | 11.48 | 11.56 | 0.1  | 0.03 | -1.06  | 0.302252 | 0.025501 | 0.590132 | 0.200333 |
| MmugDNA.25255.1.S1_s_at | MmugDNA.25255.1 | 4.17  | 4.09  | 0.56 | 0.17 | 1.06   | 0.982147 | 0.984417 | 0.993403 | 0.991287 |
| MmugDNA.25258.1.S1_s_at | MmugDNA.25258.1 | 9.8   | 10.31 | 0.12 | 0.16 | -1.43  | 0.019589 | 0.007402 | 0.19287  | 0.115643 |
| MmugDNA.25263.1.S1_at   | MmugDNA.25263.1 | 9.02  | 9.93  | 0.39 | 0.04 | -1.87  | 0.017781 | 0.002143 | 0.187001 | 0.068507 |
| MmugDNA.25267.1.S1_at   | MmugDNA.25267.1 | 10.63 | 11.78 | 0.38 | 0.13 | -2.23  | 0.009961 | 0.011498 | 0.149012 | 0.138685 |
| MmugDNA.2527.1.S1_at    | MmugDNA.2527.1  | 11.83 | 11.58 | 0.14 | 0.03 | 1.19   | 0.028821 | 0.019717 | 0.222553 | 0.176461 |
| MmugDNA.25277.1.S1_at   | MmugDNA.25277.1 | 5.77  | 5.72  | 0.14 | 0.07 | 1.03   | 0.386487 | 0.818221 | 0.654936 | 0.895149 |
| MmugDNA.25281.1.S1_at   | MmugDNA.25281.1 | 12.24 | 12.39 | 0.09 | 0.05 | -1.11  | 0.072718 | 0.271574 | 0.327657 | 0.536577 |
| MmugDNA.25285.1.S1_at   | MmugDNA.25285.1 | 6.45  | 6.61  | 0.87 | 0.1  | -1.12  | 0.474976 | 0.371051 | 0.717746 | 0.609975 |
| MmugDNA.25292.1.S1_at   | MmugDNA.25292.1 | 11.74 | 11.15 | 0.16 | 0.05 | 1.51   | 0.001693 | 0.003922 | 0.084735 | 0.089057 |
| MmugDNA.25299.1.S1_at   | MmugDNA.25299.1 | 10.03 | 9.34  | 0.16 | 0.04 | 1.61   | 0.003244 | 0.142273 | 0.101778 | 0.41579  |
| MmugDNA.25302.1.S1_at   | MmugDNA.25302.1 | 10.54 | 11.74 | 0.27 | 0.1  | -2.3   | 0.002576 | 0.023726 | 0.094992 | 0.192873 |
| MmugDNA.25305.1.S1_at   | MmugDNA.25305.1 | 6.45  | 6.53  | 0.16 | 0.05 | -1.05  | 0.242683 | 0.264117 | 0.539526 | 0.530214 |
| MmugDNA.25307.1.S1_at   | MmugDNA.25307.1 | 10.2  | 9.93  | 0.09 | 0.05 | 1.21   | 0.012301 | 0.236182 | 0.161126 | 0.507225 |
| MmugDNA.25321.1.S1_at   | MmugDNA.25321.1 | 6.41  | 6.84  | 0.71 | 0.1  | -1.35  | 0.288129 | 0.56358  | 0.577838 | 0.738718 |
| MmugDNA.25322.1.S1_at   | MmugDNA.25322.1 | 8.93  | 8.86  | 0.31 | 0.08 | 1.05   | 0.591447 | 0.066717 | 0.792608 | 0.304114 |
| MmugDNA.25327.1.S1_at   | MmugDNA.25327.1 | 9.87  | 9.72  | 0.45 | 0.09 | 1.11   | 0.458058 | 0.577435 | 0.706772 | 0.747923 |
| MmugDNA.2533.1.S1_at    | MmugDNA.2533.1  | 11.98 | 11.73 | 0.32 | 0.14 | 1.19   | 0.749611 | 0.325527 | 0.884066 | 0.575827 |
| MmugDNA.25337.1.S1_at   | MmugDNA.25337.1 | 5.93  | 5.95  | 0.2  | 0.05 | -1.02  | 0.962089 | 0.445285 | 0.984578 | 0.662338 |
| MmugDNA.25341.1.S1_at   | MmugDNA.25341.1 | 10.56 | 11.27 | 0.17 | 0.28 | -1.64  | 0.032681 | 0.025865 | 0.234993 | 0.201654 |
| MmugDNA.25342.1.S1_at   | MmugDNA.25342.1 | 6.71  | 6.7   | 0.14 | 0.09 | 1      | 0.503234 | 0.259632 | 0.736835 | 0.526525 |
| MmugDNA.25343.1.S1_at   | MmugDNA.25343.1 | 9.34  | 9.44  | 0.22 | 0.14 | -1.07  | 0.490294 | 0.013455 | 0.728387 | 0.148623 |
| MmugDNA.25347.1.S1_at   | MmugDNA.25347.1 | 8.39  | 8.84  | 0.28 | 0.13 | -1.37  | 0.260819 | 0.290653 | 0.554996 | 0.551363 |
| MmugDNA.25348.1.S1_at   | MmugDNA.25348.1 | 6.37  | 5.7   | 0.44 | 0.05 | 1.59   | 0.070841 | 0.11295  | 0.324317 | 0.378759 |
| MmugDNA.25353.1.S1_at   | MmugDNA.25353.1 | 10.73 | 10.38 | 0.23 | 0.18 | 1.28   | 0.116153 | 0.360182 | 0.393212 | 0.601275 |
| MmugDNA.25354.1.S1_at   | MmugDNA.25354.1 | 11.38 | 11.23 | 0.12 | 0.12 | 1.11   | 0.209744 | 0.428663 | 0.507182 | 0.650233 |
| MmugDNA.25359.1.S1_at   | MmugDNA.25359.1 | 11.41 | 11.53 | 0.43 | 0.04 | -1.09  | 0.595436 | 0.10314  | 0.795236 | 0.364041 |
| MmugDNA.25362.1.S1_at   | MmugDNA.25362.1 | 6.62  | 10.07 | 1.07 | 0.3  | -10.97 | 0.013644 | 0.144241 | 0.167583 | 0.418146 |
| MmugDNA.25367.1.S1_at   | MmugDNA.25367.1 | 7.83  | 7.39  | 0.43 | 0.41 | 1.36   | 0.333741 | 0.24849  | 0.615089 | 0.517769 |
| MmugDNA.25369.1.S1_at   | MmugDNA.25369.1 | 3.32  | 3.28  | 0.5  | 0.06 | 1.03   | 0.580884 | 0.752288 | 0.786166 | 0.855787 |



|                         |                 |       |       |      |      |       |          |          |          |          |
|-------------------------|-----------------|-------|-------|------|------|-------|----------|----------|----------|----------|
| MmugDNA.25370.1.S1_at   | MmugDNA.25370.1 | 7.67  | 7.43  | 0.18 | 0.34 | 1.19  | 0.838297 | 0.883472 | 0.929053 | 0.933594 |
| MmugDNA.25384.1.S1_at   | MmugDNA.25384.1 | 13.01 | 11.72 | 0.07 | 0.33 | 2.45  | 0.003109 | 0.015679 | 0.100877 | 0.158633 |
| MmugDNA.25386.1.S1_at   | MmugDNA.25386.1 | 11.24 | 10.04 | 0.81 | 0.25 | 2.29  | 0.295468 | 0.44138  | 0.58425  | 0.659552 |
| MmugDNA.25389.1.S1_at   | MmugDNA.25389.1 | 10.02 | 9.48  | 0.14 | 0.02 | 1.45  | 0.002638 | 0.00067  | 0.095464 | 0.04413  |
| MmugDNA.25396.1.S1_at   | MmugDNA.25396.1 | 13.64 | 13.53 | 0.09 | 0.05 | 1.08  | 0.065667 | 0.143157 | 0.313663 | 0.417029 |
| MmugDNA.254.1.S1_at     | MmugDNA.254.1   | 3.61  | 3.48  | 0.29 | 0.1  | 1.09  | 0.249635 | 0.290404 | 0.544677 | 0.551169 |
| MmugDNA.25400.1.S1_s_at | MmugDNA.25400.1 | 13.44 | 13.06 | 0.04 | 0.01 | 1.3   | 0.000163 | 0.151498 | 0.053494 | 0.426223 |
| MmugDNA.25404.1.S1_at   | MmugDNA.25404.1 | 7.45  | 8.16  | 0.68 | 0.22 | -1.64 | 0.231924 | 0.430636 | 0.530559 | 0.651655 |
| MmugDNA.25409.1.S1_at   | MmugDNA.25409.1 | 7.21  | 6.69  | 0.62 | 0.31 | 1.43  | 0.071088 | 0.088872 | 0.324551 | 0.34272  |
| MmugDNA.25416.1.S1_at   | MmugDNA.25416.1 | 3.48  | 3.42  | 0.12 | 0.24 | 1.04  | 0.707099 | 0.360666 | 0.861311 | 0.601717 |
| MmugDNA.2542.1.S1_at    | MmugDNA.2542.1  | 7.65  | 7.69  | 0.11 | 0.15 | -1.02 | 0.847716 | 0.083938 | 0.933674 | 0.334848 |
| MmugDNA.25428.1.S1_at   | MmugDNA.25428.1 | 6.97  | 6.47  | 0.41 | 0.22 | 1.42  | 0.237531 | 0.297083 | 0.535004 | 0.555996 |
| MmugDNA.2543.1.S1_at    | MmugDNA.2543.1  | 8.6   | 9.95  | 0.3  | 0.15 | -2.55 | 0.001648 | 0.005851 | 0.084462 | 0.104779 |
| MmugDNA.25431.1.S1_at   | MmugDNA.25431.1 | 8.59  | 8.37  | 0.09 | 0.13 | 1.17  | 0.052711 | 0.008144 | 0.286588 | 0.119736 |
| MmugDNA.25433.1.S1_at   | MmugDNA.25433.1 | 5.5   | 5.42  | 0.08 | 0.03 | 1.05  | 0.167049 | 0.791655 | 0.460309 | 0.879663 |
| MmugDNA.25436.1.S1_at   | MmugDNA.25436.1 | 12.35 | 10.97 | 0.15 | 0.16 | 2.59  | 0.000613 | 0.000069 | 0.070727 | 0.025812 |
| MmugDNA.25439.1.S1_at   | MmugDNA.25439.1 | 4.41  | 3.77  | 0.13 | 0.17 | 1.56  | 0.011203 | 0.009282 | 0.155478 | 0.127101 |
| MmugDNA.25440.1.S1_at   | MmugDNA.25440.1 | 7.14  | 7.19  | 0.21 | 0.04 | -1.03 | 0.526244 | 0.674949 | 0.752437 | 0.810089 |
| MmugDNA.25440.1.S1_s_at | MmugDNA.25440.1 | 5.9   | 6.03  | 0.12 | 0.22 | -1.1  | 0.631451 | 0.232793 | 0.819043 | 0.504426 |
| MmugDNA.25452.1.S1_at   | MmugDNA.25452.1 | 11.57 | 11.78 | 0.53 | 0.44 | -1.15 | 0.857431 | 0.192897 | 0.938077 | 0.468379 |
| MmugDNA.25454.1.S1_at   | MmugDNA.25454.1 | 8.28  | 7.96  | 0.36 | 0.08 | 1.26  | 0.629804 | 0.345295 | 0.81817  | 0.590593 |
| MmugDNA.25459.1.S1_at   | MmugDNA.25459.1 | 2.83  | 2.86  | 0.06 | 0.13 | -1.02 | 0.378574 | 0.606779 | 0.648732 | 0.766027 |
| MmugDNA.25461.1.S1_at   | MmugDNA.25461.1 | 12.4  | 12.51 | 0.07 | 0.06 | -1.08 | 0.420854 | 0.883814 | 0.67979  | 0.933691 |
| MmugDNA.25463.1.S1_at   | MmugDNA.25463.1 | 12.7  | 12.55 | 0.12 | 0.03 | 1.11  | 0.082264 | 0.002909 | 0.343869 | 0.079157 |
| MmugDNA.25463.1.S1_s_at | MmugDNA.25463.1 | 11.76 | 11.58 | 0.13 | 0.02 | 1.13  | 0.02763  | 0.020417 | 0.21866  | 0.179442 |
| MmugDNA.25468.1.S1_at   | MmugDNA.25468.1 | 8.38  | 7.95  | 0.5  | 0.41 | 1.35  | 0.393833 | 0.286012 | 0.660512 | 0.547512 |
| MmugDNA.25469.1.S1_at   | MmugDNA.25469.1 | 9     | 8.86  | 0.28 | 0.03 | 1.1   | 0.497812 | 0.704082 | 0.73333  | 0.828326 |
| MmugDNA.25471.1.S1_at   | MmugDNA.25471.1 | 10.75 | 10.57 | 0.19 | 0.09 | 1.13  | 0.150312 | 0.000893 | 0.43942  | 0.047789 |
| MmugDNA.25472.1.S1_at   | MmugDNA.25472.1 | 4.14  | 4.12  | 0.11 | 0.32 | 1.01  | 0.679587 | 0.632934 | 0.84714  | 0.783881 |
| MmugDNA.25477.1.S1_at   | MmugDNA.25477.1 | 6.67  | 6.37  | 0.54 | 0.15 | 1.24  | 0.17786  | 0.096673 | 0.472595 | 0.35417  |
| MmugDNA.25481.1.S1_at   | MmugDNA.25481.1 | 6.75  | 6.6   | 0.11 | 0.02 | 1.1   | 0.189843 | 0.129884 | 0.486238 | 0.401509 |
| MmugDNA.25487.1.S1_at   | MmugDNA.25487.1 | 13.45 | 13.44 | 0.07 | 0.03 | 1     | 0.930701 | 0.525219 | 0.970866 | 0.714809 |
| MmugDNA.2549.1.S1_at    | MmugDNA.2549.1  | 8.19  | 7.9   | 0.53 | 0.3  | 1.22  | 0.648179 | 0.584385 | 0.829161 | 0.75242  |
| MmugDNA.2549.1.S1_x_at  | MmugDNA.2549.1  | 8.06  | 7.87  | 0.55 | 0.3  | 1.14  | 0.962331 | 0.489787 | 0.984644 | 0.691918 |
| MmugDNA.25492.1.S1_s_at | MmugDNA.25492.1 | 10.8  | 10.39 | 0.23 | 0.03 | 1.33  | 0.043298 | 0.255983 | 0.265362 | 0.523919 |
| MmugDNA.25494.1.S1_at   | MmugDNA.25494.1 | 11.97 | 12    | 0.03 | 0.13 | -1.02 | 0.467252 | 0.159676 | 0.712818 | 0.435785 |
| MmugDNA.25496.1.S1_at   | MmugDNA.25496.1 | 5.59  | 5.2   | 0.18 | 0.26 | 1.31  | 0.062917 | 0.15689  | 0.307612 | 0.432372 |
| MmugDNA.2550.1.S1_at    | MmugDNA.2550.1  | 13.27 | 13.31 | 0.12 | 0.05 | -1.03 | 0.671242 | 0.559742 | 0.842316 | 0.736365 |
| MmugDNA.25504.1.S1_at   | MmugDNA.25504.1 | 10.2  | 9.34  | 0.35 | 0.26 | 1.82  | 0.10266  | 0.012404 | 0.37496  | 0.144058 |
| MmugDNA.25508.1.S1_at   | MmugDNA.25508.1 | 9.49  | 9.7   | 0.39 | 0.19 | -1.16 | 0.514919 | 0.020018 | 0.744801 | 0.177698 |
| MmugDNA.25509.1.S1_at   | MmugDNA.25509.1 | 5.21  | 5.21  | 0.18 | 0.32 | -1    | 0.549012 | 0.753806 | 0.766905 | 0.856687 |
| MmugDNA.25513.1.S1_at   | MmugDNA.25513.1 | 7.36  | 7.39  | 0.27 | 0.14 | -1.02 | 0.563454 | 0.662461 | 0.775461 | 0.802351 |
| MmugDNA.25515.1.S1_at   | MmugDNA.25515.1 | 8.27  | 7.63  | 0.35 | 0.18 | 1.56  | 0.076307 | 0.000209 | 0.33441  | 0.032262 |

|                         |                 |       |       |      |      |       |          |          |          |          |
|-------------------------|-----------------|-------|-------|------|------|-------|----------|----------|----------|----------|
| MmugDNA.25525.1.S1_at   | MmugDNA.25525.1 | 6.92  | 7.04  | 0.23 | 0.16 | -1.09 | 0.559043 | 0.416542 | 0.77314  | 0.641647 |
| MmugDNA.25527.1.S1_at   | MmugDNA.25527.1 | 4.91  | 5.07  | 0.11 | 0.06 | -1.12 | 0.086345 | 0.119005 | 0.351168 | 0.387269 |
| MmugDNA.25529.1.S1_at   | MmugDNA.25529.1 | 12.49 | 12.49 | 0.19 | 0.07 | 1.01  | 0.905608 | 0.082894 | 0.960065 | 0.332437 |
| MmugDNA.25530.1.S1_at   | MmugDNA.25530.1 | 12.69 | 12.78 | 0.09 | 0.02 | -1.06 | 0.544362 | 0.37971  | 0.764016 | 0.616542 |
| MmugDNA.25535.1.S1_at   | MmugDNA.25535.1 | 10.47 | 10.64 | 0.13 | 0.07 | -1.12 | 0.320792 | 0.107895 | 0.605277 | 0.370945 |
| MmugDNA.25538.1.S1_at   | MmugDNA.25538.1 | 3.66  | 3.6   | 0.31 | 0.21 | 1.04  | 0.921501 | 0.867678 | 0.966402 | 0.924794 |
| MmugDNA.25540.1.S1_at   | MmugDNA.25540.1 | 11.86 | 12    | 0.15 | 0.06 | -1.1  | 0.135221 | 0.183775 | 0.419109 | 0.459871 |
| MmugDNA.25541.1.S1_at   | MmugDNA.25541.1 | 7.73  | 7.23  | 0.26 | 0.05 | 1.41  | 0.084409 | 0.216142 | 0.347914 | 0.489701 |
| MmugDNA.25552.1.S1_at   | MmugDNA.25552.1 | 3.96  | 3.71  | 0.4  | 0.06 | 1.19  | 0.205713 | 0.296275 | 0.503526 | 0.555423 |
| MmugDNA.25552.1.S1_s_at | MmugDNA.25552.1 | 5.97  | 5.69  | 0.15 | 0.12 | 1.21  | 0.053448 | 0.109677 | 0.288494 | 0.373675 |
| MmugDNA.25553.1.S1_at   | MmugDNA.25553.1 | 8.67  | 8     | 0.44 | 0.22 | 1.59  | 0.070099 | 0.025122 | 0.323085 | 0.198608 |
| MmugDNA.25561.1.S1_at   | MmugDNA.25561.1 | 7.01  | 7.21  | 0.49 | 0.07 | -1.15 | 0.191984 | 0.468294 | 0.488531 | 0.6777   |
| MmugDNA.25570.1.S1_at   | MmugDNA.25570.1 | 6.18  | 4.73  | 0.47 | 0.3  | 2.74  | 0.007066 | 0.020716 | 0.131484 | 0.180645 |
| MmugDNA.25572.1.S1_at   | MmugDNA.25572.1 | 13.97 | 13.93 | 0.02 | 0.02 | 1.03  | 0.021711 | 0.446627 | 0.200687 | 0.66287  |
| MmugDNA.25572.1.S1_s_at | MmugDNA.25572.1 | 13.45 | 13.43 | 0.04 | 0.03 | 1.02  | 0.470701 | 0.304541 | 0.715067 | 0.561803 |
| MmugDNA.25573.1.S1_at   | MmugDNA.25573.1 | 6.85  | 6.65  | 0.08 | 0.08 | 1.15  | 0.04724  | 0.876406 | 0.274594 | 0.929683 |
| MmugDNA.25583.1.S1_at   | MmugDNA.25583.1 | 8.36  | 8.81  | 0.38 | 0.17 | -1.36 | 0.162755 | 0.019433 | 0.454811 | 0.175133 |
| MmugDNA.25587.1.S1_at   | MmugDNA.25587.1 | 10.85 | 10.38 | 0.15 | 0.01 | 1.39  | 0.005073 | 0.058381 | 0.116398 | 0.288369 |
| MmugDNA.25590.1.S1_at   | MmugDNA.25590.1 | 10.72 | 10.71 | 0.04 | 0.05 | 1     | 0.761372 | 0.75984  | 0.890581 | 0.860462 |
| MmugDNA.25594.1.S1_at   | MmugDNA.25594.1 | 4.55  | 3.9   | 0.53 | 0.17 | 1.56  | 0.129808 | 0.12909  | 0.412066 | 0.400583 |
| MmugDNA.25601.1.S1_at   | MmugDNA.25601.1 | 7.1   | 7.48  | 0.19 | 0.21 | -1.3  | 0.038171 | 0.282253 | 0.251357 | 0.544991 |
| MmugDNA.25616.1.S1_at   | MmugDNA.25616.1 | 6.37  | 6.61  | 0.09 | 0.17 | -1.18 | 0.103055 | 0.071152 | 0.375707 | 0.313041 |
| MmugDNA.25617.1.S1_at   | MmugDNA.25617.1 | 3.41  | 3.15  | 0.24 | 0.07 | 1.2   | 0.348917 | 0.176761 | 0.626929 | 0.45319  |
| MmugDNA.25619.1.S1_at   | MmugDNA.25619.1 | 9.39  | 8.92  | 0.3  | 0.15 | 1.38  | 0.141868 | 0.248265 | 0.427804 | 0.517596 |
| MmugDNA.25621.1.S1_at   | MmugDNA.25621.1 | 8.85  | 8.76  | 0.21 | 0.04 | 1.07  | 0.303831 | 0.048001 | 0.591195 | 0.264109 |
| MmugDNA.25622.1.S1_at   | MmugDNA.25622.1 | 9.25  | 9.26  | 0.29 | 0.41 | -1.01 | 0.788825 | 0.128209 | 0.904019 | 0.399281 |
| MmugDNA.25626.1.S1_at   | MmugDNA.25626.1 | 8.08  | 8.55  | 0.27 | 0.06 | -1.39 | 0.039292 | 0.040739 | 0.254695 | 0.246735 |
| MmugDNA.2563.1.S1_at    | MmugDNA.2563.1  | 10.49 | 10.43 | 0.23 | 0.12 | 1.04  | 0.445333 | 0.142937 | 0.697825 | 0.416854 |
| MmugDNA.25634.1.S1_at   | MmugDNA.25634.1 | 10.76 | 10.95 | 0.03 | 0.12 | -1.14 | 0.046183 | 0.012737 | 0.272667 | 0.14546  |
| MmugDNA.25642.1.S1_at   | MmugDNA.25642.1 | 3.42  | 3.31  | 0.11 | 0.11 | 1.07  | 0.67465  | 0.313297 | 0.84465  | 0.567753 |
| MmugDNA.25646.1.S1_s_at | MmugDNA.25646.1 | 10.27 | 10.4  | 0.14 | 0.08 | -1.09 | 0.069201 | 0.428049 | 0.321158 | 0.649619 |
| MmugDNA.25647.1.S1_at   | MmugDNA.25647.1 | 4.34  | 4.06  | 0.43 | 0.07 | 1.22  | 0.149659 | 0.213413 | 0.438613 | 0.48728  |
| MmugDNA.25649.1.S1_at   | MmugDNA.25649.1 | 4.9   | 4.65  | 0.2  | 0.04 | 1.18  | 0.293917 | 0.34448  | 0.582905 | 0.589886 |
| MmugDNA.2565.1.S1_at    | MmugDNA.2565.1  | 4.96  | 4.94  | 0.1  | 0.13 | 1.01  | 0.554665 | 0.519838 | 0.770788 | 0.71135  |
| MmugDNA.25652.1.S1_at   | MmugDNA.25652.1 | 6.76  | 8.14  | 0.24 | 0.09 | -2.6  | 0.000918 | 0.004689 | 0.075607 | 0.095363 |
| MmugDNA.25656.1.S1_at   | MmugDNA.25656.1 | 7.26  | 6.57  | 0.67 | 0.56 | 1.62  | 0.500191 | 0.013373 | 0.734575 | 0.14827  |
| MmugDNA.2566.1.S1_at    | MmugDNA.2566.1  | 9.57  | 9.28  | 0.12 | 0.14 | 1.22  | 0.06097  | 0.086154 | 0.303842 | 0.338528 |
| MmugDNA.25666.1.S1_at   | MmugDNA.25666.1 | 12.5  | 12.66 | 0.11 | 0.04 | -1.12 | 0.112542 | 0.517131 | 0.388857 | 0.709435 |
| MmugDNA.25667.1.S1_at   | MmugDNA.25667.1 | 7.56  | 8.84  | 0.51 | 0.07 | -2.44 | 0.02946  | 0.155532 | 0.224639 | 0.430888 |
| MmugDNA.25674.1.S1_at   | MmugDNA.25674.1 | 6.98  | 7.16  | 0.08 | 0.18 | -1.13 | 0.540492 | 0.979477 | 0.76151  | 0.988961 |
| MmugDNA.25678.1.S1_at   | MmugDNA.25678.1 | 7.08  | 7.36  | 0.16 | 0.03 | -1.21 | 0.047123 | 0.056091 | 0.274594 | 0.282723 |
| MmugDNA.25679.1.S1_at   | MmugDNA.25679.1 | 8.15  | 8.19  | 0.04 | 0.03 | -1.03 | 0.299589 | 0.444421 | 0.587907 | 0.662053 |
| MmugDNA.25681.1.S1_at   | MmugDNA.25681.1 | 7.75  | 7.54  | 0.3  | 0.18 | 1.16  | 0.241305 | 0.010602 | 0.538538 | 0.134272 |

|                         |                 |       |       |      |      |       |          |          |          |          |
|-------------------------|-----------------|-------|-------|------|------|-------|----------|----------|----------|----------|
| MmugDNA.25693.1.S1_at   | MmugDNA.25693.1 | 9.54  | 8.48  | 0.21 | 0.44 | 2.08  | 0.02569  | 0.020477 | 0.212966 | 0.179644 |
| MmugDNA.25698.1.S1_at   | MmugDNA.25698.1 | 9.16  | 9.61  | 0.17 | 0.19 | -1.37 | 0.041125 | 0.087548 | 0.259341 | 0.340753 |
| MmugDNA.25703.1.S1_at   | MmugDNA.25703.1 | 12.49 | 12.3  | 0.22 | 0.04 | 1.14  | 0.621866 | 0.434271 | 0.812905 | 0.65444  |
| MmugDNA.25704.1.S1_at   | MmugDNA.25704.1 | 9.35  | 9.06  | 0.24 | 0.13 | 1.22  | 0.052538 | 0.806004 | 0.286297 | 0.888436 |
| MmugDNA.2571.1.S1_at    | MmugDNA.2571.1  | 9.72  | 8.11  | 0.42 | 0.29 | 3.03  | 0.00459  | 0.000674 | 0.113875 | 0.04413  |
| MmugDNA.2571.1.S1_s_at  | MmugDNA.2571.1  | 10.43 | 8.87  | 0.38 | 0.21 | 2.95  | 0.003156 | 0.0004   | 0.101284 | 0.037471 |
| MmugDNA.2571.1.S1_x_at  | MmugDNA.2571.1  | 10.12 | 8.49  | 0.38 | 0.26 | 3.08  | 0.00357  | 0.000496 | 0.104895 | 0.038955 |
| MmugDNA.25716.1.S1_at   | MmugDNA.25716.1 | 8.82  | 8.85  | 0.11 | 0.1  | -1.02 | 0.637688 | 0.83962  | 0.82257  | 0.908582 |
| MmugDNA.25719.1.S1_at   | MmugDNA.25719.1 | 9.13  | 9.58  | 0.16 | 0.16 | -1.37 | 0.027195 | 0.169553 | 0.217796 | 0.446179 |
| MmugDNA.25725.1.S1_at   | MmugDNA.25725.1 | 4.72  | 4.66  | 0.82 | 0.15 | 1.04  | 0.876684 | 0.92632  | 0.947265 | 0.958277 |
| MmugDNA.2573.1.S1_at    | MmugDNA.2573.1  | 12.71 | 12.64 | 0.05 | 0.05 | 1.05  | 0.088772 | 0.393151 | 0.355162 | 0.626102 |
| MmugDNA.25730.1.S1_at   | MmugDNA.25730.1 | 11.74 | 11.44 | 0.06 | 0.05 | 1.23  | 0.004374 | 0.129158 | 0.112249 | 0.400611 |
| MmugDNA.25736.1.S1_at   | MmugDNA.25736.1 | 3.18  | 3.21  | 0.11 | 0.05 | -1.03 | 0.557946 | 0.609771 | 0.772485 | 0.768079 |
| MmugDNA.25746.1.S1_at   | MmugDNA.25746.1 | 3.81  | 3.6   | 0.18 | 0.05 | 1.16  | 0.149165 | 0.253269 | 0.437947 | 0.521645 |
| MmugDNA.25753.1.S1_at   | MmugDNA.25753.1 | 7.25  | 6.88  | 0.14 | 0.18 | 1.29  | 0.051496 | 0.044088 | 0.284376 | 0.254278 |
| MmugDNA.25755.1.S1_at   | MmugDNA.25755.1 | 8.44  | 8.82  | 0.58 | 0.32 | -1.3  | 0.0887   | 0.131336 | 0.355022 | 0.403431 |
| MmugDNA.25759.1.S1_at   | MmugDNA.25759.1 | 5.13  | 5.15  | 0.06 | 0.09 | -1.02 | 0.654526 | 0.802819 | 0.832788 | 0.886441 |
| MmugDNA.25764.1.S1_at   | MmugDNA.25764.1 | 6.46  | 6.69  | 0.2  | 0.02 | -1.17 | 0.136889 | 0.493897 | 0.421672 | 0.69445  |
| MmugDNA.25765.1.S1_at   | MmugDNA.25765.1 | 7.08  | 7     | 0.27 | 0.14 | 1.06  | 0.72291  | 0.718451 | 0.869766 | 0.837045 |
| MmugDNA.25766.1.S1_at   | MmugDNA.25766.1 | 12.33 | 12.26 | 0.16 | 0.09 | 1.05  | 0.290089 | 0.19966  | 0.579598 | 0.474335 |
| MmugDNA.25768.1.S1_at   | MmugDNA.25768.1 | 14.25 | 14.24 | 0.1  | 0    | 1.01  | 0.705829 | 0.804614 | 0.860633 | 0.88762  |
| MmugDNA.25770.1.S1_at   | MmugDNA.25770.1 | 14.34 | 14.27 | 0.07 | 0.01 | 1.05  | 0.618496 | 0.547454 | 0.810674 | 0.728464 |
| MmugDNA.25771.1.S1_at   | MmugDNA.25771.1 | 3.64  | 3.71  | 0.15 | 0.05 | -1.05 | 0.158978 | 0.139778 | 0.450274 | 0.413114 |
| MmugDNA.25777.1.S1_at   | MmugDNA.25777.1 | 10.39 | 9.96  | 0.28 | 0.1  | 1.35  | 0.163726 | 0.057749 | 0.456321 | 0.286658 |
| MmugDNA.25779.1.S1_at   | MmugDNA.25779.1 | 7.32  | 8.13  | 0.14 | 0.2  | -1.76 | 0.004512 | 0.052274 | 0.113436 | 0.274146 |
| MmugDNA.25789.1.S1_at   | MmugDNA.25789.1 | 8.98  | 8.99  | 0.1  | 0.05 | -1.01 | 0.985684 | 0.998179 | 0.994868 | 0.999049 |
| MmugDNA.25794.1.S1_s_at | MmugDNA.25794.1 | 5.21  | 6.16  | 0.82 | 0.21 | -1.93 | 0.171203 | 0.359809 | 0.465113 | 0.601084 |
| MmugDNA.25795.1.S1_at   | MmugDNA.25795.1 | 11.07 | 11.13 | 0.1  | 0.09 | -1.05 | 0.644497 | 0.158488 | 0.826935 | 0.434433 |
| MmugDNA.25796.1.S1_s_at | MmugDNA.25796.1 | 13.89 | 13.96 | 0.07 | 0.02 | -1.05 | 0.496375 | 0.774768 | 0.732272 | 0.868861 |
| MmugDNA.258.1.S1_s_at   | MmugDNA.258.1   | 10.44 | 10.61 | 0.19 | 0.08 | -1.13 | 0.286854 | 0.091935 | 0.5766   | 0.347267 |
| MmugDNA.25805.1.S1_at   | MmugDNA.25805.1 | 4.06  | 4.09  | 0.16 | 0.09 | -1.03 | 0.330093 | 0.290432 | 0.612143 | 0.551169 |
| MmugDNA.25824.1.S1_at   | MmugDNA.25824.1 | 5.05  | 5.06  | 0.08 | 0.22 | -1.01 | 0.970351 | 0.886173 | 0.988298 | 0.935211 |
| MmugDNA.2583.1.S1_s_at  | MmugDNA.2583.1  | 5.09  | 5.25  | 0.06 | 0.23 | -1.12 | 0.224596 | 0.365115 | 0.522693 | 0.605299 |
| MmugDNA.25831.1.S1_at   | MmugDNA.25831.1 | 13.4  | 13.33 | 0.34 | 0.04 | 1.05  | 0.73127  | 0.768417 | 0.874456 | 0.865521 |
| MmugDNA.25831.1.S1_s_at | MmugDNA.25831.1 | 14.46 | 14.45 | 0.08 | 0.02 | 1.01  | 0.91339  | 0.96273  | 0.963369 | 0.979102 |
| MmugDNA.25833.1.S1_at   | MmugDNA.25833.1 | 14.08 | 14.1  | 0.06 | 0.05 | -1.02 | 0.155024 | 0.321402 | 0.445174 | 0.573207 |
| MmugDNA.25833.1.S1_s_at | MmugDNA.25833.1 | 14.26 | 14.3  | 0.04 | 0.05 | -1.03 | 0.106931 | 0.267439 | 0.381299 | 0.533173 |
| MmugDNA.25843.1.S1_at   | MmugDNA.25843.1 | 14.28 | 14.33 | 0.07 | 0.01 | -1.03 | 0.303561 | 0.585488 | 0.591015 | 0.752852 |
| MmugDNA.2586.1.S1_at    | MmugDNA.2586.1  | 11.55 | 11.57 | 0.16 | 0.09 | -1.01 | 0.943371 | 0.94854  | 0.976201 | 0.970655 |
| MmugDNA.25861.1.S1_at   | MmugDNA.25861.1 | 6.71  | 6.72  | 0.11 | 0.06 | -1.01 | 0.795628 | 0.859034 | 0.907596 | 0.919753 |
| MmugDNA.25864.1.S1_at   | MmugDNA.25864.1 | 13.38 | 13.66 | 0.13 | 0.04 | -1.22 | 0.009216 | 0.004568 | 0.145865 | 0.094375 |
| MmugDNA.25869.1.S1_at   | MmugDNA.25869.1 | 14.26 | 14.23 | 0.04 | 0.01 | 1.02  | 0.627883 | 0.927593 | 0.817059 | 0.958862 |
| MmugDNA.25870.1.S1_at   | MmugDNA.25870.1 | 6.89  | 6.9   | 0.52 | 0.55 | -1.01 | 0.928856 | 0.047059 | 0.969898 | 0.261469 |

|                         |                 |       |       |      |      |       |          |          |          |          |
|-------------------------|-----------------|-------|-------|------|------|-------|----------|----------|----------|----------|
| MmugDNA.25879.1.S1_at   | MmugDNA.25879.1 | 8.76  | 8.84  | 0.27 | 0.05 | -1.06 | 0.536165 | 0.252435 | 0.758845 | 0.521061 |
| MmugDNA.2588.1.S1_at    | MmugDNA.2588.1  | 9.98  | 10.25 | 0.27 | 0.09 | -1.21 | 0.136668 | 0.394986 | 0.421354 | 0.627225 |
| MmugDNA.25881.1.S1_at   | MmugDNA.25881.1 | 8.46  | 8.26  | 0.71 | 0.09 | 1.14  | 0.234067 | 0.236401 | 0.532201 | 0.507314 |
| MmugDNA.25884.1.S1_at   | MmugDNA.25884.1 | 7.64  | 8.33  | 0.46 | 0.06 | -1.61 | 0.066937 | 0.068254 | 0.316399 | 0.307556 |
| MmugDNA.25888.1.S1_at   | MmugDNA.25888.1 | 4.88  | 4.92  | 0.23 | 0    | -1.02 | 0.946127 | 0.994587 | 0.977211 | 0.99666  |
| MmugDNA.2589.1.S1_at    | MmugDNA.2589.1  | 8.62  | 8.72  | 0.23 | 0.08 | -1.07 | 0.640725 | 0.038664 | 0.824496 | 0.24169  |
| MmugDNA.25896.1.S1_at   | MmugDNA.25896.1 | 8.06  | 7.63  | 0.25 | 0.14 | 1.34  | 0.059225 | 0.029717 | 0.300415 | 0.214029 |
| MmugDNA.25900.1.S1_at   | MmugDNA.25900.1 | 8.55  | 8.7   | 0.24 | 0.1  | -1.11 | 0.801817 | 0.944891 | 0.911061 | 0.968825 |
| MmugDNA.25903.1.S1_at   | MmugDNA.25903.1 | 14.05 | 14.09 | 0.1  | 0.07 | -1.02 | 0.31522  | 0.526361 | 0.600287 | 0.71555  |
| MmugDNA.25903.1.S1_s_at | MmugDNA.25903.1 | 14.09 | 14.15 | 0.04 | 0.04 | -1.04 | 0.640447 | 0.112274 | 0.824302 | 0.377561 |
| MmugDNA.2591.1.S1_at    | MmugDNA.2591.1  | 11.63 | 11.67 | 0.03 | 0.02 | -1.03 | 0.106933 | 0.568296 | 0.381299 | 0.741876 |
| MmugDNA.2591.1.S1_s_at  | MmugDNA.2591.1  | 10.97 | 10.92 | 0.08 | 0.09 | 1.04  | 0.408312 | 0.062312 | 0.671167 | 0.296445 |
| MmugDNA.2592.1.S1_at    | MmugDNA.2592.1  | 10.21 | 9.9   | 0.34 | 0.09 | 1.24  | 0.19264  | 0.352407 | 0.489253 | 0.595722 |
| MmugDNA.25921.1.S1_at   | MmugDNA.25921.1 | 14.01 | 14.01 | 0.1  | 0.04 | 1     | 0.768379 | 0.907286 | 0.893594 | 0.947562 |
| MmugDNA.25923.1.S1_at   | MmugDNA.25923.1 | 7.77  | 7.33  | 0.42 | 0.37 | 1.35  | 0.527911 | 0.752234 | 0.753395 | 0.855787 |
| MmugDNA.25924.1.S1_s_at | MmugDNA.25924.1 | 10.4  | 10.11 | 0.24 | 0.26 | 1.22  | 0.435271 | 0.493018 | 0.690407 | 0.69397  |
| MmugDNA.25925.1.S1_at   | MmugDNA.25925.1 | 12.42 | 12.21 | 0.15 | 0.04 | 1.15  | 0.24698  | 0.119971 | 0.5426   | 0.388672 |
| MmugDNA.25927.1.S1_at   | MmugDNA.25927.1 | 11.14 | 10.64 | 0.23 | 0.34 | 1.41  | 0.108339 | 0.420391 | 0.382975 | 0.644099 |
| MmugDNA.25931.1.S1_at   | MmugDNA.25931.1 | 5.09  | 5.1   | 0.15 | 0.02 | -1.01 | 0.413426 | 0.431547 | 0.674789 | 0.652437 |
| MmugDNA.25936.1.S1_at   | MmugDNA.25936.1 | 9.42  | 9.18  | 0.1  | 0.11 | 1.17  | 0.108468 | 0.296236 | 0.383095 | 0.555423 |
| MmugDNA.25941.1.S1_at   | MmugDNA.25941.1 | 5.88  | 6.5   | 0.33 | 0.38 | -1.54 | 0.048523 | 0.027134 | 0.277767 | 0.205864 |
| MmugDNA.25943.1.S1_at   | MmugDNA.25943.1 | 10.81 | 10.78 | 0.2  | 0.1  | 1.02  | 0.859978 | 0.23947  | 0.939228 | 0.510159 |
| MmugDNA.25950.1.S1_at   | MmugDNA.25950.1 | 14.11 | 14.06 | 0.06 | 0.02 | 1.03  | 0.105816 | 0.288625 | 0.379857 | 0.549827 |
| MmugDNA.25951.1.S1_at   | MmugDNA.25951.1 | 8.59  | 9.16  | 0.44 | 0.15 | -1.48 | 0.308459 | 0.203674 | 0.595066 | 0.477907 |
| MmugDNA.25954.1.S1_at   | MmugDNA.25954.1 | 14.33 | 14.29 | 0.1  | 0.04 | 1.03  | 0.829504 | 0.705345 | 0.924914 | 0.829145 |
| MmugDNA.25955.1.S1_at   | MmugDNA.25955.1 | 14.26 | 14.27 | 0.08 | 0.04 | -1.01 | 0.546003 | 0.688488 | 0.7651   | 0.818184 |
| MmugDNA.25958.1.S1_at   | MmugDNA.25958.1 | 8.85  | 8.68  | 0.2  | 0.1  | 1.12  | 0.118806 | 0.084559 | 0.396589 | 0.335953 |
| MmugDNA.25963.1.S1_at   | MmugDNA.25963.1 | 7.89  | 7.78  | 0.16 | 0.08 | 1.08  | 0.391327 | 0.328695 | 0.658628 | 0.578213 |
| MmugDNA.25964.1.S1_at   | MmugDNA.25964.1 | 11.41 | 10.83 | 0.1  | 0.06 | 1.49  | 0.00108  | 0.258106 | 0.077048 | 0.525574 |
| MmugDNA.25969.1.S1_at   | MmugDNA.25969.1 | 8.8   | 7.78  | 0.25 | 0.18 | 2.02  | 0.003927 | 0.017257 | 0.108453 | 0.166393 |
| MmugDNA.25970.1.S1_at   | MmugDNA.25970.1 | 6.42  | 6.4   | 0.08 | 0.03 | 1.02  | 0.894144 | 0.342888 | 0.954822 | 0.588712 |
| MmugDNA.25986.1.S1_at   | MmugDNA.25986.1 | 10.29 | 10.29 | 0.49 | 0.3  | -1    | 0.241288 | 0.443284 | 0.538538 | 0.661138 |
| MmugDNA.25993.1.S1_at   | MmugDNA.25993.1 | 10.03 | 10.04 | 0.05 | 0.02 | -1    | 0.205918 | 0.640184 | 0.503741 | 0.788741 |
| MmugDNA.2600.1.S1_at    | MmugDNA.2600.1  | 7.07  | 6.38  | 0.08 | 0.08 | 1.62  | 0.00037  | 0.03824  | 0.062479 | 0.240265 |
| MmugDNA.26005.1.S1_at   | MmugDNA.26005.1 | 8.64  | 6.98  | 0.6  | 0.13 | 3.15  | 0.008321 | 0.003035 | 0.140121 | 0.080386 |
| MmugDNA.26015.1.S1_at   | MmugDNA.26015.1 | 6.1   | 7.1   | 0.41 | 0.09 | -2    | 0.010407 | 0.003579 | 0.151942 | 0.085582 |
| MmugDNA.26022.1.S1_at   | MmugDNA.26022.1 | 5.3   | 5.51  | 0.3  | 0.03 | -1.15 | 0.597944 | 0.274072 | 0.797048 | 0.538557 |
| MmugDNA.26028.1.S1_at   | MmugDNA.26028.1 | 8.75  | 7.55  | 0.09 | 0.03 | 2.3   | 0.000026 | 0.000578 | 0.045594 | 0.041382 |
| MmugDNA.26044.1.S1_at   | MmugDNA.26044.1 | 4.66  | 4.93  | 0.18 | 0.16 | -1.2  | 0.601943 | 0.062203 | 0.799922 | 0.296296 |
| MmugDNA.26045.1.S1_at   | MmugDNA.26045.1 | 6.86  | 7.17  | 0.63 | 0.45 | -1.24 | 0.979775 | 0.866283 | 0.992265 | 0.923959 |
| MmugDNA.2605.1.S1_at    | MmugDNA.2605.1  | 8.54  | 8.6   | 0.12 | 0.2  | -1.04 | 0.938933 | 0.973779 | 0.974223 | 0.985656 |
| MmugDNA.26069.1.S1_at   | MmugDNA.26069.1 | 4.76  | 4.31  | 0.2  | 0.43 | 1.36  | 0.385009 | 0.532164 | 0.653886 | 0.718995 |
| MmugDNA.2607.1.S1_at    | MmugDNA.2607.1  | 5.27  | 5.14  | 0.23 | 0.15 | 1.09  | 0.324743 | 0.375924 | 0.608363 | 0.61375  |

|                       |                 |       |       |      |      |       |          |          |          |          |
|-----------------------|-----------------|-------|-------|------|------|-------|----------|----------|----------|----------|
| MmugDNA.26072.1.S1_at | MmugDNA.26072.1 | 8.99  | 9.71  | 0.37 | 0.08 | -1.65 | 0.103058 | 0.330134 | 0.375707 | 0.578987 |
| MmugDNA.26076.1.S1_at | MmugDNA.26076.1 | 3.55  | 3.47  | 0.19 | 0.14 | 1.06  | 0.357711 | 0.245449 | 0.633636 | 0.515213 |
| MmugDNA.26077.1.A1_at | MmugDNA.26077.1 | 7.49  | 7.4   | 0.29 | 0.08 | 1.07  | 0.260135 | 0.452064 | 0.554308 | 0.66677  |
| MmugDNA.26077.1.S1_at | MmugDNA.26077.1 | 7.44  | 7.39  | 0.34 | 0.05 | 1.04  | 0.320831 | 0.398352 | 0.605306 | 0.629355 |
| MmugDNA.26084.1.S1_at | MmugDNA.26084.1 | 11.01 | 11.29 | 0.08 | 0.11 | -1.21 | 0.019103 | 0.616194 | 0.191749 | 0.772513 |
| MmugDNA.26094.1.S1_at | MmugDNA.26094.1 | 12.29 | 12.19 | 0.14 | 0.03 | 1.07  | 0.157339 | 0.058207 | 0.448021 | 0.287988 |
| MmugDNA.26095.1.S1_at | MmugDNA.26095.1 | 10.07 | 10.69 | 0.04 | 0.13 | -1.53 | 0.002251 | 0.003248 | 0.091317 | 0.082187 |
| MmugDNA.26104.1.S1_at | MmugDNA.26104.1 | 8.82  | 8.97  | 0.43 | 0.34 | -1.11 | 0.479764 | 0.020984 | 0.7209   | 0.181647 |
| MmugDNA.2612.1.S1_at  | MmugDNA.2612.1  | 3.58  | 3.57  | 0.07 | 0.18 | 1.01  | 0.878515 | 0.378218 | 0.948158 | 0.615438 |
| MmugDNA.26132.1.S1_at | MmugDNA.26132.1 | 3.02  | 2.98  | 0.19 | 0.13 | 1.03  | 0.611899 | 0.849538 | 0.80658  | 0.914587 |
| MmugDNA.2614.1.S1_at  | MmugDNA.2614.1  | 8.64  | 8.84  | 0.47 | 0.1  | -1.16 | 0.707395 | 0.979386 | 0.861471 | 0.988889 |
| MmugDNA.26140.1.S1_at | MmugDNA.26140.1 | 7.35  | 7.65  | 0.15 | 0.06 | -1.23 | 0.026696 | 0.007165 | 0.216593 | 0.113808 |
| MmugDNA.26148.1.S1_at | MmugDNA.26148.1 | 9.14  | 8.47  | 0.09 | 0.05 | 1.59  | 0.000391 | 0.000129 | 0.062519 | 0.029087 |
| MmugDNA.26149.1.S1_at | MmugDNA.26149.1 | 5.73  | 5.72  | 0.36 | 0.1  | 1     | 0.366527 | 0.574797 | 0.640793 | 0.746142 |
| MmugDNA.26150.1.S1_at | MmugDNA.26150.1 | 8.96  | 8.53  | 0.18 | 0.02 | 1.35  | 0.027321 | 0.075643 | 0.218069 | 0.320087 |
| MmugDNA.26151.1.S1_at | MmugDNA.26151.1 | 4.36  | 4.15  | 0.06 | 0.12 | 1.15  | 0.034464 | 0.171245 | 0.24024  | 0.447792 |
| MmugDNA.26155.1.S1_at | MmugDNA.26155.1 | 5.61  | 5.42  | 0.04 | 0.11 | 1.14  | 0.203744 | 0.085615 | 0.501439 | 0.337614 |
| MmugDNA.26158.1.S1_at | MmugDNA.26158.1 | 5.29  | 5.15  | 0.27 | 0.12 | 1.1   | 0.401502 | 0.463953 | 0.666053 | 0.674724 |
| MmugDNA.26163.1.S1_at | MmugDNA.26163.1 | 6.94  | 7.09  | 0.14 | 0.06 | -1.11 | 0.724074 | 0.001992 | 0.870379 | 0.066247 |
| MmugDNA.26165.1.S1_at | MmugDNA.26165.1 | 7.53  | 7.7   | 0.05 | 0.18 | -1.12 | 0.189431 | 0.005871 | 0.485933 | 0.104856 |
| MmugDNA.26169.1.S1_at | MmugDNA.26169.1 | 4.92  | 5.05  | 0.21 | 0.01 | -1.09 | 0.898962 | 0.980804 | 0.957024 | 0.989478 |
| MmugDNA.26170.1.S1_at | MmugDNA.26170.1 | 4.16  | 4.51  | 0.16 | 0.02 | -1.27 | 0.06833  | 0.190698 | 0.319192 | 0.466141 |
| MmugDNA.26171.1.S1_at | MmugDNA.26171.1 | 8.42  | 8.26  | 0.07 | 0.16 | 1.12  | 0.286436 | 0.205565 | 0.576218 | 0.47981  |
| MmugDNA.26174.1.S1_at | MmugDNA.26174.1 | 4.7   | 5.01  | 0.39 | 0.79 | -1.24 | 0.586323 | 0.723088 | 0.789745 | 0.839592 |
| MmugDNA.26177.1.S1_at | MmugDNA.26177.1 | 11.69 | 11.42 | 0.06 | 0.16 | 1.21  | 0.051202 | 0.505091 | 0.283674 | 0.70197  |
| MmugDNA.26179.1.S1_at | MmugDNA.26179.1 | 4.46  | 4.48  | 0.22 | 0.06 | -1.01 | 0.477255 | 0.555315 | 0.719345 | 0.733767 |
| MmugDNA.26187.1.S1_at | MmugDNA.26187.1 | 11.11 | 10.82 | 0.12 | 0.19 | 1.22  | 0.249546 | 0.128382 | 0.544627 | 0.399645 |
| MmugDNA.26188.1.S1_at | MmugDNA.26188.1 | 6.92  | 6.85  | 0.28 | 0.07 | 1.05  | 0.246695 | 0.305419 | 0.54248  | 0.562418 |
| MmugDNA.26193.1.S1_at | MmugDNA.26193.1 | 7.12  | 7.93  | 0.32 | 0.05 | -1.75 | 0.023835 | 0.004152 | 0.207466 | 0.091036 |
| MmugDNA.26195.1.S1_at | MmugDNA.26195.1 | 5.1   | 5.12  | 0.17 | 0.13 | -1.02 | 0.895811 | 0.390055 | 0.955589 | 0.624002 |
| MmugDNA.262.1.S1_at   | MmugDNA.262.1   | 12.39 | 12.2  | 0.09 | 0.04 | 1.14  | 0.021803 | 0.428562 | 0.200878 | 0.650098 |
| MmugDNA.2620.1.S1_at  | MmugDNA.2620.1  | 12.04 | 11.93 | 0.2  | 0.05 | 1.08  | 0.689015 | 0.907644 | 0.851484 | 0.947753 |
| MmugDNA.26204.1.S1_at | MmugDNA.26204.1 | 10.04 | 10.24 | 0.23 | 0.06 | -1.15 | 0.276118 | 0.509021 | 0.567711 | 0.703967 |
| MmugDNA.26209.1.S1_at | MmugDNA.26209.1 | 10.49 | 10.68 | 0.23 | 0.04 | -1.14 | 0.182565 | 0.126201 | 0.478356 | 0.396748 |
| MmugDNA.2621.1.S1_at  | MmugDNA.2621.1  | 12.37 | 12.31 | 0.19 | 0.08 | 1.04  | 0.983333 | 0.388213 | 0.99383  | 0.62268  |
| MmugDNA.26212.1.S1_at | MmugDNA.26212.1 | 11.11 | 9.08  | 0.43 | 0.27 | 4.09  | 0.002602 | 0.000367 | 0.095164 | 0.037273 |
| MmugDNA.26219.1.S1_at | MmugDNA.26219.1 | 12.58 | 11.71 | 0.21 | 0.08 | 1.84  | 0.002118 | 0.115373 | 0.090208 | 0.382394 |
| MmugDNA.2622.1.S1_at  | MmugDNA.2622.1  | 10.08 | 9.64  | 0.05 | 0.11 | 1.36  | 0.003695 | 0.259776 | 0.106124 | 0.526648 |
| MmugDNA.26226.1.S1_at | MmugDNA.26226.1 | 12.48 | 12.7  | 0.06 | 0.08 | -1.16 | 0.02581  | 0.089123 | 0.213398 | 0.343152 |
| MmugDNA.2623.1.S1_at  | MmugDNA.2623.1  | 9.71  | 10.11 | 0.1  | 0.2  | -1.32 | 0.050104 | 0.462844 | 0.28154  | 0.674149 |
| MmugDNA.2624.1.S1_at  | MmugDNA.2624.1  | 6.11  | 6.35  | 0.69 | 0.3  | -1.18 | 0.135665 | 0.137074 | 0.419659 | 0.409843 |
| MmugDNA.26243.1.S1_at | MmugDNA.26243.1 | 7.52  | 6.42  | 1.8  | 0.2  | 2.14  | 0.592027 | 0.405868 | 0.793125 | 0.634037 |
| MmugDNA.26251.1.S1_at | MmugDNA.26251.1 | 12.13 | 11.77 | 0.25 | 0.03 | 1.28  | 0.028929 | 0.000079 | 0.22298  | 0.027016 |

|                         |                 |       |       |      |      |        |          |          |          |          |
|-------------------------|-----------------|-------|-------|------|------|--------|----------|----------|----------|----------|
| MmugDNA.26256.1.S1_at   | MmugDNA.26256.1 | 6.67  | 10.52 | 1.77 | 0.22 | -14.48 | 0.02847  | 0.232433 | 0.22113  | 0.504189 |
| MmugDNA.26261.1.S1_at   | MmugDNA.26261.1 | 12.74 | 12.7  | 0.07 | 0.03 | 1.03   | 0.301228 | 0.205238 | 0.589242 | 0.479596 |
| MmugDNA.26264.1.S1_at   | MmugDNA.26264.1 | 11.63 | 12.1  | 0.08 | 0.09 | -1.39  | 0.00216  | 0.100978 | 0.090391 | 0.360543 |
| MmugDNA.26272.1.S1_s_at | MmugDNA.26272.1 | 9.14  | 8.42  | 0.23 | 0.32 | 1.64   | 0.023538 | 0.016254 | 0.206602 | 0.161612 |
| MmugDNA.26281.1.S1_at   | MmugDNA.26281.1 | 6.76  | 6.76  | 0.03 | 0.03 | 1.01   | 0.393055 | 0.115901 | 0.659919 | 0.383065 |
| MmugDNA.26286.1.S1_at   | MmugDNA.26286.1 | 6.62  | 6.62  | 0.91 | 0.17 | -1     | 0.377794 | 0.384496 | 0.648249 | 0.620142 |
| MmugDNA.26288.1.S1_at   | MmugDNA.26288.1 | 6.01  | 6.01  | 0.07 | 0.05 | 1      | 0.854229 | 0.094262 | 0.936616 | 0.350889 |
| MmugDNA.26289.1.S1_at   | MmugDNA.26289.1 | 10.37 | 10.29 | 0.31 | 0    | 1.06   | 0.985893 | 0.15916  | 0.994984 | 0.435217 |
| MmugDNA.26298.1.S1_at   | MmugDNA.26298.1 | 7.3   | 7.17  | 0.26 | 0.73 | 1.1    | 0.533546 | 0.600029 | 0.757063 | 0.761762 |
| MmugDNA.26305.1.S1_at   | MmugDNA.26305.1 | 4.99  | 4.84  | 0.1  | 0.16 | 1.11   | 0.638803 | 0.760797 | 0.823276 | 0.861028 |
| MmugDNA.26307.1.S1_at   | MmugDNA.26307.1 | 6.54  | 5.43  | 0.95 | 0.06 | 2.17   | 0.038576 | 0.027119 | 0.252332 | 0.205797 |
| MmugDNA.26310.1.S1_at   | MmugDNA.26310.1 | 13.16 | 12.85 | 0.1  | 0.02 | 1.24   | 0.014612 | 0.176661 | 0.172728 | 0.453138 |
| MmugDNA.26314.1.S1_at   | MmugDNA.26314.1 | 10.74 | 10.87 | 0.26 | 0.01 | -1.1   | 0.461345 | 0.360001 | 0.708826 | 0.601198 |
| MmugDNA.26316.1.S1_at   | MmugDNA.26316.1 | 6.21  | 6.49  | 0.17 | 0.14 | -1.22  | 0.069943 | 0.148719 | 0.322957 | 0.423201 |
| MmugDNA.26317.1.S1_at   | MmugDNA.26317.1 | 11.46 | 11.24 | 0.15 | 0.09 | 1.17   | 0.0238   | 0.022667 | 0.207275 | 0.188607 |
| MmugDNA.26318.1.S1_at   | MmugDNA.26318.1 | 12.08 | 12.52 | 0.11 | 0.08 | -1.36  | 0.006026 | 0.003197 | 0.124151 | 0.08199  |
| MmugDNA.26323.1.S1_at   | MmugDNA.26323.1 | 3.46  | 3.49  | 0.14 | 0.07 | -1.02  | 0.577994 | 0.18452  | 0.783846 | 0.460559 |
| MmugDNA.26328.1.S1_at   | MmugDNA.26328.1 | 12.95 | 12.71 | 0.08 | 0.02 | 1.18   | 0.011024 | 0.001881 | 0.154661 | 0.064979 |
| MmugDNA.2633.1.S1_at    | MmugDNA.2633.1  | 9.7   | 9.36  | 0.09 | 0.01 | 1.26   | 0.002734 | 0.005249 | 0.096991 | 0.100352 |
| MmugDNA.26347.1.S1_at   | MmugDNA.26347.1 | 11.37 | 11.77 | 0.21 | 0.14 | -1.32  | 0.205285 | 0.078527 | 0.503171 | 0.325285 |
| MmugDNA.2635.1.S1_s_at  | MmugDNA.2635.1  | 8.28  | 8.28  | 0.3  | 0.06 | 1      | 0.849588 | 0.613129 | 0.93451  | 0.770419 |
| MmugDNA.26353.1.S1_at   | MmugDNA.26353.1 | 8.45  | 8.59  | 0.14 | 0.15 | -1.1   | 0.233091 | 0.500905 | 0.531318 | 0.699336 |
| MmugDNA.26355.1.S1_at   | MmugDNA.26355.1 | 7.94  | 10.25 | 0.87 | 0.31 | -4.94  | 0.036354 | 0.079491 | 0.245737 | 0.32681  |
| MmugDNA.26357.1.S1_at   | MmugDNA.26357.1 | 4.25  | 4.06  | 1.24 | 0.42 | 1.14   | 0.651826 | 0.842592 | 0.830892 | 0.910315 |
| MmugDNA.26358.1.S1_at   | MmugDNA.26358.1 | 5.89  | 4.78  | 0.37 | 0.23 | 2.16   | 0.009042 | 0.003115 | 0.144777 | 0.081314 |
| MmugDNA.26367.1.S1_at   | MmugDNA.26367.1 | 10.06 | 10.32 | 0.31 | 0.28 | -1.2   | 0.650976 | 0.937349 | 0.83053  | 0.964687 |
| MmugDNA.2637.1.S1_at    | MmugDNA.2637.1  | 8.99  | 8.82  | 0.15 | 0.1  | 1.13   | 0.133895 | 0.050671 | 0.417214 | 0.270317 |
| MmugDNA.26376.1.S1_at   | MmugDNA.26376.1 | 5.23  | 5.35  | 0.18 | 0.19 | -1.08  | 0.684317 | 0.769256 | 0.84959  | 0.866004 |
| MmugDNA.26382.1.S1_at   | MmugDNA.26382.1 | 12.06 | 11.9  | 0.16 | 0.12 | 1.12   | 0.11182  | 0.142411 | 0.387954 | 0.415965 |
| MmugDNA.2639.1.S1_at    | MmugDNA.2639.1  | 7.54  | 7.65  | 0.13 | 0.14 | -1.08  | 0.47293  | 0.039293 | 0.716389 | 0.243338 |
| MmugDNA.26391.1.S1_at   | MmugDNA.26391.1 | 4.86  | 4.76  | 0.16 | 0.07 | 1.07   | 0.684549 | 0.910171 | 0.84962  | 0.949342 |
| MmugDNA.26394.1.S1_at   | MmugDNA.26394.1 | 6.55  | 6.56  | 0.72 | 0.09 | -1.01  | 0.557967 | 0.791932 | 0.772494 | 0.879785 |
| MmugDNA.26396.1.S1_at   | MmugDNA.26396.1 | 11.93 | 11.22 | 0.26 | 0.23 | 1.63   | 0.060261 | 0.526878 | 0.30263  | 0.71564  |
| MmugDNA.26397.1.S1_at   | MmugDNA.26397.1 | 11.48 | 11.61 | 0.16 | 0.03 | -1.1   | 0.192841 | 0.546554 | 0.489416 | 0.728079 |
| MmugDNA.26399.1.S1_at   | MmugDNA.26399.1 | 6.59  | 6.62  | 0.1  | 0.09 | -1.02  | 0.72044  | 0.363597 | 0.868039 | 0.603996 |
| MmugDNA.26399.1.S1_s_at | MmugDNA.26399.1 | 9.8   | 9.79  | 0.15 | 0.06 | 1.01   | 0.819218 | 0.774016 | 0.91949  | 0.868608 |
| MmugDNA.2640.1.S1_at    | MmugDNA.2640.1  | 5.62  | 5.52  | 0.08 | 0.07 | 1.07   | 0.170843 | 0.081752 | 0.464646 | 0.330085 |
| MmugDNA.26408.1.S1_at   | MmugDNA.26408.1 | 5.97  | 6.04  | 0.06 | 0.04 | -1.05  | 0.277855 | 0.213749 | 0.569311 | 0.487564 |
| MmugDNA.26410.1.S1_at   | MmugDNA.26410.1 | 5.74  | 4.98  | 0.7  | 0.4  | 1.69   | 0.495832 | 0.349831 | 0.731886 | 0.593595 |
| MmugDNA.26413.1.S1_at   | MmugDNA.26413.1 | 10.94 | 11.07 | 0.06 | 0.07 | -1.09  | 0.21825  | 0.519193 | 0.515982 | 0.710878 |
| MmugDNA.26426.1.S1_at   | MmugDNA.26426.1 | 6.65  | 8.69  | 0.83 | 0.26 | -4.11  | 0.026077 | 0.107738 | 0.214592 | 0.370816 |
| MmugDNA.26430.1.S1_at   | MmugDNA.26430.1 | 10.59 | 10.9  | 0.15 | 0.02 | -1.24  | 0.016044 | 0.007962 | 0.179208 | 0.118702 |
| MmugDNA.26432.1.S1_at   | MmugDNA.26432.1 | 4.63  | 4.7   | 0.46 | 0.09 | -1.05  | 0.767152 | 0.928874 | 0.893123 | 0.959449 |

|                         |                 |       |       |      |      |       |          |          |          |          |
|-------------------------|-----------------|-------|-------|------|------|-------|----------|----------|----------|----------|
| MmugDNA.26436.1.S1_at   | MmugDNA.26436.1 | 10.43 | 10.55 | 0.07 | 0.13 | -1.09 | 0.14004  | 0.809121 | 0.425735 | 0.889995 |
| MmugDNA.26446.1.S1_at   | MmugDNA.26446.1 | 11    | 10.72 | 0.25 | 0.09 | 1.21  | 0.069814 | 0.270908 | 0.322698 | 0.536026 |
| MmugDNA.26447.1.S1_at   | MmugDNA.26447.1 | 7.71  | 8.23  | 0.41 | 0.26 | -1.43 | 0.174716 | 0.364737 | 0.468957 | 0.605053 |
| MmugDNA.2646.1.S1_at    | MmugDNA.2646.1  | 9.34  | 9.55  | 0.13 | 0.12 | -1.16 | 0.050899 | 0.25016  | 0.283242 | 0.519186 |
| MmugDNA.26461.1.S1_at   | MmugDNA.26461.1 | 9.67  | 9.91  | 0.12 | 0.13 | -1.18 | 0.078062 | 0.001431 | 0.33743  | 0.057607 |
| MmugDNA.26466.1.S1_at   | MmugDNA.26466.1 | 7.98  | 8.21  | 0.01 | 0.11 | -1.17 | 0.027677 | 0.008405 | 0.218873 | 0.121726 |
| MmugDNA.26467.1.S1_at   | MmugDNA.26467.1 | 12.22 | 12.22 | 0.02 | 0.06 | -1    | 0.777739 | 0.951161 | 0.898434 | 0.972331 |
| MmugDNA.2647.1.S1_s_at  | MmugDNA.2647.1  | 12.24 | 12.42 | 0.25 | 0    | -1.13 | 0.226702 | 0.742904 | 0.524513 | 0.851074 |
| MmugDNA.26476.1.S1_at   | MmugDNA.26476.1 | 8.43  | 8.19  | 0.37 | 0.09 | 1.18  | 0.863046 | 0.03474  | 0.940468 | 0.230577 |
| MmugDNA.26485.1.S1_s_at | MmugDNA.26485.1 | 14.07 | 14.06 | 0.22 | 0.03 | 1.01  | 0.588974 | 0.609305 | 0.791361 | 0.767713 |
| MmugDNA.26489.1.S1_at   | MmugDNA.26489.1 | 12.35 | 12.09 | 0.18 | 0.01 | 1.2   | 0.065811 | 0.256951 | 0.314024 | 0.524777 |
| MmugDNA.26491.1.S1_at   | MmugDNA.26491.1 | 10.05 | 9.31  | 0.19 | 0.06 | 1.67  | 0.002825 | 0.074349 | 0.09805  | 0.318046 |
| MmugDNA.26500.1.S1_at   | MmugDNA.26500.1 | 10.44 | 9.92  | 0.29 | 0.04 | 1.43  | 0.046539 | 0.178745 | 0.273563 | 0.455039 |
| MmugDNA.26505.1.S1_at   | MmugDNA.26505.1 | 11.92 | 11.55 | 0.26 | 0.05 | 1.29  | 0.048138 | 0.2001   | 0.276908 | 0.474603 |
| MmugDNA.26506.1.S1_at   | MmugDNA.26506.1 | 14.46 | 14.48 | 0.03 | 0.04 | -1.02 | 0.385326 | 0.407304 | 0.654129 | 0.634886 |
| MmugDNA.26509.1.S1_at   | MmugDNA.26509.1 | 3.46  | 3.26  | 0.08 | 0.12 | 1.14  | 0.321399 | 0.469691 | 0.605666 | 0.678347 |
| MmugDNA.26510.1.S1_at   | MmugDNA.26510.1 | 4.81  | 5.88  | 0.59 | 0.65 | -2.1  | 0.231282 | 0.138194 | 0.530006 | 0.411145 |
| MmugDNA.26511.1.S1_at   | MmugDNA.26511.1 | 12.54 | 12.59 | 0.09 | 0.05 | -1.03 | 0.184998 | 0.007989 | 0.4811   | 0.118791 |
| MmugDNA.26514.1.S1_at   | MmugDNA.26514.1 | 5.31  | 5.43  | 0.13 | 0.02 | -1.08 | 0.108568 | 0.234429 | 0.383317 | 0.505674 |
| MmugDNA.26520.1.S1_at   | MmugDNA.26520.1 | 5.77  | 6.22  | 0.46 | 0.02 | -1.37 | 0.053549 | 0.415483 | 0.288636 | 0.64091  |
| MmugDNA.26525.1.S1_at   | MmugDNA.26525.1 | 6.06  | 6.2   | 0.1  | 0.03 | -1.1  | 0.078986 | 0.040272 | 0.338745 | 0.245902 |
| MmugDNA.26529.1.S1_at   | MmugDNA.26529.1 | 14.27 | 14.31 | 0.02 | 0.03 | -1.03 | 0.556187 | 0.162017 | 0.771545 | 0.438108 |
| MmugDNA.26533.1.S1_at   | MmugDNA.26533.1 | 4.74  | 4.9   | 0.12 | 0.02 | -1.12 | 0.092149 | 0.074734 | 0.360155 | 0.318465 |
| MmugDNA.26537.1.S1_at   | MmugDNA.26537.1 | 7.44  | 7.32  | 0.06 | 0.01 | 1.08  | 0.046543 | 0.534437 | 0.273563 | 0.720369 |
| MmugDNA.26541.1.S1_at   | MmugDNA.26541.1 | 6.12  | 6.31  | 0.14 | 0.17 | -1.14 | 0.062374 | 0.000248 | 0.306481 | 0.032979 |
| MmugDNA.26545.1.S1_at   | MmugDNA.26545.1 | 10.24 | 6.17  | 0.53 | 0.46 | 16.8  | 0.00092  | 0.006219 | 0.075607 | 0.106916 |
| MmugDNA.26547.1.S1_at   | MmugDNA.26547.1 | 6.45  | 6.37  | 0.19 | 0.01 | 1.06  | 0.337081 | 0.515348 | 0.617686 | 0.708259 |
| MmugDNA.26552.1.S1_at   | MmugDNA.26552.1 | 5.8   | 5.77  | 0.08 | 0.06 | 1.02  | 0.231168 | 0.365534 | 0.529962 | 0.605602 |
| MmugDNA.26556.1.S1_at   | MmugDNA.26556.1 | 7.01  | 7.06  | 0.01 | 0.13 | -1.03 | 0.690812 | 0.464419 | 0.85219  | 0.675068 |
| MmugDNA.26557.1.S1_at   | MmugDNA.26557.1 | 8.02  | 7.94  | 0.05 | 0.14 | 1.06  | 0.98677  | 0.088011 | 0.995228 | 0.341482 |
| MmugDNA.2656.1.S1_at    | MmugDNA.2656.1  | 6.13  | 6.25  | 0.15 | 0.05 | -1.09 | 0.499329 | 0.531667 | 0.734148 | 0.718819 |
| MmugDNA.26561.1.S1_at   | MmugDNA.26561.1 | 7.14  | 7.13  | 0.06 | 0.1  | 1.01  | 0.968064 | 0.176466 | 0.987338 | 0.452836 |
| MmugDNA.26564.1.S1_at   | MmugDNA.26564.1 | 8.5   | 8.33  | 0.2  | 0.06 | 1.12  | 0.250375 | 0.010147 | 0.54512  | 0.132001 |
| MmugDNA.26568.1.S1_at   | MmugDNA.26568.1 | 7.74  | 7.96  | 0.19 | 0.1  | -1.16 | 0.17041  | 0.386271 | 0.464056 | 0.621469 |
| MmugDNA.26575.1.S1_at   | MmugDNA.26575.1 | 5.69  | 5.9   | 0.19 | 0.12 | -1.16 | 0.306309 | 0.272182 | 0.593269 | 0.536939 |
| MmugDNA.26578.1.S1_x_at | MmugDNA.26578.1 | 7.24  | 7.33  | 0.14 | 0.04 | -1.06 | 0.516729 | 0.274041 | 0.74601  | 0.538527 |
| MmugDNA.26579.1.S1_at   | MmugDNA.26579.1 | 7.4   | 7.57  | 0.29 | 0.21 | -1.13 | 0.455807 | 0.681044 | 0.705414 | 0.813776 |
| MmugDNA.26585.1.S1_at   | MmugDNA.26585.1 | 12.19 | 11.54 | 0.17 | 0.05 | 1.57  | 0.002815 | 0.000619 | 0.097939 | 0.042444 |
| MmugDNA.26588.1.S1_at   | MmugDNA.26588.1 | 10.8  | 10.42 | 0.04 | 0.18 | 1.3   | 0.050614 | 0.006577 | 0.282692 | 0.109968 |
| MmugDNA.26593.1.S1_at   | MmugDNA.26593.1 | 9.67  | 9.77  | 0.05 | 0.14 | -1.07 | 0.179314 | 0.000715 | 0.474374 | 0.044419 |
| MmugDNA.26597.1.S1_at   | MmugDNA.26597.1 | 6.94  | 6.99  | 0.17 | 0.04 | -1.03 | 0.457594 | 0.511075 | 0.706421 | 0.705383 |
| MmugDNA.2660.1.S1_at    | MmugDNA.2660.1  | 10.88 | 10.83 | 0.13 | 0.08 | 1.03  | 0.611822 | 0.004423 | 0.806543 | 0.092904 |
| MmugDNA.26602.1.S1_at   | MmugDNA.26602.1 | 8.14  | 8.83  | 0.42 | 0.11 | -1.61 | 0.039045 | 0.003212 | 0.253985 | 0.082023 |

|                         |                 |       |       |      |      |       |          |          |          |          |
|-------------------------|-----------------|-------|-------|------|------|-------|----------|----------|----------|----------|
| MmugDNA.26604.1.S1_at   | MmugDNA.26604.1 | 10.98 | 11.32 | 0.07 | 0.12 | -1.26 | 0.045056 | 0.010709 | 0.269602 | 0.135227 |
| MmugDNA.26604.1.S1_s_at | MmugDNA.26604.1 | 12.05 | 12.3  | 0.01 | 0.13 | -1.19 | 0.074796 | 0.022706 | 0.331606 | 0.188723 |
| MmugDNA.26610.1.S1_at   | MmugDNA.26610.1 | 5.74  | 5.82  | 0.34 | 0.37 | -1.06 | 0.745418 | 0.052085 | 0.881893 | 0.273814 |
| MmugDNA.26613.1.S1_at   | MmugDNA.26613.1 | 6.27  | 8.24  | 0.45 | 0.23 | -3.92 | 0.004013 | 0.061498 | 0.108676 | 0.294828 |
| MmugDNA.26623.1.S1_at   | MmugDNA.26623.1 | 5.1   | 5.35  | 0.09 | 0.31 | -1.18 | 0.118882 | 0.190501 | 0.396589 | 0.465906 |
| MmugDNA.26626.1.S1_at   | MmugDNA.26626.1 | 5.44  | 5.63  | 0.31 | 0.02 | -1.14 | 0.341348 | 0.011643 | 0.621268 | 0.139789 |
| MmugDNA.26627.1.S1_at   | MmugDNA.26627.1 | 4.62  | 4.48  | 0.16 | 0.13 | 1.11  | 0.187655 | 0.149958 | 0.483874 | 0.424608 |
| MmugDNA.26629.1.S1_at   | MmugDNA.26629.1 | 11.84 | 11.39 | 0.09 | 0.08 | 1.36  | 0.005696 | 0.027231 | 0.121164 | 0.206279 |
| MmugDNA.26637.1.S1_at   | MmugDNA.26637.1 | 10.24 | 10.35 | 0.06 | 0.17 | -1.08 | 0.883672 | 0.065723 | 0.950562 | 0.30176  |
| MmugDNA.26642.1.S1_at   | MmugDNA.26642.1 | 12.81 | 12.94 | 0.13 | 0.02 | -1.1  | 0.502773 | 0.572032 | 0.736405 | 0.744198 |
| MmugDNA.26643.1.S1_at   | MmugDNA.26643.1 | 5.98  | 5.83  | 0.19 | 0.03 | 1.11  | 0.795489 | 0.740329 | 0.907558 | 0.849596 |
| MmugDNA.26645.1.S1_at   | MmugDNA.26645.1 | 10.13 | 10.21 | 0.18 | 0.04 | -1.06 | 0.515424 | 0.890262 | 0.745313 | 0.937505 |
| MmugDNA.26646.1.S1_at   | MmugDNA.26646.1 | 4.37  | 4.24  | 0.42 | 0.06 | 1.09  | 0.512417 | 0.259997 | 0.742962 | 0.52675  |
| MmugDNA.26648.1.S1_at   | MmugDNA.26648.1 | 9.3   | 8.59  | 0.04 | 0.21 | 1.64  | 0.004265 | 0.00406  | 0.11123  | 0.090288 |
| MmugDNA.26661.1.S1_at   | MmugDNA.26661.1 | 6.78  | 6.77  | 0.19 | 0.25 | 1.01  | 0.35447  | 0.644357 | 0.631669 | 0.791566 |
| MmugDNA.26664.1.S1_at   | MmugDNA.26664.1 | 12.66 | 12.19 | 0.38 | 0.19 | 1.39  | 0.171437 | 0.167407 | 0.465391 | 0.443785 |
| MmugDNA.26668.1.S1_s_at | MmugDNA.26668.1 | 13.7  | 13.81 | 0.15 | 0.1  | -1.08 | 0.294595 | 0.433185 | 0.583572 | 0.653513 |
| MmugDNA.26669.1.S1_at   | MmugDNA.26669.1 | 11.49 | 11.67 | 0.12 | 0.03 | -1.14 | 0.04619  | 0.434284 | 0.272677 | 0.65444  |
| MmugDNA.26670.1.S1_at   | MmugDNA.26670.1 | 6.52  | 6.54  | 0.16 | 0.05 | -1.01 | 0.630074 | 0.116634 | 0.818359 | 0.383829 |
| MmugDNA.26672.1.S1_at   | MmugDNA.26672.1 | 13.26 | 13.41 | 0.1  | 0.08 | -1.11 | 0.093149 | 0.392522 | 0.361736 | 0.625813 |
| MmugDNA.26673.1.S1_at   | MmugDNA.26673.1 | 6.24  | 6.42  | 0.12 | 0.26 | -1.13 | 0.129403 | 0.236705 | 0.411701 | 0.507459 |
| MmugDNA.26674.1.S1_at   | MmugDNA.26674.1 | 11.54 | 12.71 | 0.65 | 0.11 | -2.25 | 0.033134 | 0.052584 | 0.236258 | 0.274848 |
| MmugDNA.26679.1.S1_at   | MmugDNA.26679.1 | 4.94  | 4.54  | 0.29 | 0.13 | 1.33  | 0.034124 | 0.049104 | 0.239433 | 0.266518 |
| MmugDNA.2668.1.S1_at    | MmugDNA.2668.1  | 6.55  | 6.58  | 0.17 | 0.14 | -1.02 | 0.780989 | 0.579159 | 0.900006 | 0.748918 |
| MmugDNA.26681.1.S1_at   | MmugDNA.26681.1 | 12.68 | 13.08 | 0.01 | 0.09 | -1.31 | 0.003361 | 0.001074 | 0.10283  | 0.051908 |
| MmugDNA.26686.1.S1_at   | MmugDNA.26686.1 | 11.14 | 11.21 | 0.09 | 0.02 | -1.05 | 0.302848 | 0.870099 | 0.590429 | 0.926348 |
| MmugDNA.26687.1.S1_at   | MmugDNA.26687.1 | 9.18  | 9.21  | 0.29 | 0.04 | -1.02 | 0.71949  | 0.870897 | 0.867718 | 0.926656 |
| MmugDNA.26689.1.S1_at   | MmugDNA.26689.1 | 3.61  | 3.36  | 0.34 | 0.03 | 1.19  | 0.444612 | 0.495072 | 0.69746  | 0.695319 |
| MmugDNA.2669.1.S1_at    | MmugDNA.2669.1  | 11.03 | 10.87 | 0.03 | 0.16 | 1.12  | 0.154195 | 0.7461   | 0.444557 | 0.852688 |
| MmugDNA.26693.1.S1_at   | MmugDNA.26693.1 | 13.13 | 13.06 | 0.09 | 0.03 | 1.05  | 0.198566 | 0.828051 | 0.495759 | 0.901214 |
| MmugDNA.26695.1.S1_at   | MmugDNA.26695.1 | 10.93 | 10.84 | 0.39 | 0.01 | 1.07  | 0.754174 | 0.000564 | 0.886723 | 0.041049 |
| MmugDNA.26696.1.S1_at   | MmugDNA.26696.1 | 8.53  | 8.02  | 0.27 | 0.13 | 1.42  | 0.027345 | 0.035775 | 0.218179 | 0.233489 |
| MmugDNA.26702.1.S1_at   | MmugDNA.26702.1 | 8.49  | 8.9   | 0.21 | 0.08 | -1.33 | 0.055493 | 0.271472 | 0.292516 | 0.536512 |
| MmugDNA.26707.1.S1_at   | MmugDNA.26707.1 | 8.09  | 8.25  | 0.35 | 0.11 | -1.12 | 0.510312 | 0.494285 | 0.741715 | 0.694791 |
| MmugDNA.26715.1.S1_at   | MmugDNA.26715.1 | 4.92  | 4.82  | 0.06 | 0.16 | 1.07  | 0.543054 | 0.125693 | 0.763201 | 0.396249 |
| MmugDNA.26729.1.S1_at   | MmugDNA.26729.1 | 7.25  | 7.2   | 0.17 | 0    | 1.04  | 0.37077  | 0.283727 | 0.643582 | 0.54618  |
| MmugDNA.2673.1.S1_at    | MmugDNA.2673.1  | 6.64  | 7.41  | 0.21 | 0.06 | -1.71 | 0.007502 | 0.053863 | 0.134856 | 0.277613 |
| MmugDNA.26732.1.S1_at   | MmugDNA.26732.1 | 3.62  | 3.65  | 0.16 | 0.07 | -1.02 | 0.645004 | 0.689007 | 0.827097 | 0.818488 |
| MmugDNA.26734.1.S1_at   | MmugDNA.26734.1 | 10.18 | 9.77  | 0.23 | 0.16 | 1.33  | 0.021875 | 0.012312 | 0.201211 | 0.143646 |
| MmugDNA.26735.1.S1_at   | MmugDNA.26735.1 | 7.89  | 7.53  | 0.39 | 0.2  | 1.29  | 0.20388  | 0.35283  | 0.501449 | 0.596151 |
| MmugDNA.26737.1.S1_at   | MmugDNA.26737.1 | 6.31  | 6.25  | 0.29 | 0.03 | 1.04  | 0.634032 | 0.840178 | 0.820633 | 0.908919 |
| MmugDNA.26746.1.S1_at   | MmugDNA.26746.1 | 7.95  | 9.07  | 0.54 | 0.21 | -2.17 | 0.052863 | 0.054223 | 0.286978 | 0.278275 |
| MmugDNA.26749.1.S1_at   | MmugDNA.26749.1 | 6.31  | 6.33  | 0.09 | 0.13 | -1.01 | 0.814143 | 0.550381 | 0.916927 | 0.73041  |



|                         |                 |       |       |      |      |       |          |          |          |          |
|-------------------------|-----------------|-------|-------|------|------|-------|----------|----------|----------|----------|
| MmugDNA.26751.1.S1_at   | MmugDNA.26751.1 | 9.97  | 10.09 | 0.07 | 0.07 | -1.09 | 0.085779 | 0.704171 | 0.350079 | 0.828349 |
| MmugDNA.26752.1.S1_at   | MmugDNA.26752.1 | 3.91  | 3.66  | 0.11 | 0.08 | 1.19  | 0.034617 | 0.038878 | 0.240605 | 0.24211  |
| MmugDNA.26759.1.S1_at   | MmugDNA.26759.1 | 4     | 3.93  | 0.02 | 0.12 | 1.05  | 0.928175 | 0.687389 | 0.969685 | 0.817576 |
| MmugDNA.26763.1.S1_at   | MmugDNA.26763.1 | 11.62 | 11.41 | 0.15 | 0.12 | 1.15  | 0.142163 | 0.489289 | 0.428166 | 0.691774 |
| MmugDNA.26767.1.S1_at   | MmugDNA.26767.1 | 3.19  | 2.97  | 0.08 | 0.17 | 1.17  | 0.131014 | 0.161837 | 0.413746 | 0.437937 |
| MmugDNA.26767.1.S1_x_at | MmugDNA.26767.1 | 3.27  | 3.13  | 0.21 | 0.04 | 1.1   | 0.295779 | 0.38922  | 0.58458  | 0.623403 |
| MmugDNA.26774.1.S1_at   | MmugDNA.26774.1 | 12.68 | 12.36 | 0.02 | 0.05 | 1.24  | 0.000686 | 0.025365 | 0.071248 | 0.199629 |
| MmugDNA.26787.1.S1_at   | MmugDNA.26787.1 | 9.46  | 8.9   | 0.41 | 0.15 | 1.47  | 0.183514 | 0.012056 | 0.479416 | 0.142044 |
| MmugDNA.2679.1.S1_at    | MmugDNA.2679.1  | 11.9  | 11.64 | 0.06 | 0.15 | 1.2   | 0.079324 | 0.014528 | 0.339285 | 0.15376  |
| MmugDNA.26796.1.S1_at   | MmugDNA.26796.1 | 12.32 | 11.83 | 0.1  | 0.04 | 1.4   | 0.000788 | 0.008532 | 0.072971 | 0.122563 |
| MmugDNA.26797.1.S1_s_at | MmugDNA.26797.1 | 10.18 | 9.56  | 0.28 | 0.07 | 1.53  | 0.052049 | 0.094572 | 0.285668 | 0.351353 |
| MmugDNA.26799.1.S1_at   | MmugDNA.26799.1 | 6.97  | 10.16 | 2.29 | 0.24 | -9.11 | 0.162324 | 0.344977 | 0.454348 | 0.590239 |
| MmugDNA.26806.1.S1_at   | MmugDNA.26806.1 | 4.38  | 4.39  | 0.07 | 0.28 | -1    | 0.830093 | 0.381211 | 0.92519  | 0.617537 |
| MmugDNA.26808.1.S1_at   | MmugDNA.26808.1 | 4.33  | 4.16  | 0.08 | 0.17 | 1.13  | 0.253804 | 0.043531 | 0.548075 | 0.253227 |
| MmugDNA.2681.1.S1_s_at  | MmugDNA.2681.1  | 11.72 | 11.67 | 0.17 | 0.05 | 1.03  | 0.237706 | 0.39328  | 0.535124 | 0.626189 |
| MmugDNA.26814.1.S1_at   | MmugDNA.26814.1 | 8.09  | 8.2   | 0.2  | 0.11 | -1.08 | 0.681283 | 0.514119 | 0.847995 | 0.707434 |
| MmugDNA.26818.1.S1_at   | MmugDNA.26818.1 | 9.76  | 9.12  | 0.19 | 0.25 | 1.56  | 0.029681 | 0.003845 | 0.225494 | 0.088232 |
| MmugDNA.2682.1.S1_s_at  | MmugDNA.2682.1  | 13.29 | 13.21 | 0.05 | 0.07 | 1.06  | 0.269062 | 0.580339 | 0.561488 | 0.749637 |
| MmugDNA.26828.1.S1_at   | MmugDNA.26828.1 | 12.35 | 12.36 | 0.1  | 0.04 | -1.01 | 0.969149 | 0.334945 | 0.98776  | 0.58275  |
| MmugDNA.26837.1.S1_at   | MmugDNA.26837.1 | 12.77 | 12.7  | 0.08 | 0.13 | 1.05  | 0.821818 | 0.710679 | 0.920645 | 0.83219  |
| MmugDNA.26838.1.S1_s_at | MmugDNA.26838.1 | 5.81  | 5.85  | 0.29 | 0.11 | -1.03 | 0.86735  | 0.977017 | 0.942651 | 0.987496 |
| MmugDNA.26841.1.S1_at   | MmugDNA.26841.1 | 7.58  | 8     | 0.14 | 0.04 | -1.35 | 0.013024 | 0.007761 | 0.164909 | 0.117626 |
| MmugDNA.26854.1.S1_at   | MmugDNA.26854.1 | 9.95  | 9.74  | 0.28 | 0.18 | 1.15  | 0.117597 | 0.230027 | 0.39494  | 0.501872 |
| MmugDNA.26855.1.S1_at   | MmugDNA.26855.1 | 13.33 | 13.36 | 0.27 | 0.08 | -1.02 | 0.524219 | 0.048129 | 0.751005 | 0.264417 |
| MmugDNA.26872.1.S1_at   | MmugDNA.26872.1 | 13.22 | 13.17 | 0.12 | 0.04 | 1.04  | 0.676083 | 0.170557 | 0.845327 | 0.447179 |
| MmugDNA.26873.1.S1_at   | MmugDNA.26873.1 | 8.92  | 8.78  | 0.2  | 0.2  | 1.1   | 0.300893 | 0.032198 | 0.589006 | 0.222139 |
| MmugDNA.26881.1.S1_at   | MmugDNA.26881.1 | 6.54  | 6.47  | 0.16 | 0.05 | 1.05  | 0.557825 | 0.69339  | 0.77242  | 0.821664 |
| MmugDNA.26884.1.S1_at   | MmugDNA.26884.1 | 6.87  | 7.02  | 0.12 | 0.01 | -1.11 | 0.165879 | 0.416539 | 0.458853 | 0.641647 |
| MmugDNA.26885.1.S1_at   | MmugDNA.26885.1 | 3.74  | 3.73  | 0.01 | 0.28 | 1.01  | 0.93865  | 0.844528 | 0.974178 | 0.911525 |
| MmugDNA.26899.1.S1_at   | MmugDNA.26899.1 | 10.27 | 9.24  | 0.4  | 0.05 | 2.05  | 0.007387 | 0.001582 | 0.134211 | 0.060356 |
| MmugDNA.26903.1.S1_at   | MmugDNA.26903.1 | 10.85 | 11.15 | 0.03 | 0.03 | -1.23 | 0.000245 | 0.182069 | 0.054642 | 0.45857  |
| MmugDNA.26904.1.S1_at   | MmugDNA.26904.1 | 9.88  | 9.64  | 0.06 | 0.11 | 1.18  | 0.044145 | 0.270436 | 0.267197 | 0.535785 |
| MmugDNA.26905.1.S1_at   | MmugDNA.26905.1 | 12.19 | 12.07 | 0.13 | 0.11 | 1.09  | 0.25069  | 0.021827 | 0.545228 | 0.184799 |
| MmugDNA.26911.1.S1_at   | MmugDNA.26911.1 | 6.38  | 7.13  | 0.32 | 0.09 | -1.68 | 0.015685 | 0.007788 | 0.177718 | 0.117764 |
| MmugDNA.26915.1.S1_at   | MmugDNA.26915.1 | 12.12 | 11.2  | 0.31 | 0.12 | 1.89  | 0.006305 | 0.243143 | 0.125833 | 0.513356 |
| MmugDNA.26923.1.S1_at   | MmugDNA.26923.1 | 5.64  | 6.24  | 0.22 | 0.17 | -1.52 | 0.038938 | 0.128835 | 0.253692 | 0.400277 |
| MmugDNA.26925.1.S1_s_at | MmugDNA.26925.1 | 10.69 | 13.5  | 1.38 | 0.13 | -7.04 | 0.066329 | 0.374326 | 0.315047 | 0.612807 |
| MmugDNA.26926.1.S1_at   | MmugDNA.26926.1 | 12.83 | 12.75 | 0.27 | 0.09 | 1.06  | 0.86221  | 0.951569 | 0.940177 | 0.972522 |
| MmugDNA.26929.1.S1_s_at | MmugDNA.26929.1 | 5.58  | 5.47  | 0.23 | 0.03 | 1.08  | 0.216842 | 0.155659 | 0.514637 | 0.431037 |
| MmugDNA.26932.1.S1_at   | MmugDNA.26932.1 | 8.86  | 8.6   | 0.21 | 0.19 | 1.2   | 0.125027 | 0.686611 | 0.405516 | 0.81711  |
| MmugDNA.26933.1.S1_at   | MmugDNA.26933.1 | 7.16  | 7.15  | 0.22 | 0.24 | 1.01  | 0.351395 | 0.421888 | 0.628979 | 0.645369 |
| MmugDNA.2694.1.S1_at    | MmugDNA.2694.1  | 12.49 | 10.85 | 0.19 | 0.3  | 3.11  | 0.002531 | 0.002222 | 0.094413 | 0.069434 |
| MmugDNA.26947.1.S1_at   | MmugDNA.26947.1 | 10.65 | 9.77  | 0.08 | 0.05 | 1.85  | 0.000075 | 0.000127 | 0.051196 | 0.029087 |

|                         |                 |       |       |      |      |       |          |          |          |          |
|-------------------------|-----------------|-------|-------|------|------|-------|----------|----------|----------|----------|
| MmugDNA.26949.1.S1_at   | MmugDNA.26949.1 | 9.48  | 9.5   | 0.05 | 0.1  | -1.01 | 0.605684 | 0.905986 | 0.802615 | 0.946822 |
| MmugDNA.26951.1.S1_at   | MmugDNA.26951.1 | 8.19  | 7.72  | 0.16 | 0.07 | 1.38  | 0.01117  | 0.207693 | 0.15539  | 0.481924 |
| MmugDNA.26957.1.S1_at   | MmugDNA.26957.1 | 6.83  | 7.08  | 0.03 | 0.08 | -1.19 | 0.014226 | 0.019744 | 0.17101  | 0.176666 |
| MmugDNA.26959.1.S1_at   | MmugDNA.26959.1 | 4.3   | 4.14  | 0.17 | 0.11 | 1.12  | 0.349125 | 0.410542 | 0.627023 | 0.637376 |
| MmugDNA.26962.1.S1_at   | MmugDNA.26962.1 | 3.52  | 3.5   | 0.23 | 0.18 | 1.01  | 0.873011 | 0.927255 | 0.945555 | 0.958645 |
| MmugDNA.26964.1.S1_at   | MmugDNA.26964.1 | 7.47  | 7.68  | 0.55 | 0.21 | -1.16 | 0.307041 | 0.163098 | 0.593773 | 0.439256 |
| MmugDNA.26968.1.S1_at   | MmugDNA.26968.1 | 11.8  | 12.17 | 0.04 | 0.03 | -1.3  | 0.000174 | 0.017538 | 0.053494 | 0.167632 |
| MmugDNA.26968.1.S1_s_at | MmugDNA.26968.1 | 12.21 | 12.46 | 0.12 | 0.1  | -1.19 | 0.027513 | 0.007601 | 0.218484 | 0.116611 |
| MmugDNA.26971.1.S1_at   | MmugDNA.26971.1 | 7.23  | 5.58  | 1.17 | 0.15 | 3.12  | 0.028676 | 0.016066 | 0.221859 | 0.160618 |
| MmugDNA.26972.1.S1_at   | MmugDNA.26972.1 | 11.94 | 12.13 | 0.12 | 0.05 | -1.14 | 0.153112 | 0.558721 | 0.442808 | 0.735863 |
| MmugDNA.26975.1.S1_at   | MmugDNA.26975.1 | 7.35  | 7.32  | 0.16 | 0.14 | 1.02  | 0.755329 | 0.112013 | 0.887245 | 0.377171 |
| MmugDNA.26976.1.S1_at   | MmugDNA.26976.1 | 12.21 | 11.99 | 0.05 | 0.02 | 1.16  | 0.003704 | 0.168188 | 0.106124 | 0.444824 |
| MmugDNA.26978.1.S1_s_at | MmugDNA.26978.1 | 4.98  | 4.98  | 0.21 | 0.17 | 1     | 0.885293 | 0.046234 | 0.951028 | 0.259397 |
| MmugDNA.2698.1.S1_at    | MmugDNA.2698.1  | 13.37 | 12.74 | 0.19 | 0.17 | 1.55  | 0.023164 | 0.020512 | 0.205331 | 0.179742 |
| MmugDNA.26982.1.S1_at   | MmugDNA.26982.1 | 10.51 | 10.27 | 0.1  | 0.01 | 1.18  | 0.018435 | 0.007295 | 0.188873 | 0.114639 |
| MmugDNA.26990.1.S1_at   | MmugDNA.26990.1 | 8.16  | 8.58  | 0.51 | 0.23 | -1.34 | 0.951757 | 0.032578 | 0.980036 | 0.223585 |
| MmugDNA.26993.1.S1_at   | MmugDNA.26993.1 | 8.9   | 8.9   | 0.32 | 0.13 | -1    | 0.736691 | 0.494413 | 0.87765  | 0.694859 |
| MmugDNA.26994.1.S1_at   | MmugDNA.26994.1 | 5.92  | 5.92  | 0.24 | 0.03 | -1    | 0.62432  | 0.483438 | 0.814789 | 0.687931 |
| MmugDNA.26997.1.S1_at   | MmugDNA.26997.1 | 10.07 | 10.05 | 0.13 | 0    | 1.01  | 0.528491 | 0.583961 | 0.753694 | 0.752073 |
| MmugDNA.27000.1.S1_at   | MmugDNA.27000.1 | 9.84  | 9.79  | 0.04 | 0.06 | 1.04  | 0.14881  | 0.25621  | 0.437337 | 0.524069 |
| MmugDNA.27001.1.S1_at   | MmugDNA.27001.1 | 7.08  | 6.45  | 0.18 | 0.12 | 1.55  | 0.009446 | 0.038615 | 0.147092 | 0.241584 |
| MmugDNA.27002.1.S1_at   | MmugDNA.27002.1 | 8.54  | 8.11  | 0.36 | 0.15 | 1.35  | 0.133897 | 0.17125  | 0.417214 | 0.447792 |
| MmugDNA.27004.1.S1_at   | MmugDNA.27004.1 | 13.05 | 12.97 | 0.08 | 0.02 | 1.06  | 0.053571 | 0.234128 | 0.288683 | 0.505319 |
| MmugDNA.27006.1.S1_at   | MmugDNA.27006.1 | 3.86  | 4.01  | 0.15 | 0.1  | -1.12 | 0.115066 | 0.349386 | 0.392115 | 0.593405 |
| MmugDNA.27009.1.S1_at   | MmugDNA.27009.1 | 3.17  | 3.15  | 0.01 | 0.03 | 1.02  | 0.204754 | 0.429796 | 0.502498 | 0.651036 |
| MmugDNA.2701.1.S1_at    | MmugDNA.2701.1  | 13.58 | 13.33 | 0.07 | 0.01 | 1.19  | 0.006928 | 0.005737 | 0.130411 | 0.104271 |
| MmugDNA.27012.1.S1_at   | MmugDNA.27012.1 | 11.45 | 11.74 | 0.45 | 0.05 | -1.23 | 0.81261  | 0.641683 | 0.916193 | 0.789672 |
| MmugDNA.27017.1.S1_at   | MmugDNA.27017.1 | 7.84  | 8.12  | 0.02 | 0.07 | -1.21 | 0.001136 | 0.000036 | 0.077306 | 0.023031 |
| MmugDNA.27018.1.S1_at   | MmugDNA.27018.1 | 8.09  | 7.83  | 0.14 | 0.08 | 1.2   | 0.079651 | 0.438034 | 0.33985  | 0.657058 |
| MmugDNA.27019.1.S1_at   | MmugDNA.27019.1 | 11.85 | 11.93 | 0.08 | 0.03 | -1.05 | 0.516595 | 0.733925 | 0.745961 | 0.845896 |
| MmugDNA.2702.1.S1_at    | MmugDNA.2702.1  | 5.62  | 5.54  | 0.2  | 0.03 | 1.06  | 0.451186 | 0.674508 | 0.702065 | 0.809853 |
| MmugDNA.27020.1.S1_at   | MmugDNA.27020.1 | 8.93  | 8.31  | 0.07 | 0.09 | 1.54  | 0.000802 | 0.016454 | 0.073056 | 0.162441 |
| MmugDNA.27022.1.S1_s_at | MmugDNA.27022.1 | 10.47 | 10.32 | 0.18 | 0.17 | 1.11  | 0.361647 | 0.217281 | 0.637014 | 0.490911 |
| MmugDNA.27023.1.S1_at   | MmugDNA.27023.1 | 10.56 | 10.8  | 0.15 | 0.06 | -1.19 | 0.244797 | 0.631574 | 0.541082 | 0.782845 |
| MmugDNA.27027.1.S1_at   | MmugDNA.27027.1 | 7.37  | 6.98  | 0.19 | 0.48 | 1.31  | 0.308294 | 0.062464 | 0.594964 | 0.296717 |
| MmugDNA.27029.1.S1_at   | MmugDNA.27029.1 | 6.42  | 6.46  | 0.08 | 0.07 | -1.03 | 0.286006 | 0.285727 | 0.575858 | 0.54744  |
| MmugDNA.27030.1.S1_at   | MmugDNA.27030.1 | 7.52  | 7.8   | 0.27 | 0.13 | -1.22 | 0.153359 | 0.083958 | 0.443144 | 0.334877 |
| MmugDNA.27038.1.S1_at   | MmugDNA.27038.1 | 10.73 | 10.65 | 0.1  | 0.06 | 1.06  | 0.403845 | 0.120902 | 0.667853 | 0.389796 |
| MmugDNA.2704.1.S1_at    | MmugDNA.2704.1  | 12.3  | 12.54 | 0.21 | 0.31 | -1.18 | 0.291846 | 0.09275  | 0.581262 | 0.34896  |
| MmugDNA.27042.1.S1_at   | MmugDNA.27042.1 | 5.96  | 7.08  | 0.42 | 0.18 | -2.17 | 0.023608 | 0.087991 | 0.206972 | 0.341456 |
| MmugDNA.27044.1.S1_at   | MmugDNA.27044.1 | 6.15  | 6.09  | 0.22 | 0.07 | 1.05  | 0.686759 | 0.142244 | 0.850752 | 0.415754 |
| MmugDNA.27045.1.S1_at   | MmugDNA.27045.1 | 9.38  | 10.13 | 0.76 | 0.12 | -1.69 | 0.133953 | 0.423813 | 0.417364 | 0.646547 |
| MmugDNA.27046.1.S1_at   | MmugDNA.27046.1 | 6.09  | 6.14  | 0.39 | 0.14 | -1.03 | 0.346315 | 0.554952 | 0.624923 | 0.733559 |

|                         |                 |       |       |      |      |       |          |          |          |          |
|-------------------------|-----------------|-------|-------|------|------|-------|----------|----------|----------|----------|
| MmugDNA.27050.1.S1_at   | MmugDNA.27050.1 | 9.29  | 10.28 | 0.58 | 0.21 | -1.99 | 0.032895 | 0.039512 | 0.235601 | 0.243706 |
| MmugDNA.27052.1.S1_at   | MmugDNA.27052.1 | 9.05  | 8.93  | 0.2  | 0.19 | 1.08  | 0.528669 | 0.212961 | 0.753764 | 0.4869   |
| MmugDNA.27053.1.S1_at   | MmugDNA.27053.1 | 12.13 | 11.89 | 0.2  | 0.02 | 1.18  | 0.372498 | 0.369879 | 0.64495  | 0.609138 |
| MmugDNA.27053.1.S1_s_at | MmugDNA.27053.1 | 11.23 | 11.01 | 0.18 | 0.05 | 1.16  | 0.134259 | 0.34056  | 0.417818 | 0.586789 |
| MmugDNA.27056.1.S1_at   | MmugDNA.27056.1 | 11.07 | 10.75 | 0.3  | 0.15 | 1.25  | 0.113039 | 0.294598 | 0.389564 | 0.554282 |
| MmugDNA.27059.1.S1_at   | MmugDNA.27059.1 | 12.66 | 12.81 | 0.14 | 0.04 | -1.11 | 0.065179 | 0.141657 | 0.312165 | 0.415207 |
| MmugDNA.27071.1.S1_at   | MmugDNA.27071.1 | 12.18 | 12.76 | 0.14 | 0.08 | -1.49 | 0.001618 | 0.026537 | 0.08404  | 0.203915 |
| MmugDNA.27080.1.S1_at   | MmugDNA.27080.1 | 6.67  | 6.53  | 0.31 | 0.25 | 1.1   | 0.477314 | 0.820599 | 0.719345 | 0.896677 |
| MmugDNA.27082.1.S1_at   | MmugDNA.27082.1 | 11.78 | 11.88 | 0.08 | 0.05 | -1.07 | 0.489803 | 0.269284 | 0.727998 | 0.534534 |
| MmugDNA.27084.1.S1_at   | MmugDNA.27084.1 | 7.46  | 7.33  | 0.1  | 0.05 | 1.1   | 0.487162 | 0.062981 | 0.726032 | 0.297633 |
| MmugDNA.27090.1.S1_at   | MmugDNA.27090.1 | 10.16 | 9.82  | 0.08 | 0.08 | 1.27  | 0.011694 | 0.027527 | 0.157975 | 0.207161 |
| MmugDNA.27093.1.S1_at   | MmugDNA.27093.1 | 9.95  | 12.65 | 1.22 | 0.17 | -6.5  | 0.055595 | 0.330739 | 0.292866 | 0.57952  |
| MmugDNA.27107.1.S1_at   | MmugDNA.27107.1 | 6.3   | 6.8   | 0.22 | 0.39 | -1.41 | 0.367565 | 0.419882 | 0.641471 | 0.643733 |
| MmugDNA.27108.1.S1_at   | MmugDNA.27108.1 | 9.52  | 8.76  | 0.46 | 0.05 | 1.69  | 0.060025 | 0.228576 | 0.302259 | 0.500752 |
| MmugDNA.27111.1.S1_at   | MmugDNA.27111.1 | 11.9  | 11.63 | 0.08 | 0.07 | 1.2   | 0.020027 | 0.010726 | 0.194982 | 0.135271 |
| MmugDNA.27116.1.S1_at   | MmugDNA.27116.1 | 7.61  | 8.33  | 0.42 | 0.02 | -1.65 | 0.030473 | 0.00401  | 0.227409 | 0.089969 |
| MmugDNA.27119.1.S1_at   | MmugDNA.27119.1 | 10.03 | 9.35  | 0.1  | 0.18 | 1.61  | 0.005989 | 0.070029 | 0.124151 | 0.310889 |
| MmugDNA.27126.1.S1_at   | MmugDNA.27126.1 | 12.5  | 12.86 | 0.18 | 0.14 | -1.29 | 0.039182 | 0.336701 | 0.254402 | 0.584037 |
| MmugDNA.27127.1.S1_at   | MmugDNA.27127.1 | 3.29  | 3.3   | 0.07 | 0.15 | -1.01 | 0.966245 | 0.801466 | 0.986351 | 0.885779 |
| MmugDNA.27128.1.S1_at   | MmugDNA.27128.1 | 8.82  | 9.2   | 0.16 | 0.13 | -1.3  | 0.07544  | 0.150929 | 0.332899 | 0.425523 |
| MmugDNA.27129.1.S1_at   | MmugDNA.27129.1 | 6.7   | 6.78  | 0.14 | 0.16 | -1.05 | 0.472292 | 0.560554 | 0.716147 | 0.736809 |
| MmugDNA.27133.1.S1_at   | MmugDNA.27133.1 | 4.45  | 4.38  | 0.03 | 0.12 | 1.05  | 0.443887 | 0.631031 | 0.696899 | 0.782599 |
| MmugDNA.27139.1.S1_at   | MmugDNA.27139.1 | 11.25 | 10.05 | 0.19 | 0.23 | 2.29  | 0.003172 | 0.002226 | 0.101357 | 0.069502 |
| MmugDNA.2714.1.S1_at    | MmugDNA.2714.1  | 6.97  | 6.58  | 0.28 | 0.04 | 1.31  | 0.069667 | 0.192105 | 0.322305 | 0.46757  |
| MmugDNA.27155.1.S1_at   | MmugDNA.27155.1 | 8.03  | 7.45  | 0.14 | 0.22 | 1.5   | 0.013423 | 0.006533 | 0.166584 | 0.109634 |
| MmugDNA.27157.1.S1_at   | MmugDNA.27157.1 | 8.08  | 7.98  | 0.05 | 0.02 | 1.07  | 0.088379 | 0.078126 | 0.354479 | 0.324578 |
| MmugDNA.27160.1.S1_at   | MmugDNA.27160.1 | 9.2   | 9.67  | 0.47 | 0.18 | -1.39 | 0.259898 | 0.133001 | 0.554139 | 0.404667 |
| MmugDNA.27163.1.S1_at   | MmugDNA.27163.1 | 3.82  | 3.93  | 0.22 | 0.37 | -1.08 | 0.715153 | 0.326122 | 0.865467 | 0.576315 |
| MmugDNA.27171.1.S1_at   | MmugDNA.27171.1 | 5.27  | 4.11  | 0.53 | 0.27 | 2.24  | 0.041863 | 0.145703 | 0.261395 | 0.419653 |
| MmugDNA.27171.1.S1_x_at | MmugDNA.27171.1 | 5.37  | 4.51  | 0.4  | 0.09 | 1.82  | 0.052796 | 0.135397 | 0.286794 | 0.407478 |
| MmugDNA.27173.1.S1_at   | MmugDNA.27173.1 | 11.77 | 11.73 | 0.07 | 0.09 | 1.03  | 0.420966 | 0.655446 | 0.679818 | 0.798546 |
| MmugDNA.27174.1.S1_at   | MmugDNA.27174.1 | 11.52 | 11.16 | 0.12 | 0.03 | 1.28  | 0.007265 | 0.022216 | 0.13284  | 0.186513 |
| MmugDNA.27177.1.S1_at   | MmugDNA.27177.1 | 7.29  | 7.39  | 0.03 | 0.01 | -1.07 | 0.002795 | 0.055407 | 0.097799 | 0.28129  |
| MmugDNA.27181.1.S1_at   | MmugDNA.27181.1 | 8.97  | 8.99  | 0.12 | 0.18 | -1.02 | 0.968003 | 0.262006 | 0.987324 | 0.52836  |
| MmugDNA.27185.1.S1_at   | MmugDNA.27185.1 | 11.57 | 11.54 | 0.17 | 0.03 | 1.02  | 0.889732 | 0.009843 | 0.953075 | 0.130274 |
| MmugDNA.27189.1.S1_at   | MmugDNA.27189.1 | 10.53 | 10.66 | 0.14 | 0.2  | -1.1  | 0.395749 | 0.704939 | 0.662054 | 0.828883 |
| MmugDNA.2719.1.S1_at    | MmugDNA.2719.1  | 10.86 | 11.34 | 0.29 | 0.15 | -1.4  | 0.162272 | 0.613507 | 0.454227 | 0.770578 |
| MmugDNA.27195.1.S1_s_at | MmugDNA.27195.1 | 9.49  | 9.06  | 0.35 | 0.05 | 1.35  | 0.080343 | 0.093287 | 0.340986 | 0.349412 |
| MmugDNA.27199.1.S1_at   | MmugDNA.27199.1 | 5.68  | 5.58  | 0.2  | 0.13 | 1.07  | 0.45244  | 0.366361 | 0.702899 | 0.606087 |
| MmugDNA.27201.1.S1_at   | MmugDNA.27201.1 | 12.51 | 12.53 | 0.11 | 0.03 | -1.01 | 0.772828 | 0.397378 | 0.895994 | 0.628812 |
| MmugDNA.27204.1.S1_at   | MmugDNA.27204.1 | 12.67 | 11.65 | 0.07 | 0.24 | 2.02  | 0.001836 | 0.000379 | 0.086666 | 0.037273 |
| MmugDNA.27208.1.S1_at   | MmugDNA.27208.1 | 7.01  | 7.11  | 0.05 | 0.03 | -1.07 | 0.051664 | 0.001385 | 0.284589 | 0.056984 |
| MmugDNA.27213.1.S1_at   | MmugDNA.27213.1 | 8.4   | 8.63  | 0.27 | 0.21 | -1.17 | 0.464098 | 0.003247 | 0.710505 | 0.082187 |

|                         |                 |       |       |      |      |        |          |          |          |          |
|-------------------------|-----------------|-------|-------|------|------|--------|----------|----------|----------|----------|
| MmugDNA.27214.1.S1_at   | MmugDNA.27214.1 | 5.47  | 5.57  | 0.52 | 0.12 | -1.07  | 0.924234 | 0.95499  | 0.967791 | 0.974501 |
| MmugDNA.27218.1.S1_at   | MmugDNA.27218.1 | 3.16  | 3.12  | 0.66 | 0.14 | 1.03   | 0.33885  | 0.52683  | 0.619223 | 0.715627 |
| MmugDNA.27219.1.S1_at   | MmugDNA.27219.1 | 10.01 | 10.27 | 0.08 | 0.11 | -1.2   | 0.014747 | 0.027189 | 0.173373 | 0.206016 |
| MmugDNA.27223.1.S1_at   | MmugDNA.27223.1 | 8.43  | 7.21  | 0.65 | 0.01 | 2.32   | 0.085161 | 0.065059 | 0.349307 | 0.301009 |
| MmugDNA.27226.1.S1_at   | MmugDNA.27226.1 | 4.9   | 5.01  | 0.11 | 0.15 | -1.08  | 0.194797 | 0.284649 | 0.491407 | 0.546877 |
| MmugDNA.27230.1.S1_at   | MmugDNA.27230.1 | 4.66  | 4.68  | 0.17 | 0.05 | -1.01  | 0.351403 | 0.432519 | 0.628979 | 0.65297  |
| MmugDNA.27232.1.S1_at   | MmugDNA.27232.1 | 8.48  | 8.38  | 0.32 | 0.41 | 1.07   | 0.414269 | 0.094164 | 0.675539 | 0.350859 |
| MmugDNA.27237.1.S1_at   | MmugDNA.27237.1 | 6.98  | 8.47  | 0.69 | 0.3  | -2.8   | 0.039093 | 0.24665  | 0.254137 | 0.515994 |
| MmugDNA.27238.1.S1_at   | MmugDNA.27238.1 | 14.31 | 14.19 | 0.02 | 0.02 | 1.09   | 0.00946  | 0.335294 | 0.147192 | 0.58305  |
| MmugDNA.27239.1.S1_at   | MmugDNA.27239.1 | 4.91  | 4.64  | 0.73 | 0.56 | 1.21   | 0.969735 | 0.016723 | 0.987995 | 0.163772 |
| MmugDNA.27239.1.S1_s_at | MmugDNA.27239.1 | 5.43  | 5.49  | 0.2  | 0.19 | -1.04  | 0.906903 | 0.229462 | 0.960578 | 0.501527 |
| MmugDNA.27240.1.S1_at   | MmugDNA.27240.1 | 3.32  | 3.19  | 0.01 | 0.07 | 1.1    | 0.028124 | 0.272878 | 0.22013  | 0.537598 |
| MmugDNA.27241.1.S1_at   | MmugDNA.27241.1 | 4.24  | 4.01  | 0.07 | 0.1  | 1.17   | 0.036412 | 0.077502 | 0.245841 | 0.323421 |
| MmugDNA.27242.1.S1_at   | MmugDNA.27242.1 | 6.32  | 6.76  | 0.09 | 0.16 | -1.36  | 0.018861 | 0.148736 | 0.190935 | 0.423201 |
| MmugDNA.27246.1.S1_s_at | MmugDNA.27246.1 | 10.3  | 10.47 | 0.25 | 0.08 | -1.12  | 0.481856 | 0.106631 | 0.722245 | 0.36916  |
| MmugDNA.27250.1.S1_at   | MmugDNA.27250.1 | 3.48  | 3.67  | 0.21 | 0.07 | -1.14  | 0.193759 | 0.275427 | 0.490333 | 0.539682 |
| MmugDNA.27258.1.S1_at   | MmugDNA.27258.1 | 6.61  | 6.63  | 0.13 | 0.07 | -1.01  | 0.669341 | 0.646163 | 0.841412 | 0.792676 |
| MmugDNA.27262.1.S1_at   | MmugDNA.27262.1 | 3.75  | 4     | 0.06 | 0.19 | -1.19  | 0.070333 | 0.081438 | 0.323556 | 0.329632 |
| MmugDNA.27263.1.S1_at   | MmugDNA.27263.1 | 3.43  | 3.51  | 0.22 | 0.23 | -1.05  | 0.809635 | 0.872102 | 0.914755 | 0.927229 |
| MmugDNA.27265.1.S1_at   | MmugDNA.27265.1 | 5.84  | 6.48  | 0.4  | 0.44 | -1.56  | 0.402613 | 0.004126 | 0.666923 | 0.090887 |
| MmugDNA.27267.1.S1_at   | MmugDNA.27267.1 | 12.26 | 12.83 | 0.33 | 0.27 | -1.49  | 0.084848 | 0.388573 | 0.34881  | 0.622897 |
| MmugDNA.2727.1.S1_at    | MmugDNA.2727.1  | 13.69 | 13.63 | 0.07 | 0.04 | 1.04   | 0.177186 | 0.038926 | 0.471808 | 0.242297 |
| MmugDNA.27272.1.S1_at   | MmugDNA.27272.1 | 6.88  | 6.83  | 0.15 | 0.01 | 1.03   | 0.740144 | 0.423376 | 0.879525 | 0.646277 |
| MmugDNA.27274.1.S1_at   | MmugDNA.27274.1 | 11.31 | 11.08 | 0.13 | 0.13 | 1.17   | 0.081271 | 0.060573 | 0.342222 | 0.292769 |
| MmugDNA.27276.1.S1_at   | MmugDNA.27276.1 | 10    | 9.66  | 0.18 | 0.26 | 1.26   | 0.1654   | 0.015461 | 0.458328 | 0.157878 |
| MmugDNA.27279.1.S1_at   | MmugDNA.27279.1 | 9.95  | 9.99  | 0.23 | 0.18 | -1.03  | 0.519348 | 0.533394 | 0.747997 | 0.719587 |
| MmugDNA.27280.1.S1_at   | MmugDNA.27280.1 | 5.93  | 5.89  | 0.04 | 0.1  | 1.03   | 0.606774 | 0.483405 | 0.803313 | 0.687911 |
| MmugDNA.27284.1.S1_at   | MmugDNA.27284.1 | 9.68  | 9.94  | 0.37 | 0.03 | -1.2   | 0.222412 | 0.570339 | 0.520349 | 0.743056 |
| MmugDNA.27292.1.S1_at   | MmugDNA.27292.1 | 4.02  | 4.32  | 0.32 | 0.21 | -1.23  | 0.733992 | 0.627361 | 0.876041 | 0.780374 |
| MmugDNA.27298.1.S1_at   | MmugDNA.27298.1 | 4.9   | 11.03 | 1.66 | 0.19 | -70.04 | 0.006131 | 0.069467 | 0.124614 | 0.309778 |
| MmugDNA.27300.1.S1_at   | MmugDNA.27300.1 | 9.12  | 8.51  | 0.17 | 0.03 | 1.53   | 0.007623 | 0.43212  | 0.13577  | 0.652775 |
| MmugDNA.27318.1.S1_at   | MmugDNA.27318.1 | 5.04  | 5.05  | 0.13 | 0.19 | -1.01  | 0.995278 | 0.072073 | 0.99811  | 0.314519 |
| MmugDNA.27320.1.S1_s_at | MmugDNA.27320.1 | 10.95 | 10.94 | 0.22 | 0.02 | 1.01   | 0.868672 | 0.992119 | 0.943559 | 0.995515 |
| MmugDNA.27327.1.S1_at   | MmugDNA.27327.1 | 7.72  | 6.12  | 0.4  | 0.41 | 3.03   | 0.018459 | 0.01587  | 0.189006 | 0.159807 |
| MmugDNA.2733.1.S1_s_at  | MmugDNA.2733.1  | 7.84  | 8.23  | 0.36 | 0.09 | -1.31  | 0.12772  | 0.242392 | 0.409611 | 0.51282  |
| MmugDNA.27330.1.S1_at   | MmugDNA.27330.1 | 10.43 | 10.15 | 0.25 | 0.05 | 1.21   | 0.519366 | 0.041004 | 0.747997 | 0.247202 |
| MmugDNA.27332.1.S1_at   | MmugDNA.27332.1 | 7.21  | 7.33  | 0.04 | 0.08 | -1.09  | 0.115632 | 0.392943 | 0.392723 | 0.625917 |
| MmugDNA.27337.1.S1_at   | MmugDNA.27337.1 | 11.68 | 11.46 | 0.29 | 0.03 | 1.16   | 0.716371 | 0.875409 | 0.866177 | 0.929245 |
| MmugDNA.27339.1.S1_at   | MmugDNA.27339.1 | 12.01 | 12.21 | 0.22 | 0.07 | -1.14  | 0.215324 | 0.672931 | 0.513001 | 0.808874 |
| MmugDNA.27341.1.S1_at   | MmugDNA.27341.1 | 5.41  | 5.38  | 0.18 | 0.12 | 1.02   | 0.767986 | 0.432479 | 0.893437 | 0.65293  |
| MmugDNA.27342.1.S1_at   | MmugDNA.27342.1 | 8.13  | 8.09  | 0.65 | 0.08 | 1.03   | 0.495749 | 0.712549 | 0.73183  | 0.833383 |
| MmugDNA.27352.1.S1_at   | MmugDNA.27352.1 | 8.58  | 9.34  | 0.28 | 0.21 | -1.69  | 0.03657  | 0.009644 | 0.246184 | 0.129267 |
| MmugDNA.27353.1.S1_at   | MmugDNA.27353.1 | 6.23  | 6.06  | 0.23 | 0.11 | 1.12   | 0.112624 | 0.0541   | 0.388962 | 0.277914 |

|                         |                 |       |       |      |      |       |          |          |          |          |
|-------------------------|-----------------|-------|-------|------|------|-------|----------|----------|----------|----------|
| MmugDNA.27356.1.S1_at   | MmugDNA.27356.1 | 3.5   | 3.4   | 0.05 | 0.07 | 1.07  | 0.368032 | 0.782768 | 0.641778 | 0.874253 |
| MmugDNA.27358.1.S1_at   | MmugDNA.27358.1 | 10.81 | 10.2  | 0.42 | 0.13 | 1.52  | 0.099744 | 0.009284 | 0.370728 | 0.127101 |
| MmugDNA.27361.1.S1_at   | MmugDNA.27361.1 | 3.03  | 3.46  | 0.4  | 0.54 | -1.35 | 0.255389 | 0.222975 | 0.549833 | 0.495821 |
| MmugDNA.27362.1.S1_at   | MmugDNA.27362.1 | 6.58  | 6.51  | 0.05 | 0.1  | 1.05  | 0.321644 | 0.004816 | 0.605956 | 0.096904 |
| MmugDNA.27363.1.S1_at   | MmugDNA.27363.1 | 11.4  | 10.84 | 0.21 | 0.05 | 1.47  | 0.010932 | 0.008307 | 0.154359 | 0.120929 |
| MmugDNA.27364.1.S1_at   | MmugDNA.27364.1 | 6.76  | 7.09  | 0.17 | 0.04 | -1.26 | 0.039781 | 0.034951 | 0.256153 | 0.231062 |
| MmugDNA.2737.1.S1_at    | MmugDNA.2737.1  | 4.05  | 4.2   | 0.26 | 0.05 | -1.11 | 0.979783 | 0.874929 | 0.992265 | 0.929042 |
| MmugDNA.2738.1.S1_at    | MmugDNA.2738.1  | 6.12  | 5.96  | 0.08 | 0.11 | 1.12  | 0.15122  | 0.493302 | 0.440769 | 0.694036 |
| MmugDNA.27381.1.S1_at   | MmugDNA.27381.1 | 9.92  | 10.18 | 0.18 | 0.12 | -1.2  | 0.026238 | 0.013231 | 0.215016 | 0.147534 |
| MmugDNA.27382.1.S1_at   | MmugDNA.27382.1 | 11.97 | 12.04 | 0.13 | 0.02 | -1.05 | 0.138001 | 0.412061 | 0.423144 | 0.638478 |
| MmugDNA.27383.1.S1_at   | MmugDNA.27383.1 | 3.39  | 3.12  | 0.28 | 0.27 | 1.2   | 0.199836 | 0.057942 | 0.497351 | 0.287157 |
| MmugDNA.27384.1.S1_at   | MmugDNA.27384.1 | 7.76  | 7.72  | 0.42 | 0.05 | 1.03  | 0.597327 | 0.538771 | 0.796572 | 0.723368 |
| MmugDNA.27385.1.S1_at   | MmugDNA.27385.1 | 12.45 | 12.51 | 0.07 | 0.13 | -1.04 | 0.871409 | 0.987674 | 0.944625 | 0.993121 |
| MmugDNA.27387.1.S1_s_at | MmugDNA.27387.1 | 8.8   | 9.07  | 0.4  | 0.08 | -1.2  | 0.144653 | 0.552001 | 0.43164  | 0.731422 |
| MmugDNA.2739.1.S1_at    | MmugDNA.2739.1  | 3.16  | 3.25  | 0.13 | 0.09 | -1.06 | 0.860689 | 0.084027 | 0.939536 | 0.334975 |
| MmugDNA.27403.1.S1_at   | MmugDNA.27403.1 | 8.93  | 7.62  | 1.03 | 0.19 | 2.47  | 0.098196 | 0.010808 | 0.36881  | 0.135636 |
| MmugDNA.27412.1.S1_at   | MmugDNA.27412.1 | 4.11  | 6.89  | 0.86 | 0.43 | -6.85 | 0.021115 | 0.034941 | 0.198834 | 0.231062 |
| MmugDNA.27425.1.S1_at   | MmugDNA.27425.1 | 7.44  | 7.84  | 0.14 | 0.23 | -1.32 | 0.051305 | 0.108081 | 0.283884 | 0.371281 |
| MmugDNA.27427.1.S1_at   | MmugDNA.27427.1 | 11.78 | 11.83 | 0.05 | 0.05 | -1.04 | 0.677594 | 0.208183 | 0.846252 | 0.482086 |
| MmugDNA.27428.1.S1_at   | MmugDNA.27428.1 | 3.77  | 3.76  | 0.11 | 0.12 | 1.01  | 0.808876 | 0.867518 | 0.914357 | 0.924699 |
| MmugDNA.27429.1.S1_at   | MmugDNA.27429.1 | 7.76  | 7.63  | 0.07 | 0.07 | 1.09  | 0.080418 | 0.030848 | 0.341026 | 0.217427 |
| MmugDNA.2743.1.S1_at    | MmugDNA.2743.1  | 7.73  | 7.79  | 0.64 | 0.19 | -1.04 | 0.64045  | 0.403159 | 0.824302 | 0.631964 |
| MmugDNA.27432.1.S1_at   | MmugDNA.27432.1 | 10.66 | 11.52 | 0.19 | 0.17 | -1.82 | 0.004256 | 0.00725  | 0.111107 | 0.114309 |
| MmugDNA.27435.1.S1_at   | MmugDNA.27435.1 | 10.36 | 10.31 | 0.13 | 0.1  | 1.03  | 0.644144 | 0.632596 | 0.826642 | 0.783658 |
| MmugDNA.27438.1.S1_at   | MmugDNA.27438.1 | 9.81  | 9.36  | 0.19 | 0.18 | 1.37  | 0.06887  | 0.092555 | 0.320468 | 0.348519 |
| MmugDNA.27452.1.S1_at   | MmugDNA.27452.1 | 13.38 | 13.19 | 0.05 | 0    | 1.14  | 0.004904 | 0.195758 | 0.115126 | 0.470637 |
| MmugDNA.27463.1.S1_at   | MmugDNA.27463.1 | 12.16 | 11.94 | 0.15 | 0.02 | 1.17  | 0.051588 | 0.241757 | 0.284576 | 0.512327 |
| MmugDNA.27464.1.S1_at   | MmugDNA.27464.1 | 5.99  | 5.81  | 0.27 | 0.1  | 1.13  | 0.945317 | 0.742994 | 0.977063 | 0.851103 |
| MmugDNA.27467.1.S1_at   | MmugDNA.27467.1 | 3.73  | 3.61  | 0.02 | 0.05 | 1.09  | 0.017925 | 0.048858 | 0.187151 | 0.265858 |
| MmugDNA.27476.1.S1_at   | MmugDNA.27476.1 | 11.58 | 11.69 | 0.06 | 0.06 | -1.08 | 0.044471 | 0.56789  | 0.267977 | 0.741693 |
| MmugDNA.27477.1.S1_at   | MmugDNA.27477.1 | 5.3   | 5.28  | 0.12 | 0.11 | 1.01  | 0.905766 | 0.15211  | 0.960077 | 0.426866 |
| MmugDNA.27484.1.S1_at   | MmugDNA.27484.1 | 3.75  | 3.75  | 0.07 | 0.16 | 1     | 0.262552 | 0.632526 | 0.556605 | 0.783598 |
| MmugDNA.27489.1.S1_at   | MmugDNA.27489.1 | 5.37  | 5.58  | 0.51 | 0.22 | -1.16 | 0.496661 | 0.649004 | 0.732528 | 0.794525 |
| MmugDNA.27495.1.S1_at   | MmugDNA.27495.1 | 11.01 | 11.21 | 0.19 | 0.05 | -1.15 | 0.052919 | 0.012727 | 0.287075 | 0.145429 |
| MmugDNA.27497.1.S1_at   | MmugDNA.27497.1 | 4.58  | 5.86  | 0.42 | 0.46 | -2.42 | 0.013337 | 0.045166 | 0.166232 | 0.256979 |
| MmugDNA.27499.1.S1_at   | MmugDNA.27499.1 | 11.29 | 10.16 | 0.16 | 0.12 | 2.18  | 0.00073  | 0.010401 | 0.072318 | 0.133414 |
| MmugDNA.2752.1.S1_at    | MmugDNA.2752.1  | 11.43 | 11.55 | 0.11 | 0.01 | -1.08 | 0.222406 | 0.199044 | 0.520349 | 0.473621 |
| MmugDNA.27520.1.S1_at   | MmugDNA.27520.1 | 8.15  | 8.18  | 0.1  | 0.16 | -1.02 | 0.572655 | 0.229149 | 0.780725 | 0.501438 |
| MmugDNA.27539.1.S1_at   | MmugDNA.27539.1 | 6.08  | 7.77  | 1.09 | 0.03 | -3.21 | 0.172534 | 0.158624 | 0.466621 | 0.434612 |
| MmugDNA.2755.1.S1_at    | MmugDNA.2755.1  | 11.69 | 10.32 | 0.15 | 0.47 | 2.58  | 0.017014 | 0.295569 | 0.183848 | 0.555051 |
| MmugDNA.27552.1.S1_at   | MmugDNA.27552.1 | 8.6   | 8.23  | 0.05 | 0.19 | 1.3   | 0.038352 | 0.143499 | 0.251853 | 0.417442 |
| MmugDNA.27557.1.S1_at   | MmugDNA.27557.1 | 11.44 | 10.97 | 0.13 | 0.05 | 1.38  | 0.010535 | 0.319227 | 0.152501 | 0.571716 |
| MmugDNA.27564.1.S1_at   | MmugDNA.27564.1 | 3.17  | 3.13  | 0.18 | 0.27 | 1.03  | 0.522027 | 0.740607 | 0.749514 | 0.849805 |

|                         |                 |       |       |      |      |       |          |          |          |          |
|-------------------------|-----------------|-------|-------|------|------|-------|----------|----------|----------|----------|
| MmugDNA.27579.1.S1_at   | MmugDNA.27579.1 | 12.51 | 12.77 | 0.18 | 0.09 | -1.2  | 0.262516 | 0.281376 | 0.556605 | 0.544411 |
| MmugDNA.27580.1.S1_at   | MmugDNA.27580.1 | 5.21  | 5.23  | 0.27 | 0.05 | -1.01 | 0.563412 | 0.729626 | 0.775443 | 0.843613 |
| MmugDNA.27584.1.S1_at   | MmugDNA.27584.1 | 5.64  | 5.31  | 0.4  | 0.17 | 1.25  | 0.354288 | 0.007373 | 0.631471 | 0.115313 |
| MmugDNA.27593.1.S1_at   | MmugDNA.27593.1 | 7.62  | 7.38  | 0.06 | 0.07 | 1.18  | 0.009546 | 0.14755  | 0.147873 | 0.421872 |
| MmugDNA.27606.1.S1_at   | MmugDNA.27606.1 | 9.73  | 10.39 | 0.3  | 0.04 | -1.58 | 0.026278 | 0.026295 | 0.215228 | 0.203132 |
| MmugDNA.27612.1.S1_at   | MmugDNA.27612.1 | 10.69 | 10.71 | 0.13 | 0.07 | -1.01 | 0.947782 | 0.127726 | 0.978041 | 0.398581 |
| MmugDNA.27617.1.S1_at   | MmugDNA.27617.1 | 6.81  | 6.76  | 0.17 | 0.13 | 1.03  | 0.373371 | 0.290422 | 0.645118 | 0.551169 |
| MmugDNA.27621.1.S1_at   | MmugDNA.27621.1 | 6.96  | 5.66  | 0.49 | 0.46 | 2.46  | 0.040434 | 0.078418 | 0.257381 | 0.325192 |
| MmugDNA.27626.1.S1_at   | MmugDNA.27626.1 | 5.76  | 5.74  | 0.11 | 0.06 | 1.02  | 0.790095 | 0.368327 | 0.904508 | 0.607917 |
| MmugDNA.27628.1.S1_s_at | MmugDNA.27628.1 | 14.04 | 14.09 | 0.09 | 0.01 | -1.04 | 0.111877 | 0.094837 | 0.387979 | 0.35185  |
| MmugDNA.2764.1.S1_at    | MmugDNA.2764.1  | 11.89 | 12.43 | 0.27 | 0.14 | -1.45 | 0.094847 | 0.254054 | 0.363741 | 0.522387 |
| MmugDNA.27652.1.S1_at   | MmugDNA.27652.1 | 11.18 | 11.15 | 0.29 | 0.06 | 1.02  | 0.430181 | 0.621644 | 0.686516 | 0.77621  |
| MmugDNA.27655.1.S1_at   | MmugDNA.27655.1 | 7.91  | 8.28  | 0.47 | 0.06 | -1.29 | 0.356022 | 0.780223 | 0.632435 | 0.87255  |
| MmugDNA.27659.1.S1_at   | MmugDNA.27659.1 | 7.88  | 8.18  | 0.25 | 0.04 | -1.23 | 0.075663 | 0.004994 | 0.333356 | 0.098469 |
| MmugDNA.27659.1.S1_s_at | MmugDNA.27659.1 | 7.18  | 7.35  | 0.04 | 0.19 | -1.12 | 0.205373 | 0.01     | 0.503171 | 0.131262 |
| MmugDNA.27660.1.S1_at   | MmugDNA.27660.1 | 5.67  | 5.71  | 0.07 | 0.04 | -1.03 | 0.512376 | 0.587144 | 0.742962 | 0.754042 |
| MmugDNA.27663.1.S1_at   | MmugDNA.27663.1 | 5.82  | 9.9   | 1.31 | 0.28 | -16.9 | 0.012997 | 0.183614 | 0.16477  | 0.459681 |
| MmugDNA.27664.1.S1_at   | MmugDNA.27664.1 | 10.06 | 12.47 | 0.91 | 0.14 | -5.32 | 0.017743 | 0.193079 | 0.18688  | 0.468554 |
| MmugDNA.27666.1.S1_at   | MmugDNA.27666.1 | 9.67  | 9.58  | 0.25 | 0.18 | 1.06  | 0.636833 | 0.048889 | 0.822282 | 0.265897 |
| MmugDNA.2767.1.S1_at    | MmugDNA.2767.1  | 11.18 | 11.1  | 0.13 | 0.08 | 1.06  | 0.410554 | 0.011853 | 0.672532 | 0.140973 |
| MmugDNA.27671.1.S1_at   | MmugDNA.27671.1 | 7.57  | 7.94  | 0.29 | 0.04 | -1.29 | 0.090312 | 0.145258 | 0.356907 | 0.419278 |
| MmugDNA.27675.1.S1_at   | MmugDNA.27675.1 | 4.68  | 4.91  | 1.26 | 0.41 | -1.18 | 0.84582  | 0.702692 | 0.932616 | 0.827658 |
| MmugDNA.27676.1.S1_at   | MmugDNA.27676.1 | 6.53  | 5.71  | 1.32 | 0.35 | 1.76  | 0.362335 | 0.103544 | 0.637219 | 0.364346 |
| MmugDNA.2768.1.S1_at    | MmugDNA.2768.1  | 11.43 | 9.77  | 0.24 | 0.19 | 3.16  | 0.000793 | 0.001051 | 0.073056 | 0.051467 |
| MmugDNA.27681.1.S1_at   | MmugDNA.27681.1 | 4.14  | 5.26  | 0.54 | 0.01 | -2.18 | 0.026185 | 0.259992 | 0.21487  | 0.52675  |
| MmugDNA.27682.1.S1_at   | MmugDNA.27682.1 | 12.65 | 12.62 | 0.01 | 0.03 | 1.02  | 0.124696 | 0.71822  | 0.404982 | 0.836905 |
| MmugDNA.27683.1.S1_at   | MmugDNA.27683.1 | 7.25  | 6.88  | 0.16 | 0.15 | 1.29  | 0.018528 | 0.258076 | 0.189367 | 0.525574 |
| MmugDNA.27684.1.S1_at   | MmugDNA.27684.1 | 6.28  | 7.21  | 0.76 | 0.22 | -1.9  | 0.344321 | 0.776505 | 0.623695 | 0.870052 |
| MmugDNA.27685.1.S1_at   | MmugDNA.27685.1 | 12.22 | 12.51 | 0.18 | 0.07 | -1.22 | 0.060218 | 0.024576 | 0.30255  | 0.196149 |
| MmugDNA.27687.1.S1_at   | MmugDNA.27687.1 | 10.81 | 11.8  | 0.09 | 0.15 | -1.98 | 0.0006   | 0.002045 | 0.070727 | 0.066887 |
| MmugDNA.27687.1.S1_s_at | MmugDNA.27687.1 | 12.23 | 13.06 | 0.15 | 0.13 | -1.78 | 0.001828 | 0.001641 | 0.086456 | 0.06124  |
| MmugDNA.27688.1.S1_at   | MmugDNA.27688.1 | 5.58  | 5.68  | 0.21 | 0.16 | -1.07 | 0.241279 | 0.282584 | 0.538538 | 0.545292 |
| MmugDNA.27689.1.S1_at   | MmugDNA.27689.1 | 11.99 | 11.93 | 0.08 | 0.06 | 1.04  | 0.088349 | 0.248063 | 0.35445  | 0.517567 |
| MmugDNA.27690.1.S1_at   | MmugDNA.27690.1 | 5.29  | 5.06  | 0.19 | 0.03 | 1.17  | 0.457575 | 0.66964  | 0.706421 | 0.806795 |
| MmugDNA.27691.1.S1_at   | MmugDNA.27691.1 | 3.83  | 4.15  | 0.06 | 0.29 | -1.25 | 0.485192 | 0.618819 | 0.724739 | 0.774185 |
| MmugDNA.27693.1.S1_at   | MmugDNA.27693.1 | 14.35 | 14.37 | 0.05 | 0.01 | -1.01 | 0.521143 | 0.789668 | 0.749221 | 0.87847  |
| MmugDNA.27695.1.S1_at   | MmugDNA.27695.1 | 9.25  | 9.27  | 0.21 | 0.3  | -1.02 | 0.953893 | 0.693234 | 0.981106 | 0.821571 |
| MmugDNA.27696.1.S1_at   | MmugDNA.27696.1 | 3.7   | 3.36  | 0.81 | 0.02 | 1.27  | 0.158886 | 0.177278 | 0.450158 | 0.45372  |
| MmugDNA.27699.1.S1_at   | MmugDNA.27699.1 | 7.27  | 7.33  | 0.13 | 0.09 | -1.04 | 0.662654 | 0.332518 | 0.837251 | 0.580937 |
| MmugDNA.277.1.S1_at     | MmugDNA.277.1   | 10.22 | 10.57 | 0.54 | 0.32 | -1.27 | 0.690087 | 0.578596 | 0.851908 | 0.748595 |
| MmugDNA.27710.1.S1_at   | MmugDNA.27710.1 | 11.13 | 11.11 | 0.16 | 0.03 | 1.01  | 0.893009 | 0.055415 | 0.954376 | 0.281304 |
| MmugDNA.27715.1.S1_at   | MmugDNA.27715.1 | 3.76  | 4.08  | 0.27 | 0.25 | -1.24 | 0.463779 | 0.528554 | 0.710222 | 0.716664 |
| MmugDNA.27729.1.S1_at   | MmugDNA.27729.1 | 4.61  | 4.37  | 0.44 | 0.28 | 1.18  | 0.708305 | 0.728762 | 0.861844 | 0.843203 |

|                         |                 |       |       |      |      |       |          |          |          |          |
|-------------------------|-----------------|-------|-------|------|------|-------|----------|----------|----------|----------|
| MmugDNA.27730.1.S1_at   | MmugDNA.27730.1 | 9.55  | 10.22 | 0.53 | 0.45 | -1.59 | 0.369695 | 0.892952 | 0.642998 | 0.938954 |
| MmugDNA.27741.1.S1_at   | MmugDNA.27741.1 | 6.79  | 6.53  | 0.11 | 0.17 | 1.19  | 0.096018 | 0.24631  | 0.365529 | 0.515889 |
| MmugDNA.27744.1.S1_at   | MmugDNA.27744.1 | 12.02 | 12.12 | 0.1  | 0.07 | -1.07 | 0.287704 | 0.000268 | 0.577473 | 0.033786 |
| MmugDNA.27746.1.S1_at   | MmugDNA.27746.1 | 7.32  | 7.26  | 0.09 | 0.32 | 1.04  | 0.56878  | 0.052641 | 0.778594 | 0.274934 |
| MmugDNA.27747.1.S1_at   | MmugDNA.27747.1 | 10.41 | 11.89 | 0.17 | 0.17 | -2.78 | 0.000584 | 0.000085 | 0.070727 | 0.027016 |
| MmugDNA.27747.1.S1_s_at | MmugDNA.27747.1 | 11.5  | 12.23 | 0.29 | 0.14 | -1.65 | 0.027464 | 0.019348 | 0.218484 | 0.174785 |
| MmugDNA.27752.1.S1_at   | MmugDNA.27752.1 | 9.02  | 10.9  | 0.54 | 0.16 | -3.69 | 0.006133 | 0.303851 | 0.124614 | 0.561225 |
| MmugDNA.27753.1.S1_at   | MmugDNA.27753.1 | 6.77  | 7.45  | 0.77 | 0.13 | -1.6  | 0.530835 | 0.491895 | 0.755314 | 0.693275 |
| MmugDNA.27757.1.S1_at   | MmugDNA.27757.1 | 6.7   | 6.38  | 0.26 | 0.21 | 1.24  | 0.114351 | 0.583875 | 0.391274 | 0.752043 |
| MmugDNA.27758.1.S1_at   | MmugDNA.27758.1 | 11.05 | 10.73 | 0.12 | 0.16 | 1.25  | 0.182307 | 0.080409 | 0.478059 | 0.328048 |
| MmugDNA.27760.1.S1_at   | MmugDNA.27760.1 | 6.67  | 6.57  | 0.11 | 0.1  | 1.07  | 0.089141 | 0.144129 | 0.355884 | 0.418024 |
| MmugDNA.27762.1.S1_at   | MmugDNA.27762.1 | 6.95  | 6.68  | 0.25 | 0.15 | 1.21  | 0.060028 | 0.00908  | 0.302259 | 0.125944 |
| MmugDNA.27763.1.S1_at   | MmugDNA.27763.1 | 13.7  | 13.7  | 0.07 | 0.04 | 1     | 0.855836 | 0.475916 | 0.937248 | 0.682387 |
| MmugDNA.27766.1.S1_at   | MmugDNA.27766.1 | 13.25 | 13.18 | 0.06 | 0.07 | 1.05  | 0.071904 | 0.043437 | 0.326088 | 0.253043 |
| MmugDNA.27769.1.S1_at   | MmugDNA.27769.1 | 8.93  | 8.88  | 0.15 | 0.04 | 1.04  | 0.169333 | 0.156498 | 0.462593 | 0.431866 |
| MmugDNA.2777.1.S1_at    | MmugDNA.2777.1  | 4.09  | 4.01  | 0.03 | 0.08 | 1.05  | 0.215701 | 0.272975 | 0.513483 | 0.53761  |
| MmugDNA.27772.1.S1_at   | MmugDNA.27772.1 | 3.94  | 5.76  | 1.01 | 0.14 | -3.53 | 0.076378 | 0.145041 | 0.334608 | 0.418994 |
| MmugDNA.27773.1.S1_s_at | MmugDNA.27773.1 | 4.17  | 4.27  | 1.04 | 0.57 | -1.07 | 0.969758 | 0.455639 | 0.987995 | 0.669614 |
| MmugDNA.27776.1.S1_at   | MmugDNA.27776.1 | 7.67  | 7.78  | 0.12 | 0.12 | -1.08 | 0.116554 | 0.21491  | 0.393692 | 0.488845 |
| MmugDNA.27779.1.S1_at   | MmugDNA.27779.1 | 11.53 | 11.91 | 0.2  | 0.01 | -1.3  | 0.083572 | 0.064426 | 0.34613  | 0.300001 |
| MmugDNA.2778.1.S1_at    | MmugDNA.2778.1  | 11.19 | 11.65 | 0.32 | 0.04 | -1.37 | 0.080157 | 0.086338 | 0.340547 | 0.338777 |
| MmugDNA.27781.1.S1_at   | MmugDNA.27781.1 | 5.69  | 5.55  | 0.13 | 0.05 | 1.1   | 0.21852  | 0.237395 | 0.516172 | 0.508117 |
| MmugDNA.27785.1.S1_at   | MmugDNA.27785.1 | 11.29 | 11.79 | 0.48 | 0.21 | -1.42 | 0.151954 | 0.204843 | 0.441523 | 0.479223 |
| MmugDNA.27787.1.S1_at   | MmugDNA.27787.1 | 10.39 | 10.21 | 0.07 | 0.09 | 1.13  | 0.157141 | 0.457577 | 0.447994 | 0.670864 |
| MmugDNA.27788.1.S1_at   | MmugDNA.27788.1 | 13.28 | 13.48 | 0.05 | 0.02 | -1.15 | 0.002108 | 0.006357 | 0.090208 | 0.108372 |
| MmugDNA.27793.1.S1_at   | MmugDNA.27793.1 | 6.47  | 9.18  | 1.08 | 0.44 | -6.55 | 0.018955 | 0.011486 | 0.191192 | 0.138627 |
| MmugDNA.278.1.S1_at     | MmugDNA.278.1   | 13.63 | 13.83 | 0.12 | 0.02 | -1.14 | 0.0239   | 0.220449 | 0.207647 | 0.493818 |
| MmugDNA.2780.1.S1_at    | MmugDNA.2780.1  | 9.83  | 9.83  | 0.04 | 0.16 | -1    | 0.496386 | 0.472976 | 0.732272 | 0.680272 |
| MmugDNA.27801.1.S1_at   | MmugDNA.27801.1 | 9.22  | 8.78  | 0.34 | 0.05 | 1.35  | 0.120707 | 0.451692 | 0.399081 | 0.666544 |
| MmugDNA.27804.1.S1_at   | MmugDNA.27804.1 | 10.58 | 10.3  | 0.23 | 0.1  | 1.21  | 0.23861  | 0.43281  | 0.535974 | 0.653151 |
| MmugDNA.27805.1.S1_at   | MmugDNA.27805.1 | 8.64  | 8.64  | 0.11 | 0.06 | 1     | 0.56618  | 0.906655 | 0.777188 | 0.947216 |
| MmugDNA.27808.1.S1_at   | MmugDNA.27808.1 | 9.35  | 9.41  | 0.05 | 0.06 | -1.04 | 0.095959 | 0.833066 | 0.365529 | 0.90427  |
| MmugDNA.2781.1.S1_at    | MmugDNA.2781.1  | 5.98  | 9.03  | 0.9  | 0.38 | -8.31 | 0.014447 | 0.185257 | 0.171859 | 0.461194 |
| MmugDNA.27816.1.S1_at   | MmugDNA.27816.1 | 10    | 9.78  | 0.29 | 0.13 | 1.17  | 0.357008 | 0.356557 | 0.633245 | 0.598459 |
| MmugDNA.2782.1.S1_at    | MmugDNA.2782.1  | 9.44  | 8.76  | 0.19 | 0.12 | 1.59  | 0.006152 | 0.001273 | 0.12462  | 0.055241 |
| MmugDNA.27827.1.S1_at   | MmugDNA.27827.1 | 8.63  | 8.38  | 0.41 | 0.23 | 1.18  | 0.390358 | 0.506423 | 0.657982 | 0.702383 |
| MmugDNA.27829.1.S1_at   | MmugDNA.27829.1 | 6.66  | 5.56  | 0.24 | 0.35 | 2.13  | 0.012349 | 0.004181 | 0.161511 | 0.091077 |
| MmugDNA.27833.1.S1_at   | MmugDNA.27833.1 | 8.06  | 8.69  | 0.15 | 0.16 | -1.55 | 0.007732 | 0.000305 | 0.13671  | 0.034907 |
| MmugDNA.27835.1.S1_at   | MmugDNA.27835.1 | 11.42 | 11.47 | 0.04 | 0.08 | -1.04 | 0.292356 | 0.02056  | 0.581685 | 0.179918 |
| MmugDNA.27836.1.S1_at   | MmugDNA.27836.1 | 6     | 6.21  | 0.31 | 0.18 | -1.16 | 0.22538  | 0.310563 | 0.523263 | 0.565771 |
| MmugDNA.27839.1.S1_at   | MmugDNA.27839.1 | 3.26  | 3.22  | 0.02 | 0.03 | 1.03  | 0.088028 | 0.396876 | 0.354244 | 0.62846  |
| MmugDNA.27844.1.S1_at   | MmugDNA.27844.1 | 3.43  | 3.78  | 0.08 | 0.33 | -1.27 | 0.113553 | 0.155584 | 0.390238 | 0.430941 |
| MmugDNA.27845.1.S1_at   | MmugDNA.27845.1 | 12.12 | 11.54 | 0.23 | 0.16 | 1.5   | 0.075023 | 0.39678  | 0.332088 | 0.62845  |

|                         |                 |       |       |      |      |       |          |          |          |          |
|-------------------------|-----------------|-------|-------|------|------|-------|----------|----------|----------|----------|
| MmugDNA.27848.1.S1_at   | MmugDNA.27848.1 | 12.14 | 11.78 | 0.13 | 0.02 | 1.28  | 0.022866 | 0.092537 | 0.204235 | 0.348504 |
| MmugDNA.2785.1.S1_at    | MmugDNA.2785.1  | 6.57  | 5.82  | 0.67 | 0.42 | 1.69  | 0.125309 | 0.351268 | 0.405737 | 0.594937 |
| MmugDNA.27850.1.S1_at   | MmugDNA.27850.1 | 3.47  | 3.88  | 0.48 | 0.28 | -1.33 | 0.401132 | 0.235567 | 0.665888 | 0.506633 |
| MmugDNA.27857.1.S1_at   | MmugDNA.27857.1 | 8.44  | 8.54  | 0.19 | 0.19 | -1.07 | 0.531543 | 0.654987 | 0.755824 | 0.7982   |
| MmugDNA.2786.1.S1_at    | MmugDNA.2786.1  | 5.6   | 8.6   | 1.22 | 0.24 | -8.02 | 0.038506 | 0.233702 | 0.252121 | 0.505032 |
| MmugDNA.27869.1.S1_at   | MmugDNA.27869.1 | 10.82 | 10.88 | 0.14 | 0.04 | -1.04 | 0.558743 | 0.038705 | 0.773051 | 0.24169  |
| MmugDNA.27870.1.S1_at   | MmugDNA.27870.1 | 10.93 | 10.89 | 0.09 | 0.08 | 1.03  | 0.852139 | 0.953419 | 0.9357   | 0.97351  |
| MmugDNA.27873.1.S1_at   | MmugDNA.27873.1 | 6.57  | 6.54  | 0.13 | 0.05 | 1.02  | 0.428053 | 0.400787 | 0.68508  | 0.63064  |
| MmugDNA.27876.1.S1_at   | MmugDNA.27876.1 | 10.82 | 9.27  | 0.53 | 0.1  | 2.92  | 0.009931 | 0.027388 | 0.149006 | 0.206719 |
| MmugDNA.2788.1.S1_at    | MmugDNA.2788.1  | 7.45  | 7.64  | 0.14 | 0.17 | -1.14 | 0.191605 | 0.52967  | 0.488    | 0.717463 |
| MmugDNA.27885.1.S1_at   | MmugDNA.27885.1 | 9.68  | 8.09  | 0.4  | 0.08 | 3     | 0.002813 | 0.001122 | 0.097939 | 0.052924 |
| MmugDNA.27886.1.S1_at   | MmugDNA.27886.1 | 9.57  | 9.17  | 0.08 | 0.05 | 1.32  | 0.002238 | 0.191008 | 0.091067 | 0.46629  |
| MmugDNA.27888.1.S1_at   | MmugDNA.27888.1 | 5.38  | 5.27  | 0.49 | 0.23 | 1.08  | 0.593474 | 0.643148 | 0.79401  | 0.79068  |
| MmugDNA.27895.1.S1_at   | MmugDNA.27895.1 | 7.7   | 7.58  | 0.4  | 0.05 | 1.09  | 0.301571 | 0.719442 | 0.589431 | 0.837645 |
| MmugDNA.27900.1.S1_at   | MmugDNA.27900.1 | 9     | 8.79  | 0.33 | 0.14 | 1.16  | 0.245967 | 0.189646 | 0.541732 | 0.465297 |
| MmugDNA.27903.1.S1_at   | MmugDNA.27903.1 | 4.7   | 4.92  | 0.37 | 0.21 | -1.16 | 0.213478 | 0.404175 | 0.511324 | 0.632691 |
| MmugDNA.27905.1.S1_at   | MmugDNA.27905.1 | 3.86  | 3.49  | 0.28 | 0.04 | 1.29  | 0.089722 | 0.327191 | 0.356703 | 0.577156 |
| MmugDNA.27907.1.S1_at   | MmugDNA.27907.1 | 6.5   | 6.59  | 0.11 | 0    | -1.06 | 0.312932 | 0.117143 | 0.598837 | 0.384582 |
| MmugDNA.27910.1.S1_at   | MmugDNA.27910.1 | 3.8   | 3.82  | 0.42 | 0.05 | -1.01 | 0.741081 | 0.834319 | 0.880012 | 0.905078 |
| MmugDNA.27912.1.S1_at   | MmugDNA.27912.1 | 9.62  | 9.84  | 0.15 | 0.05 | -1.16 | 0.150291 | 0.605133 | 0.439408 | 0.764917 |
| MmugDNA.27913.1.S1_at   | MmugDNA.27913.1 | 6.74  | 8.51  | 1.01 | 0.19 | -3.41 | 0.141301 | 0.139649 | 0.42729  | 0.412964 |
| MmugDNA.27914.1.S1_at   | MmugDNA.27914.1 | 3.31  | 3.27  | 0.07 | 0.03 | 1.03  | 0.4432   | 0.699368 | 0.696527 | 0.825344 |
| MmugDNA.27915.1.S1_at   | MmugDNA.27915.1 | 12.07 | 11.84 | 0.29 | 0.09 | 1.17  | 0.367218 | 0.091785 | 0.641323 | 0.346977 |
| MmugDNA.2792.1.S1_at    | MmugDNA.2792.1  | 10.6  | 10.26 | 0.09 | 0.03 | 1.26  | 0.00503  | 0.004837 | 0.116222 | 0.097041 |
| MmugDNA.27922.1.S1_at   | MmugDNA.27922.1 | 8.02  | 8.17  | 0.52 | 0.07 | -1.11 | 0.252802 | 0.268344 | 0.547383 | 0.534041 |
| MmugDNA.27929.1.S1_at   | MmugDNA.27929.1 | 7.52  | 7.38  | 0.5  | 0.11 | 1.11  | 0.698375 | 0.567676 | 0.856544 | 0.74156  |
| MmugDNA.27934.1.S1_at   | MmugDNA.27934.1 | 5.47  | 5.55  | 0.13 | 0.06 | -1.06 | 0.113041 | 0.12253  | 0.389564 | 0.392427 |
| MmugDNA.27940.1.S1_at   | MmugDNA.27940.1 | 11.84 | 12.16 | 0.29 | 0.07 | -1.25 | 0.210489 | 0.289683 | 0.5081   | 0.550747 |
| MmugDNA.2795.1.S1_at    | MmugDNA.2795.1  | 4.49  | 4.32  | 0.07 | 0.11 | 1.12  | 0.227789 | 0.135425 | 0.525854 | 0.407515 |
| MmugDNA.27954.1.S1_at   | MmugDNA.27954.1 | 3.03  | 3.04  | 0.13 | 0.05 | -1    | 0.37533  | 0.532461 | 0.646186 | 0.719065 |
| MmugDNA.27955.1.S1_at   | MmugDNA.27955.1 | 8.91  | 8.84  | 0.49 | 0.03 | 1.05  | 0.796875 | 0.701005 | 0.908267 | 0.826611 |
| MmugDNA.27957.1.S1_at   | MmugDNA.27957.1 | 9.74  | 10    | 0.37 | 0.13 | -1.2  | 0.364516 | 0.080626 | 0.639104 | 0.328427 |
| MmugDNA.27961.1.S1_at   | MmugDNA.27961.1 | 4.74  | 4.87  | 0.28 | 0.22 | -1.1  | 0.238936 | 0.131111 | 0.536182 | 0.403084 |
| MmugDNA.27963.1.S1_at   | MmugDNA.27963.1 | 3.21  | 3.43  | 0.07 | 0.05 | -1.17 | 0.021676 | 0.001542 | 0.20067  | 0.05949  |
| MmugDNA.27963.1.S1_x_at | MmugDNA.27963.1 | 3.4   | 3.74  | 0.04 | 0.09 | -1.27 | 0.004683 | 0.023743 | 0.115008 | 0.192893 |
| MmugDNA.2797.1.S1_at    | MmugDNA.2797.1  | 6.51  | 6.41  | 0.27 | 0.06 | 1.07  | 0.584886 | 0.48511  | 0.788855 | 0.688913 |
| MmugDNA.27971.1.S1_at   | MmugDNA.27971.1 | 7.04  | 9.35  | 0.58 | 0.14 | -4.96 | 0.002936 | 0.025744 | 0.099331 | 0.201029 |
| MmugDNA.27973.1.S1_at   | MmugDNA.27973.1 | 7.54  | 9.5   | 1.36 | 0.32 | -3.87 | 0.098795 | 0.163835 | 0.369716 | 0.440054 |
| MmugDNA.27978.1.S1_at   | MmugDNA.27978.1 | 7.14  | 7.16  | 0.07 | 0.08 | -1.01 | 0.962301 | 0.020362 | 0.984644 | 0.17912  |
| MmugDNA.27983.1.S1_at   | MmugDNA.27983.1 | 10.17 | 10.2  | 0.11 | 0.12 | -1.02 | 0.993248 | 0.508491 | 0.997379 | 0.703646 |
| MmugDNA.27987.1.S1_at   | MmugDNA.27987.1 | 5.81  | 7.55  | 0.7  | 0.3  | -3.33 | 0.00768  | 0.191098 | 0.136336 | 0.466364 |
| MmugDNA.27990.1.S1_at   | MmugDNA.27990.1 | 12.34 | 12.52 | 0.09 | 0.03 | -1.13 | 0.033493 | 0.001357 | 0.237024 | 0.056687 |
| MmugDNA.27992.1.S1_at   | MmugDNA.27992.1 | 4.54  | 4.59  | 0.29 | 0.09 | -1.04 | 0.976568 | 0.592869 | 0.990755 | 0.757932 |



|                         |                 |       |       |      |      |       |          |          |          |          |
|-------------------------|-----------------|-------|-------|------|------|-------|----------|----------|----------|----------|
| MmugDNA.27997.1.S1_at   | MmugDNA.27997.1 | 5.16  | 5.1   | 0.21 | 0.06 | 1.05  | 0.374192 | 0.485508 | 0.645421 | 0.689159 |
| MmugDNA.28001.1.S1_at   | MmugDNA.28001.1 | 4.75  | 4.78  | 0.12 | 0.08 | -1.02 | 0.321814 | 0.119595 | 0.606128 | 0.388247 |
| MmugDNA.28002.1.S1_at   | MmugDNA.28002.1 | 11.04 | 9.35  | 0.32 | 0.42 | 3.23  | 0.0072   | 0.013811 | 0.132536 | 0.150628 |
| MmugDNA.28005.1.S1_at   | MmugDNA.28005.1 | 10.63 | 10.2  | 0.06 | 0.13 | 1.34  | 0.005923 | 0.323852 | 0.123442 | 0.574656 |
| MmugDNA.2801.1.S1_at    | MmugDNA.2801.1  | 6.1   | 5.91  | 0.13 | 0.1  | 1.14  | 0.087595 | 0.090525 | 0.353569 | 0.345015 |
| MmugDNA.28015.1.S1_at   | MmugDNA.28015.1 | 10.81 | 11.32 | 0.16 | 0.12 | -1.42 | 0.011338 | 0.2404   | 0.156654 | 0.510966 |
| MmugDNA.28020.1.S1_at   | MmugDNA.28020.1 | 11.36 | 10.24 | 0.2  | 0.15 | 2.18  | 0.001416 | 0.0004   | 0.07964  | 0.037471 |
| MmugDNA.28023.1.S1_at   | MmugDNA.28023.1 | 14.33 | 14.35 | 0.04 | 0.03 | -1.02 | 0.312804 | 0.105313 | 0.598778 | 0.367145 |
| MmugDNA.28027.1.S1_at   | MmugDNA.28027.1 | 3.29  | 3.47  | 0.21 | 0.09 | -1.13 | 0.213405 | 0.445633 | 0.511268 | 0.662468 |
| MmugDNA.28033.1.S1_at   | MmugDNA.28033.1 | 10.09 | 8.45  | 0.37 | 0.4  | 3.12  | 0.00504  | 0.070671 | 0.116282 | 0.312011 |
| MmugDNA.28034.1.S1_at   | MmugDNA.28034.1 | 12.78 | 12.97 | 0.09 | 0.05 | -1.14 | 0.039201 | 0.076763 | 0.254458 | 0.322197 |
| MmugDNA.28036.1.S1_at   | MmugDNA.28036.1 | 6.82  | 6.59  | 0.2  | 0.1  | 1.18  | 0.224493 | 0.226273 | 0.52264  | 0.498726 |
| MmugDNA.28037.1.S1_s_at | MmugDNA.28037.1 | 9.61  | 9.64  | 0.2  | 0.09 | -1.02 | 0.540996 | 0.305481 | 0.761865 | 0.562437 |
| MmugDNA.28038.1.S1_at   | MmugDNA.28038.1 | 5.66  | 5.53  | 0.14 | 0.11 | 1.09  | 0.354231 | 0.568889 | 0.631413 | 0.742129 |
| MmugDNA.2804.1.S1_at    | MmugDNA.2804.1  | 10.17 | 9.71  | 0.13 | 0.1  | 1.37  | 0.014398 | 0.016477 | 0.171686 | 0.162551 |
| MmugDNA.28042.1.S1_at   | MmugDNA.28042.1 | 9.46  | 9.47  | 0.29 | 0.06 | -1.01 | 0.894388 | 0.077946 | 0.954956 | 0.324283 |
| MmugDNA.28049.1.S1_at   | MmugDNA.28049.1 | 10.96 | 10.54 | 0.25 | 0.12 | 1.34  | 0.063099 | 0.015963 | 0.307923 | 0.160375 |
| MmugDNA.28053.1.S1_at   | MmugDNA.28053.1 | 9.76  | 10    | 0.02 | 0.07 | -1.18 | 0.004244 | 0.354746 | 0.111028 | 0.597422 |
| MmugDNA.28057.1.S1_at   | MmugDNA.28057.1 | 6.33  | 6.39  | 0.2  | 0.04 | -1.05 | 0.72823  | 0.520065 | 0.872988 | 0.711472 |
| MmugDNA.28060.1.S1_s_at | MmugDNA.28060.1 | 10.02 | 10    | 0.02 | 0.06 | 1.01  | 0.977709 | 0.103123 | 0.991259 | 0.364026 |
| MmugDNA.28067.1.S1_at   | MmugDNA.28067.1 | 6.02  | 6.94  | 0.63 | 0.39 | -1.89 | 0.150741 | 0.072147 | 0.439883 | 0.314664 |
| MmugDNA.2807.1.S1_at    | MmugDNA.2807.1  | 5.28  | 5.38  | 0.54 | 0.1  | -1.08 | 0.704529 | 0.682447 | 0.859743 | 0.814526 |
| MmugDNA.28073.1.S1_at   | MmugDNA.28073.1 | 8.82  | 8.84  | 0.77 | 0.39 | -1.01 | 0.811973 | 0.102681 | 0.91581  | 0.363067 |
| MmugDNA.28076.1.S1_at   | MmugDNA.28076.1 | 11.8  | 11.96 | 0.06 | 0.03 | -1.12 | 0.01943  | 0.260534 | 0.192344 | 0.527039 |
| MmugDNA.28079.1.S1_at   | MmugDNA.28079.1 | 8.21  | 8.99  | 0.14 | 0.1  | -1.71 | 0.00162  | 0.115986 | 0.08404  | 0.383164 |
| MmugDNA.28086.1.S1_at   | MmugDNA.28086.1 | 7.91  | 8.07  | 0.28 | 0.08 | -1.12 | 0.895358 | 0.978708 | 0.95534  | 0.988411 |
| MmugDNA.28096.1.S1_at   | MmugDNA.28096.1 | 9.55  | 9.21  | 0.27 | 0.29 | 1.27  | 0.217518 | 0.184038 | 0.515377 | 0.460224 |
| MmugDNA.28097.1.S1_s_at | MmugDNA.28097.1 | 6.34  | 6.75  | 0.37 | 0.12 | -1.33 | 0.195517 | 0.008502 | 0.492277 | 0.1223   |
| MmugDNA.28101.1.S1_at   | MmugDNA.28101.1 | 11.34 | 10.84 | 0.17 | 0.13 | 1.41  | 0.016134 | 0.010495 | 0.179543 | 0.133872 |
| MmugDNA.28109.1.S1_at   | MmugDNA.28109.1 | 6.96  | 6.91  | 0.06 | 0.03 | 1.03  | 0.234913 | 0.628328 | 0.532945 | 0.781112 |
| MmugDNA.28113.1.S1_at   | MmugDNA.28113.1 | 3.62  | 3.76  | 0.14 | 0.14 | -1.1  | 0.159135 | 0.505788 | 0.450505 | 0.702218 |
| MmugDNA.28117.1.S1_at   | MmugDNA.28117.1 | 11.97 | 11.58 | 0.15 | 0.06 | 1.32  | 0.010711 | 0.005935 | 0.153282 | 0.105426 |
| MmugDNA.28118.1.S1_at   | MmugDNA.28118.1 | 9.92  | 9.4   | 0.16 | 0.02 | 1.44  | 0.002721 | 0.000359 | 0.096851 | 0.037273 |
| MmugDNA.28121.1.S1_at   | MmugDNA.28121.1 | 4.67  | 5.16  | 0.58 | 0.41 | -1.41 | 0.397732 | 0.599093 | 0.663261 | 0.761287 |
| MmugDNA.28128.1.S1_at   | MmugDNA.28128.1 | 8.29  | 8.06  | 0.3  | 0.17 | 1.18  | 0.153245 | 0.11051  | 0.442946 | 0.374711 |
| MmugDNA.28137.1.S1_at   | MmugDNA.28137.1 | 5.97  | 6.23  | 0.23 | 0.38 | -1.2  | 0.289279 | 0.254279 | 0.578884 | 0.522605 |
| MmugDNA.28147.1.S1_at   | MmugDNA.28147.1 | 5.89  | 5.9   | 0.05 | 0.05 | -1    | 0.227406 | 0.299698 | 0.525446 | 0.558037 |
| MmugDNA.28159.1.S1_at   | MmugDNA.28159.1 | 8.01  | 7.84  | 0.07 | 0.16 | 1.12  | 0.100309 | 0.116552 | 0.371099 | 0.383705 |
| MmugDNA.2816.1.S1_at    | MmugDNA.2816.1  | 8.41  | 8.3   | 0.16 | 0.05 | 1.08  | 0.946559 | 0.009693 | 0.977455 | 0.129497 |
| MmugDNA.2816.1.S1_s_at  | MmugDNA.2816.1  | 6.81  | 6.83  | 0.16 | 0.07 | -1.01 | 0.214264 | 0.27531  | 0.51193  | 0.539663 |
| MmugDNA.28164.1.S1_at   | MmugDNA.28164.1 | 12.14 | 12.12 | 0.16 | 0.04 | 1.02  | 0.315554 | 0.39036  | 0.600423 | 0.624156 |
| MmugDNA.28165.1.S1_at   | MmugDNA.28165.1 | 7.81  | 6.73  | 0.11 | 0.27 | 2.12  | 0.003329 | 0.229455 | 0.102526 | 0.501527 |
| MmugDNA.28169.1.S1_at   | MmugDNA.28169.1 | 7.46  | 7.36  | 0.13 | 0.07 | 1.08  | 0.401291 | 0.697496 | 0.665992 | 0.824228 |

|                         |                 |       |       |      |      |       |          |          |          |          |
|-------------------------|-----------------|-------|-------|------|------|-------|----------|----------|----------|----------|
| MmugDNA.28179.1.S1_at   | MmugDNA.28179.1 | 11.63 | 11.89 | 0.17 | 0    | -1.19 | 0.062492 | 0.529089 | 0.306597 | 0.717133 |
| MmugDNA.28186.1.S1_at   | MmugDNA.28186.1 | 6.82  | 6.85  | 0.15 | 0.05 | -1.02 | 0.588059 | 0.445338 | 0.790795 | 0.662338 |
| MmugDNA.28190.1.S1_s_at | MmugDNA.28190.1 | 4.71  | 4.68  | 0.31 | 0.04 | 1.02  | 0.82057  | 0.916687 | 0.919941 | 0.953368 |
| MmugDNA.28191.1.S1_at   | MmugDNA.28191.1 | 9.83  | 9.64  | 0.1  | 0.04 | 1.14  | 0.110441 | 0.920858 | 0.385799 | 0.955413 |
| MmugDNA.28192.1.S1_at   | MmugDNA.28192.1 | 5.01  | 5.51  | 0.38 | 0.11 | -1.42 | 0.04568  | 0.234912 | 0.271157 | 0.506125 |
| MmugDNA.28198.1.S1_at   | MmugDNA.28198.1 | 5.5   | 6.11  | 0.03 | 0.18 | -1.52 | 0.002542 | 0.270276 | 0.094413 | 0.535654 |
| MmugDNA.2820.1.S1_at    | MmugDNA.2820.1  | 4     | 3.99  | 0.22 | 0.09 | 1.01  | 0.312155 | 0.221071 | 0.598226 | 0.494475 |
| MmugDNA.28206.1.S1_at   | MmugDNA.28206.1 | 4.59  | 4.49  | 0.12 | 0.16 | 1.07  | 0.40909  | 0.534562 | 0.671651 | 0.72045  |
| MmugDNA.28206.1.S1_x_at | MmugDNA.28206.1 | 8.08  | 8.07  | 0.04 | 0.06 | 1.01  | 0.169408 | 0.657011 | 0.462638 | 0.799401 |
| MmugDNA.28210.1.S1_at   | MmugDNA.28210.1 | 10.35 | 10.32 | 0.16 | 0.11 | 1.02  | 0.380828 | 0.003336 | 0.6504   | 0.083072 |
| MmugDNA.28211.1.S1_at   | MmugDNA.28211.1 | 9.42  | 9.01  | 0.14 | 0.08 | 1.33  | 0.011168 | 0.004755 | 0.15539  | 0.096208 |
| MmugDNA.28230.1.S1_at   | MmugDNA.28230.1 | 9.62  | 9.62  | 0.09 | 0.06 | 1     | 0.262978 | 0.774237 | 0.556723 | 0.868735 |
| MmugDNA.28234.1.S1_at   | MmugDNA.28234.1 | 4.75  | 6.08  | 1.35 | 0.07 | -2.52 | 0.272339 | 0.546268 | 0.564374 | 0.727894 |
| MmugDNA.28244.1.S1_at   | MmugDNA.28244.1 | 10.63 | 10.44 | 0.08 | 0.04 | 1.14  | 0.036364 | 0.001713 | 0.245737 | 0.062657 |
| MmugDNA.28246.1.S1_at   | MmugDNA.28246.1 | 11.2  | 10.78 | 0.19 | 0.07 | 1.34  | 0.052184 | 0.015431 | 0.285936 | 0.157727 |
| MmugDNA.28250.1.S1_at   | MmugDNA.28250.1 | 8.07  | 8.7   | 0.21 | 0.19 | -1.55 | 0.017234 | 0.146733 | 0.184429 | 0.42078  |
| MmugDNA.28252.1.S1_s_at | MmugDNA.28252.1 | 10.8  | 10.49 | 0.18 | 0.1  | 1.24  | 0.071696 | 0.042031 | 0.325611 | 0.249464 |
| MmugDNA.28260.1.S1_at   | MmugDNA.28260.1 | 6.89  | 9.63  | 1.23 | 0.31 | -6.7  | 0.022636 | 0.155409 | 0.203548 | 0.430802 |
| MmugDNA.28279.1.S1_at   | MmugDNA.28279.1 | 11.74 | 11.87 | 0.11 | 0.07 | -1.1  | 0.373577 | 0.918106 | 0.645118 | 0.954068 |
| MmugDNA.2828.1.S1_at    | MmugDNA.2828.1  | 6.1   | 6.1   | 0.09 | 0    | -1    | 0.328517 | 0.613712 | 0.610849 | 0.770786 |
| MmugDNA.28282.1.S1_at   | MmugDNA.28282.1 | 9     | 9.36  | 0.4  | 0.05 | -1.29 | 0.174483 | 0.123575 | 0.468676 | 0.393637 |
| MmugDNA.28284.1.S1_at   | MmugDNA.28284.1 | 11.86 | 11.71 | 0.17 | 0.07 | 1.1   | 0.331908 | 0.435786 | 0.613772 | 0.655526 |
| MmugDNA.28288.1.S1_at   | MmugDNA.28288.1 | 9.22  | 9.68  | 0.26 | 0.2  | -1.37 | 0.147481 | 0.018086 | 0.435407 | 0.169435 |
| MmugDNA.28291.1.S1_at   | MmugDNA.28291.1 | 9.87  | 9.48  | 0.13 | 0.3  | 1.31  | 0.312227 | 0.545797 | 0.598235 | 0.727653 |
| MmugDNA.28294.1.S1_at   | MmugDNA.28294.1 | 9.3   | 9.04  | 0.01 | 0.03 | 1.19  | 0.000179 | 0.000005 | 0.053494 | 0.015647 |
| MmugDNA.28294.1.S1_s_at | MmugDNA.28294.1 | 10.2  | 10.01 | 0.1  | 0.04 | 1.14  | 0.020481 | 0.000182 | 0.196606 | 0.030511 |
| MmugDNA.28295.1.S1_at   | MmugDNA.28295.1 | 6.41  | 6.6   | 0.1  | 0.13 | -1.14 | 0.27165  | 0.073631 | 0.563498 | 0.316952 |
| MmugDNA.2830.1.S1_at    | MmugDNA.2830.1  | 9.76  | 9.63  | 0.17 | 0.18 | 1.09  | 0.269197 | 0.756594 | 0.561608 | 0.858257 |
| MmugDNA.28301.1.S1_at   | MmugDNA.28301.1 | 4.92  | 4.73  | 0.11 | 0.13 | 1.15  | 0.118564 | 0.25194  | 0.396229 | 0.520632 |
| MmugDNA.28305.1.S1_at   | MmugDNA.28305.1 | 8.78  | 8.62  | 0.3  | 0.08 | 1.11  | 0.907492 | 0.005624 | 0.960895 | 0.103682 |
| MmugDNA.28307.1.S1_at   | MmugDNA.28307.1 | 5.16  | 5.06  | 0.2  | 0.17 | 1.07  | 0.274189 | 0.350217 | 0.566167 | 0.593975 |
| MmugDNA.28309.1.S1_at   | MmugDNA.28309.1 | 4.62  | 4.66  | 0.13 | 0.11 | -1.03 | 0.652089 | 0.06118  | 0.831092 | 0.293981 |
| MmugDNA.28314.1.S1_at   | MmugDNA.28314.1 | 10.7  | 10.62 | 0.23 | 0.09 | 1.06  | 0.743033 | 0.829784 | 0.881162 | 0.902214 |
| MmugDNA.28316.1.S1_at   | MmugDNA.28316.1 | 12.73 | 12.52 | 0.14 | 0.06 | 1.15  | 0.231081 | 0.281723 | 0.529845 | 0.544807 |
| MmugDNA.28322.1.S1_at   | MmugDNA.28322.1 | 11.97 | 11.82 | 0.21 | 0.03 | 1.11  | 0.218567 | 0.343439 | 0.516192 | 0.58921  |
| MmugDNA.28323.1.S1_at   | MmugDNA.28323.1 | 4.82  | 4.94  | 0.24 | 0.07 | -1.09 | 0.94956  | 0.445367 | 0.978971 | 0.662343 |
| MmugDNA.28328.1.S1_at   | MmugDNA.28328.1 | 12.28 | 12.42 | 0.09 | 0.03 | -1.1  | 0.290949 | 0.714188 | 0.580307 | 0.834155 |
| MmugDNA.2833.1.S1_at    | MmugDNA.2833.1  | 5.83  | 5.81  | 0.16 | 0.06 | 1.01  | 0.600735 | 0.540866 | 0.799126 | 0.724604 |
| MmugDNA.28331.1.S1_at   | MmugDNA.28331.1 | 6.11  | 5.91  | 0.23 | 0.06 | 1.15  | 0.169333 | 0.097609 | 0.462593 | 0.355473 |
| MmugDNA.28333.1.S1_at   | MmugDNA.28333.1 | 3.63  | 3.72  | 0.1  | 0.1  | -1.06 | 0.351102 | 0.221387 | 0.628776 | 0.494644 |
| MmugDNA.28347.1.S1_at   | MmugDNA.28347.1 | 6.61  | 6.39  | 0.17 | 0.08 | 1.17  | 0.064851 | 0.114427 | 0.311366 | 0.38101  |
| MmugDNA.28349.1.S1_at   | MmugDNA.28349.1 | 8.06  | 7.51  | 0.43 | 0.13 | 1.46  | 0.088218 | 0.268553 | 0.354244 | 0.534126 |
| MmugDNA.28351.1.S1_at   | MmugDNA.28351.1 | 9.37  | 8.98  | 0.29 | 0.12 | 1.31  | 0.112169 | 0.334721 | 0.388288 | 0.582615 |

|                         |                 |       |       |      |      |       |          |          |          |          |
|-------------------------|-----------------|-------|-------|------|------|-------|----------|----------|----------|----------|
| MmugDNA.2836.1.S1_s_at  | MmugDNA.2836.1  | 11.48 | 11.47 | 0.09 | 0.12 | 1.01  | 0.438862 | 0.03397  | 0.693357 | 0.227969 |
| MmugDNA.28361.1.S1_at   | MmugDNA.28361.1 | 4.21  | 4.19  | 0.29 | 0.1  | 1.01  | 0.61116  | 0.726169 | 0.806132 | 0.84147  |
| MmugDNA.28367.1.S1_at   | MmugDNA.28367.1 | 12.97 | 13.37 | 0.33 | 0.02 | -1.31 | 0.330501 | 0.366141 | 0.612534 | 0.605941 |
| MmugDNA.28369.1.S1_at   | MmugDNA.28369.1 | 9.2   | 9.66  | 0.39 | 0.08 | -1.38 | 0.109881 | 0.056762 | 0.385105 | 0.284379 |
| MmugDNA.28376.1.S1_at   | MmugDNA.28376.1 | 4.37  | 4.44  | 0.16 | 0.09 | -1.05 | 0.458668 | 0.491944 | 0.707171 | 0.693325 |
| MmugDNA.28380.1.S1_at   | MmugDNA.28380.1 | 5.44  | 5.43  | 0.48 | 0.19 | 1.01  | 0.715979 | 0.828919 | 0.865989 | 0.901662 |
| MmugDNA.28382.1.S1_at   | MmugDNA.28382.1 | 7.49  | 7.34  | 0.21 | 0.11 | 1.11  | 0.991751 | 0.494476 | 0.997004 | 0.694893 |
| MmugDNA.28382.1.S1_s_at | MmugDNA.28382.1 | 8.22  | 8.32  | 0.19 | 0.09 | -1.07 | 0.578387 | 0.761886 | 0.784232 | 0.861579 |
| MmugDNA.28390.1.S1_at   | MmugDNA.28390.1 | 7.18  | 7.21  | 0.15 | 0.05 | -1.02 | 0.705162 | 0.647321 | 0.860178 | 0.793411 |
| MmugDNA.28393.1.S1_s_at | MmugDNA.28393.1 | 8.67  | 9.14  | 0.28 | 0.1  | -1.39 | 0.044785 | 0.045815 | 0.268918 | 0.258337 |
| MmugDNA.2840.1.S1_at    | MmugDNA.2840.1  | 10.2  | 10.14 | 0.1  | 0.2  | 1.04  | 0.820345 | 0.447839 | 0.919887 | 0.663881 |
| MmugDNA.28401.1.S1_at   | MmugDNA.28401.1 | 4.8   | 4.84  | 0.45 | 0.07 | -1.02 | 0.409669 | 0.526397 | 0.671978 | 0.715557 |
| MmugDNA.28402.1.S1_at   | MmugDNA.28402.1 | 7.09  | 7.04  | 0.05 | 0.05 | 1.03  | 0.662313 | 0.198344 | 0.837065 | 0.473267 |
| MmugDNA.28413.1.S1_at   | MmugDNA.28413.1 | 6.03  | 7.51  | 0.14 | 0.4  | -2.79 | 0.005261 | 0.075897 | 0.117461 | 0.320523 |
| MmugDNA.28414.1.S1_at   | MmugDNA.28414.1 | 4.24  | 4.28  | 0.09 | 0.07 | -1.03 | 0.462735 | 0.390261 | 0.70975  | 0.624128 |
| MmugDNA.28415.1.S1_at   | MmugDNA.28415.1 | 10.99 | 10.07 | 0.16 | 0.1  | 1.89  | 0.001125 | 0.094994 | 0.077306 | 0.352071 |
| MmugDNA.28418.1.S1_at   | MmugDNA.28418.1 | 4.06  | 4.25  | 0.03 | 0.45 | -1.14 | 0.23157  | 0.056703 | 0.530249 | 0.284214 |
| MmugDNA.28419.1.S1_at   | MmugDNA.28419.1 | 6.24  | 6.13  | 0.07 | 0.14 | 1.09  | 0.250639 | 0.068098 | 0.545228 | 0.307142 |
| MmugDNA.28420.1.S1_at   | MmugDNA.28420.1 | 11.74 | 12.01 | 0.12 | 0.01 | -1.21 | 0.054711 | 0.094843 | 0.290681 | 0.35185  |
| MmugDNA.28420.1.S1_s_at | MmugDNA.28420.1 | 9.89  | 10.17 | 0.19 | 0.1  | -1.21 | 0.330151 | 0.488653 | 0.612186 | 0.691273 |
| MmugDNA.28422.1.S1_at   | MmugDNA.28422.1 | 10.89 | 10.87 | 0.13 | 0.09 | 1.02  | 0.704664 | 0.729303 | 0.859786 | 0.843541 |
| MmugDNA.28423.1.S1_s_at | MmugDNA.28423.1 | 6.9   | 7.49  | 0.4  | 0.08 | -1.51 | 0.203477 | 0.156492 | 0.501192 | 0.431866 |
| MmugDNA.28430.1.S1_at   | MmugDNA.28430.1 | 9.31  | 9.59  | 0.14 | 0.1  | -1.22 | 0.059867 | 0.049915 | 0.301975 | 0.268548 |
| MmugDNA.28437.1.S1_at   | MmugDNA.28437.1 | 7.91  | 8.24  | 0.1  | 0.15 | -1.26 | 0.059827 | 0.142954 | 0.301876 | 0.416854 |
| MmugDNA.28439.1.S1_at   | MmugDNA.28439.1 | 8.29  | 8.62  | 0.09 | 0.44 | -1.26 | 0.236115 | 0.007969 | 0.533741 | 0.118702 |
| MmugDNA.28440.1.S1_at   | MmugDNA.28440.1 | 6.4   | 6.48  | 0.07 | 0.08 | -1.06 | 0.579914 | 0.353031 | 0.785437 | 0.596356 |
| MmugDNA.28441.1.S1_at   | MmugDNA.28441.1 | 4.49  | 4.45  | 0.06 | 0.08 | 1.03  | 0.105005 | 0.058149 | 0.378728 | 0.287812 |
| MmugDNA.28443.1.S1_at   | MmugDNA.28443.1 | 3.75  | 3.45  | 0.19 | 0.17 | 1.23  | 0.083066 | 0.527545 | 0.345372 | 0.716154 |
| MmugDNA.28444.1.S1_at   | MmugDNA.28444.1 | 5.35  | 5.35  | 0.1  | 0.06 | 1     | 0.804813 | 0.007943 | 0.91238  | 0.118702 |
| MmugDNA.28446.1.S1_at   | MmugDNA.28446.1 | 10.02 | 9.98  | 0.04 | 0.23 | 1.03  | 0.265589 | 0.535738 | 0.558222 | 0.721262 |
| MmugDNA.28451.1.S1_at   | MmugDNA.28451.1 | 9.59  | 10.05 | 0.27 | 0.02 | -1.37 | 0.028401 | 0.062805 | 0.221039 | 0.297213 |
| MmugDNA.28453.1.S1_at   | MmugDNA.28453.1 | 5.26  | 5.66  | 0.06 | 0.08 | -1.33 | 0.002119 | 0.343306 | 0.090208 | 0.58905  |
| MmugDNA.28455.1.S1_at   | MmugDNA.28455.1 | 7.2   | 6.94  | 0.13 | 0.16 | 1.19  | 0.162919 | 0.120413 | 0.45504  | 0.38925  |
| MmugDNA.28455.1.S1_s_at | MmugDNA.28455.1 | 7.26  | 6.88  | 0.14 | 0.17 | 1.3   | 0.034567 | 0.116488 | 0.240515 | 0.383671 |
| MmugDNA.2846.1.S1_at    | MmugDNA.2846.1  | 11.01 | 10.89 | 0.14 | 0.09 | 1.09  | 0.594848 | 0.269857 | 0.794991 | 0.535135 |
| MmugDNA.28461.1.S1_at   | MmugDNA.28461.1 | 2.98  | 2.98  | 0.07 | 0.05 | -1    | 0.220075 | 0.352956 | 0.517678 | 0.596268 |
| MmugDNA.28462.1.S1_at   | MmugDNA.28462.1 | 5.75  | 6.63  | 0.39 | 0.41 | -1.85 | 0.027379 | 0.000154 | 0.218317 | 0.030065 |
| MmugDNA.28465.1.S1_at   | MmugDNA.28465.1 | 8.08  | 6.46  | 0.3  | 0.27 | 3.08  | 0.002066 | 0.055956 | 0.090098 | 0.28236  |
| MmugDNA.28467.1.S1_at   | MmugDNA.28467.1 | 11.34 | 11.57 | 0.21 | 0.08 | -1.17 | 0.140461 | 0.025275 | 0.426202 | 0.19945  |
| MmugDNA.2847.1.S1_at    | MmugDNA.2847.1  | 9.49  | 9.08  | 0.24 | 0.08 | 1.33  | 0.033405 | 0.148237 | 0.236756 | 0.422745 |
| MmugDNA.28471.1.S1_at   | MmugDNA.28471.1 | 7.25  | 7.21  | 0.22 | 0.14 | 1.03  | 0.478424 | 0.378595 | 0.71999  | 0.615638 |
| MmugDNA.28472.1.S1_at   | MmugDNA.28472.1 | 9.76  | 9.6   | 0.13 | 0.09 | 1.12  | 0.330109 | 0.181325 | 0.612152 | 0.457834 |
| MmugDNA.28473.1.S1_at   | MmugDNA.28473.1 | 4.03  | 3.88  | 0.18 | 0.11 | 1.11  | 0.372028 | 0.53201  | 0.644659 | 0.718995 |

|                         |                 |       |       |      |      |       |          |          |          |          |
|-------------------------|-----------------|-------|-------|------|------|-------|----------|----------|----------|----------|
| MmugDNA.28474.1.S1_at   | MmugDNA.28474.1 | 12.68 | 12.65 | 0.07 | 0.04 | 1.02  | 0.837155 | 0.4807   | 0.928581 | 0.68597  |
| MmugDNA.28478.1.S1_at   | MmugDNA.28478.1 | 6.55  | 6.8   | 0.3  | 0.36 | -1.19 | 0.558431 | 0.169715 | 0.772894 | 0.446287 |
| MmugDNA.28479.1.S1_at   | MmugDNA.28479.1 | 5.04  | 4.69  | 0.26 | 0.13 | 1.27  | 0.061131 | 0.139876 | 0.304069 | 0.413173 |
| MmugDNA.28485.1.S1_at   | MmugDNA.28485.1 | 8.35  | 8.4   | 1.47 | 0.12 | -1.03 | 0.872793 | 0.631294 | 0.945492 | 0.782751 |
| MmugDNA.28489.1.S1_at   | MmugDNA.28489.1 | 12.89 | 13.03 | 0.13 | 0.02 | -1.1  | 0.117371 | 0.225029 | 0.394682 | 0.49773  |
| MmugDNA.2849.1.S1_s_at  | MmugDNA.2849.1  | 9.73  | 10.58 | 0.3  | 0.13 | -1.79 | 0.007751 | 0.06393  | 0.136735 | 0.29906  |
| MmugDNA.28490.1.S1_at   | MmugDNA.28490.1 | 9.82  | 9.65  | 0.24 | 0.08 | 1.13  | 0.30319  | 0.780637 | 0.590648 | 0.872726 |
| MmugDNA.28493.1.S1_at   | MmugDNA.28493.1 | 3.61  | 3.54  | 0.16 | 0.09 | 1.05  | 0.751806 | 0.765475 | 0.885488 | 0.863679 |
| MmugDNA.28495.1.S1_at   | MmugDNA.28495.1 | 8.72  | 8.43  | 0.16 | 0.09 | 1.23  | 0.235252 | 0.050046 | 0.53312  | 0.268916 |
| MmugDNA.28497.1.S1_at   | MmugDNA.28497.1 | 5.73  | 9.19  | 1.77 | 0.11 | -11   | 0.075911 | 0.378388 | 0.333877 | 0.615443 |
| MmugDNA.28501.1.S1_at   | MmugDNA.28501.1 | 9.58  | 9.57  | 0.62 | 0.2  | 1.01  | 0.951065 | 0.35816  | 0.979735 | 0.599694 |
| MmugDNA.28504.1.S1_at   | MmugDNA.28504.1 | 13.31 | 13.08 | 0.09 | 0.02 | 1.17  | 0.012331 | 0.000477 | 0.16135  | 0.038572 |
| MmugDNA.28514.1.S1_at   | MmugDNA.28514.1 | 6.06  | 6.03  | 0.38 | 0.03 | 1.03  | 0.785779 | 0.945287 | 0.902185 | 0.968942 |
| MmugDNA.28527.1.S1_at   | MmugDNA.28527.1 | 5.98  | 5.93  | 0.11 | 0.15 | 1.04  | 0.296611 | 0.023446 | 0.585315 | 0.191956 |
| MmugDNA.2853.1.S1_at    | MmugDNA.2853.1  | 13.1  | 12.93 | 0.11 | 0.02 | 1.13  | 0.023305 | 0.117637 | 0.205593 | 0.385352 |
| MmugDNA.28530.1.S1_s_at | MmugDNA.28530.1 | 10.99 | 11.33 | 0.1  | 0.2  | -1.26 | 0.197723 | 0.042106 | 0.495034 | 0.249656 |
| MmugDNA.28531.1.S1_at   | MmugDNA.28531.1 | 11.42 | 10.04 | 0.32 | 0.63 | 2.61  | 0.068881 | 0.056771 | 0.320479 | 0.284379 |
| MmugDNA.28534.1.S1_at   | MmugDNA.28534.1 | 8     | 9.42  | 0.39 | 0.17 | -2.67 | 0.007046 | 0.00775  | 0.131294 | 0.117622 |
| MmugDNA.28535.1.S1_s_at | MmugDNA.28535.1 | 11.16 | 10.82 | 0.16 | 0.12 | 1.27  | 0.189619 | 0.004088 | 0.486064 | 0.09055  |
| MmugDNA.28538.1.S1_at   | MmugDNA.28538.1 | 9.75  | 9.67  | 0.27 | 0.28 | 1.06  | 0.690563 | 0.488595 | 0.852093 | 0.691222 |
| MmugDNA.28544.1.S1_at   | MmugDNA.28544.1 | 8.69  | 8.29  | 0.92 | 0.21 | 1.32  | 0.651057 | 0.209578 | 0.830545 | 0.483264 |
| MmugDNA.28546.1.S1_at   | MmugDNA.28546.1 | 11.28 | 11.35 | 0.24 | 0.07 | -1.05 | 0.703242 | 0.000405 | 0.859182 | 0.03749  |
| MmugDNA.2855.1.S1_at    | MmugDNA.2855.1  | 11.3  | 10.9  | 0.07 | 0.11 | 1.31  | 0.010338 | 0.082761 | 0.151596 | 0.33223  |
| MmugDNA.28554.1.S1_at   | MmugDNA.28554.1 | 6.37  | 6.13  | 0.27 | 0.16 | 1.17  | 0.478235 | 0.686194 | 0.719852 | 0.816834 |
| MmugDNA.28561.1.S1_at   | MmugDNA.28561.1 | 6.51  | 6.02  | 0.39 | 0.21 | 1.4   | 0.111834 | 0.491822 | 0.387954 | 0.693275 |
| MmugDNA.28566.1.S1_at   | MmugDNA.28566.1 | 3.07  | 3.8   | 0.23 | 0.66 | -1.66 | 0.053548 | 0.032181 | 0.288636 | 0.222111 |
| MmugDNA.28569.1.S1_at   | MmugDNA.28569.1 | 4.44  | 4.07  | 0.2  | 0.06 | 1.29  | 0.151689 | 0.195744 | 0.441235 | 0.470637 |
| MmugDNA.2857.1.S1_at    | MmugDNA.2857.1  | 9.76  | 9.42  | 0.05 | 0.05 | 1.27  | 0.00127  | 0.014518 | 0.078631 | 0.15371  |
| MmugDNA.28570.1.S1_at   | MmugDNA.28570.1 | 4.92  | 4.99  | 0.04 | 0.13 | -1.05 | 0.555027 | 0.150393 | 0.770988 | 0.424934 |
| MmugDNA.28571.1.S1_at   | MmugDNA.28571.1 | 8.73  | 8.2   | 0.66 | 0.29 | 1.44  | 0.41502  | 0.256128 | 0.675916 | 0.524069 |
| MmugDNA.28572.1.S1_at   | MmugDNA.28572.1 | 8.47  | 8.45  | 0.12 | 0.03 | 1.01  | 0.872603 | 0.990658 | 0.945406 | 0.994725 |
| MmugDNA.28574.1.S1_at   | MmugDNA.28574.1 | 7.43  | 7.21  | 0.33 | 0.2  | 1.16  | 0.192349 | 0.002772 | 0.488949 | 0.077863 |
| MmugDNA.28591.1.S1_s_at | MmugDNA.28591.1 | 7.49  | 7.71  | 0.21 | 0.31 | -1.16 | 0.430935 | 0.691834 | 0.687194 | 0.82074  |
| MmugDNA.28599.1.S1_at   | MmugDNA.28599.1 | 12.36 | 12.65 | 0.22 | 0.05 | -1.23 | 0.064697 | 0.052148 | 0.311107 | 0.273955 |
| MmugDNA.286.1.S1_at     | MmugDNA.286.1   | 5.66  | 5.52  | 0.36 | 0.36 | 1.1   | 0.348393 | 0.022216 | 0.626353 | 0.186513 |
| MmugDNA.286.1.S1_s_at   | MmugDNA.286.1   | 7.26  | 7.21  | 0.34 | 0.21 | 1.04  | 0.923354 | 0.009772 | 0.967345 | 0.130026 |
| MmugDNA.28603.1.S1_at   | MmugDNA.28603.1 | 3.81  | 3.77  | 0.02 | 0.04 | 1.03  | 0.070906 | 0.278618 | 0.324335 | 0.542329 |
| MmugDNA.28625.1.S1_at   | MmugDNA.28625.1 | 9.17  | 9.21  | 0.07 | 0.02 | -1.03 | 0.972435 | 0.792999 | 0.988877 | 0.880435 |
| MmugDNA.28626.1.S1_at   | MmugDNA.28626.1 | 11.75 | 11.8  | 0.07 | 0.04 | -1.04 | 0.113278 | 0.675702 | 0.390051 | 0.810429 |
| MmugDNA.28627.1.S1_at   | MmugDNA.28627.1 | 9.8   | 9.78  | 0.09 | 0.17 | 1.01  | 0.618499 | 0.951225 | 0.810674 | 0.972378 |
| MmugDNA.2863.1.S1_at    | MmugDNA.2863.1  | 11.09 | 11.08 | 0.06 | 0.04 | 1     | 0.519501 | 0.380061 | 0.748059 | 0.61674  |
| MmugDNA.28631.1.S1_at   | MmugDNA.28631.1 | 9.23  | 11.55 | 0.67 | 0.21 | -4.98 | 0.008842 | 0.010315 | 0.143863 | 0.132962 |
| MmugDNA.28634.1.S1_at   | MmugDNA.28634.1 | 10.81 | 10.9  | 0.23 | 0.06 | -1.07 | 0.563143 | 0.076976 | 0.775309 | 0.322421 |

|                         |                 |       |       |      |      |       |          |          |          |          |
|-------------------------|-----------------|-------|-------|------|------|-------|----------|----------|----------|----------|
| MmugDNA.28635.1.S1_at   | MmugDNA.28635.1 | 11.75 | 12.68 | 0.67 | 0.23 | -1.91 | 0.07401  | 0.011823 | 0.330034 | 0.140866 |
| MmugDNA.28641.1.S1_at   | MmugDNA.28641.1 | 8.07  | 8.42  | 0.19 | 0.12 | -1.27 | 0.094299 | 0.433074 | 0.363294 | 0.653448 |
| MmugDNA.28643.1.S1_at   | MmugDNA.28643.1 | 7.13  | 6.8   | 0.86 | 0.14 | 1.25  | 0.355439 | 0.426434 | 0.632237 | 0.648601 |
| MmugDNA.28666.1.S1_at   | MmugDNA.28666.1 | 6.9   | 7.24  | 0.41 | 0.21 | -1.27 | 0.283054 | 0.625662 | 0.573539 | 0.779265 |
| MmugDNA.28672.1.S1_at   | MmugDNA.28672.1 | 3.3   | 3.36  | 0.16 | 0.08 | -1.04 | 0.611044 | 0.511778 | 0.806059 | 0.705797 |
| MmugDNA.28678.1.S1_at   | MmugDNA.28678.1 | 10.62 | 10.12 | 0.07 | 0.15 | 1.42  | 0.00556  | 0.004408 | 0.12008  | 0.092846 |
| MmugDNA.28682.1.S1_at   | MmugDNA.28682.1 | 4.1   | 4.01  | 0.46 | 0.05 | 1.07  | 0.22444  | 0.314638 | 0.522615 | 0.568415 |
| MmugDNA.28683.1.S1_at   | MmugDNA.28683.1 | 8.89  | 8.69  | 0.08 | 0.25 | 1.15  | 0.247339 | 0.002983 | 0.542869 | 0.079958 |
| MmugDNA.28686.1.S1_at   | MmugDNA.28686.1 | 10.25 | 10.4  | 0.07 | 0.09 | -1.1  | 0.057425 | 0.278647 | 0.296977 | 0.542347 |
| MmugDNA.28689.1.S1_at   | MmugDNA.28689.1 | 11.92 | 12.17 | 0.18 | 0.13 | -1.2  | 0.207528 | 0.056372 | 0.505248 | 0.283382 |
| MmugDNA.28694.1.S1_at   | MmugDNA.28694.1 | 10.74 | 10.54 | 0.35 | 0.26 | 1.15  | 0.31287  | 0.444697 | 0.598797 | 0.662072 |
| MmugDNA.28694.1.S1_s_at | MmugDNA.28694.1 | 10.41 | 10.35 | 0.29 | 0.14 | 1.04  | 0.580742 | 0.852472 | 0.786042 | 0.916174 |
| MmugDNA.28698.1.S1_at   | MmugDNA.28698.1 | 12.27 | 8.3   | 2.56 | 0.59 | 15.72 | 0.175082 | 0.194944 | 0.469373 | 0.470088 |
| MmugDNA.28698.1.S1_x_at | MmugDNA.28698.1 | 12.32 | 8.38  | 2.55 | 0.59 | 15.27 | 0.177512 | 0.197663 | 0.472191 | 0.472633 |
| MmugDNA.2870.1.S1_at    | MmugDNA.2870.1  | 9.05  | 8.74  | 0.28 | 0.33 | 1.24  | 0.709353 | 0.653642 | 0.862485 | 0.797546 |
| MmugDNA.28700.1.S1_at   | MmugDNA.28700.1 | 10.15 | 10.08 | 0.09 | 0.11 | 1.05  | 0.467029 | 0.386976 | 0.712594 | 0.621935 |
| MmugDNA.28704.1.S1_at   | MmugDNA.28704.1 | 11.46 | 11.88 | 0.12 | 0.11 | -1.34 | 0.011482 | 0.006468 | 0.15722  | 0.109304 |
| MmugDNA.28706.1.S1_at   | MmugDNA.28706.1 | 4.8   | 4.63  | 0.1  | 0.14 | 1.13  | 0.285106 | 0.422576 | 0.575118 | 0.645762 |
| MmugDNA.28721.1.S1_at   | MmugDNA.28721.1 | 10.83 | 10.73 | 0.4  | 0.09 | 1.07  | 0.592879 | 0.360068 | 0.793684 | 0.601204 |
| MmugDNA.28724.1.S1_at   | MmugDNA.28724.1 | 10.83 | 10.68 | 0.09 | 0.11 | 1.11  | 0.311937 | 0.028242 | 0.598112 | 0.209816 |
| MmugDNA.2873.1.S1_at    | MmugDNA.2873.1  | 8.68  | 8.8   | 0.28 | 0.07 | -1.08 | 0.447641 | 0.544836 | 0.699576 | 0.727177 |
| MmugDNA.28738.1.S1_at   | MmugDNA.28738.1 | 11.15 | 10.83 | 0.17 | 0.06 | 1.25  | 0.099621 | 0.154139 | 0.370515 | 0.42887  |
| MmugDNA.2874.1.S1_at    | MmugDNA.2874.1  | 9.88  | 9.57  | 0.14 | 0.09 | 1.24  | 0.024401 | 0.002726 | 0.209245 | 0.076945 |
| MmugDNA.28742.1.S1_at   | MmugDNA.28742.1 | 10.97 | 11    | 0.12 | 0.07 | -1.02 | 0.533274 | 0.397935 | 0.756897 | 0.629138 |
| MmugDNA.28748.1.S1_at   | MmugDNA.28748.1 | 9.71  | 9.76  | 0.09 | 0.08 | -1.04 | 0.895902 | 0.011281 | 0.955609 | 0.138076 |
| MmugDNA.28749.1.S1_at   | MmugDNA.28749.1 | 7.11  | 7.56  | 0.2  | 0.09 | -1.37 | 0.041005 | 0.076634 | 0.258927 | 0.321912 |
| MmugDNA.2875.1.S1_at    | MmugDNA.2875.1  | 9.14  | 8.89  | 0.1  | 0.06 | 1.19  | 0.010213 | 0.000324 | 0.150739 | 0.035587 |
| MmugDNA.28752.1.S1_at   | MmugDNA.28752.1 | 7.37  | 7.45  | 0.05 | 0.04 | -1.06 | 0.091525 | 0.008278 | 0.359218 | 0.12078  |
| MmugDNA.28757.1.S1_at   | MmugDNA.28757.1 | 4.61  | 4.53  | 0.2  | 0.23 | 1.06  | 0.704326 | 0.787747 | 0.859703 | 0.877256 |
| MmugDNA.28758.1.S1_at   | MmugDNA.28758.1 | 3.62  | 3.64  | 0.26 | 0.05 | -1.01 | 0.841226 | 0.831838 | 0.930189 | 0.903518 |
| MmugDNA.28773.1.S1_at   | MmugDNA.28773.1 | 4.52  | 4.84  | 0.15 | 0.09 | -1.25 | 0.082418 | 0.107517 | 0.344143 | 0.370389 |
| MmugDNA.28779.1.S1_at   | MmugDNA.28779.1 | 13.59 | 13.61 | 0.04 | 0.03 | -1.01 | 0.496038 | 0.562535 | 0.732047 | 0.738055 |
| MmugDNA.2878.1.S1_at    | MmugDNA.2878.1  | 8.6   | 8.44  | 0.09 | 0.34 | 1.11  | 0.844763 | 0.102635 | 0.93215  | 0.362991 |
| MmugDNA.28787.1.S1_at   | MmugDNA.28787.1 | 11.4  | 11.75 | 0.3  | 0.13 | -1.27 | 0.182284 | 0.004664 | 0.478038 | 0.095301 |
| MmugDNA.28792.1.S1_at   | MmugDNA.28792.1 | 10.03 | 9.63  | 0.13 | 0.24 | 1.32  | 0.044997 | 0.387278 | 0.269447 | 0.622027 |
| MmugDNA.2881.1.S1_at    | MmugDNA.2881.1  | 5.51  | 5.87  | 0.18 | 0.39 | -1.28 | 0.302327 | 0.720744 | 0.590132 | 0.838368 |
| MmugDNA.2882.1.S1_at    | MmugDNA.2882.1  | 10.13 | 10.22 | 0.15 | 0.05 | -1.07 | 0.409367 | 0.280441 | 0.671738 | 0.543648 |
| MmugDNA.28820.1.S1_at   | MmugDNA.28820.1 | 8.62  | 9.56  | 0.71 | 0.26 | -1.92 | 0.422314 | 0.396283 | 0.680514 | 0.628076 |
| MmugDNA.28821.1.S1_at   | MmugDNA.28821.1 | 10.93 | 10.05 | 0.06 | 0.12 | 1.85  | 0.000514 | 0.000214 | 0.069024 | 0.032361 |
| MmugDNA.28822.1.S1_at   | MmugDNA.28822.1 | 3.86  | 3.87  | 0.1  | 0.18 | -1.01 | 0.881496 | 0.989421 | 0.949612 | 0.994009 |
| MmugDNA.28828.1.S1_at   | MmugDNA.28828.1 | 4.72  | 4.98  | 0.11 | 0.31 | -1.2  | 0.25013  | 0.063652 | 0.544879 | 0.298815 |
| MmugDNA.28831.1.S1_at   | MmugDNA.28831.1 | 6.1   | 6.1   | 0.06 | 0.13 | -1    | 0.686521 | 0.851025 | 0.850618 | 0.915265 |
| MmugDNA.28837.1.S1_at   | MmugDNA.28837.1 | 5.16  | 5.09  | 0.07 | 0.05 | 1.05  | 0.17228  | 0.1032   | 0.466481 | 0.364123 |

|                         |                 |       |       |      |      |       |          |          |          |          |
|-------------------------|-----------------|-------|-------|------|------|-------|----------|----------|----------|----------|
| MmugDNA.2884.1.S1_at    | MmugDNA.2884.1  | 10.88 | 11.11 | 0.05 | 0.05 | -1.17 | 0.005865 | 0.044452 | 0.122699 | 0.25521  |
| MmugDNA.28842.1.S1_at   | MmugDNA.28842.1 | 9.22  | 9.48  | 0.36 | 0.09 | -1.2  | 0.18089  | 0.059576 | 0.476157 | 0.290619 |
| MmugDNA.28843.1.S1_at   | MmugDNA.28843.1 | 13.2  | 13.3  | 0.12 | 0.02 | -1.08 | 0.054741 | 0.087247 | 0.290784 | 0.340237 |
| MmugDNA.28848.1.S1_at   | MmugDNA.28848.1 | 11.93 | 11.53 | 0.05 | 0.1  | 1.32  | 0.008528 | 0.06369  | 0.141678 | 0.298842 |
| MmugDNA.28855.1.S1_at   | MmugDNA.28855.1 | 13.39 | 13.59 | 0.15 | 0.03 | -1.15 | 0.041988 | 0.080059 | 0.261908 | 0.327429 |
| MmugDNA.28875.1.S1_at   | MmugDNA.28875.1 | 3.11  | 3.22  | 0.04 | 0.09 | -1.08 | 0.132254 | 0.712534 | 0.415489 | 0.833383 |
| MmugDNA.28879.1.S1_at   | MmugDNA.28879.1 | 8.23  | 8.33  | 0.62 | 0.1  | -1.07 | 0.862585 | 0.712437 | 0.940257 | 0.833371 |
| MmugDNA.28880.1.S1_at   | MmugDNA.28880.1 | 6.87  | 7     | 0.04 | 0.04 | -1.09 | 0.0101   | 0.000135 | 0.150153 | 0.029087 |
| MmugDNA.28883.1.S1_at   | MmugDNA.28883.1 | 9.42  | 9.72  | 0.12 | 0.06 | -1.23 | 0.006814 | 0.032874 | 0.129236 | 0.224478 |
| MmugDNA.28889.1.S1_at   | MmugDNA.28889.1 | 6.05  | 5.93  | 0.54 | 0.17 | 1.09  | 0.559833 | 0.620247 | 0.773535 | 0.775303 |
| MmugDNA.28890.1.S1_at   | MmugDNA.28890.1 | 6.92  | 6.83  | 0.15 | 0.01 | 1.07  | 0.113737 | 0.054754 | 0.390429 | 0.279506 |
| MmugDNA.289.1.S1_at     | MmugDNA.289.1   | 3.19  | 3.27  | 0.1  | 0.15 | -1.06 | 0.403173 | 0.589908 | 0.667341 | 0.755994 |
| MmugDNA.28903.1.S1_at   | MmugDNA.28903.1 | 4.17  | 4.19  | 0.14 | 0.04 | -1.01 | 0.305731 | 0.257593 | 0.592792 | 0.525302 |
| MmugDNA.28907.1.S1_at   | MmugDNA.28907.1 | 7.47  | 7.06  | 0.11 | 0.3  | 1.33  | 0.070869 | 0.115627 | 0.324317 | 0.382714 |
| MmugDNA.28911.1.S1_at   | MmugDNA.28911.1 | 8.76  | 8.9   | 0.12 | 0.02 | -1.11 | 0.044564 | 0.283804 | 0.268287 | 0.546209 |
| MmugDNA.28916.1.S1_at   | MmugDNA.28916.1 | 7.86  | 7.42  | 0.27 | 0.13 | 1.36  | 0.300186 | 0.546087 | 0.588392 | 0.727769 |
| MmugDNA.28918.1.S1_at   | MmugDNA.28918.1 | 11.54 | 11.87 | 0.05 | 0.1  | -1.26 | 0.005865 | 0.005221 | 0.122699 | 0.100105 |
| MmugDNA.28919.1.A1_at   | MmugDNA.28919.1 | 3.72  | 3.7   | 0.19 | 0.11 | 1.01  | 0.834735 | 0.810629 | 0.927335 | 0.890812 |
| MmugDNA.28919.1.S1_at   | MmugDNA.28919.1 | 3.67  | 3.6   | 0.08 | 0.01 | 1.05  | 0.358812 | 0.697664 | 0.634504 | 0.824317 |
| MmugDNA.2892.1.S1_at    | MmugDNA.2892.1  | 3.89  | 3.97  | 0.08 | 0.21 | -1.05 | 0.998705 | 0.610552 | 0.999537 | 0.768734 |
| MmugDNA.28922.1.S1_at   | MmugDNA.28922.1 | 7.9   | 8.13  | 0.26 | 0.04 | -1.17 | 0.096537 | 0.07073  | 0.366442 | 0.31213  |
| MmugDNA.28933.1.S1_at   | MmugDNA.28933.1 | 12.84 | 12.17 | 0.14 | 0.05 | 1.59  | 0.00092  | 0.011672 | 0.075607 | 0.140009 |
| MmugDNA.28936.1.S1_x_at | MmugDNA.28936.1 | 11.79 | 11.89 | 0.44 | 0.17 | -1.07 | 0.602554 | 0.301625 | 0.800303 | 0.55955  |
| MmugDNA.2895.1.S1_at    | MmugDNA.2895.1  | 9     | 9.52  | 0.35 | 0.1  | -1.43 | 0.07271  | 0.24405  | 0.327657 | 0.514111 |
| MmugDNA.28958.1.S1_at   | MmugDNA.28958.1 | 10.59 | 11.02 | 0.22 | 0.06 | -1.34 | 0.024188 | 0.002948 | 0.208762 | 0.079945 |
| MmugDNA.28959.1.S1_s_at | MmugDNA.28959.1 | 12.15 | 12.01 | 0.16 | 0.06 | 1.1   | 0.305143 | 0.076379 | 0.592121 | 0.321368 |
| MmugDNA.28963.1.S1_at   | MmugDNA.28963.1 | 4.83  | 7.05  | 0.55 | 0.35 | -4.66 | 0.003571 | 0.032804 | 0.104895 | 0.22427  |
| MmugDNA.28965.1.S1_at   | MmugDNA.28965.1 | 12.26 | 12.17 | 0.05 | 0.03 | 1.06  | 0.040092 | 0.000003 | 0.256783 | 0.013386 |
| MmugDNA.2897.1.S1_at    | MmugDNA.2897.1  | 10.87 | 10.97 | 0.22 | 0.09 | -1.07 | 0.801076 | 0.6455   | 0.910582 | 0.792355 |
| MmugDNA.28982.1.S1_s_at | MmugDNA.28982.1 | 12.15 | 12.17 | 0.11 | 0.08 | -1.01 | 0.776517 | 0.107475 | 0.89778  | 0.370311 |
| MmugDNA.28984.1.S1_at   | MmugDNA.28984.1 | 8.22  | 7.92  | 0.34 | 0.06 | 1.23  | 0.141589 | 0.091423 | 0.42755  | 0.34639  |
| MmugDNA.28986.1.S1_at   | MmugDNA.28986.1 | 9.6   | 9.77  | 0.21 | 0.02 | -1.13 | 0.755195 | 0.1266   | 0.887167 | 0.397214 |
| MmugDNA.28987.1.S1_at   | MmugDNA.28987.1 | 8.45  | 8.23  | 0.14 | 0.14 | 1.17  | 0.244134 | 0.163036 | 0.540834 | 0.439203 |
| MmugDNA.28997.1.S1_at   | MmugDNA.28997.1 | 8.37  | 8.32  | 0.28 | 0.18 | 1.04  | 0.800938 | 0.46749  | 0.910474 | 0.677091 |
| MmugDNA.28998.1.S1_at   | MmugDNA.28998.1 | 12.07 | 12.28 | 0.17 | 0.09 | -1.15 | 0.303815 | 0.457561 | 0.591195 | 0.670864 |
| MmugDNA.29.1.S1_at      | MmugDNA.29.1    | 11.3  | 11.06 | 0.1  | 0.04 | 1.18  | 0.054357 | 0.363545 | 0.290262 | 0.603957 |
| MmugDNA.29001.1.S1_at   | MmugDNA.29001.1 | 12.83 | 12.94 | 0.07 | 0.04 | -1.08 | 0.14955  | 0.225594 | 0.438535 | 0.498155 |
| MmugDNA.29006.1.S1_at   | MmugDNA.29006.1 | 9.48  | 8.99  | 0.34 | 0.27 | 1.41  | 0.289913 | 0.116403 | 0.579464 | 0.383671 |
| MmugDNA.29007.1.S1_at   | MmugDNA.29007.1 | 10.41 | 10.23 | 0.29 | 0.15 | 1.14  | 0.809186 | 0.994041 | 0.914501 | 0.996397 |
| MmugDNA.2901.1.S1_at    | MmugDNA.2901.1  | 9.86  | 9.79  | 0.11 | 0.01 | 1.05  | 0.171894 | 0.338567 | 0.46589  | 0.585564 |
| MmugDNA.29014.1.S1_at   | MmugDNA.29014.1 | 4.93  | 5.15  | 0.16 | 0.1  | -1.16 | 0.393173 | 0.052357 | 0.660012 | 0.274315 |
| MmugDNA.29018.1.S1_at   | MmugDNA.29018.1 | 11.64 | 11.99 | 0.02 | 0.05 | -1.27 | 0.000282 | 0.000046 | 0.056985 | 0.025273 |
| MmugDNA.2902.1.S1_at    | MmugDNA.2902.1  | 8.04  | 7.67  | 0.11 | 0.07 | 1.29  | 0.019531 | 0.025666 | 0.192506 | 0.200834 |

|                       |                 |       |       |      |      |       |          |          |          |          |
|-----------------------|-----------------|-------|-------|------|------|-------|----------|----------|----------|----------|
| MmugDNA.29022.1.S1_at | MmugDNA.29022.1 | 11.94 | 11.62 | 0.04 | 0.1  | 1.24  | 0.008012 | 0.001484 | 0.138479 | 0.058804 |
| MmugDNA.29023.1.S1_at | MmugDNA.29023.1 | 11.44 | 12.06 | 0.4  | 0.09 | -1.53 | 0.041402 | 0.022435 | 0.259966 | 0.187441 |
| MmugDNA.29025.1.S1_at | MmugDNA.29025.1 | 5.46  | 5.72  | 0.08 | 0.14 | -1.2  | 0.043075 | 0.304421 | 0.264735 | 0.561712 |
| MmugDNA.29029.1.S1_at | MmugDNA.29029.1 | 6.79  | 7.53  | 0.2  | 0.14 | -1.66 | 0.018541 | 0.014214 | 0.189405 | 0.152269 |
| MmugDNA.29030.1.S1_at | MmugDNA.29030.1 | 8     | 8.9   | 0.05 | 0.43 | -1.87 | 0.055543 | 0.085393 | 0.292664 | 0.337289 |
| MmugDNA.29036.1.S1_at | MmugDNA.29036.1 | 12.05 | 11.82 | 0.16 | 0.1  | 1.17  | 0.114885 | 0.000934 | 0.391855 | 0.048962 |
| MmugDNA.29038.1.S1_at | MmugDNA.29038.1 | 5.53  | 5.35  | 0.17 | 0.13 | 1.13  | 0.427915 | 0.173714 | 0.68503  | 0.450055 |
| MmugDNA.29040.1.S1_at | MmugDNA.29040.1 | 9.81  | 10.24 | 0.13 | 0.22 | -1.35 | 0.185545 | 0.166014 | 0.481745 | 0.442579 |
| MmugDNA.29042.1.S1_at | MmugDNA.29042.1 | 9.92  | 9.41  | 0.21 | 0.05 | 1.42  | 0.019452 | 0.014198 | 0.192344 | 0.152173 |
| MmugDNA.29046.1.S1_at | MmugDNA.29046.1 | 6.64  | 7.51  | 0.56 | 0.32 | -1.83 | 0.137435 | 0.01907  | 0.422407 | 0.173701 |
| MmugDNA.29048.1.S1_at | MmugDNA.29048.1 | 5.57  | 5.59  | 0.15 | 0.18 | -1.02 | 0.283732 | 0.411056 | 0.574001 | 0.637874 |
| MmugDNA.29049.1.S1_at | MmugDNA.29049.1 | 4.65  | 4.77  | 0.16 | 0.24 | -1.08 | 0.197061 | 0.583104 | 0.49422  | 0.751559 |
| MmugDNA.2905.1.S1_at  | MmugDNA.2905.1  | 10.3  | 10.35 | 0.03 | 0.1  | -1.04 | 0.879726 | 0.300093 | 0.948777 | 0.558262 |
| MmugDNA.29053.1.S1_at | MmugDNA.29053.1 | 11.1  | 10.88 | 0.1  | 0.04 | 1.17  | 0.029082 | 0.101289 | 0.223234 | 0.361069 |
| MmugDNA.29055.1.S1_at | MmugDNA.29055.1 | 3.37  | 3.42  | 0.1  | 0.03 | -1.03 | 0.157934 | 0.561215 | 0.448708 | 0.737235 |
| MmugDNA.2906.1.S1_at  | MmugDNA.2906.1  | 3.26  | 3.16  | 1.05 | 0.19 | 1.07  | 0.272617 | 0.392804 | 0.564685 | 0.625846 |
| MmugDNA.29066.1.S1_at | MmugDNA.29066.1 | 4.8   | 4.89  | 0.03 | 0.21 | -1.07 | 0.198143 | 0.203851 | 0.495381 | 0.478102 |
| MmugDNA.29068.1.S1_at | MmugDNA.29068.1 | 5.91  | 5.96  | 0.02 | 0.02 | -1.03 | 0.043643 | 0.388141 | 0.265899 | 0.622607 |
| MmugDNA.29073.1.S1_at | MmugDNA.29073.1 | 7.19  | 6.99  | 0.16 | 0.24 | 1.15  | 0.11493  | 0.390556 | 0.391986 | 0.624329 |
| MmugDNA.29075.1.S1_at | MmugDNA.29075.1 | 3.43  | 3.41  | 0.22 | 0.06 | 1.02  | 0.344859 | 0.754796 | 0.624058 | 0.857323 |
| MmugDNA.29088.1.S1_at | MmugDNA.29088.1 | 3.01  | 3.18  | 0.07 | 0.17 | -1.12 | 0.183502 | 0.252316 | 0.479416 | 0.52096  |
| MmugDNA.29090.1.S1_at | MmugDNA.29090.1 | 12.57 | 12.71 | 0.11 | 0.02 | -1.1  | 0.031337 | 0.049005 | 0.23018  | 0.266254 |
| MmugDNA.29093.1.S1_at | MmugDNA.29093.1 | 7.32  | 9.39  | 0.93 | 0.24 | -4.21 | 0.063622 | 0.172076 | 0.308797 | 0.448508 |
| MmugDNA.29094.1.S1_at | MmugDNA.29094.1 | 5.15  | 5.86  | 1.76 | 0.22 | -1.63 | 0.467095 | 0.31316  | 0.71262  | 0.567717 |
| MmugDNA.29100.1.S1_at | MmugDNA.29100.1 | 13.67 | 13.62 | 0.03 | 0.01 | 1.04  | 0.030708 | 0.729035 | 0.228035 | 0.843391 |
| MmugDNA.29101.1.S1_at | MmugDNA.29101.1 | 9.92  | 11.22 | 0.6  | 0.19 | -2.47 | 0.024698 | 0.035733 | 0.210249 | 0.233413 |
| MmugDNA.29104.1.S1_at | MmugDNA.29104.1 | 5.55  | 5.52  | 0.13 | 0.06 | 1.02  | 0.24209  | 0.394969 | 0.539116 | 0.627216 |
| MmugDNA.29110.1.S1_at | MmugDNA.29110.1 | 9.94  | 9.42  | 0.23 | 0.18 | 1.44  | 0.069581 | 0.048656 | 0.322194 | 0.265613 |
| MmugDNA.29118.1.S1_at | MmugDNA.29118.1 | 8.33  | 8.76  | 0.34 | 0.22 | -1.35 | 0.245902 | 0.59359  | 0.541732 | 0.758334 |
| MmugDNA.29119.1.S1_at | MmugDNA.29119.1 | 5.36  | 5.92  | 0.24 | 0.34 | -1.48 | 0.087349 | 0.300074 | 0.353109 | 0.558262 |
| MmugDNA.2912.1.S1_at  | MmugDNA.2912.1  | 12.25 | 12.53 | 0.06 | 0.05 | -1.21 | 0.003294 | 0.043921 | 0.102106 | 0.254098 |
| MmugDNA.29127.1.S1_at | MmugDNA.29127.1 | 9.59  | 9.49  | 0.08 | 0.12 | 1.07  | 0.63005  | 0.011284 | 0.818349 | 0.138076 |
| MmugDNA.29130.1.S1_at | MmugDNA.29130.1 | 6.15  | 6.26  | 0.67 | 0.45 | -1.08 | 0.778293 | 0.96555  | 0.898724 | 0.980739 |
| MmugDNA.29134.1.S1_at | MmugDNA.29134.1 | 10.77 | 10.14 | 0.55 | 0.12 | 1.54  | 0.37656  | 0.544761 | 0.647284 | 0.727107 |
| MmugDNA.29136.1.S1_at | MmugDNA.29136.1 | 6.33  | 6.27  | 0.16 | 0.04 | 1.04  | 0.579367 | 0.055669 | 0.785057 | 0.281785 |
| MmugDNA.29138.1.S1_at | MmugDNA.29138.1 | 6.97  | 7.06  | 0.04 | 0.12 | -1.06 | 0.135272 | 0.201436 | 0.419126 | 0.475963 |
| MmugDNA.29139.1.S1_at | MmugDNA.29139.1 | 5.36  | 5.34  | 0.15 | 0.19 | 1.02  | 0.982671 | 0.157812 | 0.993625 | 0.433475 |
| MmugDNA.29144.1.S1_at | MmugDNA.29144.1 | 13.1  | 13.08 | 0.09 | 0.08 | 1.01  | 0.690116 | 0.275479 | 0.851908 | 0.539697 |
| MmugDNA.29146.1.S1_at | MmugDNA.29146.1 | 7.75  | 7.73  | 0.17 | 0.24 | 1.01  | 0.669744 | 0.508004 | 0.841513 | 0.703358 |
| MmugDNA.29147.1.S1_at | MmugDNA.29147.1 | 7.09  | 6.56  | 0.09 | 0.19 | 1.44  | 0.006224 | 0.030599 | 0.125175 | 0.216887 |
| MmugDNA.2915.1.S1_at  | MmugDNA.2915.1  | 7.8   | 8.8   | 0.48 | 0.21 | -2    | 0.085864 | 0.059199 | 0.350245 | 0.290208 |
| MmugDNA.29151.1.S1_at | MmugDNA.29151.1 | 11.39 | 11.47 | 0.24 | 0.11 | -1.06 | 0.693062 | 0.1768   | 0.853323 | 0.45321  |
| MmugDNA.29154.1.S1_at | MmugDNA.29154.1 | 3.77  | 3.74  | 0.05 | 0.11 | 1.02  | 0.979356 | 0.694635 | 0.992155 | 0.822439 |

|                         |                 |       |       |      |      |       |          |          |          |          |
|-------------------------|-----------------|-------|-------|------|------|-------|----------|----------|----------|----------|
| MmugDNA.29157.1.S1_at   | MmugDNA.29157.1 | 11.63 | 11.84 | 0.07 | 0.08 | -1.16 | 0.044349 | 0.023455 | 0.267789 | 0.191956 |
| MmugDNA.29164.1.S1_a_at | MmugDNA.29164.1 | 6.5   | 6.68  | 0.23 | 0.15 | -1.14 | 0.305869 | 0.028196 | 0.592863 | 0.209526 |
| MmugDNA.29172.1.S1_at   | MmugDNA.29172.1 | 7.53  | 7.27  | 0.06 | 0.04 | 1.2   | 0.002649 | 0.134055 | 0.095666 | 0.406276 |
| MmugDNA.29174.1.S1_at   | MmugDNA.29174.1 | 8.01  | 8.28  | 0.32 | 0.04 | -1.21 | 0.190365 | 0.262402 | 0.486685 | 0.528655 |
| MmugDNA.29174.1.S1_s_at | MmugDNA.29174.1 | 6.89  | 6.89  | 0.19 | 0.02 | 1     | 0.900499 | 0.812796 | 0.957767 | 0.891795 |
| MmugDNA.29176.1.S1_at   | MmugDNA.29176.1 | 4.12  | 3.7   | 0.79 | 0.3  | 1.33  | 0.458318 | 0.701114 | 0.70694  | 0.826647 |
| MmugDNA.29183.1.S1_at   | MmugDNA.29183.1 | 12.23 | 12.29 | 0.09 | 0.05 | -1.05 | 0.230228 | 0.007984 | 0.529091 | 0.118766 |
| MmugDNA.29186.1.S1_at   | MmugDNA.29186.1 | 10.68 | 10.47 | 0.67 | 0.18 | 1.15  | 0.628548 | 0.620852 | 0.817472 | 0.775643 |
| MmugDNA.29188.1.S1_at   | MmugDNA.29188.1 | 12.12 | 12.04 | 0.09 | 0.08 | 1.05  | 0.144649 | 0.003274 | 0.43164  | 0.082366 |
| MmugDNA.29191.1.S1_at   | MmugDNA.29191.1 | 10.85 | 10.6  | 0.09 | 0.14 | 1.2   | 0.089119 | 0.113    | 0.355884 | 0.378851 |
| MmugDNA.29196.1.S1_at   | MmugDNA.29196.1 | 3.86  | 3.57  | 0.15 | 0.08 | 1.22  | 0.111585 | 0.403827 | 0.387683 | 0.632393 |
| MmugDNA.29197.1.S1_at   | MmugDNA.29197.1 | 10.07 | 10.54 | 0.15 | 0.06 | -1.38 | 0.011173 | 0.015981 | 0.15539  | 0.160458 |
| MmugDNA.29204.1.S1_at   | MmugDNA.29204.1 | 9.93  | 9.54  | 0.4  | 0.11 | 1.31  | 0.057719 | 0.005968 | 0.297463 | 0.105656 |
| MmugDNA.29211.1.S1_s_at | MmugDNA.29211.1 | 3.28  | 3.24  | 0.13 | 0.06 | 1.03  | 0.628779 | 0.82705  | 0.817507 | 0.900686 |
| MmugDNA.29213.1.S1_at   | MmugDNA.29213.1 | 7.37  | 6.3   | 0.58 | 0.5  | 2.11  | 0.03777  | 0.0432   | 0.250055 | 0.25263  |
| MmugDNA.29213.1.S1_s_at | MmugDNA.29213.1 | 9.44  | 9.86  | 0.23 | 0.13 | -1.34 | 0.019589 | 0.049279 | 0.19287  | 0.266845 |
| MmugDNA.29217.1.S1_at   | MmugDNA.29217.1 | 6.33  | 6.19  | 0.14 | 0.07 | 1.1   | 0.321179 | 0.189408 | 0.605468 | 0.465117 |
| MmugDNA.29218.1.S1_at   | MmugDNA.29218.1 | 3.69  | 3.66  | 0.14 | 0.14 | 1.02  | 0.592104 | 0.134429 | 0.793208 | 0.406603 |
| MmugDNA.29220.1.S1_at   | MmugDNA.29220.1 | 8.04  | 7.22  | 0.2  | 0.13 | 1.77  | 0.002415 | 0.004611 | 0.093606 | 0.09488  |
| MmugDNA.29223.1.S1_at   | MmugDNA.29223.1 | 9.42  | 9.56  | 0.17 | 0.07 | -1.1  | 0.283145 | 0.854512 | 0.573595 | 0.917099 |
| MmugDNA.2923.1.S1_at    | MmugDNA.2923.1  | 13.99 | 14.03 | 0.16 | 0.08 | -1.03 | 0.450175 | 0.68918  | 0.701214 | 0.818618 |
| MmugDNA.29230.1.S1_at   | MmugDNA.29230.1 | 10.66 | 10.59 | 0.06 | 0.1  | 1.05  | 0.207268 | 0.437715 | 0.50501  | 0.656896 |
| MmugDNA.29234.1.S1_at   | MmugDNA.29234.1 | 10.3  | 10.45 | 0.13 | 0.09 | -1.11 | 0.209633 | 0.066121 | 0.507107 | 0.302613 |
| MmugDNA.29242.1.S1_at   | MmugDNA.29242.1 | 9.68  | 9.58  | 0.16 | 0.11 | 1.07  | 0.789777 | 0.452822 | 0.904456 | 0.667356 |
| MmugDNA.29244.1.S1_at   | MmugDNA.29244.1 | 6.95  | 6.55  | 0.31 | 0.14 | 1.32  | 0.10946  | 0.123114 | 0.384538 | 0.393123 |
| MmugDNA.29246.1.S1_at   | MmugDNA.29246.1 | 6.39  | 6.15  | 0.16 | 0.09 | 1.18  | 0.148519 | 0.541034 | 0.437096 | 0.724718 |
| MmugDNA.2925.1.S1_at    | MmugDNA.2925.1  | 8.23  | 9.05  | 0.88 | 0.22 | -1.76 | 0.214714 | 0.651635 | 0.512314 | 0.796299 |
| MmugDNA.29251.1.S1_at   | MmugDNA.29251.1 | 6.99  | 5.84  | 0.57 | 0.18 | 2.21  | 0.099195 | 0.113492 | 0.370154 | 0.37961  |
| MmugDNA.29254.1.S1_at   | MmugDNA.29254.1 | 3.6   | 3.4   | 0.41 | 0.11 | 1.15  | 0.23462  | 0.309826 | 0.532759 | 0.565044 |
| MmugDNA.29263.1.S1_at   | MmugDNA.29263.1 | 8.86  | 10.07 | 0.57 | 0.25 | -2.3  | 0.04078  | 0.178952 | 0.258464 | 0.455243 |
| MmugDNA.29265.1.S1_at   | MmugDNA.29265.1 | 4.93  | 5.08  | 0.05 | 0.12 | -1.11 | 0.099621 | 0.046342 | 0.370515 | 0.259796 |
| MmugDNA.29269.1.S1_at   | MmugDNA.29269.1 | 9.47  | 9.37  | 0.37 | 0.16 | 1.07  | 0.58787  | 0.663477 | 0.790702 | 0.803016 |
| MmugDNA.29272.1.S1_at   | MmugDNA.29272.1 | 5.93  | 5.88  | 0.01 | 0.03 | 1.04  | 0.10444  | 0.076006 | 0.377773 | 0.320676 |
| MmugDNA.29274.1.S1_at   | MmugDNA.29274.1 | 8.34  | 8.2   | 0.19 | 0.08 | 1.1   | 0.790816 | 0.205671 | 0.904981 | 0.480015 |
| MmugDNA.29275.1.S1_s_at | MmugDNA.29275.1 | 9.34  | 8.75  | 0.16 | 0.07 | 1.5   | 0.002634 | 0.003416 | 0.095417 | 0.084071 |
| MmugDNA.29277.1.S1_at   | MmugDNA.29277.1 | 12.46 | 12.45 | 0.06 | 0.03 | 1.01  | 0.806245 | 0.703984 | 0.913185 | 0.828326 |
| MmugDNA.29278.1.S1_at   | MmugDNA.29278.1 | 9.37  | 9.95  | 0.16 | 0.18 | -1.49 | 0.023025 | 0.076807 | 0.204743 | 0.322252 |
| MmugDNA.2928.1.S1_at    | MmugDNA.2928.1  | 11.53 | 11.27 | 0.09 | 0.04 | 1.2   | 0.022547 | 0.181719 | 0.203331 | 0.458324 |
| MmugDNA.29285.1.S1_at   | MmugDNA.29285.1 | 9.21  | 7.68  | 0.43 | 0.98 | 2.9   | 0.179131 | 0.390523 | 0.474075 | 0.624319 |
| MmugDNA.29288.1.S1_at   | MmugDNA.29288.1 | 7.27  | 7.9   | 0.67 | 0.11 | -1.55 | 0.071296 | 0.114733 | 0.324878 | 0.381279 |
| MmugDNA.29299.1.S1_at   | MmugDNA.29299.1 | 10.1  | 10.05 | 0.32 | 0.04 | 1.03  | 0.821878 | 0.064073 | 0.920658 | 0.299311 |
| MmugDNA.29304.1.S1_at   | MmugDNA.29304.1 | 7     | 8.01  | 0.76 | 0.27 | -2.01 | 0.033368 | 0.031071 | 0.236556 | 0.218117 |
| MmugDNA.29308.1.S1_at   | MmugDNA.29308.1 | 4.62  | 4.5   | 0.8  | 0.25 | 1.09  | 0.288707 | 0.390478 | 0.578453 | 0.624267 |



|                         |                 |       |       |      |      |        |          |          |          |          |
|-------------------------|-----------------|-------|-------|------|------|--------|----------|----------|----------|----------|
| MmugDNA.29314.1.S1_at   | MmugDNA.29314.1 | 10.34 | 10.54 | 0.07 | 0.14 | -1.15  | 0.208991 | 0.044484 | 0.506432 | 0.255252 |
| MmugDNA.29316.1.S1_at   | MmugDNA.29316.1 | 11.08 | 11.25 | 0.45 | 0.05 | -1.13  | 0.470425 | 0.846725 | 0.714956 | 0.912823 |
| MmugDNA.29319.1.S1_at   | MmugDNA.29319.1 | 5.56  | 5.81  | 0.09 | 0.14 | -1.19  | 0.044163 | 0.038996 | 0.267226 | 0.242644 |
| MmugDNA.29320.1.S1_at   | MmugDNA.29320.1 | 12.3  | 11.71 | 0.1  | 0.32 | 1.5    | 0.103915 | 0.210153 | 0.377213 | 0.483994 |
| MmugDNA.29321.1.S1_at   | MmugDNA.29321.1 | 7.86  | 7.63  | 0.17 | 0.19 | 1.18   | 0.080899 | 0.322709 | 0.341702 | 0.574043 |
| MmugDNA.29321.1.S1_s_at | MmugDNA.29321.1 | 9.67  | 9.37  | 0.1  | 0.09 | 1.23   | 0.027795 | 0.33148  | 0.21918  | 0.580121 |
| MmugDNA.29322.1.S1_at   | MmugDNA.29322.1 | 2.81  | 2.92  | 0.04 | 0.22 | -1.08  | 0.437515 | 0.573125 | 0.692389 | 0.744941 |
| MmugDNA.29327.1.S1_at   | MmugDNA.29327.1 | 11.93 | 11.94 | 0.16 | 0.08 | -1.01  | 0.676304 | 0.204001 | 0.84542  | 0.47829  |
| MmugDNA.29328.1.S1_at   | MmugDNA.29328.1 | 6.33  | 6.28  | 0.13 | 0.07 | 1.04   | 0.731943 | 0.463332 | 0.874717 | 0.674359 |
| MmugDNA.2933.1.S1_at    | MmugDNA.2933.1  | 11.7  | 11.78 | 0    | 0.02 | -1.06  | 0.00214  | 0.014364 | 0.090208 | 0.152977 |
| MmugDNA.29330.1.S1_at   | MmugDNA.29330.1 | 10.79 | 10.7  | 0.21 | 0.04 | 1.06   | 0.133226 | 0.532672 | 0.416749 | 0.719186 |
| MmugDNA.29333.1.S1_at   | MmugDNA.29333.1 | 11.32 | 10.19 | 0.59 | 0.32 | 2.19   | 0.073709 | 0.12684  | 0.329321 | 0.397499 |
| MmugDNA.2934.1.S1_at    | MmugDNA.2934.1  | 12.52 | 12.58 | 0.2  | 0.04 | -1.05  | 0.979422 | 0.767908 | 0.992179 | 0.865256 |
| MmugDNA.2935.1.S1_at    | MmugDNA.2935.1  | 9.79  | 9.46  | 0.18 | 0.13 | 1.26   | 0.276393 | 0.002096 | 0.567973 | 0.067731 |
| MmugDNA.29353.1.S1_at   | MmugDNA.29353.1 | 4.97  | 7.57  | 1.06 | 0.02 | -6.08  | 0.015786 | 0.145299 | 0.178054 | 0.41934  |
| MmugDNA.2936.1.S1_at    | MmugDNA.2936.1  | 9.17  | 9.84  | 0.8  | 0.18 | -1.59  | 0.340161 | 0.033121 | 0.620367 | 0.225287 |
| MmugDNA.29370.1.S1_at   | MmugDNA.29370.1 | 11.92 | 11.9  | 0.05 | 0.06 | 1.01   | 0.497557 | 0.039    | 0.733194 | 0.242645 |
| MmugDNA.29374.1.S1_at   | MmugDNA.29374.1 | 12.16 | 12.47 | 0.18 | 0.07 | -1.24  | 0.098586 | 0.266883 | 0.369312 | 0.53244  |
| MmugDNA.29375.1.S1_at   | MmugDNA.29375.1 | 10.1  | 9.97  | 0.23 | 0.06 | 1.09   | 0.140575 | 0.070857 | 0.426348 | 0.312357 |
| MmugDNA.29391.1.S1_at   | MmugDNA.29391.1 | 9.32  | 9.04  | 0.08 | 0.13 | 1.21   | 0.117511 | 0.525771 | 0.394804 | 0.715217 |
| MmugDNA.2940.1.S1_at    | MmugDNA.2940.1  | 13.13 | 12.92 | 0.04 | 0.09 | 1.15   | 0.053923 | 0.07079  | 0.28932  | 0.312277 |
| MmugDNA.29410.1.S1_at   | MmugDNA.29410.1 | 5.78  | 5.81  | 0    | 0.11 | -1.02  | 0.248783 | 0.022485 | 0.544151 | 0.187631 |
| MmugDNA.29411.1.S1_at   | MmugDNA.29411.1 | 12.34 | 12.41 | 0.18 | 0.07 | -1.05  | 0.226463 | 0.409326 | 0.524282 | 0.636442 |
| MmugDNA.29417.1.S1_at   | MmugDNA.29417.1 | 7.4   | 7.4   | 0.14 | 0.04 | -1     | 0.876714 | 0.876181 | 0.947278 | 0.929602 |
| MmugDNA.29418.1.S1_at   | MmugDNA.29418.1 | 9.95  | 9.91  | 0.06 | 0.22 | 1.03   | 0.940178 | 0.572292 | 0.97477  | 0.744371 |
| MmugDNA.2942.1.S1_at    | MmugDNA.2942.1  | 7.79  | 7.72  | 0.18 | 0.2  | 1.04   | 0.784562 | 0.85979  | 0.901768 | 0.920098 |
| MmugDNA.29433.1.S1_at   | MmugDNA.29433.1 | 4.2   | 3.94  | 0.18 | 0.18 | 1.19   | 0.109738 | 0.312063 | 0.384862 | 0.566894 |
| MmugDNA.29436.1.S1_at   | MmugDNA.29436.1 | 10.92 | 11.58 | 0.06 | 0.14 | -1.58  | 0.00271  | 0.604297 | 0.096803 | 0.764558 |
| MmugDNA.2944.1.S1_at    | MmugDNA.2944.1  | 3.16  | 3.3   | 0.06 | 0.13 | -1.11  | 0.080542 | 0.200411 | 0.34112  | 0.474782 |
| MmugDNA.29440.1.S1_at   | MmugDNA.29440.1 | 12.26 | 11.98 | 0.1  | 0.04 | 1.21   | 0.021406 | 0.026688 | 0.199957 | 0.204241 |
| MmugDNA.29444.1.S1_at   | MmugDNA.29444.1 | 5.76  | 5.9   | 0.07 | 0.12 | -1.1   | 0.135489 | 0.074285 | 0.419375 | 0.318046 |
| MmugDNA.29449.1.S1_at   | MmugDNA.29449.1 | 8.49  | 8.07  | 0.14 | 0.07 | 1.34   | 0.010344 | 0.001445 | 0.151647 | 0.05795  |
| MmugDNA.2945.1.S1_at    | MmugDNA.2945.1  | 7.94  | 7.99  | 0.16 | 0.03 | -1.03  | 0.544883 | 0.492869 | 0.764357 | 0.693817 |
| MmugDNA.29467.1.S1_at   | MmugDNA.29467.1 | 11.89 | 11.57 | 0.1  | 0.25 | 1.25   | 0.442982 | 0.302316 | 0.696392 | 0.560092 |
| MmugDNA.29473.1.S1_at   | MmugDNA.29473.1 | 5.56  | 9.04  | 1.55 | 0.42 | -11.18 | 0.059413 | 0.275364 | 0.300867 | 0.539663 |
| MmugDNA.29475.1.S1_at   | MmugDNA.29475.1 | 5.95  | 5.93  | 0.21 | 0    | 1.01   | 0.443566 | 0.302083 | 0.696626 | 0.560071 |
| MmugDNA.29477.1.S1_at   | MmugDNA.29477.1 | 8.45  | 5.57  | 1.91 | 0.51 | 7.33   | 0.18229  | 0.195863 | 0.478038 | 0.470757 |
| MmugDNA.2948.1.S1_at    | MmugDNA.2948.1  | 9.81  | 10.14 | 0.07 | 0.1  | -1.26  | 0.003956 | 0.000386 | 0.108453 | 0.037273 |
| MmugDNA.29483.1.S1_at   | MmugDNA.29483.1 | 3.79  | 3.62  | 0.11 | 0.02 | 1.12   | 0.032623 | 0.165744 | 0.234926 | 0.442014 |
| MmugDNA.29494.1.S1_at   | MmugDNA.29494.1 | 11.41 | 11.6  | 0.14 | 0.1  | -1.14  | 0.249616 | 0.049347 | 0.544677 | 0.267081 |
| MmugDNA.29507.1.S1_at   | MmugDNA.29507.1 | 11.55 | 11.5  | 0.26 | 0.03 | 1.04   | 0.632694 | 0.823816 | 0.819945 | 0.898803 |
| MmugDNA.2951.1.S1_at    | MmugDNA.2951.1  | 11.45 | 11.24 | 0.28 | 0.05 | 1.16   | 0.097148 | 0.193665 | 0.367275 | 0.468785 |
| MmugDNA.2951.1.S1_s_at  | MmugDNA.2951.1  | 10.94 | 10.61 | 0.25 | 0.07 | 1.25   | 0.036756 | 0.273502 | 0.246773 | 0.537917 |

|                         |                 |       |       |      |      |       |          |          |          |          |
|-------------------------|-----------------|-------|-------|------|------|-------|----------|----------|----------|----------|
| MmugDNA.29514.1.S1_at   | MmugDNA.29514.1 | 5.19  | 5.85  | 0.12 | 0.05 | -1.58 | 0.001074 | 0.037639 | 0.076944 | 0.238465 |
| MmugDNA.29517.1.S1_at   | MmugDNA.29517.1 | 8.94  | 9.58  | 0.29 | 0.24 | -1.56 | 0.071539 | 0.160775 | 0.325561 | 0.436897 |
| MmugDNA.29522.1.S1_at   | MmugDNA.29522.1 | 5.46  | 5.59  | 0.19 | 0.04 | -1.09 | 0.476915 | 0.293956 | 0.719161 | 0.553909 |
| MmugDNA.29529.1.S1_at   | MmugDNA.29529.1 | 12.46 | 12.78 | 0.07 | 0.08 | -1.25 | 0.005024 | 0.008326 | 0.116192 | 0.121089 |
| MmugDNA.2953.1.S1_at    | MmugDNA.2953.1  | 5.82  | 5.6   | 0.23 | 0.14 | 1.16  | 0.276547 | 0.446345 | 0.568108 | 0.662773 |
| MmugDNA.29530.1.S1_at   | MmugDNA.29530.1 | 9.98  | 10.16 | 0.16 | 0.08 | -1.13 | 0.707729 | 0.246745 | 0.861542 | 0.51609  |
| MmugDNA.29530.1.S1_s_at | MmugDNA.29530.1 | 11.02 | 10.82 | 0.1  | 0.04 | 1.15  | 0.043753 | 0.193612 | 0.266257 | 0.468785 |
| MmugDNA.29531.1.S1_at   | MmugDNA.29531.1 | 6.79  | 6.81  | 0.08 | 0.02 | -1.02 | 0.871844 | 0.463123 | 0.944893 | 0.67424  |
| MmugDNA.29533.1.S1_at   | MmugDNA.29533.1 | 5.51  | 5.42  | 0.15 | 0.19 | 1.06  | 0.49463  | 0.72181  | 0.73129  | 0.838851 |
| MmugDNA.29534.1.S1_at   | MmugDNA.29534.1 | 11.93 | 11.7  | 0.09 | 0.1  | 1.18  | 0.020797 | 0.545634 | 0.197815 | 0.727579 |
| MmugDNA.2954.1.S1_at    | MmugDNA.2954.1  | 6.16  | 6.86  | 0.84 | 0.1  | -1.62 | 0.301511 | 0.375872 | 0.589355 | 0.613746 |
| MmugDNA.29540.1.S1_at   | MmugDNA.29540.1 | 6.86  | 6.72  | 0.13 | 0.06 | 1.1   | 0.187001 | 0.429649 | 0.483083 | 0.650973 |
| MmugDNA.29558.1.S1_at   | MmugDNA.29558.1 | 3.23  | 2.99  | 0.26 | 0.15 | 1.18  | 0.342479 | 0.47458  | 0.622192 | 0.681553 |
| MmugDNA.29561.1.S1_at   | MmugDNA.29561.1 | 6.77  | 6.76  | 0.09 | 0.05 | 1     | 0.218918 | 0.32649  | 0.516629 | 0.576576 |
| MmugDNA.29562.1.S1_at   | MmugDNA.29562.1 | 10.59 | 10.4  | 0.15 | 0.05 | 1.14  | 0.091714 | 0.642083 | 0.359438 | 0.789995 |
| MmugDNA.29565.1.S1_at   | MmugDNA.29565.1 | 9.97  | 10.11 | 0.17 | 0.1  | -1.1  | 0.144374 | 0.000635 | 0.431253 | 0.042882 |
| MmugDNA.29566.1.S1_s_at | MmugDNA.29566.1 | 6.89  | 8.18  | 0.65 | 0.35 | -2.44 | 0.070606 | 0.399954 | 0.324085 | 0.630116 |
| MmugDNA.29569.1.S1_at   | MmugDNA.29569.1 | 10.36 | 10.35 | 0.22 | 0.05 | 1.01  | 0.361483 | 0.005707 | 0.636937 | 0.104143 |
| MmugDNA.29570.1.S1_at   | MmugDNA.29570.1 | 3.48  | 3.46  | 0.65 | 0.04 | 1.01  | 0.461897 | 0.693927 | 0.709191 | 0.821989 |
| MmugDNA.29571.1.S1_at   | MmugDNA.29571.1 | 12.03 | 12.04 | 0.04 | 0.07 | -1    | 0.226797 | 0.055579 | 0.524686 | 0.281596 |
| MmugDNA.29577.1.S1_at   | MmugDNA.29577.1 | 5.46  | 4.44  | 0.61 | 0.63 | 2.03  | 0.281177 | 0.424825 | 0.572073 | 0.64729  |
| MmugDNA.29578.1.S1_at   | MmugDNA.29578.1 | 10.45 | 9.92  | 0.07 | 0.15 | 1.44  | 0.003844 | 0.08237  | 0.107412 | 0.331354 |
| MmugDNA.29582.1.S1_at   | MmugDNA.29582.1 | 5.06  | 5.17  | 0.3  | 0.47 | -1.08 | 0.560278 | 0.663198 | 0.773749 | 0.802857 |
| MmugDNA.29585.1.S1_at   | MmugDNA.29585.1 | 12.54 | 12.41 | 0.89 | 0.14 | 1.1   | 0.429855 | 0.549343 | 0.686234 | 0.729804 |
| MmugDNA.29588.1.S1_at   | MmugDNA.29588.1 | 7.66  | 7.9   | 0.27 | 0.2  | -1.18 | 0.114566 | 0.337069 | 0.391622 | 0.584337 |
| MmugDNA.29593.1.S1_at   | MmugDNA.29593.1 | 6.57  | 6.51  | 0.09 | 0.05 | 1.05  | 0.661883 | 0.410827 | 0.836852 | 0.637644 |
| MmugDNA.29594.1.S1_at   | MmugDNA.29594.1 | 4.62  | 3.88  | 0.54 | 0.32 | 1.67  | 0.073392 | 0.12355  | 0.328804 | 0.393629 |
| MmugDNA.29599.1.S1_at   | MmugDNA.29599.1 | 8.98  | 10.3  | 0.41 | 0.31 | -2.5  | 0.01957  | 0.12263  | 0.192766 | 0.392564 |
| MmugDNA.2960.1.S1_at    | MmugDNA.2960.1  | 3.28  | 3.31  | 0.19 | 0.1  | -1.02 | 0.323822 | 0.317922 | 0.607547 | 0.571046 |
| MmugDNA.29604.1.S1_at   | MmugDNA.29604.1 | 9.85  | 9.3   | 0.18 | 0.02 | 1.47  | 0.014365 | 0.005075 | 0.171567 | 0.099077 |
| MmugDNA.29616.1.S1_at   | MmugDNA.29616.1 | 7.44  | 8.21  | 0.39 | 0.27 | -1.71 | 0.034666 | 0.060039 | 0.240791 | 0.291714 |
| MmugDNA.29617.1.S1_at   | MmugDNA.29617.1 | 7.91  | 7.82  | 0.13 | 0.02 | 1.07  | 0.259883 | 0.547495 | 0.554139 | 0.728479 |
| MmugDNA.29617.1.S1_s_at | MmugDNA.29617.1 | 10.61 | 10.64 | 0.09 | 0.04 | -1.02 | 0.701306 | 0.174486 | 0.858142 | 0.450952 |
| MmugDNA.29621.1.S1_at   | MmugDNA.29621.1 | 6.96  | 7.42  | 0.31 | 0.05 | -1.38 | 0.190321 | 0.197897 | 0.486666 | 0.472828 |
| MmugDNA.29622.1.S1_at   | MmugDNA.29622.1 | 6.53  | 6.14  | 0.25 | 0.12 | 1.32  | 0.047215 | 0.11802  | 0.274594 | 0.385881 |
| MmugDNA.29625.1.S1_at   | MmugDNA.29625.1 | 6.54  | 7.23  | 0.14 | 0.26 | -1.62 | 0.028501 | 0.016686 | 0.22113  | 0.163569 |
| MmugDNA.29627.1.S1_at   | MmugDNA.29627.1 | 4.32  | 4.39  | 0.25 | 0.18 | -1.05 | 0.68458  | 0.84391  | 0.849637 | 0.911089 |
| MmugDNA.2963.1.S1_at    | MmugDNA.2963.1  | 5.36  | 5.97  | 0.18 | 0.22 | -1.53 | 0.030729 | 0.016328 | 0.228035 | 0.16183  |
| MmugDNA.29648.1.S1_at   | MmugDNA.29648.1 | 8.14  | 8.28  | 0.29 | 0.14 | -1.1  | 0.899859 | 0.592945 | 0.957435 | 0.757956 |
| MmugDNA.29656.1.S1_at   | MmugDNA.29656.1 | 7.47  | 7.38  | 0.25 | 0.09 | 1.06  | 0.141824 | 0.172858 | 0.427793 | 0.449424 |
| MmugDNA.29670.1.S1_at   | MmugDNA.29670.1 | 8.6   | 9.85  | 0.41 | 0.14 | -2.37 | 0.012616 | 0.009643 | 0.162521 | 0.129267 |
| MmugDNA.29675.1.S1_at   | MmugDNA.29675.1 | 9.55  | 9.17  | 0.07 | 0.16 | 1.3   | 0.024913 | 0.010307 | 0.211036 | 0.132897 |
| MmugDNA.29681.1.S1_at   | MmugDNA.29681.1 | 10.38 | 10.7  | 0.07 | 0.03 | -1.25 | 0.002258 | 0.000824 | 0.091423 | 0.046626 |

|                         |                 |       |       |      |      |       |          |          |          |          |
|-------------------------|-----------------|-------|-------|------|------|-------|----------|----------|----------|----------|
| MmugDNA.29689.1.S1_at   | MmugDNA.29689.1 | 4.65  | 4.6   | 0.06 | 0.2  | 1.03  | 0.550368 | 0.758973 | 0.767803 | 0.859942 |
| MmugDNA.2969.1.S1_at    | MmugDNA.2969.1  | 2.97  | 2.97  | 0.08 | 0.05 | -1    | 0.636738 | 0.436431 | 0.822252 | 0.65599  |
| MmugDNA.29697.1.S1_s_at | MmugDNA.29697.1 | 6.25  | 6.51  | 0.11 | 0.14 | -1.19 | 0.037731 | 0.057413 | 0.249882 | 0.285608 |
| MmugDNA.29706.1.S1_at   | MmugDNA.29706.1 | 9.72  | 9.66  | 0.02 | 0.06 | 1.04  | 0.135548 | 0.532783 | 0.419392 | 0.719235 |
| MmugDNA.29710.1.S1_at   | MmugDNA.29710.1 | 6.91  | 7.53  | 0.2  | 0.32 | -1.54 | 0.05441  | 0.154379 | 0.290487 | 0.429245 |
| MmugDNA.29712.1.S1_at   | MmugDNA.29712.1 | 3.58  | 3.47  | 0.62 | 0.18 | 1.08  | 0.204744 | 0.162598 | 0.502496 | 0.43872  |
| MmugDNA.2972.1.S1_at    | MmugDNA.2972.1  | 9.84  | 10.04 | 0.39 | 0.25 | -1.15 | 0.545012 | 0.865881 | 0.764388 | 0.923757 |
| MmugDNA.29720.1.S1_at   | MmugDNA.29720.1 | 5.64  | 5.79  | 0.1  | 0.04 | -1.11 | 0.089133 | 0.212772 | 0.355884 | 0.486769 |
| MmugDNA.29722.1.S1_at   | MmugDNA.29722.1 | 5     | 6.24  | 0.98 | 0.09 | -2.36 | 0.13202  | 0.392688 | 0.415154 | 0.625813 |
| MmugDNA.29723.1.S1_at   | MmugDNA.29723.1 | 13.68 | 13.52 | 0.08 | 0.04 | 1.12  | 0.053509 | 0.102349 | 0.288617 | 0.362527 |
| MmugDNA.29724.1.S1_at   | MmugDNA.29724.1 | 3.86  | 3.66  | 0.21 | 0.02 | 1.15  | 0.248641 | 0.401002 | 0.544034 | 0.630658 |
| MmugDNA.29726.1.S1_at   | MmugDNA.29726.1 | 7.79  | 7.55  | 0.28 | 0.35 | 1.18  | 0.392736 | 0.16757  | 0.659638 | 0.443998 |
| MmugDNA.29727.1.S1_at   | MmugDNA.29727.1 | 2.99  | 3.5   | 0.1  | 0.1  | -1.42 | 0.004278 | 0.039297 | 0.11146  | 0.243338 |
| MmugDNA.29729.1.S1_at   | MmugDNA.29729.1 | 6.41  | 6.62  | 0.3  | 0.23 | -1.16 | 0.184611 | 0.232671 | 0.480668 | 0.504359 |
| MmugDNA.2973.1.S1_at    | MmugDNA.2973.1  | 10.88 | 10.96 | 0.1  | 0.08 | -1.06 | 0.241172 | 0.139526 | 0.538538 | 0.412743 |
| MmugDNA.29735.1.S1_at   | MmugDNA.29735.1 | 6.91  | 6.67  | 0.16 | 0.05 | 1.18  | 0.025365 | 0.050496 | 0.21227  | 0.270052 |
| MmugDNA.29736.1.S1_at   | MmugDNA.29736.1 | 6.96  | 7.1   | 0.12 | 0.03 | -1.11 | 0.253171 | 0.225059 | 0.547579 | 0.49773  |
| MmugDNA.2974.1.S1_at    | MmugDNA.2974.1  | 8.12  | 7.57  | 0.24 | 0.06 | 1.47  | 0.012947 | 0.008378 | 0.164442 | 0.121478 |
| MmugDNA.29743.1.S1_at   | MmugDNA.29743.1 | 7.37  | 7.75  | 1.26 | 0.29 | -1.3  | 0.741629 | 0.637863 | 0.880267 | 0.787216 |
| MmugDNA.29744.1.S1_at   | MmugDNA.29744.1 | 6.43  | 6.5   | 0.22 | 0.12 | -1.05 | 0.797873 | 0.859635 | 0.90876  | 0.92003  |
| MmugDNA.29748.1.S1_at   | MmugDNA.29748.1 | 8.03  | 7.9   | 0.1  | 0.14 | 1.09  | 0.713865 | 0.836756 | 0.864758 | 0.906703 |
| MmugDNA.2975.1.S1_at    | MmugDNA.2975.1  | 10.89 | 10.28 | 0.3  | 0.13 | 1.53  | 0.026104 | 0.007035 | 0.214714 | 0.113112 |
| MmugDNA.29754.1.S1_at   | MmugDNA.29754.1 | 5.93  | 5.81  | 0.69 | 0.34 | 1.09  | 0.943147 | 0.946446 | 0.976048 | 0.969629 |
| MmugDNA.29761.1.S1_at   | MmugDNA.29761.1 | 6.34  | 6.25  | 0.07 | 0.06 | 1.06  | 0.066239 | 0.328001 | 0.314845 | 0.5778   |
| MmugDNA.29763.1.S1_at   | MmugDNA.29763.1 | 12.76 | 12.58 | 0.07 | 0.06 | 1.14  | 0.020507 | 0.124091 | 0.196642 | 0.394389 |
| MmugDNA.29779.1.S1_at   | MmugDNA.29779.1 | 4.31  | 4.28  | 0.05 | 0.12 | 1.02  | 0.433794 | 0.675746 | 0.689189 | 0.810457 |
| MmugDNA.2978.1.S1_at    | MmugDNA.2978.1  | 11.18 | 11.05 | 0.1  | 0.05 | 1.09  | 0.273762 | 0.012253 | 0.56586  | 0.143179 |
| MmugDNA.29788.1.S1_at   | MmugDNA.29788.1 | 5.76  | 5.78  | 0.08 | 0.04 | -1.01 | 0.468978 | 0.539835 | 0.713905 | 0.723976 |
| MmugDNA.29792.1.S1_s_at | MmugDNA.29792.1 | 5.88  | 6.94  | 0.99 | 0.43 | -2.08 | 0.470474 | 0.628867 | 0.714968 | 0.781499 |
| MmugDNA.29799.1.S1_at   | MmugDNA.29799.1 | 10.59 | 10.83 | 0.14 | 0.2  | -1.18 | 0.415993 | 0.048715 | 0.676502 | 0.265744 |
| MmugDNA.29801.1.S1_at   | MmugDNA.29801.1 | 10.34 | 10.29 | 0.29 | 0.09 | 1.03  | 0.719659 | 0.437276 | 0.867731 | 0.656613 |
| MmugDNA.29802.1.S1_at   | MmugDNA.29802.1 | 9.35  | 8.93  | 0.4  | 0.14 | 1.34  | 0.114132 | 0.21108  | 0.390885 | 0.485099 |
| MmugDNA.29807.1.S1_at   | MmugDNA.29807.1 | 3.03  | 3.04  | 0.1  | 0.02 | -1    | 0.779356 | 0.871463 | 0.899222 | 0.926844 |
| MmugDNA.29807.1.S1_x_at | MmugDNA.29807.1 | 3.25  | 3.32  | 0.1  | 0.13 | -1.05 | 0.43616  | 0.490487 | 0.691113 | 0.692472 |
| MmugDNA.2981.1.S1_s_at  | MmugDNA.2981.1  | 10.44 | 10.57 | 0.13 | 0.07 | -1.09 | 0.086581 | 0.065367 | 0.351623 | 0.301409 |
| MmugDNA.29812.1.S1_at   | MmugDNA.29812.1 | 5.87  | 6.22  | 0.13 | 0.17 | -1.28 | 0.067808 | 0.132419 | 0.318214 | 0.404409 |
| MmugDNA.29814.1.S1_at   | MmugDNA.29814.1 | 8.43  | 9.14  | 0.4  | 0.2  | -1.63 | 0.051014 | 0.230357 | 0.283499 | 0.502115 |
| MmugDNA.29815.1.S1_at   | MmugDNA.29815.1 | 7.03  | 6.93  | 0.13 | 0.08 | 1.07  | 0.36678  | 0.036983 | 0.640964 | 0.236733 |
| MmugDNA.29819.1.S1_at   | MmugDNA.29819.1 | 6.84  | 6.37  | 0.09 | 0.24 | 1.39  | 0.057231 | 0.018597 | 0.296612 | 0.171539 |
| MmugDNA.29820.1.S1_at   | MmugDNA.29820.1 | 8.72  | 9.1   | 0.17 | 0.12 | -1.3  | 0.032445 | 0.198768 | 0.23435  | 0.473391 |
| MmugDNA.29822.1.S1_at   | MmugDNA.29822.1 | 7.61  | 7.27  | 0.44 | 0.08 | 1.27  | 0.764447 | 0.950253 | 0.891963 | 0.971666 |
| MmugDNA.29828.1.S1_at   | MmugDNA.29828.1 | 5.94  | 5.62  | 0.16 | 0.21 | 1.25  | 0.121658 | 0.751242 | 0.400504 | 0.855385 |
| MmugDNA.29830.1.S1_at   | MmugDNA.29830.1 | 4.35  | 3.86  | 0.68 | 0.21 | 1.4   | 0.124205 | 0.132289 | 0.404242 | 0.404294 |

|                         |                 |       |       |      |      |       |          |          |          |          |
|-------------------------|-----------------|-------|-------|------|------|-------|----------|----------|----------|----------|
| MmugDNA.29833.1.S1_at   | MmugDNA.29833.1 | 11.26 | 10.99 | 0.09 | 0.09 | 1.21  | 0.03838  | 0.051024 | 0.251895 | 0.271203 |
| MmugDNA.29839.1.S1_at   | MmugDNA.29839.1 | 9.47  | 10    | 0.05 | 0.12 | -1.45 | 0.003832 | 0.562809 | 0.107129 | 0.738167 |
| MmugDNA.29843.1.S1_at   | MmugDNA.29843.1 | 10.82 | 11.24 | 0.1  | 0.04 | -1.34 | 0.002426 | 0.001807 | 0.093606 | 0.063714 |
| MmugDNA.2985.1.S1_at    | MmugDNA.2985.1  | 5.02  | 5.01  | 0.14 | 0.06 | 1.01  | 0.456191 | 0.819033 | 0.705665 | 0.895738 |
| MmugDNA.29851.1.S1_at   | MmugDNA.29851.1 | 11.98 | 11.91 | 0.1  | 0.01 | 1.05  | 0.487556 | 0.003226 | 0.726353 | 0.082124 |
| MmugDNA.29855.1.S1_at   | MmugDNA.29855.1 | 12.69 | 12.66 | 0.21 | 0.25 | 1.02  | 0.958151 | 0.816268 | 0.982859 | 0.894028 |
| MmugDNA.29858.1.S1_at   | MmugDNA.29858.1 | 5.02  | 5.28  | 0.25 | 0.21 | -1.2  | 0.122169 | 0.124411 | 0.400941 | 0.394857 |
| MmugDNA.29861.1.S1_at   | MmugDNA.29861.1 | 8.23  | 8.48  | 0.02 | 0.04 | -1.2  | 0.000692 | 0.605809 | 0.071248 | 0.765497 |
| MmugDNA.29863.1.S1_at   | MmugDNA.29863.1 | 11.58 | 11.11 | 0.16 | 0.27 | 1.38  | 0.138364 | 0.338455 | 0.423617 | 0.585447 |
| MmugDNA.29867.1.S1_at   | MmugDNA.29867.1 | 6.37  | 6.32  | 0.2  | 0.03 | 1.03  | 0.81167  | 0.881575 | 0.915683 | 0.932407 |
| MmugDNA.29871.1.S1_at   | MmugDNA.29871.1 | 12.62 | 12.43 | 0.07 | 0.03 | 1.14  | 0.006092 | 0.098528 | 0.124422 | 0.356636 |
| MmugDNA.29871.1.S1_s_at | MmugDNA.29871.1 | 12.51 | 12.43 | 0.12 | 0.07 | 1.05  | 0.411564 | 0.224796 | 0.673498 | 0.497617 |
| MmugDNA.29872.1.S1_at   | MmugDNA.29872.1 | 10.65 | 10.75 | 0.14 | 0.13 | -1.07 | 0.235481 | 0.019919 | 0.533339 | 0.177443 |
| MmugDNA.29873.1.S1_at   | MmugDNA.29873.1 | 12.3  | 12.15 | 0.19 | 0.13 | 1.11  | 0.360205 | 0.150282 | 0.635802 | 0.424877 |
| MmugDNA.29876.1.S1_at   | MmugDNA.29876.1 | 6.3   | 6.18  | 0.2  | 0.09 | 1.08  | 0.954921 | 0.143018 | 0.98151  | 0.41689  |
| MmugDNA.29878.1.S1_at   | MmugDNA.29878.1 | 10.45 | 10.7  | 0.17 | 0.1  | -1.19 | 0.053766 | 0.473443 | 0.289059 | 0.680697 |
| MmugDNA.29879.1.S1_at   | MmugDNA.29879.1 | 13.11 | 13.26 | 0.11 | 0.03 | -1.11 | 0.140642 | 0.298573 | 0.426393 | 0.557183 |
| MmugDNA.2988.1.S1_at    | MmugDNA.2988.1  | 10.32 | 10.45 | 0.21 | 0.19 | -1.09 | 0.796499 | 0.21335  | 0.908112 | 0.487225 |
| MmugDNA.29880.1.S1_at   | MmugDNA.29880.1 | 7.91  | 7.21  | 0.41 | 0.11 | 1.62  | 0.039811 | 0.089041 | 0.256213 | 0.342913 |
| MmugDNA.29884.1.S1_at   | MmugDNA.29884.1 | 13.37 | 13.06 | 0.09 | 0.04 | 1.24  | 0.003298 | 0.00038  | 0.102152 | 0.037273 |
| MmugDNA.2989.1.S1_at    | MmugDNA.2989.1  | 12.19 | 12.35 | 0.1  | 0.08 | -1.12 | 0.168028 | 0.718886 | 0.461204 | 0.83732  |
| MmugDNA.29890.1.S1_at   | MmugDNA.29890.1 | 6.64  | 6.72  | 0.04 | 0.14 | -1.05 | 0.852545 | 0.77035  | 0.935873 | 0.866591 |
| MmugDNA.29891.1.S1_s_at | MmugDNA.29891.1 | 9.7   | 9.65  | 0.31 | 0.22 | 1.03  | 0.788064 | 0.918792 | 0.903631 | 0.954387 |
| MmugDNA.29895.1.S1_at   | MmugDNA.29895.1 | 11.04 | 10.89 | 0.46 | 0.14 | 1.11  | 0.225853 | 0.250136 | 0.523604 | 0.519168 |
| MmugDNA.29897.1.S1_s_at | MmugDNA.29897.1 | 11.46 | 11.53 | 0.08 | 0.13 | -1.06 | 0.678829 | 0.79376  | 0.846794 | 0.881039 |
| MmugDNA.29922.1.S1_at   | MmugDNA.29922.1 | 4.4   | 4.51  | 0.19 | 0.12 | -1.08 | 0.731326 | 0.917181 | 0.874456 | 0.953758 |
| MmugDNA.29924.1.S1_at   | MmugDNA.29924.1 | 9.23  | 9.28  | 0.24 | 0.16 | -1.04 | 0.461075 | 0.068073 | 0.708593 | 0.307142 |
| MmugDNA.29936.1.S1_at   | MmugDNA.29936.1 | 10.56 | 10.87 | 0.29 | 0.05 | -1.24 | 0.154153 | 0.021817 | 0.444483 | 0.184771 |
| MmugDNA.29939.1.S1_at   | MmugDNA.29939.1 | 5.58  | 5.37  | 0.08 | 0.19 | 1.16  | 0.036451 | 0.041739 | 0.246006 | 0.24892  |
| MmugDNA.29941.1.S1_at   | MmugDNA.29941.1 | 5.28  | 5.16  | 0.08 | 0.01 | 1.08  | 0.078426 | 0.544906 | 0.338116 | 0.727184 |
| MmugDNA.29950.1.S1_at   | MmugDNA.29950.1 | 3.9   | 4.32  | 0.21 | 0.09 | -1.34 | 0.072881 | 0.081245 | 0.327658 | 0.329351 |
| MmugDNA.29952.1.S1_at   | MmugDNA.29952.1 | 9.46  | 8.83  | 0.16 | 0.5  | 1.54  | 0.341436 | 0.493206 | 0.621327 | 0.694005 |
| MmugDNA.29954.1.S1_at   | MmugDNA.29954.1 | 7.55  | 7.71  | 0.12 | 0.14 | -1.12 | 0.132163 | 0.796687 | 0.415386 | 0.882782 |
| MmugDNA.29956.1.S1_at   | MmugDNA.29956.1 | 2.74  | 2.75  | 0.13 | 0.18 | -1.01 | 0.726144 | 0.731941 | 0.871495 | 0.844751 |
| MmugDNA.29958.1.S1_s_at | MmugDNA.29958.1 | 11.42 | 11.61 | 0.07 | 0.07 | -1.14 | 0.04819  | 0.603722 | 0.276908 | 0.764262 |
| MmugDNA.29962.1.S1_at   | MmugDNA.29962.1 | 5.74  | 5.74  | 0.18 | 0.17 | -1    | 0.323411 | 0.20587  | 0.607185 | 0.480109 |
| MmugDNA.29965.1.S1_at   | MmugDNA.29965.1 | 8.57  | 8.05  | 0.17 | 0.17 | 1.43  | 0.035172 | 0.115697 | 0.242214 | 0.382814 |
| MmugDNA.2997.1.S1_at    | MmugDNA.2997.1  | 4.62  | 5.53  | 0.7  | 0.25 | -1.88 | 0.074019 | 0.099554 | 0.330044 | 0.35796  |
| MmugDNA.29970.1.S1_at   | MmugDNA.29970.1 | 5.06  | 5.05  | 0.11 | 0.1  | 1.01  | 0.596429 | 0.62729  | 0.795816 | 0.780361 |
| MmugDNA.29972.1.S1_at   | MmugDNA.29972.1 | 11.07 | 11.36 | 0.63 | 0.08 | -1.22 | 0.152688 | 0.218482 | 0.442388 | 0.492079 |
| MmugDNA.29975.1.S1_at   | MmugDNA.29975.1 | 6.4   | 6.47  | 0.24 | 0.17 | -1.05 | 0.387134 | 0.648512 | 0.655432 | 0.7943   |
| MmugDNA.29977.1.S1_at   | MmugDNA.29977.1 | 6.28  | 6.27  | 0.1  | 0.07 | 1.01  | 0.650725 | 0.492516 | 0.83033  | 0.693604 |
| MmugDNA.29979.1.A1_at   | MmugDNA.29979.1 | 7.4   | 7.19  | 0.21 | 0.03 | 1.15  | 0.109768 | 0.064913 | 0.384935 | 0.300818 |

|                         |                 |       |       |      |      |       |          |          |          |          |
|-------------------------|-----------------|-------|-------|------|------|-------|----------|----------|----------|----------|
| MmugDNA.29979.1.S1_at   | MmugDNA.29979.1 | 6.71  | 6.61  | 0.12 | 0.02 | 1.07  | 0.09782  | 0.006273 | 0.368268 | 0.107461 |
| MmugDNA.29989.1.S1_at   | MmugDNA.29989.1 | 5.01  | 5.21  | 0.13 | 0.1  | -1.15 | 0.080158 | 0.163605 | 0.340547 | 0.439768 |
| MmugDNA.2999.1.S1_at    | MmugDNA.2999.1  | 4.36  | 4.31  | 0.23 | 0.16 | 1.03  | 0.499829 | 0.282132 | 0.734372 | 0.544937 |
| MmugDNA.29994.1.S1_at   | MmugDNA.29994.1 | 12.59 | 12.62 | 0.25 | 0    | -1.02 | 0.307411 | 0.450938 | 0.594183 | 0.665908 |
| MmugDNA.29996.1.S1_at   | MmugDNA.29996.1 | 11.89 | 12.01 | 0.19 | 0.1  | -1.09 | 0.508308 | 0.16029  | 0.740303 | 0.436406 |
| MmugDNA.3000.1.S1_at    | MmugDNA.3000.1  | 11.15 | 11.18 | 0.27 | 0.06 | -1.02 | 0.795744 | 0.082553 | 0.907656 | 0.3317   |
| MmugDNA.30003.1.S1_at   | MmugDNA.30003.1 | 7.21  | 8.88  | 0.41 | 0.15 | -3.19 | 0.003871 | 0.011476 | 0.107741 | 0.138611 |
| MmugDNA.3001.1.S1_at    | MmugDNA.3001.1  | 12.4  | 12.1  | 0.25 | 0.21 | 1.23  | 0.156282 | 0.582629 | 0.446893 | 0.751273 |
| MmugDNA.30010.1.S1_at   | MmugDNA.30010.1 | 9.18  | 9.13  | 0.11 | 0.04 | 1.03  | 0.278058 | 0.742379 | 0.569395 | 0.850786 |
| MmugDNA.30011.1.S1_at   | MmugDNA.30011.1 | 3.33  | 3.44  | 0.11 | 0.06 | -1.08 | 0.744839 | 0.059451 | 0.881702 | 0.290548 |
| MmugDNA.30013.1.S1_at   | MmugDNA.30013.1 | 9.54  | 9.06  | 0.16 | 0.07 | 1.39  | 0.005627 | 0.06312  | 0.120803 | 0.29795  |
| MmugDNA.30016.1.S1_at   | MmugDNA.30016.1 | 5.49  | 5.33  | 0.04 | 0.01 | 1.12  | 0.001734 | 0.013664 | 0.085035 | 0.149643 |
| MmugDNA.30019.1.S1_at   | MmugDNA.30019.1 | 8.38  | 11.33 | 1.29 | 0.11 | -7.76 | 0.020756 | 0.060638 | 0.197677 | 0.292849 |
| MmugDNA.30026.1.S1_at   | MmugDNA.30026.1 | 8.74  | 8.59  | 0.19 | 0.08 | 1.11  | 0.317479 | 0.809335 | 0.602251 | 0.890103 |
| MmugDNA.30027.1.S1_at   | MmugDNA.30027.1 | 9.89  | 10.01 | 0.19 | 0.15 | -1.09 | 0.45112  | 0.945073 | 0.702003 | 0.968834 |
| MmugDNA.30028.1.S1_at   | MmugDNA.30028.1 | 11.06 | 11.8  | 0.27 | 0.19 | -1.67 | 0.028727 | 0.344725 | 0.222132 | 0.590076 |
| MmugDNA.30030.1.S1_at   | MmugDNA.30030.1 | 6.79  | 6.78  | 0.26 | 0.1  | 1     | 0.817844 | 0.936329 | 0.918669 | 0.964104 |
| MmugDNA.30031.1.S1_at   | MmugDNA.30031.1 | 4.09  | 4.27  | 0.14 | 0.27 | -1.13 | 0.545056 | 0.753317 | 0.764388 | 0.85647  |
| MmugDNA.30032.1.S1_at   | MmugDNA.30032.1 | 9.85  | 10    | 0.41 | 0.12 | -1.11 | 0.587942 | 0.283163 | 0.790724 | 0.545694 |
| MmugDNA.30033.1.S1_at   | MmugDNA.30033.1 | 12.61 | 12.83 | 0.08 | 0.06 | -1.16 | 0.020531 | 0.160972 | 0.196807 | 0.437116 |
| MmugDNA.30038.1.S1_at   | MmugDNA.30038.1 | 6.83  | 6.54  | 0.56 | 0.42 | 1.22  | 0.458547 | 0.602821 | 0.707108 | 0.763752 |
| MmugDNA.3004.1.S1_at    | MmugDNA.3004.1  | 11.71 | 12.05 | 0.18 | 0.1  | -1.26 | 0.044223 | 0.042932 | 0.267305 | 0.251759 |
| MmugDNA.30042.1.S1_at   | MmugDNA.30042.1 | 9.5   | 9.82  | 0.26 | 0.08 | -1.25 | 0.15845  | 0.322563 | 0.449548 | 0.573991 |
| MmugDNA.30044.1.S1_at   | MmugDNA.30044.1 | 10.26 | 10.04 | 0.48 | 0.09 | 1.16  | 0.720519 | 0.116507 | 0.868055 | 0.383671 |
| MmugDNA.30045.1.S1_at   | MmugDNA.30045.1 | 6.65  | 6.59  | 0.17 | 0.02 | 1.04  | 0.823922 | 0.375468 | 0.921717 | 0.613412 |
| MmugDNA.30046.1.S1_at   | MmugDNA.30046.1 | 6.3   | 6.35  | 0.2  | 0.03 | -1.03 | 0.841529 | 0.125525 | 0.930364 | 0.396226 |
| MmugDNA.3005.1.S1_at    | MmugDNA.3005.1  | 11.76 | 11.69 | 0.16 | 0.04 | 1.05  | 0.531066 | 0.752282 | 0.755559 | 0.855787 |
| MmugDNA.30057.1.S1_at   | MmugDNA.30057.1 | 7.25  | 7.27  | 0.12 | 0.07 | -1.01 | 0.68248  | 0.893583 | 0.848621 | 0.939277 |
| MmugDNA.30059.1.S1_at   | MmugDNA.30059.1 | 3.28  | 3.21  | 0    | 0.07 | 1.05  | 0.177282 | 0.336562 | 0.471929 | 0.58391  |
| MmugDNA.30064.1.S1_at   | MmugDNA.30064.1 | 9.36  | 9.05  | 0.15 | 0.09 | 1.24  | 0.016871 | 0.000223 | 0.183253 | 0.032385 |
| MmugDNA.30067.1.S1_at   | MmugDNA.30067.1 | 7.83  | 7.62  | 0.06 | 0.07 | 1.16  | 0.035686 | 0.215363 | 0.243824 | 0.489067 |
| MmugDNA.30069.1.S1_at   | MmugDNA.30069.1 | 4.71  | 4.53  | 0.21 | 0.09 | 1.13  | 0.391365 | 0.620264 | 0.658628 | 0.775303 |
| MmugDNA.30074.1.S1_at   | MmugDNA.30074.1 | 5.57  | 5.46  | 0.23 | 0.1  | 1.08  | 0.263905 | 0.241133 | 0.557422 | 0.511749 |
| MmugDNA.30076.1.S1_at   | MmugDNA.30076.1 | 10.38 | 10.12 | 1.04 | 0.21 | 1.2   | 0.718611 | 0.929935 | 0.867276 | 0.960138 |
| MmugDNA.30079.1.S1_at   | MmugDNA.30079.1 | 11.62 | 11.68 | 0.17 | 0.08 | -1.04 | 0.25066  | 0.300643 | 0.545228 | 0.558941 |
| MmugDNA.30085.1.S1_at   | MmugDNA.30085.1 | 6.4   | 6.26  | 0.19 | 0.02 | 1.11  | 0.735388 | 0.723773 | 0.876836 | 0.840126 |
| MmugDNA.30089.1.S1_at   | MmugDNA.30089.1 | 5.96  | 6.1   | 0.16 | 0.05 | -1.11 | 0.600739 | 0.688279 | 0.799126 | 0.818009 |
| MmugDNA.30089.1.S1_x_at | MmugDNA.30089.1 | 6.07  | 6.13  | 0.04 | 0.02 | -1.04 | 0.067192 | 0.088532 | 0.316853 | 0.341947 |
| MmugDNA.30097.1.S1_at   | MmugDNA.30097.1 | 11.49 | 11.57 | 0.49 | 0.25 | -1.06 | 0.986421 | 0.629882 | 0.995228 | 0.782009 |
| MmugDNA.30098.1.S1_at   | MmugDNA.30098.1 | 7.66  | 7.94  | 0.14 | 0.07 | -1.21 | 0.063952 | 0.241876 | 0.309333 | 0.512475 |
| MmugDNA.30102.1.S1_at   | MmugDNA.30102.1 | 7.2   | 10.47 | 1.31 | 0.15 | -9.69 | 0.016434 | 0.156276 | 0.181069 | 0.43161  |
| MmugDNA.30103.1.S1_at   | MmugDNA.30103.1 | 7.73  | 8.45  | 0.54 | 0.24 | -1.65 | 0.039472 | 0.157891 | 0.255157 | 0.433583 |
| MmugDNA.30105.1.S1_at   | MmugDNA.30105.1 | 9.41  | 7.86  | 0.37 | 0.19 | 2.93  | 0.004789 | 0.014342 | 0.115098 | 0.152889 |

|                         |                 |       |       |      |      |       |          |          |          |          |
|-------------------------|-----------------|-------|-------|------|------|-------|----------|----------|----------|----------|
| MmugDNA.30108.1.S1_at   | MmugDNA.30108.1 | 2.68  | 2.67  | 0.13 | 0.03 | 1.01  | 0.766681 | 0.838973 | 0.892936 | 0.908226 |
| MmugDNA.30111.1.S1_at   | MmugDNA.30111.1 | 11.13 | 11.13 | 0.22 | 0.04 | 1     | 0.899785 | 0.087334 | 0.95742  | 0.340404 |
| MmugDNA.3013.1.S1_at    | MmugDNA.3013.1  | 4.26  | 4.17  | 0.13 | 0.11 | 1.06  | 0.253651 | 0.143012 | 0.547927 | 0.41689  |
| MmugDNA.30136.1.S1_at   | MmugDNA.30136.1 | 10.81 | 10.64 | 0.21 | 0.18 | 1.13  | 0.14978  | 0.004313 | 0.438771 | 0.092121 |
| MmugDNA.30138.1.S1_at   | MmugDNA.30138.1 | 3.99  | 4.09  | 0.07 | 0.22 | -1.07 | 0.543994 | 0.461484 | 0.763753 | 0.673151 |
| MmugDNA.30140.1.S1_at   | MmugDNA.30140.1 | 9.86  | 9.84  | 0.19 | 0.1  | 1.01  | 0.405094 | 0.204579 | 0.668684 | 0.478946 |
| MmugDNA.30145.1.S1_at   | MmugDNA.30145.1 | 5.56  | 5.56  | 0.01 | 0.08 | -1    | 0.407989 | 0.080109 | 0.670905 | 0.327579 |
| MmugDNA.30147.1.S1_at   | MmugDNA.30147.1 | 5.34  | 4.86  | 0.43 | 0.38 | 1.39  | 0.148642 | 0.488591 | 0.437221 | 0.691222 |
| MmugDNA.3015.1.S1_at    | MmugDNA.3015.1  | 12.49 | 11.99 | 0.11 | 0.09 | 1.41  | 0.003623 | 0.000741 | 0.105654 | 0.044929 |
| MmugDNA.30154.1.S1_at   | MmugDNA.30154.1 | 9.01  | 8.83  | 0.14 | 0.08 | 1.13  | 0.176739 | 0.029767 | 0.471201 | 0.214185 |
| MmugDNA.30156.1.S1_at   | MmugDNA.30156.1 | 7.76  | 7.8   | 0.03 | 0.1  | -1.03 | 0.659775 | 0.002109 | 0.835796 | 0.067909 |
| MmugDNA.30162.1.S1_at   | MmugDNA.30162.1 | 4.26  | 4.48  | 0.4  | 0.42 | -1.16 | 0.902851 | 0.968503 | 0.958791 | 0.982645 |
| MmugDNA.30163.1.S1_at   | MmugDNA.30163.1 | 7.9   | 8.09  | 0.12 | 0.09 | -1.14 | 0.113135 | 0.643929 | 0.389736 | 0.791217 |
| MmugDNA.30164.1.S1_at   | MmugDNA.30164.1 | 10.68 | 10.11 | 0.37 | 0.17 | 1.48  | 0.279985 | 0.086847 | 0.571213 | 0.339651 |
| MmugDNA.30168.1.S1_at   | MmugDNA.30168.1 | 9.4   | 9.25  | 0.02 | 0.14 | 1.11  | 0.164698 | 0.071016 | 0.457769 | 0.312648 |
| MmugDNA.30169.1.S1_at   | MmugDNA.30169.1 | 5.83  | 6.37  | 0.19 | 0.06 | -1.46 | 0.015176 | 0.009961 | 0.175242 | 0.131094 |
| MmugDNA.30175.1.S1_at   | MmugDNA.30175.1 | 3.8   | 3.62  | 0.07 | 0.02 | 1.13  | 0.023855 | 0.132632 | 0.207529 | 0.404544 |
| MmugDNA.30177.1.S1_at   | MmugDNA.30177.1 | 5     | 4.96  | 0.08 | 0.18 | 1.02  | 0.471653 | 0.09372  | 0.71569  | 0.350192 |
| MmugDNA.3018.1.S1_at    | MmugDNA.3018.1  | 6.07  | 6.01  | 0.02 | 0.05 | 1.04  | 0.240008 | 0.097582 | 0.537559 | 0.355456 |
| MmugDNA.30181.1.S1_at   | MmugDNA.30181.1 | 9.63  | 9.68  | 0.38 | 0.27 | -1.03 | 0.549825 | 0.079484 | 0.767442 | 0.32681  |
| MmugDNA.30181.1.S1_s_at | MmugDNA.30181.1 | 7.76  | 7.83  | 0.53 | 0.17 | -1.05 | 0.560865 | 0.113557 | 0.774056 | 0.379632 |
| MmugDNA.30183.1.S1_at   | MmugDNA.30183.1 | 12.74 | 12.77 | 0.15 | 0.02 | -1.02 | 0.741277 | 0.626814 | 0.880122 | 0.779995 |
| MmugDNA.30186.1.S1_at   | MmugDNA.30186.1 | 9.17  | 7.35  | 0.96 | 0.37 | 3.53  | 0.067821 | 0.279076 | 0.318245 | 0.542782 |
| MmugDNA.30187.1.S1_at   | MmugDNA.30187.1 | 11.44 | 11.49 | 0.18 | 0.09 | -1.04 | 0.593206 | 0.181952 | 0.793939 | 0.458483 |
| MmugDNA.30190.1.S1_at   | MmugDNA.30190.1 | 4.8   | 4.91  | 0.05 | 0.09 | -1.08 | 0.071373 | 0.013283 | 0.325101 | 0.147922 |
| MmugDNA.30193.1.S1_at   | MmugDNA.30193.1 | 4.59  | 4.36  | 0.18 | 0.16 | 1.18  | 0.154852 | 0.190381 | 0.44505  | 0.465906 |
| MmugDNA.30200.1.S1_at   | MmugDNA.30200.1 | 8.96  | 8.59  | 0.07 | 0.06 | 1.29  | 0.001802 | 0.000391 | 0.086149 | 0.03746  |
| MmugDNA.30215.1.S1_at   | MmugDNA.30215.1 | 8.6   | 8.05  | 0.23 | 0.21 | 1.47  | 0.033259 | 0.025715 | 0.236446 | 0.201008 |
| MmugDNA.30219.1.S1_at   | MmugDNA.30219.1 | 3.27  | 3.22  | 0.04 | 0.04 | 1.03  | 0.242519 | 0.789988 | 0.539382 | 0.878631 |
| MmugDNA.30220.1.S1_at   | MmugDNA.30220.1 | 4.18  | 4.25  | 0.76 | 0.66 | -1.05 | 0.805098 | 0.046295 | 0.912553 | 0.25959  |
| MmugDNA.30227.1.S1_at   | MmugDNA.30227.1 | 12.17 | 11.83 | 0.21 | 0.06 | 1.27  | 0.168378 | 0.083306 | 0.461622 | 0.333375 |
| MmugDNA.30229.1.S1_at   | MmugDNA.30229.1 | 3.79  | 3.83  | 0.09 | 0.04 | -1.03 | 0.511828 | 0.057081 | 0.742775 | 0.284945 |
| MmugDNA.30249.1.S1_s_at | MmugDNA.30249.1 | 6.38  | 6.52  | 0.19 | 0.01 | -1.11 | 0.791747 | 0.514592 | 0.905419 | 0.707767 |
| MmugDNA.30250.1.S1_at   | MmugDNA.30250.1 | 8.18  | 6.34  | 0.26 | 0.55 | 3.6   | 0.006145 | 0.002473 | 0.12462  | 0.073576 |
| MmugDNA.30255.1.S1_at   | MmugDNA.30255.1 | 10.92 | 11.02 | 0.11 | 0.15 | -1.07 | 0.387178 | 0.124773 | 0.655438 | 0.395215 |
| MmugDNA.30257.1.S1_at   | MmugDNA.30257.1 | 13.1  | 12.96 | 0.1  | 0.05 | 1.11  | 0.045448 | 0.229902 | 0.270804 | 0.501802 |
| MmugDNA.3026.1.S1_at    | MmugDNA.3026.1  | 4.22  | 4.02  | 0.21 | 0.17 | 1.15  | 0.545984 | 0.768707 | 0.7651   | 0.865653 |
| MmugDNA.30263.1.S1_at   | MmugDNA.30263.1 | 4.94  | 5.21  | 0.28 | 0.28 | -1.2  | 0.256327 | 0.284903 | 0.550836 | 0.54701  |
| MmugDNA.30266.1.S1_at   | MmugDNA.30266.1 | 6.53  | 6.65  | 0.1  | 0.02 | -1.09 | 0.22336  | 0.105209 | 0.52116  | 0.366982 |
| MmugDNA.30268.1.S1_at   | MmugDNA.30268.1 | 11.54 | 11.57 | 0.05 | 0.05 | -1.03 | 0.083707 | 0.000572 | 0.346423 | 0.041171 |
| MmugDNA.3027.1.S1_at    | MmugDNA.3027.1  | 3.79  | 3.72  | 0.08 | 0.06 | 1.05  | 0.305713 | 0.410072 | 0.592779 | 0.637065 |
| MmugDNA.3027.1.S1_s_at  | MmugDNA.3027.1  | 10.03 | 10.42 | 0.2  | 0.02 | -1.31 | 0.031092 | 0.442215 | 0.22934  | 0.660275 |
| MmugDNA.30271.1.S1_at   | MmugDNA.30271.1 | 10.61 | 12.25 | 0.46 | 0.19 | -3.11 | 0.008459 | 0.011304 | 0.141205 | 0.138076 |

|                         |                 |       |       |      |      |       |          |          |          |          |
|-------------------------|-----------------|-------|-------|------|------|-------|----------|----------|----------|----------|
| MmugDNA.30286.1.S1_at   | MmugDNA.30286.1 | 10.09 | 10.32 | 0.65 | 0.44 | -1.17 | 0.944219 | 0.308478 | 0.976508 | 0.564515 |
| MmugDNA.30287.1.S1_at   | MmugDNA.30287.1 | 6.91  | 9.24  | 1.04 | 0.2  | -5.03 | 0.023206 | 0.130978 | 0.205385 | 0.403037 |
| MmugDNA.30297.1.S1_at   | MmugDNA.30297.1 | 5.19  | 5.39  | 0.14 | 0.23 | -1.15 | 0.707143 | 0.891187 | 0.861311 | 0.937993 |
| MmugDNA.30298.1.S1_at   | MmugDNA.30298.1 | 10.91 | 10.6  | 0.06 | 0.07 | 1.24  | 0.004782 | 0.00047  | 0.115098 | 0.038572 |
| MmugDNA.30299.1.S1_at   | MmugDNA.30299.1 | 6.73  | 6.8   | 0.14 | 0.17 | -1.05 | 0.708224 | 0.878866 | 0.861785 | 0.930872 |
| MmugDNA.30300.1.S1_at   | MmugDNA.30300.1 | 11.54 | 10.84 | 0.14 | 0.21 | 1.63  | 0.016661 | 0.193691 | 0.182466 | 0.468785 |
| MmugDNA.30302.1.S1_at   | MmugDNA.30302.1 | 6.04  | 6.05  | 0.13 | 0.02 | -1.01 | 0.990839 | 0.764122 | 0.996664 | 0.862852 |
| MmugDNA.30319.1.S1_at   | MmugDNA.30319.1 | 10.56 | 11.47 | 0.28 | 0.13 | -1.88 | 0.020175 | 0.181284 | 0.195628 | 0.457821 |
| MmugDNA.30321.1.S1_at   | MmugDNA.30321.1 | 9.8   | 9.52  | 0.31 | 0.05 | 1.22  | 0.063944 | 0.041262 | 0.309333 | 0.247995 |
| MmugDNA.30322.1.S1_at   | MmugDNA.30322.1 | 5.98  | 6.13  | 0.33 | 0.12 | -1.11 | 0.491269 | 0.13512  | 0.729196 | 0.407131 |
| MmugDNA.30323.1.S1_at   | MmugDNA.30323.1 | 10.9  | 10.86 | 0.09 | 0.05 | 1.02  | 0.366122 | 0.763422 | 0.640626 | 0.862471 |
| MmugDNA.30328.1.S1_at   | MmugDNA.30328.1 | 13.31 | 13.23 | 0.08 | 0.01 | 1.06  | 0.418011 | 0.831623 | 0.678023 | 0.903452 |
| MmugDNA.30329.1.S1_at   | MmugDNA.30329.1 | 11.61 | 11.59 | 0.07 | 0.11 | 1.02  | 0.887714 | 0.723171 | 0.952052 | 0.839639 |
| MmugDNA.30331.1.S1_at   | MmugDNA.30331.1 | 8.59  | 9.66  | 0.77 | 0.28 | -2.09 | 0.03375  | 0.201838 | 0.237928 | 0.476367 |
| MmugDNA.30333.1.S1_at   | MmugDNA.30333.1 | 6.07  | 6.14  | 0.12 | 0.03 | -1.05 | 0.487277 | 0.291746 | 0.726061 | 0.552054 |
| MmugDNA.30334.1.S1_at   | MmugDNA.30334.1 | 7.55  | 7.07  | 0.26 | 0.05 | 1.39  | 0.038078 | 0.090104 | 0.251025 | 0.344402 |
| MmugDNA.3034.1.S1_at    | MmugDNA.3034.1  | 5.96  | 5.95  | 0.05 | 0.13 | 1.01  | 0.511486 | 0.121267 | 0.74242  | 0.390351 |
| MmugDNA.30341.1.S1_at   | MmugDNA.30341.1 | 6.77  | 6.66  | 0.25 | 0.33 | 1.08  | 0.998157 | 0.114974 | 0.999328 | 0.381719 |
| MmugDNA.30350.1.S1_at   | MmugDNA.30350.1 | 5.17  | 6.66  | 0.8  | 0.51 | -2.82 | 0.041986 | 0.337101 | 0.261908 | 0.584337 |
| MmugDNA.30351.1.S1_at   | MmugDNA.30351.1 | 13.46 | 13.42 | 0.05 | 0.04 | 1.03  | 0.220456 | 0.454148 | 0.518158 | 0.668407 |
| MmugDNA.30352.1.S1_at   | MmugDNA.30352.1 | 13.02 | 13.02 | 0.15 | 0.05 | -1    | 0.420085 | 0.336764 | 0.679303 | 0.584089 |
| MmugDNA.30355.1.S1_s_at | MmugDNA.30355.1 | 5.85  | 5.98  | 0.18 | 0.15 | -1.09 | 0.885803 | 0.986234 | 0.951294 | 0.992174 |
| MmugDNA.30359.1.S1_at   | MmugDNA.30359.1 | 7.88  | 7.59  | 0.25 | 0.26 | 1.22  | 0.321621 | 0.203352 | 0.605955 | 0.477574 |
| MmugDNA.30361.1.S1_at   | MmugDNA.30361.1 | 6.46  | 6.53  | 0.23 | 0.09 | -1.05 | 0.41935  | 0.656915 | 0.67873  | 0.799401 |
| MmugDNA.30366.1.S1_at   | MmugDNA.30366.1 | 3.92  | 5.79  | 0.68 | 0.74 | -3.66 | 0.055302 | 0.046904 | 0.292072 | 0.261281 |
| MmugDNA.30367.1.S1_at   | MmugDNA.30367.1 | 6.25  | 6.82  | 0.67 | 0.31 | -1.49 | 0.217021 | 0.380812 | 0.514863 | 0.617426 |
| MmugDNA.30371.1.S1_at   | MmugDNA.30371.1 | 3.36  | 3.23  | 0.06 | 0.03 | 1.09  | 0.083969 | 0.742758 | 0.347068 | 0.851023 |
| MmugDNA.30376.1.S1_at   | MmugDNA.30376.1 | 11.84 | 10.91 | 0.08 | 0.19 | 1.9   | 0.0022   | 0.010141 | 0.090729 | 0.131979 |
| MmugDNA.30378.1.S1_at   | MmugDNA.30378.1 | 3.91  | 3.99  | 0.41 | 0.13 | -1.06 | 0.591551 | 0.781864 | 0.792688 | 0.873558 |
| MmugDNA.30384.1.S1_s_at | MmugDNA.30384.1 | 7.89  | 7.63  | 0.67 | 0.16 | 1.19  | 0.599719 | 0.876023 | 0.798347 | 0.929528 |
| MmugDNA.30391.1.S1_at   | MmugDNA.30391.1 | 7.07  | 7.12  | 0.19 | 0.16 | -1.03 | 0.382592 | 0.0213   | 0.652037 | 0.182706 |
| MmugDNA.30392.1.S1_at   | MmugDNA.30392.1 | 6.27  | 7.15  | 0.08 | 0.1  | -1.84 | 0.000395 | 0.011914 | 0.062519 | 0.141283 |
| MmugDNA.3040.1.S1_at    | MmugDNA.3040.1  | 8.18  | 7.08  | 0.82 | 0.61 | 2.13  | 0.097323 | 0.158016 | 0.367523 | 0.433769 |
| MmugDNA.30406.1.S1_at   | MmugDNA.30406.1 | 9.41  | 9.01  | 0.21 | 0.13 | 1.32  | 0.049516 | 0.003122 | 0.279984 | 0.081345 |
| MmugDNA.30412.1.S1_at   | MmugDNA.30412.1 | 7.86  | 8.16  | 0.17 | 0.03 | -1.24 | 0.037051 | 0.103071 | 0.247751 | 0.36396  |
| MmugDNA.30416.1.S1_at   | MmugDNA.30416.1 | 3.09  | 3.08  | 0.08 | 0.02 | 1.01  | 0.313753 | 0.329697 | 0.599637 | 0.578874 |
| MmugDNA.30419.1.S1_at   | MmugDNA.30419.1 | 10.55 | 10.71 | 0.2  | 0.03 | -1.12 | 0.244391 | 0.088056 | 0.540909 | 0.341547 |
| MmugDNA.30425.1.S1_at   | MmugDNA.30425.1 | 10.21 | 9.62  | 0.05 | 0.21 | 1.51  | 0.017758 | 0.049468 | 0.186892 | 0.267334 |
| MmugDNA.30427.1.S1_at   | MmugDNA.30427.1 | 8.58  | 8.64  | 0.35 | 0.07 | -1.05 | 0.790746 | 0.898234 | 0.904945 | 0.942072 |
| MmugDNA.30429.1.S1_at   | MmugDNA.30429.1 | 11.1  | 11.14 | 0.04 | 0.05 | -1.03 | 0.338854 | 0.126107 | 0.619223 | 0.39672  |
| MmugDNA.30433.1.S1_at   | MmugDNA.30433.1 | 10.38 | 9.57  | 0.34 | 0.02 | 1.75  | 0.013838 | 0.014061 | 0.168627 | 0.151841 |
| MmugDNA.30435.1.S1_at   | MmugDNA.30435.1 | 11.15 | 11.5  | 0.33 | 0.05 | -1.27 | 0.463308 | 0.588655 | 0.710026 | 0.755137 |
| MmugDNA.30439.1.S1_at   | MmugDNA.30439.1 | 9.64  | 9.51  | 0.14 | 0.08 | 1.1   | 0.789645 | 0.037199 | 0.904456 | 0.237285 |

|                       |                 |       |       |      |      |       |          |          |          |          |
|-----------------------|-----------------|-------|-------|------|------|-------|----------|----------|----------|----------|
| MmugDNA.30445.1.S1_at | MmugDNA.30445.1 | 10.52 | 10.56 | 0.08 | 0.02 | -1.03 | 0.856856 | 0.017208 | 0.937807 | 0.166206 |
| MmugDNA.30446.1.S1_at | MmugDNA.30446.1 | 7.82  | 7.4   | 0.32 | 0.17 | 1.34  | 0.099882 | 0.073486 | 0.370803 | 0.316769 |
| MmugDNA.30447.1.S1_at | MmugDNA.30447.1 | 7.37  | 8     | 0.28 | 0.13 | -1.55 | 0.057684 | 0.015553 | 0.297451 | 0.158118 |
| MmugDNA.3045.1.S1_at  | MmugDNA.3045.1  | 10.77 | 10.48 | 0.39 | 0.04 | 1.22  | 0.370038 | 0.490174 | 0.643241 | 0.692234 |
| MmugDNA.30456.1.S1_at | MmugDNA.30456.1 | 10.19 | 10.1  | 0.1  | 0.08 | 1.06  | 0.904182 | 0.00116  | 0.959379 | 0.053615 |
| MmugDNA.3046.1.S1_at  | MmugDNA.3046.1  | 13.58 | 13.67 | 0.14 | 0.02 | -1.07 | 0.096746 | 0.049456 | 0.366756 | 0.267334 |
| MmugDNA.30463.1.S1_at | MmugDNA.30463.1 | 11.25 | 11.51 | 0.5  | 0.06 | -1.19 | 0.385997 | 0.138623 | 0.654513 | 0.41168  |
| MmugDNA.30464.1.S1_at | MmugDNA.30464.1 | 9.12  | 10.31 | 0.2  | 0.07 | -2.29 | 0.001014 | 0.048357 | 0.076321 | 0.265081 |
| MmugDNA.30466.1.S1_at | MmugDNA.30466.1 | 9.07  | 8.68  | 0.13 | 0.4  | 1.31  | 0.049321 | 0.011175 | 0.279484 | 0.137551 |
| MmugDNA.30467.1.S1_at | MmugDNA.30467.1 | 4.57  | 4.35  | 0.18 | 0.26 | 1.17  | 0.499492 | 0.600611 | 0.734205 | 0.762183 |
| MmugDNA.30481.1.S1_at | MmugDNA.30481.1 | 6.44  | 5.83  | 0.74 | 0.03 | 1.52  | 0.171758 | 0.180388 | 0.465678 | 0.457066 |
| MmugDNA.30487.1.S1_at | MmugDNA.30487.1 | 3.84  | 3.46  | 0.26 | 0.07 | 1.3   | 0.070887 | 0.085769 | 0.324317 | 0.337818 |
| MmugDNA.3049.1.S1_at  | MmugDNA.3049.1  | 11.16 | 11.4  | 0.25 | 0.25 | -1.19 | 0.292089 | 0.047722 | 0.581449 | 0.263325 |
| MmugDNA.30490.1.S1_at | MmugDNA.30490.1 | 8.44  | 8.46  | 0.09 | 0.14 | -1.01 | 0.298996 | 0.299239 | 0.58725  | 0.557769 |
| MmugDNA.30496.1.S1_at | MmugDNA.30496.1 | 8.4   | 8.43  | 0.12 | 0.1  | -1.02 | 0.802251 | 0.096406 | 0.911218 | 0.354015 |
| MmugDNA.30503.1.A1_at | MmugDNA.30503.1 | 3.34  | 3.31  | 0.09 | 0.16 | 1.02  | 0.49108  | 0.76475  | 0.729015 | 0.863203 |
| MmugDNA.30503.1.S1_at | MmugDNA.30503.1 | 4.99  | 4.88  | 0.26 | 0.33 | 1.07  | 0.283738 | 0.465365 | 0.574001 | 0.675748 |
| MmugDNA.30507.1.S1_at | MmugDNA.30507.1 | 3.53  | 3.48  | 0.06 | 0.03 | 1.03  | 0.664195 | 0.847175 | 0.838332 | 0.91316  |
| MmugDNA.30510.1.S1_at | MmugDNA.30510.1 | 7.94  | 8.13  | 0.33 | 0.08 | -1.14 | 0.400027 | 0.659357 | 0.665173 | 0.800682 |
| MmugDNA.30512.1.S1_at | MmugDNA.30512.1 | 4.93  | 5.68  | 0.38 | 0.65 | -1.68 | 0.102657 | 0.128412 | 0.37496  | 0.399676 |
| MmugDNA.30515.1.S1_at | MmugDNA.30515.1 | 5.45  | 5.45  | 0.09 | 0.04 | 1     | 0.619249 | 0.000165 | 0.811061 | 0.030511 |
| MmugDNA.30517.1.S1_at | MmugDNA.30517.1 | 5.77  | 5.86  | 0.16 | 0.03 | -1.06 | 0.426836 | 0.207746 | 0.684255 | 0.482005 |
| MmugDNA.30526.1.S1_at | MmugDNA.30526.1 | 3.25  | 3.06  | 0.06 | 0    | 1.14  | 0.00625  | 0.001242 | 0.125292 | 0.054826 |
| MmugDNA.30528.1.S1_at | MmugDNA.30528.1 | 4.69  | 4.58  | 0.04 | 0.04 | 1.08  | 0.018194 | 0.011285 | 0.187854 | 0.138076 |
| MmugDNA.3053.1.S1_at  | MmugDNA.3053.1  | 8.27  | 8.21  | 0.06 | 0.11 | 1.04  | 0.955498 | 0.233521 | 0.981771 | 0.504849 |
| MmugDNA.30530.1.S1_at | MmugDNA.30530.1 | 11.41 | 11.08 | 0.22 | 0.13 | 1.25  | 0.149195 | 0.010766 | 0.437947 | 0.135471 |
| MmugDNA.30534.1.S1_at | MmugDNA.30534.1 | 2.98  | 3.01  | 0.28 | 0.03 | -1.02 | 0.85953  | 0.80191  | 0.93919  | 0.885989 |
| MmugDNA.30537.1.S1_at | MmugDNA.30537.1 | 9.8   | 9.3   | 0.07 | 0.27 | 1.41  | 0.125805 | 0.818657 | 0.406645 | 0.895512 |
| MmugDNA.30541.1.S1_at | MmugDNA.30541.1 | 6.51  | 6.91  | 0.15 | 0.18 | -1.32 | 0.072228 | 0.018045 | 0.326716 | 0.169372 |
| MmugDNA.30551.1.S1_at | MmugDNA.30551.1 | 10.19 | 10.18 | 0.27 | 0.19 | 1.01  | 0.847274 | 0.369868 | 0.933382 | 0.609138 |
| MmugDNA.30554.1.S1_at | MmugDNA.30554.1 | 10.43 | 11.04 | 0.39 | 0.12 | -1.53 | 0.046589 | 0.095443 | 0.273564 | 0.35247  |
| MmugDNA.30555.1.S1_at | MmugDNA.30555.1 | 9.04  | 8.68  | 0.19 | 0.18 | 1.28  | 0.090173 | 0.043771 | 0.356864 | 0.25387  |
| MmugDNA.30559.1.S1_at | MmugDNA.30559.1 | 8.37  | 8.43  | 0.08 | 0.07 | -1.04 | 0.412877 | 0.207967 | 0.674373 | 0.482049 |
| MmugDNA.30562.1.S1_at | MmugDNA.30562.1 | 4.64  | 4.31  | 0.26 | 0.17 | 1.25  | 0.247888 | 0.722637 | 0.543263 | 0.83935  |
| MmugDNA.30563.1.S1_at | MmugDNA.30563.1 | 3.45  | 3.3   | 0.07 | 0.1  | 1.11  | 0.1223   | 0.226111 | 0.40112  | 0.49859  |
| MmugDNA.30565.1.S1_at | MmugDNA.30565.1 | 6.65  | 7.53  | 0.19 | 0.22 | -1.84 | 0.011202 | 0.191023 | 0.155478 | 0.46629  |
| MmugDNA.30566.1.S1_at | MmugDNA.30566.1 | 12.47 | 12.37 | 0.03 | 0.09 | 1.07  | 0.191167 | 0.079856 | 0.487392 | 0.327179 |
| MmugDNA.30568.1.S1_at | MmugDNA.30568.1 | 6.17  | 6.38  | 0.11 | 0.07 | -1.15 | 0.061633 | 0.297174 | 0.304849 | 0.556031 |
| MmugDNA.30572.1.S1_at | MmugDNA.30572.1 | 11    | 11.59 | 0.18 | 0.18 | -1.5  | 0.040231 | 0.014558 | 0.257084 | 0.153907 |
| MmugDNA.30578.1.S1_at | MmugDNA.30578.1 | 11.47 | 11.29 | 0.23 | 0.06 | 1.13  | 0.729095 | 0.575226 | 0.873447 | 0.746406 |
| MmugDNA.30581.1.S1_at | MmugDNA.30581.1 | 8.29  | 8.33  | 0.05 | 0.21 | -1.03 | 0.706087 | 0.742801 | 0.86081  | 0.851029 |
| MmugDNA.30582.1.S1_at | MmugDNA.30582.1 | 10.33 | 10.12 | 0.64 | 0.37 | 1.16  | 0.913413 | 0.127138 | 0.963369 | 0.397922 |
| MmugDNA.3059.1.S1_at  | MmugDNA.3059.1  | 4.76  | 4.82  | 0.14 | 0.08 | -1.04 | 0.93076  | 0.007433 | 0.970878 | 0.115858 |



|                         |                 |       |       |      |      |       |          |          |          |          |
|-------------------------|-----------------|-------|-------|------|------|-------|----------|----------|----------|----------|
| MmugDNA.30592.1.S1_at   | MmugDNA.30592.1 | 11.54 | 11.72 | 2.87 | 0.11 | -1.13 | 0.345815 | 0.510629 | 0.62466  | 0.705036 |
| MmugDNA.30592.1.S1_s_at | MmugDNA.30592.1 | 11.33 | 11.52 | 0.11 | 0.16 | -1.14 | 0.235059 | 0.040176 | 0.533056 | 0.245709 |
| MmugDNA.30593.1.S1_at   | MmugDNA.30593.1 | 11.51 | 11.05 | 0.15 | 0.04 | 1.38  | 0.006454 | 0.207051 | 0.127119 | 0.481115 |
| MmugDNA.30594.1.S1_at   | MmugDNA.30594.1 | 6.56  | 6.32  | 0.08 | 0.02 | 1.18  | 0.010973 | 0.005703 | 0.154584 | 0.104102 |
| MmugDNA.30595.1.S1_at   | MmugDNA.30595.1 | 8.22  | 9.33  | 0.13 | 0.47 | -2.15 | 0.008176 | 0.001959 | 0.139381 | 0.065832 |
| MmugDNA.30598.1.S1_at   | MmugDNA.30598.1 | 10.89 | 10.75 | 0.25 | 0.05 | 1.1   | 0.500958 | 0.050947 | 0.735133 | 0.270968 |
| MmugDNA.3060.1.S1_at    | MmugDNA.3060.1  | 10.71 | 10.69 | 0.13 | 0    | 1.02  | 0.544613 | 0.259477 | 0.764167 | 0.526418 |
| MmugDNA.30601.1.S1_at   | MmugDNA.30601.1 | 9.2   | 9.42  | 0.29 | 0.21 | -1.16 | 0.339087 | 0.003198 | 0.619372 | 0.08199  |
| MmugDNA.30604.1.S1_at   | MmugDNA.30604.1 | 6.3   | 6.63  | 0.4  | 0.12 | -1.26 | 0.186478 | 0.181197 | 0.482628 | 0.457667 |
| MmugDNA.30609.1.S1_at   | MmugDNA.30609.1 | 5.06  | 5     | 0.09 | 0.14 | 1.04  | 0.79807  | 0.942163 | 0.908855 | 0.967154 |
| MmugDNA.30611.1.S1_at   | MmugDNA.30611.1 | 9.86  | 9.95  | 0.07 | 0.13 | -1.06 | 0.917752 | 0.171794 | 0.96488  | 0.448198 |
| MmugDNA.30615.1.S1_at   | MmugDNA.30615.1 | 6.26  | 6.44  | 0.04 | 0.14 | -1.13 | 0.095597 | 0.038375 | 0.365116 | 0.240795 |
| MmugDNA.30619.1.S1_at   | MmugDNA.30619.1 | 13.47 | 13.5  | 0.05 | 0.05 | -1.03 | 0.811919 | 0.751202 | 0.915788 | 0.855385 |
| MmugDNA.30620.1.S1_at   | MmugDNA.30620.1 | 12.47 | 12.65 | 0.08 | 0.1  | -1.13 | 0.060224 | 0.085607 | 0.302553 | 0.337607 |
| MmugDNA.30621.1.S1_at   | MmugDNA.30621.1 | 12.25 | 12.08 | 0.23 | 0.11 | 1.12  | 0.579284 | 0.527236 | 0.785017 | 0.715896 |
| MmugDNA.30623.1.S1_at   | MmugDNA.30623.1 | 5.85  | 5.99  | 0.26 | 0.25 | -1.1  | 0.224301 | 0.289559 | 0.522502 | 0.55061  |
| MmugDNA.30628.1.S1_at   | MmugDNA.30628.1 | 10.27 | 9.59  | 0.08 | 0.05 | 1.6   | 0.000222 | 0.000114 | 0.054604 | 0.028568 |
| MmugDNA.30629.1.S1_at   | MmugDNA.30629.1 | 3.78  | 3.7   | 0.03 | 0.04 | 1.06  | 0.111695 | 0.657636 | 0.38771  | 0.79986  |
| MmugDNA.30632.1.S1_at   | MmugDNA.30632.1 | 9.95  | 9.69  | 0.2  | 0.06 | 1.2   | 0.263663 | 0.097705 | 0.55714  | 0.355581 |
| MmugDNA.30634.1.S1_at   | MmugDNA.30634.1 | 3.44  | 3.43  | 0.08 | 0.07 | 1     | 0.488534 | 0.263108 | 0.726931 | 0.529431 |
| MmugDNA.30635.1.S1_s_at | MmugDNA.30635.1 | 10.18 | 10.68 | 0.22 | 0.06 | -1.41 | 0.010746 | 0.037466 | 0.153406 | 0.237837 |
| MmugDNA.30636.1.S1_at   | MmugDNA.30636.1 | 8.67  | 8.66  | 0.31 | 0.23 | 1     | 0.769376 | 0.687614 | 0.894208 | 0.817624 |
| MmugDNA.30639.1.S1_at   | MmugDNA.30639.1 | 7.15  | 7.06  | 0.13 | 0.13 | 1.06  | 0.989058 | 0.584511 | 0.996219 | 0.752435 |
| MmugDNA.3064.1.S1_at    | MmugDNA.3064.1  | 13.79 | 13.52 | 0.01 | 0.04 | 1.21  | 0.000495 | 0.000051 | 0.068271 | 0.025273 |
| MmugDNA.30643.1.S1_at   | MmugDNA.30643.1 | 9.54  | 9.45  | 0.3  | 0.07 | 1.06  | 0.816997 | 0.451696 | 0.918205 | 0.666544 |
| MmugDNA.30644.1.S1_at   | MmugDNA.30644.1 | 11.65 | 11.82 | 0.26 | 0.13 | -1.12 | 0.717672 | 0.859683 | 0.866659 | 0.920049 |
| MmugDNA.30645.1.S1_at   | MmugDNA.30645.1 | 9.77  | 9.84  | 0.29 | 0.13 | -1.05 | 0.678002 | 0.701396 | 0.846363 | 0.826814 |
| MmugDNA.30646.1.S1_at   | MmugDNA.30646.1 | 12.01 | 12.08 | 0.25 | 0.06 | -1.05 | 0.229834 | 0.557562 | 0.528728 | 0.73509  |
| MmugDNA.30648.1.S1_at   | MmugDNA.30648.1 | 9.18  | 9.12  | 0.18 | 0.11 | 1.05  | 0.606359 | 0.7927   | 0.803106 | 0.880287 |
| MmugDNA.30649.1.S1_at   | MmugDNA.30649.1 | 9.86  | 9.82  | 0.24 | 0.03 | 1.03  | 0.540313 | 0.839057 | 0.761387 | 0.908268 |
| MmugDNA.3065.1.S1_at    | MmugDNA.3065.1  | 6.46  | 7.01  | 0.23 | 0.34 | -1.47 | 0.048931 | 0.183211 | 0.278833 | 0.459553 |
| MmugDNA.30654.1.S1_at   | MmugDNA.30654.1 | 7.84  | 10.6  | 0.61 | 0.09 | -6.76 | 0.000938 | 0.031549 | 0.075939 | 0.219708 |
| MmugDNA.30659.1.S1_at   | MmugDNA.30659.1 | 11.86 | 11.72 | 0.09 | 0.02 | 1.11  | 0.124099 | 0.025059 | 0.40411  | 0.198332 |
| MmugDNA.30662.1.S1_at   | MmugDNA.30662.1 | 4.13  | 4.85  | 0.24 | 0.21 | -1.65 | 0.026158 | 0.17269  | 0.21478  | 0.449186 |
| MmugDNA.30665.1.S1_at   | MmugDNA.30665.1 | 12.14 | 12.02 | 0.13 | 0.12 | 1.09  | 0.308086 | 0.419382 | 0.594785 | 0.643466 |
| MmugDNA.30666.1.S1_at   | MmugDNA.30666.1 | 6.75  | 6.86  | 0.32 | 0.26 | -1.08 | 0.843056 | 0.176266 | 0.931219 | 0.452718 |
| MmugDNA.30667.1.S1_at   | MmugDNA.30667.1 | 12.1  | 12.01 | 0.13 | 0.01 | 1.06  | 0.257821 | 0.056397 | 0.55205  | 0.283382 |
| MmugDNA.30670.1.S1_at   | MmugDNA.30670.1 | 5.93  | 5.95  | 0.11 | 0.12 | -1.02 | 0.701757 | 0.544769 | 0.858401 | 0.727107 |
| MmugDNA.30671.1.S1_at   | MmugDNA.30671.1 | 11.38 | 10.92 | 0.06 | 0.03 | 1.37  | 0.00019  | 0.014289 | 0.053494 | 0.152639 |
| MmugDNA.30677.1.S1_at   | MmugDNA.30677.1 | 5.45  | 5.56  | 0.69 | 0.18 | -1.08 | 0.683081 | 0.892716 | 0.848853 | 0.938817 |
| MmugDNA.30678.1.S1_at   | MmugDNA.30678.1 | 6.78  | 6.69  | 0.12 | 0.06 | 1.06  | 0.211189 | 0.44729  | 0.509003 | 0.663434 |
| MmugDNA.30679.1.S1_at   | MmugDNA.30679.1 | 8.88  | 8.53  | 0.38 | 0.17 | 1.28  | 0.516468 | 0.050949 | 0.745883 | 0.270968 |
| MmugDNA.30683.1.S1_at   | MmugDNA.30683.1 | 9.03  | 7.4   | 0.73 | 0.25 | 3.09  | 0.035598 | 0.0254   | 0.243518 | 0.199747 |

|                         |                 |       |       |      |      |       |          |          |          |          |
|-------------------------|-----------------|-------|-------|------|------|-------|----------|----------|----------|----------|
| MmugDNA.30684.1.S1_at   | MmugDNA.30684.1 | 6.54  | 6.74  | 0.1  | 0.02 | -1.14 | 0.04578  | 0.031177 | 0.271472 | 0.21838  |
| MmugDNA.30686.1.S1_at   | MmugDNA.30686.1 | 9.27  | 8.73  | 0.29 | 0.15 | 1.46  | 0.188809 | 0.058383 | 0.485415 | 0.288369 |
| MmugDNA.30688.1.S1_at   | MmugDNA.30688.1 | 3.41  | 3.34  | 0.05 | 0.07 | 1.05  | 0.163274 | 0.584629 | 0.455558 | 0.752482 |
| MmugDNA.30689.1.S1_at   | MmugDNA.30689.1 | 8.49  | 8.69  | 0.07 | 0.08 | -1.15 | 0.028775 | 0.070131 | 0.222365 | 0.311029 |
| MmugDNA.30691.1.S1_at   | MmugDNA.30691.1 | 9.83  | 9.69  | 0.28 | 0.17 | 1.1   | 0.6022   | 0.015668 | 0.800043 | 0.158598 |
| MmugDNA.30694.1.S1_s_at | MmugDNA.30694.1 | 10.11 | 9.9   | 0.38 | 0.14 | 1.15  | 0.335681 | 0.514217 | 0.616542 | 0.707531 |
| MmugDNA.30706.1.S1_at   | MmugDNA.30706.1 | 7.22  | 8.33  | 0.27 | 0.33 | -2.16 | 0.007211 | 0.095659 | 0.132536 | 0.35269  |
| MmugDNA.30711.1.S1_at   | MmugDNA.30711.1 | 5.12  | 5.24  | 0.33 | 0    | -1.08 | 0.246903 | 0.055745 | 0.542575 | 0.282006 |
| MmugDNA.30712.1.S1_at   | MmugDNA.30712.1 | 10.29 | 10.08 | 0.06 | 0.08 | 1.16  | 0.035709 | 0.017031 | 0.243896 | 0.165384 |
| MmugDNA.30712.1.S1_s_at | MmugDNA.30712.1 | 9.54  | 9.15  | 0.1  | 0.06 | 1.31  | 0.010013 | 0.119855 | 0.149483 | 0.388577 |
| MmugDNA.30713.1.S1_at   | MmugDNA.30713.1 | 7.96  | 7.52  | 0.11 | 0.28 | 1.36  | 0.103535 | 0.199341 | 0.376729 | 0.474002 |
| MmugDNA.30715.1.S1_at   | MmugDNA.30715.1 | 9.85  | 9.81  | 0.15 | 0.06 | 1.03  | 0.780559 | 0.967488 | 0.899886 | 0.982071 |
| MmugDNA.30719.1.S1_at   | MmugDNA.30719.1 | 8.98  | 8.62  | 0.27 | 0.06 | 1.28  | 0.071005 | 0.022872 | 0.324424 | 0.189285 |
| MmugDNA.30725.1.S1_at   | MmugDNA.30725.1 | 6.93  | 10.1  | 1.26 | 0.14 | -9.03 | 0.02031  | 0.283954 | 0.196136 | 0.546237 |
| MmugDNA.30730.1.S1_at   | MmugDNA.30730.1 | 6.77  | 6.79  | 0.03 | 0.09 | -1.01 | 0.593484 | 0.218087 | 0.79401  | 0.491683 |
| MmugDNA.30733.1.S1_at   | MmugDNA.30733.1 | 8.05  | 7.87  | 0.04 | 0.05 | 1.14  | 0.016375 | 0.005545 | 0.180807 | 0.10275  |
| MmugDNA.30744.1.S1_at   | MmugDNA.30744.1 | 9.28  | 9.91  | 0.31 | 0.36 | -1.55 | 0.175436 | 0.086703 | 0.469899 | 0.339345 |
| MmugDNA.30744.1.S1_s_at | MmugDNA.30744.1 | 9.79  | 9.59  | 0.33 | 0.07 | 1.15  | 0.302082 | 0.416587 | 0.590044 | 0.641647 |
| MmugDNA.30746.1.S1_at   | MmugDNA.30746.1 | 6.09  | 6.01  | 0.12 | 0.08 | 1.06  | 0.930527 | 0.178539 | 0.97078  | 0.454778 |
| MmugDNA.30747.1.S1_s_at | MmugDNA.30747.1 | 9.33  | 9.24  | 0.19 | 0.07 | 1.06  | 0.76508  | 0.387538 | 0.892236 | 0.622163 |
| MmugDNA.30757.1.S1_at   | MmugDNA.30757.1 | 11.32 | 11.2  | 0.21 | 0.13 | 1.09  | 0.157443 | 0.635777 | 0.448088 | 0.785637 |
| MmugDNA.3076.1.S1_at    | MmugDNA.3076.1  | 6.95  | 7     | 0.49 | 0.11 | -1.04 | 0.474524 | 0.157561 | 0.717514 | 0.433131 |
| MmugDNA.30765.1.S1_at   | MmugDNA.30765.1 | 3.24  | 3.25  | 0.07 | 0.04 | -1.01 | 0.689865 | 0.734108 | 0.851884 | 0.845896 |
| MmugDNA.30768.1.S1_at   | MmugDNA.30768.1 | 11.94 | 12.36 | 0.11 | 0.05 | -1.34 | 0.002068 | 0.029422 | 0.090125 | 0.213368 |
| MmugDNA.30769.1.S1_at   | MmugDNA.30769.1 | 12.77 | 12.68 | 0.2  | 0.18 | 1.07  | 0.440857 | 0.116165 | 0.694673 | 0.383524 |
| MmugDNA.30771.1.S1_at   | MmugDNA.30771.1 | 6.68  | 5.82  | 0.22 | 0.33 | 1.82  | 0.043368 | 0.121455 | 0.265602 | 0.390578 |
| MmugDNA.30772.1.S1_at   | MmugDNA.30772.1 | 6.16  | 6.23  | 0.21 | 0.14 | -1.06 | 0.764262 | 0.10257  | 0.891911 | 0.362929 |
| MmugDNA.30775.1.S1_at   | MmugDNA.30775.1 | 8.12  | 8     | 0.37 | 0.05 | 1.09  | 0.722273 | 0.982667 | 0.869355 | 0.990442 |
| MmugDNA.30776.1.S1_at   | MmugDNA.30776.1 | 9.11  | 9.21  | 0.05 | 0.06 | -1.07 | 0.05965  | 0.299991 | 0.301387 | 0.558262 |
| MmugDNA.30778.1.S1_at   | MmugDNA.30778.1 | 7.03  | 6.97  | 0.11 | 0.09 | 1.04  | 0.806913 | 0.867489 | 0.913554 | 0.924699 |
| MmugDNA.30780.1.S1_at   | MmugDNA.30780.1 | 11.54 | 11.27 | 0.17 | 0.12 | 1.21  | 0.034504 | 0.127226 | 0.24039  | 0.397935 |
| MmugDNA.30781.1.S1_at   | MmugDNA.30781.1 | 10.05 | 10.16 | 0.28 | 0.09 | -1.08 | 0.865954 | 0.063919 | 0.941967 | 0.29906  |
| MmugDNA.30784.1.S1_at   | MmugDNA.30784.1 | 9.85  | 9.81  | 0.44 | 0.35 | 1.03  | 0.747964 | 0.242494 | 0.883193 | 0.51284  |
| MmugDNA.30790.1.S1_at   | MmugDNA.30790.1 | 8.62  | 8.91  | 0.12 | 0.17 | -1.22 | 0.194713 | 0.038087 | 0.491311 | 0.239753 |
| MmugDNA.30797.1.S1_at   | MmugDNA.30797.1 | 2.79  | 2.85  | 0.15 | 0.19 | -1.04 | 0.909392 | 0.510593 | 0.961565 | 0.70503  |
| MmugDNA.30798.1.S1_s_at | MmugDNA.30798.1 | 13.14 | 13.21 | 0.07 | 0.07 | -1.06 | 0.245973 | 0.345338 | 0.541732 | 0.590627 |
| MmugDNA.30799.1.S1_at   | MmugDNA.30799.1 | 10.86 | 11.13 | 0.04 | 0.09 | -1.21 | 0.009944 | 0.018937 | 0.149006 | 0.173137 |
| MmugDNA.30800.1.S1_at   | MmugDNA.30800.1 | 8.68  | 9.94  | 0.06 | 0.28 | -2.39 | 0.002531 | 0.301537 | 0.094413 | 0.55955  |
| MmugDNA.30802.1.S1_at   | MmugDNA.30802.1 | 11.53 | 11.26 | 0.24 | 0.17 | 1.21  | 0.376423 | 0.234951 | 0.647138 | 0.506146 |
| MmugDNA.30803.1.S1_at   | MmugDNA.30803.1 | 8.44  | 7.68  | 0.2  | 0.09 | 1.7   | 0.002917 | 0.003902 | 0.099212 | 0.088806 |
| MmugDNA.30804.1.S1_at   | MmugDNA.30804.1 | 6.42  | 6.41  | 0.17 | 0.03 | 1     | 0.961931 | 0.358484 | 0.984483 | 0.600011 |
| MmugDNA.30818.1.S1_at   | MmugDNA.30818.1 | 7.27  | 6.86  | 0.32 | 0.34 | 1.32  | 0.132558 | 0.084701 | 0.415892 | 0.336196 |
| MmugDNA.3082.1.S1_at    | MmugDNA.3082.1  | 11.34 | 11.18 | 0.23 | 0.07 | 1.12  | 0.679629 | 0.944382 | 0.847153 | 0.968528 |

|                         |                 |       |       |      |      |       |          |          |          |          |
|-------------------------|-----------------|-------|-------|------|------|-------|----------|----------|----------|----------|
| MmugDNA.30824.1.S1_at   | MmugDNA.30824.1 | 8.07  | 8.18  | 0.31 | 0.08 | -1.08 | 0.551786 | 0.659058 | 0.768708 | 0.800504 |
| MmugDNA.30828.1.S1_at   | MmugDNA.30828.1 | 11.99 | 11.85 | 0.13 | 0.05 | 1.11  | 0.414765 | 0.399844 | 0.675681 | 0.630048 |
| MmugDNA.30829.1.S1_at   | MmugDNA.30829.1 | 12.48 | 12.47 | 0.19 | 0.04 | 1     | 0.93686  | 0.164404 | 0.973607 | 0.440678 |
| MmugDNA.30830.1.S1_s_at | MmugDNA.30830.1 | 11.99 | 11.96 | 0.05 | 0.04 | 1.02  | 0.3674   | 0.837953 | 0.641394 | 0.907475 |
| MmugDNA.30831.1.S1_at   | MmugDNA.30831.1 | 10.3  | 10.66 | 0.2  | 0.13 | -1.28 | 0.08046  | 0.148811 | 0.341026 | 0.423201 |
| MmugDNA.30832.1.S1_at   | MmugDNA.30832.1 | 7.16  | 7.8   | 1.18 | 0.29 | -1.56 | 0.832025 | 0.96348  | 0.926042 | 0.979631 |
| MmugDNA.30836.1.S1_at   | MmugDNA.30836.1 | 10.59 | 10.8  | 0.18 | 0.19 | -1.16 | 0.244205 | 0.237474 | 0.540864 | 0.508139 |
| MmugDNA.30837.1.S1_at   | MmugDNA.30837.1 | 11.55 | 11.17 | 0.14 | 0.02 | 1.3   | 0.010517 | 0.022398 | 0.15243  | 0.187298 |
| MmugDNA.30841.1.S1_at   | MmugDNA.30841.1 | 8.36  | 8.43  | 0.23 | 0.15 | -1.05 | 0.548106 | 0.39803  | 0.766347 | 0.629138 |
| MmugDNA.30841.1.S1_x_at | MmugDNA.30841.1 | 9.36  | 9.35  | 0.13 | 0.07 | 1.01  | 0.499709 | 0.765858 | 0.734372 | 0.863946 |
| MmugDNA.30847.1.S1_at   | MmugDNA.30847.1 | 8.01  | 8.56  | 0.25 | 0.2  | -1.47 | 0.050761 | 0.028973 | 0.283078 | 0.212109 |
| MmugDNA.30848.1.S1_at   | MmugDNA.30848.1 | 8.04  | 7.85  | 0.03 | 0.44 | 1.14  | 0.62465  | 0.661223 | 0.814918 | 0.801687 |
| MmugDNA.30862.1.S1_at   | MmugDNA.30862.1 | 9.27  | 10.07 | 0.47 | 0.34 | -1.74 | 0.09903  | 0.147266 | 0.36989  | 0.421464 |
| MmugDNA.30874.1.S1_at   | MmugDNA.30874.1 | 4.97  | 5.08  | 0.64 | 0.36 | -1.08 | 0.714515 | 0.06395  | 0.86508  | 0.29906  |
| MmugDNA.30885.1.S1_at   | MmugDNA.30885.1 | 11.47 | 10.31 | 0.16 | 0.11 | 2.23  | 0.000673 | 0.021419 | 0.071248 | 0.183315 |
| MmugDNA.30894.1.S1_at   | MmugDNA.30894.1 | 3.08  | 2.94  | 0.04 | 0.06 | 1.1   | 0.032434 | 0.02962  | 0.234344 | 0.213783 |
| MmugDNA.30897.1.S1_at   | MmugDNA.30897.1 | 11.12 | 10.52 | 0.1  | 0.12 | 1.51  | 0.001685 | 0.001186 | 0.084735 | 0.054053 |
| MmugDNA.30902.1.S1_at   | MmugDNA.30902.1 | 8.75  | 8.78  | 0.07 | 0.2  | -1.02 | 0.868501 | 0.370837 | 0.943475 | 0.609814 |
| MmugDNA.3091.1.S1_at    | MmugDNA.3091.1  | 7.5   | 7.82  | 0.3  | 0.22 | -1.25 | 0.411264 | 0.01627  | 0.67323  | 0.161649 |
| MmugDNA.30914.1.S1_at   | MmugDNA.30914.1 | 5.31  | 5.89  | 0.06 | 0.27 | -1.49 | 0.014547 | 0.179129 | 0.172573 | 0.45547  |
| MmugDNA.30916.1.S1_at   | MmugDNA.30916.1 | 3.49  | 3.56  | 0.11 | 0.07 | -1.05 | 0.188963 | 0.178631 | 0.485564 | 0.454847 |
| MmugDNA.30919.1.S1_at   | MmugDNA.30919.1 | 8.49  | 7.01  | 0.44 | 0.19 | 2.78  | 0.008807 | 0.001243 | 0.143663 | 0.054826 |
| MmugDNA.3092.1.S1_at    | MmugDNA.3092.1  | 10.07 | 10.16 | 0.8  | 0.2  | -1.06 | 0.601597 | 0.585388 | 0.799744 | 0.752844 |
| MmugDNA.30921.1.S1_at   | MmugDNA.30921.1 | 7.33  | 7.71  | 0.34 | 0.09 | -1.3  | 0.264799 | 0.583796 | 0.557962 | 0.751989 |
| MmugDNA.30922.1.S1_x_at | MmugDNA.30922.1 | 4.18  | 4.18  | 0.22 | 0.02 | -1    | 0.389512 | 0.364508 | 0.657329 | 0.604846 |
| MmugDNA.30929.1.S1_at   | MmugDNA.30929.1 | 7.26  | 8.41  | 0.3  | 0.15 | -2.22 | 0.004989 | 0.001603 | 0.115785 | 0.060491 |
| MmugDNA.30933.1.S1_at   | MmugDNA.30933.1 | 6.48  | 6.63  | 0.22 | 0.09 | -1.11 | 0.294486 | 0.50837  | 0.583448 | 0.703589 |
| MmugDNA.30934.1.S1_at   | MmugDNA.30934.1 | 6.64  | 6.63  | 0.04 | 0.1  | 1.01  | 0.991128 | 0.003209 | 0.996757 | 0.082023 |
| MmugDNA.30937.1.S1_at   | MmugDNA.30937.1 | 8.97  | 8.45  | 0.12 | 0.19 | 1.44  | 0.015632 | 0.118401 | 0.177553 | 0.3864   |
| MmugDNA.30943.1.S1_at   | MmugDNA.30943.1 | 10.9  | 10.64 | 0.19 | 0.09 | 1.2   | 0.296756 | 0.556448 | 0.58546  | 0.734507 |
| MmugDNA.30953.1.S1_at   | MmugDNA.30953.1 | 7.6   | 7.56  | 0.33 | 0.09 | 1.03  | 0.799674 | 0.470806 | 0.909612 | 0.679123 |
| MmugDNA.30966.1.S1_at   | MmugDNA.30966.1 | 9.77  | 8.86  | 0.32 | 0.38 | 1.88  | 0.081518 | 0.007554 | 0.342512 | 0.116437 |
| MmugDNA.30973.1.S1_at   | MmugDNA.30973.1 | 10.34 | 10.4  | 0.29 | 0.09 | -1.04 | 0.995469 | 0.966539 | 0.998169 | 0.98139  |
| MmugDNA.30978.1.S1_at   | MmugDNA.30978.1 | 7.58  | 6.39  | 0.35 | 0.1  | 2.27  | 0.00395  | 0.084541 | 0.108453 | 0.335953 |
| MmugDNA.30984.1.S1_at   | MmugDNA.30984.1 | 10.42 | 9.18  | 0.1  | 0.03 | 2.36  | 0.000039 | 0.087484 | 0.045594 | 0.340617 |
| MmugDNA.30985.1.S1_at   | MmugDNA.30985.1 | 8.41  | 8.3   | 0.15 | 0.04 | 1.08  | 0.346411 | 0.070547 | 0.624993 | 0.311777 |
| MmugDNA.30998.1.S1_at   | MmugDNA.30998.1 | 12.18 | 11.57 | 0.2  | 0.21 | 1.53  | 0.057534 | 0.268664 | 0.297199 | 0.534138 |
| MmugDNA.3100.1.S1_at    | MmugDNA.3100.1  | 6.15  | 6.02  | 0.42 | 0.11 | 1.1   | 0.669639 | 0.365494 | 0.841513 | 0.605587 |
| MmugDNA.31002.1.S1_at   | MmugDNA.31002.1 | 6.45  | 6.43  | 0.06 | 0.01 | 1.02  | 0.842301 | 0.656998 | 0.930778 | 0.799401 |
| MmugDNA.31012.1.S1_at   | MmugDNA.31012.1 | 10.02 | 11.37 | 0.76 | 0.19 | -2.54 | 0.020741 | 0.38701  | 0.1976   | 0.621935 |
| MmugDNA.31013.1.S1_at   | MmugDNA.31013.1 | 6.3   | 6.53  | 0.11 | 0.13 | -1.17 | 0.093641 | 0.561586 | 0.362277 | 0.737505 |
| MmugDNA.31015.1.S1_at   | MmugDNA.31015.1 | 10.1  | 9.66  | 0.34 | 0.26 | 1.35  | 0.333209 | 0.774307 | 0.614682 | 0.868751 |
| MmugDNA.31018.1.S1_at   | MmugDNA.31018.1 | 7.57  | 7.58  | 0.22 | 0.04 | -1.01 | 0.875564 | 0.697842 | 0.946674 | 0.824445 |

|                         |                 |       |       |      |      |        |          |          |          |          |
|-------------------------|-----------------|-------|-------|------|------|--------|----------|----------|----------|----------|
| MmugDNA.31021.1.S1_at   | MmugDNA.31021.1 | 10.58 | 10.08 | 0.27 | 0.07 | 1.41   | 0.082946 | 0.160855 | 0.345109 | 0.43709  |
| MmugDNA.31030.1.S1_at   | MmugDNA.31030.1 | 8.35  | 6.85  | 0.53 | 0.39 | 2.84   | 0.011996 | 0.004582 | 0.159499 | 0.094484 |
| MmugDNA.31034.1.S1_at   | MmugDNA.31034.1 | 13.46 | 12.55 | 0.62 | 0.27 | 1.89   | 0.150814 | 0.443835 | 0.440003 | 0.661517 |
| MmugDNA.31040.1.S1_at   | MmugDNA.31040.1 | 10    | 9.81  | 0.16 | 0.05 | 1.14   | 0.12672  | 0.005218 | 0.408182 | 0.100105 |
| MmugDNA.31043.1.S1_at   | MmugDNA.31043.1 | 7.54  | 6.77  | 0.49 | 0.18 | 1.72   | 0.055294 | 0.079189 | 0.292072 | 0.32639  |
| MmugDNA.31049.1.S1_at   | MmugDNA.31049.1 | 3.49  | 3.37  | 0.09 | 0.02 | 1.09   | 0.309444 | 0.579518 | 0.59582  | 0.74918  |
| MmugDNA.3105.1.S1_at    | MmugDNA.3105.1  | 6.16  | 6.41  | 0.09 | 0.12 | -1.19  | 0.039945 | 0.050556 | 0.25663  | 0.270222 |
| MmugDNA.31054.1.S1_at   | MmugDNA.31054.1 | 6.01  | 5.05  | 0.61 | 0.07 | 1.94   | 0.098333 | 0.177801 | 0.368957 | 0.454111 |
| MmugDNA.31056.1.S1_at   | MmugDNA.31056.1 | 8.43  | 8.7   | 0.47 | 0.15 | -1.2   | 0.335837 | 0.282137 | 0.616625 | 0.544937 |
| MmugDNA.31057.1.S1_at   | MmugDNA.31057.1 | 5.07  | 5.07  | 0.01 | 0.07 | 1      | 0.339418 | 0.410342 | 0.619741 | 0.637216 |
| MmugDNA.3106.1.S1_at    | MmugDNA.3106.1  | 11.86 | 13.01 | 0.41 | 0.11 | -2.21  | 0.024033 | 0.419529 | 0.208189 | 0.643507 |
| MmugDNA.31067.1.S1_x_at | MmugDNA.31067.1 | 9.09  | 9.08  | 0.3  | 0.12 | 1.01   | 0.382705 | 0.606205 | 0.652092 | 0.765727 |
| MmugDNA.31070.1.S1_at   | MmugDNA.31070.1 | 10.34 | 10.39 | 0.1  | 0.07 | -1.03  | 0.705624 | 0.652193 | 0.860484 | 0.796592 |
| MmugDNA.31080.1.S1_at   | MmugDNA.31080.1 | 9.17  | 8.77  | 0.05 | 0.06 | 1.33   | 0.00046  | 0.002818 | 0.066236 | 0.078275 |
| MmugDNA.31085.1.S1_at   | MmugDNA.31085.1 | 10.91 | 10.96 | 0.14 | 0.01 | -1.04  | 0.543174 | 0.983158 | 0.763308 | 0.990726 |
| MmugDNA.31088.1.S1_at   | MmugDNA.31088.1 | 11.73 | 11.76 | 0.05 | 0.07 | -1.02  | 0.637337 | 0.035463 | 0.822407 | 0.232564 |
| MmugDNA.31090.1.S1_at   | MmugDNA.31090.1 | 10.98 | 10.2  | 0.13 | 0.11 | 1.71   | 0.001622 | 0.049088 | 0.08405  | 0.266518 |
| MmugDNA.31092.1.S1_at   | MmugDNA.31092.1 | 9     | 8.17  | 0.31 | 0.23 | 1.78   | 0.033061 | 0.015911 | 0.236091 | 0.160062 |
| MmugDNA.31096.1.S1_at   | MmugDNA.31096.1 | 12.08 | 12.19 | 0.06 | 0.11 | -1.08  | 0.172058 | 0.099513 | 0.466119 | 0.357898 |
| MmugDNA.31096.1.S1_x_at | MmugDNA.31096.1 | 12.26 | 12.26 | 0.04 | 0.02 | -1     | 0.887554 | 0.45379  | 0.951977 | 0.668253 |
| MmugDNA.31098.1.S1_at   | MmugDNA.31098.1 | 7.47  | 8.42  | 0.34 | 0.11 | -1.93  | 0.029066 | 0.0015   | 0.223234 | 0.059054 |
| MmugDNA.31100.1.S1_at   | MmugDNA.31100.1 | 10.15 | 9.97  | 0.12 | 0.27 | 1.13   | 0.268958 | 0.003231 | 0.561347 | 0.08214  |
| MmugDNA.31106.1.S1_at   | MmugDNA.31106.1 | 10.11 | 10.18 | 0.12 | 0.14 | -1.05  | 0.431419 | 0.045963 | 0.687507 | 0.258818 |
| MmugDNA.31107.1.S1_at   | MmugDNA.31107.1 | 6.98  | 7.03  | 0.24 | 0.12 | -1.04  | 0.312796 | 0.243637 | 0.598778 | 0.513777 |
| MmugDNA.31109.1.S1_at   | MmugDNA.31109.1 | 9.75  | 9.65  | 0.34 | 0.23 | 1.07   | 0.345614 | 0.044316 | 0.624534 | 0.255021 |
| MmugDNA.31112.1.S1_at   | MmugDNA.31112.1 | 10.95 | 11.58 | 0.2  | 0.07 | -1.54  | 0.013742 | 0.003244 | 0.167976 | 0.082187 |
| MmugDNA.31114.1.S1_at   | MmugDNA.31114.1 | 7.69  | 7.1   | 0.47 | 0.26 | 1.5    | 0.359967 | 0.454667 | 0.63552  | 0.668763 |
| MmugDNA.31120.1.S1_at   | MmugDNA.31120.1 | 9.35  | 9.06  | 0.09 | 0.04 | 1.22   | 0.007522 | 0.175888 | 0.134968 | 0.452486 |
| MmugDNA.31122.1.S1_at   | MmugDNA.31122.1 | 10.57 | 10.61 | 0.3  | 0.07 | -1.03  | 0.686513 | 0.30502  | 0.850618 | 0.562176 |
| MmugDNA.31125.1.S1_at   | MmugDNA.31125.1 | 5.5   | 9.86  | 1.61 | 0.33 | -20.53 | 0.022676 | 0.244316 | 0.203642 | 0.514184 |
| MmugDNA.31131.1.S1_at   | MmugDNA.31131.1 | 11.75 | 11.91 | 0.11 | 0.14 | -1.12  | 0.725091 | 0.895019 | 0.871012 | 0.940055 |
| MmugDNA.31132.1.S1_at   | MmugDNA.31132.1 | 5.04  | 5.28  | 0.15 | 0.3  | -1.18  | 0.299411 | 0.050714 | 0.58771  | 0.270344 |
| MmugDNA.31134.1.S1_at   | MmugDNA.31134.1 | 3.7   | 2.9   | 0.65 | 0.11 | 1.75   | 0.264152 | 0.260763 | 0.557422 | 0.52721  |
| MmugDNA.31135.1.S1_at   | MmugDNA.31135.1 | 10.82 | 10.66 | 0.16 | 0.03 | 1.12   | 0.087253 | 0.504064 | 0.352917 | 0.701301 |
| MmugDNA.31139.1.S1_at   | MmugDNA.31139.1 | 5.03  | 5.12  | 0.07 | 0.1  | -1.07  | 0.260276 | 0.297507 | 0.554455 | 0.556122 |
| MmugDNA.3114.1.S1_at    | MmugDNA.3114.1  | 12.27 | 11.59 | 0.13 | 0.06 | 1.6    | 0.000948 | 0.001115 | 0.076054 | 0.052851 |
| MmugDNA.31141.1.S1_at   | MmugDNA.31141.1 | 7.07  | 9.8   | 0.91 | 0.25 | -6.64  | 0.016356 | 0.229674 | 0.180774 | 0.501661 |
| MmugDNA.31148.1.S1_at   | MmugDNA.31148.1 | 6.47  | 6.41  | 0.02 | 0.08 | 1.04   | 0.300919 | 0.00079  | 0.589015 | 0.045969 |
| MmugDNA.31150.1.S1_at   | MmugDNA.31150.1 | 10.91 | 10.84 | 0.1  | 0.12 | 1.05   | 0.601391 | 0.174029 | 0.79955  | 0.450275 |
| MmugDNA.31154.1.S1_at   | MmugDNA.31154.1 | 9.65  | 9.89  | 0.17 | 0.01 | -1.18  | 0.106824 | 0.201414 | 0.381108 | 0.475963 |
| MmugDNA.31157.1.S1_at   | MmugDNA.31157.1 | 7.02  | 7.04  | 0.17 | 0.03 | -1.02  | 0.617526 | 0.209071 | 0.810046 | 0.482861 |
| MmugDNA.31162.1.S1_at   | MmugDNA.31162.1 | 9.24  | 9.2   | 0.29 | 0.29 | 1.02   | 0.494866 | 0.160274 | 0.731438 | 0.436406 |
| MmugDNA.31166.1.S1_at   | MmugDNA.31166.1 | 7.23  | 7.44  | 0.37 | 0.19 | -1.16  | 0.17416  | 0.279255 | 0.468365 | 0.54293  |

|                         |                 |       |       |      |      |       |          |          |          |          |
|-------------------------|-----------------|-------|-------|------|------|-------|----------|----------|----------|----------|
| MmugDNA.31172.1.S1_at   | MmugDNA.31172.1 | 5.76  | 6.36  | 0.1  | 0.1  | -1.52 | 0.001387 | 0.025357 | 0.079595 | 0.199595 |
| MmugDNA.31175.1.S1_at   | MmugDNA.31175.1 | 5.67  | 5.51  | 0.14 | 0.16 | 1.11  | 0.193913 | 0.388068 | 0.490511 | 0.622598 |
| MmugDNA.31177.1.S1_at   | MmugDNA.31177.1 | 5.98  | 6.38  | 0.13 | 0.41 | -1.32 | 0.148542 | 0.154411 | 0.437096 | 0.429288 |
| MmugDNA.31181.1.S1_at   | MmugDNA.31181.1 | 12.63 | 12.57 | 0.13 | 0.07 | 1.05  | 0.863442 | 0.071594 | 0.940655 | 0.313714 |
| MmugDNA.31181.1.S1_s_at | MmugDNA.31181.1 | 12.1  | 11.99 | 0.22 | 0.11 | 1.08  | 0.915031 | 0.069851 | 0.963913 | 0.310389 |
| MmugDNA.31185.1.S1_at   | MmugDNA.31185.1 | 5.74  | 5.7   | 0.18 | 0.09 | 1.03  | 0.615953 | 0.730452 | 0.809244 | 0.844017 |
| MmugDNA.31198.1.S1_at   | MmugDNA.31198.1 | 9.37  | 8.91  | 0.14 | 0.11 | 1.37  | 0.007332 | 0.000772 | 0.133605 | 0.045568 |
| MmugDNA.31201.1.S1_at   | MmugDNA.31201.1 | 8.23  | 8.53  | 0.44 | 0.27 | -1.23 | 0.921213 | 0.126482 | 0.966268 | 0.397038 |
| MmugDNA.31211.1.S1_at   | MmugDNA.31211.1 | 11.57 | 11.43 | 0.03 | 0.07 | 1.1   | 0.022528 | 0.21503  | 0.203331 | 0.488898 |
| MmugDNA.31218.1.S1_at   | MmugDNA.31218.1 | 5.81  | 6.04  | 0.1  | 0.1  | -1.18 | 0.026012 | 0.260523 | 0.214209 | 0.527038 |
| MmugDNA.31219.1.S1_at   | MmugDNA.31219.1 | 6.97  | 6.85  | 0.22 | 0.02 | 1.09  | 0.455752 | 0.15035  | 0.705369 | 0.42489  |
| MmugDNA.3122.1.S1_at    | MmugDNA.3122.1  | 11.34 | 11.81 | 0.15 | 0.21 | -1.38 | 0.016904 | 0.101467 | 0.183348 | 0.361266 |
| MmugDNA.31221.1.S1_at   | MmugDNA.31221.1 | 4.97  | 4.8   | 0.23 | 0.28 | 1.12  | 0.297363 | 0.487153 | 0.585786 | 0.690281 |
| MmugDNA.31223.1.S1_at   | MmugDNA.31223.1 | 4.15  | 4.88  | 0.54 | 0.01 | -1.65 | 0.065581 | 0.537206 | 0.313465 | 0.72233  |
| MmugDNA.31225.1.S1_at   | MmugDNA.31225.1 | 5.8   | 5.64  | 0.3  | 0.29 | 1.11  | 0.51864  | 0.76862  | 0.747601 | 0.865637 |
| MmugDNA.31227.1.S1_at   | MmugDNA.31227.1 | 3.19  | 3.15  | 0.62 | 0.17 | 1.03  | 0.360391 | 0.445898 | 0.635954 | 0.662593 |
| MmugDNA.31232.1.S1_at   | MmugDNA.31232.1 | 7.21  | 6.63  | 0.36 | 0.33 | 1.5   | 0.099005 | 0.195207 | 0.369887 | 0.470253 |
| MmugDNA.31244.1.S1_at   | MmugDNA.31244.1 | 7.31  | 7.22  | 0.45 | 0.67 | 1.07  | 0.934924 | 0.573076 | 0.972776 | 0.744941 |
| MmugDNA.31256.1.S1_at   | MmugDNA.31256.1 | 6.29  | 7.13  | 1.05 | 0.41 | -1.78 | 0.140605 | 0.234889 | 0.426355 | 0.506125 |
| MmugDNA.31258.1.S1_at   | MmugDNA.31258.1 | 12.01 | 11.59 | 0.3  | 0.25 | 1.34  | 0.105927 | 0.137945 | 0.379974 | 0.410912 |
| MmugDNA.31261.1.S1_at   | MmugDNA.31261.1 | 5.88  | 6.56  | 0.19 | 0.23 | -1.61 | 0.061049 | 0.343777 | 0.303985 | 0.589483 |
| MmugDNA.31263.1.S1_at   | MmugDNA.31263.1 | 4.12  | 4.12  | 0.27 | 0.11 | 1     | 0.981217 | 0.993014 | 0.992918 | 0.995888 |
| MmugDNA.31269.1.S1_at   | MmugDNA.31269.1 | 8.42  | 8.22  | 0.08 | 0.09 | 1.15  | 0.035413 | 0.033209 | 0.242973 | 0.225663 |
| MmugDNA.31270.1.S1_at   | MmugDNA.31270.1 | 7.03  | 7.01  | 0.06 | 0.07 | 1.01  | 0.660519 | 0.041122 | 0.83613  | 0.247654 |
| MmugDNA.31272.1.S1_at   | MmugDNA.31272.1 | 7.67  | 7.97  | 0.3  | 0.12 | -1.23 | 0.508216 | 0.752703 | 0.740295 | 0.855968 |
| MmugDNA.31274.1.S1_at   | MmugDNA.31274.1 | 8.23  | 7.61  | 0.24 | 0.07 | 1.53  | 0.010211 | 0.034565 | 0.150739 | 0.23001  |
| MmugDNA.31277.1.S1_at   | MmugDNA.31277.1 | 12.69 | 12.63 | 0.04 | 0.05 | 1.04  | 0.083114 | 0.562816 | 0.345372 | 0.738167 |
| MmugDNA.31288.1.S1_at   | MmugDNA.31288.1 | 9.85  | 9.42  | 0.17 | 0.05 | 1.34  | 0.006885 | 0.034528 | 0.129886 | 0.229979 |
| MmugDNA.31289.1.S1_at   | MmugDNA.31289.1 | 10.34 | 10.46 | 0.14 | 0.07 | -1.08 | 0.715056 | 0.002604 | 0.865437 | 0.075487 |
| MmugDNA.3129.1.S1_at    | MmugDNA.3129.1  | 6.97  | 8.43  | 0.37 | 0.1  | -2.76 | 0.002593 | 0.256809 | 0.095012 | 0.524607 |
| MmugDNA.31291.1.S1_at   | MmugDNA.31291.1 | 12.15 | 11.92 | 0.15 | 0.05 | 1.18  | 0.066428 | 0.207614 | 0.31527  | 0.481906 |
| MmugDNA.31292.1.S1_at   | MmugDNA.31292.1 | 7.1   | 6.89  | 0.22 | 0.13 | 1.15  | 0.221095 | 0.56617  | 0.519102 | 0.740296 |
| MmugDNA.31293.1.S1_at   | MmugDNA.31293.1 | 5.87  | 6.25  | 0.7  | 0.36 | -1.3  | 0.28357  | 0.113163 | 0.573936 | 0.379184 |
| MmugDNA.3130.1.S1_at    | MmugDNA.3130.1  | 5.1   | 5.17  | 0.14 | 0.2  | -1.05 | 0.159649 | 0.448554 | 0.450943 | 0.66441  |
| MmugDNA.31306.1.S1_at   | MmugDNA.31306.1 | 10.7  | 10.13 | 0.15 | 0.07 | 1.48  | 0.002951 | 0.028643 | 0.099482 | 0.210901 |
| MmugDNA.31312.1.S1_at   | MmugDNA.31312.1 | 4.96  | 5.06  | 0.62 | 0.01 | -1.07 | 0.50916  | 0.752795 | 0.740889 | 0.855968 |
| MmugDNA.31313.1.S1_at   | MmugDNA.31313.1 | 11.18 | 11.52 | 0.83 | 0.08 | -1.27 | 0.156598 | 0.169843 | 0.44712  | 0.446544 |
| MmugDNA.31324.1.S1_at   | MmugDNA.31324.1 | 10.57 | 10.25 | 0.15 | 0.12 | 1.25  | 0.041438 | 0.015019 | 0.259966 | 0.155736 |
| MmugDNA.31327.1.S1_at   | MmugDNA.31327.1 | 5.7   | 6.12  | 0.26 | 0.06 | -1.34 | 0.033308 | 0.108977 | 0.236556 | 0.37269  |
| MmugDNA.3133.1.S1_at    | MmugDNA.3133.1  | 11.2  | 10.93 | 0.13 | 0.09 | 1.21  | 0.086668 | 0.025099 | 0.351711 | 0.19845  |
| MmugDNA.31330.1.S1_at   | MmugDNA.31330.1 | 11.47 | 11.35 | 0.03 | 0.09 | 1.08  | 0.077479 | 0.000036 | 0.336173 | 0.023031 |
| MmugDNA.31331.1.S1_at   | MmugDNA.31331.1 | 10.94 | 9.78  | 0.14 | 0.27 | 2.24  | 0.004956 | 0.009167 | 0.115356 | 0.126331 |
| MmugDNA.31333.1.S1_at   | MmugDNA.31333.1 | 13.72 | 13.58 | 0.07 | 0.03 | 1.1   | 0.024679 | 0.006372 | 0.210155 | 0.108546 |

|                         |                 |       |       |      |      |       |          |          |          |          |
|-------------------------|-----------------|-------|-------|------|------|-------|----------|----------|----------|----------|
| MmugDNA.31335.1.S1_at   | MmugDNA.31335.1 | 11.97 | 12.16 | 0.06 | 0.05 | -1.15 | 0.013443 | 0.026252 | 0.166705 | 0.202991 |
| MmugDNA.31336.1.S1_at   | MmugDNA.31336.1 | 7.37  | 7.5   | 0.14 | 0.44 | -1.09 | 0.217268 | 0.385793 | 0.515088 | 0.621079 |
| MmugDNA.31337.1.S1_at   | MmugDNA.31337.1 | 13.11 | 12.93 | 0.02 | 0.02 | 1.13  | 0.000593 | 0.000678 | 0.070727 | 0.04413  |
| MmugDNA.31341.1.S1_at   | MmugDNA.31341.1 | 6.56  | 6.7   | 0.13 | 0.15 | -1.1  | 0.383064 | 0.183432 | 0.652427 | 0.459574 |
| MmugDNA.3135.1.S1_at    | MmugDNA.3135.1  | 5.93  | 6.07  | 0.17 | 0.18 | -1.1  | 0.284251 | 0.184104 | 0.574388 | 0.460323 |
| MmugDNA.31351.1.S1_at   | MmugDNA.31351.1 | 9.08  | 9.31  | 0.34 | 0.02 | -1.17 | 0.09207  | 0.136427 | 0.360151 | 0.408839 |
| MmugDNA.31356.1.S1_at   | MmugDNA.31356.1 | 10.17 | 9.98  | 0.33 | 0.05 | 1.14  | 0.396257 | 0.017731 | 0.66235  | 0.168367 |
| MmugDNA.31359.1.S1_at   | MmugDNA.31359.1 | 3.76  | 3.67  | 0.28 | 0.08 | 1.07  | 0.249804 | 0.411924 | 0.544804 | 0.638434 |
| MmugDNA.31360.1.S1_at   | MmugDNA.31360.1 | 3.66  | 3.44  | 0.14 | 0.1  | 1.16  | 0.17571  | 0.180667 | 0.470151 | 0.457245 |
| MmugDNA.31362.1.S1_at   | MmugDNA.31362.1 | 7.89  | 8.75  | 0.17 | 0.05 | -1.81 | 0.000927 | 0.000384 | 0.075639 | 0.037273 |
| MmugDNA.3137.1.S1_at    | MmugDNA.3137.1  | 11.27 | 10.88 | 0.03 | 0.06 | 1.31  | 0.000741 | 0.115444 | 0.072567 | 0.382557 |
| MmugDNA.31371.1.S1_at   | MmugDNA.31371.1 | 8.67  | 8.78  | 0.15 | 0.21 | -1.07 | 0.69717  | 0.871452 | 0.85586  | 0.926844 |
| MmugDNA.31378.1.S1_at   | MmugDNA.31378.1 | 10.9  | 10.72 | 0.16 | 0.04 | 1.14  | 0.044039 | 0.061071 | 0.266926 | 0.293952 |
| MmugDNA.31385.1.S1_at   | MmugDNA.31385.1 | 7.91  | 7.69  | 0.03 | 0.16 | 1.16  | 0.076464 | 0.274525 | 0.334738 | 0.538987 |
| MmugDNA.31387.1.S1_x_at | MmugDNA.31387.1 | 3.59  | 3.59  | 0.07 | 0.14 | -1    | 0.479209 | 0.698385 | 0.720456 | 0.82478  |
| MmugDNA.31388.1.S1_at   | MmugDNA.31388.1 | 10.6  | 10.3  | 0.35 | 0.2  | 1.23  | 0.39566  | 0.216008 | 0.661945 | 0.48965  |
| MmugDNA.31388.1.S1_s_at | MmugDNA.31388.1 | 12.08 | 11.9  | 0.28 | 0.19 | 1.14  | 0.744653 | 0.505352 | 0.881599 | 0.702077 |
| MmugDNA.31389.1.S1_at   | MmugDNA.31389.1 | 7.14  | 8.44  | 0.48 | 0.41 | -2.47 | 0.045638 | 0.005952 | 0.271064 | 0.105513 |
| MmugDNA.31391.1.S1_at   | MmugDNA.31391.1 | 8.49  | 8.45  | 0.18 | 0.05 | 1.03  | 0.820874 | 0.37292  | 0.920074 | 0.611775 |
| MmugDNA.31393.1.S1_at   | MmugDNA.31393.1 | 3.96  | 3.88  | 0.1  | 0.06 | 1.06  | 0.703018 | 0.682467 | 0.859069 | 0.814526 |
| MmugDNA.31394.1.S1_at   | MmugDNA.31394.1 | 10.49 | 10.47 | 0.08 | 0.12 | 1.02  | 0.763685 | 0.629877 | 0.891841 | 0.782009 |
| MmugDNA.31396.1.S1_at   | MmugDNA.31396.1 | 11.73 | 11.77 | 0.15 | 0.12 | -1.03 | 0.625566 | 0.305116 | 0.81545  | 0.562255 |
| MmugDNA.31398.1.S1_at   | MmugDNA.31398.1 | 3.83  | 3.69  | 0.11 | 0.05 | 1.1   | 0.304908 | 0.024011 | 0.591912 | 0.194236 |
| MmugDNA.31405.1.S1_at   | MmugDNA.31405.1 | 12.02 | 12.07 | 0.1  | 0.02 | -1.04 | 0.216337 | 0.398034 | 0.514109 | 0.629138 |
| MmugDNA.31406.1.S1_at   | MmugDNA.31406.1 | 10.89 | 11.82 | 0.15 | 0.13 | -1.9  | 0.002719 | 0.010748 | 0.096851 | 0.135385 |
| MmugDNA.31411.1.S1_at   | MmugDNA.31411.1 | 6.24  | 6.14  | 0.14 | 0.03 | 1.07  | 0.298153 | 0.283755 | 0.586554 | 0.546185 |
| MmugDNA.31412.1.S1_at   | MmugDNA.31412.1 | 5.75  | 5.78  | 0.05 | 0.14 | -1.01 | 0.364873 | 0.73048  | 0.63954  | 0.844017 |
| MmugDNA.31412.1.S1_s_at | MmugDNA.31412.1 | 13.99 | 13.95 | 0.05 | 0.02 | 1.03  | 0.103215 | 0.050352 | 0.376048 | 0.269642 |
| MmugDNA.31414.1.S1_at   | MmugDNA.31414.1 | 9.95  | 9.55  | 0.23 | 0.1  | 1.32  | 0.033755 | 0.36059  | 0.237928 | 0.601629 |
| MmugDNA.31419.1.S1_at   | MmugDNA.31419.1 | 6.43  | 6.43  | 0.07 | 0.07 | 1     | 0.944482 | 0.518525 | 0.976597 | 0.710477 |
| MmugDNA.31425.1.S1_at   | MmugDNA.31425.1 | 4.11  | 4.08  | 0.02 | 0.04 | 1.02  | 0.092442 | 0.09259  | 0.360582 | 0.348529 |
| MmugDNA.31427.1.S1_at   | MmugDNA.31427.1 | 4.58  | 4.82  | 0.13 | 0.08 | -1.18 | 0.090577 | 0.320053 | 0.357339 | 0.572421 |
| MmugDNA.31428.1.S1_at   | MmugDNA.31428.1 | 9.99  | 9.54  | 0.27 | 0.12 | 1.37  | 0.0579   | 0.08884  | 0.297782 | 0.342663 |
| MmugDNA.31436.1.S1_at   | MmugDNA.31436.1 | 9.24  | 9.46  | 0.09 | 0.11 | -1.16 | 0.173958 | 0.020228 | 0.468349 | 0.178641 |
| MmugDNA.3144.1.S1_at    | MmugDNA.3144.1  | 10.43 | 10.75 | 0.18 | 0.08 | -1.25 | 0.028189 | 0.470203 | 0.220384 | 0.678572 |
| MmugDNA.31446.1.S1_at   | MmugDNA.31446.1 | 11.16 | 10.95 | 0.11 | 0.15 | 1.16  | 0.070803 | 0.058777 | 0.324317 | 0.289182 |
| MmugDNA.31447.1.S1_at   | MmugDNA.31447.1 | 3.59  | 3.54  | 0.1  | 0.02 | 1.03  | 0.61675  | 0.143318 | 0.809647 | 0.417294 |
| MmugDNA.31448.1.S1_at   | MmugDNA.31448.1 | 12.14 | 12.29 | 0.03 | 0.03 | -1.11 | 0.002616 | 0.007983 | 0.095176 | 0.118766 |
| MmugDNA.31449.1.S1_at   | MmugDNA.31449.1 | 4.25  | 4.33  | 0.18 | 0.06 | -1.06 | 0.681811 | 0.063291 | 0.848244 | 0.298244 |
| MmugDNA.31450.1.S1_at   | MmugDNA.31450.1 | 6.82  | 6.82  | 0.18 | 0.08 | -1    | 0.687927 | 0.069956 | 0.850935 | 0.31072  |
| MmugDNA.31452.1.S1_at   | MmugDNA.31452.1 | 3.4   | 3.38  | 0.1  | 0.08 | 1.01  | 0.371995 | 0.324242 | 0.644645 | 0.57488  |
| MmugDNA.31456.1.S1_at   | MmugDNA.31456.1 | 7.28  | 7.44  | 0.75 | 0.68 | -1.12 | 0.786322 | 0.969521 | 0.902518 | 0.983323 |
| MmugDNA.31458.1.S1_at   | MmugDNA.31458.1 | 9.71  | 9.82  | 0.17 | 0.07 | -1.08 | 0.54517  | 0.061007 | 0.764467 | 0.293811 |

|                         |                 |       |       |      |      |       |          |          |          |          |
|-------------------------|-----------------|-------|-------|------|------|-------|----------|----------|----------|----------|
| MmugDNA.31462.1.S1_at   | MmugDNA.31462.1 | 5     | 5.04  | 0.06 | 0.01 | -1.03 | 0.138082 | 0.052063 | 0.423226 | 0.273754 |
| MmugDNA.31467.1.S1_at   | MmugDNA.31467.1 | 12.89 | 12.65 | 0.15 | 0.05 | 1.18  | 0.162905 | 0.164797 | 0.455034 | 0.441106 |
| MmugDNA.31476.1.S1_at   | MmugDNA.31476.1 | 5.56  | 5.55  | 0.26 | 0.22 | 1.01  | 0.755553 | 0.234082 | 0.887352 | 0.505319 |
| MmugDNA.31478.1.S1_at   | MmugDNA.31478.1 | 7.08  | 6.7   | 0.12 | 0.24 | 1.3   | 0.126144 | 0.107776 | 0.407197 | 0.370847 |
| MmugDNA.31481.1.S1_at   | MmugDNA.31481.1 | 6.42  | 6.62  | 0.19 | 0.05 | -1.15 | 0.196345 | 0.531791 | 0.493451 | 0.718951 |
| MmugDNA.31482.1.S1_at   | MmugDNA.31482.1 | 7.57  | 7.6   | 0.36 | 0.08 | -1.02 | 0.436676 | 0.564273 | 0.691585 | 0.739142 |
| MmugDNA.31482.1.S1_s_at | MmugDNA.31482.1 | 13.47 | 13.64 | 0.23 | 0.08 | -1.13 | 0.252827 | 0.353759 | 0.547416 | 0.596815 |
| MmugDNA.31484.1.S1_at   | MmugDNA.31484.1 | 5.29  | 5.39  | 0.1  | 0.13 | -1.07 | 0.943948 | 0.266789 | 0.976384 | 0.53241  |
| MmugDNA.31486.1.S1_at   | MmugDNA.31486.1 | 5.33  | 5.35  | 0.21 | 0.13 | -1.01 | 0.452008 | 0.509095 | 0.702692 | 0.703993 |
| MmugDNA.31492.1.S1_at   | MmugDNA.31492.1 | 11.48 | 11.31 | 0.03 | 0.05 | 1.12  | 0.003812 | 0.701673 | 0.107015 | 0.826974 |
| MmugDNA.31501.1.S1_at   | MmugDNA.31501.1 | 7.39  | 6.78  | 0.07 | 0.25 | 1.53  | 0.03551  | 0.020332 | 0.243291 | 0.179024 |
| MmugDNA.31505.1.S1_at   | MmugDNA.31505.1 | 11.47 | 11.47 | 0.15 | 0.09 | 1     | 0.458815 | 0.542001 | 0.707233 | 0.725169 |
| MmugDNA.31506.1.S1_at   | MmugDNA.31506.1 | 10.61 | 8.1   | 0.64 | 1.42 | 5.71  | 0.054804 | 0.188899 | 0.290915 | 0.464818 |
| MmugDNA.31508.1.S1_at   | MmugDNA.31508.1 | 12.38 | 12.54 | 0.23 | 0.1  | -1.12 | 0.533122 | 0.34111  | 0.756823 | 0.587233 |
| MmugDNA.31509.1.S1_at   | MmugDNA.31509.1 | 11.28 | 11.49 | 0.15 | 0.09 | -1.16 | 0.2154   | 0.250465 | 0.513072 | 0.519391 |
| MmugDNA.31513.1.S1_at   | MmugDNA.31513.1 | 10.48 | 10.7  | 0.05 | 0.07 | -1.16 | 0.049131 | 0.001937 | 0.27921  | 0.065795 |
| MmugDNA.31523.1.S1_at   | MmugDNA.31523.1 | 11.1  | 11.22 | 0.25 | 0.12 | -1.08 | 0.512237 | 0.185116 | 0.742899 | 0.460962 |
| MmugDNA.31523.1.S1_s_at | MmugDNA.31523.1 | 11.9  | 12.03 | 0.21 | 0.09 | -1.09 | 0.353804 | 0.126684 | 0.631    | 0.397363 |
| MmugDNA.31524.1.S1_at   | MmugDNA.31524.1 | 11.15 | 10.89 | 0.08 | 0.06 | 1.2   | 0.006992 | 0.304617 | 0.130898 | 0.561838 |
| MmugDNA.31528.1.S1_at   | MmugDNA.31528.1 | 5.08  | 5.14  | 0.03 | 0.09 | -1.04 | 0.086825 | 0.133467 | 0.352049 | 0.405337 |
| MmugDNA.31529.1.S1_at   | MmugDNA.31529.1 | 9.44  | 9.76  | 0.1  | 0.14 | -1.25 | 0.029341 | 0.030898 | 0.224212 | 0.217584 |
| MmugDNA.31531.1.S1_at   | MmugDNA.31531.1 | 5.31  | 5.46  | 0.23 | 0.07 | -1.11 | 0.368641 | 0.356564 | 0.642282 | 0.598459 |
| MmugDNA.31532.1.S1_at   | MmugDNA.31532.1 | 8.7   | 8.62  | 0.18 | 0.05 | 1.05  | 0.190531 | 0.779916 | 0.486767 | 0.872422 |
| MmugDNA.31533.1.S1_at   | MmugDNA.31533.1 | 8.6   | 9.93  | 1.58 | 0.26 | -2.52 | 0.319604 | 0.782615 | 0.604201 | 0.874202 |
| MmugDNA.31534.1.S1_at   | MmugDNA.31534.1 | 5.87  | 5.94  | 0.44 | 0.22 | -1.05 | 0.34698  | 0.086793 | 0.625173 | 0.339559 |
| MmugDNA.31535.1.S1_at   | MmugDNA.31535.1 | 11.45 | 11.51 | 0.11 | 0.04 | -1.04 | 0.85489  | 0.758693 | 0.93686  | 0.859734 |
| MmugDNA.31536.1.S1_at   | MmugDNA.31536.1 | 8.61  | 8.76  | 0.07 | 0.14 | -1.11 | 0.07181  | 0.078997 | 0.325857 | 0.326009 |
| MmugDNA.31538.1.S1_at   | MmugDNA.31538.1 | 3.89  | 4.02  | 0.13 | 0.09 | -1.1  | 0.511214 | 0.189422 | 0.74238  | 0.465117 |
| MmugDNA.31540.1.S1_at   | MmugDNA.31540.1 | 6.18  | 5.94  | 0.15 | 0.03 | 1.18  | 0.079037 | 0.124352 | 0.338745 | 0.394826 |
| MmugDNA.31545.1.A1_at   | MmugDNA.31545.1 | 6.74  | 6.68  | 0.05 | 0.07 | 1.04  | 0.550883 | 0.055469 | 0.768158 | 0.281404 |
| MmugDNA.31545.1.S1_at   | MmugDNA.31545.1 | 5.65  | 5.73  | 0.08 | 0.03 | -1.06 | 0.550962 | 0.38125  | 0.768202 | 0.617581 |
| MmugDNA.31553.1.S1_at   | MmugDNA.31553.1 | 8.94  | 8.62  | 0.14 | 0.1  | 1.25  | 0.037036 | 0.028479 | 0.247708 | 0.21056  |
| MmugDNA.31554.1.S1_at   | MmugDNA.31554.1 | 6.26  | 6.33  | 0.25 | 0.14 | -1.05 | 0.662911 | 0.893324 | 0.83735  | 0.939163 |
| MmugDNA.31555.1.S1_at   | MmugDNA.31555.1 | 6.35  | 6.29  | 0.06 | 0.1  | 1.05  | 0.130802 | 0.144693 | 0.413365 | 0.418546 |
| MmugDNA.31556.1.S1_at   | MmugDNA.31556.1 | 12.24 | 12.58 | 0.08 | 0.11 | -1.27 | 0.021916 | 0.129491 | 0.201211 | 0.400938 |
| MmugDNA.31557.1.S1_at   | MmugDNA.31557.1 | 9.52  | 9.05  | 0.17 | 0.05 | 1.39  | 0.004881 | 0.062867 | 0.115123 | 0.297427 |
| MmugDNA.31558.1.S1_at   | MmugDNA.31558.1 | 9.45  | 9     | 0.17 | 0.16 | 1.37  | 0.015409 | 0.18293  | 0.176257 | 0.45941  |
| MmugDNA.31559.1.S1_at   | MmugDNA.31559.1 | 10.13 | 10.69 | 0.23 | 0.07 | -1.47 | 0.008859 | 0.007588 | 0.143995 | 0.11658  |
| MmugDNA.31560.1.S1_at   | MmugDNA.31560.1 | 5.75  | 5.88  | 0.14 | 0.1  | -1.09 | 0.521744 | 0.53975  | 0.749403 | 0.723926 |
| MmugDNA.31562.1.S1_at   | MmugDNA.31562.1 | 10.24 | 10.21 | 0.12 | 0.1  | 1.02  | 0.404547 | 0.059296 | 0.668261 | 0.290528 |
| MmugDNA.31563.1.S1_at   | MmugDNA.31563.1 | 10.41 | 10.45 | 0.19 | 0.12 | -1.03 | 0.710982 | 0.396759 | 0.863523 | 0.628438 |
| MmugDNA.31564.1.S1_at   | MmugDNA.31564.1 | 8.19  | 7.74  | 0.83 | 0.19 | 1.37  | 0.423381 | 0.273255 | 0.681371 | 0.537788 |
| MmugDNA.31566.1.S1_at   | MmugDNA.31566.1 | 7.36  | 6.84  | 0.87 | 0.18 | 1.44  | 0.242843 | 0.059442 | 0.539589 | 0.290548 |

|                         |                 |       |       |      |      |        |          |          |          |          |
|-------------------------|-----------------|-------|-------|------|------|--------|----------|----------|----------|----------|
| MmugDNA.31571.1.S1_at   | MmugDNA.31571.1 | 8.03  | 8.2   | 0.26 | 0.08 | -1.12  | 0.165109 | 0.395284 | 0.458103 | 0.62738  |
| MmugDNA.3158.1.S1_at    | MmugDNA.3158.1  | 8.27  | 10.04 | 1.18 | 0.1  | -3.4   | 0.101298 | 0.357182 | 0.372655 | 0.598833 |
| MmugDNA.31583.1.S1_at   | MmugDNA.31583.1 | 5.64  | 5.68  | 0.48 | 0.11 | -1.03  | 0.670477 | 0.916105 | 0.841859 | 0.953063 |
| MmugDNA.31588.1.S1_s_at | MmugDNA.31588.1 | 5.77  | 9.96  | 1.36 | 0.37 | -18.29 | 0.016842 | 0.269232 | 0.183141 | 0.534534 |
| MmugDNA.31591.1.S1_at   | MmugDNA.31591.1 | 6.52  | 6.55  | 0.1  | 0.04 | -1.02  | 0.430519 | 0.774443 | 0.686765 | 0.868766 |
| MmugDNA.31593.1.S1_at   | MmugDNA.31593.1 | 7.85  | 7.66  | 0.04 | 0.1  | 1.14   | 0.053397 | 0.032425 | 0.288383 | 0.223049 |
| MmugDNA.31597.1.S1_at   | MmugDNA.31597.1 | 13.04 | 13.33 | 0.09 | 0.07 | -1.22  | 0.045084 | 0.002602 | 0.269643 | 0.075487 |
| MmugDNA.316.1.S1_at     | MmugDNA.316.1   | 6.51  | 5.89  | 0.63 | 0.03 | 1.54   | 0.511374 | 0.594827 | 0.742401 | 0.758675 |
| MmugDNA.3160.1.S1_s_at  | MmugDNA.3160.1  | 12.78 | 12.6  | 0.08 | 0.05 | 1.13   | 0.025237 | 0.031385 | 0.211843 | 0.219065 |
| MmugDNA.31603.1.S1_at   | MmugDNA.31603.1 | 6.63  | 6.63  | 0.07 | 0.08 | -1     | 0.246809 | 0.419345 | 0.542546 | 0.643449 |
| MmugDNA.31613.1.S1_at   | MmugDNA.31613.1 | 6.49  | 6.58  | 0.09 | 0.05 | -1.07  | 0.60271  | 0.031383 | 0.800378 | 0.219065 |
| MmugDNA.31618.1.S1_at   | MmugDNA.31618.1 | 9.43  | 8.99  | 0.15 | 0.13 | 1.36   | 0.026141 | 0.148699 | 0.214757 | 0.423201 |
| MmugDNA.31619.1.S1_at   | MmugDNA.31619.1 | 13.07 | 13    | 0.04 | 0.01 | 1.05   | 0.084668 | 0.014063 | 0.348571 | 0.151841 |
| MmugDNA.31619.1.S1_s_at | MmugDNA.31619.1 | 9.74  | 9.49  | 0.07 | 0.09 | 1.19   | 0.016008 | 0.330286 | 0.179129 | 0.579046 |
| MmugDNA.31624.1.S1_at   | MmugDNA.31624.1 | 9     | 8.79  | 0.15 | 0.05 | 1.15   | 0.142539 | 0.113213 | 0.428631 | 0.379229 |
| MmugDNA.31625.1.S1_at   | MmugDNA.31625.1 | 5.92  | 5.97  | 0.05 | 0.04 | -1.03  | 0.265264 | 0.871093 | 0.557962 | 0.926785 |
| MmugDNA.31630.1.S1_at   | MmugDNA.31630.1 | 10.79 | 11    | 0.12 | 0.13 | -1.16  | 0.130789 | 0.065151 | 0.413353 | 0.301225 |
| MmugDNA.31633.1.S1_at   | MmugDNA.31633.1 | 5.02  | 5.36  | 0.3  | 0.13 | -1.26  | 0.14009  | 0.076472 | 0.425819 | 0.321562 |
| MmugDNA.31636.1.S1_at   | MmugDNA.31636.1 | 10.7  | 10.47 | 0.29 | 0.05 | 1.17   | 0.28541  | 0.310625 | 0.575167 | 0.565787 |
| MmugDNA.3164.1.S1_at    | MmugDNA.3164.1  | 11.21 | 10.86 | 0.15 | 0.22 | 1.27   | 0.251833 | 0.210803 | 0.546516 | 0.484883 |
| MmugDNA.31644.1.S1_at   | MmugDNA.31644.1 | 11.04 | 11.12 | 0.18 | 0.14 | -1.05  | 0.753029 | 0.941709 | 0.885907 | 0.966969 |
| MmugDNA.31645.1.S1_at   | MmugDNA.31645.1 | 6.21  | 6.26  | 0.14 | 0.11 | -1.04  | 0.677938 | 0.045574 | 0.846342 | 0.257646 |
| MmugDNA.31647.1.S1_at   | MmugDNA.31647.1 | 12.96 | 12.84 | 0.11 | 0.01 | 1.09   | 0.352962 | 0.910752 | 0.630239 | 0.949643 |
| MmugDNA.31649.1.S1_at   | MmugDNA.31649.1 | 3.08  | 3.08  | 0.16 | 0.08 | 1      | 0.992898 | 0.998151 | 0.997263 | 0.999039 |
| MmugDNA.31652.1.S1_at   | MmugDNA.31652.1 | 10.84 | 11.2  | 0.23 | 0.07 | -1.29  | 0.082722 | 0.228065 | 0.344584 | 0.500249 |
| MmugDNA.31654.1.S1_s_at | MmugDNA.31654.1 | 9.26  | 9.08  | 0.24 | 0.08 | 1.13   | 0.144585 | 0.205394 | 0.431591 | 0.479751 |
| MmugDNA.31655.1.S1_at   | MmugDNA.31655.1 | 10    | 10.11 | 0.31 | 0.23 | -1.08  | 0.952107 | 0.361478 | 0.980198 | 0.602216 |
| MmugDNA.31657.1.S1_at   | MmugDNA.31657.1 | 12.56 | 12.14 | 0.12 | 0.05 | 1.34   | 0.00651  | 0.017548 | 0.127373 | 0.167632 |
| MmugDNA.31659.1.S1_at   | MmugDNA.31659.1 | 8.81  | 8.96  | 0.21 | 0.15 | -1.11  | 0.147068 | 0.416512 | 0.435049 | 0.641647 |
| MmugDNA.31660.1.S1_at   | MmugDNA.31660.1 | 7.46  | 7.21  | 0.13 | 0.05 | 1.19   | 0.030288 | 0.036777 | 0.227112 | 0.236291 |
| MmugDNA.31662.1.S1_at   | MmugDNA.31662.1 | 9.46  | 9.49  | 0.14 | 0.03 | -1.02  | 0.256683 | 0.666151 | 0.551205 | 0.804415 |
| MmugDNA.31671.1.S1_at   | MmugDNA.31671.1 | 4.23  | 4.27  | 0.22 | 0.07 | -1.03  | 0.675846 | 0.390855 | 0.845248 | 0.624588 |
| MmugDNA.31677.1.S1_s_at | MmugDNA.31677.1 | 13.24 | 13.13 | 0.09 | 0.01 | 1.08   | 0.032567 | 0.030641 | 0.234816 | 0.217046 |
| MmugDNA.31679.1.S1_at   | MmugDNA.31679.1 | 9.94  | 9.88  | 0.13 | 0.13 | 1.04   | 0.784997 | 0.037788 | 0.901953 | 0.238765 |
| MmugDNA.31682.1.S1_at   | MmugDNA.31682.1 | 7.63  | 7.59  | 0.04 | 0.05 | 1.03   | 0.291492 | 0.333568 | 0.580819 | 0.581791 |
| MmugDNA.31684.1.S1_at   | MmugDNA.31684.1 | 5.67  | 5.61  | 0.17 | 0.02 | 1.04   | 0.537934 | 0.651632 | 0.759999 | 0.796299 |
| MmugDNA.31685.1.S1_at   | MmugDNA.31685.1 | 10.45 | 10.78 | 0.12 | 0.09 | -1.25  | 0.039594 | 0.300576 | 0.255601 | 0.558876 |
| MmugDNA.31689.1.S1_at   | MmugDNA.31689.1 | 9.52  | 9.5   | 0.14 | 0.12 | 1.02   | 0.714913 | 0.232083 | 0.865343 | 0.503802 |
| MmugDNA.3169.1.S1_at    | MmugDNA.3169.1  | 12.3  | 12.89 | 0.12 | 0.1  | -1.51  | 0.003033 | 0.001325 | 0.100141 | 0.056164 |
| MmugDNA.31690.1.S1_at   | MmugDNA.31690.1 | 11.97 | 11.8  | 0.21 | 0.1  | 1.12   | 0.777062 | 0.971867 | 0.898158 | 0.984795 |
| MmugDNA.31692.1.S1_at   | MmugDNA.31692.1 | 5.75  | 8.54  | 0.41 | 0.5  | -6.9   | 0.002079 | 0.048835 | 0.090206 | 0.265858 |
| MmugDNA.31696.1.S1_at   | MmugDNA.31696.1 | 9.46  | 8.77  | 0.48 | 0.1  | 1.62   | 0.067351 | 0.06958  | 0.31714  | 0.309848 |
| MmugDNA.31699.1.S1_at   | MmugDNA.31699.1 | 7.02  | 7.24  | 0.84 | 0.23 | -1.16  | 0.527365 | 0.852698 | 0.753064 | 0.916254 |



|                         |                 |       |       |      |      |       |          |          |          |          |
|-------------------------|-----------------|-------|-------|------|------|-------|----------|----------|----------|----------|
| MmugDNA.31704.1.S1_at   | MmugDNA.31704.1 | 11.15 | 11.06 | 0.11 | 0.18 | 1.06  | 0.119032 | 0.156805 | 0.396713 | 0.432353 |
| MmugDNA.31709.1.S1_at   | MmugDNA.31709.1 | 12.04 | 12.09 | 0.22 | 0.15 | -1.04 | 0.817105 | 0.261102 | 0.91826  | 0.527481 |
| MmugDNA.31713.1.S1_at   | MmugDNA.31713.1 | 5.11  | 4.99  | 0.2  | 0.25 | 1.09  | 0.988283 | 0.995202 | 0.995799 | 0.996999 |
| MmugDNA.31716.1.S1_s_at | MmugDNA.31716.1 | 6.99  | 7.52  | 0.3  | 0.32 | -1.44 | 0.078689 | 0.273067 | 0.338535 | 0.537644 |
| MmugDNA.31718.1.S1_at   | MmugDNA.31718.1 | 10.59 | 11    | 0.28 | 0.07 | -1.33 | 0.061799 | 0.445944 | 0.305078 | 0.662623 |
| MmugDNA.31719.1.S1_at   | MmugDNA.31719.1 | 10.01 | 9.94  | 0.12 | 0.04 | 1.05  | 0.731611 | 0.076532 | 0.874589 | 0.321612 |
| MmugDNA.31719.1.S1_s_at | MmugDNA.31719.1 | 10.52 | 10.32 | 0.21 | 0.02 | 1.16  | 0.275317 | 0.166692 | 0.56699  | 0.443163 |
| MmugDNA.3172.1.S1_at    | MmugDNA.3172.1  | 6.87  | 7.23  | 0.07 | 0.17 | -1.28 | 0.072556 | 0.115039 | 0.327336 | 0.381885 |
| MmugDNA.31728.1.S1_at   | MmugDNA.31728.1 | 2.93  | 2.9   | 0.05 | 0.02 | 1.02  | 0.881875 | 0.153891 | 0.949737 | 0.428542 |
| MmugDNA.31733.1.S1_at   | MmugDNA.31733.1 | 11.78 | 11.43 | 0.1  | 0.05 | 1.27  | 0.009762 | 0.499618 | 0.148542 | 0.698424 |
| MmugDNA.31738.1.S1_at   | MmugDNA.31738.1 | 3.94  | 4.08  | 0.11 | 0.06 | -1.1  | 0.130255 | 0.093709 | 0.412564 | 0.350192 |
| MmugDNA.31746.1.S1_at   | MmugDNA.31746.1 | 10.12 | 10.29 | 0.55 | 0.01 | -1.13 | 0.59776  | 0.491122 | 0.796926 | 0.692777 |
| MmugDNA.31753.1.S1_at   | MmugDNA.31753.1 | 4.73  | 4.82  | 0.58 | 0.03 | -1.07 | 0.733619 | 0.855426 | 0.875837 | 0.917581 |
| MmugDNA.3176.1.S1_at    | MmugDNA.3176.1  | 6.1   | 6.21  | 0.07 | 0.12 | -1.08 | 0.250664 | 0.329774 | 0.545228 | 0.578874 |
| MmugDNA.31764.1.S1_at   | MmugDNA.31764.1 | 10.83 | 10.67 | 0.12 | 0.05 | 1.12  | 0.119338 | 0.279064 | 0.397153 | 0.542782 |
| MmugDNA.31765.1.S1_at   | MmugDNA.31765.1 | 12.73 | 12.25 | 0.17 | 0.05 | 1.39  | 0.007964 | 0.159454 | 0.138304 | 0.435568 |
| MmugDNA.31767.1.S1_at   | MmugDNA.31767.1 | 4.44  | 4.91  | 0.41 | 0.18 | -1.38 | 0.121911 | 0.187536 | 0.400622 | 0.463628 |
| MmugDNA.31772.1.S1_at   | MmugDNA.31772.1 | 12.59 | 12.64 | 0.05 | 0.02 | -1.03 | 0.176603 | 0.790309 | 0.471068 | 0.878795 |
| MmugDNA.31779.1.S1_at   | MmugDNA.31779.1 | 6.02  | 5.97  | 0.03 | 0.02 | 1.04  | 0.085191 | 0.638495 | 0.349307 | 0.78765  |
| MmugDNA.31781.1.S1_at   | MmugDNA.31781.1 | 8.89  | 9.24  | 0.12 | 0.08 | -1.28 | 0.012535 | 0.059927 | 0.162479 | 0.291419 |
| MmugDNA.31784.1.S1_at   | MmugDNA.31784.1 | 7.03  | 7.32  | 0.33 | 0.25 | -1.22 | 0.274721 | 0.391207 | 0.566556 | 0.624922 |
| MmugDNA.31789.1.S1_s_at | MmugDNA.31789.1 | 6.51  | 6.6   | 0.19 | 0.09 | -1.06 | 0.77852  | 0.06984  | 0.898791 | 0.310363 |
| MmugDNA.31791.1.S1_at   | MmugDNA.31791.1 | 6.31  | 6.22  | 0.13 | 0.02 | 1.06  | 0.342468 | 0.480926 | 0.622192 | 0.686018 |
| MmugDNA.3180.1.S1_at    | MmugDNA.3180.1  | 10.48 | 11.21 | 0.15 | 0.14 | -1.66 | 0.003773 | 0.006842 | 0.106813 | 0.111782 |
| MmugDNA.31806.1.S1_at   | MmugDNA.31806.1 | 8.79  | 8.53  | 0.26 | 0.07 | 1.2   | 0.254982 | 0.001389 | 0.549525 | 0.057005 |
| MmugDNA.3182.1.S1_at    | MmugDNA.3182.1  | 7.65  | 7.58  | 0.3  | 0.16 | 1.04  | 0.830633 | 0.708041 | 0.925496 | 0.830647 |
| MmugDNA.31837.1.S1_at   | MmugDNA.31837.1 | 10.63 | 10.72 | 0.17 | 0.11 | -1.07 | 0.516012 | 0.757327 | 0.745613 | 0.85872  |
| MmugDNA.31841.1.S1_at   | MmugDNA.31841.1 | 6.17  | 9.48  | 0.63 | 0.22 | -9.96 | 0.001515 | 0.188639 | 0.081668 | 0.464569 |
| MmugDNA.31850.1.S1_at   | MmugDNA.31850.1 | 9.93  | 9.52  | 0.58 | 0.21 | 1.33  | 0.274234 | 0.083072 | 0.566229 | 0.332911 |
| MmugDNA.31861.1.S1_at   | MmugDNA.31861.1 | 7.66  | 7.47  | 0.37 | 0.11 | 1.14  | 0.625048 | 0.449517 | 0.815156 | 0.665109 |
| MmugDNA.31867.1.S1_at   | MmugDNA.31867.1 | 10.14 | 10.11 | 0.1  | 0.22 | 1.02  | 0.701666 | 0.066809 | 0.858329 | 0.304365 |
| MmugDNA.31877.1.S1_at   | MmugDNA.31877.1 | 5.58  | 5.4   | 0.22 | 0.35 | 1.14  | 0.820888 | 0.669134 | 0.920074 | 0.806492 |
| MmugDNA.31893.1.S1_at   | MmugDNA.31893.1 | 6.97  | 7.14  | 0.23 | 0.08 | -1.13 | 0.174066 | 0.03136  | 0.468351 | 0.219062 |
| MmugDNA.31899.1.S1_at   | MmugDNA.31899.1 | 7.24  | 7.37  | 0.23 | 0.03 | -1.09 | 0.758606 | 0.823991 | 0.889356 | 0.898873 |
| MmugDNA.319.1.S1_at     | MmugDNA.319.1   | 11.29 | 10.92 | 0.12 | 0.11 | 1.28  | 0.034565 | 0.074029 | 0.240515 | 0.317579 |
| MmugDNA.3190.1.S1_at    | MmugDNA.3190.1  | 8.36  | 8.67  | 0.33 | 0.04 | -1.24 | 0.055655 | 0.166368 | 0.293047 | 0.442884 |
| MmugDNA.31903.1.S1_at   | MmugDNA.31903.1 | 8.33  | 9.19  | 0.36 | 0.13 | -1.81 | 0.019112 | 0.263155 | 0.191749 | 0.529465 |
| MmugDNA.31905.1.S1_at   | MmugDNA.31905.1 | 4.66  | 5.56  | 0.68 | 0.56 | -1.86 | 0.246825 | 0.033814 | 0.542546 | 0.227489 |
| MmugDNA.31906.1.S1_at   | MmugDNA.31906.1 | 6.4   | 6.35  | 0.08 | 0.11 | 1.04  | 0.274155 | 0.655887 | 0.566119 | 0.798739 |
| MmugDNA.31916.1.S1_at   | MmugDNA.31916.1 | 6.78  | 6.99  | 0.13 | 0.06 | -1.16 | 0.104435 | 0.113545 | 0.377773 | 0.379632 |
| MmugDNA.31918.1.S1_at   | MmugDNA.31918.1 | 8.61  | 9.48  | 0.84 | 0.36 | -1.83 | 0.115561 | 0.246431 | 0.392723 | 0.515899 |
| MmugDNA.31920.1.S1_at   | MmugDNA.31920.1 | 7.53  | 7.47  | 0.68 | 0.16 | 1.04  | 0.46246  | 0.876449 | 0.709665 | 0.929683 |
| MmugDNA.31931.1.S1_at   | MmugDNA.31931.1 | 9.02  | 9.43  | 0.37 | 0.25 | -1.32 | 0.096635 | 0.030576 | 0.36655  | 0.216818 |

|                         |                 |       |       |      |      |       |          |          |          |          |
|-------------------------|-----------------|-------|-------|------|------|-------|----------|----------|----------|----------|
| MmugDNA.31934.1.S1_at   | MmugDNA.31934.1 | 6.63  | 6.55  | 0.01 | 0.1  | 1.06  | 0.193731 | 0.648    | 0.490333 | 0.793947 |
| MmugDNA.31936.1.S1_at   | MmugDNA.31936.1 | 5.03  | 7.27  | 1.62 | 0.27 | -4.73 | 0.107565 | 0.399174 | 0.382272 | 0.629695 |
| MmugDNA.31945.1.S1_at   | MmugDNA.31945.1 | 5.28  | 5.12  | 0.47 | 0.05 | 1.11  | 0.187281 | 0.118001 | 0.483404 | 0.385881 |
| MmugDNA.31946.1.S1_at   | MmugDNA.31946.1 | 4.84  | 4.7   | 0.71 | 0.1  | 1.1   | 0.254293 | 0.287379 | 0.548754 | 0.548636 |
| MmugDNA.31948.1.S1_at   | MmugDNA.31948.1 | 6.91  | 7.01  | 0.07 | 0.03 | -1.07 | 0.170273 | 0.427852 | 0.463911 | 0.649582 |
| MmugDNA.31955.1.S1_at   | MmugDNA.31955.1 | 11.72 | 11.53 | 0.09 | 0.01 | 1.14  | 0.024624 | 0.23388  | 0.209989 | 0.505169 |
| MmugDNA.31962.1.S1_s_at | MmugDNA.31962.1 | 10.36 | 10.37 | 0.05 | 0.03 | -1.01 | 0.488367 | 0.85619  | 0.726901 | 0.917861 |
| MmugDNA.31965.1.S1_at   | MmugDNA.31965.1 | 11.75 | 11.81 | 0.08 | 0.09 | -1.04 | 0.610159 | 0.790012 | 0.805697 | 0.878631 |
| MmugDNA.31968.1.S1_at   | MmugDNA.31968.1 | 11.96 | 11.74 | 0.1  | 0.06 | 1.16  | 0.029039 | 0.317563 | 0.223234 | 0.570774 |
| MmugDNA.31970.1.S1_at   | MmugDNA.31970.1 | 7.44  | 8.06  | 0.22 | 0.07 | -1.53 | 0.010195 | 0.120766 | 0.150739 | 0.389579 |
| MmugDNA.31979.1.S1_at   | MmugDNA.31979.1 | 9.42  | 9.42  | 0.21 | 0.16 | -1    | 0.871202 | 0.103456 | 0.944585 | 0.364346 |
| MmugDNA.31987.1.S1_at   | MmugDNA.31987.1 | 6.24  | 6.41  | 0.2  | 0.1  | -1.12 | 0.396435 | 0.706182 | 0.6625   | 0.829634 |
| MmugDNA.31989.1.S1_at   | MmugDNA.31989.1 | 11.94 | 11.92 | 0.03 | 0.04 | 1.01  | 0.992284 | 0.056656 | 0.997161 | 0.284094 |
| MmugDNA.31993.1.S1_at   | MmugDNA.31993.1 | 6.14  | 8.41  | 0.9  | 0.29 | -4.83 | 0.019818 | 0.139603 | 0.193874 | 0.41286  |
| MmugDNA.31995.1.S1_at   | MmugDNA.31995.1 | 8.37  | 9.08  | 0.37 | 0.02 | -1.63 | 0.048764 | 0.654977 | 0.278362 | 0.7982   |
| MmugDNA.31996.1.S1_at   | MmugDNA.31996.1 | 7.21  | 7.28  | 0.01 | 0.4  | -1.04 | 0.910979 | 0.37874  | 0.962223 | 0.615748 |
| MmugDNA.31997.1.S1_at   | MmugDNA.31997.1 | 5.91  | 5.92  | 0.16 | 0.04 | -1.01 | 0.655785 | 0.204913 | 0.833545 | 0.479254 |
| MmugDNA.32002.1.S1_at   | MmugDNA.32002.1 | 7.16  | 7.02  | 0.25 | 0.09 | 1.11  | 0.275719 | 0.276843 | 0.567274 | 0.540757 |
| MmugDNA.32004.1.S1_at   | MmugDNA.32004.1 | 7     | 8.12  | 0.51 | 0.2  | -2.18 | 0.028263 | 0.07927  | 0.220719 | 0.326444 |
| MmugDNA.32007.1.S1_at   | MmugDNA.32007.1 | 10.97 | 11.08 | 0.2  | 0.14 | -1.08 | 0.553455 | 0.404198 | 0.769979 | 0.632691 |
| MmugDNA.32013.1.S1_at   | MmugDNA.32013.1 | 10.99 | 10.73 | 0.23 | 0.13 | 1.19  | 0.253046 | 0.111345 | 0.547557 | 0.376045 |
| MmugDNA.32014.1.S1_at   | MmugDNA.32014.1 | 3.26  | 3.28  | 0.11 | 0.14 | -1.02 | 0.707767 | 0.922474 | 0.861544 | 0.956333 |
| MmugDNA.32018.1.S1_at   | MmugDNA.32018.1 | 11.4  | 11.34 | 0.03 | 0.06 | 1.04  | 0.255372 | 0.050183 | 0.549821 | 0.269223 |
| MmugDNA.32019.1.S1_at   | MmugDNA.32019.1 | 12.28 | 12.35 | 0.05 | 0    | -1.05 | 0.081697 | 0.003175 | 0.342933 | 0.081873 |
| MmugDNA.32022.1.S1_at   | MmugDNA.32022.1 | 4.33  | 4.81  | 0.16 | 0.18 | -1.39 | 0.025662 | 0.32627  | 0.212966 | 0.576452 |
| MmugDNA.32024.1.S1_at   | MmugDNA.32024.1 | 4.63  | 4.61  | 0.08 | 0.14 | 1.01  | 0.498465 | 0.129402 | 0.733653 | 0.4008   |
| MmugDNA.32031.1.S1_at   | MmugDNA.32031.1 | 4.78  | 4.69  | 0.17 | 0.09 | 1.07  | 0.42604  | 0.434257 | 0.68331  | 0.654437 |
| MmugDNA.32037.1.S1_at   | MmugDNA.32037.1 | 9.4   | 9.04  | 0.19 | 0.04 | 1.28  | 0.101532 | 0.182981 | 0.372929 | 0.459452 |
| MmugDNA.32042.1.S1_at   | MmugDNA.32042.1 | 3.73  | 3.95  | 0.18 | 0.33 | -1.17 | 0.303959 | 0.268726 | 0.591303 | 0.534138 |
| MmugDNA.32051.1.S1_at   | MmugDNA.32051.1 | 10.61 | 12.24 | 0.41 | 0.24 | -3.09 | 0.010405 | 0.017319 | 0.151942 | 0.166509 |
| MmugDNA.32054.1.S1_at   | MmugDNA.32054.1 | 10.08 | 10.59 | 0.24 | 0.03 | -1.43 | 0.022231 | 0.14023  | 0.202307 | 0.413405 |
| MmugDNA.32058.1.S1_at   | MmugDNA.32058.1 | 6.13  | 6.1   | 0.17 | 0.12 | 1.03  | 0.719044 | 0.254563 | 0.867444 | 0.522863 |
| MmugDNA.32059.1.S1_at   | MmugDNA.32059.1 | 7.34  | 9.19  | 1.18 | 0.22 | -3.6  | 0.073524 | 0.145841 | 0.328947 | 0.419888 |
| MmugDNA.32063.1.S1_at   | MmugDNA.32063.1 | 11.11 | 11.44 | 0.03 | 0.18 | -1.26 | 0.095902 | 0.013559 | 0.365529 | 0.149001 |
| MmugDNA.32064.1.S1_at   | MmugDNA.32064.1 | 6.67  | 7     | 1.09 | 0.29 | -1.26 | 0.942368 | 0.972994 | 0.975651 | 0.985389 |
| MmugDNA.32065.1.S1_at   | MmugDNA.32065.1 | 10.6  | 9.98  | 0.24 | 0.03 | 1.53  | 0.019243 | 0.004629 | 0.192035 | 0.094988 |
| MmugDNA.32067.1.S1_at   | MmugDNA.32067.1 | 6     | 6.28  | 0.35 | 0.16 | -1.22 | 0.662022 | 0.913364 | 0.836881 | 0.95123  |
| MmugDNA.32074.1.S1_at   | MmugDNA.32074.1 | 7.92  | 7.98  | 0.11 | 0.06 | -1.04 | 0.520966 | 0.275785 | 0.749066 | 0.540035 |
| MmugDNA.32079.1.S1_at   | MmugDNA.32079.1 | 9.44  | 9.5   | 0.18 | 0.04 | -1.04 | 0.60765  | 0.74287  | 0.803844 | 0.851074 |
| MmugDNA.3208.1.S1_at    | MmugDNA.3208.1  | 10.89 | 10.97 | 0.04 | 0.07 | -1.05 | 0.108848 | 0.021728 | 0.383769 | 0.184348 |
| MmugDNA.32081.1.S1_at   | MmugDNA.32081.1 | 13.78 | 13.81 | 0.04 | 0.02 | -1.02 | 0.315335 | 0.133658 | 0.600287 | 0.405612 |
| MmugDNA.32084.1.S1_at   | MmugDNA.32084.1 | 4.74  | 4.67  | 0.97 | 0.23 | 1.05  | 0.328125 | 0.39665  | 0.61059  | 0.628434 |
| MmugDNA.32085.1.S1_at   | MmugDNA.32085.1 | 10.97 | 10.75 | 0.24 | 0.02 | 1.17  | 0.075261 | 0.02694  | 0.332504 | 0.2053   |

|                         |                 |       |       |      |      |       |          |          |          |          |
|-------------------------|-----------------|-------|-------|------|------|-------|----------|----------|----------|----------|
| MmugDNA.32086.1.S1_at   | MmugDNA.32086.1 | 7.44  | 7.36  | 0.1  | 0.06 | 1.06  | 0.107836 | 0.093385 | 0.382472 | 0.349581 |
| MmugDNA.32089.1.S1_at   | MmugDNA.32089.1 | 9.97  | 9.51  | 0.2  | 0.16 | 1.38  | 0.016767 | 0.023576 | 0.182686 | 0.192311 |
| MmugDNA.3209.1.S1_at    | MmugDNA.3209.1  | 10.03 | 10.04 | 0.26 | 0.12 | -1.01 | 0.438146 | 0.36807  | 0.692786 | 0.607669 |
| MmugDNA.32090.1.S1_at   | MmugDNA.32090.1 | 11.88 | 11.69 | 0.07 | 0.07 | 1.14  | 0.103212 | 0.023131 | 0.376048 | 0.190443 |
| MmugDNA.32091.1.S1_at   | MmugDNA.32091.1 | 7.37  | 7.41  | 0.08 | 0.02 | -1.03 | 0.35729  | 0.000134 | 0.633468 | 0.029087 |
| MmugDNA.32093.1.S1_at   | MmugDNA.32093.1 | 5.1   | 4.89  | 0.14 | 0.03 | 1.16  | 0.080044 | 0.089575 | 0.340399 | 0.343811 |
| MmugDNA.32094.1.S1_at   | MmugDNA.32094.1 | 11.26 | 13.97 | 2.16 | 0.1  | -6.54 | 0.109985 | 0.173655 | 0.385253 | 0.450003 |
| MmugDNA.32097.1.S1_at   | MmugDNA.32097.1 | 8.36  | 8.12  | 0.15 | 0.39 | 1.18  | 0.968831 | 0.527243 | 0.987676 | 0.715896 |
| MmugDNA.32098.1.S1_at   | MmugDNA.32098.1 | 8.36  | 8.53  | 0.31 | 0.12 | -1.13 | 0.420102 | 0.221993 | 0.67931  | 0.49507  |
| MmugDNA.32099.1.S1_at   | MmugDNA.32099.1 | 8.77  | 8.8   | 0.23 | 0.06 | -1.03 | 0.79679  | 0.176697 | 0.908259 | 0.453142 |
| MmugDNA.32101.1.S1_s_at | MmugDNA.32101.1 | 11.49 | 11.56 | 0.22 | 0.02 | -1.04 | 0.662396 | 0.933855 | 0.837065 | 0.962344 |
| MmugDNA.32103.1.S1_at   | MmugDNA.32103.1 | 3.4   | 3.55  | 0.07 | 0.11 | -1.11 | 0.199904 | 0.221634 | 0.497432 | 0.494901 |
| MmugDNA.32116.1.S1_at   | MmugDNA.32116.1 | 11.97 | 11.8  | 0.12 | 0.15 | 1.12  | 0.91014  | 0.118884 | 0.961887 | 0.387068 |
| MmugDNA.32116.1.S1_s_at | MmugDNA.32116.1 | 11.47 | 11.34 | 0.06 | 0.02 | 1.09  | 0.026742 | 0.180472 | 0.21673  | 0.457115 |
| MmugDNA.32124.1.S1_at   | MmugDNA.32124.1 | 12.97 | 12.89 | 0.22 | 0.05 | 1.06  | 0.587769 | 0.158288 | 0.790667 | 0.43403  |
| MmugDNA.32124.1.S1_s_at | MmugDNA.32124.1 | 12.11 | 11.92 | 0.33 | 0.18 | 1.14  | 0.288368 | 0.053192 | 0.578081 | 0.276445 |
| MmugDNA.32127.1.S1_at   | MmugDNA.32127.1 | 9.87  | 8.49  | 0.18 | 0.1  | 2.6   | 0.000407 | 0.000023 | 0.06311  | 0.019635 |
| MmugDNA.32128.1.S1_at   | MmugDNA.32128.1 | 5.12  | 4.61  | 0.17 | 0.23 | 1.42  | 0.08309  | 0.070284 | 0.345372 | 0.31135  |
| MmugDNA.32129.1.S1_at   | MmugDNA.32129.1 | 4     | 4.01  | 0.11 | 0.12 | -1    | 0.576347 | 0.563483 | 0.783164 | 0.738692 |
| MmugDNA.32131.1.S1_at   | MmugDNA.32131.1 | 6.47  | 6.57  | 0.17 | 0.08 | -1.08 | 0.722914 | 0.232122 | 0.869766 | 0.503844 |
| MmugDNA.32132.1.S1_at   | MmugDNA.32132.1 | 4.6   | 4.65  | 0.34 | 0.04 | -1.03 | 0.541316 | 0.540529 | 0.762075 | 0.724446 |
| MmugDNA.32144.1.S1_at   | MmugDNA.32144.1 | 3.8   | 3.71  | 0.36 | 0.08 | 1.07  | 0.239343 | 0.314012 | 0.536594 | 0.568178 |
| MmugDNA.32145.1.S1_at   | MmugDNA.32145.1 | 11.37 | 11.15 | 0.15 | 0.01 | 1.16  | 0.204798 | 0.125139 | 0.50256  | 0.395577 |
| MmugDNA.32148.1.S1_at   | MmugDNA.32148.1 | 7.22  | 6.22  | 0.49 | 0.32 | 2.01  | 0.041049 | 0.074527 | 0.259111 | 0.318173 |
| MmugDNA.32150.1.S1_at   | MmugDNA.32150.1 | 4.37  | 4.14  | 0.16 | 0.37 | 1.17  | 0.903347 | 0.957168 | 0.959027 | 0.975774 |
| MmugDNA.32163.1.S1_at   | MmugDNA.32163.1 | 4.33  | 4.16  | 0.04 | 0.12 | 1.12  | 0.295792 | 0.271672 | 0.584581 | 0.536577 |
| MmugDNA.32169.1.S1_at   | MmugDNA.32169.1 | 6.45  | 6.26  | 0.17 | 0.39 | 1.14  | 0.488493 | 0.624116 | 0.726931 | 0.778434 |
| MmugDNA.32170.1.S1_at   | MmugDNA.32170.1 | 8.62  | 8.37  | 1.4  | 0.32 | 1.19  | 0.98232  | 0.583544 | 0.993483 | 0.751822 |
| MmugDNA.32172.1.S1_at   | MmugDNA.32172.1 | 11.79 | 11.46 | 0.06 | 0.2  | 1.26  | 0.148102 | 0.003261 | 0.436494 | 0.082278 |
| MmugDNA.32180.1.S1_at   | MmugDNA.32180.1 | 10.07 | 11.98 | 0.88 | 0.23 | -3.75 | 0.026947 | 0.237307 | 0.217062 | 0.508027 |
| MmugDNA.32182.1.S1_at   | MmugDNA.32182.1 | 9.86  | 8.27  | 0.65 | 0.43 | 3.01  | 0.024328 | 0.303383 | 0.209024 | 0.560842 |
| MmugDNA.32186.1.S1_at   | MmugDNA.32186.1 | 12.09 | 12.1  | 0.19 | 0.08 | -1.01 | 0.883308 | 0.9805   | 0.950401 | 0.989333 |
| MmugDNA.32191.1.S1_at   | MmugDNA.32191.1 | 9.3   | 9.82  | 0.09 | 0.08 | -1.43 | 0.001956 | 0.060341 | 0.088671 | 0.292254 |
| MmugDNA.32194.1.S1_at   | MmugDNA.32194.1 | 3     | 2.99  | 0.03 | 0.02 | 1     | 0.76751  | 0.567741 | 0.893318 | 0.741608 |
| MmugDNA.32195.1.S1_at   | MmugDNA.32195.1 | 7.96  | 7.62  | 0.44 | 0.54 | 1.27  | 0.932076 | 0.99436  | 0.971437 | 0.996547 |
| MmugDNA.322.1.S1_at     | MmugDNA.322.1   | 4.96  | 5.06  | 0.04 | 0.42 | -1.07 | 0.619944 | 0.806485 | 0.811571 | 0.888651 |
| MmugDNA.3220.1.S1_at    | MmugDNA.3220.1  | 9.35  | 9     | 0.39 | 0.04 | 1.28  | 0.067039 | 0.455076 | 0.316598 | 0.669066 |
| MmugDNA.32206.1.S1_at   | MmugDNA.32206.1 | 13.02 | 12.83 | 0.08 | 0.04 | 1.14  | 0.015636 | 0.025879 | 0.177553 | 0.201696 |
| MmugDNA.32220.1.S1_at   | MmugDNA.32220.1 | 6.3   | 6.47  | 0.26 | 0.03 | -1.12 | 0.821698 | 0.730744 | 0.92058  | 0.844055 |
| MmugDNA.32221.1.S1_at   | MmugDNA.32221.1 | 11.39 | 11.22 | 0.07 | 0.05 | 1.12  | 0.075185 | 0.158283 | 0.332303 | 0.43403  |
| MmugDNA.32223.1.S1_at   | MmugDNA.32223.1 | 13.5  | 13.51 | 0.01 | 0.03 | -1.01 | 0.803509 | 0.019315 | 0.911852 | 0.174723 |
| MmugDNA.32226.1.S1_at   | MmugDNA.32226.1 | 4.4   | 4.37  | 0.05 | 0.21 | 1.02  | 0.854508 | 0.937756 | 0.936744 | 0.964687 |
| MmugDNA.32229.1.S1_at   | MmugDNA.32229.1 | 9.87  | 9.4   | 0.2  | 0.11 | 1.38  | 0.03684  | 0.006277 | 0.247088 | 0.107487 |

|                         |                 |       |       |      |      |       |          |          |          |          |
|-------------------------|-----------------|-------|-------|------|------|-------|----------|----------|----------|----------|
| MmugDNA.3223.1.S1_at    | MmugDNA.3223.1  | 7.92  | 7.46  | 0.49 | 0.2  | 1.38  | 0.522786 | 0.127476 | 0.749989 | 0.398349 |
| MmugDNA.32230.1.S1_at   | MmugDNA.32230.1 | 7.04  | 7.72  | 0.63 | 0.35 | -1.6  | 0.1768   | 0.511574 | 0.471308 | 0.705677 |
| MmugDNA.32239.1.S1_at   | MmugDNA.32239.1 | 7.8   | 8     | 0.2  | 0.18 | -1.15 | 0.519705 | 0.61782  | 0.748228 | 0.773715 |
| MmugDNA.32242.1.S1_at   | MmugDNA.32242.1 | 5.23  | 5.16  | 0.14 | 0.01 | 1.05  | 0.96555  | 0.625165 | 0.986023 | 0.779025 |
| MmugDNA.32243.1.S1_at   | MmugDNA.32243.1 | 7     | 7.02  | 0.2  | 0.1  | -1.01 | 0.699708 | 0.880029 | 0.857382 | 0.93148  |
| MmugDNA.32245.1.S1_at   | MmugDNA.32245.1 | 10.27 | 10.37 | 0.6  | 0.12 | -1.07 | 0.777087 | 0.571283 | 0.898158 | 0.743642 |
| MmugDNA.32248.1.S1_at   | MmugDNA.32248.1 | 10.1  | 10.26 | 0.06 | 0.1  | -1.11 | 0.135227 | 0.047461 | 0.419109 | 0.262486 |
| MmugDNA.32248.1.S1_s_at | MmugDNA.32248.1 | 9.1   | 9.01  | 0.04 | 0.17 | 1.06  | 0.483215 | 0.020533 | 0.723431 | 0.179788 |
| MmugDNA.32249.1.S1_at   | MmugDNA.32249.1 | 9.91  | 9.7   | 0.21 | 0.06 | 1.16  | 0.127431 | 0.254129 | 0.409324 | 0.522439 |
| MmugDNA.32251.1.S1_at   | MmugDNA.32251.1 | 12.71 | 12.47 | 0.08 | 0.02 | 1.18  | 0.003999 | 0.000186 | 0.108676 | 0.030511 |
| MmugDNA.32254.1.S1_s_at | MmugDNA.32254.1 | 11.01 | 11.52 | 0.37 | 0.08 | -1.42 | 0.131495 | 0.411758 | 0.41434  | 0.638434 |
| MmugDNA.32255.1.S1_at   | MmugDNA.32255.1 | 10.05 | 9.99  | 0.25 | 0.07 | 1.04  | 0.245859 | 0.505462 | 0.541732 | 0.702161 |
| MmugDNA.32258.1.S1_at   | MmugDNA.32258.1 | 8.01  | 7.24  | 0.27 | 0.18 | 1.7   | 0.049893 | 0.630168 | 0.281011 | 0.782181 |
| MmugDNA.3226.1.S1_at    | MmugDNA.3226.1  | 12.65 | 12.79 | 0.04 | 0.1  | -1.1  | 0.112347 | 0.103282 | 0.388511 | 0.364143 |
| MmugDNA.32264.1.S1_at   | MmugDNA.32264.1 | 7.28  | 9.65  | 0.8  | 0.3  | -5.19 | 0.02396  | 0.062052 | 0.207881 | 0.29597  |
| MmugDNA.32274.1.S1_at   | MmugDNA.32274.1 | 13.92 | 13.83 | 0.05 | 0.06 | 1.06  | 0.151507 | 0.482102 | 0.440961 | 0.687016 |
| MmugDNA.32277.1.S1_at   | MmugDNA.32277.1 | 9.01  | 8.4   | 0.22 | 0.31 | 1.53  | 0.036359 | 0.023534 | 0.245737 | 0.192231 |
| MmugDNA.32278.1.S1_at   | MmugDNA.32278.1 | 11.16 | 10.52 | 0.25 | 0.12 | 1.56  | 0.015558 | 0.006471 | 0.177138 | 0.109304 |
| MmugDNA.32280.1.S1_at   | MmugDNA.32280.1 | 10.5  | 10.22 | 0.09 | 0.03 | 1.21  | 0.005516 | 0.055572 | 0.119675 | 0.28159  |
| MmugDNA.32283.1.S1_at   | MmugDNA.32283.1 | 6.32  | 6.44  | 0.08 | 0.1  | -1.09 | 0.065727 | 0.308701 | 0.31383  | 0.564619 |
| MmugDNA.32289.1.S1_at   | MmugDNA.32289.1 | 6.2   | 6.14  | 0.08 | 0.14 | 1.04  | 0.616264 | 0.117693 | 0.809428 | 0.385421 |
| MmugDNA.32293.1.S1_at   | MmugDNA.32293.1 | 10.37 | 10.55 | 0.09 | 0.2  | -1.13 | 0.467016 | 0.389216 | 0.712594 | 0.623403 |
| MmugDNA.32295.1.S1_s_at | MmugDNA.32295.1 | 9.19  | 8.56  | 0.07 | 0.12 | 1.55  | 0.002588 | 0.179543 | 0.094992 | 0.456011 |
| MmugDNA.323.1.S1_at     | MmugDNA.323.1   | 8.79  | 9.06  | 0.2  | 0.13 | -1.21 | 0.084948 | 0.774219 | 0.348877 | 0.868735 |
| MmugDNA.32300.1.S1_at   | MmugDNA.32300.1 | 12.85 | 12.81 | 0.07 | 0.09 | 1.03  | 0.504502 | 0.004128 | 0.737712 | 0.090887 |
| MmugDNA.32302.1.S1_at   | MmugDNA.32302.1 | 13.35 | 13.33 | 0.03 | 0.03 | 1.02  | 0.443955 | 0.729812 | 0.696906 | 0.843695 |
| MmugDNA.32306.1.S1_at   | MmugDNA.32306.1 | 6.19  | 6.3   | 0.2  | 0.15 | -1.08 | 0.32558  | 0.448849 | 0.608792 | 0.664661 |
| MmugDNA.32307.1.S1_at   | MmugDNA.32307.1 | 12.98 | 13.2  | 0.09 | 0.1  | -1.17 | 0.047315 | 0.088197 | 0.274836 | 0.341721 |
| MmugDNA.32309.1.S1_at   | MmugDNA.32309.1 | 13.13 | 13.41 | 0.07 | 0.07 | -1.21 | 0.009415 | 0.493185 | 0.146817 | 0.694004 |
| MmugDNA.3231.1.S1_at    | MmugDNA.3231.1  | 6.88  | 8.54  | 0.65 | 0.26 | -3.16 | 0.028945 | 0.226951 | 0.22298  | 0.499276 |
| MmugDNA.32318.1.S1_at   | MmugDNA.32318.1 | 5.37  | 5.24  | 0.08 | 0.07 | 1.09  | 0.177134 | 0.009967 | 0.47177  | 0.131094 |
| MmugDNA.3232.1.S1_at    | MmugDNA.3232.1  | 6.96  | 6.82  | 0.17 | 0.18 | 1.11  | 0.235682 | 0.526716 | 0.533475 | 0.715627 |
| MmugDNA.32321.1.S1_at   | MmugDNA.32321.1 | 9.41  | 9.46  | 0.49 | 0.1  | -1.03 | 0.575748 | 0.418291 | 0.78295  | 0.642707 |
| MmugDNA.32328.1.S1_at   | MmugDNA.32328.1 | 11.58 | 11.95 | 0.37 | 0.05 | -1.3  | 0.114796 | 0.232377 | 0.391813 | 0.504088 |
| MmugDNA.32329.1.S1_at   | MmugDNA.32329.1 | 12.73 | 12.65 | 0.05 | 0.06 | 1.06  | 0.121563 | 0.000529 | 0.400375 | 0.040069 |
| MmugDNA.32334.1.S1_at   | MmugDNA.32334.1 | 13.16 | 13.16 | 0.04 | 0.03 | -1.01 | 0.852491 | 0.478297 | 0.935873 | 0.684289 |
| MmugDNA.32339.1.S1_at   | MmugDNA.32339.1 | 6.64  | 6.12  | 0.29 | 0.07 | 1.44  | 0.021566 | 0.097812 | 0.200582 | 0.355639 |
| MmugDNA.32344.1.S1_at   | MmugDNA.32344.1 | 9.01  | 8.34  | 0.41 | 0.33 | 1.59  | 0.136713 | 0.334895 | 0.421401 | 0.58275  |
| MmugDNA.32345.1.S1_at   | MmugDNA.32345.1 | 9.65  | 9.2   | 0.27 | 0.16 | 1.37  | 0.186315 | 0.211375 | 0.482544 | 0.48553  |
| MmugDNA.32346.1.A1_at   | MmugDNA.32346.1 | 4.37  | 4.26  | 0.19 | 0.08 | 1.08  | 0.291993 | 0.265041 | 0.581449 | 0.531    |
| MmugDNA.32346.1.S1_at   | MmugDNA.32346.1 | 4.6   | 4.66  | 0.22 | 0.11 | -1.04 | 0.740049 | 0.259457 | 0.879501 | 0.526418 |
| MmugDNA.32347.1.S1_at   | MmugDNA.32347.1 | 9.57  | 9.75  | 0.09 | 0.06 | -1.13 | 0.035172 | 0.045708 | 0.242214 | 0.258049 |
| MmugDNA.32354.1.S1_at   | MmugDNA.32354.1 | 5.59  | 5.84  | 0.14 | 0.28 | -1.2  | 0.098754 | 0.124503 | 0.369673 | 0.39495  |

|                       |                 |       |       |      |      |       |          |          |          |          |
|-----------------------|-----------------|-------|-------|------|------|-------|----------|----------|----------|----------|
| MmugDNA.32355.1.S1_at | MmugDNA.32355.1 | 11.73 | 11.91 | 0.05 | 0.04 | -1.13 | 0.009458 | 0.005257 | 0.147192 | 0.100401 |
| MmugDNA.32359.1.S1_at | MmugDNA.32359.1 | 11.05 | 10.86 | 0.27 | 0.49 | 1.14  | 0.905659 | 0.988592 | 0.960065 | 0.993572 |
| MmugDNA.32362.1.S1_at | MmugDNA.32362.1 | 11.15 | 13.03 | 0.81 | 0.12 | -3.66 | 0.047869 | 0.202264 | 0.276176 | 0.476672 |
| MmugDNA.32364.1.S1_at | MmugDNA.32364.1 | 10.78 | 10.82 | 0.03 | 0.14 | -1.03 | 0.479205 | 0.000233 | 0.720456 | 0.03241  |
| MmugDNA.32366.1.S1_at | MmugDNA.32366.1 | 6.79  | 6.35  | 0.27 | 0.23 | 1.36  | 0.044046 | 0.04186  | 0.266926 | 0.249172 |
| MmugDNA.32374.1.S1_at | MmugDNA.32374.1 | 8.62  | 8.28  | 0.21 | 0.07 | 1.27  | 0.041057 | 0.097718 | 0.259134 | 0.355598 |
| MmugDNA.32375.1.S1_at | MmugDNA.32375.1 | 5.16  | 5.29  | 0.04 | 0.17 | -1.09 | 0.21249  | 0.090215 | 0.51051  | 0.344604 |
| MmugDNA.32377.1.S1_at | MmugDNA.32377.1 | 9.17  | 9.1   | 0.06 | 0.04 | 1.05  | 0.311474 | 0.027303 | 0.597553 | 0.206611 |
| MmugDNA.32381.1.S1_at | MmugDNA.32381.1 | 11.41 | 10.95 | 0.35 | 0.05 | 1.38  | 0.080305 | 0.166489 | 0.34088  | 0.442928 |
| MmugDNA.32384.1.S1_at | MmugDNA.32384.1 | 7.51  | 7.5   | 0.02 | 0.04 | 1.01  | 0.713693 | 0.745768 | 0.864758 | 0.852562 |
| MmugDNA.32385.1.S1_at | MmugDNA.32385.1 | 10.88 | 10.99 | 0.15 | 0.09 | -1.08 | 0.805402 | 0.042408 | 0.9127   | 0.250603 |
| MmugDNA.32386.1.S1_at | MmugDNA.32386.1 | 11.4  | 11.49 | 0.36 | 0.04 | -1.06 | 0.768396 | 0.182953 | 0.893594 | 0.459434 |
| MmugDNA.32387.1.S1_at | MmugDNA.32387.1 | 8.25  | 8.71  | 0.64 | 0.12 | -1.38 | 0.310522 | 0.516702 | 0.59685  | 0.709161 |
| MmugDNA.32388.1.S1_at | MmugDNA.32388.1 | 12.62 | 12.53 | 0.14 | 0.03 | 1.07  | 0.249459 | 0.956341 | 0.544627 | 0.975138 |
| MmugDNA.32390.1.S1_at | MmugDNA.32390.1 | 9.1   | 9.07  | 0.29 | 0.06 | 1.02  | 0.254715 | 0.259887 | 0.549255 | 0.526748 |
| MmugDNA.32391.1.S1_at | MmugDNA.32391.1 | 11.46 | 12.36 | 0.17 | 0.12 | -1.87 | 0.003481 | 0.002043 | 0.103559 | 0.066887 |
| MmugDNA.32393.1.S1_at | MmugDNA.32393.1 | 4.71  | 4.62  | 0.02 | 0.05 | 1.07  | 0.041232 | 0.075711 | 0.259553 | 0.320299 |
| MmugDNA.32395.1.S1_at | MmugDNA.32395.1 | 9.45  | 9.25  | 0.23 | 0.13 | 1.15  | 0.184373 | 0.009096 | 0.480429 | 0.125944 |
| MmugDNA.32398.1.S1_at | MmugDNA.32398.1 | 5.85  | 5.95  | 0.12 | 0.19 | -1.07 | 0.153709 | 0.304035 | 0.443768 | 0.561388 |
| MmugDNA.32400.1.S1_at | MmugDNA.32400.1 | 6.23  | 6.27  | 0.23 | 0.17 | -1.03 | 0.440742 | 0.823927 | 0.694666 | 0.898821 |
| MmugDNA.32405.1.S1_at | MmugDNA.32405.1 | 4.55  | 4.38  | 0.11 | 0.08 | 1.12  | 0.155903 | 0.359691 | 0.446276 | 0.600963 |
| MmugDNA.32408.1.S1_at | MmugDNA.32408.1 | 7.4   | 7.44  | 0.16 | 0.04 | -1.03 | 0.462954 | 0.198373 | 0.709909 | 0.473292 |
| MmugDNA.32410.1.S1_at | MmugDNA.32410.1 | 11.19 | 10.42 | 0.23 | 0.14 | 1.71  | 0.007302 | 0.187644 | 0.13327  | 0.463663 |
| MmugDNA.32413.1.S1_at | MmugDNA.32413.1 | 8.74  | 7.34  | 0.42 | 0.14 | 2.63  | 0.004536 | 0.002026 | 0.113436 | 0.066885 |
| MmugDNA.32415.1.S1_at | MmugDNA.32415.1 | 5.18  | 5.07  | 0.18 | 0.08 | 1.08  | 0.512032 | 0.389529 | 0.742848 | 0.623635 |
| MmugDNA.32419.1.S1_at | MmugDNA.32419.1 | 11.52 | 11.26 | 0.09 | 0.14 | 1.2   | 0.095973 | 0.000672 | 0.365529 | 0.04413  |
| MmugDNA.32420.1.S1_at | MmugDNA.32420.1 | 10.62 | 10.85 | 0.02 | 0.06 | -1.17 | 0.002616 | 0.003949 | 0.095176 | 0.089397 |
| MmugDNA.32422.1.S1_at | MmugDNA.32422.1 | 6.37  | 9.5   | 1.26 | 0.15 | -8.74 | 0.034109 | 0.274348 | 0.239433 | 0.538779 |
| MmugDNA.32423.1.S1_at | MmugDNA.32423.1 | 7.39  | 7.76  | 0.16 | 0.13 | -1.29 | 0.07728  | 0.202661 | 0.335964 | 0.477075 |
| MmugDNA.32430.1.S1_at | MmugDNA.32430.1 | 10.06 | 10.1  | 0.05 | 0.02 | -1.03 | 0.139348 | 0.837028 | 0.424947 | 0.906826 |
| MmugDNA.32432.1.S1_at | MmugDNA.32432.1 | 9.68  | 9.8   | 0.12 | 0.07 | -1.08 | 0.392602 | 0.003267 | 0.659492 | 0.082312 |
| MmugDNA.32433.1.S1_at | MmugDNA.32433.1 | 8.07  | 7.94  | 0.18 | 0.01 | 1.09  | 0.091641 | 0.010404 | 0.3594   | 0.133414 |
| MmugDNA.32435.1.S1_at | MmugDNA.32435.1 | 5.43  | 5.63  | 0.17 | 0.03 | -1.15 | 0.378154 | 0.47366  | 0.648422 | 0.680935 |
| MmugDNA.32442.1.S1_at | MmugDNA.32442.1 | 12.11 | 12.14 | 0.08 | 0.04 | -1.02 | 0.527815 | 0.62224  | 0.753319 | 0.776771 |
| MmugDNA.3245.1.S1_at  | MmugDNA.3245.1  | 5.53  | 5.96  | 0.14 | 0.28 | -1.34 | 0.162091 | 0.286649 | 0.453951 | 0.548077 |
| MmugDNA.32450.1.S1_at | MmugDNA.32450.1 | 6.91  | 6.59  | 0.6  | 0.1  | 1.24  | 0.229152 | 0.520485 | 0.527871 | 0.711799 |
| MmugDNA.32452.1.S1_at | MmugDNA.32452.1 | 10.83 | 10.94 | 0.04 | 0.1  | -1.08 | 0.10132  | 0.412757 | 0.372661 | 0.63909  |
| MmugDNA.32453.1.S1_at | MmugDNA.32453.1 | 10.11 | 10.75 | 0.22 | 0.21 | -1.56 | 0.051536 | 0.31364  | 0.284421 | 0.568002 |
| MmugDNA.32458.1.S1_at | MmugDNA.32458.1 | 10.42 | 10.59 | 0.25 | 0.03 | -1.12 | 0.3118   | 0.877111 | 0.597915 | 0.92996  |
| MmugDNA.32459.1.S1_at | MmugDNA.32459.1 | 7.61  | 7.89  | 0.12 | 0.07 | -1.22 | 0.09724  | 0.201127 | 0.367303 | 0.475519 |
| MmugDNA.32460.1.S1_at | MmugDNA.32460.1 | 5.45  | 5.62  | 0.19 | 0.4  | -1.12 | 0.861666 | 0.822595 | 0.939915 | 0.89799  |
| MmugDNA.32466.1.S1_at | MmugDNA.32466.1 | 9.93  | 9.9   | 0.21 | 0.07 | 1.02  | 0.550215 | 0.10459  | 0.767734 | 0.36588  |
| MmugDNA.32470.1.S1_at | MmugDNA.32470.1 | 12.73 | 12.57 | 0.1  | 0.08 | 1.11  | 0.10442  | 0.461031 | 0.377773 | 0.672829 |

|                         |                 |       |       |      |      |        |          |          |          |          |
|-------------------------|-----------------|-------|-------|------|------|--------|----------|----------|----------|----------|
| MmugDNA.32485.1.S1_at   | MmugDNA.32485.1 | 6.42  | 5.84  | 0.2  | 0.08 | 1.5    | 0.017394 | 0.003958 | 0.185386 | 0.089504 |
| MmugDNA.32493.1.S1_at   | MmugDNA.32493.1 | 6.07  | 6.94  | 0.53 | 0.15 | -1.83  | 0.038384 | 0.039498 | 0.251895 | 0.243676 |
| MmugDNA.32495.1.S1_at   | MmugDNA.32495.1 | 10.79 | 10.48 | 0.7  | 0.29 | 1.24   | 0.470864 | 0.072736 | 0.715211 | 0.31565  |
| MmugDNA.32496.1.S1_at   | MmugDNA.32496.1 | 7.09  | 7.26  | 0.32 | 0.03 | -1.12  | 0.977449 | 0.953405 | 0.991176 | 0.97351  |
| MmugDNA.32501.1.S1_at   | MmugDNA.32501.1 | 9.43  | 9.47  | 0.44 | 0.16 | -1.03  | 0.655718 | 0.779995 | 0.833526 | 0.872428 |
| MmugDNA.32504.1.S1_at   | MmugDNA.32504.1 | 6.34  | 6.16  | 0.17 | 0.04 | 1.13   | 0.043961 | 0.022985 | 0.266638 | 0.189624 |
| MmugDNA.3251.1.S1_at    | MmugDNA.3251.1  | 7.6   | 7.73  | 0.41 | 0.08 | -1.09  | 0.984261 | 0.006662 | 0.994129 | 0.110544 |
| MmugDNA.32511.1.S1_x_at | MmugDNA.32511.1 | 3.03  | 2.99  | 0.1  | 0.11 | 1.02   | 0.915802 | 0.239943 | 0.964189 | 0.510627 |
| MmugDNA.32515.1.S1_at   | MmugDNA.32515.1 | 6.72  | 7.22  | 0.15 | 0.16 | -1.42  | 0.0274   | 0.145102 | 0.218385 | 0.419055 |
| MmugDNA.32516.1.S1_at   | MmugDNA.32516.1 | 7.09  | 6.86  | 0.31 | 0.38 | 1.18   | 0.28948  | 0.02217  | 0.579036 | 0.186409 |
| MmugDNA.32522.1.S1_at   | MmugDNA.32522.1 | 6.91  | 6.58  | 0.12 | 0.17 | 1.26   | 0.226006 | 0.103187 | 0.523718 | 0.364123 |
| MmugDNA.32528.1.S1_at   | MmugDNA.32528.1 | 9.26  | 8.91  | 0.05 | 0.08 | 1.27   | 0.003612 | 0.001192 | 0.105451 | 0.054172 |
| MmugDNA.32529.1.S1_at   | MmugDNA.32529.1 | 6.16  | 6.18  | 0.07 | 0.01 | -1.02  | 0.353884 | 0.189104 | 0.631084 | 0.464934 |
| MmugDNA.32531.1.S1_at   | MmugDNA.32531.1 | 6.54  | 6.16  | 0.41 | 0.2  | 1.3    | 0.617751 | 0.662789 | 0.810176 | 0.802583 |
| MmugDNA.32535.1.S1_x_at | MmugDNA.32535.1 | 5.37  | 4.66  | 0.65 | 0.02 | 1.64   | 0.110652 | 0.222995 | 0.386022 | 0.495821 |
| MmugDNA.32538.1.S1_at   | MmugDNA.32538.1 | 5.6   | 9.5   | 1.4  | 0.3  | -14.99 | 0.016055 | 0.261641 | 0.179208 | 0.528107 |
| MmugDNA.32540.1.S1_at   | MmugDNA.32540.1 | 6.1   | 8.45  | 1.06 | 0.44 | -5.09  | 0.08627  | 0.360816 | 0.350983 | 0.601929 |
| MmugDNA.32541.1.S1_at   | MmugDNA.32541.1 | 5.16  | 5.04  | 0.03 | 0.02 | 1.09   | 0.002389 | 0.629945 | 0.093345 | 0.782031 |
| MmugDNA.32542.1.S1_at   | MmugDNA.32542.1 | 9.44  | 9.37  | 0.12 | 0.12 | 1.05   | 0.438304 | 0.062707 | 0.692911 | 0.297117 |
| MmugDNA.32546.1.S1_at   | MmugDNA.32546.1 | 10.34 | 10.31 | 0.15 | 0.12 | 1.02   | 0.689125 | 0.067211 | 0.85154  | 0.305225 |
| MmugDNA.32558.1.S1_at   | MmugDNA.32558.1 | 5.1   | 5.02  | 0.08 | 0.07 | 1.05   | 0.373611 | 0.060531 | 0.645118 | 0.292664 |
| MmugDNA.32561.1.S1_at   | MmugDNA.32561.1 | 9.94  | 9.94  | 0.27 | 0.01 | -1     | 0.964439 | 0.806347 | 0.985637 | 0.888642 |
| MmugDNA.32566.1.S1_at   | MmugDNA.32566.1 | 5.87  | 5.94  | 0.08 | 0.04 | -1.05  | 0.250074 | 0.46386  | 0.544879 | 0.674663 |
| MmugDNA.32567.1.S1_at   | MmugDNA.32567.1 | 9.22  | 9.93  | 0.16 | 0.02 | -1.63  | 0.002388 | 0.170459 | 0.093345 | 0.447103 |
| MmugDNA.32570.1.S1_at   | MmugDNA.32570.1 | 10.49 | 13.27 | 1.26 | 0.09 | -6.86  | 0.048334 | 0.243863 | 0.277225 | 0.514047 |
| MmugDNA.32576.1.S1_at   | MmugDNA.32576.1 | 6.52  | 6.33  | 0.16 | 0.04 | 1.14   | 0.286349 | 0.623832 | 0.576174 | 0.778207 |
| MmugDNA.32577.1.S1_s_at | MmugDNA.32577.1 | 11.55 | 11.31 | 0.22 | 0.08 | 1.18   | 0.123071 | 0.019601 | 0.402192 | 0.175863 |
| MmugDNA.3258.1.S1_at    | MmugDNA.3258.1  | 11.6  | 11.65 | 0.1  | 0.03 | -1.04  | 0.730952 | 0.081564 | 0.874299 | 0.329764 |
| MmugDNA.32582.1.S1_at   | MmugDNA.32582.1 | 9.65  | 10.24 | 0.36 | 0.04 | -1.5   | 0.127806 | 0.049138 | 0.409656 | 0.266534 |
| MmugDNA.32583.1.S1_at   | MmugDNA.32583.1 | 6.08  | 5.97  | 0.02 | 0.08 | 1.08   | 0.030191 | 0.132826 | 0.226892 | 0.404544 |
| MmugDNA.32584.1.S1_at   | MmugDNA.32584.1 | 9.65  | 9.26  | 0.29 | 0.19 | 1.31   | 0.318035 | 0.01545  | 0.602808 | 0.157803 |
| MmugDNA.32585.1.S1_at   | MmugDNA.32585.1 | 8.17  | 7.53  | 0.11 | 0.15 | 1.56   | 0.002161 | 0.002048 | 0.090391 | 0.066887 |
| MmugDNA.32586.1.S1_at   | MmugDNA.32586.1 | 4.14  | 4.19  | 0.11 | 0.09 | -1.03  | 0.905795 | 0.420003 | 0.960077 | 0.643787 |
| MmugDNA.32591.1.S1_at   | MmugDNA.32591.1 | 9.13  | 9.41  | 0.06 | 0.14 | -1.22  | 0.026108 | 0.000731 | 0.214718 | 0.044701 |
| MmugDNA.32594.1.S1_at   | MmugDNA.32594.1 | 9.02  | 8.96  | 0.07 | 0.02 | 1.04   | 0.07088  | 0.07094  | 0.324317 | 0.312444 |
| MmugDNA.32596.1.S1_at   | MmugDNA.32596.1 | 12.94 | 12.72 | 0.05 | 0.09 | 1.17   | 0.017138 | 0.201692 | 0.184186 | 0.476214 |
| MmugDNA.326.1.S1_at     | MmugDNA.326.1   | 8.57  | 8.81  | 0.16 | 0.41 | -1.18  | 0.201674 | 0.200494 | 0.499203 | 0.474913 |
| MmugDNA.32601.1.S1_at   | MmugDNA.32601.1 | 8.92  | 9.62  | 0.27 | 0.17 | -1.63  | 0.038846 | 0.000419 | 0.253371 | 0.038093 |
| MmugDNA.32608.1.S1_at   | MmugDNA.32608.1 | 10.06 | 9.45  | 0.21 | 0.14 | 1.53   | 0.006411 | 0.040928 | 0.126645 | 0.247161 |
| MmugDNA.32612.1.S1_s_at | MmugDNA.32612.1 | 9.02  | 10.51 | 2.06 | 0.1  | -2.81  | 0.832001 | 0.951891 | 0.926042 | 0.972702 |
| MmugDNA.32613.1.S1_at   | MmugDNA.32613.1 | 4.77  | 4.86  | 0.04 | 0.04 | -1.06  | 0.279822 | 0.061494 | 0.571107 | 0.294828 |
| MmugDNA.32624.1.S1_at   | MmugDNA.32624.1 | 12.69 | 11.54 | 0.29 | 0.48 | 2.21   | 0.025306 | 0.038691 | 0.212149 | 0.24169  |
| MmugDNA.32626.1.S1_at   | MmugDNA.32626.1 | 12.53 | 12.08 | 0.22 | 0.07 | 1.37   | 0.067954 | 0.078817 | 0.318434 | 0.325757 |

|                         |                 |       |       |      |      |       |          |          |          |          |
|-------------------------|-----------------|-------|-------|------|------|-------|----------|----------|----------|----------|
| MmugDNA.32641.1.S1_at   | MmugDNA.32641.1 | 8.48  | 8.27  | 0.18 | 0.11 | 1.15  | 0.10668  | 0.208953 | 0.380862 | 0.482751 |
| MmugDNA.32643.1.S1_at   | MmugDNA.32643.1 | 7.02  | 6.9   | 0.15 | 0.19 | 1.08  | 0.548585 | 0.57628  | 0.766578 | 0.747148 |
| MmugDNA.32645.1.S1_at   | MmugDNA.32645.1 | 2.95  | 2.88  | 0.21 | 0.03 | 1.05  | 0.193404 | 0.281026 | 0.490022 | 0.544179 |
| MmugDNA.32653.1.S1_at   | MmugDNA.32653.1 | 4.52  | 3.65  | 0.62 | 0.07 | 1.82  | 0.086013 | 0.067527 | 0.35042  | 0.305921 |
| MmugDNA.32656.1.S1_at   | MmugDNA.32656.1 | 7.35  | 7.18  | 0.34 | 0.13 | 1.12  | 0.785413 | 0.131688 | 0.90204  | 0.403835 |
| MmugDNA.32660.1.S1_at   | MmugDNA.32660.1 | 13.12 | 12.87 | 0.12 | 0.06 | 1.19  | 0.033055 | 0.044056 | 0.236091 | 0.254195 |
| MmugDNA.32660.1.S1_s_at | MmugDNA.32660.1 | 12.29 | 12.13 | 0.12 | 0.03 | 1.12  | 0.267409 | 0.029776 | 0.560238 | 0.214208 |
| MmugDNA.32678.1.S1_at   | MmugDNA.32678.1 | 3.02  | 2.77  | 0.05 | 0.08 | 1.19  | 0.026622 | 0.092383 | 0.216408 | 0.348294 |
| MmugDNA.32683.1.S1_at   | MmugDNA.32683.1 | 6.51  | 6.79  | 0.28 | 0.05 | -1.21 | 0.157716 | 0.290713 | 0.44853  | 0.551382 |
| MmugDNA.32690.1.S1_at   | MmugDNA.32690.1 | 11.98 | 12.09 | 0.24 | 0.09 | -1.08 | 0.193714 | 0.250055 | 0.490322 | 0.519111 |
| MmugDNA.32697.1.S1_s_at | MmugDNA.32697.1 | 10.06 | 10.02 | 0.18 | 0.1  | 1.03  | 0.952619 | 0.06591  | 0.980494 | 0.302129 |
| MmugDNA.327.1.S1_at     | MmugDNA.327.1   | 8.09  | 8.1   | 0.18 | 0.02 | -1.01 | 0.801755 | 0.991947 | 0.911061 | 0.995469 |
| MmugDNA.32703.1.S1_at   | MmugDNA.32703.1 | 7.22  | 6.5   | 0.73 | 0.06 | 1.65  | 0.195358 | 0.008025 | 0.492049 | 0.119047 |
| MmugDNA.32709.1.S1_at   | MmugDNA.32709.1 | 6.68  | 6.01  | 0.32 | 0.1  | 1.59  | 0.019714 | 0.02839  | 0.193384 | 0.210321 |
| MmugDNA.32715.1.S1_at   | MmugDNA.32715.1 | 12.13 | 11.81 | 0.19 | 0.01 | 1.24  | 0.040036 | 0.206205 | 0.256732 | 0.480377 |
| MmugDNA.32716.1.S1_at   | MmugDNA.32716.1 | 5.87  | 7.02  | 0.15 | 0.22 | -2.21 | 0.001537 | 0.024669 | 0.081678 | 0.196608 |
| MmugDNA.3272.1.S1_at    | MmugDNA.3272.1  | 7.17  | 7.12  | 0.19 | 0.04 | 1.04  | 0.651686 | 0.433369 | 0.830755 | 0.653658 |
| MmugDNA.32724.1.S1_at   | MmugDNA.32724.1 | 7.18  | 7.46  | 0.27 | 0.25 | -1.21 | 0.116732 | 0.001681 | 0.39382  | 0.062096 |
| MmugDNA.32725.1.S1_at   | MmugDNA.32725.1 | 3.39  | 3.3   | 0.15 | 0.13 | 1.07  | 0.233425 | 0.298787 | 0.53162  | 0.557392 |
| MmugDNA.32728.1.S1_at   | MmugDNA.32728.1 | 7.87  | 8.05  | 0.18 | 0.08 | -1.13 | 0.055155 | 0.467493 | 0.291849 | 0.677091 |
| MmugDNA.32731.1.S1_at   | MmugDNA.32731.1 | 6.23  | 5.53  | 0.8  | 0.27 | 1.63  | 0.079005 | 0.085974 | 0.338745 | 0.338116 |
| MmugDNA.32732.1.S1_at   | MmugDNA.32732.1 | 6.42  | 6.37  | 0.19 | 0.07 | 1.03  | 0.259297 | 0.342706 | 0.55365  | 0.588666 |
| MmugDNA.32734.1.S1_at   | MmugDNA.32734.1 | 3.66  | 3.63  | 0.06 | 0.07 | 1.02  | 0.280466 | 0.547842 | 0.571599 | 0.728723 |
| MmugDNA.32735.1.S1_at   | MmugDNA.32735.1 | 10.08 | 9.58  | 0.07 | 0.09 | 1.42  | 0.002429 | 0.02532  | 0.093606 | 0.199522 |
| MmugDNA.32740.1.S1_at   | MmugDNA.32740.1 | 4.86  | 4.69  | 0.08 | 0.05 | 1.12  | 0.037004 | 0.025789 | 0.247648 | 0.201323 |
| MmugDNA.32741.1.S1_at   | MmugDNA.32741.1 | 6.7   | 6.8   | 0.07 | 0.05 | -1.07 | 0.19402  | 0.118183 | 0.490602 | 0.386115 |
| MmugDNA.32742.1.S1_at   | MmugDNA.32742.1 | 5.8   | 5.69  | 0.17 | 0.3  | 1.08  | 0.411099 | 0.659577 | 0.673091 | 0.800802 |
| MmugDNA.3276.1.S1_at    | MmugDNA.3276.1  | 10.4  | 10.09 | 0.53 | 0.07 | 1.24  | 0.353135 | 0.065255 | 0.630353 | 0.301239 |
| MmugDNA.32761.1.S1_at   | MmugDNA.32761.1 | 9.98  | 9.97  | 0.34 | 0.04 | 1.01  | 0.962965 | 0.139833 | 0.985007 | 0.413131 |
| MmugDNA.32763.1.S1_at   | MmugDNA.32763.1 | 3.7   | 3.3   | 0.07 | 0.09 | 1.32  | 0.003455 | 0.275938 | 0.103385 | 0.540035 |
| MmugDNA.32776.1.S1_at   | MmugDNA.32776.1 | 10.91 | 10.87 | 0.14 | 0.09 | 1.03  | 0.911758 | 0.001008 | 0.962635 | 0.050657 |
| MmugDNA.32777.1.S1_at   | MmugDNA.32777.1 | 9.41  | 8.97  | 0.09 | 0.07 | 1.36  | 0.002528 | 0.00374  | 0.094413 | 0.08718  |
| MmugDNA.32784.1.S1_at   | MmugDNA.32784.1 | 12.39 | 12.59 | 0.09 | 0.11 | -1.15 | 0.080514 | 0.007597 | 0.341026 | 0.11661  |
| MmugDNA.32786.1.S1_at   | MmugDNA.32786.1 | 4.26  | 4.3   | 0.35 | 0.06 | -1.03 | 0.905534 | 0.975273 | 0.960065 | 0.986526 |
| MmugDNA.32799.1.S1_at   | MmugDNA.32799.1 | 10.62 | 11.71 | 0.25 | 0.13 | -2.12 | 0.004907 | 0.064218 | 0.115126 | 0.299668 |
| MmugDNA.328.1.S1_at     | MmugDNA.328.1   | 12.21 | 13.02 | 0.24 | 0.09 | -1.76 | 0.004776 | 0.016168 | 0.115098 | 0.161172 |
| MmugDNA.32800.1.S1_at   | MmugDNA.32800.1 | 4.66  | 3.68  | 0.56 | 0.17 | 1.98  | 0.030327 | 0.027347 | 0.227183 | 0.206637 |
| MmugDNA.32803.1.S1_at   | MmugDNA.32803.1 | 5.17  | 5.33  | 0.12 | 0.14 | -1.12 | 0.172522 | 0.191659 | 0.466621 | 0.466936 |
| MmugDNA.32804.1.S1_at   | MmugDNA.32804.1 | 7.61  | 7.62  | 0.12 | 0.1  | -1.01 | 0.678913 | 0.722707 | 0.846843 | 0.839378 |
| MmugDNA.32805.1.S1_at   | MmugDNA.32805.1 | 7.18  | 7.08  | 0.09 | 0.03 | 1.07  | 0.223158 | 0.233704 | 0.520981 | 0.505032 |
| MmugDNA.32807.1.S1_at   | MmugDNA.32807.1 | 9.43  | 9.28  | 0.12 | 0.02 | 1.11  | 0.184331 | 0.521515 | 0.480413 | 0.712483 |
| MmugDNA.32812.1.S1_at   | MmugDNA.32812.1 | 7.6   | 8.32  | 0.82 | 0.46 | -1.65 | 0.206175 | 0.271531 | 0.503843 | 0.536547 |
| MmugDNA.3282.1.S1_at    | MmugDNA.3282.1  | 4.26  | 4.17  | 0.18 | 0.05 | 1.07  | 0.866547 | 0.182653 | 0.942399 | 0.459186 |

|                         |                 |       |       |      |      |       |          |          |          |          |
|-------------------------|-----------------|-------|-------|------|------|-------|----------|----------|----------|----------|
| MmugDNA.32821.1.S1_at   | MmugDNA.32821.1 | 3.22  | 3.18  | 0.1  | 0.06 | 1.02  | 0.858799 | 0.873223 | 0.938801 | 0.92788  |
| MmugDNA.32827.1.S1_at   | MmugDNA.32827.1 | 11.41 | 11.94 | 0.23 | 0.08 | -1.45 | 0.03208  | 0.66064  | 0.232919 | 0.801485 |
| MmugDNA.32828.1.S1_at   | MmugDNA.32828.1 | 6.77  | 6.67  | 0.19 | 0.11 | 1.07  | 0.336387 | 0.539854 | 0.617028 | 0.723982 |
| MmugDNA.32837.1.S1_at   | MmugDNA.32837.1 | 11.5  | 12.06 | 0.23 | 0.14 | -1.48 | 0.03359  | 0.074092 | 0.237144 | 0.317745 |
| MmugDNA.32840.1.S1_at   | MmugDNA.32840.1 | 8.46  | 8.42  | 0.2  | 0.03 | 1.03  | 0.552428 | 0.730583 | 0.769177 | 0.844055 |
| MmugDNA.32841.1.S1_at   | MmugDNA.32841.1 | 5.84  | 5.94  | 0.24 | 0.1  | -1.07 | 0.56223  | 0.450829 | 0.774865 | 0.665869 |
| MmugDNA.32848.1.S1_at   | MmugDNA.32848.1 | 7.45  | 9.37  | 0.68 | 0.27 | -3.79 | 0.012034 | 0.490007 | 0.159675 | 0.692076 |
| MmugDNA.32852.1.S1_at   | MmugDNA.32852.1 | 7.75  | 8.67  | 0.54 | 0.17 | -1.9  | 0.023515 | 0.179448 | 0.20653  | 0.455929 |
| MmugDNA.32856.1.S1_at   | MmugDNA.32856.1 | 8.99  | 8.54  | 0.27 | 0.14 | 1.37  | 0.020366 | 0.012285 | 0.196305 | 0.143369 |
| MmugDNA.32866.1.S1_at   | MmugDNA.32866.1 | 5.26  | 5.34  | 0.14 | 0.02 | -1.06 | 0.926404 | 0.755328 | 0.968882 | 0.857558 |
| MmugDNA.32870.1.S1_at   | MmugDNA.32870.1 | 7.92  | 7.75  | 0.09 | 0.12 | 1.13  | 0.182965 | 0.499147 | 0.478788 | 0.698006 |
| MmugDNA.32873.1.S1_at   | MmugDNA.32873.1 | 11.4  | 11.39 | 0.08 | 0.05 | 1     | 0.649212 | 0.801332 | 0.829606 | 0.885696 |
| MmugDNA.32876.1.S1_at   | MmugDNA.32876.1 | 8.7   | 8.98  | 0.23 | 0.11 | -1.21 | 0.117662 | 0.190302 | 0.39507  | 0.465906 |
| MmugDNA.32877.1.S1_at   | MmugDNA.32877.1 | 11.69 | 11.37 | 0.07 | 0.06 | 1.24  | 0.002991 | 0.000036 | 0.099744 | 0.023031 |
| MmugDNA.32878.1.S1_at   | MmugDNA.32878.1 | 5.22  | 5.4   | 0.1  | 0.06 | -1.13 | 0.032773 | 0.020164 | 0.235082 | 0.178414 |
| MmugDNA.32883.1.S1_at   | MmugDNA.32883.1 | 4.87  | 4.67  | 0.22 | 0.06 | 1.15  | 0.55955  | 0.262058 | 0.773349 | 0.528374 |
| MmugDNA.32885.1.S1_at   | MmugDNA.32885.1 | 7.09  | 9.05  | 0.66 | 0.12 | -3.89 | 0.015393 | 0.174184 | 0.176257 | 0.450479 |
| MmugDNA.32888.1.S1_at   | MmugDNA.32888.1 | 12.03 | 11.21 | 0.61 | 0.62 | 1.76  | 0.182099 | 0.311455 | 0.47775  | 0.566456 |
| MmugDNA.32889.1.S1_at   | MmugDNA.32889.1 | 8.54  | 8.29  | 0.2  | 0.1  | 1.19  | 0.171364 | 0.567659 | 0.465251 | 0.74156  |
| MmugDNA.32889.1.S1_s_at | MmugDNA.32889.1 | 8.21  | 7.88  | 0.21 | 0.15 | 1.26  | 0.18755  | 0.347875 | 0.48383  | 0.592196 |
| MmugDNA.32890.1.S1_at   | MmugDNA.32890.1 | 9.67  | 9.7   | 0.08 | 0.1  | -1.02 | 0.654848 | 0.224261 | 0.832917 | 0.497164 |
| MmugDNA.32902.1.S1_at   | MmugDNA.32902.1 | 11.48 | 11.54 | 0.1  | 0    | -1.04 | 0.110465 | 0.450023 | 0.385799 | 0.665446 |
| MmugDNA.32903.1.S1_at   | MmugDNA.32903.1 | 9.27  | 8.45  | 0.22 | 0.25 | 1.77  | 0.017672 | 0.075554 | 0.186509 | 0.319982 |
| MmugDNA.32904.1.S1_at   | MmugDNA.32904.1 | 12.99 | 12.8  | 0.05 | 0.04 | 1.14  | 0.005648 | 0.008588 | 0.120879 | 0.123008 |
| MmugDNA.32907.1.S1_at   | MmugDNA.32907.1 | 11.35 | 11.05 | 0.17 | 0.03 | 1.23  | 0.09222  | 0.034445 | 0.360192 | 0.229628 |
| MmugDNA.32908.1.S1_at   | MmugDNA.32908.1 | 9.03  | 8.63  | 0.44 | 0.14 | 1.32  | 0.204852 | 0.146851 | 0.502623 | 0.42088  |
| MmugDNA.32914.1.S1_at   | MmugDNA.32914.1 | 12.1  | 11.43 | 0.02 | 0.08 | 1.59  | 0.000145 | 0.00001  | 0.051196 | 0.016526 |
| MmugDNA.32917.1.S1_at   | MmugDNA.32917.1 | 11.78 | 10.54 | 0.24 | 0.24 | 2.36  | 0.003889 | 0.162279 | 0.108039 | 0.438447 |
| MmugDNA.32920.1.S1_at   | MmugDNA.32920.1 | 13.09 | 12.94 | 0.04 | 0.04 | 1.11  | 0.007419 | 0.114638 | 0.134325 | 0.381156 |
| MmugDNA.32921.1.S1_at   | MmugDNA.32921.1 | 6.76  | 7.19  | 0.52 | 0.26 | -1.35 | 0.109317 | 0.069707 | 0.384379 | 0.310164 |
| MmugDNA.32925.1.S1_s_at | MmugDNA.32925.1 | 12.12 | 12.09 | 0.13 | 0.03 | 1.02  | 0.41965  | 0.027401 | 0.678954 | 0.206752 |
| MmugDNA.32938.1.S1_at   | MmugDNA.32938.1 | 3.4   | 3.38  | 0.2  | 0.14 | 1.02  | 0.364423 | 0.354825 | 0.639064 | 0.59746  |
| MmugDNA.32939.1.S1_at   | MmugDNA.32939.1 | 11.47 | 11.95 | 0.16 | 0.06 | -1.39 | 0.013916 | 0.007664 | 0.16912  | 0.117095 |
| MmugDNA.32944.1.S1_at   | MmugDNA.32944.1 | 5.11  | 4.9   | 0.18 | 0.1  | 1.16  | 0.13525  | 0.22764  | 0.419109 | 0.499898 |
| MmugDNA.32950.1.S1_at   | MmugDNA.32950.1 | 4.82  | 4.75  | 0.49 | 0.12 | 1.05  | 0.28928  | 0.057103 | 0.578884 | 0.284945 |
| MmugDNA.32953.1.S1_at   | MmugDNA.32953.1 | 8.94  | 6.09  | 1.06 | 0.19 | 7.24  | 0.011019 | 0.003247 | 0.154661 | 0.082187 |
| MmugDNA.32954.1.S1_at   | MmugDNA.32954.1 | 10.36 | 9.56  | 0.09 | 0.11 | 1.73  | 0.000862 | 0.000228 | 0.073779 | 0.032385 |
| MmugDNA.32958.1.S1_at   | MmugDNA.32958.1 | 6.56  | 6.79  | 0.3  | 0.09 | -1.17 | 0.408859 | 0.513035 | 0.671451 | 0.706696 |
| MmugDNA.32960.1.S1_at   | MmugDNA.32960.1 | 5.43  | 5.55  | 0.26 | 0.08 | -1.09 | 0.733254 | 0.643294 | 0.875635 | 0.79084  |
| MmugDNA.32962.1.S1_at   | MmugDNA.32962.1 | 10.72 | 10.1  | 0.39 | 0.13 | 1.54  | 0.235573 | 0.255076 | 0.533367 | 0.52317  |
| MmugDNA.32966.1.S1_at   | MmugDNA.32966.1 | 7.11  | 7.47  | 0.17 | 0.12 | -1.28 | 0.062643 | 0.586304 | 0.306914 | 0.753427 |
| MmugDNA.32968.1.S1_at   | MmugDNA.32968.1 | 7.8   | 7.83  | 0.19 | 0.01 | -1.02 | 0.850879 | 0.77183  | 0.935254 | 0.867369 |
| MmugDNA.32977.1.S1_at   | MmugDNA.32977.1 | 9.84  | 10.18 | 0.26 | 0.21 | -1.26 | 0.352983 | 0.03072  | 0.630239 | 0.217174 |



|                         |                 |       |       |      |      |       |          |          |          |          |
|-------------------------|-----------------|-------|-------|------|------|-------|----------|----------|----------|----------|
| MmugDNA.3298.1.S1_at    | MmugDNA.3298.1  | 12.55 | 12.64 | 0.05 | 0.06 | -1.07 | 0.109998 | 0.000017 | 0.385253 | 0.019635 |
| MmugDNA.32988.1.S1_at   | MmugDNA.32988.1 | 7.97  | 7.91  | 0.24 | 0.08 | 1.04  | 0.935073 | 0.324993 | 0.972854 | 0.575512 |
| MmugDNA.32990.1.S1_at   | MmugDNA.32990.1 | 5.86  | 6.32  | 0.44 | 0.06 | -1.38 | 0.151155 | 0.742738 | 0.440703 | 0.851023 |
| MmugDNA.32991.1.S1_at   | MmugDNA.32991.1 | 8.75  | 7.22  | 0.7  | 0.37 | 2.9   | 0.109947 | 0.22868  | 0.385169 | 0.500897 |
| MmugDNA.32998.1.S1_at   | MmugDNA.32998.1 | 7.06  | 7.17  | 0.33 | 0.09 | -1.08 | 0.773314 | 0.877227 | 0.896046 | 0.930041 |
| MmugDNA.33001.1.S1_at   | MmugDNA.33001.1 | 9.83  | 10.66 | 0.25 | 0.08 | -1.78 | 0.009824 | 0.202723 | 0.148542 | 0.477174 |
| MmugDNA.33003.1.S1_at   | MmugDNA.33003.1 | 2.94  | 2.98  | 0.15 | 0.03 | -1.03 | 0.789506 | 0.37389  | 0.90444  | 0.612508 |
| MmugDNA.33004.1.S1_at   | MmugDNA.33004.1 | 5.15  | 5.31  | 0.49 | 0.15 | -1.12 | 0.942797 | 0.948772 | 0.975902 | 0.970752 |
| MmugDNA.33011.1.S1_at   | MmugDNA.33011.1 | 9.64  | 9.95  | 0.18 | 0.27 | -1.24 | 0.1277   | 0.686987 | 0.409591 | 0.817375 |
| MmugDNA.33014.1.S1_at   | MmugDNA.33014.1 | 12.05 | 12.14 | 0.02 | 0.02 | -1.06 | 0.008103 | 0.105531 | 0.138956 | 0.367515 |
| MmugDNA.33017.1.S1_at   | MmugDNA.33017.1 | 10.94 | 10.92 | 0.23 | 0.04 | 1.01  | 0.45441  | 0.741    | 0.704345 | 0.850089 |
| MmugDNA.33019.1.S1_at   | MmugDNA.33019.1 | 7.51  | 7.52  | 0.26 | 0.05 | -1.01 | 0.919943 | 0.977482 | 0.96576  | 0.987777 |
| MmugDNA.3303.1.S1_at    | MmugDNA.3303.1  | 11.42 | 11.41 | 0.03 | 0.01 | 1.01  | 0.136612 | 0.116339 | 0.421269 | 0.383671 |
| MmugDNA.33031.1.S1_at   | MmugDNA.33031.1 | 12.05 | 11.66 | 0.16 | 0.03 | 1.31  | 0.007466 | 0.020271 | 0.134751 | 0.17872  |
| MmugDNA.33032.1.S1_at   | MmugDNA.33032.1 | 8.69  | 8.33  | 0.35 | 0.11 | 1.28  | 0.276477 | 0.208005 | 0.568029 | 0.482049 |
| MmugDNA.33036.1.S1_at   | MmugDNA.33036.1 | 6.63  | 5.91  | 0.67 | 0.36 | 1.65  | 0.772853 | 0.575178 | 0.895994 | 0.746362 |
| MmugDNA.33037.1.S1_s_at | MmugDNA.33037.1 | 7.67  | 8.2   | 0.36 | 0.3  | -1.44 | 0.291041 | 0.028597 | 0.580424 | 0.210901 |
| MmugDNA.3304.1.S1_at    | MmugDNA.3304.1  | 3.41  | 3.26  | 0.22 | 0.03 | 1.11  | 0.802428 | 0.935104 | 0.91128  | 0.963274 |
| MmugDNA.33042.1.S1_at   | MmugDNA.33042.1 | 7.41  | 8.1   | 0.39 | 0.24 | -1.61 | 0.0432   | 0.086987 | 0.265109 | 0.339851 |
| MmugDNA.3305.1.S1_at    | MmugDNA.3305.1  | 10.25 | 10.16 | 0.26 | 0.08 | 1.07  | 0.663118 | 0.072695 | 0.837472 | 0.31561  |
| MmugDNA.33059.1.S1_at   | MmugDNA.33059.1 | 12.52 | 12.2  | 0.18 | 0.07 | 1.25  | 0.027625 | 0.002754 | 0.21866  | 0.077522 |
| MmugDNA.3306.1.S1_at    | MmugDNA.3306.1  | 7.42  | 7.61  | 0.34 | 0.19 | -1.14 | 0.336109 | 0.02958  | 0.616766 | 0.213628 |
| MmugDNA.33060.1.S1_at   | MmugDNA.33060.1 | 7.77  | 10.5  | 1.85 | 0.16 | -6.64 | 0.071705 | 0.354235 | 0.325611 | 0.597105 |
| MmugDNA.33060.1.S1_x_at | MmugDNA.33060.1 | 7.84  | 10.45 | 1.74 | 0.19 | -6.13 | 0.070764 | 0.349224 | 0.324313 | 0.593263 |
| MmugDNA.33065.1.S1_at   | MmugDNA.33065.1 | 11.37 | 11.24 | 0.13 | 0.02 | 1.09  | 0.105208 | 0.527509 | 0.379027 | 0.716154 |
| MmugDNA.33067.1.S1_at   | MmugDNA.33067.1 | 4.87  | 5.11  | 0.02 | 0.2  | -1.19 | 0.09619  | 0.584731 | 0.365761 | 0.752515 |
| MmugDNA.33071.1.S1_at   | MmugDNA.33071.1 | 9.02  | 9.95  | 0.99 | 0.02 | -1.9  | 0.26403  | 0.353191 | 0.557422 | 0.596432 |
| MmugDNA.33079.1.S1_at   | MmugDNA.33079.1 | 5.76  | 5.88  | 0.13 | 0.04 | -1.09 | 0.35163  | 0.181051 | 0.629259 | 0.457562 |
| MmugDNA.33082.1.S1_s_at | MmugDNA.33082.1 | 10.31 | 9.6   | 0.36 | 0.04 | 1.63  | 0.028638 | 0.015006 | 0.221765 | 0.155713 |
| MmugDNA.33083.1.S1_at   | MmugDNA.33083.1 | 12.6  | 12.41 | 0.2  | 0.19 | 1.14  | 0.257892 | 0.317707 | 0.552089 | 0.57089  |
| MmugDNA.33085.1.S1_at   | MmugDNA.33085.1 | 4.26  | 4.16  | 0.55 | 0.27 | 1.07  | 0.253413 | 0.207665 | 0.547829 | 0.481906 |
| MmugDNA.33088.1.S1_at   | MmugDNA.33088.1 | 3.83  | 3.88  | 0.13 | 0.06 | -1.04 | 0.841858 | 0.477827 | 0.930518 | 0.683839 |
| MmugDNA.33089.1.S1_at   | MmugDNA.33089.1 | 9.83  | 10.36 | 0.23 | 0.16 | -1.44 | 0.120466 | 0.675684 | 0.398818 | 0.810429 |
| MmugDNA.33093.1.S1_at   | MmugDNA.33093.1 | 3     | 3.04  | 0.02 | 0.05 | -1.02 | 0.812272 | 0.05909  | 0.91603  | 0.289985 |
| MmugDNA.33095.1.S1_at   | MmugDNA.33095.1 | 3.62  | 3.36  | 0.18 | 0.35 | 1.2   | 0.861285 | 0.297064 | 0.939733 | 0.555996 |
| MmugDNA.33098.1.S1_at   | MmugDNA.33098.1 | 8.56  | 8.73  | 0.18 | 0.47 | -1.13 | 0.134779 | 0.001748 | 0.418624 | 0.062998 |
| MmugDNA.33099.1.S1_at   | MmugDNA.33099.1 | 10.74 | 10.59 | 0.15 | 0.13 | 1.11  | 0.335    | 0.011276 | 0.616013 | 0.138076 |
| MmugDNA.3310.1.S1_at    | MmugDNA.3310.1  | 10.49 | 10.98 | 0.26 | 0.02 | -1.4  | 0.029179 | 0.002256 | 0.223658 | 0.069943 |
| MmugDNA.33114.1.S1_at   | MmugDNA.33114.1 | 4.34  | 4.76  | 0.3  | 0.16 | -1.34 | 0.08577  | 0.08891  | 0.350079 | 0.34275  |
| MmugDNA.33116.1.S1_at   | MmugDNA.33116.1 | 3.52  | 3.71  | 0.03 | 0.25 | -1.14 | 0.441517 | 0.68595  | 0.695043 | 0.816691 |
| MmugDNA.33119.1.S1_at   | MmugDNA.33119.1 | 9.72  | 9.44  | 0.57 | 0.07 | 1.21  | 0.887093 | 0.874669 | 0.951902 | 0.928837 |
| MmugDNA.33120.1.S1_x_at | MmugDNA.33120.1 | 4.18  | 4.43  | 0.43 | 0.27 | -1.19 | 0.688729 | 0.449369 | 0.851369 | 0.665021 |
| MmugDNA.33123.1.S1_at   | MmugDNA.33123.1 | 8.62  | 9.39  | 0.35 | 0.04 | -1.7  | 0.013131 | 0.002501 | 0.16524  | 0.074067 |

|                         |                 |       |       |      |      |       |          |          |          |          |
|-------------------------|-----------------|-------|-------|------|------|-------|----------|----------|----------|----------|
| MmugDNA.33130.1.S1_at   | MmugDNA.33130.1 | 10.53 | 9.65  | 0.22 | 0.11 | 1.85  | 0.005657 | 0.002391 | 0.120889 | 0.072347 |
| MmugDNA.33135.1.S1_at   | MmugDNA.33135.1 | 9.77  | 9.59  | 0.02 | 0.16 | 1.13  | 0.439361 | 0.482944 | 0.693654 | 0.687681 |
| MmugDNA.33136.1.S1_at   | MmugDNA.33136.1 | 3.33  | 3.24  | 0.07 | 0.13 | 1.06  | 0.210691 | 0.222806 | 0.5083   | 0.495734 |
| MmugDNA.33137.1.S1_at   | MmugDNA.33137.1 | 8.09  | 7.76  | 0.48 | 0.08 | 1.25  | 0.188034 | 0.0167   | 0.484319 | 0.163642 |
| MmugDNA.33139.1.S1_at   | MmugDNA.33139.1 | 5.32  | 4.82  | 0.88 | 0.55 | 1.42  | 0.439015 | 0.572964 | 0.693412 | 0.744895 |
| MmugDNA.33140.1.S1_at   | MmugDNA.33140.1 | 5.98  | 5.97  | 0.05 | 0.05 | 1.01  | 0.818281 | 0.309825 | 0.918879 | 0.565044 |
| MmugDNA.33141.1.S1_at   | MmugDNA.33141.1 | 9.05  | 8.74  | 0.18 | 0.09 | 1.23  | 0.108553 | 0.009464 | 0.383292 | 0.128094 |
| MmugDNA.33143.1.S1_at   | MmugDNA.33143.1 | 11.8  | 11.21 | 0.71 | 0.31 | 1.51  | 0.564565 | 0.184713 | 0.776201 | 0.460645 |
| MmugDNA.33149.1.S1_s_at | MmugDNA.33149.1 | 10.81 | 10.44 | 0.05 | 0.04 | 1.29  | 0.000469 | 0.089405 | 0.066672 | 0.343637 |
| MmugDNA.33159.1.S1_s_at | MmugDNA.33159.1 | 9.72  | 9.61  | 0.15 | 0.02 | 1.08  | 0.177968 | 0.485451 | 0.472775 | 0.68914  |
| MmugDNA.33161.1.S1_at   | MmugDNA.33161.1 | 4.12  | 3.77  | 0.32 | 0.09 | 1.27  | 0.346321 | 0.584201 | 0.624923 | 0.75229  |
| MmugDNA.33162.1.S1_at   | MmugDNA.33162.1 | 10.17 | 12.17 | 0.7  | 0.27 | -3.99 | 0.029074 | 0.006537 | 0.223234 | 0.109634 |
| MmugDNA.33163.1.S1_at   | MmugDNA.33163.1 | 13.07 | 13.17 | 0.03 | 0.04 | -1.07 | 0.02895  | 0.015693 | 0.22298  | 0.158742 |
| MmugDNA.33171.1.S1_at   | MmugDNA.33171.1 | 6.09  | 6.68  | 0.33 | 0.17 | -1.51 | 0.046547 | 0.05211  | 0.273563 | 0.273866 |
| MmugDNA.33172.1.S1_at   | MmugDNA.33172.1 | 12.1  | 11.73 | 0.63 | 0.05 | 1.29  | 0.362835 | 0.520083 | 0.637485 | 0.711472 |
| MmugDNA.33179.1.S1_s_at | MmugDNA.33179.1 | 8.22  | 7.37  | 0.47 | 0.07 | 1.81  | 0.042473 | 0.013187 | 0.263254 | 0.14735  |
| MmugDNA.33183.1.S1_at   | MmugDNA.33183.1 | 11.3  | 10.61 | 0.18 | 0.12 | 1.61  | 0.008009 | 0.134482 | 0.138479 | 0.406626 |
| MmugDNA.33184.1.S1_at   | MmugDNA.33184.1 | 10.79 | 10.44 | 0.19 | 0.05 | 1.27  | 0.045768 | 0.000373 | 0.271429 | 0.037273 |
| MmugDNA.33191.1.S1_at   | MmugDNA.33191.1 | 12.22 | 12.39 | 0.17 | 0.03 | -1.12 | 0.048546 | 0.055879 | 0.277767 | 0.282172 |
| MmugDNA.33193.1.S1_at   | MmugDNA.33193.1 | 6.09  | 5.84  | 0.15 | 0.04 | 1.18  | 0.037503 | 0.086498 | 0.249065 | 0.33907  |
| MmugDNA.33194.1.S1_at   | MmugDNA.33194.1 | 6.75  | 6.76  | 0.1  | 0.04 | -1.01 | 0.669804 | 0.525106 | 0.841529 | 0.714766 |
| MmugDNA.33195.1.S1_at   | MmugDNA.33195.1 | 9.64  | 10.61 | 0.63 | 0.25 | -1.96 | 0.090545 | 0.270499 | 0.357339 | 0.535835 |
| MmugDNA.33210.1.S1_at   | MmugDNA.33210.1 | 12.13 | 10.66 | 0.11 | 0.04 | 2.77  | 0.000027 | 0.002115 | 0.045594 | 0.068023 |
| MmugDNA.33212.1.S1_at   | MmugDNA.33212.1 | 10.38 | 10.37 | 0.24 | 0.05 | 1.01  | 0.80033  | 0.982178 | 0.910076 | 0.990279 |
| MmugDNA.33214.1.S1_at   | MmugDNA.33214.1 | 7.99  | 9.73  | 0.34 | 0.16 | -3.35 | 0.002252 | 0.02319  | 0.091317 | 0.190776 |
| MmugDNA.33216.1.S1_s_at | MmugDNA.33216.1 | 11.42 | 11.4  | 0.11 | 0.08 | 1.02  | 0.382618 | 0.098394 | 0.652037 | 0.356531 |
| MmugDNA.33218.1.S1_at   | MmugDNA.33218.1 | 11.02 | 11.28 | 0.19 | 0.13 | -1.2  | 0.351764 | 0.00405  | 0.629379 | 0.090281 |
| MmugDNA.33218.1.S1_s_at | MmugDNA.33218.1 | 10.94 | 11.12 | 0.31 | 0.04 | -1.13 | 0.518647 | 0.00069  | 0.747601 | 0.044166 |
| MmugDNA.33225.1.S1_at   | MmugDNA.33225.1 | 6.94  | 7.05  | 0.16 | 0.02 | -1.08 | 0.44487  | 0.610741 | 0.697568 | 0.768844 |
| MmugDNA.33226.1.S1_at   | MmugDNA.33226.1 | 9.25  | 10.09 | 0.25 | 0.21 | -1.78 | 0.020119 | 0.044858 | 0.195301 | 0.256375 |
| MmugDNA.33236.1.S1_at   | MmugDNA.33236.1 | 10.11 | 9.89  | 0.13 | 0.17 | 1.16  | 0.233446 | 0.092791 | 0.53162  | 0.34899  |
| MmugDNA.33237.1.S1_at   | MmugDNA.33237.1 | 6.98  | 6.99  | 0.13 | 0.11 | -1.01 | 0.377091 | 0.587196 | 0.647659 | 0.754083 |
| MmugDNA.33240.1.S1_at   | MmugDNA.33240.1 | 5.92  | 6.84  | 0.79 | 0.14 | -1.89 | 0.104805 | 0.48647  | 0.378347 | 0.68984  |
| MmugDNA.33242.1.S1_at   | MmugDNA.33242.1 | 11.08 | 10.5  | 0.44 | 0.2  | 1.5   | 0.062443 | 0.106574 | 0.306597 | 0.369107 |
| MmugDNA.33249.1.S1_at   | MmugDNA.33249.1 | 3.67  | 3.55  | 0.12 | 0.07 | 1.09  | 0.274812 | 0.099192 | 0.566556 | 0.357379 |
| MmugDNA.33251.1.S1_at   | MmugDNA.33251.1 | 11.69 | 11.89 | 0.15 | 0.12 | -1.15 | 0.133541 | 0.009691 | 0.41701  | 0.129497 |
| MmugDNA.33252.1.S1_at   | MmugDNA.33252.1 | 11.28 | 10.55 | 0.09 | 0.05 | 1.66  | 0.000264 | 0.011922 | 0.056004 | 0.141304 |
| MmugDNA.33255.1.S1_at   | MmugDNA.33255.1 | 11.49 | 11.79 | 0.1  | 0.06 | -1.23 | 0.008476 | 0.00687  | 0.141304 | 0.111992 |
| MmugDNA.33260.1.S1_s_at | MmugDNA.33260.1 | 10.48 | 10.31 | 0.09 | 0.02 | 1.13  | 0.028338 | 0.032814 | 0.220898 | 0.22427  |
| MmugDNA.33262.1.S1_at   | MmugDNA.33262.1 | 6.23  | 6.19  | 0.07 | 0.09 | 1.02  | 0.263283 | 0.177504 | 0.556921 | 0.453888 |
| MmugDNA.33263.1.S1_at   | MmugDNA.33263.1 | 8.53  | 8.61  | 0.35 | 0.16 | -1.06 | 0.375651 | 0.470649 | 0.646404 | 0.67895  |
| MmugDNA.33270.1.S1_at   | MmugDNA.33270.1 | 8.5   | 9.14  | 0.17 | 0.08 | -1.56 | 0.00308  | 0.044927 | 0.100578 | 0.25646  |
| MmugDNA.33272.1.S1_at   | MmugDNA.33272.1 | 9.74  | 9.82  | 0.04 | 0.06 | -1.05 | 0.08263  | 0.730622 | 0.344435 | 0.844055 |

|                         |                 |       |       |      |      |       |          |          |          |          |
|-------------------------|-----------------|-------|-------|------|------|-------|----------|----------|----------|----------|
| MmugDNA.33274.1.S1_at   | MmugDNA.33274.1 | 11.87 | 11.96 | 0.38 | 0.04 | -1.06 | 0.602051 | 0.381504 | 0.799986 | 0.617691 |
| MmugDNA.33276.1.S1_at   | MmugDNA.33276.1 | 8.91  | 8.67  | 0.05 | 0.03 | 1.18  | 0.001017 | 0.000613 | 0.076321 | 0.042275 |
| MmugDNA.33279.1.S1_at   | MmugDNA.33279.1 | 3.89  | 3.59  | 0.08 | 0.13 | 1.24  | 0.012152 | 0.006543 | 0.160493 | 0.109667 |
| MmugDNA.33281.1.S1_at   | MmugDNA.33281.1 | 9.28  | 8.8   | 0.12 | 0.06 | 1.4   | 0.002791 | 0.000234 | 0.097799 | 0.03241  |
| MmugDNA.33283.1.S1_at   | MmugDNA.33283.1 | 7.05  | 6.54  | 0.35 | 0.03 | 1.42  | 0.069516 | 0.309677 | 0.322002 | 0.565005 |
| MmugDNA.33286.1.S1_at   | MmugDNA.33286.1 | 10.37 | 9.98  | 0.3  | 0.06 | 1.31  | 0.328198 | 0.011846 | 0.61059  | 0.140973 |
| MmugDNA.33290.1.S1_at   | MmugDNA.33290.1 | 6.09  | 6.21  | 0.09 | 0.06 | -1.09 | 0.118871 | 0.185702 | 0.396589 | 0.46163  |
| MmugDNA.33292.1.S1_at   | MmugDNA.33292.1 | 10.09 | 9.82  | 0.28 | 0.03 | 1.2   | 0.133471 | 0.753554 | 0.416989 | 0.856527 |
| MmugDNA.33296.1.S1_at   | MmugDNA.33296.1 | 12.29 | 12.3  | 0.03 | 0.02 | -1.01 | 0.699326 | 0.660537 | 0.857245 | 0.801398 |
| MmugDNA.333.1.S1_at     | MmugDNA.333.1   | 7.23  | 7.28  | 0.16 | 0.13 | -1.04 | 0.938836 | 0.099119 | 0.974191 | 0.357258 |
| MmugDNA.33302.1.S1_at   | MmugDNA.33302.1 | 11.45 | 11.28 | 0.12 | 0.01 | 1.12  | 0.078925 | 0.015017 | 0.338745 | 0.155736 |
| MmugDNA.33303.1.S1_at   | MmugDNA.33303.1 | 13.38 | 13.37 | 0.13 | 0.02 | 1     | 0.932695 | 0.994904 | 0.971802 | 0.996846 |
| MmugDNA.33307.1.S1_s_at | MmugDNA.33307.1 | 4.34  | 4.49  | 0.36 | 0.07 | -1.11 | 0.680791 | 0.873059 | 0.847795 | 0.927822 |
| MmugDNA.33308.1.S1_at   | MmugDNA.33308.1 | 9.74  | 9.84  | 0.23 | 0.17 | -1.07 | 0.511155 | 0.305324 | 0.742366 | 0.562304 |
| MmugDNA.3331.1.S1_at    | MmugDNA.3331.1  | 4.05  | 7.05  | 0.23 | 0.49 | -8    | 0.000988 | 0.06235  | 0.076321 | 0.296503 |
| MmugDNA.33312.1.S1_at   | MmugDNA.33312.1 | 11.62 | 11.55 | 0.21 | 0.05 | 1.04  | 0.429292 | 0.743689 | 0.685718 | 0.851456 |
| MmugDNA.33318.1.S1_at   | MmugDNA.33318.1 | 11.6  | 11.32 | 0.06 | 0.09 | 1.21  | 0.026546 | 0.000293 | 0.216097 | 0.034892 |
| MmugDNA.33320.1.S1_at   | MmugDNA.33320.1 | 11.52 | 11.58 | 0.05 | 0.09 | -1.05 | 0.577532 | 0.392835 | 0.783666 | 0.625854 |
| MmugDNA.33323.1.S1_at   | MmugDNA.33323.1 | 8.75  | 8.48  | 0.13 | 0.2  | 1.2   | 0.088693 | 0.007533 | 0.355022 | 0.116336 |
| MmugDNA.33325.1.S1_at   | MmugDNA.33325.1 | 5.74  | 5.58  | 0.24 | 0.22 | 1.11  | 0.233622 | 0.190828 | 0.531728 | 0.466228 |
| MmugDNA.33326.1.S1_at   | MmugDNA.33326.1 | 7     | 7.12  | 0.28 | 0.07 | -1.09 | 0.328773 | 0.893382 | 0.611086 | 0.939163 |
| MmugDNA.33327.1.S1_s_at | MmugDNA.33327.1 | 11.55 | 12.05 | 0.26 | 0.03 | -1.41 | 0.035844 | 0.387133 | 0.244374 | 0.621935 |
| MmugDNA.33329.1.S1_at   | MmugDNA.33329.1 | 6.33  | 6.18  | 0.74 | 0.23 | 1.11  | 0.851663 | 0.989915 | 0.93543  | 0.994222 |
| MmugDNA.33330.1.S1_at   | MmugDNA.33330.1 | 7.3   | 7.03  | 0.31 | 0.05 | 1.21  | 0.200594 | 0.56063  | 0.497869 | 0.736889 |
| MmugDNA.33331.1.S1_at   | MmugDNA.33331.1 | 3.63  | 3.64  | 0.12 | 0.03 | -1.01 | 0.713253 | 0.367685 | 0.864601 | 0.607369 |
| MmugDNA.33333.1.S1_at   | MmugDNA.33333.1 | 12.14 | 12.18 | 0.07 | 0.04 | -1.03 | 0.667767 | 0.84374  | 0.840528 | 0.91098  |
| MmugDNA.33336.1.S1_at   | MmugDNA.33336.1 | 5.65  | 5.86  | 0.14 | 0.17 | -1.15 | 0.065686 | 0.05584  | 0.313714 | 0.282161 |
| MmugDNA.33338.1.S1_at   | MmugDNA.33338.1 | 5.56  | 6.82  | 0.2  | 0.18 | -2.39 | 0.001827 | 0.019069 | 0.086456 | 0.173701 |
| MmugDNA.33341.1.S1_at   | MmugDNA.33341.1 | 4.93  | 5.04  | 0.18 | 0.23 | -1.08 | 0.838048 | 0.002998 | 0.929038 | 0.079958 |
| MmugDNA.33343.1.S1_at   | MmugDNA.33343.1 | 3.41  | 3.28  | 0.08 | 0.13 | 1.09  | 0.970531 | 0.489517 | 0.988339 | 0.691824 |
| MmugDNA.33360.1.S1_at   | MmugDNA.33360.1 | 2.97  | 2.94  | 0.1  | 0.12 | 1.02  | 0.760309 | 0.896553 | 0.890148 | 0.940905 |
| MmugDNA.33366.1.S1_s_at | MmugDNA.33366.1 | 7.94  | 8.07  | 0.21 | 0.04 | -1.1  | 0.504553 | 0.169678 | 0.737745 | 0.446263 |
| MmugDNA.33367.1.S1_at   | MmugDNA.33367.1 | 5.48  | 5.37  | 0.32 | 0.13 | 1.08  | 0.588223 | 0.521601 | 0.790932 | 0.712505 |
| MmugDNA.33370.1.S1_at   | MmugDNA.33370.1 | 12.93 | 12.87 | 0.08 | 0.02 | 1.04  | 0.447539 | 0.626625 | 0.69951  | 0.779896 |
| MmugDNA.33370.1.S1_s_at | MmugDNA.33370.1 | 12.2  | 11.97 | 0.16 | 0.05 | 1.18  | 0.163906 | 0.618821 | 0.456649 | 0.774185 |
| MmugDNA.33371.1.S1_at   | MmugDNA.33371.1 | 6.99  | 6.54  | 0.16 | 0.13 | 1.36  | 0.043514 | 0.035319 | 0.265724 | 0.232207 |
| MmugDNA.33387.1.S1_at   | MmugDNA.33387.1 | 11.32 | 9.4   | 0.15 | 0.29 | 3.79  | 0.000684 | 0.00011  | 0.071248 | 0.028099 |
| MmugDNA.33390.1.S1_at   | MmugDNA.33390.1 | 5.77  | 5.83  | 0.16 | 0.03 | -1.04 | 0.673427 | 0.330948 | 0.843819 | 0.579631 |
| MmugDNA.33390.1.S1_s_at | MmugDNA.33390.1 | 5.6   | 5.59  | 0.14 | 0.01 | 1     | 0.414763 | 0.110493 | 0.675681 | 0.374684 |
| MmugDNA.33392.1.S1_at   | MmugDNA.33392.1 | 12.11 | 12.28 | 0.16 | 0.01 | -1.13 | 0.129565 | 0.017077 | 0.411947 | 0.165589 |
| MmugDNA.33395.1.S1_at   | MmugDNA.33395.1 | 4.5   | 4.79  | 0.55 | 0.06 | -1.22 | 0.454241 | 0.296253 | 0.704125 | 0.555423 |
| MmugDNA.334.1.S1_at     | MmugDNA.334.1   | 6.64  | 7.12  | 0.97 | 0.26 | -1.4  | 0.157741 | 0.087623 | 0.448548 | 0.340878 |
| MmugDNA.33409.1.S1_at   | MmugDNA.33409.1 | 7.68  | 7.72  | 0.18 | 0.05 | -1.03 | 0.874924 | 0.862404 | 0.94633  | 0.921765 |

|                         |                 |       |       |      |      |       |          |          |          |          |
|-------------------------|-----------------|-------|-------|------|------|-------|----------|----------|----------|----------|
| MmugDNA.33410.1.S1_at   | MmugDNA.33410.1 | 9.36  | 9.58  | 0.28 | 0.14 | -1.16 | 0.316955 | 0.356863 | 0.601688 | 0.598641 |
| MmugDNA.3342.1.S1_at    | MmugDNA.3342.1  | 10.37 | 10.67 | 0.24 | 0.07 | -1.24 | 0.09477  | 0.513147 | 0.36369  | 0.706796 |
| MmugDNA.33423.1.S1_at   | MmugDNA.33423.1 | 5.28  | 5.19  | 0.03 | 0.21 | 1.06  | 0.562293 | 0.346567 | 0.774871 | 0.591427 |
| MmugDNA.33426.1.S1_at   | MmugDNA.33426.1 | 10.07 | 10.64 | 0.46 | 0.05 | -1.48 | 0.089622 | 0.086161 | 0.356524 | 0.33853  |
| MmugDNA.33429.1.S1_at   | MmugDNA.33429.1 | 12.06 | 12.05 | 0.1  | 0.04 | 1.01  | 0.689327 | 0.98879  | 0.85167  | 0.993611 |
| MmugDNA.33430.1.S1_at   | MmugDNA.33430.1 | 11.65 | 11.73 | 0.17 | 0.04 | -1.06 | 0.353239 | 0.070841 | 0.630388 | 0.31232  |
| MmugDNA.33433.1.S1_at   | MmugDNA.33433.1 | 9.36  | 8.77  | 0.11 | 0.32 | 1.5   | 0.050593 | 0.042467 | 0.282639 | 0.250702 |
| MmugDNA.33434.1.S1_at   | MmugDNA.33434.1 | 6.58  | 7.27  | 0.31 | 0.05 | -1.61 | 0.03528  | 0.095849 | 0.242544 | 0.352962 |
| MmugDNA.33436.1.S1_at   | MmugDNA.33436.1 | 12.62 | 12.31 | 0.16 | 0.12 | 1.24  | 0.098477 | 0.641253 | 0.369125 | 0.789506 |
| MmugDNA.33438.1.S1_at   | MmugDNA.33438.1 | 10.67 | 10.72 | 0.1  | 0.19 | -1.03 | 0.600681 | 0.769045 | 0.799089 | 0.865823 |
| MmugDNA.33439.1.S1_at   | MmugDNA.33439.1 | 4.32  | 4.42  | 0.27 | 0.01 | -1.07 | 0.526927 | 0.681572 | 0.752839 | 0.814092 |
| MmugDNA.33443.1.S1_at   | MmugDNA.33443.1 | 7.33  | 7.48  | 0.42 | 0.21 | -1.12 | 0.903666 | 0.900637 | 0.959207 | 0.943473 |
| MmugDNA.33449.1.S1_at   | MmugDNA.33449.1 | 6.11  | 6.67  | 0.19 | 0.18 | -1.47 | 0.021493 | 0.308698 | 0.200377 | 0.564619 |
| MmugDNA.33451.1.S1_at   | MmugDNA.33451.1 | 4.83  | 5.18  | 0.32 | 0.09 | -1.27 | 0.175003 | 0.117465 | 0.469297 | 0.385175 |
| MmugDNA.33460.1.S1_at   | MmugDNA.33460.1 | 10.68 | 11.04 | 0.14 | 0.09 | -1.29 | 0.017661 | 0.009276 | 0.186448 | 0.127101 |
| MmugDNA.33463.1.S1_at   | MmugDNA.33463.1 | 11.95 | 11.68 | 0.03 | 0.15 | 1.2   | 0.045462 | 0.037517 | 0.270804 | 0.23801  |
| MmugDNA.33465.1.S1_s_at | MmugDNA.33465.1 | 7.96  | 7.23  | 0.37 | 0.28 | 1.66  | 0.025709 | 0.017317 | 0.212966 | 0.166509 |
| MmugDNA.33466.1.S1_s_at | MmugDNA.33466.1 | 11.49 | 11.79 | 0.06 | 0.05 | -1.23 | 0.002164 | 0.136058 | 0.090419 | 0.408363 |
| MmugDNA.33467.1.S1_at   | MmugDNA.33467.1 | 5.16  | 5.16  | 0.09 | 0.03 | -1    | 0.449825 | 0.141396 | 0.701103 | 0.414874 |
| MmugDNA.33472.1.S1_at   | MmugDNA.33472.1 | 4.61  | 5.53  | 0.35 | 0.51 | -1.9  | 0.110854 | 0.312078 | 0.386352 | 0.566904 |
| MmugDNA.33483.1.S1_at   | MmugDNA.33483.1 | 11.99 | 12.05 | 0.07 | 0    | -1.05 | 0.178084 | 0.764576 | 0.472824 | 0.863128 |
| MmugDNA.33484.1.S1_at   | MmugDNA.33484.1 | 6.76  | 6.88  | 0.32 | 0.21 | -1.08 | 0.20267  | 0.501234 | 0.500389 | 0.699458 |
| MmugDNA.3350.1.S1_at    | MmugDNA.3350.1  | 10.31 | 10    | 0.37 | 0.05 | 1.24  | 0.100533 | 0.099312 | 0.371552 | 0.357584 |
| MmugDNA.33513.1.S1_at   | MmugDNA.33513.1 | 9.29  | 9.77  | 0.31 | 0.21 | -1.39 | 0.10009  | 0.258952 | 0.37088  | 0.526175 |
| MmugDNA.33515.1.S1_at   | MmugDNA.33515.1 | 6.59  | 6.38  | 0.12 | 0.11 | 1.16  | 0.052473 | 0.244553 | 0.286213 | 0.514375 |
| MmugDNA.33518.1.S1_at   | MmugDNA.33518.1 | 11.6  | 10.95 | 0.23 | 0.03 | 1.56  | 0.009159 | 0.365943 | 0.145702 | 0.605798 |
| MmugDNA.33529.1.S1_at   | MmugDNA.33529.1 | 5.83  | 6.28  | 0.18 | 0.14 | -1.37 | 0.028333 | 0.240186 | 0.220898 | 0.51084  |
| MmugDNA.33535.1.S1_at   | MmugDNA.33535.1 | 5.39  | 5.63  | 0.08 | 0.12 | -1.18 | 0.054662 | 0.443935 | 0.290604 | 0.661553 |
| MmugDNA.33536.1.S1_at   | MmugDNA.33536.1 | 4.88  | 5.07  | 0.19 | 0.27 | -1.14 | 0.352698 | 0.083282 | 0.630029 | 0.333372 |
| MmugDNA.33537.1.S1_at   | MmugDNA.33537.1 | 7.68  | 7.09  | 0.16 | 0.36 | 1.51  | 0.101549 | 0.06464  | 0.372929 | 0.300314 |
| MmugDNA.33538.1.S1_at   | MmugDNA.33538.1 | 6.07  | 6     | 0.31 | 0.15 | 1.05  | 0.691658 | 0.843877 | 0.852609 | 0.911072 |
| MmugDNA.33538.1.S1_s_at | MmugDNA.33538.1 | 4.8   | 4.74  | 0.04 | 0.07 | 1.04  | 0.142671 | 0.523151 | 0.428709 | 0.713528 |
| MmugDNA.33541.1.S1_at   | MmugDNA.33541.1 | 4.78  | 4.85  | 0.1  | 0.15 | -1.05 | 0.629923 | 0.09569  | 0.818284 | 0.3527   |
| MmugDNA.33543.1.S1_at   | MmugDNA.33543.1 | 5.42  | 5.15  | 0.16 | 0.42 | 1.2   | 0.392362 | 0.143854 | 0.659383 | 0.417712 |
| MmugDNA.33544.1.S1_at   | MmugDNA.33544.1 | 10.51 | 10.49 | 0.03 | 0.08 | 1.01  | 0.570443 | 0.171801 | 0.779298 | 0.448198 |
| MmugDNA.33546.1.S1_at   | MmugDNA.33546.1 | 8.97  | 8.99  | 0.34 | 0.07 | -1.02 | 0.506888 | 0.863825 | 0.739358 | 0.922697 |
| MmugDNA.33558.1.S1_s_at | MmugDNA.33558.1 | 5.28  | 6.65  | 0.85 | 0.47 | -2.59 | 0.134785 | 0.157978 | 0.418624 | 0.433725 |
| MmugDNA.33562.1.S1_at   | MmugDNA.33562.1 | 6.38  | 6.17  | 0.45 | 0.09 | 1.16  | 0.262091 | 0.628362 | 0.556309 | 0.781113 |
| MmugDNA.33563.1.S1_at   | MmugDNA.33563.1 | 9.01  | 9.03  | 0.3  | 0.95 | -1.01 | 0.32466  | 0.207906 | 0.608278 | 0.482049 |
| MmugDNA.33563.1.S1_s_at | MmugDNA.33563.1 | 7.14  | 7.32  | 0.23 | 0.81 | -1.13 | 0.231257 | 0.145875 | 0.530005 | 0.419888 |
| MmugDNA.33569.1.S1_at   | MmugDNA.33569.1 | 10.72 | 9.92  | 0.2  | 0.36 | 1.73  | 0.045995 | 0.089642 | 0.272121 | 0.343842 |
| MmugDNA.33571.1.S1_at   | MmugDNA.33571.1 | 5.13  | 5.02  | 0.09 | 0.03 | 1.08  | 0.146238 | 0.532694 | 0.434075 | 0.719197 |
| MmugDNA.33572.1.S1_at   | MmugDNA.33572.1 | 4.15  | 4.16  | 0.06 | 0.63 | -1.01 | 0.369822 | 0.373224 | 0.643125 | 0.612045 |

|                         |                 |       |       |      |      |        |          |          |          |          |
|-------------------------|-----------------|-------|-------|------|------|--------|----------|----------|----------|----------|
| MmugDNA.33573.1.S1_at   | MmugDNA.33573.1 | 9.85  | 10.07 | 0.36 | 0.13 | -1.17  | 0.794276 | 0.117117 | 0.907114 | 0.384557 |
| MmugDNA.33573.1.S1_s_at | MmugDNA.33573.1 | 9.75  | 9.94  | 0.35 | 0.09 | -1.14  | 0.946803 | 0.041281 | 0.977631 | 0.247995 |
| MmugDNA.33589.1.S1_at   | MmugDNA.33589.1 | 10.59 | 10.35 | 0.45 | 0.31 | 1.19   | 0.581977 | 0.275203 | 0.786897 | 0.53962  |
| MmugDNA.33590.1.S1_at   | MmugDNA.33590.1 | 10.96 | 10.51 | 0.24 | 0.07 | 1.37   | 0.03068  | 0.001595 | 0.228035 | 0.06044  |
| MmugDNA.33592.1.S1_at   | MmugDNA.33592.1 | 8.8   | 8.73  | 0.67 | 0.13 | 1.05   | 0.375277 | 0.437183 | 0.646139 | 0.656591 |
| MmugDNA.33593.1.S1_at   | MmugDNA.33593.1 | 5     | 4.98  | 0.17 | 0.07 | 1.02   | 0.538801 | 0.427341 | 0.760398 | 0.649175 |
| MmugDNA.33599.1.S1_at   | MmugDNA.33599.1 | 11.13 | 10.46 | 0.27 | 0.16 | 1.59   | 0.023797 | 0.009917 | 0.207275 | 0.130767 |
| MmugDNA.33600.1.S1_at   | MmugDNA.33600.1 | 6.39  | 6.43  | 0.23 | 0.02 | -1.03  | 0.774718 | 0.708524 | 0.897014 | 0.830943 |
| MmugDNA.33607.1.S1_at   | MmugDNA.33607.1 | 11.4  | 11.08 | 0.28 | 0.2  | 1.25   | 0.140895 | 0.065617 | 0.426729 | 0.301554 |
| MmugDNA.33607.1.S1_s_at | MmugDNA.33607.1 | 10.79 | 10.6  | 0.3  | 0.15 | 1.14   | 0.232438 | 0.118986 | 0.530886 | 0.387269 |
| MmugDNA.33609.1.S1_at   | MmugDNA.33609.1 | 10.43 | 10.48 | 0.07 | 0.05 | -1.04  | 0.729479 | 0.60585  | 0.873673 | 0.765513 |
| MmugDNA.33612.1.S1_at   | MmugDNA.33612.1 | 6.3   | 4.95  | 0.25 | 0.36 | 2.55   | 0.004842 | 0.001247 | 0.115123 | 0.054879 |
| MmugDNA.33618.1.S1_at   | MmugDNA.33618.1 | 7.29  | 7.57  | 0.14 | 0.05 | -1.22  | 0.013715 | 0.16357  | 0.16797  | 0.439765 |
| MmugDNA.33619.1.S1_at   | MmugDNA.33619.1 | 11.96 | 11.97 | 0.06 | 0.03 | -1.01  | 0.655323 | 0.220083 | 0.83326  | 0.493519 |
| MmugDNA.33625.1.S1_at   | MmugDNA.33625.1 | 3.25  | 9.15  | 1.66 | 0.48 | -59.62 | 0.008345 | 0.053606 | 0.14036  | 0.277182 |
| MmugDNA.33630.1.S1_at   | MmugDNA.33630.1 | 6.8   | 8.64  | 0.44 | 0.31 | -3.59  | 0.010646 | 0.011458 | 0.152845 | 0.138479 |
| MmugDNA.33633.1.S1_at   | MmugDNA.33633.1 | 9.81  | 8.63  | 0.29 | 0.13 | 2.26   | 0.002159 | 0.001375 | 0.090391 | 0.05691  |
| MmugDNA.33640.1.S1_at   | MmugDNA.33640.1 | 6     | 6.12  | 0.12 | 0.05 | -1.09  | 0.607618 | 0.00292  | 0.803827 | 0.079396 |
| MmugDNA.33643.1.S1_at   | MmugDNA.33643.1 | 5.03  | 5.03  | 0.03 | 0.06 | -1     | 0.742866 | 0.66688  | 0.881088 | 0.804864 |
| MmugDNA.33644.1.S1_at   | MmugDNA.33644.1 | 7.6   | 9.5   | 0.9  | 0.18 | -3.71  | 0.072679 | 0.414136 | 0.327605 | 0.640063 |
| MmugDNA.33646.1.S1_at   | MmugDNA.33646.1 | 6.38  | 6.2   | 0.13 | 0.1  | 1.13   | 0.073666 | 0.258385 | 0.329194 | 0.525642 |
| MmugDNA.33653.1.S1_at   | MmugDNA.33653.1 | 4.48  | 5.72  | 0.64 | 0.45 | -2.36  | 0.046557 | 0.090291 | 0.273564 | 0.3447   |
| MmugDNA.33655.1.S1_at   | MmugDNA.33655.1 | 11.72 | 11.67 | 0.26 | 0.01 | 1.04   | 0.65164  | 0.387917 | 0.830755 | 0.622509 |
| MmugDNA.33658.1.S1_at   | MmugDNA.33658.1 | 7.16  | 7.12  | 0.09 | 0.04 | 1.03   | 0.304166 | 0.242908 | 0.591362 | 0.513284 |
| MmugDNA.33659.1.S1_at   | MmugDNA.33659.1 | 8.65  | 9.28  | 0.34 | 0.23 | -1.55  | 0.097003 | 0.241526 | 0.367217 | 0.512152 |
| MmugDNA.33661.1.S1_at   | MmugDNA.33661.1 | 12.1  | 11.32 | 0.42 | 0.11 | 1.71   | 0.072786 | 0.447935 | 0.327658 | 0.663902 |
| MmugDNA.33666.1.S1_at   | MmugDNA.33666.1 | 11.67 | 11.56 | 0.1  | 0.07 | 1.08   | 0.268191 | 0.027161 | 0.560923 | 0.205893 |
| MmugDNA.33669.1.S1_at   | MmugDNA.33669.1 | 4.99  | 4.66  | 0.13 | 0.12 | 1.25   | 0.043037 | 0.041819 | 0.264642 | 0.249099 |
| MmugDNA.33670.1.S1_at   | MmugDNA.33670.1 | 6.88  | 6.78  | 0.14 | 0.06 | 1.06   | 0.837071 | 0.855007 | 0.928546 | 0.917393 |
| MmugDNA.33675.1.S1_at   | MmugDNA.33675.1 | 11.65 | 11.22 | 0.1  | 0.07 | 1.35   | 0.002489 | 0.206038 | 0.094326 | 0.480273 |
| MmugDNA.33677.1.S1_at   | MmugDNA.33677.1 | 7.16  | 7.15  | 0.17 | 0.05 | 1.01   | 0.817374 | 0.60067  | 0.918429 | 0.762228 |
| MmugDNA.33678.1.S1_at   | MmugDNA.33678.1 | 8.02  | 7.47  | 0.58 | 0.14 | 1.46   | 0.126892 | 0.121515 | 0.408456 | 0.39064  |
| MmugDNA.33685.1.S1_at   | MmugDNA.33685.1 | 11.29 | 11.41 | 0.12 | 0.14 | -1.09  | 0.490111 | 0.000749 | 0.728313 | 0.045119 |
| MmugDNA.3369.1.S1_at    | MmugDNA.3369.1  | 8.96  | 9.44  | 0.26 | 0.08 | -1.39  | 0.03281  | 0.365883 | 0.235221 | 0.605775 |
| MmugDNA.33695.1.S1_at   | MmugDNA.33695.1 | 8.23  | 8.49  | 0.1  | 0.28 | -1.2   | 0.661003 | 0.134587 | 0.836427 | 0.406629 |
| MmugDNA.337.1.S1_at     | MmugDNA.337.1   | 4.61  | 4.35  | 0.55 | 0.34 | 1.2    | 0.363184 | 0.349768 | 0.637864 | 0.593578 |
| MmugDNA.3370.1.S1_at    | MmugDNA.3370.1  | 8.01  | 7.92  | 0.44 | 0.19 | 1.07   | 0.702577 | 0.254826 | 0.858848 | 0.523051 |
| MmugDNA.33712.1.S1_at   | MmugDNA.33712.1 | 10.25 | 10.27 | 0.1  | 0.05 | -1.02  | 0.570642 | 0.019239 | 0.779362 | 0.174494 |
| MmugDNA.33714.1.S1_at   | MmugDNA.33714.1 | 9.22  | 9.27  | 0.12 | 0.05 | -1.04  | 0.459042 | 0.071186 | 0.707356 | 0.31311  |
| MmugDNA.33715.1.S1_at   | MmugDNA.33715.1 | 6.76  | 6.17  | 0.33 | 0.28 | 1.51   | 0.050072 | 0.083836 | 0.281479 | 0.33469  |
| MmugDNA.33723.1.S1_at   | MmugDNA.33723.1 | 6.6   | 7.27  | 0.21 | 0.17 | -1.6   | 0.014601 | 0.033066 | 0.172727 | 0.225068 |
| MmugDNA.33729.1.S1_at   | MmugDNA.33729.1 | 7.19  | 7.05  | 0.31 | 0.02 | 1.1    | 0.874746 | 0.465234 | 0.946258 | 0.675638 |
| MmugDNA.33732.1.S1_s_at | MmugDNA.33732.1 | 9.02  | 8.98  | 0.18 | 0.2  | 1.03   | 0.864291 | 0.128964 | 0.941243 | 0.400429 |

|                         |                 |       |       |      |      |        |          |          |          |          |
|-------------------------|-----------------|-------|-------|------|------|--------|----------|----------|----------|----------|
| MmugDNA.33737.1.S1_at   | MmugDNA.33737.1 | 8.58  | 8.79  | 0.18 | 0.07 | -1.16  | 0.255719 | 0.203921 | 0.55032  | 0.478164 |
| MmugDNA.33738.1.S1_at   | MmugDNA.33738.1 | 11.91 | 12.03 | 0.02 | 0.02 | -1.08  | 0.004402 | 0.03732  | 0.1125   | 0.237622 |
| MmugDNA.33746.1.S1_at   | MmugDNA.33746.1 | 7.72  | 7.53  | 0.24 | 0.15 | 1.14   | 0.119146 | 0.06702  | 0.396724 | 0.304872 |
| MmugDNA.33751.1.S1_at   | MmugDNA.33751.1 | 7.65  | 7.09  | 0.22 | 0.17 | 1.47   | 0.070105 | 0.205004 | 0.323085 | 0.479296 |
| MmugDNA.33762.1.S1_at   | MmugDNA.33762.1 | 9.31  | 9.35  | 0.19 | 0.14 | -1.03  | 0.781562 | 0.070533 | 0.900218 | 0.311777 |
| MmugDNA.33773.1.S1_at   | MmugDNA.33773.1 | 9.79  | 9.52  | 0.15 | 0.11 | 1.2    | 0.033143 | 0.334518 | 0.236295 | 0.582498 |
| MmugDNA.33776.1.S1_at   | MmugDNA.33776.1 | 4.35  | 4.39  | 0.14 | 0.04 | -1.03  | 0.697419 | 0.022648 | 0.855967 | 0.188488 |
| MmugDNA.33779.1.S1_at   | MmugDNA.33779.1 | 4.89  | 4.48  | 0.2  | 0.2  | 1.33   | 0.069658 | 0.090947 | 0.322305 | 0.345594 |
| MmugDNA.33782.1.S1_at   | MmugDNA.33782.1 | 9.53  | 9.03  | 0.12 | 0.02 | 1.41   | 0.001275 | 0.023286 | 0.078631 | 0.191274 |
| MmugDNA.33787.1.S1_at   | MmugDNA.33787.1 | 10.45 | 10.54 | 0.13 | 0.22 | -1.06  | 0.203133 | 0.750123 | 0.500939 | 0.854713 |
| MmugDNA.33794.1.S1_at   | MmugDNA.33794.1 | 3.41  | 3.56  | 0.08 | 0.05 | -1.11  | 0.165068 | 0.264955 | 0.458049 | 0.530944 |
| MmugDNA.33795.1.S1_at   | MmugDNA.33795.1 | 6.27  | 6.4   | 0.28 | 0.1  | -1.09  | 0.443259 | 0.357322 | 0.696549 | 0.598949 |
| MmugDNA.33798.1.S1_at   | MmugDNA.33798.1 | 7.23  | 6.74  | 0.2  | 0.17 | 1.41   | 0.049805 | 0.011275 | 0.28073  | 0.138076 |
| MmugDNA.33800.1.S1_at   | MmugDNA.33800.1 | 12.48 | 12.77 | 0.17 | 0.07 | -1.22  | 0.113713 | 0.020953 | 0.390392 | 0.181537 |
| MmugDNA.33806.1.S1_at   | MmugDNA.33806.1 | 6.22  | 6.42  | 0.03 | 0.07 | -1.15  | 0.015172 | 0.108094 | 0.175242 | 0.371281 |
| MmugDNA.33816.1.S1_at   | MmugDNA.33816.1 | 3.37  | 3.43  | 0.16 | 0.41 | -1.04  | 0.942976 | 0.443361 | 0.975977 | 0.661168 |
| MmugDNA.33817.1.S1_at   | MmugDNA.33817.1 | 11.43 | 11.02 | 0.1  | 0.13 | 1.33   | 0.008284 | 0.010118 | 0.13996  | 0.131869 |
| MmugDNA.33820.1.S1_at   | MmugDNA.33820.1 | 9.47  | 9.44  | 0.09 | 0.05 | 1.02   | 0.608287 | 0.199711 | 0.804344 | 0.474335 |
| MmugDNA.33826.1.S1_at   | MmugDNA.33826.1 | 10.83 | 10.79 | 0.04 | 0.06 | 1.03   | 0.498944 | 0.268467 | 0.73397  | 0.534123 |
| MmugDNA.33830.1.S1_at   | MmugDNA.33830.1 | 12.1  | 12.14 | 0.12 | 0.13 | -1.03  | 0.910081 | 0.541635 | 0.961883 | 0.725033 |
| MmugDNA.33832.1.S1_at   | MmugDNA.33832.1 | 4.64  | 4.55  | 0.04 | 0.17 | 1.07   | 0.843901 | 0.980877 | 0.931598 | 0.989478 |
| MmugDNA.33832.1.S1_s_at | MmugDNA.33832.1 | 5.08  | 5.03  | 0.14 | 0.05 | 1.04   | 0.199266 | 0.408303 | 0.496613 | 0.635596 |
| MmugDNA.33845.1.S1_at   | MmugDNA.33845.1 | 6.76  | 11.43 | 2.06 | 0.24 | -25.47 | 0.037332 | 0.21199  | 0.248625 | 0.485975 |
| MmugDNA.33846.1.S1_at   | MmugDNA.33846.1 | 6.27  | 6.49  | 0.16 | 0.13 | -1.16  | 0.595197 | 0.787205 | 0.795096 | 0.876889 |
| MmugDNA.33851.1.S1_at   | MmugDNA.33851.1 | 10.22 | 10.35 | 0.12 | 0.07 | -1.09  | 0.295329 | 0.213803 | 0.58412  | 0.487564 |
| MmugDNA.33855.1.S1_at   | MmugDNA.33855.1 | 10.43 | 10.29 | 0.15 | 0.17 | 1.1    | 0.15298  | 0.012751 | 0.442701 | 0.145496 |
| MmugDNA.33857.1.S1_at   | MmugDNA.33857.1 | 12.45 | 12.42 | 0.08 | 0.08 | 1.02   | 0.637534 | 0.041169 | 0.822534 | 0.247733 |
| MmugDNA.33858.1.S1_at   | MmugDNA.33858.1 | 3.8   | 3.79  | 0.11 | 0.1  | 1.01   | 0.578706 | 0.527586 | 0.784534 | 0.716154 |
| MmugDNA.33859.1.S1_at   | MmugDNA.33859.1 | 5.3   | 5.31  | 0.08 | 0.1  | -1.01  | 0.982137 | 0.661936 | 0.993403 | 0.802028 |
| MmugDNA.33876.1.S1_s_at | MmugDNA.33876.1 | 6.87  | 7.53  | 0.17 | 0.12 | -1.57  | 0.004828 | 0.245066 | 0.115098 | 0.51484  |
| MmugDNA.33879.1.S1_at   | MmugDNA.33879.1 | 4.77  | 5.66  | 0.11 | 0.26 | -1.85  | 0.004889 | 0.035989 | 0.115123 | 0.234165 |
| MmugDNA.33882.1.S1_at   | MmugDNA.33882.1 | 9.13  | 8.85  | 0.05 | 0.07 | 1.21   | 0.004782 | 0.045708 | 0.115098 | 0.258049 |
| MmugDNA.33885.1.S1_at   | MmugDNA.33885.1 | 3.83  | 3.9   | 0.04 | 0.1  | -1.05  | 0.369217 | 0.4529   | 0.642795 | 0.667359 |
| MmugDNA.33893.1.S1_at   | MmugDNA.33893.1 | 4.49  | 4.37  | 0.07 | 0.05 | 1.08   | 0.159626 | 0.45044  | 0.450943 | 0.665643 |
| MmugDNA.33897.1.S1_at   | MmugDNA.33897.1 | 10.46 | 10.13 | 0.24 | 0.06 | 1.26   | 0.093255 | 0.387621 | 0.361736 | 0.622239 |
| MmugDNA.33900.1.S1_at   | MmugDNA.33900.1 | 6.46  | 6.27  | 0.05 | 0.36 | 1.14   | 0.987828 | 0.004576 | 0.995601 | 0.094474 |
| MmugDNA.33902.1.S1_at   | MmugDNA.33902.1 | 10    | 9.85  | 0.11 | 0.14 | 1.11   | 0.29099  | 0.290447 | 0.580345 | 0.551169 |
| MmugDNA.33905.1.S1_at   | MmugDNA.33905.1 | 12.12 | 12.07 | 0.23 | 0.06 | 1.04   | 0.593287 | 0.501257 | 0.79394  | 0.699458 |
| MmugDNA.33907.1.S1_at   | MmugDNA.33907.1 | 6.05  | 6.45  | 0.94 | 0.59 | -1.31  | 0.780193 | 0.38651  | 0.89973  | 0.621626 |
| MmugDNA.33908.1.S1_at   | MmugDNA.33908.1 | 10.69 | 10.78 | 0.16 | 0.04 | -1.07  | 0.513254 | 0.227998 | 0.743578 | 0.500211 |
| MmugDNA.33918.1.S1_at   | MmugDNA.33918.1 | 11.08 | 9.42  | 0.51 | 0.15 | 3.17   | 0.012296 | 0.114052 | 0.161126 | 0.380421 |
| MmugDNA.33920.1.S1_at   | MmugDNA.33920.1 | 6.52  | 6.91  | 0.34 | 0.07 | -1.31  | 0.152216 | 0.335907 | 0.441747 | 0.58354  |
| MmugDNA.33926.1.S1_at   | MmugDNA.33926.1 | 12.92 | 12.7  | 0.18 | 0.09 | 1.17   | 0.078538 | 0.125061 | 0.338335 | 0.395506 |

|                         |                 |       |       |      |      |        |          |          |          |          |
|-------------------------|-----------------|-------|-------|------|------|--------|----------|----------|----------|----------|
| MmugDNA.33927.1.S1_at   | MmugDNA.33927.1 | 7.3   | 8.21  | 0.41 | 0.13 | -1.89  | 0.023711 | 0.000555 | 0.207081 | 0.040995 |
| MmugDNA.33928.1.S1_at   | MmugDNA.33928.1 | 10.71 | 10.92 | 0.19 | 0.03 | -1.16  | 0.103483 | 0.093972 | 0.376635 | 0.350467 |
| MmugDNA.33929.1.S1_at   | MmugDNA.33929.1 | 8.48  | 7     | 0.24 | 0.09 | 2.79   | 0.000804 | 0.000109 | 0.073056 | 0.028099 |
| MmugDNA.33931.1.S1_at   | MmugDNA.33931.1 | 12.55 | 12.77 | 0.17 | 0.11 | -1.16  | 0.139499 | 0.38958  | 0.425004 | 0.623668 |
| MmugDNA.33932.1.S1_at   | MmugDNA.33932.1 | 5.73  | 6.05  | 0.53 | 0.06 | -1.25  | 0.263408 | 0.219878 | 0.556958 | 0.493401 |
| MmugDNA.33934.1.S1_at   | MmugDNA.33934.1 | 12.29 | 12.44 | 0.07 | 0.13 | -1.11  | 0.233245 | 0.324706 | 0.53152  | 0.575255 |
| MmugDNA.33935.1.S1_at   | MmugDNA.33935.1 | 8.74  | 8.92  | 0.12 | 0.1  | -1.13  | 0.169094 | 0.343537 | 0.462306 | 0.589301 |
| MmugDNA.3394.1.S1_at    | MmugDNA.3394.1  | 4.4   | 4.21  | 0.17 | 0.09 | 1.14   | 0.382367 | 0.607381 | 0.651848 | 0.766384 |
| MmugDNA.33941.1.S1_at   | MmugDNA.33941.1 | 5.25  | 5.24  | 0.13 | 0.04 | 1.01   | 0.764128 | 0.910295 | 0.891902 | 0.949391 |
| MmugDNA.33949.1.S1_at   | MmugDNA.33949.1 | 8.14  | 9.16  | 0.44 | 0.12 | -2.03  | 0.021012 | 0.260091 | 0.198347 | 0.52675  |
| MmugDNA.33950.1.S1_at   | MmugDNA.33950.1 | 9.99  | 9.9   | 0.39 | 0.2  | 1.07   | 0.732412 | 0.157326 | 0.874985 | 0.432817 |
| MmugDNA.33951.1.S1_at   | MmugDNA.33951.1 | 3.37  | 3.35  | 0.01 | 0.08 | 1.02   | 0.584455 | 0.657995 | 0.788586 | 0.80013  |
| MmugDNA.33952.1.S1_at   | MmugDNA.33952.1 | 7.12  | 6.98  | 0.24 | 0.07 | 1.1    | 0.412562 | 0.576568 | 0.674192 | 0.747267 |
| MmugDNA.33953.1.S1_at   | MmugDNA.33953.1 | 3.67  | 3.65  | 0.08 | 0.01 | 1.01   | 0.688814 | 0.602839 | 0.851433 | 0.763752 |
| MmugDNA.33954.1.S1_at   | MmugDNA.33954.1 | 9.05  | 7.52  | 0.58 | 0.28 | 2.88   | 0.028538 | 0.006685 | 0.22128  | 0.110612 |
| MmugDNA.33962.1.S1_at   | MmugDNA.33962.1 | 6.26  | 6.18  | 0.54 | 0.32 | 1.06   | 0.642211 | 0.505108 | 0.825502 | 0.70197  |
| MmugDNA.33965.1.S1_at   | MmugDNA.33965.1 | 6.47  | 6.25  | 0.09 | 0.17 | 1.17   | 0.184359 | 0.176204 | 0.480429 | 0.452714 |
| MmugDNA.33966.1.S1_s_at | MmugDNA.33966.1 | 11.36 | 12.18 | 0.05 | 0.02 | -1.77  | 0.000012 | 0.002785 | 0.045594 | 0.077966 |
| MmugDNA.33967.1.S1_at   | MmugDNA.33967.1 | 10.92 | 10.7  | 0.22 | 0.02 | 1.16   | 0.055045 | 0.085668 | 0.291637 | 0.337744 |
| MmugDNA.33969.1.S1_at   | MmugDNA.33969.1 | 10.88 | 10.72 | 0.19 | 0.02 | 1.12   | 0.200582 | 0.000596 | 0.497869 | 0.041941 |
| MmugDNA.3397.1.S1_at    | MmugDNA.3397.1  | 6.75  | 6.6   | 0.05 | 0.06 | 1.11   | 0.017954 | 0.060412 | 0.187151 | 0.292435 |
| MmugDNA.33973.1.S1_at   | MmugDNA.33973.1 | 11.02 | 11.01 | 0.33 | 0.06 | 1.01   | 0.358392 | 0.088073 | 0.634198 | 0.341573 |
| MmugDNA.33975.1.S1_at   | MmugDNA.33975.1 | 12.74 | 12.82 | 0.06 | 0.05 | -1.06  | 0.150775 | 0.445391 | 0.439937 | 0.662343 |
| MmugDNA.33978.1.S1_at   | MmugDNA.33978.1 | 11.72 | 11.77 | 0.08 | 0.02 | -1.03  | 0.259991 | 0.087346 | 0.554191 | 0.340426 |
| MmugDNA.33979.1.S1_at   | MmugDNA.33979.1 | 13.52 | 13.14 | 0.17 | 0.08 | 1.31   | 0.015579 | 0.212518 | 0.177262 | 0.486502 |
| MmugDNA.33982.1.S1_at   | MmugDNA.33982.1 | 8.47  | 8.29  | 0.18 | 0.06 | 1.13   | 0.265297 | 0.440376 | 0.557962 | 0.658939 |
| MmugDNA.33987.1.S1_at   | MmugDNA.33987.1 | 6.27  | 6.19  | 0.16 | 0.11 | 1.06   | 0.710867 | 0.28854  | 0.863433 | 0.549821 |
| MmugDNA.33989.1.S1_at   | MmugDNA.33989.1 | 9.05  | 8.97  | 0.18 | 0.17 | 1.06   | 0.200529 | 0.009837 | 0.497869 | 0.130274 |
| MmugDNA.33994.1.S1_at   | MmugDNA.33994.1 | 7.39  | 8.98  | 0.19 | 0.25 | -3.01  | 0.001383 | 0.08655  | 0.079595 | 0.33911  |
| MmugDNA.33996.1.S1_at   | MmugDNA.33996.1 | 4.1   | 4.24  | 0.42 | 0.26 | -1.1   | 0.612798 | 0.736168 | 0.807089 | 0.847335 |
| MmugDNA.33997.1.S1_at   | MmugDNA.33997.1 | 4.52  | 4.46  | 0.12 | 0.11 | 1.04   | 0.149386 | 0.09872  | 0.438257 | 0.356811 |
| MmugDNA.34.1.S1_at      | MmugDNA.34.1    | 6.22  | 9.82  | 1.65 | 0.29 | -12.11 | 0.062779 | 0.371754 | 0.307182 | 0.610541 |
| MmugDNA.34003.1.S1_at   | MmugDNA.34003.1 | 11.66 | 11.66 | 0.07 | 0.01 | 1.01   | 0.306018 | 0.480942 | 0.592958 | 0.686018 |
| MmugDNA.34004.1.S1_at   | MmugDNA.34004.1 | 9.64  | 9.89  | 0.06 | 0.21 | -1.19  | 0.355794 | 0.440404 | 0.632428 | 0.658939 |
| MmugDNA.34004.1.S1_s_at | MmugDNA.34004.1 | 10.66 | 10.8  | 0.07 | 0.06 | -1.1   | 0.024061 | 0.207103 | 0.208287 | 0.481189 |
| MmugDNA.34008.1.S1_at   | MmugDNA.34008.1 | 7.31  | 7.38  | 0.22 | 0.06 | -1.05  | 0.696682 | 0.925668 | 0.855586 | 0.957937 |
| MmugDNA.34009.1.S1_at   | MmugDNA.34009.1 | 8.51  | 8.09  | 0.19 | 0.04 | 1.33   | 0.047061 | 0.022377 | 0.274593 | 0.187176 |
| MmugDNA.34011.1.S1_at   | MmugDNA.34011.1 | 5.78  | 5.83  | 0.22 | 0.12 | -1.04  | 0.75926  | 0.921015 | 0.889659 | 0.955491 |
| MmugDNA.34012.1.S1_at   | MmugDNA.34012.1 | 10.79 | 10.48 | 0.17 | 0.09 | 1.24   | 0.049289 | 0.196555 | 0.279456 | 0.471584 |
| MmugDNA.34012.1.S1_x_at | MmugDNA.34012.1 | 10.89 | 10.59 | 0.18 | 0.08 | 1.23   | 0.069713 | 0.216204 | 0.322426 | 0.489765 |
| MmugDNA.34014.1.S1_at   | MmugDNA.34014.1 | 5.3   | 4.62  | 0.49 | 0.17 | 1.59   | 0.04641  | 0.028465 | 0.273215 | 0.210523 |
| MmugDNA.3402.1.S1_at    | MmugDNA.3402.1  | 5.31  | 3.76  | 1.47 | 0.12 | 2.93   | 0.178349 | 0.189011 | 0.473099 | 0.464897 |
| MmugDNA.34026.1.S1_at   | MmugDNA.34026.1 | 6.86  | 7.33  | 0.38 | 0.23 | -1.39  | 0.047784 | 0.386112 | 0.275924 | 0.621345 |

|                         |                 |       |       |      |      |        |          |          |          |          |
|-------------------------|-----------------|-------|-------|------|------|--------|----------|----------|----------|----------|
| MmugDNA.34027.1.S1_at   | MmugDNA.34027.1 | 6.4   | 7.46  | 0.69 | 0.17 | -2.08  | 0.077862 | 0.420028 | 0.336977 | 0.643804 |
| MmugDNA.34029.1.S1_at   | MmugDNA.34029.1 | 10.96 | 10.48 | 0.08 | 0.11 | 1.39   | 0.006008 | 0.198706 | 0.124151 | 0.473391 |
| MmugDNA.34030.1.S1_at   | MmugDNA.34030.1 | 9.31  | 9.49  | 0.29 | 0.12 | -1.13  | 0.18589  | 0.126198 | 0.482073 | 0.396748 |
| MmugDNA.34032.1.S1_at   | MmugDNA.34032.1 | 12.26 | 12.51 | 0.14 | 0.07 | -1.19  | 0.111416 | 0.053035 | 0.387378 | 0.275954 |
| MmugDNA.34033.1.S1_at   | MmugDNA.34033.1 | 9.31  | 8.84  | 0.27 | 0.04 | 1.38   | 0.130963 | 0.161346 | 0.413656 | 0.437519 |
| MmugDNA.34034.1.S1_at   | MmugDNA.34034.1 | 4.65  | 4.3   | 0.21 | 0.15 | 1.28   | 0.190454 | 0.137181 | 0.486767 | 0.410045 |
| MmugDNA.34035.1.S1_at   | MmugDNA.34035.1 | 9.44  | 9.62  | 0.12 | 0.08 | -1.14  | 0.147244 | 0.415079 | 0.435327 | 0.640695 |
| MmugDNA.34040.1.S1_at   | MmugDNA.34040.1 | 11.83 | 11.53 | 0.07 | 0.23 | 1.23   | 0.113009 | 0.229912 | 0.389505 | 0.501802 |
| MmugDNA.3405.1.S1_at    | MmugDNA.3405.1  | 9.41  | 9.97  | 0.3  | 0.18 | -1.48  | 0.090418 | 0.453026 | 0.357185 | 0.667463 |
| MmugDNA.34055.1.S1_at   | MmugDNA.34055.1 | 10.84 | 10.95 | 0.08 | 0.05 | -1.08  | 0.042481 | 0.016407 | 0.263254 | 0.162188 |
| MmugDNA.34056.1.S1_at   | MmugDNA.34056.1 | 11.08 | 10.72 | 0.34 | 0.14 | 1.28   | 0.215207 | 0.072463 | 0.512891 | 0.315294 |
| MmugDNA.34057.1.S1_at   | MmugDNA.34057.1 | 11.68 | 11.9  | 0.15 | 0.08 | -1.16  | 0.188433 | 0.366082 | 0.484839 | 0.605906 |
| MmugDNA.3406.1.S1_at    | MmugDNA.3406.1  | 11.31 | 11.73 | 0.23 | 0.13 | -1.34  | 0.035286 | 0.13041  | 0.242544 | 0.402257 |
| MmugDNA.34063.1.S1_at   | MmugDNA.34063.1 | 10.27 | 10.46 | 0.19 | 0.09 | -1.14  | 0.259301 | 0.236289 | 0.55365  | 0.507287 |
| MmugDNA.34063.1.S1_s_at | MmugDNA.34063.1 | 11.97 | 12.02 | 0.03 | 0.06 | -1.03  | 0.462573 | 0.275777 | 0.709736 | 0.540035 |
| MmugDNA.34064.1.S1_at   | MmugDNA.34064.1 | 9.07  | 9.5   | 0.48 | 0.23 | -1.35  | 0.33359  | 0.294332 | 0.614974 | 0.55407  |
| MmugDNA.34065.1.S1_at   | MmugDNA.34065.1 | 10.46 | 10.99 | 0.38 | 0.1  | -1.44  | 0.227554 | 0.29741  | 0.525656 | 0.556078 |
| MmugDNA.34067.1.S1_s_at | MmugDNA.34067.1 | 5.37  | 5.34  | 0.04 | 0.11 | 1.02   | 0.962368 | 0.058227 | 0.984644 | 0.287988 |
| MmugDNA.34068.1.S1_at   | MmugDNA.34068.1 | 6.79  | 6.64  | 0.13 | 0.15 | 1.12   | 0.167624 | 0.055768 | 0.460814 | 0.282044 |
| MmugDNA.34070.1.S1_at   | MmugDNA.34070.1 | 9.27  | 9.54  | 0.2  | 0.08 | -1.21  | 0.407702 | 0.205315 | 0.670697 | 0.479639 |
| MmugDNA.34071.1.S1_at   | MmugDNA.34071.1 | 7.65  | 7.59  | 0.06 | 0.1  | 1.04   | 0.231395 | 0.320863 | 0.530173 | 0.572849 |
| MmugDNA.34076.1.S1_at   | MmugDNA.34076.1 | 5     | 4.79  | 0.14 | 0.06 | 1.16   | 0.152602 | 0.382849 | 0.442287 | 0.61893  |
| MmugDNA.3408.1.S1_at    | MmugDNA.3408.1  | 9.97  | 9.71  | 0.1  | 0.08 | 1.2    | 0.009755 | 0.215001 | 0.148542 | 0.488898 |
| MmugDNA.34085.1.S1_at   | MmugDNA.34085.1 | 6.21  | 6.25  | 0.05 | 0.05 | -1.03  | 0.176052 | 0.241633 | 0.470426 | 0.512225 |
| MmugDNA.34089.1.S1_at   | MmugDNA.34089.1 | 10.68 | 10.75 | 0.33 | 0.04 | -1.05  | 0.961989 | 0.986918 | 0.984504 | 0.992589 |
| MmugDNA.34092.1.S1_at   | MmugDNA.34092.1 | 11.28 | 11.02 | 0.35 | 0.28 | 1.2    | 0.552723 | 0.017598 | 0.769364 | 0.167721 |
| MmugDNA.34095.1.S1_at   | MmugDNA.34095.1 | 3.38  | 3.27  | 0.18 | 0.07 | 1.08   | 0.334256 | 0.543579 | 0.615415 | 0.726214 |
| MmugDNA.34097.1.S1_at   | MmugDNA.34097.1 | 9.77  | 9.59  | 0.15 | 0.18 | 1.13   | 0.491951 | 0.211427 | 0.729433 | 0.485559 |
| MmugDNA.34098.1.S1_at   | MmugDNA.34098.1 | 6.65  | 6.12  | 0.07 | 0.33 | 1.44   | 0.140023 | 0.079654 | 0.425735 | 0.326981 |
| MmugDNA.341.1.S1_at     | MmugDNA.341.1   | 5.67  | 5.41  | 0.81 | 0.17 | 1.2    | 0.837158 | 0.218753 | 0.928581 | 0.492438 |
| MmugDNA.3410.1.S1_at    | MmugDNA.3410.1  | 5.36  | 5.55  | 0.23 | 0.08 | -1.14  | 0.108756 | 0.022216 | 0.383665 | 0.186513 |
| MmugDNA.34105.1.S1_at   | MmugDNA.34105.1 | 4.34  | 5.12  | 0.4  | 0.29 | -1.72  | 0.064178 | 0.145329 | 0.309799 | 0.419365 |
| MmugDNA.34108.1.S1_at   | MmugDNA.34108.1 | 9.19  | 9.88  | 0.45 | 0.05 | -1.61  | 0.022215 | 0.203076 | 0.202276 | 0.477343 |
| MmugDNA.34116.1.S1_x_at | MmugDNA.34116.1 | 12.41 | 12.4  | 0.55 | 0.16 | 1.01   | 0.376599 | 0.353915 | 0.647284 | 0.596894 |
| MmugDNA.34119.1.S1_at   | MmugDNA.34119.1 | 6.57  | 10.48 | 1.96 | 0.47 | -15.01 | 0.054056 | 0.186103 | 0.289645 | 0.461934 |
| MmugDNA.34120.1.S1_at   | MmugDNA.34120.1 | 11.37 | 11.37 | 0.07 | 0.02 | -1     | 0.937986 | 0.804193 | 0.973844 | 0.887383 |
| MmugDNA.34121.1.S1_at   | MmugDNA.34121.1 | 4.23  | 4.22  | 0.03 | 0.06 | 1      | 0.524931 | 0.749917 | 0.751591 | 0.854631 |
| MmugDNA.34123.1.S1_at   | MmugDNA.34123.1 | 8.06  | 8.48  | 0.6  | 0.34 | -1.34  | 0.172491 | 0.676688 | 0.466621 | 0.811035 |
| MmugDNA.34133.1.S1_at   | MmugDNA.34133.1 | 12.62 | 12.76 | 0.09 | 0.1  | -1.11  | 0.150005 | 0.091957 | 0.439035 | 0.347297 |
| MmugDNA.34135.1.S1_at   | MmugDNA.34135.1 | 12.38 | 12.49 | 0.46 | 0.11 | -1.08  | 0.306949 | 0.019062 | 0.593716 | 0.173688 |
| MmugDNA.34136.1.S1_at   | MmugDNA.34136.1 | 7.52  | 9.11  | 0.63 | 0.24 | -3     | 0.041701 | 0.02869  | 0.260729 | 0.211093 |
| MmugDNA.34143.1.S1_at   | MmugDNA.34143.1 | 10.11 | 10.05 | 0.16 | 0.03 | 1.04   | 0.457132 | 0.270083 | 0.706142 | 0.535356 |
| MmugDNA.34144.1.S1_at   | MmugDNA.34144.1 | 7.52  | 6.88  | 0.51 | 0.41 | 1.56   | 0.240977 | 0.367177 | 0.538362 | 0.606834 |



|                         |                 |       |       |      |      |       |          |          |          |          |
|-------------------------|-----------------|-------|-------|------|------|-------|----------|----------|----------|----------|
| MmugDNA.34145.1.S1_at   | MmugDNA.34145.1 | 11.97 | 11.78 | 0.07 | 0.05 | 1.14  | 0.013183 | 0.02122  | 0.16538  | 0.182388 |
| MmugDNA.34151.1.S1_at   | MmugDNA.34151.1 | 10.76 | 11.12 | 0.24 | 0.07 | -1.28 | 0.069127 | 0.117844 | 0.321019 | 0.38576  |
| MmugDNA.34153.1.S1_at   | MmugDNA.34153.1 | 5.35  | 5.47  | 0.16 | 0.26 | -1.08 | 0.577466 | 0.687745 | 0.783629 | 0.817665 |
| MmugDNA.3416.1.S1_at    | MmugDNA.3416.1  | 12.33 | 12.24 | 0.01 | 0.06 | 1.06  | 0.061188 | 0.900815 | 0.304243 | 0.943562 |
| MmugDNA.34160.1.S1_at   | MmugDNA.34160.1 | 9.33  | 8.98  | 0.3  | 0.24 | 1.28  | 0.172872 | 0.285564 | 0.466937 | 0.547395 |
| MmugDNA.34168.1.S1_at   | MmugDNA.34168.1 | 4.73  | 4.87  | 0.14 | 0.36 | -1.1  | 0.766763 | 0.946677 | 0.892938 | 0.969772 |
| MmugDNA.34171.1.S1_at   | MmugDNA.34171.1 | 10.08 | 10.64 | 0.13 | 0.06 | -1.48 | 0.003348 | 0.000023 | 0.102592 | 0.019635 |
| MmugDNA.34174.1.S1_s_at | MmugDNA.34174.1 | 3.66  | 3.67  | 0.76 | 0.28 | -1.01 | 0.409912 | 0.445777 | 0.672167 | 0.662505 |
| MmugDNA.3418.1.S1_at    | MmugDNA.3418.1  | 9.59  | 8.89  | 0.12 | 0.06 | 1.62  | 0.001007 | 0.096044 | 0.076321 | 0.353306 |
| MmugDNA.34184.1.S1_at   | MmugDNA.34184.1 | 12.94 | 12.64 | 0.08 | 0.11 | 1.23  | 0.041274 | 0.35653  | 0.259648 | 0.598459 |
| MmugDNA.3420.1.S1_at    | MmugDNA.3420.1  | 9.19  | 9.17  | 0.05 | 0.04 | 1.01  | 0.840349 | 0.045973 | 0.929916 | 0.258818 |
| MmugDNA.34204.1.S1_at   | MmugDNA.34204.1 | 8     | 8.46  | 0.03 | 0.15 | -1.37 | 0.016518 | 0.018798 | 0.181539 | 0.172349 |
| MmugDNA.34209.1.S1_at   | MmugDNA.34209.1 | 4.19  | 4.2   | 0.01 | 0.02 | -1.01 | 0.483372 | 0.788065 | 0.723504 | 0.877426 |
| MmugDNA.34216.1.S1_at   | MmugDNA.34216.1 | 9.25  | 8.66  | 0.23 | 0.15 | 1.51  | 0.036543 | 0.264653 | 0.246142 | 0.530661 |
| MmugDNA.34222.1.S1_s_at | MmugDNA.34222.1 | 8.87  | 8.99  | 0.1  | 0.09 | -1.09 | 0.0629   | 0.309234 | 0.307577 | 0.564807 |
| MmugDNA.34227.1.S1_at   | MmugDNA.34227.1 | 4.34  | 3.95  | 0.09 | 0.12 | 1.31  | 0.035926 | 0.024382 | 0.244561 | 0.195473 |
| MmugDNA.3423.1.S1_at    | MmugDNA.3423.1  | 6.12  | 6.17  | 0.2  | 0.23 | -1.03 | 0.878032 | 0.888669 | 0.947946 | 0.936536 |
| MmugDNA.34233.1.S1_at   | MmugDNA.34233.1 | 9.32  | 9.18  | 0.15 | 0.27 | 1.1   | 0.708335 | 0.004111 | 0.861861 | 0.090887 |
| MmugDNA.34241.1.S1_at   | MmugDNA.34241.1 | 8.35  | 8.19  | 0.1  | 0.09 | 1.12  | 0.126777 | 0.659283 | 0.408266 | 0.80063  |
| MmugDNA.34243.1.S1_at   | MmugDNA.34243.1 | 7.12  | 7.48  | 0.81 | 0.22 | -1.28 | 0.329506 | 0.238224 | 0.611763 | 0.508825 |
| MmugDNA.34245.1.S1_at   | MmugDNA.34245.1 | 3.67  | 3.61  | 0.05 | 0.03 | 1.04  | 0.086894 | 0.391782 | 0.352245 | 0.625301 |
| MmugDNA.34254.1.S1_at   | MmugDNA.34254.1 | 7.21  | 6.47  | 0.55 | 0.21 | 1.67  | 0.052179 | 0.045236 | 0.285936 | 0.257005 |
| MmugDNA.34254.1.S1_s_at | MmugDNA.34254.1 | 7.55  | 6.61  | 0.41 | 0.2  | 1.92  | 0.021323 | 0.014936 | 0.199623 | 0.155342 |
| MmugDNA.34256.1.S1_at   | MmugDNA.34256.1 | 5.16  | 5.16  | 0.22 | 0.1  | 1     | 0.781004 | 0.72163  | 0.900006 | 0.838771 |
| MmugDNA.34259.1.S1_at   | MmugDNA.34259.1 | 10.38 | 10.64 | 0.09 | 0.07 | -1.2  | 0.019339 | 0.638139 | 0.192215 | 0.787396 |
| MmugDNA.34260.1.S1_at   | MmugDNA.34260.1 | 5.16  | 5.04  | 0.06 | 0.02 | 1.09  | 0.095865 | 0.396908 | 0.365496 | 0.628464 |
| MmugDNA.34264.1.S1_at   | MmugDNA.34264.1 | 9.32  | 10.95 | 0.54 | 0.24 | -3.08 | 0.012031 | 0.032146 | 0.159675 | 0.222002 |
| MmugDNA.34265.1.S1_at   | MmugDNA.34265.1 | 12.07 | 12.18 | 0.25 | 0.07 | -1.08 | 0.735585 | 0.067049 | 0.876915 | 0.304872 |
| MmugDNA.34265.1.S1_s_at | MmugDNA.34265.1 | 11.01 | 11.15 | 0.24 | 0.09 | -1.1  | 0.978116 | 0.131679 | 0.991503 | 0.403829 |
| MmugDNA.34269.1.S1_at   | MmugDNA.34269.1 | 10.99 | 10.92 | 0.17 | 0.03 | 1.05  | 0.274625 | 0.063044 | 0.566523 | 0.297758 |
| MmugDNA.3427.1.S1_at    | MmugDNA.3427.1  | 13.12 | 13.12 | 0.09 | 0.01 | -1    | 0.854915 | 0.594307 | 0.93686  | 0.758574 |
| MmugDNA.3428.1.S1_at    | MmugDNA.3428.1  | 9.79  | 8.14  | 0.45 | 0.49 | 3.14  | 0.017938 | 0.008769 | 0.187151 | 0.124009 |
| MmugDNA.34280.1.S1_at   | MmugDNA.34280.1 | 7.62  | 7.71  | 0.25 | 0.19 | -1.06 | 0.527434 | 0.285591 | 0.753064 | 0.547395 |
| MmugDNA.34283.1.S1_at   | MmugDNA.34283.1 | 5.37  | 5.35  | 0.14 | 0.18 | 1.01  | 0.538534 | 0.807087 | 0.760315 | 0.888946 |
| MmugDNA.34287.1.S1_at   | MmugDNA.34287.1 | 10.84 | 10.81 | 0.17 | 0.04 | 1.02  | 0.703673 | 0.043524 | 0.859331 | 0.253227 |
| MmugDNA.34290.1.S1_at   | MmugDNA.34290.1 | 7.36  | 7.24  | 0.41 | 0.46 | 1.09  | 0.34956  | 0.840098 | 0.627316 | 0.908905 |
| MmugDNA.34292.1.S1_at   | MmugDNA.34292.1 | 9.42  | 9.4   | 0.45 | 0.2  | 1.01  | 0.760363 | 0.875664 | 0.890152 | 0.929374 |
| MmugDNA.34293.1.S1_at   | MmugDNA.34293.1 | 12.49 | 12.99 | 0.11 | 0.15 | -1.42 | 0.018832 | 0.022464 | 0.190794 | 0.187548 |
| MmugDNA.34309.1.S1_at   | MmugDNA.34309.1 | 6.16  | 5.93  | 0.31 | 0.28 | 1.17  | 0.699246 | 0.246239 | 0.857194 | 0.515889 |
| MmugDNA.3431.1.S1_at    | MmugDNA.3431.1  | 12.23 | 11.96 | 0.12 | 0.07 | 1.21  | 0.042277 | 0.027327 | 0.262598 | 0.206625 |
| MmugDNA.34310.1.S1_at   | MmugDNA.34310.1 | 8.75  | 8.71  | 0.16 | 0.11 | 1.03  | 0.558552 | 0.163523 | 0.772919 | 0.439751 |
| MmugDNA.34326.1.S1_at   | MmugDNA.34326.1 | 11.24 | 10.81 | 0.32 | 0.21 | 1.34  | 0.065898 | 0.018126 | 0.314217 | 0.169609 |
| MmugDNA.34328.1.S1_at   | MmugDNA.34328.1 | 4.53  | 4.74  | 0.39 | 0.23 | -1.15 | 0.388017 | 0.076975 | 0.656101 | 0.322421 |

|                         |                 |       |       |      |      |       |          |          |          |          |
|-------------------------|-----------------|-------|-------|------|------|-------|----------|----------|----------|----------|
| MmugDNA.3433.1.S1_at    | MmugDNA.3433.1  | 11.15 | 11.22 | 0.13 | 0.16 | -1.05 | 0.717221 | 0.918957 | 0.866489 | 0.954477 |
| MmugDNA.34330.1.S1_at   | MmugDNA.34330.1 | 6.51  | 7.01  | 0.27 | 0.18 | -1.42 | 0.248037 | 0.097965 | 0.543371 | 0.355867 |
| MmugDNA.34332.1.S1_at   | MmugDNA.34332.1 | 11.23 | 11.18 | 0.28 | 0.06 | 1.04  | 0.24306  | 0.009235 | 0.539753 | 0.126941 |
| MmugDNA.34333.1.S1_at   | MmugDNA.34333.1 | 9.83  | 9.88  | 0.1  | 0.04 | -1.03 | 0.519308 | 0.045446 | 0.747997 | 0.2575   |
| MmugDNA.34338.1.S1_at   | MmugDNA.34338.1 | 4.24  | 4.69  | 0.21 | 0.18 | -1.36 | 0.066766 | 0.074901 | 0.31618  | 0.318838 |
| MmugDNA.3434.1.S1_at    | MmugDNA.3434.1  | 11.76 | 12.05 | 0.1  | 0.1  | -1.22 | 0.041228 | 0.077629 | 0.259553 | 0.323621 |
| MmugDNA.34340.1.S1_at   | MmugDNA.34340.1 | 11.63 | 11.53 | 0.05 | 0.1  | 1.07  | 0.176525 | 0.709849 | 0.470959 | 0.831863 |
| MmugDNA.3435.1.S1_at    | MmugDNA.3435.1  | 13.19 | 13.18 | 0.04 | 0.06 | 1.01  | 0.915181 | 0.148639 | 0.963919 | 0.423201 |
| MmugDNA.34353.1.S1_at   | MmugDNA.34353.1 | 8.85  | 8.75  | 0.47 | 0.34 | 1.07  | 0.95406  | 0.994092 | 0.981138 | 0.99641  |
| MmugDNA.34356.1.S1_at   | MmugDNA.34356.1 | 5.06  | 4.99  | 0.21 | 0.12 | 1.05  | 0.388623 | 0.650337 | 0.656606 | 0.795586 |
| MmugDNA.3436.1.S1_at    | MmugDNA.3436.1  | 13.02 | 12.84 | 0.11 | 0.03 | 1.13  | 0.052101 | 0.038421 | 0.28583  | 0.240918 |
| MmugDNA.34364.1.S1_at   | MmugDNA.34364.1 | 3.72  | 3.81  | 0.03 | 0.13 | -1.07 | 0.163628 | 0.104516 | 0.456114 | 0.365803 |
| MmugDNA.34376.1.S1_at   | MmugDNA.34376.1 | 4.19  | 3.73  | 0.43 | 0.22 | 1.37  | 0.192916 | 0.18902  | 0.48947  | 0.464897 |
| MmugDNA.34380.1.S1_at   | MmugDNA.34380.1 | 10.38 | 10.37 | 0.18 | 0.02 | 1     | 0.372389 | 0.494349 | 0.644917 | 0.694829 |
| MmugDNA.34382.1.S1_at   | MmugDNA.34382.1 | 11.27 | 10.48 | 0.3  | 0.07 | 1.73  | 0.015724 | 0.003416 | 0.177808 | 0.084071 |
| MmugDNA.34384.1.S1_s_at | MmugDNA.34384.1 | 12.44 | 12.66 | 0.06 | 0.09 | -1.17 | 0.040096 | 0.025229 | 0.256783 | 0.199215 |
| MmugDNA.34389.1.S1_at   | MmugDNA.34389.1 | 11.59 | 11.73 | 0.28 | 0.06 | -1.1  | 0.879085 | 0.785689 | 0.948523 | 0.875924 |
| MmugDNA.34397.1.S1_at   | MmugDNA.34397.1 | 5.26  | 5.19  | 0.12 | 0.04 | 1.05  | 0.899303 | 0.242157 | 0.957134 | 0.512652 |
| MmugDNA.3440.1.S1_at    | MmugDNA.3440.1  | 7.33  | 7.32  | 0.13 | 0.06 | 1.01  | 0.481428 | 0.341043 | 0.721944 | 0.587164 |
| MmugDNA.34402.1.S1_at   | MmugDNA.34402.1 | 4.14  | 4.22  | 0.06 | 0.04 | -1.06 | 0.649818 | 0.01636  | 0.829934 | 0.161959 |
| MmugDNA.34405.1.S1_at   | MmugDNA.34405.1 | 5.72  | 5.44  | 0.14 | 0.12 | 1.21  | 0.054831 | 0.0592   | 0.291026 | 0.290208 |
| MmugDNA.34405.1.S1_s_at | MmugDNA.34405.1 | 5.43  | 5.45  | 0.11 | 0.11 | -1.02 | 0.380133 | 0.072156 | 0.649885 | 0.314676 |
| MmugDNA.34407.1.S1_at   | MmugDNA.34407.1 | 7.35  | 7.1   | 0.48 | 0.29 | 1.19  | 0.418488 | 0.324501 | 0.678425 | 0.57507  |
| MmugDNA.34409.1.S1_at   | MmugDNA.34409.1 | 5.48  | 3.98  | 0.51 | 0.83 | 2.83  | 0.121776 | 0.040234 | 0.400504 | 0.245805 |
| MmugDNA.34415.1.S1_at   | MmugDNA.34415.1 | 5.43  | 5.39  | 0.25 | 0.07 | 1.03  | 0.31008  | 0.415297 | 0.596347 | 0.640769 |
| MmugDNA.34420.1.S1_at   | MmugDNA.34420.1 | 7.09  | 7.25  | 0.15 | 0.06 | -1.12 | 0.281144 | 0.579559 | 0.572037 | 0.749192 |
| MmugDNA.34428.1.S1_s_at | MmugDNA.34428.1 | 10.66 | 10.81 | 0.2  | 0.05 | -1.11 | 0.091297 | 0.101049 | 0.358855 | 0.3607   |
| MmugDNA.34431.1.S1_at   | MmugDNA.34431.1 | 12.2  | 11.93 | 0.12 | 0.03 | 1.2   | 0.019688 | 0.003544 | 0.193204 | 0.085371 |
| MmugDNA.34440.1.S1_at   | MmugDNA.34440.1 | 11.93 | 12.03 | 0.13 | 0.02 | -1.08 | 0.35009  | 0.783329 | 0.627905 | 0.874571 |
| MmugDNA.34442.1.S1_at   | MmugDNA.34442.1 | 5.43  | 5.24  | 0.19 | 0.11 | 1.14  | 0.560754 | 0.697197 | 0.774002 | 0.824045 |
| MmugDNA.34451.1.S1_at   | MmugDNA.34451.1 | 4.89  | 7.39  | 1.29 | 0.01 | -5.66 | 0.066677 | 0.015309 | 0.315848 | 0.157082 |
| MmugDNA.34456.1.S1_at   | MmugDNA.34456.1 | 4.73  | 4.75  | 0.02 | 0.05 | -1.01 | 0.755044 | 0.072791 | 0.887035 | 0.315651 |
| MmugDNA.34468.1.S1_at   | MmugDNA.34468.1 | 9.29  | 8.82  | 0.16 | 0.1  | 1.39  | 0.030988 | 0.141793 | 0.229092 | 0.415331 |
| MmugDNA.34471.1.S1_at   | MmugDNA.34471.1 | 12.5  | 12.05 | 0.23 | 0.15 | 1.37  | 0.20973  | 0.313928 | 0.507182 | 0.568116 |
| MmugDNA.34471.1.S1_s_at | MmugDNA.34471.1 | 12.63 | 12.17 | 0.21 | 0.09 | 1.37  | 0.066929 | 0.276048 | 0.316392 | 0.540071 |
| MmugDNA.34474.1.S1_at   | MmugDNA.34474.1 | 7.36  | 7.41  | 0.25 | 0.18 | -1.04 | 0.776388 | 0.377905 | 0.89774  | 0.615264 |
| MmugDNA.3448.1.S1_at    | MmugDNA.3448.1  | 7.5   | 7.53  | 0.06 | 0.03 | -1.02 | 0.730443 | 0.44616  | 0.873958 | 0.662743 |
| MmugDNA.34482.1.S1_at   | MmugDNA.34482.1 | 6.77  | 6.72  | 0.05 | 0.08 | 1.03  | 0.40484  | 0.652952 | 0.668477 | 0.797125 |
| MmugDNA.34496.1.S1_at   | MmugDNA.34496.1 | 2.72  | 2.75  | 0.13 | 0.04 | -1.02 | 0.450153 | 0.618408 | 0.701214 | 0.774054 |
| MmugDNA.34498.1.S1_at   | MmugDNA.34498.1 | 6.4   | 6.43  | 0.45 | 0.41 | -1.02 | 0.759387 | 0.685337 | 0.889659 | 0.816458 |
| MmugDNA.3450.1.S1_at    | MmugDNA.3450.1  | 11.61 | 11.6  | 0.16 | 0.11 | 1.01  | 0.368876 | 0.715348 | 0.64242  | 0.834994 |
| MmugDNA.34500.1.S1_s_at | MmugDNA.34500.1 | 6.12  | 6.75  | 0.16 | 0.23 | -1.54 | 0.029576 | 0.149919 | 0.22511  | 0.424549 |
| MmugDNA.34501.1.S1_at   | MmugDNA.34501.1 | 7.96  | 8.02  | 0.32 | 0.14 | -1.04 | 0.756527 | 0.077041 | 0.887988 | 0.322481 |

|                         |                 |       |       |      |      |       |          |          |          |          |
|-------------------------|-----------------|-------|-------|------|------|-------|----------|----------|----------|----------|
| MmugDNA.34503.1.S1_at   | MmugDNA.34503.1 | 5.29  | 5.3   | 0.1  | 0.09 | -1.01 | 0.76744  | 0.323858 | 0.893274 | 0.574656 |
| MmugDNA.34505.1.S1_at   | MmugDNA.34505.1 | 5.63  | 5.68  | 0.12 | 0.08 | -1.03 | 0.233957 | 0.040925 | 0.532172 | 0.247161 |
| MmugDNA.34509.1.S1_at   | MmugDNA.34509.1 | 6.55  | 6.57  | 0.24 | 0.01 | -1.01 | 0.92464  | 0.937009 | 0.967957 | 0.964492 |
| MmugDNA.34510.1.S1_at   | MmugDNA.34510.1 | 9.6   | 9.04  | 0.21 | 0.14 | 1.47  | 0.02111  | 0.17752  | 0.198834 | 0.453888 |
| MmugDNA.34517.1.S1_at   | MmugDNA.34517.1 | 9.6   | 7.27  | 2.63 | 0.89 | 5.05  | 0.852943 | 0.861301 | 0.935999 | 0.921113 |
| MmugDNA.34523.1.S1_at   | MmugDNA.34523.1 | 3.41  | 3.32  | 0.07 | 0.1  | 1.07  | 0.499129 | 0.675364 | 0.734029 | 0.81026  |
| MmugDNA.34528.1.S1_at   | MmugDNA.34528.1 | 11.12 | 10.78 | 0.08 | 0.05 | 1.26  | 0.003199 | 0.079102 | 0.101477 | 0.326188 |
| MmugDNA.34534.1.S1_at   | MmugDNA.34534.1 | 8.94  | 9.35  | 0.2  | 0.03 | -1.33 | 0.049176 | 0.796969 | 0.279211 | 0.882822 |
| MmugDNA.34538.1.S1_at   | MmugDNA.34538.1 | 10.73 | 10.03 | 0.23 | 0.13 | 1.63  | 0.02386  | 0.472216 | 0.207529 | 0.679876 |
| MmugDNA.34542.1.S1_at   | MmugDNA.34542.1 | 11.31 | 11.45 | 0.19 | 0.08 | -1.1  | 0.212656 | 0.580079 | 0.510654 | 0.749447 |
| MmugDNA.34546.1.S1_at   | MmugDNA.34546.1 | 6.89  | 7.29  | 0.22 | 0.29 | -1.32 | 0.078341 | 0.089618 | 0.338004 | 0.343811 |
| MmugDNA.34550.1.S1_at   | MmugDNA.34550.1 | 8.46  | 8.37  | 0.12 | 0.09 | 1.06  | 0.618379 | 0.787867 | 0.810674 | 0.877314 |
| MmugDNA.34551.1.S1_at   | MmugDNA.34551.1 | 10.66 | 11.55 | 0.35 | 0.03 | -1.86 | 0.011895 | 0.034676 | 0.159207 | 0.230412 |
| MmugDNA.34554.1.S1_at   | MmugDNA.34554.1 | 8.65  | 8.93  | 0.07 | 0.04 | -1.21 | 0.002236 | 0.082417 | 0.091055 | 0.331381 |
| MmugDNA.34557.1.S1_at   | MmugDNA.34557.1 | 12.25 | 12.18 | 0.09 | 0.02 | 1.05  | 0.314391 | 0.205901 | 0.599959 | 0.480109 |
| MmugDNA.3456.1.S1_at    | MmugDNA.3456.1  | 7.12  | 7.08  | 0.17 | 0.08 | 1.03  | 0.28662  | 0.270998 | 0.576462 | 0.536124 |
| MmugDNA.34566.1.S1_at   | MmugDNA.34566.1 | 8.59  | 9.26  | 0.23 | 0.21 | -1.6  | 0.025577 | 0.011175 | 0.212928 | 0.137551 |
| MmugDNA.34567.1.S1_at   | MmugDNA.34567.1 | 5.5   | 5.5   | 0.13 | 0.14 | -1.01 | 0.891476 | 0.046634 | 0.953744 | 0.260495 |
| MmugDNA.34575.1.S1_at   | MmugDNA.34575.1 | 10.98 | 10.88 | 0.17 | 0.05 | 1.07  | 0.450243 | 0.833986 | 0.7013   | 0.904865 |
| MmugDNA.34575.1.S1_s_at | MmugDNA.34575.1 | 10.24 | 10.18 | 0.18 | 0.01 | 1.04  | 0.553533 | 0.909056 | 0.770026 | 0.948511 |
| MmugDNA.34582.1.S1_at   | MmugDNA.34582.1 | 6.48  | 7     | 0.2  | 0.25 | -1.44 | 0.024927 | 0.03362  | 0.211049 | 0.227006 |
| MmugDNA.34583.1.S1_at   | MmugDNA.34583.1 | 8.3   | 8.26  | 0.09 | 0.06 | 1.02  | 0.938199 | 0.568047 | 0.973844 | 0.741761 |
| MmugDNA.34588.1.S1_at   | MmugDNA.34588.1 | 11.33 | 11.45 | 0.1  | 0.03 | -1.08 | 0.108061 | 0.006038 | 0.382757 | 0.106089 |
| MmugDNA.34589.1.S1_at   | MmugDNA.34589.1 | 12.31 | 12.61 | 0.25 | 0.04 | -1.23 | 0.103559 | 0.247168 | 0.376749 | 0.516341 |
| MmugDNA.34589.1.S1_s_at | MmugDNA.34589.1 | 11.42 | 11.77 | 0.34 | 0.03 | -1.27 | 0.112809 | 0.331711 | 0.389296 | 0.580294 |
| MmugDNA.34597.1.S1_at   | MmugDNA.34597.1 | 4.48  | 4.78  | 0.02 | 0.2  | -1.23 | 0.191439 | 0.663098 | 0.48775  | 0.802828 |
| MmugDNA.34598.1.S1_at   | MmugDNA.34598.1 | 4.16  | 4.06  | 0.38 | 0.07 | 1.07  | 0.427762 | 0.519096 | 0.68494  | 0.710813 |
| MmugDNA.34599.1.S1_at   | MmugDNA.34599.1 | 8.58  | 8.71  | 0.17 | 0.17 | -1.1  | 0.397266 | 0.696345 | 0.662987 | 0.823596 |
| MmugDNA.34603.1.S1_at   | MmugDNA.34603.1 | 9.52  | 9.97  | 0.25 | 0.17 | -1.36 | 0.150471 | 0.025563 | 0.439507 | 0.200612 |
| MmugDNA.34608.1.S1_at   | MmugDNA.34608.1 | 8.92  | 8.95  | 0.24 | 0.2  | -1.02 | 0.84687  | 0.900675 | 0.933151 | 0.943491 |
| MmugDNA.34609.1.S1_at   | MmugDNA.34609.1 | 8.07  | 7.98  | 0.69 | 0.14 | 1.06  | 0.276898 | 0.602645 | 0.568365 | 0.763561 |
| MmugDNA.34622.1.S1_at   | MmugDNA.34622.1 | 9.27  | 8.89  | 0.36 | 0.25 | 1.31  | 0.084066 | 0.165184 | 0.34731  | 0.441389 |
| MmugDNA.34623.1.S1_at   | MmugDNA.34623.1 | 6.2   | 6.11  | 0.27 | 0.04 | 1.06  | 0.478449 | 0.612687 | 0.71999  | 0.770138 |
| MmugDNA.34627.1.S1_at   | MmugDNA.34627.1 | 12.12 | 12.42 | 0.06 | 0.14 | -1.23 | 0.064771 | 0.230911 | 0.311257 | 0.502548 |
| MmugDNA.3463.1.S1_at    | MmugDNA.3463.1  | 8.48  | 8.45  | 0.11 | 0.07 | 1.02  | 0.878082 | 0.000355 | 0.947962 | 0.037229 |
| MmugDNA.34635.1.S1_at   | MmugDNA.34635.1 | 11.89 | 8.92  | 0.55 | 1.23 | 7.84  | 0.066312 | 0.09156  | 0.314995 | 0.346652 |
| MmugDNA.34639.1.S1_at   | MmugDNA.34639.1 | 6.63  | 5.81  | 0.33 | 0.15 | 1.76  | 0.017848 | 0.004061 | 0.187044 | 0.090288 |
| MmugDNA.34645.1.S1_s_at | MmugDNA.34645.1 | 9.65  | 11.02 | 0.4  | 0.21 | -2.58 | 0.005228 | 0.018256 | 0.117353 | 0.169945 |
| MmugDNA.34649.1.S1_at   | MmugDNA.34649.1 | 4.19  | 3.99  | 0.6  | 0.14 | 1.15  | 0.480668 | 0.800353 | 0.72148  | 0.885129 |
| MmugDNA.34650.1.S1_at   | MmugDNA.34650.1 | 11.65 | 12.43 | 0.05 | 0.05 | -1.72 | 0.000047 | 0.00006  | 0.045594 | 0.025666 |
| MmugDNA.34652.1.S1_at   | MmugDNA.34652.1 | 10.28 | 10.22 | 0.05 | 0.04 | 1.04  | 0.468175 | 0.471916 | 0.713381 | 0.679793 |
| MmugDNA.34655.1.S1_at   | MmugDNA.34655.1 | 5.33  | 4.96  | 0.57 | 0.26 | 1.29  | 0.769845 | 0.926649 | 0.894412 | 0.958374 |
| MmugDNA.34656.1.S1_at   | MmugDNA.34656.1 | 8.67  | 8.6   | 0.33 | 0.07 | 1.05  | 0.827706 | 0.173853 | 0.923713 | 0.450133 |

|                         |                 |       |       |      |      |        |          |          |          |          |
|-------------------------|-----------------|-------|-------|------|------|--------|----------|----------|----------|----------|
| MmugDNA.34658.1.S1_at   | MmugDNA.34658.1 | 7.1   | 11.89 | 2.28 | 0.25 | -27.68 | 0.0266   | 0.092153 | 0.216314 | 0.347825 |
| MmugDNA.34663.1.S1_at   | MmugDNA.34663.1 | 3.48  | 4.08  | 0.2  | 0.2  | -1.51  | 0.045272 | 0.08475  | 0.270246 | 0.336233 |
| MmugDNA.3467.1.S1_s_at  | MmugDNA.3467.1  | 11.97 | 11.73 | 0.1  | 0.04 | 1.18   | 0.027313 | 0.087471 | 0.218069 | 0.340617 |
| MmugDNA.34671.1.S1_at   | MmugDNA.34671.1 | 12.32 | 12.78 | 0.2  | 0.07 | -1.38  | 0.023733 | 0.062352 | 0.207099 | 0.296503 |
| MmugDNA.34672.1.S1_at   | MmugDNA.34672.1 | 3.53  | 3.59  | 0.09 | 0.05 | -1.04  | 0.405694 | 0.556545 | 0.669103 | 0.734607 |
| MmugDNA.34674.1.S1_at   | MmugDNA.34674.1 | 6.17  | 6.26  | 0.18 | 0.14 | -1.06  | 0.246157 | 0.386384 | 0.541923 | 0.621593 |
| MmugDNA.34676.1.S1_at   | MmugDNA.34676.1 | 11.34 | 11.69 | 0.53 | 0.09 | -1.27  | 0.108956 | 0.236361 | 0.383909 | 0.507308 |
| MmugDNA.34679.1.S1_at   | MmugDNA.34679.1 | 14.15 | 14.08 | 0.12 | 0.02 | 1.05   | 0.957772 | 0.893789 | 0.982604 | 0.939386 |
| MmugDNA.3468.1.S1_at    | MmugDNA.3468.1  | 13.4  | 13.36 | 0.11 | 0.03 | 1.03   | 0.30967  | 0.711711 | 0.595927 | 0.832794 |
| MmugDNA.34680.1.S1_at   | MmugDNA.34680.1 | 9.24  | 9.57  | 0.05 | 0.04 | -1.25  | 0.000651 | 0.548093 | 0.071241 | 0.728874 |
| MmugDNA.34681.1.S1_at   | MmugDNA.34681.1 | 9.24  | 8.92  | 0.18 | 0.26 | 1.24   | 0.167344 | 0.578398 | 0.460585 | 0.748482 |
| MmugDNA.34692.1.S1_at   | MmugDNA.34692.1 | 6.76  | 7.04  | 0.1  | 0.1  | -1.21  | 0.025755 | 0.107141 | 0.213108 | 0.36981  |
| MmugDNA.34696.1.S1_at   | MmugDNA.34696.1 | 11.41 | 11.4  | 0.1  | 0.11 | 1      | 0.630877 | 0.12989  | 0.818647 | 0.401509 |
| MmugDNA.34697.1.S1_at   | MmugDNA.34697.1 | 4.38  | 4.31  | 0.08 | 0.09 | 1.04   | 0.520642 | 0.562865 | 0.748924 | 0.738191 |
| MmugDNA.34699.1.S1_at   | MmugDNA.34699.1 | 4.24  | 4.24  | 0.14 | 0.07 | 1.01   | 0.569774 | 0.294191 | 0.779068 | 0.553979 |
| MmugDNA.34701.1.S1_at   | MmugDNA.34701.1 | 5.16  | 5.21  | 0.36 | 0.39 | -1.04  | 0.778528 | 0.882457 | 0.898791 | 0.933022 |
| MmugDNA.34704.1.S1_at   | MmugDNA.34704.1 | 10.2  | 9.93  | 0.28 | 0.21 | 1.2    | 0.080734 | 0.09295  | 0.341441 | 0.349044 |
| MmugDNA.3471.1.S1_at    | MmugDNA.3471.1  | 7.49  | 7.89  | 0.33 | 0.06 | -1.32  | 0.104154 | 0.196015 | 0.377457 | 0.471016 |
| MmugDNA.34717.1.S1_at   | MmugDNA.34717.1 | 9.42  | 8.89  | 0.25 | 0.03 | 1.44   | 0.035743 | 0.335863 | 0.243972 | 0.583533 |
| MmugDNA.34718.1.S1_at   | MmugDNA.34718.1 | 6.21  | 5.92  | 0.47 | 0.24 | 1.22   | 0.990293 | 0.49525  | 0.996514 | 0.695411 |
| MmugDNA.34721.1.S1_at   | MmugDNA.34721.1 | 4.91  | 4.72  | 0.35 | 0.15 | 1.14   | 0.370065 | 0.536022 | 0.643241 | 0.721454 |
| MmugDNA.34729.1.S1_s_at | MmugDNA.34729.1 | 8.66  | 10.03 | 0.56 | 0.38 | -2.59  | 0.047348 | 0.04939  | 0.274971 | 0.267165 |
| MmugDNA.34732.1.S1_at   | MmugDNA.34732.1 | 4.95  | 4.98  | 0.13 | 0.13 | -1.02  | 0.923374 | 0.655579 | 0.967345 | 0.798663 |
| MmugDNA.34735.1.S1_at   | MmugDNA.34735.1 | 3.25  | 3.1   | 0.26 | 0.11 | 1.11   | 0.621267 | 0.685546 | 0.81255  | 0.816542 |
| MmugDNA.34736.1.S1_at   | MmugDNA.34736.1 | 5.21  | 5.14  | 0.15 | 0.29 | 1.05   | 0.372444 | 0.416969 | 0.64495  | 0.641869 |
| MmugDNA.34739.1.S1_at   | MmugDNA.34739.1 | 12.21 | 11.67 | 0.04 | 0.12 | 1.46   | 0.00171  | 0.000257 | 0.085035 | 0.033501 |
| MmugDNA.34743.1.S1_at   | MmugDNA.34743.1 | 11.45 | 11.51 | 0.17 | 0.1  | -1.04  | 0.372226 | 0.000857 | 0.644813 | 0.047296 |
| MmugDNA.34747.1.S1_at   | MmugDNA.34747.1 | 10.27 | 11.25 | 0.13 | 0.05 | -1.97  | 0.000419 | 0.070291 | 0.063209 | 0.31135  |
| MmugDNA.34748.1.S1_at   | MmugDNA.34748.1 | 12.14 | 12.95 | 0.22 | 0.08 | -1.76  | 0.004615 | 0.056464 | 0.114154 | 0.283516 |
| MmugDNA.34753.1.S1_at   | MmugDNA.34753.1 | 5.78  | 5.67  | 0.04 | 0.02 | 1.08   | 0.014222 | 0.026176 | 0.17101  | 0.202787 |
| MmugDNA.34757.1.S1_s_at | MmugDNA.34757.1 | 12.84 | 12.57 | 0.11 | 0.06 | 1.21   | 0.051897 | 0.048975 | 0.285232 | 0.266119 |
| MmugDNA.34759.1.S1_at   | MmugDNA.34759.1 | 10.96 | 11.14 | 0.17 | 0.18 | -1.13  | 0.298349 | 0.036306 | 0.586678 | 0.235105 |
| MmugDNA.34761.1.S1_at   | MmugDNA.34761.1 | 11.12 | 10.28 | 0.15 | 0.08 | 1.79   | 0.001165 | 0.000118 | 0.077718 | 0.028664 |
| MmugDNA.34763.1.S1_at   | MmugDNA.34763.1 | 7.89  | 8.17  | 0.3  | 0.18 | -1.22  | 0.50126  | 0.657883 | 0.735287 | 0.800051 |
| MmugDNA.34766.1.S1_at   | MmugDNA.34766.1 | 3.31  | 3.17  | 0.18 | 0.22 | 1.1    | 0.346706 | 0.427314 | 0.625    | 0.649175 |
| MmugDNA.34768.1.S1_at   | MmugDNA.34768.1 | 8.66  | 8.51  | 0.1  | 0.09 | 1.11   | 0.082527 | 0.021688 | 0.344304 | 0.184333 |
| MmugDNA.34773.1.S1_at   | MmugDNA.34773.1 | 5.23  | 5.09  | 0.28 | 0.15 | 1.1    | 0.311989 | 0.470144 | 0.598156 | 0.678572 |
| MmugDNA.34776.1.S1_at   | MmugDNA.34776.1 | 8.46  | 8.36  | 0.35 | 0.13 | 1.07   | 0.464509 | 0.68861  | 0.710664 | 0.818251 |
| MmugDNA.34778.1.S1_s_at | MmugDNA.34778.1 | 11.92 | 12.23 | 0.04 | 0.06 | -1.24  | 0.001573 | 0.018694 | 0.082509 | 0.171742 |
| MmugDNA.34780.1.S1_at   | MmugDNA.34780.1 | 6.05  | 5.98  | 0.02 | 0.16 | 1.05   | 0.176966 | 0.311167 | 0.471563 | 0.566215 |
| MmugDNA.34781.1.S1_at   | MmugDNA.34781.1 | 3.24  | 3.3   | 0.05 | 0.04 | -1.04  | 0.886379 | 0.061614 | 0.951556 | 0.295094 |
| MmugDNA.34787.1.S1_at   | MmugDNA.34787.1 | 8.15  | 10.36 | 1.54 | 0.18 | -4.64  | 0.068175 | 0.305812 | 0.318943 | 0.562731 |
| MmugDNA.34796.1.S1_at   | MmugDNA.34796.1 | 5.61  | 5.59  | 0.23 | 0.05 | 1.01   | 0.821018 | 0.736062 | 0.920123 | 0.847311 |

|                         |                 |       |       |      |      |       |          |          |          |          |
|-------------------------|-----------------|-------|-------|------|------|-------|----------|----------|----------|----------|
| MmugDNA.34798.1.S1_at   | MmugDNA.34798.1 | 5.49  | 5.59  | 0.22 | 0.19 | -1.07 | 0.564187 | 0.677078 | 0.775903 | 0.811373 |
| MmugDNA.348.1.S1_at     | MmugDNA.348.1   | 12.23 | 11.99 | 0.11 | 0.05 | 1.18  | 0.099308 | 0.094597 | 0.370274 | 0.351371 |
| MmugDNA.3480.1.S1_at    | MmugDNA.3480.1  | 10.3  | 11.12 | 0.29 | 0.15 | -1.77 | 0.016927 | 0.335996 | 0.183478 | 0.583601 |
| MmugDNA.34800.1.S1_at   | MmugDNA.34800.1 | 8.63  | 8.94  | 0.25 | 0.19 | -1.24 | 0.741993 | 0.021436 | 0.880498 | 0.183342 |
| MmugDNA.34804.1.S1_at   | MmugDNA.34804.1 | 5.86  | 6.2   | 0.09 | 0.08 | -1.27 | 0.005333 | 0.028147 | 0.118146 | 0.209306 |
| MmugDNA.34807.1.S1_at   | MmugDNA.34807.1 | 7.89  | 7.29  | 0.35 | 0.09 | 1.52  | 0.019666 | 0.011328 | 0.193139 | 0.138076 |
| MmugDNA.34813.1.S1_at   | MmugDNA.34813.1 | 5.48  | 6.36  | 0.27 | 0.1  | -1.84 | 0.012046 | 0.033699 | 0.159687 | 0.227173 |
| MmugDNA.34814.1.S1_at   | MmugDNA.34814.1 | 11.02 | 10.5  | 0.09 | 0.11 | 1.43  | 0.00548  | 0.326504 | 0.119547 | 0.576576 |
| MmugDNA.34815.1.S1_at   | MmugDNA.34815.1 | 2.96  | 3     | 0.02 | 0.08 | -1.03 | 0.990857 | 0.531346 | 0.996664 | 0.718588 |
| MmugDNA.34816.1.S1_at   | MmugDNA.34816.1 | 11.56 | 12.07 | 0.16 | 0.19 | -1.43 | 0.040508 | 0.006037 | 0.257668 | 0.106089 |
| MmugDNA.34819.1.S1_at   | MmugDNA.34819.1 | 10.88 | 10.94 | 0.35 | 0.16 | -1.04 | 0.817984 | 0.168631 | 0.918705 | 0.445303 |
| MmugDNA.34848.1.S1_at   | MmugDNA.34848.1 | 3.09  | 3.14  | 0.18 | 0.03 | -1.03 | 0.282522 | 0.276643 | 0.573225 | 0.540596 |
| MmugDNA.34850.1.S1_at   | MmugDNA.34850.1 | 3.56  | 3.56  | 0.01 | 0.02 | 1     | 0.881541 | 0.818022 | 0.949624 | 0.895039 |
| MmugDNA.34854.1.S1_at   | MmugDNA.34854.1 | 8.32  | 7.62  | 0.18 | 0.03 | 1.63  | 0.001895 | 0.010713 | 0.087757 | 0.135227 |
| MmugDNA.34873.1.S1_at   | MmugDNA.34873.1 | 4.17  | 4.28  | 0.14 | 0.14 | -1.08 | 0.182584 | 0.221895 | 0.478381 | 0.495019 |
| MmugDNA.34874.1.S1_at   | MmugDNA.34874.1 | 8.84  | 9.14  | 0.18 | 0.28 | -1.23 | 0.137166 | 0.181838 | 0.422016 | 0.458388 |
| MmugDNA.34879.1.S1_at   | MmugDNA.34879.1 | 8.37  | 8.42  | 0.14 | 0.21 | -1.04 | 0.518744 | 0.000527 | 0.747719 | 0.040039 |
| MmugDNA.34882.1.S1_at   | MmugDNA.34882.1 | 5.85  | 7.43  | 0.68 | 0.25 | -3    | 0.05468  | 0.227559 | 0.290604 | 0.499841 |
| MmugDNA.34884.1.S1_at   | MmugDNA.34884.1 | 3.74  | 3.68  | 0.13 | 0.12 | 1.04  | 0.333446 | 0.576642 | 0.614877 | 0.747307 |
| MmugDNA.34886.1.S1_at   | MmugDNA.34886.1 | 8.88  | 8.78  | 0.21 | 0.12 | 1.07  | 0.347859 | 0.030833 | 0.626027 | 0.21742  |
| MmugDNA.34889.1.S1_at   | MmugDNA.34889.1 | 8.6   | 8.36  | 0.13 | 0.16 | 1.18  | 0.205052 | 0.012893 | 0.50286  | 0.14622  |
| MmugDNA.34895.1.S1_at   | MmugDNA.34895.1 | 8.96  | 9.55  | 0.22 | 0.12 | -1.51 | 0.01153  | 0.113757 | 0.15722  | 0.379943 |
| MmugDNA.3490.1.S1_at    | MmugDNA.3490.1  | 5.89  | 10.04 | 2.18 | 0.53 | -17.8 | 0.115931 | 0.082801 | 0.392991 | 0.332331 |
| MmugDNA.34901.1.S1_at   | MmugDNA.34901.1 | 9.41  | 10.18 | 0.41 | 0.1  | -1.71 | 0.025369 | 0.103124 | 0.21227  | 0.364026 |
| MmugDNA.34903.1.S1_at   | MmugDNA.34903.1 | 9.66  | 9.54  | 0.14 | 0.21 | 1.09  | 0.53769  | 0.743084 | 0.759884 | 0.851135 |
| MmugDNA.34905.1.S1_at   | MmugDNA.34905.1 | 5.95  | 6.13  | 0.15 | 0.14 | -1.14 | 0.495534 | 0.626907 | 0.731829 | 0.780046 |
| MmugDNA.3491.1.S1_at    | MmugDNA.3491.1  | 7.28  | 7.36  | 0.6  | 0.73 | -1.05 | 0.279722 | 0.487027 | 0.571034 | 0.690176 |
| MmugDNA.34916.1.S1_at   | MmugDNA.34916.1 | 7.79  | 7.34  | 0.18 | 0.19 | 1.37  | 0.100872 | 0.029517 | 0.372048 | 0.21349  |
| MmugDNA.34917.1.S1_at   | MmugDNA.34917.1 | 7.88  | 7.82  | 1.14 | 0.07 | 1.04  | 0.986624 | 0.981146 | 0.995228 | 0.989586 |
| MmugDNA.34921.1.S1_at   | MmugDNA.34921.1 | 5.78  | 4.56  | 1.07 | 0.63 | 2.34  | 0.21154  | 0.152938 | 0.509328 | 0.42777  |
| MmugDNA.34925.1.S1_at   | MmugDNA.34925.1 | 13.28 | 13.35 | 0.1  | 0    | -1.05 | 0.279016 | 0.328069 | 0.570342 | 0.577851 |
| MmugDNA.34926.1.S1_at   | MmugDNA.34926.1 | 4.65  | 4.66  | 0.15 | 0.13 | -1    | 0.333359 | 0.325551 | 0.614792 | 0.575831 |
| MmugDNA.34929.1.S1_at   | MmugDNA.34929.1 | 10.4  | 10.4  | 0.14 | 0.08 | -1    | 0.628998 | 0.250543 | 0.817604 | 0.519391 |
| MmugDNA.34930.1.S1_at   | MmugDNA.34930.1 | 6.4   | 6.04  | 0.21 | 0.12 | 1.28  | 0.061758 | 0.095775 | 0.304962 | 0.352753 |
| MmugDNA.34933.1.S1_at   | MmugDNA.34933.1 | 7.55  | 7.95  | 0.55 | 0.05 | -1.33 | 0.65476  | 0.293936 | 0.832889 | 0.553893 |
| MmugDNA.34933.1.S1_x_at | MmugDNA.34933.1 | 7.94  | 8     | 0.48 | 0.04 | -1.05 | 0.7898   | 0.218337 | 0.904456 | 0.491877 |
| MmugDNA.34935.1.S1_at   | MmugDNA.34935.1 | 5.64  | 5.65  | 0.05 | 0.1  | -1.01 | 0.634467 | 0.845397 | 0.820798 | 0.912061 |
| MmugDNA.34940.1.S1_at   | MmugDNA.34940.1 | 5.93  | 5.94  | 0.11 | 0.17 | -1.01 | 0.525229 | 0.276047 | 0.751861 | 0.540071 |
| MmugDNA.34947.1.S1_at   | MmugDNA.34947.1 | 9.23  | 9.19  | 0.4  | 0.05 | 1.02  | 0.487869 | 0.417117 | 0.726532 | 0.642022 |
| MmugDNA.34949.1.S1_at   | MmugDNA.34949.1 | 7.65  | 7.47  | 0.07 | 0.1  | 1.13  | 0.150426 | 0.000636 | 0.439474 | 0.042882 |
| MmugDNA.34951.1.S1_at   | MmugDNA.34951.1 | 13.29 | 13.42 | 0.09 | 0.08 | -1.09 | 0.160319 | 0.190075 | 0.451651 | 0.465717 |
| MmugDNA.34954.1.S1_at   | MmugDNA.34954.1 | 11.81 | 11.99 | 0.1  | 0.04 | -1.13 | 0.062418 | 0.506597 | 0.306582 | 0.702503 |
| MmugDNA.34955.1.S1_at   | MmugDNA.34955.1 | 7.99  | 8.66  | 0.08 | 0.14 | -1.6  | 0.00458  | 0.101349 | 0.113728 | 0.36112  |

|                         |                 |       |       |      |      |       |          |          |          |          |
|-------------------------|-----------------|-------|-------|------|------|-------|----------|----------|----------|----------|
| MmugDNA.34961.1.S1_at   | MmugDNA.34961.1 | 10.64 | 10.66 | 0.23 | 0.07 | -1.01 | 0.9759   | 0.309699 | 0.990409 | 0.565005 |
| MmugDNA.34968.1.S1_at   | MmugDNA.34968.1 | 3.26  | 3.35  | 0.08 | 0.06 | -1.06 | 0.143542 | 0.1885   | 0.429995 | 0.464458 |
| MmugDNA.34970.1.S1_at   | MmugDNA.34970.1 | 12.01 | 12.15 | 0.01 | 0.08 | -1.11 | 0.019265 | 0.000804 | 0.192035 | 0.04607  |
| MmugDNA.34971.1.S1_at   | MmugDNA.34971.1 | 8.14  | 8.09  | 0.2  | 0.09 | 1.03  | 0.295288 | 0.339803 | 0.584116 | 0.586394 |
| MmugDNA.34978.1.S1_at   | MmugDNA.34978.1 | 10.26 | 10.36 | 0.07 | 0.07 | -1.07 | 0.119376 | 0.000415 | 0.397207 | 0.038093 |
| MmugDNA.34981.1.S1_at   | MmugDNA.34981.1 | 7.3   | 6.25  | 0.36 | 0.56 | 2.07  | 0.056336 | 0.128879 | 0.294668 | 0.400306 |
| MmugDNA.34986.1.S1_at   | MmugDNA.34986.1 | 8.81  | 9.55  | 0.45 | 0.08 | -1.67 | 0.039332 | 0.015067 | 0.254835 | 0.155875 |
| MmugDNA.3499.1.S1_at    | MmugDNA.3499.1  | 10.37 | 9.52  | 0.35 | 0.1  | 1.8   | 0.026556 | 0.113162 | 0.216119 | 0.379184 |
| MmugDNA.34990.1.S1_at   | MmugDNA.34990.1 | 11.5  | 11.2  | 0.14 | 0.03 | 1.23  | 0.032699 | 0.201963 | 0.234993 | 0.476412 |
| MmugDNA.34998.1.S1_s_at | MmugDNA.34998.1 | 9.91  | 9.81  | 0.14 | 0.08 | 1.08  | 0.163085 | 0.00329  | 0.455284 | 0.082553 |
| MmugDNA.34999.1.S1_at   | MmugDNA.34999.1 | 11.98 | 11.96 | 0.09 | 0.05 | 1.01  | 0.702354 | 0.000013 | 0.858741 | 0.017532 |
| MmugDNA.35.1.S1_at      | MmugDNA.35.1    | 9.96  | 9.95  | 0.11 | 0.06 | 1.01  | 0.694486 | 0.002977 | 0.854171 | 0.079958 |
| MmugDNA.3500.1.S1_at    | MmugDNA.3500.1  | 6.05  | 6.11  | 0.08 | 0.16 | -1.04 | 0.989492 | 0.983754 | 0.996357 | 0.990952 |
| MmugDNA.35000.1.S1_at   | MmugDNA.35000.1 | 9.02  | 8.21  | 0.17 | 0.19 | 1.76  | 0.00485  | 0.056866 | 0.115123 | 0.284598 |
| MmugDNA.35001.1.S1_at   | MmugDNA.35001.1 | 4.72  | 5.56  | 1.14 | 0.19 | -1.79 | 0.322264 | 0.233011 | 0.606311 | 0.50445  |
| MmugDNA.35003.1.S1_at   | MmugDNA.35003.1 | 11.68 | 11.81 | 0.14 | 0.04 | -1.09 | 0.247477 | 0.750222 | 0.542973 | 0.854752 |
| MmugDNA.35009.1.S1_at   | MmugDNA.35009.1 | 5.89  | 5.82  | 0.1  | 0.12 | 1.05  | 0.961747 | 0.628347 | 0.984403 | 0.781112 |
| MmugDNA.35011.1.S1_at   | MmugDNA.35011.1 | 5.36  | 6.24  | 0.23 | 0.3  | -1.85 | 0.029596 | 0.453954 | 0.225124 | 0.668338 |
| MmugDNA.35014.1.S1_at   | MmugDNA.35014.1 | 5.1   | 5.02  | 0.09 | 0.03 | 1.05  | 0.222074 | 0.287253 | 0.520181 | 0.548526 |
| MmugDNA.35015.1.S1_at   | MmugDNA.35015.1 | 7.25  | 7.38  | 0.08 | 0.08 | -1.1  | 0.280516 | 0.04515  | 0.571609 | 0.256979 |
| MmugDNA.35017.1.S1_at   | MmugDNA.35017.1 | 8.34  | 8.36  | 0.25 | 0.01 | -1.01 | 0.347173 | 0.482735 | 0.625329 | 0.687512 |
| MmugDNA.35019.1.S1_at   | MmugDNA.35019.1 | 11.14 | 11.18 | 0.05 | 0.05 | -1.03 | 0.745637 | 0.054736 | 0.881995 | 0.27944  |
| MmugDNA.3502.1.S1_at    | MmugDNA.3502.1  | 12.88 | 12.41 | 0.16 | 0.02 | 1.38  | 0.014922 | 0.146822 | 0.174272 | 0.42088  |
| MmugDNA.35020.1.S1_at   | MmugDNA.35020.1 | 10.21 | 10.48 | 0.21 | 0.05 | -1.2  | 0.05916  | 0.026877 | 0.30037  | 0.205096 |
| MmugDNA.35022.1.S1_at   | MmugDNA.35022.1 | 12.76 | 12.86 | 0.06 | 0.04 | -1.07 | 0.120818 | 0.244929 | 0.399267 | 0.514752 |
| MmugDNA.35035.1.S1_at   | MmugDNA.35035.1 | 11.91 | 12.33 | 0.25 | 0.12 | -1.34 | 0.077596 | 0.128649 | 0.336434 | 0.400083 |
| MmugDNA.35040.1.S1_s_at | MmugDNA.35040.1 | 9.03  | 9.2   | 0.09 | 0.08 | -1.12 | 0.164979 | 0.187557 | 0.457897 | 0.463628 |
| MmugDNA.35046.1.S1_at   | MmugDNA.35046.1 | 6.44  | 6.45  | 0.01 | 0.02 | -1.01 | 0.690764 | 0.000447 | 0.852151 | 0.038539 |
| MmugDNA.3505.1.S1_at    | MmugDNA.3505.1  | 4.44  | 6.26  | 0.39 | 0.38 | -3.52 | 0.00583  | 0.013512 | 0.122259 | 0.148824 |
| MmugDNA.35050.1.S1_at   | MmugDNA.35050.1 | 9.94  | 9.79  | 0.22 | 0.11 | 1.11  | 0.114077 | 0.40477  | 0.39084  | 0.633269 |
| MmugDNA.35052.1.S1_at   | MmugDNA.35052.1 | 10.96 | 11.93 | 0.44 | 0.11 | -1.96 | 0.066303 | 0.26986  | 0.314985 | 0.535135 |
| MmugDNA.35053.1.S1_at   | MmugDNA.35053.1 | 6.91  | 6.88  | 0.11 | 0.04 | 1.02  | 0.873421 | 0.082379 | 0.945619 | 0.331354 |
| MmugDNA.35054.1.S1_at   | MmugDNA.35054.1 | 7.16  | 7.23  | 0.41 | 0.19 | -1.05 | 0.890693 | 0.615467 | 0.95338  | 0.772012 |
| MmugDNA.35059.1.S1_at   | MmugDNA.35059.1 | 8.5   | 7.31  | 0.81 | 0.67 | 2.28  | 0.254271 | 0.17366  | 0.548743 | 0.450003 |
| MmugDNA.35061.1.S1_at   | MmugDNA.35061.1 | 11.64 | 11.49 | 0.13 | 0.03 | 1.1   | 0.113415 | 0.048573 | 0.390238 | 0.265572 |
| MmugDNA.35063.1.S1_at   | MmugDNA.35063.1 | 9.15  | 10.09 | 0.28 | 0.02 | -1.92 | 0.007252 | 0.037385 | 0.132747 | 0.237776 |
| MmugDNA.35064.1.S1_at   | MmugDNA.35064.1 | 8.64  | 8.29  | 0.15 | 0.03 | 1.28  | 0.010964 | 0.004049 | 0.154565 | 0.090281 |
| MmugDNA.35066.1.S1_at   | MmugDNA.35066.1 | 5.63  | 5.86  | 0.15 | 0.04 | -1.17 | 0.056216 | 0.03712  | 0.294294 | 0.23717  |
| MmugDNA.35067.1.S1_at   | MmugDNA.35067.1 | 11.61 | 11.33 | 0.1  | 0.09 | 1.21  | 0.013374 | 0.003162 | 0.16632  | 0.081787 |
| MmugDNA.35069.1.S1_at   | MmugDNA.35069.1 | 10.66 | 10.17 | 0.11 | 0.21 | 1.4   | 0.0568   | 0.797327 | 0.295745 | 0.883144 |
| MmugDNA.35077.1.S1_at   | MmugDNA.35077.1 | 6.04  | 6.29  | 0.2  | 0.15 | -1.19 | 0.339436 | 0.204982 | 0.619743 | 0.479296 |
| MmugDNA.35081.1.S1_at   | MmugDNA.35081.1 | 4.3   | 4.31  | 0.15 | 0.07 | -1    | 0.368459 | 0.671002 | 0.64218  | 0.807635 |
| MmugDNA.35086.1.S1_at   | MmugDNA.35086.1 | 11.6  | 11.71 | 0.09 | 0.06 | -1.08 | 0.095909 | 0.006932 | 0.365529 | 0.112493 |

|                         |                 |       |       |      |      |       |          |          |          |          |
|-------------------------|-----------------|-------|-------|------|------|-------|----------|----------|----------|----------|
| MmugDNA.35098.1.S1_at   | MmugDNA.35098.1 | 7.93  | 8.07  | 0.23 | 0.06 | -1.1  | 0.800888 | 0.000566 | 0.910458 | 0.041049 |
| MmugDNA.35103.1.S1_at   | MmugDNA.35103.1 | 14.46 | 14.29 | 0.04 | 0.02 | 1.12  | 0.003189 | 0.046891 | 0.101477 | 0.261281 |
| MmugDNA.35105.1.S1_at   | MmugDNA.35105.1 | 11.16 | 11.26 | 0.19 | 0.14 | -1.07 | 0.262955 | 0.741115 | 0.556723 | 0.850131 |
| MmugDNA.35106.1.S1_at   | MmugDNA.35106.1 | 7.5   | 6.46  | 0.18 | 0.3  | 2.05  | 0.008046 | 0.008476 | 0.138783 | 0.12212  |
| MmugDNA.35108.1.S1_at   | MmugDNA.35108.1 | 9.11  | 9.31  | 0.3  | 0.06 | -1.15 | 0.480362 | 0.637948 | 0.721302 | 0.787234 |
| MmugDNA.3511.1.S1_at    | MmugDNA.3511.1  | 6.85  | 6.85  | 0.05 | 0.09 | 1     | 0.703909 | 0.030268 | 0.859443 | 0.215828 |
| MmugDNA.35114.1.S1_at   | MmugDNA.35114.1 | 9.46  | 9.59  | 0.31 | 0.17 | -1.09 | 0.128562 | 0.168554 | 0.410612 | 0.445172 |
| MmugDNA.3512.1.S1_at    | MmugDNA.3512.1  | 7.44  | 7.7   | 0.45 | 0.11 | -1.2  | 0.282004 | 0.504531 | 0.572752 | 0.701656 |
| MmugDNA.35120.1.S1_at   | MmugDNA.35120.1 | 3.35  | 3.24  | 0.3  | 0.05 | 1.08  | 0.35253  | 0.531465 | 0.630029 | 0.718657 |
| MmugDNA.35121.1.S1_at   | MmugDNA.35121.1 | 6.62  | 5.47  | 0.42 | 0.32 | 2.22  | 0.042818 | 0.254155 | 0.264078 | 0.522453 |
| MmugDNA.35129.1.S1_at   | MmugDNA.35129.1 | 6.15  | 5.93  | 0.2  | 0.55 | 1.16  | 0.945403 | 0.164729 | 0.977063 | 0.441044 |
| MmugDNA.35130.1.S1_at   | MmugDNA.35130.1 | 12.57 | 12.44 | 0.1  | 0.05 | 1.1   | 0.042673 | 0.051849 | 0.263867 | 0.273151 |
| MmugDNA.35131.1.S1_at   | MmugDNA.35131.1 | 4.82  | 5.02  | 0.12 | 0.14 | -1.15 | 0.146078 | 0.011765 | 0.433854 | 0.140492 |
| MmugDNA.35133.1.S1_at   | MmugDNA.35133.1 | 4.6   | 4.89  | 0.15 | 0.15 | -1.22 | 0.036386 | 0.043808 | 0.24584  | 0.25387  |
| MmugDNA.35136.1.S1_at   | MmugDNA.35136.1 | 11.38 | 11.44 | 0.3  | 0.13 | -1.04 | 0.548086 | 0.697172 | 0.766347 | 0.824045 |
| MmugDNA.35141.1.S1_at   | MmugDNA.35141.1 | 10.08 | 10.37 | 0.35 | 0.12 | -1.22 | 0.081501 | 0.16328  | 0.342512 | 0.439456 |
| MmugDNA.35145.1.S1_at   | MmugDNA.35145.1 | 9.02  | 8.64  | 0.21 | 0.09 | 1.3   | 0.028072 | 0.188338 | 0.219913 | 0.46433  |
| MmugDNA.35149.1.S1_at   | MmugDNA.35149.1 | 9.05  | 9.18  | 0.31 | 0.08 | -1.09 | 0.238343 | 0.007504 | 0.53577  | 0.116291 |
| MmugDNA.35150.1.S1_at   | MmugDNA.35150.1 | 10.21 | 10.14 | 0.37 | 0.01 | 1.05  | 0.252312 | 0.010106 | 0.546837 | 0.131859 |
| MmugDNA.35156.1.S1_at   | MmugDNA.35156.1 | 12.73 | 12.63 | 0.07 | 0.09 | 1.07  | 0.212713 | 0.531964 | 0.510686 | 0.718995 |
| MmugDNA.3516.1.S1_s_at  | MmugDNA.3516.1  | 9.27  | 9.62  | 0.28 | 0.12 | -1.27 | 0.054007 | 0.110723 | 0.289501 | 0.374854 |
| MmugDNA.35161.1.S1_at   | MmugDNA.35161.1 | 3.02  | 3     | 0.14 | 0.15 | 1.01  | 0.339613 | 0.239287 | 0.619844 | 0.509995 |
| MmugDNA.35165.1.S1_at   | MmugDNA.35165.1 | 10.34 | 10.07 | 0.17 | 0.13 | 1.2   | 0.14974  | 0.586309 | 0.438721 | 0.753427 |
| MmugDNA.35169.1.S1_at   | MmugDNA.35169.1 | 6.56  | 7.25  | 0.13 | 0.47 | -1.62 | 0.14958  | 0.142913 | 0.438553 | 0.416854 |
| MmugDNA.3517.1.S1_at    | MmugDNA.3517.1  | 7.73  | 7.24  | 0.22 | 0.18 | 1.41  | 0.174315 | 0.004425 | 0.468499 | 0.092904 |
| MmugDNA.35178.1.S1_at   | MmugDNA.35178.1 | 12.67 | 12.8  | 0.04 | 0.03 | -1.1  | 0.006451 | 0.101359 | 0.127119 | 0.36112  |
| MmugDNA.3518.1.S1_at    | MmugDNA.3518.1  | 6.4   | 6.22  | 0.03 | 0.25 | 1.13  | 0.670027 | 0.070564 | 0.841673 | 0.311781 |
| MmugDNA.35182.1.S1_at   | MmugDNA.35182.1 | 9.1   | 9.19  | 0.22 | 0.08 | -1.07 | 0.731152 | 0.861973 | 0.874409 | 0.921556 |
| MmugDNA.35184.1.S1_at   | MmugDNA.35184.1 | 7.26  | 7.19  | 0.48 | 0.12 | 1.05  | 0.43979  | 0.595474 | 0.693902 | 0.759091 |
| MmugDNA.35189.1.S1_at   | MmugDNA.35189.1 | 12.58 | 12.93 | 0.02 | 0.05 | -1.28 | 0.00029  | 0.003882 | 0.057043 | 0.0887   |
| MmugDNA.3519.1.S1_at    | MmugDNA.3519.1  | 4.38  | 4.37  | 0.03 | 0.04 | 1.01  | 0.29674  | 0.062997 | 0.58546  | 0.297642 |
| MmugDNA.35192.1.S1_at   | MmugDNA.35192.1 | 9.96  | 9.16  | 0.13 | 0.15 | 1.74  | 0.002103 | 0.000123 | 0.090208 | 0.029087 |
| MmugDNA.35206.1.S1_at   | MmugDNA.35206.1 | 9.77  | 10.01 | 0.1  | 0.21 | -1.19 | 0.239228 | 0.625812 | 0.53651  | 0.779339 |
| MmugDNA.35206.1.S1_s_at | MmugDNA.35206.1 | 9.48  | 9.35  | 0.08 | 0.01 | 1.1   | 0.038837 | 0.064263 | 0.253345 | 0.299692 |
| MmugDNA.35207.1.S1_at   | MmugDNA.35207.1 | 4.63  | 5.15  | 0.06 | 0.78 | -1.43 | 0.258765 | 0.009672 | 0.552939 | 0.129405 |
| MmugDNA.35208.1.S1_at   | MmugDNA.35208.1 | 4.39  | 4.27  | 0.2  | 0.21 | 1.09  | 0.218998 | 0.330107 | 0.516662 | 0.578983 |
| MmugDNA.35209.1.S1_at   | MmugDNA.35209.1 | 12.67 | 12.37 | 0.21 | 0.06 | 1.23  | 0.083694 | 0.011376 | 0.346423 | 0.138214 |
| MmugDNA.35210.1.S1_at   | MmugDNA.35210.1 | 5.54  | 5.29  | 0.18 | 0.06 | 1.19  | 0.279242 | 0.511036 | 0.570643 | 0.705358 |
| MmugDNA.35214.1.S1_at   | MmugDNA.35214.1 | 3.3   | 3.15  | 0.15 | 0.27 | 1.11  | 0.9999   | 0.907638 | 1        | 0.947753 |
| MmugDNA.35228.1.S1_at   | MmugDNA.35228.1 | 11.74 | 11.61 | 0.14 | 0.02 | 1.09  | 0.072234 | 0.474281 | 0.326716 | 0.68135  |
| MmugDNA.35232.1.S1_at   | MmugDNA.35232.1 | 7.71  | 7.08  | 0.34 | 0.06 | 1.55  | 0.014198 | 0.003687 | 0.170837 | 0.086591 |
| MmugDNA.35236.1.S1_at   | MmugDNA.35236.1 | 11.21 | 11.15 | 0.2  | 0.03 | 1.04  | 0.212226 | 0.270635 | 0.51017  | 0.535927 |
| MmugDNA.35241.1.S1_at   | MmugDNA.35241.1 | 12.05 | 12    | 0.15 | 0.07 | 1.03  | 0.788362 | 0.770727 | 0.903792 | 0.866807 |

|                         |                 |       |       |      |      |       |          |          |          |          |
|-------------------------|-----------------|-------|-------|------|------|-------|----------|----------|----------|----------|
| MmugDNA.35243.1.S1_s_at | MmugDNA.35243.1 | 3.76  | 3.66  | 0.05 | 0.09 | 1.07  | 0.192197 | 0.009686 | 0.488778 | 0.129473 |
| MmugDNA.35245.1.S1_at   | MmugDNA.35245.1 | 11.28 | 11.24 | 0.08 | 0.11 | 1.03  | 0.850012 | 0.109412 | 0.93482  | 0.373239 |
| MmugDNA.3526.1.S1_at    | MmugDNA.3526.1  | 2.95  | 2.97  | 0.09 | 0.06 | -1.01 | 0.979201 | 0.117909 | 0.992078 | 0.385837 |
| MmugDNA.35260.1.S1_at   | MmugDNA.35260.1 | 7.19  | 7.28  | 0.2  | 0.12 | -1.07 | 0.98361  | 0.001271 | 0.993875 | 0.055241 |
| MmugDNA.35261.1.S1_at   | MmugDNA.35261.1 | 9.76  | 12.49 | 0.97 | 0.21 | -6.62 | 0.020568 | 0.206436 | 0.196858 | 0.480571 |
| MmugDNA.35263.1.S1_at   | MmugDNA.35263.1 | 13.16 | 13.15 | 0.1  | 0.04 | 1.01  | 0.712356 | 0.457939 | 0.864309 | 0.670999 |
| MmugDNA.35267.1.S1_at   | MmugDNA.35267.1 | 9.9   | 9.6   | 0.27 | 0.14 | 1.24  | 0.314431 | 0.501011 | 0.599959 | 0.699373 |
| MmugDNA.35270.1.S1_at   | MmugDNA.35270.1 | 6.77  | 7.18  | 0.18 | 0.08 | -1.33 | 0.013069 | 0.030222 | 0.165033 | 0.21576  |
| MmugDNA.35286.1.S1_at   | MmugDNA.35286.1 | 6.99  | 7.01  | 0.61 | 0.31 | -1.01 | 0.960327 | 0.074586 | 0.983718 | 0.318266 |
| MmugDNA.3529.1.S1_at    | MmugDNA.3529.1  | 11.65 | 11.36 | 0.35 | 0.05 | 1.22  | 0.179388 | 0.313429 | 0.474478 | 0.567879 |
| MmugDNA.35293.1.S1_at   | MmugDNA.35293.1 | 13.54 | 13.76 | 0.08 | 0.01 | -1.17 | 0.021116 | 0.227592 | 0.198834 | 0.499882 |
| MmugDNA.35294.1.S1_at   | MmugDNA.35294.1 | 11.05 | 10.68 | 0.1  | 0.1  | 1.29  | 0.007976 | 0.040983 | 0.138389 | 0.247202 |
| MmugDNA.35302.1.S1_at   | MmugDNA.35302.1 | 11.73 | 10.93 | 0.32 | 0.03 | 1.74  | 0.013165 | 0.018699 | 0.165301 | 0.171742 |
| MmugDNA.35304.1.S1_at   | MmugDNA.35304.1 | 11.98 | 11.97 | 0.24 | 0.04 | 1.01  | 0.915982 | 0.991784 | 0.964302 | 0.995392 |
| MmugDNA.35307.1.S1_at   | MmugDNA.35307.1 | 12.47 | 12.58 | 0.52 | 0.2  | -1.07 | 0.587983 | 0.267593 | 0.790754 | 0.53333  |
| MmugDNA.35311.1.S1_at   | MmugDNA.35311.1 | 6.6   | 8.23  | 0.97 | 0.25 | -3.09 | 0.069718 | 0.326082 | 0.322426 | 0.576315 |
| MmugDNA.35313.1.S1_at   | MmugDNA.35313.1 | 8.76  | 9.07  | 0.61 | 0.13 | -1.24 | 0.290809 | 0.315402 | 0.580217 | 0.568939 |
| MmugDNA.35321.1.S1_at   | MmugDNA.35321.1 | 10.06 | 10.96 | 0.3  | 0.1  | -1.87 | 0.00555  | 0.000092 | 0.119965 | 0.027225 |
| MmugDNA.35328.1.S1_at   | MmugDNA.35328.1 | 8.13  | 8.47  | 0.32 | 0.04 | -1.26 | 0.155795 | 0.324534 | 0.446184 | 0.57507  |
| MmugDNA.35331.1.S1_at   | MmugDNA.35331.1 | 8.07  | 8.55  | 0.31 | 0.12 | -1.4  | 0.058131 | 0.248958 | 0.298185 | 0.518026 |
| MmugDNA.35334.1.S1_at   | MmugDNA.35334.1 | 4.68  | 4.59  | 0.25 | 0.06 | 1.06  | 0.265595 | 0.471177 | 0.558222 | 0.679213 |
| MmugDNA.35338.1.S1_at   | MmugDNA.35338.1 | 4.5   | 4.04  | 0.25 | 0.28 | 1.37  | 0.137111 | 0.143728 | 0.421956 | 0.417583 |
| MmugDNA.35339.1.S1_at   | MmugDNA.35339.1 | 5.03  | 5.17  | 0.08 | 0.19 | -1.1  | 0.33279  | 0.106134 | 0.61438  | 0.368499 |
| MmugDNA.3534.1.S1_at    | MmugDNA.3534.1  | 11.25 | 10.99 | 0.14 | 0.18 | 1.2   | 0.238284 | 0.007125 | 0.53577  | 0.113654 |
| MmugDNA.35341.1.S1_at   | MmugDNA.35341.1 | 12.13 | 11.85 | 0.06 | 0.05 | 1.22  | 0.00214  | 0.001653 | 0.090208 | 0.061436 |
| MmugDNA.35361.1.S1_at   | MmugDNA.35361.1 | 12.38 | 12.33 | 0.13 | 0.13 | 1.03  | 0.606748 | 0.226337 | 0.803313 | 0.498783 |
| MmugDNA.35362.1.S1_at   | MmugDNA.35362.1 | 10.88 | 10.76 | 0.02 | 0.07 | 1.09  | 0.01944  | 0.558133 | 0.192344 | 0.735418 |
| MmugDNA.35363.1.S1_at   | MmugDNA.35363.1 | 9.67  | 9.77  | 0.2  | 0.15 | -1.07 | 0.507955 | 0.074372 | 0.740166 | 0.318053 |
| MmugDNA.35367.1.S1_at   | MmugDNA.35367.1 | 10.8  | 11.03 | 0.09 | 0.09 | -1.17 | 0.039698 | 0.149025 | 0.255929 | 0.423337 |
| MmugDNA.35368.1.S1_at   | MmugDNA.35368.1 | 8.02  | 8.16  | 0.23 | 0.21 | -1.11 | 0.513113 | 0.132621 | 0.743476 | 0.404544 |
| MmugDNA.35383.1.S1_at   | MmugDNA.35383.1 | 11.53 | 11.38 | 0.19 | 0.07 | 1.11  | 0.168237 | 0.000459 | 0.461466 | 0.038572 |
| MmugDNA.35389.1.S1_at   | MmugDNA.35389.1 | 8.06  | 5.98  | 0.67 | 0.13 | 4.22  | 0.007508 | 0.011416 | 0.134911 | 0.138384 |
| MmugDNA.35394.1.S1_at   | MmugDNA.35394.1 | 4.26  | 4.26  | 0.02 | 0.12 | -1    | 0.424076 | 0.3811   | 0.681872 | 0.617478 |
| MmugDNA.35395.1.S1_at   | MmugDNA.35395.1 | 6.64  | 7.06  | 0.26 | 0.21 | -1.34 | 0.286622 | 0.050917 | 0.576462 | 0.270955 |
| MmugDNA.35402.1.S1_at   | MmugDNA.35402.1 | 4.57  | 5.23  | 0.59 | 0.7  | -1.59 | 0.428957 | 0.399615 | 0.685557 | 0.629912 |
| MmugDNA.35404.1.S1_at   | MmugDNA.35404.1 | 14.4  | 14.28 | 0.05 | 0.02 | 1.09  | 0.019929 | 0.025669 | 0.19445  | 0.200834 |
| MmugDNA.35424.1.S1_at   | MmugDNA.35424.1 | 12.15 | 11.56 | 0.1  | 0.17 | 1.5   | 0.013263 | 0.010788 | 0.165811 | 0.135565 |
| MmugDNA.35426.1.S1_at   | MmugDNA.35426.1 | 6.66  | 6.65  | 0.08 | 0.13 | 1.01  | 0.556503 | 0.229347 | 0.771669 | 0.501527 |
| MmugDNA.35427.1.S1_at   | MmugDNA.35427.1 | 12.57 | 12.57 | 0.17 | 0.2  | 1     | 0.497697 | 0.468406 | 0.73333  | 0.677714 |
| MmugDNA.35430.1.S1_s_at | MmugDNA.35430.1 | 5.95  | 5.8   | 0.34 | 0.1  | 1.11  | 0.368798 | 0.395934 | 0.642367 | 0.627788 |
| MmugDNA.35432.1.S1_at   | MmugDNA.35432.1 | 13.5  | 13.26 | 0.51 | 0.06 | 1.18  | 0.941007 | 0.995916 | 0.975231 | 0.997533 |
| MmugDNA.3544.1.S1_at    | MmugDNA.3544.1  | 7.24  | 7.81  | 0.71 | 0.3  | -1.48 | 0.12703  | 0.063258 | 0.408591 | 0.298244 |
| MmugDNA.35444.1.S1_at   | MmugDNA.35444.1 | 6.16  | 5.41  | 2.43 | 0.53 | 1.67  | 0.423945 | 0.4474   | 0.681813 | 0.66348  |



|                         |                 |       |       |      |      |       |          |          |          |          |
|-------------------------|-----------------|-------|-------|------|------|-------|----------|----------|----------|----------|
| MmugDNA.35444.1.S1_x_at | MmugDNA.35444.1 | 6.32  | 5.2   | 2.1  | 0.43 | 2.16  | 0.40963  | 0.527433 | 0.671955 | 0.716117 |
| MmugDNA.35447.1.S1_at   | MmugDNA.35447.1 | 6.43  | 6.26  | 0.12 | 0.14 | 1.12  | 0.162799 | 0.201057 | 0.4549   | 0.475509 |
| MmugDNA.35448.1.S1_at   | MmugDNA.35448.1 | 12.04 | 11.57 | 0.16 | 0.1  | 1.38  | 0.021595 | 0.030728 | 0.200598 | 0.217179 |
| MmugDNA.35448.1.S1_s_at | MmugDNA.35448.1 | 12.22 | 11.86 | 0.17 | 0.11 | 1.29  | 0.017871 | 0.019033 | 0.187044 | 0.173644 |
| MmugDNA.35450.1.S1_at   | MmugDNA.35450.1 | 12.45 | 12.84 | 0.13 | 0.08 | -1.3  | 0.006036 | 0.496434 | 0.124151 | 0.69607  |
| MmugDNA.35453.1.S1_at   | MmugDNA.35453.1 | 7.21  | 7.18  | 0.06 | 0.07 | 1.02  | 0.384986 | 0.361265 | 0.653868 | 0.602104 |
| MmugDNA.35455.1.S1_at   | MmugDNA.35455.1 | 5.94  | 5.35  | 0.66 | 0.21 | 1.51  | 0.826837 | 0.832546 | 0.923258 | 0.903934 |
| MmugDNA.35457.1.S1_s_at | MmugDNA.35457.1 | 12.6  | 13.03 | 0.15 | 0.13 | -1.35 | 0.023941 | 0.02731  | 0.207856 | 0.206625 |
| MmugDNA.35459.1.S1_at   | MmugDNA.35459.1 | 4.38  | 4.04  | 0.1  | 0.1  | 1.26  | 0.056637 | 0.044742 | 0.295477 | 0.256009 |
| MmugDNA.35468.1.S1_at   | MmugDNA.35468.1 | 8.96  | 7.88  | 0.32 | 0.07 | 2.11  | 0.003532 | 0.026039 | 0.104419 | 0.202252 |
| MmugDNA.35469.1.S1_at   | MmugDNA.35469.1 | 8.66  | 8.04  | 0.04 | 0.07 | 1.54  | 0.000202 | 0.007469 | 0.053494 | 0.115888 |
| MmugDNA.3547.1.S1_at    | MmugDNA.3547.1  | 9.2   | 9.5   | 0.2  | 0.16 | -1.23 | 0.2768   | 0.162529 | 0.568317 | 0.438649 |
| MmugDNA.35470.1.S1_at   | MmugDNA.35470.1 | 6.89  | 7.05  | 0.26 | 0.19 | -1.12 | 0.268304 | 0.327847 | 0.561028 | 0.577625 |
| MmugDNA.35473.1.S1_at   | MmugDNA.35473.1 | 9.2   | 8.78  | 0.14 | 0.12 | 1.33  | 0.027182 | 0.007728 | 0.217756 | 0.117463 |
| MmugDNA.3548.1.S1_at    | MmugDNA.3548.1  | 7.07  | 7.41  | 0.09 | 0.09 | -1.27 | 0.010376 | 0.048621 | 0.15181  | 0.265602 |
| MmugDNA.35480.1.S1_at   | MmugDNA.35480.1 | 11.9  | 12.4  | 0.12 | 0.02 | -1.41 | 0.001104 | 0.149357 | 0.077306 | 0.423811 |
| MmugDNA.35484.1.S1_at   | MmugDNA.35484.1 | 10.62 | 10.6  | 0.1  | 0.05 | 1.02  | 0.780224 | 0.032461 | 0.89973  | 0.22324  |
| MmugDNA.35488.1.S1_at   | MmugDNA.35488.1 | 4.21  | 4.16  | 0.14 | 0.18 | 1.04  | 0.580737 | 0.648689 | 0.786042 | 0.794407 |
| MmugDNA.3549.1.S1_at    | MmugDNA.3549.1  | 8.41  | 8.33  | 0.07 | 0.02 | 1.05  | 0.189738 | 0.093531 | 0.486162 | 0.349846 |
| MmugDNA.35490.1.S1_at   | MmugDNA.35490.1 | 6.9   | 6.34  | 1.04 | 0.34 | 1.48  | 0.413592 | 0.423836 | 0.674909 | 0.646547 |
| MmugDNA.35494.1.S1_at   | MmugDNA.35494.1 | 13.24 | 13.22 | 0.05 | 0.08 | 1.01  | 0.691072 | 0.014031 | 0.852289 | 0.15169  |
| MmugDNA.35496.1.S1_at   | MmugDNA.35496.1 | 3.26  | 3.31  | 0.06 | 0.06 | -1.03 | 0.812887 | 0.370263 | 0.916222 | 0.609406 |
| MmugDNA.35498.1.S1_at   | MmugDNA.35498.1 | 5.79  | 5.8   | 0.01 | 0.15 | -1.01 | 0.440401 | 0.640593 | 0.694455 | 0.789025 |
| MmugDNA.355.1.S1_at     | MmugDNA.355.1   | 3.95  | 3.92  | 0.04 | 0.06 | 1.02  | 0.762464 | 0.026113 | 0.891191 | 0.202544 |
| MmugDNA.35503.1.S1_at   | MmugDNA.35503.1 | 7.21  | 7.34  | 0.21 | 0.24 | -1.09 | 0.524809 | 0.348248 | 0.751585 | 0.592441 |
| MmugDNA.35504.1.S1_at   | MmugDNA.35504.1 | 8.13  | 8     | 0.02 | 0.08 | 1.09  | 0.039235 | 0.025615 | 0.254526 | 0.200819 |
| MmugDNA.3551.1.S1_at    | MmugDNA.3551.1  | 7.59  | 8.32  | 0.83 | 0.3  | -1.65 | 0.660229 | 0.394165 | 0.83613  | 0.62675  |
| MmugDNA.35516.1.S1_at   | MmugDNA.35516.1 | 10.61 | 12.1  | 0.67 | 0.11 | -2.8  | 0.022315 | 0.365524 | 0.202621 | 0.605602 |
| MmugDNA.35522.1.S1_at   | MmugDNA.35522.1 | 5.07  | 4.93  | 0.03 | 0.1  | 1.11  | 0.112638 | 0.021236 | 0.388985 | 0.182455 |
| MmugDNA.35525.1.S1_at   | MmugDNA.35525.1 | 5.75  | 5.77  | 0.05 | 0.05 | -1.02 | 0.63692  | 0.151183 | 0.822282 | 0.42587  |
| MmugDNA.35529.1.S1_at   | MmugDNA.35529.1 | 6.77  | 6.31  | 0.49 | 0.52 | 1.38  | 0.142155 | 0.200114 | 0.428166 | 0.474603 |
| MmugDNA.35530.1.S1_at   | MmugDNA.35530.1 | 6.72  | 6.83  | 0.19 | 0.18 | -1.08 | 0.255466 | 0.605965 | 0.549917 | 0.765547 |
| MmugDNA.35532.1.S1_at   | MmugDNA.35532.1 | 2.78  | 2.78  | 0.05 | 0.08 | -1    | 0.688293 | 0.647017 | 0.851109 | 0.793279 |
| MmugDNA.35534.1.S1_at   | MmugDNA.35534.1 | 6.29  | 6.2   | 0.1  | 0.15 | 1.06  | 0.929211 | 0.06849  | 0.969943 | 0.308214 |
| MmugDNA.35537.1.S1_at   | MmugDNA.35537.1 | 11.92 | 13.1  | 0.65 | 0.23 | -2.28 | 0.067453 | 0.027596 | 0.317391 | 0.207431 |
| MmugDNA.35544.1.S1_at   | MmugDNA.35544.1 | 10.85 | 10.24 | 0.06 | 0.1  | 1.53  | 0.000997 | 0.102348 | 0.076321 | 0.362527 |
| MmugDNA.35548.1.S1_s_at | MmugDNA.35548.1 | 8.22  | 8.6   | 0.33 | 0.2  | -1.31 | 0.738137 | 0.654512 | 0.878569 | 0.798087 |
| MmugDNA.35557.1.S1_at   | MmugDNA.35557.1 | 10.62 | 10.47 | 0.06 | 0.05 | 1.11  | 0.030145 | 0.001502 | 0.226716 | 0.059065 |
| MmugDNA.35558.1.S1_at   | MmugDNA.35558.1 | 10.82 | 10.64 | 0.23 | 0.11 | 1.14  | 0.473038 | 0.179043 | 0.716437 | 0.455404 |
| MmugDNA.35559.1.S1_at   | MmugDNA.35559.1 | 13.15 | 11.87 | 0.06 | 0.39 | 2.42  | 0.008487 | 0.078931 | 0.141304 | 0.325916 |
| MmugDNA.35562.1.S1_at   | MmugDNA.35562.1 | 7.59  | 7.42  | 0.04 | 0.18 | 1.13  | 0.065987 | 0.863718 | 0.314318 | 0.922638 |
| MmugDNA.35566.1.S1_at   | MmugDNA.35566.1 | 9.8   | 9.86  | 0.22 | 0.14 | -1.04 | 0.64406  | 0.780323 | 0.826574 | 0.872592 |
| MmugDNA.35571.1.S1_at   | MmugDNA.35571.1 | 10.17 | 9.63  | 0.24 | 0.4  | 1.46  | 0.450456 | 0.004247 | 0.701508 | 0.091685 |

|                         |                 |       |       |      |      |       |          |          |          |          |
|-------------------------|-----------------|-------|-------|------|------|-------|----------|----------|----------|----------|
| MmugDNA.35573.1.S1_at   | MmugDNA.35573.1 | 8.47  | 7.88  | 0.64 | 0.18 | 1.5   | 0.215896 | 0.019228 | 0.513611 | 0.174494 |
| MmugDNA.35576.1.S1_at   | MmugDNA.35576.1 | 3.94  | 4.02  | 0.21 | 0    | -1.06 | 0.668958 | 0.777573 | 0.841208 | 0.870732 |
| MmugDNA.35579.1.S1_at   | MmugDNA.35579.1 | 10.78 | 10.6  | 0.2  | 0.03 | 1.13  | 0.48351  | 0.855093 | 0.72362  | 0.91741  |
| MmugDNA.3558.1.S1_at    | MmugDNA.3558.1  | 11.12 | 11.21 | 0.19 | 0.08 | -1.06 | 0.372812 | 0.147928 | 0.645067 | 0.422304 |
| MmugDNA.35580.1.S1_at   | MmugDNA.35580.1 | 9.3   | 9.61  | 0.31 | 0.23 | -1.25 | 0.137575 | 0.507556 | 0.422683 | 0.703118 |
| MmugDNA.35583.1.S1_at   | MmugDNA.35583.1 | 4.44  | 3.35  | 0.47 | 0.22 | 2.12  | 0.033464 | 0.340239 | 0.236931 | 0.586637 |
| MmugDNA.35585.1.S1_at   | MmugDNA.35585.1 | 5.25  | 5.97  | 0.33 | 0.32 | -1.65 | 0.027241 | 0.232956 | 0.217978 | 0.50445  |
| MmugDNA.35588.1.S1_at   | MmugDNA.35588.1 | 10.17 | 10.4  | 0.1  | 0.15 | -1.18 | 0.059745 | 0.064848 | 0.301662 | 0.30069  |
| MmugDNA.35589.1.S1_at   | MmugDNA.35589.1 | 4.39  | 4.56  | 0.17 | 0.09 | -1.13 | 0.532508 | 0.499088 | 0.756566 | 0.697988 |
| MmugDNA.3559.1.S1_at    | MmugDNA.3559.1  | 3.24  | 3.37  | 0.03 | 0.13 | -1.09 | 0.214078 | 0.103254 | 0.511862 | 0.364143 |
| MmugDNA.35592.1.S1_at   | MmugDNA.35592.1 | 4.38  | 4.35  | 0.18 | 0.08 | 1.02  | 0.951802 | 0.887518 | 0.980036 | 0.935902 |
| MmugDNA.35594.1.S1_at   | MmugDNA.35594.1 | 6.71  | 9.24  | 0.92 | 0.26 | -5.79 | 0.024217 | 0.294871 | 0.208762 | 0.554429 |
| MmugDNA.35598.1.S1_at   | MmugDNA.35598.1 | 6.4   | 6.49  | 0.12 | 0.06 | -1.06 | 0.751255 | 0.144591 | 0.885233 | 0.418466 |
| MmugDNA.3560.1.S1_at    | MmugDNA.3560.1  | 4.36  | 4.32  | 0.13 | 0.11 | 1.03  | 0.610799 | 0.782633 | 0.805939 | 0.874202 |
| MmugDNA.35607.1.S1_at   | MmugDNA.35607.1 | 11.66 | 11.57 | 0.09 | 0.1  | 1.06  | 0.138891 | 0.233328 | 0.424543 | 0.50468  |
| MmugDNA.35610.1.S1_at   | MmugDNA.35610.1 | 10.18 | 9.58  | 0.35 | 0.12 | 1.52  | 0.147296 | 0.117141 | 0.435385 | 0.384582 |
| MmugDNA.35613.1.S1_at   | MmugDNA.35613.1 | 4.11  | 4.06  | 0.27 | 0.18 | 1.03  | 0.454564 | 0.57453  | 0.704418 | 0.745961 |
| MmugDNA.35617.1.S1_at   | MmugDNA.35617.1 | 4.56  | 4.21  | 0.18 | 0.13 | 1.27  | 0.077794 | 0.069005 | 0.336904 | 0.309017 |
| MmugDNA.35619.1.S1_at   | MmugDNA.35619.1 | 4.89  | 4.77  | 0.31 | 0.19 | 1.08  | 0.761336 | 0.2342   | 0.890581 | 0.505449 |
| MmugDNA.35629.1.S1_at   | MmugDNA.35629.1 | 12.41 | 10.12 | 0.47 | 0.37 | 4.9   | 0.002739 | 0.011393 | 0.09702  | 0.13824  |
| MmugDNA.3563.1.S1_at    | MmugDNA.3563.1  | 3.69  | 3.62  | 0.03 | 0.11 | 1.05  | 0.088136 | 0.085829 | 0.354244 | 0.337901 |
| MmugDNA.35637.1.S1_at   | MmugDNA.35637.1 | 6.13  | 6.42  | 0.12 | 0.04 | -1.23 | 0.054771 | 0.289717 | 0.290805 | 0.550776 |
| MmugDNA.35638.1.S1_at   | MmugDNA.35638.1 | 5.94  | 6.09  | 0.08 | 0    | -1.11 | 0.086868 | 0.003631 | 0.352168 | 0.086261 |
| MmugDNA.35643.1.S1_at   | MmugDNA.35643.1 | 11.51 | 11.67 | 0.11 | 0.05 | -1.12 | 0.073469 | 0.244845 | 0.328846 | 0.514662 |
| MmugDNA.35645.1.S1_s_at | MmugDNA.35645.1 | 5.04  | 6.47  | 0.44 | 0.31 | -2.71 | 0.010217 | 0.173854 | 0.150739 | 0.450133 |
| MmugDNA.35647.1.S1_at   | MmugDNA.35647.1 | 9.42  | 9.26  | 0.43 | 0.31 | 1.12  | 0.642451 | 0.804529 | 0.825608 | 0.887587 |
| MmugDNA.35648.1.S1_at   | MmugDNA.35648.1 | 9.73  | 9.25  | 0.08 | 0.04 | 1.39  | 0.000785 | 0.000236 | 0.072818 | 0.03241  |
| MmugDNA.35651.1.S1_at   | MmugDNA.35651.1 | 5.51  | 6.52  | 0.45 | 0.08 | -2.01 | 0.036274 | 0.130188 | 0.245534 | 0.401892 |
| MmugDNA.35656.1.S1_at   | MmugDNA.35656.1 | 4.9   | 4.12  | 0.39 | 0.2  | 1.71  | 0.097373 | 0.283118 | 0.367528 | 0.545694 |
| MmugDNA.3566.1.S1_at    | MmugDNA.3566.1  | 5.87  | 5.45  | 0.23 | 0.3  | 1.33  | 0.366531 | 0.524753 | 0.640793 | 0.714552 |
| MmugDNA.35679.1.S1_at   | MmugDNA.35679.1 | 9.56  | 9.08  | 0.26 | 0.07 | 1.39  | 0.016168 | 0.007965 | 0.179793 | 0.118702 |
| MmugDNA.35680.1.S1_at   | MmugDNA.35680.1 | 6.77  | 6.88  | 0.24 | 0.44 | -1.08 | 0.947449 | 0.308804 | 0.977941 | 0.56463  |
| MmugDNA.35681.1.S1_at   | MmugDNA.35681.1 | 5.34  | 6.2   | 0.21 | 0.16 | -1.81 | 0.004923 | 0.18886  | 0.115175 | 0.464789 |
| MmugDNA.35682.1.S1_at   | MmugDNA.35682.1 | 9.18  | 9.47  | 0.08 | 0.03 | -1.23 | 0.003461 | 0.021283 | 0.103385 | 0.182646 |
| MmugDNA.35683.1.S1_at   | MmugDNA.35683.1 | 6.06  | 5.99  | 0.21 | 0.43 | 1.05  | 0.833747 | 0.714039 | 0.926824 | 0.834108 |
| MmugDNA.35685.1.S1_at   | MmugDNA.35685.1 | 11.27 | 11.01 | 0.18 | 0.12 | 1.2   | 0.101513 | 0.180326 | 0.372929 | 0.456953 |
| MmugDNA.35687.1.S1_at   | MmugDNA.35687.1 | 10.98 | 11.13 | 0.07 | 0.06 | -1.11 | 0.053284 | 0.112823 | 0.287986 | 0.37844  |
| MmugDNA.35695.1.S1_at   | MmugDNA.35695.1 | 8.21  | 8.18  | 0.09 | 0.11 | 1.02  | 0.791626 | 0.973404 | 0.905386 | 0.985537 |
| MmugDNA.35697.1.S1_at   | MmugDNA.35697.1 | 9.52  | 9.8   | 0.43 | 0.01 | -1.21 | 0.885811 | 0.875903 | 0.951294 | 0.929502 |
| MmugDNA.35700.1.S1_at   | MmugDNA.35700.1 | 10.29 | 11.1  | 0.79 | 0.14 | -1.75 | 0.147817 | 0.043379 | 0.435995 | 0.25294  |
| MmugDNA.35702.1.S1_at   | MmugDNA.35702.1 | 6.73  | 6.13  | 0.31 | 0.44 | 1.52  | 0.606789 | 0.879165 | 0.803313 | 0.931052 |
| MmugDNA.35704.1.S1_at   | MmugDNA.35704.1 | 11.06 | 11.03 | 0.15 | 0.14 | 1.02  | 0.184464 | 0.199587 | 0.480429 | 0.474211 |
| MmugDNA.35709.1.S1_at   | MmugDNA.35709.1 | 8.35  | 8.36  | 0.49 | 0.19 | -1.01 | 0.931617 | 0.911736 | 0.971265 | 0.950257 |

|                         |                 |       |       |      |      |       |          |          |          |          |
|-------------------------|-----------------|-------|-------|------|------|-------|----------|----------|----------|----------|
| MmugDNA.3571.1.S1_at    | MmugDNA.3571.1  | 11.92 | 12.04 | 0.07 | 0.16 | -1.09 | 0.473269 | 0.775071 | 0.716569 | 0.869035 |
| MmugDNA.35711.1.S1_at   | MmugDNA.35711.1 | 10.95 | 11.24 | 0.14 | 0.08 | -1.23 | 0.042929 | 0.763482 | 0.264327 | 0.862471 |
| MmugDNA.3572.1.S1_at    | MmugDNA.3572.1  | 7.5   | 7.85  | 0.11 | 0.19 | -1.28 | 0.074614 | 0.223114 | 0.331249 | 0.49588  |
| MmugDNA.35720.1.S1_at   | MmugDNA.35720.1 | 6.5   | 6.69  | 0.18 | 0.19 | -1.14 | 0.353458 | 0.005775 | 0.630635 | 0.104378 |
| MmugDNA.35724.1.S1_at   | MmugDNA.35724.1 | 12.3  | 12.52 | 0.32 | 0.2  | -1.16 | 0.260442 | 0.071508 | 0.554556 | 0.313706 |
| MmugDNA.35730.1.S1_at   | MmugDNA.35730.1 | 5.84  | 7.41  | 1.44 | 0.47 | -2.97 | 0.167304 | 0.257545 | 0.460507 | 0.525294 |
| MmugDNA.35734.1.S1_at   | MmugDNA.35734.1 | 9.45  | 6.91  | 0.89 | 0.26 | 5.79  | 0.020301 | 0.05266  | 0.196136 | 0.275004 |
| MmugDNA.35738.1.S1_at   | MmugDNA.35738.1 | 10.52 | 9.54  | 0.11 | 0.16 | 1.97  | 0.001005 | 0.000019 | 0.076321 | 0.019635 |
| MmugDNA.35741.1.S1_at   | MmugDNA.35741.1 | 10.75 | 10.48 | 0.35 | 0.22 | 1.21  | 0.172558 | 0.179406 | 0.466621 | 0.455908 |
| MmugDNA.35742.1.S1_at   | MmugDNA.35742.1 | 7.42  | 7.17  | 0.13 | 0.14 | 1.18  | 0.090109 | 0.114973 | 0.356863 | 0.381719 |
| MmugDNA.35745.1.S1_at   | MmugDNA.35745.1 | 7.83  | 8.71  | 0.08 | 0.31 | -1.85 | 0.017805 | 0.184846 | 0.187001 | 0.460776 |
| MmugDNA.3575.1.S1_at    | MmugDNA.3575.1  | 6.3   | 5.88  | 0.07 | 0.11 | 1.34  | 0.003525 | 0.097421 | 0.104286 | 0.355097 |
| MmugDNA.35758.1.S1_at   | MmugDNA.35758.1 | 5.36  | 4.94  | 0.4  | 0.06 | 1.34  | 0.307982 | 0.506686 | 0.59471  | 0.702546 |
| MmugDNA.35759.1.S1_at   | MmugDNA.35759.1 | 7.42  | 7.39  | 0.14 | 0.03 | 1.02  | 0.65924  | 0.905124 | 0.835549 | 0.94617  |
| MmugDNA.3576.1.S1_at    | MmugDNA.3576.1  | 8.2   | 7.94  | 0.23 | 0.06 | 1.2   | 0.473527 | 0.001007 | 0.716826 | 0.050657 |
| MmugDNA.35760.1.S1_at   | MmugDNA.35760.1 | 6.91  | 6.28  | 0.79 | 0.2  | 1.55  | 0.082551 | 0.084505 | 0.344304 | 0.335901 |
| MmugDNA.35763.1.S1_at   | MmugDNA.35763.1 | 10.19 | 10.14 | 0.21 | 0.13 | 1.04  | 0.954283 | 0.40849  | 0.981196 | 0.635694 |
| MmugDNA.35767.1.S1_s_at | MmugDNA.35767.1 | 12.76 | 12.88 | 0.16 | 0.04 | -1.09 | 0.255854 | 0.049331 | 0.55043  | 0.267063 |
| MmugDNA.35771.1.S1_at   | MmugDNA.35771.1 | 9.26  | 8.75  | 0.06 | 0.22 | 1.42  | 0.017039 | 0.019949 | 0.183882 | 0.177476 |
| MmugDNA.35773.1.S1_at   | MmugDNA.35773.1 | 6.26  | 6.21  | 0.15 | 0.02 | 1.04  | 0.760897 | 0.928426 | 0.890383 | 0.959349 |
| MmugDNA.35776.1.S1_at   | MmugDNA.35776.1 | 11.43 | 10.72 | 0.11 | 0.14 | 1.64  | 0.002485 | 0.015037 | 0.094326 | 0.155766 |
| MmugDNA.35779.1.S1_at   | MmugDNA.35779.1 | 5.13  | 4.97  | 0.19 | 0.17 | 1.12  | 0.319216 | 0.411169 | 0.603834 | 0.637937 |
| MmugDNA.3578.1.S1_at    | MmugDNA.3578.1  | 6.42  | 6.55  | 0.18 | 0.03 | -1.1  | 0.799532 | 0.255362 | 0.909612 | 0.523406 |
| MmugDNA.35783.1.S1_at   | MmugDNA.35783.1 | 11.24 | 11.8  | 0.16 | 0.03 | -1.48 | 0.004509 | 0.308819 | 0.113436 | 0.56463  |
| MmugDNA.35790.1.S1_at   | MmugDNA.35790.1 | 7.68  | 6.81  | 1.39 | 0.54 | 1.83  | 0.126601 | 0.255019 | 0.408002 | 0.52317  |
| MmugDNA.35791.1.S1_at   | MmugDNA.35791.1 | 10.64 | 10.92 | 0.28 | 0.12 | -1.21 | 0.559103 | 0.287414 | 0.773148 | 0.548663 |
| MmugDNA.35794.1.S1_at   | MmugDNA.35794.1 | 7.97  | 9     | 0.14 | 0.23 | -2.05 | 0.004902 | 0.263083 | 0.115126 | 0.529402 |
| MmugDNA.35796.1.S1_at   | MmugDNA.35796.1 | 6.81  | 6.23  | 0.6  | 0.04 | 1.5   | 0.173252 | 0.32956  | 0.467457 | 0.578781 |
| MmugDNA.3580.1.S1_at    | MmugDNA.3580.1  | 11.88 | 11.77 | 0.12 | 0.03 | 1.08  | 0.120046 | 0.328331 | 0.398372 | 0.578034 |
| MmugDNA.35804.1.S1_at   | MmugDNA.35804.1 | 8.83  | 8.66  | 0.03 | 0.03 | 1.12  | 0.002437 | 0.119543 | 0.093707 | 0.388208 |
| MmugDNA.35807.1.S1_at   | MmugDNA.35807.1 | 8.07  | 6.75  | 0.74 | 0.47 | 2.49  | 0.125725 | 0.074603 | 0.406504 | 0.318299 |
| MmugDNA.35808.1.S1_at   | MmugDNA.35808.1 | 9.54  | 9.85  | 0.05 | 0.03 | -1.24 | 0.001774 | 0.000517 | 0.085481 | 0.039588 |
| MmugDNA.35810.1.S1_at   | MmugDNA.35810.1 | 6.69  | 8.47  | 1.24 | 0.11 | -3.43 | 0.065268 | 0.031835 | 0.312394 | 0.220909 |
| MmugDNA.35814.1.S1_at   | MmugDNA.35814.1 | 8.47  | 8.49  | 0.12 | 0.29 | -1.01 | 0.804124 | 0.011784 | 0.912015 | 0.140575 |
| MmugDNA.35816.1.S1_at   | MmugDNA.35816.1 | 6.46  | 6.52  | 0.16 | 0.03 | -1.05 | 0.448183 | 0.486856 | 0.699844 | 0.690091 |
| MmugDNA.35818.1.S1_at   | MmugDNA.35818.1 | 6.91  | 7.19  | 0.28 | 0.01 | -1.22 | 0.165373 | 0.279163 | 0.458328 | 0.542814 |
| MmugDNA.35823.1.S1_s_at | MmugDNA.35823.1 | 5.24  | 5.32  | 0.12 | 0.03 | -1.06 | 0.103558 | 0.097243 | 0.376749 | 0.3549   |
| MmugDNA.35828.1.S1_s_at | MmugDNA.35828.1 | 8.48  | 8.78  | 0.39 | 0.13 | -1.23 | 0.193251 | 0.075144 | 0.489751 | 0.319332 |
| MmugDNA.3583.1.S1_at    | MmugDNA.3583.1  | 6.43  | 6.33  | 0.12 | 0.11 | 1.07  | 0.207059 | 0.350198 | 0.504797 | 0.593963 |
| MmugDNA.35831.1.S1_at   | MmugDNA.35831.1 | 5.39  | 4.47  | 0.83 | 0.12 | 1.89  | 0.110972 | 0.142924 | 0.386642 | 0.416854 |
| MmugDNA.35837.1.S1_at   | MmugDNA.35837.1 | 7.81  | 7.69  | 0.1  | 0.07 | 1.09  | 0.731769 | 0.103725 | 0.874671 | 0.364519 |
| MmugDNA.35839.1.S1_at   | MmugDNA.35839.1 | 9.9   | 10.08 | 0.2  | 0.03 | -1.13 | 0.44744  | 0.611647 | 0.699448 | 0.769481 |
| MmugDNA.3584.1.S1_at    | MmugDNA.3584.1  | 5.6   | 5.55  | 0.13 | 0.03 | 1.03  | 0.587617 | 0.646133 | 0.790523 | 0.792676 |

|                         |                 |       |       |      |      |        |          |          |          |          |
|-------------------------|-----------------|-------|-------|------|------|--------|----------|----------|----------|----------|
| MmugDNA.35843.1.S1_at   | MmugDNA.35843.1 | 9.72  | 9.54  | 0.11 | 0.05 | 1.13   | 0.094458 | 0.000691 | 0.363371 | 0.044166 |
| MmugDNA.35844.1.S1_at   | MmugDNA.35844.1 | 10.79 | 10.51 | 0.29 | 0.03 | 1.21   | 0.536016 | 0.189343 | 0.75873  | 0.465092 |
| MmugDNA.35846.1.S1_at   | MmugDNA.35846.1 | 10.24 | 10.63 | 0.09 | 0.06 | -1.31  | 0.003339 | 0.118116 | 0.102526 | 0.385993 |
| MmugDNA.35847.1.S1_at   | MmugDNA.35847.1 | 7.09  | 7.13  | 0.14 | 0.11 | -1.03  | 0.855699 | 0.448233 | 0.937133 | 0.664158 |
| MmugDNA.35851.1.S1_at   | MmugDNA.35851.1 | 8.96  | 8.6   | 0.15 | 0.09 | 1.29   | 0.043429 | 0.051267 | 0.265644 | 0.271825 |
| MmugDNA.35853.1.S1_at   | MmugDNA.35853.1 | 7.49  | 6.58  | 0.75 | 0.27 | 1.88   | 0.081666 | 0.208005 | 0.342855 | 0.482049 |
| MmugDNA.35854.1.S1_at   | MmugDNA.35854.1 | 7.72  | 9.34  | 0.24 | 0.11 | -3.07  | 0.000637 | 0.113755 | 0.070727 | 0.379943 |
| MmugDNA.35867.1.S1_at   | MmugDNA.35867.1 | 6.55  | 7.19  | 1.31 | 0.17 | -1.56  | 0.993424 | 0.848183 | 0.997386 | 0.913817 |
| MmugDNA.35868.1.S1_at   | MmugDNA.35868.1 | 3.54  | 3.19  | 0.3  | 0.06 | 1.27   | 0.148287 | 0.154084 | 0.436869 | 0.428867 |
| MmugDNA.35870.1.S1_at   | MmugDNA.35870.1 | 7.33  | 7.85  | 0.17 | 0.1  | -1.43  | 0.013257 | 0.165174 | 0.165796 | 0.441389 |
| MmugDNA.35871.1.S1_at   | MmugDNA.35871.1 | 3.59  | 3.62  | 0.06 | 0.17 | -1.02  | 0.736128 | 0.909417 | 0.877243 | 0.948813 |
| MmugDNA.35874.1.S1_at   | MmugDNA.35874.1 | 5.1   | 5.22  | 0.19 | 0.02 | -1.09  | 0.429104 | 0.211649 | 0.685625 | 0.485681 |
| MmugDNA.35875.1.S1_at   | MmugDNA.35875.1 | 12.92 | 12.99 | 0.09 | 0.04 | -1.05  | 0.201194 | 0.835458 | 0.498709 | 0.905836 |
| MmugDNA.35876.1.S1_at   | MmugDNA.35876.1 | 5.92  | 7.67  | 0.81 | 0.16 | -3.36  | 0.055039 | 0.124979 | 0.291637 | 0.395386 |
| MmugDNA.35877.1.S1_s_at | MmugDNA.35877.1 | 13.53 | 13.22 | 0.04 | 0.13 | 1.24   | 0.015167 | 0.058128 | 0.175242 | 0.287755 |
| MmugDNA.3588.1.S1_at    | MmugDNA.3588.1  | 11.34 | 10.69 | 0.32 | 0.22 | 1.57   | 0.03458  | 0.024368 | 0.24053  | 0.195393 |
| MmugDNA.35887.1.S1_at   | MmugDNA.35887.1 | 6.3   | 6.06  | 0.07 | 0.08 | 1.18   | 0.034428 | 0.026273 | 0.240132 | 0.203033 |
| MmugDNA.35890.1.S1_at   | MmugDNA.35890.1 | 8.05  | 8.23  | 0.25 | 0.09 | -1.13  | 0.253241 | 0.626163 | 0.547616 | 0.779643 |
| MmugDNA.35890.1.S1_s_at | MmugDNA.35890.1 | 8.21  | 8.13  | 0.45 | 0.2  | 1.06   | 0.564153 | 0.877576 | 0.775892 | 0.930173 |
| MmugDNA.35891.1.S1_at   | MmugDNA.35891.1 | 6.21  | 6.3   | 0.11 | 0.19 | -1.06  | 0.879849 | 0.704108 | 0.948824 | 0.82833  |
| MmugDNA.35897.1.S1_at   | MmugDNA.35897.1 | 10.18 | 9.93  | 0.07 | 0.1  | 1.19   | 0.025418 | 0.729825 | 0.212416 | 0.843695 |
| MmugDNA.3590.1.S1_at    | MmugDNA.3590.1  | 10.09 | 10.22 | 0.16 | 0.08 | -1.09  | 0.95799  | 0.931437 | 0.982752 | 0.961034 |
| MmugDNA.35906.1.S1_at   | MmugDNA.35906.1 | 8.36  | 8.54  | 0.26 | 0.1  | -1.14  | 0.291361 | 0.006418 | 0.580647 | 0.108813 |
| MmugDNA.35910.1.S1_at   | MmugDNA.35910.1 | 9.29  | 8.78  | 0.33 | 0.2  | 1.42   | 0.03518  | 0.025684 | 0.242214 | 0.200834 |
| MmugDNA.35916.1.S1_at   | MmugDNA.35916.1 | 12.54 | 12.43 | 0.04 | 0.09 | 1.08   | 0.166076 | 0.174884 | 0.459137 | 0.451561 |
| MmugDNA.35917.1.S1_at   | MmugDNA.35917.1 | 7.91  | 6.89  | 0.47 | 0.05 | 2.02   | 0.031652 | 0.105195 | 0.231371 | 0.366982 |
| MmugDNA.35934.1.S1_at   | MmugDNA.35934.1 | 13.44 | 13.54 | 0.06 | 0.03 | -1.07  | 0.057275 | 0.082872 | 0.296671 | 0.332423 |
| MmugDNA.35937.1.S1_at   | MmugDNA.35937.1 | 7.35  | 7.33  | 0.15 | 0.04 | 1.01   | 0.333718 | 0.444412 | 0.615072 | 0.662053 |
| MmugDNA.35940.1.S1_at   | MmugDNA.35940.1 | 9.33  | 8.9   | 0.17 | 0.04 | 1.35   | 0.011414 | 0.010948 | 0.157067 | 0.13621  |
| MmugDNA.35942.1.S1_at   | MmugDNA.35942.1 | 6.72  | 5.66  | 0.84 | 0.19 | 2.08   | 0.151328 | 0.213884 | 0.440914 | 0.48758  |
| MmugDNA.35949.1.S1_at   | MmugDNA.35949.1 | 6.94  | 6.83  | 0.13 | 0.08 | 1.07   | 0.264721 | 0.150492 | 0.55795  | 0.425011 |
| MmugDNA.35951.1.S1_at   | MmugDNA.35951.1 | 11.71 | 12.06 | 0.19 | 0    | -1.27  | 0.015492 | 0.380789 | 0.176662 | 0.617426 |
| MmugDNA.3596.1.S1_at    | MmugDNA.3596.1  | 7.21  | 7.34  | 0.26 | 0.04 | -1.1   | 0.391457 | 0.519922 | 0.658679 | 0.7114   |
| MmugDNA.35963.1.S1_at   | MmugDNA.35963.1 | 7.31  | 7.24  | 0.06 | 0.07 | 1.04   | 0.616483 | 0.953709 | 0.809516 | 0.973663 |
| MmugDNA.35965.1.S1_at   | MmugDNA.35965.1 | 5.14  | 8.6   | 1.56 | 0.16 | -10.95 | 0.040862 | 0.327446 | 0.25855  | 0.577284 |
| MmugDNA.35972.1.S1_at   | MmugDNA.35972.1 | 4.83  | 4.81  | 0.13 | 0.05 | 1.01   | 0.684466 | 0.478956 | 0.84962  | 0.684806 |
| MmugDNA.35983.1.S1_at   | MmugDNA.35983.1 | 3.55  | 3.6   | 0.14 | 0.32 | -1.04  | 0.892498 | 0.967044 | 0.954212 | 0.981752 |
| MmugDNA.35984.1.S1_at   | MmugDNA.35984.1 | 4.85  | 4.57  | 0.08 | 0.23 | 1.21   | 0.172964 | 0.049984 | 0.467041 | 0.268812 |
| MmugDNA.35986.1.S1_at   | MmugDNA.35986.1 | 5.45  | 5.55  | 0.08 | 0.33 | -1.07  | 0.963468 | 0.258083 | 0.985197 | 0.525574 |
| MmugDNA.35993.1.S1_at   | MmugDNA.35993.1 | 5.04  | 4.55  | 0.19 | 0.11 | 1.4    | 0.017185 | 0.016041 | 0.184348 | 0.160532 |
| MmugDNA.36.1.S1_at      | MmugDNA.36.1    | 7.52  | 10.02 | 1.39 | 0.37 | -5.65  | 0.149566 | 0.323548 | 0.438536 | 0.574497 |
| MmugDNA.36001.1.S1_at   | MmugDNA.36001.1 | 6.26  | 7.04  | 0.19 | 0.18 | -1.72  | 0.006366 | 0.228923 | 0.126143 | 0.501181 |
| MmugDNA.36005.1.S1_at   | MmugDNA.36005.1 | 9.42  | 8.32  | 0.29 | 0.42 | 2.15   | 0.078208 | 0.140452 | 0.337766 | 0.413627 |

|                         |                 |       |       |      |      |       |          |          |          |          |
|-------------------------|-----------------|-------|-------|------|------|-------|----------|----------|----------|----------|
| MmugDNA.3601.1.S1_at    | MmugDNA.3601.1  | 5.92  | 5.5   | 0.36 | 0.03 | 1.34  | 0.129677 | 0.061948 | 0.412005 | 0.295734 |
| MmugDNA.36013.1.S1_at   | MmugDNA.36013.1 | 7.13  | 7.29  | 0.21 | 0.05 | -1.12 | 0.147486 | 0.458669 | 0.435407 | 0.671276 |
| MmugDNA.36017.1.S1_at   | MmugDNA.36017.1 | 5.98  | 5.93  | 0.02 | 0.12 | 1.03  | 0.790066 | 0.779809 | 0.904494 | 0.87235  |
| MmugDNA.36018.1.S1_at   | MmugDNA.36018.1 | 10.96 | 11.29 | 0.19 | 0.12 | -1.26 | 0.170527 | 0.082735 | 0.464183 | 0.332205 |
| MmugDNA.36026.1.S1_at   | MmugDNA.36026.1 | 3.84  | 3.68  | 0.04 | 0.16 | 1.12  | 0.166002 | 0.050814 | 0.459032 | 0.270632 |
| MmugDNA.36031.1.S1_at   | MmugDNA.36031.1 | 11.52 | 11.78 | 0.17 | 0.09 | -1.2  | 0.202449 | 0.170691 | 0.500091 | 0.447288 |
| MmugDNA.36034.1.S1_at   | MmugDNA.36034.1 | 3.48  | 3.12  | 0.35 | 0.14 | 1.28  | 0.161861 | 0.193093 | 0.453651 | 0.468554 |
| MmugDNA.36035.1.S1_s_at | MmugDNA.36035.1 | 11.75 | 11.9  | 0.4  | 0.09 | -1.11 | 0.649504 | 0.724758 | 0.829674 | 0.840668 |
| MmugDNA.36037.1.S1_at   | MmugDNA.36037.1 | 10.92 | 10.67 | 0.11 | 0.07 | 1.19  | 0.026907 | 0.01484  | 0.217035 | 0.154918 |
| MmugDNA.36038.1.S1_s_at | MmugDNA.36038.1 | 3.42  | 3.46  | 0.1  | 0.03 | -1.03 | 0.606496 | 0.173266 | 0.803146 | 0.449791 |
| MmugDNA.36039.1.S1_at   | MmugDNA.36039.1 | 5.11  | 5.09  | 0.16 | 0.09 | 1.01  | 0.567278 | 0.066185 | 0.77771  | 0.302785 |
| MmugDNA.36041.1.S1_at   | MmugDNA.36041.1 | 6.83  | 7.14  | 0.08 | 0.36 | -1.24 | 0.556479 | 0.850998 | 0.771669 | 0.915265 |
| MmugDNA.36042.1.S1_at   | MmugDNA.36042.1 | 11.02 | 10.22 | 0.53 | 0.08 | 1.74  | 0.153698 | 0.167108 | 0.443759 | 0.4436   |
| MmugDNA.36046.1.S1_at   | MmugDNA.36046.1 | 10.63 | 10.07 | 0.27 | 0.08 | 1.48  | 0.049996 | 0.050588 | 0.281266 | 0.270301 |
| MmugDNA.36047.1.S1_at   | MmugDNA.36047.1 | 9.19  | 9.95  | 0.29 | 0.01 | -1.69 | 0.010562 | 0.041633 | 0.152643 | 0.24887  |
| MmugDNA.36049.1.S1_at   | MmugDNA.36049.1 | 10.68 | 9.41  | 0.43 | 0.24 | 2.42  | 0.015807 | 0.007157 | 0.178173 | 0.113788 |
| MmugDNA.36053.1.S1_at   | MmugDNA.36053.1 | 6.28  | 6.27  | 0.13 | 0.06 | 1.01  | 0.747284 | 0.956365 | 0.882955 | 0.975143 |
| MmugDNA.36055.1.S1_at   | MmugDNA.36055.1 | 8.5   | 10.02 | 0.84 | 0.22 | -2.88 | 0.060851 | 0.205137 | 0.303707 | 0.47951  |
| MmugDNA.36058.1.S1_at   | MmugDNA.36058.1 | 10.98 | 10.78 | 0.08 | 0.13 | 1.15  | 0.033238 | 0.036334 | 0.236446 | 0.235105 |
| MmugDNA.36059.1.S1_at   | MmugDNA.36059.1 | 3.29  | 3.48  | 0.17 | 0.12 | -1.14 | 0.097019 | 0.20078  | 0.367217 | 0.475282 |
| MmugDNA.36064.1.S1_at   | MmugDNA.36064.1 | 7.52  | 7.91  | 0.09 | 0.15 | -1.31 | 0.036446 | 0.02109  | 0.246006 | 0.181869 |
| MmugDNA.36073.1.S1_at   | MmugDNA.36073.1 | 9.63  | 9.54  | 0.06 | 0.12 | 1.07  | 0.685965 | 0.027105 | 0.850432 | 0.205797 |
| MmugDNA.36074.1.S1_at   | MmugDNA.36074.1 | 5.44  | 5.48  | 0.16 | 0.04 | -1.03 | 0.821479 | 0.966483 | 0.920411 | 0.981353 |
| MmugDNA.36076.1.S1_at   | MmugDNA.36076.1 | 13.01 | 13.1  | 0.07 | 0.03 | -1.06 | 0.074001 | 0.517621 | 0.330021 | 0.709722 |
| MmugDNA.36085.1.S1_at   | MmugDNA.36085.1 | 11.69 | 11.44 | 0.05 | 0.09 | 1.18  | 0.03073  | 0.138047 | 0.228035 | 0.410919 |
| MmugDNA.36086.1.S1_at   | MmugDNA.36086.1 | 11.84 | 11.45 | 0.14 | 0.33 | 1.31  | 0.242587 | 0.377261 | 0.539382 | 0.614869 |
| MmugDNA.36086.1.S1_s_at | MmugDNA.36086.1 | 11.96 | 11.55 | 0.13 | 0.33 | 1.33  | 0.177432 | 0.279397 | 0.472172 | 0.543027 |
| MmugDNA.36098.1.S1_at   | MmugDNA.36098.1 | 10.46 | 9.59  | 0.6  | 0.27 | 1.84  | 0.132482 | 0.00548  | 0.415892 | 0.102081 |
| MmugDNA.36100.1.S1_at   | MmugDNA.36100.1 | 10.66 | 10.67 | 0.18 | 0.03 | -1    | 0.799238 | 0.213284 | 0.909484 | 0.487179 |
| MmugDNA.36101.1.S1_at   | MmugDNA.36101.1 | 4.73  | 4.61  | 0.1  | 0.19 | 1.08  | 0.930522 | 0.486118 | 0.97078  | 0.689618 |
| MmugDNA.36102.1.S1_at   | MmugDNA.36102.1 | 8.14  | 8.2   | 0.26 | 0.04 | -1.04 | 0.844635 | 0.366407 | 0.932048 | 0.606092 |
| MmugDNA.36103.1.S1_at   | MmugDNA.36103.1 | 10.19 | 9.7   | 0.22 | 0.07 | 1.4   | 0.06123  | 0.059534 | 0.304296 | 0.290548 |
| MmugDNA.36105.1.S1_at   | MmugDNA.36105.1 | 8.56  | 8.69  | 0.37 | 0.02 | -1.1  | 0.637181 | 0.746327 | 0.822365 | 0.85272  |
| MmugDNA.36108.1.S1_at   | MmugDNA.36108.1 | 9.43  | 9.5   | 0.27 | 0.25 | -1.05 | 0.730278 | 0.068523 | 0.873936 | 0.308267 |
| MmugDNA.36110.1.S1_at   | MmugDNA.36110.1 | 4.29  | 4.06  | 0.13 | 0.14 | 1.17  | 0.07439  | 0.150089 | 0.331002 | 0.424698 |
| MmugDNA.36114.1.S1_at   | MmugDNA.36114.1 | 10.01 | 10.1  | 0.27 | 0.26 | -1.06 | 0.352676 | 0.531096 | 0.630029 | 0.718415 |
| MmugDNA.36116.1.S1_at   | MmugDNA.36116.1 | 5.29  | 8.34  | 1.41 | 0.34 | -8.27 | 0.069939 | 0.251764 | 0.322957 | 0.520444 |
| MmugDNA.36118.1.S1_at   | MmugDNA.36118.1 | 10.2  | 10.01 | 0.07 | 0.1  | 1.15  | 0.05759  | 0.047908 | 0.297348 | 0.263765 |
| MmugDNA.36120.1.S1_at   | MmugDNA.36120.1 | 5.49  | 5.3   | 0.58 | 0.13 | 1.14  | 0.263447 | 0.333399 | 0.556984 | 0.581668 |
| MmugDNA.36127.1.S1_at   | MmugDNA.36127.1 | 5.96  | 6.21  | 0.25 | 0.05 | -1.19 | 0.613643 | 0.692156 | 0.807564 | 0.82091  |
| MmugDNA.36129.1.S1_at   | MmugDNA.36129.1 | 10.99 | 11.15 | 0.14 | 0.05 | -1.12 | 0.370079 | 0.11506  | 0.643241 | 0.381931 |
| MmugDNA.3613.1.S1_at    | MmugDNA.3613.1  | 6.97  | 6.94  | 0.1  | 0.04 | 1.02  | 0.712364 | 0.865453 | 0.864309 | 0.923596 |
| MmugDNA.36130.1.S1_at   | MmugDNA.36130.1 | 10.15 | 10.21 | 0.14 | 0.11 | -1.04 | 0.532827 | 0.005119 | 0.756693 | 0.09927  |

|                         |                 |       |       |      |      |        |          |          |          |          |
|-------------------------|-----------------|-------|-------|------|------|--------|----------|----------|----------|----------|
| MmugDNA.36132.1.S1_at   | MmugDNA.36132.1 | 6.83  | 6.93  | 0.16 | 0.01 | -1.08  | 0.865007 | 0.130362 | 0.941423 | 0.402216 |
| MmugDNA.36140.1.S1_at   | MmugDNA.36140.1 | 10.83 | 11.03 | 0.04 | 0.01 | -1.15  | 0.000756 | 0.011217 | 0.072567 | 0.137962 |
| MmugDNA.36144.1.S1_at   | MmugDNA.36144.1 | 5.32  | 5     | 0.18 | 0.08 | 1.25   | 0.044674 | 0.134702 | 0.268619 | 0.406729 |
| MmugDNA.36148.1.S1_at   | MmugDNA.36148.1 | 4.92  | 5.87  | 0.17 | 0.4  | -1.93  | 0.017663 | 0.007454 | 0.186448 | 0.115872 |
| MmugDNA.3615.1.S1_at    | MmugDNA.3615.1  | 4.03  | 3.8   | 0.12 | 0.07 | 1.17   | 0.130579 | 0.17326  | 0.413011 | 0.449791 |
| MmugDNA.36161.1.S1_at   | MmugDNA.36161.1 | 6     | 6.17  | 0.67 | 0.33 | -1.13  | 0.421153 | 0.566149 | 0.679846 | 0.740296 |
| MmugDNA.36167.1.S1_at   | MmugDNA.36167.1 | 3.2   | 3.02  | 1.16 | 0.02 | 1.13   | 0.27823  | 0.360893 | 0.56957  | 0.60194  |
| MmugDNA.36168.1.S1_at   | MmugDNA.36168.1 | 5.9   | 5.91  | 0.17 | 0.21 | -1.01  | 0.259912 | 0.473285 | 0.554139 | 0.680582 |
| MmugDNA.36171.1.S1_at   | MmugDNA.36171.1 | 3.43  | 3.41  | 0.26 | 0.24 | 1.01   | 0.460374 | 0.616834 | 0.708167 | 0.772992 |
| MmugDNA.36175.1.S1_at   | MmugDNA.36175.1 | 12.07 | 11.95 | 0.32 | 0.09 | 1.09   | 0.407522 | 0.186918 | 0.67054  | 0.462786 |
| MmugDNA.36182.1.S1_at   | MmugDNA.36182.1 | 9.98  | 10.69 | 1.19 | 0.08 | -1.63  | 0.181952 | 0.374963 | 0.477459 | 0.613186 |
| MmugDNA.36183.1.S1_at   | MmugDNA.36183.1 | 6.23  | 6.19  | 0.05 | 0.12 | 1.03   | 0.185737 | 0.523995 | 0.481947 | 0.714108 |
| MmugDNA.36185.1.S1_at   | MmugDNA.36185.1 | 6.55  | 5.99  | 1.45 | 0.11 | 1.47   | 0.24926  | 0.332963 | 0.544486 | 0.581326 |
| MmugDNA.36186.1.S1_at   | MmugDNA.36186.1 | 3.51  | 3.51  | 0.08 | 0.13 | -1     | 0.347448 | 0.501082 | 0.625532 | 0.699435 |
| MmugDNA.36188.1.S1_at   | MmugDNA.36188.1 | 8.12  | 8.08  | 0.06 | 0.17 | 1.03   | 0.673984 | 0.309581 | 0.844284 | 0.564987 |
| MmugDNA.36196.1.S1_at   | MmugDNA.36196.1 | 9.75  | 10.31 | 0.08 | 0.03 | -1.47  | 0.000334 | 0.243105 | 0.060233 | 0.513356 |
| MmugDNA.36197.1.S1_at   | MmugDNA.36197.1 | 7.5   | 7.42  | 0.03 | 0.07 | 1.05   | 0.263138 | 0.293149 | 0.556921 | 0.553061 |
| MmugDNA.36201.1.S1_at   | MmugDNA.36201.1 | 4.81  | 9.08  | 1.4  | 0.26 | -19.27 | 0.015059 | 0.007566 | 0.174736 | 0.116437 |
| MmugDNA.36212.1.S1_at   | MmugDNA.36212.1 | 4.89  | 4.98  | 0.17 | 0.09 | -1.06  | 0.632633 | 0.366187 | 0.81991  | 0.605975 |
| MmugDNA.36216.1.S1_at   | MmugDNA.36216.1 | 11.17 | 11.14 | 0.05 | 0.05 | 1.02   | 0.863495 | 0.000429 | 0.940667 | 0.038359 |
| MmugDNA.36219.1.S1_at   | MmugDNA.36219.1 | 12.71 | 12.5  | 0.04 | 0.08 | 1.16   | 0.019041 | 0.14989  | 0.191514 | 0.424511 |
| MmugDNA.3622.1.S1_at    | MmugDNA.3622.1  | 8.57  | 7.79  | 0.57 | 0.18 | 1.72   | 0.064799 | 0.258366 | 0.311307 | 0.525631 |
| MmugDNA.36222.1.S1_at   | MmugDNA.36222.1 | 6.27  | 5.75  | 0.76 | 0.07 | 1.43   | 0.2612   | 0.306749 | 0.555294 | 0.5633   |
| MmugDNA.3623.1.S1_at    | MmugDNA.3623.1  | 8.44  | 8.27  | 1.09 | 0.41 | 1.13   | 0.557405 | 0.676561 | 0.772121 | 0.810956 |
| MmugDNA.36233.1.S1_at   | MmugDNA.36233.1 | 13.22 | 13.16 | 0.05 | 0    | 1.04   | 0.052288 | 0.019052 | 0.285979 | 0.173688 |
| MmugDNA.36234.1.S1_at   | MmugDNA.36234.1 | 5.34  | 5.18  | 0.18 | 0.08 | 1.12   | 0.619744 | 0.356573 | 0.81142  | 0.598459 |
| MmugDNA.3624.1.S1_at    | MmugDNA.3624.1  | 10.48 | 10.68 | 0.08 | 0.19 | -1.15  | 0.522729 | 0.087429 | 0.749928 | 0.340617 |
| MmugDNA.36241.1.S1_at   | MmugDNA.36241.1 | 12.26 | 12.17 | 0.14 | 0.05 | 1.07   | 0.614891 | 0.484004 | 0.808551 | 0.688263 |
| MmugDNA.36250.1.S1_at   | MmugDNA.36250.1 | 9     | 9.1   | 0.19 | 0.06 | -1.07  | 0.82039  | 0.006551 | 0.919887 | 0.109707 |
| MmugDNA.36250.1.S1_x_at | MmugDNA.36250.1 | 8.94  | 8.91  | 0.29 | 0.09 | 1.02   | 0.836977 | 0.016036 | 0.928546 | 0.160532 |
| MmugDNA.36251.1.S1_at   | MmugDNA.36251.1 | 8.54  | 7.82  | 0.15 | 0.23 | 1.65   | 0.005999 | 0.016438 | 0.124151 | 0.162368 |
| MmugDNA.36254.1.S1_at   | MmugDNA.36254.1 | 11.49 | 11.09 | 0.05 | 0.09 | 1.32   | 0.002765 | 0.087003 | 0.097385 | 0.339865 |
| MmugDNA.36256.1.S1_at   | MmugDNA.36256.1 | 3.26  | 3.18  | 0.09 | 0.09 | 1.05   | 0.083104 | 0.173826 | 0.345372 | 0.450128 |
| MmugDNA.36257.1.S1_at   | MmugDNA.36257.1 | 9     | 9.02  | 0.07 | 0.06 | -1.01  | 0.84279  | 0.231892 | 0.93112  | 0.503594 |
| MmugDNA.36263.1.S1_at   | MmugDNA.36263.1 | 7.46  | 7.54  | 0.1  | 0.05 | -1.06  | 0.268471 | 0.344029 | 0.561069 | 0.58962  |
| MmugDNA.36266.1.S1_at   | MmugDNA.36266.1 | 7.59  | 7.18  | 0.08 | 0.18 | 1.33   | 0.082954 | 0.215387 | 0.345114 | 0.489067 |
| MmugDNA.36271.1.S1_at   | MmugDNA.36271.1 | 4     | 4.01  | 0.06 | 0.02 | -1.01  | 0.422427 | 0.069687 | 0.680613 | 0.310164 |
| MmugDNA.36276.1.S1_at   | MmugDNA.36276.1 | 9.86  | 10.35 | 0.21 | 0.05 | -1.41  | 0.025068 | 0.014403 | 0.211247 | 0.153204 |
| MmugDNA.36278.1.S1_at   | MmugDNA.36278.1 | 9.18  | 9.01  | 0.24 | 0.04 | 1.12   | 0.305285 | 0.49512  | 0.592297 | 0.695319 |
| MmugDNA.36279.1.S1_at   | MmugDNA.36279.1 | 8.05  | 8.6   | 0.3  | 0.14 | -1.47  | 0.031985 | 0.028808 | 0.23262  | 0.211578 |
| MmugDNA.36280.1.S1_at   | MmugDNA.36280.1 | 6.42  | 6.25  | 0.37 | 0.07 | 1.13   | 0.862387 | 0.056852 | 0.940196 | 0.284556 |
| MmugDNA.36281.1.S1_at   | MmugDNA.36281.1 | 8.43  | 8.3   | 0.29 | 0.41 | 1.1    | 0.734119 | 0.079221 | 0.876074 | 0.326399 |
| MmugDNA.36282.1.S1_at   | MmugDNA.36282.1 | 4.32  | 4.83  | 0.5  | 0.4  | -1.43  | 0.697506 | 0.244175 | 0.856015 | 0.514164 |

|                         |                 |       |       |      |      |       |          |          |          |          |
|-------------------------|-----------------|-------|-------|------|------|-------|----------|----------|----------|----------|
| MmugDNA.36283.1.S1_at   | MmugDNA.36283.1 | 9.79  | 9.22  | 0.53 | 0.32 | 1.49  | 0.241885 | 0.096411 | 0.538882 | 0.354015 |
| MmugDNA.36284.1.S1_at   | MmugDNA.36284.1 | 12.23 | 12.25 | 0.05 | 0.12 | -1.02 | 0.421542 | 0.181867 | 0.679956 | 0.458395 |
| MmugDNA.36286.1.S1_at   | MmugDNA.36286.1 | 11.52 | 11.89 | 0.26 | 0.01 | -1.3  | 0.067505 | 0.000979 | 0.317446 | 0.049927 |
| MmugDNA.36293.1.S1_at   | MmugDNA.36293.1 | 9.52  | 9.09  | 0.55 | 0.32 | 1.34  | 0.419129 | 0.435507 | 0.678626 | 0.655256 |
| MmugDNA.36294.1.S1_at   | MmugDNA.36294.1 | 4.88  | 4.08  | 0.58 | 0.19 | 1.75  | 0.090223 | 0.084547 | 0.356864 | 0.335953 |
| MmugDNA.36297.1.S1_at   | MmugDNA.36297.1 | 8.4   | 8.88  | 0.37 | 0.16 | -1.4  | 0.200126 | 0.05385  | 0.497633 | 0.277598 |
| MmugDNA.36298.1.S1_at   | MmugDNA.36298.1 | 5.7   | 5.85  | 0.13 | 0.01 | -1.11 | 0.274643 | 0.170746 | 0.566523 | 0.447316 |
| MmugDNA.36299.1.S1_s_at | MmugDNA.36299.1 | 3.71  | 3.64  | 0.13 | 0.07 | 1.05  | 0.656014 | 0.118732 | 0.83356  | 0.386775 |
| MmugDNA.36301.1.S1_at   | MmugDNA.36301.1 | 11.41 | 11.48 | 0.13 | 0.13 | -1.05 | 0.525261 | 0.06582  | 0.751886 | 0.301933 |
| MmugDNA.36303.1.S1_at   | MmugDNA.36303.1 | 6.09  | 5.7   | 0.49 | 0.06 | 1.31  | 0.145225 | 0.162447 | 0.432542 | 0.438575 |
| MmugDNA.36308.1.S1_at   | MmugDNA.36308.1 | 11.61 | 11.52 | 0.09 | 0.02 | 1.07  | 0.166864 | 0.039173 | 0.460015 | 0.243072 |
| MmugDNA.3631.1.S1_at    | MmugDNA.3631.1  | 8.69  | 8.23  | 0.1  | 0.03 | 1.37  | 0.000973 | 0.000893 | 0.076222 | 0.047789 |
| MmugDNA.36318.1.S1_at   | MmugDNA.36318.1 | 10.5  | 11.4  | 1    | 0.28 | -1.86 | 0.232898 | 0.507757 | 0.531154 | 0.703325 |
| MmugDNA.36319.1.S1_at   | MmugDNA.36319.1 | 6.28  | 6.27  | 0.2  | 0.06 | 1     | 0.342447 | 0.67243  | 0.622192 | 0.808568 |
| MmugDNA.3633.1.S1_at    | MmugDNA.3633.1  | 9.6   | 9.67  | 0.08 | 0.08 | -1.05 | 0.318241 | 0.042026 | 0.602921 | 0.249463 |
| MmugDNA.3634.1.S1_at    | MmugDNA.3634.1  | 5.6   | 5.58  | 0.21 | 0.41 | 1.01  | 0.450448 | 0.436905 | 0.701508 | 0.656357 |
| MmugDNA.36342.1.S1_s_at | MmugDNA.36342.1 | 9.32  | 9.15  | 0.21 | 0.03 | 1.12  | 0.547226 | 0.301627 | 0.765823 | 0.55955  |
| MmugDNA.36345.1.S1_at   | MmugDNA.36345.1 | 10.52 | 10.68 | 0.35 | 0.07 | -1.12 | 0.819482 | 0.352538 | 0.919572 | 0.595789 |
| MmugDNA.3635.1.S1_at    | MmugDNA.3635.1  | 4.09  | 4.09  | 0.43 | 0.26 | -1    | 0.96526  | 0.978862 | 0.985924 | 0.988548 |
| MmugDNA.36354.1.S1_at   | MmugDNA.36354.1 | 7.58  | 7.17  | 0.65 | 0.17 | 1.33  | 0.736795 | 0.798489 | 0.87768  | 0.884012 |
| MmugDNA.36355.1.S1_at   | MmugDNA.36355.1 | 10.7  | 10.97 | 0.23 | 0.09 | -1.2  | 0.17376  | 0.060048 | 0.468211 | 0.291714 |
| MmugDNA.3636.1.S1_at    | MmugDNA.3636.1  | 3.79  | 3.91  | 0.26 | 0.08 | -1.08 | 0.898958 | 0.985949 | 0.957024 | 0.99201  |
| MmugDNA.36364.1.S1_at   | MmugDNA.36364.1 | 3.97  | 4.06  | 0.08 | 0.01 | -1.06 | 0.387604 | 0.510339 | 0.655701 | 0.704837 |
| MmugDNA.36368.1.S1_at   | MmugDNA.36368.1 | 11.1  | 11.2  | 0.21 | 0.05 | -1.07 | 0.453277 | 0.229044 | 0.703496 | 0.501378 |
| MmugDNA.36369.1.S1_at   | MmugDNA.36369.1 | 4.28  | 6.24  | 0.2  | 0.09 | -3.89 | 0.000113 | 0.04209  | 0.051196 | 0.249638 |
| MmugDNA.36371.1.S1_at   | MmugDNA.36371.1 | 7.33  | 7.24  | 0.16 | 0.03 | 1.06  | 0.268924 | 0.232373 | 0.561347 | 0.504088 |
| MmugDNA.36372.1.S1_at   | MmugDNA.36372.1 | 9.9   | 9.95  | 0.2  | 0.03 | -1.03 | 0.80064  | 0.942726 | 0.910305 | 0.967499 |
| MmugDNA.36375.1.S1_at   | MmugDNA.36375.1 | 3.68  | 3.69  | 0.01 | 0.08 | -1.01 | 0.830068 | 0.535202 | 0.92519  | 0.720821 |
| MmugDNA.36378.1.S1_at   | MmugDNA.36378.1 | 5.4   | 5.45  | 0.1  | 0.02 | -1.04 | 0.746929 | 0.843642 | 0.882818 | 0.91093  |
| MmugDNA.36382.1.S1_at   | MmugDNA.36382.1 | 10.92 | 10.52 | 0.24 | 0.07 | 1.32  | 0.052735 | 0.110174 | 0.28664  | 0.374314 |
| MmugDNA.36383.1.S1_at   | MmugDNA.36383.1 | 5.52  | 5.75  | 0.19 | 0.1  | -1.17 | 0.122373 | 0.120884 | 0.40112  | 0.389784 |
| MmugDNA.36389.1.S1_at   | MmugDNA.36389.1 | 5.97  | 8.81  | 0.67 | 0.25 | -7.15 | 0.002718 | 0.000187 | 0.096851 | 0.030598 |
| MmugDNA.36391.1.S1_at   | MmugDNA.36391.1 | 9.11  | 9.01  | 0.2  | 0.1  | 1.07  | 0.391506 | 0.322046 | 0.658699 | 0.57365  |
| MmugDNA.36392.1.S1_at   | MmugDNA.36392.1 | 11.17 | 11.43 | 0.23 | 0.01 | -1.19 | 0.114571 | 0.312181 | 0.391622 | 0.566915 |
| MmugDNA.36394.1.S1_s_at | MmugDNA.36394.1 | 12.1  | 12.44 | 0.06 | 0.16 | -1.27 | 0.076491 | 0.875841 | 0.334798 | 0.929484 |
| MmugDNA.36395.1.S1_at   | MmugDNA.36395.1 | 12.49 | 12.1  | 0.15 | 0.02 | 1.31  | 0.012874 | 0.006512 | 0.164076 | 0.109536 |
| MmugDNA.36404.1.S1_at   | MmugDNA.36404.1 | 12.51 | 12.44 | 0.03 | 0.05 | 1.05  | 0.030404 | 0.277289 | 0.227249 | 0.54125  |
| MmugDNA.36406.1.S1_at   | MmugDNA.36406.1 | 12.14 | 12.16 | 0.03 | 0.1  | -1.01 | 0.361611 | 0.299005 | 0.637014 | 0.557628 |
| MmugDNA.36408.1.S1_at   | MmugDNA.36408.1 | 5.01  | 4.65  | 0.24 | 0.15 | 1.29  | 0.288968 | 0.283633 | 0.578669 | 0.546058 |
| MmugDNA.36409.1.S1_at   | MmugDNA.36409.1 | 4.01  | 3.17  | 0.7  | 0.3  | 1.78  | 0.398061 | 0.236416 | 0.663593 | 0.507314 |
| MmugDNA.36411.1.S1_at   | MmugDNA.36411.1 | 11.16 | 11.02 | 0.05 | 0.1  | 1.1   | 0.045257 | 0.003141 | 0.270246 | 0.081652 |
| MmugDNA.36418.1.S1_at   | MmugDNA.36418.1 | 5.63  | 5.62  | 0.2  | 0.13 | 1.01  | 0.704116 | 0.391487 | 0.859616 | 0.625086 |
| MmugDNA.36425.1.S1_at   | MmugDNA.36425.1 | 8.59  | 8.77  | 0.04 | 0.04 | -1.13 | 0.003321 | 0.000271 | 0.102493 | 0.033839 |

|                         |                 |       |       |      |      |       |          |          |          |          |
|-------------------------|-----------------|-------|-------|------|------|-------|----------|----------|----------|----------|
| MmugDNA.36430.1.S1_at   | MmugDNA.36430.1 | 3.56  | 3.12  | 0.24 | 0.55 | 1.35  | 0.824    | 0.953484 | 0.921745 | 0.97352  |
| MmugDNA.36433.1.S1_at   | MmugDNA.36433.1 | 6.84  | 7.78  | 0.47 | 0.1  | -1.93 | 0.027433 | 0.147769 | 0.21846  | 0.422056 |
| MmugDNA.36434.1.S1_at   | MmugDNA.36434.1 | 5.38  | 6.74  | 0.61 | 0.19 | -2.57 | 0.052306 | 0.133125 | 0.285983 | 0.404764 |
| MmugDNA.36435.1.S1_s_at | MmugDNA.36435.1 | 10.62 | 10.7  | 0.04 | 0.13 | -1.05 | 0.833834 | 0.013182 | 0.926862 | 0.14735  |
| MmugDNA.36443.1.S1_at   | MmugDNA.36443.1 | 11.96 | 12.19 | 0.27 | 0.12 | -1.17 | 0.845372 | 0.198836 | 0.932457 | 0.473475 |
| MmugDNA.36444.1.S1_at   | MmugDNA.36444.1 | 11.38 | 11.19 | 0.14 | 0.07 | 1.14  | 0.339939 | 0.400998 | 0.620135 | 0.630658 |
| MmugDNA.36445.1.S1_at   | MmugDNA.36445.1 | 6.73  | 6.73  | 0.14 | 0.01 | -1    | 0.359961 | 0.305842 | 0.63552  | 0.562731 |
| MmugDNA.36448.1.S1_at   | MmugDNA.36448.1 | 11.41 | 10.94 | 0.16 | 0.17 | 1.39  | 0.091416 | 0.205436 | 0.359068 | 0.479764 |
| MmugDNA.3645.1.S1_at    | MmugDNA.3645.1  | 11.92 | 11.87 | 0.02 | 0.11 | 1.03  | 0.141651 | 0.031672 | 0.427605 | 0.22028  |
| MmugDNA.36451.1.S1_at   | MmugDNA.36451.1 | 14.35 | 14.29 | 0.12 | 0.02 | 1.04  | 0.913677 | 0.945267 | 0.963382 | 0.968942 |
| MmugDNA.36454.1.S1_at   | MmugDNA.36454.1 | 6.2   | 6.15  | 0.13 | 0.02 | 1.04  | 0.804572 | 0.102409 | 0.91222  | 0.36259  |
| MmugDNA.36456.1.S1_at   | MmugDNA.36456.1 | 6.81  | 6.63  | 0.04 | 0.32 | 1.13  | 0.681639 | 0.495799 | 0.848178 | 0.695734 |
| MmugDNA.36458.1.S1_at   | MmugDNA.36458.1 | 11.88 | 11.87 | 0.08 | 0.02 | 1.01  | 0.355841 | 0.401046 | 0.632435 | 0.630667 |
| MmugDNA.36459.1.S1_at   | MmugDNA.36459.1 | 8.57  | 12.16 | 1.88 | 0.29 | -12   | 0.091615 | 0.38946  | 0.359368 | 0.623564 |
| MmugDNA.36468.1.S1_at   | MmugDNA.36468.1 | 3.73  | 3.39  | 0.13 | 0.07 | 1.27  | 0.032706 | 0.114104 | 0.234993 | 0.380528 |
| MmugDNA.36470.1.S1_at   | MmugDNA.36470.1 | 10.99 | 9.93  | 0.21 | 0.27 | 2.08  | 0.005493 | 0.006053 | 0.119561 | 0.106152 |
| MmugDNA.36471.1.S1_at   | MmugDNA.36471.1 | 5.88  | 5.87  | 0.16 | 0.01 | 1.01  | 0.99009  | 0.272182 | 0.996449 | 0.536939 |
| MmugDNA.36474.1.S1_at   | MmugDNA.36474.1 | 11.87 | 10.38 | 0.21 | 0.74 | 2.8   | 0.025987 | 0.040744 | 0.214184 | 0.246735 |
| MmugDNA.36475.1.S1_at   | MmugDNA.36475.1 | 11.7  | 11.69 | 0.15 | 0.06 | 1.01  | 0.470492 | 0.651438 | 0.71497  | 0.796213 |
| MmugDNA.36477.1.S1_at   | MmugDNA.36477.1 | 6.99  | 6.99  | 0.18 | 0.03 | 1     | 0.396661 | 0.249047 | 0.662694 | 0.518159 |
| MmugDNA.36481.1.S1_at   | MmugDNA.36481.1 | 9.2   | 10    | 0.07 | 0.07 | -1.75 | 0.000137 | 0.018045 | 0.051196 | 0.169372 |
| MmugDNA.36482.1.S1_at   | MmugDNA.36482.1 | 11.96 | 11.87 | 0.14 | 0.03 | 1.06  | 0.969459 | 0.879185 | 0.987881 | 0.931052 |
| MmugDNA.36483.1.S1_at   | MmugDNA.36483.1 | 7.85  | 8.53  | 0.37 | 0.06 | -1.6  | 0.087796 | 0.216419 | 0.353927 | 0.49     |
| MmugDNA.36489.1.S1_at   | MmugDNA.36489.1 | 12.3  | 12.68 | 0.43 | 0.08 | -1.29 | 0.183885 | 0.208171 | 0.479745 | 0.482086 |
| MmugDNA.36492.1.S1_at   | MmugDNA.36492.1 | 4.32  | 6.31  | 0.12 | 0.34 | -3.98 | 0.000508 | 0.001426 | 0.068843 | 0.057607 |
| MmugDNA.36495.1.S1_at   | MmugDNA.36495.1 | 8.77  | 7.83  | 0.85 | 0.07 | 1.92  | 0.118172 | 0.074955 | 0.39564  | 0.318932 |
| MmugDNA.36496.1.S1_at   | MmugDNA.36496.1 | 5.49  | 5.33  | 0.57 | 0.47 | 1.11  | 0.966411 | 0.58147  | 0.98642  | 0.750474 |
| MmugDNA.36497.1.S1_at   | MmugDNA.36497.1 | 7.83  | 10.44 | 1.04 | 0.22 | -6.12 | 0.036272 | 0.28986  | 0.245534 | 0.550831 |
| MmugDNA.36501.1.S1_at   | MmugDNA.36501.1 | 5.35  | 5.32  | 0.05 | 0.02 | 1.02  | 0.849497 | 0.12306  | 0.934488 | 0.393015 |
| MmugDNA.36502.1.S1_at   | MmugDNA.36502.1 | 11.05 | 11.09 | 0.02 | 0.05 | -1.02 | 0.077091 | 0.068177 | 0.335647 | 0.307314 |
| MmugDNA.36503.1.S1_at   | MmugDNA.36503.1 | 3.72  | 3.75  | 0.24 | 0.01 | -1.02 | 0.50474  | 0.429851 | 0.737875 | 0.651082 |
| MmugDNA.36505.1.S1_at   | MmugDNA.36505.1 | 9.68  | 9.69  | 0.35 | 0.12 | -1.01 | 0.287002 | 0.401719 | 0.576707 | 0.631068 |
| MmugDNA.36507.1.S1_at   | MmugDNA.36507.1 | 10.04 | 9.82  | 0.22 | 0.06 | 1.17  | 0.483158 | 0.877281 | 0.723389 | 0.930079 |
| MmugDNA.36516.1.S1_at   | MmugDNA.36516.1 | 8.74  | 9.93  | 0.43 | 0.26 | -2.29 | 0.029402 | 0.00756  | 0.224424 | 0.116437 |
| MmugDNA.36517.1.S1_at   | MmugDNA.36517.1 | 11.86 | 11.78 | 0.08 | 0.13 | 1.06  | 0.943211 | 0.057445 | 0.976095 | 0.285736 |
| MmugDNA.3652.1.S1_at    | MmugDNA.3652.1  | 11.97 | 12.15 | 0.11 | 0.05 | -1.13 | 0.076587 | 0.116164 | 0.334857 | 0.383524 |
| MmugDNA.36521.1.S1_at   | MmugDNA.36521.1 | 10.94 | 11    | 0.42 | 0.23 | -1.04 | 0.956167 | 0.305153 | 0.981989 | 0.562255 |
| MmugDNA.36523.1.S1_at   | MmugDNA.36523.1 | 9.55  | 9.71  | 0.42 | 0.2  | -1.12 | 0.647106 | 0.061467 | 0.828492 | 0.294736 |
| MmugDNA.36525.1.S1_at   | MmugDNA.36525.1 | 9.68  | 10.22 | 0.3  | 0.09 | -1.46 | 0.023835 | 0.054032 | 0.207466 | 0.277914 |
| MmugDNA.36529.1.S1_at   | MmugDNA.36529.1 | 10.73 | 11.05 | 0.16 | 0.1  | -1.24 | 0.131369 | 0.095431 | 0.414229 | 0.352453 |
| MmugDNA.3654.1.S1_at    | MmugDNA.3654.1  | 7.29  | 7.39  | 0.41 | 0.1  | -1.08 | 0.547675 | 0.628462 | 0.766193 | 0.781199 |
| MmugDNA.36544.1.S1_at   | MmugDNA.36544.1 | 10.29 | 10.28 | 0.28 | 0.13 | 1     | 0.529712 | 0.447525 | 0.754479 | 0.663579 |
| MmugDNA.36545.1.S1_at   | MmugDNA.36545.1 | 9.82  | 10.35 | 0.48 | 0.07 | -1.45 | 0.10845  | 0.044663 | 0.383055 | 0.255753 |



|                         |                 |       |       |      |      |        |          |          |          |          |
|-------------------------|-----------------|-------|-------|------|------|--------|----------|----------|----------|----------|
| MmugDNA.36546.1.S1_at   | MmugDNA.36546.1 | 12.64 | 12.63 | 0.14 | 0.07 | 1.01   | 0.979219 | 0.019313 | 0.992078 | 0.174723 |
| MmugDNA.36547.1.S1_at   | MmugDNA.36547.1 | 4.03  | 4.1   | 0.25 | 0.07 | -1.05  | 0.794179 | 0.409784 | 0.907055 | 0.636816 |
| MmugDNA.36548.1.S1_at   | MmugDNA.36548.1 | 6.52  | 6.37  | 0.11 | 0.15 | 1.1    | 0.165158 | 0.308055 | 0.458108 | 0.56421  |
| MmugDNA.36550.1.S1_at   | MmugDNA.36550.1 | 3.59  | 3.39  | 1.46 | 0.15 | 1.14   | 0.337547 | 0.411897 | 0.617966 | 0.638434 |
| MmugDNA.36554.1.S1_at   | MmugDNA.36554.1 | 3.61  | 3.44  | 0.51 | 0.07 | 1.12   | 0.204397 | 0.233117 | 0.502114 | 0.504458 |
| MmugDNA.36555.1.S1_at   | MmugDNA.36555.1 | 9.21  | 8.72  | 0.87 | 0.2  | 1.41   | 0.639193 | 0.39023  | 0.823346 | 0.624116 |
| MmugDNA.36556.1.S1_at   | MmugDNA.36556.1 | 10.24 | 8.66  | 0.31 | 0.14 | 2.98   | 0.001296 | 0.001635 | 0.078631 | 0.061167 |
| MmugDNA.36559.1.S1_at   | MmugDNA.36559.1 | 9.02  | 8.79  | 0.28 | 0.03 | 1.17   | 0.200498 | 0.326912 | 0.497869 | 0.576863 |
| MmugDNA.36563.1.S1_at   | MmugDNA.36563.1 | 6.09  | 6.1   | 0.07 | 0.05 | -1.01  | 0.697164 | 0.470837 | 0.85586  | 0.679124 |
| MmugDNA.36566.1.S1_at   | MmugDNA.36566.1 | 11.94 | 11.98 | 0.18 | 0.06 | -1.03  | 0.615203 | 0.058306 | 0.80876  | 0.288258 |
| MmugDNA.36567.1.S1_at   | MmugDNA.36567.1 | 9.52  | 8.53  | 0.37 | 0.12 | 1.99   | 0.007763 | 0.009969 | 0.136748 | 0.131094 |
| MmugDNA.36570.1.S1_at   | MmugDNA.36570.1 | 5.54  | 5.57  | 0.05 | 0.07 | -1.03  | 0.989122 | 0.01767  | 0.996231 | 0.168065 |
| MmugDNA.36573.1.S1_at   | MmugDNA.36573.1 | 3.54  | 3.84  | 0.23 | 0.09 | -1.23  | 0.075278 | 0.354036 | 0.332516 | 0.597005 |
| MmugDNA.36574.1.S1_at   | MmugDNA.36574.1 | 8.75  | 8.55  | 0.03 | 0.11 | 1.15   | 0.014175 | 0.068681 | 0.170738 | 0.308653 |
| MmugDNA.36576.1.S1_at   | MmugDNA.36576.1 | 7.99  | 12.06 | 2.28 | 0.21 | -16.77 | 0.061763 | 0.210054 | 0.304962 | 0.483835 |
| MmugDNA.36578.1.S1_at   | MmugDNA.36578.1 | 7.59  | 7.82  | 0.68 | 0.28 | -1.17  | 0.21389  | 0.258262 | 0.511689 | 0.52558  |
| MmugDNA.36580.1.S1_at   | MmugDNA.36580.1 | 7.16  | 7.53  | 0.04 | 0.02 | -1.29  | 0.000129 | 0.114847 | 0.051196 | 0.381487 |
| MmugDNA.36588.1.S1_at   | MmugDNA.36588.1 | 6.93  | 6.86  | 0.02 | 0.05 | 1.05   | 0.101901 | 0.423981 | 0.373528 | 0.646619 |
| MmugDNA.3659.1.S1_at    | MmugDNA.3659.1  | 11.9  | 11.96 | 0.22 | 0.09 | -1.04  | 0.747851 | 0.856143 | 0.883182 | 0.917847 |
| MmugDNA.36593.1.S1_at   | MmugDNA.36593.1 | 7.68  | 7.24  | 0.33 | 0.09 | 1.36   | 0.194708 | 0.07968  | 0.491311 | 0.326981 |
| MmugDNA.36597.1.S1_at   | MmugDNA.36597.1 | 6.55  | 7.07  | 0.22 | 0.14 | -1.43  | 0.034796 | 0.025278 | 0.241087 | 0.19945  |
| MmugDNA.366.1.S1_at     | MmugDNA.366.1   | 6.63  | 6.38  | 0.42 | 0.38 | 1.19   | 0.764775 | 0.306201 | 0.892078 | 0.562901 |
| MmugDNA.3660.1.S1_at    | MmugDNA.3660.1  | 11.4  | 10.69 | 0.18 | 0.01 | 1.62   | 0.003044 | 0.000369 | 0.100201 | 0.037273 |
| MmugDNA.36601.1.S1_at   | MmugDNA.36601.1 | 5.9   | 5.91  | 0.09 | 0.07 | -1.01  | 0.848646 | 0.028086 | 0.934034 | 0.209154 |
| MmugDNA.36608.1.S1_at   | MmugDNA.36608.1 | 3.81  | 3.74  | 0.14 | 0.09 | 1.05   | 0.361464 | 0.686945 | 0.636937 | 0.817365 |
| MmugDNA.36609.1.S1_at   | MmugDNA.36609.1 | 11.13 | 11.29 | 0.06 | 0.04 | -1.11  | 0.074632 | 0.017303 | 0.331298 | 0.166509 |
| MmugDNA.3661.1.S1_at    | MmugDNA.3661.1  | 10.99 | 10.95 | 0.04 | 0.09 | 1.03   | 0.286117 | 0.81553  | 0.575972 | 0.893609 |
| MmugDNA.36610.1.S1_at   | MmugDNA.36610.1 | 11.33 | 11.52 | 0.23 | 0.16 | -1.14  | 0.28699  | 0.317111 | 0.576707 | 0.570377 |
| MmugDNA.36612.1.S1_at   | MmugDNA.36612.1 | 12.6  | 12.73 | 0.08 | 0.08 | -1.09  | 0.279347 | 0.235314 | 0.57071  | 0.506346 |
| MmugDNA.36612.1.S1_s_at | MmugDNA.36612.1 | 12.6  | 12.71 | 0.04 | 0.09 | -1.07  | 0.688001 | 0.077375 | 0.850987 | 0.323177 |
| MmugDNA.36613.1.S1_at   | MmugDNA.36613.1 | 6.5   | 6.33  | 0.3  | 0.29 | 1.13   | 0.94015  | 0.961321 | 0.97477  | 0.97814  |
| MmugDNA.36617.1.S1_at   | MmugDNA.36617.1 | 4.8   | 5.02  | 0.14 | 0.19 | -1.16  | 0.154991 | 0.200135 | 0.445174 | 0.474603 |
| MmugDNA.36618.1.S1_at   | MmugDNA.36618.1 | 8.81  | 8.51  | 0.39 | 0.22 | 1.23   | 0.856087 | 0.958009 | 0.937367 | 0.976273 |
| MmugDNA.36618.1.S1_s_at | MmugDNA.36618.1 | 10.24 | 9.81  | 0.38 | 0.2  | 1.35   | 0.480335 | 0.402868 | 0.721302 | 0.631631 |
| MmugDNA.36620.1.S1_at   | MmugDNA.36620.1 | 10.91 | 10.79 | 0.11 | 0.01 | 1.08   | 0.124941 | 0.703103 | 0.405468 | 0.827866 |
| MmugDNA.36621.1.S1_s_at | MmugDNA.36621.1 | 6.94  | 7.43  | 0.62 | 0.17 | -1.4   | 0.446793 | 0.653414 | 0.698851 | 0.797435 |
| MmugDNA.36630.1.S1_at   | MmugDNA.36630.1 | 9.31  | 10.45 | 0.47 | 0.03 | -2.2   | 0.01574  | 0.007909 | 0.177874 | 0.118534 |
| MmugDNA.36631.1.S1_at   | MmugDNA.36631.1 | 10.01 | 9.79  | 0.21 | 0.18 | 1.17   | 0.989928 | 0.580266 | 0.996442 | 0.749616 |
| MmugDNA.36632.1.S1_s_at | MmugDNA.36632.1 | 4.85  | 4.75  | 0.1  | 0.03 | 1.07   | 0.674147 | 0.199753 | 0.844381 | 0.474382 |
| MmugDNA.36633.1.S1_at   | MmugDNA.36633.1 | 5.99  | 5.92  | 0.21 | 0.06 | 1.05   | 0.563809 | 0.475878 | 0.775707 | 0.682387 |
| MmugDNA.36634.1.S1_at   | MmugDNA.36634.1 | 6.37  | 6.04  | 0.36 | 0.46 | 1.25   | 0.428155 | 0.639218 | 0.685123 | 0.788125 |
| MmugDNA.36636.1.S1_at   | MmugDNA.36636.1 | 9.76  | 9.62  | 0.09 | 0.09 | 1.1    | 0.176071 | 0.284148 | 0.470426 | 0.546362 |
| MmugDNA.36639.1.S1_at   | MmugDNA.36639.1 | 9.12  | 9.23  | 0.16 | 0.21 | -1.08  | 0.355484 | 0.088107 | 0.632237 | 0.341641 |

|                         |                 |       |       |      |      |       |          |          |          |          |
|-------------------------|-----------------|-------|-------|------|------|-------|----------|----------|----------|----------|
| MmugDNA.3664.1.S1_at    | MmugDNA.3664.1  | 11.47 | 11.33 | 0.14 | 0.1  | 1.1   | 0.232009 | 0.397295 | 0.530597 | 0.628775 |
| MmugDNA.36640.1.S1_s_at | MmugDNA.36640.1 | 7.89  | 7.86  | 0.14 | 0.3  | 1.02  | 0.214314 | 0.266471 | 0.511984 | 0.532234 |
| MmugDNA.36642.1.S1_at   | MmugDNA.36642.1 | 4.99  | 4.66  | 0.37 | 0.04 | 1.26  | 0.681409 | 0.771415 | 0.848068 | 0.867177 |
| MmugDNA.36643.1.S1_at   | MmugDNA.36643.1 | 9.95  | 10.77 | 0.23 | 0.17 | -1.77 | 0.004274 | 0.003068 | 0.111415 | 0.080783 |
| MmugDNA.36644.1.S1_at   | MmugDNA.36644.1 | 5.14  | 5.73  | 0.27 | 0.25 | -1.5  | 0.028936 | 0.092598 | 0.22298  | 0.348536 |
| MmugDNA.36645.1.S1_at   | MmugDNA.36645.1 | 12.23 | 11.49 | 0.23 | 0.1  | 1.67  | 0.00824  | 0.005041 | 0.139904 | 0.098963 |
| MmugDNA.36647.1.S1_at   | MmugDNA.36647.1 | 3.26  | 3.27  | 0.05 | 0.03 | -1    | 0.345285 | 0.355891 | 0.624363 | 0.597869 |
| MmugDNA.36648.1.S1_at   | MmugDNA.36648.1 | 10.48 | 9.3   | 0.3  | 0.2  | 2.26  | 0.012641 | 0.003728 | 0.162521 | 0.087042 |
| MmugDNA.36649.1.S1_at   | MmugDNA.36649.1 | 11.86 | 11.9  | 0.34 | 0.41 | -1.03 | 0.856074 | 0.964751 | 0.937367 | 0.980422 |
| MmugDNA.36650.1.S1_at   | MmugDNA.36650.1 | 10.7  | 10.54 | 0.03 | 0.19 | 1.12  | 0.10104  | 0.046644 | 0.372328 | 0.260499 |
| MmugDNA.36655.1.S1_at   | MmugDNA.36655.1 | 3.66  | 3.39  | 0.31 | 0.14 | 1.2   | 0.215704 | 0.262214 | 0.513483 | 0.528516 |
| MmugDNA.36657.1.S1_at   | MmugDNA.36657.1 | 10.38 | 10.64 | 0.14 | 0.02 | -1.2  | 0.014441 | 0.005625 | 0.171859 | 0.103682 |
| MmugDNA.3666.1.S1_at    | MmugDNA.3666.1  | 9.35  | 8.95  | 0.18 | 0.06 | 1.32  | 0.024409 | 0.075129 | 0.209245 | 0.31932  |
| MmugDNA.36660.1.S1_at   | MmugDNA.36660.1 | 9.33  | 9.29  | 0.34 | 0.06 | 1.03  | 0.862075 | 0.006682 | 0.940146 | 0.110612 |
| MmugDNA.36662.1.S1_at   | MmugDNA.36662.1 | 9.22  | 9.98  | 0.76 | 0.07 | -1.7  | 0.191931 | 0.076495 | 0.488491 | 0.321584 |
| MmugDNA.36664.1.S1_at   | MmugDNA.36664.1 | 11.5  | 11.51 | 0.15 | 0.01 | -1    | 0.886809 | 0.650876 | 0.951794 | 0.795849 |
| MmugDNA.36668.1.S1_at   | MmugDNA.36668.1 | 12.45 | 12.33 | 0.05 | 0.04 | 1.08  | 0.045998 | 0.256978 | 0.272121 | 0.524781 |
| MmugDNA.36672.1.S1_at   | MmugDNA.36672.1 | 11.4  | 11.65 | 0.21 | 0.05 | -1.2  | 0.10081  | 0.678674 | 0.371905 | 0.812328 |
| MmugDNA.36673.1.S1_at   | MmugDNA.36673.1 | 3.62  | 3.4   | 0.25 | 0.06 | 1.17  | 0.269086 | 0.569376 | 0.561488 | 0.742382 |
| MmugDNA.36676.1.S1_at   | MmugDNA.36676.1 | 11.6  | 11.24 | 0.14 | 0.11 | 1.28  | 0.034411 | 0.228284 | 0.24012  | 0.500466 |
| MmugDNA.36678.1.S1_at   | MmugDNA.36678.1 | 11.04 | 11.16 | 0.28 | 0.05 | -1.09 | 0.435793 | 0.490023 | 0.6908   | 0.692076 |
| MmugDNA.36680.1.S1_s_at | MmugDNA.36680.1 | 12.65 | 12.76 | 0.19 | 0.11 | -1.08 | 0.32651  | 0.012688 | 0.609577 | 0.145243 |
| MmugDNA.36693.1.S1_at   | MmugDNA.36693.1 | 11.1  | 11.21 | 0.12 | 0.09 | -1.08 | 0.092549 | 0.282503 | 0.360784 | 0.545215 |
| MmugDNA.36699.1.S1_at   | MmugDNA.36699.1 | 8.32  | 7.84  | 0.35 | 0.33 | 1.39  | 0.723325 | 0.015527 | 0.869971 | 0.158053 |
| MmugDNA.36701.1.S1_at   | MmugDNA.36701.1 | 6.61  | 7.43  | 0.79 | 0.19 | -1.76 | 0.118981 | 0.132579 | 0.396683 | 0.404544 |
| MmugDNA.36704.1.S1_at   | MmugDNA.36704.1 | 5.31  | 5.27  | 0.12 | 0.11 | 1.02  | 0.782569 | 0.360866 | 0.900788 | 0.601938 |
| MmugDNA.36705.1.S1_at   | MmugDNA.36705.1 | 11.85 | 11.97 | 0.49 | 0.32 | -1.09 | 0.420602 | 0.54574  | 0.679563 | 0.727653 |
| MmugDNA.36707.1.S1_at   | MmugDNA.36707.1 | 12.03 | 11.97 | 0.09 | 0.47 | 1.05  | 0.619991 | 0.67397  | 0.811604 | 0.809483 |
| MmugDNA.36711.1.S1_at   | MmugDNA.36711.1 | 10.53 | 10.09 | 0.45 | 0.28 | 1.36  | 0.197331 | 0.029006 | 0.494449 | 0.212234 |
| MmugDNA.36714.1.S1_at   | MmugDNA.36714.1 | 9.25  | 9.1   | 0.23 | 0.05 | 1.11  | 0.2753   | 0.014595 | 0.566986 | 0.154067 |
| MmugDNA.36718.1.S1_at   | MmugDNA.36718.1 | 5.79  | 5.98  | 0.17 | 0.09 | -1.13 | 0.311054 | 0.369108 | 0.597264 | 0.608618 |
| MmugDNA.36719.1.S1_at   | MmugDNA.36719.1 | 8.11  | 7.96  | 0.06 | 0.03 | 1.1   | 0.034831 | 0.023978 | 0.241113 | 0.194091 |
| MmugDNA.36720.1.S1_at   | MmugDNA.36720.1 | 7.28  | 7.3   | 0.08 | 0.07 | -1.01 | 0.971735 | 0.006023 | 0.988595 | 0.106089 |
| MmugDNA.36721.1.S1_at   | MmugDNA.36721.1 | 6.01  | 5.93  | 0.07 | 0.11 | 1.06  | 0.827641 | 0.837187 | 0.923688 | 0.906927 |
| MmugDNA.36725.1.S1_at   | MmugDNA.36725.1 | 3.35  | 3.42  | 0.15 | 0.05 | -1.05 | 0.440062 | 0.465945 | 0.694134 | 0.676055 |
| MmugDNA.36726.1.S1_at   | MmugDNA.36726.1 | 7.42  | 6.96  | 0.56 | 0.26 | 1.37  | 0.253017 | 0.137355 | 0.547557 | 0.41029  |
| MmugDNA.36727.1.S1_at   | MmugDNA.36727.1 | 10.8  | 10.32 | 0.28 | 0.08 | 1.4   | 0.168872 | 0.040624 | 0.462098 | 0.246424 |
| MmugDNA.3673.1.S1_at    | MmugDNA.3673.1  | 12.54 | 12.8  | 0.13 | 0.03 | -1.2  | 0.045545 | 0.261998 | 0.270946 | 0.52836  |
| MmugDNA.36730.1.S1_at   | MmugDNA.36730.1 | 6.83  | 6.6   | 0.37 | 0.27 | 1.17  | 0.188038 | 0.825519 | 0.484319 | 0.89976  |
| MmugDNA.36731.1.S1_at   | MmugDNA.36731.1 | 11.2  | 11.21 | 0.12 | 0.07 | -1.01 | 0.442755 | 0.830205 | 0.696138 | 0.902541 |
| MmugDNA.36732.1.S1_s_at | MmugDNA.36732.1 | 11.07 | 11.85 | 0.35 | 0.11 | -1.71 | 0.029809 | 0.001877 | 0.225856 | 0.064979 |
| MmugDNA.36733.1.S1_at   | MmugDNA.36733.1 | 12.09 | 11.79 | 0.03 | 0.1  | 1.23  | 0.015317 | 0.016194 | 0.176072 | 0.161289 |
| MmugDNA.36733.1.S1_s_at | MmugDNA.36733.1 | 12.24 | 11.88 | 0.03 | 0.09 | 1.29  | 0.005285 | 0.010917 | 0.117714 | 0.136017 |

|                         |                 |       |       |      |      |        |          |          |          |          |
|-------------------------|-----------------|-------|-------|------|------|--------|----------|----------|----------|----------|
| MmugDNA.36736.1.S1_at   | MmugDNA.36736.1 | 6.75  | 6.15  | 0.41 | 0.2  | 1.52   | 0.051517 | 0.04729  | 0.284376 | 0.262176 |
| MmugDNA.36737.1.S1_at   | MmugDNA.36737.1 | 5.4   | 5.19  | 0.37 | 0.21 | 1.16   | 0.72836  | 0.933589 | 0.873011 | 0.962229 |
| MmugDNA.36737.1.S1_s_at | MmugDNA.36737.1 | 6.56  | 6.64  | 0.3  | 0.2  | -1.06  | 0.156484 | 0.051477 | 0.446993 | 0.27227  |
| MmugDNA.36740.1.S1_at   | MmugDNA.36740.1 | 4.99  | 4.93  | 0.31 | 0.05 | 1.04   | 0.32847  | 0.465649 | 0.610835 | 0.675863 |
| MmugDNA.36744.1.S1_at   | MmugDNA.36744.1 | 13.63 | 13.57 | 0.05 | 0.01 | 1.04   | 0.378485 | 0.706047 | 0.648694 | 0.829633 |
| MmugDNA.36747.1.S1_at   | MmugDNA.36747.1 | 6.47  | 6.46  | 0.14 | 0.07 | 1      | 0.887447 | 0.587502 | 0.951963 | 0.754278 |
| MmugDNA.36748.1.S1_at   | MmugDNA.36748.1 | 11.19 | 10.07 | 0.34 | 0.55 | 2.17   | 0.077469 | 0.054889 | 0.336173 | 0.279748 |
| MmugDNA.36749.1.S1_at   | MmugDNA.36749.1 | 6.49  | 10.8  | 1.66 | 0.42 | -19.76 | 0.031035 | 0.276498 | 0.229143 | 0.540513 |
| MmugDNA.36752.1.S1_at   | MmugDNA.36752.1 | 5.92  | 6.02  | 0.13 | 0.13 | -1.07  | 0.606119 | 0.754918 | 0.802904 | 0.857334 |
| MmugDNA.36753.1.S1_at   | MmugDNA.36753.1 | 6.73  | 6.74  | 0.23 | 0.23 | -1.01  | 0.893261 | 0.059489 | 0.954486 | 0.290548 |
| MmugDNA.36754.1.S1_at   | MmugDNA.36754.1 | 9.61  | 9.56  | 0.19 | 0.18 | 1.04   | 0.58253  | 0.352003 | 0.787305 | 0.595381 |
| MmugDNA.36754.1.S1_s_at | MmugDNA.36754.1 | 9.53  | 9.62  | 0.13 | 0.15 | -1.06  | 0.348705 | 0.569667 | 0.626632 | 0.742565 |
| MmugDNA.36756.1.S1_at   | MmugDNA.36756.1 | 10.49 | 10.11 | 0.08 | 0.11 | 1.3    | 0.011139 | 0.437501 | 0.155216 | 0.656769 |
| MmugDNA.36766.1.S1_at   | MmugDNA.36766.1 | 10.1  | 9.97  | 0.23 | 0.1  | 1.1    | 0.27846  | 0.383587 | 0.5698   | 0.619556 |
| MmugDNA.36767.1.S1_s_at | MmugDNA.36767.1 | 12.39 | 12.18 | 0.01 | 0.04 | 1.16   | 0.001092 | 0.001805 | 0.077278 | 0.063714 |
| MmugDNA.36779.1.S1_at   | MmugDNA.36779.1 | 12.33 | 12.33 | 0.19 | 0.1  | 1      | 0.716948 | 0.347656 | 0.866434 | 0.592045 |
| MmugDNA.36783.1.S1_at   | MmugDNA.36783.1 | 6.08  | 6.03  | 0.01 | 0.04 | 1.04   | 0.092753 | 0.027697 | 0.361198 | 0.207837 |
| MmugDNA.36784.1.S1_at   | MmugDNA.36784.1 | 10.72 | 10.53 | 0.14 | 0.13 | 1.14   | 0.308744 | 0.915157 | 0.59525  | 0.952344 |
| MmugDNA.36789.1.S1_at   | MmugDNA.36789.1 | 6.85  | 6.61  | 0.23 | 0.17 | 1.18   | 0.64083  | 0.601839 | 0.824509 | 0.763113 |
| MmugDNA.36793.1.S1_at   | MmugDNA.36793.1 | 8.42  | 8.46  | 0.19 | 0.2  | -1.03  | 0.424128 | 0.865831 | 0.681872 | 0.923757 |
| MmugDNA.36794.1.S1_at   | MmugDNA.36794.1 | 11.12 | 11.03 | 0.39 | 0.13 | 1.07   | 0.975137 | 0.140233 | 0.990102 | 0.413405 |
| MmugDNA.36795.1.S1_at   | MmugDNA.36795.1 | 4.08  | 4.04  | 0.09 | 0.1  | 1.03   | 0.609553 | 0.737619 | 0.805359 | 0.847996 |
| MmugDNA.36796.1.S1_at   | MmugDNA.36796.1 | 3.78  | 3.62  | 0.09 | 0.08 | 1.12   | 0.050537 | 0.299395 | 0.282549 | 0.557857 |
| MmugDNA.36797.1.S1_at   | MmugDNA.36797.1 | 9.99  | 10.02 | 0.21 | 0.16 | -1.02  | 0.806038 | 0.00342  | 0.91309  | 0.084124 |
| MmugDNA.36806.1.S1_at   | MmugDNA.36806.1 | 10.92 | 11.05 | 0.09 | 0.05 | -1.1   | 0.110601 | 0.215746 | 0.385979 | 0.489503 |
| MmugDNA.36827.1.S1_at   | MmugDNA.36827.1 | 5.54  | 6.82  | 0.97 | 0.25 | -2.44  | 0.099888 | 0.06855  | 0.370803 | 0.308364 |
| MmugDNA.36828.1.S1_at   | MmugDNA.36828.1 | 4.74  | 4.69  | 0.03 | 0.07 | 1.03   | 0.278375 | 0.08729  | 0.569692 | 0.340327 |
| MmugDNA.36834.1.S1_at   | MmugDNA.36834.1 | 9.42  | 9.6   | 0.4  | 0.15 | -1.13  | 0.262647 | 0.097517 | 0.556683 | 0.355338 |
| MmugDNA.36847.1.S1_at   | MmugDNA.36847.1 | 5.69  | 6.02  | 0.66 | 0.35 | -1.25  | 0.6809   | 0.343599 | 0.847795 | 0.589322 |
| MmugDNA.3685.1.S1_at    | MmugDNA.3685.1  | 8.78  | 8.46  | 0.36 | 0.16 | 1.25   | 0.241858 | 0.254766 | 0.538882 | 0.523037 |
| MmugDNA.36854.1.S1_at   | MmugDNA.36854.1 | 4.38  | 4.41  | 0.1  | 0.09 | -1.03  | 0.565241 | 0.374513 | 0.776566 | 0.6129   |
| MmugDNA.36863.1.S1_at   | MmugDNA.36863.1 | 5.42  | 5.29  | 0.2  | 0.03 | 1.09   | 0.107419 | 0.096108 | 0.382122 | 0.353322 |
| MmugDNA.36864.1.S1_at   | MmugDNA.36864.1 | 4.21  | 4.2   | 0.03 | 0.14 | 1.01   | 0.89596  | 0.809328 | 0.955631 | 0.890103 |
| MmugDNA.36867.1.S1_at   | MmugDNA.36867.1 | 5.41  | 5.55  | 0.08 | 0.08 | -1.1   | 0.19318  | 0.330071 | 0.489748 | 0.578938 |
| MmugDNA.3687.1.S1_at    | MmugDNA.3687.1  | 4.45  | 4.44  | 0.06 | 0.03 | 1.01   | 0.817435 | 0.351014 | 0.918429 | 0.594736 |
| MmugDNA.36875.1.S1_at   | MmugDNA.36875.1 | 3.38  | 3.38  | 0.02 | 0.01 | -1     | 0.130867 | 0.243956 | 0.413427 | 0.514069 |
| MmugDNA.36878.1.S1_at   | MmugDNA.36878.1 | 5.19  | 6.56  | 0.94 | 0.2  | -2.58  | 0.182264 | 0.108437 | 0.478038 | 0.371943 |
| MmugDNA.36883.1.S1_at   | MmugDNA.36883.1 | 11.9  | 10.75 | 0.27 | 0.16 | 2.22   | 0.004319 | 0.010562 | 0.111813 | 0.134181 |
| MmugDNA.36886.1.S1_at   | MmugDNA.36886.1 | 3.68  | 3.63  | 0.09 | 0.04 | 1.03   | 0.183894 | 0.132643 | 0.479745 | 0.404544 |
| MmugDNA.36887.1.S1_at   | MmugDNA.36887.1 | 5.72  | 5.8   | 0.25 | 0.02 | -1.06  | 0.819057 | 0.567852 | 0.919387 | 0.741693 |
| MmugDNA.3689.1.S1_at    | MmugDNA.3689.1  | 8.12  | 8.19  | 0.41 | 0.21 | -1.05  | 0.66215  | 0.888432 | 0.836929 | 0.936361 |
| MmugDNA.36894.1.S1_at   | MmugDNA.36894.1 | 13    | 12.84 | 0.09 | 0.01 | 1.12   | 0.019253 | 0.010371 | 0.192035 | 0.133236 |
| MmugDNA.36897.1.S1_at   | MmugDNA.36897.1 | 8.59  | 8.32  | 0.75 | 0.25 | 1.21   | 0.183049 | 0.195443 | 0.478911 | 0.470259 |

|                         |                 |       |       |      |      |       |          |          |          |          |
|-------------------------|-----------------|-------|-------|------|------|-------|----------|----------|----------|----------|
| MmugDNA.3690.1.S1_at    | MmugDNA.3690.1  | 5.17  | 6.39  | 0.76 | 0.11 | -2.34 | 0.154369 | 0.086339 | 0.444653 | 0.338777 |
| MmugDNA.36905.1.S1_at   | MmugDNA.36905.1 | 12.4  | 12.09 | 0.15 | 0.06 | 1.24  | 0.055332 | 0.087414 | 0.292123 | 0.340589 |
| MmugDNA.36906.1.S1_at   | MmugDNA.36906.1 | 3.79  | 3.79  | 0.06 | 0.15 | 1.01  | 0.949111 | 0.627394 | 0.978791 | 0.780374 |
| MmugDNA.36907.1.S1_at   | MmugDNA.36907.1 | 8.89  | 8.99  | 0.17 | 0.03 | -1.07 | 0.196292 | 0.139494 | 0.493359 | 0.412743 |
| MmugDNA.36912.1.S1_at   | MmugDNA.36912.1 | 8.15  | 9.28  | 0.67 | 0.17 | -2.18 | 0.019355 | 0.083895 | 0.192255 | 0.334776 |
| MmugDNA.36918.1.S1_at   | MmugDNA.36918.1 | 4.02  | 3.91  | 0.06 | 0.05 | 1.09  | 0.07633  | 0.529195 | 0.334426 | 0.717207 |
| MmugDNA.36924.1.S1_at   | MmugDNA.36924.1 | 7.07  | 7.02  | 0.17 | 0.06 | 1.03  | 0.888356 | 0.462482 | 0.952402 | 0.673807 |
| MmugDNA.36934.1.S1_at   | MmugDNA.36934.1 | 7.55  | 7.84  | 0.47 | 0.12 | -1.22 | 0.367845 | 0.747047 | 0.641596 | 0.853124 |
| MmugDNA.36939.1.S1_at   | MmugDNA.36939.1 | 7.65  | 7.5   | 0.19 | 0.09 | 1.11  | 0.127827 | 0.142624 | 0.409675 | 0.416343 |
| MmugDNA.36940.1.S1_at   | MmugDNA.36940.1 | 7.23  | 6.54  | 0.28 | 0.06 | 1.61  | 0.032638 | 0.013565 | 0.234971 | 0.149001 |
| MmugDNA.36946.1.S1_at   | MmugDNA.36946.1 | 12.92 | 12.38 | 0.1  | 0.11 | 1.45  | 0.003634 | 0.107391 | 0.10567  | 0.370219 |
| MmugDNA.36948.1.S1_at   | MmugDNA.36948.1 | 10.96 | 10.49 | 0.07 | 0.05 | 1.39  | 0.000869 | 0.000107 | 0.074234 | 0.028099 |
| MmugDNA.36954.1.S1_at   | MmugDNA.36954.1 | 7.88  | 8.61  | 0.48 | 0.09 | -1.66 | 0.192095 | 0.164459 | 0.488697 | 0.440678 |
| MmugDNA.36963.1.S1_at   | MmugDNA.36963.1 | 11.9  | 12.14 | 0.12 | 0.09 | -1.18 | 0.050715 | 0.337413 | 0.283048 | 0.58462  |
| MmugDNA.36965.1.S1_at   | MmugDNA.36965.1 | 10.48 | 10.47 | 0.34 | 0.13 | 1.01  | 0.754625 | 0.05129  | 0.886871 | 0.271872 |
| MmugDNA.36966.1.S1_at   | MmugDNA.36966.1 | 5.97  | 5.92  | 0.12 | 0.08 | 1.03  | 0.703229 | 0.841437 | 0.859182 | 0.909663 |
| MmugDNA.36967.1.S1_at   | MmugDNA.36967.1 | 5.26  | 6.45  | 0.11 | 0.24 | -2.28 | 0.001725 | 0.09009  | 0.085035 | 0.344402 |
| MmugDNA.36968.1.S1_at   | MmugDNA.36968.1 | 8.12  | 5.28  | 1.01 | 0.66 | 7.17  | 0.01507  | 0.007592 | 0.174736 | 0.11661  |
| MmugDNA.36971.1.S1_at   | MmugDNA.36971.1 | 8.34  | 7.9   | 0.13 | 0.11 | 1.35  | 0.012034 | 0.229276 | 0.159675 | 0.501527 |
| MmugDNA.36979.1.S1_at   | MmugDNA.36979.1 | 4.93  | 5.35  | 1.52 | 0.09 | -1.33 | 0.607453 | 0.600736 | 0.803755 | 0.76224  |
| MmugDNA.36982.1.S1_at   | MmugDNA.36982.1 | 12.55 | 12.21 | 0.14 | 0.05 | 1.27  | 0.019993 | 0.213926 | 0.194766 | 0.487596 |
| MmugDNA.36982.1.S1_s_at | MmugDNA.36982.1 | 12.13 | 11.63 | 0.22 | 0.07 | 1.41  | 0.045464 | 0.221615 | 0.270804 | 0.494901 |
| MmugDNA.36983.1.S1_at   | MmugDNA.36983.1 | 5.3   | 5.65  | 0.08 | 0.13 | -1.27 | 0.030283 | 0.018901 | 0.227112 | 0.172961 |
| MmugDNA.36985.1.S1_at   | MmugDNA.36985.1 | 11.72 | 11.3  | 0.18 | 0.12 | 1.34  | 0.078696 | 0.338367 | 0.338535 | 0.585432 |
| MmugDNA.36986.1.S1_at   | MmugDNA.36986.1 | 9.52  | 8.97  | 0.16 | 0.21 | 1.46  | 0.020851 | 0.025332 | 0.197998 | 0.199522 |
| MmugDNA.36990.1.S1_at   | MmugDNA.36990.1 | 6.32  | 7.67  | 0.72 | 0.08 | -2.54 | 0.079142 | 0.074325 | 0.338938 | 0.318046 |
| MmugDNA.36992.1.S1_at   | MmugDNA.36992.1 | 10.04 | 10.3  | 0.05 | 0.26 | -1.2  | 0.143608 | 0.832169 | 0.430076 | 0.90371  |
| MmugDNA.37002.1.S1_at   | MmugDNA.37002.1 | 5.29  | 5.48  | 0.18 | 0.18 | -1.15 | 0.60947  | 0.551069 | 0.805285 | 0.730772 |
| MmugDNA.37003.1.S1_at   | MmugDNA.37003.1 | 6.05  | 6.04  | 0.43 | 0.22 | 1.01  | 0.938884 | 0.468469 | 0.974191 | 0.67773  |
| MmugDNA.37004.1.S1_at   | MmugDNA.37004.1 | 6.64  | 6.35  | 0.29 | 0.27 | 1.22  | 0.796913 | 0.815643 | 0.908267 | 0.893657 |
| MmugDNA.37016.1.S1_s_at | MmugDNA.37016.1 | 10.91 | 10.98 | 0.27 | 0.01 | -1.05 | 0.598079 | 0.211457 | 0.797132 | 0.485578 |
| MmugDNA.37017.1.S1_at   | MmugDNA.37017.1 | 9.46  | 9.25  | 0.22 | 0.49 | 1.16  | 0.877579 | 0.212872 | 0.947695 | 0.486798 |
| MmugDNA.37020.1.S1_at   | MmugDNA.37020.1 | 9.09  | 8.66  | 0.02 | 0.07 | 1.35  | 0.000616 | 0.004293 | 0.070727 | 0.091989 |
| MmugDNA.37022.1.S1_at   | MmugDNA.37022.1 | 11.32 | 11.23 | 0.21 | 0.04 | 1.06  | 0.171638 | 0.724311 | 0.465636 | 0.840433 |
| MmugDNA.37028.1.S1_at   | MmugDNA.37028.1 | 3.93  | 3.81  | 0.05 | 0.05 | 1.08  | 0.039128 | 0.024119 | 0.254238 | 0.1945   |
| MmugDNA.3703.1.S1_at    | MmugDNA.3703.1  | 8.1   | 8.07  | 0.09 | 0.13 | 1.02  | 0.706209 | 0.068908 | 0.860879 | 0.308844 |
| MmugDNA.37031.1.S1_at   | MmugDNA.37031.1 | 7.16  | 7.17  | 0.16 | 0.05 | -1.01 | 0.476219 | 0.329268 | 0.718743 | 0.57869  |
| MmugDNA.37034.1.S1_at   | MmugDNA.37034.1 | 11.38 | 11.45 | 0.25 | 0.17 | -1.05 | 0.588615 | 0.739334 | 0.791201 | 0.848915 |
| MmugDNA.37035.1.S1_at   | MmugDNA.37035.1 | 10.43 | 10.52 | 0.11 | 0.02 | -1.06 | 0.640188 | 0.024217 | 0.824105 | 0.19489  |
| MmugDNA.37042.1.S1_at   | MmugDNA.37042.1 | 9.83  | 9.94  | 0.09 | 0.09 | -1.08 | 0.22462  | 0.626632 | 0.522693 | 0.779896 |
| MmugDNA.37044.1.S1_at   | MmugDNA.37044.1 | 10.73 | 10.68 | 0.37 | 0.2  | 1.04  | 0.734945 | 0.026971 | 0.876604 | 0.205423 |
| MmugDNA.37044.1.S1_s_at | MmugDNA.37044.1 | 11.11 | 10.96 | 0.08 | 0.11 | 1.11  | 0.199725 | 0.000638 | 0.497195 | 0.042882 |
| MmugDNA.37045.1.S1_at   | MmugDNA.37045.1 | 2.88  | 2.99  | 0.13 | 0.07 | -1.08 | 0.327685 | 0.670622 | 0.610332 | 0.807444 |

|                         |                 |       |       |      |      |        |          |          |          |          |
|-------------------------|-----------------|-------|-------|------|------|--------|----------|----------|----------|----------|
| MmugDNA.37050.1.S1_at   | MmugDNA.37050.1 | 11.97 | 12.29 | 0.38 | 0.09 | -1.24  | 0.09982  | 0.152909 | 0.370801 | 0.42777  |
| MmugDNA.37053.1.S1_at   | MmugDNA.37053.1 | 6.96  | 7.15  | 0.11 | 0.02 | -1.15  | 0.090217 | 0.228765 | 0.356864 | 0.501005 |
| MmugDNA.37054.1.S1_at   | MmugDNA.37054.1 | 7     | 9.35  | 1.22 | 0.26 | -5.07  | 0.094134 | 0.260334 | 0.363134 | 0.526897 |
| MmugDNA.37055.1.S1_at   | MmugDNA.37055.1 | 7.2   | 7.19  | 0.17 | 0.08 | 1.01   | 0.922738 | 0.994761 | 0.966967 | 0.996729 |
| MmugDNA.37061.1.S1_at   | MmugDNA.37061.1 | 12.97 | 12.94 | 0.04 | 0.03 | 1.02   | 0.415976 | 0.887934 | 0.676502 | 0.936115 |
| MmugDNA.37064.1.S1_at   | MmugDNA.37064.1 | 6.9   | 9.73  | 0.3  | 0.37 | -7.12  | 0.000831 | 0.099911 | 0.07338  | 0.358624 |
| MmugDNA.37068.1.S1_at   | MmugDNA.37068.1 | 4.46  | 4.34  | 0.19 | 0.24 | 1.09   | 0.678792 | 0.647125 | 0.846794 | 0.793279 |
| MmugDNA.37069.1.S1_at   | MmugDNA.37069.1 | 6.02  | 6.53  | 0.38 | 0.07 | -1.42  | 0.156305 | 0.138837 | 0.446893 | 0.412015 |
| MmugDNA.3707.1.S1_at    | MmugDNA.3707.1  | 10.49 | 10.23 | 0.08 | 0.14 | 1.19   | 0.128829 | 0.000546 | 0.411041 | 0.040793 |
| MmugDNA.37072.1.S1_at   | MmugDNA.37072.1 | 13.11 | 13.1  | 0.02 | 0.05 | 1.01   | 0.562978 | 0.461034 | 0.77525  | 0.672829 |
| MmugDNA.37074.1.S1_at   | MmugDNA.37074.1 | 4.9   | 4.82  | 0.06 | 0.17 | 1.06   | 0.568742 | 0.808508 | 0.778583 | 0.889757 |
| MmugDNA.37076.1.S1_at   | MmugDNA.37076.1 | 13.32 | 13.31 | 0.14 | 0.02 | 1.01   | 0.756641 | 0.124458 | 0.888095 | 0.394865 |
| MmugDNA.37077.1.S1_at   | MmugDNA.37077.1 | 6.71  | 6.98  | 0.17 | 0.14 | -1.21  | 0.222452 | 0.297338 | 0.520373 | 0.556071 |
| MmugDNA.37078.1.S1_at   | MmugDNA.37078.1 | 4.93  | 4.9   | 0.15 | 0.09 | 1.02   | 0.370267 | 0.195175 | 0.643268 | 0.470253 |
| MmugDNA.37083.1.S1_at   | MmugDNA.37083.1 | 10.38 | 11.35 | 0.53 | 0.12 | -1.96  | 0.029203 | 0.042603 | 0.22368  | 0.251035 |
| MmugDNA.37089.1.S1_at   | MmugDNA.37089.1 | 7.61  | 8.19  | 0.28 | 0.33 | -1.49  | 0.038112 | 0.035533 | 0.251175 | 0.232768 |
| MmugDNA.37094.1.S1_at   | MmugDNA.37094.1 | 6.25  | 7.39  | 0.47 | 0.1  | -2.2   | 0.017205 | 0.120011 | 0.184359 | 0.388672 |
| MmugDNA.37097.1.S1_at   | MmugDNA.37097.1 | 4.24  | 4.45  | 0.24 | 0.09 | -1.16  | 0.44066  | 0.480421 | 0.694639 | 0.685781 |
| MmugDNA.371.1.S1_at     | MmugDNA.371.1   | 5.85  | 6.05  | 0.15 | 0.16 | -1.15  | 0.367571 | 0.002248 | 0.641471 | 0.069739 |
| MmugDNA.37104.1.S1_at   | MmugDNA.37104.1 | 6.21  | 6.21  | 0.1  | 0.23 | -1     | 0.402614 | 0.389951 | 0.666923 | 0.624002 |
| MmugDNA.37106.1.S1_at   | MmugDNA.37106.1 | 7.63  | 7.66  | 0.11 | 0.04 | -1.02  | 0.359097 | 0.174466 | 0.634671 | 0.450952 |
| MmugDNA.37110.1.S1_at   | MmugDNA.37110.1 | 4.47  | 4.28  | 0.2  | 0.06 | 1.14   | 0.27478  | 0.018197 | 0.566556 | 0.169696 |
| MmugDNA.37114.1.S1_at   | MmugDNA.37114.1 | 6.82  | 9.08  | 0.23 | 0.35 | -4.79  | 0.001106 | 0.347091 | 0.077306 | 0.591815 |
| MmugDNA.37116.1.S1_at   | MmugDNA.37116.1 | 8.11  | 7.9   | 0.1  | 0.05 | 1.15   | 0.078708 | 0.078245 | 0.338539 | 0.324785 |
| MmugDNA.37118.1.S1_at   | MmugDNA.37118.1 | 9.76  | 9.96  | 0.06 | 0.02 | -1.15  | 0.005815 | 0.002171 | 0.122176 | 0.068862 |
| MmugDNA.3712.1.S1_at    | MmugDNA.3712.1  | 11.86 | 11.92 | 0.14 | 0.11 | -1.04  | 0.452765 | 0.001835 | 0.703182 | 0.064337 |
| MmugDNA.37121.1.S1_at   | MmugDNA.37121.1 | 11.98 | 11.78 | 0.14 | 0.12 | 1.15   | 0.048685 | 0.352939 | 0.278061 | 0.596259 |
| MmugDNA.37128.1.S1_at   | MmugDNA.37128.1 | 11.57 | 11.07 | 0.37 | 0.09 | 1.42   | 0.117268 | 0.241335 | 0.39452  | 0.511952 |
| MmugDNA.37135.1.S1_at   | MmugDNA.37135.1 | 8.9   | 8.62  | 0.5  | 0.07 | 1.21   | 0.4557   | 0.796817 | 0.70531  | 0.882803 |
| MmugDNA.37137.1.S1_at   | MmugDNA.37137.1 | 6.73  | 6.78  | 0.17 | 0.14 | -1.04  | 0.639177 | 0.327926 | 0.823346 | 0.577744 |
| MmugDNA.37138.1.S1_at   | MmugDNA.37138.1 | 5.91  | 7.42  | 0.97 | 0.16 | -2.85  | 0.16944  | 0.08682  | 0.462654 | 0.339594 |
| MmugDNA.37144.1.S1_at   | MmugDNA.37144.1 | 6.14  | 6.01  | 0.09 | 0.05 | 1.1    | 0.037099 | 0.032709 | 0.24788  | 0.223942 |
| MmugDNA.37147.1.S1_at   | MmugDNA.37147.1 | 7.26  | 7.34  | 0.31 | 0.13 | -1.05  | 0.489836 | 0.85998  | 0.728026 | 0.920188 |
| MmugDNA.37149.1.S1_at   | MmugDNA.37149.1 | 6.92  | 7.35  | 0.5  | 0.13 | -1.34  | 0.069196 | 0.268989 | 0.321158 | 0.534389 |
| MmugDNA.37149.1.S1_s_at | MmugDNA.37149.1 | 7.9   | 8.37  | 0.29 | 0.23 | -1.38  | 0.0763   | 0.334967 | 0.33441  | 0.58275  |
| MmugDNA.37153.1.S1_at   | MmugDNA.37153.1 | 11.31 | 11.3  | 0.16 | 0.14 | 1.01   | 0.568194 | 0.259497 | 0.778211 | 0.526418 |
| MmugDNA.37154.1.S1_at   | MmugDNA.37154.1 | 9.28  | 12.6  | 1.63 | 0.13 | -9.93  | 0.07073  | 0.137577 | 0.324274 | 0.410555 |
| MmugDNA.37156.1.S1_at   | MmugDNA.37156.1 | 6.34  | 6.16  | 0.25 | 0.17 | 1.14   | 0.156608 | 0.542286 | 0.44712  | 0.725385 |
| MmugDNA.37167.1.S1_at   | MmugDNA.37167.1 | 9.1   | 9.12  | 1.12 | 0.68 | -1.01  | 0.94923  | 0.838501 | 0.978837 | 0.907883 |
| MmugDNA.37168.1.S1_at   | MmugDNA.37168.1 | 5.96  | 9.52  | 1.62 | 0.29 | -11.83 | 0.051323 | 0.163343 | 0.283923 | 0.43947  |
| MmugDNA.37168.1.S1_s_at | MmugDNA.37168.1 | 5.3   | 8.75  | 1.7  | 0.29 | -10.88 | 0.068    | 0.182601 | 0.318434 | 0.459107 |
| MmugDNA.3717.1.S1_at    | MmugDNA.3717.1  | 9.71  | 9.58  | 0.17 | 0.05 | 1.09   | 0.090026 | 0.040494 | 0.356863 | 0.246264 |
| MmugDNA.37171.1.S1_at   | MmugDNA.37171.1 | 6.79  | 6.8   | 0.21 | 0.01 | -1.01  | 0.818961 | 0.949213 | 0.919338 | 0.970902 |

|                         |                 |       |       |      |      |       |          |          |          |          |
|-------------------------|-----------------|-------|-------|------|------|-------|----------|----------|----------|----------|
| MmugDNA.37173.1.S1_at   | MmugDNA.37173.1 | 4.4   | 5.1   | 0.29 | 0.21 | -1.63 | 0.042839 | 0.022588 | 0.264135 | 0.188092 |
| MmugDNA.37175.1.S1_at   | MmugDNA.37175.1 | 12.11 | 12.4  | 0.12 | 0.14 | -1.22 | 0.060684 | 0.056842 | 0.303381 | 0.284531 |
| MmugDNA.37176.1.S1_at   | MmugDNA.37176.1 | 5.05  | 7.46  | 1.33 | 0.14 | -5.35 | 0.048138 | 0.169277 | 0.276908 | 0.44588  |
| MmugDNA.37178.1.S1_at   | MmugDNA.37178.1 | 3.34  | 3.18  | 0.27 | 0.17 | 1.12  | 0.724982 | 0.919971 | 0.87097  | 0.954967 |
| MmugDNA.37179.1.S1_at   | MmugDNA.37179.1 | 10.49 | 10.49 | 0.2  | 0.05 | 1     | 0.394475 | 0.012698 | 0.661066 | 0.145316 |
| MmugDNA.37188.1.S1_at   | MmugDNA.37188.1 | 6.7   | 6.83  | 0.15 | 0.1  | -1.09 | 0.433351 | 0.515603 | 0.68886  | 0.708449 |
| MmugDNA.37189.1.S1_at   | MmugDNA.37189.1 | 6     | 6.37  | 0.46 | 0.27 | -1.3  | 0.299964 | 0.289244 | 0.588233 | 0.550293 |
| MmugDNA.37200.1.S1_at   | MmugDNA.37200.1 | 10.3  | 10.76 | 0.48 | 0.09 | -1.38 | 0.639672 | 0.861531 | 0.823651 | 0.921307 |
| MmugDNA.37201.1.S1_at   | MmugDNA.37201.1 | 10.22 | 9.69  | 0.36 | 0.15 | 1.44  | 0.05451  | 0.475742 | 0.290603 | 0.682332 |
| MmugDNA.37205.1.S1_at   | MmugDNA.37205.1 | 6.95  | 6.18  | 0.34 | 0.22 | 1.71  | 0.034364 | 0.046434 | 0.24001  | 0.260036 |
| MmugDNA.37206.1.S1_at   | MmugDNA.37206.1 | 8.69  | 9.79  | 0.58 | 0.26 | -2.15 | 0.051157 | 0.169852 | 0.283595 | 0.446544 |
| MmugDNA.37209.1.S1_at   | MmugDNA.37209.1 | 7.06  | 6.95  | 0.14 | 0.06 | 1.07  | 0.808287 | 0.048273 | 0.914178 | 0.264779 |
| MmugDNA.37212.1.S1_at   | MmugDNA.37212.1 | 9.97  | 10    | 0.21 | 0.09 | -1.02 | 0.326521 | 0.589126 | 0.609577 | 0.755393 |
| MmugDNA.37225.1.S1_at   | MmugDNA.37225.1 | 8.14  | 8.12  | 0.4  | 0.2  | 1.02  | 0.225983 | 0.402598 | 0.523718 | 0.631505 |
| MmugDNA.37237.1.S1_at   | MmugDNA.37237.1 | 7.82  | 7.86  | 0.07 | 0.08 | -1.03 | 0.567281 | 0.04159  | 0.77771  | 0.248831 |
| MmugDNA.37248.1.S1_at   | MmugDNA.37248.1 | 4.7   | 4.79  | 0.08 | 0.03 | -1.06 | 0.17299  | 0.004695 | 0.467064 | 0.095363 |
| MmugDNA.37251.1.S1_at   | MmugDNA.37251.1 | 12.37 | 11.89 | 0.21 | 0.05 | 1.4   | 0.016938 | 0.024339 | 0.183564 | 0.19528  |
| MmugDNA.37253.1.S1_at   | MmugDNA.37253.1 | 11.96 | 11.64 | 0.18 | 0.14 | 1.25  | 0.358292 | 0.876755 | 0.63414  | 0.92982  |
| MmugDNA.37253.1.S1_s_at | MmugDNA.37253.1 | 9.29  | 9     | 0.4  | 0.09 | 1.22  | 0.265297 | 0.500378 | 0.557962 | 0.699024 |
| MmugDNA.37257.1.S1_at   | MmugDNA.37257.1 | 3.52  | 3.05  | 0.17 | 0.11 | 1.38  | 0.021074 | 0.054576 | 0.198734 | 0.279138 |
| MmugDNA.37261.1.S1_at   | MmugDNA.37261.1 | 7.68  | 7.7   | 0.16 | 0.1  | -1.01 | 0.928534 | 0.589308 | 0.969772 | 0.755536 |
| MmugDNA.37262.1.S1_at   | MmugDNA.37262.1 | 6.29  | 6.29  | 0.04 | 0.08 | -1    | 0.531762 | 0.322741 | 0.755933 | 0.574043 |
| MmugDNA.37265.1.S1_s_at | MmugDNA.37265.1 | 8.1   | 8.85  | 0.89 | 0.12 | -1.68 | 0.23076  | 0.486328 | 0.529522 | 0.689731 |
| MmugDNA.37268.1.S1_at   | MmugDNA.37268.1 | 6.24  | 6.26  | 0.24 | 0.06 | -1.02 | 0.946696 | 0.561897 | 0.977558 | 0.737659 |
| MmugDNA.37269.1.S1_at   | MmugDNA.37269.1 | 9.82  | 9.35  | 0.2  | 0.09 | 1.39  | 0.038534 | 0.026543 | 0.252238 | 0.203915 |
| MmugDNA.37270.1.S1_at   | MmugDNA.37270.1 | 7.69  | 7.54  | 0.09 | 0.12 | 1.11  | 0.291996 | 0.601052 | 0.581449 | 0.762475 |
| MmugDNA.37271.1.S1_at   | MmugDNA.37271.1 | 8.66  | 8.53  | 0.1  | 0.07 | 1.09  | 0.633377 | 0.035475 | 0.820372 | 0.232564 |
| MmugDNA.37272.1.S1_at   | MmugDNA.37272.1 | 6.11  | 6.39  | 0.09 | 0.19 | -1.21 | 0.087812 | 0.178122 | 0.353927 | 0.454504 |
| MmugDNA.37274.1.S1_at   | MmugDNA.37274.1 | 5.76  | 5.73  | 0.2  | 0.14 | 1.02  | 0.645742 | 0.071421 | 0.82755  | 0.313555 |
| MmugDNA.37274.1.S1_s_at | MmugDNA.37274.1 | 7.19  | 7.29  | 0.1  | 0.07 | -1.07 | 0.432872 | 0.042926 | 0.688545 | 0.251759 |
| MmugDNA.37276.1.S1_at   | MmugDNA.37276.1 | 10.82 | 10.84 | 0.05 | 0.03 | -1.02 | 0.972609 | 0.056207 | 0.988997 | 0.282978 |
| MmugDNA.37277.1.S1_at   | MmugDNA.37277.1 | 11.16 | 11.05 | 0.21 | 0.29 | 1.07  | 0.838049 | 0.871    | 0.929038 | 0.926745 |
| MmugDNA.37286.1.S1_at   | MmugDNA.37286.1 | 4.3   | 4.3   | 0.13 | 0.05 | 1     | 0.98768  | 0.834556 | 0.995514 | 0.905227 |
| MmugDNA.37289.1.S1_at   | MmugDNA.37289.1 | 11.6  | 11.42 | 0.04 | 0.02 | 1.13  | 0.001642 | 0.013304 | 0.084462 | 0.14804  |
| MmugDNA.37290.1.S1_at   | MmugDNA.37290.1 | 4.94  | 5.15  | 0.09 | 0.1  | -1.16 | 0.052826 | 0.099359 | 0.286839 | 0.357636 |
| MmugDNA.37292.1.S1_at   | MmugDNA.37292.1 | 8.53  | 8.09  | 0.27 | 0.04 | 1.36  | 0.114493 | 0.063293 | 0.391531 | 0.298244 |
| MmugDNA.37297.1.S1_at   | MmugDNA.37297.1 | 12.67 | 12.46 | 0.12 | 0.05 | 1.15  | 0.086563 | 0.337117 | 0.351577 | 0.584337 |
| MmugDNA.37304.1.S1_at   | MmugDNA.37304.1 | 5.71  | 5.55  | 0.31 | 0.11 | 1.12  | 0.258173 | 0.351369 | 0.552434 | 0.595032 |
| MmugDNA.37304.1.S1_x_at | MmugDNA.37304.1 | 5.74  | 5.12  | 0.29 | 0.23 | 1.53  | 0.089412 | 0.090635 | 0.356406 | 0.345151 |
| MmugDNA.37306.1.S1_at   | MmugDNA.37306.1 | 7.99  | 7.56  | 0.1  | 0.03 | 1.35  | 0.001996 | 0.042562 | 0.089614 | 0.250978 |
| MmugDNA.37307.1.S1_at   | MmugDNA.37307.1 | 10.02 | 9.43  | 0.09 | 0.13 | 1.51  | 0.00475  | 0.008633 | 0.115098 | 0.123154 |
| MmugDNA.37310.1.S1_at   | MmugDNA.37310.1 | 5.29  | 5.43  | 0.47 | 0.06 | -1.1  | 0.789913 | 0.419258 | 0.90449  | 0.643425 |
| MmugDNA.37316.1.S1_s_at | MmugDNA.37316.1 | 10.31 | 10.51 | 0.27 | 0.07 | -1.15 | 0.791332 | 0.177796 | 0.905296 | 0.454111 |

|                         |                 |       |       |      |      |       |          |          |          |          |
|-------------------------|-----------------|-------|-------|------|------|-------|----------|----------|----------|----------|
| MmugDNA.37317.1.S1_at   | MmugDNA.37317.1 | 4.29  | 4.19  | 0.08 | 0    | 1.07  | 0.078904 | 0.035923 | 0.338745 | 0.234021 |
| MmugDNA.37327.1.S1_at   | MmugDNA.37327.1 | 6.42  | 6.5   | 0.1  | 0.04 | -1.06 | 0.24563  | 0.387848 | 0.541668 | 0.622486 |
| MmugDNA.3733.1.S1_at    | MmugDNA.3733.1  | 12.27 | 12.01 | 0.15 | 0.04 | 1.2   | 0.04549  | 0.186299 | 0.270813 | 0.462168 |
| MmugDNA.37332.1.S1_at   | MmugDNA.37332.1 | 5.7   | 6.68  | 0.77 | 0.3  | -1.97 | 0.141429 | 0.015399 | 0.427383 | 0.157585 |
| MmugDNA.37336.1.S1_at   | MmugDNA.37336.1 | 3.77  | 4.12  | 0.45 | 0.04 | -1.27 | 0.794354 | 0.692546 | 0.90713  | 0.821061 |
| MmugDNA.37337.1.S1_at   | MmugDNA.37337.1 | 12.87 | 12.65 | 0.1  | 0.05 | 1.16  | 0.079035 | 0.37798  | 0.338745 | 0.615264 |
| MmugDNA.37341.1.S1_at   | MmugDNA.37341.1 | 9.22  | 9.9   | 0.13 | 0.2  | -1.6  | 0.011784 | 0.616987 | 0.158421 | 0.773098 |
| MmugDNA.37343.1.S1_at   | MmugDNA.37343.1 | 10.93 | 11.59 | 0.12 | 0.1  | -1.59 | 0.003784 | 0.000487 | 0.106813 | 0.038813 |
| MmugDNA.37345.1.S1_s_at | MmugDNA.37345.1 | 10.84 | 10.92 | 0.06 | 0.14 | -1.06 | 0.417664 | 0.910471 | 0.67772  | 0.949462 |
| MmugDNA.37346.1.S1_at   | MmugDNA.37346.1 | 3.32  | 4.3   | 0.19 | 0.26 | -1.98 | 0.009042 | 0.007212 | 0.144777 | 0.11412  |
| MmugDNA.3736.1.S1_at    | MmugDNA.3736.1  | 6.33  | 7.1   | 0.24 | 0.06 | -1.71 | 0.012205 | 0.491439 | 0.160818 | 0.693004 |
| MmugDNA.37362.1.S1_at   | MmugDNA.37362.1 | 7.37  | 7.64  | 0.1  | 0.06 | -1.21 | 0.017995 | 0.380521 | 0.187151 | 0.617172 |
| MmugDNA.37364.1.S1_at   | MmugDNA.37364.1 | 10.94 | 11.22 | 0.13 | 0.05 | -1.22 | 0.057709 | 0.237846 | 0.297463 | 0.508341 |
| MmugDNA.37366.1.S1_at   | MmugDNA.37366.1 | 10.11 | 10.13 | 0.29 | 0.13 | -1.01 | 0.460411 | 0.226228 | 0.708167 | 0.498692 |
| MmugDNA.37385.1.S1_at   | MmugDNA.37385.1 | 11.15 | 11.59 | 0.08 | 0.01 | -1.35 | 0.00085  | 0.000486 | 0.073467 | 0.038806 |
| MmugDNA.37389.1.S1_x_at | MmugDNA.37389.1 | 10.64 | 10.67 | 0.52 | 0.17 | -1.02 | 0.407709 | 0.260042 | 0.670697 | 0.52675  |
| MmugDNA.37391.1.S1_at   | MmugDNA.37391.1 | 12.07 | 10.97 | 0.14 | 0.15 | 2.14  | 0.00075  | 0.063439 | 0.072567 | 0.298441 |
| MmugDNA.37393.1.S1_at   | MmugDNA.37393.1 | 6.69  | 6.7   | 0.13 | 0.05 | -1.01 | 0.483362 | 0.173954 | 0.723504 | 0.450247 |
| MmugDNA.37403.1.S1_at   | MmugDNA.37403.1 | 11.4  | 11.58 | 0.12 | 0.06 | -1.13 | 0.115109 | 0.175973 | 0.392115 | 0.452526 |
| MmugDNA.37403.1.S1_s_at | MmugDNA.37403.1 | 10.92 | 11.03 | 0.15 | 0.13 | -1.08 | 0.348716 | 0.503466 | 0.626632 | 0.700892 |
| MmugDNA.37404.1.S1_at   | MmugDNA.37404.1 | 11.8  | 11.66 | 0.21 | 0.03 | 1.1   | 0.106227 | 0.117007 | 0.380284 | 0.384405 |
| MmugDNA.37407.1.S1_at   | MmugDNA.37407.1 | 5.84  | 6.33  | 0.3  | 0.15 | -1.4  | 0.042753 | 0.17017  | 0.263924 | 0.446906 |
| MmugDNA.37408.1.S1_at   | MmugDNA.37408.1 | 9.65  | 9.6   | 0.16 | 0.06 | 1.03  | 0.869414 | 0.216956 | 0.94371  | 0.490571 |
| MmugDNA.3741.1.S1_at    | MmugDNA.3741.1  | 3.12  | 3     | 0.25 | 0.14 | 1.09  | 0.840363 | 0.924598 | 0.929916 | 0.957386 |
| MmugDNA.37410.1.S1_at   | MmugDNA.37410.1 | 7.28  | 6.58  | 0.3  | 0.15 | 1.62  | 0.008107 | 0.009012 | 0.138956 | 0.125499 |
| MmugDNA.37420.1.S1_at   | MmugDNA.37420.1 | 4.01  | 3.93  | 0.09 | 0.16 | 1.05  | 0.143546 | 0.549846 | 0.429995 | 0.730104 |
| MmugDNA.37422.1.S1_at   | MmugDNA.37422.1 | 9.68  | 10.45 | 0.19 | 0.13 | -1.7  | 0.007771 | 0.00265  | 0.136848 | 0.07609  |
| MmugDNA.37426.1.S1_at   | MmugDNA.37426.1 | 11.58 | 11.64 | 0.08 | 0.07 | -1.05 | 0.37547  | 0.379312 | 0.646344 | 0.616294 |
| MmugDNA.3743.1.S1_at    | MmugDNA.3743.1  | 7.57  | 8.2   | 0.6  | 0.22 | -1.55 | 0.157198 | 0.148833 | 0.447994 | 0.423218 |
| MmugDNA.37430.1.S1_at   | MmugDNA.37430.1 | 5.1   | 4.72  | 0.41 | 0.03 | 1.31  | 0.107671 | 0.179914 | 0.382296 | 0.456453 |
| MmugDNA.37431.1.S1_at   | MmugDNA.37431.1 | 5.21  | 4.88  | 0.22 | 0.14 | 1.25  | 0.17395  | 0.038031 | 0.468349 | 0.239596 |
| MmugDNA.37444.1.S1_at   | MmugDNA.37444.1 | 11.5  | 11.39 | 0.08 | 0.03 | 1.08  | 0.061588 | 0.007782 | 0.30471  | 0.117732 |
| MmugDNA.37448.1.S1_at   | MmugDNA.37448.1 | 11.36 | 11.25 | 0.09 | 0.03 | 1.08  | 0.128743 | 0.242673 | 0.410916 | 0.513032 |
| MmugDNA.37450.1.S1_at   | MmugDNA.37450.1 | 10.42 | 10.56 | 0.35 | 0.14 | -1.1  | 0.188014 | 0.780792 | 0.484319 | 0.872821 |
| MmugDNA.37451.1.S1_at   | MmugDNA.37451.1 | 11    | 10.52 | 0.1  | 0.11 | 1.4   | 0.011616 | 0.140145 | 0.157638 | 0.413394 |
| MmugDNA.3746.1.S1_at    | MmugDNA.3746.1  | 4.67  | 8.31  | 1.61 | 0.27 | -12.5 | 0.027723 | 0.234575 | 0.21894  | 0.505783 |
| MmugDNA.37467.1.S1_at   | MmugDNA.37467.1 | 10.77 | 11.51 | 0.26 | 0.1  | -1.68 | 0.009679 | 0.038753 | 0.14832  | 0.241916 |
| MmugDNA.37470.1.S1_at   | MmugDNA.37470.1 | 10.59 | 10.47 | 0.13 | 0.06 | 1.08  | 0.142523 | 0.391315 | 0.428631 | 0.625    |
| MmugDNA.37472.1.S1_at   | MmugDNA.37472.1 | 12.23 | 12.66 | 0.35 | 0.12 | -1.34 | 0.30708  | 0.298513 | 0.593774 | 0.557175 |
| MmugDNA.37474.1.S1_at   | MmugDNA.37474.1 | 10.94 | 11.11 | 0.05 | 0.13 | -1.12 | 0.093507 | 0.009254 | 0.362114 | 0.126968 |
| MmugDNA.37475.1.S1_s_at | MmugDNA.37475.1 | 10.8  | 10.54 | 0.21 | 0.14 | 1.2   | 0.135137 | 0.148136 | 0.419109 | 0.422668 |
| MmugDNA.37488.1.S1_at   | MmugDNA.37488.1 | 9.02  | 9.07  | 0.21 | 0.05 | -1.04 | 0.334921 | 0.113845 | 0.615988 | 0.380071 |
| MmugDNA.3749.1.S1_at    | MmugDNA.3749.1  | 4.17  | 4.09  | 0.28 | 0.05 | 1.05  | 0.231751 | 0.363851 | 0.530393 | 0.604215 |

|                         |                 |       |       |      |      |       |          |          |          |          |
|-------------------------|-----------------|-------|-------|------|------|-------|----------|----------|----------|----------|
| MmugDNA.37494.1.S1_at   | MmugDNA.37494.1 | 7.05  | 7.34  | 0.03 | 0.14 | -1.22 | 0.018183 | 0.301527 | 0.187817 | 0.55955  |
| MmugDNA.37497.1.S1_at   | MmugDNA.37497.1 | 11.01 | 11.02 | 0.66 | 0.04 | -1    | 0.375239 | 0.502418 | 0.646093 | 0.700154 |
| MmugDNA.37498.1.S1_at   | MmugDNA.37498.1 | 5.76  | 5.81  | 0.1  | 0.04 | -1.03 | 0.319879 | 0.517597 | 0.604461 | 0.709722 |
| MmugDNA.375.1.S1_s_at   | MmugDNA.375.1   | 11.28 | 11.11 | 0.38 | 0.2  | 1.12  | 0.91611  | 0.920636 | 0.964383 | 0.955258 |
| MmugDNA.37500.1.S1_at   | MmugDNA.37500.1 | 3.59  | 4.02  | 0.05 | 0.17 | -1.35 | 0.029186 | 0.026878 | 0.223679 | 0.205096 |
| MmugDNA.37502.1.S1_at   | MmugDNA.37502.1 | 8.94  | 9.2   | 0.17 | 0.1  | -1.2  | 0.235717 | 0.816222 | 0.533475 | 0.893995 |
| MmugDNA.37503.1.S1_at   | MmugDNA.37503.1 | 7.42  | 7.62  | 0.19 | 0.09 | -1.14 | 0.17266  | 0.021654 | 0.46677  | 0.184333 |
| MmugDNA.37504.1.S1_at   | MmugDNA.37504.1 | 4.43  | 5.24  | 0.51 | 0.59 | -1.76 | 0.162478 | 0.34916  | 0.454544 | 0.59321  |
| MmugDNA.37505.1.S1_at   | MmugDNA.37505.1 | 8.12  | 9.07  | 0.25 | 0.2  | -1.93 | 0.020502 | 0.263151 | 0.196642 | 0.529465 |
| MmugDNA.37512.1.S1_s_at | MmugDNA.37512.1 | 9.2   | 9.36  | 0.1  | 0.01 | -1.12 | 0.111956 | 0.406192 | 0.388128 | 0.634213 |
| MmugDNA.37513.1.S1_at   | MmugDNA.37513.1 | 8.05  | 8.52  | 0.81 | 0.24 | -1.38 | 0.131481 | 0.101667 | 0.41434  | 0.361562 |
| MmugDNA.37516.1.S1_at   | MmugDNA.37516.1 | 7.19  | 6.87  | 0.33 | 0.2  | 1.25  | 0.428838 | 0.245342 | 0.685531 | 0.515132 |
| MmugDNA.37517.1.S1_at   | MmugDNA.37517.1 | 8.77  | 9.14  | 0.22 | 0.01 | -1.3  | 0.035685 | 0.110053 | 0.243824 | 0.374179 |
| MmugDNA.37520.1.S1_at   | MmugDNA.37520.1 | 8.34  | 8.29  | 0.17 | 0.07 | 1.04  | 0.239372 | 0.022893 | 0.536636 | 0.18934  |
| MmugDNA.37522.1.S1_at   | MmugDNA.37522.1 | 3.1   | 3.16  | 0.2  | 0.1  | -1.04 | 0.526955 | 0.477183 | 0.752843 | 0.683287 |
| MmugDNA.37529.1.S1_at   | MmugDNA.37529.1 | 10.78 | 10.14 | 0.55 | 0.24 | 1.56  | 0.544988 | 0.216735 | 0.764374 | 0.490311 |
| MmugDNA.37537.1.S1_at   | MmugDNA.37537.1 | 11.08 | 11.31 | 0.04 | 0.12 | -1.17 | 0.084769 | 0.351407 | 0.348712 | 0.595054 |
| MmugDNA.3754.1.S1_at    | MmugDNA.3754.1  | 10.62 | 11.1  | 0.09 | 0.08 | -1.39 | 0.001926 | 0.004488 | 0.088159 | 0.093554 |
| MmugDNA.37542.1.S1_at   | MmugDNA.37542.1 | 8.92  | 8.75  | 0.2  | 0.05 | 1.12  | 0.184568 | 0.179471 | 0.48058  | 0.455939 |
| MmugDNA.37543.1.S1_at   | MmugDNA.37543.1 | 11.02 | 10.64 | 0.04 | 0.06 | 1.3   | 0.000822 | 0.163922 | 0.07338  | 0.440105 |
| MmugDNA.37544.1.S1_at   | MmugDNA.37544.1 | 10.34 | 10.04 | 0.17 | 0.11 | 1.23  | 0.117126 | 0.25815  | 0.394287 | 0.525574 |
| MmugDNA.37546.1.S1_at   | MmugDNA.37546.1 | 10.08 | 8.81  | 0.68 | 0.08 | 2.42  | 0.086675 | 0.184696 | 0.351711 | 0.460645 |
| MmugDNA.37554.1.S1_at   | MmugDNA.37554.1 | 4.83  | 4.67  | 0.82 | 0.2  | 1.12  | 0.550435 | 0.744727 | 0.767803 | 0.852165 |
| MmugDNA.37557.1.S1_at   | MmugDNA.37557.1 | 8.27  | 8.22  | 0.6  | 0.2  | 1.03  | 0.319982 | 0.737058 | 0.60457  | 0.847791 |
| MmugDNA.37558.1.S1_at   | MmugDNA.37558.1 | 8.81  | 9.1   | 0.14 | 0.15 | -1.22 | 0.049704 | 0.042625 | 0.280409 | 0.251037 |
| MmugDNA.37561.1.S1_at   | MmugDNA.37561.1 | 7.88  | 7.17  | 0.09 | 0.09 | 1.64  | 0.000392 | 0.071041 | 0.062519 | 0.312704 |
| MmugDNA.37563.1.S1_at   | MmugDNA.37563.1 | 5.78  | 4.86  | 0.77 | 0.15 | 1.9   | 0.212769 | 0.23092  | 0.510725 | 0.502548 |
| MmugDNA.37564.1.S1_at   | MmugDNA.37564.1 | 11.67 | 11.47 | 0.1  | 0.07 | 1.15  | 0.013141 | 0.005207 | 0.165277 | 0.100033 |
| MmugDNA.37566.1.S1_at   | MmugDNA.37566.1 | 7.26  | 7.41  | 0.14 | 0.06 | -1.11 | 0.150422 | 0.472826 | 0.439474 | 0.680162 |
| MmugDNA.37572.1.S1_at   | MmugDNA.37572.1 | 5.35  | 5.38  | 0.12 | 0.02 | -1.02 | 0.854564 | 0.904925 | 0.936768 | 0.946143 |
| MmugDNA.37575.1.S1_at   | MmugDNA.37575.1 | 4.8   | 4.87  | 0.13 | 0.13 | -1.05 | 0.25488  | 0.255619 | 0.549392 | 0.523608 |
| MmugDNA.37587.1.S1_at   | MmugDNA.37587.1 | 5.41  | 5.33  | 0.04 | 0.11 | 1.06  | 0.516852 | 0.661317 | 0.746092 | 0.801687 |
| MmugDNA.3759.1.S1_a_at  | MmugDNA.3759.1  | 8.03  | 7.82  | 0.36 | 0.26 | 1.16  | 0.909481 | 0.11987  | 0.96159  | 0.388577 |
| MmugDNA.3759.1.S1_at    | MmugDNA.3759.1  | 8.06  | 7.72  | 0.42 | 0.33 | 1.27  | 0.825927 | 0.087467 | 0.92268  | 0.340617 |
| MmugDNA.37591.1.S1_at   | MmugDNA.37591.1 | 10.73 | 11    | 0.37 | 0.03 | -1.21 | 0.291292 | 0.063367 | 0.580618 | 0.298403 |
| MmugDNA.37593.1.S1_at   | MmugDNA.37593.1 | 5.61  | 5.51  | 0.05 | 0.02 | 1.07  | 0.059862 | 0.017837 | 0.301975 | 0.168707 |
| MmugDNA.37599.1.S1_at   | MmugDNA.37599.1 | 8.3   | 8.47  | 0.35 | 0.17 | -1.12 | 0.761018 | 0.761604 | 0.890485 | 0.861459 |
| MmugDNA.37601.1.S1_at   | MmugDNA.37601.1 | 10.76 | 11.46 | 0.65 | 0.13 | -1.62 | 0.154693 | 0.082608 | 0.444927 | 0.33182  |
| MmugDNA.37601.1.S1_s_at | MmugDNA.37601.1 | 12.13 | 12.24 | 0.65 | 0.08 | -1.08 | 0.412239 | 0.22127  | 0.674018 | 0.4946   |
| MmugDNA.37605.1.S1_at   | MmugDNA.37605.1 | 11.3  | 11.36 | 0.17 | 0.19 | -1.04 | 0.918791 | 0.5316   | 0.96536  | 0.718783 |
| MmugDNA.37608.1.S1_at   | MmugDNA.37608.1 | 8.7   | 9.13  | 0.35 | 0.19 | -1.35 | 0.108791 | 0.014257 | 0.383665 | 0.152418 |
| MmugDNA.37621.1.S1_at   | MmugDNA.37621.1 | 5.13  | 5.22  | 0.1  | 0.03 | -1.06 | 0.362133 | 0.603783 | 0.637183 | 0.764299 |
| MmugDNA.37622.1.S1_at   | MmugDNA.37622.1 | 6.04  | 6.05  | 0.59 | 0.11 | -1.01 | 0.888281 | 0.988653 | 0.952341 | 0.993595 |



|                         |                 |       |       |      |      |       |          |          |          |          |
|-------------------------|-----------------|-------|-------|------|------|-------|----------|----------|----------|----------|
| MmugDNA.37624.1.S1_at   | MmugDNA.37624.1 | 6.11  | 6.52  | 0.26 | 0.14 | -1.33 | 0.066467 | 0.054338 | 0.315341 | 0.278605 |
| MmugDNA.3763.1.S1_at    | MmugDNA.3763.1  | 7.9   | 7.9   | 0.16 | 0.17 | -1    | 0.981024 | 0.464789 | 0.992909 | 0.67542  |
| MmugDNA.3764.1.S1_at    | MmugDNA.3764.1  | 5.15  | 5.1   | 0.2  | 0.1  | 1.03  | 0.973818 | 0.312259 | 0.989501 | 0.566963 |
| MmugDNA.37640.1.S1_at   | MmugDNA.37640.1 | 8.33  | 7.93  | 0.25 | 0.07 | 1.32  | 0.064603 | 0.040589 | 0.310789 | 0.246322 |
| MmugDNA.37648.1.S1_at   | MmugDNA.37648.1 | 6.31  | 6.33  | 0.36 | 0.5  | -1.02 | 0.862192 | 0.320292 | 0.940177 | 0.572616 |
| MmugDNA.3765.1.S1_at    | MmugDNA.3765.1  | 11.25 | 11.47 | 0.23 | 0.18 | -1.17 | 0.471156 | 0.648178 | 0.715413 | 0.794002 |
| MmugDNA.37655.1.S1_at   | MmugDNA.37655.1 | 5.69  | 5.74  | 0.03 | 0.12 | -1.04 | 0.662721 | 0.15097  | 0.837251 | 0.425588 |
| MmugDNA.37656.1.S1_at   | MmugDNA.37656.1 | 3.83  | 3.7   | 0.18 | 0.16 | 1.09  | 0.435383 | 0.308757 | 0.690435 | 0.56463  |
| MmugDNA.3766.1.S1_at    | MmugDNA.3766.1  | 4.57  | 4.59  | 0.22 | 0.18 | -1.01 | 0.945046 | 0.761687 | 0.976877 | 0.861459 |
| MmugDNA.37663.1.S1_at   | MmugDNA.37663.1 | 11.04 | 11.27 | 0.02 | 0.15 | -1.18 | 0.059769 | 0.256725 | 0.301699 | 0.524574 |
| MmugDNA.37667.1.S1_at   | MmugDNA.37667.1 | 7.11  | 8.63  | 0.5  | 0.15 | -2.86 | 0.008085 | 0.181316 | 0.138956 | 0.457834 |
| MmugDNA.37670.1.S1_at   | MmugDNA.37670.1 | 12.37 | 12.38 | 0.03 | 0.01 | -1.01 | 0.544178 | 0.073562 | 0.763878 | 0.31689  |
| MmugDNA.37671.1.S1_at   | MmugDNA.37671.1 | 9.52  | 9.18  | 0.23 | 0.06 | 1.27  | 0.279744 | 0.672102 | 0.571035 | 0.808305 |
| MmugDNA.37672.1.S1_s_at | MmugDNA.37672.1 | 12.37 | 12.43 | 0.45 | 0.1  | -1.04 | 0.639132 | 0.521204 | 0.823331 | 0.712304 |
| MmugDNA.37674.1.S1_at   | MmugDNA.37674.1 | 7.76  | 7.95  | 0.21 | 0.06 | -1.14 | 0.219463 | 0.167792 | 0.5172   | 0.444359 |
| MmugDNA.37678.1.S1_at   | MmugDNA.37678.1 | 4.23  | 4.23  | 0.89 | 0.11 | 1     | 0.32803  | 0.541198 | 0.61059  | 0.724781 |
| MmugDNA.3768.1.S1_at    | MmugDNA.3768.1  | 7.85  | 6.92  | 0.13 | 0.15 | 1.91  | 0.002123 | 0.011381 | 0.090208 | 0.138214 |
| MmugDNA.37680.1.S1_at   | MmugDNA.37680.1 | 10.08 | 8.88  | 0.37 | 0.16 | 2.3   | 0.01269  | 0.013319 | 0.162687 | 0.148042 |
| MmugDNA.37690.1.S1_at   | MmugDNA.37690.1 | 8.74  | 8.31  | 0.26 | 0.15 | 1.35  | 0.079089 | 0.000193 | 0.33882  | 0.030888 |
| MmugDNA.37698.1.S1_at   | MmugDNA.37698.1 | 7.37  | 7.19  | 0.04 | 0.11 | 1.13  | 0.026901 | 0.072462 | 0.217016 | 0.315294 |
| MmugDNA.37708.1.S1_at   | MmugDNA.37708.1 | 9.71  | 10.42 | 0.42 | 0.4  | -1.64 | 0.489145 | 0.011441 | 0.727587 | 0.13846  |
| MmugDNA.37710.1.S1_at   | MmugDNA.37710.1 | 9.62  | 9.4   | 0.12 | 0.04 | 1.16  | 0.099822 | 0.673985 | 0.370801 | 0.809483 |
| MmugDNA.37715.1.S1_at   | MmugDNA.37715.1 | 9.83  | 8.81  | 0.31 | 0.14 | 2.02  | 0.005722 | 0.004141 | 0.121186 | 0.091027 |
| MmugDNA.37728.1.S1_at   | MmugDNA.37728.1 | 12.05 | 12.2  | 0.07 | 0.01 | -1.11 | 0.052552 | 0.344996 | 0.286297 | 0.590253 |
| MmugDNA.37732.1.S1_at   | MmugDNA.37732.1 | 9     | 8.71  | 0.14 | 0.09 | 1.23  | 0.050757 | 0.023367 | 0.283078 | 0.19158  |
| MmugDNA.37737.1.S1_at   | MmugDNA.37737.1 | 10.09 | 10.37 | 0.05 | 0.14 | -1.22 | 0.040973 | 0.16361  | 0.258877 | 0.439768 |
| MmugDNA.37741.1.S1_at   | MmugDNA.37741.1 | 7.82  | 7.81  | 0.08 | 0.16 | 1.01  | 0.587515 | 0.240139 | 0.790485 | 0.510821 |
| MmugDNA.37744.1.S1_at   | MmugDNA.37744.1 | 5.3   | 5.45  | 0.21 | 0.11 | -1.11 | 0.816377 | 0.878464 | 0.917994 | 0.930638 |
| MmugDNA.37748.1.S1_at   | MmugDNA.37748.1 | 3.51  | 5.17  | 0.37 | 0.38 | -3.15 | 0.005351 | 0.037943 | 0.118207 | 0.239302 |
| MmugDNA.37748.1.S1_s_at | MmugDNA.37748.1 | 5.15  | 6.67  | 0.51 | 0.3  | -2.86 | 0.01226  | 0.038077 | 0.161109 | 0.239748 |
| MmugDNA.3775.1.S1_at    | MmugDNA.3775.1  | 9.55  | 8.99  | 0.07 | 0.1  | 1.48  | 0.002783 | 0.048535 | 0.097767 | 0.265534 |
| MmugDNA.37756.1.S1_at   | MmugDNA.37756.1 | 10.35 | 10.45 | 0.41 | 0.43 | -1.07 | 0.488409 | 0.665182 | 0.726924 | 0.803767 |
| MmugDNA.37759.1.S1_at   | MmugDNA.37759.1 | 6.76  | 6.3   | 0.23 | 0.05 | 1.37  | 0.094843 | 0.302125 | 0.363741 | 0.560071 |
| MmugDNA.3776.1.S1_at    | MmugDNA.3776.1  | 9.01  | 9.17  | 0.15 | 0.16 | -1.11 | 0.743896 | 0.920704 | 0.881384 | 0.95529  |
| MmugDNA.37762.1.S1_at   | MmugDNA.37762.1 | 11.7  | 10.93 | 0.08 | 0.07 | 1.7   | 0.000316 | 0.023054 | 0.058857 | 0.190013 |
| MmugDNA.37765.1.S1_at   | MmugDNA.37765.1 | 4.08  | 4.14  | 0.13 | 0.55 | -1.04 | 0.3152   | 0.407185 | 0.600287 | 0.634794 |
| MmugDNA.37766.1.S1_at   | MmugDNA.37766.1 | 7.62  | 7.51  | 0.03 | 0.09 | 1.08  | 0.121878 | 0.008497 | 0.400614 | 0.122289 |
| MmugDNA.37779.1.S1_at   | MmugDNA.37779.1 | 6.61  | 6.99  | 0.84 | 0.09 | -1.3  | 0.70921  | 0.755702 | 0.86235  | 0.85776  |
| MmugDNA.37784.1.S1_at   | MmugDNA.37784.1 | 3.46  | 3.04  | 1.07 | 0.16 | 1.34  | 0.165637 | 0.147871 | 0.458665 | 0.422231 |
| MmugDNA.37797.1.S1_at   | MmugDNA.37797.1 | 6.65  | 6.77  | 0.16 | 0.01 | -1.09 | 0.251988 | 0.264473 | 0.546689 | 0.530437 |
| MmugDNA.37798.1.S1_at   | MmugDNA.37798.1 | 14.26 | 14.26 | 0.02 | 0.01 | 1     | 0.346162 | 0.852205 | 0.624868 | 0.915967 |
| MmugDNA.37802.1.S1_at   | MmugDNA.37802.1 | 13.91 | 13.78 | 0.16 | 0.07 | 1.1   | 0.6391   | 0.90806  | 0.823331 | 0.947901 |
| MmugDNA.37803.1.S1_at   | MmugDNA.37803.1 | 6.69  | 6.55  | 0.12 | 0.07 | 1.1   | 0.3289   | 0.813367 | 0.611174 | 0.892144 |

|                         |                 |       |       |      |      |       |          |          |          |          |
|-------------------------|-----------------|-------|-------|------|------|-------|----------|----------|----------|----------|
| MmugDNA.37811.1.S1_at   | MmugDNA.37811.1 | 9     | 9.45  | 0.23 | 0.24 | -1.37 | 0.120544 | 0.166258 | 0.398904 | 0.442798 |
| MmugDNA.37813.1.S1_at   | MmugDNA.37813.1 | 12.46 | 12.51 | 0.11 | 0.05 | -1.04 | 0.442223 | 0.495511 | 0.695653 | 0.695527 |
| MmugDNA.37814.1.S1_at   | MmugDNA.37814.1 | 8.57  | 7.37  | 0.11 | 0.3  | 2.29  | 0.00261  | 0.002521 | 0.095164 | 0.074158 |
| MmugDNA.3782.1.S1_at    | MmugDNA.3782.1  | 9.53  | 9.57  | 0.03 | 0.1  | -1.03 | 0.270081 | 0.658469 | 0.562292 | 0.800376 |
| MmugDNA.37820.1.S1_s_at | MmugDNA.37820.1 | 13.76 | 13.87 | 0.03 | 0.06 | -1.08 | 0.037214 | 0.018647 | 0.248244 | 0.171648 |
| MmugDNA.37823.1.S1_at   | MmugDNA.37823.1 | 5.7   | 5.84  | 0.13 | 0.05 | -1.1  | 0.594524 | 0.048434 | 0.794839 | 0.265307 |
| MmugDNA.37829.1.S1_at   | MmugDNA.37829.1 | 10.22 | 10.05 | 0.06 | 0.15 | 1.12  | 0.174181 | 0.119616 | 0.468365 | 0.388255 |
| MmugDNA.37834.1.S1_at   | MmugDNA.37834.1 | 7.9   | 7.37  | 0.41 | 0.22 | 1.45  | 0.107649 | 0.09119  | 0.382296 | 0.346097 |
| MmugDNA.37835.1.S1_at   | MmugDNA.37835.1 | 7.03  | 7.05  | 0.09 | 0.09 | -1.01 | 0.775492 | 0.008171 | 0.897425 | 0.119886 |
| MmugDNA.37837.1.S1_at   | MmugDNA.37837.1 | 10.12 | 10.06 | 0.05 | 0.05 | 1.04  | 0.41714  | 0.275302 | 0.677381 | 0.539663 |
| MmugDNA.3784.1.S1_at    | MmugDNA.3784.1  | 2.95  | 2.79  | 0.08 | 0.06 | 1.12  | 0.063896 | 0.057051 | 0.309277 | 0.284945 |
| MmugDNA.37840.1.S1_at   | MmugDNA.37840.1 | 8.03  | 8.93  | 0.21 | 0.07 | -1.87 | 0.002727 | 0.004403 | 0.096899 | 0.092846 |
| MmugDNA.37845.1.S1_at   | MmugDNA.37845.1 | 8.33  | 7.72  | 0.3  | 0.12 | 1.53  | 0.023956 | 0.00795  | 0.207881 | 0.118702 |
| MmugDNA.37853.1.S1_at   | MmugDNA.37853.1 | 9.51  | 9.9   | 0.2  | 0.08 | -1.31 | 0.067464 | 0.215746 | 0.317394 | 0.489503 |
| MmugDNA.37861.1.S1_s_at | MmugDNA.37861.1 | 9.94  | 9.61  | 0.28 | 0.15 | 1.26  | 0.242579 | 0.068295 | 0.539382 | 0.307706 |
| MmugDNA.37865.1.S1_at   | MmugDNA.37865.1 | 11.45 | 11.48 | 0.23 | 0.04 | -1.02 | 0.819431 | 0.918804 | 0.919554 | 0.954387 |
| MmugDNA.37869.1.S1_at   | MmugDNA.37869.1 | 8.53  | 8.47  | 0.18 | 0.13 | 1.04  | 0.837994 | 0.510799 | 0.929038 | 0.705196 |
| MmugDNA.3787.1.S1_at    | MmugDNA.3787.1  | 10.16 | 10.27 | 0.21 | 0.04 | -1.09 | 0.37768  | 0.450815 | 0.64816  | 0.665869 |
| MmugDNA.37871.1.S1_at   | MmugDNA.37871.1 | 4.55  | 4.56  | 0.02 | 0.09 | -1.01 | 0.427378 | 0.41657  | 0.684668 | 0.641647 |
| MmugDNA.37880.1.S1_at   | MmugDNA.37880.1 | 6.85  | 6.05  | 0.77 | 0.39 | 1.75  | 0.173181 | 0.057242 | 0.467373 | 0.285059 |
| MmugDNA.37891.1.S1_at   | MmugDNA.37891.1 | 4.39  | 4.44  | 0.07 | 0.12 | -1.03 | 0.628711 | 0.101733 | 0.817507 | 0.361601 |
| MmugDNA.37899.1.S1_at   | MmugDNA.37899.1 | 4.47  | 4.15  | 0.24 | 0.11 | 1.25  | 0.181243 | 0.253244 | 0.476588 | 0.521614 |
| MmugDNA.37900.1.S1_at   | MmugDNA.37900.1 | 12.89 | 12.77 | 0.06 | 0.07 | 1.09  | 0.135187 | 0.175846 | 0.419109 | 0.452475 |
| MmugDNA.37904.1.S1_at   | MmugDNA.37904.1 | 11.15 | 11.15 | 0.49 | 0.29 | -1    | 0.761607 | 0.449667 | 0.890644 | 0.665156 |
| MmugDNA.37909.1.S1_at   | MmugDNA.37909.1 | 9.69  | 9.57  | 0.06 | 0.08 | 1.08  | 0.103569 | 0.093323 | 0.376749 | 0.349412 |
| MmugDNA.3791.1.S1_at    | MmugDNA.3791.1  | 11.33 | 11.94 | 0.13 | 0.08 | -1.52 | 0.003692 | 0.001398 | 0.106124 | 0.057005 |
| MmugDNA.37921.1.S1_at   | MmugDNA.37921.1 | 8.21  | 9.63  | 0.64 | 0.15 | -2.67 | 0.034265 | 0.283155 | 0.239765 | 0.545694 |
| MmugDNA.37922.1.S1_at   | MmugDNA.37922.1 | 5.06  | 4.73  | 0.66 | 0.16 | 1.26  | 0.139459 | 0.161479 | 0.425004 | 0.437616 |
| MmugDNA.37923.1.S1_at   | MmugDNA.37923.1 | 12.24 | 11.56 | 0.2  | 0.17 | 1.6   | 0.031356 | 0.051256 | 0.23018  | 0.271825 |
| MmugDNA.37925.1.S1_at   | MmugDNA.37925.1 | 10.61 | 10.34 | 0.25 | 0.04 | 1.2   | 0.242767 | 0.016612 | 0.539556 | 0.163117 |
| MmugDNA.37927.1.S1_at   | MmugDNA.37927.1 | 9.51  | 9.12  | 0.99 | 0.15 | 1.31  | 0.760626 | 0.655153 | 0.890273 | 0.798309 |
| MmugDNA.37935.1.S1_at   | MmugDNA.37935.1 | 5.2   | 5.38  | 0.1  | 0.07 | -1.13 | 0.324969 | 0.360861 | 0.608444 | 0.601938 |
| MmugDNA.37936.1.S1_at   | MmugDNA.37936.1 | 9.21  | 9.12  | 0.25 | 0.11 | 1.06  | 0.219093 | 0.352903 | 0.516769 | 0.596217 |
| MmugDNA.37947.1.S1_at   | MmugDNA.37947.1 | 5.85  | 5.85  | 0.08 | 0.11 | 1     | 0.230146 | 0.692259 | 0.529056 | 0.820949 |
| MmugDNA.37954.1.S1_at   | MmugDNA.37954.1 | 2.95  | 2.97  | 0.06 | 0.06 | -1.01 | 0.405113 | 0.399616 | 0.668695 | 0.629912 |
| MmugDNA.37957.1.S1_at   | MmugDNA.37957.1 | 5.41  | 4.9   | 0.21 | 0.1  | 1.42  | 0.039852 | 0.02482  | 0.2563   | 0.197372 |
| MmugDNA.37959.1.S1_at   | MmugDNA.37959.1 | 4.24  | 4.39  | 0.22 | 0.39 | -1.11 | 0.78915  | 0.160415 | 0.904142 | 0.436528 |
| MmugDNA.37960.1.S1_at   | MmugDNA.37960.1 | 6.3   | 6.38  | 0.16 | 0.13 | -1.06 | 0.260164 | 0.440902 | 0.554308 | 0.659138 |
| MmugDNA.37961.1.S1_at   | MmugDNA.37961.1 | 8.48  | 8.99  | 0.29 | 0.13 | -1.42 | 0.048362 | 0.111196 | 0.277357 | 0.375832 |
| MmugDNA.37962.1.S1_at   | MmugDNA.37962.1 | 3.42  | 3.4   | 0.88 | 0.13 | 1.02  | 0.359361 | 0.442847 | 0.634935 | 0.660759 |
| MmugDNA.37963.1.S1_at   | MmugDNA.37963.1 | 9.3   | 9.41  | 0.22 | 0.07 | -1.08 | 0.489146 | 0.319038 | 0.727587 | 0.571591 |
| MmugDNA.37965.1.S1_at   | MmugDNA.37965.1 | 5.64  | 7.27  | 0.67 | 0.24 | -3.09 | 0.029584 | 0.002545 | 0.22511  | 0.07453  |
| MmugDNA.37973.1.S1_at   | MmugDNA.37973.1 | 2.98  | 3.11  | 0.09 | 0.1  | -1.09 | 0.111425 | 0.169087 | 0.387378 | 0.44561  |

|                         |                 |       |       |      |      |       |          |          |          |          |
|-------------------------|-----------------|-------|-------|------|------|-------|----------|----------|----------|----------|
| MmugDNA.37974.1.S1_at   | MmugDNA.37974.1 | 5.84  | 5.79  | 0.02 | 0.04 | 1.04  | 0.092305 | 0.043935 | 0.360355 | 0.254098 |
| MmugDNA.37980.1.S1_s_at | MmugDNA.37980.1 | 10.09 | 9.9   | 0.04 | 0.15 | 1.14  | 0.094104 | 0.024833 | 0.363099 | 0.197413 |
| MmugDNA.37982.1.S1_at   | MmugDNA.37982.1 | 6.24  | 6.28  | 0.69 | 0.16 | -1.03 | 0.400355 | 0.206208 | 0.665412 | 0.480377 |
| MmugDNA.37992.1.S1_at   | MmugDNA.37992.1 | 10.25 | 10.45 | 0.17 | 0.04 | -1.14 | 0.241288 | 0.004494 | 0.538538 | 0.093593 |
| MmugDNA.37993.1.S1_s_at | MmugDNA.37993.1 | 12.51 | 12.64 | 0.22 | 0.09 | -1.09 | 0.395805 | 0.346416 | 0.662054 | 0.591247 |
| MmugDNA.37995.1.S1_at   | MmugDNA.37995.1 | 10.94 | 10.86 | 0.14 | 0.05 | 1.06  | 0.913419 | 0.10041  | 0.963369 | 0.359541 |
| MmugDNA.37996.1.S1_at   | MmugDNA.37996.1 | 6.11  | 5.77  | 0.44 | 0.31 | 1.27  | 0.341679 | 0.009145 | 0.621474 | 0.12613  |
| MmugDNA.37998.1.S1_s_at | MmugDNA.37998.1 | 11.11 | 11.09 | 0.33 | 0.4  | 1.02  | 0.959685 | 0.654785 | 0.983565 | 0.798154 |
| MmugDNA.37999.1.S1_at   | MmugDNA.37999.1 | 4.85  | 4.76  | 0.12 | 0.07 | 1.06  | 0.541126 | 0.641553 | 0.761929 | 0.7896   |
| MmugDNA.38.1.S1_at      | MmugDNA.38.1    | 11.08 | 11.36 | 0.03 | 0.03 | -1.21 | 0.000205 | 0.101562 | 0.053494 | 0.361407 |
| MmugDNA.38000.1.S1_at   | MmugDNA.38000.1 | 12.72 | 12.78 | 0.18 | 0.06 | -1.04 | 0.634203 | 0.404237 | 0.820638 | 0.632691 |
| MmugDNA.38001.1.S1_at   | MmugDNA.38001.1 | 10.01 | 9.97  | 0.3  | 0.11 | 1.03  | 0.83046  | 0.00326  | 0.925486 | 0.082278 |
| MmugDNA.38003.1.S1_at   | MmugDNA.38003.1 | 11.51 | 11.42 | 0.19 | 0.1  | 1.06  | 0.348487 | 0.301605 | 0.626397 | 0.55955  |
| MmugDNA.38006.1.S1_s_at | MmugDNA.38006.1 | 6.04  | 9.39  | 1.18 | 0.36 | -10.2 | 0.020174 | 0.137714 | 0.195628 | 0.410711 |
| MmugDNA.38008.1.S1_at   | MmugDNA.38008.1 | 9.13  | 9.18  | 0.33 | 0.08 | -1.03 | 0.562639 | 0.089922 | 0.775027 | 0.344119 |
| MmugDNA.38010.1.S1_at   | MmugDNA.38010.1 | 13.43 | 13.68 | 0.07 | 0.05 | -1.19 | 0.010798 | 0.021675 | 0.153792 | 0.184333 |
| MmugDNA.38026.1.S1_at   | MmugDNA.38026.1 | 9.62  | 9.41  | 0.29 | 0.1  | 1.16  | 0.382707 | 0.053931 | 0.652092 | 0.277766 |
| MmugDNA.38029.1.S1_at   | MmugDNA.38029.1 | 3.16  | 3.08  | 0.02 | 0.02 | 1.06  | 0.007749 | 0.07007  | 0.136735 | 0.310966 |
| MmugDNA.38047.1.S1_at   | MmugDNA.38047.1 | 7.39  | 7.63  | 0.26 | 0.13 | -1.18 | 0.309572 | 0.040914 | 0.595886 | 0.247161 |
| MmugDNA.38049.1.S1_at   | MmugDNA.38049.1 | 8     | 7.43  | 0.16 | 0.24 | 1.49  | 0.044952 | 0.317638 | 0.26933  | 0.570802 |
| MmugDNA.38052.1.S1_at   | MmugDNA.38052.1 | 8.37  | 7.37  | 0.15 | 0.17 | 1.99  | 0.001159 | 0.000296 | 0.077718 | 0.034892 |
| MmugDNA.38053.1.S1_at   | MmugDNA.38053.1 | 7.52  | 9.2   | 0.46 | 0.34 | -3.2  | 0.014305 | 0.000182 | 0.171429 | 0.030511 |
| MmugDNA.38054.1.S1_at   | MmugDNA.38054.1 | 5.69  | 5.83  | 0.21 | 0.06 | -1.1  | 0.937458 | 0.278141 | 0.973767 | 0.541783 |
| MmugDNA.38062.1.S1_at   | MmugDNA.38062.1 | 10.79 | 11.03 | 0.44 | 0.04 | -1.18 | 0.296478 | 0.413101 | 0.585196 | 0.639419 |
| MmugDNA.38063.1.S1_at   | MmugDNA.38063.1 | 4.8   | 4.21  | 0.47 | 0.05 | 1.51  | 0.303655 | 0.577913 | 0.591084 | 0.748185 |
| MmugDNA.38069.1.S1_at   | MmugDNA.38069.1 | 8.12  | 8.02  | 0.27 | 0.01 | 1.07  | 0.523307 | 0.0528   | 0.750308 | 0.275412 |
| MmugDNA.38070.1.S1_at   | MmugDNA.38070.1 | 6.1   | 5.91  | 0.24 | 0.29 | 1.14  | 0.341806 | 0.743549 | 0.621589 | 0.851395 |
| MmugDNA.38072.1.S1_at   | MmugDNA.38072.1 | 10.24 | 10.08 | 0.17 | 0.15 | 1.11  | 0.446418 | 0.027168 | 0.698677 | 0.205893 |
| MmugDNA.38081.1.S1_at   | MmugDNA.38081.1 | 3.19  | 3.24  | 0.06 | 0.17 | -1.03 | 0.726843 | 0.417915 | 0.871957 | 0.642484 |
| MmugDNA.38086.1.S1_at   | MmugDNA.38086.1 | 10.35 | 10.29 | 0.24 | 0.09 | 1.04  | 0.595274 | 0.004852 | 0.795142 | 0.097235 |
| MmugDNA.38099.1.S1_at   | MmugDNA.38099.1 | 10.29 | 10.11 | 0.16 | 0.15 | 1.13  | 0.24257  | 0.079905 | 0.539382 | 0.327207 |
| MmugDNA.38102.1.S1_at   | MmugDNA.38102.1 | 11.16 | 10.75 | 0.15 | 0.06 | 1.34  | 0.016136 | 0.022863 | 0.179543 | 0.189271 |
| MmugDNA.38103.1.S1_at   | MmugDNA.38103.1 | 8.36  | 8.25  | 0.07 | 0.14 | 1.08  | 0.230758 | 0.181438 | 0.529522 | 0.457927 |
| MmugDNA.38107.1.S1_at   | MmugDNA.38107.1 | 3.94  | 3.93  | 0.04 | 0.07 | 1.01  | 0.515399 | 0.645206 | 0.745297 | 0.792105 |
| MmugDNA.3811.1.S1_at    | MmugDNA.3811.1  | 9.04  | 8.5   | 0.21 | 0.13 | 1.46  | 0.03188  | 0.014478 | 0.232236 | 0.153571 |
| MmugDNA.38117.1.S1_at   | MmugDNA.38117.1 | 12.18 | 12    | 0.2  | 0.07 | 1.13  | 0.675986 | 0.219621 | 0.845314 | 0.493215 |
| MmugDNA.38121.1.S1_at   | MmugDNA.38121.1 | 10.42 | 10.05 | 0.76 | 0.24 | 1.29  | 0.944326 | 0.995269 | 0.976561 | 0.997042 |
| MmugDNA.38124.1.S1_at   | MmugDNA.38124.1 | 7.18  | 6.94  | 0.25 | 0.05 | 1.18  | 0.097378 | 0.023719 | 0.367528 | 0.192852 |
| MmugDNA.38132.1.S1_at   | MmugDNA.38132.1 | 12.48 | 12.51 | 0.11 | 0.08 | -1.02 | 0.400343 | 0.030537 | 0.665412 | 0.216711 |
| MmugDNA.38135.1.S1_at   | MmugDNA.38135.1 | 9.84  | 9.65  | 0.13 | 0.1  | 1.14  | 0.074973 | 0.12989  | 0.331989 | 0.401509 |
| MmugDNA.38136.1.S1_at   | MmugDNA.38136.1 | 6.47  | 6.43  | 0.06 | 0.04 | 1.03  | 0.27069  | 0.008735 | 0.562838 | 0.12396  |
| MmugDNA.38137.1.S1_at   | MmugDNA.38137.1 | 8.19  | 8.23  | 0.26 | 0.14 | -1.03 | 0.796685 | 0.685539 | 0.908217 | 0.816542 |
| MmugDNA.38137.1.S1_x_at | MmugDNA.38137.1 | 8.42  | 8.59  | 0.26 | 0.09 | -1.13 | 0.869879 | 0.72026  | 0.944042 | 0.838202 |

|                         |                 |       |       |      |      |       |          |          |          |          |
|-------------------------|-----------------|-------|-------|------|------|-------|----------|----------|----------|----------|
| MmugDNA.38138.1.S1_at   | MmugDNA.38138.1 | 9.77  | 9.88  | 0.65 | 0.04 | -1.08 | 0.24955  | 0.116494 | 0.544627 | 0.383671 |
| MmugDNA.38148.1.S1_at   | MmugDNA.38148.1 | 12.15 | 12.14 | 0.08 | 0.07 | 1.01  | 0.343721 | 0.548574 | 0.623057 | 0.729276 |
| MmugDNA.3815.1.S1_at    | MmugDNA.3815.1  | 3.14  | 3.19  | 0.04 | 0.03 | -1.04 | 0.399114 | 0.059828 | 0.664624 | 0.291286 |
| MmugDNA.38153.1.S1_at   | MmugDNA.38153.1 | 6.58  | 6.5   | 0.14 | 0.04 | 1.06  | 0.389392 | 0.183549 | 0.657321 | 0.459681 |
| MmugDNA.38158.1.S1_at   | MmugDNA.38158.1 | 6.78  | 6.77  | 0.12 | 0.2  | 1.01  | 0.814956 | 0.038812 | 0.917374 | 0.241916 |
| MmugDNA.38158.1.S1_s_at | MmugDNA.38158.1 | 8.02  | 8     | 0.13 | 0.09 | 1.01  | 0.693885 | 0.081006 | 0.853757 | 0.329134 |
| MmugDNA.3816.1.S1_at    | MmugDNA.3816.1  | 12.83 | 12.76 | 0.07 | 0.03 | 1.05  | 0.404978 | 0.723497 | 0.668575 | 0.839925 |
| MmugDNA.38161.1.S1_at   | MmugDNA.38161.1 | 12.3  | 12.28 | 0.07 | 0.03 | 1.01  | 0.959284 | 0.874302 | 0.983355 | 0.928616 |
| MmugDNA.38165.1.S1_at   | MmugDNA.38165.1 | 9.12  | 8.43  | 0.35 | 0.22 | 1.61  | 0.194401 | 0.266025 | 0.491041 | 0.531815 |
| MmugDNA.38167.1.S1_at   | MmugDNA.38167.1 | 10.14 | 10.24 | 0.13 | 0.09 | -1.07 | 0.33685  | 0.30369  | 0.617378 | 0.561113 |
| MmugDNA.38182.1.S1_at   | MmugDNA.38182.1 | 5.85  | 5.73  | 0.29 | 0.08 | 1.09  | 0.460411 | 0.599255 | 0.708167 | 0.761382 |
| MmugDNA.38182.1.S1_s_at | MmugDNA.38182.1 | 5.72  | 5.72  | 0.25 | 0.12 | -1.01 | 0.468676 | 0.585032 | 0.713693 | 0.752682 |
| MmugDNA.38186.1.S1_at   | MmugDNA.38186.1 | 10.46 | 10.32 | 0.14 | 0    | 1.1   | 0.141361 | 0.265372 | 0.427324 | 0.531337 |
| MmugDNA.38195.1.S1_at   | MmugDNA.38195.1 | 7.4   | 6.94  | 0.15 | 0.06 | 1.37  | 0.021714 | 0.009636 | 0.200687 | 0.129267 |
| MmugDNA.38196.1.S1_at   | MmugDNA.38196.1 | 8.61  | 8.77  | 0.26 | 0.11 | -1.12 | 0.187522 | 0.079953 | 0.483789 | 0.327321 |
| MmugDNA.382.1.S1_at     | MmugDNA.382.1   | 7.56  | 7.6   | 0.12 | 0.01 | -1.02 | 0.648535 | 0.36407  | 0.829237 | 0.604449 |
| MmugDNA.38203.1.S1_at   | MmugDNA.38203.1 | 3.83  | 4.4   | 0.09 | 0.36 | -1.49 | 0.063237 | 0.05276  | 0.308134 | 0.275315 |
| MmugDNA.3821.1.A1_at    | MmugDNA.3821.1  | 4.88  | 4.83  | 0.06 | 0.12 | 1.04  | 0.192138 | 0.010317 | 0.488745 | 0.132962 |
| MmugDNA.3821.1.S1_at    | MmugDNA.3821.1  | 5.03  | 4.99  | 0.21 | 0.02 | 1.03  | 0.264739 | 0.145491 | 0.55795  | 0.419424 |
| MmugDNA.38216.1.S1_at   | MmugDNA.38216.1 | 12.64 | 12.58 | 0.07 | 0.01 | 1.05  | 0.257979 | 0.805819 | 0.55217  | 0.888395 |
| MmugDNA.38217.1.S1_at   | MmugDNA.38217.1 | 7.03  | 7.01  | 0.03 | 0.05 | 1.02  | 0.3702   | 0.476772 | 0.643242 | 0.682921 |
| MmugDNA.3822.1.S1_at    | MmugDNA.3822.1  | 6.33  | 5.32  | 0.38 | 0.24 | 2.02  | 0.021436 | 0.209769 | 0.199988 | 0.483536 |
| MmugDNA.38223.1.S1_at   | MmugDNA.38223.1 | 6.16  | 6.2   | 0.05 | 0.09 | -1.03 | 0.921141 | 0.098535 | 0.966268 | 0.356636 |
| MmugDNA.3823.1.S1_at    | MmugDNA.3823.1  | 6.28  | 6.41  | 0.26 | 0.04 | -1.09 | 0.916235 | 0.507296 | 0.964383 | 0.702917 |
| MmugDNA.38239.1.S1_at   | MmugDNA.38239.1 | 11.24 | 10.66 | 0.15 | 0.15 | 1.5   | 0.024753 | 0.072432 | 0.210464 | 0.315282 |
| MmugDNA.38240.1.S1_at   | MmugDNA.38240.1 | 11.33 | 11.19 | 0.53 | 0.03 | 1.1   | 0.592893 | 0.724706 | 0.793684 | 0.840645 |
| MmugDNA.38244.1.S1_at   | MmugDNA.38244.1 | 4.43  | 4.31  | 0.01 | 0.1  | 1.08  | 0.117557 | 0.01161  | 0.394882 | 0.139525 |
| MmugDNA.3825.1.S1_at    | MmugDNA.3825.1  | 6.52  | 6.61  | 0.19 | 0    | -1.06 | 0.853102 | 0.597291 | 0.936096 | 0.76013  |
| MmugDNA.38252.1.S1_at   | MmugDNA.38252.1 | 6.05  | 5.51  | 0.32 | 0.68 | 1.45  | 0.41032  | 0.17785  | 0.672397 | 0.454167 |
| MmugDNA.38254.1.S1_at   | MmugDNA.38254.1 | 9.21  | 9.14  | 0.2  | 0.06 | 1.05  | 0.832211 | 0.373849 | 0.926055 | 0.61248  |
| MmugDNA.38255.1.S1_at   | MmugDNA.38255.1 | 8.47  | 9.32  | 0.12 | 0.34 | -1.8  | 0.01829  | 0.155685 | 0.1882   | 0.431054 |
| MmugDNA.38256.1.S1_at   | MmugDNA.38256.1 | 5.86  | 5.94  | 0.11 | 0.04 | -1.06 | 0.958673 | 0.643138 | 0.983166 | 0.79068  |
| MmugDNA.38257.1.S1_at   | MmugDNA.38257.1 | 8.12  | 7.29  | 0.16 | 0.13 | 1.77  | 0.003272 | 0.002895 | 0.102069 | 0.079107 |
| MmugDNA.38258.1.S1_at   | MmugDNA.38258.1 | 4.24  | 4     | 0.15 | 0.56 | 1.18  | 0.788097 | 0.452887 | 0.903649 | 0.667359 |
| MmugDNA.3826.1.S1_at    | MmugDNA.3826.1  | 3.73  | 3.57  | 1.38 | 0.08 | 1.12  | 0.282923 | 0.185356 | 0.573503 | 0.461323 |
| MmugDNA.38260.1.S1_at   | MmugDNA.38260.1 | 8.11  | 8.94  | 0.18 | 0.12 | -1.77 | 0.00286  | 0.036775 | 0.098428 | 0.236291 |
| MmugDNA.38266.1.S1_at   | MmugDNA.38266.1 | 11.94 | 12.23 | 0.33 | 0.07 | -1.22 | 0.645015 | 0.090679 | 0.827097 | 0.345151 |
| MmugDNA.38270.1.S1_at   | MmugDNA.38270.1 | 6.62  | 6.49  | 0.14 | 0.07 | 1.09  | 0.341881 | 0.139274 | 0.621647 | 0.412461 |
| MmugDNA.38277.1.S1_at   | MmugDNA.38277.1 | 6.63  | 6.33  | 0.15 | 0.1  | 1.22  | 0.13705  | 0.244336 | 0.421892 | 0.514184 |
| MmugDNA.38277.1.S1_s_at | MmugDNA.38277.1 | 7.79  | 7.89  | 0.14 | 0.13 | -1.07 | 0.62491  | 0.032994 | 0.815077 | 0.224886 |
| MmugDNA.38282.1.S1_at   | MmugDNA.38282.1 | 6.23  | 6.19  | 0.6  | 0.12 | 1.03  | 0.928461 | 0.154222 | 0.969772 | 0.428967 |
| MmugDNA.38283.1.S1_at   | MmugDNA.38283.1 | 9.06  | 9.56  | 0.06 | 0.15 | -1.41 | 0.01482  | 0.002192 | 0.173867 | 0.069173 |
| MmugDNA.38284.1.S1_x_at | MmugDNA.38284.1 | 9.09  | 8.69  | 0.09 | 0.17 | 1.32  | 0.054612 | 0.047817 | 0.290604 | 0.263649 |

|                         |                 |       |       |      |      |       |          |          |          |          |
|-------------------------|-----------------|-------|-------|------|------|-------|----------|----------|----------|----------|
| MmugDNA.38290.1.S1_at   | MmugDNA.38290.1 | 11.05 | 11.75 | 0.1  | 0.18 | -1.62 | 0.004937 | 0.08843  | 0.11523  | 0.341877 |
| MmugDNA.38293.1.S1_at   | MmugDNA.38293.1 | 7.88  | 8.66  | 0.39 | 0.16 | -1.71 | 0.037481 | 0.065635 | 0.249007 | 0.301564 |
| MmugDNA.38298.1.S1_at   | MmugDNA.38298.1 | 8.22  | 8.52  | 0.52 | 0.42 | -1.23 | 0.214661 | 0.194216 | 0.512304 | 0.469316 |
| MmugDNA.383.1.S1_at     | MmugDNA.383.1   | 5.6   | 5.71  | 0.26 | 0.03 | -1.08 | 0.730674 | 0.552531 | 0.874132 | 0.731829 |
| MmugDNA.38309.1.S1_s_at | MmugDNA.38309.1 | 12.53 | 12.28 | 0.16 | 0.01 | 1.19  | 0.048175 | 0.109125 | 0.276908 | 0.372957 |
| MmugDNA.3831.1.S1_at    | MmugDNA.3831.1  | 4.57  | 4.55  | 0.1  | 0.29 | 1.02  | 0.552165 | 0.13217  | 0.768986 | 0.404274 |
| MmugDNA.38323.1.S1_at   | MmugDNA.38323.1 | 4.61  | 4.46  | 0.16 | 0.06 | 1.11  | 0.128216 | 0.246289 | 0.410227 | 0.515889 |
| MmugDNA.38327.1.S1_at   | MmugDNA.38327.1 | 7.07  | 7     | 0.25 | 0.07 | 1.05  | 0.660893 | 0.480383 | 0.83636  | 0.685752 |
| MmugDNA.38328.1.S1_at   | MmugDNA.38328.1 | 9.79  | 9.87  | 0.16 | 0.04 | -1.05 | 0.613477 | 0.454801 | 0.807435 | 0.668859 |
| MmugDNA.38332.1.S1_at   | MmugDNA.38332.1 | 7.28  | 7.25  | 0.12 | 0.03 | 1.03  | 0.711851 | 0.8056   | 0.864071 | 0.888306 |
| MmugDNA.38334.1.S1_at   | MmugDNA.38334.1 | 7.61  | 8.5   | 0.76 | 0.15 | -1.85 | 0.034126 | 0.216152 | 0.239433 | 0.489701 |
| MmugDNA.38339.1.S1_at   | MmugDNA.38339.1 | 10.39 | 10.51 | 0.14 | 0.15 | -1.08 | 0.751601 | 0.061303 | 0.885365 | 0.294321 |
| MmugDNA.38343.1.S1_at   | MmugDNA.38343.1 | 3.55  | 3.65  | 0.5  | 0.59 | -1.07 | 0.638006 | 0.846454 | 0.822679 | 0.912643 |
| MmugDNA.38346.1.S1_at   | MmugDNA.38346.1 | 8.05  | 8.57  | 0.61 | 0.55 | -1.42 | 0.300624 | 0.029144 | 0.588826 | 0.212767 |
| MmugDNA.38357.1.S1_at   | MmugDNA.38357.1 | 11.42 | 10.85 | 0.21 | 0.02 | 1.49  | 0.004941 | 0.108525 | 0.115244 | 0.37207  |
| MmugDNA.38358.1.S1_at   | MmugDNA.38358.1 | 8.8   | 8.54  | 0.16 | 0.14 | 1.2   | 0.13358  | 0.018999 | 0.41701  | 0.173527 |
| MmugDNA.38361.1.S1_at   | MmugDNA.38361.1 | 11.41 | 11.41 | 0.23 | 0.07 | -1    | 0.319181 | 0.315872 | 0.603812 | 0.569327 |
| MmugDNA.38366.1.S1_at   | MmugDNA.38366.1 | 10.45 | 10.51 | 0.24 | 0.18 | -1.05 | 0.598363 | 0.00718  | 0.79737  | 0.113932 |
| MmugDNA.38367.1.S1_at   | MmugDNA.38367.1 | 10.97 | 11.38 | 0.1  | 0.12 | -1.33 | 0.02169  | 0.021321 | 0.20067  | 0.182772 |
| MmugDNA.38368.1.S1_at   | MmugDNA.38368.1 | 13.46 | 13.56 | 0.16 | 0.02 | -1.07 | 0.317025 | 0.181146 | 0.601693 | 0.457583 |
| MmugDNA.3837.1.S1_at    | MmugDNA.3837.1  | 2.74  | 2.74  | 0.07 | 0.09 | 1     | 0.393676 | 0.079612 | 0.660406 | 0.326981 |
| MmugDNA.38371.1.S1_at   | MmugDNA.38371.1 | 11.1  | 10.98 | 0.36 | 0.09 | 1.09  | 0.657952 | 0.842592 | 0.834819 | 0.910315 |
| MmugDNA.38375.1.S1_at   | MmugDNA.38375.1 | 5.75  | 5.84  | 0.2  | 0.11 | -1.06 | 0.737532 | 0.761639 | 0.878205 | 0.861459 |
| MmugDNA.38379.1.S1_at   | MmugDNA.38379.1 | 11.18 | 10.87 | 0.08 | 0.05 | 1.23  | 0.004487 | 0.001243 | 0.113436 | 0.054826 |
| MmugDNA.38386.1.S1_at   | MmugDNA.38386.1 | 3.16  | 3.16  | 0.02 | 0.24 | 1     | 0.636198 | 0.507973 | 0.822072 | 0.703358 |
| MmugDNA.38387.1.S1_at   | MmugDNA.38387.1 | 13.17 | 13.39 | 0.12 | 0.02 | -1.16 | 0.018412 | 0.0291   | 0.18871  | 0.212733 |
| MmugDNA.38388.1.S1_at   | MmugDNA.38388.1 | 3.38  | 3.32  | 0.12 | 0.08 | 1.05  | 0.231587 | 0.332151 | 0.530249 | 0.580584 |
| MmugDNA.38396.1.S1_at   | MmugDNA.38396.1 | 8.48  | 8.47  | 0.12 | 0.09 | 1.01  | 0.900013 | 0.989907 | 0.95752  | 0.994222 |
| MmugDNA.38404.1.S1_at   | MmugDNA.38404.1 | 4.85  | 5.08  | 0.56 | 0.15 | -1.17 | 0.331047 | 0.568038 | 0.613008 | 0.741761 |
| MmugDNA.38411.1.S1_at   | MmugDNA.38411.1 | 10.4  | 10.41 | 0.16 | 0.02 | -1.01 | 0.781563 | 0.462908 | 0.900218 | 0.674149 |
| MmugDNA.38412.1.S1_at   | MmugDNA.38412.1 | 12.76 | 12.74 | 0.04 | 0.03 | 1.01  | 0.333954 | 0.853177 | 0.615174 | 0.916521 |
| MmugDNA.38416.1.S1_at   | MmugDNA.38416.1 | 8.75  | 8.7   | 0.11 | 0.03 | 1.04  | 0.438021 | 0.371007 | 0.692763 | 0.609964 |
| MmugDNA.38416.1.S1_s_at | MmugDNA.38416.1 | 11.24 | 11.25 | 0.16 | 0.03 | -1    | 0.802331 | 0.903772 | 0.911235 | 0.945386 |
| MmugDNA.38417.1.S1_at   | MmugDNA.38417.1 | 3.73  | 3.59  | 0.07 | 0.03 | 1.1   | 0.105799 | 0.33771  | 0.379857 | 0.584885 |
| MmugDNA.38426.1.S1_at   | MmugDNA.38426.1 | 9.75  | 9.84  | 0.17 | 0.08 | -1.06 | 0.427162 | 0.021221 | 0.684488 | 0.182388 |
| MmugDNA.38433.1.S1_at   | MmugDNA.38433.1 | 10.58 | 10.95 | 0.22 | 0.06 | -1.3  | 0.040357 | 0.031765 | 0.257247 | 0.220664 |
| MmugDNA.38439.1.S1_at   | MmugDNA.38439.1 | 6.49  | 6.4   | 0.17 | 0.08 | 1.07  | 0.474912 | 0.62862  | 0.7177   | 0.781323 |
| MmugDNA.38450.1.S1_at   | MmugDNA.38450.1 | 5.16  | 5.24  | 0.08 | 0.11 | -1.06 | 0.565649 | 0.425896 | 0.776758 | 0.6481   |
| MmugDNA.38454.1.S1_at   | MmugDNA.38454.1 | 7.8   | 7.7   | 0.06 | 0.11 | 1.07  | 0.173966 | 0.086566 | 0.468349 | 0.33911  |
| MmugDNA.38455.1.S1_at   | MmugDNA.38455.1 | 5.39  | 5.59  | 0.1  | 0.05 | -1.15 | 0.013368 | 0.005378 | 0.16632  | 0.101199 |
| MmugDNA.38459.1.S1_at   | MmugDNA.38459.1 | 8.98  | 9.13  | 0.08 | 0.07 | -1.11 | 0.105413 | 0.053862 | 0.379375 | 0.277613 |
| MmugDNA.38460.1.S1_at   | MmugDNA.38460.1 | 6.46  | 6.42  | 0.09 | 0.05 | 1.03  | 0.559021 | 0.190775 | 0.77314  | 0.466228 |
| MmugDNA.38469.1.S1_at   | MmugDNA.38469.1 | 5.28  | 4.84  | 0.47 | 0.12 | 1.36  | 0.269309 | 0.354999 | 0.561618 | 0.597466 |

|                         |                 |       |       |      |      |        |          |          |          |          |
|-------------------------|-----------------|-------|-------|------|------|--------|----------|----------|----------|----------|
| MmugDNA.38474.1.S1_at   | MmugDNA.38474.1 | 10.29 | 10.58 | 0.5  | 0.16 | -1.22  | 0.563755 | 0.59411  | 0.775658 | 0.758517 |
| MmugDNA.38474.1.S1_s_at | MmugDNA.38474.1 | 11    | 11.39 | 0.5  | 0.14 | -1.31  | 0.577659 | 0.661986 | 0.783728 | 0.802051 |
| MmugDNA.38475.1.S1_at   | MmugDNA.38475.1 | 10.91 | 10.64 | 0.17 | 0.08 | 1.21   | 0.148768 | 0.192328 | 0.437317 | 0.467833 |
| MmugDNA.38479.1.S1_at   | MmugDNA.38479.1 | 5.87  | 6.04  | 0.12 | 0.08 | -1.12  | 0.214642 | 0.325513 | 0.512282 | 0.575827 |
| MmugDNA.38481.1.S1_at   | MmugDNA.38481.1 | 10.65 | 11.61 | 0.76 | 0.28 | -1.95  | 0.277671 | 0.014001 | 0.569172 | 0.151595 |
| MmugDNA.38484.1.S1_at   | MmugDNA.38484.1 | 7.05  | 8.54  | 1.09 | 0.53 | -2.81  | 0.46166  | 0.223004 | 0.709034 | 0.495821 |
| MmugDNA.38488.1.S1_s_at | MmugDNA.38488.1 | 9.71  | 9.41  | 0.21 | 0.16 | 1.22   | 0.40982  | 0.304592 | 0.672078 | 0.561838 |
| MmugDNA.38489.1.S1_at   | MmugDNA.38489.1 | 3.37  | 3.29  | 0.11 | 0.1  | 1.05   | 0.496382 | 0.736982 | 0.732272 | 0.847779 |
| MmugDNA.38492.1.S1_at   | MmugDNA.38492.1 | 5.64  | 4.48  | 0.13 | 0.29 | 2.24   | 0.004309 | 0.057413 | 0.111813 | 0.285608 |
| MmugDNA.38498.1.S1_at   | MmugDNA.38498.1 | 11.1  | 11.23 | 0.15 | 0.13 | -1.09  | 0.294336 | 0.305976 | 0.58332  | 0.562732 |
| MmugDNA.38501.1.S1_at   | MmugDNA.38501.1 | 10.52 | 10.58 | 0.56 | 0.09 | -1.04  | 0.922897 | 0.592696 | 0.967075 | 0.757854 |
| MmugDNA.38506.1.S1_at   | MmugDNA.38506.1 | 10.47 | 11.87 | 0.55 | 0.23 | -2.64  | 0.027104 | 0.026018 | 0.217323 | 0.202179 |
| MmugDNA.38508.1.S1_at   | MmugDNA.38508.1 | 10.88 | 10.87 | 0.05 | 0.03 | 1.01   | 0.709081 | 0.920225 | 0.862272 | 0.95511  |
| MmugDNA.3851.1.S1_at    | MmugDNA.3851.1  | 4.19  | 4.3   | 0.32 | 0.31 | -1.08  | 0.369666 | 0.110644 | 0.642969 | 0.374854 |
| MmugDNA.38510.1.S1_at   | MmugDNA.38510.1 | 5.9   | 7.47  | 0.67 | 0.26 | -2.96  | 0.025298 | 0.208271 | 0.212134 | 0.48217  |
| MmugDNA.38513.1.S1_at   | MmugDNA.38513.1 | 6.11  | 6.06  | 0.09 | 0.06 | 1.04   | 0.508439 | 0.062706 | 0.740398 | 0.297117 |
| MmugDNA.38515.1.S1_at   | MmugDNA.38515.1 | 7.39  | 7.3   | 0.21 | 0.08 | 1.06   | 0.37692  | 0.258478 | 0.647491 | 0.525758 |
| MmugDNA.38516.1.S1_at   | MmugDNA.38516.1 | 8.34  | 10.92 | 1.01 | 0.26 | -5.96  | 0.019111 | 0.063878 | 0.191749 | 0.29906  |
| MmugDNA.38518.1.S1_at   | MmugDNA.38518.1 | 5.16  | 5.01  | 0.17 | 0.04 | 1.11   | 0.284334 | 0.413549 | 0.574388 | 0.639648 |
| MmugDNA.38522.1.S1_at   | MmugDNA.38522.1 | 9.88  | 9.76  | 0.48 | 0.04 | 1.08   | 0.569071 | 0.756942 | 0.778679 | 0.858495 |
| MmugDNA.38524.1.S1_at   | MmugDNA.38524.1 | 13.19 | 12.94 | 0.06 | 0.07 | 1.19   | 0.008901 | 0.005419 | 0.144048 | 0.10157  |
| MmugDNA.38525.1.S1_at   | MmugDNA.38525.1 | 10.87 | 10.14 | 0.32 | 0.35 | 1.67   | 0.107769 | 0.132776 | 0.382464 | 0.404544 |
| MmugDNA.38526.1.S1_at   | MmugDNA.38526.1 | 10.78 | 10.67 | 0.22 | 0.24 | 1.08   | 0.272586 | 0.017    | 0.564665 | 0.165304 |
| MmugDNA.38527.1.S1_at   | MmugDNA.38527.1 | 4.3   | 4.39  | 0.15 | 0.19 | -1.07  | 0.903715 | 0.605789 | 0.959219 | 0.76549  |
| MmugDNA.38528.1.S1_at   | MmugDNA.38528.1 | 7.75  | 7.77  | 0.42 | 0.06 | -1.01  | 0.427275 | 0.433034 | 0.684627 | 0.653414 |
| MmugDNA.3853.1.S1_at    | MmugDNA.3853.1  | 7.61  | 8.13  | 0.33 | 0.27 | -1.43  | 0.188929 | 0.347585 | 0.485516 | 0.592019 |
| MmugDNA.38530.1.S1_at   | MmugDNA.38530.1 | 7.14  | 10.67 | 1.23 | 0.29 | -11.58 | 0.015463 | 0.186694 | 0.176449 | 0.462471 |
| MmugDNA.38534.1.S1_at   | MmugDNA.38534.1 | 13.11 | 13.16 | 0.19 | 0.03 | -1.03  | 0.975914 | 0.04928  | 0.990409 | 0.266845 |
| MmugDNA.38535.1.S1_at   | MmugDNA.38535.1 | 8.26  | 8.49  | 0.21 | 0.11 | -1.17  | 0.749598 | 0.145548 | 0.884066 | 0.419451 |
| MmugDNA.38539.1.S1_x_at | MmugDNA.38539.1 | 6.89  | 6.92  | 0.22 | 0.03 | -1.02  | 0.997167 | 0.609345 | 0.999081 | 0.767726 |
| MmugDNA.38548.1.S1_s_at | MmugDNA.38548.1 | 11.37 | 11.18 | 0.19 | 0.06 | 1.14   | 0.045646 | 0.034953 | 0.271074 | 0.231062 |
| MmugDNA.38549.1.S1_at   | MmugDNA.38549.1 | 9.79  | 9.24  | 0.09 | 0.07 | 1.46   | 0.001308 | 0.028851 | 0.078631 | 0.211661 |
| MmugDNA.38554.1.S1_at   | MmugDNA.38554.1 | 8.51  | 8.65  | 0.06 | 0.08 | -1.11  | 0.049355 | 0.036317 | 0.27956  | 0.235105 |
| MmugDNA.38556.1.S1_at   | MmugDNA.38556.1 | 10.1  | 10.61 | 0.17 | 0.06 | -1.43  | 0.008107 | 0.078815 | 0.138956 | 0.325757 |
| MmugDNA.38558.1.S1_at   | MmugDNA.38558.1 | 12.68 | 12.61 | 0.04 | 0.12 | 1.05   | 0.890486 | 0.00132  | 0.953316 | 0.055996 |
| MmugDNA.38562.1.S1_at   | MmugDNA.38562.1 | 5.73  | 5.77  | 0.28 | 0.24 | -1.03  | 0.695311 | 0.722262 | 0.854789 | 0.839137 |
| MmugDNA.38563.1.S1_at   | MmugDNA.38563.1 | 5.85  | 9.53  | 1.65 | 0.3  | -12.77 | 0.044569 | 0.072337 | 0.268287 | 0.315103 |
| MmugDNA.38565.1.S1_at   | MmugDNA.38565.1 | 12.77 | 12.27 | 0.63 | 0.04 | 1.42   | 0.21374  | 0.00642  | 0.511664 | 0.108813 |
| MmugDNA.38579.1.S1_at   | MmugDNA.38579.1 | 8.44  | 7.93  | 0.54 | 0.17 | 1.42   | 0.241098 | 0.330356 | 0.538472 | 0.579112 |
| MmugDNA.38581.1.S1_at   | MmugDNA.38581.1 | 10.44 | 10.37 | 0.17 | 0.12 | 1.05   | 0.960987 | 0.09821  | 0.98408  | 0.356253 |
| MmugDNA.38595.1.S1_at   | MmugDNA.38595.1 | 7.37  | 7.27  | 0.18 | 0.12 | 1.07   | 0.322442 | 0.445143 | 0.606443 | 0.662309 |
| MmugDNA.38599.1.S1_at   | MmugDNA.38599.1 | 10.61 | 10.48 | 0.28 | 0.1  | 1.09   | 0.716945 | 0.752096 | 0.866434 | 0.855744 |
| MmugDNA.386.1.S1_at     | MmugDNA.386.1   | 5.47  | 5.47  | 0.03 | 0.04 | -1     | 0.501315 | 0.171463 | 0.735287 | 0.447895 |

|                         |                 |       |       |      |      |       |          |          |          |          |
|-------------------------|-----------------|-------|-------|------|------|-------|----------|----------|----------|----------|
| MmugDNA.38600.1.S1_at   | MmugDNA.38600.1 | 9.88  | 9.42  | 0.11 | 0.1  | 1.38  | 0.003392 | 0.00068  | 0.102989 | 0.04413  |
| MmugDNA.38601.1.S1_at   | MmugDNA.38601.1 | 9.1   | 9.1   | 0.38 | 0.09 | -1    | 0.965142 | 0.656222 | 0.985924 | 0.798968 |
| MmugDNA.38602.1.S1_at   | MmugDNA.38602.1 | 6.13  | 5.64  | 0.65 | 0.63 | 1.4   | 0.193821 | 0.037949 | 0.490373 | 0.239302 |
| MmugDNA.38606.1.S1_at   | MmugDNA.38606.1 | 8.9   | 9.45  | 0.31 | 0.03 | -1.46 | 0.098792 | 0.191634 | 0.369716 | 0.466918 |
| MmugDNA.38611.1.S1_at   | MmugDNA.38611.1 | 7.11  | 7.09  | 0.17 | 0.1  | 1.01  | 0.628401 | 0.761985 | 0.817431 | 0.861597 |
| MmugDNA.38615.1.S1_s_at | MmugDNA.38615.1 | 8.03  | 8.72  | 0.13 | 0.15 | -1.61 | 0.004521 | 0.005946 | 0.113436 | 0.105482 |
| MmugDNA.38618.1.S1_at   | MmugDNA.38618.1 | 13.44 | 13.33 | 0.29 | 0.09 | 1.08  | 0.803775 | 0.967253 | 0.911913 | 0.981908 |
| MmugDNA.38626.1.S1_at   | MmugDNA.38626.1 | 8.14  | 8.67  | 0.68 | 0.06 | -1.45 | 0.471462 | 0.215874 | 0.715544 | 0.489536 |
| MmugDNA.38628.1.S1_at   | MmugDNA.38628.1 | 9.37  | 9.41  | 0.03 | 0.05 | -1.03 | 0.337519 | 0.533856 | 0.617937 | 0.71991  |
| MmugDNA.38630.1.S1_at   | MmugDNA.38630.1 | 12.44 | 11.73 | 0.22 | 0.18 | 1.64  | 0.015986 | 0.041515 | 0.178971 | 0.24862  |
| MmugDNA.38638.1.S1_at   | MmugDNA.38638.1 | 9.7   | 9.61  | 0.04 | 0.08 | 1.07  | 0.421791 | 0.6692   | 0.680127 | 0.806492 |
| MmugDNA.38640.1.S1_at   | MmugDNA.38640.1 | 8.47  | 8.73  | 0.37 | 0.3  | -1.2  | 0.326734 | 0.433082 | 0.609643 | 0.653448 |
| MmugDNA.38641.1.S1_at   | MmugDNA.38641.1 | 12.38 | 12.4  | 0.06 | 0.03 | -1.01 | 0.587944 | 0.185596 | 0.790724 | 0.461566 |
| MmugDNA.38644.1.S1_at   | MmugDNA.38644.1 | 8.93  | 10.06 | 0.35 | 0.12 | -2.19 | 0.008537 | 0.00043  | 0.141745 | 0.038359 |
| MmugDNA.38654.1.S1_at   | MmugDNA.38654.1 | 11.02 | 10.67 | 0.15 | 0.36 | 1.28  | 0.525817 | 0.137581 | 0.752112 | 0.410555 |
| MmugDNA.38658.1.S1_at   | MmugDNA.38658.1 | 5.85  | 7.15  | 0.43 | 0.22 | -2.47 | 0.009335 | 0.027485 | 0.146531 | 0.207144 |
| MmugDNA.38660.1.S1_at   | MmugDNA.38660.1 | 6.61  | 6.53  | 0.08 | 0.09 | 1.06  | 0.120124 | 0.438458 | 0.398476 | 0.65742  |
| MmugDNA.38661.1.S1_at   | MmugDNA.38661.1 | 9.15  | 9.43  | 0.15 | 0.15 | -1.21 | 0.175341 | 0.342866 | 0.469734 | 0.588712 |
| MmugDNA.38662.1.S1_at   | MmugDNA.38662.1 | 6.68  | 6.62  | 0.15 | 0.08 | 1.05  | 0.949054 | 0.314445 | 0.97875  | 0.568319 |
| MmugDNA.38663.1.S1_at   | MmugDNA.38663.1 | 9.53  | 8.96  | 0.32 | 0.05 | 1.49  | 0.035893 | 0.024037 | 0.244522 | 0.194358 |
| MmugDNA.38664.1.S1_at   | MmugDNA.38664.1 | 12.61 | 12.66 | 0.15 | 0.03 | -1.03 | 0.561334 | 0.808503 | 0.774384 | 0.889757 |
| MmugDNA.38666.1.S1_at   | MmugDNA.38666.1 | 12.07 | 12.09 | 0.13 | 0.03 | -1.02 | 0.923365 | 0.996087 | 0.967345 | 0.997616 |
| MmugDNA.38675.1.S1_at   | MmugDNA.38675.1 | 4.77  | 3.77  | 1.16 | 0.38 | 2     | 0.118776 | 0.083124 | 0.396582 | 0.332999 |
| MmugDNA.38675.1.S1_s_at | MmugDNA.38675.1 | 12.68 | 12.35 | 0.12 | 0.08 | 1.26  | 0.039142 | 0.001889 | 0.25427  | 0.065004 |
| MmugDNA.38679.1.S1_at   | MmugDNA.38679.1 | 9.99  | 8.93  | 0.74 | 0.08 | 2.09  | 0.085003 | 0.068021 | 0.348996 | 0.307083 |
| MmugDNA.38686.1.S1_at   | MmugDNA.38686.1 | 12.44 | 12.62 | 0.12 | 0.05 | -1.14 | 0.203095 | 0.353981 | 0.500893 | 0.596951 |
| MmugDNA.38688.1.S1_at   | MmugDNA.38688.1 | 11.09 | 11.12 | 0.15 | 0.06 | -1.02 | 0.827439 | 0.977991 | 0.923637 | 0.988027 |
| MmugDNA.38690.1.S1_at   | MmugDNA.38690.1 | 8.03  | 8.6   | 1.08 | 0.03 | -1.49 | 0.273914 | 0.479335 | 0.565975 | 0.685088 |
| MmugDNA.38692.1.S1_at   | MmugDNA.38692.1 | 6.55  | 6.45  | 0.23 | 0.12 | 1.08  | 0.862287 | 0.414874 | 0.940186 | 0.64049  |
| MmugDNA.38693.1.S1_at   | MmugDNA.38693.1 | 11.91 | 12.03 | 0.12 | 0.06 | -1.08 | 0.597939 | 0.054423 | 0.797048 | 0.278814 |
| MmugDNA.38694.1.S1_at   | MmugDNA.38694.1 | 12.99 | 12.85 | 0.04 | 0.02 | 1.1   | 0.005468 | 0.01342  | 0.119451 | 0.148424 |
| MmugDNA.38697.1.S1_at   | MmugDNA.38697.1 | 9.48  | 8.47  | 0.17 | 0.16 | 2.02  | 0.001668 | 0.000405 | 0.084462 | 0.03749  |
| MmugDNA.38698.1.S1_at   | MmugDNA.38698.1 | 10.64 | 11.93 | 0.65 | 0.16 | -2.44 | 0.081672 | 0.532042 | 0.342855 | 0.718995 |
| MmugDNA.38699.1.S1_at   | MmugDNA.38699.1 | 5.56  | 4.7   | 0.79 | 0.15 | 1.81  | 0.156435 | 0.090188 | 0.446993 | 0.344588 |
| MmugDNA.38700.1.S1_at   | MmugDNA.38700.1 | 6.52  | 8.16  | 0.63 | 0.29 | -3.11 | 0.018108 | 0.230005 | 0.18753  | 0.501865 |
| MmugDNA.38701.1.S1_at   | MmugDNA.38701.1 | 9.51  | 9.04  | 0.15 | 0.09 | 1.39  | 0.010216 | 0.015642 | 0.150739 | 0.158535 |
| MmugDNA.38706.1.S1_s_at | MmugDNA.38706.1 | 11.01 | 11.3  | 0.09 | 0.02 | -1.22 | 0.003295 | 0.015498 | 0.102106 | 0.158044 |
| MmugDNA.3871.1.S1_at    | MmugDNA.3871.1  | 4.77  | 5.51  | 0.27 | 0.57 | -1.67 | 0.130627 | 0.176126 | 0.413084 | 0.452581 |
| MmugDNA.38710.1.S1_at   | MmugDNA.38710.1 | 13.61 | 13.59 | 0.14 | 0.06 | 1.02  | 0.917194 | 0.970915 | 0.964746 | 0.984133 |
| MmugDNA.38714.1.S1_at   | MmugDNA.38714.1 | 3.01  | 2.82  | 0.02 | 0.02 | 1.14  | 0.00038  | 0.005082 | 0.062479 | 0.099108 |
| MmugDNA.38715.1.S1_at   | MmugDNA.38715.1 | 5.58  | 5.92  | 0.55 | 0.08 | -1.27 | 0.52713  | 0.701097 | 0.75293  | 0.826646 |
| MmugDNA.38722.1.S1_at   | MmugDNA.38722.1 | 8.63  | 9.3   | 0.17 | 0.26 | -1.59 | 0.059592 | 0.002033 | 0.301206 | 0.066885 |
| MmugDNA.38723.1.S1_at   | MmugDNA.38723.1 | 3.71  | 5.31  | 0.75 | 0.59 | -3.03 | 0.077614 | 0.234896 | 0.33648  | 0.506125 |

|                         |                 |       |       |      |      |       |          |          |          |          |
|-------------------------|-----------------|-------|-------|------|------|-------|----------|----------|----------|----------|
| MmugDNA.38725.1.S1_at   | MmugDNA.38725.1 | 6.22  | 6.36  | 0.05 | 0.11 | -1.1  | 0.097008 | 0.055303 | 0.367217 | 0.280981 |
| MmugDNA.38729.1.S1_at   | MmugDNA.38729.1 | 6.35  | 6.58  | 0.27 | 0.06 | -1.17 | 0.761284 | 0.750182 | 0.890581 | 0.854731 |
| MmugDNA.3873.1.S1_at    | MmugDNA.3873.1  | 4.68  | 4.8   | 0.32 | 0.16 | -1.09 | 0.20884  | 0.281833 | 0.506325 | 0.544844 |
| MmugDNA.38733.1.S1_at   | MmugDNA.38733.1 | 4.51  | 4.42  | 0.26 | 0.13 | 1.06  | 0.908597 | 0.871659 | 0.961257 | 0.926963 |
| MmugDNA.38736.1.S1_at   | MmugDNA.38736.1 | 11.8  | 11.52 | 0.09 | 0.08 | 1.21  | 0.013742 | 0.128772 | 0.167976 | 0.400248 |
| MmugDNA.38747.1.S1_at   | MmugDNA.38747.1 | 12.26 | 12.08 | 0.2  | 0.02 | 1.14  | 0.174328 | 0.001845 | 0.468499 | 0.064452 |
| MmugDNA.38752.1.A1_at   | MmugDNA.38752.1 | 6.85  | 6.64  | 0.11 | 0.13 | 1.15  | 0.159349 | 0.175292 | 0.450699 | 0.452061 |
| MmugDNA.38752.1.S1_at   | MmugDNA.38752.1 | 5.05  | 4.86  | 0.07 | 0.06 | 1.14  | 0.025201 | 0.0199   | 0.211801 | 0.177357 |
| MmugDNA.38756.1.S1_at   | MmugDNA.38756.1 | 10.85 | 10.69 | 0.23 | 0.32 | 1.12  | 0.596202 | 0.854206 | 0.795673 | 0.916964 |
| MmugDNA.38761.1.S1_at   | MmugDNA.38761.1 | 6.51  | 6.68  | 0.25 | 0.03 | -1.12 | 0.892601 | 0.389274 | 0.954283 | 0.623403 |
| MmugDNA.38761.1.S1_x_at | MmugDNA.38761.1 | 6.66  | 6.7   | 0.11 | 0.07 | -1.03 | 0.590178 | 0.001573 | 0.791777 | 0.060185 |
| MmugDNA.38770.1.S1_at   | MmugDNA.38770.1 | 3.24  | 3.25  | 0.07 | 0.12 | -1.01 | 0.69855  | 0.891935 | 0.856639 | 0.938407 |
| MmugDNA.38778.1.S1_at   | MmugDNA.38778.1 | 8.53  | 8.29  | 0.16 | 0.2  | 1.18  | 0.072428 | 0.000939 | 0.327004 | 0.049026 |
| MmugDNA.38779.1.S1_at   | MmugDNA.38779.1 | 11.66 | 11.73 | 0.09 | 0.01 | -1.05 | 0.552253 | 0.111454 | 0.769054 | 0.376126 |
| MmugDNA.38780.1.S1_at   | MmugDNA.38780.1 | 6.46  | 6.36  | 0.14 | 0.09 | 1.07  | 0.206119 | 0.237304 | 0.503843 | 0.508027 |
| MmugDNA.38786.1.S1_at   | MmugDNA.38786.1 | 12.17 | 12.7  | 0.1  | 0.03 | -1.44 | 0.001309 | 0.085137 | 0.078631 | 0.336972 |
| MmugDNA.38791.1.S1_at   | MmugDNA.38791.1 | 5.04  | 5.04  | 0.14 | 0.06 | 1     | 0.782371 | 0.614923 | 0.900675 | 0.771627 |
| MmugDNA.38793.1.S1_at   | MmugDNA.38793.1 | 5.98  | 5.78  | 0.2  | 1.01 | 1.14  | 0.562785 | 0.780449 | 0.775125 | 0.872614 |
| MmugDNA.38799.1.S1_at   | MmugDNA.38799.1 | 10.97 | 11.24 | 0.62 | 0.15 | -1.21 | 0.682511 | 0.808237 | 0.848621 | 0.889636 |
| MmugDNA.38800.1.S1_at   | MmugDNA.38800.1 | 14.14 | 14.14 | 0.06 | 0.07 | 1     | 0.810186 | 0.626809 | 0.914977 | 0.779995 |
| MmugDNA.38801.1.S1_at   | MmugDNA.38801.1 | 7.9   | 7.93  | 0.12 | 0.09 | -1.02 | 0.89038  | 0.354794 | 0.953296 | 0.597445 |
| MmugDNA.38810.1.S1_at   | MmugDNA.38810.1 | 7.9   | 8.71  | 0.34 | 0.3  | -1.75 | 0.043335 | 0.28127  | 0.265486 | 0.544385 |
| MmugDNA.38813.1.S1_at   | MmugDNA.38813.1 | 8.78  | 8.5   | 0.34 | 0.2  | 1.22  | 0.370343 | 0.057713 | 0.643343 | 0.2866   |
| MmugDNA.38816.1.S1_at   | MmugDNA.38816.1 | 9.21  | 9.22  | 0.08 | 0.14 | -1.01 | 0.379425 | 0.018742 | 0.649328 | 0.171985 |
| MmugDNA.38818.1.S1_at   | MmugDNA.38818.1 | 11.54 | 11.36 | 0.08 | 0.17 | 1.13  | 0.749034 | 0.046874 | 0.883781 | 0.261272 |
| MmugDNA.3882.1.S1_at    | MmugDNA.3882.1  | 8.32  | 8.15  | 0.09 | 0.11 | 1.13  | 0.304056 | 0.057189 | 0.59132  | 0.285009 |
| MmugDNA.3883.1.S1_at    | MmugDNA.3883.1  | 10.58 | 11.21 | 1.03 | 0.18 | -1.55 | 0.137341 | 0.073073 | 0.42229  | 0.316017 |
| MmugDNA.38830.1.S1_s_at | MmugDNA.38830.1 | 6.82  | 6.72  | 0.06 | 0.05 | 1.07  | 0.051619 | 0.191413 | 0.284589 | 0.466776 |
| MmugDNA.38831.1.S1_at   | MmugDNA.38831.1 | 8.49  | 8.27  | 0.1  | 0.1  | 1.16  | 0.051334 | 0.022553 | 0.283923 | 0.187981 |
| MmugDNA.38831.1.S1_s_at | MmugDNA.38831.1 | 9.82  | 9.65  | 0.07 | 0.12 | 1.13  | 0.058989 | 0.022743 | 0.300026 | 0.188834 |
| MmugDNA.38833.1.S1_at   | MmugDNA.38833.1 | 12.39 | 12.36 | 0.06 | 0.02 | 1.02  | 0.133436 | 0.325751 | 0.416977 | 0.57602  |
| MmugDNA.38839.1.S1_at   | MmugDNA.38839.1 | 10.68 | 10.68 | 0.14 | 0.12 | 1     | 0.617002 | 0.419507 | 0.809777 | 0.643507 |
| MmugDNA.38840.1.S1_at   | MmugDNA.38840.1 | 4.25  | 4.34  | 0.06 | 0.16 | -1.07 | 0.596185 | 0.462243 | 0.79567  | 0.673608 |
| MmugDNA.38841.1.S1_at   | MmugDNA.38841.1 | 4.87  | 4.8   | 0.4  | 0.06 | 1.05  | 0.324959 | 0.463601 | 0.608444 | 0.674537 |
| MmugDNA.38845.1.S1_s_at | MmugDNA.38845.1 | 7.12  | 7.91  | 0.25 | 0.06 | -1.73 | 0.009802 | 0.158597 | 0.148542 | 0.434597 |
| MmugDNA.38851.1.S1_at   | MmugDNA.38851.1 | 8.91  | 9.17  | 0.19 | 0.14 | -1.2  | 0.09057  | 0.766894 | 0.357339 | 0.864635 |
| MmugDNA.38856.1.S1_at   | MmugDNA.38856.1 | 6.59  | 6.6   | 0.18 | 0.07 | -1.01 | 0.964558 | 0.046296 | 0.985701 | 0.25959  |
| MmugDNA.38870.1.S1_at   | MmugDNA.38870.1 | 8.93  | 10.03 | 0.32 | 0.07 | -2.14 | 0.004765 | 0.000208 | 0.115098 | 0.032262 |
| MmugDNA.38875.1.S1_at   | MmugDNA.38875.1 | 5.42  | 5.46  | 0.12 | 0.04 | -1.03 | 0.57005  | 0.152958 | 0.779266 | 0.42777  |
| MmugDNA.38879.1.S1_at   | MmugDNA.38879.1 | 4.31  | 4.38  | 0.11 | 0.14 | -1.05 | 0.474361 | 0.603908 | 0.717451 | 0.764392 |
| MmugDNA.38885.1.S1_at   | MmugDNA.38885.1 | 5.62  | 5.84  | 0.73 | 0.43 | -1.16 | 0.712122 | 0.561008 | 0.864221 | 0.737076 |
| MmugDNA.38886.1.S1_at   | MmugDNA.38886.1 | 5.6   | 5.5   | 0.12 | 0.08 | 1.07  | 0.530353 | 0.004018 | 0.754903 | 0.090008 |
| MmugDNA.38887.1.S1_s_at | MmugDNA.38887.1 | 5.31  | 5.03  | 0.13 | 0.36 | 1.22  | 0.289809 | 0.033818 | 0.579365 | 0.227489 |



|                        |                 |       |       |      |      |       |          |          |          |          |
|------------------------|-----------------|-------|-------|------|------|-------|----------|----------|----------|----------|
| MmugDNA.38889.1.S1_at  | MmugDNA.38889.1 | 12.75 | 12.05 | 0.11 | 0.18 | 1.62  | 0.012375 | 0.216763 | 0.161664 | 0.490311 |
| MmugDNA.38892.1.S1_at  | MmugDNA.38892.1 | 8.85  | 5.86  | 1.08 | 0.79 | 7.93  | 0.068582 | 0.120308 | 0.319718 | 0.38925  |
| MmugDNA.38899.1.S1_at  | MmugDNA.38899.1 | 7.84  | 7.95  | 0.22 | 0.12 | -1.08 | 0.799343 | 0.567885 | 0.909502 | 0.741693 |
| MmugDNA.38900.1.S1_at  | MmugDNA.38900.1 | 5.98  | 6.03  | 0.19 | 0.01 | -1.03 | 0.670493 | 0.755921 | 0.841859 | 0.8579   |
| MmugDNA.3891.1.S1_at   | MmugDNA.3891.1  | 7.31  | 7.15  | 0.2  | 0.22 | 1.12  | 0.155962 | 0.2193   | 0.446335 | 0.493094 |
| MmugDNA.38910.1.S1_at  | MmugDNA.38910.1 | 8.09  | 8.19  | 0.34 | 0.22 | -1.07 | 0.361267 | 0.47327  | 0.63674  | 0.680582 |
| MmugDNA.38911.1.S1_at  | MmugDNA.38911.1 | 8.53  | 8.18  | 0.3  | 0.2  | 1.27  | 0.262224 | 0.175808 | 0.556354 | 0.4524   |
| MmugDNA.38914.1.S1_at  | MmugDNA.38914.1 | 8.13  | 8.47  | 0.25 | 0.18 | -1.26 | 0.173908 | 0.117664 | 0.468323 | 0.385372 |
| MmugDNA.38919.1.S1_at  | MmugDNA.38919.1 | 12.81 | 13.37 | 0.25 | 0.1  | -1.48 | 0.029151 | 0.039301 | 0.223538 | 0.243338 |
| MmugDNA.3892.1.S1_s_at | MmugDNA.3892.1  | 10.53 | 10.46 | 0.22 | 0.05 | 1.05  | 0.823771 | 0.353323 | 0.921686 | 0.596477 |
| MmugDNA.38920.1.S1_at  | MmugDNA.38920.1 | 4.73  | 4.38  | 0.08 | 0.16 | 1.27  | 0.025529 | 0.373694 | 0.212834 | 0.612403 |
| MmugDNA.38923.1.S1_at  | MmugDNA.38923.1 | 4.46  | 4.12  | 0.31 | 0.1  | 1.27  | 0.144974 | 0.151516 | 0.43207  | 0.426239 |
| MmugDNA.3893.1.S1_at   | MmugDNA.3893.1  | 4.82  | 4.76  | 0.04 | 0.01 | 1.04  | 0.154897 | 0.088794 | 0.445083 | 0.342534 |
| MmugDNA.38930.1.S1_at  | MmugDNA.38930.1 | 6.29  | 6.14  | 0.04 | 0.1  | 1.11  | 0.085822 | 0.506141 | 0.350131 | 0.702359 |
| MmugDNA.38939.1.S1_at  | MmugDNA.38939.1 | 11.77 | 11.77 | 0.06 | 0.03 | -1    | 0.504577 | 0.001282 | 0.73776  | 0.05538  |
| MmugDNA.38940.1.S1_at  | MmugDNA.38940.1 | 9.76  | 9.98  | 0.47 | 0.08 | -1.16 | 0.147001 | 0.27499  | 0.434942 | 0.539402 |
| MmugDNA.38945.1.S1_at  | MmugDNA.38945.1 | 6.85  | 6.93  | 0.09 | 0.32 | -1.06 | 0.241841 | 0.720919 | 0.538882 | 0.838368 |
| MmugDNA.38953.1.S1_at  | MmugDNA.38953.1 | 6.41  | 6.4   | 0.05 | 0.04 | 1     | 0.275064 | 0.202163 | 0.566763 | 0.476559 |
| MmugDNA.38956.1.S1_at  | MmugDNA.38956.1 | 12.75 | 11.62 | 0.16 | 0.26 | 2.19  | 0.003707 | 0.001223 | 0.106142 | 0.054593 |
| MmugDNA.38959.1.S1_at  | MmugDNA.38959.1 | 10.77 | 10.55 | 0.06 | 0.01 | 1.16  | 0.004437 | 0.41267  | 0.112976 | 0.639042 |
| MmugDNA.38960.1.S1_at  | MmugDNA.38960.1 | 2.98  | 2.96  | 0.08 | 0.05 | 1.01  | 0.305365 | 0.103639 | 0.592408 | 0.364433 |
| MmugDNA.38962.1.S1_at  | MmugDNA.38962.1 | 11.49 | 11.08 | 0.17 | 0.08 | 1.33  | 0.052956 | 0.12273  | 0.287165 | 0.392719 |
| MmugDNA.38963.1.S1_at  | MmugDNA.38963.1 | 7.79  | 7.97  | 0.35 | 0.1  | -1.13 | 0.332408 | 0.069502 | 0.614085 | 0.309848 |
| MmugDNA.38966.1.S1_at  | MmugDNA.38966.1 | 4.82  | 4.76  | 0.08 | 0.23 | 1.04  | 0.833918 | 0.980655 | 0.926916 | 0.989424 |
| MmugDNA.38968.1.S1_at  | MmugDNA.38968.1 | 13.7  | 13.81 | 0.03 | 0.02 | -1.08 | 0.007946 | 0.347891 | 0.138304 | 0.592196 |
| MmugDNA.38971.1.S1_at  | MmugDNA.38971.1 | 6.9   | 6.94  | 0.14 | 0.13 | -1.03 | 0.702141 | 0.669227 | 0.858655 | 0.806499 |
| MmugDNA.38972.1.S1_at  | MmugDNA.38972.1 | 11.55 | 11.59 | 0.16 | 0.1  | -1.03 | 0.921166 | 0.53481  | 0.966268 | 0.720557 |
| MmugDNA.38981.1.S1_at  | MmugDNA.38981.1 | 3.76  | 4.28  | 1.06 | 0.27 | -1.44 | 0.742941 | 0.506787 | 0.881093 | 0.702575 |
| MmugDNA.38984.1.S1_at  | MmugDNA.38984.1 | 7.43  | 8.21  | 0.24 | 0.08 | -1.72 | 0.009792 | 0.002682 | 0.148542 | 0.076408 |
| MmugDNA.38987.1.S1_at  | MmugDNA.38987.1 | 7.79  | 8.04  | 0.16 | 0.09 | -1.19 | 0.130018 | 0.053751 | 0.412127 | 0.277384 |
| MmugDNA.39000.1.S1_at  | MmugDNA.39000.1 | 12.55 | 12.44 | 0.01 | 0.11 | 1.08  | 0.544555 | 0.008621 | 0.764148 | 0.123117 |
| MmugDNA.39004.1.S1_at  | MmugDNA.39004.1 | 6.55  | 6.43  | 0.12 | 0.07 | 1.09  | 0.11349  | 0.206524 | 0.390238 | 0.480571 |
| MmugDNA.39009.1.S1_at  | MmugDNA.39009.1 | 6.04  | 5.94  | 0.04 | 0.04 | 1.07  | 0.032146 | 0.065304 | 0.233243 | 0.301249 |
| MmugDNA.39012.1.S1_at  | MmugDNA.39012.1 | 10.36 | 10.4  | 0.14 | 0.08 | -1.03 | 0.586487 | 0.607072 | 0.789846 | 0.766185 |
| MmugDNA.39014.1.S1_at  | MmugDNA.39014.1 | 4.9   | 4.85  | 0.15 | 0.06 | 1.04  | 0.706615 | 0.041864 | 0.861097 | 0.249172 |
| MmugDNA.39015.1.S1_at  | MmugDNA.39015.1 | 5.29  | 5.3   | 0.06 | 0.08 | -1.01 | 0.289139 | 0.402572 | 0.578755 | 0.631493 |
| MmugDNA.39016.1.S1_at  | MmugDNA.39016.1 | 4.93  | 5.28  | 0.17 | 0.01 | -1.27 | 0.02295  | 0.065398 | 0.204353 | 0.301415 |
| MmugDNA.39018.1.S1_at  | MmugDNA.39018.1 | 5.08  | 5.01  | 0.1  | 0.03 | 1.05  | 0.285236 | 0.084382 | 0.575162 | 0.335713 |
| MmugDNA.3902.1.S1_at   | MmugDNA.3902.1  | 9.17  | 9.08  | 0.14 | 0.17 | 1.07  | 0.96843  | 0.826278 | 0.987529 | 0.900217 |
| MmugDNA.39022.1.S1_at  | MmugDNA.39022.1 | 11.68 | 11.49 | 0.07 | 0.04 | 1.14  | 0.021434 | 0.004261 | 0.199988 | 0.09182  |
| MmugDNA.39025.1.S1_at  | MmugDNA.39025.1 | 11.36 | 11.71 | 0.02 | 0.04 | -1.28 | 0.00015  | 0.011304 | 0.051907 | 0.138076 |
| MmugDNA.39029.1.S1_at  | MmugDNA.39029.1 | 11.97 | 11.97 | 0.01 | 0.08 | -1    | 0.903352 | 0.79564  | 0.959027 | 0.882255 |
| MmugDNA.39031.1.S1_at  | MmugDNA.39031.1 | 4.4   | 4.3   | 0.22 | 0.29 | 1.07  | 0.393683 | 0.756674 | 0.660406 | 0.858329 |

|                         |                 |       |       |      |      |       |          |          |          |          |
|-------------------------|-----------------|-------|-------|------|------|-------|----------|----------|----------|----------|
| MmugDNA.39034.1.S1_at   | MmugDNA.39034.1 | 8.54  | 8.33  | 0.34 | 0.04 | 1.16  | 0.128854 | 0.107814 | 0.411072 | 0.370945 |
| MmugDNA.39036.1.S1_at   | MmugDNA.39036.1 | 10.72 | 10.74 | 0.04 | 0.07 | -1.01 | 0.591599 | 0.881067 | 0.792697 | 0.932111 |
| MmugDNA.39049.1.S1_at   | MmugDNA.39049.1 | 10.58 | 10.49 | 0.06 | 0.08 | 1.07  | 0.055676 | 0.060513 | 0.293071 | 0.292656 |
| MmugDNA.3906.1.S1_at    | MmugDNA.3906.1  | 8.02  | 8.24  | 0.28 | 0.04 | -1.16 | 0.656859 | 0.207868 | 0.834022 | 0.482049 |
| MmugDNA.39061.1.S1_at   | MmugDNA.39061.1 | 10.45 | 10.11 | 0.1  | 0.04 | 1.27  | 0.003416 | 0.000047 | 0.103083 | 0.025273 |
| MmugDNA.39062.1.S1_at   | MmugDNA.39062.1 | 6.71  | 6.63  | 0.24 | 0.01 | 1.05  | 0.954243 | 0.753933 | 0.981196 | 0.856764 |
| MmugDNA.39068.1.S1_at   | MmugDNA.39068.1 | 4.82  | 4.48  | 0.81 | 1.03 | 1.26  | 0.785447 | 0.540791 | 0.90204  | 0.724559 |
| MmugDNA.39070.1.S1_at   | MmugDNA.39070.1 | 11.87 | 11.91 | 0.18 | 0.06 | -1.03 | 0.548246 | 0.232703 | 0.766442 | 0.504359 |
| MmugDNA.39074.1.S1_at   | MmugDNA.39074.1 | 3.39  | 3.39  | 0.04 | 0.04 | -1    | 0.234844 | 0.470912 | 0.532896 | 0.679128 |
| MmugDNA.39085.1.S1_at   | MmugDNA.39085.1 | 10.59 | 11.1  | 0.16 | 0.07 | -1.41 | 0.016712 | 0.000832 | 0.182634 | 0.046851 |
| MmugDNA.39090.1.S1_at   | MmugDNA.39090.1 | 11.43 | 11.42 | 0.1  | 0.1  | 1.01  | 0.883825 | 0.851248 | 0.950628 | 0.915366 |
| MmugDNA.39092.1.S1_at   | MmugDNA.39092.1 | 8.16  | 8.23  | 0.23 | 0.06 | -1.05 | 0.468449 | 0.431442 | 0.713557 | 0.652371 |
| MmugDNA.39093.1.S1_at   | MmugDNA.39093.1 | 10.98 | 10.52 | 0.26 | 0.11 | 1.38  | 0.057452 | 0.069825 | 0.296977 | 0.310353 |
| MmugDNA.39094.1.S1_at   | MmugDNA.39094.1 | 12.58 | 12.73 | 0.06 | 0.02 | -1.11 | 0.01469  | 0.023364 | 0.173148 | 0.19158  |
| MmugDNA.39094.1.S1_s_at | MmugDNA.39094.1 | 10.84 | 11.04 | 0.17 | 0.07 | -1.15 | 0.165375 | 0.143501 | 0.458328 | 0.417442 |
| MmugDNA.39095.1.S1_at   | MmugDNA.39095.1 | 4.47  | 4.6   | 0.28 | 0.2  | -1.1  | 0.917139 | 0.233621 | 0.964746 | 0.50492  |
| MmugDNA.391.1.S1_at     | MmugDNA.391.1   | 6.12  | 5.99  | 0.15 | 0.14 | 1.09  | 0.176254 | 0.39914  | 0.470611 | 0.62969  |
| MmugDNA.39100.1.S1_s_at | MmugDNA.39100.1 | 12.44 | 12.51 | 0.02 | 0.03 | -1.05 | 0.011527 | 0.164768 | 0.15722  | 0.441104 |
| MmugDNA.39112.1.S1_at   | MmugDNA.39112.1 | 10.72 | 10.81 | 0.23 | 0.14 | -1.07 | 0.215708 | 0.001703 | 0.513483 | 0.062505 |
| MmugDNA.39121.1.S1_at   | MmugDNA.39121.1 | 11.56 | 11.26 | 0.12 | 0.08 | 1.24  | 0.029873 | 0.099184 | 0.226143 | 0.357379 |
| MmugDNA.39122.1.S1_at   | MmugDNA.39122.1 | 10.92 | 10.64 | 0.11 | 0.09 | 1.22  | 0.017516 | 0.195371 | 0.185974 | 0.470253 |
| MmugDNA.39131.1.S1_at   | MmugDNA.39131.1 | 4.04  | 3.99  | 0.54 | 0.24 | 1.03  | 0.867028 | 0.546826 | 0.942519 | 0.728203 |
| MmugDNA.39132.1.S1_at   | MmugDNA.39132.1 | 11.57 | 11.93 | 0.02 | 0.08 | -1.28 | 0.003718 | 0.004122 | 0.10625  | 0.090887 |
| MmugDNA.39133.1.S1_at   | MmugDNA.39133.1 | 12.24 | 11.99 | 0.1  | 0.01 | 1.19  | 0.024291 | 0.105345 | 0.208905 | 0.367182 |
| MmugDNA.39136.1.S1_at   | MmugDNA.39136.1 | 12.52 | 12.36 | 0.17 | 0.1  | 1.12  | 0.580084 | 0.416026 | 0.785606 | 0.641342 |
| MmugDNA.39138.1.S1_at   | MmugDNA.39138.1 | 12.14 | 12.55 | 0.06 | 0.02 | -1.33 | 0.000377 | 0.063783 | 0.062479 | 0.29906  |
| MmugDNA.39139.1.S1_at   | MmugDNA.39139.1 | 11.78 | 11.67 | 0.18 | 0.08 | 1.08  | 0.147986 | 0.2778   | 0.436226 | 0.541664 |
| MmugDNA.39141.1.S1_at   | MmugDNA.39141.1 | 8.23  | 7.65  | 0.57 | 0.09 | 1.49  | 0.478463 | 0.198541 | 0.71999  | 0.473391 |
| MmugDNA.39149.1.S1_at   | MmugDNA.39149.1 | 12.45 | 12.59 | 0.07 | 0.02 | -1.11 | 0.023066 | 0.221708 | 0.204882 | 0.494901 |
| MmugDNA.39149.1.S1_s_at | MmugDNA.39149.1 | 12.34 | 12.26 | 0.16 | 0.09 | 1.05  | 0.512137 | 0.163742 | 0.742874 | 0.439924 |
| MmugDNA.39154.1.S1_at   | MmugDNA.39154.1 | 3.71  | 4.28  | 0.6  | 0.47 | -1.49 | 0.937618 | 0.804133 | 0.973776 | 0.887336 |
| MmugDNA.39157.1.S1_at   | MmugDNA.39157.1 | 7.26  | 7.08  | 0.21 | 0.11 | 1.13  | 0.327048 | 0.168717 | 0.609778 | 0.445379 |
| MmugDNA.39158.1.S1_at   | MmugDNA.39158.1 | 7.28  | 7.41  | 0.25 | 0.06 | -1.09 | 0.422473 | 0.193535 | 0.680619 | 0.468785 |
| MmugDNA.39159.1.S1_s_at | MmugDNA.39159.1 | 8.55  | 8.66  | 0.1  | 0.03 | -1.08 | 0.093796 | 0.309647 | 0.362545 | 0.564991 |
| MmugDNA.39160.1.S1_at   | MmugDNA.39160.1 | 11.83 | 11.78 | 0.13 | 0.01 | 1.03  | 0.398643 | 0.003269 | 0.664174 | 0.082312 |
| MmugDNA.39163.1.S1_at   | MmugDNA.39163.1 | 11.28 | 11.14 | 0.19 | 0.08 | 1.1   | 0.826257 | 0.250692 | 0.922883 | 0.51941  |
| MmugDNA.39166.1.S1_at   | MmugDNA.39166.1 | 5.71  | 5.76  | 0.11 | 0.09 | -1.03 | 0.467574 | 0.100331 | 0.713007 | 0.359424 |
| MmugDNA.39167.1.S1_at   | MmugDNA.39167.1 | 12.2  | 12.18 | 0.09 | 0.05 | 1.01  | 0.955525 | 0.421987 | 0.981771 | 0.645406 |
| MmugDNA.39168.1.S1_at   | MmugDNA.39168.1 | 13.03 | 12.95 | 0.17 | 0.13 | 1.06  | 0.451525 | 0.155893 | 0.702379 | 0.431279 |
| MmugDNA.39170.1.S1_at   | MmugDNA.39170.1 | 10.44 | 10.57 | 0.1  | 0.18 | -1.1  | 0.91379  | 0.465    | 0.96343  | 0.675534 |
| MmugDNA.39170.1.S1_s_at | MmugDNA.39170.1 | 11.03 | 11.22 | 0.13 | 0.19 | -1.14 | 0.238767 | 0.075212 | 0.536007 | 0.319389 |
| MmugDNA.39171.1.S1_at   | MmugDNA.39171.1 | 10.48 | 10.58 | 0.03 | 0.08 | -1.07 | 0.335507 | 0.0122   | 0.616435 | 0.142876 |
| MmugDNA.3918.1.S1_at    | MmugDNA.3918.1  | 9.96  | 9.87  | 0.12 | 0.02 | 1.06  | 0.101001 | 0.189659 | 0.37232  | 0.465297 |

|                         |                 |       |       |      |      |        |          |          |          |          |
|-------------------------|-----------------|-------|-------|------|------|--------|----------|----------|----------|----------|
| MmugDNA.39180.1.S1_at   | MmugDNA.39180.1 | 6.28  | 6.81  | 0.83 | 0.5  | -1.44  | 0.75277  | 0.539047 | 0.885809 | 0.723487 |
| MmugDNA.39182.1.S1_at   | MmugDNA.39182.1 | 5.2   | 5.08  | 0.05 | 0.07 | 1.09   | 0.073863 | 0.061168 | 0.329795 | 0.293981 |
| MmugDNA.39187.1.S1_at   | MmugDNA.39187.1 | 10.6  | 10.6  | 0.28 | 0.07 | -1     | 0.489193 | 0.644264 | 0.727602 | 0.791506 |
| MmugDNA.39188.1.S1_at   | MmugDNA.39188.1 | 4.07  | 4.07  | 0.16 | 0.15 | -1     | 0.997996 | 0.911532 | 0.999236 | 0.950138 |
| MmugDNA.39189.1.S1_at   | MmugDNA.39189.1 | 11.17 | 10.87 | 0.22 | 0.14 | 1.23   | 0.058873 | 0.006942 | 0.299752 | 0.112568 |
| MmugDNA.39192.1.S1_at   | MmugDNA.39192.1 | 6.82  | 7.11  | 0.08 | 0.06 | -1.22  | 0.012733 | 0.027755 | 0.163022 | 0.208032 |
| MmugDNA.39208.1.S1_at   | MmugDNA.39208.1 | 4.1   | 4.11  | 0.08 | 0.07 | -1.01  | 0.524451 | 0.68627  | 0.751276 | 0.816907 |
| MmugDNA.3921.1.S1_at    | MmugDNA.3921.1  | 6.05  | 6.02  | 0.29 | 0.03 | 1.02   | 0.525437 | 0.634218 | 0.75194  | 0.78472  |
| MmugDNA.39211.1.S1_at   | MmugDNA.39211.1 | 9.87  | 11.08 | 0.31 | 0.31 | -2.31  | 0.030224 | 0.01458  | 0.226971 | 0.153966 |
| MmugDNA.39216.1.S1_at   | MmugDNA.39216.1 | 9.86  | 9.95  | 0.2  | 0.22 | -1.07  | 0.988431 | 0.868947 | 0.995872 | 0.925568 |
| MmugDNA.39217.1.S1_at   | MmugDNA.39217.1 | 6.62  | 6.6   | 0.15 | 0.04 | 1.01   | 0.873596 | 0.206055 | 0.945678 | 0.480273 |
| MmugDNA.39221.1.S1_at   | MmugDNA.39221.1 | 6.15  | 10.29 | 2.05 | 0.3  | -17.58 | 0.080108 | 0.208763 | 0.340456 | 0.482608 |
| MmugDNA.39223.1.S1_at   | MmugDNA.39223.1 | 6.8   | 6.85  | 0.11 | 0.08 | -1.03  | 0.992883 | 0.839667 | 0.997263 | 0.908582 |
| MmugDNA.39227.1.S1_at   | MmugDNA.39227.1 | 6.74  | 6.69  | 0.3  | 0.06 | 1.03   | 0.585656 | 0.693959 | 0.789285 | 0.822006 |
| MmugDNA.39241.1.S1_at   | MmugDNA.39241.1 | 7.16  | 7.98  | 0.25 | 0.14 | -1.77  | 0.007164 | 0.098267 | 0.132203 | 0.356328 |
| MmugDNA.39243.1.S1_at   | MmugDNA.39243.1 | 5.78  | 5.77  | 0.08 | 0.04 | 1.01   | 0.764843 | 0.023162 | 0.892078 | 0.190579 |
| MmugDNA.39243.1.S1_x_at | MmugDNA.39243.1 | 5.97  | 5.92  | 0.06 | 0.05 | 1.03   | 0.816102 | 0.039091 | 0.917941 | 0.242995 |
| MmugDNA.39244.1.S1_at   | MmugDNA.39244.1 | 5.24  | 5.46  | 0.3  | 0.05 | -1.17  | 0.822483 | 0.979171 | 0.921022 | 0.988766 |
| MmugDNA.39247.1.S1_at   | MmugDNA.39247.1 | 13.63 | 13.64 | 0.16 | 0.05 | -1     | 0.607811 | 0.680649 | 0.804002 | 0.813542 |
| MmugDNA.39251.1.S1_at   | MmugDNA.39251.1 | 8.6   | 8.56  | 0.2  | 0.05 | 1.03   | 0.457077 | 0.242504 | 0.706099 | 0.51284  |
| MmugDNA.39253.1.S1_at   | MmugDNA.39253.1 | 7.76  | 8.01  | 0.11 | 0.09 | -1.19  | 0.038394 | 0.226376 | 0.251895 | 0.498806 |
| MmugDNA.39257.1.S1_at   | MmugDNA.39257.1 | 4.62  | 4.16  | 0.54 | 0.63 | 1.38   | 0.705826 | 0.873019 | 0.860633 | 0.927822 |
| MmugDNA.39263.1.S1_at   | MmugDNA.39263.1 | 7.01  | 7.06  | 0.18 | 0.1  | -1.04  | 0.752389 | 0.458129 | 0.885576 | 0.671077 |
| MmugDNA.39263.1.S1_s_at | MmugDNA.39263.1 | 6.77  | 6.75  | 0.13 | 0.12 | 1.02   | 0.577743 | 0.207812 | 0.783728 | 0.482031 |
| MmugDNA.39265.1.S1_at   | MmugDNA.39265.1 | 9.97  | 10.05 | 0.69 | 0.15 | -1.05  | 0.91521  | 0.870197 | 0.963931 | 0.926372 |
| MmugDNA.39273.1.S1_at   | MmugDNA.39273.1 | 6.05  | 6.47  | 0.32 | 0.1  | -1.34  | 0.088836 | 0.118669 | 0.355377 | 0.386699 |
| MmugDNA.39278.1.S1_at   | MmugDNA.39278.1 | 4.4   | 4.41  | 0.23 | 0.33 | -1.01  | 0.855117 | 0.036177 | 0.93691  | 0.234778 |
| MmugDNA.39281.1.S1_at   | MmugDNA.39281.1 | 4.67  | 4.56  | 0.12 | 0.04 | 1.08   | 0.214429 | 0.125595 | 0.512121 | 0.396226 |
| MmugDNA.39282.1.S1_at   | MmugDNA.39282.1 | 5.13  | 8.11  | 1.05 | 0.5  | -7.85  | 0.03594  | 0.375037 | 0.244591 | 0.613186 |
| MmugDNA.39283.1.S1_at   | MmugDNA.39283.1 | 4.04  | 4.05  | 0.06 | 0.07 | -1.01  | 0.974094 | 0.006862 | 0.989627 | 0.111933 |
| MmugDNA.39285.1.S1_at   | MmugDNA.39285.1 | 7.5   | 7.79  | 1.36 | 0.22 | -1.22  | 0.66422  | 0.583126 | 0.838343 | 0.751565 |
| MmugDNA.39291.1.S1_at   | MmugDNA.39291.1 | 8.14  | 8.09  | 0.52 | 0.08 | 1.04   | 0.448593 | 0.02205  | 0.700097 | 0.185911 |
| MmugDNA.39297.1.S1_at   | MmugDNA.39297.1 | 7.34  | 7.34  | 0.17 | 0.05 | 1      | 0.400951 | 0.205643 | 0.665692 | 0.479969 |
| MmugDNA.39298.1.S1_at   | MmugDNA.39298.1 | 8.12  | 9.23  | 0.44 | 0.2  | -2.16  | 0.026807 | 0.032922 | 0.216925 | 0.22466  |
| MmugDNA.39300.1.S1_at   | MmugDNA.39300.1 | 9.53  | 8.35  | 0.4  | 0.17 | 2.26   | 0.005239 | 0.007414 | 0.117387 | 0.115758 |
| MmugDNA.39305.1.S1_at   | MmugDNA.39305.1 | 7.56  | 7.27  | 0.29 | 0.23 | 1.22   | 0.22616  | 0.447908 | 0.523944 | 0.663881 |
| MmugDNA.39306.1.S1_at   | MmugDNA.39306.1 | 10.83 | 10.36 | 0.19 | 0.13 | 1.39   | 0.01716  | 0.006571 | 0.184254 | 0.109922 |
| MmugDNA.39307.1.S1_s_at | MmugDNA.39307.1 | 8.75  | 8.48  | 0.1  | 0.22 | 1.21   | 0.120647 | 0.03258  | 0.399023 | 0.223585 |
| MmugDNA.39309.1.S1_at   | MmugDNA.39309.1 | 11.01 | 11.09 | 0.06 | 0.02 | -1.06  | 0.089179 | 0.670645 | 0.3559   | 0.807453 |
| MmugDNA.39310.1.S1_at   | MmugDNA.39310.1 | 10.02 | 10.17 | 0.38 | 0.1  | -1.11  | 0.436715 | 0.021939 | 0.691598 | 0.185351 |
| MmugDNA.39312.1.S1_at   | MmugDNA.39312.1 | 11.94 | 11.61 | 0.14 | 0.13 | 1.26   | 0.079676 | 0.053248 | 0.33985  | 0.276449 |
| MmugDNA.39316.1.S1_s_at | MmugDNA.39316.1 | 3.17  | 3.12  | 0.48 | 0.29 | 1.04   | 0.404168 | 0.51797  | 0.66805  | 0.710053 |
| MmugDNA.39317.1.S1_at   | MmugDNA.39317.1 | 4.08  | 4.24  | 0.12 | 0.02 | -1.12  | 0.030625 | 0.035552 | 0.227933 | 0.232812 |

|                         |                 |       |       |      |      |        |          |          |          |          |
|-------------------------|-----------------|-------|-------|------|------|--------|----------|----------|----------|----------|
| MmugDNA.39320.1.S1_at   | MmugDNA.39320.1 | 6.64  | 6.58  | 0.14 | 0.04 | 1.04   | 0.179785 | 0.213498 | 0.474837 | 0.487394 |
| MmugDNA.39325.1.S1_at   | MmugDNA.39325.1 | 10.86 | 10.94 | 0.17 | 0.26 | -1.06  | 0.497542 | 0.110477 | 0.733194 | 0.374684 |
| MmugDNA.39328.1.S1_at   | MmugDNA.39328.1 | 3.31  | 7.15  | 1.37 | 0.5  | -14.29 | 0.029228 | 0.121041 | 0.223805 | 0.390053 |
| MmugDNA.3933.1.S1_at    | MmugDNA.3933.1  | 7.85  | 7.28  | 0.19 | 0.53 | 1.49   | 0.38828  | 0.772906 | 0.656363 | 0.867952 |
| MmugDNA.39331.1.S1_s_at | MmugDNA.39331.1 | 7.72  | 7.69  | 0.32 | 0.02 | 1.02   | 0.906797 | 0.984328 | 0.960562 | 0.991284 |
| MmugDNA.39336.1.S1_at   | MmugDNA.39336.1 | 5.8   | 5.69  | 0.43 | 0.18 | 1.08   | 0.403345 | 0.59483  | 0.667485 | 0.758675 |
| MmugDNA.39345.1.S1_at   | MmugDNA.39345.1 | 9.49  | 9.49  | 0.13 | 0.34 | -1     | 0.809106 | 0.125383 | 0.914463 | 0.396008 |
| MmugDNA.39352.1.S1_at   | MmugDNA.39352.1 | 11.48 | 12.38 | 0.16 | 0.18 | -1.88  | 0.00261  | 0.004931 | 0.095164 | 0.097846 |
| MmugDNA.39356.1.S1_at   | MmugDNA.39356.1 | 9.99  | 10.02 | 0.07 | 0.04 | -1.02  | 0.592305 | 0.46864  | 0.793342 | 0.677755 |
| MmugDNA.3936.1.S1_at    | MmugDNA.3936.1  | 3.18  | 3.1   | 0.02 | 0.13 | 1.06   | 0.321727 | 0.584862 | 0.606089 | 0.75256  |
| MmugDNA.39366.1.S1_at   | MmugDNA.39366.1 | 4.64  | 8.37  | 1.02 | 0.37 | -13.3  | 0.009464 | 0.158136 | 0.147192 | 0.433962 |
| MmugDNA.39367.1.S1_at   | MmugDNA.39367.1 | 7.51  | 7.48  | 0.15 | 0.05 | 1.02   | 0.87642  | 0.168583 | 0.947077 | 0.445206 |
| MmugDNA.39371.1.S1_at   | MmugDNA.39371.1 | 8.15  | 7.38  | 0.16 | 0.21 | 1.71   | 0.015928 | 0.105385 | 0.17868  | 0.367262 |
| MmugDNA.39375.1.S1_at   | MmugDNA.39375.1 | 10.59 | 10.49 | 0.27 | 0.06 | 1.07   | 0.661845 | 0.930538 | 0.836823 | 0.960527 |
| MmugDNA.39377.1.S1_s_at | MmugDNA.39377.1 | 10.08 | 9.84  | 0.09 | 0.13 | 1.18   | 0.063663 | 0.000375 | 0.308797 | 0.037273 |
| MmugDNA.39378.1.S1_at   | MmugDNA.39378.1 | 11.22 | 10.04 | 0.19 | 0.16 | 2.26   | 0.00139  | 0.000747 | 0.079595 | 0.045119 |
| MmugDNA.3938.1.S1_at    | MmugDNA.3938.1  | 4.23  | 4.21  | 0.05 | 0.02 | 1.02   | 0.234132 | 0.010834 | 0.532201 | 0.135705 |
| MmugDNA.39382.1.S1_at   | MmugDNA.39382.1 | 6.1   | 6.3   | 0.08 | 0.21 | -1.14  | 0.121003 | 0.140238 | 0.399514 | 0.413405 |
| MmugDNA.39392.1.S1_at   | MmugDNA.39392.1 | 7.25  | 7.96  | 0.47 | 0.08 | -1.63  | 0.117195 | 0.120318 | 0.394442 | 0.38925  |
| MmugDNA.39396.1.S1_at   | MmugDNA.39396.1 | 6.35  | 6.46  | 0.19 | 0.07 | -1.08  | 0.94643  | 0.829018 | 0.97738  | 0.901696 |
| MmugDNA.39397.1.S1_at   | MmugDNA.39397.1 | 10.86 | 10.92 | 0.17 | 0.13 | -1.04  | 0.612903 | 0.830475 | 0.807104 | 0.902724 |
| MmugDNA.39401.1.S1_at   | MmugDNA.39401.1 | 6.68  | 6.45  | 0.2  | 0.12 | 1.18   | 0.039252 | 0.219781 | 0.254579 | 0.493388 |
| MmugDNA.39404.1.S1_at   | MmugDNA.39404.1 | 4.24  | 4.26  | 0    | 0.15 | -1.02  | 0.701445 | 0.808692 | 0.858213 | 0.889895 |
| MmugDNA.39405.1.S1_at   | MmugDNA.39405.1 | 7.42  | 7.43  | 0.33 | 0.2  | -1     | 0.63284  | 0.556967 | 0.820038 | 0.734853 |
| MmugDNA.39412.1.S1_at   | MmugDNA.39412.1 | 3.38  | 3.17  | 0.08 | 0.17 | 1.16   | 0.149139 | 0.29495  | 0.437947 | 0.5545   |
| MmugDNA.39414.1.S1_at   | MmugDNA.39414.1 | 11.94 | 11.03 | 0.17 | 0.12 | 1.88   | 0.002245 | 0.00901  | 0.091175 | 0.125499 |
| MmugDNA.39415.1.S1_at   | MmugDNA.39415.1 | 5.16  | 5.75  | 0.59 | 0.37 | -1.51  | 0.246617 | 0.327961 | 0.542477 | 0.577785 |
| MmugDNA.39416.1.S1_at   | MmugDNA.39416.1 | 8.5   | 9.48  | 0.53 | 0.16 | -1.98  | 0.047741 | 0.347799 | 0.275898 | 0.592154 |
| MmugDNA.39422.1.S1_at   | MmugDNA.39422.1 | 10.58 | 9.82  | 0.09 | 0.19 | 1.7    | 0.007065 | 0.000131 | 0.131484 | 0.029087 |
| MmugDNA.39424.1.S1_at   | MmugDNA.39424.1 | 11.79 | 11.48 | 0.04 | 0.09 | 1.24   | 0.005601 | 0.000734 | 0.120502 | 0.04476  |
| MmugDNA.39425.1.S1_at   | MmugDNA.39425.1 | 8.04  | 7.93  | 0.08 | 0.03 | 1.08   | 0.099997 | 0.618376 | 0.37088  | 0.774031 |
| MmugDNA.39427.1.S1_at   | MmugDNA.39427.1 | 5.97  | 5.87  | 0.05 | 0.17 | 1.07   | 0.647999 | 0.303973 | 0.829095 | 0.561344 |
| MmugDNA.39430.1.S1_at   | MmugDNA.39430.1 | 6.54  | 6.81  | 0.1  | 0.1  | -1.21  | 0.065349 | 0.231347 | 0.312756 | 0.503029 |
| MmugDNA.3944.1.S1_at    | MmugDNA.3944.1  | 9.75  | 9.46  | 0.15 | 0.24 | 1.22   | 0.214251 | 0.126556 | 0.51193  | 0.397149 |
| MmugDNA.39440.1.S1_at   | MmugDNA.39440.1 | 8.66  | 8.03  | 0.3  | 0.05 | 1.55   | 0.025267 | 0.21816  | 0.211966 | 0.491731 |
| MmugDNA.39443.1.S1_at   | MmugDNA.39443.1 | 6.47  | 6.49  | 0.23 | 0.03 | -1.02  | 0.779066 | 0.767085 | 0.89919  | 0.864712 |
| MmugDNA.39446.1.S1_at   | MmugDNA.39446.1 | 9.47  | 9.5   | 0.17 | 0.39 | -1.02  | 0.414356 | 0.713207 | 0.675619 | 0.833655 |
| MmugDNA.39450.1.S1_at   | MmugDNA.39450.1 | 10.42 | 10.18 | 0.53 | 0.04 | 1.19   | 0.883895 | 0.832282 | 0.950642 | 0.903796 |
| MmugDNA.39455.1.S1_at   | MmugDNA.39455.1 | 6.42  | 6.36  | 0.19 | 0.01 | 1.05   | 0.702137 | 0.907071 | 0.858655 | 0.947374 |
| MmugDNA.39457.1.S1_at   | MmugDNA.39457.1 | 8.31  | 8.88  | 0.43 | 0.13 | -1.48  | 0.067113 | 0.618977 | 0.316802 | 0.774229 |
| MmugDNA.39460.1.S1_at   | MmugDNA.39460.1 | 11.5  | 11.61 | 0.36 | 0.14 | -1.08  | 0.641368 | 0.597888 | 0.824821 | 0.760468 |
| MmugDNA.39465.1.S1_at   | MmugDNA.39465.1 | 8.98  | 9.16  | 0.06 | 0.03 | -1.14  | 0.018735 | 0.124185 | 0.19025  | 0.394496 |
| MmugDNA.39476.1.S1_s_at | MmugDNA.39476.1 | 10.31 | 10.67 | 0.78 | 0.09 | -1.28  | 0.245838 | 0.374533 | 0.541732 | 0.6129   |

|                       |                 |       |       |      |      |       |          |          |          |          |
|-----------------------|-----------------|-------|-------|------|------|-------|----------|----------|----------|----------|
| MmugDNA.39477.1.S1_at | MmugDNA.39477.1 | 8.02  | 8.07  | 0.24 | 0.14 | -1.04 | 0.41854  | 0.112959 | 0.678425 | 0.378763 |
| MmugDNA.39487.1.S1_at | MmugDNA.39487.1 | 9.45  | 9.68  | 0.24 | 0.03 | -1.18 | 0.172811 | 0.055623 | 0.466842 | 0.281649 |
| MmugDNA.39490.1.S1_at | MmugDNA.39490.1 | 7.18  | 6.77  | 0.21 | 0.28 | 1.33  | 0.073416 | 0.082915 | 0.328846 | 0.332446 |
| MmugDNA.39494.1.S1_at | MmugDNA.39494.1 | 5.77  | 5.5   | 0.1  | 0.12 | 1.21  | 0.063846 | 0.057227 | 0.309197 | 0.285059 |
| MmugDNA.395.1.S1_at   | MmugDNA.395.1   | 10.22 | 11    | 0.36 | 0.38 | -1.73 | 0.115703 | 0.016051 | 0.392821 | 0.160532 |
| MmugDNA.39501.1.S1_at | MmugDNA.39501.1 | 11.52 | 11.69 | 0.11 | 0.05 | -1.13 | 0.323854 | 0.634978 | 0.607567 | 0.785108 |
| MmugDNA.39503.1.S1_at | MmugDNA.39503.1 | 11.9  | 11.7  | 0.03 | 0.1  | 1.15  | 0.073617 | 0.059093 | 0.329086 | 0.289985 |
| MmugDNA.39507.1.S1_at | MmugDNA.39507.1 | 4.75  | 4.55  | 0.22 | 0.09 | 1.15  | 0.21015  | 0.333045 | 0.507681 | 0.581374 |
| MmugDNA.3951.1.S1_at  | MmugDNA.3951.1  | 7.47  | 8.59  | 0.25 | 0.08 | -2.17 | 0.001865 | 0.070995 | 0.087447 | 0.312604 |
| MmugDNA.39510.1.S1_at | MmugDNA.39510.1 | 11.15 | 11.43 | 0.07 | 0.07 | -1.21 | 0.006213 | 0.161051 | 0.125037 | 0.437227 |
| MmugDNA.39525.1.S1_at | MmugDNA.39525.1 | 7.57  | 6.37  | 0.26 | 0.18 | 2.29  | 0.006312 | 0.002101 | 0.125873 | 0.067779 |
| MmugDNA.39529.1.S1_at | MmugDNA.39529.1 | 13.14 | 13.3  | 0.11 | 0.03 | -1.12 | 0.157368 | 0.235959 | 0.448021 | 0.507056 |
| MmugDNA.39530.1.S1_at | MmugDNA.39530.1 | 5.51  | 5.3   | 0.37 | 0.07 | 1.16  | 0.127767 | 0.107133 | 0.40963  | 0.369808 |
| MmugDNA.39532.1.S1_at | MmugDNA.39532.1 | 8.13  | 8.36  | 0.44 | 0.14 | -1.17 | 0.727203 | 0.266551 | 0.872172 | 0.532301 |
| MmugDNA.39534.1.S1_at | MmugDNA.39534.1 | 6.18  | 6.88  | 0.16 | 0.23 | -1.62 | 0.008418 | 0.05526  | 0.140949 | 0.280809 |
| MmugDNA.39536.1.S1_at | MmugDNA.39536.1 | 9.07  | 9.04  | 0.13 | 0.1  | 1.02  | 0.678909 | 0.608041 | 0.846843 | 0.766741 |
| MmugDNA.39539.1.S1_at | MmugDNA.39539.1 | 6.52  | 6.64  | 0.49 | 0.21 | -1.09 | 0.354228 | 0.284657 | 0.631413 | 0.546877 |
| MmugDNA.39540.1.S1_at | MmugDNA.39540.1 | 3.85  | 4.37  | 0.17 | 0.19 | -1.44 | 0.018443 | 0.180013 | 0.188913 | 0.456552 |
| MmugDNA.39542.1.S1_at | MmugDNA.39542.1 | 9.74  | 10.46 | 0.11 | 0.13 | -1.65 | 0.001344 | 0.079931 | 0.079324 | 0.327258 |
| MmugDNA.39545.1.S1_at | MmugDNA.39545.1 | 6.75  | 6.89  | 0.38 | 0.11 | -1.1  | 0.456057 | 0.470834 | 0.705636 | 0.679124 |
| MmugDNA.39547.1.S1_at | MmugDNA.39547.1 | 11.67 | 11.79 | 0.06 | 0.08 | -1.09 | 0.100379 | 0.02055  | 0.371217 | 0.179861 |
| MmugDNA.39548.1.S1_at | MmugDNA.39548.1 | 4.06  | 4.12  | 0.07 | 0.08 | -1.04 | 0.421051 | 0.116375 | 0.679846 | 0.383671 |
| MmugDNA.39555.1.S1_at | MmugDNA.39555.1 | 10.11 | 10.87 | 0.4  | 0.08 | -1.69 | 0.024988 | 0.164982 | 0.211192 | 0.44123  |
| MmugDNA.39559.1.S1_at | MmugDNA.39559.1 | 11.91 | 11.48 | 0.22 | 0.11 | 1.35  | 0.154828 | 0.343611 | 0.44505  | 0.589322 |
| MmugDNA.3956.1.S1_at  | MmugDNA.3956.1  | 2.82  | 2.92  | 0.05 | 0.03 | -1.07 | 0.065467 | 0.34978  | 0.313204 | 0.593578 |
| MmugDNA.39560.1.S1_at | MmugDNA.39560.1 | 4.2   | 4.12  | 0.39 | 0.07 | 1.06  | 0.244379 | 0.390901 | 0.540909 | 0.624603 |
| MmugDNA.39571.1.S1_at | MmugDNA.39571.1 | 5.09  | 4.67  | 0.5  | 0.28 | 1.34  | 0.718928 | 0.080505 | 0.867363 | 0.328159 |
| MmugDNA.39574.1.S1_at | MmugDNA.39574.1 | 8.45  | 8.04  | 0.19 | 0.26 | 1.33  | 0.22868  | 0.136415 | 0.527113 | 0.408839 |
| MmugDNA.39580.1.S1_at | MmugDNA.39580.1 | 4.48  | 4.37  | 0.28 | 0.22 | 1.08  | 0.629435 | 0.29042  | 0.817951 | 0.551169 |
| MmugDNA.39582.1.S1_at | MmugDNA.39582.1 | 10.05 | 11.02 | 0.23 | 0.15 | -1.96 | 0.00336  | 0.067647 | 0.10283  | 0.306199 |
| MmugDNA.39584.1.S1_at | MmugDNA.39584.1 | 5.33  | 5.19  | 0.19 | 0.06 | 1.11  | 0.214704 | 0.45969  | 0.512314 | 0.671948 |
| MmugDNA.39588.1.S1_at | MmugDNA.39588.1 | 8.85  | 8.86  | 0.73 | 0.15 | -1    | 0.736553 | 0.559693 | 0.877553 | 0.736365 |
| MmugDNA.396.1.S1_at   | MmugDNA.396.1   | 10.47 | 10.38 | 0.26 | 0.05 | 1.06  | 0.19811  | 0.603824 | 0.495359 | 0.764323 |
| MmugDNA.39606.1.S1_at | MmugDNA.39606.1 | 10.25 | 10.45 | 0.17 | 0.19 | -1.14 | 0.581619 | 0.127427 | 0.786737 | 0.398274 |
| MmugDNA.39607.1.S1_at | MmugDNA.39607.1 | 3.88  | 3.57  | 0.2  | 0.11 | 1.24  | 0.105986 | 0.289794 | 0.379988 | 0.55082  |
| MmugDNA.39609.1.S1_at | MmugDNA.39609.1 | 5.44  | 7.65  | 0.94 | 0.2  | -4.63 | 0.038636 | 0.245572 | 0.252598 | 0.515348 |
| MmugDNA.39616.1.S1_at | MmugDNA.39616.1 | 11.32 | 11.15 | 0.13 | 0.07 | 1.12  | 0.415968 | 0.001761 | 0.676502 | 0.063161 |
| MmugDNA.39618.1.S1_at | MmugDNA.39618.1 | 4.75  | 4.01  | 0.4  | 0.27 | 1.66  | 0.060426 | 0.067339 | 0.302968 | 0.305492 |
| MmugDNA.39619.1.S1_at | MmugDNA.39619.1 | 7.63  | 10.38 | 1.2  | 0.29 | -6.73 | 0.020938 | 0.022062 | 0.198298 | 0.185927 |
| MmugDNA.3962.1.S1_at  | MmugDNA.3962.1  | 7.05  | 6.85  | 0.09 | 0.08 | 1.14  | 0.051038 | 0.130177 | 0.283564 | 0.40188  |
| MmugDNA.39621.1.S1_at | MmugDNA.39621.1 | 5.26  | 5.49  | 0.5  | 0.3  | -1.17 | 0.212718 | 0.373627 | 0.510686 | 0.612389 |
| MmugDNA.39626.1.S1_at | MmugDNA.39626.1 | 10.43 | 8.8   | 0.18 | 0.03 | 3.11  | 0.00008  | 0.018337 | 0.051196 | 0.170279 |
| MmugDNA.39627.1.S1_at | MmugDNA.39627.1 | 3.19  | 3.13  | 0.09 | 0.53 | 1.05  | 0.426915 | 0.642382 | 0.684257 | 0.790178 |

|                         |                 |       |       |      |      |        |          |          |          |          |
|-------------------------|-----------------|-------|-------|------|------|--------|----------|----------|----------|----------|
| MmugDNA.3963.1.S1_at    | MmugDNA.3963.1  | 9.59  | 9.35  | 0.34 | 0.18 | 1.18   | 0.400247 | 0.024395 | 0.665358 | 0.19551  |
| MmugDNA.39631.1.S1_at   | MmugDNA.39631.1 | 9.79  | 9.59  | 0.06 | 0.11 | 1.15   | 0.034928 | 0.053125 | 0.241431 | 0.276232 |
| MmugDNA.39632.1.S1_at   | MmugDNA.39632.1 | 3.3   | 3.36  | 0.24 | 0.04 | -1.04  | 0.671095 | 0.625544 | 0.842222 | 0.779222 |
| MmugDNA.39634.1.S1_s_at | MmugDNA.39634.1 | 3.56  | 3.71  | 0.14 | 0.12 | -1.11  | 0.262005 | 0.486562 | 0.556238 | 0.689898 |
| MmugDNA.39637.1.S1_at   | MmugDNA.39637.1 | 9.75  | 9.42  | 0.17 | 0.23 | 1.25   | 0.144948 | 0.006967 | 0.432015 | 0.112743 |
| MmugDNA.39645.1.S1_at   | MmugDNA.39645.1 | 6.33  | 6.01  | 0.26 | 0.28 | 1.25   | 0.600154 | 0.199401 | 0.798649 | 0.474002 |
| MmugDNA.3965.1.S1_at    | MmugDNA.3965.1  | 12.04 | 11.9  | 0.14 | 0.01 | 1.1    | 0.183807 | 0.044758 | 0.479745 | 0.256009 |
| MmugDNA.39652.1.S1_at   | MmugDNA.39652.1 | 7.55  | 7.2   | 0.12 | 0.13 | 1.28   | 0.037842 | 0.049238 | 0.250187 | 0.266752 |
| MmugDNA.39653.1.S1_at   | MmugDNA.39653.1 | 11.99 | 12    | 0.13 | 0.05 | -1     | 0.960649 | 0.492706 | 0.983913 | 0.693724 |
| MmugDNA.3966.1.S1_at    | MmugDNA.3966.1  | 7.42  | 7.1   | 0.38 | 0.19 | 1.24   | 0.840277 | 0.752011 | 0.929898 | 0.855739 |
| MmugDNA.39663.1.S1_at   | MmugDNA.39663.1 | 10.95 | 10.97 | 0.14 | 0.07 | -1.02  | 0.61747  | 0.272974 | 0.810046 | 0.53761  |
| MmugDNA.39664.1.S1_at   | MmugDNA.39664.1 | 2.96  | 3.03  | 0.04 | 0.12 | -1.05  | 0.317238 | 0.206728 | 0.601944 | 0.480825 |
| MmugDNA.39669.1.S1_at   | MmugDNA.39669.1 | 7.45  | 7.07  | 0.17 | 0.14 | 1.3    | 0.047777 | 0.048077 | 0.275924 | 0.26428  |
| MmugDNA.39678.1.S1_at   | MmugDNA.39678.1 | 6.87  | 6.64  | 0.13 | 0.08 | 1.17   | 0.097082 | 0.779751 | 0.367275 | 0.872303 |
| MmugDNA.39679.1.S1_at   | MmugDNA.39679.1 | 7.47  | 7.45  | 0.28 | 0.14 | 1.01   | 0.440367 | 0.146252 | 0.694448 | 0.420241 |
| MmugDNA.39699.1.S1_at   | MmugDNA.39699.1 | 8.87  | 9.34  | 0.29 | 0.08 | -1.38  | 0.159884 | 0.020085 | 0.451246 | 0.178007 |
| MmugDNA.39701.1.S1_at   | MmugDNA.39701.1 | 4.95  | 5.21  | 0.26 | 0.15 | -1.2   | 0.222624 | 0.332604 | 0.520511 | 0.580982 |
| MmugDNA.39708.1.S1_s_at | MmugDNA.39708.1 | 9.93  | 9.99  | 0.16 | 0.39 | -1.04  | 0.300944 | 0.2098   | 0.58902  | 0.483538 |
| MmugDNA.39709.1.S1_at   | MmugDNA.39709.1 | 5.03  | 6.61  | 0.67 | 0.13 | -3     | 0.03523  | 0.062749 | 0.242376 | 0.297193 |
| MmugDNA.3971.1.S1_at    | MmugDNA.3971.1  | 10.12 | 9.86  | 0.2  | 0.16 | 1.2    | 0.084964 | 0.688208 | 0.34889  | 0.817998 |
| MmugDNA.39714.1.S1_at   | MmugDNA.39714.1 | 5.46  | 9.06  | 1.51 | 0.27 | -12.14 | 0.042993 | 0.157549 | 0.264529 | 0.433131 |
| MmugDNA.3972.1.S1_at    | MmugDNA.3972.1  | 10.17 | 9.94  | 0.16 | 0.08 | 1.17   | 0.175463 | 0.562471 | 0.469926 | 0.738025 |
| MmugDNA.3973.1.S1_at    | MmugDNA.3973.1  | 12.61 | 12.21 | 0.09 | 0.05 | 1.33   | 0.005153 | 0.060242 | 0.116998 | 0.292091 |
| MmugDNA.39744.1.S1_at   | MmugDNA.39744.1 | 9.15  | 9.1   | 0.18 | 0.06 | 1.04   | 0.599814 | 0.137522 | 0.798417 | 0.410484 |
| MmugDNA.39763.1.S1_at   | MmugDNA.39763.1 | 8.82  | 9.93  | 0.39 | 0.08 | -2.16  | 0.009201 | 0.003853 | 0.145865 | 0.08832  |
| MmugDNA.39772.1.S1_at   | MmugDNA.39772.1 | 9.46  | 9.94  | 0.03 | 0.11 | -1.39  | 0.002303 | 0.055454 | 0.092394 | 0.281393 |
| MmugDNA.39774.1.S1_at   | MmugDNA.39774.1 | 8.95  | 8.25  | 0.39 | 0.08 | 1.63   | 0.036733 | 0.143944 | 0.24673  | 0.417867 |
| MmugDNA.39776.1.S1_at   | MmugDNA.39776.1 | 10.28 | 10.17 | 0.55 | 0.06 | 1.08   | 0.285651 | 0.590778 | 0.575384 | 0.756448 |
| MmugDNA.39779.1.S1_at   | MmugDNA.39779.1 | 5.38  | 4.92  | 0.35 | 0.17 | 1.37   | 0.18962  | 0.080816 | 0.486064 | 0.32873  |
| MmugDNA.39782.1.S1_at   | MmugDNA.39782.1 | 10.15 | 10.47 | 0.18 | 0.08 | -1.25  | 0.063778 | 0.134899 | 0.309012 | 0.406878 |
| MmugDNA.39789.1.S1_at   | MmugDNA.39789.1 | 6.38  | 6.47  | 0.22 | 0.12 | -1.07  | 0.58053  | 0.005678 | 0.785928 | 0.103959 |
| MmugDNA.39791.1.S1_at   | MmugDNA.39791.1 | 11.81 | 11.49 | 0.09 | 0.04 | 1.25   | 0.003095 | 0.008097 | 0.100824 | 0.119551 |
| MmugDNA.39796.1.S1_at   | MmugDNA.39796.1 | 7.11  | 7.71  | 0.36 | 0.2  | -1.51  | 0.294933 | 0.001736 | 0.583869 | 0.062895 |
| MmugDNA.39807.1.S1_at   | MmugDNA.39807.1 | 6.74  | 6.6   | 0.38 | 0.45 | 1.1    | 0.560064 | 0.08775  | 0.773651 | 0.341027 |
| MmugDNA.39811.1.S1_at   | MmugDNA.39811.1 | 7.92  | 7.87  | 0.11 | 0.04 | 1.04   | 0.331655 | 0.58095  | 0.613555 | 0.750041 |
| MmugDNA.39813.1.S1_at   | MmugDNA.39813.1 | 6.3   | 6.75  | 0.43 | 0.15 | -1.37  | 0.067881 | 0.115641 | 0.318295 | 0.382714 |
| MmugDNA.39821.1.S1_at   | MmugDNA.39821.1 | 10.61 | 10.97 | 0.08 | 0.16 | -1.28  | 0.05684  | 0.212225 | 0.295812 | 0.486124 |
| MmugDNA.39823.1.S1_at   | MmugDNA.39823.1 | 4.82  | 7.14  | 0.33 | 0.26 | -5     | 0.000599 | 0.081148 | 0.070727 | 0.329333 |
| MmugDNA.39828.1.S1_at   | MmugDNA.39828.1 | 8.39  | 8.41  | 0.4  | 0.21 | -1.01  | 0.871693 | 0.939738 | 0.944788 | 0.965752 |
| MmugDNA.3983.1.S1_at    | MmugDNA.3983.1  | 12.42 | 12.43 | 0.14 | 0.09 | -1.01  | 0.534037 | 0.634295 | 0.757384 | 0.784742 |
| MmugDNA.39834.1.S1_s_at | MmugDNA.39834.1 | 9.39  | 9.25  | 0.25 | 0.24 | 1.1    | 0.976543 | 0.999694 | 0.990749 | 0.999883 |
| MmugDNA.39839.1.S1_at   | MmugDNA.39839.1 | 10.12 | 10.13 | 0.18 | 0.12 | -1.01  | 0.724294 | 0.407135 | 0.870539 | 0.634753 |
| MmugDNA.39842.1.S1_at   | MmugDNA.39842.1 | 11.94 | 11.83 | 0.29 | 0.15 | 1.08   | 0.931141 | 0.93159  | 0.971037 | 0.961152 |

|                         |                 |       |       |      |      |       |          |          |          |          |
|-------------------------|-----------------|-------|-------|------|------|-------|----------|----------|----------|----------|
| MmugDNA.39842.1.S1_s_at | MmugDNA.39842.1 | 11.29 | 11.33 | 0.14 | 0.09 | -1.03 | 0.714492 | 0.053527 | 0.86508  | 0.277016 |
| MmugDNA.39847.1.S1_at   | MmugDNA.39847.1 | 10.52 | 10.41 | 0.07 | 0.13 | 1.08  | 0.208222 | 0.065661 | 0.505958 | 0.301631 |
| MmugDNA.39849.1.S1_at   | MmugDNA.39849.1 | 4.69  | 4.44  | 0.04 | 0.11 | 1.19  | 0.022837 | 0.000225 | 0.204235 | 0.032385 |
| MmugDNA.39851.1.S1_at   | MmugDNA.39851.1 | 10.33 | 10.53 | 0.25 | 0.19 | -1.15 | 0.159504 | 0.276065 | 0.450798 | 0.540086 |
| MmugDNA.39858.1.S1_at   | MmugDNA.39858.1 | 6.53  | 6.7   | 0.05 | 0.03 | -1.13 | 0.008366 | 0.043714 | 0.140536 | 0.253804 |
| MmugDNA.39859.1.S1_at   | MmugDNA.39859.1 | 11.91 | 11.76 | 0.06 | 0.15 | 1.11  | 0.340725 | 0.513215 | 0.620859 | 0.706851 |
| MmugDNA.39861.1.S1_at   | MmugDNA.39861.1 | 12.09 | 11.89 | 0.1  | 0.06 | 1.14  | 0.048188 | 0.000632 | 0.276908 | 0.042882 |
| MmugDNA.39864.1.S1_at   | MmugDNA.39864.1 | 3.03  | 2.92  | 0.17 | 0.12 | 1.07  | 0.777311 | 0.789999 | 0.898237 | 0.878631 |
| MmugDNA.39874.1.S1_at   | MmugDNA.39874.1 | 5.93  | 6.16  | 0.61 | 0.1  | -1.17 | 0.232856 | 0.391305 | 0.531142 | 0.625    |
| MmugDNA.39876.1.S1_at   | MmugDNA.39876.1 | 4.26  | 4.25  | 0.07 | 0.23 | 1.01  | 0.704252 | 0.572431 | 0.859667 | 0.744497 |
| MmugDNA.39881.1.S1_at   | MmugDNA.39881.1 | 6.9   | 7.42  | 0.32 | 0.19 | -1.44 | 0.060263 | 0.389092 | 0.30263  | 0.623345 |
| MmugDNA.39890.1.S1_at   | MmugDNA.39890.1 | 5.32  | 5.23  | 0.09 | 0.06 | 1.07  | 0.067316 | 0.027322 | 0.317061 | 0.206625 |
| MmugDNA.39898.1.S1_at   | MmugDNA.39898.1 | 10.13 | 9.79  | 0.18 | 0.09 | 1.27  | 0.019119 | 0.24266  | 0.191749 | 0.513025 |
| MmugDNA.399.1.S1_at     | MmugDNA.399.1   | 7.6   | 7.31  | 0.17 | 0.04 | 1.23  | 0.156256 | 0.191572 | 0.446849 | 0.466896 |
| MmugDNA.3990.1.S1_at    | MmugDNA.3990.1  | 7.2   | 7.07  | 0.09 | 0.09 | 1.09  | 0.074884 | 0.071554 | 0.331829 | 0.313714 |
| MmugDNA.39907.1.S1_at   | MmugDNA.39907.1 | 3.33  | 3.33  | 0.09 | 0.25 | 1     | 0.590061 | 0.666172 | 0.791771 | 0.804415 |
| MmugDNA.39913.1.S1_at   | MmugDNA.39913.1 | 14.09 | 14.4  | 0.21 | 0.06 | -1.24 | 0.063989 | 0.172272 | 0.309389 | 0.448666 |
| MmugDNA.39914.1.S1_at   | MmugDNA.39914.1 | 11.74 | 12.12 | 0.15 | 0.05 | -1.3  | 0.028301 | 0.348695 | 0.220769 | 0.592707 |
| MmugDNA.39919.1.S1_at   | MmugDNA.39919.1 | 10.85 | 12.05 | 0.8  | 0.2  | -2.3  | 0.061357 | 0.342143 | 0.304438 | 0.588322 |
| MmugDNA.39924.1.S1_at   | MmugDNA.39924.1 | 14.1  | 13.98 | 0.15 | 0.07 | 1.09  | 0.94344  | 0.907961 | 0.976209 | 0.947889 |
| MmugDNA.39925.1.S1_at   | MmugDNA.39925.1 | 4.65  | 4.52  | 0.1  | 0.19 | 1.09  | 0.131539 | 0.152155 | 0.414385 | 0.426919 |
| MmugDNA.39927.1.S1_s_at | MmugDNA.39927.1 | 10.75 | 10.01 | 0.13 | 0.05 | 1.67  | 0.000665 | 0.035851 | 0.071248 | 0.233788 |
| MmugDNA.39935.1.S1_at   | MmugDNA.39935.1 | 8.43  | 8.76  | 0.21 | 0.3  | -1.26 | 0.048003 | 0.045266 | 0.276468 | 0.257084 |
| MmugDNA.39939.1.S1_at   | MmugDNA.39939.1 | 13.13 | 12.75 | 0.28 | 0.04 | 1.3   | 0.06705  | 0.137864 | 0.316625 | 0.410833 |
| MmugDNA.3994.1.S1_at    | MmugDNA.3994.1  | 10.86 | 10.84 | 0.05 | 0.09 | 1.01  | 0.620798 | 0.2657   | 0.812178 | 0.531561 |
| MmugDNA.39948.1.S1_at   | MmugDNA.39948.1 | 9.11  | 8.91  | 0.24 | 0.04 | 1.15  | 0.206036 | 0.072735 | 0.50382  | 0.31565  |
| MmugDNA.39957.1.S1_at   | MmugDNA.39957.1 | 5.63  | 5.45  | 0.39 | 0.28 | 1.13  | 0.716164 | 0.063464 | 0.866043 | 0.298441 |
| MmugDNA.39958.1.S1_at   | MmugDNA.39958.1 | 11.4  | 10.37 | 0.19 | 0.05 | 2.03  | 0.000612 | 0.13207  | 0.070727 | 0.404046 |
| MmugDNA.3996.1.S1_at    | MmugDNA.3996.1  | 11.28 | 11.28 | 0.05 | 0.03 | -1    | 0.224396 | 0.312469 | 0.522615 | 0.567211 |
| MmugDNA.39967.1.S1_at   | MmugDNA.39967.1 | 3.13  | 3.04  | 0.28 | 0.06 | 1.06  | 0.213299 | 0.260267 | 0.511085 | 0.526809 |
| MmugDNA.39969.1.S1_at   | MmugDNA.39969.1 | 4.39  | 4.38  | 0.06 | 0.21 | 1.01  | 0.359582 | 0.525103 | 0.635235 | 0.714766 |
| MmugDNA.39974.1.S1_at   | MmugDNA.39974.1 | 6.37  | 9.19  | 0.79 | 0.37 | -7.07 | 0.011829 | 0.067201 | 0.158709 | 0.305204 |
| MmugDNA.39975.1.S1_at   | MmugDNA.39975.1 | 5.28  | 7.77  | 0.31 | 0.53 | -5.62 | 0.003769 | 0.101665 | 0.106813 | 0.361562 |
| MmugDNA.3998.1.S1_at    | MmugDNA.3998.1  | 3.67  | 4.62  | 0.06 | 0.55 | -1.93 | 0.046237 | 0.163306 | 0.272772 | 0.439468 |
| MmugDNA.39985.1.S1_at   | MmugDNA.39985.1 | 6.6   | 5.57  | 0.41 | 0.03 | 2.05  | 0.015282 | 0.010299 | 0.175968 | 0.132854 |
| MmugDNA.39994.1.S1_at   | MmugDNA.39994.1 | 5.84  | 5.56  | 0.5  | 0.11 | 1.22  | 0.163434 | 0.105973 | 0.455676 | 0.368302 |
| MmugDNA.39996.1.S1_at   | MmugDNA.39996.1 | 7.49  | 8.04  | 0.84 | 0.33 | -1.46 | 0.117404 | 0.142201 | 0.394715 | 0.415754 |
| MmugDNA.40001.1.S1_at   | MmugDNA.40001.1 | 10.12 | 10.61 | 0.12 | 0.2  | -1.4  | 0.031874 | 0.502495 | 0.232227 | 0.700192 |
| MmugDNA.40017.1.S1_at   | MmugDNA.40017.1 | 6.23  | 6.22  | 0.09 | 0.1  | 1.01  | 0.501753 | 0.502298 | 0.735507 | 0.700078 |
| MmugDNA.4002.1.S1_at    | MmugDNA.4002.1  | 7.62  | 8.37  | 0.53 | 0.25 | -1.68 | 0.39702  | 0.063615 | 0.662823 | 0.298759 |
| MmugDNA.40026.1.S1_at   | MmugDNA.40026.1 | 10.83 | 10.83 | 0.02 | 0.1  | -1    | 0.906208 | 0.021543 | 0.960282 | 0.183828 |
| MmugDNA.40045.1.S1_at   | MmugDNA.40045.1 | 7.8   | 7.59  | 0.03 | 0.1  | 1.16  | 0.027346 | 0.005013 | 0.218179 | 0.09867  |
| MmugDNA.40047.1.S1_at   | MmugDNA.40047.1 | 7.42  | 7.37  | 0.16 | 0.07 | 1.04  | 0.983921 | 0.475326 | 0.99403  | 0.682032 |

|                         |                 |       |       |      |      |        |          |          |          |          |
|-------------------------|-----------------|-------|-------|------|------|--------|----------|----------|----------|----------|
| MmugDNA.40058.1.S1_at   | MmugDNA.40058.1 | 10.19 | 9.85  | 0.07 | 0.13 | 1.27   | 0.017496 | 0.4474   | 0.185974 | 0.66348  |
| MmugDNA.40059.1.S1_at   | MmugDNA.40059.1 | 9.05  | 9.02  | 0.34 | 0.13 | 1.03   | 0.603847 | 0.010257 | 0.801334 | 0.132655 |
| MmugDNA.4006.1.S1_at    | MmugDNA.4006.1  | 10.86 | 10.54 | 0.16 | 0.02 | 1.25   | 0.040292 | 0.017179 | 0.257247 | 0.166059 |
| MmugDNA.40060.1.S1_s_at | MmugDNA.40060.1 | 4.94  | 5.93  | 0.73 | 0.09 | -1.99  | 0.21265  | 0.425778 | 0.510654 | 0.648089 |
| MmugDNA.40061.1.S1_at   | MmugDNA.40061.1 | 5.13  | 5.36  | 0.03 | 0.15 | -1.17  | 0.020692 | 0.091754 | 0.197469 | 0.346977 |
| MmugDNA.40066.1.S1_at   | MmugDNA.40066.1 | 10.13 | 8.86  | 0.14 | 0.1  | 2.41   | 0.000317 | 0.00008  | 0.058857 | 0.027016 |
| MmugDNA.40077.1.S1_at   | MmugDNA.40077.1 | 11.31 | 11.24 | 0.13 | 0.09 | 1.05   | 0.196798 | 0.020608 | 0.493895 | 0.180131 |
| MmugDNA.40078.1.S1_at   | MmugDNA.40078.1 | 6.12  | 6.29  | 0.2  | 0.04 | -1.12  | 0.166262 | 0.231797 | 0.459458 | 0.503592 |
| MmugDNA.40080.1.S1_at   | MmugDNA.40080.1 | 6.78  | 6.97  | 0.41 | 0.1  | -1.14  | 0.451047 | 0.024484 | 0.701934 | 0.195845 |
| MmugDNA.40085.1.S1_at   | MmugDNA.40085.1 | 5.95  | 5.85  | 0.2  | 0.08 | 1.07   | 0.100155 | 0.161136 | 0.37088  | 0.437288 |
| MmugDNA.40088.1.S1_at   | MmugDNA.40088.1 | 3.42  | 3.46  | 0.15 | 0.09 | -1.03  | 0.717077 | 0.537729 | 0.866435 | 0.722664 |
| MmugDNA.40088.1.S1_x_at | MmugDNA.40088.1 | 4     | 3.58  | 0.31 | 0.04 | 1.33   | 0.112514 | 0.100415 | 0.388836 | 0.359541 |
| MmugDNA.40090.1.S1_at   | MmugDNA.40090.1 | 10.21 | 10.17 | 0.25 | 0.04 | 1.03   | 0.913477 | 0.252746 | 0.963382 | 0.521174 |
| MmugDNA.40091.1.S1_at   | MmugDNA.40091.1 | 8.01  | 7.36  | 0.09 | 0.08 | 1.57   | 0.001057 | 0.418831 | 0.076562 | 0.643118 |
| MmugDNA.40097.1.S1_at   | MmugDNA.40097.1 | 9.86  | 9.7   | 0.26 | 0.06 | 1.12   | 0.473911 | 0.172515 | 0.717141 | 0.448864 |
| MmugDNA.40105.1.S1_at   | MmugDNA.40105.1 | 8.77  | 9.61  | 0.11 | 0.15 | -1.79  | 0.001667 | 0.000044 | 0.084462 | 0.025273 |
| MmugDNA.40109.1.S1_at   | MmugDNA.40109.1 | 9.78  | 9.73  | 0.21 | 0.04 | 1.03   | 0.31611  | 0.120478 | 0.600905 | 0.38925  |
| MmugDNA.40113.1.S1_at   | MmugDNA.40113.1 | 7.21  | 7.46  | 0.34 | 0.13 | -1.19  | 0.45532  | 0.114625 | 0.705079 | 0.381156 |
| MmugDNA.40118.1.S1_at   | MmugDNA.40118.1 | 6.65  | 6.55  | 0.14 | 0.12 | 1.08   | 0.315342 | 0.336434 | 0.600287 | 0.583831 |
| MmugDNA.40124.1.S1_at   | MmugDNA.40124.1 | 9.55  | 9.66  | 0.12 | 0.07 | -1.08  | 0.281869 | 0.784462 | 0.572738 | 0.875181 |
| MmugDNA.40124.1.S1_s_at | MmugDNA.40124.1 | 10.92 | 11.06 | 0.11 | 0.06 | -1.11  | 0.201527 | 0.850992 | 0.499098 | 0.915265 |
| MmugDNA.40134.1.S1_at   | MmugDNA.40134.1 | 12.09 | 12.08 | 0.11 | 0.13 | 1      | 0.590445 | 0.01131  | 0.791869 | 0.138076 |
| MmugDNA.40137.1.S1_at   | MmugDNA.40137.1 | 10.6  | 11.31 | 0.45 | 0.23 | -1.64  | 0.120962 | 0.146179 | 0.399467 | 0.420124 |
| MmugDNA.40138.1.S1_at   | MmugDNA.40138.1 | 10.3  | 10.54 | 0.77 | 0.08 | -1.17  | 0.666584 | 0.859818 | 0.839898 | 0.920108 |
| MmugDNA.40139.1.S1_at   | MmugDNA.40139.1 | 3.27  | 3.37  | 0.07 | 0.12 | -1.07  | 0.1077   | 0.088435 | 0.382296 | 0.341877 |
| MmugDNA.40144.1.S1_at   | MmugDNA.40144.1 | 10    | 11.03 | 0.38 | 0.08 | -2.05  | 0.021989 | 0.309601 | 0.201462 | 0.564987 |
| MmugDNA.40146.1.S1_at   | MmugDNA.40146.1 | 8.92  | 8.68  | 0.15 | 0.02 | 1.18   | 0.125964 | 0.156513 | 0.406905 | 0.431885 |
| MmugDNA.40147.1.S1_at   | MmugDNA.40147.1 | 11.82 | 11.94 | 0.06 | 0.05 | -1.09  | 0.110087 | 0.46744  | 0.385346 | 0.677085 |
| MmugDNA.40153.1.S1_at   | MmugDNA.40153.1 | 11.09 | 10.95 | 0.09 | 0.13 | 1.1    | 0.179739 | 0.207511 | 0.474837 | 0.481819 |
| MmugDNA.40164.1.S1_at   | MmugDNA.40164.1 | 6.58  | 7.96  | 0.68 | 0.12 | -2.61  | 0.021495 | 0.52815  | 0.200377 | 0.716456 |
| MmugDNA.40170.1.S1_s_at | MmugDNA.40170.1 | 4.81  | 8.16  | 0.39 | 0.48 | -10.15 | 0.000956 | 0.000769 | 0.076054 | 0.04544  |
| MmugDNA.40178.1.S1_at   | MmugDNA.40178.1 | 11.29 | 11.55 | 0.15 | 0.1  | -1.19  | 0.053108 | 0.087084 | 0.287721 | 0.340056 |
| MmugDNA.4019.1.S1_at    | MmugDNA.4019.1  | 9.17  | 8.54  | 0.16 | 0.06 | 1.55   | 0.005968 | 0.133815 | 0.12392  | 0.405813 |
| MmugDNA.4019.1.S1_s_at  | MmugDNA.4019.1  | 9.21  | 8.66  | 0.1  | 0.09 | 1.46   | 0.00326  | 0.218143 | 0.10198  | 0.491731 |
| MmugDNA.40192.1.S1_at   | MmugDNA.40192.1 | 11.93 | 11.42 | 0.07 | 0.07 | 1.42   | 0.001059 | 0.004266 | 0.076562 | 0.091847 |
| MmugDNA.40193.1.S1_at   | MmugDNA.40193.1 | 6.01  | 5.98  | 0.2  | 0.05 | 1.02   | 0.661546 | 0.823842 | 0.836625 | 0.898803 |
| MmugDNA.40198.1.S1_at   | MmugDNA.40198.1 | 8.3   | 8.31  | 0.17 | 0.04 | -1.01  | 0.763448 | 0.564596 | 0.89173  | 0.739382 |
| MmugDNA.40204.1.S1_at   | MmugDNA.40204.1 | 12.23 | 12.89 | 0.26 | 0.1  | -1.59  | 0.015067 | 0.043823 | 0.174736 | 0.253914 |
| MmugDNA.40206.1.S1_at   | MmugDNA.40206.1 | 9.77  | 9.77  | 0.29 | 0.06 | -1     | 0.317092 | 0.45729  | 0.601798 | 0.670746 |
| MmugDNA.40208.1.S1_at   | MmugDNA.40208.1 | 8.96  | 8.91  | 0.1  | 0.16 | 1.03   | 0.832786 | 0.054074 | 0.92634  | 0.277914 |
| MmugDNA.40213.1.S1_s_at | MmugDNA.40213.1 | 12.5  | 12.64 | 0.11 | 0.08 | -1.1   | 0.131281 | 0.10109  | 0.414066 | 0.360724 |
| MmugDNA.40218.1.S1_at   | MmugDNA.40218.1 | 7.79  | 7.39  | 0.11 | 0.31 | 1.32   | 0.052025 | 0.002765 | 0.285663 | 0.077756 |
| MmugDNA.40218.1.S1_x_at | MmugDNA.40218.1 | 7.69  | 7.36  | 0.16 | 0.27 | 1.25   | 0.046892 | 0.002433 | 0.27425  | 0.073093 |



|                         |                 |       |       |      |      |       |          |          |          |          |
|-------------------------|-----------------|-------|-------|------|------|-------|----------|----------|----------|----------|
| MmugDNA.40219.1.S1_s_at | MmugDNA.40219.1 | 11.18 | 11.2  | 0.09 | 0.01 | -1.01 | 0.611195 | 0.141748 | 0.806139 | 0.415331 |
| MmugDNA.40225.1.S1_at   | MmugDNA.40225.1 | 10.2  | 10.64 | 0.03 | 0.13 | -1.35 | 0.004849 | 0.03917  | 0.115123 | 0.243072 |
| MmugDNA.40227.1.S1_at   | MmugDNA.40227.1 | 7.67  | 7.81  | 0.1  | 0.01 | -1.1  | 0.225625 | 0.150389 | 0.523395 | 0.424934 |
| MmugDNA.40227.1.S1_s_at | MmugDNA.40227.1 | 9.03  | 10.09 | 0.23 | 0.19 | -2.08 | 0.001649 | 0.010509 | 0.084462 | 0.133936 |
| MmugDNA.40228.1.S1_at   | MmugDNA.40228.1 | 7.53  | 7.22  | 0.21 | 0.16 | 1.24  | 0.242581 | 0.073371 | 0.539382 | 0.316469 |
| MmugDNA.40230.1.S1_at   | MmugDNA.40230.1 | 4.59  | 4.47  | 0.02 | 0.05 | 1.09  | 0.032745 | 0.047759 | 0.234993 | 0.26344  |
| MmugDNA.40232.1.S1_at   | MmugDNA.40232.1 | 5.7   | 5.69  | 0.18 | 0.4  | 1     | 0.847875 | 0.498589 | 0.933771 | 0.697641 |
| MmugDNA.40233.1.S1_at   | MmugDNA.40233.1 | 11.93 | 11.56 | 0.25 | 0.28 | 1.29  | 0.184472 | 0.030184 | 0.480429 | 0.215679 |
| MmugDNA.40236.1.S1_at   | MmugDNA.40236.1 | 10.25 | 10.02 | 0.21 | 0.1  | 1.17  | 0.208748 | 0.013198 | 0.506255 | 0.147385 |
| MmugDNA.40254.1.S1_at   | MmugDNA.40254.1 | 8.57  | 8.7   | 0.31 | 0.2  | -1.1  | 0.978434 | 0.626401 | 0.991677 | 0.77972  |
| MmugDNA.40258.1.S1_at   | MmugDNA.40258.1 | 11.26 | 10.07 | 0.23 | 0.14 | 2.28  | 0.001718 | 0.012483 | 0.085035 | 0.144302 |
| MmugDNA.40259.1.S1_at   | MmugDNA.40259.1 | 4.09  | 3.71  | 0.35 | 0.27 | 1.3   | 0.40402  | 0.462918 | 0.667926 | 0.674149 |
| MmugDNA.4026.1.S1_s_at  | MmugDNA.4026.1  | 9.75  | 10.23 | 0.46 | 0.09 | -1.39 | 0.052336 | 0.073761 | 0.286005 | 0.317123 |
| MmugDNA.40261.1.S1_at   | MmugDNA.40261.1 | 5.72  | 5.72  | 0.19 | 0.08 | 1     | 0.712279 | 0.05484  | 0.864309 | 0.279675 |
| MmugDNA.40264.1.S1_at   | MmugDNA.40264.1 | 11.66 | 11.9  | 0.11 | 0.05 | -1.18 | 0.074615 | 0.080419 | 0.331249 | 0.328057 |
| MmugDNA.40274.1.S1_at   | MmugDNA.40274.1 | 3.65  | 6.08  | 1.22 | 0.43 | -5.36 | 0.084883 | 0.166606 | 0.348829 | 0.443115 |
| MmugDNA.40274.1.S1_s_at | MmugDNA.40274.1 | 3.77  | 5.82  | 0.66 | 0.61 | -4.15 | 0.062627 | 0.139075 | 0.306893 | 0.412165 |
| MmugDNA.40283.1.S1_at   | MmugDNA.40283.1 | 4.45  | 4.39  | 0.04 | 0.05 | 1.04  | 0.443549 | 0.545641 | 0.696624 | 0.727579 |
| MmugDNA.40288.1.S1_at   | MmugDNA.40288.1 | 4.75  | 4.55  | 0.48 | 0.02 | 1.15  | 0.171677 | 0.241018 | 0.465636 | 0.511657 |
| MmugDNA.4029.1.S1_at    | MmugDNA.4029.1  | 13.05 | 12.82 | 0.06 | 0.03 | 1.17  | 0.004339 | 0.081303 | 0.111896 | 0.329355 |
| MmugDNA.40291.1.S1_at   | MmugDNA.40291.1 | 7.65  | 7.81  | 0.64 | 0.4  | -1.12 | 0.746091 | 0.148858 | 0.882314 | 0.42322  |
| MmugDNA.40292.1.S1_at   | MmugDNA.40292.1 | 10.69 | 10.16 | 0.16 | 0.07 | 1.44  | 0.004457 | 0.003297 | 0.113172 | 0.082571 |
| MmugDNA.40294.1.S1_at   | MmugDNA.40294.1 | 6.44  | 6.34  | 0.2  | 0.08 | 1.07  | 0.834505 | 0.236614 | 0.927257 | 0.50743  |
| MmugDNA.403.1.S1_s_at   | MmugDNA.403.1   | 8.63  | 8.99  | 0.33 | 0.11 | -1.28 | 0.24598  | 0.852694 | 0.541732 | 0.916254 |
| MmugDNA.40305.1.S1_at   | MmugDNA.40305.1 | 11.25 | 11.02 | 0.25 | 0.17 | 1.17  | 0.352607 | 0.878466 | 0.630029 | 0.930638 |
| MmugDNA.40307.1.S1_at   | MmugDNA.40307.1 | 6.08  | 5.93  | 0.1  | 0.12 | 1.11  | 0.152357 | 0.072077 | 0.441916 | 0.314519 |
| MmugDNA.40309.1.S1_at   | MmugDNA.40309.1 | 6.55  | 6.59  | 0.07 | 0.11 | -1.03 | 0.919935 | 0.749955 | 0.96576  | 0.85465  |
| MmugDNA.4031.1.S1_at    | MmugDNA.4031.1  | 10.53 | 10.59 | 0.08 | 0.07 | -1.04 | 0.080412 | 0.592982 | 0.341026 | 0.757985 |
| MmugDNA.40310.1.S1_at   | MmugDNA.40310.1 | 6.32  | 5.58  | 0.23 | 0.29 | 1.67  | 0.030362 | 0.270358 | 0.227199 | 0.535681 |
| MmugDNA.40311.1.S1_at   | MmugDNA.40311.1 | 6     | 5.75  | 0.05 | 0.03 | 1.18  | 0.002397 | 0.004671 | 0.093439 | 0.095314 |
| MmugDNA.40314.1.S1_at   | MmugDNA.40314.1 | 5.89  | 6.94  | 0.27 | 0.54 | -2.08 | 0.097885 | 0.024553 | 0.368354 | 0.196073 |
| MmugDNA.40315.1.S1_at   | MmugDNA.40315.1 | 5.89  | 6.04  | 0.13 | 0.01 | -1.11 | 0.297161 | 0.622884 | 0.585605 | 0.777391 |
| MmugDNA.40319.1.S1_at   | MmugDNA.40319.1 | 8.12  | 8.26  | 0.21 | 0.06 | -1.1  | 0.466683 | 0.656375 | 0.71234  | 0.799062 |
| MmugDNA.4032.1.S1_at    | MmugDNA.4032.1  | 11.93 | 12.05 | 0.38 | 0.15 | -1.08 | 0.712256 | 0.198514 | 0.864309 | 0.473391 |
| MmugDNA.40329.1.S1_at   | MmugDNA.40329.1 | 11.6  | 11.62 | 0.04 | 0.06 | -1.01 | 0.449294 | 0.895001 | 0.700621 | 0.940055 |
| MmugDNA.40331.1.S1_at   | MmugDNA.40331.1 | 8.97  | 8.71  | 0.19 | 0.06 | 1.2   | 0.08231  | 0.003287 | 0.343946 | 0.082551 |
| MmugDNA.40333.1.S1_at   | MmugDNA.40333.1 | 11.24 | 11.13 | 0.22 | 0.01 | 1.08  | 0.414753 | 0.569026 | 0.675681 | 0.742233 |
| MmugDNA.40334.1.S1_at   | MmugDNA.40334.1 | 6.2   | 6.26  | 0.21 | 0.2  | -1.05 | 0.991958 | 0.369151 | 0.997006 | 0.608669 |
| MmugDNA.40337.1.S1_at   | MmugDNA.40337.1 | 11.8  | 11.55 | 0.14 | 0.26 | 1.19  | 0.275584 | 0.166914 | 0.567274 | 0.443394 |
| MmugDNA.40338.1.S1_s_at | MmugDNA.40338.1 | 11.81 | 11.98 | 0.16 | 0.04 | -1.12 | 0.054162 | 0.709423 | 0.289903 | 0.831622 |
| MmugDNA.40357.1.S1_at   | MmugDNA.40357.1 | 5.27  | 4.88  | 0.63 | 0.33 | 1.3   | 0.156615 | 0.207037 | 0.44712  | 0.481115 |
| MmugDNA.40359.1.S1_at   | MmugDNA.40359.1 | 9.55  | 9.52  | 0.14 | 0.12 | 1.02  | 0.802777 | 0.923077 | 0.911428 | 0.956739 |
| MmugDNA.40361.1.S1_at   | MmugDNA.40361.1 | 12.08 | 12.03 | 0.16 | 0.13 | 1.03  | 0.61746  | 0.550638 | 0.810046 | 0.730605 |

|                         |                 |       |       |      |      |       |          |          |          |          |
|-------------------------|-----------------|-------|-------|------|------|-------|----------|----------|----------|----------|
| MmugDNA.40364.1.S1_at   | MmugDNA.40364.1 | 6.12  | 6.59  | 0.17 | 0.12 | -1.38 | 0.012628 | 0.153126 | 0.162521 | 0.428011 |
| MmugDNA.40365.1.S1_at   | MmugDNA.40365.1 | 3.28  | 3.33  | 0.14 | 0.08 | -1.04 | 0.56326  | 0.592939 | 0.775375 | 0.757956 |
| MmugDNA.40366.1.S1_at   | MmugDNA.40366.1 | 9.16  | 9.57  | 0.41 | 0.25 | -1.32 | 0.058678 | 0.085255 | 0.299394 | 0.337096 |
| MmugDNA.40371.1.S1_at   | MmugDNA.40371.1 | 7.17  | 6.84  | 0.05 | 0.11 | 1.25  | 0.007618 | 0.096527 | 0.135757 | 0.354096 |
| MmugDNA.40381.1.S1_at   | MmugDNA.40381.1 | 7.35  | 8.36  | 0.34 | 0.57 | -2.01 | 0.214272 | 0.067199 | 0.51193  | 0.305204 |
| MmugDNA.40383.1.S1_at   | MmugDNA.40383.1 | 5.41  | 3.83  | 0.51 | 0.51 | 2.99  | 0.038872 | 0.049472 | 0.253448 | 0.267334 |
| MmugDNA.40384.1.S1_at   | MmugDNA.40384.1 | 9.07  | 8.2   | 0.63 | 0.09 | 1.82  | 0.110105 | 0.269878 | 0.38535  | 0.53515  |
| MmugDNA.40386.1.S1_at   | MmugDNA.40386.1 | 6.3   | 6.78  | 0.15 | 0.02 | -1.39 | 0.011129 | 0.027885 | 0.155142 | 0.208455 |
| MmugDNA.40388.1.S1_at   | MmugDNA.40388.1 | 7.06  | 7.25  | 0.04 | 0.1  | -1.14 | 0.065055 | 0.097361 | 0.31189  | 0.35507  |
| MmugDNA.40391.1.S1_at   | MmugDNA.40391.1 | 7.05  | 6.97  | 0.28 | 0.08 | 1.06  | 0.325578 | 0.505479 | 0.608792 | 0.702161 |
| MmugDNA.40392.1.S1_at   | MmugDNA.40392.1 | 10.61 | 8.63  | 0.51 | 0.74 | 3.96  | 0.04146  | 0.000229 | 0.259966 | 0.032385 |
| MmugDNA.40394.1.S1_at   | MmugDNA.40394.1 | 10.16 | 9.69  | 0.51 | 0.19 | 1.38  | 0.313969 | 0.341885 | 0.599734 | 0.587972 |
| MmugDNA.40397.1.S1_at   | MmugDNA.40397.1 | 11.11 | 12.01 | 0.41 | 0.06 | -1.87 | 0.031313 | 0.067247 | 0.230161 | 0.30531  |
| MmugDNA.40400.1.S1_at   | MmugDNA.40400.1 | 5.28  | 5.34  | 0.07 | 0.23 | -1.04 | 0.481578 | 0.091906 | 0.722067 | 0.347243 |
| MmugDNA.40403.1.S1_at   | MmugDNA.40403.1 | 11.24 | 11.14 | 0.03 | 0.05 | 1.07  | 0.020454 | 0.077133 | 0.19653  | 0.322675 |
| MmugDNA.40405.1.S1_at   | MmugDNA.40405.1 | 4.42  | 4.95  | 0.13 | 0.1  | -1.44 | 0.00876  | 0.202315 | 0.14333  | 0.476691 |
| MmugDNA.40406.1.S1_at   | MmugDNA.40406.1 | 6.45  | 6.52  | 0.14 | 0.1  | -1.04 | 0.839402 | 0.596273 | 0.929572 | 0.759456 |
| MmugDNA.40407.1.S1_at   | MmugDNA.40407.1 | 7.89  | 7.34  | 0.74 | 0.32 | 1.46  | 0.860824 | 0.51005  | 0.939561 | 0.704549 |
| MmugDNA.40408.1.S1_at   | MmugDNA.40408.1 | 3.49  | 3.31  | 0.21 | 0.1  | 1.13  | 0.341048 | 0.072649 | 0.620979 | 0.315579 |
| MmugDNA.40410.1.S1_at   | MmugDNA.40410.1 | 3.92  | 4.07  | 0.13 | 0.02 | -1.11 | 0.127316 | 0.290112 | 0.409027 | 0.551128 |
| MmugDNA.40417.1.S1_at   | MmugDNA.40417.1 | 5.79  | 5.62  | 0.16 | 0.06 | 1.13  | 0.087351 | 0.121337 | 0.353109 | 0.390364 |
| MmugDNA.4042.1.S1_at    | MmugDNA.4042.1  | 8.97  | 8.69  | 0.01 | 0.08 | 1.21  | 0.008947 | 0.225613 | 0.144294 | 0.498155 |
| MmugDNA.40424.1.S1_at   | MmugDNA.40424.1 | 11.03 | 11.25 | 0.12 | 0.01 | -1.16 | 0.0511   | 0.062218 | 0.283595 | 0.296307 |
| MmugDNA.40427.1.S1_at   | MmugDNA.40427.1 | 12.13 | 11.14 | 0.25 | 0.09 | 1.98  | 0.003715 | 0.001365 | 0.106219 | 0.056835 |
| MmugDNA.40429.1.S1_at   | MmugDNA.40429.1 | 9.95  | 10.91 | 0.43 | 0.21 | -1.94 | 0.034881 | 0.011453 | 0.241271 | 0.13846  |
| MmugDNA.40431.1.S1_at   | MmugDNA.40431.1 | 7.75  | 7.38  | 0.09 | 0.07 | 1.3   | 0.006292 | 0.001797 | 0.125705 | 0.063638 |
| MmugDNA.40438.1.S1_at   | MmugDNA.40438.1 | 5.74  | 5.28  | 0.5  | 0.32 | 1.37  | 0.436512 | 0.728605 | 0.691456 | 0.843115 |
| MmugDNA.40449.1.S1_at   | MmugDNA.40449.1 | 6.35  | 6.93  | 0.19 | 0.27 | -1.49 | 0.044413 | 0.190172 | 0.267911 | 0.465826 |
| MmugDNA.40451.1.S1_at   | MmugDNA.40451.1 | 9.71  | 10.19 | 0.22 | 0.05 | -1.39 | 0.018573 | 0.279514 | 0.189513 | 0.543055 |
| MmugDNA.40456.1.S1_at   | MmugDNA.40456.1 | 6.25  | 6.29  | 0.22 | 0.16 | -1.03 | 0.476919 | 0.284995 | 0.719161 | 0.547087 |
| MmugDNA.40457.1.S1_at   | MmugDNA.40457.1 | 11.74 | 11.79 | 0.14 | 0.04 | -1.03 | 0.565985 | 0.007901 | 0.77703  | 0.11849  |
| MmugDNA.40459.1.S1_at   | MmugDNA.40459.1 | 3.5   | 3.37  | 0.14 | 0.07 | 1.09  | 0.276109 | 0.259616 | 0.567711 | 0.526525 |
| MmugDNA.40462.1.S1_at   | MmugDNA.40462.1 | 11.29 | 11.23 | 0.17 | 0.04 | 1.05  | 0.84771  | 0.68177  | 0.933674 | 0.81413  |
| MmugDNA.40470.1.S1_at   | MmugDNA.40470.1 | 4.61  | 4.66  | 0.21 | 0.14 | -1.03 | 0.315305 | 0.159383 | 0.600287 | 0.435442 |
| MmugDNA.40481.1.S1_at   | MmugDNA.40481.1 | 11.92 | 11.8  | 0.16 | 0.08 | 1.09  | 0.271214 | 0.212148 | 0.563126 | 0.486036 |
| MmugDNA.40482.1.S1_at   | MmugDNA.40482.1 | 3.99  | 4.08  | 0.24 | 0.08 | -1.07 | 0.585591 | 0.629075 | 0.789283 | 0.781597 |
| MmugDNA.40485.1.S1_x_at | MmugDNA.40485.1 | 10.77 | 10.74 | 0.4  | 0.13 | 1.02  | 0.539194 | 0.299691 | 0.760647 | 0.558037 |
| MmugDNA.40486.1.S1_s_at | MmugDNA.40486.1 | 7.76  | 7.55  | 0.23 | 0.17 | 1.16  | 0.911868 | 0.22677  | 0.962655 | 0.499176 |
| MmugDNA.40487.1.S1_at   | MmugDNA.40487.1 | 5.45  | 5.47  | 0.17 | 0.07 | -1.02 | 0.588822 | 0.164351 | 0.791302 | 0.44061  |
| MmugDNA.40488.1.S1_at   | MmugDNA.40488.1 | 3.11  | 4.42  | 0.24 | 0.25 | -2.48 | 0.003936 | 0.003142 | 0.108453 | 0.081652 |
| MmugDNA.40489.1.S1_at   | MmugDNA.40489.1 | 9.68  | 9.29  | 0.46 | 0.15 | 1.3   | 0.349068 | 0.334349 | 0.62702  | 0.582352 |
| MmugDNA.40492.1.S1_at   | MmugDNA.40492.1 | 3.68  | 3.54  | 0.14 | 0.05 | 1.1   | 0.151869 | 0.244001 | 0.441347 | 0.514069 |
| MmugDNA.40495.1.S1_at   | MmugDNA.40495.1 | 4.88  | 4.84  | 0.2  | 0.03 | 1.02  | 0.660296 | 0.789336 | 0.83613  | 0.878316 |

|                         |                 |       |       |      |      |       |          |          |          |          |
|-------------------------|-----------------|-------|-------|------|------|-------|----------|----------|----------|----------|
| MmugDNA.40504.1.S1_at   | MmugDNA.40504.1 | 11.26 | 11.49 | 0.37 | 0.23 | -1.17 | 0.444247 | 0.231242 | 0.697126 | 0.502925 |
| MmugDNA.40506.1.S1_at   | MmugDNA.40506.1 | 10.51 | 10.48 | 0.09 | 0.01 | 1.02  | 0.780686 | 0.088277 | 0.899918 | 0.341721 |
| MmugDNA.40509.1.S1_at   | MmugDNA.40509.1 | 11.24 | 10.95 | 0.27 | 0.05 | 1.23  | 0.141395 | 0.210913 | 0.427329 | 0.484934 |
| MmugDNA.40512.1.S1_at   | MmugDNA.40512.1 | 10.25 | 10.04 | 0.16 | 0.15 | 1.16  | 0.072886 | 0.033804 | 0.327658 | 0.227489 |
| MmugDNA.40513.1.S1_at   | MmugDNA.40513.1 | 6.04  | 6.1   | 0.05 | 0.08 | -1.04 | 0.53579  | 0.030547 | 0.758659 | 0.216711 |
| MmugDNA.4052.1.S1_at    | MmugDNA.4052.1  | 6.57  | 7.55  | 0.93 | 0.09 | -1.97 | 0.116767 | 0.391765 | 0.39382  | 0.625301 |
| MmugDNA.40527.1.S1_at   | MmugDNA.40527.1 | 10.61 | 10.99 | 0.32 | 0.18 | -1.3  | 0.53116  | 0.827728 | 0.755624 | 0.901127 |
| MmugDNA.40531.1.A1_at   | MmugDNA.40531.1 | 5.8   | 5.98  | 0.09 | 0.02 | -1.13 | 0.039637 | 0.201523 | 0.255709 | 0.476036 |
| MmugDNA.40531.1.S1_at   | MmugDNA.40531.1 | 6.36  | 6.45  | 0.13 | 0.05 | -1.07 | 0.479521 | 0.594741 | 0.720709 | 0.758628 |
| MmugDNA.40532.1.S1_at   | MmugDNA.40532.1 | 5.11  | 5.31  | 0.11 | 0.08 | -1.14 | 0.066994 | 0.052586 | 0.316461 | 0.274848 |
| MmugDNA.40536.1.S1_at   | MmugDNA.40536.1 | 9.79  | 10.1  | 0.17 | 0.16 | -1.23 | 0.093513 | 0.344886 | 0.362114 | 0.590208 |
| MmugDNA.40551.1.S1_s_at | MmugDNA.40551.1 | 5.25  | 5.12  | 0.15 | 0.08 | 1.09  | 0.36811  | 0.470859 | 0.641846 | 0.679124 |
| MmugDNA.40551.1.S1_x_at | MmugDNA.40551.1 | 3.81  | 3.78  | 0.15 | 0.06 | 1.02  | 0.900153 | 0.612326 | 0.957601 | 0.76996  |
| MmugDNA.40552.1.S1_at   | MmugDNA.40552.1 | 10.63 | 10.31 | 0.21 | 0.06 | 1.25  | 0.033502 | 0.48162  | 0.237028 | 0.686557 |
| MmugDNA.40554.1.S1_at   | MmugDNA.40554.1 | 4.5   | 4.25  | 0.07 | 0.3  | 1.19  | 0.755395 | 0.928244 | 0.887284 | 0.959217 |
| MmugDNA.40569.1.S1_at   | MmugDNA.40569.1 | 11.03 | 10.97 | 0.01 | 0.1  | 1.04  | 0.13613  | 0.177143 | 0.420552 | 0.453611 |
| MmugDNA.40572.1.S1_at   | MmugDNA.40572.1 | 11.98 | 12.86 | 0.18 | 0.09 | -1.83 | 0.002126 | 0.417344 | 0.090208 | 0.642147 |
| MmugDNA.40581.1.S1_at   | MmugDNA.40581.1 | 11.64 | 11.74 | 0.1  | 0.1  | -1.07 | 0.427794 | 0.12408  | 0.68494  | 0.394389 |
| MmugDNA.40584.1.S1_at   | MmugDNA.40584.1 | 9.01  | 8.5   | 0.26 | 0.11 | 1.42  | 0.065149 | 0.010222 | 0.312079 | 0.132544 |
| MmugDNA.4059.1.S1_at    | MmugDNA.4059.1  | 3.25  | 2.97  | 0.3  | 0.07 | 1.21  | 0.627564 | 0.78575  | 0.816897 | 0.875936 |
| MmugDNA.40592.1.S1_at   | MmugDNA.40592.1 | 5.96  | 6.49  | 0.26 | 0.07 | -1.44 | 0.025158 | 0.002897 | 0.211649 | 0.079107 |
| MmugDNA.40598.1.S1_at   | MmugDNA.40598.1 | 6.7   | 7.79  | 0.66 | 0.22 | -2.13 | 0.152926 | 0.245396 | 0.442643 | 0.515213 |
| MmugDNA.406.1.S1_s_at   | MmugDNA.406.1   | 14.02 | 14.04 | 0.06 | 0.03 | -1.01 | 0.883691 | 0.401799 | 0.950562 | 0.631068 |
| MmugDNA.40603.1.S1_x_at | MmugDNA.40603.1 | 11.11 | 10.97 | 0.62 | 0.14 | 1.1   | 0.293164 | 0.300694 | 0.58211  | 0.558959 |
| MmugDNA.40607.1.S1_at   | MmugDNA.40607.1 | 4.56  | 4.29  | 0.3  | 0.1  | 1.21  | 0.605884 | 0.769946 | 0.802758 | 0.866376 |
| MmugDNA.40610.1.S1_at   | MmugDNA.40610.1 | 8.04  | 6.62  | 0.28 | 0.35 | 2.68  | 0.006356 | 0.056337 | 0.126104 | 0.283348 |
| MmugDNA.40614.1.S1_at   | MmugDNA.40614.1 | 8.97  | 9.37  | 0.23 | 0.14 | -1.32 | 0.02106  | 0.065303 | 0.198668 | 0.301249 |
| MmugDNA.40615.1.S1_at   | MmugDNA.40615.1 | 10.74 | 10.87 | 0.08 | 0.01 | -1.1  | 0.049062 | 0.454512 | 0.279099 | 0.668664 |
| MmugDNA.40616.1.S1_at   | MmugDNA.40616.1 | 6.82  | 6.82  | 0.1  | 0.07 | -1    | 0.300662 | 0.256954 | 0.588854 | 0.524777 |
| MmugDNA.40623.1.S1_at   | MmugDNA.40623.1 | 8.14  | 9.08  | 0.56 | 0.24 | -1.92 | 0.0849   | 0.02948  | 0.348845 | 0.213368 |
| MmugDNA.40625.1.S1_at   | MmugDNA.40625.1 | 10.41 | 10.97 | 0.25 | 0.11 | -1.48 | 0.032696 | 0.006968 | 0.234993 | 0.112743 |
| MmugDNA.40626.1.S1_at   | MmugDNA.40626.1 | 3.55  | 4.78  | 0.14 | 0.32 | -2.35 | 0.006628 | 0.018182 | 0.127935 | 0.169673 |
| MmugDNA.40628.1.S1_at   | MmugDNA.40628.1 | 7.8   | 7.3   | 0.11 | 0.19 | 1.42  | 0.032334 | 0.127922 | 0.233934 | 0.398878 |
| MmugDNA.40630.1.S1_at   | MmugDNA.40630.1 | 5.17  | 4.57  | 0.35 | 0.12 | 1.52  | 0.10368  | 0.058734 | 0.376988 | 0.28904  |
| MmugDNA.40633.1.S1_at   | MmugDNA.40633.1 | 8.5   | 8.07  | 0.22 | 0.06 | 1.35  | 0.027405 | 0.042798 | 0.218385 | 0.251394 |
| MmugDNA.40640.1.S1_at   | MmugDNA.40640.1 | 11.06 | 10.75 | 0.21 | 0.04 | 1.24  | 0.019736 | 0.153164 | 0.193466 | 0.428011 |
| MmugDNA.40644.1.S1_at   | MmugDNA.40644.1 | 11.98 | 11.65 | 0.04 | 0.04 | 1.26  | 0.000923 | 0.000459 | 0.075607 | 0.038572 |
| MmugDNA.40645.1.S1_at   | MmugDNA.40645.1 | 6.62  | 6.32  | 0.1  | 0.09 | 1.23  | 0.018104 | 0.023872 | 0.18753  | 0.193495 |
| MmugDNA.40647.1.S1_at   | MmugDNA.40647.1 | 5.98  | 5.85  | 0.29 | 0.08 | 1.09  | 0.411289 | 0.803022 | 0.673236 | 0.886557 |
| MmugDNA.40648.1.S1_at   | MmugDNA.40648.1 | 9.63  | 10.07 | 0.27 | 0.11 | -1.36 | 0.074389 | 0.197982 | 0.331002 | 0.472936 |
| MmugDNA.40649.1.S1_at   | MmugDNA.40649.1 | 9.67  | 10.15 | 0.26 | 0.36 | -1.4  | 0.193014 | 0.021794 | 0.489582 | 0.184765 |
| MmugDNA.40661.1.S1_at   | MmugDNA.40661.1 | 8.54  | 8.5   | 0.09 | 0.07 | 1.03  | 0.714996 | 0.041328 | 0.865404 | 0.247995 |
| MmugDNA.40662.1.S1_at   | MmugDNA.40662.1 | 5.68  | 6.94  | 0.87 | 0.56 | -2.4  | 0.498727 | 0.016269 | 0.7339   | 0.161649 |

|                         |                 |       |       |      |      |       |          |          |          |          |
|-------------------------|-----------------|-------|-------|------|------|-------|----------|----------|----------|----------|
| MmugDNA.40663.1.S1_at   | MmugDNA.40663.1 | 11.77 | 11.55 | 0.59 | 0.03 | 1.17  | 0.507039 | 0.717625 | 0.739417 | 0.836506 |
| MmugDNA.40668.1.S1_at   | MmugDNA.40668.1 | 11.91 | 11.69 | 0.13 | 0.02 | 1.16  | 0.064516 | 0.007279 | 0.310585 | 0.114488 |
| MmugDNA.40669.1.S1_at   | MmugDNA.40669.1 | 5.28  | 5.32  | 0.4  | 0.04 | -1.03 | 0.415753 | 0.658921 | 0.676389 | 0.800473 |
| MmugDNA.40670.1.S1_at   | MmugDNA.40670.1 | 8.41  | 8.32  | 0.37 | 0.3  | 1.06  | 0.494884 | 0.112216 | 0.731438 | 0.377537 |
| MmugDNA.40671.1.S1_at   | MmugDNA.40671.1 | 6.58  | 6.59  | 0.06 | 0.08 | -1    | 0.966062 | 0.94784  | 0.986286 | 0.970378 |
| MmugDNA.40672.1.S1_at   | MmugDNA.40672.1 | 6.72  | 6.58  | 0.11 | 0.15 | 1.1   | 0.386795 | 0.032508 | 0.655097 | 0.223271 |
| MmugDNA.40673.1.S1_at   | MmugDNA.40673.1 | 3.55  | 3.49  | 0.17 | 0.07 | 1.04  | 0.29054  | 0.470074 | 0.579962 | 0.678572 |
| MmugDNA.40686.1.S1_at   | MmugDNA.40686.1 | 3.39  | 3.43  | 0.14 | 0.12 | -1.02 | 0.746661 | 0.865927 | 0.882673 | 0.923766 |
| MmugDNA.40688.1.S1_at   | MmugDNA.40688.1 | 8.42  | 8.33  | 0.07 | 0.08 | 1.07  | 0.458058 | 0.000015 | 0.706772 | 0.018485 |
| MmugDNA.40690.1.S1_at   | MmugDNA.40690.1 | 7.89  | 7.64  | 0.09 | 0.04 | 1.19  | 0.009748 | 0.02045  | 0.148542 | 0.179597 |
| MmugDNA.40693.1.S1_s_at | MmugDNA.40693.1 | 6.03  | 5.88  | 0.09 | 0.12 | 1.11  | 0.063554 | 0.352479 | 0.308742 | 0.595743 |
| MmugDNA.40703.1.S1_at   | MmugDNA.40703.1 | 3.28  | 3.27  | 0.2  | 0.05 | 1.01  | 0.728857 | 0.754302 | 0.873303 | 0.857018 |
| MmugDNA.40704.1.S1_at   | MmugDNA.40704.1 | 9.09  | 9.54  | 0.23 | 0.06 | -1.37 | 0.011521 | 0.008883 | 0.15722  | 0.124698 |
| MmugDNA.40707.1.S1_at   | MmugDNA.40707.1 | 11.13 | 11.38 | 0.1  | 0.1  | -1.18 | 0.0388   | 0.251521 | 0.253262 | 0.520274 |
| MmugDNA.40707.1.S1_s_at | MmugDNA.40707.1 | 9.65  | 9.92  | 0.14 | 0.15 | -1.2  | 0.133549 | 0.254305 | 0.41701  | 0.522613 |
| MmugDNA.40709.1.S1_at   | MmugDNA.40709.1 | 7.18  | 6.67  | 0.31 | 0.13 | 1.42  | 0.209184 | 0.836257 | 0.50665  | 0.906346 |
| MmugDNA.40711.1.S1_at   | MmugDNA.40711.1 | 5     | 4.84  | 0.07 | 0    | 1.11  | 0.028958 | 0.019899 | 0.222981 | 0.177357 |
| MmugDNA.40714.1.S1_at   | MmugDNA.40714.1 | 10.87 | 11.26 | 0.38 | 0.46 | -1.31 | 0.75508  | 0.017987 | 0.887051 | 0.169137 |
| MmugDNA.40717.1.S1_at   | MmugDNA.40717.1 | 8.99  | 9.3   | 0.3  | 0.16 | -1.24 | 0.096991 | 0.213527 | 0.367217 | 0.48741  |
| MmugDNA.40718.1.S1_at   | MmugDNA.40718.1 | 5.34  | 5.18  | 0.17 | 0.05 | 1.12  | 0.131812 | 0.446336 | 0.414849 | 0.662773 |
| MmugDNA.40719.1.S1_at   | MmugDNA.40719.1 | 8.07  | 7.93  | 0.12 | 0.13 | 1.1   | 0.572926 | 0.035311 | 0.780942 | 0.232207 |
| MmugDNA.40720.1.S1_at   | MmugDNA.40720.1 | 4.46  | 4.7   | 0.16 | 0.02 | -1.19 | 0.071305 | 0.203218 | 0.324878 | 0.477415 |
| MmugDNA.40722.1.S1_at   | MmugDNA.40722.1 | 10.91 | 10.79 | 0.1  | 0.12 | 1.09  | 0.122284 | 0.04028  | 0.40112  | 0.245902 |
| MmugDNA.4073.1.S1_at    | MmugDNA.4073.1  | 10.1  | 9.58  | 0.54 | 0.19 | 1.43  | 0.281929 | 0.179422 | 0.572752 | 0.455908 |
| MmugDNA.40734.1.S1_at   | MmugDNA.40734.1 | 5.81  | 5.82  | 0.17 | 0.08 | -1.01 | 0.852617 | 0.206897 | 0.935897 | 0.481052 |
| MmugDNA.40737.1.S1_s_at | MmugDNA.40737.1 | 13.57 | 13.43 | 0.27 | 0.04 | 1.11  | 0.445584 | 0.699399 | 0.698029 | 0.825344 |
| MmugDNA.40739.1.S1_at   | MmugDNA.40739.1 | 12.39 | 12.46 | 0.11 | 0.06 | -1.05 | 0.171307 | 0.382574 | 0.465234 | 0.61876  |
| MmugDNA.4074.1.S1_at    | MmugDNA.4074.1  | 10.66 | 10.49 | 0.15 | 0.12 | 1.13  | 0.067153 | 0.018308 | 0.31683  | 0.170154 |
| MmugDNA.40742.1.S1_at   | MmugDNA.40742.1 | 11.85 | 10.57 | 0.14 | 0.24 | 2.42  | 0.00124  | 0.001016 | 0.078631 | 0.050814 |
| MmugDNA.40743.1.S1_at   | MmugDNA.40743.1 | 7.07  | 9     | 1.09 | 0.07 | -3.82 | 0.0682   | 0.189942 | 0.318984 | 0.4655   |
| MmugDNA.40744.1.S1_at   | MmugDNA.40744.1 | 4.77  | 4.69  | 0.14 | 0.37 | 1.06  | 0.771573 | 0.675531 | 0.895305 | 0.810383 |
| MmugDNA.40745.1.S1_at   | MmugDNA.40745.1 | 7.68  | 8.47  | 0.23 | 0.17 | -1.73 | 0.007918 | 0.370187 | 0.138212 | 0.609371 |
| MmugDNA.40753.1.S1_at   | MmugDNA.40753.1 | 11.8  | 11.58 | 0.15 | 0.06 | 1.17  | 0.193671 | 0.004561 | 0.490322 | 0.094371 |
| MmugDNA.40760.1.S1_at   | MmugDNA.40760.1 | 7.95  | 7.34  | 0.27 | 0.28 | 1.53  | 0.098624 | 0.017824 | 0.369387 | 0.168645 |
| MmugDNA.40763.1.S1_at   | MmugDNA.40763.1 | 6.27  | 6.28  | 0.13 | 0.08 | -1.01 | 0.661487 | 0.672443 | 0.836571 | 0.808568 |
| MmugDNA.40764.1.S1_at   | MmugDNA.40764.1 | 4.87  | 6.86  | 1.38 | 0.43 | -3.96 | 0.097258 | 0.205842 | 0.36733  | 0.480094 |
| MmugDNA.40764.1.S1_s_at | MmugDNA.40764.1 | 6.71  | 7.85  | 0.54 | 0.15 | -2.21 | 0.033466 | 0.063431 | 0.236931 | 0.298441 |
| MmugDNA.40765.1.S1_at   | MmugDNA.40765.1 | 10.99 | 10.93 | 0.06 | 0.07 | 1.04  | 0.15256  | 0.026971 | 0.442239 | 0.205423 |
| MmugDNA.4077.1.S1_at    | MmugDNA.4077.1  | 9.31  | 8.99  | 0.33 | 0.3  | 1.25  | 0.869431 | 0.028129 | 0.94371  | 0.209306 |
| MmugDNA.40770.1.S1_at   | MmugDNA.40770.1 | 7.87  | 8.25  | 0.07 | 0.14 | -1.3  | 0.006813 | 0.089807 | 0.129236 | 0.34404  |
| MmugDNA.40798.1.S1_at   | MmugDNA.40798.1 | 4.12  | 4.19  | 0.04 | 0.08 | -1.05 | 0.402573 | 0.709602 | 0.666923 | 0.831691 |
| MmugDNA.4080.1.S1_at    | MmugDNA.4080.1  | 12.74 | 12.45 | 0.08 | 0.12 | 1.22  | 0.020204 | 0.308569 | 0.195767 | 0.564575 |
| MmugDNA.40800.1.S1_at   | MmugDNA.40800.1 | 5.24  | 5.16  | 0.04 | 0.11 | 1.06  | 0.50797  | 0.300489 | 0.740166 | 0.55882  |

|                         |                 |       |       |      |      |        |          |          |          |          |
|-------------------------|-----------------|-------|-------|------|------|--------|----------|----------|----------|----------|
| MmugDNA.40802.1.S1_at   | MmugDNA.40802.1 | 6.72  | 6.76  | 0.18 | 0.11 | -1.03  | 0.973113 | 0.940764 | 0.989243 | 0.966468 |
| MmugDNA.40803.1.S1_at   | MmugDNA.40803.1 | 5.29  | 5.09  | 0.05 | 0.12 | 1.15   | 0.206823 | 0.10902  | 0.504508 | 0.372792 |
| MmugDNA.40811.1.S1_at   | MmugDNA.40811.1 | 7.76  | 7.7   | 0.15 | 0.06 | 1.04   | 0.208163 | 0.393645 | 0.505958 | 0.626522 |
| MmugDNA.40814.1.S1_at   | MmugDNA.40814.1 | 10.36 | 10.63 | 0.19 | 0.27 | -1.21  | 0.43124  | 0.29307  | 0.687375 | 0.552978 |
| MmugDNA.40816.1.S1_at   | MmugDNA.40816.1 | 5.28  | 7.57  | 1    | 0.43 | -4.9   | 0.030237 | 0.18761  | 0.226977 | 0.463631 |
| MmugDNA.40819.1.S1_at   | MmugDNA.40819.1 | 6.42  | 6.65  | 0.22 | 0.03 | -1.17  | 0.447167 | 0.4193   | 0.699206 | 0.643445 |
| MmugDNA.4084.1.S1_at    | MmugDNA.4084.1  | 6.31  | 6.36  | 0.27 | 0.02 | -1.03  | 0.799641 | 0.870522 | 0.909612 | 0.926446 |
| MmugDNA.40846.1.S1_at   | MmugDNA.40846.1 | 9.17  | 9.61  | 0.11 | 0.09 | -1.36  | 0.004611 | 0.5438   | 0.114111 | 0.726362 |
| MmugDNA.4085.1.S1_at    | MmugDNA.4085.1  | 11.24 | 10.77 | 0.2  | 0.11 | 1.39   | 0.023886 | 0.005276 | 0.20758  | 0.100659 |
| MmugDNA.40855.1.S1_s_at | MmugDNA.40855.1 | 8.61  | 8.56  | 0.16 | 0.1  | 1.03   | 0.901392 | 0.774446 | 0.95827  | 0.868766 |
| MmugDNA.40858.1.S1_at   | MmugDNA.40858.1 | 3.19  | 3.13  | 0.01 | 0.04 | 1.04   | 0.031512 | 0.548349 | 0.230955 | 0.729086 |
| MmugDNA.40868.1.S1_at   | MmugDNA.40868.1 | 4.99  | 4.99  | 0.15 | 0.04 | 1      | 0.363133 | 0.294461 | 0.637795 | 0.554212 |
| MmugDNA.40871.1.S1_at   | MmugDNA.40871.1 | 3.36  | 3.34  | 0.19 | 0.08 | 1.02   | 0.313218 | 0.469224 | 0.598982 | 0.678155 |
| MmugDNA.40872.1.S1_at   | MmugDNA.40872.1 | 8.95  | 7.8   | 0.27 | 0.1  | 2.22   | 0.00412  | 0.023767 | 0.10967  | 0.193002 |
| MmugDNA.40876.1.S1_at   | MmugDNA.40876.1 | 8.8   | 8.65  | 0.11 | 0.08 | 1.11   | 0.07104  | 0.23524  | 0.324424 | 0.50629  |
| MmugDNA.4088.1.S1_at    | MmugDNA.4088.1  | 7.38  | 7.36  | 0.54 | 0.17 | 1.01   | 0.817713 | 0.958064 | 0.9186   | 0.976273 |
| MmugDNA.40882.1.S1_at   | MmugDNA.40882.1 | 9.62  | 9.48  | 0.07 | 0.17 | 1.1    | 0.52769  | 0.307465 | 0.753222 | 0.563734 |
| MmugDNA.40885.1.S1_at   | MmugDNA.40885.1 | 3.28  | 3.13  | 0.1  | 0.1  | 1.11   | 0.404842 | 0.422565 | 0.668477 | 0.645762 |
| MmugDNA.40886.1.S1_at   | MmugDNA.40886.1 | 5.11  | 4.89  | 0.13 | 0.17 | 1.16   | 0.140942 | 0.169995 | 0.426802 | 0.446725 |
| MmugDNA.4089.1.S1_at    | MmugDNA.4089.1  | 9.98  | 9.76  | 0.1  | 0.06 | 1.17   | 0.058157 | 0.664921 | 0.298244 | 0.803709 |
| MmugDNA.40893.1.S1_at   | MmugDNA.40893.1 | 4.54  | 4.6   | 0.25 | 0.06 | -1.04  | 0.629547 | 0.013743 | 0.818032 | 0.150134 |
| MmugDNA.40899.1.S1_at   | MmugDNA.40899.1 | 6.59  | 6.45  | 0.36 | 0.09 | 1.1    | 0.604209 | 0.795447 | 0.801436 | 0.882189 |
| MmugDNA.4090.1.S1_at    | MmugDNA.4090.1  | 6.5   | 6.55  | 0.95 | 0.57 | -1.04  | 0.273198 | 0.503053 | 0.565268 | 0.700559 |
| MmugDNA.40909.1.S1_at   | MmugDNA.40909.1 | 4.78  | 5.35  | 0.2  | 0.11 | -1.48  | 0.040338 | 0.598875 | 0.257247 | 0.761193 |
| MmugDNA.4091.1.S1_at    | MmugDNA.4091.1  | 10.98 | 10.69 | 0.18 | 0.08 | 1.22   | 0.063829 | 0.0985   | 0.309173 | 0.356636 |
| MmugDNA.40917.1.S1_at   | MmugDNA.40917.1 | 5.68  | 5.69  | 0.01 | 0.11 | -1     | 0.989291 | 0.585415 | 0.996277 | 0.752846 |
| MmugDNA.4092.1.S1_at    | MmugDNA.4092.1  | 8.67  | 8     | 0.39 | 0.07 | 1.6    | 0.024797 | 0.021718 | 0.210464 | 0.184333 |
| MmugDNA.4092.1.S1_s_at  | MmugDNA.4092.1  | 8.56  | 8.38  | 0.29 | 0.07 | 1.13   | 0.104752 | 0.118436 | 0.378312 | 0.386431 |
| MmugDNA.40922.1.S1_at   | MmugDNA.40922.1 | 10.71 | 11.16 | 0.24 | 0.1  | -1.36  | 0.060782 | 0.148435 | 0.303507 | 0.423007 |
| MmugDNA.40926.1.S1_at   | MmugDNA.40926.1 | 5.7   | 5.64  | 0.25 | 0.02 | 1.04   | 0.731291 | 0.54524  | 0.874456 | 0.727441 |
| MmugDNA.4093.1.S1_at    | MmugDNA.4093.1  | 6.74  | 6.74  | 0.17 | 0.28 | -1     | 0.643789 | 0.176559 | 0.826406 | 0.452965 |
| MmugDNA.40937.1.S1_at   | MmugDNA.40937.1 | 10.19 | 10.23 | 0.2  | 0.07 | -1.02  | 0.523058 | 0.845014 | 0.750171 | 0.911799 |
| MmugDNA.40943.1.S1_at   | MmugDNA.40943.1 | 2.79  | 3.1   | 0.1  | 0.25 | -1.24  | 0.114523 | 0.131963 | 0.391581 | 0.404024 |
| MmugDNA.40945.1.S1_at   | MmugDNA.40945.1 | 11.27 | 11.69 | 0.03 | 0.06 | -1.34  | 0.00066  | 0.027867 | 0.071248 | 0.208453 |
| MmugDNA.40954.1.S1_at   | MmugDNA.40954.1 | 6.14  | 9.57  | 1.13 | 0.35 | -10.79 | 0.017482 | 0.150449 | 0.185974 | 0.424978 |
| MmugDNA.40954.1.S1_x_at | MmugDNA.40954.1 | 5.77  | 9.42  | 1.31 | 0.36 | -12.59 | 0.022591 | 0.130147 | 0.203416 | 0.401835 |
| MmugDNA.40957.1.S1_at   | MmugDNA.40957.1 | 4.11  | 4.1   | 0.06 | 0.03 | 1.01   | 0.860876 | 0.115628 | 0.939561 | 0.382714 |
| MmugDNA.40962.1.S1_at   | MmugDNA.40962.1 | 11.89 | 10.71 | 0.47 | 0.57 | 2.27   | 0.095364 | 0.025336 | 0.364817 | 0.199522 |
| MmugDNA.40973.1.S1_at   | MmugDNA.40973.1 | 11.27 | 10.93 | 0.09 | 0.04 | 1.27   | 0.005994 | 0.108026 | 0.124151 | 0.37124  |
| MmugDNA.40975.1.S1_at   | MmugDNA.40975.1 | 9.3   | 9.4   | 0.32 | 0.04 | -1.08  | 0.166815 | 0.277868 | 0.460006 | 0.541664 |
| MmugDNA.40977.1.S1_at   | MmugDNA.40977.1 | 10.43 | 9.72  | 0.16 | 0.12 | 1.64   | 0.006003 | 0.142576 | 0.124151 | 0.416239 |
| MmugDNA.40979.1.S1_at   | MmugDNA.40979.1 | 10.7  | 10.72 | 0.24 | 0.01 | -1.01  | 0.683075 | 0.630228 | 0.848853 | 0.782181 |
| MmugDNA.40981.1.S1_at   | MmugDNA.40981.1 | 5.71  | 5.83  | 0.1  | 0.03 | -1.09  | 0.111094 | 0.120749 | 0.386863 | 0.389579 |

|                         |                 |       |       |      |      |       |          |          |          |          |
|-------------------------|-----------------|-------|-------|------|------|-------|----------|----------|----------|----------|
| MmugDNA.40984.1.S1_at   | MmugDNA.40984.1 | 8.76  | 9     | 0.21 | 0.16 | -1.18 | 0.188985 | 0.008012 | 0.485597 | 0.118982 |
| MmugDNA.40987.1.S1_at   | MmugDNA.40987.1 | 9.58  | 9.3   | 0.25 | 0.09 | 1.21  | 0.104829 | 0.01675  | 0.378397 | 0.163916 |
| MmugDNA.40987.1.S1_s_at | MmugDNA.40987.1 | 9.19  | 8.79  | 0.27 | 0.12 | 1.31  | 0.063468 | 0.039911 | 0.308631 | 0.244852 |
| MmugDNA.40999.1.S1_at   | MmugDNA.40999.1 | 11.49 | 11.28 | 0.13 | 0.06 | 1.16  | 0.071568 | 0.512326 | 0.325567 | 0.706198 |
| MmugDNA.41000.1.S1_at   | MmugDNA.41000.1 | 5.34  | 5.22  | 0.25 | 0.26 | 1.09  | 0.433067 | 0.809411 | 0.688696 | 0.890131 |
| MmugDNA.41001.1.S1_at   | MmugDNA.41001.1 | 10.11 | 10.17 | 0.01 | 0.05 | -1.05 | 0.268337 | 0.000485 | 0.561061 | 0.038753 |
| MmugDNA.41003.1.S1_s_at | MmugDNA.41003.1 | 8.43  | 8.57  | 0.11 | 0.06 | -1.11 | 0.528741 | 0.055478 | 0.753786 | 0.281404 |
| MmugDNA.4101.1.S1_at    | MmugDNA.4101.1  | 2.89  | 2.87  | 0.28 | 0.11 | 1.02  | 0.228217 | 0.300034 | 0.526419 | 0.558262 |
| MmugDNA.41012.1.S1_at   | MmugDNA.41012.1 | 11.25 | 10.81 | 0.24 | 0.19 | 1.35  | 0.054691 | 0.121274 | 0.290604 | 0.390351 |
| MmugDNA.41014.1.S1_at   | MmugDNA.41014.1 | 11.42 | 11.72 | 0.09 | 0.08 | -1.23 | 0.016894 | 0.089895 | 0.183348 | 0.344073 |
| MmugDNA.41018.1.S1_at   | MmugDNA.41018.1 | 5.78  | 5.82  | 0.02 | 0.15 | -1.02 | 0.897906 | 0.064921 | 0.956646 | 0.300818 |
| MmugDNA.41026.1.S1_at   | MmugDNA.41026.1 | 7.98  | 8.13  | 0.26 | 0.04 | -1.11 | 0.385692 | 0.065111 | 0.654415 | 0.301119 |
| MmugDNA.41042.1.S1_at   | MmugDNA.41042.1 | 3.15  | 3.18  | 0.05 | 0.04 | -1.02 | 0.081327 | 0.067661 | 0.342222 | 0.306199 |
| MmugDNA.41046.1.S1_at   | MmugDNA.41046.1 | 10.61 | 10.78 | 0.18 | 0.07 | -1.12 | 0.833101 | 0.130865 | 0.926515 | 0.403037 |
| MmugDNA.41046.1.S1_s_at | MmugDNA.41046.1 | 14.08 | 14.1  | 0.05 | 0.02 | -1.01 | 0.405159 | 0.392229 | 0.668706 | 0.625652 |
| MmugDNA.41051.1.S1_at   | MmugDNA.41051.1 | 11.69 | 11.95 | 0.15 | 0.01 | -1.2  | 0.120232 | 0.201674 | 0.398635 | 0.476208 |
| MmugDNA.41055.1.S1_at   | MmugDNA.41055.1 | 8.77  | 8.64  | 0.06 | 0.11 | 1.1   | 0.623826 | 0.003483 | 0.814486 | 0.084834 |
| MmugDNA.41056.1.S1_s_at | MmugDNA.41056.1 | 11.32 | 11.36 | 0.26 | 0.12 | -1.03 | 0.459139 | 0.039483 | 0.707406 | 0.243642 |
| MmugDNA.41066.1.S1_at   | MmugDNA.41066.1 | 6.26  | 6.21  | 0.59 | 0.06 | 1.03  | 0.815896 | 0.948829 | 0.917866 | 0.97077  |
| MmugDNA.41067.1.S1_at   | MmugDNA.41067.1 | 6.56  | 4.62  | 1.3  | 0.89 | 3.84  | 0.252752 | 0.505783 | 0.547383 | 0.702218 |
| MmugDNA.41076.1.S1_at   | MmugDNA.41076.1 | 7.26  | 7.47  | 0.3  | 0.1  | -1.16 | 0.597262 | 0.798055 | 0.796505 | 0.883728 |
| MmugDNA.41079.1.S1_at   | MmugDNA.41079.1 | 7.92  | 7.86  | 0.21 | 0.04 | 1.04  | 0.531947 | 0.195511 | 0.756113 | 0.470351 |
| MmugDNA.41082.1.S1_at   | MmugDNA.41082.1 | 11.44 | 10.88 | 0.03 | 0.07 | 1.47  | 0.00026  | 0.08811  | 0.055399 | 0.341641 |
| MmugDNA.41087.1.S1_at   | MmugDNA.41087.1 | 3.74  | 3.6   | 0.05 | 0.12 | 1.1   | 0.133149 | 0.103573 | 0.416662 | 0.364346 |
| MmugDNA.41090.1.S1_at   | MmugDNA.41090.1 | 4.47  | 4.43  | 0.17 | 0.02 | 1.03  | 0.63999  | 0.279702 | 0.823951 | 0.543228 |
| MmugDNA.41091.1.S1_at   | MmugDNA.41091.1 | 8.94  | 8.66  | 0.15 | 0.11 | 1.22  | 0.140005 | 0.239489 | 0.425707 | 0.510162 |
| MmugDNA.41093.1.S1_at   | MmugDNA.41093.1 | 5.87  | 9.14  | 1.17 | 0.19 | -9.6  | 0.019733 | 0.161214 | 0.193466 | 0.437386 |
| MmugDNA.41094.1.S1_at   | MmugDNA.41094.1 | 5.04  | 5.18  | 0.09 | 0.06 | -1.1  | 0.091331 | 0.11736  | 0.358885 | 0.384998 |
| MmugDNA.41097.1.S1_at   | MmugDNA.41097.1 | 7.69  | 7.44  | 0.15 | 0.23 | 1.19  | 0.109079 | 0.49824  | 0.384173 | 0.697383 |
| MmugDNA.41100.1.S1_at   | MmugDNA.41100.1 | 5.23  | 5.26  | 0.11 | 0.16 | -1.02 | 0.525007 | 0.08392  | 0.751646 | 0.334824 |
| MmugDNA.41101.1.S1_at   | MmugDNA.41101.1 | 12.86 | 12.86 | 0.06 | 0.03 | 1     | 0.726168 | 0.778063 | 0.871504 | 0.871097 |
| MmugDNA.41102.1.S1_at   | MmugDNA.41102.1 | 11.48 | 11.81 | 0.04 | 0.11 | -1.26 | 0.008292 | 0.044042 | 0.13996  | 0.254195 |
| MmugDNA.41102.1.S1_x_at | MmugDNA.41102.1 | 11.65 | 11.99 | 0.06 | 0.09 | -1.27 | 0.009358 | 0.035005 | 0.14664  | 0.231203 |
| MmugDNA.41105.1.S1_s_at | MmugDNA.41105.1 | 6.56  | 6.57  | 0.12 | 0.03 | -1.01 | 0.973382 | 0.930587 | 0.989318 | 0.960549 |
| MmugDNA.41106.1.S1_at   | MmugDNA.41106.1 | 3.66  | 3.65  | 0.03 | 0.06 | 1.01  | 0.327925 | 0.84486  | 0.610549 | 0.911705 |
| MmugDNA.41110.1.S1_s_at | MmugDNA.41110.1 | 11.7  | 11.62 | 0.22 | 0.16 | 1.06  | 0.443786 | 0.548813 | 0.696813 | 0.72944  |
| MmugDNA.41111.1.S1_at   | MmugDNA.41111.1 | 11.11 | 10.73 | 1.01 | 0.16 | 1.3   | 0.158668 | 0.069213 | 0.449855 | 0.309372 |
| MmugDNA.41114.1.S1_at   | MmugDNA.41114.1 | 10.97 | 11.2  | 0.04 | 0.11 | -1.17 | 0.024074 | 0.009648 | 0.208287 | 0.129267 |
| MmugDNA.41119.1.S1_at   | MmugDNA.41119.1 | 4.2   | 4.54  | 0.3  | 0.41 | -1.27 | 0.675747 | 0.871364 | 0.845203 | 0.926844 |
| MmugDNA.41122.1.S1_at   | MmugDNA.41122.1 | 7.5   | 9.16  | 0.51 | 0.37 | -3.18 | 0.012826 | 0.006693 | 0.163664 | 0.110702 |
| MmugDNA.41128.1.S1_at   | MmugDNA.41128.1 | 6.6   | 6.92  | 0.13 | 0.05 | -1.25 | 0.033782 | 0.100473 | 0.237957 | 0.359615 |
| MmugDNA.4113.1.S1_at    | MmugDNA.4113.1  | 7.35  | 8.32  | 0.27 | 0.08 | -1.96 | 0.003184 | 0.010404 | 0.10146  | 0.133414 |
| MmugDNA.41134.1.S1_at   | MmugDNA.41134.1 | 3.77  | 3.91  | 0.09 | 0.04 | -1.1  | 0.1254   | 0.091986 | 0.405837 | 0.347348 |

|                       |                 |       |       |      |      |       |          |          |          |          |
|-----------------------|-----------------|-------|-------|------|------|-------|----------|----------|----------|----------|
| MmugDNA.41136.1.S1_at | MmugDNA.41136.1 | 11.65 | 11.89 | 0.05 | 0.1  | -1.18 | 0.033276 | 0.370032 | 0.236493 | 0.609286 |
| MmugDNA.41138.1.S1_at | MmugDNA.41138.1 | 4.68  | 4.7   | 0.18 | 0.33 | -1.01 | 0.276499 | 0.693152 | 0.568053 | 0.821511 |
| MmugDNA.41148.1.S1_at | MmugDNA.41148.1 | 3.08  | 3     | 0.12 | 0.46 | 1.06  | 0.472036 | 0.418903 | 0.71594  | 0.643141 |
| MmugDNA.41149.1.S1_at | MmugDNA.41149.1 | 4.27  | 3.76  | 0.68 | 0.14 | 1.43  | 0.243575 | 0.281375 | 0.54025  | 0.544411 |
| MmugDNA.41155.1.S1_at | MmugDNA.41155.1 | 10.95 | 10.88 | 0.32 | 0.03 | 1.05  | 0.617056 | 0.406776 | 0.809826 | 0.634497 |
| MmugDNA.41156.1.S1_at | MmugDNA.41156.1 | 5.45  | 5.36  | 0.22 | 0.24 | 1.06  | 0.717647 | 0.601165 | 0.866659 | 0.762545 |
| MmugDNA.41157.1.S1_at | MmugDNA.41157.1 | 10.2  | 12    | 1.29 | 0.21 | -3.49 | 0.0833   | 0.215725 | 0.345547 | 0.489503 |
| MmugDNA.41164.1.S1_at | MmugDNA.41164.1 | 8.84  | 8.96  | 0.18 | 0.24 | -1.09 | 0.4256   | 0.036602 | 0.682976 | 0.235884 |
| MmugDNA.41170.1.S1_at | MmugDNA.41170.1 | 12.46 | 12.48 | 0.08 | 0.14 | -1.01 | 0.835026 | 0.972973 | 0.927446 | 0.985389 |
| MmugDNA.41172.1.S1_at | MmugDNA.41172.1 | 9.59  | 10.41 | 0.53 | 0.05 | -1.76 | 0.063489 | 0.125069 | 0.308631 | 0.395506 |
| MmugDNA.41173.1.S1_at | MmugDNA.41173.1 | 10.48 | 10.21 | 0.21 | 0.03 | 1.21  | 0.33525  | 0.031441 | 0.616208 | 0.219107 |
| MmugDNA.41174.1.S1_at | MmugDNA.41174.1 | 10.95 | 11.21 | 0.17 | 0.1  | -1.2  | 0.120567 | 0.045488 | 0.398909 | 0.2575   |
| MmugDNA.41175.1.S1_at | MmugDNA.41175.1 | 12.3  | 12.01 | 0.28 | 0.04 | 1.23  | 0.147308 | 0.243036 | 0.435394 | 0.513356 |
| MmugDNA.41188.1.S1_at | MmugDNA.41188.1 | 6.59  | 7.08  | 0.4  | 0.2  | -1.4  | 0.09057  | 0.037107 | 0.357339 | 0.237165 |
| MmugDNA.41189.1.S1_at | MmugDNA.41189.1 | 5.97  | 5.97  | 0.18 | 0.12 | -1    | 0.388707 | 0.320814 | 0.656681 | 0.572849 |
| MmugDNA.41192.1.S1_at | MmugDNA.41192.1 | 10.4  | 10.13 | 0.21 | 0.1  | 1.2   | 0.128285 | 0.123894 | 0.410227 | 0.3942   |
| MmugDNA.41194.1.S1_at | MmugDNA.41194.1 | 7.39  | 7.53  | 0.25 | 0.15 | -1.1  | 0.480445 | 0.825989 | 0.721309 | 0.900031 |
| MmugDNA.41197.1.S1_at | MmugDNA.41197.1 | 12.73 | 12.53 | 0.11 | 0.03 | 1.15  | 0.08661  | 0.00335  | 0.351653 | 0.083346 |
| MmugDNA.41198.1.S1_at | MmugDNA.41198.1 | 7.32  | 7.18  | 0.07 | 0.11 | 1.1   | 0.138592 | 0.047381 | 0.424118 | 0.262418 |
| MmugDNA.4120.1.S1_at  | MmugDNA.4120.1  | 4.11  | 3.91  | 0.18 | 0.12 | 1.14  | 0.162812 | 0.20939  | 0.4549   | 0.483069 |
| MmugDNA.41203.1.S1_at | MmugDNA.41203.1 | 4.75  | 4.92  | 0.19 | 0.05 | -1.13 | 0.715375 | 0.499504 | 0.865645 | 0.69832  |
| MmugDNA.41205.1.S1_at | MmugDNA.41205.1 | 8.8   | 8.96  | 0.14 | 0.13 | -1.11 | 0.048646 | 0.120389 | 0.278052 | 0.38925  |
| MmugDNA.41211.1.S1_at | MmugDNA.41211.1 | 10.35 | 10.48 | 0.25 | 0.14 | -1.09 | 0.166598 | 0.280255 | 0.459786 | 0.543514 |
| MmugDNA.41217.1.S1_at | MmugDNA.41217.1 | 11.65 | 11.7  | 0.13 | 0.08 | -1.03 | 0.3336   | 0.374983 | 0.614974 | 0.613186 |
| MmugDNA.41220.1.S1_at | MmugDNA.41220.1 | 5.55  | 6.13  | 0.56 | 0.19 | -1.49 | 0.67908  | 0.586475 | 0.846949 | 0.753512 |
| MmugDNA.4124.1.S1_at  | MmugDNA.4124.1  | 10.43 | 8.5   | 0.18 | 0.24 | 3.8   | 0.000521 | 0.000155 | 0.0694   | 0.030072 |
| MmugDNA.41244.1.S1_at | MmugDNA.41244.1 | 11.66 | 12.32 | 0.33 | 0.13 | -1.58 | 0.016849 | 0.125254 | 0.183141 | 0.395813 |
| MmugDNA.41250.1.S1_at | MmugDNA.41250.1 | 9.7   | 10.04 | 0.25 | 0.04 | -1.26 | 0.085533 | 0.506231 | 0.349921 | 0.702368 |
| MmugDNA.41252.1.S1_at | MmugDNA.41252.1 | 9.1   | 9.02  | 0.28 | 0.05 | 1.06  | 0.763932 | 0.222575 | 0.891841 | 0.495615 |
| MmugDNA.41254.1.S1_at | MmugDNA.41254.1 | 10.72 | 10.5  | 0.06 | 0.23 | 1.17  | 0.080615 | 0.32263  | 0.341245 | 0.574024 |
| MmugDNA.41258.1.S1_at | MmugDNA.41258.1 | 4.26  | 4.09  | 0.08 | 0.11 | 1.12  | 0.084082 | 0.063291 | 0.347329 | 0.298244 |
| MmugDNA.41264.1.S1_at | MmugDNA.41264.1 | 2.88  | 3.13  | 0.11 | 0.09 | -1.19 | 0.111847 | 0.306478 | 0.387954 | 0.563029 |
| MmugDNA.41265.1.S1_at | MmugDNA.41265.1 | 4.01  | 4.05  | 0.23 | 0.21 | -1.03 | 0.386159 | 0.550338 | 0.654632 | 0.73039  |
| MmugDNA.41267.1.S1_at | MmugDNA.41267.1 | 11.02 | 11.12 | 0.35 | 0.1  | -1.07 | 0.696976 | 0.908832 | 0.855721 | 0.948389 |
| MmugDNA.41286.1.S1_at | MmugDNA.41286.1 | 8.47  | 7.55  | 1.26 | 0.11 | 1.9   | 0.198752 | 0.266715 | 0.495887 | 0.53241  |
| MmugDNA.41293.1.S1_at | MmugDNA.41293.1 | 11    | 10.89 | 0.12 | 0.08 | 1.08  | 0.169521 | 0.43403  | 0.462756 | 0.654207 |
| MmugDNA.41296.1.S1_at | MmugDNA.41296.1 | 7.61  | 7.26  | 0.19 | 0.02 | 1.27  | 0.017602 | 0.13585  | 0.186392 | 0.408027 |
| MmugDNA.41299.1.S1_at | MmugDNA.41299.1 | 3.99  | 4.12  | 0.05 | 0.03 | -1.09 | 0.008643 | 0.183622 | 0.142384 | 0.459681 |
| MmugDNA.4130.1.S1_at  | MmugDNA.4130.1  | 11.54 | 11.51 | 0.06 | 0.07 | 1.02  | 0.271225 | 0.004823 | 0.563126 | 0.096904 |
| MmugDNA.41308.1.S1_at | MmugDNA.41308.1 | 13.42 | 13.28 | 0.1  | 0.12 | 1.1   | 0.769904 | 0.324188 | 0.894412 | 0.57488  |
| MmugDNA.41310.1.S1_at | MmugDNA.41310.1 | 8.3   | 8.57  | 0.18 | 0.23 | -1.21 | 0.082812 | 0.098026 | 0.344741 | 0.355964 |
| MmugDNA.41311.1.S1_at | MmugDNA.41311.1 | 6.22  | 7.29  | 0.21 | 0.21 | -2.09 | 0.004565 | 0.056366 | 0.113728 | 0.283382 |
| MmugDNA.41312.1.S1_at | MmugDNA.41312.1 | 13.57 | 13.29 | 0.07 | 0.05 | 1.21  | 0.003708 | 0.027372 | 0.106142 | 0.206695 |

|                         |                 |       |       |      |      |       |          |          |          |          |
|-------------------------|-----------------|-------|-------|------|------|-------|----------|----------|----------|----------|
| MmugDNA.41313.1.S1_at   | MmugDNA.41313.1 | 5.98  | 6.18  | 0.26 | 0.29 | -1.15 | 0.336125 | 0.059682 | 0.616774 | 0.290919 |
| MmugDNA.41314.1.S1_at   | MmugDNA.41314.1 | 7.3   | 7.06  | 0.16 | 0.28 | 1.18  | 0.954996 | 0.715384 | 0.98151  | 0.835018 |
| MmugDNA.41315.1.S1_at   | MmugDNA.41315.1 | 9.36  | 9.89  | 0.66 | 0.19 | -1.44 | 0.100723 | 0.028644 | 0.371857 | 0.210901 |
| MmugDNA.41318.1.S1_at   | MmugDNA.41318.1 | 3.58  | 3.49  | 0.87 | 0.32 | 1.06  | 0.334374 | 0.311979 | 0.615487 | 0.566838 |
| MmugDNA.41334.1.S1_at   | MmugDNA.41334.1 | 10.07 | 9.43  | 0.2  | 0.11 | 1.56  | 0.005189 | 0.004015 | 0.116998 | 0.089976 |
| MmugDNA.41336.1.S1_at   | MmugDNA.41336.1 | 6.32  | 6.48  | 0.21 | 0.12 | -1.11 | 0.616711 | 0.146347 | 0.80962  | 0.420368 |
| MmugDNA.41339.1.S1_at   | MmugDNA.41339.1 | 9.06  | 9.57  | 0.05 | 0.17 | -1.42 | 0.016355 | 0.000779 | 0.180774 | 0.045626 |
| MmugDNA.41345.1.S1_at   | MmugDNA.41345.1 | 7.95  | 7.84  | 0.19 | 0.09 | 1.08  | 0.42971  | 0.498596 | 0.686099 | 0.697641 |
| MmugDNA.41347.1.S1_at   | MmugDNA.41347.1 | 5.15  | 4.94  | 0.12 | 0.09 | 1.16  | 0.046316 | 0.068036 | 0.272999 | 0.307124 |
| MmugDNA.41356.1.S1_at   | MmugDNA.41356.1 | 4.55  | 4.49  | 0.42 | 0.32 | 1.04  | 0.666016 | 0.453148 | 0.839495 | 0.667568 |
| MmugDNA.41357.1.S1_at   | MmugDNA.41357.1 | 12.62 | 12.63 | 0.28 | 0.14 | -1.01 | 0.562262 | 0.732362 | 0.774871 | 0.844986 |
| MmugDNA.41359.1.S1_at   | MmugDNA.41359.1 | 11.98 | 11.61 | 0.1  | 0.21 | 1.29  | 0.178784 | 0.020764 | 0.473583 | 0.180781 |
| MmugDNA.41361.1.S1_at   | MmugDNA.41361.1 | 4.96  | 4.78  | 0.34 | 0.09 | 1.13  | 0.952661 | 0.92323  | 0.980501 | 0.956822 |
| MmugDNA.41364.1.S1_at   | MmugDNA.41364.1 | 12.09 | 13.04 | 0.45 | 0.11 | -1.93 | 0.044481 | 0.083608 | 0.268007 | 0.334212 |
| MmugDNA.41371.1.S1_at   | MmugDNA.41371.1 | 10.06 | 9.94  | 0.26 | 0.03 | 1.08  | 0.193254 | 0.136356 | 0.489751 | 0.408804 |
| MmugDNA.41374.1.S1_at   | MmugDNA.41374.1 | 6.57  | 7.43  | 0.53 | 0.06 | -1.81 | 0.01934  | 0.044032 | 0.192215 | 0.254195 |
| MmugDNA.41376.1.S1_at   | MmugDNA.41376.1 | 4.33  | 4.7   | 0.13 | 0.11 | -1.3  | 0.048172 | 0.029715 | 0.276908 | 0.214029 |
| MmugDNA.41379.1.S1_at   | MmugDNA.41379.1 | 6.14  | 6.09  | 0.24 | 0.19 | 1.03  | 0.889616 | 0.980882 | 0.953043 | 0.989478 |
| MmugDNA.4138.1.S1_at    | MmugDNA.4138.1  | 11.11 | 11.21 | 0.06 | 0.11 | -1.07 | 0.306928 | 0.030707 | 0.593698 | 0.217148 |
| MmugDNA.41383.1.S1_at   | MmugDNA.41383.1 | 7.36  | 7.86  | 0.59 | 0.21 | -1.41 | 0.372997 | 0.700468 | 0.645118 | 0.826162 |
| MmugDNA.41384.1.S1_at   | MmugDNA.41384.1 | 6.01  | 9.03  | 0.96 | 0.41 | -8.12 | 0.009792 | 0.170755 | 0.148542 | 0.447316 |
| MmugDNA.4139.1.S1_at    | MmugDNA.4139.1  | 8.94  | 8.59  | 0.16 | 0.21 | 1.28  | 0.345363 | 0.231882 | 0.624372 | 0.503594 |
| MmugDNA.41391.1.S1_at   | MmugDNA.41391.1 | 3.87  | 3.75  | 0.04 | 0.03 | 1.09  | 0.01435  | 0.013909 | 0.171567 | 0.151286 |
| MmugDNA.41395.1.S1_at   | MmugDNA.41395.1 | 3.29  | 3.1   | 0.11 | 0.1  | 1.15  | 0.091677 | 0.087761 | 0.359427 | 0.341027 |
| MmugDNA.41402.1.S1_at   | MmugDNA.41402.1 | 6.88  | 6.9   | 0.06 | 0.08 | -1.02 | 0.171593 | 0.234302 | 0.465575 | 0.505553 |
| MmugDNA.41405.1.S1_at   | MmugDNA.41405.1 | 9.74  | 9.32  | 0.1  | 0.03 | 1.33  | 0.004095 | 0.001402 | 0.109394 | 0.057117 |
| MmugDNA.41412.1.S1_at   | MmugDNA.41412.1 | 6.18  | 5.28  | 0.34 | 0.4  | 1.87  | 0.099959 | 0.185091 | 0.370858 | 0.460961 |
| MmugDNA.41413.1.S1_at   | MmugDNA.41413.1 | 12.03 | 11.75 | 0.15 | 0.02 | 1.21  | 0.043282 | 0.258773 | 0.265351 | 0.525949 |
| MmugDNA.41414.1.S1_at   | MmugDNA.41414.1 | 4.6   | 4.47  | 0.29 | 0.22 | 1.09  | 0.129635 | 0.126119 | 0.412005 | 0.39672  |
| MmugDNA.41417.1.S1_at   | MmugDNA.41417.1 | 7.61  | 7.87  | 0.31 | 0.11 | -1.2  | 0.236909 | 0.18127  | 0.534514 | 0.457809 |
| MmugDNA.41418.1.S1_at   | MmugDNA.41418.1 | 12.17 | 12.05 | 0.06 | 0.04 | 1.09  | 0.028319 | 0.228767 | 0.220853 | 0.501005 |
| MmugDNA.41418.1.S1_s_at | MmugDNA.41418.1 | 12.08 | 12.04 | 0.01 | 0.04 | 1.03  | 0.026966 | 0.730113 | 0.217062 | 0.843808 |
| MmugDNA.41419.1.S1_at   | MmugDNA.41419.1 | 12.32 | 12.24 | 0.06 | 0.01 | 1.06  | 0.054188 | 0.520806 | 0.289903 | 0.711942 |
| MmugDNA.41420.1.S1_at   | MmugDNA.41420.1 | 5.24  | 5.13  | 0.27 | 0.2  | 1.08  | 0.462293 | 0.07863  | 0.709533 | 0.32546  |
| MmugDNA.41424.1.S1_at   | MmugDNA.41424.1 | 9.86  | 10.17 | 0.08 | 0.04 | -1.24 | 0.004251 | 0.029425 | 0.111075 | 0.213368 |
| MmugDNA.41424.1.S1_s_at | MmugDNA.41424.1 | 10.37 | 10.69 | 0.07 | 0.07 | -1.25 | 0.004763 | 0.063474 | 0.115098 | 0.298441 |
| MmugDNA.41430.1.S1_at   | MmugDNA.41430.1 | 10.09 | 10.1  | 0.03 | 0.1  | -1.01 | 0.636083 | 0.013786 | 0.821984 | 0.150462 |
| MmugDNA.41434.1.S1_at   | MmugDNA.41434.1 | 8.7   | 8.87  | 0.43 | 0.06 | -1.13 | 0.643704 | 0.443128 | 0.826378 | 0.661003 |
| MmugDNA.41447.1.S1_at   | MmugDNA.41447.1 | 5.34  | 5.38  | 0.3  | 0.09 | -1.03 | 0.406009 | 0.527578 | 0.669443 | 0.716154 |
| MmugDNA.41448.1.S1_at   | MmugDNA.41448.1 | 3.64  | 3.56  | 0.1  | 0.04 | 1.06  | 0.914488 | 0.099986 | 0.963657 | 0.3588   |
| MmugDNA.41452.1.S1_at   | MmugDNA.41452.1 | 9.6   | 8.47  | 0.17 | 0.65 | 2.2   | 0.091176 | 0.184278 | 0.358578 | 0.460412 |
| MmugDNA.41453.1.S1_at   | MmugDNA.41453.1 | 8.13  | 9.54  | 0.71 | 0.17 | -2.65 | 0.036364 | 0.378644 | 0.245737 | 0.61568  |
| MmugDNA.41454.1.S1_at   | MmugDNA.41454.1 | 5.35  | 5.3   | 0.15 | 0.16 | 1.03  | 0.279246 | 0.372937 | 0.570643 | 0.611783 |



|                         |                 |       |       |      |      |       |          |          |          |          |
|-------------------------|-----------------|-------|-------|------|------|-------|----------|----------|----------|----------|
| MmugDNA.4146.1.S1_at    | MmugDNA.4146.1  | 10.85 | 10.63 | 0.09 | 0.13 | 1.17  | 0.067714 | 0.047187 | 0.318077 | 0.261793 |
| MmugDNA.41461.1.S1_at   | MmugDNA.41461.1 | 9.37  | 9.04  | 0.17 | 0.17 | 1.26  | 0.175314 | 0.001008 | 0.469716 | 0.050657 |
| MmugDNA.41462.1.S1_at   | MmugDNA.41462.1 | 9.97  | 10    | 0.17 | 0.13 | -1.02 | 0.574999 | 0.250675 | 0.782427 | 0.51941  |
| MmugDNA.41468.1.S1_at   | MmugDNA.41468.1 | 11.18 | 11.14 | 0.1  | 0.18 | 1.03  | 0.173545 | 0.088785 | 0.467895 | 0.342524 |
| MmugDNA.41469.1.S1_at   | MmugDNA.41469.1 | 9.58  | 8.89  | 0.27 | 0.11 | 1.61  | 0.006485 | 0.02368  | 0.127306 | 0.19268  |
| MmugDNA.41472.1.S1_at   | MmugDNA.41472.1 | 6.01  | 6.2   | 0.37 | 0.18 | -1.14 | 0.740816 | 0.718193 | 0.879855 | 0.836902 |
| MmugDNA.41475.1.S1_at   | MmugDNA.41475.1 | 8.53  | 8.83  | 0.29 | 0.05 | -1.24 | 0.114813 | 0.125638 | 0.391813 | 0.396249 |
| MmugDNA.41481.1.S1_at   | MmugDNA.41481.1 | 5.61  | 5.75  | 0.18 | 0.1  | -1.1  | 0.227985 | 0.058943 | 0.526101 | 0.28962  |
| MmugDNA.41486.1.S1_at   | MmugDNA.41486.1 | 11.02 | 10.95 | 0.38 | 0.09 | 1.05  | 0.772477 | 0.771052 | 0.895784 | 0.86692  |
| MmugDNA.41486.1.S1_s_at | MmugDNA.41486.1 | 12.06 | 11.91 | 0.38 | 0.01 | 1.11  | 0.45281  | 0.799786 | 0.703205 | 0.884885 |
| MmugDNA.41487.1.S1_at   | MmugDNA.41487.1 | 9.99  | 10.19 | 0.35 | 0.14 | -1.15 | 0.406157 | 0.59674  | 0.669555 | 0.759776 |
| MmugDNA.41488.1.S1_s_at | MmugDNA.41488.1 | 12.32 | 12.28 | 0.13 | 0.07 | 1.03  | 0.92225  | 0.945408 | 0.966724 | 0.968942 |
| MmugDNA.41491.1.S1_at   | MmugDNA.41491.1 | 4.44  | 4.48  | 0.16 | 0.01 | -1.03 | 0.508684 | 0.611602 | 0.740531 | 0.769451 |
| MmugDNA.41502.1.S1_at   | MmugDNA.41502.1 | 3.96  | 3.93  | 0.32 | 0.06 | 1.02  | 0.263289 | 0.337609 | 0.556921 | 0.584788 |
| MmugDNA.41506.1.S1_at   | MmugDNA.41506.1 | 7.51  | 7.36  | 0.24 | 0.09 | 1.11  | 0.589809 | 0.188091 | 0.791747 | 0.464169 |
| MmugDNA.41507.1.S1_at   | MmugDNA.41507.1 | 8.75  | 8.63  | 0.18 | 0    | 1.08  | 0.31452  | 0.039145 | 0.599987 | 0.243072 |
| MmugDNA.41509.1.S1_at   | MmugDNA.41509.1 | 7.2   | 6.76  | 0.16 | 0.08 | 1.36  | 0.012539 | 0.005168 | 0.162479 | 0.099727 |
| MmugDNA.41515.1.S1_s_at | MmugDNA.41515.1 | 4.32  | 4.29  | 0.08 | 0.16 | 1.02  | 0.835127 | 0.899567 | 0.92748  | 0.942903 |
| MmugDNA.4152.1.S1_at    | MmugDNA.4152.1  | 9.16  | 8.73  | 0.49 | 0.86 | 1.34  | 0.714083 | 0.257038 | 0.864933 | 0.524781 |
| MmugDNA.41522.1.S1_at   | MmugDNA.41522.1 | 5.22  | 4.93  | 0.1  | 0.12 | 1.22  | 0.056846 | 0.142552 | 0.295816 | 0.416206 |
| MmugDNA.41532.1.S1_at   | MmugDNA.41532.1 | 6.17  | 6.6   | 0.68 | 0.15 | -1.34 | 0.570179 | 0.728388 | 0.779298 | 0.842993 |
| MmugDNA.4154.1.S1_at    | MmugDNA.4154.1  | 9.03  | 9.44  | 0.3  | 0.18 | -1.32 | 0.292171 | 0.387027 | 0.581449 | 0.621935 |
| MmugDNA.41540.1.S1_at   | MmugDNA.41540.1 | 6.69  | 7.45  | 0.96 | 0.1  | -1.69 | 0.136572 | 0.318148 | 0.42123  | 0.571046 |
| MmugDNA.41546.1.S1_at   | MmugDNA.41546.1 | 3.23  | 3.24  | 0.07 | 0.11 | -1.01 | 0.290861 | 0.810135 | 0.580217 | 0.890539 |
| MmugDNA.41547.1.S1_at   | MmugDNA.41547.1 | 11.26 | 10.51 | 0.08 | 0.14 | 1.68  | 0.001518 | 0.000816 | 0.081668 | 0.046361 |
| MmugDNA.41548.1.S1_at   | MmugDNA.41548.1 | 3.97  | 4.69  | 0.2  | 0.3  | -1.65 | 0.031106 | 0.025876 | 0.229371 | 0.201696 |
| MmugDNA.41559.1.S1_at   | MmugDNA.41559.1 | 3.45  | 3.49  | 0.04 | 0.07 | -1.03 | 0.692656 | 0.448019 | 0.853112 | 0.663986 |
| MmugDNA.4156.1.S1_at    | MmugDNA.4156.1  | 9.02  | 8.74  | 0.12 | 0.14 | 1.21  | 0.096108 | 0.025681 | 0.365576 | 0.200834 |
| MmugDNA.41562.1.S1_at   | MmugDNA.41562.1 | 3.3   | 3.44  | 0.12 | 0.06 | -1.1  | 0.179824 | 0.202348 | 0.474882 | 0.4767   |
| MmugDNA.41568.1.S1_at   | MmugDNA.41568.1 | 4.15  | 3.96  | 0.15 | 0.36 | 1.14  | 0.409998 | 0.656476 | 0.672223 | 0.799097 |
| MmugDNA.4157.1.S1_at    | MmugDNA.4157.1  | 4.85  | 4.7   | 0.35 | 0.23 | 1.11  | 0.913073 | 0.315688 | 0.963254 | 0.569119 |
| MmugDNA.41570.1.S1_at   | MmugDNA.41570.1 | 5.94  | 4.98  | 1.12 | 0.75 | 1.94  | 0.490573 | 0.600452 | 0.728671 | 0.762128 |
| MmugDNA.41572.1.S1_at   | MmugDNA.41572.1 | 11.16 | 10.93 | 0.12 | 0.05 | 1.17  | 0.080054 | 0.450506 | 0.340402 | 0.665705 |
| MmugDNA.41576.1.S1_at   | MmugDNA.41576.1 | 9.25  | 9.4   | 0.31 | 0.06 | -1.11 | 0.863488 | 0.692418 | 0.940667 | 0.821009 |
| MmugDNA.41579.1.S1_at   | MmugDNA.41579.1 | 5.97  | 6.26  | 0.26 | 0.06 | -1.22 | 0.118062 | 0.167398 | 0.395593 | 0.443785 |
| MmugDNA.4158.1.S1_at    | MmugDNA.4158.1  | 13.53 | 13.56 | 0.11 | 0.02 | -1.02 | 0.784584 | 0.027578 | 0.901768 | 0.207355 |
| MmugDNA.41581.1.S1_at   | MmugDNA.41581.1 | 7.23  | 7.38  | 0.24 | 0.53 | -1.1  | 0.350408 | 0.21857  | 0.628235 | 0.492172 |
| MmugDNA.41582.1.S1_at   | MmugDNA.41582.1 | 11.49 | 11.27 | 0.15 | 0.01 | 1.17  | 0.044916 | 0.000519 | 0.269298 | 0.039636 |
| MmugDNA.41588.1.S1_at   | MmugDNA.41588.1 | 4.98  | 6.07  | 0.19 | 0.12 | -2.13 | 0.002309 | 0.065747 | 0.092457 | 0.301766 |
| MmugDNA.41594.1.S1_at   | MmugDNA.41594.1 | 7.09  | 7.11  | 0.66 | 0.08 | -1.01 | 0.367957 | 0.369896 | 0.641707 | 0.609138 |
| MmugDNA.41595.1.S1_at   | MmugDNA.41595.1 | 2.97  | 3     | 0.14 | 0.07 | -1.02 | 0.311246 | 0.402514 | 0.597394 | 0.631481 |
| MmugDNA.41601.1.S1_at   | MmugDNA.41601.1 | 8.16  | 8.9   | 0.35 | 0.19 | -1.67 | 0.048847 | 0.155767 | 0.278594 | 0.431134 |
| MmugDNA.41606.1.S1_at   | MmugDNA.41606.1 | 12.38 | 12.31 | 0.01 | 0.07 | 1.05  | 0.127564 | 0.07941  | 0.409503 | 0.326766 |

|                         |                 |       |       |      |      |        |          |          |          |          |
|-------------------------|-----------------|-------|-------|------|------|--------|----------|----------|----------|----------|
| MmugDNA.4162.1.S1_s_at  | MmugDNA.4162.1  | 5.73  | 6.38  | 0.66 | 0.26 | -1.57  | 0.140628 | 0.252688 | 0.426393 | 0.521174 |
| MmugDNA.41626.1.S1_at   | MmugDNA.41626.1 | 8.41  | 8.67  | 0.2  | 0.13 | -1.2   | 0.05309  | 0.072319 | 0.287689 | 0.31505  |
| MmugDNA.41632.1.S1_at   | MmugDNA.41632.1 | 10.46 | 11.38 | 0.83 | 0.21 | -1.9   | 0.162542 | 0.060232 | 0.454561 | 0.292091 |
| MmugDNA.41633.1.S1_at   | MmugDNA.41633.1 | 13.56 | 13.5  | 0.09 | 0.04 | 1.04   | 0.556721 | 0.738103 | 0.771861 | 0.848202 |
| MmugDNA.41636.1.S1_at   | MmugDNA.41636.1 | 8.52  | 8.55  | 0.02 | 0.05 | -1.02  | 0.704334 | 0.019387 | 0.859703 | 0.175012 |
| MmugDNA.41640.1.S1_at   | MmugDNA.41640.1 | 3.26  | 3.26  | 0.02 | 0.1  | 1.01   | 0.402912 | 0.210928 | 0.667108 | 0.484934 |
| MmugDNA.41641.1.S1_at   | MmugDNA.41641.1 | 8     | 11.92 | 1.35 | 0.24 | -15.21 | 0.010601 | 0.195097 | 0.152762 | 0.470241 |
| MmugDNA.41647.1.S1_s_at | MmugDNA.41647.1 | 6.54  | 6.55  | 0.2  | 0.04 | -1     | 0.472483 | 0.05417  | 0.716189 | 0.27811  |
| MmugDNA.41648.1.S1_at   | MmugDNA.41648.1 | 11.73 | 11.95 | 0.29 | 0.03 | -1.16  | 0.709958 | 0.113683 | 0.862704 | 0.379818 |
| MmugDNA.41661.1.S1_at   | MmugDNA.41661.1 | 4.14  | 4.34  | 0.17 | 0.04 | -1.15  | 0.348152 | 0.226361 | 0.62632  | 0.498806 |
| MmugDNA.4167.1.S1_at    | MmugDNA.4167.1  | 3.06  | 3.01  | 0.34 | 0.07 | 1.03   | 0.370194 | 0.5322   | 0.643242 | 0.718995 |
| MmugDNA.41672.1.S1_at   | MmugDNA.41672.1 | 4.82  | 4.92  | 0.11 | 0.04 | -1.07  | 0.292326 | 0.150605 | 0.581648 | 0.425171 |
| MmugDNA.41674.1.S1_at   | MmugDNA.41674.1 | 13.9  | 13.63 | 0.1  | 0.16 | 1.21   | 0.039796 | 0.115572 | 0.256213 | 0.382674 |
| MmugDNA.41674.1.S1_x_at | MmugDNA.41674.1 | 13.81 | 13.5  | 0.14 | 0.16 | 1.24   | 0.044669 | 0.163985 | 0.268619 | 0.440128 |
| MmugDNA.41683.1.S1_at   | MmugDNA.41683.1 | 8.94  | 9.19  | 0.36 | 0.09 | -1.18  | 0.716141 | 0.712103 | 0.866043 | 0.833156 |
| MmugDNA.41685.1.S1_at   | MmugDNA.41685.1 | 4.39  | 4.4   | 0.1  | 0.08 | -1     | 0.676353 | 0.843295 | 0.845441 | 0.910767 |
| MmugDNA.41689.1.S1_at   | MmugDNA.41689.1 | 11.41 | 11.6  | 0.13 | 0.03 | -1.14  | 0.077651 | 0.071801 | 0.336558 | 0.314082 |
| MmugDNA.4169.1.S1_at    | MmugDNA.4169.1  | 3.56  | 3.53  | 0.11 | 0.21 | 1.02   | 0.634688 | 0.890794 | 0.820892 | 0.937722 |
| MmugDNA.41691.1.S1_at   | MmugDNA.41691.1 | 8.95  | 8.47  | 0.11 | 0.02 | 1.39   | 0.000998 | 0.115974 | 0.076321 | 0.383164 |
| MmugDNA.41701.1.S1_at   | MmugDNA.41701.1 | 6.82  | 6.67  | 0.16 | 0.08 | 1.1    | 0.844236 | 0.190807 | 0.931782 | 0.466228 |
| MmugDNA.41710.1.S1_at   | MmugDNA.41710.1 | 7.45  | 7.48  | 0.13 | 0.03 | -1.02  | 0.596381 | 0.050411 | 0.795793 | 0.269746 |
| MmugDNA.4172.1.S1_at    | MmugDNA.4172.1  | 12.6  | 12.93 | 0.64 | 0.02 | -1.26  | 0.131729 | 0.124606 | 0.414663 | 0.394995 |
| MmugDNA.41726.1.S1_at   | MmugDNA.41726.1 | 4.69  | 4.39  | 0.2  | 0.04 | 1.24   | 0.06428  | 0.076198 | 0.309888 | 0.321076 |
| MmugDNA.41728.1.S1_at   | MmugDNA.41728.1 | 7.66  | 11.07 | 1.49 | 0.33 | -10.59 | 0.032588 | 0.293402 | 0.234863 | 0.553341 |
| MmugDNA.41731.1.S1_at   | MmugDNA.41731.1 | 9.11  | 8.85  | 0.13 | 0.21 | 1.2    | 0.274855 | 0.457581 | 0.566556 | 0.670864 |
| MmugDNA.41732.1.S1_at   | MmugDNA.41732.1 | 3.49  | 3.5   | 0.05 | 0.19 | -1.01  | 0.936941 | 0.561688 | 0.97363  | 0.73751  |
| MmugDNA.41734.1.S1_at   | MmugDNA.41734.1 | 8.77  | 7.8   | 0.21 | 0.17 | 1.95   | 0.004395 | 0.001665 | 0.1125   | 0.061711 |
| MmugDNA.41738.1.S1_at   | MmugDNA.41738.1 | 11.8  | 11.35 | 0.02 | 0.05 | 1.37   | 0.000136 | 0.000435 | 0.051196 | 0.038359 |
| MmugDNA.41741.1.S1_at   | MmugDNA.41741.1 | 5.7   | 5.58  | 0.22 | 0.08 | 1.09   | 0.321798 | 0.730726 | 0.606128 | 0.844055 |
| MmugDNA.41750.1.S1_at   | MmugDNA.41750.1 | 9.55  | 9.57  | 0.34 | 0.06 | -1.01  | 0.856014 | 0.867949 | 0.937346 | 0.925008 |
| MmugDNA.41752.1.S1_at   | MmugDNA.41752.1 | 6.24  | 6.3   | 0.14 | 0.1  | -1.04  | 0.412341 | 0.472664 | 0.674115 | 0.68007  |
| MmugDNA.41752.1.S1_s_at | MmugDNA.41752.1 | 6.4   | 6.38  | 0.14 | 0.14 | 1.02   | 0.442399 | 0.394544 | 0.695806 | 0.627068 |
| MmugDNA.41756.1.S1_at   | MmugDNA.41756.1 | 10.17 | 9.56  | 0.28 | 0.2  | 1.52   | 0.030335 | 0.219794 | 0.227183 | 0.493388 |
| MmugDNA.41768.1.S1_at   | MmugDNA.41768.1 | 11.12 | 11.43 | 0.1  | 0.08 | -1.23  | 0.012054 | 0.670539 | 0.159706 | 0.807399 |
| MmugDNA.41774.1.S1_at   | MmugDNA.41774.1 | 5.57  | 5.38  | 0.6  | 0.14 | 1.15   | 0.263809 | 0.529274 | 0.557349 | 0.717233 |
| MmugDNA.41776.1.S1_at   | MmugDNA.41776.1 | 7.7   | 5.97  | 0.65 | 0.35 | 3.33   | 0.015074 | 0.013329 | 0.174736 | 0.148042 |
| MmugDNA.41782.1.S1_at   | MmugDNA.41782.1 | 12.7  | 12.77 | 0.15 | 0.03 | -1.05  | 0.860603 | 0.015877 | 0.939526 | 0.15984  |
| MmugDNA.41783.1.S1_at   | MmugDNA.41783.1 | 10.85 | 10.69 | 0.14 | 0.04 | 1.11   | 0.038399 | 0.156325 | 0.251895 | 0.43161  |
| MmugDNA.41791.1.S1_at   | MmugDNA.41791.1 | 6.73  | 7.07  | 0.42 | 0.24 | -1.27  | 0.18687  | 0.421922 | 0.482992 | 0.645378 |
| MmugDNA.41792.1.S1_at   | MmugDNA.41792.1 | 5.31  | 5.3   | 0.1  | 0.13 | 1.01   | 0.830625 | 0.978292 | 0.925496 | 0.988124 |
| MmugDNA.41794.1.S1_at   | MmugDNA.41794.1 | 12.55 | 13.09 | 0.14 | 0.06 | -1.45  | 0.007397 | 0.091622 | 0.134211 | 0.346716 |
| MmugDNA.41799.1.S1_at   | MmugDNA.41799.1 | 4.57  | 4.22  | 0.15 | 0.04 | 1.27   | 0.04415  | 0.099692 | 0.267197 | 0.358226 |
| MmugDNA.418.1.S1_at     | MmugDNA.418.1   | 6.83  | 8.33  | 0.55 | 0.16 | -2.82  | 0.025604 | 0.275495 | 0.212928 | 0.539709 |

|                         |                 |       |       |      |      |       |          |          |          |          |
|-------------------------|-----------------|-------|-------|------|------|-------|----------|----------|----------|----------|
| MmugDNA.41809.1.S1_at   | MmugDNA.41809.1 | 10.12 | 9.86  | 0.57 | 0.13 | 1.19  | 0.606665 | 0.490358 | 0.803284 | 0.692363 |
| MmugDNA.41811.1.S1_at   | MmugDNA.41811.1 | 13.1  | 13    | 0.03 | 0.03 | 1.07  | 0.006266 | 0.002625 | 0.125436 | 0.075772 |
| MmugDNA.41812.1.S1_at   | MmugDNA.41812.1 | 9.33  | 8.18  | 1.05 | 0.66 | 2.22  | 0.174716 | 0.44833  | 0.468957 | 0.66421  |
| MmugDNA.41818.1.S1_at   | MmugDNA.41818.1 | 6.38  | 6.23  | 0.22 | 0.28 | 1.11  | 0.475419 | 0.375423 | 0.718106 | 0.613405 |
| MmugDNA.41819.1.S1_at   | MmugDNA.41819.1 | 7.43  | 8.55  | 0.69 | 0.17 | -2.17 | 0.047305 | 0.199915 | 0.27481  | 0.474603 |
| MmugDNA.41821.1.S1_at   | MmugDNA.41821.1 | 6.95  | 7.15  | 0.67 | 0.04 | -1.15 | 0.824496 | 0.94676  | 0.922007 | 0.96978  |
| MmugDNA.4183.1.S1_at    | MmugDNA.4183.1  | 3.88  | 3.88  | 0.13 | 0.04 | 1     | 0.707551 | 0.55178  | 0.861502 | 0.73122  |
| MmugDNA.41832.1.S1_at   | MmugDNA.41832.1 | 5.16  | 5.21  | 0.07 | 0.07 | -1.04 | 0.924365 | 0.27023  | 0.967845 | 0.535587 |
| MmugDNA.41833.1.S1_at   | MmugDNA.41833.1 | 11.76 | 11.81 | 0.25 | 0.1  | -1.04 | 0.788441 | 0.818181 | 0.903828 | 0.89514  |
| MmugDNA.41835.1.S1_at   | MmugDNA.41835.1 | 11.18 | 9.87  | 0.11 | 0.06 | 2.47  | 0.000067 | 0.000505 | 0.051142 | 0.039158 |
| MmugDNA.41837.1.S1_at   | MmugDNA.41837.1 | 11.78 | 11.58 | 0.05 | 0.07 | 1.15  | 0.018025 | 0.063481 | 0.187281 | 0.298441 |
| MmugDNA.41838.1.S1_at   | MmugDNA.41838.1 | 11.47 | 12.21 | 0.2  | 0.08 | -1.67 | 0.008176 | 0.286163 | 0.139381 | 0.5477   |
| MmugDNA.41838.1.S1_x_at | MmugDNA.41838.1 | 11.07 | 11.83 | 0.16 | 0.09 | -1.69 | 0.003798 | 0.251109 | 0.106813 | 0.519792 |
| MmugDNA.41840.1.S1_at   | MmugDNA.41840.1 | 10.45 | 10.53 | 0.14 | 0.04 | -1.06 | 0.992724 | 0.344892 | 0.997263 | 0.590208 |
| MmugDNA.41842.1.S1_at   | MmugDNA.41842.1 | 10.16 | 9.24  | 0.19 | 0.3  | 1.89  | 0.012924 | 0.004987 | 0.164364 | 0.09844  |
| MmugDNA.41843.1.S1_at   | MmugDNA.41843.1 | 11.36 | 11.21 | 0.31 | 0.05 | 1.11  | 0.474708 | 0.623099 | 0.717627 | 0.777513 |
| MmugDNA.41844.1.S1_at   | MmugDNA.41844.1 | 8.22  | 8.59  | 0.74 | 0.29 | -1.3  | 0.670577 | 0.378145 | 0.841904 | 0.615438 |
| MmugDNA.41848.1.S1_at   | MmugDNA.41848.1 | 10.53 | 10.27 | 0.18 | 0.07 | 1.2   | 0.054313 | 0.429543 | 0.290104 | 0.650961 |
| MmugDNA.41849.1.S1_s_at | MmugDNA.41849.1 | 13.51 | 13.26 | 0.04 | 0.04 | 1.19  | 0.000739 | 0.235916 | 0.072567 | 0.507056 |
| MmugDNA.4185.1.S1_at    | MmugDNA.4185.1  | 7.15  | 7.04  | 0.07 | 0.03 | 1.08  | 0.052233 | 0.000528 | 0.285979 | 0.040039 |
| MmugDNA.41858.1.S1_at   | MmugDNA.41858.1 | 5.51  | 6.04  | 0.23 | 0.19 | -1.45 | 0.026784 | 0.330569 | 0.216901 | 0.579307 |
| MmugDNA.41863.1.S1_at   | MmugDNA.41863.1 | 12.32 | 12.12 | 0.12 | 0.07 | 1.14  | 0.07606  | 0.21599  | 0.33408  | 0.48965  |
| MmugDNA.41865.1.S1_at   | MmugDNA.41865.1 | 11.15 | 10.86 | 0.42 | 0.1  | 1.22  | 0.837914 | 0.677564 | 0.928995 | 0.81168  |
| MmugDNA.41866.1.S1_at   | MmugDNA.41866.1 | 5.07  | 5.33  | 0.29 | 0.12 | -1.2  | 0.267369 | 0.626329 | 0.560202 | 0.779698 |
| MmugDNA.41868.1.S1_at   | MmugDNA.41868.1 | 6.55  | 6.45  | 0.19 | 0.07 | 1.07  | 0.456196 | 0.222569 | 0.705665 | 0.495615 |
| MmugDNA.41870.1.S1_at   | MmugDNA.41870.1 | 4.66  | 6.26  | 0.92 | 0.14 | -3.02 | 0.142403 | 0.308873 | 0.42843  | 0.564656 |
| MmugDNA.41882.1.S1_at   | MmugDNA.41882.1 | 8.51  | 9.65  | 0.56 | 0.12 | -2.2  | 0.061844 | 0.178483 | 0.305205 | 0.454778 |
| MmugDNA.41887.1.S1_at   | MmugDNA.41887.1 | 9.73  | 8.52  | 0.09 | 0.05 | 2.32  | 0.000031 | 0.000562 | 0.045594 | 0.041049 |
| MmugDNA.41890.1.S1_at   | MmugDNA.41890.1 | 9.05  | 9.16  | 0.19 | 0.27 | -1.08 | 0.709647 | 0.480293 | 0.86264  | 0.68574  |
| MmugDNA.41900.1.S1_at   | MmugDNA.41900.1 | 6.14  | 5.93  | 0.83 | 0.2  | 1.15  | 0.714275 | 0.599528 | 0.865055 | 0.761473 |
| MmugDNA.41909.1.S1_at   | MmugDNA.41909.1 | 8.03  | 9.32  | 0.46 | 0.09 | -2.44 | 0.007841 | 0.109088 | 0.137256 | 0.372869 |
| MmugDNA.41913.1.S1_at   | MmugDNA.41913.1 | 7.82  | 7.45  | 0.65 | 0.09 | 1.3   | 0.441814 | 0.136321 | 0.6953   | 0.408746 |
| MmugDNA.41914.1.S1_at   | MmugDNA.41914.1 | 8.9   | 8.91  | 0.29 | 0.21 | -1    | 0.980418 | 0.14404  | 0.992718 | 0.417912 |
| MmugDNA.4192.1.S1_at    | MmugDNA.4192.1  | 5.3   | 4.86  | 0.66 | 0.12 | 1.35  | 0.282408 | 0.347025 | 0.573155 | 0.59181  |
| MmugDNA.41922.1.S1_at   | MmugDNA.41922.1 | 11.07 | 10.81 | 0.09 | 0.11 | 1.2   | 0.057616 | 0.253686 | 0.297348 | 0.522037 |
| MmugDNA.41926.1.S1_at   | MmugDNA.41926.1 | 11.41 | 11.23 | 0.18 | 0.03 | 1.14  | 0.153982 | 0.005033 | 0.444262 | 0.098963 |
| MmugDNA.41934.1.S1_at   | MmugDNA.41934.1 | 5.4   | 5.39  | 0.17 | 0.07 | 1.01  | 0.825432 | 0.150741 | 0.922449 | 0.4253   |
| MmugDNA.41946.1.S1_at   | MmugDNA.41946.1 | 4.46  | 4.53  | 0.87 | 0.15 | -1.05 | 0.538171 | 0.750643 | 0.760149 | 0.854991 |
| MmugDNA.41949.1.S1_at   | MmugDNA.41949.1 | 7.51  | 7.22  | 0.32 | 0.46 | 1.23  | 0.608501 | 0.871909 | 0.804533 | 0.927098 |
| MmugDNA.41953.1.S1_at   | MmugDNA.41953.1 | 4.18  | 4.18  | 0.03 | 0.07 | 1     | 0.97952  | 0.478005 | 0.992184 | 0.684037 |
| MmugDNA.41963.1.S1_at   | MmugDNA.41963.1 | 6.89  | 6.91  | 0.29 | 0.09 | -1.02 | 0.942449 | 0.96427  | 0.975651 | 0.98014  |
| MmugDNA.41963.1.S1_s_at | MmugDNA.41963.1 | 11.79 | 11.42 | 0.06 | 0.06 | 1.29  | 0.001645 | 0.083875 | 0.084462 | 0.334771 |
| MmugDNA.41966.1.S1_at   | MmugDNA.41966.1 | 4.31  | 5.45  | 0.15 | 0.55 | -2.21 | 0.026983 | 0.162308 | 0.217138 | 0.438447 |

|                         |                 |       |       |      |      |        |          |          |          |          |
|-------------------------|-----------------|-------|-------|------|------|--------|----------|----------|----------|----------|
| MmugDNA.4197.1.S1_at    | MmugDNA.4197.1  | 8.15  | 8.29  | 0.07 | 0.14 | -1.1   | 0.177573 | 0.480635 | 0.472227 | 0.685926 |
| MmugDNA.41984.1.S1_at   | MmugDNA.41984.1 | 9.43  | 9.2   | 0.3  | 0.07 | 1.17   | 0.228557 | 0.886066 | 0.526913 | 0.935136 |
| MmugDNA.41986.1.S1_at   | MmugDNA.41986.1 | 4.14  | 4.23  | 0.12 | 0.07 | -1.06  | 0.785722 | 0.635021 | 0.902158 | 0.785143 |
| MmugDNA.41994.1.S1_at   | MmugDNA.41994.1 | 7.3   | 7.61  | 0.11 | 0.03 | -1.24  | 0.010483 | 0.258209 | 0.152291 | 0.52558  |
| MmugDNA.42006.1.S1_at   | MmugDNA.42006.1 | 6.89  | 6.8   | 0.08 | 0.11 | 1.06   | 0.127245 | 0.219601 | 0.408925 | 0.49321  |
| MmugDNA.42009.1.S1_at   | MmugDNA.42009.1 | 6.58  | 7     | 0.18 | 0.12 | -1.33  | 0.022553 | 0.065408 | 0.203331 | 0.301415 |
| MmugDNA.4201.1.S1_at    | MmugDNA.4201.1  | 9.88  | 9.59  | 0.21 | 0.15 | 1.22   | 0.13781  | 0.440656 | 0.422876 | 0.659046 |
| MmugDNA.42015.1.S1_at   | MmugDNA.42015.1 | 11.29 | 11.22 | 0.18 | 0.08 | 1.05   | 0.118077 | 0.181954 | 0.395593 | 0.458483 |
| MmugDNA.42018.1.S1_at   | MmugDNA.42018.1 | 11.55 | 11.63 | 0.09 | 0.11 | -1.06  | 0.849887 | 0.025536 | 0.934722 | 0.200461 |
| MmugDNA.42019.1.S1_at   | MmugDNA.42019.1 | 7.03  | 6.83  | 0.15 | 0.11 | 1.15   | 0.206456 | 0.392512 | 0.504097 | 0.625813 |
| MmugDNA.42026.1.S1_at   | MmugDNA.42026.1 | 5.65  | 9.55  | 1.29 | 0.27 | -14.88 | 0.01696  | 0.126169 | 0.183747 | 0.396742 |
| MmugDNA.42027.1.S1_at   | MmugDNA.42027.1 | 10.87 | 10.98 | 0.18 | 0.11 | -1.08  | 0.277746 | 0.85498  | 0.569265 | 0.917383 |
| MmugDNA.42036.1.S1_at   | MmugDNA.42036.1 | 11.54 | 11.55 | 0.39 | 0.04 | -1.01  | 0.947061 | 0.828084 | 0.977707 | 0.901214 |
| MmugDNA.42044.1.S1_at   | MmugDNA.42044.1 | 12.69 | 13.11 | 0.28 | 0.11 | -1.34  | 0.090649 | 0.036673 | 0.357569 | 0.235973 |
| MmugDNA.42046.1.S1_at   | MmugDNA.42046.1 | 5.23  | 5.23  | 0.12 | 0.07 | -1     | 0.719788 | 0.035064 | 0.867767 | 0.231425 |
| MmugDNA.42049.1.S1_at   | MmugDNA.42049.1 | 7.98  | 6.9   | 0.19 | 0.7  | 2.11   | 0.057939 | 0.037437 | 0.297852 | 0.237777 |
| MmugDNA.42051.1.S1_at   | MmugDNA.42051.1 | 7.98  | 8.18  | 0.3  | 0.04 | -1.15  | 0.282623 | 0.042535 | 0.573304 | 0.250848 |
| MmugDNA.42058.1.S1_at   | MmugDNA.42058.1 | 3.35  | 4.18  | 0.64 | 0.47 | -1.77  | 0.395292 | 0.290702 | 0.661824 | 0.551382 |
| MmugDNA.42064.1.S1_at   | MmugDNA.42064.1 | 8.09  | 8.28  | 0.36 | 0.18 | -1.14  | 0.814078 | 0.926159 | 0.916916 | 0.95813  |
| MmugDNA.42065.1.S1_at   | MmugDNA.42065.1 | 6.11  | 5.45  | 0.83 | 0.47 | 1.58   | 0.345243 | 0.563298 | 0.624343 | 0.738523 |
| MmugDNA.42069.1.S1_s_at | MmugDNA.42069.1 | 6.23  | 6.16  | 0.21 | 0.1  | 1.06   | 0.397334 | 0.27574  | 0.662987 | 0.540008 |
| MmugDNA.42070.1.S1_at   | MmugDNA.42070.1 | 11.21 | 10.94 | 0.18 | 0.07 | 1.21   | 0.090088 | 0.043332 | 0.356863 | 0.252847 |
| MmugDNA.42071.1.S1_at   | MmugDNA.42071.1 | 10.09 | 10.45 | 0.05 | 0.13 | -1.29  | 0.010507 | 0.331329 | 0.152429 | 0.58006  |
| MmugDNA.4208.1.S1_at    | MmugDNA.4208.1  | 5.01  | 4.91  | 0.24 | 0.08 | 1.08   | 0.418473 | 0.552781 | 0.678425 | 0.732052 |
| MmugDNA.42088.1.S1_at   | MmugDNA.42088.1 | 7.17  | 7.05  | 0.17 | 0.24 | 1.09   | 0.532101 | 0.573434 | 0.756211 | 0.745125 |
| MmugDNA.42100.1.S1_at   | MmugDNA.42100.1 | 12.39 | 12.6  | 0.29 | 0.12 | -1.16  | 0.295882 | 0.084919 | 0.584649 | 0.336523 |
| MmugDNA.42107.1.S1_at   | MmugDNA.42107.1 | 12.46 | 12.61 | 0.13 | 0.08 | -1.11  | 0.035584 | 0.101361 | 0.243518 | 0.36112  |
| MmugDNA.4211.1.S1_s_at  | MmugDNA.4211.1  | 10.47 | 10.64 | 0.14 | 0.09 | -1.13  | 0.650061 | 0.288587 | 0.830164 | 0.549827 |
| MmugDNA.42128.1.S1_at   | MmugDNA.42128.1 | 11.08 | 10.41 | 0.63 | 0.17 | 1.59   | 0.339707 | 0.353763 | 0.619946 | 0.596815 |
| MmugDNA.42129.1.S1_at   | MmugDNA.42129.1 | 5.97  | 6     | 0.23 | 0.19 | -1.02  | 0.97075  | 0.014825 | 0.9884   | 0.154895 |
| MmugDNA.42130.1.S1_at   | MmugDNA.42130.1 | 5.48  | 3.65  | 0.96 | 0.56 | 3.57   | 0.130205 | 0.072071 | 0.412471 | 0.314519 |
| MmugDNA.42139.1.S1_at   | MmugDNA.42139.1 | 5.63  | 6.07  | 0.25 | 0.11 | -1.36  | 0.048901 | 0.102363 | 0.278728 | 0.362527 |
| MmugDNA.42141.1.S1_at   | MmugDNA.42141.1 | 5.84  | 5.8   | 0.23 | 0.09 | 1.03   | 0.948881 | 0.562293 | 0.978649 | 0.737938 |
| MmugDNA.42143.1.S1_at   | MmugDNA.42143.1 | 10.61 | 10.65 | 0.02 | 0.04 | -1.03  | 0.134429 | 0.931    | 0.418098 | 0.960769 |
| MmugDNA.42149.1.S1_at   | MmugDNA.42149.1 | 10.09 | 10.12 | 0.17 | 0.13 | -1.02  | 0.949847 | 0.007401 | 0.979097 | 0.115643 |
| MmugDNA.4215.1.S1_at    | MmugDNA.4215.1  | 7.91  | 8.55  | 0.08 | 0.1  | -1.56  | 0.001054 | 0.003836 | 0.076562 | 0.088143 |
| MmugDNA.42153.1.S1_at   | MmugDNA.42153.1 | 10.65 | 10.72 | 0.17 | 0.09 | -1.05  | 0.854128 | 0.012569 | 0.9366   | 0.144568 |
| MmugDNA.42162.1.S1_at   | MmugDNA.42162.1 | 5.12  | 4.99  | 0.12 | 0.08 | 1.09   | 0.193929 | 0.244467 | 0.490515 | 0.514295 |
| MmugDNA.42175.1.S1_at   | MmugDNA.42175.1 | 4.65  | 4.53  | 0.12 | 0.21 | 1.09   | 0.984289 | 0.104826 | 0.994129 | 0.366341 |
| MmugDNA.42177.1.S1_at   | MmugDNA.42177.1 | 10.67 | 10.69 | 0.03 | 0.17 | -1.01  | 0.993936 | 0.014272 | 0.997578 | 0.152546 |
| MmugDNA.42181.1.S1_at   | MmugDNA.42181.1 | 11.18 | 11.69 | 0.17 | 0.12 | -1.43  | 0.009737 | 0.056159 | 0.148542 | 0.282888 |
| MmugDNA.42186.1.S1_at   | MmugDNA.42186.1 | 11    | 10.92 | 0.06 | 0.04 | 1.06   | 0.217384 | 0.255614 | 0.515291 | 0.523608 |
| MmugDNA.42189.1.S1_at   | MmugDNA.42189.1 | 13.22 | 13.16 | 0.05 | 0.04 | 1.04   | 0.159423 | 0.254052 | 0.450703 | 0.522387 |

|                         |                 |       |       |      |      |       |          |          |          |          |
|-------------------------|-----------------|-------|-------|------|------|-------|----------|----------|----------|----------|
| MmugDNA.4219.1.S1_at    | MmugDNA.4219.1  | 11.48 | 12.16 | 0.38 | 0.08 | -1.6  | 0.037906 | 0.302356 | 0.250522 | 0.560109 |
| MmugDNA.42196.1.S1_at   | MmugDNA.42196.1 | 9.57  | 11.86 | 0.98 | 0.17 | -4.88 | 0.047158 | 0.448166 | 0.274594 | 0.664096 |
| MmugDNA.42198.1.S1_at   | MmugDNA.42198.1 | 7.88  | 7.57  | 0.09 | 0.03 | 1.24  | 0.005621 | 0.059457 | 0.120803 | 0.290548 |
| MmugDNA.422.1.S1_at     | MmugDNA.422.1   | 6.71  | 6.73  | 0.25 | 0.2  | -1.02 | 0.84022  | 0.770936 | 0.929894 | 0.866807 |
| MmugDNA.42202.1.S1_at   | MmugDNA.42202.1 | 9.9   | 9.43  | 0.36 | 0.12 | 1.39  | 0.132146 | 0.695703 | 0.415359 | 0.823132 |
| MmugDNA.42203.1.S1_at   | MmugDNA.42203.1 | 10.82 | 9.83  | 0.12 | 0.01 | 1.98  | 0.000115 | 0.132035 | 0.051196 | 0.404043 |
| MmugDNA.42205.1.S1_at   | MmugDNA.42205.1 | 9.51  | 9.16  | 0.24 | 0.21 | 1.27  | 0.360936 | 0.111481 | 0.63639  | 0.376193 |
| MmugDNA.42206.1.S1_at   | MmugDNA.42206.1 | 7.81  | 8.45  | 0.46 | 0.29 | -1.56 | 0.262981 | 0.674262 | 0.556723 | 0.809716 |
| MmugDNA.42215.1.S1_at   | MmugDNA.42215.1 | 10.12 | 9.87  | 0.04 | 0.08 | 1.19  | 0.009024 | 0.574578 | 0.144777 | 0.745995 |
| MmugDNA.42222.1.S1_at   | MmugDNA.42222.1 | 7.99  | 7.8   | 0.1  | 0.18 | 1.15  | 0.2473   | 0.215469 | 0.542869 | 0.489168 |
| MmugDNA.42230.1.S1_s_at | MmugDNA.42230.1 | 10.83 | 10.64 | 0.15 | 0.16 | 1.14  | 0.518959 | 0.567291 | 0.747833 | 0.741185 |
| MmugDNA.4224.1.S1_at    | MmugDNA.4224.1  | 11.36 | 11.79 | 0.02 | 0.21 | -1.35 | 0.071608 | 0.004597 | 0.325611 | 0.094706 |
| MmugDNA.42240.1.S1_at   | MmugDNA.42240.1 | 7.36  | 7.35  | 0.14 | 0.07 | 1.01  | 0.565668 | 0.447548 | 0.776758 | 0.663579 |
| MmugDNA.42241.1.S1_at   | MmugDNA.42241.1 | 5.62  | 5.54  | 0.03 | 0.02 | 1.05  | 0.07455  | 0.472214 | 0.331249 | 0.679876 |
| MmugDNA.42243.1.S1_at   | MmugDNA.42243.1 | 12.63 | 12.63 | 0.07 | 0.02 | -1    | 0.647688 | 0.918181 | 0.828875 | 0.954096 |
| MmugDNA.42245.1.S1_at   | MmugDNA.42245.1 | 11.06 | 11.65 | 0.22 | 0.17 | -1.51 | 0.029253 | 0.504015 | 0.223819 | 0.701269 |
| MmugDNA.42247.1.S1_at   | MmugDNA.42247.1 | 9.72  | 9.94  | 0.05 | 0.04 | -1.17 | 0.004336 | 0.233059 | 0.111896 | 0.50445  |
| MmugDNA.42249.1.S1_at   | MmugDNA.42249.1 | 7.23  | 7.52  | 0.56 | 0.2  | -1.23 | 0.487691 | 0.641192 | 0.726421 | 0.789487 |
| MmugDNA.42250.1.S1_at   | MmugDNA.42250.1 | 9.64  | 9.56  | 0.07 | 0.06 | 1.06  | 0.288527 | 0.135106 | 0.578246 | 0.407128 |
| MmugDNA.42251.1.S1_at   | MmugDNA.42251.1 | 8.77  | 8.12  | 0.28 | 0.11 | 1.57  | 0.014065 | 0.492481 | 0.169997 | 0.693583 |
| MmugDNA.42255.1.S1_at   | MmugDNA.42255.1 | 10.76 | 11.05 | 0.05 | 0.1  | -1.22 | 0.020791 | 0.513896 | 0.197815 | 0.707322 |
| MmugDNA.42257.1.S1_at   | MmugDNA.42257.1 | 5.84  | 5.77  | 0.1  | 0.08 | 1.05  | 0.072572 | 0.144834 | 0.327336 | 0.418716 |
| MmugDNA.42265.1.S1_at   | MmugDNA.42265.1 | 5.94  | 5.95  | 0.05 | 0.17 | -1.01 | 0.992591 | 0.814412 | 0.997226 | 0.892923 |
| MmugDNA.42269.1.S1_at   | MmugDNA.42269.1 | 7.52  | 8.03  | 0.75 | 0.23 | -1.42 | 0.217924 | 0.68309  | 0.51576  | 0.815134 |
| MmugDNA.4227.1.S1_at    | MmugDNA.4227.1  | 4.38  | 3.89  | 0.53 | 0.1  | 1.4   | 0.097893 | 0.070805 | 0.368354 | 0.31231  |
| MmugDNA.42270.1.S1_at   | MmugDNA.42270.1 | 13.36 | 12.61 | 0.35 | 0.11 | 1.68  | 0.072969 | 0.166476 | 0.327826 | 0.442916 |
| MmugDNA.42283.1.S1_at   | MmugDNA.42283.1 | 5.45  | 5.4   | 0.11 | 0.04 | 1.03  | 0.318841 | 0.528216 | 0.603528 | 0.716462 |
| MmugDNA.42284.1.S1_at   | MmugDNA.42284.1 | 12.77 | 12.86 | 0.19 | 0.05 | -1.06 | 0.309352 | 0.002847 | 0.595817 | 0.078601 |
| MmugDNA.42284.1.S1_s_at | MmugDNA.42284.1 | 8.6   | 9     | 0.45 | 0.14 | -1.32 | 0.200465 | 0.019341 | 0.497869 | 0.174785 |
| MmugDNA.42287.1.S1_at   | MmugDNA.42287.1 | 5.76  | 6.11  | 0.14 | 0.21 | -1.27 | 0.151617 | 0.123608 | 0.441124 | 0.393646 |
| MmugDNA.42302.1.S1_at   | MmugDNA.42302.1 | 12.6  | 12.15 | 0.16 | 0.19 | 1.37  | 0.034633 | 0.109471 | 0.240618 | 0.373337 |
| MmugDNA.42304.1.S1_at   | MmugDNA.42304.1 | 6.49  | 7.58  | 0.39 | 0.42 | -2.13 | 0.021669 | 0.173336 | 0.20067  | 0.449791 |
| MmugDNA.4231.1.S1_at    | MmugDNA.4231.1  | 4.72  | 4.71  | 0.09 | 0.01 | 1     | 0.879564 | 0.916137 | 0.948767 | 0.953065 |
| MmugDNA.42323.1.S1_at   | MmugDNA.42323.1 | 9.34  | 9.36  | 0.22 | 0.1  | -1.01 | 0.469299 | 0.014436 | 0.714096 | 0.153335 |
| MmugDNA.42326.1.S1_at   | MmugDNA.42326.1 | 9.84  | 9.82  | 0.18 | 0.14 | 1.01  | 0.902715 | 0.168456 | 0.958703 | 0.445092 |
| MmugDNA.42327.1.S1_at   | MmugDNA.42327.1 | 13.31 | 13.13 | 0.05 | 0.14 | 1.13  | 0.218549 | 0.215049 | 0.516177 | 0.488898 |
| MmugDNA.42328.1.S1_at   | MmugDNA.42328.1 | 11.73 | 11.73 | 0.19 | 0.08 | -1    | 0.663932 | 0.296469 | 0.838159 | 0.555528 |
| MmugDNA.42336.1.S1_s_at | MmugDNA.42336.1 | 10.72 | 10.59 | 0.21 | 0.06 | 1.1   | 0.10876  | 0.015371 | 0.383665 | 0.157415 |
| MmugDNA.42341.1.S1_at   | MmugDNA.42341.1 | 9.14  | 9.14  | 0.22 | 0.2  | 1     | 0.554751 | 0.594666 | 0.770788 | 0.758623 |
| MmugDNA.42345.1.S1_at   | MmugDNA.42345.1 | 7.95  | 7.86  | 0.11 | 0.09 | 1.06  | 0.648125 | 0.885007 | 0.829161 | 0.934484 |
| MmugDNA.42355.1.S1_at   | MmugDNA.42355.1 | 9.46  | 9.62  | 0.34 | 0.03 | -1.12 | 0.88081  | 0.946743 | 0.949338 | 0.96978  |
| MmugDNA.42361.1.S1_at   | MmugDNA.42361.1 | 5.44  | 5.03  | 0.67 | 0.25 | 1.33  | 0.799681 | 0.328935 | 0.909612 | 0.578482 |
| MmugDNA.42375.1.S1_at   | MmugDNA.42375.1 | 4.17  | 5.02  | 0.46 | 0.45 | -1.81 | 0.094064 | 0.199822 | 0.363072 | 0.474491 |

|                         |                 |       |       |      |      |        |          |          |          |          |
|-------------------------|-----------------|-------|-------|------|------|--------|----------|----------|----------|----------|
| MmugDNA.42376.1.S1_at   | MmugDNA.42376.1 | 12.25 | 12.02 | 0.21 | 0.24 | 1.17   | 0.441533 | 0.520573 | 0.695043 | 0.711831 |
| MmugDNA.42378.1.S1_at   | MmugDNA.42378.1 | 5.94  | 5.85  | 0.38 | 0.2  | 1.07   | 0.918954 | 0.855478 | 0.965374 | 0.9176   |
| MmugDNA.42380.1.S1_at   | MmugDNA.42380.1 | 6.05  | 6.21  | 0.16 | 0.13 | -1.11  | 0.12609  | 0.26149  | 0.40715  | 0.527999 |
| MmugDNA.42381.1.S1_at   | MmugDNA.42381.1 | 5.29  | 5.74  | 0.68 | 0.14 | -1.36  | 0.411931 | 0.647699 | 0.673744 | 0.793691 |
| MmugDNA.42382.1.S1_at   | MmugDNA.42382.1 | 8.75  | 8.52  | 0.33 | 0.23 | 1.17   | 0.408556 | 0.129629 | 0.671316 | 0.401242 |
| MmugDNA.42383.1.S1_s_at | MmugDNA.42383.1 | 9.19  | 10.32 | 0.14 | 0.24 | -2.18  | 0.004484 | 0.149569 | 0.113436 | 0.424095 |
| MmugDNA.42385.1.S1_at   | MmugDNA.42385.1 | 5.49  | 5.59  | 0.62 | 0.16 | -1.07  | 0.490731 | 0.572068 | 0.728804 | 0.744208 |
| MmugDNA.42399.1.S1_at   | MmugDNA.42399.1 | 11.83 | 11.99 | 0.05 | 0.11 | -1.12  | 0.076751 | 0.385908 | 0.33513  | 0.621161 |
| MmugDNA.42401.1.S1_at   | MmugDNA.42401.1 | 11.62 | 11.39 | 0.24 | 0.08 | 1.18   | 0.357077 | 0.178013 | 0.633283 | 0.45438  |
| MmugDNA.42405.1.S1_at   | MmugDNA.42405.1 | 10.57 | 11.03 | 0.13 | 0.09 | -1.37  | 0.017258 | 0.031437 | 0.184559 | 0.219107 |
| MmugDNA.42410.1.S1_at   | MmugDNA.42410.1 | 11.28 | 11.21 | 0.09 | 0.04 | 1.05   | 0.099369 | 0.072176 | 0.370308 | 0.314715 |
| MmugDNA.42411.1.S1_at   | MmugDNA.42411.1 | 2.99  | 2.99  | 0.07 | 0.09 | 1      | 0.567338 | 0.30321  | 0.77771  | 0.560717 |
| MmugDNA.42412.1.S1_at   | MmugDNA.42412.1 | 4.59  | 4.61  | 0.14 | 0.14 | -1.02  | 0.468594 | 0.467323 | 0.71365  | 0.677035 |
| MmugDNA.42418.1.S1_at   | MmugDNA.42418.1 | 8.52  | 8.63  | 0.13 | 0.14 | -1.08  | 0.464906 | 0.891417 | 0.711025 | 0.938143 |
| MmugDNA.42423.1.S1_at   | MmugDNA.42423.1 | 9.04  | 9.15  | 0.24 | 0.12 | -1.08  | 0.20513  | 0.419069 | 0.502954 | 0.643266 |
| MmugDNA.42442.1.S1_at   | MmugDNA.42442.1 | 6.25  | 6.51  | 0.09 | 0.32 | -1.2   | 0.225924 | 0.299595 | 0.523661 | 0.557956 |
| MmugDNA.42446.1.S1_at   | MmugDNA.42446.1 | 7.69  | 7.94  | 0.43 | 0.14 | -1.18  | 0.314594 | 0.033643 | 0.599987 | 0.227006 |
| MmugDNA.4245.1.S1_at    | MmugDNA.4245.1  | 5.3   | 5.34  | 0.14 | 0.11 | -1.03  | 0.589032 | 0.620301 | 0.791378 | 0.775303 |
| MmugDNA.42454.1.S1_at   | MmugDNA.42454.1 | 12.72 | 12.92 | 0.24 | 0.03 | -1.15  | 0.07227  | 0.355511 | 0.326794 | 0.597777 |
| MmugDNA.42458.1.S1_at   | MmugDNA.42458.1 | 6.85  | 6.83  | 0.17 | 0.1  | 1.02   | 0.735383 | 0.374176 | 0.876836 | 0.612678 |
| MmugDNA.42468.1.S1_at   | MmugDNA.42468.1 | 4.08  | 4.35  | 0.17 | 0.13 | -1.21  | 0.238879 | 0.119012 | 0.536098 | 0.387269 |
| MmugDNA.42469.1.S1_at   | MmugDNA.42469.1 | 12.51 | 12.57 | 0.12 | 0.01 | -1.04  | 0.961956 | 0.786388 | 0.984489 | 0.876296 |
| MmugDNA.42476.1.S1_at   | MmugDNA.42476.1 | 9.29  | 9.55  | 0.55 | 0.05 | -1.2   | 0.901486 | 0.816582 | 0.95827  | 0.894202 |
| MmugDNA.42480.1.S1_at   | MmugDNA.42480.1 | 8.15  | 8.15  | 0.22 | 0.04 | 1      | 0.740781 | 0.248886 | 0.879853 | 0.517964 |
| MmugDNA.42481.1.S1_at   | MmugDNA.42481.1 | 11.84 | 11.46 | 0.14 | 0.19 | 1.3    | 0.058953 | 0.063478 | 0.299954 | 0.298441 |
| MmugDNA.42482.1.S1_at   | MmugDNA.42482.1 | 10.49 | 9.62  | 0.21 | 0.05 | 1.84   | 0.00307  | 0.008806 | 0.100495 | 0.124117 |
| MmugDNA.42484.1.S1_at   | MmugDNA.42484.1 | 10.11 | 9.89  | 0.2  | 0.11 | 1.16   | 0.309162 | 0.363049 | 0.5956   | 0.603503 |
| MmugDNA.42485.1.S1_at   | MmugDNA.42485.1 | 11.8  | 11.78 | 0.06 | 0.04 | 1.02   | 0.919197 | 0.079153 | 0.965424 | 0.326338 |
| MmugDNA.42489.1.S1_at   | MmugDNA.42489.1 | 4.44  | 4.04  | 0.08 | 0.08 | 1.31   | 0.005494 | 0.030087 | 0.119561 | 0.215257 |
| MmugDNA.4249.1.S1_at    | MmugDNA.4249.1  | 8.32  | 7.89  | 0.08 | 0.23 | 1.35   | 0.037924 | 0.007704 | 0.250541 | 0.117294 |
| MmugDNA.42499.1.S1_at   | MmugDNA.42499.1 | 4.6   | 8.41  | 2.36 | 0.33 | -14.07 | 0.165587 | 0.35116  | 0.458665 | 0.594851 |
| MmugDNA.42505.1.S1_at   | MmugDNA.42505.1 | 10.2  | 9.97  | 0.22 | 0.25 | 1.17   | 0.841444 | 0.746272 | 0.930364 | 0.85272  |
| MmugDNA.42506.1.S1_at   | MmugDNA.42506.1 | 7.76  | 7.62  | 0.12 | 0.13 | 1.1    | 0.250552 | 0.181778 | 0.545215 | 0.458373 |
| MmugDNA.42507.1.S1_at   | MmugDNA.42507.1 | 13.07 | 13.12 | 0.06 | 0.02 | -1.04  | 0.274055 | 0.544122 | 0.566044 | 0.726618 |
| MmugDNA.42511.1.S1_at   | MmugDNA.42511.1 | 5.36  | 5.37  | 0.03 | 0.09 | -1     | 0.628906 | 0.0808   | 0.817525 | 0.328703 |
| MmugDNA.42517.1.S1_at   | MmugDNA.42517.1 | 6.48  | 6.55  | 0.22 | 0.01 | -1.05  | 0.692768 | 0.47197  | 0.853171 | 0.679799 |
| MmugDNA.42519.1.S1_at   | MmugDNA.42519.1 | 6.58  | 6.65  | 0.18 | 0.08 | -1.05  | 0.288608 | 0.394743 | 0.578343 | 0.627208 |
| MmugDNA.42521.1.S1_at   | MmugDNA.42521.1 | 12.93 | 12.92 | 0.03 | 0.03 | 1.01   | 0.896731 | 0.05974  | 0.956107 | 0.29107  |
| MmugDNA.42522.1.S1_at   | MmugDNA.42522.1 | 12.97 | 12.95 | 0.08 | 0.03 | 1.01   | 0.655678 | 0.048679 | 0.833512 | 0.265631 |
| MmugDNA.42525.1.S1_at   | MmugDNA.42525.1 | 11.51 | 11.5  | 0.18 | 0.02 | 1      | 0.570346 | 0.527234 | 0.779298 | 0.715896 |
| MmugDNA.42528.1.S1_at   | MmugDNA.42528.1 | 4.79  | 4.72  | 0.14 | 0.07 | 1.05   | 0.957289 | 0.488715 | 0.982547 | 0.691325 |
| MmugDNA.42530.1.S1_at   | MmugDNA.42530.1 | 12.7  | 12.76 | 0.15 | 0.07 | -1.05  | 0.88858  | 0.024527 | 0.952485 | 0.196012 |
| MmugDNA.42544.1.S1_at   | MmugDNA.42544.1 | 11    | 11.27 | 0.38 | 0.08 | -1.21  | 0.810903 | 0.947672 | 0.915287 | 0.970284 |

|                         |                 |       |       |      |      |       |          |          |          |          |
|-------------------------|-----------------|-------|-------|------|------|-------|----------|----------|----------|----------|
| MmugDNA.42544.1.S1_s_at | MmugDNA.42544.1 | 12.19 | 12.32 | 0.24 | 0.06 | -1.09 | 0.980563 | 0.999816 | 0.992769 | 0.999948 |
| MmugDNA.42547.1.S1_at   | MmugDNA.42547.1 | 9.99  | 9.94  | 0.12 | 0.03 | 1.03  | 0.443191 | 0.000845 | 0.696527 | 0.047038 |
| MmugDNA.42549.1.S1_at   | MmugDNA.42549.1 | 8.95  | 9.82  | 0.28 | 0.11 | -1.83 | 0.005348 | 0.018711 | 0.118207 | 0.171763 |
| MmugDNA.4255.1.S1_at    | MmugDNA.4255.1  | 7.1   | 7.13  | 0    | 0.13 | -1.02 | 0.788768 | 0.528526 | 0.904019 | 0.716664 |
| MmugDNA.42553.1.S1_at   | MmugDNA.42553.1 | 7.87  | 7.28  | 0.4  | 0.15 | 1.5   | 0.061377 | 0.041987 | 0.304438 | 0.249463 |
| MmugDNA.42562.1.S1_at   | MmugDNA.42562.1 | 3.93  | 4.4   | 0.44 | 0.34 | -1.38 | 0.268742 | 0.402048 | 0.561278 | 0.631153 |
| MmugDNA.42571.1.S1_at   | MmugDNA.42571.1 | 11.11 | 11.59 | 0.17 | 0.15 | -1.39 | 0.023217 | 0.009108 | 0.205385 | 0.125983 |
| MmugDNA.42575.1.S1_at   | MmugDNA.42575.1 | 6.08  | 6.09  | 0.09 | 0.08 | -1.01 | 0.81625  | 0.910391 | 0.91799  | 0.949416 |
| MmugDNA.4258.1.S1_at    | MmugDNA.4258.1  | 4.2   | 4.1   | 0.03 | 0.11 | 1.07  | 0.529337 | 0.218041 | 0.754208 | 0.491683 |
| MmugDNA.42588.1.S1_at   | MmugDNA.42588.1 | 7.42  | 8.32  | 0.21 | 0.11 | -1.86 | 0.003174 | 0.009721 | 0.101357 | 0.129718 |
| MmugDNA.4260.1.S1_at    | MmugDNA.4260.1  | 7.99  | 7.92  | 0.12 | 0.09 | 1.04  | 0.999792 | 0.81068  | 0.999962 | 0.890836 |
| MmugDNA.42607.1.S1_at   | MmugDNA.42607.1 | 9.33  | 9.05  | 0.09 | 0.09 | 1.21  | 0.034426 | 0.047693 | 0.240132 | 0.263323 |
| MmugDNA.42613.1.S1_at   | MmugDNA.42613.1 | 4.84  | 4.61  | 0.57 | 0.16 | 1.18  | 0.183575 | 0.540941 | 0.479482 | 0.724649 |
| MmugDNA.42615.1.S1_at   | MmugDNA.42615.1 | 9.85  | 9.99  | 0.35 | 0.09 | -1.1  | 0.760838 | 0.023162 | 0.890353 | 0.190579 |
| MmugDNA.42624.1.S1_at   | MmugDNA.42624.1 | 4.94  | 4.83  | 0.29 | 0.23 | 1.08  | 0.660447 | 0.432882 | 0.83613  | 0.653221 |
| MmugDNA.42634.1.S1_at   | MmugDNA.42634.1 | 3.25  | 3.29  | 0.16 | 0.04 | -1.02 | 0.681878 | 0.399259 | 0.848273 | 0.629735 |
| MmugDNA.42635.1.S1_at   | MmugDNA.42635.1 | 7.72  | 7.78  | 0.5  | 0.1  | -1.04 | 0.336051 | 0.13198  | 0.616699 | 0.404024 |
| MmugDNA.42638.1.S1_at   | MmugDNA.42638.1 | 12.18 | 11.92 | 0.12 | 0.06 | 1.2   | 0.031517 | 0.074912 | 0.230962 | 0.318845 |
| MmugDNA.42657.1.S1_s_at | MmugDNA.42657.1 | 11.11 | 11.12 | 0.06 | 0.05 | -1.01 | 0.196372 | 0.000101 | 0.493451 | 0.027996 |
| MmugDNA.42663.1.S1_at   | MmugDNA.42663.1 | 10.58 | 9.93  | 0.88 | 0.15 | 1.57  | 0.281141 | 0.607521 | 0.572037 | 0.766417 |
| MmugDNA.42664.1.S1_at   | MmugDNA.42664.1 | 8.42  | 8.32  | 0.58 | 0.17 | 1.07  | 0.882709 | 0.933611 | 0.950145 | 0.962229 |
| MmugDNA.42668.1.S1_at   | MmugDNA.42668.1 | 5.54  | 5.38  | 0.15 | 0.07 | 1.12  | 0.32922  | 0.200962 | 0.611528 | 0.475426 |
| MmugDNA.4267.1.S1_at    | MmugDNA.4267.1  | 9.83  | 9.73  | 0.2  | 0.05 | 1.07  | 0.538522 | 0.022877 | 0.760315 | 0.189288 |
| MmugDNA.42682.1.S1_at   | MmugDNA.42682.1 | 10.34 | 10.98 | 0.28 | 0.04 | -1.55 | 0.038996 | 0.094205 | 0.253755 | 0.350889 |
| MmugDNA.42683.1.S1_at   | MmugDNA.42683.1 | 7.35  | 7.62  | 0.2  | 0.33 | -1.2  | 0.09601  | 0.006914 | 0.365529 | 0.112399 |
| MmugDNA.42684.1.S1_at   | MmugDNA.42684.1 | 9.01  | 9.38  | 0.17 | 0.07 | -1.29 | 0.055888 | 0.002742 | 0.293434 | 0.077231 |
| MmugDNA.42694.1.S1_at   | MmugDNA.42694.1 | 7.12  | 7.15  | 0.32 | 0.22 | -1.02 | 0.899324 | 0.995679 | 0.957134 | 0.997321 |
| MmugDNA.42698.1.S1_at   | MmugDNA.42698.1 | 10.09 | 10.04 | 0.25 | 0.13 | 1.03  | 0.879423 | 0.070199 | 0.948738 | 0.311194 |
| MmugDNA.42699.1.S1_at   | MmugDNA.42699.1 | 7.83  | 6.61  | 0.26 | 0.28 | 2.33  | 0.007743 | 0.022005 | 0.136735 | 0.18564  |
| MmugDNA.427.1.S1_at     | MmugDNA.427.1   | 7.29  | 7.36  | 0.63 | 0.1  | -1.05 | 0.870326 | 0.978919 | 0.944208 | 0.988587 |
| MmugDNA.42705.1.S1_at   | MmugDNA.42705.1 | 10.15 | 10.84 | 0.29 | 0.16 | -1.61 | 0.04776  | 0.032877 | 0.27591  | 0.224478 |
| MmugDNA.42706.1.S1_at   | MmugDNA.42706.1 | 12.66 | 12.7  | 0.05 | 0.04 | -1.03 | 0.918075 | 0.895267 | 0.965083 | 0.940185 |
| MmugDNA.4271.1.S1_at    | MmugDNA.4271.1  | 10.08 | 9.96  | 0.07 | 0.06 | 1.09  | 0.10003  | 0.552124 | 0.37088  | 0.731511 |
| MmugDNA.42717.1.S1_at   | MmugDNA.42717.1 | 3.2   | 3.42  | 0.33 | 0.18 | -1.16 | 0.763113 | 0.217951 | 0.891497 | 0.491553 |
| MmugDNA.42724.1.S1_at   | MmugDNA.42724.1 | 4.99  | 5     | 0.08 | 0.21 | -1.01 | 0.781665 | 0.868671 | 0.900264 | 0.925405 |
| MmugDNA.42726.1.S1_at   | MmugDNA.42726.1 | 9.05  | 8.06  | 0.23 | 0.11 | 1.99  | 0.002215 | 0.000104 | 0.090954 | 0.028099 |
| MmugDNA.42739.1.S1_at   | MmugDNA.42739.1 | 9.5   | 9.97  | 0.28 | 0.18 | -1.39 | 0.031025 | 0.0013   | 0.229114 | 0.055602 |
| MmugDNA.4274.1.S1_at    | MmugDNA.4274.1  | 7.36  | 8.01  | 1.28 | 0.18 | -1.58 | 0.326669 | 0.713077 | 0.609643 | 0.833638 |
| MmugDNA.42742.1.S1_at   | MmugDNA.42742.1 | 11    | 9.53  | 0.44 | 0.54 | 2.78  | 0.050799 | 0.041366 | 0.283144 | 0.247995 |
| MmugDNA.42748.1.S1_at   | MmugDNA.42748.1 | 12.14 | 13.07 | 0.17 | 0.12 | -1.91 | 0.00246  | 0.175109 | 0.093953 | 0.451787 |
| MmugDNA.42749.1.S1_at   | MmugDNA.42749.1 | 3.66  | 3.58  | 0.09 | 0.04 | 1.06  | 0.940007 | 0.421682 | 0.974707 | 0.645222 |
| MmugDNA.4275.1.S1_at    | MmugDNA.4275.1  | 9.1   | 8.79  | 0.1  | 0.05 | 1.24  | 0.009361 | 0.097743 | 0.14664  | 0.355598 |
| MmugDNA.42752.1.S1_at   | MmugDNA.42752.1 | 7.92  | 7.55  | 0.14 | 0.03 | 1.29  | 0.013246 | 0.230154 | 0.165695 | 0.502007 |

|                         |                 |       |       |      |      |       |          |          |          |          |
|-------------------------|-----------------|-------|-------|------|------|-------|----------|----------|----------|----------|
| MmugDNA.42754.1.S1_at   | MmugDNA.42754.1 | 10.06 | 9.89  | 0.29 | 0.13 | 1.12  | 0.340844 | 0.298266 | 0.620908 | 0.556931 |
| MmugDNA.42755.1.S1_at   | MmugDNA.42755.1 | 5.95  | 5.66  | 0.17 | 0.11 | 1.23  | 0.091056 | 0.119012 | 0.358316 | 0.387269 |
| MmugDNA.42762.1.S1_at   | MmugDNA.42762.1 | 11.35 | 11.71 | 0.16 | 0.02 | -1.28 | 0.022897 | 0.026274 | 0.204235 | 0.203033 |
| MmugDNA.42768.1.S1_at   | MmugDNA.42768.1 | 10.47 | 10.13 | 0.16 | 0.09 | 1.27  | 0.034765 | 0.087485 | 0.241036 | 0.340617 |
| MmugDNA.42769.1.S1_at   | MmugDNA.42769.1 | 7.13  | 6.08  | 0.89 | 0.08 | 2.06  | 0.145323 | 0.124865 | 0.432623 | 0.395219 |
| MmugDNA.42770.1.S1_at   | MmugDNA.42770.1 | 4.96  | 5.02  | 0.1  | 0.16 | -1.04 | 0.496772 | 0.377552 | 0.732595 | 0.615012 |
| MmugDNA.42772.1.S1_at   | MmugDNA.42772.1 | 10.53 | 10.92 | 0.18 | 0.07 | -1.31 | 0.076615 | 0.113431 | 0.334909 | 0.379509 |
| MmugDNA.42775.1.S1_at   | MmugDNA.42775.1 | 6.82  | 7.2   | 0.38 | 0.17 | -1.3  | 0.521376 | 0.331667 | 0.749308 | 0.580237 |
| MmugDNA.42776.1.S1_at   | MmugDNA.42776.1 | 8.07  | 8.07  | 0.08 | 0.05 | -1    | 0.443996 | 0.60734  | 0.696949 | 0.766359 |
| MmugDNA.42778.1.S1_at   | MmugDNA.42778.1 | 12.81 | 12.63 | 0.11 | 0.12 | 1.13  | 0.063956 | 0.036808 | 0.309333 | 0.236386 |
| MmugDNA.42779.1.S1_at   | MmugDNA.42779.1 | 9.22  | 8.81  | 0.28 | 0.09 | 1.33  | 0.0584   | 0.071597 | 0.298756 | 0.313714 |
| MmugDNA.42780.1.S1_at   | MmugDNA.42780.1 | 8.25  | 8.22  | 0.26 | 0.1  | 1.02  | 0.225969 | 0.398619 | 0.523711 | 0.629458 |
| MmugDNA.42783.1.S1_at   | MmugDNA.42783.1 | 11.81 | 11.16 | 0.14 | 0.02 | 1.57  | 0.001012 | 0.000003 | 0.076321 | 0.013386 |
| MmugDNA.42793.1.S1_at   | MmugDNA.42793.1 | 6.51  | 8.15  | 0.73 | 0.28 | -3.11 | 0.067184 | 0.107217 | 0.316853 | 0.369902 |
| MmugDNA.42794.1.S1_at   | MmugDNA.42794.1 | 4.74  | 4.44  | 0.29 | 0.09 | 1.22  | 0.700616 | 0.583506 | 0.857793 | 0.751817 |
| MmugDNA.42795.1.S1_s_at | MmugDNA.42795.1 | 10.99 | 10.75 | 0.28 | 0.04 | 1.18  | 0.074157 | 0.006181 | 0.330427 | 0.106774 |
| MmugDNA.42796.1.S1_at   | MmugDNA.42796.1 | 9.16  | 9.45  | 0.08 | 0.07 | -1.23 | 0.018774 | 0.152276 | 0.190391 | 0.42706  |
| MmugDNA.42799.1.S1_at   | MmugDNA.42799.1 | 12.54 | 12.65 | 0.04 | 0.04 | -1.08 | 0.020231 | 0.0106   | 0.195882 | 0.134272 |
| MmugDNA.42801.1.S1_at   | MmugDNA.42801.1 | 7.11  | 6.95  | 0.09 | 0.19 | 1.11  | 0.248034 | 0.339237 | 0.543371 | 0.585918 |
| MmugDNA.42810.1.S1_at   | MmugDNA.42810.1 | 9.77  | 9.37  | 0.13 | 0.09 | 1.32  | 0.036291 | 0.052289 | 0.24562  | 0.27415  |
| MmugDNA.42815.1.S1_at   | MmugDNA.42815.1 | 8.32  | 6.18  | 1.18 | 0.55 | 4.4   | 0.106559 | 0.087209 | 0.380675 | 0.340194 |
| MmugDNA.42816.1.S1_at   | MmugDNA.42816.1 | 10.38 | 10.33 | 0.07 | 0.04 | 1.03  | 0.646626 | 0.953203 | 0.828299 | 0.973457 |
| MmugDNA.4282.1.S1_at    | MmugDNA.4282.1  | 11.26 | 12    | 0.52 | 0.11 | -1.67 | 0.033049 | 0.005786 | 0.236091 | 0.104502 |
| MmugDNA.42823.1.S1_at   | MmugDNA.42823.1 | 8.66  | 9.79  | 0.59 | 0.16 | -2.19 | 0.046615 | 0.41628  | 0.273564 | 0.641518 |
| MmugDNA.42828.1.S1_at   | MmugDNA.42828.1 | 5.79  | 6.47  | 0.2  | 0.17 | -1.6  | 0.018539 | 0.011451 | 0.189405 | 0.13846  |
| MmugDNA.42829.1.S1_s_at | MmugDNA.42829.1 | 8.26  | 7.86  | 0.21 | 0.09 | 1.32  | 0.085745 | 0.151641 | 0.350079 | 0.426383 |
| MmugDNA.42832.1.S1_at   | MmugDNA.42832.1 | 7.79  | 7.87  | 0.34 | 0.22 | -1.05 | 0.842009 | 0.068842 | 0.930665 | 0.308714 |
| MmugDNA.42838.1.S1_at   | MmugDNA.42838.1 | 9.38  | 9.71  | 0.16 | 0.15 | -1.25 | 0.152077 | 0.092465 | 0.441589 | 0.34836  |
| MmugDNA.42847.1.S1_at   | MmugDNA.42847.1 | 11.22 | 11.52 | 0.29 | 0.15 | -1.23 | 0.296174 | 0.431021 | 0.584902 | 0.651995 |
| MmugDNA.42847.1.S1_s_at | MmugDNA.42847.1 | 10.37 | 10.48 | 0.25 | 0.1  | -1.08 | 0.398338 | 0.287872 | 0.663851 | 0.549161 |
| MmugDNA.42851.1.S1_at   | MmugDNA.42851.1 | 6.48  | 6.49  | 0.15 | 0.05 | -1.01 | 0.686671 | 0.736853 | 0.850709 | 0.847693 |
| MmugDNA.42852.1.S1_at   | MmugDNA.42852.1 | 4.96  | 4.64  | 0.35 | 0.27 | 1.25  | 0.185295 | 0.110978 | 0.481498 | 0.375405 |
| MmugDNA.42852.1.S1_s_at | MmugDNA.42852.1 | 12.67 | 12.51 | 0.11 | 0.05 | 1.12  | 0.14265  | 0.057097 | 0.428696 | 0.284945 |
| MmugDNA.42859.1.S1_at   | MmugDNA.42859.1 | 8.32  | 8.3   | 0.33 | 0.09 | 1.01  | 0.783722 | 0.853399 | 0.901321 | 0.916579 |
| MmugDNA.42860.1.S1_at   | MmugDNA.42860.1 | 5.12  | 5.12  | 0.07 | 0.02 | 1     | 0.423292 | 0.320191 | 0.681371 | 0.572551 |
| MmugDNA.42870.1.S1_at   | MmugDNA.42870.1 | 11.49 | 11.64 | 0.11 | 0.06 | -1.12 | 0.034812 | 0.356728 | 0.241109 | 0.598529 |
| MmugDNA.42872.1.S1_at   | MmugDNA.42872.1 | 6.27  | 6.16  | 0.11 | 0.03 | 1.08  | 0.135051 | 0.316185 | 0.419042 | 0.569645 |
| MmugDNA.42873.1.S1_at   | MmugDNA.42873.1 | 5.91  | 5.68  | 0.52 | 0.05 | 1.17  | 0.722524 | 0.27333  | 0.869499 | 0.537788 |
| MmugDNA.42876.1.S1_at   | MmugDNA.42876.1 | 3.46  | 3.55  | 0.1  | 0.04 | -1.06 | 0.179756 | 0.007031 | 0.474837 | 0.113112 |
| MmugDNA.42877.1.S1_at   | MmugDNA.42877.1 | 9.96  | 9.95  | 0.12 | 0.23 | 1     | 0.981881 | 0.0117   | 0.993299 | 0.140174 |
| MmugDNA.42880.1.S1_at   | MmugDNA.42880.1 | 4.68  | 4.64  | 0.18 | 0.22 | 1.03  | 0.874892 | 0.985287 | 0.94633  | 0.991665 |
| MmugDNA.42881.1.S1_at   | MmugDNA.42881.1 | 10.95 | 10.83 | 0.03 | 0.09 | 1.09  | 0.023951 | 0.000477 | 0.207872 | 0.038572 |
| MmugDNA.42883.1.S1_at   | MmugDNA.42883.1 | 6.73  | 6.96  | 0.24 | 0.13 | -1.17 | 0.470883 | 0.290861 | 0.71522  | 0.551436 |



|                         |                 |       |       |      |      |       |          |          |          |          |
|-------------------------|-----------------|-------|-------|------|------|-------|----------|----------|----------|----------|
| MmugDNA.42885.1.S1_at   | MmugDNA.42885.1 | 8.03  | 8.8   | 0.3  | 0.13 | -1.7  | 0.012517 | 0.417227 | 0.16232  | 0.642079 |
| MmugDNA.42889.1.S1_at   | MmugDNA.42889.1 | 11.28 | 11.28 | 0.13 | 0.04 | 1     | 0.781603 | 0.051214 | 0.900245 | 0.271799 |
| MmugDNA.42890.1.S1_at   | MmugDNA.42890.1 | 13.07 | 13.53 | 0.1  | 0.02 | -1.38 | 0.000778 | 0.000995 | 0.072818 | 0.050459 |
| MmugDNA.42891.1.S1_at   | MmugDNA.42891.1 | 3.88  | 3.56  | 0.08 | 0.14 | 1.25  | 0.061079 | 0.05319  | 0.304005 | 0.276445 |
| MmugDNA.42897.1.S1_at   | MmugDNA.42897.1 | 6.78  | 6.43  | 0.44 | 0.24 | 1.28  | 0.676142 | 0.268493 | 0.845327 | 0.534123 |
| MmugDNA.42899.1.S1_at   | MmugDNA.42899.1 | 13.21 | 13.25 | 0.05 | 0.04 | -1.03 | 0.166524 | 0.12045  | 0.459742 | 0.38925  |
| MmugDNA.42901.1.S1_at   | MmugDNA.42901.1 | 10.38 | 10.6  | 0.07 | 0.08 | -1.16 | 0.030119 | 0.000221 | 0.226716 | 0.032385 |
| MmugDNA.42902.1.S1_at   | MmugDNA.42902.1 | 12.88 | 12.99 | 0.17 | 0.06 | -1.08 | 0.334041 | 0.818465 | 0.615174 | 0.895358 |
| MmugDNA.42903.1.S1_at   | MmugDNA.42903.1 | 8.2   | 7.47  | 0.28 | 0.18 | 1.67  | 0.017295 | 0.00724  | 0.184712 | 0.114286 |
| MmugDNA.42905.1.S1_at   | MmugDNA.42905.1 | 6.7   | 7.49  | 0.42 | 0.55 | -1.73 | 0.268776 | 0.119477 | 0.561284 | 0.388113 |
| MmugDNA.42910.1.S1_at   | MmugDNA.42910.1 | 8.53  | 8.82  | 0.2  | 0.25 | -1.23 | 0.655077 | 0.73705  | 0.833089 | 0.847791 |
| MmugDNA.42913.1.S1_s_at | MmugDNA.42913.1 | 3.3   | 3.33  | 0.12 | 0.01 | -1.02 | 0.680695 | 0.829047 | 0.847721 | 0.901709 |
| MmugDNA.42921.1.S1_at   | MmugDNA.42921.1 | 12.06 | 12.38 | 0.24 | 0.08 | -1.25 | 0.121951 | 0.136738 | 0.400622 | 0.409301 |
| MmugDNA.42924.1.S1_at   | MmugDNA.42924.1 | 9.62  | 10.03 | 0.06 | 0.18 | -1.33 | 0.025567 | 0.015923 | 0.212928 | 0.160155 |
| MmugDNA.42925.1.S1_at   | MmugDNA.42925.1 | 8.43  | 9.11  | 0.6  | 0.11 | -1.6  | 0.074604 | 0.063957 | 0.331249 | 0.29906  |
| MmugDNA.42926.1.S1_at   | MmugDNA.42926.1 | 10.98 | 10.88 | 0.11 | 0.08 | 1.08  | 0.291298 | 0.008287 | 0.580618 | 0.120788 |
| MmugDNA.42928.1.S1_at   | MmugDNA.42928.1 | 6.86  | 6.57  | 0.29 | 0.14 | 1.22  | 0.324114 | 0.488397 | 0.607814 | 0.691144 |
| MmugDNA.42934.1.S1_s_at | MmugDNA.42934.1 | 11.02 | 11.24 | 0.18 | 0.2  | -1.16 | 0.948363 | 0.119706 | 0.978363 | 0.388402 |
| MmugDNA.42938.1.S1_at   | MmugDNA.42938.1 | 11.75 | 11.84 | 0.07 | 0.05 | -1.07 | 0.223666 | 0.012261 | 0.521643 | 0.14321  |
| MmugDNA.42939.1.S1_at   | MmugDNA.42939.1 | 7.72  | 6.36  | 0.37 | 0.4  | 2.57  | 0.025687 | 0.016052 | 0.212966 | 0.160532 |
| MmugDNA.42942.1.S1_at   | MmugDNA.42942.1 | 9.95  | 10.19 | 0.08 | 0.1  | -1.18 | 0.028169 | 0.006777 | 0.220287 | 0.111388 |
| MmugDNA.42957.1.S1_at   | MmugDNA.42957.1 | 6.65  | 6.72  | 0.23 | 0.09 | -1.05 | 0.881434 | 0.034792 | 0.949601 | 0.230686 |
| MmugDNA.42960.1.S1_at   | MmugDNA.42960.1 | 7.47  | 8.02  | 0.65 | 0.32 | -1.46 | 0.206148 | 0.065141 | 0.503843 | 0.301205 |
| MmugDNA.42968.1.S1_at   | MmugDNA.42968.1 | 3.45  | 3.35  | 0.58 | 0.22 | 1.07  | 0.295188 | 0.317567 | 0.584067 | 0.570774 |
| MmugDNA.4297.1.S1_at    | MmugDNA.4297.1  | 12.62 | 12.63 | 0.05 | 0.09 | -1.01 | 0.980939 | 0.212095 | 0.992903 | 0.486036 |
| MmugDNA.4297.1.S1_s_at  | MmugDNA.4297.1  | 12.23 | 12.21 | 0.06 | 0.07 | 1.02  | 0.777726 | 0.532502 | 0.898434 | 0.719065 |
| MmugDNA.42977.1.S1_at   | MmugDNA.42977.1 | 11.22 | 11.47 | 0.07 | 0.07 | -1.19 | 0.010203 | 0.117187 | 0.150739 | 0.384646 |
| MmugDNA.4298.1.S1_at    | MmugDNA.4298.1  | 5.36  | 5.42  | 0.14 | 0.04 | -1.04 | 0.478236 | 0.057027 | 0.719852 | 0.284893 |
| MmugDNA.43.1.S1_at      | MmugDNA.43.1    | 10.7  | 10.78 | 0.07 | 0.06 | -1.06 | 0.142918 | 0.258758 | 0.42911  | 0.525949 |
| MmugDNA.43001.1.S1_s_at | MmugDNA.43001.1 | 9.96  | 9.63  | 0.12 | 0.06 | 1.26  | 0.013424 | 0.000218 | 0.166584 | 0.032385 |
| MmugDNA.43009.1.S1_at   | MmugDNA.43009.1 | 11.81 | 11.52 | 0.08 | 0.07 | 1.22  | 0.009647 | 0.024431 | 0.14832  | 0.195601 |
| MmugDNA.43010.1.S1_at   | MmugDNA.43010.1 | 11.38 | 10.98 | 0.2  | 0.08 | 1.32  | 0.019015 | 0.030819 | 0.191367 | 0.217376 |
| MmugDNA.43012.1.S1_at   | MmugDNA.43012.1 | 7.17  | 7.32  | 0.18 | 0.14 | -1.11 | 0.542881 | 0.78703  | 0.763074 | 0.876809 |
| MmugDNA.43019.1.S1_at   | MmugDNA.43019.1 | 10.64 | 10.88 | 0.23 | 0.04 | -1.19 | 0.049725 | 0.066753 | 0.280409 | 0.304215 |
| MmugDNA.43024.1.S1_s_at | MmugDNA.43024.1 | 10.43 | 11.17 | 0.29 | 0.11 | -1.67 | 0.009799 | 0.023347 | 0.148542 | 0.19156  |
| MmugDNA.43027.1.S1_s_at | MmugDNA.43027.1 | 8.37  | 8.51  | 0.08 | 0.07 | -1.1  | 0.076524 | 0.323695 | 0.334818 | 0.57456  |
| MmugDNA.43033.1.S1_at   | MmugDNA.43033.1 | 7.79  | 7.42  | 0.34 | 0.16 | 1.28  | 0.460174 | 0.00311  | 0.708089 | 0.081305 |
| MmugDNA.43035.1.S1_at   | MmugDNA.43035.1 | 12.52 | 12.47 | 0.05 | 0.05 | 1.04  | 0.179725 | 0.000942 | 0.474837 | 0.049026 |
| MmugDNA.43037.1.S1_at   | MmugDNA.43037.1 | 11.62 | 11.15 | 0.12 | 0.12 | 1.38  | 0.009942 | 0.036239 | 0.149006 | 0.234952 |
| MmugDNA.43038.1.S1_s_at | MmugDNA.43038.1 | 13.17 | 12.84 | 0.07 | 0.01 | 1.26  | 0.001554 | 0.248658 | 0.081985 | 0.517917 |
| MmugDNA.43040.1.S1_at   | MmugDNA.43040.1 | 11.72 | 11.23 | 0.16 | 0.16 | 1.4   | 0.043022 | 0.326449 | 0.264642 | 0.576576 |
| MmugDNA.43041.1.S1_at   | MmugDNA.43041.1 | 6.1   | 5.98  | 0.1  | 0.14 | 1.09  | 0.208599 | 0.140589 | 0.506194 | 0.413822 |
| MmugDNA.43050.1.S1_at   | MmugDNA.43050.1 | 5.92  | 5.58  | 0.34 | 0.12 | 1.27  | 0.247838 | 0.380695 | 0.543221 | 0.617363 |

|                         |                 |       |       |      |      |        |          |          |          |          |
|-------------------------|-----------------|-------|-------|------|------|--------|----------|----------|----------|----------|
| MmugDNA.43054.1.S1_at   | MmugDNA.43054.1 | 11.26 | 11.8  | 0.28 | 0.11 | -1.45  | 0.04884  | 0.065771 | 0.278585 | 0.301767 |
| MmugDNA.43055.1.S1_at   | MmugDNA.43055.1 | 9.2   | 8.99  | 0.07 | 0.15 | 1.15   | 0.092687 | 0.319363 | 0.361082 | 0.571724 |
| MmugDNA.43060.1.S1_at   | MmugDNA.43060.1 | 4.24  | 4.03  | 0.07 | 0.17 | 1.15   | 0.508695 | 0.683341 | 0.740531 | 0.815238 |
| MmugDNA.43065.1.S1_at   | MmugDNA.43065.1 | 7.31  | 7.31  | 0.3  | 0.19 | 1      | 0.560925 | 0.016455 | 0.774101 | 0.162441 |
| MmugDNA.43070.1.S1_at   | MmugDNA.43070.1 | 9.01  | 9.16  | 0.2  | 0.09 | -1.11  | 0.417966 | 0.594605 | 0.677972 | 0.758623 |
| MmugDNA.43085.1.S1_at   | MmugDNA.43085.1 | 6.69  | 6.67  | 0.09 | 0.08 | 1.01   | 0.397345 | 0.70424  | 0.662987 | 0.828375 |
| MmugDNA.43094.1.S1_at   | MmugDNA.43094.1 | 7.41  | 8.98  | 0.54 | 0.19 | -2.97  | 0.007966 | 0.109289 | 0.138304 | 0.37308  |
| MmugDNA.43096.1.S1_at   | MmugDNA.43096.1 | 10.07 | 10.34 | 0.13 | 0.11 | -1.2   | 0.037115 | 0.138959 | 0.247926 | 0.412048 |
| MmugDNA.43098.1.S1_at   | MmugDNA.43098.1 | 7.56  | 9.09  | 0.58 | 0.28 | -2.89  | 0.028965 | 0.207362 | 0.222981 | 0.481579 |
| MmugDNA.43099.1.S1_at   | MmugDNA.43099.1 | 5.96  | 5.75  | 0.16 | 0.06 | 1.15   | 0.108336 | 0.283898 | 0.382975 | 0.546237 |
| MmugDNA.4310.1.S1_at    | MmugDNA.4310.1  | 12.51 | 12.51 | 0.05 | 0.05 | 1.01   | 0.819331 | 0.000905 | 0.919515 | 0.048084 |
| MmugDNA.43107.1.S1_at   | MmugDNA.43107.1 | 3.15  | 3.41  | 0.16 | 0.24 | -1.19  | 0.149735 | 0.203813 | 0.438721 | 0.478081 |
| MmugDNA.43109.1.S1_at   | MmugDNA.43109.1 | 10.31 | 10.05 | 0.13 | 0.04 | 1.2    | 0.036473 | 0.261372 | 0.24606  | 0.527867 |
| MmugDNA.43112.1.S1_at   | MmugDNA.43112.1 | 3.67  | 3.72  | 0.07 | 0.2  | -1.04  | 0.265183 | 0.085853 | 0.557962 | 0.337972 |
| MmugDNA.43113.1.S1_at   | MmugDNA.43113.1 | 4.93  | 4.32  | 0.31 | 0.09 | 1.53   | 0.111855 | 0.021809 | 0.387954 | 0.184765 |
| MmugDNA.43116.1.S1_at   | MmugDNA.43116.1 | 10.25 | 13.72 | 2.06 | 0.1  | -11.07 | 0.079631 | 0.253639 | 0.33985  | 0.52198  |
| MmugDNA.43117.1.S1_at   | MmugDNA.43117.1 | 3.98  | 4.04  | 0.15 | 0.19 | -1.04  | 0.418912 | 0.508779 | 0.678622 | 0.703824 |
| MmugDNA.43120.1.S1_at   | MmugDNA.43120.1 | 14.02 | 13.88 | 0.09 | 0.06 | 1.1    | 0.253373 | 0.465867 | 0.547789 | 0.675982 |
| MmugDNA.43121.1.S1_at   | MmugDNA.43121.1 | 8.38  | 12    | 1.25 | 0.18 | -12.33 | 0.016145 | 0.164721 | 0.179587 | 0.441043 |
| MmugDNA.43126.1.S1_at   | MmugDNA.43126.1 | 5.05  | 4.89  | 0.29 | 0.16 | 1.12   | 0.340576 | 0.383989 | 0.620825 | 0.619866 |
| MmugDNA.43128.1.S1_at   | MmugDNA.43128.1 | 8.53  | 8.25  | 0.33 | 0.06 | 1.22   | 0.070493 | 0.237568 | 0.323891 | 0.508196 |
| MmugDNA.4313.1.S1_at    | MmugDNA.4313.1  | 10.99 | 11.83 | 0.23 | 0.13 | -1.79  | 0.007085 | 0.006925 | 0.131698 | 0.112445 |
| MmugDNA.43131.1.S1_s_at | MmugDNA.43131.1 | 7.35  | 7.6   | 0.38 | 0.11 | -1.19  | 0.896613 | 0.895528 | 0.956019 | 0.940298 |
| MmugDNA.43132.1.S1_at   | MmugDNA.43132.1 | 2.7   | 2.76  | 0.04 | 0.18 | -1.04  | 0.460133 | 0.607076 | 0.708087 | 0.766185 |
| MmugDNA.43133.1.S1_at   | MmugDNA.43133.1 | 8.59  | 7.94  | 0.39 | 0.48 | 1.57   | 0.344662 | 0.653095 | 0.623971 | 0.79718  |
| MmugDNA.43158.1.S1_at   | MmugDNA.43158.1 | 9.67  | 8.84  | 0.23 | 0.18 | 1.77   | 0.015205 | 0.011138 | 0.175349 | 0.137313 |
| MmugDNA.43167.1.S1_s_at | MmugDNA.43167.1 | 13.51 | 13.23 | 0.08 | 0.05 | 1.22   | 0.007815 | 0.073088 | 0.137244 | 0.316057 |
| MmugDNA.43169.1.S1_at   | MmugDNA.43169.1 | 6.39  | 6.46  | 0.78 | 0.06 | -1.05  | 0.459581 | 0.634876 | 0.707702 | 0.785042 |
| MmugDNA.43172.1.S1_at   | MmugDNA.43172.1 | 5.45  | 5.82  | 0.1  | 0.07 | -1.3   | 0.009632 | 0.008678 | 0.14832  | 0.12355  |
| MmugDNA.4318.1.S1_at    | MmugDNA.4318.1  | 9.55  | 9.87  | 0.1  | 0.2  | -1.25  | 0.310331 | 0.013595 | 0.59659  | 0.149236 |
| MmugDNA.43184.1.S1_at   | MmugDNA.43184.1 | 6.03  | 6     | 0.49 | 0.16 | 1.02   | 0.247198 | 0.333067 | 0.542786 | 0.581374 |
| MmugDNA.43187.1.S1_at   | MmugDNA.43187.1 | 11.99 | 11.06 | 0.18 | 0.13 | 1.91   | 0.004753 | 0.005132 | 0.115098 | 0.099446 |
| MmugDNA.4319.1.S1_at    | MmugDNA.4319.1  | 9.87  | 10.19 | 0.25 | 0.16 | -1.25  | 0.35435  | 0.091175 | 0.631518 | 0.346097 |
| MmugDNA.43190.1.S1_at   | MmugDNA.43190.1 | 5.26  | 5.23  | 0.03 | 0.06 | 1.02   | 0.425323 | 0.103897 | 0.682761 | 0.364564 |
| MmugDNA.43193.1.S1_at   | MmugDNA.43193.1 | 11.51 | 11.27 | 0.25 | 0.48 | 1.18   | 0.88163  | 0.98079  | 0.94964  | 0.989478 |
| MmugDNA.43195.1.S1_at   | MmugDNA.43195.1 | 5.3   | 7.53  | 0.9  | 0.36 | -4.71  | 0.012938 | 0.018532 | 0.164376 | 0.171243 |
| MmugDNA.43195.1.S1_s_at | MmugDNA.43195.1 | 5.74  | 7.7   | 0.52 | 0.41 | -3.88  | 0.005582 | 0.008935 | 0.120456 | 0.125013 |
| MmugDNA.4320.1.S1_at    | MmugDNA.4320.1  | 7.84  | 8.1   | 0.19 | 0.46 | -1.19  | 0.598636 | 0.111758 | 0.797532 | 0.376793 |
| MmugDNA.43201.1.S1_at   | MmugDNA.43201.1 | 5.19  | 5.52  | 0.26 | 0.16 | -1.26  | 0.064859 | 0.007078 | 0.311366 | 0.113284 |
| MmugDNA.43206.1.S1_at   | MmugDNA.43206.1 | 5.52  | 5.52  | 0.13 | 0.03 | -1     | 0.294798 | 0.182167 | 0.583732 | 0.458671 |
| MmugDNA.43209.1.S1_at   | MmugDNA.43209.1 | 6.33  | 7.95  | 0.88 | 0.41 | -3.07  | 0.069065 | 0.137747 | 0.320914 | 0.410738 |
| MmugDNA.43210.1.S1_at   | MmugDNA.43210.1 | 9.85  | 9.63  | 0.1  | 0.14 | 1.17   | 0.046687 | 0.631236 | 0.273611 | 0.782734 |
| MmugDNA.43211.1.S1_at   | MmugDNA.43211.1 | 7.84  | 8.2   | 0.06 | 0.27 | -1.29  | 0.096904 | 0.248128 | 0.367016 | 0.517567 |

|                       |                 |       |       |      |      |       |          |          |          |          |
|-----------------------|-----------------|-------|-------|------|------|-------|----------|----------|----------|----------|
| MmugDNA.43213.1.S1_at | MmugDNA.43213.1 | 10.64 | 11.29 | 0.35 | 0.06 | -1.57 | 0.090553 | 0.227983 | 0.357339 | 0.500211 |
| MmugDNA.43217.1.S1_at | MmugDNA.43217.1 | 12.29 | 12.5  | 0.13 | 0.01 | -1.16 | 0.071665 | 0.001027 | 0.325611 | 0.051145 |
| MmugDNA.43219.1.S1_at | MmugDNA.43219.1 | 8.7   | 8.47  | 0.03 | 0.05 | 1.17  | 0.005448 | 0.00817  | 0.119202 | 0.119886 |
| MmugDNA.43225.1.S1_at | MmugDNA.43225.1 | 7.75  | 7.09  | 0.59 | 0.37 | 1.58  | 0.241382 | 0.130547 | 0.538538 | 0.402412 |
| MmugDNA.43233.1.S1_at | MmugDNA.43233.1 | 6.39  | 6.43  | 0.4  | 0.15 | -1.02 | 0.529264 | 0.044159 | 0.754165 | 0.254547 |
| MmugDNA.43237.1.S1_at | MmugDNA.43237.1 | 10.32 | 9.89  | 0.12 | 0.09 | 1.35  | 0.008834 | 0.021639 | 0.143831 | 0.184333 |
| MmugDNA.43238.1.S1_at | MmugDNA.43238.1 | 6.19  | 5.88  | 0.18 | 0.04 | 1.25  | 0.089975 | 0.091777 | 0.356863 | 0.346977 |
| MmugDNA.43239.1.S1_at | MmugDNA.43239.1 | 10.31 | 10.24 | 0.22 | 0.03 | 1.05  | 0.705466 | 0.730486 | 0.860404 | 0.844017 |
| MmugDNA.4324.1.S1_at  | MmugDNA.4324.1  | 9.19  | 8.74  | 0.13 | 0.06 | 1.36  | 0.013731 | 0.022199 | 0.16797  | 0.186482 |
| MmugDNA.43242.1.S1_at | MmugDNA.43242.1 | 6.05  | 6.17  | 0.22 | 0.15 | -1.09 | 0.723146 | 0.982012 | 0.869925 | 0.99016  |
| MmugDNA.43244.1.S1_at | MmugDNA.43244.1 | 9.43  | 9.71  | 0.32 | 0.13 | -1.21 | 0.369228 | 0.864015 | 0.642795 | 0.922844 |
| MmugDNA.43246.1.S1_at | MmugDNA.43246.1 | 10.61 | 10.69 | 0.19 | 0.03 | -1.06 | 0.17066  | 0.294851 | 0.464374 | 0.554412 |
| MmugDNA.43248.1.S1_at | MmugDNA.43248.1 | 7.25  | 9.12  | 0.82 | 0.14 | -3.65 | 0.044454 | 0.06912  | 0.267911 | 0.309162 |
| MmugDNA.43249.1.S1_at | MmugDNA.43249.1 | 12.59 | 12.77 | 0.06 | 0.09 | -1.14 | 0.085066 | 0.503397 | 0.349156 | 0.700871 |
| MmugDNA.43251.1.S1_at | MmugDNA.43251.1 | 10.42 | 10.12 | 0.11 | 0.05 | 1.23  | 0.006837 | 0.047858 | 0.129382 | 0.263679 |
| MmugDNA.43253.1.S1_at | MmugDNA.43253.1 | 10.41 | 10.81 | 0.54 | 0.15 | -1.32 | 0.417133 | 0.681148 | 0.677381 | 0.813797 |
| MmugDNA.43254.1.S1_at | MmugDNA.43254.1 | 5.9   | 7.12  | 0.84 | 0.17 | -2.33 | 0.081317 | 0.152332 | 0.342222 | 0.427072 |
| MmugDNA.43255.1.S1_at | MmugDNA.43255.1 | 9.96  | 10.24 | 0.09 | 0.08 | -1.21 | 0.058021 | 0.64128  | 0.297981 | 0.789506 |
| MmugDNA.43260.1.S1_at | MmugDNA.43260.1 | 14.43 | 14.45 | 0.04 | 0.02 | -1.02 | 0.590917 | 0.70309  | 0.792099 | 0.827866 |
| MmugDNA.43265.1.S1_at | MmugDNA.43265.1 | 5.15  | 5.09  | 0.03 | 0.04 | 1.04  | 0.086125 | 0.116193 | 0.350608 | 0.383524 |
| MmugDNA.43266.1.S1_at | MmugDNA.43266.1 | 11.4  | 11.66 | 0.24 | 0.08 | -1.2  | 0.109541 | 0.079747 | 0.384571 | 0.327009 |
| MmugDNA.43267.1.S1_at | MmugDNA.43267.1 | 7.45  | 6.64  | 0.1  | 0.39 | 1.76  | 0.064014 | 0.088341 | 0.309476 | 0.341767 |
| MmugDNA.43273.1.S1_at | MmugDNA.43273.1 | 4.83  | 4.91  | 0.27 | 0.03 | -1.06 | 0.511953 | 0.775765 | 0.742834 | 0.869526 |
| MmugDNA.4328.1.S1_at  | MmugDNA.4328.1  | 5.2   | 5.07  | 0.13 | 0.19 | 1.1   | 0.424169 | 0.779325 | 0.681903 | 0.872047 |
| MmugDNA.43283.1.S1_at | MmugDNA.43283.1 | 8.33  | 8.47  | 0.24 | 0.05 | -1.11 | 0.881348 | 0.461522 | 0.949601 | 0.673152 |
| MmugDNA.43286.1.S1_at | MmugDNA.43286.1 | 6.79  | 6.82  | 0.07 | 0.02 | -1.02 | 0.54613  | 0.582721 | 0.765159 | 0.751337 |
| MmugDNA.43290.1.S1_at | MmugDNA.43290.1 | 9.64  | 9.38  | 0.28 | 0.04 | 1.2   | 0.297155 | 0.541612 | 0.585605 | 0.725033 |
| MmugDNA.43291.1.S1_at | MmugDNA.43291.1 | 3     | 3.19  | 0.11 | 0.03 | -1.14 | 0.103788 | 0.387316 | 0.377045 | 0.622027 |
| MmugDNA.43297.1.S1_at | MmugDNA.43297.1 | 4.7   | 4.96  | 0.27 | 0.46 | -1.19 | 0.250161 | 0.162616 | 0.544879 | 0.43872  |
| MmugDNA.43308.1.S1_at | MmugDNA.43308.1 | 10.56 | 10.49 | 0.36 | 0.03 | 1.05  | 0.559681 | 0.007521 | 0.773457 | 0.116291 |
| MmugDNA.43310.1.S1_at | MmugDNA.43310.1 | 9.19  | 9.2   | 0.01 | 0.06 | -1.01 | 0.923551 | 0.980494 | 0.96747  | 0.989333 |
| MmugDNA.43313.1.S1_at | MmugDNA.43313.1 | 5.64  | 5.54  | 0.13 | 0.1  | 1.07  | 0.344572 | 0.551335 | 0.623903 | 0.730922 |
| MmugDNA.43316.1.S1_at | MmugDNA.43316.1 | 11.85 | 11.84 | 0.08 | 0.02 | 1.01  | 0.582613 | 0.908648 | 0.787357 | 0.948282 |
| MmugDNA.43318.1.S1_at | MmugDNA.43318.1 | 8.87  | 8.54  | 0.31 | 0.23 | 1.25  | 0.259965 | 0.123393 | 0.554177 | 0.393391 |
| MmugDNA.43327.1.S1_at | MmugDNA.43327.1 | 9.8   | 10.14 | 0.57 | 0.07 | -1.27 | 0.506677 | 0.052966 | 0.739256 | 0.275787 |
| MmugDNA.4334.1.S1_at  | MmugDNA.4334.1  | 4.63  | 5.32  | 0.47 | 0.61 | -1.61 | 0.085401 | 0.277224 | 0.349723 | 0.54117  |
| MmugDNA.43340.1.S1_at | MmugDNA.43340.1 | 11.83 | 11.73 | 0.08 | 0.03 | 1.07  | 0.111356 | 0.005162 | 0.387378 | 0.0997   |
| MmugDNA.43343.1.S1_at | MmugDNA.43343.1 | 12.09 | 12.02 | 0.06 | 0.03 | 1.05  | 0.461752 | 0.001278 | 0.709051 | 0.055351 |
| MmugDNA.43354.1.S1_at | MmugDNA.43354.1 | 8.85  | 8.86  | 0.14 | 0.07 | -1    | 0.913438 | 0.983436 | 0.96337  | 0.99078  |
| MmugDNA.43368.1.S1_at | MmugDNA.43368.1 | 11.22 | 10.17 | 0.1  | 0.11 | 2.07  | 0.000377 | 0.012087 | 0.062479 | 0.142211 |
| MmugDNA.4337.1.S1_at  | MmugDNA.4337.1  | 6.19  | 6.15  | 0.17 | 0.01 | 1.02  | 0.506565 | 0.506767 | 0.739179 | 0.702575 |
| MmugDNA.43374.1.S1_at | MmugDNA.43374.1 | 6.98  | 7.05  | 0.13 | 0.11 | -1.05 | 0.106531 | 0.134721 | 0.380675 | 0.406763 |
| MmugDNA.43402.1.S1_at | MmugDNA.43402.1 | 10.79 | 10.24 | 0.25 | 0.04 | 1.47  | 0.016443 | 0.024419 | 0.181069 | 0.195563 |

|                         |                 |       |       |      |      |       |          |          |          |          |
|-------------------------|-----------------|-------|-------|------|------|-------|----------|----------|----------|----------|
| MmugDNA.43404.1.S1_at   | MmugDNA.43404.1 | 8.42  | 8.24  | 0.12 | 0.04 | 1.13  | 0.071237 | 0.727253 | 0.324822 | 0.84224  |
| MmugDNA.43407.1.S1_at   | MmugDNA.43407.1 | 7.58  | 7.15  | 1.31 | 0.16 | 1.35  | 0.834858 | 0.825245 | 0.927357 | 0.899591 |
| MmugDNA.43409.1.S1_at   | MmugDNA.43409.1 | 6.16  | 6.15  | 0.15 | 0.11 | 1.01  | 0.560867 | 0.353117 | 0.774056 | 0.596383 |
| MmugDNA.43412.1.S1_at   | MmugDNA.43412.1 | 13.35 | 13.26 | 0.09 | 0.08 | 1.06  | 0.30017  | 0.097837 | 0.588392 | 0.355639 |
| MmugDNA.43424.1.S1_at   | MmugDNA.43424.1 | 12.38 | 11.62 | 0.14 | 0.25 | 1.69  | 0.013481 | 0.139982 | 0.166861 | 0.413309 |
| MmugDNA.43429.1.S1_at   | MmugDNA.43429.1 | 4.26  | 4.17  | 0.62 | 0.34 | 1.06  | 0.79934  | 0.308439 | 0.909502 | 0.564482 |
| MmugDNA.43431.1.S1_at   | MmugDNA.43431.1 | 10.92 | 9.94  | 0.22 | 0.17 | 1.97  | 0.003942 | 0.004228 | 0.108453 | 0.091435 |
| MmugDNA.43433.1.S1_at   | MmugDNA.43433.1 | 9.31  | 9.22  | 0.22 | 0.14 | 1.06  | 0.515801 | 0.244347 | 0.74545  | 0.514188 |
| MmugDNA.43436.1.S1_at   | MmugDNA.43436.1 | 5.94  | 5.19  | 0.08 | 0.2  | 1.69  | 0.007125 | 0.142156 | 0.131745 | 0.41575  |
| MmugDNA.43458.1.S1_at   | MmugDNA.43458.1 | 6.31  | 6.44  | 0.08 | 0.02 | -1.09 | 0.071081 | 0.087111 | 0.324551 | 0.340073 |
| MmugDNA.43461.1.S1_at   | MmugDNA.43461.1 | 7.65  | 7.72  | 0.33 | 0.35 | -1.05 | 0.85939  | 0.277989 | 0.939175 | 0.541684 |
| MmugDNA.43464.1.S1_at   | MmugDNA.43464.1 | 13.45 | 13.5  | 0.03 | 0.01 | -1.03 | 0.403688 | 0.183309 | 0.667761 | 0.459553 |
| MmugDNA.43466.1.S1_at   | MmugDNA.43466.1 | 11.18 | 6.25  | 0.35 | 1.89 | 30.51 | 0.023876 | 0.009117 | 0.207535 | 0.125994 |
| MmugDNA.43469.1.S1_at   | MmugDNA.43469.1 | 9.63  | 9.87  | 0.17 | 0.15 | -1.17 | 0.23576  | 0.182232 | 0.533475 | 0.458762 |
| MmugDNA.4347.1.S1_at    | MmugDNA.4347.1  | 10.09 | 10.2  | 0.42 | 0.04 | -1.08 | 0.206184 | 0.147477 | 0.503843 | 0.421765 |
| MmugDNA.43477.1.S1_at   | MmugDNA.43477.1 | 5.47  | 6.5   | 0.12 | 0.2  | -2.05 | 0.001192 | 0.009025 | 0.077857 | 0.125557 |
| MmugDNA.43478.1.S1_at   | MmugDNA.43478.1 | 5.84  | 6.59  | 0.37 | 0.19 | -1.68 | 0.053794 | 0.248666 | 0.289065 | 0.517917 |
| MmugDNA.43487.1.S1_at   | MmugDNA.43487.1 | 3.86  | 3.86  | 0.02 | 0.1  | 1.01  | 0.789794 | 0.577655 | 0.904456 | 0.748038 |
| MmugDNA.43498.1.S1_at   | MmugDNA.43498.1 | 10.35 | 9.39  | 0.61 | 0.09 | 1.95  | 0.165145 | 0.201073 | 0.458108 | 0.475509 |
| MmugDNA.43500.1.S1_at   | MmugDNA.43500.1 | 7.33  | 7.03  | 0.3  | 0.31 | 1.23  | 0.189598 | 0.175497 | 0.486064 | 0.452157 |
| MmugDNA.43510.1.S1_at   | MmugDNA.43510.1 | 7.12  | 7.82  | 0.17 | 0.15 | -1.63 | 0.003656 | 0.031849 | 0.105789 | 0.220909 |
| MmugDNA.43511.1.S1_at   | MmugDNA.43511.1 | 12.72 | 12.74 | 0.16 | 0.05 | -1.01 | 0.963233 | 0.560166 | 0.985129 | 0.736517 |
| MmugDNA.43513.1.S1_at   | MmugDNA.43513.1 | 10.68 | 10.47 | 0.29 | 0.14 | 1.16  | 0.244215 | 0.760708 | 0.540864 | 0.860984 |
| MmugDNA.43514.1.S1_at   | MmugDNA.43514.1 | 3.43  | 5.26  | 0.31 | 0.68 | -3.54 | 0.019451 | 0.057158 | 0.192344 | 0.284972 |
| MmugDNA.43518.1.S1_s_at | MmugDNA.43518.1 | 12.09 | 12.13 | 0.11 | 0.03 | -1.03 | 0.570639 | 0.522529 | 0.779362 | 0.713196 |
| MmugDNA.43519.1.S1_at   | MmugDNA.43519.1 | 10.49 | 10.52 | 0.04 | 0.03 | -1.02 | 0.069868 | 0.061901 | 0.322787 | 0.295668 |
| MmugDNA.4352.1.S1_at    | MmugDNA.4352.1  | 7.78  | 8.12  | 0.11 | 0.17 | -1.26 | 0.061407 | 0.166507 | 0.304438 | 0.442933 |
| MmugDNA.43521.1.S1_at   | MmugDNA.43521.1 | 10.97 | 10.41 | 0.3  | 0.04 | 1.47  | 0.013732 | 0.011492 | 0.16797  | 0.138678 |
| MmugDNA.43526.1.S1_at   | MmugDNA.43526.1 | 9.82  | 9.84  | 0.28 | 0.12 | -1.01 | 0.693205 | 0.149255 | 0.853369 | 0.42373  |
| MmugDNA.43529.1.S1_at   | MmugDNA.43529.1 | 8.7   | 8.4   | 0.22 | 0.22 | 1.23  | 0.2159   | 0.00744  | 0.513611 | 0.115858 |
| MmugDNA.4353.1.S1_at    | MmugDNA.4353.1  | 11.59 | 11.37 | 0.01 | 0.03 | 1.17  | 0.00022  | 0.065627 | 0.054444 | 0.301554 |
| MmugDNA.43532.1.S1_at   | MmugDNA.43532.1 | 6.42  | 6.2   | 0.36 | 0.22 | 1.17  | 0.792053 | 0.566752 | 0.905632 | 0.74076  |
| MmugDNA.43533.1.S1_at   | MmugDNA.43533.1 | 7.12  | 7.02  | 0.19 | 0.13 | 1.07  | 0.758338 | 0.731279 | 0.88914  | 0.84425  |
| MmugDNA.43536.1.S1_at   | MmugDNA.43536.1 | 3.8   | 3.43  | 0.28 | 0.07 | 1.29  | 0.135318 | 0.143479 | 0.419222 | 0.417442 |
| MmugDNA.43537.1.S1_at   | MmugDNA.43537.1 | 8.45  | 8.02  | 0.08 | 0.07 | 1.35  | 0.003507 | 0.019847 | 0.104096 | 0.177189 |
| MmugDNA.43546.1.S1_at   | MmugDNA.43546.1 | 9.09  | 9     | 0.23 | 0.11 | 1.06  | 0.306998 | 0.427977 | 0.593746 | 0.649602 |
| MmugDNA.43551.1.S1_at   | MmugDNA.43551.1 | 5.81  | 5.47  | 0.21 | 0.17 | 1.27  | 0.396351 | 0.305834 | 0.662427 | 0.562731 |
| MmugDNA.43556.1.S1_at   | MmugDNA.43556.1 | 9.75  | 9.8   | 0.57 | 0.22 | -1.03 | 0.450942 | 0.561066 | 0.701871 | 0.737097 |
| MmugDNA.43557.1.S1_s_at | MmugDNA.43557.1 | 7.64  | 7.8   | 0.17 | 0.11 | -1.12 | 0.16234  | 0.168049 | 0.454369 | 0.444641 |
| MmugDNA.43560.1.S1_at   | MmugDNA.43560.1 | 9.9   | 10.17 | 0.08 | 0.06 | -1.21 | 0.008029 | 0.033641 | 0.138617 | 0.227006 |
| MmugDNA.43579.1.S1_at   | MmugDNA.43579.1 | 10.02 | 10.43 | 0.21 | 0.07 | -1.33 | 0.032674 | 0.000049 | 0.234993 | 0.025273 |
| MmugDNA.43585.1.S1_at   | MmugDNA.43585.1 | 6.8   | 6.42  | 0.14 | 0.02 | 1.3   | 0.010573 | 0.0049   | 0.152667 | 0.097632 |
| MmugDNA.43588.1.S1_at   | MmugDNA.43588.1 | 11.55 | 10.4  | 0.15 | 0.37 | 2.21  | 0.015636 | 0.007829 | 0.177553 | 0.117929 |

|                        |                 |       |       |      |      |       |          |          |          |          |
|------------------------|-----------------|-------|-------|------|------|-------|----------|----------|----------|----------|
| MmugDNA.43589.1.S1_at  | MmugDNA.43589.1 | 9.08  | 8.96  | 0.14 | 0.07 | 1.09  | 0.279502 | 0.000924 | 0.570786 | 0.048724 |
| MmugDNA.4359.1.S1_at   | MmugDNA.4359.1  | 7.6   | 7.55  | 0.12 | 0.09 | 1.04  | 0.268609 | 0.443635 | 0.561154 | 0.66135  |
| MmugDNA.43591.1.S1_at  | MmugDNA.43591.1 | 4.69  | 4.54  | 0.33 | 0.3  | 1.11  | 0.781154 | 0.918566 | 0.900025 | 0.954327 |
| MmugDNA.4360.1.S1_at   | MmugDNA.4360.1  | 11.9  | 11.91 | 0.05 | 0.01 | -1.01 | 0.500404 | 0.016965 | 0.73465  | 0.165103 |
| MmugDNA.43604.1.S1_at  | MmugDNA.43604.1 | 10.35 | 8.77  | 0.28 | 0.06 | 3     | 0.000455 | 0.006731 | 0.065937 | 0.110984 |
| MmugDNA.43613.1.S1_at  | MmugDNA.43613.1 | 7.97  | 8.01  | 0.13 | 0.03 | -1.02 | 0.394602 | 0.122277 | 0.661066 | 0.391973 |
| MmugDNA.4364.1.S1_at   | MmugDNA.4364.1  | 7.1   | 6.7   | 0.18 | 0.08 | 1.32  | 0.020327 | 0.211667 | 0.196136 | 0.485688 |
| MmugDNA.4368.1.S1_at   | MmugDNA.4368.1  | 8.84  | 8.24  | 0.27 | 0.3  | 1.52  | 0.24926  | 0.552833 | 0.544486 | 0.732102 |
| MmugDNA.4368.1.S1_s_at | MmugDNA.4368.1  | 8.26  | 8.1   | 0.25 | 0.23 | 1.11  | 0.957501 | 0.958997 | 0.982581 | 0.976777 |
| MmugDNA.4370.1.S1_at   | MmugDNA.4370.1  | 8.46  | 8.79  | 0.12 | 0.22 | -1.26 | 0.225098 | 0.318522 | 0.523009 | 0.571239 |
| MmugDNA.4374.1.S1_at   | MmugDNA.4374.1  | 9.75  | 9.89  | 0.12 | 0.08 | -1.1  | 0.34729  | 0.051039 | 0.625463 | 0.271214 |
| MmugDNA.4379.1.S1_at   | MmugDNA.4379.1  | 12.11 | 12.12 | 0.03 | 0.04 | -1.01 | 0.897998 | 0.274008 | 0.956685 | 0.538517 |
| MmugDNA.4385.1.S1_at   | MmugDNA.4385.1  | 12.32 | 12.21 | 0.06 | 0.09 | 1.08  | 0.155078 | 0.359171 | 0.445238 | 0.600528 |
| MmugDNA.4389.1.S1_at   | MmugDNA.4389.1  | 5     | 4.96  | 0.13 | 0.04 | 1.03  | 0.19897  | 0.307892 | 0.49618  | 0.563992 |
| MmugDNA.4395.1.S1_at   | MmugDNA.4395.1  | 11.27 | 10.91 | 0.29 | 0.15 | 1.28  | 0.05273  | 0.002546 | 0.28664  | 0.07453  |
| MmugDNA.440.1.S1_at    | MmugDNA.440.1   | 11.69 | 11.4  | 0.07 | 0.01 | 1.22  | 0.001744 | 0.196674 | 0.085035 | 0.47172  |
| MmugDNA.4404.1.S1_at   | MmugDNA.4404.1  | 7.76  | 9.87  | 0.94 | 0.22 | -4.31 | 0.03949  | 0.224697 | 0.255214 | 0.497614 |
| MmugDNA.4405.1.S1_at   | MmugDNA.4405.1  | 12.08 | 11.9  | 0.04 | 0.23 | 1.14  | 0.324606 | 0.589414 | 0.60824  | 0.755652 |
| MmugDNA.4406.1.S1_at   | MmugDNA.4406.1  | 3.8   | 3.76  | 0.33 | 0.09 | 1.03  | 0.297814 | 0.481481 | 0.586265 | 0.686469 |
| MmugDNA.4409.1.S1_at   | MmugDNA.4409.1  | 10.61 | 10.62 | 0.1  | 0.19 | -1.01 | 0.375919 | 0.337755 | 0.646632 | 0.584925 |
| MmugDNA.4416.1.S1_at   | MmugDNA.4416.1  | 8.56  | 8.6   | 0.2  | 0.03 | -1.03 | 0.889039 | 0.906758 | 0.952724 | 0.947216 |
| MmugDNA.4419.1.S1_at   | MmugDNA.4419.1  | 6.74  | 6.78  | 0.18 | 0.18 | -1.03 | 0.344745 | 0.256183 | 0.624009 | 0.524069 |
| MmugDNA.442.1.S1_at    | MmugDNA.442.1   | 7.05  | 7.57  | 0.16 | 0.13 | -1.43 | 0.033038 | 0.256444 | 0.236091 | 0.524201 |
| MmugDNA.4420.1.S1_at   | MmugDNA.4420.1  | 4.19  | 5.9   | 1.02 | 0.71 | -3.28 | 0.229368 | 0.292115 | 0.528143 | 0.552273 |
| MmugDNA.4422.1.S1_s_at | MmugDNA.4422.1  | 4.88  | 4.89  | 0.06 | 0.17 | -1    | 0.496046 | 0.451241 | 0.732047 | 0.666095 |
| MmugDNA.4427.1.S1_at   | MmugDNA.4427.1  | 3.33  | 3.27  | 0.04 | 0.01 | 1.04  | 0.045616 | 0.045846 | 0.271064 | 0.258382 |
| MmugDNA.4430.1.S1_at   | MmugDNA.4430.1  | 11.07 | 11.05 | 0.14 | 0.06 | 1.01  | 0.795453 | 0.45799  | 0.907556 | 0.670999 |
| MmugDNA.4433.1.S1_at   | MmugDNA.4433.1  | 8.35  | 7.67  | 0.12 | 0.24 | 1.6   | 0.0225   | 0.164136 | 0.203286 | 0.440346 |
| MmugDNA.4434.1.S1_at   | MmugDNA.4434.1  | 9.34  | 9.39  | 0.24 | 0.07 | -1.03 | 0.638443 | 0.807175 | 0.823011 | 0.888967 |
| MmugDNA.4438.1.S1_at   | MmugDNA.4438.1  | 8.26  | 8.08  | 0.34 | 0.11 | 1.13  | 0.271023 | 0.053216 | 0.562988 | 0.276445 |
| MmugDNA.4449.1.S1_at   | MmugDNA.4449.1  | 4.07  | 4.02  | 0.03 | 0.03 | 1.03  | 0.09721  | 0.604541 | 0.367275 | 0.764663 |
| MmugDNA.4461.1.S1_at   | MmugDNA.4461.1  | 10.92 | 10.81 | 0.33 | 0.1  | 1.08  | 0.493875 | 0.27749  | 0.730805 | 0.541411 |
| MmugDNA.4463.1.S1_at   | MmugDNA.4463.1  | 10.56 | 10.32 | 0.19 | 0.07 | 1.18  | 0.205425 | 0.096094 | 0.503171 | 0.353322 |
| MmugDNA.4478.1.S1_at   | MmugDNA.4478.1  | 6.51  | 9.19  | 1.3  | 0.2  | -6.4  | 0.044393 | 0.143487 | 0.267911 | 0.417442 |
| MmugDNA.4479.1.S1_at   | MmugDNA.4479.1  | 5.58  | 6.42  | 0.44 | 0.18 | -1.79 | 0.06313  | 0.206431 | 0.307954 | 0.480571 |
| MmugDNA.4487.1.S1_at   | MmugDNA.4487.1  | 3.33  | 3.13  | 0.07 | 0.1  | 1.15  | 0.08167  | 0.08864  | 0.342855 | 0.342167 |
| MmugDNA.4496.1.S1_at   | MmugDNA.4496.1  | 7.08  | 7.02  | 0.2  | 0.04 | 1.04  | 0.534051 | 0.257041 | 0.757384 | 0.524781 |
| MmugDNA.45.1.S1_at     | MmugDNA.45.1    | 5.9   | 5.98  | 0.15 | 0.1  | -1.05 | 0.914938 | 0.391466 | 0.963876 | 0.625086 |
| MmugDNA.4501.1.S1_at   | MmugDNA.4501.1  | 6.12  | 6.18  | 0.14 | 0.03 | -1.04 | 0.608179 | 0.553424 | 0.804287 | 0.732583 |
| MmugDNA.4510.1.S1_at   | MmugDNA.4510.1  | 9.55  | 9.57  | 0.42 | 0.06 | -1.01 | 0.39936  | 0.040521 | 0.664766 | 0.246264 |
| MmugDNA.4515.1.S1_at   | MmugDNA.4515.1  | 5.29  | 5.28  | 0.15 | 0.11 | 1.01  | 0.66271  | 0.915629 | 0.837251 | 0.952718 |
| MmugDNA.452.1.S1_at    | MmugDNA.452.1   | 7.57  | 7.54  | 0.28 | 0.1  | 1.02  | 0.652205 | 0.767381 | 0.831156 | 0.864926 |
| MmugDNA.4531.1.S1_at   | MmugDNA.4531.1  | 10.57 | 10.44 | 0.13 | 0.02 | 1.09  | 0.196071 | 0.055822 | 0.493068 | 0.282127 |

|                        |                |       |       |      |      |       |          |          |          |          |
|------------------------|----------------|-------|-------|------|------|-------|----------|----------|----------|----------|
| MmugDNA.4547.1.S1_at   | MmugDNA.4547.1 | 8.49  | 8.4   | 0.36 | 0.11 | 1.06  | 0.658225 | 0.146226 | 0.834902 | 0.420213 |
| MmugDNA.4552.1.S1_at   | MmugDNA.4552.1 | 8.83  | 8.93  | 0.3  | 0.09 | -1.07 | 0.598896 | 0.343204 | 0.797677 | 0.588959 |
| MmugDNA.4554.1.S1_at   | MmugDNA.4554.1 | 7.31  | 7.05  | 0.15 | 0.15 | 1.2   | 0.096725 | 0.110057 | 0.366735 | 0.374179 |
| MmugDNA.456.1.S1_at    | MmugDNA.456.1  | 11.29 | 11.56 | 0.16 | 0.19 | -1.2  | 0.077457 | 0.00315  | 0.336173 | 0.081739 |
| MmugDNA.456.1.S1_x_at  | MmugDNA.456.1  | 10.42 | 10.71 | 0.16 | 0.16 | -1.23 | 0.047772 | 0.002469 | 0.275924 | 0.073576 |
| MmugDNA.4562.1.S1_at   | MmugDNA.4562.1 | 7.64  | 7.99  | 0.3  | 0.23 | -1.27 | 0.380631 | 0.103291 | 0.650294 | 0.364143 |
| MmugDNA.4567.1.S1_at   | MmugDNA.4567.1 | 4.25  | 4.94  | 0.13 | 0.08 | -1.61 | 0.001445 | 0.427216 | 0.079991 | 0.649175 |
| MmugDNA.457.1.S1_at    | MmugDNA.457.1  | 11.29 | 11.3  | 0.12 | 0    | -1.01 | 0.790621 | 0.418676 | 0.904916 | 0.643036 |
| MmugDNA.4573.1.S1_s_at | MmugDNA.4573.1 | 9.72  | 10.08 | 0.1  | 0.2  | -1.28 | 0.026519 | 0.270284 | 0.216081 | 0.535654 |
| MmugDNA.4574.1.S1_at   | MmugDNA.4574.1 | 7.31  | 7.57  | 0.31 | 0.16 | -1.2  | 0.190542 | 0.20638  | 0.486767 | 0.480546 |
| MmugDNA.4578.1.S1_at   | MmugDNA.4578.1 | 8.13  | 7.87  | 0.13 | 0.06 | 1.2   | 0.052504 | 0.009073 | 0.286269 | 0.125944 |
| MmugDNA.4581.1.S1_at   | MmugDNA.4581.1 | 11.35 | 11.28 | 0.09 | 0.01 | 1.05  | 0.129067 | 0.0004   | 0.411377 | 0.037471 |
| MmugDNA.4584.1.S1_at   | MmugDNA.4584.1 | 8.97  | 9.24  | 0.22 | 0.14 | -1.2  | 0.179608 | 0.026642 | 0.474837 | 0.204089 |
| MmugDNA.4589.1.S1_at   | MmugDNA.4589.1 | 4.18  | 3.86  | 0.3  | 0.1  | 1.25  | 0.155792 | 0.15158  | 0.446184 | 0.426333 |
| MmugDNA.4592.1.A1_at   | MmugDNA.4592.1 | 5.47  | 5.27  | 0.22 | 0.04 | 1.15  | 0.186589 | 0.129216 | 0.482725 | 0.400635 |
| MmugDNA.4592.1.S1_at   | MmugDNA.4592.1 | 5.82  | 5.82  | 0.15 | 0.07 | 1     | 0.240721 | 0.516195 | 0.538168 | 0.708757 |
| MmugDNA.4594.1.S1_at   | MmugDNA.4594.1 | 5.8   | 5.59  | 0.08 | 0.4  | 1.15  | 0.908522 | 0.941868 | 0.961215 | 0.967076 |
| MmugDNA.4609.1.S1_at   | MmugDNA.4609.1 | 8.1   | 8.83  | 0.6  | 0.41 | -1.66 | 0.053297 | 0.113427 | 0.287986 | 0.379509 |
| MmugDNA.4615.1.S1_at   | MmugDNA.4615.1 | 13.77 | 13.78 | 0.08 | 0.02 | -1.01 | 0.646003 | 0.047724 | 0.827741 | 0.263325 |
| MmugDNA.4618.1.S1_s_at | MmugDNA.4618.1 | 10.57 | 10.56 | 0.12 | 0.23 | 1     | 0.273078 | 0.658273 | 0.565241 | 0.800244 |
| MmugDNA.4622.1.S1_at   | MmugDNA.4622.1 | 6.78  | 6.89  | 0.14 | 0.04 | -1.08 | 0.624561 | 0.440572 | 0.81488  | 0.659029 |
| MmugDNA.4630.1.S1_at   | MmugDNA.4630.1 | 6.26  | 6.12  | 0.17 | 0.07 | 1.1   | 0.509817 | 0.180515 | 0.741274 | 0.457128 |
| MmugDNA.4645.1.S1_at   | MmugDNA.4645.1 | 9.36  | 9.23  | 0.13 | 0.11 | 1.09  | 0.507181 | 0.112124 | 0.739547 | 0.377398 |
| MmugDNA.4646.1.S1_at   | MmugDNA.4646.1 | 8.51  | 7.85  | 0.15 | 0.12 | 1.58  | 0.006165 | 0.211655 | 0.124695 | 0.485681 |
| MmugDNA.4647.1.S1_at   | MmugDNA.4647.1 | 7.3   | 7.41  | 0.57 | 0.31 | -1.08 | 0.242426 | 0.32135  | 0.539382 | 0.57319  |
| MmugDNA.4651.1.S1_at   | MmugDNA.4651.1 | 6.42  | 6.52  | 0.07 | 0.11 | -1.07 | 0.754665 | 0.280169 | 0.886879 | 0.543469 |
| MmugDNA.4657.1.S1_at   | MmugDNA.4657.1 | 3.26  | 3.12  | 0.17 | 0.05 | 1.1   | 0.672054 | 0.777563 | 0.842838 | 0.870732 |
| MmugDNA.4664.1.S1_at   | MmugDNA.4664.1 | 6.62  | 6.62  | 0.11 | 0.04 | -1    | 0.969221 | 0.047891 | 0.98776  | 0.263751 |
| MmugDNA.4667.1.S1_at   | MmugDNA.4667.1 | 9.85  | 10.02 | 0.13 | 0.01 | -1.13 | 0.294703 | 0.90519  | 0.583719 | 0.946213 |
| MmugDNA.467.1.S1_at    | MmugDNA.467.1  | 5.58  | 6.01  | 0.22 | 0.03 | -1.34 | 0.084214 | 0.124824 | 0.347597 | 0.395219 |
| MmugDNA.4670.1.S1_at   | MmugDNA.4670.1 | 12.51 | 12.27 | 0.06 | 0.15 | 1.19  | 0.041294 | 0.017507 | 0.259651 | 0.167516 |
| MmugDNA.4671.1.S1_at   | MmugDNA.4671.1 | 11.93 | 12.23 | 0.08 | 0.08 | -1.23 | 0.010984 | 0.076797 | 0.154584 | 0.322252 |
| MmugDNA.4679.1.S1_at   | MmugDNA.4679.1 | 5.95  | 6.02  | 0.22 | 0.09 | -1.05 | 0.615293 | 0.812251 | 0.808799 | 0.891561 |
| MmugDNA.468.1.S1_at    | MmugDNA.468.1  | 5.16  | 5.2   | 0.2  | 0.03 | -1.02 | 0.877065 | 0.588716 | 0.947453 | 0.755137 |
| MmugDNA.4681.1.S1_at   | MmugDNA.4681.1 | 6.86  | 6.84  | 0.24 | 0.11 | 1.01  | 0.791677 | 0.926516 | 0.905386 | 0.958312 |
| MmugDNA.4693.1.S1_at   | MmugDNA.4693.1 | 9.17  | 9.02  | 0.23 | 0.2  | 1.11  | 0.22468  | 0.414731 | 0.522708 | 0.640456 |
| MmugDNA.4696.1.S1_at   | MmugDNA.4696.1 | 2.83  | 2.8   | 0.15 | 0.04 | 1.02  | 0.937019 | 0.573353 | 0.97363  | 0.745072 |
| MmugDNA.4698.1.S1_at   | MmugDNA.4698.1 | 11.58 | 11.1  | 0.12 | 0.07 | 1.4   | 0.008132 | 0.007687 | 0.138956 | 0.117153 |
| MmugDNA.4703.1.S1_at   | MmugDNA.4703.1 | 8.51  | 8.47  | 0.62 | 0.53 | 1.03  | 0.63106  | 0.898916 | 0.818772 | 0.942467 |
| MmugDNA.4707.1.S1_at   | MmugDNA.4707.1 | 6.85  | 6.86  | 0.15 | 0.05 | -1.01 | 0.805888 | 0.733492 | 0.912999 | 0.845679 |
| MmugDNA.4719.1.S1_at   | MmugDNA.4719.1 | 5.66  | 5.74  | 0.18 | 0.1  | -1.06 | 0.589707 | 0.101181 | 0.791682 | 0.360831 |
| MmugDNA.4725.1.S1_at   | MmugDNA.4725.1 | 7.28  | 7.28  | 0.12 | 0.02 | 1     | 0.366146 | 0.520247 | 0.640626 | 0.711569 |
| MmugDNA.4728.1.S1_at   | MmugDNA.4728.1 | 9.63  | 9.51  | 0.18 | 0.08 | 1.08  | 0.334624 | 0.349024 | 0.615707 | 0.593037 |

|                        |                |       |       |      |      |       |          |          |          |          |
|------------------------|----------------|-------|-------|------|------|-------|----------|----------|----------|----------|
| MmugDNA.4731.1.S1_at   | MmugDNA.4731.1 | 4.66  | 4.66  | 0.08 | 0.07 | -1    | 0.247721 | 0.343111 | 0.543078 | 0.588883 |
| MmugDNA.4732.1.S1_at   | MmugDNA.4732.1 | 9.21  | 10.04 | 0.2  | 0.14 | -1.77 | 0.003465 | 0.022728 | 0.103385 | 0.188771 |
| MmugDNA.474.1.S1_at    | MmugDNA.474.1  | 9.01  | 8.64  | 0.35 | 0.09 | 1.3   | 0.441674 | 0.758088 | 0.695145 | 0.859252 |
| MmugDNA.4740.1.S1_at   | MmugDNA.4740.1 | 9.29  | 9.49  | 0.05 | 0.05 | -1.15 | 0.0163   | 0.88818  | 0.180457 | 0.936226 |
| MmugDNA.4742.1.S1_at   | MmugDNA.4742.1 | 11.76 | 11.96 | 0.26 | 0.17 | -1.15 | 0.833666 | 0.032694 | 0.926824 | 0.223883 |
| MmugDNA.4745.1.S1_at   | MmugDNA.4745.1 | 7.56  | 7.67  | 0.1  | 0.01 | -1.08 | 0.168891 | 0.343061 | 0.462098 | 0.588878 |
| MmugDNA.4749.1.S1_at   | MmugDNA.4749.1 | 9.4   | 9.91  | 0.27 | 0.12 | -1.42 | 0.045278 | 0.340716 | 0.27025  | 0.586899 |
| MmugDNA.4752.1.S1_at   | MmugDNA.4752.1 | 7.03  | 10.53 | 1.76 | 0.18 | -11.3 | 0.080639 | 0.347488 | 0.341285 | 0.592019 |
| MmugDNA.4757.1.S1_at   | MmugDNA.4757.1 | 7.51  | 7.61  | 0.17 | 0.07 | -1.07 | 0.765222 | 0.288798 | 0.892335 | 0.549936 |
| MmugDNA.476.1.S1_s_at  | MmugDNA.476.1  | 10.77 | 10.62 | 0.17 | 0.02 | 1.11  | 0.557591 | 0.03015  | 0.77226  | 0.215504 |
| MmugDNA.4760.1.S1_s_at | MmugDNA.4760.1 | 11.63 | 11.96 | 0.08 | 0.2  | -1.25 | 0.141028 | 0.012468 | 0.42688  | 0.14417  |
| MmugDNA.4761.1.S1_at   | MmugDNA.4761.1 | 6.86  | 6.82  | 0.72 | 0.28 | 1.03  | 0.963817 | 0.741064 | 0.985345 | 0.850126 |
| MmugDNA.4762.1.S1_at   | MmugDNA.4762.1 | 5.58  | 5.59  | 0.13 | 0.02 | -1.01 | 0.783632 | 0.107912 | 0.901266 | 0.370945 |
| MmugDNA.4766.1.S1_at   | MmugDNA.4766.1 | 8.77  | 8.75  | 0.26 | 0.09 | 1.01  | 0.783461 | 0.028134 | 0.901128 | 0.209306 |
| MmugDNA.477.1.S1_at    | MmugDNA.477.1  | 3.48  | 3.49  | 0.06 | 0.08 | -1    | 0.731501 | 0.106765 | 0.874514 | 0.369349 |
| MmugDNA.4773.1.S1_a_at | MmugDNA.4773.1 | 5.23  | 4.85  | 0.26 | 0.13 | 1.3   | 0.118052 | 0.134793 | 0.395593 | 0.406854 |
| MmugDNA.4773.1.S1_at   | MmugDNA.4773.1 | 5.23  | 5.42  | 0.07 | 0.03 | -1.14 | 0.00824  | 0.006323 | 0.139904 | 0.107969 |
| MmugDNA.4778.1.S1_at   | MmugDNA.4778.1 | 6.94  | 7.26  | 0.41 | 0.13 | -1.25 | 0.089669 | 0.045523 | 0.356602 | 0.257526 |
| MmugDNA.4784.1.S1_at   | MmugDNA.4784.1 | 8.59  | 8.59  | 0.25 | 0.02 | 1     | 0.926118 | 0.801993 | 0.968794 | 0.885995 |
| MmugDNA.4789.1.S1_at   | MmugDNA.4789.1 | 10.46 | 10.2  | 0.22 | 0.06 | 1.19  | 0.134401 | 0.166802 | 0.418082 | 0.443274 |
| MmugDNA.4791.1.S1_at   | MmugDNA.4791.1 | 12.31 | 12.44 | 0.26 | 0.13 | -1.09 | 0.293801 | 0.036931 | 0.582828 | 0.236659 |
| MmugDNA.480.1.S1_at    | MmugDNA.480.1  | 6.71  | 9.01  | 1.68 | 0.16 | -4.95 | 0.270229 | 0.517069 | 0.562383 | 0.709425 |
| MmugDNA.4801.1.S1_at   | MmugDNA.4801.1 | 4.03  | 4.07  | 0.43 | 0.31 | -1.03 | 0.33288  | 0.533831 | 0.614402 | 0.719904 |
| MmugDNA.4804.1.S1_at   | MmugDNA.4804.1 | 4.06  | 4.06  | 0.01 | 0.18 | 1     | 0.370454 | 0.086975 | 0.643441 | 0.33984  |
| MmugDNA.4806.1.S1_at   | MmugDNA.4806.1 | 8.69  | 7.87  | 0.2  | 0.07 | 1.76  | 0.005805 | 0.047619 | 0.122165 | 0.262996 |
| MmugDNA.4815.1.S1_at   | MmugDNA.4815.1 | 11.83 | 12.29 | 0.34 | 0.09 | -1.38 | 0.037674 | 0.229462 | 0.249638 | 0.501527 |
| MmugDNA.4818.1.S1_at   | MmugDNA.4818.1 | 6.24  | 5.78  | 0.4  | 0.17 | 1.37  | 0.063944 | 0.061178 | 0.309333 | 0.293981 |
| MmugDNA.4820.1.S1_at   | MmugDNA.4820.1 | 10.53 | 10.16 | 0.31 | 0.28 | 1.29  | 0.222206 | 0.333446 | 0.520231 | 0.581683 |
| MmugDNA.4822.1.S1_at   | MmugDNA.4822.1 | 8.83  | 9.34  | 0.07 | 0.11 | -1.43 | 0.003286 | 0.646387 | 0.102069 | 0.792839 |
| MmugDNA.4823.1.S1_at   | MmugDNA.4823.1 | 10.75 | 10.94 | 0.1  | 0.04 | -1.14 | 0.026625 | 0.005322 | 0.216408 | 0.100928 |
| MmugDNA.4827.1.S1_at   | MmugDNA.4827.1 | 8.13  | 7.93  | 0.11 | 0.28 | 1.15  | 0.80835  | 0.000674 | 0.914202 | 0.04413  |
| MmugDNA.4828.1.S1_at   | MmugDNA.4828.1 | 9.12  | 9.1   | 0.17 | 0.12 | 1.01  | 0.909399 | 0.964941 | 0.961565 | 0.980546 |
| MmugDNA.483.1.S1_at    | MmugDNA.483.1  | 10.46 | 10.11 | 0.26 | 0.07 | 1.28  | 0.202087 | 0.047856 | 0.499672 | 0.263679 |
| MmugDNA.4830.1.S1_at   | MmugDNA.4830.1 | 11.8  | 11.4  | 0.02 | 0.02 | 1.33  | 0.000021 | 0.006528 | 0.045594 | 0.109613 |
| MmugDNA.4834.1.S1_at   | MmugDNA.4834.1 | 10.47 | 9.57  | 0.24 | 0.1  | 1.87  | 0.005273 | 0.003508 | 0.117625 | 0.08503  |
| MmugDNA.4837.1.S1_at   | MmugDNA.4837.1 | 12.71 | 12.65 | 0.04 | 0.05 | 1.04  | 0.093691 | 0.008604 | 0.362354 | 0.123072 |
| MmugDNA.484.1.S1_at    | MmugDNA.484.1  | 4.16  | 3.92  | 0.15 | 0.09 | 1.17  | 0.227822 | 0.218106 | 0.525906 | 0.491693 |
| MmugDNA.4849.1.S1_at   | MmugDNA.4849.1 | 7.43  | 7.9   | 0.27 | 0.19 | -1.38 | 0.203477 | 0.006161 | 0.501192 | 0.106774 |
| MmugDNA.4850.1.S1_at   | MmugDNA.4850.1 | 7.4   | 8.87  | 0.92 | 0.25 | -2.76 | 0.05706  | 0.173348 | 0.296197 | 0.449791 |
| MmugDNA.4857.1.S1_at   | MmugDNA.4857.1 | 10.18 | 9.14  | 0.24 | 0.13 | 2.06  | 0.004653 | 0.003554 | 0.114693 | 0.085408 |
| MmugDNA.4859.1.S1_at   | MmugDNA.4859.1 | 10.42 | 10.13 | 0.07 | 0.05 | 1.22  | 0.003485 | 0.011326 | 0.103619 | 0.138076 |
| MmugDNA.486.1.S1_at    | MmugDNA.486.1  | 9.27  | 8.74  | 0.03 | 0.1  | 1.45  | 0.001124 | 0.048137 | 0.077306 | 0.264417 |
| MmugDNA.4866.1.S1_at   | MmugDNA.4866.1 | 12.8  | 12.71 | 0.07 | 0.01 | 1.07  | 0.118166 | 0.521604 | 0.39564  | 0.712505 |

|                        |                |       |       |      |      |        |          |          |          |          |
|------------------------|----------------|-------|-------|------|------|--------|----------|----------|----------|----------|
| MmugDNA.4871.1.S1_at   | MmugDNA.4871.1 | 7.11  | 10.97 | 1.42 | 0.21 | -14.47 | 0.022314 | 0.209    | 0.202621 | 0.482795 |
| MmugDNA.4872.1.S1_at   | MmugDNA.4872.1 | 10.99 | 9.98  | 0.09 | 0.09 | 2.02   | 0.000138 | 0.000729 | 0.051196 | 0.044699 |
| MmugDNA.4874.1.S1_at   | MmugDNA.4874.1 | 6.75  | 9.72  | 0.92 | 0.25 | -7.87  | 0.008026 | 0.150306 | 0.138614 | 0.424877 |
| MmugDNA.4878.1.S1_at   | MmugDNA.4878.1 | 7.04  | 7.03  | 0.11 | 0.07 | 1.01   | 0.611492 | 0.828806 | 0.806289 | 0.901577 |
| MmugDNA.488.1.S1_at    | MmugDNA.488.1  | 3.3   | 3.28  | 0.09 | 0    | 1.02   | 0.654309 | 0.940369 | 0.832676 | 0.966182 |
| MmugDNA.4888.1.S1_at   | MmugDNA.4888.1 | 5.55  | 5.63  | 0.1  | 0.01 | -1.05  | 0.757701 | 0.198073 | 0.888866 | 0.473057 |
| MmugDNA.4895.1.S1_at   | MmugDNA.4895.1 | 5.84  | 5.88  | 0.24 | 0.05 | -1.03  | 0.64263  | 0.30199  | 0.825647 | 0.559929 |
| MmugDNA.4896.1.S1_at   | MmugDNA.4896.1 | 10.01 | 10.35 | 0.34 | 0.03 | -1.26  | 0.155989 | 0.376003 | 0.446335 | 0.613815 |
| MmugDNA.4899.1.S1_at   | MmugDNA.4899.1 | 8.78  | 9.11  | 0.18 | 0.08 | -1.26  | 0.036634 | 0.137604 | 0.246422 | 0.410562 |
| MmugDNA.49.1.S1_at     | MmugDNA.49.1   | 2.97  | 3.02  | 0.17 | 0.1  | -1.03  | 0.417454 | 0.651894 | 0.677557 | 0.796505 |
| MmugDNA.4909.1.S1_at   | MmugDNA.4909.1 | 6.09  | 5.9   | 0.08 | 0.11 | 1.14   | 0.244816 | 0.057098 | 0.541082 | 0.284945 |
| MmugDNA.4912.1.S1_at   | MmugDNA.4912.1 | 3.94  | 4.24  | 0.28 | 0.11 | -1.23  | 0.146375 | 0.030941 | 0.434224 | 0.217717 |
| MmugDNA.4913.1.S1_at   | MmugDNA.4913.1 | 9.53  | 9.42  | 0.2  | 0.08 | 1.08   | 0.357398 | 0.000318 | 0.633494 | 0.035423 |
| MmugDNA.4916.1.S1_at   | MmugDNA.4916.1 | 12.88 | 12.68 | 0.06 | 0.02 | 1.15   | 0.005653 | 0.028558 | 0.120889 | 0.210768 |
| MmugDNA.4918.1.S1_x_at | MmugDNA.4918.1 | 11.1  | 11.09 | 0.77 | 0.28 | 1.01   | 0.401305 | 0.264769 | 0.665992 | 0.530791 |
| MmugDNA.4919.1.S1_at   | MmugDNA.4919.1 | 3.89  | 4.1   | 0.98 | 0.12 | -1.15  | 0.494208 | 0.664938 | 0.731052 | 0.803712 |
| MmugDNA.4926.1.S1_at   | MmugDNA.4926.1 | 10.86 | 11.25 | 0.13 | 0.03 | -1.31  | 0.005514 | 0.007629 | 0.119675 | 0.116869 |
| MmugDNA.4927.1.S1_at   | MmugDNA.4927.1 | 11.29 | 10.6  | 0.59 | 0.07 | 1.62   | 0.136633 | 0.384902 | 0.421269 | 0.620513 |
| MmugDNA.4930.1.S1_at   | MmugDNA.4930.1 | 9.21  | 9.84  | 1.5  | 0.03 | -1.55  | 0.506098 | 0.630298 | 0.738808 | 0.782213 |
| MmugDNA.4938.1.S1_at   | MmugDNA.4938.1 | 5.65  | 5.44  | 0.4  | 0.08 | 1.16   | 0.453661 | 0.646533 | 0.703813 | 0.792953 |
| MmugDNA.4939.1.S1_at   | MmugDNA.4939.1 | 4.91  | 5.12  | 0.23 | 0.07 | -1.15  | 0.63237  | 0.879735 | 0.81979  | 0.93128  |
| MmugDNA.494.1.S1_at    | MmugDNA.494.1  | 12.25 | 12.39 | 0.18 | 0.13 | -1.11  | 0.977486 | 0.431365 | 0.991176 | 0.65231  |
| MmugDNA.4940.1.S1_at   | MmugDNA.4940.1 | 3.74  | 3.73  | 0.13 | 0.15 | 1.01   | 0.640844 | 0.814389 | 0.824509 | 0.892923 |
| MmugDNA.4944.1.S1_at   | MmugDNA.4944.1 | 6.39  | 6.02  | 0.18 | 0.42 | 1.29   | 0.415338 | 0.073142 | 0.67607  | 0.316064 |
| MmugDNA.4948.1.S1_at   | MmugDNA.4948.1 | 11.53 | 11.4  | 0.14 | 0.07 | 1.09   | 0.259366 | 0.365343 | 0.553726 | 0.605468 |
| MmugDNA.4954.1.S1_at   | MmugDNA.4954.1 | 8.42  | 8.62  | 0.23 | 0.04 | -1.15  | 0.708605 | 0.004644 | 0.86198  | 0.095    |
| MmugDNA.4962.1.S1_at   | MmugDNA.4962.1 | 4.53  | 4.41  | 0.07 | 0.03 | 1.09   | 0.035856 | 0.04274  | 0.244427 | 0.251216 |
| MmugDNA.4967.1.S1_at   | MmugDNA.4967.1 | 12.04 | 12.2  | 0.05 | 0.11 | -1.12  | 0.269276 | 0.000739 | 0.561615 | 0.044895 |
| MmugDNA.4969.1.S1_at   | MmugDNA.4969.1 | 3.91  | 4.53  | 0.31 | 0.14 | -1.53  | 0.04497  | 0.120638 | 0.269356 | 0.389476 |
| MmugDNA.497.1.S1_at    | MmugDNA.497.1  | 11.41 | 11.28 | 0.1  | 0.06 | 1.1    | 0.58387  | 0.061247 | 0.788399 | 0.294161 |
| MmugDNA.4973.1.S1_at   | MmugDNA.4973.1 | 7.79  | 7.32  | 0.19 | 0.12 | 1.39   | 0.044932 | 0.010894 | 0.269298 | 0.135939 |
| MmugDNA.4974.1.S1_at   | MmugDNA.4974.1 | 3.52  | 3.66  | 0.09 | 0.09 | -1.11  | 0.265409 | 0.338288 | 0.558032 | 0.585417 |
| MmugDNA.4983.1.S1_at   | MmugDNA.4983.1 | 10.25 | 9.99  | 0.17 | 0.12 | 1.2    | 0.060118 | 0.003934 | 0.302405 | 0.089223 |
| MmugDNA.4986.1.S1_at   | MmugDNA.4986.1 | 6.28  | 6.34  | 0.3  | 0.15 | -1.04  | 0.823295 | 0.654865 | 0.921475 | 0.798179 |
| MmugDNA.4993.1.S1_at   | MmugDNA.4993.1 | 13.28 | 13.37 | 0.05 | 0.05 | -1.07  | 0.056889 | 0.072957 | 0.295858 | 0.315986 |
| MmugDNA.4996.1.S1_at   | MmugDNA.4996.1 | 5.08  | 5.05  | 0.69 | 0.51 | 1.02   | 0.429978 | 0.292292 | 0.686317 | 0.552389 |
| MmugDNA.4997.1.S1_at   | MmugDNA.4997.1 | 6.8   | 6.72  | 0.16 | 0.1  | 1.06   | 0.476527 | 0.280439 | 0.718897 | 0.543648 |
| MmugDNA.4998.1.S1_at   | MmugDNA.4998.1 | 9.03  | 8.65  | 0.09 | 0.12 | 1.3    | 0.021442 | 0.231916 | 0.199988 | 0.503604 |
| MmugDNA.4999.1.S1_at   | MmugDNA.4999.1 | 9.44  | 9.47  | 0.2  | 0.11 | -1.02  | 0.907628 | 0.602609 | 0.960932 | 0.763534 |
| MmugDNA.50.1.S1_at     | MmugDNA.50.1   | 10.91 | 10.98 | 0.22 | 0.09 | -1.05  | 0.422424 | 0.361296 | 0.680613 | 0.602104 |
| MmugDNA.5012.1.S1_at   | MmugDNA.5012.1 | 3.98  | 3.81  | 0.13 | 0.3  | 1.12   | 0.420631 | 0.67645  | 0.679563 | 0.81095  |
| MmugDNA.5018.1.S1_at   | MmugDNA.5018.1 | 9.14  | 9.39  | 0.12 | 0.04 | -1.19  | 0.02328  | 0.514528 | 0.205562 | 0.707757 |
| MmugDNA.5023.1.S1_at   | MmugDNA.5023.1 | 8.02  | 7.97  | 0.14 | 0.1  | 1.03   | 0.265394 | 0.021053 | 0.558032 | 0.181869 |



|                        |                |       |       |      |      |       |          |          |          |          |
|------------------------|----------------|-------|-------|------|------|-------|----------|----------|----------|----------|
| MmugDNA.5024.1.S1_at   | MmugDNA.5024.1 | 9.18  | 9.13  | 0.09 | 0.14 | 1.04  | 0.346532 | 0.139854 | 0.624998 | 0.413131 |
| MmugDNA.5028.1.S1_at   | MmugDNA.5028.1 | 8.09  | 9.4   | 0.33 | 0.4  | -2.48 | 0.028599 | 0.163328 | 0.221652 | 0.43947  |
| MmugDNA.503.1.S1_at    | MmugDNA.503.1  | 5.42  | 5.29  | 0.18 | 0.23 | 1.09  | 0.543496 | 0.763495 | 0.763461 | 0.862471 |
| MmugDNA.5045.1.S1_at   | MmugDNA.5045.1 | 9.04  | 8.63  | 0.21 | 0.3  | 1.33  | 0.087805 | 0.005038 | 0.353927 | 0.098963 |
| MmugDNA.505.1.S1_at    | MmugDNA.505.1  | 8.73  | 8.11  | 0.09 | 0.26 | 1.53  | 0.028664 | 0.010815 | 0.221856 | 0.135641 |
| MmugDNA.5051.1.S1_at   | MmugDNA.5051.1 | 13.03 | 12.81 | 0.03 | 0.01 | 1.17  | 0.000205 | 0.066276 | 0.053494 | 0.303058 |
| MmugDNA.5051.1.S1_s_at | MmugDNA.5051.1 | 12.54 | 12.26 | 0.07 | 0.03 | 1.21  | 0.002527 | 0.080764 | 0.094413 | 0.328634 |
| MmugDNA.5052.1.S1_at   | MmugDNA.5052.1 | 7.46  | 7.34  | 0.21 | 0.1  | 1.08  | 0.255942 | 0.304196 | 0.55053  | 0.561558 |
| MmugDNA.5058.1.S1_at   | MmugDNA.5058.1 | 11.61 | 11.5  | 0.06 | 0.01 | 1.08  | 0.114592 | 0.030859 | 0.391641 | 0.217427 |
| MmugDNA.5059.1.S1_at   | MmugDNA.5059.1 | 9.48  | 9.82  | 0.33 | 0.2  | -1.27 | 0.087453 | 0.317063 | 0.353257 | 0.570334 |
| MmugDNA.5063.1.S1_s_at | MmugDNA.5063.1 | 12.46 | 12.29 | 0.08 | 0.15 | 1.12  | 0.0595   | 0.08829  | 0.301061 | 0.341721 |
| MmugDNA.5064.1.S1_at   | MmugDNA.5064.1 | 9.61  | 12.12 | 1.39 | 0.24 | -5.7  | 0.077287 | 0.393656 | 0.335964 | 0.626522 |
| MmugDNA.5075.1.S1_at   | MmugDNA.5075.1 | 5.95  | 6.75  | 0.24 | 0.25 | -1.75 | 0.014569 | 0.027509 | 0.172573 | 0.207161 |
| MmugDNA.5077.1.S1_at   | MmugDNA.5077.1 | 10.84 | 10.77 | 0.09 | 0.28 | 1.05  | 0.984427 | 0.085217 | 0.994206 | 0.337096 |
| MmugDNA.5086.1.S1_at   | MmugDNA.5086.1 | 10.47 | 10.4  | 0.24 | 0.25 | 1.05  | 0.683469 | 0.493276 | 0.849083 | 0.694018 |
| MmugDNA.5087.1.S1_at   | MmugDNA.5087.1 | 9.48  | 8.87  | 0.11 | 0.15 | 1.54  | 0.00772  | 0.012464 | 0.13671  | 0.14417  |
| MmugDNA.5090.1.S1_at   | MmugDNA.5090.1 | 7.21  | 6.79  | 0.44 | 0.07 | 1.33  | 0.078466 | 0.061517 | 0.338154 | 0.294835 |
| MmugDNA.5091.1.S1_at   | MmugDNA.5091.1 | 6.99  | 6.65  | 0.37 | 0.19 | 1.26  | 0.185129 | 0.020371 | 0.481305 | 0.179158 |
| MmugDNA.5094.1.S1_at   | MmugDNA.5094.1 | 9.6   | 9.29  | 0.24 | 0.14 | 1.24  | 0.05005  | 0.020227 | 0.28142  | 0.178641 |
| MmugDNA.5095.1.S1_at   | MmugDNA.5095.1 | 11.43 | 11.21 | 0.31 | 0.09 | 1.17  | 0.501268 | 0.626624 | 0.735287 | 0.779896 |
| MmugDNA.5098.1.S1_at   | MmugDNA.5098.1 | 5.88  | 5.76  | 0.09 | 0.06 | 1.08  | 0.2239   | 0.126258 | 0.521914 | 0.39678  |
| MmugDNA.510.1.S1_at    | MmugDNA.510.1  | 11.12 | 11.05 | 0.13 | 0.04 | 1.05  | 0.185182 | 0.636317 | 0.481345 | 0.786047 |
| MmugDNA.5101.1.S1_at   | MmugDNA.5101.1 | 11.46 | 11.55 | 0.11 | 0.12 | -1.06 | 0.907752 | 0.015415 | 0.960996 | 0.157687 |
| MmugDNA.5103.1.S1_at   | MmugDNA.5103.1 | 5.84  | 5.79  | 0.17 | 0.03 | 1.04  | 0.492445 | 0.298528 | 0.729741 | 0.557175 |
| MmugDNA.511.1.S1_at    | MmugDNA.511.1  | 12.93 | 12.93 | 0.11 | 0.17 | -1    | 0.369364 | 0.390032 | 0.642818 | 0.624002 |
| MmugDNA.5112.1.S1_at   | MmugDNA.5112.1 | 5.68  | 5.63  | 0.14 | 0.08 | 1.04  | 0.334425 | 0.635871 | 0.615556 | 0.785716 |
| MmugDNA.512.1.S1_at    | MmugDNA.512.1  | 6.51  | 6.6   | 0.16 | 0.06 | -1.06 | 0.982713 | 0.751566 | 0.993625 | 0.855508 |
| MmugDNA.5125.1.S1_at   | MmugDNA.5125.1 | 6.28  | 6.37  | 0.09 | 0.05 | -1.06 | 0.404883 | 0.092218 | 0.668504 | 0.347969 |
| MmugDNA.5126.1.S1_at   | MmugDNA.5126.1 | 10.82 | 11.39 | 0.16 | 0.09 | -1.48 | 0.004955 | 0.151398 | 0.115356 | 0.426104 |
| MmugDNA.5129.1.S1_at   | MmugDNA.5129.1 | 8.4   | 8.87  | 0.18 | 0.15 | -1.38 | 0.031044 | 0.157861 | 0.229144 | 0.433522 |
| MmugDNA.5130.1.S1_at   | MmugDNA.5130.1 | 11.31 | 11.11 | 0.1  | 0.08 | 1.15  | 0.060629 | 0.717198 | 0.30326  | 0.836322 |
| MmugDNA.5134.1.S1_at   | MmugDNA.5134.1 | 8.34  | 10.44 | 0.94 | 0.23 | -4.28 | 0.062489 | 0.091793 | 0.306597 | 0.346977 |
| MmugDNA.5139.1.S1_at   | MmugDNA.5139.1 | 5.42  | 5.37  | 0.07 | 0.07 | 1.03  | 0.23103  | 0.377955 | 0.529821 | 0.615264 |
| MmugDNA.514.1.S1_at    | MmugDNA.514.1  | 5.08  | 4.99  | 0.11 | 0.05 | 1.07  | 0.602383 | 0.327133 | 0.800189 | 0.577136 |
| MmugDNA.5146.1.S1_at   | MmugDNA.5146.1 | 8.42  | 8.34  | 0.09 | 0.07 | 1.06  | 0.13261  | 0.106936 | 0.415892 | 0.369499 |
| MmugDNA.515.1.S1_at    | MmugDNA.515.1  | 11.01 | 11.38 | 0.48 | 0.02 | -1.3  | 0.692633 | 0.758893 | 0.853103 | 0.859892 |
| MmugDNA.5153.1.S1_at   | MmugDNA.5153.1 | 5.72  | 5.66  | 0.14 | 0.03 | 1.04  | 0.969914 | 0.29157  | 0.98803  | 0.551953 |
| MmugDNA.5155.1.S1_at   | MmugDNA.5155.1 | 9.62  | 9.78  | 0.15 | 0.1  | -1.11 | 0.166781 | 0.19258  | 0.460006 | 0.468079 |
| MmugDNA.5160.1.S1_at   | MmugDNA.5160.1 | 11.31 | 11.34 | 0.04 | 0.07 | -1.02 | 0.361919 | 0.577985 | 0.637126 | 0.748204 |
| MmugDNA.5165.1.S1_at   | MmugDNA.5165.1 | 11.06 | 10.22 | 0.17 | 0.16 | 1.8   | 0.002223 | 0.000246 | 0.091031 | 0.032859 |
| MmugDNA.5167.1.S1_at   | MmugDNA.5167.1 | 5.62  | 5.88  | 0.22 | 0.26 | -1.19 | 0.284879 | 0.062657 | 0.574835 | 0.297022 |
| MmugDNA.5169.1.S1_at   | MmugDNA.5169.1 | 9.12  | 9.18  | 0.34 | 0.19 | -1.04 | 0.88463  | 0.04218  | 0.950933 | 0.249842 |
| MmugDNA.5170.1.S1_at   | MmugDNA.5170.1 | 3.35  | 3.35  | 0.13 | 0.05 | 1     | 0.290137 | 0.606263 | 0.579635 | 0.765727 |

|                        |                |       |       |      |      |       |          |          |          |          |
|------------------------|----------------|-------|-------|------|------|-------|----------|----------|----------|----------|
| MmugDNA.5174.1.S1_at   | MmugDNA.5174.1 | 8.19  | 7.86  | 0.16 | 0.01 | 1.26  | 0.015043 | 0.001429 | 0.174736 | 0.057607 |
| MmugDNA.5179.1.S1_at   | MmugDNA.5179.1 | 8.79  | 8.26  | 0.2  | 0.21 | 1.44  | 0.067342 | 0.000776 | 0.317123 | 0.045626 |
| MmugDNA.518.1.S1_at    | MmugDNA.518.1  | 7.45  | 7.4   | 0.06 | 0.02 | 1.04  | 0.186468 | 0.30957  | 0.482628 | 0.564987 |
| MmugDNA.5183.1.S1_at   | MmugDNA.5183.1 | 5.78  | 5.64  | 0.43 | 0.09 | 1.1   | 0.471957 | 0.640984 | 0.715918 | 0.789322 |
| MmugDNA.5186.1.S1_at   | MmugDNA.5186.1 | 10.31 | 10.22 | 0.13 | 0.16 | 1.06  | 0.962318 | 0.132896 | 0.984644 | 0.404544 |
| MmugDNA.5195.1.S1_at   | MmugDNA.5195.1 | 7.67  | 7.56  | 0.02 | 0.05 | 1.08  | 0.020049 | 0.666219 | 0.195082 | 0.804419 |
| MmugDNA.5196.1.S1_at   | MmugDNA.5196.1 | 7.16  | 7.59  | 0.1  | 0.11 | -1.35 | 0.004878 | 0.336262 | 0.115123 | 0.583736 |
| MmugDNA.5197.1.S1_at   | MmugDNA.5197.1 | 8.24  | 8.69  | 0.07 | 0.12 | -1.37 | 0.006244 | 0.112105 | 0.125292 | 0.377398 |
| MmugDNA.5201.1.S1_at   | MmugDNA.5201.1 | 10.84 | 10.57 | 0.07 | 0.06 | 1.2   | 0.004877 | 0.006293 | 0.115123 | 0.107725 |
| MmugDNA.5209.1.S1_at   | MmugDNA.5209.1 | 7.3   | 7.63  | 0.61 | 0.09 | -1.26 | 0.139121 | 0.270522 | 0.424876 | 0.535835 |
| MmugDNA.5218.1.S1_at   | MmugDNA.5218.1 | 8.26  | 8.33  | 0.22 | 0.27 | -1.05 | 0.710176 | 0.730056 | 0.862892 | 0.843796 |
| MmugDNA.522.1.S1_at    | MmugDNA.522.1  | 7.92  | 8.35  | 0.16 | 0.08 | -1.35 | 0.009829 | 0.025065 | 0.148542 | 0.198332 |
| MmugDNA.5222.1.S1_at   | MmugDNA.5222.1 | 7.25  | 7.39  | 0.16 | 0.1  | -1.1  | 0.439202 | 0.704085 | 0.69348  | 0.828326 |
| MmugDNA.5231.1.S1_at   | MmugDNA.5231.1 | 5.97  | 6     | 0.02 | 0.25 | -1.02 | 0.83726  | 0.388144 | 0.92862  | 0.622607 |
| MmugDNA.5238.1.S1_at   | MmugDNA.5238.1 | 9.93  | 10.04 | 0.08 | 0.2  | -1.08 | 0.413069 | 0.244644 | 0.674478 | 0.514463 |
| MmugDNA.5239.1.S1_at   | MmugDNA.5239.1 | 11.84 | 12.35 | 0.24 | 0.11 | -1.42 | 0.050197 | 0.244179 | 0.281792 | 0.514164 |
| MmugDNA.5250.1.S1_at   | MmugDNA.5250.1 | 10.13 | 9.97  | 0.19 | 0.09 | 1.12  | 0.25465  | 0.242658 | 0.549181 | 0.513025 |
| MmugDNA.5253.1.S1_s_at | MmugDNA.5253.1 | 11.28 | 11.35 | 0.34 | 0.12 | -1.05 | 0.940778 | 0.254101 | 0.975133 | 0.522439 |
| MmugDNA.526.1.S1_at    | MmugDNA.526.1  | 4.92  | 4.89  | 0.16 | 0.05 | 1.02  | 0.251533 | 0.381091 | 0.546344 | 0.617478 |
| MmugDNA.5261.1.S1_at   | MmugDNA.5261.1 | 12.15 | 12.31 | 0.12 | 0.08 | -1.12 | 0.088317 | 0.0831   | 0.35443  | 0.332962 |
| MmugDNA.5264.1.S1_at   | MmugDNA.5264.1 | 12.01 | 11.83 | 0.11 | 0.12 | 1.13  | 0.058385 | 0.280074 | 0.298756 | 0.543369 |
| MmugDNA.5265.1.S1_at   | MmugDNA.5265.1 | 7.8   | 6.4   | 0.36 | 0.3  | 2.64  | 0.004107 | 0.005988 | 0.109608 | 0.1058   |
| MmugDNA.5277.1.S1_at   | MmugDNA.5277.1 | 10.51 | 10.3  | 0.25 | 0.07 | 1.16  | 0.301282 | 0.078204 | 0.589245 | 0.324752 |
| MmugDNA.5278.1.S1_at   | MmugDNA.5278.1 | 6.87  | 6.69  | 0.12 | 0.04 | 1.13  | 0.057784 | 0.172855 | 0.297541 | 0.449424 |
| MmugDNA.5279.1.S1_at   | MmugDNA.5279.1 | 10.35 | 10.51 | 0.29 | 0.15 | -1.12 | 0.951134 | 0.949461 | 0.979768 | 0.971102 |
| MmugDNA.5281.1.S1_at   | MmugDNA.5281.1 | 6.36  | 6.01  | 0.12 | 0.09 | 1.27  | 0.011975 | 0.007676 | 0.159466 | 0.117153 |
| MmugDNA.5286.1.S1_at   | MmugDNA.5286.1 | 6.59  | 6.73  | 0.08 | 0.04 | -1.1  | 0.035023 | 0.029134 | 0.241804 | 0.212747 |
| MmugDNA.5288.1.S1_at   | MmugDNA.5288.1 | 10.84 | 10.91 | 0.23 | 0.09 | -1.05 | 0.606662 | 0.145607 | 0.803284 | 0.419505 |
| MmugDNA.5290.1.S1_at   | MmugDNA.5290.1 | 12.34 | 11.76 | 0.17 | 0.03 | 1.49  | 0.008316 | 0.012337 | 0.140121 | 0.143659 |
| MmugDNA.5293.1.S1_at   | MmugDNA.5293.1 | 7.56  | 7.15  | 0.13 | 0.08 | 1.33  | 0.018234 | 0.119958 | 0.188054 | 0.388671 |
| MmugDNA.5294.1.S1_at   | MmugDNA.5294.1 | 3.95  | 4.12  | 0.23 | 0.34 | -1.13 | 0.152334 | 0.552315 | 0.441909 | 0.731658 |
| MmugDNA.5299.1.S1_at   | MmugDNA.5299.1 | 13.25 | 13.26 | 0.14 | 0.08 | -1.01 | 0.832414 | 0.197203 | 0.926141 | 0.472213 |
| MmugDNA.53.1.S1_at     | MmugDNA.53.1   | 9.98  | 9.57  | 0.21 | 0.08 | 1.33  | 0.038498 | 0.010382 | 0.2521   | 0.133312 |
| MmugDNA.530.1.S1_at    | MmugDNA.530.1  | 12.09 | 11.95 | 0.12 | 0.12 | 1.1   | 0.975726 | 0.364951 | 0.990389 | 0.60517  |
| MmugDNA.5307.1.S1_at   | MmugDNA.5307.1 | 4.75  | 4.44  | 0.23 | 0.09 | 1.24  | 0.087828 | 0.07454  | 0.353944 | 0.318173 |
| MmugDNA.531.1.S1_at    | MmugDNA.531.1  | 8.51  | 8.58  | 1.04 | 0.25 | -1.05 | 0.942986 | 0.175184 | 0.975977 | 0.45196  |
| MmugDNA.5311.1.S1_at   | MmugDNA.5311.1 | 11.29 | 11.23 | 0.26 | 0.09 | 1.04  | 0.946781 | 0.173827 | 0.977627 | 0.450128 |
| MmugDNA.5318.1.S1_at   | MmugDNA.5318.1 | 8.64  | 8.56  | 0.2  | 0.03 | 1.06  | 0.391808 | 0.642914 | 0.658845 | 0.79054  |
| MmugDNA.5326.1.S1_at   | MmugDNA.5326.1 | 7.7   | 7.44  | 0.03 | 0.02 | 1.19  | 0.000126 | 0.005046 | 0.051196 | 0.09901  |
| MmugDNA.5327.1.S1_at   | MmugDNA.5327.1 | 12.11 | 11.92 | 0.05 | 0.07 | 1.15  | 0.02027  | 0.038805 | 0.196077 | 0.241916 |
| MmugDNA.5331.1.S1_at   | MmugDNA.5331.1 | 7.59  | 7.75  | 0.08 | 0.05 | -1.12 | 0.108045 | 0.083699 | 0.382725 | 0.334399 |
| MmugDNA.5338.1.S1_at   | MmugDNA.5338.1 | 9.93  | 9.46  | 0.2  | 0.2  | 1.38  | 0.036722 | 0.030306 | 0.246729 | 0.215977 |
| MmugDNA.5341.1.S1_at   | MmugDNA.5341.1 | 6.09  | 6.18  | 0.57 | 0.12 | -1.06 | 0.34305  | 0.261242 | 0.622701 | 0.527724 |

|                        |                |       |       |      |      |       |          |          |          |          |
|------------------------|----------------|-------|-------|------|------|-------|----------|----------|----------|----------|
| MmugDNA.5343.1.S1_at   | MmugDNA.5343.1 | 7.73  | 7.75  | 0.61 | 0.02 | -1.02 | 0.788786 | 0.927414 | 0.904019 | 0.958778 |
| MmugDNA.5344.1.S1_at   | MmugDNA.5344.1 | 10.05 | 10.26 | 0.13 | 0.15 | -1.16 | 0.541646 | 0.818384 | 0.762336 | 0.895287 |
| MmugDNA.5345.1.S1_at   | MmugDNA.5345.1 | 4.79  | 4.76  | 0.08 | 0.15 | 1.02  | 0.68176  | 0.363183 | 0.848213 | 0.603574 |
| MmugDNA.5347.1.S1_at   | MmugDNA.5347.1 | 11.11 | 11.67 | 0.11 | 0.31 | -1.47 | 0.045798 | 0.00015  | 0.271515 | 0.029832 |
| MmugDNA.5353.1.S1_at   | MmugDNA.5353.1 | 9.12  | 8.05  | 0.31 | 0.03 | 2.11  | 0.007228 | 0.067677 | 0.132536 | 0.306208 |
| MmugDNA.5357.1.S1_at   | MmugDNA.5357.1 | 12.46 | 12.63 | 0.08 | 0.02 | -1.13 | 0.020382 | 0.001755 | 0.196305 | 0.063111 |
| MmugDNA.5362.1.S1_at   | MmugDNA.5362.1 | 8.03  | 8.15  | 0.27 | 0.02 | -1.09 | 0.889645 | 0.266715 | 0.95305  | 0.53241  |
| MmugDNA.5366.1.S1_at   | MmugDNA.5366.1 | 4.44  | 4.56  | 0.05 | 0.02 | -1.09 | 0.01685  | 0.266384 | 0.183141 | 0.532173 |
| MmugDNA.5382.1.S1_at   | MmugDNA.5382.1 | 12.38 | 12.56 | 0.13 | 0.06 | -1.13 | 0.060276 | 0.020901 | 0.302641 | 0.181404 |
| MmugDNA.5386.1.S1_at   | MmugDNA.5386.1 | 8.82  | 9.17  | 0.45 | 0.54 | -1.27 | 0.987551 | 0.134518 | 0.995514 | 0.406629 |
| MmugDNA.5388.1.S1_at   | MmugDNA.5388.1 | 3.52  | 3.58  | 0.04 | 0.08 | -1.04 | 0.845674 | 0.235882 | 0.932611 | 0.507056 |
| MmugDNA.5388.1.S1_x_at | MmugDNA.5388.1 | 4.3   | 4.3   | 0.02 | 0.07 | -1    | 0.427698 | 0.038667 | 0.684931 | 0.24169  |
| MmugDNA.5389.1.S1_at   | MmugDNA.5389.1 | 11.57 | 11.53 | 0.07 | 0.04 | 1.03  | 0.232501 | 0.523967 | 0.530889 | 0.714099 |
| MmugDNA.539.1.S1_at    | MmugDNA.539.1  | 8.05  | 8.4   | 0.08 | 0.05 | -1.28 | 0.004893 | 0.057106 | 0.115126 | 0.284945 |
| MmugDNA.5391.1.S1_at   | MmugDNA.5391.1 | 12.18 | 12.17 | 0.12 | 0.03 | 1.01  | 0.515673 | 0.08252  | 0.745426 | 0.331642 |
| MmugDNA.54.1.S1_at     | MmugDNA.54.1   | 10.89 | 10.69 | 0.07 | 0.03 | 1.15  | 0.01488  | 0.197595 | 0.174107 | 0.472564 |
| MmugDNA.5404.1.S1_at   | MmugDNA.5404.1 | 9.59  | 9.15  | 0.17 | 0.2  | 1.36  | 0.045947 | 0.142073 | 0.27197  | 0.415655 |
| MmugDNA.5406.1.S1_at   | MmugDNA.5406.1 | 4.29  | 5.6   | 0.65 | 0.18 | -2.47 | 0.076026 | 0.090503 | 0.334035 | 0.345015 |
| MmugDNA.5408.1.S1_at   | MmugDNA.5408.1 | 11.98 | 11.15 | 0.26 | 0.04 | 1.78  | 0.005215 | 0.001901 | 0.117314 | 0.065038 |
| MmugDNA.5409.1.S1_at   | MmugDNA.5409.1 | 8.57  | 8.65  | 0.2  | 0.05 | -1.06 | 0.576937 | 0.475602 | 0.783459 | 0.68228  |
| MmugDNA.5410.1.S1_at   | MmugDNA.5410.1 | 5.3   | 5.31  | 0.18 | 0.29 | -1.01 | 0.538936 | 0.394886 | 0.76048  | 0.627216 |
| MmugDNA.5413.1.S1_at   | MmugDNA.5413.1 | 9.21  | 9.09  | 0.16 | 0.18 | 1.09  | 0.412909 | 0.624521 | 0.674405 | 0.778707 |
| MmugDNA.5415.1.S1_at   | MmugDNA.5415.1 | 6.8   | 6.54  | 0.42 | 0.37 | 1.2   | 0.337438 | 0.384478 | 0.617875 | 0.620142 |
| MmugDNA.5429.1.S1_at   | MmugDNA.5429.1 | 10.51 | 10.48 | 0.02 | 0.04 | 1.02  | 0.676479 | 0.23917  | 0.84554  | 0.509902 |
| MmugDNA.5430.1.S1_at   | MmugDNA.5430.1 | 9.99  | 9.48  | 0.14 | 0.15 | 1.42  | 0.007962 | 0.108648 | 0.138304 | 0.372171 |
| MmugDNA.5432.1.S1_at   | MmugDNA.5432.1 | 2.71  | 2.67  | 0.06 | 0.1  | 1.03  | 0.666075 | 0.674295 | 0.839504 | 0.809716 |
| MmugDNA.5435.1.S1_at   | MmugDNA.5435.1 | 7.51  | 7.4   | 0.21 | 0.03 | 1.08  | 0.90232  | 0.607003 | 0.958663 | 0.766181 |
| MmugDNA.5435.1.S1_s_at | MmugDNA.5435.1 | 7.77  | 8.45  | 0.41 | 0.04 | -1.6  | 0.026737 | 0.000385 | 0.216718 | 0.037273 |
| MmugDNA.5438.1.S1_at   | MmugDNA.5438.1 | 5.3   | 5.2   | 0.06 | 0.05 | 1.07  | 0.27479  | 0.200256 | 0.566556 | 0.474689 |
| MmugDNA.5445.1.S1_at   | MmugDNA.5445.1 | 10.06 | 10.27 | 0.77 | 0.03 | -1.15 | 0.595188 | 0.257717 | 0.795096 | 0.525343 |
| MmugDNA.5448.1.S1_at   | MmugDNA.5448.1 | 11.09 | 11.04 | 0.15 | 0.17 | 1.03  | 0.36692  | 0.599271 | 0.641083 | 0.761384 |
| MmugDNA.5453.1.S1_at   | MmugDNA.5453.1 | 5.88  | 5.88  | 0.15 | 0.08 | 1     | 0.26233  | 0.209345 | 0.556437 | 0.483065 |
| MmugDNA.5457.1.S1_at   | MmugDNA.5457.1 | 3.6   | 3.52  | 0.31 | 0.09 | 1.06  | 0.216041 | 0.326562 | 0.513759 | 0.576612 |
| MmugDNA.5459.1.S1_at   | MmugDNA.5459.1 | 3.61  | 3.54  | 0.08 | 0.07 | 1.05  | 0.236142 | 0.54199  | 0.533746 | 0.725169 |
| MmugDNA.5460.1.S1_at   | MmugDNA.5460.1 | 13.18 | 13.14 | 0.05 | 0.06 | 1.03  | 0.08463  | 0.023926 | 0.348519 | 0.19376  |
| MmugDNA.5461.1.S1_at   | MmugDNA.5461.1 | 11.81 | 11.91 | 0.35 | 0.09 | -1.07 | 0.687982 | 0.335556 | 0.850984 | 0.583326 |
| MmugDNA.5464.1.S1_at   | MmugDNA.5464.1 | 10.19 | 10.48 | 0.27 | 0.1  | -1.22 | 0.393946 | 0.025313 | 0.660637 | 0.199522 |
| MmugDNA.5464.1.S1_s_at | MmugDNA.5464.1 | 9.79  | 10.02 | 0.23 | 0.07 | -1.18 | 0.501212 | 0.025954 | 0.735287 | 0.20198  |
| MmugDNA.5466.1.S1_s_at | MmugDNA.5466.1 | 10.47 | 10.67 | 0.08 | 0.06 | -1.14 | 0.115831 | 0.495939 | 0.392964 | 0.695811 |
| MmugDNA.5467.1.S1_at   | MmugDNA.5467.1 | 13.75 | 13.81 | 0.11 | 0.04 | -1.04 | 0.463019 | 0.82923  | 0.709909 | 0.901815 |
| MmugDNA.5472.1.S1_at   | MmugDNA.5472.1 | 6.23  | 5.87  | 0.38 | 0.08 | 1.29  | 0.185739 | 0.256208 | 0.481947 | 0.524069 |
| MmugDNA.5473.1.S1_at   | MmugDNA.5473.1 | 5.87  | 5.36  | 0.19 | 0.23 | 1.43  | 0.088205 | 0.344347 | 0.354244 | 0.589762 |
| MmugDNA.5482.1.S1_at   | MmugDNA.5482.1 | 9.95  | 10.05 | 0.27 | 0.1  | -1.08 | 0.778683 | 0.982283 | 0.898859 | 0.990339 |

|                        |                |       |       |      |      |       |          |          |          |          |
|------------------------|----------------|-------|-------|------|------|-------|----------|----------|----------|----------|
| MmugDNA.5485.1.S1_at   | MmugDNA.5485.1 | 6.53  | 7.13  | 0.27 | 0.12 | -1.52 | 0.022113 | 0.173214 | 0.201899 | 0.449779 |
| MmugDNA.5486.1.S1_at   | MmugDNA.5486.1 | 8.43  | 8.42  | 0.1  | 0.05 | 1     | 0.888594 | 0.403237 | 0.952485 | 0.631996 |
| MmugDNA.5488.1.S1_at   | MmugDNA.5488.1 | 10.66 | 11.65 | 0.26 | 0.03 | -1.98 | 0.004753 | 0.000955 | 0.115098 | 0.049326 |
| MmugDNA.549.1.S1_at    | MmugDNA.549.1  | 3.73  | 3.59  | 0.06 | 0.09 | 1.1   | 0.063617 | 0.064318 | 0.308797 | 0.299804 |
| MmugDNA.5492.1.S1_at   | MmugDNA.5492.1 | 12.35 | 12.26 | 0.16 | 0.05 | 1.07  | 0.190025 | 0.892154 | 0.486331 | 0.938526 |
| MmugDNA.5506.1.S1_at   | MmugDNA.5506.1 | 3.78  | 3.7   | 0.58 | 0.6  | 1.06  | 0.570596 | 0.194697 | 0.779362 | 0.469765 |
| MmugDNA.5508.1.S1_at   | MmugDNA.5508.1 | 3.38  | 3.39  | 0.05 | 0.05 | -1.01 | 0.372661 | 0.498013 | 0.645058 | 0.697194 |
| MmugDNA.5510.1.S1_s_at | MmugDNA.5510.1 | 7.56  | 9.57  | 1.15 | 0.21 | -4.02 | 0.048712 | 0.331778 | 0.278153 | 0.580372 |
| MmugDNA.5514.1.S1_at   | MmugDNA.5514.1 | 7.16  | 7.1   | 0.21 | 0.13 | 1.04  | 0.607388 | 0.214952 | 0.803725 | 0.488897 |
| MmugDNA.5517.1.S1_at   | MmugDNA.5517.1 | 13.07 | 13.15 | 0.04 | 0.02 | -1.06 | 0.013164 | 0.00648  | 0.165301 | 0.109342 |
| MmugDNA.5518.1.S1_at   | MmugDNA.5518.1 | 7.79  | 7.4   | 0.04 | 0.28 | 1.31  | 0.237966 | 0.032881 | 0.53541  | 0.224478 |
| MmugDNA.5519.1.S1_at   | MmugDNA.5519.1 | 13.28 | 13.03 | 0.04 | 0.01 | 1.19  | 0.000936 | 0.009806 | 0.075939 | 0.130166 |
| MmugDNA.5522.1.S1_at   | MmugDNA.5522.1 | 3.21  | 3.43  | 0.22 | 0.02 | -1.17 | 0.220901 | 0.320265 | 0.51888  | 0.572605 |
| MmugDNA.553.1.S1_at    | MmugDNA.553.1  | 9.24  | 8.49  | 0.19 | 0.06 | 1.67  | 0.002728 | 0.000386 | 0.096899 | 0.037273 |
| MmugDNA.5534.1.S1_at   | MmugDNA.5534.1 | 3.42  | 3.78  | 0.27 | 0.13 | -1.28 | 0.495153 | 0.012626 | 0.73163  | 0.144972 |
| MmugDNA.5536.1.S1_at   | MmugDNA.5536.1 | 10.95 | 11.02 | 0.12 | 0.04 | -1.05 | 0.761101 | 0.307639 | 0.890543 | 0.563799 |
| MmugDNA.5537.1.S1_at   | MmugDNA.5537.1 | 4.1   | 3.68  | 0.49 | 0.12 | 1.33  | 0.1614   | 0.207963 | 0.452991 | 0.482049 |
| MmugDNA.5539.1.S1_at   | MmugDNA.5539.1 | 3.73  | 4.09  | 0.11 | 0.2  | -1.29 | 0.06167  | 0.141556 | 0.30493  | 0.415063 |
| MmugDNA.5542.1.S1_at   | MmugDNA.5542.1 | 8.99  | 8.77  | 0.05 | 0.03 | 1.16  | 0.00215  | 0.137754 | 0.090216 | 0.410738 |
| MmugDNA.5552.1.S1_at   | MmugDNA.5552.1 | 10.91 | 10.61 | 0.18 | 0.03 | 1.24  | 0.037576 | 0.082144 | 0.249272 | 0.330937 |
| MmugDNA.5553.1.S1_at   | MmugDNA.5553.1 | 4.91  | 6.42  | 0.76 | 0.4  | -2.84 | 0.044935 | 0.034584 | 0.269298 | 0.230061 |
| MmugDNA.5558.1.S1_at   | MmugDNA.5558.1 | 9.13  | 8.99  | 0.26 | 0.08 | 1.11  | 0.375748 | 0.253336 | 0.646508 | 0.521662 |
| MmugDNA.556.1.S1_at    | MmugDNA.556.1  | 7.28  | 8.53  | 0.59 | 0.17 | -2.38 | 0.030336 | 0.094228 | 0.227183 | 0.350889 |
| MmugDNA.5565.1.S1_at   | MmugDNA.5565.1 | 6.04  | 6.02  | 0.15 | 0.1  | 1.02  | 0.454098 | 0.537607 | 0.704068 | 0.722616 |
| MmugDNA.5581.1.S1_s_at | MmugDNA.5581.1 | 12.66 | 12.9  | 0.14 | 0.05 | -1.18 | 0.04751  | 0.188958 | 0.275243 | 0.464854 |
| MmugDNA.5583.1.S1_at   | MmugDNA.5583.1 | 7.23  | 7.23  | 0.04 | 0.05 | -1    | 0.452136 | 0.65946  | 0.702737 | 0.800788 |
| MmugDNA.5584.1.S1_at   | MmugDNA.5584.1 | 10.75 | 10.48 | 0.04 | 0.24 | 1.21  | 0.116071 | 0.156798 | 0.393069 | 0.432353 |
| MmugDNA.5594.1.S1_at   | MmugDNA.5594.1 | 5.27  | 4.2   | 1.07 | 0.69 | 2.11  | 0.227877 | 0.113641 | 0.525965 | 0.379775 |
| MmugDNA.5600.1.S1_at   | MmugDNA.5600.1 | 12.51 | 12.33 | 0.11 | 0.06 | 1.13  | 0.021368 | 0.023311 | 0.199771 | 0.191355 |
| MmugDNA.5601.1.S1_at   | MmugDNA.5601.1 | 12.5  | 12.64 | 0.05 | 0.01 | -1.1  | 0.011324 | 0.391227 | 0.156654 | 0.624922 |
| MmugDNA.5610.1.S1_at   | MmugDNA.5610.1 | 9.23  | 10.51 | 0.54 | 0.17 | -2.42 | 0.022964 | 0.01676  | 0.204423 | 0.163986 |
| MmugDNA.5612.1.S1_at   | MmugDNA.5612.1 | 4.33  | 4.41  | 0.29 | 0.17 | -1.06 | 0.689948 | 0.870458 | 0.851884 | 0.926446 |
| MmugDNA.5614.1.S1_at   | MmugDNA.5614.1 | 10.16 | 9.53  | 0.22 | 0.13 | 1.56  | 0.017653 | 0.014315 | 0.186448 | 0.152756 |
| MmugDNA.5620.1.S1_at   | MmugDNA.5620.1 | 6.76  | 5.03  | 1.92 | 0.36 | 3.32  | 0.193423 | 0.265064 | 0.490045 | 0.531    |
| MmugDNA.5628.1.S1_at   | MmugDNA.5628.1 | 13.98 | 14.21 | 0.03 | 0.03 | -1.18 | 0.000687 | 0.055655 | 0.071248 | 0.28174  |
| MmugDNA.563.1.S1_at    | MmugDNA.563.1  | 4.74  | 6.23  | 0.1  | 0.25 | -2.81 | 0.001063 | 0.024516 | 0.0766   | 0.196001 |
| MmugDNA.5631.1.S1_at   | MmugDNA.5631.1 | 11.71 | 11.97 | 0.12 | 0.1  | -1.2  | 0.039806 | 0.001092 | 0.256213 | 0.052283 |
| MmugDNA.564.1.S1_at    | MmugDNA.564.1  | 11.29 | 11.58 | 0.19 | 0.1  | -1.22 | 0.088223 | 0.296579 | 0.354244 | 0.555566 |
| MmugDNA.5642.1.S1_at   | MmugDNA.5642.1 | 8.68  | 7.88  | 0.34 | 0.3  | 1.75  | 0.064649 | 0.547506 | 0.310951 | 0.728479 |
| MmugDNA.5643.1.S1_at   | MmugDNA.5643.1 | 6.16  | 5.56  | 0.34 | 0.29 | 1.52  | 0.096031 | 0.111915 | 0.365529 | 0.377006 |
| MmugDNA.5645.1.S1_at   | MmugDNA.5645.1 | 9.72  | 10.17 | 0.25 | 0.07 | -1.37 | 0.030693 | 0.03632  | 0.228035 | 0.235105 |
| MmugDNA.5654.1.S1_at   | MmugDNA.5654.1 | 8.09  | 7.81  | 0.03 | 0.03 | 1.21  | 0.000533 | 0.195304 | 0.069726 | 0.470253 |
| MmugDNA.5655.1.S1_at   | MmugDNA.5655.1 | 9.39  | 9.35  | 0.29 | 0.09 | 1.03  | 0.349486 | 0.231426 | 0.627311 | 0.503138 |

|                        |                |       |       |      |      |       |          |          |          |          |
|------------------------|----------------|-------|-------|------|------|-------|----------|----------|----------|----------|
| MmugDNA.5656.1.S1_at   | MmugDNA.5656.1 | 9.88  | 9.82  | 0.14 | 0.13 | 1.04  | 0.882274 | 0.003311 | 0.949947 | 0.082825 |
| MmugDNA.5657.1.S1_at   | MmugDNA.5657.1 | 7.58  | 8.06  | 0.24 | 0.42 | -1.39 | 0.056421 | 0.233894 | 0.294966 | 0.505169 |
| MmugDNA.5658.1.S1_at   | MmugDNA.5658.1 | 8.12  | 9.37  | 1.99 | 0.47 | -2.39 | 0.427976 | 0.400993 | 0.685045 | 0.630658 |
| MmugDNA.5661.1.S1_at   | MmugDNA.5661.1 | 10.7  | 10.28 | 0.05 | 0.08 | 1.33  | 0.001206 | 0.006166 | 0.07812  | 0.106774 |
| MmugDNA.5662.1.S1_at   | MmugDNA.5662.1 | 10.42 | 10.65 | 0.16 | 0.11 | -1.17 | 0.117022 | 0.140448 | 0.394162 | 0.413627 |
| MmugDNA.5663.1.S1_at   | MmugDNA.5663.1 | 13.04 | 13.02 | 0.13 | 0.02 | 1.01  | 0.597865 | 0.445337 | 0.797008 | 0.662338 |
| MmugDNA.5665.1.S1_at   | MmugDNA.5665.1 | 12.53 | 12.45 | 0.1  | 0.03 | 1.05  | 0.290633 | 0.113606 | 0.580092 | 0.379726 |
| MmugDNA.5669.1.S1_at   | MmugDNA.5669.1 | 7.91  | 7.91  | 0.04 | 0.14 | -1    | 0.597992 | 0.930547 | 0.797056 | 0.960527 |
| MmugDNA.567.1.S1_s_at  | MmugDNA.567.1  | 6.6   | 6.49  | 0.19 | 0.01 | 1.08  | 0.200898 | 0.24254  | 0.498263 | 0.512875 |
| MmugDNA.5671.1.S1_at   | MmugDNA.5671.1 | 4.99  | 4.98  | 0.58 | 0.18 | 1     | 0.53172  | 0.020737 | 0.755933 | 0.180661 |
| MmugDNA.5683.1.S1_s_at | MmugDNA.5683.1 | 8.16  | 7.78  | 0.29 | 0.18 | 1.3   | 0.233424 | 0.265553 | 0.53162  | 0.531418 |
| MmugDNA.5685.1.S1_at   | MmugDNA.5685.1 | 3.76  | 3.71  | 0.05 | 0.23 | 1.04  | 0.793426 | 0.560869 | 0.906582 | 0.736993 |
| MmugDNA.5688.1.S1_at   | MmugDNA.5688.1 | 6.96  | 7.36  | 1.29 | 0.29 | -1.32 | 0.840758 | 0.937678 | 0.930069 | 0.964687 |
| MmugDNA.5694.1.S1_at   | MmugDNA.5694.1 | 6.11  | 6.08  | 0.12 | 0.22 | 1.02  | 0.575634 | 0.159162 | 0.782893 | 0.435217 |
| MmugDNA.5702.1.S1_at   | MmugDNA.5702.1 | 9.33  | 9.46  | 0.19 | 0.09 | -1.1  | 0.240542 | 0.022488 | 0.53802  | 0.187631 |
| MmugDNA.5704.1.S1_at   | MmugDNA.5704.1 | 5.36  | 5.4   | 0.01 | 0.1  | -1.03 | 0.753077 | 0.44002  | 0.885919 | 0.658635 |
| MmugDNA.5704.1.S1_x_at | MmugDNA.5704.1 | 4.62  | 4.62  | 0.18 | 0.05 | 1.01  | 0.819194 | 0.135353 | 0.919483 | 0.40745  |
| MmugDNA.5705.1.S1_at   | MmugDNA.5705.1 | 11.06 | 10.72 | 0.14 | 0.01 | 1.26  | 0.012412 | 0.000647 | 0.161693 | 0.043083 |
| MmugDNA.5711.1.S1_at   | MmugDNA.5711.1 | 5.38  | 6.17  | 1.34 | 0.28 | -1.73 | 0.378873 | 0.33786  | 0.648993 | 0.585031 |
| MmugDNA.5714.1.S1_at   | MmugDNA.5714.1 | 10.13 | 8.69  | 0.13 | 0.19 | 2.71  | 0.000304 | 0.000255 | 0.058024 | 0.033475 |
| MmugDNA.5715.1.S1_at   | MmugDNA.5715.1 | 13.69 | 14.07 | 0.16 | 0.1  | -1.3  | 0.053138 | 0.331825 | 0.28778  | 0.580397 |
| MmugDNA.5716.1.S1_at   | MmugDNA.5716.1 | 13.61 | 13.67 | 0.1  | 0.03 | -1.04 | 0.433885 | 0.482598 | 0.689223 | 0.687368 |
| MmugDNA.5720.1.S1_at   | MmugDNA.5720.1 | 6.63  | 6.6   | 0.15 | 0.14 | 1.02  | 0.436642 | 0.557537 | 0.691566 | 0.73509  |
| MmugDNA.5725.1.S1_at   | MmugDNA.5725.1 | 5.21  | 5.55  | 0.08 | 0.07 | -1.27 | 0.012036 | 0.001497 | 0.159675 | 0.058967 |
| MmugDNA.5729.1.S1_at   | MmugDNA.5729.1 | 8.8   | 9.29  | 0.06 | 0.09 | -1.4  | 0.001351 | 0.000175 | 0.079562 | 0.030511 |
| MmugDNA.573.1.S1_at    | MmugDNA.573.1  | 9.44  | 9.3   | 0.08 | 0.07 | 1.1   | 0.129994 | 0.296787 | 0.412127 | 0.555779 |
| MmugDNA.5731.1.S1_at   | MmugDNA.5731.1 | 8.31  | 7.3   | 0.34 | 0.48 | 2.02  | 0.063164 | 0.052953 | 0.30807  | 0.275774 |
| MmugDNA.5733.1.S1_at   | MmugDNA.5733.1 | 9.04  | 9.08  | 0.27 | 0.17 | -1.03 | 0.636524 | 0.189061 | 0.822111 | 0.464897 |
| MmugDNA.5734.1.S1_at   | MmugDNA.5734.1 | 8.11  | 7.92  | 0.12 | 0.06 | 1.14  | 0.112331 | 0.168889 | 0.38851  | 0.445458 |
| MmugDNA.5736.1.S1_at   | MmugDNA.5736.1 | 11.72 | 11.85 | 0.24 | 0.03 | -1.1  | 0.421515 | 0.050087 | 0.679956 | 0.268916 |
| MmugDNA.5738.1.S1_at   | MmugDNA.5738.1 | 9.33  | 8.97  | 0.16 | 0.27 | 1.29  | 0.067191 | 0.208646 | 0.316853 | 0.482544 |
| MmugDNA.5742.1.S1_at   | MmugDNA.5742.1 | 7.82  | 7.5   | 0.19 | 0.06 | 1.24  | 0.050163 | 0.025772 | 0.281748 | 0.201218 |
| MmugDNA.5746.1.S1_at   | MmugDNA.5746.1 | 8.72  | 7.83  | 0.24 | 0.03 | 1.85  | 0.002973 | 0.001899 | 0.099609 | 0.065035 |
| MmugDNA.5747.1.S1_at   | MmugDNA.5747.1 | 11.98 | 12.17 | 0.1  | 0.16 | -1.14 | 0.317596 | 0.071695 | 0.602344 | 0.313904 |
| MmugDNA.575.1.S1_at    | MmugDNA.575.1  | 5.13  | 5.06  | 0.06 | 0.02 | 1.05  | 0.142507 | 0.866022 | 0.42863  | 0.923791 |
| MmugDNA.5754.1.S1_at   | MmugDNA.5754.1 | 7     | 8.46  | 1.05 | 0.53 | -2.75 | 0.1273   | 0.157636 | 0.409026 | 0.433131 |
| MmugDNA.5757.1.S1_at   | MmugDNA.5757.1 | 11.08 | 10.66 | 0.31 | 0.04 | 1.34  | 0.184756 | 0.070397 | 0.480792 | 0.311676 |
| MmugDNA.5759.1.S1_at   | MmugDNA.5759.1 | 9.51  | 7.97  | 0.25 | 0.02 | 2.92  | 0.000613 | 0.000111 | 0.070727 | 0.028099 |
| MmugDNA.5761.1.S1_at   | MmugDNA.5761.1 | 9.94  | 8.57  | 0.24 | 0.33 | 2.59  | 0.007542 | 0.019286 | 0.135071 | 0.174698 |
| MmugDNA.5768.1.S1_at   | MmugDNA.5768.1 | 12.39 | 12.15 | 0.06 | 0.02 | 1.18  | 0.002061 | 0.004421 | 0.090098 | 0.092904 |
| MmugDNA.5769.1.S1_at   | MmugDNA.5769.1 | 8.35  | 7.87  | 0.33 | 0.13 | 1.39  | 0.182173 | 0.308112 | 0.477898 | 0.564219 |
| MmugDNA.5778.1.S1_at   | MmugDNA.5778.1 | 11.16 | 11.24 | 0.24 | 0.01 | -1.06 | 0.866036 | 0.067165 | 0.942018 | 0.305174 |
| MmugDNA.5781.1.S1_at   | MmugDNA.5781.1 | 7.48  | 7.98  | 0.34 | 0.26 | -1.42 | 0.108364 | 0.32651  | 0.383016 | 0.576576 |

|                        |                |       |       |      |      |       |          |          |          |          |
|------------------------|----------------|-------|-------|------|------|-------|----------|----------|----------|----------|
| MmugDNA.5783.1.S1_at   | MmugDNA.5783.1 | 4.79  | 4.82  | 0.4  | 0.32 | -1.03 | 0.883215 | 0.984422 | 0.950338 | 0.991287 |
| MmugDNA.5784.1.S1_at   | MmugDNA.5784.1 | 8.37  | 8.31  | 0.28 | 0.18 | 1.05  | 0.906987 | 0.954998 | 0.960628 | 0.974501 |
| MmugDNA.5788.1.S1_s_at | MmugDNA.5788.1 | 5.74  | 5.84  | 0.07 | 0.03 | -1.07 | 0.025903 | 0.011392 | 0.213762 | 0.13824  |
| MmugDNA.579.1.S1_at    | MmugDNA.579.1  | 9.15  | 9.83  | 0.43 | 0.07 | -1.6  | 0.099589 | 0.120441 | 0.370515 | 0.38925  |
| MmugDNA.5793.1.S1_at   | MmugDNA.5793.1 | 2.95  | 3.02  | 0.03 | 0.07 | -1.05 | 0.245853 | 0.430002 | 0.541732 | 0.65111  |
| MmugDNA.5794.1.S1_at   | MmugDNA.5794.1 | 12.38 | 13.2  | 0.59 | 0.16 | -1.77 | 0.12757  | 0.03056  | 0.409503 | 0.216739 |
| MmugDNA.5803.1.S1_at   | MmugDNA.5803.1 | 6.61  | 6.6   | 0.24 | 0.29 | 1.01  | 0.859903 | 0.951598 | 0.939228 | 0.972522 |
| MmugDNA.5807.1.S1_at   | MmugDNA.5807.1 | 9.91  | 8.96  | 0.12 | 0.2  | 1.92  | 0.003818 | 0.000178 | 0.107015 | 0.030511 |
| MmugDNA.5809.1.S1_at   | MmugDNA.5809.1 | 3.6   | 3.62  | 0.16 | 0.11 | -1.02 | 0.831746 | 0.454539 | 0.925994 | 0.668668 |
| MmugDNA.5812.1.S1_at   | MmugDNA.5812.1 | 11.18 | 11.32 | 0.09 | 0.1  | -1.1  | 0.205636 | 0.011062 | 0.503384 | 0.136934 |
| MmugDNA.5819.1.S1_at   | MmugDNA.5819.1 | 6.7   | 6.57  | 0.39 | 0.03 | 1.09  | 0.936767 | 0.603853 | 0.973607 | 0.764341 |
| MmugDNA.5825.1.A1_at   | MmugDNA.5825.1 | 3.99  | 4.05  | 0.15 | 0.11 | -1.04 | 0.665624 | 0.771199 | 0.839333 | 0.866992 |
| MmugDNA.5825.1.S1_at   | MmugDNA.5825.1 | 6.09  | 5.93  | 0.18 | 0.04 | 1.12  | 0.620659 | 0.845908 | 0.812056 | 0.912277 |
| MmugDNA.5827.1.S1_at   | MmugDNA.5827.1 | 8.86  | 10.34 | 0.86 | 0.32 | -2.79 | 0.021727 | 0.167146 | 0.200743 | 0.443629 |
| MmugDNA.5830.1.S1_at   | MmugDNA.5830.1 | 7.93  | 8.62  | 0.2  | 0.26 | -1.61 | 0.041228 | 0.025978 | 0.259553 | 0.202105 |
| MmugDNA.5833.1.S1_at   | MmugDNA.5833.1 | 9.39  | 9.1   | 0.28 | 0.01 | 1.23  | 0.164466 | 0.067007 | 0.457599 | 0.304872 |
| MmugDNA.5837.1.S1_at   | MmugDNA.5837.1 | 4.27  | 4.12  | 0.11 | 0.07 | 1.11  | 0.2552   | 0.046011 | 0.549651 | 0.258956 |
| MmugDNA.584.1.S1_at    | MmugDNA.584.1  | 6.33  | 6.5   | 0.36 | 0.16 | -1.12 | 0.677483 | 0.431623 | 0.846248 | 0.652439 |
| MmugDNA.5841.1.S1_at   | MmugDNA.5841.1 | 11.83 | 11.68 | 0.2  | 0.05 | 1.11  | 0.354993 | 0.318602 | 0.631875 | 0.571258 |
| MmugDNA.5842.1.S1_at   | MmugDNA.5842.1 | 8.43  | 8.56  | 0.12 | 0.2  | -1.09 | 0.949621 | 0.080215 | 0.978992 | 0.32783  |
| MmugDNA.585.1.S1_at    | MmugDNA.585.1  | 6.05  | 6.06  | 0.11 | 0.02 | -1    | 0.954642 | 0.089615 | 0.981374 | 0.343811 |
| MmugDNA.5856.1.S1_at   | MmugDNA.5856.1 | 8.7   | 9.52  | 0.78 | 0.29 | -1.77 | 0.243085 | 0.570805 | 0.539753 | 0.74337  |
| MmugDNA.5867.1.S1_at   | MmugDNA.5867.1 | 3.96  | 3.9   | 0.23 | 0.08 | 1.04  | 0.691657 | 0.67077  | 0.852609 | 0.807475 |
| MmugDNA.5868.1.S1_at   | MmugDNA.5868.1 | 9.94  | 10.08 | 0.33 | 0.13 | -1.1  | 0.811429 | 0.092782 | 0.915561 | 0.348989 |
| MmugDNA.5872.1.S1_at   | MmugDNA.5872.1 | 3.45  | 3.2   | 0.02 | 0.03 | 1.18  | 0.00034  | 0.011379 | 0.061152 | 0.138214 |
| MmugDNA.5873.1.S1_at   | MmugDNA.5873.1 | 11.5  | 9.7   | 0.54 | 0.29 | 3.47  | 0.009673 | 0.006535 | 0.14832  | 0.109634 |
| MmugDNA.5875.1.S1_at   | MmugDNA.5875.1 | 6.49  | 6.6   | 0.27 | 0.08 | -1.08 | 0.785415 | 0.297736 | 0.90204  | 0.556393 |
| MmugDNA.5876.1.S1_at   | MmugDNA.5876.1 | 11.03 | 10.17 | 0.23 | 0.31 | 1.82  | 0.035927 | 0.009416 | 0.244561 | 0.127871 |
| MmugDNA.5877.1.S1_at   | MmugDNA.5877.1 | 11.32 | 11.68 | 0.13 | 0    | -1.29 | 0.013746 | 0.010129 | 0.167984 | 0.131974 |
| MmugDNA.5879.1.S1_at   | MmugDNA.5879.1 | 3.52  | 3.3   | 0.16 | 0.05 | 1.16  | 0.064746 | 0.094697 | 0.311193 | 0.351482 |
| MmugDNA.588.1.S1_at    | MmugDNA.588.1  | 4.23  | 4.31  | 0.38 | 0.17 | -1.06 | 0.753146 | 0.001557 | 0.885941 | 0.059701 |
| MmugDNA.5880.1.S1_at   | MmugDNA.5880.1 | 8.04  | 8.83  | 0.09 | 0.25 | -1.72 | 0.014192 | 0.000105 | 0.170827 | 0.028099 |
| MmugDNA.5881.1.S1_at   | MmugDNA.5881.1 | 8.39  | 8.46  | 0.32 | 0.15 | -1.05 | 0.749582 | 0.148978 | 0.884066 | 0.423313 |
| MmugDNA.5885.1.S1_at   | MmugDNA.5885.1 | 10.26 | 10.59 | 0.62 | 0.16 | -1.26 | 0.759675 | 0.407887 | 0.88982  | 0.635288 |
| MmugDNA.5901.1.S1_at   | MmugDNA.5901.1 | 9.2   | 9.19  | 0.05 | 0.09 | 1.01  | 0.851819 | 0.756176 | 0.935543 | 0.858114 |
| MmugDNA.5904.1.S1_at   | MmugDNA.5904.1 | 9.04  | 9.14  | 0.31 | 0.21 | -1.07 | 0.473206 | 0.779751 | 0.716569 | 0.872303 |
| MmugDNA.5905.1.S1_at   | MmugDNA.5905.1 | 3.73  | 3.32  | 0.39 | 0.17 | 1.33  | 0.158277 | 0.19999  | 0.449228 | 0.474603 |
| MmugDNA.5912.1.S1_at   | MmugDNA.5912.1 | 6.56  | 6.59  | 0.19 | 0.06 | -1.02 | 0.885266 | 0.612256 | 0.951028 | 0.769908 |
| MmugDNA.5929.1.S1_at   | MmugDNA.5929.1 | 11.3  | 11.22 | 0.22 | 0.11 | 1.05  | 0.396681 | 0.003207 | 0.662694 | 0.082023 |
| MmugDNA.5930.1.S1_at   | MmugDNA.5930.1 | 8.86  | 8.73  | 1.2  | 0.08 | 1.09  | 0.488123 | 0.558561 | 0.726687 | 0.735725 |
| MmugDNA.5933.1.S1_at   | MmugDNA.5933.1 | 12.15 | 11.77 | 0.23 | 0.02 | 1.29  | 0.051137 | 0.01297  | 0.283595 | 0.14654  |
| MmugDNA.5939.1.S1_at   | MmugDNA.5939.1 | 8.79  | 9.26  | 0.13 | 0.23 | -1.39 | 0.041501 | 0.018036 | 0.260102 | 0.169372 |
| MmugDNA.5940.1.S1_at   | MmugDNA.5940.1 | 9.2   | 9.01  | 0.19 | 0.07 | 1.14  | 0.164888 | 0.295085 | 0.457897 | 0.554551 |

|                        |                |       |       |      |      |       |          |          |          |          |
|------------------------|----------------|-------|-------|------|------|-------|----------|----------|----------|----------|
| MmugDNA.5943.1.S1_at   | MmugDNA.5943.1 | 10.62 | 10.59 | 0.16 | 0.12 | 1.02  | 0.713621 | 0.69461  | 0.86473  | 0.822427 |
| MmugDNA.5943.1.S1_s_at | MmugDNA.5943.1 | 10.17 | 10.11 | 0.12 | 0.14 | 1.04  | 0.407535 | 0.848678 | 0.67054  | 0.914071 |
| MmugDNA.5950.1.S1_at   | MmugDNA.5950.1 | 8.2   | 8.25  | 0.13 | 0.05 | -1.03 | 0.302041 | 0.4291   | 0.589987 | 0.65062  |
| MmugDNA.5954.1.S1_at   | MmugDNA.5954.1 | 9.49  | 8.99  | 0.19 | 0.08 | 1.42  | 0.011779 | 0.029474 | 0.158421 | 0.213368 |
| MmugDNA.5963.1.S1_at   | MmugDNA.5963.1 | 4.18  | 4.01  | 0.25 | 0.08 | 1.12  | 0.147523 | 0.17888  | 0.435444 | 0.455208 |
| MmugDNA.5968.1.S1_at   | MmugDNA.5968.1 | 10.79 | 10.57 | 0.13 | 0.08 | 1.17  | 0.028413 | 0.000481 | 0.221039 | 0.038665 |
| MmugDNA.5971.1.S1_at   | MmugDNA.5971.1 | 8.47  | 7.73  | 0.04 | 0.23 | 1.67  | 0.00338  | 0.016126 | 0.102989 | 0.160936 |
| MmugDNA.5976.1.S1_at   | MmugDNA.5976.1 | 10.94 | 10.54 | 0.19 | 0.05 | 1.31  | 0.011529 | 0.01178  | 0.15722  | 0.140575 |
| MmugDNA.5988.1.S1_at   | MmugDNA.5988.1 | 7.55  | 7.72  | 0.18 | 0.1  | -1.13 | 0.411058 | 0.435188 | 0.673045 | 0.655058 |
| MmugDNA.5990.1.S1_at   | MmugDNA.5990.1 | 4.29  | 4.31  | 0.15 | 0.05 | -1.02 | 0.997357 | 0.40174  | 0.999086 | 0.631068 |
| MmugDNA.5992.1.S1_at   | MmugDNA.5992.1 | 5.19  | 5.16  | 0.02 | 0.08 | 1.02  | 0.253952 | 0.06982  | 0.54824  | 0.310353 |
| MmugDNA.5996.1.S1_at   | MmugDNA.5996.1 | 10.94 | 10.78 | 0.38 | 0.02 | 1.12  | 0.144043 | 0.1341   | 0.430898 | 0.406351 |
| MmugDNA.5997.1.S1_at   | MmugDNA.5997.1 | 9.91  | 9.73  | 0.07 | 0.12 | 1.13  | 0.245148 | 0.66281  | 0.541279 | 0.80259  |
| MmugDNA.6.1.S1_at      | MmugDNA.6.1    | 7.4   | 6.88  | 0.99 | 0.14 | 1.43  | 0.974825 | 0.999395 | 0.989924 | 0.999773 |
| MmugDNA.6002.1.S1_at   | MmugDNA.6002.1 | 11.5  | 11.28 | 0.57 | 0.17 | 1.16  | 0.696872 | 0.87759  | 0.855692 | 0.930173 |
| MmugDNA.6007.1.S1_at   | MmugDNA.6007.1 | 4.5   | 4.39  | 0.17 | 0.11 | 1.08  | 0.343456 | 0.260964 | 0.622974 | 0.527351 |
| MmugDNA.601.1.S1_at    | MmugDNA.601.1  | 8.14  | 7.83  | 0.68 | 0.2  | 1.24  | 0.170583 | 0.429461 | 0.464298 | 0.650931 |
| MmugDNA.6010.1.S1_at   | MmugDNA.6010.1 | 3.11  | 3.1   | 0.16 | 0.1  | 1.01  | 0.462216 | 0.627371 | 0.709496 | 0.780374 |
| MmugDNA.6010.1.S1_s_at | MmugDNA.6010.1 | 11.5  | 11.21 | 0.37 | 0.1  | 1.22  | 0.313538 | 0.593602 | 0.59936  | 0.758334 |
| MmugDNA.6015.1.S1_at   | MmugDNA.6015.1 | 4.26  | 4.4   | 0.49 | 0.07 | -1.1  | 0.67181  | 0.702292 | 0.842692 | 0.827417 |
| MmugDNA.6017.1.S1_at   | MmugDNA.6017.1 | 9.09  | 9.05  | 0.09 | 0.11 | 1.03  | 0.923507 | 0.221972 | 0.967446 | 0.495044 |
| MmugDNA.602.1.S1_at    | MmugDNA.602.1  | 7.99  | 8.21  | 0.28 | 0.1  | -1.17 | 0.501128 | 0.798005 | 0.73526  | 0.883691 |
| MmugDNA.6021.1.A1_at   | MmugDNA.6021.1 | 3.95  | 3.88  | 0.31 | 0.05 | 1.05  | 0.345691 | 0.508402 | 0.624565 | 0.703597 |
| MmugDNA.6021.1.S1_at   | MmugDNA.6021.1 | 4.7   | 4.73  | 0.25 | 0.14 | -1.02 | 0.645544 | 0.854175 | 0.827474 | 0.916964 |
| MmugDNA.603.1.S1_at    | MmugDNA.603.1  | 9.54  | 8.76  | 0.25 | 0.24 | 1.73  | 0.037725 | 0.199237 | 0.249882 | 0.473931 |
| MmugDNA.6032.1.S1_at   | MmugDNA.6032.1 | 11.96 | 11.81 | 0.17 | 0.05 | 1.11  | 0.343054 | 0.064465 | 0.622701 | 0.300076 |
| MmugDNA.6036.1.S1_at   | MmugDNA.6036.1 | 3.87  | 3.76  | 0.64 | 0.03 | 1.08  | 0.515833 | 0.712734 | 0.745476 | 0.8335   |
| MmugDNA.6042.1.S1_s_at | MmugDNA.6042.1 | 10.57 | 10.5  | 0.27 | 0.1  | 1.05  | 0.176405 | 0.495352 | 0.470768 | 0.695433 |
| MmugDNA.6048.1.S1_at   | MmugDNA.6048.1 | 9.56  | 9.22  | 0.02 | 0.14 | 1.27  | 0.029242 | 0.017719 | 0.223819 | 0.168367 |
| MmugDNA.6051.1.S1_at   | MmugDNA.6051.1 | 11.23 | 11.35 | 0.15 | 0.1  | -1.09 | 0.57044  | 0.003026 | 0.779298 | 0.0803   |
| MmugDNA.6063.1.S1_at   | MmugDNA.6063.1 | 8.38  | 8.39  | 0.06 | 0.03 | -1.01 | 0.754391 | 0.734402 | 0.886774 | 0.846131 |
| MmugDNA.607.1.S1_at    | MmugDNA.607.1  | 8.98  | 10.32 | 0.48 | 0.16 | -2.53 | 0.021824 | 0.003667 | 0.200931 | 0.086563 |
| MmugDNA.6070.1.S1_at   | MmugDNA.6070.1 | 11.17 | 11.6  | 0.12 | 0.14 | -1.35 | 0.034813 | 0.000374 | 0.241109 | 0.037273 |
| MmugDNA.6073.1.S1_at   | MmugDNA.6073.1 | 12.44 | 12.53 | 0.08 | 0.07 | -1.07 | 0.22966  | 0.003686 | 0.528636 | 0.086591 |
| MmugDNA.6074.1.S1_at   | MmugDNA.6074.1 | 7.52  | 7.43  | 0.75 | 0.09 | 1.07  | 0.255793 | 0.231179 | 0.550344 | 0.5029   |
| MmugDNA.6080.1.S1_at   | MmugDNA.6080.1 | 10.67 | 10.42 | 0.15 | 0.03 | 1.19  | 0.060433 | 0.494787 | 0.302968 | 0.695092 |
| MmugDNA.6083.1.S1_at   | MmugDNA.6083.1 | 5.9   | 5.86  | 0.07 | 0.05 | 1.03  | 0.181104 | 0.196225 | 0.476388 | 0.471236 |
| MmugDNA.6091.1.S1_at   | MmugDNA.6091.1 | 8.9   | 8.85  | 0.16 | 0.03 | 1.04  | 0.202665 | 0.672909 | 0.500389 | 0.80887  |
| MmugDNA.6095.1.S1_at   | MmugDNA.6095.1 | 9.67  | 9.88  | 0.27 | 0.24 | -1.16 | 0.920544 | 0.825061 | 0.966056 | 0.899488 |
| MmugDNA.6097.1.S1_at   | MmugDNA.6097.1 | 7.91  | 10.51 | 0.99 | 0.18 | -6.04 | 0.029589 | 0.40859  | 0.22511  | 0.635757 |
| MmugDNA.6100.1.S1_at   | MmugDNA.6100.1 | 5.48  | 5.56  | 0.01 | 0.18 | -1.05 | 0.164854 | 0.057852 | 0.457897 | 0.286898 |
| MmugDNA.6102.1.S1_at   | MmugDNA.6102.1 | 4.22  | 4.17  | 0.13 | 0.26 | 1.04  | 0.943781 | 0.919184 | 0.976378 | 0.954612 |
| MmugDNA.6107.1.S1_at   | MmugDNA.6107.1 | 10.94 | 10.43 | 0.17 | 0.11 | 1.42  | 0.016763 | 0.32553  | 0.182686 | 0.575827 |

|                        |                |       |       |      |      |        |          |          |          |          |
|------------------------|----------------|-------|-------|------|------|--------|----------|----------|----------|----------|
| MmugDNA.6108.1.S1_at   | MmugDNA.6108.1 | 7.14  | 8.62  | 0.78 | 0.19 | -2.79  | 0.059212 | 0.033395 | 0.300409 | 0.226396 |
| MmugDNA.6110.1.S1_at   | MmugDNA.6110.1 | 9.79  | 9.6   | 0.11 | 0.06 | 1.14   | 0.091894 | 0.03721  | 0.359849 | 0.237285 |
| MmugDNA.6111.1.S1_at   | MmugDNA.6111.1 | 8.18  | 8.59  | 0.9  | 0.18 | -1.33  | 0.16686  | 0.259358 | 0.460015 | 0.526418 |
| MmugDNA.6115.1.S1_at   | MmugDNA.6115.1 | 4.85  | 4.84  | 0.1  | 0.07 | 1.01   | 0.732624 | 0.450444 | 0.875139 | 0.665643 |
| MmugDNA.6116.1.S1_at   | MmugDNA.6116.1 | 6.52  | 6.57  | 0.13 | 0.02 | -1.03  | 0.726603 | 0.327987 | 0.871808 | 0.577794 |
| MmugDNA.612.1.S1_s_at  | MmugDNA.612.1  | 13.3  | 13.26 | 0.04 | 0.01 | 1.03   | 0.073233 | 0.007038 | 0.328341 | 0.113112 |
| MmugDNA.6120.1.S1_at   | MmugDNA.6120.1 | 7.23  | 7.39  | 0.13 | 0.07 | -1.12  | 0.13411  | 0.049809 | 0.417578 | 0.268277 |
| MmugDNA.6125.1.S1_at   | MmugDNA.6125.1 | 11.19 | 11.56 | 0.22 | 0.05 | -1.29  | 0.031112 | 0.115773 | 0.229371 | 0.382814 |
| MmugDNA.613.1.S1_at    | MmugDNA.613.1  | 11.44 | 10.91 | 0.09 | 0.04 | 1.44   | 0.000721 | 0.252481 | 0.072175 | 0.521077 |
| MmugDNA.6133.1.S1_at   | MmugDNA.6133.1 | 3.67  | 3.55  | 0.09 | 0.03 | 1.09   | 0.279775 | 0.086576 | 0.571055 | 0.33911  |
| MmugDNA.6138.1.S1_at   | MmugDNA.6138.1 | 11.25 | 10.67 | 0.26 | 0.2  | 1.5    | 0.062355 | 0.021575 | 0.306441 | 0.18405  |
| MmugDNA.6143.1.S1_at   | MmugDNA.6143.1 | 5.3   | 7.25  | 1.51 | 0.17 | -3.85  | 0.111337 | 0.404014 | 0.387378 | 0.632558 |
| MmugDNA.6144.1.S1_at   | MmugDNA.6144.1 | 8.79  | 10.12 | 0.8  | 0.25 | -2.51  | 0.07005  | 0.024082 | 0.323085 | 0.194487 |
| MmugDNA.6146.1.S1_at   | MmugDNA.6146.1 | 7.25  | 7.16  | 0.12 | 0.11 | 1.06   | 0.375545 | 0.555222 | 0.646358 | 0.733759 |
| MmugDNA.6148.1.S1_at   | MmugDNA.6148.1 | 3.83  | 3.86  | 0.74 | 0.15 | -1.02  | 0.445674 | 0.535758 | 0.698091 | 0.72127  |
| MmugDNA.615.1.S1_at    | MmugDNA.615.1  | 7.16  | 7.7   | 0.15 | 0.14 | -1.45  | 0.033554 | 0.000004 | 0.237111 | 0.014484 |
| MmugDNA.615.1.S1_s_at  | MmugDNA.615.1  | 9.38  | 9.73  | 0.22 | 0.1  | -1.28  | 0.077084 | 0.000163 | 0.335647 | 0.030506 |
| MmugDNA.6150.1.S1_at   | MmugDNA.6150.1 | 6     | 5.11  | 0.28 | 0.25 | 1.86   | 0.018884 | 0.307181 | 0.190967 | 0.563487 |
| MmugDNA.6151.1.S1_at   | MmugDNA.6151.1 | 8.65  | 8.15  | 0.05 | 0.08 | 1.42   | 0.000509 | 0.102239 | 0.068843 | 0.36236  |
| MmugDNA.6159.1.S1_at   | MmugDNA.6159.1 | 6.01  | 6.25  | 0.13 | 0.22 | -1.18  | 0.522521 | 0.445329 | 0.749811 | 0.662338 |
| MmugDNA.616.1.S1_at    | MmugDNA.616.1  | 8.13  | 13.34 | 4.45 | 0.12 | -36.88 | 0.115849 | 0.378786 | 0.392964 | 0.615795 |
| MmugDNA.6161.1.S1_at   | MmugDNA.6161.1 | 10.98 | 10.77 | 0.24 | 0.03 | 1.16   | 0.363786 | 0.015234 | 0.638393 | 0.156807 |
| MmugDNA.6167.1.S1_at   | MmugDNA.6167.1 | 11.65 | 12.07 | 0.25 | 0.08 | -1.34  | 0.07129  | 0.627867 | 0.324878 | 0.780845 |
| MmugDNA.617.1.S1_at    | MmugDNA.617.1  | 11.93 | 10.35 | 0.32 | 0.09 | 3.01   | 0.001984 | 0.008624 | 0.089587 | 0.123123 |
| MmugDNA.6170.1.S1_at   | MmugDNA.6170.1 | 10.41 | 11.03 | 0.06 | 0.31 | -1.54  | 0.025667 | 0.013129 | 0.212966 | 0.147338 |
| MmugDNA.6176.1.S1_at   | MmugDNA.6176.1 | 6.67  | 6.72  | 0.26 | 0.08 | -1.04  | 0.803433 | 0.884684 | 0.91182  | 0.934321 |
| MmugDNA.6178.1.S1_at   | MmugDNA.6178.1 | 3.83  | 3.82  | 0.09 | 0.16 | 1.01   | 0.784878 | 0.892996 | 0.901855 | 0.938982 |
| MmugDNA.6179.1.S1_at   | MmugDNA.6179.1 | 4.53  | 4.66  | 0.22 | 0.14 | -1.1   | 0.28671  | 0.232794 | 0.576528 | 0.504426 |
| MmugDNA.6182.1.S1_at   | MmugDNA.6182.1 | 12.3  | 12.47 | 0.08 | 0.01 | -1.12  | 0.025933 | 0.264011 | 0.213907 | 0.530183 |
| MmugDNA.6187.1.S1_at   | MmugDNA.6187.1 | 10.87 | 9.81  | 0.15 | 0.09 | 2.08   | 0.000745 | 0.002955 | 0.072567 | 0.079945 |
| MmugDNA.6188.1.S1_at   | MmugDNA.6188.1 | 12.58 | 12.42 | 0.08 | 0.06 | 1.12   | 0.023568 | 0.011111 | 0.206822 | 0.137209 |
| MmugDNA.6199.1.S1_at   | MmugDNA.6199.1 | 5.22  | 5.18  | 0.03 | 0.09 | 1.02   | 0.373766 | 0.126892 | 0.645118 | 0.397591 |
| MmugDNA.6202.1.S1_at   | MmugDNA.6202.1 | 4.7   | 4.8   | 0.11 | 0.07 | -1.07  | 0.23519  | 0.812307 | 0.53307  | 0.891561 |
| MmugDNA.6203.1.S1_at   | MmugDNA.6203.1 | 9.4   | 9.58  | 0.35 | 0.11 | -1.13  | 0.451116 | 0.722167 | 0.702003 | 0.839044 |
| MmugDNA.6205.1.S1_at   | MmugDNA.6205.1 | 2.88  | 2.79  | 0.12 | 0.14 | 1.06   | 0.982513 | 0.618281 | 0.993602 | 0.774002 |
| MmugDNA.6206.1.S1_at   | MmugDNA.6206.1 | 6.69  | 6.72  | 0.18 | 0.17 | -1.02  | 0.840588 | 0.034949 | 0.930009 | 0.231062 |
| MmugDNA.6206.1.S1_s_at | MmugDNA.6206.1 | 8.24  | 8.36  | 0.26 | 0.17 | -1.08  | 0.893474 | 0.010896 | 0.954549 | 0.135939 |
| MmugDNA.6210.1.S1_at   | MmugDNA.6210.1 | 9.32  | 10.46 | 0.39 | 0.16 | -2.2   | 0.012927 | 0.102877 | 0.164364 | 0.363508 |
| MmugDNA.6212.1.S1_at   | MmugDNA.6212.1 | 8.4   | 8.47  | 0.16 | 0.2  | -1.05  | 0.959895 | 0.938637 | 0.983565 | 0.965105 |
| MmugDNA.6221.1.S1_at   | MmugDNA.6221.1 | 10.68 | 10.61 | 0.34 | 0.01 | 1.05   | 0.590709 | 0.818975 | 0.792009 | 0.895712 |
| MmugDNA.6224.1.S1_at   | MmugDNA.6224.1 | 4.7   | 4.42  | 0.61 | 0.17 | 1.22   | 0.470288 | 0.548645 | 0.71485  | 0.729318 |
| MmugDNA.6229.1.S1_at   | MmugDNA.6229.1 | 10.9  | 10.14 | 0.01 | 0.08 | 1.7    | 0.000054 | 0.001899 | 0.045594 | 0.065035 |
| MmugDNA.6235.1.S1_at   | MmugDNA.6235.1 | 11.55 | 11.54 | 0.14 | 0.05 | 1.01   | 0.490104 | 0.047042 | 0.728313 | 0.261469 |



|                        |                |       |       |      |      |       |          |          |          |          |
|------------------------|----------------|-------|-------|------|------|-------|----------|----------|----------|----------|
| MmugDNA.6239.1.S1_at   | MmugDNA.6239.1 | 5.81  | 5.67  | 0.06 | 0.03 | 1.1   | 0.025242 | 0.21586  | 0.211843 | 0.489536 |
| MmugDNA.6241.1.S1_at   | MmugDNA.6241.1 | 9.28  | 9.42  | 0.17 | 0.01 | -1.11 | 0.179336 | 0.251738 | 0.47441  | 0.520444 |
| MmugDNA.6242.1.S1_at   | MmugDNA.6242.1 | 10.83 | 10.73 | 0.18 | 0.09 | 1.07  | 0.506571 | 0.135845 | 0.739179 | 0.408027 |
| MmugDNA.6242.1.S1_s_at | MmugDNA.6242.1 | 9.06  | 8.95  | 0.18 | 0.12 | 1.08  | 0.679386 | 0.131839 | 0.847057 | 0.403891 |
| MmugDNA.6245.1.S1_s_at | MmugDNA.6245.1 | 9.63  | 9.63  | 0.05 | 0.04 | 1     | 0.986135 | 0.941282 | 0.995132 | 0.966729 |
| MmugDNA.6247.1.S1_at   | MmugDNA.6247.1 | 11.1  | 11.17 | 0.06 | 0.07 | -1.04 | 0.834627 | 0.948632 | 0.927295 | 0.970666 |
| MmugDNA.6250.1.S1_at   | MmugDNA.6250.1 | 9.57  | 9.33  | 0.16 | 0.08 | 1.18  | 0.027783 | 0.006197 | 0.219124 | 0.106818 |
| MmugDNA.6260.1.S1_at   | MmugDNA.6260.1 | 6.93  | 6.95  | 0.08 | 0.06 | -1.01 | 0.672404 | 0.210159 | 0.843217 | 0.483994 |
| MmugDNA.6263.1.S1_at   | MmugDNA.6263.1 | 6.22  | 5.99  | 0.08 | 0.19 | 1.17  | 0.081232 | 0.026213 | 0.342222 | 0.202891 |
| MmugDNA.6263.1.S1_x_at | MmugDNA.6263.1 | 7.4   | 6.83  | 0.09 | 0.25 | 1.48  | 0.040667 | 0.007536 | 0.258252 | 0.116358 |
| MmugDNA.6264.1.S1_at   | MmugDNA.6264.1 | 8.54  | 8.47  | 0.19 | 0.25 | 1.05  | 0.977033 | 0.315278 | 0.99097  | 0.568939 |
| MmugDNA.6267.1.S1_at   | MmugDNA.6267.1 | 6.31  | 6.49  | 0.1  | 0.11 | -1.14 | 0.106299 | 0.414649 | 0.380284 | 0.640456 |
| MmugDNA.6269.1.S1_at   | MmugDNA.6269.1 | 10.99 | 10.63 | 0.28 | 0.15 | 1.28  | 0.571702 | 0.0253   | 0.78003  | 0.199522 |
| MmugDNA.6270.1.S1_at   | MmugDNA.6270.1 | 9.4   | 8.44  | 0.39 | 0.48 | 1.95  | 0.112309 | 0.328968 | 0.388478 | 0.578482 |
| MmugDNA.6277.1.S1_at   | MmugDNA.6277.1 | 11.47 | 9.88  | 0.17 | 0.22 | 3.01  | 0.000828 | 0.00044  | 0.07338  | 0.038359 |
| MmugDNA.6284.1.S1_at   | MmugDNA.6284.1 | 12.52 | 12.52 | 0.05 | 0.01 | -1    | 0.483131 | 0.184587 | 0.72337  | 0.460617 |
| MmugDNA.6286.1.S1_at   | MmugDNA.6286.1 | 8.3   | 8.04  | 0.48 | 0.04 | 1.2   | 0.542972 | 0.71837  | 0.763126 | 0.837024 |
| MmugDNA.6287.1.S1_at   | MmugDNA.6287.1 | 7.87  | 7.45  | 0.09 | 0.11 | 1.34  | 0.009177 | 0.425482 | 0.145783 | 0.647866 |
| MmugDNA.6295.1.S1_at   | MmugDNA.6295.1 | 2.86  | 2.81  | 0.06 | 0.05 | 1.03  | 0.731972 | 0.505003 | 0.874717 | 0.70197  |
| MmugDNA.6302.1.S1_at   | MmugDNA.6302.1 | 8.91  | 9.18  | 0.28 | 0.13 | -1.21 | 0.697418 | 0.094269 | 0.855967 | 0.350889 |
| MmugDNA.6306.1.S1_at   | MmugDNA.6306.1 | 8.94  | 8.77  | 0.2  | 0.1  | 1.13  | 0.105857 | 0.075627 | 0.379861 | 0.320061 |
| MmugDNA.6310.1.S1_at   | MmugDNA.6310.1 | 11.47 | 10.86 | 0.16 | 0.07 | 1.53  | 0.006483 | 0.003979 | 0.127306 | 0.089708 |
| MmugDNA.6313.1.S1_at   | MmugDNA.6313.1 | 10.11 | 10.06 | 0.19 | 0.09 | 1.04  | 0.986917 | 0.547607 | 0.995238 | 0.728557 |
| MmugDNA.6314.1.S1_at   | MmugDNA.6314.1 | 10.78 | 10.71 | 0.14 | 0.02 | 1.05  | 0.249537 | 0.246357 | 0.544627 | 0.515899 |
| MmugDNA.6316.1.S1_at   | MmugDNA.6316.1 | 13    | 12.96 | 0.12 | 0.04 | 1.03  | 0.987613 | 0.286363 | 0.995514 | 0.547791 |
| MmugDNA.6318.1.S1_at   | MmugDNA.6318.1 | 3.62  | 3.51  | 0.32 | 0.05 | 1.08  | 0.330209 | 0.477204 | 0.612242 | 0.683299 |
| MmugDNA.6328.1.S1_at   | MmugDNA.6328.1 | 8.24  | 6.95  | 0.28 | 0.69 | 2.46  | 0.065527 | 0.046959 | 0.313379 | 0.261341 |
| MmugDNA.633.1.S1_at    | MmugDNA.633.1  | 9.15  | 8.87  | 0.15 | 0.11 | 1.22  | 0.082667 | 0.516635 | 0.344485 | 0.709087 |
| MmugDNA.6332.1.S1_at   | MmugDNA.6332.1 | 10.3  | 9.71  | 0.63 | 0.3  | 1.5   | 0.435712 | 0.220153 | 0.690734 | 0.493612 |
| MmugDNA.6342.1.S1_at   | MmugDNA.6342.1 | 10.34 | 10.53 | 0.12 | 0.16 | -1.14 | 0.440968 | 0.022456 | 0.694685 | 0.187518 |
| MmugDNA.6343.1.S1_at   | MmugDNA.6343.1 | 5.3   | 6.77  | 0.66 | 0.45 | -2.78 | 0.034778 | 0.145281 | 0.241036 | 0.419322 |
| MmugDNA.6344.1.S1_at   | MmugDNA.6344.1 | 3.94  | 4.97  | 0.25 | 0.29 | -2.04 | 0.014755 | 0.165737 | 0.173373 | 0.442014 |
| MmugDNA.6345.1.S1_at   | MmugDNA.6345.1 | 9.04  | 9.12  | 0.44 | 0.23 | -1.06 | 0.491772 | 0.116319 | 0.729386 | 0.383671 |
| MmugDNA.6346.1.S1_at   | MmugDNA.6346.1 | 9.04  | 8.88  | 0.07 | 0.14 | 1.12  | 0.173852 | 0.392208 | 0.468263 | 0.625652 |
| MmugDNA.6347.1.S1_at   | MmugDNA.6347.1 | 5.9   | 7.55  | 0.87 | 0.34 | -3.14 | 0.038667 | 0.200708 | 0.252703 | 0.47524  |
| MmugDNA.6349.1.S1_at   | MmugDNA.6349.1 | 11.25 | 11.4  | 0.1  | 0.12 | -1.11 | 0.158715 | 0.167241 | 0.449963 | 0.443684 |
| MmugDNA.6350.1.S1_at   | MmugDNA.6350.1 | 5.15  | 5.05  | 0.04 | 0.03 | 1.07  | 0.019533 | 0.001891 | 0.192506 | 0.065004 |
| MmugDNA.6360.1.S1_at   | MmugDNA.6360.1 | 8.86  | 8.8   | 0.13 | 0.07 | 1.05  | 0.455189 | 0.020209 | 0.705015 | 0.178561 |
| MmugDNA.6368.1.S1_at   | MmugDNA.6368.1 | 12.82 | 12.69 | 0.11 | 0.08 | 1.1   | 0.187086 | 0.073057 | 0.483199 | 0.316017 |
| MmugDNA.6372.1.S1_at   | MmugDNA.6372.1 | 11.05 | 10.9  | 0.05 | 0.1  | 1.11  | 0.049289 | 0.000931 | 0.279456 | 0.048955 |
| MmugDNA.6380.1.S1_at   | MmugDNA.6380.1 | 11.22 | 11.71 | 0.42 | 0.06 | -1.41 | 0.373497 | 0.715049 | 0.645118 | 0.834792 |
| MmugDNA.6381.1.S1_at   | MmugDNA.6381.1 | 6.3   | 7.15  | 0.82 | 0.03 | -1.8  | 0.454195 | 0.672765 | 0.704125 | 0.808768 |
| MmugDNA.6382.1.S1_at   | MmugDNA.6382.1 | 7.07  | 9.08  | 0.54 | 0.29 | -4.03 | 0.004245 | 0.056619 | 0.111028 | 0.284037 |

|                        |                |       |       |      |      |       |          |          |          |          |
|------------------------|----------------|-------|-------|------|------|-------|----------|----------|----------|----------|
| MmugDNA.6385.1.S1_at   | MmugDNA.6385.1 | 9.39  | 10.98 | 0.4  | 0.09 | -3.01 | 0.002877 | 0.030674 | 0.098572 | 0.217148 |
| MmugDNA.6388.1.S1_at   | MmugDNA.6388.1 | 13.09 | 13.11 | 0.17 | 0.14 | -1.01 | 0.199247 | 0.349682 | 0.496613 | 0.593563 |
| MmugDNA.6389.1.S1_at   | MmugDNA.6389.1 | 8.01  | 8.39  | 0.51 | 0.15 | -1.3  | 0.0942   | 0.693617 | 0.363232 | 0.821804 |
| MmugDNA.6393.1.S1_at   | MmugDNA.6393.1 | 11.81 | 11.59 | 0.09 | 0.08 | 1.16  | 0.034245 | 0.00509  | 0.239765 | 0.099108 |
| MmugDNA.6398.1.S1_at   | MmugDNA.6398.1 | 6.64  | 6.88  | 0.23 | 0.08 | -1.18 | 0.170443 | 0.160549 | 0.464074 | 0.436708 |
| MmugDNA.6402.1.S1_at   | MmugDNA.6402.1 | 11.71 | 11.93 | 0.12 | 0.06 | -1.16 | 0.039981 | 0.096073 | 0.256645 | 0.353322 |
| MmugDNA.641.1.S1_at    | MmugDNA.641.1  | 3.88  | 3.92  | 0.91 | 0.02 | -1.03 | 0.543437 | 0.564135 | 0.763461 | 0.738997 |
| MmugDNA.6412.1.S1_at   | MmugDNA.6412.1 | 9.88  | 9.56  | 0.16 | 0.11 | 1.25  | 0.024757 | 0.24781  | 0.210464 | 0.517219 |
| MmugDNA.6413.1.S1_at   | MmugDNA.6413.1 | 8.46  | 9.15  | 0.3  | 0.18 | -1.61 | 0.03846  | 0.030237 | 0.2521   | 0.215784 |
| MmugDNA.6416.1.S1_at   | MmugDNA.6416.1 | 8.37  | 7.9   | 0.69 | 0.46 | 1.39  | 0.77864  | 0.094008 | 0.898859 | 0.350575 |
| MmugDNA.6418.1.S1_at   | MmugDNA.6418.1 | 9.82  | 9.83  | 0.44 | 0.22 | -1.01 | 0.48465  | 0.605013 | 0.724421 | 0.764917 |
| MmugDNA.6426.1.S1_at   | MmugDNA.6426.1 | 8.57  | 9.13  | 0.24 | 0.16 | -1.47 | 0.015301 | 0.020619 | 0.176    | 0.180141 |
| MmugDNA.6428.1.S1_at   | MmugDNA.6428.1 | 11.91 | 11.96 | 0.15 | 0.02 | -1.03 | 0.665279 | 0.081268 | 0.839098 | 0.329351 |
| MmugDNA.6430.1.S1_at   | MmugDNA.6430.1 | 9.9   | 11.78 | 0.95 | 0.23 | -3.66 | 0.100123 | 0.155986 | 0.37088  | 0.431398 |
| MmugDNA.6431.1.S1_at   | MmugDNA.6431.1 | 11.21 | 10.79 | 0.21 | 0.06 | 1.35  | 0.013095 | 0.007109 | 0.165061 | 0.113555 |
| MmugDNA.6435.1.S1_at   | MmugDNA.6435.1 | 8.86  | 9.06  | 0.3  | 0.1  | -1.15 | 0.912912 | 0.13975  | 0.963219 | 0.413109 |
| MmugDNA.6436.1.S1_at   | MmugDNA.6436.1 | 10.21 | 10.34 | 0.18 | 0.02 | -1.1  | 0.712826 | 0.733921 | 0.864436 | 0.845896 |
| MmugDNA.644.1.S1_at    | MmugDNA.644.1  | 10.51 | 10.71 | 0.18 | 0.12 | -1.15 | 0.460303 | 0.51332  | 0.708167 | 0.706881 |
| MmugDNA.6440.1.S1_at   | MmugDNA.6440.1 | 7.98  | 8.03  | 0.75 | 1.11 | -1.04 | 0.779465 | 0.282811 | 0.899252 | 0.545524 |
| MmugDNA.6443.1.S1_at   | MmugDNA.6443.1 | 11.09 | 11.36 | 0.24 | 0.04 | -1.21 | 0.331521 | 0.433879 | 0.613457 | 0.654054 |
| MmugDNA.6450.1.S1_at   | MmugDNA.6450.1 | 6.54  | 6.57  | 0.18 | 0.07 | -1.02 | 0.825631 | 0.036966 | 0.922496 | 0.236733 |
| MmugDNA.6452.1.S1_s_at | MmugDNA.6452.1 | 13.25 | 12.99 | 0.18 | 0.04 | 1.2   | 0.03078  | 0.021694 | 0.22831  | 0.184333 |
| MmugDNA.6453.1.S1_at   | MmugDNA.6453.1 | 8.6   | 8.19  | 0.25 | 0.04 | 1.33  | 0.049487 | 0.070985 | 0.279939 | 0.312602 |
| MmugDNA.6456.1.S1_at   | MmugDNA.6456.1 | 6.43  | 6.18  | 0.11 | 0.11 | 1.18  | 0.140489 | 0.338623 | 0.426202 | 0.585641 |
| MmugDNA.6457.1.S1_at   | MmugDNA.6457.1 | 2.93  | 2.78  | 0.08 | 0.05 | 1.11  | 0.123015 | 0.076005 | 0.402175 | 0.320676 |
| MmugDNA.6457.1.S1_x_at | MmugDNA.6457.1 | 3.12  | 3.13  | 0.15 | 0.18 | -1.01 | 0.255484 | 0.385238 | 0.549925 | 0.620709 |
| MmugDNA.6458.1.S1_at   | MmugDNA.6458.1 | 12.58 | 12.52 | 0.11 | 0.07 | 1.05  | 0.276719 | 0.526942 | 0.568261 | 0.715708 |
| MmugDNA.646.1.S1_at    | MmugDNA.646.1  | 9.59  | 9.53  | 0.08 | 0.22 | 1.04  | 0.910941 | 0.011213 | 0.962223 | 0.137948 |
| MmugDNA.6468.1.S1_at   | MmugDNA.6468.1 | 10.49 | 10.27 | 0.05 | 0.11 | 1.17  | 0.018396 | 0.15261  | 0.188709 | 0.427435 |
| MmugDNA.6472.1.S1_at   | MmugDNA.6472.1 | 9.34  | 9.1   | 0.26 | 0.19 | 1.18  | 0.839606 | 0.011224 | 0.92965  | 0.137995 |
| MmugDNA.6477.1.S1_at   | MmugDNA.6477.1 | 6.41  | 6.55  | 0.05 | 0.06 | -1.1  | 0.06574  | 0.815904 | 0.31383  | 0.893781 |
| MmugDNA.6478.1.S1_at   | MmugDNA.6478.1 | 7.41  | 7.05  | 0.16 | 0.18 | 1.28  | 0.067607 | 0.54248  | 0.317779 | 0.725516 |
| MmugDNA.6482.1.S1_at   | MmugDNA.6482.1 | 6.19  | 6.35  | 0.6  | 0.13 | -1.12 | 0.509494 | 0.706357 | 0.741117 | 0.829634 |
| MmugDNA.6494.1.S1_at   | MmugDNA.6494.1 | 6.89  | 7.25  | 0.3  | 0.23 | -1.29 | 0.46735  | 0.891057 | 0.712864 | 0.937894 |
| MmugDNA.6498.1.S1_at   | MmugDNA.6498.1 | 12.58 | 11.89 | 0.37 | 0.4  | 1.62  | 0.043544 | 0.108632 | 0.265724 | 0.372171 |
| MmugDNA.6505.1.S1_at   | MmugDNA.6505.1 | 5.34  | 5.29  | 0.15 | 0.01 | 1.03  | 0.607487 | 0.519393 | 0.803755 | 0.711008 |
| MmugDNA.6506.1.S1_at   | MmugDNA.6506.1 | 11.43 | 11.39 | 0.11 | 0.03 | 1.03  | 0.526484 | 0.000067 | 0.752619 | 0.025805 |
| MmugDNA.6512.1.S1_at   | MmugDNA.6512.1 | 10.54 | 10.52 | 0.51 | 0.17 | 1.02  | 0.635269 | 0.298464 | 0.821253 | 0.557143 |
| MmugDNA.6517.1.S1_at   | MmugDNA.6517.1 | 5.66  | 5.62  | 0.13 | 0.11 | 1.03  | 0.492486 | 0.586832 | 0.729756 | 0.753843 |
| MmugDNA.6520.1.S1_at   | MmugDNA.6520.1 | 3.93  | 3.97  | 0.11 | 0.02 | -1.02 | 0.600211 | 0.737175 | 0.798705 | 0.847854 |
| MmugDNA.6539.1.S1_at   | MmugDNA.6539.1 | 12.02 | 10.47 | 0.84 | 0.79 | 2.93  | 0.111357 | 0.065108 | 0.387378 | 0.301119 |
| MmugDNA.6540.1.S1_at   | MmugDNA.6540.1 | 2.83  | 2.78  | 0.04 | 0.11 | 1.03  | 0.585052 | 0.695156 | 0.78898  | 0.822797 |
| MmugDNA.6542.1.S1_at   | MmugDNA.6542.1 | 10.95 | 11.31 | 0.23 | 0.11 | -1.28 | 0.070363 | 0.166634 | 0.323623 | 0.443133 |

|                        |                |       |       |      |      |        |          |          |          |          |
|------------------------|----------------|-------|-------|------|------|--------|----------|----------|----------|----------|
| MmugDNA.6553.1.S1_at   | MmugDNA.6553.1 | 3.61  | 3.9   | 0.11 | 0.28 | -1.22  | 0.455444 | 0.763498 | 0.705136 | 0.862471 |
| MmugDNA.6554.1.S1_at   | MmugDNA.6554.1 | 7.09  | 7.23  | 0.1  | 0.08 | -1.11  | 0.052595 | 0.003211 | 0.286346 | 0.082023 |
| MmugDNA.6559.1.S1_at   | MmugDNA.6559.1 | 12.05 | 11.79 | 0.21 | 0.15 | 1.2    | 0.282351 | 0.011523 | 0.573125 | 0.138822 |
| MmugDNA.656.1.S1_at    | MmugDNA.656.1  | 8.81  | 7.84  | 0.47 | 0.04 | 1.96   | 0.023689 | 0.031434 | 0.207081 | 0.219107 |
| MmugDNA.6560.1.S1_at   | MmugDNA.6560.1 | 11.76 | 12.1  | 0.16 | 0.05 | -1.26  | 0.011796 | 0.027146 | 0.158436 | 0.205893 |
| MmugDNA.6561.1.S1_at   | MmugDNA.6561.1 | 5.18  | 9.18  | 1.57 | 0.19 | -16.06 | 0.028487 | 0.189832 | 0.22113  | 0.465403 |
| MmugDNA.6568.1.S1_at   | MmugDNA.6568.1 | 6.25  | 6.21  | 0.55 | 0.23 | 1.02   | 0.922915 | 0.743801 | 0.967075 | 0.851528 |
| MmugDNA.6571.1.S1_at   | MmugDNA.6571.1 | 11.29 | 10.62 | 0.24 | 0.26 | 1.6    | 0.025528 | 0.032726 | 0.212834 | 0.223957 |
| MmugDNA.6572.1.S1_at   | MmugDNA.6572.1 | 6.47  | 6     | 0.51 | 0.35 | 1.39   | 0.247517 | 0.189219 | 0.542974 | 0.464997 |
| MmugDNA.658.1.S1_at    | MmugDNA.658.1  | 10.28 | 10.06 | 0.24 | 0.3  | 1.17   | 0.431568 | 0.021003 | 0.687567 | 0.181715 |
| MmugDNA.6580.1.S1_at   | MmugDNA.6580.1 | 5.02  | 5.28  | 0.02 | 0.12 | -1.2   | 0.030636 | 0.220209 | 0.227949 | 0.493655 |
| MmugDNA.6583.1.S1_at   | MmugDNA.6583.1 | 12.92 | 12.95 | 0.05 | 0.08 | -1.02  | 0.553571 | 0.745489 | 0.770058 | 0.852409 |
| MmugDNA.6586.1.S1_at   | MmugDNA.6586.1 | 6.35  | 6.37  | 0.31 | 0.15 | -1.01  | 0.972251 | 0.433153 | 0.988877 | 0.653513 |
| MmugDNA.659.1.S1_at    | MmugDNA.659.1  | 9.05  | 8.98  | 0.34 | 0.04 | 1.05   | 0.755639 | 0.981218 | 0.887352 | 0.989624 |
| MmugDNA.6590.1.S1_at   | MmugDNA.6590.1 | 11.5  | 11.42 | 0.08 | 0.03 | 1.06   | 0.178071 | 0.007159 | 0.472824 | 0.113788 |
| MmugDNA.66.1.S1_at     | MmugDNA.66.1   | 8.56  | 7.92  | 0.23 | 0.24 | 1.56   | 0.033527 | 0.016817 | 0.237037 | 0.164298 |
| MmugDNA.6601.1.S1_at   | MmugDNA.6601.1 | 4.54  | 4.32  | 0.16 | 0.1  | 1.16   | 0.082314 | 0.132236 | 0.343946 | 0.404274 |
| MmugDNA.6605.1.S1_at   | MmugDNA.6605.1 | 10.45 | 8.49  | 0.83 | 0.14 | 3.89   | 0.043596 | 0.040438 | 0.265765 | 0.24621  |
| MmugDNA.6607.1.S1_at   | MmugDNA.6607.1 | 12.23 | 12.41 | 0.07 | 0.08 | -1.14  | 0.074719 | 0.327423 | 0.331432 | 0.577284 |
| MmugDNA.6608.1.S1_at   | MmugDNA.6608.1 | 9.83  | 9.4   | 0.11 | 0.01 | 1.35   | 0.002329 | 0.008536 | 0.092775 | 0.122563 |
| MmugDNA.6614.1.S1_at   | MmugDNA.6614.1 | 9.64  | 9.35  | 0.1  | 0.02 | 1.23   | 0.006661 | 0.006427 | 0.128056 | 0.108896 |
| MmugDNA.6621.1.S1_at   | MmugDNA.6621.1 | 13.42 | 13.3  | 0.08 | 0.11 | 1.09   | 0.044386 | 0.030498 | 0.267911 | 0.216644 |
| MmugDNA.6623.1.S1_at   | MmugDNA.6623.1 | 8.98  | 8.76  | 0.23 | 0.19 | 1.16   | 0.531413 | 0.326628 | 0.75568  | 0.576649 |
| MmugDNA.6623.1.S1_s_at | MmugDNA.6623.1 | 10.15 | 9.94  | 0.23 | 0.31 | 1.16   | 0.729857 | 0.124112 | 0.873808 | 0.394389 |
| MmugDNA.6626.1.S1_at   | MmugDNA.6626.1 | 7.29  | 6.65  | 0.03 | 0.19 | 1.56   | 0.009868 | 0.019924 | 0.148832 | 0.177443 |
| MmugDNA.6627.1.S1_at   | MmugDNA.6627.1 | 10.65 | 10.76 | 0.11 | 0.1  | -1.08  | 0.242713 | 0.761682 | 0.539526 | 0.861459 |
| MmugDNA.6634.1.S1_at   | MmugDNA.6634.1 | 7.64  | 7.64  | 0.18 | 0.16 | 1      | 0.520303 | 0.001281 | 0.74869  | 0.055351 |
| MmugDNA.6635.1.S1_at   | MmugDNA.6635.1 | 5.6   | 5.41  | 0.8  | 0.13 | 1.14   | 0.250568 | 0.264853 | 0.545226 | 0.530861 |
| MmugDNA.6640.1.S1_at   | MmugDNA.6640.1 | 10.05 | 9.8   | 0.28 | 0.11 | 1.19   | 0.551255 | 0.414409 | 0.768319 | 0.640293 |
| MmugDNA.6641.1.S1_at   | MmugDNA.6641.1 | 10.6  | 10.93 | 0.08 | 0.12 | -1.26  | 0.025065 | 0.011878 | 0.211247 | 0.141097 |
| MmugDNA.6642.1.S1_at   | MmugDNA.6642.1 | 12.05 | 12.47 | 0.08 | 0.21 | -1.33  | 0.059875 | 0.18422  | 0.301975 | 0.460382 |
| MmugDNA.6650.1.S1_at   | MmugDNA.6650.1 | 10.86 | 10.73 | 0.11 | 0.01 | 1.1    | 0.13718  | 0.124868 | 0.422016 | 0.395219 |
| MmugDNA.6650.1.S1_s_at | MmugDNA.6650.1 | 10.78 | 10.62 | 0.06 | 0.09 | 1.12   | 0.040669 | 0.076468 | 0.258252 | 0.321562 |
| MmugDNA.6653.1.S1_at   | MmugDNA.6653.1 | 9.4   | 9.56  | 0.09 | 0.12 | -1.12  | 0.093398 | 0.198753 | 0.361945 | 0.473391 |
| MmugDNA.6655.1.S1_at   | MmugDNA.6655.1 | 7.63  | 7.63  | 0.14 | 0.01 | -1     | 0.38067  | 0.176136 | 0.650314 | 0.452581 |
| MmugDNA.6656.1.S1_at   | MmugDNA.6656.1 | 3.51  | 3.47  | 0.72 | 0.49 | 1.02   | 0.899785 | 0.911084 | 0.95742  | 0.949839 |
| MmugDNA.6657.1.S1_at   | MmugDNA.6657.1 | 5.96  | 6.15  | 0.35 | 0.26 | -1.14  | 0.879735 | 0.845607 | 0.948777 | 0.912157 |
| MmugDNA.6659.1.S1_at   | MmugDNA.6659.1 | 11.24 | 11.44 | 0.25 | 0.12 | -1.15  | 0.997636 | 0.06489  | 0.999129 | 0.30078  |
| MmugDNA.6660.1.S1_at   | MmugDNA.6660.1 | 8.63  | 7.92  | 0.24 | 0.17 | 1.64   | 0.022598 | 0.000835 | 0.203449 | 0.046851 |
| MmugDNA.6662.1.S1_at   | MmugDNA.6662.1 | 11.41 | 10.8  | 0.15 | 0.13 | 1.53   | 0.013897 | 0.001771 | 0.168923 | 0.063359 |
| MmugDNA.6664.1.S1_at   | MmugDNA.6664.1 | 10.3  | 9.49  | 0.22 | 0.08 | 1.76   | 0.006554 | 0.019142 | 0.127421 | 0.174115 |
| MmugDNA.6668.1.S1_at   | MmugDNA.6668.1 | 10.13 | 8.83  | 0.64 | 0.85 | 2.45   | 0.264404 | 0.424775 | 0.5577   | 0.64727  |
| MmugDNA.6669.1.S1_at   | MmugDNA.6669.1 | 5.33  | 5.4   | 0.16 | 0.14 | -1.05  | 0.203618 | 0.106371 | 0.501321 | 0.368933 |

|                        |                |       |       |      |      |       |          |          |          |          |
|------------------------|----------------|-------|-------|------|------|-------|----------|----------|----------|----------|
| MmugDNA.6674.1.S1_at   | MmugDNA.6674.1 | 6.69  | 6.5   | 0.14 | 0.27 | 1.13  | 0.830431 | 0.020976 | 0.925473 | 0.181633 |
| MmugDNA.6675.1.S1_at   | MmugDNA.6675.1 | 6.07  | 6.61  | 0.34 | 0.33 | -1.46 | 0.054204 | 0.182816 | 0.289903 | 0.459321 |
| MmugDNA.6677.1.S1_at   | MmugDNA.6677.1 | 10.27 | 9.94  | 0.37 | 0.04 | 1.26  | 0.68157  | 0.113392 | 0.848112 | 0.379509 |
| MmugDNA.6678.1.S1_at   | MmugDNA.6678.1 | 13.45 | 13.19 | 0.19 | 0.11 | 1.2   | 0.057989 | 0.150786 | 0.29792  | 0.425322 |
| MmugDNA.6679.1.S1_at   | MmugDNA.6679.1 | 10.45 | 10.22 | 0.26 | 0.05 | 1.17  | 0.079194 | 0.322197 | 0.339021 | 0.573769 |
| MmugDNA.6681.1.S1_at   | MmugDNA.6681.1 | 2.77  | 3.03  | 0.15 | 0.15 | -1.2  | 0.085302 | 0.175023 | 0.349356 | 0.451676 |
| MmugDNA.6681.1.S1_s_at | MmugDNA.6681.1 | 2.99  | 3.12  | 0.03 | 0.15 | -1.1  | 0.592323 | 0.810781 | 0.793342 | 0.890845 |
| MmugDNA.6683.1.S1_at   | MmugDNA.6683.1 | 8.44  | 8.03  | 0.07 | 0.19 | 1.33  | 0.022128 | 0.199816 | 0.201965 | 0.474491 |
| MmugDNA.6685.1.S1_at   | MmugDNA.6685.1 | 9.48  | 9.43  | 0.01 | 0.05 | 1.03  | 0.246159 | 0.000743 | 0.541923 | 0.044964 |
| MmugDNA.6687.1.S1_at   | MmugDNA.6687.1 | 12.14 | 12.22 | 0.04 | 0.05 | -1.05 | 0.652586 | 0.085256 | 0.831481 | 0.337096 |
| MmugDNA.6695.1.S1_at   | MmugDNA.6695.1 | 3.3   | 3.25  | 0.72 | 0.06 | 1.03  | 0.327036 | 0.424356 | 0.609778 | 0.646929 |
| MmugDNA.6702.1.S1_at   | MmugDNA.6702.1 | 5.75  | 5.93  | 0.06 | 0.44 | -1.13 | 0.622364 | 0.230606 | 0.813229 | 0.502307 |
| MmugDNA.6706.1.S1_at   | MmugDNA.6706.1 | 12.71 | 11.65 | 0.14 | 0.21 | 2.09  | 0.002583 | 0.006738 | 0.094992 | 0.110984 |
| MmugDNA.6709.1.S1_at   | MmugDNA.6709.1 | 8.45  | 8.09  | 0.11 | 0.08 | 1.28  | 0.007088 | 0.001518 | 0.131699 | 0.059307 |
| MmugDNA.671.1.S1_at    | MmugDNA.671.1  | 4.4   | 4.79  | 0.45 | 0.07 | -1.3  | 0.295563 | 0.556447 | 0.584306 | 0.734507 |
| MmugDNA.6714.1.S1_at   | MmugDNA.6714.1 | 8.7   | 8.7   | 0.15 | 0.01 | -1    | 0.904306 | 0.654955 | 0.959379 | 0.7982   |
| MmugDNA.6717.1.S1_at   | MmugDNA.6717.1 | 9.08  | 8.43  | 0.18 | 0.05 | 1.57  | 0.004177 | 0.0156   | 0.11023  | 0.158262 |
| MmugDNA.6724.1.S1_at   | MmugDNA.6724.1 | 11.32 | 11    | 0.33 | 0.11 | 1.25  | 0.198039 | 0.314013 | 0.495303 | 0.568178 |
| MmugDNA.6728.1.S1_at   | MmugDNA.6728.1 | 5.1   | 5.45  | 0.43 | 0.45 | -1.27 | 0.542943 | 0.791586 | 0.763126 | 0.879621 |
| MmugDNA.6730.1.S1_at   | MmugDNA.6730.1 | 8.03  | 7.63  | 0.37 | 0.11 | 1.32  | 0.223155 | 0.13872  | 0.520981 | 0.411807 |
| MmugDNA.6731.1.S1_at   | MmugDNA.6731.1 | 3.61  | 3.5   | 0.1  | 0.05 | 1.07  | 0.305569 | 0.059684 | 0.592647 | 0.290919 |
| MmugDNA.6734.1.S1_at   | MmugDNA.6734.1 | 5.6   | 6.95  | 0.3  | 0.1  | -2.56 | 0.002195 | 0.033497 | 0.090721 | 0.226577 |
| MmugDNA.6735.1.S1_at   | MmugDNA.6735.1 | 8.89  | 8.46  | 0.24 | 0.13 | 1.35  | 0.118998 | 0.719915 | 0.396697 | 0.837957 |
| MmugDNA.6739.1.S1_at   | MmugDNA.6739.1 | 11.81 | 11.38 | 0.22 | 0.07 | 1.35  | 0.06113  | 0.081044 | 0.304069 | 0.329189 |
| MmugDNA.674.1.S1_at    | MmugDNA.674.1  | 5.14  | 7.9   | 0.83 | 0.3  | -6.76 | 0.007225 | 0.029214 | 0.132536 | 0.212898 |
| MmugDNA.6745.1.S1_at   | MmugDNA.6745.1 | 10.29 | 10.5  | 0.12 | 0.08 | -1.16 | 0.09987  | 0.275391 | 0.370801 | 0.539663 |
| MmugDNA.6753.1.S1_at   | MmugDNA.6753.1 | 3.75  | 3.73  | 0.07 | 0.17 | 1.01  | 0.858856 | 0.410162 | 0.938824 | 0.637086 |
| MmugDNA.6756.1.S1_at   | MmugDNA.6756.1 | 12.23 | 12.12 | 0.08 | 0.13 | 1.08  | 0.382832 | 0.527853 | 0.652236 | 0.71629  |
| MmugDNA.6757.1.S1_at   | MmugDNA.6757.1 | 6.47  | 6.75  | 0.34 | 0.04 | -1.22 | 0.663825 | 0.801275 | 0.838044 | 0.88568  |
| MmugDNA.6760.1.S1_at   | MmugDNA.6760.1 | 5.51  | 5.46  | 0.44 | 0.14 | 1.03  | 0.226847 | 0.226242 | 0.524763 | 0.498698 |
| MmugDNA.6761.1.S1_at   | MmugDNA.6761.1 | 12.49 | 12.08 | 0.15 | 0.02 | 1.33  | 0.016371 | 0.02288  | 0.180807 | 0.189288 |
| MmugDNA.6761.1.S1_x_at | MmugDNA.6761.1 | 12.34 | 12    | 0.16 | 0.03 | 1.27  | 0.032085 | 0.065513 | 0.232919 | 0.301415 |
| MmugDNA.6764.1.S1_at   | MmugDNA.6764.1 | 8.08  | 7.97  | 0.05 | 0.02 | 1.08  | 0.018019 | 0.146413 | 0.187281 | 0.420454 |
| MmugDNA.6766.1.S1_at   | MmugDNA.6766.1 | 6.48  | 5.51  | 0.42 | 0.1  | 1.96  | 0.017631 | 0.006172 | 0.186416 | 0.106774 |
| MmugDNA.6768.1.S1_at   | MmugDNA.6768.1 | 7.55  | 7.34  | 0.34 | 0.05 | 1.16  | 0.926915 | 0.580515 | 0.969096 | 0.74976  |
| MmugDNA.6772.1.S1_at   | MmugDNA.6772.1 | 10.81 | 10.8  | 0.12 | 0.08 | 1.01  | 0.933743 | 0.244511 | 0.972158 | 0.51432  |
| MmugDNA.6778.1.S1_at   | MmugDNA.6778.1 | 11.31 | 11.63 | 0.23 | 0.09 | -1.25 | 0.137776 | 0.096717 | 0.422858 | 0.354171 |
| MmugDNA.6782.1.S1_at   | MmugDNA.6782.1 | 10.5  | 9.17  | 0.04 | 0.14 | 2.52  | 0.000098 | 0.146004 | 0.051196 | 0.420006 |
| MmugDNA.6783.1.S1_at   | MmugDNA.6783.1 | 3.14  | 3.15  | 0.04 | 0.13 | -1    | 0.774346 | 0.356933 | 0.896771 | 0.5987   |
| MmugDNA.6786.1.S1_at   | MmugDNA.6786.1 | 4.98  | 4.96  | 0.03 | 0.06 | 1.01  | 0.933247 | 0.608591 | 0.972025 | 0.767142 |
| MmugDNA.6790.1.S1_at   | MmugDNA.6790.1 | 9.11  | 11.4  | 1.25 | 0.2  | -4.92 | 0.07274  | 0.295196 | 0.327657 | 0.554568 |
| MmugDNA.6793.1.S1_at   | MmugDNA.6793.1 | 11.7  | 11.33 | 0.13 | 0.03 | 1.29  | 0.004187 | 0.000329 | 0.110294 | 0.035806 |
| MmugDNA.68.1.S1_at     | MmugDNA.68.1   | 9.89  | 9.61  | 0.08 | 0.03 | 1.21  | 0.007927 | 0.316592 | 0.13826  | 0.569952 |

|                        |                |       |       |      |      |       |          |          |          |          |
|------------------------|----------------|-------|-------|------|------|-------|----------|----------|----------|----------|
| MmugDNA.6805.1.S1_at   | MmugDNA.6805.1 | 5.63  | 5.43  | 0.3  | 0.15 | 1.14  | 0.429886 | 0.005102 | 0.686234 | 0.099108 |
| MmugDNA.6808.1.S1_at   | MmugDNA.6808.1 | 9.83  | 9.7   | 0.26 | 0.12 | 1.1   | 0.972522 | 0.923793 | 0.988946 | 0.957119 |
| MmugDNA.6809.1.S1_at   | MmugDNA.6809.1 | 11.71 | 11.87 | 0.1  | 0.03 | -1.11 | 0.024224 | 0.094618 | 0.208767 | 0.351374 |
| MmugDNA.6811.1.S1_at   | MmugDNA.6811.1 | 8.72  | 8.44  | 0.23 | 0.19 | 1.21  | 0.193549 | 0.526666 | 0.490178 | 0.715627 |
| MmugDNA.6812.1.S1_at   | MmugDNA.6812.1 | 11.76 | 11.63 | 0.19 | 0.09 | 1.09  | 0.647255 | 0.747159 | 0.828637 | 0.853124 |
| MmugDNA.6815.1.S1_at   | MmugDNA.6815.1 | 3.43  | 3.21  | 0.19 | 0.11 | 1.17  | 0.116456 | 0.132835 | 0.393611 | 0.404544 |
| MmugDNA.6818.1.S1_at   | MmugDNA.6818.1 | 7.74  | 8.03  | 0.64 | 0.31 | -1.23 | 0.211663 | 0.161501 | 0.509543 | 0.437651 |
| MmugDNA.6819.1.S1_at   | MmugDNA.6819.1 | 3.22  | 3.28  | 0.07 | 0.05 | -1.04 | 0.573263 | 0.371478 | 0.781077 | 0.610204 |
| MmugDNA.6820.1.S1_at   | MmugDNA.6820.1 | 3.38  | 3.29  | 0.16 | 0.14 | 1.06  | 0.744071 | 0.658958 | 0.881384 | 0.800473 |
| MmugDNA.6823.1.S1_s_at | MmugDNA.6823.1 | 7.49  | 8.29  | 0.4  | 0.03 | -1.75 | 0.063477 | 0.087019 | 0.308631 | 0.339889 |
| MmugDNA.6828.1.S1_at   | MmugDNA.6828.1 | 6.38  | 6.24  | 0.28 | 0.31 | 1.1   | 0.699607 | 0.620033 | 0.857338 | 0.775207 |
| MmugDNA.683.1.S1_at    | MmugDNA.683.1  | 6.2   | 6.15  | 0.88 | 0.15 | 1.04  | 0.402137 | 0.506323 | 0.666552 | 0.702371 |
| MmugDNA.6836.1.S1_at   | MmugDNA.6836.1 | 6.4   | 6.26  | 0.1  | 0.08 | 1.11  | 0.53522  | 0.096912 | 0.758211 | 0.354311 |
| MmugDNA.684.1.S1_at    | MmugDNA.684.1  | 5.99  | 6.84  | 0.09 | 0.19 | -1.8  | 0.002143 | 0.003813 | 0.090208 | 0.08794  |
| MmugDNA.6840.1.S1_at   | MmugDNA.6840.1 | 10.57 | 10.4  | 0.14 | 0.07 | 1.13  | 0.323379 | 0.208022 | 0.607168 | 0.482049 |
| MmugDNA.6842.1.S1_at   | MmugDNA.6842.1 | 11.71 | 11.72 | 0.01 | 0.01 | -1.01 | 0.06574  | 0.928822 | 0.31383  | 0.959449 |
| MmugDNA.6845.1.S1_at   | MmugDNA.6845.1 | 9.02  | 8.99  | 0.07 | 0.07 | 1.02  | 0.75393  | 0.034794 | 0.886627 | 0.230686 |
| MmugDNA.6846.1.S1_at   | MmugDNA.6846.1 | 4.84  | 4.86  | 0.06 | 0.02 | -1.01 | 0.549867 | 0.012151 | 0.76747  | 0.142648 |
| MmugDNA.6849.1.S1_at   | MmugDNA.6849.1 | 7.11  | 7     | 0.03 | 0.07 | 1.09  | 0.209357 | 0.042081 | 0.506877 | 0.249638 |
| MmugDNA.6852.1.S1_at   | MmugDNA.6852.1 | 6.22  | 6.5   | 0.05 | 0.14 | -1.21 | 0.078616 | 0.131243 | 0.338468 | 0.403263 |
| MmugDNA.6854.1.S1_at   | MmugDNA.6854.1 | 9.93  | 9.99  | 0.34 | 0.19 | -1.04 | 0.922127 | 0.088677 | 0.966699 | 0.342234 |
| MmugDNA.6858.1.S1_at   | MmugDNA.6858.1 | 6.88  | 7.06  | 0.25 | 0.11 | -1.13 | 0.191711 | 0.733853 | 0.488165 | 0.845891 |
| MmugDNA.6859.1.S1_at   | MmugDNA.6859.1 | 8.61  | 7.73  | 0.23 | 0.28 | 1.84  | 0.012252 | 0.008941 | 0.161074 | 0.125013 |
| MmugDNA.6864.1.S1_at   | MmugDNA.6864.1 | 11.01 | 11.38 | 0.5  | 0.06 | -1.3  | 0.186742 | 0.096493 | 0.482843 | 0.35409  |
| MmugDNA.6866.1.S1_at   | MmugDNA.6866.1 | 6.21  | 6.27  | 0.24 | 0.12 | -1.04 | 0.477045 | 0.907869 | 0.719234 | 0.947871 |
| MmugDNA.6867.1.S1_at   | MmugDNA.6867.1 | 12.08 | 12.51 | 0.1  | 0.09 | -1.35 | 0.004453 | 0.199739 | 0.113116 | 0.47438  |
| MmugDNA.6869.1.S1_at   | MmugDNA.6869.1 | 9.01  | 8.24  | 0.31 | 0.2  | 1.71  | 0.008823 | 0.003909 | 0.14378  | 0.088806 |
| MmugDNA.6873.1.S1_at   | MmugDNA.6873.1 | 6.37  | 6.23  | 0.25 | 0.09 | 1.1   | 0.365696 | 0.300098 | 0.640149 | 0.558262 |
| MmugDNA.6875.1.S1_at   | MmugDNA.6875.1 | 7.15  | 6.71  | 1.69 | 0.13 | 1.36  | 0.779852 | 0.630654 | 0.899497 | 0.782345 |
| MmugDNA.6876.1.S1_at   | MmugDNA.6876.1 | 3.96  | 3.98  | 0.15 | 0.03 | -1.01 | 0.40061  | 0.562381 | 0.665527 | 0.738016 |
| MmugDNA.6880.1.S1_at   | MmugDNA.6880.1 | 8.11  | 8.36  | 0.46 | 0.33 | -1.19 | 0.242469 | 0.498625 | 0.539382 | 0.697648 |
| MmugDNA.6884.1.S1_at   | MmugDNA.6884.1 | 10.19 | 10.37 | 0.08 | 0.17 | -1.13 | 0.150052 | 0.021306 | 0.439035 | 0.182727 |
| MmugDNA.6887.1.S1_at   | MmugDNA.6887.1 | 6.19  | 6.08  | 0.1  | 0.11 | 1.07  | 0.18578  | 0.033243 | 0.481947 | 0.225803 |
| MmugDNA.6890.1.S1_at   | MmugDNA.6890.1 | 4.45  | 4.39  | 0.06 | 0.08 | 1.04  | 0.499182 | 0.856454 | 0.734073 | 0.917996 |
| MmugDNA.6891.1.S1_s_at | MmugDNA.6891.1 | 12.81 | 12.75 | 0.16 | 0.11 | 1.05  | 0.937116 | 0.911407 | 0.973667 | 0.950063 |
| MmugDNA.6892.1.S1_at   | MmugDNA.6892.1 | 6.25  | 6.29  | 0.2  | 0.05 | -1.03 | 0.261776 | 0.536583 | 0.555908 | 0.721903 |
| MmugDNA.6898.1.S1_at   | MmugDNA.6898.1 | 10.68 | 10.2  | 0.14 | 0.05 | 1.4   | 0.006919 | 0.057173 | 0.130303 | 0.284974 |
| MmugDNA.6899.1.S1_at   | MmugDNA.6899.1 | 10.39 | 10.47 | 0.15 | 0.07 | -1.06 | 0.607854 | 0.021191 | 0.804019 | 0.182325 |
| MmugDNA.6901.1.S1_at   | MmugDNA.6901.1 | 7.23  | 7.36  | 0.08 | 0.17 | -1.09 | 0.646882 | 0.014165 | 0.828486 | 0.152135 |
| MmugDNA.6908.1.S1_at   | MmugDNA.6908.1 | 5.46  | 5.26  | 0.15 | 0.18 | 1.15  | 0.139662 | 0.108294 | 0.42522  | 0.371557 |
| MmugDNA.6910.1.S1_at   | MmugDNA.6910.1 | 12.16 | 12.19 | 0.1  | 0.08 | -1.02 | 0.258312 | 0.532312 | 0.552505 | 0.719017 |
| MmugDNA.6911.1.S1_at   | MmugDNA.6911.1 | 4.45  | 4.6   | 0.07 | 0.06 | -1.11 | 0.078591 | 0.185952 | 0.338457 | 0.461778 |
| MmugDNA.6912.1.S1_at   | MmugDNA.6912.1 | 8.99  | 9.49  | 1.1  | 0.25 | -1.42 | 0.163128 | 0.362677 | 0.455309 | 0.603206 |

|                        |                |       |       |      |      |        |          |          |          |          |
|------------------------|----------------|-------|-------|------|------|--------|----------|----------|----------|----------|
| MmugDNA.6915.1.S1_at   | MmugDNA.6915.1 | 3.46  | 3.56  | 0.09 | 0.12 | -1.07  | 0.61569  | 0.920559 | 0.809106 | 0.955234 |
| MmugDNA.6919.1.S1_at   | MmugDNA.6919.1 | 9.23  | 8.13  | 0.21 | 0.13 | 2.13   | 0.00134  | 0.042535 | 0.079218 | 0.250848 |
| MmugDNA.6931.1.S1_at   | MmugDNA.6931.1 | 8.37  | 9.45  | 0.18 | 0.12 | -2.11  | 0.001426 | 0.05633  | 0.07964  | 0.283348 |
| MmugDNA.6932.1.S1_at   | MmugDNA.6932.1 | 3.56  | 3.49  | 0.11 | 0.14 | 1.05   | 0.51614  | 0.741416 | 0.745613 | 0.850285 |
| MmugDNA.6939.1.S1_at   | MmugDNA.6939.1 | 4.91  | 4.92  | 0.07 | 0.11 | -1.01  | 0.429802 | 0.550626 | 0.686201 | 0.730605 |
| MmugDNA.6941.1.S1_at   | MmugDNA.6941.1 | 10.11 | 9.88  | 0.17 | 0.12 | 1.17   | 0.246844 | 0.584874 | 0.54255  | 0.75256  |
| MmugDNA.6944.1.S1_at   | MmugDNA.6944.1 | 8.52  | 8.66  | 0.08 | 0.1  | -1.1   | 0.573133 | 0.081941 | 0.781077 | 0.330521 |
| MmugDNA.6948.1.S1_at   | MmugDNA.6948.1 | 7.64  | 8.56  | 0.36 | 0.18 | -1.88  | 0.008716 | 0.00107  | 0.143064 | 0.051873 |
| MmugDNA.6954.1.S1_at   | MmugDNA.6954.1 | 11.21 | 11.18 | 0.08 | 0.05 | 1.02   | 0.660345 | 0.003159 | 0.83613  | 0.081739 |
| MmugDNA.6956.1.S1_at   | MmugDNA.6956.1 | 8.68  | 8.52  | 0.19 | 0.12 | 1.12   | 0.106962 | 0.00602  | 0.38134  | 0.106089 |
| MmugDNA.6959.1.S1_at   | MmugDNA.6959.1 | 8.15  | 8.51  | 0.13 | 0.13 | -1.29  | 0.031292 | 0.588336 | 0.230107 | 0.754874 |
| MmugDNA.6962.1.S1_at   | MmugDNA.6962.1 | 6.27  | 5.96  | 0.15 | 0.56 | 1.24   | 0.467027 | 0.108737 | 0.712594 | 0.372257 |
| MmugDNA.6963.1.S1_at   | MmugDNA.6963.1 | 8.76  | 9.32  | 0.4  | 0.09 | -1.48  | 0.08741  | 0.177875 | 0.353207 | 0.454182 |
| MmugDNA.6971.1.S1_at   | MmugDNA.6971.1 | 11.15 | 10.97 | 0.16 | 0.01 | 1.13   | 0.173268 | 0.262433 | 0.467457 | 0.528697 |
| MmugDNA.6974.1.S1_at   | MmugDNA.6974.1 | 6.95  | 7.06  | 0.14 | 0.05 | -1.08  | 0.563064 | 0.775772 | 0.775287 | 0.869526 |
| MmugDNA.6975.1.S1_at   | MmugDNA.6975.1 | 5.05  | 4.86  | 0.28 | 0.07 | 1.14   | 0.873304 | 0.059329 | 0.945619 | 0.29054  |
| MmugDNA.6976.1.S1_at   | MmugDNA.6976.1 | 6.7   | 6.84  | 0.18 | 0.11 | -1.1   | 0.266192 | 0.171644 | 0.558711 | 0.448044 |
| MmugDNA.6978.1.S1_at   | MmugDNA.6978.1 | 4.78  | 4.96  | 0.11 | 0.37 | -1.13  | 0.224863 | 0.282376 | 0.522799 | 0.545076 |
| MmugDNA.6979.1.S1_at   | MmugDNA.6979.1 | 9.47  | 8.46  | 0.47 | 0.1  | 2.02   | 0.044133 | 0.015219 | 0.267189 | 0.156741 |
| MmugDNA.6980.1.S1_at   | MmugDNA.6980.1 | 12.53 | 12.56 | 0.04 | 0.04 | -1.02  | 0.376017 | 0.456375 | 0.646716 | 0.670155 |
| MmugDNA.6983.1.S1_at   | MmugDNA.6983.1 | 11.39 | 11.3  | 0.11 | 0.19 | 1.06   | 0.75405  | 0.012613 | 0.886688 | 0.144864 |
| MmugDNA.699.1.S1_at    | MmugDNA.699.1  | 6.37  | 5.75  | 0.09 | 0.07 | 1.54   | 0.001241 | 0.030363 | 0.078631 | 0.216116 |
| MmugDNA.6997.1.S1_at   | MmugDNA.6997.1 | 9.2   | 9.12  | 0.19 | 0.07 | 1.05   | 0.140296 | 0.385876 | 0.426053 | 0.621161 |
| MmugDNA.6998.1.S1_at   | MmugDNA.6998.1 | 14.34 | 14.36 | 0.02 | 0.05 | -1.01  | 0.562059 | 0.190461 | 0.774823 | 0.465906 |
| MmugDNA.70.1.S1_at     | MmugDNA.70.1   | 9.58  | 10.58 | 0.22 | 0.34 | -1.99  | 0.028117 | 0.010296 | 0.22011  | 0.132854 |
| MmugDNA.7002.1.S1_s_at | MmugDNA.7002.1 | 14.38 | 14.37 | 0.04 | 0.01 | 1.01   | 0.767747 | 0.569047 | 0.893376 | 0.742233 |
| MmugDNA.7007.1.S1_at   | MmugDNA.7007.1 | 10.22 | 10.26 | 0.03 | 0.1  | -1.02  | 0.195751 | 0.576293 | 0.492639 | 0.747148 |
| MmugDNA.701.1.S1_at    | MmugDNA.701.1  | 2.8   | 2.79  | 0.01 | 0.09 | 1.01   | 0.449304 | 0.613229 | 0.700621 | 0.770484 |
| MmugDNA.7018.1.S1_at   | MmugDNA.7018.1 | 5.56  | 7.38  | 0.8  | 0.35 | -3.51  | 0.060825 | 0.241728 | 0.303665 | 0.512306 |
| MmugDNA.7021.1.S1_at   | MmugDNA.7021.1 | 12.62 | 12.57 | 0.03 | 0.03 | 1.03   | 0.115155 | 0.087642 | 0.392172 | 0.340903 |
| MmugDNA.7023.1.S1_at   | MmugDNA.7023.1 | 8.74  | 8.79  | 0.17 | 0.16 | -1.04  | 0.761903 | 0.175222 | 0.890771 | 0.452011 |
| MmugDNA.7024.1.S1_at   | MmugDNA.7024.1 | 7.22  | 7.03  | 0.44 | 0.19 | 1.14   | 0.826154 | 0.21527  | 0.922823 | 0.489011 |
| MmugDNA.7027.1.S1_at   | MmugDNA.7027.1 | 10.51 | 10.44 | 0.05 | 0.06 | 1.05   | 0.090178 | 0.137249 | 0.356864 | 0.410155 |
| MmugDNA.7029.1.S1_at   | MmugDNA.7029.1 | 6.5   | 7.4   | 0.26 | 0.25 | -1.86  | 0.023689 | 0.205269 | 0.207081 | 0.479599 |
| MmugDNA.703.1.S1_at    | MmugDNA.703.1  | 6.96  | 6.92  | 0.34 | 0.29 | 1.03   | 0.678749 | 0.621613 | 0.846793 | 0.776191 |
| MmugDNA.7034.1.S1_at   | MmugDNA.7034.1 | 9.16  | 8.89  | 0.25 | 0.23 | 1.2    | 0.423751 | 0.01202  | 0.681707 | 0.141889 |
| MmugDNA.7037.1.S1_at   | MmugDNA.7037.1 | 4.68  | 5.85  | 0.1  | 0.21 | -2.24  | 0.000975 | 0.001687 | 0.076222 | 0.062186 |
| MmugDNA.7038.1.S1_at   | MmugDNA.7038.1 | 7.72  | 12.15 | 1.76 | 0.2  | -21.56 | 0.031302 | 0.357336 | 0.230121 | 0.598949 |
| MmugDNA.7044.1.S1_at   | MmugDNA.7044.1 | 11.79 | 11.86 | 0.18 | 0.07 | -1.05  | 0.531394 | 0.94317  | 0.75568  | 0.967774 |
| MmugDNA.7046.1.S1_at   | MmugDNA.7046.1 | 7.7   | 7.44  | 0.07 | 0.14 | 1.2    | 0.019959 | 0.088926 | 0.194588 | 0.34275  |
| MmugDNA.705.1.S1_at    | MmugDNA.705.1  | 4.18  | 4.1   | 0.1  | 0.12 | 1.06   | 0.172256 | 0.145093 | 0.466441 | 0.419053 |
| MmugDNA.7052.1.S1_at   | MmugDNA.7052.1 | 11.51 | 12.09 | 0.14 | 0.1  | -1.49  | 0.00382  | 0.066438 | 0.107015 | 0.303406 |
| MmugDNA.7057.1.S1_s_at | MmugDNA.7057.1 | 11.79 | 11.7  | 0.06 | 0.03 | 1.06   | 0.032042 | 0.456989 | 0.232887 | 0.670592 |

|                        |                |       |       |      |      |       |          |          |          |          |
|------------------------|----------------|-------|-------|------|------|-------|----------|----------|----------|----------|
| MmugDNA.7058.1.S1_at   | MmugDNA.7058.1 | 10.99 | 10.83 | 0.3  | 0.1  | 1.12  | 0.477905 | 0.038395 | 0.719648 | 0.240833 |
| MmugDNA.7059.1.S1_at   | MmugDNA.7059.1 | 12.92 | 12.98 | 0.13 | 0.11 | -1.04 | 0.995631 | 0.92953  | 0.998294 | 0.959757 |
| MmugDNA.7060.1.S1_at   | MmugDNA.7060.1 | 8.04  | 8.01  | 0.32 | 0.26 | 1.02  | 0.650542 | 0.359082 | 0.830274 | 0.600438 |
| MmugDNA.7066.1.S1_at   | MmugDNA.7066.1 | 9.33  | 8.75  | 0.46 | 0.1  | 1.5   | 0.124433 | 0.147998 | 0.404636 | 0.422406 |
| MmugDNA.7071.1.S1_at   | MmugDNA.7071.1 | 3.85  | 3.85  | 0.43 | 0.02 | 1     | 0.568024 | 0.764579 | 0.778083 | 0.863128 |
| MmugDNA.7072.1.S1_at   | MmugDNA.7072.1 | 8.94  | 9.31  | 0.2  | 0.07 | -1.29 | 0.15451  | 0.681567 | 0.444802 | 0.814092 |
| MmugDNA.7088.1.S1_at   | MmugDNA.7088.1 | 12.92 | 12.88 | 0.11 | 0.07 | 1.03  | 0.500381 | 0.411751 | 0.73465  | 0.638434 |
| MmugDNA.7099.1.S1_at   | MmugDNA.7099.1 | 12.05 | 12.12 | 0.07 | 0.03 | -1.05 | 0.17759  | 0.212068 | 0.472247 | 0.486036 |
| MmugDNA.7099.1.S1_s_at | MmugDNA.7099.1 | 12.59 | 12.72 | 0.12 | 0.04 | -1.09 | 0.454685 | 0.494079 | 0.704461 | 0.694663 |
| MmugDNA.71.1.S1_at     | MmugDNA.71.1   | 5.2   | 5.1   | 0.1  | 0.15 | 1.07  | 0.472116 | 0.091693 | 0.71594  | 0.346934 |
| MmugDNA.7103.1.S1_at   | MmugDNA.7103.1 | 7.38  | 7.27  | 0.49 | 0.09 | 1.08  | 0.540227 | 0.602123 | 0.761308 | 0.763172 |
| MmugDNA.7106.1.S1_at   | MmugDNA.7106.1 | 8.62  | 8.1   | 0.03 | 0.01 | 1.44  | 0.000005 | 0.037399 | 0.043574 | 0.237776 |
| MmugDNA.7107.1.S1_at   | MmugDNA.7107.1 | 10.62 | 9.98  | 0.54 | 0.27 | 1.56  | 0.17968  | 0.329866 | 0.474837 | 0.578874 |
| MmugDNA.7107.1.S1_s_at | MmugDNA.7107.1 | 9.38  | 8.64  | 0.67 | 0.28 | 1.67  | 0.233023 | 0.47244  | 0.531278 | 0.67999  |
| MmugDNA.7108.1.S1_at   | MmugDNA.7108.1 | 5.69  | 6.08  | 0.87 | 0.22 | -1.31 | 0.335831 | 0.09513  | 0.616625 | 0.352151 |
| MmugDNA.7109.1.S1_at   | MmugDNA.7109.1 | 6.6   | 7.78  | 0.8  | 0.33 | -2.26 | 0.086614 | 0.219325 | 0.351653 | 0.493094 |
| MmugDNA.7115.1.S1_at   | MmugDNA.7115.1 | 10.62 | 10.31 | 0.05 | 0.03 | 1.24  | 0.000615 | 0.024862 | 0.070727 | 0.197552 |
| MmugDNA.7117.1.S1_at   | MmugDNA.7117.1 | 4     | 4     | 0.17 | 0.22 | -1    | 0.940391 | 0.958735 | 0.974856 | 0.976654 |
| MmugDNA.7118.1.S1_at   | MmugDNA.7118.1 | 7.33  | 7.56  | 0.2  | 0.11 | -1.17 | 0.058116 | 0.407458 | 0.298185 | 0.635032 |
| MmugDNA.712.1.S1_at    | MmugDNA.712.1  | 9.23  | 9.2   | 0.15 | 0.23 | 1.03  | 0.450389 | 0.001292 | 0.701465 | 0.055585 |
| MmugDNA.7121.1.S1_at   | MmugDNA.7121.1 | 7.24  | 6.98  | 0.06 | 0.03 | 1.2   | 0.004009 | 0.000601 | 0.108676 | 0.041985 |
| MmugDNA.7127.1.S1_at   | MmugDNA.7127.1 | 7.54  | 6.39  | 0.41 | 0.43 | 2.22  | 0.12254  | 0.301861 | 0.401258 | 0.559788 |
| MmugDNA.7128.1.S1_at   | MmugDNA.7128.1 | 7.82  | 8.19  | 0.41 | 0.2  | -1.3  | 0.208969 | 0.831781 | 0.506432 | 0.903503 |
| MmugDNA.7129.1.S1_at   | MmugDNA.7129.1 | 7.1   | 7.47  | 0.48 | 0.15 | -1.3  | 0.598331 | 0.304051 | 0.797347 | 0.561388 |
| MmugDNA.7136.1.S1_at   | MmugDNA.7136.1 | 7.27  | 7.13  | 0.06 | 0.02 | 1.1   | 0.034139 | 0.022787 | 0.239485 | 0.18908  |
| MmugDNA.7140.1.S1_at   | MmugDNA.7140.1 | 12.07 | 11.96 | 0.13 | 0.02 | 1.08  | 0.069117 | 0.000097 | 0.321019 | 0.0278   |
| MmugDNA.7146.1.S1_at   | MmugDNA.7146.1 | 5.79  | 5.91  | 0.21 | 0.11 | -1.09 | 0.3832   | 0.18593  | 0.652511 | 0.461772 |
| MmugDNA.7147.1.S1_at   | MmugDNA.7147.1 | 10.77 | 10.2  | 0.17 | 0.25 | 1.49  | 0.059051 | 0.358623 | 0.30011  | 0.600139 |
| MmugDNA.7157.1.S1_s_at | MmugDNA.7157.1 | 5.88  | 6.11  | 0.22 | 0.09 | -1.18 | 0.124242 | 0.23653  | 0.404262 | 0.507364 |
| MmugDNA.7159.1.S1_at   | MmugDNA.7159.1 | 7.06  | 7.14  | 0.14 | 0.07 | -1.05 | 0.368459 | 0.777073 | 0.64218  | 0.870505 |
| MmugDNA.7167.1.S1_at   | MmugDNA.7167.1 | 12.1  | 11.34 | 0.42 | 0.04 | 1.69  | 0.016972 | 0.02292  | 0.183747 | 0.189403 |
| MmugDNA.7170.1.S1_at   | MmugDNA.7170.1 | 11.23 | 11.51 | 0.13 | 0.09 | -1.21 | 0.17843  | 0.016097 | 0.473173 | 0.160775 |
| MmugDNA.7171.1.S1_at   | MmugDNA.7171.1 | 11.1  | 10.99 | 0.11 | 0.01 | 1.08  | 0.15922  | 0.18067  | 0.450505 | 0.457245 |
| MmugDNA.7172.1.S1_at   | MmugDNA.7172.1 | 11.36 | 11.18 | 0.09 | 0.15 | 1.13  | 0.103898 | 0.006413 | 0.377212 | 0.108813 |
| MmugDNA.7177.1.S1_at   | MmugDNA.7177.1 | 8.28  | 8.32  | 0.3  | 0.05 | -1.03 | 0.823742 | 0.336338 | 0.921686 | 0.583813 |
| MmugDNA.7178.1.S1_at   | MmugDNA.7178.1 | 11.61 | 11.3  | 0.1  | 0.14 | 1.23  | 0.064867 | 0.006071 | 0.311366 | 0.106175 |
| MmugDNA.7181.1.S1_at   | MmugDNA.7181.1 | 7.87  | 8.17  | 0.56 | 0.06 | -1.24 | 0.343596 | 0.511094 | 0.622989 | 0.705383 |
| MmugDNA.7183.1.S1_at   | MmugDNA.7183.1 | 12.78 | 13.22 | 0.14 | 0.08 | -1.36 | 0.015844 | 0.086773 | 0.178312 | 0.339521 |
| MmugDNA.7187.1.S1_at   | MmugDNA.7187.1 | 10.49 | 10.45 | 0.02 | 0.05 | 1.02  | 0.184121 | 0.411104 | 0.480065 | 0.637874 |
| MmugDNA.7190.1.S1_at   | MmugDNA.7190.1 | 9.68  | 9.43  | 0.29 | 0.15 | 1.2   | 0.732301 | 0.199451 | 0.874932 | 0.474035 |
| MmugDNA.7204.1.S1_at   | MmugDNA.7204.1 | 12.81 | 13.22 | 0.06 | 0.08 | -1.33 | 0.00189  | 0.026181 | 0.087741 | 0.202791 |
| MmugDNA.7205.1.S1_at   | MmugDNA.7205.1 | 6.94  | 7.37  | 1.04 | 0.66 | -1.35 | 0.413145 | 0.575787 | 0.674504 | 0.746767 |
| MmugDNA.7206.1.S1_at   | MmugDNA.7206.1 | 10.69 | 10.38 | 0.17 | 0.03 | 1.23  | 0.050821 | 0.241362 | 0.283144 | 0.511961 |

|                        |                |       |       |      |      |       |          |          |          |          |
|------------------------|----------------|-------|-------|------|------|-------|----------|----------|----------|----------|
| MmugDNA.7208.1.S1_at   | MmugDNA.7208.1 | 5.42  | 5.71  | 0.08 | 0.22 | -1.22 | 0.071841 | 0.428432 | 0.325942 | 0.649993 |
| MmugDNA.7220.1.S1_at   | MmugDNA.7220.1 | 4.92  | 4.86  | 0.3  | 0.31 | 1.04  | 0.853588 | 0.782084 | 0.936335 | 0.873766 |
| MmugDNA.7222.1.S1_at   | MmugDNA.7222.1 | 8.51  | 8.44  | 0.57 | 0.21 | 1.05  | 0.806194 | 0.024295 | 0.913173 | 0.195069 |
| MmugDNA.7232.1.S1_at   | MmugDNA.7232.1 | 11.63 | 12.22 | 0.26 | 0.02 | -1.51 | 0.041156 | 0.068794 | 0.259372 | 0.308711 |
| MmugDNA.7239.1.S1_at   | MmugDNA.7239.1 | 11.68 | 11.71 | 0.03 | 0.1  | -1.02 | 0.509372 | 0.029462 | 0.741015 | 0.213368 |
| MmugDNA.724.1.S1_at    | MmugDNA.724.1  | 12.56 | 12.6  | 0.08 | 0.06 | -1.03 | 0.246651 | 0.079791 | 0.54248  | 0.327113 |
| MmugDNA.725.1.S1_at    | MmugDNA.725.1  | 5.42  | 5.76  | 0.4  | 0.27 | -1.26 | 0.101116 | 0.014018 | 0.372328 | 0.151595 |
| MmugDNA.7250.1.S1_at   | MmugDNA.7250.1 | 4.93  | 4.84  | 0.17 | 0.09 | 1.06  | 0.18     | 0.257677 | 0.475116 | 0.525332 |
| MmugDNA.7254.1.S1_at   | MmugDNA.7254.1 | 4.81  | 4.72  | 0.19 | 0.1  | 1.06  | 0.496694 | 0.136146 | 0.732536 | 0.408473 |
| MmugDNA.726.1.S1_at    | MmugDNA.726.1  | 12.61 | 12.68 | 0.16 | 0.05 | -1.04 | 0.209354 | 0.093019 | 0.506877 | 0.349177 |
| MmugDNA.7262.1.S1_at   | MmugDNA.7262.1 | 3.79  | 3.66  | 0.46 | 0.04 | 1.09  | 0.640919 | 0.739518 | 0.824509 | 0.849052 |
| MmugDNA.7275.1.S1_at   | MmugDNA.7275.1 | 11.05 | 11.12 | 0.11 | 0.12 | -1.05 | 0.555858 | 0.155477 | 0.771458 | 0.430848 |
| MmugDNA.7278.1.S1_at   | MmugDNA.7278.1 | 8.34  | 6.94  | 0.47 | 0.09 | 2.64  | 0.007122 | 0.019927 | 0.131745 | 0.177443 |
| MmugDNA.7279.1.S1_at   | MmugDNA.7279.1 | 7.08  | 6.56  | 0.45 | 0.28 | 1.44  | 0.192943 | 0.163186 | 0.48951  | 0.439316 |
| MmugDNA.7280.1.S1_at   | MmugDNA.7280.1 | 10.83 | 10.86 | 0.19 | 0.06 | -1.02 | 0.724868 | 0.19404  | 0.870893 | 0.469151 |
| MmugDNA.729.1.S1_at    | MmugDNA.729.1  | 10.19 | 9.62  | 0.13 | 0.11 | 1.48  | 0.003767 | 0.000561 | 0.106813 | 0.041049 |
| MmugDNA.7291.1.S1_at   | MmugDNA.7291.1 | 5.19  | 5.24  | 0.17 | 0.27 | -1.04 | 0.522949 | 0.234492 | 0.750166 | 0.505674 |
| MmugDNA.7301.1.S1_s_at | MmugDNA.7301.1 | 11.08 | 12.41 | 0.86 | 0.03 | -2.53 | 0.046668 | 0.015038 | 0.273608 | 0.155766 |
| MmugDNA.731.1.S1_at    | MmugDNA.731.1  | 4.65  | 4.69  | 0.02 | 0.14 | -1.02 | 0.610875 | 0.251766 | 0.805959 | 0.520444 |
| MmugDNA.7316.1.S1_at   | MmugDNA.7316.1 | 12.27 | 11.87 | 0.16 | 0.05 | 1.32  | 0.017114 | 0.01523  | 0.184186 | 0.156798 |
| MmugDNA.7319.1.S1_at   | MmugDNA.7319.1 | 4.92  | 5.07  | 0.15 | 0.1  | -1.11 | 0.160872 | 0.260242 | 0.452392 | 0.526807 |
| MmugDNA.732.1.S1_at    | MmugDNA.732.1  | 11.48 | 12.77 | 0.5  | 0.13 | -2.44 | 0.027493 | 0.14032  | 0.218484 | 0.413498 |
| MmugDNA.7320.1.S1_at   | MmugDNA.7320.1 | 4.94  | 5.08  | 0.1  | 0.04 | -1.1  | 0.072423 | 0.378211 | 0.327004 | 0.615438 |
| MmugDNA.7322.1.S1_at   | MmugDNA.7322.1 | 5.31  | 5.26  | 0.27 | 0.34 | 1.03  | 0.840517 | 0.955986 | 0.930008 | 0.97502  |
| MmugDNA.7325.1.S1_at   | MmugDNA.7325.1 | 8.18  | 7.99  | 0.02 | 0.03 | 1.14  | 0.00038  | 0.022097 | 0.062479 | 0.185973 |
| MmugDNA.7329.1.S1_s_at | MmugDNA.7329.1 | 8.98  | 8.82  | 0.31 | 0.19 | 1.11  | 0.852739 | 0.012176 | 0.935952 | 0.142754 |
| MmugDNA.7330.1.S1_at   | MmugDNA.7330.1 | 8.29  | 9.67  | 0.41 | 0.2  | -2.6  | 0.007728 | 0.27133  | 0.13671  | 0.53644  |
| MmugDNA.7332.1.S1_at   | MmugDNA.7332.1 | 5.25  | 5.09  | 0.13 | 0.04 | 1.11  | 0.169609 | 0.31789  | 0.462918 | 0.571044 |
| MmugDNA.7337.1.S1_at   | MmugDNA.7337.1 | 4.58  | 4.19  | 0.1  | 0.46 | 1.32  | 0.677921 | 0.915864 | 0.846342 | 0.952836 |
| MmugDNA.7339.1.S1_at   | MmugDNA.7339.1 | 3.68  | 4.16  | 0.23 | 0.11 | -1.39 | 0.077023 | 0.162949 | 0.335515 | 0.4391   |
| MmugDNA.7348.1.S1_at   | MmugDNA.7348.1 | 6.93  | 6.92  | 0.22 | 0.02 | 1.01  | 0.787143 | 0.310135 | 0.902963 | 0.565354 |
| MmugDNA.7349.1.S1_at   | MmugDNA.7349.1 | 10.57 | 10.42 | 0.19 | 0.03 | 1.11  | 0.073938 | 0.574963 | 0.329963 | 0.746216 |
| MmugDNA.7359.1.S1_s_at | MmugDNA.7359.1 | 10.09 | 13.17 | 1.17 | 0.13 | -8.49 | 0.024443 | 0.228184 | 0.209409 | 0.500351 |
| MmugDNA.7361.1.S1_at   | MmugDNA.7361.1 | 11.54 | 12.04 | 0.3  | 0.02 | -1.42 | 0.03754  | 0.069533 | 0.249196 | 0.309848 |
| MmugDNA.7363.1.S1_at   | MmugDNA.7363.1 | 3.24  | 3.27  | 0.05 | 0.19 | -1.02 | 0.288799 | 0.177595 | 0.578509 | 0.453962 |
| MmugDNA.7371.1.S1_at   | MmugDNA.7371.1 | 11.74 | 12.27 | 0.19 | 0.09 | -1.43 | 0.038347 | 0.426607 | 0.251853 | 0.648739 |
| MmugDNA.7372.1.S1_at   | MmugDNA.7372.1 | 4     | 3.98  | 0.17 | 0.12 | 1.01  | 0.431933 | 0.593155 | 0.687816 | 0.758096 |
| MmugDNA.7382.1.S1_at   | MmugDNA.7382.1 | 6.6   | 6.45  | 0.24 | 0.15 | 1.11  | 0.163894 | 0.007727 | 0.456639 | 0.117463 |
| MmugDNA.7383.1.S1_at   | MmugDNA.7383.1 | 6.22  | 6.37  | 0.07 | 0.15 | -1.11 | 0.241086 | 0.38444  | 0.538472 | 0.620107 |
| MmugDNA.7384.1.S1_at   | MmugDNA.7384.1 | 11.91 | 11.5  | 0.12 | 0.09 | 1.32  | 0.008739 | 0.573618 | 0.14316  | 0.745229 |
| MmugDNA.7385.1.S1_at   | MmugDNA.7385.1 | 12.22 | 12.5  | 0.48 | 0.04 | -1.21 | 0.36835  | 0.549414 | 0.642095 | 0.729841 |
| MmugDNA.7386.1.S1_at   | MmugDNA.7386.1 | 12.56 | 12.45 | 0.04 | 0.04 | 1.08  | 0.027495 | 0.011652 | 0.218484 | 0.139826 |
| MmugDNA.7390.1.S1_at   | MmugDNA.7390.1 | 8.96  | 9.2   | 0.11 | 0.03 | -1.18 | 0.031073 | 0.037557 | 0.229266 | 0.238211 |



|                        |                |       |       |      |      |       |          |          |          |          |
|------------------------|----------------|-------|-------|------|------|-------|----------|----------|----------|----------|
| MmugDNA.7393.1.S1_at   | MmugDNA.7393.1 | 3.15  | 3.18  | 0.06 | 0.08 | -1.02 | 0.982941 | 0.392941 | 0.993693 | 0.625917 |
| MmugDNA.7395.1.S1_at   | MmugDNA.7395.1 | 6.73  | 6.74  | 0.25 | 0.11 | -1.01 | 0.824097 | 0.129492 | 0.921772 | 0.400938 |
| MmugDNA.7397.1.S1_at   | MmugDNA.7397.1 | 7.93  | 7.93  | 0.24 | 0.23 | -1    | 0.934359 | 0.589809 | 0.972478 | 0.755973 |
| MmugDNA.7403.1.S1_at   | MmugDNA.7403.1 | 5.75  | 5.88  | 0.53 | 0.12 | -1.09 | 0.469264 | 0.60048  | 0.714096 | 0.762128 |
| MmugDNA.7405.1.S1_at   | MmugDNA.7405.1 | 11.33 | 11.14 | 0.15 | 0.04 | 1.14  | 0.103822 | 0.000637 | 0.377089 | 0.042882 |
| MmugDNA.7407.1.S1_at   | MmugDNA.7407.1 | 9.32  | 10.19 | 0.37 | 0.05 | -1.83 | 0.031376 | 0.064537 | 0.23018  | 0.300255 |
| MmugDNA.7408.1.S1_at   | MmugDNA.7408.1 | 10.96 | 11.12 | 0.07 | 0.05 | -1.11 | 0.028132 | 0.024544 | 0.22016  | 0.196058 |
| MmugDNA.7413.1.S1_at   | MmugDNA.7413.1 | 13.05 | 12.87 | 0.15 | 0.07 | 1.14  | 0.066209 | 0.034327 | 0.314817 | 0.229241 |
| MmugDNA.742.1.S1_at    | MmugDNA.742.1  | 10.82 | 10.7  | 0.2  | 0.04 | 1.09  | 0.899002 | 0.377971 | 0.957024 | 0.615264 |
| MmugDNA.7423.1.S1_at   | MmugDNA.7423.1 | 8.89  | 8.67  | 0.15 | 0.07 | 1.17  | 0.047419 | 0.231681 | 0.275072 | 0.503506 |
| MmugDNA.7429.1.S1_at   | MmugDNA.7429.1 | 9.94  | 9.66  | 0.12 | 0.03 | 1.22  | 0.033958 | 0.014444 | 0.23888  | 0.153383 |
| MmugDNA.743.1.S1_at    | MmugDNA.743.1  | 7.28  | 6.92  | 0.24 | 0.02 | 1.28  | 0.063519 | 0.009111 | 0.308717 | 0.125983 |
| MmugDNA.7430.1.S1_at   | MmugDNA.7430.1 | 5.61  | 6     | 0.47 | 0.15 | -1.31 | 0.089493 | 0.158537 | 0.356406 | 0.434453 |
| MmugDNA.7432.1.S1_at   | MmugDNA.7432.1 | 6.34  | 7.03  | 0.37 | 0.22 | -1.62 | 0.119071 | 0.224333 | 0.396713 | 0.497249 |
| MmugDNA.7448.1.S1_at   | MmugDNA.7448.1 | 9.81  | 8.73  | 0.28 | 0.02 | 2.11  | 0.001445 | 0.000018 | 0.079991 | 0.019635 |
| MmugDNA.7451.1.S1_at   | MmugDNA.7451.1 | 7     | 7.13  | 0.28 | 0.16 | -1.09 | 0.822215 | 0.890624 | 0.920847 | 0.937649 |
| MmugDNA.7463.1.S1_at   | MmugDNA.7463.1 | 10.45 | 10.29 | 0.12 | 0.12 | 1.12  | 0.398101 | 0.508689 | 0.663626 | 0.703791 |
| MmugDNA.7468.1.S1_at   | MmugDNA.7468.1 | 10.53 | 10.3  | 0.3  | 0.01 | 1.18  | 0.078589 | 0.144425 | 0.338457 | 0.418323 |
| MmugDNA.7471.1.S1_s_at | MmugDNA.7471.1 | 11.45 | 11.16 | 0.13 | 0.07 | 1.22  | 0.010157 | 0.028704 | 0.150613 | 0.211165 |
| MmugDNA.7478.1.S1_at   | MmugDNA.7478.1 | 12.29 | 12.38 | 0.07 | 0.03 | -1.06 | 0.0287   | 0.048776 | 0.222009 | 0.2658   |
| MmugDNA.7479.1.S1_at   | MmugDNA.7479.1 | 7.42  | 8.3   | 0.46 | 0.27 | -1.83 | 0.105161 | 0.195201 | 0.3789   | 0.470253 |
| MmugDNA.7483.1.S1_at   | MmugDNA.7483.1 | 11.82 | 11.94 | 0.09 | 0.08 | -1.09 | 0.418801 | 0.016903 | 0.678622 | 0.164899 |
| MmugDNA.7486.1.S1_at   | MmugDNA.7486.1 | 4.19  | 3.54  | 0.69 | 0.07 | 1.57  | 0.187879 | 0.201366 | 0.484145 | 0.47589  |
| MmugDNA.7493.1.S1_at   | MmugDNA.7493.1 | 8.22  | 7.77  | 0.27 | 0.02 | 1.37  | 0.123269 | 0.048541 | 0.402508 | 0.265534 |
| MmugDNA.7494.1.S1_at   | MmugDNA.7494.1 | 7.29  | 7.25  | 0.18 | 0.08 | 1.03  | 0.99375  | 0.164952 | 0.997458 | 0.44123  |
| MmugDNA.7495.1.S1_at   | MmugDNA.7495.1 | 7.41  | 7.14  | 1.12 | 0.14 | 1.2   | 0.697987 | 0.164258 | 0.856286 | 0.440539 |
| MmugDNA.7497.1.S1_at   | MmugDNA.7497.1 | 4.25  | 4.28  | 0.41 | 0.47 | -1.03 | 0.45205  | 0.527122 | 0.702706 | 0.715861 |
| MmugDNA.7499.1.S1_at   | MmugDNA.7499.1 | 4.23  | 4.3   | 0.1  | 0.07 | -1.05 | 0.764881 | 0.708478 | 0.892102 | 0.830919 |
| MmugDNA.7502.1.S1_at   | MmugDNA.7502.1 | 10.34 | 10.5  | 0.29 | 0.01 | -1.12 | 0.126632 | 0.595372 | 0.408045 | 0.759091 |
| MmugDNA.7503.1.S1_at   | MmugDNA.7503.1 | 7.36  | 6.9   | 0.8  | 0.11 | 1.38  | 0.99862  | 0.999431 | 0.999508 | 0.999791 |
| MmugDNA.7504.1.S1_at   | MmugDNA.7504.1 | 13.65 | 13.63 | 0.01 | 0.03 | 1.01  | 0.932042 | 0.523416 | 0.971437 | 0.713713 |
| MmugDNA.7508.1.S1_s_at | MmugDNA.7508.1 | 10.03 | 9.88  | 0.17 | 0.04 | 1.11  | 0.185311 | 0.122221 | 0.481498 | 0.391921 |
| MmugDNA.751.1.S1_at    | MmugDNA.751.1  | 3.99  | 3.6   | 0.15 | 0.25 | 1.31  | 0.22987  | 0.267168 | 0.528728 | 0.532773 |
| MmugDNA.7512.1.S1_at   | MmugDNA.7512.1 | 9.96  | 9.29  | 0.25 | 0.06 | 1.59  | 0.010678 | 0.012923 | 0.153062 | 0.146343 |
| MmugDNA.7516.1.S1_at   | MmugDNA.7516.1 | 11.84 | 11.2  | 0.09 | 0.1  | 1.55  | 0.001255 | 0.00035  | 0.078631 | 0.037097 |
| MmugDNA.7521.1.S1_at   | MmugDNA.7521.1 | 6.39  | 6.76  | 0.19 | 0.15 | -1.29 | 0.269676 | 0.179578 | 0.562001 | 0.45603  |
| MmugDNA.7522.1.S1_at   | MmugDNA.7522.1 | 8.72  | 8.84  | 0.38 | 0.01 | -1.09 | 0.63696  | 0.764595 | 0.822313 | 0.863128 |
| MmugDNA.7524.1.S1_at   | MmugDNA.7524.1 | 5.15  | 5.13  | 0.05 | 0.19 | 1.01  | 0.792674 | 0.061449 | 0.906087 | 0.294704 |
| MmugDNA.7526.1.S1_at   | MmugDNA.7526.1 | 5.72  | 6.29  | 0.15 | 0.21 | -1.48 | 0.006157 | 0.422472 | 0.12462  | 0.645729 |
| MmugDNA.7527.1.S1_at   | MmugDNA.7527.1 | 13.32 | 13.45 | 0.12 | 0.04 | -1.09 | 0.215047 | 0.015367 | 0.512738 | 0.157403 |
| MmugDNA.7528.1.S1_at   | MmugDNA.7528.1 | 6.01  | 6.54  | 0.27 | 0.09 | -1.45 | 0.019538 | 0.292988 | 0.192517 | 0.552954 |
| MmugDNA.7533.1.S1_at   | MmugDNA.7533.1 | 7.23  | 7.77  | 0.24 | 0.08 | -1.45 | 0.026848 | 0.105407 | 0.216925 | 0.367279 |
| MmugDNA.7534.1.S1_at   | MmugDNA.7534.1 | 11.38 | 11.54 | 0.23 | 0.01 | -1.11 | 0.246941 | 0.249457 | 0.542575 | 0.518532 |

|                        |                |       |       |      |      |       |          |          |          |          |
|------------------------|----------------|-------|-------|------|------|-------|----------|----------|----------|----------|
| MmugDNA.7535.1.S1_at   | MmugDNA.7535.1 | 6.16  | 6.13  | 0.19 | 0.06 | 1.02  | 0.77366  | 0.272118 | 0.896329 | 0.536934 |
| MmugDNA.7536.1.S1_at   | MmugDNA.7536.1 | 10.73 | 10.71 | 0.06 | 0.16 | 1.01  | 0.231588 | 0.23468  | 0.530249 | 0.505897 |
| MmugDNA.754.1.S1_at    | MmugDNA.754.1  | 9.31  | 9.52  | 0.24 | 0.07 | -1.16 | 0.184052 | 0.366937 | 0.480042 | 0.606583 |
| MmugDNA.7540.1.S1_at   | MmugDNA.7540.1 | 7.21  | 7.21  | 0.09 | 0.13 | -1    | 0.382379 | 0.891636 | 0.651848 | 0.938242 |
| MmugDNA.7542.1.S1_at   | MmugDNA.7542.1 | 12.1  | 11.54 | 0.17 | 0.04 | 1.47  | 0.00687  | 0.000068 | 0.129792 | 0.025805 |
| MmugDNA.7544.1.S1_at   | MmugDNA.7544.1 | 11.05 | 10.96 | 0.15 | 0.05 | 1.06  | 0.116711 | 0.002474 | 0.39382  | 0.073576 |
| MmugDNA.7548.1.S1_s_at | MmugDNA.7548.1 | 5.87  | 5.86  | 0.15 | 0.09 | 1     | 0.414148 | 0.859145 | 0.675439 | 0.919754 |
| MmugDNA.7549.1.S1_s_at | MmugDNA.7549.1 | 12.07 | 12.16 | 0.11 | 0.09 | -1.07 | 0.576856 | 0.183412 | 0.783459 | 0.459553 |
| MmugDNA.7550.1.S1_at   | MmugDNA.7550.1 | 8.5   | 8.85  | 0.08 | 0.18 | -1.28 | 0.06093  | 0.041137 | 0.303761 | 0.247659 |
| MmugDNA.7551.1.S1_at   | MmugDNA.7551.1 | 5.99  | 6.31  | 0.13 | 0.07 | -1.25 | 0.017982 | 0.047049 | 0.187151 | 0.261469 |
| MmugDNA.7562.1.S1_at   | MmugDNA.7562.1 | 4.33  | 4.33  | 0.09 | 0.07 | 1     | 0.982344 | 0.740435 | 0.993488 | 0.849662 |
| MmugDNA.7566.1.S1_at   | MmugDNA.7566.1 | 9.22  | 9.28  | 0.65 | 0.17 | -1.04 | 0.417386 | 0.203536 | 0.677553 | 0.477767 |
| MmugDNA.7569.1.S1_at   | MmugDNA.7569.1 | 12.61 | 12.66 | 0.08 | 0.03 | -1.03 | 0.361173 | 0.226713 | 0.63668  | 0.499176 |
| MmugDNA.7569.1.S1_s_at | MmugDNA.7569.1 | 11.17 | 11.13 | 0.17 | 0.08 | 1.03  | 0.939031 | 0.049354 | 0.974287 | 0.267081 |
| MmugDNA.7573.1.S1_at   | MmugDNA.7573.1 | 3.93  | 4.38  | 0.46 | 0.14 | -1.37 | 0.522547 | 0.530519 | 0.749811 | 0.71804  |
| MmugDNA.7582.1.S1_at   | MmugDNA.7582.1 | 6.69  | 6.6   | 0.35 | 0.08 | 1.07  | 0.491391 | 0.719723 | 0.729201 | 0.837881 |
| MmugDNA.7589.1.S1_at   | MmugDNA.7589.1 | 7.35  | 7.6   | 0.13 | 0.14 | -1.19 | 0.107174 | 0.088156 | 0.381659 | 0.341721 |
| MmugDNA.7590.1.S1_at   | MmugDNA.7590.1 | 11.52 | 11.14 | 0.27 | 0.11 | 1.3   | 0.137978 | 0.499442 | 0.423144 | 0.698289 |
| MmugDNA.7599.1.S1_at   | MmugDNA.7599.1 | 11.87 | 11.44 | 0.16 | 0.09 | 1.35  | 0.013925 | 0.029122 | 0.169154 | 0.212733 |
| MmugDNA.7602.1.S1_at   | MmugDNA.7602.1 | 10.85 | 10.61 | 0.19 | 0.01 | 1.19  | 0.09204  | 0.004686 | 0.36013  | 0.095363 |
| MmugDNA.7608.1.S1_at   | MmugDNA.7608.1 | 10.97 | 10.72 | 0.24 | 0.07 | 1.19  | 0.133473 | 0.167693 | 0.416989 | 0.444209 |
| MmugDNA.7613.1.S1_at   | MmugDNA.7613.1 | 6.22  | 6.45  | 0.67 | 0.19 | -1.17 | 0.326188 | 0.171134 | 0.609341 | 0.447694 |
| MmugDNA.7614.1.S1_at   | MmugDNA.7614.1 | 8.66  | 8.72  | 0.1  | 0.4  | -1.04 | 0.956164 | 0.108505 | 0.981989 | 0.372066 |
| MmugDNA.7619.1.S1_at   | MmugDNA.7619.1 | 4.38  | 4.39  | 0.02 | 0.07 | -1    | 0.353198 | 0.831518 | 0.630379 | 0.903392 |
| MmugDNA.7629.1.S1_at   | MmugDNA.7629.1 | 5.06  | 6.15  | 0.5  | 0.31 | -2.13 | 0.081234 | 0.176134 | 0.342222 | 0.452581 |
| MmugDNA.7635.1.S1_at   | MmugDNA.7635.1 | 5.23  | 5.22  | 0.2  | 0.12 | 1     | 0.791965 | 0.413183 | 0.90557  | 0.639484 |
| MmugDNA.7636.1.S1_at   | MmugDNA.7636.1 | 10.54 | 10.48 | 0.24 | 0.03 | 1.04  | 0.586909 | 0.6292   | 0.790207 | 0.781712 |
| MmugDNA.7639.1.S1_at   | MmugDNA.7639.1 | 5.52  | 5.22  | 0.3  | 0.07 | 1.23  | 0.282933 | 0.448659 | 0.573503 | 0.664492 |
| MmugDNA.764.1.S1_at    | MmugDNA.764.1  | 7.97  | 7.39  | 0.15 | 0.11 | 1.49  | 0.013323 | 0.085947 | 0.166232 | 0.338116 |
| MmugDNA.7642.1.S1_at   | MmugDNA.7642.1 | 5.97  | 5.8   | 0.22 | 0.07 | 1.12  | 0.084158 | 0.120524 | 0.347496 | 0.38929  |
| MmugDNA.7646.1.S1_at   | MmugDNA.7646.1 | 6.19  | 6.21  | 0.56 | 0.1  | -1.01 | 0.368531 | 0.532204 | 0.642226 | 0.718995 |
| MmugDNA.7649.1.S1_at   | MmugDNA.7649.1 | 6.12  | 6.09  | 0.11 | 0.02 | 1.02  | 0.478291 | 0.727936 | 0.719904 | 0.842707 |
| MmugDNA.7655.1.S1_at   | MmugDNA.7655.1 | 6.41  | 7.84  | 0.32 | 0.39 | -2.71 | 0.014823 | 0.229596 | 0.173867 | 0.501574 |
| MmugDNA.7656.1.S1_at   | MmugDNA.7656.1 | 3.83  | 3.93  | 0.26 | 0.07 | -1.07 | 0.356275 | 0.480169 | 0.632563 | 0.685723 |
| MmugDNA.7657.1.S1_at   | MmugDNA.7657.1 | 12.07 | 12.02 | 0.04 | 0.03 | 1.03  | 0.120113 | 0.009932 | 0.398476 | 0.130838 |
| MmugDNA.7664.1.S1_at   | MmugDNA.7664.1 | 7.36  | 7.48  | 0.12 | 0.05 | -1.09 | 0.293693 | 0.872381 | 0.582695 | 0.92745  |
| MmugDNA.7669.1.S1_at   | MmugDNA.7669.1 | 11.57 | 11.66 | 0.1  | 0.02 | -1.06 | 0.606467 | 0.913721 | 0.803128 | 0.951474 |
| MmugDNA.7683.1.S1_at   | MmugDNA.7683.1 | 13.37 | 13.31 | 0.13 | 0.05 | 1.04  | 0.583916 | 0.468873 | 0.788433 | 0.677906 |
| MmugDNA.7691.1.S1_at   | MmugDNA.7691.1 | 10.68 | 10.57 | 0.69 | 0.02 | 1.08  | 0.507779 | 0.664206 | 0.740047 | 0.803247 |
| MmugDNA.7698.1.S1_at   | MmugDNA.7698.1 | 11.49 | 11.44 | 0.22 | 0.12 | 1.03  | 0.172357 | 0.032722 | 0.466593 | 0.223956 |
| MmugDNA.7706.1.S1_at   | MmugDNA.7706.1 | 5.28  | 5     | 0.2  | 0.2  | 1.21  | 0.796784 | 0.442799 | 0.908259 | 0.660759 |
| MmugDNA.7713.1.S1_at   | MmugDNA.7713.1 | 4.69  | 4.12  | 0.25 | 0.2  | 1.48  | 0.077786 | 0.075119 | 0.336895 | 0.319301 |
| MmugDNA.7717.1.S1_at   | MmugDNA.7717.1 | 9.34  | 5.09  | 0.85 | 0.82 | 18.94 | 0.002929 | 0.0006   | 0.099331 | 0.041985 |

|                        |                |       |       |      |      |        |          |          |          |          |
|------------------------|----------------|-------|-------|------|------|--------|----------|----------|----------|----------|
| MmugDNA.7720.1.S1_at   | MmugDNA.7720.1 | 10.05 | 10.17 | 0.12 | 0.14 | -1.08  | 0.731273 | 0.244892 | 0.874456 | 0.514728 |
| MmugDNA.7721.1.S1_at   | MmugDNA.7721.1 | 4.42  | 4.36  | 0.25 | 0.18 | 1.04   | 0.677748 | 0.828373 | 0.846305 | 0.901365 |
| MmugDNA.7726.1.S1_at   | MmugDNA.7726.1 | 10.98 | 10.95 | 0.13 | 0.1  | 1.02   | 0.490162 | 0.690779 | 0.728327 | 0.819875 |
| MmugDNA.7729.1.S1_at   | MmugDNA.7729.1 | 11.69 | 12.64 | 0.65 | 0.09 | -1.93  | 0.043697 | 0.037705 | 0.266104 | 0.23859  |
| MmugDNA.7737.1.S1_at   | MmugDNA.7737.1 | 5.5   | 5.56  | 0.08 | 0.1  | -1.04  | 0.51738  | 0.491535 | 0.746589 | 0.693026 |
| MmugDNA.7739.1.S1_x_at | MmugDNA.7739.1 | 8.31  | 8.27  | 0.25 | 0.07 | 1.03   | 0.211139 | 0.171029 | 0.508977 | 0.447573 |
| MmugDNA.7743.1.S1_at   | MmugDNA.7743.1 | 8.34  | 8.64  | 0.21 | 0.14 | -1.23  | 0.159112 | 0.41288  | 0.450485 | 0.639186 |
| MmugDNA.7745.1.S1_at   | MmugDNA.7745.1 | 9.66  | 9.57  | 0.14 | 0.12 | 1.06   | 0.823604 | 0.445878 | 0.921595 | 0.662593 |
| MmugDNA.7746.1.S1_at   | MmugDNA.7746.1 | 3.85  | 3.97  | 0.04 | 0.06 | -1.09  | 0.085074 | 0.07559  | 0.349156 | 0.32003  |
| MmugDNA.7746.1.S1_s_at | MmugDNA.7746.1 | 5.33  | 6.14  | 0.22 | 0.56 | -1.75  | 0.048902 | 0.117927 | 0.278728 | 0.385837 |
| MmugDNA.7748.1.S1_s_at | MmugDNA.7748.1 | 11.17 | 10.95 | 0.22 | 0.13 | 1.17   | 0.547914 | 0.74197  | 0.766323 | 0.850556 |
| MmugDNA.7749.1.S1_at   | MmugDNA.7749.1 | 10.43 | 10.52 | 0.48 | 0.09 | -1.07  | 0.324846 | 0.013849 | 0.608366 | 0.150924 |
| MmugDNA.7752.1.S1_at   | MmugDNA.7752.1 | 9.15  | 9.1   | 0.24 | 0.19 | 1.03   | 0.955378 | 0.569857 | 0.981711 | 0.742702 |
| MmugDNA.7754.1.S1_at   | MmugDNA.7754.1 | 13.46 | 13.48 | 0.06 | 0.03 | -1.01  | 0.257116 | 0.001374 | 0.551586 | 0.05691  |
| MmugDNA.7756.1.S1_at   | MmugDNA.7756.1 | 10.24 | 10.85 | 0.16 | 0.01 | -1.52  | 0.001732 | 0.000087 | 0.085035 | 0.027016 |
| MmugDNA.776.1.S1_at    | MmugDNA.776.1  | 11.9  | 12.06 | 0.06 | 0.01 | -1.12  | 0.013572 | 0.308193 | 0.167325 | 0.564324 |
| MmugDNA.776.1.S1_s_at  | MmugDNA.776.1  | 11.89 | 11.87 | 0.18 | 0.03 | 1.01   | 0.805586 | 0.579839 | 0.912789 | 0.74931  |
| MmugDNA.7765.1.S1_at   | MmugDNA.7765.1 | 4.95  | 4.91  | 0.18 | 0.18 | 1.02   | 0.822267 | 0.772071 | 0.920878 | 0.867474 |
| MmugDNA.7768.1.S1_at   | MmugDNA.7768.1 | 7.76  | 8.38  | 0.47 | 0.08 | -1.53  | 0.079308 | 0.143438 | 0.339261 | 0.417442 |
| MmugDNA.7769.1.S1_at   | MmugDNA.7769.1 | 7.59  | 7.3   | 0.18 | 0.32 | 1.22   | 0.171335 | 0.047746 | 0.465234 | 0.263394 |
| MmugDNA.777.1.S1_at    | MmugDNA.777.1  | 3.63  | 3.82  | 0.1  | 0.05 | -1.14  | 0.072832 | 0.091283 | 0.327658 | 0.346281 |
| MmugDNA.7772.1.S1_at   | MmugDNA.7772.1 | 6.83  | 8     | 0.26 | 0.29 | -2.24  | 0.005647 | 0.053223 | 0.120879 | 0.276445 |
| MmugDNA.7776.1.S1_at   | MmugDNA.7776.1 | 12.16 | 12.16 | 0.05 | 0.02 | -1     | 0.758284 | 0.001044 | 0.88913  | 0.051426 |
| MmugDNA.7777.1.S1_s_at | MmugDNA.7777.1 | 11.87 | 11.99 | 0.32 | 0.08 | -1.09  | 0.734352 | 0.864257 | 0.87617  | 0.922977 |
| MmugDNA.7779.1.S1_at   | MmugDNA.7779.1 | 11.2  | 11.74 | 0.23 | 0.16 | -1.46  | 0.046325 | 0.050077 | 0.272999 | 0.268916 |
| MmugDNA.7782.1.S1_at   | MmugDNA.7782.1 | 6.42  | 6.84  | 0.64 | 0.09 | -1.34  | 0.090227 | 0.269497 | 0.356864 | 0.534796 |
| MmugDNA.7784.1.S1_at   | MmugDNA.7784.1 | 12.16 | 12.05 | 0.09 | 0.08 | 1.08   | 0.178596 | 0.1494   | 0.473375 | 0.423825 |
| MmugDNA.7790.1.S1_at   | MmugDNA.7790.1 | 9.03  | 8.86  | 0.29 | 0.07 | 1.13   | 0.112994 | 0.226824 | 0.389499 | 0.499232 |
| MmugDNA.7797.1.S1_at   | MmugDNA.7797.1 | 5.3   | 10.35 | 1.97 | 0.22 | -33.09 | 0.026666 | 0.109331 | 0.216444 | 0.373129 |
| MmugDNA.7806.1.S1_at   | MmugDNA.7806.1 | 10.68 | 10.73 | 0.18 | 0.16 | -1.04  | 0.600122 | 0.391538 | 0.798627 | 0.625149 |
| MmugDNA.7807.1.S1_at   | MmugDNA.7807.1 | 12.49 | 12.53 | 0.15 | 0.06 | -1.03  | 0.780034 | 0.233121 | 0.899614 | 0.504458 |
| MmugDNA.7808.1.S1_s_at | MmugDNA.7808.1 | 11.01 | 10.23 | 0.24 | 0.14 | 1.71   | 0.010633 | 0.004947 | 0.152845 | 0.097981 |
| MmugDNA.7810.1.S1_at   | MmugDNA.7810.1 | 4.53  | 3.91  | 0.58 | 0.28 | 1.54   | 0.214114 | 0.317634 | 0.511862 | 0.570802 |
| MmugDNA.7811.1.S1_at   | MmugDNA.7811.1 | 9.15  | 9.16  | 0.16 | 0.04 | -1     | 0.810783 | 0.426987 | 0.91525  | 0.649087 |
| MmugDNA.7812.1.S1_at   | MmugDNA.7812.1 | 10.3  | 10.63 | 0.18 | 0.03 | -1.26  | 0.07754  | 0.006613 | 0.336282 | 0.110163 |
| MmugDNA.7815.1.S1_at   | MmugDNA.7815.1 | 9.97  | 9.64  | 0.21 | 0.06 | 1.26   | 0.173531 | 0.068948 | 0.46788  | 0.308945 |
| MmugDNA.7820.1.S1_at   | MmugDNA.7820.1 | 9.08  | 8.99  | 0.33 | 0.22 | 1.06   | 0.891806 | 0.008599 | 0.953838 | 0.123072 |
| MmugDNA.7821.1.S1_at   | MmugDNA.7821.1 | 11.05 | 10.64 | 0.12 | 0.04 | 1.33   | 0.005384 | 0.001449 | 0.118569 | 0.057999 |
| MmugDNA.7826.1.S1_at   | MmugDNA.7826.1 | 6.67  | 6.56  | 0.16 | 0.09 | 1.08   | 0.13428  | 0.20944  | 0.417842 | 0.483069 |
| MmugDNA.7828.1.S1_at   | MmugDNA.7828.1 | 10.82 | 11.19 | 0.22 | 0.13 | -1.29  | 0.034292 | 0.030491 | 0.239767 | 0.216644 |
| MmugDNA.783.1.S1_s_at  | MmugDNA.783.1  | 10.85 | 11.65 | 0.45 | 0.11 | -1.74  | 0.13892  | 0.10172  | 0.424607 | 0.361581 |
| MmugDNA.7830.1.S1_at   | MmugDNA.7830.1 | 5.03  | 4.99  | 0.14 | 0.03 | 1.03   | 0.226787 | 0.30785  | 0.524686 | 0.56397  |
| MmugDNA.7831.1.S1_at   | MmugDNA.7831.1 | 3.23  | 3.21  | 0.07 | 0.14 | 1.02   | 0.592895 | 0.662099 | 0.793684 | 0.802107 |

|                        |                |       |       |      |      |       |          |          |          |          |
|------------------------|----------------|-------|-------|------|------|-------|----------|----------|----------|----------|
| MmugDNA.7832.1.S1_at   | MmugDNA.7832.1 | 7.3   | 7.33  | 0.32 | 0.2  | -1.02 | 0.487341 | 0.928218 | 0.726135 | 0.959209 |
| MmugDNA.7833.1.S1_at   | MmugDNA.7833.1 | 9.47  | 8.94  | 0.16 | 0.16 | 1.45  | 0.022854 | 0.003058 | 0.204235 | 0.080621 |
| MmugDNA.7834.1.S1_at   | MmugDNA.7834.1 | 6.07  | 4.75  | 0.44 | 0.41 | 2.51  | 0.025847 | 0.011481 | 0.213534 | 0.138627 |
| MmugDNA.7839.1.S1_at   | MmugDNA.7839.1 | 12.17 | 12.11 | 0.1  | 0.05 | 1.04  | 0.463773 | 0.278591 | 0.710222 | 0.542329 |
| MmugDNA.7840.1.S1_at   | MmugDNA.7840.1 | 7.03  | 5.98  | 0.18 | 0.38 | 2.06  | 0.007524 | 0.002966 | 0.134968 | 0.079958 |
| MmugDNA.7841.1.S1_at   | MmugDNA.7841.1 | 5.11  | 5.2   | 0.59 | 0.1  | -1.06 | 0.521146 | 0.565808 | 0.749221 | 0.740112 |
| MmugDNA.7849.1.S1_at   | MmugDNA.7849.1 | 4.31  | 4.46  | 0.09 | 0.28 | -1.11 | 0.533096 | 0.688709 | 0.756823 | 0.818296 |
| MmugDNA.7852.1.S1_at   | MmugDNA.7852.1 | 7.04  | 7.27  | 0.16 | 0.28 | -1.17 | 0.398033 | 0.224903 | 0.663593 | 0.497657 |
| MmugDNA.7856.1.S1_at   | MmugDNA.7856.1 | 8.94  | 8.86  | 0.09 | 0.07 | 1.06  | 0.219346 | 0.357223 | 0.517113 | 0.598864 |
| MmugDNA.7857.1.S1_at   | MmugDNA.7857.1 | 11.16 | 10.86 | 0.08 | 0.32 | 1.23  | 0.596108 | 0.749361 | 0.795628 | 0.854379 |
| MmugDNA.7860.1.S1_at   | MmugDNA.7860.1 | 3.5   | 3.46  | 0.15 | 0.08 | 1.03  | 0.257681 | 0.228788 | 0.551912 | 0.501011 |
| MmugDNA.7861.1.S1_at   | MmugDNA.7861.1 | 10    | 10.07 | 0.11 | 0.06 | -1.05 | 0.470771 | 0.073288 | 0.715132 | 0.316241 |
| MmugDNA.7862.1.S1_at   | MmugDNA.7862.1 | 5.21  | 5.22  | 0.07 | 0.02 | -1.01 | 0.731313 | 0.839663 | 0.874456 | 0.908582 |
| MmugDNA.7864.1.S1_at   | MmugDNA.7864.1 | 8.45  | 9.21  | 0.45 | 0.23 | -1.69 | 0.0955   | 0.14377  | 0.364961 | 0.41759  |
| MmugDNA.7866.1.S1_at   | MmugDNA.7866.1 | 8.04  | 7.33  | 0.13 | 0.14 | 1.64  | 0.003931 | 0.034282 | 0.108453 | 0.22906  |
| MmugDNA.7874.1.S1_at   | MmugDNA.7874.1 | 8.87  | 8.43  | 0.3  | 0.13 | 1.36  | 0.224788 | 0.010845 | 0.522763 | 0.135758 |
| MmugDNA.7878.1.S1_at   | MmugDNA.7878.1 | 7.13  | 6.55  | 0.45 | 0.12 | 1.5   | 0.038837 | 0.034461 | 0.253345 | 0.229704 |
| MmugDNA.7880.1.S1_at   | MmugDNA.7880.1 | 6.81  | 6.95  | 0.06 | 0.02 | -1.11 | 0.008888 | 0.003046 | 0.143995 | 0.080462 |
| MmugDNA.7881.1.S1_at   | MmugDNA.7881.1 | 4.44  | 4.26  | 0.44 | 0.06 | 1.14  | 0.738012 | 0.747356 | 0.878538 | 0.853149 |
| MmugDNA.7883.1.S1_at   | MmugDNA.7883.1 | 11.25 | 10.91 | 0.2  | 0.18 | 1.27  | 0.45704  | 0.604486 | 0.706061 | 0.764647 |
| MmugDNA.7889.1.S1_at   | MmugDNA.7889.1 | 7.38  | 7.59  | 0.17 | 0.21 | -1.15 | 0.546168 | 0.787235 | 0.765159 | 0.876889 |
| MmugDNA.7890.1.S1_at   | MmugDNA.7890.1 | 10.71 | 10.58 | 0.14 | 0.22 | 1.09  | 0.960831 | 0.045415 | 0.983986 | 0.257437 |
| MmugDNA.7893.1.S1_at   | MmugDNA.7893.1 | 6.53  | 6.51  | 0.33 | 0.32 | 1.01  | 0.852059 | 0.971897 | 0.93566  | 0.984807 |
| MmugDNA.790.1.S1_at    | MmugDNA.790.1  | 10.03 | 10.16 | 0.05 | 0.09 | -1.1  | 0.249762 | 0.004528 | 0.544804 | 0.093974 |
| MmugDNA.7903.1.S1_at   | MmugDNA.7903.1 | 11.52 | 11.59 | 0.33 | 0.06 | -1.05 | 0.613307 | 0.772815 | 0.807323 | 0.867905 |
| MmugDNA.7910.1.S1_at   | MmugDNA.7910.1 | 8.84  | 8.57  | 0.15 | 0.07 | 1.21  | 0.10741  | 0.183237 | 0.382114 | 0.459553 |
| MmugDNA.7913.1.S1_at   | MmugDNA.7913.1 | 7.96  | 7.5   | 0.3  | 0.09 | 1.37  | 0.063599 | 0.110495 | 0.308797 | 0.374684 |
| MmugDNA.7916.1.S1_at   | MmugDNA.7916.1 | 6.95  | 7.13  | 0.11 | 0.39 | -1.13 | 0.491396 | 0.949555 | 0.729201 | 0.971159 |
| MmugDNA.7917.1.S1_at   | MmugDNA.7917.1 | 11.6  | 11.26 | 0.1  | 0.05 | 1.27  | 0.008882 | 0.185023 | 0.143995 | 0.460856 |
| MmugDNA.792.1.S1_at    | MmugDNA.792.1  | 7.62  | 8.08  | 0.43 | 0.21 | -1.38 | 0.739989 | 0.099064 | 0.8795   | 0.357208 |
| MmugDNA.7924.1.S1_at   | MmugDNA.7924.1 | 13.62 | 13.77 | 0.17 | 0.11 | -1.11 | 0.155122 | 0.263262 | 0.445286 | 0.529531 |
| MmugDNA.793.1.S1_at    | MmugDNA.793.1  | 5.25  | 5.17  | 0.28 | 0.12 | 1.05  | 0.371024 | 0.493187 | 0.6438   | 0.694004 |
| MmugDNA.7930.1.S1_at   | MmugDNA.7930.1 | 10.25 | 10.54 | 0.29 | 0.15 | -1.22 | 0.320554 | 0.634044 | 0.605112 | 0.784615 |
| MmugDNA.7932.1.S1_at   | MmugDNA.7932.1 | 9.38  | 9.27  | 0.12 | 0.06 | 1.08  | 0.215558 | 0.308503 | 0.513263 | 0.564541 |
| MmugDNA.7933.1.S1_s_at | MmugDNA.7933.1 | 9.08  | 8.79  | 0.22 | 0.13 | 1.22  | 0.058741 | 0.01407  | 0.299483 | 0.151858 |
| MmugDNA.794.1.S1_s_at  | MmugDNA.794.1  | 5.31  | 5.48  | 0.15 | 0.13 | -1.13 | 0.252527 | 0.845862 | 0.547192 | 0.912246 |
| MmugDNA.794.1.S1_x_at  | MmugDNA.794.1  | 5.95  | 6.35  | 0.22 | 0.09 | -1.33 | 0.034035 | 0.122841 | 0.239137 | 0.392861 |
| MmugDNA.7940.1.S1_at   | MmugDNA.7940.1 | 11.56 | 11.62 | 0.06 | 0.05 | -1.04 | 0.456794 | 0.001046 | 0.705979 | 0.051426 |
| MmugDNA.7948.1.S1_at   | MmugDNA.7948.1 | 10.78 | 10.91 | 0.22 | 0.04 | -1.09 | 0.368219 | 0.773814 | 0.641952 | 0.868485 |
| MmugDNA.7950.1.S1_at   | MmugDNA.7950.1 | 11.88 | 11.6  | 0.19 | 0.04 | 1.21  | 0.107342 | 0.280772 | 0.381923 | 0.543952 |
| MmugDNA.7951.1.S1_at   | MmugDNA.7951.1 | 5.14  | 5.02  | 0.51 | 0.17 | 1.09  | 0.399861 | 0.506532 | 0.66505  | 0.702503 |
| MmugDNA.7955.1.S1_at   | MmugDNA.7955.1 | 8.4   | 7.99  | 0.22 | 0.11 | 1.33  | 0.056359 | 0.550827 | 0.29472  | 0.730625 |
| MmugDNA.7959.1.S1_at   | MmugDNA.7959.1 | 11.37 | 11.17 | 0.11 | 0.01 | 1.15  | 0.024965 | 0.000303 | 0.211179 | 0.034907 |

|                        |                |       |       |      |      |       |          |          |          |          |
|------------------------|----------------|-------|-------|------|------|-------|----------|----------|----------|----------|
| MmugDNA.7962.1.S1_at   | MmugDNA.7962.1 | 6.38  | 6.56  | 0.13 | 0.1  | -1.13 | 0.133767 | 0.004996 | 0.417199 | 0.098484 |
| MmugDNA.7964.1.S1_at   | MmugDNA.7964.1 | 7.27  | 7.19  | 0.21 | 0.1  | 1.06  | 0.2104   | 0.007137 | 0.507983 | 0.113735 |
| MmugDNA.7965.1.S1_at   | MmugDNA.7965.1 | 10.86 | 10.91 | 0.12 | 0.05 | -1.03 | 0.300209 | 0.053345 | 0.588392 | 0.276533 |
| MmugDNA.797.1.S1_at    | MmugDNA.797.1  | 13.04 | 13.34 | 0.12 | 0.02 | -1.23 | 0.035438 | 0.045546 | 0.243018 | 0.257596 |
| MmugDNA.7974.1.S1_at   | MmugDNA.7974.1 | 7.4   | 7     | 0.12 | 0.1  | 1.32  | 0.011212 | 0.242255 | 0.155485 | 0.512683 |
| MmugDNA.7984.1.S1_at   | MmugDNA.7984.1 | 4.57  | 3.9   | 0.57 | 0.37 | 1.59  | 0.314129 | 0.406666 | 0.599848 | 0.634475 |
| MmugDNA.7988.1.S1_at   | MmugDNA.7988.1 | 11.17 | 11.35 | 0.14 | 0.09 | -1.14 | 0.326852 | 0.420871 | 0.609778 | 0.644535 |
| MmugDNA.7993.1.S1_at   | MmugDNA.7993.1 | 6.91  | 6.94  | 0.15 | 0.09 | -1.03 | 0.760499 | 0.230887 | 0.890254 | 0.502546 |
| MmugDNA.7996.1.S1_at   | MmugDNA.7996.1 | 8.36  | 7.79  | 0.23 | 0.44 | 1.49  | 0.120699 | 0.765092 | 0.399081 | 0.863431 |
| MmugDNA.800.1.S1_at    | MmugDNA.800.1  | 9.7   | 10.73 | 0.13 | 0.23 | -2.04 | 0.002807 | 0.125772 | 0.097939 | 0.396313 |
| MmugDNA.8000.1.S1_at   | MmugDNA.8000.1 | 4.68  | 4.65  | 0.18 | 0.03 | 1.02  | 0.363581 | 0.407038 | 0.638251 | 0.634713 |
| MmugDNA.8002.1.S1_at   | MmugDNA.8002.1 | 3.27  | 3.02  | 0.13 | 0.07 | 1.19  | 0.112579 | 0.158949 | 0.388887 | 0.435111 |
| MmugDNA.8002.1.S1_x_at | MmugDNA.8002.1 | 3.4   | 3.34  | 0.02 | 0.02 | 1.04  | 0.043636 | 0.056027 | 0.265888 | 0.2826   |
| MmugDNA.8022.1.S1_at   | MmugDNA.8022.1 | 4.33  | 4.49  | 0.11 | 0.08 | -1.12 | 0.068004 | 0.113536 | 0.318434 | 0.379632 |
| MmugDNA.803.1.S1_at    | MmugDNA.803.1  | 12.62 | 12.49 | 0.01 | 0.04 | 1.09  | 0.004877 | 0.000005 | 0.115123 | 0.015647 |
| MmugDNA.8038.1.S1_at   | MmugDNA.8038.1 | 4.91  | 4.88  | 0.22 | 0.16 | 1.02  | 0.355587 | 0.469975 | 0.632237 | 0.678572 |
| MmugDNA.804.1.S1_at    | MmugDNA.804.1  | 4.22  | 4.83  | 0.19 | 0.8  | -1.52 | 0.372632 | 0.602135 | 0.645028 | 0.763172 |
| MmugDNA.8043.1.S1_at   | MmugDNA.8043.1 | 4.02  | 4.02  | 0.09 | 0.07 | -1    | 0.89538  | 0.892146 | 0.95534  | 0.938526 |
| MmugDNA.8044.1.S1_at   | MmugDNA.8044.1 | 3.5   | 3.43  | 0.15 | 0.03 | 1.05  | 0.897573 | 0.962749 | 0.956523 | 0.979103 |
| MmugDNA.8048.1.S1_at   | MmugDNA.8048.1 | 8.88  | 9.86  | 0.73 | 0.16 | -1.97 | 0.068451 | 0.023698 | 0.3194   | 0.192768 |
| MmugDNA.8049.1.S1_at   | MmugDNA.8049.1 | 12.35 | 11.66 | 0.39 | 0.2  | 1.62  | 0.023752 | 0.0752   | 0.207104 | 0.319384 |
| MmugDNA.8056.1.S1_at   | MmugDNA.8056.1 | 4.47  | 4.58  | 0.31 | 0.02 | -1.08 | 0.547939 | 0.751536 | 0.766338 | 0.855508 |
| MmugDNA.8057.1.S1_s_at | MmugDNA.8057.1 | 11.83 | 10.52 | 0.38 | 0.18 | 2.48  | 0.012775 | 0.03037  | 0.163242 | 0.216116 |
| MmugDNA.8062.1.S1_at   | MmugDNA.8062.1 | 6.03  | 6.59  | 0.46 | 0.3  | -1.47 | 0.142145 | 0.239853 | 0.428166 | 0.510611 |
| MmugDNA.8064.1.S1_at   | MmugDNA.8064.1 | 6.19  | 6.1   | 0.16 | 0.05 | 1.06  | 0.28163  | 0.550119 | 0.572497 | 0.730241 |
| MmugDNA.807.1.S1_at    | MmugDNA.807.1  | 9.96  | 9.74  | 0.24 | 0.11 | 1.16  | 0.680084 | 0.231168 | 0.84734  | 0.5029   |
| MmugDNA.8070.1.S1_at   | MmugDNA.8070.1 | 8.95  | 9.33  | 0.14 | 0.05 | -1.31 | 0.035705 | 0.000266 | 0.243896 | 0.033786 |
| MmugDNA.8072.1.S1_at   | MmugDNA.8072.1 | 9.59  | 10.12 | 0.11 | 0.14 | -1.45 | 0.009246 | 0.000032 | 0.145977 | 0.022097 |
| MmugDNA.8075.1.S1_at   | MmugDNA.8075.1 | 12.48 | 12.65 | 0.07 | 0.02 | -1.12 | 0.025006 | 0.019053 | 0.211194 | 0.173688 |
| MmugDNA.8076.1.S1_at   | MmugDNA.8076.1 | 6.27  | 6.96  | 0.21 | 0.27 | -1.62 | 0.030211 | 0.004208 | 0.226955 | 0.091368 |
| MmugDNA.8077.1.S1_at   | MmugDNA.8077.1 | 6.54  | 6.56  | 0.18 | 0.07 | -1.02 | 0.847548 | 0.661097 | 0.933572 | 0.801683 |
| MmugDNA.8084.1.S1_s_at | MmugDNA.8084.1 | 6.03  | 6.11  | 0.19 | 0.06 | -1.06 | 0.702964 | 0.882272 | 0.859037 | 0.932845 |
| MmugDNA.8088.1.S1_at   | MmugDNA.8088.1 | 5.73  | 5.66  | 0.1  | 0.11 | 1.05  | 0.51819  | 0.031079 | 0.747346 | 0.218117 |
| MmugDNA.8093.1.S1_at   | MmugDNA.8093.1 | 12.19 | 12.25 | 0.07 | 0.02 | -1.04 | 0.194833 | 0.361342 | 0.49141  | 0.602122 |
| MmugDNA.8100.1.S1_at   | MmugDNA.8100.1 | 9.44  | 7.87  | 0.23 | 0.1  | 2.97  | 0.0005   | 0.000499 | 0.068271 | 0.038955 |
| MmugDNA.8102.1.S1_at   | MmugDNA.8102.1 | 8.9   | 8.52  | 0.16 | 0.15 | 1.3   | 0.021437 | 0.271133 | 0.199988 | 0.536259 |
| MmugDNA.8106.1.S1_at   | MmugDNA.8106.1 | 3.09  | 3.15  | 0.07 | 0.09 | -1.04 | 0.169001 | 0.173334 | 0.462154 | 0.449791 |
| MmugDNA.8107.1.S1_at   | MmugDNA.8107.1 | 4.91  | 4.85  | 0.5  | 0.17 | 1.05  | 0.885664 | 0.06078  | 0.951213 | 0.29326  |
| MmugDNA.8111.1.S1_at   | MmugDNA.8111.1 | 10.21 | 10.39 | 0.01 | 0.11 | -1.13 | 0.047458 | 0.008672 | 0.275183 | 0.123535 |
| MmugDNA.813.1.S1_at    | MmugDNA.813.1  | 8.25  | 8.36  | 0.18 | 0.08 | -1.08 | 0.253523 | 0.007106 | 0.547829 | 0.113555 |
| MmugDNA.8132.1.S1_at   | MmugDNA.8132.1 | 4.45  | 4.41  | 0.06 | 0.11 | 1.03  | 0.218123 | 0.39898  | 0.51594  | 0.629665 |
| MmugDNA.8133.1.S1_at   | MmugDNA.8133.1 | 6.79  | 7.08  | 0.26 | 0.15 | -1.22 | 0.599999 | 0.038955 | 0.798524 | 0.242449 |
| MmugDNA.8134.1.S1_at   | MmugDNA.8134.1 | 7.36  | 6.69  | 0.25 | 0.06 | 1.59  | 0.009269 | 0.000871 | 0.146049 | 0.047471 |

|                        |                |       |       |      |      |       |          |          |          |          |
|------------------------|----------------|-------|-------|------|------|-------|----------|----------|----------|----------|
| MmugDNA.8140.1.S1_at   | MmugDNA.8140.1 | 9.53  | 9.3   | 0.17 | 0.16 | 1.17  | 0.165426 | 0.013371 | 0.458352 | 0.14827  |
| MmugDNA.8141.1.S1_at   | MmugDNA.8141.1 | 7.66  | 9.53  | 0.71 | 0.24 | -3.67 | 0.03667  | 0.059739 | 0.246619 | 0.29107  |
| MmugDNA.8145.1.S1_at   | MmugDNA.8145.1 | 6.98  | 6.21  | 0.71 | 0.1  | 1.71  | 0.040274 | 0.242152 | 0.257232 | 0.512652 |
| MmugDNA.8146.1.S1_at   | MmugDNA.8146.1 | 5.98  | 5.18  | 0.79 | 0.43 | 1.74  | 0.288519 | 0.133851 | 0.578246 | 0.405875 |
| MmugDNA.8160.1.S1_at   | MmugDNA.8160.1 | 12.23 | 12.03 | 0.14 | 0.07 | 1.15  | 0.072161 | 0.313012 | 0.326579 | 0.567594 |
| MmugDNA.8167.1.S1_at   | MmugDNA.8167.1 | 9.85  | 10.41 | 0.67 | 0.14 | -1.48 | 0.302672 | 0.416925 | 0.590379 | 0.641838 |
| MmugDNA.8172.1.S1_x_at | MmugDNA.8172.1 | 9.26  | 9.24  | 0.97 | 0.22 | 1.01  | 0.404081 | 0.310558 | 0.667992 | 0.565771 |
| MmugDNA.8183.1.S1_at   | MmugDNA.8183.1 | 12.07 | 11.63 | 0.12 | 0.16 | 1.36  | 0.043878 | 0.078332 | 0.266439 | 0.324964 |
| MmugDNA.819.1.S1_at    | MmugDNA.819.1  | 11.77 | 11.86 | 0.13 | 0.05 | -1.06 | 0.39021  | 0.053098 | 0.657921 | 0.276147 |
| MmugDNA.8190.1.S1_at   | MmugDNA.8190.1 | 7.05  | 7.16  | 0.13 | 0.12 | -1.08 | 0.265129 | 0.137035 | 0.557962 | 0.409836 |
| MmugDNA.8197.1.S1_at   | MmugDNA.8197.1 | 9.53  | 9.74  | 0.28 | 0.08 | -1.16 | 0.540877 | 0.239031 | 0.761782 | 0.509798 |
| MmugDNA.8198.1.S1_at   | MmugDNA.8198.1 | 3.62  | 3.77  | 0.13 | 0.04 | -1.11 | 0.050271 | 0.06169  | 0.282055 | 0.295135 |
| MmugDNA.8199.1.S1_at   | MmugDNA.8199.1 | 11.39 | 11.95 | 0.33 | 0.25 | -1.47 | 0.156223 | 0.207003 | 0.446803 | 0.481115 |
| MmugDNA.8200.1.S1_at   | MmugDNA.8200.1 | 7.77  | 7.96  | 0.29 | 0.28 | -1.14 | 0.092084 | 0.097286 | 0.360151 | 0.354959 |
| MmugDNA.8201.1.S1_at   | MmugDNA.8201.1 | 5.62  | 5.31  | 0.67 | 0.32 | 1.24  | 0.11035  | 0.223252 | 0.385646 | 0.496078 |
| MmugDNA.8202.1.S1_at   | MmugDNA.8202.1 | 4.36  | 4.88  | 0.17 | 0.81 | -1.44 | 0.106767 | 0.245034 | 0.380982 | 0.514813 |
| MmugDNA.8208.1.S1_at   | MmugDNA.8208.1 | 8.26  | 8.85  | 0.33 | 0.19 | -1.51 | 0.146375 | 0.181536 | 0.434224 | 0.458087 |
| MmugDNA.8209.1.S1_at   | MmugDNA.8209.1 | 4.39  | 4.45  | 0.03 | 0.19 | -1.05 | 0.472357 | 0.636037 | 0.716183 | 0.78583  |
| MmugDNA.821.1.S1_at    | MmugDNA.821.1  | 4.54  | 4.31  | 0.33 | 0.07 | 1.18  | 0.119313 | 0.083147 | 0.397123 | 0.332999 |
| MmugDNA.8210.1.S1_at   | MmugDNA.8210.1 | 4.61  | 5.13  | 0.47 | 0.42 | -1.44 | 0.303058 | 0.875483 | 0.590511 | 0.929259 |
| MmugDNA.8211.1.S1_at   | MmugDNA.8211.1 | 7.28  | 8.01  | 0.8  | 0.09 | -1.66 | 0.221111 | 0.232158 | 0.519102 | 0.503874 |
| MmugDNA.8217.1.S1_s_at | MmugDNA.8217.1 | 11.23 | 11.45 | 0.27 | 0.04 | -1.16 | 0.744843 | 0.762784 | 0.881702 | 0.862041 |
| MmugDNA.8221.1.S1_at   | MmugDNA.8221.1 | 6.63  | 6.88  | 0.34 | 0.11 | -1.19 | 0.798194 | 0.288651 | 0.908871 | 0.549827 |
| MmugDNA.8231.1.S1_at   | MmugDNA.8231.1 | 7.53  | 7.91  | 0.27 | 0.07 | -1.3  | 0.101537 | 0.126171 | 0.372929 | 0.396742 |
| MmugDNA.8242.1.S1_at   | MmugDNA.8242.1 | 7.35  | 6.93  | 0.36 | 0.03 | 1.34  | 0.383686 | 0.189064 | 0.652919 | 0.464897 |
| MmugDNA.8245.1.S1_at   | MmugDNA.8245.1 | 11.58 | 11.41 | 0.1  | 0.03 | 1.13  | 0.052592 | 0.021506 | 0.286346 | 0.18373  |
| MmugDNA.8247.1.S1_at   | MmugDNA.8247.1 | 8.16  | 8.11  | 1.03 | 0.08 | 1.03  | 0.419286 | 0.639206 | 0.67873  | 0.788125 |
| MmugDNA.8253.1.S1_at   | MmugDNA.8253.1 | 7.25  | 6.02  | 0.41 | 0.58 | 2.35  | 0.044455 | 0.047319 | 0.267911 | 0.262262 |
| MmugDNA.8254.1.S1_at   | MmugDNA.8254.1 | 6.54  | 6.96  | 0.27 | 0.11 | -1.34 | 0.059075 | 0.330468 | 0.300144 | 0.579193 |
| MmugDNA.8256.1.S1_at   | MmugDNA.8256.1 | 4.03  | 7.5   | 1.34 | 0.37 | -11.1 | 0.028278 | 0.121539 | 0.220719 | 0.390665 |
| MmugDNA.8257.1.S1_at   | MmugDNA.8257.1 | 11.7  | 11.21 | 0.06 | 0.11 | 1.41  | 0.002378 | 0.001074 | 0.093326 | 0.051908 |
| MmugDNA.8259.1.S1_at   | MmugDNA.8259.1 | 8.68  | 8.22  | 0.09 | 0.1  | 1.38  | 0.005043 | 0.00436  | 0.116282 | 0.092464 |
| MmugDNA.8261.1.S1_at   | MmugDNA.8261.1 | 4.41  | 4.35  | 0.12 | 0.06 | 1.04  | 0.432931 | 0.149737 | 0.688556 | 0.424351 |
| MmugDNA.8263.1.S1_at   | MmugDNA.8263.1 | 4.06  | 3.94  | 0.23 | 0.04 | 1.09  | 0.336436 | 0.115933 | 0.617044 | 0.383147 |
| MmugDNA.8265.1.S1_at   | MmugDNA.8265.1 | 6.02  | 5.97  | 0.27 | 0.05 | 1.03  | 0.219008 | 0.197299 | 0.516662 | 0.472213 |
| MmugDNA.8268.1.S1_at   | MmugDNA.8268.1 | 5.19  | 5.01  | 0.07 | 0.11 | 1.13  | 0.089851 | 0.144468 | 0.356764 | 0.418323 |
| MmugDNA.8275.1.S1_at   | MmugDNA.8275.1 | 5.46  | 5.94  | 0.19 | 0.1  | -1.39 | 0.012627 | 0.224819 | 0.162521 | 0.497617 |
| MmugDNA.8279.1.S1_at   | MmugDNA.8279.1 | 5.43  | 5.75  | 0.44 | 0.14 | -1.25 | 0.408722 | 0.397791 | 0.671414 | 0.629114 |
| MmugDNA.8283.1.S1_at   | MmugDNA.8283.1 | 5.32  | 5.1   | 0.44 | 0.14 | 1.16  | 0.217027 | 0.287948 | 0.514863 | 0.549227 |
| MmugDNA.8285.1.S1_at   | MmugDNA.8285.1 | 6.37  | 6.22  | 0.14 | 0.18 | 1.11  | 0.368135 | 0.199941 | 0.641869 | 0.474603 |
| MmugDNA.8287.1.S1_at   | MmugDNA.8287.1 | 8.43  | 8.37  | 0.1  | 0.12 | 1.04  | 0.964875 | 0.022387 | 0.98581  | 0.187228 |
| MmugDNA.8296.1.S1_at   | MmugDNA.8296.1 | 3.8   | 4.15  | 0.07 | 0.12 | -1.27 | 0.010575 | 0.014961 | 0.152667 | 0.155453 |
| MmugDNA.8299.1.S1_at   | MmugDNA.8299.1 | 5.38  | 5.31  | 0.23 | 0.12 | 1.05  | 0.166778 | 0.201633 | 0.460006 | 0.476208 |

|                        |                |       |       |      |      |       |          |          |          |          |
|------------------------|----------------|-------|-------|------|------|-------|----------|----------|----------|----------|
| MmugDNA.83.1.S1_at     | MmugDNA.83.1   | 9     | 8.83  | 0.07 | 0.17 | 1.13  | 0.155724 | 0.348413 | 0.446095 | 0.592591 |
| MmugDNA.8300.1.S1_at   | MmugDNA.8300.1 | 7.8   | 7.73  | 0.1  | 0.04 | 1.05  | 0.352455 | 0.248537 | 0.630029 | 0.51783  |
| MmugDNA.8308.1.S1_at   | MmugDNA.8308.1 | 11.24 | 11.12 | 0.2  | 0.29 | 1.09  | 0.548508 | 0.679704 | 0.766578 | 0.812998 |
| MmugDNA.8308.1.S1_x_at | MmugDNA.8308.1 | 11.02 | 10.83 | 0.23 | 0.36 | 1.14  | 0.493332 | 0.683608 | 0.730368 | 0.815387 |
| MmugDNA.8316.1.S1_at   | MmugDNA.8316.1 | 11.85 | 12.25 | 0.23 | 0.03 | -1.32 | 0.037788 | 0.067878 | 0.250111 | 0.306745 |
| MmugDNA.8318.1.S1_at   | MmugDNA.8318.1 | 7.98  | 8.01  | 0.13 | 0.06 | -1.02 | 0.551883 | 0.454982 | 0.768766 | 0.669026 |
| MmugDNA.8321.1.S1_at   | MmugDNA.8321.1 | 13.66 | 13.71 | 0.11 | 0.03 | -1.04 | 0.340677 | 0.440051 | 0.620859 | 0.658651 |
| MmugDNA.8324.1.S1_at   | MmugDNA.8324.1 | 8.74  | 8.5   | 0.6  | 0.19 | 1.18  | 0.362492 | 0.323481 | 0.637348 | 0.574473 |
| MmugDNA.8326.1.S1_at   | MmugDNA.8326.1 | 7.28  | 6.84  | 0.78 | 0.19 | 1.36  | 0.354983 | 0.36903  | 0.631875 | 0.608583 |
| MmugDNA.8327.1.S1_at   | MmugDNA.8327.1 | 8.09  | 8     | 0.46 | 0.18 | 1.07  | 0.797073 | 0.5383   | 0.9083   | 0.723028 |
| MmugDNA.8347.1.S1_at   | MmugDNA.8347.1 | 6.76  | 6.8   | 0.21 | 0.06 | -1.03 | 0.417941 | 0.614256 | 0.677972 | 0.77118  |
| MmugDNA.8348.1.S1_at   | MmugDNA.8348.1 | 2.97  | 3.1   | 0.16 | 0.02 | -1.09 | 0.733669 | 0.493132 | 0.875847 | 0.694001 |
| MmugDNA.8349.1.S1_at   | MmugDNA.8349.1 | 9.38  | 8.82  | 0.34 | 0.14 | 1.47  | 0.053093 | 0.04259  | 0.287689 | 0.251035 |
| MmugDNA.8354.1.S1_at   | MmugDNA.8354.1 | 7.92  | 9.38  | 0.33 | 0.13 | -2.75 | 0.001648 | 0.016481 | 0.084462 | 0.162551 |
| MmugDNA.8358.1.S1_at   | MmugDNA.8358.1 | 5.16  | 5.26  | 0.29 | 0.05 | -1.07 | 0.269297 | 0.197205 | 0.561615 | 0.472213 |
| MmugDNA.8380.1.S1_at   | MmugDNA.8380.1 | 3.66  | 3.62  | 0.33 | 0.29 | 1.03  | 0.905738 | 0.902944 | 0.960077 | 0.944917 |
| MmugDNA.8384.1.S1_at   | MmugDNA.8384.1 | 5.03  | 4.72  | 0.17 | 0.12 | 1.24  | 0.081936 | 0.241565 | 0.343216 | 0.512166 |
| MmugDNA.8387.1.S1_at   | MmugDNA.8387.1 | 2.84  | 3.15  | 0.1  | 0.11 | -1.24 | 0.02392  | 0.058585 | 0.207706 | 0.288747 |
| MmugDNA.8389.1.S1_at   | MmugDNA.8389.1 | 8.42  | 11.15 | 1.02 | 0.24 | -6.62 | 0.013944 | 0.127687 | 0.169182 | 0.398581 |
| MmugDNA.8391.1.S1_at   | MmugDNA.8391.1 | 7.42  | 6.11  | 0.97 | 0.72 | 2.48  | 0.238171 | 0.418011 | 0.535624 | 0.642537 |
| MmugDNA.8393.1.S1_at   | MmugDNA.8393.1 | 6.66  | 6.89  | 0.13 | 0.18 | -1.17 | 0.355998 | 0.440018 | 0.632435 | 0.658635 |
| MmugDNA.8397.1.S1_at   | MmugDNA.8397.1 | 8.88  | 8.78  | 0.11 | 0.08 | 1.07  | 0.285523 | 0.00366  | 0.575257 | 0.086526 |
| MmugDNA.840.1.S1_at    | MmugDNA.840.1  | 10.52 | 10.89 | 0.24 | 0.18 | -1.29 | 0.080201 | 0.585062 | 0.340626 | 0.752684 |
| MmugDNA.8403.1.S1_at   | MmugDNA.8403.1 | 5.61  | 5.79  | 0.23 | 0.06 | -1.13 | 0.941496 | 0.256194 | 0.975543 | 0.524069 |
| MmugDNA.8405.1.S1_at   | MmugDNA.8405.1 | 11.16 | 10.47 | 0.23 | 0.36 | 1.61  | 0.090733 | 0.191447 | 0.357722 | 0.466812 |
| MmugDNA.8406.1.S1_at   | MmugDNA.8406.1 | 9.33  | 9.45  | 0.23 | 0.26 | -1.09 | 0.980519 | 0.18431  | 0.992763 | 0.460458 |
| MmugDNA.8407.1.S1_at   | MmugDNA.8407.1 | 9.57  | 9.47  | 0.07 | 0.15 | 1.07  | 0.144764 | 0.698085 | 0.431711 | 0.824603 |
| MmugDNA.8408.1.S1_at   | MmugDNA.8408.1 | 5.08  | 5     | 0.11 | 0.1  | 1.05  | 0.387552 | 0.400277 | 0.655656 | 0.630158 |
| MmugDNA.8413.1.S1_at   | MmugDNA.8413.1 | 9.29  | 9.24  | 0.4  | 0.06 | 1.04  | 0.384209 | 0.315891 | 0.653283 | 0.569327 |
| MmugDNA.8414.1.S1_at   | MmugDNA.8414.1 | 9.45  | 9.06  | 0.17 | 0.14 | 1.3   | 0.017403 | 0.054068 | 0.185448 | 0.277914 |
| MmugDNA.8418.1.S1_at   | MmugDNA.8418.1 | 7.39  | 7.42  | 0.1  | 0.12 | -1.02 | 0.666482 | 0.007039 | 0.83985  | 0.113112 |
| MmugDNA.8420.1.S1_at   | MmugDNA.8420.1 | 9.49  | 9.73  | 0.14 | 0.05 | -1.18 | 0.061809 | 0.008677 | 0.305091 | 0.12355  |
| MmugDNA.8421.1.S1_at   | MmugDNA.8421.1 | 11.25 | 11.57 | 0.19 | 0.11 | -1.25 | 0.037838 | 0.000664 | 0.250187 | 0.0439   |
| MmugDNA.8422.1.S1_at   | MmugDNA.8422.1 | 6.81  | 6.87  | 0.21 | 0.07 | -1.04 | 0.333185 | 0.153723 | 0.614665 | 0.428413 |
| MmugDNA.8423.1.S1_at   | MmugDNA.8423.1 | 6.53  | 6.78  | 0.09 | 0.13 | -1.19 | 0.091928 | 0.051841 | 0.359903 | 0.273151 |
| MmugDNA.8431.1.S1_at   | MmugDNA.8431.1 | 9.7   | 9.73  | 0.14 | 0.16 | -1.02 | 0.486838 | 0.043876 | 0.725872 | 0.254088 |
| MmugDNA.8435.1.S1_at   | MmugDNA.8435.1 | 10.77 | 11.56 | 0.2  | 0.19 | -1.73 | 0.012352 | 0.009971 | 0.161511 | 0.131094 |
| MmugDNA.844.1.S1_at    | MmugDNA.844.1  | 11.68 | 11.94 | 0.13 | 0.04 | -1.19 | 0.012146 | 0.402666 | 0.160493 | 0.631543 |
| MmugDNA.8447.1.S1_at   | MmugDNA.8447.1 | 9.57  | 10.06 | 0.18 | 0.15 | -1.4  | 0.021564 | 0.464736 | 0.200582 | 0.675398 |
| MmugDNA.8449.1.S1_at   | MmugDNA.8449.1 | 6.52  | 6.51  | 0.1  | 0.05 | 1     | 0.290675 | 0.693287 | 0.580132 | 0.821612 |
| MmugDNA.8450.1.S1_at   | MmugDNA.8450.1 | 4.86  | 4.55  | 0.21 | 0.09 | 1.24  | 0.074422 | 0.077121 | 0.331004 | 0.322673 |
| MmugDNA.8455.1.S1_at   | MmugDNA.8455.1 | 9.3   | 8.78  | 0.02 | 0.14 | 1.44  | 0.00291  | 0.002089 | 0.099212 | 0.067534 |
| MmugDNA.8456.1.S1_at   | MmugDNA.8456.1 | 11.66 | 11.02 | 0.21 | 0.06 | 1.56  | 0.006157 | 0.002353 | 0.12462  | 0.07161  |

|                        |                |       |       |      |      |       |          |          |          |          |
|------------------------|----------------|-------|-------|------|------|-------|----------|----------|----------|----------|
| MmugDNA.8458.1.S1_at   | MmugDNA.8458.1 | 10.78 | 9.71  | 0.56 | 0.17 | 2.1   | 0.082003 | 0.044399 | 0.343272 | 0.255192 |
| MmugDNA.8460.1.S1_at   | MmugDNA.8460.1 | 11.77 | 11.57 | 0.12 | 0.09 | 1.14  | 0.358465 | 0.454809 | 0.634231 | 0.668859 |
| MmugDNA.8461.1.S1_at   | MmugDNA.8461.1 | 13.52 | 12.86 | 0.13 | 0.05 | 1.57  | 0.001063 | 0.157859 | 0.0766   | 0.433522 |
| MmugDNA.8462.1.S1_at   | MmugDNA.8462.1 | 5.21  | 5.17  | 0.09 | 0.04 | 1.03  | 0.891864 | 0.122266 | 0.953841 | 0.391971 |
| MmugDNA.8463.1.S1_at   | MmugDNA.8463.1 | 9.05  | 8.67  | 0.21 | 0.11 | 1.3   | 0.126068 | 0.032641 | 0.407146 | 0.223694 |
| MmugDNA.8468.1.S1_at   | MmugDNA.8468.1 | 10.12 | 10.16 | 0.05 | 0.03 | -1.03 | 0.11908  | 0.445812 | 0.396713 | 0.66252  |
| MmugDNA.8475.1.S1_at   | MmugDNA.8475.1 | 8.32  | 8.43  | 0.19 | 0.23 | -1.08 | 0.606727 | 0.270908 | 0.803313 | 0.536026 |
| MmugDNA.8481.1.S1_at   | MmugDNA.8481.1 | 9.48  | 10.35 | 0.44 | 0.26 | -1.83 | 0.019527 | 0.087166 | 0.192506 | 0.340133 |
| MmugDNA.8488.1.S1_at   | MmugDNA.8488.1 | 8.23  | 8.4   | 0.42 | 0.07 | -1.12 | 0.804859 | 0.759309 | 0.91238  | 0.860036 |
| MmugDNA.8496.1.S1_at   | MmugDNA.8496.1 | 5.8   | 5.95  | 0.2  | 0.18 | -1.11 | 0.424701 | 0.435799 | 0.682288 | 0.655528 |
| MmugDNA.8497.1.S1_at   | MmugDNA.8497.1 | 11.76 | 11.84 | 0.07 | 0.05 | -1.06 | 0.687373 | 0.020874 | 0.850804 | 0.181318 |
| MmugDNA.8498.1.S1_at   | MmugDNA.8498.1 | 4.63  | 4.8   | 0.21 | 0.06 | -1.13 | 0.308768 | 0.336588 | 0.595274 | 0.583937 |
| MmugDNA.8502.1.S1_at   | MmugDNA.8502.1 | 4.23  | 3.73  | 0.64 | 0.07 | 1.41  | 0.223436 | 0.182109 | 0.521228 | 0.45859  |
| MmugDNA.8502.1.S1_x_at | MmugDNA.8502.1 | 4.32  | 4.25  | 0.52 | 0.08 | 1.05  | 0.288548 | 0.49229  | 0.578267 | 0.693485 |
| MmugDNA.8503.1.S1_at   | MmugDNA.8503.1 | 11.63 | 11.61 | 0.16 | 0.06 | 1.01  | 0.343463 | 0.38167  | 0.622974 | 0.617883 |
| MmugDNA.8506.1.S1_at   | MmugDNA.8506.1 | 11.74 | 11.42 | 0.15 | 0.23 | 1.25  | 0.070619 | 0.001547 | 0.324085 | 0.05949  |
| MmugDNA.8509.1.S1_at   | MmugDNA.8509.1 | 11.41 | 11.76 | 0.16 | 0.07 | -1.28 | 0.063897 | 0.017319 | 0.309277 | 0.166509 |
| MmugDNA.851.1.S1_at    | MmugDNA.851.1  | 9.93  | 10.18 | 0.2  | 0.05 | -1.19 | 0.294124 | 0.157616 | 0.583157 | 0.433131 |
| MmugDNA.8510.1.S1_s_at | MmugDNA.8510.1 | 7.9   | 8.74  | 0.63 | 0.18 | -1.78 | 0.086791 | 0.189865 | 0.351991 | 0.465403 |
| MmugDNA.8511.1.S1_at   | MmugDNA.8511.1 | 7.96  | 8.52  | 0.74 | 0.06 | -1.48 | 0.09305  | 0.309091 | 0.361696 | 0.564787 |
| MmugDNA.8530.1.S1_at   | MmugDNA.8530.1 | 8.42  | 8.56  | 0.21 | 0.16 | -1.1  | 0.373904 | 0.415961 | 0.645118 | 0.641288 |
| MmugDNA.8534.1.S1_at   | MmugDNA.8534.1 | 4.77  | 4.95  | 0.02 | 0.02 | -1.14 | 0.000924 | 0.018225 | 0.075607 | 0.169777 |
| MmugDNA.8538.1.S1_at   | MmugDNA.8538.1 | 4.46  | 4.49  | 0.09 | 0.02 | -1.02 | 0.146638 | 0.152762 | 0.43458  | 0.427571 |
| MmugDNA.8540.1.S1_at   | MmugDNA.8540.1 | 5.51  | 5.08  | 1.46 | 0.62 | 1.35  | 0.652361 | 0.614509 | 0.831273 | 0.771283 |
| MmugDNA.8543.1.S1_at   | MmugDNA.8543.1 | 8.06  | 7.15  | 0.22 | 0.58 | 1.89  | 0.137703 | 0.046074 | 0.422774 | 0.258977 |
| MmugDNA.8545.1.S1_at   | MmugDNA.8545.1 | 7.21  | 6.97  | 0.13 | 0.21 | 1.18  | 0.191641 | 0.234245 | 0.488058 | 0.505485 |
| MmugDNA.8550.1.S1_at   | MmugDNA.8550.1 | 6.49  | 6.46  | 0.16 | 0.1  | 1.02  | 0.186688 | 0.253806 | 0.482816 | 0.52217  |
| MmugDNA.8552.1.S1_at   | MmugDNA.8552.1 | 4.7   | 4.83  | 0.12 | 0.14 | -1.09 | 0.122907 | 0.014628 | 0.401947 | 0.154176 |
| MmugDNA.8572.1.S1_at   | MmugDNA.8572.1 | 8.22  | 8.22  | 0.13 | 0.06 | -1    | 0.910746 | 0.569034 | 0.962201 | 0.742233 |
| MmugDNA.8574.1.S1_at   | MmugDNA.8574.1 | 6.52  | 6.59  | 0.12 | 0.12 | -1.05 | 0.420465 | 0.321817 | 0.679441 | 0.57348  |
| MmugDNA.8578.1.S1_at   | MmugDNA.8578.1 | 7.64  | 7.66  | 0.08 | 0.38 | -1.02 | 0.85017  | 0.495618 | 0.93489  | 0.695576 |
| MmugDNA.8580.1.S1_at   | MmugDNA.8580.1 | 8.19  | 8.43  | 0.41 | 0.08 | -1.18 | 0.83998  | 0.883715 | 0.929862 | 0.933691 |
| MmugDNA.8589.1.S1_at   | MmugDNA.8589.1 | 5.55  | 5.42  | 0.77 | 0.08 | 1.1   | 0.654765 | 0.259041 | 0.832889 | 0.526234 |
| MmugDNA.8591.1.S1_at   | MmugDNA.8591.1 | 8.3   | 8.19  | 0.09 | 0.24 | 1.09  | 0.602308 | 0.596041 | 0.800145 | 0.759325 |
| MmugDNA.8592.1.S1_at   | MmugDNA.8592.1 | 9.63  | 8.73  | 0.42 | 0.19 | 1.87  | 0.036518 | 0.262057 | 0.246142 | 0.528374 |
| MmugDNA.8593.1.S1_at   | MmugDNA.8593.1 | 11.97 | 12.07 | 0.06 | 0.1  | -1.08 | 0.347881 | 0.078018 | 0.626046 | 0.324416 |
| MmugDNA.8595.1.S1_at   | MmugDNA.8595.1 | 8.32  | 9.32  | 0.3  | 0.2  | -1.99 | 0.009553 | 0.023319 | 0.147889 | 0.191394 |
| MmugDNA.8597.1.S1_at   | MmugDNA.8597.1 | 9.57  | 8.99  | 0.07 | 0.26 | 1.49  | 0.043046 | 0.135553 | 0.264642 | 0.407655 |
| MmugDNA.8598.1.S1_at   | MmugDNA.8598.1 | 8.8   | 9.8   | 0.31 | 0.06 | -1.99 | 0.004721 | 0.012743 | 0.115008 | 0.145496 |
| MmugDNA.8599.1.S1_at   | MmugDNA.8599.1 | 7.87  | 7.58  | 0.32 | 0.24 | 1.22  | 0.262801 | 0.006303 | 0.556683 | 0.107813 |
| MmugDNA.86.1.S1_at     | MmugDNA.86.1   | 6.98  | 8.17  | 0.85 | 0.29 | -2.28 | 0.11669  | 0.150553 | 0.393796 | 0.425106 |
| MmugDNA.8603.1.S1_at   | MmugDNA.8603.1 | 4.28  | 6.54  | 0.94 | 0.47 | -4.8  | 0.052056 | 0.230322 | 0.28568  | 0.502102 |
| MmugDNA.8605.1.S1_at   | MmugDNA.8605.1 | 6.08  | 6.51  | 0.28 | 0.24 | -1.35 | 0.051131 | 0.046877 | 0.283595 | 0.261272 |



|                        |                |       |       |      |      |       |          |          |          |          |
|------------------------|----------------|-------|-------|------|------|-------|----------|----------|----------|----------|
| MmugDNA.8612.1.S1_at   | MmugDNA.8612.1 | 6.81  | 6.68  | 0.27 | 0.1  | 1.09  | 0.208429 | 0.317607 | 0.506128 | 0.570787 |
| MmugDNA.8617.1.S1_at   | MmugDNA.8617.1 | 8.77  | 9.29  | 0.29 | 0.08 | -1.43 | 0.046631 | 0.111098 | 0.273564 | 0.375667 |
| MmugDNA.8618.1.S1_at   | MmugDNA.8618.1 | 9.28  | 10.81 | 0.89 | 0.22 | -2.89 | 0.050826 | 0.454756 | 0.283144 | 0.668859 |
| MmugDNA.8619.1.S1_at   | MmugDNA.8619.1 | 11.09 | 10.75 | 0.04 | 0.09 | 1.26  | 0.009212 | 0.008764 | 0.145865 | 0.124009 |
| MmugDNA.8621.1.S1_at   | MmugDNA.8621.1 | 11.65 | 11.78 | 0.03 | 0.1  | -1.09 | 0.215778 | 0.084247 | 0.513555 | 0.335371 |
| MmugDNA.8622.1.S1_at   | MmugDNA.8622.1 | 10.74 | 8.61  | 0.45 | 0.15 | 4.38  | 0.002883 | 0.000385 | 0.098644 | 0.037273 |
| MmugDNA.8625.1.S1_at   | MmugDNA.8625.1 | 10.89 | 11.01 | 0.26 | 0.09 | -1.08 | 0.706314 | 0.437178 | 0.860948 | 0.656591 |
| MmugDNA.8626.1.S1_at   | MmugDNA.8626.1 | 5.74  | 6.22  | 0.31 | 0.28 | -1.4  | 0.114652 | 0.127377 | 0.391643 | 0.398205 |
| MmugDNA.863.1.S1_at    | MmugDNA.863.1  | 3.66  | 3.76  | 0.07 | 0.03 | -1.07 | 0.120368 | 0.187588 | 0.398818 | 0.463628 |
| MmugDNA.8630.1.S1_at   | MmugDNA.8630.1 | 6.54  | 6.52  | 0.09 | 0.14 | 1.01  | 0.735742 | 0.097858 | 0.877005 | 0.355649 |
| MmugDNA.8634.1.S1_at   | MmugDNA.8634.1 | 10.2  | 10.21 | 0.15 | 0.07 | -1.01 | 0.481179 | 0.879446 | 0.72184  | 0.931144 |
| MmugDNA.8639.1.S1_at   | MmugDNA.8639.1 | 12.21 | 12.16 | 0.12 | 0.06 | 1.04  | 0.76951  | 0.004909 | 0.894266 | 0.097662 |
| MmugDNA.8640.1.S1_at   | MmugDNA.8640.1 | 4.09  | 3.94  | 0.06 | 0.25 | 1.11  | 0.131515 | 0.203515 | 0.41434  | 0.477767 |
| MmugDNA.8645.1.S1_at   | MmugDNA.8645.1 | 8.77  | 3.87  | 0.63 | 0.15 | 29.92 | 0.000201 | 0.02801  | 0.053494 | 0.208903 |
| MmugDNA.8645.1.S1_x_at | MmugDNA.8645.1 | 8.62  | 5.49  | 0.71 | 0.15 | 8.72  | 0.001778 | 0.041161 | 0.085481 | 0.247723 |
| MmugDNA.8646.1.S1_at   | MmugDNA.8646.1 | 10.46 | 10.36 | 0.03 | 0.11 | 1.07  | 0.479095 | 0.937594 | 0.720448 | 0.964687 |
| MmugDNA.8648.1.S1_at   | MmugDNA.8648.1 | 10.42 | 10.2  | 0.14 | 0.15 | 1.17  | 0.640923 | 0.983175 | 0.824509 | 0.990726 |
| MmugDNA.8649.1.S1_at   | MmugDNA.8649.1 | 11.64 | 11.54 | 0.32 | 0.09 | 1.07  | 0.656124 | 0.671099 | 0.833605 | 0.80765  |
| MmugDNA.865.1.S1_at    | MmugDNA.865.1  | 12.91 | 12.52 | 0.1  | 0.09 | 1.31  | 0.006782 | 0.003396 | 0.129089 | 0.083974 |
| MmugDNA.8650.1.S1_at   | MmugDNA.8650.1 | 6.52  | 6.6   | 0.15 | 0.08 | -1.05 | 0.840764 | 0.332792 | 0.930069 | 0.58121  |
| MmugDNA.8652.1.S1_at   | MmugDNA.8652.1 | 9.4   | 8.52  | 0.14 | 0.44 | 1.84  | 0.077167 | 0.175509 | 0.335786 | 0.452159 |
| MmugDNA.8653.1.S1_at   | MmugDNA.8653.1 | 12.75 | 12.49 | 0.05 | 0.05 | 1.2   | 0.003546 | 0.003194 | 0.104675 | 0.08199  |
| MmugDNA.8656.1.S1_at   | MmugDNA.8656.1 | 4.26  | 4.4   | 0.04 | 0.23 | -1.1  | 0.141197 | 0.046959 | 0.427073 | 0.261341 |
| MmugDNA.8658.1.S1_at   | MmugDNA.8658.1 | 3.84  | 3.8   | 0.08 | 0.04 | 1.03  | 0.167493 | 0.483334 | 0.460745 | 0.687887 |
| MmugDNA.8660.1.S1_at   | MmugDNA.8660.1 | 10.34 | 10.7  | 0.33 | 0.14 | -1.29 | 0.090475 | 0.134883 | 0.35723  | 0.406878 |
| MmugDNA.8663.1.S1_at   | MmugDNA.8663.1 | 7.65  | 7.72  | 0.08 | 0.12 | -1.05 | 0.509562 | 0.064339 | 0.741152 | 0.29983  |
| MmugDNA.8667.1.S1_at   | MmugDNA.8667.1 | 7.05  | 7.15  | 0.17 | 0.07 | -1.07 | 0.368764 | 0.289239 | 0.642367 | 0.550293 |
| MmugDNA.8668.1.S1_at   | MmugDNA.8668.1 | 8.26  | 7.97  | 0.2  | 0.22 | 1.22  | 0.116423 | 0.173893 | 0.39359  | 0.450211 |
| MmugDNA.8670.1.S1_at   | MmugDNA.8670.1 | 10.03 | 10.15 | 0.22 | 0.14 | -1.09 | 0.487152 | 0.282139 | 0.726032 | 0.544937 |
| MmugDNA.8671.1.S1_at   | MmugDNA.8671.1 | 3.99  | 3.89  | 0.24 | 0.05 | 1.07  | 0.179668 | 0.355894 | 0.474837 | 0.597869 |
| MmugDNA.8676.1.S1_at   | MmugDNA.8676.1 | 8.12  | 8.26  | 0.2  | 0.09 | -1.1  | 0.716196 | 0.055326 | 0.866043 | 0.281024 |
| MmugDNA.8677.1.S1_at   | MmugDNA.8677.1 | 7.88  | 7.29  | 0.55 | 0.14 | 1.51  | 0.363613 | 0.16461  | 0.638258 | 0.440881 |
| MmugDNA.8691.1.S1_at   | MmugDNA.8691.1 | 6.54  | 4.97  | 0.51 | 0.73 | 2.97  | 0.16854  | 0.129865 | 0.461867 | 0.401509 |
| MmugDNA.8695.1.S1_at   | MmugDNA.8695.1 | 11.54 | 10.32 | 0.41 | 0.1  | 2.34  | 0.008172 | 0.00079  | 0.139381 | 0.045969 |
| MmugDNA.8697.1.S1_at   | MmugDNA.8697.1 | 3.61  | 3.25  | 0.27 | 0.16 | 1.28  | 0.074122 | 0.100672 | 0.330335 | 0.360037 |
| MmugDNA.87.1.S1_at     | MmugDNA.87.1   | 6.57  | 6.74  | 0.11 | 0.05 | -1.13 | 0.195423 | 0.053985 | 0.492136 | 0.27777  |
| MmugDNA.8700.1.S1_at   | MmugDNA.8700.1 | 6     | 5.92  | 0.2  | 0.02 | 1.05  | 0.179718 | 0.147694 | 0.474837 | 0.422007 |
| MmugDNA.8702.1.S1_at   | MmugDNA.8702.1 | 11.83 | 11.78 | 0.08 | 0.02 | 1.03  | 0.985605 | 0.045502 | 0.994817 | 0.2575   |
| MmugDNA.8704.1.S1_at   | MmugDNA.8704.1 | 5.69  | 6.13  | 0.61 | 0.29 | -1.35 | 0.334048 | 0.17862  | 0.615174 | 0.454847 |
| MmugDNA.871.1.S1_at    | MmugDNA.871.1  | 7.11  | 7.26  | 0.22 | 0.58 | -1.11 | 0.730462 | 0.877536 | 0.873959 | 0.930162 |
| MmugDNA.8711.1.S1_at   | MmugDNA.8711.1 | 12.55 | 11.87 | 0.07 | 0.23 | 1.6   | 0.016713 | 0.006018 | 0.182634 | 0.106089 |
| MmugDNA.8714.1.S1_at   | MmugDNA.8714.1 | 11.68 | 12.01 | 0.24 | 0.09 | -1.26 | 0.075843 | 0.043218 | 0.333731 | 0.252653 |
| MmugDNA.8714.1.S1_s_at | MmugDNA.8714.1 | 9.08  | 9.31  | 0.34 | 0.04 | -1.17 | 0.314757 | 0.442826 | 0.600124 | 0.660759 |

|                        |                |       |       |      |      |       |          |          |          |          |
|------------------------|----------------|-------|-------|------|------|-------|----------|----------|----------|----------|
| MmugDNA.8719.1.S1_at   | MmugDNA.8719.1 | 10.91 | 10.95 | 0.2  | 0.09 | -1.03 | 0.765346 | 0.653652 | 0.892409 | 0.797546 |
| MmugDNA.8721.1.S1_at   | MmugDNA.8721.1 | 8.94  | 8.67  | 0.43 | 0.17 | 1.2   | 0.465698 | 0.033159 | 0.711655 | 0.225374 |
| MmugDNA.8722.1.S1_at   | MmugDNA.8722.1 | 7.98  | 7.94  | 0.02 | 0.11 | 1.03  | 0.957483 | 0.043303 | 0.982581 | 0.252847 |
| MmugDNA.8723.1.S1_at   | MmugDNA.8723.1 | 12.04 | 12.24 | 0.06 | 0.11 | -1.15 | 0.139327 | 0.470113 | 0.424942 | 0.678572 |
| MmugDNA.8725.1.S1_at   | MmugDNA.8725.1 | 11.26 | 10.67 | 0.4  | 0.17 | 1.51  | 0.039107 | 0.480444 | 0.2542   | 0.685781 |
| MmugDNA.8732.1.S1_at   | MmugDNA.8732.1 | 6.66  | 9.16  | 0.84 | 0.28 | -5.65 | 0.010243 | 0.13797  | 0.150918 | 0.410912 |
| MmugDNA.8734.1.S1_s_at | MmugDNA.8734.1 | 12.9  | 12.87 | 0.19 | 0.02 | 1.03  | 0.567171 | 0.023355 | 0.777704 | 0.191568 |
| MmugDNA.8735.1.S1_at   | MmugDNA.8735.1 | 7.53  | 8.31  | 0.94 | 0.07 | -1.72 | 0.214802 | 0.521108 | 0.512402 | 0.712212 |
| MmugDNA.8741.1.S1_at   | MmugDNA.8741.1 | 3.18  | 3.25  | 0.28 | 0.04 | -1.05 | 0.908634 | 0.912689 | 0.961257 | 0.950818 |
| MmugDNA.8743.1.S1_at   | MmugDNA.8743.1 | 11.54 | 12.03 | 0.27 | 0.16 | -1.4  | 0.037486 | 0.035365 | 0.249007 | 0.232348 |
| MmugDNA.875.1.S1_at    | MmugDNA.875.1  | 6.57  | 8.23  | 0.52 | 0.27 | -3.17 | 0.008602 | 0.274862 | 0.142363 | 0.539335 |
| MmugDNA.8756.1.S1_at   | MmugDNA.8756.1 | 5.88  | 5.77  | 0.19 | 0.1  | 1.08  | 0.994169 | 0.813708 | 0.997585 | 0.892425 |
| MmugDNA.8758.1.S1_at   | MmugDNA.8758.1 | 5.22  | 5.11  | 0.34 | 0.19 | 1.07  | 0.25603  | 0.303877 | 0.550543 | 0.561243 |
| MmugDNA.876.1.S1_at    | MmugDNA.876.1  | 10.65 | 9.97  | 0.06 | 0.27 | 1.6   | 0.030485 | 0.016581 | 0.227464 | 0.163023 |
| MmugDNA.8761.1.S1_at   | MmugDNA.8761.1 | 7.25  | 6.99  | 0.12 | 0.3  | 1.2   | 0.105166 | 0.104485 | 0.3789   | 0.36573  |
| MmugDNA.8765.1.S1_at   | MmugDNA.8765.1 | 8.13  | 8.28  | 0.44 | 0.23 | -1.11 | 0.346068 | 0.075398 | 0.624849 | 0.319693 |
| MmugDNA.877.1.S1_at    | MmugDNA.877.1  | 8.92  | 11.11 | 1.29 | 0.19 | -4.55 | 0.049923 | 0.05038  | 0.281062 | 0.269722 |
| MmugDNA.8778.1.S1_at   | MmugDNA.8778.1 | 11.15 | 11.59 | 0.17 | 0.08 | -1.36 | 0.01572  | 0.079987 | 0.177801 | 0.327352 |
| MmugDNA.8781.1.S1_at   | MmugDNA.8781.1 | 8.59  | 8.4   | 0.67 | 0.22 | 1.14  | 0.543228 | 0.409425 | 0.763336 | 0.636503 |
| MmugDNA.8789.1.S1_at   | MmugDNA.8789.1 | 13.35 | 13.32 | 0.12 | 0.04 | 1.02  | 0.937438 | 0.134031 | 0.973767 | 0.406234 |
| MmugDNA.879.1.S1_at    | MmugDNA.879.1  | 8.18  | 8.52  | 0.18 | 0.16 | -1.27 | 0.136497 | 0.438883 | 0.421073 | 0.657753 |
| MmugDNA.8790.1.S1_at   | MmugDNA.8790.1 | 7.24  | 7.71  | 0.02 | 0.13 | -1.38 | 0.004574 | 0.199987 | 0.113728 | 0.474603 |
| MmugDNA.8791.1.S1_at   | MmugDNA.8791.1 | 8.74  | 8.5   | 0.1  | 0.05 | 1.18  | 0.030863 | 0.000449 | 0.228673 | 0.038539 |
| MmugDNA.8793.1.S1_at   | MmugDNA.8793.1 | 4.9   | 4.87  | 0.04 | 0.08 | 1.02  | 0.54572  | 0.465746 | 0.764894 | 0.6759   |
| MmugDNA.8794.1.S1_at   | MmugDNA.8794.1 | 6.99  | 6.59  | 0.43 | 0.36 | 1.31  | 0.693192 | 0.898931 | 0.853369 | 0.942467 |
| MmugDNA.8804.1.S1_at   | MmugDNA.8804.1 | 8.75  | 8.84  | 0.12 | 0.27 | -1.06 | 0.991573 | 0.652968 | 0.99691  | 0.797125 |
| MmugDNA.8811.1.S1_at   | MmugDNA.8811.1 | 10.45 | 10.46 | 0.04 | 0.08 | -1.01 | 0.590424 | 0.765269 | 0.791861 | 0.863539 |
| MmugDNA.8812.1.S1_at   | MmugDNA.8812.1 | 7.41  | 7.3   | 0.13 | 0.09 | 1.08  | 0.303195 | 0.02738  | 0.590648 | 0.206695 |
| MmugDNA.8817.1.S1_at   | MmugDNA.8817.1 | 5.84  | 6.03  | 0.07 | 0.01 | -1.14 | 0.020721 | 0.033664 | 0.197519 | 0.227052 |
| MmugDNA.8819.1.S1_at   | MmugDNA.8819.1 | 13.02 | 13    | 0.07 | 0.03 | 1.02  | 0.783449 | 0.589102 | 0.901128 | 0.755393 |
| MmugDNA.8820.1.S1_at   | MmugDNA.8820.1 | 12.88 | 12.95 | 0.05 | 0.02 | -1.06 | 0.100911 | 0.000072 | 0.372141 | 0.02644  |
| MmugDNA.8823.1.S1_at   | MmugDNA.8823.1 | 8.8   | 9.09  | 0.13 | 0.07 | -1.22 | 0.066512 | 0.065249 | 0.315401 | 0.301239 |
| MmugDNA.8826.1.S1_at   | MmugDNA.8826.1 | 11.16 | 11.78 | 0.37 | 0.14 | -1.54 | 0.131512 | 0.07444  | 0.41434  | 0.318062 |
| MmugDNA.8832.1.S1_s_at | MmugDNA.8832.1 | 10.34 | 10.27 | 0.18 | 0.15 | 1.05  | 0.884817 | 0.038783 | 0.951005 | 0.241916 |
| MmugDNA.8845.1.S1_at   | MmugDNA.8845.1 | 11.01 | 10.34 | 0.08 | 0.05 | 1.59  | 0.000181 | 0.198472 | 0.053494 | 0.47339  |
| MmugDNA.8850.1.S1_s_at | MmugDNA.8850.1 | 4.23  | 4.08  | 0.08 | 0.08 | 1.11  | 0.052895 | 0.046092 | 0.287033 | 0.259052 |
| MmugDNA.8851.1.S1_at   | MmugDNA.8851.1 | 10.87 | 8.96  | 0.3  | 0.25 | 3.76  | 0.001841 | 0.008445 | 0.086764 | 0.121922 |
| MmugDNA.8863.1.S1_at   | MmugDNA.8863.1 | 10.94 | 10.32 | 0.16 | 0.07 | 1.54  | 0.00409  | 0.004486 | 0.109377 | 0.093544 |
| MmugDNA.8866.1.S1_at   | MmugDNA.8866.1 | 8.34  | 8.96  | 0.15 | 0.02 | -1.54 | 0.003204 | 0.11554  | 0.101534 | 0.38267  |
| MmugDNA.8868.1.S1_at   | MmugDNA.8868.1 | 6.2   | 6.37  | 0.78 | 0.13 | -1.13 | 0.761229 | 0.834559 | 0.890581 | 0.905227 |
| MmugDNA.8870.1.S1_at   | MmugDNA.8870.1 | 7.15  | 8.18  | 0.35 | 0.16 | -2.04 | 0.009305 | 0.20043  | 0.146273 | 0.474805 |
| MmugDNA.8872.1.S1_at   | MmugDNA.8872.1 | 7.38  | 7.28  | 0.12 | 0.3  | 1.07  | 0.514765 | 0.034262 | 0.744683 | 0.228981 |
| MmugDNA.8879.1.S1_at   | MmugDNA.8879.1 | 8.58  | 9.04  | 0.15 | 0.09 | -1.38 | 0.019068 | 0.465862 | 0.191567 | 0.675982 |

|                        |                |       |       |      |      |       |          |          |          |          |
|------------------------|----------------|-------|-------|------|------|-------|----------|----------|----------|----------|
| MmugDNA.8882.1.S1_at   | MmugDNA.8882.1 | 10.27 | 9.86  | 0.05 | 0.3  | 1.33  | 0.099347 | 0.227935 | 0.370274 | 0.500211 |
| MmugDNA.8886.1.S1_at   | MmugDNA.8886.1 | 10.11 | 10.31 | 0.51 | 0.18 | -1.15 | 0.43457  | 0.04391  | 0.68975  | 0.254098 |
| MmugDNA.8887.1.S1_at   | MmugDNA.8887.1 | 6.44  | 6.45  | 0.15 | 0.12 | -1.01 | 0.408497 | 0.244935 | 0.671262 | 0.514752 |
| MmugDNA.8888.1.S1_at   | MmugDNA.8888.1 | 7.1   | 7.33  | 0.17 | 0.08 | -1.18 | 0.153297 | 0.195598 | 0.443036 | 0.470441 |
| MmugDNA.8895.1.S1_at   | MmugDNA.8895.1 | 3.63  | 3.59  | 0.06 | 0.12 | 1.03  | 0.983467 | 0.685074 | 0.99383  | 0.816309 |
| MmugDNA.8896.1.S1_at   | MmugDNA.8896.1 | 5.97  | 5.87  | 0.07 | 0.07 | 1.07  | 0.198702 | 0.286093 | 0.495861 | 0.547586 |
| MmugDNA.8903.1.S1_at   | MmugDNA.8903.1 | 8.47  | 7.86  | 0.36 | 0.17 | 1.53  | 0.101431 | 0.268731 | 0.372888 | 0.534138 |
| MmugDNA.8906.1.S1_at   | MmugDNA.8906.1 | 11.1  | 11.02 | 0.16 | 0.04 | 1.05  | 0.874907 | 0.140545 | 0.94633  | 0.413807 |
| MmugDNA.8913.1.S1_at   | MmugDNA.8913.1 | 4.93  | 4.8   | 0.14 | 0.29 | 1.09  | 0.334376 | 0.467075 | 0.615487 | 0.676825 |
| MmugDNA.8918.1.S1_at   | MmugDNA.8918.1 | 7.25  | 7.24  | 0.16 | 0.16 | 1.01  | 0.459951 | 0.796357 | 0.707972 | 0.882625 |
| MmugDNA.8921.1.S1_at   | MmugDNA.8921.1 | 10.02 | 9.88  | 0.3  | 0.06 | 1.1   | 0.485148 | 0.058467 | 0.724739 | 0.288549 |
| MmugDNA.8927.1.S1_at   | MmugDNA.8927.1 | 4.94  | 5.04  | 0.07 | 0.13 | -1.07 | 0.216433 | 0.301321 | 0.514211 | 0.559356 |
| MmugDNA.8933.1.S1_at   | MmugDNA.8933.1 | 12.63 | 12.81 | 0.07 | 0.08 | -1.13 | 0.062988 | 0.184394 | 0.30772  | 0.460458 |
| MmugDNA.8935.1.S1_at   | MmugDNA.8935.1 | 5.49  | 5.46  | 0.65 | 0.26 | 1.02  | 0.969598 | 0.245838 | 0.987931 | 0.515519 |
| MmugDNA.8936.1.S1_x_at | MmugDNA.8936.1 | 6.67  | 6.73  | 0.26 | 0.05 | -1.04 | 0.661391 | 0.829842 | 0.836571 | 0.902225 |
| MmugDNA.8950.1.S1_at   | MmugDNA.8950.1 | 2.95  | 2.91  | 0.08 | 0.01 | 1.03  | 0.353393 | 0.696007 | 0.630556 | 0.82338  |
| MmugDNA.8954.1.S1_at   | MmugDNA.8954.1 | 4.73  | 4.74  | 0.07 | 0.14 | -1.01 | 0.59818  | 0.307488 | 0.79722  | 0.563757 |
| MmugDNA.8958.1.S1_at   | MmugDNA.8958.1 | 3.09  | 3.05  | 0.21 | 0.1  | 1.03  | 0.354755 | 0.488981 | 0.631771 | 0.691529 |
| MmugDNA.896.1.S1_at    | MmugDNA.896.1  | 11.13 | 11.45 | 0.31 | 0.07 | -1.25 | 0.174062 | 0.428124 | 0.468351 | 0.649676 |
| MmugDNA.8963.1.S1_at   | MmugDNA.8963.1 | 5.85  | 6.27  | 0.41 | 0.07 | -1.34 | 0.487228 | 0.483118 | 0.726032 | 0.687725 |
| MmugDNA.8964.1.S1_at   | MmugDNA.8964.1 | 10.23 | 10.6  | 0.23 | 0.13 | -1.29 | 0.104583 | 0.197962 | 0.377932 | 0.472936 |
| MmugDNA.8964.1.S1_s_at | MmugDNA.8964.1 | 9.59  | 9.84  | 0.23 | 0.1  | -1.19 | 0.202118 | 0.174799 | 0.499683 | 0.451407 |
| MmugDNA.8970.1.S1_at   | MmugDNA.8970.1 | 10.66 | 10.49 | 0.15 | 0.16 | 1.13  | 0.098186 | 0.186263 | 0.36881  | 0.462138 |
| MmugDNA.8974.1.S1_at   | MmugDNA.8974.1 | 11.47 | 11.48 | 0.05 | 0.1  | -1.01 | 0.249175 | 0.18197  | 0.544437 | 0.458503 |
| MmugDNA.8975.1.S1_at   | MmugDNA.8975.1 | 5.49  | 5.45  | 0.01 | 0.03 | 1.03  | 0.042127 | 0.473865 | 0.262198 | 0.681082 |
| MmugDNA.899.1.S1_at    | MmugDNA.899.1  | 10.98 | 10.98 | 0.1  | 0.05 | -1    | 0.75191  | 0.653878 | 0.885488 | 0.797692 |
| MmugDNA.8996.1.S1_at   | MmugDNA.8996.1 | 8.78  | 8.82  | 0.15 | 0.08 | -1.03 | 0.99488  | 0.023835 | 0.997957 | 0.193372 |
| MmugDNA.900.1.S1_at    | MmugDNA.900.1  | 4.77  | 4.83  | 0.21 | 0.05 | -1.04 | 0.576327 | 0.664203 | 0.783164 | 0.803247 |
| MmugDNA.9000.1.S1_at   | MmugDNA.9000.1 | 11.56 | 11.96 | 0.86 | 0.18 | -1.32 | 0.47033  | 0.154137 | 0.714893 | 0.42887  |
| MmugDNA.9001.1.S1_at   | MmugDNA.9001.1 | 7.62  | 7.46  | 0.47 | 0.09 | 1.12  | 0.838582 | 0.728442 | 0.929155 | 0.843019 |
| MmugDNA.9002.1.S1_at   | MmugDNA.9002.1 | 9.73  | 9.92  | 0.29 | 0.07 | -1.14 | 0.216261 | 0.425488 | 0.514035 | 0.647866 |
| MmugDNA.9004.1.S1_at   | MmugDNA.9004.1 | 4.05  | 4.1   | 0.4  | 0.15 | -1.03 | 0.509928 | 0.682373 | 0.741324 | 0.814526 |
| MmugDNA.9006.1.S1_at   | MmugDNA.9006.1 | 6.74  | 6.85  | 0.17 | 0.14 | -1.08 | 0.673453 | 0.86168  | 0.843822 | 0.921392 |
| MmugDNA.902.1.S1_at    | MmugDNA.902.1  | 10.88 | 10.4  | 0.08 | 0.27 | 1.39  | 0.077065 | 0.007017 | 0.335617 | 0.113044 |
| MmugDNA.9020.1.S1_at   | MmugDNA.9020.1 | 10.43 | 10.22 | 0.19 | 0.09 | 1.16  | 0.088554 | 0.042656 | 0.354742 | 0.251037 |
| MmugDNA.9022.1.S1_at   | MmugDNA.9022.1 | 7.19  | 7.42  | 0.16 | 0.03 | -1.17 | 0.190284 | 0.228365 | 0.486665 | 0.50054  |
| MmugDNA.9025.1.S1_at   | MmugDNA.9025.1 | 2.83  | 2.81  | 0.02 | 0.02 | 1.02  | 0.484481 | 0.250851 | 0.724318 | 0.51956  |
| MmugDNA.903.1.S1_at    | MmugDNA.903.1  | 5.52  | 5.88  | 0.7  | 0.46 | -1.29 | 0.533035 | 0.339295 | 0.756786 | 0.58598  |
| MmugDNA.9030.1.S1_at   | MmugDNA.9030.1 | 10.09 | 10.67 | 0.32 | 0.08 | -1.49 | 0.015829 | 0.50965  | 0.178308 | 0.704273 |
| MmugDNA.9031.1.S1_at   | MmugDNA.9031.1 | 7.23  | 7.01  | 0.2  | 0.32 | 1.17  | 0.618966 | 0.234987 | 0.810946 | 0.506162 |
| MmugDNA.9032.1.S1_at   | MmugDNA.9032.1 | 12.18 | 12.4  | 0.04 | 0.05 | -1.16 | 0.00519  | 0.021081 | 0.116998 | 0.181869 |
| MmugDNA.9033.1.S1_at   | MmugDNA.9033.1 | 11.57 | 12.06 | 0.3  | 0.12 | -1.41 | 0.102127 | 0.276034 | 0.373993 | 0.540071 |
| MmugDNA.9035.1.S1_at   | MmugDNA.9035.1 | 5.75  | 5.76  | 0.02 | 0.02 | -1    | 0.98956  | 0.30921  | 0.996364 | 0.564807 |

|                        |                |       |       |      |      |       |          |          |          |          |
|------------------------|----------------|-------|-------|------|------|-------|----------|----------|----------|----------|
| MmugDNA.9040.1.S1_at   | MmugDNA.9040.1 | 6.71  | 6.52  | 0.29 | 0.45 | 1.14  | 0.370882 | 0.485978 | 0.643707 | 0.689551 |
| MmugDNA.9044.1.S1_at   | MmugDNA.9044.1 | 11.19 | 11.4  | 0.29 | 0.07 | -1.16 | 0.1514   | 0.272792 | 0.440961 | 0.537505 |
| MmugDNA.9047.1.S1_at   | MmugDNA.9047.1 | 8.58  | 8.44  | 0.1  | 0.13 | 1.1   | 0.399019 | 0.001011 | 0.66455  | 0.050657 |
| MmugDNA.9049.1.S1_at   | MmugDNA.9049.1 | 5.51  | 5.63  | 0.28 | 0.08 | -1.09 | 0.662882 | 0.417836 | 0.837334 | 0.642449 |
| MmugDNA.9051.1.S1_at   | MmugDNA.9051.1 | 9.55  | 9.24  | 0.16 | 0.06 | 1.23  | 0.02609  | 0.055501 | 0.214634 | 0.281404 |
| MmugDNA.9052.1.S1_at   | MmugDNA.9052.1 | 9.35  | 9.21  | 0.47 | 0.32 | 1.1   | 0.836622 | 0.942014 | 0.928302 | 0.967113 |
| MmugDNA.9055.1.S1_at   | MmugDNA.9055.1 | 4.15  | 4.41  | 0.42 | 0.41 | -1.2  | 0.217833 | 0.246936 | 0.515637 | 0.516238 |
| MmugDNA.9056.1.S1_at   | MmugDNA.9056.1 | 9.39  | 9.31  | 0.18 | 0.07 | 1.06  | 0.290927 | 0.011742 | 0.580285 | 0.140342 |
| MmugDNA.906.1.S1_at    | MmugDNA.906.1  | 9.64  | 9.25  | 0.22 | 0.02 | 1.31  | 0.042327 | 0.071582 | 0.262785 | 0.313714 |
| MmugDNA.9062.1.S1_at   | MmugDNA.9062.1 | 4.6   | 4.87  | 0.19 | 0.16 | -1.21 | 0.552909 | 0.181672 | 0.769522 | 0.458271 |
| MmugDNA.9066.1.S1_at   | MmugDNA.9066.1 | 12.33 | 11.96 | 0.25 | 0.11 | 1.29  | 0.113872 | 0.01726  | 0.390587 | 0.166393 |
| MmugDNA.9069.1.S1_at   | MmugDNA.9069.1 | 9.07  | 10.16 | 0.54 | 0.2  | -2.12 | 0.018653 | 0.024458 | 0.189742 | 0.195724 |
| MmugDNA.9078.1.S1_at   | MmugDNA.9078.1 | 9.71  | 9.29  | 0.2  | 0.37 | 1.33  | 0.620919 | 0.865352 | 0.812296 | 0.923563 |
| MmugDNA.9079.1.S1_at   | MmugDNA.9079.1 | 5.2   | 5.18  | 0.06 | 0.1  | 1.02  | 0.903204 | 0.978652 | 0.959024 | 0.988411 |
| MmugDNA.908.1.S1_at    | MmugDNA.908.1  | 7.31  | 7.26  | 0.66 | 0.05 | 1.04  | 0.305099 | 0.394046 | 0.592065 | 0.626734 |
| MmugDNA.908.1.S1_x_at  | MmugDNA.908.1  | 7.45  | 7.18  | 0.45 | 0.08 | 1.21  | 0.215173 | 0.232702 | 0.512891 | 0.504359 |
| MmugDNA.9083.1.S1_at   | MmugDNA.9083.1 | 6.48  | 6.16  | 0.83 | 0.19 | 1.26  | 0.719091 | 0.328359 | 0.867481 | 0.578045 |
| MmugDNA.9088.1.S1_at   | MmugDNA.9088.1 | 5.46  | 4.98  | 0.88 | 0.08 | 1.39  | 0.224943 | 0.155443 | 0.522872 | 0.430802 |
| MmugDNA.9095.1.S1_at   | MmugDNA.9095.1 | 3.59  | 3.57  | 0.36 | 0.33 | 1.01  | 0.821705 | 0.410699 | 0.92058  | 0.637509 |
| MmugDNA.91.1.S1_at     | MmugDNA.91.1   | 11.58 | 11.44 | 0.05 | 0.07 | 1.1   | 0.060924 | 0.366725 | 0.303761 | 0.606498 |
| MmugDNA.910.1.S1_at    | MmugDNA.910.1  | 6.14  | 5.73  | 0.82 | 0.48 | 1.33  | 0.68123  | 0.428443 | 0.847983 | 0.649993 |
| MmugDNA.9100.1.S1_at   | MmugDNA.9100.1 | 7.6   | 7.58  | 0.08 | 0.03 | 1.02  | 0.213207 | 0.534158 | 0.511046 | 0.720143 |
| MmugDNA.9101.1.S1_at   | MmugDNA.9101.1 | 8.11  | 9.41  | 0.49 | 0.37 | -2.46 | 0.020044 | 0.059833 | 0.195082 | 0.291286 |
| MmugDNA.9106.1.S1_at   | MmugDNA.9106.1 | 8.81  | 9.02  | 0.33 | 0.24 | -1.16 | 0.389    | 0.377284 | 0.65696  | 0.614869 |
| MmugDNA.9113.1.S1_at   | MmugDNA.9113.1 | 8.13  | 8.35  | 0.03 | 0.2  | -1.17 | 0.405171 | 0.017811 | 0.668706 | 0.168588 |
| MmugDNA.912.1.S1_at    | MmugDNA.912.1  | 9.45  | 9.95  | 0.65 | 0.08 | -1.41 | 0.766353 | 0.408365 | 0.892818 | 0.635639 |
| MmugDNA.9127.1.S1_at   | MmugDNA.9127.1 | 7.62  | 7.66  | 0.2  | 0.29 | -1.03 | 0.392966 | 0.00769  | 0.659811 | 0.117153 |
| MmugDNA.9128.1.S1_at   | MmugDNA.9128.1 | 4.15  | 4.16  | 0.11 | 0.05 | -1.01 | 0.782727 | 0.444343 | 0.900872 | 0.66198  |
| MmugDNA.9129.1.S1_at   | MmugDNA.9129.1 | 10    | 10.13 | 0.25 | 0.14 | -1.1  | 0.306886 | 0.643902 | 0.593637 | 0.791202 |
| MmugDNA.9131.1.S1_at   | MmugDNA.9131.1 | 9.65  | 8.6   | 0.23 | 0.24 | 2.07  | 0.005789 | 0.005864 | 0.121984 | 0.104856 |
| MmugDNA.9133.1.S1_s_at | MmugDNA.9133.1 | 4.15  | 4.2   | 0.09 | 0.13 | -1.04 | 0.523086 | 0.673898 | 0.750171 | 0.809483 |
| MmugDNA.9137.1.S1_at   | MmugDNA.9137.1 | 4.93  | 4.83  | 0.18 | 0.16 | 1.07  | 0.694316 | 0.948844 | 0.854084 | 0.97077  |
| MmugDNA.914.1.S1_at    | MmugDNA.914.1  | 6.05  | 6.11  | 0.24 | 0.06 | -1.04 | 0.457255 | 0.467879 | 0.706249 | 0.677386 |
| MmugDNA.9141.1.S1_at   | MmugDNA.9141.1 | 5.77  | 4.91  | 0.88 | 0.35 | 1.82  | 0.144406 | 0.135342 | 0.431301 | 0.40745  |
| MmugDNA.9141.1.S1_x_at | MmugDNA.9141.1 | 6.38  | 6     | 0.96 | 0.27 | 1.3   | 0.257769 | 0.230077 | 0.55199  | 0.50194  |
| MmugDNA.9147.1.S1_at   | MmugDNA.9147.1 | 9.49  | 8.61  | 0.24 | 0.18 | 1.83  | 0.013517 | 0.289837 | 0.167112 | 0.550831 |
| MmugDNA.9151.1.S1_at   | MmugDNA.9151.1 | 10.87 | 11.12 | 0.3  | 0.03 | -1.18 | 0.275222 | 0.41338  | 0.566906 | 0.63964  |
| MmugDNA.9158.1.S1_at   | MmugDNA.9158.1 | 12.27 | 11.88 | 0.21 | 0.02 | 1.31  | 0.029302 | 0.033067 | 0.224017 | 0.225068 |
| MmugDNA.916.1.S1_at    | MmugDNA.916.1  | 10.83 | 10.79 | 0.14 | 0.1  | 1.03  | 0.764327 | 0.741783 | 0.89193  | 0.850508 |
| MmugDNA.9164.1.S1_at   | MmugDNA.9164.1 | 4.02  | 3.91  | 0.11 | 0.11 | 1.08  | 0.94391  | 0.320664 | 0.976384 | 0.572758 |
| MmugDNA.9172.1.S1_at   | MmugDNA.9172.1 | 13.15 | 13.25 | 0.03 | 0.02 | -1.07 | 0.009013 | 0.487752 | 0.144777 | 0.690658 |
| MmugDNA.9177.1.S1_at   | MmugDNA.9177.1 | 8.14  | 8.07  | 0.2  | 0.06 | 1.05  | 0.576799 | 0.926915 | 0.783405 | 0.958424 |
| MmugDNA.9179.1.S1_at   | MmugDNA.9179.1 | 9.66  | 9.43  | 0.2  | 0.02 | 1.17  | 0.301343 | 0.319274 | 0.589283 | 0.571722 |

|                        |                |       |       |      |      |       |          |          |          |          |
|------------------------|----------------|-------|-------|------|------|-------|----------|----------|----------|----------|
| MmugDNA.9192.1.S1_at   | MmugDNA.9192.1 | 8.03  | 8.13  | 0.24 | 0.26 | -1.07 | 0.827968 | 0.693316 | 0.923804 | 0.821612 |
| MmugDNA.9195.1.S1_at   | MmugDNA.9195.1 | 6.05  | 5.64  | 0.13 | 0.18 | 1.34  | 0.040117 | 0.244776 | 0.256783 | 0.514629 |
| MmugDNA.9199.1.S1_at   | MmugDNA.9199.1 | 8.02  | 7.91  | 0.76 | 0.12 | 1.08  | 0.894355 | 0.239424 | 0.954941 | 0.510101 |
| MmugDNA.9206.1.S1_at   | MmugDNA.9206.1 | 6.01  | 6.32  | 0.07 | 0.11 | -1.25 | 0.010747 | 0.151933 | 0.153406 | 0.426597 |
| MmugDNA.9209.1.S1_at   | MmugDNA.9209.1 | 8.73  | 8.56  | 0.21 | 0.11 | 1.12  | 0.119723 | 0.126928 | 0.397683 | 0.397655 |
| MmugDNA.9210.1.S1_at   | MmugDNA.9210.1 | 8.57  | 8.53  | 0.49 | 0.37 | 1.03  | 0.688082 | 0.548822 | 0.851038 | 0.72944  |
| MmugDNA.9218.1.S1_at   | MmugDNA.9218.1 | 9.51  | 9.62  | 0.31 | 0.05 | -1.08 | 0.936755 | 0.018586 | 0.973607 | 0.171539 |
| MmugDNA.9219.1.S1_at   | MmugDNA.9219.1 | 11.32 | 11.26 | 0.18 | 0.04 | 1.04  | 0.223439 | 0.037457 | 0.521228 | 0.23783  |
| MmugDNA.9222.1.A1_at   | MmugDNA.9222.1 | 4.24  | 3.88  | 0.28 | 0.22 | 1.29  | 0.369615 | 0.692617 | 0.642965 | 0.821061 |
| MmugDNA.9222.1.S1_at   | MmugDNA.9222.1 | 3.47  | 3.48  | 0.18 | 0.09 | -1    | 0.45717  | 0.416704 | 0.706179 | 0.64167  |
| MmugDNA.9225.1.S1_at   | MmugDNA.9225.1 | 6.05  | 6.34  | 0.16 | 0.08 | -1.22 | 0.219776 | 0.497381 | 0.517527 | 0.696715 |
| MmugDNA.9227.1.S1_at   | MmugDNA.9227.1 | 8.96  | 9.08  | 0.04 | 0.05 | -1.08 | 0.079764 | 0.00223  | 0.339935 | 0.069565 |
| MmugDNA.9234.1.S1_at   | MmugDNA.9234.1 | 9.48  | 9.49  | 0.1  | 0.01 | -1    | 0.884717 | 0.006525 | 0.95097  | 0.10961  |
| MmugDNA.9235.1.S1_s_at | MmugDNA.9235.1 | 12.24 | 12.23 | 0.06 | 0.04 | 1.01  | 0.151415 | 0.002371 | 0.440961 | 0.071964 |
| MmugDNA.9238.1.S1_at   | MmugDNA.9238.1 | 9.02  | 9.37  | 0.27 | 0.11 | -1.28 | 0.046679 | 0.174749 | 0.273611 | 0.451302 |
| MmugDNA.9241.1.S1_at   | MmugDNA.9241.1 | 8.92  | 8.74  | 0.31 | 0.12 | 1.14  | 0.720711 | 0.913815 | 0.868227 | 0.951523 |
| MmugDNA.9248.1.S1_at   | MmugDNA.9248.1 | 10.75 | 10.57 | 0.24 | 0.02 | 1.13  | 0.379618 | 0.280227 | 0.649402 | 0.543487 |
| MmugDNA.9251.1.S1_at   | MmugDNA.9251.1 | 5.98  | 5.97  | 0.05 | 0.05 | 1.01  | 0.866862 | 0.024531 | 0.942479 | 0.196012 |
| MmugDNA.9253.1.S1_at   | MmugDNA.9253.1 | 6.74  | 6.87  | 0.4  | 0.08 | -1.1  | 0.596665 | 0.433674 | 0.79595  | 0.65392  |
| MmugDNA.9257.1.S1_at   | MmugDNA.9257.1 | 6.97  | 7.08  | 0.57 | 0.31 | -1.08 | 0.581281 | 0.812206 | 0.786445 | 0.891555 |
| MmugDNA.9262.1.S1_at   | MmugDNA.9262.1 | 4.58  | 4.62  | 0.16 | 0.26 | -1.02 | 0.803535 | 0.723094 | 0.911852 | 0.839592 |
| MmugDNA.9266.1.S1_at   | MmugDNA.9266.1 | 7.5   | 7.6   | 0.17 | 0.06 | -1.07 | 0.716632 | 0.711124 | 0.866324 | 0.832417 |
| MmugDNA.928.1.S1_at    | MmugDNA.928.1  | 7.69  | 8.6   | 0.68 | 0.22 | -1.89 | 0.30433  | 0.682327 | 0.59155  | 0.814506 |
| MmugDNA.9282.1.S1_at   | MmugDNA.9282.1 | 9.96  | 10.44 | 0.62 | 0.11 | -1.39 | 0.756267 | 0.712754 | 0.887735 | 0.8335   |
| MmugDNA.9284.1.S1_at   | MmugDNA.9284.1 | 13.27 | 13.31 | 0.18 | 0.05 | -1.03 | 0.711151 | 0.939421 | 0.863578 | 0.965611 |
| MmugDNA.9285.1.S1_at   | MmugDNA.9285.1 | 3.68  | 4.4   | 0.33 | 0.4  | -1.65 | 0.150547 | 0.142447 | 0.439612 | 0.416035 |
| MmugDNA.9287.1.S1_at   | MmugDNA.9287.1 | 4.24  | 4.59  | 0.7  | 0.1  | -1.27 | 0.989223 | 0.381701 | 0.996252 | 0.617895 |
| MmugDNA.9291.1.S1_at   | MmugDNA.9291.1 | 3.59  | 3.55  | 0.06 | 0.02 | 1.03  | 0.138316 | 0.528155 | 0.423592 | 0.716456 |
| MmugDNA.9293.1.S1_at   | MmugDNA.9293.1 | 4.56  | 4.52  | 0.07 | 0.09 | 1.03  | 0.304353 | 0.139316 | 0.591574 | 0.412518 |
| MmugDNA.9294.1.S1_at   | MmugDNA.9294.1 | 8.49  | 8.07  | 0.19 | 0.16 | 1.34  | 0.095506 | 0.038815 | 0.364961 | 0.241916 |
| MmugDNA.9295.1.S1_at   | MmugDNA.9295.1 | 12.8  | 12.83 | 0.34 | 0.02 | -1.02 | 0.974559 | 0.832451 | 0.98978  | 0.903893 |
| MmugDNA.9301.1.S1_at   | MmugDNA.9301.1 | 8.15  | 8.42  | 0.09 | 0.04 | -1.21 | 0.010789 | 0.097624 | 0.153792 | 0.355473 |
| MmugDNA.9302.1.S1_at   | MmugDNA.9302.1 | 6.3   | 6.33  | 0.07 | 0.08 | -1.03 | 0.143879 | 0.365747 | 0.430578 | 0.605685 |
| MmugDNA.9304.1.S1_at   | MmugDNA.9304.1 | 6.12  | 9.16  | 1.25 | 0.25 | -8.22 | 0.040811 | 0.271328 | 0.258464 | 0.53644  |
| MmugDNA.9311.1.S1_at   | MmugDNA.9311.1 | 3.64  | 3.62  | 0.2  | 0.06 | 1.02  | 0.283826 | 0.38268  | 0.574077 | 0.618843 |
| MmugDNA.9313.1.S1_at   | MmugDNA.9313.1 | 6.57  | 6.45  | 0.11 | 0.03 | 1.09  | 0.064602 | 0.1004   | 0.310789 | 0.359541 |
| MmugDNA.9315.1.S1_at   | MmugDNA.9315.1 | 6.99  | 6.93  | 0.12 | 0.1  | 1.05  | 0.235781 | 0.025448 | 0.533475 | 0.200043 |
| MmugDNA.9322.1.S1_s_at | MmugDNA.9322.1 | 11.03 | 11.07 | 0.25 | 0.01 | -1.03 | 0.30382  | 0.285333 | 0.591195 | 0.547198 |
| MmugDNA.9325.1.S1_s_at | MmugDNA.9325.1 | 10.92 | 10.6  | 0.33 | 0.2  | 1.25  | 0.784139 | 0.446637 | 0.901553 | 0.66287  |
| MmugDNA.9326.1.S1_at   | MmugDNA.9326.1 | 11.49 | 12.15 | 0.41 | 0.07 | -1.58 | 0.062284 | 0.164448 | 0.306263 | 0.440678 |
| MmugDNA.9329.1.S1_at   | MmugDNA.9329.1 | 6.61  | 6.4   | 0.05 | 0.05 | 1.16  | 0.007405 | 0.240295 | 0.134211 | 0.510871 |
| MmugDNA.933.1.S1_at    | MmugDNA.933.1  | 9.26  | 9.22  | 0.1  | 0.1  | 1.03  | 0.51919  | 0.401312 | 0.747956 | 0.630922 |
| MmugDNA.9333.1.S1_at   | MmugDNA.9333.1 | 12.34 | 12.16 | 0.05 | 0.08 | 1.13  | 0.01966  | 0.217822 | 0.193139 | 0.491385 |

|                      |                |       |       |      |      |       |          |          |          |          |
|----------------------|----------------|-------|-------|------|------|-------|----------|----------|----------|----------|
| MmugDNA.9335.1.S1_at | MmugDNA.9335.1 | 7.24  | 6.32  | 0.23 | 0.3  | 1.9   | 0.046064 | 0.022926 | 0.272301 | 0.189403 |
| MmugDNA.9336.1.S1_at | MmugDNA.9336.1 | 12.66 | 12.8  | 0.14 | 0.14 | -1.1  | 0.828972 | 0.056547 | 0.924548 | 0.283835 |
| MmugDNA.9338.1.S1_at | MmugDNA.9338.1 | 10.95 | 11.12 | 0.22 | 0.06 | -1.13 | 0.611186 | 0.812166 | 0.806139 | 0.89155  |
| MmugDNA.9339.1.S1_at | MmugDNA.9339.1 | 6.31  | 6.53  | 0.56 | 0.36 | -1.16 | 0.215375 | 0.084703 | 0.513059 | 0.336196 |
| MmugDNA.934.1.S1_at  | MmugDNA.934.1  | 6.28  | 6.29  | 0.03 | 0.07 | -1.01 | 0.295516 | 0.435905 | 0.584279 | 0.655618 |
| MmugDNA.9342.1.S1_at | MmugDNA.9342.1 | 5.17  | 6.77  | 0.71 | 0.37 | -3.04 | 0.070917 | 0.265568 | 0.324337 | 0.531428 |
| MmugDNA.9347.1.S1_at | MmugDNA.9347.1 | 6.6   | 6.44  | 0.02 | 0.05 | 1.11  | 0.01938  | 0.036357 | 0.192293 | 0.235105 |
| MmugDNA.9349.1.S1_at | MmugDNA.9349.1 | 11.09 | 11.13 | 0.22 | 0.09 | -1.03 | 0.819983 | 0.07812  | 0.919687 | 0.324578 |
| MmugDNA.9351.1.S1_at | MmugDNA.9351.1 | 12.09 | 12.45 | 0.34 | 0.04 | -1.28 | 0.142089 | 0.74573  | 0.42813  | 0.85256  |
| MmugDNA.9352.1.S1_at | MmugDNA.9352.1 | 11.45 | 11.42 | 0.1  | 0.04 | 1.02  | 0.367405 | 0.224731 | 0.641394 | 0.497614 |
| MmugDNA.9356.1.S1_at | MmugDNA.9356.1 | 6.29  | 5.38  | 0.14 | 0.1  | 1.88  | 0.000812 | 0.000927 | 0.073351 | 0.048858 |
| MmugDNA.9363.1.S1_at | MmugDNA.9363.1 | 4.8   | 4.7   | 0.17 | 0.17 | 1.07  | 0.953725 | 0.986756 | 0.981032 | 0.992539 |
| MmugDNA.9364.1.S1_at | MmugDNA.9364.1 | 11.19 | 10.96 | 0.18 | 0.03 | 1.17  | 0.100931 | 0.101677 | 0.372166 | 0.361562 |
| MmugDNA.9368.1.S1_at | MmugDNA.9368.1 | 7.69  | 8.21  | 0.24 | 0.12 | -1.44 | 0.011973 | 0.250088 | 0.159466 | 0.519139 |
| MmugDNA.9394.1.S1_at | MmugDNA.9394.1 | 5     | 5.12  | 0.25 | 0.02 | -1.09 | 0.962886 | 0.518988 | 0.984964 | 0.710813 |
| MmugDNA.9395.1.S1_at | MmugDNA.9395.1 | 6.97  | 6.88  | 0.22 | 0.12 | 1.06  | 0.979534 | 0.995604 | 0.992184 | 0.997264 |
| MmugDNA.94.1.S1_at   | MmugDNA.94.1   | 6.01  | 6.13  | 0.11 | 0.02 | -1.08 | 0.215189 | 0.310798 | 0.512891 | 0.565832 |
| MmugDNA.9400.1.S1_at | MmugDNA.9400.1 | 4.8   | 6.19  | 0.4  | 0.36 | -2.62 | 0.037793 | 0.275931 | 0.250118 | 0.540035 |
| MmugDNA.9401.1.S1_at | MmugDNA.9401.1 | 10.41 | 10.24 | 0.19 | 0.09 | 1.12  | 0.428942 | 0.558375 | 0.685557 | 0.735578 |
| MmugDNA.9403.1.S1_at | MmugDNA.9403.1 | 7.89  | 7.05  | 0.53 | 0.22 | 1.79  | 0.104057 | 0.290424 | 0.377336 | 0.551169 |
| MmugDNA.9404.1.S1_at | MmugDNA.9404.1 | 10.02 | 9.42  | 0.3  | 0.29 | 1.51  | 0.090685 | 0.036771 | 0.357658 | 0.236291 |
| MmugDNA.941.1.S1_at  | MmugDNA.941.1  | 9.14  | 7.47  | 1.36 | 0.12 | 3.19  | 0.348358 | 0.46947  | 0.626353 | 0.678248 |
| MmugDNA.9413.1.S1_at | MmugDNA.9413.1 | 13.07 | 12.9  | 0.06 | 0.04 | 1.12  | 0.044415 | 0.018601 | 0.267911 | 0.171539 |
| MmugDNA.9415.1.S1_at | MmugDNA.9415.1 | 9.15  | 9.39  | 0.2  | 0.13 | -1.18 | 0.435405 | 0.050774 | 0.690435 | 0.270472 |
| MmugDNA.9417.1.S1_at | MmugDNA.9417.1 | 10.33 | 10.31 | 0.04 | 0.11 | 1.01  | 0.996987 | 0.114753 | 0.999045 | 0.381297 |
| MmugDNA.9420.1.S1_at | MmugDNA.9420.1 | 8     | 7.9   | 0.31 | 0.01 | 1.08  | 0.189293 | 0.049374 | 0.485819 | 0.267126 |
| MmugDNA.9422.1.S1_at | MmugDNA.9422.1 | 10.31 | 9.95  | 0.27 | 0.02 | 1.28  | 0.290758 | 0.427929 | 0.580217 | 0.649602 |
| MmugDNA.9424.1.S1_at | MmugDNA.9424.1 | 11.82 | 12.23 | 0.09 | 0.08 | -1.33 | 0.006323 | 0.006071 | 0.125881 | 0.106175 |
| MmugDNA.9433.1.S1_at | MmugDNA.9433.1 | 7.44  | 7.45  | 0.04 | 0.08 | -1.01 | 0.308855 | 0.01919  | 0.595336 | 0.174282 |
| MmugDNA.9434.1.S1_at | MmugDNA.9434.1 | 10.85 | 10.24 | 0.16 | 0.14 | 1.52  | 0.011418 | 0.028765 | 0.157067 | 0.211466 |
| MmugDNA.9435.1.S1_at | MmugDNA.9435.1 | 6.01  | 5.75  | 0.31 | 0.17 | 1.2   | 0.122154 | 0.207676 | 0.400941 | 0.481906 |
| MmugDNA.9438.1.S1_at | MmugDNA.9438.1 | 11.03 | 11.36 | 0.09 | 0.06 | -1.26 | 0.011296 | 0.490016 | 0.156371 | 0.692076 |
| MmugDNA.9440.1.S1_at | MmugDNA.9440.1 | 9.56  | 9.54  | 0.13 | 0.04 | 1.01  | 0.531993 | 0.953799 | 0.756137 | 0.973691 |
| MmugDNA.9442.1.S1_at | MmugDNA.9442.1 | 6.2   | 7.1   | 0.48 | 0.22 | -1.88 | 0.045633 | 0.152461 | 0.271064 | 0.42728  |
| MmugDNA.9452.1.S1_at | MmugDNA.9452.1 | 6.7   | 6.25  | 0.06 | 0.12 | 1.36  | 0.007411 | 0.015186 | 0.134211 | 0.156614 |
| MmugDNA.9462.1.S1_at | MmugDNA.9462.1 | 13.08 | 13.05 | 0.07 | 0.08 | 1.02  | 0.146158 | 0.12351  | 0.433985 | 0.393572 |
| MmugDNA.9465.1.S1_at | MmugDNA.9465.1 | 8.63  | 8.81  | 0.09 | 0.02 | -1.13 | 0.062055 | 0.772004 | 0.305631 | 0.867436 |
| MmugDNA.9466.1.S1_at | MmugDNA.9466.1 | 11.96 | 11.9  | 0.13 | 0.15 | 1.05  | 0.148412 | 0.353582 | 0.436978 | 0.59664  |
| MmugDNA.9469.1.S1_at | MmugDNA.9469.1 | 12.64 | 12.4  | 0.08 | 0.04 | 1.18  | 0.026708 | 0.359192 | 0.216593 | 0.600528 |
| MmugDNA.9470.1.S1_at | MmugDNA.9470.1 | 12.06 | 11.91 | 0.14 | 0.07 | 1.11  | 0.494934 | 0.111133 | 0.731451 | 0.375714 |
| MmugDNA.9471.1.S1_at | MmugDNA.9471.1 | 9.95  | 9.47  | 0.32 | 0.05 | 1.39  | 0.129192 | 0.009127 | 0.411529 | 0.125994 |
| MmugDNA.9479.1.S1_at | MmugDNA.9479.1 | 5.2   | 5.73  | 0.37 | 0.5  | -1.45 | 0.184083 | 0.097879 | 0.480042 | 0.355678 |
| MmugDNA.948.1.S1_at  | MmugDNA.948.1  | 4.69  | 4.63  | 0.08 | 0.12 | 1.04  | 0.565008 | 0.421549 | 0.776489 | 0.645162 |

|                        |                |       |       |      |      |       |          |          |          |          |
|------------------------|----------------|-------|-------|------|------|-------|----------|----------|----------|----------|
| MmugDNA.948.1.S1_x_at  | MmugDNA.948.1  | 4.39  | 4.38  | 0.05 | 0.08 | 1     | 0.424749 | 0.297134 | 0.682288 | 0.555996 |
| MmugDNA.9481.1.S1_at   | MmugDNA.9481.1 | 3.88  | 3.53  | 0.55 | 0.19 | 1.27  | 0.267891 | 0.377863 | 0.560651 | 0.615263 |
| MmugDNA.9488.1.S1_at   | MmugDNA.9488.1 | 12.66 | 12.61 | 0.23 | 0.05 | 1.03  | 0.974893 | 0.952675 | 0.989954 | 0.973147 |
| MmugDNA.9491.1.S1_at   | MmugDNA.9491.1 | 9.46  | 9.39  | 0.22 | 0.1  | 1.05  | 0.757413 | 0.070101 | 0.888727 | 0.310998 |
| MmugDNA.9495.1.S1_at   | MmugDNA.9495.1 | 9.22  | 9.12  | 0.4  | 0.07 | 1.07  | 0.823161 | 0.393112 | 0.921392 | 0.626102 |
| MmugDNA.9496.1.S1_at   | MmugDNA.9496.1 | 5.36  | 5.33  | 0.12 | 0.23 | 1.02  | 0.732113 | 0.138375 | 0.874767 | 0.411244 |
| MmugDNA.9497.1.S1_at   | MmugDNA.9497.1 | 9.61  | 8.36  | 0.27 | 0.2  | 2.38  | 0.003015 | 0.02771  | 0.100006 | 0.207873 |
| MmugDNA.950.1.S1_at    | MmugDNA.950.1  | 3.22  | 3.23  | 0.16 | 0.02 | -1.01 | 0.507022 | 0.435186 | 0.739413 | 0.655058 |
| MmugDNA.9500.1.S1_at   | MmugDNA.9500.1 | 6.91  | 7.2   | 0.3  | 0.26 | -1.22 | 0.09052  | 0.29893  | 0.357339 | 0.557561 |
| MmugDNA.9513.1.S1_at   | MmugDNA.9513.1 | 11.8  | 11.53 | 0.04 | 0.09 | 1.21  | 0.015488 | 0.005973 | 0.176647 | 0.105716 |
| MmugDNA.9517.1.S1_at   | MmugDNA.9517.1 | 4.76  | 4.57  | 0.17 | 0.14 | 1.14  | 0.932881 | 0.983007 | 0.971855 | 0.990691 |
| MmugDNA.9521.1.S1_at   | MmugDNA.9521.1 | 7.47  | 8.83  | 0.87 | 0.37 | -2.56 | 0.181111 | 0.457143 | 0.476388 | 0.670743 |
| MmugDNA.9522.1.S1_at   | MmugDNA.9522.1 | 7.38  | 6.87  | 0.31 | 0.13 | 1.42  | 0.141328 | 0.327263 | 0.427323 | 0.577173 |
| MmugDNA.9523.1.S1_at   | MmugDNA.9523.1 | 3.44  | 3.35  | 0.06 | 0.14 | 1.06  | 0.898248 | 0.381139 | 0.956732 | 0.617478 |
| MmugDNA.9524.1.S1_at   | MmugDNA.9524.1 | 10.11 | 10.23 | 0.32 | 0.19 | -1.09 | 0.682712 | 0.135394 | 0.848688 | 0.407478 |
| MmugDNA.9526.1.S1_at   | MmugDNA.9526.1 | 12.07 | 11.02 | 0.21 | 0.22 | 2.07  | 0.006026 | 0.327183 | 0.124151 | 0.577156 |
| MmugDNA.9528.1.S1_at   | MmugDNA.9528.1 | 12.86 | 12.98 | 0.11 | 0.05 | -1.09 | 0.466741 | 0.603791 | 0.712397 | 0.764299 |
| MmugDNA.9529.1.S1_at   | MmugDNA.9529.1 | 11.98 | 12.04 | 0.13 | 0.04 | -1.04 | 0.930276 | 0.17711  | 0.970651 | 0.453611 |
| MmugDNA.9537.1.S1_at   | MmugDNA.9537.1 | 13.89 | 13.95 | 0.1  | 0.05 | -1.04 | 0.410272 | 0.772642 | 0.672397 | 0.867785 |
| MmugDNA.9537.1.S1_s_at | MmugDNA.9537.1 | 14.48 | 14.53 | 0.02 | 0.03 | -1.04 | 0.129918 | 0.042328 | 0.412108 | 0.250324 |
| MmugDNA.954.1.S1_at    | MmugDNA.954.1  | 11.15 | 10.81 | 0.26 | 0.1  | 1.27  | 0.246353 | 0.012281 | 0.542125 | 0.143352 |
| MmugDNA.9545.1.S1_at   | MmugDNA.9545.1 | 5.37  | 5.35  | 0.33 | 0.11 | 1.02  | 0.514132 | 0.692512 | 0.744131 | 0.821061 |
| MmugDNA.9546.1.S1_s_at | MmugDNA.9546.1 | 12.28 | 12.03 | 0.19 | 0.03 | 1.19  | 0.137412 | 0.303686 | 0.422407 | 0.561113 |
| MmugDNA.9548.1.S1_at   | MmugDNA.9548.1 | 7.53  | 8.98  | 1.09 | 0.35 | -2.75 | 0.084858 | 0.077105 | 0.34881  | 0.322673 |
| MmugDNA.9553.1.S1_at   | MmugDNA.9553.1 | 11.56 | 11.87 | 0.05 | 0.08 | -1.24 | 0.004881 | 0.109817 | 0.115123 | 0.373758 |
| MmugDNA.9555.1.S1_at   | MmugDNA.9555.1 | 7.42  | 7.47  | 0.02 | 0.13 | -1.03 | 0.238612 | 0.086371 | 0.535974 | 0.338805 |
| MmugDNA.9556.1.S1_at   | MmugDNA.9556.1 | 10.11 | 9.88  | 0.14 | 0.11 | 1.18  | 0.111696 | 0.310652 | 0.38771  | 0.565787 |
| MmugDNA.9558.1.S1_at   | MmugDNA.9558.1 | 4.86  | 4.89  | 0.31 | 0.02 | -1.02 | 0.502888 | 0.537989 | 0.736533 | 0.72281  |
| MmugDNA.9559.1.S1_at   | MmugDNA.9559.1 | 6.53  | 6.87  | 0.13 | 0.11 | -1.27 | 0.049088 | 0.139832 | 0.279154 | 0.413131 |
| MmugDNA.9560.1.S1_at   | MmugDNA.9560.1 | 8     | 6.94  | 0.18 | 0.35 | 2.08  | 0.020717 | 0.008279 | 0.197517 | 0.12078  |
| MmugDNA.9572.1.S1_at   | MmugDNA.9572.1 | 6.28  | 5.79  | 0.09 | 0.35 | 1.4   | 0.080303 | 0.176023 | 0.34088  | 0.452526 |
| MmugDNA.9575.1.S1_at   | MmugDNA.9575.1 | 8.48  | 9.03  | 0.41 | 0.11 | -1.47 | 0.082913 | 0.882962 | 0.345027 | 0.933236 |
| MmugDNA.9578.1.S1_at   | MmugDNA.9578.1 | 9.37  | 9.28  | 0.18 | 0.17 | 1.06  | 0.334752 | 0.033494 | 0.615803 | 0.226577 |
| MmugDNA.9580.1.S1_at   | MmugDNA.9580.1 | 9.31  | 9.33  | 0.16 | 0.11 | -1.01 | 0.936057 | 0.476359 | 0.97328  | 0.682695 |
| MmugDNA.9581.1.S1_at   | MmugDNA.9581.1 | 11.88 | 12.01 | 0.16 | 0.13 | -1.09 | 0.45289  | 0.069156 | 0.703282 | 0.30917  |
| MmugDNA.9582.1.S1_at   | MmugDNA.9582.1 | 3.76  | 3.7   | 0.35 | 0.13 | 1.05  | 0.725768 | 0.899014 | 0.87132  | 0.942524 |
| MmugDNA.9588.1.S1_s_at | MmugDNA.9588.1 | 10.67 | 10.8  | 0.08 | 0.06 | -1.1  | 0.021783 | 0.891736 | 0.200878 | 0.938272 |
| MmugDNA.9591.1.S1_at   | MmugDNA.9591.1 | 8     | 9.18  | 0.71 | 0.15 | -2.25 | 0.019352 | 0.002085 | 0.192255 | 0.067486 |
| MmugDNA.9592.1.S1_at   | MmugDNA.9592.1 | 9.43  | 9.53  | 0.06 | 0.07 | -1.07 | 0.137107 | 0.003159 | 0.421956 | 0.081739 |
| MmugDNA.9595.1.S1_at   | MmugDNA.9595.1 | 5.05  | 5     | 0.05 | 0.03 | 1.04  | 0.106214 | 0.109301 | 0.380284 | 0.37308  |
| MmugDNA.9597.1.S1_at   | MmugDNA.9597.1 | 7.39  | 7.36  | 0.08 | 0.09 | 1.02  | 0.997027 | 0.388466 | 0.999049 | 0.622858 |
| MmugDNA.9600.1.S1_at   | MmugDNA.9600.1 | 7.88  | 6.51  | 0.91 | 0.52 | 2.59  | 0.286935 | 0.390285 | 0.576674 | 0.624128 |
| MmugDNA.9601.1.S1_at   | MmugDNA.9601.1 | 5.28  | 5.01  | 0.19 | 0.14 | 1.21  | 0.036015 | 0.198141 | 0.244831 | 0.473135 |

|                        |                |       |       |      |      |       |          |          |          |          |
|------------------------|----------------|-------|-------|------|------|-------|----------|----------|----------|----------|
| MmugDNA.9603.1.S1_at   | MmugDNA.9603.1 | 9.39  | 9.71  | 0.14 | 0.17 | -1.25 | 0.178661 | 0.040648 | 0.47343  | 0.246539 |
| MmugDNA.9604.1.S1_at   | MmugDNA.9604.1 | 13.84 | 13.77 | 0.04 | 0.02 | 1.05  | 0.028045 | 0.012603 | 0.219909 | 0.144807 |
| MmugDNA.9605.1.S1_at   | MmugDNA.9605.1 | 12.23 | 12.23 | 0.22 | 0.1  | 1     | 0.719719 | 0.777112 | 0.867741 | 0.870511 |
| MmugDNA.9607.1.S1_at   | MmugDNA.9607.1 | 13.64 | 13.68 | 0.03 | 0.01 | -1.03 | 0.108828 | 0.585321 | 0.383749 | 0.752844 |
| MmugDNA.9612.1.S1_s_at | MmugDNA.9612.1 | 12.8  | 12.96 | 0.17 | 0.04 | -1.11 | 0.246096 | 0.018521 | 0.541875 | 0.171238 |
| MmugDNA.9614.1.S1_at   | MmugDNA.9614.1 | 4.69  | 4.61  | 0.52 | 0.15 | 1.06  | 0.413461 | 0.603451 | 0.674789 | 0.76418  |
| MmugDNA.9615.1.S1_at   | MmugDNA.9615.1 | 4.96  | 4.58  | 0.17 | 0.06 | 1.3   | 0.043989 | 0.049639 | 0.266772 | 0.267876 |
| MmugDNA.9623.1.S1_at   | MmugDNA.9623.1 | 8.56  | 8.4   | 0.17 | 0.07 | 1.11  | 0.107763 | 0.00751  | 0.382464 | 0.116291 |
| MmugDNA.9629.1.S1_at   | MmugDNA.9629.1 | 10.72 | 10.47 | 0.14 | 0.05 | 1.19  | 0.053267 | 0.107123 | 0.287986 | 0.369808 |
| MmugDNA.9631.1.S1_at   | MmugDNA.9631.1 | 9.32  | 9.17  | 0.03 | 0.03 | 1.11  | 0.006514 | 0.001271 | 0.127373 | 0.055241 |
| MmugDNA.9632.1.S1_at   | MmugDNA.9632.1 | 6.19  | 6.9   | 0.38 | 0.16 | -1.64 | 0.032697 | 0.451814 | 0.234993 | 0.66662  |
| MmugDNA.9634.1.S1_at   | MmugDNA.9634.1 | 4.87  | 4.94  | 0.07 | 0.26 | -1.05 | 0.455425 | 0.663489 | 0.705136 | 0.803016 |
| MmugDNA.9639.1.S1_at   | MmugDNA.9639.1 | 11.09 | 10.93 | 0.06 | 0.06 | 1.12  | 0.057507 | 0.051345 | 0.297176 | 0.272052 |
| MmugDNA.964.1.S1_at    | MmugDNA.964.1  | 6.52  | 7.17  | 0.25 | 0.03 | -1.58 | 0.019725 | 0.06124  | 0.193424 | 0.294151 |
| MmugDNA.9642.1.S1_at   | MmugDNA.9642.1 | 5.55  | 5.49  | 0.02 | 0.03 | 1.04  | 0.01639  | 0.056835 | 0.180891 | 0.284531 |
| MmugDNA.9646.1.S1_at   | MmugDNA.9646.1 | 7.98  | 8.69  | 0.22 | 0.22 | -1.64 | 0.032831 | 0.013554 | 0.235264 | 0.149001 |
| MmugDNA.9648.1.S1_at   | MmugDNA.9648.1 | 3.26  | 3.14  | 0.28 | 0.15 | 1.08  | 0.212039 | 0.260929 | 0.509913 | 0.527351 |
| MmugDNA.9649.1.S1_at   | MmugDNA.9649.1 | 11.61 | 11.49 | 0.13 | 0.15 | 1.09  | 0.163165 | 0.079196 | 0.455375 | 0.32639  |
| MmugDNA.9650.1.S1_at   | MmugDNA.9650.1 | 11.37 | 11.57 | 0.13 | 0.03 | -1.15 | 0.126103 | 0.494429 | 0.407155 | 0.694864 |
| MmugDNA.9652.1.S1_at   | MmugDNA.9652.1 | 6.52  | 6.59  | 0.29 | 0.1  | -1.05 | 0.272824 | 0.123413 | 0.564936 | 0.393429 |
| MmugDNA.9659.1.S1_at   | MmugDNA.9659.1 | 6.34  | 6.49  | 0.16 | 0.01 | -1.11 | 0.627334 | 0.546599 | 0.816803 | 0.728105 |
| MmugDNA.9662.1.S1_at   | MmugDNA.9662.1 | 10.96 | 11    | 0.27 | 0.2  | -1.03 | 0.978624 | 0.417154 | 0.991776 | 0.642042 |
| MmugDNA.9668.1.S1_at   | MmugDNA.9668.1 | 8.11  | 8.07  | 0.32 | 0.04 | 1.03  | 0.859105 | 0.887859 | 0.938949 | 0.936094 |
| MmugDNA.9682.1.S1_at   | MmugDNA.9682.1 | 5.46  | 5.44  | 0.1  | 0.22 | 1.01  | 0.569977 | 0.245495 | 0.779245 | 0.515269 |
| MmugDNA.9683.1.S1_at   | MmugDNA.9683.1 | 6.07  | 6.15  | 0.1  | 0.05 | -1.06 | 0.191461 | 0.489395 | 0.487764 | 0.691792 |
| MmugDNA.9689.1.S1_at   | MmugDNA.9689.1 | 12.35 | 11.98 | 0.26 | 0.18 | 1.28  | 0.079746 | 0.175067 | 0.339935 | 0.451724 |
| MmugDNA.9701.1.S1_at   | MmugDNA.9701.1 | 9.33  | 9.06  | 0.49 | 0.21 | 1.21  | 0.523098 | 0.728668 | 0.750171 | 0.843151 |
| MmugDNA.9703.1.S1_at   | MmugDNA.9703.1 | 7.3   | 10.51 | 2.63 | 0.29 | -9.28 | 0.138935 | 0.463512 | 0.424608 | 0.674472 |
| MmugDNA.9705.1.S1_at   | MmugDNA.9705.1 | 10.32 | 10.13 | 0.27 | 0.07 | 1.14  | 0.235173 | 0.407281 | 0.533056 | 0.634867 |
| MmugDNA.971.1.S1_at    | MmugDNA.971.1  | 5.23  | 5.17  | 0.13 | 0.11 | 1.04  | 0.201934 | 0.143749 | 0.499426 | 0.417583 |
| MmugDNA.9713.1.S1_at   | MmugDNA.9713.1 | 5.38  | 5.37  | 0.19 | 0.17 | 1.01  | 0.679888 | 0.496353 | 0.847268 | 0.695995 |
| MmugDNA.9720.1.S1_at   | MmugDNA.9720.1 | 7.94  | 8.07  | 0.09 | 0.18 | -1.1  | 0.100812 | 0.010433 | 0.371905 | 0.133551 |
| MmugDNA.9725.1.S1_at   | MmugDNA.9725.1 | 11.04 | 11.21 | 0.08 | 0.06 | -1.12 | 0.033584 | 0.152921 | 0.237136 | 0.42777  |
| MmugDNA.9728.1.S1_s_at | MmugDNA.9728.1 | 12.24 | 12.16 | 0.2  | 0.07 | 1.06  | 0.267876 | 0.096036 | 0.560643 | 0.353302 |
| MmugDNA.9730.1.S1_at   | MmugDNA.9730.1 | 7.53  | 7.27  | 0.61 | 0.14 | 1.2   | 0.700415 | 0.760865 | 0.857753 | 0.86105  |
| MmugDNA.9731.1.S1_s_at | MmugDNA.9731.1 | 5.23  | 5.12  | 0.12 | 0.07 | 1.08  | 0.209217 | 0.6093   | 0.5067   | 0.767713 |
| MmugDNA.9737.1.S1_at   | MmugDNA.9737.1 | 5.19  | 5.3   | 0.14 | 0.04 | -1.08 | 0.201753 | 0.219088 | 0.49925  | 0.49285  |
| MmugDNA.9737.1.S1_x_at | MmugDNA.9737.1 | 5.59  | 5.77  | 0.36 | 0.15 | -1.14 | 0.917633 | 0.933616 | 0.96488  | 0.962229 |
| MmugDNA.9740.1.S1_at   | MmugDNA.9740.1 | 5.74  | 5.7   | 0.21 | 0.19 | 1.03  | 0.893554 | 0.650333 | 0.954549 | 0.795586 |
| MmugDNA.9741.1.S1_at   | MmugDNA.9741.1 | 3.55  | 3.56  | 0.28 | 0.04 | -1.01 | 0.479639 | 0.625445 | 0.720816 | 0.779175 |
| MmugDNA.9742.1.S1_at   | MmugDNA.9742.1 | 9.59  | 9.53  | 0.26 | 0.15 | 1.04  | 0.856161 | 0.359941 | 0.937374 | 0.601191 |
| MmugDNA.9742.1.S1_s_at | MmugDNA.9742.1 | 9.99  | 9.96  | 0.22 | 0.13 | 1.02  | 0.567774 | 0.503581 | 0.777973 | 0.700979 |
| MmugDNA.9744.1.S1_at   | MmugDNA.9744.1 | 12.18 | 11.75 | 0.14 | 0.1  | 1.34  | 0.006628 | 0.015327 | 0.127935 | 0.157179 |



|                        |                |       |       |      |      |       |          |          |          |          |
|------------------------|----------------|-------|-------|------|------|-------|----------|----------|----------|----------|
| MmugDNA.9745.1.S1_at   | MmugDNA.9745.1 | 9.53  | 11.12 | 0.55 | 0.2  | -3.02 | 0.021655 | 0.105668 | 0.20067  | 0.367776 |
| MmugDNA.975.1.S1_at    | MmugDNA.975.1  | 5.62  | 5.7   | 0.19 | 0.02 | -1.06 | 0.752912 | 0.735403 | 0.885882 | 0.846919 |
| MmugDNA.9750.1.S1_at   | MmugDNA.9750.1 | 2.63  | 2.57  | 0.06 | 0.07 | 1.04  | 0.680424 | 0.847822 | 0.847548 | 0.91354  |
| MmugDNA.9750.1.S1_s_at | MmugDNA.9750.1 | 8.32  | 8.97  | 0.68 | 0.4  | -1.56 | 0.053694 | 0.066395 | 0.288946 | 0.303314 |
| MmugDNA.9755.1.S1_at   | MmugDNA.9755.1 | 6.54  | 6.68  | 0.15 | 0.06 | -1.1  | 0.252219 | 0.043145 | 0.546817 | 0.252421 |
| MmugDNA.9760.1.S1_at   | MmugDNA.9760.1 | 5.9   | 5.84  | 0.21 | 0.08 | 1.04  | 0.399674 | 0.03471  | 0.664845 | 0.230506 |
| MmugDNA.9766.1.S1_at   | MmugDNA.9766.1 | 7.03  | 7.07  | 0.46 | 0.15 | -1.03 | 0.470278 | 0.543945 | 0.71485  | 0.726502 |
| MmugDNA.9768.1.S1_at   | MmugDNA.9768.1 | 8.77  | 8.35  | 0.26 | 0.06 | 1.34  | 0.1132   | 0.295724 | 0.389884 | 0.555146 |
| MmugDNA.9768.1.S1_s_at | MmugDNA.9768.1 | 10.15 | 9.76  | 0.04 | 0.04 | 1.3   | 0.000145 | 0.208134 | 0.051196 | 0.482082 |
| MmugDNA.977.1.S1_at    | MmugDNA.977.1  | 12.1  | 12.42 | 0.02 | 0.13 | -1.24 | 0.045003 | 0.053641 | 0.269447 | 0.277224 |
| MmugDNA.9774.1.S1_at   | MmugDNA.9774.1 | 6.65  | 6.48  | 0.22 | 0.43 | 1.13  | 0.75172  | 0.051051 | 0.885465 | 0.271214 |
| MmugDNA.9774.1.S1_s_at | MmugDNA.9774.1 | 12.29 | 12.3  | 0.07 | 0.03 | -1.01 | 0.89305  | 0.132946 | 0.954376 | 0.404616 |
| MmugDNA.9779.1.S1_at   | MmugDNA.9779.1 | 11.58 | 11.37 | 0.22 | 0.07 | 1.15  | 0.584723 | 0.654517 | 0.788749 | 0.798087 |
| MmugDNA.9782.1.S1_at   | MmugDNA.9782.1 | 10.49 | 10.64 | 0.25 | 0.14 | -1.11 | 0.84391  | 0.007141 | 0.931598 | 0.113735 |
| MmugDNA.9783.1.S1_at   | MmugDNA.9783.1 | 11.16 | 11.13 | 0.23 | 0.05 | 1.02  | 0.305489 | 0.010031 | 0.59254  | 0.131295 |
| MmugDNA.9787.1.S1_s_at | MmugDNA.9787.1 | 11.89 | 11.91 | 0.01 | 0.09 | -1.01 | 0.850035 | 0.359702 | 0.934826 | 0.600963 |
| MmugDNA.979.1.S1_at    | MmugDNA.979.1  | 5.12  | 5.22  | 0.17 | 0.22 | -1.07 | 0.38121  | 0.407967 | 0.650779 | 0.635339 |
| MmugDNA.9793.1.S1_at   | MmugDNA.9793.1 | 3.9   | 3.93  | 0.07 | 0.02 | -1.02 | 0.804997 | 0.58655  | 0.912498 | 0.753589 |
| MmugDNA.9799.1.S1_at   | MmugDNA.9799.1 | 6.89  | 5.84  | 0.53 | 0.25 | 2.07  | 0.019833 | 0.012451 | 0.193981 | 0.14417  |
| MmugDNA.9802.1.S1_at   | MmugDNA.9802.1 | 6.64  | 6.73  | 0.13 | 0.01 | -1.06 | 0.332873 | 0.196163 | 0.614402 | 0.471236 |
| MmugDNA.9802.1.S1_s_at | MmugDNA.9802.1 | 6.13  | 6.24  | 0.07 | 0.07 | -1.08 | 0.034702 | 0.046531 | 0.240912 | 0.260221 |
| MmugDNA.9807.1.S1_at   | MmugDNA.9807.1 | 7.07  | 6.95  | 0.11 | 0.06 | 1.08  | 0.120947 | 0.449509 | 0.399467 | 0.665109 |
| MmugDNA.9809.1.S1_at   | MmugDNA.9809.1 | 11.26 | 11.83 | 0.77 | 0.12 | -1.49 | 0.17165  | 0.07327  | 0.465636 | 0.316233 |
| MmugDNA.9809.1.S1_s_at | MmugDNA.9809.1 | 10.65 | 11.69 | 1.13 | 0.14 | -2.05 | 0.175783 | 0.070509 | 0.470151 | 0.311777 |
| MmugDNA.9822.1.S1_at   | MmugDNA.9822.1 | 5.1   | 5.14  | 0.14 | 0.15 | -1.03 | 0.809026 | 0.499863 | 0.914402 | 0.698564 |
| MmugDNA.9823.1.S1_at   | MmugDNA.9823.1 | 11.44 | 11.57 | 0.07 | 0.02 | -1.09 | 0.026653 | 0.071505 | 0.216417 | 0.313706 |
| MmugDNA.9824.1.S1_at   | MmugDNA.9824.1 | 5.95  | 5.82  | 0.28 | 0.19 | 1.1   | 0.539554 | 0.769547 | 0.760886 | 0.866185 |
| MmugDNA.9827.1.S1_at   | MmugDNA.9827.1 | 10.24 | 10.38 | 0.14 | 0.04 | -1.1  | 0.662244 | 0.000157 | 0.837028 | 0.030199 |
| MmugDNA.9829.1.S1_at   | MmugDNA.9829.1 | 7.97  | 9.14  | 0.17 | 0.15 | -2.26 | 0.00068  | 0.358058 | 0.071248 | 0.599613 |
| MmugDNA.9845.1.S1_at   | MmugDNA.9845.1 | 10.88 | 10.52 | 0.1  | 0.08 | 1.28  | 0.027108 | 0.288639 | 0.217323 | 0.549827 |
| MmugDNA.9849.1.S1_at   | MmugDNA.9849.1 | 6.85  | 7.18  | 0.66 | 0.13 | -1.25 | 0.417597 | 0.622901 | 0.677706 | 0.777394 |
| MmugDNA.9851.1.S1_at   | MmugDNA.9851.1 | 5.18  | 5.59  | 0.13 | 0.26 | -1.33 | 0.061414 | 0.392928 | 0.304438 | 0.625917 |
| MmugDNA.9853.1.S1_at   | MmugDNA.9853.1 | 5.41  | 6.93  | 1.32 | 0.2  | -2.88 | 0.407329 | 0.611588 | 0.670407 | 0.769451 |
| MmugDNA.9854.1.S1_at   | MmugDNA.9854.1 | 8.17  | 10.39 | 1.11 | 0.29 | -4.67 | 0.089464 | 0.467295 | 0.356406 | 0.677032 |
| MmugDNA.9856.1.S1_at   | MmugDNA.9856.1 | 11.49 | 10.82 | 0.14 | 0.27 | 1.59  | 0.037166 | 0.005834 | 0.248068 | 0.104669 |
| MmugDNA.9860.1.S1_at   | MmugDNA.9860.1 | 10.51 | 9.48  | 0.41 | 0.17 | 2.05  | 0.014887 | 0.010224 | 0.174119 | 0.132544 |
| MmugDNA.9863.1.S1_at   | MmugDNA.9863.1 | 11.12 | 11.19 | 0.15 | 0.07 | -1.05 | 0.177219 | 0.029361 | 0.471817 | 0.213234 |
| MmugDNA.9872.1.S1_at   | MmugDNA.9872.1 | 12.02 | 12.32 | 0.22 | 0.11 | -1.23 | 0.444961 | 0.470852 | 0.697635 | 0.679124 |
| MmugDNA.9872.1.S1_s_at | MmugDNA.9872.1 | 12.44 | 12.76 | 0.26 | 0.14 | -1.25 | 0.523588 | 0.503147 | 0.750447 | 0.700633 |
| MmugDNA.9873.1.S1_at   | MmugDNA.9873.1 | 5.63  | 5.57  | 0.19 | 0.11 | 1.04  | 0.677102 | 0.197715 | 0.845957 | 0.472633 |
| MmugDNA.9874.1.S1_at   | MmugDNA.9874.1 | 11.97 | 10.72 | 0.13 | 0.09 | 2.38  | 0.000139 | 0.007744 | 0.051196 | 0.117619 |
| MmugDNA.9878.1.S1_at   | MmugDNA.9878.1 | 3.72  | 3.8   | 0.12 | 0.09 | -1.05 | 0.355235 | 0.588806 | 0.632072 | 0.755149 |
| MmugDNA.9883.1.S1_at   | MmugDNA.9883.1 | 7.85  | 7.63  | 0.13 | 0.04 | 1.17  | 0.071618 | 0.294655 | 0.325611 | 0.55432  |

|                         |                 |       |       |      |      |       |          |          |          |          |
|-------------------------|-----------------|-------|-------|------|------|-------|----------|----------|----------|----------|
| MmugDNA.9887.1.S1_at    | MmugDNA.9887.1  | 5.34  | 5.33  | 0.01 | 0.06 | 1.01  | 0.237739 | 0.245473 | 0.535176 | 0.515244 |
| MmugDNA.9889.1.S1_s_at  | MmugDNA.9889.1  | 9.88  | 9.59  | 0.59 | 0.21 | 1.23  | 0.314102 | 0.745726 | 0.599848 | 0.85256  |
| MmugDNA.9892.1.S1_at    | MmugDNA.9892.1  | 7.73  | 7.98  | 0.19 | 0.09 | -1.19 | 0.520727 | 0.227544 | 0.748945 | 0.499841 |
| MmugDNA.9898.1.S1_at    | MmugDNA.9898.1  | 6.18  | 6.76  | 0.13 | 0.18 | -1.49 | 0.007234 | 0.006114 | 0.132608 | 0.10649  |
| MmugDNA.99.1.S1_at      | MmugDNA.99.1    | 4.58  | 4.65  | 0.32 | 0.24 | -1.05 | 0.658414 | 0.68334  | 0.834958 | 0.815238 |
| MmugDNA.990.1.S1_at     | MmugDNA.990.1   | 9.4   | 9.28  | 0.25 | 0.03 | 1.08  | 0.153743 | 0.052122 | 0.443798 | 0.273899 |
| MmugDNA.9906.1.S1_at    | MmugDNA.9906.1  | 8.1   | 6.93  | 0.05 | 0.4  | 2.25  | 0.01575  | 0.021715 | 0.177875 | 0.184333 |
| MmugDNA.9909.1.S1_at    | MmugDNA.9909.1  | 5.05  | 5.09  | 0.01 | 0.06 | -1.03 | 0.347633 | 0.107388 | 0.625791 | 0.370219 |
| MmugDNA.9910.1.S1_at    | MmugDNA.9910.1  | 5.98  | 6.23  | 0.05 | 0.28 | -1.18 | 0.222987 | 0.254848 | 0.520934 | 0.523051 |
| MmugDNA.9920.1.S1_at    | MmugDNA.9920.1  | 11.2  | 11.18 | 0.41 | 0.04 | 1.01  | 0.918285 | 0.186963 | 0.965189 | 0.462875 |
| MmugDNA.9922.1.S1_at    | MmugDNA.9922.1  | 11.32 | 11.37 | 0.18 | 0.05 | -1.04 | 0.521285 | 0.006736 | 0.7493   | 0.110984 |
| MmugDNA.9925.1.S1_at    | MmugDNA.9925.1  | 7.98  | 8.94  | 0.67 | 0.24 | -1.93 | 0.058023 | 0.041477 | 0.297981 | 0.248517 |
| MmugDNA.9930.1.S1_s_at  | MmugDNA.9930.1  | 8.78  | 8.94  | 0.45 | 0.2  | -1.12 | 0.395663 | 0.554356 | 0.661945 | 0.733168 |
| MmugDNA.9933.1.S1_at    | MmugDNA.9933.1  | 11.41 | 10.37 | 0.26 | 0.07 | 2.06  | 0.004488 | 0.031865 | 0.113436 | 0.220909 |
| MmugDNA.9939.1.S1_at    | MmugDNA.9939.1  | 4.16  | 4.21  | 0.12 | 0.03 | -1.04 | 0.132418 | 0.082884 | 0.415769 | 0.332423 |
| MmugDNA.9940.1.S1_s_at  | MmugDNA.9940.1  | 7.4   | 7.32  | 0.47 | 0.04 | 1.06  | 0.573418 | 0.227235 | 0.781098 | 0.499574 |
| MmugDNA.9942.1.S1_at    | MmugDNA.9942.1  | 12.6  | 12.65 | 0.03 | 0.06 | -1.04 | 0.199862 | 0.195401 | 0.497351 | 0.470253 |
| MmugDNA.9944.1.S1_at    | MmugDNA.9944.1  | 6.61  | 6.69  | 0.2  | 0.01 | -1.05 | 0.91747  | 0.905842 | 0.964831 | 0.946727 |
| MmugDNA.9951.1.S1_at    | MmugDNA.9951.1  | 7.47  | 8.21  | 0.22 | 0.43 | -1.67 | 0.155449 | 0.160516 | 0.445869 | 0.436686 |
| MmugDNA.9958.1.S1_at    | MmugDNA.9958.1  | 7.18  | 8.14  | 0.89 | 0.21 | -1.95 | 0.121771 | 0.241516 | 0.400504 | 0.512152 |
| MmugDNA.9967.1.S1_s_at  | MmugDNA.9967.1  | 9.39  | 9.14  | 0.09 | 0.01 | 1.19  | 0.012398 | 0.002792 | 0.161664 | 0.077966 |
| MmugDNA.9968.1.S1_at    | MmugDNA.9968.1  | 11.67 | 11.55 | 0.09 | 0.04 | 1.09  | 0.287029 | 0.434445 | 0.57673  | 0.654569 |
| MmugDNA.9968.1.S1_s_at  | MmugDNA.9968.1  | 11.11 | 11.08 | 0.06 | 0.05 | 1.02  | 0.176031 | 0.186868 | 0.470426 | 0.462707 |
| MmugDNA.9969.1.S1_at    | MmugDNA.9969.1  | 13.86 | 13.57 | 0.07 | 0.04 | 1.22  | 0.004925 | 0.001331 | 0.115175 | 0.056205 |
| MmugDNA.9970.1.S1_at    | MmugDNA.9970.1  | 5.39  | 5.28  | 0.17 | 0.12 | 1.08  | 0.135458 | 0.098852 | 0.419375 | 0.357002 |
| MmugDNA.9973.1.S1_at    | MmugDNA.9973.1  | 12.14 | 12.18 | 0.1  | 0.04 | -1.03 | 0.812477 | 0.200776 | 0.916144 | 0.475282 |
| MmugDNA.9977.1.S1_at    | MmugDNA.9977.1  | 8.44  | 8.85  | 0.27 | 0.03 | -1.33 | 0.17769  | 0.178504 | 0.472347 | 0.454778 |
| MmugDNA.9978.1.S1_at    | MmugDNA.9978.1  | 6.03  | 5.98  | 0    | 0.14 | 1.03  | 0.857164 | 0.506664 | 0.937945 | 0.702542 |
| MmugDNA.9992.1.S1_at    | MmugDNA.9992.1  | 4.92  | 4.81  | 0.17 | 0.23 | 1.08  | 0.429217 | 0.63183  | 0.685711 | 0.782971 |
| MmugDNA.9994.1.S1_at    | MmugDNA.9994.1  | 12.07 | 12.81 | 0.18 | 0.11 | -1.67 | 0.005862 | 0.004035 | 0.122699 | 0.090281 |
| MmunewRS.1.1.S1_at      | MmunewRS.1.1    | 6.77  | 6.75  | 0.14 | 0.08 | 1.02  | 0.568205 | 0.634815 | 0.778211 | 0.785036 |
| MmunewRS.10.1.S1_at     | MmunewRS.10.1   | 2.9   | 2.86  | 0.03 | 0.03 | 1.02  | 0.653022 | 0.807303 | 0.831848 | 0.889071 |
| MmunewRS.100.1.S1_at    | MmunewRS.100.1  | 5.99  | 5.94  | 0.01 | 0.01 | 1.04  | 0.000633 | 0.113612 | 0.070727 | 0.379726 |
| MmunewRS.1000.1.S1_s_at | MmunewRS.1000.1 | 9.16  | 9.34  | 0.17 | 0.22 | -1.13 | 0.148178 | 0.545224 | 0.436671 | 0.727441 |
| MmunewRS.1001.1.S1_at   | MmunewRS.1001.1 | 5.3   | 5.85  | 0.21 | 0.47 | -1.46 | 0.068454 | 0.081801 | 0.3194   | 0.330183 |
| MmunewRS.1002.1.S1_at   | MmunewRS.1002.1 | 7.1   | 7.02  | 0.19 | 0.18 | 1.06  | 0.95416  | 0.738972 | 0.98117  | 0.848701 |
| MmunewRS.1003.1.S1_at   | MmunewRS.1003.1 | 4.2   | 4.15  | 0.08 | 0.13 | 1.04  | 0.88021  | 0.829357 | 0.949038 | 0.901879 |
| MmunewRS.1004.1.S1_at   | MmunewRS.1004.1 | 3.51  | 3.45  | 0.07 | 0.13 | 1.04  | 0.747544 | 0.212386 | 0.883101 | 0.486325 |
| MmunewRS.1005.1.S1_at   | MmunewRS.1005.1 | 3.93  | 3.87  | 0.16 | 0.06 | 1.04  | 0.136341 | 0.321945 | 0.420836 | 0.573573 |
| MmunewRS.1006.1.S1_s_at | MmunewRS.1006.1 | 3.6   | 3.65  | 0.09 | 0    | -1.03 | 0.275304 | 0.088275 | 0.566986 | 0.341721 |
| MmunewRS.1007.1.S1_at   | MmunewRS.1007.1 | 3.93  | 3.68  | 0.23 | 0.09 | 1.19  | 0.126505 | 0.129061 | 0.407915 | 0.400548 |
| MmunewRS.1008.1.S1_at   | MmunewRS.1008.1 | 3.24  | 3.27  | 0.24 | 0.14 | -1.02 | 0.417416 | 0.590272 | 0.677553 | 0.756124 |
| MmunewRS.1009.1.S1_at   | MmunewRS.1009.1 | 3.34  | 3.63  | 0.3  | 0.21 | -1.22 | 0.250043 | 0.333046 | 0.544879 | 0.581374 |

|                         |                 |       |       |      |      |       |          |          |          |          |
|-------------------------|-----------------|-------|-------|------|------|-------|----------|----------|----------|----------|
| MmunewRS.101.1.S1_at    | MmunewRS.101.1  | 4.88  | 4.82  | 0.23 | 0.04 | 1.04  | 0.472523 | 0.795511 | 0.716189 | 0.882189 |
| MmunewRS.1010.1.S1_at   | MmunewRS.1010.1 | 6.81  | 6.76  | 0.15 | 0.04 | 1.03  | 0.701563 | 0.199381 | 0.858303 | 0.474002 |
| MmunewRS.1011.1.S1_at   | MmunewRS.1011.1 | 5.41  | 5.23  | 0.13 | 0.07 | 1.13  | 0.134698 | 0.179833 | 0.418599 | 0.45636  |
| MmunewRS.1012.1.S1_at   | MmunewRS.1012.1 | 4.13  | 4.06  | 0.03 | 0.07 | 1.04  | 0.097845 | 0.156037 | 0.368268 | 0.43145  |
| MmunewRS.1013.1.S1_at   | MmunewRS.1013.1 | 2.99  | 3.02  | 0.02 | 0.05 | -1.02 | 0.957503 | 0.314723 | 0.982581 | 0.568449 |
| MmunewRS.1014.1.S1_at   | MmunewRS.1014.1 | 7.27  | 7.29  | 0.46 | 0.31 | -1.02 | 0.41815  | 0.462997 | 0.678114 | 0.674149 |
| MmunewRS.1014.1.S1_s_at | MmunewRS.1014.1 | 7.74  | 7.82  | 0.46 | 0.23 | -1.06 | 0.332862 | 0.358692 | 0.614402 | 0.600178 |
| MmunewRS.1015.1.S1_at   | MmunewRS.1015.1 | 11.17 | 11.18 | 0.17 | 0.14 | -1.01 | 0.606594 | 0.100608 | 0.803242 | 0.359897 |
| MmunewRS.1016.1.S1_at   | MmunewRS.1016.1 | 7.26  | 6.98  | 0.31 | 0.13 | 1.22  | 0.200107 | 0.265337 | 0.497633 | 0.531314 |
| MmunewRS.1017.1.S1_at   | MmunewRS.1017.1 | 5.89  | 5.81  | 0.09 | 0.09 | 1.06  | 0.484772 | 0.115775 | 0.724478 | 0.382814 |
| MmunewRS.1018.1.S1_at   | MmunewRS.1018.1 | 8.19  | 8     | 0.35 | 0.19 | 1.15  | 0.647092 | 0.912685 | 0.828492 | 0.950818 |
| MmunewRS.1019.1.S1_at   | MmunewRS.1019.1 | 4.43  | 4.47  | 0.1  | 0.12 | -1.03 | 0.206199 | 0.228255 | 0.503843 | 0.500443 |
| MmunewRS.102.1.S1_at    | MmunewRS.102.1  | 6.49  | 6.86  | 0.71 | 0.05 | -1.29 | 0.137694 | 0.282746 | 0.422774 | 0.545473 |
| MmunewRS.1020.1.S1_at   | MmunewRS.1020.1 | 4.58  | 4.54  | 0.08 | 0.22 | 1.03  | 0.584975 | 0.81664  | 0.788935 | 0.89423  |
| MmunewRS.1021.1.S1_at   | MmunewRS.1021.1 | 3.88  | 3.72  | 0.13 | 0.11 | 1.12  | 0.82438  | 0.150536 | 0.921961 | 0.42509  |
| MmunewRS.1022.1.S1_at   | MmunewRS.1022.1 | 6.16  | 6.16  | 0.15 | 0.01 | -1    | 0.784172 | 0.22416  | 0.901553 | 0.497157 |
| MmunewRS.1023.1.S1_at   | MmunewRS.1023.1 | 8.78  | 9.26  | 0.21 | 0.24 | -1.39 | 0.061307 | 0.036431 | 0.304356 | 0.235383 |
| MmunewRS.1023.1.S1_s_at | MmunewRS.1023.1 | 8.52  | 9.06  | 0.06 | 0.25 | -1.46 | 0.028845 | 0.040305 | 0.22259  | 0.245928 |
| MmunewRS.1024.1.S1_at   | MmunewRS.1024.1 | 6.55  | 6.64  | 0.07 | 0.08 | -1.07 | 0.467317 | 0.282933 | 0.712855 | 0.545692 |
| MmunewRS.1025.1.S1_at   | MmunewRS.1025.1 | 3.16  | 3.07  | 0.14 | 0.09 | 1.07  | 0.929602 | 0.938652 | 0.970197 | 0.965105 |
| MmunewRS.1026.1.S1_at   | MmunewRS.1026.1 | 3.17  | 3.06  | 0.66 | 0.61 | 1.07  | 0.981698 | 0.56568  | 0.993253 | 0.740066 |
| MmunewRS.1027.1.S1_at   | MmunewRS.1027.1 | 14.35 | 14.36 | 0.02 | 0.01 | -1    | 0.752019 | 0.190815 | 0.885502 | 0.466228 |
| MmunewRS.1028.1.S1_at   | MmunewRS.1028.1 | 9.56  | 10.22 | 0.52 | 0.01 | -1.57 | 0.264786 | 0.181356 | 0.557962 | 0.457872 |
| MmunewRS.1029.1.S1_at   | MmunewRS.1029.1 | 4.58  | 4.7   | 0.07 | 0.14 | -1.09 | 0.624432 | 0.09577  | 0.814839 | 0.352753 |
| MmunewRS.103.1.S1_at    | MmunewRS.103.1  | 6.65  | 8.86  | 0.33 | 0.16 | -4.63 | 0.000778 | 0.002125 | 0.072818 | 0.06817  |
| MmunewRS.1030.1.S1_at   | MmunewRS.1030.1 | 6.89  | 6.87  | 0.16 | 0.04 | 1.02  | 0.635674 | 0.74115  | 0.821596 | 0.850135 |
| MmunewRS.1031.1.S1_at   | MmunewRS.1031.1 | 4.47  | 4.44  | 0.1  | 0.06 | 1.02  | 0.23121  | 0.718535 | 0.530003 | 0.837072 |
| MmunewRS.1032.1.S1_at   | MmunewRS.1032.1 | 12.04 | 11.9  | 0.17 | 0.07 | 1.1   | 0.091242 | 0.004301 | 0.358687 | 0.092019 |
| MmunewRS.1033.1.S1_at   | MmunewRS.1033.1 | 3.32  | 3.34  | 0.15 | 0.04 | -1.01 | 0.861938 | 0.647429 | 0.940091 | 0.793471 |
| MmunewRS.1034.1.S1_at   | MmunewRS.1034.1 | 5.03  | 5     | 0.13 | 0.28 | 1.02  | 0.315816 | 0.442796 | 0.600606 | 0.660759 |
| MmunewRS.1035.1.S1_s_at | MmunewRS.1035.1 | 7.8   | 8.01  | 0.19 | 0.19 | -1.16 | 0.232922 | 0.052532 | 0.531154 | 0.274771 |
| MmunewRS.1037.1.S1_at   | MmunewRS.1037.1 | 7.25  | 7.29  | 0.2  | 0.07 | -1.03 | 0.844141 | 0.696152 | 0.931736 | 0.823455 |
| MmunewRS.1038.1.S1_at   | MmunewRS.1038.1 | 5.43  | 5.36  | 0.22 | 0.09 | 1.05  | 0.483241 | 0.365714 | 0.723431 | 0.605684 |
| MmunewRS.1039.1.S1_at   | MmunewRS.1039.1 | 8.32  | 9.05  | 0.94 | 0.42 | -1.65 | 0.209064 | 0.194652 | 0.506551 | 0.469765 |
| MmunewRS.104.1.S1_s_at  | MmunewRS.104.1  | 4.93  | 4.94  | 0.08 | 0.11 | -1.01 | 0.725574 | 0.586942 | 0.871206 | 0.75391  |
| MmunewRS.1040.1.S1_at   | MmunewRS.1040.1 | 5.31  | 5.4   | 0.13 | 0.03 | -1.06 | 0.927195 | 0.276801 | 0.969197 | 0.540725 |
| MmunewRS.1041.1.S1_at   | MmunewRS.1041.1 | 5.66  | 5.61  | 0.19 | 0.05 | 1.04  | 0.925163 | 0.852348 | 0.968202 | 0.916102 |
| MmunewRS.1042.1.S1_at   | MmunewRS.1042.1 | 4.64  | 4.71  | 0.14 | 0.01 | -1.05 | 0.42198  | 0.122802 | 0.680233 | 0.392784 |
| MmunewRS.1045.1.S1_at   | MmunewRS.1045.1 | 4.43  | 4.37  | 0.05 | 0.04 | 1.04  | 0.161225 | 0.067967 | 0.452756 | 0.306909 |
| MmunewRS.1046.1.S1_at   | MmunewRS.1046.1 | 4     | 3.89  | 0.13 | 0.05 | 1.08  | 0.471151 | 0.272221 | 0.715413 | 0.536976 |
| MmunewRS.1047.1.S1_at   | MmunewRS.1047.1 | 5.52  | 5.49  | 0.04 | 0    | 1.02  | 0.314968 | 0.382758 | 0.600177 | 0.618887 |
| MmunewRS.1048.1.S1_s_at | MmunewRS.1048.1 | 3.61  | 3.58  | 0.01 | 0.01 | 1.02  | 0.096575 | 0.955168 | 0.366453 | 0.9746   |
| MmunewRS.105.1.S1_at    | MmunewRS.105.1  | 4.34  | 4.31  | 0.15 | 0.08 | 1.03  | 0.747515 | 0.865889 | 0.88309  | 0.923757 |

|                         |                 |       |       |      |      |       |          |          |          |          |
|-------------------------|-----------------|-------|-------|------|------|-------|----------|----------|----------|----------|
| MmunewRS.1051.1.S1_at   | MmunewRS.1051.1 | 4.52  | 4.53  | 0.12 | 0.07 | -1.01 | 0.543212 | 0.64705  | 0.763336 | 0.793279 |
| MmunewRS.1052.1.S1_at   | MmunewRS.1052.1 | 4.06  | 4.06  | 0.07 | 0.13 | -1    | 0.668577 | 0.527769 | 0.84096  | 0.716271 |
| MmunewRS.1054.1.S1_at   | MmunewRS.1054.1 | 3.65  | 3.65  | 0.03 | 0.04 | -1    | 0.942449 | 0.205416 | 0.975651 | 0.479757 |
| MmunewRS.1055.1.S1_at   | MmunewRS.1055.1 | 13.39 | 13.59 | 0.21 | 0.05 | -1.15 | 0.20062  | 0.297555 | 0.497877 | 0.556192 |
| MmunewRS.1056.1.S1_at   | MmunewRS.1056.1 | 4.19  | 4.26  | 0.14 | 0.12 | -1.05 | 0.37321  | 0.33256  | 0.645118 | 0.580954 |
| MmunewRS.1057.1.S1_at   | MmunewRS.1057.1 | 3.67  | 3.57  | 0.09 | 0.06 | 1.07  | 0.401452 | 0.695976 | 0.666035 | 0.823362 |
| MmunewRS.1058.1.S1_at   | MmunewRS.1058.1 | 5.23  | 5.25  | 0.01 | 0.11 | -1.01 | 0.668006 | 0.460064 | 0.840528 | 0.671989 |
| MmunewRS.106.1.S1_at    | MmunewRS.106.1  | 8.2   | 7     | 0.98 | 0.87 | 2.3   | 0.370536 | 0.499845 | 0.643448 | 0.698557 |
| MmunewRS.1060.1.S1_at   | MmunewRS.1060.1 | 9.58  | 9.16  | 0.2  | 0.14 | 1.34  | 0.058735 | 0.074315 | 0.299483 | 0.318046 |
| MmunewRS.1061.1.S1_at   | MmunewRS.1061.1 | 5.13  | 5.12  | 0.07 | 0.07 | 1.01  | 0.278657 | 0.040175 | 0.569962 | 0.245709 |
| MmunewRS.1062.1.S1_at   | MmunewRS.1062.1 | 4.18  | 4.06  | 0.18 | 0.16 | 1.09  | 0.16144  | 0.219939 | 0.453006 | 0.49344  |
| MmunewRS.1063.1.S1_at   | MmunewRS.1063.1 | 7.9   | 6.5   | 0.62 | 0.24 | 2.64  | 0.021516 | 0.008165 | 0.200467 | 0.119874 |
| MmunewRS.1064.1.S1_at   | MmunewRS.1064.1 | 3.65  | 3.84  | 0.17 | 0.06 | -1.14 | 0.49457  | 0.83502  | 0.731275 | 0.905549 |
| MmunewRS.1065.1.S1_at   | MmunewRS.1065.1 | 4.35  | 4.36  | 0.57 | 0.51 | -1.01 | 0.538647 | 0.731116 | 0.760315 | 0.844198 |
| MmunewRS.1066.1.S1_s_at | MmunewRS.1066.1 | 3.42  | 3.33  | 0.12 | 0.08 | 1.06  | 0.462671 | 0.65885  | 0.70975  | 0.800473 |
| MmunewRS.1067.1.S1_at   | MmunewRS.1067.1 | 3.94  | 3.81  | 0.16 | 0.15 | 1.1   | 0.274399 | 0.384122 | 0.566281 | 0.619926 |
| MmunewRS.1068.1.S1_at   | MmunewRS.1068.1 | 3.55  | 3.55  | 0.08 | 0.1  | -1    | 0.245201 | 0.471109 | 0.541279 | 0.679173 |
| MmunewRS.1069.1.S1_s_at | MmunewRS.1069.1 | 5.21  | 5.24  | 0.09 | 0.05 | -1.03 | 0.82397  | 0.034971 | 0.92174  | 0.231149 |
| MmunewRS.107.1.S1_at    | MmunewRS.107.1  | 3.64  | 3.58  | 0.16 | 0.02 | 1.04  | 0.557367 | 0.405343 | 0.772093 | 0.633693 |
| MmunewRS.1070.1.S1_at   | MmunewRS.1070.1 | 10.75 | 10.82 | 0.67 | 0.48 | -1.05 | 0.379918 | 0.024222 | 0.649662 | 0.194904 |
| MmunewRS.1071.1.S1_at   | MmunewRS.1071.1 | 3.53  | 3.48  | 0.06 | 0.07 | 1.04  | 0.189163 | 0.220378 | 0.485784 | 0.493783 |
| MmunewRS.1073.1.S1_at   | MmunewRS.1073.1 | 13.25 | 13.18 | 0.16 | 0.02 | 1.05  | 0.905665 | 0.331394 | 0.960065 | 0.580076 |
| MmunewRS.1074.1.S1_at   | MmunewRS.1074.1 | 6.78  | 6.8   | 0.2  | 0.09 | -1.02 | 0.923703 | 0.537149 | 0.967575 | 0.722316 |
| MmunewRS.1075.1.S1_at   | MmunewRS.1075.1 | 5.7   | 5.43  | 0.11 | 0.06 | 1.21  | 0.021952 | 0.090818 | 0.201313 | 0.345355 |
| MmunewRS.1076.1.S1_at   | MmunewRS.1076.1 | 7.31  | 7.27  | 0.12 | 0.03 | 1.03  | 0.895584 | 0.9194   | 0.955442 | 0.954743 |
| MmunewRS.1077.1.S1_at   | MmunewRS.1077.1 | 4.34  | 4.35  | 0.22 | 0.08 | -1.01 | 0.42102  | 0.545602 | 0.679818 | 0.727579 |
| MmunewRS.1078.1.S1_at   | MmunewRS.1078.1 | 5.17  | 5.19  | 0.15 | 0.2  | -1.01 | 0.92901  | 0.988793 | 0.969935 | 0.993611 |
| MmunewRS.1079.1.S1_at   | MmunewRS.1079.1 | 5.94  | 5.95  | 0.2  | 0.02 | -1.01 | 0.305843 | 0.358031 | 0.592856 | 0.599604 |
| MmunewRS.108.1.S1_at    | MmunewRS.108.1  | 9.75  | 9.52  | 0.2  | 0.17 | 1.17  | 0.452569 | 0.190152 | 0.702975 | 0.465798 |
| MmunewRS.1080.1.S1_at   | MmunewRS.1080.1 | 9.57  | 10.18 | 0.15 | 0.1  | -1.53 | 0.003408 | 0.292219 | 0.103083 | 0.552363 |
| MmunewRS.1081.1.S1_at   | MmunewRS.1081.1 | 3.97  | 4.17  | 0.09 | 0.06 | -1.16 | 0.050536 | 0.123679 | 0.282549 | 0.393778 |
| MmunewRS.1082.1.S1_at   | MmunewRS.1082.1 | 5.6   | 5.58  | 0.11 | 0.05 | 1.01  | 0.621572 | 0.698794 | 0.812828 | 0.824997 |
| MmunewRS.1083.1.S1_at   | MmunewRS.1083.1 | 3.89  | 3.9   | 0.16 | 0.07 | -1.01 | 0.696953 | 0.229489 | 0.855721 | 0.501527 |
| MmunewRS.1084.1.S1_at   | MmunewRS.1084.1 | 5.32  | 5.33  | 0.04 | 0.08 | -1    | 0.691634 | 0.710218 | 0.852609 | 0.831904 |
| MmunewRS.1085.1.S1_at   | MmunewRS.1085.1 | 5.5   | 5.51  | 0.25 | 0.1  | -1.01 | 0.764382 | 0.474836 | 0.891934 | 0.681736 |
| MmunewRS.1086.1.S1_at   | MmunewRS.1086.1 | 5.28  | 5.32  | 0.13 | 0.09 | -1.03 | 0.916759 | 0.906819 | 0.964555 | 0.947238 |
| MmunewRS.1087.1.S1_at   | MmunewRS.1087.1 | 5.32  | 5.39  | 0.17 | 0.25 | -1.05 | 0.646918 | 0.105399 | 0.828492 | 0.367275 |
| MmunewRS.1088.1.S1_at   | MmunewRS.1088.1 | 4.13  | 4.14  | 0.1  | 0.15 | -1    | 0.482518 | 0.637867 | 0.722857 | 0.787216 |
| MmunewRS.1089.1.S1_at   | MmunewRS.1089.1 | 11.56 | 11.44 | 0.13 | 0.09 | 1.09  | 0.101307 | 0.13607  | 0.372655 | 0.408363 |
| MmunewRS.1090.1.S1_at   | MmunewRS.1090.1 | 4.46  | 4.58  | 0.02 | 0.11 | -1.08 | 0.157161 | 0.056287 | 0.447994 | 0.283274 |
| MmunewRS.1091.1.S1_at   | MmunewRS.1091.1 | 5.16  | 5.89  | 0.51 | 0.16 | -1.66 | 0.085999 | 0.171114 | 0.35042  | 0.447686 |
| MmunewRS.1092.1.S1_at   | MmunewRS.1092.1 | 6.7   | 7.22  | 0.57 | 0.48 | -1.44 | 0.141882 | 0.269175 | 0.427823 | 0.534497 |
| MmunewRS.1093.1.S1_at   | MmunewRS.1093.1 | 4.43  | 4.56  | 0.1  | 0.04 | -1.1  | 0.097534 | 0.277408 | 0.367761 | 0.54133  |

|                        |                 |       |       |      |      |       |          |          |          |          |
|------------------------|-----------------|-------|-------|------|------|-------|----------|----------|----------|----------|
| MmunewRS.1094.1.S1_at  | MmunewRS.1094.1 | 8.8   | 8.62  | 0.29 | 0.38 | 1.13  | 0.224763 | 0.194875 | 0.522749 | 0.469963 |
| MmunewRS.1095.1.S1_at  | MmunewRS.1095.1 | 5.31  | 5.26  | 0.02 | 0.11 | 1.03  | 0.236497 | 0.024789 | 0.534154 | 0.197269 |
| MmunewRS.1096.1.S1_at  | MmunewRS.1096.1 | 4.35  | 4.38  | 0.19 | 0.35 | -1.02 | 0.759553 | 0.885334 | 0.889794 | 0.934774 |
| MmunewRS.1097.1.S1_at  | MmunewRS.1097.1 | 5.41  | 5.48  | 0.17 | 0.01 | -1.05 | 0.799527 | 0.775679 | 0.909612 | 0.869477 |
| MmunewRS.1098.1.S1_at  | MmunewRS.1098.1 | 3.31  | 3.38  | 0.08 | 0.03 | -1.05 | 0.122877 | 0.392664 | 0.401875 | 0.625813 |
| MmunewRS.11.1.S1_at    | MmunewRS.11.1   | 3.67  | 3.78  | 0.1  | 0.08 | -1.08 | 0.458935 | 0.259627 | 0.707304 | 0.526525 |
| MmunewRS.110.1.S1_at   | MmunewRS.110.1  | 5.12  | 5.13  | 0.1  | 0.06 | -1.01 | 0.985469 | 0.02424  | 0.99479  | 0.194936 |
| MmunewRS.111.1.S1_at   | MmunewRS.111.1  | 3.56  | 3.39  | 1.27 | 0.29 | 1.13  | 0.343313 | 0.446824 | 0.622959 | 0.663037 |
| MmunewRS.112.1.S1_at   | MmunewRS.112.1  | 9.88  | 9.95  | 0.09 | 0.17 | -1.04 | 0.96605  | 0.080746 | 0.986286 | 0.328632 |
| MmunewRS.113.1.S1_at   | MmunewRS.113.1  | 4.05  | 4.04  | 0.26 | 0.21 | 1.01  | 0.714636 | 0.570897 | 0.865128 | 0.743422 |
| MmunewRS.114.1.S1_at   | MmunewRS.114.1  | 3.35  | 3.38  | 0.16 | 0.01 | -1.02 | 0.556953 | 0.664983 | 0.771975 | 0.803726 |
| MmunewRS.116.1.S1_at   | MmunewRS.116.1  | 6.03  | 6     | 0.14 | 0.06 | 1.02  | 0.808088 | 0.157907 | 0.91414  | 0.433583 |
| MmunewRS.117.1.S1_at   | MmunewRS.117.1  | 3.45  | 3.54  | 0.06 | 0.11 | -1.06 | 0.298042 | 0.255486 | 0.586488 | 0.523505 |
| MmunewRS.118.1.S1_at   | MmunewRS.118.1  | 2.6   | 2.57  | 0.03 | 0.08 | 1.02  | 0.528218 | 0.611898 | 0.753543 | 0.769622 |
| MmunewRS.119.1.S1_at   | MmunewRS.119.1  | 4.72  | 4.73  | 0.01 | 0.06 | -1    | 0.746448 | 0.944525 | 0.88254  | 0.968614 |
| MmunewRS.120.1.S1_at   | MmunewRS.120.1  | 3.7   | 4.06  | 0.08 | 0.21 | -1.29 | 0.039612 | 0.085286 | 0.255628 | 0.337119 |
| MmunewRS.121.1.S1_at   | MmunewRS.121.1  | 3.39  | 3.38  | 0.03 | 0.02 | 1     | 0.314267 | 0.834174 | 0.599959 | 0.904977 |
| MmunewRS.123.1.S1_at   | MmunewRS.123.1  | 3.76  | 3.84  | 0.06 | 0.08 | -1.05 | 0.140384 | 0.508609 | 0.426075 | 0.703719 |
| MmunewRS.126.1.S1_at   | MmunewRS.126.1  | 3.91  | 3.65  | 0.18 | 0.11 | 1.19  | 0.234497 | 0.267479 | 0.532617 | 0.533213 |
| MmunewRS.127.1.S1_at   | MmunewRS.127.1  | 8.76  | 8.53  | 0.29 | 0.18 | 1.17  | 0.110016 | 0.196313 | 0.385253 | 0.47127  |
| MmunewRS.128.1.S1_at   | MmunewRS.128.1  | 6.65  | 6.26  | 0.19 | 0.27 | 1.3   | 0.129902 | 0.070094 | 0.412108 | 0.310995 |
| MmunewRS.129.1.S1_at   | MmunewRS.129.1  | 5.92  | 5.83  | 0.09 | 0.1  | 1.07  | 0.33413  | 0.239698 | 0.615231 | 0.510405 |
| MmunewRS.13.1.S1_at    | MmunewRS.13.1   | 4.01  | 3.94  | 0.16 | 0.02 | 1.05  | 0.468843 | 0.780085 | 0.713845 | 0.872491 |
| MmunewRS.131.1.S1_at   | MmunewRS.131.1  | 3.24  | 3.33  | 0.14 | 0.02 | -1.06 | 0.838581 | 0.941366 | 0.929155 | 0.966767 |
| MmunewRS.132.1.S1_at   | MmunewRS.132.1  | 7.82  | 8.81  | 0.68 | 0.28 | -1.99 | 0.078144 | 0.150709 | 0.337673 | 0.425281 |
| MmunewRS.133.1.S1_at   | MmunewRS.133.1  | 5.16  | 5.06  | 0.18 | 0.09 | 1.07  | 0.51762  | 0.222622 | 0.746813 | 0.495617 |
| MmunewRS.134.1.S1_at   | MmunewRS.134.1  | 8.14  | 8     | 0.29 | 0.06 | 1.1   | 0.580116 | 0.156233 | 0.78563  | 0.43161  |
| MmunewRS.136.1.S1_at   | MmunewRS.136.1  | 4.7   | 4.57  | 0.18 | 0.12 | 1.09  | 0.526622 | 0.81926  | 0.75269  | 0.895838 |
| MmunewRS.137.1.S1_at   | MmunewRS.137.1  | 3.93  | 4.01  | 0.07 | 0.06 | -1.06 | 0.072727 | 0.27258  | 0.327657 | 0.537323 |
| MmunewRS.138.1.S1_at   | MmunewRS.138.1  | 6.16  | 6.41  | 0.19 | 0.08 | -1.19 | 0.06247  | 0.04347  | 0.306597 | 0.253142 |
| MmunewRS.138.1.S1_s_at | MmunewRS.138.1  | 6.83  | 6.8   | 0.12 | 0.04 | 1.02  | 0.792505 | 0.154919 | 0.905992 | 0.429909 |
| MmunewRS.139.1.S1_at   | MmunewRS.139.1  | 5.08  | 5.02  | 0.07 | 0.06 | 1.05  | 0.718765 | 0.004177 | 0.867276 | 0.091064 |
| MmunewRS.140.1.S1_at   | MmunewRS.140.1  | 4.1   | 4.16  | 0.32 | 0.14 | -1.04 | 0.385573 | 0.850294 | 0.65436  | 0.914874 |
| MmunewRS.141.1.S1_at   | MmunewRS.141.1  | 5.32  | 5.34  | 0.02 | 0.15 | -1.01 | 0.480149 | 0.268505 | 0.721151 | 0.534123 |
| MmunewRS.142.1.S1_at   | MmunewRS.142.1  | 5.2   | 5.09  | 0.16 | 0.23 | 1.08  | 0.524729 | 0.136583 | 0.751512 | 0.409084 |
| MmunewRS.143.1.S1_at   | MmunewRS.143.1  | 4.61  | 4.94  | 0.07 | 0.04 | -1.25 | 0.001673 | 0.232552 | 0.084462 | 0.504341 |
| MmunewRS.144.1.S1_at   | MmunewRS.144.1  | 3.19  | 3.19  | 0.07 | 0.07 | 1     | 0.993634 | 0.971663 | 0.997413 | 0.984608 |
| MmunewRS.144.1.S1_s_at | MmunewRS.144.1  | 3.19  | 3.22  | 0.16 | 0.04 | -1.02 | 0.691715 | 0.679297 | 0.852609 | 0.81275  |
| MmunewRS.145.1.S1_at   | MmunewRS.145.1  | 4.91  | 5.18  | 0.16 | 0.11 | -1.21 | 0.128043 | 0.137205 | 0.409995 | 0.410063 |
| MmunewRS.147.1.S1_at   | MmunewRS.147.1  | 6.73  | 6.76  | 0.17 | 0.13 | -1.02 | 0.99308  | 0.47648  | 0.997325 | 0.682725 |
| MmunewRS.149.1.S1_at   | MmunewRS.149.1  | 11.65 | 11.59 | 0.13 | 0.11 | 1.05  | 0.107622 | 0.570662 | 0.382296 | 0.743269 |
| MmunewRS.15.1.S1_at    | MmunewRS.15.1   | 5.31  | 5.28  | 0.08 | 0.07 | 1.02  | 0.814891 | 0.754062 | 0.917341 | 0.856837 |
| MmunewRS.150.1.S1_at   | MmunewRS.150.1  | 4.93  | 4.96  | 0.16 | 0.03 | -1.02 | 0.765397 | 0.796561 | 0.892409 | 0.882721 |

|                        |                |       |       |      |      |       |          |          |          |          |
|------------------------|----------------|-------|-------|------|------|-------|----------|----------|----------|----------|
| MmunewRS.151.1.S1_at   | MmunewRS.151.1 | 3.53  | 3.41  | 0.23 | 0.1  | 1.09  | 0.385719 | 0.48969  | 0.654416 | 0.691862 |
| MmunewRS.152.1.S1_at   | MmunewRS.152.1 | 3.04  | 2.98  | 0.21 | 0.12 | 1.04  | 0.670261 | 0.819531 | 0.841785 | 0.896039 |
| MmunewRS.153.1.S1_at   | MmunewRS.153.1 | 4.1   | 4.11  | 0.06 | 0.32 | -1.01 | 0.360698 | 0.555689 | 0.636187 | 0.734    |
| MmunewRS.154.1.S1_at   | MmunewRS.154.1 | 6.95  | 6.85  | 0.15 | 0.04 | 1.07  | 0.092868 | 0.062631 | 0.361387 | 0.297022 |
| MmunewRS.154.1.S1_s_at | MmunewRS.154.1 | 3.91  | 3.91  | 0.16 | 0.09 | 1     | 0.554744 | 0.079404 | 0.770788 | 0.326766 |
| MmunewRS.155.1.S1_at   | MmunewRS.155.1 | 5.76  | 5.67  | 0.1  | 0.04 | 1.07  | 0.080785 | 0.073254 | 0.341497 | 0.316233 |
| MmunewRS.156.1.S1_at   | MmunewRS.156.1 | 5.33  | 5.35  | 0.03 | 0.03 | -1.02 | 0.686097 | 0.808482 | 0.850502 | 0.889757 |
| MmunewRS.157.1.S1_at   | MmunewRS.157.1 | 4.42  | 4.47  | 0.04 | 0.19 | -1.03 | 0.622724 | 0.7021   | 0.81347  | 0.827304 |
| MmunewRS.158.1.S1_at   | MmunewRS.158.1 | 3.09  | 3.09  | 0.15 | 0.09 | 1     | 0.377513 | 0.526514 | 0.648004 | 0.715583 |
| MmunewRS.159.1.S1_at   | MmunewRS.159.1 | 10.53 | 10.58 | 0.29 | 0.08 | -1.04 | 0.991929 | 0.273528 | 0.997006 | 0.53793  |
| MmunewRS.16.1.S1_at    | MmunewRS.16.1  | 7.95  | 7.92  | 0.17 | 0.09 | 1.02  | 0.54989  | 0.025737 | 0.767477 | 0.201029 |
| MmunewRS.161.1.S1_at   | MmunewRS.161.1 | 4.67  | 4.61  | 0.13 | 0.18 | 1.05  | 0.484591 | 0.602876 | 0.724365 | 0.763762 |
| MmunewRS.163.1.S1_at   | MmunewRS.163.1 | 3.77  | 3.77  | 0.19 | 0.06 | -1    | 0.871444 | 0.75822  | 0.944634 | 0.859308 |
| MmunewRS.164.1.S1_s_at | MmunewRS.164.1 | 3.53  | 3.41  | 0.03 | 0.21 | 1.08  | 0.886822 | 0.363551 | 0.951794 | 0.603957 |
| MmunewRS.165.1.S1_at   | MmunewRS.165.1 | 4.3   | 4.2   | 0.7  | 0.11 | 1.07  | 0.291668 | 0.370117 | 0.58108  | 0.609369 |
| MmunewRS.167.1.S1_s_at | MmunewRS.167.1 | 5.88  | 5.6   | 0.11 | 0.12 | 1.21  | 0.092006 | 0.100299 | 0.360023 | 0.359368 |
| MmunewRS.169.1.S1_at   | MmunewRS.169.1 | 2.91  | 2.76  | 0.12 | 0.29 | 1.11  | 0.932192 | 0.887259 | 0.971481 | 0.935815 |
| MmunewRS.17.1.S1_at    | MmunewRS.17.1  | 10.58 | 8.98  | 0.09 | 0.31 | 3.05  | 0.001119 | 0.000697 | 0.077306 | 0.04424  |
| MmunewRS.170.1.S1_at   | MmunewRS.170.1 | 7.38  | 7.32  | 0.27 | 0.2  | 1.05  | 0.637501 | 0.846288 | 0.822534 | 0.91252  |
| MmunewRS.171.1.S1_x_at | MmunewRS.171.1 | 8.45  | 7.26  | 0.4  | 0.22 | 2.28  | 0.021687 | 0.105596 | 0.20067  | 0.367621 |
| MmunewRS.172.1.S1_at   | MmunewRS.172.1 | 6.66  | 6.76  | 0.11 | 0.05 | -1.07 | 0.657192 | 0.178359 | 0.834252 | 0.454714 |
| MmunewRS.173.1.S1_at   | MmunewRS.173.1 | 6.87  | 6.6   | 0.16 | 0.16 | 1.21  | 0.230332 | 0.114211 | 0.529161 | 0.380761 |
| MmunewRS.174.1.S1_s_at | MmunewRS.174.1 | 4.29  | 4.28  | 0.11 | 0.07 | 1.01  | 0.206858 | 0.345635 | 0.504569 | 0.590854 |
| MmunewRS.175.1.S1_at   | MmunewRS.175.1 | 3.41  | 3.38  | 0.08 | 0.08 | 1.02  | 0.68764  | 0.25724  | 0.850807 | 0.525017 |
| MmunewRS.177.1.S1_at   | MmunewRS.177.1 | 5.67  | 5.49  | 0.14 | 0.07 | 1.13  | 0.136149 | 0.100503 | 0.420564 | 0.359698 |
| MmunewRS.179.1.S1_at   | MmunewRS.179.1 | 6.46  | 6.58  | 0.15 | 0.03 | -1.09 | 0.689629 | 0.295248 | 0.851865 | 0.554627 |
| MmunewRS.18.1.S1_at    | MmunewRS.18.1  | 3.41  | 3.48  | 0.05 | 0.27 | -1.05 | 0.667138 | 0.854384 | 0.8402   | 0.91705  |
| MmunewRS.180.1.S1_at   | MmunewRS.180.1 | 5.46  | 5.69  | 0.14 | 0.05 | -1.17 | 0.132592 | 0.255383 | 0.415892 | 0.52343  |
| MmunewRS.181.1.S1_at   | MmunewRS.181.1 | 7.76  | 7.69  | 0.23 | 0.1  | 1.05  | 0.278137 | 0.301601 | 0.569485 | 0.55955  |
| MmunewRS.182.1.S1_at   | MmunewRS.182.1 | 7.25  | 7.2   | 0.34 | 0.19 | 1.04  | 0.611573 | 0.811982 | 0.806363 | 0.891493 |
| MmunewRS.183.1.S1_at   | MmunewRS.183.1 | 3.58  | 3.5   | 0.12 | 0.17 | 1.06  | 0.540106 | 0.737537 | 0.761283 | 0.847993 |
| MmunewRS.184.1.S1_at   | MmunewRS.184.1 | 6.08  | 5.91  | 0.05 | 0.16 | 1.13  | 0.323314 | 0.431286 | 0.607132 | 0.652249 |
| MmunewRS.185.1.S1_at   | MmunewRS.185.1 | 3.09  | 3.09  | 0.04 | 0.1  | 1     | 0.892115 | 0.278562 | 0.953994 | 0.542327 |
| MmunewRS.186.1.S1_at   | MmunewRS.186.1 | 8.38  | 8.15  | 0.22 | 0.29 | 1.17  | 0.260305 | 0.459981 | 0.554455 | 0.671989 |
| MmunewRS.187.1.S1_at   | MmunewRS.187.1 | 3.55  | 3.56  | 0.22 | 0.17 | -1    | 0.244293 | 0.385917 | 0.540909 | 0.621161 |
| MmunewRS.188.1.S1_at   | MmunewRS.188.1 | 2.91  | 2.91  | 0.1  | 0.12 | -1    | 0.53603  | 0.450719 | 0.75873  | 0.665844 |
| MmunewRS.189.1.S1_at   | MmunewRS.189.1 | 6.28  | 5.32  | 0.55 | 0.59 | 1.95  | 0.131102 | 0.169813 | 0.413841 | 0.446515 |
| MmunewRS.19.1.S1_at    | MmunewRS.19.1  | 3.33  | 3.33  | 0.12 | 0.06 | -1    | 0.561188 | 0.058244 | 0.774298 | 0.287992 |
| MmunewRS.190.1.S1_at   | MmunewRS.190.1 | 13.31 | 13.24 | 0.07 | 0.14 | 1.05  | 0.157558 | 0.073011 | 0.448247 | 0.316017 |
| MmunewRS.191.1.S1_at   | MmunewRS.191.1 | 3.64  | 3.65  | 0.02 | 0.07 | -1    | 0.757508 | 0.721833 | 0.888777 | 0.838859 |
| MmunewRS.192.1.S1_at   | MmunewRS.192.1 | 3.31  | 3.19  | 0.09 | 0.16 | 1.09  | 0.208208 | 0.450349 | 0.505958 | 0.665643 |
| MmunewRS.193.1.S1_at   | MmunewRS.193.1 | 6.5   | 6.49  | 0.13 | 0.08 | 1.01  | 0.775683 | 0.37696  | 0.89744  | 0.614682 |
| MmunewRS.196.1.S1_at   | MmunewRS.196.1 | 3.96  | 3.96  | 0.05 | 0.03 | 1     | 0.653032 | 0.011601 | 0.831848 | 0.139446 |

|                        |                |       |       |      |      |       |          |          |          |          |
|------------------------|----------------|-------|-------|------|------|-------|----------|----------|----------|----------|
| MmunewRS.197.1.S1_at   | MmunewRS.197.1 | 4.66  | 4.6   | 0.13 | 0.05 | 1.04  | 0.164946 | 0.320535 | 0.457897 | 0.572648 |
| MmunewRS.198.1.S1_at   | MmunewRS.198.1 | 5.61  | 5.17  | 0.28 | 0.01 | 1.36  | 0.14017  | 0.018182 | 0.425843 | 0.169673 |
| MmunewRS.199.1.S1_at   | MmunewRS.199.1 | 3.25  | 3.25  | 0.07 | 0.07 | 1     | 0.484528 | 0.875763 | 0.724353 | 0.929439 |
| MmunewRS.2.1.S1_at     | MmunewRS.2.1   | 8.41  | 8.34  | 0.5  | 0.1  | 1.05  | 0.921409 | 0.12891  | 0.966381 | 0.400331 |
| MmunewRS.20.1.S1_at    | MmunewRS.20.1  | 9.3   | 10.69 | 0.59 | 0.23 | -2.62 | 0.04197  | 0.05898  | 0.26186  | 0.289669 |
| MmunewRS.200.1.S1_at   | MmunewRS.200.1 | 5.27  | 5.2   | 0.09 | 0.01 | 1.05  | 0.77127  | 0.921279 | 0.895207 | 0.9557   |
| MmunewRS.202.1.S1_at   | MmunewRS.202.1 | 6.92  | 6.62  | 0.23 | 0.06 | 1.23  | 0.318516 | 0.541985 | 0.603179 | 0.725169 |
| MmunewRS.203.1.S1_at   | MmunewRS.203.1 | 7.05  | 6.06  | 0.31 | 0.12 | 1.99  | 0.0048   | 0.043763 | 0.115098 | 0.25387  |
| MmunewRS.203.1.S1_x_at | MmunewRS.203.1 | 7.47  | 6.39  | 0.31 | 0.18 | 2.11  | 0.005587 | 0.068807 | 0.120456 | 0.308711 |
| MmunewRS.204.1.S1_at   | MmunewRS.204.1 | 6.52  | 6.62  | 0.14 | 0.08 | -1.08 | 0.685272 | 0.112253 | 0.849991 | 0.37755  |
| MmunewRS.205.1.S1_at   | MmunewRS.205.1 | 5.54  | 6.48  | 0.33 | 0.15 | -1.92 | 0.019168 | 0.213792 | 0.191957 | 0.487564 |
| MmunewRS.206.1.S1_at   | MmunewRS.206.1 | 4.38  | 4     | 0.43 | 0.12 | 1.3   | 0.143359 | 0.264868 | 0.429655 | 0.530872 |
| MmunewRS.207.1.S1_at   | MmunewRS.207.1 | 3.11  | 3.14  | 0.56 | 0.07 | -1.02 | 0.358958 | 0.43872  | 0.634581 | 0.657639 |
| MmunewRS.208.1.S1_s_at | MmunewRS.208.1 | 11.58 | 11.06 | 0.08 | 0.07 | 1.44  | 0.001294 | 0.012703 | 0.078631 | 0.145329 |
| MmunewRS.21.1.S1_at    | MmunewRS.21.1  | 4.77  | 4.59  | 0.14 | 0.17 | 1.13  | 0.493086 | 0.636755 | 0.730197 | 0.78635  |
| MmunewRS.210.1.S1_at   | MmunewRS.210.1 | 3.89  | 3.83  | 0.67 | 0.22 | 1.04  | 0.332605 | 0.423866 | 0.614259 | 0.646555 |
| MmunewRS.211.1.S1_at   | MmunewRS.211.1 | 4.01  | 4.11  | 0.12 | 0.03 | -1.07 | 0.270146 | 0.022924 | 0.562321 | 0.189403 |
| MmunewRS.212.1.S1_at   | MmunewRS.212.1 | 3.91  | 3.95  | 0.16 | 0.03 | -1.03 | 0.810406 | 0.418389 | 0.915074 | 0.642783 |
| MmunewRS.213.1.S1_at   | MmunewRS.213.1 | 4.87  | 4.82  | 0.06 | 0.03 | 1.04  | 0.219724 | 0.236122 | 0.517494 | 0.507179 |
| MmunewRS.214.1.S1_at   | MmunewRS.214.1 | 3.76  | 3.82  | 0.02 | 0.02 | -1.04 | 0.081208 | 0.072123 | 0.342222 | 0.314611 |
| MmunewRS.215.1.S1_s_at | MmunewRS.215.1 | 4.29  | 4.41  | 0.09 | 0.03 | -1.09 | 0.076424 | 0.146996 | 0.334699 | 0.421098 |
| MmunewRS.216.1.S1_at   | MmunewRS.216.1 | 3.92  | 3.99  | 0.04 | 0.08 | -1.05 | 0.987992 | 0.330163 | 0.995695 | 0.578987 |
| MmunewRS.217.1.S1_at   | MmunewRS.217.1 | 4.14  | 4.23  | 0.3  | 0.23 | -1.06 | 0.349789 | 0.455039 | 0.627551 | 0.66903  |
| MmunewRS.219.1.S1_at   | MmunewRS.219.1 | 4.53  | 4.4   | 0.17 | 0.16 | 1.09  | 0.222676 | 0.534852 | 0.520555 | 0.720564 |
| MmunewRS.220.1.S1_at   | MmunewRS.220.1 | 4.57  | 4.66  | 0.28 | 0.06 | -1.07 | 0.822949 | 0.812916 | 0.921311 | 0.891875 |
| MmunewRS.221.1.S1_at   | MmunewRS.221.1 | 4.39  | 4.58  | 0.31 | 0.1  | -1.14 | 0.521342 | 0.768192 | 0.749308 | 0.865415 |
| MmunewRS.222.1.S1_at   | MmunewRS.222.1 | 4.32  | 4.39  | 0.07 | 0.17 | -1.05 | 0.282015 | 0.842672 | 0.572752 | 0.910333 |
| MmunewRS.223.1.S1_at   | MmunewRS.223.1 | 5.87  | 6.03  | 0.17 | 0.04 | -1.11 | 0.608528 | 0.710309 | 0.804547 | 0.831912 |
| MmunewRS.224.1.S1_at   | MmunewRS.224.1 | 8.12  | 8.4   | 0.22 | 0.21 | -1.21 | 0.425739 | 0.402627 | 0.683014 | 0.631506 |
| MmunewRS.225.1.S1_at   | MmunewRS.225.1 | 6.78  | 6.78  | 0.49 | 0.05 | 1     | 0.339071 | 0.114252 | 0.619372 | 0.380761 |
| MmunewRS.226.1.S1_at   | MmunewRS.226.1 | 9.51  | 9.72  | 0.29 | 0.13 | -1.15 | 0.365242 | 0.203408 | 0.639887 | 0.477634 |
| MmunewRS.227.1.S1_at   | MmunewRS.227.1 | 10.53 | 10.56 | 0.12 | 0.05 | -1.02 | 0.483539 | 0.781659 | 0.723632 | 0.87342  |
| MmunewRS.228.1.S1_at   | MmunewRS.228.1 | 4.45  | 4.4   | 0.04 | 0.09 | 1.03  | 0.241463 | 0.391465 | 0.538602 | 0.625086 |
| MmunewRS.229.1.S1_at   | MmunewRS.229.1 | 7.3   | 7.83  | 0.2  | 0.21 | -1.44 | 0.036707 | 0.045593 | 0.246698 | 0.257674 |
| MmunewRS.23.1.S1_at    | MmunewRS.23.1  | 3.42  | 3.49  | 0.1  | 0.11 | -1.05 | 0.475415 | 0.120867 | 0.718106 | 0.389753 |
| MmunewRS.230.1.S1_at   | MmunewRS.230.1 | 6.26  | 6.84  | 0.19 | 0.1  | -1.5  | 0.012695 | 0.005984 | 0.162701 | 0.1058   |
| MmunewRS.232.1.S1_at   | MmunewRS.232.1 | 4.92  | 4.89  | 0.06 | 0.07 | 1.02  | 0.291266 | 0.295145 | 0.580618 | 0.554551 |
| MmunewRS.233.1.S1_at   | MmunewRS.233.1 | 3.48  | 3.61  | 0.08 | 0.11 | -1.1  | 0.16563  | 0.15701  | 0.458665 | 0.432467 |
| MmunewRS.234.1.S1_at   | MmunewRS.234.1 | 7.82  | 6.64  | 0.38 | 0.27 | 2.26  | 0.009844 | 0.001003 | 0.148641 | 0.050657 |
| MmunewRS.235.1.S1_at   | MmunewRS.235.1 | 3.51  | 3.32  | 0.11 | 0.14 | 1.15  | 0.223604 | 0.186722 | 0.521546 | 0.462497 |
| MmunewRS.236.1.S1_at   | MmunewRS.236.1 | 4.15  | 4.3   | 0.25 | 0.04 | -1.1  | 0.870232 | 0.924418 | 0.944208 | 0.95736  |
| MmunewRS.237.1.S1_at   | MmunewRS.237.1 | 3     | 2.91  | 0.04 | 0.06 | 1.06  | 0.248477 | 0.640343 | 0.543877 | 0.788874 |
| MmunewRS.238.1.S1_at   | MmunewRS.238.1 | 3.58  | 3.39  | 0.97 | 0.1  | 1.14  | 0.283598 | 0.438683 | 0.573936 | 0.65762  |

|                        |                |       |       |      |      |       |          |          |          |          |
|------------------------|----------------|-------|-------|------|------|-------|----------|----------|----------|----------|
| MmunewRS.24.1.S1_at    | MmunewRS.24.1  | 6.63  | 6.23  | 0.34 | 0.08 | 1.32  | 0.108768 | 0.087931 | 0.383665 | 0.341336 |
| MmunewRS.240.1.S1_at   | MmunewRS.240.1 | 13.76 | 13.78 | 0.07 | 0.01 | -1.01 | 0.887292 | 0.582123 | 0.951911 | 0.750784 |
| MmunewRS.241.1.S1_at   | MmunewRS.241.1 | 3.78  | 3.92  | 0.08 | 0.14 | -1.1  | 0.215907 | 0.242235 | 0.513611 | 0.51267  |
| MmunewRS.242.1.S1_at   | MmunewRS.242.1 | 3.36  | 3.4   | 0.15 | 0.05 | -1.03 | 0.799083 | 0.449911 | 0.909433 | 0.665343 |
| MmunewRS.412.1.S1_s_at | MmunewRS.412.1 | 5.23  | 5.1   | 0.86 | 0.32 | 1.09  | 0.212952 | 0.1699   | 0.510909 | 0.446569 |
| MmunewRS.412.1.S1_x_at | MmunewRS.412.1 | 3.01  | 2.89  | 0.22 | 0.14 | 1.08  | 0.259482 | 0.377378 | 0.553795 | 0.6149   |
| MmunewRS.244.1.S1_at   | MmunewRS.244.1 | 3.35  | 3.41  | 0.08 | 0    | -1.04 | 0.190476 | 0.098541 | 0.486767 | 0.356636 |
| MmunewRS.245.1.S1_at   | MmunewRS.245.1 | 4.84  | 5.05  | 0.14 | 0.21 | -1.16 | 0.260821 | 0.436232 | 0.554996 | 0.655899 |
| MmunewRS.246.1.S1_at   | MmunewRS.246.1 | 2.93  | 2.94  | 0.01 | 0.03 | -1.01 | 0.665017 | 0.763594 | 0.838949 | 0.862496 |
| MmunewRS.247.1.S1_at   | MmunewRS.247.1 | 4.1   | 4.15  | 0.04 | 0.06 | -1.04 | 0.287744 | 0.46633  | 0.577473 | 0.67624  |
| MmunewRS.248.1.S1_at   | MmunewRS.248.1 | 3.27  | 3.22  | 0.13 | 0.14 | 1.04  | 0.787752 | 0.547386 | 0.903391 | 0.728447 |
| MmunewRS.249.1.S1_at   | MmunewRS.249.1 | 4.03  | 4.19  | 0.23 | 0.09 | -1.11 | 0.611454 | 0.741447 | 0.806279 | 0.850285 |
| MmunewRS.25.1.S1_at    | MmunewRS.25.1  | 3.57  | 3.88  | 0.18 | 0.94 | -1.24 | 0.201318 | 0.202373 | 0.498835 | 0.476737 |
| MmunewRS.250.1.S1_at   | MmunewRS.250.1 | 7.85  | 7.27  | 0.15 | 0.33 | 1.49  | 0.030138 | 0.094995 | 0.226716 | 0.352071 |
| MmunewRS.251.1.S1_at   | MmunewRS.251.1 | 4.48  | 4.73  | 0.18 | 0.1  | -1.19 | 0.463713 | 0.588768 | 0.710207 | 0.755137 |
| MmunewRS.252.1.S1_at   | MmunewRS.252.1 | 8.61  | 7.97  | 0.56 | 0.28 | 1.56  | 0.089476 | 0.060012 | 0.356406 | 0.291649 |
| MmunewRS.253.1.S1_at   | MmunewRS.253.1 | 7.2   | 7.18  | 0.51 | 0.2  | 1.01  | 0.829538 | 0.614384 | 0.924926 | 0.771226 |
| MmunewRS.254.1.S1_at   | MmunewRS.254.1 | 12.96 | 13.61 | 0.43 | 0.05 | -1.57 | 0.066354 | 0.08085  | 0.315112 | 0.328803 |
| MmunewRS.255.1.S1_at   | MmunewRS.255.1 | 5     | 5.22  | 0.19 | 0.36 | -1.16 | 0.269068 | 0.637135 | 0.561488 | 0.786653 |
| MmunewRS.257.1.S1_at   | MmunewRS.257.1 | 3.99  | 3.81  | 0.11 | 0.06 | 1.13  | 0.066552 | 0.093152 | 0.315484 | 0.349303 |
| MmunewRS.258.1.S1_at   | MmunewRS.258.1 | 4.82  | 4.84  | 0.26 | 0.1  | -1.01 | 0.317547 | 0.471939 | 0.602329 | 0.679793 |
| MmunewRS.259.1.S1_at   | MmunewRS.259.1 | 5.86  | 7.26  | 0.31 | 0.34 | -2.64 | 0.006744 | 0.008536 | 0.128889 | 0.122563 |
| MmunewRS.26.1.S1_s_at  | MmunewRS.26.1  | 4.56  | 4.66  | 0.23 | 0.13 | -1.07 | 0.493207 | 0.643998 | 0.730266 | 0.791265 |
| MmunewRS.260.1.S1_at   | MmunewRS.260.1 | 3.34  | 3.35  | 0.09 | 0.07 | -1.01 | 0.452243 | 0.483931 | 0.702807 | 0.688243 |
| MmunewRS.261.1.S1_at   | MmunewRS.261.1 | 5.82  | 5.92  | 0.01 | 0.1  | -1.07 | 0.505055 | 0.110294 | 0.738131 | 0.374403 |
| MmunewRS.262.1.S1_at   | MmunewRS.262.1 | 2.97  | 3.06  | 0.03 | 0.16 | -1.07 | 0.258313 | 0.554868 | 0.552505 | 0.733544 |
| MmunewRS.263.1.S1_at   | MmunewRS.263.1 | 4.96  | 6.71  | 1.08 | 0.17 | -3.38 | 0.058353 | 0.041184 | 0.298715 | 0.247733 |
| MmunewRS.264.1.S1_s_at | MmunewRS.264.1 | 6.07  | 6.17  | 0.13 | 0.1  | -1.07 | 0.286703 | 0.195158 | 0.576528 | 0.470241 |
| MmunewRS.265.1.S1_at   | MmunewRS.265.1 | 6.66  | 6.1   | 0.45 | 0.12 | 1.48  | 0.099924 | 0.376721 | 0.370858 | 0.614539 |
| MmunewRS.267.1.S1_at   | MmunewRS.267.1 | 7.69  | 7.64  | 0.19 | 0.04 | 1.03  | 0.563977 | 0.21181  | 0.775779 | 0.485784 |
| MmunewRS.268.1.S1_s_at | MmunewRS.268.1 | 12.55 | 12.12 | 0.17 | 0.14 | 1.35  | 0.0282   | 0.044903 | 0.220433 | 0.256424 |
| MmunewRS.269.1.S1_at   | MmunewRS.269.1 | 6.04  | 6     | 0.34 | 0.12 | 1.03  | 0.595018 | 0.370289 | 0.795076 | 0.609406 |
| MmunewRS.270.1.S1_at   | MmunewRS.270.1 | 5.43  | 5.36  | 0.24 | 0.05 | 1.05  | 0.782332 | 0.35583  | 0.900653 | 0.597864 |
| MmunewRS.271.1.S1_at   | MmunewRS.271.1 | 4.74  | 4.8   | 0.13 | 0.14 | -1.04 | 0.248387 | 0.569094 | 0.543799 | 0.742239 |
| MmunewRS.272.1.S1_at   | MmunewRS.272.1 | 6.69  | 6.32  | 0.14 | 0.13 | 1.29  | 0.049853 | 0.184949 | 0.280954 | 0.460776 |
| MmunewRS.273.1.S1_at   | MmunewRS.273.1 | 4.48  | 4.48  | 0.05 | 0.07 | 1     | 0.542561 | 0.926629 | 0.762884 | 0.958372 |
| MmunewRS.274.1.S1_at   | MmunewRS.274.1 | 3.3   | 3.09  | 0.24 | 0.05 | 1.16  | 0.244185 | 0.605118 | 0.540864 | 0.764917 |
| MmunewRS.275.1.S1_at   | MmunewRS.275.1 | 3.31  | 3.04  | 0.05 | 0.28 | 1.21  | 0.538666 | 0.406868 | 0.760315 | 0.634579 |
| MmunewRS.276.1.S1_at   | MmunewRS.276.1 | 4.57  | 4.56  | 0.03 | 0.13 | 1.01  | 0.706656 | 0.519884 | 0.861126 | 0.711367 |
| MmunewRS.277.1.S1_at   | MmunewRS.277.1 | 10.02 | 10.11 | 0.05 | 0.14 | -1.07 | 0.625119 | 0.097973 | 0.815208 | 0.355872 |
| MmunewRS.278.1.S1_at   | MmunewRS.278.1 | 3.28  | 3.29  | 0.07 | 0.1  | -1.01 | 0.742185 | 0.531842 | 0.880585 | 0.718957 |
| MmunewRS.279.1.S1_at   | MmunewRS.279.1 | 3.8   | 3.75  | 0.18 | 0.16 | 1.03  | 0.526446 | 0.795878 | 0.752619 | 0.882408 |
| MmunewRS.280.1.S1_at   | MmunewRS.280.1 | 5.06  | 4.86  | 0.06 | 0.15 | 1.14  | 0.110791 | 0.166247 | 0.386305 | 0.442797 |



|                        |                |       |       |      |      |       |          |          |          |          |
|------------------------|----------------|-------|-------|------|------|-------|----------|----------|----------|----------|
| MmunewRS.281.1.S1_at   | MmunewRS.281.1 | 4.51  | 4.48  | 0.07 | 0.27 | 1.02  | 0.618994 | 0.680234 | 0.810962 | 0.813311 |
| MmunewRS.283.1.S1_at   | MmunewRS.283.1 | 6.92  | 7.09  | 0.32 | 0.24 | -1.13 | 0.549148 | 0.240963 | 0.766994 | 0.511648 |
| MmunewRS.284.1.S1_at   | MmunewRS.284.1 | 3.93  | 3.85  | 0.11 | 0.13 | 1.06  | 0.212955 | 0.312261 | 0.510909 | 0.566963 |
| MmunewRS.286.1.S1_at   | MmunewRS.286.1 | 4.69  | 4.83  | 0.27 | 0.02 | -1.1  | 0.367547 | 0.43856  | 0.641471 | 0.657511 |
| MmunewRS.287.1.S1_at   | MmunewRS.287.1 | 6.55  | 6.66  | 0.18 | 0.01 | -1.08 | 0.394151 | 0.166642 | 0.660857 | 0.443133 |
| MmunewRS.288.1.S1_at   | MmunewRS.288.1 | 4.61  | 4.86  | 0.28 | 0.39 | -1.19 | 0.293255 | 0.396687 | 0.582171 | 0.628434 |
| MmunewRS.289.1.S1_at   | MmunewRS.289.1 | 5.73  | 5.73  | 0.05 | 0.01 | -1    | 0.428103 | 0.043609 | 0.685092 | 0.253501 |
| MmunewRS.290.1.S1_at   | MmunewRS.290.1 | 4.33  | 4.6   | 0.22 | 0.05 | -1.2  | 0.344362 | 0.463207 | 0.623699 | 0.674269 |
| MmunewRS.291.1.S1_at   | MmunewRS.291.1 | 8.6   | 8.45  | 0.32 | 0.15 | 1.1   | 0.219159 | 0.282102 | 0.516878 | 0.544937 |
| MmunewRS.292.1.S1_at   | MmunewRS.292.1 | 5.64  | 5.74  | 0.19 | 0.01 | -1.07 | 0.980969 | 0.807422 | 0.992903 | 0.889121 |
| MmunewRS.293.1.S1_at   | MmunewRS.293.1 | 5.96  | 4.89  | 1.34 | 0.46 | 2.11  | 0.521789 | 0.617543 | 0.749403 | 0.773477 |
| MmunewRS.294.1.S1_at   | MmunewRS.294.1 | 5.07  | 5.09  | 0.15 | 0.01 | -1.01 | 0.761739 | 0.887785 | 0.890644 | 0.936048 |
| MmunewRS.295.1.S1_at   | MmunewRS.295.1 | 4.99  | 4.9   | 0.09 | 0.05 | 1.07  | 0.399096 | 0.279648 | 0.664615 | 0.543212 |
| MmunewRS.296.1.S1_at   | MmunewRS.296.1 | 4.29  | 4.18  | 0.08 | 0.05 | 1.07  | 0.176486 | 0.134372 | 0.470901 | 0.406603 |
| MmunewRS.297.1.S1_at   | MmunewRS.297.1 | 3.09  | 3.04  | 0.04 | 0.11 | 1.04  | 0.890136 | 0.59401  | 0.953208 | 0.75851  |
| MmunewRS.298.1.S1_at   | MmunewRS.298.1 | 7.86  | 8.11  | 0.87 | 0.09 | -1.19 | 0.824756 | 0.579653 | 0.922162 | 0.749254 |
| MmunewRS.299.1.S1_at   | MmunewRS.299.1 | 4.07  | 3.8   | 0.62 | 0.09 | 1.21  | 0.135145 | 0.100439 | 0.419109 | 0.359541 |
| MmunewRS.300.1.S1_at   | MmunewRS.300.1 | 6.27  | 6.31  | 0.1  | 0.08 | -1.03 | 0.858898 | 0.988722 | 0.938851 | 0.993595 |
| MmunewRS.301.1.S1_a_at | MmunewRS.301.1 | 8.01  | 7.82  | 0.1  | 0.18 | 1.14  | 0.1283   | 0.009081 | 0.410227 | 0.125944 |
| MmunewRS.301.1.S1_at   | MmunewRS.301.1 | 5.32  | 5.24  | 0.09 | 0.13 | 1.06  | 0.152889 | 0.180516 | 0.442609 | 0.457128 |
| MmunewRS.302.1.S1_at   | MmunewRS.302.1 | 2.96  | 3.06  | 0.14 | 0.05 | -1.07 | 0.46774  | 0.488785 | 0.713172 | 0.691362 |
| MmunewRS.304.1.S1_at   | MmunewRS.304.1 | 3.19  | 3.16  | 0.07 | 0.03 | 1.02  | 0.613642 | 0.44041  | 0.807564 | 0.658939 |
| MmunewRS.306.1.S1_at   | MmunewRS.306.1 | 7.22  | 7.28  | 0.23 | 0.17 | -1.04 | 0.945662 | 0.72885  | 0.977159 | 0.843269 |
| MmunewRS.307.1.S1_at   | MmunewRS.307.1 | 13.71 | 13.8  | 0.06 | 0.06 | -1.07 | 0.048907 | 0.101576 | 0.278728 | 0.361433 |
| MmunewRS.308.1.S1_at   | MmunewRS.308.1 | 11.48 | 10.96 | 0.38 | 0.09 | 1.43  | 0.098873 | 0.011748 | 0.369716 | 0.140378 |
| MmunewRS.309.1.S1_at   | MmunewRS.309.1 | 3.82  | 3.78  | 0.27 | 0.05 | 1.03  | 0.819237 | 0.728013 | 0.919492 | 0.842711 |
| MmunewRS.31.1.S1_at    | MmunewRS.31.1  | 5.66  | 7.6   | 0.12 | 0.2  | -3.82 | 0.000109 | 0.002301 | 0.051196 | 0.070694 |
| MmunewRS.310.1.S1_at   | MmunewRS.310.1 | 11.28 | 11.28 | 0.03 | 0.12 | -1.01 | 0.618529 | 0.613347 | 0.810678 | 0.770518 |
| MmunewRS.311.1.S1_at   | MmunewRS.311.1 | 4.03  | 4.05  | 0.31 | 0.07 | -1.02 | 0.85978  | 0.805365 | 0.939213 | 0.888121 |
| MmunewRS.312.1.S1_s_at | MmunewRS.312.1 | 3.33  | 3.49  | 0.04 | 0.05 | -1.12 | 0.011853 | 0.020046 | 0.158913 | 0.177855 |
| MmunewRS.313.1.S1_at   | MmunewRS.313.1 | 3.91  | 3.83  | 0.75 | 0.08 | 1.06  | 0.269469 | 0.219493 | 0.561805 | 0.493168 |
| MmunewRS.314.1.S1_s_at | MmunewRS.314.1 | 11.46 | 10.16 | 0.03 | 0.53 | 2.45  | 0.031343 | 0.072698 | 0.23018  | 0.31561  |
| MmunewRS.315.1.S1_at   | MmunewRS.315.1 | 12.86 | 12.98 | 0.21 | 0.02 | -1.08 | 0.381097 | 0.085369 | 0.650649 | 0.337246 |
| MmunewRS.316.1.S1_at   | MmunewRS.316.1 | 2.86  | 3.12  | 0.08 | 0.07 | -1.2  | 0.015323 | 0.003934 | 0.176072 | 0.089223 |
| MmunewRS.317.1.S1_at   | MmunewRS.317.1 | 3.55  | 3.53  | 0.06 | 0.08 | 1.01  | 0.369829 | 0.843938 | 0.643125 | 0.9111   |
| MmunewRS.318.1.S1_at   | MmunewRS.318.1 | 5.86  | 5.81  | 0.12 | 0.08 | 1.03  | 0.97782  | 0.146143 | 0.991321 | 0.420099 |
| MmunewRS.319.1.S1_at   | MmunewRS.319.1 | 6.45  | 6.46  | 0.11 | 0.03 | -1.01 | 0.894681 | 0.924968 | 0.955115 | 0.957573 |
| MmunewRS.32.1.S1_at    | MmunewRS.32.1  | 4.82  | 4.03  | 1.03 | 0.55 | 1.73  | 0.305691 | 0.291021 | 0.592779 | 0.551574 |
| MmunewRS.320.1.S1_at   | MmunewRS.320.1 | 4.8   | 4.96  | 0.07 | 0.04 | -1.11 | 0.036874 | 0.032101 | 0.247118 | 0.221776 |
| MmunewRS.321.1.S1_at   | MmunewRS.321.1 | 4.4   | 4.38  | 0.09 | 0.01 | 1.01  | 0.764341 | 0.294797 | 0.89193  | 0.55437  |
| MmunewRS.322.1.S1_at   | MmunewRS.322.1 | 5.71  | 5.67  | 0.13 | 0.05 | 1.03  | 0.802092 | 0.143162 | 0.911159 | 0.417029 |
| MmunewRS.323.1.S1_at   | MmunewRS.323.1 | 6.21  | 5.96  | 0.19 | 0.1  | 1.19  | 0.338794 | 0.334608 | 0.619178 | 0.582581 |
| MmunewRS.324.1.S1_at   | MmunewRS.324.1 | 3.64  | 3.6   | 0.08 | 0.04 | 1.03  | 0.268542 | 0.853388 | 0.561073 | 0.916579 |

|                        |                |       |       |      |      |       |          |          |          |          |
|------------------------|----------------|-------|-------|------|------|-------|----------|----------|----------|----------|
| MmunewRS.325.1.S1_at   | MmunewRS.325.1 | 4.71  | 4.72  | 0.12 | 0.04 | -1.01 | 0.634159 | 0.600566 | 0.820636 | 0.76217  |
| MmunewRS.326.1.S1_at   | MmunewRS.326.1 | 3.06  | 3     | 0.16 | 0.08 | 1.05  | 0.205286 | 0.339235 | 0.503171 | 0.585918 |
| MmunewRS.328.1.S1_at   | MmunewRS.328.1 | 7.02  | 5.79  | 0.52 | 0.32 | 2.34  | 0.052258 | 0.110465 | 0.285979 | 0.374684 |
| MmunewRS.329.1.S1_at   | MmunewRS.329.1 | 4.93  | 4.92  | 0.07 | 0.01 | 1.01  | 0.572477 | 0.918944 | 0.780625 | 0.954477 |
| MmunewRS.330.1.S1_at   | MmunewRS.330.1 | 5.51  | 5.54  | 0.11 | 0.02 | -1.02 | 0.96998  | 0.063441 | 0.988053 | 0.298441 |
| MmunewRS.331.1.S1_at   | MmunewRS.331.1 | 4.44  | 4.35  | 0.66 | 0.12 | 1.06  | 0.305926 | 0.397955 | 0.59291  | 0.629138 |
| MmunewRS.332.1.S1_at   | MmunewRS.332.1 | 3.93  | 3.86  | 0.36 | 0.15 | 1.05  | 0.18389  | 0.231253 | 0.479745 | 0.502929 |
| MmunewRS.333.1.S1_at   | MmunewRS.333.1 | 6.09  | 6.5   | 0.32 | 0.15 | -1.32 | 0.109173 | 0.459236 | 0.384284 | 0.671669 |
| MmunewRS.334.1.S1_at   | MmunewRS.334.1 | 2.9   | 2.8   | 0.01 | 0.06 | 1.07  | 0.140686 | 0.050887 | 0.426406 | 0.270882 |
| MmunewRS.335.1.S1_at   | MmunewRS.335.1 | 7.09  | 7.13  | 0.37 | 0.05 | -1.03 | 0.822577 | 0.131549 | 0.921047 | 0.403665 |
| MmunewRS.338.1.S1_at   | MmunewRS.338.1 | 7.96  | 7.81  | 0.21 | 0.04 | 1.11  | 0.499824 | 0.868091 | 0.734372 | 0.925106 |
| MmunewRS.339.1.S1_at   | MmunewRS.339.1 | 3.29  | 3.43  | 0.07 | 0.1  | -1.1  | 0.387215 | 0.534793 | 0.655462 | 0.720557 |
| MmunewRS.340.1.S1_at   | MmunewRS.340.1 | 5.2   | 5.22  | 0.07 | 0.02 | -1.01 | 0.192654 | 0.37566  | 0.489253 | 0.613577 |
| MmunewRS.341.1.S1_at   | MmunewRS.341.1 | 5.73  | 5.69  | 0.12 | 0.02 | 1.03  | 0.307179 | 0.715184 | 0.593923 | 0.834894 |
| MmunewRS.342.1.S1_at   | MmunewRS.342.1 | 6.56  | 6.32  | 0.26 | 0.08 | 1.18  | 0.257408 | 0.203202 | 0.551695 | 0.477415 |
| MmunewRS.344.1.S1_at   | MmunewRS.344.1 | 4.38  | 4.37  | 0.06 | 0.02 | 1.01  | 0.907341 | 0.973166 | 0.96085  | 0.985431 |
| MmunewRS.345.1.S1_at   | MmunewRS.345.1 | 2.95  | 2.93  | 0.05 | 0.07 | 1.01  | 0.197399 | 0.078072 | 0.494549 | 0.324575 |
| MmunewRS.346.1.S1_at   | MmunewRS.346.1 | 3.89  | 3.91  | 0.11 | 0.12 | -1.02 | 0.766976 | 0.972011 | 0.893101 | 0.984884 |
| MmunewRS.347.1.S1_at   | MmunewRS.347.1 | 6.85  | 5.15  | 0.71 | 0.57 | 3.24  | 0.026931 | 0.027908 | 0.217059 | 0.208529 |
| MmunewRS.348.1.S1_at   | MmunewRS.348.1 | 3.42  | 3.41  | 0    | 0.07 | 1.01  | 0.536903 | 0.386376 | 0.759199 | 0.621593 |
| MmunewRS.35.1.S1_at    | MmunewRS.35.1  | 7.68  | 9.83  | 3.04 | 0.07 | -4.44 | 0.265217 | 0.573927 | 0.557962 | 0.745476 |
| MmunewRS.350.1.S1_at   | MmunewRS.350.1 | 5.6   | 5.5   | 0.14 | 0.11 | 1.07  | 0.7146   | 0.765811 | 0.865104 | 0.86393  |
| MmunewRS.351.1.S1_at   | MmunewRS.351.1 | 4.5   | 4.5   | 0.12 | 0.14 | -1    | 0.579129 | 0.216807 | 0.784916 | 0.490373 |
| MmunewRS.352.1.S1_at   | MmunewRS.352.1 | 5.92  | 5.87  | 0.04 | 0.1  | 1.03  | 0.64849  | 0.099707 | 0.829221 | 0.358256 |
| MmunewRS.353.1.S1_at   | MmunewRS.353.1 | 6.41  | 6.42  | 0.16 | 0.09 | -1.01 | 0.461802 | 0.338548 | 0.709107 | 0.58555  |
| MmunewRS.354.1.S1_at   | MmunewRS.354.1 | 4.12  | 4.16  | 0.1  | 0.06 | -1.03 | 0.186258 | 0.049243 | 0.482508 | 0.266752 |
| MmunewRS.355.1.S1_at   | MmunewRS.355.1 | 3.82  | 3.7   | 0.08 | 0.13 | 1.08  | 0.358638 | 0.198418 | 0.6344   | 0.473302 |
| MmunewRS.356.1.S1_s_at | MmunewRS.356.1 | 10.06 | 10.38 | 1.12 | 0.05 | -1.25 | 0.757913 | 0.828188 | 0.888972 | 0.901235 |
| MmunewRS.358.1.S1_at   | MmunewRS.358.1 | 7     | 7.48  | 0.46 | 0.09 | -1.4  | 0.259286 | 0.359186 | 0.55365  | 0.600528 |
| MmunewRS.359.1.S1_at   | MmunewRS.359.1 | 2.99  | 3.03  | 0.03 | 0.07 | -1.03 | 0.501756 | 0.421839 | 0.735507 | 0.645364 |
| MmunewRS.36.1.S1_at    | MmunewRS.36.1  | 13.36 | 13.39 | 0.3  | 0.03 | -1.02 | 0.736346 | 0.615956 | 0.877464 | 0.772359 |
| MmunewRS.360.1.S1_at   | MmunewRS.360.1 | 4.6   | 4.45  | 0.03 | 0.02 | 1.11  | 0.00706  | 0.015944 | 0.131458 | 0.160254 |
| MmunewRS.361.1.S1_at   | MmunewRS.361.1 | 3.61  | 3.55  | 0.06 | 0.01 | 1.04  | 0.198878 | 0.100431 | 0.496017 | 0.359541 |
| MmunewRS.362.1.S1_at   | MmunewRS.362.1 | 3.66  | 3.74  | 0.09 | 0.05 | -1.06 | 0.19326  | 0.408219 | 0.489751 | 0.635527 |
| MmunewRS.363.1.S1_at   | MmunewRS.363.1 | 3.1   | 3     | 0.13 | 0.14 | 1.08  | 0.129625 | 0.208728 | 0.412005 | 0.482608 |
| MmunewRS.365.1.S1_at   | MmunewRS.365.1 | 12.22 | 12.38 | 0.15 | 0.1  | -1.12 | 0.147882 | 0.035133 | 0.436081 | 0.231645 |
| MmunewRS.366.1.S1_at   | MmunewRS.366.1 | 9.43  | 8.97  | 0.03 | 0.17 | 1.37  | 0.008945 | 0.063801 | 0.144294 | 0.29906  |
| MmunewRS.367.1.S1_at   | MmunewRS.367.1 | 5.22  | 5.65  | 0.1  | 0.11 | -1.34 | 0.010989 | 0.101637 | 0.154584 | 0.361529 |
| MmunewRS.368.1.S1_at   | MmunewRS.368.1 | 5.18  | 5.07  | 0.12 | 0.04 | 1.08  | 0.848054 | 0.062857 | 0.933832 | 0.297418 |
| MmunewRS.369.1.S1_at   | MmunewRS.369.1 | 5.42  | 5.56  | 0.14 | 0.06 | -1.1  | 0.51094  | 0.153461 | 0.742219 | 0.42827  |
| MmunewRS.37.1.S1_at    | MmunewRS.37.1  | 7.26  | 5.79  | 0.29 | 0.25 | 2.79  | 0.002793 | 0.000441 | 0.097799 | 0.038359 |
| MmunewRS.371.1.S1_at   | MmunewRS.371.1 | 6.64  | 6.38  | 0.07 | 0.08 | 1.2   | 0.010918 | 0.002685 | 0.154271 | 0.076408 |
| MmunewRS.371.1.S1_x_at | MmunewRS.371.1 | 7.01  | 6.69  | 0.07 | 0.09 | 1.25  | 0.022617 | 0.012582 | 0.203481 | 0.14463  |

|                        |                |       |       |      |      |       |          |          |          |          |
|------------------------|----------------|-------|-------|------|------|-------|----------|----------|----------|----------|
| MmunewRS.372.1.S1_at   | MmunewRS.372.1 | 5.33  | 5.26  | 0.05 | 0.1  | 1.05  | 0.400597 | 0.063052 | 0.665527 | 0.297772 |
| MmunewRS.373.1.S1_at   | MmunewRS.373.1 | 6.48  | 6.33  | 0.33 | 0.06 | 1.11  | 0.481906 | 0.645374 | 0.722245 | 0.792219 |
| MmunewRS.374.1.S1_at   | MmunewRS.374.1 | 3.3   | 3.31  | 0.05 | 0.21 | -1.01 | 0.597774 | 0.561513 | 0.796926 | 0.737449 |
| MmunewRS.375.1.S1_at   | MmunewRS.375.1 | 5.68  | 5.72  | 0.14 | 0.1  | -1.02 | 0.790027 | 0.463176 | 0.90449  | 0.674261 |
| MmunewRS.377.1.S1_at   | MmunewRS.377.1 | 4.26  | 4.29  | 0.07 | 0.07 | -1.02 | 0.693134 | 0.931644 | 0.853369 | 0.961188 |
| MmunewRS.378.1.S1_at   | MmunewRS.378.1 | 9     | 8.13  | 0.14 | 0.19 | 1.83  | 0.00563  | 0.101995 | 0.120803 | 0.362071 |
| MmunewRS.379.1.S1_at   | MmunewRS.379.1 | 5.28  | 4.3   | 0.56 | 0.07 | 1.97  | 0.114963 | 0.076436 | 0.392008 | 0.321464 |
| MmunewRS.38.1.S1_at    | MmunewRS.38.1  | 5.91  | 7.81  | 0.62 | 0.07 | -3.73 | 0.008262 | 0.317246 | 0.139927 | 0.570488 |
| MmunewRS.380.1.S1_at   | MmunewRS.380.1 | 5.23  | 5.19  | 0.12 | 0.08 | 1.03  | 0.866746 | 0.08126  | 0.942468 | 0.329351 |
| MmunewRS.381.1.S1_at   | MmunewRS.381.1 | 2.85  | 2.92  | 0.02 | 0.08 | -1.05 | 0.649466 | 0.502547 | 0.829674 | 0.700192 |
| MmunewRS.382.1.S1_at   | MmunewRS.382.1 | 8.83  | 8.48  | 0.17 | 0.29 | 1.27  | 0.235103 | 0.028261 | 0.533056 | 0.209854 |
| MmunewRS.383.1.S1_at   | MmunewRS.383.1 | 11.32 | 11.16 | 0.75 | 0.21 | 1.12  | 0.190009 | 0.291175 | 0.486315 | 0.551659 |
| MmunewRS.384.1.S1_at   | MmunewRS.384.1 | 5.27  | 4.85  | 0.28 | 0.25 | 1.34  | 0.239249 | 0.538614 | 0.53651  | 0.723301 |
| MmunewRS.385.1.S1_at   | MmunewRS.385.1 | 3.58  | 3.55  | 0.04 | 0.1  | 1.02  | 0.547805 | 0.72997  | 0.766242 | 0.843733 |
| MmunewRS.387.1.S1_at   | MmunewRS.387.1 | 9.53  | 9.78  | 0.22 | 0.08 | -1.19 | 0.073993 | 0.009599 | 0.330014 | 0.129123 |
| MmunewRS.388.1.S1_s_at | MmunewRS.388.1 | 6.97  | 6.95  | 0.26 | 0.12 | 1.02  | 0.733481 | 0.298249 | 0.875708 | 0.556931 |
| MmunewRS.389.1.S1_at   | MmunewRS.389.1 | 4.47  | 4.47  | 0.08 | 0.05 | 1     | 0.658022 | 0.78508  | 0.834845 | 0.875577 |
| MmunewRS.39.1.S1_at    | MmunewRS.39.1  | 4.34  | 4.38  | 0.07 | 0.02 | -1.03 | 0.272192 | 0.008802 | 0.564152 | 0.124117 |
| MmunewRS.390.1.S1_x_at | MmunewRS.390.1 | 10.78 | 10.8  | 0.77 | 0.21 | -1.01 | 0.411017 | 0.353494 | 0.673012 | 0.596547 |
| MmunewRS.391.1.S1_at   | MmunewRS.391.1 | 8.94  | 8.92  | 0.11 | 0.12 | 1.01  | 0.414598 | 0.672578 | 0.675681 | 0.808638 |
| MmunewRS.392.1.S1_at   | MmunewRS.392.1 | 5.11  | 5.13  | 0.15 | 0.13 | -1.01 | 0.472525 | 0.422001 | 0.716189 | 0.645406 |
| MmunewRS.393.1.S1_at   | MmunewRS.393.1 | 6.26  | 6.96  | 0.36 | 0.23 | -1.63 | 0.026143 | 0.131563 | 0.214757 | 0.403665 |
| MmunewRS.394.1.S1_at   | MmunewRS.394.1 | 10.34 | 10.21 | 0.24 | 0.06 | 1.1   | 0.363443 | 0.465862 | 0.638172 | 0.675982 |
| MmunewRS.395.1.S1_at   | MmunewRS.395.1 | 2.91  | 2.9   | 0.07 | 0.04 | 1.01  | 0.30856  | 0.194153 | 0.595135 | 0.469266 |
| MmunewRS.396.1.S1_at   | MmunewRS.396.1 | 3.41  | 3.44  | 0.04 | 0.14 | -1.02 | 0.289131 | 0.632218 | 0.578755 | 0.783289 |
| MmunewRS.397.1.S1_at   | MmunewRS.397.1 | 4.08  | 3.81  | 0.17 | 0.2  | 1.2   | 0.401941 | 0.034196 | 0.666434 | 0.228773 |
| MmunewRS.398.1.S1_at   | MmunewRS.398.1 | 14.42 | 14.43 | 0.07 | 0.03 | -1    | 0.298415 | 0.438988 | 0.586735 | 0.657798 |
| MmunewRS.399.1.S1_at   | MmunewRS.399.1 | 3.38  | 3.33  | 0.47 | 0.1  | 1.04  | 0.556389 | 0.737371 | 0.771647 | 0.847889 |
| MmunewRS.4.1.S1_at     | MmunewRS.4.1   | 6.85  | 6.77  | 0.15 | 0.05 | 1.05  | 0.247343 | 0.208407 | 0.542869 | 0.482316 |
| MmunewRS.40.1.S1_at    | MmunewRS.40.1  | 4.54  | 4.49  | 0.05 | 0.15 | 1.03  | 0.705644 | 0.759451 | 0.860488 | 0.860113 |
| MmunewRS.400.1.S1_at   | MmunewRS.400.1 | 12.61 | 12.54 | 0.11 | 0    | 1.05  | 0.261695 | 0.324487 | 0.555848 | 0.57507  |
| MmunewRS.401.1.S1_at   | MmunewRS.401.1 | 6.63  | 6.67  | 0.29 | 0.08 | -1.03 | 0.920131 | 0.479953 | 0.965869 | 0.685569 |
| MmunewRS.402.1.S1_at   | MmunewRS.402.1 | 4.26  | 4.04  | 0.13 | 0.03 | 1.17  | 0.06219  | 0.095581 | 0.30606  | 0.352645 |
| MmunewRS.403.1.S1_at   | MmunewRS.403.1 | 3.44  | 3.35  | 0.13 | 0.34 | 1.06  | 0.958745 | 0.750009 | 0.983221 | 0.854656 |
| MmunewRS.405.1.S1_at   | MmunewRS.405.1 | 4.63  | 4.56  | 0.12 | 0.08 | 1.05  | 0.481375 | 0.705111 | 0.721905 | 0.828994 |
| MmunewRS.406.1.S1_at   | MmunewRS.406.1 | 4.29  | 5.88  | 1.3  | 0.34 | -3.02 | 0.312747 | 0.490208 | 0.598778 | 0.692262 |
| MmunewRS.407.1.S1_at   | MmunewRS.407.1 | 11.78 | 11.78 | 0.1  | 0.13 | 1     | 0.432649 | 0.438549 | 0.688365 | 0.657511 |
| MmunewRS.408.1.S1_at   | MmunewRS.408.1 | 3.64  | 3.62  | 0.07 | 0.14 | 1.01  | 0.628067 | 0.905056 | 0.817238 | 0.946165 |
| MmunewRS.409.1.S1_at   | MmunewRS.409.1 | 5.46  | 5.5   | 0.1  | 0.09 | -1.03 | 0.249636 | 0.269128 | 0.544677 | 0.534447 |
| MmunewRS.410.1.S1_at   | MmunewRS.410.1 | 5.99  | 7.18  | 0.7  | 0.32 | -2.28 | 0.100245 | 0.381176 | 0.371058 | 0.617518 |
| MmunewRS.411.1.S1_at   | MmunewRS.411.1 | 3.33  | 4.44  | 0.48 | 0.23 | -2.16 | 0.027056 | 0.237353 | 0.217262 | 0.508084 |
| MmunewRS.413.1.S1_at   | MmunewRS.413.1 | 12.93 | 13.2  | 0.05 | 0.06 | -1.21 | 0.00555  | 0.004445 | 0.119965 | 0.092958 |
| MmunewRS.414.1.S1_at   | MmunewRS.414.1 | 10.74 | 10.77 | 0.26 | 0.1  | -1.02 | 0.217004 | 0.184169 | 0.514863 | 0.460382 |

|                        |                |       |       |      |      |       |          |          |          |          |
|------------------------|----------------|-------|-------|------|------|-------|----------|----------|----------|----------|
| MmunewRS.415.1.S1_at   | MmunewRS.415.1 | 6.32  | 5.95  | 0.25 | 0.08 | 1.29  | 0.306247 | 0.585147 | 0.593226 | 0.752757 |
| MmunewRS.416.1.S1_at   | MmunewRS.416.1 | 4.95  | 5.33  | 0.15 | 0.17 | -1.3  | 0.068243 | 0.072462 | 0.319026 | 0.315294 |
| MmunewRS.417.1.S1_at   | MmunewRS.417.1 | 5.06  | 5.47  | 0.24 | 0.14 | -1.32 | 0.136205 | 0.249814 | 0.420589 | 0.518876 |
| MmunewRS.418.1.S1_at   | MmunewRS.418.1 | 3.35  | 3.37  | 0.11 | 0.02 | -1.01 | 0.774674 | 0.922725 | 0.897013 | 0.956468 |
| MmunewRS.419.1.S1_at   | MmunewRS.419.1 | 4.03  | 4.61  | 0.15 | 0.42 | -1.49 | 0.242318 | 0.078958 | 0.539352 | 0.325977 |
| MmunewRS.42.1.S1_at    | MmunewRS.42.1  | 4.54  | 4.59  | 0.15 | 0.06 | -1.04 | 0.29924  | 0.552544 | 0.587598 | 0.731829 |
| MmunewRS.420.1.S1_at   | MmunewRS.420.1 | 5.15  | 5.42  | 0.15 | 0.26 | -1.21 | 0.713079 | 0.491055 | 0.864548 | 0.692753 |
| MmunewRS.421.1.S1_at   | MmunewRS.421.1 | 9.08  | 8.77  | 0.26 | 0.19 | 1.24  | 0.058565 | 0.058477 | 0.299164 | 0.288549 |
| MmunewRS.423.1.S1_at   | MmunewRS.423.1 | 3.3   | 3.33  | 0.12 | 0.2  | -1.02 | 0.555893 | 0.511828 | 0.771458 | 0.705797 |
| MmunewRS.423.1.S1_s_at | MmunewRS.423.1 | 3.75  | 3.75  | 0.04 | 0.07 | 1     | 0.9971   | 0.974871 | 0.999078 | 0.986264 |
| MmunewRS.424.1.S1_s_at | MmunewRS.424.1 | 3.55  | 3.66  | 0.13 | 0.14 | -1.07 | 0.81647  | 0.72795  | 0.918022 | 0.842707 |
| MmunewRS.425.1.S1_at   | MmunewRS.425.1 | 3.84  | 3.64  | 0.12 | 0.08 | 1.15  | 0.206142 | 0.299852 | 0.503843 | 0.558138 |
| MmunewRS.426.1.S1_at   | MmunewRS.426.1 | 5.81  | 5.53  | 0.68 | 0.13 | 1.21  | 0.334046 | 0.411096 | 0.615174 | 0.63788  |
| MmunewRS.427.1.S1_at   | MmunewRS.427.1 | 10.24 | 9.48  | 0.24 | 0.17 | 1.7   | 0.019613 | 0.026616 | 0.192972 | 0.204008 |
| MmunewRS.428.1.S1_at   | MmunewRS.428.1 | 3.1   | 3.15  | 0.09 | 0.01 | -1.03 | 0.137428 | 0.145196 | 0.422407 | 0.41919  |
| MmunewRS.429.1.S1_at   | MmunewRS.429.1 | 6.39  | 6.52  | 0.13 | 0.04 | -1.09 | 0.230312 | 0.013654 | 0.529161 | 0.149597 |
| MmunewRS.43.1.S1_at    | MmunewRS.43.1  | 3.72  | 3.58  | 0.29 | 0.09 | 1.1   | 0.281692 | 0.36198  | 0.572546 | 0.602725 |
| MmunewRS.430.1.S1_at   | MmunewRS.430.1 | 4.58  | 4.32  | 0.1  | 0.19 | 1.2   | 0.173148 | 0.22324  | 0.467348 | 0.496073 |
| MmunewRS.431.1.S1_at   | MmunewRS.431.1 | 10.6  | 11.32 | 1.49 | 0.17 | -1.66 | 0.157894 | 0.168425 | 0.448694 | 0.445092 |
| MmunewRS.432.1.S1_at   | MmunewRS.432.1 | 10.04 | 10.03 | 0.16 | 0.06 | 1     | 0.575392 | 0.933439 | 0.782823 | 0.962195 |
| MmunewRS.433.1.S1_at   | MmunewRS.433.1 | 3.59  | 3.66  | 0.33 | 0.15 | -1.05 | 0.881847 | 0.973871 | 0.949737 | 0.98573  |
| MmunewRS.434.1.S1_at   | MmunewRS.434.1 | 3.66  | 3.74  | 0.06 | 0.18 | -1.06 | 0.405382 | 0.586988 | 0.668832 | 0.753933 |
| MmunewRS.435.1.S1_at   | MmunewRS.435.1 | 8.93  | 7.39  | 0.67 | 0.14 | 2.92  | 0.041263 | 0.016783 | 0.259648 | 0.164091 |
| MmunewRS.435.1.S1_s_at | MmunewRS.435.1 | 12.36 | 12.33 | 0.2  | 0.1  | 1.02  | 0.835399 | 0.258742 | 0.927627 | 0.525949 |
| MmunewRS.436.1.S1_s_at | MmunewRS.436.1 | 10.48 | 13.34 | 1.27 | 0.13 | -7.24 | 0.031741 | 0.207303 | 0.231584 | 0.481485 |
| MmunewRS.438.1.S1_at   | MmunewRS.438.1 | 2.81  | 2.82  | 0.04 | 0.09 | -1    | 0.477964 | 0.678513 | 0.71971  | 0.81221  |
| MmunewRS.439.1.S1_at   | MmunewRS.439.1 | 9.09  | 10.59 | 0.3  | 0.26 | -2.83 | 0.004857 | 0.004446 | 0.115123 | 0.092958 |
| MmunewRS.44.1.S1_at    | MmunewRS.44.1  | 4.87  | 4.56  | 0.27 | 0.18 | 1.24  | 0.13299  | 0.168282 | 0.41645  | 0.444935 |
| MmunewRS.440.1.S1_at   | MmunewRS.440.1 | 3.21  | 3.41  | 0.13 | 0.06 | -1.14 | 0.12337  | 0.064385 | 0.402711 | 0.299968 |
| MmunewRS.441.1.S1_at   | MmunewRS.441.1 | 3.63  | 4.18  | 0.35 | 0.47 | -1.46 | 0.08966  | 0.076005 | 0.356597 | 0.320676 |
| MmunewRS.442.1.S1_at   | MmunewRS.442.1 | 3.65  | 3.46  | 0.06 | 0.1  | 1.14  | 0.061362 | 0.068768 | 0.304438 | 0.308711 |
| MmunewRS.443.1.S1_at   | MmunewRS.443.1 | 3.41  | 3.46  | 0.11 | 0.16 | -1.04 | 0.258945 | 0.483916 | 0.553231 | 0.688243 |
| MmunewRS.444.1.S1_at   | MmunewRS.444.1 | 3.27  | 3.03  | 0.34 | 0.28 | 1.18  | 0.525922 | 0.710358 | 0.752178 | 0.831943 |
| MmunewRS.445.1.S1_at   | MmunewRS.445.1 | 5.9   | 6     | 0.17 | 0.04 | -1.07 | 0.398779 | 0.523516 | 0.664317 | 0.713769 |
| MmunewRS.446.1.S1_at   | MmunewRS.446.1 | 7.26  | 7.34  | 0.22 | 0.04 | -1.06 | 0.682684 | 0.480362 | 0.848688 | 0.68574  |
| MmunewRS.447.1.S1_at   | MmunewRS.447.1 | 4.88  | 4.89  | 0.52 | 0.14 | -1    | 0.391608 | 0.420005 | 0.658751 | 0.643787 |
| MmunewRS.448.1.S1_at   | MmunewRS.448.1 | 6.55  | 6.6   | 0.11 | 0.06 | -1.03 | 0.179673 | 0.496187 | 0.474837 | 0.695883 |
| MmunewRS.449.1.S1_at   | MmunewRS.449.1 | 4.75  | 4.8   | 0.11 | 0.13 | -1.04 | 0.552454 | 0.063772 | 0.769177 | 0.29906  |
| MmunewRS.450.1.S1_at   | MmunewRS.450.1 | 5.7   | 5.83  | 0.11 | 0.12 | -1.09 | 0.25709  | 0.124911 | 0.551586 | 0.395313 |
| MmunewRS.451.1.S1_at   | MmunewRS.451.1 | 6.35  | 6.99  | 0.18 | 0.12 | -1.56 | 0.009546 | 0.004942 | 0.147873 | 0.097917 |
| MmunewRS.452.1.S1_at   | MmunewRS.452.1 | 9.82  | 8.17  | 0.62 | 0.31 | 3.13  | 0.035481 | 0.059964 | 0.243185 | 0.291576 |
| MmunewRS.453.1.S1_at   | MmunewRS.453.1 | 4.12  | 4.1   | 0.08 | 0.05 | 1.01  | 0.83492  | 0.007299 | 0.927406 | 0.114662 |
| MmunewRS.454.1.S1_at   | MmunewRS.454.1 | 3.57  | 3.66  | 0.21 | 0.15 | -1.07 | 0.94121  | 0.609215 | 0.975322 | 0.767677 |

|                        |                |       |       |      |      |       |          |          |          |          |
|------------------------|----------------|-------|-------|------|------|-------|----------|----------|----------|----------|
| MmunewRS.455.1.S1_at   | MmunewRS.455.1 | 6.89  | 6.85  | 0.1  | 0.02 | 1.03  | 0.429466 | 0.604581 | 0.685892 | 0.764695 |
| MmunewRS.456.1.S1_at   | MmunewRS.456.1 | 7.36  | 7.8   | 0.29 | 0.25 | -1.36 | 0.256609 | 0.524225 | 0.551157 | 0.71422  |
| MmunewRS.458.1.S1_at   | MmunewRS.458.1 | 3.68  | 3.69  | 0.03 | 0.11 | -1.01 | 0.769088 | 0.419109 | 0.893978 | 0.643308 |
| MmunewRS.46.1.S1_at    | MmunewRS.46.1  | 5.65  | 5.37  | 0.15 | 0.01 | 1.21  | 0.047758 | 0.851967 | 0.27591  | 0.91585  |
| MmunewRS.460.1.S1_at   | MmunewRS.460.1 | 2.75  | 2.79  | 0.07 | 0.03 | -1.02 | 0.264728 | 0.302898 | 0.55795  | 0.560356 |
| MmunewRS.461.1.S1_at   | MmunewRS.461.1 | 5.07  | 5.15  | 0.18 | 0.19 | -1.06 | 0.869817 | 0.488072 | 0.944013 | 0.690889 |
| MmunewRS.462.1.S1_s_at | MmunewRS.462.1 | 4.65  | 4.36  | 0.46 | 0.21 | 1.22  | 0.229795 | 0.276683 | 0.528728 | 0.540615 |
| MmunewRS.463.1.S1_at   | MmunewRS.463.1 | 8.73  | 8.81  | 0.07 | 0.09 | -1.05 | 0.475394 | 0.933654 | 0.718106 | 0.962249 |
| MmunewRS.464.1.S1_at   | MmunewRS.464.1 | 2.99  | 3.08  | 0.08 | 0.07 | -1.06 | 0.159854 | 0.530456 | 0.451208 | 0.717991 |
| MmunewRS.465.1.S1_at   | MmunewRS.465.1 | 6.26  | 6.3   | 0.12 | 0.06 | -1.03 | 0.628234 | 0.006333 | 0.817362 | 0.108074 |
| MmunewRS.466.1.S1_at   | MmunewRS.466.1 | 4.19  | 3.99  | 0.37 | 0.12 | 1.15  | 0.135179 | 0.142455 | 0.419109 | 0.416035 |
| MmunewRS.467.1.S1_at   | MmunewRS.467.1 | 6     | 5.9   | 0.1  | 0.12 | 1.07  | 0.82098  | 0.97594  | 0.920119 | 0.986856 |
| MmunewRS.468.1.S1_at   | MmunewRS.468.1 | 7.19  | 7.24  | 0.09 | 0.14 | -1.03 | 0.681423 | 0.654132 | 0.848068 | 0.79789  |
| MmunewRS.469.1.S1_at   | MmunewRS.469.1 | 8.03  | 7.95  | 0.29 | 0.42 | 1.05  | 0.552337 | 0.721889 | 0.769112 | 0.838904 |
| MmunewRS.47.1.S1_at    | MmunewRS.47.1  | 10.17 | 10.11 | 0.08 | 0.09 | 1.04  | 0.425699 | 0.125936 | 0.682976 | 0.396461 |
| MmunewRS.47.1.S1_s_at  | MmunewRS.47.1  | 10.53 | 10.39 | 0.09 | 0.03 | 1.11  | 0.080598 | 0.308244 | 0.341245 | 0.564378 |
| MmunewRS.470.1.S1_x_at | MmunewRS.470.1 | 9.17  | 9.04  | 0.4  | 0.18 | 1.1   | 0.573427 | 0.373289 | 0.781098 | 0.612113 |
| MmunewRS.471.1.S1_at   | MmunewRS.471.1 | 4     | 3.53  | 0.24 | 0.12 | 1.39  | 0.044523 | 0.048313 | 0.26817  | 0.264916 |
| MmunewRS.472.1.S1_at   | MmunewRS.472.1 | 3.12  | 2.99  | 0.37 | 0.08 | 1.09  | 0.220943 | 0.257967 | 0.518957 | 0.525548 |
| MmunewRS.473.1.S1_at   | MmunewRS.473.1 | 4.95  | 4.99  | 0.07 | 0.09 | -1.03 | 0.383082 | 0.662384 | 0.652436 | 0.802294 |
| MmunewRS.474.1.S1_at   | MmunewRS.474.1 | 11.01 | 10.96 | 0.19 | 0.09 | 1.03  | 0.824483 | 0.752519 | 0.922007 | 0.855912 |
| MmunewRS.475.1.S1_at   | MmunewRS.475.1 | 7.82  | 6.78  | 0.28 | 0.16 | 2.05  | 0.00665  | 0.213171 | 0.127957 | 0.487068 |
| MmunewRS.476.1.S1_at   | MmunewRS.476.1 | 3.08  | 2.97  | 0.13 | 0.01 | 1.07  | 0.238251 | 0.525868 | 0.535757 | 0.715223 |
| MmunewRS.478.1.S1_at   | MmunewRS.478.1 | 2.64  | 3.01  | 0.3  | 0.22 | -1.3  | 0.584088 | 0.210912 | 0.788484 | 0.484934 |
| MmunewRS.48.1.S1_at    | MmunewRS.48.1  | 7.08  | 7.73  | 0.48 | 0.32 | -1.57 | 0.161551 | 0.745379 | 0.453168 | 0.852384 |
| MmunewRS.480.1.S1_at   | MmunewRS.480.1 | 5.11  | 5.12  | 0.17 | 0.01 | -1.01 | 0.395664 | 0.76538  | 0.661945 | 0.863627 |
| MmunewRS.481.1.S1_at   | MmunewRS.481.1 | 6.61  | 6.89  | 0.19 | 0.03 | -1.21 | 0.08495  | 0.074327 | 0.348877 | 0.318046 |
| MmunewRS.482.1.S1_at   | MmunewRS.482.1 | 3.23  | 3.27  | 0.06 | 0.11 | -1.03 | 0.504722 | 0.702141 | 0.737875 | 0.827304 |
| MmunewRS.483.1.S1_at   | MmunewRS.483.1 | 7.8   | 8.82  | 0.23 | 0.22 | -2.02 | 0.003335 | 0.059581 | 0.102526 | 0.290619 |
| MmunewRS.484.1.S1_at   | MmunewRS.484.1 | 8.29  | 8.01  | 0.41 | 0.27 | 1.22  | 0.670047 | 0.029237 | 0.841678 | 0.212898 |
| MmunewRS.485.1.S1_at   | MmunewRS.485.1 | 3.18  | 3.24  | 0.1  | 0.05 | -1.04 | 0.246699 | 0.27478  | 0.54248  | 0.539228 |
| MmunewRS.486.1.S1_at   | MmunewRS.486.1 | 5.09  | 4.92  | 0.22 | 0.12 | 1.13  | 0.901492 | 0.958015 | 0.95827  | 0.976273 |
| MmunewRS.487.1.S1_at   | MmunewRS.487.1 | 5.85  | 5.66  | 0.8  | 0.09 | 1.14  | 0.225241 | 0.283062 | 0.52312  | 0.545692 |
| MmunewRS.488.1.S1_at   | MmunewRS.488.1 | 4.39  | 5.16  | 1.07 | 0.57 | -1.71 | 0.408339 | 0.425263 | 0.67117  | 0.647679 |
| MmunewRS.489.1.S1_at   | MmunewRS.489.1 | 12.22 | 12.69 | 0.24 | 0.09 | -1.39 | 0.053479 | 0.202976 | 0.28856  | 0.477343 |
| MmunewRS.49.1.S1_at    | MmunewRS.49.1  | 8.73  | 8.53  | 0.13 | 0.47 | 1.14  | 0.153737 | 0.081181 | 0.443798 | 0.329351 |
| MmunewRS.490.1.S1_x_at | MmunewRS.490.1 | 7.22  | 7.23  | 0.7  | 0.18 | -1.01 | 0.396993 | 0.464305 | 0.662823 | 0.674993 |
| MmunewRS.491.1.S1_at   | MmunewRS.491.1 | 6.07  | 6.06  | 0.13 | 0.02 | 1.01  | 0.930557 | 0.491807 | 0.970792 | 0.693275 |
| MmunewRS.492.1.S1_at   | MmunewRS.492.1 | 3.1   | 2.97  | 0.13 | 0.06 | 1.1   | 0.675533 | 0.497675 | 0.845076 | 0.696997 |
| MmunewRS.493.1.S1_at   | MmunewRS.493.1 | 3.24  | 3.1   | 0    | 0.03 | 1.1   | 0.000974 | 0.475948 | 0.076222 | 0.682387 |
| MmunewRS.494.1.S1_at   | MmunewRS.494.1 | 11.41 | 11.54 | 0.13 | 0.05 | -1.09 | 0.236543 | 0.061266 | 0.53419  | 0.294225 |
| MmunewRS.495.1.S1_at   | MmunewRS.495.1 | 3.53  | 3.52  | 0.08 | 0.07 | 1     | 0.534092 | 0.873212 | 0.757411 | 0.92788  |
| MmunewRS.496.1.S1_at   | MmunewRS.496.1 | 7.72  | 9.44  | 0.2  | 0.32 | -3.29 | 0.001514 | 0.014728 | 0.081668 | 0.154415 |

|                        |                |       |       |      |      |        |          |          |          |          |
|------------------------|----------------|-------|-------|------|------|--------|----------|----------|----------|----------|
| MmunewRS.497.1.S1_at   | MmunewRS.497.1 | 4.76  | 4.58  | 0.48 | 0.12 | 1.13   | 0.45895  | 0.87647  | 0.707304 | 0.929683 |
| MmunewRS.498.1.S1_at   | MmunewRS.498.1 | 8.3   | 9.89  | 0.86 | 0.2  | -2.99  | 0.056375 | 0.024945 | 0.294754 | 0.197799 |
| MmunewRS.499.1.S1_at   | MmunewRS.499.1 | 3.6   | 3.83  | 0.44 | 0.07 | -1.17  | 0.947935 | 0.582137 | 0.978054 | 0.750784 |
| MmunewRS.5.1.S1_at     | MmunewRS.5.1   | 4.4   | 4.87  | 0.2  | 0.43 | -1.39  | 0.084492 | 0.122875 | 0.348139 | 0.392923 |
| MmunewRS.50.1.S1_at    | MmunewRS.50.1  | 6.17  | 6.33  | 0.03 | 0.19 | -1.12  | 0.308645 | 0.034539 | 0.595227 | 0.229979 |
| MmunewRS.500.1.S1_at   | MmunewRS.500.1 | 12.3  | 13.57 | 0.67 | 0.1  | -2.41  | 0.099831 | 0.197605 | 0.370801 | 0.472564 |
| MmunewRS.501.1.S1_at   | MmunewRS.501.1 | 5.15  | 5.16  | 0.26 | 0.27 | -1     | 0.933624 | 0.932942 | 0.972111 | 0.961911 |
| MmunewRS.502.1.S1_at   | MmunewRS.502.1 | 4.49  | 4.42  | 0.05 | 0.11 | 1.05   | 0.883895 | 0.064617 | 0.950642 | 0.300314 |
| MmunewRS.503.1.S1_at   | MmunewRS.503.1 | 8.45  | 8.32  | 0.15 | 0.03 | 1.1    | 0.064174 | 0.007135 | 0.309799 | 0.113735 |
| MmunewRS.504.1.S1_at   | MmunewRS.504.1 | 3.52  | 3.2   | 0.21 | 0.03 | 1.24   | 0.11559  | 0.271759 | 0.392723 | 0.536577 |
| MmunewRS.505.1.S1_x_at | MmunewRS.505.1 | 7.77  | 7.84  | 0.49 | 0.21 | -1.05  | 0.619951 | 0.812201 | 0.811571 | 0.891555 |
| MmunewRS.506.1.S1_at   | MmunewRS.506.1 | 8.43  | 8.48  | 0.38 | 0.06 | -1.03  | 0.277006 | 0.495145 | 0.568475 | 0.695319 |
| MmunewRS.507.1.S1_at   | MmunewRS.507.1 | 6.67  | 10.08 | 1.32 | 0.24 | -10.58 | 0.031582 | 0.229549 | 0.231141 | 0.501534 |
| MmunewRS.508.1.S1_at   | MmunewRS.508.1 | 3.16  | 3.29  | 0.18 | 0.11 | -1.09  | 0.775851 | 0.848788 | 0.897461 | 0.914134 |
| MmunewRS.509.1.S1_at   | MmunewRS.509.1 | 3.54  | 3.48  | 0.26 | 0.07 | 1.04   | 0.675656 | 0.958856 | 0.845109 | 0.976695 |
| MmunewRS.510.1.S1_at   | MmunewRS.510.1 | 4.1   | 4.44  | 0.17 | 0.18 | -1.27  | 0.114134 | 0.120149 | 0.390885 | 0.388911 |
| MmunewRS.511.1.S1_at   | MmunewRS.511.1 | 4.25  | 4.11  | 0.06 | 0.12 | 1.1    | 0.236884 | 0.493035 | 0.534481 | 0.693975 |
| MmunewRS.512.1.S1_at   | MmunewRS.512.1 | 6.6   | 6.14  | 0.26 | 0.08 | 1.38   | 0.031197 | 0.01948  | 0.229712 | 0.175288 |
| MmunewRS.513.1.S1_at   | MmunewRS.513.1 | 4.03  | 4.13  | 0.5  | 0.12 | -1.07  | 0.43451  | 0.401909 | 0.68971  | 0.63109  |
| MmunewRS.514.1.S1_at   | MmunewRS.514.1 | 3.48  | 3.23  | 0.74 | 0.12 | 1.19   | 0.486584 | 0.694294 | 0.725773 | 0.822254 |
| MmunewRS.515.1.S1_at   | MmunewRS.515.1 | 3.71  | 3.65  | 0.13 | 0.06 | 1.04   | 0.171456 | 0.210213 | 0.465419 | 0.484033 |
| MmunewRS.517.1.S1_at   | MmunewRS.517.1 | 2.79  | 2.8   | 0.04 | 0.01 | -1.01  | 0.289306 | 0.335563 | 0.578908 | 0.583326 |
| MmunewRS.518.1.S1_at   | MmunewRS.518.1 | 3.67  | 3.57  | 0.26 | 0.03 | 1.08   | 0.19077  | 0.149714 | 0.486956 | 0.42433  |
| MmunewRS.519.1.S1_at   | MmunewRS.519.1 | 6.39  | 5.94  | 0.04 | 0.2  | 1.37   | 0.02454  | 0.061351 | 0.209655 | 0.29448  |
| MmunewRS.52.1.S1_s_at  | MmunewRS.52.1  | 13.52 | 13.33 | 0.07 | 0.03 | 1.14   | 0.018296 | 0.148455 | 0.188207 | 0.423009 |
| MmunewRS.520.1.S1_at   | MmunewRS.520.1 | 6.3   | 7.12  | 0.15 | 0.26 | -1.76  | 0.005248 | 0.000778 | 0.117387 | 0.045626 |
| MmunewRS.521.1.S1_at   | MmunewRS.521.1 | 6.47  | 6.35  | 0.09 | 0.05 | 1.08   | 0.116819 | 0.278177 | 0.393847 | 0.541811 |
| MmunewRS.522.1.S1_s_at | MmunewRS.522.1 | 14.21 | 14.11 | 0.11 | 0.02 | 1.07   | 0.247015 | 0.442831 | 0.542633 | 0.660759 |
| MmunewRS.523.1.S1_x_at | MmunewRS.523.1 | 8.36  | 8.25  | 0.77 | 0.17 | 1.08   | 0.264865 | 0.344325 | 0.557962 | 0.589762 |
| MmunewRS.524.1.S1_at   | MmunewRS.524.1 | 6.99  | 7.01  | 0.08 | 0.16 | -1.01  | 0.781452 | 0.387524 | 0.900178 | 0.622163 |
| MmunewRS.525.1.S1_at   | MmunewRS.525.1 | 3.31  | 3.25  | 0.24 | 0.02 | 1.05   | 0.477868 | 0.577589 | 0.719648 | 0.748013 |
| MmunewRS.527.1.S1_at   | MmunewRS.527.1 | 4.25  | 4.15  | 0.18 | 0.18 | 1.07   | 0.508007 | 0.544618 | 0.740166 | 0.726978 |
| MmunewRS.528.1.S1_at   | MmunewRS.528.1 | 5.32  | 5.45  | 0.2  | 0.07 | -1.1   | 0.480466 | 0.625448 | 0.72132  | 0.779175 |
| MmunewRS.53.1.S1_at    | MmunewRS.53.1  | 12.56 | 12.61 | 0.75 | 0.12 | -1.04  | 0.387364 | 0.543225 | 0.655548 | 0.726012 |
| MmunewRS.531.1.S1_at   | MmunewRS.531.1 | 2.55  | 2.63  | 0.06 | 0.01 | -1.05  | 0.287697 | 0.38026  | 0.577473 | 0.616942 |
| MmunewRS.531.1.S1_s_at | MmunewRS.531.1 | 3.9   | 3.9   | 0.12 | 0.06 | -1     | 0.74657  | 0.838004 | 0.882643 | 0.907512 |
| MmunewRS.532.1.S1_at   | MmunewRS.532.1 | 4.93  | 4.94  | 0.04 | 0.07 | -1.01  | 0.613577 | 0.082745 | 0.807527 | 0.332206 |
| MmunewRS.533.1.S1_at   | MmunewRS.533.1 | 3.09  | 3.13  | 0.37 | 0.02 | -1.02  | 0.448596 | 0.639109 | 0.700097 | 0.788078 |
| MmunewRS.534.1.S1_at   | MmunewRS.534.1 | 9.25  | 9.75  | 0.08 | 0.1  | -1.41  | 0.002218 | 0.108629 | 0.090954 | 0.372171 |
| MmunewRS.535.1.S1_at   | MmunewRS.535.1 | 4.38  | 3.85  | 0.25 | 0.15 | 1.45   | 0.06828  | 0.069071 | 0.319095 | 0.30905  |
| MmunewRS.536.1.S1_at   | MmunewRS.536.1 | 11.54 | 13.75 | 1.42 | 0.12 | -4.64  | 0.064819 | 0.190112 | 0.311316 | 0.465774 |
| MmunewRS.537.1.S1_at   | MmunewRS.537.1 | 3.97  | 3.85  | 0.17 | 0.13 | 1.09   | 0.385747 | 0.382963 | 0.654416 | 0.61903  |
| MmunewRS.538.1.S1_at   | MmunewRS.538.1 | 2.85  | 2.72  | 0.71 | 0.11 | 1.1    | 0.264167 | 0.352199 | 0.557422 | 0.595568 |

|                        |                |       |       |      |      |       |          |          |          |          |
|------------------------|----------------|-------|-------|------|------|-------|----------|----------|----------|----------|
| MmunewRS.539.1.S1_at   | MmunewRS.539.1 | 2.74  | 2.75  | 0.14 | 0.04 | -1.01 | 0.830348 | 0.497948 | 0.9254   | 0.697158 |
| MmunewRS.54.1.S1_at    | MmunewRS.54.1  | 4.15  | 4.15  | 0.04 | 0.12 | 1     | 0.642859 | 0.460012 | 0.825755 | 0.671989 |
| MmunewRS.540.1.S1_at   | MmunewRS.540.1 | 4.71  | 4.44  | 0.26 | 0.12 | 1.2   | 0.348395 | 0.477556 | 0.626353 | 0.683599 |
| MmunewRS.541.1.S1_at   | MmunewRS.541.1 | 7.1   | 5.42  | 1.3  | 0.29 | 3.2   | 0.12372  | 0.091595 | 0.403358 | 0.346713 |
| MmunewRS.543.1.S1_at   | MmunewRS.543.1 | 3.3   | 3.23  | 0.09 | 0.03 | 1.04  | 0.306805 | 0.077166 | 0.593617 | 0.322751 |
| MmunewRS.544.1.S1_at   | MmunewRS.544.1 | 3.5   | 3.45  | 0.16 | 0.06 | 1.04  | 0.502328 | 0.102965 | 0.735998 | 0.363685 |
| MmunewRS.545.1.S1_at   | MmunewRS.545.1 | 4.74  | 4.7   | 0.13 | 0.1  | 1.03  | 0.893089 | 0.568949 | 0.954395 | 0.742178 |
| MmunewRS.546.1.S1_at   | MmunewRS.546.1 | 6.01  | 5.86  | 0.22 | 0.1  | 1.11  | 0.802148 | 0.957764 | 0.911184 | 0.976118 |
| MmunewRS.547.1.S1_at   | MmunewRS.547.1 | 5.74  | 5.64  | 0.1  | 0.21 | 1.07  | 0.586632 | 0.460287 | 0.789962 | 0.672148 |
| MmunewRS.548.1.S1_at   | MmunewRS.548.1 | 2.93  | 3.2   | 0.06 | 0.14 | -1.2  | 0.099453 | 0.2665   | 0.370342 | 0.532235 |
| MmunewRS.549.1.S1_at   | MmunewRS.549.1 | 7.05  | 7.25  | 0.81 | 0.09 | -1.15 | 0.261451 | 0.310851 | 0.555643 | 0.565879 |
| MmunewRS.55.1.S1_at    | MmunewRS.55.1  | 9.95  | 13.4  | 1.74 | 0.13 | -10.9 | 0.078694 | 0.355452 | 0.338535 | 0.597738 |
| MmunewRS.550.1.S1_at   | MmunewRS.550.1 | 5.21  | 5.6   | 0.3  | 0.33 | -1.31 | 0.204229 | 0.243735 | 0.501863 | 0.513899 |
| MmunewRS.551.1.S1_at   | MmunewRS.551.1 | 5.27  | 4.42  | 1.18 | 0.54 | 1.8   | 0.55965  | 0.426765 | 0.773447 | 0.648862 |
| MmunewRS.552.1.S1_at   | MmunewRS.552.1 | 4.82  | 3.72  | 0.94 | 0.09 | 2.15  | 0.110995 | 0.086887 | 0.386673 | 0.339688 |
| MmunewRS.553.1.S1_at   | MmunewRS.553.1 | 4.21  | 4.6   | 0.12 | 0.31 | -1.31 | 0.042698 | 0.030851 | 0.263867 | 0.217427 |
| MmunewRS.555.1.S1_at   | MmunewRS.555.1 | 4.31  | 4.36  | 0.16 | 0.05 | -1.03 | 0.451202 | 0.599717 | 0.70207  | 0.761544 |
| MmunewRS.556.1.S1_at   | MmunewRS.556.1 | 4.61  | 4.44  | 0.56 | 0.1  | 1.12  | 0.258272 | 0.25072  | 0.552483 | 0.51941  |
| MmunewRS.557.1.S1_s_at | MmunewRS.557.1 | 14.31 | 14.33 | 0.03 | 0.04 | -1.01 | 0.512232 | 0.713638 | 0.742899 | 0.833863 |
| MmunewRS.559.1.S1_at   | MmunewRS.559.1 | 5.53  | 5.45  | 0.06 | 0.03 | 1.06  | 0.198371 | 0.009011 | 0.495518 | 0.125499 |
| MmunewRS.56.1.S1_at    | MmunewRS.56.1  | 4.04  | 4.1   | 0.41 | 0.11 | -1.04 | 0.436225 | 0.365493 | 0.691155 | 0.605587 |
| MmunewRS.560.1.S1_at   | MmunewRS.560.1 | 4.54  | 4.54  | 0.16 | 0.05 | 1     | 0.767626 | 0.918118 | 0.893352 | 0.954068 |
| MmunewRS.561.1.S1_at   | MmunewRS.561.1 | 5.44  | 5.45  | 0.23 | 0.12 | -1.01 | 0.931402 | 0.880837 | 0.971098 | 0.93198  |
| MmunewRS.562.1.S1_at   | MmunewRS.562.1 | 3.58  | 3.42  | 0.07 | 0.19 | 1.12  | 0.138811 | 0.139703 | 0.424397 | 0.41303  |
| MmunewRS.563.1.S1_at   | MmunewRS.563.1 | 7.47  | 7.11  | 0.06 | 0.12 | 1.28  | 0.013046 | 0.012544 | 0.16498  | 0.144478 |
| MmunewRS.564.1.S1_at   | MmunewRS.564.1 | 6.11  | 6.1   | 0.05 | 0.01 | 1.01  | 0.813405 | 0.799245 | 0.916565 | 0.884448 |
| MmunewRS.565.1.S1_at   | MmunewRS.565.1 | 4.11  | 4.12  | 0.02 | 0.07 | -1    | 0.916147 | 0.189801 | 0.964383 | 0.465403 |
| MmunewRS.566.1.S1_at   | MmunewRS.566.1 | 3.97  | 3.74  | 0.12 | 0.11 | 1.17  | 0.039548 | 0.014698 | 0.255411 | 0.154371 |
| MmunewRS.567.1.S1_at   | MmunewRS.567.1 | 6.1   | 6.01  | 0.1  | 0.12 | 1.06  | 0.515587 | 0.108941 | 0.745406 | 0.372637 |
| MmunewRS.569.1.S1_at   | MmunewRS.569.1 | 5.37  | 5.44  | 0.15 | 0.22 | -1.05 | 0.419016 | 0.4609   | 0.678626 | 0.672763 |
| MmunewRS.57.1.S1_s_at  | MmunewRS.57.1  | 9.08  | 10.01 | 0.04 | 0.17 | -1.9  | 0.00115  | 0.285609 | 0.077563 | 0.547395 |
| MmunewRS.570.1.S1_at   | MmunewRS.570.1 | 4.25  | 4.22  | 0.23 | 0.45 | 1.02  | 0.792377 | 0.25742  | 0.905866 | 0.52521  |
| MmunewRS.571.1.S1_at   | MmunewRS.571.1 | 4.18  | 4.13  | 0.08 | 0.06 | 1.04  | 0.907855 | 0.099456 | 0.961007 | 0.357827 |
| MmunewRS.572.1.S1_at   | MmunewRS.572.1 | 3.37  | 3.27  | 0.05 | 0.06 | 1.07  | 0.09029  | 0.076801 | 0.356872 | 0.322252 |
| MmunewRS.573.1.S1_at   | MmunewRS.573.1 | 7.41  | 6.32  | 0.25 | 0.5  | 2.12  | 0.109163 | 0.022689 | 0.384284 | 0.188685 |
| MmunewRS.575.1.S1_at   | MmunewRS.575.1 | 8.03  | 7.95  | 0.29 | 0.14 | 1.05  | 0.273567 | 0.477662 | 0.565699 | 0.683695 |
| MmunewRS.576.1.S1_at   | MmunewRS.576.1 | 8.44  | 8.44  | 0.03 | 0.03 | 1     | 0.997809 | 0.300047 | 0.999227 | 0.558262 |
| MmunewRS.577.1.S1_s_at | MmunewRS.577.1 | 8.44  | 8.55  | 0.15 | 0.05 | -1.08 | 0.838668 | 0.643338 | 0.929155 | 0.79084  |
| MmunewRS.578.1.S1_at   | MmunewRS.578.1 | 5.16  | 5.14  | 0.06 | 0.12 | 1.01  | 0.847637 | 0.874078 | 0.933626 | 0.928468 |
| MmunewRS.579.1.S1_at   | MmunewRS.579.1 | 7.59  | 7.05  | 0.47 | 0.16 | 1.45  | 0.54258  | 0.514057 | 0.762884 | 0.707422 |
| MmunewRS.58.1.S1_at    | MmunewRS.58.1  | 4.52  | 4.5   | 0.12 | 0.11 | 1.02  | 0.296901 | 0.157807 | 0.585528 | 0.433475 |
| MmunewRS.580.1.S1_at   | MmunewRS.580.1 | 4.97  | 4.74  | 0.08 | 0.16 | 1.17  | 0.149055 | 0.128159 | 0.437811 | 0.399148 |
| MmunewRS.581.1.S1_at   | MmunewRS.581.1 | 3.22  | 3.3   | 0.16 | 0.04 | -1.06 | 0.368266 | 0.536175 | 0.642012 | 0.721547 |

|                        |                |       |       |      |      |       |          |          |          |          |
|------------------------|----------------|-------|-------|------|------|-------|----------|----------|----------|----------|
| MmunewRS.582.1.S1_at   | MmunewRS.582.1 | 3.89  | 4.11  | 0.31 | 0.05 | -1.16 | 0.604681 | 0.805105 | 0.801909 | 0.887962 |
| MmunewRS.583.1.S1_at   | MmunewRS.583.1 | 6.2   | 5.84  | 0.19 | 0.23 | 1.28  | 0.228972 | 0.225739 | 0.527594 | 0.498159 |
| MmunewRS.584.1.S1_at   | MmunewRS.584.1 | 4.53  | 4.58  | 0.12 | 0.07 | -1.04 | 0.505733 | 0.732452 | 0.738658 | 0.845013 |
| MmunewRS.585.1.S1_at   | MmunewRS.585.1 | 5.3   | 5.17  | 0.05 | 0.03 | 1.09  | 0.033922 | 0.005649 | 0.23872  | 0.103804 |
| MmunewRS.586.1.S1_at   | MmunewRS.586.1 | 4.83  | 4.73  | 0.12 | 0.05 | 1.08  | 0.332674 | 0.397228 | 0.614336 | 0.628763 |
| MmunewRS.587.1.S1_at   | MmunewRS.587.1 | 7.83  | 6.78  | 0.43 | 0.25 | 2.08  | 0.03363  | 0.076096 | 0.237366 | 0.320848 |
| MmunewRS.588.1.S1_at   | MmunewRS.588.1 | 10.79 | 10.8  | 0.36 | 0.06 | -1.01 | 0.776524 | 0.734519 | 0.89778  | 0.84619  |
| MmunewRS.589.1.S1_at   | MmunewRS.589.1 | 3.14  | 3.15  | 0.13 | 0.06 | -1.01 | 0.855017 | 0.605606 | 0.93691  | 0.76535  |
| MmunewRS.59.1.S1_at    | MmunewRS.59.1  | 4.63  | 4.69  | 0.05 | 0.07 | -1.04 | 0.265547 | 0.137976 | 0.558199 | 0.410912 |
| MmunewRS.590.1.S1_at   | MmunewRS.590.1 | 10.5  | 11.56 | 0.48 | 0.48 | -2.09 | 0.057074 | 0.05127  | 0.296224 | 0.271825 |
| MmunewRS.591.1.S1_at   | MmunewRS.591.1 | 5.13  | 5.14  | 0.24 | 0.06 | -1.01 | 0.832223 | 0.974593 | 0.926055 | 0.986197 |
| MmunewRS.592.1.S1_at   | MmunewRS.592.1 | 3.26  | 3.29  | 0.28 | 0.11 | -1.02 | 0.471923 | 0.616199 | 0.715918 | 0.772513 |
| MmunewRS.593.1.S1_at   | MmunewRS.593.1 | 3.72  | 3.72  | 0.05 | 0.06 | 1.01  | 0.352688 | 0.760673 | 0.630029 | 0.860963 |
| MmunewRS.594.1.S1_at   | MmunewRS.594.1 | 5.21  | 5.19  | 0.01 | 0.09 | 1.02  | 0.285583 | 0.439493 | 0.575334 | 0.6582   |
| MmunewRS.597.1.S1_at   | MmunewRS.597.1 | 5.69  | 5.99  | 0.32 | 0.55 | -1.24 | 0.867187 | 0.401502 | 0.942572 | 0.631068 |
| MmunewRS.599.1.S1_s_at | MmunewRS.599.1 | 3.79  | 3.78  | 0.19 | 0.18 | 1.01  | 0.520319 | 0.255583 | 0.74869  | 0.523597 |
| MmunewRS.6.1.S1_at     | MmunewRS.6.1   | 7.35  | 7.45  | 0.16 | 0.05 | -1.07 | 0.276992 | 0.375114 | 0.568475 | 0.613186 |
| MmunewRS.60.1.S1_at    | MmunewRS.60.1  | 3.37  | 3.33  | 1.53 | 0.08 | 1.03  | 0.355993 | 0.449119 | 0.632435 | 0.664892 |
| MmunewRS.600.1.S1_at   | MmunewRS.600.1 | 3.93  | 3.92  | 0.12 | 0.07 | 1.01  | 0.54646  | 0.611777 | 0.765261 | 0.769583 |
| MmunewRS.601.1.S1_at   | MmunewRS.601.1 | 4.05  | 3.95  | 0.15 | 0.07 | 1.07  | 0.134264 | 0.095324 | 0.417818 | 0.35236  |
| MmunewRS.602.1.S1_at   | MmunewRS.602.1 | 4.51  | 4.6   | 0.1  | 0.03 | -1.07 | 0.763843 | 0.017572 | 0.891841 | 0.167721 |
| MmunewRS.603.1.S1_at   | MmunewRS.603.1 | 5.7   | 5.69  | 0.06 | 0.05 | 1     | 0.444233 | 0.493898 | 0.697126 | 0.69445  |
| MmunewRS.604.1.S1_at   | MmunewRS.604.1 | 4.37  | 4.47  | 0.04 | 0.14 | -1.07 | 0.237435 | 0.187082 | 0.534931 | 0.462997 |
| MmunewRS.605.1.S1_at   | MmunewRS.605.1 | 4.82  | 4.88  | 0.19 | 0.06 | -1.04 | 0.630788 | 0.587804 | 0.818647 | 0.75454  |
| MmunewRS.606.1.S1_at   | MmunewRS.606.1 | 5.23  | 5.31  | 0.18 | 0.25 | -1.06 | 0.944383 | 0.269295 | 0.976597 | 0.534534 |
| MmunewRS.607.1.S1_s_at | MmunewRS.607.1 | 2.98  | 3.26  | 0.25 | 0.1  | -1.21 | 0.053971 | 0.361049 | 0.289412 | 0.602069 |
| MmunewRS.608.1.S1_at   | MmunewRS.608.1 | 2.81  | 2.83  | 0.03 | 0.03 | -1.02 | 0.15819  | 0.012217 | 0.449156 | 0.142932 |
| MmunewRS.609.1.S1_at   | MmunewRS.609.1 | 4.71  | 4.71  | 0.19 | 0.14 | -1    | 0.968544 | 0.112639 | 0.987529 | 0.378183 |
| MmunewRS.61.1.S1_at    | MmunewRS.61.1  | 6.29  | 6.34  | 0.16 | 0.27 | -1.04 | 0.683696 | 0.85654  | 0.849222 | 0.918032 |
| MmunewRS.610.1.S1_at   | MmunewRS.610.1 | 3.8   | 3.78  | 0.08 | 0.04 | 1.02  | 0.33372  | 0.603262 | 0.615072 | 0.764037 |
| MmunewRS.611.1.S1_s_at | MmunewRS.611.1 | 12.76 | 12.52 | 0.07 | 0.06 | 1.18  | 0.009421 | 0.003448 | 0.146835 | 0.084511 |
| MmunewRS.612.1.S1_at   | MmunewRS.612.1 | 3.21  | 3.19  | 0.02 | 0.17 | 1.01  | 0.751193 | 0.830312 | 0.885199 | 0.902639 |
| MmunewRS.615.1.S1_at   | MmunewRS.615.1 | 3.26  | 3.19  | 0.02 | 0.17 | 1.05  | 0.783075 | 0.768759 | 0.901029 | 0.865653 |
| MmunewRS.616.1.S1_at   | MmunewRS.616.1 | 6.21  | 6.08  | 0.12 | 0.14 | 1.1   | 0.41022  | 0.269522 | 0.672349 | 0.534806 |
| MmunewRS.617.1.S1_at   | MmunewRS.617.1 | 6.15  | 5.99  | 0.15 | 0.08 | 1.12  | 0.29342  | 0.394809 | 0.582378 | 0.627216 |
| MmunewRS.618.1.S1_at   | MmunewRS.618.1 | 3.34  | 3.27  | 0.25 | 0    | 1.05  | 0.669214 | 0.789933 | 0.841311 | 0.878631 |
| MmunewRS.619.1.S1_at   | MmunewRS.619.1 | 4.77  | 4.85  | 0.3  | 0.17 | -1.05 | 0.983897 | 0.975387 | 0.99403  | 0.986565 |
| MmunewRS.62.1.S1_at    | MmunewRS.62.1  | 5.95  | 5.96  | 0.08 | 0.04 | -1.01 | 0.49783  | 0.176727 | 0.73333  | 0.453171 |
| MmunewRS.620.1.S1_at   | MmunewRS.620.1 | 4.06  | 3.85  | 0.09 | 0.05 | 1.16  | 0.088421 | 0.40349  | 0.354567 | 0.632164 |
| MmunewRS.621.1.S1_at   | MmunewRS.621.1 | 3.43  | 3.42  | 0.11 | 0.13 | 1.01  | 0.544305 | 0.048206 | 0.763992 | 0.264671 |
| MmunewRS.623.1.S1_at   | MmunewRS.623.1 | 3.35  | 3.43  | 0.05 | 0.08 | -1.06 | 0.333973 | 0.127228 | 0.615174 | 0.397935 |
| MmunewRS.624.1.S1_s_at | MmunewRS.624.1 | 14.26 | 14.31 | 0.05 | 0.06 | -1.03 | 0.898429 | 0.853705 | 0.956798 | 0.916773 |
| MmunewRS.625.1.S1_at   | MmunewRS.625.1 | 3.7   | 3.67  | 0.22 | 0.05 | 1.02  | 0.499695 | 0.698655 | 0.734372 | 0.824932 |



|                        |                |       |       |      |      |       |          |          |          |          |
|------------------------|----------------|-------|-------|------|------|-------|----------|----------|----------|----------|
| MmunewRS.626.1.S1_at   | MmunewRS.626.1 | 10.57 | 10.78 | 0.2  | 0.16 | -1.16 | 0.560607 | 0.034554 | 0.773964 | 0.229979 |
| MmunewRS.627.1.S1_at   | MmunewRS.627.1 | 3.64  | 3.75  | 0.06 | 0.09 | -1.07 | 0.2449   | 0.020236 | 0.541101 | 0.178669 |
| MmunewRS.628.1.S1_at   | MmunewRS.628.1 | 4.96  | 4.82  | 0.12 | 0.14 | 1.1   | 0.768486 | 0.026567 | 0.893625 | 0.203931 |
| MmunewRS.629.1.S1_at   | MmunewRS.629.1 | 4.68  | 4.71  | 0.04 | 0.15 | -1.02 | 0.589873 | 0.747179 | 0.791747 | 0.853124 |
| MmunewRS.630.1.S1_at   | MmunewRS.630.1 | 3.17  | 3.11  | 0.11 | 0.08 | 1.04  | 0.236311 | 0.236948 | 0.533949 | 0.507675 |
| MmunewRS.631.1.S1_at   | MmunewRS.631.1 | 9.11  | 7.48  | 0.75 | 0.3  | 3.09  | 0.033867 | 0.266655 | 0.238428 | 0.532407 |
| MmunewRS.632.1.S1_at   | MmunewRS.632.1 | 4.17  | 4.1   | 0.13 | 0.09 | 1.05  | 0.364518 | 0.802646 | 0.639104 | 0.886398 |
| MmunewRS.633.1.S1_s_at | MmunewRS.633.1 | 7.19  | 7.56  | 0.26 | 0.05 | -1.29 | 0.096486 | 0.06769  | 0.366344 | 0.306219 |
| MmunewRS.634.1.S1_at   | MmunewRS.634.1 | 3.97  | 4.15  | 0.33 | 0.32 | -1.14 | 0.235788 | 0.154873 | 0.533475 | 0.429849 |
| MmunewRS.636.1.S1_at   | MmunewRS.636.1 | 3     | 2.91  | 0.07 | 0.06 | 1.06  | 0.185228 | 0.188428 | 0.481385 | 0.464416 |
| MmunewRS.637.1.S1_s_at | MmunewRS.637.1 | 6.74  | 6.68  | 0.17 | 0.03 | 1.05  | 0.457929 | 0.433858 | 0.70667  | 0.654041 |
| MmunewRS.638.1.S1_at   | MmunewRS.638.1 | 11.5  | 11.39 | 0.09 | 0.04 | 1.08  | 0.04257  | 0.104062 | 0.263399 | 0.364998 |
| MmunewRS.639.1.S1_at   | MmunewRS.639.1 | 7.36  | 7.33  | 0.26 | 0.06 | 1.02  | 0.594575 | 0.416336 | 0.794887 | 0.641553 |
| MmunewRS.64.1.S1_at    | MmunewRS.64.1  | 12.6  | 12.35 | 0.22 | 0.16 | 1.19  | 0.257173 | 0.150923 | 0.551586 | 0.425523 |
| MmunewRS.640.1.S1_at   | MmunewRS.640.1 | 3.96  | 3.93  | 0.19 | 0.27 | 1.02  | 0.915171 | 0.880865 | 0.963919 | 0.931991 |
| MmunewRS.641.1.S1_at   | MmunewRS.641.1 | 5.94  | 6.53  | 0.16 | 0.06 | -1.51 | 0.003725 | 0.000566 | 0.106283 | 0.041049 |
| MmunewRS.642.1.S1_at   | MmunewRS.642.1 | 4.32  | 4.35  | 0.12 | 0.11 | -1.02 | 0.877091 | 0.134559 | 0.947453 | 0.406629 |
| MmunewRS.644.1.S1_at   | MmunewRS.644.1 | 3.17  | 3.03  | 0.49 | 0.11 | 1.1   | 0.243291 | 0.316371 | 0.539969 | 0.569809 |
| MmunewRS.645.1.S1_at   | MmunewRS.645.1 | 4.7   | 4.61  | 0.06 | 0.04 | 1.07  | 0.29266  | 0.19034  | 0.581743 | 0.465906 |
| MmunewRS.646.1.S1_s_at | MmunewRS.646.1 | 2.99  | 3.18  | 0.07 | 0.13 | -1.14 | 0.040952 | 0.134185 | 0.258807 | 0.406421 |
| MmunewRS.647.1.S1_at   | MmunewRS.647.1 | 6.32  | 5.83  | 0.31 | 0.13 | 1.41  | 0.053123 | 0.254647 | 0.287772 | 0.522936 |
| MmunewRS.648.1.S1_at   | MmunewRS.648.1 | 6.45  | 6.49  | 0.11 | 0.01 | -1.03 | 0.69208  | 0.167588 | 0.852876 | 0.443998 |
| MmunewRS.649.1.S1_at   | MmunewRS.649.1 | 4.35  | 4.4   | 0.08 | 0.09 | -1.04 | 0.46314  | 0.162509 | 0.709925 | 0.438649 |
| MmunewRS.65.1.S1_at    | MmunewRS.65.1  | 3.43  | 3.74  | 0.24 | 0.03 | -1.24 | 0.330868 | 0.128356 | 0.612852 | 0.399618 |
| MmunewRS.650.1.S1_at   | MmunewRS.650.1 | 4.39  | 4.23  | 0.14 | 0.06 | 1.11  | 0.4869   | 0.365375 | 0.725872 | 0.605483 |
| MmunewRS.651.1.S1_at   | MmunewRS.651.1 | 5.11  | 5.18  | 0.38 | 0.33 | -1.05 | 0.858817 | 0.062151 | 0.938801 | 0.296237 |
| MmunewRS.651.1.S1_x_at | MmunewRS.651.1 | 5.32  | 5.77  | 0.41 | 0.4  | -1.36 | 0.259695 | 0.086906 | 0.554019 | 0.339713 |
| MmunewRS.652.1.S1_at   | MmunewRS.652.1 | 13.54 | 13.49 | 0.02 | 0.03 | 1.04  | 0.063096 | 0.090647 | 0.307923 | 0.345151 |
| MmunewRS.653.1.S1_at   | MmunewRS.653.1 | 3.85  | 3.92  | 0.13 | 0.1  | -1.05 | 0.875756 | 0.850544 | 0.946747 | 0.914981 |
| MmunewRS.654.1.S1_at   | MmunewRS.654.1 | 3.55  | 3.57  | 0.11 | 0.11 | -1.02 | 0.37724  | 0.717538 | 0.64776  | 0.836463 |
| MmunewRS.655.1.S1_at   | MmunewRS.655.1 | 4.86  | 4.06  | 0.4  | 0.15 | 1.74  | 0.045509 | 0.026114 | 0.270867 | 0.202544 |
| MmunewRS.656.1.S1_at   | MmunewRS.656.1 | 8.82  | 8.76  | 0.3  | 0.13 | 1.04  | 0.913365 | 0.933903 | 0.963369 | 0.962375 |
| MmunewRS.658.1.S1_at   | MmunewRS.658.1 | 8.04  | 8     | 0.16 | 0.08 | 1.02  | 0.692821 | 0.578703 | 0.853196 | 0.748611 |
| MmunewRS.66.1.S1_at    | MmunewRS.66.1  | 11.6  | 11.7  | 0.13 | 0.01 | -1.07 | 0.26442  | 0.130605 | 0.5577   | 0.402568 |
| MmunewRS.660.1.S1_at   | MmunewRS.660.1 | 3.41  | 3.27  | 0.09 | 0.03 | 1.1   | 0.068113 | 0.009005 | 0.31871  | 0.125499 |
| MmunewRS.661.1.S1_at   | MmunewRS.661.1 | 8.29  | 7.39  | 0.41 | 0.32 | 1.86  | 0.098555 | 0.238953 | 0.369278 | 0.509678 |
| MmunewRS.662.1.S1_at   | MmunewRS.662.1 | 4.41  | 4.42  | 0.09 | 0.05 | -1.01 | 0.323516 | 0.539688 | 0.607318 | 0.72391  |
| MmunewRS.664.1.S1_at   | MmunewRS.664.1 | 4.75  | 4.7   | 0.08 | 0.07 | 1.04  | 0.625565 | 0.566769 | 0.81545  | 0.74076  |
| MmunewRS.665.1.S1_at   | MmunewRS.665.1 | 4.87  | 4.87  | 0.14 | 0.03 | 1     | 0.386205 | 0.408021 | 0.65465  | 0.635378 |
| MmunewRS.666.1.S1_at   | MmunewRS.666.1 | 3.91  | 3.88  | 0.06 | 0.1  | 1.02  | 0.910908 | 0.136077 | 0.962223 | 0.408363 |
| MmunewRS.667.1.S1_at   | MmunewRS.667.1 | 5.58  | 5.46  | 0.07 | 0.09 | 1.09  | 0.148388 | 0.058421 | 0.436978 | 0.288459 |
| MmunewRS.669.1.S1_at   | MmunewRS.669.1 | 3.62  | 3.51  | 0.09 | 0.08 | 1.08  | 0.190681 | 0.086399 | 0.486855 | 0.33887  |
| MmunewRS.67.1.S1_at    | MmunewRS.67.1  | 11.89 | 11.76 | 0.34 | 0.04 | 1.1   | 0.177102 | 0.229118 | 0.471728 | 0.501438 |

|                        |                |       |       |      |      |       |          |          |          |          |
|------------------------|----------------|-------|-------|------|------|-------|----------|----------|----------|----------|
| MmunewRS.670.1.S1_at   | MmunewRS.670.1 | 3.12  | 3.13  | 0.07 | 0.05 | -1    | 0.965282 | 0.996764 | 0.985927 | 0.998142 |
| MmunewRS.671.1.S1_at   | MmunewRS.671.1 | 8.35  | 8.19  | 0.13 | 0.17 | 1.12  | 0.235904 | 0.106892 | 0.533552 | 0.369499 |
| MmunewRS.673.1.S1_at   | MmunewRS.673.1 | 7.92  | 7.97  | 0.03 | 0.1  | -1.04 | 0.411909 | 0.099644 | 0.673728 | 0.358128 |
| MmunewRS.674.1.S1_at   | MmunewRS.674.1 | 4.24  | 4.29  | 0.29 | 0.13 | -1.04 | 0.355728 | 0.521488 | 0.632374 | 0.712474 |
| MmunewRS.675.1.S1_at   | MmunewRS.675.1 | 3.31  | 3.51  | 0.06 | 0.07 | -1.14 | 0.040604 | 0.316412 | 0.25803  | 0.569809 |
| MmunewRS.677.1.S1_at   | MmunewRS.677.1 | 4.82  | 4.05  | 0.35 | 0.24 | 1.71  | 0.088127 | 0.033382 | 0.354244 | 0.226396 |
| MmunewRS.679.1.S1_at   | MmunewRS.679.1 | 3.86  | 3.84  | 0.08 | 0.11 | 1.01  | 0.334348 | 0.344041 | 0.615487 | 0.58962  |
| MmunewRS.681.1.S1_at   | MmunewRS.681.1 | 5.39  | 6.56  | 0.24 | 0.26 | -2.26 | 0.005586 | 0.000515 | 0.120456 | 0.039579 |
| MmunewRS.682.1.S1_at   | MmunewRS.682.1 | 4.67  | 3.78  | 0.52 | 0.33 | 1.85  | 0.107161 | 0.202405 | 0.381659 | 0.476765 |
| MmunewRS.685.1.S1_at   | MmunewRS.685.1 | 7.41  | 7.23  | 0.19 | 0.09 | 1.13  | 0.244845 | 0.365561 | 0.541091 | 0.605602 |
| MmunewRS.686.1.S1_at   | MmunewRS.686.1 | 3.18  | 3.18  | 0.06 | 0.05 | -1    | 0.485198 | 0.674609 | 0.724739 | 0.809902 |
| MmunewRS.687.1.S1_at   | MmunewRS.687.1 | 3.01  | 2.9   | 0.09 | 0.15 | 1.08  | 0.606834 | 0.806667 | 0.803333 | 0.888775 |
| MmunewRS.688.1.S1_x_at | MmunewRS.688.1 | 5.1   | 5.2   | 0.59 | 0.08 | -1.07 | 0.589423 | 0.787006 | 0.791592 | 0.8768   |
| MmunewRS.689.1.S1_at   | MmunewRS.689.1 | 3.92  | 3.74  | 0.15 | 0.09 | 1.13  | 0.274892 | 0.227469 | 0.566556 | 0.499777 |
| MmunewRS.690.1.S1_at   | MmunewRS.690.1 | 4.17  | 4.12  | 0.11 | 0.04 | 1.04  | 0.338319 | 0.382855 | 0.61869  | 0.61893  |
| MmunewRS.692.1.S1_at   | MmunewRS.692.1 | 11.06 | 10.35 | 0.3  | 0.12 | 1.63  | 0.043873 | 0.413759 | 0.266439 | 0.63976  |
| MmunewRS.693.1.S1_at   | MmunewRS.693.1 | 3.12  | 3.26  | 0.08 | 0.12 | -1.11 | 0.214777 | 0.264347 | 0.512373 | 0.530385 |
| MmunewRS.695.1.S1_at   | MmunewRS.695.1 | 2.97  | 3.07  | 0.54 | 0.09 | -1.07 | 0.464616 | 0.517204 | 0.710786 | 0.709435 |
| MmunewRS.697.1.S1_at   | MmunewRS.697.1 | 3.47  | 3.29  | 0.22 | 0.1  | 1.13  | 0.726077 | 0.918434 | 0.87144  | 0.95425  |
| MmunewRS.698.1.S1_at   | MmunewRS.698.1 | 3.05  | 2.91  | 0.23 | 0.14 | 1.1   | 0.704022 | 0.739888 | 0.859541 | 0.849294 |
| MmunewRS.698.1.S1_s_at | MmunewRS.698.1 | 3.66  | 3.61  | 0.02 | 0.06 | 1.04  | 0.249145 | 0.488134 | 0.544437 | 0.690902 |
| MmunewRS.699.1.S1_at   | MmunewRS.699.1 | 5.12  | 5.25  | 0.49 | 0.44 | -1.09 | 0.415469 | 0.179899 | 0.676162 | 0.456453 |
| MmunewRS.70.1.S1_at    | MmunewRS.70.1  | 4.55  | 4.86  | 0.12 | 0.19 | -1.24 | 0.198895 | 0.092578 | 0.496017 | 0.348529 |
| MmunewRS.701.1.S1_at   | MmunewRS.701.1 | 7.12  | 7.03  | 0.73 | 0.12 | 1.07  | 0.254328 | 0.496446 | 0.548755 | 0.69607  |
| MmunewRS.702.1.S1_s_at | MmunewRS.702.1 | 4.62  | 4.66  | 0.08 | 0.11 | -1.03 | 0.98586  | 0.095937 | 0.994969 | 0.35321  |
| MmunewRS.703.1.S1_at   | MmunewRS.703.1 | 3.94  | 3.95  | 0.08 | 0.1  | -1.01 | 0.958259 | 0.893017 | 0.982932 | 0.938985 |
| MmunewRS.704.1.S1_at   | MmunewRS.704.1 | 3     | 3.05  | 0.03 | 0.09 | -1.04 | 0.174914 | 0.625079 | 0.469243 | 0.778973 |
| MmunewRS.705.1.S1_at   | MmunewRS.705.1 | 3.29  | 3.33  | 0.11 | 0.21 | -1.03 | 0.827681 | 0.924011 | 0.923713 | 0.957162 |
| MmunewRS.706.1.S1_at   | MmunewRS.706.1 | 4.69  | 4.52  | 0.22 | 0.08 | 1.12  | 0.396123 | 0.461338 | 0.66221  | 0.672994 |
| MmunewRS.707.1.S1_at   | MmunewRS.707.1 | 7.14  | 6.72  | 0.37 | 0.5  | 1.35  | 0.199014 | 0.165562 | 0.496244 | 0.441885 |
| MmunewRS.708.1.S1_at   | MmunewRS.708.1 | 3.7   | 3.59  | 0.07 | 0.08 | 1.08  | 0.070608 | 0.172141 | 0.324085 | 0.448529 |
| MmunewRS.709.1.S1_at   | MmunewRS.709.1 | 6.51  | 6.4   | 0.77 | 0.2  | 1.08  | 0.992908 | 0.510885 | 0.997263 | 0.70525  |
| MmunewRS.71.1.S1_at    | MmunewRS.71.1  | 3.44  | 3.52  | 0.27 | 1.06 | -1.05 | 0.457001 | 0.601673 | 0.706061 | 0.763001 |
| MmunewRS.710.1.S1_at   | MmunewRS.710.1 | 3.6   | 3.55  | 0.15 | 0.03 | 1.04  | 0.193685 | 0.37499  | 0.490322 | 0.613186 |
| MmunewRS.710.1.S1_s_at | MmunewRS.710.1 | 3.15  | 3.15  | 0.04 | 0.05 | 1     | 0.921942 | 0.991802 | 0.966573 | 0.995392 |
| MmunewRS.711.1.S1_at   | MmunewRS.711.1 | 13.13 | 12.88 | 0.02 | 0.05 | 1.18  | 0.001267 | 0.217569 | 0.078631 | 0.491172 |
| MmunewRS.712.1.S1_at   | MmunewRS.712.1 | 5.56  | 5.92  | 0.43 | 0.35 | -1.28 | 0.177792 | 0.226117 | 0.472499 | 0.49859  |
| MmunewRS.713.1.S1_at   | MmunewRS.713.1 | 3.61  | 3.74  | 0.04 | 0.01 | -1.09 | 0.003666 | 0.006867 | 0.105789 | 0.111982 |
| MmunewRS.714.1.S1_at   | MmunewRS.714.1 | 4.56  | 4.4   | 0.17 | 0.08 | 1.11  | 0.331393 | 0.176443 | 0.613386 | 0.45282  |
| MmunewRS.715.1.S1_at   | MmunewRS.715.1 | 3.59  | 3.57  | 0.08 | 0.07 | 1.01  | 0.699164 | 0.44926  | 0.857134 | 0.664972 |
| MmunewRS.717.1.S1_at   | MmunewRS.717.1 | 3.36  | 3.23  | 0.14 | 0.13 | 1.09  | 0.793432 | 0.942669 | 0.906582 | 0.967498 |
| MmunewRS.718.1.S1_at   | MmunewRS.718.1 | 3.11  | 3.2   | 0.09 | 0.05 | -1.06 | 0.274605 | 0.398687 | 0.566523 | 0.629458 |
| MmunewRS.719.1.S1_at   | MmunewRS.719.1 | 4.28  | 4.38  | 0.16 | 0.28 | -1.07 | 0.621978 | 0.059499 | 0.812917 | 0.290548 |

|                        |                |       |       |      |      |        |          |          |          |          |
|------------------------|----------------|-------|-------|------|------|--------|----------|----------|----------|----------|
| MmunewRS.72.1.S1_at    | MmunewRS.72.1  | 6.33  | 6.22  | 0.12 | 0.1  | 1.08   | 0.082083 | 0.036456 | 0.343409 | 0.235423 |
| MmunewRS.720.1.S1_at   | MmunewRS.720.1 | 4.62  | 4.7   | 0.28 | 0.36 | -1.05  | 0.734029 | 0.869859 | 0.876041 | 0.926148 |
| MmunewRS.721.1.S1_at   | MmunewRS.721.1 | 3.98  | 3.93  | 0.21 | 0.17 | 1.04   | 0.414907 | 0.570435 | 0.675831 | 0.743121 |
| MmunewRS.722.1.S1_at   | MmunewRS.722.1 | 4.58  | 4.42  | 0.11 | 0.06 | 1.12   | 0.092278 | 0.141889 | 0.36034  | 0.415403 |
| MmunewRS.723.1.S1_at   | MmunewRS.723.1 | 12.9  | 12.57 | 0.05 | 0.09 | 1.26   | 0.005295 | 0.051467 | 0.117714 | 0.272242 |
| MmunewRS.724.1.S1_at   | MmunewRS.724.1 | 4.22  | 4.02  | 0.26 | 0.19 | 1.14   | 0.24597  | 0.298247 | 0.541732 | 0.556931 |
| MmunewRS.725.1.S1_at   | MmunewRS.725.1 | 5.48  | 5.57  | 0.12 | 0.02 | -1.06  | 0.291244 | 0.116217 | 0.580618 | 0.38353  |
| MmunewRS.726.1.S1_at   | MmunewRS.726.1 | 12.88 | 12.91 | 0.07 | 0.05 | -1.03  | 0.952633 | 0.822144 | 0.980494 | 0.897673 |
| MmunewRS.728.1.S1_at   | MmunewRS.728.1 | 4.08  | 4.13  | 0.05 | 0.02 | -1.03  | 0.159101 | 0.074642 | 0.450479 | 0.318322 |
| MmunewRS.73.1.S1_at    | MmunewRS.73.1  | 6.04  | 5.99  | 0.05 | 0.03 | 1.03   | 0.089408 | 0.237174 | 0.356406 | 0.507908 |
| MmunewRS.730.1.S1_at   | MmunewRS.730.1 | 4.27  | 5.22  | 0.35 | 0.27 | -1.94  | 0.026018 | 0.016261 | 0.214209 | 0.161621 |
| MmunewRS.731.1.S1_a_at | MmunewRS.731.1 | 2.73  | 2.8   | 0.09 | 0.04 | -1.05  | 0.23301  | 0.37837  | 0.531272 | 0.615443 |
| MmunewRS.731.1.S1_at   | MmunewRS.731.1 | 2.8   | 2.81  | 0.06 | 0    | -1     | 0.77515  | 0.537212 | 0.897254 | 0.72233  |
| MmunewRS.732.1.S1_at   | MmunewRS.732.1 | 5.7   | 5.72  | 0.1  | 0.15 | -1.01  | 0.716811 | 0.406737 | 0.86641  | 0.634487 |
| MmunewRS.733.1.S1_at   | MmunewRS.733.1 | 3.85  | 3.84  | 0.03 | 0.12 | 1.01   | 0.838892 | 0.770036 | 0.929299 | 0.86644  |
| MmunewRS.734.1.S1_at   | MmunewRS.734.1 | 4.59  | 4.69  | 0.08 | 0.07 | -1.08  | 0.548438 | 0.905033 | 0.766568 | 0.946165 |
| MmunewRS.735.1.S1_at   | MmunewRS.735.1 | 5.24  | 5.23  | 0.02 | 0.04 | 1.01   | 0.685224 | 0.428874 | 0.849991 | 0.650408 |
| MmunewRS.736.1.S1_at   | MmunewRS.736.1 | 10.7  | 10.55 | 0.2  | 0.06 | 1.11   | 0.282385 | 0.447033 | 0.57315  | 0.663235 |
| MmunewRS.737.1.S1_at   | MmunewRS.737.1 | 4.28  | 4.28  | 0.07 | 0.02 | -1     | 0.436961 | 0.036509 | 0.691834 | 0.235526 |
| MmunewRS.738.1.S1_at   | MmunewRS.738.1 | 5.05  | 4.89  | 0.16 | 0.12 | 1.12   | 0.44821  | 0.552382 | 0.699844 | 0.731707 |
| MmunewRS.739.1.S1_at   | MmunewRS.739.1 | 4.92  | 4.38  | 0.56 | 0.1  | 1.45   | 0.119522 | 0.151333 | 0.397415 | 0.426087 |
| MmunewRS.74.1.S1_at    | MmunewRS.74.1  | 3.52  | 3.5   | 0.06 | 0.14 | 1.01   | 0.348457 | 0.808541 | 0.626378 | 0.889768 |
| MmunewRS.740.1.S1_at   | MmunewRS.740.1 | 6.58  | 6.65  | 0.12 | 0.13 | -1.05  | 0.957588 | 0.091322 | 0.982588 | 0.346281 |
| MmunewRS.743.1.S1_at   | MmunewRS.743.1 | 10.29 | 10.23 | 0.12 | 0.26 | 1.04   | 0.39382  | 0.395273 | 0.66051  | 0.62738  |
| MmunewRS.744.1.S1_at   | MmunewRS.744.1 | 2.97  | 2.92  | 0.11 | 0.08 | 1.03   | 0.319651 | 0.512772 | 0.604246 | 0.7065   |
| MmunewRS.745.1.S1_at   | MmunewRS.745.1 | 7.79  | 7.6   | 0.37 | 0.16 | 1.13   | 0.724045 | 0.314661 | 0.870379 | 0.56843  |
| MmunewRS.746.1.S1_at   | MmunewRS.746.1 | 5.17  | 4.72  | 0.15 | 0.32 | 1.36   | 0.167355 | 0.133641 | 0.460585 | 0.405587 |
| MmunewRS.747.1.S1_at   | MmunewRS.747.1 | 3.52  | 3.52  | 0.16 | 0.14 | 1      | 0.587422 | 0.826404 | 0.790473 | 0.900298 |
| MmunewRS.748.1.S1_at   | MmunewRS.748.1 | 6.3   | 6.21  | 0.12 | 0.18 | 1.07   | 0.281628 | 0.589139 | 0.572497 | 0.755393 |
| MmunewRS.749.1.S1_at   | MmunewRS.749.1 | 3.38  | 3.49  | 0.17 | 0.09 | -1.08  | 0.214622 | 0.294542 | 0.512281 | 0.554265 |
| MmunewRS.75.1.S1_at    | MmunewRS.75.1  | 3.87  | 3.77  | 0.25 | 0.33 | 1.07   | 0.748192 | 0.65841  | 0.883325 | 0.800323 |
| MmunewRS.750.1.S1_at   | MmunewRS.750.1 | 14.35 | 14.45 | 0.05 | 0.03 | -1.07  | 0.078719 | 0.163727 | 0.338551 | 0.43992  |
| MmunewRS.751.1.S1_at   | MmunewRS.751.1 | 3.81  | 3.96  | 0.06 | 0.04 | -1.11  | 0.023696 | 0.011577 | 0.207081 | 0.139225 |
| MmunewRS.752.1.S1_at   | MmunewRS.752.1 | 4.33  | 5.1   | 0.43 | 0.15 | -1.7   | 0.058492 | 0.016716 | 0.298965 | 0.163766 |
| MmunewRS.755.1.S1_at   | MmunewRS.755.1 | 9.73  | 8.92  | 0.18 | 0.22 | 1.74   | 0.013167 | 0.004732 | 0.165301 | 0.095831 |
| MmunewRS.756.1.S1_at   | MmunewRS.756.1 | 11.3  | 10.83 | 0.27 | 0.12 | 1.39   | 0.206519 | 0.005287 | 0.504184 | 0.100736 |
| MmunewRS.757.1.S1_at   | MmunewRS.757.1 | 5.08  | 5.02  | 0.16 | 0.07 | 1.05   | 0.20845  | 0.144874 | 0.506141 | 0.418762 |
| MmunewRS.759.1.S1_at   | MmunewRS.759.1 | 5.84  | 5.91  | 0.17 | 0.09 | -1.05  | 0.357833 | 0.695141 | 0.633688 | 0.822797 |
| MmunewRS.76.1.S1_at    | MmunewRS.76.1  | 7     | 6.21  | 0.23 | 0.31 | 1.72   | 0.045666 | 0.200084 | 0.271157 | 0.474603 |
| MmunewRS.760.1.S1_at   | MmunewRS.760.1 | 8.99  | 12.64 | 1.8  | 0.18 | -12.48 | 0.065661 | 0.114261 | 0.313663 | 0.380761 |
| MmunewRS.761.1.S1_at   | MmunewRS.761.1 | 3.48  | 3.41  | 0.1  | 0.04 | 1.05   | 0.156369 | 0.176051 | 0.446993 | 0.452526 |
| MmunewRS.762.1.S1_s_at | MmunewRS.762.1 | 4.36  | 4.22  | 0.1  | 0.04 | 1.1    | 0.114236 | 0.249382 | 0.39103  | 0.518496 |
| MmunewRS.764.1.S1_at   | MmunewRS.764.1 | 6.34  | 6.31  | 0.18 | 0.06 | 1.02   | 0.920782 | 0.258237 | 0.96618  | 0.52558  |

|                        |                |       |       |      |      |       |          |          |          |          |
|------------------------|----------------|-------|-------|------|------|-------|----------|----------|----------|----------|
| MmunewRS.765.1.S1_at   | MmunewRS.765.1 | 4.08  | 3.89  | 0.05 | 0.11 | 1.14  | 0.051139 | 0.089777 | 0.283595 | 0.34404  |
| MmunewRS.766.1.S1_at   | MmunewRS.766.1 | 4.62  | 4.64  | 0.3  | 0.2  | -1.01 | 0.447045 | 0.862892 | 0.69909  | 0.922054 |
| MmunewRS.767.1.S1_at   | MmunewRS.767.1 | 5.84  | 5.76  | 0.06 | 0.03 | 1.06  | 0.181911 | 0.043012 | 0.477447 | 0.252029 |
| MmunewRS.768.1.S1_at   | MmunewRS.768.1 | 7.17  | 7.29  | 0.19 | 0.1  | -1.08 | 0.976067 | 0.46695  | 0.990427 | 0.676718 |
| MmunewRS.769.1.S1_at   | MmunewRS.769.1 | 5.13  | 5.2   | 0.08 | 0.18 | -1.05 | 0.882626 | 0.401701 | 0.950093 | 0.631068 |
| MmunewRS.770.1.S1_at   | MmunewRS.770.1 | 5.94  | 6.7   | 0.74 | 0.39 | -1.7  | 0.132002 | 0.017392 | 0.415151 | 0.16699  |
| MmunewRS.771.1.S1_at   | MmunewRS.771.1 | 7.35  | 7.1   | 0.21 | 0.06 | 1.19  | 0.083507 | 0.09256  | 0.345905 | 0.348519 |
| MmunewRS.772.1.S1_x_at | MmunewRS.772.1 | 8.82  | 8.35  | 0.22 | 0.1  | 1.39  | 0.104413 | 0.162936 | 0.377773 | 0.43909  |
| MmunewRS.773.1.S1_at   | MmunewRS.773.1 | 4.55  | 4.6   | 0.19 | 0.04 | -1.04 | 0.745339 | 0.567371 | 0.881842 | 0.741271 |
| MmunewRS.774.1.S1_at   | MmunewRS.774.1 | 5.76  | 4.78  | 0.76 | 0.39 | 1.97  | 0.093306 | 0.094504 | 0.361763 | 0.35126  |
| MmunewRS.775.1.S1_at   | MmunewRS.775.1 | 3.19  | 3.14  | 0.05 | 0.06 | 1.04  | 0.595456 | 0.163918 | 0.79524  | 0.440105 |
| MmunewRS.775.1.S1_x_at | MmunewRS.775.1 | 3.11  | 3.02  | 0.06 | 0.04 | 1.07  | 0.07208  | 0.191324 | 0.326408 | 0.466637 |
| MmunewRS.776.1.S1_at   | MmunewRS.776.1 | 3.73  | 3.59  | 0.13 | 0.06 | 1.1   | 0.176473 | 0.238955 | 0.470889 | 0.509678 |
| MmunewRS.777.1.S1_at   | MmunewRS.777.1 | 6.46  | 6.35  | 0.26 | 0.07 | 1.08  | 0.350058 | 0.521268 | 0.627869 | 0.712339 |
| MmunewRS.779.1.S1_at   | MmunewRS.779.1 | 6.27  | 6.13  | 0.2  | 0.03 | 1.1   | 0.299269 | 0.483458 | 0.587634 | 0.687931 |
| MmunewRS.78.1.S1_at    | MmunewRS.78.1  | 13.19 | 13.04 | 0.05 | 0.05 | 1.11  | 0.006334 | 0.277947 | 0.125881 | 0.541664 |
| MmunewRS.784.1.S1_at   | MmunewRS.784.1 | 6.04  | 5.79  | 0.3  | 0.27 | 1.19  | 0.289747 | 0.053775 | 0.579286 | 0.27744  |
| MmunewRS.785.1.S1_at   | MmunewRS.785.1 | 4.11  | 4.1   | 0.1  | 0.16 | 1.01  | 0.885897 | 0.847735 | 0.951309 | 0.913501 |
| MmunewRS.786.1.S1_at   | MmunewRS.786.1 | 3.65  | 3.6   | 0.13 | 0.07 | 1.04  | 0.661446 | 0.380926 | 0.836571 | 0.617426 |
| MmunewRS.788.1.S1_x_at | MmunewRS.788.1 | 3.21  | 3.28  | 0.08 | 0.09 | -1.05 | 0.334769 | 0.173529 | 0.615803 | 0.449938 |
| MmunewRS.79.1.S1_at    | MmunewRS.79.1  | 3.83  | 5.02  | 0.31 | 0.41 | -2.28 | 0.025324 | 0.125382 | 0.212168 | 0.396008 |
| MmunewRS.790.1.S1_at   | MmunewRS.790.1 | 8.1   | 9.62  | 0.44 | 0.21 | -2.87 | 0.009216 | 0.108541 | 0.145865 | 0.372091 |
| MmunewRS.790.1.S1_x_at | MmunewRS.790.1 | 8.24  | 9.82  | 0.5  | 0.19 | -3    | 0.012492 | 0.124614 | 0.162099 | 0.394995 |
| MmunewRS.791.1.S1_at   | MmunewRS.791.1 | 3.82  | 4     | 1.09 | 0.98 | -1.13 | 0.864847 | 0.87444  | 0.94142  | 0.928687 |
| MmunewRS.791.1.S1_s_at | MmunewRS.791.1 | 4.19  | 3.98  | 0.74 | 0.57 | 1.16  | 0.358308 | 0.526491 | 0.634147 | 0.715574 |
| MmunewRS.793.1.S1_at   | MmunewRS.793.1 | 8.37  | 8.38  | 0.05 | 0.16 | -1.01 | 0.476271 | 0.003243 | 0.718743 | 0.082187 |
| MmunewRS.795.1.S1_at   | MmunewRS.795.1 | 3.24  | 3.41  | 0.09 | 0.09 | -1.13 | 0.157364 | 0.186278 | 0.448021 | 0.462155 |
| MmunewRS.796.1.S1_at   | MmunewRS.796.1 | 3.65  | 3.58  | 0    | 0.09 | 1.05  | 0.734745 | 0.219767 | 0.876463 | 0.493388 |
| MmunewRS.797.1.S1_at   | MmunewRS.797.1 | 2.91  | 2.96  | 0.04 | 0.07 | -1.04 | 0.547723 | 0.445508 | 0.766198 | 0.662422 |
| MmunewRS.798.1.S1_at   | MmunewRS.798.1 | 4.87  | 4.73  | 0.13 | 0.05 | 1.11  | 0.206374 | 0.543177 | 0.504034 | 0.725996 |
| MmunewRS.799.1.S1_at   | MmunewRS.799.1 | 3.7   | 3.56  | 0.09 | 0.03 | 1.1   | 0.181699 | 0.054975 | 0.477223 | 0.279898 |
| MmunewRS.8.1.S1_at     | MmunewRS.8.1   | 7.32  | 7.19  | 0.13 | 0.14 | 1.1   | 0.246194 | 0.192889 | 0.541956 | 0.468379 |
| MmunewRS.80.1.S1_at    | MmunewRS.80.1  | 7.58  | 7.63  | 0.17 | 0.07 | -1.03 | 0.533147 | 0.037398 | 0.756823 | 0.237776 |
| MmunewRS.800.1.S1_at   | MmunewRS.800.1 | 5     | 4.94  | 0.08 | 0.13 | 1.04  | 0.525443 | 0.732431 | 0.75194  | 0.845008 |
| MmunewRS.801.1.S1_at   | MmunewRS.801.1 | 3.39  | 3.47  | 0.02 | 0.04 | -1.06 | 0.024479 | 0.195412 | 0.209634 | 0.470253 |
| MmunewRS.803.1.S1_at   | MmunewRS.803.1 | 3.51  | 3.54  | 0.04 | 0.03 | -1.02 | 0.478993 | 0.818765 | 0.720418 | 0.895556 |
| MmunewRS.804.1.S1_at   | MmunewRS.804.1 | 4.18  | 4.32  | 0.08 | 0.06 | -1.1  | 0.068372 | 0.151725 | 0.319307 | 0.426383 |
| MmunewRS.805.1.S1_at   | MmunewRS.805.1 | 7.08  | 7.03  | 0.38 | 0.04 | 1.03  | 0.596796 | 0.106544 | 0.796064 | 0.369099 |
| MmunewRS.806.1.S1_at   | MmunewRS.806.1 | 4.42  | 4.58  | 0.33 | 0.17 | -1.12 | 0.265202 | 0.295129 | 0.557962 | 0.554551 |
| MmunewRS.807.1.S1_at   | MmunewRS.807.1 | 3.81  | 3.91  | 0.06 | 0.14 | -1.07 | 0.312608 | 0.524138 | 0.59866  | 0.714207 |
| MmunewRS.808.1.S1_at   | MmunewRS.808.1 | 12.76 | 12.75 | 0.23 | 0.1  | 1.01  | 0.837062 | 0.081824 | 0.928546 | 0.330204 |
| MmunewRS.809.1.S1_at   | MmunewRS.809.1 | 5.86  | 5.91  | 0.34 | 0    | -1.04 | 0.506631 | 0.725706 | 0.739209 | 0.841142 |
| MmunewRS.81.1.S1_at    | MmunewRS.81.1  | 11.25 | 11.84 | 0.67 | 0.06 | -1.5  | 0.363848 | 0.522428 | 0.638459 | 0.713139 |

|                        |                |       |       |      |      |       |          |          |          |          |
|------------------------|----------------|-------|-------|------|------|-------|----------|----------|----------|----------|
| MmunewRS.810.1.S1_at   | MmunewRS.810.1 | 10.25 | 10.38 | 0.15 | 0.05 | -1.09 | 0.059626 | 0.385794 | 0.301305 | 0.621079 |
| MmunewRS.811.1.S1_at   | MmunewRS.811.1 | 7.8   | 7.71  | 0.07 | 0.01 | 1.06  | 0.43648  | 0.89842  | 0.691433 | 0.942211 |
| MmunewRS.812.1.S1_at   | MmunewRS.812.1 | 5.55  | 5.4   | 0.03 | 0.14 | 1.11  | 0.298092 | 0.304538 | 0.5865   | 0.561803 |
| MmunewRS.813.1.S1_at   | MmunewRS.813.1 | 3.91  | 3.56  | 0.4  | 0.15 | 1.27  | 0.590466 | 0.849258 | 0.791877 | 0.914453 |
| MmunewRS.814.1.S1_at   | MmunewRS.814.1 | 3.77  | 4.16  | 0.17 | 0.34 | -1.31 | 0.310224 | 0.41118  | 0.596486 | 0.637937 |
| MmunewRS.815.1.S1_at   | MmunewRS.815.1 | 4.57  | 4.55  | 0.05 | 0.09 | 1.01  | 0.890543 | 0.618629 | 0.953316 | 0.774185 |
| MmunewRS.817.1.S1_at   | MmunewRS.817.1 | 4.37  | 3.99  | 0.37 | 0.44 | 1.31  | 0.651621 | 0.268791 | 0.830755 | 0.534218 |
| MmunewRS.818.1.S1_at   | MmunewRS.818.1 | 6.95  | 4.93  | 0.86 | 0.44 | 4.04  | 0.05258  | 0.123333 | 0.286324 | 0.393386 |
| MmunewRS.819.1.S1_at   | MmunewRS.819.1 | 4.34  | 4.36  | 0.1  | 0.04 | -1.01 | 0.450551 | 0.092843 | 0.70154  | 0.349024 |
| MmunewRS.82.1.S1_at    | MmunewRS.82.1  | 5.59  | 5.42  | 0.91 | 0.16 | 1.13  | 0.265271 | 0.117917 | 0.557962 | 0.385837 |
| MmunewRS.820.1.S1_at   | MmunewRS.820.1 | 4.15  | 4.67  | 0.13 | 0.4  | -1.43 | 0.133706 | 0.415856 | 0.417096 | 0.641182 |
| MmunewRS.821.1.S1_at   | MmunewRS.821.1 | 4.27  | 4.43  | 0.02 | 0.08 | -1.11 | 0.091529 | 0.075981 | 0.359218 | 0.320676 |
| MmunewRS.822.1.S1_at   | MmunewRS.822.1 | 3.92  | 3.88  | 0.09 | 0.11 | 1.03  | 0.848883 | 0.595748 | 0.934181 | 0.759208 |
| MmunewRS.823.1.S1_at   | MmunewRS.823.1 | 6.78  | 6.77  | 0.06 | 0.07 | 1     | 0.471173 | 0.225307 | 0.715413 | 0.497892 |
| MmunewRS.824.1.S1_at   | MmunewRS.824.1 | 3.19  | 3.1   | 0.09 | 0.08 | 1.06  | 0.278363 | 0.203928 | 0.569692 | 0.478164 |
| MmunewRS.825.1.S1_at   | MmunewRS.825.1 | 5.83  | 4.97  | 0.96 | 0.24 | 1.8   | 0.133084 | 0.17223  | 0.416571 | 0.448609 |
| MmunewRS.829.1.S1_at   | MmunewRS.829.1 | 7.9   | 7.55  | 0.73 | 0.86 | 1.27  | 0.479895 | 0.114936 | 0.720974 | 0.381665 |
| MmunewRS.83.1.S1_at    | MmunewRS.83.1  | 5.37  | 3.75  | 1.25 | 0.3  | 3.07  | 0.112876 | 0.122579 | 0.3894   | 0.39249  |
| MmunewRS.830.1.S1_at   | MmunewRS.830.1 | 3.84  | 3.85  | 0.08 | 0.12 | -1    | 0.814246 | 0.488176 | 0.917004 | 0.690944 |
| MmunewRS.831.1.S1_at   | MmunewRS.831.1 | 4.89  | 5.13  | 0.15 | 0.11 | -1.18 | 0.154685 | 0.260129 | 0.444927 | 0.526776 |
| MmunewRS.833.1.S1_at   | MmunewRS.833.1 | 4.23  | 3.88  | 0.4  | 0.13 | 1.27  | 0.189144 | 0.222179 | 0.485784 | 0.495178 |
| MmunewRS.834.1.S1_at   | MmunewRS.834.1 | 4.48  | 4.13  | 0.54 | 0.72 | 1.27  | 0.822458 | 0.671841 | 0.921014 | 0.808157 |
| MmunewRS.835.1.S1_at   | MmunewRS.835.1 | 5.08  | 5.26  | 0.14 | 0.32 | -1.13 | 0.135724 | 0.113835 | 0.419766 | 0.380062 |
| MmunewRS.836.1.S1_at   | MmunewRS.836.1 | 9.57  | 9.53  | 0.07 | 0.11 | 1.03  | 0.471252 | 0.106977 | 0.715452 | 0.369557 |
| MmunewRS.837.1.S1_at   | MmunewRS.837.1 | 4.3   | 4.22  | 0.17 | 0.11 | 1.06  | 0.555467 | 0.332118 | 0.771275 | 0.580584 |
| MmunewRS.838.1.S1_at   | MmunewRS.838.1 | 7.14  | 6.58  | 0.28 | 0.21 | 1.47  | 0.060559 | 0.164274 | 0.303166 | 0.440539 |
| MmunewRS.84.1.S1_at    | MmunewRS.84.1  | 3.16  | 3.2   | 0.16 | 0.08 | -1.03 | 0.732819 | 0.603652 | 0.875313 | 0.764215 |
| MmunewRS.840.1.S1_at   | MmunewRS.840.1 | 5.06  | 5.15  | 0.09 | 0.05 | -1.06 | 0.371983 | 0.817433 | 0.644644 | 0.894694 |
| MmunewRS.841.1.S1_at   | MmunewRS.841.1 | 3.22  | 3.12  | 0.2  | 0.02 | 1.08  | 0.4021   | 0.626714 | 0.666552 | 0.779962 |
| MmunewRS.842.1.S1_at   | MmunewRS.842.1 | 9.88  | 9.86  | 0.31 | 0.09 | 1.02  | 0.597763 | 0.095072 | 0.796926 | 0.352124 |
| MmunewRS.843.1.S1_at   | MmunewRS.843.1 | 5.77  | 7.36  | 0.3  | 0.27 | -3.01 | 0.00325  | 0.016551 | 0.101782 | 0.162881 |
| MmunewRS.844.1.S1_at   | MmunewRS.844.1 | 3.69  | 3.59  | 0.56 | 0.17 | 1.07  | 0.567524 | 0.775845 | 0.77779  | 0.869553 |
| MmunewRS.845.1.S1_at   | MmunewRS.845.1 | 4.44  | 4.44  | 0.15 | 0.02 | 1.01  | 0.771557 | 0.726107 | 0.895305 | 0.841422 |
| MmunewRS.846.1.S1_at   | MmunewRS.846.1 | 3.66  | 3.18  | 0.25 | 0.23 | 1.4   | 0.155035 | 0.151131 | 0.445174 | 0.425795 |
| MmunewRS.847.1.S1_at   | MmunewRS.847.1 | 3.42  | 3.37  | 0.54 | 0.22 | 1.04  | 0.317216 | 0.486781 | 0.601944 | 0.690091 |
| MmunewRS.848.1.S1_at   | MmunewRS.848.1 | 3.31  | 3.32  | 0.1  | 0.16 | -1    | 0.693361 | 0.3739   | 0.85343  | 0.612508 |
| MmunewRS.849.1.S1_at   | MmunewRS.849.1 | 14.34 | 14.41 | 0.04 | 0.02 | -1.05 | 0.114789 | 0.070403 | 0.391813 | 0.311676 |
| MmunewRS.849.1.S1_s_at | MmunewRS.849.1 | 14.16 | 14.25 | 0.07 | 0.04 | -1.06 | 0.401335 | 0.139008 | 0.665994 | 0.412152 |
| MmunewRS.85.1.S1_at    | MmunewRS.85.1  | 6.62  | 6.74  | 0.13 | 0.05 | -1.08 | 0.389865 | 0.737995 | 0.657536 | 0.848158 |
| MmunewRS.850.1.S1_at   | MmunewRS.850.1 | 4.69  | 4.76  | 0.2  | 0.08 | -1.05 | 0.424068 | 0.4637   | 0.681872 | 0.674615 |
| MmunewRS.851.1.S1_at   | MmunewRS.851.1 | 7.84  | 7.86  | 0.25 | 0.02 | -1.01 | 0.614828 | 0.715962 | 0.80851  | 0.835339 |
| MmunewRS.852.1.S1_at   | MmunewRS.852.1 | 3.57  | 3.55  | 0.03 | 0.08 | 1.01  | 0.282003 | 0.706274 | 0.572752 | 0.829634 |
| MmunewRS.853.1.S1_at   | MmunewRS.853.1 | 6.47  | 6.49  | 0.09 | 0.05 | -1.01 | 0.547838 | 0.078326 | 0.766242 | 0.324964 |

|                        |                |       |       |      |      |       |          |          |          |          |
|------------------------|----------------|-------|-------|------|------|-------|----------|----------|----------|----------|
| MmunewRS.854.1.S1_s_at | MmunewRS.854.1 | 3.22  | 3.25  | 0.09 | 0.04 | -1.02 | 0.829656 | 0.736407 | 0.925018 | 0.847487 |
| MmunewRS.855.1.S1_at   | MmunewRS.855.1 | 4.52  | 4.29  | 0.2  | 0.1  | 1.18  | 0.571579 | 0.116383 | 0.780017 | 0.383671 |
| MmunewRS.856.1.S1_at   | MmunewRS.856.1 | 5.49  | 5.36  | 0.07 | 0.11 | 1.1   | 0.744419 | 0.343312 | 0.881461 | 0.58905  |
| MmunewRS.857.1.S1_at   | MmunewRS.857.1 | 3.7   | 3.68  | 0.09 | 0.04 | 1.01  | 0.270306 | 0.011175 | 0.562443 | 0.137551 |
| MmunewRS.858.1.S1_at   | MmunewRS.858.1 | 6.7   | 6.01  | 0.35 | 0.04 | 1.62  | 0.073914 | 0.073056 | 0.329924 | 0.316017 |
| MmunewRS.859.1.S1_s_at | MmunewRS.859.1 | 10.89 | 11.14 | 0.15 | 0.28 | -1.19 | 0.33124  | 0.099896 | 0.613173 | 0.358618 |
| MmunewRS.859.1.S1_x_at | MmunewRS.859.1 | 10.95 | 11.22 | 0.14 | 0.26 | -1.21 | 0.109485 | 0.133251 | 0.384555 | 0.40503  |
| MmunewRS.86.1.S1_at    | MmunewRS.86.1  | 3.57  | 3.57  | 0.14 | 0.09 | 1     | 0.753804 | 0.634669 | 0.886518 | 0.784965 |
| MmunewRS.860.1.S1_at   | MmunewRS.860.1 | 3.14  | 3.21  | 0.12 | 0.03 | -1.05 | 0.14883  | 0.181023 | 0.437337 | 0.457529 |
| MmunewRS.861.1.S1_at   | MmunewRS.861.1 | 4.38  | 4.43  | 0.06 | 0.06 | -1.04 | 0.568587 | 0.928423 | 0.778471 | 0.959349 |
| MmunewRS.864.1.S1_at   | MmunewRS.864.1 | 7.89  | 7.2   | 0.09 | 0.18 | 1.62  | 0.004045 | 0.000089 | 0.108999 | 0.027016 |
| MmunewRS.865.1.S1_at   | MmunewRS.865.1 | 5.89  | 6.34  | 0.05 | 0.23 | -1.36 | 0.072576 | 0.013779 | 0.327336 | 0.150434 |
| MmunewRS.866.1.S1_at   | MmunewRS.866.1 | 3.06  | 3.09  | 0.03 | 0.01 | -1.02 | 0.092331 | 0.294997 | 0.360374 | 0.554551 |
| MmunewRS.867.1.S1_at   | MmunewRS.867.1 | 9.78  | 9.94  | 0.36 | 0.05 | -1.11 | 0.526261 | 0.053185 | 0.752443 | 0.276445 |
| MmunewRS.868.1.S1_at   | MmunewRS.868.1 | 11.64 | 11.39 | 0.3  | 0.06 | 1.19  | 0.302265 | 0.003746 | 0.590132 | 0.087236 |
| MmunewRS.869.1.S1_at   | MmunewRS.869.1 | 6.69  | 6.58  | 0.17 | 0.03 | 1.08  | 0.589517 | 0.742316 | 0.791613 | 0.850749 |
| MmunewRS.87.1.S1_at    | MmunewRS.87.1  | 8.29  | 7.7   | 0.3  | 0.24 | 1.51  | 0.037034 | 0.154845 | 0.247708 | 0.429849 |
| MmunewRS.87.1.S1_x_at  | MmunewRS.87.1  | 8.34  | 7.76  | 0.28 | 0.16 | 1.49  | 0.037096 | 0.189585 | 0.24788  | 0.465297 |
| MmunewRS.870.1.S1_at   | MmunewRS.870.1 | 4.74  | 4.64  | 0.1  | 0.04 | 1.07  | 0.142174 | 0.290149 | 0.428166 | 0.551134 |
| MmunewRS.871.1.S1_at   | MmunewRS.871.1 | 3.72  | 3.79  | 0.22 | 0.09 | -1.05 | 0.993344 | 0.600596 | 0.997386 | 0.762183 |
| MmunewRS.872.1.S1_at   | MmunewRS.872.1 | 4.82  | 4.95  | 0.08 | 0.12 | -1.1  | 0.199716 | 0.105439 | 0.497195 | 0.367279 |
| MmunewRS.873.1.S1_at   | MmunewRS.873.1 | 7.39  | 7.4   | 0.22 | 0.05 | -1.01 | 0.794902 | 0.249175 | 0.907378 | 0.518302 |
| MmunewRS.874.1.S1_at   | MmunewRS.874.1 | 4.75  | 4.26  | 0.77 | 0.34 | 1.41  | 0.636497 | 0.55368  | 0.822111 | 0.732777 |
| MmunewRS.875.1.S1_at   | MmunewRS.875.1 | 5.68  | 4.83  | 0.57 | 0.3  | 1.81  | 0.144423 | 0.516455 | 0.431327 | 0.709006 |
| MmunewRS.876.1.S1_at   | MmunewRS.876.1 | 6.56  | 6.64  | 0.2  | 0.01 | -1.05 | 0.694832 | 0.872716 | 0.854418 | 0.927621 |
| MmunewRS.878.1.S1_at   | MmunewRS.878.1 | 4.17  | 4.18  | 0.05 | 0.14 | -1.01 | 0.326209 | 0.457956 | 0.609344 | 0.670999 |
| MmunewRS.880.1.S1_at   | MmunewRS.880.1 | 7.19  | 7.26  | 0.24 | 0.04 | -1.05 | 0.562487 | 0.965052 | 0.774894 | 0.980558 |
| MmunewRS.881.1.S1_at   | MmunewRS.881.1 | 11.55 | 11.56 | 0.13 | 0.11 | -1    | 0.253122 | 0.090252 | 0.547579 | 0.344664 |
| MmunewRS.882.1.S1_at   | MmunewRS.882.1 | 3.84  | 3.91  | 0.21 | 0.1  | -1.05 | 0.397411 | 0.744949 | 0.663    | 0.852232 |
| MmunewRS.883.1.S1_at   | MmunewRS.883.1 | 5.75  | 5.68  | 0.2  | 0.11 | 1.04  | 0.956188 | 0.18014  | 0.981989 | 0.456743 |
| MmunewRS.884.1.S1_at   | MmunewRS.884.1 | 5.46  | 5.49  | 0.32 | 0.06 | -1.02 | 0.870488 | 0.55895  | 0.944238 | 0.735944 |
| MmunewRS.885.1.S1_at   | MmunewRS.885.1 | 6.21  | 6.15  | 0.09 | 0.11 | 1.05  | 0.815089 | 0.615607 | 0.917446 | 0.772101 |
| MmunewRS.886.1.S1_at   | MmunewRS.886.1 | 3.65  | 3.56  | 0.67 | 0.33 | 1.06  | 0.951905 | 0.604609 | 0.980049 | 0.764711 |
| MmunewRS.887.1.S1_at   | MmunewRS.887.1 | 3.56  | 3.83  | 0.25 | 0.34 | -1.21 | 0.150064 | 0.245102 | 0.439048 | 0.514861 |
| MmunewRS.888.1.S1_s_at | MmunewRS.888.1 | 3.33  | 3.46  | 0    | 0.05 | -1.09 | 0.019941 | 0.008055 | 0.194498 | 0.119277 |
| MmunewRS.89.1.S1_s_at  | MmunewRS.89.1  | 13.99 | 13.92 | 0.03 | 0.02 | 1.05  | 0.014235 | 0.005232 | 0.171042 | 0.100211 |
| MmunewRS.890.1.S1_at   | MmunewRS.890.1 | 6.17  | 6.4   | 0.5  | 0.68 | -1.17 | 0.517883 | 0.411972 | 0.746968 | 0.638434 |
| MmunewRS.891.1.S1_x_at | MmunewRS.891.1 | 11.01 | 10.92 | 0.48 | 0.21 | 1.06  | 0.398643 | 0.263956 | 0.664174 | 0.530153 |
| MmunewRS.893.1.S1_at   | MmunewRS.893.1 | 6.33  | 5.95  | 0.59 | 0.24 | 1.3   | 0.513565 | 0.365021 | 0.743764 | 0.605222 |
| MmunewRS.893.1.S1_x_at | MmunewRS.893.1 | 6.59  | 6.13  | 0.43 | 0.07 | 1.38  | 0.17667  | 0.147378 | 0.471175 | 0.421554 |
| MmunewRS.894.1.S1_at   | MmunewRS.894.1 | 7.26  | 7.26  | 0.3  | 0.04 | 1     | 0.801528 | 0.275062 | 0.91087  | 0.539481 |
| MmunewRS.896.1.S1_at   | MmunewRS.896.1 | 11.14 | 11.38 | 0.15 | 0.26 | -1.19 | 0.04825  | 0.243659 | 0.276959 | 0.513803 |
| MmunewRS.897.1.S1_x_at | MmunewRS.897.1 | 7.79  | 7.72  | 0.28 | 0.11 | 1.05  | 0.866123 | 0.968545 | 0.942092 | 0.982645 |

|                        |                |       |       |      |      |        |          |          |          |          |
|------------------------|----------------|-------|-------|------|------|--------|----------|----------|----------|----------|
| MmunewRS.898.1.S1_at   | MmunewRS.898.1 | 4.45  | 4.43  | 0.02 | 0.06 | 1.01   | 0.699449 | 0.766217 | 0.857288 | 0.864166 |
| MmunewRS.899.1.S1_at   | MmunewRS.899.1 | 7.71  | 7.88  | 0.08 | 0.17 | -1.12  | 0.325106 | 0.008656 | 0.608531 | 0.12341  |
| MmunewRS.9.1.S1_at     | MmunewRS.9.1   | 3.51  | 3.48  | 0.2  | 0.04 | 1.02   | 0.640095 | 0.530799 | 0.824018 | 0.718143 |
| MmunewRS.90.1.S1_at    | MmunewRS.90.1  | 3.26  | 3.25  | 0.14 | 0.04 | 1.01   | 0.89648  | 0.690421 | 0.955936 | 0.81956  |
| MmunewRS.900.1.S1_at   | MmunewRS.900.1 | 9.28  | 9.07  | 0.59 | 0.24 | 1.16   | 0.61766  | 0.400125 | 0.810118 | 0.630158 |
| MmunewRS.901.1.S1_at   | MmunewRS.901.1 | 6.86  | 6.78  | 0.04 | 0.18 | 1.06   | 0.590301 | 0.972978 | 0.791804 | 0.985389 |
| MmunewRS.902.1.S1_at   | MmunewRS.902.1 | 4.66  | 6.04  | 0.75 | 0.31 | -2.61  | 0.104149 | 0.077599 | 0.377457 | 0.323548 |
| MmunewRS.903.1.S1_at   | MmunewRS.903.1 | 2.92  | 2.99  | 0.03 | 0.05 | -1.05  | 0.260447 | 0.27048  | 0.554556 | 0.535821 |
| MmunewRS.904.1.S1_at   | MmunewRS.904.1 | 3.47  | 3.43  | 0.07 | 0.25 | 1.02   | 0.73447  | 0.665117 | 0.876236 | 0.803733 |
| MmunewRS.905.1.S1_at   | MmunewRS.905.1 | 3.99  | 3.85  | 0.1  | 0.08 | 1.1    | 0.179839 | 0.100697 | 0.474884 | 0.360078 |
| MmunewRS.906.1.S1_at   | MmunewRS.906.1 | 4.93  | 5.24  | 0.12 | 0.06 | -1.25  | 0.028347 | 0.063855 | 0.220898 | 0.29906  |
| MmunewRS.907.1.S1_at   | MmunewRS.907.1 | 5.49  | 5.5   | 0.02 | 0.1  | -1.01  | 0.913953 | 0.918648 | 0.963451 | 0.954356 |
| MmunewRS.908.1.S1_at   | MmunewRS.908.1 | 7.78  | 7.67  | 0.15 | 0.01 | 1.08   | 0.691049 | 0.716057 | 0.852289 | 0.835415 |
| MmunewRS.909.1.S1_at   | MmunewRS.909.1 | 9.6   | 9.84  | 0.63 | 0.16 | -1.18  | 0.540697 | 0.651619 | 0.761662 | 0.796299 |
| MmunewRS.91.1.S1_at    | MmunewRS.91.1  | 5.02  | 5.02  | 0.11 | 0.06 | -1     | 0.857935 | 0.510181 | 0.938213 | 0.704711 |
| MmunewRS.910.1.S1_at   | MmunewRS.910.1 | 8.15  | 8.14  | 0.17 | 0.07 | 1      | 0.444798 | 0.000368 | 0.697566 | 0.037273 |
| MmunewRS.911.1.S1_at   | MmunewRS.911.1 | 3.45  | 3.44  | 0.03 | 0.02 | 1.01   | 0.920177 | 0.507134 | 0.965871 | 0.70278  |
| MmunewRS.912.1.S1_x_at | MmunewRS.912.1 | 7.43  | 7.37  | 0.11 | 0.07 | 1.05   | 0.579683 | 0.312672 | 0.785284 | 0.567299 |
| MmunewRS.914.1.S1_at   | MmunewRS.914.1 | 7.4   | 7.39  | 0.22 | 0.06 | 1.01   | 0.570261 | 0.677527 | 0.779298 | 0.811672 |
| MmunewRS.914.1.S1_x_at | MmunewRS.914.1 | 7.13  | 7.19  | 0.27 | 0.06 | -1.05  | 0.558656 | 0.366132 | 0.772983 | 0.605941 |
| MmunewRS.915.1.S1_s_at | MmunewRS.915.1 | 4.48  | 4.52  | 0.19 | 0.1  | -1.03  | 0.87335  | 0.235919 | 0.945619 | 0.507056 |
| MmunewRS.916.1.S1_at   | MmunewRS.916.1 | 8.19  | 8.25  | 0.39 | 0.02 | -1.04  | 0.950145 | 0.938371 | 0.979278 | 0.965059 |
| MmunewRS.918.1.S1_at   | MmunewRS.918.1 | 3.81  | 3.71  | 0.3  | 0.05 | 1.07   | 0.20758  | 0.252191 | 0.50535  | 0.520864 |
| MmunewRS.92.1.S1_at    | MmunewRS.92.1  | 5.6   | 5.59  | 0.03 | 0.05 | 1.01   | 0.355541 | 0.86547  | 0.632237 | 0.923596 |
| MmunewRS.920.1.S1_at   | MmunewRS.920.1 | 3.72  | 3.58  | 0.16 | 0.27 | 1.1    | 0.832988 | 0.716694 | 0.926464 | 0.835937 |
| MmunewRS.921.1.S1_at   | MmunewRS.921.1 | 6.63  | 6.64  | 0.17 | 0.09 | -1.01  | 0.916372 | 0.969971 | 0.964424 | 0.983571 |
| MmunewRS.922.1.S1_at   | MmunewRS.922.1 | 9.84  | 10.03 | 0.04 | 0.04 | -1.14  | 0.004406 | 0.005701 | 0.1125   | 0.104102 |
| MmunewRS.923.1.S1_at   | MmunewRS.923.1 | 4.14  | 4.89  | 0.42 | 0.53 | -1.68  | 0.094603 | 0.026689 | 0.363543 | 0.204241 |
| MmunewRS.924.1.S1_at   | MmunewRS.924.1 | 4.55  | 4.67  | 0.15 | 0.16 | -1.08  | 0.828967 | 0.896951 | 0.924548 | 0.941193 |
| MmunewRS.925.1.S1_at   | MmunewRS.925.1 | 4.43  | 4.24  | 0.13 | 0.12 | 1.15   | 0.266273 | 0.53031  | 0.558747 | 0.71787  |
| MmunewRS.926.1.S1_at   | MmunewRS.926.1 | 4.94  | 4.68  | 0.09 | 0.14 | 1.2    | 0.049903 | 0.04294  | 0.281011 | 0.251776 |
| MmunewRS.927.1.S1_at   | MmunewRS.927.1 | 12.28 | 12.2  | 0.07 | 0.04 | 1.06   | 0.166313 | 0.039288 | 0.459528 | 0.243338 |
| MmunewRS.928.1.S1_at   | MmunewRS.928.1 | 3.03  | 3.04  | 0.05 | 0.03 | -1.01  | 0.613315 | 0.887105 | 0.807323 | 0.93569  |
| MmunewRS.929.1.S1_at   | MmunewRS.929.1 | 6.73  | 6.66  | 0.35 | 0.1  | 1.06   | 0.249542 | 0.325169 | 0.544627 | 0.575591 |
| MmunewRS.929.1.S1_x_at | MmunewRS.929.1 | 7.07  | 7.1   | 0.19 | 0.01 | -1.02  | 0.538473 | 0.450086 | 0.760315 | 0.665505 |
| MmunewRS.930.1.S1_at   | MmunewRS.930.1 | 6.04  | 9.76  | 0.14 | 0.21 | -13.14 | 0.000015 | 0.001966 | 0.045594 | 0.065838 |
| MmunewRS.931.1.S1_at   | MmunewRS.931.1 | 5.58  | 5.63  | 0.07 | 0.09 | -1.03  | 0.708485 | 0.937563 | 0.861951 | 0.964687 |
| MmunewRS.932.1.S1_at   | MmunewRS.932.1 | 3.02  | 3.09  | 0.12 | 0.14 | -1.04  | 0.469598 | 0.60707  | 0.714298 | 0.766185 |
| MmunewRS.934.1.S1_at   | MmunewRS.934.1 | 6.55  | 7.4   | 0.82 | 0.17 | -1.81  | 0.150269 | 0.416315 | 0.439399 | 0.641553 |
| MmunewRS.935.1.S1_at   | MmunewRS.935.1 | 9.05  | 8.53  | 0.88 | 0.51 | 1.44   | 0.166003 | 0.192141 | 0.459032 | 0.467614 |
| MmunewRS.935.1.S1_x_at | MmunewRS.935.1 | 8.87  | 8.2   | 0.89 | 0.51 | 1.6    | 0.139368 | 0.175448 | 0.424947 | 0.452157 |
| MmunewRS.936.1.S1_at   | MmunewRS.936.1 | 8.71  | 10.21 | 0.26 | 0.21 | -2.83  | 0.001184 | 0.020474 | 0.077857 | 0.179641 |
| MmunewRS.937.1.S1_at   | MmunewRS.937.1 | 5.4   | 5.37  | 0.11 | 0.19 | 1.02   | 0.570161 | 0.09603  | 0.779298 | 0.353302 |

|                        |                |       |       |      |      |       |          |          |          |          |
|------------------------|----------------|-------|-------|------|------|-------|----------|----------|----------|----------|
| MmunewRS.938.1.S1_at   | MmunewRS.938.1 | 12    | 12.3  | 0.11 | 0.11 | -1.23 | 0.045744 | 0.44837  | 0.271378 | 0.664212 |
| MmunewRS.939.1.S1_at   | MmunewRS.939.1 | 4.56  | 4.63  | 0.05 | 0.06 | -1.05 | 0.157822 | 0.40619  | 0.448605 | 0.634213 |
| MmunewRS.94.1.S1_at    | MmunewRS.94.1  | 3.18  | 3.18  | 0.18 | 0.03 | 1     | 0.387801 | 0.543933 | 0.655868 | 0.726502 |
| MmunewRS.940.1.S1_s_at | MmunewRS.940.1 | 14.44 | 14.46 | 0.04 | 0    | -1.01 | 0.920604 | 0.72083  | 0.966056 | 0.838368 |
| MmunewRS.942.1.S1_at   | MmunewRS.942.1 | 7.51  | 7.78  | 0.15 | 0.04 | -1.21 | 0.151113 | 0.302672 | 0.440652 | 0.560269 |
| MmunewRS.942.1.S1_x_at | MmunewRS.942.1 | 8.29  | 8.31  | 0.12 | 0.03 | -1.02 | 0.620995 | 0.168637 | 0.812355 | 0.445303 |
| MmunewRS.943.1.S1_at   | MmunewRS.943.1 | 7.96  | 7.99  | 0.23 | 0.01 | -1.02 | 0.805768 | 0.925071 | 0.912905 | 0.957602 |
| MmunewRS.945.1.S1_at   | MmunewRS.945.1 | 9.78  | 9.05  | 0.18 | 0.25 | 1.66  | 0.024035 | 0.099167 | 0.208189 | 0.357379 |
| MmunewRS.946.1.S1_at   | MmunewRS.946.1 | 7.3   | 7.28  | 0.3  | 0.55 | 1.01  | 0.952789 | 0.020069 | 0.980564 | 0.177952 |
| MmunewRS.947.1.S1_at   | MmunewRS.947.1 | 3.27  | 3.03  | 0.13 | 0.13 | 1.18  | 0.070309 | 0.395618 | 0.323556 | 0.627583 |
| MmunewRS.948.1.S1_at   | MmunewRS.948.1 | 6.02  | 6.14  | 0.11 | 0.08 | -1.09 | 0.854733 | 0.318509 | 0.936795 | 0.571239 |
| MmunewRS.949.1.S1_at   | MmunewRS.949.1 | 11.25 | 11.31 | 0.82 | 0.22 | -1.04 | 0.611112 | 0.250602 | 0.806129 | 0.51941  |
| MmunewRS.95.1.S1_at    | MmunewRS.95.1  | 6.43  | 6.13  | 1.04 | 0.09 | 1.23  | 0.321292 | 0.422459 | 0.605548 | 0.645729 |
| MmunewRS.950.1.S1_at   | MmunewRS.950.1 | 2.98  | 3.02  | 0.11 | 0.07 | -1.03 | 0.513695 | 0.388568 | 0.743872 | 0.622897 |
| MmunewRS.951.1.S1_at   | MmunewRS.951.1 | 5.46  | 6.02  | 0.29 | 0.27 | -1.47 | 0.150039 | 0.331559 | 0.439035 | 0.580182 |
| MmunewRS.952.1.S1_s_at | MmunewRS.952.1 | 10.71 | 10.28 | 0.07 | 0.38 | 1.35  | 0.053734 | 0.06759  | 0.288979 | 0.306076 |
| MmunewRS.953.1.S1_at   | MmunewRS.953.1 | 2.82  | 2.84  | 0.01 | 0.04 | -1.01 | 0.240465 | 0.460931 | 0.53802  | 0.672772 |
| MmunewRS.953.1.S1_x_at | MmunewRS.953.1 | 3.88  | 3.85  | 0.13 | 0.15 | 1.02  | 0.73292  | 0.840382 | 0.875334 | 0.909015 |
| MmunewRS.954.1.S1_at   | MmunewRS.954.1 | 9.31  | 8.47  | 0.15 | 0.5  | 1.78  | 0.069646 | 0.007417 | 0.322289 | 0.115764 |
| MmunewRS.955.1.S1_at   | MmunewRS.955.1 | 4.07  | 4.16  | 0.14 | 0.04 | -1.06 | 0.346252 | 0.775325 | 0.624879 | 0.869227 |
| MmunewRS.956.1.S1_at   | MmunewRS.956.1 | 8.01  | 8.02  | 0.22 | 0.14 | -1    | 0.848082 | 0.029219 | 0.933844 | 0.212898 |
| MmunewRS.956.1.S1_s_at | MmunewRS.956.1 | 9.85  | 9.42  | 0.21 | 0.12 | 1.35  | 0.15999  | 0.076987 | 0.451279 | 0.322421 |
| MmunewRS.957.1.S1_at   | MmunewRS.957.1 | 6.29  | 6.17  | 0.05 | 0.04 | 1.09  | 0.012927 | 0.250714 | 0.164364 | 0.51941  |
| MmunewRS.959.1.S1_at   | MmunewRS.959.1 | 5.42  | 5.27  | 0.13 | 0.09 | 1.11  | 0.179773 | 0.309373 | 0.474837 | 0.564912 |
| MmunewRS.960.1.S1_at   | MmunewRS.960.1 | 5.37  | 5.2   | 0.11 | 0.09 | 1.12  | 0.175811 | 0.184238 | 0.470151 | 0.460382 |
| MmunewRS.961.1.S1_at   | MmunewRS.961.1 | 5.66  | 5.69  | 0.18 | 0.09 | -1.02 | 0.796759 | 0.829708 | 0.908259 | 0.902187 |
| MmunewRS.962.1.S1_at   | MmunewRS.962.1 | 9.75  | 9.56  | 0.34 | 0.1  | 1.14  | 0.455282 | 0.195981 | 0.705066 | 0.470976 |
| MmunewRS.963.1.S1_at   | MmunewRS.963.1 | 3.72  | 3.62  | 0.23 | 0.07 | 1.07  | 0.191784 | 0.228088 | 0.488259 | 0.500265 |
| MmunewRS.964.1.S1_at   | MmunewRS.964.1 | 5.22  | 5.1   | 0.06 | 0.17 | 1.09  | 0.168652 | 0.615016 | 0.461921 | 0.771689 |
| MmunewRS.965.1.S1_at   | MmunewRS.965.1 | 5.76  | 5.79  | 0.07 | 0.08 | -1.02 | 0.7078   | 0.263592 | 0.861547 | 0.529881 |
| MmunewRS.966.1.S1_at   | MmunewRS.966.1 | 7.47  | 7.58  | 0.14 | 0.14 | -1.08 | 0.160252 | 0.058353 | 0.451608 | 0.288356 |
| MmunewRS.967.1.S1_at   | MmunewRS.967.1 | 4.87  | 7.15  | 0.95 | 0.19 | -4.85 | 0.043108 | 0.226212 | 0.264779 | 0.498692 |
| MmunewRS.968.1.S1_at   | MmunewRS.968.1 | 3.81  | 3.78  | 0.54 | 0.12 | 1.02  | 0.587553 | 0.462716 | 0.790496 | 0.674056 |
| MmunewRS.969.1.S1_at   | MmunewRS.969.1 | 8.33  | 6.8   | 0.57 | 0.28 | 2.89  | 0.014633 | 0.010635 | 0.172862 | 0.134593 |
| MmunewRS.97.1.S1_at    | MmunewRS.97.1  | 3.42  | 3.4   | 0.02 | 0.06 | 1.02  | 0.684784 | 0.691581 | 0.849802 | 0.820606 |
| MmunewRS.970.1.S1_at   | MmunewRS.970.1 | 8.23  | 8.66  | 0.44 | 0.23 | -1.35 | 0.1528   | 0.210964 | 0.442495 | 0.484938 |
| MmunewRS.971.1.S1_at   | MmunewRS.971.1 | 10.71 | 10.84 | 0.22 | 0.1  | -1.1  | 0.55992  | 0.001143 | 0.773577 | 0.053342 |
| MmunewRS.972.1.S1_at   | MmunewRS.972.1 | 3.46  | 3.49  | 0.05 | 0.03 | -1.03 | 0.849193 | 0.876786 | 0.934328 | 0.929829 |
| MmunewRS.973.1.S1_at   | MmunewRS.973.1 | 4.43  | 4.28  | 0.13 | 0.17 | 1.11  | 0.127064 | 0.098897 | 0.408591 | 0.357049 |
| MmunewRS.974.1.S1_s_at | MmunewRS.974.1 | 4.61  | 4.67  | 0.01 | 0.11 | -1.05 | 0.401023 | 0.219132 | 0.665748 | 0.492868 |
| MmunewRS.975.1.S1_at   | MmunewRS.975.1 | 7.63  | 6.98  | 0.34 | 0.19 | 1.57  | 0.061616 | 0.068635 | 0.304824 | 0.308537 |
| MmunewRS.977.1.S1_s_at | MmunewRS.977.1 | 8.29  | 9.67  | 0.24 | 0.3  | -2.61 | 0.002399 | 0.005347 | 0.093451 | 0.101089 |
| MmunewRS.978.1.S1_at   | MmunewRS.978.1 | 4.03  | 3.97  | 0.23 | 0.17 | 1.04  | 0.436792 | 0.559575 | 0.691681 | 0.736365 |



|                        |                |       |       |      |      |       |          |          |          |          |
|------------------------|----------------|-------|-------|------|------|-------|----------|----------|----------|----------|
| MmunewRS.978.1.S1_s_at | MmunewRS.978.1 | 4.89  | 4.89  | 0.29 | 0.26 | 1     | 0.785213 | 0.549028 | 0.902006 | 0.729531 |
| MmunewRS.98.1.S1_at    | MmunewRS.98.1  | 4.36  | 4.37  | 0.16 | 0.02 | -1.01 | 0.919272 | 0.759881 | 0.965478 | 0.86049  |
| MmunewRS.980.1.S1_at   | MmunewRS.980.1 | 3.72  | 3.72  | 0.03 | 0.03 | 1     | 0.185346 | 0.432286 | 0.48153  | 0.652778 |
| MmunewRS.981.1.S1_at   | MmunewRS.981.1 | 3.38  | 3.39  | 0.05 | 0.07 | -1    | 0.507348 | 0.127408 | 0.739612 | 0.398249 |
| MmunewRS.982.1.S1_at   | MmunewRS.982.1 | 4.48  | 4.55  | 0.43 | 0.14 | -1.05 | 0.599155 | 0.185773 | 0.7979   | 0.461631 |
| MmunewRS.983.1.S1_at   | MmunewRS.983.1 | 5.96  | 6.06  | 0.08 | 0.06 | -1.07 | 0.206207 | 0.07675  | 0.503843 | 0.322168 |
| MmunewRS.984.1.S1_at   | MmunewRS.984.1 | 3.72  | 3.16  | 0.44 | 0.13 | 1.48  | 0.083018 | 0.061882 | 0.345299 | 0.295625 |
| MmunewRS.985.1.S1_at   | MmunewRS.985.1 | 4.97  | 4.86  | 0.11 | 0.07 | 1.07  | 0.336577 | 0.290445 | 0.617132 | 0.551169 |
| MmunewRS.986.1.S1_at   | MmunewRS.986.1 | 3.73  | 3.31  | 0.23 | 0.24 | 1.34  | 0.336255 | 0.243031 | 0.616949 | 0.513356 |
| MmunewRS.987.1.S1_at   | MmunewRS.987.1 | 3.59  | 3.54  | 0.02 | 0.04 | 1.03  | 0.100335 | 0.23249  | 0.371104 | 0.504249 |
| MmunewRS.988.1.S1_at   | MmunewRS.988.1 | 6.54  | 6.52  | 0.26 | 0.04 | 1.02  | 0.731633 | 0.856117 | 0.874589 | 0.917842 |
| MmunewRS.989.1.S1_at   | MmunewRS.989.1 | 3.21  | 3.24  | 0.05 | 0.26 | -1.02 | 0.389419 | 0.376772 | 0.657321 | 0.614547 |
| MmunewRS.99.1.S1_at    | MmunewRS.99.1  | 9.02  | 9.35  | 0.11 | 0.1  | -1.26 | 0.01764  | 0.0252   | 0.186416 | 0.199043 |
| MmunewRS.990.1.S1_at   | MmunewRS.990.1 | 11.82 | 11.5  | 0.16 | 0.06 | 1.25  | 0.04763  | 0.029882 | 0.275691 | 0.21455  |
| MmunewRS.991.1.S1_at   | MmunewRS.991.1 | 3.98  | 4.62  | 0.35 | 0.18 | -1.55 | 0.014569 | 0.006614 | 0.172573 | 0.110163 |
| MmunewRS.992.1.S1_at   | MmunewRS.992.1 | 5.64  | 6.01  | 0.58 | 0.4  | -1.3  | 0.751038 | 0.668674 | 0.885057 | 0.806111 |
| MmunewRS.993.1.S1_at   | MmunewRS.993.1 | 5.56  | 5.51  | 0.22 | 0.13 | 1.03  | 0.666741 | 0.649264 | 0.84002  | 0.794724 |
| MmunewRS.994.1.S1_at   | MmunewRS.994.1 | 3.64  | 3.54  | 0.34 | 0.1  | 1.08  | 0.420328 | 0.574837 | 0.679364 | 0.746142 |
| MmunewRS.995.1.S1_at   | MmunewRS.995.1 | 5.63  | 5.43  | 0.07 | 0.15 | 1.15  | 0.284282 | 0.209945 | 0.574388 | 0.48371  |
| MmunewRS.996.1.S1_at   | MmunewRS.996.1 | 10.06 | 10.47 | 0.02 | 0.19 | -1.33 | 0.020328 | 0.144296 | 0.196136 | 0.418196 |
| MmunewRS.997.1.S1_at   | MmunewRS.997.1 | 5.45  | 5.42  | 0.1  | 0.18 | 1.02  | 0.849207 | 0.964416 | 0.934328 | 0.980213 |
| MmunewRS.998.1.S1_at   | MmunewRS.998.1 | 10.85 | 11.11 | 0.14 | 0.05 | -1.2  | 0.126448 | 0.001793 | 0.407818 | 0.063586 |
| MmunewRS.999.1.S1_at   | MmunewRS.999.1 | 3.88  | 3.82  | 0.18 | 0.03 | 1.05  | 0.769105 | 0.497398 | 0.893978 | 0.696721 |

| Transcript Cluster ID | Transcript ID(Array Design) | WSD Bi-weight Avg Signal (log2) | WSD+T Bi-weight Avg Signal (log2) | WSD Standard Deviation | WSD+T Standard Deviation | Fold Change (linear) vs. WSD+T) | ANOVA p-value (WSD vs. WSD+T) | ANOVA p-value (All Conditions) | FDR p-value (WSD vs. WSD+T) | FDR p-value (All Conditions) |
|-----------------------|-----------------------------|---------------------------------|-----------------------------------|------------------------|--------------------------|---------------------------------|-------------------------------|--------------------------------|-----------------------------|------------------------------|
| AFFX-BioB-5_at        | AFFX-BioB-5                 | 10.54                           | 10.48                             | 0.19                   | 0.09                     | 1.04                            | 0.667457                      | 0.895706                       | 0.868621                    | 0.940372                     |
| AFFX-BioB-M_at        | AFFX-BioB-M                 | 11.22                           | 11.17                             | 0.16                   | 0.06                     | 1.04                            | 0.582789                      | 0.886674                       | 0.828555                    | 0.935519                     |
| AFFX-BioB-3_at        | AFFX-BioB-3                 | 11.08                           | 11.04                             | 0.14                   | 0.08                     | 1.02                            | 0.604389                      | 0.910341                       | 0.839628                    | 0.949414                     |
| AFFX-BioC-5_at        | AFFX-BioC-5                 | 11.74                           | 11.75                             | 0.14                   | 0.09                     | -1                              | 0.744971                      | 0.959002                       | 0.902816                    | 0.976777                     |
| AFFX-BioC-3_at        | AFFX-BioC-3                 | 11.92                           | 11.91                             | 0.12                   | 0.08                     | -1.01                           | 0.683237                      | 0.938204                       | 0.876089                    | 0.964949                     |
| AFFX-BioDn-5_at       | AFFX-BioDn-5                | 12.93                           | 12.93                             | 0.12                   | 0.07                     | -1.01                           | 0.930531                      | 0.924374                       | 0.97685                     | 0.957351                     |
| AFFX-BioDn-3_at       | AFFX-BioDn-3                | 13.71                           | 13.7                              | 0.09                   | 0.04                     | 1.01                            | 0.876995                      | 0.67327                        | 0.957122                    | 0.809084                     |
| AFFX-CreX-5_at        | AFFX-CreX-5                 | 14.45                           | 14.46                             | 0.05                   | 0.01                     | -1                              | 0.965786                      | 0.440588                       | 0.988741                    | 0.659029                     |
| AFFX-CreX-3_at        | AFFX-CreX-3                 | 14.65                           | 14.65                             | 0.06                   | 0.02                     | 1                               | 0.894647                      | 0.167944                       | 0.963936                    | 0.444517                     |
| AFFX-DapX-5_at        | AFFX-DapX-5                 | 3.97                            | 4.01                              | 0.27                   | 0.06                     | -1.03                           | 0.391568                      | 0.441131                       | 0.717611                    | 0.659375                     |
| AFFX-DapX-M_at        | AFFX-DapX-M                 | 3.6                             | 3.34                              | 0.07                   | 0.19                     | 1.2                             | 0.227032                      | 0.299868                       | 0.596459                    | 0.558148                     |
| AFFX-DapX-3_at        | AFFX-DapX-3                 | 4.05                            | 3.98                              | 0.14                   | 0.06                     | 1.05                            | 0.369054                      | 0.465035                       | 0.704033                    | 0.675534                     |
| AFFX-LysX-5_at        | AFFX-LysX-5                 | 3.32                            | 3.15                              | 0.13                   | 0.02                     | 1.12                            | 0.227967                      | 0.067931                       | 0.596782                    | 0.306839                     |
| AFFX-LysX-M_at        | AFFX-LysX-M                 | 3.76                            | 3.73                              | 0.1                    | 0.07                     | 1.02                            | 0.485972                      | 0.57511                        | 0.774427                    | 0.746329                     |
| AFFX-LysX-3_at        | AFFX-LysX-3                 | 3.4                             | 3.24                              | 0.13                   | 0.06                     | 1.11                            | 0.114476                      | 0.054681                       | 0.487606                    | 0.27934                      |
| AFFX-PheX-5_at        | AFFX-PheX-5                 | 3.84                            | 3.79                              | 0.07                   | 0.1                      | 1.04                            | 0.627091                      | 0.901615                       | 0.850335                    | 0.944007                     |
| AFFX-PheX-M_at        | AFFX-PheX-M                 | 3.74                            | 3.75                              | 0.09                   | 0.05                     | -1.01                           | 0.301049                      | 0.620651                       | 0.655304                    | 0.775525                     |
| AFFX-PheX-3_at        | AFFX-PheX-3                 | 5.14                            | 4.93                              | 0.15                   | 0.02                     | 1.15                            | 0.100034                      | 0.29563                        | 0.470251                    | 0.555108                     |
| AFFX-ThrX-5_at        | AFFX-ThrX-5                 | 4.74                            | 4.75                              | 0.05                   | 0.09                     | -1.01                           | 0.88122                       | 0.250276                       | 0.958973                    | 0.519282                     |
| AFFX-ThrX-M_at        | AFFX-ThrX-M                 | 4.04                            | 4.03                              | 0.09                   | 0.04                     | 1.01                            | 0.480302                      | 0.679699                       | 0.771137                    | 0.812998                     |
| AFFX-ThrX-3_at        | AFFX-ThrX-3                 | 6.29                            | 6.09                              | 0.21                   | 0.05                     | 1.15                            | 0.209914                      | 0.291408                       | 0.581346                    | 0.551823                     |
| AFFX-TrpnX-5_at       | AFFX-TrpnX-5                | 3.54                            | 3.46                              | 0.05                   | 0.06                     | 1.06                            | 0.242487                      | 0.138164                       | 0.608517                    | 0.411086                     |
| AFFX-TrpnX-M_at       | AFFX-TrpnX-M                | 4.52                            | 4.48                              | 0.04                   | 0.01                     | 1.03                            | 0.104584                      | 0.089969                       | 0.475682                    | 0.34423                      |
| AFFX-TrpnX-3_at       | AFFX-TrpnX-3                | 3.58                            | 3.4                               | 0.06                   | 0.04                     | 1.13                            | 0.015539                      | 0.007857                       | 0.282681                    | 0.118059                     |
| AFFX-r2-Ec-bioB-5_at  | AFFX-r2-Ec-bioB-5           | 11.2                            | 11.15                             | 0.18                   | 0.09                     | 1.03                            | 0.740485                      | 0.890195                       | 0.900834                    | 0.937473                     |
| AFFX-r2-Ec-bioB-M_at  | AFFX-r2-Ec-bioB-M           | 11.29                           | 11.25                             | 0.15                   | 0.07                     | 1.03                            | 0.598919                      | 0.90393                        | 0.837151                    | 0.945472                     |
| AFFX-r2-Ec-bioB-3_at  | AFFX-r2-Ec-bioB-3           | 11.28                           | 11.23                             | 0.12                   | 0.11                     | 1.04                            | 0.566405                      | 0.896628                       | 0.819997                    | 0.940929                     |
| AFFX-r2-Ec-bioC-5_at  | AFFX-r2-Ec-bioC-5           | 12.42                           | 12.44                             | 0.1                    | 0.07                     | -1.01                           | 0.969009                      | 0.929291                       | 0.989849                    | 0.959661                     |
| AFFX-r2-Ec-bioC-3_at  | AFFX-r2-Ec-bioC-3           | 12.55                           | 12.54                             | 0.1                    | 0.08                     | 1.01                            | 0.757793                      | 0.960131                       | 0.90886                     | 0.977408                     |
| AFFX-r2-Ec-bioD-5_at  | AFFX-r2-Ec-bioD-5           | 13.7                            | 13.67                             | 0.06                   | 0.02                     | 1.02                            | 0.852839                      | 0.576551                       | 0.94811                     | 0.747267                     |
| AFFX-r2-Ec-bioD-3_at  | AFFX-r2-Ec-bioD-3           | 14.05                           | 13.99                             | 0.06                   | 0.02                     | 1.04                            | 0.547082                      | 0.408622                       | 0.808925                    | 0.635777                     |
| AFFX-r2-P1-cre-5_at   | AFFX-r2-P1-cre-5            | 14.78                           | 14.76                             | 0.06                   | 0.01                     | 1.01                            | 0.817674                      | 0.285154                       | 0.934085                    | 0.547098                     |
| AFFX-r2-P1-cre-3_at   | AFFX-r2-P1-cre-3            | 14.85                           | 14.85                             | 0.03                   | 0.02                     | 1                               | 0.75194                       | 0.425534                       | 0.906228                    | 0.647884                     |
| AFFX-r2-Bs-dap-5_at   | AFFX-r2-Bs-dap-5            | 3.85                            | 3.71                              | 0.11                   | 0.05                     | 1.11                            | 0.041581                      | 0.007783                       | 0.366852                    | 0.117732                     |
| AFFX-r2-Bs-dap-M_at   | AFFX-r2-Bs-dap-M            | 3.01                            | 3.03                              | 0.09                   | 0.09                     | -1.01                           | 0.389389                      | 0.342394                       | 0.716091                    | 0.588448                     |
| AFFX-r2-Bs-dap-3_at   | AFFX-r2-Bs-dap-3            | 2.91                            | 3                                 | 0.31                   | 0.05                     | -1.07                           | 0.841726                      | 0.935387                       | 0.943905                    | 0.963529                     |
| AFFX-r2-Bs-lys-5_at   | AFFX-r2-Bs-lys-5            | 3.26                            | 3                                 | 0.19                   | 0.14                     | 1.19                            | 0.21542                       | 0.266814                       | 0.585748                    | 0.53241                      |

|                          |                  |       |       |      |      |       |          |          |          |          |
|--------------------------|------------------|-------|-------|------|------|-------|----------|----------|----------|----------|
| AFFX-r2-Bs-lys-M_at      | AFFX-r2-Bs-lys-M | 3.2   | 3.16  | 0.19 | 0.03 | 1.03  | 0.284952 | 0.307542 | 0.642831 | 0.563781 |
| AFFX-r2-Bs-lys-3_at      | AFFX-r2-Bs-lys-3 | 3.53  | 3.66  | 0.14 | 0.13 | -1.09 | 0.76997  | 0.388134 | 0.913889 | 0.622607 |
| AFFX-r2-Bs-phe-5_at      | AFFX-r2-Bs-phe-5 | 3.16  | 3.14  | 0.13 | 0.08 | 1.01  | 0.49056  | 0.624769 | 0.777172 | 0.77888  |
| AFFX-r2-Bs-phe-M_at      | AFFX-r2-Bs-phe-M | 2.98  | 2.96  | 0.17 | 0.05 | 1.01  | 0.763615 | 0.933377 | 0.911265 | 0.96217  |
| AFFX-r2-Bs-phe-3_at      | AFFX-r2-Bs-phe-3 | 3.38  | 3.29  | 0.33 | 0    | 1.07  | 0.481936 | 0.454286 | 0.772261 | 0.66849  |
| AFFX-r2-Bs-thr-5_s_at    | AFFX-r2-Bs-thr-5 | 3.83  | 3.67  | 0.09 | 0    | 1.12  | 0.116526 | 0.038833 | 0.489684 | 0.242002 |
| AFFX-r2-Bs-thr-M_s_at    | AFFX-r2-Bs-thr-M | 5.17  | 4.82  | 0.18 | 0.1  | 1.28  | 0.135165 | 0.056822 | 0.50918  | 0.284531 |
| AFFX-r2-Bs-thr-3_s_at    | AFFX-r2-Bs-thr-3 | 5.11  | 5     | 0.07 | 0.11 | 1.08  | 0.048242 | 0.045947 | 0.382697 | 0.258786 |
| AFFX-r2-TagA_at          | AFFX-TagA        | 3.41  | 3.3   | 0.06 | 0.04 | 1.08  | 0.071589 | 0.088425 | 0.431049 | 0.341877 |
| AFFX-r2-TagB_at          | AFFX-TagB        | 3.9   | 3.91  | 0.24 | 0.26 | -1    | 0.234104 | 0.299018 | 0.601531 | 0.557628 |
| AFFX-r2-TagC_at          | AFFX-TagC        | 3.42  | 3.26  | 0.07 | 0.09 | -1.12 | 0.157159 | 0.121659 | 0.530266 | 0.39084  |
| AFFX-r2-TagD_at          | AFFX-TagD        | 3.86  | 3.43  | 0.12 | 0.1  | 1.35  | 0.014297 | 0.014386 | 0.274633 | 0.153115 |
| AFFX-r2-TagE_at          | AFFX-TagE        | 3.59  | 3.54  | 0.18 | 0.1  | 1.04  | 0.678254 | 0.212888 | 0.873961 | 0.486799 |
| AFFX-r2-TagF_at          | AFFX-TagF        | 3.97  | 3.85  | 0.25 | 0.14 | 1.09  | 0.479841 | 0.434679 | 0.770896 | 0.654756 |
| AFFX-r2-TagG_at          | AFFX-TagG        | 4.1   | 4.12  | 0.08 | 0.22 | -1.02 | 0.854791 | 0.919071 | 0.948598 | 0.954533 |
| AFFX-r2-TagH_at          | AFFX-TagH        | 4.5   | 4.37  | 0.16 | 0.11 | 1.1   | 0.269667 | 0.354535 | 0.629945 | 0.59726  |
| AFFX-r2-TagI-3_at        | AFFX-TagI        | 4.55  | 4.54  | 0.25 | 0.04 | 1.01  | 0.347149 | 0.369381 | 0.688563 | 0.608783 |
| AFFX-r2-TagI-5_at        | AFFX-TagI        | 3.4   | 3.29  | 0.1  | 0.07 | 1.08  | 0.315954 | 0.341099 | 0.666243 | 0.587233 |
| AFFX-r2-TagO-3_at        | AFFX-TagO        | 4.02  | 3.91  | 0.07 | 0.02 | 1.08  | 0.040163 | 0.231802 | 0.36348  | 0.503592 |
| AFFX-r2-TagO-5_at        | AFFX-TagO        | 4.66  | 4.36  | 0.17 | 0.33 | 1.23  | 0.361565 | 0.455704 | 0.698663 | 0.669654 |
| AFFX-r2-TagQ-3_at        | AFFX-TagQ        | 4.22  | 4.16  | 0.04 | 0.04 | 1.04  | 0.12455  | 0.132046 | 0.49855  | 0.404043 |
| AFFX-r2-TagQ-5_at        | AFFX-TagQ        | 3.72  | 3.65  | 0.08 | 0.03 | 1.05  | 0.302048 | 0.101043 | 0.655989 | 0.3607   |
| AFFX-r2-TagIN-3_at       | AFFX-TagIN       | 5.09  | 4.83  | 0.13 | 0.13 | 1.2   | 0.367561 | 0.417368 | 0.703069 | 0.642165 |
| AFFX-r2-TagIN-M_at       | AFFX-TagIN       | 4.13  | 4.16  | 0.18 | 0.08 | -1.02 | 0.758998 | 0.448893 | 0.909414 | 0.664672 |
| AFFX-r2-TagIN-5_at       | AFFX-TagIN       | 3.32  | 3.32  | 0.39 | 0.12 | -1    | 0.400444 | 0.483755 | 0.723823 | 0.688112 |
| AFFX-Mmu-r2-Bs-dap-3_at  | AFFX-Bs-dap      | 3.69  | 3.53  | 0.14 | 0.07 | 1.12  | 0.188382 | 0.075554 | 0.560439 | 0.319982 |
| AFFX-Mmu-r2-Bs-dap-5_at  | AFFX-Bs-dap      | 3.73  | 3.55  | 0.08 | 0.04 | 1.13  | 0.016258 | 0.074092 | 0.286876 | 0.317745 |
| AFFX-Mmu-r2-Bs-dap-M_at  | AFFX-Bs-dap      | 3.57  | 3.64  | 0.12 | 0.07 | -1.05 | 0.57702  | 0.189171 | 0.825329 | 0.464997 |
| AFFX-Mmu-r2-Bs-lys-3_at  | AFFX-Bs-lys      | 3.98  | 3.79  | 0.13 | 0.04 | 1.15  | 0.077611 | 0.063983 | 0.43966  | 0.299066 |
| AFFX-Mmu-r2-Bs-lys-5_at  | AFFX-Bs-lys      | 3.6   | 3.51  | 0.13 | 0.05 | 1.06  | 0.343734 | 0.466185 | 0.686831 | 0.676147 |
| AFFX-Mmu-r2-Bs-lys-M_at  | AFFX-Bs-lys      | 3.82  | 3.78  | 0.18 | 0.02 | 1.02  | 0.288004 | 0.401601 | 0.645144 | 0.631068 |
| AFFX-Mmu-r2-Bs-phe-3_at  | AFFX-Bs-phe      | 4.37  | 4.38  | 0.15 | 0.07 | -1    | 0.659055 | 0.509191 | 0.865035 | 0.704028 |
| AFFX-Mmu-r2-Bs-phe-5_at  | AFFX-Bs-phe      | 4.41  | 4.44  | 0.13 | 0.25 | -1.02 | 0.992134 | 0.995025 | 0.996928 | 0.996929 |
| AFFX-Mmu-r2-Bs-phe-M_at  | AFFX-Bs-phe      | 3.5   | 3.27  | 0.26 | 0.07 | 1.18  | 0.439424 | 0.405236 | 0.748153 | 0.633604 |
| AFFX-Mmu-TrpnX-3_at      | AFFX-Bs-trp      | 3.49  | 3.63  | 0.29 | 0.05 | -1.11 | 0.983752 | 0.772168 | 0.995094 | 0.867565 |
| AFFX-Mmu-TrpnX-5_at      | AFFX-Bs-trp      | 4.37  | 4.21  | 0.12 | 0.15 | 1.12  | 0.978059 | 0.926457 | 0.992929 | 0.958307 |
| AFFX-Mmu-TrpnX-M_at      | AFFX-Bs-trp      | 4.21  | 4.28  | 0.24 | 0.11 | -1.04 | 0.933113 | 0.879465 | 0.97728  | 0.931144 |
| AFFX-Mmu-r2-Ec-bioB-3_at | AFFX-Ec-bioB     | 11.43 | 11.43 | 0.1  | 0.09 | -1    | 0.83187  | 0.945118 | 0.939678 | 0.968852 |
| AFFX-Mmu-r2-Ec-bioB-5_at | AFFX-Ec-bioB     | 10.79 | 10.75 | 0.15 | 0.09 | 1.03  | 0.634601 | 0.917226 | 0.8541   | 0.953758 |
| AFFX-Mmu-r2-Ec-bioB-M_at | AFFX-Ec-bioB     | 11.25 | 11.19 | 0.11 | 0.07 | 1.04  | 0.602339 | 0.89801  | 0.838783 | 0.941931 |
| AFFX-Mmu-r2-Ec-bioC-3_at | AFFX-Ec-bioC     | 12.43 | 12.4  | 0.08 | 0.04 | 1.02  | 0.973681 | 0.983251 | 0.991461 | 0.990726 |
| AFFX-Mmu-r2-Ec-bioC-5_at | AFFX-Ec-bioC     | 12.2  | 12.19 | 0.1  | 0.06 | 1     | 0.701743 | 0.951636 | 0.883974 | 0.972522 |
| AFFX-Mmu-r2-Ec-bioD-3_at | AFFX-Ec-bioD     | 14.28 | 14.19 | 0.07 | 0.02 | 1.06  | 0.444865 | 0.405519 | 0.751608 | 0.633803 |

|                           |                |       |       |      |      |       |          |          |          |          |
|---------------------------|----------------|-------|-------|------|------|-------|----------|----------|----------|----------|
| AFFX-Mmu-r2-Ec-bioD-5_at  | AFFX-Ec-bioD   | 13.45 | 13.44 | 0.07 | 0.04 | 1     | 0.688335 | 0.655944 | 0.878257 | 0.798758 |
| AFFX-Mmu-r2-P1-cre-3_s_at | AFFX-P1-cre    | 14.83 | 14.83 | 0.02 | 0.01 | -1    | 0.368261 | 0.171954 | 0.70351  | 0.448352 |
| AFFX-Mmu-r2-P1-cre-5_s_at | AFFX-P1-cre    | 14.75 | 14.75 | 0.03 | 0.01 | -1    | 0.482069 | 0.106843 | 0.772274 | 0.369467 |
| AFFX-Mmu-r2-Bs-thr-3_s_at | AFFX-Bs-thr-r2 | 6.36  | 6.25  | 0.04 | 0.06 | 1.08  | 0.046259 | 0.015603 | 0.377673 | 0.158262 |
| AFFX-Mmu-r2-Bs-thr-5_s_at | AFFX-Bs-thr-r2 | 4.29  | 4.07  | 0.06 | 0.08 | 1.16  | 0.073197 | 0.053988 | 0.434039 | 0.27777  |
| AFFX-Mmu-r2-Bs-thr-M_s_at | AFFX-Bs-thr-r2 | 4.26  | 4.25  | 0.06 | 0.1  | 1.01  | 0.921281 | 0.794461 | 0.973336 | 0.881455 |
| RPTR-Mmu-AY342347_at      | AY342347       | 5.26  | 5     | 0.01 | 0.13 | 1.2   | 0.030325 | 0.014192 | 0.33739  | 0.152173 |
| RPTR-Mmu-U43284-1_s_at    | U43284-1       | 7.5   | 7.25  | 0.11 | 0.06 | 1.19  | 0.068038 | 0.086308 | 0.42451  | 0.338771 |
| RPTR-Mmu-AJ002682-1_s_at  | AJ002682-1     | 4.05  | 3.92  | 0.16 | 0.06 | 1.1   | 0.228517 | 0.114245 | 0.597515 | 0.380761 |
| RPTR-Mmu-AJ002682-2_s_at  | AJ002682-2     | 4.62  | 4.73  | 0.42 | 0.08 | -1.08 | 0.624061 | 0.526704 | 0.848468 | 0.715627 |
| RPTR-Mmu-X58791-1_s_at    | X58791-1       | 3.26  | 3.26  | 0.25 | 0.05 | 1     | 0.381035 | 0.285532 | 0.709875 | 0.547395 |
| RPTR-Mmu-X58791-2_s_at    | X58791-2       | 4.43  | 4.47  | 0.05 | 0.17 | -1.03 | 0.812413 | 0.668207 | 0.932076 | 0.805834 |
| RPTR-Mmu-M10961-1_at      | M10961-1       | 3.65  | 3.54  | 0.07 | 0.07 | 1.08  | 0.100408 | 0.437505 | 0.471139 | 0.656769 |
| RPTR-Mmu-M10961-2_at      | M10961-2       | 2.67  | 2.57  | 0.08 | 0.09 | 1.07  | 0.176178 | 0.22081  | 0.549319 | 0.494262 |
| RPTR-Mmu-M10961-4_at      | M10961-4       | 3.48  | 3.39  | 0.2  | 0.05 | 1.06  | 0.359425 | 0.53757  | 0.697237 | 0.722606 |
| RPTR-Mmu-A00196-1_s_at    | A00196-1       | 5.49  | 5.31  | 0.1  | 0.14 | 1.13  | 0.082556 | 0.074374 | 0.447487 | 0.318053 |
| RPTR-Mmu-M15077-1_at      | M15077-1       | 3.45  | 3.26  | 0.06 | 0.06 | 1.14  | 0.026111 | 0.017217 | 0.323344 | 0.166245 |
| RPTR-Mmu-M15077-1_s_at    | M15077-1       | 4.26  | 4.03  | 0.14 | 0.08 | 1.17  | 0.068827 | 0.035905 | 0.426107 | 0.234002 |
| RPTR-Mmu-M62653-1_at      | M62653-1       | 2.9   | 2.98  | 0.1  | 0.16 | -1.06 | 0.193401 | 0.336646 | 0.564275 | 0.583999 |
| RPTR-Mmu-M62653-1_s_at    | M62653-1       | 3.33  | 3.33  | 0.07 | 0.02 | 1     | 0.274826 | 0.795561 | 0.634184 | 0.882205 |
| RPTR-Mmu-U47295-1_at      | U47295-1       | 5.17  | 5.07  | 0.24 | 0.1  | 1.07  | 0.26441  | 0.346156 | 0.626029 | 0.591195 |
| RPTR-Mmu-AJ132968-1_at    | AJ132968-1     | 4.68  | 4.49  | 0.23 | 0.09 | 1.14  | 0.213983 | 0.25074  | 0.584533 | 0.519419 |
| RPTR-Mmu-NM_131175-1_at   | NM_131175-1    | 4.71  | 4.7   | 0.09 | 0.01 | 1     | 0.294967 | 0.525581 | 0.650971 | 0.715132 |
| RPTR-Mmu-J01636-1_at      | J01636-1       | 6.46  | 6.44  | 0.13 | 0.08 | 1.01  | 0.854922 | 0.185567 | 0.948648 | 0.461566 |
| RPTR-Mmu-E00696-1_s_at    | E00696-1       | 5.27  | 5.11  | 0.14 | 0.06 | 1.12  | 0.233223 | 0.339237 | 0.600731 | 0.585918 |
| RPTR-Mmu-J01636-3_at      | J01636-3       | 3.63  | 3.61  | 0.04 | 0.09 | 1.02  | 0.945384 | 0.1328   | 0.980927 | 0.404544 |
| RPTR-Mmu-J01636-4_at      | J01636-4       | 3.92  | 3.57  | 0.23 | 0.32 | 1.27  | 0.342952 | 0.185155 | 0.686205 | 0.461034 |
| RPTR-Mmu-ECOLOB_at        | ECOLOB         | 2.56  | 2.57  | 0.06 | 0.06 | -1.01 | 0.954916 | 0.68758  | 0.985039 | 0.81762  |
| RPTR-Mmu-K01486-1_at      | K01486-1       | 3.48  | 3.53  | 0.3  | 0.17 | -1.03 | 0.645304 | 0.693786 | 0.858731 | 0.821912 |
| RPTR-Mmu-X03453-1_at      | X03453-1       | 3.93  | 3.89  | 0.11 | 0.12 | 1.02  | 0.149791 | 0.137782 | 0.523308 | 0.410757 |
| RPTR-Mmu-AY056050-1_at    | AY056050-1     | 5.92  | 5.74  | 0.11 | 0.09 | 1.13  | 0.109556 | 0.277938 | 0.482328 | 0.541664 |
| RPTR-Mmu-AF298789-1_at    | AF298789-1     | 3.53  | 3.5   | 0.1  | 0.14 | 1.02  | 0.820661 | 0.866966 | 0.935289 | 0.924408 |
| RPTR-Mmu-J01347-1_s_at    | J01347-1       | 3.33  | 3.07  | 0.24 | 0.11 | 1.2   | 0.451057 | 0.557396 | 0.755    | 0.735031 |
| RPTR-Mmu-J01347-2_at      | J01347-2       | 3.27  | 3.13  | 0.05 | 0.02 | 1.1   | 0.020806 | 0.02052  | 0.305611 | 0.179779 |
| RPTR-Mmu-J01347-3_at      | J01347-3       | 3.61  | 3.53  | 0.06 | 0.09 | 1.06  | 0.155731 | 0.140774 | 0.528929 | 0.414137 |
| RPTR-Mmu-J01347-4_at      | J01347-4       | 3.84  | 3.82  | 0.2  | 0.27 | 1.01  | 0.216323 | 0.257046 | 0.586447 | 0.524781 |
| RPTR-Mmu-U46493-1_s_at    | U46493-1       | 3.19  | 2.94  | 0.07 | 0.24 | 1.19  | 0.305963 | 0.381197 | 0.659264 | 0.617534 |
| RPTR-Mmu-U57609-2_s_at    | U57609-2       | 3.94  | 3.87  | 0.14 | 0.27 | 1.05  | 0.977441 | 0.649956 | 0.992685 | 0.795295 |
| RPTR-Mmu-AB076373-1_at    | AB076373-1     | 5.41  | 5.19  | 0.15 | 0.06 | 1.16  | 0.132304 | 0.208199 | 0.506752 | 0.482086 |
| RPTR-Mmu-AF323980-1_at    | AF323980-1     | 3.05  | 3.02  | 0.22 | 0.08 | 1.02  | 0.593729 | 0.787193 | 0.834396 | 0.876889 |
| RPTR-Mmu-AF292559-1_at    | AF292559-1     | 2.92  | 2.9   | 0.02 | 0.06 | 1.01  | 0.677604 | 0.941114 | 0.873568 | 0.96664  |
| RPTR-Mmu-AF292559-2_s_at  | AF292559-2     | 2.92  | 2.9   | 0.1  | 0.09 | 1.01  | 0.384492 | 0.449362 | 0.712025 | 0.665021 |
| RPTR-Mmu-AF292559-3_s_at  | AF292559-3     | 3.75  | 3.52  | 0.02 | 0.09 | 1.17  | 0.031346 | 0.006944 | 0.341113 | 0.112568 |

|                           |                 |       |       |      |      |       |          |          |          |          |
|---------------------------|-----------------|-------|-------|------|------|-------|----------|----------|----------|----------|
| RPTR-Mmu-AF292559-4_s_at  | AF292559-4      | 5.51  | 5.41  | 0.05 | 0.13 | 1.07  | 0.344572 | 0.483028 | 0.686997 | 0.687687 |
| RPTR-Mmu-AF292560-1_s_at  | AF292560-1      | 3.27  | 3.2   | 0.25 | 0.04 | 1.05  | 0.572797 | 0.485112 | 0.823366 | 0.688913 |
| RPTR-Mmu-U89963-1_at      | U89963-1        | 4.15  | 4.18  | 0.14 | 0.19 | -1.02 | 0.364288 | 0.462202 | 0.700517 | 0.673601 |
| RPTR-Mmu-U89963-1_s_at    | U89963-1        | 4.92  | 4.56  | 0.26 | 0.24 | 1.29  | 0.156504 | 0.171847 | 0.529581 | 0.44825  |
| RPTR-Mmu-U89963-1_x_at    | U89963-1        | 3.66  | 3.43  | 0.09 | 0.1  | 1.17  | 0.069935 | 0.066064 | 0.428157 | 0.302431 |
| RPTR-Mmu-U55943-1_at      | U55943-1        | 4.15  | 4.13  | 0.18 | 0    | 1.02  | 0.681752 | 0.615278 | 0.875387 | 0.771908 |
| RPTR-Mmu-U55943-1_x_at    | U55943-1        | 3.75  | 3.62  | 0.03 | 0.26 | 1.09  | 0.496183 | 0.622257 | 0.780235 | 0.776775 |
| NC-001798.CDS51.S1_s_at   | NC-001798.CDS51 | 5.11  | 4.94  | 0.13 | 0.22 | 1.12  | 0.214718 | 0.20874  | 0.585143 | 0.482608 |
| RPTR-Mmu-NC_001669-1_s_at | NC_001669-1     | 4.18  | 4.15  | 0.29 | 0    | 1.02  | 0.652728 | 0.823591 | 0.86202  | 0.898664 |
| RPTR-Mmu-NC_001669-2_s_at | NC_001669-2     | 3.64  | 3.51  | 0.18 | 0.08 | 1.1   | 0.161547 | 0.170465 | 0.534843 | 0.447103 |
| RPTR-Mmu-AF403737-1_at    | AF403737-1      | 3.34  | 3.35  | 0.06 | 0.08 | -1.01 | 0.816757 | 0.854209 | 0.933716 | 0.916964 |
| RPTR-Mmu-L36849-1_at      | L36849-1        | 6.59  | 6.55  | 0.14 | 0.1  | 1.03  | 0.224775 | 0.391911 | 0.594045 | 0.625419 |
| RPTR-Mmu-AF062997-1_at    | AF062997-1      | 5.81  | 5.73  | 0.05 | 0.02 | 1.06  | 0.065397 | 0.51218  | 0.420625 | 0.706087 |
| NC-001345.CDS50.S1_s_at   | NC-001345.CDS50 | 4.57  | 4.46  | 0.11 | 0.06 | 1.08  | 0.209115 | 0.16561  | 0.580673 | 0.441901 |
| RPTR-Mmu-X17220-1_at      | X17220-1        | 6.16  | 5.97  | 0.1  | 0.11 | 1.14  | 0.107537 | 0.585743 | 0.480041 | 0.753011 |
| RPTR-Mmu-K01193-1_at      | K01193-1        | 4.65  | 4.24  | 0.23 | 0.03 | 1.32  | 0.140077 | 0.053948 | 0.515581 | 0.277769 |
| RPTR-Mmu-XXU09476-1_at    | XXU09476-1      | 3.48  | 3.41  | 0.12 | 0.14 | 1.05  | 0.509703 | 0.542873 | 0.787833 | 0.725834 |
| RPTR-Mmu-NC_002086-1_at   | NC_002086-1     | 6.59  | 6.46  | 0.12 | 0.13 | 1.09  | 0.190387 | 0.183664 | 0.561666 | 0.459681 |
| RPTR-Mmu-J03196-1_at      | J03196-1        | 5.94  | 5.59  | 0.16 | 0.06 | 1.27  | 0.050951 | 0.047443 | 0.388526 | 0.262486 |
| RPTR-Mmu-A12338-1_at      | A12338-1        | 6.15  | 5.83  | 0.12 | 0.21 | 1.25  | 0.064752 | 0.0366   | 0.418744 | 0.235884 |
| RPTR-Mmu-A06498-1_at      | A06498-1        | 4.07  | 3.81  | 0.26 | 0.12 | 1.19  | 0.306949 | 0.502195 | 0.659867 | 0.70006  |
| RPTR-Mmu-CVE247372-1_at   | CVE247372-1     | 5.27  | 4.81  | 0.09 | 0.16 | 1.38  | 0.023297 | 0.038114 | 0.314809 | 0.239867 |
| RPTR-Mmu-AE009032-1_at    | AE009032-1      | 5.41  | 5.07  | 0.06 | 0.27 | 1.26  | 0.326309 | 0.348497 | 0.67384  | 0.592599 |
| RPTR-Mmu-AY125353_at      | AY125353        | 5.16  | 5.11  | 0.14 | 0    | 1.03  | 0.70457  | 0.506894 | 0.885155 | 0.702649 |
| MmurRNA.1.1.S1_at         | MmurRNA.1.1     | 9.91  | 8.62  | 1.92 | 0.26 | 2.43  | 0.477319 | 0.555175 | 0.769812 | 0.733715 |
| MmurRNA.2.1.S1_at         | MmurRNA.2.1     | 11.12 | 9.34  | 2.82 | 0.09 | 3.43  | 0.914403 | 0.116645 | 0.970837 | 0.383843 |
| MmurRNA.2.1.S1_s_at       | MmurRNA.2.1     | 13.66 | 12.46 | 2.34 | 0.17 | 2.29  | 0.932434 | 0.252277 | 0.977227 | 0.520953 |
| MmurRNA.3.1.S1_at         | MmurRNA.3.1     | 11.61 | 10.07 | 1.96 | 0.09 | 2.9   | 0.644327 | 0.203655 | 0.858491 | 0.477904 |
| AFFX-Mmu-actin-5_at       | Mmu.4662.1      | 13.32 | 13.2  | 0.22 | 0.08 | 1.09  | 0.284397 | 0.339189 | 0.642301 | 0.585918 |
| AFFX-Mmu-actin-M_at       | Mmu.4662.1      | 14.08 | 13.99 | 0.17 | 0.08 | 1.06  | 0.28222  | 0.384077 | 0.640736 | 0.619926 |
| AFFX-Mmu-actin-M_x_at     | Mmu.4662.1      | 13.91 | 13.81 | 0.19 | 0.08 | 1.07  | 0.268154 | 0.359207 | 0.628527 | 0.600533 |
| AFFX-Mmu-actin-3_s_at     | Mmu.4662.1      | 14.32 | 14.42 | 0.02 | 0.04 | -1.07 | 0.056786 | 0.146659 | 0.401111 | 0.420683 |
| MmugDNA.28776.1.S1_s_at   | MmugDNA.28776.1 | 14.53 | 14.62 | 0.05 | 0.03 | -1.06 | 0.14895  | 0.257423 | 0.52291  | 0.52521  |
| AFFX-Mmu-ef1a-5_s_at      | Mmu.12098.2     | 14.39 | 14.4  | 0.05 | 0.03 | -1.01 | 0.699813 | 0.535323 | 0.883309 | 0.720887 |
| AFFX-Mmu-ef1a-M_s_at      | Mmu.12098.2     | 14.59 | 14.58 | 0.01 | 0.02 | 1.01  | 0.093509 | 0.086239 | 0.462739 | 0.338635 |
| AFFX-Mmu-ef1a-M_x_at      | Mmu.12098.2     | 14.49 | 14.5  | 0.03 | 0.03 | -1    | 0.560387 | 0.698444 | 0.816674 | 0.82482  |
| AFFX-Mmu-ef1a-3_x_at      | Mmu.12098.2     | 14.32 | 14.33 | 0.03 | 0.01 | -1    | 0.838866 | 0.647342 | 0.942422 | 0.793415 |
| AFFX-Mmu-gapdh-5_at       | Mmu.6661.1      | 13.24 | 13.1  | 0.23 | 0.04 | 1.1   | 0.247948 | 0.081089 | 0.613615 | 0.32927  |
| AFFX-Mmu-gapdh-M_s_at     | Mmu.6661.1      | 13.4  | 13.19 | 0.22 | 0.03 | 1.15  | 0.183601 | 0.076696 | 0.55651  | 0.322093 |
| AFFX-Mmu-gapdh-M_x_at     | Mmu.6661.1      | 13.14 | 13.03 | 0.19 | 0.04 | 1.08  | 0.174148 | 0.086875 | 0.547214 | 0.339667 |
| AFFX-Mmu-gapdh-3_at       | Mmu.6661.1      | 14.22 | 14.16 | 0.13 | 0.03 | 1.04  | 0.402222 | 0.182158 | 0.724848 | 0.45867  |
| AFFX-Mmu-gapdh-3_x_at     | Mmu.6661.1      | 14.15 | 14.13 | 0.1  | 0.03 | 1.01  | 0.748159 | 0.296103 | 0.904327 | 0.555339 |
| Mmu.10002.1.S1_at         | Mmu.10002.1     | 11.67 | 10.75 | 0.46 | 0.14 | 1.89  | 0.023586 | 0.015305 | 0.31615  | 0.157071 |

|                        |                |       |       |      |      |       |          |          |          |          |
|------------------------|----------------|-------|-------|------|------|-------|----------|----------|----------|----------|
| Mmu.10002.1.S1_s_at    | Mmu.10002.1    | 12.47 | 11.59 | 0.35 | 0.11 | 1.85  | 0.016625 | 0.010391 | 0.287478 | 0.133359 |
| Mmu.10014.1.S1_at      | Mmu.10014.1    | 10.47 | 10.46 | 0.19 | 0.15 | 1.01  | 0.210258 | 0.534643 | 0.581624 | 0.720477 |
| Mmu.10025.1.S1_at      | Mmu.10025.1    | 10.01 | 9.97  | 1.84 | 0.25 | 1.03  | 0.895863 | 0.182838 | 0.964381 | 0.459354 |
| Mmu.10030.1.S1_at      | Mmu.10030.1    | 12.01 | 11.93 | 0.59 | 0.21 | 1.05  | 0.751658 | 0.106558 | 0.906126 | 0.369099 |
| Mmu.10039.1.S1_at      | Mmu.10039.1    | 9.9   | 9.6   | 0.08 | 0.19 | 1.23  | 0.044238 | 0.204789 | 0.374279 | 0.479203 |
| Mmu.10045.2.S1_at      | Mmu.10045.2    | 10.38 | 11.81 | 1.41 | 0.15 | -2.69 | 0.11442  | 0.02172  | 0.487606 | 0.184333 |
| Mmu.10045.2.S1_x_at    | Mmu.10045.2    | 10.13 | 11.75 | 1.19 | 0.17 | -3.07 | 0.075577 | 0.011063 | 0.436722 | 0.136934 |
| Mmu.10062.1.S1_s_at    | Mmu.10062.1    | 13.68 | 13.68 | 0.05 | 0.08 | -1    | 0.26487  | 0.40588  | 0.62628  | 0.634037 |
| Mmu.10083.1.A1_at      | Mmu.10083.1    | 9.25  | 8.05  | 1.06 | 0.24 | 2.3   | 0.113176 | 0.19041  | 0.486625 | 0.465906 |
| Mmu.10083.1.S1_s_at    | Mmu.10083.1    | 8.71  | 7.59  | 1.11 | 0.14 | 2.18  | 0.141121 | 0.219849 | 0.516345 | 0.493388 |
| Mmu.10088.2.S1_at      | Mmu.10088.2    | 7.73  | 7.88  | 1.47 | 0.2  | -1.11 | 0.794886 | 0.229849 | 0.924696 | 0.501802 |
| Mmu.101.1.S1_at        | Mmu.101.1      | 9.93  | 9.24  | 0.15 | 0.18 | 1.61  | 0.007193 | 0.004468 | 0.226471 | 0.093294 |
| Mmu.10114.1.S1_at      | Mmu.10114.1    | 8.8   | 9.04  | 0.21 | 0.16 | -1.18 | 0.827658 | 0.005823 | 0.938069 | 0.104661 |
| Mmu.10116.1.S1_at      | Mmu.10116.1    | 11.72 | 11.19 | 0.13 | 0.21 | 1.45  | 0.00694  | 0.003799 | 0.224384 | 0.087835 |
| Mmu.10122.1.S1_at      | Mmu.10122.1    | 11.48 | 10.96 | 2.67 | 0.27 | 1.43  | 0.818098 | 0.17808  | 0.934249 | 0.454462 |
| Mmu.10126.1.S1_at      | Mmu.10126.1    | 10.07 | 9.79  | 0.25 | 0.14 | 1.21  | 0.149839 | 0.156564 | 0.523349 | 0.43196  |
| Mmu.10134.1.S1_at      | Mmu.10134.1    | 10.33 | 10.19 | 0.3  | 0.07 | 1.1   | 0.493347 | 0.442076 | 0.778856 | 0.660148 |
| Mmu.10135.1.S1_at      | Mmu.10135.1    | 11.64 | 11.03 | 0.08 | 0.15 | 1.53  | 0.002951 | 0.001238 | 0.189584 | 0.05478  |
| Mmu.10139.2.S1_at      | Mmu.10139.2    | 12.47 | 12.25 | 0.16 | 0.02 | 1.17  | 0.253267 | 0.34771  | 0.617943 | 0.592082 |
| Mmu.1015.1.S1_s_at     | Mmu.1015.1     | 14.26 | 14.31 | 0.05 | 0.02 | -1.03 | 0.123316 | 0.299821 | 0.496589 | 0.5581   |
| Mmu.10150.1.S1_at      | Mmu.10150.1    | 9.37  | 8.83  | 0.05 | 0.17 | 1.46  | 0.003952 | 0.000911 | 0.198571 | 0.048322 |
| Mmu.10158.1.S1_at      | Mmu.10158.1    | 9.09  | 8.82  | 0.13 | 0.25 | 1.21  | 0.23943  | 0.41455  | 0.605885 | 0.64042  |
| Mmu.10176.1.S1_at      | Mmu.10176.1    | 5.31  | 5.36  | 0.1  | 0.06 | -1.03 | 0.244327 | 0.31699  | 0.60991  | 0.570298 |
| Mmu.10185.1.S1_at      | Mmu.10185.1    | 6.36  | 6.23  | 0.2  | 0.11 | 1.1   | 0.840091 | 0.921565 | 0.943103 | 0.955761 |
| Mmu.10185.1.S1_s_at    | Mmu.10185.1    | 4.28  | 4.15  | 0.15 | 0.08 | 1.09  | 0.138241 | 0.221109 | 0.513671 | 0.494497 |
| Mmu.10186.1.S1_at      | Mmu.10186.1    | 5.34  | 4.88  | 0.55 | 0.08 | 1.37  | 0.186651 | 0.158436 | 0.559223 | 0.434313 |
| Mmu.10187.1.S1_at      | Mmu.10187.1    | 6.05  | 6     | 0.04 | 0.02 | 1.03  | 0.254311 | 0.017596 | 0.618749 | 0.167721 |
| Mmu.10195.2.S1_x_at    | Mmu.10195.2    | 12.86 | 12.9  | 0.37 | 0.09 | -1.03 | 0.938729 | 0.261778 | 0.979343 | 0.528227 |
| Mmu.2177.1.S1_x_at     | Mmu.2177.1     | 11.59 | 11.78 | 0.81 | 0.21 | -1.14 | 0.765035 | 0.161672 | 0.911696 | 0.437771 |
| Mmu.10197.1.S1_at      | Mmu.10197.1    | 12.38 | 12.24 | 0.15 | 0.06 | 1.11  | 0.248458 | 0.041712 | 0.613851 | 0.248886 |
| Mmu.2935.3.S1_s_at     | Mmu.2935.3     | 7.43  | 7.26  | 0.07 | 0.06 | 1.13  | 0.063647 | 0.084243 | 0.416123 | 0.335371 |
| Mmu.1020.1.S1_s_at     | Mmu.1020.1     | 9.66  | 9.65  | 0.12 | 0.19 | 1.01  | 0.810074 | 0.82489  | 0.931255 | 0.899427 |
| Mmu.10202.1.S1_at      | Mmu.10202.1    | 10.23 | 9.75  | 0.33 | 0.12 | 1.39  | 0.078804 | 0.041061 | 0.441464 | 0.247375 |
| Mmu.10209.1.S1_s_at    | Mmu.10209.1    | 14.46 | 14.53 | 0.01 | 0.02 | -1.05 | 0.023641 | 0.220435 | 0.316279 | 0.493818 |
| Mmu.10209.2.S1_at      | Mmu.10209.2    | 11.93 | 12.05 | 0.28 | 0.42 | -1.09 | 0.538546 | 0.124996 | 0.803337 | 0.395386 |
| MmugDNA.6969.1.S1_at   | MmugDNA.6969.1 | 10.44 | 10.29 | 0.56 | 0.04 | 1.11  | 0.628307 | 0.764112 | 0.851106 | 0.862852 |
| MmugDNA.6969.1.S1_s_at | MmugDNA.6969.1 | 9.71  | 9.33  | 0.66 | 0.17 | 1.3   | 0.897058 | 0.779729 | 0.964979 | 0.872303 |
| Mmu.10212.1.S1_at      | Mmu.10212.1    | 7.26  | 8.12  | 0.3  | 0.35 | -1.82 | 0.051439 | 0.669206 | 0.390055 | 0.806492 |
| Mmu.10214.1.S1_at      | Mmu.10214.1    | 9.4   | 8.95  | 0.21 | 0.23 | 1.37  | 0.081337 | 0.044669 | 0.445406 | 0.255759 |
| Mmu.10221.1.S1_at      | Mmu.10221.1    | 10.32 | 10.28 | 0.24 | 0.06 | 1.03  | 0.218717 | 0.3817   | 0.588341 | 0.617895 |
| Mmu.10229.1.S1_at      | Mmu.10229.1    | 9.69  | 8.65  | 0.46 | 0.05 | 2.05  | 0.018857 | 0.008431 | 0.298593 | 0.121874 |
| Mmu.10237.1.S1_at      | Mmu.10237.1    | 2.86  | 2.85  | 0.23 | 0.03 | 1.01  | 0.401577 | 0.406085 | 0.724554 | 0.634197 |
| Mmu.10239.1.S1_at      | Mmu.10239.1    | 7.86  | 8.02  | 0.22 | 0.15 | -1.12 | 0.74826  | 0.042391 | 0.904363 | 0.250533 |

|                        |                |       |       |      |      |       |          |          |          |          |
|------------------------|----------------|-------|-------|------|------|-------|----------|----------|----------|----------|
| Mmu.10240.1.S1_at      | Mmu.10240.1    | 10.43 | 10.74 | 0.31 | 0.05 | -1.25 | 0.419439 | 0.435527 | 0.736296 | 0.655267 |
| Mmu.10246.2.A1_x_at    | Mmu.10246.2    | 8.15  | 8.73  | 1.24 | 0.19 | -1.5  | 0.372821 | 0.683144 | 0.705567 | 0.815168 |
| Mmu.10246.2.S1_x_at    | Mmu.10246.2    | 10.62 | 10.79 | 1.71 | 0.18 | -1.13 | 0.485788 | 0.590187 | 0.774427 | 0.756117 |
| Mmu.10266.1.A1_at      | Mmu.10266.1    | 11.19 | 10.98 | 0.09 | 0.08 | 1.16  | 0.035004 | 0.061672 | 0.350898 | 0.295135 |
| Mmu.1028.1.S1_at       | Mmu.1028.1     | 9.02  | 8.49  | 0.96 | 0.12 | 1.44  | 0.507492 | 0.110313 | 0.78638  | 0.374403 |
| Mmu.10293.1.S1_s_at    | Mmu.10293.1    | 12.82 | 12.98 | 0.09 | 0.08 | -1.12 | 0.055334 | 0.033325 | 0.39842  | 0.226207 |
| Mmu.10300.2.S1_at      | Mmu.10300.2    | 11.83 | 12.05 | 0.22 | 0.14 | -1.17 | 0.222053 | 0.22385  | 0.591644 | 0.496802 |
| Mmu.10318.1.S1_at      | Mmu.10318.1    | 8.68  | 8.45  | 0.21 | 0.13 | 1.17  | 0.340016 | 0.289751 | 0.684135 | 0.550776 |
| Mmu.10318.1.S1_s_at    | Mmu.10318.1    | 12.88 | 12.76 | 0.08 | 0.14 | 1.08  | 0.089773 | 0.024714 | 0.457893 | 0.19685  |
| Mmu.1032.1.S1_at       | Mmu.1032.1     | 7.66  | 7.23  | 0.21 | 0.1  | 1.35  | 0.010932 | 0.026247 | 0.250796 | 0.202991 |
| Mmu.10327.1.S1_at      | Mmu.10327.1    | 8.03  | 8.25  | 0.18 | 0.07 | -1.16 | 0.138381 | 0.134507 | 0.513692 | 0.406629 |
| Mmu.10346.1.S1_at      | Mmu.10346.1    | 11.16 | 10.9  | 0.21 | 0.12 | 1.2   | 0.050636 | 0.046158 | 0.387563 | 0.259257 |
| Mmu.1036.1.S1_at       | Mmu.1036.1     | 12.95 | 11.99 | 0.21 | 0.23 | 1.95  | 0.00463  | 0.002811 | 0.201101 | 0.078181 |
| Mmu.10362.1.S1_at      | Mmu.10362.1    | 9.88  | 9.89  | 0.46 | 0.17 | -1.01 | 0.959845 | 0.032311 | 0.986953 | 0.22253  |
| Mmu.10377.1.S1_x_at    | Mmu.10377.1    | 8.7   | 8.52  | 0.06 | 0.02 | 1.13  | 0.01699  | 0.356152 | 0.288969 | 0.59815  |
| MmugDNA.7415.1.S1_s_at | MmugDNA.7415.1 | 12.77 | 12.42 | 0.16 | 0.07 | 1.27  | 0.066813 | 0.016176 | 0.422951 | 0.161214 |
| Mmu.10380.1.S1_at      | Mmu.10380.1    | 12.34 | 12.55 | 0.56 | 0.14 | -1.15 | 0.734894 | 0.458803 | 0.8985   | 0.671427 |
| Mmu.10380.2.S1_s_at    | Mmu.10380.2    | 10.84 | 10.9  | 0.61 | 0.15 | -1.04 | 0.936775 | 0.605645 | 0.978763 | 0.765377 |
| Mmu.10383.1.S1_at      | Mmu.10383.1    | 5.77  | 6.91  | 0.44 | 0.57 | -2.19 | 0.07311  | 0.107199 | 0.434019 | 0.36989  |
| Mmu.10390.1.S1_at      | Mmu.10390.1    | 6.99  | 5.95  | 0.97 | 0.17 | 2.06  | 0.122364 | 0.227343 | 0.495694 | 0.499659 |
| Mmu.10393.1.S1_x_at    | Mmu.10393.1    | 14.39 | 14.41 | 0.06 | 0.03 | -1.01 | 0.141481 | 0.122793 | 0.516365 | 0.392777 |
| Mmu.10420.1.S1_at      | Mmu.10420.1    | 8.61  | 8.53  | 0.21 | 0.08 | 1.06  | 0.352055 | 0.494131 | 0.692649 | 0.694703 |
| Mmu.10433.1.S1_at      | Mmu.10433.1    | 11.99 | 12.29 | 0.57 | 0.02 | -1.23 | 0.372356 | 0.437118 | 0.705567 | 0.656547 |
| Mmu.10436.1.S1_at      | Mmu.10436.1    | 10.7  | 10.23 | 0.01 | 0.09 | 1.39  | 0.000988 | 0.004499 | 0.155374 | 0.093593 |
| Mmu.10443.1.S1_at      | Mmu.10443.1    | 10.46 | 9.8   | 0.18 | 0.14 | 1.58  | 0.009403 | 0.004425 | 0.241869 | 0.092904 |
| Mmu.10451.1.S1_at      | Mmu.10451.1    | 7.12  | 7.49  | 0.85 | 0.28 | -1.29 | 0.39921  | 0.613269 | 0.722896 | 0.770491 |
| Mmu.10452.1.A1_at      | Mmu.10452.1    | 5.55  | 5.5   | 0.04 | 0.09 | 1.04  | 0.262197 | 0.222391 | 0.624399 | 0.495456 |
| Mmu.10452.1.S1_at      | Mmu.10452.1    | 5.8   | 5.68  | 0.29 | 0.08 | 1.09  | 0.736101 | 0.610125 | 0.899004 | 0.768398 |
| Mmu.10472.1.S1_at      | Mmu.10472.1    | 9.58  | 9.05  | 1.22 | 0.3  | 1.44  | 0.407406 | 0.078469 | 0.728597 | 0.325226 |
| Mmu.10481.1.S1_at      | Mmu.10481.1    | 2.66  | 2.67  | 0.03 | 0.03 | -1    | 0.25761  | 0.77506  | 0.621338 | 0.869035 |
| Mmu.10483.1.S1_x_at    | Mmu.10483.1    | 7.26  | 7.1   | 0.1  | 0.03 | 1.11  | 0.070702 | 0.217361 | 0.42977  | 0.490978 |
| Mmu.10484.1.A1_at      | Mmu.10484.1    | 4.24  | 4.23  | 0.15 | 0    | 1.01  | 0.96313  | 0.400878 | 0.988152 | 0.630658 |
| Mmu.10484.1.S1_at      | Mmu.10484.1    | 3.74  | 3.59  | 0.16 | 0.04 | 1.11  | 0.212214 | 0.230209 | 0.582812 | 0.502084 |
| Mmu.10484.2.A1_at      | Mmu.10484.2    | 3.07  | 3.07  | 0.05 | 0    | 1     | 0.336999 | 0.258028 | 0.682166 | 0.52557  |
| Mmu.10484.2.S1_x_at    | Mmu.10484.2    | 6.18  | 6.18  | 0.06 | 0.03 | 1     | 0.769039 | 0.593549 | 0.913416 | 0.758329 |
| Mmu.10488.1.S1_at      | Mmu.10488.1    | 4.13  | 4.47  | 0.07 | 0.36 | -1.27 | 0.255125 | 0.244398 | 0.619267 | 0.514233 |
| Mmu.105.1.S1_at        | Mmu.105.1      | 10.63 | 10.47 | 0.06 | 0.07 | 1.12  | 0.040688 | 0.211031 | 0.364778 | 0.485047 |
| Mmu.105.1.S1_s_at      | Mmu.105.1      | 10.05 | 9.97  | 0.14 | 0    | 1.06  | 0.320771 | 0.773389 | 0.669445 | 0.868269 |
| Mmu.105.1.S1_x_at      | Mmu.105.1      | 10.61 | 10.46 | 0.07 | 0.07 | 1.11  | 0.039466 | 0.286448 | 0.362032 | 0.547829 |
| Mmu.10506.1.S1_at      | Mmu.10506.1    | 11.15 | 11.45 | 0.18 | 0.23 | -1.24 | 0.372242 | 0.308899 | 0.705567 | 0.564656 |
| Mmu.10506.1.S1_s_at    | Mmu.10506.1    | 12.21 | 12.45 | 0.16 | 0.24 | -1.18 | 0.541341 | 0.27299  | 0.80512  | 0.53761  |
| Mmu.10507.1.S1_at      | Mmu.10507.1    | 13.13 | 13.1  | 0.08 | 0.03 | 1.02  | 0.951445 | 0.484455 | 0.98364  | 0.688478 |
| Mmu.1051.1.S1_at       | Mmu.1051.1     | 4.6   | 4.59  | 0.11 | 0.07 | 1.01  | 0.691876 | 0.875861 | 0.880061 | 0.929487 |

|                         |                 |       |       |      |      |       |          |          |          |          |
|-------------------------|-----------------|-------|-------|------|------|-------|----------|----------|----------|----------|
| Mmu.6048.1.S1_s_at      | Mmu.6048.1      | 13.84 | 13.89 | 0.08 | 0.11 | -1.04 | 0.189183 | 0.208541 | 0.560823 | 0.482453 |
| Mmu.10533.2.S1_s_at     | Mmu.10533.2     | 13.88 | 13.91 | 0.04 | 0.04 | -1.02 | 0.280455 | 0.544527 | 0.639257 | 0.726929 |
| Mmu.10543.1.S1_at       | Mmu.10543.1     | 11.49 | 11.53 | 0.15 | 0.05 | -1.03 | 0.931999 | 0.0141   | 0.977118 | 0.15195  |
| Mmu.10543.1.S1_x_at     | Mmu.10543.1     | 11.63 | 11.8  | 0.13 | 0.07 | -1.13 | 0.505515 | 0.014358 | 0.785389 | 0.15294  |
| Mmu.10544.1.S1_at       | Mmu.10544.1     | 9.19  | 9.04  | 0.2  | 0.08 | 1.11  | 0.171425 | 0.006653 | 0.5447   | 0.110505 |
| Mmu.10545.1.S1_at       | Mmu.10545.1     | 10.34 | 10.09 | 0.41 | 0.13 | 1.19  | 0.19141  | 0.086402 | 0.562859 | 0.33887  |
| Mmu.10556.1.S1_at       | Mmu.10556.1     | 3.18  | 4.31  | 0.69 | 0.13 | -2.18 | 0.134795 | 0.235449 | 0.508874 | 0.506491 |
| Mmu.10556.1.S1_s_at     | Mmu.10556.1     | 9.08  | 10.39 | 2.34 | 0.32 | -2.48 | 0.338155 | 0.141559 | 0.682759 | 0.415063 |
| Mmu.10570.1.S1_at       | Mmu.10570.1     | 7.5   | 7.43  | 0.11 | 0    | 1.05  | 0.110238 | 0.084886 | 0.483363 | 0.336468 |
| Mmu.10576.1.S1_at       | Mmu.10576.1     | 11.22 | 11.23 | 0.15 | 0.05 | -1.01 | 0.320863 | 0.203144 | 0.669445 | 0.477415 |
| Mmu.10576.1.S1_s_at     | Mmu.10576.1     | 10.22 | 10.21 | 0.16 | 0.06 | 1.01  | 0.991866 | 0.292468 | 0.996849 | 0.552545 |
| Mmu.10581.1.S2_at       | Mmu.10581.1     | 5.28  | 4.89  | 0.48 | 0.34 | 1.31  | 0.743271 | 0.457209 | 0.902055 | 0.670746 |
| Mmu.10602.2.S1_at       | Mmu.10602.2     | 10.04 | 10    | 0.25 | 0.03 | 1.03  | 0.258357 | 0.344422 | 0.622178 | 0.589813 |
| MmugDNA.37553.1.S1_at   | MmugDNA.37553.1 | 12.32 | 12.27 | 0.24 | 0.01 | 1.04  | 0.508259 | 0.692194 | 0.786841 | 0.82091  |
| MmugDNA.37553.1.S1_s_at | MmugDNA.37553.1 | 9.91  | 9.57  | 0.41 | 0.07 | 1.26  | 0.122827 | 0.137051 | 0.496214 | 0.409836 |
| MmugDNA.37553.1.S1_x_at | MmugDNA.37553.1 | 11.59 | 11.49 | 0.31 | 0.03 | 1.07  | 0.288909 | 0.393153 | 0.645883 | 0.626102 |
| Mmu.10608.1.S1_s_at     | Mmu.10608.1     | 3.43  | 3.49  | 0.17 | 0.11 | -1.04 | 0.521038 | 0.8149   | 0.794276 | 0.893213 |
| Mmu.10608.1.S1_x_at     | Mmu.10608.1     | 3.27  | 3.37  | 0.2  | 0.12 | -1.07 | 0.711308 | 0.202506 | 0.887569 | 0.476819 |
| Mmu.10626.1.S1_at       | Mmu.10626.1     | 10.29 | 10.36 | 0.24 | 0.19 | -1.05 | 0.850941 | 0.72564  | 0.947503 | 0.84112  |
| Mmu.10627.1.S1_at       | Mmu.10627.1     | 12.21 | 11    | 0.49 | 0.3  | 2.32  | 0.045852 | 0.004077 | 0.37735  | 0.090418 |
| Mmu.1063.2.S1_at        | Mmu.1063.2      | 7.03  | 6.92  | 0.06 | 0.13 | 1.08  | 0.352213 | 0.050689 | 0.692649 | 0.270317 |
| Mmu.10646.1.S1_at       | Mmu.10646.1     | 7.6   | 7.56  | 0.07 | 0.15 | 1.03  | 0.235056 | 0.433355 | 0.602266 | 0.653656 |
| Mmu.10665.1.S1_at       | Mmu.10665.1     | 9.38  | 9.12  | 0.29 | 0.14 | 1.2   | 0.570101 | 0.026004 | 0.821883 | 0.202179 |
| Mmu.10677.1.S1_at       | Mmu.10677.1     | 3.91  | 4.11  | 1.16 | 0.21 | -1.15 | 0.516255 | 0.807122 | 0.791342 | 0.888946 |
| Mmu.10706.1.S1_at       | Mmu.10706.1     | 5.34  | 5.37  | 0.57 | 0.15 | -1.03 | 0.459223 | 0.408271 | 0.759338 | 0.635568 |
| Mmu.1071.1.S1_at        | Mmu.1071.1      | 9.97  | 9.47  | 0.54 | 0.14 | 1.41  | 0.248541 | 0.103672 | 0.613851 | 0.364465 |
| Mmu.4786.2.S1_at        | Mmu.4786.2      | 11.64 | 11.38 | 0.36 | 0.13 | 1.19  | 0.592266 | 0.458491 | 0.833825 | 0.671192 |
| Mmu.4786.2.S1_s_at      | Mmu.4786.2      | 12.86 | 12.61 | 0.27 | 0.08 | 1.19  | 0.581958 | 0.323976 | 0.827791 | 0.574672 |
| Mmu.10769.1.S1_at       | Mmu.10769.1     | 9.72  | 9.73  | 0.42 | 0.06 | -1.01 | 0.915888 | 0.621364 | 0.97133  | 0.775982 |
| Mmu.10771.1.S1_at       | Mmu.10771.1     | 9.43  | 9.61  | 1.06 | 0.15 | -1.14 | 0.678955 | 0.221624 | 0.874211 | 0.494901 |
| Mmu.10780.1.S1_at       | Mmu.10780.1     | 8.73  | 8.3   | 1.03 | 0.19 | 1.35  | 0.840486 | 0.408815 | 0.943326 | 0.6359   |
| MmugDNA.6439.1.S1_s_at  | MmugDNA.6439.1  | 4.64  | 4.67  | 0.28 | 0.27 | -1.02 | 0.530212 | 0.011322 | 0.798816 | 0.138076 |
| Mmu.10797.1.S1_at       | Mmu.10797.1     | 11.75 | 11.45 | 0.08 | 0.02 | 1.24  | 0.004365 | 0.02207  | 0.198874 | 0.185927 |
| Mmu.10798.1.S1_at       | Mmu.10798.1     | 3.46  | 3.38  | 0.02 | 0.12 | 1.06  | 0.768692 | 0.959197 | 0.91322  | 0.976862 |
| Mmu.10798.1.S1_s_at     | Mmu.10798.1     | 12.11 | 11.81 | 0.06 | 0.06 | 1.23  | 0.00437  | 0.019795 | 0.198874 | 0.176951 |
| Mmu.1081.1.S1_at        | Mmu.1081.1      | 8.38  | 8.19  | 0.22 | 0.12 | 1.14  | 0.243846 | 0.72906  | 0.609715 | 0.843401 |
| Mmu.10820.1.S1_at       | Mmu.10820.1     | 8.46  | 8.36  | 0.42 | 0.21 | 1.07  | 0.191384 | 0.157646 | 0.562836 | 0.433137 |
| Mmu.10820.1.S1_s_at     | Mmu.10820.1     | 11.96 | 11.76 | 0.47 | 0.19 | 1.15  | 0.238942 | 0.229869 | 0.60548  | 0.501802 |
| Mmu.10830.1.S1_at       | Mmu.10830.1     | 7.14  | 6.78  | 0.12 | 0.06 | 1.28  | 0.02043  | 0.00581  | 0.303985 | 0.104646 |
| Mmu.10843.1.S1_at       | Mmu.10843.1     | 8.29  | 8.32  | 0.38 | 0.19 | -1.02 | 0.478346 | 0.012706 | 0.770076 | 0.145332 |
| Mmu.10853.1.S1_at       | Mmu.10853.1     | 7.03  | 6.98  | 0.24 | 0.13 | 1.04  | 0.486758 | 0.853299 | 0.774678 | 0.916546 |
| Mmu.10858.1.S1_s_at     | Mmu.10858.1     | 12.45 | 12.25 | 0.34 | 0.32 | 1.15  | 0.234565 | 0.279323 | 0.601837 | 0.542962 |
| Mmu.10874.1.S1_at       | Mmu.10874.1     | 8.87  | 8.47  | 0.49 | 0.31 | 1.32  | 0.401021 | 0.202921 | 0.724096 | 0.477343 |



|                     |             |       |       |      |      |       |          |          |          |          |
|---------------------|-------------|-------|-------|------|------|-------|----------|----------|----------|----------|
| Mmu.10885.1.S1_at   | Mmu.10885.1 | 12.47 | 12.39 | 0.09 | 0.01 | 1.05  | 0.722581 | 0.037796 | 0.892352 | 0.238765 |
| Mmu.10886.1.S1_at   | Mmu.10886.1 | 9.29  | 8.55  | 0.07 | 0.22 | 1.68  | 0.004389 | 0.000641 | 0.198874 | 0.042928 |
| Mmu.10905.1.S1_at   | Mmu.10905.1 | 6.83  | 6.86  | 0.02 | 0.15 | -1.02 | 0.592188 | 0.592144 | 0.83377  | 0.757536 |
| Mmu.10913.1.S1_at   | Mmu.10913.1 | 6.66  | 6.38  | 0.16 | 0.21 | 1.21  | 0.241738 | 0.593184 | 0.60791  | 0.758097 |
| Mmu.10924.1.S1_a_at | Mmu.10924.1 | 4.37  | 4.26  | 0.29 | 0.09 | 1.08  | 0.457307 | 0.652475 | 0.758326 | 0.796793 |
| Mmu.10938.1.S1_at   | Mmu.10938.1 | 8.45  | 8.67  | 0.86 | 0.2  | -1.16 | 0.328101 | 0.333076 | 0.675589 | 0.581374 |
| Mmu.10939.1.S1_at   | Mmu.10939.1 | 10.89 | 10.78 | 0.11 | 0.04 | 1.07  | 0.066704 | 0.051937 | 0.422542 | 0.273337 |
| Mmu.10941.2.S1_at   | Mmu.10941.2 | 9.36  | 9.38  | 2.08 | 0.24 | -1.01 | 0.842708 | 0.191935 | 0.944281 | 0.467295 |
| Mmu.10947.1.A1_at   | Mmu.10947.1 | 10.68 | 9.59  | 0.44 | 0.22 | 2.13  | 0.039236 | 0.016629 | 0.361498 | 0.163189 |
| Mmu.10973.1.S1_at   | Mmu.10973.1 | 10.94 | 10.97 | 0.47 | 0.04 | -1.02 | 0.85054  | 0.875488 | 0.947381 | 0.929259 |
| Mmu.10979.1.S1_at   | Mmu.10979.1 | 6.56  | 6.48  | 0.01 | 0.26 | -1.06 | 0.245988 | 0.154071 | 0.611421 | 0.428867 |
| Mmu.1098.1.A1_at    | Mmu.1098.1  | 3.99  | 3.93  | 0.09 | 0.13 | 1.04  | 0.917951 | 0.580591 | 0.972062 | 0.749782 |
| Mmu.10988.1.S1_at   | Mmu.10988.1 | 4.16  | 4.04  | 0.19 | 0.07 | 1.08  | 0.913134 | 0.263179 | 0.970425 | 0.529492 |
| Mmu.10994.1.S1_at   | Mmu.10994.1 | 9.97  | 9.17  | 0.09 | 0.25 | 1.74  | 0.003961 | 0.000613 | 0.198571 | 0.042275 |
| Mmu.11000.1.S1_at   | Mmu.11000.1 | 11.3  | 10.41 | 0.5  | 0.09 | 1.86  | 0.044717 | 0.066023 | 0.374984 | 0.302361 |
| Mmu.6085.1.S1_x_at  | Mmu.6085.1  | 13.3  | 13.57 | 0.34 | 0.06 | -1.21 | 0.267743 | 0.109759 | 0.62827  | 0.373701 |
| Mmu.11032.1.A1_at   | Mmu.11032.1 | 6.13  | 5.87  | 0.88 | 0.33 | 1.2   | 0.245776 | 0.296611 | 0.611202 | 0.555606 |
| Mmu.11047.2.S1_s_at | Mmu.11047.2 | 5.91  | 7.05  | 0.11 | 0.15 | -2.2  | 0.00056  | 0.000168 | 0.143137 | 0.030511 |
| Mmu.11049.1.S1_s_at | Mmu.11049.1 | 14.26 | 14.23 | 0.13 | 0.01 | 1.02  | 0.883001 | 0.984843 | 0.959529 | 0.991445 |
| Mmu.11053.1.S1_s_at | Mmu.11053.1 | 11.12 | 10.9  | 0.68 | 0.29 | 1.16  | 0.545206 | 0.122255 | 0.807687 | 0.39196  |
| Mmu.11074.1.S1_at   | Mmu.11074.1 | 11.97 | 11.7  | 0.1  | 0.05 | 1.21  | 0.013116 | 0.078819 | 0.266768 | 0.325757 |
| Mmu.11077.2.S1_at   | Mmu.11077.2 | 12.26 | 12.57 | 0.17 | 0.04 | -1.24 | 0.026419 | 0.037211 | 0.32471  | 0.237285 |
| Mmu.11093.1.S1_at   | Mmu.11093.1 | 11.61 | 11.71 | 0.18 | 0.03 | -1.07 | 0.989722 | 0.091026 | 0.996185 | 0.345819 |
| Mmu.11097.1.S1_at   | Mmu.11097.1 | 10.25 | 10.28 | 0.19 | 0.12 | -1.02 | 0.655552 | 0.058607 | 0.863179 | 0.288819 |
| Mmu.11135.1.S1_at   | Mmu.11135.1 | 10.78 | 10.52 | 0.32 | 0.07 | 1.21  | 0.603939 | 0.015797 | 0.8394   | 0.15934  |
| Mmu.11137.1.S1_x_at | Mmu.11137.1 | 4.51  | 4.59  | 0.06 | 0.35 | -1.06 | 0.636881 | 0.62467  | 0.855281 | 0.778812 |
| Mmu.11137.2.S1_at   | Mmu.11137.2 | 3.52  | 3.51  | 0.08 | 0.12 | 1.01  | 0.774695 | 0.815776 | 0.91642  | 0.893766 |
| Mmu.11141.1.S1_at   | Mmu.11141.1 | 10.46 | 10.25 | 0.16 | 0.2  | 1.16  | 0.050029 | 0.036747 | 0.386663 | 0.236287 |
| Mmu.11151.1.S1_at   | Mmu.11151.1 | 11.35 | 11.37 | 0.1  | 0.14 | -1.01 | 0.971631 | 0.014044 | 0.990709 | 0.15177  |
| Mmu.11151.1.S1_s_at | Mmu.11151.1 | 11.7  | 11.8  | 0.09 | 0.1  | -1.07 | 0.655354 | 0.010589 | 0.863101 | 0.134213 |
| Mmu.11154.1.A1_at   | Mmu.11154.1 | 6.75  | 7.06  | 1.64 | 0.44 | -1.24 | 0.753551 | 0.450187 | 0.907065 | 0.665542 |
| Mmu.11154.2.S1_at   | Mmu.11154.2 | 6.66  | 6.09  | 0.72 | 0.23 | 1.48  | 0.341881 | 0.638262 | 0.685487 | 0.787493 |
| Mmu.11164.1.S1_at   | Mmu.11164.1 | 5.94  | 5.9   | 0.13 | 0.04 | 1.03  | 0.54308  | 0.541101 | 0.806165 | 0.72475  |
| Mmu.11165.2.S1_at   | Mmu.11165.2 | 4.93  | 4.86  | 0.05 | 0.17 | 1.05  | 0.962674 | 0.184655 | 0.987962 | 0.460645 |
| Mmu.11167.1.A1_at   | Mmu.11167.1 | 7.38  | 7.2   | 0.18 | 0.04 | 1.14  | 0.096404 | 0.013625 | 0.4651   | 0.149406 |
| Mmu.1117.1.S1_at    | Mmu.1117.1  | 4.62  | 4.48  | 0.03 | 0.08 | 1.1   | 0.074804 | 0.009645 | 0.435313 | 0.129267 |
| Mmu.11179.1.S1_at   | Mmu.11179.1 | 9.05  | 8.06  | 0.77 | 0.23 | 1.98  | 0.087622 | 0.085502 | 0.455349 | 0.337495 |
| Mmu.11185.2.S1_at   | Mmu.11185.2 | 4.64  | 4.99  | 0.19 | 0.03 | -1.27 | 0.098509 | 0.574235 | 0.467939 | 0.745688 |
| Mmu.11188.1.S1_at   | Mmu.11188.1 | 11.58 | 11.81 | 0.17 | 0.07 | -1.18 | 0.033157 | 0.016487 | 0.346294 | 0.162562 |
| Mmu.11192.1.S1_at   | Mmu.11192.1 | 6.62  | 6.86  | 0.14 | 0.22 | -1.18 | 0.074476 | 0.11344  | 0.435313 | 0.379509 |
| Mmu.11195.1.S1_at   | Mmu.11195.1 | 11.32 | 10.01 | 1.04 | 0.14 | 2.48  | 0.29975  | 0.05157  | 0.654182 | 0.272544 |
| Mmu.11197.1.S1_at   | Mmu.11197.1 | 3.67  | 3.65  | 0.32 | 0.13 | 1.01  | 0.98563  | 0.933344 | 0.995461 | 0.962162 |
| Mmu.11201.1.S1_at   | Mmu.11201.1 | 4.53  | 4.53  | 0.17 | 0.29 | 1     | 0.89618  | 0.775993 | 0.964538 | 0.869682 |

|                        |                |       |       |      |      |       |          |          |          |          |
|------------------------|----------------|-------|-------|------|------|-------|----------|----------|----------|----------|
| Mmu.11204.1.S1_s_at    | Mmu.11204.1    | 13.16 | 12.52 | 0.25 | 0.28 | 1.56  | 0.054776 | 0.008453 | 0.397122 | 0.121922 |
| Mmu.11208.1.S1_at      | Mmu.11208.1    | 9     | 7.72  | 1.09 | 0.19 | 2.44  | 0.292558 | 0.177981 | 0.648901 | 0.454339 |
| Mmu.11220.1.S1_at      | Mmu.11220.1    | 10.22 | 9.95  | 0.09 | 0.12 | 1.21  | 0.024266 | 0.073188 | 0.317812 | 0.316064 |
| Mmu.11224.1.S1_at      | Mmu.11224.1    | 9.07  | 8.13  | 0.4  | 0.13 | 1.91  | 0.014671 | 0.004823 | 0.277052 | 0.096904 |
| Mmu.11229.1.S1_at      | Mmu.11229.1    | 11.38 | 11.1  | 0.21 | 0.06 | 1.21  | 0.066907 | 0.04075  | 0.422979 | 0.246735 |
| Mmu.11231.1.A1_at      | Mmu.11231.1    | 7.41  | 7.37  | 0.1  | 0.03 | 1.03  | 0.424203 | 0.877671 | 0.739457 | 0.930219 |
| Mmu.11231.1.S1_at      | Mmu.11231.1    | 8.31  | 8.28  | 0.16 | 0.07 | 1.02  | 0.935134 | 0.958854 | 0.978066 | 0.976695 |
| Mmu.11243.2.S1_at      | Mmu.11243.2    | 9.79  | 9.61  | 0.61 | 0.04 | 1.13  | 0.677279 | 0.254129 | 0.873405 | 0.522439 |
| Mmu.11250.2.S1_at      | Mmu.11250.2    | 6.58  | 6.45  | 0.02 | 0.08 | 1.1   | 0.056158 | 0.077352 | 0.399665 | 0.323153 |
| Mmu.11268.1.S1_at      | Mmu.11268.1    | 9.82  | 9.81  | 0.59 | 0.23 | 1.01  | 0.397045 | 0.311281 | 0.721621 | 0.566351 |
| Mmu.11289.1.S1_at      | Mmu.11289.1    | 6.23  | 5.94  | 0.72 | 0.45 | 1.22  | 0.57049  | 0.402731 | 0.822151 | 0.631543 |
| Mmu.11306.1.S1_at      | Mmu.11306.1    | 7.38  | 7.92  | 0.32 | 0.24 | -1.46 | 0.148526 | 0.295479 | 0.522567 | 0.554921 |
| Mmu.11314.1.S1_x_at    | Mmu.11314.1    | 14.1  | 14.18 | 0.05 | 0.07 | -1.06 | 0.125446 | 0.563931 | 0.499523 | 0.738913 |
| MmunewRS.816.1.S1_s_at | MmunewRS.816.1 | 6.53  | 7.88  | 1.47 | 0.18 | -2.55 | 0.173266 | 0.11331  | 0.546427 | 0.379388 |
| Mmu.11342.1.S1_at      | Mmu.11342.1    | 6.8   | 6.91  | 0.9  | 0.21 | -1.08 | 0.396731 | 0.142036 | 0.721565 | 0.415633 |
| Mmu.11343.1.S1_at      | Mmu.11343.1    | 10.08 | 10.08 | 0.03 | 0.17 | -1    | 0.450588 | 0.007288 | 0.754829 | 0.114596 |
| Mmu.11358.1.S1_at      | Mmu.11358.1    | 4.05  | 4.17  | 0.11 | 0.16 | -1.08 | 0.272553 | 0.196189 | 0.632303 | 0.471236 |
| Mmu.11363.1.S1_at      | Mmu.11363.1    | 6.83  | 6.16  | 1.53 | 0.5  | 1.59  | 0.513059 | 0.410077 | 0.789641 | 0.637065 |
| Mmu.11366.1.S1_at      | Mmu.11366.1    | 4.26  | 3.7   | 0.54 | 0.11 | 1.47  | 0.194496 | 0.042982 | 0.565072 | 0.251882 |
| Mmu.11367.1.S1_at      | Mmu.11367.1    | 11.11 | 10.96 | 0.35 | 0.07 | 1.11  | 0.466134 | 0.183082 | 0.763389 | 0.459493 |
| Mmu.11369.1.S1_at      | Mmu.11369.1    | 10.22 | 10.2  | 0.33 | 0.23 | 1.02  | 0.977745 | 0.069133 | 0.99273  | 0.30917  |
| Mmu.1137.1.S1_at       | Mmu.1137.1     | 3.64  | 3.73  | 0.71 | 0.1  | -1.06 | 0.487726 | 0.650122 | 0.775172 | 0.795406 |
| Mmu.1137.1.S1_s_at     | Mmu.1137.1     | 5.92  | 5.85  | 1.37 | 0.18 | 1.05  | 0.842697 | 0.468587 | 0.944281 | 0.677755 |
| Mmu.11373.1.S1_at      | Mmu.11373.1    | 10.11 | 9.79  | 0.07 | 0.24 | 1.25  | 0.033535 | 0.054806 | 0.346461 | 0.279635 |
| Mmu.1138.1.S1_at       | Mmu.1138.1     | 3.34  | 3.36  | 0.15 | 0.09 | -1.01 | 0.679572 | 0.939876 | 0.87431  | 0.96581  |
| Mmu.11384.1.S1_at      | Mmu.11384.1    | 10.83 | 10.55 | 0.17 | 0.2  | 1.21  | 0.125523 | 0.146856 | 0.499523 | 0.42088  |
| Mmu.3044.12.S1_s_at    | Mmu.3044.12    | 14.26 | 14.27 | 0.03 | 0.06 | -1    | 0.229677 | 0.091507 | 0.59847  | 0.346552 |
| Mmu.11403.1.S1_at      | Mmu.11403.1    | 8.68  | 8.59  | 0.2  | 0.15 | 1.06  | 0.195054 | 0.02     | 0.565479 | 0.177634 |
| Mmu.11403.1.S1_x_at    | Mmu.11403.1    | 9.32  | 9.03  | 0.2  | 0.13 | 1.22  | 0.050903 | 0.01077  | 0.388364 | 0.135471 |
| Mmu.11412.1.S1_at      | Mmu.11412.1    | 10.53 | 9.7   | 0.31 | 0.1  | 1.77  | 0.025849 | 0.017409 | 0.32273  | 0.166995 |
| Mmu.11413.1.S1_at      | Mmu.11413.1    | 7.34  | 7.24  | 0.14 | 0.1  | 1.07  | 0.432064 | 0.227421 | 0.743696 | 0.499693 |
| Mmu.11414.1.S1_a_at    | Mmu.11414.1    | 4.55  | 4.67  | 0.54 | 0.2  | -1.09 | 0.974663 | 0.613858 | 0.991912 | 0.770884 |
| Mmu.11416.1.A1_at      | Mmu.11416.1    | 3.55  | 3.36  | 0.15 | 0.32 | 1.15  | 0.963506 | 0.439778 | 0.988152 | 0.658439 |
| Mmu.11416.1.S1_at      | Mmu.11416.1    | 4.24  | 4.08  | 0.11 | 0.3  | 1.12  | 0.211867 | 0.223097 | 0.582715 | 0.49588  |
| Mmu.11417.1.S1_at      | Mmu.11417.1    | 6.52  | 6.52  | 0.04 | 0    | 1     | 0.373901 | 0.250521 | 0.705567 | 0.519391 |
| Mmu.11419.1.S1_at      | Mmu.11419.1    | 5.99  | 5.69  | 0.05 | 0.2  | 1.23  | 0.039979 | 0.054498 | 0.362955 | 0.278959 |
| Mmu.11420.1.S1_at      | Mmu.11420.1    | 5.18  | 5.01  | 0.29 | 0.21 | 1.12  | 0.187051 | 0.189792 | 0.559702 | 0.465403 |
| Mmu.11421.1.S1_a_at    | Mmu.11421.1    | 4.74  | 4.55  | 0.16 | 0.08 | 1.14  | 0.372087 | 0.289632 | 0.705567 | 0.5507   |
| Mmu.11423.1.S1_a_at    | Mmu.11423.1    | 4.79  | 4.75  | 0.36 | 0.16 | 1.03  | 0.666459 | 0.620057 | 0.868243 | 0.775218 |
| Mmu.11429.1.A1_at      | Mmu.11429.1    | 4.36  | 5.57  | 0.64 | 0.09 | -2.31 | 0.035777 | 0.14557  | 0.353107 | 0.419456 |
| Mmu.11473.1.S1_at      | Mmu.11473.1    | 2.94  | 2.8   | 0.14 | 0.06 | 1.1   | 0.166902 | 0.241321 | 0.539517 | 0.511952 |
| Mmu.11473.1.S1_s_at    | Mmu.11473.1    | 12.17 | 12.27 | 0.21 | 0.13 | -1.07 | 0.972922 | 0.032858 | 0.991155 | 0.224478 |
| Mmu.11492.1.S1_x_at    | Mmu.11492.1    | 7.68  | 7.9   | 0.25 | 0.14 | -1.16 | 0.471112 | 0.218124 | 0.766384 | 0.491711 |

|                         |                 |       |       |      |      |       |          |          |          |          |
|-------------------------|-----------------|-------|-------|------|------|-------|----------|----------|----------|----------|
| Mmu.11516.1.S1_at       | Mmu.11516.1     | 12.14 | 12.13 | 0.12 | 0.08 | 1.01  | 0.901138 | 0.802766 | 0.966467 | 0.886441 |
| Mmu.11526.1.S1_at       | Mmu.11526.1     | 5.86  | 5.74  | 0.26 | 0.12 | 1.09  | 0.591338 | 0.668038 | 0.833385 | 0.805709 |
| Mmu.11557.1.S1_at       | Mmu.11557.1     | 8.44  | 8.59  | 0.1  | 0.03 | -1.11 | 0.278649 | 0.193623 | 0.637754 | 0.468785 |
| Mmu.11562.1.S1_at       | Mmu.11562.1     | 7.12  | 7.53  | 0.64 | 0.21 | -1.33 | 0.082865 | 0.04017  | 0.44803  | 0.245709 |
| Mmu.11565.1.S1_at       | Mmu.11565.1     | 10.35 | 9.82  | 0.1  | 0.2  | 1.44  | 0.014919 | 0.011938 | 0.278597 | 0.141357 |
| Mmu.11584.1.S1_at       | Mmu.11584.1     | 11.11 | 11.05 | 0.32 | 0.1  | 1.04  | 0.545015 | 0.746068 | 0.807571 | 0.852688 |
| Mmu.116.1.S1_s_at       | Mmu.116.1       | 12.76 | 12.58 | 0.06 | 0.12 | 1.13  | 0.431543 | 0.171651 | 0.743474 | 0.448044 |
| Mmu.11607.1.S1_at       | Mmu.11607.1     | 8.69  | 9.07  | 0.44 | 0.16 | -1.3  | 0.87458  | 0.120016 | 0.956467 | 0.388672 |
| Mmu.1161.1.S1_at        | Mmu.1161.1      | 7.03  | 6.74  | 1.63 | 0.29 | 1.22  | 0.91676  | 0.355174 | 0.971796 | 0.597552 |
| Mmu.1162.1.S1_at        | Mmu.1162.1      | 10.8  | 10.3  | 0.69 | 0.02 | 1.42  | 0.766142 | 0.545074 | 0.912101 | 0.727313 |
| Mmu.11635.1.S1_at       | Mmu.11635.1     | 9.05  | 8.83  | 0.21 | 0.15 | -1.16 | 0.111494 | 0.117574 | 0.484755 | 0.38531  |
| Mmu.11636.1.S1_at       | Mmu.11636.1     | 6.08  | 6.1   | 0.13 | 0.1  | -1.02 | 0.627558 | 0.772928 | 0.850597 | 0.867957 |
| Mmu.11638.2.S1_at       | Mmu.11638.2     | 10.38 | 9.82  | 0.44 | 0.18 | 1.47  | 0.08176  | 0.058825 | 0.446188 | 0.289228 |
| Mmu.11640.1.S1_at       | Mmu.11640.1     | 12.93 | 12.87 | 0.08 | 0.03 | 1.04  | 0.296231 | 0.523787 | 0.651907 | 0.714028 |
| Mmu.11645.2.S1_at       | Mmu.11645.2     | 3.52  | 3.7   | 0.12 | 0.02 | -1.13 | 0.04478  | 0.138931 | 0.37512  | 0.412037 |
| Mmu.11646.1.S1_at       | Mmu.11646.1     | 4.9   | 4.9   | 0.15 | 0.02 | -1    | 0.784112 | 0.390147 | 0.920625 | 0.624002 |
| Mmu.11647.1.A1_at       | Mmu.11647.1     | 8     | 8.06  | 0.57 | 0.42 | -1.04 | 0.517675 | 0.006132 | 0.792232 | 0.106665 |
| Mmu.11662.1.S1_at       | Mmu.11662.1     | 11.23 | 10.61 | 0.21 | 0.35 | 1.55  | 0.027363 | 0.019939 | 0.327416 | 0.177457 |
| Mmu.11663.1.S1_at       | Mmu.11663.1     | 10.03 | 9.89  | 0.41 | 0.17 | 1.1   | 0.60871  | 0.14755  | 0.841329 | 0.421872 |
| Mmu.11667.1.S1_at       | Mmu.11667.1     | 11.99 | 12.04 | 0.1  | 0.06 | -1.03 | 0.844833 | 0.379275 | 0.94551  | 0.616251 |
| Mmu.11667.1.S1_x_at     | Mmu.11667.1     | 11.97 | 11.96 | 0.13 | 0.04 | 1.01  | 0.235195 | 0.411952 | 0.602266 | 0.638434 |
| Mmu.11668.1.S1_at       | Mmu.11668.1     | 6.96  | 5.69  | 0.52 | 0.47 | 2.41  | 0.032716 | 0.04391  | 0.34527  | 0.254098 |
| Mmu.1167.1.S1_at        | Mmu.1167.1      | 5.71  | 5.61  | 0.43 | 0.24 | 1.08  | 0.525964 | 0.174393 | 0.796442 | 0.450842 |
| Mmu.11672.1.S1_at       | Mmu.11672.1     | 11.98 | 12.13 | 0.12 | 0.03 | -1.11 | 0.063531 | 0.073038 | 0.415717 | 0.316017 |
| Mmu.11693.1.S1_at       | Mmu.11693.1     | 8.56  | 7.95  | 0.58 | 0.15 | 1.52  | 0.143044 | 0.326951 | 0.518337 | 0.576911 |
| Mmu.11695.1.S1_at       | Mmu.11695.1     | 7.43  | 7.6   | 0.61 | 0.47 | -1.12 | 0.938857 | 0.233946 | 0.979343 | 0.505211 |
| Mmu.11700.1.S1_at       | Mmu.11700.1     | 5.88  | 5.74  | 0.37 | 0.09 | 1.1   | 0.238212 | 0.197398 | 0.605262 | 0.472311 |
| Mmu.11707.1.S1_at       | Mmu.11707.1     | 8.32  | 8.16  | 0.95 | 0.2  | 1.11  | 0.518582 | 0.058372 | 0.792748 | 0.288369 |
| Mmu.11727.1.S1_at       | Mmu.11727.1     | 8.52  | 8.21  | 0.45 | 0.28 | 1.24  | 0.078128 | 0.006675 | 0.440229 | 0.110612 |
| Mmu.11729.1.S1_s_at     | Mmu.11729.1     | 12.87 | 12.79 | 0.09 | 0.05 | 1.06  | 0.306397 | 0.471657 | 0.659434 | 0.679552 |
| MmugDNA.28319.1.S1_s_at | MmugDNA.28319.1 | 14.39 | 14.41 | 0.03 | 0.01 | -1.01 | 0.381917 | 0.785224 | 0.710335 | 0.875672 |
| Mmu.11739.1.S1_at       | Mmu.11739.1     | 11.81 | 10.97 | 0.44 | 0.24 | 1.78  | 0.022282 | 0.028171 | 0.310495 | 0.209433 |
| Mmu.11741.1.S1_at       | Mmu.11741.1     | 7.77  | 8.53  | 0.81 | 0.09 | -1.69 | 0.245822 | 0.378657 | 0.611231 | 0.615681 |
| Mmu.11741.2.S1_a_at     | Mmu.11741.2     | 3.4   | 3.4   | 0.12 | 0.1  | 1     | 0.945065 | 0.914135 | 0.980852 | 0.951725 |
| Mmu.11745.1.A1_at       | Mmu.11745.1     | 8.28  | 8.6   | 0.49 | 0.17 | -1.24 | 0.308729 | 0.353819 | 0.661293 | 0.596829 |
| Mmu.11775.1.S1_at       | Mmu.11775.1     | 11.58 | 11.44 | 0.27 | 0.1  | 1.1   | 0.491755 | 0.227792 | 0.778032 | 0.500072 |
| Mmu.11792.1.S1_at       | Mmu.11792.1     | 9.62  | 9.88  | 0.42 | 0.27 | -1.2  | 0.658206 | 0.089372 | 0.864473 | 0.343635 |
| Mmu.11804.2.S1_at       | Mmu.11804.2     | 12.58 | 12.63 | 0.12 | 0.07 | -1.03 | 0.48884  | 0.230523 | 0.775818 | 0.502251 |
| Mmu.1181.1.S1_at        | Mmu.1181.1      | 5.34  | 5.38  | 0.05 | 0.04 | -1.02 | 0.253116 | 0.34059  | 0.617917 | 0.586789 |
| Mmu.11815.1.S1_s_at     | Mmu.11815.1     | 10.37 | 10.1  | 0.16 | 0.03 | 1.21  | 0.044676 | 0.130328 | 0.374916 | 0.402172 |
| Mmu.11819.2.S1_at       | Mmu.11819.2     | 10.12 | 10.47 | 0.08 | 0.16 | -1.28 | 0.039167 | 0.390882 | 0.361205 | 0.624592 |
| Mmu.11820.13.S1_a_at    | Mmu.11820.13    | 13.25 | 12.88 | 0.95 | 0.08 | 1.29  | 0.749915 | 0.222239 | 0.905306 | 0.495265 |
| Mmu.11826.1.S1_at       | Mmu.11826.1     | 12.75 | 12.68 | 0.13 | 0.17 | 1.05  | 0.840096 | 0.515063 | 0.943103 | 0.70805  |

|                         |                 |       |       |      |      |       |          |          |          |          |
|-------------------------|-----------------|-------|-------|------|------|-------|----------|----------|----------|----------|
| Mmu.11827.1.A1_at       | Mmu.11827.1     | 4.66  | 4.64  | 0.17 | 0.13 | 1.01  | 0.202856 | 0.193607 | 0.574251 | 0.468785 |
| Mmu.11827.1.S1_at       | Mmu.11827.1     | 3.95  | 3.72  | 0.02 | 0.11 | 1.17  | 0.056472 | 0.047072 | 0.400268 | 0.261469 |
| Mmu.11828.1.S1_at       | Mmu.11828.1     | 4     | 4.03  | 0.32 | 0.11 | -1.02 | 0.338783 | 0.514694 | 0.683213 | 0.707841 |
| Mmu.1183.2.S1_at        | Mmu.1183.2      | 11.57 | 11.77 | 1.86 | 0.11 | -1.15 | 0.578626 | 0.282828 | 0.826218 | 0.545524 |
| Mmu.1183.4.A1_at        | Mmu.1183.4      | 3.39  | 3.33  | 0.11 | 0.21 | 1.04  | 0.822617 | 0.156859 | 0.936084 | 0.432372 |
| Mmu.1183.4.S1_at        | Mmu.1183.4      | 3.3   | 3.29  | 0.14 | 0.05 | 1.01  | 0.646649 | 0.210829 | 0.859193 | 0.484902 |
| Mmu.11837.1.S1_at       | Mmu.11837.1     | 8.11  | 8.09  | 0.17 | 0.12 | 1.01  | 0.750638 | 0.106009 | 0.905556 | 0.36838  |
| Mmu.11839.1.S1_at       | Mmu.11839.1     | 8.77  | 8.86  | 0.23 | 0.1  | -1.06 | 0.18613  | 0.131825 | 0.559096 | 0.403891 |
| Mmu.1184.1.S1_at        | Mmu.1184.1      | 9.44  | 8.96  | 0.19 | 0.12 | 1.39  | 0.023384 | 0.008228 | 0.31528  | 0.120459 |
| Mmu.11841.1.S1_s_at     | Mmu.11841.1     | 10.53 | 10.96 | 0.35 | 0.16 | -1.35 | 0.218333 | 0.323249 | 0.58818  | 0.574408 |
| Mmu.11859.1.S1_at       | Mmu.11859.1     | 8.04  | 7.82  | 2.56 | 0.37 | -1.17 | 0.945685 | 0.603516 | 0.981093 | 0.764189 |
| Mmu.11863.1.S1_at       | Mmu.11863.1     | 9.79  | 9.43  | 0.14 | 0.07 | 1.29  | 0.028032 | 0.016375 | 0.330072 | 0.16199  |
| Mmu.11884.1.S1_at       | Mmu.11884.1     | 4.11  | 3.92  | 0.19 | 0.11 | 1.14  | 0.573746 | 0.323754 | 0.823742 | 0.574607 |
| Mmu.11885.2.S1_at       | Mmu.11885.2     | 8.09  | 8.62  | 0.36 | 0.25 | -1.45 | 0.103731 | 0.068808 | 0.474343 | 0.308711 |
| Mmu.1189.5.S1_x_at      | Mmu.1189.5      | 11.54 | 11    | 0.28 | 0.05 | 1.45  | 0.038782 | 0.360411 | 0.36035  | 0.601462 |
| Mmu.11893.1.S1_at       | Mmu.11893.1     | 3.36  | 3.61  | 0.33 | 0.1  | -1.19 | 0.705235 | 0.864604 | 0.885355 | 0.923249 |
| Mmu.11899.1.S1_at       | Mmu.11899.1     | 8.39  | 8.34  | 3.04 | 0.39 | 1.04  | 0.695738 | 0.221686 | 0.881723 | 0.494901 |
| Mmu.11912.1.S1_at       | Mmu.11912.1     | 6.82  | 7.73  | 1.11 | 0.08 | -1.87 | 0.23082  | 0.25244  | 0.599045 | 0.521061 |
| Mmu.11914.1.S1_at       | Mmu.11914.1     | 6.61  | 6.19  | 0.24 | 0.06 | 1.34  | 0.111337 | 0.0555   | 0.484526 | 0.281404 |
| MmugDNA.27313.1.S1_at   | MmugDNA.27313.1 | 6.32  | 6.17  | 0.07 | 0.06 | 1.11  | 0.123815 | 0.104554 | 0.497339 | 0.365805 |
| MmugDNA.27313.1.S1_s_at | MmugDNA.27313.1 | 7.13  | 7.06  | 0.2  | 0.08 | 1.05  | 0.254867 | 0.40663  | 0.619267 | 0.634468 |
| Mmu.11943.1.S1_at       | Mmu.11943.1     | 8.83  | 7.83  | 0.28 | 0.3  | 2     | 0.017254 | 0.007747 | 0.290207 | 0.117619 |
| Mmu.11959.1.A1_at       | Mmu.11959.1     | 3.74  | 3.73  | 0.16 | 0.07 | 1.01  | 0.481888 | 0.353324 | 0.772261 | 0.596477 |
| Mmu.11960.1.S1_at       | Mmu.11960.1     | 8.9   | 8.55  | 0.51 | 0.31 | 1.28  | 0.210273 | 0.018968 | 0.581624 | 0.173308 |
| Mmu.11960.1.S1_x_at     | Mmu.11960.1     | 8.83  | 8.53  | 0.41 | 0.31 | 1.23  | 0.252494 | 0.012865 | 0.617481 | 0.146025 |
| Mmu.11961.1.S1_at       | Mmu.11961.1     | 6.92  | 5.84  | 0.54 | 0.39 | 2.1   | 0.076978 | 0.02346  | 0.438889 | 0.191956 |
| Mmu.11961.1.S1_x_at     | Mmu.11961.1     | 8.21  | 7.3   | 0.55 | 0.36 | 1.88  | 0.086572 | 0.023741 | 0.454436 | 0.192893 |
| Mmu.11962.1.S1_at       | Mmu.11962.1     | 10.59 | 10.5  | 0.21 | 0.21 | 1.06  | 0.649356 | 0.845179 | 0.860269 | 0.9119   |
| Mmu.1198.1.S1_at        | Mmu.1198.1      | 7.69  | 7.38  | 0.23 | 0.25 | 1.24  | 0.417332 | 0.324669 | 0.734845 | 0.575208 |
| Mmu.11980.1.S1_at       | Mmu.11980.1     | 9.33  | 8.46  | 0.45 | 0.27 | 1.83  | 0.045298 | 0.001808 | 0.376169 | 0.063723 |
| Mmu.11986.2.S1_at       | Mmu.11986.2     | 7.8   | 7.47  | 1.35 | 0.15 | 1.26  | 0.670779 | 0.518333 | 0.870072 | 0.71038  |
| Mmu.11987.1.S1_at       | Mmu.11987.1     | 4.63  | 4.61  | 0.11 | 0.18 | 1.01  | 0.419523 | 0.313235 | 0.736303 | 0.567753 |
| Mmu.11995.1.S1_at       | Mmu.11995.1     | 4.72  | 4.91  | 0.62 | 0.07 | -1.14 | 0.989363 | 0.986243 | 0.996033 | 0.992174 |
| Mmu.11997.1.S1_at       | Mmu.11997.1     | 12.46 | 12.26 | 0.69 | 0.09 | 1.15  | 0.642187 | 0.529663 | 0.857628 | 0.717463 |
| Mmu.12.1.S1_at          | Mmu.12.1        | 10.74 | 9.99  | 0.33 | 0.06 | 1.69  | 0.018219 | 0.006803 | 0.295538 | 0.111444 |
| Mmu.12003.1.S1_s_at     | Mmu.12003.1     | 14.47 | 14.54 | 0.03 | 0.03 | -1.05 | 0.015096 | 0.019311 | 0.2796   | 0.174723 |
| Mmu.12005.1.S1_at       | Mmu.12005.1     | 3.3   | 3.18  | 0.08 | 0.06 | 1.08  | 0.350055 | 0.225971 | 0.691084 | 0.498391 |
| Mmu.12007.1.S1_s_at     | Mmu.12007.1     | 7.66  | 7.51  | 0.25 | 0.23 | 1.11  | 0.323666 | 0.357154 | 0.672279 | 0.598825 |
| Mmu.12009.1.S1_at       | Mmu.12009.1     | 4.43  | 4.4   | 0.26 | 0.09 | 1.02  | 0.662567 | 0.392357 | 0.866906 | 0.625756 |
| Mmu.12027.2.S1_at       | Mmu.12027.2     | 5.77  | 5.55  | 0.18 | 0    | 1.16  | 0.339975 | 0.504258 | 0.684103 | 0.701474 |
| Mmu.12027.3.S1_at       | Mmu.12027.3     | 11.85 | 11.63 | 0.15 | 0.13 | 1.17  | 0.127814 | 0.039597 | 0.502223 | 0.244002 |
| Mmu.12045.1.S1_at       | Mmu.12045.1     | 9.28  | 9.09  | 0.22 | 0.13 | 1.14  | 0.138093 | 0.01034  | 0.513671 | 0.133123 |
| Mmu.12046.1.S1_at       | Mmu.12046.1     | 5.13  | 5.32  | 0.3  | 0.09 | -1.14 | 0.89605  | 0.178487 | 0.964483 | 0.454778 |

|                         |                 |       |       |      |      |       |          |          |          |          |
|-------------------------|-----------------|-------|-------|------|------|-------|----------|----------|----------|----------|
| Mmu.12059.1.S1_at       | Mmu.12059.1     | 11.43 | 11.66 | 0.11 | 0.1  | -1.17 | 0.038231 | 0.055935 | 0.358577 | 0.282317 |
| MmugDNA.29332.1.S1_at   | MmugDNA.29332.1 | 7.24  | 7.22  | 0.33 | 0.02 | 1.01  | 0.848411 | 0.895302 | 0.946776 | 0.940185 |
| MmugDNA.29332.1.S1_s_at | MmugDNA.29332.1 | 10.13 | 10.17 | 0.24 | 0.02 | -1.03 | 0.938694 | 0.994256 | 0.979343 | 0.996461 |
| MmugDNA.30012.1.S1_s_at | MmugDNA.30012.1 | 10.49 | 10.3  | 0.48 | 0.27 | 1.14  | 0.267762 | 0.150746 | 0.62827  | 0.4253   |
| Mmu.12077.1.S1_at       | Mmu.12077.1     | 8.51  | 8.65  | 0.06 | 0.07 | -1.1  | 0.06809  | 0.295976 | 0.424723 | 0.555264 |
| Mmu.12078.1.S1_at       | Mmu.12078.1     | 9.83  | 9.59  | 0.04 | 0.15 | 1.18  | 0.092652 | 0.007711 | 0.461192 | 0.117372 |
| Mmu.12079.1.A1_at       | Mmu.12079.1     | 6.85  | 6.9   | 0.32 | 0.06 | -1.03 | 0.634448 | 0.704089 | 0.854063 | 0.828326 |
| Mmu.12087.1.S1_x_at     | Mmu.12087.1     | 6.14  | 6.13  | 0.12 | 0.03 | 1.01  | 0.768305 | 0.94507  | 0.912975 | 0.968834 |
| Mmu.12088.1.S1_at       | Mmu.12088.1     | 4.9   | 4.59  | 0.62 | 0.27 | 1.24  | 0.521883 | 0.752739 | 0.794899 | 0.855968 |
| Mmu.12088.1.S1_x_at     | Mmu.12088.1     | 5.05  | 5     | 0.13 | 0.19 | 1.03  | 0.404176 | 0.581982 | 0.726203 | 0.750784 |
| Mmu.12088.2.A1_s_at     | Mmu.12088.2     | 4.02  | 3.92  | 0.09 | 0.25 | -1.07 | 0.91108  | 0.564413 | 0.969818 | 0.739252 |
| Mmu.12088.2.S1_s_at     | Mmu.12088.2     | 3.96  | 3.97  | 0.29 | 0.16 | -1.01 | 0.717904 | 0.903189 | 0.890572 | 0.944982 |
| Mmu.12088.3.A1_at       | Mmu.12088.3     | 3.57  | 3.59  | 0.24 | 0.05 | -1.02 | 0.513996 | 0.15782  | 0.790236 | 0.433475 |
| Mmu.12088.3.A1_x_at     | Mmu.12088.3     | 4.06  | 3.82  | 0.24 | 0.01 | 1.18  | 0.298963 | 0.284793 | 0.653465 | 0.546966 |
| Mmu.12088.3.S1_at       | Mmu.12088.3     | 3.51  | 3.36  | 0.12 | 0.05 | 1.11  | 0.17337  | 0.229392 | 0.54656  | 0.501527 |
| Mmu.12088.3.S1_x_at     | Mmu.12088.3     | 4.27  | 4.12  | 0.06 | 0.09 | 1.1   | 0.082974 | 0.117599 | 0.44828  | 0.38531  |
| Mmu.12088.4.A1_at       | Mmu.12088.4     | 3.71  | 3.73  | 0.12 | 0.07 | -1.01 | 0.966585 | 0.371764 | 0.989053 | 0.610541 |
| Mmu.12088.4.A1_x_at     | Mmu.12088.4     | 4.25  | 4.18  | 0.14 | 0.12 | 1.05  | 0.917183 | 0.457243 | 0.97197  | 0.670746 |
| Mmu.12088.4.S1_at       | Mmu.12088.4     | 3.93  | 3.7   | 0.16 | 0.09 | 1.18  | 0.235987 | 0.453209 | 0.603072 | 0.66762  |
| Mmu.12088.4.S1_x_at     | Mmu.12088.4     | 3.26  | 3.21  | 0.03 | 0.05 | 1.04  | 0.35434  | 0.02427  | 0.693914 | 0.194957 |
| Mmu.12089.1.S1_at       | Mmu.12089.1     | 2.72  | 2.73  | 0.12 | 0.01 | -1.01 | 0.40841  | 0.423389 | 0.72928  | 0.646277 |
| Mmu.12089.1.S1_x_at     | Mmu.12089.1     | 3.11  | 3.15  | 0.14 | 0.02 | -1.03 | 0.480519 | 0.640061 | 0.77125  | 0.788682 |
| Mmu.1209.5.S1_x_at      | Mmu.1209.5      | 3.55  | 3.45  | 0.1  | 0.06 | 1.07  | 0.229731 | 0.177592 | 0.59847  | 0.453962 |
| Mmu.12090.1.S1_at       | Mmu.12090.1     | 9.06  | 9.46  | 0.63 | 0.19 | -1.32 | 0.290413 | 0.200381 | 0.646973 | 0.47478  |
| Mmu.12096.1.S1_at       | Mmu.12096.1     | 10.45 | 8.84  | 4.04 | 0.23 | 3.05  | 0.798913 | 0.437824 | 0.926372 | 0.656977 |
| Mmu.12098.1.S1_x_at     | Mmu.12098.1     | 14.61 | 14.63 | 0.04 | 0.02 | -1.01 | 0.642783 | 0.807706 | 0.857894 | 0.889292 |
| Mmu.12098.2.S1_x_at     | Mmu.12098.2     | 14.47 | 14.45 | 0.05 | 0.03 | 1.02  | 0.991883 | 0.878146 | 0.996849 | 0.930474 |
| Mmu.12104.1.A1_at       | Mmu.12104.1     | 4.57  | 4.59  | 0.06 | 0.2  | -1.02 | 0.606518 | 0.42335  | 0.840496 | 0.646277 |
| Mmu.12104.1.S1_at       | Mmu.12104.1     | 5.82  | 5.71  | 0.08 | 0.06 | 1.08  | 0.048705 | 0.373422 | 0.383952 | 0.612236 |
| Mmu.12105.1.S1_a_at     | Mmu.12105.1     | 4.98  | 4.82  | 0.21 | 0.11 | 1.11  | 0.471789 | 0.043497 | 0.766635 | 0.25316  |
| Mmu.12110.1.S1_at       | Mmu.12110.1     | 8.62  | 9.2   | 0.85 | 0.06 | -1.49 | 0.3193   | 0.11157  | 0.668689 | 0.376407 |
| Mmu.12129.1.S1_at       | Mmu.12129.1     | 3.86  | 3.79  | 0.24 | 0.21 | 1.05  | 0.714942 | 0.512977 | 0.889025 | 0.706653 |
| Mmu.12135.1.S1_at       | Mmu.12135.1     | 9.93  | 10.01 | 0.18 | 0.07 | -1.06 | 0.586951 | 0.055193 | 0.831568 | 0.280555 |
| Mmu.12136.2.S1_at       | Mmu.12136.2     | 10.96 | 10.82 | 0.24 | 0.05 | 1.11  | 0.97076  | 0.045196 | 0.990451 | 0.256979 |
| Mmu.12145.1.S1_at       | Mmu.12145.1     | 6.26  | 6.28  | 0.15 | 0.06 | -1.01 | 0.413336 | 0.548539 | 0.732218 | 0.729266 |
| Mmu.12145.1.S1_s_at     | Mmu.12145.1     | 14.44 | 14.41 | 0.05 | 0.03 | 1.02  | 0.580914 | 0.559669 | 0.827317 | 0.736365 |
| Mmu.1215.1.S1_at        | Mmu.1215.1      | 7.21  | 7.17  | 0.05 | 0.2  | 1.03  | 0.72291  | 0.321837 | 0.89262  | 0.573496 |
| Mmu.12174.1.S1_at       | Mmu.12174.1     | 4.38  | 4.08  | 0.09 | 0.15 | 1.23  | 0.107194 | 0.000443 | 0.47976  | 0.038359 |
| Mmu.1218.1.S1_at        | Mmu.1218.1      | 6.75  | 6.62  | 0.04 | 0.06 | 1.1   | 0.049358 | 0.407426 | 0.385474 | 0.63502  |
| Mmu.12187.1.S1_at       | Mmu.12187.1     | 10.79 | 11.1  | 0.47 | 0.04 | -1.24 | 0.323638 | 0.599406 | 0.672279 | 0.76144  |
| Mmu.12196.1.S1_at       | Mmu.12196.1     | 9.75  | 9.86  | 0.33 | 0.18 | -1.08 | 0.618682 | 0.697109 | 0.846161 | 0.824045 |
| Mmu.12206.2.S1_at       | Mmu.12206.2     | 12.35 | 11.99 | 0.2  | 0.05 | 1.29  | 0.036817 | 0.044875 | 0.355874 | 0.256424 |
| Mmu.12206.3.S1_at       | Mmu.12206.3     | 5.88  | 5.51  | 0.2  | 0.08 | 1.29  | 0.038188 | 0.041879 | 0.358577 | 0.249202 |

|                         |                 |       |       |      |      |       |          |          |          |          |
|-------------------------|-----------------|-------|-------|------|------|-------|----------|----------|----------|----------|
| Mmu.12206.3.S1_x_at     | Mmu.12206.3     | 11.57 | 11.07 | 0.25 | 0.09 | 1.41  | 0.058753 | 0.039902 | 0.405368 | 0.244852 |
| Mmu.12211.1.A1_at       | Mmu.12211.1     | 6.62  | 6.83  | 0.51 | 0.07 | -1.15 | 0.789915 | 0.000356 | 0.922714 | 0.037229 |
| Mmu.12211.1.S1_at       | Mmu.12211.1     | 5.56  | 5.7   | 0.5  | 0.06 | -1.1  | 0.634191 | 0.000442 | 0.853953 | 0.038359 |
| Mmu.12227.1.S1_at       | Mmu.12227.1     | 3.55  | 3.4   | 0.09 | 0.04 | 1.11  | 0.114033 | 0.114195 | 0.487405 | 0.380758 |
| Mmu.12235.2.S1_at       | Mmu.12235.2     | 6.46  | 5.64  | 0.37 | 0.13 | 1.77  | 0.020797 | 0.002622 | 0.305611 | 0.075772 |
| Mmu.12240.1.S1_at       | Mmu.12240.1     | 5.89  | 6.2   | 0.72 | 0.37 | -1.24 | 0.683366 | 0.857071 | 0.876089 | 0.91834  |
| Mmu.12241.1.S1_at       | Mmu.12241.1     | 4.11  | 4.08  | 0.26 | 0.05 | 1.02  | 0.367829 | 0.525152 | 0.703298 | 0.714766 |
| Mmu.12242.1.S1_at       | Mmu.12242.1     | 6.24  | 6.07  | 0.02 | 0.1  | 1.12  | 0.111216 | 0.590743 | 0.484305 | 0.756437 |
| Mmu.12242.1.S1_x_at     | Mmu.12242.1     | 5.99  | 5.78  | 0.08 | 0.16 | 1.15  | 0.08504  | 0.166374 | 0.451642 | 0.442884 |
| Mmu.12243.1.A1_at       | Mmu.12243.1     | 4.94  | 4.94  | 0.16 | 0.07 | -1    | 0.99501  | 0.973419 | 0.99815  | 0.985537 |
| Mmu.12243.1.S1_at       | Mmu.12243.1     | 5.9   | 5.84  | 0.16 | 0.08 | -1.04 | 0.912619 | 0.556833 | 0.970287 | 0.734831 |
| Mmu.12249.1.S1_at       | Mmu.12249.1     | 13.87 | 13.75 | 0.37 | 0.03 | 1.08  | 0.950205 | 0.990535 | 0.98328  | 0.994656 |
| MmugDNA.41518.1.S1_s_at | MmugDNA.41518.1 | 13.8  | 13.66 | 0.59 | 0.09 | 1.1   | 0.903203 | 0.958057 | 0.967436 | 0.976273 |
| Mmu.12251.1.S1_s_at     | Mmu.12251.1     | 13.38 | 13    | 0.48 | 0.21 | 1.31  | 0.980386 | 0.366048 | 0.993785 | 0.605891 |
| Mmu.12263.1.S1_at       | Mmu.12263.1     | 10.9  | 11.12 | 0.3  | 0.06 | -1.16 | 0.236082 | 0.072684 | 0.603096 | 0.31561  |
| Mmu.12264.1.S1_at       | Mmu.12264.1     | 12.03 | 12.19 | 0.07 | 0.04 | -1.11 | 0.032054 | 0.130711 | 0.342916 | 0.402799 |
| Mmu.12266.1.S1_at       | Mmu.12266.1     | 11.69 | 11.66 | 0.16 | 0.01 | 1.02  | 0.254744 | 0.459734 | 0.619146 | 0.671948 |
| Mmu.12268.1.S1_at       | Mmu.12268.1     | 10.33 | 10.63 | 0.58 | 0.14 | -1.23 | 0.76715  | 0.255469 | 0.912485 | 0.523505 |
| Mmu.12272.2.A1_at       | Mmu.12272.2     | 4.87  | 4.76  | 0.15 | 0.06 | 1.08  | 0.35245  | 0.560868 | 0.692649 | 0.736993 |
| Mmu.12272.2.S1_at       | Mmu.12272.2     | 3.88  | 3.92  | 0.24 | 0.21 | -1.03 | 0.367865 | 0.393513 | 0.703308 | 0.626447 |
| Mmu.12281.1.S1_at       | Mmu.12281.1     | 11.36 | 11.48 | 0.04 | 0.12 | -1.09 | 0.71104  | 0.362283 | 0.887436 | 0.602931 |
| Mmu.12285.1.S1_at       | Mmu.12285.1     | 9.07  | 9.35  | 1.78 | 0.29 | -1.21 | 0.84935  | 0.287079 | 0.947057 | 0.548379 |
| Mmu.12305.1.S1_at       | Mmu.12305.1     | 8.23  | 8.14  | 0.27 | 0.07 | 1.07  | 0.311948 | 0.426611 | 0.663542 | 0.648739 |
| Mmu.12307.1.S1_at       | Mmu.12307.1     | 7.89  | 7.46  | 0.41 | 0.13 | 1.35  | 0.149335 | 0.349774 | 0.523197 | 0.593578 |
| Mmu.12320.1.S1_at       | Mmu.12320.1     | 10.4  | 10.28 | 0.07 | 0.13 | 1.09  | 0.632879 | 0.789618 | 0.853367 | 0.87847  |
| Mmu.12324.1.S1_at       | Mmu.12324.1     | 8.03  | 8.55  | 0.11 | 0.05 | -1.43 | 0.002005 | 0.001327 | 0.173156 | 0.056164 |
| Mmu.12330.1.S1_at       | Mmu.12330.1     | 13.36 | 13.2  | 0.06 | 0.11 | 1.12  | 0.052005 | 0.00413  | 0.391724 | 0.090891 |
| Mmu.12345.2.S1_at       | Mmu.12345.2     | 10.41 | 10.54 | 0.15 | 0.11 | -1.09 | 0.886682 | 0.094195 | 0.96068  | 0.350889 |
| Mmu.12356.1.S1_at       | Mmu.12356.1     | 5.07  | 4.8   | 1.06 | 0.15 | 1.21  | 0.492396 | 0.447889 | 0.778247 | 0.663881 |
| Mmu.12356.1.S1_s_at     | Mmu.12356.1     | 5.54  | 5.65  | 0.48 | 0.09 | -1.08 | 0.793317 | 0.640857 | 0.92426  | 0.789221 |
| Mmu.12364.1.S1_at       | Mmu.12364.1     | 7.39  | 7.32  | 0.35 | 0.09 | 1.05  | 0.433923 | 0.646124 | 0.744754 | 0.792676 |
| Mmu.12364.1.S1_x_at     | Mmu.12364.1     | 7.05  | 7.09  | 0.26 | 0.2  | -1.02 | 0.678355 | 0.867484 | 0.873961 | 0.924699 |
| Mmu.12381.1.S1_at       | Mmu.12381.1     | 10.53 | 10.16 | 0.54 | 0.2  | 1.29  | 0.256263 | 0.039907 | 0.620399 | 0.244852 |
| Mmu.12382.1.S1_s_at     | Mmu.12382.1     | 11.27 | 11.25 | 0.16 | 0.27 | 1.01  | 0.457479 | 0.654876 | 0.758353 | 0.798179 |
| Mmu.12383.1.S1_at       | Mmu.12383.1     | 11.69 | 11.25 | 0.04 | 0.22 | 1.36  | 0.023297 | 0.043754 | 0.314809 | 0.25387  |
| Mmu.12385.2.S1_x_at     | Mmu.12385.2     | 12.71 | 12.96 | 0.54 | 0.12 | -1.19 | 0.532987 | 0.257049 | 0.800589 | 0.524781 |
| Mmu.12385.4.S1_x_at     | Mmu.12385.4     | 12.59 | 12.87 | 0.53 | 0.14 | -1.22 | 0.555678 | 0.237003 | 0.813597 | 0.507675 |
| Mmu.12385.5.S1_x_at     | Mmu.12385.5     | 9.08  | 9.16  | 0.18 | 0.08 | -1.05 | 0.352535 | 0.138334 | 0.692659 | 0.411244 |
| Mmu.12391.1.S1_at       | Mmu.12391.1     | 7.37  | 7.61  | 0.42 | 0.1  | -1.18 | 0.931935 | 0.875314 | 0.977118 | 0.929211 |
| Mmu.12394.1.S1_at       | Mmu.12394.1     | 5.71  | 5.7   | 0.1  | 0.11 | 1.01  | 0.218611 | 0.026601 | 0.588341 | 0.204008 |
| Mmu.12401.1.S1_at       | Mmu.12401.1     | 9.6   | 10.2  | 0.34 | 0.16 | -1.52 | 0.214546 | 0.134583 | 0.58502  | 0.406629 |
| Mmu.12401.1.S1_s_at     | Mmu.12401.1     | 9.63  | 10.43 | 0.38 | 0.22 | -1.74 | 0.151118 | 0.13183  | 0.52444  | 0.403891 |
| Mmu.12405.1.S1_at       | Mmu.12405.1     | 6.34  | 7.01  | 0.42 | 0.12 | -1.59 | 0.070129 | 0.159956 | 0.428522 | 0.436061 |

|                         |                 |       |       |      |      |       |          |          |          |          |
|-------------------------|-----------------|-------|-------|------|------|-------|----------|----------|----------|----------|
| Mmu.12407.1.S1_at       | Mmu.12407.1     | 6.97  | 6.46  | 0.14 | 0.2  | 1.42  | 0.08074  | 0.140067 | 0.444813 | 0.413394 |
| Mmu.12414.1.S1_at       | Mmu.12414.1     | 7.55  | 7.54  | 0.04 | 0.11 | 1.01  | 0.795155 | 0.885605 | 0.924811 | 0.934982 |
| Mmu.12423.1.S1_at       | Mmu.12423.1     | 6.08  | 5.89  | 0.07 | 0.17 | 1.14  | 0.092282 | 0.005871 | 0.460762 | 0.104856 |
| Mmu.12425.1.S1_at       | Mmu.12425.1     | 6.3   | 5.89  | 0.47 | 0    | 1.32  | 0.467906 | 0.393359 | 0.764607 | 0.626258 |
| Mmu.12426.1.S1_at       | Mmu.12426.1     | 4     | 3.98  | 0.16 | 0.45 | 1.02  | 0.633186 | 0.259057 | 0.853404 | 0.526246 |
| Mmu.12439.1.S1_s_at     | Mmu.12439.1     | 12.52 | 12.57 | 0.13 | 0.13 | -1.03 | 0.281232 | 0.080039 | 0.639849 | 0.327429 |
| Mmu.12441.1.S1_at       | Mmu.12441.1     | 13.63 | 13.53 | 0.18 | 0.06 | 1.07  | 0.756919 | 0.045761 | 0.908337 | 0.258277 |
| MmugDNA.31343.1.S1_at   | MmugDNA.31343.1 | 13.65 | 13.8  | 0.16 | 0.04 | -1.11 | 0.172398 | 0.037039 | 0.545696 | 0.236886 |
| MmugDNA.31343.1.S1_s_at | MmugDNA.31343.1 | 13.19 | 13.35 | 0.21 | 0.06 | -1.12 | 0.257606 | 0.072488 | 0.621338 | 0.315339 |
| Mmu.12449.1.S1_at       | Mmu.12449.1     | 6.95  | 6.84  | 0.21 | 0.1  | 1.08  | 0.181532 | 0.159687 | 0.554659 | 0.435785 |
| Mmu.12457.1.S1_at       | Mmu.12457.1     | 11.75 | 11.74 | 0.21 | 0.07 | -1.01 | 0.833948 | 0.620995 | 0.94048  | 0.775745 |
| Mmu.12457.1.S1_s_at     | Mmu.12457.1     | 12.74 | 12.81 | 0.14 | 0.01 | -1.05 | 0.316311 | 0.297353 | 0.666471 | 0.556071 |
| Mmu.12458.2.S1_at       | Mmu.12458.2     | 12.2  | 12.56 | 0.17 | 0.05 | -1.28 | 0.021967 | 0.02002  | 0.309781 | 0.177698 |
| Mmu.12458.2.S1_x_at     | Mmu.12458.2     | 12.65 | 13.01 | 0.18 | 0.05 | -1.28 | 0.024236 | 0.022647 | 0.317812 | 0.188488 |
| Mmu.12467.1.S1_at       | Mmu.12467.1     | 8.21  | 7.93  | 0.6  | 0.06 | 1.21  | 0.573816 | 0.006218 | 0.823742 | 0.106916 |
| Mmu.12468.1.S1_at       | Mmu.12468.1     | 7.75  | 7.5   | 0.43 | 0.31 | 1.18  | 0.173742 | 0.119393 | 0.546749 | 0.387887 |
| Mmu.12476.2.S1_a_at     | Mmu.12476.2     | 4.71  | 4.9   | 0.21 | 0.11 | -1.14 | 0.388449 | 0.18257  | 0.715344 | 0.459065 |
| Mmu.1249.1.S1_at        | Mmu.1249.1      | 7.95  | 7.83  | 1    | 0.11 | 1.09  | 0.842183 | 0.309596 | 0.944083 | 0.564987 |
| Mmu.12497.1.S1_at       | Mmu.12497.1     | 11.88 | 11.96 | 0.19 | 0.05 | -1.05 | 0.788502 | 0.763462 | 0.922359 | 0.862471 |
| Mmu.125.1.S1_at         | Mmu.125.1       | 4.71  | 4.57  | 0.15 | 0.09 | 1.1   | 0.128275 | 0.178522 | 0.502907 | 0.454778 |
| Mmu.12516.1.A1_at       | Mmu.12516.1     | 3.81  | 3.95  | 0.28 | 0.14 | -1.1  | 0.437243 | 0.554085 | 0.746719 | 0.732953 |
| Mmu.12516.1.S1_at       | Mmu.12516.1     | 4.06  | 4.24  | 0.33 | 0.37 | -1.13 | 0.325416 | 0.485464 | 0.673233 | 0.68914  |
| Mmu.12522.1.S1_at       | Mmu.12522.1     | 12.48 | 12.5  | 0.16 | 0.03 | -1.01 | 0.34036  | 0.429945 | 0.684512 | 0.65111  |
| Mmu.12522.1.S1_x_at     | Mmu.12522.1     | 12.36 | 12.4  | 0.2  | 0.04 | -1.03 | 0.604372 | 0.70329  | 0.839628 | 0.827958 |
| Mmu.12524.1.S1_at       | Mmu.12524.1     | 8.32  | 8.26  | 0.44 | 0.13 | 1.04  | 0.410519 | 0.524467 | 0.730749 | 0.714384 |
| Mmu.1257.1.S1_at        | Mmu.1257.1      | 4.21  | 3.66  | 0.32 | 0.31 | 1.47  | 0.042319 | 0.036676 | 0.368868 | 0.235973 |
| Mmu.12585.1.S1_at       | Mmu.12585.1     | 9.44  | 9.37  | 0.3  | 0.11 | 1.05  | 0.495304 | 0.148441 | 0.779921 | 0.423007 |
| Mmu.12596.1.S1_at       | Mmu.12596.1     | 7.81  | 7.65  | 0.24 | 0.09 | 1.12  | 0.115755 | 0.129554 | 0.489041 | 0.401081 |
| Mmu.126.1.S1_a_at       | Mmu.126.1       | 4.11  | 4.08  | 0.21 | 0.13 | 1.02  | 0.302427 | 0.336783 | 0.656367 | 0.584093 |
| Mmu.126.2.A1_at         | Mmu.126.2       | 4.1   | 4.14  | 0.35 | 0.06 | -1.03 | 0.57828  | 0.340044 | 0.826202 | 0.586516 |
| Mmu.12603.1.S1_a_at     | Mmu.12603.1     | 10.11 | 10.96 | 0.17 | 0.37 | -1.8  | 0.044823 | 0.037618 | 0.375225 | 0.238384 |
| Mmu.12603.1.S1_at       | Mmu.12603.1     | 10.21 | 11.04 | 0.21 | 0.31 | -1.77 | 0.023698 | 0.020663 | 0.316281 | 0.180392 |
| Mmu.12603.2.S1_at       | Mmu.12603.2     | 3.01  | 3.04  | 0.02 | 0.03 | -1.02 | 0.393087 | 0.013322 | 0.718976 | 0.148042 |
| Mmu.1261.1.S1_at        | Mmu.1261.1      | 3.58  | 3.6   | 0.07 | 0.14 | -1.01 | 0.897462 | 0.942371 | 0.965207 | 0.967292 |
| Mmu.2120.1.S1_s_at      | Mmu.2120.1      | 14.72 | 14.73 | 0.01 | 0.02 | -1.01 | 0.141822 | 0.149626 | 0.516824 | 0.424172 |
| Mmu.12611.1.S1_at       | Mmu.12611.1     | 9.51  | 9.4   | 0.18 | 0.06 | 1.08  | 0.217206 | 0.378812 | 0.587151 | 0.615795 |
| Mmu.1262.1.A1_at        | Mmu.1262.1      | 11.93 | 12.01 | 0.13 | 0.07 | -1.06 | 0.437463 | 0.34797  | 0.746834 | 0.592215 |
| Mmu.12628.1.S1_at       | Mmu.12628.1     | 8.86  | 9.8   | 0.64 | 0.22 | -1.91 | 0.215212 | 0.029915 | 0.585748 | 0.214643 |
| Mmu.12633.1.S1_at       | Mmu.12633.1     | 10.05 | 9.59  | 0.23 | 0.27 | 1.37  | 0.034282 | 0.001551 | 0.349194 | 0.059602 |
| Mmu.12638.1.S1_at       | Mmu.12638.1     | 9.85  | 9.46  | 0.15 | 0.24 | 1.31  | 0.019863 | 0.005271 | 0.302615 | 0.100589 |
| Mmu.12642.1.S1_at       | Mmu.12642.1     | 6.1   | 6.57  | 0.38 | 0.2  | -1.39 | 0.235517 | 0.141012 | 0.602643 | 0.414507 |
| Mmu.12644.1.S1_at       | Mmu.12644.1     | 7.19  | 7.47  | 0.83 | 0.08 | -1.21 | 0.546811 | 0.208066 | 0.808796 | 0.482049 |
| Mmu.12647.1.S1_at       | Mmu.12647.1     | 8.36  | 8.44  | 0.27 | 0.16 | -1.05 | 0.735834 | 0.902436 | 0.89895  | 0.944564 |

|                         |                 |       |       |      |      |       |          |          |          |          |
|-------------------------|-----------------|-------|-------|------|------|-------|----------|----------|----------|----------|
| Mmu.1265.1.S1_at        | Mmu.1265.1      | 9.41  | 10    | 0.5  | 0.06 | -1.51 | 0.105119 | 0.123116 | 0.476837 | 0.393123 |
| Mmu.12651.3.S1_at       | Mmu.12651.3     | 10.08 | 8.93  | 0.29 | 0.28 | 2.22  | 0.004715 | 0.000626 | 0.201699 | 0.042692 |
| Mmu.12653.1.S1_at       | Mmu.12653.1     | 10.98 | 10.55 | 0.21 | 0.05 | 1.35  | 0.048216 | 0.109755 | 0.382603 | 0.373701 |
| Mmu.12672.1.S1_at       | Mmu.12672.1     | 3.04  | 3.04  | 0.14 | 0.17 | -1    | 0.443593 | 0.612043 | 0.750908 | 0.76972  |
| Mmu.12672.1.S1_s_at     | Mmu.12672.1     | 11.14 | 10.9  | 0.3  | 0.12 | 1.18  | 0.59312  | 0.33902  | 0.834072 | 0.585891 |
| Mmu.7460.2.S1_x_at      | Mmu.7460.2      | 5.94  | 4.41  | 1.37 | 0.23 | 2.89  | 0.12741  | 0.062476 | 0.501582 | 0.296745 |
| Mmu.127.1.A1_at         | Mmu.127.1       | 2.98  | 2.81  | 0.26 | 0.08 | 1.12  | 0.258895 | 0.325122 | 0.622286 | 0.575547 |
| Mmu.127.1.S1_at         | Mmu.127.1       | 3.32  | 3.41  | 0.17 | 0.02 | -1.06 | 0.806318 | 0.76878  | 0.929704 | 0.865653 |
| Mmu.12708.1.S1_at       | Mmu.12708.1     | 5.47  | 5.15  | 0.46 | 0.11 | 1.25  | 0.201549 | 0.223988 | 0.573165 | 0.497025 |
| Mmu.12740.1.S1_at       | Mmu.12740.1     | 10.17 | 10.29 | 0.2  | 0.27 | -1.08 | 0.942844 | 0.419699 | 0.98034  | 0.643616 |
| Mmu.12743.1.S1_at       | Mmu.12743.1     | 9.01  | 8.75  | 0.24 | 0.1  | 1.2   | 0.118989 | 0.008926 | 0.492511 | 0.124951 |
| Mmu.12751.1.S1_at       | Mmu.12751.1     | 9.84  | 9.08  | 0.1  | 0.2  | 1.69  | 0.006722 | 0.00101  | 0.223059 | 0.050657 |
| Mmu.12759.1.S1_at       | Mmu.12759.1     | 6.51  | 6.47  | 0.21 | 0.05 | 1.03  | 0.966903 | 0.436442 | 0.989086 | 0.65599  |
| Mmu.1276.1.S1_at        | Mmu.1276.1      | 10.76 | 10.23 | 0.9  | 0.1  | 1.44  | 0.649335 | 0.788244 | 0.860264 | 0.877514 |
| Mmu.1278.1.S1_s_at      | Mmu.1278.1      | 14.82 | 14.84 | 0.01 | 0.01 | -1.01 | 0.136856 | 0.26336  | 0.511963 | 0.529635 |
| Mmu.12784.1.S1_at       | Mmu.12784.1     | 11.79 | 10.97 | 0.11 | 0.19 | 1.77  | 0.002425 | 0.000428 | 0.177075 | 0.038359 |
| Mmu.128.1.S1_at         | Mmu.128.1       | 14.03 | 14.31 | 0.16 | 0.03 | -1.21 | 0.044043 | 0.053796 | 0.373552 | 0.277457 |
| MmugDNA.2157.1.S1_s_at  | MmugDNA.2157.1  | 12.76 | 13.35 | 0.22 | 0.09 | -1.5  | 0.022026 | 0.034627 | 0.309781 | 0.230247 |
| Mmu.12802.1.S1_at       | Mmu.12802.1     | 12.84 | 12.85 | 0.25 | 0.06 | -1.01 | 0.956286 | 0.996932 | 0.985496 | 0.99822  |
| Mmu.12802.2.S1_a_at     | Mmu.12802.2     | 12.01 | 12.08 | 0.29 | 0.09 | -1.05 | 0.93831  | 0.900504 | 0.979247 | 0.943447 |
| Mmu.12802.2.S1_at       | Mmu.12802.2     | 5.78  | 5.14  | 0.35 | 0.1  | 1.55  | 0.058137 | 0.047167 | 0.403716 | 0.261755 |
| Mmu.12806.1.S1_at       | Mmu.12806.1     | 10.33 | 10.02 | 0.04 | 0.07 | 1.25  | 0.002466 | 0.219654 | 0.177304 | 0.493246 |
| Mmu.12819.1.S1_at       | Mmu.12819.1     | 7.31  | 7.29  | 0.04 | 0.03 | 1.01  | 0.262928 | 0.863729 | 0.624987 | 0.922638 |
| Mmu.12819.1.S1_s_at     | Mmu.12819.1     | 5.44  | 5.33  | 0.12 | 0.03 | 1.08  | 0.150144 | 0.070938 | 0.523642 | 0.312444 |
| Mmu.12831.2.S1_at       | Mmu.12831.2     | 10.48 | 10.41 | 0.2  | 0.15 | 1.05  | 0.200936 | 0.205902 | 0.57267  | 0.480109 |
| Mmu.12852.1.S1_at       | Mmu.12852.1     | 11.4  | 11.08 | 0.5  | 0.04 | 1.24  | 0.342524 | 0.105418 | 0.685918 | 0.367279 |
| Mmu.12860.1.S1_at       | Mmu.12860.1     | 9.72  | 10.09 | 0.14 | 0.06 | -1.3  | 0.024824 | 0.546558 | 0.319921 | 0.728079 |
| Mmu.12861.1.S1_at       | Mmu.12861.1     | 12.51 | 12.56 | 0.29 | 0.06 | -1.03 | 0.365945 | 0.32261  | 0.701433 | 0.574023 |
| Mmu.12861.2.S1_at       | Mmu.12861.2     | 10.89 | 10.82 | 0.25 | 0.04 | 1.05  | 0.680567 | 0.515849 | 0.874731 | 0.708504 |
| MmugDNA.41416.1.S1_s_at | MmugDNA.41416.1 | 10.88 | 10.75 | 0.31 | 0.05 | 1.1   | 0.580302 | 0.558025 | 0.826958 | 0.735346 |
| Mmu.12863.1.S1_at       | Mmu.12863.1     | 11.31 | 10.92 | 0.16 | 0.14 | 1.32  | 0.019728 | 0.016014 | 0.302296 | 0.160458 |
| Mmu.12864.1.S1_at       | Mmu.12864.1     | 10.39 | 10.07 | 0.12 | 0.05 | 1.24  | 0.017489 | 0.009448 | 0.292066 | 0.128022 |
| Mmu.12865.1.S1_s_at     | Mmu.12865.1     | 9.19  | 8.94  | 0.31 | 0.3  | 1.19  | 0.153056 | 0.183531 | 0.526128 | 0.459681 |
| Mmu.12870.1.S1_at       | Mmu.12870.1     | 12.21 | 12.27 | 0.23 | 0.03 | -1.05 | 0.679283 | 0.117328 | 0.874274 | 0.384947 |
| Mmu.12873.1.S1_at       | Mmu.12873.1     | 7.36  | 7.41  | 0.4  | 0.05 | -1.03 | 0.970124 | 0.780193 | 0.990146 | 0.872539 |
| Mmu.12875.1.S1_at       | Mmu.12875.1     | 9.52  | 9.78  | 0.46 | 0.26 | -1.2  | 0.989523 | 0.138705 | 0.996071 | 0.411807 |
| Mmu.12880.1.S1_at       | Mmu.12880.1     | 10.25 | 10.01 | 0.38 | 0.06 | 1.18  | 0.298562 | 0.128534 | 0.653176 | 0.39989  |
| Mmu.12897.1.A1_at       | Mmu.12897.1     | 12.23 | 12.03 | 0.25 | 0.14 | 1.15  | 0.197391 | 0.079217 | 0.568435 | 0.326399 |
| Mmu.12897.1.S1_at       | Mmu.12897.1     | 11.76 | 11.76 | 0.25 | 0.18 | 1     | 0.32635  | 0.026212 | 0.673872 | 0.202891 |
| Mmu.12899.1.S1_at       | Mmu.12899.1     | 12.15 | 12.36 | 0.84 | 0.06 | -1.15 | 0.479015 | 0.197594 | 0.770426 | 0.472564 |
| Mmu.12915.1.A1_at       | Mmu.12915.1     | 3.37  | 3.37  | 0.02 | 0.04 | 1     | 0.572979 | 0.419347 | 0.823428 | 0.643449 |
| Mmu.12915.1.S1_at       | Mmu.12915.1     | 4.39  | 3.99  | 0.2  | 0.04 | 1.32  | 0.083472 | 0.050283 | 0.449546 | 0.269566 |
| Mmu.12921.1.S1_at       | Mmu.12921.1     | 7.58  | 7.64  | 0.68 | 0.08 | -1.04 | 0.79619  | 0.946001 | 0.925068 | 0.969324 |



|                      |              |       |       |      |      |       |          |          |          |          |
|----------------------|--------------|-------|-------|------|------|-------|----------|----------|----------|----------|
| Mmu.12925.2.S1_at    | Mmu.12925.2  | 3.8   | 3.51  | 0.12 | 0.1  | 1.22  | 0.027695 | 0.008764 | 0.328792 | 0.124009 |
| Mmu.12935.1.S1_at    | Mmu.12935.1  | 5.16  | 5.14  | 0.1  | 0.06 | 1.01  | 0.679883 | 0.977407 | 0.874376 | 0.987721 |
| Mmu.12948.1.S1_at    | Mmu.12948.1  | 9.8   | 9.51  | 0.22 | 0.26 | 1.23  | 0.072367 | 0.029649 | 0.432231 | 0.213852 |
| Mmu.12952.1.S1_at    | Mmu.12952.1  | 10.97 | 10.9  | 2.26 | 0.26 | 1.05  | 0.795179 | 0.458422 | 0.924811 | 0.671165 |
| Mmu.12953.1.A1_at    | Mmu.12953.1  | 10.94 | 11.04 | 0.14 | 0.21 | -1.07 | 0.938282 | 0.416818 | 0.979247 | 0.641749 |
| Mmu.12959.1.S1_at    | Mmu.12959.1  | 12.7  | 12.57 | 0.14 | 0.03 | 1.1   | 0.205924 | 0.16151  | 0.577849 | 0.437651 |
| Mmu.12966.1.S1_at    | Mmu.12966.1  | 7.77  | 8.21  | 0.36 | 0.22 | -1.35 | 0.190642 | 0.1331   | 0.561788 | 0.404734 |
| Mmu.12981.1.S1_at    | Mmu.12981.1  | 12.39 | 12.56 | 0.31 | 0.05 | -1.13 | 0.301749 | 0.204197 | 0.655973 | 0.478507 |
| Mmu.12981.1.S1_s_at  | Mmu.12981.1  | 12.87 | 13.06 | 0.2  | 0.02 | -1.14 | 0.152556 | 0.137645 | 0.525558 | 0.410618 |
| Mmu.12987.1.S1_at    | Mmu.12987.1  | 9.94  | 9.39  | 0.08 | 0.2  | 1.46  | 0.00926  | 0.005904 | 0.241866 | 0.105118 |
| Mmu.12990.1.S1_x_at  | Mmu.12990.1  | 8.29  | 8.11  | 0.31 | 0.16 | -1.13 | 0.677255 | 0.052059 | 0.873403 | 0.273754 |
| Mmu.12999.1.S1_at    | Mmu.12999.1  | 7.39  | 6.76  | 0.57 | 0.16 | 1.55  | 0.183152 | 0.264126 | 0.556057 | 0.530214 |
| Mmu.1300.1.S1_at     | Mmu.1300.1   | 6.37  | 5.74  | 0.36 | 0.22 | 1.55  | 0.040432 | 0.028927 | 0.364378 | 0.211953 |
| Mmu.15247.37.S1_s_at | Mmu.15247.37 | 3.07  | 2.93  | 0.16 | 0.17 | 1.11  | 0.681596 | 0.914319 | 0.875363 | 0.951823 |
| Mmu.15247.37.S1_x_at | Mmu.15247.37 | 2.94  | 2.94  | 0.02 | 0.1  | -1    | 0.70724  | 0.877599 | 0.886085 | 0.930173 |
| Mmu.13011.1.S1_at    | Mmu.13011.1  | 6.75  | 7.53  | 0.28 | 0.22 | -1.72 | 0.058316 | 0.005071 | 0.40405  | 0.09907  |
| Mmu.13012.1.S1_at    | Mmu.13012.1  | 4.29  | 4.01  | 0.26 | 0.18 | 1.21  | 0.545422 | 0.230294 | 0.807818 | 0.502102 |
| Mmu.13013.1.S1_at    | Mmu.13013.1  | 7.96  | 8.05  | 0.24 | 0.06 | -1.06 | 0.787833 | 0.268165 | 0.922045 | 0.533876 |
| Mmu.13013.1.S1_x_at  | Mmu.13013.1  | 7.45  | 7.39  | 0.18 | 0.08 | 1.05  | 0.194686 | 0.246433 | 0.565144 | 0.515899 |
| Mmu.13018.1.S1_at    | Mmu.13018.1  | 7.89  | 7.51  | 0.59 | 0.04 | 1.3   | 0.225373 | 0.296371 | 0.594611 | 0.555492 |
| Mmu.13018.2.S1_a_at  | Mmu.13018.2  | 8.99  | 8.65  | 0.22 | 0.06 | 1.26  | 0.065912 | 0.154835 | 0.421278 | 0.429849 |
| Mmu.13021.1.S1_at    | Mmu.13021.1  | 7.58  | 6.47  | 0.19 | 0.23 | 2.16  | 0.003165 | 0.002828 | 0.191107 | 0.078363 |
| Mmu.1303.1.A1_at     | Mmu.1303.1   | 6.3   | 6.22  | 0.16 | 0.11 | 1.05  | 0.412806 | 0.289448 | 0.732098 | 0.55046  |
| Mmu.1303.1.S1_at     | Mmu.1303.1   | 6.25  | 6.22  | 0.35 | 0.07 | 1.03  | 0.829834 | 0.940908 | 0.93888  | 0.966553 |
| Mmu.13051.1.S1_at    | Mmu.13051.1  | 4.99  | 5.19  | 0.25 | 0.11 | -1.15 | 0.71023  | 0.722162 | 0.887263 | 0.839044 |
| Mmu.13059.1.S1_at    | Mmu.13059.1  | 10.74 | 10.27 | 0.12 | 0.17 | 1.38  | 0.008376 | 0.007952 | 0.233808 | 0.118702 |
| Mmu.13079.1.S1_at    | Mmu.13079.1  | 3.39  | 3.39  | 0.17 | 0.02 | -1    | 0.89358  | 0.863632 | 0.963474 | 0.922638 |
| Mmu.13079.1.S1_s_at  | Mmu.13079.1  | 12.24 | 12.87 | 0.17 | 0.07 | -1.55 | 0.003996 | 0.000062 | 0.198571 | 0.025666 |
| Mmu.13084.1.S1_x_at  | Mmu.13084.1  | 3.43  | 3.74  | 0.66 | 0.11 | -1.24 | 0.81909  | 0.506292 | 0.934706 | 0.702368 |
| Mmu.1309.1.S1_at     | Mmu.1309.1   | 11.91 | 11.9  | 0.26 | 0.07 | 1.01  | 0.855629 | 0.343018 | 0.948973 | 0.58885  |
| Mmu.13092.1.S1_s_at  | Mmu.13092.1  | 13.07 | 12.85 | 0.08 | 0.01 | 1.17  | 0.008107 | 0.106252 | 0.232005 | 0.368669 |
| Mmu.13096.1.S1_at    | Mmu.13096.1  | 10.24 | 10.02 | 0.27 | 0.16 | 1.17  | 0.245021 | 0.169718 | 0.610441 | 0.446287 |
| Mmu.1310.2.S1_at     | Mmu.1310.2   | 10.78 | 10.32 | 0.22 | 0.14 | 1.38  | 0.013448 | 0.008534 | 0.268462 | 0.122563 |
| Mmu.13104.1.S1_at    | Mmu.13104.1  | 11.63 | 11.57 | 0.16 | 0.13 | 1.05  | 0.457419 | 0.114301 | 0.758343 | 0.380835 |
| Mmu.13105.1.S1_at    | Mmu.13105.1  | 13.06 | 13.14 | 0.06 | 0.01 | -1.06 | 0.23938  | 0.007192 | 0.60587  | 0.114057 |
| Mmu.13110.1.S1_at    | Mmu.13110.1  | 9.91  | 10.1  | 0.17 | 0.14 | -1.14 | 0.504896 | 0.030501 | 0.785092 | 0.216644 |
| Mmu.13110.1.S1_s_at  | Mmu.13110.1  | 9.01  | 9.19  | 0.18 | 0.19 | -1.14 | 0.387138 | 0.021693 | 0.71407  | 0.184333 |
| Mmu.13111.1.S1_at    | Mmu.13111.1  | 7.33  | 7.09  | 0.31 | 0.13 | 1.18  | 0.130854 | 0.114244 | 0.505266 | 0.380761 |
| Mmu.1314.2.S1_a_at   | Mmu.1314.2   | 9.79  | 9.38  | 1.25 | 0.23 | 1.32  | 0.504998 | 0.035687 | 0.785092 | 0.233314 |
| Mmu.13156.2.A1_x_at  | Mmu.13156.2  | 7.21  | 6.05  | 1.26 | 0.1  | 2.23  | 0.198709 | 0.429979 | 0.570106 | 0.65111  |
| Mmu.13156.2.S1_x_at  | Mmu.13156.2  | 7.97  | 7.35  | 0.96 | 0.04 | 1.54  | 0.29788  | 0.487523 | 0.652791 | 0.690559 |
| Mmu.13156.3.A1_at    | Mmu.13156.3  | 3.75  | 4.01  | 0.21 | 0.06 | -1.2  | 0.048962 | 0.330269 | 0.385063 | 0.579044 |
| Mmu.13156.3.S1_at    | Mmu.13156.3  | 5.98  | 6.06  | 0.05 | 0.13 | -1.06 | 0.163721 | 0.332305 | 0.536523 | 0.580738 |

|                         |                 |       |       |      |      |       |          |          |          |          |
|-------------------------|-----------------|-------|-------|------|------|-------|----------|----------|----------|----------|
| Mmu.13156.4.S1_x_at     | Mmu.13156.4     | 10.15 | 10.57 | 1.38 | 0.16 | -1.34 | 0.595981 | 0.090491 | 0.835679 | 0.345002 |
| Mmu.13156.5.A1_x_at     | Mmu.13156.5     | 8.7   | 9.42  | 1.28 | 0.18 | -1.65 | 0.381118 | 0.251606 | 0.709924 | 0.520349 |
| Mmu.13156.5.S1_x_at     | Mmu.13156.5     | 9.64  | 10.86 | 1.54 | 0.29 | -2.33 | 0.203968 | 0.149338 | 0.575205 | 0.423811 |
| Mmu.13168.1.S1_at       | Mmu.13168.1     | 9.92  | 10.18 | 0.12 | 0.14 | -1.2  | 0.166655 | 0.001731 | 0.539303 | 0.062895 |
| Mmu.13168.2.S1_at       | Mmu.13168.2     | 7.96  | 8.18  | 0.19 | 0.14 | -1.17 | 0.489425 | 0.00253  | 0.776182 | 0.074291 |
| Mmu.13181.1.S1_at       | Mmu.13181.1     | 8.6   | 8.51  | 0.16 | 0.12 | 1.06  | 0.411315 | 0.273973 | 0.73129  | 0.538503 |
| Mmu.13184.1.S1_x_at     | Mmu.13184.1     | 9.92  | 9.92  | 0.06 | 0.09 | -1    | 0.734552 | 0.243265 | 0.898442 | 0.513356 |
| Mmu.13185.1.S1_s_at     | Mmu.13185.1     | 13.27 | 13.31 | 0.14 | 0.05 | -1.03 | 0.396236 | 0.508587 | 0.721241 | 0.703719 |
| Mmu.132.1.S1_at         | Mmu.132.1       | 9.14  | 8.04  | 0.45 | 0.19 | 2.14  | 0.017139 | 0.024553 | 0.28947  | 0.196073 |
| Mmu.13251.1.A1_at       | Mmu.13251.1     | 5.72  | 5.69  | 0.07 | 0.05 | 1.02  | 0.714415 | 0.009115 | 0.888774 | 0.125994 |
| Mmu.13254.1.S1_at       | Mmu.13254.1     | 8.26  | 7.65  | 0.23 | 0.07 | -1.52 | 0.014171 | 0.004329 | 0.274019 | 0.092251 |
| Mmu.13271.1.S1_s_at     | Mmu.13271.1     | 6.51  | 6.44  | 0.07 | 0.06 | 1.06  | 0.114656 | 0.376117 | 0.487751 | 0.613952 |
| Mmu.13281.1.S1_at       | Mmu.13281.1     | 9.59  | 9.6   | 0.31 | 0.12 | -1.01 | 0.919702 | 0.762804 | 0.972712 | 0.862045 |
| Mmu.13282.1.A1_at       | Mmu.13282.1     | 4.99  | 4.88  | 0.07 | 0.07 | 1.08  | 0.078558 | 0.173583 | 0.441197 | 0.449956 |
| Mmu.13282.1.S1_at       | Mmu.13282.1     | 3.74  | 3.3   | 0.2  | 0.05 | 1.36  | 0.053066 | 0.037662 | 0.393954 | 0.23853  |
| Mmu.13291.1.S1_at       | Mmu.13291.1     | 11.38 | 10.54 | 0.5  | 0.14 | 1.79  | 0.101781 | 0.030222 | 0.472027 | 0.21576  |
| Mmu.13294.1.S1_at       | Mmu.13294.1     | 9.51  | 9.47  | 0.13 | 0.09 | 1.03  | 0.701329 | 0.53089  | 0.883866 | 0.718247 |
| Mmu.13324.1.S1_at       | Mmu.13324.1     | 9.15  | 9.15  | 0.1  | 0.14 | -1    | 0.270195 | 0.140671 | 0.630252 | 0.41397  |
| Mmu.13335.1.S1_at       | Mmu.13335.1     | 7.98  | 8.3   | 0.26 | 0.16 | -1.24 | 0.177597 | 0.011325 | 0.55065  | 0.138076 |
| Mmu.13339.1.S1_at       | Mmu.13339.1     | 7.52  | 7.44  | 0.12 | 0.12 | 1.06  | 0.471679 | 0.478653 | 0.76658  | 0.684657 |
| Mmu.13340.1.S1_at       | Mmu.13340.1     | 7.59  | 7.17  | 0.45 | 0.28 | 1.34  | 0.3117   | 0.209607 | 0.663471 | 0.483271 |
| Mmu.13354.1.A1_at       | Mmu.13354.1     | 9.16  | 9.62  | 0.12 | 0.18 | -1.38 | 0.019199 | 0.046361 | 0.300345 | 0.259844 |
| Mmu.13354.1.S1_at       | Mmu.13354.1     | 9.85  | 10.22 | 0.11 | 0.18 | -1.29 | 0.030496 | 0.054811 | 0.338095 | 0.279637 |
| Mmu.13356.1.S1_at       | Mmu.13356.1     | 10.23 | 10.22 | 0.32 | 0.14 | 1.01  | 0.672772 | 0.439133 | 0.871072 | 0.657885 |
| Mmu.13360.1.S1_at       | Mmu.13360.1     | 5.76  | 5.77  | 0.23 | 0.18 | -1.01 | 0.873068 | 0.82409  | 0.955976 | 0.898903 |
| Mmu.13368.1.S1_at       | Mmu.13368.1     | 11.55 | 11.14 | 0.24 | 0.05 | 1.33  | 0.11767  | 0.077662 | 0.491034 | 0.323709 |
| Mmu.13380.2.S1_at       | Mmu.13380.2     | 3.88  | 3.87  | 0.2  | 0.01 | 1.01  | 0.326344 | 0.572064 | 0.673872 | 0.744208 |
| Mmu.13384.1.S1_at       | Mmu.13384.1     | 7.95  | 8.05  | 0.16 | 0.11 | -1.08 | 0.700578 | 0.783439 | 0.883597 | 0.874577 |
| Mmu.13405.1.S1_at       | Mmu.13405.1     | 6.92  | 7.09  | 0.03 | 0.16 | -1.13 | 0.429136 | 0.041501 | 0.742138 | 0.248606 |
| MmugDNA.19759.1.S1_s_at | MmugDNA.19759.1 | 13.08 | 12.46 | 0.3  | 0.06 | 1.54  | 0.061227 | 0.046442 | 0.41029  | 0.260042 |
| Mmu.13435.1.S1_at       | Mmu.13435.1     | 13.94 | 13.84 | 0.13 | 0.04 | 1.08  | 0.771539 | 0.796818 | 0.91468  | 0.882803 |
| Mmu.13445.1.S1_at       | Mmu.13445.1     | 13.18 | 13.2  | 0.1  | 0.04 | -1.01 | 0.369989 | 0.581369 | 0.704429 | 0.750417 |
| Mmu.13450.1.S1_s_at     | Mmu.13450.1     | 14.49 | 14.5  | 0.02 | 0.01 | -1.01 | 0.197308 | 0.140916 | 0.568336 | 0.414394 |
| Mmu.13463.1.S1_at       | Mmu.13463.1     | 3.09  | 3.08  | 0.08 | 0.06 | 1     | 0.25141  | 0.370897 | 0.616657 | 0.609874 |
| Mmu.13476.1.A1_at       | Mmu.13476.1     | 5.19  | 5.07  | 0.03 | 0.09 | 1.09  | 0.098132 | 0.034148 | 0.467605 | 0.228692 |
| Mmu.13476.1.S1_at       | Mmu.13476.1     | 6.08  | 5.96  | 0.03 | 0.13 | 1.09  | 0.394437 | 0.002909 | 0.719752 | 0.079157 |
| Mmu.13482.1.S1_at       | Mmu.13482.1     | 8.23  | 7.65  | 0.83 | 0.27 | 1.5   | 0.327677 | 0.305257 | 0.675137 | 0.562255 |
| Mmu.13488.1.S1_at       | Mmu.13488.1     | 3.88  | 3.98  | 0.09 | 0.18 | -1.07 | 0.737755 | 0.904288 | 0.899629 | 0.945683 |
| Mmu.13493.1.S1_at       | Mmu.13493.1     | 6.87  | 7.38  | 0.19 | 0.36 | -1.42 | 0.294389 | 0.263825 | 0.650593 | 0.530086 |
| Mmu.1351.1.S1_at        | Mmu.1351.1      | 6.78  | 7.02  | 0.25 | 0.08 | -1.18 | 0.740387 | 0.152251 | 0.900777 | 0.427045 |
| Mmu.13511.1.S1_at       | Mmu.13511.1     | 7.78  | 7.57  | 0.07 | 0.13 | 1.15  | 0.121079 | 0.454774 | 0.494725 | 0.668859 |
| Mmu.13514.1.S1_s_at     | Mmu.13514.1     | 11.42 | 11.19 | 0.07 | 0.11 | 1.17  | 0.028254 | 0.007403 | 0.33163  | 0.115643 |
| Mmu.13516.1.S1_at       | Mmu.13516.1     | 8.87  | 8.7   | 1.04 | 0.29 | 1.12  | 0.724895 | 0.279602 | 0.893318 | 0.543186 |

|                     |             |       |       |      |      |       |          |          |          |          |
|---------------------|-------------|-------|-------|------|------|-------|----------|----------|----------|----------|
| Mmu.1995.1.S1_s_at  | Mmu.1995.1  | 13.05 | 13.61 | 0.13 | 0.06 | -1.48 | 0.002991 | 0.000084 | 0.190762 | 0.027016 |
| Mmu.13540.1.A1_at   | Mmu.13540.1 | 6.97  | 7.02  | 0.05 | 0.07 | -1.03 | 0.701291 | 0.375093 | 0.883866 | 0.613186 |
| Mmu.13540.1.S1_at   | Mmu.13540.1 | 6.5   | 6.45  | 0.1  | 0.03 | 1.04  | 0.588153 | 0.615945 | 0.83181  | 0.772359 |
| Mmu.1356.2.S1_at    | Mmu.1356.2  | 7.92  | 7.54  | 0.04 | 0.05 | 1.3   | 0.000354 | 0.033395 | 0.137028 | 0.226396 |
| Mmu.13562.1.S1_at   | Mmu.13562.1 | 11.66 | 11.36 | 0.1  | 0.08 | 1.23  | 0.024286 | 0.216    | 0.317812 | 0.48965  |
| Mmu.13562.1.S1_x_at | Mmu.13562.1 | 11.77 | 11.49 | 0.07 | 0.06 | 1.22  | 0.007853 | 0.151394 | 0.231027 | 0.426104 |
| Mmu.13564.1.S1_at   | Mmu.13564.1 | 5.41  | 4.75  | 0.2  | 0.16 | 1.58  | 0.014125 | 0.039385 | 0.274019 | 0.243406 |
| Mmu.13566.1.A1_at   | Mmu.13566.1 | 6.27  | 6.23  | 0.04 | 0.11 | 1.03  | 0.804343 | 0.157281 | 0.928886 | 0.432782 |
| Mmu.13566.1.S1_at   | Mmu.13566.1 | 5.74  | 5.37  | 0.34 | 0.16 | 1.29  | 0.399089 | 0.551248 | 0.722883 | 0.730863 |
| Mmu.13573.1.S1_at   | Mmu.13573.1 | 12.01 | 11.89 | 0.06 | 0.08 | 1.09  | 0.042666 | 0.359556 | 0.369882 | 0.600813 |
| Mmu.1358.2.S1_at    | Mmu.1358.2  | 13.3  | 13.26 | 0.18 | 0    | -1.03 | 0.766261 | 0.794192 | 0.912101 | 0.881296 |
| Mmu.13595.1.S1_at   | Mmu.13595.1 | 9.06  | 9.76  | 0.78 | 0.04 | -1.63 | 0.606526 | 0.66167  | 0.840496 | 0.801903 |
| Mmu.13611.1.S1_at   | Mmu.13611.1 | 8.46  | 8.19  | 0.28 | 0.24 | 1.2   | 0.187882 | 0.2001   | 0.560014 | 0.474603 |
| Mmu.13628.1.S1_s_at | Mmu.13628.1 | 9.61  | 10.33 | 0.52 | 0.11 | -1.64 | 0.118955 | 0.130508 | 0.49249  | 0.402373 |
| Mmu.13628.1.S1_x_at | Mmu.13628.1 | 6.96  | 7.76  | 1.02 | 0.11 | -1.73 | 0.779059 | 0.453617 | 0.918562 | 0.668054 |
| Mmu.13644.1.A1_at   | Mmu.13644.1 | 4.37  | 5.87  | 0.18 | 0.14 | -2.84 | 0.000389 | 0.041065 | 0.137028 | 0.247375 |
| Mmu.13644.1.S1_at   | Mmu.13644.1 | 4     | 5.65  | 0.45 | 0.45 | -3.15 | 0.008074 | 0.03686  | 0.232005 | 0.23648  |
| Mmu.13651.1.S1_s_at | Mmu.13651.1 | 9.07  | 8.79  | 0.19 | 0.21 | 1.21  | 0.044852 | 0.027607 | 0.375225 | 0.207455 |
| Mmu.13667.1.S1_s_at | Mmu.13667.1 | 13.31 | 13.09 | 0.14 | 0.03 | 1.17  | 0.065148 | 0.084802 | 0.419835 | 0.336325 |
| Mmu.1367.1.S1_at    | Mmu.1367.1  | 3.96  | 3.86  | 0.11 | 0.17 | 1.07  | 0.485923 | 0.157173 | 0.774427 | 0.432623 |
| Mmu.1367.1.S1_x_at  | Mmu.1367.1  | 4.22  | 4.21  | 0.11 | 0.09 | 1     | 0.215327 | 0.270577 | 0.585748 | 0.535837 |
| Mmu.13672.1.S1_s_at | Mmu.13672.1 | 13.76 | 13.1  | 0.35 | 0.22 | 1.58  | 0.122591 | 0.085585 | 0.496133 | 0.33757  |
| Mmu.13676.1.S1_at   | Mmu.13676.1 | 7.62  | 8.96  | 0.57 | 0.17 | -2.53 | 0.01801  | 0.0016   | 0.294862 | 0.060468 |
| Mmu.13676.1.S1_s_at | Mmu.13676.1 | 9.24  | 10.74 | 0.63 | 0.15 | -2.82 | 0.018538 | 0.002037 | 0.297536 | 0.066885 |
| Mmu.13692.1.S1_at   | Mmu.13692.1 | 10.99 | 11.33 | 0.17 | 0.09 | -1.27 | 0.152522 | 0.393594 | 0.525558 | 0.626497 |
| Mmu.13696.1.S1_at   | Mmu.13696.1 | 10.18 | 10.07 | 0.1  | 0.07 | 1.09  | 0.1017   | 0.583584 | 0.471947 | 0.751826 |
| Mmu.13707.1.S1_at   | Mmu.13707.1 | 10.25 | 10.29 | 0.24 | 0.11 | -1.03 | 0.720396 | 0.814987 | 0.891578 | 0.893221 |
| Mmu.13713.1.S1_s_at | Mmu.13713.1 | 12.67 | 12.94 | 0.3  | 0.02 | -1.2  | 0.504427 | 0.706267 | 0.784765 | 0.829634 |
| Mmu.13716.1.S1_at   | Mmu.13716.1 | 9.73  | 9.78  | 0.37 | 0.29 | -1.04 | 0.38117  | 0.271969 | 0.709924 | 0.53674  |
| Mmu.13728.1.S1_a_at | Mmu.13728.1 | 6.51  | 6.45  | 0.27 | 0.06 | 1.04  | 0.945673 | 0.958589 | 0.981093 | 0.976525 |
| Mmu.13729.1.S1_at   | Mmu.13729.1 | 3.34  | 3.47  | 0.59 | 0.21 | -1.09 | 0.709592 | 0.45038  | 0.88699  | 0.665643 |
| Mmu.13736.1.S1_at   | Mmu.13736.1 | 9.44  | 8.96  | 0.36 | 0.16 | 1.4   | 0.32384  | 0.063575 | 0.672332 | 0.298666 |
| Mmu.13746.1.S1_at   | Mmu.13746.1 | 7.04  | 7.22  | 0.15 | 0.14 | -1.14 | 0.076701 | 0.025006 | 0.438075 | 0.198121 |
| Mmu.13750.1.S1_at   | Mmu.13750.1 | 9.39  | 9.09  | 0.19 | 0.07 | 1.23  | 0.295224 | 0.368925 | 0.651026 | 0.608449 |
| Mmu.13764.1.S1_s_at | Mmu.13764.1 | 8.12  | 7.84  | 0.43 | 0.1  | 1.22  | 0.261215 | 0.360116 | 0.623819 | 0.601254 |
| Mmu.13773.1.S1_at   | Mmu.13773.1 | 9.27  | 9.66  | 0.23 | 0.12 | -1.31 | 0.038777 | 0.007213 | 0.36035  | 0.11412  |
| Mmu.13782.1.S1_at   | Mmu.13782.1 | 11.9  | 11.55 | 0.12 | 0.08 | 1.27  | 0.006524 | 0.002713 | 0.219791 | 0.076643 |
| Mmu.13787.1.S1_at   | Mmu.13787.1 | 11.91 | 11.58 | 0.36 | 0.06 | 1.26  | 0.601239 | 0.482546 | 0.838121 | 0.68734  |
| Mmu.1379.1.S1_at    | Mmu.1379.1  | 3.25  | 3.35  | 0.26 | 0.04 | -1.07 | 0.84778  | 0.776016 | 0.946572 | 0.869689 |
| Mmu.13791.1.S1_at   | Mmu.13791.1 | 12.65 | 12.5  | 0.35 | 0.07 | 1.11  | 0.485319 | 0.163712 | 0.774229 | 0.439902 |
| Mmu.13792.1.S1_at   | Mmu.13792.1 | 12.54 | 12.47 | 0.39 | 0.03 | 1.05  | 0.778421 | 0.51921  | 0.918259 | 0.710878 |
| Mmu.13799.1.S1_at   | Mmu.13799.1 | 9.88  | 10.02 | 0.06 | 0.2  | -1.1  | 0.207382 | 0.218267 | 0.578933 | 0.491804 |
| Mmu.13800.1.S1_at   | Mmu.13800.1 | 10.36 | 10.57 | 0.18 | 0.07 | -1.16 | 0.261607 | 0.374421 | 0.62388  | 0.612886 |

|                       |               |       |       |      |      |       |          |          |          |          |
|-----------------------|---------------|-------|-------|------|------|-------|----------|----------|----------|----------|
| Mmu.13804.1.S1_s_at   | Mmu.13804.1   | 13.54 | 13.54 | 0.09 | 0.03 | -1    | 0.670163 | 0.872431 | 0.869829 | 0.927467 |
| Mmu.1384.2.S1_at      | Mmu.1384.2    | 3.69  | 3.68  | 0    | 0.08 | 1.01  | 0.840681 | 0.536078 | 0.943406 | 0.721462 |
| Mmu.13843.2.S1_s_at   | Mmu.13843.2   | 2.66  | 2.63  | 0.03 | 0.04 | 1.03  | 0.065125 | 0.011093 | 0.419835 | 0.137051 |
| Mmu.13854.1.S1_at     | Mmu.13854.1   | 6.38  | 6.11  | 0.05 | 0.12 | 1.2   | 0.030373 | 0.11231  | 0.337508 | 0.377592 |
| Mmu.13858.1.S1_at     | Mmu.13858.1   | 7.26  | 7.23  | 0.03 | 0.28 | 1.03  | 0.294467 | 0.186511 | 0.650602 | 0.462364 |
| Mmu.13865.1.S1_s_at   | Mmu.13865.1   | 13.66 | 13.66 | 0.09 | 0.09 | -1    | 0.317114 | 0.344647 | 0.666951 | 0.590018 |
| Mmu.13868.1.S1_at     | Mmu.13868.1   | 8.23  | 7.65  | 0.3  | 0.08 | 1.49  | 0.037532 | 0.049968 | 0.357309 | 0.268752 |
| Mmu.1387.1.A1_at      | Mmu.1387.1    | 9.4   | 8.89  | 0.21 | 0.19 | 1.42  | 0.03554  | 0.09908  | 0.352302 | 0.357215 |
| Mmu.13876.1.S1_at     | Mmu.13876.1   | 8.16  | 8.41  | 0.99 | 0.33 | -1.19 | 0.576704 | 0.78588  | 0.825166 | 0.875989 |
| Mmu.13883.1.S1_s_at   | Mmu.13883.1   | 8.82  | 9.13  | 0.87 | 0.03 | -1.24 | 0.701425 | 0.887215 | 0.883866 | 0.935788 |
| Mmu.13908.1.S1_at     | Mmu.13908.1   | 4.81  | 4.8   | 0.16 | 0.19 | 1     | 0.461358 | 0.787222 | 0.760883 | 0.876889 |
| Mmu.13908.2.A1_at     | Mmu.13908.2   | 2.78  | 2.7   | 0.05 | 0.02 | 1.06  | 0.053359 | 0.053054 | 0.394644 | 0.276025 |
| Mmu.13917.1.S1_at     | Mmu.13917.1   | 8.52  | 8.08  | 0.56 | 0.15 | 1.35  | 0.227269 | 0.20331  | 0.596459 | 0.477517 |
| Mmu.13923.1.S1_at     | Mmu.13923.1   | 6.79  | 6.33  | 0.12 | 0.09 | 1.38  | 0.003761 | 0.001039 | 0.197739 | 0.051426 |
| Mmu.1393.1.S1_s_at    | Mmu.1393.1    | 13.54 | 13.46 | 0.11 | 0.04 | 1.06  | 0.902501 | 0.965376 | 0.967096 | 0.980661 |
| Mmu.13937.1.S1_s_at   | Mmu.13937.1   | 14.16 | 13.88 | 0.15 | 0.11 | 1.22  | 0.135171 | 0.089447 | 0.50918  | 0.343748 |
| Mmu.1394.1.S1_s_at    | Mmu.1394.1    | 11.87 | 11.92 | 0.08 | 0.02 | -1.04 | 0.392056 | 0.050647 | 0.718033 | 0.270317 |
| Mmu.13944.1.A1_at     | Mmu.13944.1   | 11.17 | 9.96  | 0.3  | 0.37 | 2.31  | 0.006498 | 0.003841 | 0.21968  | 0.088205 |
| Mmu.13944.1.S1_at     | Mmu.13944.1   | 5.78  | 5.79  | 0.3  | 0.21 | -1    | 0.855809 | 0.466342 | 0.949014 | 0.67624  |
| MmuSTS.1922.1.S1_at   | MmuSTS.1922.1 | 12.72 | 12.52 | 0.16 | 0.07 | 1.15  | 0.03763  | 0.006523 | 0.357733 | 0.10961  |
| MmuSTS.1922.1.S1_s_at | MmuSTS.1922.1 | 11.18 | 10.37 | 0.27 | 0.24 | 1.75  | 0.008035 | 0.003689 | 0.232005 | 0.086591 |
| Mmu.13947.1.S1_at     | Mmu.13947.1   | 7.4   | 7.33  | 0.14 | 0.44 | 1.05  | 0.284215 | 0.261139 | 0.642095 | 0.527538 |
| Mmu.13948.1.S1_at     | Mmu.13948.1   | 4.75  | 4.58  | 0.32 | 0.22 | 1.13  | 0.307484 | 0.405502 | 0.660255 | 0.633795 |
| Mmu.13956.1.S1_at     | Mmu.13956.1   | 9.99  | 9.84  | 0.67 | 0.07 | 1.11  | 0.772633 | 0.911453 | 0.915403 | 0.950093 |
| Mmu.13959.1.S1_at     | Mmu.13959.1   | 7.79  | 7.36  | 0.12 | 0.29 | 1.35  | 0.056457 | 0.02386  | 0.400239 | 0.193489 |
| Mmu.1396.1.S1_at      | Mmu.1396.1    | 10.74 | 10.78 | 0.05 | 0.06 | -1.03 | 0.824961 | 0.02256  | 0.937097 | 0.187982 |
| Mmu.13961.1.S1_at     | Mmu.13961.1   | 9.66  | 9.88  | 0.12 | 0.07 | -1.16 | 0.108007 | 0.045232 | 0.480459 | 0.257005 |
| Mmu.13982.2.S1_at     | Mmu.13982.2   | 7.17  | 7.7   | 0.61 | 0.09 | -1.45 | 0.25869  | 0.452028 | 0.622286 | 0.666754 |
| Mmu.13989.1.S1_at     | Mmu.13989.1   | 10.27 | 9.88  | 0.77 | 0.26 | 1.31  | 0.446835 | 0.146066 | 0.752889 | 0.420074 |
| Mmu.13993.1.S1_at     | Mmu.13993.1   | 3.89  | 3.94  | 0.2  | 0.12 | -1.03 | 0.654372 | 0.87435  | 0.862772 | 0.928629 |
| Mmu.13995.1.A1_at     | Mmu.13995.1   | 9.17  | 9.61  | 0.23 | 0.04 | -1.36 | 0.035182 | 0.002692 | 0.351216 | 0.076455 |
| Mmu.14024.1.S1_at     | Mmu.14024.1   | 7.71  | 8.02  | 0.43 | 0.28 | -1.24 | 0.366493 | 0.133206 | 0.701955 | 0.404941 |
| Mmu.14035.1.S1_at     | Mmu.14035.1   | 9.53  | 9.16  | 0.55 | 0.13 | 1.29  | 0.713746 | 0.90359  | 0.888497 | 0.945251 |
| Mmu.14041.1.S1_at     | Mmu.14041.1   | 9.4   | 9.28  | 0.49 | 0.1  | 1.08  | 0.710289 | 0.302414 | 0.887279 | 0.560109 |
| Mmu.14057.1.S1_at     | Mmu.14057.1   | 5.19  | 5.17  | 0.27 | 0.07 | 1.01  | 0.481405 | 0.661887 | 0.772038 | 0.802004 |
| Mmu.14060.1.A1_at     | Mmu.14060.1   | 11.95 | 12.39 | 0.71 | 0.05 | -1.35 | 0.39057  | 0.566986 | 0.716814 | 0.740935 |
| Mmu.14063.1.S1_at     | Mmu.14063.1   | 7.3   | 8.37  | 0.79 | 0.22 | -2.1  | 0.066465 | 0.040026 | 0.422326 | 0.245244 |
| Mmu.14068.1.S1_at     | Mmu.14068.1   | 7.49  | 7.49  | 1.27 | 0.48 | 1     | 0.96918  | 0.174132 | 0.989875 | 0.45044  |
| Mmu.14068.2.A1_at     | Mmu.14068.2   | 9.15  | 10.01 | 1.79 | 0.52 | -1.82 | 0.46492  | 0.218161 | 0.762771 | 0.491731 |
| Mmu.14082.1.S1_at     | Mmu.14082.1   | 10.48 | 10.33 | 0.13 | 0.07 | 1.11  | 0.289668 | 0.10387  | 0.646342 | 0.364519 |
| Mmu.14100.1.S1_at     | Mmu.14100.1   | 9.51  | 9.86  | 0.31 | 0.08 | -1.27 | 0.073453 | 0.001295 | 0.434496 | 0.055585 |
| Mmu.1412.1.S1_at      | Mmu.1412.1    | 9.57  | 9.37  | 0.18 | 0.16 | 1.14  | 0.089443 | 0.101248 | 0.457657 | 0.360971 |
| Mmu.14121.1.S1_at     | Mmu.14121.1   | 6.79  | 7.07  | 0.14 | 0.16 | -1.21 | 0.052417 | 0.006637 | 0.392384 | 0.110446 |

|                         |                 |       |       |      |      |       |          |          |          |          |
|-------------------------|-----------------|-------|-------|------|------|-------|----------|----------|----------|----------|
| Mmu.14152.1.S1_at       | Mmu.14152.1     | 7.42  | 7.83  | 1.94 | 0.36 | -1.33 | 0.698524 | 0.155808 | 0.882799 | 0.431211 |
| Mmu.14166.1.S1_at       | Mmu.14166.1     | 7.25  | 6.9   | 0.12 | 0.11 | 1.27  | 0.026492 | 0.045616 | 0.325143 | 0.257766 |
| Mmu.14167.1.S1_at       | Mmu.14167.1     | 9.92  | 9.33  | 0.15 | 0.16 | 1.51  | 0.006499 | 0.002073 | 0.21968  | 0.067389 |
| Mmu.14173.1.S1_at       | Mmu.14173.1     | 11.25 | 11.36 | 0.19 | 0.11 | -1.08 | 0.407273 | 0.531612 | 0.728545 | 0.718783 |
| Mmu.14174.1.S1_at       | Mmu.14174.1     | 9.57  | 9.38  | 0.24 | 0.06 | 1.14  | 0.162683 | 0.489029 | 0.535867 | 0.691559 |
| Mmu.14177.1.S1_at       | Mmu.14177.1     | 9.58  | 9.4   | 0.19 | 0.28 | 1.14  | 0.111203 | 0.204189 | 0.484303 | 0.478507 |
| Mmu.14179.2.S1_at       | Mmu.14179.2     | 9.86  | 10.04 | 0.29 | 0.16 | -1.13 | 0.423452 | 0.607935 | 0.739103 | 0.76668  |
| Mmu.14179.2.S1_x_at     | Mmu.14179.2     | 10.15 | 10.14 | 0.07 | 0.15 | 1     | 0.435546 | 0.562688 | 0.745762 | 0.7381   |
| Mmu.14180.1.S1_at       | Mmu.14180.1     | 8.38  | 8.28  | 0.22 | 0.17 | 1.07  | 0.311444 | 0.246508 | 0.663221 | 0.515917 |
| Mmu.14181.1.S1_at       | Mmu.14181.1     | 9.64  | 10.17 | 0.41 | 0.02 | -1.44 | 0.098664 | 0.019534 | 0.468025 | 0.175505 |
| Mmu.14202.1.S1_at       | Mmu.14202.1     | 12.99 | 12.27 | 0.21 | 0.17 | 1.65  | 0.011922 | 0.004451 | 0.257858 | 0.092997 |
| Mmu.14209.1.A1_at       | Mmu.14209.1     | 4.19  | 3.87  | 0.25 | 0.65 | 1.25  | 0.77209  | 0.872492 | 0.91501  | 0.927494 |
| Mmu.14209.1.S1_at       | Mmu.14209.1     | 3.19  | 3.12  | 0.01 | 0.51 | 1.05  | 0.5118   | 0.70263  | 0.7889   | 0.827641 |
| Mmu.14221.2.S1_at       | Mmu.14221.2     | 7.71  | 8.29  | 0.46 | 0.21 | -1.5  | 0.145325 | 0.243801 | 0.520409 | 0.513949 |
| Mmu.14247.1.S1_at       | Mmu.14247.1     | 4.4   | 4.07  | 0.83 | 0.26 | 1.26  | 0.446554 | 0.263881 | 0.752779 | 0.530118 |
| Mmu.14249.1.S1_at       | Mmu.14249.1     | 6.28  | 7.66  | 1.77 | 0.35 | -2.59 | 0.224075 | 0.118447 | 0.593223 | 0.386431 |
| Mmu.1425.1.S1_at        | Mmu.1425.1      | 9.63  | 7.13  | 0.91 | 0.38 | 5.66  | 0.014822 | 0.008842 | 0.278564 | 0.124493 |
| Mmu.1426.1.S1_at        | Mmu.1426.1      | 9.28  | 8.27  | 0.86 | 0.4  | 2.01  | 0.052595 | 0.008277 | 0.392678 | 0.12078  |
| Mmu.14263.2.S1_at       | Mmu.14263.2     | 9.28  | 8.55  | 0.32 | 0    | 1.65  | 0.025277 | 0.002341 | 0.321068 | 0.071588 |
| MmugDNA.26809.1.S1_s_at | MmugDNA.26809.1 | 13.67 | 13.63 | 0.12 | 0.03 | 1.03  | 0.865282 | 0.282192 | 0.952585 | 0.544949 |
| Mmu.14275.1.S1_at       | Mmu.14275.1     | 11.26 | 10.47 | 0.4  | 0.08 | 1.73  | 0.093557 | 0.094417 | 0.462739 | 0.351036 |
| Mmu.14298.1.S1_at       | Mmu.14298.1     | 5.49  | 5.09  | 0.16 | 0.13 | 1.32  | 0.060699 | 0.086424 | 0.408585 | 0.338882 |
| Mmu.14306.1.S1_s_at     | Mmu.14306.1     | 11.42 | 11.3  | 0.13 | 0.33 | 1.08  | 0.137865 | 0.144537 | 0.513592 | 0.418408 |
| Mmu.14311.1.S1_at       | Mmu.14311.1     | 8.02  | 7.6   | 1.51 | 0.27 | 1.33  | 0.740077 | 0.167842 | 0.900699 | 0.444426 |
| Mmu.14315.1.S1_at       | Mmu.14315.1     | 7.25  | 7.28  | 0.17 | 0.14 | -1.02 | 0.358148 | 0.735426 | 0.69611  | 0.846919 |
| Mmu.14317.2.S1_at       | Mmu.14317.2     | 9.96  | 9.89  | 0.01 | 0.11 | 1.05  | 0.101143 | 0.62185  | 0.471667 | 0.776413 |
| Mmu.14327.1.S1_at       | Mmu.14327.1     | 11.31 | 11.26 | 0.23 | 0.02 | 1.04  | 0.925541 | 0.004406 | 0.975188 | 0.092846 |
| Mmu.14341.1.S1_at       | Mmu.14341.1     | 7.09  | 6.98  | 0.18 | 0.07 | 1.08  | 0.33833  | 0.822113 | 0.682891 | 0.897658 |
| Mmu.14369.1.S1_at       | Mmu.14369.1     | 4.94  | 4.61  | 0.07 | 0.24 | 1.26  | 0.079116 | 0.10346  | 0.44198  | 0.364346 |
| Mmu.14389.1.S1_at       | Mmu.14389.1     | 7.65  | 7.61  | 0.26 | 0.08 | 1.03  | 0.279429 | 0.121029 | 0.638319 | 0.390038 |
| Mmu.14395.1.S1_at       | Mmu.14395.1     | 11.14 | 11.25 | 0.42 | 0.07 | -1.08 | 0.787806 | 0.081629 | 0.922045 | 0.329824 |
| Mmu.14396.1.S1_at       | Mmu.14396.1     | 10.69 | 10.65 | 0.13 | 0.1  | 1.03  | 0.94457  | 0.087606 | 0.980747 | 0.340846 |
| Mmu.1440.1.S1_at        | Mmu.1440.1      | 9.24  | 9.12  | 0.7  | 0.05 | 1.09  | 0.932655 | 0.993824 | 0.977227 | 0.996274 |
| Mmu.14402.2.A1_at       | Mmu.14402.2     | 6.32  | 6.48  | 0.66 | 0.17 | -1.12 | 0.984671 | 0.01058  | 0.995256 | 0.134213 |
| Mmu.14402.2.S1_at       | Mmu.14402.2     | 5.61  | 5.52  | 0.06 | 0.04 | 1.06  | 0.094843 | 0.417727 | 0.464075 | 0.642382 |
| Mmu.14426.1.S1_at       | Mmu.14426.1     | 4.26  | 4.38  | 0.19 | 0.1  | -1.08 | 0.681859 | 0.681316 | 0.87542  | 0.813957 |
| Mmu.14429.1.A1_at       | Mmu.14429.1     | 5.86  | 5.76  | 0.26 | 0.35 | 1.07  | 0.789172 | 0.50329  | 0.92249  | 0.700767 |
| Mmu.14429.1.S1_at       | Mmu.14429.1     | 4.16  | 4.34  | 0.18 | 0.35 | -1.13 | 0.286285 | 0.145852 | 0.64358  | 0.419888 |
| Mmu.14431.1.S1_at       | Mmu.14431.1     | 4.39  | 4.43  | 0.25 | 0.09 | -1.03 | 0.944686 | 0.792911 | 0.980778 | 0.880392 |
| Mmu.14436.1.S1_at       | Mmu.14436.1     | 11.7  | 10.85 | 3.48 | 0.27 | 1.8   | 0.635617 | 0.269616 | 0.854618 | 0.534868 |
| Mmu.14440.1.S1_at       | Mmu.14440.1     | 7.83  | 7.71  | 0.35 | 0.13 | 1.08  | 0.442826 | 0.352246 | 0.750392 | 0.595568 |
| Mmu.14441.1.S1_at       | Mmu.14441.1     | 9.62  | 9.86  | 0.22 | 0.12 | -1.18 | 0.294168 | 0.024472 | 0.650324 | 0.195777 |
| Mmu.14442.2.S1_at       | Mmu.14442.2     | 6     | 6.07  | 0.32 | 0.11 | -1.05 | 0.795446 | 0.304533 | 0.924854 | 0.561803 |

|                         |                 |       |       |      |      |       |          |          |          |          |
|-------------------------|-----------------|-------|-------|------|------|-------|----------|----------|----------|----------|
| Mmu.14456.1.S1_at       | Mmu.14456.1     | 9.95  | 10.12 | 0.19 | 0.14 | -1.13 | 0.293558 | 0.020305 | 0.649839 | 0.178871 |
| Mmu.14457.1.S1_at       | Mmu.14457.1     | 8.08  | 8.35  | 0.06 | 0.14 | -1.21 | 0.038814 | 0.085574 | 0.36035  | 0.337567 |
| Mmu.1447.1.A1_at        | Mmu.1447.1      | 6     | 5.85  | 0.08 | 0.08 | 1.11  | 0.047757 | 0.014014 | 0.381152 | 0.151595 |
| Mmu.1447.1.S1_at        | Mmu.1447.1      | 6.72  | 6.51  | 0.02 | 0.07 | 1.16  | 0.004762 | 0.124132 | 0.20206  | 0.394389 |
| Mmu.14488.1.S1_x_at     | Mmu.14488.1     | 5.24  | 5.79  | 0.36 | 0.55 | -1.46 | 0.23267  | 0.282174 | 0.600181 | 0.544937 |
| Mmu.14495.1.S1_at       | Mmu.14495.1     | 11.39 | 11.1  | 0.02 | 0.06 | 1.23  | 0.001441 | 0.001677 | 0.161412 | 0.061994 |
| Mmu.14509.2.S1_at       | Mmu.14509.2     | 11    | 10.94 | 0.22 | 0.08 | 1.04  | 0.159636 | 0.015816 | 0.532583 | 0.159476 |
| Mmu.1451.1.S1_at        | Mmu.1451.1      | 12.75 | 13.05 | 0.12 | 0.05 | -1.24 | 0.020521 | 0.006601 | 0.304231 | 0.110088 |
| Mmu.14510.1.S2_at       | Mmu.14510.1     | 2.76  | 2.76  | 0.15 | 0.06 | 1     | 0.264586 | 0.288843 | 0.626029 | 0.549981 |
| MmuSTS.4665.1.S1_at     | MmuSTS.4665.1   | 6.12  | 6.15  | 0.51 | 0.02 | -1.02 | 0.813106 | 0.93371  | 0.932369 | 0.962289 |
| MmuSTS.4665.1.S1_s_at   | MmuSTS.4665.1   | 8.53  | 8.62  | 0.71 | 0.07 | -1.07 | 0.980305 | 0.980106 | 0.993785 | 0.989236 |
| Mmu.14519.1.S1_at       | Mmu.14519.1     | 11.28 | 10.49 | 0.43 | 0.05 | 1.72  | 0.030229 | 0.001442 | 0.337005 | 0.057912 |
| Mmu.14534.1.S1_at       | Mmu.14534.1     | 5.63  | 5.05  | 0.4  | 0.12 | 1.5   | 0.058124 | 0.156686 | 0.403716 | 0.432182 |
| Mmu.14535.1.S1_at       | Mmu.14535.1     | 12.68 | 11.98 | 0.22 | 0.01 | 1.62  | 0.010362 | 0.00357  | 0.246974 | 0.085525 |
| MmugDNA.29503.1.S1_s_at | MmugDNA.29503.1 | 12.05 | 11.27 | 0.26 | 0.05 | 1.71  | 0.012092 | 0.004041 | 0.259433 | 0.090281 |
| Mmu.14551.1.S1_at       | Mmu.14551.1     | 4.93  | 5.02  | 0.12 | 0.19 | -1.07 | 0.956755 | 0.743538 | 0.985654 | 0.851395 |
| Mmu.14552.1.S1_a_at     | Mmu.14552.1     | 3.27  | 3.17  | 0.17 | 0.21 | 1.07  | 0.534783 | 0.483878 | 0.801404 | 0.688227 |
| Mmu.15973.50.S1_x_at    | Mmu.15973.50    | 6.13  | 5.88  | 0.1  | 0.23 | 1.19  | 0.204264 | 0.541913 | 0.575652 | 0.725146 |
| Mmu.14560.3.S1_at       | Mmu.14560.3     | 5.85  | 5.9   | 0.05 | 0.09 | -1.03 | 0.595327 | 0.820544 | 0.835317 | 0.896648 |
| Mmu.14562.1.S1_at       | Mmu.14562.1     | 8.65  | 8.39  | 0.29 | 0.2  | 1.2   | 0.350306 | 0.021243 | 0.691193 | 0.182465 |
| Mmu.1457.1.S1_at        | Mmu.1457.1      | 5.29  | 5.25  | 0.07 | 0.19 | 1.03  | 0.573209 | 0.736608 | 0.823465 | 0.847627 |
| Mmu.1457.1.S1_x_at      | Mmu.1457.1      | 5.11  | 5.18  | 0    | 0.14 | -1.05 | 0.938602 | 0.975955 | 0.979343 | 0.986856 |
| Mmu.14571.1.S1_at       | Mmu.14571.1     | 3.07  | 3.09  | 0.05 | 0.06 | -1.02 | 0.320629 | 0.754861 | 0.669445 | 0.857323 |
| Mmu.14583.1.S1_at       | Mmu.14583.1     | 10.49 | 9.85  | 0.27 | 0.11 | 1.56  | 0.019466 | 0.019028 | 0.30143  | 0.173644 |
| Mmu.14589.1.A1_at       | Mmu.14589.1     | 10.52 | 10.53 | 0.12 | 0.13 | -1    | 0.729681 | 0.058548 | 0.895824 | 0.288669 |
| Mmu.14593.1.S1_at       | Mmu.14593.1     | 10.71 | 10.62 | 0.66 | 0.09 | 1.06  | 0.655982 | 0.074434 | 0.8634   | 0.318062 |
| Mmu.6867.1.S1_at        | Mmu.6867.1      | 2.96  | 2.86  | 0.07 | 0.07 | 1.07  | 0.643868 | 0.721604 | 0.858276 | 0.838759 |
| Mmu.6867.1.S1_s_at      | Mmu.6867.1      | 13.94 | 13.92 | 0.06 | 0.09 | 1.01  | 0.356618 | 0.53423  | 0.695204 | 0.720204 |
| Mmu.14635.1.S1_s_at     | Mmu.14635.1     | 5.3   | 5.1   | 0.19 | 0.27 | 1.15  | 0.440611 | 0.609219 | 0.748535 | 0.767677 |
| Mmu.14640.1.S1_x_at     | Mmu.14640.1     | 8.53  | 8.41  | 0.17 | 0.15 | 1.09  | 0.394049 | 0.592555 | 0.719608 | 0.757844 |
| Mmu.14669.1.S1_at       | Mmu.14669.1     | 8.14  | 8.02  | 0.33 | 0.2  | 1.09  | 0.198906 | 0.255895 | 0.570422 | 0.523862 |
| Mmu.14676.1.S1_at       | Mmu.14676.1     | 5.41  | 5.43  | 0.19 | 0.05 | -1.01 | 0.620407 | 0.644368 | 0.84711  | 0.791566 |
| Mmu.14695.1.A1_at       | Mmu.14695.1     | 6.95  | 7.21  | 0.37 | 0.11 | -1.2  | 0.967793 | 0.650539 | 0.989373 | 0.795663 |
| Mmu.14710.1.S1_at       | Mmu.14710.1     | 4.85  | 4.78  | 0.02 | 0    | 1.05  | 0.001408 | 0.031283 | 0.160065 | 0.218752 |
| Mmu.14712.1.S1_at       | Mmu.14712.1     | 12.77 | 12.7  | 1.14 | 0.07 | 1.05  | 0.451415 | 0.515395 | 0.755167 | 0.708274 |
| Mmu.14715.2.S1_at       | Mmu.14715.2     | 3.83  | 3.62  | 0.06 | 0.07 | 1.16  | 0.037954 | 0.095485 | 0.358308 | 0.352525 |
| Mmu.14728.1.S1_at       | Mmu.14728.1     | 9.88  | 9.68  | 0.73 | 0.13 | 1.15  | 0.724452 | 0.468288 | 0.893143 | 0.6777   |
| Mmu.14737.1.S1_s_at     | Mmu.14737.1     | 13.89 | 13.97 | 0.2  | 0.05 | -1.06 | 0.782109 | 0.934986 | 0.919732 | 0.96319  |
| Mmu.14749.1.S1_s_at     | Mmu.14749.1     | 7.66  | 7.56  | 0.37 | 0.11 | 1.07  | 0.231051 | 0.041354 | 0.599045 | 0.247995 |
| Mmu.1477.1.S1_at        | Mmu.1477.1      | 9.96  | 9.91  | 0.49 | 0.11 | 1.03  | 0.600303 | 0.740046 | 0.837821 | 0.849396 |
| Mmu.14771.1.S1_at       | Mmu.14771.1     | 10.72 | 9.91  | 0.19 | 0.52 | 1.75  | 0.028684 | 0.014157 | 0.332977 | 0.152107 |
| Mmu.14774.1.S1_at       | Mmu.14774.1     | 10.41 | 10.61 | 0.37 | 0.1  | -1.15 | 0.329367 | 0.633017 | 0.676319 | 0.783894 |
| Mmu.14785.1.S1_at       | Mmu.14785.1     | 8.23  | 7.93  | 0.19 | 0.19 | 1.23  | 0.060435 | 0.078552 | 0.408186 | 0.325285 |

|                         |                 |       |       |      |      |       |          |          |          |          |
|-------------------------|-----------------|-------|-------|------|------|-------|----------|----------|----------|----------|
| Mmu.14786.1.S1_at       | Mmu.14786.1     | 10.12 | 9.81  | 0.27 | 0.23 | 1.24  | 0.080289 | 0.068103 | 0.443795 | 0.307142 |
| Mmu.14787.1.S1_at       | Mmu.14787.1     | 8.6   | 8.31  | 0.3  | 0.12 | 1.22  | 0.174761 | 0.224656 | 0.548031 | 0.497613 |
| Mmu.14792.1.S1_at       | Mmu.14792.1     | 10.48 | 11.07 | 0.96 | 0.12 | -1.5  | 0.361118 | 0.140105 | 0.698314 | 0.413394 |
| Mmu.14795.1.S1_at       | Mmu.14795.1     | 11.21 | 11.28 | 0.27 | 0.07 | -1.05 | 0.825584 | 0.141148 | 0.937359 | 0.414665 |
| Mmu.14798.1.S1_s_at     | Mmu.14798.1     | 9.08  | 9.05  | 0.85 | 0.19 | 1.02  | 0.865275 | 0.914541 | 0.952585 | 0.95196  |
| Mmu.14801.1.S1_at       | Mmu.14801.1     | 12.38 | 12.24 | 0.19 | 0.05 | 1.1   | 0.233748 | 0.417721 | 0.60129  | 0.642382 |
| MmugDNA.37414.1.S1_s_at | MmugDNA.37414.1 | 12.47 | 12.3  | 0.14 | 0.07 | 1.12  | 0.131778 | 0.301298 | 0.506189 | 0.559356 |
| Mmu.14807.1.S1_s_at     | Mmu.14807.1     | 12.5  | 12.2  | 0.11 | 0.07 | 1.23  | 0.00884  | 0.006609 | 0.237612 | 0.110149 |
| Mmu.14809.1.S1_at       | Mmu.14809.1     | 6.78  | 6.71  | 0.24 | 0.11 | 1.05  | 0.603287 | 0.368052 | 0.83918  | 0.607669 |
| Mmu.1481.2.S1_at        | Mmu.1481.2      | 6.41  | 5.16  | 1.04 | 0.11 | 2.39  | 0.07549  | 0.056446 | 0.436722 | 0.283516 |
| Mmu.1481.2.S1_s_at      | Mmu.1481.2      | 11.13 | 9.42  | 0.05 | 0.16 | 3.29  | 0.000049 | 0.000096 | 0.108151 | 0.027665 |
| Mmu.14814.1.S1_at       | Mmu.14814.1     | 10.36 | 10.13 | 0.63 | 0.16 | 1.18  | 0.375529 | 0.042628 | 0.706527 | 0.251037 |
| Mmu.14836.1.S1_at       | Mmu.14836.1     | 10.85 | 11.21 | 0.32 | 0.18 | -1.28 | 0.320107 | 0.452472 | 0.669154 | 0.667111 |
| Mmu.14838.1.S1_at       | Mmu.14838.1     | 12.31 | 12    | 0.12 | 0.15 | 1.24  | 0.044254 | 0.104443 | 0.374279 | 0.365719 |
| Mmu.1485.1.S1_at        | Mmu.1485.1      | 12.26 | 11.8  | 2.7  | 0.22 | 1.38  | 0.668593 | 0.294046 | 0.86912  | 0.553912 |
| Mmu.14856.1.A1_at       | Mmu.14856.1     | 12.31 | 12.05 | 0.63 | 0.18 | 1.2   | 0.411208 | 0.057151 | 0.731248 | 0.284972 |
| Mmu.14866.1.S1_at       | Mmu.14866.1     | 12.2  | 11.1  | 0.4  | 0.14 | 2.15  | 0.021303 | 0.008784 | 0.307611 | 0.124066 |
| Mmu.14874.1.S1_at       | Mmu.14874.1     | 6.85  | 6.83  | 0.7  | 0.11 | 1.02  | 0.942765 | 0.84206  | 0.98031  | 0.910022 |
| MmugDNA.40586.1.S1_s_at | MmugDNA.40586.1 | 7.95  | 8.12  | 0.65 | 0.23 | -1.13 | 0.624017 | 0.008914 | 0.848468 | 0.12491  |
| Mmu.14893.1.S1_x_at     | Mmu.14893.1     | 3.88  | 3.91  | 0.75 | 0.32 | -1.02 | 0.734663 | 0.722074 | 0.898485 | 0.838998 |
| Mmu.14901.1.S1_at       | Mmu.14901.1     | 7.15  | 6.97  | 0.18 | 0.28 | 1.14  | 0.079509 | 0.240197 | 0.442306 | 0.51084  |
| Mmu.14917.1.S1_s_at     | Mmu.14917.1     | 4.41  | 5.93  | 0.1  | 0.32 | -2.87 | 0.002294 | 0.001497 | 0.174887 | 0.058967 |
| Mmu.14917.2.S1_at       | Mmu.14917.2     | 3.21  | 3.03  | 0.04 | 0.04 | 1.13  | 0.008118 | 0.012966 | 0.232005 | 0.146523 |
| Mmu.14931.1.A1_at       | Mmu.14931.1     | 12.37 | 12.98 | 0.09 | 0.07 | -1.52 | 0.001036 | 0.000009 | 0.155374 | 0.016421 |
| Mmu.14932.1.S1_at       | Mmu.14932.1     | 8.5   | 8.68  | 0.38 | 0.22 | -1.13 | 0.539859 | 0.46882  | 0.804055 | 0.677906 |
| Mmu.14942.1.S1_at       | Mmu.14942.1     | 4.24  | 4.01  | 0.12 | 0.16 | 1.18  | 0.538764 | 0.052597 | 0.803474 | 0.274853 |
| Mmu.7847.1.S1_s_at      | Mmu.7847.1      | 10.34 | 10.21 | 0.31 | 0.12 | 1.1   | 0.464862 | 0.329903 | 0.762723 | 0.578874 |
| Mmu.14945.2.S1_at       | Mmu.14945.2     | 9.99  | 9.6   | 0.43 | 0.18 | 1.32  | 0.219831 | 0.096701 | 0.589114 | 0.35417  |
| Mmu.14958.1.S1_at       | Mmu.14958.1     | 10.12 | 9.37  | 0.49 | 0.2  | 1.68  | 0.023932 | 0.010506 | 0.317529 | 0.133936 |
| Mmu.14962.1.S1_at       | Mmu.14962.1     | 9.31  | 9.43  | 0.04 | 0.04 | -1.09 | 0.007431 | 0.000037 | 0.22918  | 0.023051 |
| Mmu.14966.1.S1_at       | Mmu.14966.1     | 9.84  | 8.92  | 0.49 | 0.16 | 1.9   | 0.091126 | 0.141183 | 0.459015 | 0.414709 |
| Mmu.1499.1.S1_at        | Mmu.1499.1      | 7.73  | 7.31  | 0.78 | 0.16 | 1.34  | 0.43356  | 0.13349  | 0.744524 | 0.405385 |
| Mmu.14994.1.S1_at       | Mmu.14994.1     | 4.74  | 4.57  | 0.11 | 0.05 | 1.13  | 0.168785 | 0.355793 | 0.541668 | 0.597864 |
| Mmu.150.1.S1_at         | Mmu.150.1       | 11.06 | 10.81 | 0.23 | 0.03 | 1.19  | 0.150863 | 0.412361 | 0.524381 | 0.638793 |
| Mmu.15003.1.S1_at       | Mmu.15003.1     | 10.24 | 10.15 | 0.23 | 0.07 | 1.07  | 0.664007 | 0.127296 | 0.867567 | 0.398032 |
| Mmu.15003.1.S1_s_at     | Mmu.15003.1     | 10.87 | 10.82 | 0.23 | 0.08 | 1.03  | 0.605256 | 0.165715 | 0.839879 | 0.441982 |
| Mmu.15003.1.S1_x_at     | Mmu.15003.1     | 10.34 | 10.35 | 0.3  | 0.08 | -1.01 | 0.985991 | 0.357797 | 0.995501 | 0.599418 |
| Mmu.15008.1.S1_at       | Mmu.15008.1     | 11.53 | 11.11 | 0.25 | 0.13 | 1.34  | 0.032045 | 0.006509 | 0.342916 | 0.109521 |
| Mmu.15009.1.S1_at       | Mmu.15009.1     | 7.54  | 7.1   | 0.23 | 0.04 | 1.36  | 0.047847 | 0.010545 | 0.381395 | 0.134072 |
| Mmu.15028.1.S1_at       | Mmu.15028.1     | 5.18  | 5.09  | 0.05 | 0.21 | 1.06  | 0.794877 | 0.981069 | 0.924696 | 0.989567 |
| Mmu.15029.1.A1_at       | Mmu.15029.1     | 3.38  | 3.23  | 0.22 | 0.15 | 1.11  | 0.727596 | 0.906217 | 0.894744 | 0.94693  |
| Mmu.15029.1.S1_at       | Mmu.15029.1     | 3.43  | 3.24  | 0.42 | 0.11 | 1.14  | 0.404182 | 0.541349 | 0.726203 | 0.724874 |
| Mmu.15032.1.S1_at       | Mmu.15032.1     | 11.96 | 11.75 | 0.51 | 0.22 | 1.16  | 0.412331 | 0.389299 | 0.731945 | 0.623403 |

|                         |                 |       |       |      |      |       |          |          |          |          |
|-------------------------|-----------------|-------|-------|------|------|-------|----------|----------|----------|----------|
| Mmu.15035.1.S1_at       | Mmu.15035.1     | 6.39  | 6.72  | 1.33 | 0.18 | -1.26 | 0.708348 | 0.200402 | 0.886591 | 0.474782 |
| Mmu.15041.1.S1_at       | Mmu.15041.1     | 10.17 | 9.8   | 0.41 | 0.13 | 1.29  | 0.072168 | 0.0857   | 0.432091 | 0.337761 |
| Mmu.15054.1.S1_at       | Mmu.15054.1     | 11.16 | 11.62 | 0.49 | 0.08 | -1.38 | 0.061709 | 0.062656 | 0.41138  | 0.297022 |
| Mmu.15056.1.S2_at       | Mmu.15056.1     | 4.69  | 4.87  | 0.32 | 0.07 | -1.14 | 0.160416 | 0.205753 | 0.533524 | 0.48007  |
| Mmu.15059.1.S1_at       | Mmu.15059.1     | 8.55  | 8.35  | 0.22 | 0.24 | 1.15  | 0.160683 | 0.1679   | 0.533821 | 0.444485 |
| Mmu.15062.1.S1_at       | Mmu.15062.1     | 9.05  | 9.21  | 0.28 | 0.06 | -1.12 | 0.22376  | 0.277141 | 0.592907 | 0.541154 |
| Mmu.15077.1.S1_at       | Mmu.15077.1     | 11.85 | 11.51 | 0.13 | 0.03 | 1.26  | 0.022038 | 0.018069 | 0.309781 | 0.169379 |
| Mmu.15102.1.S1_at       | Mmu.15102.1     | 9.59  | 9.31  | 0.13 | 0.04 | 1.21  | 0.06126  | 0.046473 | 0.410357 | 0.260113 |
| Mmu.15103.2.A1_at       | Mmu.15103.2     | 4.11  | 4.03  | 0.11 | 0.08 | 1.06  | 0.128281 | 0.183288 | 0.502907 | 0.459553 |
| Mmu.15103.2.S1_at       | Mmu.15103.2     | 5.55  | 5.41  | 0.12 | 0.07 | 1.11  | 0.112252 | 0.204653 | 0.485454 | 0.479012 |
| MmugDNA.13086.1.S1_s_at | MmugDNA.13086.1 | 10.4  | 11.02 | 0.43 | 0.34 | -1.54 | 0.108021 | 0.171133 | 0.480475 | 0.447694 |
| Mmu.15115.1.S1_at       | Mmu.15115.1     | 10.45 | 10.57 | 0.2  | 0.07 | -1.09 | 0.719648 | 0.017283 | 0.891153 | 0.166461 |
| MmugDNA.35753.1.S1_at   | MmugDNA.35753.1 | 4.44  | 4.3   | 0.15 | 0.18 | 1.1   | 0.308718 | 0.322168 | 0.661293 | 0.573758 |
| MmugDNA.35753.1.S1_s_at | MmugDNA.35753.1 | 10.19 | 10.27 | 0.19 | 0.21 | -1.05 | 0.840072 | 0.069071 | 0.943103 | 0.30905  |
| Mmu.15125.1.S1_at       | Mmu.15125.1     | 7.43  | 6.87  | 0.6  | 0.02 | 1.48  | 0.552271 | 0.096121 | 0.811712 | 0.353345 |
| Mmu.15143.1.S1_at       | Mmu.15143.1     | 9     | 8.9   | 0.45 | 0.24 | 1.07  | 0.927059 | 0.67728  | 0.975789 | 0.811578 |
| Mmu.15145.1.A1_at       | Mmu.15145.1     | 6.12  | 6.15  | 0.26 | 0.04 | -1.02 | 0.802025 | 0.755511 | 0.92785  | 0.857658 |
| Mmu.15145.1.A1_x_at     | Mmu.15145.1     | 6.07  | 6.12  | 0.29 | 0.29 | -1.03 | 0.434489 | 0.481326 | 0.745174 | 0.686365 |
| Mmu.15162.1.S1_at       | Mmu.15162.1     | 6.41  | 6.29  | 0.09 | 0.11 | 1.09  | 0.095038 | 0.364683 | 0.464131 | 0.605001 |
| Mmu.1520.2.S1_at        | Mmu.1520.2      | 11.49 | 11.22 | 0.15 | 0.17 | 1.2   | 0.073908 | 0.092372 | 0.434623 | 0.348294 |
| Mmu.15219.1.S1_at       | Mmu.15219.1     | 8.86  | 7.32  | 2.26 | 0.18 | 2.9   | 0.893378 | 0.982359 | 0.963467 | 0.990358 |
| Mmu.15231.1.S1_at       | Mmu.15231.1     | 9.68  | 9.34  | 0.06 | 0.1  | 1.27  | 0.008807 | 0.002898 | 0.237176 | 0.079107 |
| Mmu.15242.1.S1_at       | Mmu.15242.1     | 9.61  | 9.34  | 0.45 | 0.1  | 1.2   | 0.207756 | 0.062238 | 0.579365 | 0.296307 |
| Mmu.15247.1.S1_s_at     | Mmu.15247.1     | 5.11  | 4.63  | 0.23 | 0.1  | 1.4   | 0.038123 | 0.099044 | 0.358577 | 0.357183 |
| Mmu.15247.26.S1_x_at    | Mmu.15247.26    | 3.8   | 3.87  | 1.03 | 0.52 | -1.05 | 0.754485 | 0.501993 | 0.907353 | 0.699986 |
| Mmu.15247.11.S1_s_at    | Mmu.15247.11    | 2.84  | 2.82  | 0.08 | 0.1  | 1.02  | 0.498534 | 0.50903  | 0.781796 | 0.703967 |
| Mmu.15247.13.S1_at      | Mmu.15247.13    | 3.53  | 3.29  | 0.13 | 0.11 | 1.18  | 0.109707 | 0.103728 | 0.48257  | 0.364519 |
| Mmu.15247.13.S1_x_at    | Mmu.15247.13    | 3.36  | 3.22  | 0.43 | 0    | 1.11  | 0.581962 | 0.805912 | 0.827791 | 0.888395 |
| Mmu.15247.15.S1_x_at    | Mmu.15247.15    | 4.04  | 4.06  | 0.19 | 0.43 | -1.02 | 0.889828 | 0.196984 | 0.962057 | 0.472099 |
| Mmu.15247.16.S1_x_at    | Mmu.15247.16    | 5.58  | 5.55  | 0.06 | 0.08 | 1.02  | 0.379094 | 0.489497 | 0.708606 | 0.691824 |
| Mmu.15247.18.S1_at      | Mmu.15247.18    | 3.64  | 3.56  | 0.17 | 0.28 | 1.06  | 0.671185 | 0.864312 | 0.870255 | 0.923012 |
| Mmu.15247.23.S1_x_at    | Mmu.15247.23    | 4.39  | 4.41  | 0    | 0.22 | -1.01 | 0.613179 | 0.463805 | 0.843382 | 0.674656 |
| Mmu.9242.6.S1_x_at      | Mmu.9242.6      | 6.35  | 6.18  | 0.18 | 0.23 | 1.13  | 0.157865 | 0.144723 | 0.530818 | 0.418549 |
| Mmu.15247.21.S1_x_at    | Mmu.15247.21    | 3.51  | 3.42  | 0.2  | 0.36 | 1.06  | 0.435379 | 0.234032 | 0.745661 | 0.505312 |
| Mmu.15247.25.S1_x_at    | Mmu.15247.25    | 6.34  | 5.99  | 0.37 | 0.41 | 1.27  | 0.952638 | 0.599181 | 0.984136 | 0.761359 |
| Mmu.15247.3.S1_x_at     | Mmu.15247.3     | 6.09  | 5.91  | 0.82 | 0.47 | 1.13  | 0.976252 | 0.919867 | 0.992281 | 0.954947 |
| Mmu.15247.33.S1_at      | Mmu.15247.33    | 5.43  | 5.65  | 0.33 | 0.25 | -1.16 | 0.891354 | 0.080871 | 0.962572 | 0.328841 |
| Mmu.15247.40.S1_at      | Mmu.15247.40    | 7.65  | 8.06  | 0.24 | 0.35 | -1.33 | 0.162155 | 0.368217 | 0.535244 | 0.607811 |
| Mmu.15247.8.S1_x_at     | Mmu.15247.8     | 2.66  | 2.62  | 0.1  | 0.02 | 1.02  | 0.914771 | 0.770264 | 0.970941 | 0.866566 |
| Mmu.15247.42.S1_s_at    | Mmu.15247.42    | 2.75  | 2.71  | 0.08 | 0.05 | 1.03  | 0.097804 | 0.483619 | 0.466795 | 0.688067 |
| Mmu.15247.43.S1_at      | Mmu.15247.43    | 2.88  | 2.82  | 0.16 | 0.09 | 1.04  | 0.608825 | 0.731087 | 0.841357 | 0.844197 |
| Mmu.15247.44.S1_x_at    | Mmu.15247.44    | 3.17  | 3.18  | 0.07 | 0.05 | -1    | 0.71662  | 0.220732 | 0.88994  | 0.494199 |
| Mmu.15247.45.S1_x_at    | Mmu.15247.45    | 7.29  | 7.34  | 0.28 | 0.1  | -1.04 | 0.192654 | 0.013907 | 0.563577 | 0.151286 |



|                         |                 |       |       |      |      |       |          |          |          |          |
|-------------------------|-----------------|-------|-------|------|------|-------|----------|----------|----------|----------|
| Mmu.15247.7.S1_s_at     | Mmu.15247.7     | 3.18  | 3.02  | 0.15 | 0.18 | 1.12  | 0.222771 | 0.250416 | 0.592343 | 0.519391 |
| Mmu.15249.2.S1_at       | Mmu.15249.2     | 12.44 | 12.12 | 0.09 | 0.11 | 1.25  | 0.010471 | 0.009247 | 0.24804  | 0.126966 |
| MmugDNA.41786.1.S1_s_at | MmugDNA.41786.1 | 13.69 | 13.61 | 0.04 | 0.03 | 1.06  | 0.025098 | 0.079091 | 0.320458 | 0.326184 |
| Mmu.1526.1.S1_a_at      | Mmu.1526.1      | 6.35  | 5.79  | 0.78 | 0.12 | 1.48  | 0.36798  | 0.134299 | 0.703469 | 0.406573 |
| Mmu.1527.1.S1_at        | Mmu.1527.1      | 7.11  | 7.21  | 0.67 | 0.1  | -1.07 | 0.283433 | 0.064934 | 0.641407 | 0.300855 |
| Mmu.15276.1.S1_s_at     | Mmu.15276.1     | 11.87 | 10.52 | 0.62 | 0.16 | 2.54  | 0.032373 | 0.008105 | 0.344071 | 0.119551 |
| Mmu.15280.1.S1_at       | Mmu.15280.1     | 7.01  | 9.19  | 0.23 | 0.23 | -4.51 | 0.000268 | 0.000281 | 0.130979 | 0.03453  |
| Mmu.15281.1.S1_at       | Mmu.15281.1     | 11.08 | 10.63 | 0.11 | 0.08 | 1.36  | 0.005881 | 0.025078 | 0.211937 | 0.198405 |
| Mmu.15288.1.S1_at       | Mmu.15288.1     | 6.5   | 6.5   | 0.23 | 0.07 | 1     | 0.273846 | 0.290285 | 0.633479 | 0.551169 |
| Mmu.15288.1.S1_s_at     | Mmu.15288.1     | 13.98 | 13.96 | 0.14 | 0.03 | 1.01  | 0.810499 | 0.853548 | 0.931338 | 0.916683 |
| Mmu.1530.1.S1_at        | Mmu.1530.1      | 10.22 | 8.92  | 0.3  | 0.11 | 2.47  | 0.00308  | 0.012996 | 0.191107 | 0.146803 |
| MmugDNA.31308.1.S1_s_at | MmugDNA.31308.1 | 13.02 | 12.89 | 0.2  | 0.03 | 1.09  | 0.319898 | 0.449603 | 0.669028 | 0.665143 |
| Mmu.15331.1.S1_at       | Mmu.15331.1     | 7.35  | 7.11  | 0.25 | 0.16 | 1.18  | 0.39536  | 0.294015 | 0.72044  | 0.553909 |
| Mmu.15347.1.S1_s_at     | Mmu.15347.1     | 12.08 | 12.28 | 0.4  | 0.04 | -1.15 | 0.633689 | 0.191679 | 0.853646 | 0.466942 |
| Mmu.15352.1.S1_at       | Mmu.15352.1     | 9.8   | 9.77  | 0.14 | 0.05 | 1.02  | 0.270227 | 0.52778  | 0.630252 | 0.716271 |
| Mmu.15359.1.S1_s_at     | Mmu.15359.1     | 6.52  | 5.6   | 0.62 | 0.57 | 1.89  | 0.112848 | 0.124535 | 0.486223 | 0.394987 |
| MmugDNA.3842.1.S1_at    | MmugDNA.3842.1  | 8.01  | 7.94  | 0.13 | 0.06 | 1.05  | 0.482975 | 0.35225  | 0.772774 | 0.595568 |
| MmugDNA.3842.1.S1_s_at  | MmugDNA.3842.1  | 14.61 | 14.6  | 0.04 | 0.03 | 1.01  | 0.753009 | 0.95195  | 0.906908 | 0.972743 |
| Mmu.1538.1.S1_at        | Mmu.1538.1      | 9.18  | 9.08  | 0.13 | 0.18 | 1.07  | 0.303497 | 0.64572  | 0.657314 | 0.792516 |
| Mmu.15402.1.A1_at       | Mmu.15402.1     | 14.62 | 14.66 | 0.01 | 0.01 | -1.02 | 0.0059   | 0.093591 | 0.21217  | 0.349952 |
| Mmu.15402.10.S1_s_at    | Mmu.15402.10    | 14.79 | 14.86 | 0.02 | 0.03 | -1.05 | 0.053192 | 0.466048 | 0.394158 | 0.676096 |
| Mmu.15402.11.S1_at      | Mmu.15402.11    | 2.96  | 2.97  | 0.06 | 0.07 | -1.01 | 0.933676 | 0.768439 | 0.977576 | 0.865527 |
| Mmu.15433.1.S1_at       | Mmu.15433.1     | 5.67  | 5.57  | 0.08 | 0.03 | 1.08  | 0.095677 | 0.073578 | 0.4643   | 0.316905 |
| Mmu.15440.1.S1_at       | Mmu.15440.1     | 9.54  | 9.21  | 0.23 | 0.1  | 1.26  | 0.084012 | 0.270921 | 0.45029  | 0.536033 |
| Mmu.15443.1.S1_x_at     | Mmu.15443.1     | 6.66  | 7.66  | 0.7  | 0.33 | -2    | 0.140268 | 0.027001 | 0.515581 | 0.2055   |
| Mmu.15490.1.A1_at       | Mmu.15490.1     | 6.72  | 6.05  | 0.75 | 0.22 | 1.6   | 0.243527 | 0.364487 | 0.609448 | 0.604846 |
| Mmu.15491.1.S1_s_at     | Mmu.15491.1     | 7.66  | 7.48  | 0.03 | 0.02 | 1.13  | 0.002624 | 0.184934 | 0.181779 | 0.460776 |
| Mmu.15494.1.S1_at       | Mmu.15494.1     | 11.53 | 11.55 | 0.11 | 0.05 | -1.02 | 0.659431 | 0.879389 | 0.865216 | 0.931144 |
| Mmu.15499.1.S1_s_at     | Mmu.15499.1     | 11.98 | 11.43 | 0.1  | 0.14 | 1.46  | 0.005499 | 0.000145 | 0.208157 | 0.029509 |
| Mmu.15501.1.S1_s_at     | Mmu.15501.1     | 12.08 | 12.51 | 0.54 | 0.06 | -1.35 | 0.786467 | 0.022765 | 0.921467 | 0.188931 |
| Mmu.15507.1.A1_at       | Mmu.15507.1     | 4.7   | 5.17  | 0.35 | 0.35 | -1.38 | 0.173626 | 0.02842  | 0.546749 | 0.210385 |
| Mmu.15507.1.S1_x_at     | Mmu.15507.1     | 5.88  | 6.44  | 0.18 | 0.01 | -1.47 | 0.004062 | 0.01266  | 0.198571 | 0.145089 |
| Mmu.15516.1.S1_at       | Mmu.15516.1     | 5.45  | 5.45  | 0.25 | 0.02 | 1     | 0.432179 | 0.23371  | 0.743737 | 0.505032 |
| Mmu.15516.1.S1_x_at     | Mmu.15516.1     | 6.69  | 6.76  | 0.06 | 0.08 | -1.05 | 0.090646 | 0.000324 | 0.458873 | 0.035587 |
| Mmu.3361.2.S1_s_at      | Mmu.3361.2      | 13.92 | 13.94 | 0.06 | 0.05 | -1.01 | 0.181379 | 0.325759 | 0.554575 | 0.57602  |
| Mmu.15555.1.S1_at       | Mmu.15555.1     | 10.48 | 9.66  | 0.75 | 0.05 | 1.76  | 0.293991 | 0.044373 | 0.650287 | 0.255144 |
| Mmu.15572.1.S1_at       | Mmu.15572.1     | 9.59  | 9.46  | 0.13 | 0.05 | 1.1   | 0.057527 | 0.235436 | 0.402327 | 0.506489 |
| Mmu.15592.2.S1_at       | Mmu.15592.2     | 10.46 | 10.44 | 0.27 | 0.14 | 1.01  | 0.729663 | 0.056467 | 0.895824 | 0.283516 |
| Mmu.8286.1.S1_s_at      | Mmu.8286.1      | 13.69 | 13.84 | 0.03 | 0.03 | -1.11 | 0.003021 | 0.005185 | 0.19086  | 0.099739 |
| Mmu.156.2.S1_at         | Mmu.156.2       | 13.22 | 13.3  | 0.05 | 0.1  | -1.06 | 0.665707 | 0.108619 | 0.868043 | 0.372171 |
| Mmu.156.2.S1_x_at       | Mmu.156.2       | 12.99 | 13.09 | 0.07 | 0.09 | -1.07 | 0.562836 | 0.127434 | 0.817877 | 0.398274 |
| Mmu.15601.1.S2_at       | Mmu.15601.1     | 2.76  | 2.78  | 0.01 | 0.04 | -1.02 | 0.169706 | 0.634608 | 0.542712 | 0.784946 |
| Mmu.15601.1.S2_s_at     | Mmu.15601.1     | 3.79  | 4.13  | 0.09 | 0.27 | -1.27 | 0.103632 | 0.126141 | 0.474343 | 0.396734 |

|                     |             |       |       |      |      |       |          |          |          |          |
|---------------------|-------------|-------|-------|------|------|-------|----------|----------|----------|----------|
| Mmu.15609.1.S1_at   | Mmu.15609.1 | 11.78 | 11.21 | 0.21 | 0.3  | 1.49  | 0.046097 | 0.031854 | 0.37735  | 0.220909 |
| Mmu.15616.1.S1_at   | Mmu.15616.1 | 3.74  | 3.47  | 0.21 | 0.38 | 1.2   | 0.837401 | 0.851424 | 0.941594 | 0.915468 |
| Mmu.15616.1.S1_x_at | Mmu.15616.1 | 3.15  | 2.94  | 0.06 | 0.29 | 1.16  | 0.658733 | 0.914967 | 0.864839 | 0.952272 |
| Mmu.15620.1.S1_at   | Mmu.15620.1 | 7.75  | 7.52  | 1    | 0.17 | 1.18  | 0.693282 | 0.494961 | 0.880531 | 0.695223 |
| Mmu.1563.1.S1_at    | Mmu.1563.1  | 9.73  | 9.67  | 0.09 | 0.13 | 1.04  | 0.214872 | 0.292098 | 0.585284 | 0.552261 |
| Mmu.15662.1.S1_at   | Mmu.15662.1 | 9.6   | 9.38  | 0.13 | 0.23 | 1.16  | 0.244145 | 0.250744 | 0.60991  | 0.519419 |
| Mmu.15690.2.S1_at   | Mmu.15690.2 | 10.08 | 8.92  | 0.38 | 0.18 | 2.24  | 0.018515 | 0.029992 | 0.297536 | 0.214956 |
| Mmu.15700.2.S1_at   | Mmu.15700.2 | 11.25 | 11.05 | 1.4  | 0.32 | 1.15  | 0.954065 | 0.242163 | 0.984705 | 0.512652 |
| Mmu.15708.2.S1_at   | Mmu.15708.2 | 13.63 | 13.64 | 0.07 | 0.03 | -1    | 0.311971 | 0.153055 | 0.663542 | 0.427928 |
| Mmu.15723.1.S1_s_at | Mmu.15723.1 | 12.16 | 11.89 | 0.23 | 0.05 | 1.21  | 0.039353 | 0.001605 | 0.361498 | 0.060501 |
| Mmu.15723.2.S1_at   | Mmu.15723.2 | 8.96  | 8.76  | 0.44 | 0.04 | -1.15 | 0.158943 | 0.03416  | 0.531703 | 0.228708 |
| Mmu.15730.2.S1_at   | Mmu.15730.2 | 7.67  | 7.59  | 0.09 | 0.08 | 1.05  | 0.157914 | 0.188878 | 0.530914 | 0.464789 |
| Mmu.15738.1.S1_at   | Mmu.15738.1 | 7.96  | 8.43  | 2.49 | 0.6  | -1.38 | 0.762795 | 0.180667 | 0.91092  | 0.457245 |
| Mmu.15748.1.S1_s_at | Mmu.15748.1 | 4.16  | 4.14  | 0.05 | 0.17 | 1.01  | 0.969793 | 0.921    | 0.990053 | 0.955491 |
| Mmu.15752.2.S1_at   | Mmu.15752.2 | 7.6   | 7.59  | 0.04 | 0.03 | 1     | 0.417574 | 0.303851 | 0.735015 | 0.561225 |
| Mmu.15755.1.S1_at   | Mmu.15755.1 | 9.75  | 9.31  | 0.2  | 0.18 | 1.36  | 0.037148 | 0.027839 | 0.356778 | 0.208365 |
| Mmu.15770.1.S1_at   | Mmu.15770.1 | 5.89  | 5.72  | 0.21 | 0.24 | 1.12  | 0.289166 | 0.367534 | 0.645892 | 0.607197 |
| Mmu.15774.1.S1_at   | Mmu.15774.1 | 8.32  | 8.36  | 0.23 | 0.07 | -1.03 | 0.709154 | 0.919697 | 0.886715 | 0.954878 |
| Mmu.15814.5.S1_at   | Mmu.15814.5 | 4.43  | 4.42  | 0.02 | 0.15 | 1     | 0.407752 | 0.038786 | 0.728886 | 0.241916 |
| Mmu.15827.1.S1_at   | Mmu.15827.1 | 6.98  | 7.08  | 0.25 | 0.06 | -1.07 | 0.575561 | 0.414836 | 0.824671 | 0.640469 |
| Mmu.15835.1.S1_at   | Mmu.15835.1 | 8.25  | 8.11  | 0.45 | 0.18 | 1.1   | 0.707189 | 0.47497  | 0.88608  | 0.681837 |
| Mmu.15843.1.S1_at   | Mmu.15843.1 | 10.57 | 10.86 | 0.43 | 0.13 | -1.22 | 0.405983 | 0.356217 | 0.727638 | 0.598166 |
| Mmu.15848.1.S1_at   | Mmu.15848.1 | 10.03 | 9.73  | 0.33 | 0.08 | 1.23  | 0.19713  | 0.18594  | 0.568041 | 0.461772 |
| Mmu.15849.1.S1_a_at | Mmu.15849.1 | 10.29 | 9.78  | 0.41 | 0.15 | 1.42  | 0.142992 | 0.241499 | 0.51822  | 0.512152 |
| Mmu.15849.1.S1_at   | Mmu.15849.1 | 9.26  | 8.69  | 0.41 | 0.16 | 1.49  | 0.088888 | 0.11392  | 0.456644 | 0.38018  |
| Mmu.15849.2.S1_at   | Mmu.15849.2 | 6.18  | 5.49  | 0.55 | 0.28 | 1.61  | 0.380377 | 0.472577 | 0.709387 | 0.68007  |
| Mmu.15852.1.S1_s_at | Mmu.15852.1 | 11.93 | 11.89 | 0.18 | 0.01 | 1.03  | 0.243747 | 0.315503 | 0.609656 | 0.569004 |
| Mmu.15853.1.S1_s_at | Mmu.15853.1 | 11.74 | 11.86 | 0.22 | 0.08 | -1.09 | 0.514952 | 0.719412 | 0.790722 | 0.837629 |
| Mmu.15853.1.S1_x_at | Mmu.15853.1 | 12.01 | 12.24 | 0.25 | 0.18 | -1.17 | 0.681164 | 0.503492 | 0.874999 | 0.700892 |
| Mmu.15859.1.S1_at   | Mmu.15859.1 | 9.47  | 9.38  | 0.21 | 0.03 | 1.06  | 0.591892 | 0.208887 | 0.833648 | 0.482717 |
| Mmu.1586.1.S1_at    | Mmu.1586.1  | 9.04  | 8.48  | 0.07 | 0.22 | 1.48  | 0.016913 | 0.054399 | 0.288966 | 0.278799 |
| Mmu.15886.1.S1_s_at | Mmu.15886.1 | 13.15 | 12.93 | 0.36 | 0.05 | 1.17  | 0.373285 | 0.041999 | 0.705567 | 0.249463 |
| Mmu.15890.1.S1_s_at | Mmu.15890.1 | 7.41  | 8.51  | 0.37 | 0.05 | -2.15 | 0.007135 | 0.065427 | 0.225651 | 0.301415 |
| Mmu.15894.3.S1_at   | Mmu.15894.3 | 10.96 | 11.02 | 0.16 | 0.41 | -1.04 | 0.719326 | 0.903025 | 0.890921 | 0.944941 |
| Mmu.15897.1.S1_at   | Mmu.15897.1 | 11.75 | 11.14 | 0.28 | 0.09 | 1.53  | 0.055094 | 0.041339 | 0.397965 | 0.247995 |
| Mmu.15902.2.S1_at   | Mmu.15902.2 | 5.61  | 5.51  | 0.01 | 0.2  | 1.07  | 0.157159 | 0.300493 | 0.530266 | 0.55882  |
| Mmu.15921.1.S1_at   | Mmu.15921.1 | 11.65 | 11.45 | 0.12 | 0.29 | 1.15  | 0.084955 | 0.086767 | 0.451555 | 0.339521 |
| Mmu.15931.1.S1_at   | Mmu.15931.1 | 9.2   | 8.45  | 0.36 | 0.15 | 1.68  | 0.012654 | 0.00332  | 0.263546 | 0.082861 |
| Mmu.15937.1.S1_at   | Mmu.15937.1 | 10.23 | 10.18 | 0.13 | 0.11 | 1.04  | 0.912782 | 0.823358 | 0.970334 | 0.898479 |
| Mmu.15939.2.S1_at   | Mmu.15939.2 | 3.96  | 3.91  | 0.04 | 0.42 | 1.03  | 0.881243 | 0.099193 | 0.958973 | 0.357379 |
| Mmu.1595.1.S1_at    | Mmu.1595.1  | 5.22  | 5.34  | 0.09 | 0.14 | -1.09 | 0.428873 | 0.076353 | 0.742105 | 0.321368 |
| Mmu.15951.1.A1_at   | Mmu.15951.1 | 4.15  | 4.05  | 0.06 | 0.02 | 1.07  | 0.093724 | 0.125914 | 0.46305  | 0.396452 |
| Mmu.15951.1.S1_at   | Mmu.15951.1 | 3.73  | 3.56  | 0.15 | 0.2  | 1.12  | 0.947914 | 0.957058 | 0.982111 | 0.975699 |

|                         |                 |       |       |      |      |       |          |          |          |          |
|-------------------------|-----------------|-------|-------|------|------|-------|----------|----------|----------|----------|
| Mmu.15952.1.A1_at       | Mmu.15952.1     | 3.82  | 3.9   | 0.11 | 0.03 | -1.05 | 0.917299 | 0.08894  | 0.97197  | 0.342771 |
| Mmu.15952.1.S1_at       | Mmu.15952.1     | 3.87  | 3.61  | 0.06 | 0.07 | 1.2   | 0.015843 | 0.019333 | 0.284408 | 0.174785 |
| Mmu.15953.1.A1_at       | Mmu.15953.1     | 4.87  | 4.87  | 0.01 | 0.15 | -1    | 0.928339 | 0.85964  | 0.976259 | 0.92003  |
| Mmu.15953.1.S1_at       | Mmu.15953.1     | 6.56  | 6.25  | 0.12 | 0.23 | 1.24  | 0.084056 | 0.137345 | 0.45029  | 0.41029  |
| Mmu.15956.1.A1_at       | Mmu.15956.1     | 3.85  | 3.76  | 0.09 | 0.05 | 1.07  | 0.318929 | 0.460806 | 0.668481 | 0.672749 |
| Mmu.15956.1.S1_at       | Mmu.15956.1     | 3.81  | 3.71  | 0.21 | 0.14 | 1.07  | 0.24752  | 0.104175 | 0.613175 | 0.365297 |
| Mmu.15966.1.S1_at       | Mmu.15966.1     | 9.23  | 8.93  | 0.8  | 0.12 | 1.23  | 0.497291 | 0.463295 | 0.781055 | 0.674323 |
| MmugDNA.11221.1.S1_s_at | MmugDNA.11221.1 | 7.34  | 8.03  | 0.96 | 0.14 | -1.61 | 0.537294 | 0.393012 | 0.802735 | 0.625971 |
| Mmu.15973.1.S1_a_at     | Mmu.15973.1     | 3.54  | 3.56  | 0.16 | 0.05 | -1.01 | 0.553293 | 0.770832 | 0.812089 | 0.866807 |
| Mmu.15973.17.S1_x_at    | Mmu.15973.17    | 4.93  | 4.78  | 0.08 | 0.05 | 1.1   | 0.17256  | 0.254626 | 0.545793 | 0.522912 |
| Mmu.15973.14.S1_at      | Mmu.15973.14    | 5.59  | 5.56  | 0.04 | 0.03 | -1.02 | 0.472841 | 0.302841 | 0.767284 | 0.560356 |
| Mmu.15973.16.S1_at      | Mmu.15973.16    | 5.1   | 5     | 0.07 | 0.15 | 1.07  | 0.200347 | 0.537475 | 0.572164 | 0.722606 |
| Mmu.15973.16.S1_x_at    | Mmu.15973.16    | 4.87  | 4.88  | 0.11 | 0.08 | -1.01 | 0.690569 | 0.657434 | 0.879504 | 0.799704 |
| Mmu.15973.19.S1_at      | Mmu.15973.19    | 5.29  | 5.23  | 0.09 | 0.15 | 1.05  | 0.15142  | 0.247884 | 0.524547 | 0.517326 |
| Mmu.15973.19.S1_x_at    | Mmu.15973.19    | 5.54  | 5.57  | 0.07 | 0.08 | -1.02 | 0.339563 | 0.461664 | 0.68383  | 0.673228 |
| Mmu.15973.2.S1_x_at     | Mmu.15973.2     | 4.85  | 4.84  | 0.15 | 0.15 | 1.01  | 0.92897  | 0.946077 | 0.976332 | 0.969369 |
| Mmu.15976.1.S1_at       | Mmu.15976.1     | 7.87  | 8.01  | 0.25 | 0.08 | -1.1  | 0.420475 | 0.32167  | 0.737009 | 0.573346 |
| Mmu.15983.1.S1_at       | Mmu.15983.1     | 7.46  | 7.45  | 0.03 | 0.19 | 1.01  | 0.468644 | 0.612872 | 0.765035 | 0.770261 |
| Mmu.15987.2.S1_at       | Mmu.15987.2     | 8.97  | 8.58  | 0.35 | 0.16 | 1.31  | 0.226194 | 0.38798  | 0.595328 | 0.62253  |
| Mmu.15993.1.S1_s_at     | Mmu.15993.1     | 13.44 | 13.3  | 0.14 | 0.09 | 1.1   | 0.265343 | 0.658887 | 0.626435 | 0.800473 |
| MmugDNA.11151.1.S1_s_at | MmugDNA.11151.1 | 9.08  | 8.84  | 0.01 | 0.07 | 1.18  | 0.003309 | 0.000768 | 0.194511 | 0.04544  |
| Mmu.15999.1.S1_at       | Mmu.15999.1     | 10.57 | 10.31 | 0.16 | 0.16 | 1.2   | 0.05764  | 0.044544 | 0.402592 | 0.255417 |
| Mmu.16001.1.S1_at       | Mmu.16001.1     | 6.3   | 6.11  | 0.6  | 0.11 | 1.15  | 0.520189 | 0.615111 | 0.793553 | 0.771754 |
| Mmu.16022.1.S1_at       | Mmu.16022.1     | 5     | 4.81  | 0.06 | 0.09 | 1.14  | 0.039656 | 0.002774 | 0.362432 | 0.077892 |
| Mmu.16023.1.S1_at       | Mmu.16023.1     | 9.15  | 8.94  | 0.17 | 0.25 | 1.16  | 0.08956  | 0.183377 | 0.457712 | 0.459553 |
| Mmu.16024.1.S1_at       | Mmu.16024.1     | 9.37  | 9.41  | 0.15 | 0.06 | -1.03 | 0.821558 | 0.587265 | 0.935582 | 0.754106 |
| Mmu.16030.2.S1_a_at     | Mmu.16030.2     | 8.73  | 8.6   | 0.69 | 0.05 | 1.09  | 0.620653 | 0.251962 | 0.847191 | 0.520646 |
| Mmu.16043.1.S1_at       | Mmu.16043.1     | 5.26  | 5.25  | 0.11 | 0.02 | 1.01  | 0.384747 | 0.258676 | 0.712173 | 0.525937 |
| Mmu.1605.1.S1_at        | Mmu.1605.1      | 8.46  | 9.37  | 2.81 | 0.35 | -1.87 | 0.463508 | 0.4175   | 0.762205 | 0.642252 |
| Mmu.16061.1.S1_at       | Mmu.16061.1     | 9.62  | 9.76  | 1.32 | 0.38 | -1.1  | 0.8256   | 0.116411 | 0.937359 | 0.383671 |
| MmugDNA.33134.1.S1_at   | MmugDNA.33134.1 | 6.53  | 6.45  | 0.13 | 0.08 | 1.06  | 0.242757 | 0.296014 | 0.608793 | 0.555295 |
| MmugDNA.33134.1.S1_s_at | MmugDNA.33134.1 | 10.74 | 10.87 | 0.15 | 0.03 | -1.09 | 0.645927 | 0.06114  | 0.858905 | 0.293981 |
| Mmu.16078.1.S1_at       | Mmu.16078.1     | 7.29  | 7.41  | 0.26 | 0.26 | -1.08 | 0.52251  | 0.711678 | 0.795143 | 0.832794 |
| Mmu.16091.1.A1_at       | Mmu.16091.1     | 9.45  | 8.87  | 0.16 | 0.22 | 1.49  | 0.011203 | 0.006058 | 0.252783 | 0.106152 |
| Mmu.16091.1.S1_at       | Mmu.16091.1     | 12.99 | 12.78 | 0.15 | 0.05 | 1.16  | 0.157152 | 0.16166  | 0.530266 | 0.437771 |
| Mmu.16093.1.S1_at       | Mmu.16093.1     | 5.94  | 5.93  | 0.25 | 0.23 | 1     | 0.222823 | 0.299798 | 0.592354 | 0.558081 |
| Mmu.16103.1.S1_s_at     | Mmu.16103.1     | 14.04 | 13.91 | 0.11 | 0.07 | 1.09  | 0.244425 | 0.175753 | 0.61     | 0.452344 |
| Mmu.16106.1.S1_at       | Mmu.16106.1     | 11.05 | 11.14 | 0.34 | 0.07 | -1.06 | 0.623621 | 0.306955 | 0.848284 | 0.563427 |
| Mmu.16109.1.S1_at       | Mmu.16109.1     | 11.24 | 10.59 | 0.21 | 0.12 | 1.57  | 0.010115 | 0.003504 | 0.246634 | 0.08503  |
| Mmu.16110.1.S1_s_at     | Mmu.16110.1     | 11.64 | 12.15 | 0.27 | 0.07 | -1.43 | 0.06342  | 0.063386 | 0.415717 | 0.298439 |
| Mmu.16117.1.S1_at       | Mmu.16117.1     | 4.99  | 5.32  | 0.25 | 0.38 | -1.26 | 0.227977 | 0.098919 | 0.596782 | 0.357049 |
| Mmu.1612.1.S1_at        | Mmu.1612.1      | 9.69  | 9.41  | 0.09 | 0.14 | 1.21  | 0.036225 | 0.135973 | 0.354703 | 0.408258 |
| Mmu.16121.1.S1_at       | Mmu.16121.1     | 3.85  | 3.81  | 0.21 | 0.12 | 1.03  | 0.509051 | 0.278059 | 0.787424 | 0.541754 |

|                         |                 |       |       |      |      |       |          |          |          |          |
|-------------------------|-----------------|-------|-------|------|------|-------|----------|----------|----------|----------|
| Mmu.16121.1.S1_s_at     | Mmu.16121.1     | 9.57  | 9.35  | 0.26 | 0.14 | 1.17  | 0.791033 | 0.30964  | 0.923182 | 0.564991 |
| Mmu.16123.2.S1_at       | Mmu.16123.2     | 10.6  | 10.11 | 0.23 | 0.26 | 1.41  | 0.036523 | 0.014393 | 0.355049 | 0.153146 |
| Mmu.16124.1.S1_at       | Mmu.16124.1     | 6.75  | 7.02  | 1.84 | 0.84 | -1.21 | 0.962459 | 0.198242 | 0.987835 | 0.473234 |
| Mmu.16174.1.S1_at       | Mmu.16174.1     | 9.76  | 9.32  | 0.19 | 0.2  | 1.35  | 0.05192  | 0.060114 | 0.3916   | 0.291847 |
| Mmu.16174.1.S1_x_at     | Mmu.16174.1     | 9.95  | 9.5   | 0.17 | 0.26 | 1.37  | 0.097116 | 0.134637 | 0.465734 | 0.406629 |
| Mmu.16175.1.S1_at       | Mmu.16175.1     | 10.8  | 10.49 | 3.02 | 0.28 | 1.24  | 0.692156 | 0.329401 | 0.880095 | 0.578733 |
| Mmu.16205.1.S1_at       | Mmu.16205.1     | 10.41 | 10.14 | 0.29 | 0.06 | 1.2   | 0.250177 | 0.745075 | 0.615476 | 0.852267 |
| Mmu.16211.1.S1_at       | Mmu.16211.1     | 10.57 | 10.05 | 0.2  | 0.14 | 1.44  | 0.052861 | 0.170786 | 0.393368 | 0.447359 |
| Mmu.16215.1.S1_at       | Mmu.16215.1     | 9.49  | 10.08 | 0.87 | 0.31 | -1.5  | 0.469698 | 0.146727 | 0.765623 | 0.42078  |
| Mmu.16226.1.S1_at       | Mmu.16226.1     | 5.39  | 5.38  | 0.03 | 0.09 | 1.01  | 0.774234 | 0.106044 | 0.916231 | 0.368427 |
| Mmu.16226.1.S1_x_at     | Mmu.16226.1     | 5.81  | 5.71  | 0.15 | 0.12 | 1.07  | 0.652436 | 0.431591 | 0.862004 | 0.652439 |
| Mmu.16227.2.S1_at       | Mmu.16227.2     | 2.94  | 2.82  | 0.14 | 0.06 | 1.09  | 0.225633 | 0.393785 | 0.594769 | 0.626565 |
| Mmu.16227.3.S1_at       | Mmu.16227.3     | 5.19  | 5     | 0.11 | 0.04 | 1.14  | 0.151324 | 0.081069 | 0.524506 | 0.329249 |
| Mmu.16235.1.S1_at       | Mmu.16235.1     | 12.51 | 12.27 | 0.04 | 0.03 | 1.18  | 0.000998 | 0.006806 | 0.155374 | 0.111444 |
| Mmu.16242.1.S1_at       | Mmu.16242.1     | 9.08  | 8.11  | 0.23 | 0.24 | 1.95  | 0.006731 | 0.001743 | 0.223086 | 0.062895 |
| Mmu.16242.1.S1_s_at     | Mmu.16242.1     | 8.59  | 8.06  | 0.49 | 0.16 | 1.45  | 0.207394 | 0.038799 | 0.578933 | 0.241916 |
| Mmu.16247.1.S1_at       | Mmu.16247.1     | 10.7  | 10.25 | 0.14 | 0.08 | 1.36  | 0.004499 | 0.012856 | 0.200185 | 0.145997 |
| Mmu.1625.1.S1_at        | Mmu.1625.1      | 10.29 | 10.14 | 0.41 | 0.32 | 1.11  | 0.370253 | 0.013185 | 0.704572 | 0.14735  |
| Mmu.16255.1.S1_at       | Mmu.16255.1     | 8.86  | 8.9   | 0.29 | 0.08 | -1.03 | 0.511538 | 0.624153 | 0.78871  | 0.778457 |
| Mmu.16260.1.S1_at       | Mmu.16260.1     | 9.95  | 10.24 | 0.32 | 0.16 | -1.22 | 0.114367 | 0.250695 | 0.487606 | 0.51941  |
| Mmu.16261.1.S1_at       | Mmu.16261.1     | 9.74  | 10.12 | 0.42 | 0.07 | -1.31 | 0.576766 | 0.543453 | 0.825166 | 0.726138 |
| Mmu.16278.1.S1_at       | Mmu.16278.1     | 12.32 | 12.03 | 0.23 | 0.01 | 1.23  | 0.115833 | 0.469376 | 0.489213 | 0.678207 |
| Mmu.16285.1.A1_at       | Mmu.16285.1     | 12.85 | 12.77 | 0.1  | 0.05 | 1.05  | 0.935456 | 0.002707 | 0.978197 | 0.07652  |
| Mmu.16290.1.S1_at       | Mmu.16290.1     | 12.11 | 11.38 | 0.74 | 0.18 | 1.66  | 0.669768 | 0.363471 | 0.869701 | 0.6039   |
| Mmu.16292.1.S1_at       | Mmu.16292.1     | 9.09  | 9.01  | 0.7  | 0.13 | 1.06  | 0.405692 | 0.282627 | 0.727426 | 0.545355 |
| Mmu.16297.1.S1_s_at     | Mmu.16297.1     | 8.76  | 9.85  | 0.69 | 0.15 | -2.12 | 0.191237 | 0.2448   | 0.562685 | 0.514644 |
| Mmu.16299.1.S1_at       | Mmu.16299.1     | 13.17 | 13.04 | 0.15 | 0.04 | 1.1   | 0.254797 | 0.28194  | 0.619189 | 0.544868 |
| MmugDNA.10121.1.S1_s_at | MmugDNA.10121.1 | 12.93 | 12.57 | 0.13 | 0.05 | 1.29  | 0.0238   | 0.048258 | 0.316761 | 0.264727 |
| Mmu.16305.1.S1_at       | Mmu.16305.1     | 7.11  | 7.02  | 0.14 | 0.13 | 1.06  | 0.405226 | 0.593245 | 0.727263 | 0.758138 |
| Mmu.16311.1.S1_at       | Mmu.16311.1     | 9.37  | 8.96  | 0.04 | 0.13 | 1.33  | 0.004471 | 0.001477 | 0.199467 | 0.058628 |
| Mmu.16317.1.S1_at       | Mmu.16317.1     | 9.64  | 9.23  | 0.28 | 0.13 | 1.32  | 0.070975 | 0.00808  | 0.430118 | 0.119476 |
| Mmu.16324.1.S1_at       | Mmu.16324.1     | 11.87 | 11.79 | 0.15 | 0.02 | 1.06  | 0.376487 | 0.099752 | 0.706899 | 0.358296 |
| Mmu.16330.1.S1_at       | Mmu.16330.1     | 7.77  | 7.83  | 0.53 | 0.1  | -1.04 | 0.31095  | 0.009718 | 0.662774 | 0.129718 |
| Mmu.16335.1.S1_at       | Mmu.16335.1     | 8.09  | 8.03  | 0.05 | 0.03 | 1.05  | 0.336826 | 0.831951 | 0.682156 | 0.90356  |
| Mmu.16349.1.S1_at       | Mmu.16349.1     | 9.21  | 9.12  | 0.56 | 0.07 | 1.07  | 0.662248 | 0.222537 | 0.866677 | 0.495594 |
| Mmu.16352.2.S1_at       | Mmu.16352.2     | 2.89  | 2.86  | 0.12 | 0.2  | 1.02  | 0.726613 | 0.781152 | 0.894387 | 0.873038 |
| Mmu.16352.3.S1_at       | Mmu.16352.3     | 4.29  | 4.19  | 0.17 | 0.96 | 1.07  | 0.5543   | 0.551366 | 0.812575 | 0.730922 |
| Mmu.16358.1.S1_at       | Mmu.16358.1     | 9.84  | 9.86  | 0.38 | 0.03 | -1.01 | 0.85786  | 0.836326 | 0.94975  | 0.906363 |
| Mmu.16365.1.S1_at       | Mmu.16365.1     | 8.77  | 8.69  | 0.06 | 0.09 | 1.05  | 0.162158 | 0.191004 | 0.535244 | 0.46629  |
| Mmu.16379.1.S1_at       | Mmu.16379.1     | 12.78 | 12.61 | 0.09 | 0.05 | 1.13  | 0.204951 | 0.42596  | 0.576619 | 0.648141 |
| Mmu.16380.2.S1_at       | Mmu.16380.2     | 10.08 | 9.56  | 0.16 | 0.23 | 1.44  | 0.015245 | 0.158864 | 0.280527 | 0.434967 |
| Mmu.16385.1.S1_a_at     | Mmu.16385.1     | 8.06  | 7.98  | 0.14 | 0.23 | 1.06  | 0.298528 | 0.392221 | 0.653176 | 0.625652 |
| Mmu.16385.1.S1_at       | Mmu.16385.1     | 7.52  | 7.41  | 0.2  | 0.16 | 1.08  | 0.4625   | 0.475292 | 0.76166  | 0.682031 |

|                         |                 |       |       |      |      |       |          |          |          |          |
|-------------------------|-----------------|-------|-------|------|------|-------|----------|----------|----------|----------|
| Mmu.16385.2.S1_at       | Mmu.16385.2     | 3     | 3.02  | 0    | 0.13 | -1.01 | 0.298279 | 0.240498 | 0.653102 | 0.511123 |
| Mmu.1639.1.S1_at        | Mmu.1639.1      | 4.3   | 5.34  | 0.34 | 0.22 | -2.05 | 0.021499 | 0.09007  | 0.30891  | 0.344402 |
| Mmu.16390.2.S1_at       | Mmu.16390.2     | 8.96  | 9.06  | 0.46 | 0.32 | -1.07 | 0.770836 | 0.174846 | 0.914237 | 0.451505 |
| Mmu.16391.1.S1_at       | Mmu.16391.1     | 10.53 | 10.27 | 0.28 | 0.05 | 1.19  | 0.134216 | 0.18528  | 0.508462 | 0.461194 |
| Mmu.16393.1.S1_at       | Mmu.16393.1     | 8.47  | 8.98  | 0.99 | 0.39 | -1.43 | 0.473855 | 0.059171 | 0.767803 | 0.290203 |
| Mmu.16400.1.S1_at       | Mmu.16400.1     | 9.91  | 9.57  | 0.35 | 0.09 | 1.27  | 0.356509 | 0.315641 | 0.695183 | 0.569053 |
| Mmu.16411.1.S1_at       | Mmu.16411.1     | 3.86  | 3.84  | 0.12 | 0.03 | 1.02  | 0.252021 | 0.461109 | 0.616982 | 0.672855 |
| Mmu.16415.2.S1_at       | Mmu.16415.2     | 8.31  | 8.73  | 0.21 | 0.51 | -1.34 | 0.374481 | 0.506382 | 0.705924 | 0.702371 |
| Mmu.16418.1.A1_at       | Mmu.16418.1     | 12.07 | 12    | 0.04 | 0.11 | 1.05  | 0.69983  | 0.661408 | 0.883309 | 0.801755 |
| Mmu.16421.1.S1_at       | Mmu.16421.1     | 6.73  | 7.14  | 0.32 | 0.17 | -1.32 | 0.369669 | 0.413464 | 0.704264 | 0.639648 |
| Mmu.16432.1.S1_at       | Mmu.16432.1     | 7     | 6.94  | 0.25 | 0.04 | 1.04  | 0.6388   | 0.826431 | 0.856034 | 0.900309 |
| Mmu.16433.2.S1_at       | Mmu.16433.2     | 12.76 | 13.11 | 0.37 | 0.03 | -1.28 | 0.169746 | 0.260782 | 0.542744 | 0.52721  |
| Mmu.16444.1.S1_at       | Mmu.16444.1     | 3.75  | 3.6   | 0.11 | 0.29 | 1.11  | 0.603515 | 0.664884 | 0.839251 | 0.803709 |
| Mmu.16444.2.S1_a_at     | Mmu.16444.2     | 3.26  | 3.26  | 0.27 | 0.07 | -1.01 | 0.310287 | 0.43603  | 0.662073 | 0.655726 |
| Mmu.16445.1.S1_at       | Mmu.16445.1     | 3.55  | 2.92  | 0.17 | 0.14 | 1.54  | 0.010281 | 0.421594 | 0.246929 | 0.645173 |
| Mmu.16454.1.S1_at       | Mmu.16454.1     | 8.55  | 8.67  | 0.72 | 0.03 | -1.09 | 0.564111 | 0.659592 | 0.81857  | 0.800802 |
| Mmu.16454.1.S2_at       | Mmu.16454.1     | 11.06 | 11.01 | 0.76 | 0.14 | 1.03  | 0.818227 | 0.806197 | 0.934266 | 0.888575 |
| MmugDNA.34165.1.S1_at   | MmugDNA.34165.1 | 10.64 | 10.55 | 0.73 | 0.14 | 1.06  | 0.784799 | 0.817784 | 0.920949 | 0.894834 |
| MmugDNA.34165.1.S1_s_at | MmugDNA.34165.1 | 9.41  | 9.18  | 0.76 | 0.07 | 1.18  | 0.587392 | 0.701494 | 0.831578 | 0.826875 |
| Mmu.16465.1.S1_at       | Mmu.16465.1     | 10.04 | 9.98  | 0.36 | 0.06 | 1.04  | 0.302047 | 0.178334 | 0.655989 | 0.454672 |
| Mmu.16468.1.S1_at       | Mmu.16468.1     | 10.2  | 10.74 | 0.3  | 0.04 | -1.45 | 0.124356 | 0.012197 | 0.498488 | 0.142872 |
| Mmu.16475.1.S1_at       | Mmu.16475.1     | 9.67  | 9.67  | 0.37 | 0.07 | -1    | 0.911551 | 0.889895 | 0.970108 | 0.937287 |
| Mmu.16489.1.S1_at       | Mmu.16489.1     | 3.43  | 3.47  | 0.05 | 0.03 | -1.03 | 0.149229 | 0.203004 | 0.523073 | 0.477343 |
| Mmu.16497.1.S1_at       | Mmu.16497.1     | 5.43  | 5.24  | 0.08 | 0.15 | 1.14  | 0.637659 | 0.272407 | 0.855602 | 0.537122 |
| Mmu.16501.1.S1_at       | Mmu.16501.1     | 8.19  | 8.44  | 0.63 | 0.43 | -1.19 | 0.791678 | 0.945896 | 0.923472 | 0.969245 |
| Mmu.16504.1.S1_at       | Mmu.16504.1     | 10.84 | 10.33 | 0.04 | 0.16 | 1.43  | 0.004002 | 0.061041 | 0.198571 | 0.29389  |
| Mmu.1653.1.S1_at        | Mmu.1653.1      | 11.12 | 10.9  | 0.14 | 0.09 | 1.16  | 0.143671 | 0.419217 | 0.519043 | 0.643398 |
| Mmu.16530.1.S1_at       | Mmu.16530.1     | 8.16  | 8.14  | 0.33 | 0.36 | 1.01  | 0.992105 | 0.729413 | 0.996928 | 0.843541 |
| Mmu.16536.10.S1_at      | Mmu.16536.10    | 11.25 | 11.1  | 0.26 | 0.06 | 1.12  | 0.952852 | 0.970399 | 0.984203 | 0.983873 |
| Mmu.16547.1.S1_at       | Mmu.16547.1     | 3.95  | 4.28  | 0.24 | 0.23 | -1.25 | 0.779522 | 0.220637 | 0.918705 | 0.494069 |
| MmugDNA.19689.1.S1_s_at | MmugDNA.19689.1 | 4.67  | 4.69  | 0.16 | 0.11 | -1.01 | 0.316208 | 0.41348  | 0.666364 | 0.639648 |
| Mmu.16551.1.S1_at       | Mmu.16551.1     | 11.69 | 11.94 | 0.25 | 0.04 | -1.19 | 0.560846 | 0.787343 | 0.816958 | 0.876973 |
| Mmu.16556.1.S1_at       | Mmu.16556.1     | 5.47  | 5.6   | 0.12 | 0.3  | -1.1  | 0.973705 | 0.49691  | 0.991466 | 0.696273 |
| Mmu.1671.1.S1_at        | Mmu.1671.1      | 9.67  | 9.48  | 0.21 | 0.12 | 1.14  | 0.140184 | 0.021806 | 0.515581 | 0.184765 |
| Mmu.1700.1.S1_x_at      | Mmu.1700.1      | 12.88 | 11.54 | 0.38 | 0.31 | 2.53  | 0.014487 | 0.247089 | 0.275993 | 0.516259 |
| Mmu.1716.2.S1_at        | Mmu.1716.2      | 5.21  | 5.21  | 0.16 | 0.09 | -1    | 0.389674 | 0.254506 | 0.716272 | 0.522829 |
| Mmu.1719.1.S1_at        | Mmu.1719.1      | 5.64  | 5.34  | 0.35 | 0.13 | 1.23  | 0.403489 | 0.505117 | 0.725709 | 0.70197  |
| Mmu.1726.1.S1_at        | Mmu.1726.1      | 10.91 | 11.24 | 0.74 | 0.03 | -1.26 | 0.485123 | 0.433212 | 0.774055 | 0.653533 |
| Mmu.1730.1.S1_at        | Mmu.1730.1      | 11.94 | 11.74 | 0.22 | 0.05 | 1.15  | 0.194336 | 0.297133 | 0.564869 | 0.555996 |
| Mmu.1734.1.S1_at        | Mmu.1734.1      | 10.19 | 11.01 | 1.03 | 0.37 | -1.76 | 0.155573 | 0.252274 | 0.528929 | 0.520953 |
| Mmu.1738.2.S1_at        | Mmu.1738.2      | 5.28  | 5.09  | 0.34 | 0.11 | 1.14  | 0.923158 | 0.185585 | 0.974166 | 0.461566 |
| Mmu.1748.1.A1_at        | Mmu.1748.1      | 3.08  | 3.03  | 0.08 | 0.08 | 1.03  | 0.309811 | 0.298457 | 0.661834 | 0.557143 |
| Mmu.1748.1.S1_at        | Mmu.1748.1      | 2.9   | 2.91  | 0.09 | 0.13 | -1.01 | 0.864544 | 0.974029 | 0.952391 | 0.985833 |

|                     |             |       |       |      |      |       |          |          |          |          |
|---------------------|-------------|-------|-------|------|------|-------|----------|----------|----------|----------|
| Mmu.175.1.A1_at     | Mmu.175.1   | 2.73  | 2.79  | 0.01 | 0.06 | -1.04 | 0.150135 | 0.171293 | 0.523642 | 0.447809 |
| Mmu.175.1.A1_x_at   | Mmu.175.1   | 3.12  | 3.15  | 0.09 | 0    | -1.02 | 0.710352 | 0.948174 | 0.887279 | 0.97046  |
| Mmu.175.1.S1_at     | Mmu.175.1   | 6.32  | 6.44  | 0.06 | 0.09 | -1.09 | 0.140362 | 0.318951 | 0.515777 | 0.571532 |
| Mmu.1757.2.S1_at    | Mmu.1757.2  | 11.76 | 11.62 | 0.03 | 0.09 | 1.1   | 0.044621 | 0.003293 | 0.374916 | 0.082571 |
| Mmu.1773.1.S1_at    | Mmu.1773.1  | 6.02  | 5.86  | 0.14 | 0.08 | 1.12  | 0.151876 | 0.291088 | 0.525001 | 0.551574 |
| Mmu.1775.1.S1_at    | Mmu.1775.1  | 10.64 | 11.04 | 0.42 | 0.11 | -1.32 | 0.424902 | 0.089269 | 0.739715 | 0.343391 |
| Mmu.181.1.S1_at     | Mmu.181.1   | 11.67 | 11.39 | 0.17 | 0.05 | 1.22  | 0.064377 | 0.03975  | 0.418055 | 0.244402 |
| Mmu.1815.1.S1_at    | Mmu.1815.1  | 13.66 | 13.65 | 0.07 | 0.05 | 1.01  | 0.571305 | 0.745118 | 0.822652 | 0.852267 |
| Mmu.1817.1.S1_at    | Mmu.1817.1  | 9.18  | 8.75  | 0.41 | 0.32 | 1.34  | 0.518671 | 0.426813 | 0.792794 | 0.648894 |
| Mmu.1818.1.S1_at    | Mmu.1818.1  | 4.89  | 4.58  | 0.37 | 0.21 | 1.23  | 0.321941 | 0.48899  | 0.67054  | 0.691529 |
| Mmu.1819.1.S1_at    | Mmu.1819.1  | 9.6   | 10.06 | 1.23 | 0.33 | -1.37 | 0.664368 | 0.155331 | 0.867683 | 0.430693 |
| Mmu.1836.1.S1_at    | Mmu.1836.1  | 6.73  | 6.79  | 0.26 | 0.18 | -1.04 | 0.389498 | 0.068425 | 0.716173 | 0.308011 |
| Mmu.1837.2.S1_at    | Mmu.1837.2  | 8.12  | 7.88  | 0.39 | 0.29 | 1.18  | 0.447584 | 0.17053  | 0.753399 | 0.447177 |
| Mmu.1854.1.S1_at    | Mmu.1854.1  | 7.77  | 7.88  | 0.85 | 0.1  | -1.08 | 0.954548 | 0.989646 | 0.984902 | 0.994102 |
| Mmu.1855.1.S1_at    | Mmu.1855.1  | 10.4  | 10.44 | 0.18 | 0.06 | -1.03 | 0.836243 | 0.208217 | 0.941202 | 0.482104 |
| Mmu.1884.1.S1_at    | Mmu.1884.1  | 6.91  | 6.42  | 0.05 | 0.03 | 1.4   | 0.000107 | 0.000013 | 0.108151 | 0.017532 |
| Mmu.19.1.S1_at      | Mmu.19.1    | 7.98  | 8.82  | 0.13 | 0.05 | -1.79 | 0.000637 | 0.000471 | 0.144177 | 0.038572 |
| Mmu.190.1.S1_at     | Mmu.190.1   | 10.26 | 9.62  | 0.14 | 0.06 | 1.56  | 0.002845 | 0.000217 | 0.187326 | 0.032385 |
| Mmu.190.2.S1_at     | Mmu.190.2   | 8.42  | 8.06  | 0.2  | 0.04 | 1.29  | 0.026903 | 0.002241 | 0.326584 | 0.069683 |
| Mmu.1900.1.S1_s_at  | Mmu.1900.1  | 12.69 | 12.56 | 0.17 | 0.05 | 1.09  | 0.820715 | 0.946771 | 0.935289 | 0.96978  |
| Mmu.1903.1.S1_at    | Mmu.1903.1  | 13.01 | 12.86 | 0.06 | 0.09 | 1.11  | 0.336926 | 0.679934 | 0.682166 | 0.8131   |
| Mmu.1906.10.S1_a_at | Mmu.1906.10 | 3.71  | 4.37  | 0.4  | 0.27 | -1.57 | 0.140362 | 0.043501 | 0.515777 | 0.25316  |
| Mmu.1906.10.S1_s_at | Mmu.1906.10 | 4.03  | 3.72  | 0.29 | 0.14 | 1.24  | 0.718975 | 0.455694 | 0.890843 | 0.669654 |
| Mmu.1906.11.S1_a_at | Mmu.1906.11 | 4.29  | 4.99  | 0.61 | 0.12 | -1.63 | 0.050344 | 0.008888 | 0.386982 | 0.124698 |
| Mmu.1906.11.S1_x_at | Mmu.1906.11 | 4.4   | 4.56  | 0.22 | 0.08 | -1.12 | 0.097901 | 0.015447 | 0.467104 | 0.157803 |
| Mmu.1906.13.S1_at   | Mmu.1906.13 | 3.45  | 3.46  | 0.14 | 0.06 | -1.01 | 0.31619  | 0.541806 | 0.666364 | 0.725074 |
| Mmu.1906.3.S1_x_at  | Mmu.1906.3  | 2.78  | 2.76  | 0.04 | 0.05 | 1.02  | 0.173238 | 0.374526 | 0.5464   | 0.6129   |
| Mmu.1906.5.S1_s_at  | Mmu.1906.5  | 3.52  | 3.58  | 0.07 | 0.13 | -1.04 | 0.819188 | 0.527239 | 0.934737 | 0.715896 |
| Mmu.1906.7.S1_at    | Mmu.1906.7  | 5.61  | 6.5   | 0.13 | 0.08 | -1.86 | 0.000413 | 0.000214 | 0.137028 | 0.032361 |
| Mmu.1906.9.S1_s_at  | Mmu.1906.9  | 3.6   | 3.6   | 0.11 | 0.06 | -1    | 0.504033 | 0.883493 | 0.784489 | 0.933594 |
| Mmu.1907.1.S1_at    | Mmu.1907.1  | 3.97  | 4.04  | 0.28 | 0.04 | -1.05 | 0.861898 | 0.982082 | 0.951316 | 0.990211 |
| Mmu.1914.1.S1_s_at  | Mmu.1914.1  | 11.85 | 11.69 | 0.02 | 0.44 | 1.12  | 0.718046 | 0.613368 | 0.890613 | 0.770518 |
| Mmu.1942.1.S1_at    | Mmu.1942.1  | 14.19 | 14.22 | 0.07 | 0.06 | -1.02 | 0.283647 | 0.769894 | 0.641413 | 0.866376 |
| Mmu.1942.1.S1_x_at  | Mmu.1942.1  | 14.17 | 14.21 | 0.08 | 0.07 | -1.03 | 0.233267 | 0.645047 | 0.600754 | 0.791993 |
| Mmu.1943.1.S1_at    | Mmu.1943.1  | 11.75 | 11.2  | 0.04 | 0.33 | 1.46  | 0.01612  | 0.008022 | 0.285918 | 0.119047 |
| Mmu.1946.1.S1_at    | Mmu.1946.1  | 9.57  | 9.21  | 0.21 | 0.14 | 1.28  | 0.058869 | 0.069973 | 0.405539 | 0.31072  |
| Mmu.1956.1.S1_at    | Mmu.1956.1  | 11.7  | 11.83 | 0.18 | 0.02 | -1.09 | 0.089339 | 0.040232 | 0.45747  | 0.245805 |
| Mmu.1976.1.A1_at    | Mmu.1976.1  | 10.45 | 10.44 | 0.18 | 0.1  | 1.01  | 0.379985 | 0.491316 | 0.709343 | 0.692931 |
| Mmu.1976.1.S1_at    | Mmu.1976.1  | 9.88  | 9.79  | 0.26 | 0.05 | 1.07  | 0.754188 | 0.064672 | 0.907331 | 0.300314 |
| Mmu.2010.1.S1_s_at  | Mmu.2010.1  | 4.63  | 4.59  | 0.01 | 0.12 | 1.03  | 0.351053 | 0.229286 | 0.691811 | 0.501527 |
| Mmu.2013.1.S1_at    | Mmu.2013.1  | 9.76  | 9.47  | 0.52 | 0.15 | 1.23  | 0.096528 | 0.02873  | 0.465152 | 0.211301 |
| Mmu.2018.1.S1_at    | Mmu.2018.1  | 10.37 | 10.35 | 2.15 | 0.18 | 1.01  | 0.852301 | 0.204967 | 0.947963 | 0.479296 |
| Mmu.2031.1.S1_at    | Mmu.2031.1  | 9.71  | 10.04 | 1.23 | 0.1  | -1.25 | 0.620614 | 0.558937 | 0.847158 | 0.735944 |

|                    |            |       |       |      |      |       |          |          |          |          |
|--------------------|------------|-------|-------|------|------|-------|----------|----------|----------|----------|
| Mmu.2033.2.S1_at   | Mmu.2033.2 | 5.22  | 5.05  | 0.1  | 0.06 | 1.12  | 0.094738 | 0.470215 | 0.463921 | 0.678572 |
| Mmu.2043.1.S1_at   | Mmu.2043.1 | 6.87  | 6.44  | 0.13 | 0.08 | 1.34  | 0.015994 | 0.007955 | 0.284693 | 0.118702 |
| Mmu.2046.1.S1_at   | Mmu.2046.1 | 10.94 | 10.41 | 0.13 | 0.16 | 1.45  | 0.008401 | 0.003473 | 0.233808 | 0.084834 |
| Mmu.2048.1.S1_at   | Mmu.2048.1 | 6.2   | 6.3   | 0.11 | 0.06 | -1.07 | 0.418999 | 0.052192 | 0.73604  | 0.274036 |
| Mmu.2050.1.S1_s_at | Mmu.2050.1 | 10.98 | 9.97  | 0.47 | 0.25 | 2.01  | 0.024102 | 0.00434  | 0.317812 | 0.092354 |
| Mmu.2053.1.S1_s_at | Mmu.2053.1 | 7.95  | 9.14  | 1.59 | 0.17 | -2.28 | 0.238739 | 0.543556 | 0.605393 | 0.726202 |
| Mmu.2056.1.S1_at   | Mmu.2056.1 | 3.1   | 3.02  | 0.08 | 0.06 | 1.06  | 0.111693 | 0.212144 | 0.484896 | 0.486036 |
| Mmu.2057.1.S1_at   | Mmu.2057.1 | 3.29  | 3.08  | 0.18 | 0.07 | 1.16  | 0.114964 | 0.13272  | 0.488167 | 0.404544 |
| Mmu.2057.1.S1_s_at | Mmu.2057.1 | 10.03 | 10.05 | 0.09 | 0.03 | -1.01 | 0.913102 | 0.959227 | 0.970415 | 0.976875 |
| Mmu.2059.1.S1_at   | Mmu.2059.1 | 7.41  | 7.47  | 0.26 | 0.07 | -1.04 | 0.232659 | 0.090198 | 0.600181 | 0.344588 |
| Mmu.2066.1.A1_at   | Mmu.2066.1 | 13.43 | 13.29 | 0.24 | 0.01 | 1.1   | 0.977324 | 0.999568 | 0.992684 | 0.999859 |
| Mmu.2074.1.S1_at   | Mmu.2074.1 | 7.66  | 7.66  | 0.18 | 0.03 | -1    | 0.398935 | 0.440485 | 0.722819 | 0.658967 |
| Mmu.2083.1.S1_at   | Mmu.2083.1 | 3.36  | 3.33  | 0.25 | 0.2  | 1.02  | 0.592819 | 0.736836 | 0.833974 | 0.847693 |
| Mmu.2088.1.S1_at   | Mmu.2088.1 | 6.49  | 6.99  | 0.57 | 0.13 | -1.41 | 0.14458  | 0.006636 | 0.519872 | 0.110446 |
| Mmu.2091.1.S1_x_at | Mmu.2091.1 | 13.49 | 13.43 | 0.22 | 0.02 | 1.04  | 0.780417 | 0.185749 | 0.919137 | 0.461631 |
| Mmu.2091.3.S1_at   | Mmu.2091.3 | 8.14  | 7.77  | 0.13 | 0.09 | 1.29  | 0.041377 | 0.012054 | 0.366275 | 0.142044 |
| Mmu.2091.3.S1_x_at | Mmu.2091.3 | 8.18  | 7.92  | 0.15 | 0.12 | 1.2   | 0.210119 | 0.035439 | 0.581555 | 0.232561 |
| Mmu.2091.5.S1_a_at | Mmu.2091.5 | 6.15  | 5.76  | 0.26 | 0.01 | 1.31  | 0.022707 | 0.000821 | 0.312142 | 0.046565 |
| Mmu.2091.5.S1_x_at | Mmu.2091.5 | 6.78  | 6.63  | 0.09 | 0.02 | 1.11  | 0.022417 | 0.026349 | 0.310499 | 0.203321 |
| Mmu.2104.1.S1_at   | Mmu.2104.1 | 7.1   | 6.9   | 0.05 | 0.04 | 1.15  | 0.008753 | 0.098964 | 0.236545 | 0.357049 |
| Mmu.2107.1.S1_at   | Mmu.2107.1 | 7.9   | 7.73  | 0.07 | 0.07 | 1.13  | 0.017977 | 0.01619  | 0.294714 | 0.161274 |
| Mmu.211.1.S1_at    | Mmu.211.1  | 13.4  | 13.42 | 0.22 | 0.06 | -1.02 | 0.449848 | 0.636032 | 0.754621 | 0.78583  |
| Mmu.2114.1.A1_at   | Mmu.2114.1 | 5.19  | 5.27  | 0.25 | 0.28 | -1.06 | 0.315183 | 0.128644 | 0.665641 | 0.400083 |
| Mmu.2114.1.S1_at   | Mmu.2114.1 | 5.74  | 5.98  | 0.03 | 0.05 | -1.18 | 0.005724 | 0.020396 | 0.210666 | 0.179286 |
| Mmu.2120.1.A1_at   | Mmu.2120.1 | 14.38 | 14.45 | 0.04 | 0.02 | -1.05 | 0.024862 | 0.121788 | 0.320135 | 0.391074 |
| Mmu.2126.1.S1_at   | Mmu.2126.1 | 12.84 | 12.8  | 0.05 | 0.08 | 1.03  | 0.185721 | 0.001358 | 0.558625 | 0.056687 |
| Mmu.2126.1.S1_s_at | Mmu.2126.1 | 13.14 | 13.06 | 0.02 | 0.1  | 1.06  | 0.145368 | 0.001301 | 0.520409 | 0.055613 |
| Mmu.2128.1.S1_x_at | Mmu.2128.1 | 6.8   | 6.88  | 0.29 | 0.35 | -1.05 | 0.772593 | 0.384982 | 0.915396 | 0.620583 |
| Mmu.2136.1.S1_at   | Mmu.2136.1 | 8.16  | 8.21  | 0.35 | 0.02 | -1.04 | 0.546802 | 0.223118 | 0.808796 | 0.49588  |
| Mmu.2142.1.S1_at   | Mmu.2142.1 | 8.67  | 9.39  | 0.69 | 0.2  | -1.65 | 0.353233 | 0.019861 | 0.693204 | 0.177189 |
| Mmu.2143.1.S1_x_at | Mmu.2143.1 | 7.02  | 7.16  | 0.39 | 0.44 | -1.1  | 0.794064 | 0.584661 | 0.924489 | 0.752482 |
| Mmu.2174.1.S1_at   | Mmu.2174.1 | 8.56  | 8.18  | 0.57 | 0.26 | 1.3   | 0.251115 | 0.279152 | 0.616304 | 0.542814 |
| Mmu.2196.1.A1_at   | Mmu.2196.1 | 9.88  | 9.2   | 0.19 | 0.23 | 1.6   | 0.015867 | 0.013023 | 0.284461 | 0.146821 |
| Mmu.2196.1.S1_at   | Mmu.2196.1 | 10    | 9.31  | 0.17 | 0.26 | 1.61  | 0.012802 | 0.010891 | 0.265199 | 0.135939 |
| Mmu.22.2.S1_at     | Mmu.22.2   | 11.5  | 11.35 | 0.13 | 0.11 | 1.11  | 0.065876 | 0.051692 | 0.421234 | 0.272892 |
| Mmu.2224.1.A1_at   | Mmu.2224.1 | 11.01 | 10.27 | 0.4  | 0.03 | 1.67  | 0.036529 | 0.004247 | 0.355049 | 0.091685 |
| Mmu.2226.2.S1_at   | Mmu.2226.2 | 10.91 | 10.55 | 0.09 | 0.07 | 1.28  | 0.003594 | 0.004696 | 0.197111 | 0.095363 |
| Mmu.2231.1.S1_at   | Mmu.2231.1 | 8.24  | 7.14  | 0.39 | 0.04 | 2.15  | 0.01814  | 0.303174 | 0.295439 | 0.56067  |
| Mmu.2238.1.S1_at   | Mmu.2238.1 | 12.57 | 12.55 | 0.05 | 0.09 | 1.02  | 0.593312 | 0.411228 | 0.83412  | 0.637954 |
| Mmu.2240.1.A1_at   | Mmu.2240.1 | 2.84  | 2.89  | 0.03 | 0.08 | -1.03 | 0.740655 | 0.354424 | 0.900871 | 0.59721  |
| Mmu.2243.1.S1_at   | Mmu.2243.1 | 12.62 | 12.56 | 0.02 | 0.01 | 1.04  | 0.03157  | 0.173422 | 0.341578 | 0.449918 |
| Mmu.225.1.S1_at    | Mmu.225.1  | 10.34 | 10.48 | 0.34 | 0.1  | -1.1  | 0.57596  | 0.766985 | 0.825044 | 0.864663 |
| Mmu.2250.1.S1_at   | Mmu.2250.1 | 4.06  | 3.96  | 0.09 | 0.06 | 1.07  | 0.076472 | 0.30521  | 0.437977 | 0.562255 |

|                        |                |       |       |      |      |       |          |          |          |          |
|------------------------|----------------|-------|-------|------|------|-------|----------|----------|----------|----------|
| Mmu.2252.1.S1_at       | Mmu.2252.1     | 8.8   | 8.64  | 0.12 | 0.06 | 1.11  | 0.105026 | 0.118494 | 0.476624 | 0.386469 |
| Mmu.2256.2.S1_at       | Mmu.2256.2     | 5.94  | 5.9   | 0.26 | 0.51 | 1.03  | 0.872558 | 0.755186 | 0.955759 | 0.857488 |
| Mmu.2276.1.S1_at       | Mmu.2276.1     | 5.76  | 6.27  | 1.11 | 0.1  | -1.43 | 0.45867  | 0.193314 | 0.759019 | 0.468656 |
| Mmu.2277.1.S1_at       | Mmu.2277.1     | 10.99 | 10.7  | 0.34 | 0.08 | 1.22  | 0.592026 | 0.339342 | 0.833648 | 0.585984 |
| Mmu.2297.1.S1_at       | Mmu.2297.1     | 7.88  | 6.8   | 0.53 | 0.07 | 2.11  | 0.028769 | 0.002344 | 0.333062 | 0.07161  |
| Mmu.2302.1.S1_at       | Mmu.2302.1     | 6.96  | 6.77  | 0.56 | 0.22 | 1.14  | 0.241861 | 0.045686 | 0.607952 | 0.258049 |
| Mmu.2304.1.S1_at       | Mmu.2304.1     | 8     | 8.45  | 2.11 | 0.26 | -1.37 | 0.679089 | 0.369424 | 0.874243 | 0.608816 |
| Mmu.2305.1.S1_at       | Mmu.2305.1     | 9.87  | 10.75 | 1.77 | 0.35 | -1.84 | 0.44328  | 0.274087 | 0.750657 | 0.538565 |
| Mmu.2313.1.S1_at       | Mmu.2313.1     | 10.55 | 9.8   | 0.03 | 0.17 | 1.68  | 0.00163  | 0.005381 | 0.162459 | 0.101199 |
| Mmu.2323.2.S1_at       | Mmu.2323.2     | 6.95  | 7.22  | 0.05 | 0.09 | -1.2  | 0.014035 | 0.012158 | 0.273301 | 0.142648 |
| Mmu.2333.1.S1_at       | Mmu.2333.1     | 8.51  | 9.12  | 0.35 | 0.08 | -1.53 | 0.038095 | 0.014135 | 0.358577 | 0.15208  |
| Mmu.234.1.A1_at        | Mmu.234.1      | 7.72  | 7.82  | 1.04 | 0.11 | -1.08 | 0.80378  | 0.792023 | 0.928583 | 0.879813 |
| Mmu.2342.1.S1_at       | Mmu.2342.1     | 5.23  | 6.54  | 0.38 | 0.27 | -2.48 | 0.019033 | 0.004115 | 0.29965  | 0.090887 |
| Mmu.2344.1.A1_at       | Mmu.2344.1     | 5.81  | 5.66  | 0.18 | 0.19 | 1.11  | 0.368009 | 0.538231 | 0.703469 | 0.72298  |
| Mmu.2344.1.S1_at       | Mmu.2344.1     | 4.49  | 4.5   | 0.06 | 0.03 | -1    | 0.778909 | 0.957425 | 0.918474 | 0.975899 |
| Mmu.235.1.S1_at        | Mmu.235.1      | 5.17  | 4.91  | 0.21 | 0.2  | 1.2   | 0.224809 | 0.29867  | 0.594045 | 0.557252 |
| Mmu.2375.1.S1_at       | Mmu.2375.1     | 6.29  | 6.6   | 0.12 | 0.07 | -1.24 | 0.016897 | 0.056729 | 0.288956 | 0.284291 |
| Mmu.2391.1.S1_at       | Mmu.2391.1     | 5.61  | 5.51  | 0.05 | 0.05 | 1.07  | 0.09804  | 0.111912 | 0.46743  | 0.377006 |
| Mmu.2392.1.S1_at       | Mmu.2392.1     | 5.8   | 5.76  | 0.69 | 0.07 | 1.03  | 0.973401 | 0.991757 | 0.991366 | 0.995392 |
| Mmu.2411.1.S1_at       | Mmu.2411.1     | 11.34 | 11.34 | 0.1  | 0.04 | 1     | 0.317914 | 0.869175 | 0.667635 | 0.925755 |
| Mmu.2416.1.S1_at       | Mmu.2416.1     | 9.87  | 9.56  | 0.16 | 0.05 | 1.25  | 0.016642 | 0.056558 | 0.287478 | 0.283838 |
| Mmu.2442.1.S1_at       | Mmu.2442.1     | 10.39 | 10.28 | 0.89 | 0.14 | 1.08  | 0.764347 | 0.026667 | 0.911447 | 0.20423  |
| Mmu.245.1.S1_x_at      | Mmu.245.1      | 13.19 | 13.11 | 0.16 | 0.02 | 1.06  | 0.84304  | 0.684001 | 0.944479 | 0.81565  |
| Mmu.2452.1.S1_at       | Mmu.2452.1     | 11.65 | 10.7  | 0.04 | 0.23 | 1.93  | 0.002068 | 0.000484 | 0.174088 | 0.038753 |
| Mmu.2461.3.S1_at       | Mmu.2461.3     | 3.96  | 3.95  | 0.13 | 0.11 | 1     | 0.556203 | 0.618868 | 0.814002 | 0.774212 |
| Mmu.2484.1.S1_at       | Mmu.2484.1     | 5.76  | 5.71  | 0    | 0.04 | 1.04  | 0.237013 | 0.293897 | 0.6039   | 0.553878 |
| Mmu.249.1.S1_at        | Mmu.249.1      | 10.09 | 9.94  | 0.89 | 0.24 | 1.11  | 0.625824 | 0.708937 | 0.849619 | 0.831181 |
| MmugDNA.7350.1.S1_s_at | MmugDNA.7350.1 | 11.3  | 11.3  | 0.82 | 0.23 | 1.01  | 0.837401 | 0.638382 | 0.941594 | 0.787623 |
| Mmu.2499.1.S1_at       | Mmu.2499.1     | 13.69 | 13.69 | 0.02 | 0.01 | -1.01 | 0.583444 | 0.883799 | 0.829086 | 0.933691 |
| Mmu.2514.1.S1_at       | Mmu.2514.1     | 9.31  | 9.41  | 0.25 | 0.13 | -1.07 | 0.875756 | 0.727013 | 0.956794 | 0.842084 |
| Mmu.2523.1.S1_at       | Mmu.2523.1     | 12.71 | 12.12 | 2.31 | 0.22 | 1.51  | 0.784926 | 0.239095 | 0.920961 | 0.509827 |
| Mmu.2524.1.S1_at       | Mmu.2524.1     | 6.68  | 6.8   | 0.21 | 0.1  | -1.09 | 0.910967 | 0.038486 | 0.969779 | 0.241138 |
| Mmu.2541.1.S1_at       | Mmu.2541.1     | 11.36 | 11.39 | 0.29 | 0.09 | -1.02 | 0.81159  | 0.56584  | 0.931835 | 0.740112 |
| Mmu.2554.1.A1_at       | Mmu.2554.1     | 6.16  | 5.91  | 0.37 | 0.14 | 1.19  | 0.776666 | 0.676397 | 0.917412 | 0.810935 |
| Mmu.2556.1.S1_at       | Mmu.2556.1     | 11.39 | 11.12 | 0.43 | 0.04 | 1.21  | 0.939635 | 0.742884 | 0.979532 | 0.851074 |
| Mmu.2571.1.S1_at       | Mmu.2571.1     | 3.33  | 3.33  | 0.03 | 0.06 | 1     | 0.223599 | 0.585258 | 0.592699 | 0.752837 |
| Mmu.2576.1.S1_at       | Mmu.2576.1     | 10.73 | 10.33 | 0.03 | 0.08 | 1.32  | 0.001069 | 0.004856 | 0.155464 | 0.09727  |
| Mmu.258.1.S1_s_at      | Mmu.258.1      | 11.45 | 11.49 | 0.13 | 0.14 | -1.03 | 0.301509 | 0.035472 | 0.655783 | 0.232564 |
| Mmu.2594.1.S1_at       | Mmu.2594.1     | 14    | 13.95 | 0.1  | 0.02 | 1.03  | 0.646907 | 0.675334 | 0.85932  | 0.81026  |
| Mmu.2601.1.S1_at       | Mmu.2601.1     | 11.57 | 11.83 | 0.02 | 0.12 | -1.19 | 0.020522 | 0.002378 | 0.304231 | 0.072042 |
| Mmu.2604.1.S1_s_at     | Mmu.2604.1     | 12.44 | 12.33 | 0.16 | 0.03 | 1.08  | 0.786762 | 0.775244 | 0.921669 | 0.869162 |
| Mmu.2612.1.S1_at       | Mmu.2612.1     | 4.67  | 4.76  | 0.36 | 0.14 | -1.06 | 0.459934 | 0.070063 | 0.759871 | 0.310966 |
| Mmu.2615.1.S1_at       | Mmu.2615.1     | 6.31  | 6.26  | 0.19 | 0.01 | 1.03  | 0.238823 | 0.363517 | 0.605452 | 0.603941 |



|                         |                 |       |       |      |      |       |          |          |          |          |
|-------------------------|-----------------|-------|-------|------|------|-------|----------|----------|----------|----------|
| Mmu.2633.1.S1_at        | Mmu.2633.1      | 4.51  | 4.13  | 0.31 | 0.47 | 1.31  | 0.501494 | 0.603109 | 0.783296 | 0.763947 |
| Mmu.2659.1.S1_at        | Mmu.2659.1      | 5.7   | 5.71  | 0.03 | 0.06 | -1    | 0.628997 | 0.654861 | 0.851379 | 0.798179 |
| Mmu.2665.1.S1_at        | Mmu.2665.1      | 5.5   | 5.34  | 0.07 | 0.08 | 1.12  | 0.035977 | 0.062342 | 0.353759 | 0.296503 |
| Mmu.2673.1.S1_at        | Mmu.2673.1      | 5.89  | 5.7   | 0.15 | 0.02 | 1.13  | 0.315142 | 0.186311 | 0.665641 | 0.462172 |
| Mmu.2694.1.S1_at        | Mmu.2694.1      | 12.05 | 12.36 | 0.2  | 0.06 | -1.24 | 0.059395 | 0.03797  | 0.406303 | 0.239302 |
| Mmu.2694.1.S1_s_at      | Mmu.2694.1      | 10.43 | 10.64 | 0.22 | 0.03 | -1.16 | 0.189687 | 0.134418 | 0.561075 | 0.406603 |
| Mmu.2695.1.S1_at        | Mmu.2695.1      | 8.09  | 8.13  | 0.21 | 0.08 | -1.03 | 0.883285 | 0.513691 | 0.95964  | 0.707212 |
| Mmu.2704.1.S1_at        | Mmu.2704.1      | 8.81  | 8.58  | 0.55 | 0.4  | 1.17  | 0.662145 | 0.11725  | 0.866635 | 0.384781 |
| Mmu.2718.1.S1_at        | Mmu.2718.1      | 11.57 | 11.43 | 0.17 | 0.21 | 1.1   | 0.210438 | 0.019671 | 0.581688 | 0.176276 |
| MmugDNA.1323.1.S1_s_at  | MmugDNA.1323.1  | 12.71 | 12.58 | 0.26 | 0.07 | 1.09  | 0.699372 | 0.752508 | 0.883137 | 0.855912 |
| Mmu.2721.1.S1_at        | Mmu.2721.1      | 6.79  | 6.63  | 0.06 | 0.22 | -1.12 | 0.273737 | 0.634062 | 0.633406 | 0.784619 |
| Mmu.2724.1.S1_at        | Mmu.2724.1      | 9.73  | 9.52  | 0.1  | 0.14 | 1.16  | 0.066238 | 0.234636 | 0.421918 | 0.505853 |
| Mmu.2746.2.S1_at        | Mmu.2746.2      | 5.38  | 5.52  | 0.1  | 0.04 | -1.1  | 0.322877 | 0.084829 | 0.671692 | 0.336352 |
| Mmu.2749.1.S1_at        | Mmu.2749.1      | 9.97  | 9.49  | 0.17 | 0.09 | 1.39  | 0.016268 | 0.0501   | 0.28695  | 0.268916 |
| Mmu.2756.1.S1_at        | Mmu.2756.1      | 8.37  | 8.61  | 0.25 | 0.12 | -1.18 | 0.349447 | 0.009047 | 0.69047  | 0.1257   |
| MmugDNA.23929.1.S1_at   | MmugDNA.23929.1 | 12.56 | 12.62 | 0.41 | 0.14 | -1.04 | 0.990144 | 0.149221 | 0.996306 | 0.423728 |
| MmugDNA.23929.1.S1_s_at | MmugDNA.23929.1 | 12.3  | 12.38 | 0.42 | 0.14 | -1.06 | 0.967384 | 0.177515 | 0.989259 | 0.453888 |
| Mmu.2761.1.S1_at        | Mmu.2761.1      | 4.7   | 4.7   | 0.01 | 0.17 | 1     | 0.355225 | 0.676994 | 0.69464  | 0.811292 |
| Mmu.2763.1.S1_at        | Mmu.2763.1      | 3.97  | 3.65  | 0.35 | 0.22 | 1.25  | 0.446193 | 0.669046 | 0.752589 | 0.806427 |
| Mmu.2776.1.S1_at        | Mmu.2776.1      | 10.77 | 10.19 | 0.29 | 0.36 | 1.5   | 0.466272 | 0.002928 | 0.763448 | 0.079497 |
| Mmu.2787.1.S1_at        | Mmu.2787.1      | 11.86 | 11.87 | 0.06 | 0.06 | -1.01 | 0.726387 | 0.054229 | 0.894295 | 0.278278 |
| Mmu.2787.1.S1_x_at      | Mmu.2787.1      | 11.9  | 11.98 | 0.08 | 0.07 | -1.06 | 0.590883 | 0.04856  | 0.833165 | 0.265572 |
| Mmu.2788.1.S1_at        | Mmu.2788.1      | 5.91  | 6.17  | 0.11 | 0.14 | -1.2  | 0.052006 | 0.32993  | 0.391724 | 0.578874 |
| Mmu.2788.1.S1_s_at      | Mmu.2788.1      | 8.94  | 9.53  | 0.25 | 0.1  | -1.51 | 0.026129 | 0.062482 | 0.323344 | 0.296749 |
| Mmu.2800.1.S1_at        | Mmu.2800.1      | 9.06  | 9.12  | 0.35 | 0.17 | -1.04 | 0.438052 | 0.66671  | 0.747165 | 0.804734 |
| Mmu.2804.1.S1_at        | Mmu.2804.1      | 7.84  | 7.68  | 0.13 | 0.06 | 1.12  | 0.08226  | 0.220478 | 0.447052 | 0.493818 |
| Mmu.2810.1.S1_at        | Mmu.2810.1      | 7.67  | 7.8   | 0.31 | 0.25 | -1.09 | 0.984981 | 0.067657 | 0.995288 | 0.306199 |
| Mmu.2851.1.S1_at        | Mmu.2851.1      | 5.93  | 6.26  | 0.47 | 0.26 | -1.25 | 0.908811 | 0.159151 | 0.969277 | 0.435217 |
| Mmu.2852.1.S1_at        | Mmu.2852.1      | 3.26  | 3.29  | 0.1  | 0.14 | -1.02 | 0.773021 | 0.932567 | 0.915591 | 0.961739 |
| Mmu.2852.1.S1_x_at      | Mmu.2852.1      | 3.39  | 3.49  | 0.07 | 0.13 | -1.08 | 0.301839 | 0.232026 | 0.655978 | 0.503761 |
| Mmu.2856.1.S1_at        | Mmu.2856.1      | 7.21  | 7.45  | 0.04 | 0.09 | -1.18 | 0.040697 | 0.056973 | 0.364778 | 0.284811 |
| Mmu.2860.1.S1_at        | Mmu.2860.1      | 4.75  | 4.77  | 0.17 | 0    | -1.01 | 0.64652  | 0.755687 | 0.859096 | 0.85776  |
| Mmu.2868.1.S1_at        | Mmu.2868.1      | 3.44  | 3.4   | 0.04 | 0.07 | 1.03  | 0.632406 | 0.731049 | 0.852926 | 0.844197 |
| Mmu.2883.1.S1_at        | Mmu.2883.1      | 9.8   | 7.38  | 0.83 | 0.38 | 5.37  | 0.006288 | 0.035363 | 0.218069 | 0.232348 |
| Mmu.2887.1.S1_at        | Mmu.2887.1      | 12.15 | 11.92 | 0.11 | 0.17 | 1.17  | 0.028525 | 0.105102 | 0.332598 | 0.366755 |
| Mmu.289.1.S1_at         | Mmu.289.1       | 7.44  | 8.58  | 0.27 | 0.15 | -2.2  | 0.003657 | 0.001503 | 0.197111 | 0.059065 |
| MmugDNA.15562.1.S1_s_at | MmugDNA.15562.1 | 14.3  | 14.32 | 0.01 | 0.05 | -1.01 | 0.159647 | 0.244213 | 0.532583 | 0.514167 |
| Mmu.2918.1.S1_at        | Mmu.2918.1      | 9.64  | 9.62  | 0.11 | 0.16 | 1.01  | 0.894678 | 0.104735 | 0.96395  | 0.366144 |
| Mmu.2925.1.S1_at        | Mmu.2925.1      | 10.44 | 10.16 | 0.34 | 0.11 | 1.21  | 0.238054 | 0.056919 | 0.605216 | 0.284712 |
| Mmu.2935.3.A1_a_at      | Mmu.2935.3      | 8.84  | 9.03  | 0.45 | 0.16 | -1.14 | 0.884363 | 0.050073 | 0.959932 | 0.268916 |
| Mmu.2935.1.S1_at        | Mmu.2935.1      | 5.78  | 5.81  | 0.3  | 0.21 | -1.02 | 0.844097 | 0.866655 | 0.945046 | 0.924203 |
| Mmu.2935.2.S1_at        | Mmu.2935.2      | 7.52  | 6.93  | 0.33 | 0.1  | 1.5   | 0.117444 | 0.016928 | 0.490925 | 0.164991 |
| Mmu.2935.4.S1_x_at      | Mmu.2935.4      | 12.47 | 13.04 | 0.63 | 0.06 | -1.48 | 0.183972 | 0.1692   | 0.556932 | 0.445812 |

|                          |                  |       |       |      |      |       |          |          |          |          |
|--------------------------|------------------|-------|-------|------|------|-------|----------|----------|----------|----------|
| MmunewRS.781.1.S1_s_at   | MmunewRS.781.1   | 13.42 | 13.06 | 0.22 | 0.02 | 1.28  | 0.059591 | 0.017816 | 0.406669 | 0.168612 |
| Mmu.2975.1.S1_at         | Mmu.2975.1       | 8.51  | 8.42  | 0.6  | 0.11 | 1.06  | 0.418993 | 0.642861 | 0.73604  | 0.790529 |
| Mmu.2976.1.S1_at         | Mmu.2976.1       | 10.16 | 9.59  | 0.61 | 0.26 | 1.48  | 0.049586 | 0.030353 | 0.385822 | 0.216116 |
| Mmu.2984.1.S1_at         | Mmu.2984.1       | 10.52 | 10.89 | 0.31 | 0.11 | -1.29 | 0.399335 | 0.505044 | 0.723024 | 0.70197  |
| Mmu.2985.1.S1_at         | Mmu.2985.1       | 13.32 | 13.29 | 0.04 | 0.01 | 1.02  | 0.163255 | 0.542434 | 0.536063 | 0.725516 |
| Mmu.2989.1.S1_s_at       | Mmu.2989.1       | 13.92 | 13.84 | 0.13 | 0.03 | 1.06  | 0.742892 | 0.66654  | 0.901935 | 0.804636 |
| Mmu.3027.1.S1_at         | Mmu.3027.1       | 11.55 | 11.55 | 0.03 | 0.03 | 1     | 0.491276 | 0.895412 | 0.777687 | 0.940218 |
| Mmu.303.1.S1_at          | Mmu.303.1        | 7.46  | 6.9   | 0.14 | 0.27 | 1.47  | 0.062537 | 0.000696 | 0.413307 | 0.044237 |
| Mmu.3035.1.S1_x_at       | Mmu.3035.1       | 3.47  | 3.49  | 0.14 | 0.04 | -1.01 | 0.914246 | 0.751835 | 0.970825 | 0.855698 |
| Mmu.3041.1.S1_at         | Mmu.3041.1       | 3.61  | 3.63  | 0.16 | 0.18 | -1.02 | 0.724316 | 0.70118  | 0.893143 | 0.826707 |
| Mmu.3044.1.S1_x_at       | Mmu.3044.1       | 14.44 | 14.46 | 0.04 | 0.04 | -1.01 | 0.140274 | 0.143463 | 0.515581 | 0.417442 |
| Mmu.3044.13.S1_x_at      | Mmu.3044.13      | 14.43 | 14.46 | 0.02 | 0.03 | -1.02 | 0.096076 | 0.203008 | 0.464614 | 0.477343 |
| Mmu.3044.15.S1_at        | Mmu.3044.15      | 7.48  | 7.6   | 0.07 | 0.15 | -1.08 | 0.376178 | 0.177786 | 0.706679 | 0.454111 |
| Mmu.3044.17.S1_x_at      | Mmu.3044.17      | 14.56 | 14.57 | 0    | 0.03 | -1.01 | 0.202459 | 0.434456 | 0.573947 | 0.654569 |
| Mmu.3044.6.S1_at         | Mmu.3044.6       | 3.08  | 3.02  | 0.1  | 0.1  | 1.04  | 0.769893 | 0.950128 | 0.913889 | 0.971594 |
| Mmu.3053.1.S1_at         | Mmu.3053.1       | 5.27  | 5.21  | 0.06 | 0.07 | 1.04  | 0.145399 | 0.204135 | 0.520416 | 0.478458 |
| Mmu.3054.2.S1_at         | Mmu.3054.2       | 11.39 | 11.04 | 0.05 | 0.22 | 1.28  | 0.021119 | 0.011924 | 0.306884 | 0.141304 |
| MmuMitochon.12.1.S1_s_at | MmuMitochon.12.1 | 13.67 | 13.7  | 0.08 | 0.08 | -1.02 | 0.594304 | 0.890041 | 0.834694 | 0.937384 |
| Mmu.3058.1.S1_at         | Mmu.3058.1       | 8.44  | 7.74  | 0.19 | 0.28 | 1.62  | 0.012668 | 0.000657 | 0.263546 | 0.043559 |
| Mmu.3064.1.S1_s_at       | Mmu.3064.1       | 14.51 | 14.55 | 0.03 | 0.03 | -1.03 | 0.068015 | 0.231193 | 0.42451  | 0.5029   |
| Mmu.3064.4.S1_s_at       | Mmu.3064.4       | 14.36 | 14.44 | 0.03 | 0.03 | -1.05 | 0.0257   | 0.086904 | 0.322523 | 0.339713 |
| Mmu.3073.1.A1_s_at       | Mmu.3073.1       | 6.59  | 6.24  | 0.73 | 0.08 | 1.28  | 0.427947 | 0.207847 | 0.741509 | 0.482049 |
| Mmu.3073.1.S1_x_at       | Mmu.3073.1       | 5.75  | 5.55  | 0.41 | 0.03 | 1.15  | 0.302801 | 0.180005 | 0.656669 | 0.456552 |
| Mmu.3075.1.S1_at         | Mmu.3075.1       | 3.31  | 3.36  | 0.12 | 0.16 | -1.04 | 0.701641 | 0.246925 | 0.883974 | 0.516238 |
| Mmu.3079.1.S1_at         | Mmu.3079.1       | 10.33 | 9.87  | 0.31 | 0.07 | 1.37  | 0.022724 | 0.011247 | 0.312165 | 0.138014 |
| Mmu.309.1.S1_s_at        | Mmu.309.1        | 7.18  | 7.05  | 0.15 | 0.21 | 1.09  | 0.229487 | 0.121167 | 0.598339 | 0.390223 |
| Mmu.3094.1.S1_at         | Mmu.3094.1       | 14.25 | 14.32 | 0.07 | 0.05 | -1.05 | 0.204459 | 0.175541 | 0.575907 | 0.452174 |
| Mmu.3117.1.S1_at         | Mmu.3117.1       | 13.76 | 13.87 | 0.02 | 0.08 | -1.08 | 0.057157 | 0.084859 | 0.401473 | 0.336411 |
| Mmu.312.1.S1_at          | Mmu.312.1        | 11.32 | 11.24 | 0.26 | 0.03 | 1.06  | 0.535468 | 0.78546  | 0.801777 | 0.875798 |
| Mmu.3126.6.S1_x_at       | Mmu.3126.6       | 14.29 | 14.38 | 0.03 | 0.04 | -1.06 | 0.049072 | 0.429297 | 0.385273 | 0.650754 |
| Mmu.3126.23.S1_at        | Mmu.3126.23      | 3.75  | 3.72  | 0.13 | 0    | 1.03  | 0.636993 | 0.768598 | 0.855316 | 0.865637 |
| Mmu.3126.28.S1_at        | Mmu.3126.28      | 3.65  | 3.7   | 0.16 | 0.06 | -1.03 | 0.64246  | 0.678452 | 0.857755 | 0.812209 |
| Mmu.3126.4.S1_at         | Mmu.3126.4       | 3.37  | 3.4   | 0.02 | 0.04 | -1.02 | 0.756079 | 0.736344 | 0.908123 | 0.847451 |
| Mmu.3127.1.S1_at         | Mmu.3127.1       | 2.9   | 2.85  | 0.15 | 0.05 | 1.03  | 0.469744 | 0.683736 | 0.765623 | 0.815491 |
| Mmu.313.1.S1_at          | Mmu.313.1        | 10.23 | 10.56 | 0.25 | 0.11 | -1.26 | 0.081886 | 0.006178 | 0.446396 | 0.106774 |
| Mmu.3131.1.S1_at         | Mmu.3131.1       | 6.21  | 6.06  | 0.22 | 0.19 | 1.11  | 0.623583 | 0.608467 | 0.848284 | 0.767077 |
| Mmu.3131.1.S1_x_at       | Mmu.3131.1       | 6.21  | 6.21  | 0.05 | 0    | 1     | 0.567552 | 0.792279 | 0.820556 | 0.879986 |
| Mmu.3132.1.S1_at         | Mmu.3132.1       | 4.94  | 4.76  | 0.19 | 0.06 | 1.13  | 0.291596 | 0.247581 | 0.647943 | 0.516939 |
| Mmu.3140.1.A1_at         | Mmu.3140.1       | 2.95  | 2.86  | 0.03 | 0.16 | 1.07  | 0.551743 | 0.692567 | 0.81144  | 0.821061 |
| Mmu.3140.1.S1_at         | Mmu.3140.1       | 2.98  | 2.82  | 0.1  | 0.14 | 1.12  | 0.160035 | 0.030697 | 0.533064 | 0.217148 |
| Mmu.3149.1.S1_at         | Mmu.3149.1       | 12.79 | 12.5  | 0.26 | 0.07 | 1.22  | 0.424968 | 0.681115 | 0.739773 | 0.813791 |
| Mmu.3173.1.S1_at         | Mmu.3173.1       | 7.93  | 8.26  | 0.7  | 0.15 | -1.26 | 0.869977 | 0.977268 | 0.954672 | 0.987637 |
| Mmu.3176.1.S1_at         | Mmu.3176.1       | 3.48  | 3.63  | 0.17 | 0.02 | -1.11 | 0.5181   | 0.02737  | 0.792419 | 0.206695 |

|                    |            |       |       |      |      |       |          |          |          |          |
|--------------------|------------|-------|-------|------|------|-------|----------|----------|----------|----------|
| Mmu.3186.1.S1_s_at | Mmu.3186.1 | 14.51 | 14.51 | 0.02 | 0.04 | -1    | 0.188483 | 0.279047 | 0.560489 | 0.542782 |
| Mmu.3186.3.S1_at   | Mmu.3186.3 | 3.67  | 3.57  | 0.1  | 0.04 | 1.07  | 0.281035 | 0.071986 | 0.639612 | 0.314305 |
| Mmu.3186.4.S1_at   | Mmu.3186.4 | 3.28  | 3.27  | 0.12 | 0.03 | 1.01  | 0.99414  | 0.954172 | 0.997789 | 0.973959 |
| Mmu.3186.4.S1_x_at | Mmu.3186.4 | 2.93  | 2.93  | 0.03 | 0    | -1    | 0.737475 | 0.929974 | 0.89952  | 0.960154 |
| Mmu.3187.1.S1_at   | Mmu.3187.1 | 5.11  | 5.49  | 0.81 | 0.32 | -1.3  | 0.546982 | 0.286401 | 0.808912 | 0.547817 |
| Mmu.3193.1.S1_at   | Mmu.3193.1 | 8.64  | 8.2   | 0.61 | 0.11 | 1.35  | 0.812383 | 0.825405 | 0.932076 | 0.899709 |
| Mmu.3203.2.S1_at   | Mmu.3203.2 | 11.06 | 10.6  | 0.22 | 0.15 | 1.37  | 0.098001 | 0.15739  | 0.467373 | 0.432859 |
| Mmu.3223.1.S1_at   | Mmu.3223.1 | 10.13 | 9.37  | 0.25 | 0.24 | 1.69  | 0.014091 | 0.013984 | 0.273972 | 0.151585 |
| Mmu.3224.1.S1_at   | Mmu.3224.1 | 9.07  | 8.49  | 0.49 | 0.14 | 1.49  | 0.083552 | 0.022237 | 0.449622 | 0.18659  |
| Mmu.3235.1.S1_at   | Mmu.3235.1 | 5.19  | 5.52  | 0.51 | 0.16 | -1.25 | 0.917886 | 0.331347 | 0.972062 | 0.58006  |
| Mmu.3243.1.S1_at   | Mmu.3243.1 | 7.27  | 7.56  | 0.27 | 0.05 | -1.23 | 0.053119 | 0.024123 | 0.394017 | 0.1945   |
| Mmu.3265.1.S1_at   | Mmu.3265.1 | 11.25 | 11.07 | 0.15 | 0.13 | 1.14  | 0.247004 | 0.275219 | 0.612582 | 0.539628 |
| Mmu.3265.1.S1_s_at | Mmu.3265.1 | 12.35 | 12.08 | 0.14 | 0.09 | 1.21  | 0.052633 | 0.051266 | 0.392806 | 0.271825 |
| Mmu.3271.1.A1_at   | Mmu.3271.1 | 8.53  | 8.29  | 0.07 | 0.15 | 1.18  | 0.039729 | 0.028268 | 0.362432 | 0.209859 |
| Mmu.3271.1.S1_at   | Mmu.3271.1 | 7.05  | 7.1   | 0.8  | 0.06 | -1.03 | 0.966698 | 0.997916 | 0.989053 | 0.998971 |
| Mmu.3274.1.S1_at   | Mmu.3274.1 | 12.28 | 12.19 | 0.05 | 0.05 | 1.07  | 0.071191 | 0.571091 | 0.430589 | 0.743541 |
| Mmu.3276.1.S1_at   | Mmu.3276.1 | 2.89  | 3.34  | 0.15 | 0.28 | -1.36 | 0.323521 | 0.092901 | 0.672279 | 0.349024 |
| Mmu.328.1.S1_at    | Mmu.328.1  | 9.22  | 9.21  | 0.13 | 0.19 | 1.01  | 0.245043 | 0.349579 | 0.610441 | 0.593539 |
| Mmu.3280.1.S1_at   | Mmu.3280.1 | 8.69  | 8.62  | 0.36 | 0.05 | 1.05  | 0.271235 | 0.288967 | 0.631138 | 0.550098 |
| Mmu.3285.1.S1_s_at | Mmu.3285.1 | 9.31  | 8.92  | 0.43 | 0.26 | 1.31  | 0.453877 | 0.032365 | 0.756364 | 0.222725 |
| Mmu.3298.1.S1_at   | Mmu.3298.1 | 12.29 | 12.61 | 0.13 | 0.02 | -1.25 | 0.034588 | 0.145984 | 0.350124 | 0.419998 |
| Mmu.3308.1.S1_at   | Mmu.3308.1 | 4.84  | 4.86  | 0.31 | 0.2  | -1.01 | 0.902302 | 0.738017 | 0.96698  | 0.848158 |
| Mmu.3320.1.S1_at   | Mmu.3320.1 | 5.83  | 5.17  | 0.21 | 0.19 | 1.58  | 0.062045 | 0.035249 | 0.412011 | 0.231974 |
| Mmu.3343.2.S1_at   | Mmu.3343.2 | 10.46 | 10.01 | 0.12 | 0.06 | 1.37  | 0.005384 | 0.004561 | 0.208157 | 0.094371 |
| Mmu.3346.2.S1_at   | Mmu.3346.2 | 3.48  | 3.47  | 0.06 | 0.07 | 1.01  | 0.932862 | 0.04706  | 0.977227 | 0.261469 |
| Mmu.335.1.S1_at    | Mmu.335.1  | 6.86  | 6.71  | 1.2  | 0.17 | 1.11  | 0.268661 | 0.244588 | 0.628969 | 0.514387 |
| Mmu.3350.1.S1_at   | Mmu.3350.1 | 7.48  | 7.26  | 0.11 | 0.18 | 1.17  | 0.104701 | 0.068756 | 0.475918 | 0.308711 |
| Mmu.3375.1.S1_at   | Mmu.3375.1 | 8.4   | 8.28  | 0.62 | 0.13 | 1.08  | 0.267827 | 0.283403 | 0.62827  | 0.545936 |
| Mmu.3378.1.S1_at   | Mmu.3378.1 | 5.56  | 5.35  | 0.06 | 0.11 | 1.16  | 0.012402 | 0.005093 | 0.262097 | 0.099108 |
| Mmu.3384.1.S1_at   | Mmu.3384.1 | 10.8  | 10.71 | 0.02 | 0.01 | 1.07  | 0.001655 | 0.071281 | 0.163214 | 0.313318 |
| Mmu.3395.1.S1_at   | Mmu.3395.1 | 13.15 | 13.04 | 0.2  | 0.02 | 1.08  | 0.466197 | 0.282123 | 0.763431 | 0.544937 |
| Mmu.3395.1.S1_s_at | Mmu.3395.1 | 13.63 | 13.55 | 0.13 | 0.03 | 1.06  | 0.620117 | 0.405862 | 0.847027 | 0.634037 |
| Mmu.3404.1.S1_at   | Mmu.3404.1 | 9.01  | 9.48  | 1.32 | 0.18 | -1.39 | 0.579303 | 0.507018 | 0.82645  | 0.702701 |
| Mmu.3412.1.A1_at   | Mmu.3412.1 | 9.79  | 9.78  | 0.8  | 0.09 | 1.01  | 0.989856 | 0.999855 | 0.996244 | 0.999954 |
| Mmu.3418.2.S1_at   | Mmu.3418.2 | 11.55 | 10.25 | 0.33 | 0.21 | 2.46  | 0.004268 | 0.003847 | 0.198874 | 0.088232 |
| Mmu.3422.1.A1_at   | Mmu.3422.1 | 9.4   | 8.83  | 2.84 | 0.32 | 1.48  | 0.851332 | 0.232871 | 0.947639 | 0.50445  |
| Mmu.3422.1.S1_at   | Mmu.3422.1 | 9.31  | 8.81  | 2.49 | 0.35 | 1.41  | 0.907646 | 0.22046  | 0.968722 | 0.493818 |
| Mmu.3435.1.S1_at   | Mmu.3435.1 | 7.71  | 7.88  | 0.15 | 0.03 | -1.13 | 0.044429 | 0.148842 | 0.374916 | 0.423218 |
| Mmu.3463.1.S1_at   | Mmu.3463.1 | 9.2   | 8.39  | 0.24 | 0.44 | 1.75  | 0.036674 | 0.06908  | 0.355272 | 0.309061 |
| Mmu.3466.1.S1_at   | Mmu.3466.1 | 3.83  | 4.38  | 0.49 | 0.35 | -1.46 | 0.220669 | 0.148464 | 0.589979 | 0.423011 |
| Mmu.3474.1.S1_at   | Mmu.3474.1 | 8.93  | 9.16  | 0.85 | 0.1  | -1.17 | 0.588808 | 0.314398 | 0.831968 | 0.56831  |
| Mmu.3483.1.S1_at   | Mmu.3483.1 | 6.29  | 6.38  | 0.33 | 0.19 | -1.06 | 0.539489 | 0.414419 | 0.803858 | 0.640293 |
| Mmu.3486.1.S1_at   | Mmu.3486.1 | 7.46  | 7.91  | 0.6  | 0.21 | -1.37 | 0.2845   | 0.517209 | 0.642303 | 0.709435 |

|                         |                 |       |       |      |      |       |          |          |          |          |
|-------------------------|-----------------|-------|-------|------|------|-------|----------|----------|----------|----------|
| Mmu.3486.2.S1_at        | Mmu.3486.2      | 9.02  | 9.27  | 0.44 | 0.13 | -1.19 | 0.76261  | 0.94946  | 0.91092  | 0.971102 |
| Mmu.3500.1.S1_at        | Mmu.3500.1      | 7.97  | 7.61  | 0.53 | 0.15 | 1.28  | 0.369787 | 0.282302 | 0.704309 | 0.545046 |
| Mmu.3505.2.S1_s_at      | Mmu.3505.2      | 12.76 | 12.69 | 0.03 | 0.07 | 1.05  | 0.187208 | 0.000748 | 0.559729 | 0.045119 |
| Mmu.3513.1.S1_at        | Mmu.3513.1      | 9.96  | 10.28 | 0.78 | 0.05 | -1.25 | 0.173548 | 0.139104 | 0.546692 | 0.412205 |
| Mmu.3521.1.A1_at        | Mmu.3521.1      | 9.15  | 8.62  | 1.18 | 0.34 | 1.45  | 0.831284 | 0.205404 | 0.939628 | 0.479751 |
| Mmu.3521.1.S1_at        | Mmu.3521.1      | 9.29  | 8.63  | 1.13 | 0.34 | 1.58  | 0.799987 | 0.152789 | 0.926791 | 0.427601 |
| Mmu.3524.1.S1_at        | Mmu.3524.1      | 7.18  | 7     | 0.07 | 0.19 | 1.14  | 0.161622 | 0.018845 | 0.535013 | 0.172686 |
| Mmu.3529.1.S1_at        | Mmu.3529.1      | 11.29 | 10.99 | 0.09 | 0.12 | 1.24  | 0.01083  | 0.074179 | 0.250427 | 0.317916 |
| Mmu.3531.1.A1_at        | Mmu.3531.1      | 5.35  | 5.34  | 0.18 | 0.08 | 1     | 0.392559 | 0.363372 | 0.718456 | 0.603755 |
| Mmu.3531.1.S1_at        | Mmu.3531.1      | 4.75  | 4.75  | 0.05 | 0.04 | 1     | 0.680392 | 0.162797 | 0.874646 | 0.438915 |
| Mmu.3541.1.S1_at        | Mmu.3541.1      | 11.34 | 11.12 | 0.14 | 0.16 | -1.17 | 0.125409 | 0.256425 | 0.499523 | 0.524183 |
| Mmu.3553.1.A1_at        | Mmu.3553.1      | 11.43 | 10.8  | 0.12 | 0.16 | 1.55  | 0.013444 | 0.002185 | 0.268462 | 0.069035 |
| Mmu.3554.1.S1_at        | Mmu.3554.1      | 10.52 | 10.12 | 0.14 | 0.14 | 1.33  | 0.019312 | 0.00195  | 0.300531 | 0.065813 |
| Mmu.3556.1.S1_s_at      | Mmu.3556.1      | 11.64 | 11.83 | 0.12 | 0.03 | -1.14 | 0.177159 | 0.079453 | 0.550212 | 0.326766 |
| Mmu.3567.1.S1_at        | Mmu.3567.1      | 9.67  | 9.42  | 0.32 | 0.2  | 1.19  | 0.199378 | 0.295917 | 0.571138 | 0.555241 |
| MmugDNA.19826.1.S1_at   | MmugDNA.19826.1 | 8.58  | 9.43  | 0.92 | 0.07 | -1.8  | 0.264546 | 0.284729 | 0.626029 | 0.546934 |
| MmugDNA.19826.1.S1_s_at | MmugDNA.19826.1 | 8.55  | 9.43  | 1    | 0.06 | -1.85 | 0.225894 | 0.233746 | 0.594935 | 0.50505  |
| Mmu.357.1.S1_at         | Mmu.357.1       | 5.57  | 5.64  | 0.52 | 0.31 | -1.05 | 0.722686 | 0.501333 | 0.892406 | 0.69951  |
| Mmu.357.1.S1_x_at       | Mmu.357.1       | 7.93  | 8.1   | 0.16 | 0.11 | -1.13 | 0.237498 | 0.783222 | 0.604473 | 0.874547 |
| Mmu.3573.1.S1_at        | Mmu.3573.1      | 9.67  | 9.65  | 0.28 | 0.24 | 1.01  | 0.279507 | 0.38464  | 0.638364 | 0.620255 |
| Mmu.359.1.S1_at         | Mmu.359.1       | 7.18  | 7.19  | 0.57 | 0.09 | -1.01 | 0.426173 | 0.549401 | 0.740376 | 0.729841 |
| Mmu.3604.1.S1_s_at      | Mmu.3604.1      | 13.18 | 12.47 | 1.46 | 0.25 | 1.63  | 0.981892 | 0.103023 | 0.994301 | 0.363839 |
| Mmu.3605.1.S1_at        | Mmu.3605.1      | 11.12 | 10.64 | 0.1  | 0.06 | 1.39  | 0.001533 | 0.00058  | 0.161959 | 0.041447 |
| Mmu.3605.1.S1_s_at      | Mmu.3605.1      | 10.73 | 10.34 | 0.11 | 0.07 | 1.31  | 0.002459 | 0.002029 | 0.177304 | 0.066885 |
| MmunewRS.789.1.S1_s_at  | MmunewRS.789.1  | 3.6   | 3.54  | 0.08 | 0.1  | 1.04  | 0.377955 | 0.269614 | 0.707914 | 0.534868 |
| Mmu.3611.1.S1_at        | Mmu.3611.1      | 7.19  | 7.11  | 0.09 | 0.05 | 1.06  | 0.171999 | 0.13043  | 0.545311 | 0.402262 |
| Mmu.3625.1.S1_at        | Mmu.3625.1      | 5.09  | 5     | 0.06 | 0.23 | 1.07  | 0.360568 | 0.234447 | 0.697965 | 0.505674 |
| Mmu.3626.1.S1_at        | Mmu.3626.1      | 6.32  | 6.22  | 0.04 | 0.05 | 1.07  | 0.209759 | 0.772745 | 0.581302 | 0.867844 |
| Mmu.3634.1.S1_at        | Mmu.3634.1      | 8.43  | 7.9   | 0.23 | 0.37 | 1.45  | 0.068479 | 0.061013 | 0.42567  | 0.293811 |
| Mmu.364.1.S1_at         | Mmu.364.1       | 10.33 | 9.7   | 0.3  | 0.13 | 1.56  | 0.031431 | 0.006491 | 0.341227 | 0.109489 |
| Mmu.367.1.S1_at         | Mmu.367.1       | 12.48 | 12.94 | 0.48 | 0.23 | -1.37 | 0.671801 | 0.180406 | 0.870562 | 0.457077 |
| Mmu.3675.1.S1_at        | Mmu.3675.1      | 8.04  | 8     | 0.69 | 0.02 | 1.02  | 0.672943 | 0.594591 | 0.871072 | 0.758623 |
| Mmu.3690.1.S1_x_at      | Mmu.3690.1      | 6.49  | 6.32  | 0.3  | 0.07 | 1.13  | 0.254627 | 0.415769 | 0.61906  | 0.641104 |
| Mmu.3691.1.A1_at        | Mmu.3691.1      | 5.82  | 5.73  | 0.1  | 0.06 | 1.07  | 0.60045  | 0.272232 | 0.837873 | 0.536977 |
| Mmu.3691.1.S1_at        | Mmu.3691.1      | 4.72  | 4.74  | 0.15 | 0.01 | -1.02 | 0.544757 | 0.505795 | 0.807474 | 0.702218 |
| Mmu.3692.1.S1_at        | Mmu.3692.1      | 6.05  | 5.72  | 0.16 | 0.06 | 1.26  | 0.049981 | 0.216037 | 0.386663 | 0.48965  |
| Mmu.3693.1.A1_at        | Mmu.3693.1      | 10.13 | 9.73  | 0.17 | 0.12 | 1.31  | 0.046326 | 0.159504 | 0.377706 | 0.43566  |
| Mmu.3693.1.S1_at        | Mmu.3693.1      | 8.24  | 9.17  | 0.46 | 0.07 | -1.9  | 0.077952 | 0.079157 | 0.439987 | 0.326338 |
| Mmu.3695.1.S1_s_at      | Mmu.3695.1      | 12.72 | 12.94 | 0.21 | 0.04 | -1.17 | 0.145947 | 0.153614 | 0.520572 | 0.428341 |
| Mmu.3696.1.S1_at        | Mmu.3696.1      | 4.28  | 4.54  | 0.13 | 0.28 | -1.2  | 0.579461 | 0.388331 | 0.826489 | 0.62274  |
| Mmu.3708.1.S1_at        | Mmu.3708.1      | 10.15 | 10.74 | 0.34 | 0.3  | -1.5  | 0.231436 | 0.044019 | 0.599368 | 0.254195 |
| Mmu.3718.1.S1_at        | Mmu.3718.1      | 10.68 | 10.6  | 0.04 | 0.14 | 1.05  | 0.101202 | 0.051877 | 0.471667 | 0.273151 |
| Mmu.3719.1.S1_at        | Mmu.3719.1      | 9.34  | 9.28  | 0.14 | 0.13 | 1.05  | 0.990496 | 0.091928 | 0.996425 | 0.347267 |

|                         |                 |       |       |      |      |       |          |          |          |          |
|-------------------------|-----------------|-------|-------|------|------|-------|----------|----------|----------|----------|
| Mmu.374.1.S1_at         | Mmu.374.1       | 8.01  | 8.37  | 0.19 | 0.23 | -1.29 | 0.526661 | 0.043691 | 0.796781 | 0.253732 |
| Mmu.3743.1.S1_s_at      | Mmu.3743.1      | 11.83 | 11.74 | 0.06 | 0.02 | 1.06  | 0.089391 | 0.022901 | 0.457564 | 0.189371 |
| Mmu.3745.1.S1_at        | Mmu.3745.1      | 3.68  | 3.62  | 0.16 | 0.16 | 1.04  | 0.816857 | 0.290653 | 0.933751 | 0.551363 |
| MmugDNA.23135.1.S1_s_at | MmugDNA.23135.1 | 11.72 | 11.93 | 0.74 | 0.11 | -1.16 | 0.755126 | 0.312723 | 0.9077   | 0.567299 |
| Mmu.3750.1.S1_at        | Mmu.3750.1      | 7.72  | 7.29  | 0.08 | 0.07 | 1.35  | 0.002425 | 0.000237 | 0.177075 | 0.03241  |
| Mmu.3756.1.S1_at        | Mmu.3756.1      | 6.1   | 6.04  | 0.01 | 0.08 | 1.04  | 0.219804 | 0.726949 | 0.589114 | 0.84203  |
| Mmu.3779.1.S1_at        | Mmu.3779.1      | 10.1  | 9.84  | 0.34 | 0.22 | 1.2   | 0.500174 | 0.166859 | 0.782374 | 0.443311 |
| Mmu.3782.2.S1_a_at      | Mmu.3782.2      | 7.96  | 7.15  | 0.69 | 0.22 | 1.76  | 0.073977 | 0.015812 | 0.434665 | 0.159466 |
| Mmu.3793.1.S1_at        | Mmu.3793.1      | 11.53 | 11.33 | 0.19 | 0.03 | 1.15  | 0.135287 | 0.166525 | 0.509424 | 0.442958 |
| Mmu.3794.1.S1_at        | Mmu.3794.1      | 10.22 | 10.21 | 0.73 | 0.15 | 1.01  | 0.642356 | 0.007808 | 0.857724 | 0.117858 |
| Mmu.3795.1.S1_at        | Mmu.3795.1      | 10.67 | 9.85  | 1.9  | 0.29 | -1.76 | 0.586268 | 0.27161  | 0.831211 | 0.536577 |
| Mmu.3798.1.S1_at        | Mmu.3798.1      | 9.58  | 9.25  | 0.06 | 0.11 | 1.26  | 0.008679 | 0.023527 | 0.236048 | 0.192231 |
| Mmu.380.1.S1_at         | Mmu.380.1       | 8.96  | 8.76  | 0.36 | 0.16 | 1.15  | 0.098176 | 0.011452 | 0.467651 | 0.13846  |
| Mmu.3806.2.S1_at        | Mmu.3806.2      | 4.29  | 4.07  | 0.08 | 0.21 | 1.17  | 0.170255 | 0.266839 | 0.543379 | 0.53241  |
| Mmu.3811.1.S1_at        | Mmu.3811.1      | 10.43 | 10.7  | 0.41 | 0.21 | -1.21 | 0.600135 | 0.743941 | 0.837736 | 0.851597 |
| Mmu.3814.1.S1_at        | Mmu.3814.1      | 11.57 | 11.3  | 0.09 | 0.08 | 1.21  | 0.016573 | 0.050931 | 0.287478 | 0.270955 |
| Mmu.3820.1.S1_at        | Mmu.3820.1      | 6.31  | 6.09  | 0.03 | 0.2  | 1.17  | 0.176009 | 0.282984 | 0.549155 | 0.545692 |
| Mmu.3845.1.S1_at        | Mmu.3845.1      | 5.63  | 5.57  | 0.1  | 0.05 | 1.05  | 0.29006  | 0.064339 | 0.646655 | 0.29983  |
| Mmu.3845.1.S1_x_at      | Mmu.3845.1      | 5.4   | 5.31  | 0.28 | 0.18 | 1.06  | 0.645714 | 0.099077 | 0.858801 | 0.357215 |
| Mmu.3847.1.S1_at        | Mmu.3847.1      | 8.49  | 8.43  | 0.22 | 0.07 | 1.04  | 0.517009 | 0.000417 | 0.791672 | 0.038093 |
| Mmu.3853.1.S1_at        | Mmu.3853.1      | 7.59  | 7.23  | 0.52 | 0.35 | 1.28  | 0.235574 | 0.292343 | 0.602691 | 0.552408 |
| Mmu.3865.1.A1_at        | Mmu.3865.1      | 9.91  | 9.44  | 0.29 | 0.14 | 1.39  | 0.039689 | 0.053164 | 0.362432 | 0.276383 |
| Mmu.3886.1.S1_at        | Mmu.3886.1      | 6.09  | 6.12  | 0.09 | 0.11 | -1.03 | 0.85606  | 0.410113 | 0.949177 | 0.637065 |
| Mmu.3898.1.A1_at        | Mmu.3898.1      | 8.23  | 7.9   | 0.38 | 0.17 | 1.26  | 0.664618 | 0.049148 | 0.867683 | 0.266534 |
| Mmu.3902.1.S1_at        | Mmu.3902.1      | 13.37 | 13.34 | 0.03 | 0.05 | 1.02  | 0.415189 | 0.000183 | 0.733613 | 0.030511 |
| Mmu.3906.1.S1_at        | Mmu.3906.1      | 11.52 | 11.74 | 0.4  | 0.03 | -1.16 | 0.461033 | 0.199505 | 0.760738 | 0.4741   |
| Mmu.3907.1.S1_at        | Mmu.3907.1      | 10.08 | 10.58 | 0.01 | 0.21 | -1.41 | 0.01533  | 0.035402 | 0.281008 | 0.232488 |
| Mmu.3908.1.S1_s_at      | Mmu.3908.1      | 10.77 | 10.65 | 0.15 | 0.11 | 1.08  | 0.349351 | 0.601443 | 0.690424 | 0.762787 |
| Mmu.3911.1.S1_at        | Mmu.3911.1      | 12.01 | 12.38 | 0.87 | 0.19 | -1.29 | 0.40287  | 0.373689 | 0.725243 | 0.612403 |
| Mmu.3918.1.S1_at        | Mmu.3918.1      | 6.07  | 5.92  | 0.17 | 0    | 1.11  | 0.171888 | 0.178792 | 0.545239 | 0.455095 |
| Mmu.3931.1.S1_at        | Mmu.3931.1      | 8.22  | 7.31  | 0.09 | 0.11 | 1.88  | 0.000533 | 0.008771 | 0.143137 | 0.124009 |
| Mmu.3936.1.S1_at        | Mmu.3936.1      | 8.35  | 8.3   | 0.07 | 0.06 | 1.04  | 0.854762 | 0.031885 | 0.948598 | 0.220977 |
| Mmu.3937.1.S1_at        | Mmu.3937.1      | 3.02  | 2.97  | 0.05 | 0.06 | 1.04  | 0.401624 | 0.313042 | 0.724554 | 0.567601 |
| MmugDNA.15042.1.S1_s_at | MmugDNA.15042.1 | 10.85 | 10.87 | 0.07 | 0.05 | -1.01 | 0.165964 | 0.550414 | 0.538693 | 0.730421 |
| Mmu.394.1.S1_at         | Mmu.394.1       | 11.69 | 11.16 | 0.38 | 0.19 | 1.45  | 0.079842 | 0.027885 | 0.442789 | 0.208455 |
| Mmu.3952.1.A1_at        | Mmu.3952.1      | 6.25  | 5.3   | 0.43 | 0.19 | 1.94  | 0.086474 | 0.327511 | 0.454228 | 0.577321 |
| Mmu.3952.1.S1_at        | Mmu.3952.1      | 2.66  | 2.78  | 0.06 | 0.11 | -1.09 | 0.141537 | 0.191924 | 0.516365 | 0.467295 |
| Mmu.3978.1.S1_at        | Mmu.3978.1      | 5.59  | 5.38  | 0.31 | 0.3  | 1.16  | 0.804444 | 0.899316 | 0.928962 | 0.942758 |
| Mmu.4005.1.S1_s_at      | Mmu.4005.1      | 13.46 | 13.37 | 0.13 | 0.1  | 1.07  | 0.074689 | 0.086993 | 0.435313 | 0.339851 |
| Mmu.4013.1.S1_at        | Mmu.4013.1      | 7.57  | 7.46  | 0.58 | 0.16 | 1.08  | 0.385969 | 0.062767 | 0.713136 | 0.297193 |
| Mmu.4026.1.S1_at        | Mmu.4026.1      | 8.97  | 8.86  | 0.52 | 0.11 | 1.08  | 0.621992 | 0.213058 | 0.847631 | 0.48702  |
| Mmu.4039.1.S1_at        | Mmu.4039.1      | 10.26 | 10.24 | 0.15 | 0.31 | 1.02  | 0.923657 | 0.09896  | 0.974389 | 0.357049 |
| Mmu.4060.1.S1_at        | Mmu.4060.1      | 7.07  | 7.03  | 0.68 | 0.05 | 1.03  | 0.58702  | 0.238808 | 0.831568 | 0.509485 |

|                    |            |       |       |      |      |       |          |          |          |          |
|--------------------|------------|-------|-------|------|------|-------|----------|----------|----------|----------|
| Mmu.408.1.S1_at    | Mmu.408.1  | 2.76  | 2.89  | 0.08 | 0.04 | -1.09 | 0.07777  | 0.013076 | 0.439884 | 0.147079 |
| Mmu.4085.1.A1_x_at | Mmu.4085.1 | 3.84  | 3.84  | 0.04 | 0.09 | -1    | 0.395212 | 0.110717 | 0.720394 | 0.374854 |
| Mmu.4088.1.S1_at   | Mmu.4088.1 | 11.2  | 10.75 | 0.19 | 0.18 | 1.36  | 0.017186 | 0.001847 | 0.289858 | 0.064494 |
| Mmu.4098.1.S1_at   | Mmu.4098.1 | 9.95  | 8.77  | 1.39 | 0.39 | 2.26  | 0.255963 | 0.173591 | 0.619906 | 0.449956 |
| Mmu.4110.1.S1_s_at | Mmu.4110.1 | 14.38 | 14.4  | 0.05 | 0.01 | -1.01 | 0.208    | 0.33407  | 0.579653 | 0.582104 |
| Mmu.4117.1.S1_at   | Mmu.4117.1 | 3.55  | 3.45  | 0.3  | 0.11 | 1.07  | 0.869475 | 0.734128 | 0.954458 | 0.845896 |
| Mmu.4119.2.S1_a_at | Mmu.4119.2 | 2.9   | 3.24  | 0.08 | 0.25 | -1.27 | 0.167032 | 0.209129 | 0.539622 | 0.482939 |
| Mmu.4119.2.S1_s_at | Mmu.4119.2 | 6.04  | 6.04  | 0.06 | 0.06 | 1     | 0.353685 | 0.50424  | 0.693411 | 0.701473 |
| Mmu.4118.1.S1_s_at | Mmu.4118.1 | 3.72  | 3.34  | 0.22 | 0.07 | 1.3   | 0.14957  | 0.095432 | 0.523226 | 0.352453 |
| Mmu.4118.1.S1_x_at | Mmu.4118.1 | 5.4   | 5.3   | 0.15 | 0.16 | 1.07  | 0.13814  | 0.161854 | 0.513671 | 0.437937 |
| Mmu.4119.1.S1_x_at | Mmu.4119.1 | 3.05  | 3.07  | 0.12 | 0.18 | -1.02 | 0.211969 | 0.340394 | 0.582752 | 0.586725 |
| Mmu.4119.3.S1_a_at | Mmu.4119.3 | 2.75  | 2.76  | 0.04 | 0.06 | -1    | 0.818592 | 0.992777 | 0.93444  | 0.995715 |
| Mmu.4119.3.S1_at   | Mmu.4119.3 | 3.16  | 3.14  | 0.14 | 0.19 | 1.01  | 0.874639 | 0.975874 | 0.956493 | 0.986856 |
| Mmu.4119.3.S1_x_at | Mmu.4119.3 | 2.97  | 2.96  | 0.05 | 0.04 | 1.01  | 0.950844 | 0.948053 | 0.983338 | 0.970446 |
| Mmu.4120.1.S1_x_at | Mmu.4120.1 | 4.87  | 4.67  | 0.1  | 0.12 | 1.16  | 0.076587 | 0.098088 | 0.437977 | 0.356166 |
| Mmu.4122.1.A1_at   | Mmu.4122.1 | 3.59  | 3.61  | 0.16 | 0.11 | -1.01 | 0.908865 | 0.2546   | 0.969277 | 0.522879 |
| Mmu.4122.1.S1_x_at | Mmu.4122.1 | 3.33  | 3.31  | 0.17 | 0.09 | 1.01  | 0.538275 | 0.487539 | 0.803182 | 0.690559 |
| Mmu.4123.1.S1_x_at | Mmu.4123.1 | 3.55  | 3.28  | 0.12 | 0.23 | 1.21  | 0.091208 | 0.100218 | 0.459035 | 0.359205 |
| Mmu.4124.1.S1_a_at | Mmu.4124.1 | 4.81  | 4.6   | 0.17 | 0.03 | 1.16  | 0.040211 | 0.031413 | 0.36348  | 0.219107 |
| Mmu.4125.1.A1_at   | Mmu.4125.1 | 7.46  | 7.32  | 0.16 | 0.08 | 1.11  | 0.077124 | 0.073962 | 0.438923 | 0.317472 |
| Mmu.4125.1.S1_at   | Mmu.4125.1 | 6.75  | 6.62  | 0.07 | 0.07 | 1.09  | 0.090471 | 0.238432 | 0.458706 | 0.50907  |
| Mmu.4125.1.S1_x_at | Mmu.4125.1 | 6.9   | 6.87  | 0.05 | 0.23 | 1.02  | 0.445856 | 0.481058 | 0.752392 | 0.686122 |
| Mmu.4129.1.S1_at   | Mmu.4129.1 | 9.57  | 9.19  | 0.03 | 0.09 | 1.3   | 0.001945 | 0.000815 | 0.171359 | 0.046302 |
| Mmu.414.1.S1_at    | Mmu.414.1  | 9.92  | 10.26 | 1.05 | 0.24 | -1.27 | 0.699106 | 0.20375  | 0.883052 | 0.478011 |
| Mmu.4140.1.S1_at   | Mmu.4140.1 | 9.99  | 9.65  | 0.47 | 0.11 | 1.27  | 0.644916 | 0.824315 | 0.85869  | 0.899073 |
| Mmu.4152.2.S1_at   | Mmu.4152.2 | 12.38 | 12.67 | 0.12 | 0.08 | -1.22 | 0.035267 | 0.006781 | 0.351575 | 0.111388 |
| Mmu.4154.1.S1_at   | Mmu.4154.1 | 3.26  | 3.31  | 0.23 | 0.03 | -1.04 | 0.865491 | 0.575919 | 0.95264  | 0.746847 |
| Mmu.4184.1.A1_at   | Mmu.4184.1 | 3.82  | 3.84  | 0.13 | 0.07 | -1.01 | 0.511337 | 0.882087 | 0.788632 | 0.932794 |
| Mmu.4184.1.S1_at   | Mmu.4184.1 | 3.44  | 3.4   | 0.16 | 0.26 | 1.03  | 0.481255 | 0.820189 | 0.771914 | 0.896372 |
| Mmu.4189.1.S1_at   | Mmu.4189.1 | 3.21  | 3.25  | 0.42 | 0.15 | -1.03 | 0.696996 | 0.751088 | 0.882175 | 0.855314 |
| Mmu.4194.1.S1_at   | Mmu.4194.1 | 4.18  | 4.05  | 0.13 | 0.17 | 1.09  | 0.625549 | 0.681729 | 0.849478 | 0.814123 |
| Mmu.4204.1.S1_at   | Mmu.4204.1 | 9.78  | 9.5   | 0.46 | 0.2  | 1.21  | 0.224643 | 0.031047 | 0.593878 | 0.218115 |
| Mmu.421.1.S1_at    | Mmu.421.1  | 11.89 | 11.69 | 0.2  | 0.03 | 1.15  | 0.25877  | 0.016044 | 0.622286 | 0.160532 |
| Mmu.4246.1.S1_at   | Mmu.4246.1 | 5.16  | 5.11  | 0.05 | 0.04 | 1.04  | 0.115967 | 0.71895  | 0.48949  | 0.83732  |
| Mmu.4246.1.S1_s_at | Mmu.4246.1 | 9.98  | 10.21 | 0.26 | 0.31 | -1.18 | 0.674408 | 0.753193 | 0.871957 | 0.856365 |
| Mmu.4266.1.S1_at   | Mmu.4266.1 | 11.08 | 11.06 | 0.22 | 0.11 | 1.02  | 0.229649 | 0.272975 | 0.59847  | 0.53761  |
| Mmu.4269.1.S1_at   | Mmu.4269.1 | 7.68  | 7.21  | 0.33 | 0.1  | 1.39  | 0.0334   | 0.015363 | 0.346442 | 0.157392 |
| Mmu.4271.1.S1_at   | Mmu.4271.1 | 9.99  | 9.86  | 0.11 | 0.05 | 1.1   | 0.092485 | 0.093717 | 0.461062 | 0.350192 |
| Mmu.4290.1.S1_at   | Mmu.4290.1 | 5.09  | 5.16  | 0.67 | 0.13 | -1.05 | 0.93376  | 0.9781   | 0.977625 | 0.988066 |
| Mmu.4305.1.S1_at   | Mmu.4305.1 | 5.73  | 5.85  | 0.08 | 0.13 | -1.09 | 0.123875 | 0.280877 | 0.497392 | 0.544054 |
| Mmu.4317.1.S1_at   | Mmu.4317.1 | 5.88  | 6.02  | 0.03 | 0.03 | -1.11 | 0.00479  | 0.009019 | 0.202416 | 0.125502 |
| Mmu.4317.2.S1_s_at | Mmu.4317.2 | 11.94 | 12.1  | 0.1  | 0.07 | -1.11 | 0.054186 | 0.049471 | 0.396146 | 0.267334 |
| Mmu.4328.1.S1_at   | Mmu.4328.1 | 5.65  | 5.62  | 0.06 | 0.12 | 1.02  | 0.555045 | 0.588635 | 0.813148 | 0.755131 |

|                        |                |       |       |      |      |       |          |          |          |          |
|------------------------|----------------|-------|-------|------|------|-------|----------|----------|----------|----------|
| Mmu.4331.1.S1_s_at     | Mmu.4331.1     | 12.05 | 11.98 | 0.09 | 0.1  | 1.05  | 0.166    | 0.260192 | 0.538776 | 0.526807 |
| Mmu.4348.1.S1_at       | Mmu.4348.1     | 11.15 | 11.12 | 0.3  | 0.09 | 1.02  | 0.970408 | 0.342172 | 0.990302 | 0.588334 |
| Mmu.436.1.S1_at        | Mmu.436.1      | 10.82 | 10.78 | 0.06 | 0.08 | 1.03  | 0.522376 | 0.145808 | 0.795143 | 0.419833 |
| MmugDNA.5037.1.S1_s_at | MmugDNA.5037.1 | 6.32  | 6.2   | 0.31 | 0.15 | 1.09  | 0.232533 | 0.062944 | 0.600124 | 0.297579 |
| Mmu.4374.2.S1_s_at     | Mmu.4374.2     | 11.22 | 11.26 | 0.94 | 0.05 | -1.03 | 0.978764 | 0.448361 | 0.993097 | 0.664212 |
| Mmu.4374.2.S1_x_at     | Mmu.4374.2     | 10.86 | 10.87 | 0.74 | 0.09 | -1    | 0.958251 | 0.519956 | 0.986346 | 0.71141  |
| Mmu.4376.1.A1_at       | Mmu.4376.1     | 6.69  | 6.56  | 0.2  | 0.16 | 1.1   | 0.167741 | 0.138885 | 0.540411 | 0.412037 |
| Mmu.4376.1.S1_at       | Mmu.4376.1     | 7.17  | 6.85  | 0.12 | 0.1  | 1.25  | 0.052787 | 0.050685 | 0.39321  | 0.270317 |
| Mmu.4380.1.S1_at       | Mmu.4380.1     | 2.93  | 2.8   | 0.18 | 0.07 | 1.09  | 0.122743 | 0.189696 | 0.496198 | 0.465328 |
| Mmu.4380.1.S1_s_at     | Mmu.4380.1     | 12.11 | 11.95 | 0.46 | 0.03 | 1.11  | 0.727926 | 0.860198 | 0.894905 | 0.920292 |
| Mmu.4385.1.S1_at       | Mmu.4385.1     | 5.83  | 5.65  | 0.26 | 0.16 | -1.14 | 0.159976 | 0.230729 | 0.533013 | 0.50243  |
| Mmu.439.1.S1_x_at      | Mmu.439.1      | 5.95  | 5.97  | 0.16 | 0.22 | -1.01 | 0.855204 | 0.178164 | 0.948797 | 0.454527 |
| Mmu.4390.1.S1_at       | Mmu.4390.1     | 5.31  | 5.04  | 0.14 | 0.28 | 1.2   | 0.078655 | 0.293815 | 0.441461 | 0.553823 |
| Mmu.4398.1.S1_s_at     | Mmu.4398.1     | 12.1  | 11.66 | 0.19 | 0.1  | 1.36  | 0.019063 | 0.0034   | 0.299756 | 0.083992 |
| Mmu.4403.1.S1_at       | Mmu.4403.1     | 10.32 | 10.35 | 0.41 | 0.19 | -1.02 | 0.812409 | 0.95226  | 0.932076 | 0.972946 |
| Mmu.4413.1.S1_at       | Mmu.4413.1     | 6.79  | 6.93  | 0.28 | 0.09 | -1.11 | 0.966349 | 0.274346 | 0.988971 | 0.538779 |
| Mmu.4422.1.S1_s_at     | Mmu.4422.1     | 11.25 | 11.08 | 0.51 | 0.05 | 1.12  | 0.58702  | 0.07778  | 0.831568 | 0.323933 |
| Mmu.4423.1.S1_at       | Mmu.4423.1     | 8.42  | 8.41  | 0.29 | 0.2  | 1.01  | 0.495999 | 0.618691 | 0.780178 | 0.774185 |
| Mmu.4425.1.S1_at       | Mmu.4425.1     | 5.52  | 5.55  | 0.07 | 0.11 | -1.02 | 0.975029 | 0.025938 | 0.991912 | 0.201919 |
| Mmu.443.1.S1_at        | Mmu.443.1      | 7.4   | 7.52  | 0.29 | 0.12 | -1.08 | 0.901291 | 0.026864 | 0.966485 | 0.205049 |
| Mmu.4434.1.S1_at       | Mmu.4434.1     | 10.91 | 11.06 | 0.35 | 0.17 | -1.11 | 0.830834 | 0.962109 | 0.939469 | 0.978697 |
| Mmu.4437.1.S1_at       | Mmu.4437.1     | 5.92  | 6.3   | 0.34 | 0.31 | -1.3  | 0.496946 | 0.520039 | 0.780993 | 0.711472 |
| Mmu.4440.1.S1_at       | Mmu.4440.1     | 4.5   | 4.23  | 0.34 | 0.29 | 1.21  | 0.339786 | 0.173763 | 0.684042 | 0.450128 |
| Mmu.4442.1.S1_at       | Mmu.4442.1     | 11.02 | 10.17 | 0.33 | 0.18 | 1.8   | 0.0269   | 0.083075 | 0.326584 | 0.332911 |
| Mmu.4442.1.S1_s_at     | Mmu.4442.1     | 11.98 | 11.56 | 0.18 | 0.15 | 1.34  | 0.036797 | 0.138513 | 0.355785 | 0.411492 |
| MmuAffx.23.16.S1_s_at  | MmuAffx.23.16  | 13.97 | 14.06 | 0.07 | 0.05 | -1.07 | 0.065309 | 0.402364 | 0.420378 | 0.631393 |
| Mmu.4443.6.S1_at       | Mmu.4443.6     | 5.08  | 5.03  | 0.04 | 0.08 | 1.04  | 0.335745 | 0.338315 | 0.681213 | 0.585417 |
| Mmu.4443.8.S1_at       | Mmu.4443.8     | 2.5   | 2.59  | 0.09 | 0.08 | -1.06 | 0.315532 | 0.644094 | 0.666002 | 0.791328 |
| Mmu.4443.9.S1_at       | Mmu.4443.9     | 4.1   | 4.09  | 0.1  | 0.04 | 1.01  | 0.579572 | 0.771156 | 0.826497 | 0.866992 |
| Mmu.4443.9.S1_x_at     | Mmu.4443.9     | 5.01  | 5     | 0.09 | 0.03 | 1     | 0.857182 | 0.404913 | 0.94963  | 0.633399 |
| Mmu.4444.2.S1_at       | Mmu.4444.2     | 4.23  | 4.21  | 0.17 | 0.04 | 1.02  | 0.664215 | 0.590204 | 0.867648 | 0.756117 |
| Mmu.4448.1.S1_at       | Mmu.4448.1     | 5.97  | 5.75  | 0.71 | 0.27 | 1.17  | 0.363129 | 0.269281 | 0.699873 | 0.534534 |
| Mmu.4450.1.S1_x_at     | Mmu.4450.1     | 3.03  | 3.07  | 0.09 | 0.07 | -1.03 | 0.618113 | 0.799704 | 0.845802 | 0.884812 |
| Mmu.4459.1.S1_at       | Mmu.4459.1     | 11.29 | 11.25 | 0.09 | 0.16 | 1.03  | 0.413768 | 0.244583 | 0.732521 | 0.514387 |
| Mmu.4460.1.S1_at       | Mmu.4460.1     | 7.55  | 7.61  | 0.19 | 0.23 | -1.04 | 0.378415 | 0.191893 | 0.708317 | 0.46727  |
| Mmu.4465.1.S1_s_at     | Mmu.4465.1     | 10.32 | 10.68 | 0.49 | 0.16 | -1.29 | 0.992056 | 0.61752  | 0.996928 | 0.773477 |
| Mmu.4493.1.S1_at       | Mmu.4493.1     | 7.67  | 7.84  | 0.09 | 0.25 | -1.13 | 0.458548 | 0.419528 | 0.758944 | 0.643507 |
| Mmu.4504.1.S1_at       | Mmu.4504.1     | 11.82 | 12.03 | 0.31 | 0.04 | -1.16 | 0.788614 | 0.484363 | 0.922448 | 0.688478 |
| Mmu.4512.2.S1_at       | Mmu.4512.2     | 10.71 | 10.93 | 0.13 | 0.06 | -1.16 | 0.168972 | 0.09416  | 0.541912 | 0.350859 |
| Mmu.4519.1.S1_x_at     | Mmu.4519.1     | 6.63  | 6.55  | 0.05 | 0.09 | 1.05  | 0.9881   | 0.891023 | 0.995831 | 0.937877 |
| Mmu.452.1.S1_at        | Mmu.452.1      | 8.51  | 9.6   | 1.27 | 0.24 | -2.14 | 0.213862 | 0.132234 | 0.584484 | 0.404274 |
| Mmu.4523.1.S1_at       | Mmu.4523.1     | 6.11  | 6.13  | 0.41 | 0.17 | -1.02 | 0.86557  | 0.340229 | 0.952645 | 0.586637 |
| Mmu.4529.1.S1_at       | Mmu.4529.1     | 6.19  | 6.66  | 0.62 | 0.43 | -1.39 | 0.828092 | 0.82429  | 0.938183 | 0.899073 |

|                         |                 |       |       |      |      |       |          |          |          |          |
|-------------------------|-----------------|-------|-------|------|------|-------|----------|----------|----------|----------|
| Mmu.4533.1.S1_at        | Mmu.4533.1      | 9.46  | 9.46  | 2.1  | 0.28 | -1.01 | 0.691208 | 0.20145  | 0.879715 | 0.475963 |
| Mmu.4535.1.S1_at        | Mmu.4535.1      | 3.9   | 4.02  | 0.03 | 0.07 | -1.09 | 0.184476 | 0.853253 | 0.557285 | 0.916534 |
| Mmu.4542.1.A1_at        | Mmu.4542.1      | 3.38  | 3.21  | 0.11 | 0.13 | 1.13  | 0.316741 | 0.266911 | 0.666682 | 0.532461 |
| Mmu.4542.1.S1_at        | Mmu.4542.1      | 3.91  | 3.78  | 0.19 | 0.04 | 1.09  | 0.388556 | 0.146092 | 0.715408 | 0.420092 |
| Mmu.4542.2.A1_s_at      | Mmu.4542.2      | 3.19  | 3.36  | 0.05 | 0.25 | -1.12 | 0.223322 | 0.102863 | 0.592569 | 0.363492 |
| Mmu.4542.2.A1_x_at      | Mmu.4542.2      | 6.57  | 6.46  | 0.06 | 0.12 | 1.08  | 0.224441 | 0.280098 | 0.593639 | 0.543369 |
| Mmu.4542.2.S1_s_at      | Mmu.4542.2      | 3.97  | 4.2   | 0.14 | 0.34 | -1.18 | 0.235858 | 0.054694 | 0.602926 | 0.279343 |
| Mmu.4542.2.S1_x_at      | Mmu.4542.2      | 5.92  | 5.97  | 0.08 | 0.01 | -1.04 | 0.823394 | 0.80637  | 0.936294 | 0.888642 |
| Mmu.4580.1.S1_at        | Mmu.4580.1      | 12.88 | 12.71 | 0.08 | 0.05 | 1.12  | 0.025781 | 0.151692 | 0.32273  | 0.426383 |
| Mmu.4582.1.S1_at        | Mmu.4582.1      | 3.15  | 3.14  | 0.04 | 0.12 | 1.01  | 0.434192 | 0.493658 | 0.744883 | 0.694288 |
| Mmu.4582.2.S1_x_at      | Mmu.4582.2      | 7.08  | 6.86  | 0.1  | 0.15 | -1.17 | 0.083659 | 0.104446 | 0.449639 | 0.365719 |
| Mmu.4582.3.S1_s_at      | Mmu.4582.3      | 3.84  | 3.63  | 0.33 | 0.34 | 1.16  | 0.563528 | 0.842949 | 0.818294 | 0.910554 |
| Mmu.4582.4.S1_at        | Mmu.4582.4      | 3.62  | 3.58  | 0.25 | 0.08 | 1.03  | 0.379455 | 0.50662  | 0.708981 | 0.702509 |
| Mmu.4594.1.S1_s_at      | Mmu.4594.1      | 14.77 | 14.74 | 0.01 | 0.01 | 1.02  | 0.073167 | 0.350788 | 0.434019 | 0.594515 |
| Mmu.460.1.S1_s_at       | Mmu.460.1       | 13.52 | 13.59 | 0.11 | 0.03 | -1.05 | 0.372645 | 0.544196 | 0.705567 | 0.726643 |
| Mmu.4602.1.S1_at        | Mmu.4602.1      | 10.75 | 11.03 | 0.08 | 0.14 | -1.21 | 0.046214 | 0.027078 | 0.377596 | 0.20576  |
| Mmu.4615.1.S1_s_at      | Mmu.4615.1      | 9.25  | 10.21 | 0.3  | 0.22 | -1.95 | 0.007521 | 0.065988 | 0.229281 | 0.302293 |
| MmugDNA.8926.1.S1_s_at  | MmugDNA.8926.1  | 10.22 | 10.84 | 0.42 | 0.07 | -1.53 | 0.038609 | 0.14082  | 0.359972 | 0.414202 |
| Mmu.4627.1.S1_at        | Mmu.4627.1      | 5.74  | 5.41  | 0.33 | 0.6  | 1.25  | 0.822571 | 0.468834 | 0.936084 | 0.677906 |
| MmugDNA.22652.1.S1_s_at | MmugDNA.22652.1 | 8.07  | 8.17  | 0.08 | 0.04 | -1.08 | 0.228497 | 0.188966 | 0.597493 | 0.464854 |
| Mmu.4647.4.S1_s_at      | Mmu.4647.4      | 3.74  | 3.74  | 0.35 | 0.07 | 1     | 0.849877 | 0.650441 | 0.947185 | 0.79565  |
| Mmu.4660.1.A1_at        | Mmu.4660.1      | 4.09  | 4.04  | 0.06 | 0.18 | 1.03  | 0.883856 | 0.907416 | 0.959789 | 0.947622 |
| Mmu.4662.5.S1_at        | Mmu.4662.5      | 10.54 | 10.2  | 0.73 | 0.15 | 1.26  | 0.209713 | 0.274865 | 0.581302 | 0.539335 |
| Mmu.4677.1.S1_s_at      | Mmu.4677.1      | 9.17  | 9.39  | 0.76 | 0.1  | -1.16 | 0.503046 | 0.63284  | 0.784008 | 0.783788 |
| Mmu.4682.1.S1_at        | Mmu.4682.1      | 9.69  | 9.38  | 0.52 | 0.15 | 1.25  | 0.381209 | 0.346349 | 0.709924 | 0.59124  |
| Mmu.4689.1.S1_at        | Mmu.4689.1      | 10.1  | 9.87  | 0.21 | 0.07 | 1.18  | 0.131438 | 0.147239 | 0.505767 | 0.421464 |
| Mmu.4690.1.S1_at        | Mmu.4690.1      | 8.24  | 8.51  | 0.32 | 0.15 | -1.21 | 0.257199 | 0.326051 | 0.621021 | 0.576285 |
| Mmu.4697.1.S1_at        | Mmu.4697.1      | 8     | 7.9   | 0.21 | 0.17 | 1.07  | 0.295404 | 0.682435 | 0.651089 | 0.814526 |
| Mmu.4703.1.S1_at        | Mmu.4703.1      | 10.2  | 10.67 | 0.27 | 0.15 | -1.39 | 0.108067 | 0.418052 | 0.480526 | 0.642569 |
| Mmu.4705.1.S1_at        | Mmu.4705.1      | 12.48 | 12.35 | 0.17 | 0.09 | 1.1   | 0.148742 | 0.140564 | 0.522743 | 0.413822 |
| Mmu.4707.1.S1_at        | Mmu.4707.1      | 6.3   | 6.66  | 0.98 | 0.35 | -1.28 | 0.588722 | 0.853206 | 0.831968 | 0.916521 |
| Mmu.4717.1.S1_at        | Mmu.4717.1      | 5.64  | 5.23  | 0.36 | 0.16 | 1.33  | 0.081448 | 0.121312 | 0.445406 | 0.390351 |
| Mmu.4722.1.S1_at        | Mmu.4722.1      | 7.93  | 8.62  | 0.43 | 0.3  | -1.61 | 0.149389 | 0.032621 | 0.523218 | 0.223644 |
| Mmu.4737.1.S1_at        | Mmu.4737.1      | 8.44  | 8.12  | 0.21 | 0.16 | 1.25  | 0.028056 | 0.123562 | 0.330178 | 0.393637 |
| Mmu.4754.1.S1_at        | Mmu.4754.1      | 10.74 | 10.69 | 0.33 | 0.09 | 1.04  | 0.360189 | 0.044546 | 0.697768 | 0.255417 |
| Mmu.4761.1.S1_at        | Mmu.4761.1      | 10.25 | 9.89  | 0.17 | 0.03 | 1.28  | 0.0193   | 0.000716 | 0.300531 | 0.044419 |
| Mmu.4778.1.S1_at        | Mmu.4778.1      | 9.7   | 9.51  | 0.15 | 0.14 | 1.14  | 0.119532 | 0.004186 | 0.49288  | 0.091107 |
| Mmu.4813.1.S1_at        | Mmu.4813.1      | 5.28  | 5.12  | 0.25 | 0.03 | 1.12  | 0.188435 | 0.640483 | 0.560489 | 0.788963 |
| Mmu.4815.2.S1_at        | Mmu.4815.2      | 2.84  | 2.82  | 0.08 | 0.04 | 1.02  | 0.455935 | 0.283592 | 0.75759  | 0.546021 |
| Mmu.483.1.S1_at         | Mmu.483.1       | 3.86  | 3.85  | 0.28 | 0.14 | 1.01  | 0.730069 | 0.853748 | 0.895956 | 0.916773 |
| Mmu.4846.1.S1_at        | Mmu.4846.1      | 8.75  | 9.06  | 0.71 | 0.18 | -1.24 | 0.820958 | 0.198995 | 0.93538  | 0.473569 |
| Mmu.4846.2.S1_at        | Mmu.4846.2      | 9.69  | 10.1  | 0.56 | 0.15 | -1.32 | 0.999669 | 0.104555 | 0.999934 | 0.365805 |
| Mmu.4853.1.S1_at        | Mmu.4853.1      | 11.48 | 11.48 | 0.22 | 0.04 | -1    | 0.836522 | 0.934649 | 0.941249 | 0.962994 |



|                         |                 |       |       |      |      |       |          |          |          |          |
|-------------------------|-----------------|-------|-------|------|------|-------|----------|----------|----------|----------|
| Mmu.488.1.S1_at         | Mmu.488.1       | 9.37  | 9.19  | 0.2  | 0.05 | 1.13  | 0.1567   | 0.028257 | 0.529833 | 0.209854 |
| Mmu.4882.1.S1_at        | Mmu.4882.1      | 10.06 | 10.4  | 0.07 | 0.1  | -1.26 | 0.003663 | 0.003484 | 0.197111 | 0.084834 |
| Mmu.4888.1.S1_at        | Mmu.4888.1      | 10.16 | 10.22 | 0.15 | 0.2  | -1.04 | 0.81262  | 0.00306  | 0.932111 | 0.080641 |
| Mmu.4889.1.S1_at        | Mmu.4889.1      | 5.13  | 5.12  | 0.08 | 0.14 | 1.01  | 0.746897 | 0.671096 | 0.903767 | 0.80765  |
| Mmu.4898.1.S1_at        | Mmu.4898.1      | 11.07 | 10.61 | 0.3  | 0.24 | 1.38  | 0.075269 | 0.073191 | 0.436118 | 0.316064 |
| Mmu.4904.1.S1_at        | Mmu.4904.1      | 10.24 | 10.15 | 0.33 | 0.12 | 1.07  | 0.696922 | 0.37421  | 0.882175 | 0.612711 |
| Mmu.4923.1.S1_at        | Mmu.4923.1      | 3.64  | 3.6   | 0.19 | 0.06 | 1.03  | 0.88146  | 0.367823 | 0.959052 | 0.607466 |
| Mmu.4926.1.S1_at        | Mmu.4926.1      | 8.26  | 8.4   | 0.36 | 0.19 | -1.1  | 0.89     | 0.370816 | 0.962106 | 0.609797 |
| Mmu.4940.1.S1_at        | Mmu.4940.1      | 8.75  | 8.83  | 0.3  | 0.13 | -1.06 | 0.723661 | 0.745126 | 0.892847 | 0.852267 |
| Mmu.4943.1.S1_at        | Mmu.4943.1      | 10.98 | 10.55 | 0.4  | 0.18 | 1.35  | 0.325688 | 0.065904 | 0.673403 | 0.302129 |
| Mmu.4946.1.S1_at        | Mmu.4946.1      | 10.32 | 10.6  | 0.19 | 0.23 | -1.22 | 0.181775 | 0.190514 | 0.554854 | 0.465906 |
| Mmu.4947.1.S1_at        | Mmu.4947.1      | 7.01  | 6.93  | 0.12 | 0.16 | 1.06  | 0.894451 | 0.415645 | 0.963846 | 0.641007 |
| Mmu.4949.1.A1_at        | Mmu.4949.1      | 6.24  | 6.65  | 0.65 | 0.16 | -1.33 | 0.473421 | 0.365252 | 0.767523 | 0.605412 |
| Mmu.4957.1.S1_at        | Mmu.4957.1      | 4.29  | 4.29  | 0.04 | 0.03 | -1    | 0.372628 | 0.488022 | 0.705567 | 0.690855 |
| Mmu.4958.1.S1_at        | Mmu.4958.1      | 4.05  | 4.06  | 0.03 | 0.04 | -1    | 0.77527  | 0.975643 | 0.916675 | 0.98673  |
| Mmu.4959.1.S1_at        | Mmu.4959.1      | 7.14  | 7.14  | 0.4  | 0.34 | 1     | 0.934503 | 0.791371 | 0.977802 | 0.879472 |
| Mmu.497.1.A1_at         | Mmu.497.1       | 3.26  | 3.16  | 0.06 | 0.01 | 1.07  | 0.101765 | 0.310637 | 0.472011 | 0.565787 |
| MmugDNA.19865.1.S1_s_at | MmugDNA.19865.1 | 13.88 | 13.92 | 0.32 | 0.04 | -1.03 | 0.756213 | 0.730792 | 0.90814  | 0.844057 |
| MmugDNA.19865.1.S1_x_at | MmugDNA.19865.1 | 13.24 | 13.27 | 0.42 | 0.04 | -1.02 | 0.950841 | 0.672776 | 0.983338 | 0.808768 |
| Mmu.4984.1.S1_at        | Mmu.4984.1      | 7.36  | 7.17  | 0.23 | 0.32 | 1.15  | 0.184282 | 0.26049  | 0.557009 | 0.527026 |
| Mmu.4985.1.S1_at        | Mmu.4985.1      | 8     | 8.08  | 0.58 | 0.12 | -1.06 | 0.6471   | 0.882556 | 0.859341 | 0.933072 |
| Mmu.4997.1.S1_at        | Mmu.4997.1      | 7.69  | 6.86  | 0.37 | 0.35 | 1.77  | 0.031439 | 0.012658 | 0.341227 | 0.145088 |
| Mmu.5019.1.S1_s_at      | Mmu.5019.1      | 9.04  | 9.17  | 0.65 | 0.26 | -1.09 | 0.595743 | 0.256965 | 0.835605 | 0.524779 |
| Mmu.5026.1.S1_at        | Mmu.5026.1      | 5.04  | 4.89  | 0.15 | 0.06 | 1.1   | 0.797773 | 0.01553  | 0.925727 | 0.158053 |
| MmugDNA.33122.1.S1_at   | MmugDNA.33122.1 | 11.68 | 11.61 | 0.44 | 0.14 | 1.05  | 0.95809  | 0.127249 | 0.986223 | 0.397935 |
| MmugDNA.33122.1.S1_s_at | MmugDNA.33122.1 | 12.35 | 12.37 | 0.54 | 0.11 | -1.01 | 0.805967 | 0.252143 | 0.929563 | 0.520828 |
| Mmu.5028.1.S1_at        | Mmu.5028.1      | 4.18  | 4.07  | 0.27 | 0.05 | 1.08  | 0.505754 | 0.707314 | 0.785398 | 0.830236 |
| Mmu.5034.1.A1_at        | Mmu.5034.1      | 6.79  | 7     | 0.44 | 0.07 | -1.16 | 0.770167 | 0.963117 | 0.913903 | 0.97942  |
| Mmu.5034.1.S1_s_at      | Mmu.5034.1      | 10.73 | 10.91 | 0.46 | 0.03 | -1.13 | 0.514191 | 0.774003 | 0.790322 | 0.868608 |
| Mmu.5034.1.S1_x_at      | Mmu.5034.1      | 11.26 | 11.46 | 0.44 | 0.02 | -1.15 | 0.513771 | 0.748865 | 0.790154 | 0.853944 |
| Mmu.506.1.A1_at         | Mmu.506.1       | 8.79  | 9.12  | 1.69 | 0.28 | -1.25 | 0.82495  | 0.147242 | 0.937097 | 0.421464 |
| Mmu.506.1.S1_at         | Mmu.506.1       | 7.79  | 8.35  | 2.25 | 0.41 | -1.47 | 0.710698 | 0.177794 | 0.887398 | 0.454111 |
| Mmu.5060.1.S1_at        | Mmu.5060.1      | 8.96  | 8.61  | 0.15 | 0.17 | 1.27  | 0.024953 | 0.153854 | 0.320402 | 0.428506 |
| MmugDNA.19825.1.S1_at   | MmugDNA.19825.1 | 5.13  | 5.06  | 0.09 | 0.03 | 1.05  | 0.108465 | 0.034496 | 0.480777 | 0.229879 |
| MmugDNA.19825.1.S1_s_at | MmugDNA.19825.1 | 9.4   | 8.89  | 0.11 | 0.22 | 1.42  | 0.011027 | 0.043449 | 0.251928 | 0.253079 |
| Mmu.5062.1.S1_at        | Mmu.5062.1      | 4.62  | 4.68  | 0.2  | 0.14 | -1.04 | 0.751157 | 0.75346  | 0.905812 | 0.856527 |
| Mmu.5066.1.S1_at        | Mmu.5066.1      | 9.41  | 9.3   | 0.37 | 0.11 | 1.08  | 0.357079 | 0.219567 | 0.69549  | 0.493192 |
| Mmu.5073.1.S1_at        | Mmu.5073.1      | 8.61  | 8.59  | 0.32 | 0.19 | 1.01  | 0.377467 | 0.48957  | 0.707543 | 0.691824 |
| Mmu.5090.1.S1_at        | Mmu.5090.1      | 8.5   | 8.87  | 0.2  | 0.1  | -1.29 | 0.087989 | 0.002984 | 0.456029 | 0.079958 |
| Mmu.5094.1.S1_at        | Mmu.5094.1      | 5.89  | 5.95  | 0.2  | 0.15 | -1.04 | 0.415544 | 0.04179  | 0.733656 | 0.248986 |
| Mmu.511.1.S1_at         | Mmu.511.1       | 4.6   | 4.42  | 0.08 | 0.01 | 1.14  | 0.013051 | 0.004169 | 0.266282 | 0.091036 |
| Mmu.512.1.S1_at         | Mmu.512.1       | 12.09 | 12.42 | 0.68 | 0.02 | -1.26 | 0.332455 | 0.134578 | 0.678846 | 0.406629 |
| Mmu.5124.1.S1_at        | Mmu.5124.1      | 12.6  | 12.61 | 0.06 | 0.12 | -1.01 | 0.585449 | 0.081172 | 0.830549 | 0.329351 |

|                         |                 |       |       |      |      |        |          |          |          |          |
|-------------------------|-----------------|-------|-------|------|------|--------|----------|----------|----------|----------|
| Mmu.5133.1.S1_at        | Mmu.5133.1      | 6.99  | 6.84  | 0.33 | 0.2  | 1.11   | 0.806252 | 0.718392 | 0.929649 | 0.837031 |
| Mmu.5150.1.A1_at        | Mmu.5150.1      | 6.09  | 6.07  | 0.12 | 0.05 | 1.01   | 0.490299 | 0.623211 | 0.776921 | 0.777635 |
| Mmu.5150.1.S1_at        | Mmu.5150.1      | 6.19  | 6.17  | 0.12 | 0.12 | 1.02   | 0.564213 | 0.794984 | 0.81857  | 0.881864 |
| Mmu.5151.1.S1_s_at      | Mmu.5151.1      | 5.88  | 6.25  | 0.27 | 0.31 | -1.29  | 0.278934 | 0.319519 | 0.637923 | 0.571872 |
| Mmu.5152.1.S1_at        | Mmu.5152.1      | 3.25  | 3.23  | 0.26 | 0.06 | 1.01   | 0.436312 | 0.445251 | 0.746272 | 0.662338 |
| Mmu.5152.1.S1_x_at      | Mmu.5152.1      | 4.61  | 4.8   | 0.17 | 0.09 | -1.15  | 0.309223 | 0.054024 | 0.661595 | 0.277914 |
| Mmu.5155.1.S1_s_at      | Mmu.5155.1      | 9.11  | 9.14  | 0.46 | 0.17 | -1.02  | 0.949663 | 0.027515 | 0.983004 | 0.207161 |
| Mmu.5166.1.S1_at        | Mmu.5166.1      | 9.92  | 10.51 | 0.14 | 0.17 | -1.51  | 0.019203 | 0.047411 | 0.300345 | 0.262476 |
| Mmu.518.1.S1_at         | Mmu.518.1       | 3.5   | 3.75  | 0.11 | 0.2  | -1.18  | 0.373594 | 0.559111 | 0.705567 | 0.736046 |
| Mmu.5186.1.S1_at        | Mmu.5186.1      | 5.48  | 3.55  | 1.13 | 0.1  | 3.81   | 0.037358 | 0.019512 | 0.357066 | 0.175439 |
| Mmu.5207.1.S1_at        | Mmu.5207.1      | 6.98  | 6.71  | 0.03 | 0.07 | -1.21  | 0.004151 | 0.04221  | 0.198874 | 0.24989  |
| Mmu.5234.1.S1_at        | Mmu.5234.1      | 7.62  | 7.57  | 0.55 | 0.41 | 1.04   | 0.739825 | 0.098729 | 0.900699 | 0.356811 |
| Mmu.524.1.S1_at         | Mmu.524.1       | 3.81  | 3.56  | 0.28 | 0.38 | 1.19   | 0.483262 | 0.652905 | 0.772986 | 0.797125 |
| Mmu.5240.1.S1_at        | Mmu.5240.1      | 6.93  | 6.56  | 0.44 | 0.05 | 1.29   | 0.224137 | 0.086325 | 0.593263 | 0.338771 |
| Mmu.5247.1.A1_at        | Mmu.5247.1      | 9.38  | 9.33  | 0.61 | 0.38 | 1.03   | 0.555873 | 0.044254 | 0.813775 | 0.25493  |
| Mmu.5251.1.S1_at        | Mmu.5251.1      | 8.16  | 8.1   | 0.96 | 0.04 | 1.04   | 0.94786  | 0.480098 | 0.982079 | 0.685659 |
| Mmu.5257.1.S1_at        | Mmu.5257.1      | 12.83 | 12.76 | 0.11 | 0.02 | 1.05   | 0.157634 | 0.267196 | 0.530616 | 0.532809 |
| Mmu.5288.1.S1_at        | Mmu.5288.1      | 11.76 | 12.4  | 0.23 | 0.1  | -1.57  | 0.020245 | 0.145704 | 0.303799 | 0.419653 |
| Mmu.53.1.S1_at          | Mmu.53.1        | 11.22 | 11.19 | 0.08 | 0.13 | 1.02   | 0.359836 | 0.504903 | 0.697545 | 0.701947 |
| Mmu.5300.1.S1_at        | Mmu.5300.1      | 5.46  | 5.15  | 0.06 | 0.32 | 1.24   | 0.145154 | 0.22242  | 0.520309 | 0.495479 |
| Mmu.5303.1.S1_at        | Mmu.5303.1      | 13.65 | 5.5   | 4.69 | 0.05 | 283.99 | 0.114503 | 0.069717 | 0.487606 | 0.310183 |
| MmugDNA.15798.1.S1_s_at | MmugDNA.15798.1 | 11.76 | 10.81 | 2.01 | 0.13 | 1.94   | 0.732089 | 0.325716 | 0.896996 | 0.57602  |
| Mmu.5321.1.S1_at        | Mmu.5321.1      | 7.3   | 7.07  | 0.12 | 0.17 | 1.17   | 0.17342  | 0.013206 | 0.546571 | 0.147409 |
| Mmu.5328.1.S1_x_at      | Mmu.5328.1      | 13.82 | 13.81 | 0.01 | 0.01 | 1      | 0.707713 | 0.955745 | 0.88624  | 0.974924 |
| Mmu.5329.1.S1_at        | Mmu.5329.1      | 11.06 | 10.8  | 0.31 | 0.05 | 1.2    | 0.223314 | 0.471785 | 0.592569 | 0.679681 |
| Mmu.5333.1.S1_at        | Mmu.5333.1      | 8.99  | 9.07  | 0.08 | 0.11 | -1.05  | 0.713056 | 0.304107 | 0.888233 | 0.561453 |
| Mmu.5339.1.S1_at        | Mmu.5339.1      | 11.41 | 10.85 | 0.1  | 0.13 | 1.47   | 0.003874 | 0.001539 | 0.198571 | 0.05949  |
| Mmu.534.1.S1_at         | Mmu.534.1       | 9.71  | 8.79  | 0.41 | 0.12 | 1.89   | 0.019623 | 0.001894 | 0.302081 | 0.065004 |
| Mmu.535.1.S1_at         | Mmu.535.1       | 9.92  | 9.47  | 0.28 | 0.08 | 1.37   | 0.04762  | 0.044032 | 0.380795 | 0.254195 |
| Mmu.5354.1.S1_at        | Mmu.5354.1      | 10.69 | 10.53 | 0.23 | 0.14 | 1.12   | 0.364405 | 0.450318 | 0.700569 | 0.665643 |
| Mmu.5356.1.S1_at        | Mmu.5356.1      | 12.24 | 12.19 | 0.29 | 0.06 | 1.03   | 0.989052 | 0.890297 | 0.995916 | 0.937505 |
| Mmu.5357.1.S1_at        | Mmu.5357.1      | 8.97  | 8.9   | 0.04 | 0.04 | 1.05   | 0.148723 | 0.413145 | 0.522734 | 0.639461 |
| Mmu.5363.1.S1_at        | Mmu.5363.1      | 10.5  | 10    | 1.06 | 0.16 | 1.41   | 0.969466 | 0.835075 | 0.989952 | 0.905549 |
| Mmu.5373.1.S1_s_at      | Mmu.5373.1      | 12.45 | 12.72 | 0.12 | 0.04 | -1.21  | 0.012586 | 0.01124  | 0.263116 | 0.138014 |
| Mmu.5386.1.S1_at        | Mmu.5386.1      | 7.71  | 7.2   | 0.19 | 0.41 | 1.42   | 0.066566 | 0.128785 | 0.422404 | 0.400248 |
| Mmu.5392.1.S1_at        | Mmu.5392.1      | 4.11  | 4.06  | 0.26 | 0.06 | 1.03   | 0.731436 | 0.832653 | 0.896631 | 0.904017 |
| Mmu.5406.1.S1_at        | Mmu.5406.1      | 5.73  | 5.53  | 0.14 | 0    | 1.15   | 0.158076 | 0.125143 | 0.531053 | 0.395577 |
| Mmu.5409.1.S1_at        | Mmu.5409.1      | 7.31  | 7.7   | 0.4  | 0.11 | -1.32  | 0.689944 | 0.75715  | 0.879216 | 0.858648 |
| Mmu.5423.1.S1_at        | Mmu.5423.1      | 11.58 | 11.77 | 0.05 | 0.08 | -1.14  | 0.035168 | 0.009777 | 0.351216 | 0.130028 |
| Mmu.5427.1.S1_at        | Mmu.5427.1      | 4.81  | 4.96  | 0.22 | 0.17 | -1.11  | 0.747052 | 0.39902  | 0.90386  | 0.62969  |
| Mmu.5431.1.S1_at        | Mmu.5431.1      | 9.07  | 8.96  | 0.19 | 0.13 | 1.08   | 0.352501 | 0.472916 | 0.692659 | 0.680236 |
| Mmu.5435.1.S1_at        | Mmu.5435.1      | 7.9   | 8.6   | 0.57 | 0.15 | -1.63  | 0.138663 | 0.014939 | 0.514023 | 0.155342 |
| Mmu.5448.1.S1_at        | Mmu.5448.1      | 7.63  | 7.82  | 0.07 | 0.18 | -1.15  | 0.162071 | 0.046883 | 0.535244 | 0.261276 |

|                         |                 |       |       |      |      |       |          |          |          |          |
|-------------------------|-----------------|-------|-------|------|------|-------|----------|----------|----------|----------|
| Mmu.5468.1.S1_at        | Mmu.5468.1      | 9.17  | 9.02  | 0.02 | 0.04 | 1.12  | 0.0092   | 0.426285 | 0.241866 | 0.648468 |
| Mmu.5484.1.S1_s_at      | Mmu.5484.1      | 11.6  | 12.01 | 0.5  | 0.08 | -1.33 | 0.227798 | 0.162254 | 0.596693 | 0.438447 |
| Mmu.549.1.S1_x_at       | Mmu.549.1       | 3.21  | 3.15  | 0.11 | 0.06 | 1.04  | 0.171668 | 0.56016  | 0.544918 | 0.736517 |
| Mmu.5491.1.S1_at        | Mmu.5491.1      | 10.28 | 9.78  | 1.16 | 0.28 | 1.42  | 0.458428 | 0.336694 | 0.758831 | 0.584037 |
| Mmu.5499.1.S1_at        | Mmu.5499.1      | 12.76 | 12.9  | 0.1  | 0.07 | -1.11 | 0.202524 | 0.402207 | 0.574003 | 0.631247 |
| Mmu.5502.1.S1_at        | Mmu.5502.1      | 5.92  | 5.87  | 0.17 | 0    | 1.04  | 0.999188 | 0.906789 | 0.999788 | 0.947229 |
| Mmu.5514.1.S1_at        | Mmu.5514.1      | 5.24  | 5.25  | 0.14 | 0.06 | -1.01 | 0.61576  | 0.3808   | 0.844625 | 0.617426 |
| Mmu.5523.1.S1_at        | Mmu.5523.1      | 8.99  | 8.82  | 0.24 | 0.09 | 1.13  | 0.218928 | 0.221836 | 0.588341 | 0.49495  |
| Mmu.5524.1.S1_at        | Mmu.5524.1      | 9.54  | 9.48  | 0.21 | 0.34 | 1.04  | 0.183095 | 0.231342 | 0.556028 | 0.503029 |
| Mmu.5534.1.S1_at        | Mmu.5534.1      | 5.96  | 5.72  | 0.17 | 0.14 | 1.18  | 0.337608 | 0.111494 | 0.682537 | 0.376205 |
| Mmu.5541.2.S1_at        | Mmu.5541.2      | 3.77  | 4.1   | 0.68 | 0.27 | -1.26 | 0.645618 | 0.454458 | 0.858801 | 0.668603 |
| Mmu.5569.1.S1_at        | Mmu.5569.1      | 5     | 5.07  | 0.45 | 0.12 | -1.05 | 0.702323 | 0.49772  | 0.884197 | 0.697025 |
| Mmu.5587.1.S1_at        | Mmu.5587.1      | 8.92  | 8.86  | 0.03 | 0.17 | 1.04  | 0.466607 | 0.68447  | 0.763714 | 0.815959 |
| Mmu.5593.1.S1_at        | Mmu.5593.1      | 9.88  | 9.7   | 0.08 | 0.02 | 1.14  | 0.027953 | 0.377093 | 0.330017 | 0.614795 |
| Mmu.5631.1.A1_at        | Mmu.5631.1      | 6.82  | 6.79  | 0.58 | 0.06 | 1.02  | 0.788246 | 0.944091 | 0.922202 | 0.968306 |
| Mmu.5646.1.A1_at        | Mmu.5646.1      | 3.37  | 3.27  | 0.08 | 0.04 | 1.08  | 0.087159 | 0.139606 | 0.454785 | 0.41286  |
| Mmu.5654.1.S1_at        | Mmu.5654.1      | 7.5   | 7.41  | 0.2  | 0.21 | 1.06  | 0.916337 | 0.371343 | 0.971583 | 0.610172 |
| Mmu.5655.1.S1_s_at      | Mmu.5655.1      | 13.18 | 13.1  | 0.1  | 0.08 | 1.06  | 0.418279 | 0.082721 | 0.735459 | 0.332171 |
| Mmu.5673.1.S1_at        | Mmu.5673.1      | 8.68  | 8.34  | 1.08 | 0.18 | 1.27  | 0.591845 | 0.134385 | 0.833648 | 0.406603 |
| Mmu.5674.1.A1_at        | Mmu.5674.1      | 3.87  | 3.72  | 0.18 | 0.16 | 1.11  | 0.126438 | 0.210821 | 0.500271 | 0.484902 |
| Mmu.5674.1.S1_at        | Mmu.5674.1      | 4.21  | 4.04  | 0.09 | 0.15 | 1.13  | 0.054708 | 0.085996 | 0.397122 | 0.338156 |
| Mmu.5677.4.S1_at        | Mmu.5677.4      | 6.98  | 6.85  | 0.68 | 0.46 | 1.09  | 0.464097 | 0.473146 | 0.76239  | 0.68048  |
| Mmu.5680.1.S1_at        | Mmu.5680.1      | 8.87  | 8.42  | 0.41 | 0.06 | 1.37  | 0.106328 | 0.146249 | 0.478791 | 0.420241 |
| Mmu.5689.1.S1_at        | Mmu.5689.1      | 11.62 | 11.12 | 0.73 | 0.13 | 1.42  | 0.786001 | 0.457852 | 0.921288 | 0.670983 |
| Mmu.5691.1.S1_at        | Mmu.5691.1      | 7.42  | 6.76  | 0.23 | 0.26 | 1.58  | 0.051982 | 0.051187 | 0.391724 | 0.271771 |
| Mmu.5692.1.S1_at        | Mmu.5692.1      | 12.24 | 12.27 | 0.07 | 0.04 | -1.03 | 0.614304 | 0.188169 | 0.843887 | 0.464251 |
| MmugDNA.25237.1.S1_s_at | MmugDNA.25237.1 | 11.86 | 11.75 | 0.06 | 0.06 | 1.08  | 0.239276 | 0.055795 | 0.605786 | 0.282044 |
| Mmu.5693.1.S1_at        | Mmu.5693.1      | 5.05  | 4.85  | 0.01 | 0.05 | 1.15  | 0.00339  | 0.000395 | 0.194985 | 0.037471 |
| Mmu.5696.1.S1_at        | Mmu.5696.1      | 5.93  | 5.87  | 0.14 | 0.17 | 1.04  | 0.381019 | 0.46174  | 0.70987  | 0.673302 |
| Mmu.5709.1.S1_x_at      | Mmu.5709.1      | 14.23 | 14.23 | 0.03 | 0.05 | -1    | 0.697896 | 0.828984 | 0.882511 | 0.901691 |
| Mmu.5709.2.S1_s_at      | Mmu.5709.2      | 12.58 | 12.43 | 0.25 | 0.12 | 1.11  | 0.667221 | 0.093315 | 0.868549 | 0.349412 |
| Mmu.5714.1.S1_at        | Mmu.5714.1      | 5.91  | 5.88  | 0.09 | 0.05 | 1.02  | 0.767537 | 0.703837 | 0.912495 | 0.828251 |
| Mmu.5725.1.S1_at        | Mmu.5725.1      | 4.54  | 3.94  | 0.38 | 0.15 | 1.52  | 0.128354 | 0.083206 | 0.50293  | 0.333184 |
| Mmu.5727.1.S1_at        | Mmu.5727.1      | 11.89 | 10.78 | 1.01 | 0.04 | 2.16  | 0.410929 | 0.229078 | 0.731022 | 0.501396 |
| Mmu.5757.1.S1_at        | Mmu.5757.1      | 8.21  | 8.56  | 0.67 | 0.21 | -1.27 | 0.531501 | 0.147592 | 0.79971  | 0.421901 |
| Mmu.5766.1.S1_at        | Mmu.5766.1      | 10.05 | 9.93  | 0.43 | 0.29 | 1.08  | 0.529321 | 0.538871 | 0.798256 | 0.723368 |
| Mmu.5767.1.A1_at        | Mmu.5767.1      | 4.65  | 4.65  | 0.05 | 0.07 | -1    | 0.801579 | 0.558978 | 0.927672 | 0.735963 |
| Mmu.577.1.S1_at         | Mmu.577.1       | 8.39  | 8.26  | 0.42 | 0.36 | 1.1   | 0.44801  | 0.309781 | 0.753741 | 0.565044 |
| Mmu.5782.1.S1_at        | Mmu.5782.1      | 11.18 | 11.12 | 0.03 | 0.03 | 1.05  | 0.079023 | 0.768706 | 0.441671 | 0.865653 |
| Mmu.5802.2.S1_at        | Mmu.5802.2      | 11.56 | 11.62 | 0.18 | 0.04 | -1.04 | 0.164859 | 0.177692 | 0.537595 | 0.454073 |
| Mmu.5808.1.S1_at        | Mmu.5808.1      | 8.8   | 8.66  | 1.43 | 0.25 | 1.1   | 0.916358 | 0.70827  | 0.971586 | 0.830841 |
| Mmu.5811.1.A1_at        | Mmu.5811.1      | 7.6   | 7.06  | 0.25 | 0.07 | 1.45  | 0.029872 | 0.065527 | 0.336071 | 0.301415 |
| Mmu.5814.1.S1_at        | Mmu.5814.1      | 4.84  | 4.78  | 0.09 | 0.19 | 1.04  | 0.571157 | 0.489871 | 0.822551 | 0.691972 |

|                       |               |       |       |      |      |       |          |          |          |          |
|-----------------------|---------------|-------|-------|------|------|-------|----------|----------|----------|----------|
| Mmu.5825.1.S1_s_at    | Mmu.5825.1    | 12.44 | 12.26 | 0.21 | 0.05 | 1.13  | 0.236977 | 0.323393 | 0.603869 | 0.574453 |
| Mmu.5849.1.S1_at      | Mmu.5849.1    | 3.81  | 4.03  | 0.2  | 0.25 | -1.17 | 0.200004 | 0.232753 | 0.571864 | 0.504385 |
| Mmu.586.1.S1_at       | Mmu.586.1     | 9.16  | 9.02  | 0.45 | 0.18 | 1.1   | 0.389575 | 0.062911 | 0.716244 | 0.297501 |
| Mmu.586.2.S1_at       | Mmu.586.2     | 10.19 | 10.28 | 0.74 | 0.32 | -1.07 | 0.957482 | 0.145393 | 0.985977 | 0.419421 |
| Mmu.5870.1.S1_at      | Mmu.5870.1    | 6.14  | 6.18  | 0.12 | 0.15 | -1.03 | 0.626387 | 0.489145 | 0.849991 | 0.691629 |
| Mmu.5871.1.S1_x_at    | Mmu.5871.1    | 14.31 | 14.33 | 0.07 | 0.01 | -1.01 | 0.259977 | 0.144537 | 0.622946 | 0.418408 |
| Mmu.5875.1.S1_at      | Mmu.5875.1    | 3.2   | 3.15  | 0.05 | 0.25 | 1.03  | 0.787853 | 0.80221  | 0.922049 | 0.886112 |
| Mmu.5879.1.S1_at      | Mmu.5879.1    | 12.57 | 12.53 | 0.34 | 0.03 | 1.02  | 0.578946 | 0.80541  | 0.826338 | 0.888152 |
| Mmu.5899.1.S1_at      | Mmu.5899.1    | 12.52 | 12.43 | 0.1  | 0.09 | 1.06  | 0.242526 | 0.171625 | 0.608517 | 0.448044 |
| Mmu.5967.1.S1_s_at    | Mmu.5967.1    | 11.69 | 11.58 | 0.09 | 0.08 | 1.08  | 0.210849 | 0.174515 | 0.582007 | 0.450998 |
| Mmu.5901.1.S1_at      | Mmu.5901.1    | 7.73  | 7.41  | 0.12 | 0.19 | -1.25 | 0.033016 | 0.09789  | 0.345897 | 0.355679 |
| Mmu.5908.1.S1_at      | Mmu.5908.1    | 9.98  | 10.24 | 0.15 | 0.3  | -1.2  | 0.400207 | 0.482894 | 0.723621 | 0.68765  |
| Mmu.5912.1.S1_at      | Mmu.5912.1    | 5.81  | 5.47  | 0.26 | 0.1  | 1.26  | 0.102097 | 0.08227  | 0.472436 | 0.331165 |
| Mmu.5921.1.S1_at      | Mmu.5921.1    | 11.97 | 11.82 | 0.13 | 0.07 | 1.11  | 0.319464 | 0.635223 | 0.668733 | 0.785279 |
| Mmu.5974.1.S1_at      | Mmu.5974.1    | 7.13  | 7.22  | 0.29 | 0.24 | -1.06 | 0.756608 | 0.853748 | 0.908325 | 0.916773 |
| Mmu.5978.1.S1_at      | Mmu.5978.1    | 9.16  | 9.42  | 0.29 | 0.19 | -1.2  | 0.838407 | 0.471861 | 0.942207 | 0.679772 |
| Mmu.5991.1.S1_at      | Mmu.5991.1    | 6.05  | 6.03  | 0.2  | 0.09 | 1.02  | 0.937088 | 0.581438 | 0.978861 | 0.750451 |
| Mmu.5996.1.S1_s_at    | Mmu.5996.1    | 3.44  | 3.56  | 0.17 | 0.19 | -1.09 | 0.318679 | 0.42404  | 0.668228 | 0.646666 |
| Mmu.5996.1.S1_x_at    | Mmu.5996.1    | 4.42  | 4.24  | 0.21 | 0.08 | 1.13  | 0.214396 | 0.330018 | 0.584751 | 0.578915 |
| Mmu.5996.2.S1_at      | Mmu.5996.2    | 4.33  | 4.19  | 0.07 | 0.17 | 1.1   | 0.304968 | 0.160626 | 0.658533 | 0.436745 |
| Mmu.5996.2.S1_x_at    | Mmu.5996.2    | 4.82  | 4.54  | 0.1  | 0.12 | 1.21  | 0.067218 | 0.063491 | 0.423286 | 0.298444 |
| Mmu.6007.1.S1_at      | Mmu.6007.1    | 7.36  | 7.31  | 0.08 | 0.05 | 1.03  | 0.446863 | 0.951643 | 0.752889 | 0.972522 |
| Mmu.6016.1.S1_at      | Mmu.6016.1    | 12.47 | 12.44 | 0.28 | 0.08 | 1.02  | 0.898971 | 0.459507 | 0.965677 | 0.671805 |
| Mmu.6025.1.S1_at      | Mmu.6025.1    | 11.74 | 11.67 | 0.13 | 0.23 | 1.05  | 0.711308 | 0.06171  | 0.887569 | 0.295166 |
| MmuAffx.23.18.S1_s_at | MmuAffx.23.18 | 14.15 | 14.16 | 0.01 | 0.05 | -1.01 | 0.687445 | 0.576143 | 0.877778 | 0.747028 |
| Mmu.6027.1.S1_at      | Mmu.6027.1    | 8.62  | 8.41  | 0.68 | 0.27 | 1.15  | 0.212064 | 0.254842 | 0.582812 | 0.523051 |
| Mmu.6042.1.S1_at      | Mmu.6042.1    | 4.64  | 5.04  | 0.08 | 0.32 | -1.32 | 0.131752 | 0.216959 | 0.506189 | 0.490571 |
| Mmu.6048.2.S1_at      | Mmu.6048.2    | 8.16  | 8.13  | 0.1  | 0.22 | 1.02  | 0.481173 | 0.092902 | 0.771807 | 0.349024 |
| Mmu.6050.1.S1_at      | Mmu.6050.1    | 10.12 | 10.19 | 0.38 | 0.05 | -1.05 | 0.30183  | 0.019142 | 0.655978 | 0.174115 |
| Mmu.6053.1.S1_at      | Mmu.6053.1    | 8.45  | 7.75  | 0.33 | 0.37 | 1.62  | 0.049975 | 0.067762 | 0.386663 | 0.306425 |
| Mmu.6061.1.A1_at      | Mmu.6061.1    | 3.4   | 3.33  | 0.08 | 0.14 | 1.05  | 0.941726 | 0.511371 | 0.980207 | 0.705534 |
| Mmu.6061.1.S1_at      | Mmu.6061.1    | 3.28  | 3.27  | 0.19 | 0.08 | 1.01  | 0.940448 | 0.826209 | 0.979714 | 0.900203 |
| Mmu.6083.1.S1_at      | Mmu.6083.1    | 12.95 | 12.73 | 0.1  | 0.09 | 1.17  | 0.04601  | 0.006222 | 0.37735  | 0.106937 |
| Mmu.6085.2.S1_x_at    | Mmu.6085.2    | 11.83 | 11.87 | 0.31 | 0.03 | -1.03 | 0.81527  | 0.357868 | 0.933137 | 0.599493 |
| Mmu.6118.1.S1_at      | Mmu.6118.1    | 9.68  | 9.43  | 1.25 | 0.2  | 1.19  | 0.799717 | 0.359485 | 0.926711 | 0.600754 |
| Mmu.6125.1.A1_at      | Mmu.6125.1    | 5.69  | 5.84  | 0.21 | 0.05 | -1.11 | 0.658148 | 0.072369 | 0.864461 | 0.315164 |
| Mmu.6125.1.S1_at      | Mmu.6125.1    | 5.66  | 5.76  | 0.24 | 0.06 | -1.07 | 0.967273 | 0.931661 | 0.989229 | 0.961188 |
| Mmu.6135.1.S1_at      | Mmu.6135.1    | 11.85 | 11.46 | 0.15 | 0.08 | 1.31  | 0.033513 | 0.018364 | 0.346442 | 0.170406 |
| Mmu.6139.1.S1_s_at    | Mmu.6139.1    | 9.95  | 10.05 | 0.1  | 0.04 | -1.07 | 0.090688 | 0.299129 | 0.458873 | 0.557663 |
| Mmu.6141.1.A1_at      | Mmu.6141.1    | 8.45  | 9.15  | 0.45 | 0.07 | -1.62 | 0.053973 | 0.01256  | 0.395633 | 0.144501 |
| Mmu.6141.1.S1_at      | Mmu.6141.1    | 8.58  | 9.3   | 0.4  | 0.05 | -1.65 | 0.03781  | 0.008848 | 0.358028 | 0.124493 |
| Mmu.616.1.S1_at       | Mmu.616.1     | 9.96  | 9.78  | 0.15 | 0.08 | 1.13  | 0.043502 | 0.037767 | 0.372168 | 0.238746 |
| Mmu.6177.1.A1_at      | Mmu.6177.1    | 11.69 | 11.36 | 1.31 | 0.28 | 1.26  | 0.621011 | 0.067865 | 0.847482 | 0.306744 |

|                         |                 |       |       |      |      |       |          |          |          |          |
|-------------------------|-----------------|-------|-------|------|------|-------|----------|----------|----------|----------|
| Mmu.6180.1.S1_s_at      | Mmu.6180.1      | 12.96 | 12.66 | 0.09 | 0.18 | 1.23  | 0.054128 | 0.034941 | 0.395995 | 0.231062 |
| Mmu.6187.1.S1_at        | Mmu.6187.1      | 7.57  | 7.84  | 0.58 | 0.14 | -1.21 | 0.33387  | 0.008466 | 0.679921 | 0.122057 |
| Mmu.6201.1.S1_at        | Mmu.6201.1      | 11.81 | 11.76 | 1.05 | 0.05 | 1.03  | 0.933996 | 0.645274 | 0.977707 | 0.792151 |
| Mmu.6263.1.S1_s_at      | Mmu.6263.1      | 14.11 | 14.12 | 0.09 | 0.01 | -1.01 | 0.633901 | 0.566889 | 0.853701 | 0.740843 |
| Mmu.6269.1.S1_at        | Mmu.6269.1      | 4.64  | 4.67  | 0.17 | 0.14 | -1.02 | 0.599767 | 0.618784 | 0.837539 | 0.774185 |
| Mmu.6271.1.S1_at        | Mmu.6271.1      | 10.03 | 9.55  | 3.31 | 0.34 | 1.4   | 0.638989 | 0.300844 | 0.856133 | 0.55906  |
| Mmu.6271.2.S1_a_at      | Mmu.6271.2      | 10.32 | 9.41  | 3.2  | 0.29 | 1.88  | 0.760753 | 0.362329 | 0.910166 | 0.60295  |
| Mmu.6272.2.S1_at        | Mmu.6272.2      | 10.55 | 10.55 | 2.7  | 0.25 | 1     | 0.664405 | 0.175321 | 0.867683 | 0.45207  |
| Mmu.6282.1.S1_at        | Mmu.6282.1      | 7.2   | 6.34  | 1.18 | 0.1  | 1.81  | 0.286067 | 0.275266 | 0.64358  | 0.539641 |
| Mmu.629.1.S1_s_at       | Mmu.629.1       | 12.53 | 12.48 | 1.21 | 0.15 | 1.03  | 0.455903 | 0.123958 | 0.75759  | 0.394261 |
| Mmu.629.2.S1_a_at       | Mmu.629.2       | 11.47 | 11.57 | 1.81 | 0.27 | -1.07 | 0.744347 | 0.128502 | 0.902542 | 0.399838 |
| Mmu.629.2.S1_at         | Mmu.629.2       | 10.78 | 11.01 | 1.87 | 0.32 | -1.17 | 0.812618 | 0.128903 | 0.932111 | 0.400331 |
| Mmu.6308.1.S1_at        | Mmu.6308.1      | 10.93 | 10.76 | 0.12 | 0.18 | 1.12  | 0.20543  | 0.214197 | 0.577261 | 0.487851 |
| Mmu.6310.1.S1_at        | Mmu.6310.1      | 11.75 | 11.72 | 0.19 | 0.04 | 1.02  | 0.371598 | 0.024238 | 0.705567 | 0.194936 |
| Mmu.6311.1.S1_at        | Mmu.6311.1      | 9.78  | 9.21  | 0.82 | 0.13 | 1.49  | 0.325862 | 0.021537 | 0.67351  | 0.183818 |
| Mmu.6318.1.S1_at        | Mmu.6318.1      | 9.12  | 9.13  | 0.21 | 0.01 | -1.01 | 0.96924  | 0.99066  | 0.989875 | 0.994725 |
| Mmu.6342.1.S1_at        | Mmu.6342.1      | 9.99  | 10.49 | 0.05 | 0.05 | -1.41 | 0.000273 | 0.00004  | 0.130983 | 0.02409  |
| Mmu.6352.1.S1_at        | Mmu.6352.1      | 8.15  | 8.36  | 0.16 | 0.23 | -1.16 | 0.568151 | 0.533962 | 0.820687 | 0.720008 |
| Mmu.6387.1.S1_s_at      | Mmu.6387.1      | 11.16 | 11.18 | 0.12 | 0.08 | -1.02 | 0.576109 | 0.157477 | 0.825056 | 0.432985 |
| Mmu.6397.2.S1_at        | Mmu.6397.2      | 9.94  | 9.66  | 0.26 | 0.16 | 1.21  | 0.187488 | 0.232692 | 0.559815 | 0.504359 |
| Mmu.6399.1.S1_at        | Mmu.6399.1      | 9.88  | 10.18 | 0.11 | 0.06 | -1.23 | 0.028525 | 0.248142 | 0.332598 | 0.517567 |
| Mmu.6412.1.S1_at        | Mmu.6412.1      | 11.11 | 11.21 | 0.39 | 0.03 | -1.07 | 0.80396  | 0.202096 | 0.928633 | 0.476545 |
| Mmu.6416.1.S1_at        | Mmu.6416.1      | 9.04  | 9.21  | 0.33 | 0.05 | -1.13 | 0.770279 | 0.822681 | 0.913936 | 0.898006 |
| Mmu.6423.1.S1_at        | Mmu.6423.1      | 9.28  | 9.31  | 0.14 | 0.1  | -1.02 | 0.329428 | 0.251487 | 0.676319 | 0.520246 |
| Mmu.6425.1.S1_at        | Mmu.6425.1      | 6.71  | 6.77  | 0.21 | 0.32 | -1.04 | 0.40038  | 0.229279 | 0.7238   | 0.501527 |
| Mmu.6430.2.S1_at        | Mmu.6430.2      | 7.17  | 7.04  | 0.1  | 0.09 | 1.09  | 0.091737 | 0.386881 | 0.45996  | 0.621935 |
| Mmu.6446.1.S1_at        | Mmu.6446.1      | 11.03 | 11.12 | 0.08 | 0.04 | -1.06 | 0.061938 | 0.017517 | 0.411683 | 0.167516 |
| Mmu.6446.1.S1_x_at      | Mmu.6446.1      | 11    | 11.09 | 0.09 | 0.07 | -1.06 | 0.097664 | 0.049223 | 0.466607 | 0.266697 |
| Mmu.6455.1.S1_at        | Mmu.6455.1      | 6.63  | 7.06  | 0.56 | 0.17 | -1.35 | 0.725121 | 0.480815 | 0.893356 | 0.686    |
| Mmu.6457.1.A1_at        | Mmu.6457.1      | 7.71  | 8.05  | 0.45 | 0.07 | -1.27 | 0.336616 | 0.382684 | 0.681969 | 0.618843 |
| Mmu.6457.1.S1_at        | Mmu.6457.1      | 7.83  | 7.93  | 0.35 | 0.05 | -1.07 | 0.756705 | 0.444836 | 0.908337 | 0.662072 |
| Mmu.6469.1.S1_at        | Mmu.6469.1      | 5.38  | 5.47  | 1.05 | 0.18 | -1.06 | 0.375107 | 0.575667 | 0.706298 | 0.746703 |
| Mmu.6470.1.S1_at        | Mmu.6470.1      | 12.67 | 12.46 | 4    | 0.15 | 1.16  | 0.416121 | 0.260422 | 0.734059 | 0.526995 |
| Mmu.6471.1.S1_at        | Mmu.6471.1      | 7.5   | 8.18  | 0.94 | 0.12 | -1.61 | 0.203794 | 0.494789 | 0.57513  | 0.695092 |
| Mmu.6471.1.S1_x_at      | Mmu.6471.1      | 8.42  | 9.24  | 1.11 | 0.08 | -1.77 | 0.247633 | 0.585451 | 0.613245 | 0.752852 |
| Mmu.6481.1.S1_at        | Mmu.6481.1      | 3.99  | 3.8   | 0.24 | 0.04 | 1.14  | 0.248269 | 0.455023 | 0.613822 | 0.66903  |
| MmugDNA.22710.1.S1_at   | MmugDNA.22710.1 | 5.74  | 5.75  | 0.03 | 0.09 | -1.01 | 0.541246 | 0.042089 | 0.805026 | 0.249638 |
| MmugDNA.22710.1.S1_s_at | MmugDNA.22710.1 | 8.13  | 8.19  | 0.24 | 0.19 | -1.04 | 0.944521 | 0.045591 | 0.980747 | 0.257674 |
| Mmu.6504.1.S1_at        | Mmu.6504.1      | 10.78 | 10.65 | 0.2  | 0.14 | 1.09  | 0.112385 | 0.064009 | 0.485674 | 0.299139 |
| Mmu.6513.1.S1_at        | Mmu.6513.1      | 7.23  | 7.41  | 0.52 | 0.05 | -1.14 | 0.712909 | 0.017629 | 0.888133 | 0.167839 |
| Mmu.6514.1.S1_at        | Mmu.6514.1      | 8.3   | 8.16  | 0.06 | 0.12 | 1.1   | 0.078892 | 0.230511 | 0.441525 | 0.502251 |
| Mmu.6522.1.S1_at        | Mmu.6522.1      | 10.12 | 10.27 | 0.15 | 0.09 | -1.11 | 0.155428 | 0.045498 | 0.528651 | 0.2575   |
| Mmu.6550.1.S1_at        | Mmu.6550.1      | 3.2   | 3.27  | 0    | 0.12 | -1.05 | 0.937046 | 0.990812 | 0.978859 | 0.99482  |

|                        |                |       |       |      |      |       |          |          |          |          |
|------------------------|----------------|-------|-------|------|------|-------|----------|----------|----------|----------|
| Mmu.6551.1.S1_at       | Mmu.6551.1     | 10.64 | 10.78 | 0.33 | 0.1  | -1.1  | 0.737482 | 0.263969 | 0.89952  | 0.530153 |
| Mmu.6554.1.S1_at       | Mmu.6554.1     | 11.09 | 11.12 | 0.16 | 0.14 | -1.02 | 0.343748 | 0.152211 | 0.686834 | 0.427012 |
| Mmu.6556.1.S1_at       | Mmu.6556.1     | 10.15 | 10.36 | 1.72 | 0.18 | -1.15 | 0.771132 | 0.11963  | 0.914377 | 0.388275 |
| Mmu.6559.1.S1_s_at     | Mmu.6559.1     | 11.62 | 10.25 | 0.68 | 0.34 | 2.59  | 0.025413 | 0.06523  | 0.32178  | 0.301239 |
| Mmu.656.1.S1_at        | Mmu.656.1      | 10.55 | 10.27 | 0.08 | 0.04 | 1.22  | 0.008039 | 0.019431 | 0.232005 | 0.175133 |
| Mmu.6573.1.S1_at       | Mmu.6573.1     | 9.87  | 9.25  | 0.16 | 0.11 | 1.55  | 0.005014 | 0.000211 | 0.204532 | 0.032262 |
| Mmu.6593.2.S1_x_at     | Mmu.6593.2     | 6.39  | 6.06  | 0.37 | 0.21 | 1.26  | 0.712266 | 0.863724 | 0.887927 | 0.922638 |
| Mmu.6609.1.S1_at       | Mmu.6609.1     | 5.71  | 7.37  | 0.63 | 0.26 | -3.15 | 0.034452 | 0.113027 | 0.350047 | 0.378888 |
| Mmu.6623.1.S1_at       | Mmu.6623.1     | 6.71  | 6.98  | 0.46 | 0.14 | -1.21 | 0.984265 | 0.233898 | 0.995203 | 0.505169 |
| MmugDNA.1902.1.S1_s_at | MmugDNA.1902.1 | 13.08 | 13    | 0.03 | 0.01 | 1.06  | 0.004067 | 0.054979 | 0.198571 | 0.279898 |
| Mmu.6637.1.S1_at       | Mmu.6637.1     | 3.31  | 3.18  | 0.14 | 0.09 | 1.1   | 0.394195 | 0.34913  | 0.719657 | 0.593178 |
| Mmu.6642.1.S1_at       | Mmu.6642.1     | 5.3   | 5.2   | 0.09 | 0.09 | 1.07  | 0.138683 | 0.082575 | 0.514055 | 0.331761 |
| Mmu.6646.1.S1_at       | Mmu.6646.1     | 8.3   | 7.85  | 0.33 | 0.15 | 1.37  | 0.091738 | 0.13921  | 0.45996  | 0.412358 |
| Mmu.666.1.S1_at        | Mmu.666.1      | 5.36  | 4.17  | 0.32 | 0.16 | 2.28  | 0.007817 | 0.002796 | 0.230997 | 0.077966 |
| Mmu.6678.1.S1_at       | Mmu.6678.1     | 9.77  | 10.14 | 2.39 | 0.34 | -1.3  | 0.688413 | 0.07169  | 0.878322 | 0.313904 |
| Mmu.6678.1.S1_x_at     | Mmu.6678.1     | 10.67 | 10.67 | 1.26 | 0.23 | -1    | 0.94432  | 0.039713 | 0.980654 | 0.244271 |
| Mmu.6687.1.S1_at       | Mmu.6687.1     | 13.12 | 12.94 | 0.1  | 0.04 | 1.14  | 0.106469 | 0.005676 | 0.478853 | 0.103959 |
| Mmu.6716.1.S1_at       | Mmu.6716.1     | 13.31 | 12.61 | 2.39 | 0.21 | 1.62  | 0.757036 | 0.159202 | 0.908357 | 0.435217 |
| Mmu.6730.1.S1_at       | Mmu.6730.1     | 11.56 | 11.91 | 3.6  | 0.26 | -1.28 | 0.325894 | 0.193342 | 0.67351  | 0.46866  |
| Mmu.6738.1.S1_at       | Mmu.6738.1     | 9.58  | 8.65  | 0.75 | 0.22 | 1.91  | 0.050733 | 0.030322 | 0.387852 | 0.216032 |
| Mmu.6738.1.S1_s_at     | Mmu.6738.1     | 9.41  | 8.54  | 0.71 | 0.17 | 1.82  | 0.053198 | 0.034132 | 0.394158 | 0.228692 |
| Mmu.6739.1.S1_at       | Mmu.6739.1     | 5.76  | 5.33  | 0.5  | 0.11 | 1.34  | 0.820299 | 0.740369 | 0.935289 | 0.849623 |
| Mmu.6744.2.S1_at       | Mmu.6744.2     | 12.57 | 12.44 | 0.15 | 0.03 | 1.09  | 0.61734  | 0.094536 | 0.845362 | 0.351296 |
| Mmu.6763.1.S1_at       | Mmu.6763.1     | 9     | 9.27  | 1.29 | 0.19 | -1.21 | 0.814831 | 0.673055 | 0.933137 | 0.808955 |
| Mmu.6769.1.S1_at       | Mmu.6769.1     | 3.01  | 2.98  | 0.11 | 0.03 | 1.03  | 0.857085 | 0.042885 | 0.94962  | 0.251731 |
| Mmu.6773.1.S1_at       | Mmu.6773.1     | 7.89  | 7.76  | 0.3  | 0.03 | 1.1   | 0.156933 | 0.270865 | 0.530175 | 0.536026 |
| Mmu.6776.1.A1_at       | Mmu.6776.1     | 7.45  | 7.09  | 0.21 | 0.09 | 1.28  | 0.071708 | 0.010236 | 0.431368 | 0.1326   |
| Mmu.6776.1.S1_at       | Mmu.6776.1     | 6.77  | 6.32  | 0.23 | 0.27 | 1.37  | 0.201774 | 0.018077 | 0.573323 | 0.169379 |
| Mmu.6784.1.S1_at       | Mmu.6784.1     | 9.53  | 9.57  | 0.23 | 0.15 | -1.03 | 0.547367 | 0.05815  | 0.809053 | 0.287812 |
| Mmu.6788.1.S1_at       | Mmu.6788.1     | 12.21 | 11.95 | 0.19 | 0.05 | 1.2   | 0.191575 | 0.432014 | 0.562859 | 0.652738 |
| Mmu.6796.1.S1_at       | Mmu.6796.1     | 6.14  | 6.16  | 0.1  | 0.08 | -1.01 | 0.943645 | 0.976842 | 0.980562 | 0.987413 |
| Mmu.6800.1.S1_at       | Mmu.6800.1     | 11.92 | 11.65 | 0.19 | 0.09 | 1.21  | 0.078786 | 0.110375 | 0.441464 | 0.374541 |
| Mmu.6832.1.S1_at       | Mmu.6832.1     | 12.34 | 12.36 | 0.31 | 0.08 | -1.01 | 0.572535 | 0.023285 | 0.823222 | 0.191274 |
| Mmu.6835.1.S1_at       | Mmu.6835.1     | 5.6   | 5.45  | 0.04 | 0.13 | 1.11  | 0.066047 | 0.041485 | 0.421613 | 0.24854  |
| Mmu.6867.1.A1_at       | Mmu.6867.1     | 14.05 | 14.1  | 0.07 | 0.07 | -1.04 | 0.076839 | 0.129816 | 0.438527 | 0.40147  |
| Mmu.6867.2.S1_at       | Mmu.6867.2     | 3     | 3.01  | 0.05 | 0.03 | -1.01 | 0.20486  | 0.31956  | 0.576459 | 0.571875 |
| Mmu.6867.3.S1_s_at     | Mmu.6867.3     | 14.33 | 13.8  | 0.05 | 0.54 | 1.45  | 0.15824  | 0.207858 | 0.531211 | 0.482049 |
| Mmu.6887.1.S1_at       | Mmu.6887.1     | 11.62 | 11.42 | 0.33 | 0.08 | 1.15  | 0.425514 | 0.219801 | 0.740112 | 0.493388 |
| Mmu.6892.1.S1_at       | Mmu.6892.1     | 6.18  | 6.23  | 0.52 | 0.02 | -1.03 | 0.430908 | 0.172836 | 0.743205 | 0.449424 |
| Mmu.6898.1.S1_at       | Mmu.6898.1     | 4.39  | 3.93  | 0.12 | 0.13 | 1.38  | 0.018483 | 0.022143 | 0.297469 | 0.186249 |
| Mmu.6922.1.A1_at       | Mmu.6922.1     | 6.53  | 6.5   | 0.1  | 0.04 | 1.03  | 0.955783 | 0.347914 | 0.985346 | 0.592196 |
| Mmu.6922.1.S1_at       | Mmu.6922.1     | 3.97  | 3.76  | 0.22 | 0.18 | 1.16  | 0.43522  | 0.142556 | 0.745582 | 0.416206 |
| Mmu.6936.1.S1_at       | Mmu.6936.1     | 5.07  | 5.13  | 0.07 | 0.08 | -1.04 | 0.105802 | 0.007832 | 0.477611 | 0.117929 |

|                         |                 |       |       |      |      |       |          |          |          |          |
|-------------------------|-----------------|-------|-------|------|------|-------|----------|----------|----------|----------|
| Mmu.6961.1.S1_at        | Mmu.6961.1      | 8.87  | 9.14  | 0.43 | 0.14 | -1.21 | 0.969442 | 0.518881 | 0.989952 | 0.710789 |
| Mmu.6961.1.S1_s_at      | Mmu.6961.1      | 8.7   | 8.75  | 0.46 | 0.12 | -1.04 | 0.694689 | 0.530576 | 0.881132 | 0.718042 |
| Mmu.6977.1.S1_at        | Mmu.6977.1      | 7.17  | 7.54  | 0.08 | 0.08 | -1.29 | 0.003577 | 0.012731 | 0.197111 | 0.145429 |
| Mmu.6979.1.S1_at        | Mmu.6979.1      | 10.86 | 9.89  | 0.19 | 0.03 | 1.95  | 0.001136 | 0.000597 | 0.156386 | 0.041941 |
| Mmu.6994.1.S1_at        | Mmu.6994.1      | 8.52  | 8.02  | 0.61 | 0.34 | 1.42  | 0.235386 | 0.173178 | 0.602482 | 0.44977  |
| Mmu.7027.1.S1_at        | Mmu.7027.1      | 11.04 | 10.65 | 0.17 | 0.13 | 1.31  | 0.014604 | 0.010352 | 0.276621 | 0.133191 |
| Mmu.7028.1.S1_at        | Mmu.7028.1      | 12.88 | 12.9  | 0.15 | 0.01 | -1.01 | 0.51926  | 0.697405 | 0.793113 | 0.824183 |
| Mmu.7032.1.S1_s_at      | Mmu.7032.1      | 13.7  | 13.56 | 0.08 | 0.06 | 1.1   | 0.089543 | 0.006982 | 0.457672 | 0.112771 |
| Mmu.7046.1.S1_at        | Mmu.7046.1      | 6.23  | 5.01  | 0.17 | 0.26 | 2.33  | 0.003632 | 0.007    | 0.197111 | 0.112958 |
| Mmu.7053.1.S1_at        | Mmu.7053.1      | 8.58  | 9.08  | 0.89 | 0.41 | -1.41 | 0.263272 | 0.309955 | 0.625264 | 0.565222 |
| Mmu.7057.1.S1_at        | Mmu.7057.1      | 9.03  | 8.13  | 0.15 | 0.29 | -1.86 | 0.016877 | 0.134446 | 0.288837 | 0.406605 |
| Mmu.7075.1.S1_at        | Mmu.7075.1      | 4.59  | 4.51  | 0.07 | 0.02 | 1.06  | 0.11969  | 0.264719 | 0.493172 | 0.530753 |
| Mmu.7075.1.S2_s_at      | Mmu.7075.1      | 2.85  | 2.73  | 0.14 | 0.03 | 1.09  | 0.211954 | 0.248276 | 0.582752 | 0.517596 |
| Mmu.7078.1.S1_s_at      | Mmu.7078.1      | 13.52 | 13.56 | 0.13 | 0.09 | -1.03 | 0.41376  | 0.565153 | 0.732521 | 0.739748 |
| Mmu.7081.1.S1_at        | Mmu.7081.1      | 11.22 | 10.8  | 0.47 | 0.18 | 1.34  | 0.141752 | 0.166283 | 0.516701 | 0.442825 |
| Mmu.7083.1.S1_at        | Mmu.7083.1      | 7.36  | 8.36  | 1.71 | 0.4  | -2.01 | 0.380464 | 0.404821 | 0.709387 | 0.63333  |
| Mmu.7088.1.S1_at        | Mmu.7088.1      | 9.82  | 10.06 | 0.23 | 0.05 | -1.18 | 0.112105 | 0.107181 | 0.485224 | 0.36989  |
| Mmu.7098.1.S1_at        | Mmu.7098.1      | 5.56  | 5.34  | 0.27 | 0.24 | 1.16  | 0.24447  | 0.267687 | 0.61     | 0.533467 |
| Mmu.7120.1.S1_at        | Mmu.7120.1      | 10    | 10.01 | 0.29 | 0.06 | -1.01 | 0.332669 | 0.649477 | 0.679122 | 0.794911 |
| Mmu.7135.1.S1_at        | Mmu.7135.1      | 9.09  | 9.29  | 0.22 | 0.04 | -1.15 | 0.207202 | 0.002975 | 0.578828 | 0.079958 |
| Mmu.7150.1.S1_at        | Mmu.7150.1      | 12.51 | 11.89 | 0.11 | 0.18 | 1.53  | 0.005869 | 0.001094 | 0.211798 | 0.052283 |
| Mmu.7164.1.S1_at        | Mmu.7164.1      | 10.49 | 10.01 | 0.25 | 0.4  | 1.39  | 0.056066 | 0.029495 | 0.399441 | 0.213423 |
| Mmu.7173.1.S1_at        | Mmu.7173.1      | 4.24  | 3.72  | 0.25 | 0.14 | 1.43  | 0.054407 | 0.038532 | 0.396392 | 0.241292 |
| Mmu.7179.1.S1_at        | Mmu.7179.1      | 7.84  | 7.57  | 0.12 | 0.06 | 1.21  | 0.036949 | 0.153669 | 0.356252 | 0.428413 |
| Mmu.7190.1.A1_at        | Mmu.7190.1      | 10.87 | 9.87  | 0.35 | 0.24 | 2     | 0.019309 | 0.003318 | 0.300531 | 0.082861 |
| Mmu.7191.1.S1_at        | Mmu.7191.1      | 7.63  | 8.17  | 0.57 | 0.33 | -1.45 | 0.399684 | 0.315002 | 0.723284 | 0.568759 |
| Mmu.7193.1.S1_at        | Mmu.7193.1      | 3.43  | 3.39  | 0.26 | 0.22 | 1.02  | 0.529845 | 0.770794 | 0.798514 | 0.866807 |
| Mmu.7205.1.A1_at        | Mmu.7205.1      | 5.99  | 6.26  | 0.39 | 0.09 | -1.2  | 0.078314 | 0.060154 | 0.440707 | 0.291882 |
| Mmu.7207.1.S1_at        | Mmu.7207.1      | 10.52 | 11.09 | 0.13 | 0.1  | -1.49 | 0.00339  | 0.040575 | 0.194985 | 0.246296 |
| Mmu.7208.1.S1_at        | Mmu.7208.1      | 10.81 | 10.55 | 0.18 | 0.12 | 1.2   | 0.04456  | 0.038426 | 0.374916 | 0.240918 |
| Mmu.722.1.S1_at         | Mmu.722.1       | 3.08  | 3.19  | 0.24 | 0.03 | -1.08 | 0.742959 | 0.833674 | 0.901935 | 0.90462  |
| Mmu.7225.1.S1_at        | Mmu.7225.1      | 10.87 | 10.31 | 0.16 | 0.14 | 1.47  | 0.006194 | 0.001776 | 0.217213 | 0.0634   |
| Mmu.7236.1.S1_at        | Mmu.7236.1      | 6.97  | 6.74  | 0.79 | 0.22 | 1.17  | 0.678841 | 0.250116 | 0.874196 | 0.519168 |
| Mmu.7236.1.S1_s_at      | Mmu.7236.1      | 12.4  | 12.52 | 0.8  | 0.2  | -1.09 | 0.782698 | 0.097681 | 0.920007 | 0.355554 |
| MmugDNA.14187.1.S1_at   | MmugDNA.14187.1 | 5.46  | 5.19  | 0.27 | 0.06 | 1.21  | 0.346168 | 0.460045 | 0.687873 | 0.671989 |
| MmugDNA.14187.1.S1_s_at | MmugDNA.14187.1 | 13.06 | 12.96 | 0.35 | 0.16 | 1.07  | 0.533871 | 0.727454 | 0.801042 | 0.842336 |
| Mmu.7267.1.S1_at        | Mmu.7267.1      | 7.68  | 7.59  | 1.76 | 0.3  | 1.07  | 0.337377 | 0.480743 | 0.682344 | 0.686    |
| Mmu.7278.1.A1_at        | Mmu.7278.1      | 5.94  | 5.72  | 0.13 | 0.05 | 1.16  | 0.068989 | 0.16614  | 0.426361 | 0.442694 |
| Mmu.7278.1.S1_at        | Mmu.7278.1      | 5.35  | 5.23  | 0.14 | 0.08 | 1.09  | 0.155509 | 0.49184  | 0.528781 | 0.693275 |
| Mmu.7280.1.S1_at        | Mmu.7280.1      | 10.25 | 9.77  | 0.12 | 0.02 | 1.4   | 0.005394 | 0.008233 | 0.208157 | 0.120504 |
| Mmu.7281.1.S1_s_at      | Mmu.7281.1      | 10.14 | 9.9   | 0.26 | 0.12 | 1.18  | 0.129055 | 0.320457 | 0.503706 | 0.572648 |
| Mmu.7287.1.S1_at        | Mmu.7287.1      | 7.74  | 6.94  | 1.11 | 0.32 | 1.75  | 0.271986 | 0.132225 | 0.631746 | 0.404274 |
| Mmu.729.1.S1_at         | Mmu.729.1       | 4.98  | 4.7   | 0.17 | 0.12 | 1.22  | 0.110683 | 0.104307 | 0.483893 | 0.365518 |

|                        |                |       |       |      |      |       |          |          |          |          |
|------------------------|----------------|-------|-------|------|------|-------|----------|----------|----------|----------|
| Mmu.7319.1.S1_at       | Mmu.7319.1     | 10.51 | 10.44 | 0.39 | 0.05 | 1.05  | 0.262638 | 0.240826 | 0.624887 | 0.511521 |
| Mmu.7346.1.S1_at       | Mmu.7346.1     | 5.38  | 5.33  | 0.18 | 0.19 | 1.03  | 0.542731 | 0.115105 | 0.805983 | 0.381985 |
| Mmu.7348.2.S1_a_at     | Mmu.7348.2     | 10.98 | 10.89 | 0.52 | 0.17 | 1.07  | 0.551215 | 0.682272 | 0.811314 | 0.814486 |
| Mmu.7348.2.S1_at       | Mmu.7348.2     | 11.02 | 11.03 | 0.59 | 0.27 | -1    | 0.70534  | 0.809277 | 0.885355 | 0.890102 |
| Mmu.737.1.S1_s_at      | Mmu.737.1      | 13.56 | 13.58 | 0.06 | 0.01 | -1.01 | 0.630637 | 0.691247 | 0.852018 | 0.820338 |
| Mmu.7379.1.A1_at       | Mmu.7379.1     | 6.37  | 6.32  | 0.07 | 0.03 | 1.04  | 0.544853 | 0.61912  | 0.807495 | 0.774377 |
| Mmu.7380.1.S1_at       | Mmu.7380.1     | 8.24  | 8.22  | 0.28 | 0.14 | 1.01  | 0.49578  | 0.35226  | 0.780125 | 0.595568 |
| Mmu.7385.1.S1_at       | Mmu.7385.1     | 12.69 | 12.44 | 0.15 | 0.1  | 1.19  | 0.068415 | 0.047081 | 0.425599 | 0.261469 |
| Mmu.7390.1.S1_at       | Mmu.7390.1     | 8.95  | 8.9   | 0.08 | 0.14 | 1.03  | 0.458087 | 0.138449 | 0.758638 | 0.411392 |
| Mmu.7394.1.A1_at       | Mmu.7394.1     | 9.99  | 8.8   | 0.39 | 0.24 | 2.29  | 0.009143 | 0.00564  | 0.241781 | 0.103751 |
| Mmu.7399.1.S1_at       | Mmu.7399.1     | 13.45 | 13.44 | 0.03 | 0.03 | 1.01  | 0.251494 | 0.161094 | 0.616712 | 0.437279 |
| Mmu.7434.1.S1_at       | Mmu.7434.1     | 9.45  | 9.52  | 0.32 | 0.05 | -1.05 | 0.706554 | 0.528085 | 0.885774 | 0.716432 |
| Mmu.7445.1.S1_at       | Mmu.7445.1     | 13.79 | 13.63 | 0.17 | 0.03 | 1.12  | 0.504338 | 0.715953 | 0.784703 | 0.835339 |
| MmugDNA.5580.1.S1_at   | MmugDNA.5580.1 | 13.52 | 13.69 | 0.19 | 0.06 | -1.12 | 0.307898 | 0.35651  | 0.660765 | 0.598459 |
| MmugDNA.5580.1.S1_s_at | MmugDNA.5580.1 | 13.47 | 13.27 | 0.17 | 0.02 | 1.15  | 0.318288 | 0.564759 | 0.667975 | 0.739427 |
| Mmu.7448.1.S1_at       | Mmu.7448.1     | 12.54 | 12.5  | 0.54 | 0.05 | 1.03  | 0.920897 | 0.308109 | 0.973217 | 0.564219 |
| Mmu.7453.1.S1_at       | Mmu.7453.1     | 10.68 | 10.7  | 0.23 | 0.05 | -1.01 | 0.967483 | 0.083874 | 0.98927  | 0.334771 |
| Mmu.7454.1.S1_at       | Mmu.7454.1     | 9.18  | 9.25  | 0.09 | 0.1  | -1.05 | 0.257803 | 0.012325 | 0.621456 | 0.143659 |
| Mmu.7458.1.S1_at       | Mmu.7458.1     | 12.24 | 12.26 | 0.13 | 0.06 | -1.01 | 0.897477 | 0.826503 | 0.965207 | 0.90035  |
| Mmu.7460.1.S1_x_at     | Mmu.7460.1     | 11.09 | 8.77  | 3.8  | 0.18 | 5     | 0.904063 | 0.512152 | 0.967748 | 0.706087 |
| Mmu.7460.10.S1_x_at    | Mmu.7460.10    | 5.41  | 4.68  | 0.36 | 0.11 | 1.65  | 0.055628 | 0.041352 | 0.398946 | 0.247995 |
| Mmu.7460.12.S1_at      | Mmu.7460.12    | 5.2   | 4.77  | 0.33 | 0.08 | 1.35  | 0.116866 | 0.117094 | 0.490029 | 0.384548 |
| Mmu.7460.12.S1_x_at    | Mmu.7460.12    | 4.73  | 4.01  | 0.64 | 0.03 | 1.65  | 0.114486 | 0.078987 | 0.487606 | 0.325995 |
| Mmu.7460.14.S1_s_at    | Mmu.7460.14    | 10.35 | 8.5   | 3.63 | 0.18 | 3.6   | 0.966123 | 0.524654 | 0.988888 | 0.714472 |
| Mmu.7460.14.S1_x_at    | Mmu.7460.14    | 9.41  | 8.02  | 2.23 | 0.15 | 2.63  | 0.4855   | 0.32485  | 0.774354 | 0.575375 |
| Mmu.7460.15.S1_x_at    | Mmu.7460.15    | 6.19  | 4.58  | 1.51 | 0.08 | 3.07  | 0.139714 | 0.092072 | 0.515168 | 0.34762  |
| Mmu.7460.17.S1_s_at    | Mmu.7460.17    | 2.87  | 2.91  | 0.05 | 0.09 | -1.03 | 0.193113 | 0.338415 | 0.563935 | 0.585432 |
| Mmu.7460.17.S1_x_at    | Mmu.7460.17    | 3.73  | 3.45  | 0.26 | 0.18 | 1.21  | 0.147439 | 0.161933 | 0.521578 | 0.438029 |
| Mmu.7460.18.S1_x_at    | Mmu.7460.18    | 4.22  | 4.09  | 0.12 | 0.02 | 1.09  | 0.120638 | 0.193412 | 0.494114 | 0.468711 |
| Mmu.7460.4.S1_a_at     | Mmu.7460.4     | 2.99  | 2.92  | 0.2  | 0.04 | 1.05  | 0.663296 | 0.333633 | 0.867106 | 0.581808 |
| Mmu.7460.4.S1_x_at     | Mmu.7460.4     | 3.94  | 3.37  | 0.8  | 0.02 | 1.49  | 0.211613 | 0.126349 | 0.582623 | 0.396852 |
| Mmu.7460.6.S1_x_at     | Mmu.7460.6     | 6.03  | 4.14  | 1.39 | 0.04 | 3.7   | 0.127583 | 0.067358 | 0.501756 | 0.305525 |
| Mmu.7460.7.S1_x_at     | Mmu.7460.7     | 6.08  | 4.16  | 1.56 | 0.09 | 3.77  | 0.121757 | 0.094948 | 0.495432 | 0.352054 |
| Mmu.7469.1.S1_at       | Mmu.7469.1     | 13.4  | 13.26 | 0.16 | 0.06 | 1.1   | 0.20705  | 0.217361 | 0.578774 | 0.490978 |
| Mmu.7474.1.S1_at       | Mmu.7474.1     | 12.28 | 12.44 | 0.22 | 0.05 | -1.12 | 0.309697 | 0.270728 | 0.661815 | 0.53602  |
| Mmu.7474.1.S1_x_at     | Mmu.7474.1     | 12.09 | 12.25 | 0.27 | 0.09 | -1.12 | 0.432143 | 0.218888 | 0.743709 | 0.492656 |
| Mmu.7476.1.S1_s_at     | Mmu.7476.1     | 14.54 | 14.46 | 0.09 | 0.05 | 1.06  | 0.292713 | 0.523398 | 0.649033 | 0.713713 |
| Mmu.7481.1.A1_at       | Mmu.7481.1     | 8.74  | 8.81  | 0.47 | 0.18 | -1.05 | 0.778886 | 0.551402 | 0.918468 | 0.730925 |
| Mmu.749.1.S1_at        | Mmu.749.1      | 10.72 | 10.94 | 0.29 | 0.07 | -1.17 | 0.605803 | 0.371602 | 0.840193 | 0.610389 |
| Mmu.7507.2.S1_at       | Mmu.7507.2     | 11.45 | 12.12 | 0.52 | 0.15 | -1.58 | 0.084969 | 0.063319 | 0.451581 | 0.298315 |
| Mmu.7520.1.S1_x_at     | Mmu.7520.1     | 5.16  | 5.16  | 0.15 | 0.15 | -1    | 0.245718 | 0.335744 | 0.611181 | 0.583489 |
| Mmu.7528.1.S1_at       | Mmu.7528.1     | 9.76  | 9.88  | 0.3  | 0.04 | -1.09 | 0.407757 | 0.529345 | 0.728886 | 0.717257 |
| Mmu.7531.1.S1_at       | Mmu.7531.1     | 7.56  | 7.55  | 0.15 | 0.22 | 1     | 0.489789 | 0.146336 | 0.776518 | 0.420368 |



|                    |            |       |       |      |      |       |          |          |          |          |
|--------------------|------------|-------|-------|------|------|-------|----------|----------|----------|----------|
| Mmu.7535.1.S1_at   | Mmu.7535.1 | 5.13  | 5.09  | 0.08 | 0.04 | 1.02  | 0.364502 | 0.204103 | 0.700603 | 0.478418 |
| Mmu.7543.1.S1_at   | Mmu.7543.1 | 9.87  | 9.81  | 0.14 | 0.27 | 1.04  | 0.317913 | 0.570944 | 0.667635 | 0.743422 |
| Mmu.7546.1.S1_at   | Mmu.7546.1 | 8.84  | 8.58  | 0.36 | 0.22 | 1.19  | 0.47175  | 0.110404 | 0.766635 | 0.374614 |
| Mmu.7561.1.S1_at   | Mmu.7561.1 | 9.18  | 8.23  | 0.29 | 0.13 | 1.93  | 0.00385  | 0.00449  | 0.198541 | 0.093558 |
| Mmu.7599.1.S1_at   | Mmu.7599.1 | 9.9   | 10.66 | 0.39 | 0.12 | -1.69 | 0.031023 | 0.023658 | 0.339397 | 0.192574 |
| Mmu.7601.1.S1_at   | Mmu.7601.1 | 3.32  | 3.18  | 0.13 | 0.2  | 1.1   | 0.506208 | 0.484281 | 0.785704 | 0.688434 |
| Mmu.7605.1.S1_at   | Mmu.7605.1 | 12.37 | 12.45 | 0.09 | 0.07 | -1.06 | 0.636029 | 0.002477 | 0.854813 | 0.073576 |
| Mmu.7638.1.S1_at   | Mmu.7638.1 | 8.05  | 8.71  | 0.92 | 0.25 | -1.58 | 0.30022  | 0.345478 | 0.654777 | 0.590746 |
| Mmu.7639.1.S1_at   | Mmu.7639.1 | 10.88 | 11.03 | 0.37 | 0.13 | -1.11 | 0.583943 | 0.190396 | 0.829397 | 0.465906 |
| Mmu.7643.1.S1_at   | Mmu.7643.1 | 3.37  | 3.5   | 0.08 | 0.33 | -1.09 | 0.384026 | 0.236456 | 0.71171  | 0.507314 |
| Mmu.7649.1.S1_at   | Mmu.7649.1 | 5.8   | 6     | 0.64 | 0.1  | -1.15 | 0.724675 | 0.054617 | 0.893235 | 0.279211 |
| Mmu.7660.1.S1_at   | Mmu.7660.1 | 9.28  | 8.66  | 0.27 | 0.13 | 1.54  | 0.047011 | 0.010438 | 0.379253 | 0.133573 |
| Mmu.7663.1.S1_at   | Mmu.7663.1 | 10.69 | 10.37 | 0.24 | 0.07 | 1.24  | 0.071082 | 0.006089 | 0.430341 | 0.106327 |
| Mmu.7667.1.S1_at   | Mmu.7667.1 | 4.35  | 4.31  | 0.06 | 0.08 | 1.02  | 0.147297 | 0.529935 | 0.521578 | 0.71758  |
| Mmu.7673.1.S1_at   | Mmu.7673.1 | 11.29 | 10.95 | 0.43 | 0.08 | 1.27  | 0.812333 | 0.783341 | 0.932076 | 0.874571 |
| Mmu.7683.1.S1_at   | Mmu.7683.1 | 12.58 | 12.32 | 0.27 | 0.05 | 1.2   | 0.358628 | 0.729921 | 0.69653  | 0.843733 |
| Mmu.7710.1.S1_at   | Mmu.7710.1 | 9.3   | 8.72  | 0.18 | 0.29 | 1.49  | 0.027673 | 0.003255 | 0.3286   | 0.082277 |
| Mmu.7716.1.S1_at   | Mmu.7716.1 | 9.15  | 9.27  | 0.56 | 0.2  | -1.08 | 0.968041 | 0.35453  | 0.989447 | 0.59726  |
| Mmu.7717.1.S1_at   | Mmu.7717.1 | 9.34  | 8.9   | 0.14 | 0.14 | 1.35  | 0.022349 | 0.033582 | 0.310499 | 0.226848 |
| Mmu.7730.1.S1_at   | Mmu.7730.1 | 8.24  | 8.19  | 0.42 | 0.04 | 1.03  | 0.313632 | 0.055792 | 0.664799 | 0.282044 |
| Mmu.7746.1.S1_at   | Mmu.7746.1 | 9.49  | 8.61  | 0.32 | 0.24 | 1.84  | 0.021186 | 0.021232 | 0.307099 | 0.182449 |
| Mmu.7752.1.S1_at   | Mmu.7752.1 | 10.91 | 10.39 | 0.38 | 0.13 | 1.44  | 0.277279 | 0.049148 | 0.636787 | 0.266534 |
| Mmu.7758.1.S1_at   | Mmu.7758.1 | 12.1  | 11.99 | 0.07 | 0.04 | 1.08  | 0.074078 | 0.080349 | 0.434845 | 0.327965 |
| Mmu.7792.1.S1_at   | Mmu.7792.1 | 11.81 | 11.42 | 0.34 | 0.11 | 1.31  | 0.413375 | 0.570571 | 0.732218 | 0.743175 |
| Mmu.7801.1.S1_at   | Mmu.7801.1 | 11.02 | 10.76 | 0.41 | 0.1  | 1.19  | 0.853272 | 0.212969 | 0.948299 | 0.4869   |
| Mmu.7805.1.S1_at   | Mmu.7805.1 | 10.35 | 10.36 | 0.39 | 0.05 | -1.01 | 0.991284 | 0.045507 | 0.996655 | 0.2575   |
| Mmu.7831.2.S1_at   | Mmu.7831.2 | 9.05  | 8.61  | 0.09 | 0.02 | 1.36  | 0.001587 | 0.003012 | 0.162459 | 0.08009  |
| Mmu.7836.1.S1_at   | Mmu.7836.1 | 9.15  | 8.28  | 0.34 | 0.24 | 1.84  | 0.025364 | 0.003909 | 0.32151  | 0.088806 |
| Mmu.7836.1.S1_x_at | Mmu.7836.1 | 8.94  | 8.07  | 0.35 | 0.26 | 1.84  | 0.020271 | 0.006113 | 0.303799 | 0.10649  |
| Mmu.7841.1.S1_at   | Mmu.7841.1 | 6.58  | 6.53  | 0.16 | 0.07 | 1.04  | 0.803991 | 0.569413 | 0.928641 | 0.742382 |
| Mmu.7842.1.S1_at   | Mmu.7842.1 | 12.2  | 12.19 | 0.14 | 0.08 | 1     | 0.240631 | 0.083638 | 0.606937 | 0.334255 |
| Mmu.7855.1.S1_at   | Mmu.7855.1 | 9.41  | 9.17  | 0.13 | 0.25 | 1.18  | 0.12598  | 0.121127 | 0.49972  | 0.390187 |
| Mmu.7856.1.S1_at   | Mmu.7856.1 | 6.94  | 6.78  | 0.25 | 0.02 | 1.12  | 0.32578  | 0.289963 | 0.673458 | 0.550984 |
| Mmu.7863.1.S1_at   | Mmu.7863.1 | 2.65  | 2.53  | 0.03 | 0.1  | 1.09  | 0.269733 | 0.341123 | 0.629945 | 0.587233 |
| Mmu.7865.1.S1_at   | Mmu.7865.1 | 5.85  | 5.94  | 0.67 | 0.22 | -1.07 | 0.962977 | 0.464776 | 0.988098 | 0.675419 |
| Mmu.7878.1.S1_at   | Mmu.7878.1 | 11.68 | 11.78 | 0.46 | 0.08 | -1.07 | 0.496619 | 0.751577 | 0.780665 | 0.855508 |
| Mmu.7883.1.S1_x_at | Mmu.7883.1 | 14.68 | 14.63 | 0.01 | 0.03 | 1.03  | 0.08251  | 0.15094  | 0.447377 | 0.425525 |
| Mmu.7886.1.S1_at   | Mmu.7886.1 | 10.28 | 10.09 | 0.33 | 0.06 | 1.14  | 0.40166  | 0.031117 | 0.724554 | 0.218175 |
| Mmu.7889.1.S1_at   | Mmu.7889.1 | 4.65  | 4.51  | 0.15 | 0.19 | 1.1   | 0.410374 | 0.616099 | 0.730749 | 0.772461 |
| Mmu.789.1.S1_at    | Mmu.789.1  | 8.26  | 8.17  | 0.18 | 0.06 | 1.06  | 0.135612 | 0.167016 | 0.510116 | 0.443466 |
| Mmu.7914.1.S1_at   | Mmu.7914.1 | 7.71  | 8.14  | 0.47 | 0.17 | -1.35 | 0.658126 | 0.661884 | 0.864461 | 0.802004 |
| Mmu.792.1.S1_at    | Mmu.792.1  | 7.19  | 6.98  | 0.49 | 0.14 | 1.16  | 0.273948 | 0.135234 | 0.633632 | 0.407303 |
| Mmu.7922.1.S1_at   | Mmu.7922.1 | 4.11  | 4.05  | 0.13 | 0.19 | 1.04  | 0.901249 | 0.926743 | 0.966477 | 0.958404 |

|                        |                |       |       |      |      |       |          |          |          |          |
|------------------------|----------------|-------|-------|------|------|-------|----------|----------|----------|----------|
| Mmu.7922.1.S1_x_at     | Mmu.7922.1     | 4.36  | 4.24  | 0.1  | 0.02 | 1.08  | 0.103023 | 0.093495 | 0.473714 | 0.349846 |
| Mmu.7935.1.S1_at       | Mmu.7935.1     | 10.57 | 10.05 | 0.49 | 0.06 | 1.43  | 0.525477 | 0.402539 | 0.796198 | 0.631481 |
| Mmu.7940.1.A1_at       | Mmu.7940.1     | 4.19  | 4.21  | 0.25 | 0.18 | -1.02 | 0.58552  | 0.618957 | 0.830549 | 0.774229 |
| Mmu.7944.1.S1_at       | Mmu.7944.1     | 10.4  | 10.35 | 0.17 | 0.09 | 1.03  | 0.991193 | 0.096158 | 0.996655 | 0.353432 |
| Mmu.7947.1.S1_at       | Mmu.7947.1     | 6.55  | 7.12  | 1.23 | 0.37 | -1.48 | 0.695071 | 0.878305 | 0.881279 | 0.93053  |
| Mmu.7958.1.S1_at       | Mmu.7958.1     | 9.14  | 8.87  | 0.44 | 0.13 | 1.2   | 0.654494 | 0.79878  | 0.862839 | 0.884072 |
| Mmu.7958.1.S1_s_at     | Mmu.7958.1     | 10.16 | 9.83  | 0.26 | 0.2  | 1.25  | 0.410926 | 0.49785  | 0.731022 | 0.697071 |
| Mmu.7978.1.S1_at       | Mmu.7978.1     | 3.43  | 3.29  | 0.13 | 0.03 | 1.1   | 0.126754 | 0.134227 | 0.500599 | 0.406456 |
| MmugDNA.7764.1.S1_at   | MmugDNA.7764.1 | 7.53  | 7.3   | 0.07 | 0.08 | 1.18  | 0.017713 | 0.016461 | 0.293353 | 0.162471 |
| MmugDNA.7764.1.S1_s_at | MmugDNA.7764.1 | 12.08 | 11.44 | 0.14 | 0.16 | 1.56  | 0.006046 | 0.005861 | 0.214521 | 0.104856 |
| Mmu.799.1.S1_at        | Mmu.799.1      | 12.5  | 12.1  | 0.37 | 0.11 | 1.32  | 0.364227 | 0.398524 | 0.700507 | 0.629458 |
| Mmu.800.1.S1_at        | Mmu.800.1      | 11.87 | 11.71 | 0.33 | 0.16 | 1.12  | 0.314132 | 0.351145 | 0.665    | 0.594844 |
| Mmu.8008.1.S1_at       | Mmu.8008.1     | 9.43  | 9.3   | 0.24 | 0.06 | 1.09  | 0.240337 | 0.077226 | 0.60669  | 0.322852 |
| Mmu.8044.1.S1_at       | Mmu.8044.1     | 5.66  | 5.64  | 0.15 | 0.09 | 1.01  | 0.199526 | 0.316563 | 0.571426 | 0.569938 |
| Mmu.8046.1.S1_at       | Mmu.8046.1     | 7.06  | 7.04  | 0.59 | 0.07 | 1.02  | 0.94446  | 0.470449 | 0.980724 | 0.678756 |
| Mmu.8048.1.S1_at       | Mmu.8048.1     | 10.14 | 10.14 | 0.49 | 0.09 | -1    | 0.950764 | 0.522349 | 0.983338 | 0.713115 |
| Mmu.8051.1.S1_at       | Mmu.8051.1     | 11.2  | 9.77  | 0.54 | 0.35 | 2.69  | 0.03221  | 0.029014 | 0.343301 | 0.212267 |
| Mmu.8060.2.S1_at       | Mmu.8060.2     | 13.3  | 13.3  | 0.2  | 0.11 | 1     | 0.400232 | 0.059986 | 0.723621 | 0.291599 |
| Mmu.8061.1.S1_at       | Mmu.8061.1     | 12    | 11.99 | 0.28 | 0.16 | 1     | 0.305953 | 0.063981 | 0.659264 | 0.299066 |
| Mmu.8065.1.S1_at       | Mmu.8065.1     | 6.74  | 6.72  | 0.17 | 0.08 | 1.02  | 0.271896 | 0.521472 | 0.631647 | 0.71247  |
| Mmu.8073.1.S1_at       | Mmu.8073.1     | 8.1   | 8.53  | 0.29 | 0.22 | -1.35 | 0.526284 | 0.098122 | 0.796483 | 0.356218 |
| Mmu.8078.2.S1_at       | Mmu.8078.2     | 12.38 | 12.35 | 0.45 | 0.06 | 1.02  | 0.914453 | 0.992076 | 0.970865 | 0.995515 |
| Mmu.8081.1.S1_at       | Mmu.8081.1     | 12.22 | 10.7  | 0.66 | 0.18 | 2.87  | 0.043376 | 0.014056 | 0.372015 | 0.151841 |
| Mmu.8081.1.S1_x_at     | Mmu.8081.1     | 12.23 | 10.8  | 0.63 | 0.17 | 2.7   | 0.045262 | 0.014994 | 0.376169 | 0.155662 |
| Mmu.8084.1.S1_at       | Mmu.8084.1     | 4.42  | 5.55  | 0.54 | 0.27 | -2.18 | 0.019786 | 0.01657  | 0.302615 | 0.163004 |
| Mmu.8090.1.S1_at       | Mmu.8090.1     | 11.41 | 11.37 | 1.12 | 0.08 | 1.03  | 0.764019 | 0.648988 | 0.911355 | 0.794525 |
| MmuSTS.2072.1.S1_s_at  | MmuSTS.2072.1  | 11.88 | 11.77 | 1.15 | 0.14 | 1.08  | 0.847638 | 0.663143 | 0.946572 | 0.80284  |
| Mmu.8100.1.S1_at       | Mmu.8100.1     | 5.75  | 5.55  | 0.21 | 0.17 | 1.15  | 0.645279 | 0.013174 | 0.858731 | 0.14735  |
| Mmu.8117.1.S1_at       | Mmu.8117.1     | 6.34  | 6.28  | 0.18 | 0    | 1.04  | 0.189125 | 0.08144  | 0.560746 | 0.329632 |
| Mmu.8122.1.A1_at       | Mmu.8122.1     | 11.28 | 11.5  | 0.36 | 0.04 | -1.16 | 0.316574 | 0.276034 | 0.666494 | 0.540071 |
| Mmu.8122.1.S1_at       | Mmu.8122.1     | 11.24 | 11.51 | 0.34 | 0.06 | -1.2  | 0.283243 | 0.31667  | 0.641313 | 0.569995 |
| Mmu.8123.1.S1_at       | Mmu.8123.1     | 6.23  | 6.1   | 0.22 | 0.08 | 1.09  | 0.149708 | 0.262288 | 0.523226 | 0.528605 |
| Mmu.8137.1.S1_at       | Mmu.8137.1     | 6.87  | 7.28  | 0.45 | 0.14 | -1.33 | 0.343248 | 0.239108 | 0.686509 | 0.509827 |
| Mmu.8143.1.S1_at       | Mmu.8143.1     | 5.21  | 4.24  | 0.87 | 0.01 | 1.96  | 0.043717 | 0.019451 | 0.372554 | 0.175136 |
| Mmu.8145.1.S1_at       | Mmu.8145.1     | 8.25  | 10.01 | 0.36 | 0.23 | -3.4  | 0.002823 | 0.002789 | 0.186571 | 0.077966 |
| Mmu.8147.1.A1_at       | Mmu.8147.1     | 5.18  | 5.21  | 0.04 | 0.04 | -1.02 | 0.279974 | 0.029084 | 0.638821 | 0.212721 |
| Mmu.8149.1.S1_s_at     | Mmu.8149.1     | 9.96  | 9.93  | 0.17 | 0.14 | 1.02  | 0.303977 | 0.470628 | 0.657774 | 0.67894  |
| Mmu.8156.1.S1_at       | Mmu.8156.1     | 8.81  | 8.15  | 0.69 | 0.16 | 1.58  | 0.442303 | 0.320131 | 0.749962 | 0.572472 |
| Mmu.8163.1.S1_at       | Mmu.8163.1     | 9.55  | 9.44  | 0.17 | 0.05 | 1.08  | 0.307015 | 0.001075 | 0.659905 | 0.051908 |
| Mmu.8192.1.S1_at       | Mmu.8192.1     | 7.14  | 7.28  | 0.5  | 0.15 | -1.1  | 0.662687 | 0.549572 | 0.866912 | 0.729956 |
| Mmu.8197.1.S1_at       | Mmu.8197.1     | 8.65  | 8.55  | 0.14 | 0.12 | 1.07  | 0.147916 | 0.365268 | 0.522184 | 0.605413 |
| Mmu.8209.1.S1_at       | Mmu.8209.1     | 10.1  | 9.64  | 0.34 | 0.03 | 1.37  | 0.222788 | 0.154369 | 0.592343 | 0.429245 |
| Mmu.8218.1.S1_at       | Mmu.8218.1     | 6.19  | 7.04  | 0.7  | 0.2  | -1.8  | 0.105806 | 0.046996 | 0.477611 | 0.261469 |

|                    |            |       |       |      |      |       |          |          |          |          |
|--------------------|------------|-------|-------|------|------|-------|----------|----------|----------|----------|
| Mmu.8222.1.S1_at   | Mmu.8222.1 | 11.96 | 11.33 | 0.71 | 0.03 | 1.55  | 0.521661 | 0.183374 | 0.794698 | 0.459553 |
| Mmu.8245.1.S1_at   | Mmu.8245.1 | 4.94  | 5     | 0.44 | 0.05 | -1.04 | 0.469236 | 0.484652 | 0.765531 | 0.688591 |
| Mmu.826.1.S1_at    | Mmu.826.1  | 8.45  | 7.87  | 0.34 | 0.14 | 1.49  | 0.218028 | 0.315252 | 0.587987 | 0.568939 |
| Mmu.8262.1.S1_at   | Mmu.8262.1 | 9.59  | 8.84  | 0.48 | 0.04 | 1.68  | 0.18148  | 0.16163  | 0.554659 | 0.437771 |
| Mmu.8265.1.S1_at   | Mmu.8265.1 | 10.43 | 9.73  | 0.25 | 0.32 | 1.63  | 0.024461 | 0.01394  | 0.318814 | 0.151391 |
| Mmu.8273.1.S1_at   | Mmu.8273.1 | 4.16  | 4.27  | 0.13 | 0.21 | -1.07 | 0.549839 | 0.570399 | 0.810447 | 0.743103 |
| Mmu.8277.1.S1_at   | Mmu.8277.1 | 7.8   | 8.08  | 0.11 | 0.28 | -1.22 | 0.179422 | 0.130803 | 0.552682 | 0.40299  |
| Mmu.8277.2.S1_at   | Mmu.8277.2 | 8     | 8.12  | 0.15 | 0.1  | -1.09 | 0.528831 | 0.867089 | 0.798077 | 0.924465 |
| Mmu.828.1.S1_at    | Mmu.828.1  | 8.46  | 8.75  | 0.22 | 0.25 | -1.23 | 0.689875 | 0.721717 | 0.879161 | 0.838808 |
| Mmu.8299.1.S1_at   | Mmu.8299.1 | 9.18  | 8.98  | 0.2  | 0.08 | 1.14  | 0.128684 | 0.122473 | 0.503433 | 0.392348 |
| Mmu.8299.1.S1_s_at | Mmu.8299.1 | 10    | 9.99  | 0.13 | 0.02 | -1.01 | 0.471784 | 0.37267  | 0.766635 | 0.611617 |
| Mmu.8323.1.S1_at   | Mmu.8323.1 | 8.31  | 8.17  | 0.38 | 0.15 | 1.1   | 0.775477 | 0.532001 | 0.916777 | 0.718995 |
| Mmu.8324.2.S1_at   | Mmu.8324.2 | 9.26  | 8.57  | 0.27 | 0.13 | 1.61  | 0.056179 | 0.018154 | 0.399676 | 0.169673 |
| Mmu.8324.2.S1_s_at | Mmu.8324.2 | 10.55 | 10.45 | 0.17 | 0.13 | 1.07  | 0.194798 | 0.051364 | 0.565198 | 0.272082 |
| Mmu.8335.1.S1_s_at | Mmu.8335.1 | 11.35 | 11.42 | 0.5  | 0.05 | -1.05 | 0.291877 | 0.285474 | 0.648213 | 0.547351 |
| Mmu.8339.1.S1_at   | Mmu.8339.1 | 3.06  | 3.04  | 0.22 | 0.13 | 1.01  | 0.460179 | 0.568231 | 0.76004  | 0.741866 |
| Mmu.8361.1.S1_at   | Mmu.8361.1 | 6.55  | 6.2   | 0.21 | 0.26 | 1.28  | 0.073642 | 0.088624 | 0.434623 | 0.342167 |
| Mmu.8365.1.S1_at   | Mmu.8365.1 | 12    | 11.98 | 0.24 | 0.05 | 1.02  | 0.908982 | 0.01396  | 0.969287 | 0.151509 |
| Mmu.8365.1.S1_s_at | Mmu.8365.1 | 11.94 | 11.87 | 0.23 | 0.07 | 1.05  | 0.904077 | 0.019556 | 0.967748 | 0.175563 |
| Mmu.8378.1.S1_at   | Mmu.8378.1 | 4.98  | 4.99  | 0.18 | 0.06 | -1.01 | 0.496014 | 0.550749 | 0.780178 | 0.730611 |
| Mmu.8380.1.S1_at   | Mmu.8380.1 | 3.36  | 3.33  | 0.03 | 0.07 | 1.02  | 0.43794  | 0.222978 | 0.747043 | 0.495821 |
| Mmu.8395.1.S1_at   | Mmu.8395.1 | 3.17  | 3.16  | 0.08 | 0.06 | 1     | 0.829005 | 0.260613 | 0.938657 | 0.527118 |
| Mmu.8402.1.S1_at   | Mmu.8402.1 | 10.98 | 10.75 | 0.06 | 0.06 | 1.18  | 0.008236 | 0.019624 | 0.232164 | 0.176044 |
| Mmu.8410.1.S1_at   | Mmu.8410.1 | 10.24 | 10.06 | 0.16 | 0.06 | 1.13  | 0.209094 | 0.000319 | 0.580645 | 0.035423 |
| Mmu.8428.1.S1_at   | Mmu.8428.1 | 9.28  | 8.98  | 0.5  | 0.11 | 1.22  | 0.415314 | 0.137042 | 0.733613 | 0.409836 |
| Mmu.8473.1.A1_at   | Mmu.8473.1 | 3.24  | 3.35  | 0.49 | 0.16 | -1.08 | 0.441035 | 0.388162 | 0.748943 | 0.622617 |
| Mmu.8473.1.S1_x_at | Mmu.8473.1 | 3.74  | 3.51  | 0.09 | 0.11 | 1.18  | 0.020001 | 0.00514  | 0.303174 | 0.099496 |
| Mmu.8487.1.S1_at   | Mmu.8487.1 | 11.18 | 10.93 | 0.06 | 0.16 | 1.19  | 0.044105 | 0.021948 | 0.373833 | 0.185352 |
| Mmu.849.1.S1_at    | Mmu.849.1  | 4.82  | 4.85  | 0.06 | 0.21 | -1.02 | 0.417064 | 0.487429 | 0.734701 | 0.690508 |
| Mmu.85.1.S1_at     | Mmu.85.1   | 5.91  | 5.99  | 0.04 | 0.35 | -1.06 | 0.778972 | 0.487935 | 0.918508 | 0.690787 |
| Mmu.8527.2.A1_at   | Mmu.8527.2 | 8.93  | 9.33  | 2.26 | 0.32 | -1.32 | 0.613649 | 0.155946 | 0.843603 | 0.431357 |
| Mmu.8527.2.A1_s_at | Mmu.8527.2 | 10.1  | 10.17 | 2.21 | 0.14 | -1.05 | 0.633791 | 0.339411 | 0.853666 | 0.586066 |
| Mmu.8548.1.S1_at   | Mmu.8548.1 | 9.38  | 9.3   | 0.41 | 0.17 | 1.06  | 0.785812 | 0.071383 | 0.921215 | 0.313478 |
| Mmu.8566.2.S1_at   | Mmu.8566.2 | 10.3  | 10.61 | 0.16 | 0.07 | -1.23 | 0.12709  | 0.289341 | 0.50102  | 0.550378 |
| Mmu.8574.2.S1_at   | Mmu.8574.2 | 8     | 8.15  | 0.25 | 0.18 | -1.11 | 0.139164 | 0.379515 | 0.514459 | 0.616433 |
| Mmu.8581.1.A1_at   | Mmu.8581.1 | 12.68 | 13    | 0.11 | 0.07 | -1.25 | 0.020396 | 0.119363 | 0.303985 | 0.387887 |
| Mmu.8587.1.S1_at   | Mmu.8587.1 | 11.47 | 11.32 | 0.26 | 0.2  | 1.11  | 0.207862 | 0.296515 | 0.579509 | 0.555528 |
| Mmu.8604.1.A1_at   | Mmu.8604.1 | 9.83  | 9.7   | 0.18 | 0.03 | 1.09  | 0.219928 | 0.329369 | 0.589114 | 0.578733 |
| Mmu.8608.1.S2_at   | Mmu.8608.1 | 7.08  | 6.21  | 0.72 | 0.02 | 1.83  | 0.098468 | 0.109277 | 0.467888 | 0.37308  |
| Mmu.8637.1.S1_at   | Mmu.8637.1 | 11.31 | 12.57 | 0.36 | 0.04 | -2.39 | 0.00394  | 0.006506 | 0.198571 | 0.109521 |
| Mmu.865.1.S1_at    | Mmu.865.1  | 6.45  | 6.55  | 0.35 | 0.14 | -1.07 | 0.994795 | 0.474399 | 0.998057 | 0.681423 |
| Mmu.8677.1.S1_at   | Mmu.8677.1 | 3.89  | 3.78  | 0.01 | 0.03 | 1.08  | 0.018464 | 0.128849 | 0.297469 | 0.400277 |
| Mmu.8707.1.S1_s_at | Mmu.8707.1 | 9.72  | 9.37  | 0.22 | 0.11 | 1.27  | 0.069788 | 0.059641 | 0.427798 | 0.290838 |

|                    |            |       |       |      |      |       |          |          |          |          |
|--------------------|------------|-------|-------|------|------|-------|----------|----------|----------|----------|
| Mmu.8713.1.S1_at   | Mmu.8713.1 | 8.23  | 7.62  | 0.06 | 0.57 | 1.53  | 0.046434 | 0.044759 | 0.377929 | 0.256009 |
| Mmu.8713.1.S1_s_at | Mmu.8713.1 | 10.01 | 9.25  | 0.07 | 0.31 | 1.68  | 0.010998 | 0.013191 | 0.251468 | 0.147352 |
| Mmu.8716.1.S1_at   | Mmu.8716.1 | 8.34  | 7.92  | 0.29 | 0.04 | 1.33  | 0.078683 | 0.044449 | 0.441464 | 0.25521  |
| Mmu.8731.1.S1_at   | Mmu.8731.1 | 11.27 | 11.04 | 0.09 | 0.03 | 1.17  | 0.012915 | 0.24407  | 0.265815 | 0.514116 |
| Mmu.8731.1.S1_x_at | Mmu.8731.1 | 11.46 | 11.16 | 0.05 | 0.06 | 1.24  | 0.004695 | 0.15208  | 0.201699 | 0.426827 |
| Mmu.8739.1.S1_at   | Mmu.8739.1 | 12.03 | 12.02 | 0.81 | 0.16 | 1.01  | 0.924352 | 0.061442 | 0.974666 | 0.294704 |
| Mmu.874.1.S1_at    | Mmu.874.1  | 6.22  | 6.2   | 0.51 | 0.17 | 1.02  | 0.922542 | 0.146598 | 0.973884 | 0.420619 |
| Mmu.8747.1.S1_at   | Mmu.8747.1 | 3.58  | 4.81  | 0.15 | 0.49 | -2.35 | 0.024593 | 0.005269 | 0.319173 | 0.100589 |
| Mmu.8757.1.S1_at   | Mmu.8757.1 | 9.52  | 10.31 | 0.27 | 0.22 | -1.72 | 0.048457 | 0.04202  | 0.38332  | 0.249463 |
| Mmu.8766.1.S1_at   | Mmu.8766.1 | 8.61  | 8.49  | 0.18 | 0.18 | 1.09  | 0.214399 | 0.111797 | 0.584751 | 0.376856 |
| Mmu.8769.1.S1_s_at | Mmu.8769.1 | 11.02 | 9.94  | 0.19 | 0.29 | 2.11  | 0.003676 | 0.000874 | 0.197111 | 0.047471 |
| Mmu.8777.1.S1_s_at | Mmu.8777.1 | 14.53 | 14.49 | 0.03 | 0.02 | 1.03  | 0.160732 | 0.204211 | 0.533929 | 0.478507 |
| Mmu.8778.1.S1_at   | Mmu.8778.1 | 2.64  | 2.77  | 0.18 | 0.02 | -1.1  | 0.489793 | 0.800646 | 0.776518 | 0.885317 |
| Mmu.8787.1.S1_at   | Mmu.8787.1 | 10.82 | 10.69 | 0.66 | 0.16 | 1.09  | 0.705232 | 0.328232 | 0.885355 | 0.577956 |
| Mmu.8794.2.S1_s_at | Mmu.8794.2 | 13.18 | 13.26 | 0.06 | 0.02 | -1.05 | 0.106942 | 0.044884 | 0.479433 | 0.256424 |
| Mmu.8798.1.S1_at   | Mmu.8798.1 | 10.04 | 9.47  | 0.54 | 0.27 | 1.49  | 0.100977 | 0.017233 | 0.47159  | 0.166331 |
| Mmu.8798.1.S1_s_at | Mmu.8798.1 | 10.49 | 10.06 | 0.52 | 0.28 | 1.35  | 0.160759 | 0.034184 | 0.533929 | 0.228728 |
| Mmu.8810.2.S1_at   | Mmu.8810.2 | 9.77  | 9.66  | 0.19 | 0.03 | 1.08  | 0.242105 | 0.088486 | 0.608253 | 0.341946 |
| Mmu.8849.1.S1_at   | Mmu.8849.1 | 11.48 | 10.81 | 0.03 | 0.17 | 1.59  | 0.001722 | 0.003569 | 0.166176 | 0.085525 |
| Mmu.8855.1.S1_at   | Mmu.8855.1 | 7.06  | 7.37  | 0.29 | 0.07 | -1.24 | 0.479296 | 0.003508 | 0.770691 | 0.08503  |
| Mmu.8859.1.S1_at   | Mmu.8859.1 | 6.3   | 7.15  | 0.7  | 0.47 | -1.8  | 0.437665 | 0.14558  | 0.746873 | 0.419456 |
| Mmu.886.1.S1_at    | Mmu.886.1  | 4.86  | 4.84  | 0.1  | 0.25 | 1.01  | 0.8953   | 0.96856  | 0.964244 | 0.982645 |
| Mmu.8876.1.S1_at   | Mmu.8876.1 | 8.25  | 8.24  | 0.09 | 0.1  | 1.01  | 0.446135 | 0.101938 | 0.752589 | 0.361967 |
| Mmu.8887.1.S1_at   | Mmu.8887.1 | 4.68  | 4.6   | 0.24 | 0.26 | 1.05  | 0.342885 | 0.100272 | 0.686198 | 0.359318 |
| Mmu.8893.1.S1_s_at | Mmu.8893.1 | 12.33 | 12.21 | 0.14 | 0.05 | 1.08  | 0.351205 | 0.141904 | 0.691945 | 0.415427 |
| Mmu.8901.1.S1_at   | Mmu.8901.1 | 7.05  | 7.03  | 0.2  | 0.19 | 1.01  | 0.700724 | 0.408166 | 0.883597 | 0.635498 |
| Mmu.8905.1.S1_at   | Mmu.8905.1 | 6.82  | 6.89  | 0.04 | 0.03 | -1.05 | 0.09524  | 0.153127 | 0.464131 | 0.428011 |
| Mmu.891.1.S1_at    | Mmu.891.1  | 4.36  | 4.42  | 0.08 | 0.14 | -1.04 | 0.793844 | 0.689811 | 0.924471 | 0.819112 |
| Mmu.8925.1.S1_at   | Mmu.8925.1 | 6.05  | 6.34  | 0.24 | 0.18 | -1.22 | 0.179032 | 0.173999 | 0.552029 | 0.450247 |
| Mmu.8934.1.S1_at   | Mmu.8934.1 | 10.42 | 9.8   | 0.34 | 0.33 | 1.54  | 0.0881   | 0.124725 | 0.45606  | 0.39513  |
| Mmu.8939.2.S1_at   | Mmu.8939.2 | 10.18 | 9.97  | 0.25 | 0.06 | 1.16  | 0.273142 | 0.398066 | 0.632791 | 0.629148 |
| Mmu.8945.1.S1_at   | Mmu.8945.1 | 9.68  | 8.9   | 0.59 | 0.11 | 1.72  | 0.073597 | 0.012544 | 0.434623 | 0.144478 |
| Mmu.8948.1.S1_at   | Mmu.8948.1 | 13.36 | 13.28 | 0.13 | 0.12 | 1.05  | 0.107683 | 0.155146 | 0.480288 | 0.430291 |
| Mmu.8970.1.S1_at   | Mmu.8970.1 | 8.47  | 8.17  | 0.19 | 0.28 | 1.22  | 0.080624 | 0.053541 | 0.44458  | 0.277021 |
| Mmu.8971.1.S1_at   | Mmu.8971.1 | 12.97 | 12.62 | 0.56 | 0.03 | 1.28  | 0.717132 | 0.885634 | 0.890289 | 0.934982 |
| Mmu.8980.1.S1_at   | Mmu.8980.1 | 14.31 | 14.31 | 0.04 | 0    | 1     | 0.802581 | 0.521334 | 0.92801  | 0.712346 |
| Mmu.8980.1.S1_s_at | Mmu.8980.1 | 14.01 | 14.01 | 0.04 | 0.01 | 1     | 0.534877 | 0.656564 | 0.801404 | 0.799163 |
| Mmu.8984.1.S1_at   | Mmu.8984.1 | 7.29  | 7.08  | 0.12 | 0.23 | 1.16  | 0.048997 | 0.183239 | 0.385127 | 0.459553 |
| Mmu.8988.1.S1_at   | Mmu.8988.1 | 4.3   | 4.15  | 0.25 | 0.07 | 1.11  | 0.412332 | 0.558823 | 0.731945 | 0.735887 |
| Mmu.8999.1.S1_at   | Mmu.8999.1 | 11.49 | 11.35 | 0.25 | 0.03 | 1.11  | 0.918567 | 0.524427 | 0.972212 | 0.714366 |
| Mmu.90.1.S1_at     | Mmu.90.1   | 11.94 | 12.01 | 0.12 | 0.12 | -1.05 | 0.529067 | 0.552073 | 0.798106 | 0.73147  |
| Mmu.9008.1.S1_at   | Mmu.9008.1 | 7.6   | 8.12  | 0.48 | 0.05 | -1.44 | 0.159373 | 0.294016 | 0.532232 | 0.553909 |
| Mmu.9015.1.S1_at   | Mmu.9015.1 | 7.47  | 6.85  | 0.34 | 0.1  | 1.53  | 0.02031  | 0.020464 | 0.303816 | 0.179619 |

|                     |             |       |       |      |      |       |          |          |          |          |
|---------------------|-------------|-------|-------|------|------|-------|----------|----------|----------|----------|
| Mmu.9017.1.S1_at    | Mmu.9017.1  | 5.4   | 5.33  | 0.25 | 0.17 | 1.05  | 0.703333 | 0.835833 | 0.884629 | 0.90607  |
| Mmu.9020.1.S1_at    | Mmu.9020.1  | 7.2   | 6.69  | 0.16 | 0.09 | 1.42  | 0.006741 | 0.000464 | 0.22323  | 0.038572 |
| Mmu.9040.1.S1_at    | Mmu.9040.1  | 10.02 | 9.06  | 0.17 | 0.27 | 1.95  | 0.004297 | 0.000884 | 0.198874 | 0.047602 |
| Mmu.9070.1.S1_at    | Mmu.9070.1  | 3.01  | 3.03  | 0.16 | 0.08 | -1.01 | 0.658067 | 0.736196 | 0.864423 | 0.847336 |
| Mmu.9097.1.S1_at    | Mmu.9097.1  | 7.21  | 7.2   | 0.13 | 0.09 | 1.01  | 0.508731 | 0.126692 | 0.787228 | 0.397363 |
| Mmu.9109.1.A1_at    | Mmu.9109.1  | 4.81  | 4.81  | 0.07 | 0.15 | 1.01  | 0.355205 | 0.295909 | 0.69464  | 0.555241 |
| Mmu.9109.1.A1_x_at  | Mmu.9109.1  | 5.14  | 5.23  | 0.3  | 0.22 | -1.07 | 0.285676 | 0.170996 | 0.643438 | 0.447561 |
| Mmu.9109.1.S1_at    | Mmu.9109.1  | 7.16  | 7.18  | 0.45 | 0.48 | -1.01 | 0.829699 | 0.332129 | 0.938862 | 0.580584 |
| Mmu.9118.1.S1_at    | Mmu.9118.1  | 10.14 | 10.23 | 0.1  | 0.13 | -1.07 | 0.499559 | 0.190982 | 0.7821   | 0.46629  |
| Mmu.912.1.S1_at     | Mmu.912.1   | 3.2   | 5.45  | 0.02 | 0.76 | -4.77 | 0.003696 | 0.00013  | 0.197111 | 0.029087 |
| Mmu.9127.1.S1_a_at  | Mmu.9127.1  | 5.54  | 5.24  | 0.11 | 0.16 | 1.23  | 0.061307 | 0.235238 | 0.410515 | 0.50629  |
| Mmu.915.1.S1_at     | Mmu.915.1   | 10.22 | 10.05 | 0.26 | 0.29 | 1.12  | 0.191603 | 0.250276 | 0.562859 | 0.519282 |
| Mmu.9154.1.S1_at    | Mmu.9154.1  | 8.91  | 8.78  | 0.21 | 0.04 | 1.09  | 0.82561  | 0.969146 | 0.937359 | 0.983055 |
| Mmu.9155.1.S1_at    | Mmu.9155.1  | 8.72  | 8.57  | 0.04 | 0.07 | 1.11  | 0.00988  | 0.000135 | 0.244171 | 0.029087 |
| Mmu.919.1.S1_at     | Mmu.919.1   | 8.01  | 8.2   | 0.87 | 0.09 | -1.14 | 0.803369 | 0.068522 | 0.928371 | 0.308267 |
| Mmu.9198.1.S1_at    | Mmu.9198.1  | 8.74  | 8.95  | 0.27 | 0.09 | -1.15 | 0.843668 | 0.380065 | 0.944855 | 0.61674  |
| Mmu.92.1.S1_at      | Mmu.92.1    | 8.76  | 8.56  | 0.33 | 0.11 | 1.15  | 0.406345 | 0.18108  | 0.727915 | 0.457577 |
| Mmu.923.1.S1_at     | Mmu.923.1   | 9.29  | 8.72  | 0.29 | 0.07 | 1.48  | 0.058828 | 0.010887 | 0.405521 | 0.135939 |
| Mmu.9230.1.S1_at    | Mmu.9230.1  | 8.16  | 7.37  | 0.29 | 0.17 | 1.73  | 0.016324 | 0.02354  | 0.287398 | 0.192231 |
| Mmu.9231.1.S1_s_at  | Mmu.9231.1  | 11.06 | 10.93 | 0.16 | 0.05 | 1.09  | 0.323135 | 0.386608 | 0.671991 | 0.621765 |
| Mmu.9239.1.S1_at    | Mmu.9239.1  | 4.84  | 4.55  | 0.34 | 0.1  | 1.23  | 0.636122 | 0.790256 | 0.854813 | 0.878754 |
| Mmu.924.1.S1_at     | Mmu.924.1   | 10.91 | 11.06 | 0.2  | 0    | -1.11 | 0.306379 | 0.062205 | 0.659434 | 0.296296 |
| Mmu.9241.2.S1_at    | Mmu.9241.2  | 13.69 | 13.54 | 1.63 | 0.09 | 1.11  | 0.491856 | 0.226531 | 0.778032 | 0.499001 |
| Mmu.9242.1.S1_x_at  | Mmu.9242.1  | 4.2   | 4.22  | 0.17 | 0.03 | -1.02 | 0.742209 | 0.793747 | 0.901638 | 0.881039 |
| Mmu.9242.10.S1_x_at | Mmu.9242.10 | 2.95  | 2.94  | 0.05 | 0.09 | 1     | 0.565315 | 0.702683 | 0.819183 | 0.827658 |
| Mmu.9242.11.S1_x_at | Mmu.9242.11 | 3.19  | 3.19  | 0.36 | 0.08 | -1    | 0.38659  | 0.488451 | 0.713641 | 0.691147 |
| Mmu.9242.12.S1_at   | Mmu.9242.12 | 3.32  | 3.38  | 0.07 | 0.21 | -1.05 | 0.194045 | 0.097431 | 0.564621 | 0.355097 |
| Mmu.9242.12.S1_x_at | Mmu.9242.12 | 3.14  | 3.21  | 0.06 | 0.2  | -1.05 | 0.183774 | 0.186363 | 0.556596 | 0.46221  |
| Mmu.9242.2.S1_at    | Mmu.9242.2  | 2.81  | 2.72  | 0.07 | 0.04 | 1.06  | 0.102832 | 0.13375  | 0.473259 | 0.405732 |
| Mmu.9242.2.S1_x_at  | Mmu.9242.2  | 3.03  | 3.12  | 0.06 | 0.09 | -1.07 | 0.103734 | 0.252638 | 0.474343 | 0.521174 |
| Mmu.9242.8.S1_at    | Mmu.9242.8  | 3.24  | 3.22  | 0.12 | 0.06 | 1.01  | 0.448504 | 0.832691 | 0.753886 | 0.904017 |
| Mmu.9244.1.S1_at    | Mmu.9244.1  | 11.55 | 11.3  | 0.22 | 0.06 | 1.18  | 0.182785 | 0.12378  | 0.555631 | 0.393908 |
| Mmu.926.1.S1_at     | Mmu.926.1   | 11.84 | 11.96 | 0.18 | 0.05 | -1.08 | 0.457656 | 0.14979  | 0.758364 | 0.424394 |
| Mmu.9266.1.S1_x_at  | Mmu.9266.1  | 4.28  | 4.06  | 0.12 | 0.07 | 1.16  | 0.03149  | 0.029406 | 0.341227 | 0.213363 |
| Mmu.9306.1.S1_at    | Mmu.9306.1  | 10.42 | 9.82  | 1.21 | 0.17 | 1.52  | 0.789018 | 0.862599 | 0.922472 | 0.92189  |
| Mmu.9308.1.S1_at    | Mmu.9308.1  | 9.65  | 9.34  | 0.36 | 0.05 | 1.24  | 0.236288 | 0.504057 | 0.603291 | 0.701301 |
| Mmu.9309.1.S1_at    | Mmu.9309.1  | 11.95 | 12.09 | 0.02 | 0.02 | -1.1  | 0.00259  | 0.011912 | 0.180906 | 0.141283 |
| Mmu.9314.1.S1_at    | Mmu.9314.1  | 9.54  | 9.63  | 0.46 | 0.16 | -1.07 | 0.477366 | 0.267114 | 0.769812 | 0.532727 |
| Mmu.9316.1.S1_at    | Mmu.9316.1  | 11.44 | 11.31 | 0.12 | 0.12 | 1.1   | 0.107732 | 0.590431 | 0.480288 | 0.756223 |
| Mmu.9324.1.S1_at    | Mmu.9324.1  | 11.59 | 11.4  | 0.13 | 0.08 | 1.14  | 0.173935 | 0.035174 | 0.546898 | 0.231708 |
| Mmu.9324.2.S1_a_at  | Mmu.9324.2  | 11.65 | 11.41 | 0.23 | 0.04 | 1.18  | 0.144272 | 0.018355 | 0.519687 | 0.170357 |
| Mmu.9324.2.S1_at    | Mmu.9324.2  | 10.78 | 10.3  | 0.21 | 0.1  | 1.39  | 0.026129 | 0.003906 | 0.323344 | 0.088806 |
| Mmu.9329.1.S1_at    | Mmu.9329.1  | 4.97  | 4.96  | 0.23 | 0.18 | 1.01  | 0.452819 | 0.319531 | 0.755901 | 0.571873 |

|                        |                |       |       |      |      |       |          |          |          |          |
|------------------------|----------------|-------|-------|------|------|-------|----------|----------|----------|----------|
| Mmu.9335.1.S1_at       | Mmu.9335.1     | 10.65 | 10.47 | 0.57 | 0.19 | 1.13  | 0.648511 | 0.518095 | 0.859926 | 0.710138 |
| Mmu.9362.1.S1_at       | Mmu.9362.1     | 6.01  | 5.89  | 0.27 | 0.03 | 1.08  | 0.330196 | 0.492806 | 0.676897 | 0.6938   |
| Mmu.937.1.S1_at        | Mmu.937.1      | 9.13  | 8.83  | 0.24 | 0.12 | 1.23  | 0.033933 | 0.042129 | 0.347468 | 0.249753 |
| Mmu.9375.1.S1_at       | Mmu.9375.1     | 5.25  | 5.17  | 0.66 | 0.13 | 1.06  | 0.825397 | 0.193233 | 0.937278 | 0.468578 |
| Mmu.9409.1.S1_at       | Mmu.9409.1     | 9.61  | 9.65  | 0.82 | 0.11 | -1.03 | 0.880794 | 0.436538 | 0.958787 | 0.656048 |
| Mmu.9420.1.S1_at       | Mmu.9420.1     | 11.22 | 11.27 | 0.1  | 0.07 | -1.03 | 0.987447 | 0.007839 | 0.995831 | 0.118    |
| Mmu.9425.2.S1_at       | Mmu.9425.2     | 5.73  | 5.65  | 0.25 | 0.13 | 1.06  | 0.642609 | 0.234267 | 0.857864 | 0.505511 |
| Mmu.9437.1.S1_at       | Mmu.9437.1     | 10.78 | 10.72 | 0.21 | 0.11 | 1.04  | 0.345095 | 0.072062 | 0.68735  | 0.314519 |
| Mmu.9444.1.S1_at       | Mmu.9444.1     | 8.63  | 8.56  | 0.03 | 0.02 | 1.05  | 0.01298  | 0.102492 | 0.26612  | 0.362765 |
| Mmu.9460.1.S1_s_at     | Mmu.9460.1     | 12.6  | 12.3  | 0.32 | 0.11 | 1.23  | 0.569006 | 0.718123 | 0.821147 | 0.836865 |
| Mmu.9470.1.A1_x_at     | Mmu.9470.1     | 10.62 | 9.24  | 1.81 | 0.2  | 2.6   | 0.364932 | 0.106403 | 0.700775 | 0.36895  |
| Mmu.9470.1.S1_x_at     | Mmu.9470.1     | 11.23 | 9.12  | 3.03 | 0.28 | 4.31  | 0.899179 | 0.137538 | 0.965792 | 0.410509 |
| Mmu.9470.2.A1_at       | Mmu.9470.2     | 4.09  | 4.3   | 0.03 | 0.2  | -1.15 | 0.064539 | 0.006141 | 0.418343 | 0.10676  |
| Mmu.9470.2.S1_at       | Mmu.9470.2     | 5.01  | 5.49  | 0.1  | 0.23 | -1.4  | 0.062664 | 0.098193 | 0.413501 | 0.356253 |
| Mmu.9470.4.A1_x_at     | Mmu.9470.4     | 9.19  | 8.01  | 1.9  | 0.15 | 2.27  | 0.601307 | 0.392642 | 0.838121 | 0.625813 |
| Mmu.9470.4.S1_x_at     | Mmu.9470.4     | 9.65  | 8.55  | 1.81 | 0.15 | 2.16  | 0.523764 | 0.50778  | 0.795656 | 0.703325 |
| Mmu.9481.2.S1_a_at     | Mmu.9481.2     | 8.04  | 7.41  | 1.43 | 0.01 | 1.54  | 0.818935 | 0.906282 | 0.934641 | 0.946953 |
| Mmu.9497.1.S1_at       | Mmu.9497.1     | 11.42 | 11.37 | 0.14 | 0.2  | 1.04  | 0.816754 | 0.987743 | 0.933716 | 0.993169 |
| Mmu.9501.1.S1_at       | Mmu.9501.1     | 11.72 | 11.81 | 0.91 | 0.19 | -1.06 | 0.999211 | 0.283022 | 0.999788 | 0.545692 |
| MmugDNA.7045.1.S1_s_at | MmugDNA.7045.1 | 10.74 | 10.51 | 0.11 | 0.03 | 1.17  | 0.046461 | 0.010059 | 0.377929 | 0.13156  |
| Mmu.952.1.S1_at        | Mmu.952.1      | 7.89  | 7.68  | 0.21 | 0.11 | 1.16  | 0.549371 | 0.62833  | 0.810299 | 0.781112 |
| Mmu.9527.1.S1_s_at     | Mmu.9527.1     | 6.99  | 6.73  | 0.54 | 0.32 | 1.2   | 0.346649 | 0.740201 | 0.688361 | 0.849504 |
| Mmu.954.1.S1_at        | Mmu.954.1      | 9.85  | 9.7   | 0.17 | 0.05 | 1.1   | 0.296331 | 0.588961 | 0.651995 | 0.755275 |
| Mmu.9543.1.S1_at       | Mmu.9543.1     | 9.7   | 8.78  | 0.6  | 0.3  | 1.89  | 0.127348 | 0.008257 | 0.501548 | 0.12078  |
| Mmu.9549.1.S1_at       | Mmu.9549.1     | 9.01  | 7.75  | 0.22 | 0.28 | 2.4   | 0.002365 | 0.001257 | 0.176928 | 0.055042 |
| Mmu.9550.1.S1_at       | Mmu.9550.1     | 6.08  | 6.34  | 0.28 | 0.06 | -1.19 | 0.281568 | 0.199568 | 0.640011 | 0.474208 |
| Mmu.9550.2.S1_at       | Mmu.9550.2     | 9.8   | 9.12  | 0.22 | 0.22 | 1.6   | 0.016294 | 0.011903 | 0.287127 | 0.141251 |
| Mmu.9557.1.S1_at       | Mmu.9557.1     | 11.92 | 11.65 | 0.28 | 0.16 | 1.2   | 0.065569 | 0.137208 | 0.420827 | 0.410063 |
| Mmu.9567.1.S1_at       | Mmu.9567.1     | 12.37 | 12.08 | 0.09 | 0.08 | 1.22  | 0.00976  | 0.002433 | 0.243347 | 0.073093 |
| Mmu.9589.1.S1_at       | Mmu.9589.1     | 3.18  | 3.53  | 0.26 | 0.03 | -1.27 | 0.299364 | 0.108558 | 0.653772 | 0.372125 |
| Mmu.9596.1.S1_at       | Mmu.9596.1     | 8.67  | 8.16  | 0.49 | 0.23 | 1.43  | 0.15187  | 0.044045 | 0.525001 | 0.254195 |
| Mmu.9614.1.A1_at       | Mmu.9614.1     | 4.6   | 4.5   | 0.1  | 0.1  | 1.07  | 0.129543 | 0.288763 | 0.504312 | 0.549927 |
| Mmu.9614.1.S1_at       | Mmu.9614.1     | 2.84  | 2.82  | 0.16 | 0.13 | 1.01  | 0.33435  | 0.381072 | 0.680321 | 0.617478 |
| Mmu.9632.1.A1_at       | Mmu.9632.1     | 10.08 | 10.29 | 0.84 | 0.02 | -1.16 | 0.606243 | 0.652333 | 0.840408 | 0.796688 |
| Mmu.964.1.S1_at        | Mmu.964.1      | 12.93 | 13.14 | 0.24 | 0.02 | -1.16 | 0.199705 | 0.118683 | 0.571494 | 0.38672  |
| MmugDNA.4836.1.S1_s_at | MmugDNA.4836.1 | 10.45 | 10.66 | 0.27 | 0.1  | -1.15 | 0.328599 | 0.18849  | 0.67577  | 0.464458 |
| Mmu.9654.1.S1_at       | Mmu.9654.1     | 8.14  | 7.79  | 0.44 | 0.11 | 1.27  | 0.185274 | 0.096583 | 0.558325 | 0.354126 |
| Mmu.9655.1.S1_at       | Mmu.9655.1     | 12.56 | 12.44 | 0.17 | 0.16 | 1.09  | 0.179299 | 0.030933 | 0.552498 | 0.217705 |
| Mmu.967.1.S1_s_at      | Mmu.967.1      | 10.43 | 10.23 | 0.09 | 0.19 | 1.15  | 0.076407 | 0.046511 | 0.437977 | 0.260216 |
| Mmu.9670.2.S1_at       | Mmu.9670.2     | 12.29 | 12.59 | 0.15 | 0.12 | -1.23 | 0.051692 | 0.000809 | 0.390999 | 0.046123 |
| Mmu.9670.2.S1_x_at     | Mmu.9670.2     | 11.63 | 11.93 | 0.14 | 0.13 | -1.23 | 0.046312 | 0.000471 | 0.377679 | 0.038572 |
| Mmu.9683.1.S1_at       | Mmu.9683.1     | 8.47  | 8.55  | 0.15 | 0.27 | -1.06 | 0.517867 | 0.516511 | 0.792289 | 0.709034 |
| Mmu.9686.1.S1_at       | Mmu.9686.1     | 7.97  | 7.88  | 0.94 | 0.17 | 1.07  | 0.738702 | 0.442298 | 0.900053 | 0.660336 |

|                         |                 |       |       |      |      |       |          |          |          |          |
|-------------------------|-----------------|-------|-------|------|------|-------|----------|----------|----------|----------|
| Mmu.9689.2.S1_at        | Mmu.9689.2      | 3.87  | 3.78  | 0.09 | 0.05 | 1.06  | 0.050867 | 0.028742 | 0.388223 | 0.211357 |
| MmugDNA.34564.1.S1_s_at | MmugDNA.34564.1 | 13.03 | 12.98 | 0.03 | 0.05 | 1.03  | 0.100853 | 0.248374 | 0.47159  | 0.517634 |
| Mmu.971.2.S1_at         | Mmu.971.2       | 8.2   | 8.21  | 0.9  | 0.09 | -1.01 | 0.986843 | 0.975645 | 0.995774 | 0.98673  |
| Mmu.9711.1.S1_at        | Mmu.9711.1      | 8.9   | 8.92  | 0.11 | 0.26 | -1.01 | 0.553646 | 0.160187 | 0.812271 | 0.436308 |
| Mmu.9720.1.S1_at        | Mmu.9720.1      | 12.24 | 12.08 | 0.08 | 0.09 | 1.12  | 0.071301 | 0.095136 | 0.43069  | 0.352151 |
| Mmu.9731.1.S1_at        | Mmu.9731.1      | 6.17  | 6.23  | 0.48 | 0.18 | -1.04 | 0.728221 | 0.17453  | 0.895067 | 0.450998 |
| Mmu.9738.1.S1_at        | Mmu.9738.1      | 3.85  | 3.78  | 0.13 | 0.04 | 1.05  | 0.422851 | 0.871764 | 0.738585 | 0.927056 |
| Mmu.9738.1.S1_s_at      | Mmu.9738.1      | 4.07  | 3.97  | 0.09 | 0.2  | 1.07  | 0.333146 | 0.453124 | 0.679469 | 0.667551 |
| Mmu.9769.1.S1_s_at      | Mmu.9769.1      | 12.68 | 12.62 | 0.08 | 0.08 | 1.04  | 0.217289 | 0.299077 | 0.587227 | 0.557663 |
| Mmu.9771.1.S1_at        | Mmu.9771.1      | 7.98  | 8.31  | 0.47 | 0.2  | -1.25 | 0.169165 | 0.005216 | 0.542061 | 0.100105 |
| Mmu.9773.1.S1_at        | Mmu.9773.1      | 9.83  | 10.28 | 0.7  | 0.15 | -1.37 | 0.950258 | 0.060175 | 0.983286 | 0.291882 |
| Mmu.9777.1.S1_a_at      | Mmu.9777.1      | 3.84  | 4.4   | 0.16 | 0.36 | -1.47 | 0.311398 | 0.370222 | 0.663221 | 0.609392 |
| Mmu.9792.1.S1_at        | Mmu.9792.1      | 12.04 | 11.79 | 0.47 | 0.1  | 1.19  | 0.323675 | 0.144005 | 0.672279 | 0.417912 |
| Mmu.9793.1.S1_at        | Mmu.9793.1      | 8.15  | 8.5   | 0.98 | 0.18 | -1.28 | 0.599694 | 0.105668 | 0.837539 | 0.367776 |
| Mmu.9798.1.S1_at        | Mmu.9798.1      | 10.04 | 9.3   | 0.39 | 0.05 | 1.67  | 0.011719 | 0.006094 | 0.256742 | 0.106327 |
| Mmu.9802.1.S1_at        | Mmu.9802.1      | 7.62  | 6.81  | 0.95 | 0.3  | 1.75  | 0.364317 | 0.400404 | 0.700517 | 0.630187 |
| Mmu.9805.1.S1_at        | Mmu.9805.1      | 8.41  | 8.04  | 0.63 | 0.43 | 1.29  | 0.201387 | 0.064723 | 0.57304  | 0.300314 |
| Mmu.9808.1.S1_s_at      | Mmu.9808.1      | 11.01 | 11.04 | 0.1  | 0.08 | -1.03 | 0.125752 | 0.146362 | 0.49972  | 0.420368 |
| Mmu.9831.1.S1_at        | Mmu.9831.1      | 7.59  | 7.67  | 1.34 | 0.42 | -1.06 | 0.963438 | 0.669774 | 0.988152 | 0.806882 |
| Mmu.9837.1.S1_at        | Mmu.9837.1      | 8.35  | 8.32  | 0.35 | 0.06 | 1.03  | 0.840965 | 0.041888 | 0.943498 | 0.249206 |
| Mmu.9862.2.S1_at        | Mmu.9862.2      | 8.81  | 8.04  | 0.68 | 0.04 | 1.71  | 0.069409 | 0.059356 | 0.427013 | 0.29054  |
| Mmu.9866.1.S1_s_at      | Mmu.9866.1      | 11.46 | 11.49 | 0.61 | 0.23 | -1.02 | 0.719981 | 0.226946 | 0.891311 | 0.499276 |
| MmugDNA.19922.1.S1_at   | MmugDNA.19922.1 | 11.23 | 10.91 | 0.21 | 0.03 | 1.25  | 0.168766 | 0.340383 | 0.541668 | 0.586725 |
| MmugDNA.19922.1.S1_s_at | MmugDNA.19922.1 | 11.07 | 10.72 | 0.26 | 0.09 | 1.27  | 0.279098 | 0.339811 | 0.637997 | 0.586394 |
| Mmu.9876.2.S1_at        | Mmu.9876.2      | 7.77  | 7.76  | 0.72 | 0.16 | 1.01  | 0.315194 | 0.493848 | 0.665641 | 0.694433 |
| Mmu.9888.1.S1_at        | Mmu.9888.1      | 11.75 | 11.32 | 0.37 | 0.07 | 1.34  | 0.133214 | 0.117388 | 0.507702 | 0.38505  |
| Mmu.9888.1.S1_s_at      | Mmu.9888.1      | 12.5  | 12.21 | 0.35 | 0.08 | 1.22  | 0.228983 | 0.164829 | 0.597935 | 0.441152 |
| Mmu.9951.1.S1_at        | Mmu.9951.1      | 12.15 | 12.07 | 0.1  | 0.16 | 1.05  | 0.18912  | 0.046897 | 0.560746 | 0.261281 |
| Mmu.9961.1.S1_at        | Mmu.9961.1      | 7.88  | 7.68  | 1.4  | 0.33 | 1.15  | 0.807666 | 0.156565 | 0.930244 | 0.43196  |
| Mmu.9964.1.S1_at        | Mmu.9964.1      | 4.54  | 5.61  | 1.28 | 0.17 | -2.11 | 0.243542 | 0.361155 | 0.609448 | 0.60207  |
| Mmu.9975.10.S1_x_at     | Mmu.9975.10     | 3.72  | 3.72  | 0.03 | 0.18 | -1    | 0.826005 | 0.805739 | 0.937613 | 0.888331 |
| Mmu.9975.17.S1_at       | Mmu.9975.17     | 2.62  | 2.66  | 0.14 | 0.06 | -1.02 | 0.94264  | 0.894942 | 0.98031  | 0.940055 |
| Mmu.9989.1.S1_s_at      | Mmu.9989.1      | 10.49 | 10.53 | 0.11 | 0.1  | -1.03 | 0.780952 | 0.460672 | 0.919347 | 0.672598 |
| MmuAffx.1.1.S1_at       | MmuAffx.1.1     | 4.13  | 4.15  | 0.17 | 0.04 | -1.02 | 0.657895 | 0.707706 | 0.864304 | 0.830472 |
| MmuAffx.10.1.A1_x_at    | MmuAffx.10.1    | 7.74  | 7.96  | 0.19 | 0.24 | -1.17 | 0.705386 | 0.149645 | 0.885355 | 0.424181 |
| MmuAffx.1008.1.S1_at    | MmuAffx.1008.1  | 7.14  | 6.92  | 0.74 | 0.16 | 1.17  | 0.610672 | 0.744562 | 0.841982 | 0.852091 |
| MmuAffx.11.1.A1_at      | MmuAffx.11.1    | 2.66  | 2.63  | 0.06 | 0.16 | 1.02  | 0.352638 | 0.463828 | 0.692659 | 0.674663 |
| MmuAffx.11.1.S1_x_at    | MmuAffx.11.1    | 2.58  | 2.52  | 0.12 | 0.07 | 1.04  | 0.613258 | 0.791888 | 0.843393 | 0.87976  |
| MmuAffx.1125.1.S1_at    | MmuAffx.1125.1  | 3.93  | 3.84  | 0.09 | 0.01 | 1.06  | 0.594655 | 0.395001 | 0.834876 | 0.627229 |
| MmuAffx.1186.1.S1_at    | MmuAffx.1186.1  | 3.1   | 3.11  | 0.16 | 0    | -1.01 | 0.972348 | 0.998605 | 0.99102  | 0.999247 |
| MmuAffx.12.1.A1_at      | MmuAffx.12.1    | 7.05  | 8.02  | 0.56 | 0.08 | -1.95 | 0.059783 | 0.011868 | 0.40703  | 0.141016 |
| MmuAffx.12.1.S1_x_at    | MmuAffx.12.1    | 7.52  | 8.01  | 0.51 | 0.16 | -1.4  | 0.457359 | 0.290391 | 0.758326 | 0.551169 |
| MmuAffx.1252.1.A1_at    | MmuAffx.1252.1  | 5.54  | 6.25  | 1.21 | 0.27 | -1.64 | 0.451505 | 0.419874 | 0.755176 | 0.643733 |

|                         |                 |       |       |      |      |       |          |          |          |          |
|-------------------------|-----------------|-------|-------|------|------|-------|----------|----------|----------|----------|
| MmuAffx.1533.1.S1_at    | MmuAffx.1533.1  | 8.68  | 8.84  | 0.45 | 0.24 | -1.12 | 0.862684 | 0.980468 | 0.951672 | 0.989333 |
| MmuAffx.161.1.S1_at     | MmuAffx.161.1   | 12.25 | 12.33 | 0.67 | 0.05 | -1.05 | 0.913054 | 0.281258 | 0.970415 | 0.544385 |
| MmuAffx.18.1.A1_at      | MmuAffx.18.1    | 6.34  | 6.28  | 0.02 | 0.06 | 1.04  | 0.223473 | 0.033798 | 0.592569 | 0.227489 |
| MmuAffx.18.1.S1_x_at    | MmuAffx.18.1    | 6.27  | 6.37  | 0.17 | 0.12 | -1.07 | 0.765273 | 0.147298 | 0.911736 | 0.421493 |
| MmuAffx.19.1.A1_at      | MmuAffx.19.1    | 6.48  | 6.61  | 0.76 | 0.13 | -1.09 | 0.552753 | 0.459074 | 0.811917 | 0.671544 |
| MmuAffx.19.1.S1_s_at    | MmuAffx.19.1    | 7.87  | 7.65  | 0.41 | 0.19 | 1.16  | 0.294452 | 0.208287 | 0.650602 | 0.48217  |
| MmuAffx.2.1.S1_at       | MmuAffx.2.1     | 4.53  | 4.5   | 0.1  | 0.22 | 1.02  | 0.799958 | 0.733084 | 0.926777 | 0.845503 |
| MmuAffx.204.1.A1_at     | MmuAffx.204.1   | 4.11  | 4.12  | 0.34 | 0.38 | -1    | 0.867429 | 0.411027 | 0.953499 | 0.637874 |
| MmuAffx.204.1.S1_at     | MmuAffx.204.1   | 4.41  | 4.26  | 0.04 | 0.47 | 1.11  | 0.19744  | 0.119749 | 0.568435 | 0.388496 |
| MmuAffx.2095.1.S1_at    | MmuAffx.2095.1  | 4.43  | 4.43  | 0.08 | 0.05 | 1     | 0.477004 | 0.658256 | 0.76966  | 0.800244 |
| MmuAffx.21.1.A1_at      | MmuAffx.21.1    | 5.4   | 5.31  | 0.09 | 0.04 | -1.07 | 0.113271 | 0.420722 | 0.486648 | 0.644381 |
| MmuAffx.21.1.S1_at      | MmuAffx.21.1    | 5.26  | 5.14  | 0.07 | 0.04 | 1.09  | 0.108509 | 0.103587 | 0.480777 | 0.364346 |
| MmuAffx.2165.1.A1_at    | MmuAffx.2165.1  | 3.84  | 4.65  | 0.08 | 0.13 | -1.75 | 0.001508 | 0.000091 | 0.161549 | 0.027225 |
| MmuAffx.2165.1.S1_at    | MmuAffx.2165.1  | 3.9   | 5.01  | 0.2  | 0.12 | -2.17 | 0.002103 | 0.001712 | 0.174757 | 0.062657 |
| MmuAffx.2166.1.A1_a_at  | MmuAffx.2166.1  | 3.58  | 3.58  | 0.02 | 0.05 | -1    | 0.701546 | 0.783333 | 0.883924 | 0.874571 |
| MmuAffx.2166.1.S1_at    | MmuAffx.2166.1  | 5.97  | 5.84  | 0.11 | 0.2  | 1.09  | 0.250882 | 0.335097 | 0.615977 | 0.582853 |
| MmugDNA.38587.1.S1_at   | MmugDNA.38587.1 | 2.64  | 2.54  | 0.04 | 0.04 | 1.07  | 0.078859 | 0.285722 | 0.441464 | 0.54744  |
| MmugDNA.38587.1.S1_s_at | MmugDNA.38587.1 | 3.64  | 3.59  | 0.06 | 0.07 | 1.04  | 0.432883 | 0.395995 | 0.744141 | 0.627823 |
| MmuAffx.2166.1.S1_x_at  | MmuAffx.2166.1  | 4.02  | 4     | 0.03 | 0.16 | 1.01  | 0.563668 | 0.699633 | 0.818336 | 0.825545 |
| MmuAffx.2166.2.S1_at    | MmuAffx.2166.2  | 4.17  | 3.96  | 0.14 | 0.04 | 1.16  | 0.160219 | 0.152651 | 0.533273 | 0.427483 |
| MmuAffx.2166.2.S1_x_at  | MmuAffx.2166.2  | 3.59  | 3.51  | 0.01 | 0.11 | 1.05  | 0.083485 | 0.152318 | 0.449573 | 0.427072 |
| MmuAffx.2168.1.A1_at    | MmuAffx.2168.1  | 4.75  | 4.78  | 0.06 | 0.18 | -1.02 | 0.597164 | 0.550914 | 0.83613  | 0.730659 |
| MmuAffx.2168.1.S1_at    | MmuAffx.2168.1  | 5.74  | 5.62  | 0.16 | 0.09 | 1.09  | 0.593957 | 0.165289 | 0.834539 | 0.441488 |
| MmuAffx.2168.1.S1_x_at  | MmuAffx.2168.1  | 5.69  | 5.7   | 0.02 | 0.03 | -1    | 0.282474 | 0.350448 | 0.640925 | 0.594161 |
| MmuAffx.2169.1.S1_at    | MmuAffx.2169.1  | 2.87  | 2.76  | 0.11 | 0.01 | 1.08  | 0.457851 | 0.828777 | 0.758542 | 0.901565 |
| MmuAffx.2170.1.A1_at    | MmuAffx.2170.1  | 3.39  | 3.48  | 0.06 | 0.17 | -1.06 | 0.653935 | 0.372731 | 0.862532 | 0.611661 |
| MmuAffx.2170.1.S1_at    | MmuAffx.2170.1  | 3.85  | 3.97  | 0.06 | 0.11 | -1.09 | 0.752698 | 0.082386 | 0.906733 | 0.331354 |
| MmuAffx.2181.1.S1_s_at  | MmuAffx.2181.1  | 8.5   | 8.95  | 0.07 | 0.05 | -1.37 | 0.001065 | 0.000023 | 0.155464 | 0.019635 |
| MmuAffx.22.1.S1_at      | MmuAffx.22.1    | 6.24  | 6.11  | 0.08 | 0.11 | 1.09  | 0.206177 | 0.041132 | 0.578134 | 0.247659 |
| MmuAffx.225.1.A1_x_at   | MmuAffx.225.1   | 3.27  | 3.27  | 0.17 | 0.02 | 1     | 0.754585 | 0.876295 | 0.9074   | 0.929668 |
| MmuAffx.225.1.S1_at     | MmuAffx.225.1   | 3.25  | 3.31  | 0.05 | 0.1  | -1.04 | 0.883232 | 0.357934 | 0.95964  | 0.599532 |
| MmuAffx.228.1.A1_at     | MmuAffx.228.1   | 4.92  | 4.39  | 0.17 | 0.25 | 1.44  | 0.134558 | 0.270326 | 0.508462 | 0.535676 |
| MmuAffx.228.1.S1_x_at   | MmuAffx.228.1   | 4.83  | 4.62  | 0.22 | 0.29 | 1.16  | 0.171007 | 0.15262  | 0.544137 | 0.427435 |
| MmuAffx.23.12.S1_at     | MmuAffx.23.12   | 11.19 | 11.22 | 0.74 | 0.12 | -1.02 | 0.930162 | 0.423705 | 0.976644 | 0.646515 |
| MmuAffx.23.12.S1_x_at   | MmuAffx.23.12   | 11.65 | 11.68 | 0.71 | 0.1  | -1.02 | 0.951389 | 0.457761 | 0.983634 | 0.670897 |
| MmuAffx.23.13.S1_s_at   | MmuAffx.23.13   | 13.5  | 13.66 | 0.29 | 0.02 | -1.12 | 0.383663 | 0.099965 | 0.711503 | 0.358768 |
| MmuAffx.23.14.S1_at     | MmuAffx.23.14   | 3.3   | 3.29  | 0.13 | 0.27 | 1     | 0.522456 | 0.271689 | 0.795143 | 0.536577 |
| MmuAffx.23.14.S1_s_at   | MmuAffx.23.14   | 14.64 | 14.68 | 0.01 | 0.02 | -1.03 | 0.0261   | 0.12057  | 0.323344 | 0.389378 |
| MmuAffx.23.21.S1_s_at   | MmuAffx.23.21   | 12.95 | 13.02 | 0.55 | 0.04 | -1.05 | 0.866684 | 0.446282 | 0.953153 | 0.662743 |
| MmuAffx.23.22.S1_at     | MmuAffx.23.22   | 3.15  | 3.15  | 0.15 | 0.05 | -1    | 0.41536  | 0.302437 | 0.733613 | 0.560109 |
| MmuAffx.23.23.S1_s_at   | MmuAffx.23.23   | 9.48  | 9.7   | 3.58 | 0.36 | -1.16 | 0.456067 | 0.217757 | 0.7577   | 0.491309 |
| MmuAffx.23.3.S1_s_at    | MmuAffx.23.3    | 14.33 | 14.35 | 0.02 | 0.01 | -1.01 | 0.3522   | 0.110598 | 0.692649 | 0.374854 |
| MmuAffx.23.30.S1_at     | MmuAffx.23.30   | 2.95  | 2.84  | 0.11 | 0.08 | 1.08  | 0.449291 | 0.048225 | 0.754301 | 0.264682 |



|                         |                 |       |       |      |      |       |          |          |          |          |
|-------------------------|-----------------|-------|-------|------|------|-------|----------|----------|----------|----------|
| MmuAffx.23.31.S1_at     | MmuAffx.23.31   | 2.81  | 2.81  | 0.03 | 0.06 | 1     | 0.257615 | 0.299268 | 0.621338 | 0.557769 |
| MmuAffx.23.32.S1_at     | MmuAffx.23.32   | 7.71  | 7.63  | 0.25 | 0.19 | 1.05  | 0.553136 | 0.637656 | 0.811981 | 0.787067 |
| MmuAffx.23.33.S1_at     | MmuAffx.23.33   | 4.7   | 4.51  | 0.13 | 0    | 1.15  | 0.121236 | 0.063617 | 0.494848 | 0.298759 |
| MmuAffx.23.35.S1_at     | MmuAffx.23.35   | 3.33  | 3.31  | 0.23 | 0.05 | 1.02  | 0.890881 | 0.54154  | 0.962507 | 0.725015 |
| MmuAffx.23.8.S1_s_at    | MmuAffx.23.8    | 14.21 | 14.12 | 0.39 | 0.01 | 1.07  | 0.608019 | 0.282706 | 0.840979 | 0.545448 |
| MmuAffx.259.1.A1_at     | MmuAffx.259.1   | 6.53  | 6.54  | 0.25 | 0.15 | -1.01 | 0.537079 | 0.307059 | 0.802624 | 0.563427 |
| MmuAffx.259.1.S1_x_at   | MmuAffx.259.1   | 6.65  | 6.33  | 0.12 | 0.14 | 1.25  | 0.026896 | 0.156329 | 0.326584 | 0.43161  |
| MmuAffx.396.1.A1_at     | MmuAffx.396.1   | 3.95  | 4.1   | 0.12 | 0.1  | -1.11 | 0.387178 | 0.219081 | 0.714071 | 0.49285  |
| MmuAffx.52.1.A1_at      | MmuAffx.52.1    | 9.43  | 9.6   | 0.61 | 0.14 | -1.13 | 0.837221 | 0.842761 | 0.94155  | 0.910388 |
| MmuAffx.52.1.S1_s_at    | MmuAffx.52.1    | 8.86  | 8.76  | 0.61 | 0.14 | 1.07  | 0.841277 | 0.794816 | 0.943701 | 0.881767 |
| MmuAffx.730.1.A1_at     | MmuAffx.730.1   | 3.2   | 3.11  | 0.07 | 0.07 | -1.07 | 0.108502 | 0.148733 | 0.480777 | 0.423201 |
| MmuAffx.738.1.S1_at     | MmuAffx.738.1   | 2.78  | 2.65  | 0.09 | 0.03 | 1.09  | 0.103414 | 0.092285 | 0.474234 | 0.348128 |
| MmuAffx.78.1.S1_s_at    | MmuAffx.78.1    | 13.32 | 13.38 | 0.17 | 0.25 | -1.04 | 0.328876 | 0.14095  | 0.676056 | 0.414469 |
| MmuAffx.8.1.A1_at       | MmuAffx.8.1     | 4.82  | 4.72  | 0.13 | 0.09 | 1.07  | 0.239225 | 0.707293 | 0.605741 | 0.83023  |
| MmuAffx.8.1.S1_at       | MmuAffx.8.1     | 4     | 4.06  | 0.06 | 0.18 | -1.04 | 0.234265 | 0.096718 | 0.601579 | 0.354171 |
| MmuAffx.84.1.S1_at      | MmuAffx.84.1    | 9.52  | 9.21  | 2.13 | 0.07 | 1.24  | 0.777037 | 0.597803 | 0.917443 | 0.760411 |
| MmuAffx.873.1.A1_at     | MmuAffx.873.1   | 8.15  | 7.93  | 0.1  | 0.05 | 1.16  | 0.018806 | 0.088634 | 0.298593 | 0.342167 |
| MmuAffx.873.1.S1_at     | MmuAffx.873.1   | 8.74  | 8.52  | 0.19 | 0.02 | 1.16  | 0.294734 | 0.258175 | 0.65084  | 0.525574 |
| MmuAffx.885.1.S1_at     | MmuAffx.885.1   | 9.31  | 8.92  | 0.16 | 0.02 | 1.32  | 0.010517 | 0.000067 | 0.248118 | 0.025805 |
| MmuAffx.888.1.A1_at     | MmuAffx.888.1   | 6.44  | 6.11  | 0.14 | 0.1  | 1.26  | 0.016977 | 0.040348 | 0.288969 | 0.245984 |
| MmuAffx.888.1.S1_at     | MmuAffx.888.1   | 6.29  | 6.23  | 0.14 | 0    | 1.04  | 0.891105 | 0.381076 | 0.962566 | 0.617478 |
| MmuAffx.914.1.S1_at     | MmuAffx.914.1   | 13.09 | 12.48 | 0.44 | 0.52 | 1.52  | 0.469263 | 0.948947 | 0.765531 | 0.97078  |
| MmuAffx.949.1.A1_at     | MmuAffx.949.1   | 10.75 | 9.46  | 0.1  | 0.33 | 2.44  | 0.002784 | 0.000882 | 0.185369 | 0.047602 |
| MmuAffx.949.1.S1_x_at   | MmuAffx.949.1   | 10.17 | 8.97  | 0.09 | 0.33 | 2.3   | 0.003157 | 0.001547 | 0.191107 | 0.05949  |
| MmuAffx.951.1.S1_at     | MmuAffx.951.1   | 3.02  | 3.03  | 0.14 | 0.05 | -1    | 0.914466 | 0.022353 | 0.970865 | 0.187159 |
| MmuAffx.951.1.S1_x_at   | MmuAffx.951.1   | 2.95  | 2.86  | 0.19 | 0.08 | 1.07  | 0.232618 | 0.154341 | 0.600133 | 0.429208 |
| MmuAffx.956.1.S1_at     | MmuAffx.956.1   | 13.19 | 13.15 | 0.08 | 0.06 | 1.03  | 0.634359 | 0.532203 | 0.854043 | 0.718995 |
| MmugDNA.1.1.S1_at       | MmugDNA.1.1     | 6.11  | 6.6   | 1.14 | 0.16 | -1.4  | 0.815678 | 0.577795 | 0.933219 | 0.748124 |
| MmugDNA.1000.1.S1_at    | MmugDNA.1000.1  | 2.9   | 2.91  | 0.14 | 0.09 | -1.01 | 0.685809 | 0.569332 | 0.876883 | 0.742375 |
| MmugDNA.10002.1.S1_at   | MmugDNA.10002.1 | 4     | 3.52  | 0.64 | 0.58 | 1.39  | 0.364169 | 0.563835 | 0.700459 | 0.73888  |
| MmugDNA.10003.1.S1_at   | MmugDNA.10003.1 | 5.6   | 4.57  | 0.49 | 0.21 | 2.04  | 0.069374 | 0.092567 | 0.426951 | 0.348519 |
| MmugDNA.10005.1.S1_at   | MmugDNA.10005.1 | 7.39  | 7.49  | 0.19 | 0.13 | -1.08 | 0.914152 | 0.206006 | 0.970825 | 0.480243 |
| MmugDNA.10007.1.S1_at   | MmugDNA.10007.1 | 4.57  | 4.52  | 0.06 | 0.17 | 1.04  | 0.232271 | 0.274307 | 0.600117 | 0.538751 |
| MmugDNA.10009.1.S1_at   | MmugDNA.10009.1 | 8.29  | 8.18  | 0.32 | 0.02 | 1.08  | 0.801725 | 0.562357 | 0.927736 | 0.738004 |
| MmugDNA.1001.1.S1_s_at  | MmugDNA.1001.1  | 6.11  | 5.61  | 1.1  | 0.34 | 1.42  | 0.65573  | 0.434914 | 0.863273 | 0.654901 |
| MmugDNA.10010.1.S1_at   | MmugDNA.10010.1 | 3.38  | 3.36  | 0.13 | 0    | 1.01  | 0.81057  | 0.707792 | 0.931338 | 0.830472 |
| MmugDNA.10013.1.S1_s_at | MmugDNA.10013.1 | 5.48  | 5.75  | 0.26 | 0.19 | -1.21 | 0.551751 | 0.50252  | 0.81144  | 0.700192 |
| MmugDNA.10015.1.S1_at   | MmugDNA.10015.1 | 8.19  | 8     | 0.09 | 0.28 | 1.14  | 0.382514 | 0.368342 | 0.710759 | 0.607917 |
| MmugDNA.10016.1.S1_at   | MmugDNA.10016.1 | 7.61  | 7.37  | 0.06 | 0.09 | 1.18  | 0.017197 | 0.082909 | 0.289858 | 0.332446 |
| MmugDNA.10017.1.S1_at   | MmugDNA.10017.1 | 8.99  | 8.7   | 0.46 | 0.19 | 1.22  | 0.731358 | 0.163851 | 0.896567 | 0.440054 |
| MmugDNA.10019.1.S1_at   | MmugDNA.10019.1 | 12.09 | 11.61 | 0.2  | 0.21 | 1.39  | 0.035372 | 0.02733  | 0.351775 | 0.206625 |
| MmugDNA.1002.1.S1_at    | MmugDNA.1002.1  | 6.93  | 7.15  | 0.16 | 0.01 | -1.16 | 0.115177 | 0.059771 | 0.488314 | 0.291114 |
| MmugDNA.10020.1.S1_at   | MmugDNA.10020.1 | 3.55  | 3.22  | 0.12 | 0.1  | 1.26  | 0.041648 | 0.01011  | 0.367007 | 0.131859 |

|                         |                 |       |       |      |      |       |          |          |          |          |
|-------------------------|-----------------|-------|-------|------|------|-------|----------|----------|----------|----------|
| MmugDNA.10021.1.S1_at   | MmugDNA.10021.1 | 3.6   | 3.57  | 0.15 | 0.02 | 1.03  | 0.649282 | 0.864952 | 0.860245 | 0.923415 |
| MmugDNA.10022.1.S1_at   | MmugDNA.10022.1 | 3.56  | 3.37  | 0.13 | 0.13 | 1.14  | 0.335678 | 0.444517 | 0.681167 | 0.662072 |
| MmugDNA.10023.1.S1_at   | MmugDNA.10023.1 | 3.53  | 3.48  | 0.1  | 0.04 | 1.03  | 0.16688  | 0.359833 | 0.539511 | 0.601086 |
| MmugDNA.10024.1.S1_at   | MmugDNA.10024.1 | 5.08  | 4.64  | 0.45 | 0.08 | 1.36  | 0.182383 | 0.137652 | 0.555371 | 0.410618 |
| MmugDNA.10026.1.S1_at   | MmugDNA.10026.1 | 4.04  | 3.99  | 0.09 | 0.09 | 1.04  | 0.272894 | 0.50459  | 0.632536 | 0.701719 |
| MmugDNA.10027.1.S1_at   | MmugDNA.10027.1 | 3.15  | 3.25  | 0.09 | 0.11 | -1.08 | 0.169762 | 0.105442 | 0.542744 | 0.367279 |
| MmugDNA.10028.1.S1_s_at | MmugDNA.10028.1 | 8.31  | 8.14  | 0.02 | 0.08 | 1.12  | 0.051482 | 0.291476 | 0.390197 | 0.551848 |
| MmugDNA.10029.1.S1_at   | MmugDNA.10029.1 | 7.2   | 7.14  | 0.24 | 0.14 | 1.05  | 0.715629 | 0.962195 | 0.889404 | 0.978747 |
| MmugDNA.1003.1.S1_at    | MmugDNA.1003.1  | 9.27  | 9.26  | 0.41 | 0.06 | 1.01  | 0.941255 | 0.862244 | 0.980045 | 0.921663 |
| MmugDNA.10030.1.S1_at   | MmugDNA.10030.1 | 3.6   | 3.46  | 0.08 | 0.11 | 1.1   | 0.169874 | 0.087238 | 0.542785 | 0.340233 |
| MmugDNA.10034.1.S1_at   | MmugDNA.10034.1 | 4.18  | 4.38  | 0.2  | 0.13 | -1.15 | 0.159205 | 0.311045 | 0.531873 | 0.566076 |
| MmugDNA.10035.1.S1_at   | MmugDNA.10035.1 | 9.58  | 8.27  | 3.57 | 0.29 | 2.48  | 0.923079 | 0.240877 | 0.97416  | 0.511584 |
| MmugDNA.10035.1.S1_s_at | MmugDNA.10035.1 | 7.9   | 6.97  | 2.02 | 0.18 | 1.9   | 0.619909 | 0.22116  | 0.846932 | 0.494506 |
| MmugDNA.10036.1.S1_at   | MmugDNA.10036.1 | 6.45  | 6.78  | 0.3  | 0.24 | -1.25 | 0.521613 | 0.649254 | 0.794648 | 0.794724 |
| MmugDNA.10037.1.S1_at   | MmugDNA.10037.1 | 3.24  | 3.09  | 0.07 | 0.11 | 1.11  | 0.461115 | 0.376146 | 0.760754 | 0.613978 |
| MmugDNA.10038.1.S1_at   | MmugDNA.10038.1 | 5.49  | 5.83  | 0.87 | 0.37 | -1.27 | 0.463661 | 0.755348 | 0.762278 | 0.857558 |
| MmugDNA.1004.1.S1_at    | MmugDNA.1004.1  | 3.6   | 3.54  | 0.16 | 0.11 | 1.04  | 0.956845 | 0.08665  | 0.985709 | 0.339212 |
| MmugDNA.10041.1.S1_at   | MmugDNA.10041.1 | 5.22  | 5.08  | 0.07 | 0.08 | 1.1   | 0.08277  | 0.276158 | 0.448001 | 0.540169 |
| MmugDNA.10042.1.S1_at   | MmugDNA.10042.1 | 3.45  | 3.25  | 0.17 | 0.08 | 1.15  | 0.13604  | 0.128725 | 0.510562 | 0.400135 |
| MmugDNA.10043.1.S1_at   | MmugDNA.10043.1 | 3.93  | 3.95  | 0.11 | 0.22 | -1.01 | 0.610286 | 0.444474 | 0.841839 | 0.662072 |
| MmugDNA.10045.1.S1_at   | MmugDNA.10045.1 | 3.85  | 3.44  | 0.23 | 0.11 | 1.33  | 0.126882 | 0.379211 | 0.500716 | 0.616197 |
| MmugDNA.10046.1.S1_s_at | MmugDNA.10046.1 | 8.23  | 7.95  | 0.35 | 0.29 | 1.21  | 0.193717 | 0.154376 | 0.564275 | 0.429245 |
| MmugDNA.10047.1.S1_at   | MmugDNA.10047.1 | 8.06  | 8.04  | 0.09 | 0.04 | 1.01  | 0.461191 | 0.31453  | 0.760828 | 0.568372 |
| MmugDNA.10048.1.S1_at   | MmugDNA.10048.1 | 5.93  | 5.36  | 0.27 | 0.34 | 1.48  | 0.102968 | 0.04643  | 0.473543 | 0.260036 |
| MmugDNA.10049.1.S1_at   | MmugDNA.10049.1 | 3.08  | 2.97  | 0.06 | 0.12 | 1.08  | 0.151528 | 0.122716 | 0.524628 | 0.392719 |
| MmugDNA.1005.1.S1_at    | MmugDNA.1005.1  | 3.35  | 3.42  | 0.52 | 0.27 | -1.05 | 0.952132 | 0.966053 | 0.983952 | 0.980991 |
| MmugDNA.10050.1.S1_at   | MmugDNA.10050.1 | 5.5   | 5.34  | 0.34 | 0.05 | 1.12  | 0.509982 | 0.764759 | 0.787917 | 0.863203 |
| MmugDNA.10051.1.S1_at   | MmugDNA.10051.1 | 3.86  | 3.87  | 0.16 | 0.22 | -1.01 | 0.648648 | 0.824102 | 0.859988 | 0.898903 |
| MmugDNA.10052.1.S1_at   | MmugDNA.10052.1 | 9.75  | 9.64  | 0.09 | 0.18 | 1.08  | 0.371605 | 0.013093 | 0.705567 | 0.14718  |
| MmugDNA.10053.1.S1_at   | MmugDNA.10053.1 | 4.07  | 3.89  | 0.17 | 0.12 | 1.14  | 0.215426 | 0.266736 | 0.585748 | 0.53241  |
| MmugDNA.10054.1.S1_at   | MmugDNA.10054.1 | 7.25  | 7.6   | 0.32 | 0.03 | -1.28 | 0.133418 | 0.052817 | 0.507921 | 0.275444 |
| MmugDNA.10055.1.S1_at   | MmugDNA.10055.1 | 3.35  | 3.12  | 0.07 | 0.17 | 1.17  | 0.164794 | 0.103776 | 0.53747  | 0.364519 |
| MmugDNA.10056.1.S1_at   | MmugDNA.10056.1 | 5.25  | 5.75  | 0.55 | 0.45 | -1.41 | 0.139608 | 0.233941 | 0.515028 | 0.505211 |
| MmugDNA.10057.1.S1_at   | MmugDNA.10057.1 | 10.23 | 10.41 | 0.15 | 0.09 | -1.13 | 0.440486 | 0.416497 | 0.748529 | 0.641647 |
| MmugDNA.10058.1.S1_at   | MmugDNA.10058.1 | 9.82  | 9.81  | 0.23 | 0.12 | 1.01  | 0.817084 | 0.698364 | 0.933848 | 0.82478  |
| MmugDNA.1006.1.S1_at    | MmugDNA.1006.1  | 6.07  | 5.72  | 0.14 | 0.14 | 1.28  | 0.065868 | 0.183035 | 0.421234 | 0.459493 |
| MmugDNA.10060.1.S1_at   | MmugDNA.10060.1 | 10.73 | 10.77 | 0.16 | 0.08 | -1.03 | 0.504438 | 0.656493 | 0.784765 | 0.799097 |
| MmugDNA.10060.1.S1_s_at | MmugDNA.10060.1 | 11.11 | 11.23 | 0.15 | 0.09 | -1.08 | 0.356863 | 0.575397 | 0.695351 | 0.746486 |
| MmugDNA.10061.1.S1_s_at | MmugDNA.10061.1 | 7.54  | 6.87  | 0.69 | 0.4  | 1.59  | 0.322375 | 0.156327 | 0.671118 | 0.43161  |
| MmugDNA.10062.1.S1_at   | MmugDNA.10062.1 | 7.6   | 7.61  | 0.17 | 0.11 | -1.01 | 0.512629 | 0.651372 | 0.789481 | 0.796212 |
| MmugDNA.10063.1.S1_at   | MmugDNA.10063.1 | 6.54  | 6.11  | 0.09 | 0.3  | 1.35  | 0.076892 | 0.110464 | 0.438738 | 0.374684 |
| MmugDNA.10065.1.S1_at   | MmugDNA.10065.1 | 4.17  | 4.17  | 0.2  | 0.11 | 1.01  | 0.939737 | 0.908397 | 0.979532 | 0.948141 |
| MmugDNA.10066.1.S1_at   | MmugDNA.10066.1 | 9.91  | 10.42 | 0.28 | 0.02 | -1.42 | 0.041381 | 0.010712 | 0.366275 | 0.135227 |

|                         |                 |       |       |      |      |       |          |          |          |          |
|-------------------------|-----------------|-------|-------|------|------|-------|----------|----------|----------|----------|
| MmugDNA.10067.1.S1_at   | MmugDNA.10067.1 | 4.3   | 4.38  | 0.05 | 0.26 | -1.06 | 0.538319 | 0.29639  | 0.803224 | 0.555508 |
| MmugDNA.10068.1.S1_at   | MmugDNA.10068.1 | 3.06  | 3.03  | 0.18 | 0.03 | 1.02  | 0.788635 | 0.218972 | 0.922452 | 0.492722 |
| MmugDNA.1007.1.S1_at    | MmugDNA.1007.1  | 5.57  | 5.55  | 0.05 | 0.09 | 1.01  | 0.202274 | 0.742061 | 0.573733 | 0.850608 |
| MmugDNA.10070.1.S1_at   | MmugDNA.10070.1 | 9.66  | 8.82  | 0.32 | 0.31 | 1.8   | 0.021208 | 0.007145 | 0.307172 | 0.113735 |
| MmugDNA.10071.1.S1_at   | MmugDNA.10071.1 | 5.99  | 5.82  | 0.13 | 0.18 | 1.13  | 0.648154 | 0.082316 | 0.859776 | 0.331257 |
| MmugDNA.10072.1.S1_at   | MmugDNA.10072.1 | 3.36  | 3.63  | 0.66 | 0.73 | -1.21 | 0.658783 | 0.563469 | 0.86486  | 0.738692 |
| MmugDNA.10074.1.S1_at   | MmugDNA.10074.1 | 6.13  | 5.99  | 0.04 | 0.29 | 1.1   | 0.196576 | 0.091606 | 0.567194 | 0.346715 |
| MmugDNA.10075.1.S1_at   | MmugDNA.10075.1 | 9.57  | 9.79  | 0.17 | 0.05 | -1.17 | 0.191443 | 0.201992 | 0.562859 | 0.476444 |
| MmugDNA.10076.1.S1_at   | MmugDNA.10076.1 | 9.47  | 9.9   | 0.07 | 0.03 | -1.35 | 0.001105 | 0.001783 | 0.156386 | 0.063434 |
| MmugDNA.10077.1.S1_at   | MmugDNA.10077.1 | 5.68  | 5.5   | 0.28 | 0.28 | 1.14  | 0.562139 | 0.149808 | 0.817608 | 0.424394 |
| MmugDNA.10079.1.S1_at   | MmugDNA.10079.1 | 3.06  | 3.02  | 0.19 | 0.08 | -1.02 | 0.829721 | 0.365136 | 0.938862 | 0.605316 |
| MmugDNA.1008.1.S1_at    | MmugDNA.1008.1  | 3.84  | 3.84  | 0.14 | 0.07 | 1     | 0.436626 | 0.652027 | 0.746362 | 0.796529 |
| MmugDNA.10080.1.S1_at   | MmugDNA.10080.1 | 6.37  | 6.44  | 0.39 | 0.04 | -1.05 | 0.302081 | 0.639247 | 0.656021 | 0.788125 |
| MmugDNA.10081.1.S1_at   | MmugDNA.10081.1 | 7.53  | 7.93  | 0.29 | 0.1  | -1.32 | 0.137795 | 0.045391 | 0.513574 | 0.257395 |
| MmugDNA.10082.1.S1_s_at | MmugDNA.10082.1 | 9.7   | 9.58  | 0.38 | 0.04 | 1.09  | 0.562821 | 0.739972 | 0.817877 | 0.849334 |
| MmugDNA.10083.1.S1_at   | MmugDNA.10083.1 | 3.64  | 3.6   | 0.06 | 0.06 | 1.03  | 0.83397  | 0.56396  | 0.94048  | 0.738913 |
| MmugDNA.10085.1.S1_at   | MmugDNA.10085.1 | 9.07  | 9.43  | 0.48 | 0.11 | -1.28 | 0.829189 | 0.380843 | 0.938708 | 0.617426 |
| MmugDNA.10086.1.S1_at   | MmugDNA.10086.1 | 8.41  | 8.06  | 0.11 | 0.04 | 1.27  | 0.007805 | 0.091773 | 0.230997 | 0.346977 |
| MmugDNA.10087.1.S1_at   | MmugDNA.10087.1 | 4.19  | 4.39  | 0.06 | 0.13 | -1.15 | 0.14253  | 0.426594 | 0.517603 | 0.648739 |
| MmugDNA.10088.1.S1_at   | MmugDNA.10088.1 | 8.89  | 8.89  | 0.44 | 0.05 | -1    | 0.912582 | 0.457417 | 0.970287 | 0.670829 |
| MmugDNA.10089.1.S1_at   | MmugDNA.10089.1 | 8.54  | 8.73  | 0.53 | 0.02 | -1.14 | 0.751368 | 0.796962 | 0.90594  | 0.882822 |
| MmugDNA.1009.1.S1_at    | MmugDNA.1009.1  | 7.45  | 7.41  | 0.15 | 0.13 | 1.03  | 0.148271 | 0.067971 | 0.522535 | 0.306909 |
| MmugDNA.10090.1.S1_at   | MmugDNA.10090.1 | 6.15  | 6.26  | 0.35 | 0.25 | -1.08 | 0.361221 | 0.575401 | 0.698411 | 0.746486 |
| MmugDNA.10091.1.S1_at   | MmugDNA.10091.1 | 3.32  | 3.3   | 0.16 | 0.01 | 1.02  | 0.866444 | 0.718082 | 0.953112 | 0.836855 |
| MmugDNA.10092.1.S1_at   | MmugDNA.10092.1 | 4.13  | 4.08  | 0.12 | 0.09 | 1.04  | 0.761894 | 0.380372 | 0.910735 | 0.61703  |
| MmugDNA.10093.1.S1_at   | MmugDNA.10093.1 | 5.32  | 5.02  | 1.33 | 0.35 | 1.24  | 0.429166 | 0.413637 | 0.742138 | 0.639688 |
| MmugDNA.10094.1.S1_at   | MmugDNA.10094.1 | 4.66  | 4.81  | 0.29 | 0.19 | -1.11 | 0.427203 | 0.077403 | 0.740948 | 0.323204 |
| MmugDNA.10095.1.S1_at   | MmugDNA.10095.1 | 4.75  | 4.63  | 0.28 | 0.09 | 1.09  | 0.494007 | 0.677493 | 0.779169 | 0.81167  |
| MmugDNA.10097.1.S1_at   | MmugDNA.10097.1 | 4.01  | 3.99  | 0.12 | 0.02 | 1.01  | 0.299628 | 0.71338  | 0.654106 | 0.833698 |
| MmugDNA.10098.1.S1_at   | MmugDNA.10098.1 | 5.12  | 5.1   | 0.08 | 0.1  | 1.01  | 0.723487 | 0.666765 | 0.892813 | 0.804779 |
| MmugDNA.10099.1.S1_at   | MmugDNA.10099.1 | 4.85  | 4.13  | 0.25 | 0.09 | 1.64  | 0.007517 | 0.002685 | 0.229281 | 0.076408 |
| MmugDNA.101.1.S1_at     | MmugDNA.101.1   | 6.7   | 6.66  | 0.15 | 0.03 | 1.03  | 0.61793  | 0.784409 | 0.845744 | 0.87518  |
| MmugDNA.1010.1.S1_at    | MmugDNA.1010.1  | 3.67  | 3.63  | 0.16 | 0.03 | 1.02  | 0.252536 | 0.54709  | 0.617528 | 0.728283 |
| MmugDNA.10100.1.S1_at   | MmugDNA.10100.1 | 6.67  | 6.98  | 0.26 | 0.05 | -1.24 | 0.121211 | 0.079395 | 0.494848 | 0.32676  |
| MmugDNA.10102.1.S1_s_at | MmugDNA.10102.1 | 13.74 | 14.02 | 0.05 | 0.02 | -1.21 | 0.000779 | 0.000077 | 0.15004  | 0.027016 |
| MmugDNA.10103.1.S1_at   | MmugDNA.10103.1 | 11.37 | 11.34 | 0.17 | 0.01 | 1.02  | 0.262294 | 0.198939 | 0.624545 | 0.473521 |
| MmugDNA.10104.1.S1_at   | MmugDNA.10104.1 | 2.84  | 2.76  | 0.07 | 0.01 | 1.06  | 0.439829 | 0.044003 | 0.748282 | 0.254195 |
| MmugDNA.10105.1.S1_at   | MmugDNA.10105.1 | 4.51  | 4.49  | 0.07 | 0.08 | 1.01  | 0.830669 | 0.392668 | 0.939399 | 0.625813 |
| MmugDNA.10106.1.S1_at   | MmugDNA.10106.1 | 3.1   | 3.15  | 0.12 | 0.03 | -1.04 | 0.699638 | 0.473301 | 0.883309 | 0.680586 |
| MmugDNA.10107.1.S1_at   | MmugDNA.10107.1 | 4.71  | 4.59  | 0.17 | 0.02 | 1.09  | 0.823073 | 0.768345 | 0.9362   | 0.865493 |
| MmugDNA.10108.1.S1_at   | MmugDNA.10108.1 | 6.08  | 5.93  | 0.09 | 0.05 | 1.11  | 0.036663 | 0.06464  | 0.35527  | 0.300314 |
| MmugDNA.10109.1.S1_at   | MmugDNA.10109.1 | 7.67  | 7.8   | 0.09 | 0.02 | -1.09 | 0.138948 | 0.002856 | 0.514459 | 0.078756 |
| MmugDNA.1011.1.S1_at    | MmugDNA.1011.1  | 8.21  | 7.33  | 0.44 | 0.44 | 1.83  | 0.151499 | 0.2441   | 0.524628 | 0.514121 |

|                         |                 |       |       |      |      |       |          |          |          |          |
|-------------------------|-----------------|-------|-------|------|------|-------|----------|----------|----------|----------|
| MmugDNA.10111.1.S1_at   | MmugDNA.10111.1 | 10.1  | 10.33 | 0.22 | 0.11 | -1.18 | 0.164321 | 0.050092 | 0.537322 | 0.268916 |
| MmugDNA.10112.1.S1_at   | MmugDNA.10112.1 | 9.4   | 9.19  | 0.27 | 0.09 | 1.15  | 0.340787 | 0.367747 | 0.684721 | 0.607416 |
| MmugDNA.10112.1.S1_s_at | MmugDNA.10112.1 | 10.59 | 10.29 | 0.19 | 0.1  | 1.24  | 0.125703 | 0.070564 | 0.499685 | 0.311781 |
| MmugDNA.10113.1.S1_at   | MmugDNA.10113.1 | 5.05  | 4.88  | 0    | 0.23 | 1.13  | 0.214361 | 0.186866 | 0.584751 | 0.462707 |
| MmugDNA.10115.1.S1_at   | MmugDNA.10115.1 | 9.91  | 10.69 | 1.05 | 0.05 | -1.72 | 0.295151 | 0.379461 | 0.651016 | 0.616406 |
| MmugDNA.10117.1.S1_s_at | MmugDNA.10117.1 | 6.51  | 6.92  | 0.55 | 0.07 | -1.33 | 0.383373 | 0.008312 | 0.711306 | 0.120929 |
| MmugDNA.10118.1.S1_at   | MmugDNA.10118.1 | 5.53  | 5.46  | 0.08 | 0.05 | 1.05  | 0.37274  | 0.575871 | 0.705567 | 0.746841 |
| MmugDNA.10120.1.S1_at   | MmugDNA.10120.1 | 7.26  | 6.78  | 0.39 | 0.19 | 1.4   | 0.217711 | 0.515257 | 0.587622 | 0.708226 |
| MmugDNA.10123.1.S1_at   | MmugDNA.10123.1 | 3.67  | 3.36  | 0.3  | 0.17 | 1.23  | 0.522872 | 0.306266 | 0.795346 | 0.562907 |
| MmugDNA.10124.1.S1_at   | MmugDNA.10124.1 | 4.89  | 4.93  | 0.14 | 0.13 | -1.02 | 0.389431 | 0.477121 | 0.716129 | 0.683217 |
| MmugDNA.10125.1.S1_at   | MmugDNA.10125.1 | 4.54  | 4.44  | 0.38 | 0.21 | 1.07  | 0.2098   | 0.263921 | 0.581305 | 0.530153 |
| MmugDNA.10126.1.S1_s_at | MmugDNA.10126.1 | 4.33  | 4.29  | 0.19 | 0.06 | 1.03  | 0.374701 | 0.450432 | 0.706036 | 0.665643 |
| MmugDNA.10127.1.S1_at   | MmugDNA.10127.1 | 10.08 | 9.64  | 0.75 | 0.26 | 1.35  | 0.303627 | 0.092757 | 0.657406 | 0.34896  |
| MmugDNA.10128.1.S1_at   | MmugDNA.10128.1 | 11.93 | 10.94 | 0.32 | 0.42 | 1.99  | 0.027253 | 0.004445 | 0.327322 | 0.092958 |
| MmugDNA.10129.1.S1_at   | MmugDNA.10129.1 | 5.55  | 5.52  | 0.19 | 0.05 | 1.02  | 0.286226 | 0.533297 | 0.64358  | 0.719552 |
| MmugDNA.1013.1.S1_at    | MmugDNA.1013.1  | 6.89  | 7.03  | 0.39 | 0.21 | -1.1  | 0.493031 | 0.846201 | 0.778657 | 0.912444 |
| MmugDNA.10131.1.S1_at   | MmugDNA.10131.1 | 6.91  | 6.79  | 0.04 | 0.11 | 1.08  | 0.050493 | 0.127471 | 0.387308 | 0.398349 |
| MmugDNA.10132.1.S1_at   | MmugDNA.10132.1 | 4.71  | 4.58  | 0.15 | 0.03 | 1.1   | 0.202401 | 0.42819  | 0.573876 | 0.64972  |
| MmugDNA.10133.1.S1_at   | MmugDNA.10133.1 | 4.12  | 4.15  | 0.19 | 0.2  | -1.02 | 0.54507  | 0.390281 | 0.807598 | 0.624128 |
| MmugDNA.10135.1.S1_at   | MmugDNA.10135.1 | 7.62  | 7.51  | 0.21 | 0.04 | 1.08  | 0.456911 | 0.132876 | 0.758051 | 0.404544 |
| MmugDNA.10136.1.S1_at   | MmugDNA.10136.1 | 7.41  | 8.52  | 0.65 | 0.22 | -2.15 | 0.052861 | 0.015189 | 0.393368 | 0.15662  |
| MmugDNA.10139.1.S1_at   | MmugDNA.10139.1 | 10.55 | 9.55  | 0.68 | 0.26 | 1.99  | 0.060711 | 0.054306 | 0.408585 | 0.278539 |
| MmugDNA.1014.1.S1_at    | MmugDNA.1014.1  | 5.98  | 5.98  | 0.16 | 0.22 | -1    | 0.900366 | 0.735901 | 0.966088 | 0.847202 |
| MmugDNA.10140.1.S1_at   | MmugDNA.10140.1 | 11.83 | 11.08 | 0.51 | 0.18 | 1.69  | 0.194829 | 0.00188  | 0.565228 | 0.064979 |
| MmugDNA.10141.1.S1_at   | MmugDNA.10141.1 | 3.78  | 3.4   | 0.22 | 0.05 | 1.3   | 0.03893  | 0.007816 | 0.360586 | 0.117908 |
| MmugDNA.10142.1.S1_s_at | MmugDNA.10142.1 | 9.27  | 9.19  | 0.42 | 0.11 | 1.06  | 0.718338 | 0.313018 | 0.890613 | 0.567594 |
| MmugDNA.10143.1.S1_at   | MmugDNA.10143.1 | 5.35  | 5.02  | 0.44 | 0.14 | 1.26  | 0.363938 | 0.128547 | 0.700334 | 0.399908 |
| MmugDNA.10144.1.S1_at   | MmugDNA.10144.1 | 6.53  | 6.3   | 0.51 | 0.1  | 1.18  | 0.898167 | 0.967937 | 0.965455 | 0.982248 |
| MmugDNA.10145.1.S1_at   | MmugDNA.10145.1 | 3.14  | 3.17  | 0.15 | 0.03 | -1.02 | 0.579832 | 0.400325 | 0.826689 | 0.630169 |
| MmugDNA.10146.1.S1_at   | MmugDNA.10146.1 | 11.26 | 11.14 | 0.03 | 0.05 | 1.08  | 0.023671 | 0.747079 | 0.316281 | 0.853124 |
| MmugDNA.10147.1.S1_at   | MmugDNA.10147.1 | 8.14  | 8.05  | 0.15 | 0.06 | 1.06  | 0.352831 | 0.648413 | 0.692857 | 0.794235 |
| MmugDNA.10148.1.S1_at   | MmugDNA.10148.1 | 11.24 | 11.4  | 0.66 | 0.09 | -1.12 | 0.71016  | 0.719462 | 0.887263 | 0.837651 |
| MmugDNA.10149.1.S1_at   | MmugDNA.10149.1 | 6.46  | 6.49  | 0.07 | 0.02 | -1.02 | 0.721275 | 0.735437 | 0.891977 | 0.846919 |
| MmugDNA.1015.1.S1_at    | MmugDNA.1015.1  | 3.73  | 3.73  | 0.35 | 0.06 | 1     | 0.555187 | 0.643741 | 0.813288 | 0.791112 |
| MmugDNA.10151.1.S1_at   | MmugDNA.10151.1 | 4.54  | 5.16  | 0.43 | 0.23 | -1.54 | 0.145472 | 0.400551 | 0.52043  | 0.630361 |
| MmugDNA.10152.1.S1_at   | MmugDNA.10152.1 | 5.69  | 5.51  | 0.63 | 0.91 | 1.13  | 0.772212 | 0.35101  | 0.915051 | 0.594736 |
| MmugDNA.10154.1.S1_at   | MmugDNA.10154.1 | 4.53  | 4.27  | 0.34 | 0.19 | 1.2   | 0.165902 | 0.246317 | 0.538623 | 0.515889 |
| MmugDNA.10155.1.S1_at   | MmugDNA.10155.1 | 3.44  | 3.32  | 0.06 | 0.03 | 1.08  | 0.037642 | 0.317867 | 0.357745 | 0.571042 |
| MmugDNA.10157.1.S1_at   | MmugDNA.10157.1 | 3.77  | 3.65  | 0.27 | 0.19 | 1.09  | 0.48522  | 0.444732 | 0.774118 | 0.662072 |
| MmugDNA.10159.1.S1_at   | MmugDNA.10159.1 | 8.92  | 8.46  | 0.41 | 0.32 | 1.37  | 0.167957 | 0.191672 | 0.540514 | 0.466942 |
| MmugDNA.1016.1.S1_at    | MmugDNA.1016.1  | 4.95  | 5.46  | 0.47 | 0.34 | -1.43 | 0.148541 | 0.275969 | 0.522567 | 0.540057 |
| MmugDNA.10160.1.S1_at   | MmugDNA.10160.1 | 9.73  | 8.81  | 0.55 | 0.12 | 1.9   | 0.104252 | 0.037336 | 0.475369 | 0.237659 |
| MmugDNA.10161.1.S1_s_at | MmugDNA.10161.1 | 10.87 | 11.12 | 0.22 | 0.21 | -1.18 | 0.382595 | 0.37819  | 0.710805 | 0.615438 |

|                         |                 |       |       |      |      |       |          |          |          |          |
|-------------------------|-----------------|-------|-------|------|------|-------|----------|----------|----------|----------|
| MmugDNA.10161.1.S1_x_at | MmugDNA.10161.1 | 10.7  | 11.02 | 0.23 | 0.15 | -1.25 | 0.19022  | 0.237844 | 0.561441 | 0.508341 |
| MmugDNA.10163.1.S1_at   | MmugDNA.10163.1 | 6.42  | 5.91  | 0.56 | 0.17 | 1.42  | 0.765691 | 0.432203 | 0.911899 | 0.652775 |
| MmugDNA.10164.1.S1_at   | MmugDNA.10164.1 | 4.01  | 4.18  | 0.8  | 0.38 | -1.12 | 0.735242 | 0.654077 | 0.898612 | 0.797844 |
| MmugDNA.10165.1.S1_at   | MmugDNA.10165.1 | 6.63  | 7.3   | 0.55 | 0.3  | -1.59 | 0.186068 | 0.318743 | 0.559019 | 0.571373 |
| MmugDNA.10166.1.S1_at   | MmugDNA.10166.1 | 4.12  | 4.58  | 0.27 | 0.63 | -1.37 | 0.285584 | 0.440456 | 0.643438 | 0.658967 |
| MmugDNA.10167.1.S1_at   | MmugDNA.10167.1 | 7.76  | 8.22  | 0.49 | 0.2  | -1.37 | 0.14844  | 0.064798 | 0.522567 | 0.300493 |
| MmugDNA.10168.1.S1_at   | MmugDNA.10168.1 | 7.07  | 7.17  | 0.2  | 0.02 | -1.07 | 0.878965 | 0.024399 | 0.95792  | 0.19551  |
| MmugDNA.10169.1.S1_at   | MmugDNA.10169.1 | 3.15  | 3.15  | 0.12 | 0    | 1     | 0.611906 | 0.82702  | 0.842626 | 0.900672 |
| MmugDNA.1017.1.S1_at    | MmugDNA.1017.1  | 9.25  | 7.36  | 1.14 | 0.62 | -3.71 | 0.103294 | 0.002545 | 0.474096 | 0.07453  |
| MmugDNA.10170.1.S1_at   | MmugDNA.10170.1 | 5.9   | 5.79  | 0.02 | 0.06 | 1.08  | 0.019403 | 0.047189 | 0.300972 | 0.261793 |
| MmugDNA.10171.1.S1_at   | MmugDNA.10171.1 | 9.09  | 9.07  | 0.32 | 0.18 | -1.01 | 0.611096 | 0.476442 | 0.842323 | 0.682725 |
| MmugDNA.10172.1.S1_at   | MmugDNA.10172.1 | 9.54  | 10.55 | 0.87 | 0.1  | -2.01 | 0.124485 | 0.039916 | 0.498544 | 0.244857 |
| MmugDNA.10173.1.S1_at   | MmugDNA.10173.1 | 4.74  | 4.81  | 0.5  | 0.09 | -1.05 | 0.607884 | 0.824982 | 0.840979 | 0.899487 |
| MmugDNA.10174.1.S1_at   | MmugDNA.10174.1 | 4.79  | 4.65  | 0.21 | 0.05 | 1.1   | 0.437548 | 0.695544 | 0.746859 | 0.823054 |
| MmugDNA.10175.1.S1_at   | MmugDNA.10175.1 | 5.72  | 5.48  | 0.19 | 0.19 | 1.18  | 0.219198 | 0.346328 | 0.588637 | 0.59124  |
| MmugDNA.10176.1.S1_at   | MmugDNA.10176.1 | 3.33  | 3.33  | 0.01 | 0.04 | 1     | 0.438638 | 0.711213 | 0.747368 | 0.832484 |
| MmugDNA.10178.1.S1_at   | MmugDNA.10178.1 | 7.56  | 8.03  | 0.36 | 0.15 | -1.39 | 0.111434 | 0.167926 | 0.484572 | 0.444493 |
| MmugDNA.10179.1.S1_at   | MmugDNA.10179.1 | 3.32  | 3.36  | 0.06 | 0.06 | -1.03 | 0.157075 | 0.788894 | 0.530266 | 0.878011 |
| MmugDNA.1018.1.S1_at    | MmugDNA.1018.1  | 3.37  | 3.29  | 0.22 | 0.06 | 1.06  | 0.581246 | 0.124351 | 0.827478 | 0.394826 |
| MmugDNA.10180.1.S1_at   | MmugDNA.10180.1 | 4.82  | 4.75  | 0.03 | 0.14 | 1.05  | 0.334602 | 0.054386 | 0.680478 | 0.278784 |
| MmugDNA.10181.1.S1_at   | MmugDNA.10181.1 | 7     | 6.83  | 0.14 | 0.44 | 1.12  | 0.186348 | 0.199667 | 0.559101 | 0.474335 |
| MmugDNA.10183.1.S1_at   | MmugDNA.10183.1 | 3.41  | 3.48  | 0.24 | 0.09 | -1.05 | 0.625653 | 0.863254 | 0.849478 | 0.922329 |
| MmugDNA.10184.1.S1_at   | MmugDNA.10184.1 | 3.94  | 3.93  | 0.12 | 0.07 | 1.01  | 0.422405 | 0.78048  | 0.738123 | 0.872614 |
| MmugDNA.10185.1.S1_at   | MmugDNA.10185.1 | 4.09  | 4.05  | 0.12 | 0.04 | 1.03  | 0.297948 | 0.269421 | 0.652791 | 0.534742 |
| MmugDNA.10187.1.S1_at   | MmugDNA.10187.1 | 7.32  | 8.27  | 0.69 | 0.24 | -1.93 | 0.089033 | 0.087188 | 0.456872 | 0.340135 |
| MmugDNA.10188.1.S1_at   | MmugDNA.10188.1 | 3.39  | 3.4   | 0.04 | 0.02 | -1.01 | 0.282666 | 0.171524 | 0.641025 | 0.447895 |
| MmugDNA.10189.1.S1_at   | MmugDNA.10189.1 | 4.84  | 4.63  | 0.11 | 0.11 | 1.16  | 0.037159 | 0.110942 | 0.356778 | 0.375376 |
| MmugDNA.1019.1.S1_at    | MmugDNA.1019.1  | 6.04  | 6.01  | 0.06 | 0.03 | 1.02  | 0.162814 | 0.26788  | 0.535867 | 0.533607 |
| MmugDNA.10190.1.S1_at   | MmugDNA.10190.1 | 5.31  | 5.42  | 1.11 | 0.03 | -1.08 | 0.816301 | 0.466424 | 0.933478 | 0.676289 |
| MmugDNA.10191.1.S1_at   | MmugDNA.10191.1 | 3.78  | 3.82  | 0.12 | 0.33 | -1.03 | 0.681101 | 0.63465  | 0.87494  | 0.784964 |
| MmugDNA.10192.1.S1_at   | MmugDNA.10192.1 | 4.17  | 4.16  | 0.12 | 0.28 | 1.01  | 0.280354 | 0.323647 | 0.639232 | 0.574525 |
| MmugDNA.10193.1.S1_at   | MmugDNA.10193.1 | 10.75 | 10.57 | 0.58 | 0.04 | 1.13  | 0.982362 | 0.981443 | 0.994472 | 0.989775 |
| MmugDNA.10194.1.S1_at   | MmugDNA.10194.1 | 8.78  | 9.22  | 0.23 | 0.15 | -1.36 | 0.138074 | 0.306945 | 0.513671 | 0.563427 |
| MmugDNA.10198.1.S1_at   | MmugDNA.10198.1 | 7.67  | 7.54  | 0.12 | 0.07 | 1.09  | 0.10853  | 0.065279 | 0.480777 | 0.301239 |
| MmugDNA.10199.1.S1_at   | MmugDNA.10199.1 | 4.2   | 4.04  | 0.13 | 0.06 | 1.12  | 0.143728 | 0.164795 | 0.519054 | 0.441106 |
| MmugDNA.102.1.S1_at     | MmugDNA.102.1   | 9.76  | 9.74  | 0.37 | 0.09 | 1.01  | 0.318044 | 0.439162 | 0.667674 | 0.657909 |
| MmugDNA.1020.1.S1_at    | MmugDNA.1020.1  | 9.08  | 9.72  | 1.01 | 0.21 | -1.57 | 0.766162 | 0.380833 | 0.912101 | 0.617426 |
| MmugDNA.10201.1.S1_at   | MmugDNA.10201.1 | 4.99  | 5.08  | 0.15 | 0.1  | -1.07 | 0.163464 | 0.330742 | 0.536242 | 0.57952  |
| MmugDNA.10202.1.S1_at   | MmugDNA.10202.1 | 5.71  | 5.36  | 0.16 | 0.1  | 1.28  | 0.045233 | 0.031216 | 0.376159 | 0.218485 |
| MmugDNA.10203.1.S1_at   | MmugDNA.10203.1 | 6.38  | 6.33  | 0.21 | 0.11 | 1.03  | 0.167945 | 0.338425 | 0.540514 | 0.585432 |
| MmugDNA.10204.1.S1_at   | MmugDNA.10204.1 | 5.29  | 5.41  | 0.64 | 0.28 | -1.08 | 0.832456 | 0.392666 | 0.939875 | 0.625813 |
| MmugDNA.10205.1.S1_at   | MmugDNA.10205.1 | 2.92  | 2.91  | 0.19 | 0.05 | 1.01  | 0.729807 | 0.802432 | 0.895824 | 0.886217 |
| MmugDNA.10206.1.S1_at   | MmugDNA.10206.1 | 3.84  | 3.9   | 0.09 | 0.18 | -1.04 | 0.979206 | 0.556212 | 0.993355 | 0.734449 |

|                         |                 |       |       |      |      |       |          |          |          |          |
|-------------------------|-----------------|-------|-------|------|------|-------|----------|----------|----------|----------|
| MmugDNA.10207.1.S1_at   | MmugDNA.10207.1 | 5.99  | 5.99  | 0.15 | 0.15 | -1    | 0.570642 | 0.456853 | 0.822247 | 0.670521 |
| MmugDNA.10208.1.S1_s_at | MmugDNA.10208.1 | 7.07  | 7.15  | 0.11 | 0.28 | -1.06 | 0.705878 | 0.104694 | 0.885404 | 0.366073 |
| MmugDNA.1021.1.S1_at    | MmugDNA.1021.1  | 3.47  | 3.46  | 0.11 | 0.16 | 1.01  | 0.370787 | 0.288237 | 0.704995 | 0.5495   |
| MmugDNA.10210.1.S1_at   | MmugDNA.10210.1 | 3.72  | 3.73  | 0.03 | 0.03 | -1    | 0.188889 | 0.480705 | 0.560718 | 0.68597  |
| MmugDNA.10211.1.S1_at   | MmugDNA.10211.1 | 6.31  | 6.11  | 0.06 | 0.1  | 1.15  | 0.044788 | 0.053657 | 0.37512  | 0.277225 |
| MmugDNA.10213.1.S1_at   | MmugDNA.10213.1 | 6.62  | 7.36  | 1.32 | 0.27 | -1.67 | 0.241614 | 0.277966 | 0.607771 | 0.541664 |
| MmugDNA.10215.1.S1_at   | MmugDNA.10215.1 | 8.32  | 8.45  | 0.08 | 0.03 | -1.1  | 0.032791 | 0.004051 | 0.345393 | 0.090281 |
| MmugDNA.10217.1.S1_at   | MmugDNA.10217.1 | 6.77  | 6.94  | 0.13 | 0.05 | -1.13 | 0.091021 | 0.151598 | 0.458927 | 0.426333 |
| MmugDNA.10219.1.S1_at   | MmugDNA.10219.1 | 5.44  | 5.35  | 0.11 | 0.13 | 1.06  | 0.67188  | 0.702419 | 0.870562 | 0.827522 |
| MmugDNA.1022.1.S1_s_at  | MmugDNA.1022.1  | 7.02  | 6.75  | 2.3  | 0.27 | 1.21  | 0.488185 | 0.077607 | 0.775435 | 0.323558 |
| MmugDNA.10221.1.S1_at   | MmugDNA.10221.1 | 5.62  | 5.45  | 0.13 | 0.24 | -1.12 | 0.471666 | 0.417133 | 0.76658  | 0.642029 |
| MmugDNA.10224.1.S1_at   | MmugDNA.10224.1 | 6.23  | 5.8   | 0.21 | 0.18 | 1.34  | 0.054303 | 0.214232 | 0.396212 | 0.487856 |
| MmugDNA.10225.1.S1_at   | MmugDNA.10225.1 | 5.86  | 5.79  | 0.51 | 0.39 | 1.05  | 0.576482 | 0.383786 | 0.825166 | 0.619734 |
| MmugDNA.10226.1.S1_at   | MmugDNA.10226.1 | 7.74  | 8.04  | 0.83 | 0.37 | -1.24 | 0.595033 | 0.654267 | 0.835053 | 0.797979 |
| MmugDNA.10228.1.S1_at   | MmugDNA.10228.1 | 5.76  | 5.73  | 0.14 | 0.12 | 1.02  | 0.833376 | 0.544452 | 0.940218 | 0.726849 |
| MmugDNA.10229.1.S1_at   | MmugDNA.10229.1 | 4.37  | 4.36  | 0.36 | 0.43 | 1     | 0.240549 | 0.14597  | 0.606882 | 0.419981 |
| MmugDNA.1023.1.S1_at    | MmugDNA.1023.1  | 7.06  | 7.03  | 0.36 | 0.21 | 1.02  | 0.274742 | 0.342833 | 0.634079 | 0.588712 |
| MmugDNA.10230.1.S1_at   | MmugDNA.10230.1 | 4.58  | 4.99  | 0.2  | 0.12 | -1.33 | 0.09542  | 0.166098 | 0.464229 | 0.442669 |
| MmugDNA.10231.1.S1_at   | MmugDNA.10231.1 | 6.58  | 6.78  | 0.38 | 0.17 | -1.15 | 0.710466 | 0.324965 | 0.887305 | 0.575512 |
| MmugDNA.10232.1.S1_at   | MmugDNA.10232.1 | 4.43  | 5.65  | 0.64 | 0.19 | -2.32 | 0.056444 | 0.060309 | 0.400201 | 0.292254 |
| MmugDNA.10233.1.S1_s_at | MmugDNA.10233.1 | 7.05  | 6.68  | 0.17 | 0.11 | 1.3   | 0.067954 | 0.091109 | 0.42451  | 0.345945 |
| MmugDNA.10234.1.S1_at   | MmugDNA.10234.1 | 6.91  | 6.26  | 0.42 | 0.1  | 1.58  | 0.054883 | 0.039694 | 0.397124 | 0.244271 |
| MmugDNA.10235.1.S1_at   | MmugDNA.10235.1 | 10.8  | 10.8  | 0.18 | 0.09 | -1    | 0.599196 | 0.248201 | 0.837299 | 0.517574 |
| MmugDNA.10237.1.S1_at   | MmugDNA.10237.1 | 7.11  | 7.21  | 0.19 | 0.15 | -1.07 | 0.230827 | 0.089524 | 0.599045 | 0.343811 |
| MmugDNA.10238.1.S1_at   | MmugDNA.10238.1 | 7.56  | 7.63  | 0.59 | 0.24 | -1.05 | 0.703824 | 0.49664  | 0.884872 | 0.696119 |
| MmugDNA.10239.1.S1_at   | MmugDNA.10239.1 | 4.86  | 5.06  | 0.33 | 0.24 | -1.15 | 0.483075 | 0.749989 | 0.772862 | 0.854652 |
| MmugDNA.1024.1.S1_s_at  | MmugDNA.1024.1  | 8.84  | 8.4   | 1.41 | 0.12 | 1.35  | 0.700058 | 0.124052 | 0.883386 | 0.394349 |
| MmugDNA.10241.1.S1_at   | MmugDNA.10241.1 | 3.62  | 3.61  | 0.09 | 0.06 | 1     | 0.936963 | 0.721713 | 0.978849 | 0.838808 |
| MmugDNA.10244.1.S1_at   | MmugDNA.10244.1 | 3.76  | 3.72  | 0.1  | 0    | 1.02  | 0.639465 | 0.823839 | 0.85626  | 0.898803 |
| MmugDNA.10245.1.S1_at   | MmugDNA.10245.1 | 5.74  | 5.49  | 0.23 | 0.8  | 1.19  | 0.745561 | 0.762578 | 0.903066 | 0.861882 |
| MmugDNA.10246.1.S1_at   | MmugDNA.10246.1 | 9.72  | 9.78  | 0.24 | 0.13 | -1.05 | 0.471316 | 0.140309 | 0.766509 | 0.413498 |
| MmugDNA.10247.1.S1_at   | MmugDNA.10247.1 | 3.95  | 3.84  | 0.32 | 0.28 | 1.08  | 0.546145 | 0.339205 | 0.808354 | 0.585918 |
| MmugDNA.10248.1.S1_at   | MmugDNA.10248.1 | 6.67  | 7.1   | 0.41 | 0.15 | -1.35 | 0.59731  | 0.386889 | 0.836206 | 0.621935 |
| MmugDNA.1025.1.S1_at    | MmugDNA.1025.1  | 6.01  | 6.11  | 0.43 | 0.25 | -1.07 | 0.295743 | 0.195778 | 0.651408 | 0.470637 |
| MmugDNA.10250.1.S1_at   | MmugDNA.10250.1 | 3.1   | 3.22  | 0.24 | 0.1  | -1.08 | 0.754192 | 0.886712 | 0.907331 | 0.935519 |
| MmugDNA.10251.1.S1_at   | MmugDNA.10251.1 | 11.13 | 10.19 | 1.18 | 0.19 | 1.93  | 0.721605 | 0.889474 | 0.892101 | 0.937014 |
| MmugDNA.10252.1.S1_at   | MmugDNA.10252.1 | 3.58  | 3.74  | 0.26 | 0.29 | -1.12 | 0.958482 | 0.849422 | 0.986346 | 0.914533 |
| MmugDNA.10254.1.S1_at   | MmugDNA.10254.1 | 5.04  | 5.01  | 0.2  | 0.18 | 1.01  | 0.504617 | 0.238475 | 0.784928 | 0.509084 |
| MmugDNA.10255.1.S1_at   | MmugDNA.10255.1 | 6.03  | 5.59  | 0.05 | 0.25 | 1.36  | 0.144573 | 0.292601 | 0.519872 | 0.552659 |
| MmugDNA.10256.1.S1_at   | MmugDNA.10256.1 | 7.16  | 7.3   | 0.13 | 0.2  | -1.1  | 0.750011 | 0.044606 | 0.905347 | 0.255589 |
| MmugDNA.10258.1.S1_at   | MmugDNA.10258.1 | 7.53  | 7.35  | 0.07 | 0.07 | 1.14  | 0.06903  | 0.283642 | 0.426515 | 0.546058 |
| MmugDNA.1026.1.S1_at    | MmugDNA.1026.1  | 3.39  | 3.39  | 0.03 | 0.04 | -1    | 0.975829 | 0.329379 | 0.992214 | 0.578733 |
| MmugDNA.10263.1.S1_at   | MmugDNA.10263.1 | 4.51  | 4.5   | 0.07 | 0.17 | 1.01  | 0.353403 | 0.219955 | 0.693234 | 0.49344  |

|                         |                 |       |       |      |      |       |          |          |          |          |
|-------------------------|-----------------|-------|-------|------|------|-------|----------|----------|----------|----------|
| MmugDNA.10264.1.S1_at   | MmugDNA.10264.1 | 6.62  | 6.55  | 0.15 | 0.06 | 1.05  | 0.222851 | 0.635173 | 0.592367 | 0.785258 |
| MmugDNA.10265.1.S1_at   | MmugDNA.10265.1 | 5.73  | 6.29  | 0.3  | 0.17 | -1.47 | 0.054979 | 0.000316 | 0.39755  | 0.035358 |
| MmugDNA.10266.1.S1_at   | MmugDNA.10266.1 | 3.45  | 3.19  | 0.05 | 0.31 | 1.2   | 0.542515 | 0.571318 | 0.805778 | 0.743642 |
| MmugDNA.10270.1.S1_at   | MmugDNA.10270.1 | 5.85  | 5.73  | 0    | 0.12 | 1.09  | 0.141887 | 0.452691 | 0.516871 | 0.667253 |
| MmugDNA.10273.1.S1_at   | MmugDNA.10273.1 | 11.4  | 10.81 | 0.07 | 0.09 | 1.5   | 0.000697 | 0.000477 | 0.147476 | 0.038572 |
| MmugDNA.10275.1.S1_x_at | MmugDNA.10275.1 | 7.3   | 7.36  | 0.2  | 0.23 | -1.05 | 0.569429 | 0.172922 | 0.82149  | 0.449546 |
| MmugDNA.10276.1.S1_at   | MmugDNA.10276.1 | 9.05  | 8.98  | 0.53 | 0.21 | 1.05  | 0.210152 | 0.014552 | 0.581555 | 0.153907 |
| MmugDNA.10277.1.S1_at   | MmugDNA.10277.1 | 5.76  | 5.83  | 0.3  | 0.19 | -1.05 | 0.282815 | 0.251687 | 0.641027 | 0.520444 |
| MmugDNA.10279.1.S1_at   | MmugDNA.10279.1 | 4.37  | 4.42  | 0.08 | 0    | -1.04 | 0.843069 | 0.885834 | 0.944479 | 0.93508  |
| MmugDNA.10280.1.S1_at   | MmugDNA.10280.1 | 5.29  | 5.36  | 0.26 | 0.13 | -1.05 | 0.656418 | 0.467511 | 0.863588 | 0.677091 |
| MmugDNA.10281.1.S1_s_at | MmugDNA.10281.1 | 3.14  | 3.06  | 0.1  | 0.23 | -1.06 | 0.814079 | 0.304624 | 0.932911 | 0.561838 |
| MmugDNA.10282.1.S1_at   | MmugDNA.10282.1 | 5.16  | 4.78  | 0.48 | 0.29 | 1.3   | 0.195775 | 0.114782 | 0.56611  | 0.381311 |
| MmugDNA.10285.1.S1_at   | MmugDNA.10285.1 | 3.63  | 3.52  | 0.39 | 0.06 | 1.08  | 0.188693 | 0.467631 | 0.560598 | 0.677203 |
| MmugDNA.10289.1.S1_at   | MmugDNA.10289.1 | 9.05  | 9.25  | 0.09 | 0.09 | -1.15 | 0.037933 | 0.003645 | 0.358308 | 0.086526 |
| MmugDNA.1029.1.S1_at    | MmugDNA.1029.1  | 4.08  | 4.33  | 0.14 | 0.42 | -1.19 | 0.398424 | 0.577691 | 0.722489 | 0.748038 |
| MmugDNA.10290.1.S1_at   | MmugDNA.10290.1 | 8.64  | 8.27  | 0.22 | 0.13 | 1.29  | 0.141099 | 0.249585 | 0.516345 | 0.518645 |
| MmugDNA.10291.1.S1_at   | MmugDNA.10291.1 | 3.2   | 3.32  | 0.15 | 0.06 | -1.09 | 0.721792 | 0.751846 | 0.892101 | 0.855698 |
| MmugDNA.10292.1.S1_at   | MmugDNA.10292.1 | 3.67  | 4.16  | 0.43 | 0.12 | -1.4  | 0.130412 | 0.103407 | 0.504689 | 0.3643   |
| MmugDNA.10293.1.S1_at   | MmugDNA.10293.1 | 4.54  | 4.51  | 0.69 | 0.18 | 1.02  | 0.363148 | 0.50274  | 0.699884 | 0.700289 |
| MmugDNA.10294.1.S1_at   | MmugDNA.10294.1 | 5.76  | 5.78  | 0.2  | 0.12 | -1.02 | 0.525922 | 0.838729 | 0.796442 | 0.908041 |
| MmugDNA.10295.1.S1_at   | MmugDNA.10295.1 | 4.23  | 3.93  | 0.07 | 0.15 | 1.23  | 0.023173 | 0.044275 | 0.314809 | 0.254941 |
| MmugDNA.10296.1.S1_at   | MmugDNA.10296.1 | 4.26  | 4.37  | 0.27 | 0.6  | -1.08 | 0.487518 | 0.47235  | 0.775077 | 0.679977 |
| MmugDNA.10297.1.S1_at   | MmugDNA.10297.1 | 9.46  | 9.33  | 0.88 | 0.12 | 1.1   | 0.443714 | 0.280723 | 0.750982 | 0.543924 |
| MmugDNA.10298.1.S1_at   | MmugDNA.10298.1 | 3.52  | 3.52  | 0.05 | 0.14 | 1     | 0.271301 | 0.336555 | 0.631176 | 0.58391  |
| MmugDNA.10299.1.S1_at   | MmugDNA.10299.1 | 3.59  | 3.86  | 0.14 | 0.19 | -1.21 | 0.098467 | 0.142856 | 0.467888 | 0.416786 |
| MmugDNA.103.1.S1_at     | MmugDNA.103.1   | 9.36  | 9.22  | 0.54 | 0.13 | 1.1   | 0.845091 | 0.959175 | 0.945658 | 0.976862 |
| MmugDNA.1030.1.S1_at    | MmugDNA.1030.1  | 10.27 | 10.23 | 0.26 | 0.03 | 1.03  | 0.503913 | 0.841483 | 0.78444  | 0.909663 |
| MmugDNA.10300.1.S1_at   | MmugDNA.10300.1 | 4.77  | 4.75  | 0.03 | 0.14 | 1.01  | 0.622706 | 0.794349 | 0.847926 | 0.881371 |
| MmugDNA.10301.1.S1_at   | MmugDNA.10301.1 | 6.32  | 7.07  | 0.35 | 0.27 | -1.69 | 0.023656 | 0.010572 | 0.316279 | 0.134182 |
| MmugDNA.10303.1.S1_at   | MmugDNA.10303.1 | 6.2   | 7.15  | 2.31 | 0.19 | -1.92 | 0.45581  | 0.21336  | 0.757582 | 0.487226 |
| MmugDNA.10304.1.S1_at   | MmugDNA.10304.1 | 7.48  | 7.32  | 0.06 | 0.06 | 1.12  | 0.03971  | 0.504172 | 0.362432 | 0.701433 |
| MmugDNA.10304.1.S1_s_at | MmugDNA.10304.1 | 6.6   | 6.47  | 0.05 | 0.02 | 1.09  | 0.01149  | 0.00489  | 0.255331 | 0.097632 |
| MmugDNA.10305.1.S1_at   | MmugDNA.10305.1 | 10.84 | 10.76 | 0.17 | 0.02 | 1.06  | 0.527358 | 0.259489 | 0.797084 | 0.526418 |
| MmugDNA.10308.1.S1_at   | MmugDNA.10308.1 | 4.36  | 3.84  | 0.05 | 0.22 | 1.43  | 0.041491 | 0.04     | 0.366704 | 0.254195 |
| MmugDNA.10309.1.S1_at   | MmugDNA.10309.1 | 5.83  | 5.56  | 0.1  | 0.05 | 1.21  | 0.011773 | 0.006373 | 0.257291 | 0.108546 |
| MmugDNA.1031.1.S1_at    | MmugDNA.1031.1  | 5.45  | 5.72  | 0.18 | 0.64 | -1.2  | 0.510732 | 0.323275 | 0.788283 | 0.574408 |
| MmugDNA.10310.1.S1_at   | MmugDNA.10310.1 | 7.31  | 7     | 0.37 | 0.23 | 1.24  | 0.104895 | 0.289596 | 0.476242 | 0.550661 |
| MmugDNA.10312.1.S1_at   | MmugDNA.10312.1 | 9.92  | 10.12 | 0.3  | 0.24 | -1.15 | 0.206154 | 0.05694  | 0.578134 | 0.284726 |
| MmugDNA.10313.1.S1_at   | MmugDNA.10313.1 | 3.34  | 3.25  | 0.22 | 0.08 | 1.06  | 0.522509 | 0.772329 | 0.795143 | 0.867672 |
| MmugDNA.10314.1.S1_at   | MmugDNA.10314.1 | 7.73  | 7.47  | 0.16 | 0.03 | 1.2   | 0.133939 | 0.279721 | 0.50813  | 0.543228 |
| MmugDNA.10315.1.S1_at   | MmugDNA.10315.1 | 3.85  | 3.89  | 0.15 | 0.02 | -1.03 | 0.428918 | 0.676322 | 0.74211  | 0.810904 |
| MmugDNA.10316.1.S1_s_at | MmugDNA.10316.1 | 8.57  | 8.35  | 0.15 | 0.07 | 1.16  | 0.088697 | 0.159749 | 0.456425 | 0.435871 |
| MmugDNA.10317.1.S1_at   | MmugDNA.10317.1 | 9.41  | 9.07  | 0.1  | 0.05 | 1.27  | 0.005163 | 0.000427 | 0.205828 | 0.038359 |

|                         |                 |       |       |      |      |       |          |          |          |          |
|-------------------------|-----------------|-------|-------|------|------|-------|----------|----------|----------|----------|
| MmugDNA.10318.1.S1_at   | MmugDNA.10318.1 | 10.66 | 10.58 | 0.24 | 0.11 | 1.06  | 0.37354  | 0.168903 | 0.705567 | 0.445458 |
| MmugDNA.10319.1.S1_at   | MmugDNA.10319.1 | 3.32  | 3.29  | 0.08 | 0.06 | 1.02  | 0.734549 | 0.913811 | 0.898442 | 0.951523 |
| MmugDNA.1032.1.S1_at    | MmugDNA.1032.1  | 6.11  | 5.86  | 0.17 | 0.29 | 1.18  | 0.181475 | 0.232622 | 0.554659 | 0.504359 |
| MmugDNA.10321.1.S1_at   | MmugDNA.10321.1 | 12.74 | 12.56 | 0.11 | 0.04 | 1.14  | 0.077826 | 0.154411 | 0.439956 | 0.429288 |
| MmugDNA.10323.1.S1_s_at | MmugDNA.10323.1 | 12.26 | 11.85 | 0.19 | 0.03 | 1.33  | 0.025511 | 0.021106 | 0.322263 | 0.181869 |
| MmugDNA.10325.1.S1_at   | MmugDNA.10325.1 | 12.21 | 11.36 | 0.04 | 0.13 | 1.8   | 0.000421 | 0.00706  | 0.137028 | 0.113278 |
| MmugDNA.10326.1.S1_at   | MmugDNA.10326.1 | 10.26 | 10.17 | 0.34 | 0.12 | 1.07  | 0.636589 | 0.076102 | 0.855143 | 0.320848 |
| MmugDNA.10329.1.S1_at   | MmugDNA.10329.1 | 7.58  | 8.13  | 0.85 | 0.23 | -1.46 | 0.851467 | 0.588738 | 0.947639 | 0.755137 |
| MmugDNA.1033.1.S1_at    | MmugDNA.1033.1  | 4.74  | 4.79  | 0.21 | 0.24 | -1.03 | 0.734126 | 0.175519 | 0.898145 | 0.452161 |
| MmugDNA.10330.1.S1_at   | MmugDNA.10330.1 | 5.35  | 5.33  | 0.19 | 0.09 | 1.01  | 0.847581 | 0.318679 | 0.946572 | 0.571315 |
| MmugDNA.10332.1.S1_at   | MmugDNA.10332.1 | 4.53  | 4.38  | 0.22 | 0.13 | -1.11 | 0.707067 | 0.01946  | 0.886012 | 0.175136 |
| MmugDNA.10336.1.S1_at   | MmugDNA.10336.1 | 5.88  | 5.72  | 0.13 | 0.03 | 1.12  | 0.113254 | 0.040837 | 0.486648 | 0.246981 |
| MmugDNA.10337.1.S1_at   | MmugDNA.10337.1 | 7.76  | 7.68  | 0.71 | 0.12 | 1.06  | 0.666755 | 0.777811 | 0.868398 | 0.870888 |
| MmugDNA.10339.1.S1_at   | MmugDNA.10339.1 | 4.47  | 4.37  | 0.15 | 0.11 | 1.08  | 0.826231 | 0.318172 | 0.937734 | 0.571046 |
| MmugDNA.1034.1.S1_at    | MmugDNA.1034.1  | 7.28  | 7.69  | 0.57 | 0.21 | -1.33 | 0.810525 | 0.970636 | 0.931338 | 0.984019 |
| MmugDNA.10340.1.S1_at   | MmugDNA.10340.1 | 8.94  | 8.77  | 0.13 | 0.07 | 1.13  | 0.181472 | 0.57129  | 0.554659 | 0.743642 |
| MmugDNA.10341.1.S1_at   | MmugDNA.10341.1 | 5.24  | 5.54  | 0.18 | 0.14 | -1.23 | 0.084034 | 0.100839 | 0.45029  | 0.360364 |
| MmugDNA.10342.1.S1_at   | MmugDNA.10342.1 | 9.58  | 8.86  | 0.6  | 0.5  | 1.64  | 0.106621 | 0.016946 | 0.479    | 0.165073 |
| MmugDNA.10343.1.S1_at   | MmugDNA.10343.1 | 6.21  | 5.98  | 0.26 | 0.1  | 1.17  | 0.415408 | 0.468487 | 0.733634 | 0.677738 |
| MmugDNA.10344.1.S1_at   | MmugDNA.10344.1 | 3.52  | 3.37  | 0.07 | 0.12 | 1.11  | 0.095108 | 0.058411 | 0.464131 | 0.288454 |
| MmugDNA.10346.1.S1_at   | MmugDNA.10346.1 | 5.53  | 5.39  | 0.13 | 0.02 | 1.1   | 0.458262 | 0.366259 | 0.758668 | 0.606019 |
| MmugDNA.10348.1.S1_s_at | MmugDNA.10348.1 | 12.64 | 11.94 | 0.17 | 0.3  | 1.63  | 0.011906 | 0.008422 | 0.257858 | 0.121844 |
| MmugDNA.1035.1.S1_at    | MmugDNA.1035.1  | 3.13  | 3.11  | 0.08 | 0.08 | 1.01  | 0.802159 | 0.91578  | 0.927856 | 0.952836 |
| MmugDNA.15783.1.S1_s_at | MmugDNA.15783.1 | 4.02  | 4     | 0.19 | 0.01 | 1.01  | 0.285817 | 0.335104 | 0.643438 | 0.582853 |
| MmugDNA.10351.1.S1_at   | MmugDNA.10351.1 | 4.69  | 4.89  | 0.25 | 0.28 | -1.15 | 0.857595 | 0.366088 | 0.949729 | 0.605906 |
| MmugDNA.10352.1.S1_at   | MmugDNA.10352.1 | 13.86 | 13.99 | 0.06 | 0.01 | -1.09 | 0.024024 | 0.012211 | 0.317529 | 0.142932 |
| MmugDNA.10353.1.S1_at   | MmugDNA.10353.1 | 6.14  | 6.05  | 0.1  | 0.23 | 1.07  | 0.208876 | 0.258502 | 0.580477 | 0.525786 |
| MmugDNA.10354.1.S1_at   | MmugDNA.10354.1 | 11.57 | 11.29 | 0.28 | 0.17 | 1.22  | 0.194282 | 0.168506 | 0.564864 | 0.445136 |
| MmugDNA.10355.1.S1_at   | MmugDNA.10355.1 | 8.44  | 8.51  | 0.15 | 0.26 | -1.05 | 0.887881 | 0.331822 | 0.961191 | 0.580397 |
| MmugDNA.10358.1.S1_at   | MmugDNA.10358.1 | 6.88  | 6.79  | 0.04 | 0.04 | 1.06  | 0.12827  | 0.39004  | 0.502907 | 0.624002 |
| MmugDNA.10359.1.S1_at   | MmugDNA.10359.1 | 9.72  | 9.68  | 0.31 | 0.01 | 1.02  | 0.850089 | 0.188309 | 0.947281 | 0.46433  |
| MmugDNA.10359.1.S1_s_at | MmugDNA.10359.1 | 9.35  | 9.47  | 0.31 | 0.07 | -1.09 | 0.703494 | 0.131902 | 0.88474  | 0.403927 |
| MmugDNA.1036.1.S1_at    | MmugDNA.1036.1  | 5.49  | 5.33  | 0.04 | 0.03 | 1.12  | 0.007003 | 0.225003 | 0.225012 | 0.49773  |
| MmugDNA.10360.1.S1_at   | MmugDNA.10360.1 | 7.77  | 7.5   | 0.17 | 0.15 | 1.2   | 0.197898 | 0.593806 | 0.569012 | 0.758418 |
| MmugDNA.10361.1.S1_at   | MmugDNA.10361.1 | 3.89  | 3.65  | 0.18 | 0.12 | 1.18  | 0.227677 | 0.283636 | 0.596693 | 0.546058 |
| MmugDNA.10362.1.S1_at   | MmugDNA.10362.1 | 5.63  | 7.79  | 0.73 | 0.19 | -4.49 | 0.004786 | 0.00139  | 0.202416 | 0.057005 |
| MmugDNA.20020.1.S1_s_at | MmugDNA.20020.1 | 6.78  | 7.05  | 0.99 | 0.12 | -1.21 | 0.837125 | 0.500949 | 0.941548 | 0.69936  |
| MmugDNA.10365.1.S1_at   | MmugDNA.10365.1 | 6.37  | 5.58  | 0.29 | 0.17 | 1.74  | 0.050471 | 0.053434 | 0.387218 | 0.276777 |
| MmugDNA.10366.1.S1_at   | MmugDNA.10366.1 | 6.61  | 6.3   | 0.36 | 0.27 | 1.24  | 0.383738 | 0.169377 | 0.711503 | 0.445989 |
| MmugDNA.10367.1.S1_at   | MmugDNA.10367.1 | 4.64  | 4.7   | 0.14 | 0.24 | -1.05 | 0.277877 | 0.433168 | 0.637172 | 0.653513 |
| MmugDNA.10368.1.S1_at   | MmugDNA.10368.1 | 4.95  | 4.92  | 0.46 | 0.68 | 1.02  | 0.995106 | 0.995292 | 0.99815  | 0.997046 |
| MmugDNA.10372.1.S1_at   | MmugDNA.10372.1 | 10.07 | 10.14 | 0.51 | 0.12 | -1.05 | 0.68313  | 0.87883  | 0.876057 | 0.930872 |
| MmugDNA.10373.1.S1_at   | MmugDNA.10373.1 | 11.77 | 11.91 | 0.07 | 0.03 | -1.1  | 0.033032 | 0.07454  | 0.345921 | 0.318173 |



|                         |                 |       |       |      |      |       |          |          |          |          |
|-------------------------|-----------------|-------|-------|------|------|-------|----------|----------|----------|----------|
| MmugDNA.10374.1.S1_at   | MmugDNA.10374.1 | 6.79  | 6.64  | 0.71 | 0.43 | 1.11  | 0.465863 | 0.561843 | 0.763236 | 0.737659 |
| MmugDNA.29281.1.S1_s_at | MmugDNA.29281.1 | 13.55 | 13.52 | 0.29 | 0.06 | 1.02  | 0.956571 | 0.130962 | 0.985575 | 0.403037 |
| MmugDNA.10376.1.S1_at   | MmugDNA.10376.1 | 6.2   | 5.78  | 0.45 | 0.07 | 1.33  | 0.250495 | 0.144945 | 0.615697 | 0.418862 |
| MmugDNA.10377.1.S1_at   | MmugDNA.10377.1 | 7.52  | 6.64  | 1.04 | 0.45 | 1.84  | 0.496577 | 0.718762 | 0.780645 | 0.837241 |
| MmugDNA.10378.1.S1_at   | MmugDNA.10378.1 | 3.12  | 3.31  | 0.07 | 0.11 | -1.14 | 0.069861 | 0.120435 | 0.427911 | 0.38925  |
| MmugDNA.10379.1.S1_at   | MmugDNA.10379.1 | 12.18 | 12.45 | 0.42 | 0.01 | -1.2  | 0.107223 | 0.070645 | 0.47976  | 0.311975 |
| MmugDNA.1038.1.S1_at    | MmugDNA.1038.1  | 6.41  | 6.39  | 0.17 | 0.13 | 1.02  | 0.722388 | 0.83968  | 0.892328 | 0.908582 |
| MmugDNA.10380.1.S1_at   | MmugDNA.10380.1 | 9.64  | 9.78  | 0.36 | 0.3  | -1.1  | 0.187818 | 0.16503  | 0.560011 | 0.44123  |
| MmugDNA.10381.1.S1_at   | MmugDNA.10381.1 | 5.3   | 5.19  | 0.18 | 0.21 | 1.08  | 0.647611 | 0.266465 | 0.859364 | 0.532234 |
| MmugDNA.10382.1.S1_at   | MmugDNA.10382.1 | 3.39  | 3.53  | 0.47 | 0.17 | -1.1  | 0.675932 | 0.438189 | 0.872796 | 0.657196 |
| MmugDNA.10384.1.S1_at   | MmugDNA.10384.1 | 7.61  | 7.1   | 0.51 | 0.53 | -1.42 | 0.842542 | 0.044327 | 0.944281 | 0.255035 |
| MmugDNA.10388.1.S1_at   | MmugDNA.10388.1 | 3.57  | 3.51  | 0.01 | 0.12 | 1.05  | 0.389297 | 0.409474 | 0.716031 | 0.636521 |
| MmugDNA.1039.1.S1_at    | MmugDNA.1039.1  | 3.46  | 3.35  | 0.1  | 0.08 | 1.08  | 0.943898 | 0.845432 | 0.980618 | 0.912071 |
| MmugDNA.10391.1.S1_at   | MmugDNA.10391.1 | 3.27  | 3.29  | 0.06 | 0.17 | -1.02 | 0.975475 | 0.998296 | 0.992064 | 0.999091 |
| MmugDNA.10393.1.S1_at   | MmugDNA.10393.1 | 5.95  | 5.87  | 0.07 | 0.13 | 1.06  | 0.359764 | 0.5387   | 0.697545 | 0.723315 |
| MmugDNA.10396.1.S1_at   | MmugDNA.10396.1 | 8.54  | 8.63  | 0.4  | 0.11 | -1.07 | 0.576762 | 0.357074 | 0.825166 | 0.59875  |
| MmugDNA.104.1.S1_at     | MmugDNA.104.1   | 6.47  | 7     | 0.04 | 0.1  | -1.44 | 0.001043 | 0.064548 | 0.155374 | 0.300255 |
| MmugDNA.10400.1.S1_at   | MmugDNA.10400.1 | 7.22  | 6.85  | 0.77 | 0.16 | 1.28  | 0.337012 | 0.638502 | 0.682166 | 0.78765  |
| MmugDNA.10401.1.S1_at   | MmugDNA.10401.1 | 9.88  | 10.53 | 0.34 | 0.17 | -1.57 | 0.016818 | 0.008803 | 0.288567 | 0.124117 |
| MmugDNA.10402.1.S1_at   | MmugDNA.10402.1 | 5.23  | 5.18  | 0.14 | 0.12 | 1.04  | 0.68557  | 0.769608 | 0.876846 | 0.866216 |
| MmugDNA.10404.1.S1_at   | MmugDNA.10404.1 | 9.47  | 10.22 | 0.18 | 0.15 | -1.68 | 0.002808 | 0.000904 | 0.185983 | 0.048084 |
| MmugDNA.10406.1.S1_at   | MmugDNA.10406.1 | 6.82  | 7.41  | 0.44 | 0.16 | -1.51 | 0.286526 | 0.01138  | 0.643768 | 0.138214 |
| MmugDNA.10407.1.S1_at   | MmugDNA.10407.1 | 5.09  | 5.02  | 0.31 | 0.1  | 1.05  | 0.854133 | 0.739568 | 0.948437 | 0.849084 |
| MmugDNA.10408.1.S1_at   | MmugDNA.10408.1 | 9.68  | 9.85  | 0.82 | 0.14 | -1.12 | 0.626074 | 0.052668 | 0.849762 | 0.27502  |
| MmugDNA.10409.1.S1_at   | MmugDNA.10409.1 | 3.7   | 3.7   | 0.09 | 0.1  | -1    | 0.528309 | 0.73786  | 0.797609 | 0.848106 |
| MmugDNA.1041.1.S1_s_at  | MmugDNA.1041.1  | 10.59 | 10.1  | 0.19 | 0.23 | 1.4   | 0.025118 | 0.007375 | 0.320458 | 0.115315 |
| MmugDNA.10412.1.S1_at   | MmugDNA.10412.1 | 4.81  | 4.91  | 0.12 | 0.2  | -1.07 | 0.963223 | 0.558778 | 0.988152 | 0.735887 |
| MmugDNA.10412.1.S1_x_at | MmugDNA.10412.1 | 4.94  | 4.95  | 0.03 | 0.2  | -1.01 | 0.38593  | 0.800375 | 0.713125 | 0.885129 |
| MmugDNA.10413.1.S1_at   | MmugDNA.10413.1 | 5.56  | 5.5   | 0.39 | 0.04 | 1.04  | 0.814826 | 0.52301  | 0.933137 | 0.713429 |
| MmugDNA.10414.1.S1_at   | MmugDNA.10414.1 | 8.01  | 7.73  | 0.65 | 0.11 | 1.22  | 0.540279 | 0.530452 | 0.804343 | 0.717991 |
| MmugDNA.10416.1.S1_at   | MmugDNA.10416.1 | 4.43  | 4.35  | 0.06 | 0.09 | 1.06  | 0.331989 | 0.267276 | 0.678409 | 0.532909 |
| MmugDNA.10418.1.S1_at   | MmugDNA.10418.1 | 3.87  | 3.69  | 0.05 | 0.49 | 1.13  | 0.78886  | 0.926338 | 0.922472 | 0.958277 |
| MmugDNA.10419.1.S1_at   | MmugDNA.10419.1 | 9.47  | 9.04  | 1.07 | 0.21 | 1.35  | 0.436559 | 0.047205 | 0.746328 | 0.26183  |
| MmugDNA.10420.1.S1_at   | MmugDNA.10420.1 | 3.51  | 3.4   | 0.17 | 0.13 | 1.08  | 0.905044 | 0.184995 | 0.968109 | 0.460814 |
| MmugDNA.10427.1.S1_at   | MmugDNA.10427.1 | 8.86  | 9.14  | 0.33 | 0.12 | -1.21 | 0.252536 | 0.077717 | 0.617528 | 0.323851 |
| MmugDNA.10428.1.S1_at   | MmugDNA.10428.1 | 6.07  | 6.02  | 0.07 | 0.09 | 1.03  | 0.674364 | 0.785722 | 0.871922 | 0.875928 |
| MmugDNA.10430.1.S1_at   | MmugDNA.10430.1 | 8.5   | 8.35  | 0.41 | 0.1  | 1.11  | 0.588476 | 0.577689 | 0.831946 | 0.748038 |
| MmugDNA.10431.1.S1_at   | MmugDNA.10431.1 | 7.96  | 8.03  | 0.45 | 0.23 | -1.05 | 0.693506 | 0.370187 | 0.880681 | 0.609371 |
| MmugDNA.10433.1.S1_at   | MmugDNA.10433.1 | 3.51  | 3.27  | 0.1  | 0.07 | 1.18  | 0.059123 | 0.091337 | 0.406071 | 0.346281 |
| MmugDNA.10434.1.S1_at   | MmugDNA.10434.1 | 11.65 | 10.63 | 0.42 | 0.45 | 2.03  | 0.076577 | 0.013384 | 0.437977 | 0.14827  |
| MmugDNA.10436.1.S1_at   | MmugDNA.10436.1 | 3.83  | 3.58  | 0.2  | 0.07 | 1.19  | 0.319023 | 0.432661 | 0.668492 | 0.653054 |
| MmugDNA.10437.1.S1_at   | MmugDNA.10437.1 | 7.8   | 8.18  | 0.1  | 0.02 | -1.29 | 0.004306 | 0.001425 | 0.198874 | 0.057604 |
| MmugDNA.10438.1.S1_at   | MmugDNA.10438.1 | 5.09  | 4.89  | 0.06 | 0.09 | 1.15  | 0.065246 | 0.015471 | 0.420212 | 0.157908 |

|                         |                 |       |       |      |      |       |          |          |          |          |
|-------------------------|-----------------|-------|-------|------|------|-------|----------|----------|----------|----------|
| MmugDNA.10439.1.S1_at   | MmugDNA.10439.1 | 6.46  | 6.21  | 0.23 | 0.08 | 1.19  | 0.204326 | 0.189345 | 0.575722 | 0.465092 |
| MmugDNA.1044.1.S1_at    | MmugDNA.1044.1  | 9.25  | 9.66  | 0.49 | 0.04 | -1.33 | 0.472116 | 0.612809 | 0.766866 | 0.770218 |
| MmugDNA.10440.1.S1_at   | MmugDNA.10440.1 | 8.26  | 7.97  | 0.38 | 0.16 | 1.22  | 0.380695 | 0.32254  | 0.70956  | 0.573991 |
| MmugDNA.10441.1.S1_at   | MmugDNA.10441.1 | 9.27  | 8.84  | 0.21 | 0.13 | 1.35  | 0.026605 | 0.042142 | 0.325515 | 0.249753 |
| MmugDNA.10442.1.S1_s_at | MmugDNA.10442.1 | 8.33  | 8.48  | 1.53 | 0.34 | -1.11 | 0.905394 | 0.55164  | 0.968115 | 0.731126 |
| MmugDNA.10447.1.S1_at   | MmugDNA.10447.1 | 4.26  | 4.22  | 0.24 | 0.17 | 1.03  | 0.690061 | 0.692525 | 0.879271 | 0.821061 |
| MmugDNA.10449.1.S1_at   | MmugDNA.10449.1 | 11.43 | 11.79 | 0.28 | 0.11 | -1.29 | 0.330718 | 0.618926 | 0.677358 | 0.774229 |
| MmugDNA.1045.1.S1_at    | MmugDNA.1045.1  | 6.76  | 6.61  | 0.15 | 0.02 | 1.11  | 0.226217 | 0.307734 | 0.595342 | 0.563932 |
| MmugDNA.10451.1.S1_at   | MmugDNA.10451.1 | 9.47  | 9.56  | 1.8  | 0.4  | -1.06 | 0.937068 | 0.383337 | 0.978859 | 0.619368 |
| MmugDNA.10454.1.S1_at   | MmugDNA.10454.1 | 4.34  | 3.88  | 0.55 | 0.4  | 1.38  | 0.245472 | 0.319718 | 0.611079 | 0.572054 |
| MmugDNA.10455.1.S1_at   | MmugDNA.10455.1 | 6.25  | 6.22  | 0.15 | 0.03 | -1.02 | 0.661762 | 0.80098  | 0.8665   | 0.885538 |
| MmugDNA.10456.1.S1_at   | MmugDNA.10456.1 | 6.56  | 6.48  | 0.55 | 0.42 | 1.06  | 0.416657 | 0.533027 | 0.734439 | 0.71937  |
| MmugDNA.10457.1.S1_at   | MmugDNA.10457.1 | 5.04  | 5.07  | 0.09 | 0.2  | -1.02 | 0.521831 | 0.663442 | 0.794855 | 0.803016 |
| MmugDNA.1046.1.S1_at    | MmugDNA.1046.1  | 13.81 | 13.82 | 1.15 | 0.05 | -1.01 | 0.37129  | 0.151152 | 0.705454 | 0.425805 |
| MmugDNA.1046.1.S1_s_at  | MmugDNA.1046.1  | 13.99 | 14.02 | 1.23 | 0.1  | -1.02 | 0.436445 | 0.150378 | 0.746319 | 0.424934 |
| MmugDNA.10460.1.S1_at   | MmugDNA.10460.1 | 5.13  | 4.95  | 0.35 | 0.06 | 1.14  | 0.985905 | 0.008338 | 0.995501 | 0.121147 |
| MmugDNA.10461.1.S1_at   | MmugDNA.10461.1 | 5.96  | 6.02  | 0.09 | 0.05 | -1.04 | 0.760127 | 0.107474 | 0.909862 | 0.370311 |
| MmugDNA.10462.1.S1_at   | MmugDNA.10462.1 | 6.87  | 6.26  | 2    | 0.66 | 1.53  | 0.734174 | 0.307894 | 0.898179 | 0.563992 |
| MmugDNA.10465.1.S1_at   | MmugDNA.10465.1 | 8.33  | 8.58  | 0.56 | 0.15 | -1.19 | 0.428473 | 0.065462 | 0.741885 | 0.301415 |
| MmugDNA.10466.1.S1_at   | MmugDNA.10466.1 | 12.93 | 13.09 | 0.02 | 0.05 | -1.12 | 0.004441 | 0.006306 | 0.198947 | 0.107813 |
| MmugDNA.10469.1.S1_at   | MmugDNA.10469.1 | 3.87  | 4.21  | 1.01 | 0.39 | -1.26 | 0.705469 | 0.712961 | 0.885355 | 0.83357  |
| MmugDNA.1047.1.S1_at    | MmugDNA.1047.1  | 4.73  | 4.57  | 0.26 | 0.29 | 1.12  | 0.868725 | 0.798198 | 0.954083 | 0.883849 |
| MmugDNA.10470.1.S1_at   | MmugDNA.10470.1 | 3.64  | 4.45  | 0.23 | 0.42 | -1.76 | 0.029139 | 0.020574 | 0.333944 | 0.179964 |
| MmugDNA.10471.1.S1_at   | MmugDNA.10471.1 | 4.29  | 4.15  | 0.07 | 0.12 | 1.1   | 0.067893 | 0.270308 | 0.42451  | 0.535676 |
| MmugDNA.10472.1.S1_at   | MmugDNA.10472.1 | 5.4   | 5.8   | 0.45 | 0.16 | -1.33 | 0.54868  | 0.687099 | 0.809852 | 0.817434 |
| MmugDNA.10473.1.S1_at   | MmugDNA.10473.1 | 5.85  | 5.73  | 0.15 | 0.08 | 1.09  | 0.441597 | 0.635817 | 0.749468 | 0.785669 |
| MmugDNA.11511.1.S1_s_at | MmugDNA.11511.1 | 8.87  | 8.9   | 0.76 | 0.34 | -1.02 | 0.711818 | 0.431964 | 0.887709 | 0.652723 |
| MmugDNA.10476.1.S1_at   | MmugDNA.10476.1 | 5.94  | 5.8   | 0.68 | 0.26 | 1.1   | 0.493437 | 0.092841 | 0.778968 | 0.349024 |
| MmugDNA.10478.1.S1_at   | MmugDNA.10478.1 | 5.24  | 5.07  | 0.03 | 0.08 | 1.13  | 0.015145 | 0.283283 | 0.2796   | 0.545836 |
| MmugDNA.10479.1.S1_at   | MmugDNA.10479.1 | 6.35  | 6.35  | 0.2  | 0.31 | 1     | 0.960991 | 0.700854 | 0.987225 | 0.826525 |
| MmugDNA.1048.1.S1_at    | MmugDNA.1048.1  | 4.16  | 4.21  | 0.06 | 0.08 | -1.03 | 0.970498 | 0.808066 | 0.990336 | 0.889504 |
| MmugDNA.10480.1.S1_at   | MmugDNA.10480.1 | 9.39  | 9.38  | 0.35 | 0.01 | 1     | 0.975115 | 0.926809 | 0.991912 | 0.958404 |
| MmugDNA.10483.1.S1_at   | MmugDNA.10483.1 | 6.25  | 6.43  | 0.11 | 0.13 | -1.13 | 0.53919  | 0.146306 | 0.803644 | 0.420306 |
| MmugDNA.10484.1.S1_at   | MmugDNA.10484.1 | 3.96  | 4.04  | 0.12 | 0.13 | -1.05 | 0.567892 | 0.330541 | 0.820586 | 0.579302 |
| MmugDNA.10485.1.S1_at   | MmugDNA.10485.1 | 4.06  | 4.09  | 0.15 | 0    | -1.02 | 0.707965 | 0.80194  | 0.886424 | 0.885989 |
| MmugDNA.10486.1.S1_at   | MmugDNA.10486.1 | 7.24  | 7.31  | 0.17 | 0.02 | -1.05 | 0.765618 | 0.874655 | 0.911873 | 0.928837 |
| MmugDNA.10487.1.S1_at   | MmugDNA.10487.1 | 6.9   | 6.7   | 0.07 | 0.15 | 1.15  | 0.101619 | 0.205522 | 0.4719   | 0.479794 |
| MmugDNA.10488.1.S1_at   | MmugDNA.10488.1 | 5.87  | 5.78  | 0.29 | 0.08 | 1.06  | 0.595995 | 0.798512 | 0.835679 | 0.884012 |
| MmugDNA.10489.1.S1_at   | MmugDNA.10489.1 | 5.89  | 5.58  | 0.04 | 0.07 | 1.24  | 0.003277 | 0.038693 | 0.194357 | 0.24169  |
| MmugDNA.10489.1.S1_s_at | MmugDNA.10489.1 | 6.77  | 6.59  | 0.09 | 0.04 | 1.13  | 0.053551 | 0.611073 | 0.394949 | 0.769031 |
| MmugDNA.1049.1.S1_at    | MmugDNA.1049.1  | 4.5   | 4.35  | 0.24 | 0.27 | 1.11  | 0.231501 | 0.316844 | 0.599418 | 0.570212 |
| MmugDNA.10490.1.S1_at   | MmugDNA.10490.1 | 3.54  | 3.34  | 0.1  | 0.04 | 1.15  | 0.087103 | 0.191981 | 0.454785 | 0.467377 |
| MmugDNA.10492.1.S1_at   | MmugDNA.10492.1 | 4.11  | 4.09  | 1.12 | 0.3  | 1.01  | 0.512665 | 0.16697  | 0.789481 | 0.44345  |

|                         |                 |       |       |      |      |       |          |          |          |          |
|-------------------------|-----------------|-------|-------|------|------|-------|----------|----------|----------|----------|
| MmugDNA.10493.1.S1_at   | MmugDNA.10493.1 | 4.01  | 4     | 0.01 | 0.03 | 1.01  | 0.213628 | 0.321856 | 0.58427  | 0.57351  |
| MmugDNA.10495.1.S1_at   | MmugDNA.10495.1 | 8.35  | 8.91  | 0.57 | 0.05 | -1.47 | 0.209723 | 0.165715 | 0.581302 | 0.441982 |
| MmugDNA.10496.1.S1_at   | MmugDNA.10496.1 | 10.26 | 10.76 | 0.51 | 0.11 | -1.42 | 0.148616 | 0.058806 | 0.522658 | 0.289228 |
| MmugDNA.10497.1.S1_at   | MmugDNA.10497.1 | 5.87  | 5.86  | 0.06 | 0.09 | 1     | 0.920373 | 0.684848 | 0.972913 | 0.816189 |
| MmugDNA.10498.1.S1_at   | MmugDNA.10498.1 | 4.19  | 4.37  | 0.36 | 0    | -1.13 | 0.890292 | 0.985535 | 0.962263 | 0.991808 |
| MmugDNA.10499.1.S1_at   | MmugDNA.10499.1 | 5.15  | 5.27  | 0.28 | 0.68 | -1.08 | 0.36967  | 0.38798  | 0.704264 | 0.62253  |
| MmugDNA.105.1.S1_at     | MmugDNA.105.1   | 5.46  | 5.59  | 0.35 | 0.28 | -1.1  | 0.678873 | 0.418673 | 0.874202 | 0.643036 |
| MmugDNA.10500.1.S1_at   | MmugDNA.10500.1 | 8.93  | 9.02  | 0.87 | 0.23 | -1.07 | 0.915065 | 0.129933 | 0.971014 | 0.401515 |
| MmugDNA.10501.1.S1_at   | MmugDNA.10501.1 | 3.97  | 3.88  | 0.11 | 0.1  | 1.07  | 0.137218 | 0.200849 | 0.512291 | 0.475369 |
| MmugDNA.10502.1.S1_at   | MmugDNA.10502.1 | 6.41  | 6.69  | 0.43 | 0.15 | -1.21 | 0.218741 | 0.492106 | 0.588341 | 0.693442 |
| MmugDNA.10503.1.S1_at   | MmugDNA.10503.1 | 4.98  | 5.21  | 0.53 | 0.39 | -1.17 | 0.635217 | 0.44483  | 0.854522 | 0.662072 |
| MmugDNA.10504.1.S1_at   | MmugDNA.10504.1 | 12.22 | 11.1  | 0.18 | 0.1  | 2.19  | 0.000778 | 0.028544 | 0.15004  | 0.210754 |
| MmugDNA.10505.1.S1_at   | MmugDNA.10505.1 | 8.36  | 8.62  | 0.36 | 0.03 | -1.19 | 0.477584 | 0.264435 | 0.76987  | 0.530385 |
| MmugDNA.10505.1.S1_s_at | MmugDNA.10505.1 | 7.21  | 7.86  | 0.37 | 0.09 | -1.57 | 0.136563 | 0.0501   | 0.511723 | 0.268916 |
| MmugDNA.10507.1.S1_at   | MmugDNA.10507.1 | 5.34  | 5.21  | 0.1  | 0.12 | 1.09  | 0.195709 | 0.50802  | 0.565981 | 0.703358 |
| MmugDNA.10508.1.S1_at   | MmugDNA.10508.1 | 3.42  | 3.46  | 0.09 | 0.03 | -1.02 | 0.544823 | 0.014776 | 0.807495 | 0.154617 |
| MmugDNA.10509.1.S1_s_at | MmugDNA.10509.1 | 3.27  | 2.98  | 0.21 | 0.01 | 1.23  | 0.083041 | 0.110422 | 0.448369 | 0.374651 |
| MmugDNA.10510.1.S1_at   | MmugDNA.10510.1 | 5.72  | 5.38  | 0.27 | 0.14 | 1.27  | 0.17897  | 0.233914 | 0.552029 | 0.505183 |
| MmugDNA.10511.1.S1_at   | MmugDNA.10511.1 | 4.14  | 4.44  | 0.22 | 0.04 | -1.23 | 0.081485 | 0.145476 | 0.445423 | 0.419424 |
| MmugDNA.10513.1.S1_at   | MmugDNA.10513.1 | 4.3   | 4.57  | 0.43 | 0.11 | -1.21 | 0.267008 | 0.149459 | 0.627652 | 0.423928 |
| MmugDNA.10514.1.S1_at   | MmugDNA.10514.1 | 3.06  | 3.18  | 0.18 | 0.1  | -1.08 | 0.398336 | 0.483254 | 0.722451 | 0.687881 |
| MmugDNA.10515.1.S1_at   | MmugDNA.10515.1 | 4.18  | 3.9   | 0.16 | 0.22 | 1.22  | 0.061738 | 0.053777 | 0.411419 | 0.27744  |
| MmugDNA.10516.1.S1_at   | MmugDNA.10516.1 | 7.18  | 6.23  | 0.25 | 0    | 1.93  | 0.002568 | 0.000944 | 0.180597 | 0.049054 |
| MmugDNA.10517.1.S1_at   | MmugDNA.10517.1 | 8.66  | 8.72  | 0.61 | 0.14 | -1.04 | 0.903145 | 0.94652  | 0.967394 | 0.969668 |
| MmugDNA.10518.1.S1_at   | MmugDNA.10518.1 | 3.11  | 3.1   | 0.14 | 0.02 | 1.01  | 0.624391 | 0.206872 | 0.848721 | 0.481034 |
| MmugDNA.10519.1.S1_at   | MmugDNA.10519.1 | 4.69  | 4.55  | 0.14 | 0.11 | 1.1   | 0.935526 | 0.33634  | 0.978214 | 0.583813 |
| MmugDNA.1052.1.S1_at    | MmugDNA.1052.1  | 3.84  | 3.66  | 0.16 | 0.12 | 1.14  | 0.439006 | 0.69853  | 0.747754 | 0.824852 |
| MmugDNA.10520.1.S1_at   | MmugDNA.10520.1 | 9.19  | 9.12  | 0.51 | 0.32 | 1.05  | 0.23817  | 0.198247 | 0.605262 | 0.473234 |
| MmugDNA.10521.1.S1_at   | MmugDNA.10521.1 | 3.27  | 3.08  | 0.17 | 0.1  | 1.14  | 0.770192 | 0.529256 | 0.913903 | 0.717233 |
| MmugDNA.10522.1.S1_at   | MmugDNA.10522.1 | 4.24  | 4.04  | 0.35 | 0.08 | 1.15  | 0.344667 | 0.579732 | 0.686997 | 0.74927  |
| MmugDNA.10523.1.S1_at   | MmugDNA.10523.1 | 8.13  | 8.4   | 0.2  | 0.06 | -1.2  | 0.111286 | 0.029528 | 0.484508 | 0.213512 |
| MmugDNA.10524.1.S1_at   | MmugDNA.10524.1 | 5.99  | 6.09  | 0.12 | 0.15 | -1.07 | 0.628209 | 0.175619 | 0.851104 | 0.45218  |
| MmugDNA.10527.1.S1_at   | MmugDNA.10527.1 | 5.16  | 5.23  | 0.29 | 0.22 | -1.05 | 0.759011 | 0.452481 | 0.909414 | 0.667111 |
| MmugDNA.10529.1.S1_at   | MmugDNA.10529.1 | 3.95  | 4.63  | 0.22 | 0.59 | -1.6  | 0.20049  | 0.094839 | 0.572371 | 0.35185  |
| MmugDNA.1053.1.S1_at    | MmugDNA.1053.1  | 11.12 | 11.39 | 0.3  | 0.18 | -1.21 | 0.455307 | 0.048594 | 0.757353 | 0.265572 |
| MmugDNA.10532.1.S1_s_at | MmugDNA.10532.1 | 10.64 | 10.47 | 0.52 | 0.04 | 1.13  | 0.877969 | 0.944304 | 0.957532 | 0.968468 |
| MmugDNA.10533.1.S1_at   | MmugDNA.10533.1 | 4.27  | 4.31  | 0.05 | 0.03 | -1.03 | 0.04774  | 0.377187 | 0.381152 | 0.614825 |
| MmugDNA.10534.1.S1_at   | MmugDNA.10534.1 | 8.4   | 7.9   | 0.66 | 0.12 | 1.41  | 0.726635 | 0.522762 | 0.894387 | 0.713367 |
| MmugDNA.11916.1.S1_s_at | MmugDNA.11916.1 | 13.77 | 13.98 | 0.02 | 0.05 | -1.16 | 0.004363 | 0.000303 | 0.198874 | 0.034907 |
| MmugDNA.10536.1.S1_at   | MmugDNA.10536.1 | 8.82  | 8.71  | 0.34 | 0.25 | 1.08  | 0.380275 | 0.568817 | 0.709387 | 0.74211  |
| MmugDNA.10537.1.S1_at   | MmugDNA.10537.1 | 6.71  | 6.67  | 0.19 | 0.17 | 1.03  | 0.73582  | 0.098588 | 0.89895  | 0.356709 |
| MmugDNA.10538.1.S1_at   | MmugDNA.10538.1 | 8.18  | 7.97  | 0.05 | 0.05 | 1.16  | 0.004154 | 0.013044 | 0.198874 | 0.14696  |
| MmugDNA.10538.1.S1_s_at | MmugDNA.10538.1 | 6.81  | 6.61  | 0.16 | 0.17 | 1.15  | 0.219667 | 0.207113 | 0.589083 | 0.481191 |

|                         |                 |       |       |      |      |       |          |          |          |          |
|-------------------------|-----------------|-------|-------|------|------|-------|----------|----------|----------|----------|
| MmugDNA.1054.1.S1_at    | MmugDNA.1054.1  | 3.36  | 3.46  | 0.06 | 0.06 | -1.07 | 0.10254  | 0.093183 | 0.472772 | 0.34931  |
| MmugDNA.10540.1.S1_at   | MmugDNA.10540.1 | 4.15  | 4.14  | 0.04 | 0.1  | 1.01  | 0.886923 | 0.459074 | 0.960715 | 0.671544 |
| MmugDNA.10541.1.S1_at   | MmugDNA.10541.1 | 3.04  | 3.25  | 0.05 | 0.17 | -1.16 | 0.35297  | 0.6273   | 0.692958 | 0.780361 |
| MmugDNA.10543.1.S1_at   | MmugDNA.10543.1 | 4.65  | 4.63  | 0.21 | 0.66 | 1.02  | 0.899438 | 0.844107 | 0.965794 | 0.911246 |
| MmugDNA.10544.1.S1_at   | MmugDNA.10544.1 | 3.48  | 3.46  | 0.22 | 0.03 | 1.02  | 0.355133 | 0.737072 | 0.69464  | 0.847791 |
| MmugDNA.10545.1.S1_at   | MmugDNA.10545.1 | 4.4   | 4.46  | 0.26 | 0.3  | -1.04 | 0.382143 | 0.806482 | 0.710505 | 0.888651 |
| MmugDNA.10546.1.S1_at   | MmugDNA.10546.1 | 6.08  | 5.91  | 0.88 | 0.4  | 1.13  | 0.852474 | 0.035841 | 0.947963 | 0.233777 |
| MmugDNA.10547.1.S1_at   | MmugDNA.10547.1 | 7.14  | 6.8   | 0.28 | 0.26 | 1.27  | 0.440052 | 0.53993  | 0.748282 | 0.723995 |
| MmugDNA.1055.1.S1_at    | MmugDNA.1055.1  | 5.19  | 5.12  | 0.04 | 0.24 | 1.05  | 0.711231 | 0.112566 | 0.887567 | 0.377995 |
| MmugDNA.10550.1.S1_at   | MmugDNA.10550.1 | 4.39  | 4.25  | 0.71 | 0.49 | 1.1   | 0.990221 | 0.222999 | 0.996346 | 0.495821 |
| MmugDNA.10551.1.S1_at   | MmugDNA.10551.1 | 10.57 | 9.43  | 0.08 | 0.12 | 2.2   | 0.000134 | 0.000028 | 0.111942 | 0.021152 |
| MmugDNA.10552.1.S1_at   | MmugDNA.10552.1 | 3.52  | 3.36  | 0.16 | 0.1  | 1.12  | 0.235271 | 0.313894 | 0.602334 | 0.568094 |
| MmugDNA.10553.1.S1_at   | MmugDNA.10553.1 | 4.95  | 5.01  | 0.14 | 0.06 | -1.05 | 0.941395 | 0.217286 | 0.980073 | 0.490911 |
| MmugDNA.10554.1.S1_at   | MmugDNA.10554.1 | 4.6   | 4.41  | 0.04 | 0.16 | 1.14  | 0.104375 | 0.225766 | 0.475466 | 0.498159 |
| MmugDNA.10555.1.S1_at   | MmugDNA.10555.1 | 7.42  | 7.2   | 0.09 | 0.17 | 1.17  | 0.157495 | 0.420771 | 0.530588 | 0.64442  |
| MmugDNA.10556.1.S1_at   | MmugDNA.10556.1 | 3.76  | 3.61  | 0.1  | 0.13 | 1.11  | 0.077331 | 0.149635 | 0.439109 | 0.424175 |
| MmugDNA.10557.1.S1_at   | MmugDNA.10557.1 | 6.54  | 6.49  | 0.01 | 0.13 | 1.03  | 0.741808 | 0.862226 | 0.901509 | 0.921663 |
| MmugDNA.10558.1.S1_at   | MmugDNA.10558.1 | 10.63 | 10.32 | 0.26 | 0.13 | 1.24  | 0.07783  | 0.077044 | 0.439956 | 0.322481 |
| MmugDNA.10559.1.S1_at   | MmugDNA.10559.1 | 4.2   | 3.75  | 0.38 | 0.2  | 1.36  | 0.184135 | 0.288008 | 0.55696  | 0.549277 |
| MmugDNA.10560.1.S1_at   | MmugDNA.10560.1 | 11.61 | 11.29 | 0.1  | 0.16 | 1.24  | 0.041234 | 0.00116  | 0.365746 | 0.053615 |
| MmugDNA.10561.1.S1_at   | MmugDNA.10561.1 | 5.48  | 5.29  | 0.13 | 0.22 | 1.13  | 0.157793 | 0.234823 | 0.53073  | 0.506125 |
| MmugDNA.10562.1.S1_at   | MmugDNA.10562.1 | 10.16 | 10.25 | 0.64 | 0.25 | -1.06 | 0.906004 | 0.576533 | 0.968201 | 0.747267 |
| MmugDNA.10564.1.S1_at   | MmugDNA.10564.1 | 11.06 | 11.19 | 0.31 | 0.15 | -1.09 | 0.17534  | 0.00061  | 0.548245 | 0.042176 |
| MmugDNA.10565.1.S1_at   | MmugDNA.10565.1 | 4.86  | 4.65  | 0.28 | 0.07 | 1.16  | 0.918897 | 0.988381 | 0.972289 | 0.993461 |
| MmugDNA.10566.1.S1_at   | MmugDNA.10566.1 | 2.91  | 3.07  | 0.15 | 0.07 | -1.12 | 0.482623 | 0.462908 | 0.772515 | 0.674149 |
| MmugDNA.10567.1.S1_at   | MmugDNA.10567.1 | 6.79  | 6.95  | 0.16 | 0.28 | -1.12 | 0.675344 | 0.015745 | 0.872634 | 0.158972 |
| MmugDNA.10568.1.S1_at   | MmugDNA.10568.1 | 6.73  | 7.99  | 1.18 | 0.26 | -2.41 | 0.504942 | 0.260157 | 0.785092 | 0.5268   |
| MmugDNA.10569.1.S1_at   | MmugDNA.10569.1 | 8.6   | 8.74  | 0.35 | 0.17 | -1.1  | 0.256799 | 0.182257 | 0.620706 | 0.458766 |
| MmugDNA.1057.1.S1_at    | MmugDNA.1057.1  | 11.04 | 11.92 | 0.41 | 0.07 | -1.84 | 0.022787 | 0.019555 | 0.312286 | 0.175563 |
| MmugDNA.10571.1.S1_at   | MmugDNA.10571.1 | 6.08  | 5.25  | 0.82 | 0.4  | 1.78  | 0.053363 | 0.035408 | 0.394644 | 0.232497 |
| MmugDNA.10572.1.S1_at   | MmugDNA.10572.1 | 9.83  | 10.09 | 0.55 | 0.19 | -1.2  | 0.973332 | 0.019828 | 0.991334 | 0.177124 |
| MmugDNA.10573.1.S1_at   | MmugDNA.10573.1 | 8     | 8.17  | 0.2  | 0.05 | -1.12 | 0.306008 | 0.394762 | 0.659264 | 0.627208 |
| MmugDNA.10576.1.S1_at   | MmugDNA.10576.1 | 6.32  | 6.35  | 0.25 | 0.05 | -1.02 | 0.89519  | 0.986887 | 0.964244 | 0.992589 |
| MmugDNA.10577.1.S1_at   | MmugDNA.10577.1 | 5.93  | 5.99  | 0.32 | 0.02 | -1.05 | 0.561177 | 0.942682 | 0.81716  | 0.967498 |
| MmugDNA.10579.1.S1_at   | MmugDNA.10579.1 | 10.04 | 8.15  | 1.36 | 0.11 | 3.69  | 0.25536  | 0.37536  | 0.619432 | 0.613359 |
| MmugDNA.1058.1.S1_at    | MmugDNA.1058.1  | 5.01  | 4.65  | 0.24 | 0.19 | 1.28  | 0.294161 | 0.255121 | 0.650324 | 0.52317  |
| MmugDNA.10580.1.S1_at   | MmugDNA.10580.1 | 9.64  | 9.58  | 0.2  | 0.02 | 1.05  | 0.191882 | 0.202304 | 0.562984 | 0.476691 |
| MmugDNA.10581.1.S1_s_at | MmugDNA.10581.1 | 6.57  | 6.4   | 0.1  | 0.09 | 1.12  | 0.09896  | 0.279269 | 0.468321 | 0.542937 |
| MmugDNA.10582.1.S1_at   | MmugDNA.10582.1 | 5.68  | 5.72  | 0.19 | 0.17 | -1.03 | 0.984741 | 0.743384 | 0.995256 | 0.851291 |
| MmugDNA.10583.1.S1_at   | MmugDNA.10583.1 | 4.62  | 4.64  | 0.23 | 0.12 | -1.01 | 0.475015 | 0.692195 | 0.768317 | 0.82091  |
| MmugDNA.10584.1.S1_s_at | MmugDNA.10584.1 | 11.44 | 11.55 | 0.25 | 0.06 | -1.08 | 0.915716 | 0.136429 | 0.971302 | 0.408839 |
| MmugDNA.10585.1.S1_at   | MmugDNA.10585.1 | 9.93  | 10.35 | 0.51 | 0.05 | -1.33 | 0.541986 | 0.54155  | 0.805445 | 0.725015 |
| MmugDNA.10586.1.S1_at   | MmugDNA.10586.1 | 6.04  | 5.87  | 0.1  | 0.09 | 1.13  | 0.076155 | 0.065747 | 0.437507 | 0.301766 |

|                         |                 |       |       |      |      |       |          |          |          |          |
|-------------------------|-----------------|-------|-------|------|------|-------|----------|----------|----------|----------|
| MmugDNA.1059.1.S1_at    | MmugDNA.1059.1  | 6.95  | 8.89  | 0.91 | 0.19 | -3.84 | 0.040194 | 0.029703 | 0.36348  | 0.214029 |
| MmugDNA.10590.1.S1_at   | MmugDNA.10590.1 | 8.15  | 7.07  | 0.52 | 0.16 | 2.12  | 0.087929 | 0.139156 | 0.455812 | 0.412266 |
| MmugDNA.10591.1.S1_at   | MmugDNA.10591.1 | 3.12  | 2.98  | 0.03 | 0.06 | 1.1   | 0.013202 | 0.005431 | 0.266951 | 0.101706 |
| MmugDNA.10592.1.S1_at   | MmugDNA.10592.1 | 6.33  | 7.02  | 0.66 | 0.23 | -1.61 | 0.249364 | 0.203718 | 0.614718 | 0.477966 |
| MmugDNA.10593.1.S1_at   | MmugDNA.10593.1 | 8.81  | 9.13  | 0.14 | 0.11 | -1.24 | 0.01936  | 0.006529 | 0.300575 | 0.109613 |
| MmugDNA.10595.1.S1_at   | MmugDNA.10595.1 | 9.86  | 10.16 | 0.36 | 0.08 | -1.23 | 0.682415 | 0.704876 | 0.875741 | 0.828846 |
| MmugDNA.10596.1.S1_s_at | MmugDNA.10596.1 | 12.79 | 12.97 | 0.29 | 0.1  | -1.14 | 0.829738 | 0.067774 | 0.938862 | 0.30644  |
| MmugDNA.10597.1.S1_at   | MmugDNA.10597.1 | 6.42  | 6.86  | 0.36 | 0.19 | -1.36 | 0.081048 | 0.750706 | 0.445056 | 0.855009 |
| MmugDNA.10598.1.S1_s_at | MmugDNA.10598.1 | 5.99  | 6.05  | 0.11 | 0.03 | -1.04 | 0.940966 | 0.881316 | 0.979891 | 0.932281 |
| MmugDNA.106.1.S1_at     | MmugDNA.106.1   | 4.78  | 4.66  | 0.69 | 0.31 | 1.09  | 0.628861 | 0.831195 | 0.851318 | 0.903172 |
| MmugDNA.1060.1.S1_at    | MmugDNA.1060.1  | 5.92  | 6.63  | 0.62 | 0.61 | -1.64 | 0.047879 | 0.031183 | 0.381444 | 0.21838  |
| MmugDNA.10600.1.S1_at   | MmugDNA.10600.1 | 5.99  | 5.82  | 0.21 | 0.03 | 1.12  | 0.081964 | 0.323327 | 0.44659  | 0.57443  |
| MmugDNA.10601.1.S1_at   | MmugDNA.10601.1 | 10.6  | 10.76 | 0.12 | 0.3  | -1.12 | 0.791883 | 0.353114 | 0.923517 | 0.596383 |
| MmugDNA.10601.1.S1_s_at | MmugDNA.10601.1 | 10.49 | 10.59 | 0.16 | 0.21 | -1.07 | 0.357801 | 0.163293 | 0.695993 | 0.439468 |
| MmugDNA.10602.1.S1_at   | MmugDNA.10602.1 | 9.54  | 9.38  | 0.21 | 0.11 | 1.12  | 0.066249 | 0.034851 | 0.421918 | 0.230897 |
| MmugDNA.10603.1.S1_at   | MmugDNA.10603.1 | 5.21  | 5.01  | 0.15 | 0.09 | 1.14  | 0.040523 | 0.05184  | 0.364613 | 0.273151 |
| MmugDNA.10604.1.S1_at   | MmugDNA.10604.1 | 3.77  | 3.76  | 0.03 | 0.11 | 1     | 0.365087 | 0.586973 | 0.700784 | 0.753932 |
| MmugDNA.35526.1.S1_s_at | MmugDNA.35526.1 | 11.26 | 10.9  | 0.14 | 0.09 | 1.29  | 0.018441 | 0.036134 | 0.297408 | 0.234582 |
| MmugDNA.10606.1.S1_at   | MmugDNA.10606.1 | 10.02 | 10.03 | 0.34 | 0.18 | -1.01 | 0.572102 | 0.174155 | 0.823145 | 0.450451 |
| MmugDNA.10607.1.S1_s_at | MmugDNA.10607.1 | 11.53 | 11.5  | 0.24 | 0.05 | 1.02  | 0.658177 | 0.023753 | 0.864461 | 0.192931 |
| MmugDNA.10608.1.S1_s_at | MmugDNA.10608.1 | 10.52 | 10.23 | 0.1  | 0.23 | 1.22  | 0.552603 | 0.297331 | 0.811888 | 0.556071 |
| MmugDNA.10609.1.S1_at   | MmugDNA.10609.1 | 3.21  | 3.26  | 0.08 | 0.04 | -1.04 | 0.607704 | 0.599727 | 0.840969 | 0.761544 |
| MmugDNA.1061.1.S1_at    | MmugDNA.1061.1  | 5.97  | 5.85  | 0.04 | 0.11 | 1.09  | 0.262392 | 0.138726 | 0.624639 | 0.411807 |
| MmugDNA.10612.1.S1_at   | MmugDNA.10612.1 | 3.67  | 4.04  | 0.15 | 0.3  | -1.29 | 0.371081 | 0.167983 | 0.705325 | 0.444576 |
| MmugDNA.10613.1.S1_at   | MmugDNA.10613.1 | 4.12  | 3.94  | 0.09 | 0.15 | 1.14  | 0.147311 | 0.054637 | 0.521578 | 0.279266 |
| MmugDNA.10615.1.S1_at   | MmugDNA.10615.1 | 6.46  | 6.47  | 0.18 | 0.03 | -1    | 0.400718 | 0.580564 | 0.723941 | 0.749782 |
| MmugDNA.10616.1.S1_at   | MmugDNA.10616.1 | 5.21  | 5.07  | 0.85 | 0.58 | 1.1   | 0.684881 | 0.365841 | 0.876588 | 0.605763 |
| MmugDNA.10617.1.S1_s_at | MmugDNA.10617.1 | 3.82  | 3.91  | 0.23 | 0.08 | -1.07 | 0.667588 | 0.884813 | 0.868641 | 0.934373 |
| MmugDNA.10618.1.S1_at   | MmugDNA.10618.1 | 11.33 | 11.29 | 0.36 | 0.19 | 1.03  | 0.544231 | 0.016619 | 0.807148 | 0.163117 |
| MmugDNA.10619.1.S1_at   | MmugDNA.10619.1 | 4.15  | 4.09  | 0.02 | 0.4  | 1.04  | 0.70895  | 0.90781  | 0.886591 | 0.947847 |
| MmugDNA.1062.1.S1_at    | MmugDNA.1062.1  | 3.74  | 3.77  | 0.21 | 0.05 | -1.02 | 0.40922  | 0.560144 | 0.72983  | 0.736517 |
| MmugDNA.10620.1.S1_at   | MmugDNA.10620.1 | 9.03  | 8.5   | 0.7  | 0.25 | 1.44  | 0.201091 | 0.045434 | 0.572867 | 0.2575   |
| MmugDNA.10621.1.S1_at   | MmugDNA.10621.1 | 11.21 | 10.85 | 0.39 | 0.11 | 1.28  | 0.05447  | 0.028845 | 0.396542 | 0.211661 |
| MmugDNA.10622.1.S1_at   | MmugDNA.10622.1 | 5.69  | 5.59  | 0.2  | 0.1  | 1.08  | 0.553836 | 0.712805 | 0.812304 | 0.833516 |
| MmugDNA.10623.1.S1_at   | MmugDNA.10623.1 | 4.7   | 4.59  | 0.06 | 0.07 | 1.08  | 0.106084 | 0.084909 | 0.478296 | 0.336511 |
| MmugDNA.10624.1.S1_at   | MmugDNA.10624.1 | 6.35  | 6.55  | 0.38 | 0.28 | -1.14 | 0.432457 | 0.74607  | 0.743915 | 0.852688 |
| MmugDNA.10625.1.S1_at   | MmugDNA.10625.1 | 5.49  | 5.74  | 0.26 | 0.17 | -1.19 | 0.104465 | 0.073672 | 0.475505 | 0.317014 |
| MmugDNA.10626.1.S1_at   | MmugDNA.10626.1 | 4.41  | 4.49  | 0.31 | 0.74 | -1.05 | 0.335616 | 0.053906 | 0.681167 | 0.277699 |
| MmugDNA.10627.1.S1_at   | MmugDNA.10627.1 | 10.65 | 10.5  | 0.58 | 0.16 | 1.11  | 0.461891 | 0.227104 | 0.761322 | 0.499432 |
| MmugDNA.10629.1.S1_at   | MmugDNA.10629.1 | 11.27 | 11    | 0.47 | 0.08 | 1.21  | 0.147662 | 0.155417 | 0.521766 | 0.430802 |
| MmugDNA.1063.1.S1_at    | MmugDNA.1063.1  | 6.54  | 7.19  | 0.48 | 0.32 | -1.56 | 0.173083 | 0.023639 | 0.546142 | 0.192555 |
| MmugDNA.10630.1.S1_s_at | MmugDNA.10630.1 | 11.1  | 10.75 | 0.68 | 0.14 | 1.28  | 0.796521 | 0.12649  | 0.925188 | 0.397038 |
| MmugDNA.10631.1.S1_at   | MmugDNA.10631.1 | 9.63  | 9.46  | 0.65 | 0.22 | 1.13  | 0.990689 | 0.036193 | 0.996456 | 0.234827 |

|                         |                 |       |       |      |      |       |          |          |          |          |
|-------------------------|-----------------|-------|-------|------|------|-------|----------|----------|----------|----------|
| MmugDNA.10632.1.S1_at   | MmugDNA.10632.1 | 6.21  | 6.23  | 1.53 | 0.63 | -1.01 | 0.931833 | 0.352429 | 0.977116 | 0.595722 |
| MmugDNA.10633.1.S1_s_at | MmugDNA.10633.1 | 4.76  | 6.01  | 0.26 | 0.43 | -2.37 | 0.016176 | 0.014933 | 0.286419 | 0.155342 |
| MmugDNA.10634.1.S1_at   | MmugDNA.10634.1 | 7.44  | 7.05  | 0.99 | 0.05 | 1.32  | 0.744038 | 0.83748  | 0.902414 | 0.907127 |
| MmugDNA.10635.1.S1_at   | MmugDNA.10635.1 | 10.04 | 10.23 | 0.13 | 0.11 | -1.14 | 0.632229 | 0.030242 | 0.852795 | 0.215784 |
| MmugDNA.10639.1.S1_at   | MmugDNA.10639.1 | 9.24  | 9     | 0.12 | 0.08 | 1.18  | 0.114811 | 0.121009 | 0.487957 | 0.389997 |
| MmugDNA.10641.1.S1_at   | MmugDNA.10641.1 | 9.23  | 9.69  | 0.44 | 0.1  | -1.37 | 0.304025 | 0.906497 | 0.657781 | 0.947112 |
| MmugDNA.10642.1.S1_at   | MmugDNA.10642.1 | 3.66  | 3.51  | 0.08 | 0.05 | 1.11  | 0.069391 | 0.014467 | 0.426951 | 0.153478 |
| MmugDNA.10644.1.S1_at   | MmugDNA.10644.1 | 8.23  | 7.57  | 0.33 | 0.4  | 1.59  | 0.346723 | 0.564733 | 0.688361 | 0.739425 |
| MmugDNA.10645.1.S1_at   | MmugDNA.10645.1 | 6.53  | 6.33  | 0.08 | 0.12 | 1.15  | 0.066539 | 0.128558 | 0.422382 | 0.399918 |
| MmugDNA.10646.1.S1_at   | MmugDNA.10646.1 | 3.33  | 3.16  | 0.12 | 0.1  | 1.13  | 0.100339 | 0.05646  | 0.470959 | 0.283516 |
| MmugDNA.10648.1.S1_at   | MmugDNA.10648.1 | 5.92  | 5.93  | 0.07 | 0.13 | -1    | 0.436722 | 0.624456 | 0.746437 | 0.778655 |
| MmugDNA.1065.1.S1_at    | MmugDNA.1065.1  | 4.56  | 4.46  | 0.17 | 0.15 | 1.07  | 0.97967  | 0.168306 | 0.993574 | 0.444942 |
| MmugDNA.10650.1.S1_at   | MmugDNA.10650.1 | 5.04  | 5.29  | 0.16 | 0.65 | -1.18 | 0.523407 | 0.35592  | 0.795628 | 0.597894 |
| MmugDNA.10651.1.S1_at   | MmugDNA.10651.1 | 3.43  | 3.08  | 0.32 | 0.14 | 1.28  | 0.273641 | 0.153512 | 0.633308 | 0.42827  |
| MmugDNA.10652.1.S1_at   | MmugDNA.10652.1 | 3.92  | 3.87  | 0.11 | 0.08 | 1.03  | 0.246755 | 0.696951 | 0.612254 | 0.824002 |
| MmugDNA.10653.1.S1_at   | MmugDNA.10653.1 | 3.59  | 3.69  | 0.14 | 0.19 | -1.07 | 0.312278 | 0.281732 | 0.663896 | 0.544807 |
| MmugDNA.10654.1.S1_at   | MmugDNA.10654.1 | 6.17  | 5.66  | 0.2  | 0.46 | 1.43  | 0.210927 | 0.525722 | 0.582007 | 0.715217 |
| MmugDNA.10655.1.S1_at   | MmugDNA.10655.1 | 3.86  | 3.63  | 0.19 | 0.37 | 1.18  | 0.842522 | 0.662933 | 0.944281 | 0.802665 |
| MmugDNA.10656.1.S1_at   | MmugDNA.10656.1 | 9.33  | 9.74  | 0.81 | 0.04 | -1.33 | 0.704746 | 0.910855 | 0.885183 | 0.949709 |
| MmugDNA.10657.1.S1_at   | MmugDNA.10657.1 | 5.11  | 5.14  | 0.18 | 0.11 | -1.03 | 0.234688 | 0.218743 | 0.602061 | 0.492438 |
| MmugDNA.10658.1.S1_at   | MmugDNA.10658.1 | 4.55  | 4.48  | 0.14 | 0.03 | 1.04  | 0.185744 | 0.436621 | 0.558625 | 0.656124 |
| MmugDNA.10659.1.S1_at   | MmugDNA.10659.1 | 11.08 | 12.12 | 1.37 | 0.27 | -2.05 | 0.257773 | 0.113679 | 0.621456 | 0.379818 |
| MmugDNA.1066.1.S1_at    | MmugDNA.1066.1  | 7.66  | 8.74  | 0.39 | 0.1  | -2.12 | 0.010527 | 0.002159 | 0.248118 | 0.068763 |
| MmugDNA.10660.1.S1_at   | MmugDNA.10660.1 | 11.55 | 11.16 | 0.07 | 0.07 | 1.31  | 0.002623 | 0.036769 | 0.181779 | 0.236291 |
| MmugDNA.10661.1.S1_at   | MmugDNA.10661.1 | 5.73  | 5.52  | 0.14 | 0.04 | 1.16  | 0.058223 | 0.248446 | 0.403824 | 0.517727 |
| MmugDNA.10662.1.S1_at   | MmugDNA.10662.1 | 5.47  | 5.31  | 0.19 | 0.01 | 1.12  | 0.196856 | 0.364985 | 0.567663 | 0.605199 |
| MmugDNA.10664.1.S1_at   | MmugDNA.10664.1 | 7.16  | 7.29  | 0.74 | 0.2  | -1.09 | 0.377228 | 0.644377 | 0.707423 | 0.791566 |
| MmugDNA.10665.1.S1_at   | MmugDNA.10665.1 | 11.96 | 12.51 | 0.17 | 0.02 | -1.46 | 0.005479 | 0.006161 | 0.208157 | 0.106774 |
| MmugDNA.10667.1.S1_at   | MmugDNA.10667.1 | 12.32 | 12.41 | 0.24 | 0.07 | -1.06 | 0.568757 | 0.304208 | 0.821041 | 0.561558 |
| MmugDNA.10670.1.S1_at   | MmugDNA.10670.1 | 4.7   | 4.78  | 0.2  | 0.41 | -1.06 | 0.896612 | 0.284228 | 0.964799 | 0.546461 |
| MmugDNA.10671.1.S1_at   | MmugDNA.10671.1 | 6.4   | 6.52  | 0.05 | 0.58 | -1.09 | 0.236714 | 0.682954 | 0.603684 | 0.815033 |
| MmugDNA.10672.1.S1_at   | MmugDNA.10672.1 | 5.92  | 6.65  | 0.1  | 0.12 | -1.65 | 0.001677 | 0.004357 | 0.164185 | 0.092421 |
| MmugDNA.10673.1.S1_at   | MmugDNA.10673.1 | 5.84  | 5.8   | 0.04 | 0.24 | 1.03  | 0.720146 | 0.045076 | 0.891414 | 0.256789 |
| MmugDNA.10674.1.S1_at   | MmugDNA.10674.1 | 10.95 | 11.06 | 0.46 | 0.18 | -1.08 | 0.779649 | 0.751903 | 0.918773 | 0.855714 |
| MmugDNA.10677.1.S1_at   | MmugDNA.10677.1 | 9.54  | 9.55  | 0.56 | 0.06 | -1.01 | 0.918661 | 0.704081 | 0.972234 | 0.828326 |
| MmugDNA.10678.1.S1_at   | MmugDNA.10678.1 | 5.98  | 6.24  | 0.16 | 0.12 | -1.2  | 0.220058 | 0.098942 | 0.589121 | 0.357049 |
| MmugDNA.10681.1.S1_at   | MmugDNA.10681.1 | 5.9   | 5.64  | 0.16 | 0.1  | 1.2   | 0.065669 | 0.328581 | 0.420827 | 0.578148 |
| MmugDNA.10683.1.S1_at   | MmugDNA.10683.1 | 8.51  | 8.25  | 0.34 | 0.18 | 1.2   | 0.084242 | 0.020747 | 0.450882 | 0.180721 |
| MmugDNA.10686.1.S1_at   | MmugDNA.10686.1 | 5.85  | 5.88  | 0.13 | 0.21 | -1.02 | 0.501212 | 0.239122 | 0.783112 | 0.509827 |
| MmugDNA.10689.1.S1_at   | MmugDNA.10689.1 | 3.53  | 3.92  | 0.18 | 0.22 | -1.31 | 0.054513 | 0.016392 | 0.396542 | 0.162128 |
| MmugDNA.1069.1.S1_at    | MmugDNA.1069.1  | 8.37  | 8.48  | 0.35 | 0.15 | -1.08 | 0.22331  | 0.538819 | 0.592569 | 0.723368 |
| MmugDNA.10690.1.S1_at   | MmugDNA.10690.1 | 4.46  | 4.55  | 0.22 | 0.18 | -1.07 | 0.707692 | 0.596483 | 0.88624  | 0.759596 |
| MmugDNA.10691.1.S1_at   | MmugDNA.10691.1 | 8.36  | 9.51  | 1.02 | 0.42 | -2.22 | 0.273736 | 0.16013  | 0.633406 | 0.436296 |

|                         |                 |       |       |      |      |       |          |          |          |          |
|-------------------------|-----------------|-------|-------|------|------|-------|----------|----------|----------|----------|
| MmugDNA.10693.1.S1_at   | MmugDNA.10693.1 | 6.38  | 6.29  | 0.07 | 0.1  | 1.06  | 0.805233 | 0.427293 | 0.929175 | 0.649175 |
| MmugDNA.10694.1.S1_at   | MmugDNA.10694.1 | 3.07  | 3.22  | 0.04 | 0.11 | -1.11 | 0.047315 | 0.429758 | 0.379847 | 0.651032 |
| MmugDNA.10696.1.S1_at   | MmugDNA.10696.1 | 6.9   | 6.88  | 0.1  | 0.01 | 1.02  | 0.779623 | 0.046336 | 0.918762 | 0.25979  |
| MmugDNA.10697.1.S1_at   | MmugDNA.10697.1 | 3.89  | 3.9   | 0.04 | 0.02 | -1    | 0.815118 | 0.532817 | 0.933137 | 0.719235 |
| MmugDNA.1070.1.S1_at    | MmugDNA.1070.1  | 8.68  | 9.2   | 0.35 | 0.24 | -1.43 | 0.205219 | 0.045188 | 0.576964 | 0.256979 |
| MmugDNA.1070.1.S1_s_at  | MmugDNA.1070.1  | 10.53 | 10.87 | 0.61 | 0.23 | -1.27 | 0.403235 | 0.552935 | 0.725542 | 0.732201 |
| MmugDNA.10700.1.S1_at   | MmugDNA.10700.1 | 9.92  | 9.49  | 0.38 | 0.01 | 1.34  | 0.116782 | 0.0038   | 0.490029 | 0.087835 |
| MmugDNA.10701.1.S1_at   | MmugDNA.10701.1 | 5.48  | 5.26  | 0.11 | 0.04 | 1.16  | 0.037287 | 0.318031 | 0.357061 | 0.571046 |
| MmugDNA.10702.1.S1_at   | MmugDNA.10702.1 | 6.41  | 6.74  | 0.59 | 0.21 | -1.26 | 0.380616 | 0.251249 | 0.709519 | 0.519984 |
| MmugDNA.10703.1.S1_at   | MmugDNA.10703.1 | 6.6   | 6.49  | 0.04 | 0.02 | 1.08  | 0.015896 | 0.112205 | 0.284532 | 0.377537 |
| MmugDNA.10704.1.S1_at   | MmugDNA.10704.1 | 4.64  | 4.54  | 0.05 | 0.06 | 1.07  | 0.087845 | 0.478802 | 0.455734 | 0.684733 |
| MmugDNA.10705.1.S1_at   | MmugDNA.10705.1 | 8.21  | 7.96  | 0.35 | 0.13 | 1.19  | 0.911751 | 0.880245 | 0.970168 | 0.931571 |
| MmugDNA.10706.1.S1_at   | MmugDNA.10706.1 | 7.91  | 7.68  | 0.31 | 0.11 | 1.17  | 0.238566 | 0.702113 | 0.605359 | 0.827304 |
| MmugDNA.10709.1.S1_at   | MmugDNA.10709.1 | 6     | 5.7   | 0.3  | 0.12 | 1.23  | 0.166074 | 0.174919 | 0.538883 | 0.451595 |
| MmugDNA.1071.1.S1_s_at  | MmugDNA.1071.1  | 13.35 | 13.09 | 0.15 | 0.02 | 1.2   | 0.036077 | 0.058324 | 0.354225 | 0.288292 |
| MmugDNA.10711.1.S1_s_at | MmugDNA.10711.1 | 11.69 | 11.84 | 0.25 | 0.02 | -1.11 | 0.667396 | 0.662108 | 0.868621 | 0.802107 |
| MmugDNA.10713.1.S1_at   | MmugDNA.10713.1 | 5.47  | 5.54  | 0.27 | 0.16 | -1.05 | 0.695123 | 0.33867  | 0.881302 | 0.585703 |
| MmugDNA.10714.1.S1_at   | MmugDNA.10714.1 | 4.27  | 4.39  | 0.39 | 0.44 | -1.08 | 0.713479 | 0.771744 | 0.88844  | 0.867344 |
| MmugDNA.10715.1.S1_at   | MmugDNA.10715.1 | 3.51  | 3.35  | 0.21 | 0.19 | 1.12  | 0.795101 | 0.94365  | 0.924799 | 0.967966 |
| MmugDNA.10716.1.S1_at   | MmugDNA.10716.1 | 10.37 | 10.33 | 0.25 | 0.11 | 1.02  | 0.501924 | 0.196592 | 0.783483 | 0.471608 |
| MmugDNA.10717.1.S1_at   | MmugDNA.10717.1 | 6.05  | 5.86  | 0.11 | 0.15 | 1.14  | 0.797942 | 0.812128 | 0.925842 | 0.89155  |
| MmugDNA.10718.1.S1_at   | MmugDNA.10718.1 | 11.48 | 12.07 | 0.3  | 0.08 | -1.5  | 0.047011 | 0.096666 | 0.379253 | 0.35417  |
| MmugDNA.10718.1.S1_s_at | MmugDNA.10718.1 | 9.54  | 9.62  | 0.22 | 0.04 | -1.06 | 0.648655 | 0.637561 | 0.859988 | 0.787033 |
| MmugDNA.10719.1.S1_at   | MmugDNA.10719.1 | 6.56  | 6.6   | 0.19 | 0.1  | -1.03 | 0.181885 | 0.461319 | 0.55498  | 0.672984 |
| MmugDNA.1072.1.S1_at    | MmugDNA.1072.1  | 6.9   | 6.57  | 0.12 | 0.13 | 1.25  | 0.041179 | 0.094689 | 0.365734 | 0.351481 |
| MmugDNA.10720.1.S1_at   | MmugDNA.10720.1 | 6.89  | 6.79  | 0.27 | 0.14 | 1.08  | 0.774983 | 0.108284 | 0.916523 | 0.371557 |
| MmugDNA.10721.1.S1_at   | MmugDNA.10721.1 | 5     | 4.75  | 0.57 | 0.33 | 1.19  | 0.956439 | 0.34565  | 0.985548 | 0.590854 |
| MmugDNA.10722.1.S1_at   | MmugDNA.10722.1 | 3.36  | 3.06  | 0.28 | 0.53 | 1.23  | 0.971402 | 0.982314 | 0.990664 | 0.990348 |
| MmugDNA.10723.1.S1_at   | MmugDNA.10723.1 | 5.17  | 5.81  | 0.21 | 0.27 | -1.55 | 0.06424  | 0.34611  | 0.417874 | 0.591182 |
| MmugDNA.10724.1.S1_at   | MmugDNA.10724.1 | 3.73  | 3.79  | 0.19 | 0.1  | -1.04 | 0.275732 | 0.323943 | 0.635198 | 0.57466  |
| MmugDNA.2695.1.S1_x_at  | MmugDNA.2695.1  | 12.22 | 12.4  | 0.11 | 0.17 | -1.13 | 0.131922 | 0.256305 | 0.506356 | 0.524079 |
| MmugDNA.10726.1.S1_at   | MmugDNA.10726.1 | 7.51  | 7.92  | 0.64 | 0.17 | -1.32 | 0.495872 | 0.39858  | 0.780141 | 0.629458 |
| MmugDNA.10729.1.S1_at   | MmugDNA.10729.1 | 3.77  | 3.61  | 0.06 | 0.09 | 1.12  | 0.323765 | 0.049854 | 0.672332 | 0.268412 |
| MmugDNA.1073.1.S1_at    | MmugDNA.1073.1  | 11.24 | 11.24 | 0.12 | 0.04 | -1    | 0.563263 | 0.738258 | 0.818148 | 0.84825  |
| MmugDNA.10730.1.S1_at   | MmugDNA.10730.1 | 9.81  | 9.44  | 0.12 | 0.28 | 1.29  | 0.027549 | 0.076369 | 0.327903 | 0.321368 |
| MmugDNA.10731.1.S1_at   | MmugDNA.10731.1 | 2.78  | 2.77  | 0.14 | 0.08 | 1.01  | 0.73996  | 0.70357  | 0.900699 | 0.828139 |
| MmugDNA.10732.1.S1_at   | MmugDNA.10732.1 | 3.53  | 3.51  | 0.24 | 0.11 | 1.01  | 0.826304 | 0.890128 | 0.937736 | 0.937438 |
| MmugDNA.10733.1.S1_s_at | MmugDNA.10733.1 | 10.13 | 10.29 | 0.15 | 0.04 | -1.12 | 0.500645 | 0.759225 | 0.78278  | 0.860036 |
| MmugDNA.10735.1.S1_at   | MmugDNA.10735.1 | 10.07 | 10.91 | 0.61 | 0.02 | -1.8  | 0.221778 | 0.17755  | 0.591359 | 0.453943 |
| MmugDNA.10737.1.S1_at   | MmugDNA.10737.1 | 10.07 | 9.74  | 0.46 | 0.21 | 1.26  | 0.583661 | 0.698391 | 0.829152 | 0.82478  |
| MmugDNA.10738.1.S1_s_at | MmugDNA.10738.1 | 8.85  | 8.38  | 0.48 | 0.07 | 1.39  | 0.214897 | 0.491415 | 0.585324 | 0.693004 |
| MmugDNA.10739.1.S1_at   | MmugDNA.10739.1 | 4.4   | 4.44  | 0.22 | 0.12 | -1.02 | 0.590504 | 0.309101 | 0.832911 | 0.564787 |
| MmugDNA.1074.1.S1_at    | MmugDNA.1074.1  | 4.59  | 4.66  | 0.09 | 0.07 | -1.05 | 0.141615 | 0.103281 | 0.516487 | 0.364143 |

|                         |                 |       |       |      |      |       |          |          |          |          |
|-------------------------|-----------------|-------|-------|------|------|-------|----------|----------|----------|----------|
| MmugDNA.10740.1.S1_at   | MmugDNA.10740.1 | 4.45  | 4.31  | 0.32 | 0.05 | 1.11  | 0.542352 | 0.667339 | 0.805672 | 0.805297 |
| MmugDNA.10742.1.S1_at   | MmugDNA.10742.1 | 10.36 | 9.71  | 0.54 | 0.12 | 1.57  | 0.118643 | 0.046373 | 0.492161 | 0.259844 |
| MmugDNA.10746.1.S1_at   | MmugDNA.10746.1 | 8.33  | 8.83  | 0.37 | 0.08 | -1.41 | 0.038235 | 0.036425 | 0.358577 | 0.235375 |
| MmugDNA.10747.1.S1_at   | MmugDNA.10747.1 | 6.17  | 6.22  | 0.17 | 0.16 | -1.03 | 0.622815 | 0.742593 | 0.847958 | 0.850976 |
| MmugDNA.10748.1.S1_at   | MmugDNA.10748.1 | 4.63  | 4.37  | 0.16 | 0.22 | 1.2   | 0.288969 | 0.347181 | 0.645892 | 0.591815 |
| MmugDNA.10749.1.S1_at   | MmugDNA.10749.1 | 4.94  | 4.69  | 0.06 | 0.18 | 1.19  | 0.032477 | 0.030023 | 0.344399 | 0.215056 |
| MmugDNA.1075.1.S1_at    | MmugDNA.1075.1  | 5.66  | 5.61  | 0.22 | 0.25 | 1.03  | 0.478029 | 0.65274  | 0.769934 | 0.796986 |
| MmugDNA.10750.1.S1_at   | MmugDNA.10750.1 | 9.55  | 9.6   | 0.33 | 0.18 | -1.04 | 0.470788 | 0.012453 | 0.766191 | 0.14417  |
| MmugDNA.10750.1.S1_s_at | MmugDNA.10750.1 | 9.42  | 9.6   | 0.43 | 0.17 | -1.14 | 0.584046 | 0.044983 | 0.829433 | 0.256531 |
| MmugDNA.10751.1.S1_at   | MmugDNA.10751.1 | 4.97  | 4.51  | 0.44 | 0.15 | 1.37  | 0.129429 | 0.246083 | 0.504211 | 0.515827 |
| MmugDNA.10752.1.S1_at   | MmugDNA.10752.1 | 6.63  | 6.93  | 1.65 | 0.42 | -1.23 | 0.824107 | 0.156206 | 0.936573 | 0.43161  |
| MmugDNA.10753.1.S1_at   | MmugDNA.10753.1 | 5.2   | 5.09  | 0.14 | 0.04 | 1.08  | 0.54883  | 0.964854 | 0.809968 | 0.980489 |
| MmugDNA.10755.1.S1_at   | MmugDNA.10755.1 | 3.22  | 3.13  | 0.1  | 0.16 | 1.06  | 0.124275 | 0.138056 | 0.498334 | 0.410919 |
| MmugDNA.10756.1.S1_at   | MmugDNA.10756.1 | 2.89  | 2.81  | 0.05 | 0.04 | 1.05  | 0.108146 | 0.130642 | 0.480558 | 0.402634 |
| MmugDNA.10757.1.S1_at   | MmugDNA.10757.1 | 3.7   | 3.75  | 0.56 | 1.16 | -1.04 | 0.520188 | 0.631842 | 0.793553 | 0.782971 |
| MmugDNA.10758.1.S1_at   | MmugDNA.10758.1 | 5.83  | 6.01  | 0.26 | 0.02 | -1.13 | 0.859947 | 0.752736 | 0.950535 | 0.855968 |
| MmugDNA.10759.1.S1_at   | MmugDNA.10759.1 | 6.22  | 5.96  | 0.32 | 0.04 | 1.2   | 0.556907 | 0.671895 | 0.814405 | 0.808166 |
| MmugDNA.10760.1.S1_at   | MmugDNA.10760.1 | 3.88  | 3.89  | 0.08 | 0.14 | -1    | 0.479368 | 0.162507 | 0.770712 | 0.438649 |
| MmugDNA.10761.1.S1_at   | MmugDNA.10761.1 | 7.37  | 7.32  | 0.21 | 0.17 | 1.04  | 0.754888 | 0.761246 | 0.907518 | 0.861279 |
| MmugDNA.10762.1.S1_at   | MmugDNA.10762.1 | 6.41  | 6.15  | 0.31 | 0.13 | 1.2   | 0.875292 | 0.959251 | 0.956677 | 0.97688  |
| MmugDNA.10765.1.S1_at   | MmugDNA.10765.1 | 5.93  | 5.83  | 0.01 | 0.12 | 1.07  | 0.19282  | 0.183792 | 0.563577 | 0.459871 |
| MmugDNA.10766.1.S1_at   | MmugDNA.10766.1 | 3.57  | 3.52  | 0.04 | 0    | 1.03  | 0.15517  | 0.140135 | 0.528509 | 0.413394 |
| MmugDNA.10767.1.S1_at   | MmugDNA.10767.1 | 9.53  | 9.53  | 0.86 | 0.16 | 1     | 0.833477 | 0.943279 | 0.940265 | 0.967814 |
| MmugDNA.10768.1.S1_at   | MmugDNA.10768.1 | 3.46  | 3.68  | 0.36 | 0.22 | -1.16 | 0.597159 | 0.785867 | 0.83613  | 0.875989 |
| MmugDNA.10770.1.S1_at   | MmugDNA.10770.1 | 3.84  | 3.84  | 0.06 | 0.09 | 1     | 0.240402 | 0.590282 | 0.606714 | 0.756124 |
| MmugDNA.10772.1.S1_at   | MmugDNA.10772.1 | 7.5   | 8.16  | 0.43 | 0.28 | -1.59 | 0.076491 | 0.164001 | 0.437977 | 0.440128 |
| MmugDNA.10774.1.S1_at   | MmugDNA.10774.1 | 4.95  | 4.68  | 0.11 | 0.1  | 1.2   | 0.03064  | 0.027107 | 0.338263 | 0.205797 |
| MmugDNA.10775.1.S1_at   | MmugDNA.10775.1 | 8.03  | 7.98  | 0.34 | 0.36 | 1.03  | 0.418221 | 0.041541 | 0.735441 | 0.248704 |
| MmugDNA.10775.1.S1_s_at | MmugDNA.10775.1 | 8     | 7.89  | 0.32 | 0.24 | 1.08  | 0.364984 | 0.028594 | 0.700775 | 0.210901 |
| MmugDNA.10779.1.S1_at   | MmugDNA.10779.1 | 13.93 | 13.94 | 0.06 | 0.04 | -1.01 | 0.631021 | 0.724309 | 0.852361 | 0.840433 |
| MmugDNA.1078.1.S1_at    | MmugDNA.1078.1  | 4.27  | 4.07  | 0.05 | 0.09 | 1.15  | 0.035207 | 0.04444  | 0.351366 | 0.25521  |
| MmugDNA.10780.1.S1_at   | MmugDNA.10780.1 | 5.72  | 5.31  | 0.15 | 0.14 | 1.33  | 0.107301 | 0.05062  | 0.47976  | 0.270317 |
| MmugDNA.10781.1.S1_at   | MmugDNA.10781.1 | 9.53  | 10.32 | 0.94 | 0.18 | -1.72 | 0.230427 | 0.283434 | 0.598513 | 0.545955 |
| MmugDNA.10782.1.S1_at   | MmugDNA.10782.1 | 5.83  | 6.68  | 0.43 | 0.54 | -1.8  | 0.337853 | 0.61055  | 0.682728 | 0.768734 |
| MmugDNA.10784.1.S1_at   | MmugDNA.10784.1 | 4.69  | 4.3   | 0.23 | 0.11 | 1.31  | 0.191306 | 0.057    | 0.562786 | 0.284868 |
| MmugDNA.10785.1.S1_at   | MmugDNA.10785.1 | 3.88  | 3.91  | 0.75 | 0.22 | -1.02 | 0.467772 | 0.437541 | 0.764607 | 0.656769 |
| MmugDNA.10786.1.S1_at   | MmugDNA.10786.1 | 10.07 | 10    | 0.75 | 0.35 | 1.05  | 0.370524 | 0.080482 | 0.704875 | 0.328159 |
| MmugDNA.10787.1.S1_at   | MmugDNA.10787.1 | 8.12  | 8.4   | 0.35 | 0.33 | -1.22 | 0.164265 | 0.189733 | 0.5373   | 0.465396 |
| MmugDNA.10788.1.S1_at   | MmugDNA.10788.1 | 5.76  | 5.7   | 0.22 | 0.13 | 1.04  | 0.158819 | 0.286872 | 0.531595 | 0.548182 |
| MmugDNA.10789.1.S1_at   | MmugDNA.10789.1 | 4.64  | 4.82  | 1.58 | 0.43 | -1.13 | 0.99757  | 0.856348 | 0.999184 | 0.917938 |
| MmugDNA.1079.1.S1_at    | MmugDNA.1079.1  | 4.75  | 4.53  | 0.23 | 0.15 | 1.16  | 0.875977 | 0.170007 | 0.956847 | 0.446736 |
| MmugDNA.10792.1.S1_at   | MmugDNA.10792.1 | 9.97  | 10.11 | 0.19 | 0.11 | -1.1  | 0.925421 | 0.000105 | 0.975188 | 0.028099 |
| MmugDNA.10793.1.S1_at   | MmugDNA.10793.1 | 7.41  | 7.47  | 0.11 | 0.17 | -1.04 | 0.877587 | 0.127537 | 0.957399 | 0.398407 |



|                         |                 |       |       |      |      |       |          |          |          |          |
|-------------------------|-----------------|-------|-------|------|------|-------|----------|----------|----------|----------|
| MmugDNA.10794.1.S1_at   | MmugDNA.10794.1 | 5.06  | 4.79  | 0.12 | 0.12 | 1.21  | 0.229497 | 0.380998 | 0.598339 | 0.617476 |
| MmugDNA.10795.1.S1_at   | MmugDNA.10795.1 | 9.49  | 9.95  | 0.23 | 0.09 | -1.38 | 0.031592 | 0.08956  | 0.341627 | 0.343811 |
| MmugDNA.10797.1.S1_at   | MmugDNA.10797.1 | 11.17 | 11.89 | 0.16 | 0.04 | -1.64 | 0.002279 | 0.001459 | 0.174757 | 0.058204 |
| MmugDNA.10798.1.S1_at   | MmugDNA.10798.1 | 3.17  | 3.17  | 0.06 | 0    | 1     | 0.373901 | 0.940989 | 0.705567 | 0.966568 |
| MmugDNA.10799.1.S1_at   | MmugDNA.10799.1 | 3.76  | 3.62  | 0.12 | 0.1  | 1.1   | 0.176378 | 0.509395 | 0.549355 | 0.704159 |
| MmugDNA.108.1.S1_at     | MmugDNA.108.1   | 5.3   | 4.79  | 0.4  | 0.65 | 1.43  | 0.607268 | 0.354311 | 0.840774 | 0.597164 |
| MmugDNA.1080.1.S1_at    | MmugDNA.1080.1  | 5.81  | 5.77  | 0.22 | 0.17 | 1.03  | 0.881354 | 0.951343 | 0.959035 | 0.972417 |
| MmugDNA.10800.1.S1_at   | MmugDNA.10800.1 | 4.01  | 4.29  | 0.16 | 0.08 | -1.21 | 0.130882 | 0.389986 | 0.505301 | 0.624002 |
| MmugDNA.10801.1.S1_s_at | MmugDNA.10801.1 | 3.3   | 2.96  | 0.12 | 0.11 | 1.26  | 0.054212 | 0.106769 | 0.396159 | 0.369349 |
| MmugDNA.10802.1.S1_at   | MmugDNA.10802.1 | 4.7   | 4.54  | 0.21 | 0.06 | 1.12  | 0.584254 | 0.864499 | 0.8296   | 0.923174 |
| MmugDNA.10803.1.S1_s_at | MmugDNA.10803.1 | 9.69  | 10    | 1.51 | 0.31 | -1.24 | 0.7957   | 0.544693 | 0.924946 | 0.727041 |
| MmugDNA.10804.1.S1_at   | MmugDNA.10804.1 | 3.51  | 3.34  | 0.07 | 0.28 | 1.13  | 0.459473 | 0.12532  | 0.759538 | 0.395949 |
| MmugDNA.10805.1.S1_at   | MmugDNA.10805.1 | 6.72  | 7.2   | 0.27 | 0.21 | -1.4  | 0.106163 | 0.07612  | 0.478418 | 0.320899 |
| MmugDNA.10805.1.S1_s_at | MmugDNA.10805.1 | 7.59  | 7.74  | 0.19 | 0.13 | -1.11 | 0.173992 | 0.044474 | 0.546951 | 0.255242 |
| MmugDNA.10806.1.S1_at   | MmugDNA.10806.1 | 5.63  | 5.36  | 0.1  | 0.19 | 1.2   | 0.098783 | 0.09981  | 0.468167 | 0.358431 |
| MmugDNA.10808.1.S1_at   | MmugDNA.10808.1 | 4.1   | 4.28  | 0.08 | 0.1  | -1.13 | 0.24811  | 0.226812 | 0.613685 | 0.499232 |
| MmugDNA.10809.1.S1_at   | MmugDNA.10809.1 | 5.34  | 5.07  | 0.11 | 0.1  | 1.21  | 0.031799 | 0.153461 | 0.342447 | 0.42827  |
| MmugDNA.10810.1.S1_at   | MmugDNA.10810.1 | 5.57  | 5.58  | 0.06 | 0.14 | -1    | 0.543147 | 0.578675 | 0.806241 | 0.748603 |
| MmugDNA.10813.1.S1_at   | MmugDNA.10813.1 | 7.82  | 8.51  | 0.76 | 0.2  | -1.61 | 0.223487 | 0.072751 | 0.592569 | 0.315651 |
| MmugDNA.10814.1.S1_at   | MmugDNA.10814.1 | 3.1   | 3.08  | 0.15 | 0.08 | 1.02  | 0.870833 | 0.275926 | 0.955116 | 0.540035 |
| MmugDNA.10815.1.S1_at   | MmugDNA.10815.1 | 7.59  | 8.06  | 0.95 | 0.2  | -1.38 | 0.63551  | 0.165828 | 0.854585 | 0.442152 |
| MmugDNA.10816.1.S1_at   | MmugDNA.10816.1 | 5.64  | 6.45  | 0.09 | 0.27 | -1.75 | 0.018342 | 0.07351  | 0.296892 | 0.316778 |
| MmugDNA.10817.1.S1_at   | MmugDNA.10817.1 | 5.46  | 5.84  | 0.09 | 0.38 | -1.3  | 0.056903 | 0.053636 | 0.401454 | 0.277224 |
| MmugDNA.10818.1.S1_at   | MmugDNA.10818.1 | 5.43  | 5.54  | 0.31 | 0.13 | -1.08 | 0.756268 | 0.601801 | 0.908165 | 0.763113 |
| MmugDNA.1082.1.S1_at    | MmugDNA.1082.1  | 3.44  | 3.34  | 0.14 | 0.05 | 1.07  | 0.114952 | 0.115359 | 0.488167 | 0.382394 |
| MmugDNA.10820.1.S1_at   | MmugDNA.10820.1 | 6.51  | 8.37  | 1.14 | 0.31 | -3.64 | 0.08946  | 0.051643 | 0.457657 | 0.272698 |
| MmugDNA.10821.1.S1_at   | MmugDNA.10821.1 | 3.15  | 3.11  | 0.27 | 0.38 | 1.03  | 0.99296  | 0.913372 | 0.997404 | 0.95123  |
| MmugDNA.10822.1.S1_at   | MmugDNA.10822.1 | 4.57  | 5.57  | 0.51 | 0.5  | -2    | 0.216402 | 0.43974  | 0.586564 | 0.65842  |
| MmugDNA.10824.1.S1_at   | MmugDNA.10824.1 | 5.1   | 4.69  | 0.67 | 0.53 | 1.32  | 0.592457 | 0.513584 | 0.833893 | 0.707103 |
| MmugDNA.10825.1.S1_at   | MmugDNA.10825.1 | 3.1   | 3.11  | 0.06 | 0.09 | -1.01 | 0.567172 | 0.403651 | 0.820321 | 0.632266 |
| MmugDNA.10826.1.S1_at   | MmugDNA.10826.1 | 4.02  | 3.9   | 0.09 | 0.01 | 1.09  | 0.281573 | 0.060584 | 0.640011 | 0.292769 |
| MmugDNA.10827.1.S1_at   | MmugDNA.10827.1 | 9.72  | 9.42  | 0.25 | 0.1  | 1.23  | 0.110378 | 0.119089 | 0.483363 | 0.387386 |
| MmugDNA.10828.1.S1_at   | MmugDNA.10828.1 | 10.11 | 10.22 | 0.34 | 0.19 | -1.08 | 0.971796 | 0.156677 | 0.990806 | 0.432179 |
| MmugDNA.1083.1.S1_at    | MmugDNA.1083.1  | 6.81  | 6.14  | 1.82 | 0.17 | 1.59  | 0.663187 | 0.560967 | 0.867106 | 0.737076 |
| MmugDNA.10830.1.S1_at   | MmugDNA.10830.1 | 4.65  | 4.36  | 0.17 | 0.04 | 1.23  | 0.098604 | 0.077743 | 0.468025 | 0.323869 |
| MmugDNA.10831.1.S1_at   | MmugDNA.10831.1 | 9.2   | 10.01 | 0.46 | 0.24 | -1.75 | 0.162846 | 0.113252 | 0.535867 | 0.379287 |
| MmugDNA.10832.1.S1_at   | MmugDNA.10832.1 | 6.91  | 6.49  | 0.23 | 0.19 | 1.34  | 0.347084 | 0.014716 | 0.68852  | 0.154415 |
| MmugDNA.10833.1.S1_at   | MmugDNA.10833.1 | 7.63  | 7.75  | 0.4  | 0.21 | -1.09 | 0.745483 | 0.812973 | 0.903049 | 0.891895 |
| MmugDNA.10834.1.S1_at   | MmugDNA.10834.1 | 13.27 | 13.17 | 2.61 | 0.11 | 1.08  | 0.414481 | 0.224819 | 0.733097 | 0.497617 |
| MmugDNA.10835.1.S1_at   | MmugDNA.10835.1 | 3.19  | 3.2   | 0.18 | 0.03 | -1.01 | 0.500178 | 0.660871 | 0.782374 | 0.801618 |
| MmugDNA.10836.1.S1_at   | MmugDNA.10836.1 | 4.85  | 4.8   | 0.19 | 0.12 | 1.03  | 0.339274 | 0.484255 | 0.683755 | 0.688416 |
| MmugDNA.10837.1.S1_at   | MmugDNA.10837.1 | 7.49  | 8.09  | 0.77 | 0.1  | -1.51 | 0.726986 | 0.532279 | 0.894589 | 0.719017 |
| MmugDNA.10838.1.S1_at   | MmugDNA.10838.1 | 3.78  | 3.55  | 0.23 | 0.2  | 1.17  | 0.276778 | 0.17229  | 0.636451 | 0.448666 |

|                         |                 |       |       |      |      |       |          |          |          |          |
|-------------------------|-----------------|-------|-------|------|------|-------|----------|----------|----------|----------|
| MmugDNA.10839.1.S1_at   | MmugDNA.10839.1 | 12.04 | 11.95 | 0.92 | 0.21 | 1.06  | 0.879261 | 0.134606 | 0.958098 | 0.406629 |
| MmugDNA.1084.1.S1_at    | MmugDNA.1084.1  | 6.62  | 6.42  | 0.16 | 0.02 | 1.15  | 0.093385 | 0.137178 | 0.462462 | 0.410045 |
| MmugDNA.10841.1.S1_at   | MmugDNA.10841.1 | 4.94  | 5.1   | 0.37 | 0.16 | -1.12 | 0.180826 | 0.269224 | 0.554165 | 0.534534 |
| MmugDNA.10842.1.S1_at   | MmugDNA.10842.1 | 6.7   | 6.55  | 0.06 | 0.12 | 1.11  | 0.230901 | 0.141847 | 0.599045 | 0.41535  |
| MmugDNA.10843.1.S1_at   | MmugDNA.10843.1 | 4.61  | 4.85  | 0.04 | 0.05 | -1.17 | 0.002044 | 0.01073  | 0.173807 | 0.135287 |
| MmugDNA.10845.1.S1_at   | MmugDNA.10845.1 | 6.83  | 6.66  | 0.07 | 0.01 | 1.13  | 0.017026 | 0.257451 | 0.288969 | 0.52521  |
| MmugDNA.10846.1.S1_at   | MmugDNA.10846.1 | 5.78  | 5.87  | 1    | 0.22 | -1.06 | 0.818904 | 0.95322  | 0.934641 | 0.973457 |
| MmugDNA.10847.1.S1_at   | MmugDNA.10847.1 | 7.65  | 7.47  | 0.14 | 0.1  | 1.13  | 0.117545 | 0.394948 | 0.490984 | 0.627216 |
| MmugDNA.10848.1.S1_at   | MmugDNA.10848.1 | 5.65  | 5.51  | 0.08 | 0.08 | 1.1   | 0.09167  | 0.135906 | 0.45996  | 0.408103 |
| MmugDNA.10849.1.S1_at   | MmugDNA.10849.1 | 6.03  | 5.83  | 0.22 | 0.11 | 1.15  | 0.714625 | 0.868743 | 0.888874 | 0.925426 |
| MmugDNA.1085.1.S1_at    | MmugDNA.1085.1  | 3.5   | 3.33  | 0.12 | 0.01 | -1.12 | 0.11043  | 0.153184 | 0.483467 | 0.428017 |
| MmugDNA.10851.1.S1_at   | MmugDNA.10851.1 | 2.96  | 3.06  | 0.09 | 0.19 | -1.07 | 0.261504 | 0.577788 | 0.623872 | 0.748124 |
| MmugDNA.10852.1.S1_at   | MmugDNA.10852.1 | 5.29  | 5.29  | 0.08 | 0.03 | -1    | 0.857308 | 0.45919  | 0.949683 | 0.67164  |
| MmugDNA.10853.1.S1_at   | MmugDNA.10853.1 | 7.82  | 7.78  | 0.27 | 0.2  | 1.03  | 0.8371   | 0.094217 | 0.941548 | 0.350889 |
| MmugDNA.10854.1.S1_at   | MmugDNA.10854.1 | 4.51  | 4.35  | 0.23 | 0.22 | 1.12  | 0.452571 | 0.61593  | 0.755901 | 0.772359 |
| MmugDNA.10856.1.S1_at   | MmugDNA.10856.1 | 6.44  | 6.27  | 0.02 | 0.1  | 1.13  | 0.120859 | 0.3412   | 0.494442 | 0.587312 |
| MmugDNA.10857.1.S1_at   | MmugDNA.10857.1 | 5.79  | 5.61  | 0.2  | 0.15 | 1.14  | 0.909937 | 0.020347 | 0.96945  | 0.179112 |
| MmugDNA.10858.1.S1_at   | MmugDNA.10858.1 | 4.61  | 4.5   | 0.24 | 0.11 | 1.09  | 0.446324 | 0.554407 | 0.752653 | 0.733195 |
| MmugDNA.10859.1.S1_at   | MmugDNA.10859.1 | 3.16  | 3.15  | 0.05 | 0.14 | 1     | 0.284159 | 0.318476 | 0.642084 | 0.571239 |
| MmugDNA.1086.1.S1_at    | MmugDNA.1086.1  | 7.86  | 7.81  | 0.03 | 0.13 | 1.03  | 0.775016 | 0.5281   | 0.916541 | 0.716435 |
| MmugDNA.10860.1.S1_s_at | MmugDNA.10860.1 | 8.23  | 8.09  | 0.35 | 0.14 | 1.1   | 0.19228  | 0.122535 | 0.563464 | 0.392427 |
| MmugDNA.10861.1.S1_at   | MmugDNA.10861.1 | 3.96  | 3.86  | 0.09 | 0.15 | 1.07  | 0.889337 | 0.490859 | 0.961841 | 0.692666 |
| MmugDNA.10862.1.S1_at   | MmugDNA.10862.1 | 3.83  | 3.65  | 0.13 | 0.16 | 1.13  | 0.259279 | 0.303287 | 0.622607 | 0.560748 |
| MmugDNA.10864.1.S1_at   | MmugDNA.10864.1 | 7.09  | 6.97  | 0.23 | 0.07 | 1.09  | 0.887097 | 0.826273 | 0.960795 | 0.900217 |
| MmugDNA.10864.1.S1_s_at | MmugDNA.10864.1 | 7.58  | 7.46  | 0.27 | 0.04 | 1.09  | 0.459095 | 0.104981 | 0.759258 | 0.36659  |
| MmugDNA.10865.1.S1_at   | MmugDNA.10865.1 | 11.79 | 11.79 | 0.21 | 0.1  | -1    | 0.712221 | 0.454382 | 0.887927 | 0.668576 |
| MmugDNA.10866.1.S1_at   | MmugDNA.10866.1 | 4.38  | 3.75  | 0.17 | 0.07 | 1.55  | 0.006411 | 0.001381 | 0.219106 | 0.056947 |
| MmugDNA.10867.1.S1_at   | MmugDNA.10867.1 | 3.96  | 4.02  | 0.11 | 0.05 | -1.05 | 0.244744 | 0.614186 | 0.610301 | 0.771143 |
| MmugDNA.10868.1.S1_at   | MmugDNA.10868.1 | 4.36  | 4.32  | 0.17 | 0.08 | 1.03  | 0.178278 | 0.154534 | 0.551301 | 0.429405 |
| MmugDNA.1087.1.S1_at    | MmugDNA.1087.1  | 9.37  | 9.37  | 0.36 | 0.04 | 1     | 0.72976  | 0.508008 | 0.895824 | 0.703358 |
| MmugDNA.10870.1.S1_at   | MmugDNA.10870.1 | 4.91  | 4.78  | 0.09 | 0.29 | 1.09  | 0.647091 | 0.570496 | 0.859341 | 0.743151 |
| MmugDNA.10871.1.S1_at   | MmugDNA.10871.1 | 4.78  | 4.63  | 0.2  | 0.02 | 1.1   | 0.161338 | 0.37731  | 0.534712 | 0.614891 |
| MmugDNA.10873.1.S1_at   | MmugDNA.10873.1 | 5.25  | 5.27  | 0.08 | 0.08 | -1.01 | 0.963664 | 0.112782 | 0.988152 | 0.37844  |
| MmugDNA.10877.1.S1_at   | MmugDNA.10877.1 | 8.57  | 7.91  | 1.46 | 0.17 | 1.57  | 0.470351 | 0.034638 | 0.766116 | 0.230247 |
| MmugDNA.10879.1.S1_at   | MmugDNA.10879.1 | 5.3   | 5.08  | 0.26 | 0.06 | 1.17  | 0.79881  | 0.892634 | 0.926306 | 0.938769 |
| MmugDNA.1088.1.S1_at    | MmugDNA.1088.1  | 5.55  | 5.42  | 0.09 | 0.08 | 1.09  | 0.374084 | 0.109236 | 0.705754 | 0.37308  |
| MmugDNA.10880.1.S1_at   | MmugDNA.10880.1 | 10.83 | 10.27 | 0.24 | 0.13 | 1.48  | 0.024869 | 0.01774  | 0.320135 | 0.168367 |
| MmugDNA.10881.1.S1_at   | MmugDNA.10881.1 | 11.72 | 10.81 | 0.43 | 0.06 | 1.88  | 0.056786 | 0.084554 | 0.401111 | 0.335953 |
| MmugDNA.10882.1.S1_at   | MmugDNA.10882.1 | 11.85 | 11.54 | 1.18 | 0.32 | 1.24  | 0.607592 | 0.568185 | 0.840951 | 0.741859 |
| MmugDNA.10885.1.S1_at   | MmugDNA.10885.1 | 8.97  | 9.48  | 0.28 | 0.09 | -1.42 | 0.042116 | 0.005818 | 0.368438 | 0.104661 |
| MmugDNA.10886.1.S1_at   | MmugDNA.10886.1 | 5.67  | 5.81  | 0    | 0.04 | -1.11 | 0.003277 | 0.208712 | 0.194357 | 0.482595 |
| MmugDNA.10887.1.S1_at   | MmugDNA.10887.1 | 5.51  | 5.51  | 0.07 | 0.06 | 1     | 0.835448 | 0.775846 | 0.941022 | 0.869553 |
| MmugDNA.10888.1.S1_at   | MmugDNA.10888.1 | 7.36  | 7.03  | 0.22 | 0.21 | 1.25  | 0.032769 | 0.047487 | 0.345393 | 0.262539 |

|                         |                 |       |       |      |      |       |          |          |          |          |
|-------------------------|-----------------|-------|-------|------|------|-------|----------|----------|----------|----------|
| MmugDNA.1089.1.S1_at    | MmugDNA.1089.1  | 9.37  | 9.87  | 0.27 | 0.1  | -1.42 | 0.031699 | 0.022422 | 0.341772 | 0.187403 |
| MmugDNA.1089.1.S1_s_at  | MmugDNA.1089.1  | 8.94  | 9.31  | 0.26 | 0.11 | -1.29 | 0.043694 | 0.038136 | 0.372554 | 0.239923 |
| MmugDNA.10890.1.S1_at   | MmugDNA.10890.1 | 6.1   | 5.51  | 0.31 | 0.08 | 1.51  | 0.105453 | 0.300737 | 0.477116 | 0.558959 |
| MmugDNA.10891.1.S1_at   | MmugDNA.10891.1 | 3.31  | 3.15  | 0.15 | 0.15 | 1.11  | 0.21083  | 0.162294 | 0.582007 | 0.438447 |
| MmugDNA.10892.1.S1_at   | MmugDNA.10892.1 | 5.92  | 4.91  | 0.45 | 0.7  | 2.01  | 0.505761 | 0.895786 | 0.785398 | 0.940438 |
| MmugDNA.10894.1.S1_at   | MmugDNA.10894.1 | 5.06  | 4.93  | 0.22 | 0.24 | 1.09  | 0.474954 | 0.183444 | 0.768242 | 0.459574 |
| MmugDNA.10895.1.S1_at   | MmugDNA.10895.1 | 2.82  | 2.89  | 0.2  | 0.16 | -1.05 | 0.895223 | 0.869743 | 0.964244 | 0.926118 |
| MmugDNA.10897.1.S1_at   | MmugDNA.10897.1 | 8.6   | 8.63  | 0.13 | 0.02 | -1.02 | 0.679447 | 0.541061 | 0.874274 | 0.724737 |
| MmugDNA.10897.1.S1_s_at | MmugDNA.10897.1 | 9.5   | 9.66  | 0.07 | 0.16 | -1.12 | 0.088722 | 0.089129 | 0.456425 | 0.343152 |
| MmugDNA.10898.1.S1_at   | MmugDNA.10898.1 | 7.23  | 8.06  | 0.6  | 0.19 | -1.77 | 0.378986 | 0.359483 | 0.708548 | 0.600754 |
| MmugDNA.109.1.S1_at     | MmugDNA.109.1   | 3.29  | 3.06  | 0.04 | 0.13 | -1.17 | 0.110848 | 0.302899 | 0.48424  | 0.560356 |
| MmugDNA.1090.1.S1_at    | MmugDNA.1090.1  | 10.3  | 10.02 | 0.29 | 0.04 | 1.21  | 0.618181 | 0.283086 | 0.845802 | 0.545692 |
| MmugDNA.10901.1.S1_at   | MmugDNA.10901.1 | 3.98  | 3.93  | 0.38 | 0.23 | 1.03  | 0.789018 | 0.932719 | 0.922472 | 0.961786 |
| MmugDNA.10902.1.S1_at   | MmugDNA.10902.1 | 4.2   | 4.58  | 0.32 | 0.28 | -1.3  | 0.11375  | 0.080136 | 0.487196 | 0.327639 |
| MmugDNA.10903.1.S1_at   | MmugDNA.10903.1 | 8.14  | 7.92  | 0.26 | 0.23 | 1.16  | 0.146634 | 0.37414  | 0.520956 | 0.612678 |
| MmugDNA.10905.1.S1_at   | MmugDNA.10905.1 | 8.89  | 9.03  | 0.49 | 0.02 | -1.11 | 0.695946 | 0.599443 | 0.881839 | 0.761455 |
| MmugDNA.10909.1.S1_at   | MmugDNA.10909.1 | 7.75  | 7.53  | 0.16 | 0.54 | 1.17  | 0.912959 | 0.317351 | 0.970415 | 0.570599 |
| MmugDNA.10910.1.S1_at   | MmugDNA.10910.1 | 2.96  | 2.99  | 0.11 | 0.15 | -1.02 | 0.518701 | 0.780992 | 0.792804 | 0.872934 |
| MmugDNA.10913.1.S1_at   | MmugDNA.10913.1 | 6.19  | 5.98  | 0.13 | 0.13 | 1.15  | 0.041734 | 0.161475 | 0.36716  | 0.437616 |
| MmugDNA.10914.1.S1_at   | MmugDNA.10914.1 | 3.05  | 3.05  | 0.05 | 0.08 | -1    | 0.672838 | 0.685185 | 0.871072 | 0.816369 |
| MmugDNA.10915.1.S1_at   | MmugDNA.10915.1 | 4.96  | 5.22  | 0.11 | 0.49 | -1.19 | 0.462601 | 0.49828  | 0.761708 | 0.697403 |
| MmugDNA.10916.1.S1_at   | MmugDNA.10916.1 | 5.65  | 6.19  | 0.46 | 0.09 | -1.45 | 0.346752 | 0.435131 | 0.688361 | 0.655026 |
| MmugDNA.10917.1.S1_at   | MmugDNA.10917.1 | 4.59  | 4.59  | 0.13 | 0.12 | -1    | 0.328401 | 0.518688 | 0.67577  | 0.710613 |
| MmugDNA.10918.1.S1_at   | MmugDNA.10918.1 | 2.99  | 3.07  | 0.01 | 0.2  | -1.05 | 0.955757 | 0.902658 | 0.985346 | 0.944707 |
| MmugDNA.10919.1.S1_at   | MmugDNA.10919.1 | 5.61  | 5.61  | 0.08 | 0.07 | -1    | 0.625247 | 0.702022 | 0.849267 | 0.827276 |
| MmugDNA.10920.1.S1_at   | MmugDNA.10920.1 | 2.97  | 2.96  | 0.11 | 0.17 | 1.01  | 0.904207 | 0.886055 | 0.967773 | 0.935136 |
| MmugDNA.10924.1.S1_at   | MmugDNA.10924.1 | 6.02  | 5.55  | 0.28 | 0.07 | 1.39  | 0.138783 | 0.022712 | 0.514296 | 0.188723 |
| MmugDNA.10927.1.S1_at   | MmugDNA.10927.1 | 4.9   | 4.91  | 0.33 | 0.11 | -1.01 | 0.436242 | 0.602414 | 0.746244 | 0.763396 |
| MmugDNA.10929.1.S1_at   | MmugDNA.10929.1 | 9.04  | 9.1   | 0.29 | 0.07 | -1.04 | 0.532802 | 0.022687 | 0.800482 | 0.188685 |
| MmugDNA.10930.1.S1_s_at | MmugDNA.10930.1 | 7.09  | 6.91  | 0.41 | 0.05 | 1.13  | 0.352914 | 0.449914 | 0.692895 | 0.665343 |
| MmugDNA.10932.1.S1_at   | MmugDNA.10932.1 | 3.27  | 3.24  | 0.24 | 0.18 | 1.02  | 0.753276 | 0.511132 | 0.907008 | 0.705399 |
| MmugDNA.10933.1.S1_at   | MmugDNA.10933.1 | 10.36 | 11.3  | 0.4  | 0.01 | -1.92 | 0.019286 | 0.004641 | 0.300531 | 0.095    |
| MmugDNA.10934.1.S1_at   | MmugDNA.10934.1 | 5.29  | 4.95  | 0.2  | 0.27 | 1.27  | 0.219906 | 0.452396 | 0.589114 | 0.667073 |
| MmugDNA.10935.1.S1_at   | MmugDNA.10935.1 | 4.59  | 4.66  | 0.54 | 0.15 | -1.05 | 0.789817 | 0.893923 | 0.922682 | 0.939452 |
| MmugDNA.10936.1.S1_at   | MmugDNA.10936.1 | 3.65  | 3.65  | 0.09 | 0.22 | 1     | 0.422742 | 0.576381 | 0.738477 | 0.747202 |
| MmugDNA.10938.1.S1_at   | MmugDNA.10938.1 | 5.02  | 4.84  | 0.08 | 0.12 | 1.13  | 0.074528 | 0.188366 | 0.435313 | 0.46435  |
| MmugDNA.10939.1.S1_at   | MmugDNA.10939.1 | 5.82  | 5.48  | 0.19 | 0.1  | 1.27  | 0.112509 | 0.134371 | 0.485849 | 0.406603 |
| MmugDNA.10941.1.S1_at   | MmugDNA.10941.1 | 4.33  | 4.29  | 0.54 | 0.29 | 1.02  | 0.280172 | 0.288038 | 0.639052 | 0.54928  |
| MmugDNA.10944.1.S1_at   | MmugDNA.10944.1 | 10.18 | 10.67 | 0.36 | 0.11 | -1.4  | 0.083261 | 0.097259 | 0.449053 | 0.354912 |
| MmugDNA.35889.1.S1_at   | MmugDNA.35889.1 | 8     | 7.84  | 0.06 | 0.04 | 1.12  | 0.013333 | 0.055607 | 0.267807 | 0.281649 |
| MmugDNA.35889.1.S1_s_at | MmugDNA.35889.1 | 7.13  | 7.37  | 0.34 | 0.07 | -1.18 | 0.817271 | 0.090558 | 0.933935 | 0.345026 |
| MmugDNA.10947.1.S1_at   | MmugDNA.10947.1 | 3.71  | 3.48  | 0.09 | 0.18 | 1.17  | 0.181806 | 0.565471 | 0.554854 | 0.739886 |
| MmugDNA.10948.1.S1_at   | MmugDNA.10948.1 | 6.52  | 6.93  | 0.52 | 0.11 | -1.32 | 0.722598 | 0.235313 | 0.892352 | 0.506346 |

|                       |                 |       |       |      |      |       |          |          |          |          |
|-----------------------|-----------------|-------|-------|------|------|-------|----------|----------|----------|----------|
| MmugDNA.10949.1.S1_at | MmugDNA.10949.1 | 11.08 | 11.6  | 1.23 | 0.06 | -1.43 | 0.509909 | 0.626354 | 0.787863 | 0.779698 |
| MmugDNA.1095.1.S1_at  | MmugDNA.1095.1  | 8.54  | 8.37  | 0.17 | 0.12 | 1.12  | 0.086125 | 0.00138  | 0.453703 | 0.056947 |
| MmugDNA.10950.1.S1_at | MmugDNA.10950.1 | 9.65  | 9.59  | 0.44 | 0.03 | 1.04  | 0.960082 | 0.809047 | 0.986981 | 0.889981 |
| MmugDNA.10951.1.S1_at | MmugDNA.10951.1 | 4.49  | 4.54  | 0.17 | 0.09 | -1.04 | 0.394975 | 0.27974  | 0.720296 | 0.543232 |
| MmugDNA.10952.1.S1_at | MmugDNA.10952.1 | 5.96  | 5.6   | 0.08 | 0.1  | 1.28  | 0.012477 | 0.01077  | 0.262327 | 0.135471 |
| MmugDNA.10953.1.S1_at | MmugDNA.10953.1 | 9.34  | 10.54 | 0.6  | 0.21 | -2.3  | 0.117451 | 0.105793 | 0.490925 | 0.368018 |
| MmugDNA.10954.1.S1_at | MmugDNA.10954.1 | 9.25  | 9.05  | 0.2  | 0.18 | 1.15  | 0.230989 | 0.328654 | 0.599045 | 0.578213 |
| MmugDNA.10955.1.S1_at | MmugDNA.10955.1 | 9.46  | 10.12 | 0.15 | 0.07 | -1.58 | 0.003474 | 0.050976 | 0.195142 | 0.271055 |
| MmugDNA.10956.1.S1_at | MmugDNA.10956.1 | 9.5   | 8.98  | 1.33 | 0.2  | 1.43  | 0.66391  | 0.840568 | 0.867528 | 0.909134 |
| MmugDNA.10958.1.S1_at | MmugDNA.10958.1 | 8.55  | 8.69  | 0.48 | 0.14 | -1.1  | 0.783201 | 0.851211 | 0.920185 | 0.915364 |
| MmugDNA.10959.1.S1_at | MmugDNA.10959.1 | 3.38  | 3.08  | 0.27 | 0.21 | 1.24  | 0.435519 | 0.709591 | 0.745755 | 0.831691 |
| MmugDNA.10960.1.S1_at | MmugDNA.10960.1 | 7.65  | 7.76  | 0.5  | 0.13 | -1.08 | 0.678279 | 0.87368  | 0.873961 | 0.928169 |
| MmugDNA.10961.1.S1_at | MmugDNA.10961.1 | 4.62  | 4.55  | 0.05 | 0.03 | 1.05  | 0.089905 | 0.375782 | 0.457894 | 0.613689 |
| MmugDNA.10962.1.S1_at | MmugDNA.10962.1 | 5.74  | 5.51  | 0    | 0.05 | 1.17  | 0.001249 | 0.210865 | 0.15724  | 0.484934 |
| MmugDNA.10963.1.S1_at | MmugDNA.10963.1 | 4.04  | 4.02  | 0.13 | 0.17 | 1.01  | 0.404411 | 0.564732 | 0.726492 | 0.739425 |
| MmugDNA.10964.1.S1_at | MmugDNA.10964.1 | 6.34  | 6.14  | 0.11 | 0.12 | 1.15  | 0.087475 | 0.084157 | 0.455067 | 0.335181 |
| MmugDNA.10965.1.S1_at | MmugDNA.10965.1 | 5.65  | 5.69  | 0.05 | 0.07 | -1.02 | 0.661702 | 0.07091  | 0.8665   | 0.312439 |
| MmugDNA.10966.1.S1_at | MmugDNA.10966.1 | 6.01  | 5.72  | 0.36 | 0.2  | 1.22  | 0.432327 | 0.145505 | 0.74388  | 0.419441 |
| MmugDNA.10967.1.S1_at | MmugDNA.10967.1 | 6.27  | 6.13  | 0.06 | 0.09 | 1.1   | 0.054765 | 0.03761  | 0.397122 | 0.238384 |
| MmugDNA.10968.1.S1_at | MmugDNA.10968.1 | 5.48  | 5.45  | 0.12 | 0.01 | 1.02  | 0.667452 | 0.502649 | 0.868621 | 0.700236 |
| MmugDNA.10969.1.S1_at | MmugDNA.10969.1 | 3.52  | 3.65  | 0.5  | 0.08 | -1.1  | 0.59049  | 0.626353 | 0.832911 | 0.779698 |
| MmugDNA.1097.1.S1_at  | MmugDNA.1097.1  | 8.37  | 9.01  | 0.12 | 0.06 | -1.56 | 0.00063  | 0.392097 | 0.143669 | 0.625588 |
| MmugDNA.10970.1.S1_at | MmugDNA.10970.1 | 12.78 | 12.34 | 0.27 | 0.18 | 1.36  | 0.185403 | 0.00914  | 0.55849  | 0.126119 |
| MmugDNA.10971.1.S1_at | MmugDNA.10971.1 | 11.39 | 11.77 | 0.08 | 0.07 | -1.3  | 0.004454 | 0.101385 | 0.199102 | 0.36112  |
| MmugDNA.10972.1.S1_at | MmugDNA.10972.1 | 5.02  | 5.09  | 0.16 | 0    | -1.04 | 0.349847 | 0.504433 | 0.690899 | 0.701557 |
| MmugDNA.10973.1.S1_at | MmugDNA.10973.1 | 4.86  | 4.84  | 0.26 | 0.03 | 1.01  | 0.980495 | 0.227889 | 0.993785 | 0.500201 |
| MmugDNA.10974.1.S1_at | MmugDNA.10974.1 | 4.93  | 4.94  | 0.12 | 0.05 | -1.01 | 0.341795 | 0.500611 | 0.685418 | 0.699165 |
| MmugDNA.10978.1.S1_at | MmugDNA.10978.1 | 4.01  | 4.01  | 0.21 | 0.04 | 1     | 0.308582 | 0.670398 | 0.661257 | 0.807285 |
| MmugDNA.1098.1.S1_at  | MmugDNA.1098.1  | 5.21  | 5.31  | 0.17 | 0.17 | -1.07 | 0.996156 | 0.159714 | 0.998498 | 0.435828 |
| MmugDNA.10980.1.S1_at | MmugDNA.10980.1 | 9.88  | 9.3   | 0.25 | 0.21 | 1.49  | 0.098169 | 0.132306 | 0.467651 | 0.404294 |
| MmugDNA.10982.1.S1_at | MmugDNA.10982.1 | 7.54  | 8.02  | 1.3  | 0.18 | -1.4  | 0.663092 | 0.840133 | 0.867092 | 0.908905 |
| MmugDNA.10983.1.S1_at | MmugDNA.10983.1 | 11.17 | 10.49 | 0.7  | 0.09 | 1.6   | 0.284776 | 0.290198 | 0.642539 | 0.551169 |
| MmugDNA.10984.1.S1_at | MmugDNA.10984.1 | 3.67  | 3.89  | 0.27 | 0.05 | -1.17 | 0.239948 | 0.308558 | 0.606208 | 0.564575 |
| MmugDNA.10985.1.S1_at | MmugDNA.10985.1 | 5.09  | 5.52  | 0.26 | 0.03 | -1.35 | 0.134164 | 0.191268 | 0.508395 | 0.466553 |
| MmugDNA.10987.1.S1_at | MmugDNA.10987.1 | 5.75  | 5.73  | 0.28 | 0.08 | 1.02  | 0.687387 | 0.87502  | 0.877758 | 0.929098 |
| MmugDNA.10988.1.S1_at | MmugDNA.10988.1 | 5.41  | 4.68  | 0.48 | 0.39 | 1.67  | 0.05921  | 0.020394 | 0.406296 | 0.179286 |
| MmugDNA.10989.1.S1_at | MmugDNA.10989.1 | 3.74  | 3.71  | 0.28 | 0.19 | 1.02  | 0.383252 | 0.52898  | 0.711269 | 0.71703  |
| MmugDNA.10991.1.S1_at | MmugDNA.10991.1 | 3.39  | 3.35  | 0.14 | 0.38 | 1.02  | 0.480365 | 0.696791 | 0.771141 | 0.823939 |
| MmugDNA.10992.1.S1_at | MmugDNA.10992.1 | 3.76  | 3.74  | 0.12 | 0.19 | 1.01  | 0.450456 | 0.437965 | 0.754829 | 0.657057 |
| MmugDNA.10993.1.S1_at | MmugDNA.10993.1 | 7.03  | 7.81  | 0.14 | 0.49 | -1.71 | 0.070588 | 0.23667  | 0.429614 | 0.507459 |
| MmugDNA.10994.1.S1_at | MmugDNA.10994.1 | 5.75  | 6.06  | 0.52 | 0.35 | -1.24 | 0.831804 | 0.983097 | 0.939661 | 0.990726 |
| MmugDNA.10996.1.S1_at | MmugDNA.10996.1 | 2.95  | 2.96  | 0.06 | 0.12 | -1.01 | 0.491897 | 0.513368 | 0.778032 | 0.706881 |
| MmugDNA.10997.1.S1_at | MmugDNA.10997.1 | 10.91 | 10.82 | 0.25 | 0.04 | 1.06  | 0.233722 | 0.162386 | 0.60129  | 0.438575 |

|                         |                 |       |       |      |      |       |          |          |          |          |
|-------------------------|-----------------|-------|-------|------|------|-------|----------|----------|----------|----------|
| MmugDNA.10999.1.S1_at   | MmugDNA.10999.1 | 7.56  | 6.98  | 1.08 | 0.26 | 1.49  | 0.399148 | 0.424231 | 0.722884 | 0.646833 |
| MmugDNA.11.1.S1_at      | MmugDNA.11.1    | 5.64  | 5.31  | 0.18 | 0.1  | 1.25  | 0.12601  | 0.138322 | 0.499737 | 0.411244 |
| MmugDNA.110.1.S1_at     | MmugDNA.110.1   | 4.95  | 4.96  | 0.14 | 0.05 | -1.01 | 0.816173 | 0.167259 | 0.933414 | 0.443684 |
| MmugDNA.1100.1.S1_at    | MmugDNA.1100.1  | 6.12  | 5.98  | 0.32 | 0.42 | 1.11  | 0.995292 | 0.383524 | 0.998216 | 0.619481 |
| MmugDNA.11000.1.S1_at   | MmugDNA.11000.1 | 4.6   | 4.6   | 0.08 | 0.15 | 1     | 0.708847 | 0.251276 | 0.886591 | 0.519984 |
| MmugDNA.11005.1.S1_at   | MmugDNA.11005.1 | 5.53  | 5.35  | 0.2  | 0.03 | 1.14  | 0.162851 | 0.23512  | 0.535867 | 0.50629  |
| MmugDNA.11006.1.S1_at   | MmugDNA.11006.1 | 8.57  | 8.63  | 0.27 | 0.09 | -1.04 | 0.767243 | 0.959075 | 0.912495 | 0.976813 |
| MmugDNA.11007.1.S1_at   | MmugDNA.11007.1 | 8.05  | 8.9   | 0.65 | 0.09 | -1.81 | 0.12439  | 0.159228 | 0.498504 | 0.435217 |
| MmugDNA.11008.1.S1_at   | MmugDNA.11008.1 | 4.15  | 4.33  | 0.05 | 0.16 | -1.13 | 0.550805 | 0.5736   | 0.81105  | 0.745228 |
| MmugDNA.1101.1.S1_at    | MmugDNA.1101.1  | 6.7   | 5.97  | 0.97 | 0.58 | 1.65  | 0.85755  | 0.921573 | 0.949729 | 0.955761 |
| MmugDNA.11010.1.S1_at   | MmugDNA.11010.1 | 3.74  | 3.74  | 0.14 | 0.24 | -1    | 0.614964 | 0.590914 | 0.844155 | 0.756512 |
| MmugDNA.11011.1.S1_at   | MmugDNA.11011.1 | 4.06  | 4.06  | 0.2  | 0.07 | -1    | 0.429606 | 0.640102 | 0.74228  | 0.788696 |
| MmugDNA.11012.1.S1_at   | MmugDNA.11012.1 | 3.33  | 3.27  | 0.08 | 0.08 | 1.04  | 0.427161 | 0.876112 | 0.740947 | 0.92958  |
| MmugDNA.11013.1.S1_at   | MmugDNA.11013.1 | 8.94  | 8.64  | 0.31 | 0.08 | 1.23  | 0.139406 | 0.148318 | 0.514858 | 0.422869 |
| MmugDNA.11014.1.S1_at   | MmugDNA.11014.1 | 8.6   | 7.42  | 0.61 | 0.17 | 2.27  | 0.034864 | 0.012508 | 0.350453 | 0.144302 |
| MmugDNA.11015.1.S1_at   | MmugDNA.11015.1 | 5.81  | 5.59  | 0.15 | 0.2  | 1.17  | 0.159942 | 0.114035 | 0.533013 | 0.380416 |
| MmugDNA.11016.1.S1_at   | MmugDNA.11016.1 | 4.75  | 4.52  | 0.27 | 0.2  | 1.17  | 0.303043 | 0.790397 | 0.656949 | 0.878857 |
| MmugDNA.11017.1.S1_at   | MmugDNA.11017.1 | 4.22  | 4.23  | 0.06 | 0.25 | -1.01 | 0.882087 | 0.420652 | 0.959161 | 0.644323 |
| MmugDNA.11018.1.S1_at   | MmugDNA.11018.1 | 4.18  | 4.29  | 0.11 | 0.22 | -1.08 | 0.498196 | 0.474429 | 0.781608 | 0.68143  |
| MmugDNA.1102.1.S1_at    | MmugDNA.1102.1  | 6.48  | 6.35  | 0.04 | 0.01 | 1.1   | 0.00719  | 0.002627 | 0.226471 | 0.075772 |
| MmugDNA.11021.1.S1_at   | MmugDNA.11021.1 | 4.15  | 4.37  | 0.39 | 0.35 | -1.17 | 0.927583 | 0.622719 | 0.975951 | 0.777232 |
| MmugDNA.11022.1.S1_at   | MmugDNA.11022.1 | 10.52 | 9.68  | 0.98 | 0.28 | 1.79  | 0.431634 | 0.544285 | 0.743486 | 0.726717 |
| MmugDNA.11023.1.S1_at   | MmugDNA.11023.1 | 11.1  | 10.55 | 0.35 | 0.17 | 1.46  | 0.062445 | 0.008953 | 0.413164 | 0.125082 |
| MmugDNA.11024.1.S1_at   | MmugDNA.11024.1 | 7.93  | 7.47  | 0.63 | 0.46 | 1.37  | 0.525932 | 0.430882 | 0.796442 | 0.651894 |
| MmugDNA.11025.1.S1_at   | MmugDNA.11025.1 | 11.33 | 11.55 | 0.13 | 0.07 | -1.17 | 0.078882 | 0.00379  | 0.441516 | 0.087708 |
| MmugDNA.11028.1.S1_at   | MmugDNA.11028.1 | 7.42  | 7.08  | 0.14 | 0.1  | 1.26  | 0.02598  | 0.048289 | 0.322777 | 0.264814 |
| MmugDNA.11029.1.S1_at   | MmugDNA.11029.1 | 6.44  | 6.93  | 0.49 | 0.13 | -1.41 | 0.164843 | 0.487099 | 0.537595 | 0.69025  |
| MmugDNA.1103.1.S1_at    | MmugDNA.1103.1  | 9.46  | 9.55  | 0.11 | 0.14 | -1.06 | 0.557807 | 0.46443  | 0.815038 | 0.675068 |
| MmugDNA.11030.1.S1_s_at | MmugDNA.11030.1 | 7.06  | 6.24  | 0.82 | 0.24 | 1.77  | 0.675605 | 0.746298 | 0.872698 | 0.85272  |
| MmugDNA.11031.1.S1_at   | MmugDNA.11031.1 | 5.21  | 5.12  | 0.14 | 0.05 | 1.07  | 0.072026 | 0.154986 | 0.431899 | 0.429984 |
| MmugDNA.11033.1.S1_at   | MmugDNA.11033.1 | 7.61  | 8.67  | 0.71 | 0.12 | -2.09 | 0.219304 | 0.262844 | 0.588802 | 0.529182 |
| MmugDNA.11034.1.S1_at   | MmugDNA.11034.1 | 6.95  | 6.18  | 0.69 | 0.29 | 1.7   | 0.398898 | 0.011713 | 0.722777 | 0.140206 |
| MmugDNA.11037.1.S1_at   | MmugDNA.11037.1 | 6.57  | 6.19  | 0.23 | 0.1  | 1.3   | 0.060615 | 0.151403 | 0.408568 | 0.426104 |
| MmugDNA.11037.1.S1_s_at | MmugDNA.11037.1 | 3.01  | 3.05  | 0.08 | 0.06 | -1.03 | 0.600653 | 0.612646 | 0.837957 | 0.770123 |
| MmugDNA.11038.1.S1_at   | MmugDNA.11038.1 | 7.91  | 7.77  | 0.16 | 0.01 | 1.1   | 0.194633 | 0.070126 | 0.565144 | 0.311029 |
| MmugDNA.11038.1.S1_s_at | MmugDNA.11038.1 | 7.51  | 7.28  | 0.09 | 0.02 | 1.17  | 0.020726 | 0.043384 | 0.305611 | 0.25294  |
| MmugDNA.11039.1.S1_at   | MmugDNA.11039.1 | 5.09  | 5.22  | 0.21 | 0.18 | -1.09 | 0.955487 | 0.901442 | 0.985326 | 0.943931 |
| MmugDNA.1104.1.S1_at    | MmugDNA.1104.1  | 5.14  | 4.83  | 0.42 | 0.05 | 1.25  | 0.230497 | 0.24809  | 0.598639 | 0.517567 |
| MmugDNA.11041.1.S1_at   | MmugDNA.11041.1 | 3.01  | 2.9   | 0.12 | 0.05 | 1.08  | 0.388741 | 0.597326 | 0.715631 | 0.760137 |
| MmugDNA.11042.1.S1_at   | MmugDNA.11042.1 | 6.83  | 7.17  | 0.45 | 0.18 | -1.27 | 0.146345 | 0.093728 | 0.520698 | 0.350198 |
| MmugDNA.11043.1.S1_at   | MmugDNA.11043.1 | 4.82  | 3.52  | 1.25 | 0.14 | 2.47  | 0.1445   | 0.087962 | 0.519872 | 0.341368 |
| MmugDNA.11043.1.S1_s_at | MmugDNA.11043.1 | 4.99  | 4.65  | 0.09 | 0.09 | 1.26  | 0.009622 | 0.04549  | 0.243006 | 0.2575   |
| MmugDNA.1105.1.S1_at    | MmugDNA.1105.1  | 5.25  | 5     | 0.16 | 0.12 | 1.19  | 0.167819 | 0.132253 | 0.540465 | 0.404294 |

|                         |                 |       |       |      |      |       |          |          |          |          |
|-------------------------|-----------------|-------|-------|------|------|-------|----------|----------|----------|----------|
| MmugDNA.11050.1.S1_at   | MmugDNA.11050.1 | 7.57  | 7.4   | 0.45 | 0.42 | 1.13  | 0.420639 | 0.873662 | 0.737035 | 0.928169 |
| MmugDNA.11053.1.S1_at   | MmugDNA.11053.1 | 5.66  | 5.87  | 0.33 | 0.4  | -1.16 | 0.674325 | 0.073815 | 0.871914 | 0.317146 |
| MmugDNA.11054.1.S1_at   | MmugDNA.11054.1 | 7.61  | 7.38  | 0.56 | 0.15 | 1.18  | 0.371661 | 0.501677 | 0.705567 | 0.6998   |
| MmugDNA.11055.1.S1_at   | MmugDNA.11055.1 | 9.8   | 10.6  | 0.91 | 0.11 | -1.74 | 0.270077 | 0.1877   | 0.630217 | 0.46368  |
| MmugDNA.11056.1.S1_at   | MmugDNA.11056.1 | 4.39  | 4.1   | 0.33 | 0.17 | 1.22  | 0.315689 | 0.236759 | 0.666057 | 0.507512 |
| MmugDNA.11057.1.S1_at   | MmugDNA.11057.1 | 5.82  | 5.58  | 0.26 | 0.1  | 1.18  | 0.675598 | 0.302982 | 0.872698 | 0.560452 |
| MmugDNA.11059.1.S1_at   | MmugDNA.11059.1 | 4.73  | 4.69  | 0.39 | 0    | 1.03  | 0.650479 | 0.846115 | 0.860959 | 0.912389 |
| MmugDNA.11060.1.S1_at   | MmugDNA.11060.1 | 8.13  | 8.36  | 0.39 | 0.13 | -1.17 | 0.645443 | 0.61342  | 0.858779 | 0.770528 |
| MmugDNA.11061.1.S1_at   | MmugDNA.11061.1 | 6.36  | 6.16  | 0.07 | 0.14 | 1.15  | 0.153316 | 0.79316  | 0.526421 | 0.880576 |
| MmugDNA.11062.1.S1_at   | MmugDNA.11062.1 | 8.13  | 8.45  | 0.12 | 0.17 | -1.24 | 0.097756 | 0.175536 | 0.466724 | 0.452174 |
| MmugDNA.11063.1.S1_at   | MmugDNA.11063.1 | 11.63 | 11.42 | 0.29 | 0.15 | 1.16  | 0.071206 | 0.005341 | 0.430589 | 0.101089 |
| MmugDNA.11065.1.S1_at   | MmugDNA.11065.1 | 3.29  | 3.42  | 0.23 | 0.19 | -1.09 | 0.998568 | 0.784845 | 0.999597 | 0.875432 |
| MmugDNA.11067.1.S1_at   | MmugDNA.11067.1 | 6.55  | 6.55  | 0.82 | 0.84 | -1    | 0.841856 | 0.859883 | 0.943937 | 0.92016  |
| MmugDNA.11068.1.S1_at   | MmugDNA.11068.1 | 5.39  | 5.39  | 0.17 | 0.01 | 1     | 0.388526 | 0.430277 | 0.715408 | 0.651316 |
| MmugDNA.11069.1.S1_at   | MmugDNA.11069.1 | 5.49  | 5.31  | 0.07 | 0.09 | 1.13  | 0.102294 | 0.070545 | 0.472589 | 0.311777 |
| MmugDNA.1107.1.S1_at    | MmugDNA.1107.1  | 4.32  | 4.71  | 0.36 | 0.2  | -1.32 | 0.253039 | 0.126806 | 0.617861 | 0.397446 |
| MmugDNA.11070.1.S1_at   | MmugDNA.11070.1 | 3.15  | 3.23  | 0.06 | 0.17 | -1.05 | 0.224439 | 0.439456 | 0.593639 | 0.6582   |
| MmugDNA.11071.1.S1_at   | MmugDNA.11071.1 | 6.84  | 7.27  | 1.03 | 0.25 | -1.35 | 0.604308 | 0.715839 | 0.839621 | 0.83529  |
| MmugDNA.11074.1.S1_at   | MmugDNA.11074.1 | 9.89  | 10.72 | 0.15 | 0.06 | -1.78 | 0.000905 | 0.000212 | 0.153739 | 0.032262 |
| MmugDNA.11076.1.S1_at   | MmugDNA.11076.1 | 8.1   | 8.97  | 0.16 | 0.23 | -1.83 | 0.002494 | 0.004206 | 0.178226 | 0.091368 |
| MmugDNA.11077.1.S1_at   | MmugDNA.11077.1 | 5.76  | 5.67  | 0.14 | 0.09 | 1.06  | 0.155319 | 0.496775 | 0.528651 | 0.696198 |
| MmugDNA.1108.1.S1_at    | MmugDNA.1108.1  | 10.23 | 10    | 0.3  | 0.11 | 1.18  | 0.238012 | 0.334727 | 0.605206 | 0.582615 |
| MmugDNA.11080.1.S1_at   | MmugDNA.11080.1 | 5.76  | 5.88  | 0.26 | 0.22 | -1.08 | 0.374337 | 0.530305 | 0.705837 | 0.71787  |
| MmugDNA.11081.1.S1_at   | MmugDNA.11081.1 | 7.42  | 7.24  | 0.2  | 0.05 | 1.13  | 0.207055 | 0.256078 | 0.578774 | 0.524052 |
| MmugDNA.11081.1.S1_x_at | MmugDNA.11081.1 | 7.19  | 7.31  | 0.17 | 0.15 | -1.09 | 0.694049 | 0.460895 | 0.880942 | 0.672763 |
| MmugDNA.11082.1.S1_at   | MmugDNA.11082.1 | 9.47  | 9.21  | 0.1  | 0.04 | 1.2   | 0.009061 | 0.009611 | 0.240704 | 0.129157 |
| MmugDNA.11083.1.S1_at   | MmugDNA.11083.1 | 6.86  | 5.99  | 1.09 | 0.64 | 1.83  | 0.988613 | 0.991412 | 0.995877 | 0.995196 |
| MmugDNA.11085.1.S1_at   | MmugDNA.11085.1 | 4.34  | 4.58  | 0.14 | 0.3  | -1.18 | 0.999373 | 0.585361 | 0.99987  | 0.752844 |
| MmugDNA.11086.1.S1_at   | MmugDNA.11086.1 | 6.83  | 6.83  | 0.05 | 0    | 1     | 0.366839 | 0.9627   | 0.702346 | 0.979091 |
| MmugDNA.11087.1.S1_s_at | MmugDNA.11087.1 | 11.56 | 11.61 | 0.3  | 0.03 | -1.03 | 0.609654 | 0.131153 | 0.841773 | 0.403153 |
| MmugDNA.11089.1.S1_s_at | MmugDNA.11089.1 | 7.55  | 7.49  | 0.13 | 0.04 | 1.05  | 0.188752 | 0.223054 | 0.56071  | 0.49588  |
| MmugDNA.1109.1.S1_at    | MmugDNA.1109.1  | 8.63  | 8.63  | 0.2  | 0.2  | 1     | 0.513644 | 0.31433  | 0.790027 | 0.568273 |
| MmugDNA.11090.1.S1_at   | MmugDNA.11090.1 | 5.47  | 5.48  | 0.33 | 0.14 | -1.01 | 0.838194 | 0.941292 | 0.942028 | 0.966729 |
| MmugDNA.11091.1.S1_at   | MmugDNA.11091.1 | 4.79  | 4.24  | 0.23 | 0.26 | 1.46  | 0.048419 | 0.129935 | 0.383306 | 0.401515 |
| MmugDNA.11093.1.S1_at   | MmugDNA.11093.1 | 4.21  | 3.94  | 0.1  | 0.09 | 1.21  | 0.109271 | 0.061355 | 0.482149 | 0.29448  |
| MmugDNA.11094.1.S1_at   | MmugDNA.11094.1 | 4.61  | 4.02  | 0.71 | 0.37 | 1.5   | 0.650062 | 0.855612 | 0.860714 | 0.917679 |
| MmugDNA.11096.1.S1_at   | MmugDNA.11096.1 | 7.57  | 8.06  | 0.57 | 0.24 | -1.41 | 0.121274 | 0.208864 | 0.494864 | 0.482717 |
| MmugDNA.11097.1.S1_at   | MmugDNA.11097.1 | 8.54  | 8.79  | 0.93 | 0.09 | -1.19 | 0.731994 | 0.634316 | 0.896977 | 0.78475  |
| MmugDNA.11098.1.S1_at   | MmugDNA.11098.1 | 6.86  | 6.67  | 0.11 | 0.03 | 1.14  | 0.043472 | 0.207209 | 0.372168 | 0.48136  |
| MmugDNA.11099.1.S1_at   | MmugDNA.11099.1 | 6.34  | 6.38  | 0.25 | 0.17 | -1.02 | 0.571664 | 0.973932 | 0.822859 | 0.985754 |
| MmugDNA.1110.1.S1_at    | MmugDNA.1110.1  | 4.4   | 4.18  | 0.23 | 0.13 | 1.16  | 0.155786 | 0.507918 | 0.528999 | 0.703358 |
| MmugDNA.11100.1.S1_at   | MmugDNA.11100.1 | 4.15  | 4.08  | 0.24 | 0.11 | 1.05  | 0.745191 | 0.025328 | 0.902907 | 0.199522 |
| MmugDNA.11102.1.S1_at   | MmugDNA.11102.1 | 7.13  | 7.53  | 0.47 | 0.25 | -1.32 | 0.116954 | 0.03664  | 0.490074 | 0.235943 |

|                         |                 |       |       |      |      |       |          |          |          |          |
|-------------------------|-----------------|-------|-------|------|------|-------|----------|----------|----------|----------|
| MmugDNA.11103.1.S1_at   | MmugDNA.11103.1 | 4.77  | 4.58  | 0.26 | 0.11 | 1.13  | 0.551405 | 0.13197  | 0.811368 | 0.404024 |
| MmugDNA.11104.1.S1_at   | MmugDNA.11104.1 | 6.86  | 6.87  | 0.26 | 0.14 | -1    | 0.487669 | 0.59753  | 0.775148 | 0.760237 |
| MmugDNA.11106.1.S1_at   | MmugDNA.11106.1 | 6.05  | 6.68  | 0.38 | 0.34 | -1.55 | 0.261373 | 0.495795 | 0.623819 | 0.695734 |
| MmugDNA.11107.1.S1_at   | MmugDNA.11107.1 | 8.49  | 8.43  | 0.52 | 0.25 | 1.04  | 0.586719 | 0.48126  | 0.831418 | 0.686318 |
| MmugDNA.11109.1.S1_at   | MmugDNA.11109.1 | 4.26  | 4.17  | 0.25 | 0.04 | 1.06  | 0.206027 | 0.124126 | 0.57802  | 0.394389 |
| MmugDNA.1111.1.S1_at    | MmugDNA.1111.1  | 6.1   | 6.19  | 0.09 | 0.12 | -1.07 | 0.776462 | 0.280938 | 0.917307 | 0.544102 |
| MmugDNA.11110.1.S1_at   | MmugDNA.11110.1 | 11.22 | 11.07 | 0.26 | 0.2  | 1.11  | 0.103144 | 0.050971 | 0.473929 | 0.271055 |
| MmugDNA.11111.1.S1_at   | MmugDNA.11111.1 | 8.79  | 8.67  | 0.11 | 0.05 | 1.08  | 0.324171 | 0.017904 | 0.672526 | 0.168922 |
| MmugDNA.11113.1.S1_at   | MmugDNA.11113.1 | 9.44  | 9.86  | 0.45 | 0.09 | -1.34 | 0.190709 | 0.304714 | 0.561788 | 0.561921 |
| MmugDNA.11114.1.S1_s_at | MmugDNA.11114.1 | 9.74  | 10.06 | 0.05 | 0.22 | -1.24 | 0.104013 | 0.28727  | 0.474656 | 0.548526 |
| MmugDNA.11116.1.S1_at   | MmugDNA.11116.1 | 6.04  | 5.68  | 0.37 | 0.05 | 1.28  | 0.140577 | 0.075806 | 0.516012 | 0.320402 |
| MmugDNA.11118.1.S1_at   | MmugDNA.11118.1 | 4.39  | 4.17  | 0.18 | 0.03 | 1.16  | 0.117427 | 0.059463 | 0.490925 | 0.290548 |
| MmugDNA.11119.1.S1_at   | MmugDNA.11119.1 | 3.47  | 3.29  | 0.02 | 0.1  | 1.13  | 0.047357 | 0.036549 | 0.380034 | 0.235649 |
| MmugDNA.1112.1.S1_at    | MmugDNA.1112.1  | 5.19  | 5.28  | 0.12 | 0.11 | -1.07 | 0.534052 | 0.336081 | 0.801189 | 0.583652 |
| MmugDNA.11120.1.S1_at   | MmugDNA.11120.1 | 6.37  | 6.35  | 0.17 | 0.12 | 1.01  | 0.727153 | 0.921556 | 0.894637 | 0.955761 |
| MmugDNA.11121.1.S1_at   | MmugDNA.11121.1 | 4.01  | 3.9   | 0.08 | 0.03 | 1.08  | 0.097144 | 0.58658  | 0.465765 | 0.753592 |
| MmugDNA.11122.1.S1_at   | MmugDNA.11122.1 | 3.97  | 4.03  | 0.19 | 0    | -1.04 | 0.701386 | 0.586794 | 0.883866 | 0.753819 |
| MmugDNA.11123.1.S1_at   | MmugDNA.11123.1 | 5.22  | 5.13  | 0.05 | 0.04 | 1.06  | 0.089239 | 0.063005 | 0.457133 | 0.297656 |
| MmugDNA.11124.1.S1_at   | MmugDNA.11124.1 | 4.6   | 4.59  | 0.08 | 0.08 | 1.01  | 0.201371 | 0.346368 | 0.57304  | 0.59124  |
| MmugDNA.11125.1.S1_at   | MmugDNA.11125.1 | 4.17  | 4.17  | 0.07 | 0.14 | -1    | 0.619926 | 0.250176 | 0.846932 | 0.519199 |
| MmugDNA.11126.1.S1_at   | MmugDNA.11126.1 | 5.27  | 4.65  | 0.55 | 0.22 | 1.54  | 0.135485 | 0.239205 | 0.51     | 0.509902 |
| MmugDNA.11127.1.S1_at   | MmugDNA.11127.1 | 5.27  | 5.13  | 0.1  | 0.07 | 1.1   | 0.111608 | 0.347072 | 0.484892 | 0.591815 |
| MmugDNA.11128.1.S1_at   | MmugDNA.11128.1 | 5.98  | 5.69  | 0.37 | 0.17 | 1.22  | 0.289552 | 0.392658 | 0.646199 | 0.625813 |
| MmugDNA.11129.1.S1_at   | MmugDNA.11129.1 | 7.52  | 7.97  | 0.5  | 0.07 | -1.36 | 0.522059 | 0.706344 | 0.795052 | 0.829634 |
| MmugDNA.1113.1.S1_at    | MmugDNA.1113.1  | 4.08  | 4.08  | 0.13 | 0.08 | 1     | 0.285044 | 0.359021 | 0.642951 | 0.600412 |
| MmugDNA.11130.1.S1_at   | MmugDNA.11130.1 | 7     | 7.35  | 0.61 | 0.13 | -1.27 | 0.71823  | 0.594437 | 0.890613 | 0.758623 |
| MmugDNA.11131.1.S1_at   | MmugDNA.11131.1 | 4.49  | 4.43  | 0.08 | 0.04 | 1.04  | 0.82801  | 0.457545 | 0.938183 | 0.670864 |
| MmugDNA.11133.1.S1_at   | MmugDNA.11133.1 | 3.1   | 3.1   | 0.06 | 0.11 | 1     | 0.873977 | 0.678151 | 0.956342 | 0.812015 |
| MmugDNA.11135.1.S1_at   | MmugDNA.11135.1 | 9.2   | 10.17 | 0.31 | 0.03 | -1.97 | 0.010944 | 0.004343 | 0.250796 | 0.092354 |
| MmugDNA.11136.1.S1_at   | MmugDNA.11136.1 | 6.3   | 6.24  | 0.23 | 0.09 | 1.05  | 0.99387  | 0.150484 | 0.99766  | 0.42501  |
| MmugDNA.11137.1.S1_at   | MmugDNA.11137.1 | 5.28  | 5.07  | 0.22 | 0.15 | 1.16  | 0.064563 | 0.034409 | 0.418362 | 0.229473 |
| MmugDNA.11138.1.S1_at   | MmugDNA.11138.1 | 5.01  | 4.82  | 0.16 | 0.18 | 1.14  | 0.168286 | 0.212305 | 0.540913 | 0.486202 |
| MmugDNA.11139.1.S1_at   | MmugDNA.11139.1 | 2.98  | 3.09  | 0.08 | 0.15 | -1.08 | 0.276056 | 0.291392 | 0.635669 | 0.551823 |
| MmugDNA.11140.1.S1_at   | MmugDNA.11140.1 | 3.27  | 2.94  | 0.13 | 0.18 | 1.26  | 0.289122 | 0.574981 | 0.645892 | 0.746216 |
| MmugDNA.11141.1.S1_at   | MmugDNA.11141.1 | 8.81  | 9.94  | 0.88 | 0.18 | -2.19 | 0.28639  | 0.395171 | 0.643673 | 0.627379 |
| MmugDNA.11142.1.S1_at   | MmugDNA.11142.1 | 4.75  | 4.67  | 0.21 | 0.04 | 1.05  | 0.325202 | 0.241044 | 0.673069 | 0.511657 |
| MmugDNA.11144.1.S1_s_at | MmugDNA.11144.1 | 7     | 6.88  | 0.11 | 0.05 | 1.08  | 0.164967 | 0.631008 | 0.537689 | 0.782599 |
| MmugDNA.11145.1.S1_at   | MmugDNA.11145.1 | 4.09  | 3.99  | 0.13 | 0.09 | 1.07  | 0.155913 | 0.298034 | 0.529116 | 0.556695 |
| MmugDNA.11146.1.S1_at   | MmugDNA.11146.1 | 6.28  | 6.16  | 0.17 | 0.3  | 1.08  | 0.39901  | 0.533589 | 0.722883 | 0.719808 |
| MmugDNA.11146.1.S1_s_at | MmugDNA.11146.1 | 6.62  | 6.26  | 0.62 | 0.56 | 1.28  | 0.849475 | 0.519004 | 0.947095 | 0.710813 |
| MmugDNA.11147.1.S1_at   | MmugDNA.11147.1 | 3.4   | 3.33  | 0.06 | 0.22 | 1.05  | 0.56143  | 0.779354 | 0.817219 | 0.872061 |
| MmugDNA.11148.1.S1_at   | MmugDNA.11148.1 | 4.54  | 4.42  | 0.54 | 0.08 | 1.08  | 0.245814 | 0.243886 | 0.611231 | 0.514055 |
| MmugDNA.11149.1.S1_at   | MmugDNA.11149.1 | 4.94  | 4.94  | 0.09 | 0.07 | 1.01  | 0.581165 | 0.468761 | 0.827417 | 0.677885 |

|                         |                 |       |       |      |      |       |          |          |          |          |
|-------------------------|-----------------|-------|-------|------|------|-------|----------|----------|----------|----------|
| MmugDNA.1115.1.S1_at    | MmugDNA.1115.1  | 3.58  | 3.4   | 0.3  | 0    | 1.14  | 0.48672  | 0.495091 | 0.774667 | 0.695319 |
| MmugDNA.11150.1.S1_at   | MmugDNA.11150.1 | 3.6   | 3.55  | 0.22 | 0.06 | 1.03  | 0.269293 | 0.595896 | 0.629582 | 0.759258 |
| MmugDNA.11152.1.S1_at   | MmugDNA.11152.1 | 4.78  | 4.54  | 0.15 | 0.13 | 1.18  | 0.264811 | 0.424701 | 0.626224 | 0.647232 |
| MmugDNA.11153.1.S1_at   | MmugDNA.11153.1 | 4.75  | 4.23  | 0.44 | 0.24 | 1.43  | 0.193443 | 0.002349 | 0.564275 | 0.07161  |
| MmugDNA.11154.1.S1_at   | MmugDNA.11154.1 | 3.19  | 3.13  | 0.16 | 0.13 | 1.04  | 0.725327 | 0.955216 | 0.893539 | 0.97461  |
| MmugDNA.11155.1.S1_at   | MmugDNA.11155.1 | 4.86  | 4.81  | 0.12 | 0.16 | 1.04  | 0.808837 | 0.092876 | 0.930844 | 0.349024 |
| MmugDNA.11156.1.S1_at   | MmugDNA.11156.1 | 4     | 4     | 0.41 | 0.23 | -1    | 0.517611 | 0.70013  | 0.792204 | 0.825967 |
| MmugDNA.11158.1.S1_at   | MmugDNA.11158.1 | 4.18  | 3.84  | 0.16 | 0.13 | 1.27  | 0.057647 | 0.050005 | 0.402592 | 0.268843 |
| MmugDNA.11159.1.S1_at   | MmugDNA.11159.1 | 5.59  | 5.21  | 0.34 | 0.15 | 1.3   | 0.134868 | 0.291659 | 0.50897  | 0.552042 |
| MmugDNA.1116.1.S1_at    | MmugDNA.1116.1  | 6.18  | 6.34  | 0.42 | 0.6  | -1.12 | 0.877586 | 0.733975 | 0.957399 | 0.845896 |
| MmugDNA.11160.1.S1_at   | MmugDNA.11160.1 | 7.29  | 5.42  | 0.37 | 0.61 | 3.64  | 0.004191 | 0.000447 | 0.198874 | 0.038539 |
| MmugDNA.11161.1.S1_at   | MmugDNA.11161.1 | 3.67  | 3.67  | 0    | 0.02 | 1     | 0.373901 | 0.413998 | 0.705567 | 0.639979 |
| MmugDNA.11162.1.S1_at   | MmugDNA.11162.1 | 5.27  | 5.09  | 0.05 | 0.12 | 1.13  | 0.045135 | 0.033753 | 0.375796 | 0.227395 |
| MmugDNA.11164.1.S1_at   | MmugDNA.11164.1 | 5.63  | 5.62  | 0.21 | 0.14 | 1     | 0.443976 | 0.744307 | 0.751068 | 0.851942 |
| MmugDNA.11167.1.S1_at   | MmugDNA.11167.1 | 7.69  | 7.47  | 0.48 | 0.26 | 1.17  | 0.425075 | 0.184863 | 0.739805 | 0.460776 |
| MmugDNA.11169.1.S1_at   | MmugDNA.11169.1 | 6.72  | 7.41  | 0.27 | 0.08 | -1.62 | 0.037728 | 0.000186 | 0.357858 | 0.030511 |
| MmugDNA.1117.1.S1_at    | MmugDNA.1117.1  | 4.68  | 4.85  | 0.08 | 0.36 | -1.13 | 0.880612 | 0.81806  | 0.958682 | 0.895063 |
| MmugDNA.11170.1.S1_at   | MmugDNA.11170.1 | 5.14  | 5.32  | 0.53 | 0.49 | -1.13 | 0.796109 | 0.943892 | 0.925049 | 0.968158 |
| MmugDNA.11173.1.S1_at   | MmugDNA.11173.1 | 6.15  | 6.46  | 0.35 | 0.06 | -1.24 | 0.20199  | 0.557434 | 0.573629 | 0.735031 |
| MmugDNA.11174.1.S1_at   | MmugDNA.11174.1 | 4.47  | 4.44  | 0.28 | 0.27 | 1.02  | 0.422201 | 0.678761 | 0.738059 | 0.812378 |
| MmugDNA.11175.1.S1_at   | MmugDNA.11175.1 | 3.83  | 3.67  | 0.58 | 0.12 | 1.12  | 0.174194 | 0.409078 | 0.547325 | 0.63613  |
| MmugDNA.11177.1.S1_at   | MmugDNA.11177.1 | 3.02  | 2.99  | 0.13 | 0.21 | 1.02  | 0.583757 | 0.747508 | 0.829244 | 0.853149 |
| MmugDNA.11178.1.S1_at   | MmugDNA.11178.1 | 5.55  | 5.66  | 0.33 | 0.16 | -1.08 | 0.532983 | 0.751994 | 0.800589 | 0.855739 |
| MmugDNA.11179.1.S1_at   | MmugDNA.11179.1 | 10.55 | 10.62 | 0.28 | 0.09 | -1.05 | 0.490914 | 0.618939 | 0.777361 | 0.774229 |
| MmugDNA.1118.1.S1_at    | MmugDNA.1118.1  | 5.3   | 5.2   | 0.13 | 0.02 | 1.07  | 0.759217 | 0.555268 | 0.909578 | 0.733767 |
| MmugDNA.11180.1.S1_at   | MmugDNA.11180.1 | 5.75  | 5.79  | 0.05 | 0.13 | -1.02 | 0.171159 | 0.370611 | 0.54426  | 0.609664 |
| MmugDNA.11181.1.S1_at   | MmugDNA.11181.1 | 5.17  | 4.8   | 0.4  | 0.86 | 1.3   | 0.345385 | 0.329841 | 0.687499 | 0.578874 |
| MmugDNA.11182.1.S1_at   | MmugDNA.11182.1 | 3.39  | 3.44  | 0.05 | 0.14 | -1.04 | 0.892675 | 0.030774 | 0.963245 | 0.217323 |
| MmugDNA.11183.1.S1_at   | MmugDNA.11183.1 | 6.19  | 6.32  | 0.28 | 0.14 | -1.09 | 0.502635 | 0.255243 | 0.783781 | 0.523284 |
| MmugDNA.11184.1.S1_at   | MmugDNA.11184.1 | 4.97  | 4.86  | 0.11 | 0.21 | 1.08  | 0.64914  | 0.746931 | 0.86022  | 0.853062 |
| MmugDNA.11185.1.S1_at   | MmugDNA.11185.1 | 7.88  | 9.1   | 0.64 | 0.1  | -2.33 | 0.103571 | 0.104899 | 0.474343 | 0.366451 |
| MmugDNA.11186.1.S1_at   | MmugDNA.11186.1 | 6.37  | 5.94  | 0.99 | 0.21 | 1.35  | 0.475105 | 0.166738 | 0.768373 | 0.443215 |
| MmugDNA.11186.1.S1_s_at | MmugDNA.11186.1 | 6.81  | 6.49  | 0.66 | 0.1  | 1.24  | 0.504363 | 0.260458 | 0.784709 | 0.527006 |
| MmugDNA.11187.1.S1_at   | MmugDNA.11187.1 | 4.78  | 4.72  | 0.24 | 0.03 | 1.05  | 0.563156 | 0.49092  | 0.818094 | 0.692666 |
| MmugDNA.11188.1.S1_at   | MmugDNA.11188.1 | 7.69  | 8.11  | 0.5  | 0.19 | -1.34 | 0.26615  | 0.381486 | 0.627106 | 0.617691 |
| MmugDNA.11189.1.S1_at   | MmugDNA.11189.1 | 7.96  | 7.41  | 0.79 | 0.17 | 1.47  | 0.419491 | 0.444655 | 0.736303 | 0.662072 |
| MmugDNA.1119.1.S1_at    | MmugDNA.1119.1  | 5.29  | 5.44  | 1.19 | 0.25 | -1.11 | 0.840939 | 0.563277 | 0.943498 | 0.738514 |
| MmugDNA.11190.1.S1_at   | MmugDNA.11190.1 | 4.76  | 4.34  | 0.24 | 0.23 | 1.33  | 0.054772 | 0.043252 | 0.397122 | 0.252708 |
| MmugDNA.11191.1.S1_at   | MmugDNA.11191.1 | 5.48  | 5.4   | 0.05 | 0.12 | 1.06  | 0.649026 | 0.466804 | 0.860193 | 0.676543 |
| MmugDNA.11193.1.S1_s_at | MmugDNA.11193.1 | 8.89  | 8.5   | 0.39 | 0.14 | 1.31  | 0.061701 | 0.011126 | 0.41138  | 0.137286 |
| MmugDNA.11194.1.S1_at   | MmugDNA.11194.1 | 6.02  | 5.77  | 0.24 | 0.1  | 1.19  | 0.156725 | 0.169635 | 0.529849 | 0.446221 |
| MmugDNA.11195.1.S1_at   | MmugDNA.11195.1 | 6.13  | 4.26  | 0.35 | 0.31 | 3.63  | 0.002712 | 0.001593 | 0.184127 | 0.06044  |
| MmugDNA.11196.1.S1_at   | MmugDNA.11196.1 | 6.46  | 6.86  | 0.77 | 0.07 | -1.32 | 0.309788 | 0.407265 | 0.661829 | 0.634862 |



|                         |                 |       |       |      |      |       |          |          |          |          |
|-------------------------|-----------------|-------|-------|------|------|-------|----------|----------|----------|----------|
| MmugDNA.11198.1.S1_at   | MmugDNA.11198.1 | 6.03  | 5.5   | 0.32 | 0.1  | 1.45  | 0.119972 | 0.290869 | 0.493259 | 0.551436 |
| MmugDNA.11199.1.S1_at   | MmugDNA.11199.1 | 5.17  | 5.18  | 0.07 | 0.06 | -1.01 | 0.316924 | 0.654308 | 0.666859 | 0.797979 |
| MmugDNA.112.1.S1_at     | MmugDNA.112.1   | 8.09  | 8.38  | 0.55 | 0.25 | -1.23 | 0.369765 | 0.125842 | 0.704295 | 0.396315 |
| MmugDNA.11200.1.S1_at   | MmugDNA.11200.1 | 6.81  | 6.67  | 0.12 | 0    | 1.1   | 0.347193 | 0.51851  | 0.688563 | 0.710477 |
| MmugDNA.11201.1.S1_at   | MmugDNA.11201.1 | 3.76  | 3.62  | 0.15 | 0.2  | 1.1   | 0.250711 | 0.262153 | 0.615874 | 0.528414 |
| MmugDNA.11202.1.S1_at   | MmugDNA.11202.1 | 4.29  | 4.26  | 0.05 | 0.14 | 1.02  | 0.517589 | 0.57719  | 0.792194 | 0.747688 |
| MmugDNA.39039.1.S1_s_at | MmugDNA.39039.1 | 14.34 | 14.34 | 0.06 | 0.02 | -1    | 0.645781 | 0.947487 | 0.858805 | 0.970206 |
| MmugDNA.11205.1.S1_at   | MmugDNA.11205.1 | 3.78  | 3.71  | 0.06 | 0.47 | 1.05  | 0.759719 | 0.724878 | 0.909769 | 0.840716 |
| MmugDNA.11208.1.S1_at   | MmugDNA.11208.1 | 10.58 | 10.37 | 0.1  | 0.04 | 1.16  | 0.008204 | 0.003153 | 0.232005 | 0.081739 |
| MmugDNA.11208.1.S1_s_at | MmugDNA.11208.1 | 12.23 | 11.98 | 0.05 | 0.09 | 1.19  | 0.026956 | 0.005648 | 0.326847 | 0.103804 |
| MmugDNA.11209.1.S1_at   | MmugDNA.11209.1 | 4.33  | 4.39  | 0.36 | 0.26 | -1.04 | 0.626583 | 0.686127 | 0.849991 | 0.81681  |
| MmugDNA.1121.1.S1_at    | MmugDNA.1121.1  | 4.08  | 3.78  | 0.44 | 0.1  | 1.23  | 0.193489 | 0.475785 | 0.564275 | 0.682376 |
| MmugDNA.11211.1.S1_at   | MmugDNA.11211.1 | 10.19 | 10.36 | 0.41 | 0.13 | -1.12 | 0.36537  | 0.308461 | 0.701002 | 0.564504 |
| MmugDNA.11212.1.S1_s_at | MmugDNA.11212.1 | 10.18 | 10.08 | 0.12 | 0.12 | 1.07  | 0.375645 | 0.503106 | 0.7066   | 0.700595 |
| MmugDNA.11213.1.S1_at   | MmugDNA.11213.1 | 5.1   | 4.89  | 0.09 | 0.23 | 1.15  | 0.350773 | 0.320507 | 0.691616 | 0.572648 |
| MmugDNA.11214.1.S1_at   | MmugDNA.11214.1 | 10.28 | 10.29 | 0.5  | 0.04 | -1.01 | 0.757169 | 0.344512 | 0.908483 | 0.589905 |
| MmugDNA.11215.1.S1_at   | MmugDNA.11215.1 | 4.75  | 5.47  | 0.57 | 0.51 | -1.64 | 0.312146 | 0.595807 | 0.66374  | 0.759258 |
| MmugDNA.11217.1.S1_at   | MmugDNA.11217.1 | 11.75 | 11.58 | 0.14 | 0.03 | 1.13  | 0.039006 | 0.138769 | 0.36091  | 0.411885 |
| MmugDNA.11218.1.S1_at   | MmugDNA.11218.1 | 8.62  | 8.76  | 0.45 | 0.08 | -1.1  | 0.789199 | 0.016214 | 0.92249  | 0.161389 |
| MmugDNA.1122.1.S1_at    | MmugDNA.1122.1  | 6.07  | 5.66  | 0.15 | 0.14 | 1.32  | 0.033078 | 0.032745 | 0.346021 | 0.224042 |
| MmugDNA.1122.1.S1_s_at  | MmugDNA.1122.1  | 7.39  | 7.22  | 0.11 | 0.01 | 1.12  | 0.049766 | 0.029399 | 0.386252 | 0.213352 |
| MmugDNA.11220.1.S1_at   | MmugDNA.11220.1 | 6.8   | 6.27  | 1.11 | 0.27 | 1.44  | 0.211769 | 0.172007 | 0.582625 | 0.448404 |
| MmugDNA.11222.1.S1_at   | MmugDNA.11222.1 | 4.82  | 4.54  | 0.08 | 0.12 | 1.21  | 0.041062 | 0.083094 | 0.365672 | 0.332962 |
| MmugDNA.11224.1.S1_at   | MmugDNA.11224.1 | 8.12  | 8.57  | 0.45 | 0.04 | -1.36 | 0.148905 | 0.021727 | 0.522869 | 0.184348 |
| MmugDNA.11225.1.S1_s_at | MmugDNA.11225.1 | 11.77 | 11.96 | 0.97 | 0.17 | -1.13 | 0.467465 | 0.619984 | 0.764361 | 0.775163 |
| MmugDNA.11226.1.S1_at   | MmugDNA.11226.1 | 3.73  | 3.72  | 0.08 | 0.07 | 1.01  | 0.419838 | 0.598257 | 0.736572 | 0.760715 |
| MmugDNA.11227.1.S1_at   | MmugDNA.11227.1 | 3.4   | 3.4   | 0.05 | 0.09 | 1     | 0.970335 | 0.327499 | 0.990282 | 0.57732  |
| MmugDNA.11228.1.S1_at   | MmugDNA.11228.1 | 10.25 | 10.34 | 0.22 | 0.17 | -1.06 | 0.366174 | 0.523651 | 0.701699 | 0.713879 |
| MmugDNA.11229.1.S1_at   | MmugDNA.11229.1 | 4.55  | 3.91  | 0.29 | 0.4  | 1.55  | 0.285543 | 0.405116 | 0.643438 | 0.633482 |
| MmugDNA.1123.1.S1_at    | MmugDNA.1123.1  | 5.79  | 5.79  | 0.01 | 0.03 | -1    | 0.581281 | 0.983243 | 0.827483 | 0.990726 |
| MmugDNA.11230.1.S1_at   | MmugDNA.11230.1 | 5.4   | 5.33  | 0.14 | 0.14 | 1.05  | 0.169361 | 0.53181  | 0.542311 | 0.718955 |
| MmugDNA.11231.1.S1_at   | MmugDNA.11231.1 | 3.45  | 3.21  | 0.12 | 0.13 | 1.18  | 0.081184 | 0.198185 | 0.445179 | 0.473153 |
| MmugDNA.11232.1.S1_at   | MmugDNA.11232.1 | 4.69  | 4.54  | 0.16 | 0.05 | 1.11  | 0.170424 | 0.185351 | 0.543525 | 0.461323 |
| MmugDNA.11233.1.S1_at   | MmugDNA.11233.1 | 5.31  | 5.3   | 0.17 | 0.06 | 1.01  | 0.343967 | 0.127277 | 0.686913 | 0.397996 |
| MmugDNA.11234.1.S1_at   | MmugDNA.11234.1 | 3.27  | 3.14  | 0.11 | 0.08 | 1.09  | 0.157589 | 0.059391 | 0.530588 | 0.290548 |
| MmugDNA.11236.1.S1_at   | MmugDNA.11236.1 | 3.29  | 3.27  | 0.1  | 0.04 | 1.02  | 0.592937 | 0.512567 | 0.834001 | 0.706419 |
| MmugDNA.11239.1.S1_at   | MmugDNA.11239.1 | 4.11  | 3.7   | 0.02 | 0.18 | 1.33  | 0.027126 | 0.162351 | 0.327173 | 0.438518 |
| MmugDNA.1124.1.S1_at    | MmugDNA.1124.1  | 3.52  | 3.51  | 0.07 | 0.07 | 1.01  | 0.44036  | 0.247261 | 0.748445 | 0.516473 |
| MmugDNA.11240.1.S1_at   | MmugDNA.11240.1 | 4.43  | 4.37  | 0.03 | 0.14 | 1.04  | 0.433647 | 0.922891 | 0.744552 | 0.956603 |
| MmugDNA.11241.1.S1_at   | MmugDNA.11241.1 | 5.56  | 5.66  | 0.23 | 0.11 | -1.07 | 0.907827 | 0.768389 | 0.968816 | 0.865508 |
| MmugDNA.11242.1.S1_at   | MmugDNA.11242.1 | 6.71  | 6.49  | 0.27 | 0.06 | 1.16  | 0.152981 | 0.03518  | 0.52592  | 0.231723 |
| MmugDNA.11244.1.S1_at   | MmugDNA.11244.1 | 3.61  | 3.4   | 0.16 | 0.07 | 1.16  | 0.163896 | 0.072695 | 0.536665 | 0.31561  |
| MmugDNA.11245.1.S1_at   | MmugDNA.11245.1 | 4.8   | 4.79  | 0.43 | 0.36 | 1.01  | 0.397241 | 0.313726 | 0.721717 | 0.568083 |

|                         |                 |       |       |      |      |       |          |          |          |          |
|-------------------------|-----------------|-------|-------|------|------|-------|----------|----------|----------|----------|
| MmugDNA.11246.1.S1_at   | MmugDNA.11246.1 | 3.81  | 3.99  | 0.11 | 0.19 | -1.13 | 0.700365 | 0.301367 | 0.883486 | 0.559391 |
| MmugDNA.11247.1.S1_at   | MmugDNA.11247.1 | 2.86  | 2.8   | 0.1  | 0.13 | 1.04  | 0.952399 | 0.993173 | 0.984024 | 0.995946 |
| MmugDNA.11248.1.S1_s_at | MmugDNA.11248.1 | 8.98  | 9.2   | 2.44 | 0.39 | -1.16 | 0.787616 | 0.586349 | 0.921976 | 0.753442 |
| MmugDNA.11249.1.S1_at   | MmugDNA.11249.1 | 10.07 | 10.56 | 0.74 | 0.33 | -1.4  | 0.809467 | 0.046463 | 0.93104  | 0.260089 |
| MmugDNA.1125.1.S1_at    | MmugDNA.1125.1  | 7.6   | 6.89  | 0.42 | 0.35 | 1.63  | 0.063947 | 0.016783 | 0.416836 | 0.164091 |
| MmugDNA.11250.1.S1_at   | MmugDNA.11250.1 | 4.31  | 4.41  | 0.24 | 0.43 | -1.07 | 0.851376 | 0.937629 | 0.947639 | 0.964687 |
| MmugDNA.11252.1.S1_at   | MmugDNA.11252.1 | 8.33  | 8.48  | 0.24 | 0.13 | -1.12 | 0.387439 | 0.374123 | 0.714279 | 0.612678 |
| MmugDNA.11252.1.S1_s_at | MmugDNA.11252.1 | 8.08  | 8.4   | 0.25 | 0.1  | -1.26 | 0.309093 | 0.467428 | 0.661444 | 0.677085 |
| MmugDNA.11253.1.S1_at   | MmugDNA.11253.1 | 6.21  | 5.89  | 0.2  | 0.28 | 1.24  | 0.147682 | 0.279712 | 0.521802 | 0.543228 |
| MmugDNA.11255.1.S1_at   | MmugDNA.11255.1 | 9.24  | 8.54  | 0.15 | 0.19 | 1.63  | 0.007283 | 0.002105 | 0.226979 | 0.067867 |
| MmugDNA.11258.1.S1_at   | MmugDNA.11258.1 | 4.12  | 3.73  | 0.29 | 0.18 | -1.31 | 0.30177  | 0.160661 | 0.655978 | 0.436745 |
| MmugDNA.1126.1.S1_at    | MmugDNA.1126.1  | 4.25  | 4.32  | 0.71 | 0.47 | -1.05 | 0.893886 | 0.026831 | 0.963627 | 0.204912 |
| MmugDNA.11260.1.S1_at   | MmugDNA.11260.1 | 4.29  | 4.02  | 0.17 | 0.16 | 1.2   | 0.117795 | 0.182454 | 0.491105 | 0.459043 |
| MmugDNA.11261.1.S1_at   | MmugDNA.11261.1 | 5.12  | 5.38  | 0.31 | 0.21 | -1.2  | 0.875662 | 0.393989 | 0.956794 | 0.626733 |
| MmugDNA.11262.1.S1_at   | MmugDNA.11262.1 | 9.91  | 9.94  | 0.08 | 0.01 | -1.03 | 0.486073 | 0.005536 | 0.774427 | 0.102661 |
| MmugDNA.11264.1.S1_at   | MmugDNA.11264.1 | 5.25  | 5.18  | 0.16 | 0.06 | 1.05  | 0.499849 | 0.759972 | 0.782239 | 0.860514 |
| MmugDNA.11265.1.S1_at   | MmugDNA.11265.1 | 6.35  | 6.04  | 0.28 | 0.34 | 1.24  | 0.711079 | 0.079468 | 0.887463 | 0.326781 |
| MmugDNA.11266.1.S1_s_at | MmugDNA.11266.1 | 10.52 | 10.5  | 0.18 | 0.05 | 1.01  | 0.230191 | 0.279571 | 0.598481 | 0.543146 |
| MmugDNA.11267.1.S1_at   | MmugDNA.11267.1 | 5.33  | 5.4   | 0.22 | 0.07 | -1.05 | 0.554229 | 0.497812 | 0.812493 | 0.697071 |
| MmugDNA.11268.1.S1_at   | MmugDNA.11268.1 | 5.68  | 5.83  | 0    | 0.13 | -1.12 | 0.292584 | 0.215896 | 0.648912 | 0.489536 |
| MmugDNA.11269.1.S1_at   | MmugDNA.11269.1 | 7.98  | 7.79  | 0.31 | 0.16 | 1.14  | 0.229015 | 0.135832 | 0.597959 | 0.408019 |
| MmugDNA.1127.1.S1_at    | MmugDNA.1127.1  | 5.12  | 5.11  | 0.26 | 0.06 | 1.01  | 0.712368 | 0.854406 | 0.887958 | 0.91705  |
| MmugDNA.11270.1.S1_at   | MmugDNA.11270.1 | 8.33  | 8.29  | 0.52 | 0.22 | 1.03  | 0.595281 | 0.784652 | 0.835312 | 0.875304 |
| MmugDNA.11271.1.S1_at   | MmugDNA.11271.1 | 10.66 | 10.52 | 0.53 | 0.27 | 1.1   | 0.998576 | 0.704564 | 0.999597 | 0.828608 |
| MmugDNA.11272.1.S1_at   | MmugDNA.11272.1 | 3.4   | 3.39  | 0.15 | 0.01 | 1.01  | 0.282745 | 0.175778 | 0.641027 | 0.452344 |
| MmugDNA.11274.1.S1_at   | MmugDNA.11274.1 | 6.95  | 6.94  | 0.04 | 0.01 | 1.01  | 0.762802 | 0.000722 | 0.91092  | 0.044531 |
| MmugDNA.11275.1.S1_at   | MmugDNA.11275.1 | 6.65  | 6.71  | 0.17 | 0.11 | -1.04 | 0.420021 | 0.227873 | 0.736634 | 0.500201 |
| MmugDNA.11276.1.S1_at   | MmugDNA.11276.1 | 9.13  | 9.34  | 0.15 | 0.03 | -1.16 | 0.051013 | 0.016003 | 0.3887   | 0.160458 |
| MmugDNA.11277.1.S1_at   | MmugDNA.11277.1 | 7.01  | 6.9   | 0.26 | 0.12 | 1.07  | 0.199691 | 0.235235 | 0.571494 | 0.50629  |
| MmugDNA.11278.1.S1_at   | MmugDNA.11278.1 | 5.36  | 5.16  | 0.16 | 0.25 | 1.15  | 0.995291 | 0.21427  | 0.998216 | 0.487891 |
| MmugDNA.1128.1.S1_at    | MmugDNA.1128.1  | 10.35 | 11.19 | 0.5  | 0.06 | -1.79 | 0.037119 | 0.051047 | 0.356778 | 0.271214 |
| MmugDNA.11280.1.S1_at   | MmugDNA.11280.1 | 4.71  | 4.7   | 0.16 | 0.23 | 1.01  | 0.927223 | 0.758381 | 0.97587  | 0.859454 |
| MmugDNA.11282.1.S1_at   | MmugDNA.11282.1 | 6.8   | 8.47  | 0.28 | 0.03 | -3.19 | 0.000459 | 0.003034 | 0.140406 | 0.080386 |
| MmugDNA.11283.1.S1_at   | MmugDNA.11283.1 | 5.08  | 4.82  | 0.08 | 0.2  | 1.2   | 0.262914 | 0.053247 | 0.624987 | 0.276449 |
| MmugDNA.11284.1.S1_s_at | MmugDNA.11284.1 | 12.94 | 13.07 | 0.05 | 0.05 | -1.09 | 0.160303 | 0.196228 | 0.533335 | 0.471236 |
| MmugDNA.11285.1.S1_at   | MmugDNA.11285.1 | 3.22  | 3.44  | 0.29 | 0.07 | -1.17 | 0.934269 | 0.964743 | 0.977732 | 0.980422 |
| MmugDNA.11288.1.S1_s_at | MmugDNA.11288.1 | 7.32  | 7.12  | 0.12 | 0.05 | 1.15  | 0.103876 | 0.401558 | 0.474583 | 0.631068 |
| MmugDNA.11289.1.S1_at   | MmugDNA.11289.1 | 5.32  | 5.27  | 0.09 | 0.1  | 1.04  | 0.643869 | 0.95948  | 0.858276 | 0.977017 |
| MmugDNA.1129.1.S1_at    | MmugDNA.1129.1  | 4.55  | 4.53  | 0.03 | 0.2  | 1.01  | 0.908567 | 0.976084 | 0.969247 | 0.98693  |
| MmugDNA.11290.1.S1_at   | MmugDNA.11290.1 | 11.41 | 11.1  | 0.26 | 0.13 | 1.24  | 0.068338 | 0.083803 | 0.425273 | 0.334647 |
| MmugDNA.11291.1.S1_s_at | MmugDNA.11291.1 | 11.68 | 11.61 | 0.16 | 0.02 | 1.06  | 0.136133 | 0.163473 | 0.510655 | 0.439707 |
| MmugDNA.11291.1.S1_x_at | MmugDNA.11291.1 | 3.25  | 3.26  | 0.17 | 0.11 | -1.01 | 0.442277 | 0.592341 | 0.749953 | 0.757716 |
| MmugDNA.6252.1.S1_s_at  | MmugDNA.6252.1  | 7.53  | 8.04  | 0.09 | 0.13 | -1.42 | 0.007681 | 0.004824 | 0.230571 | 0.096904 |

|                         |                 |       |       |      |      |       |          |          |          |          |
|-------------------------|-----------------|-------|-------|------|------|-------|----------|----------|----------|----------|
| MmugDNA.11293.1.S1_at   | MmugDNA.11293.1 | 9.85  | 9.25  | 0.5  | 0.17 | 1.52  | 0.06059  | 0.034581 | 0.408456 | 0.230061 |
| MmugDNA.11295.1.S1_at   | MmugDNA.11295.1 | 5.28  | 5.11  | 0.15 | 0.08 | 1.13  | 0.240369 | 0.243219 | 0.60669  | 0.513356 |
| MmugDNA.11296.1.S1_at   | MmugDNA.11296.1 | 11.75 | 11.67 | 0.69 | 0.1  | 1.06  | 0.737137 | 0.841586 | 0.899368 | 0.909677 |
| MmugDNA.11297.1.S1_at   | MmugDNA.11297.1 | 6.74  | 6.32  | 0.26 | 0.13 | 1.33  | 0.179824 | 0.305505 | 0.553052 | 0.562461 |
| MmugDNA.11299.1.S1_at   | MmugDNA.11299.1 | 10.98 | 11.51 | 1.16 | 0.09 | -1.44 | 0.370314 | 0.502366 | 0.704572 | 0.700134 |
| MmugDNA.1130.1.S1_at    | MmugDNA.1130.1  | 6.31  | 6.21  | 0.2  | 0.13 | 1.07  | 0.724561 | 0.715553 | 0.893178 | 0.835123 |
| MmugDNA.11302.1.S1_at   | MmugDNA.11302.1 | 6.25  | 5.71  | 0.54 | 0.39 | 1.45  | 0.09729  | 0.062127 | 0.466086 | 0.296182 |
| MmugDNA.11304.1.S1_at   | MmugDNA.11304.1 | 7.07  | 7.18  | 0.08 | 0.16 | -1.08 | 0.408165 | 0.715445 | 0.729194 | 0.835033 |
| MmugDNA.11305.1.S1_at   | MmugDNA.11305.1 | 2.97  | 2.92  | 0.03 | 0.06 | 1.03  | 0.481734 | 0.519047 | 0.772225 | 0.710813 |
| MmugDNA.11306.1.S1_at   | MmugDNA.11306.1 | 2.99  | 2.99  | 0.01 | 0.06 | -1    | 0.356285 | 0.261558 | 0.69508  | 0.52802  |
| MmugDNA.11307.1.S1_at   | MmugDNA.11307.1 | 11.11 | 11.54 | 0.11 | 0    | -1.35 | 0.002743 | 0.00058  | 0.185352 | 0.041447 |
| MmugDNA.11308.1.S1_at   | MmugDNA.11308.1 | 4.07  | 3.84  | 0.26 | 0.31 | 1.17  | 0.26429  | 0.252108 | 0.626029 | 0.520787 |
| MmugDNA.1131.1.S1_at    | MmugDNA.1131.1  | 6.43  | 4.99  | 0.52 | 0.32 | 2.73  | 0.029026 | 0.039376 | 0.333482 | 0.243406 |
| MmugDNA.11312.1.S1_at   | MmugDNA.11312.1 | 3.53  | 3.48  | 0.07 | 0.47 | 1.03  | 0.457235 | 0.411982 | 0.758282 | 0.638434 |
| MmugDNA.11313.1.S1_at   | MmugDNA.11313.1 | 7.64  | 7.58  | 0.09 | 0.07 | 1.04  | 0.191979 | 0.730615 | 0.563029 | 0.844055 |
| MmugDNA.11317.1.S1_at   | MmugDNA.11317.1 | 5.47  | 5.42  | 0.08 | 0.05 | 1.04  | 0.146437 | 0.193131 | 0.520747 | 0.468554 |
| MmugDNA.11318.1.S1_at   | MmugDNA.11318.1 | 8.23  | 8.7   | 0.53 | 0.19 | -1.38 | 0.57307  | 0.40055  | 0.823428 | 0.630361 |
| MmugDNA.11319.1.S1_at   | MmugDNA.11319.1 | 10.62 | 11.48 | 0.19 | 0.06 | -1.82 | 0.001213 | 0.00019  | 0.156386 | 0.030754 |
| MmugDNA.1132.1.S1_at    | MmugDNA.1132.1  | 4.74  | 4.86  | 0.19 | 0.1  | -1.09 | 0.72329  | 0.098829 | 0.892777 | 0.357002 |
| MmugDNA.26114.1.S1_s_at | MmugDNA.26114.1 | 4.2   | 4.2   | 0.29 | 0    | 1     | 0.380518 | 0.434231 | 0.709387 | 0.654422 |
| MmugDNA.11322.1.S1_at   | MmugDNA.11322.1 | 4.75  | 4.95  | 0.36 | 0.09 | -1.15 | 0.795426 | 0.38449  | 0.92485  | 0.620142 |
| MmugDNA.11323.1.S1_at   | MmugDNA.11323.1 | 3.38  | 3.32  | 0.06 | 0.03 | 1.04  | 0.143976 | 0.034852 | 0.519328 | 0.230897 |
| MmugDNA.11324.1.S1_at   | MmugDNA.11324.1 | 10.57 | 10.54 | 0.4  | 0.04 | 1.03  | 0.816997 | 0.041944 | 0.93383  | 0.249397 |
| MmugDNA.11325.1.S1_at   | MmugDNA.11325.1 | 4.28  | 4.17  | 0.12 | 0.02 | 1.07  | 0.08564  | 0.083955 | 0.452706 | 0.334877 |
| MmugDNA.11326.1.S1_at   | MmugDNA.11326.1 | 7.52  | 6.5   | 0.23 | 0.11 | 2.03  | 0.002437 | 0.000459 | 0.177103 | 0.038572 |
| MmugDNA.11329.1.S1_at   | MmugDNA.11329.1 | 4.65  | 4.23  | 0.39 | 0.09 | 1.34  | 0.145399 | 0.148215 | 0.520416 | 0.422745 |
| MmugDNA.1133.1.S1_at    | MmugDNA.1133.1  | 4.9   | 4.79  | 0.27 | 0.84 | 1.08  | 0.591303 | 0.816946 | 0.833379 | 0.894418 |
| MmugDNA.11330.1.S1_at   | MmugDNA.11330.1 | 5.58  | 5.56  | 0.18 | 0.05 | 1.01  | 0.602886 | 0.67075  | 0.839074 | 0.807469 |
| MmugDNA.11331.1.S1_at   | MmugDNA.11331.1 | 3.64  | 3.77  | 0.1  | 0.16 | -1.1  | 0.132344 | 0.613308 | 0.506752 | 0.770498 |
| MmugDNA.11333.1.S1_at   | MmugDNA.11333.1 | 4.42  | 4.55  | 0.28 | 0.06 | -1.1  | 0.536844 | 0.713205 | 0.802473 | 0.833655 |
| MmugDNA.11334.1.S1_at   | MmugDNA.11334.1 | 3.21  | 3.3   | 0.36 | 0.1  | -1.06 | 0.772495 | 0.704285 | 0.915321 | 0.828392 |
| MmugDNA.11335.1.S1_at   | MmugDNA.11335.1 | 3.88  | 3.73  | 0.12 | 0.16 | 1.11  | 0.191191 | 0.326255 | 0.56258  | 0.576452 |
| MmugDNA.11337.1.S1_at   | MmugDNA.11337.1 | 4.53  | 4.36  | 0.11 | 0.1  | 1.13  | 0.09011  | 0.198733 | 0.457992 | 0.473391 |
| MmugDNA.11339.1.S1_at   | MmugDNA.11339.1 | 10.59 | 10.89 | 0.53 | 0.06 | -1.23 | 0.315245 | 0.138019 | 0.665686 | 0.410919 |
| MmugDNA.1134.1.S1_at    | MmugDNA.1134.1  | 4.91  | 4.94  | 0.1  | 0.07 | -1.02 | 0.187873 | 0.367163 | 0.560014 | 0.606832 |
| MmugDNA.11340.1.S1_at   | MmugDNA.11340.1 | 5.94  | 6.01  | 0.05 | 0.25 | -1.05 | 0.958756 | 0.731602 | 0.986447 | 0.844457 |
| MmugDNA.11343.1.S1_s_at | MmugDNA.11343.1 | 8.66  | 8.52  | 0.09 | 0.04 | 1.1   | 0.070354 | 0.137063 | 0.429078 | 0.409836 |
| MmugDNA.11344.1.S1_at   | MmugDNA.11344.1 | 4.39  | 4.37  | 0.21 | 0.08 | 1.01  | 0.224655 | 0.270846 | 0.593878 | 0.536026 |
| MmugDNA.11345.1.S1_at   | MmugDNA.11345.1 | 5.38  | 5.89  | 0.27 | 0.37 | -1.43 | 0.115513 | 0.246197 | 0.488793 | 0.515883 |
| MmugDNA.11348.1.S1_at   | MmugDNA.11348.1 | 4.94  | 4.76  | 0.32 | 0.37 | 1.13  | 0.801893 | 0.408472 | 0.927779 | 0.635694 |
| MmugDNA.1135.1.S1_at    | MmugDNA.1135.1  | 7.91  | 9.44  | 0.14 | 0.12 | -2.89 | 0.000169 | 0.000017 | 0.112975 | 0.019635 |
| MmugDNA.11354.1.S1_at   | MmugDNA.11354.1 | 2.9   | 3.18  | 0.21 | 0.13 | -1.21 | 0.348202 | 0.636839 | 0.689479 | 0.786404 |
| MmugDNA.11356.1.S1_at   | MmugDNA.11356.1 | 9.09  | 9.6   | 0.68 | 0.05 | -1.42 | 0.745132 | 0.836117 | 0.902871 | 0.906284 |

|                         |                 |       |       |      |      |       |          |          |          |          |
|-------------------------|-----------------|-------|-------|------|------|-------|----------|----------|----------|----------|
| MmugDNA.11357.1.S1_at   | MmugDNA.11357.1 | 4.14  | 3.91  | 0.18 | 0.17 | 1.17  | 0.223522 | 0.506401 | 0.592569 | 0.702371 |
| MmugDNA.11359.1.S1_at   | MmugDNA.11359.1 | 3.36  | 3.35  | 0.01 | 0.14 | 1.01  | 0.574028 | 0.89494  | 0.823829 | 0.940055 |
| MmugDNA.11361.1.S1_at   | MmugDNA.11361.1 | 3.56  | 3.42  | 0.2  | 0.05 | 1.11  | 0.119334 | 0.089815 | 0.492749 | 0.34404  |
| MmugDNA.11363.1.S1_at   | MmugDNA.11363.1 | 3.11  | 3.12  | 0.12 | 0.05 | -1    | 0.795251 | 0.620109 | 0.924811 | 0.775227 |
| MmugDNA.11367.1.S1_at   | MmugDNA.11367.1 | 5.09  | 5.08  | 0.13 | 0.14 | 1.01  | 0.898291 | 0.998329 | 0.965455 | 0.999091 |
| MmugDNA.1137.1.S1_at    | MmugDNA.1137.1  | 5.64  | 5.64  | 0.05 | 0.09 | 1     | 0.722597 | 0.622868 | 0.892352 | 0.77739  |
| MmugDNA.11370.1.S1_at   | MmugDNA.11370.1 | 5.97  | 5.57  | 0.24 | 0.01 | 1.31  | 0.132995 | 0.08712  | 0.507273 | 0.340073 |
| MmugDNA.11371.1.S1_at   | MmugDNA.11371.1 | 4.61  | 4.55  | 0.13 | 0.02 | 1.04  | 0.972879 | 0.996699 | 0.991155 | 0.998097 |
| MmugDNA.11372.1.S1_at   | MmugDNA.11372.1 | 4.76  | 4.82  | 0.14 | 0.26 | -1.05 | 0.157539 | 0.001699 | 0.530588 | 0.062399 |
| MmugDNA.11373.1.S1_at   | MmugDNA.11373.1 | 4.51  | 4.32  | 0.22 | 0.04 | 1.14  | 0.73514  | 0.796899 | 0.898576 | 0.882822 |
| MmugDNA.11374.1.S1_at   | MmugDNA.11374.1 | 4.67  | 4.73  | 0.66 | 0.12 | -1.04 | 0.920159 | 0.503893 | 0.972913 | 0.701193 |
| MmugDNA.11374.1.S1_s_at | MmugDNA.11374.1 | 8     | 8.34  | 1.14 | 0.23 | -1.27 | 0.723463 | 0.288565 | 0.892813 | 0.549827 |
| MmugDNA.11376.1.S1_at   | MmugDNA.11376.1 | 5.54  | 5.29  | 0.54 | 0.56 | 1.19  | 0.540413 | 0.38895  | 0.804374 | 0.623255 |
| MmugDNA.11377.1.S1_s_at | MmugDNA.11377.1 | 6.51  | 5.89  | 1.61 | 0.2  | 1.53  | 0.698924 | 0.196611 | 0.882967 | 0.471632 |
| MmugDNA.1138.1.S1_at    | MmugDNA.1138.1  | 4     | 3.66  | 0.11 | 0.54 | 1.27  | 0.426237 | 0.274769 | 0.740398 | 0.539225 |
| MmugDNA.11381.1.S1_at   | MmugDNA.11381.1 | 3.85  | 3.85  | 0.29 | 0.16 | 1     | 0.816864 | 0.389957 | 0.933751 | 0.624002 |
| MmugDNA.11383.1.S1_at   | MmugDNA.11383.1 | 7.06  | 7.31  | 0.56 | 0.17 | -1.19 | 0.340338 | 0.460336 | 0.684511 | 0.672182 |
| MmugDNA.11384.1.S1_at   | MmugDNA.11384.1 | 5.01  | 5.41  | 0.34 | 0.4  | -1.32 | 0.362502 | 0.246594 | 0.699302 | 0.515917 |
| MmugDNA.11385.1.S1_at   | MmugDNA.11385.1 | 3.77  | 3.76  | 0.05 | 0.03 | 1.01  | 0.832064 | 0.96904  | 0.939756 | 0.982966 |
| MmugDNA.11388.1.S1_at   | MmugDNA.11388.1 | 10.87 | 10.67 | 0.15 | 0.11 | 1.15  | 0.167481 | 0.219137 | 0.540065 | 0.492868 |
| MmugDNA.1139.1.S1_at    | MmugDNA.1139.1  | 8.33  | 7.99  | 0.74 | 0.13 | 1.27  | 0.154774 | 0.087443 | 0.528082 | 0.340617 |
| MmugDNA.11390.1.S1_at   | MmugDNA.11390.1 | 4.39  | 4.29  | 0.09 | 0.27 | 1.07  | 0.321539 | 0.257667 | 0.6703   | 0.525332 |
| MmugDNA.11391.1.S1_at   | MmugDNA.11391.1 | 7.43  | 7.47  | 0.38 | 0.34 | -1.03 | 0.814143 | 0.4101   | 0.932947 | 0.637065 |
| MmugDNA.11392.1.S1_at   | MmugDNA.11392.1 | 6.78  | 6.42  | 0.47 | 0.16 | 1.28  | 0.437806 | 0.661085 | 0.746961 | 0.801683 |
| MmugDNA.11393.1.S1_at   | MmugDNA.11393.1 | 7.32  | 7.08  | 0.92 | 0.01 | 1.19  | 0.851578 | 0.805238 | 0.947639 | 0.888036 |
| MmugDNA.11394.1.S1_at   | MmugDNA.11394.1 | 3.42  | 3.02  | 0.16 | 0.1  | 1.32  | 0.040928 | 0.091425 | 0.365487 | 0.34639  |
| MmugDNA.11395.1.S1_at   | MmugDNA.11395.1 | 7.43  | 7.38  | 0.86 | 0.65 | 1.03  | 0.576873 | 0.611043 | 0.825252 | 0.769023 |
| MmugDNA.11396.1.S1_s_at | MmugDNA.11396.1 | 7.05  | 7.25  | 0.37 | 0.11 | -1.15 | 0.615619 | 0.89084  | 0.844574 | 0.937722 |
| MmugDNA.11397.1.S1_at   | MmugDNA.11397.1 | 3.54  | 3.58  | 0.63 | 0.08 | -1.02 | 0.41675  | 0.518535 | 0.734506 | 0.710477 |
| MmugDNA.11399.1.S1_at   | MmugDNA.11399.1 | 8.13  | 7.99  | 0.34 | 0.4  | 1.1   | 0.494453 | 0.591919 | 0.779472 | 0.757386 |
| MmugDNA.114.1.S1_at     | MmugDNA.114.1   | 2.92  | 2.91  | 0.09 | 0.01 | 1.01  | 0.464858 | 0.406256 | 0.762723 | 0.634225 |
| MmugDNA.1140.1.S1_at    | MmugDNA.1140.1  | 4.42  | 3.87  | 0.44 | 0.13 | 1.47  | 0.084737 | 0.060273 | 0.451303 | 0.292164 |
| MmugDNA.11400.1.S1_at   | MmugDNA.11400.1 | 6.62  | 6.25  | 0.77 | 0.58 | 1.3   | 0.803054 | 0.365022 | 0.928208 | 0.605222 |
| MmugDNA.11401.1.S1_at   | MmugDNA.11401.1 | 7.1   | 7     | 0.27 | 0.09 | 1.07  | 0.622195 | 0.727928 | 0.847666 | 0.842707 |
| MmugDNA.11402.1.S1_at   | MmugDNA.11402.1 | 7.47  | 7.23  | 0.1  | 0.15 | 1.18  | 0.188766 | 0.33422  | 0.560718 | 0.582266 |
| MmugDNA.11403.1.S1_at   | MmugDNA.11403.1 | 4.75  | 4.96  | 0.36 | 0.21 | -1.16 | 0.928129 | 0.61343  | 0.976259 | 0.770528 |
| MmugDNA.11404.1.S1_at   | MmugDNA.11404.1 | 4.99  | 4.79  | 0.03 | 0.09 | 1.15  | 0.02138  | 0.092919 | 0.308142 | 0.349024 |
| MmugDNA.11405.1.S1_s_at | MmugDNA.11405.1 | 9.21  | 8.56  | 0.2  | 0.2  | 1.57  | 0.005881 | 0.006204 | 0.211937 | 0.106825 |
| MmugDNA.11407.1.S1_at   | MmugDNA.11407.1 | 4.77  | 5.36  | 0.36 | 0.31 | -1.5  | 0.069766 | 0.05713  | 0.427714 | 0.284945 |
| MmugDNA.11408.1.S1_at   | MmugDNA.11408.1 | 3.96  | 3.95  | 0.1  | 0.1  | 1     | 0.627749 | 0.61753  | 0.850686 | 0.773477 |
| MmugDNA.11409.1.S1_at   | MmugDNA.11409.1 | 2.92  | 2.9   | 0.06 | 0.23 | 1.02  | 0.455158 | 0.202847 | 0.75733  | 0.477312 |
| MmugDNA.1141.1.S1_at    | MmugDNA.1141.1  | 5.67  | 5.47  | 0.1  | 0.02 | 1.15  | 0.05841  | 0.625624 | 0.404364 | 0.779265 |
| MmugDNA.11410.1.S1_at   | MmugDNA.11410.1 | 10.3  | 10.24 | 0.12 | 0.11 | 1.04  | 0.907356 | 0.353349 | 0.968548 | 0.596477 |

|                         |                 |       |       |      |      |       |          |          |          |          |
|-------------------------|-----------------|-------|-------|------|------|-------|----------|----------|----------|----------|
| MmugDNA.11411.1.S1_at   | MmugDNA.11411.1 | 12.48 | 12.13 | 0.18 | 0.11 | 1.27  | 0.052344 | 0.015866 | 0.392196 | 0.159789 |
| MmugDNA.11412.1.S1_at   | MmugDNA.11412.1 | 12.43 | 12.45 | 0.13 | 0.04 | -1.01 | 0.305878 | 0.274514 | 0.659264 | 0.538987 |
| MmugDNA.11413.1.S1_at   | MmugDNA.11413.1 | 4.07  | 4.09  | 0.2  | 0.3  | -1.01 | 0.801379 | 0.476563 | 0.92755  | 0.682787 |
| MmugDNA.11413.1.S1_s_at | MmugDNA.11413.1 | 6.5   | 6.35  | 0.09 | 0.06 | 1.11  | 0.192652 | 0.239951 | 0.563577 | 0.510627 |
| MmugDNA.11414.1.S1_at   | MmugDNA.11414.1 | 5.53  | 4.71  | 1.2  | 0.19 | 1.77  | 0.343411 | 0.106982 | 0.686631 | 0.369557 |
| MmugDNA.11415.1.S1_at   | MmugDNA.11415.1 | 5.09  | 5.15  | 0.03 | 0.11 | -1.04 | 0.762867 | 0.604672 | 0.910973 | 0.764769 |
| MmugDNA.11415.1.S1_s_at | MmugDNA.11415.1 | 6.18  | 6.21  | 0.22 | 0.17 | -1.02 | 0.197051 | 0.475967 | 0.567874 | 0.682397 |
| MmugDNA.11416.1.S1_at   | MmugDNA.11416.1 | 8.89  | 10.03 | 0.45 | 0.07 | -2.22 | 0.031186 | 0.122771 | 0.340278 | 0.392755 |
| MmugDNA.11417.1.S1_at   | MmugDNA.11417.1 | 8.16  | 8.98  | 0.46 | 0.05 | -1.76 | 0.040458 | 0.052428 | 0.364432 | 0.274496 |
| MmugDNA.11418.1.S1_at   | MmugDNA.11418.1 | 3.27  | 3.29  | 0.42 | 0.09 | -1.01 | 0.911867 | 0.91413  | 0.970171 | 0.951725 |
| MmugDNA.1142.1.S1_at    | MmugDNA.1142.1  | 8.66  | 8.04  | 0.73 | 0.13 | -1.54 | 0.181275 | 0.071263 | 0.554504 | 0.313318 |
| MmugDNA.11420.1.S1_at   | MmugDNA.11420.1 | 5.71  | 5.75  | 0.35 | 0.16 | -1.03 | 0.333013 | 0.651286 | 0.679412 | 0.796167 |
| MmugDNA.11421.1.S1_at   | MmugDNA.11421.1 | 6.05  | 5.95  | 0.04 | 0.06 | 1.07  | 0.035547 | 0.05833  | 0.352302 | 0.288296 |
| MmugDNA.11422.1.S1_at   | MmugDNA.11422.1 | 6.97  | 6.49  | 0.16 | 0.33 | 1.4   | 0.022993 | 0.081851 | 0.313862 | 0.330284 |
| MmugDNA.11423.1.S1_at   | MmugDNA.11423.1 | 3.29  | 3.18  | 0.08 | 0.13 | 1.08  | 0.588162 | 0.065542 | 0.83181  | 0.301415 |
| MmugDNA.11425.1.S1_at   | MmugDNA.11425.1 | 6.1   | 4.38  | 1.43 | 0.14 | 3.31  | 0.109442 | 0.082318 | 0.482287 | 0.331257 |
| MmugDNA.11428.1.S1_at   | MmugDNA.11428.1 | 8.02  | 8     | 0.19 | 0.17 | 1.01  | 0.803047 | 0.993151 | 0.928208 | 0.995946 |
| MmugDNA.11429.1.S1_at   | MmugDNA.11429.1 | 6.53  | 7.59  | 1.2  | 0.03 | -2.08 | 0.623662 | 0.460815 | 0.848306 | 0.672749 |
| MmugDNA.1143.1.S1_at    | MmugDNA.1143.1  | 8.96  | 8.75  | 0.06 | 0.21 | 1.16  | 0.50166  | 0.265832 | 0.783394 | 0.531695 |
| MmugDNA.11431.1.S1_at   | MmugDNA.11431.1 | 4.44  | 4.36  | 0.12 | 0.13 | 1.06  | 0.145894 | 0.282212 | 0.520572 | 0.544952 |
| MmugDNA.11432.1.S1_at   | MmugDNA.11432.1 | 12.04 | 12.46 | 0.54 | 0.09 | -1.33 | 0.164748 | 0.061162 | 0.537466 | 0.293981 |
| MmugDNA.11433.1.S1_at   | MmugDNA.11433.1 | 3.13  | 3.34  | 0.27 | 0.1  | -1.16 | 0.997044 | 0.664126 | 0.998914 | 0.803247 |
| MmugDNA.11434.1.S1_at   | MmugDNA.11434.1 | 9.7   | 9.8   | 0.28 | 0.05 | -1.07 | 0.391226 | 0.454424 | 0.717502 | 0.66859  |
| MmugDNA.11435.1.S1_at   | MmugDNA.11435.1 | 6.36  | 6.52  | 0.05 | 0.07 | -1.12 | 0.09456  | 0.050687 | 0.463794 | 0.270317 |
| MmugDNA.11436.1.S1_at   | MmugDNA.11436.1 | 11.75 | 11.94 | 0.18 | 0.02 | -1.14 | 0.051254 | 0.033025 | 0.38958  | 0.224983 |
| MmugDNA.11437.1.S1_at   | MmugDNA.11437.1 | 3.63  | 3.7   | 0.12 | 0.03 | -1.05 | 0.45469  | 0.379819 | 0.756934 | 0.616587 |
| MmugDNA.11439.1.S1_at   | MmugDNA.11439.1 | 4.87  | 5.39  | 0.13 | 0.11 | -1.44 | 0.008287 | 0.01009  | 0.232289 | 0.131767 |
| MmugDNA.1144.1.S1_at    | MmugDNA.1144.1  | 4.66  | 4.66  | 0.77 | 0.23 | 1     | 0.381535 | 0.457544 | 0.710122 | 0.670864 |
| MmugDNA.11440.1.S1_at   | MmugDNA.11440.1 | 5.32  | 5.45  | 0.2  | 0.12 | -1.09 | 0.349602 | 0.138049 | 0.690595 | 0.410919 |
| MmugDNA.11441.1.S1_at   | MmugDNA.11441.1 | 8.13  | 8.32  | 0.42 | 0.03 | -1.14 | 0.171057 | 0.012822 | 0.54417  | 0.145864 |
| MmugDNA.11442.1.S1_at   | MmugDNA.11442.1 | 5.01  | 4.93  | 0.15 | 0.16 | 1.05  | 0.205717 | 0.688533 | 0.577556 | 0.818201 |
| MmugDNA.11443.1.S1_at   | MmugDNA.11443.1 | 6     | 6.32  | 0.14 | 0.33 | -1.24 | 0.258663 | 0.361759 | 0.622286 | 0.602476 |
| MmugDNA.11444.1.S1_at   | MmugDNA.11444.1 | 3.87  | 3.79  | 0.11 | 0.1  | 1.05  | 0.225798 | 0.093201 | 0.594935 | 0.34931  |
| MmugDNA.11445.1.S1_at   | MmugDNA.11445.1 | 12.04 | 12.02 | 0.22 | 0.01 | 1.01  | 0.421941 | 0.419567 | 0.737802 | 0.643528 |
| MmugDNA.11446.1.S1_at   | MmugDNA.11446.1 | 4.96  | 5.39  | 0.33 | 0.26 | -1.35 | 0.183253 | 0.039786 | 0.556197 | 0.244453 |
| MmugDNA.11447.1.S1_at   | MmugDNA.11447.1 | 7.9   | 8.33  | 0.2  | 0.34 | -1.35 | 0.085369 | 0.275446 | 0.452611 | 0.539693 |
| MmugDNA.11448.1.S1_at   | MmugDNA.11448.1 | 6.2   | 6.09  | 0.17 | 0.22 | 1.07  | 0.166951 | 0.31472  | 0.539531 | 0.568449 |
| MmugDNA.11449.1.S1_at   | MmugDNA.11449.1 | 10.04 | 11.39 | 1.38 | 0.29 | -2.55 | 0.156214 | 0.05441  | 0.529536 | 0.278799 |
| MmugDNA.1145.1.S1_at    | MmugDNA.1145.1  | 3.16  | 3.14  | 0.1  | 0.01 | 1.01  | 0.748079 | 0.938417 | 0.904315 | 0.965059 |
| MmugDNA.1145.1.S1_x_at  | MmugDNA.1145.1  | 4.82  | 4.68  | 0.1  | 0.03 | 1.1   | 0.192649 | 0.060433 | 0.563577 | 0.292482 |
| MmugDNA.11450.1.S1_at   | MmugDNA.11450.1 | 11.79 | 11.88 | 0.37 | 0.06 | -1.06 | 0.862112 | 0.506256 | 0.951394 | 0.702368 |
| MmugDNA.11451.1.S1_at   | MmugDNA.11451.1 | 4.74  | 4.9   | 0.33 | 0.13 | -1.12 | 0.548279 | 0.759335 | 0.809676 | 0.860037 |
| MmugDNA.11452.1.S1_at   | MmugDNA.11452.1 | 3.9   | 3.93  | 0    | 0.25 | -1.02 | 0.750325 | 0.948565 | 0.905449 | 0.970655 |

|                         |                 |       |       |      |      |       |          |          |          |          |
|-------------------------|-----------------|-------|-------|------|------|-------|----------|----------|----------|----------|
| MmugDNA.11453.1.S1_at   | MmugDNA.11453.1 | 4.42  | 4.4   | 0.36 | 0.06 | 1.01  | 0.966987 | 0.318614 | 0.989102 | 0.571258 |
| MmugDNA.11454.1.S1_at   | MmugDNA.11454.1 | 6.27  | 5.49  | 0.51 | 0.5  | 1.72  | 0.227186 | 0.362892 | 0.596459 | 0.603393 |
| MmugDNA.11455.1.S1_s_at | MmugDNA.11455.1 | 3.2   | 3.25  | 0.03 | 0.11 | -1.03 | 0.796029 | 0.013204 | 0.925023 | 0.147409 |
| MmugDNA.11457.1.S1_at   | MmugDNA.11457.1 | 10.08 | 9.95  | 0.24 | 0.19 | 1.09  | 0.998275 | 0.229239 | 0.999447 | 0.501527 |
| MmugDNA.11458.1.S1_at   | MmugDNA.11458.1 | 11.64 | 11.08 | 1.42 | 0.02 | 1.48  | 0.774723 | 0.493368 | 0.91642  | 0.694092 |
| MmugDNA.11459.1.S1_at   | MmugDNA.11459.1 | 3.06  | 3.35  | 0.18 | 0.35 | -1.22 | 0.460076 | 0.35421  | 0.759917 | 0.597105 |
| MmugDNA.11460.1.S1_at   | MmugDNA.11460.1 | 5.52  | 5.42  | 0.44 | 0.12 | 1.07  | 0.87108  | 0.449633 | 0.955209 | 0.665152 |
| MmugDNA.11464.1.S1_at   | MmugDNA.11464.1 | 5.16  | 4.71  | 0.12 | 0.07 | 1.37  | 0.007208 | 0.014182 | 0.226509 | 0.152173 |
| MmugDNA.11467.1.S1_at   | MmugDNA.11467.1 | 3.07  | 2.97  | 0.06 | 0.1  | 1.07  | 0.217622 | 0.037019 | 0.587515 | 0.236867 |
| MmugDNA.11469.1.S1_at   | MmugDNA.11469.1 | 5.29  | 5.11  | 0.04 | 0.05 | 1.13  | 0.00813  | 0.035151 | 0.232005 | 0.231645 |
| MmugDNA.1147.1.S1_at    | MmugDNA.1147.1  | 5.77  | 5.87  | 0.16 | 0.23 | -1.08 | 0.243106 | 0.204044 | 0.608941 | 0.478372 |
| MmugDNA.11470.1.S1_at   | MmugDNA.11470.1 | 12.59 | 12.62 | 0.16 | 0.05 | -1.02 | 0.790798 | 0.053234 | 0.923002 | 0.276445 |
| MmugDNA.11470.1.S1_s_at | MmugDNA.11470.1 | 13.83 | 13.83 | 0.13 | 0.02 | 1     | 0.469431 | 0.648058 | 0.76556  | 0.793977 |
| MmugDNA.11471.1.S1_at   | MmugDNA.11471.1 | 8.19  | 8.84  | 0.85 | 0.13 | -1.57 | 0.71541  | 0.429656 | 0.889274 | 0.650973 |
| MmugDNA.11472.1.S1_at   | MmugDNA.11472.1 | 10.03 | 10.53 | 0.06 | 0.19 | -1.41 | 0.029209 | 0.045325 | 0.333974 | 0.257202 |
| MmugDNA.11473.1.S1_at   | MmugDNA.11473.1 | 4.21  | 4.09  | 0.07 | 0.04 | 1.08  | 0.091205 | 0.082137 | 0.459035 | 0.330937 |
| MmugDNA.11474.1.S1_at   | MmugDNA.11474.1 | 3.51  | 3.5   | 0.09 | 0.01 | 1     | 0.750023 | 0.397741 | 0.905347 | 0.629105 |
| MmugDNA.11475.1.S1_at   | MmugDNA.11475.1 | 10.87 | 10.9  | 0.33 | 0.06 | -1.02 | 0.352388 | 0.489212 | 0.692649 | 0.691706 |
| MmugDNA.11476.1.S1_at   | MmugDNA.11476.1 | 4.37  | 4.2   | 0.2  | 0.05 | 1.12  | 0.161041 | 0.203883 | 0.534327 | 0.478102 |
| MmugDNA.11477.1.S1_at   | MmugDNA.11477.1 | 7.52  | 7.31  | 0.07 | 0.1  | 1.16  | 0.038833 | 0.258727 | 0.36035  | 0.525949 |
| MmugDNA.11478.1.S1_at   | MmugDNA.11478.1 | 6.35  | 6.57  | 0.39 | 0.19 | -1.17 | 0.314706 | 0.013003 | 0.665423 | 0.146803 |
| MmugDNA.11479.1.S1_at   | MmugDNA.11479.1 | 5.69  | 5.75  | 0.33 | 0.02 | -1.04 | 0.85279  | 0.375313 | 0.94811  | 0.613336 |
| MmugDNA.1148.1.S1_at    | MmugDNA.1148.1  | 9.5   | 9.81  | 0.31 | 0.18 | -1.24 | 0.605473 | 0.578661 | 0.839993 | 0.748603 |
| MmugDNA.11480.1.S1_at   | MmugDNA.11480.1 | 4.65  | 4.35  | 0.18 | 0.07 | 1.23  | 0.081266 | 0.074326 | 0.445338 | 0.318046 |
| MmugDNA.11481.1.S1_at   | MmugDNA.11481.1 | 7.06  | 6.65  | 0.36 | 0.36 | 1.33  | 0.788941 | 0.47004  | 0.922472 | 0.678572 |
| MmugDNA.11482.1.S1_at   | MmugDNA.11482.1 | 6.26  | 6.67  | 0.76 | 0.24 | -1.33 | 0.990539 | 0.03155  | 0.996425 | 0.219708 |
| MmugDNA.11483.1.S1_at   | MmugDNA.11483.1 | 8.8   | 8.72  | 1.87 | 0.25 | 1.06  | 0.881023 | 0.435273 | 0.958931 | 0.655127 |
| MmugDNA.11484.1.S1_at   | MmugDNA.11484.1 | 5.39  | 5.29  | 0.27 | 0.07 | 1.07  | 0.156341 | 0.193785 | 0.529536 | 0.468847 |
| MmugDNA.11485.1.S1_at   | MmugDNA.11485.1 | 7.39  | 7.6   | 0.11 | 0.15 | -1.16 | 0.16806  | 0.492873 | 0.540683 | 0.693817 |
| MmugDNA.11487.1.S1_at   | MmugDNA.11487.1 | 6.59  | 6.48  | 0.62 | 0.27 | 1.08  | 0.569502 | 0.040608 | 0.82149  | 0.246364 |
| MmugDNA.11488.1.S1_at   | MmugDNA.11488.1 | 5.07  | 5.43  | 0.21 | 0.39 | -1.28 | 0.472112 | 0.495898 | 0.766866 | 0.695781 |
| MmugDNA.11489.1.S1_at   | MmugDNA.11489.1 | 6.01  | 5.28  | 0.56 | 0.25 | 1.67  | 0.442872 | 0.130088 | 0.750405 | 0.401724 |
| MmugDNA.1149.1.S1_at    | MmugDNA.1149.1  | 6.75  | 6.42  | 0.14 | 0.36 | 1.26  | 0.076625 | 0.07197  | 0.437977 | 0.314305 |
| MmugDNA.11490.1.S1_at   | MmugDNA.11490.1 | 7.91  | 7.66  | 1.43 | 0.09 | 1.18  | 0.901585 | 0.380314 | 0.96664  | 0.616984 |
| MmugDNA.11491.1.S1_at   | MmugDNA.11491.1 | 6.31  | 5.98  | 0.04 | 0.15 | 1.26  | 0.05132  | 0.24831  | 0.389803 | 0.5176   |
| MmugDNA.11492.1.S1_at   | MmugDNA.11492.1 | 4.97  | 5.8   | 0.34 | 0.24 | -1.78 | 0.024633 | 0.054877 | 0.319253 | 0.279748 |
| MmugDNA.11493.1.S1_at   | MmugDNA.11493.1 | 4.69  | 4.53  | 0.16 | 0.35 | 1.12  | 0.637831 | 0.39623  | 0.855669 | 0.628068 |
| MmugDNA.11495.1.S1_at   | MmugDNA.11495.1 | 3.59  | 3.58  | 0.04 | 0.06 | 1.01  | 0.982853 | 0.73119  | 0.994764 | 0.84424  |
| MmugDNA.11496.1.S1_at   | MmugDNA.11496.1 | 9.92  | 9.78  | 1.82 | 0.24 | 1.1   | 0.506935 | 0.689405 | 0.786064 | 0.818813 |
| MmugDNA.11497.1.S1_at   | MmugDNA.11497.1 | 3.41  | 3.7   | 0.35 | 0.3  | -1.22 | 0.711783 | 0.240801 | 0.887709 | 0.511521 |
| MmugDNA.11498.1.S1_at   | MmugDNA.11498.1 | 10.31 | 9.33  | 0.53 | 0.64 | 1.98  | 0.125846 | 0.213598 | 0.49972  | 0.487432 |
| MmugDNA.11499.1.S1_at   | MmugDNA.11499.1 | 3.48  | 3.69  | 0.14 | 0.08 | -1.15 | 0.057451 | 0.132179 | 0.40213  | 0.404274 |
| MmugDNA.115.1.S1_at     | MmugDNA.115.1   | 4.69  | 4.78  | 0.11 | 0.13 | -1.07 | 0.35525  | 0.195389 | 0.69464  | 0.470253 |

|                         |                 |       |       |      |      |        |          |          |          |          |
|-------------------------|-----------------|-------|-------|------|------|--------|----------|----------|----------|----------|
| MmugDNA.38313.1.S1_at   | MmugDNA.38313.1 | 6.68  | 6.49  | 0.08 | 0.07 | 1.14   | 0.030769 | 0.028788 | 0.338524 | 0.211521 |
| MmugDNA.38313.1.S1_s_at | MmugDNA.38313.1 | 6.74  | 6.65  | 0.06 | 0.03 | 1.07   | 0.172392 | 0.181082 | 0.545696 | 0.457577 |
| MmugDNA.11500.1.S1_at   | MmugDNA.11500.1 | 5.92  | 6.01  | 0.65 | 0.43 | -1.06  | 0.192718 | 0.117808 | 0.563577 | 0.385702 |
| MmugDNA.11501.1.S1_at   | MmugDNA.11501.1 | 4.69  | 4.82  | 0.11 | 0.16 | -1.1   | 0.209243 | 0.261844 | 0.580725 | 0.528265 |
| MmugDNA.11502.1.S1_at   | MmugDNA.11502.1 | 4.68  | 4.68  | 0.11 | 0.14 | -1     | 0.950433 | 0.955859 | 0.983308 | 0.975006 |
| MmugDNA.11503.1.S1_at   | MmugDNA.11503.1 | 5.21  | 4.98  | 0.05 | 0.07 | 1.17   | 0.02433  | 0.108247 | 0.317812 | 0.371557 |
| MmugDNA.11504.1.S1_at   | MmugDNA.11504.1 | 2.76  | 2.78  | 0.1  | 0.02 | -1.01  | 0.548746 | 0.443293 | 0.809898 | 0.661138 |
| MmugDNA.11505.1.S1_at   | MmugDNA.11505.1 | 6.8   | 8.66  | 0.91 | 0.02 | -3.64  | 0.063519 | 0.023658 | 0.415717 | 0.192574 |
| MmugDNA.11506.1.S1_at   | MmugDNA.11506.1 | 7.93  | 7.92  | 0.17 | 0.08 | 1      | 0.756328 | 0.911224 | 0.908175 | 0.949929 |
| MmugDNA.11507.1.S1_at   | MmugDNA.11507.1 | 5.94  | 6.05  | 0.96 | 0.16 | -1.08  | 0.370262 | 0.041751 | 0.704572 | 0.248933 |
| MmugDNA.1151.1.S1_at    | MmugDNA.1151.1  | 7.32  | 7.25  | 0.06 | 0.01 | -1.04  | 0.205941 | 0.076482 | 0.577849 | 0.32158  |
| MmugDNA.11510.1.S1_at   | MmugDNA.11510.1 | 8.91  | 8.79  | 0.55 | 0.06 | 1.08   | 0.831453 | 0.120663 | 0.939628 | 0.389476 |
| MmugDNA.11512.1.S1_at   | MmugDNA.11512.1 | 7.56  | 7.18  | 0.61 | 0.33 | 1.3    | 0.477354 | 0.679533 | 0.769812 | 0.812884 |
| MmugDNA.11513.1.S1_at   | MmugDNA.11513.1 | 9.01  | 8.96  | 1.1  | 0.21 | 1.03   | 0.942753 | 0.972734 | 0.98031  | 0.985334 |
| MmugDNA.11514.1.S1_at   | MmugDNA.11514.1 | 7.15  | 7     | 1.08 | 0.94 | 1.11   | 0.334586 | 0.492234 | 0.680478 | 0.693477 |
| MmugDNA.11515.1.S1_at   | MmugDNA.11515.1 | 10.14 | 10.33 | 0.14 | 0.16 | -1.14  | 0.175735 | 0.12181  | 0.548907 | 0.3911   |
| MmugDNA.11517.1.S1_at   | MmugDNA.11517.1 | 3.66  | 3.73  | 0.1  | 0.17 | -1.05  | 0.560808 | 0.226061 | 0.816958 | 0.498529 |
| MmugDNA.11518.1.S1_at   | MmugDNA.11518.1 | 5.22  | 8.98  | 1.26 | 0.15 | -13.58 | 0.01379  | 0.044357 | 0.272024 | 0.255109 |
| MmugDNA.11518.1.S1_s_at | MmugDNA.11518.1 | 5.01  | 8.35  | 1.27 | 0.21 | -10.16 | 0.01624  | 0.050472 | 0.286783 | 0.26998  |
| MmugDNA.1152.1.S1_at    | MmugDNA.1152.1  | 5.84  | 5.86  | 0.04 | 0.05 | -1.01  | 0.375412 | 0.079095 | 0.706463 | 0.326184 |
| MmugDNA.11520.1.S1_at   | MmugDNA.11520.1 | 5.39  | 5.3   | 0.11 | 0.17 | 1.07   | 0.436695 | 0.370304 | 0.746416 | 0.609407 |
| MmugDNA.11521.1.S1_at   | MmugDNA.11521.1 | 7.36  | 7.69  | 0.53 | 0.06 | -1.26  | 0.246743 | 0.057314 | 0.612253 | 0.285275 |
| MmugDNA.11522.1.S1_at   | MmugDNA.11522.1 | 5.26  | 5.18  | 0.05 | 0.34 | 1.06   | 0.265969 | 0.132889 | 0.627047 | 0.404544 |
| MmugDNA.11523.1.S1_at   | MmugDNA.11523.1 | 6.31  | 6.25  | 0.14 | 0.1  | 1.04   | 0.257432 | 0.499038 | 0.621166 | 0.697964 |
| MmugDNA.11524.1.S1_at   | MmugDNA.11524.1 | 7.38  | 7.38  | 0.1  | 0.07 | 1      | 0.638813 | 0.007565 | 0.856034 | 0.116437 |
| MmugDNA.11525.1.S1_at   | MmugDNA.11525.1 | 8.95  | 8.21  | 0.3  | 0.03 | 1.67   | 0.0144   | 0.007953 | 0.27544  | 0.118702 |
| MmugDNA.11526.1.S1_at   | MmugDNA.11526.1 | 5.35  | 5.34  | 0.05 | 0.15 | 1.01   | 0.986507 | 0.840872 | 0.995654 | 0.909295 |
| MmugDNA.11528.1.S1_at   | MmugDNA.11528.1 | 7.37  | 8.12  | 0.6  | 0.15 | -1.68  | 0.133227 | 0.074423 | 0.507715 | 0.318058 |
| MmugDNA.11529.1.S1_at   | MmugDNA.11529.1 | 6.63  | 6.38  | 0.82 | 0.06 | 1.19   | 0.572047 | 0.763762 | 0.823145 | 0.862648 |
| MmugDNA.1153.1.S1_at    | MmugDNA.1153.1  | 9.74  | 9.85  | 0.24 | 0.14 | -1.08  | 0.907063 | 0.142129 | 0.968482 | 0.415728 |
| MmugDNA.11530.1.S1_at   | MmugDNA.11530.1 | 5.09  | 5.16  | 0.16 | 0.17 | -1.05  | 0.206322 | 0.30286  | 0.578142 | 0.560356 |
| MmugDNA.11531.1.S1_at   | MmugDNA.11531.1 | 10.2  | 9.29  | 0.44 | 0.11 | 1.87   | 0.026723 | 0.009339 | 0.325965 | 0.127598 |
| MmugDNA.11534.1.S1_at   | MmugDNA.11534.1 | 9.71  | 9.57  | 0.75 | 0.18 | 1.1    | 0.627922 | 0.362501 | 0.850829 | 0.603066 |
| MmugDNA.11536.1.S1_at   | MmugDNA.11536.1 | 8.3   | 9.09  | 0.22 | 0.07 | -1.73  | 0.003955 | 0.001371 | 0.198571 | 0.05691  |
| MmugDNA.11537.1.S1_at   | MmugDNA.11537.1 | 6.07  | 5.94  | 0.1  | 0.03 | 1.09   | 0.132445 | 0.10606  | 0.506752 | 0.368438 |
| MmugDNA.11538.1.S1_at   | MmugDNA.11538.1 | 6.19  | 6.39  | 0.07 | 0.23 | -1.15  | 0.624223 | 0.494341 | 0.848579 | 0.694829 |
| MmugDNA.11542.1.S1_at   | MmugDNA.11542.1 | 7.54  | 7.4   | 0.31 | 0.04 | 1.11   | 0.151419 | 0.229923 | 0.524547 | 0.501802 |
| MmugDNA.11543.1.S1_at   | MmugDNA.11543.1 | 3.16  | 3.15  | 0.11 | 0.01 | 1      | 0.917977 | 0.945274 | 0.972062 | 0.968942 |
| MmugDNA.11544.1.S1_at   | MmugDNA.11544.1 | 4.19  | 4.16  | 0.23 | 0.25 | 1.02   | 0.522482 | 0.189823 | 0.795143 | 0.465403 |
| MmugDNA.11545.1.S1_at   | MmugDNA.11545.1 | 8.43  | 9.49  | 0.31 | 0.14 | -2.07  | 0.004942 | 0.007661 | 0.203775 | 0.117089 |
| MmugDNA.11546.1.S1_at   | MmugDNA.11546.1 | 7.43  | 7.38  | 0.07 | 0.04 | 1.03   | 0.14853  | 0.740752 | 0.522567 | 0.849915 |
| MmugDNA.11547.1.S1_at   | MmugDNA.11547.1 | 10.28 | 10.46 | 0.6  | 0.04 | -1.14  | 0.584353 | 0.563682 | 0.829667 | 0.7388   |
| MmugDNA.11548.1.S1_at   | MmugDNA.11548.1 | 4.02  | 3.79  | 0.08 | 0.1  | 1.17   | 0.027074 | 0.086913 | 0.327141 | 0.339715 |

|                         |                 |       |       |      |      |       |          |          |          |          |
|-------------------------|-----------------|-------|-------|------|------|-------|----------|----------|----------|----------|
| MmugDNA.1155.1.S1_at    | MmugDNA.1155.1  | 7.15  | 7.04  | 0.07 | 0.03 | 1.08  | 0.091419 | 0.205385 | 0.45929  | 0.479751 |
| MmugDNA.11550.1.S1_at   | MmugDNA.11550.1 | 5.11  | 4.76  | 0.22 | 0.19 | 1.28  | 0.111393 | 0.138916 | 0.484548 | 0.412037 |
| MmugDNA.11551.1.S1_at   | MmugDNA.11551.1 | 8.64  | 9.95  | 1.06 | 0.18 | -2.47 | 0.097566 | 0.192492 | 0.466487 | 0.467952 |
| MmugDNA.11552.1.S1_at   | MmugDNA.11552.1 | 4.7   | 5.81  | 0.21 | 0.3  | -2.15 | 0.018708 | 0.396255 | 0.298184 | 0.628074 |
| MmugDNA.11553.1.S1_at   | MmugDNA.11553.1 | 3.53  | 3.48  | 0.27 | 0.05 | 1.04  | 0.240007 | 0.221528 | 0.60621  | 0.494849 |
| MmugDNA.11554.1.S1_at   | MmugDNA.11554.1 | 7.58  | 7.94  | 0.84 | 0.15 | -1.28 | 0.425755 | 0.545587 | 0.740112 | 0.727579 |
| MmugDNA.11556.1.S1_at   | MmugDNA.11556.1 | 3.61  | 3.8   | 0.13 | 0.02 | -1.14 | 0.149203 | 0.056779 | 0.523063 | 0.284379 |
| MmugDNA.11558.1.S1_at   | MmugDNA.11558.1 | 4.02  | 3.84  | 0.18 | 0.05 | 1.14  | 0.141471 | 0.177154 | 0.516365 | 0.453611 |
| MmugDNA.11559.1.S1_at   | MmugDNA.11559.1 | 3.46  | 3.55  | 0.05 | 0.14 | -1.07 | 0.526746 | 0.152249 | 0.796797 | 0.427045 |
| MmugDNA.11560.1.S1_at   | MmugDNA.11560.1 | 8.27  | 8.44  | 0.29 | 0.14 | -1.12 | 0.409854 | 0.039175 | 0.730334 | 0.243072 |
| MmugDNA.11561.1.S1_at   | MmugDNA.11561.1 | 3.83  | 3.81  | 0.11 | 0.03 | 1.02  | 0.360214 | 0.495147 | 0.697783 | 0.695319 |
| MmugDNA.11562.1.S1_at   | MmugDNA.11562.1 | 6.28  | 6.43  | 0.37 | 0.24 | -1.11 | 0.223413 | 0.036885 | 0.592569 | 0.236506 |
| MmugDNA.11563.1.S1_at   | MmugDNA.11563.1 | 5.54  | 6.69  | 1.7  | 0.35 | -2.23 | 0.331899 | 0.068299 | 0.678336 | 0.307706 |
| MmugDNA.11565.1.S1_at   | MmugDNA.11565.1 | 4.29  | 4.44  | 0.35 | 0.29 | -1.1  | 0.463921 | 0.631345 | 0.762315 | 0.78278  |
| MmugDNA.11566.1.S1_at   | MmugDNA.11566.1 | 3.59  | 3.78  | 0.1  | 0.02 | -1.14 | 0.040445 | 0.175904 | 0.364432 | 0.452486 |
| MmugDNA.11567.1.S1_s_at | MmugDNA.11567.1 | 9.41  | 10.03 | 0.47 | 0.11 | -1.53 | 0.108141 | 0.117267 | 0.480558 | 0.384813 |
| MmugDNA.11568.1.S1_at   | MmugDNA.11568.1 | 5.18  | 5.13  | 0.16 | 0.13 | 1.04  | 0.83559  | 0.868093 | 0.941057 | 0.925106 |
| MmugDNA.11569.1.S1_at   | MmugDNA.11569.1 | 7.06  | 7.07  | 0.18 | 0.04 | -1.01 | 0.346051 | 0.576934 | 0.687873 | 0.747521 |
| MmugDNA.1157.1.S1_at    | MmugDNA.1157.1  | 5.5   | 5.18  | 0.09 | 0.08 | 1.24  | 0.007286 | 0.09533  | 0.226979 | 0.35236  |
| MmugDNA.11571.1.S1_at   | MmugDNA.11571.1 | 8.8   | 8.81  | 1.23 | 0.04 | -1.01 | 0.975883 | 0.989524 | 0.99225  | 0.994037 |
| MmugDNA.11572.1.S1_at   | MmugDNA.11572.1 | 10.73 | 11.58 | 0.55 | 0.04 | -1.79 | 0.11725  | 0.129071 | 0.490908 | 0.400548 |
| MmugDNA.11573.1.S1_at   | MmugDNA.11573.1 | 6.51  | 6.34  | 0.47 | 0.21 | 1.12  | 0.855692 | 0.869722 | 0.949003 | 0.926114 |
| MmugDNA.11574.1.S1_at   | MmugDNA.11574.1 | 3.08  | 3.92  | 0.26 | 0.14 | -1.79 | 0.021589 | 0.034148 | 0.309241 | 0.228692 |
| MmugDNA.11576.1.S1_at   | MmugDNA.11576.1 | 8.78  | 7.59  | 0.97 | 0.43 | 2.29  | 0.353318 | 0.500006 | 0.693208 | 0.698744 |
| MmugDNA.11577.1.S1_at   | MmugDNA.11577.1 | 4.22  | 3.99  | 0.14 | 0.34 | 1.18  | 0.449379 | 0.704378 | 0.754342 | 0.828445 |
| MmugDNA.11578.1.S1_at   | MmugDNA.11578.1 | 5.29  | 5.3   | 0.22 | 0.43 | -1.01 | 0.242799 | 0.358279 | 0.608808 | 0.599779 |
| MmugDNA.11579.1.S1_at   | MmugDNA.11579.1 | 5.51  | 5.5   | 0.08 | 0.13 | 1.01  | 0.866624 | 0.859169 | 0.953134 | 0.919754 |
| MmugDNA.1158.1.S1_at    | MmugDNA.1158.1  | 10.18 | 9.85  | 2.83 | 0.74 | 1.25  | 0.88515  | 0.35162  | 0.960259 | 0.595114 |
| MmugDNA.11581.1.S1_at   | MmugDNA.11581.1 | 7.04  | 6.65  | 0.32 | 0.13 | 1.31  | 0.070644 | 0.024638 | 0.429758 | 0.196442 |
| MmugDNA.11584.1.S1_at   | MmugDNA.11584.1 | 7.08  | 7.57  | 0.31 | 0.25 | -1.41 | 0.061683 | 0.003462 | 0.411131 | 0.084734 |
| MmugDNA.11586.1.S1_at   | MmugDNA.11586.1 | 3.74  | 4.3   | 0.61 | 0.52 | -1.48 | 0.205706 | 0.161602 | 0.577556 | 0.43777  |
| MmugDNA.11587.1.S1_at   | MmugDNA.11587.1 | 4.55  | 4.28  | 0.11 | 0.21 | 1.2   | 0.089376 | 0.494083 | 0.457564 | 0.694663 |
| MmugDNA.11588.1.S1_at   | MmugDNA.11588.1 | 8.92  | 9.29  | 0.25 | 0.19 | -1.29 | 0.375201 | 0.422606 | 0.706399 | 0.64577  |
| MmugDNA.1159.1.S1_at    | MmugDNA.1159.1  | 6.39  | 6.16  | 0.08 | 0.11 | 1.18  | 0.058769 | 0.111907 | 0.405381 | 0.377006 |
| MmugDNA.11590.1.S1_at   | MmugDNA.11590.1 | 8.56  | 8.46  | 0.99 | 0.29 | 1.07  | 0.876822 | 0.978154 | 0.95711  | 0.988066 |
| MmugDNA.11592.1.S1_at   | MmugDNA.11592.1 | 2.71  | 2.68  | 0.09 | 0.07 | 1.02  | 0.353169 | 0.43067  | 0.693168 | 0.651688 |
| MmugDNA.11592.1.S1_s_at | MmugDNA.11592.1 | 3.08  | 3.23  | 0.22 | 0.05 | -1.11 | 0.555611 | 0.67094  | 0.813597 | 0.807629 |
| MmugDNA.11593.1.S1_at   | MmugDNA.11593.1 | 11.52 | 10.98 | 0.18 | 0.07 | 1.45  | 0.019905 | 0.013513 | 0.302615 | 0.148824 |
| MmugDNA.11596.1.S1_at   | MmugDNA.11596.1 | 6.87  | 8.46  | 0.68 | 0.24 | -3.01 | 0.029184 | 0.028748 | 0.333974 | 0.211372 |
| MmugDNA.11597.1.S1_at   | MmugDNA.11597.1 | 4.92  | 4.7   | 0.37 | 0.28 | 1.16  | 0.294887 | 0.333975 | 0.650971 | 0.582063 |
| MmugDNA.11598.1.S1_at   | MmugDNA.11598.1 | 3.57  | 3.51  | 0.09 | 0.11 | 1.05  | 0.157802 | 0.11555  | 0.53073  | 0.38267  |
| MmugDNA.11599.1.S1_at   | MmugDNA.11599.1 | 4.39  | 4.32  | 0.6  | 0.2  | 1.05  | 0.303731 | 0.670197 | 0.657579 | 0.807153 |
| MmugDNA.116.1.S1_at     | MmugDNA.116.1   | 8.87  | 8.25  | 0.22 | 0.11 | 1.54  | 0.010396 | 0.020473 | 0.24744  | 0.179641 |



|                         |                 |       |       |      |      |       |          |          |          |          |
|-------------------------|-----------------|-------|-------|------|------|-------|----------|----------|----------|----------|
| MmugDNA.11600.1.S1_at   | MmugDNA.11600.1 | 6.22  | 6.03  | 0.11 | 0.09 | 1.14  | 0.043388 | 0.251017 | 0.372033 | 0.519638 |
| MmugDNA.11602.1.S1_at   | MmugDNA.11602.1 | 7.99  | 7.71  | 0.29 | 0.17 | 1.21  | 0.929415 | 0.032993 | 0.976344 | 0.224886 |
| MmugDNA.11603.1.S1_at   | MmugDNA.11603.1 | 6.74  | 6.74  | 0.07 | 0.05 | -1    | 0.256349 | 0.396823 | 0.620399 | 0.628452 |
| MmugDNA.11603.1.S1_s_at | MmugDNA.11603.1 | 10.67 | 10.1  | 0.48 | 0.21 | 1.49  | 0.241014 | 0.404219 | 0.607241 | 0.632691 |
| MmugDNA.11604.1.S1_at   | MmugDNA.11604.1 | 7.18  | 7.54  | 0.42 | 0.1  | -1.28 | 0.256895 | 0.377408 | 0.620749 | 0.6149   |
| MmugDNA.11606.1.S1_at   | MmugDNA.11606.1 | 5.89  | 6.34  | 0.26 | 0.1  | -1.36 | 0.030641 | 0.026956 | 0.338263 | 0.205395 |
| MmugDNA.11607.1.S1_at   | MmugDNA.11607.1 | 4.18  | 4.22  | 0.19 | 0    | -1.03 | 0.603526 | 0.810977 | 0.839251 | 0.890949 |
| MmugDNA.11608.1.S1_at   | MmugDNA.11608.1 | 3.46  | 3.44  | 0.07 | 0.13 | 1.01  | 0.248166 | 0.412575 | 0.61369  | 0.638941 |
| MmugDNA.11609.1.S1_at   | MmugDNA.11609.1 | 3.2   | 3.23  | 0.13 | 0.03 | -1.02 | 0.519745 | 0.574766 | 0.793357 | 0.746142 |
| MmugDNA.1161.1.S1_at    | MmugDNA.1161.1  | 3.71  | 3.72  | 0.13 | 0.09 | -1.01 | 0.925695 | 0.364957 | 0.975188 | 0.60517  |
| MmugDNA.11611.1.S1_at   | MmugDNA.11611.1 | 4.64  | 4.31  | 0.19 | 0.17 | 1.26  | 0.068179 | 0.193425 | 0.425017 | 0.468711 |
| MmugDNA.11612.1.S1_at   | MmugDNA.11612.1 | 3.54  | 3.31  | 0.44 | 0.11 | 1.17  | 0.45976  | 0.615866 | 0.759799 | 0.772353 |
| MmugDNA.11613.1.S1_at   | MmugDNA.11613.1 | 2.84  | 2.85  | 0.1  | 0.04 | -1.01 | 0.9016   | 0.511163 | 0.96664  | 0.705422 |
| MmugDNA.11615.1.S1_at   | MmugDNA.11615.1 | 3.81  | 3.6   | 0.22 | 0.11 | 1.15  | 0.092245 | 0.556423 | 0.460762 | 0.734507 |
| MmugDNA.11616.1.S1_at   | MmugDNA.11616.1 | 8.08  | 8.46  | 0.15 | 0.08 | -1.3  | 0.044615 | 0.045818 | 0.374916 | 0.258337 |
| MmugDNA.11617.1.S1_at   | MmugDNA.11617.1 | 10.56 | 10.54 | 0.05 | 0.08 | 1.02  | 0.549193 | 0.521379 | 0.81025  | 0.712376 |
| MmugDNA.11619.1.S1_at   | MmugDNA.11619.1 | 4.18  | 4.05  | 0.05 | 0.02 | 1.09  | 0.039462 | 0.03355  | 0.362032 | 0.226764 |
| MmugDNA.11620.1.S1_at   | MmugDNA.11620.1 | 6.41  | 6.31  | 0.19 | 0.14 | 1.07  | 0.09982  | 0.072407 | 0.469818 | 0.31528  |
| MmugDNA.11621.1.S1_at   | MmugDNA.11621.1 | 4.13  | 4.16  | 0.21 | 0.09 | -1.02 | 0.616383 | 0.825651 | 0.84491  | 0.899784 |
| MmugDNA.11628.1.S1_at   | MmugDNA.11628.1 | 7.58  | 7.4   | 0.09 | 0.04 | 1.13  | 0.034739 | 0.017504 | 0.350358 | 0.167516 |
| MmugDNA.11629.1.S1_at   | MmugDNA.11629.1 | 4.91  | 4.73  | 0.16 | 0.34 | 1.13  | 0.261669 | 0.527912 | 0.62388  | 0.716345 |
| MmugDNA.1163.1.S1_a_at  | MmugDNA.1163.1  | 8.57  | 8.62  | 0.04 | 0.08 | -1.04 | 0.718439 | 0.985806 | 0.890635 | 0.991942 |
| MmugDNA.1163.1.S1_at    | MmugDNA.1163.1  | 5.15  | 5.09  | 0.25 | 0.09 | 1.04  | 0.67575  | 0.829746 | 0.872746 | 0.902191 |
| MmugDNA.11632.1.S1_at   | MmugDNA.11632.1 | 7.02  | 6.73  | 0.82 | 0.14 | 1.22  | 0.6526   | 0.851876 | 0.86202  | 0.915799 |
| MmugDNA.11633.1.S1_at   | MmugDNA.11633.1 | 3.86  | 3.84  | 0.15 | 0.05 | 1.01  | 0.535148 | 0.774726 | 0.801478 | 0.868833 |
| MmugDNA.11634.1.S1_at   | MmugDNA.11634.1 | 8.73  | 8.8   | 0.32 | 0.23 | -1.05 | 0.172226 | 0.133825 | 0.545586 | 0.405819 |
| MmugDNA.11636.1.S1_at   | MmugDNA.11636.1 | 3.26  | 3.35  | 0.1  | 0.11 | -1.06 | 0.379065 | 0.185715 | 0.708577 | 0.46163  |
| MmugDNA.11638.1.S1_at   | MmugDNA.11638.1 | 4.58  | 4.93  | 0.33 | 0.27 | -1.27 | 0.22939  | 0.355751 | 0.598339 | 0.597864 |
| MmugDNA.1164.1.S1_at    | MmugDNA.1164.1  | 8.43  | 9.13  | 0.63 | 0.23 | -1.63 | 0.624742 | 0.291639 | 0.848936 | 0.552025 |
| MmugDNA.11640.1.S1_at   | MmugDNA.11640.1 | 5.57  | 5.52  | 0.13 | 0.07 | 1.04  | 0.934733 | 0.186762 | 0.977918 | 0.46257  |
| MmugDNA.11641.1.S1_s_at | MmugDNA.11641.1 | 8.7   | 8.93  | 0.23 | 0.16 | -1.17 | 0.707785 | 0.144144 | 0.886283 | 0.418024 |
| MmugDNA.11642.1.S1_at   | MmugDNA.11642.1 | 5.79  | 5.49  | 0.32 | 0.09 | 1.24  | 0.263332 | 0.3684   | 0.625264 | 0.607932 |
| MmugDNA.11643.1.S1_at   | MmugDNA.11643.1 | 12.38 | 12.69 | 0.45 | 0.07 | -1.24 | 0.356838 | 0.482021 | 0.695328 | 0.686939 |
| MmugDNA.11644.1.S1_at   | MmugDNA.11644.1 | 8.83  | 7.91  | 0.87 | 0.25 | 1.89  | 0.405627 | 0.2856   | 0.727426 | 0.547395 |
| MmugDNA.11645.1.S1_at   | MmugDNA.11645.1 | 6.81  | 6.48  | 0.21 | 0.3  | 1.26  | 0.066081 | 0.026505 | 0.421668 | 0.203897 |
| MmugDNA.11646.1.S1_at   | MmugDNA.11646.1 | 3.76  | 3.89  | 0.06 | 0.12 | -1.09 | 0.155732 | 0.125903 | 0.528929 | 0.396452 |
| MmugDNA.1165.1.S1_at    | MmugDNA.1165.1  | 6.55  | 6.54  | 0.41 | 0.36 | 1.01  | 0.78243  | 0.641506 | 0.919855 | 0.789578 |
| MmugDNA.11651.1.S1_at   | MmugDNA.11651.1 | 4.54  | 4.59  | 0.04 | 0.02 | -1.04 | 0.095156 | 0.705533 | 0.464131 | 0.829287 |
| MmugDNA.11656.1.S1_at   | MmugDNA.11656.1 | 8.66  | 8.69  | 0.22 | 0.01 | -1.02 | 0.679456 | 0.413645 | 0.874274 | 0.639688 |
| MmugDNA.11657.1.S1_at   | MmugDNA.11657.1 | 3.75  | 3.76  | 0.06 | 0.07 | -1    | 0.764612 | 0.673516 | 0.911553 | 0.809257 |
| MmugDNA.11658.1.S1_at   | MmugDNA.11658.1 | 11.15 | 11.3  | 0.23 | 0.05 | -1.11 | 0.828826 | 0.612448 | 0.938563 | 0.770057 |
| MmugDNA.11659.1.S1_s_at | MmugDNA.11659.1 | 11.48 | 11.71 | 0.71 | 0.06 | -1.17 | 0.551861 | 0.11534  | 0.811474 | 0.382394 |
| MmugDNA.1166.1.S1_at    | MmugDNA.1166.1  | 6.21  | 6.7   | 0.22 | 0.41 | -1.4  | 0.178044 | 0.27001  | 0.551187 | 0.535312 |

|                         |                 |       |       |      |      |       |          |          |          |          |
|-------------------------|-----------------|-------|-------|------|------|-------|----------|----------|----------|----------|
| MmugDNA.11663.1.S1_at   | MmugDNA.11663.1 | 3.22  | 3.35  | 0.2  | 0.35 | -1.09 | 0.539112 | 0.765249 | 0.803644 | 0.863535 |
| MmugDNA.11664.1.S1_at   | MmugDNA.11664.1 | 8.99  | 9.3   | 0.89 | 0.11 | -1.25 | 0.564302 | 0.050921 | 0.818633 | 0.270955 |
| MmugDNA.11665.1.S1_at   | MmugDNA.11665.1 | 9.59  | 9.36  | 0.22 | 0.14 | 1.18  | 0.16604  | 0.060162 | 0.538839 | 0.291882 |
| MmugDNA.11666.1.S1_at   | MmugDNA.11666.1 | 3.86  | 3.78  | 0.13 | 0.03 | 1.05  | 0.920411 | 0.936839 | 0.972917 | 0.964385 |
| MmugDNA.11667.1.S1_at   | MmugDNA.11667.1 | 6.52  | 6.62  | 0.3  | 0.04 | -1.07 | 0.220971 | 0.463469 | 0.590219 | 0.674446 |
| MmugDNA.11668.1.S1_at   | MmugDNA.11668.1 | 4.72  | 4.67  | 0.11 | 0.05 | 1.04  | 0.708369 | 0.297287 | 0.886591 | 0.556071 |
| MmugDNA.11669.1.S1_at   | MmugDNA.11669.1 | 4.62  | 4.24  | 0.2  | 0.12 | 1.3   | 0.063768 | 0.188938 | 0.416611 | 0.464854 |
| MmugDNA.11670.1.S1_at   | MmugDNA.11670.1 | 6.12  | 5.85  | 0.12 | 0.08 | 1.2   | 0.026247 | 0.01473  | 0.323734 | 0.154415 |
| MmugDNA.11671.1.S1_at   | MmugDNA.11671.1 | 5     | 4.89  | 0.13 | 0.29 | 1.08  | 0.52964  | 0.288573 | 0.798376 | 0.549827 |
| MmugDNA.11674.1.S1_at   | MmugDNA.11674.1 | 5     | 5.09  | 0.32 | 0.04 | -1.06 | 0.872365 | 0.211582 | 0.955759 | 0.485681 |
| MmugDNA.11675.1.S1_at   | MmugDNA.11675.1 | 4.98  | 4.24  | 0.91 | 0.07 | -1.67 | 0.226068 | 0.188657 | 0.595263 | 0.464569 |
| MmugDNA.11676.1.S1_at   | MmugDNA.11676.1 | 4.85  | 4.7   | 0.08 | 0.13 | 1.11  | 0.451515 | 0.770274 | 0.755176 | 0.866566 |
| MmugDNA.11677.1.S1_at   | MmugDNA.11677.1 | 5.36  | 5.45  | 0.45 | 0.19 | -1.06 | 0.846503 | 0.311822 | 0.946257 | 0.566807 |
| MmugDNA.11678.1.S1_at   | MmugDNA.11678.1 | 12.21 | 11.77 | 2.66 | 0.25 | 1.36  | 0.603058 | 0.090217 | 0.83911  | 0.344604 |
| MmugDNA.11679.1.S1_at   | MmugDNA.11679.1 | 3.78  | 3.76  | 0.16 | 0.13 | 1.02  | 0.71183  | 0.13762  | 0.887709 | 0.410568 |
| MmugDNA.1168.1.S1_at    | MmugDNA.1168.1  | 6.55  | 6.45  | 0.12 | 0.1  | 1.08  | 0.296532 | 0.193609 | 0.652168 | 0.468785 |
| MmugDNA.1168.1.S1_s_at  | MmugDNA.1168.1  | 6.21  | 5.86  | 0.09 | 0.27 | 1.27  | 0.309496 | 0.73727  | 0.661766 | 0.847869 |
| MmugDNA.11682.1.S1_at   | MmugDNA.11682.1 | 3.16  | 2.84  | 0.06 | 0.09 | 1.25  | 0.010009 | 0.022404 | 0.245352 | 0.187311 |
| MmugDNA.11683.1.S1_at   | MmugDNA.11683.1 | 5.66  | 5.9   | 0.43 | 0.35 | -1.18 | 0.560348 | 0.373999 | 0.81664  | 0.612612 |
| MmugDNA.11686.1.S1_at   | MmugDNA.11686.1 | 10.19 | 9.97  | 0.26 | 0.15 | 1.16  | 0.731348 | 0.022542 | 0.896567 | 0.187965 |
| MmugDNA.15822.1.S1_s_at | MmugDNA.15822.1 | 9.12  | 9.14  | 0.31 | 0.07 | -1.01 | 0.846791 | 0.01016  | 0.94629  | 0.1321   |
| MmugDNA.11687.1.S1_at   | MmugDNA.11687.1 | 3.9   | 3.9   | 0.15 | 0.09 | 1     | 0.241421 | 0.373195 | 0.607596 | 0.612036 |
| MmugDNA.11688.1.S1_at   | MmugDNA.11688.1 | 7.77  | 6.4   | 0.37 | 0.22 | 2.6   | 0.005537 | 0.001254 | 0.208157 | 0.055001 |
| MmugDNA.11689.1.S1_at   | MmugDNA.11689.1 | 4.27  | 3.74  | 0.32 | 0.2  | 1.45  | 0.259212 | 0.315929 | 0.622592 | 0.569358 |
| MmugDNA.1169.1.S1_at    | MmugDNA.1169.1  | 4.99  | 4.9   | 0.11 | 0.01 | 1.07  | 0.079946 | 0.259023 | 0.443024 | 0.526218 |
| MmugDNA.11690.1.S1_at   | MmugDNA.11690.1 | 3.66  | 3.35  | 0.12 | 0.12 | 1.24  | 0.076483 | 0.143538 | 0.437977 | 0.41747  |
| MmugDNA.11695.1.S1_at   | MmugDNA.11695.1 | 5.23  | 5.07  | 0.16 | 0.02 | 1.11  | 0.221596 | 0.259492 | 0.591315 | 0.526418 |
| MmugDNA.11696.1.S1_at   | MmugDNA.11696.1 | 5.42  | 5.18  | 0.34 | 0.25 | 1.18  | 0.695231 | 0.214033 | 0.881398 | 0.487633 |
| MmugDNA.11697.1.S1_at   | MmugDNA.11697.1 | 5.42  | 5.36  | 0.37 | 0.08 | 1.04  | 0.704866 | 0.693357 | 0.885227 | 0.821643 |
| MmugDNA.11698.1.S1_at   | MmugDNA.11698.1 | 6.91  | 6.91  | 0.04 | 0.05 | 1     | 0.232581 | 0.224718 | 0.600124 | 0.497614 |
| MmugDNA.117.1.S1_at     | MmugDNA.117.1   | 9.25  | 9.35  | 0.31 | 0.26 | -1.07 | 0.825162 | 0.078128 | 0.937164 | 0.324578 |
| MmugDNA.11700.1.S1_at   | MmugDNA.11700.1 | 10.64 | 10.4  | 0.28 | 0.07 | 1.18  | 0.256614 | 0.301003 | 0.620603 | 0.559198 |
| MmugDNA.11703.1.S1_at   | MmugDNA.11703.1 | 5.78  | 5.7   | 0.55 | 0.2  | 1.06  | 0.304101 | 0.300757 | 0.657861 | 0.558976 |
| MmugDNA.11704.1.S1_at   | MmugDNA.11704.1 | 5.42  | 4.99  | 0.32 | 0.18 | 1.35  | 0.101538 | 0.664154 | 0.471812 | 0.803247 |
| MmugDNA.11705.1.S1_at   | MmugDNA.11705.1 | 4.91  | 5.24  | 0.25 | 0.51 | -1.25 | 0.329259 | 0.305187 | 0.676288 | 0.562255 |
| MmugDNA.11706.1.S1_at   | MmugDNA.11706.1 | 4.1   | 4.01  | 0.1  | 0.01 | 1.06  | 0.176655 | 0.68147  | 0.549766 | 0.81409  |
| MmugDNA.11707.1.S1_at   | MmugDNA.11707.1 | 3.15  | 3.06  | 0.17 | 0.09 | 1.07  | 0.163571 | 0.235106 | 0.536326 | 0.50629  |
| MmugDNA.11709.1.S1_at   | MmugDNA.11709.1 | 3.45  | 3.59  | 0.51 | 0.21 | -1.11 | 0.446887 | 0.743287 | 0.752905 | 0.851281 |
| MmugDNA.1171.1.S1_at    | MmugDNA.1171.1  | 6.52  | 6.23  | 0.14 | 0.07 | 1.22  | 0.030816 | 0.106777 | 0.338901 | 0.369349 |
| MmugDNA.11710.1.S1_at   | MmugDNA.11710.1 | 8.33  | 8.07  | 0.86 | 0.19 | 1.19  | 0.988257 | 0.348482 | 0.995877 | 0.592593 |
| MmugDNA.11713.1.S1_at   | MmugDNA.11713.1 | 4.15  | 4.29  | 0.02 | 0.04 | -1.1  | 0.004902 | 0.095535 | 0.203301 | 0.352627 |
| MmugDNA.11714.1.S1_at   | MmugDNA.11714.1 | 10.06 | 10.13 | 0.55 | 0.1  | -1.05 | 0.884964 | 0.015988 | 0.960159 | 0.160458 |
| MmugDNA.11715.1.S1_at   | MmugDNA.11715.1 | 5.1   | 5.11  | 0.06 | 0.04 | -1.01 | 0.510655 | 0.70759  | 0.788228 | 0.830424 |

|                         |                 |       |       |      |      |       |          |          |          |          |
|-------------------------|-----------------|-------|-------|------|------|-------|----------|----------|----------|----------|
| MmugDNA.11717.1.S1_at   | MmugDNA.11717.1 | 3.25  | 3.2   | 0.15 | 0.01 | 1.04  | 0.750883 | 0.896073 | 0.905606 | 0.940608 |
| MmugDNA.11718.1.S1_at   | MmugDNA.11718.1 | 6.44  | 6.11  | 0.21 | 0.47 | 1.26  | 0.153459 | 0.577111 | 0.526586 | 0.74764  |
| MmugDNA.11719.1.S1_at   | MmugDNA.11719.1 | 4.65  | 4.65  | 0    | 0    | 1     | 0.373901 | 0.998275 | 0.705567 | 0.999091 |
| MmugDNA.1172.1.S1_at    | MmugDNA.1172.1  | 4.61  | 4.7   | 0.09 | 0.13 | -1.06 | 0.854717 | 0.935706 | 0.948598 | 0.963725 |
| MmugDNA.11721.1.S1_a_at | MmugDNA.11721.1 | 2.62  | 2.56  | 0.12 | 0.1  | 1.04  | 0.877851 | 0.298484 | 0.95748  | 0.557161 |
| MmugDNA.11722.1.S1_at   | MmugDNA.11722.1 | 10.23 | 10.84 | 0.37 | 0.03 | -1.52 | 0.017929 | 0.002084 | 0.294439 | 0.067486 |
| MmugDNA.11723.1.S1_at   | MmugDNA.11723.1 | 4.99  | 5.15  | 0.25 | 0.12 | -1.12 | 0.891343 | 0.930265 | 0.962572 | 0.960382 |
| MmugDNA.11724.1.S1_at   | MmugDNA.11724.1 | 7.76  | 8.49  | 0.42 | 0.15 | -1.66 | 0.069089 | 0.077789 | 0.426529 | 0.323933 |
| MmugDNA.11725.1.S1_at   | MmugDNA.11725.1 | 5     | 5.49  | 0.69 | 0.31 | -1.4  | 0.82736  | 0.958    | 0.938039 | 0.976273 |
| MmugDNA.11726.1.S1_at   | MmugDNA.11726.1 | 10.31 | 10.33 | 0.46 | 0.09 | -1.01 | 0.856643 | 0.948585 | 0.9495   | 0.970655 |
| MmugDNA.11727.1.S1_at   | MmugDNA.11727.1 | 3.32  | 3.37  | 0.08 | 0.07 | -1.04 | 0.985962 | 0.131973 | 0.995501 | 0.404024 |
| MmugDNA.1173.1.S1_at    | MmugDNA.1173.1  | 4.42  | 4.34  | 0.2  | 0.07 | 1.06  | 0.485653 | 0.720907 | 0.774411 | 0.838368 |
| MmugDNA.11730.1.S1_at   | MmugDNA.11730.1 | 6.6   | 4.83  | 1.95 | 1.07 | 3.43  | 0.313942 | 0.53881  | 0.664925 | 0.723368 |
| MmugDNA.11731.1.S1_at   | MmugDNA.11731.1 | 5.43  | 5.42  | 0.1  | 0.05 | 1.01  | 0.980965 | 0.990909 | 0.993927 | 0.994898 |
| MmugDNA.11732.1.S1_at   | MmugDNA.11732.1 | 4.26  | 4.26  | 0.14 | 0.11 | -1    | 0.889223 | 0.008743 | 0.96181  | 0.123975 |
| MmugDNA.11733.1.S1_at   | MmugDNA.11733.1 | 3.71  | 3.6   | 0.18 | 0.21 | 1.08  | 0.105705 | 0.178076 | 0.477409 | 0.454462 |
| MmugDNA.11734.1.S1_at   | MmugDNA.11734.1 | 3.89  | 3.84  | 0.45 | 0.03 | 1.04  | 0.39055  | 0.277664 | 0.716814 | 0.541636 |
| MmugDNA.11736.1.S1_at   | MmugDNA.11736.1 | 5.7   | 5.22  | 0.31 | 0.48 | 1.4   | 0.265853 | 0.073021 | 0.626921 | 0.316017 |
| MmugDNA.11737.1.S1_at   | MmugDNA.11737.1 | 4.27  | 4.56  | 0.46 | 0.57 | -1.22 | 0.793102 | 0.120301 | 0.924208 | 0.38925  |
| MmugDNA.11738.1.S1_at   | MmugDNA.11738.1 | 13.85 | 13.79 | 0.15 | 0.02 | 1.04  | 0.731994 | 0.094985 | 0.896977 | 0.352071 |
| MmugDNA.11739.1.S1_s_at | MmugDNA.11739.1 | 13.48 | 13.49 | 0.01 | 0.03 | -1.01 | 0.233398 | 0.199136 | 0.600944 | 0.473735 |
| MmugDNA.1174.1.S1_at    | MmugDNA.1174.1  | 6.14  | 6.14  | 0.04 | 0.1  | 1     | 0.740971 | 0.531124 | 0.901072 | 0.718416 |
| MmugDNA.11740.1.S1_at   | MmugDNA.11740.1 | 7.85  | 8.36  | 0.16 | 0.14 | -1.42 | 0.028385 | 0.137812 | 0.332352 | 0.41077  |
| MmugDNA.11742.1.S1_at   | MmugDNA.11742.1 | 3.57  | 3.57  | 0.09 | 0.17 | -1    | 0.365774 | 0.055264 | 0.701331 | 0.280809 |
| MmugDNA.11743.1.S1_at   | MmugDNA.11743.1 | 5.69  | 6.45  | 0.9  | 0.22 | -1.69 | 0.833688 | 0.86243  | 0.940368 | 0.921766 |
| MmugDNA.11744.1.S1_at   | MmugDNA.11744.1 | 4.55  | 4.62  | 0.29 | 0.08 | -1.06 | 0.748675 | 0.173216 | 0.904573 | 0.449779 |
| MmugDNA.11745.1.S1_at   | MmugDNA.11745.1 | 8.43  | 9.1   | 0.37 | 0.14 | -1.59 | 0.062295 | 0.079681 | 0.412841 | 0.326981 |
| MmugDNA.11747.1.S1_at   | MmugDNA.11747.1 | 10.4  | 10.13 | 0.27 | 0.17 | 1.21  | 0.740608 | 0.001123 | 0.900871 | 0.052924 |
| MmugDNA.11749.1.S1_at   | MmugDNA.11749.1 | 6.5   | 7.02  | 0.34 | 0.21 | -1.43 | 0.244688 | 0.0033   | 0.610258 | 0.082611 |
| MmugDNA.11750.1.S1_at   | MmugDNA.11750.1 | 4.88  | 4.76  | 0.17 | 0.1  | 1.09  | 0.782527 | 0.667484 | 0.919923 | 0.805333 |
| MmugDNA.11751.1.S1_at   | MmugDNA.11751.1 | 4.25  | 4.27  | 0.09 | 0.11 | -1.01 | 0.822728 | 0.351552 | 0.936084 | 0.595094 |
| MmugDNA.11752.1.S1_at   | MmugDNA.11752.1 | 9.05  | 9.79  | 0.39 | 0.21 | -1.66 | 0.018801 | 0.002997 | 0.298593 | 0.079958 |
| MmugDNA.11753.1.S1_at   | MmugDNA.11753.1 | 3.8   | 3.61  | 0.15 | 0.1  | 1.14  | 0.148107 | 0.12863  | 0.522369 | 0.400072 |
| MmugDNA.11757.1.S1_at   | MmugDNA.11757.1 | 2.99  | 3.07  | 0.05 | 0.18 | -1.06 | 0.541812 | 0.323328 | 0.805276 | 0.57443  |
| MmugDNA.1176.1.S1_at    | MmugDNA.1176.1  | 8.42  | 8.42  | 0.74 | 0.13 | -1    | 0.587497 | 0.812485 | 0.831673 | 0.891676 |
| MmugDNA.11760.1.S1_at   | MmugDNA.11760.1 | 5.41  | 5.43  | 0.11 | 0.12 | -1.01 | 0.749947 | 0.8501   | 0.905325 | 0.914709 |
| MmugDNA.11761.1.S1_at   | MmugDNA.11761.1 | 10.71 | 10.45 | 1.17 | 0.22 | 1.2   | 0.770921 | 0.137695 | 0.914317 | 0.410701 |
| MmugDNA.11762.1.S1_at   | MmugDNA.11762.1 | 5.53  | 5.32  | 0.15 | 0.04 | 1.16  | 0.070206 | 0.346232 | 0.42877  | 0.591201 |
| MmugDNA.11764.1.S1_at   | MmugDNA.11764.1 | 4.38  | 4.84  | 0.49 | 0.24 | -1.37 | 0.122784 | 0.361988 | 0.496214 | 0.602725 |
| MmugDNA.11766.1.S1_at   | MmugDNA.11766.1 | 6.06  | 6.07  | 0.08 | 0.1  | -1    | 0.588014 | 0.004212 | 0.83181  | 0.091368 |
| MmugDNA.11767.1.S1_at   | MmugDNA.11767.1 | 12.57 | 12.74 | 0.08 | 0.08 | -1.12 | 0.029924 | 0.09682  | 0.3363   | 0.354213 |
| MmugDNA.11768.1.S1_at   | MmugDNA.11768.1 | 4.4   | 4.66  | 0.22 | 0.16 | -1.2  | 0.155706 | 0.107112 | 0.528929 | 0.369808 |
| MmugDNA.11769.1.S1_at   | MmugDNA.11769.1 | 6.53  | 5.57  | 0.45 | 0.28 | 1.94  | 0.156448 | 0.09241  | 0.529581 | 0.348296 |

|                         |                 |       |       |      |      |       |          |          |          |          |
|-------------------------|-----------------|-------|-------|------|------|-------|----------|----------|----------|----------|
| MmugDNA.1177.1.S1_at    | MmugDNA.1177.1  | 5.62  | 5.61  | 0.06 | 0.02 | 1.01  | 0.367677 | 0.918509 | 0.703178 | 0.954287 |
| MmugDNA.11771.1.S1_at   | MmugDNA.11771.1 | 4.6   | 4.5   | 0.13 | 0.11 | 1.07  | 0.384315 | 0.286417 | 0.711947 | 0.547829 |
| MmugDNA.11772.1.S1_at   | MmugDNA.11772.1 | 5.97  | 5.95  | 0.51 | 0.23 | 1.01  | 0.99154  | 0.993608 | 0.996693 | 0.996218 |
| MmugDNA.11774.1.S1_at   | MmugDNA.11774.1 | 3.69  | 3.56  | 0.17 | 0.03 | 1.1   | 0.184819 | 0.248909 | 0.557578 | 0.517972 |
| MmugDNA.11775.1.S1_at   | MmugDNA.11775.1 | 6.47  | 6.19  | 0.32 | 0.08 | 1.22  | 0.216437 | 0.156005 | 0.586564 | 0.431431 |
| MmugDNA.11776.1.S1_at   | MmugDNA.11776.1 | 7.55  | 7.51  | 0.06 | 0.09 | 1.03  | 0.208555 | 0.106128 | 0.580248 | 0.368499 |
| MmugDNA.11776.1.S1_x_at | MmugDNA.11776.1 | 7.64  | 7.64  | 0.03 | 0.07 | 1     | 0.667171 | 0.339128 | 0.868543 | 0.585891 |
| MmugDNA.11777.1.S1_at   | MmugDNA.11777.1 | 9.05  | 9.05  | 0.41 | 0.03 | -1    | 0.984719 | 0.159863 | 0.995256 | 0.435986 |
| MmugDNA.11778.1.S1_at   | MmugDNA.11778.1 | 7.85  | 8.59  | 1.02 | 0.23 | -1.67 | 0.322334 | 0.373567 | 0.671085 | 0.612361 |
| MmugDNA.1178.1.S1_at    | MmugDNA.1178.1  | 5.17  | 4.79  | 0.86 | 0.1  | 1.3   | 0.175327 | 0.146935 | 0.548245 | 0.421008 |
| MmugDNA.11782.1.S1_s_at | MmugDNA.11782.1 | 4.27  | 4.42  | 0.13 | 0.41 | -1.11 | 0.618355 | 0.65892  | 0.845915 | 0.800473 |
| MmugDNA.11785.1.S1_at   | MmugDNA.11785.1 | 5.7   | 4.21  | 1.74 | 0.1  | 2.82  | 0.234774 | 0.194267 | 0.602111 | 0.469384 |
| MmugDNA.11786.1.S1_at   | MmugDNA.11786.1 | 9.13  | 9.51  | 0.37 | 0.13 | -1.3  | 0.093742 | 0.308286 | 0.46305  | 0.564425 |
| MmugDNA.11789.1.S1_at   | MmugDNA.11789.1 | 7.83  | 7.98  | 0.35 | 0.12 | -1.11 | 0.628146 | 0.096331 | 0.851045 | 0.35382  |
| MmugDNA.11790.1.S1_at   | MmugDNA.11790.1 | 4.94  | 5.04  | 0.24 | 0.17 | -1.07 | 0.420632 | 0.589555 | 0.737035 | 0.755724 |
| MmugDNA.11792.1.S1_at   | MmugDNA.11792.1 | 7.59  | 7.58  | 0.16 | 0.08 | 1.01  | 0.554543 | 0.355766 | 0.8128   | 0.597864 |
| MmugDNA.11794.1.S1_at   | MmugDNA.11794.1 | 4.77  | 4.49  | 0.3  | 0.1  | 1.21  | 0.199668 | 0.24909  | 0.571494 | 0.51821  |
| MmugDNA.11796.1.S1_at   | MmugDNA.11796.1 | 6.59  | 6.34  | 0.22 | 0.04 | 1.19  | 0.151701 | 0.289761 | 0.524628 | 0.550776 |
| MmugDNA.11798.1.S1_at   | MmugDNA.11798.1 | 5.18  | 4.68  | 0.15 | 0.21 | 1.41  | 0.056732 | 0.013021 | 0.401061 | 0.146821 |
| MmugDNA.118.1.S1_at     | MmugDNA.118.1   | 3.64  | 3.52  | 0.14 | 0.11 | 1.09  | 0.291536 | 0.589491 | 0.647943 | 0.755691 |
| MmugDNA.1180.1.S1_at    | MmugDNA.1180.1  | 4.68  | 4.64  | 0.28 | 0.05 | 1.03  | 0.504552 | 0.038546 | 0.784873 | 0.241322 |
| MmugDNA.11800.1.S1_at   | MmugDNA.11800.1 | 4.11  | 4.22  | 0.28 | 0.15 | -1.08 | 0.155573 | 0.387974 | 0.528865 | 0.62253  |
| MmugDNA.11802.1.S1_at   | MmugDNA.11802.1 | 4.67  | 4.66  | 0.23 | 0.07 | 1.01  | 0.571488 | 0.320955 | 0.822782 | 0.572948 |
| MmugDNA.11803.1.S1_at   | MmugDNA.11803.1 | 4.7   | 4.84  | 0.22 | 0.32 | -1.1  | 0.494539 | 0.636753 | 0.779478 | 0.78635  |
| MmugDNA.11804.1.S1_at   | MmugDNA.11804.1 | 10.93 | 11.07 | 0.38 | 0.14 | -1.1  | 0.634691 | 0.77525  | 0.854193 | 0.869162 |
| MmugDNA.11805.1.S1_at   | MmugDNA.11805.1 | 3.84  | 3.79  | 0    | 0.17 | 1.04  | 0.629194 | 0.817686 | 0.851418 | 0.894805 |
| MmugDNA.11806.1.S1_at   | MmugDNA.11806.1 | 3.41  | 3.62  | 0.02 | 0.22 | -1.16 | 0.222515 | 0.458393 | 0.592042 | 0.671165 |
| MmugDNA.11807.1.S1_at   | MmugDNA.11807.1 | 11.11 | 11.32 | 0.33 | 0.07 | -1.16 | 0.286698 | 0.377592 | 0.643923 | 0.61503  |
| MmugDNA.11807.1.S1_s_at | MmugDNA.11807.1 | 12.49 | 12.72 | 0.4  | 0.06 | -1.17 | 0.12494  | 0.142961 | 0.498917 | 0.416854 |
| MmugDNA.11808.1.S1_at   | MmugDNA.11808.1 | 9.04  | 8.97  | 0.29 | 0.1  | 1.05  | 0.616177 | 0.696907 | 0.844767 | 0.824002 |
| MmugDNA.1181.1.S1_at    | MmugDNA.1181.1  | 8.63  | 8.68  | 0.44 | 0.02 | -1.04 | 0.909834 | 0.782955 | 0.96945  | 0.87441  |
| MmugDNA.11810.1.S1_at   | MmugDNA.11810.1 | 9.57  | 9.54  | 0.23 | 0.11 | 1.02  | 0.326164 | 0.134068 | 0.673733 | 0.406276 |
| MmugDNA.11812.1.S1_x_at | MmugDNA.11812.1 | 12.34 | 12.62 | 0.2  | 0.15 | -1.22 | 0.12338  | 0.185569 | 0.49665  | 0.461566 |
| MmugDNA.11813.1.S1_at   | MmugDNA.11813.1 | 3.38  | 3.34  | 0.1  | 0.16 | 1.03  | 0.677024 | 0.347375 | 0.873333 | 0.591967 |
| MmugDNA.11815.1.S1_at   | MmugDNA.11815.1 | 4.76  | 4.69  | 0.15 | 0.05 | 1.05  | 0.382854 | 0.684917 | 0.710984 | 0.816234 |
| MmugDNA.11816.1.S1_at   | MmugDNA.11816.1 | 4.14  | 4.15  | 0.34 | 0.21 | -1    | 0.319707 | 0.282158 | 0.668882 | 0.544937 |
| MmugDNA.11819.1.S1_at   | MmugDNA.11819.1 | 10.68 | 10.99 | 0.63 | 0.1  | -1.25 | 0.461203 | 0.539019 | 0.760828 | 0.723468 |
| MmugDNA.1182.1.S1_at    | MmugDNA.1182.1  | 7.61  | 7.38  | 0.49 | 0.08 | 1.17  | 0.149682 | 0.117062 | 0.523226 | 0.384494 |
| MmugDNA.11821.1.S1_at   | MmugDNA.11821.1 | 7.11  | 6.97  | 0.95 | 0.21 | 1.1   | 0.617291 | 0.751795 | 0.845362 | 0.855696 |
| MmugDNA.11822.1.S1_at   | MmugDNA.11822.1 | 4.12  | 4.1   | 0.13 | 0.27 | 1.02  | 0.770183 | 0.552234 | 0.913903 | 0.731602 |
| MmugDNA.11823.1.S1_at   | MmugDNA.11823.1 | 4.15  | 4.15  | 0.12 | 0.05 | -1    | 0.971271 | 0.638711 | 0.990583 | 0.787808 |
| MmugDNA.11826.1.S1_at   | MmugDNA.11826.1 | 4.86  | 5.55  | 2.42 | 1.54 | -1.61 | 0.847996 | 0.600934 | 0.946629 | 0.762424 |
| MmugDNA.11827.1.S1_at   | MmugDNA.11827.1 | 4.64  | 4.5   | 0.2  | 0.2  | 1.1   | 0.179914 | 0.256751 | 0.553155 | 0.524607 |

|                         |                 |       |       |      |      |       |          |          |          |          |
|-------------------------|-----------------|-------|-------|------|------|-------|----------|----------|----------|----------|
| MmugDNA.11829.1.S1_at   | MmugDNA.11829.1 | 6.8   | 7.09  | 0.26 | 0.05 | -1.22 | 0.355041 | 0.295491 | 0.69464  | 0.554925 |
| MmugDNA.11830.1.S1_at   | MmugDNA.11830.1 | 7.64  | 7.73  | 0.24 | 0.04 | -1.06 | 0.164649 | 0.060475 | 0.537466 | 0.292553 |
| MmugDNA.11831.1.S1_at   | MmugDNA.11831.1 | 5.38  | 4.39  | 0.98 | 0.55 | 1.98  | 0.288937 | 0.236986 | 0.645891 | 0.507675 |
| MmugDNA.11832.1.S1_at   | MmugDNA.11832.1 | 5.67  | 5.96  | 0.25 | 0.11 | -1.22 | 0.108135 | 0.599456 | 0.480558 | 0.761455 |
| MmugDNA.11833.1.S1_at   | MmugDNA.11833.1 | 5.91  | 5.77  | 0.12 | 0.06 | 1.1   | 0.107104 | 0.640955 | 0.47951  | 0.789319 |
| MmugDNA.11834.1.S1_at   | MmugDNA.11834.1 | 8.15  | 8.72  | 0.29 | 0.11 | -1.48 | 0.064458 | 0.031058 | 0.418264 | 0.218115 |
| MmugDNA.11835.1.S1_at   | MmugDNA.11835.1 | 5.37  | 5.55  | 0.23 | 0.13 | -1.13 | 0.750041 | 0.844236 | 0.905347 | 0.911327 |
| MmugDNA.11836.1.S1_at   | MmugDNA.11836.1 | 7.31  | 7.35  | 0.01 | 0.04 | -1.03 | 0.061923 | 0.765435 | 0.411683 | 0.863671 |
| MmugDNA.11838.1.S1_at   | MmugDNA.11838.1 | 4.83  | 4.94  | 0.39 | 0.22 | -1.08 | 0.895915 | 0.947286 | 0.964401 | 0.970103 |
| MmugDNA.11839.1.S1_at   | MmugDNA.11839.1 | 3.14  | 3.31  | 0.27 | 0.11 | -1.12 | 0.922022 | 0.290797 | 0.973666 | 0.551399 |
| MmugDNA.11840.1.S1_at   | MmugDNA.11840.1 | 5.9   | 6.42  | 0.27 | 0.1  | -1.43 | 0.031156 | 0.441933 | 0.34011  | 0.66004  |
| MmugDNA.11841.1.S1_at   | MmugDNA.11841.1 | 3.75  | 3.66  | 0.13 | 0.15 | 1.06  | 0.885743 | 0.016354 | 0.96038  | 0.161943 |
| MmugDNA.11842.1.S1_at   | MmugDNA.11842.1 | 7.95  | 8.02  | 0.21 | 0.33 | -1.05 | 0.860565 | 0.180186 | 0.950856 | 0.456751 |
| MmugDNA.11844.1.S1_at   | MmugDNA.11844.1 | 5.59  | 5.95  | 0.07 | 0.42 | -1.28 | 0.470015 | 0.016276 | 0.765832 | 0.161661 |
| MmugDNA.11845.1.S1_at   | MmugDNA.11845.1 | 3.96  | 3.8   | 0.21 | 0.2  | 1.12  | 0.388187 | 0.557951 | 0.715134 | 0.735306 |
| MmugDNA.11847.1.S1_at   | MmugDNA.11847.1 | 3.25  | 3.18  | 0.1  | 0.04 | 1.05  | 0.326108 | 0.151467 | 0.673716 | 0.426214 |
| MmugDNA.11849.1.S1_at   | MmugDNA.11849.1 | 7.68  | 7.67  | 0.05 | 0.02 | 1.01  | 0.828477 | 0.643324 | 0.938275 | 0.79084  |
| MmugDNA.1185.1.S1_at    | MmugDNA.1185.1  | 6.08  | 5.82  | 0.2  | 0.07 | 1.19  | 0.129882 | 0.028448 | 0.504535 | 0.210466 |
| MmugDNA.11850.1.S1_at   | MmugDNA.11850.1 | 5.75  | 6.32  | 0.95 | 0.06 | -1.48 | 0.942194 | 0.947911 | 0.980283 | 0.970378 |
| MmugDNA.11851.1.S1_at   | MmugDNA.11851.1 | 5.38  | 5.45  | 0.38 | 0.33 | -1.05 | 0.687218 | 0.302768 | 0.877656 | 0.560307 |
| MmugDNA.11851.1.S1_x_at | MmugDNA.11851.1 | 5.88  | 5.89  | 0.32 | 0.26 | -1.01 | 0.421459 | 0.219526 | 0.737563 | 0.493168 |
| MmugDNA.11852.1.S1_at   | MmugDNA.11852.1 | 10.34 | 10.73 | 0.53 | 0.17 | -1.31 | 0.226552 | 0.27089  | 0.595855 | 0.536026 |
| MmugDNA.11854.1.S1_at   | MmugDNA.11854.1 | 3.14  | 3.15  | 0.2  | 0.09 | -1.01 | 0.911205 | 0.949936 | 0.969856 | 0.971436 |
| MmugDNA.11855.1.S1_at   | MmugDNA.11855.1 | 6.27  | 6.76  | 0.27 | 0.14 | -1.4  | 0.140075 | 0.083137 | 0.515581 | 0.332999 |
| MmugDNA.11856.1.S1_at   | MmugDNA.11856.1 | 3.75  | 3.32  | 0.93 | 0.07 | 1.35  | 0.253719 | 0.472394 | 0.618332 | 0.679986 |
| MmugDNA.11857.1.S1_at   | MmugDNA.11857.1 | 4.96  | 4.94  | 0.04 | 0.24 | 1.02  | 0.325239 | 0.203416 | 0.673103 | 0.477634 |
| MmugDNA.11859.1.S1_at   | MmugDNA.11859.1 | 10.26 | 10.05 | 0.13 | 0.01 | 1.16  | 0.01855  | 0.074747 | 0.297536 | 0.318471 |
| MmugDNA.1186.1.S1_at    | MmugDNA.1186.1  | 4.35  | 4.43  | 0.27 | 0.05 | -1.06 | 0.699864 | 0.366037 | 0.883331 | 0.605891 |
| MmugDNA.11860.1.S1_at   | MmugDNA.11860.1 | 4.08  | 4     | 0.12 | 0.03 | 1.05  | 0.280792 | 0.452337 | 0.639467 | 0.667046 |
| MmugDNA.11861.1.S1_at   | MmugDNA.11861.1 | 11.16 | 11.16 | 0.06 | 0.11 | -1    | 0.412133 | 0.030695 | 0.73192  | 0.217148 |
| MmugDNA.11862.1.S1_at   | MmugDNA.11862.1 | 7.47  | 7.21  | 0.52 | 0.2  | 1.19  | 0.305514 | 0.447548 | 0.658979 | 0.663579 |
| MmugDNA.11865.1.S1_at   | MmugDNA.11865.1 | 5.92  | 5.92  | 0.06 | 0.06 | 1     | 0.230223 | 0.297158 | 0.598481 | 0.556022 |
| MmugDNA.11866.1.S1_at   | MmugDNA.11866.1 | 5.66  | 5.61  | 0.28 | 0.09 | 1.04  | 0.719136 | 0.893218 | 0.890866 | 0.939141 |
| MmugDNA.11867.1.S1_at   | MmugDNA.11867.1 | 5.8   | 5.72  | 0.15 | 0.11 | 1.06  | 0.606232 | 0.78947  | 0.840408 | 0.87838  |
| MmugDNA.11869.1.S1_at   | MmugDNA.11869.1 | 11.32 | 10.31 | 0.53 | 0.15 | 2.01  | 0.066214 | 0.058822 | 0.421918 | 0.289228 |
| MmugDNA.1187.1.S1_at    | MmugDNA.1187.1  | 5.98  | 6.4   | 0.57 | 0.66 | -1.33 | 0.310734 | 0.0679   | 0.662635 | 0.306745 |
| MmugDNA.11870.1.S1_at   | MmugDNA.11870.1 | 3.73  | 3.39  | 0.53 | 0.08 | 1.26  | 0.331311 | 0.12769  | 0.677949 | 0.398581 |
| MmugDNA.11871.1.S1_at   | MmugDNA.11871.1 | 11.35 | 10.61 | 0.68 | 0.09 | 1.68  | 0.356426 | 0.462831 | 0.695154 | 0.674149 |
| MmugDNA.11872.1.S1_at   | MmugDNA.11872.1 | 7.87  | 7.72  | 0.64 | 0.41 | 1.11  | 0.321763 | 0.530497 | 0.670529 | 0.718028 |
| MmugDNA.11874.1.S1_at   | MmugDNA.11874.1 | 4.69  | 4.37  | 0.71 | 0.24 | 1.24  | 0.464738 | 0.511961 | 0.762686 | 0.705897 |
| MmugDNA.11875.1.S1_at   | MmugDNA.11875.1 | 4.84  | 4.83  | 0.06 | 0.15 | 1     | 0.984677 | 0.609436 | 0.995256 | 0.767768 |
| MmugDNA.11876.1.S1_at   | MmugDNA.11876.1 | 6.48  | 6.67  | 0.27 | 0.05 | -1.14 | 0.833961 | 0.436815 | 0.94048  | 0.65629  |
| MmugDNA.11877.1.S1_at   | MmugDNA.11877.1 | 7.62  | 7.63  | 0.06 | 0.05 | -1.01 | 0.718808 | 0.066531 | 0.890773 | 0.303705 |

|                         |                 |       |       |      |      |       |          |          |          |          |
|-------------------------|-----------------|-------|-------|------|------|-------|----------|----------|----------|----------|
| MmugDNA.11878.1.S1_at   | MmugDNA.11878.1 | 6.69  | 6.38  | 0.24 | 0.14 | 1.24  | 0.56224  | 0.1571   | 0.81764  | 0.432579 |
| MmugDNA.1188.1.S1_at    | MmugDNA.1188.1  | 5.89  | 5.97  | 0.59 | 0.78 | -1.06 | 0.247219 | 0.443338 | 0.612636 | 0.661168 |
| MmugDNA.11880.1.S1_at   | MmugDNA.11880.1 | 5.48  | 4.87  | 0.39 | 0.25 | 1.53  | 0.230427 | 0.313551 | 0.598513 | 0.56796  |
| MmugDNA.11881.1.S1_at   | MmugDNA.11881.1 | 7.23  | 7     | 0.08 | 0.13 | 1.17  | 0.027225 | 0.012321 | 0.327322 | 0.143659 |
| MmugDNA.11882.1.S1_at   | MmugDNA.11882.1 | 7.34  | 7.21  | 0.07 | 0.06 | 1.1   | 0.042346 | 0.180119 | 0.368919 | 0.456712 |
| MmugDNA.11883.1.S1_at   | MmugDNA.11883.1 | 5.9   | 5.72  | 0.04 | 0.02 | 1.13  | 0.002114 | 0.001425 | 0.174757 | 0.057604 |
| MmugDNA.11885.1.S1_at   | MmugDNA.11885.1 | 9.55  | 9.44  | 1.02 | 0.04 | 1.08  | 0.844762 | 0.384805 | 0.945495 | 0.620432 |
| MmugDNA.11887.1.S1_at   | MmugDNA.11887.1 | 6.14  | 6.08  | 0.16 | 0.22 | 1.04  | 0.154057 | 0.594645 | 0.527392 | 0.758623 |
| MmugDNA.11888.1.S1_at   | MmugDNA.11888.1 | 6.42  | 6.16  | 0.14 | 0.4  | 1.2   | 0.675137 | 0.158508 | 0.872479 | 0.434442 |
| MmugDNA.1189.1.S1_at    | MmugDNA.1189.1  | 6.63  | 7.64  | 1.45 | 0.48 | -2.01 | 0.564454 | 0.747387 | 0.818716 | 0.853149 |
| MmugDNA.11892.1.S1_at   | MmugDNA.11892.1 | 7.23  | 7.12  | 0.1  | 0.15 | 1.07  | 0.868477 | 0.502127 | 0.953968 | 0.70006  |
| MmugDNA.11894.1.S1_at   | MmugDNA.11894.1 | 3.14  | 3.17  | 0.05 | 0.19 | -1.02 | 0.591819 | 0.21666  | 0.833648 | 0.490307 |
| MmugDNA.11897.1.S1_at   | MmugDNA.11897.1 | 5.32  | 4.75  | 0.26 | 0.06 | 1.47  | 0.018156 | 0.006118 | 0.295482 | 0.106503 |
| MmugDNA.11899.1.S1_at   | MmugDNA.11899.1 | 10.6  | 9.66  | 0.51 | 0.07 | 1.91  | 0.077979 | 0.069565 | 0.439987 | 0.309848 |
| MmugDNA.1190.1.S1_at    | MmugDNA.1190.1  | 4.76  | 4.85  | 0.12 | 0.16 | -1.06 | 0.192395 | 0.513373 | 0.56355  | 0.706881 |
| MmugDNA.11900.1.S1_at   | MmugDNA.11900.1 | 6.39  | 6.55  | 1.15 | 0.22 | -1.11 | 0.606902 | 0.134913 | 0.840731 | 0.406878 |
| MmugDNA.11901.1.S1_at   | MmugDNA.11901.1 | 12.07 | 12.46 | 0.18 | 0.03 | -1.31 | 0.044541 | 0.047279 | 0.374916 | 0.262158 |
| MmugDNA.11902.1.S1_at   | MmugDNA.11902.1 | 6.74  | 6.37  | 0.09 | 0.19 | 1.3   | 0.037889 | 0.059462 | 0.358192 | 0.290548 |
| MmugDNA.11903.1.S1_at   | MmugDNA.11903.1 | 9.56  | 9.05  | 1.54 | 0.27 | 1.42  | 0.589359 | 0.341856 | 0.832304 | 0.587944 |
| MmugDNA.11904.1.S1_at   | MmugDNA.11904.1 | 4.76  | 4.76  | 0.1  | 0.07 | -1    | 0.367403 | 0.835078 | 0.702896 | 0.905549 |
| MmugDNA.11905.1.S1_at   | MmugDNA.11905.1 | 5.44  | 5.39  | 0.22 | 0.16 | 1.03  | 0.642624 | 0.630457 | 0.857864 | 0.782237 |
| MmugDNA.11906.1.S1_at   | MmugDNA.11906.1 | 5.84  | 5.98  | 0.03 | 0.18 | -1.1  | 0.408719 | 0.630814 | 0.729499 | 0.78245  |
| MmugDNA.11907.1.S1_s_at | MmugDNA.11907.1 | 8.16  | 8.57  | 1.06 | 0.19 | -1.32 | 0.168973 | 0.33615  | 0.541912 | 0.583675 |
| MmugDNA.11908.1.S1_s_at | MmugDNA.11908.1 | 12.59 | 12.5  | 0.01 | 0.11 | 1.06  | 0.078865 | 0.13097  | 0.441464 | 0.403037 |
| MmugDNA.11909.1.S1_s_at | MmugDNA.11909.1 | 9.95  | 9.54  | 0.23 | 0.07 | 1.33  | 0.018473 | 0.001341 | 0.297469 | 0.056396 |
| MmugDNA.1191.1.S1_at    | MmugDNA.1191.1  | 4.64  | 5.14  | 0.45 | 0.26 | -1.41 | 0.329064 | 0.295958 | 0.676176 | 0.555249 |
| MmugDNA.11912.1.S1_at   | MmugDNA.11912.1 | 6.17  | 6.09  | 0.07 | 0.22 | 1.06  | 0.271048 | 0.375112 | 0.630952 | 0.613186 |
| MmugDNA.11914.1.S1_at   | MmugDNA.11914.1 | 10.88 | 10.82 | 0.16 | 0.03 | 1.04  | 0.635382 | 0.252437 | 0.854526 | 0.521061 |
| MmugDNA.11919.1.S1_at   | MmugDNA.11919.1 | 5.36  | 5.11  | 0.14 | 0.26 | 1.19  | 0.174878 | 0.268268 | 0.548031 | 0.533981 |
| MmugDNA.1192.1.S1_at    | MmugDNA.1192.1  | 4.12  | 4.19  | 0.04 | 0.27 | -1.05 | 0.476145 | 0.656962 | 0.768922 | 0.799401 |
| MmugDNA.11920.1.S1_at   | MmugDNA.11920.1 | 5.94  | 5.92  | 0.14 | 0.27 | 1.01  | 0.416784 | 0.524371 | 0.734521 | 0.714309 |
| MmugDNA.11921.1.S1_at   | MmugDNA.11921.1 | 8.51  | 8.9   | 0.26 | 0.12 | -1.31 | 0.082321 | 0.031739 | 0.447129 | 0.22057  |
| MmugDNA.11922.1.S1_at   | MmugDNA.11922.1 | 4.91  | 3.02  | 0.33 | 0.16 | 3.7   | 0.000941 | 0.00007  | 0.153739 | 0.025812 |
| MmugDNA.11923.1.S1_at   | MmugDNA.11923.1 | 9.43  | 9.86  | 0.28 | 0.04 | -1.35 | 0.052677 | 0.021259 | 0.392818 | 0.182504 |
| MmugDNA.11924.1.S1_at   | MmugDNA.11924.1 | 3.13  | 2.9   | 0.04 | 0.11 | 1.18  | 0.095149 | 0.311174 | 0.464131 | 0.566215 |
| MmugDNA.11925.1.S1_at   | MmugDNA.11925.1 | 13.51 | 13.59 | 0.13 | 0.06 | -1.06 | 0.2053   | 0.067932 | 0.57702  | 0.306839 |
| MmugDNA.11926.1.S1_at   | MmugDNA.11926.1 | 6.57  | 5.3   | 0.16 | 0.21 | 2.42  | 0.0008   | 0.000332 | 0.15004  | 0.036036 |
| MmugDNA.11927.1.S1_at   | MmugDNA.11927.1 | 5.79  | 5.73  | 0.06 | 0.11 | 1.04  | 0.763276 | 0.122723 | 0.911116 | 0.392719 |
| MmugDNA.11928.1.S1_at   | MmugDNA.11928.1 | 3.98  | 3.81  | 0.18 | 0.25 | 1.12  | 0.392987 | 0.663357 | 0.718866 | 0.802976 |
| MmugDNA.11929.1.S1_at   | MmugDNA.11929.1 | 6.27  | 5.84  | 0.83 | 0.21 | 1.35  | 0.292009 | 0.123319 | 0.64837  | 0.393386 |
| MmugDNA.1193.1.S1_at    | MmugDNA.1193.1  | 6.06  | 6.18  | 0.12 | 0.32 | -1.09 | 0.985519 | 0.691857 | 0.995461 | 0.820749 |
| MmugDNA.11930.1.S1_at   | MmugDNA.11930.1 | 3.86  | 4.38  | 0.4  | 0.14 | -1.43 | 0.281152 | 0.162989 | 0.639796 | 0.439145 |
| MmugDNA.11931.1.S1_at   | MmugDNA.11931.1 | 5.12  | 4.71  | 0.49 | 0.21 | 1.33  | 0.312852 | 0.176959 | 0.664259 | 0.453374 |

|                         |                 |       |       |      |      |       |          |          |          |          |
|-------------------------|-----------------|-------|-------|------|------|-------|----------|----------|----------|----------|
| MmugDNA.11932.1.S1_at   | MmugDNA.11932.1 | 5.18  | 5.15  | 0.46 | 0.13 | 1.02  | 0.873592 | 0.398727 | 0.956238 | 0.629464 |
| MmugDNA.11933.1.S1_at   | MmugDNA.11933.1 | 6.8   | 6.98  | 0.16 | 0.07 | -1.14 | 0.133565 | 0.563691 | 0.508012 | 0.7388   |
| MmugDNA.11935.1.S1_x_at | MmugDNA.11935.1 | 6.67  | 7.05  | 0.24 | 0.22 | -1.3  | 0.258319 | 0.247054 | 0.622142 | 0.516247 |
| MmugDNA.11936.1.S1_at   | MmugDNA.11936.1 | 7.94  | 7.88  | 0.34 | 0.35 | 1.04  | 0.911887 | 0.142841 | 0.970173 | 0.416786 |
| MmugDNA.11938.1.S1_at   | MmugDNA.11938.1 | 5.92  | 5.87  | 0.03 | 0.08 | 1.04  | 0.554331 | 0.298853 | 0.812598 | 0.557455 |
| MmugDNA.11939.1.S1_at   | MmugDNA.11939.1 | 5     | 5.24  | 0.36 | 0.19 | -1.18 | 0.755302 | 0.245769 | 0.907767 | 0.515519 |
| MmugDNA.1194.1.S1_at    | MmugDNA.1194.1  | 3.32  | 3.48  | 0.2  | 0.37 | -1.12 | 0.370134 | 0.501622 | 0.704536 | 0.699764 |
| MmugDNA.11940.1.S1_at   | MmugDNA.11940.1 | 9.92  | 9.92  | 0.28 | 0.1  | -1    | 0.490766 | 0.032866 | 0.777266 | 0.224478 |
| MmugDNA.11941.1.S1_at   | MmugDNA.11941.1 | 7.32  | 7.31  | 0.16 | 0.08 | 1     | 0.7102   | 0.870608 | 0.887263 | 0.926446 |
| MmugDNA.11942.1.S1_at   | MmugDNA.11942.1 | 5.86  | 5.62  | 0.13 | 0.04 | 1.18  | 0.035174 | 0.038498 | 0.351216 | 0.241139 |
| MmugDNA.11943.1.S1_at   | MmugDNA.11943.1 | 5.79  | 5.87  | 0.13 | 0.17 | -1.05 | 0.512605 | 0.277269 | 0.789481 | 0.541239 |
| MmugDNA.11944.1.S1_at   | MmugDNA.11944.1 | 11.14 | 10.38 | 0.1  | 0.2  | 1.69  | 0.002432 | 0.000845 | 0.177075 | 0.047038 |
| MmugDNA.11946.1.S1_at   | MmugDNA.11946.1 | 4.26  | 4.31  | 0.05 | 0.14 | -1.04 | 0.750692 | 0.293977 | 0.905556 | 0.553909 |
| MmugDNA.11947.1.S1_at   | MmugDNA.11947.1 | 5.62  | 5.46  | 0.02 | 0.13 | 1.11  | 0.409733 | 0.811407 | 0.730334 | 0.891158 |
| MmugDNA.11948.1.S1_at   | MmugDNA.11948.1 | 4.44  | 4.42  | 0.23 | 0.1  | 1.01  | 0.763644 | 0.826042 | 0.911265 | 0.900052 |
| MmugDNA.11949.1.S1_at   | MmugDNA.11949.1 | 3.15  | 3.14  | 0.2  | 0.21 | 1     | 0.537957 | 0.653269 | 0.802959 | 0.797337 |
| MmugDNA.1195.1.S1_at    | MmugDNA.1195.1  | 6.1   | 6.05  | 0    | 0.13 | 1.03  | 0.930481 | 0.244224 | 0.976823 | 0.514167 |
| MmugDNA.11950.1.S1_at   | MmugDNA.11950.1 | 6.54  | 6.32  | 0.08 | 0.04 | 1.16  | 0.017566 | 0.106738 | 0.29276  | 0.369337 |
| MmugDNA.11951.1.S1_at   | MmugDNA.11951.1 | 5.76  | 5.54  | 0.19 | 0.03 | 1.16  | 0.112339 | 0.132198 | 0.48564  | 0.404274 |
| MmugDNA.11952.1.S1_at   | MmugDNA.11952.1 | 10.23 | 10.05 | 0.69 | 0.07 | 1.14  | 0.682755 | 0.878788 | 0.875915 | 0.930855 |
| MmugDNA.11953.1.S1_at   | MmugDNA.11953.1 | 12.79 | 12.41 | 0.22 | 0.14 | 1.3   | 0.092022 | 0.012655 | 0.460597 | 0.145088 |
| MmugDNA.11954.1.S1_at   | MmugDNA.11954.1 | 4.42  | 4.44  | 0.1  | 0.14 | -1.01 | 0.533499 | 0.675256 | 0.80084  | 0.81026  |
| MmugDNA.11955.1.S1_at   | MmugDNA.11955.1 | 7.75  | 7.59  | 0.05 | 0.17 | 1.11  | 0.098761 | 0.166499 | 0.468167 | 0.442933 |
| MmugDNA.11956.1.S1_at   | MmugDNA.11956.1 | 3.49  | 3.51  | 0.13 | 0.05 | -1.01 | 0.45964  | 0.845699 | 0.759696 | 0.912219 |
| MmugDNA.11957.1.S1_at   | MmugDNA.11957.1 | 10.2  | 9.89  | 0.09 | 0.11 | 1.24  | 0.016013 | 0.01349  | 0.284833 | 0.148728 |
| MmugDNA.11958.1.S1_at   | MmugDNA.11958.1 | 7.81  | 7.72  | 0.06 | 0.04 | 1.07  | 0.352146 | 0.111062 | 0.692649 | 0.375588 |
| MmugDNA.11959.1.S1_at   | MmugDNA.11959.1 | 6.36  | 6.36  | 0.13 | 0.15 | 1     | 0.9761   | 0.787101 | 0.992259 | 0.876832 |
| MmugDNA.1196.1.S1_s_at  | MmugDNA.1196.1  | 13.41 | 13.45 | 0.11 | 0.13 | -1.03 | 0.549824 | 0.685742 | 0.810447 | 0.816612 |
| MmugDNA.11960.1.S1_at   | MmugDNA.11960.1 | 5.09  | 5.39  | 0.59 | 0.11 | -1.23 | 0.621249 | 0.454083 | 0.847514 | 0.668398 |
| MmugDNA.11961.1.S1_at   | MmugDNA.11961.1 | 3.42  | 3.27  | 0.25 | 0.22 | 1.11  | 0.856439 | 0.7979   | 0.949414 | 0.88363  |
| MmugDNA.11962.1.S1_at   | MmugDNA.11962.1 | 3.95  | 4     | 0.12 | 0.07 | -1.04 | 0.497605 | 0.805701 | 0.781215 | 0.888324 |
| MmugDNA.11964.1.S1_at   | MmugDNA.11964.1 | 4.34  | 4.28  | 0.34 | 0.41 | 1.04  | 0.377501 | 0.445308 | 0.707555 | 0.662338 |
| MmugDNA.11965.1.S1_x_at | MmugDNA.11965.1 | 10.43 | 10.76 | 0.27 | 0.19 | -1.25 | 0.218943 | 0.346314 | 0.588341 | 0.59124  |
| MmugDNA.11967.1.S1_at   | MmugDNA.11967.1 | 7.69  | 7.59  | 0.3  | 0.32 | 1.07  | 0.828482 | 0.623935 | 0.938275 | 0.77828  |
| MmugDNA.11968.1.S1_at   | MmugDNA.11968.1 | 5.08  | 4.97  | 0.5  | 0.29 | 1.08  | 0.532324 | 0.610302 | 0.800242 | 0.768529 |
| MmugDNA.11969.1.S1_at   | MmugDNA.11969.1 | 7.24  | 7.27  | 0.24 | 0.11 | -1.02 | 0.538088 | 0.308185 | 0.803016 | 0.564324 |
| MmugDNA.1197.1.S1_at    | MmugDNA.1197.1  | 9.51  | 8.45  | 0.76 | 0.21 | 2.08  | 0.083742 | 0.009091 | 0.449639 | 0.125944 |
| MmugDNA.11971.1.S1_at   | MmugDNA.11971.1 | 3.58  | 3.57  | 0.14 | 0.03 | 1.01  | 0.684718 | 0.760785 | 0.876519 | 0.861028 |
| MmugDNA.11972.1.S1_at   | MmugDNA.11972.1 | 7.67  | 7.67  | 0.04 | 0.05 | -1    | 0.515151 | 0.462893 | 0.790792 | 0.674149 |
| MmugDNA.11973.1.S1_at   | MmugDNA.11973.1 | 4.02  | 4.03  | 0.11 | 0.06 | -1    | 0.458249 | 0.855564 | 0.758668 | 0.917669 |
| MmugDNA.11975.1.S1_at   | MmugDNA.11975.1 | 7.81  | 8.55  | 0.34 | 0.22 | -1.68 | 0.033272 | 0.000433 | 0.346442 | 0.038359 |
| MmugDNA.11976.1.S1_s_at | MmugDNA.11976.1 | 7.5   | 7.22  | 0.53 | 0.16 | 1.21  | 0.837531 | 0.220988 | 0.941684 | 0.494389 |
| MmugDNA.11977.1.S1_at   | MmugDNA.11977.1 | 5.38  | 5.13  | 0.05 | 0.05 | 1.19  | 0.007905 | 0.021245 | 0.231391 | 0.182465 |

|                         |                 |       |       |      |      |       |          |          |          |          |
|-------------------------|-----------------|-------|-------|------|------|-------|----------|----------|----------|----------|
| MmugDNA.11980.1.S1_at   | MmugDNA.11980.1 | 5.71  | 5.73  | 0.51 | 0.46 | -1.02 | 0.643859 | 0.91848  | 0.858276 | 0.954275 |
| MmugDNA.11981.1.S1_x_at | MmugDNA.11981.1 | 10.54 | 10.84 | 0.14 | 0.15 | -1.23 | 0.140997 | 0.394899 | 0.516345 | 0.627216 |
| MmugDNA.11982.1.S1_at   | MmugDNA.11982.1 | 3.46  | 3.55  | 0.02 | 0.03 | -1.06 | 0.008186 | 0.000472 | 0.232005 | 0.038572 |
| MmugDNA.11983.1.S1_s_at | MmugDNA.11983.1 | 7.02  | 7.49  | 1.27 | 0.55 | -1.39 | 0.860359 | 0.42703  | 0.950769 | 0.649087 |
| MmugDNA.11984.1.S1_at   | MmugDNA.11984.1 | 3.53  | 3.62  | 0.2  | 0.17 | -1.07 | 0.486836 | 0.44304  | 0.774758 | 0.660947 |
| MmugDNA.11986.1.S1_at   | MmugDNA.11986.1 | 4.4   | 4.52  | 0.31 | 0.08 | -1.09 | 0.88816  | 0.97816  | 0.96126  | 0.988066 |
| MmugDNA.11987.1.S1_at   | MmugDNA.11987.1 | 8.93  | 8.41  | 0.57 | 0.21 | 1.43  | 0.217791 | 0.752265 | 0.587785 | 0.855787 |
| MmugDNA.11988.1.S1_at   | MmugDNA.11988.1 | 5.23  | 5     | 0.08 | 0.21 | 1.17  | 0.249349 | 0.349634 | 0.614709 | 0.593541 |
| MmugDNA.1199.1.S1_at    | MmugDNA.1199.1  | 5.64  | 5.64  | 0.1  | 0.14 | -1    | 0.905103 | 0.754274 | 0.968109 | 0.857004 |
| MmugDNA.11990.1.S1_at   | MmugDNA.11990.1 | 9.67  | 9.28  | 1.28 | 0.04 | 1.31  | 0.678146 | 0.300392 | 0.873905 | 0.55871  |
| MmugDNA.11991.1.S1_at   | MmugDNA.11991.1 | 8.15  | 7.62  | 0.21 | 0.22 | -1.44 | 0.025674 | 0.011447 | 0.322444 | 0.13846  |
| MmugDNA.11992.1.S1_at   | MmugDNA.11992.1 | 11.1  | 11.06 | 0.08 | 0.03 | 1.02  | 0.562188 | 0.356834 | 0.817608 | 0.59863  |
| MmugDNA.11994.1.S1_at   | MmugDNA.11994.1 | 3.25  | 3     | 0.17 | 0.09 | 1.19  | 0.207222 | 0.706093 | 0.578837 | 0.829633 |
| MmugDNA.11995.1.S1_at   | MmugDNA.11995.1 | 3.45  | 3.54  | 0.16 | 0.15 | -1.07 | 0.914619 | 0.575289 | 0.97089  | 0.74643  |
| MmugDNA.11996.1.S1_at   | MmugDNA.11996.1 | 7     | 6.69  | 0.2  | 0.08 | 1.24  | 0.278093 | 0.04784  | 0.637354 | 0.263679 |
| MmugDNA.11996.1.S1_s_at | MmugDNA.11996.1 | 5.23  | 5.19  | 0.2  | 0.04 | 1.03  | 0.24572  | 0.085118 | 0.611181 | 0.336936 |
| MmugDNA.11997.1.S1_at   | MmugDNA.11997.1 | 8.64  | 8.86  | 0.55 | 0.17 | -1.16 | 0.943708 | 0.855979 | 0.98057  | 0.917783 |
| MmugDNA.11999.1.S1_at   | MmugDNA.11999.1 | 4.04  | 3.9   | 0.12 | 0.13 | 1.1   | 0.111424 | 0.094172 | 0.484571 | 0.350865 |
| MmugDNA.12.1.S1_at      | MmugDNA.12.1    | 4.34  | 4.29  | 0.21 | 0.14 | 1.03  | 0.897855 | 0.647072 | 0.965326 | 0.793279 |
| MmugDNA.120.1.S1_at     | MmugDNA.120.1   | 7.38  | 7.33  | 0.14 | 0.27 | 1.03  | 0.677583 | 0.843302 | 0.873568 | 0.910767 |
| MmugDNA.1200.1.S1_at    | MmugDNA.1200.1  | 3.3   | 3.2   | 0.13 | 0.1  | 1.07  | 0.585677 | 0.539435 | 0.830611 | 0.723763 |
| MmugDNA.12000.1.S1_at   | MmugDNA.12000.1 | 5.89  | 5.42  | 0.17 | 0.1  | 1.39  | 0.043168 | 0.118358 | 0.371553 | 0.386398 |
| MmugDNA.12001.1.S1_at   | MmugDNA.12001.1 | 4.9   | 4.56  | 0.25 | 0.2  | 1.27  | 0.251888 | 0.84104  | 0.616976 | 0.909421 |
| MmugDNA.12002.1.S1_at   | MmugDNA.12002.1 | 9.44  | 9.81  | 0.93 | 0.19 | -1.29 | 0.539865 | 0.565985 | 0.804055 | 0.740174 |
| MmugDNA.12004.1.S1_at   | MmugDNA.12004.1 | 5.44  | 5.4   | 0.16 | 0.25 | 1.03  | 0.635003 | 0.606922 | 0.854497 | 0.766134 |
| MmugDNA.12005.1.S1_at   | MmugDNA.12005.1 | 3.8   | 3.8   | 0.04 | 0.05 | 1     | 0.463997 | 0.85033  | 0.762369 | 0.914874 |
| MmugDNA.12006.1.S1_at   | MmugDNA.12006.1 | 7.55  | 7.71  | 0.23 | 0.07 | -1.12 | 0.652403 | 0.1083   | 0.862004 | 0.371557 |
| MmugDNA.12009.1.S1_at   | MmugDNA.12009.1 | 3.2   | 3.05  | 0.1  | 0.14 | 1.11  | 0.510527 | 0.279813 | 0.788228 | 0.543276 |
| MmugDNA.12010.1.S1_at   | MmugDNA.12010.1 | 4.77  | 4.56  | 0.05 | 0.38 | 1.16  | 0.985594 | 0.988921 | 0.995461 | 0.993666 |
| MmugDNA.25123.1.S1_s_at | MmugDNA.25123.1 | 8.01  | 6.62  | 2.57 | 0.19 | 2.62  | 0.62836  | 0.273253 | 0.851106 | 0.537788 |
| MmugDNA.12012.1.S1_at   | MmugDNA.12012.1 | 3.29  | 3.33  | 0.04 | 0.1  | -1.03 | 0.830401 | 0.387157 | 0.93928  | 0.621935 |
| MmugDNA.12014.1.S1_at   | MmugDNA.12014.1 | 4.44  | 4.4   | 0.03 | 0.16 | 1.03  | 0.622979 | 0.807854 | 0.84804  | 0.8894   |
| MmugDNA.12015.1.S1_at   | MmugDNA.12015.1 | 3.93  | 4.06  | 0.2  | 0.09 | -1.09 | 0.404297 | 0.795362 | 0.726311 | 0.882132 |
| MmugDNA.12017.1.S1_at   | MmugDNA.12017.1 | 7.9   | 8.09  | 1.08 | 0    | -1.14 | 0.779398 | 0.806366 | 0.918638 | 0.888642 |
| MmugDNA.12018.1.S1_at   | MmugDNA.12018.1 | 4.9   | 4.56  | 0.19 | 0.09 | 1.26  | 0.041407 | 0.059045 | 0.366358 | 0.289904 |
| MmugDNA.1202.1.S1_at    | MmugDNA.1202.1  | 4.56  | 4.75  | 0.24 | 0.16 | -1.14 | 0.339063 | 0.407403 | 0.683527 | 0.635002 |
| MmugDNA.12020.1.S1_at   | MmugDNA.12020.1 | 8.67  | 7.82  | 0.47 | 0.34 | 1.8   | 0.098275 | 0.053023 | 0.467704 | 0.27592  |
| MmugDNA.12022.1.S1_at   | MmugDNA.12022.1 | 8.08  | 7.24  | 0.61 | 0.18 | 1.78  | 0.078615 | 0.044624 | 0.441376 | 0.255589 |
| MmugDNA.12023.1.S1_at   | MmugDNA.12023.1 | 6.44  | 6.34  | 0.22 | 0.04 | 1.08  | 0.573463 | 0.820604 | 0.823614 | 0.896677 |
| MmugDNA.12023.1.S1_s_at | MmugDNA.12023.1 | 6.83  | 6.9   | 0.07 | 0.16 | -1.05 | 0.577709 | 0.870581 | 0.825346 | 0.926446 |
| MmugDNA.12024.1.S1_s_at | MmugDNA.12024.1 | 4.48  | 4.22  | 0.27 | 0.12 | 1.21  | 0.39576  | 0.234015 | 0.720706 | 0.505312 |
| MmugDNA.12025.1.S1_at   | MmugDNA.12025.1 | 12.09 | 12.29 | 0.12 | 0.05 | -1.15 | 0.037797 | 0.023299 | 0.358028 | 0.191315 |
| MmugDNA.12027.1.S1_at   | MmugDNA.12027.1 | 4.86  | 5.12  | 0.08 | 0.32 | -1.2  | 0.261401 | 0.507912 | 0.623819 | 0.703358 |



|                         |                 |       |       |      |      |       |          |          |          |          |
|-------------------------|-----------------|-------|-------|------|------|-------|----------|----------|----------|----------|
| MmugDNA.12028.1.S1_at   | MmugDNA.12028.1 | 6.46  | 5.42  | 0.47 | 0.09 | 2.06  | 0.027226 | 0.014674 | 0.327322 | 0.15428  |
| MmugDNA.12029.1.S1_at   | MmugDNA.12029.1 | 7.55  | 7.32  | 0.22 | 0.17 | 1.17  | 0.148404 | 0.203173 | 0.522567 | 0.477415 |
| MmugDNA.1203.1.S1_s_at  | MmugDNA.1203.1  | 4.34  | 4.44  | 0.33 | 0.24 | -1.07 | 0.862834 | 0.281654 | 0.951773 | 0.54471  |
| MmugDNA.12030.1.S1_at   | MmugDNA.12030.1 | 7.9   | 8.11  | 0.53 | 0.24 | -1.16 | 0.561457 | 0.839282 | 0.817219 | 0.908393 |
| MmugDNA.12031.1.S1_at   | MmugDNA.12031.1 | 6.14  | 6.17  | 0.09 | 0.1  | -1.02 | 0.559776 | 0.175579 | 0.816426 | 0.45218  |
| MmugDNA.36977.1.S1_at   | MmugDNA.36977.1 | 6.65  | 6.93  | 0.41 | 0.37 | -1.22 | 0.456402 | 0.44482  | 0.75784  | 0.662072 |
| MmugDNA.36977.1.S1_s_at | MmugDNA.36977.1 | 11.1  | 11.59 | 0.74 | 0.08 | -1.4  | 0.241161 | 0.250351 | 0.607368 | 0.519362 |
| MmugDNA.12034.1.S1_at   | MmugDNA.12034.1 | 3.53  | 3.46  | 0.02 | 0.08 | 1.05  | 0.061875 | 0.047533 | 0.411654 | 0.262712 |
| MmugDNA.12035.1.S1_at   | MmugDNA.12035.1 | 8.87  | 9.49  | 0.9  | 0.17 | -1.53 | 0.133484 | 0.076993 | 0.507931 | 0.322421 |
| MmugDNA.12036.1.S1_at   | MmugDNA.12036.1 | 5.53  | 5.53  | 1.12 | 0.09 | -1    | 0.944146 | 0.17033  | 0.980647 | 0.447103 |
| MmugDNA.12037.1.S1_at   | MmugDNA.12037.1 | 6.13  | 6.44  | 0.23 | 0.3  | -1.24 | 0.392171 | 0.047366 | 0.7181   | 0.262362 |
| MmugDNA.12038.1.S1_at   | MmugDNA.12038.1 | 5.63  | 5.44  | 0.23 | 0.13 | 1.14  | 0.89726  | 0.584425 | 0.96506  | 0.752435 |
| MmugDNA.12038.1.S1_x_at | MmugDNA.12038.1 | 5.64  | 5.7   | 0.2  | 0.13 | -1.04 | 0.562048 | 0.513835 | 0.817608 | 0.707281 |
| MmugDNA.12039.1.S1_at   | MmugDNA.12039.1 | 4.55  | 4.27  | 0.99 | 0.21 | 1.22  | 0.652232 | 0.693929 | 0.862004 | 0.821989 |
| MmugDNA.1204.1.S1_at    | MmugDNA.1204.1  | 4.07  | 3.5   | 0.31 | 0.11 | 1.49  | 0.05564  | 0.14783  | 0.398946 | 0.42217  |
| MmugDNA.12040.1.S1_at   | MmugDNA.12040.1 | 3.61  | 3.46  | 0.17 | 0.13 | 1.11  | 0.303262 | 0.396267 | 0.65718  | 0.628074 |
| MmugDNA.12041.1.S1_at   | MmugDNA.12041.1 | 7.25  | 7.73  | 0.34 | 0.14 | -1.39 | 0.077871 | 0.401089 | 0.439987 | 0.630684 |
| MmugDNA.12042.1.S1_at   | MmugDNA.12042.1 | 4.39  | 4.21  | 0.12 | 0.27 | 1.13  | 0.368002 | 0.470215 | 0.703469 | 0.678572 |
| MmugDNA.12043.1.S1_at   | MmugDNA.12043.1 | 7.83  | 8.35  | 1.09 | 0.23 | -1.43 | 0.512096 | 0.446478 | 0.789086 | 0.662842 |
| MmugDNA.12044.1.S1_at   | MmugDNA.12044.1 | 5.28  | 5.01  | 0.24 | 0.27 | 1.21  | 0.443911 | 0.558226 | 0.751068 | 0.735467 |
| MmugDNA.12045.1.S1_at   | MmugDNA.12045.1 | 8.47  | 7.73  | 0.51 | 0.23 | 1.67  | 0.048384 | 0.008104 | 0.38321  | 0.119551 |
| MmugDNA.12047.1.S1_at   | MmugDNA.12047.1 | 7.6   | 7.79  | 1.27 | 0.38 | -1.14 | 0.994005 | 0.321273 | 0.997741 | 0.573168 |
| MmugDNA.12048.1.S1_at   | MmugDNA.12048.1 | 4.1   | 4.1   | 0.09 | 0.03 | -1    | 0.69665  | 0.551006 | 0.882169 | 0.730751 |
| MmugDNA.12049.1.S1_at   | MmugDNA.12049.1 | 4.47  | 4.08  | 0.34 | 0.12 | 1.3   | 0.146137 | 0.135764 | 0.520572 | 0.407932 |
| MmugDNA.1205.1.S1_at    | MmugDNA.1205.1  | 9.21  | 9.31  | 0.28 | 0.19 | -1.07 | 0.241429 | 0.546294 | 0.607596 | 0.727896 |
| MmugDNA.12050.1.S1_at   | MmugDNA.12050.1 | 12.17 | 12.16 | 0.09 | 0.02 | 1     | 0.457041 | 0.288652 | 0.758078 | 0.549827 |
| MmugDNA.12051.1.S1_at   | MmugDNA.12051.1 | 4.6   | 4.28  | 0.23 | 0.38 | 1.25  | 0.582099 | 0.284832 | 0.827911 | 0.546966 |
| MmugDNA.12052.1.S1_at   | MmugDNA.12052.1 | 8     | 8.35  | 0.51 | 0.19 | -1.28 | 0.550089 | 0.764637 | 0.81061  | 0.863158 |
| MmugDNA.12053.1.S1_at   | MmugDNA.12053.1 | 4.42  | 4.5   | 0.08 | 0.24 | -1.06 | 0.470179 | 0.253832 | 0.76595  | 0.522173 |
| MmugDNA.12054.1.S1_at   | MmugDNA.12054.1 | 4.69  | 4.48  | 0.19 | 0.11 | 1.16  | 0.468087 | 0.622443 | 0.764699 | 0.776933 |
| MmugDNA.12055.1.S1_at   | MmugDNA.12055.1 | 6.87  | 7.01  | 0.64 | 0.43 | -1.11 | 0.617307 | 0.811437 | 0.845362 | 0.891158 |
| MmugDNA.12056.1.S1_at   | MmugDNA.12056.1 | 5.69  | 5.48  | 0.05 | 0.03 | 1.16  | 0.004282 | 0.025052 | 0.198874 | 0.198316 |
| MmugDNA.12057.1.S1_at   | MmugDNA.12057.1 | 4.98  | 4.88  | 0.23 | 0.16 | 1.07  | 0.536541 | 0.020388 | 0.802417 | 0.179281 |
| MmugDNA.12058.1.S1_at   | MmugDNA.12058.1 | 6.72  | 6.52  | 0.1  | 0.09 | 1.15  | 0.038291 | 0.017187 | 0.358719 | 0.166089 |
| MmugDNA.12059.1.S1_at   | MmugDNA.12059.1 | 5.53  | 5.36  | 0.1  | 0.13 | 1.12  | 0.675936 | 0.290402 | 0.872796 | 0.551169 |
| MmugDNA.12061.1.S1_at   | MmugDNA.12061.1 | 6.48  | 6.61  | 0.43 | 0.23 | -1.1  | 0.815213 | 0.478102 | 0.933137 | 0.684103 |
| MmugDNA.12062.1.S1_at   | MmugDNA.12062.1 | 4.29  | 4.42  | 0.22 | 0.1  | -1.09 | 0.4124   | 0.186453 | 0.731989 | 0.462306 |
| MmugDNA.12063.1.S1_at   | MmugDNA.12063.1 | 3.41  | 3.31  | 0.15 | 0.13 | 1.07  | 0.166105 | 0.186499 | 0.538897 | 0.462364 |
| MmugDNA.12064.1.S1_at   | MmugDNA.12064.1 | 6.07  | 6.14  | 0.25 | 0.08 | -1.05 | 0.781357 | 0.881402 | 0.919573 | 0.932335 |
| MmugDNA.12064.1.S1_s_at | MmugDNA.12064.1 | 6.58  | 6.45  | 0.04 | 0.14 | 1.1   | 0.059435 | 0.047618 | 0.406365 | 0.262996 |
| MmugDNA.12066.1.S1_at   | MmugDNA.12066.1 | 4.39  | 4.4   | 0.13 | 0.19 | -1.01 | 0.978586 | 0.972971 | 0.993032 | 0.985389 |
| MmugDNA.12068.1.S1_at   | MmugDNA.12068.1 | 4.01  | 4.16  | 0.26 | 0.23 | -1.11 | 0.59626  | 0.274106 | 0.835825 | 0.538565 |
| MmugDNA.1207.1.S1_at    | MmugDNA.1207.1  | 7.05  | 7.21  | 0.55 | 0.11 | -1.12 | 0.74074  | 0.923791 | 0.900905 | 0.957119 |

|                         |                 |       |       |      |      |       |          |          |          |          |
|-------------------------|-----------------|-------|-------|------|------|-------|----------|----------|----------|----------|
| MmugDNA.12072.1.S1_at   | MmugDNA.12072.1 | 3.41  | 3.27  | 0.08 | 0.04 | 1.1   | 0.052845 | 0.052528 | 0.393368 | 0.274771 |
| MmugDNA.12074.1.S1_at   | MmugDNA.12074.1 | 3     | 3.09  | 0.05 | 0.06 | -1.06 | 0.113611 | 0.242888 | 0.486911 | 0.513274 |
| MmugDNA.12076.1.S1_at   | MmugDNA.12076.1 | 5.07  | 4.94  | 0    | 0.02 | 1.09  | 0.000456 | 0.290434 | 0.140406 | 0.551169 |
| MmugDNA.12077.1.S1_at   | MmugDNA.12077.1 | 6.97  | 6.53  | 1.2  | 0.1  | 1.35  | 0.203599 | 0.259078 | 0.575083 | 0.526263 |
| MmugDNA.12077.1.S1_s_at | MmugDNA.12077.1 | 6.63  | 6.06  | 1.93 | 0.18 | 1.48  | 0.372627 | 0.485419 | 0.705567 | 0.68914  |
| MmugDNA.12078.1.S1_at   | MmugDNA.12078.1 | 4.27  | 4.19  | 0.55 | 0.18 | 1.06  | 0.299722 | 0.708885 | 0.654176 | 0.831167 |
| MmugDNA.12079.1.S1_at   | MmugDNA.12079.1 | 5.46  | 5.41  | 0.16 | 0.1  | 1.04  | 0.141034 | 0.215532 | 0.516345 | 0.489269 |
| MmugDNA.1208.1.S1_at    | MmugDNA.1208.1  | 10.71 | 10.43 | 0.34 | 0.21 | 1.21  | 0.332256 | 0.444784 | 0.678724 | 0.662072 |
| MmugDNA.12080.1.S1_at   | MmugDNA.12080.1 | 5.15  | 5.19  | 0.23 | 0.08 | -1.02 | 0.528959 | 0.595145 | 0.798106 | 0.758988 |
| MmugDNA.12081.1.S1_at   | MmugDNA.12081.1 | 8.12  | 8.41  | 0.12 | 0.19 | -1.22 | 0.16815  | 0.2401   | 0.540716 | 0.5108   |
| MmugDNA.12083.1.S1_at   | MmugDNA.12083.1 | 2.84  | 2.97  | 0.19 | 0.19 | -1.09 | 0.437375 | 0.538219 | 0.746793 | 0.72298  |
| MmugDNA.12084.1.S1_at   | MmugDNA.12084.1 | 5.51  | 5.77  | 0.35 | 0.28 | -1.2  | 0.428955 | 0.508196 | 0.74212  | 0.703422 |
| MmugDNA.12085.1.S1_at   | MmugDNA.12085.1 | 4.98  | 4.82  | 0.09 | 0.03 | 1.12  | 0.073561 | 0.322554 | 0.434623 | 0.573991 |
| MmugDNA.12086.1.S1_at   | MmugDNA.12086.1 | 2.9   | 3.03  | 0.15 | 0.18 | -1.1  | 0.686011 | 0.509642 | 0.87707  | 0.704273 |
| MmugDNA.12088.1.S1_at   | MmugDNA.12088.1 | 4.33  | 4.55  | 0.22 | 0.16 | -1.16 | 0.226973 | 0.312096 | 0.596396 | 0.566904 |
| MmugDNA.12089.1.S1_at   | MmugDNA.12089.1 | 7.13  | 6.8   | 0.32 | 0.12 | 1.26  | 0.140128 | 0.071688 | 0.515581 | 0.313904 |
| MmugDNA.1209.1.S1_at    | MmugDNA.1209.1  | 5.9   | 5.43  | 0.35 | 0.09 | 1.39  | 0.186695 | 0.300724 | 0.559225 | 0.558959 |
| MmugDNA.12092.1.S1_at   | MmugDNA.12092.1 | 11.19 | 11.46 | 0.11 | 0.08 | -1.21 | 0.102009 | 0.314161 | 0.472436 | 0.568185 |
| MmugDNA.12093.1.S1_s_at | MmugDNA.12093.1 | 7.05  | 7.43  | 0.16 | 0.13 | -1.3  | 0.017059 | 0.001396 | 0.289048 | 0.057005 |
| MmugDNA.12095.1.S1_at   | MmugDNA.12095.1 | 4.5   | 4.44  | 0.04 | 0.02 | 1.05  | 0.026865 | 0.029992 | 0.326584 | 0.214956 |
| MmugDNA.12096.1.S1_at   | MmugDNA.12096.1 | 5.34  | 5.47  | 0.1  | 0.12 | -1.1  | 0.162554 | 0.311985 | 0.535667 | 0.566838 |
| MmugDNA.12097.1.S1_at   | MmugDNA.12097.1 | 5.35  | 5.42  | 0.14 | 0    | -1.05 | 0.955505 | 0.415789 | 0.985326 | 0.641116 |
| MmugDNA.12098.1.S1_at   | MmugDNA.12098.1 | 3.12  | 3.14  | 0.27 | 0.09 | -1.02 | 0.763597 | 0.900364 | 0.911265 | 0.94344  |
| MmugDNA.12099.1.S1_at   | MmugDNA.12099.1 | 9.25  | 9.21  | 0.73 | 0.35 | 1.02  | 0.573089 | 0.658118 | 0.823428 | 0.800181 |
| MmugDNA.121.1.S1_at     | MmugDNA.121.1   | 8.66  | 9.1   | 0.43 | 0.13 | -1.36 | 0.506586 | 0.509349 | 0.78591  | 0.704113 |
| MmugDNA.121.1.S1_s_at   | MmugDNA.121.1   | 9.14  | 9.46  | 0.36 | 0.1  | -1.25 | 0.516038 | 0.492203 | 0.791221 | 0.693477 |
| MmugDNA.1210.1.S1_at    | MmugDNA.1210.1  | 3.59  | 3.6   | 0.13 | 0.03 | -1.01 | 0.840163 | 0.805952 | 0.943127 | 0.888397 |
| MmugDNA.12100.1.S1_at   | MmugDNA.12100.1 | 3.87  | 3.77  | 0.1  | 0.06 | 1.07  | 0.1413   | 0.544353 | 0.516365 | 0.726752 |
| MmugDNA.12101.1.S1_at   | MmugDNA.12101.1 | 4.89  | 4.9   | 0.1  | 0.14 | -1.01 | 0.775929 | 0.081099 | 0.916944 | 0.329276 |
| MmugDNA.12102.1.S1_at   | MmugDNA.12102.1 | 4.8   | 5.22  | 0.4  | 0.72 | -1.34 | 0.463117 | 0.242747 | 0.761988 | 0.5131   |
| MmugDNA.12103.1.S1_at   | MmugDNA.12103.1 | 3.92  | 3.84  | 0.18 | 0.09 | 1.06  | 0.235296 | 0.590264 | 0.602341 | 0.756124 |
| MmugDNA.17454.1.S1_s_at | MmugDNA.17454.1 | 4.6   | 4.43  | 0.1  | 0.07 | 1.12  | 0.044793 | 0.056039 | 0.37512  | 0.2826   |
| MmugDNA.12104.1.S1_at   | MmugDNA.12104.1 | 10.92 | 10.08 | 0.19 | 0.1  | 1.79  | 0.002275 | 0.001799 | 0.174757 | 0.063652 |
| MmugDNA.12104.1.S1_s_at | MmugDNA.12104.1 | 11.34 | 10.68 | 0.16 | 0.11 | 1.59  | 0.006147 | 0.008712 | 0.216392 | 0.123746 |
| MmugDNA.12105.1.S1_at   | MmugDNA.12105.1 | 8.43  | 6.52  | 1.12 | 0.36 | 3.78  | 0.124868 | 0.134888 | 0.498917 | 0.406878 |
| MmugDNA.12106.1.S1_at   | MmugDNA.12106.1 | 9.44  | 9.38  | 0.25 | 0.08 | 1.04  | 0.423701 | 0.770208 | 0.739193 | 0.86656  |
| MmugDNA.12107.1.S1_at   | MmugDNA.12107.1 | 5.2   | 5.16  | 0.05 | 0.14 | 1.03  | 0.231211 | 0.348936 | 0.599136 | 0.592945 |
| MmugDNA.12108.1.S1_at   | MmugDNA.12108.1 | 4.31  | 3.97  | 0.17 | 0.26 | 1.27  | 0.04277  | 0.05796  | 0.370349 | 0.287221 |
| MmugDNA.1211.1.S1_s_at  | MmugDNA.1211.1  | 12.59 | 13.04 | 0.19 | 0.13 | -1.37 | 0.047368 | 0.062647 | 0.380048 | 0.297022 |
| MmugDNA.1211.1.S1_x_at  | MmugDNA.1211.1  | 12.53 | 12.98 | 0.14 | 0.14 | -1.37 | 0.026147 | 0.051457 | 0.323485 | 0.272242 |
| MmugDNA.12111.1.S1_at   | MmugDNA.12111.1 | 5.1   | 5.05  | 0.49 | 0.17 | 1.03  | 0.673179 | 0.404931 | 0.871201 | 0.633408 |
| MmugDNA.12112.1.S1_at   | MmugDNA.12112.1 | 5.7   | 5.26  | 0.23 | 0.31 | 1.35  | 0.208068 | 0.267598 | 0.579747 | 0.53333  |
| MmugDNA.12113.1.S1_s_at | MmugDNA.12113.1 | 8.46  | 8.53  | 0.17 | 0.15 | -1.05 | 0.476896 | 0.059447 | 0.769546 | 0.290548 |

|                         |                 |       |       |      |      |       |          |          |          |          |
|-------------------------|-----------------|-------|-------|------|------|-------|----------|----------|----------|----------|
| MmugDNA.12115.1.S1_at   | MmugDNA.12115.1 | 3.28  | 3.26  | 0.19 | 0.05 | 1.02  | 0.554462 | 0.819494 | 0.812723 | 0.89602  |
| MmugDNA.12116.1.S1_at   | MmugDNA.12116.1 | 6.04  | 5.6   | 0.09 | 0.13 | 1.36  | 0.027332 | 0.014112 | 0.327322 | 0.15195  |
| MmugDNA.12117.1.S1_at   | MmugDNA.12117.1 | 3.97  | 4.1   | 0.14 | 0.14 | -1.09 | 0.796431 | 0.843816 | 0.925177 | 0.911025 |
| MmugDNA.12118.1.S1_at   | MmugDNA.12118.1 | 8.15  | 8.24  | 0.67 | 0.21 | -1.06 | 0.400014 | 0.219422 | 0.723437 | 0.493156 |
| MmugDNA.12119.1.S1_s_at | MmugDNA.12119.1 | 11.55 | 11.51 | 0.24 | 0.04 | 1.03  | 0.916405 | 0.044027 | 0.971609 | 0.254195 |
| MmugDNA.1212.1.S1_at    | MmugDNA.1212.1  | 2.86  | 2.81  | 0.21 | 0.06 | 1.04  | 0.83737  | 0.930016 | 0.941594 | 0.960166 |
| MmugDNA.12120.1.S1_at   | MmugDNA.12120.1 | 2.7   | 2.76  | 0.13 | 0.05 | -1.04 | 0.287499 | 0.419469 | 0.644595 | 0.643488 |
| MmugDNA.12121.1.S1_at   | MmugDNA.12121.1 | 7.02  | 6.53  | 0.48 | 0.48 | 1.41  | 0.136016 | 0.287377 | 0.510541 | 0.548636 |
| MmugDNA.12122.1.S1_s_at | MmugDNA.12122.1 | 9.9   | 10.26 | 0.3  | 0.1  | -1.28 | 0.087185 | 0.025347 | 0.454785 | 0.199552 |
| MmugDNA.12123.1.S1_at   | MmugDNA.12123.1 | 10.52 | 11.05 | 0.22 | 0.06 | -1.44 | 0.017656 | 0.065784 | 0.292958 | 0.301802 |
| MmugDNA.12125.1.S1_at   | MmugDNA.12125.1 | 3.63  | 3.78  | 0.09 | 0.26 | -1.11 | 0.515047 | 0.58321  | 0.790752 | 0.751637 |
| MmugDNA.12126.1.S1_at   | MmugDNA.12126.1 | 4.66  | 4.28  | 0.05 | 0.19 | 1.29  | 0.077583 | 0.040099 | 0.43966  | 0.245388 |
| MmugDNA.12127.1.S1_at   | MmugDNA.12127.1 | 4.96  | 5.51  | 0.24 | 0.39 | -1.46 | 0.096896 | 0.0761   | 0.465626 | 0.320848 |
| MmugDNA.12129.1.S1_at   | MmugDNA.12129.1 | 5.82  | 5.7   | 0.14 | 0.1  | 1.09  | 0.209089 | 0.402209 | 0.580645 | 0.631247 |
| MmugDNA.1213.1.S1_at    | MmugDNA.1213.1  | 4.01  | 3.92  | 0.06 | 0.2  | 1.07  | 0.126982 | 0.296713 | 0.500834 | 0.555718 |
| MmugDNA.12130.1.S1_at   | MmugDNA.12130.1 | 5.89  | 5.83  | 0.42 | 0.12 | 1.04  | 0.58253  | 0.563524 | 0.828349 | 0.738718 |
| MmugDNA.12131.1.S1_at   | MmugDNA.12131.1 | 6.24  | 6.16  | 0.16 | 0.06 | 1.06  | 0.189084 | 0.390942 | 0.560735 | 0.624649 |
| MmugDNA.12132.1.S1_at   | MmugDNA.12132.1 | 9.96  | 10.8  | 0.21 | 0.11 | -1.79 | 0.005066 | 0.021704 | 0.204969 | 0.184333 |
| MmugDNA.12133.1.S1_at   | MmugDNA.12133.1 | 6.79  | 6.4   | 0.84 | 0.24 | 1.31  | 0.428926 | 0.218066 | 0.74211  | 0.491683 |
| MmugDNA.12133.1.S1_s_at | MmugDNA.12133.1 | 7.57  | 7.5   | 0.33 | 0.11 | 1.05  | 0.339045 | 0.162147 | 0.683527 | 0.438282 |
| MmugDNA.12135.1.S1_at   | MmugDNA.12135.1 | 10.87 | 11.43 | 0.52 | 0.05 | -1.47 | 0.152385 | 0.084972 | 0.525402 | 0.336607 |
| MmugDNA.12137.1.S1_at   | MmugDNA.12137.1 | 3.45  | 3.46  | 0.09 | 0.09 | -1    | 0.318652 | 0.586283 | 0.668228 | 0.753427 |
| MmugDNA.12138.1.S1_at   | MmugDNA.12138.1 | 8.79  | 8.9   | 0.46 | 0.08 | -1.08 | 0.668659 | 0.688768 | 0.869132 | 0.818332 |
| MmugDNA.1214.1.S1_at    | MmugDNA.1214.1  | 2.9   | 2.94  | 0.04 | 0.07 | -1.02 | 0.633375 | 0.362227 | 0.853438 | 0.602875 |
| MmugDNA.12142.1.S1_s_at | MmugDNA.12142.1 | 7.79  | 7.05  | 0.22 | 0.15 | 1.66  | 0.01658  | 0.023464 | 0.287478 | 0.191956 |
| MmugDNA.12143.1.S1_at   | MmugDNA.12143.1 | 4.61  | 4.98  | 0.12 | 0.36 | -1.29 | 0.42073  | 0.533775 | 0.737059 | 0.719866 |
| MmugDNA.12144.1.S1_at   | MmugDNA.12144.1 | 3.46  | 3.33  | 0.11 | 0.13 | 1.09  | 0.098761 | 0.056101 | 0.468167 | 0.282723 |
| MmugDNA.12145.1.S1_at   | MmugDNA.12145.1 | 3.52  | 3.52  | 0.15 | 0.07 | -1    | 0.261422 | 0.285715 | 0.623819 | 0.54744  |
| MmugDNA.12146.1.S1_at   | MmugDNA.12146.1 | 8.98  | 9.24  | 0.23 | 0.19 | -1.2  | 0.171475 | 0.033706 | 0.544774 | 0.227194 |
| MmugDNA.12147.1.S1_at   | MmugDNA.12147.1 | 6.05  | 5.76  | 0.44 | 0.26 | 1.22  | 0.584046 | 0.646173 | 0.829433 | 0.792676 |
| MmugDNA.12149.1.S1_at   | MmugDNA.12149.1 | 6.39  | 6.58  | 0.53 | 0.17 | -1.14 | 0.549241 | 0.550761 | 0.810281 | 0.730611 |
| MmugDNA.1215.1.S1_at    | MmugDNA.1215.1  | 6.9   | 6.42  | 0.52 | 0.25 | 1.39  | 0.361817 | 0.468988 | 0.698823 | 0.67798  |
| MmugDNA.12152.1.S1_at   | MmugDNA.12152.1 | 3.24  | 3.14  | 0.14 | 0.09 | 1.08  | 0.528864 | 0.213963 | 0.7981   | 0.487596 |
| MmugDNA.12154.1.S1_at   | MmugDNA.12154.1 | 7.11  | 7.09  | 0.34 | 0.2  | 1.01  | 0.472311 | 0.362575 | 0.767001 | 0.603132 |
| MmugDNA.12155.1.S1_at   | MmugDNA.12155.1 | 5.07  | 5.14  | 0.29 | 0.1  | -1.06 | 0.94617  | 0.610163 | 0.981309 | 0.768419 |
| MmugDNA.12157.1.S1_at   | MmugDNA.12157.1 | 5.58  | 5.58  | 0.17 | 0.03 | 1     | 0.36152  | 0.243761 | 0.698663 | 0.513899 |
| MmugDNA.12158.1.S1_at   | MmugDNA.12158.1 | 6.03  | 6.21  | 0.18 | 0.14 | -1.13 | 0.133808 | 0.554195 | 0.508034 | 0.73306  |
| MmugDNA.12159.1.S1_at   | MmugDNA.12159.1 | 6.18  | 6.1   | 0.14 | 0.1  | 1.06  | 0.9716   | 0.788052 | 0.990709 | 0.877426 |
| MmugDNA.1216.1.S1_at    | MmugDNA.1216.1  | 3.85  | 3.7   | 0.2  | 0.16 | 1.11  | 0.255032 | 0.355795 | 0.619267 | 0.597864 |
| MmugDNA.12160.1.S1_at   | MmugDNA.12160.1 | 6.76  | 6.43  | 0.22 | 0.51 | 1.25  | 0.581148 | 0.857421 | 0.827417 | 0.918603 |
| MmugDNA.12162.1.S1_s_at | MmugDNA.12162.1 | 8.83  | 7.99  | 0.67 | 0.08 | 1.8   | 0.089492 | 0.180943 | 0.457657 | 0.457418 |
| MmugDNA.12163.1.S1_at   | MmugDNA.12163.1 | 4.25  | 4.18  | 0.26 | 0.27 | 1.05  | 0.327459 | 0.307634 | 0.675118 | 0.563799 |
| MmugDNA.12164.1.S1_at   | MmugDNA.12164.1 | 4.79  | 4.71  | 0.08 | 0.03 | 1.06  | 0.104438 | 0.176412 | 0.475473 | 0.45282  |

|                         |                 |       |       |      |      |       |          |          |          |          |
|-------------------------|-----------------|-------|-------|------|------|-------|----------|----------|----------|----------|
| MmugDNA.12164.1.S1_s_at | MmugDNA.12164.1 | 8.28  | 8.39  | 0.46 | 0.22 | -1.08 | 0.400994 | 0.087658 | 0.724096 | 0.340938 |
| MmugDNA.12167.1.S1_at   | MmugDNA.12167.1 | 4.48  | 4.69  | 0.12 | 0.07 | -1.16 | 0.269673 | 0.011276 | 0.629945 | 0.138076 |
| MmugDNA.12168.1.S1_at   | MmugDNA.12168.1 | 8.39  | 8.81  | 0.67 | 0.12 | -1.34 | 0.324681 | 0.025632 | 0.672781 | 0.200834 |
| MmugDNA.12169.1.S1_at   | MmugDNA.12169.1 | 6.02  | 5.85  | 0.49 | 0.24 | 1.12  | 0.332332 | 0.178413 | 0.678802 | 0.454778 |
| MmugDNA.12170.1.S1_at   | MmugDNA.12170.1 | 3.43  | 3.62  | 0.13 | 0.06 | -1.14 | 0.063883 | 0.064319 | 0.416731 | 0.299804 |
| MmugDNA.12171.1.S1_at   | MmugDNA.12171.1 | 3.97  | 3.3   | 0.83 | 0.16 | 1.6   | 0.239941 | 0.325441 | 0.606208 | 0.575807 |
| MmugDNA.12172.1.S1_at   | MmugDNA.12172.1 | 8.74  | 9.2   | 0.61 | 0.25 | -1.37 | 0.947657 | 0.087295 | 0.981984 | 0.340327 |
| MmugDNA.12173.1.S1_at   | MmugDNA.12173.1 | 9.56  | 10.19 | 0.44 | 0.19 | -1.55 | 0.023327 | 0.024242 | 0.314989 | 0.194936 |
| MmugDNA.12174.1.S1_at   | MmugDNA.12174.1 | 4.69  | 4.71  | 0.13 | 0.05 | -1.01 | 0.572782 | 0.665033 | 0.823366 | 0.803733 |
| MmugDNA.12176.1.S1_at   | MmugDNA.12176.1 | 4.89  | 4.37  | 0.26 | 0.25 | 1.44  | 0.114556 | 0.042641 | 0.48763  | 0.251037 |
| MmugDNA.12177.1.S1_at   | MmugDNA.12177.1 | 5.88  | 5.89  | 0.07 | 0.22 | -1.01 | 0.504979 | 0.696953 | 0.785092 | 0.824002 |
| MmugDNA.12178.1.S1_s_at | MmugDNA.12178.1 | 8.48  | 8.46  | 0.11 | 0.02 | 1.01  | 0.227887 | 0.51838  | 0.596693 | 0.71038  |
| MmugDNA.12179.1.S1_at   | MmugDNA.12179.1 | 8.61  | 9.2   | 0.68 | 0.16 | -1.51 | 0.19276  | 0.234859 | 0.563577 | 0.506125 |
| MmugDNA.1218.1.S1_at    | MmugDNA.1218.1  | 5.28  | 5.29  | 0.06 | 0.12 | -1.01 | 0.565224 | 0.83247  | 0.819139 | 0.903893 |
| MmugDNA.12180.1.S1_at   | MmugDNA.12180.1 | 7.8   | 7.28  | 0.93 | 0.08 | 1.43  | 0.368263 | 0.499751 | 0.70351  | 0.698494 |
| MmugDNA.12181.1.S1_at   | MmugDNA.12181.1 | 11.7  | 11.89 | 0.35 | 0.07 | -1.13 | 0.296713 | 0.364136 | 0.652381 | 0.604488 |
| MmugDNA.12182.1.S1_at   | MmugDNA.12182.1 | 2.72  | 2.68  | 0.03 | 0.11 | 1.03  | 0.618949 | 0.713557 | 0.846305 | 0.83382  |
| MmugDNA.12183.1.S1_at   | MmugDNA.12183.1 | 5.56  | 5.53  | 0.53 | 0.16 | 1.02  | 0.915881 | 0.451034 | 0.97133  | 0.665993 |
| MmugDNA.12185.1.S1_at   | MmugDNA.12185.1 | 4.98  | 5.22  | 0.36 | 0.48 | -1.18 | 0.665035 | 0.305875 | 0.867733 | 0.562731 |
| MmugDNA.12186.1.S1_at   | MmugDNA.12186.1 | 9.65  | 10.03 | 0.39 | 0.2  | -1.3  | 0.115363 | 0.010984 | 0.488677 | 0.136546 |
| MmugDNA.12187.1.S1_at   | MmugDNA.12187.1 | 5.02  | 4.81  | 0.23 | 0.06 | 1.16  | 0.188147 | 0.265494 | 0.56029  | 0.531381 |
| MmugDNA.12188.1.S1_at   | MmugDNA.12188.1 | 9.42  | 10.11 | 1.46 | 0.23 | -1.62 | 0.502219 | 0.596071 | 0.783497 | 0.759339 |
| MmugDNA.12189.1.S1_at   | MmugDNA.12189.1 | 9.96  | 10.04 | 0.19 | 0.11 | -1.06 | 0.865445 | 0.919783 | 0.952638 | 0.954906 |
| MmugDNA.1219.1.S1_at    | MmugDNA.1219.1  | 5.02  | 5.11  | 0.52 | 0.33 | -1.07 | 0.750466 | 0.656857 | 0.905496 | 0.799401 |
| MmugDNA.12191.1.S1_at   | MmugDNA.12191.1 | 3.46  | 3.46  | 0    | 0.14 | -1.01 | 0.938893 | 0.690513 | 0.979343 | 0.819604 |
| MmugDNA.12192.1.S1_at   | MmugDNA.12192.1 | 6.67  | 6.46  | 0.12 | 0.04 | 1.16  | 0.090654 | 0.354133 | 0.458873 | 0.597059 |
| MmugDNA.12195.1.S1_at   | MmugDNA.12195.1 | 7.35  | 5.01  | 0.66 | 0.28 | 5.08  | 0.009466 | 0.004407 | 0.242283 | 0.092846 |
| MmugDNA.12196.1.S1_at   | MmugDNA.12196.1 | 2.8   | 2.78  | 0.05 | 0.11 | 1.01  | 0.512811 | 0.47431  | 0.789522 | 0.68135  |
| MmugDNA.12197.1.S1_at   | MmugDNA.12197.1 | 5.84  | 5.74  | 0.09 | 0.09 | 1.07  | 0.252899 | 0.553778 | 0.617842 | 0.732802 |
| MmugDNA.12198.1.S1_at   | MmugDNA.12198.1 | 5.03  | 5.03  | 0.04 | 0.11 | 1     | 0.515086 | 0.333181 | 0.790767 | 0.581467 |
| MmugDNA.12199.1.S1_at   | MmugDNA.12199.1 | 7.31  | 7.22  | 0.11 | 0.05 | 1.06  | 0.314518 | 0.185621 | 0.665212 | 0.461586 |
| MmugDNA.122.1.S1_at     | MmugDNA.122.1   | 4.17  | 3.75  | 0.98 | 0.42 | 1.35  | 0.289729 | 0.290797 | 0.646376 | 0.551399 |
| MmugDNA.1220.1.S1_at    | MmugDNA.1220.1  | 5.35  | 5.38  | 0.09 | 0.17 | -1.02 | 0.773858 | 0.368275 | 0.915991 | 0.60787  |
| MmugDNA.12201.1.S1_at   | MmugDNA.12201.1 | 7.62  | 7.07  | 0.46 | 0.2  | 1.46  | 0.094417 | 0.044527 | 0.463794 | 0.255364 |
| MmugDNA.12203.1.S1_at   | MmugDNA.12203.1 | 10.1  | 9.13  | 0.49 | 0.13 | 1.97  | 0.023572 | 0.00961  | 0.31615  | 0.129157 |
| MmugDNA.12204.1.S1_x_at | MmugDNA.12204.1 | 8.04  | 8.15  | 0.45 | 0.39 | -1.09 | 0.756954 | 0.289406 | 0.908337 | 0.550439 |
| MmugDNA.12205.1.S1_at   | MmugDNA.12205.1 | 4.26  | 4.31  | 0.69 | 0.24 | -1.03 | 0.953566 | 0.642891 | 0.98451  | 0.790529 |
| MmugDNA.12207.1.S1_at   | MmugDNA.12207.1 | 6.64  | 6.82  | 0.3  | 0.1  | -1.13 | 0.124474 | 0.037138 | 0.498544 | 0.2372   |
| MmugDNA.12208.1.S1_at   | MmugDNA.12208.1 | 3.31  | 3.21  | 0.18 | 0.03 | 1.08  | 0.882916 | 0.873636 | 0.95947  | 0.928169 |
| MmugDNA.12209.1.S1_at   | MmugDNA.12209.1 | 3.98  | 3.95  | 0.1  | 0.05 | 1.02  | 0.193983 | 0.106394 | 0.564574 | 0.36895  |
| MmugDNA.1221.1.S1_at    | MmugDNA.1221.1  | 11.91 | 11.74 | 0.11 | 0.13 | 1.12  | 0.050606 | 0.022499 | 0.387563 | 0.187696 |
| MmugDNA.1221.1.S1_s_at  | MmugDNA.1221.1  | 12.43 | 12.28 | 0.09 | 0.04 | 1.11  | 0.051962 | 0.010721 | 0.391695 | 0.135271 |
| MmugDNA.12210.1.S1_at   | MmugDNA.12210.1 | 8.25  | 8.42  | 0.91 | 0.05 | -1.12 | 0.908656 | 0.636538 | 0.969262 | 0.786247 |

|                         |                 |       |       |      |      |       |          |          |          |          |
|-------------------------|-----------------|-------|-------|------|------|-------|----------|----------|----------|----------|
| MmugDNA.12211.1.S1_at   | MmugDNA.12211.1 | 4.78  | 4.83  | 0.24 | 0.12 | -1.03 | 0.359427 | 0.463275 | 0.697237 | 0.674323 |
| MmugDNA.12212.1.S1_at   | MmugDNA.12212.1 | 8.61  | 8.51  | 0.25 | 0.07 | 1.07  | 0.988551 | 0.092366 | 0.995877 | 0.348294 |
| MmugDNA.12213.1.S1_at   | MmugDNA.12213.1 | 6.42  | 6.3   | 0.13 | 0.13 | 1.09  | 0.692848 | 0.943583 | 0.880305 | 0.967955 |
| MmugDNA.12214.1.S1_at   | MmugDNA.12214.1 | 4.79  | 4.14  | 0.72 | 0.12 | 1.57  | 0.130231 | 0.349483 | 0.504682 | 0.593473 |
| MmugDNA.12216.1.S1_at   | MmugDNA.12216.1 | 5.64  | 5.63  | 0.05 | 0.01 | 1     | 0.94106  | 0.605089 | 0.97995  | 0.764917 |
| MmugDNA.12217.1.S1_at   | MmugDNA.12217.1 | 10.67 | 10.7  | 0.36 | 0.07 | -1.02 | 0.980731 | 0.70535  | 0.993904 | 0.829145 |
| MmugDNA.12220.1.S1_at   | MmugDNA.12220.1 | 9.7   | 10.14 | 0.45 | 0.12 | -1.35 | 0.162758 | 0.168032 | 0.535867 | 0.444641 |
| MmugDNA.12221.1.S1_at   | MmugDNA.12221.1 | 5.99  | 5.88  | 0.16 | 0.08 | 1.08  | 0.295955 | 0.452497 | 0.651657 | 0.667111 |
| MmugDNA.12223.1.S1_at   | MmugDNA.12223.1 | 11.61 | 11.17 | 0.15 | 0.21 | 1.36  | 0.012591 | 0.010912 | 0.263116 | 0.136002 |
| MmugDNA.12224.1.S1_at   | MmugDNA.12224.1 | 4.02  | 5.13  | 0.37 | 0    | -2.16 | 0.010352 | 0.00787  | 0.246974 | 0.118132 |
| MmugDNA.12225.1.S1_at   | MmugDNA.12225.1 | 6.78  | 7.11  | 0.48 | 0.11 | -1.26 | 0.396651 | 0.230778 | 0.721525 | 0.502452 |
| MmugDNA.12227.1.S1_at   | MmugDNA.12227.1 | 8.98  | 9.32  | 0.31 | 0.09 | -1.27 | 0.465322 | 0.422028 | 0.763035 | 0.645422 |
| MmugDNA.12230.1.S1_at   | MmugDNA.12230.1 | 3.49  | 3.48  | 0.07 | 0.09 | 1.01  | 0.380325 | 0.472782 | 0.709387 | 0.680117 |
| MmugDNA.12230.1.S1_x_at | MmugDNA.12230.1 | 3.17  | 2.9   | 0.22 | 0.38 | 1.21  | 0.805366 | 0.302247 | 0.929214 | 0.560092 |
| MmugDNA.12231.1.S1_at   | MmugDNA.12231.1 | 6.67  | 6.7   | 0.16 | 0.11 | -1.02 | 0.435991 | 0.78399  | 0.746002 | 0.874963 |
| MmugDNA.12231.1.S1_s_at | MmugDNA.12231.1 | 10.61 | 10.31 | 0.11 | 0.1  | 1.23  | 0.014215 | 0.004277 | 0.274019 | 0.091847 |
| MmugDNA.12232.1.S1_at   | MmugDNA.12232.1 | 11.34 | 11.15 | 0.11 | 0.06 | 1.14  | 0.055355 | 0.008155 | 0.39842  | 0.119759 |
| MmugDNA.12233.1.S1_at   | MmugDNA.12233.1 | 4.29  | 4.43  | 0.08 | 0.16 | -1.1  | 0.632188 | 0.359545 | 0.852783 | 0.600813 |
| MmugDNA.12235.1.S1_at   | MmugDNA.12235.1 | 3.15  | 3.15  | 0.17 | 0.04 | -1    | 0.485608 | 0.333871 | 0.774398 | 0.582011 |
| MmugDNA.12236.1.S1_at   | MmugDNA.12236.1 | 3.68  | 3.65  | 0.18 | 0.14 | 1.02  | 0.86425  | 0.842241 | 0.952282 | 0.910143 |
| MmugDNA.12237.1.S1_at   | MmugDNA.12237.1 | 4.17  | 4.08  | 0.61 | 0.45 | 1.06  | 0.797278 | 0.595568 | 0.925402 | 0.759091 |
| MmugDNA.12238.1.S1_at   | MmugDNA.12238.1 | 4.28  | 4.41  | 0.33 | 0.21 | -1.09 | 0.930972 | 0.932883 | 0.976942 | 0.961886 |
| MmugDNA.1224.1.S1_s_at  | MmugDNA.1224.1  | 6.69  | 6.77  | 0.29 | 0.11 | -1.06 | 0.242572 | 0.64784  | 0.608517 | 0.793789 |
| MmugDNA.12240.1.S1_at   | MmugDNA.12240.1 | 7.49  | 8     | 1.31 | 0.19 | -1.42 | 0.184169 | 0.290971 | 0.55696  | 0.551525 |
| MmugDNA.12241.1.S1_at   | MmugDNA.12241.1 | 4.41  | 4.32  | 0.07 | 0.31 | 1.07  | 0.78714  | 0.679933 | 0.92182  | 0.8131   |
| MmugDNA.12242.1.S1_at   | MmugDNA.12242.1 | 7.04  | 6.77  | 0.12 | 0.06 | 1.21  | 0.055209 | 0.097237 | 0.398095 | 0.3549   |
| MmugDNA.12243.1.S1_at   | MmugDNA.12243.1 | 11.35 | 11.52 | 0.25 | 0.02 | -1.12 | 0.36005  | 0.391736 | 0.697741 | 0.625301 |
| MmugDNA.12244.1.S1_at   | MmugDNA.12244.1 | 3.76  | 3.56  | 0.11 | 0.05 | 1.14  | 0.154151 | 0.302604 | 0.527483 | 0.560201 |
| MmugDNA.12245.1.S1_at   | MmugDNA.12245.1 | 10.88 | 11.2  | 0.04 | 0.03 | -1.25 | 0.000582 | 0.00109  | 0.143137 | 0.052283 |
| MmugDNA.12246.1.S1_at   | MmugDNA.12246.1 | 7.13  | 7.18  | 0.33 | 0.28 | -1.03 | 0.990588 | 0.677494 | 0.996425 | 0.81167  |
| MmugDNA.12247.1.S1_at   | MmugDNA.12247.1 | 12.07 | 12    | 0.31 | 0.05 | 1.05  | 0.497042 | 0.536016 | 0.781055 | 0.721454 |
| MmugDNA.12248.1.S1_at   | MmugDNA.12248.1 | 3.5   | 3.27  | 0.27 | 0.14 | 1.17  | 0.229553 | 0.394915 | 0.598388 | 0.627216 |
| MmugDNA.12249.1.S1_at   | MmugDNA.12249.1 | 7.75  | 7.62  | 0.89 | 0.16 | 1.1   | 0.730805 | 0.669683 | 0.896252 | 0.806827 |
| MmugDNA.12249.1.S1_s_at | MmugDNA.12249.1 | 9.62  | 9.75  | 0.75 | 0.05 | -1.09 | 0.762728 | 0.917891 | 0.91092  | 0.954027 |
| MmugDNA.12250.1.S1_at   | MmugDNA.12250.1 | 6.08  | 7.97  | 1.11 | 0.11 | -3.71 | 0.10776  | 0.098285 | 0.480288 | 0.356337 |
| MmugDNA.12252.1.S1_at   | MmugDNA.12252.1 | 5.51  | 5.37  | 0.02 | 0.03 | 1.1   | 0.004775 | 0.284009 | 0.202416 | 0.546246 |
| MmugDNA.12253.1.S1_at   | MmugDNA.12253.1 | 12.18 | 12.02 | 0.32 | 0    | 1.12  | 0.135084 | 0.163167 | 0.50914  | 0.439303 |
| MmugDNA.12254.1.S1_at   | MmugDNA.12254.1 | 4.93  | 5.08  | 0.03 | 0.31 | -1.11 | 0.791756 | 0.876799 | 0.923474 | 0.929829 |
| MmugDNA.12255.1.S1_at   | MmugDNA.12255.1 | 9.96  | 10.73 | 0.19 | 0.14 | -1.7  | 0.004096 | 0.001513 | 0.198572 | 0.059188 |
| MmugDNA.12256.1.S1_at   | MmugDNA.12256.1 | 6.63  | 6.63  | 0.27 | 0.05 | -1    | 0.972736 | 0.998984 | 0.991136 | 0.999494 |
| MmugDNA.12256.1.S1_s_at | MmugDNA.12256.1 | 6.88  | 7.21  | 0.47 | 0.04 | -1.26 | 0.308949 | 0.182506 | 0.661399 | 0.459065 |
| MmugDNA.12257.1.S1_at   | MmugDNA.12257.1 | 7.9   | 8.04  | 0.24 | 0.02 | -1.11 | 0.209664 | 0.234855 | 0.581295 | 0.506125 |
| MmugDNA.12259.1.S1_at   | MmugDNA.12259.1 | 4.3   | 4.22  | 0.2  | 0.14 | 1.06  | 0.651309 | 0.586572 | 0.861519 | 0.753592 |

|                         |                 |       |       |      |      |       |          |          |          |          |
|-------------------------|-----------------|-------|-------|------|------|-------|----------|----------|----------|----------|
| MmugDNA.1226.1.S1_at    | MmugDNA.1226.1  | 3.9   | 3.89  | 0.09 | 0.25 | 1.01  | 0.427937 | 0.717556 | 0.741509 | 0.836463 |
| MmugDNA.12260.1.S1_at   | MmugDNA.12260.1 | 7.93  | 7.81  | 1.36 | 0.38 | 1.09  | 0.676265 | 0.115169 | 0.873043 | 0.382079 |
| MmugDNA.12261.1.S1_at   | MmugDNA.12261.1 | 4.07  | 4.11  | 0.18 | 0.14 | -1.03 | 0.783611 | 0.932464 | 0.920384 | 0.961716 |
| MmugDNA.12263.1.S1_at   | MmugDNA.12263.1 | 3.1   | 3.16  | 0.26 | 0.09 | -1.04 | 0.965397 | 0.9802   | 0.988598 | 0.989257 |
| MmugDNA.12265.1.S1_at   | MmugDNA.12265.1 | 5.52  | 5.35  | 0.06 | 0.17 | 1.12  | 0.191084 | 0.094675 | 0.562359 | 0.351481 |
| MmugDNA.12266.1.S1_at   | MmugDNA.12266.1 | 3.53  | 3.8   | 0.11 | 0.05 | -1.2  | 0.057807 | 0.532371 | 0.403025 | 0.719017 |
| MmugDNA.12267.1.S1_at   | MmugDNA.12267.1 | 3.27  | 3.2   | 0.17 | 0.04 | 1.05  | 0.501729 | 0.460948 | 0.783425 | 0.672778 |
| MmugDNA.12268.1.S1_at   | MmugDNA.12268.1 | 4.7   | 4.63  | 0.1  | 0    | 1.05  | 0.087817 | 0.500756 | 0.455676 | 0.699257 |
| MmugDNA.12269.1.S1_s_at | MmugDNA.12269.1 | 4.74  | 4.73  | 0.22 | 0.11 | 1.01  | 0.627654 | 0.804626 | 0.850661 | 0.88762  |
| MmugDNA.12270.1.S1_at   | MmugDNA.12270.1 | 4.36  | 4.31  | 0.07 | 0.09 | 1.04  | 0.095693 | 0.063166 | 0.4643   | 0.298071 |
| MmugDNA.12271.1.S1_at   | MmugDNA.12271.1 | 6.9   | 6.78  | 0.07 | 0.03 | 1.09  | 0.05705  | 0.394595 | 0.401454 | 0.627112 |
| MmugDNA.12272.1.S1_at   | MmugDNA.12272.1 | 4.37  | 4.36  | 0.02 | 0.12 | 1     | 0.48228  | 0.812919 | 0.772308 | 0.891875 |
| MmugDNA.12273.1.S1_at   | MmugDNA.12273.1 | 11.89 | 11.31 | 0.35 | 0.27 | 1.5   | 0.370772 | 0.002337 | 0.704995 | 0.071533 |
| MmugDNA.12274.1.S1_at   | MmugDNA.12274.1 | 6.44  | 6.63  | 1.73 | 0.13 | -1.14 | 0.824485 | 0.78419  | 0.936798 | 0.875049 |
| MmugDNA.12275.1.S1_at   | MmugDNA.12275.1 | 5.08  | 5.01  | 0.13 | 0.03 | 1.05  | 0.766323 | 0.608658 | 0.912101 | 0.767185 |
| MmugDNA.12276.1.S1_at   | MmugDNA.12276.1 | 7.61  | 6.55  | 0.33 | 0.28 | 2.09  | 0.028861 | 0.118095 | 0.333062 | 0.385973 |
| MmugDNA.12278.1.S1_at   | MmugDNA.12278.1 | 3.46  | 3.55  | 0.34 | 0.08 | -1.06 | 0.699153 | 0.485471 | 0.883066 | 0.68914  |
| MmugDNA.12279.1.S1_at   | MmugDNA.12279.1 | 5.76  | 5.7   | 0.16 | 0.13 | 1.05  | 0.166275 | 0.34891  | 0.538973 | 0.592939 |
| MmugDNA.1228.1.S1_at    | MmugDNA.1228.1  | 3.4   | 3.34  | 0.1  | 0.29 | 1.04  | 0.437203 | 0.772377 | 0.746719 | 0.867685 |
| MmugDNA.12280.1.S1_at   | MmugDNA.12280.1 | 8.5   | 9.01  | 0.35 | 0.06 | -1.42 | 0.090546 | 0.100275 | 0.458835 | 0.359318 |
| MmugDNA.12281.1.S1_at   | MmugDNA.12281.1 | 6.07  | 5.98  | 0.07 | 0.34 | 1.06  | 0.3796   | 0.731227 | 0.709065 | 0.84425  |
| MmugDNA.12281.1.S1_x_at | MmugDNA.12281.1 | 6.24  | 6.11  | 0.16 | 0.13 | 1.1   | 0.165299 | 0.407806 | 0.538018 | 0.63521  |
| MmugDNA.12282.1.S1_at   | MmugDNA.12282.1 | 5.97  | 6.27  | 0.14 | 0.1  | -1.23 | 0.032409 | 0.058822 | 0.344245 | 0.289228 |
| MmugDNA.12283.1.S1_at   | MmugDNA.12283.1 | 3.57  | 3.85  | 0.1  | 0.37 | -1.21 | 0.161482 | 0.417551 | 0.534843 | 0.642252 |
| MmugDNA.12284.1.S1_at   | MmugDNA.12284.1 | 6.55  | 6.4   | 0.1  | 0.11 | 1.11  | 0.041313 | 0.002584 | 0.366103 | 0.075213 |
| MmugDNA.12285.1.S1_at   | MmugDNA.12285.1 | 3.4   | 3.4   | 0.17 | 0.02 | 1     | 0.969043 | 0.889757 | 0.989865 | 0.937198 |
| MmugDNA.12286.1.S1_at   | MmugDNA.12286.1 | 3.5   | 3.46  | 0.47 | 0.05 | 1.03  | 0.274815 | 0.51243  | 0.634184 | 0.706299 |
| MmugDNA.12287.1.S1_at   | MmugDNA.12287.1 | 8.5   | 8.36  | 0.42 | 0.38 | 1.1   | 0.999472 | 0.720582 | 0.999871 | 0.838346 |
| MmugDNA.12288.1.S1_at   | MmugDNA.12288.1 | 9.95  | 9.87  | 0.3  | 0.07 | 1.05  | 0.573542 | 0.077657 | 0.823642 | 0.323709 |
| MmugDNA.12289.1.S1_at   | MmugDNA.12289.1 | 4.14  | 4.42  | 0.23 | 0.17 | -1.21 | 0.283361 | 0.037795 | 0.641407 | 0.238765 |
| MmugDNA.1229.1.S1_s_at  | MmugDNA.1229.1  | 13.18 | 13.16 | 0.74 | 0.07 | 1.01  | 0.932515 | 0.52184  | 0.977227 | 0.712654 |
| MmugDNA.12291.1.S1_at   | MmugDNA.12291.1 | 7.74  | 8.07  | 0.1  | 0.08 | -1.26 | 0.011122 | 0.031084 | 0.252486 | 0.218117 |
| MmugDNA.12292.1.S1_at   | MmugDNA.12292.1 | 6.07  | 5.62  | 0.57 | 0.17 | 1.37  | 0.235062 | 0.071937 | 0.602266 | 0.314293 |
| MmugDNA.12294.1.S1_at   | MmugDNA.12294.1 | 5.39  | 5.46  | 0.24 | 0.02 | -1.05 | 0.728589 | 0.404954 | 0.895243 | 0.633415 |
| MmugDNA.12295.1.S1_at   | MmugDNA.12295.1 | 5.26  | 5.2   | 0.35 | 0.19 | 1.04  | 0.65632  | 0.579644 | 0.863538 | 0.749254 |
| MmugDNA.12297.1.S1_at   | MmugDNA.12297.1 | 5.54  | 4.95  | 0.37 | 0.39 | 1.5   | 0.125949 | 0.356407 | 0.49972  | 0.598396 |
| MmugDNA.12298.1.S1_x_at | MmugDNA.12298.1 | 3.84  | 3.75  | 0.08 | 0.04 | 1.06  | 0.179268 | 0.048368 | 0.552498 | 0.265081 |
| MmugDNA.12299.1.S1_at   | MmugDNA.12299.1 | 5.97  | 6.87  | 0.94 | 0.15 | -1.86 | 0.315023 | 0.278612 | 0.665641 | 0.542329 |
| MmugDNA.123.1.S1_at     | MmugDNA.123.1   | 8.21  | 7.85  | 1.04 | 0.16 | 1.28  | 0.57235  | 0.206207 | 0.823212 | 0.480377 |
| MmugDNA.1230.1.S1_at    | MmugDNA.1230.1  | 4.27  | 4.27  | 0.1  | 0.04 | 1     | 0.916845 | 0.075309 | 0.971796 | 0.319475 |
| MmugDNA.12300.1.S1_at   | MmugDNA.12300.1 | 4.16  | 4.53  | 0.81 | 0.44 | -1.29 | 0.748313 | 0.616632 | 0.904363 | 0.772837 |
| MmugDNA.12301.1.S1_at   | MmugDNA.12301.1 | 3.79  | 3.49  | 0.28 | 0.08 | 1.23  | 0.232484 | 0.501984 | 0.600124 | 0.699986 |
| MmugDNA.12303.1.S1_at   | MmugDNA.12303.1 | 6.11  | 6.36  | 0.51 | 0.34 | -1.18 | 0.347509 | 0.865444 | 0.688775 | 0.923596 |

|                         |                 |       |       |      |      |       |          |          |          |          |
|-------------------------|-----------------|-------|-------|------|------|-------|----------|----------|----------|----------|
| MmugDNA.12304.1.S1_at   | MmugDNA.12304.1 | 8.19  | 7.78  | 0.72 | 0.5  | 1.33  | 0.398107 | 0.148542 | 0.722323 | 0.423074 |
| MmugDNA.12306.1.S1_at   | MmugDNA.12306.1 | 5.57  | 5.77  | 0.7  | 0.21 | -1.15 | 0.647066 | 0.73047  | 0.859341 | 0.844017 |
| MmugDNA.9265.1.S1_s_at  | MmugDNA.9265.1  | 11.22 | 11.57 | 0.75 | 0.23 | -1.28 | 0.193839 | 0.164269 | 0.564465 | 0.440539 |
| MmugDNA.12308.1.S1_at   | MmugDNA.12308.1 | 8.34  | 8.31  | 0.62 | 0.04 | 1.02  | 0.955556 | 0.036969 | 0.985346 | 0.236733 |
| MmugDNA.12309.1.S1_at   | MmugDNA.12309.1 | 3.64  | 3.5   | 0.16 | 0.07 | 1.1   | 0.363334 | 0.588016 | 0.699988 | 0.754703 |
| MmugDNA.1231.1.S1_at    | MmugDNA.1231.1  | 6.43  | 6.27  | 0.43 | 0.16 | 1.12  | 0.985276 | 0.714968 | 0.995387 | 0.834753 |
| MmugDNA.12310.1.S1_at   | MmugDNA.12310.1 | 11.96 | 11.38 | 0.37 | 0.1  | 1.49  | 0.023111 | 0.006793 | 0.314725 | 0.111388 |
| MmugDNA.12311.1.S1_at   | MmugDNA.12311.1 | 5.15  | 5.18  | 0.65 | 0.25 | -1.02 | 0.363888 | 0.611013 | 0.700307 | 0.769004 |
| MmugDNA.12312.1.S1_at   | MmugDNA.12312.1 | 7.63  | 7.68  | 0.27 | 0.05 | -1.04 | 0.721714 | 0.563429 | 0.892101 | 0.738659 |
| MmugDNA.12313.1.S1_at   | MmugDNA.12313.1 | 6.52  | 6.68  | 0.54 | 0.27 | -1.12 | 0.696581 | 0.567862 | 0.882169 | 0.741693 |
| MmugDNA.12316.1.S1_at   | MmugDNA.12316.1 | 6.82  | 5.69  | 0.81 | 0.33 | 2.19  | 0.122699 | 0.058526 | 0.496146 | 0.288646 |
| MmugDNA.12317.1.S1_at   | MmugDNA.12317.1 | 4.94  | 4.93  | 0.16 | 0.12 | 1     | 0.805292 | 0.718925 | 0.929175 | 0.83732  |
| MmugDNA.12318.1.S1_at   | MmugDNA.12318.1 | 12.44 | 12.3  | 0.5  | 0.14 | 1.1   | 0.656158 | 0.01222  | 0.863482 | 0.142932 |
| MmugDNA.12319.1.S1_at   | MmugDNA.12319.1 | 5.4   | 5.42  | 0.19 | 0.05 | -1.02 | 0.558135 | 0.787571 | 0.815182 | 0.877098 |
| MmugDNA.1232.1.S1_at    | MmugDNA.1232.1  | 6.66  | 6.12  | 0.51 | 0.11 | 1.45  | 0.155661 | 0.049301 | 0.528929 | 0.266927 |
| MmugDNA.12320.1.S1_at   | MmugDNA.12320.1 | 2.98  | 2.93  | 0.08 | 0.04 | 1.04  | 0.259516 | 0.537193 | 0.622626 | 0.72233  |
| MmugDNA.12322.1.S1_at   | MmugDNA.12322.1 | 5.06  | 4.84  | 0.07 | 0.17 | 1.16  | 0.155076 | 0.626325 | 0.528433 | 0.779698 |
| MmugDNA.12323.1.S1_at   | MmugDNA.12323.1 | 13.27 | 13.05 | 0.08 | 0.03 | 1.16  | 0.013065 | 0.045828 | 0.266473 | 0.258354 |
| MmugDNA.12324.1.S1_at   | MmugDNA.12324.1 | 5.27  | 5.09  | 0.3  | 0.16 | 1.13  | 0.153931 | 0.186124 | 0.527271 | 0.461946 |
| MmugDNA.12325.1.S1_at   | MmugDNA.12325.1 | 5.87  | 5.85  | 0.2  | 0.02 | 1.01  | 0.97428  | 0.810823 | 0.991855 | 0.890845 |
| MmugDNA.12326.1.S1_at   | MmugDNA.12326.1 | 3.86  | 3.84  | 0.18 | 0.04 | 1.01  | 0.552462 | 0.764417 | 0.811861 | 0.863093 |
| MmugDNA.12327.1.S1_at   | MmugDNA.12327.1 | 9.3   | 9.17  | 0.16 | 0.19 | 1.09  | 0.537719 | 0.715347 | 0.802792 | 0.834994 |
| MmugDNA.12329.1.S1_at   | MmugDNA.12329.1 | 12.15 | 12.08 | 0.82 | 0.24 | 1.04  | 0.789983 | 0.290135 | 0.922743 | 0.551134 |
| MmugDNA.1233.1.S1_at    | MmugDNA.1233.1  | 10.73 | 11.32 | 0.23 | 0.06 | -1.5  | 0.011459 | 0.001442 | 0.255165 | 0.057912 |
| MmugDNA.12330.1.S1_at   | MmugDNA.12330.1 | 5.14  | 5.09  | 0.2  | 0.15 | 1.04  | 0.361093 | 0.295815 | 0.698314 | 0.555199 |
| MmugDNA.12331.1.S1_x_at | MmugDNA.12331.1 | 10.09 | 10.58 | 0.35 | 0.2  | -1.4  | 0.316551 | 0.255646 | 0.666494 | 0.523619 |
| MmugDNA.12332.1.S1_at   | MmugDNA.12332.1 | 9.41  | 9.27  | 1.99 | 0.08 | 1.11  | 0.440505 | 0.250861 | 0.748529 | 0.51956  |
| MmugDNA.12333.1.S1_at   | MmugDNA.12333.1 | 8.11  | 7.81  | 0.28 | 0.13 | 1.22  | 0.06879  | 0.088955 | 0.426081 | 0.342807 |
| MmugDNA.12335.1.S1_at   | MmugDNA.12335.1 | 6.68  | 7.01  | 0.34 | 0.33 | -1.26 | 0.073879 | 0.08414  | 0.434623 | 0.335181 |
| MmugDNA.12336.1.S1_at   | MmugDNA.12336.1 | 4.55  | 4.55  | 0.1  | 0.09 | 1     | 0.230413 | 0.599676 | 0.598513 | 0.761533 |
| MmugDNA.12337.1.S1_at   | MmugDNA.12337.1 | 3.67  | 3.6   | 0.34 | 0.18 | 1.05  | 0.471872 | 0.012382 | 0.766685 | 0.143958 |
| MmugDNA.12338.1.S1_at   | MmugDNA.12338.1 | 10.03 | 10.24 | 0.16 | 0.24 | -1.15 | 0.215504 | 0.025338 | 0.585748 | 0.199522 |
| MmugDNA.12339.1.S1_at   | MmugDNA.12339.1 | 5.43  | 5.43  | 0.18 | 0.14 | 1     | 0.927879 | 0.127712 | 0.976185 | 0.398581 |
| MmugDNA.1234.1.S1_at    | MmugDNA.1234.1  | 5.83  | 5.1   | 0.34 | 0.25 | 1.66  | 0.046384 | 0.256269 | 0.377929 | 0.524079 |
| MmugDNA.12340.1.S1_at   | MmugDNA.12340.1 | 4.53  | 4.63  | 0.21 | 0.12 | -1.07 | 0.980496 | 0.6016   | 0.993785 | 0.762951 |
| MmugDNA.12341.1.S1_at   | MmugDNA.12341.1 | 5.83  | 5.7   | 0.45 | 0.33 | 1.09  | 0.51642  | 0.131713 | 0.791459 | 0.403854 |
| MmugDNA.12343.1.S1_at   | MmugDNA.12343.1 | 5.99  | 6.34  | 0.06 | 0.17 | -1.28 | 0.070834 | 0.11765  | 0.430067 | 0.385352 |
| MmugDNA.12344.1.S1_at   | MmugDNA.12344.1 | 5.79  | 5.8   | 0.06 | 0.07 | -1    | 0.424611 | 0.662345 | 0.739618 | 0.802265 |
| MmugDNA.12345.1.S1_at   | MmugDNA.12345.1 | 11.7  | 11.32 | 0.38 | 0.07 | 1.3   | 0.381261 | 0.022911 | 0.709924 | 0.189395 |
| MmugDNA.12346.1.S1_at   | MmugDNA.12346.1 | 4.19  | 4.36  | 0.62 | 0.64 | -1.13 | 0.963574 | 0.720823 | 0.988152 | 0.838368 |
| MmugDNA.12347.1.S1_at   | MmugDNA.12347.1 | 4.63  | 4.33  | 0.17 | 0.26 | 1.23  | 0.088184 | 0.065501 | 0.45606  | 0.301415 |
| MmugDNA.12348.1.S1_at   | MmugDNA.12348.1 | 6.78  | 7.02  | 0.13 | 0.17 | -1.18 | 0.516999 | 0.964126 | 0.791672 | 0.980052 |
| MmugDNA.1235.1.S1_at    | MmugDNA.1235.1  | 4.08  | 4.08  | 0.11 | 0.07 | -1    | 0.631525 | 0.80566  | 0.852417 | 0.888316 |

|                         |                 |       |       |      |      |       |          |          |          |          |
|-------------------------|-----------------|-------|-------|------|------|-------|----------|----------|----------|----------|
| MmugDNA.12351.1.S1_at   | MmugDNA.12351.1 | 5.82  | 5.57  | 0.01 | 0.07 | 1.19  | 0.005142 | 0.495126 | 0.205615 | 0.695319 |
| MmugDNA.12355.1.S1_at   | MmugDNA.12355.1 | 4.32  | 4.02  | 1.04 | 0.21 | 1.24  | 0.414859 | 0.512816 | 0.733395 | 0.70653  |
| MmugDNA.12356.1.S1_at   | MmugDNA.12356.1 | 7.89  | 7.89  | 0.42 | 0.13 | -1    | 0.954444 | 0.942747 | 0.984894 | 0.967499 |
| MmugDNA.12357.1.S1_at   | MmugDNA.12357.1 | 3.59  | 3.43  | 0.09 | 0.1  | 1.11  | 0.164388 | 0.261879 | 0.537322 | 0.528284 |
| MmugDNA.12358.1.S1_at   | MmugDNA.12358.1 | 3.37  | 3.4   | 0.48 | 0.04 | -1.02 | 0.501746 | 0.565763 | 0.783425 | 0.740112 |
| MmugDNA.12359.1.S1_at   | MmugDNA.12359.1 | 6.7   | 6.63  | 0.09 | 0.06 | 1.05  | 0.523125 | 0.385352 | 0.795458 | 0.620818 |
| MmugDNA.1236.1.S1_at    | MmugDNA.1236.1  | 9.79  | 10.67 | 0.35 | 0.04 | -1.84 | 0.029025 | 0.003387 | 0.333482 | 0.083858 |
| MmugDNA.12360.1.S1_at   | MmugDNA.12360.1 | 4.26  | 4.04  | 0.05 | 0.16 | 1.17  | 0.092288 | 0.096864 | 0.460762 | 0.354275 |
| MmugDNA.12362.1.S1_at   | MmugDNA.12362.1 | 6.36  | 6.37  | 0.1  | 0.04 | -1.01 | 0.500117 | 0.989762 | 0.78233  | 0.994108 |
| MmugDNA.12363.1.S1_at   | MmugDNA.12363.1 | 12.25 | 12.23 | 0.29 | 0.05 | 1.01  | 0.964858 | 0.869903 | 0.988452 | 0.926177 |
| MmugDNA.12364.1.S1_at   | MmugDNA.12364.1 | 10.55 | 11.1  | 0.32 | 0.07 | -1.46 | 0.052597 | 0.030603 | 0.392678 | 0.216887 |
| MmugDNA.12366.1.S1_at   | MmugDNA.12366.1 | 3.61  | 3.64  | 0.21 | 0.06 | -1.02 | 0.392032 | 0.75804  | 0.718015 | 0.859249 |
| MmugDNA.12367.1.S1_at   | MmugDNA.12367.1 | 6.55  | 6.09  | 0.76 | 0.19 | 1.37  | 0.362391 | 0.118551 | 0.699302 | 0.38654  |
| MmugDNA.12368.1.S1_at   | MmugDNA.12368.1 | 4.28  | 4.41  | 0.17 | 0.15 | -1.1  | 0.781221 | 0.067247 | 0.919541 | 0.30531  |
| MmugDNA.12369.1.S1_at   | MmugDNA.12369.1 | 3.48  | 3.17  | 0.16 | 0.1  | 1.25  | 0.100837 | 0.162444 | 0.47159  | 0.438575 |
| MmugDNA.1237.1.S1_at    | MmugDNA.1237.1  | 5.32  | 5.32  | 0.22 | 0.09 | -1    | 0.316464 | 0.262097 | 0.666494 | 0.528382 |
| MmugDNA.12370.1.S1_at   | MmugDNA.12370.1 | 3.57  | 3.75  | 0.22 | 0.08 | -1.13 | 0.399208 | 0.509889 | 0.722896 | 0.704492 |
| MmugDNA.12372.1.S1_at   | MmugDNA.12372.1 | 4.73  | 4.73  | 0.13 | 0.24 | -1.01 | 0.710125 | 0.658756 | 0.887263 | 0.800473 |
| MmugDNA.12375.1.S1_at   | MmugDNA.12375.1 | 11.44 | 11.79 | 0.15 | 0.08 | -1.28 | 0.022587 | 0.014139 | 0.311427 | 0.15208  |
| MmugDNA.12377.1.S1_at   | MmugDNA.12377.1 | 6.43  | 6.55  | 0.28 | 0.11 | -1.08 | 0.917604 | 0.1833   | 0.972048 | 0.459553 |
| MmugDNA.12378.1.S1_at   | MmugDNA.12378.1 | 6     | 5.31  | 1.01 | 0.24 | 1.62  | 0.854795 | 0.1831   | 0.948598 | 0.459493 |
| MmugDNA.12379.1.S1_at   | MmugDNA.12379.1 | 5.13  | 5.04  | 0.15 | 0.05 | 1.06  | 0.80034  | 0.93878  | 0.926874 | 0.965181 |
| MmugDNA.1238.1.S1_at    | MmugDNA.1238.1  | 3.54  | 3.51  | 0.17 | 0.1  | 1.01  | 0.834475 | 0.982187 | 0.940665 | 0.990279 |
| MmugDNA.12380.1.S1_at   | MmugDNA.12380.1 | 5.2   | 5.13  | 0.3  | 0.03 | 1.05  | 0.868851 | 0.980943 | 0.954083 | 0.989478 |
| MmugDNA.12381.1.S1_s_at | MmugDNA.12381.1 | 6.46  | 6.98  | 0.65 | 0.09 | -1.43 | 0.734659 | 0.928207 | 0.898485 | 0.959209 |
| MmugDNA.12384.1.S1_at   | MmugDNA.12384.1 | 8.21  | 7.26  | 0.53 | 0.23 | 1.93  | 0.045998 | 0.019773 | 0.37735  | 0.176901 |
| MmugDNA.12385.1.S1_at   | MmugDNA.12385.1 | 11.82 | 12.13 | 0.14 | 0.09 | -1.24 | 0.046053 | 0.094491 | 0.37735  | 0.35125  |
| MmugDNA.12387.1.S1_at   | MmugDNA.12387.1 | 11.09 | 10.62 | 0.1  | 0.13 | 1.39  | 0.010462 | 0.027827 | 0.24804  | 0.208337 |
| MmugDNA.12388.1.S1_at   | MmugDNA.12388.1 | 11.7  | 11.33 | 0.17 | 0.01 | 1.29  | 0.046039 | 0.002027 | 0.37735  | 0.066885 |
| MmugDNA.12389.1.S1_at   | MmugDNA.12389.1 | 5.62  | 5.3   | 0.07 | 0.14 | 1.25  | 0.016918 | 0.013686 | 0.288966 | 0.149772 |
| MmugDNA.1239.1.S1_at    | MmugDNA.1239.1  | 4.48  | 4.17  | 0.14 | 0.05 | 1.24  | 0.035695 | 0.017853 | 0.352932 | 0.168774 |
| MmugDNA.12392.1.S1_at   | MmugDNA.12392.1 | 3.54  | 3.51  | 0.04 | 0.18 | 1.02  | 0.594722 | 0.513715 | 0.834904 | 0.707217 |
| MmugDNA.12394.1.S1_at   | MmugDNA.12394.1 | 11.16 | 11.09 | 0.08 | 0.08 | 1.05  | 0.584045 | 0.858233 | 0.829433 | 0.919151 |
| MmugDNA.12395.1.S1_s_at | MmugDNA.12395.1 | 10.65 | 10.46 | 0.09 | 0.1  | 1.14  | 0.028752 | 0.010946 | 0.333062 | 0.13621  |
| MmugDNA.12396.1.S1_at   | MmugDNA.12396.1 | 8.84  | 7.9   | 0.78 | 0.2  | 1.92  | 0.334702 | 0.892085 | 0.680538 | 0.938526 |
| MmugDNA.12397.1.S1_at   | MmugDNA.12397.1 | 3.49  | 3.42  | 0.2  | 0.19 | 1.05  | 0.723603 | 0.637878 | 0.892847 | 0.787216 |
| MmugDNA.12398.1.S1_at   | MmugDNA.12398.1 | 9.91  | 10.03 | 0.38 | 0.11 | -1.09 | 0.785491 | 0.038491 | 0.921144 | 0.241138 |
| MmugDNA.124.1.S1_at     | MmugDNA.124.1   | 8.06  | 7.93  | 0.42 | 0.18 | 1.1   | 0.482083 | 0.04578  | 0.772274 | 0.258303 |
| MmugDNA.1240.1.S1_at    | MmugDNA.1240.1  | 10.35 | 10.68 | 0.35 | 0.03 | -1.25 | 0.253638 | 0.103839 | 0.618323 | 0.364519 |
| MmugDNA.12400.1.S1_at   | MmugDNA.12400.1 | 6.12  | 5.93  | 0.17 | 0.15 | 1.14  | 0.104756 | 0.121642 | 0.476011 | 0.39083  |
| MmugDNA.12401.1.S1_at   | MmugDNA.12401.1 | 6.14  | 5.95  | 0.13 | 0.18 | 1.14  | 0.195307 | 0.192488 | 0.565686 | 0.467952 |
| MmugDNA.12402.1.S1_at   | MmugDNA.12402.1 | 2.99  | 3.05  | 0.12 | 0.01 | -1.04 | 0.21552  | 0.161013 | 0.585748 | 0.437161 |
| MmugDNA.12403.1.S1_at   | MmugDNA.12403.1 | 10.03 | 10    | 0.38 | 0.1  | 1.02  | 0.434791 | 0.057882 | 0.745329 | 0.28702  |



|                         |                 |       |       |      |      |       |          |          |          |          |
|-------------------------|-----------------|-------|-------|------|------|-------|----------|----------|----------|----------|
| MmugDNA.12404.1.S1_at   | MmugDNA.12404.1 | 3.71  | 3.54  | 0.03 | 0.18 | 1.13  | 0.157431 | 0.181257 | 0.530565 | 0.457798 |
| MmugDNA.12405.1.S1_at   | MmugDNA.12405.1 | 12.03 | 12.02 | 0.11 | 0.02 | 1.01  | 0.876617 | 0.206834 | 0.957052 | 0.481008 |
| MmugDNA.12405.1.S1_s_at | MmugDNA.12405.1 | 11.58 | 11.39 | 0.1  | 0.02 | 1.14  | 0.066668 | 0.201501 | 0.422542 | 0.476036 |
| MmugDNA.12406.1.S1_s_at | MmugDNA.12406.1 | 6.68  | 6.76  | 0.26 | 0.1  | -1.06 | 0.912771 | 0.912994 | 0.970334 | 0.951043 |
| MmugDNA.12407.1.S1_at   | MmugDNA.12407.1 | 4.35  | 4.15  | 0.16 | 0.07 | 1.15  | 0.099274 | 0.100136 | 0.468747 | 0.359064 |
| MmugDNA.12409.1.S1_at   | MmugDNA.12409.1 | 5.58  | 5.64  | 0.05 | 0.05 | -1.04 | 0.327772 | 0.401457 | 0.675226 | 0.631018 |
| MmugDNA.1241.1.S1_at    | MmugDNA.1241.1  | 4.89  | 4.89  | 0.25 | 0.14 | -1    | 0.610187 | 0.716921 | 0.841839 | 0.836147 |
| MmugDNA.12410.1.S1_at   | MmugDNA.12410.1 | 4.25  | 3.92  | 0.26 | 0.16 | 1.26  | 0.338123 | 0.528026 | 0.682759 | 0.716426 |
| MmugDNA.12411.1.S1_at   | MmugDNA.12411.1 | 4.4   | 4.18  | 0.19 | 0.19 | 1.16  | 0.218339 | 0.274283 | 0.58818  | 0.538751 |
| MmugDNA.12412.1.S1_s_at | MmugDNA.12412.1 | 10.35 | 10.43 | 0.46 | 0.03 | -1.05 | 0.827662 | 0.080343 | 0.938069 | 0.327965 |
| MmugDNA.12413.1.S1_at   | MmugDNA.12413.1 | 6.58  | 6.63  | 1.06 | 0.25 | -1.04 | 0.920798 | 0.709509 | 0.973159 | 0.831686 |
| MmugDNA.12414.1.S1_at   | MmugDNA.12414.1 | 4.89  | 4.89  | 0.27 | 0.16 | 1.01  | 0.411672 | 0.688278 | 0.73158  | 0.818009 |
| MmugDNA.12415.1.S1_at   | MmugDNA.12415.1 | 8.36  | 8.18  | 1.02 | 0.04 | 1.13  | 0.740286 | 0.198735 | 0.900758 | 0.473391 |
| MmugDNA.12416.1.S1_at   | MmugDNA.12416.1 | 7.89  | 8.21  | 0.35 | 0.05 | -1.24 | 0.056697 | 0.005375 | 0.401061 | 0.101199 |
| MmugDNA.12417.1.S1_at   | MmugDNA.12417.1 | 9.02  | 9.12  | 0.07 | 0.19 | -1.07 | 0.388899 | 0.458186 | 0.715799 | 0.671077 |
| MmugDNA.12418.1.S1_at   | MmugDNA.12418.1 | 8.02  | 7.6   | 0.38 | 0.1  | 1.34  | 0.161933 | 0.02348  | 0.535244 | 0.192031 |
| MmugDNA.12419.1.S1_at   | MmugDNA.12419.1 | 9.94  | 9.77  | 0.23 | 0.09 | 1.12  | 0.083524 | 0.000609 | 0.449622 | 0.042176 |
| MmugDNA.1242.1.S1_at    | MmugDNA.1242.1  | 6.45  | 6.49  | 0.26 | 0.08 | -1.03 | 0.83356  | 0.313897 | 0.940338 | 0.568094 |
| MmugDNA.12420.1.S1_at   | MmugDNA.12420.1 | 9.84  | 10.69 | 0.46 | 0.04 | -1.8  | 0.092245 | 0.100027 | 0.460762 | 0.3589   |
| MmugDNA.12421.1.S1_at   | MmugDNA.12421.1 | 6.3   | 6.16  | 0.22 | 0.18 | 1.1   | 0.566217 | 0.585266 | 0.819955 | 0.752837 |
| MmugDNA.12422.1.S1_at   | MmugDNA.12422.1 | 11.58 | 12.17 | 0.25 | 0.08 | -1.51 | 0.038852 | 0.041284 | 0.360395 | 0.247995 |
| MmugDNA.12422.1.S1_s_at | MmugDNA.12422.1 | 11.77 | 12.33 | 0.24 | 0.04 | -1.47 | 0.042761 | 0.05416  | 0.370345 | 0.278084 |
| MmugDNA.12423.1.S1_at   | MmugDNA.12423.1 | 4.31  | 3.79  | 0.47 | 0.19 | 1.44  | 0.293562 | 0.5198   | 0.649839 | 0.71135  |
| MmugDNA.12424.1.S1_at   | MmugDNA.12424.1 | 6.01  | 5.86  | 0.1  | 0.09 | 1.11  | 0.213667 | 0.546297 | 0.584304 | 0.727896 |
| MmugDNA.12425.1.S1_at   | MmugDNA.12425.1 | 3.67  | 3.67  | 0.33 | 0.25 | 1     | 0.676945 | 0.05776  | 0.873333 | 0.286677 |
| MmugDNA.12427.1.S1_at   | MmugDNA.12427.1 | 4.58  | 4.73  | 0.3  | 0.12 | -1.12 | 0.16959  | 0.219964 | 0.542592 | 0.49344  |
| MmugDNA.12428.1.S1_at   | MmugDNA.12428.1 | 4.63  | 4.65  | 0.65 | 0.33 | -1.01 | 0.89918  | 0.952539 | 0.965792 | 0.973066 |
| MmugDNA.12429.1.S1_at   | MmugDNA.12429.1 | 3.45  | 3.54  | 0.21 | 0.16 | -1.07 | 0.492822 | 0.629764 | 0.778629 | 0.781989 |
| MmugDNA.1243.1.S1_at    | MmugDNA.1243.1  | 3.47  | 3.59  | 0.1  | 0.06 | -1.08 | 0.109993 | 0.164427 | 0.482795 | 0.440678 |
| MmugDNA.12430.1.S1_at   | MmugDNA.12430.1 | 8.91  | 9.53  | 0.81 | 0.13 | -1.54 | 0.254185 | 0.186338 | 0.61872  | 0.46218  |
| MmugDNA.12431.1.S1_at   | MmugDNA.12431.1 | 10.9  | 10.58 | 0.05 | 0.04 | 1.25  | 0.000676 | 0.012524 | 0.146807 | 0.144385 |
| MmugDNA.12432.1.S1_at   | MmugDNA.12432.1 | 3.84  | 4.21  | 0.28 | 0.37 | -1.29 | 0.087646 | 0.04527  | 0.455349 | 0.257084 |
| MmugDNA.12433.1.S1_s_at | MmugDNA.12433.1 | 6.32  | 6.65  | 0.28 | 0.04 | -1.25 | 0.115124 | 0.047173 | 0.488314 | 0.261761 |
| MmugDNA.12434.1.S1_at   | MmugDNA.12434.1 | 4.43  | 3.95  | 0.36 | 0.02 | 1.4   | 0.119109 | 0.055785 | 0.492552 | 0.282044 |
| MmugDNA.12435.1.S1_at   | MmugDNA.12435.1 | 3.2   | 3.29  | 0.2  | 0.05 | -1.06 | 0.488899 | 0.02284  | 0.775866 | 0.189246 |
| MmugDNA.12437.1.S1_at   | MmugDNA.12437.1 | 6.14  | 7.12  | 0.79 | 0.35 | -1.98 | 0.176722 | 0.192955 | 0.549912 | 0.468455 |
| MmugDNA.12438.1.S1_at   | MmugDNA.12438.1 | 10.37 | 10.32 | 0.21 | 0.08 | 1.03  | 0.630252 | 0.022055 | 0.851919 | 0.185927 |
| MmugDNA.12439.1.S1_at   | MmugDNA.12439.1 | 11    | 10.4  | 0.31 | 0.34 | 1.52  | 0.109988 | 0.152048 | 0.482795 | 0.42682  |
| MmugDNA.12440.1.S1_s_at | MmugDNA.12440.1 | 4.26  | 4.07  | 0.17 | 0.27 | 1.14  | 0.965995 | 0.619582 | 0.988796 | 0.774788 |
| MmugDNA.12441.1.S1_at   | MmugDNA.12441.1 | 4.85  | 4.74  | 0.25 | 0.1  | 1.08  | 0.435082 | 0.635496 | 0.745472 | 0.785405 |
| MmugDNA.12442.1.S1_at   | MmugDNA.12442.1 | 6.49  | 7.81  | 0.12 | 0.17 | -2.48 | 0.000366 | 0.080586 | 0.137028 | 0.328361 |
| MmugDNA.12444.1.S1_at   | MmugDNA.12444.1 | 5.64  | 5.77  | 0.33 | 0.17 | -1.1  | 0.361647 | 0.553826 | 0.698674 | 0.732843 |
| MmugDNA.12445.1.S1_at   | MmugDNA.12445.1 | 3.47  | 3.46  | 0.03 | 0.09 | 1.01  | 0.874544 | 0.697143 | 0.956467 | 0.824045 |

|                         |                 |       |       |      |      |       |          |          |          |          |
|-------------------------|-----------------|-------|-------|------|------|-------|----------|----------|----------|----------|
| MmugDNA.12447.1.S1_at   | MmugDNA.12447.1 | 3.61  | 3.62  | 0.1  | 0.03 | -1.01 | 0.525973 | 0.056642 | 0.796442 | 0.284094 |
| MmugDNA.12448.1.S1_at   | MmugDNA.12448.1 | 3.21  | 3.3   | 0.11 | 0.17 | -1.06 | 0.481307 | 0.301219 | 0.771945 | 0.559356 |
| MmugDNA.12449.1.S1_at   | MmugDNA.12449.1 | 4.62  | 4.38  | 0.06 | 0.09 | 1.18  | 0.013187 | 0.007443 | 0.266951 | 0.115858 |
| MmugDNA.1245.1.S1_at    | MmugDNA.1245.1  | 10.75 | 11.05 | 0.49 | 0.15 | -1.24 | 0.846165 | 0.968352 | 0.946059 | 0.982571 |
| MmugDNA.12451.1.S1_at   | MmugDNA.12451.1 | 4.33  | 4.03  | 0.45 | 0.37 | 1.23  | 0.971283 | 0.998025 | 0.990583 | 0.999008 |
| MmugDNA.12452.1.S1_at   | MmugDNA.12452.1 | 11.19 | 11.14 | 0.27 | 0.07 | 1.03  | 0.761693 | 0.465671 | 0.910656 | 0.675863 |
| MmugDNA.12453.1.S1_at   | MmugDNA.12453.1 | 10.22 | 10.32 | 0.23 | 0.11 | -1.08 | 0.752365 | 0.21533  | 0.906442 | 0.489062 |
| MmugDNA.12454.1.S1_at   | MmugDNA.12454.1 | 7.75  | 7.03  | 0.31 | 0.1  | 1.64  | 0.018171 | 0.119951 | 0.295482 | 0.388671 |
| MmugDNA.12455.1.S1_at   | MmugDNA.12455.1 | 3.21  | 3.09  | 0.12 | 0.02 | 1.09  | 0.142558 | 0.253079 | 0.517603 | 0.521415 |
| MmugDNA.12456.1.S1_at   | MmugDNA.12456.1 | 10.31 | 11.23 | 0.11 | 0.16 | -1.9  | 0.001212 | 0.000851 | 0.156386 | 0.047111 |
| MmugDNA.12457.1.S1_at   | MmugDNA.12457.1 | 5.74  | 6.38  | 0.63 | 0.49 | -1.56 | 0.269833 | 0.156265 | 0.629983 | 0.43161  |
| MmugDNA.12458.1.S1_at   | MmugDNA.12458.1 | 6.28  | 6.24  | 0.01 | 0.04 | 1.03  | 0.401309 | 0.881434 | 0.724291 | 0.93235  |
| MmugDNA.1246.1.S1_at    | MmugDNA.1246.1  | 8.08  | 8.17  | 0.11 | 0.1  | -1.07 | 0.752047 | 0.000584 | 0.906265 | 0.041486 |
| MmugDNA.12462.1.S1_at   | MmugDNA.12462.1 | 4.87  | 5     | 0.07 | 0.03 | -1.1  | 0.110624 | 0.251171 | 0.483783 | 0.519897 |
| MmugDNA.12463.1.S1_at   | MmugDNA.12463.1 | 5.43  | 4.76  | 0.47 | 0.45 | 1.58  | 0.200803 | 0.079969 | 0.572488 | 0.327352 |
| MmugDNA.12464.1.S1_at   | MmugDNA.12464.1 | 5.49  | 5.51  | 0.11 | 0.05 | -1.01 | 0.357844 | 0.449823 | 0.695993 | 0.665284 |
| MmugDNA.12466.1.S1_at   | MmugDNA.12466.1 | 6.51  | 6.53  | 0.17 | 0.07 | -1.01 | 0.330652 | 0.445047 | 0.677328 | 0.66224  |
| MmugDNA.12467.1.S1_at   | MmugDNA.12467.1 | 10    | 11.04 | 0.29 | 0.11 | -2.06 | 0.006984 | 0.001355 | 0.225012 | 0.056687 |
| MmugDNA.12468.1.S1_s_at | MmugDNA.12468.1 | 11.07 | 11.85 | 0.22 | 0.06 | -1.72 | 0.003463 | 0.002951 | 0.195142 | 0.079945 |
| MmugDNA.1247.1.S1_s_at  | MmugDNA.1247.1  | 5.97  | 6.09  | 0.27 | 0.22 | -1.09 | 0.645934 | 0.438746 | 0.858905 | 0.657658 |
| MmugDNA.12470.1.S1_at   | MmugDNA.12470.1 | 10.76 | 11.68 | 0.18 | 0.07 | -1.9  | 0.00154  | 0.000279 | 0.161959 | 0.03453  |
| MmugDNA.12471.1.S1_at   | MmugDNA.12471.1 | 5.4   | 5.37  | 0.43 | 0.55 | 1.02  | 0.997614 | 0.789745 | 0.999184 | 0.878519 |
| MmugDNA.12472.1.S1_at   | MmugDNA.12472.1 | 4.42  | 4.43  | 0.07 | 0.06 | -1.01 | 0.191325 | 0.316629 | 0.562786 | 0.569963 |
| MmugDNA.12473.1.S1_at   | MmugDNA.12473.1 | 8.29  | 8.76  | 0.54 | 0.24 | -1.39 | 0.478286 | 0.014504 | 0.770076 | 0.153682 |
| MmugDNA.12474.1.S1_at   | MmugDNA.12474.1 | 6.59  | 7.22  | 0.64 | 0.45 | -1.54 | 0.369057 | 0.574491 | 0.704033 | 0.745928 |
| MmugDNA.12475.1.S1_s_at | MmugDNA.12475.1 | 8.98  | 8.75  | 0.31 | 0.14 | 1.18  | 0.403387 | 0.001475 | 0.725707 | 0.058588 |
| MmugDNA.12476.1.S1_at   | MmugDNA.12476.1 | 3.33  | 3.23  | 0.09 | 0.12 | 1.08  | 0.200495 | 0.504794 | 0.572371 | 0.701855 |
| MmugDNA.12477.1.S1_at   | MmugDNA.12477.1 | 2.98  | 2.91  | 0.11 | 0.11 | 1.05  | 0.689725 | 0.930701 | 0.879055 | 0.960648 |
| MmugDNA.12479.1.S1_at   | MmugDNA.12479.1 | 7.93  | 8.38  | 0.68 | 0.19 | -1.37 | 0.900705 | 0.012234 | 0.966257 | 0.142996 |
| MmugDNA.12481.1.S1_at   | MmugDNA.12481.1 | 4.8   | 3.74  | 0.63 | 0.21 | 2.1   | 0.069648 | 0.100198 | 0.427522 | 0.359195 |
| MmugDNA.12482.1.S1_at   | MmugDNA.12482.1 | 4.16  | 4.15  | 0.11 | 0.15 | 1     | 0.807147 | 0.900738 | 0.930053 | 0.943538 |
| MmugDNA.12485.1.S1_at   | MmugDNA.12485.1 | 10.13 | 10.31 | 0.55 | 0.1  | -1.13 | 0.784293 | 0.048503 | 0.920715 | 0.265472 |
| MmugDNA.12486.1.S1_at   | MmugDNA.12486.1 | 4.11  | 4.14  | 0.14 | 0.56 | -1.02 | 0.873706 | 0.557436 | 0.956275 | 0.735031 |
| MmugDNA.12488.1.S1_at   | MmugDNA.12488.1 | 12.25 | 12.51 | 0.26 | 0.09 | -1.19 | 0.560512 | 0.151103 | 0.816767 | 0.425782 |
| MmugDNA.12489.1.S1_at   | MmugDNA.12489.1 | 9.52  | 10.1  | 0.13 | 0.08 | -1.49 | 0.002238 | 0.000831 | 0.174757 | 0.046851 |
| MmugDNA.1249.1.S1_at    | MmugDNA.1249.1  | 4.36  | 4.34  | 0.16 | 0.13 | 1.02  | 0.888372 | 0.145864 | 0.961348 | 0.419888 |
| MmugDNA.12491.1.S1_at   | MmugDNA.12491.1 | 9.6   | 9.61  | 0.27 | 0.17 | -1.01 | 0.306183 | 0.614613 | 0.659271 | 0.771367 |
| MmugDNA.12492.1.S1_at   | MmugDNA.12492.1 | 6.12  | 5.7   | 0.29 | 0.14 | 1.34  | 0.09974  | 0.211422 | 0.469608 | 0.485559 |
| MmugDNA.12493.1.S1_at   | MmugDNA.12493.1 | 6.7   | 7.02  | 0.24 | 0.27 | -1.25 | 0.313409 | 0.215847 | 0.664755 | 0.489536 |
| MmugDNA.12494.1.S1_at   | MmugDNA.12494.1 | 6.39  | 6.54  | 0.13 | 0.22 | -1.11 | 0.363882 | 0.576042 | 0.700307 | 0.746951 |
| MmugDNA.12495.1.S1_at   | MmugDNA.12495.1 | 7.41  | 7.39  | 0.01 | 0.12 | 1.01  | 0.28716  | 0.280431 | 0.644253 | 0.543648 |
| MmugDNA.12496.1.S1_at   | MmugDNA.12496.1 | 6.76  | 6.96  | 0.19 | 0.22 | -1.15 | 0.513649 | 0.148964 | 0.790027 | 0.423294 |
| MmugDNA.12497.1.S1_at   | MmugDNA.12497.1 | 6.72  | 6.65  | 0.06 | 0.04 | 1.05  | 0.189734 | 0.663676 | 0.561075 | 0.803086 |

|                         |                 |       |       |      |      |       |          |          |          |          |
|-------------------------|-----------------|-------|-------|------|------|-------|----------|----------|----------|----------|
| MmugDNA.12498.1.S1_at   | MmugDNA.12498.1 | 4.09  | 4.09  | 0.05 | 0.03 | -1    | 0.649524 | 0.685022 | 0.860382 | 0.816304 |
| MmugDNA.24190.1.S1_s_at | MmugDNA.24190.1 | 10.58 | 10.48 | 0.57 | 0.35 | 1.08  | 0.633146 | 0.39611  | 0.853404 | 0.627916 |
| MmugDNA.1250.1.S1_at    | MmugDNA.1250.1  | 5.74  | 5.59  | 0.11 | 0.16 | 1.11  | 0.229384 | 0.339439 | 0.598339 | 0.586093 |
| MmugDNA.12500.1.S1_at   | MmugDNA.12500.1 | 3.14  | 3.04  | 0.07 | 0.22 | 1.07  | 0.282426 | 0.196718 | 0.640907 | 0.471783 |
| MmugDNA.12502.1.S1_at   | MmugDNA.12502.1 | 3.64  | 3.61  | 0.24 | 0.17 | 1.03  | 0.481744 | 0.272922 | 0.772225 | 0.53761  |
| MmugDNA.12504.1.S1_at   | MmugDNA.12504.1 | 10.21 | 10.73 | 0.25 | 0.19 | -1.43 | 0.047553 | 0.005087 | 0.380487 | 0.099108 |
| MmugDNA.12506.1.S1_at   | MmugDNA.12506.1 | 4.95  | 4.9   | 0.07 | 0.13 | 1.03  | 0.453568 | 0.482401 | 0.756208 | 0.687259 |
| MmugDNA.12507.1.S1_at   | MmugDNA.12507.1 | 9.45  | 10.44 | 0.53 | 0.14 | -1.97 | 0.030538 | 0.013045 | 0.338095 | 0.14696  |
| MmugDNA.12508.1.S1_at   | MmugDNA.12508.1 | 5.72  | 5.62  | 0.13 | 0.35 | 1.07  | 0.22777  | 0.328119 | 0.596693 | 0.577873 |
| MmugDNA.12509.1.S1_at   | MmugDNA.12509.1 | 5.44  | 5.46  | 0.17 | 0.32 | -1.02 | 0.909452 | 0.324782 | 0.969434 | 0.575311 |
| MmugDNA.12510.1.S1_at   | MmugDNA.12510.1 | 8.1   | 7.8   | 0.37 | 0.29 | 1.23  | 0.281787 | 0.298426 | 0.640218 | 0.557131 |
| MmugDNA.12512.1.S1_at   | MmugDNA.12512.1 | 2.95  | 2.9   | 0.21 | 0.04 | 1.03  | 0.467965 | 0.563214 | 0.764607 | 0.738468 |
| MmugDNA.12513.1.S1_at   | MmugDNA.12513.1 | 6.72  | 6.61  | 0.11 | 0.01 | 1.08  | 0.177472 | 0.061345 | 0.550585 | 0.29448  |
| MmugDNA.12514.1.S1_at   | MmugDNA.12514.1 | 4.1   | 3.94  | 0.12 | 0.11 | 1.12  | 0.349802 | 0.522953 | 0.690835 | 0.713429 |
| MmugDNA.12517.1.S1_at   | MmugDNA.12517.1 | 3.7   | 3.63  | 0.19 | 0.21 | 1.05  | 0.663377 | 0.402454 | 0.867106 | 0.631481 |
| MmugDNA.12518.1.S1_at   | MmugDNA.12518.1 | 5.56  | 5.08  | 0.49 | 0.65 | 1.39  | 0.769908 | 0.3587   | 0.913889 | 0.600178 |
| MmugDNA.12519.1.S1_at   | MmugDNA.12519.1 | 5.41  | 5.37  | 0.25 | 0.05 | 1.02  | 0.670332 | 0.855894 | 0.869878 | 0.917744 |
| MmugDNA.1252.1.S1_at    | MmugDNA.1252.1  | 5.06  | 4.5   | 1.36 | 0.5  | 1.48  | 0.466563 | 0.582684 | 0.763702 | 0.751307 |
| MmugDNA.1252.1.S1_s_at  | MmugDNA.1252.1  | 4.02  | 3.64  | 1.33 | 0.38 | 1.31  | 0.405356 | 0.429468 | 0.727374 | 0.650931 |
| MmugDNA.12520.1.S1_at   | MmugDNA.12520.1 | 8.38  | 7.95  | 1.08 | 0.11 | 1.34  | 0.542621 | 0.087893 | 0.805913 | 0.341301 |
| MmugDNA.12521.1.S1_at   | MmugDNA.12521.1 | 9.09  | 9.17  | 0.28 | 0.13 | -1.06 | 0.27136  | 0.44509  | 0.631217 | 0.662281 |
| MmugDNA.12522.1.S1_at   | MmugDNA.12522.1 | 7.49  | 7.33  | 0.13 | 0.17 | 1.11  | 0.439565 | 0.051223 | 0.748221 | 0.271799 |
| MmugDNA.12523.1.S1_at   | MmugDNA.12523.1 | 4.17  | 4.73  | 0.16 | 0.24 | -1.47 | 0.127319 | 0.528987 | 0.501542 | 0.71703  |
| MmugDNA.12525.1.S1_at   | MmugDNA.12525.1 | 6.25  | 5.87  | 0.62 | 0.2  | 1.3   | 0.088192 | 0.022327 | 0.45606  | 0.187022 |
| MmugDNA.12526.1.S1_at   | MmugDNA.12526.1 | 4.96  | 4.92  | 0.4  | 0.1  | 1.03  | 0.740484 | 0.871146 | 0.900834 | 0.92679  |
| MmugDNA.12527.1.S1_at   | MmugDNA.12527.1 | 6.02  | 5.85  | 0.21 | 0.12 | 1.12  | 0.14136  | 0.175282 | 0.516365 | 0.452061 |
| MmugDNA.12528.1.S1_at   | MmugDNA.12528.1 | 12.19 | 12.14 | 0.09 | 0.03 | 1.04  | 0.988031 | 0.321531 | 0.995831 | 0.573226 |
| MmugDNA.1253.1.S1_at    | MmugDNA.1253.1  | 9.45  | 10.2  | 0.42 | 0.11 | -1.68 | 0.039033 | 0.010235 | 0.36091  | 0.1326   |
| MmugDNA.12531.1.S1_at   | MmugDNA.12531.1 | 3.79  | 3.86  | 0.16 | 0.06 | -1.05 | 0.64188  | 0.821194 | 0.857564 | 0.8971   |
| MmugDNA.12532.1.S1_at   | MmugDNA.12532.1 | 4.57  | 4.21  | 0.26 | 0.13 | 1.28  | 0.238304 | 0.348261 | 0.605262 | 0.592446 |
| MmugDNA.12534.1.S1_at   | MmugDNA.12534.1 | 5.74  | 6.06  | 0.22 | 0.36 | -1.25 | 0.277505 | 0.280017 | 0.636861 | 0.543369 |
| MmugDNA.12536.1.S1_at   | MmugDNA.12536.1 | 6.09  | 6.15  | 0.54 | 0.27 | -1.04 | 0.799294 | 0.070566 | 0.926464 | 0.311781 |
| MmugDNA.12537.1.S1_at   | MmugDNA.12537.1 | 3.22  | 3.13  | 0.17 | 0.1  | 1.06  | 0.879552 | 0.968015 | 0.958257 | 0.982304 |
| MmugDNA.12538.1.S1_at   | MmugDNA.12538.1 | 4.88  | 4.43  | 0.19 | 0.09 | 1.37  | 0.046195 | 0.029507 | 0.377596 | 0.213475 |
| MmugDNA.1254.1.S1_at    | MmugDNA.1254.1  | 6.82  | 6.72  | 0.02 | 0.16 | 1.07  | 0.369052 | 0.000382 | 0.704033 | 0.037273 |
| MmugDNA.12541.1.S1_at   | MmugDNA.12541.1 | 3.24  | 3.27  | 0.1  | 0.07 | -1.02 | 0.964683 | 0.054274 | 0.988371 | 0.278456 |
| MmugDNA.12542.1.S1_at   | MmugDNA.12542.1 | 7.11  | 6.84  | 0.18 | 0.06 | 1.21  | 0.098127 | 0.022238 | 0.467605 | 0.18659  |
| MmugDNA.12545.1.S1_at   | MmugDNA.12545.1 | 3.85  | 3.91  | 0.49 | 0.02 | -1.05 | 0.576897 | 0.650416 | 0.825252 | 0.795636 |
| MmugDNA.12547.1.S1_at   | MmugDNA.12547.1 | 4.02  | 4.21  | 0.2  | 0.4  | -1.14 | 0.479892 | 0.46191  | 0.770922 | 0.673419 |
| MmugDNA.1255.1.S1_at    | MmugDNA.1255.1  | 7.15  | 6.91  | 0.1  | 0.07 | 1.18  | 0.049141 | 0.176315 | 0.385273 | 0.452752 |
| MmugDNA.12552.1.S1_at   | MmugDNA.12552.1 | 4.94  | 4.61  | 0.21 | 0.16 | 1.25  | 0.102097 | 0.091591 | 0.472436 | 0.346713 |
| MmugDNA.12553.1.S1_at   | MmugDNA.12553.1 | 3.66  | 3.69  | 0.25 | 0.17 | -1.02 | 0.770324 | 0.537068 | 0.913936 | 0.722261 |
| MmugDNA.12553.1.S1_s_at | MmugDNA.12553.1 | 4.95  | 5     | 0.28 | 0.13 | -1.04 | 0.98478  | 0.522682 | 0.995256 | 0.713295 |

|                         |                 |       |       |      |      |       |          |          |          |          |
|-------------------------|-----------------|-------|-------|------|------|-------|----------|----------|----------|----------|
| MmugDNA.12554.1.S1_at   | MmugDNA.12554.1 | 4.55  | 4.49  | 0.09 | 0.07 | 1.04  | 0.156917 | 0.173113 | 0.530162 | 0.449765 |
| MmugDNA.12558.1.S1_at   | MmugDNA.12558.1 | 7.76  | 6.75  | 0.04 | 0.25 | 2.02  | 0.00231  | 0.00145  | 0.175236 | 0.057999 |
| MmugDNA.1256.1.S1_at    | MmugDNA.1256.1  | 5.15  | 5.08  | 0.11 | 0.17 | 1.05  | 0.37461  | 0.734967 | 0.706016 | 0.846604 |
| MmugDNA.12561.1.S1_at   | MmugDNA.12561.1 | 6.23  | 5.7   | 0.14 | 0.15 | 1.44  | 0.032335 | 0.124188 | 0.343902 | 0.394496 |
| MmugDNA.12562.1.S1_at   | MmugDNA.12562.1 | 5.99  | 5.9   | 0.27 | 0.18 | 1.06  | 0.968238 | 0.983288 | 0.989539 | 0.990726 |
| MmugDNA.12565.1.S1_at   | MmugDNA.12565.1 | 4.96  | 4.81  | 0.18 | 0.04 | 1.11  | 0.206912 | 0.26616  | 0.578774 | 0.531988 |
| MmugDNA.12566.1.S1_at   | MmugDNA.12566.1 | 6.09  | 5.94  | 0.14 | 0.02 | 1.11  | 0.235567 | 0.612551 | 0.602691 | 0.770077 |
| MmugDNA.12569.1.S1_at   | MmugDNA.12569.1 | 4.77  | 5.35  | 0.54 | 0.34 | -1.49 | 0.101405 | 0.08549  | 0.471667 | 0.337495 |
| MmugDNA.12572.1.S1_at   | MmugDNA.12572.1 | 4.95  | 5.25  | 0.15 | 0.17 | -1.23 | 0.161783 | 0.393564 | 0.535175 | 0.626497 |
| MmugDNA.12575.1.S1_at   | MmugDNA.12575.1 | 9.17  | 9.1   | 0.13 | 0.1  | 1.05  | 0.532344 | 0.213131 | 0.800247 | 0.487054 |
| MmugDNA.17018.1.S1_s_at | MmugDNA.17018.1 | 9.49  | 9.42  | 0.07 | 0.11 | -1.05 | 0.372007 | 0.131999 | 0.705567 | 0.404036 |
| MmugDNA.12576.1.S1_at   | MmugDNA.12576.1 | 3.61  | 3.72  | 0.11 | 0.05 | -1.08 | 0.507377 | 0.127615 | 0.786331 | 0.398557 |
| MmugDNA.12578.1.S1_at   | MmugDNA.12578.1 | 3.1   | 2.96  | 0.12 | 0.07 | 1.1   | 0.706558 | 0.056816 | 0.885774 | 0.284531 |
| MmugDNA.12579.1.S1_at   | MmugDNA.12579.1 | 10.86 | 10.16 | 0.82 | 0.1  | 1.63  | 0.577125 | 0.056037 | 0.825353 | 0.2826   |
| MmugDNA.1258.1.S1_at    | MmugDNA.1258.1  | 7.55  | 7.55  | 0.43 | 0.07 | -1    | 0.848404 | 0.496105 | 0.946776 | 0.695877 |
| MmugDNA.12580.1.S1_at   | MmugDNA.12580.1 | 3.88  | 3.69  | 0.17 | 0.06 | 1.14  | 0.154236 | 0.428227 | 0.527483 | 0.649721 |
| MmugDNA.12581.1.S1_at   | MmugDNA.12581.1 | 7.27  | 7.08  | 0.1  | 0.03 | 1.14  | 0.03755  | 0.052716 | 0.35733  | 0.275218 |
| MmugDNA.12581.1.S1_s_at | MmugDNA.12581.1 | 5.87  | 5.71  | 0.15 | 0.14 | 1.12  | 0.123257 | 0.132071 | 0.496589 | 0.404046 |
| MmugDNA.12582.1.S1_at   | MmugDNA.12582.1 | 4.1   | 3.95  | 0.14 | 0.02 | 1.11  | 0.173846 | 0.081043 | 0.546898 | 0.329189 |
| MmugDNA.12583.1.S1_at   | MmugDNA.12583.1 | 10.6  | 10.57 | 0.19 | 0.15 | 1.02  | 0.950469 | 0.867463 | 0.983308 | 0.924699 |
| MmugDNA.12584.1.S1_at   | MmugDNA.12584.1 | 10.11 | 9.69  | 0.38 | 0.34 | 1.33  | 0.219428 | 0.164454 | 0.588927 | 0.440678 |
| MmugDNA.12585.1.S1_at   | MmugDNA.12585.1 | 3.37  | 3.44  | 0.07 | 0.14 | -1.05 | 0.773544 | 0.773539 | 0.915826 | 0.868348 |
| MmugDNA.12586.1.S1_at   | MmugDNA.12586.1 | 11.27 | 11.15 | 0.26 | 0.14 | 1.09  | 0.916514 | 0.743555 | 0.971654 | 0.851395 |
| MmugDNA.12588.1.S1_at   | MmugDNA.12588.1 | 8.26  | 9.3   | 0.5  | 0.04 | -2.05 | 0.013295 | 0.003461 | 0.267646 | 0.084734 |
| MmugDNA.12589.1.S1_at   | MmugDNA.12589.1 | 7.51  | 9.28  | 1.27 | 0.27 | -3.42 | 0.214137 | 0.239552 | 0.584673 | 0.510209 |
| MmugDNA.1259.1.S1_at    | MmugDNA.1259.1  | 12.52 | 11.67 | 0.13 | 0.16 | 1.8   | 0.001976 | 0.001122 | 0.17214  | 0.052924 |
| MmugDNA.1259.1.S1_s_at  | MmugDNA.1259.1  | 12.64 | 12.18 | 0.1  | 0.04 | 1.38  | 0.001571 | 0.000455 | 0.161959 | 0.038572 |
| MmugDNA.12590.1.S1_at   | MmugDNA.12590.1 | 6.99  | 7.24  | 0.36 | 0.34 | -1.2  | 0.36458  | 0.28443  | 0.700605 | 0.546637 |
| MmugDNA.12591.1.S1_s_at | MmugDNA.12591.1 | 11.34 | 11.3  | 0.29 | 0.04 | 1.03  | 0.672567 | 0.823674 | 0.871025 | 0.898726 |
| MmugDNA.12594.1.S1_at   | MmugDNA.12594.1 | 5.16  | 5.56  | 0.68 | 0.06 | -1.33 | 0.352635 | 0.46842  | 0.692659 | 0.677714 |
| MmugDNA.12597.1.S1_at   | MmugDNA.12597.1 | 4.77  | 4.4   | 0.03 | 0.13 | 1.29  | 0.009371 | 0.004899 | 0.241869 | 0.097632 |
| MmugDNA.12600.1.S1_at   | MmugDNA.12600.1 | 5.26  | 5.53  | 0.13 | 0.56 | -1.2  | 0.648552 | 0.256174 | 0.859959 | 0.524069 |
| MmugDNA.12601.1.S1_at   | MmugDNA.12601.1 | 9.34  | 9.33  | 0.38 | 0.15 | 1.01  | 0.910431 | 0.106661 | 0.969634 | 0.369213 |
| MmugDNA.12603.1.S1_at   | MmugDNA.12603.1 | 3.99  | 3.74  | 0.31 | 0.02 | 1.18  | 0.244085 | 0.342347 | 0.609867 | 0.588413 |
| MmugDNA.12605.1.S1_at   | MmugDNA.12605.1 | 7.09  | 7.17  | 0.14 | 0.1  | -1.05 | 0.81197  | 0.251641 | 0.932004 | 0.520387 |
| MmugDNA.12606.1.S1_at   | MmugDNA.12606.1 | 3.71  | 3.91  | 0.11 | 0.14 | -1.16 | 0.175093 | 0.285777 | 0.548031 | 0.547484 |
| MmugDNA.12607.1.S1_at   | MmugDNA.12607.1 | 7.73  | 7.53  | 0.08 | 0.16 | 1.15  | 0.054406 | 0.232826 | 0.396392 | 0.504441 |
| MmugDNA.12607.1.S1_x_at | MmugDNA.12607.1 | 7.69  | 7.66  | 0.09 | 0.11 | 1.03  | 0.220828 | 0.578555 | 0.590135 | 0.748589 |
| MmugDNA.12608.1.S1_at   | MmugDNA.12608.1 | 4.38  | 4.36  | 0.19 | 0.04 | 1.02  | 0.597738 | 0.738313 | 0.836517 | 0.848258 |
| MmugDNA.12609.1.S1_at   | MmugDNA.12609.1 | 9.21  | 8.77  | 0.85 | 0.12 | 1.36  | 0.448887 | 0.359793 | 0.754037 | 0.601077 |
| MmugDNA.1261.1.S1_at    | MmugDNA.1261.1  | 7.09  | 7.68  | 0.49 | 0.23 | -1.51 | 0.433179 | 0.478643 | 0.744296 | 0.684657 |
| MmugDNA.12612.1.S1_s_at | MmugDNA.12612.1 | 7.26  | 7.47  | 0.72 | 0.24 | -1.16 | 0.742768 | 0.692382 | 0.90193  | 0.820984 |
| MmugDNA.12613.1.S1_at   | MmugDNA.12613.1 | 7.19  | 7.2   | 0.14 | 0.14 | -1.01 | 0.866816 | 0.850482 | 0.953182 | 0.91497  |

|                         |                 |       |       |      |      |       |          |          |          |          |
|-------------------------|-----------------|-------|-------|------|------|-------|----------|----------|----------|----------|
| MmugDNA.12614.1.S1_at   | MmugDNA.12614.1 | 12.81 | 12.42 | 0.31 | 0.05 | 1.31  | 0.100686 | 0.020092 | 0.471575 | 0.178033 |
| MmugDNA.12615.1.S1_at   | MmugDNA.12615.1 | 6.53  | 5.56  | 0.38 | 0.56 | 1.96  | 0.045202 | 0.014019 | 0.376019 | 0.151595 |
| MmugDNA.12616.1.S1_at   | MmugDNA.12616.1 | 8.35  | 8.39  | 0.38 | 0.11 | -1.03 | 0.760078 | 0.917329 | 0.909862 | 0.953807 |
| MmugDNA.12618.1.S1_at   | MmugDNA.12618.1 | 3.17  | 3.21  | 0.1  | 0.18 | -1.03 | 0.648942 | 0.308078 | 0.860173 | 0.564219 |
| MmugDNA.12619.1.S1_at   | MmugDNA.12619.1 | 3.89  | 3.6   | 0.15 | 0.1  | 1.23  | 0.059671 | 0.032169 | 0.406705 | 0.222069 |
| MmugDNA.12620.1.S1_at   | MmugDNA.12620.1 | 2.73  | 2.63  | 0.16 | 0.05 | 1.07  | 0.959339 | 0.973041 | 0.986721 | 0.985401 |
| MmugDNA.12621.1.S1_at   | MmugDNA.12621.1 | 4.06  | 4.53  | 0.33 | 0.48 | -1.38 | 0.456199 | 0.355801 | 0.757783 | 0.597864 |
| MmugDNA.12626.1.S1_s_at | MmugDNA.12626.1 | 9.3   | 9.26  | 0.2  | 0.08 | 1.03  | 0.633614 | 0.540237 | 0.853619 | 0.724221 |
| MmugDNA.12629.1.S1_at   | MmugDNA.12629.1 | 4.22  | 3.95  | 0.17 | 0.13 | 1.21  | 0.085358 | 0.114549 | 0.452611 | 0.381098 |
| MmugDNA.1263.1.S1_at    | MmugDNA.1263.1  | 7.13  | 7.7   | 0.41 | 0.04 | -1.49 | 0.11235  | 0.092951 | 0.48564  | 0.349044 |
| MmugDNA.12630.1.S1_at   | MmugDNA.12630.1 | 3.04  | 3     | 0.19 | 0.07 | 1.03  | 0.180523 | 0.306697 | 0.553752 | 0.563264 |
| MmugDNA.12631.1.S1_at   | MmugDNA.12631.1 | 4.59  | 4.15  | 0.1  | 0.27 | 1.36  | 0.241412 | 0.377629 | 0.607596 | 0.615071 |
| MmugDNA.12632.1.S1_at   | MmugDNA.12632.1 | 5.52  | 5.43  | 0.1  | 0.07 | 1.07  | 0.22216  | 0.057463 | 0.591752 | 0.285751 |
| MmugDNA.12633.1.S1_at   | MmugDNA.12633.1 | 7.04  | 7.45  | 0.32 | 0    | -1.33 | 0.270987 | 0.285279 | 0.630919 | 0.547192 |
| MmugDNA.12635.1.S1_at   | MmugDNA.12635.1 | 4.42  | 4.38  | 0.14 | 0.01 | 1.03  | 0.709008 | 0.617175 | 0.886611 | 0.773242 |
| MmugDNA.12636.1.S1_at   | MmugDNA.12636.1 | 7.07  | 6.93  | 0.21 | 0.04 | 1.1   | 0.254171 | 0.053309 | 0.61872  | 0.276463 |
| MmugDNA.12637.1.S1_at   | MmugDNA.12637.1 | 7.33  | 7.52  | 0.15 | 0.12 | -1.14 | 0.325593 | 0.000593 | 0.673403 | 0.041912 |
| MmugDNA.12638.1.S1_at   | MmugDNA.12638.1 | 5.19  | 5.62  | 0.6  | 0.61 | -1.35 | 0.44399  | 0.604271 | 0.751068 | 0.764558 |
| MmugDNA.12639.1.S1_at   | MmugDNA.12639.1 | 5.99  | 5.8   | 0.19 | 0.2  | 1.14  | 0.164997 | 0.212113 | 0.537704 | 0.486036 |
| MmugDNA.1264.1.S1_at    | MmugDNA.1264.1  | 3.89  | 3.49  | 0.19 | 0.09 | 1.32  | 0.081892 | 0.318351 | 0.446396 | 0.571192 |
| MmugDNA.12641.1.S1_at   | MmugDNA.12641.1 | 5.84  | 5.8   | 0.43 | 0.06 | 1.03  | 0.96631  | 0.935725 | 0.988971 | 0.963726 |
| MmugDNA.12642.1.S1_at   | MmugDNA.12642.1 | 2.98  | 2.86  | 0.22 | 0.14 | 1.09  | 0.736841 | 0.907728 | 0.899286 | 0.94778  |
| MmugDNA.12643.1.S1_at   | MmugDNA.12643.1 | 4.98  | 4.69  | 0.26 | 0.4  | 1.23  | 0.449614 | 0.067544 | 0.754534 | 0.305949 |
| MmugDNA.12644.1.S1_at   | MmugDNA.12644.1 | 11.64 | 11.34 | 0.22 | 0.08 | 1.23  | 0.158035 | 0.04507  | 0.531053 | 0.256789 |
| MmugDNA.12645.1.S1_at   | MmugDNA.12645.1 | 9.02  | 8.27  | 0.15 | 0.27 | 1.68  | 0.019639 | 0.012074 | 0.302163 | 0.142158 |
| MmugDNA.12646.1.S1_at   | MmugDNA.12646.1 | 9.45  | 9.54  | 0.05 | 0.06 | -1.07 | 0.076264 | 0.020208 | 0.437755 | 0.178561 |
| MmugDNA.12647.1.S1_at   | MmugDNA.12647.1 | 8.99  | 9.64  | 0.48 | 0.23 | -1.57 | 0.476951 | 0.046205 | 0.769612 | 0.259359 |
| MmugDNA.12649.1.S1_at   | MmugDNA.12649.1 | 2.99  | 3.03  | 0.13 | 0.09 | -1.03 | 0.890779 | 0.162871 | 0.962492 | 0.438966 |
| MmugDNA.12650.1.S1_at   | MmugDNA.12650.1 | 7.51  | 7.59  | 0.66 | 0.18 | -1.06 | 0.833472 | 0.956219 | 0.940265 | 0.975088 |
| MmugDNA.12651.1.S1_at   | MmugDNA.12651.1 | 6.85  | 6.66  | 0.85 | 0.08 | 1.14  | 0.273689 | 0.260595 | 0.633365 | 0.527103 |
| MmugDNA.12652.1.S1_at   | MmugDNA.12652.1 | 3.61  | 3.59  | 0.29 | 0.06 | 1.01  | 0.871934 | 0.884507 | 0.95559  | 0.934199 |
| MmugDNA.12654.1.S1_at   | MmugDNA.12654.1 | 3.51  | 3.32  | 0.07 | 0.19 | 1.15  | 0.673777 | 0.149573 | 0.871567 | 0.424095 |
| MmugDNA.12655.1.S1_at   | MmugDNA.12655.1 | 4.04  | 3.79  | 0.08 | 0.13 | 1.19  | 0.047328 | 0.209427 | 0.379897 | 0.483069 |
| MmugDNA.12656.1.S1_at   | MmugDNA.12656.1 | 8.81  | 8.42  | 1.35 | 0.08 | 1.31  | 0.708932 | 0.816413 | 0.886591 | 0.89413  |
| MmugDNA.12658.1.S1_at   | MmugDNA.12658.1 | 2.94  | 2.78  | 0.26 | 0.06 | 1.12  | 0.298469 | 0.401763 | 0.653176 | 0.631068 |
| MmugDNA.1266.1.S1_at    | MmugDNA.1266.1  | 5.01  | 4.94  | 0.21 | 0.18 | 1.05  | 0.948355 | 0.773963 | 0.982226 | 0.868585 |
| MmugDNA.12660.1.S1_at   | MmugDNA.12660.1 | 9.96  | 9.84  | 0.4  | 0.06 | 1.09  | 0.727345 | 0.026968 | 0.894656 | 0.205423 |
| MmugDNA.12661.1.S1_at   | MmugDNA.12661.1 | 5.43  | 5.32  | 0.05 | 0.12 | 1.09  | 0.194493 | 0.470592 | 0.565072 | 0.678925 |
| MmugDNA.12662.1.S1_at   | MmugDNA.12662.1 | 6.79  | 7.25  | 0.85 | 0.33 | -1.38 | 0.999224 | 0.64746  | 0.999788 | 0.793487 |
| MmugDNA.12663.1.S1_at   | MmugDNA.12663.1 | 7.22  | 7.52  | 0.26 | 0.09 | -1.23 | 0.076342 | 0.163059 | 0.437977 | 0.439224 |
| MmugDNA.12664.1.S1_at   | MmugDNA.12664.1 | 9.64  | 8.42  | 0.2  | 0.51 | 2.32  | 0.024286 | 0.019038 | 0.317812 | 0.173644 |
| MmugDNA.12665.1.S1_at   | MmugDNA.12665.1 | 5.25  | 5.29  | 0    | 0.37 | -1.03 | 0.95719  | 0.994605 | 0.985852 | 0.99666  |
| MmugDNA.12667.1.S1_at   | MmugDNA.12667.1 | 4.63  | 4.56  | 0.08 | 0.12 | 1.05  | 0.277675 | 0.729365 | 0.636957 | 0.843541 |

|                         |                 |      |      |      |      |       |          |          |          |          |
|-------------------------|-----------------|------|------|------|------|-------|----------|----------|----------|----------|
| MmugDNA.12668.1.S1_at   | MmugDNA.12668.1 | 5.35 | 5.68 | 0.6  | 0.19 | -1.26 | 0.393375 | 0.328577 | 0.71919  | 0.578148 |
| MmugDNA.12668.1.S1_s_at | MmugDNA.12668.1 | 6.02 | 6.2  | 0.58 | 0.23 | -1.13 | 0.604047 | 0.315579 | 0.839485 | 0.569053 |
| MmugDNA.12669.1.S1_at   | MmugDNA.12669.1 | 5.93 | 5.94 | 0.33 | 0.23 | -1.01 | 0.832683 | 0.343964 | 0.940026 | 0.58962  |
| MmugDNA.1267.1.S1_s_at  | MmugDNA.1267.1  | 5.96 | 5.35 | 0.34 | 0.09 | 1.52  | 0.040196 | 0.033836 | 0.36348  | 0.227575 |
| MmugDNA.12670.1.S1_at   | MmugDNA.12670.1 | 3.79 | 3.66 | 0.09 | 0.19 | 1.1   | 0.344281 | 0.367876 | 0.686913 | 0.607469 |
| MmugDNA.12671.1.S1_at   | MmugDNA.12671.1 | 7.04 | 7.11 | 0.69 | 0.13 | -1.05 | 0.330279 | 0.536836 | 0.676941 | 0.722119 |
| MmugDNA.12672.1.S1_s_at | MmugDNA.12672.1 | 4.76 | 5.07 | 0.07 | 0.22 | -1.24 | 0.238505 | 0.351954 | 0.605359 | 0.595336 |
| MmugDNA.12673.1.S1_at   | MmugDNA.12673.1 | 4.72 | 4.65 | 0.04 | 0.25 | 1.04  | 0.647993 | 0.558944 | 0.859627 | 0.735944 |
| MmugDNA.12674.1.S1_at   | MmugDNA.12674.1 | 4.67 | 4.63 | 0.18 | 0.13 | 1.03  | 0.263936 | 0.283139 | 0.62583  | 0.545694 |
| MmugDNA.12675.1.S1_at   | MmugDNA.12675.1 | 4.59 | 4.65 | 0.06 | 0.05 | -1.04 | 0.951297 | 0.888413 | 0.983558 | 0.93636  |
| MmugDNA.12676.1.S1_at   | MmugDNA.12676.1 | 4.66 | 4.6  | 0.05 | 0.15 | 1.04  | 0.374988 | 0.522392 | 0.706257 | 0.713139 |
| MmugDNA.12677.1.S1_at   | MmugDNA.12677.1 | 4.34 | 4.4  | 0.24 | 0.13 | -1.04 | 0.94349  | 0.59844  | 0.980509 | 0.760839 |
| MmugDNA.12678.1.S1_at   | MmugDNA.12678.1 | 4.67 | 4.69 | 0.06 | 0.1  | -1.02 | 0.983911 | 0.678269 | 0.99515  | 0.812064 |
| MmugDNA.12679.1.S1_at   | MmugDNA.12679.1 | 3.65 | 3.68 | 0.08 | 0.21 | -1.02 | 0.531984 | 0.439726 | 0.799992 | 0.65842  |
| MmugDNA.1268.1.S1_at    | MmugDNA.1268.1  | 5.2  | 6.1  | 0.63 | 0.13 | -1.87 | 0.038135 | 0.065427 | 0.358577 | 0.301415 |
| MmugDNA.12680.1.S1_at   | MmugDNA.12680.1 | 4.02 | 4.11 | 0.15 | 0.15 | -1.06 | 0.269026 | 0.344226 | 0.62935  | 0.589762 |
| MmugDNA.12681.1.S1_at   | MmugDNA.12681.1 | 4.16 | 4.17 | 0.31 | 0.24 | -1.01 | 0.477612 | 0.230228 | 0.76987  | 0.502084 |
| MmugDNA.12682.1.S1_at   | MmugDNA.12682.1 | 7.33 | 7.34 | 0.15 | 0.09 | -1    | 0.955434 | 0.325065 | 0.985312 | 0.575545 |
| MmugDNA.12683.1.S1_at   | MmugDNA.12683.1 | 5.29 | 5.16 | 0.05 | 0.2  | 1.1   | 0.931352 | 0.169858 | 0.97706  | 0.446544 |
| MmugDNA.12684.1.S1_at   | MmugDNA.12684.1 | 4.33 | 4.53 | 0.18 | 0.6  | -1.15 | 0.476776 | 0.649006 | 0.7694   | 0.794525 |
| MmugDNA.12685.1.S1_at   | MmugDNA.12685.1 | 8.31 | 8.3  | 0.12 | 0.25 | 1.01  | 0.414657 | 0.564648 | 0.733212 | 0.739414 |
| MmugDNA.12686.1.S1_at   | MmugDNA.12686.1 | 3.32 | 3.19 | 0.18 | 0.15 | 1.09  | 0.660051 | 0.868665 | 0.865536 | 0.925405 |
| MmugDNA.12687.1.S1_at   | MmugDNA.12687.1 | 7.4  | 7.33 | 0.17 | 0.09 | 1.05  | 0.434159 | 0.252512 | 0.744883 | 0.521079 |
| MmugDNA.12689.1.S1_at   | MmugDNA.12689.1 | 3.29 | 3.34 | 0.18 | 0.18 | -1.04 | 0.205125 | 0.330854 | 0.576897 | 0.57958  |
| MmugDNA.12690.1.S1_at   | MmugDNA.12690.1 | 6.66 | 6.91 | 0.16 | 0.08 | -1.19 | 0.051831 | 0.122467 | 0.39149  | 0.392348 |
| MmugDNA.12692.1.S1_at   | MmugDNA.12692.1 | 8.39 | 9.17 | 0.53 | 0.23 | -1.72 | 0.2175   | 0.380644 | 0.587269 | 0.6173   |
| MmugDNA.12693.1.S1_at   | MmugDNA.12693.1 | 7.17 | 7.71 | 0.79 | 0.05 | -1.46 | 0.808252 | 0.943355 | 0.930534 | 0.967832 |
| MmugDNA.12694.1.S1_at   | MmugDNA.12694.1 | 5.09 | 5.75 | 0.14 | 0.27 | -1.59 | 0.030556 | 0.102345 | 0.338095 | 0.362527 |
| MmugDNA.12696.1.S1_at   | MmugDNA.12696.1 | 5.29 | 5.09 | 0.09 | 0.17 | 1.15  | 0.220027 | 0.516133 | 0.589114 | 0.70873  |
| MmugDNA.12697.1.S1_at   | MmugDNA.12697.1 | 4.93 | 5.2  | 0.15 | 0.14 | -1.2  | 0.151045 | 0.182136 | 0.52444  | 0.458636 |
| MmugDNA.12698.1.S1_at   | MmugDNA.12698.1 | 4.04 | 4.06 | 0.09 | 0.18 | -1.01 | 0.602231 | 0.372125 | 0.838783 | 0.610981 |
| MmugDNA.12699.1.S1_at   | MmugDNA.12699.1 | 3.56 | 3.92 | 0.16 | 0.15 | -1.28 | 0.238589 | 0.197295 | 0.605376 | 0.472213 |
| MmugDNA.127.1.S1_at     | MmugDNA.127.1   | 6.41 | 6.4  | 0.24 | 0.09 | 1.01  | 0.241113 | 0.555688 | 0.60735  | 0.734    |
| MmugDNA.127.1.S1_x_at   | MmugDNA.127.1   | 9.23 | 8.59 | 0.04 | 0.18 | 1.56  | 0.002192 | 0.001995 | 0.174757 | 0.066264 |
| MmugDNA.12700.1.S1_at   | MmugDNA.12700.1 | 4.19 | 4.03 | 0.08 | 0.1  | 1.12  | 0.200887 | 0.276159 | 0.572594 | 0.540169 |
| MmugDNA.12701.1.S1_at   | MmugDNA.12701.1 | 4.49 | 4.77 | 0.2  | 0.27 | -1.22 | 0.631344 | 0.209293 | 0.852417 | 0.48303  |
| MmugDNA.12702.1.S1_at   | MmugDNA.12702.1 | 3.92 | 3.97 | 0.05 | 0.01 | -1.04 | 0.449857 | 0.05955  | 0.754621 | 0.290548 |
| MmugDNA.12704.1.S1_s_at | MmugDNA.12704.1 | 7.75 | 7.5  | 0.13 | 0.06 | 1.19  | 0.026114 | 0.047146 | 0.323344 | 0.261745 |
| MmugDNA.12705.1.S1_at   | MmugDNA.12705.1 | 5.43 | 5.52 | 0.15 | 0.12 | -1.07 | 0.935156 | 0.094725 | 0.978066 | 0.351535 |
| MmugDNA.12706.1.S1_at   | MmugDNA.12706.1 | 9.96 | 9.48 | 0.47 | 0.3  | 1.39  | 0.281408 | 0.156923 | 0.639917 | 0.432372 |
| MmugDNA.12707.1.S1_at   | MmugDNA.12707.1 | 6.27 | 5.22 | 0.59 | 0.37 | 2.06  | 0.03393  | 0.037136 | 0.347468 | 0.2372   |
| MmugDNA.12708.1.S1_at   | MmugDNA.12708.1 | 7.45 | 7.55 | 0.42 | 0.57 | -1.07 | 0.371844 | 0.011826 | 0.705567 | 0.140866 |
| MmugDNA.12709.1.S1_at   | MmugDNA.12709.1 | 6.92 | 6.69 | 0.33 | 0.27 | 1.17  | 0.887986 | 0.702558 | 0.961205 | 0.827615 |

|                         |                 |       |       |      |      |       |          |          |          |          |
|-------------------------|-----------------|-------|-------|------|------|-------|----------|----------|----------|----------|
| MmugDNA.1271.1.S1_at    | MmugDNA.1271.1  | 5.25  | 5.04  | 0.2  | 0.1  | 1.15  | 0.201696 | 0.489954 | 0.573304 | 0.692051 |
| MmugDNA.12710.1.S1_at   | MmugDNA.12710.1 | 4.25  | 4.06  | 0.15 | 0.41 | 1.14  | 0.322549 | 0.236554 | 0.671216 | 0.507364 |
| MmugDNA.12712.1.S1_s_at | MmugDNA.12712.1 | 10.26 | 10.53 | 0.69 | 0.15 | -1.2  | 0.710743 | 0.840308 | 0.887398 | 0.909001 |
| MmugDNA.12713.1.S1_at   | MmugDNA.12713.1 | 5.89  | 5.66  | 0    | 0.16 | 1.17  | 0.222405 | 0.228881 | 0.591979 | 0.501124 |
| MmugDNA.12714.1.S1_at   | MmugDNA.12714.1 | 9.01  | 8.82  | 0.34 | 0.06 | 1.14  | 0.857051 | 0.019976 | 0.94962  | 0.177532 |
| MmugDNA.12715.1.S1_s_at | MmugDNA.12715.1 | 10.8  | 11.09 | 0.2  | 0.07 | -1.22 | 0.243826 | 0.198993 | 0.609715 | 0.473569 |
| MmugDNA.12716.1.S1_at   | MmugDNA.12716.1 | 7.76  | 7.63  | 0.09 | 0.02 | 1.09  | 0.070927 | 0.102156 | 0.430067 | 0.362212 |
| MmugDNA.12717.1.S1_at   | MmugDNA.12717.1 | 6.16  | 5.79  | 0.06 | 0.05 | 1.29  | 0.001916 | 0.011004 | 0.170174 | 0.136623 |
| MmugDNA.12718.1.S1_at   | MmugDNA.12718.1 | 7.82  | 7.72  | 0.11 | 0.09 | 1.07  | 0.624653 | 0.542282 | 0.848871 | 0.725385 |
| MmugDNA.12719.1.S1_at   | MmugDNA.12719.1 | 3.81  | 3.94  | 0.14 | 0.28 | -1.1  | 0.593549 | 0.843493 | 0.834267 | 0.910881 |
| MmugDNA.1272.1.S1_at    | MmugDNA.1272.1  | 6.73  | 6.58  | 0.1  | 0.15 | -1.12 | 0.380059 | 0.709882 | 0.709357 | 0.831863 |
| MmugDNA.17946.1.S1_s_at | MmugDNA.17946.1 | 8.1   | 8.22  | 0.58 | 0.09 | -1.08 | 0.306196 | 0.332232 | 0.659271 | 0.580686 |
| MmugDNA.12721.1.S1_at   | MmugDNA.12721.1 | 4.43  | 4.42  | 0.11 | 0.08 | 1.01  | 0.506535 | 0.256278 | 0.785899 | 0.524079 |
| MmugDNA.12722.1.S1_at   | MmugDNA.12722.1 | 3.03  | 3.22  | 0.22 | 0.09 | -1.14 | 0.660628 | 0.865163 | 0.865819 | 0.923491 |
| MmugDNA.12723.1.S1_at   | MmugDNA.12723.1 | 5.54  | 5.27  | 0.15 | 0.04 | 1.21  | 0.030093 | 0.073811 | 0.336449 | 0.317146 |
| MmugDNA.12724.1.S1_at   | MmugDNA.12724.1 | 5.2   | 5.04  | 0.09 | 0.19 | 1.12  | 0.099521 | 0.101835 | 0.469245 | 0.361805 |
| MmugDNA.12726.1.S1_at   | MmugDNA.12726.1 | 6.02  | 5.92  | 0.06 | 0.07 | 1.07  | 0.109992 | 0.783692 | 0.482795 | 0.87473  |
| MmugDNA.12727.1.S1_at   | MmugDNA.12727.1 | 8.76  | 9.69  | 0.32 | 0.13 | -1.9  | 0.012243 | 0.002021 | 0.260865 | 0.066833 |
| MmugDNA.12729.1.S1_at   | MmugDNA.12729.1 | 3.69  | 3.72  | 0.08 | 0.04 | -1.02 | 0.332757 | 0.5517   | 0.679249 | 0.731155 |
| MmugDNA.1273.1.S1_at    | MmugDNA.1273.1  | 4.48  | 4.38  | 0.2  | 0.08 | 1.07  | 0.414289 | 0.638491 | 0.732978 | 0.78765  |
| MmugDNA.12730.1.S1_at   | MmugDNA.12730.1 | 6.9   | 6.66  | 0.02 | 0.11 | 1.18  | 0.01903  | 0.018705 | 0.29965  | 0.171763 |
| MmugDNA.12731.1.S1_at   | MmugDNA.12731.1 | 4.54  | 4.44  | 0.04 | 0.09 | 1.08  | 0.108544 | 0.135254 | 0.480777 | 0.407325 |
| MmugDNA.12732.1.S1_at   | MmugDNA.12732.1 | 4.11  | 3.97  | 0.18 | 0.09 | 1.1   | 0.210924 | 0.1621   | 0.582007 | 0.438244 |
| MmugDNA.12733.1.S1_at   | MmugDNA.12733.1 | 4.51  | 4.49  | 0.08 | 0.21 | 1.01  | 0.516396 | 0.684574 | 0.791459 | 0.816019 |
| MmugDNA.12734.1.S1_at   | MmugDNA.12734.1 | 6.2   | 6.05  | 1.35 | 0.24 | 1.11  | 0.76205  | 0.796469 | 0.910776 | 0.882693 |
| MmugDNA.12735.1.S1_at   | MmugDNA.12735.1 | 7.08  | 6.99  | 0.16 | 0.16 | 1.07  | 0.704766 | 0.929986 | 0.885183 | 0.960154 |
| MmugDNA.12739.1.S1_at   | MmugDNA.12739.1 | 10.62 | 10.78 | 0.36 | 0.07 | -1.11 | 0.376059 | 0.2447   | 0.706657 | 0.514521 |
| MmugDNA.1274.1.S1_at    | MmugDNA.1274.1  | 5.63  | 5.71  | 0.22 | 0.3  | -1.06 | 0.15456  | 0.289115 | 0.52775  | 0.55027  |
| MmugDNA.31816.1.S1_s_at | MmugDNA.31816.1 | 12.95 | 12.42 | 0.23 | 0.09 | 1.44  | 0.063646 | 0.02833  | 0.416123 | 0.210111 |
| MmugDNA.12742.1.S1_at   | MmugDNA.12742.1 | 3.44  | 3.48  | 0.23 | 0.13 | -1.03 | 0.678085 | 0.774715 | 0.873899 | 0.868833 |
| MmugDNA.12744.1.S1_at   | MmugDNA.12744.1 | 3.36  | 3.38  | 0.23 | 0.05 | -1.01 | 0.957785 | 0.810821 | 0.986101 | 0.890845 |
| MmugDNA.12746.1.S1_at   | MmugDNA.12746.1 | 12.15 | 11.51 | 0.09 | 0.14 | 1.56  | 0.00254  | 0.000644 | 0.179931 | 0.042928 |
| MmugDNA.27345.1.S1_at   | MmugDNA.27345.1 | 12.5  | 12.3  | 0.18 | 0.07 | 1.15  | 0.090521 | 0.123452 | 0.458781 | 0.393482 |
| MmugDNA.27345.1.S1_s_at | MmugDNA.27345.1 | 12.91 | 12.69 | 0.17 | 0.11 | 1.17  | 0.075315 | 0.107318 | 0.436226 | 0.370219 |
| MmugDNA.12747.1.S1_at   | MmugDNA.12747.1 | 3.94  | 3.9   | 0.14 | 0.17 | 1.03  | 0.557534 | 0.60686  | 0.814852 | 0.766111 |
| MmugDNA.1275.1.S1_at    | MmugDNA.1275.1  | 7.35  | 8.28  | 0.3  | 0.12 | -1.9  | 0.01042  | 0.015997 | 0.247904 | 0.160458 |
| MmugDNA.1275.1.S1_x_at  | MmugDNA.1275.1  | 7.34  | 8.14  | 0.16 | 0.09 | -1.74 | 0.002542 | 0.007075 | 0.179931 | 0.113284 |
| MmugDNA.12750.1.S1_at   | MmugDNA.12750.1 | 5.1   | 5.08  | 0.17 | 0.21 | 1.01  | 0.910041 | 0.187414 | 0.969453 | 0.46345  |
| MmugDNA.12752.1.S1_s_at | MmugDNA.12752.1 | 11.66 | 11.82 | 0.47 | 0.03 | -1.12 | 0.311176 | 0.044892 | 0.663025 | 0.256424 |
| MmugDNA.12753.1.S1_at   | MmugDNA.12753.1 | 6     | 6.07  | 0.27 | 0.18 | -1.05 | 0.235879 | 0.152478 | 0.602926 | 0.427287 |
| MmugDNA.12754.1.S1_s_at | MmugDNA.12754.1 | 3.95  | 4.04  | 0.1  | 0.04 | -1.06 | 0.181953 | 0.048758 | 0.555022 | 0.265764 |
| MmugDNA.12755.1.S1_s_at | MmugDNA.12755.1 | 8.13  | 7.86  | 0.22 | 0.07 | 1.2   | 0.328505 | 0.260993 | 0.67577  | 0.527363 |
| MmugDNA.12756.1.S1_at   | MmugDNA.12756.1 | 5.73  | 5.76  | 0.07 | 0.07 | -1.02 | 0.708283 | 0.877461 | 0.886591 | 0.930158 |

|                         |                 |       |       |      |      |       |          |          |          |          |
|-------------------------|-----------------|-------|-------|------|------|-------|----------|----------|----------|----------|
| MmugDNA.12758.1.S1_at   | MmugDNA.12758.1 | 7.11  | 6.92  | 0.21 | 0.09 | 1.14  | 0.099954 | 0.249473 | 0.470157 | 0.518532 |
| MmugDNA.1276.1.S1_at    | MmugDNA.1276.1  | 3.48  | 3.58  | 0.14 | 0.57 | -1.07 | 0.314813 | 0.165903 | 0.665538 | 0.442326 |
| MmugDNA.12760.1.S1_at   | MmugDNA.12760.1 | 5.72  | 6.62  | 0.73 | 0.14 | -1.86 | 0.343053 | 0.020105 | 0.686301 | 0.178091 |
| MmugDNA.12761.1.S1_at   | MmugDNA.12761.1 | 6.23  | 6.14  | 0.24 | 0.86 | 1.06  | 0.996916 | 0.368259 | 0.998844 | 0.607863 |
| MmugDNA.12762.1.S1_s_at | MmugDNA.12762.1 | 9.73  | 9.79  | 0.16 | 0.09 | -1.04 | 0.371035 | 0.000497 | 0.705285 | 0.038955 |
| MmugDNA.12763.1.S1_at   | MmugDNA.12763.1 | 10.66 | 10.37 | 0.35 | 0.01 | 1.22  | 0.216131 | 0.242216 | 0.586298 | 0.51267  |
| MmugDNA.12764.1.S1_at   | MmugDNA.12764.1 | 4.3   | 4.21  | 0.07 | 0.03 | 1.07  | 0.094857 | 0.325443 | 0.464075 | 0.575807 |
| MmugDNA.12765.1.S1_at   | MmugDNA.12765.1 | 7.35  | 7.91  | 0.62 | 0.18 | -1.47 | 0.184953 | 0.126678 | 0.557792 | 0.397363 |
| MmugDNA.12766.1.S1_at   | MmugDNA.12766.1 | 5     | 5.29  | 0.74 | 0.52 | -1.22 | 0.513022 | 0.12632  | 0.789638 | 0.396787 |
| MmugDNA.12766.1.S1_s_at | MmugDNA.12766.1 | 6.25  | 6.06  | 0.57 | 0.1  | 1.14  | 0.611639 | 0.520217 | 0.84257  | 0.711546 |
| MmugDNA.12767.1.S1_at   | MmugDNA.12767.1 | 4.91  | 5.44  | 0.48 | 0.5  | -1.45 | 0.960584 | 0.0418   | 0.987216 | 0.249015 |
| MmugDNA.12768.1.S1_at   | MmugDNA.12768.1 | 6.93  | 6.94  | 0.23 | 0.07 | -1    | 0.743382 | 0.843279 | 0.902116 | 0.910767 |
| MmugDNA.12769.1.S1_at   | MmugDNA.12769.1 | 7.65  | 7.29  | 0.18 | 0.33 | 1.28  | 0.281555 | 0.615244 | 0.640011 | 0.771884 |
| MmugDNA.1277.1.S1_at    | MmugDNA.1277.1  | 4.02  | 4.06  | 0.05 | 0.09 | -1.03 | 0.15885  | 0.67074  | 0.531595 | 0.807469 |
| MmugDNA.12770.1.S1_at   | MmugDNA.12770.1 | 4.7   | 4.69  | 0.1  | 0.07 | 1.01  | 0.307849 | 0.419899 | 0.660731 | 0.643737 |
| MmugDNA.12771.1.S1_at   | MmugDNA.12771.1 | 4.28  | 4.28  | 0.13 | 0.04 | 1     | 0.274347 | 0.481496 | 0.633792 | 0.686469 |
| MmugDNA.12772.1.S1_at   | MmugDNA.12772.1 | 9.25  | 10.69 | 1.23 | 0.22 | -2.72 | 0.448345 | 0.575989 | 0.753886 | 0.746919 |
| MmugDNA.12773.1.S1_at   | MmugDNA.12773.1 | 5.61  | 6.49  | 1.02 | 0.06 | -1.85 | 0.611525 | 0.366155 | 0.84257  | 0.605941 |
| MmugDNA.12774.1.S1_at   | MmugDNA.12774.1 | 10.11 | 10.34 | 0.27 | 0.11 | -1.18 | 0.259419 | 0.166989 | 0.622607 | 0.443466 |
| MmugDNA.12775.1.S1_at   | MmugDNA.12775.1 | 13.19 | 13.48 | 0.09 | 0.13 | -1.22 | 0.02713  | 0.003587 | 0.327173 | 0.085687 |
| MmugDNA.12775.1.S1_x_at | MmugDNA.12775.1 | 13.1  | 13.34 | 0.07 | 0.13 | -1.18 | 0.025206 | 0.005568 | 0.320761 | 0.103069 |
| MmugDNA.12776.1.S1_at   | MmugDNA.12776.1 | 9.39  | 8.79  | 0.43 | 0    | 1.52  | 0.217945 | 0.28296  | 0.587987 | 0.545692 |
| MmugDNA.12777.1.S1_at   | MmugDNA.12777.1 | 3.88  | 3.84  | 0.28 | 0.17 | 1.03  | 0.838015 | 0.952225 | 0.941963 | 0.972929 |
| MmugDNA.12778.1.S1_at   | MmugDNA.12778.1 | 11.31 | 9.96  | 0.69 | 0.41 | 2.56  | 0.049333 | 0.040609 | 0.385474 | 0.246364 |
| MmugDNA.12779.1.S1_at   | MmugDNA.12779.1 | 9.68  | 9.15  | 0.33 | 0.1  | 1.45  | 0.055256 | 0.031711 | 0.398125 | 0.220493 |
| MmugDNA.1278.1.S1_at    | MmugDNA.1278.1  | 8.96  | 9.1   | 0.83 | 0.15 | -1.1  | 0.614756 | 0.146958 | 0.844066 | 0.421011 |
| MmugDNA.12781.1.S1_at   | MmugDNA.12781.1 | 3.51  | 3.55  | 0.04 | 0.32 | -1.02 | 0.90913  | 0.992211 | 0.969287 | 0.995563 |
| MmugDNA.12782.1.S1_at   | MmugDNA.12782.1 | 7.91  | 8.2   | 0.17 | 0.16 | -1.23 | 0.045482 | 0.014741 | 0.376572 | 0.15446  |
| MmugDNA.12783.1.S1_at   | MmugDNA.12783.1 | 8.28  | 7.9   | 0.27 | 0.16 | 1.3   | 0.025131 | 0.044448 | 0.32052  | 0.25521  |
| MmugDNA.12784.1.S1_at   | MmugDNA.12784.1 | 6.68  | 6.47  | 0.39 | 0.03 | 1.16  | 0.672686 | 0.790735 | 0.871051 | 0.878973 |
| MmugDNA.12785.1.S1_at   | MmugDNA.12785.1 | 4.12  | 4.06  | 0.08 | 0.1  | 1.04  | 0.410093 | 0.360901 | 0.730583 | 0.60194  |
| MmugDNA.12787.1.S1_at   | MmugDNA.12787.1 | 11.46 | 11.7  | 0.37 | 0.03 | -1.18 | 0.573342 | 0.026636 | 0.823551 | 0.204075 |
| MmugDNA.12788.1.S1_at   | MmugDNA.12788.1 | 9.23  | 9.19  | 0.32 | 0.18 | 1.03  | 0.609793 | 0.329678 | 0.841773 | 0.578874 |
| MmugDNA.1279.1.S1_at    | MmugDNA.1279.1  | 6.26  | 6.85  | 0.39 | 0.56 | -1.51 | 0.893175 | 0.289175 | 0.963441 | 0.550293 |
| MmugDNA.12790.1.S1_at   | MmugDNA.12790.1 | 8.35  | 6.85  | 0.46 | 0.21 | 2.83  | 0.011117 | 0.004651 | 0.252486 | 0.095108 |
| MmugDNA.12793.1.S1_at   | MmugDNA.12793.1 | 6.77  | 6.62  | 0.14 | 0.14 | 1.11  | 0.17657  | 0.208521 | 0.549633 | 0.482453 |
| MmugDNA.12796.1.S1_at   | MmugDNA.12796.1 | 4.23  | 4.01  | 0.26 | 0.09 | 1.17  | 0.215546 | 0.284976 | 0.585748 | 0.547071 |
| MmugDNA.12798.1.S1_at   | MmugDNA.12798.1 | 6.52  | 6.37  | 0.32 | 0.25 | 1.11  | 0.761767 | 0.793893 | 0.910682 | 0.881131 |
| MmugDNA.12799.1.S1_at   | MmugDNA.12799.1 | 5.09  | 5.09  | 0.01 | 0.05 | -1    | 0.419238 | 0.102581 | 0.736167 | 0.362933 |
| MmugDNA.1280.1.S1_at    | MmugDNA.1280.1  | 4.24  | 4.34  | 0.56 | 0.21 | -1.07 | 0.529637 | 0.160003 | 0.798376 | 0.436167 |
| MmugDNA.12800.1.S1_at   | MmugDNA.12800.1 | 4.77  | 4.7   | 0.09 | 0.12 | 1.05  | 0.583103 | 0.139964 | 0.828783 | 0.413309 |
| MmugDNA.12802.1.S1_at   | MmugDNA.12802.1 | 6.59  | 6.18  | 0.09 | 0.06 | 1.32  | 0.005684 | 0.001617 | 0.210153 | 0.06074  |
| MmugDNA.12804.1.S1_at   | MmugDNA.12804.1 | 2.99  | 3.06  | 0.04 | 0.28 | -1.05 | 0.713468 | 0.767105 | 0.88844  | 0.864712 |



|                         |                 |       |       |      |      |       |          |          |          |          |
|-------------------------|-----------------|-------|-------|------|------|-------|----------|----------|----------|----------|
| MmugDNA.12805.1.S1_at   | MmugDNA.12805.1 | 3.93  | 3.73  | 0.21 | 0.09 | 1.15  | 0.120218 | 0.163139 | 0.49354  | 0.4393   |
| MmugDNA.12806.1.S1_at   | MmugDNA.12806.1 | 6.36  | 6.36  | 0.28 | 0.11 | 1     | 0.731972 | 0.749322 | 0.896977 | 0.854352 |
| MmugDNA.12807.1.S1_at   | MmugDNA.12807.1 | 3.65  | 3.7   | 0.27 | 0.13 | -1.03 | 0.882182 | 0.796355 | 0.959161 | 0.882625 |
| MmugDNA.12808.1.S1_at   | MmugDNA.12808.1 | 8.71  | 8.61  | 0.53 | 0.19 | 1.07  | 0.940626 | 0.10938  | 0.979797 | 0.373156 |
| MmugDNA.12809.1.S1_at   | MmugDNA.12809.1 | 5.32  | 5.26  | 0.14 | 0.04 | 1.05  | 0.348695 | 0.592262 | 0.689977 | 0.757652 |
| MmugDNA.1281.1.S1_at    | MmugDNA.1281.1  | 5.05  | 4.97  | 0.32 | 0.19 | 1.05  | 0.904812 | 0.952677 | 0.968042 | 0.973147 |
| MmugDNA.12812.1.S1_at   | MmugDNA.12812.1 | 11.68 | 11.88 | 0.32 | 0.07 | -1.15 | 0.3091   | 0.139409 | 0.661444 | 0.412691 |
| MmugDNA.12813.1.S1_at   | MmugDNA.12813.1 | 3.21  | 3.2   | 0.05 | 0.11 | 1.01  | 0.434765 | 0.589246 | 0.745319 | 0.755509 |
| MmugDNA.12814.1.S1_at   | MmugDNA.12814.1 | 4.72  | 4.65  | 0.24 | 0.08 | 1.04  | 0.444788 | 0.365924 | 0.751542 | 0.605798 |
| MmugDNA.12815.1.S1_at   | MmugDNA.12815.1 | 3.56  | 3.66  | 0.12 | 0.32 | -1.07 | 0.356027 | 0.492273 | 0.695045 | 0.693485 |
| MmugDNA.12816.1.S1_at   | MmugDNA.12816.1 | 7     | 7.18  | 0.2  | 0.31 | -1.13 | 0.304901 | 0.017883 | 0.658493 | 0.168819 |
| MmugDNA.12817.1.S1_at   | MmugDNA.12817.1 | 9.7   | 10.74 | 0.43 | 0.04 | -2.06 | 0.006701 | 0.00096  | 0.222642 | 0.049342 |
| MmugDNA.12818.1.S1_at   | MmugDNA.12818.1 | 5.13  | 5.25  | 0.54 | 0.24 | -1.08 | 0.946058 | 0.92914  | 0.981287 | 0.959637 |
| MmugDNA.12819.1.S1_at   | MmugDNA.12819.1 | 3.66  | 3.65  | 0.04 | 0.11 | 1.01  | 0.467427 | 0.7834   | 0.76435  | 0.874571 |
| MmugDNA.1282.1.S1_at    | MmugDNA.1282.1  | 4.57  | 4.45  | 0.07 | 0.11 | 1.09  | 0.521371 | 0.766403 | 0.794462 | 0.864265 |
| MmugDNA.12820.1.S1_at   | MmugDNA.12820.1 | 3.82  | 3.87  | 0.16 | 0.11 | -1.03 | 0.601803 | 0.238702 | 0.838575 | 0.509385 |
| MmugDNA.12821.1.S1_at   | MmugDNA.12821.1 | 10.39 | 11.34 | 0.28 | 0.03 | -1.93 | 0.004388 | 0.014292 | 0.198874 | 0.152639 |
| MmugDNA.12822.1.S1_at   | MmugDNA.12822.1 | 4.49  | 4.67  | 0.15 | 0.35 | -1.13 | 0.168342 | 0.148387 | 0.540932 | 0.422996 |
| MmugDNA.12824.1.S1_at   | MmugDNA.12824.1 | 6.83  | 6.22  | 0.34 | 0.22 | 1.52  | 0.067276 | 0.060334 | 0.423412 | 0.292254 |
| MmugDNA.12825.1.S1_at   | MmugDNA.12825.1 | 3.26  | 3.31  | 0.16 | 0.15 | -1.04 | 0.721426 | 0.823001 | 0.891996 | 0.898312 |
| MmugDNA.12826.1.S1_x_at | MmugDNA.12826.1 | 9.87  | 9.62  | 0.23 | 0.05 | 1.19  | 0.134598 | 0.247813 | 0.508533 | 0.517219 |
| MmugDNA.12827.1.S1_at   | MmugDNA.12827.1 | 5.22  | 5.12  | 0.05 | 0.08 | 1.07  | 0.240392 | 0.686964 | 0.606714 | 0.817365 |
| MmugDNA.12829.1.S1_at   | MmugDNA.12829.1 | 6.08  | 4.85  | 0.22 | 0.09 | 2.36  | 0.001472 | 0.000234 | 0.16146  | 0.03241  |
| MmugDNA.1283.1.S1_at    | MmugDNA.1283.1  | 3.83  | 3.37  | 0.37 | 0.19 | 1.38  | 0.579007 | 0.260236 | 0.82636  | 0.526807 |
| MmugDNA.12830.1.S1_at   | MmugDNA.12830.1 | 6.39  | 6.25  | 0.07 | 0.13 | 1.11  | 0.192202 | 0.425615 | 0.563267 | 0.647989 |
| MmugDNA.24441.1.S1_s_at | MmugDNA.24441.1 | 10.42 | 11.19 | 0.4  | 0.03 | -1.7  | 0.04909  | 0.298001 | 0.385273 | 0.556695 |
| MmugDNA.12832.1.S1_at   | MmugDNA.12832.1 | 5.18  | 5     | 0.1  | 0.14 | 1.13  | 0.266684 | 0.162235 | 0.627565 | 0.438447 |
| MmugDNA.12833.1.S1_at   | MmugDNA.12833.1 | 7.49  | 7.53  | 0.6  | 0.16 | -1.03 | 0.429782 | 0.584431 | 0.742367 | 0.752435 |
| MmugDNA.12834.1.S1_at   | MmugDNA.12834.1 | 6.61  | 6.33  | 1.13 | 0.09 | 1.22  | 0.655066 | 0.832877 | 0.863003 | 0.904108 |
| MmugDNA.12837.1.S1_at   | MmugDNA.12837.1 | 4.17  | 4     | 0.15 | 0.23 | 1.12  | 0.28424  | 0.187076 | 0.642123 | 0.462997 |
| MmugDNA.12838.1.S1_at   | MmugDNA.12838.1 | 7.38  | 8.07  | 0.35 | 0.14 | -1.62 | 0.069177 | 0.758164 | 0.426664 | 0.8593   |
| MmugDNA.12839.1.S1_at   | MmugDNA.12839.1 | 6.85  | 6.16  | 0.49 | 0.38 | 1.62  | 0.103363 | 0.259691 | 0.474122 | 0.526583 |
| MmugDNA.1284.1.S1_s_at  | MmugDNA.1284.1  | 8.03  | 7.95  | 0.18 | 0.11 | 1.06  | 0.257096 | 0.360149 | 0.620962 | 0.601268 |
| MmugDNA.12840.1.S1_at   | MmugDNA.12840.1 | 3.71  | 3.63  | 0.2  | 0.11 | 1.05  | 0.547974 | 0.822381 | 0.809338 | 0.897821 |
| MmugDNA.12840.1.S1_s_at | MmugDNA.12840.1 | 4.02  | 3.97  | 0.33 | 0.17 | 1.04  | 0.533839 | 0.255786 | 0.801035 | 0.523727 |
| MmugDNA.12842.1.S1_at   | MmugDNA.12842.1 | 6.04  | 7.1   | 0.06 | 0.11 | -2.09 | 0.000123 | 0.000263 | 0.11102  | 0.033786 |
| MmugDNA.12843.1.S1_at   | MmugDNA.12843.1 | 4.69  | 4.55  | 0.14 | 0.29 | 1.1   | 0.561184 | 0.183575 | 0.81716  | 0.459681 |
| MmugDNA.12844.1.S1_at   | MmugDNA.12844.1 | 6.16  | 6.37  | 1.06 | 0.66 | -1.16 | 0.451267 | 0.619175 | 0.755064 | 0.774408 |
| MmugDNA.12845.1.S1_at   | MmugDNA.12845.1 | 3.67  | 3.13  | 0.1  | 0.3  | 1.46  | 0.162432 | 0.224215 | 0.53549  | 0.497164 |
| MmugDNA.12846.1.S1_s_at | MmugDNA.12846.1 | 9.75  | 9.69  | 0.14 | 0.2  | 1.04  | 0.163924 | 0.381494 | 0.536665 | 0.617691 |
| MmugDNA.12848.1.S1_at   | MmugDNA.12848.1 | 6.94  | 6.89  | 0.45 | 0.04 | 1.04  | 0.296568 | 0.38749  | 0.652213 | 0.622163 |
| MmugDNA.12849.1.S1_at   | MmugDNA.12849.1 | 9.27  | 8.89  | 0.19 | 0.08 | 1.3   | 0.021238 | 0.008807 | 0.307222 | 0.124117 |
| MmugDNA.1285.1.S1_at    | MmugDNA.1285.1  | 7.82  | 7.87  | 0.11 | 0.09 | -1.03 | 0.142151 | 0.375805 | 0.51712  | 0.613697 |

|                         |                 |       |       |      |      |       |          |          |          |          |
|-------------------------|-----------------|-------|-------|------|------|-------|----------|----------|----------|----------|
| MmugDNA.12850.1.S1_at   | MmugDNA.12850.1 | 6.24  | 6.26  | 0.07 | 0.05 | -1.01 | 0.33442  | 0.166059 | 0.680437 | 0.442653 |
| MmugDNA.12852.1.S1_at   | MmugDNA.12852.1 | 3.68  | 3.7   | 0.02 | 0.02 | -1.01 | 0.721723 | 0.065101 | 0.892101 | 0.301119 |
| MmugDNA.12853.1.S1_at   | MmugDNA.12853.1 | 5.86  | 6.39  | 0.74 | 0.33 | -1.44 | 0.242519 | 0.097363 | 0.608517 | 0.35507  |
| MmugDNA.12856.1.S1_at   | MmugDNA.12856.1 | 4.81  | 5.34  | 0.84 | 0.72 | -1.44 | 0.904072 | 0.529536 | 0.967748 | 0.717341 |
| MmugDNA.12858.1.S1_at   | MmugDNA.12858.1 | 4.83  | 4.81  | 0.19 | 0.35 | 1.01  | 0.996625 | 0.890353 | 0.998707 | 0.937508 |
| MmugDNA.12859.1.S1_at   | MmugDNA.12859.1 | 5.6   | 5.55  | 0.1  | 0.03 | 1.04  | 0.774361 | 0.655453 | 0.916259 | 0.798546 |
| MmugDNA.12860.1.S1_at   | MmugDNA.12860.1 | 7.89  | 8.36  | 0.41 | 0.16 | -1.38 | 0.408258 | 0.114581 | 0.729223 | 0.381131 |
| MmugDNA.12861.1.S1_at   | MmugDNA.12861.1 | 6.74  | 6.6   | 0.18 | 0.02 | 1.11  | 0.207072 | 0.116039 | 0.578774 | 0.383257 |
| MmugDNA.12862.1.S1_at   | MmugDNA.12862.1 | 9.88  | 10.64 | 0.56 | 0.28 | -1.68 | 0.055641 | 0.04976  | 0.398946 | 0.268151 |
| MmugDNA.12864.1.S1_x_at | MmugDNA.12864.1 | 9.11  | 9     | 0.29 | 0.13 | 1.08  | 0.223239 | 0.67526  | 0.592569 | 0.81026  |
| MmugDNA.12867.1.S1_at   | MmugDNA.12867.1 | 11.81 | 11.93 | 0.31 | 0.06 | -1.09 | 0.50228  | 0.108877 | 0.783529 | 0.372496 |
| MmugDNA.12868.1.S1_at   | MmugDNA.12868.1 | 9.89  | 10.17 | 0.25 | 0.09 | -1.22 | 0.079056 | 0.053882 | 0.441739 | 0.277682 |
| MmugDNA.12869.1.S1_at   | MmugDNA.12869.1 | 11.27 | 11.21 | 0.11 | 0.13 | 1.04  | 0.442283 | 0.524529 | 0.749953 | 0.714395 |
| MmugDNA.1287.1.S1_s_at  | MmugDNA.1287.1  | 8.46  | 8.22  | 1.39 | 0.22 | 1.18  | 0.792534 | 0.327382 | 0.923927 | 0.577284 |
| MmugDNA.12870.1.S1_at   | MmugDNA.12870.1 | 3.62  | 3.57  | 0.19 | 0    | 1.04  | 0.452831 | 0.270061 | 0.755901 | 0.535338 |
| MmugDNA.12871.1.S1_at   | MmugDNA.12871.1 | 4.84  | 4.96  | 0.14 | 0.04 | -1.09 | 0.894225 | 0.054085 | 0.963756 | 0.277914 |
| MmugDNA.12872.1.S1_at   | MmugDNA.12872.1 | 6.75  | 6.84  | 0.29 | 0.11 | -1.06 | 0.400065 | 0.001381 | 0.723454 | 0.056947 |
| MmugDNA.12874.1.S1_at   | MmugDNA.12874.1 | 6.31  | 6.55  | 0.85 | 0.11 | -1.18 | 0.741565 | 0.848502 | 0.901443 | 0.914012 |
| MmugDNA.12876.1.S1_at   | MmugDNA.12876.1 | 5.34  | 5.47  | 0.26 | 0.06 | -1.09 | 0.86324  | 0.200159 | 0.952006 | 0.474603 |
| MmugDNA.12877.1.S1_at   | MmugDNA.12877.1 | 2.81  | 2.79  | 0.08 | 0.02 | 1.01  | 0.576525 | 0.535206 | 0.825166 | 0.720821 |
| MmugDNA.12879.1.S1_at   | MmugDNA.12879.1 | 4.48  | 4.83  | 0.26 | 0.07 | -1.28 | 0.125988 | 0.042463 | 0.49972  | 0.250702 |
| MmugDNA.1288.1.S1_at    | MmugDNA.1288.1  | 9.49  | 9.56  | 1.63 | 0.21 | -1.05 | 0.904543 | 0.257682 | 0.967857 | 0.525332 |
| MmugDNA.12882.1.S1_at   | MmugDNA.12882.1 | 6     | 5.94  | 0.11 | 0.02 | 1.04  | 0.347016 | 0.354371 | 0.688497 | 0.597166 |
| MmugDNA.12883.1.S1_at   | MmugDNA.12883.1 | 4.88  | 4.72  | 0.08 | 0.11 | 1.12  | 0.037739 | 0.027897 | 0.357858 | 0.208505 |
| MmugDNA.12884.1.S1_at   | MmugDNA.12884.1 | 4.66  | 4.54  | 0.1  | 0.06 | 1.09  | 0.095706 | 0.084961 | 0.4643   | 0.336592 |
| MmugDNA.12886.1.S1_at   | MmugDNA.12886.1 | 3.15  | 3.09  | 0.03 | 0.08 | 1.04  | 0.846985 | 0.026493 | 0.946375 | 0.203897 |
| MmugDNA.12887.1.S1_at   | MmugDNA.12887.1 | 5.73  | 5.63  | 0.13 | 0.05 | 1.07  | 0.149114 | 0.09249  | 0.523005 | 0.348429 |
| MmugDNA.12888.1.S1_at   | MmugDNA.12888.1 | 8.34  | 8.75  | 0.26 | 0.14 | -1.32 | 0.034005 | 0.398191 | 0.347501 | 0.629257 |
| MmugDNA.1289.1.S1_at    | MmugDNA.1289.1  | 5.2   | 5.16  | 0.09 | 0.03 | 1.03  | 0.114333 | 0.796945 | 0.487606 | 0.882822 |
| MmugDNA.12890.1.S1_at   | MmugDNA.12890.1 | 7.37  | 8.06  | 0.95 | 0.34 | -1.61 | 0.40942  | 0.236485 | 0.730032 | 0.507336 |
| MmugDNA.12891.1.S1_at   | MmugDNA.12891.1 | 5.55  | 5.71  | 0.11 | 0.38 | -1.12 | 0.170578 | 0.236741 | 0.543588 | 0.507512 |
| MmugDNA.12892.1.S1_at   | MmugDNA.12892.1 | 10.12 | 10.26 | 0.25 | 0.16 | -1.1  | 0.597941 | 0.713274 | 0.836624 | 0.833666 |
| MmugDNA.12893.1.S1_at   | MmugDNA.12893.1 | 5.37  | 5.77  | 0.45 | 0.45 | -1.32 | 0.48613  | 0.432018 | 0.774427 | 0.652738 |
| MmugDNA.12894.1.S1_at   | MmugDNA.12894.1 | 10.45 | 11.16 | 1.18 | 0.17 | -1.64 | 0.382317 | 0.280057 | 0.710586 | 0.543369 |
| MmugDNA.12897.1.S1_at   | MmugDNA.12897.1 | 9.66  | 9.76  | 0.15 | 0.07 | -1.07 | 0.425209 | 0.001905 | 0.739924 | 0.065139 |
| MmugDNA.12898.1.S1_at   | MmugDNA.12898.1 | 3.4   | 3.27  | 0.15 | 0.07 | 1.1   | 0.195236 | 0.451965 | 0.565674 | 0.666717 |
| MmugDNA.12899.1.S1_at   | MmugDNA.12899.1 | 8.74  | 8.97  | 0.36 | 0.29 | -1.17 | 0.968736 | 0.984379 | 0.989723 | 0.991287 |
| MmugDNA.129.1.S1_s_at   | MmugDNA.129.1   | 5.18  | 5.24  | 0.28 | 0.28 | -1.05 | 0.76811  | 0.24329  | 0.912812 | 0.513356 |
| MmugDNA.12901.1.S1_at   | MmugDNA.12901.1 | 3.04  | 2.9   | 0.01 | 0.11 | 1.1   | 0.318943 | 0.200072 | 0.668481 | 0.474603 |
| MmugDNA.12902.1.S1_at   | MmugDNA.12902.1 | 6.79  | 6.92  | 0.8  | 0.22 | -1.1  | 0.682992 | 0.232001 | 0.876006 | 0.503726 |
| MmugDNA.12903.1.S1_at   | MmugDNA.12903.1 | 3.71  | 3.8   | 0.22 | 0.25 | -1.07 | 0.268823 | 0.313429 | 0.629182 | 0.567879 |
| MmugDNA.12903.1.S1_s_at | MmugDNA.12903.1 | 5.6   | 6.27  | 0.46 | 0.44 | -1.58 | 0.1415   | 0.171948 | 0.516365 | 0.448352 |
| MmugDNA.12905.1.S1_at   | MmugDNA.12905.1 | 3.1   | 3.3   | 0.25 | 0.12 | -1.15 | 0.425898 | 0.188344 | 0.740154 | 0.46433  |

|                         |                 |       |       |      |      |       |          |          |          |          |
|-------------------------|-----------------|-------|-------|------|------|-------|----------|----------|----------|----------|
| MmugDNA.12906.1.S1_at   | MmugDNA.12906.1 | 7.27  | 7.68  | 0.5  | 0.34 | -1.33 | 0.290062 | 0.270882 | 0.646655 | 0.536026 |
| MmugDNA.12907.1.S1_at   | MmugDNA.12907.1 | 4.4   | 4.84  | 0.61 | 0.51 | -1.35 | 0.269215 | 0.354565 | 0.629522 | 0.597269 |
| MmugDNA.12909.1.S1_at   | MmugDNA.12909.1 | 4.09  | 4.08  | 0.06 | 0.2  | 1.01  | 0.625469 | 0.45821  | 0.849422 | 0.671077 |
| MmugDNA.1291.1.S1_at    | MmugDNA.1291.1  | 7.12  | 6     | 0.54 | 0.18 | 2.18  | 0.066389 | 0.578986 | 0.422255 | 0.748791 |
| MmugDNA.12910.1.S1_at   | MmugDNA.12910.1 | 6.95  | 6.86  | 0.07 | 0.04 | 1.06  | 0.606994 | 0.149002 | 0.840743 | 0.423337 |
| MmugDNA.12911.1.S1_at   | MmugDNA.12911.1 | 8.35  | 8.1   | 0.04 | 0.13 | 1.19  | 0.017201 | 0.07481  | 0.289858 | 0.318603 |
| MmugDNA.12912.1.S1_at   | MmugDNA.12912.1 | 10.7  | 10.63 | 1.55 | 0.17 | 1.05  | 0.859503 | 0.689727 | 0.9504   | 0.819049 |
| MmugDNA.12913.1.S1_at   | MmugDNA.12913.1 | 6.16  | 6.38  | 0.19 | 0.25 | -1.17 | 0.12932  | 0.194739 | 0.504128 | 0.469774 |
| MmugDNA.12915.1.S1_at   | MmugDNA.12915.1 | 3.4   | 3.41  | 0.4  | 0.01 | -1    | 0.400796 | 0.436487 | 0.723941 | 0.656022 |
| MmugDNA.12916.1.S1_at   | MmugDNA.12916.1 | 9.44  | 9.25  | 0.17 | 0.17 | 1.14  | 0.397467 | 0.028788 | 0.721771 | 0.211521 |
| MmugDNA.12917.1.S1_at   | MmugDNA.12917.1 | 11.11 | 10.97 | 0.09 | 0.07 | -1.11 | 0.043135 | 0.036459 | 0.371446 | 0.235423 |
| MmugDNA.25653.1.S1_s_at | MmugDNA.25653.1 | 9.26  | 9.49  | 0.18 | 0.07 | -1.17 | 0.209421 | 0.28376  | 0.580868 | 0.546185 |
| MmugDNA.12919.1.S1_s_at | MmugDNA.12919.1 | 10.03 | 10.22 | 0.18 | 0.15 | -1.14 | 0.117594 | 0.295885 | 0.490984 | 0.555241 |
| MmugDNA.1292.1.S1_at    | MmugDNA.1292.1  | 4.02  | 4.11  | 0.08 | 0.09 | -1.06 | 0.543044 | 0.013181 | 0.806133 | 0.14735  |
| MmugDNA.12920.1.S1_at   | MmugDNA.12920.1 | 6.29  | 4.88  | 0.83 | 0.17 | 2.65  | 0.134248 | 0.134543 | 0.508462 | 0.406629 |
| MmugDNA.12921.1.S1_at   | MmugDNA.12921.1 | 5.13  | 4.84  | 0.3  | 0.12 | 1.22  | 0.12696  | 0.329508 | 0.500834 | 0.578781 |
| MmugDNA.12922.1.S1_at   | MmugDNA.12922.1 | 3.03  | 3.04  | 0.05 | 0.16 | -1.01 | 0.544677 | 0.54043  | 0.807438 | 0.724383 |
| MmugDNA.12925.1.S1_at   | MmugDNA.12925.1 | 4.33  | 4.47  | 0.12 | 0.15 | -1.1  | 0.250125 | 0.275352 | 0.615476 | 0.539663 |
| MmugDNA.12926.1.S1_at   | MmugDNA.12926.1 | 7.58  | 7.67  | 0.15 | 0.13 | -1.06 | 0.909354 | 0.683006 | 0.969429 | 0.815061 |
| MmugDNA.12927.1.S1_at   | MmugDNA.12927.1 | 6.23  | 6.26  | 0.1  | 0.05 | -1.02 | 0.536569 | 0.024521 | 0.802417 | 0.196001 |
| MmugDNA.12928.1.S1_at   | MmugDNA.12928.1 | 5.56  | 5.52  | 0.21 | 0.22 | 1.02  | 0.365432 | 0.483031 | 0.701065 | 0.687687 |
| MmugDNA.12929.1.S1_at   | MmugDNA.12929.1 | 7.32  | 7.18  | 0.13 | 0.12 | 1.11  | 0.23606  | 0.23912  | 0.603096 | 0.509827 |
| MmugDNA.9943.1.S1_at    | MmugDNA.9943.1  | 8.07  | 8.23  | 0.25 | 0.13 | -1.11 | 0.406021 | 0.010489 | 0.727638 | 0.133872 |
| MmugDNA.9943.1.S1_s_at  | MmugDNA.9943.1  | 9.25  | 9.57  | 0.51 | 0.15 | -1.25 | 0.219401 | 0.053747 | 0.588927 | 0.277384 |
| MmugDNA.12930.1.S1_at   | MmugDNA.12930.1 | 5.96  | 5.94  | 0.07 | 0.05 | 1.02  | 0.430534 | 0.807899 | 0.742836 | 0.889413 |
| MmugDNA.12931.1.S1_at   | MmugDNA.12931.1 | 5.53  | 5.47  | 0.1  | 0.08 | 1.04  | 0.630468 | 0.01032  | 0.851961 | 0.132962 |
| MmugDNA.12932.1.S1_at   | MmugDNA.12932.1 | 4.14  | 4.11  | 0.04 | 0.05 | 1.02  | 0.22483  | 0.819395 | 0.594045 | 0.895966 |
| MmugDNA.12933.1.S1_at   | MmugDNA.12933.1 | 3.27  | 3.02  | 0.15 | 0.15 | 1.19  | 0.104308 | 0.323395 | 0.475417 | 0.574453 |
| MmugDNA.12934.1.S1_at   | MmugDNA.12934.1 | 6.15  | 6.86  | 1.14 | 0.14 | -1.63 | 0.30201  | 0.369973 | 0.655989 | 0.609208 |
| MmugDNA.12935.1.S1_at   | MmugDNA.12935.1 | 4.65  | 4.64  | 0.03 | 0    | 1     | 0.46537  | 0.196264 | 0.763035 | 0.471236 |
| MmugDNA.12936.1.S1_at   | MmugDNA.12936.1 | 3.58  | 3.78  | 0.23 | 0.24 | -1.15 | 0.753397 | 0.48085  | 0.907028 | 0.686    |
| MmugDNA.12937.1.S1_at   | MmugDNA.12937.1 | 4.41  | 4.49  | 0.11 | 0.62 | -1.06 | 0.818758 | 0.948609 | 0.934569 | 0.970661 |
| MmugDNA.12938.1.S1_at   | MmugDNA.12938.1 | 5.01  | 4.95  | 0.06 | 0.09 | 1.04  | 0.595838 | 0.893621 | 0.835646 | 0.939284 |
| MmugDNA.12939.1.S1_at   | MmugDNA.12939.1 | 10.2  | 10.46 | 0.3  | 0.1  | -1.2  | 0.240447 | 0.31223  | 0.606743 | 0.566963 |
| MmugDNA.12940.1.S1_at   | MmugDNA.12940.1 | 9.62  | 10.18 | 0.97 | 0.2  | -1.47 | 0.286765 | 0.272371 | 0.643977 | 0.537122 |
| MmugDNA.12941.1.S1_at   | MmugDNA.12941.1 | 9.88  | 10.19 | 1.18 | 0.18 | -1.24 | 0.355115 | 0.451206 | 0.69464  | 0.666085 |
| MmugDNA.12942.1.S1_at   | MmugDNA.12942.1 | 3.93  | 3.8   | 0.09 | 0.12 | 1.09  | 0.976153 | 0.015566 | 0.992259 | 0.15814  |
| MmugDNA.12945.1.S1_at   | MmugDNA.12945.1 | 7.47  | 7.93  | 0.08 | 0.2  | -1.38 | 0.044743 | 0.479647 | 0.375097 | 0.685331 |
| MmugDNA.12946.1.S1_at   | MmugDNA.12946.1 | 7.43  | 7.46  | 0.42 | 0.17 | -1.01 | 0.646658 | 0.10659  | 0.859193 | 0.369136 |
| MmugDNA.12947.1.S1_at   | MmugDNA.12947.1 | 5.97  | 5.9   | 0.65 | 0.15 | 1.05  | 0.434034 | 0.537835 | 0.744825 | 0.722758 |
| MmugDNA.12948.1.S1_at   | MmugDNA.12948.1 | 9.95  | 9.73  | 0.18 | 0.15 | 1.17  | 0.072024 | 0.126807 | 0.431899 | 0.397446 |
| MmugDNA.12949.1.S1_at   | MmugDNA.12949.1 | 10.09 | 10.93 | 1.07 | 0.08 | -1.79 | 0.474558 | 0.54913  | 0.768047 | 0.729611 |
| MmugDNA.12950.1.S1_at   | MmugDNA.12950.1 | 6.83  | 7.55  | 0.45 | 0.14 | -1.65 | 0.072392 | 0.086824 | 0.432302 | 0.339594 |

|                         |                 |       |       |      |      |       |          |          |          |          |
|-------------------------|-----------------|-------|-------|------|------|-------|----------|----------|----------|----------|
| MmugDNA.12953.1.S1_at   | MmugDNA.12953.1 | 7.23  | 7.84  | 0.49 | 0.02 | -1.53 | 0.095489 | 0.004896 | 0.464229 | 0.097632 |
| MmugDNA.12956.1.S1_at   | MmugDNA.12956.1 | 4.4   | 3.95  | 0.14 | 0.09 | 1.36  | 0.014937 | 0.049098 | 0.27883  | 0.266518 |
| MmugDNA.12957.1.S1_at   | MmugDNA.12957.1 | 4.31  | 4.08  | 0.09 | 0.03 | 1.17  | 0.018227 | 0.039895 | 0.295569 | 0.244852 |
| MmugDNA.12959.1.S1_at   | MmugDNA.12959.1 | 5.02  | 4.84  | 0.13 | 0.1  | 1.13  | 0.102217 | 0.125939 | 0.472527 | 0.396461 |
| MmugDNA.12960.1.S1_at   | MmugDNA.12960.1 | 4.5   | 4.69  | 0.35 | 0.25 | -1.15 | 0.287304 | 0.103388 | 0.644392 | 0.3643   |
| MmugDNA.12961.1.S1_at   | MmugDNA.12961.1 | 3.49  | 3.34  | 0.13 | 0.13 | 1.11  | 0.098975 | 0.189652 | 0.468321 | 0.465297 |
| MmugDNA.12962.1.S1_at   | MmugDNA.12962.1 | 6.16  | 6.15  | 0.05 | 0.04 | 1.01  | 0.350973 | 0.095061 | 0.691768 | 0.352124 |
| MmugDNA.12962.1.S1_s_at | MmugDNA.12962.1 | 8.96  | 8.96  | 0.15 | 0.19 | -1    | 0.98076  | 0.634849 | 0.993904 | 0.785041 |
| MmugDNA.12963.1.S1_at   | MmugDNA.12963.1 | 3.7   | 3.54  | 0.14 | 0.22 | 1.12  | 0.224746 | 0.349599 | 0.594031 | 0.593539 |
| MmugDNA.12964.1.S1_at   | MmugDNA.12964.1 | 6.21  | 6.54  | 0.14 | 0.25 | -1.25 | 0.086785 | 0.075985 | 0.454762 | 0.320676 |
| MmugDNA.12965.1.S1_at   | MmugDNA.12965.1 | 10.3  | 10.77 | 0.45 | 0.05 | -1.39 | 0.084122 | 0.068065 | 0.450477 | 0.307142 |
| MmugDNA.12966.1.S1_at   | MmugDNA.12966.1 | 3.74  | 3.64  | 0.11 | 0.28 | 1.07  | 0.46025  | 0.090232 | 0.760108 | 0.344636 |
| MmugDNA.12967.1.S1_at   | MmugDNA.12967.1 | 4.4   | 4.25  | 0.06 | 0.02 | 1.11  | 0.042082 | 0.061521 | 0.368438 | 0.294835 |
| MmugDNA.12970.1.S1_at   | MmugDNA.12970.1 | 5.24  | 5.04  | 0.36 | 0.24 | 1.15  | 0.435667 | 0.814947 | 0.745816 | 0.893221 |
| MmugDNA.12972.1.S1_at   | MmugDNA.12972.1 | 5.91  | 6.41  | 1.8  | 0.42 | -1.41 | 0.648216 | 0.172715 | 0.859825 | 0.449206 |
| MmugDNA.12974.1.S1_at   | MmugDNA.12974.1 | 3.91  | 3.76  | 0.05 | 0.25 | 1.11  | 0.932605 | 0.625938 | 0.977227 | 0.7794   |
| MmugDNA.12976.1.S1_at   | MmugDNA.12976.1 | 4.76  | 4.66  | 0.04 | 0.09 | 1.07  | 0.223498 | 0.701672 | 0.592569 | 0.826974 |
| MmugDNA.12978.1.S1_at   | MmugDNA.12978.1 | 8.07  | 7.57  | 0.18 | 0.28 | 1.42  | 0.061268 | 0.012119 | 0.410357 | 0.142442 |
| MmugDNA.12979.1.S1_s_at | MmugDNA.12979.1 | 10.71 | 10.76 | 0.1  | 0.06 | -1.03 | 0.899766 | 0.108849 | 0.965967 | 0.37247  |
| MmugDNA.1298.1.S1_at    | MmugDNA.1298.1  | 12.03 | 12.06 | 0.22 | 0.05 | -1.02 | 0.853905 | 0.438005 | 0.948426 | 0.657058 |
| MmugDNA.12981.1.S1_at   | MmugDNA.12981.1 | 5.43  | 4.28  | 0.74 | 0.6  | 2.21  | 0.224539 | 0.293066 | 0.593809 | 0.552978 |
| MmugDNA.12982.1.S1_at   | MmugDNA.12982.1 | 8.37  | 8.44  | 0.37 | 0.09 | -1.05 | 0.638422 | 0.144454 | 0.855923 | 0.418323 |
| MmugDNA.12983.1.S1_at   | MmugDNA.12983.1 | 8.14  | 8.4   | 0.32 | 0.29 | -1.2  | 0.374382 | 0.278897 | 0.705837 | 0.542633 |
| MmugDNA.12984.1.S1_at   | MmugDNA.12984.1 | 13.25 | 13.29 | 1.07 | 0.09 | -1.03 | 0.361614 | 0.480624 | 0.698663 | 0.685926 |
| MmugDNA.12985.1.S1_at   | MmugDNA.12985.1 | 5.22  | 5.26  | 0.11 | 0.1  | -1.03 | 0.81194  | 0.454949 | 0.932004 | 0.669021 |
| MmugDNA.12986.1.S1_at   | MmugDNA.12986.1 | 5.86  | 5.69  | 0.31 | 0.41 | 1.13  | 0.488374 | 0.580167 | 0.775522 | 0.749524 |
| MmugDNA.12987.1.S1_at   | MmugDNA.12987.1 | 10.46 | 10.76 | 0.25 | 0.07 | -1.24 | 0.290689 | 0.530641 | 0.647278 | 0.718094 |
| MmugDNA.12988.1.S1_s_at | MmugDNA.12988.1 | 10.6  | 10.81 | 0.56 | 0.08 | -1.16 | 0.70795  | 0.747815 | 0.886424 | 0.853252 |
| MmugDNA.1299.1.S1_at    | MmugDNA.1299.1  | 10    | 9.73  | 0.13 | 0.03 | 1.2   | 0.056434 | 0.0429   | 0.400189 | 0.251759 |
| MmugDNA.12990.1.S1_at   | MmugDNA.12990.1 | 4.39  | 4.07  | 0.43 | 0.16 | 1.25  | 0.206351 | 0.237764 | 0.578142 | 0.50826  |
| MmugDNA.12991.1.S1_at   | MmugDNA.12991.1 | 4.14  | 4.06  | 0.16 | 0.11 | 1.06  | 0.655214 | 0.234377 | 0.86308  | 0.505646 |
| MmugDNA.12992.1.S1_at   | MmugDNA.12992.1 | 4.14  | 4.03  | 0.25 | 0.16 | 1.07  | 0.767517 | 0.443683 | 0.912495 | 0.661384 |
| MmugDNA.12993.1.S1_at   | MmugDNA.12993.1 | 6.93  | 7.57  | 0.3  | 0.32 | -1.56 | 0.087683 | 0.01934  | 0.455349 | 0.174785 |
| MmugDNA.12995.1.S1_at   | MmugDNA.12995.1 | 6.1   | 6.03  | 0.2  | 0.14 | 1.05  | 0.63051  | 0.533638 | 0.851978 | 0.719846 |
| MmugDNA.12998.1.S1_at   | MmugDNA.12998.1 | 8.64  | 9.76  | 0.32 | 0.03 | -2.17 | 0.003844 | 0.076083 | 0.198541 | 0.320848 |
| MmugDNA.13.1.S1_at      | MmugDNA.13.1    | 4.6   | 4.52  | 0.06 | 0.13 | 1.06  | 0.436124 | 0.217872 | 0.746139 | 0.491408 |
| MmugDNA.1300.1.S1_at    | MmugDNA.1300.1  | 5.37  | 5.83  | 0.28 | 0.4  | -1.38 | 0.071966 | 0.131065 | 0.431889 | 0.403084 |
| MmugDNA.13000.1.S1_at   | MmugDNA.13000.1 | 6.22  | 6.53  | 0.16 | 0.16 | -1.24 | 0.149751 | 0.091058 | 0.523238 | 0.345842 |
| MmugDNA.13002.1.S1_at   | MmugDNA.13002.1 | 8.59  | 7.68  | 0.88 | 0.24 | 1.88  | 0.488433 | 0.265491 | 0.775568 | 0.531381 |
| MmugDNA.13003.1.S1_at   | MmugDNA.13003.1 | 3.03  | 2.97  | 0.15 | 0.13 | 1.04  | 0.384806 | 0.225128 | 0.71223  | 0.497779 |
| MmugDNA.13004.1.S1_at   | MmugDNA.13004.1 | 7.9   | 8.98  | 0.75 | 0.02 | -2.12 | 0.082201 | 0.025859 | 0.447052 | 0.201654 |
| MmugDNA.13005.1.S1_at   | MmugDNA.13005.1 | 6.57  | 6.61  | 0.42 | 0.25 | -1.03 | 0.527582 | 0.885679 | 0.797158 | 0.934982 |
| MmugDNA.13006.1.S1_at   | MmugDNA.13006.1 | 3.31  | 3.15  | 0.31 | 0.09 | 1.12  | 0.41266  | 0.563568 | 0.732098 | 0.738718 |

|                         |                 |       |       |      |      |       |          |          |          |          |
|-------------------------|-----------------|-------|-------|------|------|-------|----------|----------|----------|----------|
| MmugDNA.13007.1.S1_at   | MmugDNA.13007.1 | 5.91  | 5.92  | 0.07 | 0.01 | -1.01 | 0.614526 | 0.883902 | 0.84397  | 0.933747 |
| MmugDNA.13008.1.S1_at   | MmugDNA.13008.1 | 4.66  | 4.93  | 0.2  | 0.38 | -1.2  | 0.35525  | 0.313291 | 0.69464  | 0.567753 |
| MmugDNA.6104.1.S1_s_at  | MmugDNA.6104.1  | 9.44  | 9.71  | 0.18 | 0.06 | -1.21 | 0.187422 | 0.027999 | 0.559787 | 0.208898 |
| MmugDNA.13012.1.S1_at   | MmugDNA.13012.1 | 5.75  | 5.41  | 0.11 | 0.39 | 1.27  | 0.221775 | 0.105561 | 0.591359 | 0.367526 |
| MmugDNA.13013.1.S1_at   | MmugDNA.13013.1 | 9.14  | 8.85  | 0.64 | 0.12 | 1.22  | 0.978219 | 0.594438 | 0.992941 | 0.758623 |
| MmugDNA.13014.1.S1_at   | MmugDNA.13014.1 | 5.85  | 5.75  | 0.2  | 0.05 | 1.08  | 0.446965 | 0.671518 | 0.752941 | 0.807948 |
| MmugDNA.13015.1.S1_at   | MmugDNA.13015.1 | 9.71  | 9.26  | 0.13 | 0.11 | 1.36  | 0.008091 | 0.005327 | 0.232005 | 0.100928 |
| MmugDNA.13015.1.S1_s_at | MmugDNA.13015.1 | 9.06  | 8.65  | 0.07 | 0.2  | 1.33  | 0.012884 | 0.005479 | 0.265776 | 0.102081 |
| MmugDNA.13016.1.S1_at   | MmugDNA.13016.1 | 4.23  | 4.27  | 0.23 | 0.07 | -1.03 | 0.843574 | 0.921526 | 0.94482  | 0.955761 |
| MmugDNA.13017.1.S1_at   | MmugDNA.13017.1 | 5.73  | 5.44  | 0.07 | 0.21 | 1.22  | 0.107556 | 0.049486 | 0.480045 | 0.267375 |
| MmugDNA.13018.1.S1_at   | MmugDNA.13018.1 | 4.94  | 5.84  | 0.3  | 0.6  | -1.87 | 0.181088 | 0.263873 | 0.554326 | 0.530118 |
| MmugDNA.1302.1.S1_at    | MmugDNA.1302.1  | 10.5  | 10.59 | 0.23 | 0.08 | -1.06 | 0.308617 | 0.298378 | 0.661287 | 0.557061 |
| MmugDNA.13020.1.S1_at   | MmugDNA.13020.1 | 8.47  | 8.56  | 0.5  | 0.09 | -1.07 | 0.912858 | 0.971648 | 0.970366 | 0.984608 |
| MmugDNA.13021.1.S1_at   | MmugDNA.13021.1 | 3.46  | 3.78  | 0.09 | 0.19 | -1.25 | 0.089989 | 0.280643 | 0.457959 | 0.543828 |
| MmugDNA.13022.1.S1_at   | MmugDNA.13022.1 | 4.37  | 4.11  | 0.15 | 0.03 | 1.19  | 0.125725 | 0.436015 | 0.499701 | 0.655722 |
| MmugDNA.13024.1.S1_at   | MmugDNA.13024.1 | 3.12  | 3.48  | 0.2  | 0.23 | -1.28 | 0.230597 | 0.291065 | 0.598749 | 0.551574 |
| MmugDNA.13026.1.S1_at   | MmugDNA.13026.1 | 3.52  | 3.63  | 0.33 | 0.02 | -1.08 | 0.561915 | 0.757096 | 0.817493 | 0.858642 |
| MmugDNA.13027.1.S1_at   | MmugDNA.13027.1 | 4.56  | 4.4   | 0.21 | 0.06 | 1.11  | 0.232212 | 0.281234 | 0.600083 | 0.544374 |
| MmugDNA.13028.1.S1_at   | MmugDNA.13028.1 | 6.6   | 6.58  | 0.55 | 0.12 | 1.01  | 0.465071 | 0.076784 | 0.762882 | 0.322252 |
| MmugDNA.13029.1.S1_at   | MmugDNA.13029.1 | 6.84  | 7.25  | 0.55 | 0.25 | -1.32 | 0.121505 | 0.184339 | 0.495106 | 0.460458 |
| MmugDNA.13031.1.S1_at   | MmugDNA.13031.1 | 4.25  | 4.29  | 0.32 | 0.13 | -1.03 | 0.537426 | 0.788844 | 0.802735 | 0.877997 |
| MmugDNA.13033.1.S1_at   | MmugDNA.13033.1 | 9.96  | 9.61  | 0.2  | 0.18 | 1.27  | 0.031917 | 0.127769 | 0.34281  | 0.398627 |
| MmugDNA.13038.1.S1_at   | MmugDNA.13038.1 | 4.55  | 4.25  | 0.09 | 0.01 | 1.24  | 0.003072 | 0.293907 | 0.191107 | 0.553878 |
| MmugDNA.1304.1.S1_at    | MmugDNA.1304.1  | 12.57 | 12.73 | 0.08 | 0.08 | -1.12 | 0.034043 | 0.014421 | 0.347625 | 0.153273 |
| MmugDNA.13041.1.S1_s_at | MmugDNA.13041.1 | 5.25  | 5.21  | 0.13 | 0.11 | 1.02  | 0.15201  | 0.230319 | 0.525094 | 0.502102 |
| MmugDNA.13042.1.S1_at   | MmugDNA.13042.1 | 6.61  | 6.45  | 0.13 | 0.19 | 1.12  | 0.162171 | 0.052529 | 0.535244 | 0.274771 |
| MmugDNA.13043.1.S1_at   | MmugDNA.13043.1 | 10.29 | 9.28  | 0.59 | 0.15 | 2.02  | 0.15674  | 0.055631 | 0.529867 | 0.281649 |
| MmugDNA.13045.1.S1_at   | MmugDNA.13045.1 | 5.87  | 5.57  | 0.15 | 0.16 | 1.23  | 0.188273 | 0.285441 | 0.560388 | 0.547307 |
| MmugDNA.13047.1.S1_at   | MmugDNA.13047.1 | 6.38  | 5.9   | 0.81 | 0.43 | 1.39  | 0.93465  | 0.678094 | 0.977899 | 0.811973 |
| MmugDNA.13048.1.S1_at   | MmugDNA.13048.1 | 5.54  | 6.25  | 0.05 | 0.07 | -1.64 | 0.000165 | 0.226213 | 0.112975 | 0.498692 |
| MmugDNA.13049.1.S1_at   | MmugDNA.13049.1 | 6.84  | 6.82  | 0.25 | 0.21 | 1.01  | 0.330542 | 0.182757 | 0.677159 | 0.459215 |
| MmugDNA.1305.1.S1_x_at  | MmugDNA.1305.1  | 5.7   | 5.64  | 0.01 | 0.09 | 1.05  | 0.713127 | 0.522966 | 0.888238 | 0.713429 |
| MmugDNA.13050.1.S1_at   | MmugDNA.13050.1 | 5.01  | 4.87  | 0.22 | 0.1  | 1.11  | 0.385161 | 0.55862  | 0.712501 | 0.735766 |
| MmugDNA.13051.1.S1_at   | MmugDNA.13051.1 | 4.9   | 4.9   | 0.91 | 0.01 | -1    | 0.596787 | 0.699731 | 0.836126 | 0.825643 |
| MmugDNA.13054.1.S1_at   | MmugDNA.13054.1 | 5.63  | 5.56  | 0.35 | 0.29 | 1.05  | 0.734783 | 0.902585 | 0.898487 | 0.944668 |
| MmugDNA.13055.1.S1_at   | MmugDNA.13055.1 | 3.22  | 3.27  | 0.1  | 0.03 | -1.03 | 0.379505 | 0.131826 | 0.709048 | 0.403891 |
| MmugDNA.13056.1.S1_at   | MmugDNA.13056.1 | 8.25  | 8.18  | 0.51 | 0.17 | 1.05  | 0.745871 | 0.192725 | 0.90313  | 0.468231 |
| MmugDNA.13059.1.S1_at   | MmugDNA.13059.1 | 4.2   | 4.12  | 0.05 | 0.13 | 1.06  | 0.176903 | 0.43545  | 0.549959 | 0.655208 |
| MmugDNA.13060.1.S1_at   | MmugDNA.13060.1 | 5.56  | 5.27  | 0.22 | 0.12 | 1.22  | 0.303449 | 0.02344  | 0.657314 | 0.191956 |
| MmugDNA.13062.1.S1_at   | MmugDNA.13062.1 | 5.71  | 6.02  | 0.19 | 0.04 | -1.25 | 0.02709  | 0.098325 | 0.327141 | 0.356397 |
| MmugDNA.13063.1.S1_at   | MmugDNA.13063.1 | 4.36  | 4.16  | 0.22 | 0.13 | 1.15  | 0.4993   | 0.45036  | 0.781984 | 0.665643 |
| MmugDNA.13065.1.S1_at   | MmugDNA.13065.1 | 6.85  | 7.38  | 0.74 | 0.18 | -1.44 | 0.762642 | 0.008846 | 0.91092  | 0.124493 |
| MmugDNA.13066.1.S1_at   | MmugDNA.13066.1 | 4.24  | 4.35  | 0.61 | 0.45 | -1.08 | 0.62225  | 0.746074 | 0.847678 | 0.852688 |

|                         |                 |       |       |      |      |       |          |          |          |          |
|-------------------------|-----------------|-------|-------|------|------|-------|----------|----------|----------|----------|
| MmugDNA.13067.1.S1_at   | MmugDNA.13067.1 | 5.78  | 6.1   | 0.27 | 0.44 | -1.25 | 0.419457 | 0.744631 | 0.736296 | 0.852121 |
| MmugDNA.13068.1.S1_at   | MmugDNA.13068.1 | 6.35  | 6.34  | 0.11 | 0.2  | 1.01  | 0.659512 | 0.154498 | 0.865268 | 0.429395 |
| MmugDNA.13069.1.S1_at   | MmugDNA.13069.1 | 3.21  | 3.12  | 0.05 | 0.14 | 1.06  | 0.882322 | 0.279908 | 0.959179 | 0.543342 |
| MmugDNA.2307.1.S1_at    | MmugDNA.2307.1  | 4.02  | 4     | 0.06 | 0.17 | 1.01  | 0.580725 | 0.744964 | 0.827248 | 0.852232 |
| MmugDNA.2307.1.S1_s_at  | MmugDNA.2307.1  | 7.38  | 7.27  | 0.01 | 0.12 | 1.08  | 0.174953 | 0.416148 | 0.548031 | 0.641371 |
| MmugDNA.13070.1.S1_s_at | MmugDNA.13070.1 | 8.78  | 9.17  | 0.17 | 0.05 | -1.31 | 0.025592 | 0.001495 | 0.322382 | 0.058967 |
| MmugDNA.13071.1.S1_at   | MmugDNA.13071.1 | 3.95  | 3.95  | 0.33 | 0.2  | -1    | 0.59821  | 0.51731  | 0.836817 | 0.709435 |
| MmugDNA.13072.1.S1_at   | MmugDNA.13072.1 | 4.3   | 4.3   | 0.1  | 0.17 | 1.01  | 0.496782 | 0.779511 | 0.780829 | 0.872163 |
| MmugDNA.13073.1.S1_at   | MmugDNA.13073.1 | 6.66  | 6.56  | 0.05 | 0.1  | 1.07  | 0.106651 | 0.184113 | 0.479    | 0.460323 |
| MmugDNA.13075.1.S1_at   | MmugDNA.13075.1 | 6.59  | 6.9   | 0.25 | 0.34 | -1.24 | 0.26436  | 0.225281 | 0.626029 | 0.497892 |
| MmugDNA.13078.1.S1_at   | MmugDNA.13078.1 | 5.41  | 5.61  | 0.56 | 0.89 | -1.14 | 0.777002 | 0.466564 | 0.917443 | 0.676398 |
| MmugDNA.8372.1.S1_s_at  | MmugDNA.8372.1  | 10.99 | 10.81 | 0.25 | 0.07 | 1.13  | 0.128495 | 0.141521 | 0.503216 | 0.415063 |
| MmugDNA.1308.1.S1_at    | MmugDNA.1308.1  | 4.75  | 4.54  | 0.01 | 0.18 | 1.16  | 0.128019 | 0.049869 | 0.502449 | 0.268436 |
| MmugDNA.13080.1.S1_at   | MmugDNA.13080.1 | 5.23  | 5.1   | 0.29 | 0.54 | 1.09  | 0.825572 | 0.347923 | 0.937359 | 0.592196 |
| MmugDNA.13081.1.S1_at   | MmugDNA.13081.1 | 3.59  | 3.63  | 0.09 | 0.2  | -1.02 | 0.579537 | 0.706187 | 0.826489 | 0.829634 |
| MmugDNA.13082.1.S1_at   | MmugDNA.13082.1 | 5.77  | 5.69  | 0.11 | 0.09 | 1.06  | 0.252917 | 0.537521 | 0.617858 | 0.722606 |
| MmugDNA.13083.1.S1_at   | MmugDNA.13083.1 | 6.08  | 5.91  | 0.12 | 0.4  | 1.13  | 0.513001 | 0.030024 | 0.789629 | 0.215056 |
| MmugDNA.13084.1.S1_at   | MmugDNA.13084.1 | 4.28  | 4.28  | 0.08 | 0.12 | 1     | 0.633389 | 0.725664 | 0.853438 | 0.841129 |
| MmugDNA.13087.1.S1_at   | MmugDNA.13087.1 | 5.46  | 5.38  | 1.02 | 1.22 | 1.06  | 0.582905 | 0.101211 | 0.828613 | 0.360863 |
| MmugDNA.13088.1.S1_at   | MmugDNA.13088.1 | 3.7   | 4.36  | 0.94 | 0.13 | -1.57 | 0.838428 | 0.440789 | 0.942207 | 0.659136 |
| MmugDNA.13089.1.S1_at   | MmugDNA.13089.1 | 7.07  | 6.64  | 0.07 | 0.11 | 1.35  | 0.007006 | 0.026087 | 0.225012 | 0.202477 |
| MmugDNA.13089.1.S1_x_at | MmugDNA.13089.1 | 7.08  | 6.84  | 0.09 | 0.08 | 1.18  | 0.022051 | 0.035167 | 0.309862 | 0.231696 |
| MmugDNA.1309.1.S1_at    | MmugDNA.1309.1  | 4.39  | 4.49  | 0.6  | 0.05 | -1.07 | 0.505638 | 0.625815 | 0.785398 | 0.779339 |
| MmugDNA.13090.1.S1_at   | MmugDNA.13090.1 | 6.42  | 7.08  | 0.44 | 0.23 | -1.58 | 0.06019  | 0.069537 | 0.407653 | 0.309848 |
| MmugDNA.13091.1.S1_at   | MmugDNA.13091.1 | 5.88  | 5.58  | 0.15 | 0.09 | 1.23  | 0.058862 | 0.053716 | 0.405539 | 0.277384 |
| MmugDNA.13092.1.S1_at   | MmugDNA.13092.1 | 8.55  | 9.79  | 0.6  | 0.08 | -2.35 | 0.052913 | 0.039529 | 0.393459 | 0.243753 |
| MmugDNA.13093.1.S1_at   | MmugDNA.13093.1 | 4.7   | 4.71  | 0.21 | 0.15 | -1.01 | 0.623265 | 0.536925 | 0.848214 | 0.722124 |
| MmugDNA.13094.1.S1_at   | MmugDNA.13094.1 | 6.11  | 5.67  | 0.98 | 1.04 | 1.35  | 0.937755 | 0.566786 | 0.979074 | 0.740763 |
| MmugDNA.13095.1.S1_at   | MmugDNA.13095.1 | 4.62  | 4.42  | 0.25 | 0.06 | 1.15  | 0.77722  | 0.840607 | 0.917505 | 0.909157 |
| MmugDNA.13098.1.S1_at   | MmugDNA.13098.1 | 3.91  | 4.02  | 0.2  | 0.14 | -1.08 | 0.906905 | 0.392284 | 0.968438 | 0.625694 |
| MmugDNA.13100.1.S1_at   | MmugDNA.13100.1 | 10.05 | 9.95  | 0.35 | 0.16 | 1.07  | 0.178006 | 0.123542 | 0.551187 | 0.393629 |
| MmugDNA.13101.1.S1_at   | MmugDNA.13101.1 | 3.21  | 3.2   | 0.09 | 0.14 | 1.01  | 0.325034 | 0.40157  | 0.672944 | 0.631068 |
| MmugDNA.13103.1.S1_at   | MmugDNA.13103.1 | 5.49  | 5.11  | 1.15 | 0.56 | 1.3   | 0.419294 | 0.573069 | 0.736228 | 0.744941 |
| MmugDNA.13105.1.S1_at   | MmugDNA.13105.1 | 2.98  | 2.97  | 0.19 | 0.05 | 1.01  | 0.417493 | 0.671877 | 0.735015 | 0.808164 |
| MmugDNA.13106.1.S1_at   | MmugDNA.13106.1 | 6.42  | 6.31  | 0.2  | 0.13 | 1.08  | 0.459818 | 0.766095 | 0.759823 | 0.864102 |
| MmugDNA.13107.1.S1_at   | MmugDNA.13107.1 | 7.07  | 6.75  | 0.18 | 0.08 | 1.25  | 0.113129 | 0.138412 | 0.486619 | 0.41133  |
| MmugDNA.13108.1.S1_at   | MmugDNA.13108.1 | 9.7   | 9.81  | 0.35 | 0.13 | -1.08 | 0.227368 | 0.048657 | 0.596459 | 0.265613 |
| MmugDNA.13109.1.S1_at   | MmugDNA.13109.1 | 7.84  | 8.71  | 0.8  | 0.05 | -1.83 | 0.447634 | 0.526725 | 0.75342  | 0.715627 |
| MmugDNA.1311.1.S1_at    | MmugDNA.1311.1  | 5.48  | 5.51  | 0.08 | 0.18 | -1.02 | 0.833084 | 0.50602  | 0.940095 | 0.702337 |
| MmugDNA.13110.1.S1_at   | MmugDNA.13110.1 | 3.29  | 3.21  | 0    | 0.07 | 1.05  | 0.167637 | 0.492522 | 0.54021  | 0.693604 |
| MmugDNA.13111.1.S1_at   | MmugDNA.13111.1 | 3.58  | 3.34  | 0.11 | 0.16 | 1.18  | 0.215548 | 0.253471 | 0.585748 | 0.521768 |
| MmugDNA.13112.1.S1_at   | MmugDNA.13112.1 | 4.94  | 4.84  | 0.44 | 0.04 | 1.07  | 0.284502 | 0.118259 | 0.642303 | 0.386244 |
| MmugDNA.13113.1.S1_at   | MmugDNA.13113.1 | 3.41  | 3.32  | 0.24 | 0.13 | 1.07  | 0.428577 | 0.2907   | 0.741963 | 0.551382 |

|                         |                 |       |       |      |      |       |          |          |          |          |
|-------------------------|-----------------|-------|-------|------|------|-------|----------|----------|----------|----------|
| MmugDNA.13114.1.S1_at   | MmugDNA.13114.1 | 4.05  | 4.05  | 0    | 0.02 | 1     | 0.582859 | 0.500224 | 0.82857  | 0.698951 |
| MmugDNA.13115.1.S1_at   | MmugDNA.13115.1 | 9.05  | 9.33  | 0.42 | 0.05 | -1.21 | 0.898527 | 0.706856 | 0.965555 | 0.829968 |
| MmugDNA.13116.1.S1_at   | MmugDNA.13116.1 | 6.85  | 6.67  | 0.21 | 0.27 | 1.14  | 0.335282 | 0.82632  | 0.680829 | 0.900243 |
| MmugDNA.13117.1.S1_at   | MmugDNA.13117.1 | 9.33  | 9.09  | 0.88 | 0.25 | 1.18  | 0.638267 | 0.784384 | 0.855896 | 0.87518  |
| MmugDNA.13118.1.S1_at   | MmugDNA.13118.1 | 7.57  | 7.8   | 0.14 | 0.26 | -1.18 | 0.119455 | 0.148232 | 0.492875 | 0.422745 |
| MmugDNA.13119.1.S1_at   | MmugDNA.13119.1 | 6.11  | 5.86  | 0.1  | 0.13 | 1.19  | 0.079513 | 0.292525 | 0.442306 | 0.55258  |
| MmugDNA.1312.1.S1_at    | MmugDNA.1312.1  | 6.21  | 6.01  | 0.04 | 0.13 | 1.15  | 0.050129 | 0.074419 | 0.386758 | 0.318058 |
| MmugDNA.13123.1.S1_at   | MmugDNA.13123.1 | 4.43  | 4.79  | 0.18 | 0.2  | -1.29 | 0.202418 | 0.784756 | 0.573893 | 0.875383 |
| MmugDNA.13124.1.S1_at   | MmugDNA.13124.1 | 5.98  | 6.12  | 0.4  | 0.1  | -1.1  | 0.398488 | 0.850921 | 0.722525 | 0.91522  |
| MmugDNA.13125.1.S1_at   | MmugDNA.13125.1 | 5.86  | 5.72  | 0.53 | 0.34 | 1.1   | 0.687132 | 0.676831 | 0.877656 | 0.811172 |
| MmugDNA.13126.1.S1_at   | MmugDNA.13126.1 | 6     | 6.09  | 0.03 | 0.12 | -1.06 | 0.688322 | 0.506382 | 0.878257 | 0.702371 |
| MmugDNA.13128.1.S1_at   | MmugDNA.13128.1 | 12.04 | 12.13 | 0.57 | 0.03 | -1.06 | 0.291761 | 0.173981 | 0.648084 | 0.450247 |
| MmugDNA.13129.1.S1_at   | MmugDNA.13129.1 | 4.31  | 3.93  | 0.11 | 0.1  | 1.3   | 0.017703 | 0.011265 | 0.293353 | 0.138076 |
| MmugDNA.1313.1.S1_at    | MmugDNA.1313.1  | 12.17 | 11.58 | 0.38 | 0.08 | 1.51  | 0.057603 | 0.017698 | 0.402592 | 0.168304 |
| MmugDNA.13130.1.S1_s_at | MmugDNA.13130.1 | 5.65  | 5.65  | 0.03 | 0.05 | 1     | 0.779768 | 0.634967 | 0.918831 | 0.785108 |
| MmugDNA.13131.1.S1_at   | MmugDNA.13131.1 | 6.79  | 6.98  | 0.7  | 0.64 | -1.15 | 0.77864  | 0.349909 | 0.918374 | 0.593668 |
| MmugDNA.13132.1.S1_at   | MmugDNA.13132.1 | 10.14 | 9.74  | 0.04 | 0.21 | 1.32  | 0.030163 | 0.081327 | 0.336644 | 0.329427 |
| MmugDNA.13133.1.S1_at   | MmugDNA.13133.1 | 9.44  | 9.63  | 0.33 | 0.17 | -1.14 | 0.95427  | 0.894494 | 0.984783 | 0.939772 |
| MmugDNA.13134.1.S1_at   | MmugDNA.13134.1 | 7.84  | 8.01  | 0.25 | 0.05 | -1.13 | 0.125869 | 0.367891 | 0.49972  | 0.607469 |
| MmugDNA.13135.1.S1_at   | MmugDNA.13135.1 | 9.09  | 8.56  | 0.24 | 0.3  | 1.44  | 0.085451 | 0.006181 | 0.452653 | 0.106774 |
| MmugDNA.13136.1.S1_at   | MmugDNA.13136.1 | 3.95  | 3.94  | 0.09 | 0.15 | 1.01  | 0.438542 | 0.525816 | 0.747368 | 0.715217 |
| MmugDNA.13137.1.S1_at   | MmugDNA.13137.1 | 6.43  | 7.14  | 0.17 | 0.19 | -1.63 | 0.012281 | 0.003355 | 0.260951 | 0.083359 |
| MmugDNA.13138.1.S1_at   | MmugDNA.13138.1 | 4.49  | 4.44  | 0.31 | 0.23 | 1.04  | 0.751469 | 0.900462 | 0.906003 | 0.943447 |
| MmugDNA.13139.1.S1_at   | MmugDNA.13139.1 | 3.87  | 3.91  | 0.15 | 0.13 | -1.03 | 0.716649 | 0.078915 | 0.88994  | 0.325912 |
| MmugDNA.1314.1.S1_at    | MmugDNA.1314.1  | 4.36  | 4.11  | 0.17 | 0.18 | 1.19  | 0.329999 | 0.515697 | 0.676703 | 0.708451 |
| MmugDNA.13141.1.S1_at   | MmugDNA.13141.1 | 2.9   | 2.95  | 0.13 | 0.03 | -1.03 | 0.71375  | 0.906234 | 0.888497 | 0.94693  |
| MmugDNA.13141.1.S1_x_at | MmugDNA.13141.1 | 3.53  | 3.51  | 0.02 | 0.03 | 1.01  | 0.177185 | 0.56879  | 0.550215 | 0.74211  |
| MmugDNA.13142.1.S1_at   | MmugDNA.13142.1 | 3.29  | 3.31  | 0.21 | 0.12 | -1.02 | 0.564669 | 0.474756 | 0.818918 | 0.681695 |
| MmugDNA.13143.1.S1_at   | MmugDNA.13143.1 | 5.37  | 5.07  | 0.09 | 0.14 | 1.23  | 0.066959 | 0.062453 | 0.422979 | 0.296717 |
| MmugDNA.13144.1.S1_at   | MmugDNA.13144.1 | 7.78  | 7.2   | 0.08 | 0.22 | 1.49  | 0.010241 | 0.009456 | 0.246929 | 0.12804  |
| MmugDNA.13145.1.S1_at   | MmugDNA.13145.1 | 3.43  | 3.75  | 0.22 | 0.2  | -1.25 | 0.178072 | 0.220011 | 0.551191 | 0.49344  |
| MmugDNA.13146.1.S1_at   | MmugDNA.13146.1 | 5.24  | 5.36  | 0.24 | 0.26 | -1.08 | 0.283448 | 0.351715 | 0.641407 | 0.595164 |
| MmugDNA.13147.1.S1_at   | MmugDNA.13147.1 | 4.86  | 4.74  | 0.11 | 0.11 | 1.09  | 0.389075 | 0.026525 | 0.715919 | 0.203899 |
| MmugDNA.13148.1.S1_at   | MmugDNA.13148.1 | 4.71  | 4.71  | 0.21 | 0.02 | 1     | 0.342791 | 0.93344  | 0.686105 | 0.962195 |
| MmugDNA.13149.1.S1_at   | MmugDNA.13149.1 | 3.65  | 3.57  | 0.13 | 0.15 | 1.05  | 0.518136 | 0.771526 | 0.792419 | 0.867249 |
| MmugDNA.1315.1.S1_at    | MmugDNA.1315.1  | 5.09  | 5.05  | 0.68 | 0.03 | 1.03  | 0.915496 | 0.876145 | 0.971239 | 0.929583 |
| MmugDNA.13150.1.S1_at   | MmugDNA.13150.1 | 7.33  | 6.53  | 0.39 | 0.12 | 1.73  | 0.051442 | 0.007961 | 0.390055 | 0.118702 |
| MmugDNA.13152.1.S1_at   | MmugDNA.13152.1 | 7.02  | 6.67  | 0.63 | 0.09 | 1.27  | 0.924139 | 0.011108 | 0.974622 | 0.137198 |
| MmugDNA.13153.1.S1_at   | MmugDNA.13153.1 | 7.79  | 7.87  | 1.03 | 0.22 | -1.06 | 0.870991 | 0.816002 | 0.95519  | 0.893865 |
| MmugDNA.13154.1.S1_at   | MmugDNA.13154.1 | 5.61  | 5.91  | 0.79 | 0.14 | -1.23 | 0.580039 | 0.026622 | 0.826842 | 0.204028 |
| MmugDNA.13155.1.S1_at   | MmugDNA.13155.1 | 12.94 | 12.93 | 0.27 | 0.03 | 1.01  | 0.422259 | 0.018465 | 0.738068 | 0.170923 |
| MmugDNA.13157.1.S1_s_at | MmugDNA.13157.1 | 3.51  | 3.3   | 0.08 | 0.19 | 1.16  | 0.118491 | 0.098986 | 0.491933 | 0.357049 |
| MmugDNA.13158.1.S1_at   | MmugDNA.13158.1 | 2.99  | 2.99  | 0.2  | 0.02 | -1    | 0.950952 | 0.940246 | 0.983356 | 0.966105 |

|                         |                 |       |       |      |      |       |          |          |          |          |
|-------------------------|-----------------|-------|-------|------|------|-------|----------|----------|----------|----------|
| MmugDNA.13159.1.S1_at   | MmugDNA.13159.1 | 4.66  | 6.21  | 1.29 | 0.14 | -2.93 | 0.386594 | 0.525079 | 0.713641 | 0.714766 |
| MmugDNA.1316.1.S1_at    | MmugDNA.1316.1  | 3.18  | 3     | 0.12 | 0.05 | 1.13  | 0.065688 | 0.189498 | 0.420827 | 0.465237 |
| MmugDNA.13160.1.S1_at   | MmugDNA.13160.1 | 3.27  | 3.48  | 0.03 | 0.16 | -1.16 | 0.203559 | 0.355544 | 0.575032 | 0.597801 |
| MmugDNA.13164.1.S1_at   | MmugDNA.13164.1 | 5.48  | 5.28  | 0.22 | 0.01 | 1.15  | 0.161385 | 0.284458 | 0.534731 | 0.546637 |
| MmugDNA.13166.1.S1_at   | MmugDNA.13166.1 | 3.45  | 3.41  | 0.12 | 0.03 | 1.03  | 0.38911  | 0.673268 | 0.715919 | 0.809084 |
| MmugDNA.13167.1.S1_at   | MmugDNA.13167.1 | 4.28  | 4.23  | 0.04 | 0.08 | 1.04  | 0.385609 | 0.764726 | 0.712944 | 0.863203 |
| MmugDNA.13168.1.S1_at   | MmugDNA.13168.1 | 7.79  | 8.3   | 0.12 | 0.29 | -1.43 | 0.199754 | 0.140222 | 0.571494 | 0.413405 |
| MmugDNA.13169.1.S1_at   | MmugDNA.13169.1 | 6.34  | 6.67  | 0.28 | 0.05 | -1.26 | 0.120669 | 0.177362 | 0.494164 | 0.453742 |
| MmugDNA.1317.1.S1_at    | MmugDNA.1317.1  | 3.89  | 4.17  | 0.07 | 0.23 | -1.21 | 0.288907 | 0.346007 | 0.645883 | 0.59115  |
| MmugDNA.13170.1.S1_at   | MmugDNA.13170.1 | 3.55  | 3.55  | 0.1  | 0.16 | 1     | 0.858154 | 0.978055 | 0.9499   | 0.988066 |
| MmugDNA.13171.1.S1_at   | MmugDNA.13171.1 | 4.67  | 4.57  | 0.3  | 0.09 | -1.07 | 0.380273 | 0.202336 | 0.709387 | 0.476691 |
| MmugDNA.13174.1.S1_at   | MmugDNA.13174.1 | 10.37 | 10.81 | 0.07 | 0.21 | -1.36 | 0.026574 | 0.049265 | 0.325381 | 0.266828 |
| MmugDNA.13175.1.S1_at   | MmugDNA.13175.1 | 4.29  | 4.9   | 0.34 | 0.3  | -1.53 | 0.166695 | 0.49068  | 0.539343 | 0.692652 |
| MmugDNA.13176.1.S1_at   | MmugDNA.13176.1 | 4.25  | 4.1   | 0.06 | 0.16 | 1.11  | 0.149922 | 0.160626 | 0.523408 | 0.436745 |
| MmugDNA.1318.1.S1_at    | MmugDNA.1318.1  | 6.3   | 6.3   | 0.08 | 0.06 | 1     | 0.235488 | 0.85034  | 0.602643 | 0.914874 |
| MmugDNA.13180.1.S1_at   | MmugDNA.13180.1 | 6.11  | 5.84  | 0.05 | 0.13 | 1.21  | 0.095692 | 0.216281 | 0.4643   | 0.489844 |
| MmugDNA.13181.1.S1_at   | MmugDNA.13181.1 | 6.13  | 6.16  | 0.06 | 0.05 | -1.02 | 0.781569 | 0.151262 | 0.919573 | 0.426    |
| MmugDNA.13182.1.S1_at   | MmugDNA.13182.1 | 10.33 | 9.98  | 3.12 | 0.26 | 1.28  | 0.610808 | 0.331515 | 0.842123 | 0.580163 |
| MmugDNA.13183.1.S1_at   | MmugDNA.13183.1 | 6.15  | 6.17  | 0.09 | 0.29 | -1.01 | 0.365002 | 0.537933 | 0.700775 | 0.722799 |
| MmugDNA.30742.1.S1_s_at | MmugDNA.30742.1 | 7.9   | 7.77  | 0.1  | 0.11 | 1.09  | 0.44842  | 0.664182 | 0.753886 | 0.803247 |
| MmugDNA.13187.1.S1_at   | MmugDNA.13187.1 | 4.52  | 4.68  | 0.2  | 0.31 | -1.12 | 0.499961 | 0.34624  | 0.782311 | 0.591201 |
| MmugDNA.1319.1.S1_at    | MmugDNA.1319.1  | 6.84  | 6.83  | 0.51 | 0.13 | 1.01  | 0.702795 | 0.72026  | 0.884465 | 0.838202 |
| MmugDNA.13190.1.S1_at   | MmugDNA.13190.1 | 3.66  | 3.78  | 0.42 | 0.5  | -1.09 | 0.458881 | 0.400278 | 0.759132 | 0.630158 |
| MmugDNA.13191.1.S1_at   | MmugDNA.13191.1 | 6.19  | 6.44  | 0.08 | 0.11 | -1.19 | 0.031498 | 0.095225 | 0.341227 | 0.35218  |
| MmugDNA.13192.1.S1_s_at | MmugDNA.13192.1 | 10.1  | 10.05 | 0.1  | 0.07 | 1.04  | 0.820332 | 0.30554  | 0.935289 | 0.562486 |
| MmugDNA.13193.1.S1_at   | MmugDNA.13193.1 | 7.28  | 7.22  | 0.12 | 0.07 | 1.04  | 0.69772  | 0.067485 | 0.882415 | 0.305811 |
| MmugDNA.13194.1.S1_at   | MmugDNA.13194.1 | 5.12  | 4.8   | 0.17 | 0.2  | 1.25  | 0.255124 | 0.233347 | 0.619267 | 0.504701 |
| MmugDNA.13194.1.S1_s_at | MmugDNA.13194.1 | 6.19  | 6.37  | 0.07 | 0.25 | -1.13 | 0.929094 | 0.783659 | 0.976333 | 0.874712 |
| MmugDNA.13195.1.S1_at   | MmugDNA.13195.1 | 4.74  | 5.79  | 0.79 | 0.43 | -2.07 | 0.106322 | 0.145243 | 0.478791 | 0.419256 |
| MmugDNA.13196.1.S1_at   | MmugDNA.13196.1 | 4.61  | 4.47  | 0.36 | 0.15 | 1.1   | 0.314823 | 0.188772 | 0.665538 | 0.464761 |
| MmugDNA.13198.1.S1_at   | MmugDNA.13198.1 | 2.71  | 2.67  | 0.08 | 0.08 | 1.03  | 0.268909 | 0.363639 | 0.629195 | 0.604046 |
| MmugDNA.13199.1.S1_at   | MmugDNA.13199.1 | 3.21  | 2.98  | 0.1  | 0.08 | 1.18  | 0.034761 | 0.038655 | 0.350358 | 0.24169  |
| MmugDNA.1320.1.S1_at    | MmugDNA.1320.1  | 4.7   | 4.62  | 0.09 | 0.02 | 1.06  | 0.059646 | 0.048556 | 0.406693 | 0.265572 |
| MmugDNA.13200.1.S1_at   | MmugDNA.13200.1 | 4.23  | 4.34  | 1.38 | 0.24 | -1.08 | 0.462492 | 0.475545 | 0.76166  | 0.682235 |
| MmugDNA.13202.1.S1_at   | MmugDNA.13202.1 | 5.14  | 5.07  | 0.2  | 0.45 | 1.05  | 0.916823 | 0.383169 | 0.971796 | 0.619153 |
| MmugDNA.13203.1.S1_at   | MmugDNA.13203.1 | 8.83  | 8.68  | 0.31 | 0.08 | 1.11  | 0.911615 | 0.464163 | 0.970117 | 0.674918 |
| MmugDNA.13204.1.S1_at   | MmugDNA.13204.1 | 7.1   | 7.03  | 0.47 | 0.47 | 1.05  | 0.452754 | 0.035825 | 0.755901 | 0.233727 |
| MmugDNA.13205.1.S1_at   | MmugDNA.13205.1 | 3.68  | 3.79  | 0.12 | 0.26 | -1.08 | 0.30138  | 0.176793 | 0.655738 | 0.45321  |
| MmugDNA.13206.1.S1_at   | MmugDNA.13206.1 | 3.82  | 3.72  | 0.21 | 0.17 | 1.07  | 0.449306 | 0.315185 | 0.754301 | 0.568899 |
| MmugDNA.13207.1.S1_at   | MmugDNA.13207.1 | 7.45  | 8.22  | 0.39 | 0.07 | -1.7  | 0.012035 | 0.025484 | 0.258642 | 0.200302 |
| MmugDNA.13208.1.S1_at   | MmugDNA.13208.1 | 4.08  | 3.94  | 0.16 | 0.18 | 1.11  | 0.737643 | 0.594133 | 0.899619 | 0.758517 |
| MmugDNA.13209.1.S1_at   | MmugDNA.13209.1 | 3.87  | 3.95  | 0.09 | 0.1  | -1.05 | 0.401515 | 0.215847 | 0.724554 | 0.489536 |
| MmugDNA.1321.1.S1_at    | MmugDNA.1321.1  | 3.75  | 3.65  | 0.04 | 0.1  | 1.07  | 0.146687 | 0.471614 | 0.521037 | 0.679537 |



|                         |                 |       |       |      |      |       |          |          |          |          |
|-------------------------|-----------------|-------|-------|------|------|-------|----------|----------|----------|----------|
| MmugDNA.13210.1.S1_at   | MmugDNA.13210.1 | 3.45  | 3.58  | 0.25 | 0.22 | -1.1  | 0.978499 | 0.240317 | 0.993032 | 0.510874 |
| MmugDNA.13211.1.S1_at   | MmugDNA.13211.1 | 5.67  | 4.79  | 0.21 | 0.33 | 1.83  | 0.026766 | 0.037656 | 0.326171 | 0.23852  |
| MmugDNA.13212.1.S1_at   | MmugDNA.13212.1 | 3.48  | 3.35  | 0.19 | 0.36 | 1.09  | 0.418675 | 0.237746 | 0.735862 | 0.50826  |
| MmugDNA.13213.1.S1_at   | MmugDNA.13213.1 | 3.04  | 2.94  | 0.14 | 0.15 | 1.07  | 0.55413  | 0.343468 | 0.812456 | 0.58924  |
| MmugDNA.13214.1.S1_at   | MmugDNA.13214.1 | 3.95  | 3.95  | 0.09 | 0.29 | 1     | 0.407458 | 0.627663 | 0.728597 | 0.780629 |
| MmugDNA.13215.1.S1_at   | MmugDNA.13215.1 | 5.37  | 7.4   | 0.79 | 0.36 | -4.07 | 0.015945 | 0.00869  | 0.284606 | 0.123663 |
| MmugDNA.13216.1.S1_at   | MmugDNA.13216.1 | 5.3   | 5.29  | 0.03 | 0    | 1.01  | 0.838917 | 0.597134 | 0.942422 | 0.760094 |
| MmugDNA.13217.1.S1_at   | MmugDNA.13217.1 | 10.45 | 10.67 | 0.32 | 0.04 | -1.16 | 0.273655 | 0.289261 | 0.633314 | 0.550293 |
| MmugDNA.13219.1.S1_at   | MmugDNA.13219.1 | 7.02  | 7     | 0.09 | 0.01 | 1.01  | 0.820605 | 0.617594 | 0.935289 | 0.773511 |
| MmugDNA.1322.1.S1_at    | MmugDNA.1322.1  | 6.46  | 6.41  | 0.11 | 0.09 | 1.03  | 0.164293 | 0.194713 | 0.537322 | 0.469765 |
| MmugDNA.1322.1.S1_s_at  | MmugDNA.1322.1  | 8.61  | 8.04  | 0.15 | 0.09 | -1.48 | 0.009544 | 0.000699 | 0.242426 | 0.04424  |
| MmugDNA.13220.1.S1_at   | MmugDNA.13220.1 | 2.99  | 2.91  | 0.16 | 0.05 | 1.05  | 0.320497 | 0.656712 | 0.669365 | 0.79927  |
| MmugDNA.13221.1.S1_at   | MmugDNA.13221.1 | 11.66 | 11.12 | 0.71 | 0.07 | 1.46  | 0.767497 | 0.451404 | 0.912495 | 0.666186 |
| MmugDNA.13222.1.S1_s_at | MmugDNA.13222.1 | 5.52  | 5.22  | 0.33 | 0.11 | 1.23  | 0.132038 | 0.250948 | 0.506472 | 0.519618 |
| MmugDNA.13223.1.S1_at   | MmugDNA.13223.1 | 4.77  | 4.03  | 0.06 | 0.14 | 1.67  | 0.00123  | 0.000162 | 0.156419 | 0.030478 |
| MmugDNA.13225.1.S1_at   | MmugDNA.13225.1 | 8.24  | 7.83  | 0.76 | 0.1  | 1.33  | 0.494738 | 0.358859 | 0.779514 | 0.600291 |
| MmugDNA.13226.1.S1_at   | MmugDNA.13226.1 | 6.4   | 6.63  | 0.09 | 0.34 | -1.18 | 0.163323 | 0.113862 | 0.536063 | 0.380084 |
| MmugDNA.13228.1.S1_at   | MmugDNA.13228.1 | 5.45  | 6.07  | 0.65 | 0.05 | -1.54 | 0.54052  | 0.774101 | 0.804382 | 0.868685 |
| MmugDNA.13229.1.S1_at   | MmugDNA.13229.1 | 4.56  | 4.52  | 0.13 | 0.08 | 1.03  | 0.663167 | 0.081878 | 0.867106 | 0.330339 |
| MmugDNA.13232.1.S1_at   | MmugDNA.13232.1 | 6.79  | 6.77  | 0.14 | 0.03 | 1.01  | 0.841664 | 0.673909 | 0.943862 | 0.809483 |
| MmugDNA.13232.1.S1_s_at | MmugDNA.13232.1 | 7.89  | 7.84  | 0.14 | 0.07 | 1.04  | 0.148402 | 0.183067 | 0.522567 | 0.459493 |
| MmugDNA.41625.1.S1_s_at | MmugDNA.41625.1 | 5.54  | 5.38  | 0.15 | 0.06 | 1.12  | 0.173931 | 0.333356 | 0.546898 | 0.581668 |
| MmugDNA.13235.1.S1_at   | MmugDNA.13235.1 | 7.68  | 7.83  | 0.02 | 0.08 | -1.11 | 0.130615 | 0.000189 | 0.505008 | 0.030754 |
| MmugDNA.13236.1.S1_at   | MmugDNA.13236.1 | 7.67  | 6.67  | 0.28 | 0.19 | 1.99  | 0.00384  | 0.001125 | 0.198541 | 0.052924 |
| MmugDNA.13237.1.S1_s_at | MmugDNA.13237.1 | 11.97 | 11.47 | 0.22 | 0.11 | 1.42  | 0.015317 | 0.005107 | 0.281008 | 0.099116 |
| MmugDNA.13238.1.S1_at   | MmugDNA.13238.1 | 6.41  | 6.32  | 0.16 | 0.11 | 1.06  | 0.3124   | 0.485627 | 0.664001 | 0.68924  |
| MmugDNA.13239.1.S1_at   | MmugDNA.13239.1 | 8.86  | 7.52  | 0.57 | 0.08 | 2.55  | 0.015139 | 0.013966 | 0.2796   | 0.151509 |
| MmugDNA.1324.1.S1_s_at  | MmugDNA.1324.1  | 6.68  | 6.71  | 0.68 | 0.67 | -1.02 | 0.944001 | 0.711589 | 0.980618 | 0.832761 |
| MmugDNA.13240.1.S1_at   | MmugDNA.13240.1 | 4.01  | 3.99  | 0.07 | 0.02 | 1.02  | 0.189407 | 0.558475 | 0.560894 | 0.735631 |
| MmugDNA.13241.1.S1_at   | MmugDNA.13241.1 | 6.29  | 6.44  | 0.43 | 0.07 | -1.11 | 0.662793 | 0.751248 | 0.866926 | 0.855385 |
| MmugDNA.13243.1.S1_at   | MmugDNA.13243.1 | 4.44  | 4.72  | 0.11 | 0.27 | -1.21 | 0.042442 | 0.235184 | 0.369047 | 0.50629  |
| MmugDNA.13244.1.S1_at   | MmugDNA.13244.1 | 3.21  | 3.36  | 0.1  | 0.28 | -1.11 | 0.289518 | 0.629714 | 0.646199 | 0.781989 |
| MmugDNA.13245.1.S1_at   | MmugDNA.13245.1 | 4.93  | 4.89  | 0.06 | 0.06 | 1.02  | 0.770098 | 0.356978 | 0.913903 | 0.598736 |
| MmugDNA.13246.1.S1_at   | MmugDNA.13246.1 | 4.52  | 4.33  | 0.22 | 0.13 | 1.14  | 0.308236 | 0.280686 | 0.660917 | 0.543874 |
| MmugDNA.13247.1.S1_at   | MmugDNA.13247.1 | 4.39  | 4.43  | 0.11 | 0.17 | -1.02 | 0.987737 | 0.100314 | 0.995831 | 0.359386 |
| MmugDNA.13248.1.S1_at   | MmugDNA.13248.1 | 4.94  | 4.88  | 0.05 | 0.1  | 1.05  | 0.140747 | 0.298777 | 0.51617  | 0.557392 |
| MmugDNA.13249.1.S1_at   | MmugDNA.13249.1 | 7.14  | 6.62  | 0.85 | 0.31 | 1.44  | 0.965148 | 0.946081 | 0.988542 | 0.969369 |
| MmugDNA.1325.1.S1_at    | MmugDNA.1325.1  | 4.54  | 4.54  | 0.04 | 0.09 | 1     | 0.411852 | 0.089592 | 0.731751 | 0.343811 |
| MmugDNA.13250.1.S1_at   | MmugDNA.13250.1 | 9.61  | 9.57  | 0.32 | 0.07 | 1.03  | 0.392164 | 0.550417 | 0.7181   | 0.730421 |
| MmugDNA.13251.1.S1_at   | MmugDNA.13251.1 | 5.55  | 5.41  | 0.25 | 0.03 | 1.1   | 0.427766 | 0.725414 | 0.741365 | 0.841043 |
| MmugDNA.13253.1.S1_at   | MmugDNA.13253.1 | 4.31  | 4.14  | 0.63 | 0.15 | 1.12  | 0.673537 | 0.446271 | 0.871407 | 0.662743 |
| MmugDNA.13253.1.S1_x_at | MmugDNA.13253.1 | 5.05  | 5.09  | 0.36 | 0.08 | -1.03 | 0.933231 | 0.671118 | 0.977342 | 0.807655 |
| MmugDNA.13254.1.S1_at   | MmugDNA.13254.1 | 3.83  | 4.09  | 0.21 | 0.08 | -1.2  | 0.078656 | 0.336468 | 0.441461 | 0.583831 |

|                         |                 |       |       |      |      |       |          |          |          |          |
|-------------------------|-----------------|-------|-------|------|------|-------|----------|----------|----------|----------|
| MmugDNA.13255.1.S1_at   | MmugDNA.13255.1 | 5.41  | 5.31  | 0.22 | 0.19 | 1.08  | 0.580246 | 0.592642 | 0.826923 | 0.757854 |
| MmugDNA.13256.1.S1_at   | MmugDNA.13256.1 | 8.84  | 8.94  | 1.25 | 0.17 | -1.07 | 0.307015 | 0.425497 | 0.659905 | 0.647866 |
| MmugDNA.13257.1.S1_at   | MmugDNA.13257.1 | 4.65  | 4.62  | 0    | 0.05 | 1.03  | 0.104731 | 0.159678 | 0.475972 | 0.435785 |
| MmugDNA.13258.1.S1_at   | MmugDNA.13258.1 | 4.57  | 6.48  | 1.22 | 0.19 | -3.76 | 0.162549 | 0.345289 | 0.535667 | 0.590593 |
| MmugDNA.13259.1.S1_at   | MmugDNA.13259.1 | 12.06 | 12.03 | 0.12 | 0.06 | 1.02  | 0.931487 | 0.008241 | 0.97706  | 0.12058  |
| MmugDNA.1326.1.S1_at    | MmugDNA.1326.1  | 4.51  | 4.92  | 0.17 | 0.37 | -1.33 | 0.0774   | 0.542311 | 0.439366 | 0.725385 |
| MmugDNA.13260.1.S1_at   | MmugDNA.13260.1 | 4     | 3.86  | 0.11 | 0.34 | 1.1   | 0.784978 | 0.898329 | 0.920961 | 0.942152 |
| MmugDNA.13261.1.S1_at   | MmugDNA.13261.1 | 6.27  | 6.23  | 0.08 | 0.18 | 1.03  | 0.229825 | 0.402131 | 0.598481 | 0.631232 |
| MmugDNA.13262.1.S1_at   | MmugDNA.13262.1 | 5.8   | 5.7   | 0.24 | 0.02 | 1.07  | 0.27557  | 0.232608 | 0.635035 | 0.504359 |
| MmugDNA.13263.1.S1_at   | MmugDNA.13263.1 | 3.28  | 3.2   | 0.26 | 0.05 | 1.06  | 0.255971 | 0.493357 | 0.619906 | 0.694092 |
| MmugDNA.13264.1.S1_at   | MmugDNA.13264.1 | 6.07  | 5.77  | 0.13 | 0.24 | 1.23  | 0.131333 | 0.118477 | 0.505676 | 0.386457 |
| MmugDNA.13265.1.S1_at   | MmugDNA.13265.1 | 5.09  | 4.91  | 0.22 | 0.23 | 1.13  | 0.171917 | 0.218057 | 0.54526  | 0.491683 |
| MmugDNA.13267.1.S1_at   | MmugDNA.13267.1 | 9.23  | 9.6   | 0.53 | 0.2  | -1.3  | 0.514044 | 0.626709 | 0.790236 | 0.779962 |
| MmugDNA.13268.1.S1_at   | MmugDNA.13268.1 | 11.59 | 10.91 | 0.41 | 0.03 | 1.61  | 0.0373   | 0.006738 | 0.357061 | 0.110984 |
| MmugDNA.13271.1.S1_at   | MmugDNA.13271.1 | 5.19  | 5.21  | 0.14 | 0.12 | -1.02 | 0.428616 | 0.457712 | 0.741963 | 0.670897 |
| MmugDNA.13272.1.S1_at   | MmugDNA.13272.1 | 3.52  | 4.27  | 0.15 | 0.16 | -1.69 | 0.005051 | 0.022099 | 0.204763 | 0.185973 |
| MmugDNA.13274.1.S1_at   | MmugDNA.13274.1 | 5.33  | 5.41  | 0.34 | 0.13 | -1.06 | 0.972554 | 0.948079 | 0.991114 | 0.970446 |
| MmugDNA.13275.1.S1_at   | MmugDNA.13275.1 | 4.92  | 4.8   | 0.92 | 0.34 | 1.09  | 0.547513 | 0.778356 | 0.809164 | 0.871276 |
| MmugDNA.13276.1.S1_at   | MmugDNA.13276.1 | 2.93  | 2.82  | 0.19 | 0.12 | 1.08  | 0.208913 | 0.242466 | 0.580477 | 0.512835 |
| MmugDNA.13278.1.S1_at   | MmugDNA.13278.1 | 10.23 | 10.54 | 0.43 | 0.12 | -1.24 | 0.293142 | 0.259926 | 0.649496 | 0.52675  |
| MmugDNA.13279.1.S1_at   | MmugDNA.13279.1 | 9.93  | 9.78  | 0.31 | 0.03 | 1.11  | 0.135657 | 0.138288 | 0.510119 | 0.411198 |
| MmugDNA.1328.1.S1_at    | MmugDNA.1328.1  | 7.62  | 7.54  | 0.35 | 0.17 | 1.06  | 0.46449  | 0.094082 | 0.762534 | 0.350727 |
| MmugDNA.13280.1.S1_at   | MmugDNA.13280.1 | 5.58  | 5.62  | 0.03 | 0.12 | -1.03 | 0.639286 | 0.970482 | 0.856238 | 0.983936 |
| MmugDNA.13281.1.S1_at   | MmugDNA.13281.1 | 5.94  | 5.77  | 0.15 | 0.08 | 1.12  | 0.175349 | 0.098534 | 0.548245 | 0.356636 |
| MmugDNA.13282.1.S1_at   | MmugDNA.13282.1 | 6.2   | 6.27  | 0.21 | 0.03 | -1.05 | 0.465971 | 0.439869 | 0.763311 | 0.658468 |
| MmugDNA.13283.1.S1_at   | MmugDNA.13283.1 | 3.93  | 3.81  | 0.18 | 0.05 | 1.08  | 0.685602 | 0.690052 | 0.876865 | 0.819235 |
| MmugDNA.13286.1.S1_at   | MmugDNA.13286.1 | 10.99 | 10.84 | 2.59 | 0.23 | 1.11  | 0.702236 | 0.366792 | 0.884153 | 0.606502 |
| MmugDNA.22482.1.S1_s_at | MmugDNA.22482.1 | 9.48  | 9.76  | 0.24 | 0.06 | -1.21 | 0.474426 | 0.022371 | 0.767951 | 0.187176 |
| MmugDNA.13288.1.S1_s_at | MmugDNA.13288.1 | 13.62 | 13.59 | 0.16 | 0.02 | 1.02  | 0.886406 | 0.538447 | 0.960501 | 0.723141 |
| MmugDNA.13289.1.S1_at   | MmugDNA.13289.1 | 8.28  | 8.12  | 0.71 | 0.22 | 1.12  | 0.852422 | 0.930762 | 0.947963 | 0.960673 |
| MmugDNA.1329.1.S1_at    | MmugDNA.1329.1  | 4.84  | 4.99  | 0.1  | 0.16 | -1.11 | 0.082078 | 0.085267 | 0.446841 | 0.337096 |
| MmugDNA.13291.1.S1_at   | MmugDNA.13291.1 | 3.98  | 4.2   | 0.3  | 0.32 | -1.16 | 0.387672 | 0.661322 | 0.714584 | 0.801687 |
| MmugDNA.13292.1.S1_at   | MmugDNA.13292.1 | 3.2   | 3.03  | 0.12 | 0.02 | 1.12  | 0.173928 | 0.27736  | 0.546898 | 0.541302 |
| MmugDNA.13294.1.S1_at   | MmugDNA.13294.1 | 3.95  | 3.73  | 0.06 | 0.13 | 1.16  | 0.089744 | 0.07723  | 0.457893 | 0.322852 |
| MmugDNA.13295.1.S1_at   | MmugDNA.13295.1 | 4.17  | 4.16  | 0.18 | 0.15 | 1     | 0.223268 | 0.412383 | 0.592569 | 0.6388   |
| MmugDNA.13296.1.S1_at   | MmugDNA.13296.1 | 5.73  | 5.68  | 0.05 | 0    | 1.04  | 0.181237 | 0.692366 | 0.554504 | 0.820984 |
| MmugDNA.13297.1.S1_at   | MmugDNA.13297.1 | 4.83  | 4.93  | 0.42 | 0.27 | -1.08 | 0.876461 | 0.932638 | 0.956921 | 0.961739 |
| MmugDNA.13298.1.S1_at   | MmugDNA.13298.1 | 7.14  | 7.87  | 0.45 | 0.16 | -1.65 | 0.09856  | 0.043036 | 0.468009 | 0.252089 |
| MmugDNA.1330.1.S1_at    | MmugDNA.1330.1  | 4.49  | 4.51  | 0.21 | 0.31 | -1.01 | 0.836129 | 0.831594 | 0.941202 | 0.903439 |
| MmugDNA.13301.1.S1_at   | MmugDNA.13301.1 | 12.75 | 12.39 | 0.11 | 0.13 | 1.29  | 0.010956 | 0.003021 | 0.250904 | 0.080204 |
| MmugDNA.13305.1.S1_at   | MmugDNA.13305.1 | 4.91  | 4.93  | 0.09 | 0.15 | -1.01 | 0.89713  | 0.556854 | 0.964979 | 0.734831 |
| MmugDNA.13307.1.S1_at   | MmugDNA.13307.1 | 3.94  | 3.87  | 0.12 | 0.17 | 1.05  | 0.382654 | 0.554974 | 0.710805 | 0.733559 |
| MmugDNA.13309.1.S1_at   | MmugDNA.13309.1 | 6.59  | 6.18  | 0.18 | 0.16 | 1.33  | 0.084955 | 0.081125 | 0.451555 | 0.32931  |



|                         |                 |       |       |      |      |       |          |          |          |          |
|-------------------------|-----------------|-------|-------|------|------|-------|----------|----------|----------|----------|
| MmugDNA.13361.1.S1_at   | MmugDNA.13361.1 | 7.81  | 7.56  | 0.18 | 0.17 | 1.2   | 0.138362 | 0.345502 | 0.51369  | 0.590747 |
| MmugDNA.13363.1.S1_at   | MmugDNA.13363.1 | 3.94  | 3.7   | 0.19 | 0.23 | 1.19  | 0.834037 | 0.446112 | 0.940492 | 0.662706 |
| MmugDNA.13364.1.S1_at   | MmugDNA.13364.1 | 3.9   | 3.73  | 0.2  | 0.09 | 1.12  | 0.288594 | 0.824859 | 0.645615 | 0.899427 |
| MmugDNA.13365.1.S1_at   | MmugDNA.13365.1 | 4.14  | 4.15  | 0.22 | 0.06 | -1.01 | 0.452905 | 0.770227 | 0.755901 | 0.866562 |
| MmugDNA.13368.1.S1_at   | MmugDNA.13368.1 | 7     | 6.99  | 0.05 | 0    | 1.01  | 0.466812 | 0.315346 | 0.763884 | 0.568939 |
| MmugDNA.13369.1.S1_at   | MmugDNA.13369.1 | 3.62  | 3.62  | 0.18 | 0.28 | 1     | 0.78549  | 0.192704 | 0.921144 | 0.468219 |
| MmugDNA.1337.1.S1_at    | MmugDNA.1337.1  | 11.84 | 11.83 | 0.32 | 0.08 | 1.01  | 0.414741 | 0.021969 | 0.733287 | 0.185463 |
| MmugDNA.13370.1.S1_at   | MmugDNA.13370.1 | 3.44  | 3.45  | 0.2  | 0.06 | -1.01 | 0.453377 | 0.715573 | 0.75608  | 0.835127 |
| MmugDNA.13371.1.S1_at   | MmugDNA.13371.1 | 2.84  | 3.07  | 0.06 | 0.26 | -1.17 | 0.498653 | 0.339881 | 0.781829 | 0.586417 |
| MmugDNA.13372.1.S1_at   | MmugDNA.13372.1 | 6.04  | 5.76  | 0.2  | 0.07 | 1.21  | 0.178295 | 0.224888 | 0.551301 | 0.497657 |
| MmugDNA.13373.1.S1_at   | MmugDNA.13373.1 | 4.81  | 5.79  | 0.61 | 0.6  | -1.97 | 0.203856 | 0.210422 | 0.57513  | 0.484303 |
| MmugDNA.13374.1.S1_at   | MmugDNA.13374.1 | 4.46  | 4.37  | 0.08 | 0.18 | 1.06  | 0.310946 | 0.679303 | 0.662774 | 0.81275  |
| MmugDNA.13375.1.S1_at   | MmugDNA.13375.1 | 11.38 | 11.04 | 0.39 | 0.14 | 1.27  | 0.150332 | 0.019962 | 0.523947 | 0.17752  |
| MmugDNA.13376.1.S1_at   | MmugDNA.13376.1 | 4.47  | 4.42  | 0.16 | 0.04 | 1.04  | 0.49821  | 0.28023  | 0.781608 | 0.543487 |
| MmugDNA.13377.1.S1_at   | MmugDNA.13377.1 | 3.59  | 3.24  | 0.42 | 0.19 | 1.27  | 0.281798 | 0.23282  | 0.640218 | 0.504441 |
| MmugDNA.13378.1.S1_at   | MmugDNA.13378.1 | 4.23  | 4.22  | 0.07 | 0.09 | 1.01  | 0.356408 | 0.733067 | 0.695154 | 0.845503 |
| MmugDNA.13379.1.S1_at   | MmugDNA.13379.1 | 7.03  | 7.11  | 0.11 | 0.03 | -1.06 | 0.284419 | 0.100582 | 0.642301 | 0.359845 |
| MmugDNA.1338.1.S1_at    | MmugDNA.1338.1  | 5.65  | 5.65  | 0    | 0    | 1     | 0.373901 | 0.132699 | 0.705567 | 0.404544 |
| MmugDNA.13383.1.S1_at   | MmugDNA.13383.1 | 2.76  | 2.81  | 0.18 | 0    | -1.04 | 0.670409 | 0.685971 | 0.869943 | 0.816691 |
| MmugDNA.13384.1.S1_at   | MmugDNA.13384.1 | 7.12  | 7.37  | 0.13 | 0.12 | -1.19 | 0.026528 | 0.001084 | 0.325308 | 0.05215  |
| MmugDNA.13385.1.S1_at   | MmugDNA.13385.1 | 5     | 5.22  | 0.56 | 0.23 | -1.16 | 0.574622 | 0.534733 | 0.824155 | 0.720524 |
| MmugDNA.13387.1.S1_at   | MmugDNA.13387.1 | 6.61  | 7.26  | 0.44 | 0.08 | -1.57 | 0.188853 | 0.013384 | 0.560718 | 0.14827  |
| MmugDNA.13388.1.S1_at   | MmugDNA.13388.1 | 6.37  | 6.11  | 0.25 | 0.01 | 1.2   | 0.491873 | 0.69712  | 0.778032 | 0.824045 |
| MmugDNA.13389.1.S1_s_at | MmugDNA.13389.1 | 7     | 7.14  | 0.47 | 0.29 | -1.1  | 0.809461 | 0.418593 | 0.93104  | 0.642999 |
| MmugDNA.1339.1.S1_at    | MmugDNA.1339.1  | 11.44 | 11.42 | 0.11 | 0.14 | 1.02  | 0.679758 | 0.024159 | 0.874376 | 0.194601 |
| MmugDNA.13390.1.S1_at   | MmugDNA.13390.1 | 3.5   | 3.34  | 0.37 | 0.27 | 1.12  | 0.674185 | 0.667329 | 0.871851 | 0.805297 |
| MmugDNA.13392.1.S1_at   | MmugDNA.13392.1 | 10.22 | 10.62 | 0.72 | 0.6  | -1.32 | 0.343843 | 0.42334  | 0.686882 | 0.646277 |
| MmugDNA.13393.1.S1_at   | MmugDNA.13393.1 | 9.23  | 8.87  | 0.52 | 0.22 | 1.28  | 0.087774 | 0.030693 | 0.455547 | 0.217148 |
| MmugDNA.13395.1.S1_at   | MmugDNA.13395.1 | 10.64 | 10.83 | 0.73 | 0.14 | -1.14 | 0.793129 | 0.09585  | 0.924208 | 0.352962 |
| MmugDNA.13396.1.S1_at   | MmugDNA.13396.1 | 5.21  | 5.34  | 0.1  | 0.03 | -1.09 | 0.106897 | 0.504655 | 0.479405 | 0.701754 |
| MmugDNA.13399.1.S1_at   | MmugDNA.13399.1 | 11.82 | 11.88 | 0.31 | 0.15 | -1.04 | 0.502838 | 0.113532 | 0.783914 | 0.379632 |
| MmugDNA.1340.1.S1_at    | MmugDNA.1340.1  | 11.36 | 11.26 | 0.05 | 0.05 | 1.07  | 0.174598 | 0.036356 | 0.547978 | 0.235105 |
| MmugDNA.13401.1.S1_s_at | MmugDNA.13401.1 | 10.1  | 10.11 | 0.41 | 0.06 | -1    | 0.942482 | 0.449315 | 0.98031  | 0.665015 |
| MmugDNA.13404.1.S1_at   | MmugDNA.13404.1 | 4.25  | 4.15  | 0.27 | 0.13 | 1.08  | 0.547179 | 0.732351 | 0.808925 | 0.844986 |
| MmugDNA.13405.1.S1_at   | MmugDNA.13405.1 | 7.84  | 7.76  | 1    | 0.16 | 1.06  | 0.450361 | 0.590161 | 0.754829 | 0.756117 |
| MmugDNA.13409.1.S1_at   | MmugDNA.13409.1 | 5.59  | 5.41  | 0.24 | 0.05 | 1.14  | 0.407678 | 0.293679 | 0.728818 | 0.553665 |
| MmugDNA.13410.1.S1_at   | MmugDNA.13410.1 | 3.41  | 3.85  | 0.03 | 0.44 | -1.35 | 0.168922 | 0.144296 | 0.541871 | 0.418196 |
| MmugDNA.13411.1.S1_at   | MmugDNA.13411.1 | 4.43  | 4.5   | 0.02 | 0.23 | -1.05 | 0.710318 | 0.667346 | 0.887279 | 0.805297 |
| MmugDNA.13412.1.S1_at   | MmugDNA.13412.1 | 5.58  | 5.67  | 0.07 | 0.08 | -1.06 | 0.083669 | 0.000171 | 0.449639 | 0.030511 |
| MmugDNA.13413.1.S1_at   | MmugDNA.13413.1 | 4.78  | 5.62  | 0.89 | 0.31 | -1.79 | 0.477624 | 0.026336 | 0.76987  | 0.203321 |
| MmugDNA.13414.1.S1_at   | MmugDNA.13414.1 | 2.93  | 2.92  | 0.02 | 0.12 | 1.01  | 0.854869 | 0.252923 | 0.948629 | 0.521258 |
| MmugDNA.13415.1.S1_at   | MmugDNA.13415.1 | 4.87  | 4.86  | 0.02 | 0.07 | 1.01  | 0.653474 | 0.159571 | 0.86241  | 0.435774 |
| MmugDNA.13415.1.S1_s_at | MmugDNA.13415.1 | 7.08  | 7.01  | 0.19 | 0.06 | 1.06  | 0.837109 | 0.729988 | 0.941548 | 0.843736 |

|                         |                 |       |       |      |      |       |          |          |          |          |
|-------------------------|-----------------|-------|-------|------|------|-------|----------|----------|----------|----------|
| MmugDNA.13416.1.S1_at   | MmugDNA.13416.1 | 2.99  | 2.92  | 0.65 | 0.05 | 1.05  | 0.301357 | 0.446513 | 0.655714 | 0.662842 |
| MmugDNA.13419.1.S1_at   | MmugDNA.13419.1 | 6.59  | 6.67  | 0.44 | 0.28 | -1.06 | 0.578436 | 0.069446 | 0.826202 | 0.309778 |
| MmugDNA.1342.1.S1_at    | MmugDNA.1342.1  | 5.16  | 5.05  | 0.1  | 0.16 | 1.08  | 0.925307 | 0.186632 | 0.975138 | 0.462425 |
| MmugDNA.13420.1.S1_at   | MmugDNA.13420.1 | 10.37 | 10.95 | 0.07 | 0.11 | -1.5  | 0.002277 | 0.000228 | 0.174757 | 0.032385 |
| MmugDNA.13421.1.S1_at   | MmugDNA.13421.1 | 8.91  | 9.36  | 0.64 | 0.11 | -1.37 | 0.474364 | 0.055136 | 0.767951 | 0.280429 |
| MmugDNA.13423.1.S1_at   | MmugDNA.13423.1 | 11.42 | 11.29 | 0.17 | 0.06 | 1.1   | 0.343571 | 0.021936 | 0.686769 | 0.185351 |
| MmugDNA.13425.1.S1_at   | MmugDNA.13425.1 | 5.64  | 5.61  | 0.11 | 0.12 | 1.02  | 0.525362 | 0.583001 | 0.796198 | 0.751495 |
| MmugDNA.13427.1.S1_at   | MmugDNA.13427.1 | 6.51  | 6.42  | 0.38 | 0.01 | 1.06  | 0.92377  | 0.409922 | 0.974442 | 0.636956 |
| MmugDNA.13429.1.S1_at   | MmugDNA.13429.1 | 3.33  | 3.28  | 0.23 | 0.04 | 1.04  | 0.249857 | 0.334281 | 0.615347 | 0.582323 |
| MmugDNA.1343.1.S1_at    | MmugDNA.1343.1  | 4.55  | 4.57  | 0.16 | 0.09 | -1.01 | 0.312739 | 0.679032 | 0.664208 | 0.812591 |
| MmugDNA.13430.1.S1_at   | MmugDNA.13430.1 | 4.49  | 4.2   | 0.17 | 0.11 | 1.22  | 0.068944 | 0.129707 | 0.426331 | 0.401344 |
| MmugDNA.13431.1.S1_at   | MmugDNA.13431.1 | 5.26  | 5.16  | 0.18 | 0.05 | 1.07  | 0.288308 | 0.340503 | 0.645413 | 0.586776 |
| MmugDNA.13433.1.S1_at   | MmugDNA.13433.1 | 4.37  | 4.37  | 0    | 0.14 | 1     | 0.388007 | 0.335997 | 0.714947 | 0.583601 |
| MmugDNA.13434.1.S1_at   | MmugDNA.13434.1 | 7.78  | 7.45  | 0.73 | 0.16 | 1.25  | 0.510045 | 0.282749 | 0.787923 | 0.545473 |
| MmugDNA.13435.1.S1_at   | MmugDNA.13435.1 | 6.03  | 6.03  | 0.15 | 0.06 | -1    | 0.566389 | 0.705283 | 0.819997 | 0.829122 |
| MmugDNA.13437.1.S1_at   | MmugDNA.13437.1 | 9.86  | 10.01 | 1.21 | 0.08 | -1.1  | 0.495995 | 0.584613 | 0.780178 | 0.752482 |
| MmugDNA.13438.1.S1_at   | MmugDNA.13438.1 | 9.45  | 9.49  | 0.66 | 0.2  | -1.03 | 0.305876 | 0.07373  | 0.659264 | 0.317071 |
| MmugDNA.13440.1.S1_at   | MmugDNA.13440.1 | 8.5   | 9.42  | 0.39 | 0.31 | -1.89 | 0.039873 | 0.003331 | 0.362804 | 0.083001 |
| MmugDNA.13441.1.S1_at   | MmugDNA.13441.1 | 3.53  | 3.79  | 0.45 | 0.11 | -1.2  | 0.97156  | 0.973332 | 0.990709 | 0.985515 |
| MmugDNA.13442.1.S1_at   | MmugDNA.13442.1 | 10.77 | 10.87 | 0.42 | 0.05 | -1.07 | 0.831487 | 0.610235 | 0.939628 | 0.768481 |
| MmugDNA.13443.1.S1_at   | MmugDNA.13443.1 | 6.61  | 6.49  | 0.14 | 0.13 | 1.09  | 0.142478 | 0.122511 | 0.517603 | 0.392423 |
| MmugDNA.13446.1.S1_at   | MmugDNA.13446.1 | 5.79  | 5.75  | 0.07 | 0.23 | 1.03  | 0.579827 | 0.109689 | 0.826689 | 0.373675 |
| MmugDNA.13447.1.S1_at   | MmugDNA.13447.1 | 5.34  | 5.48  | 0.22 | 0.15 | -1.1  | 0.769712 | 0.923534 | 0.913805 | 0.956997 |
| MmugDNA.13448.1.S1_at   | MmugDNA.13448.1 | 9.51  | 10.23 | 0.32 | 0.26 | -1.65 | 0.042418 | 0.106324 | 0.369024 | 0.368819 |
| MmugDNA.13449.1.S1_at   | MmugDNA.13449.1 | 3.33  | 3.32  | 0.02 | 0.08 | 1     | 0.457453 | 0.133781 | 0.758343 | 0.405778 |
| MmugDNA.1345.1.S1_at    | MmugDNA.1345.1  | 4.2   | 3.99  | 0.33 | 0.05 | 1.16  | 0.519186 | 0.631759 | 0.793113 | 0.782957 |
| MmugDNA.1345.1.S1_s_at  | MmugDNA.1345.1  | 5.16  | 5.18  | 0.08 | 0.09 | -1.02 | 0.454622 | 0.818845 | 0.756874 | 0.895606 |
| MmugDNA.13450.1.S1_at   | MmugDNA.13450.1 | 12.42 | 11.66 | 1.26 | 0.04 | 1.69  | 0.914175 | 0.475521 | 0.970825 | 0.682219 |
| MmugDNA.13451.1.S1_at   | MmugDNA.13451.1 | 6.69  | 6.74  | 0.15 | 0.05 | -1.04 | 0.244998 | 0.278521 | 0.610441 | 0.542311 |
| MmugDNA.13452.1.S1_at   | MmugDNA.13452.1 | 6.81  | 6.51  | 0.37 | 0.12 | 1.24  | 0.079504 | 0.053303 | 0.442306 | 0.276463 |
| MmugDNA.13453.1.S1_at   | MmugDNA.13453.1 | 6.95  | 6.84  | 0.06 | 0.09 | 1.08  | 0.078608 | 0.060907 | 0.441376 | 0.293514 |
| MmugDNA.13454.1.S1_at   | MmugDNA.13454.1 | 6.79  | 6.71  | 0.01 | 0.08 | 1.06  | 0.332724 | 0.243136 | 0.679208 | 0.513356 |
| MmugDNA.13456.1.S1_at   | MmugDNA.13456.1 | 3.09  | 3.23  | 0.24 | 0.19 | -1.11 | 0.759778 | 0.271435 | 0.909769 | 0.536512 |
| MmugDNA.13457.1.S1_at   | MmugDNA.13457.1 | 4.67  | 4.44  | 0.12 | 0.25 | 1.17  | 0.804248 | 0.358939 | 0.928797 | 0.600333 |
| MmugDNA.13458.1.S1_at   | MmugDNA.13458.1 | 10.79 | 10.95 | 0.44 | 0.04 | -1.12 | 0.778417 | 0.471711 | 0.918259 | 0.679612 |
| MmugDNA.13458.1.S1_s_at | MmugDNA.13458.1 | 11.43 | 11.59 | 0.37 | 0.05 | -1.12 | 0.940167 | 0.261893 | 0.979649 | 0.528287 |
| MmugDNA.13459.1.S1_at   | MmugDNA.13459.1 | 2.9   | 2.87  | 0.07 | 0.21 | 1.02  | 0.681653 | 0.954561 | 0.875365 | 0.974203 |
| MmugDNA.1346.1.S1_at    | MmugDNA.1346.1  | 4.16  | 4.15  | 0.07 | 0.05 | 1     | 0.782214 | 0.210049 | 0.919732 | 0.483835 |
| MmugDNA.13460.1.S1_at   | MmugDNA.13460.1 | 12.75 | 12.94 | 0.12 | 0.04 | -1.14 | 0.071476 | 0.003412 | 0.431049 | 0.084071 |
| MmugDNA.13460.1.S1_s_at | MmugDNA.13460.1 | 12.58 | 12.67 | 0.29 | 0.08 | -1.07 | 0.182723 | 0.035065 | 0.555631 | 0.231425 |
| MmugDNA.13462.1.S1_at   | MmugDNA.13462.1 | 12.48 | 12.37 | 0.14 | 0.11 | 1.08  | 0.296035 | 0.297612 | 0.651699 | 0.55624  |
| MmugDNA.13463.1.S1_at   | MmugDNA.13463.1 | 12.46 | 12.38 | 0.05 | 0.02 | 1.06  | 0.137127 | 0.011251 | 0.512061 | 0.138039 |
| MmugDNA.13465.1.S1_s_at | MmugDNA.13465.1 | 6.76  | 6.6   | 0.65 | 0.1  | 1.12  | 0.738134 | 0.070425 | 0.899775 | 0.311729 |

|                         |                 |       |       |      |      |       |          |          |          |          |
|-------------------------|-----------------|-------|-------|------|------|-------|----------|----------|----------|----------|
| MmugDNA.13466.1.S1_at   | MmugDNA.13466.1 | 10.26 | 10.07 | 0.58 | 0.1  | 1.14  | 0.624128 | 0.651987 | 0.848537 | 0.796529 |
| MmugDNA.13468.1.S1_at   | MmugDNA.13468.1 | 8.97  | 9.35  | 0.48 | 0.04 | -1.31 | 0.238384 | 0.059366 | 0.605341 | 0.29054  |
| MmugDNA.13469.1.S1_at   | MmugDNA.13469.1 | 6.75  | 6.59  | 0.09 | 0.23 | 1.12  | 0.489482 | 0.682017 | 0.776198 | 0.814299 |
| MmugDNA.1347.1.S1_at    | MmugDNA.1347.1  | 5.96  | 5.96  | 0.08 | 0.06 | -1    | 0.272792 | 0.331077 | 0.632514 | 0.5798   |
| MmugDNA.13470.1.S1_at   | MmugDNA.13470.1 | 4.7   | 4.55  | 0.4  | 0.96 | 1.11  | 0.596479 | 0.171397 | 0.835994 | 0.447862 |
| MmugDNA.13471.1.S1_at   | MmugDNA.13471.1 | 6.67  | 7.33  | 0.58 | 0.22 | -1.58 | 0.073618 | 0.044442 | 0.434623 | 0.25521  |
| MmugDNA.13473.1.S1_at   | MmugDNA.13473.1 | 3.28  | 3.19  | 0.13 | 0    | 1.07  | 0.213268 | 0.390723 | 0.583803 | 0.624501 |
| MmugDNA.13474.1.S1_at   | MmugDNA.13474.1 | 3.24  | 3.27  | 0.09 | 0.21 | -1.02 | 0.330426 | 0.432672 | 0.677027 | 0.653054 |
| MmugDNA.13475.1.S1_at   | MmugDNA.13475.1 | 5     | 4.98  | 0.02 | 0.12 | 1.01  | 0.942778 | 0.478848 | 0.98031  | 0.684745 |
| MmugDNA.13476.1.S1_at   | MmugDNA.13476.1 | 3.84  | 3.87  | 0.03 | 0.1  | -1.02 | 0.711706 | 0.914235 | 0.887702 | 0.951773 |
| MmugDNA.13477.1.S1_at   | MmugDNA.13477.1 | 3.39  | 3.24  | 0.33 | 0.16 | 1.1   | 0.314341 | 0.727876 | 0.665127 | 0.842703 |
| MmugDNA.13478.1.S1_at   | MmugDNA.13478.1 | 10.6  | 10.81 | 0.52 | 0.07 | -1.16 | 0.629088 | 0.681642 | 0.851386 | 0.814092 |
| MmugDNA.13479.1.S1_at   | MmugDNA.13479.1 | 3.66  | 3.92  | 0.13 | 0.23 | -1.2  | 0.101379 | 0.173976 | 0.471667 | 0.450247 |
| MmugDNA.1348.1.S1_at    | MmugDNA.1348.1  | 6.12  | 6.17  | 0.22 | 0.33 | -1.03 | 0.683958 | 0.811333 | 0.876251 | 0.891133 |
| MmugDNA.13480.1.S1_at   | MmugDNA.13480.1 | 5.53  | 5.79  | 0.12 | 0.1  | -1.2  | 0.071953 | 0.279993 | 0.431889 | 0.543369 |
| MmugDNA.13483.1.S1_at   | MmugDNA.13483.1 | 8.03  | 8.48  | 0.34 | 0.26 | -1.37 | 0.110592 | 0.153146 | 0.483739 | 0.428011 |
| MmugDNA.13484.1.S1_at   | MmugDNA.13484.1 | 10.01 | 10.05 | 0.1  | 0.17 | -1.03 | 0.435026 | 0.50295  | 0.745466 | 0.700471 |
| MmugDNA.13485.1.S1_s_at | MmugDNA.13485.1 | 8.78  | 8.74  | 0.2  | 0.11 | 1.03  | 0.780192 | 0.605025 | 0.919043 | 0.764917 |
| MmugDNA.13487.1.S1_at   | MmugDNA.13487.1 | 3.3   | 3.29  | 0.26 | 0.09 | 1.01  | 0.395386 | 0.47658  | 0.720458 | 0.682787 |
| MmugDNA.13489.1.S1_at   | MmugDNA.13489.1 | 9.57  | 9.81  | 0.15 | 0.05 | -1.18 | 0.074835 | 0.084148 | 0.435313 | 0.335181 |
| MmugDNA.1349.1.S1_at    | MmugDNA.1349.1  | 6.03  | 6.06  | 0.16 | 0.16 | -1.02 | 0.673281 | 0.653882 | 0.87123  | 0.797692 |
| MmugDNA.13491.1.S1_at   | MmugDNA.13491.1 | 9.23  | 8.98  | 0.24 | 0.09 | 1.19  | 0.060718 | 0.048743 | 0.408585 | 0.265744 |
| MmugDNA.13492.1.S1_at   | MmugDNA.13492.1 | 5.86  | 5.73  | 0.12 | 0.37 | 1.1   | 0.363486 | 0.542609 | 0.700102 | 0.725615 |
| MmugDNA.13494.1.S1_at   | MmugDNA.13494.1 | 4.4   | 4.55  | 0.1  | 0.41 | -1.11 | 0.192779 | 0.324611 | 0.563577 | 0.575163 |
| MmugDNA.13495.1.S1_at   | MmugDNA.13495.1 | 5.72  | 5.85  | 0.16 | 0.12 | -1.09 | 0.214181 | 0.146146 | 0.584673 | 0.420099 |
| MmugDNA.13496.1.S1_at   | MmugDNA.13496.1 | 3.93  | 3.86  | 0.09 | 0.18 | 1.05  | 0.373545 | 0.509155 | 0.705567 | 0.704028 |
| MmugDNA.13497.1.S1_at   | MmugDNA.13497.1 | 7.77  | 6.7   | 1.62 | 0.06 | 2.1   | 0.330162 | 0.242208 | 0.676891 | 0.51267  |
| MmugDNA.13499.1.S1_at   | MmugDNA.13499.1 | 9.21  | 8.92  | 0.32 | 0.04 | 1.22  | 0.123918 | 0.178739 | 0.497477 | 0.455039 |
| MmugDNA.135.1.S1_at     | MmugDNA.135.1   | 4.88  | 5.07  | 0.27 | 0.36 | -1.14 | 0.963382 | 0.000522 | 0.988152 | 0.039743 |
| MmugDNA.13500.1.S1_at   | MmugDNA.13500.1 | 3.23  | 3.24  | 0.12 | 0.16 | -1.01 | 0.810342 | 0.749166 | 0.931335 | 0.854211 |
| MmugDNA.13501.1.S1_at   | MmugDNA.13501.1 | 6.42  | 6.38  | 0.07 | 0.1  | 1.03  | 0.426171 | 0.30522  | 0.740376 | 0.562255 |
| MmugDNA.13502.1.S1_at   | MmugDNA.13502.1 | 11.01 | 10.98 | 0.79 | 0.12 | 1.02  | 0.528172 | 0.713178 | 0.797492 | 0.833655 |
| MmugDNA.13503.1.S1_at   | MmugDNA.13503.1 | 3.21  | 3.1   | 0.05 | 0.06 | 1.08  | 0.212184 | 0.73566  | 0.582812 | 0.847033 |
| MmugDNA.13504.1.S1_at   | MmugDNA.13504.1 | 6.75  | 6.28  | 0.29 | 0.26 | 1.39  | 0.538352 | 0.572635 | 0.803227 | 0.744597 |
| MmugDNA.13504.1.S1_x_at | MmugDNA.13504.1 | 7.78  | 7.49  | 0.32 | 0.08 | 1.22  | 0.473226 | 0.532442 | 0.767466 | 0.719059 |
| MmugDNA.13505.1.S1_at   | MmugDNA.13505.1 | 3.61  | 3.64  | 0.09 | 0.19 | -1.02 | 0.692969 | 0.833648 | 0.880403 | 0.904613 |
| MmugDNA.13506.1.S1_at   | MmugDNA.13506.1 | 10.58 | 10.52 | 0.36 | 0.06 | 1.05  | 0.792746 | 0.120729 | 0.924072 | 0.389579 |
| MmugDNA.13507.1.S1_at   | MmugDNA.13507.1 | 12.47 | 12.63 | 0.07 | 0.06 | -1.11 | 0.039952 | 0.030257 | 0.362955 | 0.215828 |
| MmugDNA.13508.1.S1_at   | MmugDNA.13508.1 | 2.81  | 2.81  | 0.04 | 0.03 | 1     | 0.231917 | 0.313749 | 0.599694 | 0.568083 |
| MmugDNA.13509.1.S1_at   | MmugDNA.13509.1 | 11.55 | 11.27 | 0.11 | 0.08 | 1.21  | 0.028358 | 0.051505 | 0.332311 | 0.272373 |
| MmugDNA.1351.1.S1_at    | MmugDNA.1351.1  | 5.31  | 5.18  | 0.06 | 0.12 | 1.09  | 0.061834 | 0.047215 | 0.411592 | 0.261855 |
| MmugDNA.13511.1.S1_at   | MmugDNA.13511.1 | 4.07  | 4.09  | 0.12 | 0.25 | -1.01 | 0.484933 | 0.38454  | 0.773846 | 0.620194 |
| MmugDNA.13512.1.S1_at   | MmugDNA.13512.1 | 3.23  | 3.04  | 0.25 | 0.08 | 1.14  | 0.279263 | 0.461955 | 0.638166 | 0.673467 |

|                         |                 |       |       |      |      |       |          |          |          |          |
|-------------------------|-----------------|-------|-------|------|------|-------|----------|----------|----------|----------|
| MmugDNA.13514.1.S1_at   | MmugDNA.13514.1 | 5.93  | 6.08  | 0.11 | 0.02 | -1.1  | 0.082297 | 0.043803 | 0.447124 | 0.25387  |
| MmugDNA.13515.1.S1_at   | MmugDNA.13515.1 | 8.34  | 7.65  | 0.53 | 0.43 | 1.62  | 0.219946 | 0.257728 | 0.589114 | 0.525344 |
| MmugDNA.13516.1.S1_at   | MmugDNA.13516.1 | 4.02  | 3.91  | 0.04 | 0.1  | 1.07  | 0.143595 | 0.481828 | 0.519019 | 0.686795 |
| MmugDNA.13517.1.S1_at   | MmugDNA.13517.1 | 10.25 | 10.74 | 0.51 | 0.07 | -1.4  | 0.159712 | 0.288226 | 0.532663 | 0.5495   |
| MmugDNA.13518.1.S1_at   | MmugDNA.13518.1 | 3.26  | 3.14  | 0.2  | 0.22 | 1.09  | 0.745996 | 0.428552 | 0.903166 | 0.650098 |
| MmugDNA.13519.1.S1_at   | MmugDNA.13519.1 | 11.63 | 11.69 | 0.07 | 0.01 | -1.04 | 0.255524 | 0.132792 | 0.619604 | 0.404544 |
| MmugDNA.13521.1.S1_at   | MmugDNA.13521.1 | 4.38  | 4     | 0.1  | 0.13 | 1.3   | 0.017782 | 0.023812 | 0.293582 | 0.193276 |
| MmugDNA.13522.1.S1_at   | MmugDNA.13522.1 | 4.28  | 4.05  | 0.04 | 0.24 | 1.17  | 0.235292 | 0.206459 | 0.602341 | 0.480571 |
| MmugDNA.13523.1.S1_at   | MmugDNA.13523.1 | 10.51 | 9.69  | 1.03 | 0.1  | 1.76  | 0.785625 | 0.942873 | 0.921215 | 0.967564 |
| MmugDNA.13525.1.S1_at   | MmugDNA.13525.1 | 3.5   | 3.51  | 0.08 | 0    | -1    | 0.909578 | 0.513844 | 0.969434 | 0.707281 |
| MmugDNA.13526.1.S1_at   | MmugDNA.13526.1 | 4.77  | 4.6   | 0.66 | 0.29 | -1.13 | 0.694059 | 0.52667  | 0.880942 | 0.715627 |
| MmugDNA.13527.1.S1_at   | MmugDNA.13527.1 | 7.47  | 7.59  | 0.13 | 0.13 | -1.09 | 0.371991 | 0.090311 | 0.705567 | 0.3447   |
| MmugDNA.13529.1.S1_at   | MmugDNA.13529.1 | 5.58  | 4.47  | 0.62 | 1.28 | 2.15  | 0.427743 | 0.278457 | 0.741365 | 0.542235 |
| MmugDNA.13530.1.S1_at   | MmugDNA.13530.1 | 3.19  | 3.19  | 0.22 | 0.13 | 1     | 0.795376 | 0.934748 | 0.92485  | 0.963039 |
| MmugDNA.13533.1.S1_at   | MmugDNA.13533.1 | 7.08  | 7.14  | 0.15 | 0.02 | -1.04 | 0.514017 | 0.845812 | 0.790236 | 0.912246 |
| MmugDNA.13534.1.S1_at   | MmugDNA.13534.1 | 8.59  | 9.64  | 0.57 | 0.2  | -2.08 | 0.069749 | 0.137782 | 0.427657 | 0.410757 |
| MmugDNA.13535.1.S1_at   | MmugDNA.13535.1 | 11.87 | 11.46 | 0.14 | 0.04 | 1.32  | 0.005474 | 0.01886  | 0.208157 | 0.172765 |
| MmugDNA.13539.1.S1_at   | MmugDNA.13539.1 | 5.54  | 6.26  | 0.68 | 0.25 | -1.65 | 0.327362 | 0.692367 | 0.675065 | 0.820984 |
| MmugDNA.1354.1.S1_at    | MmugDNA.1354.1  | 3.78  | 4     | 0.06 | 0.58 | -1.16 | 0.573802 | 0.494809 | 0.823742 | 0.695103 |
| MmugDNA.13540.1.S1_at   | MmugDNA.13540.1 | 7.97  | 8.62  | 0.12 | 0.01 | -1.56 | 0.000791 | 0.000649 | 0.15004  | 0.04316  |
| MmugDNA.13541.1.S1_at   | MmugDNA.13541.1 | 3.84  | 4.01  | 0.49 | 0.07 | -1.12 | 0.720611 | 0.662912 | 0.891635 | 0.802665 |
| MmugDNA.13542.1.S1_at   | MmugDNA.13542.1 | 4.72  | 4.78  | 0.41 | 0.17 | -1.04 | 0.801785 | 0.605188 | 0.927756 | 0.764968 |
| MmugDNA.13543.1.S1_at   | MmugDNA.13543.1 | 8.71  | 8.89  | 0.83 | 0.37 | -1.14 | 0.878029 | 0.149349 | 0.957565 | 0.423811 |
| MmugDNA.13545.1.S1_at   | MmugDNA.13545.1 | 8.01  | 7.8   | 0.25 | 0.17 | 1.16  | 0.525801 | 0.703399 | 0.796442 | 0.828011 |
| MmugDNA.13546.1.S1_at   | MmugDNA.13546.1 | 3.73  | 3.72  | 0.39 | 0.23 | 1.01  | 0.584561 | 0.292046 | 0.829783 | 0.552201 |
| MmugDNA.13547.1.S1_at   | MmugDNA.13547.1 | 6.54  | 5.79  | 0.37 | 0.16 | 1.68  | 0.051409 | 0.03233  | 0.390032 | 0.222602 |
| MmugDNA.13548.1.S1_at   | MmugDNA.13548.1 | 8.22  | 7.96  | 0.24 | 0.09 | 1.19  | 0.173986 | 0.123738 | 0.546951 | 0.393883 |
| MmugDNA.13549.1.S1_at   | MmugDNA.13549.1 | 4.06  | 4.03  | 0.57 | 0.2  | 1.02  | 0.941752 | 0.69402  | 0.980207 | 0.82206  |
| MmugDNA.1355.1.S1_at    | MmugDNA.1355.1  | 4.36  | 3.98  | 0.13 | 0.37 | 1.3   | 0.185586 | 0.444636 | 0.558594 | 0.662072 |
| MmugDNA.13550.1.S1_at   | MmugDNA.13550.1 | 9.2   | 9.17  | 1.04 | 0.08 | 1.02  | 0.910305 | 0.551011 | 0.969563 | 0.730751 |
| MmugDNA.13551.1.S1_at   | MmugDNA.13551.1 | 5.71  | 5.7   | 0.42 | 0.2  | 1.01  | 0.587061 | 0.547994 | 0.831568 | 0.72884  |
| MmugDNA.13552.1.S1_at   | MmugDNA.13552.1 | 4.85  | 6.6   | 1.24 | 0.13 | -3.34 | 0.250647 | 0.308295 | 0.615805 | 0.564425 |
| MmugDNA.13553.1.S1_at   | MmugDNA.13553.1 | 4.9   | 4.9   | 0.17 | 0.03 | -1    | 0.303482 | 0.540917 | 0.657314 | 0.724649 |
| MmugDNA.13554.1.S1_at   | MmugDNA.13554.1 | 3.49  | 3.39  | 0.09 | 0.03 | 1.07  | 0.357427 | 0.647093 | 0.695809 | 0.793279 |
| MmugDNA.13555.1.S1_at   | MmugDNA.13555.1 | 3.74  | 4.09  | 0.15 | 0.39 | -1.28 | 0.50761  | 0.345455 | 0.78646  | 0.590746 |
| MmugDNA.13556.1.S1_at   | MmugDNA.13556.1 | 6.93  | 6.88  | 0.11 | 0.05 | 1.03  | 0.441954 | 0.223203 | 0.749733 | 0.496011 |
| MmugDNA.13556.1.S1_s_at | MmugDNA.13556.1 | 7.19  | 7.15  | 0.07 | 0.21 | 1.03  | 0.614136 | 0.577681 | 0.843828 | 0.748038 |
| MmugDNA.13557.1.S1_at   | MmugDNA.13557.1 | 5.31  | 5.28  | 0.2  | 0.08 | 1.02  | 0.802984 | 0.273062 | 0.928167 | 0.537644 |
| MmugDNA.13558.1.S1_at   | MmugDNA.13558.1 | 4.99  | 4.86  | 0.1  | 0.08 | 1.1   | 0.188516 | 0.509022 | 0.560489 | 0.703967 |
| MmugDNA.1356.1.S1_at    | MmugDNA.1356.1  | 6.85  | 6.83  | 0.09 | 0.15 | 1.01  | 0.819794 | 0.547217 | 0.935065 | 0.728342 |
| MmugDNA.27184.1.S1_s_at | MmugDNA.27184.1 | 14.3  | 14.3  | 0.04 | 0.01 | -1    | 0.740922 | 0.747999 | 0.901034 | 0.853341 |
| MmugDNA.13562.1.S1_at   | MmugDNA.13562.1 | 6.53  | 6.41  | 0.41 | 0.12 | 1.09  | 0.469188 | 0.31193  | 0.765521 | 0.566833 |
| MmugDNA.13563.1.S1_at   | MmugDNA.13563.1 | 4.66  | 4.42  | 0.19 | 0.33 | 1.18  | 0.509038 | 0.682415 | 0.787424 | 0.814526 |

|                         |                 |       |       |      |      |       |          |          |          |          |
|-------------------------|-----------------|-------|-------|------|------|-------|----------|----------|----------|----------|
| MmugDNA.13564.1.S1_at   | MmugDNA.13564.1 | 6.19  | 6.1   | 0.09 | 0.09 | 1.07  | 0.121042 | 0.069531 | 0.494696 | 0.309848 |
| MmugDNA.13566.1.S1_at   | MmugDNA.13566.1 | 5.89  | 7.31  | 1.29 | 0.13 | -2.69 | 0.143313 | 0.249799 | 0.5186   | 0.518876 |
| MmugDNA.13567.1.S1_at   | MmugDNA.13567.1 | 7.21  | 7.16  | 0.26 | 0.05 | 1.04  | 0.309228 | 0.321089 | 0.661595 | 0.57307  |
| MmugDNA.1357.1.S1_at    | MmugDNA.1357.1  | 5.14  | 5.23  | 0.35 | 0.08 | -1.06 | 0.524742 | 0.134026 | 0.796069 | 0.406234 |
| MmugDNA.13570.1.S1_at   | MmugDNA.13570.1 | 5.05  | 4.97  | 0.1  | 0.13 | 1.06  | 0.845824 | 0.753649 | 0.945918 | 0.856589 |
| MmugDNA.13572.1.S1_at   | MmugDNA.13572.1 | 8     | 9.26  | 0.57 | 0.1  | -2.4  | 0.008301 | 0.001048 | 0.23244  | 0.051466 |
| MmugDNA.13573.1.S1_at   | MmugDNA.13573.1 | 3.03  | 3.11  | 0.07 | 0.02 | -1.06 | 0.490126 | 0.060328 | 0.776766 | 0.292254 |
| MmugDNA.13574.1.S1_at   | MmugDNA.13574.1 | 3.95  | 3.95  | 0.24 | 0.11 | -1    | 0.441607 | 0.316964 | 0.749468 | 0.570275 |
| MmugDNA.13575.1.S1_at   | MmugDNA.13575.1 | 4.38  | 4.1   | 0.2  | 0.08 | 1.22  | 0.13212  | 0.082102 | 0.506637 | 0.330917 |
| MmugDNA.13576.1.S1_at   | MmugDNA.13576.1 | 10.25 | 10.5  | 0.69 | 0.09 | -1.19 | 0.314109 | 0.194169 | 0.665    | 0.469266 |
| MmugDNA.13577.1.S1_at   | MmugDNA.13577.1 | 6.68  | 6.58  | 0.19 | 0.23 | 1.07  | 0.121574 | 0.163566 | 0.495204 | 0.439765 |
| MmugDNA.13578.1.S1_at   | MmugDNA.13578.1 | 5.39  | 4.98  | 0.38 | 0.27 | 1.33  | 0.128949 | 0.228656 | 0.503646 | 0.500887 |
| MmugDNA.13579.1.S1_at   | MmugDNA.13579.1 | 5.69  | 5.39  | 0.01 | 0.43 | 1.23  | 0.284648 | 0.756919 | 0.642354 | 0.858495 |
| MmugDNA.13579.1.S1_s_at | MmugDNA.13579.1 | 6.17  | 6.24  | 0.05 | 0.13 | -1.05 | 0.299073 | 0.263138 | 0.653475 | 0.529465 |
| MmugDNA.1358.1.S1_at    | MmugDNA.1358.1  | 6.1   | 6.17  | 0.64 | 0.17 | -1.05 | 0.504788 | 0.398123 | 0.785075 | 0.6292   |
| MmugDNA.13580.1.S1_at   | MmugDNA.13580.1 | 3.88  | 4.44  | 0.73 | 0.14 | -1.48 | 0.736591 | 0.920972 | 0.899221 | 0.955491 |
| MmugDNA.13581.1.S1_at   | MmugDNA.13581.1 | 3.62  | 3.62  | 0.05 | 0.3  | 1     | 0.656566 | 0.756497 | 0.863636 | 0.858223 |
| MmugDNA.13582.1.S1_at   | MmugDNA.13582.1 | 4.19  | 4.2   | 0.31 | 0.36 | -1.01 | 0.859633 | 0.87429  | 0.9504   | 0.928616 |
| MmugDNA.13583.1.S1_at   | MmugDNA.13583.1 | 3.52  | 3.52  | 0    | 0.09 | -1    | 0.348305 | 0.310649 | 0.689616 | 0.565787 |
| MmugDNA.13585.1.S1_at   | MmugDNA.13585.1 | 6.76  | 7.01  | 0.84 | 0.19 | -1.18 | 0.421361 | 0.721519 | 0.737543 | 0.838734 |
| MmugDNA.13586.1.S1_at   | MmugDNA.13586.1 | 8.06  | 4.08  | 2.15 | 1.1  | 15.84 | 0.202352 | 0.380108 | 0.573821 | 0.616791 |
| MmugDNA.13587.1.S1_at   | MmugDNA.13587.1 | 3.84  | 3.72  | 0.05 | 0.07 | 1.09  | 0.042141 | 0.246115 | 0.368535 | 0.51585  |
| MmugDNA.13588.1.S1_at   | MmugDNA.13588.1 | 5.18  | 5.1   | 0.18 | 0.08 | 1.06  | 0.177078 | 0.314805 | 0.550212 | 0.568554 |
| MmugDNA.13589.1.S1_at   | MmugDNA.13589.1 | 5.38  | 5.29  | 0.05 | 0.17 | 1.07  | 0.431896 | 0.432753 | 0.74367  | 0.653101 |
| MmugDNA.1359.1.S1_at    | MmugDNA.1359.1  | 7.91  | 7.14  | 0.53 | 0.3  | 1.71  | 0.040606 | 0.024444 | 0.364613 | 0.195642 |
| MmugDNA.13591.1.S1_at   | MmugDNA.13591.1 | 11.28 | 11.6  | 0.49 | 0.08 | -1.25 | 0.263463 | 0.282003 | 0.625387 | 0.544886 |
| MmugDNA.13592.1.S1_at   | MmugDNA.13592.1 | 5.31  | 5.13  | 0.15 | 0.23 | 1.13  | 0.3007   | 0.018875 | 0.655174 | 0.172814 |
| MmugDNA.13594.1.S1_at   | MmugDNA.13594.1 | 8.01  | 8.13  | 1.4  | 0.33 | -1.09 | 0.36108  | 0.169227 | 0.698314 | 0.445815 |
| MmugDNA.13595.1.S1_at   | MmugDNA.13595.1 | 7.83  | 7.98  | 0.17 | 0.13 | -1.11 | 0.86822  | 0.022959 | 0.953843 | 0.189548 |
| MmugDNA.13595.1.S1_s_at | MmugDNA.13595.1 | 9.89  | 9.66  | 0.2  | 0.05 | 1.17  | 0.124844 | 0.063417 | 0.498917 | 0.298441 |
| MmugDNA.13597.1.S1_at   | MmugDNA.13597.1 | 3.27  | 3.11  | 0.17 | 0.12 | 1.12  | 0.124302 | 0.234847 | 0.498371 | 0.506125 |
| MmugDNA.13598.1.S1_at   | MmugDNA.13598.1 | 8.59  | 7.86  | 0.29 | 0.13 | 1.65  | 0.011003 | 0.012497 | 0.251485 | 0.144302 |
| MmugDNA.13599.1.S1_at   | MmugDNA.13599.1 | 5.71  | 5.87  | 0.22 | 0.08 | -1.11 | 0.316484 | 0.012926 | 0.666494 | 0.146343 |
| MmugDNA.136.1.S1_at     | MmugDNA.136.1   | 3.76  | 3.58  | 0.65 | 0.17 | 1.14  | 0.52431  | 0.009726 | 0.795835 | 0.129723 |
| MmugDNA.136.1.S1_s_at   | MmugDNA.136.1   | 5.43  | 5.27  | 1.29 | 0.38 | 1.11  | 0.626857 | 0.007648 | 0.850214 | 0.117015 |
| MmugDNA.1360.1.S1_at    | MmugDNA.1360.1  | 4.79  | 4.69  | 0.14 | 0.13 | 1.07  | 0.458277 | 0.188315 | 0.758668 | 0.46433  |
| MmugDNA.13600.1.S1_at   | MmugDNA.13600.1 | 5.42  | 5.62  | 0.29 | 0.2  | -1.16 | 0.381853 | 0.258829 | 0.710335 | 0.525985 |
| MmugDNA.13601.1.S1_at   | MmugDNA.13601.1 | 10.51 | 10.13 | 0.5  | 0.14 | 1.31  | 0.50805  | 0.363985 | 0.786611 | 0.60434  |
| MmugDNA.5372.1.S1_at    | MmugDNA.5372.1  | 10.8  | 10.51 | 0.5  | 0.13 | 1.23  | 0.883059 | 0.814568 | 0.959567 | 0.892959 |
| MmugDNA.5372.1.S1_s_at  | MmugDNA.5372.1  | 11.3  | 11.07 | 0.46 | 0.09 | 1.18  | 0.660802 | 0.455496 | 0.865819 | 0.669479 |
| MmugDNA.13602.1.S1_at   | MmugDNA.13602.1 | 3.64  | 3.79  | 0.14 | 0.1  | -1.11 | 0.158608 | 0.276045 | 0.531588 | 0.540071 |
| MmugDNA.13604.1.S1_s_at | MmugDNA.13604.1 | 7.28  | 6.75  | 0.05 | 0.09 | 1.45  | 0.00061  | 0.000462 | 0.143137 | 0.038572 |
| MmugDNA.13606.1.S1_at   | MmugDNA.13606.1 | 2.89  | 2.9   | 0.07 | 0.13 | -1.01 | 0.905383 | 0.273156 | 0.968115 | 0.537776 |



|                         |                 |       |       |      |      |       |          |          |          |          |
|-------------------------|-----------------|-------|-------|------|------|-------|----------|----------|----------|----------|
| MmugDNA.13607.1.S1_at   | MmugDNA.13607.1 | 3.94  | 4.04  | 0.27 | 0.08 | -1.07 | 0.523886 | 0.515771 | 0.795658 | 0.708485 |
| MmugDNA.13609.1.S1_at   | MmugDNA.13609.1 | 5.96  | 5.1   | 0.63 | 0.17 | 1.82  | 0.247397 | 0.306744 | 0.613012 | 0.5633   |
| MmugDNA.1361.1.S1_at    | MmugDNA.1361.1  | 3.51  | 3.59  | 0.08 | 0.03 | -1.05 | 0.206049 | 0.02608  | 0.578049 | 0.202453 |
| MmugDNA.13610.1.S1_at   | MmugDNA.13610.1 | 11.09 | 11.18 | 0.24 | 0.1  | -1.07 | 0.683256 | 0.029541 | 0.876089 | 0.213535 |
| MmugDNA.13611.1.S1_at   | MmugDNA.13611.1 | 4.35  | 4.48  | 0.13 | 0.11 | -1.09 | 0.609899 | 0.273424 | 0.841821 | 0.537863 |
| MmugDNA.13614.1.S1_s_at | MmugDNA.13614.1 | 9.95  | 10.2  | 0.25 | 0.11 | -1.19 | 0.25971  | 0.291437 | 0.622771 | 0.551823 |
| MmugDNA.13615.1.S1_at   | MmugDNA.13615.1 | 6.1   | 6.13  | 0.1  | 0.02 | -1.02 | 0.177785 | 0.1896   | 0.550946 | 0.465297 |
| MmugDNA.13616.1.S1_at   | MmugDNA.13616.1 | 5.1   | 5.04  | 0.07 | 0.08 | 1.04  | 0.450568 | 0.88406  | 0.754829 | 0.933894 |
| MmugDNA.13618.1.S1_at   | MmugDNA.13618.1 | 6.83  | 6.76  | 0.1  | 0.17 | 1.05  | 0.964624 | 0.368194 | 0.988371 | 0.607793 |
| MmugDNA.1362.1.S1_at    | MmugDNA.1362.1  | 3.11  | 2.91  | 0.21 | 0.13 | 1.15  | 0.55314  | 0.796188 | 0.811981 | 0.88253  |
| MmugDNA.13621.1.S1_at   | MmugDNA.13621.1 | 11.19 | 11.76 | 0.32 | 0.05 | -1.49 | 0.057663 | 0.02734  | 0.402592 | 0.206637 |
| MmugDNA.13623.1.S1_at   | MmugDNA.13623.1 | 4.06  | 4.07  | 0.2  | 0.03 | -1.01 | 0.860863 | 0.673537 | 0.950958 | 0.809257 |
| MmugDNA.13624.1.S1_at   | MmugDNA.13624.1 | 7.48  | 7.14  | 0.58 | 0.13 | 1.26  | 0.79365  | 0.491461 | 0.924414 | 0.693004 |
| MmugDNA.1363.1.S1_at    | MmugDNA.1363.1  | 2.95  | 2.8   | 0.08 | 0.06 | 1.11  | 0.074635 | 0.066943 | 0.435313 | 0.304713 |
| MmugDNA.13632.1.S1_at   | MmugDNA.13632.1 | 7.09  | 6.22  | 0.65 | 0.43 | 1.83  | 0.04911  | 0.185682 | 0.385273 | 0.46163  |
| MmugDNA.13633.1.S1_at   | MmugDNA.13633.1 | 10.86 | 11.24 | 0.11 | 0.02 | -1.3  | 0.004671 | 0.00506  | 0.201699 | 0.09907  |
| MmugDNA.13636.1.S1_at   | MmugDNA.13636.1 | 12.06 | 12.06 | 0.28 | 0.08 | -1    | 0.416284 | 0.329612 | 0.734198 | 0.578813 |
| MmugDNA.13637.1.S1_at   | MmugDNA.13637.1 | 9.02  | 9.42  | 1.4  | 0.07 | -1.33 | 0.471561 | 0.634213 | 0.76658  | 0.78472  |
| MmugDNA.13639.1.S1_at   | MmugDNA.13639.1 | 6.84  | 6.67  | 0.51 | 0.07 | 1.12  | 0.23054  | 0.217314 | 0.598719 | 0.490953 |
| MmugDNA.1364.1.S1_at    | MmugDNA.1364.1  | 10.23 | 10.33 | 0.11 | 0.04 | -1.07 | 0.114129 | 0.181858 | 0.487405 | 0.458395 |
| MmugDNA.13641.1.S1_at   | MmugDNA.13641.1 | 6.84  | 6.74  | 0.13 | 0.13 | 1.07  | 0.15624  | 0.166069 | 0.529536 | 0.442658 |
| MmugDNA.13642.1.S1_at   | MmugDNA.13642.1 | 13.08 | 13    | 0.25 | 0.08 | 1.06  | 0.977596 | 0.105898 | 0.992714 | 0.368187 |
| MmugDNA.13643.1.S1_at   | MmugDNA.13643.1 | 3.2   | 3.07  | 0.28 | 0.12 | 1.1   | 0.20799  | 0.29858  | 0.579653 | 0.557183 |
| MmugDNA.13645.1.S1_at   | MmugDNA.13645.1 | 4.43  | 4.3   | 0.16 | 0.08 | 1.1   | 0.059355 | 0.055793 | 0.406303 | 0.282044 |
| MmugDNA.13646.1.S1_at   | MmugDNA.13646.1 | 3.39  | 3.39  | 0.09 | 0.04 | 1     | 0.251407 | 0.5591   | 0.616657 | 0.736046 |
| MmugDNA.13647.1.S1_at   | MmugDNA.13647.1 | 5.9   | 5.89  | 0.17 | 0.11 | 1.01  | 0.571773 | 0.819652 | 0.822923 | 0.896119 |
| MmugDNA.13649.1.S1_at   | MmugDNA.13649.1 | 3.12  | 3.13  | 0.24 | 0.14 | -1.01 | 0.43038  | 0.607316 | 0.742729 | 0.766358 |
| MmugDNA.1365.1.S1_at    | MmugDNA.1365.1  | 4.66  | 4.67  | 0.71 | 0.47 | -1.01 | 0.243885 | 0.407756 | 0.609715 | 0.635158 |
| MmugDNA.13650.1.S1_at   | MmugDNA.13650.1 | 7.77  | 7.68  | 0.28 | 0.25 | 1.06  | 0.32326  | 0.049495 | 0.672034 | 0.267375 |
| MmugDNA.13651.1.S1_at   | MmugDNA.13651.1 | 6.09  | 5.9   | 0.12 | 0.05 | 1.14  | 0.035351 | 0.060093 | 0.351775 | 0.291828 |
| MmugDNA.13652.1.S1_at   | MmugDNA.13652.1 | 10.76 | 10.08 | 0.25 | 0.21 | 1.59  | 0.012961 | 0.10923  | 0.266038 | 0.37308  |
| MmugDNA.13653.1.S1_at   | MmugDNA.13653.1 | 3.6   | 3.7   | 0.79 | 0.95 | -1.08 | 0.795778 | 0.688958 | 0.924994 | 0.818449 |
| MmugDNA.13656.1.S1_at   | MmugDNA.13656.1 | 5.38  | 5.34  | 0.45 | 0.33 | 1.03  | 0.47771  | 0.563966 | 0.76987  | 0.738913 |
| MmugDNA.13657.1.S1_at   | MmugDNA.13657.1 | 4.58  | 4.28  | 0.14 | 0.13 | 1.24  | 0.053782 | 0.048148 | 0.395395 | 0.264422 |
| MmugDNA.13658.1.S1_at   | MmugDNA.13658.1 | 7.15  | 6.65  | 0.25 | 0.03 | 1.41  | 0.011612 | 0.114467 | 0.255776 | 0.381021 |
| MmugDNA.13659.1.S1_at   | MmugDNA.13659.1 | 3.83  | 4     | 0.18 | 0.07 | -1.12 | 0.682433 | 0.61594  | 0.875741 | 0.772359 |
| MmugDNA.1366.1.S1_at    | MmugDNA.1366.1  | 5.51  | 5.52  | 0.08 | 0.14 | -1.01 | 0.401887 | 0.508757 | 0.724759 | 0.703811 |
| MmugDNA.13660.1.S1_at   | MmugDNA.13660.1 | 4.98  | 4.82  | 0.04 | 0.1  | 1.12  | 0.065935 | 0.048592 | 0.421278 | 0.265572 |
| MmugDNA.13661.1.S1_at   | MmugDNA.13661.1 | 6.65  | 6.21  | 0.96 | 0.17 | 1.36  | 0.464033 | 0.45541  | 0.762376 | 0.66939  |
| MmugDNA.13665.1.S1_at   | MmugDNA.13665.1 | 4.81  | 5     | 0.05 | 0.15 | -1.14 | 0.132387 | 0.032678 | 0.506752 | 0.223827 |
| MmugDNA.13665.1.S1_s_at | MmugDNA.13665.1 | 10.19 | 10.06 | 0.3  | 0.08 | 1.09  | 0.331746 | 0.15903  | 0.678207 | 0.435217 |
| MmugDNA.13669.1.S1_at   | MmugDNA.13669.1 | 4.22  | 4.13  | 0.11 | 0.07 | 1.07  | 0.068638 | 0.324222 | 0.426    | 0.57488  |
| MmugDNA.1367.1.S1_at    | MmugDNA.1367.1  | 5.79  | 5.82  | 0.13 | 0.06 | -1.02 | 0.786204 | 0.398294 | 0.921386 | 0.629324 |

|                         |                 |       |       |      |      |       |          |          |          |          |
|-------------------------|-----------------|-------|-------|------|------|-------|----------|----------|----------|----------|
| MmugDNA.13671.1.S1_s_at | MmugDNA.13671.1 | 9.96  | 10.33 | 0.69 | 0.02 | -1.29 | 0.397188 | 0.110802 | 0.721708 | 0.375076 |
| MmugDNA.13672.1.S1_at   | MmugDNA.13672.1 | 3.53  | 3.56  | 0.03 | 0.17 | -1.02 | 0.365332 | 0.487592 | 0.701002 | 0.690565 |
| MmugDNA.13673.1.S1_s_at | MmugDNA.13673.1 | 6.78  | 6.76  | 0.12 | 0.09 | 1.02  | 0.911169 | 0.993628 | 0.969838 | 0.996218 |
| MmugDNA.13675.1.S1_at   | MmugDNA.13675.1 | 4.69  | 4.54  | 0.13 | 0.04 | 1.11  | 0.117346 | 0.116699 | 0.490925 | 0.383878 |
| MmugDNA.13676.1.S1_at   | MmugDNA.13676.1 | 4.56  | 4.13  | 0.74 | 0.25 | 1.34  | 0.735934 | 0.136428 | 0.898982 | 0.408839 |
| MmugDNA.13677.1.S1_at   | MmugDNA.13677.1 | 3.29  | 3.28  | 0.28 | 0.05 | 1.01  | 0.859381 | 0.645243 | 0.950399 | 0.792131 |
| MmugDNA.13678.1.S1_at   | MmugDNA.13678.1 | 5.91  | 5.98  | 0.07 | 0.13 | -1.05 | 0.523655 | 0.167198 | 0.795656 | 0.443675 |
| MmugDNA.1368.1.S1_at    | MmugDNA.1368.1  | 3.58  | 3.39  | 0.16 | 0.02 | 1.14  | 0.120215 | 0.431153 | 0.49354  | 0.652158 |
| MmugDNA.13680.1.S1_at   | MmugDNA.13680.1 | 5.14  | 5.24  | 0.14 | 0.06 | -1.07 | 0.807891 | 0.421893 | 0.930332 | 0.645369 |
| MmugDNA.13681.1.S1_at   | MmugDNA.13681.1 | 4.69  | 4.51  | 0.55 | 0.12 | 1.13  | 0.401166 | 0.616307 | 0.724131 | 0.772571 |
| MmugDNA.13682.1.S1_at   | MmugDNA.13682.1 | 5.7   | 5.53  | 0.04 | 0.06 | -1.13 | 0.013772 | 0.412192 | 0.271822 | 0.638588 |
| MmugDNA.13683.1.S1_at   | MmugDNA.13683.1 | 5.65  | 5.62  | 0.04 | 0.11 | 1.02  | 0.250393 | 0.780725 | 0.615561 | 0.872765 |
| MmugDNA.13684.1.S1_at   | MmugDNA.13684.1 | 3.34  | 3.4   | 0.16 | 0.09 | -1.04 | 0.187226 | 0.665803 | 0.559729 | 0.804188 |
| MmugDNA.13685.1.S1_at   | MmugDNA.13685.1 | 4.6   | 4.42  | 0.2  | 0.1  | 1.13  | 0.140044 | 0.137584 | 0.515581 | 0.410555 |
| MmugDNA.13686.1.S1_at   | MmugDNA.13686.1 | 8.52  | 8.25  | 0.21 | 0.16 | 1.2   | 0.037543 | 0.071735 | 0.35733  | 0.313981 |
| MmugDNA.13687.1.S1_at   | MmugDNA.13687.1 | 4.97  | 4.93  | 0.09 | 0.09 | 1.02  | 0.353322 | 0.808796 | 0.693208 | 0.889895 |
| MmugDNA.13688.1.S1_at   | MmugDNA.13688.1 | 6.31  | 5.93  | 0.18 | 0.11 | 1.3   | 0.141522 | 0.031786 | 0.516365 | 0.220723 |
| MmugDNA.13689.1.S1_at   | MmugDNA.13689.1 | 7.84  | 8.08  | 0.2  | 0.35 | -1.18 | 0.53879  | 0.67405  | 0.803474 | 0.809506 |
| MmugDNA.1369.1.S1_at    | MmugDNA.1369.1  | 5.31  | 5.28  | 0.16 | 0.16 | 1.03  | 0.169493 | 0.391117 | 0.542488 | 0.624833 |
| MmugDNA.13691.1.S1_at   | MmugDNA.13691.1 | 4.7   | 4.77  | 0.27 | 0.53 | -1.05 | 0.811703 | 0.980297 | 0.931849 | 0.989317 |
| MmugDNA.13692.1.S1_at   | MmugDNA.13692.1 | 6.52  | 6.51  | 0.08 | 0.19 | 1     | 0.273604 | 0.240195 | 0.633298 | 0.51084  |
| MmugDNA.13695.1.S1_at   | MmugDNA.13695.1 | 5.62  | 5.87  | 0.4  | 0.01 | -1.19 | 0.513948 | 0.764906 | 0.79023  | 0.863324 |
| MmugDNA.13697.1.S1_at   | MmugDNA.13697.1 | 13.34 | 13.24 | 0.04 | 0.04 | 1.07  | 0.074292 | 0.309088 | 0.435027 | 0.564787 |
| MmugDNA.13698.1.S1_at   | MmugDNA.13698.1 | 6.19  | 6.42  | 0.12 | 0.06 | -1.18 | 0.063015 | 0.065528 | 0.414551 | 0.301415 |
| MmugDNA.1370.1.S1_at    | MmugDNA.1370.1  | 5.52  | 5.39  | 0.12 | 0.06 | 1.1   | 0.176723 | 0.360303 | 0.549912 | 0.601339 |
| MmugDNA.13700.1.S1_at   | MmugDNA.13700.1 | 3.38  | 3.33  | 0.14 | 0.04 | 1.03  | 0.609043 | 0.334927 | 0.841511 | 0.58275  |
| MmugDNA.13703.1.S1_at   | MmugDNA.13703.1 | 6.33  | 6.42  | 0.14 | 0.09 | -1.06 | 0.912459 | 0.101388 | 0.970287 | 0.36112  |
| MmugDNA.13704.1.S1_at   | MmugDNA.13704.1 | 6.89  | 6.92  | 0.43 | 0.16 | -1.02 | 0.300643 | 0.493214 | 0.655161 | 0.694005 |
| MmugDNA.13705.1.S1_at   | MmugDNA.13705.1 | 12.63 | 10.75 | 0.74 | 0.38 | 3.7   | 0.037904 | 0.03599  | 0.358232 | 0.234165 |
| MmugDNA.18778.1.S1_at   | MmugDNA.18778.1 | 11.43 | 9.55  | 0.83 | 0.47 | 3.71  | 0.063211 | 0.041684 | 0.415267 | 0.24887  |
| MmugDNA.18778.1.S1_s_at | MmugDNA.18778.1 | 12.49 | 10.45 | 0.72 | 0.45 | 4.1   | 0.028614 | 0.025685 | 0.332769 | 0.200834 |
| MmugDNA.13706.1.S1_at   | MmugDNA.13706.1 | 5.15  | 4.93  | 0.22 | 0.06 | 1.16  | 0.122976 | 0.249858 | 0.496496 | 0.518876 |
| MmugDNA.13707.1.S1_at   | MmugDNA.13707.1 | 3.19  | 3.1   | 0.23 | 0.06 | 1.06  | 0.677596 | 0.799964 | 0.873568 | 0.884989 |
| MmugDNA.13709.1.S1_at   | MmugDNA.13709.1 | 5.08  | 4.89  | 0.12 | 0.23 | 1.13  | 0.305139 | 0.127736 | 0.658653 | 0.398581 |
| MmugDNA.13710.1.S1_at   | MmugDNA.13710.1 | 7.39  | 7.43  | 0.14 | 0.16 | -1.03 | 0.76506  | 0.517205 | 0.911696 | 0.709435 |
| MmugDNA.13711.1.S1_at   | MmugDNA.13711.1 | 3.44  | 3.41  | 0.07 | 0.02 | 1.02  | 0.204144 | 0.166954 | 0.575423 | 0.443429 |
| MmugDNA.13712.1.S1_at   | MmugDNA.13712.1 | 3.71  | 3.69  | 0.01 | 0.12 | 1.01  | 0.452683 | 0.604698 | 0.755901 | 0.764769 |
| MmugDNA.13714.1.S1_at   | MmugDNA.13714.1 | 12.09 | 12.01 | 1    | 0.23 | 1.06  | 0.784033 | 0.042025 | 0.920602 | 0.249463 |
| MmugDNA.13715.1.S1_at   | MmugDNA.13715.1 | 3.38  | 3.8   | 0.22 | 0.12 | -1.34 | 0.114313 | 0.239901 | 0.487606 | 0.510627 |
| MmugDNA.13717.1.S1_at   | MmugDNA.13717.1 | 9.27  | 9.11  | 0.38 | 0.02 | 1.12  | 0.160101 | 0.16201  | 0.53316  | 0.438108 |
| MmugDNA.1372.1.S1_at    | MmugDNA.1372.1  | 4.87  | 5.12  | 0.06 | 0.27 | -1.19 | 0.291742 | 0.037559 | 0.648076 | 0.238211 |
| MmugDNA.13720.1.S1_at   | MmugDNA.13720.1 | 3.51  | 3.53  | 0.05 | 0.03 | -1.01 | 0.717816 | 0.137666 | 0.890514 | 0.410637 |
| MmugDNA.13721.1.S1_at   | MmugDNA.13721.1 | 4.79  | 5.16  | 0.32 | 0.32 | -1.29 | 0.186604 | 0.693761 | 0.559198 | 0.8219   |

|                         |                 |       |       |      |      |       |          |          |          |          |
|-------------------------|-----------------|-------|-------|------|------|-------|----------|----------|----------|----------|
| MmugDNA.13722.1.S1_at   | MmugDNA.13722.1 | 8.1   | 7.61  | 0.45 | 0.16 | 1.4   | 0.20101  | 0.176322 | 0.572785 | 0.452752 |
| MmugDNA.13724.1.S1_at   | MmugDNA.13724.1 | 9.94  | 9.56  | 0.29 | 0.05 | 1.3   | 0.280758 | 0.004214 | 0.639467 | 0.091368 |
| MmugDNA.13725.1.S1_at   | MmugDNA.13725.1 | 8.02  | 8     | 0.26 | 0.09 | 1.02  | 0.913953 | 0.001092 | 0.970812 | 0.052283 |
| MmugDNA.13726.1.S1_at   | MmugDNA.13726.1 | 3.59  | 5.74  | 0.68 | 0.14 | -4.43 | 0.007284 | 0.001342 | 0.226979 | 0.056396 |
| MmugDNA.13728.1.S1_at   | MmugDNA.13728.1 | 5.21  | 5.25  | 0.25 | 0.02 | -1.03 | 0.461649 | 0.727666 | 0.761136 | 0.842508 |
| MmugDNA.1373.1.S1_at    | MmugDNA.1373.1  | 4.54  | 4.42  | 0.08 | 0.04 | 1.09  | 0.095495 | 0.17848  | 0.464229 | 0.454778 |
| MmugDNA.13730.1.S1_at   | MmugDNA.13730.1 | 4.42  | 4.49  | 0.06 | 0.53 | -1.05 | 0.87696  | 0.531783 | 0.957122 | 0.718951 |
| MmugDNA.13731.1.S1_at   | MmugDNA.13731.1 | 10.02 | 8.02  | 0.3  | 0.44 | 4.02  | 0.002165 | 0.000225 | 0.174757 | 0.032385 |
| MmugDNA.13732.1.S1_at   | MmugDNA.13732.1 | 9.21  | 8     | 1.27 | 0.22 | 2.31  | 0.190548 | 0.234402 | 0.561786 | 0.505674 |
| MmugDNA.13733.1.S1_at   | MmugDNA.13733.1 | 8.93  | 9.05  | 0.44 | 0.15 | -1.09 | 0.525521 | 0.73367  | 0.796198 | 0.845792 |
| MmugDNA.13735.1.S1_at   | MmugDNA.13735.1 | 3.67  | 3.58  | 0.23 | 0.15 | -1.06 | 0.875713 | 0.617311 | 0.956794 | 0.773333 |
| MmugDNA.13736.1.S1_at   | MmugDNA.13736.1 | 4.44  | 4.64  | 0.06 | 0.08 | -1.15 | 0.013026 | 0.200875 | 0.266166 | 0.475369 |
| MmugDNA.13737.1.S1_at   | MmugDNA.13737.1 | 6.52  | 5.54  | 0.26 | 0.2  | 1.97  | 0.010692 | 0.005408 | 0.249245 | 0.10146  |
| MmugDNA.13738.1.S1_at   | MmugDNA.13738.1 | 6.13  | 5.82  | 0.05 | 0.25 | 1.23  | 0.273402 | 0.344563 | 0.63317  | 0.589932 |
| MmugDNA.1374.1.S1_at    | MmugDNA.1374.1  | 4.95  | 4.66  | 0.35 | 0.08 | 1.22  | 0.074541 | 0.290269 | 0.435313 | 0.551169 |
| MmugDNA.13741.1.S1_at   | MmugDNA.13741.1 | 3.32  | 3.65  | 0.12 | 0.1  | -1.26 | 0.0418   | 0.031029 | 0.367252 | 0.218074 |
| MmugDNA.13743.1.S1_at   | MmugDNA.13743.1 | 7.79  | 8     | 0.2  | 0.04 | -1.16 | 0.345506 | 0.263534 | 0.687499 | 0.529826 |
| MmugDNA.13745.1.S1_at   | MmugDNA.13745.1 | 3.87  | 3.79  | 0.02 | 0.09 | 1.06  | 0.089147 | 0.452809 | 0.456902 | 0.667356 |
| MmugDNA.13746.1.S1_s_at | MmugDNA.13746.1 | 5.11  | 4.96  | 0.14 | 0.07 | 1.11  | 0.178857 | 0.143466 | 0.55181  | 0.417442 |
| MmugDNA.13747.1.S1_at   | MmugDNA.13747.1 | 12.77 | 12.57 | 0.33 | 0.02 | 1.14  | 0.748864 | 0.641292 | 0.904698 | 0.789506 |
| MmugDNA.13748.1.S1_at   | MmugDNA.13748.1 | 5.84  | 5.67  | 0.15 | 0.02 | 1.12  | 0.129077 | 0.66987  | 0.503739 | 0.806933 |
| MmugDNA.13749.1.S1_s_at | MmugDNA.13749.1 | 8.82  | 8.48  | 0.04 | 0.05 | 1.27  | 0.000759 | 0.012927 | 0.15004  | 0.146343 |
| MmugDNA.1375.1.S1_at    | MmugDNA.1375.1  | 6.41  | 6.13  | 0.17 | 0.03 | 1.21  | 0.03134  | 0.150574 | 0.341113 | 0.425106 |
| MmugDNA.13751.1.S1_at   | MmugDNA.13751.1 | 9.34  | 9.15  | 0.78 | 0.17 | 1.14  | 0.635066 | 0.490634 | 0.854507 | 0.692642 |
| MmugDNA.13755.1.S1_at   | MmugDNA.13755.1 | 6.03  | 5.99  | 0.04 | 0.22 | 1.03  | 0.261824 | 0.300374 | 0.62407  | 0.558696 |
| MmugDNA.13756.1.S1_at   | MmugDNA.13756.1 | 11.72 | 12.2  | 0.18 | 0.08 | -1.39 | 0.01266  | 0.003775 | 0.263546 | 0.08749  |
| MmugDNA.13759.1.S1_at   | MmugDNA.13759.1 | 6.49  | 6.47  | 0.24 | 0.22 | 1.01  | 0.404535 | 0.466361 | 0.72664  | 0.67624  |
| MmugDNA.1376.1.S1_at    | MmugDNA.1376.1  | 2.79  | 2.81  | 0.03 | 0.03 | -1.01 | 0.925553 | 0.162767 | 0.975188 | 0.438913 |
| MmugDNA.13761.1.S1_at   | MmugDNA.13761.1 | 4.08  | 4.19  | 0.16 | 0.08 | -1.08 | 0.984991 | 0.870612 | 0.995288 | 0.926446 |
| MmugDNA.13763.1.S1_at   | MmugDNA.13763.1 | 7.08  | 7.02  | 0.09 | 0.03 | 1.04  | 0.114705 | 0.353582 | 0.487881 | 0.59664  |
| MmugDNA.13764.1.S1_at   | MmugDNA.13764.1 | 5.8   | 6.33  | 0.22 | 0.28 | -1.45 | 0.06582  | 0.038374 | 0.421105 | 0.240795 |
| MmugDNA.13765.1.S1_at   | MmugDNA.13765.1 | 6.72  | 6.91  | 0.23 | 0.07 | -1.14 | 0.150677 | 0.149264 | 0.524234 | 0.42373  |
| MmugDNA.13766.1.S1_at   | MmugDNA.13766.1 | 8.23  | 7.69  | 0.21 | 0.27 | 1.45  | 0.110896 | 0.110277 | 0.48424  | 0.374403 |
| MmugDNA.13768.1.S1_at   | MmugDNA.13768.1 | 7.28  | 8.31  | 0.18 | 0.51 | -2.04 | 0.022313 | 0.083569 | 0.310495 | 0.334152 |
| MmugDNA.13769.1.S1_at   | MmugDNA.13769.1 | 8.73  | 8.2   | 0.36 | 0.05 | 1.44  | 0.182964 | 0.161352 | 0.555821 | 0.437519 |
| MmugDNA.1377.1.S1_at    | MmugDNA.1377.1  | 4.53  | 4.46  | 0.34 | 0.14 | 1.05  | 0.948851 | 0.336483 | 0.982605 | 0.583831 |
| MmugDNA.13770.1.S1_at   | MmugDNA.13770.1 | 6.64  | 6.59  | 0.87 | 0.09 | 1.03  | 0.959294 | 0.014809 | 0.986694 | 0.154838 |
| MmugDNA.13771.1.S1_at   | MmugDNA.13771.1 | 3.34  | 3.19  | 0.11 | 0.22 | 1.11  | 0.104345 | 0.030804 | 0.475417 | 0.217376 |
| MmugDNA.13772.1.S1_at   | MmugDNA.13772.1 | 4.02  | 4.05  | 0.02 | 0.11 | -1.03 | 0.585    | 0.23565  | 0.830162 | 0.506737 |
| MmugDNA.13773.1.S1_at   | MmugDNA.13773.1 | 4.29  | 4.47  | 0.33 | 0.42 | -1.14 | 0.511567 | 0.067049 | 0.78871  | 0.304872 |
| MmugDNA.13775.1.S1_at   | MmugDNA.13775.1 | 3.75  | 5.74  | 0.48 | 0.35 | -3.97 | 0.00301  | 0.014905 | 0.19086  | 0.155167 |
| MmugDNA.13778.1.S1_at   | MmugDNA.13778.1 | 4.77  | 4.42  | 0.15 | 0.07 | 1.27  | 0.021839 | 0.016364 | 0.309781 | 0.161973 |
| MmugDNA.13778.1.S1_s_at | MmugDNA.13778.1 | 3.62  | 3.6   | 0.26 | 0.08 | 1.02  | 0.48662  | 0.746106 | 0.774667 | 0.852688 |

|                         |                 |       |       |      |      |       |          |          |          |          |
|-------------------------|-----------------|-------|-------|------|------|-------|----------|----------|----------|----------|
| MmugDNA.13779.1.S1_at   | MmugDNA.13779.1 | 5.84  | 5.76  | 0.13 | 0.03 | 1.06  | 0.30078  | 0.191472 | 0.65518  | 0.466821 |
| MmugDNA.13780.1.S1_at   | MmugDNA.13780.1 | 3.3   | 3.26  | 0.37 | 0.15 | 1.03  | 0.67655  | 0.610388 | 0.873146 | 0.768582 |
| MmugDNA.13781.1.S1_at   | MmugDNA.13781.1 | 12.87 | 13.04 | 0.08 | 0.08 | -1.13 | 0.017536 | 0.067311 | 0.292528 | 0.305414 |
| MmugDNA.13782.1.S1_at   | MmugDNA.13782.1 | 5.94  | 5.75  | 0.13 | 0.05 | 1.14  | 0.074698 | 0.562715 | 0.435313 | 0.738107 |
| MmugDNA.13784.1.S1_at   | MmugDNA.13784.1 | 7.57  | 7.11  | 0.39 | 0.31 | 1.37  | 0.199809 | 0.062016 | 0.571555 | 0.295892 |
| MmugDNA.13785.1.S1_at   | MmugDNA.13785.1 | 9.11  | 9.56  | 0.12 | 0.17 | -1.37 | 0.017034 | 0.006312 | 0.28899  | 0.107847 |
| MmugDNA.13786.1.S1_at   | MmugDNA.13786.1 | 2.96  | 2.96  | 0    | 0.04 | -1    | 0.462841 | 0.562249 | 0.761819 | 0.737898 |
| MmugDNA.13787.1.S1_at   | MmugDNA.13787.1 | 10.21 | 10.84 | 0.31 | 0.21 | -1.55 | 0.085453 | 0.163323 | 0.452653 | 0.43947  |
| MmugDNA.13788.1.S1_s_at | MmugDNA.13788.1 | 5.45  | 5.35  | 0.03 | 0.23 | 1.07  | 0.434323 | 0.693312 | 0.744987 | 0.821612 |
| MmugDNA.13789.1.S1_at   | MmugDNA.13789.1 | 11.06 | 11.12 | 0.37 | 0.07 | -1.05 | 0.838724 | 0.958029 | 0.942303 | 0.976273 |
| MmugDNA.1379.1.S1_at    | MmugDNA.1379.1  | 9.34  | 9.58  | 0.23 | 0.06 | -1.17 | 0.137213 | 0.13999  | 0.512291 | 0.413309 |
| MmugDNA.13793.1.S1_at   | MmugDNA.13793.1 | 6.1   | 5.84  | 0.83 | 0.41 | 1.19  | 0.146096 | 0.141519 | 0.520572 | 0.415063 |
| MmugDNA.13794.1.S1_at   | MmugDNA.13794.1 | 3.04  | 3.03  | 0    | 0.04 | 1     | 0.674253 | 0.224351 | 0.871872 | 0.497266 |
| MmugDNA.13795.1.S1_at   | MmugDNA.13795.1 | 11.13 | 11.37 | 0.29 | 0.05 | -1.18 | 0.210279 | 0.205467 | 0.581624 | 0.479764 |
| MmugDNA.13796.1.S1_at   | MmugDNA.13796.1 | 5.38  | 5.62  | 0.08 | 0.07 | -1.18 | 0.027305 | 0.237269 | 0.327322 | 0.508008 |
| MmugDNA.13797.1.S1_at   | MmugDNA.13797.1 | 8.03  | 7.72  | 0.1  | 0.1  | 1.24  | 0.019711 | 0.02814  | 0.302208 | 0.209306 |
| MmugDNA.13797.1.S1_s_at | MmugDNA.13797.1 | 7.55  | 7.44  | 0.12 | 0.02 | 1.08  | 0.149963 | 0.249226 | 0.523486 | 0.518313 |
| MmugDNA.13798.1.S1_at   | MmugDNA.13798.1 | 11.51 | 11.42 | 0.1  | 0.23 | 1.06  | 0.214654 | 0.246757 | 0.585093 | 0.516094 |
| MmugDNA.13798.1.S1_s_at | MmugDNA.13798.1 | 11.29 | 11.09 | 0.16 | 0.2  | 1.15  | 0.207439 | 0.200649 | 0.578968 | 0.475195 |
| MmugDNA.13799.1.S1_at   | MmugDNA.13799.1 | 5.69  | 6     | 1.22 | 0.17 | -1.24 | 0.615417 | 0.70325  | 0.844453 | 0.827928 |
| MmugDNA.138.1.S1_at     | MmugDNA.138.1   | 4.23  | 4.55  | 0.14 | 0.09 | -1.25 | 0.059041 | 0.05197  | 0.405996 | 0.273453 |
| MmugDNA.1380.1.S1_at    | MmugDNA.1380.1  | 3.16  | 3.09  | 0.17 | 0.13 | 1.05  | 0.389612 | 0.500237 | 0.716272 | 0.698951 |
| MmugDNA.13800.1.S1_at   | MmugDNA.13800.1 | 10.78 | 10.55 | 0.78 | 0.16 | 1.18  | 0.687617 | 0.299391 | 0.877871 | 0.557857 |
| MmugDNA.13801.1.S1_at   | MmugDNA.13801.1 | 5.8   | 5.76  | 0.18 | 0    | 1.03  | 0.716109 | 0.876889 | 0.889675 | 0.929855 |
| MmugDNA.13803.1.S1_at   | MmugDNA.13803.1 | 6.1   | 6.13  | 0.75 | 0.89 | -1.02 | 0.365195 | 0.036019 | 0.700941 | 0.234255 |
| MmugDNA.13804.1.S1_at   | MmugDNA.13804.1 | 8.06  | 7.44  | 0.79 | 0.17 | 1.54  | 0.218279 | 0.230884 | 0.58818  | 0.502546 |
| MmugDNA.13805.1.S1_at   | MmugDNA.13805.1 | 8.06  | 7.82  | 0.47 | 0.18 | 1.18  | 0.596539 | 0.058562 | 0.836009 | 0.288686 |
| MmugDNA.13807.1.S1_at   | MmugDNA.13807.1 | 7.39  | 7.1   | 0.25 | 0.09 | 1.22  | 0.191769 | 0.258614 | 0.562902 | 0.52584  |
| MmugDNA.13808.1.S1_at   | MmugDNA.13808.1 | 5.11  | 4.56  | 0.55 | 0.34 | 1.46  | 0.149071 | 0.559739 | 0.523002 | 0.736365 |
| MmugDNA.13809.1.S1_at   | MmugDNA.13809.1 | 3.82  | 3.77  | 0.46 | 0.32 | 1.04  | 0.789085 | 0.958551 | 0.922489 | 0.976506 |
| MmugDNA.1381.1.S1_at    | MmugDNA.1381.1  | 4.39  | 4.78  | 0.29 | 0.25 | -1.31 | 0.133687 | 0.114366 | 0.508012 | 0.380871 |
| MmugDNA.13811.1.S1_at   | MmugDNA.13811.1 | 5.28  | 5.3   | 0.06 | 0.15 | -1.02 | 0.897401 | 0.89234  | 0.965172 | 0.938624 |
| MmugDNA.13812.1.S1_at   | MmugDNA.13812.1 | 8.84  | 8.89  | 0.69 | 0.21 | -1.03 | 0.964382 | 0.606545 | 0.988369 | 0.765811 |
| MmugDNA.13813.1.S1_at   | MmugDNA.13813.1 | 4.05  | 4     | 0.15 | 0.05 | 1.04  | 0.211237 | 0.66577  | 0.582141 | 0.804165 |
| MmugDNA.13814.1.S1_at   | MmugDNA.13814.1 | 6.94  | 7.04  | 0.27 | 0.43 | -1.07 | 0.252424 | 0.514468 | 0.617424 | 0.707693 |
| MmugDNA.13816.1.S1_at   | MmugDNA.13816.1 | 10.1  | 10.52 | 0.39 | 0.08 | -1.33 | 0.331787 | 0.018182 | 0.678239 | 0.169673 |
| MmugDNA.13817.1.S1_at   | MmugDNA.13817.1 | 10.09 | 9.73  | 0.08 | 0.28 | 1.28  | 0.027975 | 0.039382 | 0.330017 | 0.243406 |
| MmugDNA.13818.1.S1_at   | MmugDNA.13818.1 | 6.38  | 6.08  | 0.37 | 0.23 | 1.23  | 0.152141 | 0.149964 | 0.525249 | 0.424608 |
| MmugDNA.13819.1.S1_at   | MmugDNA.13819.1 | 3.54  | 3.82  | 0.13 | 0.28 | -1.22 | 0.604781 | 0.399413 | 0.83974  | 0.629798 |
| MmugDNA.1382.1.S1_at    | MmugDNA.1382.1  | 4.31  | 4.47  | 0.31 | 0.65 | -1.12 | 0.35054  | 0.598165 | 0.691338 | 0.760674 |
| MmugDNA.13820.1.S1_at   | MmugDNA.13820.1 | 4.46  | 4.4   | 0.4  | 0.34 | 1.04  | 0.582801 | 0.808223 | 0.828555 | 0.889636 |
| MmugDNA.13821.1.S1_s_at | MmugDNA.13821.1 | 10.76 | 10.36 | 0.98 | 1.04 | 1.32  | 0.814093 | 0.526055 | 0.932911 | 0.715374 |
| MmugDNA.13821.1.S1_x_at | MmugDNA.13821.1 | 5.78  | 5.46  | 0.83 | 0.8  | 1.25  | 0.746844 | 0.506147 | 0.903744 | 0.702359 |

|                         |                 |       |       |      |      |       |          |          |          |          |
|-------------------------|-----------------|-------|-------|------|------|-------|----------|----------|----------|----------|
| MmugDNA.30269.1.S1_s_at | MmugDNA.30269.1 | 10.31 | 10.06 | 0.58 | 0.17 | 1.18  | 0.815831 | 0.375065 | 0.933242 | 0.613186 |
| MmugDNA.13823.1.S1_at   | MmugDNA.13823.1 | 3.69  | 3.73  | 0.07 | 0.01 | -1.03 | 0.356048 | 0.681939 | 0.695045 | 0.81424  |
| MmugDNA.13824.1.S1_at   | MmugDNA.13824.1 | 9.13  | 9.14  | 0.04 | 0.1  | -1    | 0.444781 | 0.217537 | 0.751542 | 0.491121 |
| MmugDNA.13825.1.S1_at   | MmugDNA.13825.1 | 5.41  | 4.55  | 0.19 | 0.32 | 1.82  | 0.033024 | 0.11793  | 0.345908 | 0.385837 |
| MmugDNA.13826.1.S1_at   | MmugDNA.13826.1 | 3.45  | 3.42  | 0.06 | 0.03 | 1.02  | 0.928434 | 0.330247 | 0.976259 | 0.579044 |
| MmugDNA.13827.1.S1_at   | MmugDNA.13827.1 | 5.5   | 6.19  | 0.35 | 0.54 | -1.62 | 0.140273 | 0.159859 | 0.515581 | 0.435986 |
| MmugDNA.13829.1.S1_s_at | MmugDNA.13829.1 | 7.69  | 7.88  | 0.42 | 0.04 | -1.14 | 0.920557 | 0.955252 | 0.973052 | 0.974611 |
| MmugDNA.1383.1.S1_at    | MmugDNA.1383.1  | 5.16  | 4.93  | 0.15 | 0.08 | 1.17  | 0.078321 | 0.157999 | 0.440707 | 0.433744 |
| MmugDNA.13830.1.S1_at   | MmugDNA.13830.1 | 10.16 | 10.41 | 0.76 | 0.06 | -1.19 | 0.622992 | 0.809591 | 0.84804  | 0.890236 |
| MmugDNA.13831.1.S1_at   | MmugDNA.13831.1 | 9.77  | 9.84  | 0.24 | 0.13 | -1.05 | 0.927706 | 0.008529 | 0.976061 | 0.122563 |
| MmugDNA.13834.1.S1_at   | MmugDNA.13834.1 | 7.94  | 7.87  | 0.08 | 0.04 | 1.04  | 0.25873  | 0.131825 | 0.622286 | 0.403891 |
| MmugDNA.13835.1.S1_at   | MmugDNA.13835.1 | 7.45  | 7.81  | 0.3  | 0.01 | -1.28 | 0.226707 | 0.188302 | 0.596085 | 0.46433  |
| MmugDNA.13837.1.S1_at   | MmugDNA.13837.1 | 7.69  | 7.84  | 0.15 | 0.16 | -1.11 | 0.278687 | 0.000111 | 0.63781  | 0.028099 |
| MmugDNA.13839.1.S1_at   | MmugDNA.13839.1 | 5.28  | 5.18  | 0.11 | 0.02 | 1.07  | 0.246153 | 0.140244 | 0.611552 | 0.413405 |
| MmugDNA.1384.1.S1_at    | MmugDNA.1384.1  | 5.1   | 5.37  | 0.48 | 0.2  | -1.21 | 0.09344  | 0.6012   | 0.462593 | 0.762571 |
| MmugDNA.13840.1.S1_at   | MmugDNA.13840.1 | 4.84  | 4.81  | 0.18 | 0.23 | 1.02  | 0.754519 | 0.358995 | 0.907353 | 0.600389 |
| MmugDNA.13841.1.S1_at   | MmugDNA.13841.1 | 3.09  | 2.98  | 0.06 | 0.05 | 1.08  | 0.079851 | 0.228072 | 0.442789 | 0.500249 |
| MmugDNA.13843.1.S1_at   | MmugDNA.13843.1 | 3.59  | 3.88  | 0.28 | 0.14 | -1.22 | 0.564146 | 0.724036 | 0.81857  | 0.840274 |
| MmugDNA.13844.1.S1_at   | MmugDNA.13844.1 | 3.4   | 3.4   | 0.08 | 0    | -1    | 0.991547 | 0.976626 | 0.996693 | 0.987237 |
| MmugDNA.13845.1.S1_at   | MmugDNA.13845.1 | 4.86  | 4.69  | 0.04 | 0.39 | 1.12  | 0.804678 | 0.358875 | 0.929002 | 0.600291 |
| MmugDNA.13846.1.S1_at   | MmugDNA.13846.1 | 12.24 | 11.57 | 0.19 | 0.32 | 1.59  | 0.040184 | 0.003657 | 0.36348  | 0.086526 |
| MmugDNA.13847.1.S1_at   | MmugDNA.13847.1 | 3.21  | 2.99  | 0.04 | 0.05 | 1.16  | 0.003693 | 0.004337 | 0.197111 | 0.092354 |
| MmugDNA.13849.1.S1_at   | MmugDNA.13849.1 | 4.89  | 4.88  | 0.95 | 0.56 | 1.01  | 0.995475 | 0.669202 | 0.998279 | 0.806492 |
| MmugDNA.1385.1.S1_at    | MmugDNA.1385.1  | 7.44  | 7.05  | 0.36 | 0.33 | 1.31  | 0.508981 | 0.238955 | 0.787407 | 0.509678 |
| MmugDNA.13850.1.S1_at   | MmugDNA.13850.1 | 5.18  | 5.11  | 0.33 | 0.2  | 1.05  | 0.793025 | 0.965353 | 0.924203 | 0.980657 |
| MmugDNA.13851.1.S1_at   | MmugDNA.13851.1 | 4.66  | 4.53  | 0.09 | 0.22 | 1.1   | 0.371131 | 0.70954  | 0.705395 | 0.831686 |
| MmugDNA.13853.1.S1_at   | MmugDNA.13853.1 | 4.99  | 5.07  | 0.21 | 0.36 | -1.05 | 0.359856 | 0.198414 | 0.697557 | 0.473302 |
| MmugDNA.13854.1.S1_at   | MmugDNA.13854.1 | 6.05  | 6     | 0.12 | 0.16 | 1.04  | 0.663398 | 0.831791 | 0.867106 | 0.903503 |
| MmugDNA.13855.1.S1_at   | MmugDNA.13855.1 | 3.02  | 3.04  | 0.08 | 0.11 | -1.02 | 0.615439 | 0.896984 | 0.844453 | 0.941205 |
| MmugDNA.13856.1.S1_at   | MmugDNA.13856.1 | 6.15  | 6.09  | 0.11 | 0.09 | 1.05  | 0.311442 | 0.586246 | 0.663221 | 0.7534   |
| MmugDNA.13857.1.S1_at   | MmugDNA.13857.1 | 3.87  | 3.7   | 0.05 | 0.07 | 1.12  | 0.057561 | 0.150671 | 0.402505 | 0.42522  |
| MmugDNA.13858.1.S1_at   | MmugDNA.13858.1 | 7.58  | 7.87  | 0.46 | 0.12 | -1.22 | 0.963308 | 0.17316  | 0.988152 | 0.449765 |
| MmugDNA.13859.1.S1_at   | MmugDNA.13859.1 | 3.89  | 3.91  | 0.27 | 0.37 | -1.01 | 0.440268 | 0.814657 | 0.748408 | 0.893021 |
| MmugDNA.1386.1.S1_at    | MmugDNA.1386.1  | 5.51  | 5.31  | 0.2  | 0.3  | 1.15  | 0.206811 | 0.140585 | 0.578774 | 0.413822 |
| MmugDNA.13860.1.S1_at   | MmugDNA.13860.1 | 10.69 | 10.61 | 0.56 | 0.34 | 1.06  | 0.308184 | 0.623968 | 0.660917 | 0.778285 |
| MmugDNA.13862.1.S1_at   | MmugDNA.13862.1 | 10.62 | 10.91 | 0.04 | 0.18 | -1.23 | 0.021222 | 0.011683 | 0.307188 | 0.140078 |
| MmugDNA.13863.1.S1_at   | MmugDNA.13863.1 | 7.72  | 7.76  | 0.13 | 0.03 | -1.03 | 0.734745 | 0.014189 | 0.898485 | 0.152173 |
| MmugDNA.13864.1.S1_at   | MmugDNA.13864.1 | 6.43  | 6.68  | 0.08 | 0.47 | -1.19 | 0.237122 | 0.320954 | 0.604002 | 0.572948 |
| MmugDNA.13865.1.S1_at   | MmugDNA.13865.1 | 8.51  | 8.98  | 1.37 | 0.09 | -1.39 | 0.489918 | 0.387097 | 0.776634 | 0.621935 |
| MmugDNA.13866.1.S1_at   | MmugDNA.13866.1 | 7.33  | 7.06  | 0.09 | 0.05 | 1.21  | 0.023993 | 0.42605  | 0.317529 | 0.648241 |
| MmugDNA.13867.1.S1_at   | MmugDNA.13867.1 | 4.21  | 4.2   | 0.17 | 0    | 1     | 0.366334 | 0.371032 | 0.701752 | 0.609964 |
| MmugDNA.13868.1.S1_at   | MmugDNA.13868.1 | 3.67  | 3.69  | 0.04 | 0.21 | -1.02 | 0.743055 | 0.901935 | 0.901935 | 0.944174 |
| MmugDNA.1387.1.S1_at    | MmugDNA.1387.1  | 4.04  | 3.86  | 0.15 | 0.13 | 1.13  | 0.514253 | 0.510699 | 0.790322 | 0.705114 |

|                         |                 |       |       |      |      |       |          |          |          |          |
|-------------------------|-----------------|-------|-------|------|------|-------|----------|----------|----------|----------|
| MmugDNA.13870.1.S1_at   | MmugDNA.13870.1 | 3.72  | 3.7   | 0.05 | 0.01 | 1.01  | 0.66562  | 0.876485 | 0.868038 | 0.929683 |
| MmugDNA.13871.1.S1_at   | MmugDNA.13871.1 | 6.38  | 6.36  | 0.24 | 0.14 | 1.02  | 0.778148 | 0.195595 | 0.918123 | 0.470441 |
| MmugDNA.13876.1.S1_at   | MmugDNA.13876.1 | 5.11  | 4.73  | 0.23 | 0.13 | 1.3   | 0.143987 | 0.128778 | 0.519328 | 0.400248 |
| MmugDNA.13877.1.S1_at   | MmugDNA.13877.1 | 2.95  | 2.91  | 0.07 | 0.04 | 1.03  | 0.836319 | 0.129897 | 0.941202 | 0.401509 |
| MmugDNA.13878.1.S1_at   | MmugDNA.13878.1 | 3.61  | 3.71  | 0    | 0.22 | -1.07 | 0.490046 | 0.865901 | 0.776753 | 0.923757 |
| MmugDNA.13879.1.S1_at   | MmugDNA.13879.1 | 9.33  | 9.21  | 0.28 | 0.1  | 1.09  | 0.173971 | 0.039463 | 0.546951 | 0.243642 |
| MmugDNA.1388.1.S1_at    | MmugDNA.1388.1  | 4.08  | 4.04  | 0.32 | 0.07 | 1.03  | 0.48348  | 0.653295 | 0.773104 | 0.79735  |
| MmugDNA.13880.1.S1_at   | MmugDNA.13880.1 | 2.98  | 2.93  | 0.07 | 0.07 | 1.04  | 0.417004 | 0.224138 | 0.734647 | 0.497129 |
| MmugDNA.13884.1.S1_at   | MmugDNA.13884.1 | 9.64  | 9.16  | 0.23 | 0.19 | 1.4   | 0.06539  | 0.074709 | 0.420625 | 0.318465 |
| MmugDNA.13885.1.S1_at   | MmugDNA.13885.1 | 4.66  | 4.94  | 0.48 | 0.01 | -1.22 | 0.336269 | 0.332397 | 0.681654 | 0.580841 |
| MmugDNA.13885.1.S1_x_at | MmugDNA.13885.1 | 4.79  | 4.8   | 0.24 | 0.15 | -1.01 | 0.95904  | 0.520624 | 0.986548 | 0.711831 |
| MmugDNA.13887.1.S1_s_at | MmugDNA.13887.1 | 5.73  | 5.98  | 0.49 | 0.01 | -1.2  | 0.959608 | 0.468866 | 0.986863 | 0.677906 |
| MmugDNA.13887.1.S1_x_at | MmugDNA.13887.1 | 5.39  | 5.37  | 0.34 | 0.19 | 1.01  | 0.402626 | 0.329839 | 0.725018 | 0.578874 |
| MmugDNA.13888.1.S1_at   | MmugDNA.13888.1 | 8.66  | 9.01  | 0.71 | 0.17 | -1.28 | 0.355678 | 0.457376 | 0.694808 | 0.670806 |
| MmugDNA.13889.1.S1_at   | MmugDNA.13889.1 | 4.37  | 4.3   | 0.19 | 0.04 | 1.05  | 0.175076 | 0.451555 | 0.548031 | 0.666372 |
| MmugDNA.1389.1.S1_at    | MmugDNA.1389.1  | 9.97  | 9.42  | 0.13 | 0.29 | 1.46  | 0.044963 | 0.01925  | 0.375515 | 0.174522 |
| MmugDNA.13890.1.S1_at   | MmugDNA.13890.1 | 4.37  | 4.4   | 0.02 | 0.16 | -1.02 | 0.629529 | 0.427072 | 0.851663 | 0.649087 |
| MmugDNA.13891.1.S1_at   | MmugDNA.13891.1 | 4.61  | 4.41  | 0.17 | 0.01 | 1.15  | 0.103996 | 0.59856  | 0.474656 | 0.760958 |
| MmugDNA.13892.1.S1_at   | MmugDNA.13892.1 | 5.51  | 5.45  | 0.53 | 0.12 | 1.04  | 0.663527 | 0.838151 | 0.867178 | 0.907587 |
| MmugDNA.13894.1.S1_at   | MmugDNA.13894.1 | 4.89  | 4.66  | 0.16 | 0.04 | 1.18  | 0.134743 | 0.355548 | 0.508741 | 0.597801 |
| MmugDNA.13895.1.S1_at   | MmugDNA.13895.1 | 6.44  | 6.15  | 0.48 | 0.19 | 1.22  | 0.440563 | 0.379039 | 0.748529 | 0.616011 |
| MmugDNA.13896.1.S1_at   | MmugDNA.13896.1 | 4.19  | 4.3   | 0.18 | 0.25 | -1.08 | 0.381866 | 0.028012 | 0.710335 | 0.208903 |
| MmugDNA.13897.1.S1_s_at | MmugDNA.13897.1 | 8.77  | 8.16  | 0.6  | 0.09 | 1.52  | 0.060525 | 0.14827  | 0.408362 | 0.422777 |
| MmugDNA.13898.1.S1_at   | MmugDNA.13898.1 | 9.09  | 8.47  | 0.76 | 0.28 | 1.54  | 0.118677 | 0.242272 | 0.492161 | 0.512697 |
| MmugDNA.13899.1.S1_at   | MmugDNA.13899.1 | 6.06  | 5.72  | 0.32 | 0.1  | 1.26  | 0.236801 | 0.260673 | 0.603719 | 0.527199 |
| MmugDNA.1390.1.S1_at    | MmugDNA.1390.1  | 4.51  | 4     | 0.58 | 0.5  | 1.42  | 0.800615 | 0.834524 | 0.927071 | 0.905227 |
| MmugDNA.13901.1.S1_at   | MmugDNA.13901.1 | 8.52  | 8     | 0.48 | 0.08 | 1.42  | 0.29577  | 0.37738  | 0.651408 | 0.6149   |
| MmugDNA.13902.1.S1_at   | MmugDNA.13902.1 | 7.22  | 6.77  | 0.25 | 0.16 | 1.36  | 0.156265 | 0.194672 | 0.529536 | 0.469765 |
| MmugDNA.13903.1.S1_at   | MmugDNA.13903.1 | 4.05  | 3.66  | 0.14 | 0.09 | 1.31  | 0.010869 | 0.274205 | 0.250539 | 0.538698 |
| MmugDNA.13904.1.S1_at   | MmugDNA.13904.1 | 6.06  | 5.22  | 0.6  | 0.69 | 1.8   | 0.19171  | 0.239491 | 0.562859 | 0.510162 |
| MmugDNA.13905.1.S1_at   | MmugDNA.13905.1 | 7.51  | 7.3   | 0.44 | 0.17 | 1.16  | 0.841852 | 0.101437 | 0.943937 | 0.361205 |
| MmugDNA.13906.1.S1_at   | MmugDNA.13906.1 | 4.77  | 4.77  | 0.11 | 0.13 | -1    | 0.429669 | 0.42196  | 0.742304 | 0.645406 |
| MmugDNA.13907.1.S1_at   | MmugDNA.13907.1 | 9.71  | 8.99  | 0.11 | 0.1  | 1.65  | 0.001287 | 0.007309 | 0.157784 | 0.114792 |
| MmugDNA.13908.1.S1_at   | MmugDNA.13908.1 | 8.13  | 7.72  | 0.15 | 0.03 | 1.33  | 0.008725 | 0.163173 | 0.236406 | 0.439303 |
| MmugDNA.13909.1.S1_at   | MmugDNA.13909.1 | 10.13 | 10.35 | 1    | 0.08 | -1.16 | 0.471827 | 0.589645 | 0.766655 | 0.755803 |
| MmugDNA.13910.1.S1_at   | MmugDNA.13910.1 | 4.89  | 4.9   | 0.09 | 0.03 | -1.01 | 0.898194 | 0.845754 | 0.965455 | 0.912241 |
| MmugDNA.13912.1.S1_at   | MmugDNA.13912.1 | 3.4   | 3.43  | 0.13 | 0.15 | -1.02 | 0.581742 | 0.714433 | 0.827791 | 0.834313 |
| MmugDNA.13915.1.S1_at   | MmugDNA.13915.1 | 3.35  | 3.49  | 0.22 | 0.27 | -1.1  | 0.548357 | 0.562999 | 0.809701 | 0.738314 |
| MmugDNA.13918.1.S1_at   | MmugDNA.13918.1 | 5.83  | 6.33  | 0.8  | 0.09 | -1.41 | 0.694279 | 0.844997 | 0.881056 | 0.911799 |
| MmugDNA.13919.1.S1_at   | MmugDNA.13919.1 | 4.95  | 4.98  | 0.22 | 0.08 | -1.02 | 0.487265 | 0.719212 | 0.775017 | 0.837526 |
| MmugDNA.1392.1.S1_at    | MmugDNA.1392.1  | 9.35  | 9.88  | 0.25 | 0.04 | -1.44 | 0.022764 | 0.10715  | 0.312286 | 0.369817 |
| MmugDNA.13920.1.S1_at   | MmugDNA.13920.1 | 6.45  | 6.41  | 0.11 | 0.12 | 1.03  | 0.704557 | 0.581867 | 0.885155 | 0.750784 |
| MmugDNA.13921.1.S1_at   | MmugDNA.13921.1 | 4.62  | 4.15  | 0.48 | 0.85 | 1.38  | 0.713421 | 0.505027 | 0.88844  | 0.70197  |

|                         |                 |       |       |      |      |       |          |          |          |          |
|-------------------------|-----------------|-------|-------|------|------|-------|----------|----------|----------|----------|
| MmugDNA.13922.1.S1_at   | MmugDNA.13922.1 | 4.94  | 4.95  | 0.06 | 0.03 | -1    | 0.302267 | 0.236424 | 0.656154 | 0.507314 |
| MmugDNA.13924.1.S1_at   | MmugDNA.13924.1 | 12.85 | 13.03 | 0.52 | 0.09 | -1.13 | 0.7016   | 0.01492  | 0.88396  | 0.155285 |
| MmugDNA.13925.1.S1_at   | MmugDNA.13925.1 | 11.39 | 11.81 | 0.59 | 0.01 | -1.35 | 0.263591 | 0.357873 | 0.625579 | 0.599493 |
| MmugDNA.13926.1.S1_at   | MmugDNA.13926.1 | 11.78 | 12.24 | 0.71 | 0.04 | -1.37 | 0.261278 | 0.321485 | 0.623819 | 0.573226 |
| MmugDNA.13927.1.S1_at   | MmugDNA.13927.1 | 7.54  | 7.79  | 0.1  | 0.15 | -1.19 | 0.047073 | 0.03645  | 0.379283 | 0.235423 |
| MmugDNA.13927.1.S1_x_at | MmugDNA.13927.1 | 7.33  | 7.65  | 0.18 | 0.17 | -1.25 | 0.148894 | 0.089649 | 0.522869 | 0.343842 |
| MmugDNA.13928.1.S1_at   | MmugDNA.13928.1 | 5.15  | 5.08  | 0.12 | 0.05 | 1.05  | 0.494468 | 0.088856 | 0.779472 | 0.342698 |
| MmugDNA.13929.1.S1_at   | MmugDNA.13929.1 | 3.46  | 3.44  | 0.14 | 0.1  | 1.01  | 0.495889 | 0.697249 | 0.780144 | 0.824057 |
| MmugDNA.1393.1.S1_at    | MmugDNA.1393.1  | 8.12  | 7.93  | 0.16 | 0.17 | 1.14  | 0.112877 | 0.722382 | 0.486223 | 0.839202 |
| MmugDNA.13930.1.S1_at   | MmugDNA.13930.1 | 3.86  | 3.83  | 0.12 | 0.1  | 1.02  | 0.812227 | 0.301434 | 0.932076 | 0.559467 |
| MmugDNA.13931.1.S1_at   | MmugDNA.13931.1 | 10.98 | 11.03 | 0.05 | 0.07 | -1.04 | 0.293845 | 0.407079 | 0.65018  | 0.634722 |
| MmugDNA.13934.1.S1_at   | MmugDNA.13934.1 | 6.61  | 6.22  | 0.22 | 0.13 | 1.31  | 0.146155 | 0.169399 | 0.520572 | 0.446024 |
| MmugDNA.13935.1.S1_at   | MmugDNA.13935.1 | 6.51  | 6.37  | 0.11 | 0.04 | 1.1   | 0.154929 | 0.472599 | 0.528235 | 0.68007  |
| MmugDNA.13936.1.S1_at   | MmugDNA.13936.1 | 4.54  | 4.53  | 0.13 | 0.03 | 1.01  | 0.651877 | 0.819067 | 0.86186  | 0.895738 |
| MmugDNA.13937.1.S1_at   | MmugDNA.13937.1 | 5.12  | 5.52  | 0.14 | 0    | -1.32 | 0.005198 | 0.000211 | 0.206146 | 0.032262 |
| MmugDNA.13938.1.S1_at   | MmugDNA.13938.1 | 12.16 | 11.93 | 0.61 | 0.12 | 1.17  | 0.544702 | 0.603491 | 0.807438 | 0.764189 |
| MmugDNA.13939.1.S1_s_at | MmugDNA.13939.1 | 11.11 | 10.48 | 0.01 | 0.08 | 1.54  | 0.000139 | 0.000119 | 0.111942 | 0.028664 |
| MmugDNA.13940.1.S1_at   | MmugDNA.13940.1 | 3.77  | 3.79  | 0.26 | 0.18 | -1.01 | 0.690859 | 0.218536 | 0.879631 | 0.492142 |
| MmugDNA.13941.1.S1_at   | MmugDNA.13941.1 | 4.47  | 4.43  | 0.16 | 0.12 | 1.03  | 0.324612 | 0.363925 | 0.672781 | 0.604293 |
| MmugDNA.13942.1.S1_at   | MmugDNA.13942.1 | 5.46  | 5.34  | 0.23 | 0.08 | 1.08  | 0.301483 | 0.000838 | 0.655772 | 0.046968 |
| MmugDNA.13943.1.S1_at   | MmugDNA.13943.1 | 5.13  | 4.97  | 0.25 | 0.07 | 1.11  | 0.753257 | 0.447031 | 0.907008 | 0.663235 |
| MmugDNA.13944.1.S1_at   | MmugDNA.13944.1 | 3.14  | 3.29  | 0.11 | 0.05 | -1.11 | 0.258885 | 0.516168 | 0.622286 | 0.708757 |
| MmugDNA.13947.1.S1_at   | MmugDNA.13947.1 | 3.88  | 3.9   | 0.04 | 0.06 | -1.01 | 0.382629 | 0.308331 | 0.710805 | 0.564425 |
| MmugDNA.13948.1.S1_at   | MmugDNA.13948.1 | 3.19  | 3.12  | 0.22 | 0.03 | 1.05  | 0.464888 | 0.41953  | 0.762742 | 0.643507 |
| MmugDNA.13949.1.S1_at   | MmugDNA.13949.1 | 6.74  | 6.37  | 0.06 | 0.11 | 1.29  | 0.008469 | 0.062892 | 0.234392 | 0.297494 |
| MmugDNA.13950.1.S1_at   | MmugDNA.13950.1 | 4.34  | 3.79  | 0.12 | 0.2  | 1.46  | 0.021328 | 0.010879 | 0.307781 | 0.135926 |
| MmugDNA.13951.1.S1_at   | MmugDNA.13951.1 | 4.36  | 3.89  | 0.22 | 0.15 | 1.38  | 0.161412 | 0.229418 | 0.534763 | 0.501527 |
| MmugDNA.13952.1.S1_at   | MmugDNA.13952.1 | 5.76  | 5.49  | 0.58 | 0.14 | 1.2   | 0.830959 | 0.22498  | 0.939545 | 0.49773  |
| MmugDNA.13956.1.S1_at   | MmugDNA.13956.1 | 4.95  | 4.95  | 0.07 | 0.07 | 1     | 0.776925 | 0.27632  | 0.917413 | 0.540303 |
| MmugDNA.13959.1.S1_at   | MmugDNA.13959.1 | 5.26  | 5.22  | 0.1  | 0.05 | 1.02  | 0.256807 | 0.489653 | 0.620706 | 0.691862 |
| MmugDNA.1396.1.S1_at    | MmugDNA.1396.1  | 5.99  | 5.98  | 0.09 | 0.02 | 1.01  | 0.519283 | 0.785995 | 0.793113 | 0.876026 |
| MmugDNA.13960.1.S1_at   | MmugDNA.13960.1 | 7.04  | 7.69  | 0.85 | 0.1  | -1.57 | 0.227362 | 0.086309 | 0.596459 | 0.338771 |
| MmugDNA.13961.1.S1_at   | MmugDNA.13961.1 | 4.87  | 4.85  | 0.1  | 0.03 | 1.01  | 0.253928 | 0.299782 | 0.618601 | 0.558081 |
| MmugDNA.13962.1.S1_at   | MmugDNA.13962.1 | 8.05  | 8.52  | 0.43 | 0.27 | -1.38 | 0.756446 | 0.655696 | 0.908234 | 0.7987   |
| MmugDNA.13963.1.S1_at   | MmugDNA.13963.1 | 6.69  | 5.49  | 0.49 | 0.11 | 2.31  | 0.041839 | 0.095515 | 0.367361 | 0.352588 |
| MmugDNA.13964.1.S1_at   | MmugDNA.13964.1 | 6.02  | 7.13  | 0.67 | 0.48 | -2.16 | 0.098872 | 0.030975 | 0.468274 | 0.217853 |
| MmugDNA.13965.1.S1_at   | MmugDNA.13965.1 | 7     | 7.13  | 0.37 | 0.06 | -1.1  | 0.617296 | 0.76454  | 0.845362 | 0.863128 |
| MmugDNA.13966.1.S1_s_at | MmugDNA.13966.1 | 7.05  | 7.89  | 0.26 | 0.27 | -1.79 | 0.009262 | 0.04823  | 0.241866 | 0.264684 |
| MmugDNA.13967.1.S1_at   | MmugDNA.13967.1 | 7     | 7.23  | 1.03 | 0.32 | -1.17 | 0.492353 | 0.248895 | 0.77824  | 0.517964 |
| MmugDNA.13968.1.S1_at   | MmugDNA.13968.1 | 13.35 | 12.69 | 0.84 | 0.07 | 1.58  | 0.742551 | 0.283989 | 0.901832 | 0.546237 |
| MmugDNA.13969.1.S1_at   | MmugDNA.13969.1 | 4.74  | 4.51  | 0.43 | 0.09 | 1.17  | 0.499869 | 0.556681 | 0.782239 | 0.734714 |
| MmugDNA.1397.1.S1_at    | MmugDNA.1397.1  | 5.37  | 5.33  | 0.07 | 0.05 | 1.03  | 0.15356  | 0.152735 | 0.526754 | 0.427571 |
| MmugDNA.13970.1.S1_at   | MmugDNA.13970.1 | 8.49  | 8.72  | 0.21 | 0.12 | -1.17 | 0.278896 | 0.01091  | 0.637923 | 0.136002 |

|                         |                 |       |       |      |      |       |          |          |          |          |
|-------------------------|-----------------|-------|-------|------|------|-------|----------|----------|----------|----------|
| MmugDNA.13971.1.S1_at   | MmugDNA.13971.1 | 6.02  | 5.82  | 0.13 | 0.1  | 1.15  | 0.096354 | 0.170049 | 0.465096 | 0.446789 |
| MmugDNA.13972.1.S1_at   | MmugDNA.13972.1 | 4.44  | 4.02  | 0.7  | 0.27 | 1.34  | 0.267044 | 0.294533 | 0.627686 | 0.554265 |
| MmugDNA.32487.1.S1_s_at | MmugDNA.32487.1 | 5.61  | 5.57  | 0.26 | 0.12 | 1.03  | 0.361949 | 0.411364 | 0.698882 | 0.638108 |
| MmugDNA.13975.1.S1_at   | MmugDNA.13975.1 | 3.84  | 3.94  | 0.21 | 0.14 | -1.08 | 0.760827 | 0.842108 | 0.910166 | 0.910036 |
| MmugDNA.13977.1.S1_at   | MmugDNA.13977.1 | 5.06  | 4.92  | 0.22 | 0.07 | 1.1   | 0.251863 | 0.220108 | 0.616976 | 0.493552 |
| MmugDNA.13978.1.S1_at   | MmugDNA.13978.1 | 10.23 | 10.78 | 0.66 | 0.12 | -1.47 | 0.774974 | 0.711608 | 0.916523 | 0.832761 |
| MmugDNA.1398.1.S1_at    | MmugDNA.1398.1  | 8.02  | 8.41  | 0.72 | 0.63 | -1.31 | 0.424297 | 0.007006 | 0.739547 | 0.112986 |
| MmugDNA.13980.1.S1_at   | MmugDNA.13980.1 | 11.76 | 11.34 | 0.35 | 0.12 | 1.34  | 0.058541 | 0.059559 | 0.404669 | 0.290568 |
| MmugDNA.13981.1.S1_at   | MmugDNA.13981.1 | 5.4   | 5.17  | 0.13 | 0.07 | 1.18  | 0.038183 | 0.016552 | 0.358577 | 0.162881 |
| MmugDNA.13985.1.S1_s_at | MmugDNA.13985.1 | 9.71  | 9.06  | 0.14 | 0.1  | 1.58  | 0.003971 | 0.03222  | 0.198571 | 0.222159 |
| MmugDNA.26902.1.S1_at   | MmugDNA.26902.1 | 4.1   | 4.28  | 0.03 | 0.21 | -1.13 | 0.21658  | 0.186241 | 0.586672 | 0.462127 |
| MmugDNA.26902.1.S1_s_at | MmugDNA.26902.1 | 9.91  | 9.75  | 0.79 | 0.05 | 1.12  | 0.853553 | 0.972244 | 0.948299 | 0.985011 |
| MmugDNA.13987.1.S1_at   | MmugDNA.13987.1 | 5.35  | 5.26  | 0.04 | 0.39 | 1.07  | 0.71681  | 0.094863 | 0.890035 | 0.351901 |
| MmugDNA.13988.1.S1_at   | MmugDNA.13988.1 | 3.19  | 3.13  | 0.05 | 0    | 1.04  | 0.132197 | 0.722656 | 0.506752 | 0.839355 |
| MmugDNA.13989.1.S1_at   | MmugDNA.13989.1 | 3.9   | 3.91  | 0.03 | 0.12 | -1.01 | 0.614186 | 0.27979  | 0.843828 | 0.543251 |
| MmugDNA.1399.1.S1_at    | MmugDNA.1399.1  | 3.88  | 3.7   | 0.16 | 0.08 | 1.13  | 0.480491 | 0.300592 | 0.771243 | 0.558885 |
| MmugDNA.13990.1.S1_at   | MmugDNA.13990.1 | 4.64  | 4.57  | 0.2  | 0.05 | 1.05  | 0.254042 | 0.524949 | 0.618635 | 0.714672 |
| MmugDNA.13991.1.S1_at   | MmugDNA.13991.1 | 7.25  | 6.62  | 0.09 | 0.61 | 1.55  | 0.085857 | 0.203001 | 0.453025 | 0.477343 |
| MmugDNA.13993.1.S1_at   | MmugDNA.13993.1 | 8.76  | 9.31  | 0.12 | 0.13 | -1.46 | 0.012168 | 0.012221 | 0.260124 | 0.142932 |
| MmugDNA.13994.1.S1_at   | MmugDNA.13994.1 | 4.08  | 3.99  | 0.03 | 0.06 | 1.07  | 0.050371 | 0.284483 | 0.387047 | 0.546642 |
| MmugDNA.13995.1.S1_at   | MmugDNA.13995.1 | 4.5   | 4.6   | 0.13 | 0.05 | -1.07 | 0.794668 | 0.545646 | 0.924622 | 0.727579 |
| MmugDNA.13996.1.S1_at   | MmugDNA.13996.1 | 6.59  | 6.55  | 0.14 | 0.28 | 1.03  | 0.501837 | 0.315371 | 0.783444 | 0.568939 |
| MmugDNA.13997.1.S1_at   | MmugDNA.13997.1 | 7.01  | 6.94  | 0.06 | 0.19 | 1.05  | 0.266212 | 0.039373 | 0.627106 | 0.243406 |
| MmugDNA.13997.1.S1_s_at | MmugDNA.13997.1 | 6.15  | 5.8   | 0.09 | 0.28 | 1.28  | 0.455116 | 0.111366 | 0.75733  | 0.376087 |
| MmugDNA.13998.1.S1_at   | MmugDNA.13998.1 | 7.75  | 7.24  | 0.66 | 0.04 | 1.42  | 0.707021 | 0.728016 | 0.886005 | 0.842711 |
| MmugDNA.14.1.S1_at      | MmugDNA.14.1    | 3.73  | 3.65  | 0.12 | 0.01 | 1.05  | 0.097538 | 0.124394 | 0.466487 | 0.394857 |
| MmugDNA.140.1.S1_at     | MmugDNA.140.1   | 5.69  | 5.65  | 0.2  | 0.11 | 1.02  | 0.957848 | 0.99833  | 0.986116 | 0.999091 |
| MmugDNA.1400.1.S1_at    | MmugDNA.1400.1  | 3.44  | 3.78  | 0.96 | 0.58 | -1.27 | 0.721947 | 0.355393 | 0.892112 | 0.597738 |
| MmugDNA.14000.1.S1_at   | MmugDNA.14000.1 | 4.72  | 4.4   | 0.06 | 0.17 | 1.25  | 0.082949 | 0.059379 | 0.44828  | 0.290548 |
| MmugDNA.14001.1.S1_at   | MmugDNA.14001.1 | 10.54 | 10.53 | 0.8  | 0.1  | 1.01  | 0.953985 | 0.47194  | 0.984675 | 0.679793 |
| MmugDNA.14002.1.S1_at   | MmugDNA.14002.1 | 7.91  | 7.4   | 0.29 | 0.08 | 1.42  | 0.04505  | 0.039966 | 0.375796 | 0.245076 |
| MmugDNA.14003.1.S1_at   | MmugDNA.14003.1 | 8.83  | 9.61  | 0.08 | 0.03 | -1.72 | 0.000097 | 0.000078 | 0.108151 | 0.027016 |
| MmugDNA.14004.1.S1_at   | MmugDNA.14004.1 | 11.2  | 11.15 | 0.99 | 0.27 | 1.03  | 0.983804 | 0.246455 | 0.995094 | 0.515899 |
| MmugDNA.14005.1.S1_at   | MmugDNA.14005.1 | 2.97  | 2.99  | 0.13 | 0.13 | -1.01 | 0.520493 | 0.492675 | 0.79373  | 0.693708 |
| MmugDNA.14007.1.S1_at   | MmugDNA.14007.1 | 3.69  | 3.59  | 0.29 | 0.13 | 1.07  | 0.667795 | 0.826343 | 0.868753 | 0.900249 |
| MmugDNA.14008.1.S1_s_at | MmugDNA.14008.1 | 7.63  | 8.09  | 0.13 | 0.16 | -1.38 | 0.014848 | 0.004289 | 0.278597 | 0.091951 |
| MmugDNA.1401.1.S1_at    | MmugDNA.1401.1  | 3.53  | 3.51  | 0.1  | 0.04 | 1.01  | 0.986872 | 0.266832 | 0.995774 | 0.53241  |
| MmugDNA.14010.1.S1_at   | MmugDNA.14010.1 | 2.94  | 2.93  | 0.1  | 0.14 | 1     | 0.429866 | 0.528386 | 0.742401 | 0.716583 |
| MmugDNA.14012.1.S1_at   | MmugDNA.14012.1 | 3.24  | 3.18  | 0.22 | 0.07 | 1.04  | 0.304118 | 0.570297 | 0.657861 | 0.743056 |
| MmugDNA.14013.1.S1_at   | MmugDNA.14013.1 | 6.2   | 4.65  | 0.79 | 0.55 | 2.93  | 0.129823 | 0.126013 | 0.504468 | 0.396648 |
| MmugDNA.14014.1.S1_at   | MmugDNA.14014.1 | 3.29  | 3.39  | 0.13 | 0.13 | -1.08 | 0.496825 | 0.302538 | 0.780864 | 0.560201 |
| MmugDNA.14015.1.S1_at   | MmugDNA.14015.1 | 7.97  | 7.17  | 0.56 | 0.1  | 1.73  | 0.211946 | 0.232324 | 0.582752 | 0.504054 |
| MmugDNA.14016.1.S1_at   | MmugDNA.14016.1 | 4.52  | 4.23  | 0.2  | 0.21 | 1.22  | 0.146952 | 0.18113  | 0.521545 | 0.457582 |



|                         |                 |       |       |      |      |       |          |          |          |          |
|-------------------------|-----------------|-------|-------|------|------|-------|----------|----------|----------|----------|
| MmugDNA.14017.1.S1_at   | MmugDNA.14017.1 | 6.53  | 6.19  | 0.24 | 0.19 | 1.27  | 0.115679 | 0.328521 | 0.488929 | 0.578137 |
| MmugDNA.14018.1.S1_at   | MmugDNA.14018.1 | 4.88  | 4.7   | 0.14 | 0.22 | 1.13  | 0.116902 | 0.242222 | 0.490067 | 0.51267  |
| MmugDNA.14019.1.S1_at   | MmugDNA.14019.1 | 5.51  | 4.97  | 0.14 | 0.19 | 1.45  | 0.011234 | 0.025051 | 0.253143 | 0.198316 |
| MmugDNA.1402.1.S1_at    | MmugDNA.1402.1  | 4.54  | 4.72  | 0.6  | 0.15 | -1.14 | 0.48741  | 0.345089 | 0.775077 | 0.590354 |
| MmugDNA.14021.1.S1_at   | MmugDNA.14021.1 | 4.93  | 4.97  | 0.07 | 0.15 | -1.02 | 0.488262 | 0.812663 | 0.77546  | 0.891778 |
| MmugDNA.14023.1.S1_at   | MmugDNA.14023.1 | 12.67 | 12.73 | 0.1  | 0.1  | -1.04 | 0.972462 | 0.363729 | 0.991078 | 0.604138 |
| MmugDNA.14024.1.S1_at   | MmugDNA.14024.1 | 3.67  | 4.09  | 0.17 | 0.2  | -1.34 | 0.04254  | 0.047848 | 0.369399 | 0.263679 |
| MmugDNA.14025.1.S1_at   | MmugDNA.14025.1 | 4.69  | 4.64  | 0.1  | 0.1  | 1.04  | 0.299169 | 0.393264 | 0.653536 | 0.626183 |
| MmugDNA.14026.1.S1_at   | MmugDNA.14026.1 | 5.41  | 5.42  | 0.09 | 0.12 | -1    | 0.933001 | 0.074527 | 0.977247 | 0.318173 |
| MmugDNA.14027.1.S1_at   | MmugDNA.14027.1 | 3.65  | 3.4   | 0.33 | 0.18 | 1.19  | 0.265538 | 0.496544 | 0.626737 | 0.696119 |
| MmugDNA.14028.1.S1_at   | MmugDNA.14028.1 | 3.69  | 3.7   | 0.07 | 0.13 | -1.01 | 0.556072 | 0.745419 | 0.813904 | 0.852384 |
| MmugDNA.14029.1.S1_at   | MmugDNA.14029.1 | 4.4   | 4.4   | 0.06 | 0.08 | -1.01 | 0.307187 | 0.594634 | 0.660096 | 0.758623 |
| MmugDNA.1403.1.S1_at    | MmugDNA.1403.1  | 7.57  | 7.61  | 0.57 | 0.09 | -1.03 | 0.992581 | 0.270897 | 0.997203 | 0.536026 |
| MmugDNA.14030.1.S1_at   | MmugDNA.14030.1 | 5.14  | 5.13  | 0.12 | 0.08 | 1     | 0.765044 | 0.757844 | 0.911696 | 0.859085 |
| MmugDNA.14032.1.S1_at   | MmugDNA.14032.1 | 5.45  | 5.12  | 0.5  | 0.17 | 1.26  | 0.890221 | 0.340905 | 0.962246 | 0.587035 |
| MmugDNA.14034.1.S1_at   | MmugDNA.14034.1 | 3.74  | 3.67  | 0.12 | 0.08 | 1.05  | 0.441976 | 0.595887 | 0.749746 | 0.759258 |
| MmugDNA.14035.1.S1_at   | MmugDNA.14035.1 | 4.51  | 4.6   | 0.05 | 0.14 | -1.06 | 0.48377  | 0.038796 | 0.773275 | 0.241916 |
| MmugDNA.14036.1.S1_at   | MmugDNA.14036.1 | 4.2   | 4.14  | 0.16 | 0.13 | 1.04  | 0.670196 | 0.631541 | 0.86983  | 0.782845 |
| MmugDNA.14038.1.S1_at   | MmugDNA.14038.1 | 5.37  | 5.49  | 0.1  | 0.09 | -1.09 | 0.170239 | 0.068684 | 0.543379 | 0.308653 |
| MmugDNA.14039.1.S1_at   | MmugDNA.14039.1 | 5.27  | 5.63  | 0.23 | 0.58 | -1.28 | 0.535014 | 0.271547 | 0.801404 | 0.536547 |
| MmugDNA.1404.1.S1_at    | MmugDNA.1404.1  | 8.53  | 8.73  | 0.7  | 0.32 | -1.15 | 0.914067 | 0.61783  | 0.970812 | 0.773715 |
| MmugDNA.14040.1.S1_at   | MmugDNA.14040.1 | 3.67  | 3.64  | 0.17 | 0.06 | 1.02  | 0.307764 | 0.271806 | 0.660628 | 0.536577 |
| MmugDNA.14041.1.S1_at   | MmugDNA.14041.1 | 4.47  | 4.65  | 0.15 | 0.29 | -1.14 | 0.095574 | 0.093648 | 0.464229 | 0.350047 |
| MmugDNA.14042.1.S1_at   | MmugDNA.14042.1 | 8.81  | 8.68  | 0.8  | 0.26 | 1.1   | 0.352248 | 0.170911 | 0.692649 | 0.447561 |
| MmugDNA.14043.1.S1_at   | MmugDNA.14043.1 | 10.99 | 10.83 | 0.76 | 0.27 | 1.12  | 0.901343 | 0.847    | 0.966509 | 0.913045 |
| MmugDNA.14044.1.S1_at   | MmugDNA.14044.1 | 5.59  | 5.42  | 0.23 | 0.13 | 1.12  | 0.797596 | 0.975517 | 0.925605 | 0.986659 |
| MmugDNA.14047.1.S1_at   | MmugDNA.14047.1 | 4.28  | 4.36  | 0.15 | 0.07 | -1.06 | 0.329807 | 0.107851 | 0.676544 | 0.370945 |
| MmugDNA.14049.1.S1_at   | MmugDNA.14049.1 | 3.86  | 3.7   | 0.08 | 0.24 | 1.12  | 0.370913 | 0.615369 | 0.705157 | 0.771962 |
| MmugDNA.1405.1.S1_at    | MmugDNA.1405.1  | 6.5   | 6.57  | 0.52 | 0.1  | -1.05 | 0.76296  | 0.833556 | 0.910975 | 0.904566 |
| MmugDNA.14050.1.S1_at   | MmugDNA.14050.1 | 5.38  | 5.38  | 0.08 | 0.09 | 1     | 0.230999 | 0.107367 | 0.599045 | 0.370219 |
| MmugDNA.14051.1.S1_at   | MmugDNA.14051.1 | 6.13  | 5.93  | 0.36 | 0.38 | 1.14  | 0.232293 | 0.357961 | 0.600124 | 0.59955  |
| MmugDNA.14053.1.S1_at   | MmugDNA.14053.1 | 6.52  | 6.61  | 0.47 | 0.09 | -1.06 | 0.652276 | 0.725464 | 0.862004 | 0.841043 |
| MmugDNA.14055.1.S1_at   | MmugDNA.14055.1 | 7.31  | 7.35  | 0.48 | 0.24 | -1.03 | 0.826322 | 0.241917 | 0.937736 | 0.512489 |
| MmugDNA.14056.1.S1_at   | MmugDNA.14056.1 | 6.35  | 6.55  | 0.48 | 0.05 | -1.15 | 0.718354 | 0.887411 | 0.890613 | 0.935867 |
| MmugDNA.14057.1.S1_at   | MmugDNA.14057.1 | 4.12  | 4.1   | 0.17 | 0.08 | 1.02  | 0.206331 | 0.321374 | 0.578142 | 0.573207 |
| MmugDNA.14058.1.S1_at   | MmugDNA.14058.1 | 8.19  | 8.45  | 0.64 | 0.16 | -1.19 | 0.690651 | 0.02118  | 0.879535 | 0.182297 |
| MmugDNA.14059.1.S1_at   | MmugDNA.14059.1 | 10.27 | 10.54 | 0.43 | 0.04 | -1.21 | 0.108477 | 0.114785 | 0.480777 | 0.381311 |
| MmugDNA.1406.1.S1_at    | MmugDNA.1406.1  | 7.5   | 7.73  | 0.35 | 0.14 | -1.18 | 0.567128 | 0.021891 | 0.820279 | 0.185194 |
| MmugDNA.14060.1.S1_at   | MmugDNA.14060.1 | 6.29  | 6.24  | 0.28 | 0.09 | 1.04  | 0.403224 | 0.052743 | 0.725542 | 0.275315 |
| MmugDNA.22926.1.S1_s_at | MmugDNA.22926.1 | 11.57 | 11.49 | 0.22 | 0.06 | 1.05  | 0.308872 | 0.104622 | 0.661293 | 0.365941 |
| MmugDNA.14063.1.S1_at   | MmugDNA.14063.1 | 3.29  | 3.4   | 0.35 | 0.04 | -1.08 | 0.730598 | 0.649442 | 0.896248 | 0.794887 |
| MmugDNA.14064.1.S1_at   | MmugDNA.14064.1 | 5.3   | 5.37  | 0.25 | 0.08 | -1.05 | 0.899989 | 0.29178  | 0.96599  | 0.552054 |
| MmugDNA.14065.1.S1_at   | MmugDNA.14065.1 | 6.47  | 7.45  | 0.39 | 0.26 | -1.97 | 0.088574 | 0.245577 | 0.456267 | 0.515348 |

|                         |                 |       |       |      |      |       |          |          |          |          |
|-------------------------|-----------------|-------|-------|------|------|-------|----------|----------|----------|----------|
| MmugDNA.14066.1.S1_at   | MmugDNA.14066.1 | 5.45  | 5.58  | 0.03 | 0.22 | -1.09 | 0.99576  | 0.996936 | 0.998312 | 0.99822  |
| MmugDNA.14069.1.S1_at   | MmugDNA.14069.1 | 4.5   | 4.64  | 0.09 | 0.05 | -1.1  | 0.081385 | 0.421732 | 0.445406 | 0.645254 |
| MmugDNA.1407.1.S1_at    | MmugDNA.1407.1  | 3.98  | 4.09  | 0.2  | 0.07 | -1.08 | 0.797435 | 0.347581 | 0.925538 | 0.592019 |
| MmugDNA.14070.1.S1_at   | MmugDNA.14070.1 | 4.32  | 4.56  | 0.14 | 0.18 | -1.18 | 0.384981 | 0.156321 | 0.712306 | 0.43161  |
| MmugDNA.14071.1.S1_at   | MmugDNA.14071.1 | 5.41  | 5.52  | 0.12 | 0.02 | -1.08 | 0.716288 | 0.910836 | 0.889759 | 0.949709 |
| MmugDNA.14072.1.S1_at   | MmugDNA.14072.1 | 3.51  | 3.45  | 0.05 | 0.06 | 1.04  | 0.094251 | 0.084649 | 0.463756 | 0.33618  |
| MmugDNA.14073.1.S1_at   | MmugDNA.14073.1 | 6.83  | 7.04  | 0.55 | 0.33 | -1.15 | 0.374828 | 0.280311 | 0.706109 | 0.543544 |
| MmugDNA.14074.1.S1_at   | MmugDNA.14074.1 | 4.59  | 4.46  | 0.23 | 0.1  | 1.09  | 0.211557 | 0.725951 | 0.582565 | 0.841316 |
| MmugDNA.14077.1.S1_at   | MmugDNA.14077.1 | 4.52  | 4.6   | 0.38 | 0.39 | -1.05 | 0.534892 | 0.736044 | 0.801404 | 0.847309 |
| MmugDNA.14079.1.S1_at   | MmugDNA.14079.1 | 6.56  | 6.65  | 0.36 | 0.09 | -1.06 | 0.608834 | 0.233737 | 0.841357 | 0.50505  |
| MmugDNA.1408.1.S1_at    | MmugDNA.1408.1  | 9.3   | 8.8   | 0.47 | 0.14 | -1.42 | 0.457347 | 0.35085  | 0.758326 | 0.594572 |
| MmugDNA.14082.1.S1_at   | MmugDNA.14082.1 | 6.96  | 6.79  | 0.06 | 0.1  | 1.12  | 0.074309 | 0.063657 | 0.435067 | 0.298815 |
| MmugDNA.33264.1.S1_at   | MmugDNA.33264.1 | 5.2   | 5.22  | 0.95 | 0.31 | -1.01 | 0.625655 | 0.583056 | 0.849478 | 0.75153  |
| MmugDNA.33264.1.S1_s_at | MmugDNA.33264.1 | 12.27 | 12.52 | 0.12 | 0.04 | -1.18 | 0.077017 | 0.331234 | 0.438911 | 0.579978 |
| MmugDNA.14084.1.S1_at   | MmugDNA.14084.1 | 3.18  | 3     | 0.62 | 0.21 | 1.14  | 0.222327 | 0.34926  | 0.591869 | 0.593267 |
| MmugDNA.14085.1.S1_at   | MmugDNA.14085.1 | 9.79  | 10.2  | 0.44 | 0.02 | -1.32 | 0.225622 | 0.120744 | 0.594769 | 0.389579 |
| MmugDNA.14086.1.S1_at   | MmugDNA.14086.1 | 6.57  | 7.42  | 1.89 | 0.55 | -1.81 | 0.351736 | 0.251918 | 0.692508 | 0.520632 |
| MmugDNA.14087.1.S1_at   | MmugDNA.14087.1 | 7.8   | 7.76  | 0.09 | 0.16 | 1.03  | 0.7387   | 0.86972  | 0.900053 | 0.926114 |
| MmugDNA.1409.1.S1_at    | MmugDNA.1409.1  | 5.99  | 6.21  | 0.57 | 0.09 | -1.16 | 0.527092 | 0.641583 | 0.796919 | 0.789618 |
| MmugDNA.37584.1.S1_s_at | MmugDNA.37584.1 | 9.09  | 9.18  | 0.37 | 0.05 | -1.06 | 0.942415 | 0.900202 | 0.980289 | 0.943313 |
| MmugDNA.14092.1.S1_s_at | MmugDNA.14092.1 | 9.09  | 8.87  | 0.86 | 0.1  | 1.16  | 0.635897 | 0.703038 | 0.854813 | 0.827866 |
| MmugDNA.14094.1.S1_at   | MmugDNA.14094.1 | 5.25  | 5.16  | 0.06 | 0    | 1.07  | 0.068919 | 0.237758 | 0.42633  | 0.50826  |
| MmugDNA.14095.1.S1_at   | MmugDNA.14095.1 | 3.54  | 3.53  | 0.06 | 0.01 | 1.01  | 0.676705 | 0.465011 | 0.873224 | 0.675534 |
| MmugDNA.14097.1.S1_at   | MmugDNA.14097.1 | 5.31  | 5.31  | 0.02 | 0.09 | -1    | 0.92028  | 0.99174  | 0.972913 | 0.995392 |
| MmugDNA.14098.1.S1_at   | MmugDNA.14098.1 | 11.48 | 11.52 | 0.43 | 0.2  | -1.03 | 0.308263 | 0.056112 | 0.660925 | 0.282751 |
| MmugDNA.141.1.S1_at     | MmugDNA.141.1   | 3.77  | 3.93  | 0.07 | 0.18 | -1.12 | 0.412739 | 0.807234 | 0.732098 | 0.889014 |
| MmugDNA.14100.1.S1_at   | MmugDNA.14100.1 | 8     | 9.13  | 1.75 | 0.13 | -2.2  | 0.334615 | 0.200448 | 0.680478 | 0.474826 |
| MmugDNA.14101.1.S1_at   | MmugDNA.14101.1 | 11.07 | 10.89 | 0.2  | 0.07 | 1.14  | 0.049357 | 0.048955 | 0.385474 | 0.266062 |
| MmugDNA.14102.1.S1_at   | MmugDNA.14102.1 | 3.25  | 3.32  | 0.04 | 0.19 | -1.04 | 0.906594 | 0.046802 | 0.968356 | 0.261073 |
| MmugDNA.14103.1.S1_at   | MmugDNA.14103.1 | 3.44  | 3.39  | 0.28 | 0.1  | 1.03  | 0.20027  | 0.342845 | 0.572075 | 0.588712 |
| MmugDNA.14104.1.S1_at   | MmugDNA.14104.1 | 10.83 | 10.94 | 0.7  | 0.18 | -1.08 | 0.637109 | 0.726181 | 0.855385 | 0.84147  |
| MmugDNA.14105.1.S1_at   | MmugDNA.14105.1 | 3.57  | 3.38  | 0.14 | 0.12 | 1.15  | 0.086594 | 0.076383 | 0.454461 | 0.321368 |
| MmugDNA.14106.1.S1_at   | MmugDNA.14106.1 | 5.13  | 4.98  | 0.59 | 0.09 | 1.11  | 0.729051 | 0.861078 | 0.895601 | 0.920972 |
| MmugDNA.14107.1.S1_at   | MmugDNA.14107.1 | 4.71  | 4.54  | 0.09 | 0.12 | 1.12  | 0.105159 | 0.160988 | 0.476883 | 0.437116 |
| MmugDNA.14108.1.S1_at   | MmugDNA.14108.1 | 3.91  | 3.9   | 0.06 | 0    | 1.01  | 0.296962 | 0.329159 | 0.652525 | 0.578548 |
| MmugDNA.1411.1.S1_at    | MmugDNA.1411.1  | 3.67  | 3.72  | 0.11 | 0.04 | -1.03 | 0.563326 | 0.666665 | 0.818183 | 0.804716 |
| MmugDNA.14111.1.S1_at   | MmugDNA.14111.1 | 5.73  | 5.79  | 0.11 | 0.02 | -1.04 | 0.387226 | 0.132853 | 0.71411  | 0.404544 |
| MmugDNA.14112.1.S1_at   | MmugDNA.14112.1 | 9.97  | 10.71 | 0.32 | 0.07 | -1.67 | 0.051876 | 0.153615 | 0.3916   | 0.428341 |
| MmugDNA.14113.1.S1_at   | MmugDNA.14113.1 | 4.78  | 4.81  | 0.31 | 0.03 | -1.02 | 0.591402 | 0.759936 | 0.83343  | 0.860511 |
| MmugDNA.14114.1.S1_at   | MmugDNA.14114.1 | 4.46  | 5.08  | 0.72 | 0.23 | -1.54 | 0.843912 | 0.255072 | 0.944991 | 0.52317  |
| MmugDNA.14115.1.S1_at   | MmugDNA.14115.1 | 5.01  | 4.99  | 0.16 | 0.02 | 1.01  | 0.878979 | 0.40981  | 0.95792  | 0.636825 |
| MmugDNA.14116.1.S1_at   | MmugDNA.14116.1 | 6.18  | 6.07  | 0.48 | 0.11 | 1.08  | 0.251843 | 0.318786 | 0.616976 | 0.571379 |
| MmugDNA.14117.1.S1_at   | MmugDNA.14117.1 | 4.95  | 4.95  | 0.2  | 0.06 | 1     | 0.536295 | 0.379783 | 0.80223  | 0.616576 |

|                         |                 |       |       |      |      |       |          |          |          |          |
|-------------------------|-----------------|-------|-------|------|------|-------|----------|----------|----------|----------|
| MmugDNA.14119.1.S1_at   | MmugDNA.14119.1 | 3.32  | 3.47  | 0.1  | 0.09 | -1.1  | 0.401182 | 0.237521 | 0.724136 | 0.508178 |
| MmugDNA.14120.1.S1_at   | MmugDNA.14120.1 | 10.54 | 10.61 | 0.19 | 0.13 | -1.04 | 0.403793 | 0.696843 | 0.725934 | 0.823975 |
| MmugDNA.14122.1.S1_at   | MmugDNA.14122.1 | 5.4   | 5.72  | 0.13 | 0.06 | -1.25 | 0.056843 | 0.099384 | 0.401258 | 0.357673 |
| MmugDNA.14125.1.S1_at   | MmugDNA.14125.1 | 7.1   | 5.88  | 0.65 | 0.32 | 2.34  | 0.03475  | 0.004692 | 0.350358 | 0.095363 |
| MmugDNA.14126.1.S1_at   | MmugDNA.14126.1 | 7.12  | 7.7   | 0.29 | 0.06 | -1.49 | 0.020124 | 0.017423 | 0.303673 | 0.167044 |
| MmugDNA.14127.1.S1_at   | MmugDNA.14127.1 | 6.48  | 6.48  | 0.14 | 0.04 | 1     | 0.771665 | 0.892498 | 0.914788 | 0.938696 |
| MmugDNA.14129.1.S1_at   | MmugDNA.14129.1 | 11.66 | 11.56 | 0.2  | 0.17 | 1.08  | 0.903465 | 0.807463 | 0.967599 | 0.889121 |
| MmugDNA.14129.1.S1_x_at | MmugDNA.14129.1 | 11.97 | 11.88 | 0.18 | 0.15 | 1.06  | 0.98028  | 0.880274 | 0.993785 | 0.931571 |
| MmugDNA.1413.1.S1_at    | MmugDNA.1413.1  | 6.3   | 6.24  | 0.21 | 0.29 | 1.04  | 0.616572 | 0.297216 | 0.845002 | 0.556067 |
| MmugDNA.14130.1.S1_at   | MmugDNA.14130.1 | 11.95 | 11.53 | 0.35 | 0.06 | 1.33  | 0.098201 | 0.041287 | 0.467651 | 0.247995 |
| MmugDNA.14131.1.S1_at   | MmugDNA.14131.1 | 7.45  | 7.32  | 0.12 | 0.06 | -1.09 | 0.78732  | 0.526089 | 0.921894 | 0.715376 |
| MmugDNA.14133.1.S1_at   | MmugDNA.14133.1 | 7.47  | 7.19  | 0.13 | 0.11 | 1.21  | 0.042197 | 0.001232 | 0.368796 | 0.05478  |
| MmugDNA.14134.1.S1_at   | MmugDNA.14134.1 | 7.2   | 6.94  | 0.13 | 0.05 | 1.2   | 0.070486 | 0.135728 | 0.429392 | 0.407917 |
| MmugDNA.14135.1.S1_at   | MmugDNA.14135.1 | 5.99  | 5.78  | 0.03 | 0.4  | 1.16  | 0.892883 | 0.427328 | 0.963332 | 0.649175 |
| MmugDNA.14136.1.S1_at   | MmugDNA.14136.1 | 3.52  | 5.05  | 0.32 | 0.62 | -2.9  | 0.028892 | 0.039214 | 0.333062 | 0.243173 |
| MmugDNA.14138.1.S1_at   | MmugDNA.14138.1 | 4.83  | 4.69  | 0.34 | 0.1  | 1.11  | 0.629697 | 0.103613 | 0.851663 | 0.36439  |
| MmugDNA.14140.1.S1_at   | MmugDNA.14140.1 | 4.68  | 4.56  | 0.02 | 0.05 | 1.09  | 0.024945 | 0.198617 | 0.320402 | 0.473391 |
| MmugDNA.14141.1.S1_at   | MmugDNA.14141.1 | 3.86  | 3.86  | 0.14 | 0.12 | 1     | 0.315044 | 0.462092 | 0.665641 | 0.673537 |
| MmugDNA.14142.1.S1_at   | MmugDNA.14142.1 | 5.22  | 5.19  | 0.18 | 0.19 | 1.02  | 0.185926 | 0.452216 | 0.558844 | 0.666957 |
| MmugDNA.14143.1.S1_at   | MmugDNA.14143.1 | 4.93  | 4.72  | 0.15 | 0.21 | 1.15  | 0.548617 | 0.116467 | 0.809852 | 0.383671 |
| MmugDNA.14144.1.S1_s_at | MmugDNA.14144.1 | 6.52  | 6.57  | 0.06 | 0.08 | -1.04 | 0.112058 | 0.051229 | 0.485173 | 0.271799 |
| MmugDNA.14148.1.S1_at   | MmugDNA.14148.1 | 4.08  | 4.07  | 0.04 | 0.02 | 1     | 0.346046 | 0.166454 | 0.687873 | 0.442903 |
| MmugDNA.14149.1.S1_at   | MmugDNA.14149.1 | 6.27  | 6.56  | 0.23 | 0.07 | -1.23 | 0.092642 | 0.067424 | 0.461192 | 0.305664 |
| MmugDNA.1415.1.S1_at    | MmugDNA.1415.1  | 4.48  | 4.45  | 0.06 | 0.04 | 1.02  | 0.640757 | 0.4955   | 0.856931 | 0.695527 |
| MmugDNA.14150.1.S1_at   | MmugDNA.14150.1 | 7.24  | 6.94  | 0.18 | 0.08 | 1.23  | 0.067525 | 0.031908 | 0.423938 | 0.221018 |
| MmugDNA.14150.1.S1_s_at | MmugDNA.14150.1 | 7.57  | 7.72  | 0.46 | 0.08 | -1.1  | 0.477671 | 0.583107 | 0.76987  | 0.751559 |
| MmugDNA.14152.1.S1_at   | MmugDNA.14152.1 | 6.76  | 7.85  | 1.31 | 0.32 | -2.13 | 0.283462 | 0.440905 | 0.641407 | 0.659138 |
| MmugDNA.14153.1.S1_at   | MmugDNA.14153.1 | 10.69 | 10.8  | 0.25 | 0.06 | -1.08 | 0.871277 | 0.92851  | 0.955305 | 0.95936  |
| MmugDNA.14156.1.S1_at   | MmugDNA.14156.1 | 6.2   | 6.24  | 0.03 | 0.16 | -1.02 | 0.754443 | 0.644596 | 0.907353 | 0.791686 |
| MmugDNA.14157.1.S1_at   | MmugDNA.14157.1 | 5.37  | 5.28  | 0.21 | 0.16 | 1.06  | 0.756927 | 0.148684 | 0.908337 | 0.423201 |
| MmugDNA.14158.1.S1_at   | MmugDNA.14158.1 | 11.94 | 11.63 | 0.05 | 0.01 | 1.23  | 0.000377 | 0.005763 | 0.137028 | 0.104378 |
| MmugDNA.14158.1.S1_s_at | MmugDNA.14158.1 | 12.23 | 11.89 | 0.03 | 0.03 | 1.27  | 0.000108 | 0.000426 | 0.108151 | 0.038359 |
| MmugDNA.14159.1.S1_at   | MmugDNA.14159.1 | 5.33  | 5.22  | 0.26 | 0.17 | 1.08  | 0.82807  | 0.664898 | 0.938183 | 0.803709 |
| MmugDNA.14160.1.S1_at   | MmugDNA.14160.1 | 10.99 | 11.03 | 0.23 | 0.17 | -1.02 | 0.790432 | 0.211911 | 0.922945 | 0.485931 |
| MmugDNA.14161.1.S1_at   | MmugDNA.14161.1 | 3.53  | 3.59  | 0.18 | 0.13 | -1.04 | 0.3838   | 0.522566 | 0.711503 | 0.713227 |
| MmugDNA.14162.1.S1_at   | MmugDNA.14162.1 | 10.2  | 10.23 | 0.22 | 0.06 | -1.02 | 0.848896 | 0.642878 | 0.946889 | 0.790529 |
| MmugDNA.14162.1.S1_s_at | MmugDNA.14162.1 | 11.94 | 12.04 | 0.16 | 0.05 | -1.08 | 0.176238 | 0.21773  | 0.549326 | 0.491309 |
| MmugDNA.14163.1.S1_at   | MmugDNA.14163.1 | 9.18  | 9     | 0.58 | 0.26 | 1.13  | 0.307666 | 0.309448 | 0.66047  | 0.564979 |
| MmugDNA.14164.1.S1_at   | MmugDNA.14164.1 | 8.22  | 8.37  | 0.52 | 0.23 | -1.11 | 0.680703 | 0.481491 | 0.874774 | 0.686469 |
| MmugDNA.14165.1.S1_at   | MmugDNA.14165.1 | 6.61  | 5.86  | 0.5  | 0.07 | 1.68  | 0.142151 | 0.307274 | 0.51712  | 0.56352  |
| MmugDNA.14166.1.S1_at   | MmugDNA.14166.1 | 4     | 4.15  | 0.1  | 0.13 | -1.11 | 0.831742 | 0.16727  | 0.939628 | 0.443684 |
| MmugDNA.14167.1.S1_at   | MmugDNA.14167.1 | 6.37  | 6.31  | 0.18 | 0.11 | 1.04  | 0.360732 | 0.803711 | 0.698128 | 0.887094 |
| MmugDNA.14169.1.S1_at   | MmugDNA.14169.1 | 9.18  | 8.37  | 1.02 | 0.46 | 1.75  | 0.180264 | 0.0728   | 0.553439 | 0.315651 |

|                         |                 |       |       |      |      |       |          |          |          |          |
|-------------------------|-----------------|-------|-------|------|------|-------|----------|----------|----------|----------|
| MmugDNA.1417.1.S1_at    | MmugDNA.1417.1  | 10.64 | 9.75  | 0.31 | 0.17 | 1.85  | 0.008075 | 0.005689 | 0.232005 | 0.104021 |
| MmugDNA.14170.1.S1_at   | MmugDNA.14170.1 | 8.97  | 8.29  | 0.79 | 0.21 | 1.59  | 0.227388 | 0.385021 | 0.596481 | 0.620609 |
| MmugDNA.14173.1.S1_at   | MmugDNA.14173.1 | 4.47  | 4.46  | 0.06 | 0.11 | 1.01  | 0.514053 | 0.912392 | 0.790236 | 0.950641 |
| MmugDNA.14175.1.S1_at   | MmugDNA.14175.1 | 4.97  | 5.04  | 0.19 | 0.12 | -1.05 | 0.229228 | 0.189033 | 0.59816  | 0.464897 |
| MmugDNA.14176.1.S1_s_at | MmugDNA.14176.1 | 4.04  | 4.62  | 0.65 | 0.44 | -1.5  | 0.455541 | 0.420683 | 0.757444 | 0.64434  |
| MmugDNA.14179.1.S1_at   | MmugDNA.14179.1 | 5.22  | 5.07  | 0.13 | 0.27 | 1.11  | 0.269218 | 0.243291 | 0.629522 | 0.513356 |
| MmugDNA.1418.1.S1_at    | MmugDNA.1418.1  | 5.21  | 5.22  | 0.1  | 0.01 | -1    | 0.573469 | 0.19414  | 0.823614 | 0.469266 |
| MmugDNA.14180.1.S1_at   | MmugDNA.14180.1 | 4.75  | 3.77  | 0.53 | 0.13 | 1.97  | 0.043523 | 0.013322 | 0.372168 | 0.148042 |
| MmugDNA.14181.1.S1_at   | MmugDNA.14181.1 | 11.39 | 12.02 | 0.26 | 0.05 | -1.54 | 0.033981 | 0.391737 | 0.347469 | 0.625301 |
| MmugDNA.14182.1.S1_at   | MmugDNA.14182.1 | 5.07  | 5.03  | 0.2  | 0.5  | 1.03  | 0.639451 | 0.866579 | 0.85626  | 0.924174 |
| MmugDNA.14183.1.S1_at   | MmugDNA.14183.1 | 7.12  | 7.09  | 0.32 | 0.38 | -1.02 | 0.9638   | 0.906984 | 0.988182 | 0.947344 |
| MmugDNA.14184.1.S1_x_at | MmugDNA.14184.1 | 14.44 | 14.47 | 0.1  | 0.04 | -1.02 | 0.550685 | 0.724577 | 0.810963 | 0.840552 |
| MmugDNA.14186.1.S1_at   | MmugDNA.14186.1 | 4.78  | 4.76  | 0.23 | 0.08 | 1.01  | 0.793334 | 0.282334 | 0.92426  | 0.545076 |
| MmugDNA.14189.1.S1_at   | MmugDNA.14189.1 | 5.59  | 5.56  | 0.1  | 0.2  | 1.02  | 0.34757  | 0.521815 | 0.688798 | 0.712654 |
| MmugDNA.1419.1.S1_at    | MmugDNA.1419.1  | 6.74  | 7.19  | 0.47 | 0.31 | -1.36 | 0.337745 | 0.235858 | 0.682671 | 0.50704  |
| MmugDNA.14190.1.S1_at   | MmugDNA.14190.1 | 6.78  | 6.69  | 0.39 | 0.14 | 1.07  | 0.718242 | 0.023011 | 0.890613 | 0.189778 |
| MmugDNA.14191.1.S1_at   | MmugDNA.14191.1 | 11.43 | 11.65 | 1.19 | 0.17 | -1.17 | 0.741538 | 0.203809 | 0.901431 | 0.478081 |
| MmugDNA.14195.1.S1_at   | MmugDNA.14195.1 | 3.59  | 3.67  | 0.04 | 0.2  | -1.06 | 0.931354 | 0.768811 | 0.97706  | 0.86567  |
| MmugDNA.14196.1.S1_at   | MmugDNA.14196.1 | 3.82  | 3.58  | 0.05 | 0.05 | 1.18  | 0.002182 | 0.002083 | 0.174757 | 0.067486 |
| MmugDNA.14197.1.S1_at   | MmugDNA.14197.1 | 8.22  | 8.41  | 0.27 | 0.12 | -1.14 | 0.943577 | 0.503766 | 0.980524 | 0.701126 |
| MmugDNA.14198.1.S1_at   | MmugDNA.14198.1 | 6.31  | 6.63  | 0.28 | 0.22 | -1.25 | 0.199381 | 0.324978 | 0.571138 | 0.575512 |
| MmugDNA.14199.1.S1_at   | MmugDNA.14199.1 | 3.11  | 3.05  | 0.14 | 0.13 | 1.04  | 0.754906 | 0.070929 | 0.907518 | 0.312444 |
| MmugDNA.142.1.S1_at     | MmugDNA.142.1   | 4.89  | 4.82  | 0.33 | 0.07 | 1.05  | 0.908918 | 0.9926   | 0.969277 | 0.995715 |
| MmugDNA.1420.1.S1_s_at  | MmugDNA.1420.1  | 5.15  | 6.1   | 0.28 | 0.41 | -1.93 | 0.024696 | 0.020665 | 0.319523 | 0.180392 |
| MmugDNA.14200.1.S1_at   | MmugDNA.14200.1 | 3.12  | 3.15  | 0.08 | 0.07 | -1.02 | 0.301937 | 0.172741 | 0.655989 | 0.449252 |
| MmugDNA.14201.1.S1_at   | MmugDNA.14201.1 | 5.61  | 5.6   | 0.16 | 0.04 | 1.01  | 0.259048 | 0.422322 | 0.622425 | 0.645653 |
| MmugDNA.14202.1.S1_at   | MmugDNA.14202.1 | 6.52  | 6.64  | 0.09 | 0.14 | -1.09 | 0.291517 | 0.349836 | 0.647943 | 0.593595 |
| MmugDNA.14205.1.S1_at   | MmugDNA.14205.1 | 6.21  | 5.94  | 0.13 | 0.05 | 1.2   | 0.066447 | 0.3308   | 0.422326 | 0.579563 |
| MmugDNA.14207.1.S1_at   | MmugDNA.14207.1 | 4.92  | 5     | 0.21 | 0.28 | -1.06 | 0.323292 | 0.499348 | 0.672073 | 0.698217 |
| MmugDNA.14208.1.S1_at   | MmugDNA.14208.1 | 4.62  | 4.27  | 0.14 | 0.11 | 1.27  | 0.041906 | 0.104863 | 0.367754 | 0.366397 |
| MmugDNA.14212.1.S1_at   | MmugDNA.14212.1 | 6.14  | 6.14  | 0.15 | 0    | 1     | 0.578467 | 0.17891  | 0.826202 | 0.455241 |
| MmugDNA.14214.1.S1_at   | MmugDNA.14214.1 | 4.19  | 4.5   | 0.18 | 0.24 | -1.24 | 0.382247 | 0.164296 | 0.710505 | 0.440539 |
| MmugDNA.14215.1.S1_at   | MmugDNA.14215.1 | 8.74  | 8.68  | 0.29 | 0.11 | 1.04  | 0.83562  | 0.006725 | 0.941057 | 0.110963 |
| MmugDNA.14216.1.S1_at   | MmugDNA.14216.1 | 3.63  | 3.25  | 0.1  | 0.21 | 1.3   | 0.049428 | 0.031647 | 0.385474 | 0.220165 |
| MmugDNA.14217.1.S1_at   | MmugDNA.14217.1 | 5.66  | 5.68  | 0.27 | 0.16 | -1.01 | 0.379897 | 0.50392  | 0.709281 | 0.701193 |
| MmugDNA.14219.1.S1_at   | MmugDNA.14219.1 | 4.92  | 4.91  | 0.06 | 0.04 | 1.01  | 0.859679 | 0.37647  | 0.9504   | 0.614293 |
| MmugDNA.1422.1.S1_at    | MmugDNA.1422.1  | 2.97  | 2.97  | 0.08 | 0.07 | -1    | 0.499993 | 0.20579  | 0.782311 | 0.480072 |
| MmugDNA.14220.1.S1_s_at | MmugDNA.14220.1 | 5.38  | 5.2   | 0.15 | 0.1  | 1.13  | 0.225601 | 0.378857 | 0.594769 | 0.615818 |
| MmugDNA.14221.1.S1_at   | MmugDNA.14221.1 | 3.49  | 3.33  | 0.18 | 0.08 | 1.12  | 0.127473 | 0.305774 | 0.501627 | 0.562731 |
| MmugDNA.14222.1.S1_at   | MmugDNA.14222.1 | 3.74  | 3.56  | 0.18 | 0.2  | 1.13  | 0.130798 | 0.147721 | 0.505266 | 0.422007 |
| MmugDNA.14224.1.S1_at   | MmugDNA.14224.1 | 10.12 | 10.37 | 0.28 | 0.1  | -1.2  | 0.538099 | 0.517314 | 0.803016 | 0.709435 |
| MmugDNA.14225.1.S1_at   | MmugDNA.14225.1 | 3.42  | 3.05  | 0.13 | 0.17 | 1.29  | 0.04568  | 0.033738 | 0.376974 | 0.227376 |
| MmugDNA.14226.1.S1_at   | MmugDNA.14226.1 | 11.84 | 12.08 | 0.2  | 0.02 | -1.18 | 0.14134  | 0.027405 | 0.516365 | 0.206752 |

|                         |                 |       |       |      |      |       |          |          |          |          |
|-------------------------|-----------------|-------|-------|------|------|-------|----------|----------|----------|----------|
| MmugDNA.14228.1.S1_at   | MmugDNA.14228.1 | 5.27  | 5.24  | 0.12 | 0.08 | 1.02  | 0.786799 | 0.526829 | 0.921693 | 0.715627 |
| MmugDNA.14229.1.S1_at   | MmugDNA.14229.1 | 6.76  | 6.55  | 0.34 | 0.07 | 1.15  | 0.129134 | 0.181627 | 0.503825 | 0.458228 |
| MmugDNA.1423.1.S1_at    | MmugDNA.1423.1  | 4.9   | 5.07  | 0.2  | 0.17 | -1.12 | 0.110304 | 0.220971 | 0.483363 | 0.494389 |
| MmugDNA.14232.1.S1_at   | MmugDNA.14232.1 | 4.31  | 4.31  | 0.08 | 0.02 | 1     | 0.602137 | 0.656641 | 0.838751 | 0.799221 |
| MmugDNA.14235.1.S1_at   | MmugDNA.14235.1 | 9.31  | 9.49  | 0.72 | 0.11 | -1.13 | 0.597572 | 0.477049 | 0.836418 | 0.683188 |
| MmugDNA.14236.1.S1_at   | MmugDNA.14236.1 | 4.12  | 3.81  | 0.17 | 0.05 | 1.23  | 0.146283 | 0.158127 | 0.52061  | 0.433959 |
| MmugDNA.14237.1.S1_at   | MmugDNA.14237.1 | 6.35  | 6.35  | 0.13 | 0.05 | 1     | 0.677458 | 0.905406 | 0.873508 | 0.946384 |
| MmugDNA.14238.1.S1_at   | MmugDNA.14238.1 | 6.13  | 6.12  | 0.23 | 0.27 | 1.01  | 0.312798 | 0.432187 | 0.664222 | 0.652775 |
| MmugDNA.14239.1.S1_at   | MmugDNA.14239.1 | 6.49  | 6.02  | 0.11 | 0.14 | 1.38  | 0.015868 | 0.008445 | 0.284461 | 0.121922 |
| MmugDNA.14240.1.S1_at   | MmugDNA.14240.1 | 8.5   | 8.48  | 0.79 | 0.07 | 1.02  | 0.871106 | 0.205235 | 0.955216 | 0.479596 |
| MmugDNA.14241.1.S1_at   | MmugDNA.14241.1 | 5.04  | 5.07  | 0.12 | 0.1  | -1.03 | 0.659149 | 0.28647  | 0.865082 | 0.54785  |
| MmugDNA.14242.1.S1_at   | MmugDNA.14242.1 | 4.15  | 4.03  | 0.09 | 0.07 | 1.08  | 0.125585 | 0.178422 | 0.499523 | 0.454778 |
| MmugDNA.14244.1.S1_at   | MmugDNA.14244.1 | 11.39 | 11.54 | 0.16 | 0.14 | -1.11 | 0.891988 | 0.523323 | 0.962971 | 0.713653 |
| MmugDNA.4378.1.S1_s_at  | MmugDNA.4378.1  | 8.21  | 8.23  | 0.28 | 0.1  | -1.01 | 0.374402 | 0.161782 | 0.705837 | 0.437876 |
| MmugDNA.14247.1.S1_at   | MmugDNA.14247.1 | 8.23  | 8.04  | 0.13 | 0.03 | 1.14  | 0.084808 | 0.313362 | 0.451405 | 0.567811 |
| MmugDNA.14248.1.S1_at   | MmugDNA.14248.1 | 5.88  | 5.87  | 0.09 | 0.05 | 1.01  | 0.330744 | 0.84818  | 0.677364 | 0.913817 |
| MmugDNA.1425.1.S1_at    | MmugDNA.1425.1  | 11.68 | 10.14 | 1.7  | 0.77 | 2.91  | 0.835583 | 0.440056 | 0.941057 | 0.658651 |
| MmugDNA.14250.1.S1_at   | MmugDNA.14250.1 | 9.92  | 10.15 | 0.16 | 0.02 | -1.17 | 0.023416 | 0.001698 | 0.315397 | 0.062399 |
| MmugDNA.14251.1.S1_at   | MmugDNA.14251.1 | 3.45  | 3.42  | 0.15 | 0.07 | 1.02  | 0.762429 | 0.357729 | 0.910907 | 0.599352 |
| MmugDNA.14252.1.S1_at   | MmugDNA.14252.1 | 6.82  | 6.31  | 0.19 | 0.19 | 1.42  | 0.059607 | 0.135111 | 0.406669 | 0.407128 |
| MmugDNA.14254.1.S1_at   | MmugDNA.14254.1 | 7.27  | 7.08  | 0.16 | 0.16 | 1.14  | 0.942972 | 0.889026 | 0.980374 | 0.936779 |
| MmugDNA.14259.1.S1_at   | MmugDNA.14259.1 | 9.75  | 9.33  | 0.61 | 0.05 | 1.34  | 0.29773  | 0.199124 | 0.652791 | 0.473727 |
| MmugDNA.14262.1.S1_at   | MmugDNA.14262.1 | 4.89  | 4.54  | 0.08 | 0.21 | 1.27  | 0.162042 | 0.233574 | 0.535244 | 0.50492  |
| MmugDNA.14263.1.S1_at   | MmugDNA.14263.1 | 12.47 | 11.92 | 0.08 | 0.15 | 1.46  | 0.005014 | 0.001294 | 0.204532 | 0.055585 |
| MmugDNA.14264.1.S1_at   | MmugDNA.14264.1 | 3.08  | 3.1   | 0.04 | 0.23 | -1.01 | 0.953585 | 0.988691 | 0.98451  | 0.993595 |
| MmugDNA.14265.1.S1_at   | MmugDNA.14265.1 | 4.63  | 4.39  | 0.27 | 0.09 | 1.18  | 0.785736 | 0.594977 | 0.921215 | 0.758829 |
| MmugDNA.14266.1.S1_at   | MmugDNA.14266.1 | 9.65  | 8.89  | 0.38 | 0.14 | 1.7   | 0.082655 | 0.085959 | 0.447794 | 0.338116 |
| MmugDNA.14267.1.S1_at   | MmugDNA.14267.1 | 6.51  | 6.07  | 1.86 | 0.22 | 1.36  | 0.712523 | 0.249758 | 0.887958 | 0.518876 |
| MmugDNA.14269.1.S1_at   | MmugDNA.14269.1 | 3.42  | 3.64  | 0.27 | 0.13 | -1.17 | 0.773843 | 0.368551 | 0.915991 | 0.608079 |
| MmugDNA.1427.1.S1_at    | MmugDNA.1427.1  | 4.6   | 4.45  | 0.22 | 0.29 | 1.11  | 0.36342  | 0.7876   | 0.700102 | 0.877111 |
| MmugDNA.14270.1.S1_at   | MmugDNA.14270.1 | 2.94  | 3.04  | 0.13 | 0.05 | -1.07 | 0.292679 | 0.21693  | 0.649012 | 0.490566 |
| MmugDNA.14271.1.S1_at   | MmugDNA.14271.1 | 3.68  | 3.66  | 0.17 | 0.07 | 1.01  | 0.451668 | 0.221349 | 0.755353 | 0.494644 |
| MmugDNA.14273.1.S1_at   | MmugDNA.14273.1 | 4.93  | 4.86  | 0.06 | 0.07 | 1.05  | 0.128898 | 0.366891 | 0.503626 | 0.606566 |
| MmugDNA.14274.1.S1_at   | MmugDNA.14274.1 | 3.99  | 4.22  | 0.93 | 0.1  | -1.17 | 0.550716 | 0.768771 | 0.810986 | 0.865653 |
| MmugDNA.14275.1.S1_at   | MmugDNA.14275.1 | 3.27  | 3.06  | 0.07 | 0.85 | 1.16  | 0.562641 | 0.702074 | 0.817773 | 0.827304 |
| MmugDNA.14276.1.S1_at   | MmugDNA.14276.1 | 4.28  | 4.31  | 0.13 | 0.04 | -1.02 | 0.498137 | 0.275474 | 0.781592 | 0.539697 |
| MmugDNA.14277.1.S1_at   | MmugDNA.14277.1 | 6.66  | 5.61  | 1.92 | 0.1  | 2.07  | 0.680337 | 0.31088  | 0.874646 | 0.565881 |
| MmugDNA.14278.1.S1_at   | MmugDNA.14278.1 | 5.59  | 5.74  | 0.08 | 0.15 | -1.11 | 0.551297 | 0.079981 | 0.811314 | 0.327352 |
| MmugDNA.14279.1.S1_at   | MmugDNA.14279.1 | 5.33  | 5.12  | 0.65 | 0.48 | 1.16  | 0.940178 | 0.370391 | 0.979649 | 0.609478 |
| MmugDNA.1428.1.S1_at    | MmugDNA.1428.1  | 12.36 | 12.08 | 0.29 | 0.16 | 1.21  | 0.161823 | 0.054535 | 0.53522  | 0.279042 |
| MmugDNA.14280.1.S1_at   | MmugDNA.14280.1 | 10.91 | 11.05 | 0.82 | 0.1  | -1.1  | 0.706901 | 0.017826 | 0.885973 | 0.168645 |
| MmugDNA.14281.1.S1_at   | MmugDNA.14281.1 | 5.51  | 5.33  | 0.1  | 0.1  | 1.14  | 0.41652  | 0.0722   | 0.734369 | 0.31474  |
| MmugDNA.14281.1.S1_s_at | MmugDNA.14281.1 | 10.71 | 10.54 | 0.1  | 0.1  | 1.13  | 0.101728 | 0.196585 | 0.471947 | 0.471608 |

|                         |                 |       |       |      |      |       |          |          |          |          |
|-------------------------|-----------------|-------|-------|------|------|-------|----------|----------|----------|----------|
| MmugDNA.14283.1.S1_at   | MmugDNA.14283.1 | 9.34  | 8.87  | 3.1  | 0.38 | 1.39  | 0.762048 | 0.304646 | 0.910776 | 0.561859 |
| MmugDNA.14284.1.S1_at   | MmugDNA.14284.1 | 8.7   | 9.3   | 0.31 | 0.06 | -1.51 | 0.024323 | 0.01219  | 0.317812 | 0.14287  |
| MmugDNA.14286.1.S1_at   | MmugDNA.14286.1 | 12.29 | 11.98 | 0.35 | 0.1  | 1.24  | 0.187467 | 0.147267 | 0.559787 | 0.421464 |
| MmugDNA.14288.1.S1_at   | MmugDNA.14288.1 | 8.69  | 9.29  | 0.37 | 0.08 | -1.51 | 0.025952 | 0.000934 | 0.32273  | 0.048962 |
| MmugDNA.1429.1.S1_at    | MmugDNA.1429.1  | 11.42 | 11.04 | 0.24 | 0.11 | 1.3   | 0.112575 | 0.116467 | 0.485877 | 0.383671 |
| MmugDNA.14291.1.S1_at   | MmugDNA.14291.1 | 6.75  | 7.02  | 0.04 | 0.07 | -1.21 | 0.003845 | 0.015519 | 0.198541 | 0.158053 |
| MmugDNA.14292.1.S1_at   | MmugDNA.14292.1 | 7.17  | 7.65  | 0.42 | 0.19 | -1.4  | 0.089711 | 0.106007 | 0.457893 | 0.36838  |
| MmugDNA.14294.1.S1_at   | MmugDNA.14294.1 | 5.19  | 5.25  | 0.16 | 0.03 | -1.04 | 0.723488 | 0.960193 | 0.892813 | 0.977425 |
| MmugDNA.14295.1.S1_at   | MmugDNA.14295.1 | 5.59  | 5.5   | 0.18 | 0.35 | 1.06  | 0.768991 | 0.965603 | 0.9134   | 0.980751 |
| MmugDNA.14296.1.S1_at   | MmugDNA.14296.1 | 7.39  | 8.51  | 0.8  | 0.17 | -2.17 | 0.062397 | 0.026893 | 0.41305  | 0.205149 |
| MmugDNA.14299.1.S1_at   | MmugDNA.14299.1 | 10.08 | 9.93  | 0.11 | 0.13 | 1.11  | 0.185323 | 0.302126 | 0.558431 | 0.560071 |
| MmugDNA.143.1.S1_at     | MmugDNA.143.1   | 4.34  | 4.59  | 0.25 | 0.25 | -1.19 | 0.847878 | 0.026922 | 0.946593 | 0.205227 |
| MmugDNA.1430.1.S1_at    | MmugDNA.1430.1  | 5.11  | 5.03  | 0.07 | 0.06 | 1.06  | 0.116428 | 0.240463 | 0.489622 | 0.51108  |
| MmugDNA.14301.1.S1_at   | MmugDNA.14301.1 | 12.06 | 12.05 | 0.09 | 0.07 | 1.01  | 0.970897 | 0.467395 | 0.990496 | 0.677085 |
| MmugDNA.14302.1.S1_at   | MmugDNA.14302.1 | 10.16 | 10.02 | 0.34 | 0.07 | 1.1   | 0.436489 | 0.229237 | 0.746319 | 0.501527 |
| MmugDNA.14304.1.S1_x_at | MmugDNA.14304.1 | 3.17  | 2.99  | 0.03 | 0.03 | 1.13  | 0.002094 | 0.002038 | 0.174757 | 0.066885 |
| MmugDNA.14305.1.S1_at   | MmugDNA.14305.1 | 6.28  | 6.41  | 0.11 | 0.07 | -1.09 | 0.138907 | 0.004054 | 0.514459 | 0.090288 |
| MmugDNA.14309.1.S1_at   | MmugDNA.14309.1 | 10.17 | 9.95  | 0.39 | 0.3  | 1.17  | 0.230008 | 0.157162 | 0.598481 | 0.432616 |
| MmugDNA.1431.1.S1_at    | MmugDNA.1431.1  | 3.82  | 3.91  | 0.18 | 0.11 | -1.07 | 0.607211 | 0.94107  | 0.840749 | 0.966632 |
| MmugDNA.33663.1.S1_s_at | MmugDNA.33663.1 | 4.61  | 4.54  | 0.21 | 0.04 | 1.05  | 0.418591 | 0.561413 | 0.73577  | 0.737397 |
| MmugDNA.14311.1.S1_at   | MmugDNA.14311.1 | 5.42  | 5.41  | 0.14 | 0.01 | 1.01  | 0.441717 | 0.621315 | 0.749537 | 0.775946 |
| MmugDNA.14312.1.S1_at   | MmugDNA.14312.1 | 5.12  | 5.04  | 0.18 | 0.14 | 1.06  | 0.684897 | 0.836161 | 0.876588 | 0.9063   |
| MmugDNA.14313.1.S1_at   | MmugDNA.14313.1 | 7.51  | 7.35  | 0.88 | 0.29 | 1.12  | 0.577146 | 0.783186 | 0.825353 | 0.874547 |
| MmugDNA.14315.1.S1_at   | MmugDNA.14315.1 | 4.67  | 5.06  | 0.58 | 0.37 | -1.31 | 0.938884 | 0.190906 | 0.979343 | 0.466269 |
| MmugDNA.14316.1.S1_at   | MmugDNA.14316.1 | 5.28  | 5.19  | 0.17 | 0.11 | 1.07  | 0.258468 | 0.207666 | 0.622213 | 0.481906 |
| MmugDNA.14317.1.S1_at   | MmugDNA.14317.1 | 3.48  | 3.46  | 0.25 | 0.03 | 1.02  | 0.740066 | 0.901886 | 0.900699 | 0.944161 |
| MmugDNA.1432.1.S1_at    | MmugDNA.1432.1  | 6.72  | 5.91  | 1.05 | 0.25 | 1.75  | 0.705768 | 0.923623 | 0.885355 | 0.957057 |
| MmugDNA.14320.1.S1_at   | MmugDNA.14320.1 | 4.2   | 4.23  | 0.44 | 0.52 | -1.02 | 0.352308 | 0.274279 | 0.692649 | 0.538751 |
| MmugDNA.14321.1.S1_at   | MmugDNA.14321.1 | 7.87  | 9.02  | 0.75 | 0.18 | -2.22 | 0.202862 | 0.062717 | 0.574251 | 0.297117 |
| MmugDNA.14322.1.S1_at   | MmugDNA.14322.1 | 9.64  | 8.77  | 0.21 | 0.35 | 1.82  | 0.019051 | 0.015446 | 0.299651 | 0.157803 |
| MmugDNA.14323.1.S1_at   | MmugDNA.14323.1 | 3.21  | 3.27  | 0.07 | 0.05 | -1.04 | 0.142521 | 0.597005 | 0.517603 | 0.759993 |
| MmugDNA.14323.1.S1_s_at | MmugDNA.14323.1 | 3.84  | 4.01  | 0.04 | 0.08 | -1.12 | 0.024155 | 0.115745 | 0.317812 | 0.382814 |
| MmugDNA.14324.1.S1_at   | MmugDNA.14324.1 | 6.97  | 6.51  | 0.14 | 0.21 | 1.38  | 0.063174 | 0.10677  | 0.415178 | 0.369349 |
| MmugDNA.14325.1.S1_at   | MmugDNA.14325.1 | 5.18  | 5.09  | 0.48 | 0.53 | 1.07  | 0.63198  | 0.893542 | 0.852641 | 0.939277 |
| MmugDNA.14325.1.S1_x_at | MmugDNA.14325.1 | 6.14  | 6.01  | 0.61 | 0.86 | 1.09  | 0.770401 | 0.867898 | 0.913946 | 0.924973 |
| MmugDNA.14328.1.S1_at   | MmugDNA.14328.1 | 6.9   | 6.83  | 0.22 | 0.1  | 1.05  | 0.41942  | 0.70723  | 0.736296 | 0.830225 |
| MmugDNA.14330.1.S1_at   | MmugDNA.14330.1 | 7.86  | 7.65  | 0.27 | 0.09 | 1.15  | 0.272463 | 0.054475 | 0.632289 | 0.278959 |
| MmugDNA.14331.1.S1_at   | MmugDNA.14331.1 | 9.51  | 9.63  | 0.29 | 0.13 | -1.08 | 0.408319 | 0.445757 | 0.729225 | 0.662505 |
| MmugDNA.14332.1.S1_at   | MmugDNA.14332.1 | 4.59  | 4.75  | 0.1  | 0.07 | -1.11 | 0.087356 | 0.53207  | 0.454796 | 0.718995 |
| MmugDNA.14334.1.S1_at   | MmugDNA.14334.1 | 3.41  | 3.13  | 0.15 | 0.16 | 1.21  | 0.192673 | 0.209241 | 0.563577 | 0.48303  |
| MmugDNA.14336.1.S1_at   | MmugDNA.14336.1 | 11.11 | 10.43 | 3.41 | 0.26 | 1.6   | 0.609811 | 0.250485 | 0.841773 | 0.519391 |
| MmugDNA.14337.1.S1_at   | MmugDNA.14337.1 | 5.23  | 5.17  | 0.26 | 0.2  | 1.04  | 0.735782 | 0.532035 | 0.89895  | 0.718995 |
| MmugDNA.14339.1.S1_at   | MmugDNA.14339.1 | 8.69  | 7.86  | 0.97 | 0.15 | 1.77  | 0.603738 | 0.84247  | 0.839337 | 0.910315 |

|                         |                 |       |       |      |      |       |          |          |          |          |
|-------------------------|-----------------|-------|-------|------|------|-------|----------|----------|----------|----------|
| MmugDNA.1434.1.S1_at    | MmugDNA.1434.1  | 5.85  | 5.99  | 0.13 | 0.29 | -1.1  | 0.883548 | 0.669306 | 0.95964  | 0.806539 |
| MmugDNA.14340.1.S1_at   | MmugDNA.14340.1 | 10.35 | 10.07 | 0.12 | 0.11 | 1.22  | 0.032126 | 0.018661 | 0.343204 | 0.171716 |
| MmugDNA.14340.1.S1_s_at | MmugDNA.14340.1 | 9.45  | 8.93  | 0.11 | 0.05 | 1.44  | 0.001337 | 0.000216 | 0.159096 | 0.032385 |
| MmugDNA.14343.1.S1_at   | MmugDNA.14343.1 | 4.87  | 4.62  | 0.03 | 0.15 | 1.19  | 0.200419 | 0.393291 | 0.572279 | 0.626189 |
| MmugDNA.14344.1.S1_at   | MmugDNA.14344.1 | 5.93  | 5.92  | 0.21 | 0.18 | 1.01  | 0.91466  | 0.79913  | 0.970895 | 0.884363 |
| MmugDNA.14345.1.S1_at   | MmugDNA.14345.1 | 11.31 | 11.05 | 0.24 | 0.06 | 1.2   | 0.151632 | 0.067046 | 0.524628 | 0.304872 |
| MmugDNA.14345.1.S1_s_at | MmugDNA.14345.1 | 10.8  | 10.45 | 0.42 | 0.08 | 1.28  | 0.194191 | 0.106732 | 0.564806 | 0.369337 |
| MmugDNA.14346.1.S1_at   | MmugDNA.14346.1 | 6.23  | 6.56  | 0.22 | 0.72 | -1.26 | 0.183909 | 0.53629  | 0.556837 | 0.721629 |
| MmugDNA.14348.1.S1_at   | MmugDNA.14348.1 | 11.76 | 11.71 | 0.4  | 0.06 | 1.04  | 0.778548 | 0.408508 | 0.918315 | 0.635694 |
| MmugDNA.14349.1.S1_at   | MmugDNA.14349.1 | 7.94  | 7.8   | 0.78 | 0.16 | 1.11  | 0.698916 | 0.802809 | 0.882967 | 0.886441 |
| MmugDNA.1435.1.S1_at    | MmugDNA.1435.1  | 6.96  | 6.83  | 0.19 | 0.04 | -1.09 | 0.242512 | 0.25809  | 0.608517 | 0.525574 |
| MmugDNA.15990.1.S1_s_at | MmugDNA.15990.1 | 2.93  | 2.95  | 0.27 | 0.07 | -1.01 | 0.600323 | 0.554215 | 0.837828 | 0.733069 |
| MmugDNA.14354.1.S1_at   | MmugDNA.14354.1 | 2.9   | 2.9   | 0.11 | 0.08 | 1     | 0.518147 | 0.692017 | 0.792419 | 0.82091  |
| MmugDNA.14357.1.S1_at   | MmugDNA.14357.1 | 4.5   | 4.26  | 0.24 | 0.04 | 1.18  | 0.182203 | 0.238933 | 0.555361 | 0.509678 |
| MmugDNA.14358.1.S1_at   | MmugDNA.14358.1 | 4.6   | 4.52  | 0.05 | 0.16 | 1.06  | 0.1364   | 0.525232 | 0.511324 | 0.714809 |
| MmugDNA.1436.1.S1_at    | MmugDNA.1436.1  | 10.45 | 10.48 | 0.17 | 0.03 | -1.02 | 0.865844 | 0.97991  | 0.952802 | 0.989228 |
| MmugDNA.14360.1.S1_at   | MmugDNA.14360.1 | 11.38 | 11.91 | 0.25 | 0.13 | -1.44 | 0.027299 | 0.034103 | 0.327322 | 0.2286   |
| MmugDNA.14362.1.S1_at   | MmugDNA.14362.1 | 3.81  | 3.69  | 0.2  | 0.31 | 1.09  | 0.589946 | 0.895277 | 0.832714 | 0.940185 |
| MmugDNA.14363.1.S1_at   | MmugDNA.14363.1 | 6.53  | 6.05  | 0.44 | 0.09 | 1.4   | 0.158638 | 0.217058 | 0.531588 | 0.490668 |
| MmugDNA.14364.1.S1_at   | MmugDNA.14364.1 | 3.13  | 3.03  | 0.2  | 0.02 | 1.08  | 0.124906 | 0.117772 | 0.498917 | 0.385631 |
| MmugDNA.14365.1.S1_at   | MmugDNA.14365.1 | 9.22  | 8.91  | 0.1  | 0.14 | 1.24  | 0.031926 | 0.072365 | 0.342819 | 0.315164 |
| MmugDNA.14366.1.S1_at   | MmugDNA.14366.1 | 8.58  | 8.31  | 0.2  | 0.04 | 1.21  | 0.160296 | 0.256643 | 0.533335 | 0.524447 |
| MmugDNA.14367.1.S1_at   | MmugDNA.14367.1 | 6.1   | 7.65  | 1.14 | 0.2  | -2.94 | 0.07422  | 0.01504  | 0.434994 | 0.155766 |
| MmugDNA.14368.1.S1_at   | MmugDNA.14368.1 | 8.78  | 8.38  | 0.37 | 0.06 | 1.32  | 0.045584 | 0.060338 | 0.376875 | 0.292254 |
| MmugDNA.14369.1.S1_at   | MmugDNA.14369.1 | 3.54  | 3.5   | 0.08 | 0.15 | 1.03  | 0.906354 | 0.91446  | 0.96832  | 0.951914 |
| MmugDNA.1437.1.S1_at    | MmugDNA.1437.1  | 3.41  | 3.36  | 0.04 | 0.1  | 1.04  | 0.908751 | 0.494171 | 0.969262 | 0.694704 |
| MmugDNA.14371.1.S1_at   | MmugDNA.14371.1 | 10.11 | 11.13 | 0.57 | 0.1  | -2.03 | 0.038769 | 0.034149 | 0.36035  | 0.228692 |
| MmugDNA.14374.1.S1_at   | MmugDNA.14374.1 | 6.45  | 6.79  | 0.55 | 0.28 | -1.27 | 0.497889 | 0.568202 | 0.78143  | 0.741862 |
| MmugDNA.14376.1.S1_at   | MmugDNA.14376.1 | 7.28  | 6.93  | 0.27 | 0.29 | 1.27  | 0.440034 | 0.101984 | 0.748282 | 0.362058 |
| MmugDNA.14378.1.S1_at   | MmugDNA.14378.1 | 3.46  | 3.46  | 0.04 | 0.12 | 1     | 0.877666 | 0.731966 | 0.957399 | 0.844751 |
| MmugDNA.14379.1.S1_at   | MmugDNA.14379.1 | 3.57  | 3.51  | 0.09 | 0.08 | 1.04  | 0.147207 | 0.242336 | 0.521578 | 0.512793 |
| MmugDNA.14381.1.S1_at   | MmugDNA.14381.1 | 6.68  | 6.6   | 0.05 | 0.04 | 1.06  | 0.331362 | 0.020284 | 0.678025 | 0.178761 |
| MmugDNA.14381.1.S1_x_at | MmugDNA.14381.1 | 6.81  | 6.62  | 0.2  | 0.05 | 1.14  | 0.065629 | 0.05006  | 0.420827 | 0.268916 |
| MmugDNA.14383.1.S1_at   | MmugDNA.14383.1 | 2.63  | 2.69  | 0.07 | 0.45 | -1.05 | 0.666504 | 0.808086 | 0.868243 | 0.889507 |
| MmugDNA.14384.1.S1_at   | MmugDNA.14384.1 | 4.09  | 4.06  | 0.32 | 0.09 | 1.02  | 0.772827 | 0.779036 | 0.91551  | 0.871798 |
| MmugDNA.14386.1.S1_s_at | MmugDNA.14386.1 | 11.08 | 11.28 | 0.76 | 0.13 | -1.14 | 0.773684 | 0.693731 | 0.915888 | 0.8219   |
| MmugDNA.14389.1.S1_at   | MmugDNA.14389.1 | 11.27 | 11.55 | 0.15 | 0.06 | -1.22 | 0.045115 | 0.042203 | 0.375796 | 0.24989  |
| MmugDNA.1439.1.S1_at    | MmugDNA.1439.1  | 7.98  | 7.88  | 0.49 | 0.11 | 1.08  | 0.872479 | 0.904767 | 0.955759 | 0.946059 |
| MmugDNA.14390.1.S1_at   | MmugDNA.14390.1 | 4.03  | 3.62  | 0.19 | 0.24 | 1.33  | 0.160756 | 0.385647 | 0.533929 | 0.621079 |
| MmugDNA.14391.1.S1_at   | MmugDNA.14391.1 | 4.66  | 4.76  | 0.09 | 0.32 | -1.07 | 0.998932 | 0.96634  | 0.999764 | 0.981226 |
| MmugDNA.14392.1.S1_at   | MmugDNA.14392.1 | 11.93 | 11.67 | 0.17 | 0.2  | 1.19  | 0.124637 | 0.529306 | 0.498747 | 0.717233 |
| MmugDNA.14393.1.S1_at   | MmugDNA.14393.1 | 10.45 | 10.2  | 0.19 | 0.09 | 1.19  | 0.079196 | 0.039093 | 0.442056 | 0.242995 |
| MmugDNA.14395.1.S1_at   | MmugDNA.14395.1 | 5.99  | 5.85  | 0.01 | 0.07 | 1.1   | 0.087324 | 0.277733 | 0.454785 | 0.541648 |

|                         |                 |       |       |      |      |       |          |          |          |          |
|-------------------------|-----------------|-------|-------|------|------|-------|----------|----------|----------|----------|
| MmugDNA.14397.1.S1_at   | MmugDNA.14397.1 | 3.88  | 3.57  | 0.16 | 0.1  | 1.24  | 0.100431 | 0.310782 | 0.471142 | 0.565832 |
| MmugDNA.11784.1.S1_s_at | MmugDNA.11784.1 | 5     | 5.11  | 0.28 | 0.19 | -1.07 | 0.274256 | 0.180516 | 0.633792 | 0.457128 |
| MmugDNA.14399.1.S1_at   | MmugDNA.14399.1 | 6.06  | 6.14  | 0.06 | 0.08 | -1.06 | 0.506271 | 0.186375 | 0.785721 | 0.46221  |
| MmugDNA.1440.1.S1_at    | MmugDNA.1440.1  | 4.94  | 4.87  | 0.12 | 0.06 | 1.05  | 0.167504 | 0.29415  | 0.540065 | 0.553962 |
| MmugDNA.14402.1.S1_at   | MmugDNA.14402.1 | 6.71  | 6.76  | 0.62 | 0.11 | -1.04 | 0.874278 | 0.89003  | 0.956448 | 0.937384 |
| MmugDNA.14403.1.S1_at   | MmugDNA.14403.1 | 5.34  | 5.46  | 0.22 | 0.26 | -1.09 | 0.263613 | 0.611192 | 0.625586 | 0.769136 |
| MmugDNA.14405.1.S1_at   | MmugDNA.14405.1 | 3.02  | 3.03  | 0.11 | 0.11 | -1.01 | 0.804191 | 0.465996 | 0.928771 | 0.676077 |
| MmugDNA.14406.1.S1_at   | MmugDNA.14406.1 | 3.42  | 3.45  | 0.23 | 0.06 | -1.02 | 0.398526 | 0.638046 | 0.722525 | 0.787332 |
| MmugDNA.14409.1.S1_at   | MmugDNA.14409.1 | 7.19  | 5.93  | 0.88 | 1.06 | 2.38  | 0.229843 | 0.273213 | 0.598481 | 0.537788 |
| MmugDNA.1441.1.S1_at    | MmugDNA.1441.1  | 11.99 | 12.04 | 0.09 | 0.01 | -1.03 | 0.404941 | 0.38053  | 0.727024 | 0.617172 |
| MmugDNA.14411.1.S1_at   | MmugDNA.14411.1 | 4.43  | 4.15  | 0.15 | 0.02 | 1.21  | 0.08054  | 0.236965 | 0.444394 | 0.507675 |
| MmugDNA.14413.1.S1_at   | MmugDNA.14413.1 | 5.82  | 5.85  | 0.07 | 0.07 | -1.02 | 0.223499 | 0.293759 | 0.592569 | 0.553758 |
| MmugDNA.14414.1.S1_at   | MmugDNA.14414.1 | 4.38  | 4.55  | 0.18 | 0.05 | -1.13 | 0.568574 | 0.718956 | 0.820917 | 0.83732  |
| MmugDNA.14415.1.S1_at   | MmugDNA.14415.1 | 3.51  | 3.53  | 0.24 | 0.07 | -1.01 | 0.662782 | 0.478894 | 0.866926 | 0.684774 |
| MmugDNA.14417.1.S1_at   | MmugDNA.14417.1 | 3.62  | 3.49  | 0.04 | 0.04 | 1.09  | 0.019543 | 0.012417 | 0.301474 | 0.144079 |
| MmugDNA.14418.1.S1_at   | MmugDNA.14418.1 | 6.56  | 6.18  | 0.38 | 0.09 | 1.3   | 0.570569 | 0.354105 | 0.822227 | 0.597048 |
| MmugDNA.14419.1.S1_at   | MmugDNA.14419.1 | 3.44  | 3.57  | 0.07 | 0.09 | -1.09 | 0.108886 | 0.138654 | 0.48125  | 0.411705 |
| MmugDNA.1442.1.S1_at    | MmugDNA.1442.1  | 3.49  | 3.22  | 0.17 | 0.13 | 1.2   | 0.044936 | 0.016897 | 0.375405 | 0.164869 |
| MmugDNA.14420.1.S1_at   | MmugDNA.14420.1 | 5.87  | 4.98  | 0.79 | 0.18 | 1.86  | 0.04549  | 0.039345 | 0.376578 | 0.243406 |
| MmugDNA.14421.1.S1_at   | MmugDNA.14421.1 | 6.61  | 7.24  | 0.78 | 0.02 | -1.54 | 0.68693  | 0.749853 | 0.877571 | 0.854631 |
| MmugDNA.14422.1.S1_at   | MmugDNA.14422.1 | 3.77  | 3.83  | 0.15 | 0.05 | -1.05 | 0.440885 | 0.321982 | 0.748794 | 0.57358  |
| MmugDNA.14423.1.S1_at   | MmugDNA.14423.1 | 8.05  | 8.01  | 0.6  | 0.06 | 1.03  | 0.637302 | 0.625008 | 0.85549  | 0.778973 |
| MmugDNA.14424.1.S1_at   | MmugDNA.14424.1 | 3.9   | 3.92  | 0.18 | 0.03 | -1.01 | 0.789537 | 0.869778 | 0.92257  | 0.926118 |
| MmugDNA.14425.1.S1_at   | MmugDNA.14425.1 | 4.56  | 4.5   | 0.15 | 0.5  | 1.04  | 0.930576 | 0.335869 | 0.97685  | 0.583533 |
| MmugDNA.14426.1.S1_at   | MmugDNA.14426.1 | 5.08  | 5.77  | 0.48 | 0.45 | -1.62 | 0.177203 | 0.30123  | 0.550239 | 0.559356 |
| MmugDNA.14427.1.S1_at   | MmugDNA.14427.1 | 5.21  | 5.16  | 0.12 | 0.24 | 1.04  | 0.297595 | 0.440901 | 0.652791 | 0.659138 |
| MmugDNA.14428.1.S1_s_at | MmugDNA.14428.1 | 9.69  | 8.99  | 0.26 | 0.01 | 1.62  | 0.010329 | 0.000237 | 0.246929 | 0.03241  |
| MmugDNA.14429.1.S1_at   | MmugDNA.14429.1 | 5     | 5.28  | 0.3  | 0.33 | -1.21 | 0.379191 | 0.397215 | 0.708687 | 0.628763 |
| MmugDNA.1443.1.S1_at    | MmugDNA.1443.1  | 4.53  | 4.28  | 0.1  | 0.16 | 1.19  | 0.084257 | 0.054034 | 0.450882 | 0.277914 |
| MmugDNA.14430.1.S1_at   | MmugDNA.14430.1 | 4.97  | 5.71  | 0.95 | 0.13 | -1.67 | 0.43924  | 0.557057 | 0.748019 | 0.73493  |
| MmugDNA.14431.1.S1_at   | MmugDNA.14431.1 | 7.01  | 6.84  | 0.12 | 0.03 | 1.12  | 0.112027 | 0.011121 | 0.485115 | 0.137271 |
| MmugDNA.14432.1.S1_at   | MmugDNA.14432.1 | 3.68  | 3.37  | 0.1  | 0.1  | 1.24  | 0.02129  | 0.031848 | 0.307513 | 0.220909 |
| MmugDNA.14433.1.S1_at   | MmugDNA.14433.1 | 6.57  | 7.13  | 0.47 | 0.2  | -1.47 | 0.073763 | 0.215554 | 0.434623 | 0.489297 |
| MmugDNA.14434.1.S1_at   | MmugDNA.14434.1 | 12.05 | 12.02 | 0.13 | 0.03 | 1.02  | 0.600681 | 0.026857 | 0.837959 | 0.205049 |
| MmugDNA.14435.1.S1_at   | MmugDNA.14435.1 | 5.69  | 5.28  | 0.13 | 0.03 | 1.33  | 0.005959 | 0.002352 | 0.212951 | 0.07161  |
| MmugDNA.14436.1.S1_at   | MmugDNA.14436.1 | 4.99  | 5.86  | 0.54 | 0.15 | -1.84 | 0.057924 | 0.289847 | 0.403429 | 0.550831 |
| MmugDNA.14437.1.S1_at   | MmugDNA.14437.1 | 12.79 | 12.69 | 0.11 | 0    | 1.07  | 0.588445 | 0.179792 | 0.831946 | 0.456321 |
| MmugDNA.14439.1.S1_at   | MmugDNA.14439.1 | 4.94  | 4.67  | 0.04 | 0.16 | 1.21  | 0.017402 | 0.044677 | 0.29149  | 0.255776 |
| MmugDNA.1444.1.S1_s_at  | MmugDNA.1444.1  | 10.08 | 9.98  | 0.47 | 0.08 | 1.07  | 0.299013 | 0.333954 | 0.653475 | 0.582063 |
| MmugDNA.14441.1.S1_at   | MmugDNA.14441.1 | 4.69  | 5.11  | 0.12 | 0.34 | -1.34 | 0.140516 | 0.232212 | 0.516012 | 0.503916 |
| MmugDNA.14442.1.S1_at   | MmugDNA.14442.1 | 4.83  | 5.31  | 0.15 | 0.2  | -1.4  | 0.117598 | 0.340893 | 0.490984 | 0.587035 |
| MmugDNA.14444.1.S1_at   | MmugDNA.14444.1 | 4.78  | 4.84  | 0.03 | 0.07 | -1.04 | 0.15504  | 0.130914 | 0.528378 | 0.403037 |
| MmugDNA.14445.1.S1_at   | MmugDNA.14445.1 | 11.77 | 10.92 | 2.94 | 0.33 | 1.8   | 0.733756 | 0.319564 | 0.897902 | 0.571875 |



|                         |                 |       |       |      |      |       |          |          |          |          |
|-------------------------|-----------------|-------|-------|------|------|-------|----------|----------|----------|----------|
| MmugDNA.14446.1.S1_at   | MmugDNA.14446.1 | 4.42  | 4.43  | 0.06 | 0.17 | -1    | 0.429492 | 0.673385 | 0.74219  | 0.809168 |
| MmugDNA.14447.1.S1_at   | MmugDNA.14447.1 | 4.38  | 4.67  | 0.6  | 0.22 | -1.22 | 0.462891 | 0.664369 | 0.761878 | 0.803354 |
| MmugDNA.14448.1.S1_at   | MmugDNA.14448.1 | 3.49  | 3.31  | 0.19 | 0.31 | 1.13  | 0.241524 | 0.073168 | 0.60766  | 0.316064 |
| MmugDNA.14449.1.S1_at   | MmugDNA.14449.1 | 5.61  | 5.62  | 0.07 | 0.06 | -1    | 0.342947 | 0.683821 | 0.686205 | 0.815571 |
| MmugDNA.1445.1.S1_at    | MmugDNA.1445.1  | 2.92  | 2.86  | 0.14 | 0.25 | 1.04  | 0.815182 | 0.239332 | 0.933137 | 0.510029 |
| MmugDNA.14450.1.S1_at   | MmugDNA.14450.1 | 5.32  | 5.23  | 0.07 | 0.09 | 1.06  | 0.120245 | 0.635361 | 0.493545 | 0.785362 |
| MmugDNA.14451.1.S1_at   | MmugDNA.14451.1 | 4.23  | 4.22  | 0.07 | 0.03 | 1.01  | 0.775281 | 0.982494 | 0.916675 | 0.99036  |
| MmugDNA.14452.1.S1_at   | MmugDNA.14452.1 | 5.76  | 5.42  | 0.3  | 0.42 | 1.26  | 0.496416 | 0.001306 | 0.780416 | 0.055656 |
| MmugDNA.14454.1.S1_at   | MmugDNA.14454.1 | 4.98  | 4.84  | 0.26 | 0.08 | 1.1   | 0.241467 | 0.348028 | 0.607603 | 0.59222  |
| MmugDNA.14457.1.S1_at   | MmugDNA.14457.1 | 5.97  | 6.19  | 0.54 | 0.13 | -1.17 | 0.156127 | 0.216597 | 0.529456 | 0.490237 |
| MmugDNA.1446.1.S1_at    | MmugDNA.1446.1  | 4.47  | 4.21  | 0.24 | 0.13 | -1.19 | 0.193533 | 0.193659 | 0.564275 | 0.468785 |
| MmugDNA.14460.1.S1_at   | MmugDNA.14460.1 | 12.18 | 12.57 | 0.25 | 0.07 | -1.31 | 0.088316 | 0.091475 | 0.45606  | 0.346505 |
| MmugDNA.14462.1.S1_at   | MmugDNA.14462.1 | 12.45 | 13.05 | 0.67 | 0.03 | -1.52 | 0.207585 | 0.277959 | 0.579194 | 0.541664 |
| MmugDNA.14466.1.S1_at   | MmugDNA.14466.1 | 4.53  | 4.37  | 0.19 | 0.07 | 1.12  | 0.232825 | 0.310036 | 0.600228 | 0.565253 |
| MmugDNA.14467.1.S1_at   | MmugDNA.14467.1 | 4.09  | 4.03  | 0.06 | 0.21 | 1.04  | 0.941926 | 0.280859 | 0.980221 | 0.544047 |
| MmugDNA.14468.1.S1_at   | MmugDNA.14468.1 | 5.88  | 5.59  | 0.09 | 0.18 | 1.22  | 0.199066 | 0.353839 | 0.570667 | 0.596845 |
| MmugDNA.14469.1.S1_at   | MmugDNA.14469.1 | 5.4   | 5.52  | 0.13 | 0.04 | -1.08 | 0.770957 | 0.333817 | 0.914339 | 0.581974 |
| MmugDNA.1447.1.S1_at    | MmugDNA.1447.1  | 8.18  | 7.97  | 0.16 | 0.07 | 1.15  | 0.162198 | 0.186605 | 0.535244 | 0.462401 |
| MmugDNA.14470.1.S1_at   | MmugDNA.14470.1 | 6.26  | 6.08  | 0.2  | 0.13 | 1.14  | 0.19606  | 0.202612 | 0.566501 | 0.477003 |
| MmugDNA.14471.1.S1_at   | MmugDNA.14471.1 | 3.9   | 3.7   | 0.05 | 0.02 | 1.15  | 0.004429 | 0.006416 | 0.198874 | 0.108813 |
| MmugDNA.14472.1.S1_at   | MmugDNA.14472.1 | 5.3   | 5.25  | 0.04 | 0.16 | 1.03  | 0.808491 | 0.983323 | 0.930687 | 0.990726 |
| MmugDNA.14473.1.S1_at   | MmugDNA.14473.1 | 5.52  | 5.48  | 0.24 | 0.34 | 1.03  | 0.821362 | 0.817653 | 0.935568 | 0.894802 |
| MmugDNA.14474.1.S1_s_at | MmugDNA.14474.1 | 6.73  | 6.66  | 0.15 | 0.06 | 1.05  | 0.269985 | 0.625411 | 0.630215 | 0.779175 |
| MmugDNA.14475.1.S1_at   | MmugDNA.14475.1 | 5.33  | 5.45  | 0.19 | 0.03 | -1.08 | 0.856935 | 0.977153 | 0.94962  | 0.987577 |
| MmugDNA.14476.1.S1_s_at | MmugDNA.14476.1 | 6.04  | 6.04  | 0.07 | 0.07 | 1.01  | 0.861633 | 0.772294 | 0.951267 | 0.867651 |
| MmugDNA.14477.1.S1_at   | MmugDNA.14477.1 | 3.48  | 3.59  | 0.13 | 0.2  | -1.08 | 0.929125 | 0.02671  | 0.976333 | 0.204348 |
| MmugDNA.14478.1.S1_at   | MmugDNA.14478.1 | 7.13  | 7.36  | 0.39 | 0.43 | -1.18 | 0.291776 | 0.001238 | 0.648084 | 0.05478  |
| MmugDNA.14479.1.S1_at   | MmugDNA.14479.1 | 8.72  | 9.99  | 0.62 | 0.17 | -2.41 | 0.021491 | 0.017964 | 0.308897 | 0.169043 |
| MmugDNA.1448.1.S1_s_at  | MmugDNA.1448.1  | 7.71  | 7.94  | 0.05 | 0.13 | -1.18 | 0.023799 | 0.008066 | 0.316761 | 0.119402 |
| MmugDNA.14481.1.S1_at   | MmugDNA.14481.1 | 4.85  | 4.59  | 0.14 | 0.13 | 1.19  | 0.194181 | 0.359067 | 0.564806 | 0.600433 |
| MmugDNA.14482.1.S1_at   | MmugDNA.14482.1 | 11.76 | 11.42 | 0.03 | 0.06 | 1.27  | 0.000803 | 0.000454 | 0.15004  | 0.038572 |
| MmugDNA.14485.1.S1_at   | MmugDNA.14485.1 | 7.91  | 7.19  | 0.83 | 0.28 | 1.64  | 0.444069 | 0.687778 | 0.751101 | 0.817671 |
| MmugDNA.14486.1.S1_at   | MmugDNA.14486.1 | 12.81 | 12.14 | 0.15 | 0.15 | 1.59  | 0.003829 | 0.004707 | 0.198541 | 0.095489 |
| MmugDNA.14487.1.S1_at   | MmugDNA.14487.1 | 9.96  | 9.63  | 0.12 | 0.08 | 1.25  | 0.00966  | 0.005795 | 0.243152 | 0.104597 |
| MmugDNA.14488.1.S1_at   | MmugDNA.14488.1 | 8.58  | 9.12  | 0.26 | 0.16 | -1.45 | 0.015565 | 0.000056 | 0.282681 | 0.025666 |
| MmugDNA.14489.1.S1_at   | MmugDNA.14489.1 | 8.29  | 8.2   | 0.49 | 0.07 | 1.07  | 0.796442 | 0.954932 | 0.925177 | 0.974471 |
| MmugDNA.1449.1.S1_at    | MmugDNA.1449.1  | 8.31  | 8.11  | 0.09 | 0.03 | 1.15  | 0.015457 | 0.164691 | 0.281859 | 0.441008 |
| MmugDNA.14490.1.S1_at   | MmugDNA.14490.1 | 3.46  | 3.33  | 0.16 | 0.07 | 1.09  | 0.160316 | 0.207024 | 0.533335 | 0.481115 |
| MmugDNA.14491.1.S1_at   | MmugDNA.14491.1 | 5.69  | 5.57  | 0.12 | 0.08 | 1.08  | 0.313565 | 0.279847 | 0.664799 | 0.543321 |
| MmugDNA.14492.1.S1_at   | MmugDNA.14492.1 | 6.96  | 6.87  | 0.16 | 0.14 | 1.06  | 0.450658 | 0.288619 | 0.754829 | 0.549827 |
| MmugDNA.14493.1.S1_at   | MmugDNA.14493.1 | 8.13  | 7.56  | 1.2  | 0.64 | 1.49  | 0.864565 | 0.619506 | 0.952391 | 0.774712 |
| MmugDNA.14494.1.S1_at   | MmugDNA.14494.1 | 3.63  | 3.72  | 0.35 | 0.29 | -1.06 | 0.852189 | 0.180908 | 0.947936 | 0.457397 |
| MmugDNA.14495.1.S1_at   | MmugDNA.14495.1 | 4.37  | 4.36  | 0.08 | 0.24 | 1.01  | 0.708546 | 0.56252  | 0.886591 | 0.738055 |

|                         |                 |       |       |      |      |       |          |          |          |          |
|-------------------------|-----------------|-------|-------|------|------|-------|----------|----------|----------|----------|
| MmugDNA.14496.1.S1_at   | MmugDNA.14496.1 | 4.09  | 4.08  | 0.09 | 0.14 | 1.01  | 0.5336   | 0.86211  | 0.80084  | 0.921635 |
| MmugDNA.14497.1.S1_at   | MmugDNA.14497.1 | 4.13  | 3.75  | 0.28 | 0.29 | 1.3   | 0.726171 | 0.459414 | 0.894162 | 0.671741 |
| MmugDNA.14498.1.S1_at   | MmugDNA.14498.1 | 7.12  | 7.14  | 0.31 | 0.13 | -1.01 | 0.747619 | 0.676627 | 0.904082 | 0.811009 |
| MmugDNA.145.1.S1_at     | MmugDNA.145.1   | 6.05  | 6.05  | 0.05 | 0.04 | -1    | 0.962371 | 0.208893 | 0.987802 | 0.482717 |
| MmugDNA.14500.1.S1_at   | MmugDNA.14500.1 | 5.69  | 5.7   | 0.09 | 0.11 | -1.01 | 0.907067 | 0.985392 | 0.968482 | 0.991752 |
| MmugDNA.14504.1.S1_at   | MmugDNA.14504.1 | 8     | 7.93  | 0.32 | 0.09 | 1.05  | 0.287113 | 0.187975 | 0.644237 | 0.464078 |
| MmugDNA.14509.1.S1_at   | MmugDNA.14509.1 | 3.66  | 3.68  | 0.14 | 0.09 | -1.01 | 0.304254 | 0.401756 | 0.657902 | 0.631068 |
| MmugDNA.1451.1.S1_at    | MmugDNA.1451.1  | 10.64 | 10.68 | 0.37 | 0.04 | -1.03 | 0.701069 | 0.892935 | 0.883757 | 0.938954 |
| MmugDNA.14510.1.S1_at   | MmugDNA.14510.1 | 6.55  | 5.87  | 0.15 | 0.48 | 1.6   | 0.096915 | 0.074121 | 0.465626 | 0.317794 |
| MmugDNA.14534.1.S1_s_at | MmugDNA.14534.1 | 6.1   | 6.28  | 0.31 | 0.07 | -1.13 | 0.80311  | 0.661106 | 0.928218 | 0.801683 |
| MmugDNA.14512.1.S1_at   | MmugDNA.14512.1 | 3.63  | 3.24  | 0.21 | 0.09 | 1.32  | 0.049088 | 0.091223 | 0.385273 | 0.346173 |
| MmugDNA.14513.1.S1_at   | MmugDNA.14513.1 | 6.98  | 6.99  | 0.07 | 0.08 | -1.01 | 0.622028 | 0.818899 | 0.847631 | 0.895647 |
| MmugDNA.14514.1.S1_at   | MmugDNA.14514.1 | 4.35  | 4.23  | 0.09 | 0.12 | 1.09  | 0.079799 | 0.313863 | 0.442778 | 0.568094 |
| MmugDNA.14515.1.S1_at   | MmugDNA.14515.1 | 2.97  | 2.9   | 0.11 | 0.07 | 1.05  | 0.253253 | 0.860906 | 0.617936 | 0.920825 |
| MmugDNA.14517.1.S1_at   | MmugDNA.14517.1 | 10.28 | 9.88  | 0.08 | 0.12 | 1.31  | 0.014467 | 0.183294 | 0.275808 | 0.459553 |
| MmugDNA.14518.1.S1_at   | MmugDNA.14518.1 | 6.89  | 6.77  | 0.38 | 0.08 | 1.09  | 0.848307 | 0.835962 | 0.946772 | 0.906135 |
| MmugDNA.14519.1.S1_s_at | MmugDNA.14519.1 | 6.06  | 5.36  | 0.74 | 0.48 | 1.63  | 0.299668 | 0.454332 | 0.654125 | 0.66853  |
| MmugDNA.1452.1.S1_at    | MmugDNA.1452.1  | 5.46  | 5.36  | 0.03 | 0.09 | 1.07  | 0.112842 | 0.119588 | 0.486223 | 0.388247 |
| MmugDNA.14522.1.S1_at   | MmugDNA.14522.1 | 3.44  | 3.29  | 0.15 | 0.23 | 1.11  | 0.326835 | 0.441616 | 0.674453 | 0.659754 |
| MmugDNA.14523.1.S1_at   | MmugDNA.14523.1 | 9.18  | 8.68  | 0.56 | 0.11 | 1.42  | 0.454594 | 0.188779 | 0.756874 | 0.464761 |
| MmugDNA.14524.1.S1_at   | MmugDNA.14524.1 | 9.09  | 9.68  | 1.3  | 0.47 | -1.51 | 0.770563 | 0.44283  | 0.914039 | 0.660759 |
| MmugDNA.14524.1.S1_x_at | MmugDNA.14524.1 | 8.35  | 9.27  | 1.32 | 0.47 | -1.89 | 0.729436 | 0.407845 | 0.895766 | 0.635242 |
| MmugDNA.14525.1.S1_at   | MmugDNA.14525.1 | 10.09 | 10.97 | 0.26 | 0.03 | -1.85 | 0.004376 | 0.005812 | 0.198874 | 0.104646 |
| MmugDNA.14526.1.S1_at   | MmugDNA.14526.1 | 3.63  | 3.81  | 0.12 | 0.16 | -1.14 | 0.139641 | 0.14132  | 0.515042 | 0.414874 |
| MmugDNA.14528.1.S1_s_at | MmugDNA.14528.1 | 12.98 | 13.27 | 0.31 | 0.11 | -1.22 | 0.154168 | 0.197784 | 0.527483 | 0.472721 |
| MmugDNA.14529.1.S1_at   | MmugDNA.14529.1 | 6.25  | 6.26  | 0.12 | 0.06 | -1    | 0.680387 | 0.411699 | 0.874646 | 0.638422 |
| MmugDNA.14533.1.S1_at   | MmugDNA.14533.1 | 3.34  | 3.21  | 0.17 | 0.08 | 1.09  | 0.353651 | 0.755361 | 0.693411 | 0.857558 |
| MmugDNA.14535.1.S1_s_at | MmugDNA.14535.1 | 5.97  | 5.87  | 0.11 | 0.11 | 1.07  | 0.738806 | 0.927803 | 0.900108 | 0.959005 |
| MmugDNA.14536.1.S1_at   | MmugDNA.14536.1 | 4.92  | 5.28  | 0.31 | 0.13 | -1.28 | 0.113964 | 0.224722 | 0.487339 | 0.497614 |
| MmugDNA.14537.1.S1_s_at | MmugDNA.14537.1 | 6.43  | 6.49  | 0.22 | 0.4  | -1.05 | 0.766434 | 0.009836 | 0.912128 | 0.130274 |
| MmugDNA.14538.1.S1_at   | MmugDNA.14538.1 | 5.46  | 5.69  | 0.06 | 0.25 | -1.17 | 0.190357 | 0.135448 | 0.561657 | 0.407535 |
| MmugDNA.14539.1.S1_at   | MmugDNA.14539.1 | 11.42 | 10.99 | 0.43 | 0.14 | 1.35  | 0.079803 | 0.008153 | 0.442778 | 0.119754 |
| MmugDNA.14540.1.S1_s_at | MmugDNA.14540.1 | 11.98 | 11.98 | 0.23 | 0.04 | -1    | 0.831418 | 0.431594 | 0.939628 | 0.652439 |
| MmugDNA.14541.1.S1_at   | MmugDNA.14541.1 | 11.49 | 11.22 | 0.37 | 0.18 | 1.2   | 0.075727 | 0.018953 | 0.436784 | 0.173197 |
| MmugDNA.14542.1.S1_at   | MmugDNA.14542.1 | 5.2   | 4.98  | 0.47 | 0.53 | 1.16  | 0.555907 | 0.630892 | 0.81378  | 0.782527 |
| MmugDNA.14545.1.S1_at   | MmugDNA.14545.1 | 5.42  | 5.28  | 0.09 | 0.31 | 1.1   | 0.443993 | 0.123924 | 0.751068 | 0.394201 |
| MmugDNA.14547.1.S1_at   | MmugDNA.14547.1 | 4.04  | 4.97  | 0.79 | 0.61 | -1.91 | 0.126836 | 0.167332 | 0.500609 | 0.443785 |
| MmugDNA.14548.1.S1_at   | MmugDNA.14548.1 | 5.29  | 5.73  | 0.25 | 0.12 | -1.35 | 0.088522 | 0.468075 | 0.456066 | 0.677568 |
| MmugDNA.14549.1.S1_at   | MmugDNA.14549.1 | 3.46  | 3.36  | 0.11 | 0.22 | 1.07  | 0.79687  | 0.620769 | 0.925364 | 0.775593 |
| MmugDNA.1455.1.S1_at    | MmugDNA.1455.1  | 4.74  | 4.83  | 0.33 | 0.06 | -1.07 | 0.645714 | 0.775456 | 0.858801 | 0.869338 |
| MmugDNA.14550.1.S1_at   | MmugDNA.14550.1 | 5.58  | 5.48  | 0.44 | 0.08 | 1.07  | 0.706928 | 0.802515 | 0.885985 | 0.88629  |
| MmugDNA.14552.1.S1_at   | MmugDNA.14552.1 | 6.06  | 5.91  | 0.11 | 0.06 | 1.11  | 0.168816 | 0.259903 | 0.541688 | 0.52675  |
| MmugDNA.14553.1.S1_at   | MmugDNA.14553.1 | 4.12  | 4.11  | 0.03 | 0.09 | 1.01  | 0.208868 | 0.679726 | 0.580477 | 0.812998 |

|                         |                 |       |       |      |      |       |          |          |          |          |
|-------------------------|-----------------|-------|-------|------|------|-------|----------|----------|----------|----------|
| MmugDNA.14554.1.S1_at   | MmugDNA.14554.1 | 6.87  | 6.38  | 0.19 | 0.53 | 1.41  | 0.415454 | 0.089543 | 0.733656 | 0.343811 |
| MmugDNA.14556.1.S1_at   | MmugDNA.14556.1 | 3.53  | 3.52  | 0.38 | 0.2  | 1     | 0.718661 | 0.867017 | 0.890764 | 0.924444 |
| MmugDNA.14557.1.S1_at   | MmugDNA.14557.1 | 10.14 | 9.55  | 0.34 | 0.1  | 1.51  | 0.144177 | 0.08254  | 0.519528 | 0.331672 |
| MmugDNA.14559.1.S1_at   | MmugDNA.14559.1 | 3.58  | 3.55  | 0.11 | 0.39 | 1.02  | 0.963351 | 0.662739 | 0.988152 | 0.802558 |
| MmugDNA.14560.1.S1_at   | MmugDNA.14560.1 | 6.41  | 7.01  | 0.28 | 0.31 | -1.52 | 0.069979 | 0.012502 | 0.428228 | 0.144302 |
| MmugDNA.14561.1.S1_at   | MmugDNA.14561.1 | 5.72  | 5.72  | 0.59 | 0.13 | 1     | 0.485494 | 0.657445 | 0.774354 | 0.799704 |
| MmugDNA.14564.1.S1_at   | MmugDNA.14564.1 | 7.96  | 8.64  | 0.32 | 0.08 | -1.61 | 0.026502 | 0.00725  | 0.325143 | 0.114309 |
| MmugDNA.14565.1.S1_at   | MmugDNA.14565.1 | 6.62  | 6.45  | 0.28 | 0.04 | 1.13  | 0.348673 | 0.338983 | 0.689977 | 0.585891 |
| MmugDNA.14566.1.S1_at   | MmugDNA.14566.1 | 3.18  | 3.44  | 0.19 | 0.18 | -1.2  | 0.357879 | 0.618544 | 0.695993 | 0.77415  |
| MmugDNA.14567.1.S1_at   | MmugDNA.14567.1 | 6.74  | 6.93  | 0.23 | 0.12 | -1.14 | 0.669401 | 0.906221 | 0.869559 | 0.94693  |
| MmugDNA.14568.1.S1_at   | MmugDNA.14568.1 | 4.78  | 4.8   | 0.15 | 0    | -1.01 | 0.774108 | 0.917464 | 0.916164 | 0.953838 |
| MmugDNA.14569.1.S1_at   | MmugDNA.14569.1 | 3.68  | 3.63  | 0.35 | 0.09 | 1.03  | 0.591041 | 0.565773 | 0.833233 | 0.740112 |
| MmugDNA.1457.1.S1_at    | MmugDNA.1457.1  | 6.59  | 6.48  | 0.85 | 0.2  | 1.08  | 0.994203 | 0.266015 | 0.997789 | 0.531815 |
| MmugDNA.14570.1.S1_at   | MmugDNA.14570.1 | 6.87  | 6.85  | 0.14 | 0.1  | 1.01  | 0.672392 | 0.028062 | 0.870906 | 0.209031 |
| MmugDNA.14574.1.S1_at   | MmugDNA.14574.1 | 10.35 | 10.43 | 0.42 | 0.09 | -1.06 | 0.391743 | 0.014699 | 0.717759 | 0.154371 |
| MmugDNA.14575.1.S1_at   | MmugDNA.14575.1 | 10.25 | 10.96 | 0.38 | 0.15 | -1.64 | 0.039715 | 0.121396 | 0.362432 | 0.390485 |
| MmugDNA.14576.1.S1_at   | MmugDNA.14576.1 | 5.5   | 5.14  | 0.17 | 0.25 | 1.28  | 0.22348  | 0.258183 | 0.592569 | 0.525574 |
| MmugDNA.14578.1.S1_at   | MmugDNA.14578.1 | 5.63  | 5.5   | 0.34 | 0.15 | 1.09  | 0.567817 | 0.688871 | 0.820586 | 0.818363 |
| MmugDNA.14579.1.S1_at   | MmugDNA.14579.1 | 3.8   | 3.74  | 0.17 | 0.14 | 1.04  | 0.881987 | 0.408574 | 0.95911  | 0.635757 |
| MmugDNA.1458.1.S1_at    | MmugDNA.1458.1  | 8.97  | 8.96  | 0.19 | 0.04 | 1.01  | 0.675931 | 0.906833 | 0.872796 | 0.947238 |
| MmugDNA.14580.1.S1_at   | MmugDNA.14580.1 | 3.43  | 3.14  | 0.09 | 0.13 | 1.22  | 0.052889 | 0.283519 | 0.393413 | 0.545959 |
| MmugDNA.14581.1.S1_at   | MmugDNA.14581.1 | 7.28  | 7.1   | 0.13 | 0.04 | 1.13  | 0.088178 | 0.089813 | 0.45606  | 0.34404  |
| MmugDNA.14582.1.S1_x_at | MmugDNA.14582.1 | 5.95  | 5.97  | 0.23 | 0.07 | -1.01 | 0.716034 | 0.730211 | 0.889675 | 0.843882 |
| MmugDNA.14584.1.S1_at   | MmugDNA.14584.1 | 7.88  | 7.78  | 0.07 | 0.08 | 1.07  | 0.405006 | 0.230905 | 0.727065 | 0.502548 |
| MmugDNA.14585.1.S1_s_at | MmugDNA.14585.1 | 5.82  | 6.05  | 0.42 | 0.07 | -1.18 | 0.422548 | 0.525998 | 0.738218 | 0.715326 |
| MmugDNA.14586.1.S1_s_at | MmugDNA.14586.1 | 8.23  | 7.34  | 0.25 | 0.09 | 1.86  | 0.004523 | 0.000618 | 0.200606 | 0.042444 |
| MmugDNA.5639.1.S1_s_at  | MmugDNA.5639.1  | 6.27  | 6.24  | 0.59 | 0.27 | 1.02  | 0.968588 | 0.160946 | 0.989723 | 0.437116 |
| MmugDNA.14589.1.S1_at   | MmugDNA.14589.1 | 8.55  | 7.73  | 0.94 | 0.23 | 1.76  | 0.157468 | 0.021906 | 0.530565 | 0.185235 |
| MmugDNA.14589.1.S1_s_at | MmugDNA.14589.1 | 7.8   | 7.23  | 0.7  | 0.09 | 1.49  | 0.171134 | 0.015013 | 0.544246 | 0.155736 |
| MmugDNA.1459.1.S1_s_at  | MmugDNA.1459.1  | 10.55 | 10.9  | 0.32 | 0.13 | -1.28 | 0.225033 | 0.393649 | 0.594284 | 0.626522 |
| MmugDNA.14590.1.S1_at   | MmugDNA.14590.1 | 3.83  | 4.03  | 0.21 | 0.07 | -1.14 | 0.050092 | 0.11582  | 0.386704 | 0.382867 |
| MmugDNA.14591.1.S1_at   | MmugDNA.14591.1 | 6.08  | 6.36  | 0.11 | 0.53 | -1.21 | 0.225879 | 0.287155 | 0.594935 | 0.548447 |
| MmugDNA.14594.1.S1_at   | MmugDNA.14594.1 | 4.32  | 4.22  | 0.15 | 0.05 | 1.07  | 0.354449 | 0.221095 | 0.694035 | 0.494487 |
| MmugDNA.14595.1.S1_at   | MmugDNA.14595.1 | 6.51  | 6.66  | 0.21 | 0.28 | -1.11 | 0.441763 | 0.469341 | 0.749552 | 0.678197 |
| MmugDNA.14596.1.S1_at   | MmugDNA.14596.1 | 5.34  | 5.13  | 0.14 | 0.16 | 1.15  | 0.158235 | 0.312685 | 0.531211 | 0.567299 |
| MmugDNA.14597.1.S1_at   | MmugDNA.14597.1 | 10.16 | 10.54 | 0.32 | 0.07 | -1.31 | 0.336558 | 0.160377 | 0.681934 | 0.436528 |
| MmugDNA.22825.1.S1_s_at | MmugDNA.22825.1 | 10.75 | 10.75 | 0.13 | 0.1  | 1     | 0.750782 | 0.013539 | 0.905556 | 0.148928 |
| MmugDNA.14598.1.S1_s_at | MmugDNA.14598.1 | 9.7   | 9.23  | 1.04 | 0.15 | 1.39  | 0.900439 | 0.697556 | 0.966101 | 0.824244 |
| MmugDNA.14599.1.S1_at   | MmugDNA.14599.1 | 5.13  | 5.12  | 0.08 | 0.14 | 1     | 0.413367 | 0.448017 | 0.732218 | 0.663986 |
| MmugDNA.14600.1.S1_at   | MmugDNA.14600.1 | 3.32  | 3.14  | 0.1  | 0.18 | 1.14  | 0.181165 | 0.086977 | 0.554414 | 0.33984  |
| MmugDNA.14602.1.S1_at   | MmugDNA.14602.1 | 8.6   | 8.04  | 0.55 | 0.15 | 1.47  | 0.144872 | 0.044623 | 0.520198 | 0.255589 |
| MmugDNA.14603.1.S1_at   | MmugDNA.14603.1 | 8.53  | 8.9   | 0.95 | 0.03 | -1.29 | 0.735986 | 0.908793 | 0.898991 | 0.948367 |
| MmugDNA.14604.1.S1_s_at | MmugDNA.14604.1 | 7.19  | 7.19  | 0.06 | 0.22 | -1    | 0.849295 | 0.515114 | 0.947035 | 0.708103 |

|                         |                 |       |       |      |      |       |           |          |          |          |
|-------------------------|-----------------|-------|-------|------|------|-------|-----------|----------|----------|----------|
| MmugDNA.14605.1.S1_at   | MmugDNA.14605.1 | 12.58 | 12.88 | 0.21 | 0.03 | -1.23 | 0.061341  | 0.031759 | 0.410536 | 0.220651 |
| MmugDNA.14606.1.S1_at   | MmugDNA.14606.1 | 12.13 | 12.28 | 0.12 | 0.08 | -1.11 | 0.184231  | 0.573111 | 0.55696  | 0.744941 |
| MmugDNA.14606.1.S1_s_at | MmugDNA.14606.1 | 12.02 | 12.18 | 0.13 | 0.1  | -1.12 | 0.186577  | 0.535797 | 0.559164 | 0.721304 |
| MmugDNA.14607.1.S1_at   | MmugDNA.14607.1 | 12.59 | 11.84 | 0.36 | 0.07 | 1.68  | 0.059077  | 0.062634 | 0.405996 | 0.297022 |
| MmugDNA.14608.1.S1_at   | MmugDNA.14608.1 | 12.78 | 11.68 | 0.75 | 0.09 | 2.14  | 0.195876  | 0.268088 | 0.56627  | 0.533862 |
| MmugDNA.1461.1.S1_at    | MmugDNA.1461.1  | 3.45  | 3.46  | 0.07 | 0    | -1.01 | 0.471393  | 0.39272  | 0.76658  | 0.62583  |
| MmugDNA.14610.1.S1_at   | MmugDNA.14610.1 | 3.74  | 4.07  | 0.16 | 0.24 | -1.26 | 0.106814  | 0.048575 | 0.479384 | 0.265572 |
| MmugDNA.14611.1.S1_at   | MmugDNA.14611.1 | 7.05  | 7.46  | 0.54 | 0.03 | -1.33 | 0.1729006 | 0.777769 | 0.895586 | 0.87086  |
| MmugDNA.14612.1.S1_at   | MmugDNA.14612.1 | 9.88  | 10.32 | 0.36 | 0.11 | -1.36 | 0.065423  | 0.003534 | 0.420625 | 0.085312 |
| MmugDNA.14613.1.S1_at   | MmugDNA.14613.1 | 9.16  | 9.62  | 0.19 | 0.03 | -1.37 | 0.038141  | 0.000166 | 0.358577 | 0.030511 |
| MmugDNA.14614.1.S1_at   | MmugDNA.14614.1 | 5.37  | 5.25  | 0.38 | 0.04 | 1.08  | 0.386187  | 0.658607 | 0.71334  | 0.800452 |
| MmugDNA.14615.1.S1_s_at | MmugDNA.14615.1 | 7.17  | 7.67  | 0.59 | 0.22 | -1.41 | 0.56162   | 0.093502 | 0.817232 | 0.349846 |
| MmugDNA.14616.1.S1_at   | MmugDNA.14616.1 | 4.5   | 4.5   | 0    | 0.03 | 1     | 0.420851  | 0.269058 | 0.737113 | 0.534425 |
| MmugDNA.14618.1.S1_at   | MmugDNA.14618.1 | 9.41  | 9.78  | 0.34 | 0.18 | -1.29 | 0.245743  | 0.124682 | 0.611181 | 0.39513  |
| MmugDNA.14619.1.S1_at   | MmugDNA.14619.1 | 8.36  | 8.88  | 0.33 | 0.24 | -1.43 | 0.137906  | 0.074677 | 0.51366  | 0.318424 |
| MmugDNA.1462.1.S1_at    | MmugDNA.1462.1  | 4.06  | 4.05  | 0.08 | 0.28 | 1     | 0.95427   | 0.070489 | 0.984783 | 0.311777 |
| MmugDNA.15219.1.S1_at   | MmugDNA.15219.1 | 6.2   | 6.29  | 0.26 | 0.21 | -1.07 | 0.581943  | 0.292803 | 0.827791 | 0.552823 |
| MmugDNA.15219.1.S1_s_at | MmugDNA.15219.1 | 11.59 | 11.72 | 0.05 | 0.02 | -1.09 | 0.007167  | 0.156707 | 0.226342 | 0.432216 |
| MmugDNA.14622.1.S1_at   | MmugDNA.14622.1 | 5.69  | 6.04  | 1.31 | 0.41 | -1.28 | 0.780012  | 0.224035 | 0.918949 | 0.497046 |
| MmugDNA.14624.1.S1_at   | MmugDNA.14624.1 | 8.58  | 8.09  | 0.43 | 0.22 | 1.4   | 0.088439  | 0.101335 | 0.45606  | 0.361111 |
| MmugDNA.14625.1.S1_at   | MmugDNA.14625.1 | 9.95  | 9.66  | 0.41 | 0.03 | 1.22  | 0.09951   | 0.170966 | 0.469245 | 0.447561 |
| MmugDNA.14627.1.S1_at   | MmugDNA.14627.1 | 10.19 | 10.2  | 0.08 | 0.1  | -1.01 | 0.204213  | 0.3088   | 0.575588 | 0.56463  |
| MmugDNA.14628.1.S1_at   | MmugDNA.14628.1 | 13.1  | 13.18 | 0.38 | 0.11 | -1.05 | 0.836955  | 0.158088 | 0.941497 | 0.433875 |
| MmugDNA.14629.1.S1_at   | MmugDNA.14629.1 | 6.83  | 7.15  | 0.06 | 0.22 | -1.25 | 0.055896  | 0.026483 | 0.399441 | 0.203897 |
| MmugDNA.1463.1.S1_s_at  | MmugDNA.1463.1  | 7.7   | 7.96  | 0.29 | 0.1  | -1.2  | 0.17838   | 0.244245 | 0.551369 | 0.514176 |
| MmugDNA.14630.1.S1_at   | MmugDNA.14630.1 | 4.45  | 4.36  | 0.34 | 0.34 | 1.06  | 0.250821  | 0.183281 | 0.615928 | 0.459553 |
| MmugDNA.4900.1.S1_at    | MmugDNA.4900.1  | 5.73  | 6.27  | 0.21 | 0.4  | -1.45 | 0.096664  | 0.262074 | 0.465288 | 0.528374 |
| MmugDNA.4900.1.S1_s_at  | MmugDNA.4900.1  | 6.22  | 6.82  | 0.43 | 0.37 | -1.52 | 0.135313  | 0.235798 | 0.509424 | 0.506953 |
| MmugDNA.14633.1.S1_at   | MmugDNA.14633.1 | 3.52  | 3.66  | 0.18 | 0.62 | -1.11 | 0.748304  | 0.675089 | 0.904363 | 0.810146 |
| MmugDNA.8966.1.S1_s_at  | MmugDNA.8966.1  | 5.49  | 6.78  | 0.7  | 0.3  | -2.44 | 0.053623  | 0.055158 | 0.395311 | 0.280487 |
| MmugDNA.8966.1.S1_x_at  | MmugDNA.8966.1  | 5.79  | 6.62  | 0.29 | 0.16 | -1.78 | 0.009907  | 0.027745 | 0.244171 | 0.208003 |
| MmugDNA.14634.1.S1_at   | MmugDNA.14634.1 | 4.08  | 3.87  | 0.25 | 0.15 | 1.15  | 0.889368  | 0.68754  | 0.961855 | 0.817614 |
| MmugDNA.14635.1.S1_at   | MmugDNA.14635.1 | 3.27  | 3.24  | 0.15 | 0.09 | 1.02  | 0.936126  | 0.959495 | 0.978533 | 0.977017 |
| MmugDNA.14636.1.S1_at   | MmugDNA.14636.1 | 5.56  | 5.48  | 0.12 | 0.11 | 1.06  | 0.200765  | 0.354866 | 0.572488 | 0.597466 |
| MmugDNA.14638.1.S1_at   | MmugDNA.14638.1 | 6.55  | 6.21  | 0.16 | 0.07 | 1.26  | 0.077206  | 0.182876 | 0.439109 | 0.459362 |
| MmugDNA.31136.1.S1_s_at | MmugDNA.31136.1 | 11.43 | 11.83 | 0.31 | 0.06 | -1.33 | 0.274385  | 0.171765 | 0.633792 | 0.448191 |
| MmugDNA.1464.1.S1_at    | MmugDNA.1464.1  | 10.66 | 10.74 | 0.19 | 0.27 | -1.05 | 0.866699  | 0.903961 | 0.953153 | 0.945472 |
| MmugDNA.14640.1.S1_at   | MmugDNA.14640.1 | 6.32  | 6.23  | 0.11 | 0.02 | 1.06  | 0.296658  | 0.69345  | 0.652338 | 0.821713 |
| MmugDNA.14641.1.S1_at   | MmugDNA.14641.1 | 4.76  | 4.58  | 0.14 | 0.07 | 1.14  | 0.509383  | 0.183589 | 0.787587 | 0.459681 |
| MmugDNA.14642.1.S1_at   | MmugDNA.14642.1 | 7.46  | 7.12  | 0.21 | 0.17 | 1.27  | 0.0788    | 0.165592 | 0.441464 | 0.44189  |
| MmugDNA.14643.1.S1_at   | MmugDNA.14643.1 | 3.35  | 3.73  | 0.07 | 0.22 | -1.3  | 0.033107  | 0.026795 | 0.346165 | 0.204733 |
| MmugDNA.14645.1.S1_at   | MmugDNA.14645.1 | 6.62  | 6.52  | 0.36 | 0.04 | 1.08  | 0.223441  | 0.160043 | 0.592569 | 0.436208 |
| MmugDNA.14645.1.S1_s_at | MmugDNA.14645.1 | 5.79  | 5.53  | 0.39 | 0.08 | 1.2   | 0.096755  | 0.089156 | 0.465459 | 0.343188 |

|                         |                 |       |       |      |      |       |          |          |          |          |
|-------------------------|-----------------|-------|-------|------|------|-------|----------|----------|----------|----------|
| MmugDNA.14646.1.S1_at   | MmugDNA.14646.1 | 7.45  | 7.22  | 0.38 | 0.1  | 1.18  | 0.438652 | 0.259535 | 0.747368 | 0.526448 |
| MmugDNA.14647.1.S1_at   | MmugDNA.14647.1 | 4.15  | 4.2   | 0.18 | 0.39 | -1.04 | 0.710758 | 0.584789 | 0.887398 | 0.752534 |
| MmugDNA.14648.1.S1_at   | MmugDNA.14648.1 | 6.39  | 6.33  | 0.19 | 0.34 | 1.04  | 0.338739 | 0.213384 | 0.683213 | 0.48726  |
| MmugDNA.14649.1.S1_at   | MmugDNA.14649.1 | 7.33  | 7.19  | 0.07 | 0.07 | 1.1   | 0.061367 | 0.111675 | 0.410552 | 0.376631 |
| MmugDNA.14650.1.S1_at   | MmugDNA.14650.1 | 5.1   | 4.18  | 0.87 | 0.26 | 1.89  | 0.115681 | 0.041351 | 0.488929 | 0.247995 |
| MmugDNA.14652.1.S1_at   | MmugDNA.14652.1 | 5.04  | 5.14  | 0.1  | 0.13 | -1.07 | 0.552572 | 0.564563 | 0.811888 | 0.739366 |
| MmugDNA.14653.1.S1_at   | MmugDNA.14653.1 | 4.7   | 4.9   | 0.12 | 0.36 | -1.15 | 0.894067 | 0.058655 | 0.963672 | 0.288901 |
| MmugDNA.14654.1.S1_at   | MmugDNA.14654.1 | 3.78  | 3.84  | 0.11 | 0.03 | -1.04 | 0.958987 | 0.841539 | 0.986548 | 0.909663 |
| MmugDNA.14655.1.S1_at   | MmugDNA.14655.1 | 4.11  | 3.91  | 0.09 | 0.21 | 1.15  | 0.247153 | 0.314855 | 0.612582 | 0.568619 |
| MmugDNA.14657.1.S1_at   | MmugDNA.14657.1 | 3.25  | 2.99  | 0.12 | 0.35 | 1.19  | 0.418776 | 0.680496 | 0.735911 | 0.813477 |
| MmugDNA.1466.1.S1_at    | MmugDNA.1466.1  | 8.9   | 9.35  | 0.62 | 0.08 | -1.36 | 0.426537 | 0.546743 | 0.740608 | 0.728159 |
| MmugDNA.14661.1.S1_at   | MmugDNA.14661.1 | 5.83  | 6.05  | 0.37 | 0.11 | -1.16 | 0.93706  | 0.640609 | 0.978859 | 0.789026 |
| MmugDNA.14662.1.S1_at   | MmugDNA.14662.1 | 4.73  | 4.76  | 0.23 | 0.09 | -1.02 | 0.707286 | 0.983227 | 0.886085 | 0.990726 |
| MmugDNA.14663.1.S1_at   | MmugDNA.14663.1 | 3.55  | 3.46  | 0.03 | 0.05 | 1.06  | 0.084553 | 0.184705 | 0.451141 | 0.460645 |
| MmugDNA.14664.1.S1_at   | MmugDNA.14664.1 | 11.03 | 10.98 | 0.23 | 0.07 | 1.04  | 0.247215 | 0.337352 | 0.612636 | 0.584572 |
| MmugDNA.14665.1.S1_at   | MmugDNA.14665.1 | 3.16  | 3.21  | 0.03 | 0.1  | -1.04 | 0.307915 | 0.437601 | 0.660765 | 0.656798 |
| MmugDNA.14666.1.S1_at   | MmugDNA.14666.1 | 5.15  | 5.13  | 0.1  | 0.06 | 1.01  | 0.184139 | 0.603318 | 0.55696  | 0.764049 |
| MmugDNA.14667.1.S1_at   | MmugDNA.14667.1 | 3.44  | 3.52  | 0.1  | 0.11 | -1.06 | 0.828177 | 0.977573 | 0.938215 | 0.987812 |
| MmugDNA.15185.1.S1_s_at | MmugDNA.15185.1 | 11.9  | 12.23 | 0.14 | 0.05 | -1.26 | 0.02949  | 0.013455 | 0.334382 | 0.148623 |
| MmugDNA.14669.1.S1_at   | MmugDNA.14669.1 | 3.47  | 3.26  | 0.28 | 0.08 | 1.16  | 0.230609 | 0.349612 | 0.598749 | 0.593539 |
| MmugDNA.1467.1.S1_at    | MmugDNA.1467.1  | 5.77  | 5.74  | 0.61 | 0.43 | 1.02  | 0.707257 | 0.07756  | 0.886085 | 0.323421 |
| MmugDNA.14672.1.S1_at   | MmugDNA.14672.1 | 5.8   | 5.7   | 0.17 | 0.03 | 1.07  | 0.357549 | 0.098403 | 0.695892 | 0.356531 |
| MmugDNA.14674.1.S1_at   | MmugDNA.14674.1 | 4.05  | 4.04  | 0.16 | 0.11 | 1.01  | 0.325684 | 0.197365 | 0.673403 | 0.472304 |
| MmugDNA.14674.1.S1_s_at | MmugDNA.14674.1 | 6.17  | 6.17  | 0.14 | 0.1  | -1    | 0.790372 | 0.928712 | 0.922945 | 0.959449 |
| MmugDNA.14676.1.S1_at   | MmugDNA.14676.1 | 3.17  | 3.2   | 0.04 | 0.08 | -1.02 | 0.3415   | 0.763708 | 0.685061 | 0.862607 |
| MmugDNA.14677.1.S1_at   | MmugDNA.14677.1 | 7.96  | 7.74  | 0.07 | 0.06 | 1.16  | 0.019911 | 0.097604 | 0.302615 | 0.355473 |
| MmugDNA.7699.1.S1_s_at  | MmugDNA.7699.1  | 7.62  | 7.48  | 0.05 | 0.03 | 1.1   | 0.020436 | 0.086133 | 0.303985 | 0.338467 |
| MmugDNA.14679.1.S1_at   | MmugDNA.14679.1 | 10.32 | 10.25 | 0.26 | 0.08 | 1.05  | 0.645112 | 0.897113 | 0.858716 | 0.941305 |
| MmugDNA.1468.1.S1_at    | MmugDNA.1468.1  | 8.99  | 7.44  | 0.9  | 0.14 | 2.93  | 0.048951 | 0.026218 | 0.385028 | 0.202901 |
| MmugDNA.14680.1.S1_at   | MmugDNA.14680.1 | 6.4   | 6.12  | 0.11 | 0.1  | 1.21  | 0.095343 | 0.202102 | 0.464159 | 0.476545 |
| MmugDNA.14681.1.S1_at   | MmugDNA.14681.1 | 5.48  | 6.32  | 0.2  | 0.1  | -1.79 | 0.001627 | 0.009091 | 0.162459 | 0.125944 |
| MmugDNA.14682.1.S1_at   | MmugDNA.14682.1 | 7.5   | 8.48  | 0.65 | 0.14 | -1.97 | 0.239803 | 0.247775 | 0.606158 | 0.517199 |
| MmugDNA.14683.1.S1_at   | MmugDNA.14683.1 | 4.16  | 4.23  | 0.21 | 0.2  | -1.05 | 0.876225 | 0.483028 | 0.956886 | 0.687687 |
| MmugDNA.14685.1.S1_at   | MmugDNA.14685.1 | 6.54  | 6.01  | 0.13 | 0.21 | 1.44  | 0.015169 | 0.002949 | 0.279785 | 0.079945 |
| MmugDNA.14687.1.S1_at   | MmugDNA.14687.1 | 7.09  | 7.13  | 0.05 | 0.34 | -1.03 | 0.927168 | 0.437202 | 0.975848 | 0.656591 |
| MmugDNA.14688.1.S1_at   | MmugDNA.14688.1 | 5.69  | 5.69  | 0.05 | 0.08 | 1     | 0.528654 | 0.934951 | 0.797961 | 0.963177 |
| MmugDNA.14689.1.S1_at   | MmugDNA.14689.1 | 4.86  | 5.13  | 0.11 | 0.26 | -1.2  | 0.635736 | 0.343251 | 0.854713 | 0.589001 |
| MmugDNA.1469.1.S1_at    | MmugDNA.1469.1  | 3.29  | 3.26  | 0.32 | 0.06 | 1.02  | 0.984816 | 0.984599 | 0.995256 | 0.991331 |
| MmugDNA.14690.1.S1_at   | MmugDNA.14690.1 | 9.18  | 9.57  | 0.64 | 0.35 | -1.3  | 0.958938 | 0.076922 | 0.986539 | 0.322421 |
| MmugDNA.14690.1.S1_s_at | MmugDNA.14690.1 | 8.57  | 9.06  | 0.61 | 0.2  | -1.41 | 0.940432 | 0.091785 | 0.979714 | 0.346977 |
| MmugDNA.14692.1.S1_at   | MmugDNA.14692.1 | 8.98  | 9.04  | 0.36 | 0.13 | -1.04 | 0.593626 | 0.807551 | 0.834318 | 0.889177 |
| MmugDNA.14692.1.S1_s_at | MmugDNA.14692.1 | 8.55  | 8.64  | 0.31 | 0.13 | -1.06 | 0.744365 | 0.571424 | 0.902542 | 0.743737 |
| MmugDNA.14693.1.S1_at   | MmugDNA.14693.1 | 7.23  | 6.3   | 0.68 | 0.3  | 1.9   | 0.238691 | 0.330143 | 0.605393 | 0.578987 |

|                         |                 |       |       |      |      |       |          |          |          |          |
|-------------------------|-----------------|-------|-------|------|------|-------|----------|----------|----------|----------|
| MmugDNA.33837.1.S1_s_at | MmugDNA.33837.1 | 8.66  | 8.89  | 0.42 | 0.08 | -1.17 | 0.342069 | 0.172944 | 0.685569 | 0.449582 |
| MmugDNA.14695.1.S1_at   | MmugDNA.14695.1 | 5.94  | 5.88  | 0.04 | 0.07 | 1.04  | 0.422401 | 0.776323 | 0.738123 | 0.869885 |
| MmugDNA.14696.1.S1_at   | MmugDNA.14696.1 | 8.54  | 7.89  | 0.73 | 0.17 | 1.57  | 0.253692 | 0.22709  | 0.618323 | 0.499423 |
| MmugDNA.14697.1.S1_at   | MmugDNA.14697.1 | 10    | 9.32  | 0.61 | 0.08 | 1.6   | 0.150446 | 0.188329 | 0.524037 | 0.46433  |
| MmugDNA.14698.1.S1_at   | MmugDNA.14698.1 | 10.53 | 10.75 | 0.47 | 0.14 | -1.16 | 0.78889  | 0.165829 | 0.922472 | 0.442152 |
| MmugDNA.14699.1.S1_at   | MmugDNA.14699.1 | 3.77  | 3.45  | 0.16 | 0.03 | 1.25  | 0.081373 | 0.084355 | 0.445406 | 0.335672 |
| MmugDNA.1470.1.S1_at    | MmugDNA.1470.1  | 6.97  | 6.86  | 0.03 | 0.11 | 1.08  | 0.088637 | 0.077428 | 0.456387 | 0.323236 |
| MmugDNA.14701.1.S1_at   | MmugDNA.14701.1 | 9.59  | 9.02  | 0.33 | 0.41 | 1.48  | 0.030983 | 0.015101 | 0.339326 | 0.156008 |
| MmugDNA.14703.1.S1_at   | MmugDNA.14703.1 | 8.27  | 8.57  | 0.3  | 0.12 | -1.23 | 0.246915 | 0.292164 | 0.612537 | 0.552327 |
| MmugDNA.14705.1.S1_at   | MmugDNA.14705.1 | 3.38  | 3.19  | 0.09 | 0.16 | 1.14  | 0.382765 | 0.127735 | 0.710918 | 0.398581 |
| MmugDNA.14706.1.S1_at   | MmugDNA.14706.1 | 7.78  | 8.06  | 0.45 | 0.12 | -1.22 | 0.228073 | 0.162783 | 0.59694  | 0.438915 |
| MmugDNA.14707.1.S1_at   | MmugDNA.14707.1 | 5.88  | 5.9   | 0.01 | 0.07 | -1.01 | 0.755863 | 0.974563 | 0.90805  | 0.986197 |
| MmugDNA.14708.1.S1_at   | MmugDNA.14708.1 | 6.01  | 6     | 0.09 | 0.07 | 1     | 0.50716  | 0.680843 | 0.78619  | 0.813597 |
| MmugDNA.14709.1.S1_at   | MmugDNA.14709.1 | 5.17  | 4.65  | 0.15 | 0.56 | 1.43  | 0.604394 | 0.805618 | 0.839628 | 0.888307 |
| MmugDNA.1471.1.S1_at    | MmugDNA.1471.1  | 5.72  | 5.7   | 0.07 | 0.02 | 1.01  | 0.793456 | 0.46907  | 0.924329 | 0.67808  |
| MmugDNA.14710.1.S1_at   | MmugDNA.14710.1 | 7.64  | 7.61  | 0.4  | 0.19 | 1.02  | 0.934179 | 0.948875 | 0.977732 | 0.97078  |
| MmugDNA.8169.1.S1_at    | MmugDNA.8169.1  | 12.41 | 12.37 | 0.12 | 0.01 | 1.03  | 0.574344 | 0.873033 | 0.824006 | 0.927822 |
| MmugDNA.8169.1.S1_s_at  | MmugDNA.8169.1  | 13.04 | 13.01 | 0.13 | 0.02 | 1.02  | 0.687396 | 0.865326 | 0.877758 | 0.923554 |
| MmugDNA.14714.1.S1_at   | MmugDNA.14714.1 | 5.24  | 5.18  | 0.74 | 0.11 | 1.04  | 0.31099  | 0.300916 | 0.662807 | 0.559173 |
| MmugDNA.14715.1.S1_s_at | MmugDNA.14715.1 | 7.6   | 7.67  | 0.18 | 0.44 | -1.05 | 0.583832 | 0.719227 | 0.829306 | 0.837526 |
| MmugDNA.14716.1.S1_at   | MmugDNA.14716.1 | 7.68  | 7.48  | 0.11 | 0.13 | 1.15  | 0.203788 | 0.550114 | 0.57513  | 0.730241 |
| MmugDNA.14717.1.S1_at   | MmugDNA.14717.1 | 13.05 | 13.08 | 0.04 | 0.1  | -1.02 | 0.456436 | 0.007649 | 0.75784  | 0.117015 |
| MmugDNA.14718.1.S1_at   | MmugDNA.14718.1 | 6     | 5.87  | 0.07 | 0.07 | 1.1   | 0.075621 | 0.178634 | 0.436722 | 0.454847 |
| MmugDNA.14719.1.S1_at   | MmugDNA.14719.1 | 3.5   | 3.45  | 0.02 | 0.06 | 1.03  | 0.336972 | 0.390807 | 0.682166 | 0.624547 |
| MmugDNA.14723.1.S1_at   | MmugDNA.14723.1 | 7.4   | 7.48  | 0.4  | 0.11 | -1.05 | 0.972288 | 0.005413 | 0.991019 | 0.101507 |
| MmugDNA.14724.1.S1_at   | MmugDNA.14724.1 | 7.11  | 7.23  | 0.08 | 0.13 | -1.08 | 0.684479 | 0.184887 | 0.87645  | 0.460776 |
| MmugDNA.14727.1.S1_at   | MmugDNA.14727.1 | 5.03  | 4.7   | 0.18 | 0.1  | 1.26  | 0.02921  | 0.02864  | 0.333974 | 0.210901 |
| MmugDNA.14728.1.S1_at   | MmugDNA.14728.1 | 5.84  | 5.7   | 0.15 | 0.26 | 1.1   | 0.984097 | 0.926809 | 0.995199 | 0.958404 |
| MmugDNA.14731.1.S1_at   | MmugDNA.14731.1 | 7.04  | 6.98  | 0.11 | 0.16 | 1.04  | 0.566594 | 0.055052 | 0.820086 | 0.280138 |
| MmugDNA.14732.1.S1_at   | MmugDNA.14732.1 | 4.54  | 4.48  | 0.07 | 0.23 | 1.04  | 0.916534 | 0.660141 | 0.971656 | 0.801083 |
| MmugDNA.14734.1.S1_at   | MmugDNA.14734.1 | 11.17 | 11.2  | 0.36 | 0.09 | -1.02 | 0.904881 | 0.38798  | 0.968079 | 0.62253  |
| MmugDNA.14735.1.S1_at   | MmugDNA.14735.1 | 12.55 | 12.49 | 0.11 | 0.22 | 1.04  | 0.322366 | 0.38099  | 0.671118 | 0.617476 |
| MmugDNA.14736.1.S1_at   | MmugDNA.14736.1 | 6.61  | 5.64  | 0.96 | 0.41 | 1.96  | 0.316218 | 0.441138 | 0.666364 | 0.659375 |
| MmugDNA.14738.1.S1_at   | MmugDNA.14738.1 | 9.33  | 10.12 | 0.71 | 0.08 | -1.74 | 0.420812 | 0.541908 | 0.737113 | 0.725146 |
| MmugDNA.14739.1.S1_at   | MmugDNA.14739.1 | 11.79 | 12.11 | 0.13 | 0.08 | -1.25 | 0.051111 | 0.077008 | 0.389168 | 0.322457 |
| MmugDNA.1474.1.S1_at    | MmugDNA.1474.1  | 5.58  | 5.57  | 0.22 | 0    | 1.01  | 0.52418  | 0.650603 | 0.795761 | 0.795663 |
| MmugDNA.14740.1.S1_at   | MmugDNA.14740.1 | 4.05  | 3.59  | 0.29 | 0.14 | 1.38  | 0.198652 | 0.218174 | 0.570003 | 0.49174  |
| MmugDNA.14741.1.S1_at   | MmugDNA.14741.1 | 3.85  | 3.81  | 0.15 | 0.16 | 1.02  | 0.382929 | 0.890349 | 0.711061 | 0.937508 |
| MmugDNA.14742.1.S1_at   | MmugDNA.14742.1 | 5.19  | 5.27  | 0.05 | 0.07 | -1.05 | 0.112827 | 0.172628 | 0.486223 | 0.449068 |
| MmugDNA.14744.1.S1_at   | MmugDNA.14744.1 | 5.11  | 5.12  | 0.1  | 0.17 | -1    | 0.69246  | 0.872795 | 0.880095 | 0.927686 |
| MmugDNA.14745.1.S1_at   | MmugDNA.14745.1 | 13.16 | 12.81 | 0.04 | 0.07 | 1.28  | 0.000929 | 0.003191 | 0.153739 | 0.08199  |
| MmugDNA.14746.1.S1_at   | MmugDNA.14746.1 | 6.33  | 6.1   | 0.16 | 0.05 | 1.17  | 0.138502 | 0.714104 | 0.513941 | 0.834149 |
| MmugDNA.14747.1.S1_at   | MmugDNA.14747.1 | 6.17  | 6.14  | 0.14 | 0.04 | 1.02  | 0.594767 | 0.285155 | 0.83491  | 0.547098 |

|                         |                 |       |       |      |      |       |          |          |          |          |
|-------------------------|-----------------|-------|-------|------|------|-------|----------|----------|----------|----------|
| MmugDNA.14748.1.S1_at   | MmugDNA.14748.1 | 6.99  | 7.42  | 0.43 | 0.34 | -1.35 | 0.111029 | 0.354904 | 0.484303 | 0.597466 |
| MmugDNA.14749.1.S1_at   | MmugDNA.14749.1 | 6.97  | 6.69  | 0.21 | 0.16 | 1.22  | 0.208832 | 0.188206 | 0.580477 | 0.464251 |
| MmugDNA.14750.1.S1_at   | MmugDNA.14750.1 | 4.03  | 3.89  | 0.13 | 0.04 | 1.11  | 0.190558 | 0.378045 | 0.561786 | 0.615351 |
| MmugDNA.14751.1.S1_at   | MmugDNA.14751.1 | 7.94  | 7.79  | 1.2  | 0.5  | 1.11  | 0.758477 | 0.68424  | 0.909185 | 0.815842 |
| MmugDNA.14752.1.S1_at   | MmugDNA.14752.1 | 4.67  | 4.54  | 0.12 | 0.07 | 1.1   | 0.282711 | 0.429495 | 0.641025 | 0.650934 |
| MmugDNA.14754.1.S1_at   | MmugDNA.14754.1 | 11.2  | 11.02 | 0.1  | 0.1  | 1.14  | 0.068736 | 0.038627 | 0.426    | 0.241627 |
| MmugDNA.14755.1.S1_at   | MmugDNA.14755.1 | 4.6   | 4.49  | 0.04 | 0.06 | 1.08  | 0.303342 | 0.325916 | 0.657248 | 0.576181 |
| MmugDNA.14756.1.S1_at   | MmugDNA.14756.1 | 8.8   | 9.07  | 0.53 | 0.05 | -1.21 | 0.625565 | 0.294519 | 0.849478 | 0.554265 |
| MmugDNA.14757.1.S1_at   | MmugDNA.14757.1 | 4.68  | 4.47  | 0.24 | 0.26 | 1.15  | 0.294381 | 0.68185  | 0.650593 | 0.814175 |
| MmugDNA.14758.1.S1_at   | MmugDNA.14758.1 | 7.13  | 7.47  | 0.11 | 0.25 | -1.26 | 0.064604 | 0.205552 | 0.418438 | 0.47981  |
| MmugDNA.14759.1.S1_at   | MmugDNA.14759.1 | 11.74 | 11.68 | 0.22 | 0.05 | -1.04 | 0.241396 | 0.339658 | 0.607596 | 0.586242 |
| MmugDNA.14759.1.S1_s_at | MmugDNA.14759.1 | 10.61 | 10.65 | 0.14 | 0.06 | -1.03 | 0.828749 | 0.595201 | 0.938516 | 0.759023 |
| MmugDNA.1476.1.S1_at    | MmugDNA.1476.1  | 4.52  | 4.45  | 0.07 | 0.1  | 1.05  | 0.378148 | 0.52134  | 0.708016 | 0.712346 |
| MmugDNA.14760.1.S1_at   | MmugDNA.14760.1 | 4.86  | 4.53  | 0.13 | 0.18 | 1.26  | 0.266142 | 0.032874 | 0.627106 | 0.224478 |
| MmugDNA.14761.1.S1_at   | MmugDNA.14761.1 | 5.83  | 6.38  | 0.44 | 0.32 | -1.46 | 0.074735 | 0.059346 | 0.435313 | 0.29054  |
| MmugDNA.14763.1.S1_at   | MmugDNA.14763.1 | 3.63  | 3.61  | 0.1  | 0.14 | 1.02  | 0.773567 | 0.534888 | 0.915826 | 0.720595 |
| MmugDNA.14764.1.S1_at   | MmugDNA.14764.1 | 3.17  | 3.27  | 0.12 | 0.21 | -1.07 | 0.754051 | 0.314518 | 0.907295 | 0.568372 |
| MmugDNA.14766.1.S1_at   | MmugDNA.14766.1 | 6.37  | 8.81  | 1.94 | 0.4  | -5.43 | 0.120439 | 0.045032 | 0.493832 | 0.256697 |
| MmugDNA.14768.1.S1_at   | MmugDNA.14768.1 | 3.83  | 3.74  | 0.14 | 0.08 | 1.07  | 0.911362 | 0.99212  | 0.969946 | 0.995515 |
| MmugDNA.1477.1.S1_at    | MmugDNA.1477.1  | 5.77  | 5.73  | 0.14 | 0.1  | 1.03  | 0.676726 | 0.032129 | 0.873224 | 0.221941 |
| MmugDNA.1477.1.S1_s_at  | MmugDNA.1477.1  | 7.45  | 7.32  | 0.14 | 0.06 | 1.09  | 0.337267 | 0.037144 | 0.682275 | 0.237211 |
| MmugDNA.14771.1.S1_s_at | MmugDNA.14771.1 | 6.95  | 7.48  | 0.53 | 0.15 | -1.44 | 0.170577 | 0.094285 | 0.543588 | 0.350889 |
| MmugDNA.14774.1.S1_at   | MmugDNA.14774.1 | 4.49  | 4.59  | 0.09 | 0.09 | -1.07 | 0.505475 | 0.008041 | 0.785385 | 0.119166 |
| MmugDNA.14775.1.S1_at   | MmugDNA.14775.1 | 5.07  | 4.89  | 0.12 | 0.27 | 1.13  | 0.536715 | 0.748134 | 0.802461 | 0.853384 |
| MmugDNA.14776.1.S1_at   | MmugDNA.14776.1 | 11.08 | 10.69 | 0.21 | 0.06 | 1.31  | 0.030966 | 0.075698 | 0.339278 | 0.320271 |
| MmugDNA.14777.1.S1_at   | MmugDNA.14777.1 | 6.04  | 5.63  | 0.07 | 0.3  | 1.33  | 0.144434 | 0.029475 | 0.519755 | 0.213368 |
| MmugDNA.14779.1.S1_at   | MmugDNA.14779.1 | 3.94  | 3.76  | 0.09 | 0.09 | 1.13  | 0.052557 | 0.051936 | 0.392658 | 0.273337 |
| MmugDNA.1478.1.S1_at    | MmugDNA.1478.1  | 6.35  | 6.16  | 0.41 | 0.19 | 1.14  | 0.179058 | 0.108947 | 0.552065 | 0.372637 |
| MmugDNA.14780.1.S1_at   | MmugDNA.14780.1 | 6.46  | 5.86  | 0.66 | 0.34 | 1.52  | 0.216953 | 0.023297 | 0.586902 | 0.191315 |
| MmugDNA.14781.1.S1_at   | MmugDNA.14781.1 | 3.32  | 3.42  | 0.16 | 0.04 | -1.07 | 0.135613 | 0.176992 | 0.510116 | 0.453416 |
| MmugDNA.14782.1.S1_at   | MmugDNA.14782.1 | 9.21  | 9.65  | 0.17 | 0.01 | -1.36 | 0.008509 | 0.004198 | 0.234555 | 0.091319 |
| MmugDNA.14783.1.S1_s_at | MmugDNA.14783.1 | 3.92  | 3.77  | 0.18 | 0.08 | 1.11  | 0.297402 | 0.297455 | 0.65275  | 0.556105 |
| MmugDNA.14784.1.S1_at   | MmugDNA.14784.1 | 5.42  | 5.68  | 0.22 | 0.25 | -1.2  | 0.983398 | 0.924479 | 0.994928 | 0.957385 |
| MmugDNA.14785.1.S1_at   | MmugDNA.14785.1 | 3.62  | 3.59  | 0.23 | 0.28 | 1.03  | 0.901518 | 0.614172 | 0.966591 | 0.771143 |
| MmugDNA.14786.1.S1_at   | MmugDNA.14786.1 | 6.05  | 5.92  | 0.33 | 0.17 | 1.09  | 0.551877 | 0.496921 | 0.811476 | 0.696273 |
| MmugDNA.14787.1.S1_at   | MmugDNA.14787.1 | 9.02  | 9.21  | 0.53 | 0.08 | -1.14 | 0.564938 | 0.077795 | 0.819077 | 0.323933 |
| MmugDNA.14788.1.S1_at   | MmugDNA.14788.1 | 8.06  | 7.99  | 0.81 | 0.06 | 1.04  | 0.693592 | 0.679274 | 0.880681 | 0.81275  |
| MmugDNA.14789.1.S1_at   | MmugDNA.14789.1 | 5.13  | 4.99  | 0.07 | 0.22 | 1.1   | 0.454854 | 0.576672 | 0.757136 | 0.74731  |
| MmugDNA.1479.1.S1_s_at  | MmugDNA.1479.1  | 10.32 | 9.44  | 0.28 | 0.13 | 1.85  | 0.004345 | 0.000532 | 0.198874 | 0.0402   |
| MmugDNA.14790.1.S1_at   | MmugDNA.14790.1 | 5.48  | 5.58  | 0.13 | 0.13 | -1.07 | 0.585918 | 0.093594 | 0.830885 | 0.349952 |
| MmugDNA.14792.1.S1_at   | MmugDNA.14792.1 | 3.57  | 3.46  | 0.24 | 0    | 1.08  | 0.244342 | 0.351339 | 0.60991  | 0.59502  |
| MmugDNA.14793.1.S1_at   | MmugDNA.14793.1 | 5.46  | 5.67  | 0.05 | 0.23 | -1.16 | 0.172426 | 0.872398 | 0.545696 | 0.92745  |
| MmugDNA.14794.1.S1_at   | MmugDNA.14794.1 | 5     | 4.94  | 0.39 | 0.33 | 1.05  | 0.97514  | 0.460271 | 0.991912 | 0.672148 |

|                         |                 |       |       |      |      |       |          |          |          |          |
|-------------------------|-----------------|-------|-------|------|------|-------|----------|----------|----------|----------|
| MmugDNA.14795.1.S1_at   | MmugDNA.14795.1 | 5.86  | 5.69  | 0.16 | 0.09 | 1.13  | 0.244245 | 0.345486 | 0.60991  | 0.590746 |
| MmugDNA.14796.1.S1_at   | MmugDNA.14796.1 | 3.34  | 3.21  | 0.08 | 0.11 | 1.1   | 0.090652 | 0.105855 | 0.458873 | 0.368111 |
| MmugDNA.14797.1.S1_at   | MmugDNA.14797.1 | 4.65  | 4.62  | 0.03 | 0.07 | 1.02  | 0.196929 | 0.309602 | 0.567685 | 0.564987 |
| MmugDNA.14798.1.S1_at   | MmugDNA.14798.1 | 4.15  | 4.15  | 0.21 | 0.12 | 1     | 0.787187 | 0.813412 | 0.92182  | 0.892156 |
| MmugDNA.14799.1.S1_at   | MmugDNA.14799.1 | 4.4   | 4.21  | 0.12 | 0.03 | 1.14  | 0.139988 | 0.388137 | 0.515581 | 0.622607 |
| MmugDNA.148.1.S1_at     | MmugDNA.148.1   | 6.52  | 6.33  | 0.1  | 0.08 | 1.14  | 0.055943 | 0.042324 | 0.399441 | 0.250324 |
| MmugDNA.1480.1.S1_at    | MmugDNA.1480.1  | 4.46  | 4.85  | 0.26 | 0.33 | -1.32 | 0.398398 | 0.70021  | 0.722489 | 0.825987 |
| MmugDNA.14801.1.S1_at   | MmugDNA.14801.1 | 6.45  | 5.96  | 0.77 | 0.29 | 1.41  | 0.921696 | 0.895329 | 0.973516 | 0.940185 |
| MmugDNA.14802.1.S1_at   | MmugDNA.14802.1 | 4.57  | 4.57  | 0.11 | 0.08 | 1     | 0.838701 | 0.889476 | 0.942303 | 0.937014 |
| MmugDNA.14804.1.S1_at   | MmugDNA.14804.1 | 8.87  | 8.75  | 0.18 | 0.07 | 1.09  | 0.258747 | 0.330862 | 0.622286 | 0.57958  |
| MmugDNA.14805.1.S1_at   | MmugDNA.14805.1 | 5.23  | 5.17  | 0.2  | 0.07 | -1.04 | 0.588655 | 0.930823 | 0.831968 | 0.960718 |
| MmugDNA.14806.1.S1_at   | MmugDNA.14806.1 | 3.81  | 3.94  | 0.16 | 0.32 | -1.1  | 0.222018 | 0.255988 | 0.591614 | 0.523919 |
| MmugDNA.14807.1.S1_at   | MmugDNA.14807.1 | 4.27  | 4.15  | 0.1  | 0    | 1.09  | 0.311672 | 0.749605 | 0.663441 | 0.854505 |
| MmugDNA.14808.1.S1_at   | MmugDNA.14808.1 | 4.69  | 4.9   | 0.23 | 0.13 | -1.16 | 0.157383 | 0.113215 | 0.530565 | 0.379229 |
| MmugDNA.14809.1.S1_at   | MmugDNA.14809.1 | 3.89  | 4.01  | 0.09 | 0.08 | -1.09 | 0.154246 | 0.335995 | 0.527483 | 0.583601 |
| MmugDNA.14811.1.S1_at   | MmugDNA.14811.1 | 6.02  | 6.01  | 0.06 | 0.28 | 1.01  | 0.927462 | 0.629551 | 0.97593  | 0.781928 |
| MmugDNA.14812.1.S1_at   | MmugDNA.14812.1 | 7.95  | 7.94  | 0.77 | 0.03 | 1.01  | 0.521996 | 0.720782 | 0.794978 | 0.838368 |
| MmugDNA.14813.1.S1_at   | MmugDNA.14813.1 | 4.37  | 4.37  | 0.02 | 0    | 1     | 0.373901 | 0.993809 | 0.705567 | 0.996274 |
| MmugDNA.14814.1.S1_at   | MmugDNA.14814.1 | 5.34  | 5.42  | 0.19 | 0.18 | -1.05 | 0.906444 | 0.85274  | 0.968353 | 0.916281 |
| MmugDNA.14816.1.S1_at   | MmugDNA.14816.1 | 12.01 | 12.14 | 0.28 | 0.06 | -1.1  | 0.558167 | 0.5868   | 0.815182 | 0.753819 |
| MmugDNA.14816.1.S1_x_at | MmugDNA.14816.1 | 11.82 | 11.96 | 0.28 | 0.11 | -1.1  | 0.585709 | 0.667457 | 0.830611 | 0.805333 |
| MmugDNA.14818.1.S1_at   | MmugDNA.14818.1 | 5.02  | 5.21  | 0.18 | 0.13 | -1.14 | 0.350069 | 0.640833 | 0.691084 | 0.78921  |
| MmugDNA.1482.1.S1_at    | MmugDNA.1482.1  | 5.02  | 5.07  | 0.12 | 0.08 | -1.04 | 0.686616 | 0.086859 | 0.877418 | 0.339651 |
| MmugDNA.14820.1.S1_at   | MmugDNA.14820.1 | 2.92  | 2.86  | 0.19 | 0.25 | 1.04  | 0.74493  | 0.875656 | 0.902816 | 0.929374 |
| MmugDNA.14823.1.S1_at   | MmugDNA.14823.1 | 8.39  | 9.06  | 0.21 | 0.05 | -1.6  | 0.005403 | 0.002266 | 0.208157 | 0.07013  |
| MmugDNA.14827.1.S1_at   | MmugDNA.14827.1 | 6.08  | 5.56  | 1.05 | 0.47 | 1.43  | 0.54775  | 0.190484 | 0.809225 | 0.465906 |
| MmugDNA.14828.1.S1_at   | MmugDNA.14828.1 | 12.75 | 12.52 | 0.06 | 0.01 | 1.17  | 0.003137 | 0.000151 | 0.191107 | 0.029832 |
| MmugDNA.14829.1.S1_at   | MmugDNA.14829.1 | 10.78 | 10.05 | 1.11 | 0.14 | 1.66  | 0.940483 | 0.767879 | 0.979714 | 0.865256 |
| MmugDNA.14833.1.S1_at   | MmugDNA.14833.1 | 10.77 | 11.13 | 0.1  | 0.07 | -1.28 | 0.019899 | 0.098203 | 0.302615 | 0.356253 |
| MmugDNA.15123.1.S1_s_at | MmugDNA.15123.1 | 9.53  | 9.7   | 0.1  | 0.1  | -1.13 | 0.194973 | 0.643754 | 0.565401 | 0.791112 |
| MmugDNA.14834.1.S1_at   | MmugDNA.14834.1 | 11.89 | 10.92 | 1.04 | 0.11 | 1.95  | 0.368233 | 0.361409 | 0.70351  | 0.602196 |
| MmugDNA.14836.1.S1_at   | MmugDNA.14836.1 | 3.28  | 3.24  | 0.04 | 0.04 | 1.02  | 0.728534 | 0.090268 | 0.895243 | 0.344674 |
| MmugDNA.14837.1.S1_at   | MmugDNA.14837.1 | 4.2   | 4.15  | 0.08 | 0.05 | 1.03  | 0.415809 | 0.389011 | 0.73381  | 0.623288 |
| MmugDNA.1484.1.S1_at    | MmugDNA.1484.1  | 6.1   | 6.2   | 0.23 | 0.08 | -1.07 | 0.929824 | 0.287773 | 0.976518 | 0.549052 |
| MmugDNA.14840.1.S1_at   | MmugDNA.14840.1 | 3.64  | 3.7   | 0.3  | 0.14 | -1.04 | 0.850685 | 0.952542 | 0.947412 | 0.973066 |
| MmugDNA.14841.1.S1_at   | MmugDNA.14841.1 | 5.06  | 5.05  | 0.06 | 0.19 | 1.01  | 0.646403 | 0.901504 | 0.859027 | 0.943947 |
| MmugDNA.14843.1.S1_at   | MmugDNA.14843.1 | 11.23 | 9.53  | 0.65 | 0.19 | 3.26  | 0.028636 | 0.00607  | 0.332804 | 0.106175 |
| MmugDNA.14845.1.S1_at   | MmugDNA.14845.1 | 2.63  | 2.6   | 0.02 | 0.08 | 1.02  | 0.519875 | 0.721442 | 0.793373 | 0.838713 |
| MmugDNA.14845.1.S1_s_at | MmugDNA.14845.1 | 2.51  | 2.47  | 0.02 | 0.06 | 1.03  | 0.85181  | 0.718807 | 0.947748 | 0.837257 |
| MmugDNA.14846.1.S1_at   | MmugDNA.14846.1 | 9.16  | 9.08  | 0.58 | 0.12 | 1.06  | 0.684447 | 0.66396  | 0.87645  | 0.803246 |
| MmugDNA.14847.1.S1_at   | MmugDNA.14847.1 | 5.17  | 5.18  | 0.14 | 0.14 | -1.01 | 0.25902  | 0.399704 | 0.622413 | 0.629951 |
| MmugDNA.14848.1.S1_at   | MmugDNA.14848.1 | 5.75  | 5.65  | 0.3  | 0.05 | 1.07  | 0.685127 | 0.699354 | 0.87671  | 0.825344 |
| MmugDNA.14850.1.S1_at   | MmugDNA.14850.1 | 7.52  | 7.56  | 0.87 | 0.42 | -1.03 | 0.857904 | 0.419294 | 0.949754 | 0.643445 |



|                         |                 |       |       |      |      |       |          |          |          |          |
|-------------------------|-----------------|-------|-------|------|------|-------|----------|----------|----------|----------|
| MmugDNA.14851.1.S1_at   | MmugDNA.14851.1 | 4.18  | 4.02  | 0.13 | 0.22 | 1.12  | 0.695691 | 0.87645  | 0.881723 | 0.929683 |
| MmugDNA.14854.1.S1_at   | MmugDNA.14854.1 | 11.08 | 10.5  | 0.2  | 0.02 | 1.49  | 0.016554 | 0.001006 | 0.287478 | 0.050657 |
| MmugDNA.14855.1.S1_at   | MmugDNA.14855.1 | 11.65 | 11.63 | 0.46 | 0.01 | 1.01  | 0.83503  | 0.820339 | 0.940832 | 0.89648  |
| MmugDNA.14856.1.S1_at   | MmugDNA.14856.1 | 10.18 | 10.05 | 0.38 | 0.18 | 1.1   | 0.74017  | 0.273529 | 0.900721 | 0.53793  |
| MmugDNA.14859.1.S1_at   | MmugDNA.14859.1 | 6.16  | 5.95  | 0.16 | 0.24 | 1.16  | 0.156302 | 0.119606 | 0.529536 | 0.388247 |
| MmugDNA.1486.1.S1_at    | MmugDNA.1486.1  | 3.39  | 3.41  | 0.06 | 0.19 | -1.01 | 0.823303 | 0.8606   | 0.936294 | 0.920573 |
| MmugDNA.14863.1.S1_at   | MmugDNA.14863.1 | 3.78  | 3.86  | 0.19 | 0.11 | -1.05 | 0.220805 | 0.279679 | 0.590134 | 0.543228 |
| MmugDNA.14864.1.S1_s_at | MmugDNA.14864.1 | 10.25 | 10.17 | 0.52 | 0.05 | 1.06  | 0.849316 | 0.872854 | 0.947038 | 0.927711 |
| MmugDNA.14865.1.S1_at   | MmugDNA.14865.1 | 10.56 | 10.82 | 0.51 | 0.17 | -1.19 | 0.524419 | 0.597842 | 0.795867 | 0.760428 |
| MmugDNA.14867.1.S1_at   | MmugDNA.14867.1 | 6.85  | 6.6   | 0.12 | 0.18 | 1.19  | 0.060684 | 0.738237 | 0.408585 | 0.848245 |
| MmugDNA.14868.1.S1_at   | MmugDNA.14868.1 | 6.03  | 5.91  | 0.15 | 0.21 | -1.08 | 0.581953 | 0.141772 | 0.827791 | 0.415331 |
| MmugDNA.14869.1.S1_at   | MmugDNA.14869.1 | 3.24  | 3.14  | 0.04 | 0.14 | 1.07  | 0.61621  | 0.211636 | 0.844769 | 0.485681 |
| MmugDNA.1487.1.S1_at    | MmugDNA.1487.1  | 3.89  | 3.82  | 0.1  | 0.12 | 1.04  | 0.587613 | 0.876928 | 0.831749 | 0.929868 |
| MmugDNA.14870.1.S1_at   | MmugDNA.14870.1 | 5.43  | 5.42  | 0.14 | 0.08 | 1     | 0.781432 | 0.796622 | 0.919573 | 0.882754 |
| MmugDNA.14871.1.S1_at   | MmugDNA.14871.1 | 3.99  | 4.49  | 0.24 | 0.19 | -1.41 | 0.069827 | 0.213765 | 0.427911 | 0.487564 |
| MmugDNA.14873.1.S1_at   | MmugDNA.14873.1 | 5.44  | 6.49  | 0.29 | 0.33 | -2.07 | 0.030532 | 0.000152 | 0.338095 | 0.029832 |
| MmugDNA.34050.1.S1_s_at | MmugDNA.34050.1 | 6.85  | 6.11  | 0.66 | 0.28 | 1.68  | 0.153891 | 0.110215 | 0.527213 | 0.374349 |
| MmugDNA.14875.1.S1_at   | MmugDNA.14875.1 | 3.64  | 3.59  | 0.02 | 0.26 | 1.04  | 0.974486 | 0.872964 | 0.991912 | 0.927791 |
| MmugDNA.14877.1.S1_at   | MmugDNA.14877.1 | 5.94  | 6.04  | 0.08 | 0.14 | -1.07 | 0.134449 | 0.31638  | 0.508462 | 0.569809 |
| MmugDNA.14878.1.S1_at   | MmugDNA.14878.1 | 5.84  | 5.86  | 0.17 | 0.23 | -1.01 | 0.414714 | 0.095765 | 0.733276 | 0.352753 |
| MmugDNA.14879.1.S1_at   | MmugDNA.14879.1 | 5.53  | 5.11  | 0.39 | 0.24 | 1.33  | 0.379218 | 0.337146 | 0.708712 | 0.584348 |
| MmugDNA.1488.1.S1_at    | MmugDNA.1488.1  | 4.53  | 4.33  | 0.07 | 0.13 | 1.15  | 0.085659 | 0.082878 | 0.452706 | 0.332423 |
| MmugDNA.14880.1.S1_at   | MmugDNA.14880.1 | 3.84  | 3.87  | 0.18 | 0.04 | -1.02 | 0.822842 | 0.52337  | 0.9361   | 0.713698 |
| MmugDNA.14881.1.S1_at   | MmugDNA.14881.1 | 6.55  | 6.1   | 0.21 | 0.13 | 1.36  | 0.024969 | 0.015376 | 0.320402 | 0.157432 |
| MmugDNA.14882.1.S1_s_at | MmugDNA.14882.1 | 12.69 | 12.52 | 0.13 | 0.08 | 1.12  | 0.227459 | 0.046115 | 0.596578 | 0.259152 |
| MmugDNA.14883.1.S1_at   | MmugDNA.14883.1 | 4.29  | 4.17  | 0.13 | 0.05 | 1.08  | 0.101395 | 0.029227 | 0.471667 | 0.212898 |
| MmugDNA.14883.1.S1_s_at | MmugDNA.14883.1 | 10.76 | 10.7  | 0.25 | 0.12 | 1.04  | 0.829313 | 0.980022 | 0.938768 | 0.989229 |
| MmugDNA.14884.1.S1_at   | MmugDNA.14884.1 | 4.5   | 4.46  | 0.74 | 0.3  | 1.03  | 0.565601 | 0.318491 | 0.819393 | 0.571239 |
| MmugDNA.14885.1.S1_at   | MmugDNA.14885.1 | 12.04 | 12.2  | 0.56 | 0.18 | -1.12 | 0.223469 | 0.217997 | 0.592569 | 0.491614 |
| MmugDNA.14887.1.S1_at   | MmugDNA.14887.1 | 8.79  | 9.24  | 0.79 | 0.06 | -1.37 | 0.258256 | 0.132683 | 0.622127 | 0.404544 |
| MmugDNA.14888.1.S1_at   | MmugDNA.14888.1 | 6.43  | 6.68  | 0.16 | 0.47 | -1.18 | 0.497398 | 0.031734 | 0.781076 | 0.220562 |
| MmugDNA.14889.1.S1_at   | MmugDNA.14889.1 | 6.13  | 5.94  | 0.15 | 0.04 | 1.14  | 0.076012 | 0.152289 | 0.437205 | 0.427072 |
| MmugDNA.1489.1.S1_s_at  | MmugDNA.1489.1  | 7.73  | 7.59  | 0.25 | 0.13 | 1.1   | 0.476011 | 0.708475 | 0.768871 | 0.830919 |
| MmugDNA.14890.1.S1_at   | MmugDNA.14890.1 | 9.23  | 8.55  | 0.22 | 0.09 | 1.61  | 0.019694 | 0.078719 | 0.302208 | 0.325673 |
| MmugDNA.14891.1.S1_at   | MmugDNA.14891.1 | 5.83  | 6.35  | 0.59 | 0.03 | -1.43 | 0.201537 | 0.626757 | 0.573165 | 0.779979 |
| MmugDNA.14892.1.S1_at   | MmugDNA.14892.1 | 8.46  | 8.42  | 0.46 | 0.1  | 1.03  | 0.911164 | 0.018667 | 0.969838 | 0.171716 |
| MmugDNA.14894.1.S1_at   | MmugDNA.14894.1 | 3.13  | 3.27  | 0    | 0.23 | -1.1  | 0.424135 | 0.445268 | 0.739432 | 0.662338 |
| MmugDNA.14895.1.S1_at   | MmugDNA.14895.1 | 6.24  | 6.2   | 0.18 | 0.03 | 1.03  | 0.937205 | 0.96394  | 0.978872 | 0.979994 |
| MmugDNA.14896.1.S1_at   | MmugDNA.14896.1 | 12.15 | 12.02 | 0.1  | 0.12 | 1.09  | 0.101165 | 0.066419 | 0.471667 | 0.303385 |
| MmugDNA.14898.1.S1_at   | MmugDNA.14898.1 | 5.53  | 5.52  | 0.07 | 0.03 | 1.01  | 0.282993 | 0.355015 | 0.64118  | 0.597466 |
| MmugDNA.149.1.S1_at     | MmugDNA.149.1   | 6.82  | 6.87  | 0.13 | 0.2  | -1.04 | 0.376259 | 0.487033 | 0.70673  | 0.690176 |
| MmugDNA.1490.1.S1_at    | MmugDNA.1490.1  | 6.13  | 6.03  | 0.13 | 0.09 | 1.07  | 0.746725 | 0.872816 | 0.903705 | 0.92769  |
| MmugDNA.14900.1.S1_at   | MmugDNA.14900.1 | 2.94  | 2.95  | 0.04 | 0.08 | -1.01 | 0.555302 | 0.405563 | 0.813407 | 0.633804 |

|                         |                 |       |       |      |      |       |          |          |          |          |
|-------------------------|-----------------|-------|-------|------|------|-------|----------|----------|----------|----------|
| MmugDNA.14901.1.S1_at   | MmugDNA.14901.1 | 4.31  | 5.03  | 0.38 | 0.94 | -1.65 | 0.330837 | 0.212561 | 0.677482 | 0.486502 |
| MmugDNA.14902.1.S1_at   | MmugDNA.14902.1 | 6.52  | 6.32  | 0.23 | 0.04 | 1.15  | 0.241901 | 0.284556 | 0.607952 | 0.546721 |
| MmugDNA.14903.1.S1_at   | MmugDNA.14903.1 | 12.81 | 12.8  | 0.05 | 0.03 | 1.01  | 0.703015 | 0.717977 | 0.884538 | 0.836769 |
| MmugDNA.14904.1.S1_at   | MmugDNA.14904.1 | 11.48 | 10.95 | 0.11 | 0.07 | 1.45  | 0.002116 | 0.0028   | 0.174757 | 0.078022 |
| MmugDNA.14905.1.S1_at   | MmugDNA.14905.1 | 3.46  | 3.38  | 0.06 | 0.08 | 1.05  | 0.126561 | 0.283046 | 0.500465 | 0.545692 |
| MmugDNA.14906.1.S1_s_at | MmugDNA.14906.1 | 5.67  | 5.58  | 0.21 | 0.03 | 1.07  | 0.147563 | 0.271777 | 0.52159  | 0.536577 |
| MmugDNA.14907.1.S1_at   | MmugDNA.14907.1 | 5.16  | 4.82  | 0.26 | 0.41 | 1.27  | 0.638579 | 0.665732 | 0.855989 | 0.804156 |
| MmugDNA.1491.1.S1_at    | MmugDNA.1491.1  | 3.41  | 3.26  | 0.14 | 0.13 | 1.11  | 0.540101 | 0.733342 | 0.804251 | 0.845598 |
| MmugDNA.14910.1.S1_at   | MmugDNA.14910.1 | 8.23  | 7.59  | 1.3  | 0.33 | 1.56  | 0.45581  | 0.129165 | 0.757582 | 0.400611 |
| MmugDNA.14911.1.S1_at   | MmugDNA.14911.1 | 6.16  | 7.55  | 0.41 | 0.06 | -2.63 | 0.008606 | 0.003183 | 0.235856 | 0.081924 |
| MmugDNA.14914.1.S1_at   | MmugDNA.14914.1 | 4.01  | 3.94  | 0.19 | 0.07 | -1.05 | 0.693867 | 0.751383 | 0.880873 | 0.855447 |
| MmugDNA.14915.1.S1_at   | MmugDNA.14915.1 | 3.2   | 3.32  | 0.07 | 0.19 | -1.09 | 0.905259 | 0.933455 | 0.968109 | 0.962195 |
| MmugDNA.14916.1.S1_at   | MmugDNA.14916.1 | 3.71  | 3.57  | 0.09 | 0.09 | 1.1   | 0.117727 | 0.148783 | 0.491041 | 0.423201 |
| MmugDNA.14917.1.S1_at   | MmugDNA.14917.1 | 5.22  | 5.13  | 0.17 | 0.02 | 1.06  | 0.394424 | 0.581871 | 0.719752 | 0.750784 |
| MmugDNA.14918.1.S1_at   | MmugDNA.14918.1 | 9.85  | 10.38 | 0.53 | 0.2  | -1.45 | 0.209583 | 0.016157 | 0.581148 | 0.161102 |
| MmugDNA.14919.1.S1_at   | MmugDNA.14919.1 | 5.37  | 5.28  | 0.17 | 0.18 | 1.06  | 0.469065 | 0.607642 | 0.765414 | 0.766457 |
| MmugDNA.1492.1.S1_at    | MmugDNA.1492.1  | 9.02  | 8.76  | 0.37 | 0.15 | 1.19  | 0.29529  | 0.11518  | 0.651034 | 0.38209  |
| MmugDNA.14921.1.S1_at   | MmugDNA.14921.1 | 9.03  | 9.21  | 0.85 | 0.59 | -1.13 | 0.43896  | 0.582136 | 0.747715 | 0.750784 |
| MmugDNA.14922.1.S1_at   | MmugDNA.14922.1 | 5.01  | 4.72  | 0.27 | 0.07 | 1.23  | 0.514554 | 0.720327 | 0.790432 | 0.838252 |
| MmugDNA.14923.1.S1_at   | MmugDNA.14923.1 | 6.32  | 6.42  | 0.33 | 0.05 | -1.07 | 0.530052 | 0.233034 | 0.798666 | 0.50445  |
| MmugDNA.14924.1.S1_at   | MmugDNA.14924.1 | 3.94  | 3.91  | 0.31 | 1.06 | 1.02  | 0.412278 | 0.652206 | 0.731945 | 0.796592 |
| MmugDNA.14926.1.S1_at   | MmugDNA.14926.1 | 4     | 3.92  | 0.18 | 0.12 | 1.06  | 0.917937 | 0.809516 | 0.972062 | 0.890191 |
| MmugDNA.14927.1.S1_at   | MmugDNA.14927.1 | 5.28  | 5.12  | 0.12 | 0.11 | 1.12  | 0.143766 | 0.114254 | 0.519062 | 0.380761 |
| MmugDNA.14928.1.S1_at   | MmugDNA.14928.1 | 3.23  | 3.23  | 0.03 | 0.07 | 1     | 0.605918 | 0.350258 | 0.840202 | 0.594012 |
| MmugDNA.14930.1.S1_at   | MmugDNA.14930.1 | 9.18  | 10.73 | 0.53 | 0.21 | -2.93 | 0.005576 | 0.001729 | 0.208782 | 0.062895 |
| MmugDNA.14931.1.S1_at   | MmugDNA.14931.1 | 6.32  | 6.26  | 0.06 | 0.06 | 1.05  | 0.107972 | 0.49957  | 0.480459 | 0.698394 |
| MmugDNA.14932.1.S1_at   | MmugDNA.14932.1 | 4.94  | 5.09  | 0.57 | 0.15 | -1.11 | 0.802707 | 0.661699 | 0.92802  | 0.801903 |
| MmugDNA.14933.1.S1_at   | MmugDNA.14933.1 | 10.6  | 10.43 | 0.13 | 0.17 | 1.13  | 0.27103  | 0.3558   | 0.63094  | 0.597864 |
| MmugDNA.22780.1.S1_s_at | MmugDNA.22780.1 | 12.05 | 11.82 | 0.06 | 0.08 | 1.17  | 0.063872 | 0.067032 | 0.416709 | 0.304872 |
| MmugDNA.14934.1.S1_at   | MmugDNA.14934.1 | 6.75  | 6.99  | 0.42 | 0.06 | -1.19 | 0.608504 | 0.019421 | 0.841272 | 0.175117 |
| MmugDNA.14935.1.S1_at   | MmugDNA.14935.1 | 4.15  | 4.15  | 0.43 | 0.39 | -1.01 | 0.925981 | 0.802366 | 0.975372 | 0.886163 |
| MmugDNA.14937.1.S1_at   | MmugDNA.14937.1 | 7.46  | 7.38  | 0.27 | 0.26 | 1.06  | 0.863096 | 0.959497 | 0.95191  | 0.977017 |
| MmugDNA.14938.1.S1_at   | MmugDNA.14938.1 | 3.77  | 4.22  | 0.87 | 0.12 | -1.37 | 0.836837 | 0.459552 | 0.941464 | 0.671854 |
| MmugDNA.14939.1.S1_at   | MmugDNA.14939.1 | 5.36  | 5.12  | 0.99 | 0.13 | 1.19  | 0.636037 | 0.526416 | 0.854813 | 0.715557 |
| MmugDNA.14940.1.S1_at   | MmugDNA.14940.1 | 6.22  | 6.23  | 0.75 | 0.21 | -1.01 | 0.889862 | 0.786444 | 0.962057 | 0.87634  |
| MmugDNA.14941.1.S1_at   | MmugDNA.14941.1 | 3.64  | 3.65  | 0    | 0.1  | -1    | 0.591964 | 0.609428 | 0.833648 | 0.767768 |
| MmugDNA.14942.1.S1_at   | MmugDNA.14942.1 | 9     | 8.73  | 0.3  | 0.13 | 1.2   | 0.190584 | 0.168987 | 0.561788 | 0.445561 |
| MmugDNA.14943.1.S1_at   | MmugDNA.14943.1 | 3.45  | 3.56  | 0.1  | 0.15 | -1.08 | 0.809527 | 0.480626 | 0.931049 | 0.685926 |
| MmugDNA.14948.1.S1_at   | MmugDNA.14948.1 | 3.82  | 3.81  | 0.13 | 0.17 | 1.01  | 0.891928 | 0.208646 | 0.96296  | 0.482544 |
| MmugDNA.1495.1.S1_at    | MmugDNA.1495.1  | 6.32  | 6.08  | 0.14 | 0.05 | 1.18  | 0.078006 | 0.111133 | 0.439987 | 0.375714 |
| MmugDNA.14952.1.S1_at   | MmugDNA.14952.1 | 10.01 | 10.19 | 0.06 | 0.07 | -1.13 | 0.030551 | 0.31499  | 0.338095 | 0.568759 |
| MmugDNA.14952.1.S1_s_at | MmugDNA.14952.1 | 9.82  | 9.86  | 0.03 | 0.13 | -1.03 | 0.593046 | 0.173487 | 0.834049 | 0.449938 |
| MmugDNA.14953.1.S1_at   | MmugDNA.14953.1 | 3.09  | 3.09  | 0.35 | 0.21 | 1     | 0.701691 | 0.888085 | 0.883974 | 0.936183 |

|                         |                 |       |       |      |      |       |          |          |          |          |
|-------------------------|-----------------|-------|-------|------|------|-------|----------|----------|----------|----------|
| MmugDNA.14956.1.S1_at   | MmugDNA.14956.1 | 6.54  | 7.08  | 0.35 | 0.15 | -1.46 | 0.079598 | 0.000175 | 0.442496 | 0.030511 |
| MmugDNA.14957.1.S1_at   | MmugDNA.14957.1 | 4.55  | 4.22  | 0.27 | 0.07 | 1.26  | 0.121654 | 0.191041 | 0.495321 | 0.466313 |
| MmugDNA.14958.1.S1_at   | MmugDNA.14958.1 | 7.2   | 7.25  | 0.24 | 0.14 | -1.03 | 0.564408 | 0.020579 | 0.818716 | 0.179964 |
| MmugDNA.1496.1.S1_at    | MmugDNA.1496.1  | 7.38  | 7.56  | 0.38 | 0.11 | -1.13 | 0.70383  | 0.029576 | 0.884872 | 0.213628 |
| MmugDNA.1496.1.S1_s_at  | MmugDNA.1496.1  | 8.16  | 8.45  | 0.54 | 0.09 | -1.23 | 0.843514 | 0.021075 | 0.944794 | 0.181869 |
| MmugDNA.14960.1.S1_at   | MmugDNA.14960.1 | 3.39  | 3.33  | 0.25 | 0.05 | 1.04  | 0.191842 | 0.159644 | 0.56298  | 0.435785 |
| MmugDNA.14961.1.S1_at   | MmugDNA.14961.1 | 5.11  | 5.25  | 0.17 | 0.16 | -1.1  | 0.341416 | 0.489536 | 0.685061 | 0.691824 |
| MmugDNA.14963.1.S1_at   | MmugDNA.14963.1 | 7.14  | 7.05  | 0.04 | 0.06 | 1.07  | 0.172691 | 0.05792  | 0.545872 | 0.287131 |
| MmugDNA.14965.1.S1_at   | MmugDNA.14965.1 | 10.28 | 9.7   | 0.39 | 0.35 | 1.5   | 0.089627 | 0.121095 | 0.457723 | 0.390109 |
| MmugDNA.14966.1.S1_at   | MmugDNA.14966.1 | 8.63  | 8.65  | 0.12 | 0.28 | -1.01 | 0.667898 | 0.618137 | 0.868778 | 0.773929 |
| MmugDNA.14968.1.S1_at   | MmugDNA.14968.1 | 5.01  | 4.92  | 0.14 | 0.86 | 1.07  | 0.629106 | 0.822239 | 0.851386 | 0.897741 |
| MmugDNA.14969.1.S1_at   | MmugDNA.14969.1 | 6.94  | 6.76  | 0.15 | 0.11 | 1.13  | 0.066682 | 0.088527 | 0.422542 | 0.341947 |
| MmugDNA.1497.1.S1_at    | MmugDNA.1497.1  | 7.92  | 8.29  | 0.09 | 0.16 | -1.29 | 0.016114 | 0.002557 | 0.285918 | 0.074768 |
| MmugDNA.14971.1.S1_at   | MmugDNA.14971.1 | 6.68  | 6.14  | 0.64 | 0.48 | 1.45  | 0.615919 | 0.049454 | 0.844679 | 0.267334 |
| MmugDNA.14972.1.S1_at   | MmugDNA.14972.1 | 8.46  | 7.76  | 0.47 | 0.14 | 1.62  | 0.050122 | 0.061654 | 0.386758 | 0.295098 |
| MmugDNA.14974.1.S1_at   | MmugDNA.14974.1 | 11    | 11.01 | 0.12 | 0.04 | -1.01 | 0.318723 | 0.048759 | 0.668252 | 0.265764 |
| MmugDNA.14975.1.S1_at   | MmugDNA.14975.1 | 4.04  | 4.05  | 0.16 | 0.11 | -1.01 | 0.333669 | 0.429586 | 0.679825 | 0.650961 |
| MmugDNA.14976.1.S1_at   | MmugDNA.14976.1 | 10.27 | 10.14 | 0.63 | 0.05 | 1.1   | 0.572039 | 0.795244 | 0.823145 | 0.882019 |
| MmugDNA.14977.1.S1_at   | MmugDNA.14977.1 | 6.93  | 7.07  | 0.35 | 0.06 | -1.11 | 0.623982 | 0.226679 | 0.848448 | 0.49914  |
| MmugDNA.2806.1.S1_s_at  | MmugDNA.2806.1  | 7.63  | 7.86  | 0.74 | 0.16 | -1.18 | 0.697029 | 0.252283 | 0.882177 | 0.520953 |
| MmugDNA.14979.1.S1_at   | MmugDNA.14979.1 | 6.47  | 6.47  | 0.1  | 0.08 | -1    | 0.506691 | 0.380641 | 0.785958 | 0.6173   |
| MmugDNA.14980.1.S1_at   | MmugDNA.14980.1 | 4.85  | 4.81  | 0.03 | 0.19 | 1.03  | 0.265142 | 0.471553 | 0.626397 | 0.679515 |
| MmugDNA.14981.1.S1_at   | MmugDNA.14981.1 | 3.01  | 3.03  | 0.02 | 0.04 | -1.01 | 0.933518 | 0.952402 | 0.977475 | 0.973038 |
| MmugDNA.14983.1.S1_at   | MmugDNA.14983.1 | 4.61  | 5.37  | 0.6  | 0.23 | -1.69 | 0.166662 | 0.640661 | 0.539303 | 0.789053 |
| MmugDNA.14984.1.S1_s_at | MmugDNA.14984.1 | 7.95  | 7.67  | 0.1  | 0.1  | 1.21  | 0.032773 | 0.029119 | 0.345393 | 0.212733 |
| MmugDNA.14986.1.S1_at   | MmugDNA.14986.1 | 3.19  | 3.3   | 0.07 | 0.07 | -1.08 | 0.113446 | 0.420322 | 0.486757 | 0.644086 |
| MmugDNA.14987.1.S1_at   | MmugDNA.14987.1 | 10.13 | 9.89  | 0.63 | 0.22 | 1.18  | 0.313766 | 0.235365 | 0.664872 | 0.506412 |
| MmugDNA.14988.1.S1_at   | MmugDNA.14988.1 | 8     | 8.47  | 0.26 | 0.2  | -1.38 | 0.141402 | 0.229455 | 0.516365 | 0.501527 |
| MmugDNA.14990.1.S1_at   | MmugDNA.14990.1 | 5.44  | 4.12  | 1    | 1.07 | 2.51  | 0.429928 | 0.697023 | 0.742417 | 0.824045 |
| MmugDNA.14991.1.S1_at   | MmugDNA.14991.1 | 3.61  | 3.28  | 0.15 | 0.18 | 1.26  | 0.090846 | 0.329407 | 0.458873 | 0.578733 |
| MmugDNA.14993.1.S1_at   | MmugDNA.14993.1 | 3.57  | 3.19  | 0.24 | 0.14 | 1.3   | 0.138879 | 0.200866 | 0.514459 | 0.475369 |
| MmugDNA.14994.1.S1_at   | MmugDNA.14994.1 | 5.55  | 5.62  | 0.21 | 0.01 | -1.05 | 0.556922 | 0.674164 | 0.814405 | 0.809624 |
| MmugDNA.14996.1.S1_at   | MmugDNA.14996.1 | 12.53 | 12.35 | 0.2  | 0.04 | 1.13  | 0.094369 | 0.143351 | 0.463787 | 0.417349 |
| MmugDNA.14997.1.S1_at   | MmugDNA.14997.1 | 11.81 | 12.04 | 0.33 | 0.04 | -1.17 | 0.235111 | 0.362977 | 0.602266 | 0.603471 |
| MmugDNA.14998.1.S1_at   | MmugDNA.14998.1 | 5.24  | 5.12  | 0.01 | 0.23 | 1.09  | 0.451787 | 0.480233 | 0.755526 | 0.68574  |
| MmugDNA.15.1.S1_at      | MmugDNA.15.1    | 7.76  | 7.68  | 0.13 | 0.26 | 1.06  | 0.492111 | 0.24934  | 0.778149 | 0.518461 |
| MmugDNA.1500.1.S1_at    | MmugDNA.1500.1  | 4.13  | 3.68  | 0.23 | 0.55 | 1.37  | 0.639177 | 0.574331 | 0.856229 | 0.745794 |
| MmugDNA.15000.1.S1_at   | MmugDNA.15000.1 | 4.01  | 4.44  | 0.48 | 0.34 | -1.35 | 0.358031 | 0.405271 | 0.695993 | 0.63364  |
| MmugDNA.15001.1.S1_at   | MmugDNA.15001.1 | 3.85  | 3.78  | 0.1  | 0.05 | 1.05  | 0.298649 | 0.281965 | 0.653263 | 0.544868 |
| MmugDNA.15003.1.S1_at   | MmugDNA.15003.1 | 9.79  | 10.22 | 1.02 | 0.11 | -1.34 | 0.582827 | 0.068618 | 0.828562 | 0.308486 |
| MmugDNA.15005.1.S1_at   | MmugDNA.15005.1 | 9.16  | 8.93  | 0.86 | 0.46 | 1.17  | 0.624822 | 0.758876 | 0.848978 | 0.859892 |
| MmugDNA.15006.1.S1_at   | MmugDNA.15006.1 | 8.92  | 9.16  | 0.29 | 0.15 | -1.18 | 0.726386 | 0.648599 | 0.894295 | 0.794369 |
| MmugDNA.15007.1.S1_at   | MmugDNA.15007.1 | 5.78  | 5.94  | 0.66 | 0.22 | -1.12 | 0.576494 | 0.570524 | 0.825166 | 0.743151 |

|                         |                 |       |       |      |      |       |          |          |          |          |
|-------------------------|-----------------|-------|-------|------|------|-------|----------|----------|----------|----------|
| MmugDNA.15008.1.S1_at   | MmugDNA.15008.1 | 5.09  | 5.1   | 0.35 | 0.21 | -1    | 0.916453 | 0.8708   | 0.971609 | 0.926571 |
| MmugDNA.15009.1.S1_at   | MmugDNA.15009.1 | 6.06  | 6.01  | 0.09 | 0.08 | 1.04  | 0.124676 | 0.13997  | 0.498771 | 0.413309 |
| MmugDNA.15011.1.S1_at   | MmugDNA.15011.1 | 5     | 5.51  | 0.37 | 0.2  | -1.43 | 0.092599 | 0.032051 | 0.461192 | 0.221603 |
| MmugDNA.15012.1.S1_at   | MmugDNA.15012.1 | 6.43  | 6.88  | 0.26 | 0.07 | -1.36 | 0.017857 | 0.047468 | 0.294096 | 0.262486 |
| MmugDNA.15013.1.S1_at   | MmugDNA.15013.1 | 4.11  | 4.17  | 0.06 | 0.06 | -1.04 | 0.212402 | 0.55838  | 0.582881 | 0.735578 |
| MmugDNA.15015.1.S1_at   | MmugDNA.15015.1 | 2.88  | 3.17  | 0.18 | 0.1  | -1.22 | 0.188254 | 0.355067 | 0.560388 | 0.59749  |
| MmugDNA.15016.1.S1_at   | MmugDNA.15016.1 | 6.43  | 6.2   | 0.11 | 0.11 | 1.18  | 0.044281 | 0.050021 | 0.374279 | 0.268897 |
| MmugDNA.15017.1.S1_s_at | MmugDNA.15017.1 | 2.82  | 3.12  | 0.23 | 0.39 | -1.23 | 0.138016 | 0.192708 | 0.513671 | 0.468219 |
| MmugDNA.15018.1.S1_at   | MmugDNA.15018.1 | 3.97  | 3.78  | 0.01 | 0.03 | 1.14  | 0.000626 | 0.006495 | 0.143353 | 0.109521 |
| MmugDNA.15019.1.S1_at   | MmugDNA.15019.1 | 4.57  | 4.47  | 0.12 | 0.1  | 1.07  | 0.136601 | 0.33648  | 0.511723 | 0.583831 |
| MmugDNA.1502.1.S1_at    | MmugDNA.1502.1  | 3.49  | 3.28  | 0.27 | 0.15 | -1.16 | 0.21194  | 0.261503 | 0.582752 | 0.527999 |
| MmugDNA.15021.1.S1_at   | MmugDNA.15021.1 | 7.94  | 8.23  | 0.38 | 0.12 | -1.22 | 0.766838 | 0.71879  | 0.912421 | 0.837255 |
| MmugDNA.15021.1.S1_s_at | MmugDNA.15021.1 | 6.89  | 6.92  | 0.22 | 0.09 | -1.02 | 0.498015 | 0.514118 | 0.781511 | 0.707434 |
| MmugDNA.15023.1.S1_at   | MmugDNA.15023.1 | 8.1   | 7.36  | 0.96 | 0.5  | 1.67  | 0.585448 | 0.575273 | 0.830549 | 0.74643  |
| MmugDNA.15024.1.S1_at   | MmugDNA.15024.1 | 2.99  | 2.88  | 0.25 | 0.19 | 1.08  | 0.946118 | 0.981723 | 0.981288 | 0.989984 |
| MmugDNA.15025.1.S1_at   | MmugDNA.15025.1 | 4.05  | 3.81  | 0.3  | 0.17 | 1.18  | 0.490655 | 0.754863 | 0.777253 | 0.857323 |
| MmugDNA.15026.1.S1_at   | MmugDNA.15026.1 | 11.97 | 11.79 | 0.23 | 0.07 | 1.13  | 0.568885 | 0.731122 | 0.821082 | 0.844198 |
| MmugDNA.15027.1.S1_s_at | MmugDNA.15027.1 | 5.86  | 5.81  | 0.4  | 0.03 | 1.03  | 0.817422 | 0.745139 | 0.933935 | 0.852267 |
| MmugDNA.15028.1.S1_at   | MmugDNA.15028.1 | 2.9   | 2.78  | 0.08 | 0.06 | 1.08  | 0.055498 | 0.133764 | 0.39863  | 0.405752 |
| MmugDNA.15029.1.S1_at   | MmugDNA.15029.1 | 6.79  | 6.78  | 0.54 | 0.3  | 1.01  | 0.817781 | 0.592741 | 0.93417  | 0.75786  |
| MmugDNA.1503.1.S1_at    | MmugDNA.1503.1  | 4.8   | 4.87  | 0.07 | 0.06 | -1.05 | 0.116069 | 0.798769 | 0.489554 | 0.884072 |
| MmugDNA.15030.1.S1_at   | MmugDNA.15030.1 | 7.29  | 7.16  | 0.07 | 0.04 | 1.09  | 0.060538 | 0.209196 | 0.408362 | 0.483016 |
| MmugDNA.15031.1.S1_s_at | MmugDNA.15031.1 | 4.84  | 4.94  | 0.1  | 0.52 | -1.08 | 0.699913 | 0.413528 | 0.883338 | 0.639648 |
| MmugDNA.15032.1.S1_at   | MmugDNA.15032.1 | 10.36 | 10.92 | 1.15 | 0.1  | -1.48 | 0.310028 | 0.359957 | 0.661926 | 0.601195 |
| MmugDNA.33540.1.S1_s_at | MmugDNA.33540.1 | 3.35  | 3.38  | 0.13 | 0.14 | -1.02 | 0.790243 | 0.59446  | 0.922885 | 0.758623 |
| MmugDNA.15034.1.S1_at   | MmugDNA.15034.1 | 4.59  | 4.55  | 0.28 | 0.22 | 1.03  | 0.693169 | 0.186254 | 0.880472 | 0.462138 |
| MmugDNA.15035.1.S1_at   | MmugDNA.15035.1 | 3.82  | 3.76  | 0.23 | 0.07 | 1.04  | 0.522846 | 0.83961  | 0.795346 | 0.908582 |
| MmugDNA.15036.1.S1_at   | MmugDNA.15036.1 | 7.55  | 7.26  | 0.58 | 0.04 | 1.22  | 0.452901 | 0.259849 | 0.755901 | 0.526735 |
| MmugDNA.15038.1.S1_at   | MmugDNA.15038.1 | 3.65  | 3.85  | 0.1  | 0.56 | -1.14 | 0.500359 | 0.579366 | 0.782495 | 0.749058 |
| MmugDNA.15039.1.S1_at   | MmugDNA.15039.1 | 6.97  | 6.75  | 0.16 | 0.02 | 1.17  | 0.045354 | 0.093198 | 0.376335 | 0.34931  |
| MmugDNA.1504.1.S1_at    | MmugDNA.1504.1  | 6.83  | 6.55  | 0.23 | 0.29 | 1.21  | 0.494157 | 0.436917 | 0.779281 | 0.656357 |
| MmugDNA.15040.1.S1_at   | MmugDNA.15040.1 | 13.23 | 13.11 | 0.05 | 0.14 | 1.09  | 0.077285 | 0.004909 | 0.439109 | 0.097662 |
| MmugDNA.15041.1.S1_at   | MmugDNA.15041.1 | 5.9   | 5.68  | 0.11 | 0.11 | 1.16  | 0.175817 | 0.493711 | 0.548999 | 0.694316 |
| MmugDNA.15043.1.S1_at   | MmugDNA.15043.1 | 10.19 | 11.07 | 2.14 | 0.27 | -1.85 | 0.450888 | 0.327404 | 0.754931 | 0.577284 |
| MmugDNA.15047.1.S1_s_at | MmugDNA.15047.1 | 12.35 | 12.67 | 0.43 | 0.03 | -1.25 | 0.286671 | 0.118012 | 0.643923 | 0.385881 |
| MmugDNA.15048.1.S1_at   | MmugDNA.15048.1 | 9.08  | 9.09  | 0.37 | 0.05 | -1.01 | 0.930215 | 0.201514 | 0.97666  | 0.476036 |
| MmugDNA.15049.1.S1_at   | MmugDNA.15049.1 | 11.48 | 11.87 | 0.15 | 0.03 | -1.31 | 0.029607 | 0.101319 | 0.335151 | 0.361094 |
| MmugDNA.15050.1.S1_at   | MmugDNA.15050.1 | 8.83  | 9.66  | 0.23 | 0.14 | -1.78 | 0.010712 | 0.007559 | 0.249245 | 0.116437 |
| MmugDNA.15050.1.S1_x_at | MmugDNA.15050.1 | 9.08  | 9.84  | 0.23 | 0.18 | -1.7  | 0.016868 | 0.010264 | 0.288837 | 0.132661 |
| MmugDNA.15051.1.S1_at   | MmugDNA.15051.1 | 10.11 | 10.12 | 0.55 | 0.13 | -1    | 0.983727 | 0.685925 | 0.995094 | 0.81668  |
| MmugDNA.15053.1.S1_at   | MmugDNA.15053.1 | 3.43  | 3.52  | 0.13 | 0.14 | -1.07 | 0.820251 | 0.323913 | 0.935289 | 0.574658 |
| MmugDNA.15056.1.S1_at   | MmugDNA.15056.1 | 5.86  | 5.8   | 0.08 | 0.2  | 1.04  | 0.631279 | 0.887464 | 0.852417 | 0.935867 |
| MmugDNA.15057.1.S1_at   | MmugDNA.15057.1 | 3.65  | 3.5   | 0.07 | 0.06 | 1.11  | 0.04102  | 0.005205 | 0.365672 | 0.100027 |

|                         |                 |       |       |      |      |       |          |          |          |          |
|-------------------------|-----------------|-------|-------|------|------|-------|----------|----------|----------|----------|
| MmugDNA.15059.1.S1_at   | MmugDNA.15059.1 | 5.73  | 6.94  | 0.38 | 0.05 | -2.31 | 0.00515  | 0.000946 | 0.205615 | 0.049071 |
| MmugDNA.1506.1.S1_at    | MmugDNA.1506.1  | 9.28  | 9.08  | 1.05 | 0.21 | 1.15  | 0.650702 | 0.2079   | 0.861168 | 0.482049 |
| MmugDNA.15060.1.S1_at   | MmugDNA.15060.1 | 7.22  | 7.24  | 0.45 | 0.12 | -1.02 | 0.791774 | 0.323542 | 0.923474 | 0.574497 |
| MmugDNA.15061.1.S1_at   | MmugDNA.15061.1 | 7.93  | 7.28  | 0.94 | 0.13 | 1.56  | 0.241644 | 0.016313 | 0.607803 | 0.161818 |
| MmugDNA.15065.1.S1_at   | MmugDNA.15065.1 | 3.38  | 3.25  | 0.34 | 0.02 | 1.09  | 0.195426 | 0.294283 | 0.565793 | 0.55407  |
| MmugDNA.15066.1.S1_at   | MmugDNA.15066.1 | 6.24  | 6.26  | 0.17 | 0.04 | -1.01 | 0.860567 | 0.885969 | 0.950856 | 0.935119 |
| MmugDNA.15067.1.S1_at   | MmugDNA.15067.1 | 5.04  | 5.12  | 0.03 | 0.18 | -1.06 | 0.338971 | 0.022358 | 0.683462 | 0.187169 |
| MmugDNA.15068.1.S1_at   | MmugDNA.15068.1 | 4.42  | 4.73  | 0.21 | 0.58 | -1.24 | 0.435752 | 0.469709 | 0.74588  | 0.678355 |
| MmugDNA.15069.1.S1_at   | MmugDNA.15069.1 | 7.17  | 6.2   | 0.91 | 0.19 | 1.95  | 0.120046 | 0.152982 | 0.493293 | 0.427792 |
| MmugDNA.1507.1.S1_at    | MmugDNA.1507.1  | 3.38  | 3.17  | 0.51 | 0.29 | 1.15  | 0.551663 | 0.901928 | 0.81144  | 0.944174 |
| MmugDNA.15070.1.S1_at   | MmugDNA.15070.1 | 4.49  | 4.37  | 0.37 | 0.08 | 1.09  | 0.487868 | 0.420144 | 0.775277 | 0.643963 |
| MmugDNA.15071.1.S1_at   | MmugDNA.15071.1 | 4.51  | 4.43  | 0.34 | 0.13 | 1.06  | 0.576354 | 0.800996 | 0.825166 | 0.885538 |
| MmugDNA.15072.1.S1_at   | MmugDNA.15072.1 | 5.51  | 5.36  | 0.22 | 0.08 | 1.11  | 0.377356 | 0.554904 | 0.707532 | 0.733553 |
| MmugDNA.15073.1.S1_at   | MmugDNA.15073.1 | 7.78  | 7.72  | 0.66 | 0.06 | 1.04  | 0.828459 | 0.956128 | 0.938275 | 0.975053 |
| MmugDNA.15074.1.S1_at   | MmugDNA.15074.1 | 6.51  | 6.27  | 0.05 | 0.03 | 1.19  | 0.001898 | 0.058553 | 0.169816 | 0.288669 |
| MmugDNA.15077.1.S1_at   | MmugDNA.15077.1 | 4.07  | 3.94  | 0.14 | 0.13 | 1.09  | 0.287771 | 0.205693 | 0.644849 | 0.480043 |
| MmugDNA.15078.1.S1_at   | MmugDNA.15078.1 | 7.26  | 7.67  | 1.21 | 0.26 | -1.33 | 0.798246 | 0.4107   | 0.926012 | 0.637509 |
| MmugDNA.1508.1.S1_at    | MmugDNA.1508.1  | 5.88  | 5.92  | 0.08 | 0.04 | -1.02 | 0.353789 | 0.800845 | 0.693501 | 0.885464 |
| MmugDNA.15080.1.S1_at   | MmugDNA.15080.1 | 6.22  | 7.11  | 0.68 | 0.11 | -1.85 | 0.089788 | 0.046408 | 0.457893 | 0.259974 |
| MmugDNA.15081.1.S1_at   | MmugDNA.15081.1 | 5.84  | 5.84  | 0.24 | 0.07 | -1    | 0.971125 | 0.634744 | 0.990583 | 0.785012 |
| MmugDNA.15082.1.S1_at   | MmugDNA.15082.1 | 6.57  | 4.7   | 0.43 | 0.7  | 3.67  | 0.033624 | 0.050353 | 0.34712  | 0.269642 |
| MmugDNA.15083.1.S1_at   | MmugDNA.15083.1 | 6.78  | 7.11  | 0.58 | 0.06 | -1.26 | 0.130794 | 0.005835 | 0.505266 | 0.104669 |
| MmugDNA.15085.1.S1_at   | MmugDNA.15085.1 | 4.52  | 4.76  | 0.14 | 0.22 | -1.18 | 0.489313 | 0.357337 | 0.77608  | 0.598949 |
| MmugDNA.15087.1.S1_at   | MmugDNA.15087.1 | 3.63  | 3.58  | 0.06 | 0.04 | 1.03  | 0.11485  | 0.129758 | 0.487957 | 0.401362 |
| MmugDNA.15088.1.S1_at   | MmugDNA.15088.1 | 3.4   | 3.5   | 0.05 | 0.19 | -1.07 | 0.574989 | 0.759222 | 0.824422 | 0.860036 |
| MmugDNA.15090.1.S1_at   | MmugDNA.15090.1 | 3.65  | 3.5   | 0.15 | 0.12 | 1.11  | 0.119614 | 0.471633 | 0.493012 | 0.679537 |
| MmugDNA.15091.1.S1_at   | MmugDNA.15091.1 | 3.5   | 3.45  | 0.18 | 0.06 | 1.04  | 0.282545 | 0.482334 | 0.640925 | 0.687201 |
| MmugDNA.15093.1.S1_at   | MmugDNA.15093.1 | 4.69  | 5.29  | 0.6  | 0.25 | -1.52 | 0.123315 | 0.164004 | 0.496589 | 0.440128 |
| MmugDNA.15094.1.S1_at   | MmugDNA.15094.1 | 10.23 | 10.89 | 0.54 | 0.17 | -1.57 | 0.247108 | 0.221604 | 0.612582 | 0.494901 |
| MmugDNA.15094.1.S1_s_at | MmugDNA.15094.1 | 9.28  | 10.07 | 0.55 | 0.26 | -1.72 | 0.155916 | 0.112535 | 0.529116 | 0.377928 |
| MmugDNA.15095.1.S1_at   | MmugDNA.15095.1 | 6.42  | 6.54  | 0.88 | 0.22 | -1.09 | 0.733587 | 0.910509 | 0.897834 | 0.949465 |
| MmugDNA.15096.1.S1_at   | MmugDNA.15096.1 | 7.56  | 6.95  | 0.08 | 0.27 | 1.52  | 0.046783 | 0.01861  | 0.37872  | 0.171539 |
| MmugDNA.15097.1.S1_at   | MmugDNA.15097.1 | 6.86  | 6.57  | 0.29 | 0.03 | 1.22  | 0.18086  | 0.01539  | 0.554237 | 0.15752  |
| MmugDNA.15099.1.S1_at   | MmugDNA.15099.1 | 5.88  | 5.67  | 0.22 | 0.07 | 1.16  | 0.278544 | 0.201965 | 0.637744 | 0.476412 |
| MmugDNA.151.1.S1_at     | MmugDNA.151.1   | 12.02 | 11.83 | 0.38 | 0.03 | 1.13  | 0.391482 | 0.061542 | 0.717597 | 0.294865 |
| MmugDNA.36776.1.S1_at   | MmugDNA.36776.1 | 6.16  | 5.96  | 0.1  | 0.05 | 1.14  | 0.042405 | 0.326892 | 0.369024 | 0.576848 |
| MmugDNA.36776.1.S1_s_at | MmugDNA.36776.1 | 6.64  | 6.64  | 0.17 | 0.06 | 1     | 0.789667 | 0.825421 | 0.922635 | 0.899709 |
| MmugDNA.15100.1.S1_at   | MmugDNA.15100.1 | 7.94  | 8.28  | 0.67 | 0.3  | -1.26 | 0.379026 | 0.07694  | 0.708548 | 0.322421 |
| MmugDNA.15102.1.S1_at   | MmugDNA.15102.1 | 7.21  | 7.03  | 0.37 | 0.08 | 1.14  | 0.619494 | 0.055119 | 0.846702 | 0.280367 |
| MmugDNA.15103.1.S1_at   | MmugDNA.15103.1 | 3.58  | 3.84  | 0.52 | 0.21 | -1.2  | 0.77816  | 0.422761 | 0.918123 | 0.645932 |
| MmugDNA.15104.1.S1_at   | MmugDNA.15104.1 | 3.19  | 3.11  | 0.07 | 0.04 | 1.06  | 0.036212 | 0.008816 | 0.354703 | 0.124217 |
| MmugDNA.15105.1.S1_at   | MmugDNA.15105.1 | 3.93  | 4.22  | 0.15 | 0.54 | -1.23 | 0.270664 | 0.394729 | 0.63056  | 0.627208 |
| MmugDNA.15106.1.S1_at   | MmugDNA.15106.1 | 4.88  | 5.04  | 0.55 | 0.53 | -1.12 | 0.489057 | 0.64314  | 0.775981 | 0.79068  |

|                         |                 |       |       |      |      |       |          |          |          |          |
|-------------------------|-----------------|-------|-------|------|------|-------|----------|----------|----------|----------|
| MmugDNA.15107.1.S1_at   | MmugDNA.15107.1 | 10.4  | 10.5  | 0.38 | 0.13 | -1.07 | 0.578844 | 0.152069 | 0.826338 | 0.42682  |
| MmugDNA.15108.1.S1_at   | MmugDNA.15108.1 | 3.19  | 3.21  | 0.08 | 0.09 | -1.02 | 0.64756  | 0.859075 | 0.859364 | 0.919754 |
| MmugDNA.1511.1.S1_at    | MmugDNA.1511.1  | 6.05  | 6.8   | 0.3  | 0.72 | -1.68 | 0.141185 | 0.290934 | 0.516365 | 0.551499 |
| MmugDNA.15110.1.S1_at   | MmugDNA.15110.1 | 10.57 | 10.51 | 0.07 | 0.13 | 1.04  | 0.492353 | 0.000164 | 0.77824  | 0.030506 |
| MmugDNA.15111.1.S1_at   | MmugDNA.15111.1 | 5.9   | 5.54  | 0.2  | 0.15 | 1.29  | 0.073108 | 0.183461 | 0.434019 | 0.459586 |
| MmugDNA.15112.1.S1_at   | MmugDNA.15112.1 | 3.67  | 3.93  | 0.22 | 0.14 | -1.2  | 0.711849 | 0.273985 | 0.887712 | 0.538507 |
| MmugDNA.15115.1.S1_at   | MmugDNA.15115.1 | 7.68  | 8.11  | 0.71 | 0.07 | -1.35 | 0.308747 | 0.480853 | 0.661293 | 0.686    |
| MmugDNA.15115.1.S1_s_at | MmugDNA.15115.1 | 9.82  | 10.15 | 0.79 | 0.17 | -1.25 | 0.375742 | 0.58642  | 0.706638 | 0.753459 |
| MmugDNA.15116.1.S1_at   | MmugDNA.15116.1 | 4.38  | 3.81  | 0.25 | 0.24 | 1.49  | 0.057039 | 0.053612 | 0.401454 | 0.277182 |
| MmugDNA.15117.1.S1_at   | MmugDNA.15117.1 | 9.83  | 9.87  | 0.21 | 0.12 | -1.02 | 0.865934 | 0.009251 | 0.952847 | 0.126966 |
| MmugDNA.15118.1.S1_at   | MmugDNA.15118.1 | 9.74  | 10.36 | 0.25 | 0.05 | -1.54 | 0.016635 | 0.002576 | 0.287478 | 0.075148 |
| MmugDNA.15119.1.S1_at   | MmugDNA.15119.1 | 4.67  | 4.54  | 0.41 | 0.14 | 1.09  | 0.585651 | 0.415507 | 0.830611 | 0.64091  |
| MmugDNA.1512.1.S1_at    | MmugDNA.1512.1  | 6.94  | 6.71  | 0.12 | 0.04 | 1.17  | 0.040073 | 0.021081 | 0.363183 | 0.181869 |
| MmugDNA.15121.1.S1_s_at | MmugDNA.15121.1 | 5.18  | 5.08  | 0.15 | 0.11 | 1.07  | 0.350116 | 0.599758 | 0.691084 | 0.761564 |
| MmugDNA.15098.1.S1_s_at | MmugDNA.15098.1 | 8.36  | 8.76  | 0.47 | 0.22 | -1.32 | 0.444448 | 0.078178 | 0.751266 | 0.324684 |
| MmugDNA.15128.1.S1_at   | MmugDNA.15128.1 | 12    | 11.92 | 0.12 | 0.12 | 1.06  | 0.226123 | 0.15394  | 0.595288 | 0.428633 |
| MmugDNA.15129.1.S1_at   | MmugDNA.15129.1 | 4.37  | 4.62  | 0.38 | 0.14 | -1.19 | 0.918355 | 0.733728 | 0.972108 | 0.845822 |
| MmugDNA.1513.1.S1_at    | MmugDNA.1513.1  | 5.85  | 6     | 0.4  | 0.17 | -1.1  | 0.250851 | 0.457757 | 0.615972 | 0.670897 |
| MmugDNA.15130.1.S1_at   | MmugDNA.15130.1 | 4.82  | 4.67  | 0.22 | 0.19 | 1.11  | 0.478251 | 0.459426 | 0.770076 | 0.671741 |
| MmugDNA.15131.1.S1_at   | MmugDNA.15131.1 | 8.97  | 9.37  | 0.52 | 0.09 | -1.32 | 0.112849 | 0.140323 | 0.486223 | 0.413498 |
| MmugDNA.15133.1.S1_at   | MmugDNA.15133.1 | 3.65  | 4.07  | 0.24 | 0.42 | -1.34 | 0.127664 | 0.158194 | 0.501968 | 0.433986 |
| MmugDNA.15134.1.S1_at   | MmugDNA.15134.1 | 7.25  | 6.57  | 0.47 | 0.2  | 1.61  | 0.087041 | 0.142096 | 0.454785 | 0.415685 |
| MmugDNA.15136.1.S1_at   | MmugDNA.15136.1 | 9.03  | 8.7   | 0.75 | 0.28 | 1.26  | 0.769666 | 0.524578 | 0.91377  | 0.714424 |
| MmugDNA.15137.1.S1_at   | MmugDNA.15137.1 | 9.85  | 10.23 | 0.71 | 0.12 | -1.31 | 0.452156 | 0.123577 | 0.755619 | 0.393637 |
| MmugDNA.15138.1.S1_at   | MmugDNA.15138.1 | 4.52  | 4.6   | 0.18 | 0.13 | -1.06 | 0.7024   | 0.38388  | 0.884231 | 0.61978  |
| MmugDNA.15139.1.S1_at   | MmugDNA.15139.1 | 7.68  | 7.74  | 0.39 | 0.13 | -1.04 | 0.432868 | 0.431925 | 0.744141 | 0.652709 |
| MmugDNA.1514.1.S1_at    | MmugDNA.1514.1  | 5.36  | 5.28  | 0.09 | 0.23 | 1.06  | 0.204533 | 0.516556 | 0.575907 | 0.709034 |
| MmugDNA.15140.1.S1_at   | MmugDNA.15140.1 | 4.45  | 4.45  | 0.06 | 0.05 | 1     | 0.347265 | 0.385514 | 0.688577 | 0.621007 |
| MmugDNA.15142.1.S1_at   | MmugDNA.15142.1 | 5.97  | 5.68  | 0.14 | 0.1  | 1.22  | 0.097093 | 0.14358  | 0.46573  | 0.41751  |
| MmugDNA.15144.1.S1_at   | MmugDNA.15144.1 | 4.92  | 4.89  | 0.11 | 0.07 | 1.02  | 0.45379  | 0.664054 | 0.756276 | 0.803247 |
| MmugDNA.15145.1.S1_at   | MmugDNA.15145.1 | 4.77  | 4.77  | 0.18 | 0    | 1     | 0.970971 | 0.790654 | 0.990513 | 0.878957 |
| MmugDNA.15146.1.S1_at   | MmugDNA.15146.1 | 8.67  | 8.62  | 0.44 | 0.42 | 1.03  | 0.437128 | 0.620782 | 0.746719 | 0.775593 |
| MmugDNA.15147.1.S1_at   | MmugDNA.15147.1 | 4.1   | 4.02  | 0.14 | 0.07 | 1.06  | 0.416471 | 0.478461 | 0.734327 | 0.684481 |
| MmugDNA.15149.1.S1_at   | MmugDNA.15149.1 | 5.33  | 5.07  | 1.59 | 0.25 | 1.2   | 0.961955 | 0.416948 | 0.987594 | 0.641855 |
| MmugDNA.15173.1.S1_s_at | MmugDNA.15173.1 | 6.07  | 6.08  | 0.4  | 0.09 | -1.01 | 0.390185 | 0.315102 | 0.716592 | 0.568838 |
| MmugDNA.15154.1.S1_at   | MmugDNA.15154.1 | 8.11  | 8.22  | 0.46 | 0.15 | -1.08 | 0.605899 | 0.606422 | 0.840202 | 0.765747 |
| MmugDNA.15156.1.S1_at   | MmugDNA.15156.1 | 10.85 | 11.37 | 1.25 | 0.15 | -1.43 | 0.403098 | 0.137784 | 0.725464 | 0.410757 |
| MmugDNA.15157.1.S1_at   | MmugDNA.15157.1 | 3.99  | 3.97  | 0.12 | 0.24 | 1.02  | 0.552142 | 0.229531 | 0.811685 | 0.501534 |
| MmugDNA.15158.1.S1_at   | MmugDNA.15158.1 | 9.05  | 9.19  | 0.52 | 0.22 | -1.1  | 0.346729 | 0.00173  | 0.688361 | 0.062895 |
| MmugDNA.15159.1.S1_at   | MmugDNA.15159.1 | 3.22  | 3.36  | 0.12 | 0.18 | -1.11 | 0.212254 | 0.204888 | 0.582812 | 0.479227 |
| MmugDNA.1516.1.S1_at    | MmugDNA.1516.1  | 7.46  | 7.1   | 0.4  | 0.11 | 1.28  | 0.286229 | 0.006216 | 0.64358  | 0.106916 |
| MmugDNA.15160.1.S1_at   | MmugDNA.15160.1 | 4.28  | 5.39  | 0.32 | 0.36 | -2.16 | 0.0297   | 0.051528 | 0.335633 | 0.27241  |
| MmugDNA.15160.1.S1_s_at | MmugDNA.15160.1 | 4.53  | 5.25  | 0.41 | 0.48 | -1.65 | 0.141398 | 0.20364  | 0.516365 | 0.47789  |

|                         |                 |       |       |      |      |       |          |          |          |          |
|-------------------------|-----------------|-------|-------|------|------|-------|----------|----------|----------|----------|
| MmugDNA.15161.1.S1_at   | MmugDNA.15161.1 | 11.87 | 12.03 | 0.08 | 0.02 | -1.12 | 0.031751 | 0.041649 | 0.342208 | 0.24887  |
| MmugDNA.15163.1.S1_at   | MmugDNA.15163.1 | 3.65  | 3.44  | 0.17 | 0.22 | 1.15  | 0.267683 | 0.148127 | 0.62827  | 0.422667 |
| MmugDNA.15164.1.S1_s_at | MmugDNA.15164.1 | 10.12 | 10.55 | 0.22 | 0.12 | -1.35 | 0.09336  | 0.163832 | 0.462462 | 0.440054 |
| MmugDNA.15165.1.S1_at   | MmugDNA.15165.1 | 4.22  | 4.11  | 0.18 | 0.3  | 1.08  | 0.769975 | 0.953753 | 0.913889 | 0.973663 |
| MmugDNA.15166.1.S1_at   | MmugDNA.15166.1 | 7.05  | 7.46  | 0.31 | 0.25 | -1.33 | 0.08238  | 0.071513 | 0.447257 | 0.313706 |
| MmugDNA.15168.1.S1_at   | MmugDNA.15168.1 | 4.28  | 4.2   | 0.17 | 0.23 | 1.06  | 0.62163  | 0.712209 | 0.847604 | 0.833243 |
| MmugDNA.15169.1.S1_at   | MmugDNA.15169.1 | 3.66  | 3.56  | 0.09 | 0.1  | 1.07  | 0.118197 | 0.161326 | 0.491605 | 0.437494 |
| MmugDNA.1517.1.S1_at    | MmugDNA.1517.1  | 12.05 | 12.23 | 0.09 | 0.02 | -1.14 | 0.031158 | 0.000119 | 0.34011  | 0.028664 |
| MmugDNA.15171.1.S1_at   | MmugDNA.15171.1 | 3.81  | 3.73  | 0.23 | 0.18 | 1.06  | 0.531968 | 0.822073 | 0.799992 | 0.897651 |
| MmugDNA.15172.1.S1_at   | MmugDNA.15172.1 | 5.08  | 4.85  | 0.22 | 0.01 | 1.17  | 0.488249 | 0.387391 | 0.77546  | 0.622065 |
| MmugDNA.15174.1.S1_at   | MmugDNA.15174.1 | 6.91  | 6.8   | 0.25 | 0.24 | -1.08 | 0.121708 | 0.107716 | 0.495425 | 0.370779 |
| MmugDNA.15177.1.S1_at   | MmugDNA.15177.1 | 7.63  | 7.74  | 0.87 | 0.24 | -1.08 | 0.689012 | 0.740869 | 0.878634 | 0.849975 |
| MmugDNA.15179.1.S1_at   | MmugDNA.15179.1 | 9.46  | 9.32  | 0.21 | 0.26 | 1.1   | 0.102066 | 0.17174  | 0.472436 | 0.448148 |
| MmugDNA.1518.1.S1_at    | MmugDNA.1518.1  | 11.94 | 12.22 | 0.23 | 0.01 | -1.22 | 0.106097 | 0.011357 | 0.478296 | 0.138214 |
| MmugDNA.15180.1.S1_at   | MmugDNA.15180.1 | 3.28  | 3.25  | 0.18 | 0.07 | 1.02  | 0.48674  | 0.674931 | 0.774672 | 0.810089 |
| MmugDNA.15181.1.S1_at   | MmugDNA.15181.1 | 11.48 | 12.27 | 0.36 | 0.12 | -1.74 | 0.011293 | 0.00536  | 0.253564 | 0.101092 |
| MmugDNA.15182.1.S1_at   | MmugDNA.15182.1 | 5.48  | 5.39  | 0.57 | 0.53 | 1.06  | 0.493895 | 0.461457 | 0.779139 | 0.673131 |
| MmugDNA.15183.1.S1_at   | MmugDNA.15183.1 | 6.37  | 6.36  | 0.43 | 0.24 | 1     | 0.809144 | 0.456593 | 0.931038 | 0.670289 |
| MmugDNA.15184.1.S1_at   | MmugDNA.15184.1 | 6.21  | 5.84  | 0.36 | 0.74 | 1.29  | 0.944962 | 0.919017 | 0.980852 | 0.954495 |
| MmugDNA.15186.1.S1_at   | MmugDNA.15186.1 | 6.02  | 5.8   | 0.57 | 0.22 | 1.17  | 0.795411 | 0.5886   | 0.92485  | 0.755104 |
| MmugDNA.15187.1.S1_at   | MmugDNA.15187.1 | 3.92  | 4.11  | 0.14 | 0.27 | -1.14 | 0.920348 | 0.807098 | 0.972913 | 0.888946 |
| MmugDNA.15188.1.S1_at   | MmugDNA.15188.1 | 7.71  | 7.78  | 0.68 | 0.15 | -1.05 | 0.725373 | 0.950378 | 0.893574 | 0.971738 |
| MmugDNA.15189.1.S1_at   | MmugDNA.15189.1 | 5.61  | 5.88  | 0.5  | 0.27 | -1.21 | 0.407234 | 0.570705 | 0.728545 | 0.743295 |
| MmugDNA.1519.1.S1_at    | MmugDNA.1519.1  | 4.41  | 4.24  | 0.19 | 0    | 1.12  | 0.239225 | 0.184401 | 0.605741 | 0.460458 |
| MmugDNA.15190.1.S1_at   | MmugDNA.15190.1 | 7.17  | 7.55  | 0.91 | 0.33 | -1.3  | 0.275276 | 0.227935 | 0.634676 | 0.500211 |
| MmugDNA.15191.1.S1_at   | MmugDNA.15191.1 | 5.35  | 6     | 0.42 | 0.61 | -1.57 | 0.196022 | 0.31809  | 0.566454 | 0.571046 |
| MmugDNA.15192.1.S1_at   | MmugDNA.15192.1 | 7.38  | 7.31  | 0.54 | 0.13 | 1.05  | 0.290302 | 0.254349 | 0.646889 | 0.522647 |
| MmugDNA.15196.1.S1_at   | MmugDNA.15196.1 | 4.74  | 4.74  | 0.08 | 0    | -1    | 0.366883 | 0.123368 | 0.702346 | 0.393391 |
| MmugDNA.15197.1.S1_at   | MmugDNA.15197.1 | 5.34  | 5.31  | 0.15 | 0.12 | 1.02  | 0.34219  | 0.178384 | 0.685639 | 0.454755 |
| MmugDNA.15198.1.S1_at   | MmugDNA.15198.1 | 3.16  | 3.11  | 0.03 | 0    | 1.03  | 0.059692 | 0.07642  | 0.406705 | 0.321419 |
| MmugDNA.15199.1.S1_at   | MmugDNA.15199.1 | 5.07  | 5.11  | 0.81 | 0.74 | -1.02 | 0.856693 | 0.258245 | 0.949506 | 0.52558  |
| MmugDNA.152.1.S1_at     | MmugDNA.152.1   | 12.09 | 12.16 | 0.21 | 0.1  | -1.04 | 0.977439 | 0.018164 | 0.992685 | 0.169673 |
| MmugDNA.1520.1.S1_at    | MmugDNA.1520.1  | 7.71  | 7.04  | 0.16 | 0.07 | 1.59  | 0.001651 | 0.00229  | 0.163176 | 0.07045  |
| MmugDNA.15200.1.S1_at   | MmugDNA.15200.1 | 4.12  | 3.9   | 0.15 | 0.04 | 1.17  | 0.050382 | 0.315633 | 0.387072 | 0.569053 |
| MmugDNA.15201.1.S1_at   | MmugDNA.15201.1 | 6.24  | 5.95  | 0.11 | 0.43 | 1.23  | 0.348877 | 0.554805 | 0.690079 | 0.733501 |
| MmugDNA.15202.1.S1_at   | MmugDNA.15202.1 | 8.96  | 8.43  | 0.3  | 0.27 | 1.44  | 0.087294 | 0.030847 | 0.454785 | 0.217427 |
| MmugDNA.15203.1.S1_at   | MmugDNA.15203.1 | 4.49  | 4.33  | 0.38 | 0.26 | 1.12  | 0.238571 | 0.24194  | 0.605359 | 0.512489 |
| MmugDNA.15204.1.S1_at   | MmugDNA.15204.1 | 3.78  | 3.8   | 0.27 | 0.2  | -1.01 | 0.815503 | 0.540661 | 0.933137 | 0.724476 |
| MmugDNA.15206.1.S1_at   | MmugDNA.15206.1 | 5.58  | 5.37  | 0.02 | 0.07 | 1.15  | 0.011522 | 0.010208 | 0.255545 | 0.132467 |
| MmugDNA.15207.1.S1_at   | MmugDNA.15207.1 | 6.13  | 6.4   | 0.8  | 0.34 | -1.2  | 0.621759 | 0.853293 | 0.847631 | 0.916546 |
| MmugDNA.1521.1.S1_s_at  | MmugDNA.1521.1  | 7.72  | 6.41  | 0.63 | 0.11 | 2.47  | 0.034662 | 0.028911 | 0.350297 | 0.211894 |
| MmugDNA.15210.1.S1_at   | MmugDNA.15210.1 | 5     | 4.99  | 0.14 | 0.04 | 1     | 0.328299 | 0.191136 | 0.675717 | 0.4664   |
| MmugDNA.15211.1.S1_at   | MmugDNA.15211.1 | 3.45  | 3.89  | 0.33 | 0.24 | -1.35 | 0.139812 | 0.168869 | 0.515319 | 0.445458 |

|                         |                 |       |       |      |      |       |          |          |          |          |
|-------------------------|-----------------|-------|-------|------|------|-------|----------|----------|----------|----------|
| MmugDNA.15213.1.S1_at   | MmugDNA.15213.1 | 13.02 | 13.09 | 0.14 | 0.01 | -1.04 | 0.230966 | 0.135421 | 0.599045 | 0.407515 |
| MmugDNA.15214.1.S1_s_at | MmugDNA.15214.1 | 7.1   | 7.04  | 0.1  | 0.03 | 1.04  | 0.173711 | 0.861804 | 0.546749 | 0.92146  |
| MmugDNA.15215.1.S1_s_at | MmugDNA.15215.1 | 9.76  | 10.1  | 0.52 | 0.01 | -1.26 | 0.892073 | 0.911914 | 0.962988 | 0.950311 |
| MmugDNA.15216.1.S1_at   | MmugDNA.15216.1 | 6.27  | 6.29  | 0.39 | 0.23 | -1.02 | 0.52944  | 0.920455 | 0.798296 | 0.955182 |
| MmugDNA.15217.1.S1_at   | MmugDNA.15217.1 | 4.92  | 4.68  | 0.06 | 0.13 | 1.18  | 0.116053 | 0.150523 | 0.489554 | 0.425074 |
| MmugDNA.1522.1.S1_at    | MmugDNA.1522.1  | 4.78  | 4.42  | 0.33 | 0.21 | 1.29  | 0.071269 | 0.05428  | 0.430629 | 0.278459 |
| MmugDNA.15220.1.S1_s_at | MmugDNA.15220.1 | 8.53  | 8.32  | 0.31 | 0.11 | 1.16  | 0.47313  | 0.035759 | 0.767466 | 0.233437 |
| MmugDNA.15221.1.S1_at   | MmugDNA.15221.1 | 8.98  | 9.3   | 1.54 | 0.18 | -1.25 | 0.820767 | 0.175368 | 0.935289 | 0.452114 |
| MmugDNA.15223.1.S1_at   | MmugDNA.15223.1 | 5.2   | 5.13  | 0.29 | 0.25 | 1.06  | 0.559921 | 0.710011 | 0.816426 | 0.831887 |
| MmugDNA.15224.1.S1_at   | MmugDNA.15224.1 | 4.16  | 4.14  | 0.03 | 0.21 | 1.02  | 0.896916 | 0.475736 | 0.964969 | 0.682332 |
| MmugDNA.15226.1.S1_at   | MmugDNA.15226.1 | 4.37  | 4.55  | 0.37 | 0.1  | -1.13 | 0.870813 | 0.955898 | 0.955116 | 0.975006 |
| MmugDNA.15228.1.S1_at   | MmugDNA.15228.1 | 4.37  | 4.21  | 0.04 | 0.1  | 1.11  | 0.111939 | 0.081926 | 0.484976 | 0.330487 |
| MmugDNA.1523.1.S1_at    | MmugDNA.1523.1  | 4.43  | 4.97  | 0.23 | 0.23 | -1.45 | 0.037462 | 0.252312 | 0.357167 | 0.52096  |
| MmugDNA.15230.1.S1_at   | MmugDNA.15230.1 | 7.05  | 6.65  | 0.12 | 0.11 | 1.32  | 0.014884 | 0.00086  | 0.278597 | 0.047371 |
| MmugDNA.15231.1.S1_at   | MmugDNA.15231.1 | 7.16  | 7     | 0.4  | 0.08 | 1.11  | 0.602809 | 0.727619 | 0.839015 | 0.842488 |
| MmugDNA.15232.1.S1_at   | MmugDNA.15232.1 | 10.85 | 10.69 | 0.48 | 0.16 | 1.11  | 0.857577 | 0.006845 | 0.949729 | 0.111782 |
| MmugDNA.15235.1.S1_at   | MmugDNA.15235.1 | 3.04  | 3.04  | 0.01 | 0.1  | 1     | 0.938388 | 0.669397 | 0.979268 | 0.806626 |
| MmugDNA.15237.1.S1_at   | MmugDNA.15237.1 | 6.22  | 5.53  | 1.33 | 0.59 | 1.61  | 0.932708 | 0.470902 | 0.977227 | 0.679128 |
| MmugDNA.1524.1.S1_at    | MmugDNA.1524.1  | 7.99  | 7.82  | 0.15 | 0.07 | 1.13  | 0.281792 | 0.546605 | 0.640218 | 0.728105 |
| MmugDNA.15242.1.S1_at   | MmugDNA.15242.1 | 4.88  | 5.06  | 0.08 | 0.25 | -1.13 | 0.978115 | 0.464893 | 0.992929 | 0.675496 |
| MmugDNA.15243.1.S1_at   | MmugDNA.15243.1 | 7.62  | 7.03  | 0.18 | 0.15 | 1.51  | 0.024448 | 0.000861 | 0.318809 | 0.047371 |
| MmugDNA.15246.1.S1_at   | MmugDNA.15246.1 | 4.31  | 4.21  | 0.15 | 0.18 | 1.07  | 0.430444 | 0.736122 | 0.742767 | 0.84733  |
| MmugDNA.15247.1.S1_at   | MmugDNA.15247.1 | 4.73  | 4.65  | 0.13 | 0.16 | 1.05  | 0.790707 | 0.379668 | 0.922991 | 0.616523 |
| MmugDNA.32984.1.S1_at   | MmugDNA.32984.1 | 9.59  | 9.46  | 0.1  | 0.24 | 1.1   | 0.968951 | 0.000632 | 0.989849 | 0.042882 |
| MmugDNA.32984.1.S1_s_at | MmugDNA.32984.1 | 10.17 | 10.18 | 0.09 | 0.31 | -1.01 | 0.346055 | 0.002447 | 0.687873 | 0.073228 |
| MmugDNA.1525.1.S1_at    | MmugDNA.1525.1  | 4.73  | 4.45  | 0.08 | 0.29 | 1.21  | 0.244431 | 0.045114 | 0.61     | 0.256956 |
| MmugDNA.1525.1.S1_x_at  | MmugDNA.1525.1  | 5.22  | 4.93  | 0.03 | 0.09 | 1.22  | 0.019705 | 0.010305 | 0.302208 | 0.132897 |
| MmugDNA.15252.1.S1_at   | MmugDNA.15252.1 | 3.33  | 3.26  | 0.07 | 0.11 | 1.04  | 0.616172 | 0.159611 | 0.844767 | 0.435785 |
| MmugDNA.15253.1.S1_at   | MmugDNA.15253.1 | 6.35  | 7.78  | 0.76 | 0.32 | -2.69 | 0.164907 | 0.294333 | 0.537639 | 0.55407  |
| MmugDNA.15254.1.S1_at   | MmugDNA.15254.1 | 6.48  | 6.68  | 1.47 | 0.17 | -1.15 | 0.799855 | 0.533708 | 0.926711 | 0.719849 |
| MmugDNA.15255.1.S1_at   | MmugDNA.15255.1 | 3.23  | 3.15  | 0.23 | 0.12 | 1.06  | 0.89354  | 0.923543 | 0.963469 | 0.956997 |
| MmugDNA.15256.1.S1_at   | MmugDNA.15256.1 | 5.37  | 5.17  | 0.04 | 0.04 | 1.15  | 0.004224 | 0.046933 | 0.198874 | 0.261301 |
| MmugDNA.15257.1.S1_at   | MmugDNA.15257.1 | 4.74  | 4.91  | 0.27 | 0.16 | -1.12 | 0.309737 | 0.352217 | 0.661815 | 0.595568 |
| MmugDNA.15262.1.S1_at   | MmugDNA.15262.1 | 10.22 | 10.67 | 1    | 0.2  | -1.37 | 0.771726 | 0.289072 | 0.914819 | 0.550238 |
| MmugDNA.15264.1.S1_at   | MmugDNA.15264.1 | 7.99  | 7.66  | 0.64 | 0.28 | 1.26  | 0.465543 | 0.12763  | 0.763035 | 0.398571 |
| MmugDNA.15265.1.S1_at   | MmugDNA.15265.1 | 8.58  | 8.61  | 2.91 | 0.23 | -1.02 | 0.629803 | 0.12159  | 0.851714 | 0.390723 |
| MmugDNA.15266.1.S1_at   | MmugDNA.15266.1 | 7.38  | 6.98  | 0.4  | 0.19 | 1.32  | 0.193054 | 0.190923 | 0.563873 | 0.466269 |
| MmugDNA.15268.1.S1_s_at | MmugDNA.15268.1 | 10.05 | 9.35  | 3.65 | 0.31 | 1.62  | 0.545843 | 0.208965 | 0.808201 | 0.482756 |
| MmugDNA.15269.1.S1_at   | MmugDNA.15269.1 | 9.43  | 9.21  | 0.49 | 0.17 | 1.16  | 0.323043 | 0.195312 | 0.671928 | 0.470253 |
| MmugDNA.1527.1.S1_at    | MmugDNA.1527.1  | 7.51  | 7.35  | 0.13 | 0.08 | 1.12  | 0.070762 | 0.16419  | 0.429834 | 0.440466 |
| MmugDNA.15270.1.S1_at   | MmugDNA.15270.1 | 3.2   | 3.03  | 0.13 | 0.06 | 1.12  | 0.231146 | 0.345604 | 0.599085 | 0.590833 |
| MmugDNA.15272.1.S1_at   | MmugDNA.15272.1 | 7.64  | 8.01  | 0.26 | 0.36 | -1.29 | 0.099987 | 0.232992 | 0.470186 | 0.50445  |
| MmugDNA.15273.1.S1_at   | MmugDNA.15273.1 | 4.42  | 4.18  | 0.22 | 0.11 | 1.18  | 0.161722 | 0.180211 | 0.535125 | 0.456777 |



|                         |                 |       |       |      |      |       |          |          |          |          |
|-------------------------|-----------------|-------|-------|------|------|-------|----------|----------|----------|----------|
| MmugDNA.15274.1.S1_at   | MmugDNA.15274.1 | 4.88  | 4.96  | 0.21 | 0.2  | -1.05 | 0.326016 | 0.311879 | 0.673657 | 0.566833 |
| MmugDNA.15275.1.S1_at   | MmugDNA.15275.1 | 9.13  | 8.8   | 0.24 | 0.22 | 1.26  | 0.046135 | 0.062257 | 0.377425 | 0.296325 |
| MmugDNA.15276.1.S1_at   | MmugDNA.15276.1 | 6.31  | 6.17  | 0.58 | 0.42 | 1.1   | 0.384224 | 0.033544 | 0.711853 | 0.226764 |
| MmugDNA.15277.1.S1_at   | MmugDNA.15277.1 | 6.41  | 6.21  | 0.43 | 0.07 | 1.15  | 0.568569 | 0.176653 | 0.820917 | 0.453138 |
| MmugDNA.15278.1.S1_at   | MmugDNA.15278.1 | 3.97  | 3.87  | 0.1  | 0.22 | 1.07  | 0.466363 | 0.616562 | 0.763504 | 0.772767 |
| MmugDNA.15280.1.S1_at   | MmugDNA.15280.1 | 6.1   | 6.09  | 0.04 | 0.11 | 1     | 0.689125 | 0.019928 | 0.878671 | 0.177443 |
| MmugDNA.15282.1.S1_at   | MmugDNA.15282.1 | 11.16 | 10.96 | 0.53 | 0.11 | 1.14  | 0.660673 | 0.415375 | 0.865819 | 0.640852 |
| MmugDNA.15283.1.S1_at   | MmugDNA.15283.1 | 6.57  | 6.06  | 0.45 | 0.02 | 1.43  | 0.344045 | 0.130465 | 0.686913 | 0.4023   |
| MmugDNA.15284.1.S1_at   | MmugDNA.15284.1 | 7.99  | 7.99  | 0.4  | 0.23 | -1    | 0.683053 | 0.199615 | 0.876006 | 0.474255 |
| MmugDNA.15287.1.S1_at   | MmugDNA.15287.1 | 9.18  | 9.57  | 0.21 | 0.05 | -1.32 | 0.114812 | 0.003579 | 0.487957 | 0.085582 |
| MmugDNA.15289.1.S1_at   | MmugDNA.15289.1 | 13.26 | 13.19 | 0.03 | 0.04 | -1.05 | 0.119345 | 0.024703 | 0.492749 | 0.196795 |
| MmugDNA.1529.1.S1_at    | MmugDNA.1529.1  | 5.47  | 5.91  | 0.08 | 0.13 | -1.36 | 0.009552 | 0.022302 | 0.242426 | 0.186842 |
| MmugDNA.15290.1.S1_at   | MmugDNA.15290.1 | 4.24  | 4.13  | 0.19 | 0.06 | 1.08  | 0.28848  | 0.263625 | 0.645574 | 0.529913 |
| MmugDNA.15291.1.S1_at   | MmugDNA.15291.1 | 6.37  | 6.35  | 0.15 | 0.01 | 1.02  | 0.47015  | 0.778286 | 0.76595  | 0.871272 |
| MmugDNA.15294.1.S1_at   | MmugDNA.15294.1 | 5.82  | 6.15  | 0.97 | 0.2  | -1.26 | 0.775636 | 0.159074 | 0.916804 | 0.435217 |
| MmugDNA.15295.1.S1_at   | MmugDNA.15295.1 | 6.47  | 6.35  | 0.62 | 0    | 1.09  | 0.291122 | 0.142382 | 0.647537 | 0.415965 |
| MmugDNA.15297.1.S1_at   | MmugDNA.15297.1 | 4.71  | 4.59  | 0.1  | 0.2  | 1.08  | 0.17095  | 0.205559 | 0.544107 | 0.47981  |
| MmugDNA.153.1.S1_at     | MmugDNA.153.1   | 9.27  | 10.07 | 0.28 | 0.16 | -1.74 | 0.040145 | 0.02565  | 0.363462 | 0.200834 |
| MmugDNA.153.1.S1_s_at   | MmugDNA.153.1   | 9.61  | 10.29 | 0.33 | 0.13 | -1.6  | 0.080136 | 0.072198 | 0.443462 | 0.31474  |
| MmugDNA.1530.1.S1_at    | MmugDNA.1530.1  | 4.88  | 4.77  | 0.09 | 0.08 | 1.08  | 0.100336 | 0.439659 | 0.470959 | 0.658393 |
| MmugDNA.15300.1.S1_at   | MmugDNA.15300.1 | 7.04  | 7.84  | 0.35 | 0.15 | -1.74 | 0.024904 | 0.017941 | 0.320247 | 0.168998 |
| MmugDNA.15301.1.S1_at   | MmugDNA.15301.1 | 4.37  | 4.54  | 0.12 | 0.21 | -1.13 | 0.235875 | 0.305982 | 0.602926 | 0.562732 |
| MmugDNA.15303.1.S1_at   | MmugDNA.15303.1 | 7.16  | 6.71  | 0.71 | 0.08 | 1.37  | 0.267736 | 0.0744   | 0.62827  | 0.318058 |
| MmugDNA.15303.1.S1_s_at | MmugDNA.15303.1 | 8.74  | 8.59  | 1.11 | 0.21 | 1.11  | 0.70188  | 0.285165 | 0.883997 | 0.547098 |
| MmugDNA.15306.1.S1_at   | MmugDNA.15306.1 | 4.16  | 3.93  | 0.36 | 0.09 | 1.17  | 0.342764 | 0.599622 | 0.686105 | 0.761524 |
| MmugDNA.15308.1.S1_at   | MmugDNA.15308.1 | 8.31  | 8.38  | 0.44 | 0.12 | -1.05 | 0.4149   | 0.280278 | 0.733395 | 0.543528 |
| MmugDNA.15308.1.S1_s_at | MmugDNA.15308.1 | 10.67 | 10.38 | 0.4  | 0.08 | 1.22  | 0.254592 | 0.314192 | 0.619004 | 0.568185 |
| MmugDNA.1531.1.S1_at    | MmugDNA.1531.1  | 5.77  | 6.03  | 0.08 | 0.1  | -1.19 | 0.061665 | 0.26656  | 0.41131  | 0.532301 |
| MmugDNA.15312.1.S1_at   | MmugDNA.15312.1 | 5.95  | 5.95  | 0    | 0.05 | 1     | 0.351361 | 0.941417 | 0.692006 | 0.966801 |
| MmugDNA.15313.1.S1_at   | MmugDNA.15313.1 | 6.03  | 6.02  | 0.25 | 0.16 | 1     | 0.768351 | 0.946378 | 0.912989 | 0.969598 |
| MmugDNA.15316.1.S1_at   | MmugDNA.15316.1 | 10.89 | 11.26 | 0.43 | 0.16 | -1.3  | 0.323619 | 0.168724 | 0.672279 | 0.445379 |
| MmugDNA.15318.1.S1_at   | MmugDNA.15318.1 | 6.98  | 7.13  | 0.4  | 0.05 | -1.1  | 0.757527 | 0.934955 | 0.908649 | 0.963177 |
| MmugDNA.1532.1.S1_at    | MmugDNA.1532.1  | 6.92  | 7.73  | 0.43 | 0.13 | -1.75 | 0.092288 | 0.12935  | 0.460762 | 0.400748 |
| MmugDNA.15320.1.S1_at   | MmugDNA.15320.1 | 7     | 6.43  | 0.35 | 0.48 | 1.48  | 0.374655 | 0.512655 | 0.706036 | 0.706448 |
| MmugDNA.15321.1.S1_at   | MmugDNA.15321.1 | 9.41  | 8.88  | 0.61 | 0.11 | 1.44  | 0.158425 | 0.041365 | 0.531551 | 0.247995 |
| MmugDNA.15322.1.S1_at   | MmugDNA.15322.1 | 4.97  | 5.95  | 1.25 | 0.44 | -1.98 | 0.666307 | 0.22504  | 0.868243 | 0.49773  |
| MmugDNA.15324.1.S1_at   | MmugDNA.15324.1 | 7.22  | 6.97  | 0.16 | 0.02 | 1.19  | 0.06294  | 0.046364 | 0.414359 | 0.259844 |
| MmugDNA.15325.1.S1_at   | MmugDNA.15325.1 | 8.26  | 8.02  | 0.54 | 0.08 | 1.18  | 0.132622 | 0.060583 | 0.506936 | 0.292769 |
| MmugDNA.15326.1.S1_at   | MmugDNA.15326.1 | 2.66  | 2.71  | 0.08 | 0.03 | -1.03 | 0.3457   | 0.395619 | 0.687742 | 0.627583 |
| MmugDNA.15327.1.S1_at   | MmugDNA.15327.1 | 4.19  | 4.09  | 0.13 | 0.02 | 1.07  | 0.177471 | 0.14955  | 0.550585 | 0.424095 |
| MmugDNA.15330.1.S1_at   | MmugDNA.15330.1 | 6.44  | 6.29  | 0.31 | 0.06 | 1.11  | 0.425576 | 0.706152 | 0.740112 | 0.829634 |
| MmugDNA.42233.1.S1_s_at | MmugDNA.42233.1 | 7.34  | 7.59  | 0.71 | 0.11 | -1.19 | 0.474116 | 0.249683 | 0.767936 | 0.518765 |
| MmugDNA.15335.1.S1_at   | MmugDNA.15335.1 | 3.82  | 3.94  | 0.17 | 0.2  | -1.09 | 0.350447 | 0.616405 | 0.691263 | 0.772626 |



|                         |                 |       |       |      |      |       |          |          |          |          |
|-------------------------|-----------------|-------|-------|------|------|-------|----------|----------|----------|----------|
| MmugDNA.15387.1.S1_at   | MmugDNA.15387.1 | 6.41  | 6.07  | 0.1  | 0.43 | 1.27  | 0.215376 | 0.204089 | 0.585748 | 0.478413 |
| MmugDNA.15388.1.S1_at   | MmugDNA.15388.1 | 6.8   | 6.79  | 0.18 | 0.08 | 1.01  | 0.550436 | 0.871898 | 0.810822 | 0.927098 |
| MmugDNA.15389.1.S1_at   | MmugDNA.15389.1 | 13.37 | 13.19 | 0.17 | 0.04 | 1.13  | 0.225136 | 0.033005 | 0.594388 | 0.224908 |
| MmugDNA.1539.1.S1_at    | MmugDNA.1539.1  | 4.13  | 3.79  | 0.35 | 0.09 | 1.27  | 0.178422 | 0.565461 | 0.551369 | 0.739886 |
| MmugDNA.15390.1.S1_s_at | MmugDNA.15390.1 | 10.56 | 9.89  | 0.14 | 0.08 | 1.59  | 0.002083 | 0.012054 | 0.174757 | 0.142044 |
| MmugDNA.15391.1.S1_at   | MmugDNA.15391.1 | 4.52  | 4.38  | 0.22 | 0.1  | 1.1   | 0.227851 | 0.073504 | 0.596693 | 0.316778 |
| MmugDNA.15392.1.S1_at   | MmugDNA.15392.1 | 3.14  | 3.14  | 0.08 | 0.02 | 1     | 0.348988 | 0.496343 | 0.690079 | 0.695995 |
| MmugDNA.15393.1.S1_at   | MmugDNA.15393.1 | 4.98  | 4.9   | 0.07 | 0.19 | 1.05  | 0.29516  | 0.384363 | 0.651016 | 0.620041 |
| MmugDNA.15394.1.S1_at   | MmugDNA.15394.1 | 4.17  | 3.93  | 0.3  | 0.39 | 1.18  | 0.919437 | 0.728459 | 0.972575 | 0.843019 |
| MmugDNA.15395.1.S1_s_at | MmugDNA.15395.1 | 6.28  | 6.11  | 0.44 | 0.03 | 1.13  | 0.272696 | 0.351427 | 0.632448 | 0.595054 |
| MmugDNA.15396.1.S1_at   | MmugDNA.15396.1 | 7.69  | 7.34  | 0.17 | 0.09 | 1.28  | 0.041272 | 0.023566 | 0.365958 | 0.192289 |
| MmugDNA.15400.1.S1_at   | MmugDNA.15400.1 | 3.56  | 3.29  | 0.17 | 0.01 | 1.2   | 0.115101 | 0.26262  | 0.488314 | 0.528973 |
| MmugDNA.15401.1.S1_at   | MmugDNA.15401.1 | 7.51  | 7.63  | 0.43 | 0.16 | -1.09 | 0.69597  | 0.873785 | 0.881847 | 0.928234 |
| MmugDNA.15402.1.S1_at   | MmugDNA.15402.1 | 6.66  | 6.74  | 0.51 | 0.12 | -1.05 | 0.526654 | 0.206497 | 0.796781 | 0.480571 |
| MmugDNA.15403.1.S1_at   | MmugDNA.15403.1 | 4.1   | 4.18  | 0.28 | 0.2  | -1.06 | 0.593399 | 0.476054 | 0.834154 | 0.682475 |
| MmugDNA.15404.1.S1_at   | MmugDNA.15404.1 | 8.29  | 7.96  | 0.18 | 0.19 | 1.26  | 0.152619 | 0.192618 | 0.525558 | 0.468116 |
| MmugDNA.15404.1.S1_s_at | MmugDNA.15404.1 | 7.57  | 7.18  | 0.13 | 0.02 | 1.3   | 0.016859 | 0.086023 | 0.288837 | 0.33824  |
| MmugDNA.15406.1.S1_at   | MmugDNA.15406.1 | 6.83  | 6.8   | 1.1  | 0.2  | 1.02  | 0.809971 | 0.516036 | 0.931255 | 0.708688 |
| MmugDNA.15407.1.S1_at   | MmugDNA.15407.1 | 6.12  | 5.92  | 0.55 | 0.47 | 1.14  | 0.445314 | 0.697701 | 0.752029 | 0.824333 |
| MmugDNA.15407.1.S1_x_at | MmugDNA.15407.1 | 6.49  | 6.14  | 0.27 | 0.48 | 1.28  | 0.599765 | 0.477402 | 0.837539 | 0.683463 |
| MmugDNA.15408.1.S1_at   | MmugDNA.15408.1 | 5.43  | 5.38  | 0.09 | 0    | 1.03  | 0.918358 | 0.661264 | 0.972108 | 0.801687 |
| MmugDNA.1541.1.S1_at    | MmugDNA.1541.1  | 3.92  | 3.85  | 0.16 | 0.13 | 1.04  | 0.202855 | 0.281316 | 0.574251 | 0.544391 |
| MmugDNA.15410.1.S1_at   | MmugDNA.15410.1 | 9.96  | 9.85  | 0.04 | 0.09 | 1.08  | 0.038886 | 0.606109 | 0.360462 | 0.765674 |
| MmugDNA.15411.1.S1_at   | MmugDNA.15411.1 | 3.32  | 3.33  | 0.1  | 0.27 | -1    | 0.78572  | 0.228619 | 0.921215 | 0.500826 |
| MmugDNA.15412.1.S1_at   | MmugDNA.15412.1 | 5.04  | 5.01  | 0.09 | 0.06 | 1.02  | 0.607959 | 0.587373 | 0.840979 | 0.754171 |
| MmugDNA.15413.1.S1_s_at | MmugDNA.15413.1 | 7.31  | 7.61  | 0.37 | 0.05 | -1.23 | 0.68927  | 0.882774 | 0.878813 | 0.93317  |
| MmugDNA.15414.1.S1_at   | MmugDNA.15414.1 | 8.28  | 8.71  | 0.75 | 0.18 | -1.34 | 0.868319 | 0.568827 | 0.953882 | 0.74211  |
| MmugDNA.15415.1.S1_at   | MmugDNA.15415.1 | 9.02  | 9.2   | 0.45 | 0.33 | -1.13 | 0.267759 | 0.437985 | 0.62827  | 0.657058 |
| MmugDNA.15416.1.S1_at   | MmugDNA.15416.1 | 3.89  | 4.18  | 0.11 | 0.14 | -1.22 | 0.014665 | 0.029562 | 0.277052 | 0.213612 |
| MmugDNA.15417.1.S1_at   | MmugDNA.15417.1 | 9.1   | 9.51  | 0.64 | 0.13 | -1.33 | 0.977562 | 0.542282 | 0.992714 | 0.725385 |
| MmugDNA.15417.1.S1_s_at | MmugDNA.15417.1 | 11.74 | 12.15 | 0.45 | 0.04 | -1.33 | 0.635926 | 0.532807 | 0.854813 | 0.719235 |
| MmugDNA.1542.1.S1_at    | MmugDNA.1542.1  | 6.63  | 6.51  | 0.47 | 0.12 | 1.08  | 0.830905 | 0.607634 | 0.939529 | 0.766457 |
| MmugDNA.15420.1.S1_at   | MmugDNA.15420.1 | 5.34  | 5.3   | 0.06 | 0.02 | 1.03  | 0.652702 | 0.301229 | 0.86202  | 0.559356 |
| MmugDNA.15421.1.S1_at   | MmugDNA.15421.1 | 5.84  | 5.67  | 0.02 | 0.08 | 1.12  | 0.030017 | 0.257319 | 0.336449 | 0.525115 |
| MmugDNA.15423.1.S1_at   | MmugDNA.15423.1 | 8.02  | 8.43  | 0.62 | 0.07 | -1.33 | 0.310159 | 0.510891 | 0.662073 | 0.70525  |
| MmugDNA.15425.1.S1_at   | MmugDNA.15425.1 | 6.1   | 6     | 0.17 | 0.13 | 1.07  | 0.330077 | 0.54329  | 0.67679  | 0.726012 |
| MmugDNA.15426.1.S1_at   | MmugDNA.15426.1 | 10.31 | 10.45 | 0.4  | 0.06 | -1.1  | 0.664312 | 0.598027 | 0.867677 | 0.760536 |
| MmugDNA.15427.1.S1_at   | MmugDNA.15427.1 | 11.44 | 11.26 | 0.36 | 0.06 | 1.14  | 0.901203 | 0.947769 | 0.966477 | 0.970346 |
| MmugDNA.15429.1.S1_at   | MmugDNA.15429.1 | 4.09  | 3.87  | 0.26 | 0.23 | 1.17  | 0.279138 | 0.456743 | 0.638024 | 0.67043  |
| MmugDNA.15430.1.S1_at   | MmugDNA.15430.1 | 9.5   | 8.93  | 0.05 | 0.11 | 1.48  | 0.000887 | 0.007919 | 0.153739 | 0.11857  |
| MmugDNA.15431.1.S1_at   | MmugDNA.15431.1 | 6.13  | 5.99  | 0.08 | 0.2  | 1.1   | 0.390516 | 0.164961 | 0.716814 | 0.44123  |
| MmugDNA.15432.1.S1_at   | MmugDNA.15432.1 | 5.76  | 5.75  | 0.19 | 0.17 | 1.01  | 0.243875 | 0.293869 | 0.609715 | 0.553865 |
| MmugDNA.15433.1.S1_s_at | MmugDNA.15433.1 | 12.04 | 12.52 | 0.38 | 0.05 | -1.4  | 0.087302 | 0.036827 | 0.454785 | 0.236413 |

|                         |                 |       |       |      |      |       |          |          |          |          |
|-------------------------|-----------------|-------|-------|------|------|-------|----------|----------|----------|----------|
| MmugDNA.15434.1.S1_at   | MmugDNA.15434.1 | 6.26  | 5.86  | 0.17 | 0.29 | 1.32  | 0.290007 | 0.749894 | 0.646655 | 0.854631 |
| MmugDNA.15435.1.S1_at   | MmugDNA.15435.1 | 5.6   | 5.73  | 0.09 | 0.04 | -1.09 | 0.266977 | 0.923637 | 0.627652 | 0.957057 |
| MmugDNA.15436.1.S1_at   | MmugDNA.15436.1 | 8.42  | 8.36  | 0.45 | 0.04 | 1.04  | 0.924201 | 0.924305 | 0.974623 | 0.957351 |
| MmugDNA.15437.1.S1_at   | MmugDNA.15437.1 | 6.96  | 6.68  | 0.38 | 0.67 | 1.22  | 0.973824 | 0.931915 | 0.991535 | 0.9613   |
| MmugDNA.15438.1.S1_at   | MmugDNA.15438.1 | 3.23  | 3.2   | 0.2  | 0.1  | 1.02  | 0.597094 | 0.812015 | 0.83613  | 0.891493 |
| MmugDNA.15439.1.S1_at   | MmugDNA.15439.1 | 6.28  | 5.68  | 0.17 | 0.22 | 1.52  | 0.040732 | 0.038136 | 0.364864 | 0.239923 |
| MmugDNA.15440.1.S1_at   | MmugDNA.15440.1 | 5.36  | 5.49  | 0.82 | 0.08 | -1.09 | 0.275466 | 0.566631 | 0.634965 | 0.740707 |
| MmugDNA.15441.1.S1_at   | MmugDNA.15441.1 | 4.76  | 4.61  | 0.11 | 0.11 | 1.11  | 0.128362 | 0.036813 | 0.50293  | 0.236386 |
| MmugDNA.15442.1.S1_at   | MmugDNA.15442.1 | 4.25  | 3.91  | 0.17 | 0.07 | 1.27  | 0.100883 | 0.203216 | 0.47159  | 0.477415 |
| MmugDNA.15443.1.S1_at   | MmugDNA.15443.1 | 8.93  | 8.96  | 0.25 | 0.05 | -1.02 | 0.777456 | 0.008437 | 0.9176   | 0.121922 |
| MmugDNA.15447.1.S1_at   | MmugDNA.15447.1 | 5.69  | 5.67  | 0.1  | 0.09 | 1.01  | 0.371937 | 0.650382 | 0.705567 | 0.795614 |
| MmugDNA.15448.1.S1_at   | MmugDNA.15448.1 | 4.32  | 4.16  | 0.76 | 0.17 | 1.12  | 0.705207 | 0.48399  | 0.885355 | 0.688262 |
| MmugDNA.15449.1.S1_at   | MmugDNA.15449.1 | 9.83  | 10.36 | 0.73 | 0.11 | -1.45 | 0.253965 | 0.239531 | 0.618622 | 0.510206 |
| MmugDNA.1545.1.S1_at    | MmugDNA.1545.1  | 5.82  | 6.04  | 0.52 | 0.6  | -1.17 | 0.409064 | 0.251709 | 0.729748 | 0.520444 |
| MmugDNA.15450.1.S1_at   | MmugDNA.15450.1 | 3.03  | 2.98  | 0.06 | 0.08 | 1.03  | 0.508871 | 0.203198 | 0.787315 | 0.477415 |
| MmugDNA.15451.1.S1_at   | MmugDNA.15451.1 | 4.42  | 4.14  | 0.36 | 0.57 | 1.21  | 0.931632 | 0.906676 | 0.977114 | 0.947216 |
| MmugDNA.15452.1.S1_at   | MmugDNA.15452.1 | 6.24  | 6.23  | 0.09 | 0.1  | 1.01  | 0.34569  | 0.322543 | 0.687742 | 0.573991 |
| MmugDNA.15454.1.S1_at   | MmugDNA.15454.1 | 5.34  | 5.42  | 0.12 | 0.49 | -1.06 | 0.882908 | 0.827651 | 0.95947  | 0.901081 |
| MmugDNA.15456.1.S1_at   | MmugDNA.15456.1 | 4.08  | 4.1   | 0.04 | 0.21 | -1.02 | 0.573247 | 0.754921 | 0.823482 | 0.857334 |
| MmugDNA.15457.1.S1_at   | MmugDNA.15457.1 | 3.99  | 3.81  | 0.03 | 0.29 | 1.13  | 0.848676 | 0.485016 | 0.946817 | 0.688893 |
| MmugDNA.15458.1.S1_at   | MmugDNA.15458.1 | 10.32 | 10.73 | 0.44 | 0.28 | -1.33 | 0.252192 | 0.302162 | 0.61717  | 0.560092 |
| MmugDNA.15460.1.S1_at   | MmugDNA.15460.1 | 6.9   | 6.95  | 0.04 | 0.12 | -1.04 | 0.509346 | 0.730523 | 0.787587 | 0.844042 |
| MmugDNA.34659.1.S1_s_at | MmugDNA.34659.1 | 5.73  | 5.59  | 0.1  | 0.26 | 1.1   | 0.644948 | 0.625284 | 0.85869  | 0.779099 |
| MmugDNA.15462.1.S1_at   | MmugDNA.15462.1 | 8.24  | 8.95  | 0.35 | 0.08 | -1.64 | 0.029247 | 0.04993  | 0.333974 | 0.268603 |
| MmugDNA.15463.1.S1_at   | MmugDNA.15463.1 | 5.26  | 4.91  | 0.58 | 0.23 | 1.27  | 0.243928 | 0.380332 | 0.609715 | 0.616984 |
| MmugDNA.15464.1.S1_at   | MmugDNA.15464.1 | 4.73  | 4.61  | 0.2  | 0.57 | 1.08  | 0.415036 | 0.573153 | 0.733489 | 0.744941 |
| MmugDNA.15465.1.S1_at   | MmugDNA.15465.1 | 5.35  | 5.07  | 1.25 | 0.11 | 1.22  | 0.690916 | 0.584512 | 0.879661 | 0.752435 |
| MmugDNA.15466.1.S1_at   | MmugDNA.15466.1 | 7.14  | 8.14  | 0.15 | 0.2  | -1.99 | 0.002206 | 0.001972 | 0.174757 | 0.065871 |
| MmugDNA.15467.1.S1_at   | MmugDNA.15467.1 | 4     | 3.98  | 0.18 | 0.08 | 1.02  | 0.464504 | 0.402535 | 0.762534 | 0.631481 |
| MmugDNA.15468.1.S1_at   | MmugDNA.15468.1 | 6.59  | 6.81  | 0.41 | 0.05 | -1.17 | 0.309542 | 0.467697 | 0.661771 | 0.677207 |
| MmugDNA.1547.1.S1_at    | MmugDNA.1547.1  | 6.95  | 6.97  | 0.32 | 0.02 | -1.01 | 0.966496 | 0.967795 | 0.989032 | 0.982192 |
| MmugDNA.1547.1.S1_s_at  | MmugDNA.1547.1  | 9.54  | 10.78 | 0.28 | 0.35 | -2.37 | 0.008584 | 0.000741 | 0.235505 | 0.044929 |
| MmugDNA.15470.1.S1_at   | MmugDNA.15470.1 | 3.41  | 3.54  | 0.16 | 0    | -1.1  | 0.230017 | 0.40849  | 0.598481 | 0.635694 |
| MmugDNA.15471.1.S1_at   | MmugDNA.15471.1 | 4.43  | 4.59  | 0.78 | 0.17 | -1.11 | 0.857626 | 0.698951 | 0.949729 | 0.825058 |
| MmugDNA.15473.1.S1_at   | MmugDNA.15473.1 | 7.84  | 7.39  | 1.58 | 0.66 | 1.37  | 0.473402 | 0.296142 | 0.767523 | 0.555339 |
| MmugDNA.15474.1.S1_at   | MmugDNA.15474.1 | 10.84 | 10.71 | 0.56 | 0.05 | 1.09  | 0.888201 | 0.193306 | 0.961262 | 0.468656 |
| MmugDNA.15475.1.S1_at   | MmugDNA.15475.1 | 5.72  | 5.37  | 0.51 | 0.36 | 1.27  | 0.925273 | 0.417949 | 0.975138 | 0.642499 |
| MmugDNA.15477.1.S1_at   | MmugDNA.15477.1 | 4.94  | 5.29  | 0.49 | 0.4  | -1.28 | 0.205872 | 0.122993 | 0.577793 | 0.392923 |
| MmugDNA.15478.1.S1_at   | MmugDNA.15478.1 | 8.72  | 7.72  | 0.64 | 0.19 | 2     | 0.061448 | 0.020954 | 0.410677 | 0.181537 |
| MmugDNA.15479.1.S1_at   | MmugDNA.15479.1 | 5.19  | 5.17  | 0.35 | 0    | 1.01  | 0.896891 | 0.925346 | 0.964969 | 0.957778 |
| MmugDNA.1548.1.S1_at    | MmugDNA.1548.1  | 3.52  | 3.51  | 0.07 | 0.05 | 1     | 0.344355 | 0.599246 | 0.686913 | 0.761382 |
| MmugDNA.15480.1.S1_at   | MmugDNA.15480.1 | 10.29 | 10.21 | 0.64 | 0.12 | 1.06  | 0.858468 | 0.939448 | 0.95001  | 0.965611 |
| MmugDNA.15483.1.S1_at   | MmugDNA.15483.1 | 2.66  | 2.82  | 0.03 | 0.48 | -1.12 | 0.193692 | 0.205803 | 0.564275 | 0.480072 |

|                         |                 |       |       |      |      |       |          |          |          |          |
|-------------------------|-----------------|-------|-------|------|------|-------|----------|----------|----------|----------|
| MmugDNA.15484.1.S1_at   | MmugDNA.15484.1 | 5.88  | 5.92  | 0.28 | 0.09 | -1.03 | 0.724776 | 0.960097 | 0.893274 | 0.977408 |
| MmugDNA.15486.1.S1_at   | MmugDNA.15486.1 | 6.97  | 7.11  | 0.42 | 0.11 | -1.1  | 0.823744 | 0.357535 | 0.936367 | 0.599179 |
| MmugDNA.15487.1.S1_at   | MmugDNA.15487.1 | 9.51  | 9.18  | 0.22 | 0.16 | 1.26  | 0.255607 | 0.05506  | 0.61969  | 0.280147 |
| MmugDNA.15488.1.S1_at   | MmugDNA.15488.1 | 10.31 | 10.7  | 0.31 | 0.09 | -1.32 | 0.312666 | 0.294592 | 0.664165 | 0.554282 |
| MmugDNA.15489.1.S1_at   | MmugDNA.15489.1 | 4.87  | 4.78  | 0.08 | 0.12 | 1.06  | 0.229463 | 0.283303 | 0.598339 | 0.545836 |
| MmugDNA.15489.1.S1_s_at | MmugDNA.15489.1 | 5.71  | 5.71  | 0.02 | 0.05 | 1     | 0.646337 | 0.32294  | 0.859027 | 0.574261 |
| MmugDNA.1549.1.S1_at    | MmugDNA.1549.1  | 7.64  | 7.37  | 0.04 | 0.16 | 1.21  | 0.041829 | 0.046415 | 0.367361 | 0.259982 |
| MmugDNA.15491.1.S1_at   | MmugDNA.15491.1 | 7.55  | 8.81  | 0.7  | 0.12 | -2.39 | 0.019703 | 0.050551 | 0.302208 | 0.270222 |
| MmugDNA.15493.1.S1_at   | MmugDNA.15493.1 | 6.34  | 6.05  | 0.21 | 0.18 | 1.23  | 0.342899 | 0.429585 | 0.6862   | 0.650961 |
| MmugDNA.15494.1.S1_at   | MmugDNA.15494.1 | 4.7   | 4.68  | 0.12 | 0.08 | 1.01  | 0.720526 | 0.294918 | 0.891614 | 0.554462 |
| MmugDNA.15495.1.S1_at   | MmugDNA.15495.1 | 5.14  | 5.05  | 0.07 | 0.07 | -1.06 | 0.170612 | 0.245025 | 0.543664 | 0.514813 |
| MmugDNA.15496.1.S1_at   | MmugDNA.15496.1 | 7.44  | 7.08  | 0.47 | 0.12 | 1.28  | 0.14248  | 0.033077 | 0.517603 | 0.225105 |
| MmugDNA.15497.1.S1_at   | MmugDNA.15497.1 | 8.58  | 8.54  | 0.33 | 0.1  | 1.03  | 0.710868 | 0.921503 | 0.88743  | 0.955761 |
| MmugDNA.15498.1.S1_at   | MmugDNA.15498.1 | 4.03  | 4.04  | 0.23 | 0.04 | -1.01 | 0.431506 | 0.449151 | 0.743474 | 0.664892 |
| MmugDNA.15499.1.S1_at   | MmugDNA.15499.1 | 4.75  | 4.83  | 0.11 | 0.02 | -1.06 | 0.464496 | 0.92645  | 0.762534 | 0.958307 |
| MmugDNA.155.1.S1_at     | MmugDNA.155.1   | 12.31 | 12.23 | 0.09 | 0.07 | 1.05  | 0.597135 | 0.023407 | 0.83613  | 0.191786 |
| MmugDNA.1550.1.S1_at    | MmugDNA.1550.1  | 4.42  | 4.32  | 0.17 | 0.23 | 1.08  | 0.22262  | 0.581159 | 0.592081 | 0.750237 |
| MmugDNA.15502.1.S1_at   | MmugDNA.15502.1 | 6.75  | 5.94  | 0.09 | 0.27 | 1.75  | 0.006284 | 0.002301 | 0.218069 | 0.070694 |
| MmugDNA.15503.1.S1_at   | MmugDNA.15503.1 | 6.68  | 6.52  | 0.13 | 0.28 | 1.11  | 0.384734 | 0.033037 | 0.712173 | 0.225008 |
| MmugDNA.15507.1.S1_at   | MmugDNA.15507.1 | 7.26  | 6.98  | 0.11 | 0.05 | 1.21  | 0.015691 | 0.004986 | 0.28333  | 0.09844  |
| MmugDNA.15508.1.S1_at   | MmugDNA.15508.1 | 3.95  | 3.95  | 0.19 | 0.2  | 1     | 0.230272 | 0.211788 | 0.598481 | 0.485777 |
| MmugDNA.1551.1.S1_at    | MmugDNA.1551.1  | 8.95  | 8.94  | 0.22 | 0.06 | 1.01  | 0.316873 | 0.564067 | 0.666816 | 0.738956 |
| MmugDNA.1551.1.S1_s_at  | MmugDNA.1551.1  | 9.56  | 9.52  | 0.25 | 0.02 | 1.02  | 0.288608 | 0.458072 | 0.64562  | 0.671038 |
| MmugDNA.15510.1.S1_s_at | MmugDNA.15510.1 | 11.86 | 11.98 | 0.07 | 0.07 | -1.08 | 0.560943 | 0.022922 | 0.817    | 0.189403 |
| MmugDNA.15511.1.S1_s_at | MmugDNA.15511.1 | 11.33 | 11.28 | 0.29 | 0.02 | 1.04  | 0.255181 | 0.103302 | 0.619267 | 0.364143 |
| MmugDNA.15513.1.S1_at   | MmugDNA.15513.1 | 3.5   | 3.39  | 0.13 | 0.14 | 1.08  | 0.312688 | 0.203158 | 0.664186 | 0.477415 |
| MmugDNA.15514.1.S1_at   | MmugDNA.15514.1 | 4.44  | 4.87  | 0.13 | 0.36 | -1.34 | 0.364062 | 0.805872 | 0.700445 | 0.888395 |
| MmugDNA.15516.1.S1_at   | MmugDNA.15516.1 | 3.76  | 3.74  | 0.22 | 0.07 | 1.01  | 0.92973  | 0.249778 | 0.976518 | 0.518876 |
| MmugDNA.15517.1.S1_at   | MmugDNA.15517.1 | 11.16 | 11.68 | 1.56 | 0.09 | -1.44 | 0.50345  | 0.136282 | 0.784372 | 0.4087   |
| MmugDNA.15519.1.S1_at   | MmugDNA.15519.1 | 4.87  | 4.77  | 0.18 | 0.06 | 1.07  | 0.567033 | 0.309598 | 0.820189 | 0.564987 |
| MmugDNA.1552.1.S1_at    | MmugDNA.1552.1  | 12.88 | 12.9  | 0.04 | 0.05 | -1.01 | 0.509203 | 0.834085 | 0.787544 | 0.904936 |
| MmugDNA.15520.1.S1_at   | MmugDNA.15520.1 | 8.36  | 8.95  | 2.15 | 0.27 | -1.5  | 0.537889 | 0.346064 | 0.802945 | 0.591154 |
| MmugDNA.15520.1.S1_s_at | MmugDNA.15520.1 | 10.7  | 11.43 | 1.99 | 0.24 | -1.66 | 0.45771  | 0.329505 | 0.758402 | 0.578781 |
| MmugDNA.15521.1.S1_at   | MmugDNA.15521.1 | 3.46  | 3.33  | 0.13 | 0.07 | 1.09  | 0.142618 | 0.161999 | 0.517642 | 0.438108 |
| MmugDNA.15522.1.S1_at   | MmugDNA.15522.1 | 5.03  | 4.83  | 0.65 | 0.57 | 1.15  | 0.713969 | 0.409381 | 0.88857  | 0.636452 |
| MmugDNA.15524.1.S1_at   | MmugDNA.15524.1 | 4.24  | 4.11  | 0.15 | 0.16 | 1.1   | 0.704639 | 0.049659 | 0.885173 | 0.267882 |
| MmugDNA.15526.1.S1_at   | MmugDNA.15526.1 | 4.66  | 4.68  | 0.06 | 0.15 | -1.01 | 0.549611 | 0.285826 | 0.810392 | 0.547484 |
| MmugDNA.15527.1.S1_at   | MmugDNA.15527.1 | 5.3   | 5.26  | 0.39 | 0.44 | 1.03  | 0.527286 | 0.4019   | 0.797084 | 0.63109  |
| MmugDNA.15529.1.S1_at   | MmugDNA.15529.1 | 6.27  | 7.26  | 0.43 | 0.12 | -1.98 | 0.016516 | 0.001205 | 0.287478 | 0.054389 |
| MmugDNA.1553.1.S1_at    | MmugDNA.1553.1  | 6.31  | 5.8   | 0.46 | 0.35 | 1.42  | 0.256187 | 0.118474 | 0.620287 | 0.386457 |
| MmugDNA.15531.1.S1_at   | MmugDNA.15531.1 | 7.11  | 6.1   | 0.54 | 0.27 | 2.01  | 0.041676 | 0.024805 | 0.367007 | 0.197344 |
| MmugDNA.15532.1.S1_at   | MmugDNA.15532.1 | 6.27  | 6.35  | 0.3  | 0.11 | -1.06 | 0.880289 | 0.996445 | 0.958566 | 0.997918 |
| MmugDNA.15533.1.S1_at   | MmugDNA.15533.1 | 4.65  | 4.53  | 0.08 | 0.08 | 1.09  | 0.623291 | 0.00568  | 0.848224 | 0.103959 |

|                         |                 |       |       |      |      |       |          |          |          |          |
|-------------------------|-----------------|-------|-------|------|------|-------|----------|----------|----------|----------|
| MmugDNA.15534.1.S1_at   | MmugDNA.15534.1 | 3.03  | 3.03  | 0.13 | 0.26 | 1     | 0.438321 | 0.263031 | 0.747277 | 0.529397 |
| MmugDNA.15535.1.S1_at   | MmugDNA.15535.1 | 3.7   | 3.63  | 0.11 | 0.08 | 1.05  | 0.858622 | 0.700059 | 0.950076 | 0.825946 |
| MmugDNA.8824.1.S1_at    | MmugDNA.8824.1  | 11.46 | 11.66 | 0.42 | 0.04 | -1.14 | 0.84897  | 0.002977 | 0.946892 | 0.079958 |
| MmugDNA.8824.1.S1_s_at  | MmugDNA.8824.1  | 11.43 | 11.55 | 0.39 | 0.04 | -1.09 | 0.682653 | 0.002788 | 0.875848 | 0.077966 |
| MmugDNA.15539.1.S1_at   | MmugDNA.15539.1 | 11.73 | 11.79 | 0.21 | 0.24 | -1.04 | 0.920806 | 0.022231 | 0.973159 | 0.18659  |
| MmugDNA.15541.1.S1_at   | MmugDNA.15541.1 | 6.95  | 5.36  | 2    | 0.18 | 3.01  | 0.300636 | 0.24702  | 0.655161 | 0.516238 |
| MmugDNA.12653.1.S1_at   | MmugDNA.12653.1 | 9.5   | 9.75  | 0.25 | 0.12 | -1.19 | 0.206258 | 0.120325 | 0.578142 | 0.38925  |
| MmugDNA.12653.1.S1_s_at | MmugDNA.12653.1 | 12.28 | 12.04 | 0.37 | 0.1  | 1.18  | 0.383388 | 0.420475 | 0.711306 | 0.644171 |
| MmugDNA.15543.1.S1_at   | MmugDNA.15543.1 | 3.42  | 3.33  | 0.03 | 0.23 | 1.06  | 0.376121 | 0.325036 | 0.706657 | 0.575545 |
| MmugDNA.15545.1.S1_at   | MmugDNA.15545.1 | 4.27  | 4.24  | 0.07 | 0.05 | 1.02  | 0.381954 | 0.814505 | 0.710335 | 0.892948 |
| MmugDNA.15546.1.S1_at   | MmugDNA.15546.1 | 3.98  | 4.21  | 0.28 | 0.51 | -1.17 | 0.556941 | 0.515837 | 0.814405 | 0.708504 |
| MmugDNA.15547.1.S1_at   | MmugDNA.15547.1 | 5.42  | 5.33  | 0.07 | 0.09 | 1.07  | 0.949558 | 0.506996 | 0.982929 | 0.702699 |
| MmugDNA.15549.1.S1_s_at | MmugDNA.15549.1 | 8.17  | 8     | 0.05 | 0.13 | 1.12  | 0.132684 | 0.271405 | 0.506936 | 0.536507 |
| MmugDNA.15550.1.S1_at   | MmugDNA.15550.1 | 3.31  | 3.33  | 0.12 | 0.07 | -1.01 | 0.93836  | 0.731245 | 0.979268 | 0.84425  |
| MmugDNA.15551.1.S1_at   | MmugDNA.15551.1 | 5.44  | 5.18  | 0.2  | 0.2  | 1.19  | 0.166685 | 0.160396 | 0.539343 | 0.436528 |
| MmugDNA.15552.1.S1_at   | MmugDNA.15552.1 | 4.41  | 4.37  | 0.23 | 0.31 | 1.03  | 0.876013 | 0.901754 | 0.956867 | 0.944082 |
| MmugDNA.15553.1.S1_at   | MmugDNA.15553.1 | 7.76  | 7.7   | 0.06 | 0.03 | 1.04  | 0.11544  | 0.778338 | 0.488779 | 0.871276 |
| MmugDNA.15555.1.S1_at   | MmugDNA.15555.1 | 6.57  | 6.71  | 0.08 | 0.07 | -1.1  | 0.455799 | 0.521898 | 0.757582 | 0.712684 |
| MmugDNA.15557.1.S1_at   | MmugDNA.15557.1 | 6.42  | 6.2   | 0.06 | 0.05 | 1.17  | 0.004903 | 0.009556 | 0.203301 | 0.12881  |
| MmugDNA.15558.1.S1_at   | MmugDNA.15558.1 | 7.05  | 7.2   | 0.38 | 0.03 | -1.11 | 0.544053 | 0.519845 | 0.806997 | 0.71135  |
| MmugDNA.1556.1.S1_at    | MmugDNA.1556.1  | 11.19 | 11.59 | 0.72 | 0.05 | -1.32 | 0.344415 | 0.10622  | 0.686913 | 0.368604 |
| MmugDNA.15561.1.S1_at   | MmugDNA.15561.1 | 6.75  | 6.03  | 0.52 | 0.27 | 1.65  | 0.056793 | 0.097834 | 0.401111 | 0.355639 |
| MmugDNA.15564.1.S1_x_at | MmugDNA.15564.1 | 5.38  | 5.53  | 0.15 | 0.04 | -1.11 | 0.461101 | 0.188175 | 0.760754 | 0.464251 |
| MmugDNA.15569.1.S1_at   | MmugDNA.15569.1 | 4.21  | 4.21  | 0.15 | 0.03 | -1    | 0.945168 | 0.856502 | 0.980905 | 0.918027 |
| MmugDNA.1557.1.S1_at    | MmugDNA.1557.1  | 3.48  | 3.81  | 0.2  | 0.1  | -1.26 | 0.105332 | 0.04044  | 0.477051 | 0.24621  |
| MmugDNA.15570.1.S1_at   | MmugDNA.15570.1 | 4.28  | 4.26  | 0.17 | 0.1  | 1.01  | 0.556311 | 0.707279 | 0.814033 | 0.83023  |
| MmugDNA.15571.1.S1_at   | MmugDNA.15571.1 | 9.72  | 9.49  | 0.27 | 0.11 | 1.18  | 0.574547 | 0.855044 | 0.824155 | 0.917395 |
| MmugDNA.15572.1.S1_at   | MmugDNA.15572.1 | 5.05  | 4.98  | 0.07 | 0.04 | 1.05  | 0.660092 | 0.375219 | 0.865536 | 0.613261 |
| MmugDNA.15577.1.S1_s_at | MmugDNA.15577.1 | 7.62  | 7.89  | 0.34 | 0.14 | -1.21 | 0.251502 | 0.002779 | 0.616712 | 0.077966 |
| MmugDNA.15578.1.S1_at   | MmugDNA.15578.1 | 5.61  | 5.03  | 0.67 | 0.09 | 1.5   | 0.202109 | 0.192965 | 0.573629 | 0.468455 |
| MmugDNA.15579.1.S1_at   | MmugDNA.15579.1 | 6.41  | 6.3   | 0.11 | 0.11 | 1.08  | 0.105904 | 0.308572 | 0.47774  | 0.564575 |
| MmugDNA.1558.1.S1_at    | MmugDNA.1558.1  | 5.1   | 5.05  | 0.09 | 0.03 | 1.04  | 0.736757 | 0.803979 | 0.899286 | 0.887203 |
| MmugDNA.15580.1.S1_at   | MmugDNA.15580.1 | 6.38  | 6.46  | 0.33 | 0.21 | -1.06 | 0.467554 | 0.72966  | 0.764412 | 0.843634 |
| MmugDNA.15581.1.S1_at   | MmugDNA.15581.1 | 4.31  | 4.77  | 0.64 | 0.35 | -1.38 | 0.183997 | 0.408845 | 0.556944 | 0.6359   |
| MmugDNA.15582.1.S1_s_at | MmugDNA.15582.1 | 12.48 | 11.99 | 0.09 | 0.05 | 1.4   | 0.001321 | 0.000295 | 0.158997 | 0.034892 |
| MmugDNA.15584.1.S1_at   | MmugDNA.15584.1 | 7.29  | 7.33  | 0.14 | 0.12 | -1.02 | 0.967923 | 0.148727 | 0.989418 | 0.423201 |
| MmugDNA.15588.1.S1_at   | MmugDNA.15588.1 | 8.01  | 7.79  | 0.31 | 0.3  | 1.16  | 0.801535 | 0.816291 | 0.927649 | 0.894034 |
| MmugDNA.1559.1.S1_at    | MmugDNA.1559.1  | 5.06  | 5.1   | 0.17 | 0.06 | -1.03 | 0.516436 | 0.677846 | 0.791459 | 0.811833 |
| MmugDNA.36629.1.S1_at   | MmugDNA.36629.1 | 8.53  | 8.41  | 0.02 | 0.02 | 1.09  | 0.001011 | 0.414754 | 0.155374 | 0.640456 |
| MmugDNA.36629.1.S1_s_at | MmugDNA.36629.1 | 4.65  | 4.32  | 0.43 | 0.11 | 1.25  | 0.262917 | 0.26437  | 0.624987 | 0.530385 |
| MmugDNA.36629.1.S1_x_at | MmugDNA.36629.1 | 8.1   | 8.02  | 0.16 | 0.05 | 1.06  | 0.629688 | 0.876358 | 0.851663 | 0.929679 |
| MmugDNA.15590.1.S1_at   | MmugDNA.15590.1 | 5     | 4.84  | 0.32 | 0.16 | 1.12  | 0.491945 | 0.043945 | 0.778053 | 0.254098 |
| MmugDNA.15591.1.S1_at   | MmugDNA.15591.1 | 3.99  | 3.72  | 0.29 | 0.13 | 1.2   | 0.15598  | 0.118349 | 0.529225 | 0.386395 |

|                         |                 |       |       |      |      |       |          |          |          |          |
|-------------------------|-----------------|-------|-------|------|------|-------|----------|----------|----------|----------|
| MmugDNA.15595.1.S1_at   | MmugDNA.15595.1 | 10.12 | 10.62 | 2.28 | 0.1  | -1.41 | 0.469265 | 0.371355 | 0.765531 | 0.610172 |
| MmugDNA.15597.1.S1_s_at | MmugDNA.15597.1 | 5.69  | 5.41  | 0.86 | 0.26 | 1.21  | 0.489268 | 0.07258  | 0.776032 | 0.315511 |
| MmugDNA.15598.1.S1_at   | MmugDNA.15598.1 | 3     | 3.16  | 0.1  | 0.16 | -1.12 | 0.084054 | 0.069702 | 0.45029  | 0.310164 |
| MmugDNA.15599.1.S1_s_at | MmugDNA.15599.1 | 7.21  | 6.95  | 0.29 | 0.01 | 1.2   | 0.153603 | 0.169914 | 0.526754 | 0.446569 |
| MmugDNA.1560.1.S1_at    | MmugDNA.1560.1  | 10.29 | 10.02 | 0.06 | 0.27 | 1.2   | 0.050963 | 0.038473 | 0.388526 | 0.241096 |
| MmugDNA.15600.1.S1_at   | MmugDNA.15600.1 | 12.66 | 12.67 | 0.17 | 0.06 | -1.01 | 0.827261 | 0.92845  | 0.938039 | 0.959353 |
| MmugDNA.15601.1.S1_at   | MmugDNA.15601.1 | 8.35  | 8.01  | 0.65 | 0.24 | 1.26  | 0.258971 | 0.231947 | 0.622379 | 0.503631 |
| MmugDNA.15602.1.S1_at   | MmugDNA.15602.1 | 5.69  | 5.64  | 0.05 | 0.06 | 1.04  | 0.504457 | 0.034201 | 0.784771 | 0.228775 |
| MmugDNA.15606.1.S1_at   | MmugDNA.15606.1 | 3.75  | 3.5   | 0.05 | 0.25 | 1.18  | 0.546406 | 0.089518 | 0.808468 | 0.343811 |
| MmugDNA.15607.1.S1_at   | MmugDNA.15607.1 | 5.7   | 5.2   | 0.38 | 0.11 | 1.42  | 0.146255 | 0.304561 | 0.52059  | 0.561819 |
| MmugDNA.15609.1.S1_at   | MmugDNA.15609.1 | 11.28 | 11.84 | 0.44 | 0.1  | -1.47 | 0.383047 | 0.439028 | 0.71114  | 0.657802 |
| MmugDNA.1561.1.S1_at    | MmugDNA.1561.1  | 3.82  | 3.61  | 0.22 | 0.2  | 1.16  | 0.864659 | 0.618187 | 0.952416 | 0.77393  |
| MmugDNA.15612.1.S1_at   | MmugDNA.15612.1 | 3.25  | 3.28  | 0.1  | 0.11 | -1.02 | 0.69188  | 0.17128  | 0.880061 | 0.447809 |
| MmugDNA.15613.1.S1_at   | MmugDNA.15613.1 | 10.3  | 10.21 | 0.31 | 0.33 | 1.06  | 0.300538 | 0.03956  | 0.655092 | 0.243891 |
| MmugDNA.15614.1.S1_at   | MmugDNA.15614.1 | 8.58  | 8.26  | 0.2  | 0.08 | 1.25  | 0.02607  | 0.04269  | 0.323344 | 0.251049 |
| MmugDNA.15618.1.S1_s_at | MmugDNA.15618.1 | 4.57  | 3.63  | 0.93 | 0.25 | 1.93  | 0.350109 | 0.099215 | 0.691084 | 0.357394 |
| MmugDNA.15619.1.S1_at   | MmugDNA.15619.1 | 6.31  | 6.27  | 0.18 | 0.19 | 1.03  | 0.833382 | 0.938747 | 0.940218 | 0.965165 |
| MmugDNA.15619.1.S1_s_at | MmugDNA.15619.1 | 6.35  | 6.25  | 0.27 | 0.12 | 1.08  | 0.246985 | 0.23247  | 0.612582 | 0.504244 |
| MmugDNA.1562.1.S1_at    | MmugDNA.1562.1  | 5.36  | 5.39  | 0.29 | 0.02 | -1.02 | 0.82964  | 0.953003 | 0.938862 | 0.973367 |
| MmugDNA.15622.1.S1_at   | MmugDNA.15622.1 | 4.02  | 3.99  | 0.22 | 0.27 | 1.02  | 0.84571  | 0.511711 | 0.945907 | 0.705797 |
| MmugDNA.15623.1.S1_at   | MmugDNA.15623.1 | 4.3   | 4.17  | 0.06 | 0.15 | 1.09  | 0.145872 | 0.14249  | 0.520572 | 0.416082 |
| MmugDNA.15624.1.S1_at   | MmugDNA.15624.1 | 4.69  | 4.57  | 0.11 | 0.11 | 1.09  | 0.115792 | 0.129339 | 0.489123 | 0.400748 |
| MmugDNA.15627.1.S1_at   | MmugDNA.15627.1 | 4.51  | 4.48  | 0.1  | 0.05 | 1.03  | 0.87583  | 0.888936 | 0.956816 | 0.936725 |
| MmugDNA.15628.1.S1_at   | MmugDNA.15628.1 | 3.14  | 3.11  | 0.24 | 0.18 | 1.02  | 0.584618 | 0.796009 | 0.829799 | 0.882479 |
| MmugDNA.15629.1.S1_at   | MmugDNA.15629.1 | 6.41  | 6.41  | 0.19 | 0.25 | -1    | 0.532545 | 0.49474  | 0.800346 | 0.695061 |
| MmugDNA.15630.1.S1_at   | MmugDNA.15630.1 | 5.38  | 5.31  | 0.06 | 0.2  | 1.05  | 0.622028 | 0.450861 | 0.847631 | 0.665869 |
| MmugDNA.15632.1.S1_at   | MmugDNA.15632.1 | 4.7   | 4.71  | 0.06 | 0.05 | -1    | 0.608149 | 0.659963 | 0.84104  | 0.801008 |
| MmugDNA.15635.1.S1_at   | MmugDNA.15635.1 | 5.72  | 5.79  | 0.17 | 0    | -1.05 | 0.477276 | 0.114634 | 0.769812 | 0.381156 |
| MmugDNA.15636.1.S1_at   | MmugDNA.15636.1 | 4.08  | 4.04  | 0.37 | 0.29 | 1.03  | 0.866735 | 0.338318 | 0.953168 | 0.585417 |
| MmugDNA.15640.1.S1_at   | MmugDNA.15640.1 | 3.39  | 3.19  | 0.11 | 0.11 | 1.15  | 0.085945 | 0.182564 | 0.453262 | 0.459065 |
| MmugDNA.15643.1.S1_at   | MmugDNA.15643.1 | 7.35  | 7.56  | 0.27 | 0.15 | -1.16 | 0.339117 | 0.285343 | 0.683572 | 0.547198 |
| MmugDNA.15644.1.S1_at   | MmugDNA.15644.1 | 5.03  | 4.98  | 0.11 | 0.13 | 1.04  | 0.339813 | 0.57732  | 0.684042 | 0.747838 |
| MmugDNA.15645.1.S1_at   | MmugDNA.15645.1 | 5.18  | 5.18  | 0.17 | 0.03 | 1     | 0.31404  | 0.464245 | 0.665    | 0.674983 |
| MmugDNA.15648.1.S1_at   | MmugDNA.15648.1 | 8.69  | 8     | 0.63 | 0.27 | 1.61  | 0.525262 | 0.665597 | 0.796198 | 0.804075 |
| MmugDNA.15649.1.S1_at   | MmugDNA.15649.1 | 8.29  | 7.73  | 0.88 | 0.22 | 1.47  | 0.340121 | 0.065261 | 0.684293 | 0.301239 |
| MmugDNA.1565.1.S1_at    | MmugDNA.1565.1  | 3.44  | 3.54  | 0.15 | 0.11 | -1.07 | 0.279478 | 0.345085 | 0.638358 | 0.590354 |
| MmugDNA.15650.1.S1_s_at | MmugDNA.15650.1 | 9.14  | 8.4   | 0.51 | 0.12 | 1.66  | 0.027935 | 0.00204  | 0.330017 | 0.066887 |
| MmugDNA.15651.1.S1_at   | MmugDNA.15651.1 | 7.73  | 7.18  | 1    | 0.41 | 1.46  | 0.265327 | 0.063231 | 0.626435 | 0.298187 |
| MmugDNA.15652.1.S1_at   | MmugDNA.15652.1 | 13.08 | 12.97 | 0.13 | 0.02 | 1.08  | 0.167462 | 0.000734 | 0.540065 | 0.04476  |
| MmugDNA.15653.1.S1_at   | MmugDNA.15653.1 | 3.63  | 3.52  | 0.9  | 0.19 | 1.07  | 0.25056  | 0.29231  | 0.615742 | 0.552389 |
| MmugDNA.15654.1.S1_at   | MmugDNA.15654.1 | 12.17 | 11.92 | 0.25 | 0.07 | 1.19  | 0.497932 | 0.021125 | 0.781451 | 0.181957 |
| MmugDNA.15655.1.S1_at   | MmugDNA.15655.1 | 6.88  | 7.04  | 0.47 | 0.1  | -1.11 | 0.647174 | 0.209143 | 0.859341 | 0.482939 |
| MmugDNA.15657.1.S1_at   | MmugDNA.15657.1 | 6.74  | 6.44  | 0.38 | 0.06 | 1.23  | 0.156139 | 0.20439  | 0.52946  | 0.478736 |





|                         |                 |       |       |      |      |       |          |          |          |          |
|-------------------------|-----------------|-------|-------|------|------|-------|----------|----------|----------|----------|
| MmugDNA.15718.1.S1_at   | MmugDNA.15718.1 | 4.71  | 4.72  | 0.17 | 0.03 | -1    | 0.322449 | 0.278434 | 0.67114  | 0.542212 |
| MmugDNA.1572.1.S1_at    | MmugDNA.1572.1  | 6.28  | 6.16  | 0    | 0.15 | 1.08  | 0.315206 | 0.254537 | 0.665641 | 0.522863 |
| MmugDNA.15720.1.S1_at   | MmugDNA.15720.1 | 6.08  | 5.98  | 0.07 | 0.11 | 1.07  | 0.24067  | 0.092852 | 0.606937 | 0.349024 |
| MmugDNA.15722.1.S1_at   | MmugDNA.15722.1 | 5.22  | 5.07  | 0.07 | 0.08 | 1.11  | 0.074384 | 0.157468 | 0.435308 | 0.432984 |
| MmugDNA.15724.1.S1_at   | MmugDNA.15724.1 | 6.71  | 6.74  | 0.08 | 0.1  | -1.02 | 0.350186 | 0.580879 | 0.691084 | 0.749967 |
| MmugDNA.15725.1.S1_at   | MmugDNA.15725.1 | 10.41 | 9.87  | 0.27 | 0.2  | 1.45  | 0.024957 | 0.012172 | 0.320402 | 0.142744 |
| MmugDNA.15727.1.S1_at   | MmugDNA.15727.1 | 6.34  | 6.91  | 0.44 | 0.11 | -1.49 | 0.032057 | 0.015501 | 0.342916 | 0.158044 |
| MmugDNA.15728.1.S1_at   | MmugDNA.15728.1 | 4.39  | 4.7   | 0.32 | 0.36 | -1.24 | 0.303367 | 0.217654 | 0.657248 | 0.491255 |
| MmugDNA.15729.1.S1_at   | MmugDNA.15729.1 | 6     | 6.14  | 0.37 | 0.11 | -1.11 | 0.399177 | 0.390868 | 0.722886 | 0.624588 |
| MmugDNA.1573.1.S1_at    | MmugDNA.1573.1  | 6.06  | 7.83  | 0.29 | 0.12 | -3.41 | 0.000401 | 0.000103 | 0.137028 | 0.028099 |
| MmugDNA.15730.1.S1_at   | MmugDNA.15730.1 | 5.62  | 5.96  | 0.16 | 0.12 | -1.27 | 0.046076 | 0.004412 | 0.37735  | 0.092879 |
| MmugDNA.15731.1.S1_at   | MmugDNA.15731.1 | 6.56  | 6.99  | 0.29 | 0.55 | -1.34 | 0.131205 | 0.207618 | 0.505403 | 0.481906 |
| MmugDNA.15734.1.S1_at   | MmugDNA.15734.1 | 4.61  | 4.57  | 0.28 | 0.14 | 1.03  | 0.316015 | 0.474322 | 0.666249 | 0.68135  |
| MmugDNA.15735.1.S1_at   | MmugDNA.15735.1 | 4.58  | 4.34  | 0.69 | 0.26 | 1.18  | 0.440469 | 0.197452 | 0.748529 | 0.472385 |
| MmugDNA.15736.1.S1_at   | MmugDNA.15736.1 | 7.14  | 7.37  | 0.44 | 0.2  | -1.17 | 0.27893  | 0.153232 | 0.637923 | 0.428062 |
| MmugDNA.15737.1.S1_s_at | MmugDNA.15737.1 | 6.91  | 7.73  | 0.38 | 0.49 | -1.76 | 0.39083  | 0.565413 | 0.71703  | 0.739886 |
| MmugDNA.15738.1.S1_at   | MmugDNA.15738.1 | 10.92 | 9.92  | 1.5  | 0.31 | 2     | 0.310898 | 0.355416 | 0.662774 | 0.597738 |
| MmugDNA.15739.1.S1_at   | MmugDNA.15739.1 | 9     | 9.32  | 0.38 | 0.11 | -1.24 | 0.16674  | 0.343831 | 0.539391 | 0.589516 |
| MmugDNA.1574.1.S1_at    | MmugDNA.1574.1  | 4.48  | 4.31  | 0.22 | 0.37 | 1.13  | 0.881237 | 0.976029 | 0.958973 | 0.986894 |
| MmugDNA.15741.1.S1_at   | MmugDNA.15741.1 | 5.48  | 5.33  | 0.15 | 0.07 | 1.12  | 0.176269 | 0.29485  | 0.549326 | 0.554412 |
| MmugDNA.15742.1.S1_at   | MmugDNA.15742.1 | 11    | 10.99 | 0.04 | 0.04 | 1.01  | 0.703921 | 0.950798 | 0.884923 | 0.972054 |
| MmugDNA.15743.1.S1_at   | MmugDNA.15743.1 | 5.19  | 5.18  | 0.1  | 0.17 | 1.01  | 0.724165 | 0.471497 | 0.893065 | 0.6795   |
| MmugDNA.15745.1.S1_at   | MmugDNA.15745.1 | 9.37  | 9.53  | 0.11 | 0.15 | -1.11 | 0.24321  | 0.64057  | 0.609118 | 0.789015 |
| MmugDNA.15748.1.S1_at   | MmugDNA.15748.1 | 7.67  | 7.37  | 0.31 | 0.04 | 1.23  | 0.099108 | 0.207441 | 0.468468 | 0.481698 |
| MmugDNA.15749.1.S1_at   | MmugDNA.15749.1 | 8.5   | 9.52  | 1.13 | 0.17 | -2.04 | 0.618004 | 0.557325 | 0.84578  | 0.735031 |
| MmugDNA.1575.1.S1_at    | MmugDNA.1575.1  | 8.45  | 8.82  | 0.35 | 0.09 | -1.29 | 0.128362 | 0.126791 | 0.50293  | 0.397446 |
| MmugDNA.15750.1.S1_at   | MmugDNA.15750.1 | 3.9   | 3.89  | 0.12 | 0.05 | 1.01  | 0.889912 | 0.99337  | 0.962069 | 0.996064 |
| MmugDNA.15753.1.S1_at   | MmugDNA.15753.1 | 3.14  | 3.08  | 0.14 | 0.2  | 1.04  | 0.627531 | 0.833186 | 0.850583 | 0.904313 |
| MmugDNA.15755.1.S1_at   | MmugDNA.15755.1 | 5.77  | 5.36  | 0.59 | 0.23 | 1.34  | 0.361599 | 0.032583 | 0.698663 | 0.223585 |
| MmugDNA.15756.1.S1_at   | MmugDNA.15756.1 | 8.21  | 8.17  | 0.41 | 0.14 | 1.03  | 0.332483 | 0.097059 | 0.678846 | 0.35455  |
| MmugDNA.15757.1.S1_at   | MmugDNA.15757.1 | 3.25  | 3.14  | 0.07 | 0.04 | 1.08  | 0.163277 | 0.18835  | 0.536063 | 0.46433  |
| MmugDNA.15758.1.S1_at   | MmugDNA.15758.1 | 6.8   | 6.32  | 0.32 | 0.15 | 1.39  | 0.081064 | 0.132237 | 0.445056 | 0.404274 |
| MmugDNA.1576.1.S1_at    | MmugDNA.1576.1  | 5.14  | 5.17  | 0.2  | 0.14 | -1.03 | 0.657401 | 0.643602 | 0.864064 | 0.791036 |
| MmugDNA.15761.1.S1_at   | MmugDNA.15761.1 | 5.71  | 5.59  | 0.1  | 0.11 | 1.09  | 0.101656 | 0.226717 | 0.47191  | 0.499176 |
| MmugDNA.15763.1.S1_at   | MmugDNA.15763.1 | 6.48  | 6.18  | 0.98 | 0.19 | 1.23  | 0.470753 | 0.554555 | 0.766191 | 0.733264 |
| MmugDNA.15764.1.S1_at   | MmugDNA.15764.1 | 6.47  | 6.47  | 0.09 | 0.03 | 1     | 0.270921 | 0.445605 | 0.630866 | 0.662468 |
| MmugDNA.15765.1.S1_at   | MmugDNA.15765.1 | 5.65  | 5.67  | 0.09 | 0.02 | -1.01 | 0.412473 | 0.103775 | 0.731995 | 0.364519 |
| MmugDNA.15766.1.S1_at   | MmugDNA.15766.1 | 7.53  | 8.17  | 0.46 | 0.18 | -1.55 | 0.098131 | 0.016137 | 0.467605 | 0.161012 |
| MmugDNA.15767.1.S1_at   | MmugDNA.15767.1 | 7.57  | 6.92  | 1.43 | 0.25 | 1.57  | 0.511845 | 0.372015 | 0.788916 | 0.61084  |
| MmugDNA.15768.1.S1_at   | MmugDNA.15768.1 | 4.34  | 4.49  | 0.21 | 0.17 | -1.11 | 0.178042 | 0.28886  | 0.551187 | 0.549994 |
| MmugDNA.15769.1.S1_at   | MmugDNA.15769.1 | 5.37  | 7.81  | 1.77 | 0.4  | -5.42 | 0.079235 | 0.0405   | 0.442056 | 0.246264 |
| MmugDNA.1577.1.S1_at    | MmugDNA.1577.1  | 3.21  | 3.28  | 0.23 | 0.23 | -1.05 | 0.745545 | 0.46827  | 0.903066 | 0.6777   |
| MmugDNA.15771.1.S1_at   | MmugDNA.15771.1 | 5.85  | 6.53  | 1.01 | 0.08 | -1.6  | 0.862479 | 0.703221 | 0.9516   | 0.827928 |

|                         |                 |       |       |      |      |       |          |          |          |          |
|-------------------------|-----------------|-------|-------|------|------|-------|----------|----------|----------|----------|
| MmugDNA.15772.1.S1_at   | MmugDNA.15772.1 | 8.15  | 8.1   | 0.62 | 0.08 | 1.04  | 0.916787 | 0.370568 | 0.971796 | 0.609618 |
| MmugDNA.15773.1.S1_at   | MmugDNA.15773.1 | 8.61  | 7.74  | 0.36 | 0.24 | 1.83  | 0.024913 | 0.016243 | 0.320287 | 0.161591 |
| MmugDNA.15774.1.S1_at   | MmugDNA.15774.1 | 9.54  | 8.41  | 0.4  | 0.11 | 2.19  | 0.01282  | 0.009196 | 0.265262 | 0.126573 |
| MmugDNA.15776.1.S1_at   | MmugDNA.15776.1 | 6.08  | 7.13  | 0.29 | 0.27 | -2.07 | 0.024233 | 0.086768 | 0.317812 | 0.339521 |
| MmugDNA.15777.1.S1_at   | MmugDNA.15777.1 | 8.57  | 8.6   | 0.57 | 0.4  | -1.02 | 0.449896 | 0.036343 | 0.754621 | 0.235105 |
| MmugDNA.15778.1.S1_at   | MmugDNA.15778.1 | 5.49  | 5.12  | 0.11 | 0.14 | 1.29  | 0.088212 | 0.242472 | 0.45606  | 0.512835 |
| MmugDNA.15779.1.S1_at   | MmugDNA.15779.1 | 7.96  | 7.98  | 0.09 | 0.16 | -1.02 | 0.571281 | 0.007679 | 0.822641 | 0.117153 |
| MmugDNA.1578.1.S1_s_at  | MmugDNA.1578.1  | 14.36 | 14.3  | 0.05 | 0.03 | 1.04  | 0.108785 | 0.095549 | 0.481112 | 0.352627 |
| MmugDNA.15781.1.S1_at   | MmugDNA.15781.1 | 8.49  | 9.04  | 1.49 | 0.21 | -1.46 | 0.593875 | 0.127848 | 0.834469 | 0.398767 |
| MmugDNA.15784.1.S1_at   | MmugDNA.15784.1 | 3.07  | 2.95  | 0.16 | 0.08 | 1.08  | 0.290709 | 0.245234 | 0.647278 | 0.515029 |
| MmugDNA.15785.1.S1_at   | MmugDNA.15785.1 | 3.16  | 2.89  | 0.55 | 0.08 | 1.2   | 0.20717  | 0.25443  | 0.578774 | 0.522732 |
| MmugDNA.15786.1.S1_at   | MmugDNA.15786.1 | 5.87  | 5.84  | 0.2  | 0.03 | 1.02  | 0.251978 | 0.692929 | 0.616976 | 0.821308 |
| MmugDNA.15787.1.S1_at   | MmugDNA.15787.1 | 6.43  | 6.5   | 0.77 | 0.46 | -1.05 | 0.823741 | 0.656897 | 0.936367 | 0.799401 |
| MmugDNA.15788.1.S1_at   | MmugDNA.15788.1 | 7.52  | 7.45  | 0.04 | 0.08 | 1.05  | 0.960488 | 0.030407 | 0.987213 | 0.216319 |
| MmugDNA.15789.1.S1_at   | MmugDNA.15789.1 | 4.4   | 4.23  | 0.41 | 0.13 | 1.13  | 0.190392 | 0.227564 | 0.561666 | 0.499841 |
| MmugDNA.1579.1.S1_at    | MmugDNA.1579.1  | 4.75  | 4.95  | 0.05 | 0.14 | -1.15 | 0.147262 | 0.32153  | 0.521578 | 0.573226 |
| MmugDNA.15790.1.S1_at   | MmugDNA.15790.1 | 6.36  | 6.14  | 0.65 | 0.12 | 1.17  | 0.432568 | 0.195232 | 0.743936 | 0.470253 |
| MmugDNA.15791.1.S1_x_at | MmugDNA.15791.1 | 4.48  | 4.26  | 0.15 | 0.14 | 1.17  | 0.446389 | 0.526112 | 0.752738 | 0.715385 |
| MmugDNA.15792.1.S1_at   | MmugDNA.15792.1 | 5.49  | 5.36  | 0.05 | 0.22 | 1.1   | 0.192497 | 0.069391 | 0.563577 | 0.309617 |
| MmugDNA.15794.1.S1_at   | MmugDNA.15794.1 | 4.53  | 4.53  | 0.04 | 0.13 | 1     | 0.539395 | 0.68203  | 0.803764 | 0.814299 |
| MmugDNA.15795.1.S1_at   | MmugDNA.15795.1 | 3.38  | 3.23  | 0.03 | 0.06 | 1.11  | 0.061255 | 0.439989 | 0.410357 | 0.658626 |
| MmugDNA.15796.1.S1_at   | MmugDNA.15796.1 | 3.49  | 3.13  | 0.42 | 0.07 | 1.29  | 0.188578 | 0.368962 | 0.560489 | 0.608491 |
| MmugDNA.15797.1.S1_at   | MmugDNA.15797.1 | 5.39  | 5.4   | 0.04 | 0.03 | -1    | 0.29891  | 0.579367 | 0.653465 | 0.749058 |
| MmugDNA.15799.1.S1_at   | MmugDNA.15799.1 | 5.93  | 6.78  | 0.26 | 0.09 | -1.8  | 0.005499 | 0.46402  | 0.208157 | 0.674785 |
| MmugDNA.158.1.S1_at     | MmugDNA.158.1   | 8.19  | 7.83  | 0.34 | 0.04 | 1.28  | 0.115477 | 0.06115  | 0.488793 | 0.293981 |
| MmugDNA.158.1.S1_s_at   | MmugDNA.158.1   | 12.35 | 11.89 | 0.38 | 0.1  | 1.37  | 0.176203 | 0.047057 | 0.549326 | 0.261469 |
| MmugDNA.1580.1.S1_at    | MmugDNA.1580.1  | 4.49  | 4.53  | 0.22 | 0.39 | -1.03 | 0.507583 | 0.392568 | 0.786441 | 0.625813 |
| MmugDNA.15800.1.S1_at   | MmugDNA.15800.1 | 7.67  | 7.73  | 0.28 | 0.17 | -1.04 | 0.790661 | 0.223094 | 0.922991 | 0.49588  |
| MmugDNA.15801.1.S1_at   | MmugDNA.15801.1 | 6.17  | 6.99  | 0.35 | 0.16 | -1.77 | 0.074203 | 0.002197 | 0.434962 | 0.069235 |
| MmugDNA.15803.1.S1_at   | MmugDNA.15803.1 | 6.35  | 5.88  | 0.13 | 0.19 | 1.38  | 0.056212 | 0.196844 | 0.399676 | 0.471968 |
| MmugDNA.2525.1.S1_s_at  | MmugDNA.2525.1  | 5.09  | 5.03  | 0.07 | 0.07 | 1.04  | 0.404888 | 0.203074 | 0.726978 | 0.477343 |
| MmugDNA.15805.1.S1_at   | MmugDNA.15805.1 | 4.63  | 4.05  | 0.54 | 0.07 | 1.5   | 0.431826 | 0.592755 | 0.743599 | 0.75786  |
| MmugDNA.15806.1.S1_at   | MmugDNA.15806.1 | 7.86  | 7.59  | 0.8  | 0.17 | 1.21  | 0.710499 | 0.756302 | 0.887305 | 0.858165 |
| MmugDNA.15807.1.S1_at   | MmugDNA.15807.1 | 4.54  | 4.54  | 0.09 | 0.09 | 1     | 0.961622 | 0.063372 | 0.987454 | 0.298403 |
| MmugDNA.15808.1.S1_s_at | MmugDNA.15808.1 | 13.18 | 13.22 | 0.13 | 0.08 | -1.03 | 0.242565 | 0.29377  | 0.608517 | 0.553758 |
| MmugDNA.1581.1.S1_at    | MmugDNA.1581.1  | 13.87 | 13.84 | 0.12 | 0.14 | 1.02  | 0.470521 | 0.514888 | 0.766162 | 0.707931 |
| MmugDNA.1581.1.S1_s_at  | MmugDNA.1581.1  | 13.93 | 13.88 | 0.06 | 0.14 | 1.03  | 0.51732  | 0.571522 | 0.791973 | 0.743824 |
| MmugDNA.15810.1.S1_at   | MmugDNA.15810.1 | 9.3   | 9.24  | 0.48 | 0.11 | 1.04  | 0.997357 | 0.891723 | 0.999096 | 0.938272 |
| MmugDNA.15812.1.S1_at   | MmugDNA.15812.1 | 4.81  | 5.01  | 0.21 | 0.25 | -1.14 | 0.506093 | 0.237164 | 0.785698 | 0.507906 |
| MmugDNA.15813.1.S1_at   | MmugDNA.15813.1 | 5     | 5.85  | 0.54 | 0.61 | -1.8  | 0.314061 | 0.290717 | 0.665    | 0.551382 |
| MmugDNA.15814.1.S1_at   | MmugDNA.15814.1 | 5.06  | 4.9   | 0.16 | 0.02 | 1.12  | 0.148806 | 0.191531 | 0.522743 | 0.466841 |
| MmugDNA.15815.1.S1_at   | MmugDNA.15815.1 | 2.84  | 3.05  | 0.17 | 0.23 | -1.16 | 0.247051 | 0.329063 | 0.612582 | 0.578482 |
| MmugDNA.15816.1.S1_at   | MmugDNA.15816.1 | 9.49  | 10.13 | 0.27 | 0.05 | -1.56 | 0.039085 | 0.006518 | 0.361104 | 0.109602 |

|                         |                 |       |       |      |      |       |          |          |          |          |
|-------------------------|-----------------|-------|-------|------|------|-------|----------|----------|----------|----------|
| MmugDNA.1582.1.S1_at    | MmugDNA.1582.1  | 7.31  | 7.24  | 0.14 | 0.18 | 1.05  | 0.477598 | 0.812007 | 0.76987  | 0.891493 |
| MmugDNA.15823.1.S1_at   | MmugDNA.15823.1 | 7.04  | 6.94  | 0.04 | 0.16 | 1.07  | 0.107658 | 0.171833 | 0.480288 | 0.448237 |
| MmugDNA.15824.1.S1_at   | MmugDNA.15824.1 | 3.78  | 3.7   | 0.11 | 0.1  | 1.06  | 0.097093 | 0.572123 | 0.46573  | 0.744261 |
| MmugDNA.15825.1.S1_at   | MmugDNA.15825.1 | 3.78  | 3.9   | 0.32 | 0.3  | -1.08 | 0.79896  | 0.126075 | 0.926372 | 0.39672  |
| MmugDNA.15826.1.S1_at   | MmugDNA.15826.1 | 3.33  | 3.57  | 0.18 | 0.16 | -1.18 | 0.19372  | 0.288922 | 0.564275 | 0.550032 |
| MmugDNA.15827.1.S1_at   | MmugDNA.15827.1 | 5.47  | 5.45  | 0.14 | 0.15 | 1.01  | 0.703103 | 0.113214 | 0.884538 | 0.379229 |
| MmugDNA.15828.1.S1_at   | MmugDNA.15828.1 | 7.73  | 7.83  | 0.27 | 0.09 | -1.07 | 0.749844 | 0.082231 | 0.905303 | 0.331091 |
| MmugDNA.15829.1.S1_at   | MmugDNA.15829.1 | 8.07  | 8.38  | 0.41 | 0.23 | -1.24 | 0.310811 | 0.354001 | 0.662675 | 0.596966 |
| MmugDNA.15830.1.S1_at   | MmugDNA.15830.1 | 6.56  | 6.53  | 0.02 | 0.03 | 1.02  | 0.847653 | 0.317405 | 0.946572 | 0.570619 |
| MmugDNA.15831.1.S1_at   | MmugDNA.15831.1 | 6.97  | 6.75  | 0.25 | 0.21 | 1.17  | 0.600087 | 0.514821 | 0.837719 | 0.707919 |
| MmugDNA.15832.1.S1_at   | MmugDNA.15832.1 | 5.44  | 5.22  | 0.4  | 0.25 | -1.16 | 0.889271 | 0.687676 | 0.96181  | 0.81766  |
| MmugDNA.15833.1.S1_at   | MmugDNA.15833.1 | 5.8   | 5.87  | 0.33 | 0.2  | -1.05 | 0.809121 | 0.619442 | 0.931038 | 0.774669 |
| MmugDNA.15834.1.S1_at   | MmugDNA.15834.1 | 5.08  | 5.22  | 0.41 | 0.17 | -1.1  | 0.992742 | 0.561245 | 0.997307 | 0.737239 |
| MmugDNA.15836.1.S1_at   | MmugDNA.15836.1 | 7.98  | 8.21  | 1.15 | 0.1  | -1.17 | 0.548567 | 0.48872  | 0.809836 | 0.691325 |
| MmugDNA.15838.1.S1_at   | MmugDNA.15838.1 | 10.7  | 11.13 | 0.5  | 0.01 | -1.35 | 0.189382 | 0.066187 | 0.560894 | 0.302785 |
| MmugDNA.15839.1.S1_at   | MmugDNA.15839.1 | 6.62  | 6.61  | 0.06 | 0.13 | 1.01  | 0.559987 | 0.565088 | 0.816426 | 0.739714 |
| MmugDNA.1584.1.S1_at    | MmugDNA.1584.1  | 8.97  | 8.11  | 0.94 | 0.29 | 1.81  | 0.145904 | 0.190662 | 0.520572 | 0.466119 |
| MmugDNA.15840.1.S1_at   | MmugDNA.15840.1 | 3.54  | 3.39  | 0.12 | 0.05 | 1.11  | 0.482192 | 0.294837 | 0.772277 | 0.554412 |
| MmugDNA.15842.1.S1_at   | MmugDNA.15842.1 | 10.1  | 10.54 | 2.93 | 0.31 | -1.36 | 0.522339 | 0.201099 | 0.795143 | 0.475516 |
| MmugDNA.33376.1.S1_s_at | MmugDNA.33376.1 | 8.08  | 8.17  | 0.15 | 0.08 | -1.06 | 0.483962 | 0.546087 | 0.773436 | 0.727769 |
| MmugDNA.15844.1.S1_at   | MmugDNA.15844.1 | 5.94  | 5.79  | 0.27 | 0.14 | 1.11  | 0.36938  | 0.590077 | 0.704236 | 0.756117 |
| MmugDNA.15845.1.S1_at   | MmugDNA.15845.1 | 2.99  | 2.99  | 0.08 | 0.13 | -1    | 0.85141  | 0.958545 | 0.947639 | 0.976506 |
| MmugDNA.15846.1.S1_at   | MmugDNA.15846.1 | 10.68 | 10.58 | 0.28 | 0.19 | 1.07  | 0.456432 | 0.109625 | 0.75784  | 0.373602 |
| MmugDNA.15848.1.S1_at   | MmugDNA.15848.1 | 3.18  | 3.19  | 0.14 | 0.02 | -1    | 0.50609  | 0.875063 | 0.785698 | 0.929125 |
| MmugDNA.15849.1.S1_s_at | MmugDNA.15849.1 | 13.25 | 13.2  | 0.27 | 0.09 | 1.03  | 0.397037 | 0.599319 | 0.721621 | 0.761415 |
| MmugDNA.1585.1.S1_at    | MmugDNA.1585.1  | 4.49  | 4.81  | 0.56 | 0.31 | -1.25 | 0.657199 | 0.595174 | 0.863937 | 0.759007 |
| MmugDNA.15850.1.S1_at   | MmugDNA.15850.1 | 3.77  | 3.78  | 0.19 | 0.13 | -1.01 | 0.382231 | 0.394287 | 0.710505 | 0.626868 |
| MmugDNA.15852.1.S1_at   | MmugDNA.15852.1 | 4.49  | 4.55  | 0.17 | 0.23 | -1.04 | 0.810245 | 0.133095 | 0.931318 | 0.404734 |
| MmugDNA.15854.1.S1_at   | MmugDNA.15854.1 | 3.25  | 3.25  | 0.07 | 0.17 | 1     | 0.631528 | 0.1647   | 0.852417 | 0.44101  |
| MmugDNA.15855.1.S1_at   | MmugDNA.15855.1 | 5.52  | 4.87  | 0.28 | 0.27 | 1.56  | 0.216147 | 0.27945  | 0.586305 | 0.543049 |
| MmugDNA.15856.1.S1_at   | MmugDNA.15856.1 | 9.3   | 8.64  | 0.5  | 0.48 | 1.57  | 0.163622 | 0.320516 | 0.536394 | 0.572648 |
| MmugDNA.15858.1.S1_at   | MmugDNA.15858.1 | 4.12  | 4.28  | 0.3  | 0.07 | -1.11 | 0.433596 | 0.685175 | 0.744536 | 0.816369 |
| MmugDNA.15862.1.S1_at   | MmugDNA.15862.1 | 13.32 | 13.44 | 0.24 | 0.1  | -1.09 | 0.285691 | 0.01333  | 0.643438 | 0.148042 |
| MmugDNA.15863.1.S1_at   | MmugDNA.15863.1 | 10.46 | 10.12 | 0.28 | 0.12 | 1.26  | 0.11904  | 0.068751 | 0.492539 | 0.308711 |
| MmugDNA.15864.1.S1_at   | MmugDNA.15864.1 | 5.26  | 5.39  | 0.05 | 0.14 | -1.09 | 0.193482 | 0.462043 | 0.564275 | 0.673537 |
| MmugDNA.15866.1.S1_at   | MmugDNA.15866.1 | 3.82  | 4.09  | 0.05 | 0.12 | -1.21 | 0.010594 | 0.007599 | 0.2485   | 0.11661  |
| MmugDNA.15868.1.S1_at   | MmugDNA.15868.1 | 4.94  | 5     | 0.38 | 0.09 | -1.04 | 0.611762 | 0.52909  | 0.842611 | 0.717133 |
| MmugDNA.1587.1.S1_at    | MmugDNA.1587.1  | 5.97  | 6.38  | 0.22 | 0.23 | -1.33 | 0.02367  | 0.009999 | 0.316281 | 0.131262 |
| MmugDNA.15870.1.S1_at   | MmugDNA.15870.1 | 7.27  | 6.57  | 0.27 | 0.14 | 1.62  | 0.026311 | 0.023028 | 0.323925 | 0.189855 |
| MmugDNA.15871.1.S1_at   | MmugDNA.15871.1 | 8.72  | 8.53  | 0.34 | 0.05 | 1.14  | 0.889656 | 0.983515 | 0.961988 | 0.990825 |
| MmugDNA.15872.1.S1_at   | MmugDNA.15872.1 | 4.49  | 4.46  | 0.33 | 0.26 | 1.02  | 0.637181 | 0.821361 | 0.855394 | 0.897125 |
| MmugDNA.15873.1.S1_at   | MmugDNA.15873.1 | 4.89  | 4.75  | 0.29 | 0.08 | 1.1   | 0.860349 | 0.964621 | 0.950769 | 0.980347 |
| MmugDNA.15874.1.S1_at   | MmugDNA.15874.1 | 6.57  | 7.58  | 0.44 | 0.28 | -2.03 | 0.061786 | 0.065954 | 0.411529 | 0.302191 |

|                       |                 |       |       |      |      |       |          |          |          |          |
|-----------------------|-----------------|-------|-------|------|------|-------|----------|----------|----------|----------|
| MmugDNA.15875.1.S1_at | MmugDNA.15875.1 | 6.98  | 7.8   | 0.45 | 0.16 | -1.76 | 0.120887 | 0.064663 | 0.494481 | 0.300314 |
| MmugDNA.15876.1.S1_at | MmugDNA.15876.1 | 7.63  | 6.05  | 0.56 | 0.28 | 2.99  | 0.023322 | 0.106193 | 0.314989 | 0.36856  |
| MmugDNA.15877.1.S1_at | MmugDNA.15877.1 | 5.88  | 5.72  | 0.17 | 0.01 | 1.11  | 0.225837 | 0.532126 | 0.594935 | 0.718995 |
| MmugDNA.15879.1.S1_at | MmugDNA.15879.1 | 8.87  | 8.5   | 0.06 | 0.05 | 1.29  | 0.001564 | 0.001524 | 0.161959 | 0.059307 |
| MmugDNA.1588.1.S1_at  | MmugDNA.1588.1  | 5.66  | 5.6   | 0.02 | 0.2  | 1.04  | 0.680066 | 0.772369 | 0.874524 | 0.867685 |
| MmugDNA.15880.1.S1_at | MmugDNA.15880.1 | 6.06  | 6.05  | 0.27 | 0.11 | 1.01  | 0.677456 | 0.519671 | 0.873508 | 0.711241 |
| MmugDNA.15882.1.S1_at | MmugDNA.15882.1 | 9.91  | 8.93  | 0.47 | 0.26 | 1.96  | 0.024316 | 0.021168 | 0.317812 | 0.182251 |
| MmugDNA.15883.1.S1_at | MmugDNA.15883.1 | 5.37  | 5.32  | 1.04 | 0.35 | 1.03  | 0.257246 | 0.28186  | 0.621021 | 0.544844 |
| MmugDNA.15885.1.S1_at | MmugDNA.15885.1 | 5.83  | 5.78  | 0.15 | 0.17 | 1.04  | 0.534372 | 0.895602 | 0.801361 | 0.940329 |
| MmugDNA.15886.1.S1_at | MmugDNA.15886.1 | 5.46  | 5.18  | 0.23 | 0.17 | 1.21  | 0.192366 | 0.02487  | 0.56355  | 0.19759  |
| MmugDNA.15889.1.S1_at | MmugDNA.15889.1 | 6.64  | 7.52  | 0.48 | 0.51 | -1.84 | 0.046623 | 0.373838 | 0.378317 | 0.61248  |
| MmugDNA.15891.1.S1_at | MmugDNA.15891.1 | 4.3   | 4.41  | 0.12 | 0.27 | -1.08 | 0.462683 | 0.486839 | 0.761724 | 0.690091 |
| MmugDNA.15892.1.S1_at | MmugDNA.15892.1 | 4.26  | 4.07  | 0.31 | 0.16 | 1.14  | 0.718993 | 0.344913 | 0.890843 | 0.590225 |
| MmugDNA.15893.1.S1_at | MmugDNA.15893.1 | 9.78  | 9.66  | 0.15 | 0.12 | 1.08  | 0.144999 | 0.271829 | 0.520238 | 0.536584 |
| MmugDNA.15894.1.S1_at | MmugDNA.15894.1 | 9.11  | 9.89  | 0.24 | 0.22 | -1.71 | 0.037862 | 0.04029  | 0.358096 | 0.245902 |
| MmugDNA.15895.1.S1_at | MmugDNA.15895.1 | 6.88  | 7.12  | 0.29 | 0.04 | -1.18 | 0.206518 | 0.238583 | 0.578354 | 0.509192 |
| MmugDNA.15896.1.S1_at | MmugDNA.15896.1 | 4.86  | 5.07  | 0.21 | 0.6  | -1.16 | 0.845624 | 0.818223 | 0.945907 | 0.895149 |
| MmugDNA.15897.1.S1_at | MmugDNA.15897.1 | 9.69  | 9.79  | 0.45 | 0.2  | -1.07 | 0.7534   | 0.839198 | 0.907028 | 0.908339 |
| MmugDNA.15899.1.S1_at | MmugDNA.15899.1 | 4.87  | 4.87  | 0.06 | 0.09 | -1    | 0.335256 | 0.434054 | 0.680801 | 0.654223 |
| MmugDNA.1590.1.S1_at  | MmugDNA.1590.1  | 3.67  | 3.66  | 0.42 | 0.11 | 1.01  | 0.793637 | 0.122575 | 0.924414 | 0.39249  |
| MmugDNA.15900.1.S1_at | MmugDNA.15900.1 | 3.63  | 3.5   | 0.17 | 0.06 | 1.1   | 0.185745 | 0.242407 | 0.558625 | 0.51282  |
| MmugDNA.15901.1.S1_at | MmugDNA.15901.1 | 10.89 | 10.43 | 0.39 | 0.16 | 1.38  | 0.079984 | 0.114746 | 0.443128 | 0.381295 |
| MmugDNA.15902.1.S1_at | MmugDNA.15902.1 | 2.89  | 2.81  | 0.2  | 0.06 | 1.05  | 0.984477 | 0.972369 | 0.995256 | 0.985097 |
| MmugDNA.15903.1.S1_at | MmugDNA.15903.1 | 3.98  | 3.76  | 0.26 | 0.16 | 1.16  | 0.14219  | 0.388872 | 0.517194 | 0.623206 |
| MmugDNA.15905.1.S1_at | MmugDNA.15905.1 | 5.01  | 4.84  | 0.07 | 0.3  | 1.13  | 0.984694 | 0.944093 | 0.995256 | 0.968306 |
| MmugDNA.15907.1.S1_at | MmugDNA.15907.1 | 4.37  | 4.29  | 0.1  | 0.09 | 1.06  | 0.309828 | 0.559426 | 0.661834 | 0.736296 |
| MmugDNA.15908.1.S1_at | MmugDNA.15908.1 | 3.71  | 3.71  | 0.02 | 0.02 | -1    | 0.180659 | 0.322538 | 0.553878 | 0.573991 |
| MmugDNA.15909.1.S1_at | MmugDNA.15909.1 | 7.19  | 7.45  | 0.29 | 0.16 | -1.2  | 0.458973 | 0.590984 | 0.759235 | 0.756566 |
| MmugDNA.1591.1.S1_at  | MmugDNA.1591.1  | 6.29  | 6.96  | 1.1  | 0.02 | -1.59 | 0.475439 | 0.465377 | 0.768639 | 0.675748 |
| MmugDNA.15910.1.S1_at | MmugDNA.15910.1 | 6.33  | 6.19  | 0.2  | 0.05 | 1.1   | 0.896289 | 0.564123 | 0.964545 | 0.738997 |
| MmugDNA.15914.1.S1_at | MmugDNA.15914.1 | 5.82  | 5.62  | 0.14 | 0.03 | 1.15  | 0.176653 | 0.243628 | 0.549766 | 0.513777 |
| MmugDNA.15915.1.S1_at | MmugDNA.15915.1 | 4.6   | 4.29  | 0.42 | 0.1  | 1.24  | 0.15485  | 0.212494 | 0.528178 | 0.486502 |
| MmugDNA.15919.1.S1_at | MmugDNA.15919.1 | 5     | 4.83  | 0.1  | 0.12 | 1.13  | 0.136065 | 0.115782 | 0.510598 | 0.382814 |
| MmugDNA.1592.1.S1_at  | MmugDNA.1592.1  | 3.24  | 3.19  | 0.16 | 0.06 | 1.04  | 0.330486 | 0.387239 | 0.677123 | 0.622004 |
| MmugDNA.15920.1.S1_at | MmugDNA.15920.1 | 5.01  | 5.23  | 0.43 | 0.24 | -1.16 | 0.689643 | 0.342352 | 0.879045 | 0.588413 |
| MmugDNA.15922.1.S1_at | MmugDNA.15922.1 | 3.23  | 3.33  | 0.18 | 0.05 | -1.07 | 0.665895 | 0.906147 | 0.868171 | 0.946915 |
| MmugDNA.15924.1.S1_at | MmugDNA.15924.1 | 3.43  | 3.83  | 0.1  | 0.19 | -1.32 | 0.01907  | 0.161428 | 0.29977  | 0.437604 |
| MmugDNA.15925.1.S1_at | MmugDNA.15925.1 | 3.95  | 3.81  | 0.18 | 0.21 | 1.1   | 0.09223  | 0.073043 | 0.460762 | 0.316017 |
| MmugDNA.15926.1.S1_at | MmugDNA.15926.1 | 4.37  | 4.28  | 0.07 | 0.1  | 1.06  | 0.230248 | 0.280108 | 0.598481 | 0.543369 |
| MmugDNA.15928.1.S1_at | MmugDNA.15928.1 | 5.79  | 5.73  | 0.37 | 0.32 | 1.05  | 0.309333 | 0.606219 | 0.661672 | 0.765727 |
| MmugDNA.15929.1.S1_at | MmugDNA.15929.1 | 8.94  | 9.1   | 0.21 | 0.22 | -1.12 | 0.589309 | 0.001291 | 0.832298 | 0.055585 |
| MmugDNA.1593.1.S1_at  | MmugDNA.1593.1  | 5.5   | 5.43  | 0.06 | 0.32 | 1.05  | 0.919854 | 0.857752 | 0.972834 | 0.918846 |
| MmugDNA.15930.1.S1_at | MmugDNA.15930.1 | 6.19  | 5.84  | 0.08 | 0.15 | 1.27  | 0.019693 | 0.014656 | 0.302208 | 0.154231 |

|                         |                 |       |       |      |      |       |          |          |          |          |
|-------------------------|-----------------|-------|-------|------|------|-------|----------|----------|----------|----------|
| MmugDNA.15931.1.S1_at   | MmugDNA.15931.1 | 3.34  | 2.99  | 0.75 | 0.05 | 1.28  | 0.373803 | 0.513941 | 0.705567 | 0.707322 |
| MmugDNA.15933.1.S1_at   | MmugDNA.15933.1 | 7.54  | 8.24  | 0.37 | 0.11 | -1.63 | 0.038471 | 0.015672 | 0.359469 | 0.158598 |
| MmugDNA.17973.1.S1_s_at | MmugDNA.17973.1 | 9.96  | 10.05 | 0.43 | 0.07 | -1.07 | 0.915679 | 0.642124 | 0.971302 | 0.790028 |
| MmugDNA.15935.1.S1_s_at | MmugDNA.15935.1 | 5.17  | 5.23  | 0.77 | 0.24 | -1.04 | 0.827285 | 0.519305 | 0.938039 | 0.710961 |
| MmugDNA.15936.1.S1_at   | MmugDNA.15936.1 | 9.47  | 9.21  | 0.5  | 0.23 | 1.2   | 0.32184  | 0.418735 | 0.670537 | 0.643089 |
| MmugDNA.15936.1.S1_s_at | MmugDNA.15936.1 | 11    | 10.52 | 0.28 | 0.17 | 1.39  | 0.046293 | 0.125529 | 0.377679 | 0.396226 |
| MmugDNA.15937.1.S1_at   | MmugDNA.15937.1 | 5.92  | 5.76  | 0.1  | 0.08 | 1.11  | 0.095006 | 0.413104 | 0.464131 | 0.639419 |
| MmugDNA.15939.1.S1_at   | MmugDNA.15939.1 | 10    | 9.02  | 0.47 | 0.16 | 1.97  | 0.054845 | 0.042914 | 0.397122 | 0.251759 |
| MmugDNA.1594.1.S1_at    | MmugDNA.1594.1  | 11.56 | 11.81 | 0.63 | 0.04 | -1.19 | 0.163031 | 0.040934 | 0.536035 | 0.247161 |
| MmugDNA.15941.1.S1_at   | MmugDNA.15941.1 | 3.64  | 3.94  | 0.07 | 0.3  | -1.23 | 0.642143 | 0.499741 | 0.857628 | 0.698494 |
| MmugDNA.15942.1.S1_at   | MmugDNA.15942.1 | 6.92  | 6.58  | 0.19 | 0.04 | -1.26 | 0.113072 | 0.01924  | 0.486528 | 0.174494 |
| MmugDNA.15942.1.S1_s_at | MmugDNA.15942.1 | 5.65  | 5.58  | 0.08 | 0.1  | 1.05  | 0.138228 | 0.226905 | 0.513671 | 0.499276 |
| MmugDNA.15945.1.S1_at   | MmugDNA.15945.1 | 5.41  | 5.45  | 0.06 | 0.02 | -1.03 | 0.257815 | 0.592475 | 0.621456 | 0.757832 |
| MmugDNA.15946.1.S1_at   | MmugDNA.15946.1 | 5.94  | 5.92  | 0.61 | 0.28 | 1.02  | 0.272891 | 0.555166 | 0.632536 | 0.733715 |
| MmugDNA.15947.1.S1_at   | MmugDNA.15947.1 | 5.33  | 5.2   | 0.16 | 0.12 | 1.1   | 0.810393 | 0.663244 | 0.931335 | 0.802876 |
| MmugDNA.1595.1.S1_at    | MmugDNA.1595.1  | 3.69  | 3.78  | 0.11 | 0.04 | -1.07 | 0.139049 | 0.640673 | 0.514459 | 0.789053 |
| MmugDNA.15950.1.S1_at   | MmugDNA.15950.1 | 10.68 | 10.34 | 0.32 | 0.1  | 1.26  | 0.168787 | 0.067625 | 0.541668 | 0.306185 |
| MmugDNA.15951.1.S1_at   | MmugDNA.15951.1 | 11.91 | 11.68 | 0.04 | 0.23 | 1.17  | 0.047498 | 0.000754 | 0.38045  | 0.045364 |
| MmugDNA.15952.1.S1_at   | MmugDNA.15952.1 | 7.5   | 7.38  | 0.59 | 0.17 | 1.09  | 0.228654 | 0.270836 | 0.597571 | 0.536026 |
| MmugDNA.15953.1.S1_at   | MmugDNA.15953.1 | 4.96  | 4.85  | 0.15 | 0.08 | 1.08  | 0.178634 | 0.167915 | 0.551451 | 0.444485 |
| MmugDNA.15956.1.S1_at   | MmugDNA.15956.1 | 4.15  | 4.01  | 0.64 | 0.44 | 1.1   | 0.306966 | 0.374728 | 0.659867 | 0.613037 |
| MmugDNA.15958.1.S1_at   | MmugDNA.15958.1 | 5.47  | 5.27  | 0.08 | 0.05 | 1.14  | 0.055575 | 0.090561 | 0.398856 | 0.345026 |
| MmugDNA.15963.1.S1_at   | MmugDNA.15963.1 | 6.7   | 6.54  | 0.42 | 0.58 | 1.12  | 0.856693 | 0.98727  | 0.949506 | 0.992852 |
| MmugDNA.15964.1.S1_at   | MmugDNA.15964.1 | 4.46  | 4.48  | 0.32 | 0.2  | -1.01 | 0.720392 | 0.069736 | 0.891578 | 0.310191 |
| MmugDNA.28448.1.S1_s_at | MmugDNA.28448.1 | 7.76  | 7.62  | 0.14 | 0.07 | 1.11  | 0.119867 | 0.408846 | 0.493259 | 0.6359   |
| MmugDNA.15966.1.S1_at   | MmugDNA.15966.1 | 8.93  | 9.09  | 0.07 | 0.17 | -1.12 | 0.10435  | 0.009654 | 0.475417 | 0.129267 |
| MmugDNA.15967.1.S1_at   | MmugDNA.15967.1 | 6.06  | 6.7   | 0.42 | 0.15 | -1.56 | 0.198148 | 0.85425  | 0.569361 | 0.916971 |
| MmugDNA.15968.1.S1_at   | MmugDNA.15968.1 | 6.23  | 7.37  | 0.54 | 0.17 | -2.21 | 0.013865 | 0.027914 | 0.272841 | 0.208547 |
| MmugDNA.1597.1.S1_at    | MmugDNA.1597.1  | 4.05  | 3.9   | 0.12 | 0.06 | 1.11  | 0.172496 | 0.153731 | 0.545782 | 0.428413 |
| MmugDNA.15970.1.S1_at   | MmugDNA.15970.1 | 4.91  | 4.68  | 0.07 | 0.07 | 1.17  | 0.047704 | 0.184778 | 0.38112  | 0.460661 |
| MmugDNA.15971.1.S1_at   | MmugDNA.15971.1 | 4.36  | 3.95  | 0.15 | 0.08 | 1.33  | 0.005123 | 0.001361 | 0.205468 | 0.056687 |
| MmugDNA.15972.1.S1_at   | MmugDNA.15972.1 | 5.92  | 6.9   | 2.03 | 0.08 | -1.98 | 0.867031 | 0.894215 | 0.953339 | 0.939665 |
| MmugDNA.15973.1.S1_s_at | MmugDNA.15973.1 | 5.92  | 5.56  | 0.27 | 0.12 | 1.28  | 0.184274 | 0.252956 | 0.557009 | 0.521261 |
| MmugDNA.15975.1.S1_at   | MmugDNA.15975.1 | 6.22  | 6.14  | 0.11 | 0.05 | 1.06  | 0.423962 | 0.268067 | 0.739366 | 0.533841 |
| MmugDNA.15976.1.S1_at   | MmugDNA.15976.1 | 9.36  | 9.27  | 0.53 | 0.11 | 1.06  | 0.810617 | 0.555313 | 0.93135  | 0.733767 |
| MmugDNA.15977.1.S1_at   | MmugDNA.15977.1 | 6.35  | 6.19  | 0.17 | 0.12 | 1.12  | 0.721366 | 0.00876  | 0.891996 | 0.124009 |
| MmugDNA.15979.1.S1_at   | MmugDNA.15979.1 | 3.32  | 3.32  | 0    | 0.04 | 1     | 0.373901 | 0.651321 | 0.705567 | 0.796191 |
| MmugDNA.1598.1.S1_at    | MmugDNA.1598.1  | 6.25  | 6.19  | 0.04 | 0.24 | 1.04  | 0.657843 | 0.915466 | 0.864279 | 0.952567 |
| MmugDNA.15980.1.S1_at   | MmugDNA.15980.1 | 4.62  | 4.21  | 0.56 | 0.52 | 1.33  | 0.738523 | 0.224683 | 0.899959 | 0.497614 |
| MmugDNA.15981.1.S1_at   | MmugDNA.15981.1 | 11.28 | 11.35 | 0.15 | 0.11 | -1.05 | 0.806015 | 0.028384 | 0.929569 | 0.210319 |
| MmugDNA.15982.1.S1_at   | MmugDNA.15982.1 | 5.55  | 4.95  | 0.23 | 0.04 | 1.51  | 0.011363 | 0.058445 | 0.254437 | 0.288529 |
| MmugDNA.15985.1.S1_s_at | MmugDNA.15985.1 | 10.82 | 10.64 | 0.12 | 0.03 | 1.13  | 0.083322 | 0.32241  | 0.449112 | 0.573972 |
| MmugDNA.15988.1.S1_s_at | MmugDNA.15988.1 | 4.21  | 4.06  | 0.07 | 0.09 | 1.11  | 0.19187  | 0.375989 | 0.56298  | 0.613815 |

|                         |                 |       |       |      |      |       |          |          |          |          |
|-------------------------|-----------------|-------|-------|------|------|-------|----------|----------|----------|----------|
| MmugDNA.15989.1.S1_s_at | MmugDNA.15989.1 | 4.4   | 4.32  | 0.14 | 0.08 | 1.05  | 0.870429 | 0.404887 | 0.954929 | 0.633393 |
| MmugDNA.15991.1.S1_at   | MmugDNA.15991.1 | 3.32  | 3.31  | 0.79 | 0.05 | 1.01  | 0.3911   | 0.345424 | 0.717437 | 0.590736 |
| MmugDNA.15996.1.S1_s_at | MmugDNA.15996.1 | 13.84 | 13.79 | 0.11 | 0.02 | 1.03  | 0.370273 | 0.194408 | 0.704572 | 0.469481 |
| MmugDNA.15998.1.S1_at   | MmugDNA.15998.1 | 6.41  | 6.56  | 0.22 | 0.07 | -1.11 | 0.42387  | 0.405693 | 0.739315 | 0.633894 |
| MmugDNA.15999.1.S1_at   | MmugDNA.15999.1 | 10.35 | 10.09 | 0.16 | 0.1  | 1.2   | 0.052326 | 0.00031  | 0.392196 | 0.035135 |
| MmugDNA.160.1.S1_at     | MmugDNA.160.1   | 4.17  | 4.49  | 0.17 | 0.31 | -1.24 | 0.354594 | 0.227313 | 0.694116 | 0.499643 |
| MmugDNA.1600.1.S1_at    | MmugDNA.1600.1  | 3.47  | 3.56  | 0.08 | 0.01 | -1.06 | 0.169114 | 0.251921 | 0.542061 | 0.520632 |
| MmugDNA.16000.1.S1_at   | MmugDNA.16000.1 | 5.94  | 6.24  | 0.56 | 0.36 | -1.22 | 0.667184 | 0.546004 | 0.868543 | 0.727708 |
| MmugDNA.16001.1.S1_s_at | MmugDNA.16001.1 | 9.65  | 10.68 | 0.59 | 0.12 | -2.04 | 0.048275 | 0.406482 | 0.382735 | 0.634352 |
| MmugDNA.16003.1.S1_at   | MmugDNA.16003.1 | 5.48  | 5.43  | 0.3  | 0.13 | 1.04  | 0.519149 | 0.658259 | 0.793113 | 0.800244 |
| MmugDNA.16004.1.S1_at   | MmugDNA.16004.1 | 3.27  | 3.35  | 0.3  | 0.13 | -1.06 | 0.971073 | 0.569756 | 0.990579 | 0.742626 |
| MmugDNA.16005.1.S1_at   | MmugDNA.16005.1 | 3.16  | 3.12  | 0.07 | 0.07 | 1.03  | 0.483395 | 0.375101 | 0.773041 | 0.613186 |
| MmugDNA.16006.1.S1_at   | MmugDNA.16006.1 | 7.98  | 8.11  | 0.09 | 0.08 | -1.1  | 0.05185  | 0.000352 | 0.391521 | 0.037121 |
| MmugDNA.16007.1.S1_at   | MmugDNA.16007.1 | 3.46  | 3.22  | 0.28 | 0.16 | 1.18  | 0.274226 | 0.317404 | 0.633792 | 0.570619 |
| MmugDNA.16008.1.S1_at   | MmugDNA.16008.1 | 5.91  | 6.17  | 0.22 | 0.03 | -1.2  | 0.136354 | 0.48565  | 0.511193 | 0.68924  |
| MmugDNA.16009.1.S1_at   | MmugDNA.16009.1 | 5.18  | 5.07  | 0.11 | 0.2  | 1.08  | 0.150227 | 0.128821 | 0.523864 | 0.400277 |
| MmugDNA.16014.1.S1_at   | MmugDNA.16014.1 | 4.78  | 4.81  | 0.04 | 0.06 | -1.02 | 0.613653 | 0.032034 | 0.843603 | 0.221575 |
| MmugDNA.16015.1.S1_at   | MmugDNA.16015.1 | 7.03  | 6.89  | 0.28 | 0.1  | 1.1   | 0.314444 | 0.406633 | 0.665162 | 0.634468 |
| MmugDNA.16016.1.S1_at   | MmugDNA.16016.1 | 5.93  | 5.66  | 0.75 | 0.31 | 1.2   | 0.486001 | 0.527928 | 0.774427 | 0.716348 |
| MmugDNA.16017.1.S1_at   | MmugDNA.16017.1 | 3.12  | 2.99  | 0.29 | 0.2  | 1.1   | 0.861229 | 0.926815 | 0.951227 | 0.958404 |
| MmugDNA.16018.1.S1_at   | MmugDNA.16018.1 | 7.25  | 7.13  | 0.04 | 0.04 | 1.08  | 0.045061 | 0.78897  | 0.375796 | 0.878011 |
| MmugDNA.16019.1.S1_at   | MmugDNA.16019.1 | 5.22  | 5.14  | 0.22 | 0.08 | 1.06  | 0.446665 | 0.39523  | 0.752779 | 0.62738  |
| MmugDNA.1602.1.S1_at    | MmugDNA.1602.1  | 3.78  | 3.6   | 0.15 | 0.08 | 1.14  | 0.261966 | 0.21961  | 0.624194 | 0.49321  |
| MmugDNA.21938.1.S1_s_at | MmugDNA.21938.1 | 6.95  | 7.04  | 0.61 | 0.12 | -1.07 | 0.816726 | 0.782692 | 0.933716 | 0.874202 |
| MmugDNA.16023.1.S1_at   | MmugDNA.16023.1 | 9.63  | 10.04 | 0.1  | 0.05 | -1.33 | 0.003851 | 0.076804 | 0.198541 | 0.322252 |
| MmugDNA.16026.1.S1_at   | MmugDNA.16026.1 | 10.82 | 10.62 | 0.66 | 0.08 | 1.15  | 0.826054 | 0.497073 | 0.937614 | 0.696431 |
| MmugDNA.16027.1.S1_at   | MmugDNA.16027.1 | 8.15  | 8     | 0.16 | 0.12 | 1.11  | 0.051752 | 0.043922 | 0.391227 | 0.254098 |
| MmugDNA.16029.1.S1_at   | MmugDNA.16029.1 | 3.36  | 3.26  | 0.09 | 0.1  | 1.08  | 0.694068 | 0.123002 | 0.880942 | 0.392923 |
| MmugDNA.16030.1.S1_at   | MmugDNA.16030.1 | 3.56  | 3.43  | 0.22 | 0.13 | 1.09  | 0.499406 | 0.615669 | 0.782027 | 0.772141 |
| MmugDNA.16032.1.S1_at   | MmugDNA.16032.1 | 3.21  | 3.04  | 0.08 | 0.05 | 1.12  | 0.074687 | 0.423046 | 0.435313 | 0.646145 |
| MmugDNA.16033.1.S1_at   | MmugDNA.16033.1 | 12.59 | 12.19 | 0.17 | 0.08 | 1.32  | 0.016658 | 0.001882 | 0.287478 | 0.064979 |
| MmugDNA.16034.1.S1_at   | MmugDNA.16034.1 | 3.25  | 3.12  | 0.08 | 0.21 | 1.09  | 0.703916 | 0.373114 | 0.884923 | 0.61196  |
| MmugDNA.16035.1.S1_at   | MmugDNA.16035.1 | 5.42  | 5.62  | 0.05 | 0.08 | -1.15 | 0.010839 | 0.655871 | 0.250427 | 0.798739 |
| MmugDNA.16036.1.S1_at   | MmugDNA.16036.1 | 6.79  | 6.67  | 0.03 | 0.02 | 1.08  | 0.007629 | 0.176275 | 0.230204 | 0.452719 |
| MmugDNA.16037.1.S1_at   | MmugDNA.16037.1 | 3.72  | 3.62  | 0.11 | 0.09 | 1.07  | 0.318302 | 0.216364 | 0.667979 | 0.489938 |
| MmugDNA.16038.1.S1_at   | MmugDNA.16038.1 | 3.24  | 3.05  | 0.13 | 0.13 | 1.14  | 0.084604 | 0.090618 | 0.451141 | 0.345151 |
| MmugDNA.16039.1.S1_at   | MmugDNA.16039.1 | 5.97  | 5.85  | 0.04 | 0.11 | 1.09  | 0.126387 | 0.000339 | 0.500221 | 0.036516 |
| MmugDNA.1604.1.S1_at    | MmugDNA.1604.1  | 4.84  | 4.83  | 0.28 | 0.31 | 1.01  | 0.589845 | 0.037317 | 0.832674 | 0.237622 |
| MmugDNA.16042.1.S1_at   | MmugDNA.16042.1 | 7.26  | 6.83  | 0.25 | 0    | 1.35  | 0.115113 | 0.099745 | 0.488314 | 0.358295 |
| MmugDNA.16043.1.S1_at   | MmugDNA.16043.1 | 5.49  | 5.63  | 0.05 | 0.09 | -1.1  | 0.078802 | 0.291449 | 0.441464 | 0.551823 |
| MmugDNA.16044.1.S1_at   | MmugDNA.16044.1 | 5.47  | 5.37  | 0.05 | 0.04 | 1.07  | 0.040102 | 0.404853 | 0.363326 | 0.633361 |
| MmugDNA.16046.1.S1_at   | MmugDNA.16046.1 | 5.31  | 5.2   | 0.15 | 0.15 | 1.07  | 0.283512 | 0.309108 | 0.641408 | 0.564787 |
| MmugDNA.16047.1.S1_at   | MmugDNA.16047.1 | 11.24 | 11.11 | 0.06 | 0.04 | 1.1   | 0.030997 | 0.006466 | 0.339397 | 0.109304 |

|                       |                 |       |       |      |      |       |          |          |          |          |
|-----------------------|-----------------|-------|-------|------|------|-------|----------|----------|----------|----------|
| MmugDNA.1605.1.S1_at  | MmugDNA.1605.1  | 6.43  | 6.48  | 0.05 | 0.04 | -1.03 | 0.979516 | 0.743311 | 0.993506 | 0.851281 |
| MmugDNA.16055.1.S1_at | MmugDNA.16055.1 | 3.51  | 3.33  | 0.19 | 0.02 | 1.14  | 0.584985 | 0.933131 | 0.830162 | 0.962029 |
| MmugDNA.16056.1.S1_at | MmugDNA.16056.1 | 3.87  | 4.02  | 0.13 | 0.14 | -1.11 | 0.655617 | 0.09842  | 0.863222 | 0.356538 |
| MmugDNA.16061.1.S1_at | MmugDNA.16061.1 | 4.3   | 4.52  | 0.16 | 0.36 | -1.17 | 0.397241 | 0.789917 | 0.721717 | 0.878631 |
| MmugDNA.16064.1.S1_at | MmugDNA.16064.1 | 6.67  | 6.47  | 0.26 | 0.07 | 1.15  | 0.877086 | 0.502378 | 0.957122 | 0.700134 |
| MmugDNA.16065.1.S1_at | MmugDNA.16065.1 | 3.83  | 4.08  | 0.15 | 0.09 | -1.18 | 0.130892 | 0.462768 | 0.505301 | 0.674113 |
| MmugDNA.16066.1.S1_at | MmugDNA.16066.1 | 3.87  | 3.8   | 0.04 | 0.22 | 1.05  | 0.493952 | 0.811355 | 0.779161 | 0.891139 |
| MmugDNA.16067.1.S1_at | MmugDNA.16067.1 | 11.88 | 11.43 | 0.19 | 0    | 1.37  | 0.006977 | 0.00166  | 0.225012 | 0.061666 |
| MmugDNA.16068.1.S1_at | MmugDNA.16068.1 | 5.54  | 5.54  | 0.07 | 0.14 | 1     | 0.27414  | 0.55746  | 0.633792 | 0.735045 |
| MmugDNA.1607.1.S1_at  | MmugDNA.1607.1  | 7.76  | 7.91  | 0.66 | 0.29 | -1.11 | 0.471529 | 0.125589 | 0.76658  | 0.396226 |
| MmugDNA.16070.1.S1_at | MmugDNA.16070.1 | 8.11  | 7.93  | 0.41 | 0.26 | -1.13 | 0.927869 | 0.992849 | 0.976185 | 0.995769 |
| MmugDNA.16071.1.S1_at | MmugDNA.16071.1 | 10.11 | 8.57  | 0.27 | 0.08 | 2.91  | 0.000597 | 0.000048 | 0.143137 | 0.025273 |
| MmugDNA.16072.1.S1_at | MmugDNA.16072.1 | 7.14  | 5.98  | 0.12 | 0.2  | 2.22  | 0.001065 | 0.000808 | 0.155464 | 0.046123 |
| MmugDNA.16074.1.S1_at | MmugDNA.16074.1 | 5.69  | 5.7   | 0.1  | 0.03 | -1.01 | 0.851042 | 0.659697 | 0.947526 | 0.800854 |
| MmugDNA.16076.1.S1_at | MmugDNA.16076.1 | 4.39  | 4.52  | 0.09 | 0.28 | -1.1  | 0.435432 | 0.403873 | 0.745679 | 0.632446 |
| MmugDNA.16077.1.S1_at | MmugDNA.16077.1 | 3.48  | 3.4   | 0.19 | 0.26 | 1.06  | 0.819361 | 0.969614 | 0.934874 | 0.983359 |
| MmugDNA.16078.1.S1_at | MmugDNA.16078.1 | 7.43  | 6.88  | 0.88 | 0.51 | 1.46  | 0.377738 | 0.428689 | 0.707748 | 0.650253 |
| MmugDNA.16080.1.S1_at | MmugDNA.16080.1 | 5.67  | 5.71  | 0.07 | 0.13 | -1.02 | 0.934857 | 0.626994 | 0.977924 | 0.780117 |
| MmugDNA.16081.1.S1_at | MmugDNA.16081.1 | 4.6   | 4.71  | 0.39 | 0.09 | -1.08 | 0.831924 | 0.792309 | 0.939713 | 0.880001 |
| MmugDNA.16082.1.S1_at | MmugDNA.16082.1 | 6.21  | 6.21  | 0    | 0.11 | 1     | 0.369886 | 0.272403 | 0.70442  | 0.537122 |
| MmugDNA.16083.1.S1_at | MmugDNA.16083.1 | 9.53  | 9.73  | 0.54 | 0.04 | -1.15 | 0.179397 | 0.074003 | 0.552637 | 0.31757  |
| MmugDNA.16084.1.S1_at | MmugDNA.16084.1 | 4.94  | 4.93  | 0.08 | 0.02 | 1.01  | 0.25189  | 0.417222 | 0.616976 | 0.642079 |
| MmugDNA.16085.1.S1_at | MmugDNA.16085.1 | 4.49  | 4.42  | 0.13 | 0.23 | 1.05  | 0.324035 | 0.156232 | 0.672429 | 0.43161  |
| MmugDNA.16087.1.S1_at | MmugDNA.16087.1 | 4.02  | 3.93  | 0.04 | 0.04 | 1.06  | 0.113157 | 0.581948 | 0.486619 | 0.750784 |
| MmugDNA.16088.1.S1_at | MmugDNA.16088.1 | 4.75  | 4.73  | 0.23 | 0.07 | 1.02  | 0.298749 | 0.436347 | 0.653263 | 0.655923 |
| MmugDNA.16090.1.S1_at | MmugDNA.16090.1 | 9.51  | 10.06 | 1.85 | 0.25 | -1.46 | 0.578616 | 0.147917 | 0.826218 | 0.422296 |
| MmugDNA.16091.1.S1_at | MmugDNA.16091.1 | 8.89  | 9.55  | 0.08 | 0.11 | -1.59 | 0.000936 | 0.000495 | 0.153739 | 0.038955 |
| MmugDNA.16093.1.S1_at | MmugDNA.16093.1 | 6.89  | 6.41  | 0.1  | 0.1  | 1.4   | 0.004049 | 0.134599 | 0.198571 | 0.406629 |
| MmugDNA.16094.1.S1_at | MmugDNA.16094.1 | 12.66 | 12.78 | 0.31 | 0.04 | -1.09 | 0.659439 | 0.262791 | 0.865216 | 0.529136 |
| MmugDNA.16095.1.S1_at | MmugDNA.16095.1 | 9.91  | 10.12 | 0.09 | 0.02 | -1.16 | 0.013078 | 0.006933 | 0.26652  | 0.112493 |
| MmugDNA.16096.1.S1_at | MmugDNA.16096.1 | 4.17  | 4.22  | 0.34 | 0.06 | -1.03 | 0.894923 | 0.472501 | 0.964146 | 0.680025 |
| MmugDNA.16099.1.S1_at | MmugDNA.16099.1 | 3.49  | 3.65  | 0.27 | 0.06 | -1.11 | 0.848706 | 0.921828 | 0.946817 | 0.955932 |
| MmugDNA.161.1.S1_at   | MmugDNA.161.1   | 9.68  | 8.18  | 0.3  | 0.27 | 2.83  | 0.005225 | 0.006405 | 0.206305 | 0.108767 |
| MmugDNA.1610.1.S1_at  | MmugDNA.1610.1  | 9.04  | 8.53  | 0.54 | 0.15 | 1.42  | 0.200272 | 0.024905 | 0.572075 | 0.197692 |
| MmugDNA.16100.1.S1_at | MmugDNA.16100.1 | 6.32  | 6.21  | 0.17 | 0.04 | 1.08  | 0.374992 | 0.543728 | 0.706257 | 0.726303 |
| MmugDNA.16102.1.S1_at | MmugDNA.16102.1 | 3.46  | 3.49  | 0.18 | 0.28 | -1.02 | 0.476135 | 0.344826 | 0.768922 | 0.590153 |
| MmugDNA.16103.1.S1_at | MmugDNA.16103.1 | 9.52  | 9.3   | 0.33 | 0.04 | 1.16  | 0.357913 | 0.582316 | 0.695993 | 0.75096  |
| MmugDNA.16106.1.S1_at | MmugDNA.16106.1 | 8.02  | 7.77  | 0.2  | 0.06 | 1.19  | 0.099627 | 0.232478 | 0.469263 | 0.504244 |
| MmugDNA.16107.1.S1_at | MmugDNA.16107.1 | 7.97  | 9.05  | 1.01 | 0.06 | -2.11 | 0.137592 | 0.143095 | 0.513135 | 0.416995 |
| MmugDNA.16108.1.S1_at | MmugDNA.16108.1 | 4.62  | 4.44  | 0.2  | 0.15 | 1.13  | 0.54941  | 0.677868 | 0.810299 | 0.811841 |
| MmugDNA.1611.1.S1_at  | MmugDNA.1611.1  | 3.14  | 2.96  | 0.22 | 0.15 | 1.13  | 0.226387 | 0.288541 | 0.595618 | 0.549821 |
| MmugDNA.16110.1.S1_at | MmugDNA.16110.1 | 5.11  | 4.74  | 0.72 | 0.43 | 1.29  | 0.333376 | 0.385071 | 0.679593 | 0.620662 |
| MmugDNA.16111.1.S1_at | MmugDNA.16111.1 | 6.29  | 6.25  | 0.2  | 0.31 | 1.03  | 0.763851 | 0.884481 | 0.911287 | 0.93419  |

|                       |                 |       |       |      |      |       |          |          |          |          |
|-----------------------|-----------------|-------|-------|------|------|-------|----------|----------|----------|----------|
| MmugDNA.16112.1.S1_at | MmugDNA.16112.1 | 8.06  | 7.24  | 0.88 | 0.13 | 1.76  | 0.493289 | 0.669699 | 0.778798 | 0.806828 |
| MmugDNA.16114.1.S1_at | MmugDNA.16114.1 | 11.03 | 11.52 | 0.63 | 0.06 | -1.4  | 0.306391 | 0.214046 | 0.659434 | 0.487633 |
| MmugDNA.16115.1.S1_at | MmugDNA.16115.1 | 3.82  | 3.67  | 0.12 | 0.05 | 1.11  | 0.174065 | 0.309029 | 0.547067 | 0.564721 |
| MmugDNA.16117.1.S1_at | MmugDNA.16117.1 | 5.91  | 5.65  | 0.17 | 0.24 | 1.19  | 0.144966 | 0.134129 | 0.520238 | 0.406393 |
| MmugDNA.16119.1.S1_at | MmugDNA.16119.1 | 7.19  | 6.89  | 0.07 | 0.07 | 1.24  | 0.017834 | 0.039138 | 0.293979 | 0.243072 |
| MmugDNA.1612.1.S1_at  | MmugDNA.1612.1  | 5.43  | 5.22  | 0.31 | 0.11 | 1.16  | 0.460382 | 0.672128 | 0.760209 | 0.808318 |
| MmugDNA.16120.1.S1_at | MmugDNA.16120.1 | 10.08 | 9.91  | 0.53 | 0.2  | 1.13  | 0.441576 | 0.414402 | 0.749468 | 0.640293 |
| MmugDNA.16121.1.S1_at | MmugDNA.16121.1 | 4.42  | 4.37  | 0.51 | 0.14 | 1.04  | 0.632175 | 0.534684 | 0.852783 | 0.720504 |
| MmugDNA.16123.1.S1_at | MmugDNA.16123.1 | 4.2   | 4.04  | 0.37 | 0.13 | 1.12  | 0.456993 | 0.509973 | 0.758051 | 0.704535 |
| MmugDNA.16124.1.S1_at | MmugDNA.16124.1 | 4.86  | 4.6   | 0.14 | 0.2  | 1.19  | 0.679637 | 0.176247 | 0.87431  | 0.452718 |
| MmugDNA.16125.1.S1_at | MmugDNA.16125.1 | 3.39  | 3.36  | 0.11 | 0.24 | -1.02 | 0.810835 | 0.64364  | 0.931427 | 0.791063 |
| MmugDNA.16126.1.S1_at | MmugDNA.16126.1 | 4.52  | 4.61  | 0.04 | 0.09 | -1.07 | 0.277153 | 0.424193 | 0.636753 | 0.646793 |
| MmugDNA.16129.1.S1_at | MmugDNA.16129.1 | 11.02 | 9.84  | 0.65 | 0.38 | 2.27  | 0.034701 | 0.029677 | 0.350358 | 0.214008 |
| MmugDNA.1613.1.S1_at  | MmugDNA.1613.1  | 4.87  | 4.87  | 0.1  | 0.23 | 1     | 0.380449 | 0.584677 | 0.709387 | 0.752482 |
| MmugDNA.16130.1.S1_at | MmugDNA.16130.1 | 6.92  | 7.69  | 1.17 | 0.23 | -1.7  | 0.387729 | 0.476537 | 0.71464  | 0.682769 |
| MmugDNA.16133.1.S1_at | MmugDNA.16133.1 | 4.1   | 4     | 0.05 | 0.03 | 1.07  | 0.032631 | 0.546976 | 0.345045 | 0.728283 |
| MmugDNA.16134.1.S1_at | MmugDNA.16134.1 | 5.84  | 5.74  | 0.05 | 0.08 | 1.07  | 0.284532 | 0.19606  | 0.642345 | 0.471082 |
| MmugDNA.16135.1.S1_at | MmugDNA.16135.1 | 3.76  | 3.56  | 0.18 | 0.25 | 1.15  | 0.128855 | 0.281605 | 0.503618 | 0.544655 |
| MmugDNA.16136.1.S1_at | MmugDNA.16136.1 | 3.25  | 3.29  | 0.16 | 0.28 | -1.03 | 0.254479 | 0.336989 | 0.618958 | 0.58423  |
| MmugDNA.16138.1.S1_at | MmugDNA.16138.1 | 7.41  | 6.83  | 0.34 | 0.36 | 1.49  | 0.218258 | 0.098507 | 0.58818  | 0.356636 |
| MmugDNA.16139.1.S1_at | MmugDNA.16139.1 | 3.41  | 3.67  | 0.04 | 0.11 | -1.2  | 0.011707 | 0.243133 | 0.256742 | 0.513356 |
| MmugDNA.16145.1.S1_at | MmugDNA.16145.1 | 5.38  | 5.32  | 0.2  | 0.13 | 1.04  | 0.986077 | 0.606425 | 0.995531 | 0.765747 |
| MmugDNA.16146.1.S1_at | MmugDNA.16146.1 | 6.48  | 6.5   | 1.91 | 0.47 | -1.02 | 0.934413 | 0.901738 | 0.977786 | 0.944082 |
| MmugDNA.16147.1.S1_at | MmugDNA.16147.1 | 4.08  | 4.08  | 0.04 | 0.07 | 1     | 0.673561 | 0.808619 | 0.871416 | 0.889834 |
| MmugDNA.16149.1.S1_at | MmugDNA.16149.1 | 5.31  | 5     | 0.49 | 0.43 | 1.24  | 0.186799 | 0.36684  | 0.559225 | 0.606544 |
| MmugDNA.1615.1.S1_at  | MmugDNA.1615.1  | 4.3   | 4.18  | 0.08 | 0.26 | 1.09  | 0.321801 | 0.18329  | 0.670537 | 0.459553 |
| MmugDNA.16151.1.S1_at | MmugDNA.16151.1 | 6.6   | 6.76  | 0.31 | 0.1  | -1.12 | 0.638438 | 0.708471 | 0.855923 | 0.830919 |
| MmugDNA.16152.1.S1_at | MmugDNA.16152.1 | 10.25 | 9.96  | 0.18 | 0.03 | 1.22  | 0.049247 | 0.020174 | 0.385423 | 0.178414 |
| MmugDNA.16153.1.S1_at | MmugDNA.16153.1 | 3.9   | 3.9   | 0.04 | 0.01 | 1     | 0.973065 | 0.697187 | 0.99122  | 0.824045 |
| MmugDNA.16154.1.S1_at | MmugDNA.16154.1 | 9.27  | 9.25  | 0.44 | 0.11 | 1.01  | 0.77872  | 0.176063 | 0.918374 | 0.452526 |
| MmugDNA.16155.1.S1_at | MmugDNA.16155.1 | 4.39  | 4.33  | 0.21 | 0.04 | 1.04  | 0.215402 | 0.141399 | 0.585748 | 0.414874 |
| MmugDNA.16157.1.S1_at | MmugDNA.16157.1 | 4.57  | 4.47  | 0.2  | 0.1  | 1.07  | 0.854031 | 0.662758 | 0.948436 | 0.802564 |
| MmugDNA.1616.1.S1_at  | MmugDNA.1616.1  | 4.31  | 4.49  | 0.13 | 0.24 | -1.13 | 0.509732 | 0.669499 | 0.787834 | 0.806643 |
| MmugDNA.16161.1.S1_at | MmugDNA.16161.1 | 5.97  | 5.75  | 0.2  | 0.07 | 1.17  | 0.277859 | 0.337446 | 0.637156 | 0.584658 |
| MmugDNA.16163.1.S1_at | MmugDNA.16163.1 | 8.83  | 8.81  | 0.36 | 0.16 | 1.02  | 0.228763 | 0.188701 | 0.59773  | 0.464634 |
| MmugDNA.16164.1.S1_at | MmugDNA.16164.1 | 4.56  | 4.46  | 0.11 | 0.02 | 1.07  | 0.061719 | 0.190243 | 0.411393 | 0.46589  |
| MmugDNA.16167.1.S1_at | MmugDNA.16167.1 | 6.19  | 6.3   | 0.05 | 0.21 | -1.08 | 0.795899 | 0.911201 | 0.924994 | 0.949924 |
| MmugDNA.16171.1.S1_at | MmugDNA.16171.1 | 5.11  | 5.41  | 0.52 | 0.3  | -1.23 | 0.823454 | 0.7975   | 0.936294 | 0.883261 |
| MmugDNA.16172.1.S1_at | MmugDNA.16172.1 | 10.48 | 9.94  | 0.3  | 0.13 | 1.45  | 0.029769 | 0.013764 | 0.335925 | 0.150306 |
| MmugDNA.16174.1.S1_at | MmugDNA.16174.1 | 12.56 | 12.6  | 1.36 | 0.14 | -1.03 | 0.618359 | 0.271857 | 0.845915 | 0.536619 |
| MmugDNA.16175.1.S1_at | MmugDNA.16175.1 | 5.46  | 6.1   | 0.29 | 0.16 | -1.56 | 0.085797 | 0.083798 | 0.453025 | 0.334647 |
| MmugDNA.16176.1.S1_at | MmugDNA.16176.1 | 5.44  | 5.26  | 0.14 | 0.02 | 1.13  | 0.10164  | 0.198112 | 0.47191  | 0.473108 |
| MmugDNA.16177.1.S1_at | MmugDNA.16177.1 | 7.09  | 7.12  | 1.35 | 0.31 | -1.02 | 0.993757 | 0.125266 | 0.997606 | 0.395827 |



|                         |                 |       |       |      |      |       |          |          |          |          |
|-------------------------|-----------------|-------|-------|------|------|-------|----------|----------|----------|----------|
| MmugDNA.16178.1.S1_at   | MmugDNA.16178.1 | 3.5   | 3.41  | 0.13 | 0.12 | 1.07  | 0.893687 | 0.756037 | 0.963491 | 0.857974 |
| MmugDNA.16180.1.S1_at   | MmugDNA.16180.1 | 10.6  | 10.11 | 0.35 | 0.22 | 1.41  | 0.057223 | 0.01425  | 0.401473 | 0.152403 |
| MmugDNA.16182.1.S1_at   | MmugDNA.16182.1 | 8.65  | 9.78  | 0.55 | 0.46 | -2.19 | 0.028906 | 0.02706  | 0.333138 | 0.205689 |
| MmugDNA.16184.1.S1_at   | MmugDNA.16184.1 | 7.04  | 7.07  | 0.55 | 0.27 | -1.02 | 0.50373  | 0.499652 | 0.784379 | 0.698453 |
| MmugDNA.1619.1.S1_at    | MmugDNA.1619.1  | 5.52  | 5.19  | 0.48 | 0.1  | 1.25  | 0.254725 | 0.400927 | 0.619146 | 0.630658 |
| MmugDNA.16190.1.S1_at   | MmugDNA.16190.1 | 3.85  | 4.1   | 0.14 | 0.17 | -1.19 | 0.133993 | 0.63765  | 0.508253 | 0.787067 |
| MmugDNA.16191.1.S1_at   | MmugDNA.16191.1 | 6.74  | 7.09  | 1.92 | 0.29 | -1.27 | 0.703336 | 0.271274 | 0.884629 | 0.536408 |
| MmugDNA.16192.1.S1_s_at | MmugDNA.16192.1 | 3.39  | 3.39  | 0.04 | 0.09 | -1    | 0.479915 | 0.121273 | 0.770935 | 0.390351 |
| MmugDNA.16194.1.S1_at   | MmugDNA.16194.1 | 5.21  | 5.21  | 0.27 | 0.12 | -1    | 0.798065 | 0.699249 | 0.925892 | 0.825277 |
| MmugDNA.16195.1.S1_at   | MmugDNA.16195.1 | 5.05  | 4.95  | 0.08 | 0.2  | 1.07  | 0.306958 | 0.361434 | 0.659867 | 0.602201 |
| MmugDNA.16196.1.S1_at   | MmugDNA.16196.1 | 7.71  | 7.66  | 0.11 | 0.06 | -1.03 | 0.140714 | 0.256529 | 0.51617  | 0.524275 |
| MmugDNA.16197.1.S1_at   | MmugDNA.16197.1 | 4.72  | 4.76  | 0.25 | 0.02 | -1.03 | 0.929931 | 0.985117 | 0.976539 | 0.991531 |
| MmugDNA.16197.1.S1_s_at | MmugDNA.16197.1 | 6.31  | 6.39  | 0.13 | 0.02 | -1.05 | 0.365717 | 0.369894 | 0.701331 | 0.609138 |
| MmugDNA.16198.1.S1_at   | MmugDNA.16198.1 | 6.18  | 5.62  | 0.58 | 0.47 | 1.48  | 0.701841 | 0.351095 | 0.883997 | 0.594778 |
| MmugDNA.16199.1.S1_at   | MmugDNA.16199.1 | 4.08  | 4.1   | 0.18 | 0.36 | -1.01 | 0.793644 | 0.325457 | 0.924414 | 0.575812 |
| MmugDNA.162.1.S1_at     | MmugDNA.162.1   | 4.53  | 4.55  | 0.02 | 0.07 | -1.02 | 0.929321 | 0.47872  | 0.976333 | 0.684691 |
| MmugDNA.16201.1.S1_at   | MmugDNA.16201.1 | 4.37  | 4.24  | 0.16 | 0.08 | 1.1   | 0.43859  | 0.219832 | 0.747368 | 0.493388 |
| MmugDNA.16203.1.S1_at   | MmugDNA.16203.1 | 5.6   | 5.53  | 0.07 | 0.07 | 1.05  | 0.300447 | 0.668448 | 0.654974 | 0.805964 |
| MmugDNA.16204.1.S1_at   | MmugDNA.16204.1 | 5.51  | 5.51  | 0.14 | 0.02 | 1     | 0.327643 | 0.387919 | 0.675137 | 0.622509 |
| MmugDNA.16205.1.S1_at   | MmugDNA.16205.1 | 3     | 3.01  | 0.06 | 0.02 | -1.01 | 0.357988 | 0.796491 | 0.695993 | 0.882699 |
| MmugDNA.16206.1.S1_at   | MmugDNA.16206.1 | 5.93  | 6.33  | 0.19 | 0.1  | -1.32 | 0.047413 | 0.042952 | 0.380246 | 0.251794 |
| MmugDNA.16207.1.S1_at   | MmugDNA.16207.1 | 3.89  | 3.82  | 0.4  | 0.37 | 1.05  | 0.941217 | 0.30706  | 0.980036 | 0.563427 |
| MmugDNA.16208.1.S1_at   | MmugDNA.16208.1 | 3.46  | 3.43  | 0.04 | 0.08 | 1.02  | 0.584591 | 0.296476 | 0.829783 | 0.555528 |
| MmugDNA.16209.1.S1_at   | MmugDNA.16209.1 | 5.54  | 5.47  | 0.23 | 0.17 | 1.05  | 0.790397 | 0.554323 | 0.922945 | 0.733158 |
| MmugDNA.16212.1.S1_at   | MmugDNA.16212.1 | 3.7   | 3.72  | 0.22 | 0    | -1.02 | 0.53221  | 0.534918 | 0.800161 | 0.720616 |
| MmugDNA.16215.1.S1_at   | MmugDNA.16215.1 | 9.35  | 10.05 | 0.15 | 0.14 | -1.62 | 0.003697 | 0.006727 | 0.197111 | 0.110963 |
| MmugDNA.16216.1.S1_at   | MmugDNA.16216.1 | 11.37 | 11.54 | 0.41 | 0.1  | -1.13 | 0.265849 | 0.23069  | 0.626921 | 0.502381 |
| MmugDNA.16219.1.S1_at   | MmugDNA.16219.1 | 5.06  | 4.89  | 0.17 | 0.16 | 1.13  | 0.203759 | 0.302415 | 0.57513  | 0.560109 |
| MmugDNA.1622.1.S1_at    | MmugDNA.1622.1  | 4.42  | 5.64  | 1.08 | 0.35 | -2.33 | 0.260762 | 0.351525 | 0.623301 | 0.595094 |
| MmugDNA.16220.1.S1_at   | MmugDNA.16220.1 | 11.28 | 11.19 | 0.15 | 0.02 | 1.07  | 0.277445 | 0.363057 | 0.636861 | 0.603503 |
| MmugDNA.16221.1.S1_at   | MmugDNA.16221.1 | 11.17 | 11.54 | 0.39 | 0.09 | -1.3  | 0.363222 | 0.128016 | 0.699934 | 0.398985 |
| MmugDNA.16222.1.S1_at   | MmugDNA.16222.1 | 4.91  | 5.2   | 0.37 | 0.35 | -1.23 | 0.148694 | 0.312565 | 0.522734 | 0.567268 |
| MmugDNA.16223.1.S1_at   | MmugDNA.16223.1 | 8.16  | 7.99  | 0.15 | 0.33 | 1.13  | 0.896053 | 0.779596 | 0.964483 | 0.872221 |
| MmugDNA.16224.1.S1_s_at | MmugDNA.16224.1 | 12.69 | 12.65 | 0.52 | 0.03 | 1.03  | 0.981944 | 0.218401 | 0.994301 | 0.491958 |
| MmugDNA.16225.1.S1_at   | MmugDNA.16225.1 | 5.26  | 5.51  | 0.06 | 0.22 | -1.19 | 0.277412 | 0.541704 | 0.636861 | 0.725057 |
| MmugDNA.16226.1.S1_at   | MmugDNA.16226.1 | 6.19  | 6.38  | 0.5  | 0.04 | -1.14 | 0.609513 | 0.76243  | 0.841773 | 0.861818 |
| MmugDNA.16227.1.S1_at   | MmugDNA.16227.1 | 4.36  | 4.35  | 0.14 | 0.14 | 1.01  | 0.762562 | 0.748131 | 0.91092  | 0.853384 |
| MmugDNA.16228.1.S1_at   | MmugDNA.16228.1 | 3.69  | 3.68  | 0.08 | 0.04 | 1.01  | 0.598249 | 0.428049 | 0.836832 | 0.649619 |
| MmugDNA.16229.1.S1_at   | MmugDNA.16229.1 | 8.29  | 7.55  | 0.79 | 0.05 | 1.66  | 0.57778  | 0.075243 | 0.825932 | 0.319434 |
| MmugDNA.1623.1.S1_at    | MmugDNA.1623.1  | 5.78  | 5.83  | 0.05 | 0.06 | -1.03 | 0.505455 | 0.781624 | 0.785377 | 0.873418 |
| MmugDNA.16230.1.S1_at   | MmugDNA.16230.1 | 9.36  | 9.59  | 0.23 | 0.07 | -1.17 | 0.158254 | 0.050418 | 0.531211 | 0.269746 |
| MmugDNA.16231.1.S1_at   | MmugDNA.16231.1 | 12.66 | 12.26 | 0.76 | 0.03 | 1.32  | 0.965793 | 0.129238 | 0.988741 | 0.400635 |
| MmugDNA.16232.1.S1_at   | MmugDNA.16232.1 | 5.8   | 5.9   | 0.2  | 0.08 | -1.08 | 0.897124 | 0.021191 | 0.964979 | 0.182325 |

|                         |                 |       |       |      |      |       |          |          |          |          |
|-------------------------|-----------------|-------|-------|------|------|-------|----------|----------|----------|----------|
| MmugDNA.16233.1.S1_at   | MmugDNA.16233.1 | 7.24  | 6.88  | 1.54 | 0.13 | 1.28  | 0.815332 | 0.927988 | 0.933137 | 0.959116 |
| MmugDNA.16235.1.S1_at   | MmugDNA.16235.1 | 4.06  | 3.88  | 0.1  | 0.1  | 1.13  | 0.022298 | 0.014889 | 0.310495 | 0.155096 |
| MmugDNA.16236.1.S1_at   | MmugDNA.16236.1 | 7.06  | 6.91  | 0.05 | 0.16 | 1.11  | 0.617519 | 0.925009 | 0.845444 | 0.957597 |
| MmugDNA.16237.1.S1_at   | MmugDNA.16237.1 | 3.52  | 3.61  | 0.25 | 0.54 | -1.06 | 0.429179 | 0.492021 | 0.742138 | 0.693403 |
| MmugDNA.16238.1.S1_at   | MmugDNA.16238.1 | 4.85  | 5.06  | 0.14 | 0.03 | -1.16 | 0.106615 | 0.050313 | 0.479    | 0.269573 |
| MmugDNA.16239.1.S1_at   | MmugDNA.16239.1 | 9.87  | 10.53 | 0.59 | 0.21 | -1.58 | 0.175023 | 0.228554 | 0.548031 | 0.500752 |
| MmugDNA.16239.1.S1_s_at | MmugDNA.16239.1 | 8.94  | 9.76  | 0.64 | 0.25 | -1.76 | 0.160514 | 0.236375 | 0.533738 | 0.507308 |
| MmugDNA.1624.1.S1_at    | MmugDNA.1624.1  | 11.46 | 11.38 | 0.18 | 0.15 | 1.06  | 0.448054 | 0.672285 | 0.753744 | 0.808488 |
| MmugDNA.16241.1.S1_at   | MmugDNA.16241.1 | 7.79  | 7.19  | 0.92 | 0.14 | 1.51  | 0.284595 | 0.379243 | 0.642354 | 0.616218 |
| MmugDNA.16242.1.S1_at   | MmugDNA.16242.1 | 3.61  | 3.88  | 0.27 | 0.44 | -1.2  | 0.745891 | 0.896111 | 0.90313  | 0.940629 |
| MmugDNA.16244.1.S1_at   | MmugDNA.16244.1 | 5.13  | 8.45  | 2.5  | 0.18 | -9.99 | 0.253836 | 0.307806 | 0.618559 | 0.56397  |
| MmugDNA.16246.1.S1_at   | MmugDNA.16246.1 | 5.02  | 4.87  | 0.25 | 0.3  | 1.11  | 0.529062 | 0.428552 | 0.798106 | 0.650098 |
| MmugDNA.16247.1.S1_at   | MmugDNA.16247.1 | 3.07  | 3.13  | 0.03 | 0.04 | -1.04 | 0.120623 | 0.177626 | 0.49409  | 0.454005 |
| MmugDNA.16248.1.S1_at   | MmugDNA.16248.1 | 8.01  | 8.63  | 0.15 | 0.1  | -1.54 | 0.00534  | 0.033923 | 0.207831 | 0.227782 |
| MmugDNA.16248.1.S1_s_at | MmugDNA.16248.1 | 10.41 | 11.1  | 0.31 | 0.13 | -1.62 | 0.022494 | 0.01709  | 0.31097  | 0.165617 |
| MmugDNA.16249.1.S1_at   | MmugDNA.16249.1 | 4.95  | 4.8   | 0.08 | 0.01 | 1.1   | 0.089873 | 0.193913 | 0.457893 | 0.469013 |
| MmugDNA.1625.1.S1_at    | MmugDNA.1625.1  | 9.4   | 8.85  | 0.56 | 0.16 | 1.46  | 0.205002 | 0.135186 | 0.576643 | 0.407236 |
| MmugDNA.16250.1.S1_at   | MmugDNA.16250.1 | 6.46  | 6.32  | 0.11 | 0.01 | 1.11  | 0.213881 | 0.185823 | 0.584484 | 0.461654 |
| MmugDNA.16251.1.S1_at   | MmugDNA.16251.1 | 6.74  | 6.73  | 0.1  | 0.1  | 1.01  | 0.203089 | 0.254436 | 0.574564 | 0.522732 |
| MmugDNA.16252.1.S1_at   | MmugDNA.16252.1 | 7.5   | 7.35  | 0.82 | 0.24 | 1.11  | 0.546245 | 0.05449  | 0.808414 | 0.278959 |
| MmugDNA.16254.1.S1_at   | MmugDNA.16254.1 | 5.82  | 6.11  | 0.39 | 0.21 | -1.22 | 0.170464 | 0.116895 | 0.543539 | 0.384277 |
| MmugDNA.16256.1.S1_at   | MmugDNA.16256.1 | 4.42  | 4.42  | 0.02 | 0.02 | 1     | 0.230252 | 0.48726  | 0.598481 | 0.690367 |
| MmugDNA.16257.1.S1_at   | MmugDNA.16257.1 | 7.2   | 7.48  | 0.24 | 0.09 | -1.21 | 0.368319 | 0.575156 | 0.70354  | 0.746352 |
| MmugDNA.16258.1.S1_at   | MmugDNA.16258.1 | 3.5   | 3.61  | 0.21 | 0.07 | -1.08 | 0.96654  | 0.985724 | 0.989047 | 0.991878 |
| MmugDNA.16259.1.S1_at   | MmugDNA.16259.1 | 4.43  | 4.48  | 0.16 | 0.22 | -1.03 | 0.834713 | 0.064282 | 0.940727 | 0.299722 |
| MmugDNA.1626.1.S1_at    | MmugDNA.1626.1  | 3.12  | 3.15  | 0.06 | 0.11 | -1.02 | 0.29321  | 0.481525 | 0.649592 | 0.686493 |
| MmugDNA.16261.1.S1_at   | MmugDNA.16261.1 | 4.08  | 4.05  | 0.1  | 0.18 | 1.02  | 0.873917 | 0.846001 | 0.95634  | 0.912303 |
| MmugDNA.16263.1.S1_at   | MmugDNA.16263.1 | 9.98  | 10.18 | 0.55 | 0.11 | -1.15 | 0.99953  | 0.999925 | 0.999871 | 0.999968 |
| MmugDNA.16264.1.S1_at   | MmugDNA.16264.1 | 3.12  | 3.11  | 0.29 | 0.04 | 1.01  | 0.509251 | 0.824362 | 0.787587 | 0.899093 |
| MmugDNA.16265.1.S1_at   | MmugDNA.16265.1 | 3.12  | 3.01  | 0.24 | 0.14 | 1.08  | 0.550509 | 0.73214  | 0.810838 | 0.844852 |
| MmugDNA.16267.1.S1_at   | MmugDNA.16267.1 | 3.5   | 3.35  | 0.25 | 0.22 | 1.11  | 0.98576  | 0.980407 | 0.99547  | 0.989333 |
| MmugDNA.16269.1.S1_at   | MmugDNA.16269.1 | 5.71  | 5.48  | 0.12 | 0.08 | 1.17  | 0.032934 | 0.021919 | 0.345526 | 0.185265 |
| MmugDNA.16270.1.S1_at   | MmugDNA.16270.1 | 4     | 4.17  | 0.03 | 0.2  | -1.13 | 0.164538 | 0.580744 | 0.537462 | 0.749903 |
| MmugDNA.16270.1.S1_x_at | MmugDNA.16270.1 | 7.17  | 7.12  | 0.25 | 0.03 | 1.03  | 0.620539 | 0.569425 | 0.84711  | 0.742382 |
| MmugDNA.16271.1.S1_at   | MmugDNA.16271.1 | 4.47  | 4.46  | 0.16 | 0.18 | 1.01  | 0.896133 | 0.473278 | 0.964535 | 0.680582 |
| MmugDNA.16272.1.S1_at   | MmugDNA.16272.1 | 4.29  | 4.16  | 0.43 | 0.19 | 1.1   | 0.952203 | 0.851447 | 0.983956 | 0.915468 |
| MmugDNA.16273.1.S1_at   | MmugDNA.16273.1 | 4.81  | 4.59  | 0.05 | 0.02 | 1.16  | 0.00104  | 0.003287 | 0.155374 | 0.082551 |
| MmugDNA.16275.1.S1_at   | MmugDNA.16275.1 | 4.89  | 4.92  | 0.08 | 0.12 | -1.02 | 0.747972 | 0.694367 | 0.904242 | 0.822254 |
| MmugDNA.16276.1.S1_at   | MmugDNA.16276.1 | 8.35  | 8.22  | 0.13 | 0.09 | 1.09  | 0.254576 | 0.37979  | 0.618992 | 0.616576 |
| MmugDNA.16277.1.S1_at   | MmugDNA.16277.1 | 9.4   | 9.35  | 0.39 | 0.09 | 1.04  | 0.879529 | 0.974111 | 0.958252 | 0.98586  |
| MmugDNA.16278.1.S1_at   | MmugDNA.16278.1 | 11.74 | 11.77 | 0.02 | 0.05 | -1.03 | 0.366704 | 0.574403 | 0.702181 | 0.745847 |
| MmugDNA.1628.1.S1_at    | MmugDNA.1628.1  | 13.39 | 13.32 | 0.04 | 0.08 | 1.05  | 0.249076 | 0.154194 | 0.614389 | 0.428949 |
| MmugDNA.16281.1.S1_at   | MmugDNA.16281.1 | 3.56  | 3.43  | 0.25 | 0.07 | 1.1   | 0.426317 | 0.434986 | 0.740427 | 0.654901 |

|                         |                 |       |       |      |      |       |          |          |          |          |
|-------------------------|-----------------|-------|-------|------|------|-------|----------|----------|----------|----------|
| MmugDNA.16283.1.S1_s_at | MmugDNA.16283.1 | 5.05  | 5.05  | 0.05 | 0.15 | -1    | 0.559076 | 0.588243 | 0.815903 | 0.754847 |
| MmugDNA.16284.1.S1_at   | MmugDNA.16284.1 | 10.8  | 10.55 | 0.3  | 0.09 | 1.19  | 0.258153 | 0.319943 | 0.621971 | 0.572283 |
| MmugDNA.16285.1.S1_at   | MmugDNA.16285.1 | 3.43  | 3.64  | 0.28 | 0.18 | -1.15 | 0.770038 | 0.445392 | 0.913889 | 0.662343 |
| MmugDNA.16285.1.S1_s_at | MmugDNA.16285.1 | 5.26  | 5.02  | 0.18 | 0.06 | 1.18  | 0.273316 | 0.508003 | 0.633027 | 0.703358 |
| MmugDNA.16286.1.S1_at   | MmugDNA.16286.1 | 4.46  | 4.37  | 0.17 | 0.04 | 1.07  | 0.132532 | 0.302408 | 0.506856 | 0.560109 |
| MmugDNA.16287.1.S1_at   | MmugDNA.16287.1 | 4.35  | 4.22  | 0.08 | 0.23 | 1.1   | 0.808134 | 0.984461 | 0.930496 | 0.991287 |
| MmugDNA.16288.1.S1_at   | MmugDNA.16288.1 | 6.08  | 6.1   | 0.15 | 0.04 | -1.01 | 0.725953 | 0.595871 | 0.893977 | 0.759258 |
| MmugDNA.16289.1.S1_at   | MmugDNA.16289.1 | 4.86  | 4.87  | 0.36 | 0.54 | -1.01 | 0.773101 | 0.294317 | 0.915591 | 0.55407  |
| MmugDNA.1629.1.S1_at    | MmugDNA.1629.1  | 3.94  | 3.97  | 0.07 | 0.18 | -1.02 | 0.20297  | 0.020973 | 0.574381 | 0.181633 |
| MmugDNA.16290.1.S1_at   | MmugDNA.16290.1 | 7.64  | 7.85  | 0.1  | 0.24 | -1.15 | 0.720496 | 0.914375 | 0.891614 | 0.951844 |
| MmugDNA.16292.1.S1_at   | MmugDNA.16292.1 | 8.69  | 8.83  | 0.69 | 0.1  | -1.1  | 0.503483 | 0.208064 | 0.784372 | 0.482049 |
| MmugDNA.16293.1.S1_at   | MmugDNA.16293.1 | 3.4   | 3.54  | 0.1  | 0.32 | -1.1  | 0.343668 | 0.50117  | 0.686779 | 0.699449 |
| MmugDNA.16294.1.S1_at   | MmugDNA.16294.1 | 7.07  | 6.97  | 0.69 | 0.1  | 1.07  | 0.716511 | 0.907016 | 0.889896 | 0.947344 |
| MmugDNA.16295.1.S1_at   | MmugDNA.16295.1 | 10.07 | 9.96  | 0.14 | 0.1  | 1.08  | 0.637616 | 0.196473 | 0.855587 | 0.471516 |
| MmugDNA.16295.1.S1_s_at | MmugDNA.16295.1 | 5.88  | 5.79  | 0.56 | 0.25 | 1.07  | 0.892151 | 0.130214 | 0.962988 | 0.401949 |
| MmugDNA.16296.1.S1_at   | MmugDNA.16296.1 | 5.42  | 5.47  | 0.08 | 0.1  | -1.04 | 0.182845 | 0.511031 | 0.555631 | 0.705358 |
| MmugDNA.16298.1.S1_at   | MmugDNA.16298.1 | 4.71  | 4.34  | 0.09 | 0.15 | 1.29  | 0.057368 | 0.048793 | 0.402043 | 0.265812 |
| MmugDNA.16299.1.S1_at   | MmugDNA.16299.1 | 6.64  | 6.05  | 0.28 | 0.15 | 1.5   | 0.059043 | 0.153431 | 0.405996 | 0.42827  |
| MmugDNA.163.1.S1_at     | MmugDNA.163.1   | 3.48  | 3.39  | 0.09 | 0.06 | 1.06  | 0.119889 | 0.765941 | 0.493259 | 0.864021 |
| MmugDNA.1630.1.S1_at    | MmugDNA.1630.1  | 4.84  | 4.71  | 0.22 | 0.27 | 1.09  | 0.258415 | 0.749867 | 0.622212 | 0.854631 |
| MmugDNA.16300.1.S1_at   | MmugDNA.16300.1 | 7.33  | 7.76  | 0.52 | 0.06 | -1.34 | 0.22585  | 0.020801 | 0.594935 | 0.180908 |
| MmugDNA.35467.1.S1_at   | MmugDNA.35467.1 | 9.17  | 9.18  | 0.53 | 0.04 | -1.01 | 0.95459  | 0.0987   | 0.984902 | 0.356809 |
| MmugDNA.35467.1.S1_s_at | MmugDNA.35467.1 | 8.84  | 9.01  | 0.58 | 0.05 | -1.13 | 0.696486 | 0.096902 | 0.882142 | 0.354311 |
| MmugDNA.16301.1.S1_at   | MmugDNA.16301.1 | 5.23  | 5.24  | 0.23 | 0.12 | -1.01 | 0.452379 | 0.651485 | 0.755778 | 0.796226 |
| MmugDNA.16302.1.S1_at   | MmugDNA.16302.1 | 3.79  | 3.74  | 0.09 | 0.02 | 1.04  | 0.187456 | 0.067595 | 0.559787 | 0.306076 |
| MmugDNA.16303.1.S1_at   | MmugDNA.16303.1 | 10.74 | 10.76 | 0.22 | 0.16 | -1.01 | 0.409298 | 0.545918 | 0.729913 | 0.727697 |
| MmugDNA.16304.1.S1_at   | MmugDNA.16304.1 | 7.59  | 8.53  | 0.89 | 0.17 | -1.92 | 0.097622 | 0.122958 | 0.466575 | 0.392923 |
| MmugDNA.16305.1.S1_s_at | MmugDNA.16305.1 | 8.36  | 8.53  | 0.53 | 0.09 | -1.13 | 0.234085 | 0.26812  | 0.601531 | 0.533867 |
| MmugDNA.16306.1.S1_at   | MmugDNA.16306.1 | 5.6   | 5.57  | 0.02 | 0.08 | 1.02  | 0.211813 | 0.305791 | 0.582687 | 0.562731 |
| MmugDNA.16307.1.S1_at   | MmugDNA.16307.1 | 4.97  | 5.26  | 0.28 | 0.08 | -1.22 | 0.308169 | 0.017143 | 0.660917 | 0.165888 |
| MmugDNA.16308.1.S1_at   | MmugDNA.16308.1 | 5.06  | 4.83  | 0.21 | 0.37 | 1.17  | 0.955635 | 0.089444 | 0.985346 | 0.343748 |
| MmugDNA.16309.1.S1_at   | MmugDNA.16309.1 | 3.62  | 3.57  | 0.16 | 0.22 | 1.03  | 0.951901 | 0.796098 | 0.983817 | 0.882495 |
| MmugDNA.16309.1.S1_x_at | MmugDNA.16309.1 | 3.64  | 3.98  | 0.16 | 0.24 | -1.27 | 0.139375 | 0.26493  | 0.514781 | 0.530915 |
| MmugDNA.16310.1.S1_at   | MmugDNA.16310.1 | 3.76  | 3.61  | 0.07 | 0.07 | 1.11  | 0.068712 | 0.495946 | 0.426    | 0.695811 |
| MmugDNA.16312.1.S1_at   | MmugDNA.16312.1 | 9.47  | 9.31  | 0.17 | 0.04 | 1.12  | 0.553724 | 0.283987 | 0.812271 | 0.546237 |
| MmugDNA.16313.1.S1_at   | MmugDNA.16313.1 | 4.62  | 4.9   | 0.25 | 0.17 | -1.21 | 0.149256 | 0.226534 | 0.523098 | 0.499001 |
| MmugDNA.16315.1.S1_at   | MmugDNA.16315.1 | 10.27 | 9.78  | 0.29 | 0.12 | 1.41  | 0.034953 | 0.010459 | 0.350749 | 0.133651 |
| MmugDNA.16316.1.S1_at   | MmugDNA.16316.1 | 4.36  | 4.38  | 0.04 | 0.12 | -1.02 | 0.474795 | 0.496666 | 0.768229 | 0.696119 |
| MmugDNA.16317.1.S1_at   | MmugDNA.16317.1 | 5.43  | 4.98  | 0.14 | 0.27 | 1.36  | 0.051464 | 0.358067 | 0.390165 | 0.599613 |
| MmugDNA.16319.1.S1_at   | MmugDNA.16319.1 | 9.99  | 10.15 | 0.09 | 0.15 | -1.12 | 0.359317 | 0.150308 | 0.697237 | 0.424877 |
| MmugDNA.16320.1.S1_at   | MmugDNA.16320.1 | 4.42  | 3.92  | 0.2  | 0.12 | 1.41  | 0.043155 | 0.023822 | 0.3715   | 0.193328 |
| MmugDNA.16322.1.S1_at   | MmugDNA.16322.1 | 9.94  | 11.19 | 0.8  | 0.08 | -2.38 | 0.157585 | 0.079458 | 0.530588 | 0.326766 |
| MmugDNA.16324.1.S1_at   | MmugDNA.16324.1 | 8.25  | 9.21  | 1.16 | 0.15 | -1.94 | 0.126222 | 0.159478 | 0.499941 | 0.435612 |

|                         |                 |       |       |      |      |       |          |          |          |          |
|-------------------------|-----------------|-------|-------|------|------|-------|----------|----------|----------|----------|
| MmugDNA.16325.1.S1_at   | MmugDNA.16325.1 | 4.59  | 4.39  | 0.3  | 0.08 | 1.15  | 0.698751 | 0.871416 | 0.882848 | 0.926844 |
| MmugDNA.16326.1.S1_at   | MmugDNA.16326.1 | 8.91  | 8.79  | 0.17 | 0.09 | 1.09  | 0.2291   | 0.026253 | 0.598088 | 0.202991 |
| MmugDNA.16328.1.S1_at   | MmugDNA.16328.1 | 9.43  | 9.51  | 0.24 | 0.04 | -1.05 | 0.553065 | 0.102803 | 0.811981 | 0.363328 |
| MmugDNA.16328.1.S1_s_at | MmugDNA.16328.1 | 8.65  | 8.69  | 0.15 | 0.14 | -1.03 | 0.868382 | 0.012757 | 0.953932 | 0.145496 |
| MmugDNA.16329.1.S1_at   | MmugDNA.16329.1 | 8.01  | 7.11  | 0.26 | 0.23 | 1.86  | 0.004419 | 0.000217 | 0.198874 | 0.032385 |
| MmugDNA.1633.1.S1_at    | MmugDNA.1633.1  | 5.84  | 5.62  | 0.1  | 0.21 | 1.17  | 0.395439 | 0.57934  | 0.72046  | 0.749058 |
| MmugDNA.16330.1.S1_at   | MmugDNA.16330.1 | 5.86  | 5.82  | 0.17 | 0.07 | 1.03  | 0.921324 | 0.988567 | 0.973336 | 0.993572 |
| MmugDNA.16331.1.S1_at   | MmugDNA.16331.1 | 3.28  | 3.24  | 0.1  | 0.27 | 1.03  | 0.356514 | 0.669184 | 0.695183 | 0.806492 |
| MmugDNA.16333.1.S1_at   | MmugDNA.16333.1 | 11.14 | 11.27 | 0.15 | 0.02 | -1.09 | 0.311597 | 0.110928 | 0.663441 | 0.375356 |
| MmugDNA.16334.1.S1_at   | MmugDNA.16334.1 | 12.41 | 12.43 | 0.21 | 0.03 | -1.02 | 0.877097 | 0.754104 | 0.957122 | 0.856848 |
| MmugDNA.16336.1.S1_at   | MmugDNA.16336.1 | 3.9   | 3.71  | 0.16 | 0.07 | -1.14 | 0.615583 | 0.665503 | 0.844565 | 0.804009 |
| MmugDNA.16338.1.S1_at   | MmugDNA.16338.1 | 12.77 | 12.81 | 0.19 | 0.09 | -1.02 | 0.512157 | 0.15693  | 0.789111 | 0.432372 |
| MmugDNA.16339.1.S1_at   | MmugDNA.16339.1 | 5.4   | 5.23  | 0.16 | 0.23 | 1.12  | 0.725128 | 0.316814 | 0.893356 | 0.570212 |
| MmugDNA.1634.1.S1_at    | MmugDNA.1634.1  | 5.29  | 7.31  | 0.88 | 0.44 | -4.06 | 0.031971 | 0.031829 | 0.342894 | 0.220909 |
| MmugDNA.16341.1.S1_at   | MmugDNA.16341.1 | 3.69  | 3.47  | 0.12 | 0.01 | 1.16  | 0.056194 | 0.044703 | 0.399676 | 0.255871 |
| MmugDNA.16342.1.S1_at   | MmugDNA.16342.1 | 5.17  | 4.82  | 0.21 | 0.38 | 1.27  | 0.396802 | 0.098642 | 0.721565 | 0.356743 |
| MmugDNA.16344.1.S1_at   | MmugDNA.16344.1 | 4.39  | 4.41  | 0.26 | 0.04 | -1.01 | 0.936269 | 0.812297 | 0.978555 | 0.891561 |
| MmugDNA.16346.1.S1_at   | MmugDNA.16346.1 | 7.85  | 7.93  | 0.21 | 0.09 | -1.06 | 0.502107 | 0.040531 | 0.783497 | 0.246264 |
| MmugDNA.16347.1.S1_at   | MmugDNA.16347.1 | 5.58  | 5.48  | 0.16 | 0.12 | 1.07  | 0.179957 | 0.211125 | 0.553155 | 0.485153 |
| MmugDNA.16348.1.S1_at   | MmugDNA.16348.1 | 3.4   | 3.4   | 0.07 | 0.05 | -1    | 0.506898 | 0.74797  | 0.786064 | 0.853341 |
| MmugDNA.1635.1.S1_at    | MmugDNA.1635.1  | 5.61  | 5.4   | 0.42 | 0.07 | 1.15  | 0.884897 | 0.886413 | 0.960159 | 0.93539  |
| MmugDNA.16350.1.S1_at   | MmugDNA.16350.1 | 7.59  | 7.38  | 1.19 | 0.17 | 1.15  | 0.298331 | 0.145449 | 0.653109 | 0.419421 |
| MmugDNA.16351.1.S1_at   | MmugDNA.16351.1 | 10.83 | 10.9  | 1    | 0.37 | -1.05 | 0.789623 | 0.06057  | 0.922628 | 0.292769 |
| MmugDNA.16352.1.S1_at   | MmugDNA.16352.1 | 3.29  | 3.2   | 0.08 | 0.13 | 1.06  | 0.38283  | 0.467253 | 0.710964 | 0.677016 |
| MmugDNA.16353.1.S1_at   | MmugDNA.16353.1 | 6.58  | 6.55  | 0.2  | 0.02 | 1.02  | 0.858455 | 0.505804 | 0.95001  | 0.702218 |
| MmugDNA.16354.1.S1_at   | MmugDNA.16354.1 | 3.51  | 3.46  | 0.18 | 0.13 | 1.04  | 0.192169 | 0.241824 | 0.563232 | 0.512386 |
| MmugDNA.16355.1.S1_at   | MmugDNA.16355.1 | 4.94  | 4.82  | 0.25 | 0.12 | 1.09  | 0.485602 | 0.246149 | 0.774398 | 0.515864 |
| MmugDNA.16357.1.S1_at   | MmugDNA.16357.1 | 5.43  | 5.36  | 0.21 | 0.28 | 1.05  | 0.529418 | 0.065536 | 0.798296 | 0.301415 |
| MmugDNA.16357.1.S1_s_at | MmugDNA.16357.1 | 6.85  | 6.65  | 0.16 | 0.25 | 1.15  | 0.308168 | 0.127509 | 0.660917 | 0.398403 |
| MmugDNA.16358.1.S1_at   | MmugDNA.16358.1 | 3.31  | 3.44  | 0.11 | 0.07 | -1.1  | 0.654378 | 0.925575 | 0.862772 | 0.957863 |
| MmugDNA.16359.1.S1_at   | MmugDNA.16359.1 | 5.65  | 6.14  | 0.58 | 0.51 | -1.4  | 0.686615 | 0.618343 | 0.877418 | 0.774009 |
| MmugDNA.1636.1.S1_at    | MmugDNA.1636.1  | 4.49  | 4.37  | 0.18 | 0.18 | 1.08  | 0.467788 | 0.583468 | 0.764607 | 0.751805 |
| MmugDNA.16360.1.S1_at   | MmugDNA.16360.1 | 4.23  | 4.05  | 0.19 | 0.22 | 1.14  | 0.139112 | 0.147762 | 0.514459 | 0.422056 |
| MmugDNA.16361.1.S1_at   | MmugDNA.16361.1 | 5.38  | 5.95  | 0.47 | 0.11 | -1.48 | 0.17801  | 0.200174 | 0.551187 | 0.474603 |
| MmugDNA.16363.1.S1_at   | MmugDNA.16363.1 | 7.01  | 6.99  | 0.32 | 0.16 | 1.02  | 0.738094 | 0.83915  | 0.899775 | 0.908325 |
| MmugDNA.16365.1.S1_at   | MmugDNA.16365.1 | 6.26  | 6.18  | 0.01 | 0.02 | 1.06  | 0.004704 | 0.739314 | 0.201699 | 0.848911 |
| MmugDNA.16369.1.S1_at   | MmugDNA.16369.1 | 10.32 | 10.46 | 0.25 | 0.03 | -1.1  | 0.311952 | 0.018265 | 0.663542 | 0.169975 |
| MmugDNA.1637.1.S1_at    | MmugDNA.1637.1  | 4.95  | 4.8   | 0.07 | 0.03 | 1.11  | 0.02047  | 0.042932 | 0.304058 | 0.251759 |
| MmugDNA.16371.1.S1_at   | MmugDNA.16371.1 | 3.82  | 3.75  | 0.18 | 0.06 | 1.05  | 0.584516 | 0.599416 | 0.829743 | 0.76144  |
| MmugDNA.16373.1.S1_at   | MmugDNA.16373.1 | 4.58  | 4.58  | 0.07 | 0.03 | 1     | 0.628496 | 0.134175 | 0.851106 | 0.406421 |
| MmugDNA.16374.1.S1_at   | MmugDNA.16374.1 | 3.95  | 3.97  | 0.2  | 0.07 | -1.01 | 0.549549 | 0.783041 | 0.810374 | 0.874447 |
| MmugDNA.16375.1.S1_at   | MmugDNA.16375.1 | 3.14  | 3.15  | 0.29 | 0.18 | -1.01 | 0.255504 | 0.31385  | 0.619598 | 0.568091 |
| MmugDNA.16376.1.S1_at   | MmugDNA.16376.1 | 8.03  | 8.27  | 0.63 | 0.33 | -1.18 | 0.438635 | 0.849945 | 0.747368 | 0.914673 |

|                         |                 |       |       |      |      |       |          |          |          |          |
|-------------------------|-----------------|-------|-------|------|------|-------|----------|----------|----------|----------|
| MmugDNA.16377.1.S1_at   | MmugDNA.16377.1 | 7.44  | 7.17  | 1.7  | 0.29 | 1.2   | 0.921687 | 0.385653 | 0.973516 | 0.621079 |
| MmugDNA.16378.1.S1_s_at | MmugDNA.16378.1 | 12.18 | 12.13 | 0.11 | 0.02 | 1.04  | 0.490455 | 0.263029 | 0.777076 | 0.529397 |
| MmugDNA.16379.1.S1_at   | MmugDNA.16379.1 | 3.28  | 3.3   | 0.21 | 0.17 | -1.01 | 0.354198 | 0.270739 | 0.6938   | 0.53602  |
| MmugDNA.1638.1.S1_at    | MmugDNA.1638.1  | 4.15  | 4.08  | 0.02 | 0.13 | 1.05  | 0.353795 | 0.431385 | 0.693501 | 0.652321 |
| MmugDNA.16380.1.S1_at   | MmugDNA.16380.1 | 5.7   | 5.51  | 0.13 | 0.04 | 1.14  | 0.149921 | 0.094495 | 0.523408 | 0.35125  |
| MmugDNA.16381.1.S1_at   | MmugDNA.16381.1 | 11.54 | 11.88 | 0.06 | 0.01 | -1.26 | 0.001499 | 0.000011 | 0.161549 | 0.016526 |
| MmugDNA.16383.1.S1_at   | MmugDNA.16383.1 | 4.27  | 4.35  | 0.18 | 0.08 | -1.06 | 0.724832 | 0.171695 | 0.893282 | 0.448078 |
| MmugDNA.16384.1.S1_at   | MmugDNA.16384.1 | 5.5   | 5.46  | 0.16 | 0.1  | 1.02  | 0.810512 | 0.47905  | 0.931338 | 0.684903 |
| MmugDNA.16385.1.S1_at   | MmugDNA.16385.1 | 5.23  | 4.97  | 0.33 | 0.15 | 1.2   | 0.327387 | 0.578341 | 0.675065 | 0.748428 |
| MmugDNA.16386.1.S1_at   | MmugDNA.16386.1 | 3.21  | 3.09  | 0.06 | 0.07 | 1.09  | 0.079277 | 0.09926  | 0.442056 | 0.357513 |
| MmugDNA.16388.1.S1_at   | MmugDNA.16388.1 | 4.48  | 4.46  | 0.23 | 0.12 | -1.01 | 0.353686 | 0.695033 | 0.693411 | 0.822716 |
| MmugDNA.16389.1.S1_at   | MmugDNA.16389.1 | 7.06  | 6.23  | 0.47 | 0.36 | 1.79  | 0.044693 | 0.194563 | 0.374916 | 0.46966  |
| MmugDNA.16391.1.S1_at   | MmugDNA.16391.1 | 7.05  | 7.21  | 0.17 | 0.05 | -1.11 | 0.629797 | 0.808376 | 0.851714 | 0.889697 |
| MmugDNA.16392.1.S1_at   | MmugDNA.16392.1 | 4.51  | 4.44  | 0.23 | 0.18 | 1.05  | 0.397504 | 0.494557 | 0.721771 | 0.694909 |
| MmugDNA.16393.1.S1_at   | MmugDNA.16393.1 | 6.49  | 7.24  | 0.48 | 0.12 | -1.68 | 0.102081 | 0.126538 | 0.472436 | 0.39714  |
| MmugDNA.16394.1.S1_s_at | MmugDNA.16394.1 | 5.09  | 5.1   | 0.09 | 0.12 | -1.01 | 0.460785 | 0.730386 | 0.760518 | 0.844012 |
| MmugDNA.16395.1.S1_at   | MmugDNA.16395.1 | 3.99  | 4.07  | 0.2  | 0.51 | -1.06 | 0.464133 | 0.641387 | 0.762403 | 0.789506 |
| MmugDNA.16396.1.S1_at   | MmugDNA.16396.1 | 9.64  | 9.78  | 0.64 | 0.05 | -1.1  | 0.725539 | 0.37425  | 0.893676 | 0.612738 |
| MmugDNA.16398.1.S1_at   | MmugDNA.16398.1 | 9.04  | 8.65  | 0.3  | 0.09 | 1.31  | 0.314295 | 0.088234 | 0.665113 | 0.341721 |
| MmugDNA.16399.1.S1_s_at | MmugDNA.16399.1 | 9.98  | 9.75  | 0.16 | 0.17 | 1.18  | 0.071875 | 0.019527 | 0.431735 | 0.175499 |
| MmugDNA.164.1.S1_at     | MmugDNA.164.1   | 5.38  | 5.31  | 0.15 | 0.08 | 1.05  | 0.68013  | 0.225455 | 0.874543 | 0.498127 |
| MmugDNA.1640.1.S1_at    | MmugDNA.1640.1  | 7.59  | 7.46  | 0.51 | 0.35 | 1.1   | 0.851812 | 0.041466 | 0.947748 | 0.248496 |
| MmugDNA.16402.1.S1_at   | MmugDNA.16402.1 | 7.87  | 8.1   | 0.15 | 0.23 | -1.17 | 0.589315 | 0.136562 | 0.832298 | 0.409076 |
| MmugDNA.16403.1.S1_at   | MmugDNA.16403.1 | 6.03  | 5.8   | 0.13 | 0.15 | 1.17  | 0.105244 | 0.16813  | 0.477051 | 0.444724 |
| MmugDNA.16405.1.S1_a_at | MmugDNA.16405.1 | 5.29  | 5.1   | 0.26 | 0.24 | 1.14  | 0.617833 | 0.877116 | 0.845661 | 0.92996  |
| MmugDNA.16405.1.S1_at   | MmugDNA.16405.1 | 3.97  | 3.84  | 0.09 | 0.09 | 1.09  | 0.106632 | 0.169538 | 0.479    | 0.446167 |
| MmugDNA.16406.1.S1_at   | MmugDNA.16406.1 | 4.77  | 4.67  | 0.11 | 0.13 | 1.07  | 0.393818 | 0.714369 | 0.719504 | 0.834282 |
| MmugDNA.16408.1.S1_at   | MmugDNA.16408.1 | 4.15  | 4.42  | 0.31 | 0.22 | -1.21 | 0.818221 | 0.478474 | 0.934266 | 0.684481 |
| MmugDNA.16409.1.S1_at   | MmugDNA.16409.1 | 7.88  | 7.62  | 0.43 | 0.33 | 1.2   | 0.888179 | 0.200158 | 0.96126  | 0.474603 |
| MmugDNA.1641.1.S1_at    | MmugDNA.1641.1  | 6.19  | 6.3   | 0.31 | 0.23 | -1.07 | 0.6483   | 0.352405 | 0.859825 | 0.595722 |
| MmugDNA.16410.1.S1_at   | MmugDNA.16410.1 | 6.08  | 6.55  | 0.18 | 0.01 | -1.39 | 0.012716 | 0.010141 | 0.26403  | 0.131979 |
| MmugDNA.16411.1.S1_at   | MmugDNA.16411.1 | 6.31  | 6.2   | 0.04 | 0.21 | 1.08  | 0.155035 | 0.183057 | 0.528378 | 0.459493 |
| MmugDNA.16413.1.S1_at   | MmugDNA.16413.1 | 3.05  | 2.84  | 0.2  | 0.07 | 1.16  | 0.483959 | 0.458836 | 0.773436 | 0.671456 |
| MmugDNA.16414.1.S1_at   | MmugDNA.16414.1 | 6.48  | 6.94  | 0.54 | 0.06 | -1.37 | 0.152416 | 0.006787 | 0.525429 | 0.111388 |
| MmugDNA.35039.1.S1_s_at | MmugDNA.35039.1 | 9.9   | 9.9   | 0.21 | 0.05 | -1    | 0.274349 | 0.175772 | 0.633792 | 0.452344 |
| MmugDNA.16416.1.S1_at   | MmugDNA.16416.1 | 4.41  | 5.36  | 0.77 | 0.19 | -1.93 | 0.138155 | 0.229311 | 0.513671 | 0.501527 |
| MmugDNA.16417.1.S1_at   | MmugDNA.16417.1 | 10.87 | 10.74 | 0.21 | 0.09 | 1.1   | 0.409174 | 0.133187 | 0.72983  | 0.40493  |
| MmugDNA.16418.1.S1_at   | MmugDNA.16418.1 | 4.33  | 4.28  | 0.06 | 0.03 | 1.04  | 0.315704 | 0.24656  | 0.666057 | 0.515917 |
| MmugDNA.16419.1.S1_at   | MmugDNA.16419.1 | 5.18  | 5.31  | 0.02 | 0.17 | -1.09 | 0.234396 | 0.30881  | 0.601639 | 0.56463  |
| MmugDNA.1642.1.S1_at    | MmugDNA.1642.1  | 4.74  | 4.46  | 0.08 | 0.15 | 1.22  | 0.050526 | 0.325234 | 0.387394 | 0.575648 |
| MmugDNA.16422.1.S1_at   | MmugDNA.16422.1 | 7.04  | 7     | 0.12 | 0.1  | 1.03  | 0.282353 | 0.36576  | 0.640907 | 0.605685 |
| MmugDNA.16423.1.S1_at   | MmugDNA.16423.1 | 2.67  | 2.51  | 0.08 | 0.03 | 1.11  | 0.049048 | 0.228966 | 0.385247 | 0.501254 |
| MmugDNA.16425.1.S1_at   | MmugDNA.16425.1 | 4.45  | 5.84  | 0.34 | 0.4  | -2.62 | 0.010978 | 0.001952 | 0.251125 | 0.065813 |

|                         |                 |       |       |      |      |       |          |          |          |          |
|-------------------------|-----------------|-------|-------|------|------|-------|----------|----------|----------|----------|
| MmugDNA.16428.1.S1_at   | MmugDNA.16428.1 | 4.05  | 3.99  | 0.06 | 0.06 | 1.04  | 0.279987 | 0.206161 | 0.638821 | 0.480351 |
| MmugDNA.16429.1.S1_at   | MmugDNA.16429.1 | 5.73  | 6.41  | 1.01 | 0.1  | -1.6  | 0.796991 | 0.737755 | 0.925391 | 0.848078 |
| MmugDNA.1643.1.S1_at    | MmugDNA.1643.1  | 5.98  | 6.05  | 0.17 | 0.07 | -1.05 | 0.571638 | 0.03666  | 0.822859 | 0.235973 |
| MmugDNA.16430.1.S1_at   | MmugDNA.16430.1 | 2.79  | 2.81  | 0.28 | 0.14 | -1.01 | 0.295526 | 0.360235 | 0.651282 | 0.601283 |
| MmugDNA.16430.1.S1_s_at | MmugDNA.16430.1 | 4.73  | 4.9   | 0.19 | 0.01 | -1.12 | 0.640859 | 0.76213  | 0.856959 | 0.861653 |
| MmugDNA.16434.1.S1_at   | MmugDNA.16434.1 | 8.57  | 9.1   | 0.35 | 0.06 | -1.45 | 0.083032 | 0.084831 | 0.448363 | 0.336352 |
| MmugDNA.16435.1.S1_at   | MmugDNA.16435.1 | 6.21  | 5.99  | 0.29 | 0.05 | 1.16  | 0.421662 | 0.664493 | 0.737581 | 0.803396 |
| MmugDNA.16436.1.S1_at   | MmugDNA.16436.1 | 5.79  | 5.85  | 0.05 | 0.11 | -1.04 | 0.406712 | 0.116563 | 0.728299 | 0.383705 |
| MmugDNA.16437.1.S1_at   | MmugDNA.16437.1 | 3.49  | 3.42  | 0.26 | 0.09 | 1.05  | 0.581547 | 0.769241 | 0.827705 | 0.866004 |
| MmugDNA.16438.1.S1_at   | MmugDNA.16438.1 | 7.57  | 7.44  | 0.19 | 0.13 | 1.1   | 0.153351 | 0.046463 | 0.526421 | 0.260089 |
| MmugDNA.16439.1.S1_at   | MmugDNA.16439.1 | 6.09  | 5.92  | 0.42 | 0.15 | -1.13 | 0.860952 | 0.412491 | 0.951006 | 0.638915 |
| MmugDNA.1644.1.S1_at    | MmugDNA.1644.1  | 9.87  | 10.1  | 0.06 | 0.03 | -1.17 | 0.008938 | 0.513944 | 0.238998 | 0.707322 |
| MmugDNA.16440.1.S1_at   | MmugDNA.16440.1 | 3.57  | 3.71  | 0.19 | 0.14 | -1.1  | 0.399767 | 0.557989 | 0.72331  | 0.735338 |
| MmugDNA.16441.1.S1_at   | MmugDNA.16441.1 | 5     | 4.89  | 0.18 | 0.21 | 1.08  | 0.689063 | 0.633295 | 0.878634 | 0.784071 |
| MmugDNA.16442.1.S1_at   | MmugDNA.16442.1 | 6.02  | 5.95  | 0.09 | 0.08 | 1.05  | 0.134365 | 0.447077 | 0.508462 | 0.663283 |
| MmugDNA.16443.1.S1_at   | MmugDNA.16443.1 | 10.15 | 9.98  | 0.23 | 0.09 | 1.12  | 0.304244 | 0.130421 | 0.657902 | 0.402257 |
| MmugDNA.16444.1.S1_at   | MmugDNA.16444.1 | 4.9   | 5.06  | 0.75 | 0.22 | -1.11 | 0.89624  | 0.056124 | 0.964545 | 0.282786 |
| MmugDNA.16445.1.S1_at   | MmugDNA.16445.1 | 3.82  | 3.63  | 0.2  | 0.06 | 1.14  | 0.286131 | 0.709587 | 0.64358  | 0.831691 |
| MmugDNA.16446.1.S1_at   | MmugDNA.16446.1 | 5.98  | 5.53  | 0.52 | 0.63 | 1.37  | 0.8522   | 0.98424  | 0.947936 | 0.991234 |
| MmugDNA.1645.1.S1_at    | MmugDNA.1645.1  | 6.28  | 7.17  | 0.95 | 0.67 | -1.85 | 0.24019  | 0.124249 | 0.606503 | 0.394547 |
| MmugDNA.16453.1.S1_at   | MmugDNA.16453.1 | 8.99  | 8.35  | 0.06 | 0.26 | 1.56  | 0.015921 | 0.00711  | 0.284606 | 0.113555 |
| MmugDNA.16453.1.S1_s_at | MmugDNA.16453.1 | 6.43  | 6.3   | 0.11 | 0.35 | 1.1   | 0.193625 | 0.118292 | 0.564275 | 0.386305 |
| MmugDNA.16455.1.S1_at   | MmugDNA.16455.1 | 6     | 5.61  | 0.18 | 0.09 | 1.31  | 0.028261 | 0.023685 | 0.33163  | 0.192689 |
| MmugDNA.16456.1.S1_at   | MmugDNA.16456.1 | 6.95  | 6.8   | 0.26 | 0.12 | 1.11  | 0.25635  | 0.506353 | 0.620399 | 0.702371 |
| MmugDNA.16457.1.S1_at   | MmugDNA.16457.1 | 3.1   | 3.19  | 0.61 | 0.03 | -1.06 | 0.475717 | 0.758216 | 0.768676 | 0.859308 |
| MmugDNA.1646.1.S1_at    | MmugDNA.1646.1  | 7.35  | 7.2   | 0.13 | 0.03 | 1.11  | 0.196894 | 0.362291 | 0.567663 | 0.602931 |
| MmugDNA.16460.1.S1_at   | MmugDNA.16460.1 | 6.48  | 6.49  | 0.24 | 0.03 | -1.01 | 0.353802 | 0.611698 | 0.693501 | 0.769516 |
| MmugDNA.16461.1.S1_at   | MmugDNA.16461.1 | 7.79  | 7.54  | 0.34 | 0.1  | 1.19  | 0.186774 | 0.276556 | 0.559225 | 0.540566 |
| MmugDNA.16462.1.S1_at   | MmugDNA.16462.1 | 6.21  | 5.94  | 0.5  | 0.1  | 1.2   | 0.462218 | 0.056252 | 0.761504 | 0.283133 |
| MmugDNA.16463.1.S1_at   | MmugDNA.16463.1 | 7.41  | 7.16  | 0.14 | 0.02 | 1.19  | 0.071028 | 0.006601 | 0.430294 | 0.110088 |
| MmugDNA.16465.1.S1_at   | MmugDNA.16465.1 | 5     | 4.9   | 0.14 | 0.06 | 1.07  | 0.843148 | 0.326373 | 0.944529 | 0.57656  |
| MmugDNA.16467.1.S1_at   | MmugDNA.16467.1 | 8.17  | 8.09  | 0.32 | 0.04 | 1.06  | 0.722548 | 0.848269 | 0.892352 | 0.913873 |
| MmugDNA.16468.1.S1_at   | MmugDNA.16468.1 | 6.1   | 6.08  | 0.44 | 0.03 | 1.01  | 0.453215 | 0.33281  | 0.755962 | 0.581217 |
| MmugDNA.1647.1.S1_at    | MmugDNA.1647.1  | 11.24 | 11.68 | 0.76 | 0.14 | -1.36 | 0.366288 | 0.069468 | 0.701752 | 0.309778 |
| MmugDNA.16470.1.S1_at   | MmugDNA.16470.1 | 3.14  | 3.16  | 0.4  | 0.17 | -1.02 | 0.576028 | 0.273355 | 0.825049 | 0.5378   |
| MmugDNA.16471.1.S1_at   | MmugDNA.16471.1 | 8.41  | 7.66  | 0.91 | 0.16 | 1.69  | 0.165055 | 0.043937 | 0.537704 | 0.254098 |
| MmugDNA.41646.1.S1_s_at | MmugDNA.41646.1 | 8.29  | 8.56  | 0.09 | 0.25 | -1.2  | 0.061347 | 0.013293 | 0.410536 | 0.147978 |
| MmugDNA.16473.1.S1_at   | MmugDNA.16473.1 | 5.81  | 5.64  | 0.11 | 0.18 | 1.13  | 0.528636 | 0.269616 | 0.797961 | 0.534868 |
| MmugDNA.16475.1.S1_at   | MmugDNA.16475.1 | 10.15 | 10.03 | 0.1  | 0.14 | 1.09  | 0.154931 | 0.613186 | 0.528235 | 0.770473 |
| MmugDNA.16479.1.S1_at   | MmugDNA.16479.1 | 3.6   | 3.66  | 0.16 | 0    | -1.05 | 0.973458 | 0.965795 | 0.991367 | 0.980824 |
| MmugDNA.1648.1.S1_at    | MmugDNA.1648.1  | 9.71  | 9.08  | 0.66 | 0.12 | 1.54  | 0.537033 | 0.084462 | 0.802624 | 0.33582  |
| MmugDNA.16481.1.S1_at   | MmugDNA.16481.1 | 5.14  | 4.85  | 0.18 | 0.06 | 1.22  | 0.11654  | 0.127773 | 0.489684 | 0.398627 |
| MmugDNA.16482.1.S1_at   | MmugDNA.16482.1 | 5.92  | 5.71  | 0.23 | 0.03 | 1.16  | 0.174075 | 0.1674   | 0.547067 | 0.443785 |

|                         |                 |       |       |      |      |       |          |          |          |          |
|-------------------------|-----------------|-------|-------|------|------|-------|----------|----------|----------|----------|
| MmugDNA.16483.1.S1_at   | MmugDNA.16483.1 | 4.39  | 4.14  | 0.06 | 0.1  | 1.18  | 0.025931 | 0.304938 | 0.32273  | 0.562064 |
| MmugDNA.16483.1.S1_s_at | MmugDNA.16483.1 | 3.57  | 3.74  | 0.09 | 0.11 | -1.12 | 0.200258 | 0.425304 | 0.572075 | 0.647696 |
| MmugDNA.16485.1.S1_at   | MmugDNA.16485.1 | 4.75  | 5.01  | 0.08 | 0.53 | -1.19 | 0.494968 | 0.205004 | 0.77967  | 0.479296 |
| MmugDNA.16486.1.S1_at   | MmugDNA.16486.1 | 9.77  | 10.28 | 0.26 | 0.05 | -1.42 | 0.078734 | 0.03967  | 0.441464 | 0.244271 |
| MmugDNA.16487.1.S1_at   | MmugDNA.16487.1 | 10.48 | 10.17 | 0.35 | 0.06 | 1.25  | 0.123278 | 0.151043 | 0.496589 | 0.425701 |
| MmugDNA.16488.1.S1_at   | MmugDNA.16488.1 | 10.7  | 10.98 | 0.09 | 0.08 | -1.21 | 0.012619 | 0.00386  | 0.263371 | 0.088378 |
| MmugDNA.16488.1.S1_s_at | MmugDNA.16488.1 | 11.97 | 12.15 | 0.19 | 0.02 | -1.13 | 0.060852 | 0.165296 | 0.40897  | 0.441488 |
| MmugDNA.16489.1.S1_at   | MmugDNA.16489.1 | 10    | 8.29  | 0.67 | 0.21 | 3.27  | 0.009394 | 0.002188 | 0.241869 | 0.0691   |
| MmugDNA.1649.1.S1_at    | MmugDNA.1649.1  | 6.84  | 6.72  | 0.57 | 0.3  | 1.09  | 0.423204 | 0.276387 | 0.738919 | 0.540334 |
| MmugDNA.16491.1.S1_at   | MmugDNA.16491.1 | 6.66  | 6.57  | 0.35 | 0.36 | 1.06  | 0.991777 | 0.130256 | 0.996849 | 0.402007 |
| MmugDNA.16492.1.S1_at   | MmugDNA.16492.1 | 5.72  | 5.73  | 0.03 | 0.09 | -1    | 0.990119 | 0.685829 | 0.996301 | 0.816612 |
| MmugDNA.16494.1.S1_s_at | MmugDNA.16494.1 | 8.12  | 7.59  | 0.54 | 0.11 | 1.44  | 0.174696 | 0.253652 | 0.548031 | 0.521986 |
| MmugDNA.16496.1.S1_at   | MmugDNA.16496.1 | 5.71  | 5.54  | 0.45 | 0.22 | 1.13  | 0.341792 | 0.13304  | 0.685418 | 0.404715 |
| MmugDNA.16498.1.S1_at   | MmugDNA.16498.1 | 5.29  | 5.1   | 0.05 | 0.35 | 1.14  | 0.424459 | 0.328511 | 0.73961  | 0.578137 |
| MmugDNA.16499.1.S1_at   | MmugDNA.16499.1 | 6.42  | 6.31  | 0.06 | 0    | 1.08  | 0.029455 | 0.007782 | 0.334225 | 0.117732 |
| MmugDNA.165.1.S1_at     | MmugDNA.165.1   | 4.67  | 4.63  | 0.55 | 0.34 | 1.03  | 0.875068 | 0.549624 | 0.956625 | 0.729956 |
| MmugDNA.16501.1.S1_at   | MmugDNA.16501.1 | 6.87  | 8     | 0.94 | 0.23 | -2.19 | 0.203854 | 0.29511  | 0.57513  | 0.554551 |
| MmugDNA.16502.1.S1_at   | MmugDNA.16502.1 | 4.54  | 5.22  | 0.29 | 0.14 | -1.61 | 0.047132 | 0.098704 | 0.379414 | 0.356809 |
| MmugDNA.16503.1.S1_at   | MmugDNA.16503.1 | 3.11  | 3     | 0.26 | 0.15 | 1.08  | 0.530479 | 0.649638 | 0.799059 | 0.795053 |
| MmugDNA.16504.1.S1_at   | MmugDNA.16504.1 | 3.08  | 3.43  | 0    | 0.22 | -1.27 | 0.02089  | 0.021545 | 0.305752 | 0.183828 |
| MmugDNA.16505.1.S1_at   | MmugDNA.16505.1 | 7.27  | 5.28  | 2.23 | 0.29 | 3.98  | 0.216777 | 0.140097 | 0.586817 | 0.413394 |
| MmugDNA.16506.1.S1_at   | MmugDNA.16506.1 | 6.32  | 6.18  | 0.04 | 0.08 | 1.11  | 0.121623 | 0.414149 | 0.495271 | 0.640063 |
| MmugDNA.16507.1.S1_at   | MmugDNA.16507.1 | 6.03  | 6.59  | 0.61 | 0.31 | -1.47 | 0.937505 | 0.962153 | 0.978987 | 0.978723 |
| MmugDNA.16508.1.S1_at   | MmugDNA.16508.1 | 6.16  | 5.47  | 0.24 | 0.08 | 1.61  | 0.007847 | 0.052325 | 0.231023 | 0.274201 |
| MmugDNA.16509.1.S1_at   | MmugDNA.16509.1 | 6.02  | 5.95  | 0.06 | 0.05 | 1.05  | 0.447862 | 0.92488  | 0.753612 | 0.9575   |
| MmugDNA.16510.1.S1_at   | MmugDNA.16510.1 | 4.03  | 4.04  | 0.26 | 0.05 | -1.01 | 0.412062 | 0.55152  | 0.731904 | 0.731023 |
| MmugDNA.16511.1.S1_at   | MmugDNA.16511.1 | 9.69  | 9.72  | 0.11 | 0.21 | -1.02 | 0.637725 | 0.484226 | 0.855626 | 0.688408 |
| MmugDNA.16512.1.S1_at   | MmugDNA.16512.1 | 4.78  | 4.34  | 0.32 | 0.21 | 1.36  | 0.062036 | 0.104923 | 0.412007 | 0.366485 |
| MmugDNA.16513.1.S1_at   | MmugDNA.16513.1 | 6.42  | 6.29  | 0.06 | 0.16 | 1.1   | 0.077247 | 0.494258 | 0.439109 | 0.694771 |
| MmugDNA.16514.1.S1_at   | MmugDNA.16514.1 | 4.75  | 5     | 0.13 | 0.08 | -1.19 | 0.03675  | 0.088195 | 0.355695 | 0.341721 |
| MmugDNA.16515.1.S1_at   | MmugDNA.16515.1 | 3.1   | 3.33  | 0.3  | 0.19 | -1.17 | 0.9466   | 0.870564 | 0.981513 | 0.926446 |
| MmugDNA.16516.1.S1_x_at | MmugDNA.16516.1 | 12.69 | 12.85 | 0.12 | 0.1  | -1.12 | 0.239864 | 0.251111 | 0.606208 | 0.519792 |
| MmugDNA.16517.1.S1_at   | MmugDNA.16517.1 | 10.16 | 9.49  | 0.42 | 0.04 | 1.6   | 0.049396 | 0.007228 | 0.385474 | 0.114199 |
| MmugDNA.16518.1.S1_at   | MmugDNA.16518.1 | 7.72  | 7.07  | 0.37 | 0.05 | 1.56  | 0.123278 | 0.418931 | 0.496589 | 0.643157 |
| MmugDNA.16519.1.S1_at   | MmugDNA.16519.1 | 5.75  | 6.49  | 0.57 | 0.12 | -1.66 | 0.09374  | 0.204262 | 0.46305  | 0.478541 |
| MmugDNA.1652.1.S1_at    | MmugDNA.1652.1  | 3.26  | 3.25  | 0.09 | 0.16 | 1.01  | 0.854569 | 0.84235  | 0.948538 | 0.910241 |
| MmugDNA.16521.1.S1_at   | MmugDNA.16521.1 | 5.41  | 5.31  | 0.33 | 0.23 | 1.07  | 0.40024  | 0.459939 | 0.723621 | 0.671989 |
| MmugDNA.16522.1.S1_at   | MmugDNA.16522.1 | 5.4   | 5.32  | 0.14 | 0.13 | 1.06  | 0.943544 | 0.941993 | 0.980509 | 0.96711  |
| MmugDNA.16523.1.S1_at   | MmugDNA.16523.1 | 3.8   | 3.8   | 0.4  | 0.37 | -1    | 0.677592 | 0.520574 | 0.873568 | 0.711831 |
| MmugDNA.16524.1.S1_at   | MmugDNA.16524.1 | 6.66  | 6.49  | 0.06 | 0.08 | 1.13  | 0.026424 | 0.374761 | 0.32471  | 0.613063 |
| MmugDNA.17744.1.S1_at   | MmugDNA.17744.1 | 7.1   | 7.42  | 0.05 | 0.05 | -1.25 | 0.001363 | 0.000693 | 0.159096 | 0.044166 |
| MmugDNA.17744.1.S1_s_at | MmugDNA.17744.1 | 7.07  | 7.01  | 0.12 | 0.07 | 1.05  | 0.323229 | 0.114393 | 0.672034 | 0.380938 |
| MmugDNA.16526.1.S1_at   | MmugDNA.16526.1 | 6.16  | 6.12  | 0.17 | 0.23 | 1.03  | 0.823174 | 0.465563 | 0.936214 | 0.675811 |

|                         |                 |       |       |      |      |       |          |          |          |          |
|-------------------------|-----------------|-------|-------|------|------|-------|----------|----------|----------|----------|
| MmugDNA.16527.1.S1_at   | MmugDNA.16527.1 | 4.16  | 4.14  | 0.13 | 0.08 | 1.01  | 0.713527 | 0.442945 | 0.888443 | 0.660842 |
| MmugDNA.16528.1.S1_at   | MmugDNA.16528.1 | 3.36  | 3.32  | 0.04 | 0.09 | 1.03  | 0.220342 | 0.258984 | 0.589644 | 0.5262   |
| MmugDNA.16531.1.S1_at   | MmugDNA.16531.1 | 6.58  | 6.32  | 0.09 | 0.17 | 1.19  | 0.133684 | 0.191519 | 0.508012 | 0.466833 |
| MmugDNA.16532.1.S1_at   | MmugDNA.16532.1 | 4.37  | 4.06  | 0.15 | 0.11 | 1.24  | 0.105768 | 0.114    | 0.477611 | 0.380349 |
| MmugDNA.16533.1.S1_at   | MmugDNA.16533.1 | 8.78  | 8.74  | 0.18 | 0.12 | 1.03  | 0.569922 | 0.014892 | 0.821803 | 0.1551   |
| MmugDNA.16534.1.S1_at   | MmugDNA.16534.1 | 10.93 | 11.19 | 0.39 | 0.11 | -1.2  | 0.10789  | 0.019436 | 0.480398 | 0.175133 |
| MmugDNA.16535.1.S1_at   | MmugDNA.16535.1 | 4.48  | 4.89  | 0.37 | 0.11 | -1.34 | 0.116002 | 0.205518 | 0.489515 | 0.479794 |
| MmugDNA.16536.1.S1_at   | MmugDNA.16536.1 | 10.02 | 10.09 | 0.68 | 0.25 | -1.05 | 0.794203 | 0.037844 | 0.924511 | 0.238912 |
| MmugDNA.16537.1.S1_at   | MmugDNA.16537.1 | 6.35  | 6.39  | 0.21 | 0.05 | -1.03 | 0.790724 | 0.451887 | 0.922991 | 0.666676 |
| MmugDNA.9780.1.S1_s_at  | MmugDNA.9780.1  | 11.09 | 10.49 | 0.03 | 0.09 | 1.52  | 0.000364 | 0.000295 | 0.137028 | 0.034892 |
| MmugDNA.41245.1.S1_at   | MmugDNA.41245.1 | 5.57  | 5.54  | 0.26 | 0.31 | -1.02 | 0.899163 | 0.346162 | 0.965792 | 0.591195 |
| MmugDNA.41245.1.S1_s_at | MmugDNA.41245.1 | 10.72 | 10.93 | 0.37 | 0.13 | -1.16 | 0.693464 | 0.312009 | 0.880678 | 0.566838 |
| MmugDNA.1654.1.S1_at    | MmugDNA.1654.1  | 2.72  | 2.82  | 0.09 | 0.14 | -1.07 | 0.178551 | 0.201885 | 0.551383 | 0.476373 |
| MmugDNA.16540.1.S1_at   | MmugDNA.16540.1 | 6.27  | 6.17  | 0.2  | 0.18 | 1.07  | 0.278184 | 0.912969 | 0.637417 | 0.951043 |
| MmugDNA.16542.1.S1_at   | MmugDNA.16542.1 | 5.49  | 5.13  | 1.26 | 0.12 | 1.29  | 0.304757 | 0.04055  | 0.658344 | 0.246264 |
| MmugDNA.16543.1.S1_x_at | MmugDNA.16543.1 | 12.89 | 13.02 | 0.2  | 0.16 | -1.1  | 0.298536 | 0.237164 | 0.653176 | 0.507906 |
| MmugDNA.16544.1.S1_at   | MmugDNA.16544.1 | 5.73  | 5.85  | 0.27 | 0.45 | -1.09 | 0.563386 | 0.340371 | 0.818216 | 0.586725 |
| MmugDNA.16545.1.S1_at   | MmugDNA.16545.1 | 7.1   | 7     | 0.01 | 0.06 | 1.07  | 0.042223 | 0.160662 | 0.368796 | 0.436745 |
| MmugDNA.16546.1.S1_at   | MmugDNA.16546.1 | 8.72  | 9.05  | 0.53 | 0.2  | -1.26 | 0.69991  | 0.139062 | 0.883338 | 0.412165 |
| MmugDNA.16547.1.S1_at   | MmugDNA.16547.1 | 8.71  | 8.31  | 0.42 | 0.09 | 1.32  | 0.227251 | 0.321174 | 0.596459 | 0.573111 |
| MmugDNA.16548.1.S1_at   | MmugDNA.16548.1 | 3.87  | 3.76  | 1.13 | 0.35 | 1.08  | 0.728007 | 0.603034 | 0.894913 | 0.763871 |
| MmugDNA.16549.1.S1_at   | MmugDNA.16549.1 | 5.77  | 6.49  | 0.24 | 0.14 | -1.65 | 0.022923 | 0.11398  | 0.313298 | 0.380304 |
| MmugDNA.1655.1.S1_at    | MmugDNA.1655.1  | 4.36  | 3.92  | 0.04 | 0.45 | 1.35  | 0.088934 | 0.112434 | 0.45672  | 0.377784 |
| MmugDNA.16550.1.S1_at   | MmugDNA.16550.1 | 5.79  | 6.05  | 0.81 | 0.87 | -1.19 | 0.830428 | 0.315752 | 0.939291 | 0.569157 |
| MmugDNA.16551.1.S1_at   | MmugDNA.16551.1 | 3.6   | 3.6   | 0.13 | 0.07 | 1     | 0.7218   | 0.980577 | 0.892101 | 0.989391 |
| MmugDNA.16552.1.S1_x_at | MmugDNA.16552.1 | 10.14 | 9.92  | 0.29 | 0.08 | 1.17  | 0.794652 | 0.903187 | 0.924622 | 0.944982 |
| MmugDNA.16553.1.S1_at   | MmugDNA.16553.1 | 2.89  | 2.9   | 0.06 | 0.12 | -1.01 | 0.753317 | 0.57819  | 0.907011 | 0.748359 |
| MmugDNA.16555.1.S1_at   | MmugDNA.16555.1 | 9.53  | 9.72  | 1.6  | 0.3  | -1.14 | 0.906708 | 0.149867 | 0.968356 | 0.424468 |
| MmugDNA.16557.1.S1_at   | MmugDNA.16557.1 | 6.76  | 6.71  | 0.03 | 0.02 | 1.03  | 0.067156 | 0.847706 | 0.4232   | 0.913501 |
| MmugDNA.16559.1.S1_at   | MmugDNA.16559.1 | 6.02  | 5.9   | 0.47 | 0.27 | 1.08  | 0.961963 | 0.22171  | 0.987594 | 0.494901 |
| MmugDNA.16561.1.S1_at   | MmugDNA.16561.1 | 4.27  | 4.13  | 0.25 | 0.42 | 1.1   | 0.648778 | 0.868325 | 0.860071 | 0.925242 |
| MmugDNA.16562.1.S1_at   | MmugDNA.16562.1 | 5.1   | 5.32  | 0.07 | 0.24 | -1.16 | 0.521299 | 0.126583 | 0.79444  | 0.397211 |
| MmugDNA.16564.1.S1_at   | MmugDNA.16564.1 | 5.11  | 5.11  | 0.05 | 0.06 | -1    | 0.589444 | 0.465664 | 0.832358 | 0.675863 |
| MmugDNA.16565.1.S1_at   | MmugDNA.16565.1 | 6.09  | 5.87  | 0.18 | 0.17 | 1.16  | 0.461341 | 0.069463 | 0.760883 | 0.309778 |
| MmugDNA.16566.1.S1_at   | MmugDNA.16566.1 | 5.15  | 5.18  | 0.13 | 0.31 | -1.02 | 0.645595 | 0.625421 | 0.858801 | 0.779175 |
| MmugDNA.16567.1.S1_at   | MmugDNA.16567.1 | 7.11  | 7.22  | 0.21 | 0.06 | -1.08 | 0.187659 | 0.22148  | 0.559909 | 0.494795 |
| MmugDNA.16568.1.S1_at   | MmugDNA.16568.1 | 6.13  | 6.4   | 0.06 | 0.6  | -1.2  | 0.153694 | 0.089497 | 0.526882 | 0.343811 |
| MmugDNA.16569.1.S1_s_at | MmugDNA.16569.1 | 10.03 | 10.03 | 0.41 | 0.2  | 1     | 0.441481 | 0.394923 | 0.749387 | 0.627216 |
| MmugDNA.1657.1.S1_at    | MmugDNA.1657.1  | 3.36  | 3.27  | 0.14 | 0.1  | 1.06  | 0.86388  | 0.824629 | 0.952043 | 0.899309 |
| MmugDNA.16570.1.S1_at   | MmugDNA.16570.1 | 7.93  | 8.16  | 0.05 | 0.14 | -1.17 | 0.017876 | 0.015295 | 0.294124 | 0.157071 |
| MmugDNA.16571.1.S1_at   | MmugDNA.16571.1 | 4.72  | 4.56  | 0.22 | 0.11 | 1.12  | 0.373829 | 0.1204   | 0.705567 | 0.38925  |
| MmugDNA.16572.1.S1_at   | MmugDNA.16572.1 | 12.75 | 11.46 | 0.35 | 0.25 | 2.44  | 0.012586 | 0.002621 | 0.263116 | 0.075772 |
| MmugDNA.16573.1.S1_s_at | MmugDNA.16573.1 | 13.19 | 13.26 | 0.89 | 0.13 | -1.05 | 0.859331 | 0.075083 | 0.950367 | 0.319283 |



|                         |                 |       |       |      |      |       |          |          |          |          |
|-------------------------|-----------------|-------|-------|------|------|-------|----------|----------|----------|----------|
| MmugDNA.16574.1.S1_at   | MmugDNA.16574.1 | 6.74  | 5.87  | 1    | 0.2  | 1.83  | 0.199721 | 0.146525 | 0.571494 | 0.420581 |
| MmugDNA.16576.1.S1_at   | MmugDNA.16576.1 | 9.26  | 8.88  | 0.42 | 0.1  | 1.31  | 0.067002 | 0.017629 | 0.422979 | 0.167839 |
| MmugDNA.16576.1.S1_s_at | MmugDNA.16576.1 | 8.86  | 7.83  | 0.46 | 0.16 | 2.04  | 0.016376 | 0.012715 | 0.287478 | 0.145369 |
| MmugDNA.16577.1.S1_at   | MmugDNA.16577.1 | 4     | 3.93  | 0.03 | 0.21 | 1.05  | 0.20941  | 0.308305 | 0.580868 | 0.564425 |
| MmugDNA.16578.1.S1_at   | MmugDNA.16578.1 | 4.19  | 4.15  | 0.24 | 0.28 | 1.03  | 0.928708 | 0.898042 | 0.976332 | 0.941946 |
| MmugDNA.1658.1.S1_at    | MmugDNA.1658.1  | 12.47 | 12.19 | 0.23 | 0.12 | 1.22  | 0.364914 | 0.440991 | 0.700775 | 0.659248 |
| MmugDNA.16580.1.S1_at   | MmugDNA.16580.1 | 5.54  | 6.71  | 0.89 | 0.25 | -2.26 | 0.257334 | 0.457364 | 0.621065 | 0.670806 |
| MmugDNA.16581.1.S1_at   | MmugDNA.16581.1 | 12.92 | 12.79 | 0.45 | 0.02 | 1.1   | 0.652652 | 0.136972 | 0.86202  | 0.409769 |
| MmugDNA.16583.1.S1_at   | MmugDNA.16583.1 | 3.93  | 3.84  | 0.32 | 0.33 | 1.07  | 0.592555 | 0.625196 | 0.833921 | 0.779045 |
| MmugDNA.16584.1.S1_at   | MmugDNA.16584.1 | 5.71  | 5.21  | 0.23 | 0.26 | 1.41  | 0.094508 | 0.067459 | 0.463794 | 0.305749 |
| MmugDNA.16585.1.S1_at   | MmugDNA.16585.1 | 5.96  | 5.96  | 0.09 | 0.08 | -1    | 0.510167 | 0.124032 | 0.788001 | 0.39431  |
| MmugDNA.16587.1.S1_at   | MmugDNA.16587.1 | 3.66  | 3.52  | 0.21 | 0.09 | 1.1   | 0.42695  | 0.658841 | 0.740849 | 0.800473 |
| MmugDNA.16588.1.S1_at   | MmugDNA.16588.1 | 5.19  | 5.08  | 0.15 | 0.12 | 1.08  | 0.175663 | 0.209478 | 0.548781 | 0.483118 |
| MmugDNA.16589.1.S1_at   | MmugDNA.16589.1 | 7.69  | 8.02  | 0.46 | 0.25 | -1.26 | 0.565027 | 0.169597 | 0.819091 | 0.446204 |
| MmugDNA.1659.1.S1_at    | MmugDNA.1659.1  | 5.13  | 5.13  | 0.18 | 0.34 | 1     | 0.653453 | 0.2754   | 0.86241  | 0.539663 |
| MmugDNA.16590.1.S1_at   | MmugDNA.16590.1 | 5.48  | 5.04  | 1.57 | 0.2  | 1.36  | 0.476085 | 0.329065 | 0.768871 | 0.578482 |
| MmugDNA.16591.1.S1_at   | MmugDNA.16591.1 | 11.81 | 11.34 | 0.43 | 0.04 | 1.39  | 0.433017 | 0.539639 | 0.744194 | 0.723878 |
| MmugDNA.16592.1.S1_at   | MmugDNA.16592.1 | 6.45  | 6.34  | 0.03 | 0.04 | 1.08  | 0.053331 | 0.743355 | 0.394644 | 0.85129  |
| MmugDNA.16594.1.S1_at   | MmugDNA.16594.1 | 5.18  | 5.09  | 0.25 | 0.02 | 1.06  | 0.484212 | 0.496313 | 0.773472 | 0.695976 |
| MmugDNA.16595.1.S1_at   | MmugDNA.16595.1 | 7.71  | 7.51  | 0.14 | 0.06 | 1.14  | 0.039519 | 0.071834 | 0.362038 | 0.314082 |
| MmugDNA.16596.1.S1_at   | MmugDNA.16596.1 | 6.78  | 6.44  | 0.1  | 0.2  | 1.27  | 0.032053 | 0.149946 | 0.342916 | 0.424602 |
| MmugDNA.16598.1.S1_at   | MmugDNA.16598.1 | 5.43  | 5.27  | 0    | 0.16 | 1.12  | 0.152305 | 0.117871 | 0.525286 | 0.38579  |
| MmugDNA.16598.1.S1_s_at | MmugDNA.16598.1 | 4.09  | 3.99  | 0.22 | 0.14 | 1.08  | 0.477237 | 0.573689 | 0.769812 | 0.745252 |
| MmugDNA.16599.1.S1_at   | MmugDNA.16599.1 | 10.37 | 10.43 | 0.3  | 0.08 | -1.04 | 0.208824 | 0.311634 | 0.580477 | 0.566602 |
| MmugDNA.166.1.S1_at     | MmugDNA.166.1   | 5.35  | 5.47  | 0.17 | 0.04 | -1.08 | 0.291687 | 0.207668 | 0.648036 | 0.481906 |
| MmugDNA.1660.1.S1_at    | MmugDNA.1660.1  | 3.55  | 3.54  | 0.11 | 0.03 | 1     | 0.910633 | 0.351567 | 0.969704 | 0.595101 |
| MmugDNA.16600.1.S1_at   | MmugDNA.16600.1 | 12.83 | 12.64 | 0.12 | 0.03 | 1.14  | 0.090962 | 0.14013  | 0.458897 | 0.413394 |
| MmugDNA.16601.1.S1_at   | MmugDNA.16601.1 | 10.54 | 10.55 | 0.35 | 0.03 | -1.01 | 0.836304 | 0.509086 | 0.941202 | 0.703993 |
| MmugDNA.16602.1.S1_at   | MmugDNA.16602.1 | 9.28  | 9.78  | 0.53 | 0.22 | -1.41 | 0.133766 | 0.106435 | 0.508012 | 0.368986 |
| MmugDNA.16604.1.S1_at   | MmugDNA.16604.1 | 8.34  | 7.81  | 0.5  | 0.22 | 1.44  | 0.253224 | 0.508725 | 0.617925 | 0.703792 |
| MmugDNA.16605.1.S1_at   | MmugDNA.16605.1 | 7.23  | 7.15  | 0.07 | 0.01 | 1.06  | 0.031815 | 0.258285 | 0.342474 | 0.525596 |
| MmugDNA.16606.1.S1_s_at | MmugDNA.16606.1 | 9.63  | 9.77  | 0.23 | 0.15 | -1.1  | 0.52374  | 0.700061 | 0.795656 | 0.825946 |
| MmugDNA.16607.1.S1_at   | MmugDNA.16607.1 | 11.02 | 11.11 | 0.21 | 0.06 | -1.06 | 0.603716 | 0.319372 | 0.839328 | 0.571724 |
| MmugDNA.16609.1.S1_at   | MmugDNA.16609.1 | 7.27  | 6.87  | 0.76 | 0    | 1.33  | 0.236699 | 0.307263 | 0.603681 | 0.56352  |
| MmugDNA.16611.1.S1_at   | MmugDNA.16611.1 | 4.59  | 4.35  | 0.12 | 0.13 | 1.18  | 0.122149 | 0.434601 | 0.495677 | 0.654747 |
| MmugDNA.16612.1.S1_at   | MmugDNA.16612.1 | 6.27  | 6.01  | 0.14 | 0.09 | 1.19  | 0.058096 | 0.10617  | 0.403716 | 0.36856  |
| MmugDNA.16613.1.S1_at   | MmugDNA.16613.1 | 3.82  | 4.19  | 0.11 | 0.14 | -1.29 | 0.047258 | 0.286699 | 0.379841 | 0.548077 |
| MmugDNA.16615.1.S1_at   | MmugDNA.16615.1 | 4.68  | 4.71  | 0.06 | 0.03 | -1.02 | 0.376164 | 0.028885 | 0.706678 | 0.211763 |
| MmugDNA.16616.1.S1_at   | MmugDNA.16616.1 | 6.12  | 5.47  | 0.44 | 0.88 | 1.57  | 0.209207 | 0.378305 | 0.580725 | 0.615438 |
| MmugDNA.16618.1.S1_at   | MmugDNA.16618.1 | 3.87  | 3.86  | 0.06 | 0.13 | 1.01  | 0.901061 | 0.988029 | 0.966467 | 0.993307 |
| MmugDNA.16619.1.S1_at   | MmugDNA.16619.1 | 4     | 4.07  | 0.05 | 0.05 | -1.05 | 0.268464 | 0.157305 | 0.628814 | 0.432782 |
| MmugDNA.1662.1.S1_at    | MmugDNA.1662.1  | 11.03 | 10.38 | 0.14 | 0.13 | 1.58  | 0.004714 | 0.002374 | 0.201699 | 0.072006 |
| MmugDNA.16621.1.S1_at   | MmugDNA.16621.1 | 4.03  | 4.02  | 0.09 | 0.07 | 1.01  | 0.69808  | 0.917242 | 0.882642 | 0.953758 |

|                         |                 |       |       |      |      |       |          |          |          |          |
|-------------------------|-----------------|-------|-------|------|------|-------|----------|----------|----------|----------|
| MmugDNA.16622.1.S1_at   | MmugDNA.16622.1 | 4.12  | 3.99  | 0.33 | 0.26 | 1.1   | 0.661005 | 0.60084  | 0.865852 | 0.762334 |
| MmugDNA.16623.1.S1_at   | MmugDNA.16623.1 | 5.26  | 5.19  | 0.59 | 0.41 | 1.05  | 0.542227 | 0.46596  | 0.805613 | 0.676055 |
| MmugDNA.16624.1.S1_at   | MmugDNA.16624.1 | 5.05  | 5     | 0.19 | 0.03 | 1.03  | 0.215416 | 0.241946 | 0.585748 | 0.512489 |
| MmugDNA.16627.1.S1_at   | MmugDNA.16627.1 | 4.5   | 4.31  | 0.1  | 0.04 | 1.14  | 0.0114   | 0.006379 | 0.254725 | 0.108551 |
| MmugDNA.16628.1.S1_at   | MmugDNA.16628.1 | 7.01  | 6.57  | 1.06 | 0.11 | 1.36  | 0.480431 | 0.532093 | 0.771178 | 0.718995 |
| MmugDNA.16629.1.S1_at   | MmugDNA.16629.1 | 9.23  | 9.3   | 0.25 | 0.03 | -1.05 | 0.929412 | 0.883196 | 0.976344 | 0.933411 |
| MmugDNA.1663.1.S1_at    | MmugDNA.1663.1  | 7.87  | 8.19  | 0.09 | 0.06 | -1.25 | 0.005935 | 0.002198 | 0.212444 | 0.069235 |
| MmugDNA.16630.1.S1_at   | MmugDNA.16630.1 | 4.75  | 4.5   | 0.23 | 0    | 1.19  | 0.140621 | 0.045403 | 0.51604  | 0.257427 |
| MmugDNA.16631.1.S1_at   | MmugDNA.16631.1 | 4.58  | 4.53  | 0.02 | 0.12 | 1.03  | 0.956248 | 0.193565 | 0.985486 | 0.468785 |
| MmugDNA.16632.1.S1_at   | MmugDNA.16632.1 | 8.03  | 8.34  | 0.49 | 0.14 | -1.23 | 0.348747 | 0.066545 | 0.689979 | 0.303711 |
| MmugDNA.16633.1.S1_at   | MmugDNA.16633.1 | 5.72  | 5.44  | 0.18 | 0.14 | 1.21  | 0.222207 | 0.432194 | 0.591828 | 0.652775 |
| MmugDNA.16634.1.S1_at   | MmugDNA.16634.1 | 3.39  | 4.16  | 0.41 | 0.43 | -1.71 | 0.090115 | 0.087869 | 0.457992 | 0.341233 |
| MmugDNA.16635.1.S1_at   | MmugDNA.16635.1 | 3.79  | 3.56  | 0.41 | 0.08 | 1.18  | 0.850132 | 0.390807 | 0.947289 | 0.624547 |
| MmugDNA.16636.1.S1_at   | MmugDNA.16636.1 | 6.51  | 6.4   | 0.15 | 0.09 | 1.08  | 0.128373 | 0.274613 | 0.50293  | 0.539059 |
| MmugDNA.16637.1.S1_at   | MmugDNA.16637.1 | 5.8   | 5.62  | 0.25 | 0.02 | 1.13  | 0.767671 | 0.448583 | 0.91253  | 0.664435 |
| MmugDNA.16638.1.S1_at   | MmugDNA.16638.1 | 5.88  | 5.82  | 0.42 | 0.21 | 1.04  | 0.904061 | 0.485311 | 0.967748 | 0.689049 |
| MmugDNA.16639.1.S1_at   | MmugDNA.16639.1 | 6.08  | 6.36  | 0.27 | 0.09 | -1.22 | 0.236584 | 0.043602 | 0.603519 | 0.253495 |
| MmugDNA.1664.1.S1_at    | MmugDNA.1664.1  | 5.11  | 4.83  | 0.24 | 0.2  | 1.21  | 0.16975  | 0.148569 | 0.542744 | 0.423127 |
| MmugDNA.16640.1.S1_at   | MmugDNA.16640.1 | 8.02  | 7.81  | 0.26 | 0.07 | 1.15  | 0.151232 | 0.575765 | 0.52444  | 0.746758 |
| MmugDNA.16641.1.S1_at   | MmugDNA.16641.1 | 4.25  | 4.35  | 0.01 | 0.05 | -1.07 | 0.09961  | 0.535198 | 0.469263 | 0.720821 |
| MmugDNA.16642.1.S1_at   | MmugDNA.16642.1 | 11.6  | 11.77 | 0.2  | 0.07 | -1.12 | 0.325359 | 0.022834 | 0.673195 | 0.189246 |
| MmugDNA.16644.1.S1_at   | MmugDNA.16644.1 | 5.57  | 5.57  | 0.2  | 0.13 | -1    | 0.2273   | 0.514696 | 0.596459 | 0.707841 |
| MmugDNA.16646.1.S1_at   | MmugDNA.16646.1 | 9.22  | 9.33  | 0.59 | 0.09 | -1.08 | 0.793264 | 0.458616 | 0.92426  | 0.671246 |
| MmugDNA.16647.1.S1_at   | MmugDNA.16647.1 | 5.76  | 5.75  | 0.25 | 0.07 | 1.01  | 0.994023 | 0.313537 | 0.997741 | 0.56796  |
| MmugDNA.16648.1.S1_at   | MmugDNA.16648.1 | 5.7   | 5.62  | 0.11 | 0.05 | 1.06  | 0.292926 | 0.222687 | 0.649207 | 0.495617 |
| MmugDNA.1665.1.S1_at    | MmugDNA.1665.1  | 3.77  | 3.92  | 0.12 | 0.13 | -1.11 | 0.495793 | 0.693109 | 0.780125 | 0.821479 |
| MmugDNA.16650.1.S1_at   | MmugDNA.16650.1 | 5.83  | 5.84  | 0.28 | 0.08 | -1    | 0.97037  | 0.845314 | 0.990282 | 0.911994 |
| MmugDNA.16651.1.S1_at   | MmugDNA.16651.1 | 5.2   | 5.52  | 0.44 | 0.23 | -1.25 | 0.201286 | 0.351739 | 0.57304  | 0.595164 |
| MmugDNA.16652.1.S1_at   | MmugDNA.16652.1 | 4.83  | 4.74  | 0.07 | 0.17 | 1.06  | 0.337495 | 0.481252 | 0.682386 | 0.686318 |
| MmugDNA.16653.1.S1_at   | MmugDNA.16653.1 | 3.7   | 3.91  | 0.42 | 0.04 | -1.16 | 0.961816 | 0.796346 | 0.987539 | 0.882625 |
| MmugDNA.16654.1.S1_at   | MmugDNA.16654.1 | 4.1   | 4.23  | 0.12 | 0.11 | -1.1  | 0.148282 | 0.107869 | 0.522535 | 0.370945 |
| MmugDNA.16655.1.S1_at   | MmugDNA.16655.1 | 3.49  | 3.73  | 0.21 | 0.5  | -1.18 | 0.640742 | 0.659257 | 0.856931 | 0.80063  |
| MmugDNA.16656.1.S1_at   | MmugDNA.16656.1 | 12.15 | 12.28 | 0.21 | 0.06 | -1.1  | 0.565804 | 0.22762  | 0.819508 | 0.499898 |
| MmugDNA.16658.1.S1_at   | MmugDNA.16658.1 | 5.23  | 5.12  | 0.37 | 0.49 | 1.07  | 0.603292 | 0.807355 | 0.83918  | 0.889109 |
| MmugDNA.16659.1.S1_at   | MmugDNA.16659.1 | 3.09  | 3.08  | 0.14 | 0.04 | 1.01  | 0.608959 | 0.167574 | 0.841483 | 0.443998 |
| MmugDNA.1666.1.S1_at    | MmugDNA.1666.1  | 4.26  | 4.52  | 0.43 | 0.11 | -1.2  | 0.96931  | 0.520095 | 0.989889 | 0.711472 |
| MmugDNA.16660.1.S1_at   | MmugDNA.16660.1 | 3.07  | 3.22  | 0.07 | 0.08 | -1.11 | 0.151485 | 0.33134  | 0.524628 | 0.58006  |
| MmugDNA.16661.1.S1_at   | MmugDNA.16661.1 | 3.5   | 3.41  | 0.2  | 0.18 | 1.06  | 0.609386 | 0.900773 | 0.841773 | 0.943556 |
| MmugDNA.16662.1.S1_at   | MmugDNA.16662.1 | 3.3   | 3.24  | 0.1  | 0    | 1.04  | 0.798666 | 0.544995 | 0.926295 | 0.727256 |
| MmugDNA.16664.1.S1_at   | MmugDNA.16664.1 | 4.92  | 4.9   | 0.19 | 0.06 | 1.02  | 0.652064 | 0.58871  | 0.86196  | 0.755137 |
| MmugDNA.16665.1.S1_s_at | MmugDNA.16665.1 | 4.28  | 4.25  | 0.07 | 0.14 | 1.02  | 0.507949 | 0.551186 | 0.786553 | 0.730837 |
| MmugDNA.16666.1.S1_at   | MmugDNA.16666.1 | 3.35  | 3.7   | 0.42 | 0.06 | -1.28 | 0.079648 | 0.056647 | 0.442524 | 0.284094 |
| MmugDNA.16667.1.S1_at   | MmugDNA.16667.1 | 3.02  | 3.05  | 0.39 | 0.13 | -1.02 | 0.437398 | 0.516285 | 0.746793 | 0.708827 |

|                         |                 |       |       |      |      |       |          |          |          |          |
|-------------------------|-----------------|-------|-------|------|------|-------|----------|----------|----------|----------|
| MmugDNA.16669.1.S1_at   | MmugDNA.16669.1 | 5.55  | 5.4   | 0.22 | 0.1  | 1.11  | 0.282535 | 0.17785  | 0.640925 | 0.454167 |
| MmugDNA.16670.1.S1_at   | MmugDNA.16670.1 | 8.4   | 8.52  | 0.23 | 0.16 | -1.09 | 0.231894 | 0.003755 | 0.599694 | 0.087343 |
| MmugDNA.16671.1.S1_at   | MmugDNA.16671.1 | 7.47  | 7.44  | 0.04 | 0.12 | 1.02  | 0.701555 | 0.905115 | 0.883924 | 0.94617  |
| MmugDNA.16673.1.S1_at   | MmugDNA.16673.1 | 4.08  | 3.79  | 0.15 | 0.06 | 1.22  | 0.035091 | 0.016001 | 0.35097  | 0.160458 |
| MmugDNA.16674.1.S1_at   | MmugDNA.16674.1 | 3.81  | 3.72  | 0.07 | 0.13 | 1.07  | 0.219938 | 0.310453 | 0.589114 | 0.565661 |
| MmugDNA.16675.1.S1_at   | MmugDNA.16675.1 | 5.07  | 4.93  | 0.26 | 0.19 | 1.1   | 0.747344 | 0.865509 | 0.903959 | 0.923598 |
| MmugDNA.16678.1.S1_at   | MmugDNA.16678.1 | 8.69  | 8.51  | 0.67 | 0.11 | 1.13  | 0.639437 | 0.406154 | 0.85626  | 0.634211 |
| MmugDNA.16679.1.S1_x_at | MmugDNA.16679.1 | 6.53  | 6.47  | 0.24 | 0.19 | 1.04  | 0.899069 | 0.549462 | 0.965748 | 0.729879 |
| MmugDNA.16681.1.S1_at   | MmugDNA.16681.1 | 5.89  | 6.01  | 0.08 | 0.4  | -1.09 | 0.999065 | 0.310971 | 0.999788 | 0.565962 |
| MmugDNA.16682.1.S1_at   | MmugDNA.16682.1 | 6.38  | 7.29  | 0.75 | 0.41 | -1.87 | 0.387948 | 0.302433 | 0.714893 | 0.560109 |
| MmugDNA.16684.1.S1_at   | MmugDNA.16684.1 | 11.6  | 11.45 | 0.15 | 0.12 | -1.11 | 0.130162 | 0.246283 | 0.504663 | 0.515889 |
| MmugDNA.16685.1.S1_at   | MmugDNA.16685.1 | 10.53 | 10.49 | 0.01 | 0.06 | 1.03  | 0.298682 | 0.027977 | 0.653263 | 0.208777 |
| MmugDNA.16687.1.S1_at   | MmugDNA.16687.1 | 5.91  | 5.84  | 0.08 | 0.09 | 1.04  | 0.146997 | 0.152572 | 0.521545 | 0.427435 |
| MmugDNA.16688.1.S1_at   | MmugDNA.16688.1 | 7.79  | 7.64  | 0.02 | 0.05 | 1.11  | 0.010098 | 0.306324 | 0.246569 | 0.56295  |
| MmugDNA.16689.1.S1_at   | MmugDNA.16689.1 | 6.6   | 6.65  | 0.38 | 0.09 | -1.03 | 0.789174 | 0.868593 | 0.92249  | 0.925383 |
| MmugDNA.1669.1.S1_s_at  | MmugDNA.1669.1  | 9.97  | 10.05 | 0.65 | 0.14 | -1.06 | 0.794427 | 0.886568 | 0.924569 | 0.935498 |
| MmugDNA.16690.1.S1_at   | MmugDNA.16690.1 | 9.11  | 9.65  | 0.12 | 0.08 | -1.45 | 0.003187 | 0.004825 | 0.191107 | 0.096904 |
| MmugDNA.16691.1.S1_at   | MmugDNA.16691.1 | 3.61  | 3.59  | 0.09 | 0.09 | 1.01  | 0.885877 | 0.923699 | 0.960398 | 0.957083 |
| MmugDNA.16692.1.S1_at   | MmugDNA.16692.1 | 3.15  | 3.14  | 0.11 | 0.17 | 1.01  | 0.532162 | 0.765126 | 0.800135 | 0.863452 |
| MmugDNA.16693.1.S1_at   | MmugDNA.16693.1 | 4.64  | 4.66  | 0.08 | 0.06 | -1.01 | 0.763733 | 0.590125 | 0.911265 | 0.756117 |
| MmugDNA.16695.1.S1_at   | MmugDNA.16695.1 | 3.34  | 3.09  | 0.46 | 0.1  | 1.19  | 0.147183 | 0.143555 | 0.521578 | 0.417484 |
| MmugDNA.16697.1.S1_at   | MmugDNA.16697.1 | 6.34  | 6.09  | 0.57 | 0.14 | 1.19  | 0.59066  | 0.620295 | 0.832962 | 0.775303 |
| MmugDNA.16699.1.S1_at   | MmugDNA.16699.1 | 8.86  | 8.73  | 0.11 | 0.05 | 1.1   | 0.100071 | 0.314298 | 0.470321 | 0.568263 |
| MmugDNA.16700.1.S1_at   | MmugDNA.16700.1 | 8.7   | 8.57  | 0.6  | 0.27 | 1.1   | 0.378373 | 0.281983 | 0.708285 | 0.544868 |
| MmugDNA.16700.1.S1_s_at | MmugDNA.16700.1 | 10.79 | 10.56 | 0.37 | 0.12 | 1.18  | 0.08307  | 0.03346  | 0.448478 | 0.226544 |
| MmugDNA.16702.1.S1_x_at | MmugDNA.16702.1 | 6.76  | 6.82  | 0.19 | 0.1  | -1.04 | 0.87416  | 0.575765 | 0.956448 | 0.746758 |
| MmugDNA.16703.1.S1_at   | MmugDNA.16703.1 | 6.46  | 6.52  | 0.36 | 0.07 | -1.04 | 0.665626 | 0.720436 | 0.868038 | 0.838261 |
| MmugDNA.16704.1.S1_at   | MmugDNA.16704.1 | 11.88 | 8.78  | 0.43 | 1.49 | 8.57  | 0.049864 | 0.203687 | 0.386432 | 0.477916 |
| MmugDNA.39322.1.S1_s_at | MmugDNA.39322.1 | 12.64 | 12.68 | 0.07 | 0.06 | -1.03 | 0.866516 | 0.571346 | 0.953134 | 0.743653 |
| MmugDNA.16705.1.S1_at   | MmugDNA.16705.1 | 8.02  | 8.1   | 0.08 | 0.06 | -1.06 | 0.257658 | 0.628031 | 0.621338 | 0.780921 |
| MmugDNA.16705.1.S1_s_at | MmugDNA.16705.1 | 6.23  | 6.18  | 0.03 | 0.03 | 1.03  | 0.108594 | 0.097202 | 0.480791 | 0.354886 |
| MmugDNA.16706.1.S1_at   | MmugDNA.16706.1 | 4.42  | 4.42  | 0.14 | 0.05 | 1     | 0.385542 | 0.329946 | 0.71287  | 0.578874 |
| MmugDNA.16708.1.S1_at   | MmugDNA.16708.1 | 7.22  | 7.59  | 0.08 | 0.03 | -1.29 | 0.00141  | 0.069333 | 0.160065 | 0.309558 |
| MmugDNA.1671.1.S1_at    | MmugDNA.1671.1  | 10.2  | 10.18 | 0.22 | 0.1  | 1.01  | 0.967153 | 0.102045 | 0.989187 | 0.362102 |
| MmugDNA.16711.1.S1_at   | MmugDNA.16711.1 | 4.74  | 4.51  | 0.08 | 0.27 | 1.17  | 0.338385 | 0.38127  | 0.682907 | 0.617595 |
| MmugDNA.16711.1.S1_x_at | MmugDNA.16711.1 | 4.15  | 4.04  | 0.27 | 0.2  | 1.08  | 0.347408 | 0.507051 | 0.688705 | 0.70272  |
| MmugDNA.16712.1.S1_at   | MmugDNA.16712.1 | 3.53  | 3.5   | 0.11 | 0.09 | 1.02  | 0.609672 | 0.921445 | 0.841773 | 0.955761 |
| MmugDNA.16713.1.S1_at   | MmugDNA.16713.1 | 5.56  | 6     | 0.31 | 0.43 | -1.36 | 0.163188 | 0.048132 | 0.536035 | 0.264417 |
| MmugDNA.16714.1.S1_at   | MmugDNA.16714.1 | 4.16  | 3.9   | 0.23 | 0.34 | 1.2   | 0.789685 | 0.549344 | 0.922635 | 0.729804 |
| MmugDNA.16715.1.S1_at   | MmugDNA.16715.1 | 4.6   | 4.59  | 0.13 | 0.08 | 1     | 0.372752 | 0.551238 | 0.705567 | 0.730863 |
| MmugDNA.16716.1.S1_at   | MmugDNA.16716.1 | 2.77  | 2.7   | 0.05 | 0.08 | 1.05  | 0.096843 | 0.133258 | 0.465555 | 0.40503  |
| MmugDNA.16717.1.S1_s_at | MmugDNA.16717.1 | 5.65  | 5.8   | 0.06 | 0.22 | -1.11 | 0.423744 | 0.23518  | 0.739193 | 0.50629  |
| MmugDNA.16718.1.S1_at   | MmugDNA.16718.1 | 3     | 2.8   | 0.13 | 0.6  | 1.14  | 0.660848 | 0.687425 | 0.865819 | 0.817583 |

|                         |                 |       |       |      |      |       |          |          |          |          |
|-------------------------|-----------------|-------|-------|------|------|-------|----------|----------|----------|----------|
| MmugDNA.16719.1.S1_at   | MmugDNA.16719.1 | 5.43  | 5.18  | 0.21 | 0    | 1.19  | 0.132464 | 0.058448 | 0.506752 | 0.288529 |
| MmugDNA.1672.1.S1_at    | MmugDNA.1672.1  | 10.01 | 8.06  | 0.55 | 0.61 | 3.86  | 0.007784 | 0.006719 | 0.230997 | 0.110963 |
| MmugDNA.16720.1.S1_at   | MmugDNA.16720.1 | 4.65  | 4.69  | 0.14 | 0.02 | -1.03 | 0.632562 | 0.311673 | 0.853049 | 0.566653 |
| MmugDNA.16721.1.S1_at   | MmugDNA.16721.1 | 7.15  | 7.01  | 0.04 | 0.06 | 1.1   | 0.019435 | 0.207948 | 0.301394 | 0.482049 |
| MmugDNA.16723.1.S1_at   | MmugDNA.16723.1 | 4     | 4     | 0.06 | 0.05 | -1    | 0.492962 | 0.482444 | 0.778657 | 0.687298 |
| MmugDNA.16724.1.S1_at   | MmugDNA.16724.1 | 9.73  | 9.72  | 0.07 | 0.2  | 1.01  | 0.535083 | 0.791552 | 0.801404 | 0.879606 |
| MmugDNA.16725.1.S1_at   | MmugDNA.16725.1 | 3.05  | 3.06  | 0.15 | 0.05 | -1.01 | 0.559938 | 0.603648 | 0.816426 | 0.764215 |
| MmugDNA.16726.1.S1_at   | MmugDNA.16726.1 | 2.9   | 2.92  | 0.04 | 0.08 | -1.02 | 0.631346 | 0.302172 | 0.852417 | 0.560092 |
| MmugDNA.16727.1.S1_at   | MmugDNA.16727.1 | 5.71  | 5.56  | 0.12 | 0.13 | 1.12  | 0.063009 | 0.328425 | 0.414551 | 0.578066 |
| MmugDNA.16728.1.S1_at   | MmugDNA.16728.1 | 10.27 | 10.23 | 0.77 | 0.09 | 1.03  | 0.924673 | 0.2528   | 0.974823 | 0.521174 |
| MmugDNA.16728.1.S1_s_at | MmugDNA.16728.1 | 10.98 | 10.82 | 0.57 | 0.05 | -1.12 | 0.682961 | 0.116734 | 0.876006 | 0.383945 |
| MmugDNA.16730.1.S1_at   | MmugDNA.16730.1 | 11.6  | 11.71 | 0.19 | 0.09 | -1.09 | 0.324049 | 0.708805 | 0.67243  | 0.831137 |
| MmugDNA.16731.1.S1_s_at | MmugDNA.16731.1 | 10.31 | 10.18 | 0.17 | 0.09 | 1.09  | 0.188104 | 0.540702 | 0.56029  | 0.724513 |
| MmugDNA.16734.1.S1_at   | MmugDNA.16734.1 | 13.13 | 13.08 | 0.04 | 0.02 | 1.04  | 0.11756  | 0.011465 | 0.490984 | 0.138504 |
| MmugDNA.16735.1.S1_at   | MmugDNA.16735.1 | 4.1   | 3.77  | 0.48 | 0.22 | 1.26  | 0.877718 | 0.875116 | 0.957399 | 0.929163 |
| MmugDNA.16737.1.S1_at   | MmugDNA.16737.1 | 6.92  | 6.84  | 0.21 | 0.06 | 1.05  | 0.296083 | 0.954572 | 0.651722 | 0.974203 |
| MmugDNA.16739.1.S1_at   | MmugDNA.16739.1 | 4.43  | 4.37  | 0.1  | 0.06 | 1.04  | 0.316385 | 0.24012  | 0.666473 | 0.510813 |
| MmugDNA.1674.1.S1_at    | MmugDNA.1674.1  | 6.57  | 6.27  | 0.08 | 0.24 | 1.23  | 0.082057 | 0.340353 | 0.446799 | 0.586725 |
| MmugDNA.16740.1.S1_at   | MmugDNA.16740.1 | 4.55  | 4.68  | 0.56 | 0.3  | -1.09 | 0.82018  | 0.458953 | 0.935286 | 0.671504 |
| MmugDNA.16741.1.S1_at   | MmugDNA.16741.1 | 6.32  | 6.16  | 0.27 | 0.02 | 1.11  | 0.98601  | 0.92637  | 0.995501 | 0.958291 |
| MmugDNA.16742.1.S1_at   | MmugDNA.16742.1 | 4.85  | 4.49  | 0.15 | 0.51 | 1.28  | 0.959012 | 0.964997 | 0.986548 | 0.980553 |
| MmugDNA.16743.1.S1_at   | MmugDNA.16743.1 | 3.99  | 3.92  | 0.2  | 0.02 | 1.05  | 0.605899 | 0.646018 | 0.840202 | 0.792676 |
| MmugDNA.16744.1.S1_at   | MmugDNA.16744.1 | 8.51  | 7.99  | 0.16 | 0.51 | 1.43  | 0.093975 | 0.058873 | 0.463344 | 0.289391 |
| MmugDNA.16745.1.S1_s_at | MmugDNA.16745.1 | 7.1   | 7.21  | 0.24 | 0.07 | -1.08 | 0.846158 | 0.180675 | 0.946059 | 0.457245 |
| MmugDNA.16746.1.S1_at   | MmugDNA.16746.1 | 3.4   | 4.18  | 0.21 | 0.5  | -1.71 | 0.071838 | 0.032205 | 0.431668 | 0.222139 |
| MmugDNA.16749.1.S1_at   | MmugDNA.16749.1 | 5.42  | 5.62  | 0.51 | 0.02 | -1.15 | 0.516078 | 0.315712 | 0.791221 | 0.569143 |
| MmugDNA.16752.1.S1_at   | MmugDNA.16752.1 | 5.47  | 5.7   | 0.06 | 0.11 | -1.18 | 0.029735 | 0.030131 | 0.33574  | 0.21543  |
| MmugDNA.16754.1.S1_at   | MmugDNA.16754.1 | 9.27  | 9.91  | 1.05 | 0.29 | -1.56 | 0.195918 | 0.012803 | 0.566307 | 0.145832 |
| MmugDNA.16754.1.S1_s_at | MmugDNA.16754.1 | 9.86  | 10.4  | 0.93 | 0.33 | -1.46 | 0.20008  | 0.006889 | 0.571873 | 0.112196 |
| MmugDNA.16757.1.S1_at   | MmugDNA.16757.1 | 11.15 | 11.22 | 0.78 | 0.23 | -1.05 | 0.948626 | 0.016355 | 0.98243  | 0.161943 |
| MmugDNA.16759.1.S1_at   | MmugDNA.16759.1 | 2.97  | 3.03  | 0.32 | 0.08 | -1.05 | 0.722715 | 0.259782 | 0.892421 | 0.526648 |
| MmugDNA.1676.1.S1_at    | MmugDNA.1676.1  | 3.31  | 3.39  | 0.13 | 0.09 | -1.05 | 0.237516 | 0.373867 | 0.604473 | 0.612492 |
| MmugDNA.16760.1.S1_at   | MmugDNA.16760.1 | 4.24  | 4.35  | 0.08 | 0.18 | -1.07 | 0.496302 | 0.427633 | 0.780329 | 0.649406 |
| MmugDNA.16761.1.S1_at   | MmugDNA.16761.1 | 4.67  | 4.7   | 0.16 | 0.19 | -1.02 | 0.61679  | 0.910186 | 0.845103 | 0.949342 |
| MmugDNA.16762.1.S1_at   | MmugDNA.16762.1 | 3.07  | 3.11  | 0.11 | 0.07 | -1.03 | 0.479781 | 0.575148 | 0.770896 | 0.746352 |
| MmugDNA.16764.1.S1_at   | MmugDNA.16764.1 | 7.91  | 10.35 | 0.61 | 0.25 | -5.42 | 0.004221 | 0.01236  | 0.198874 | 0.143761 |
| MmugDNA.16767.1.S1_at   | MmugDNA.16767.1 | 3.2   | 3.02  | 0.18 | 0.21 | 1.14  | 0.360028 | 0.299438 | 0.697741 | 0.557899 |
| MmugDNA.16768.1.S1_s_at | MmugDNA.16768.1 | 11.39 | 10.6  | 0.78 | 0.3  | 1.73  | 0.737652 | 0.550252 | 0.899619 | 0.730367 |
| MmugDNA.16769.1.S1_at   | MmugDNA.16769.1 | 3.13  | 3.04  | 0.1  | 0.04 | 1.06  | 0.07479  | 0.077552 | 0.435313 | 0.323421 |
| MmugDNA.16770.1.S1_at   | MmugDNA.16770.1 | 5.94  | 4.69  | 0.57 | 0.15 | 2.38  | 0.038298 | 0.017559 | 0.358719 | 0.167672 |
| MmugDNA.16771.1.S1_at   | MmugDNA.16771.1 | 6.42  | 6.09  | 0.11 | 0.16 | 1.26  | 0.165805 | 0.122418 | 0.538623 | 0.392267 |
| MmugDNA.16772.1.S1_at   | MmugDNA.16772.1 | 3.99  | 3.79  | 0.12 | 0.24 | 1.15  | 0.592329 | 0.338289 | 0.833845 | 0.585417 |
| MmugDNA.16774.1.S1_s_at | MmugDNA.16774.1 | 14.38 | 14.4  | 0.07 | 0.04 | -1.01 | 0.411666 | 0.653775 | 0.73158  | 0.79766  |

|                         |                 |       |       |      |      |       |          |          |          |          |
|-------------------------|-----------------|-------|-------|------|------|-------|----------|----------|----------|----------|
| MmugDNA.16775.1.S1_at   | MmugDNA.16775.1 | 3.67  | 3.57  | 0.12 | 0.22 | 1.07  | 0.545336 | 0.480858 | 0.807751 | 0.686    |
| MmugDNA.16777.1.S1_s_at | MmugDNA.16777.1 | 9.9   | 8.9   | 0.06 | 0.2  | 2     | 0.0011   | 0.000044 | 0.156386 | 0.025273 |
| MmugDNA.16778.1.S1_at   | MmugDNA.16778.1 | 6.22  | 6.65  | 0.45 | 0.15 | -1.34 | 0.154298 | 0.734116 | 0.527483 | 0.845896 |
| MmugDNA.1678.1.S1_at    | MmugDNA.1678.1  | 8.19  | 7.98  | 0.1  | 0.24 | 1.16  | 0.053752 | 0.041468 | 0.39536  | 0.248496 |
| MmugDNA.16780.1.S1_at   | MmugDNA.16780.1 | 8.38  | 8.7   | 1.05 | 0.33 | -1.24 | 0.559832 | 0.495646 | 0.816426 | 0.695576 |
| MmugDNA.16781.1.S1_at   | MmugDNA.16781.1 | 6.2   | 6.22  | 0.16 | 0.04 | -1.01 | 0.372374 | 0.604768 | 0.705567 | 0.764797 |
| MmugDNA.16782.1.S1_at   | MmugDNA.16782.1 | 4.37  | 4.26  | 0.03 | 0.03 | 1.08  | 0.006001 | 0.04249  | 0.21386  | 0.25075  |
| MmugDNA.16783.1.S1_at   | MmugDNA.16783.1 | 9.74  | 9.03  | 0.3  | 0.08 | 1.63  | 0.040946 | 0.017882 | 0.365521 | 0.168819 |
| MmugDNA.16784.1.S1_at   | MmugDNA.16784.1 | 3.93  | 4.16  | 0.01 | 0.12 | -1.17 | 0.064194 | 0.167975 | 0.417775 | 0.444576 |
| MmugDNA.16786.1.S1_at   | MmugDNA.16786.1 | 4.53  | 4.55  | 0.22 | 0.33 | -1.01 | 0.86916  | 0.026167 | 0.954244 | 0.202772 |
| MmugDNA.16787.1.S1_at   | MmugDNA.16787.1 | 5.59  | 5.51  | 0.08 | 0.07 | -1.05 | 0.389392 | 0.230697 | 0.716091 | 0.502381 |
| MmugDNA.16789.1.S1_at   | MmugDNA.16789.1 | 7.84  | 7.41  | 0.1  | 0.6  | 1.35  | 0.474496 | 0.279619 | 0.768018 | 0.543186 |
| MmugDNA.16790.1.S1_s_at | MmugDNA.16790.1 | 8.15  | 6.4   | 0.85 | 0.69 | 3.36  | 0.196487 | 0.336244 | 0.567086 | 0.583736 |
| MmugDNA.16792.1.S1_at   | MmugDNA.16792.1 | 7.44  | 6.86  | 1.04 | 0.56 | 1.5   | 0.742489 | 0.961832 | 0.901799 | 0.978471 |
| MmugDNA.16794.1.S1_at   | MmugDNA.16794.1 | 3.83  | 4.3   | 0.46 | 0.71 | -1.38 | 0.647762 | 0.592687 | 0.859428 | 0.757854 |
| MmugDNA.16795.1.S1_at   | MmugDNA.16795.1 | 4.09  | 4.23  | 0.08 | 0.05 | -1.1  | 0.188318 | 0.077955 | 0.560429 | 0.324291 |
| MmugDNA.16797.1.S1_at   | MmugDNA.16797.1 | 3.08  | 3.09  | 0.04 | 0.05 | -1    | 0.277175 | 0.512895 | 0.636753 | 0.706595 |
| MmugDNA.16798.1.S1_at   | MmugDNA.16798.1 | 4.29  | 4.23  | 0.27 | 0.15 | 1.05  | 0.40201  | 0.524712 | 0.724787 | 0.714514 |
| MmugDNA.16799.1.S1_at   | MmugDNA.16799.1 | 6.32  | 7.18  | 0.48 | 0.49 | -1.82 | 0.130147 | 0.063208 | 0.504663 | 0.298119 |
| MmugDNA.168.1.S1_at     | MmugDNA.168.1   | 3.98  | 4.18  | 0.25 | 0.24 | -1.15 | 0.299565 | 0.18433  | 0.654022 | 0.460458 |
| MmugDNA.1680.1.S1_at    | MmugDNA.1680.1  | 3.29  | 3.22  | 0.15 | 0.04 | 1.04  | 0.190334 | 0.323884 | 0.561652 | 0.574656 |
| MmugDNA.16800.1.S1_at   | MmugDNA.16800.1 | 3.28  | 3.2   | 0.15 | 0.05 | 1.06  | 0.159713 | 0.410982 | 0.532663 | 0.637835 |
| MmugDNA.16803.1.S1_at   | MmugDNA.16803.1 | 3.65  | 3.51  | 0.11 | 0.12 | 1.1   | 0.207936 | 0.03729  | 0.579653 | 0.237598 |
| MmugDNA.16804.1.S1_at   | MmugDNA.16804.1 | 5.7   | 7.39  | 2.16 | 0.47 | -3.23 | 0.259363 | 0.407575 | 0.622607 | 0.63505  |
| MmugDNA.16806.1.S1_at   | MmugDNA.16806.1 | 7.15  | 6.64  | 1.04 | 0.4  | 1.43  | 0.308369 | 0.440304 | 0.660989 | 0.658899 |
| MmugDNA.16809.1.S1_at   | MmugDNA.16809.1 | 7.75  | 7.74  | 0.18 | 0.01 | 1.01  | 0.748589 | 0.694837 | 0.904527 | 0.822623 |
| MmugDNA.1681.1.S1_at    | MmugDNA.1681.1  | 4.21  | 3.89  | 0.08 | 0.18 | 1.25  | 0.1293   | 0.164531 | 0.504088 | 0.44076  |
| MmugDNA.16811.1.S1_at   | MmugDNA.16811.1 | 10.34 | 11.06 | 0.67 | 0.18 | -1.65 | 0.149509 | 0.036282 | 0.523226 | 0.235026 |
| MmugDNA.16813.1.S1_at   | MmugDNA.16813.1 | 4.22  | 4.37  | 0.25 | 0.06 | -1.11 | 0.90922  | 0.847248 | 0.969305 | 0.91322  |
| MmugDNA.16815.1.S1_x_at | MmugDNA.16815.1 | 9.13  | 9.12  | 0.22 | 0.23 | 1     | 0.847845 | 0.388027 | 0.946586 | 0.622551 |
| MmugDNA.16817.1.S1_at   | MmugDNA.16817.1 | 5.72  | 5.66  | 0.09 | 0.13 | 1.04  | 0.234394 | 0.4225   | 0.601639 | 0.645729 |
| MmugDNA.16818.1.S1_at   | MmugDNA.16818.1 | 9.82  | 9.96  | 1.04 | 0.15 | -1.1  | 0.818548 | 0.381416 | 0.93444  | 0.617681 |
| MmugDNA.16819.1.S1_at   | MmugDNA.16819.1 | 5.61  | 5.55  | 0.42 | 0.19 | 1.05  | 0.594592 | 0.662097 | 0.83481  | 0.802107 |
| MmugDNA.16821.1.S1_at   | MmugDNA.16821.1 | 3.99  | 3.98  | 0.17 | 0.06 | 1.01  | 0.707423 | 0.814417 | 0.886113 | 0.892923 |
| MmugDNA.16822.1.S1_at   | MmugDNA.16822.1 | 7.12  | 7.07  | 0.04 | 0.08 | 1.04  | 0.36532  | 0.716196 | 0.701002 | 0.835515 |
| MmugDNA.16824.1.S1_at   | MmugDNA.16824.1 | 6.36  | 6.4   | 0.28 | 0.21 | -1.03 | 0.614768 | 0.003775 | 0.844066 | 0.08749  |
| MmugDNA.4637.1.S1_s_at  | MmugDNA.4637.1  | 12.53 | 12.43 | 0.11 | 0.04 | 1.07  | 0.516205 | 0.431509 | 0.791334 | 0.652415 |
| MmugDNA.16826.1.S1_at   | MmugDNA.16826.1 | 8.84  | 9.04  | 0.68 | 0.07 | -1.15 | 0.737577 | 0.512117 | 0.899594 | 0.706076 |
| MmugDNA.16826.1.S1_s_at | MmugDNA.16826.1 | 12.66 | 12.68 | 0.45 | 0.12 | -1.01 | 0.346725 | 0.436937 | 0.688361 | 0.656361 |
| MmugDNA.16827.1.S1_at   | MmugDNA.16827.1 | 9.02  | 9.08  | 0.4  | 0.25 | -1.05 | 0.529838 | 0.02305  | 0.798514 | 0.190012 |
| MmugDNA.16828.1.S1_at   | MmugDNA.16828.1 | 10.75 | 10.72 | 0.65 | 0.17 | 1.02  | 0.850424 | 0.755335 | 0.947375 | 0.857558 |
| MmugDNA.16829.1.S1_at   | MmugDNA.16829.1 | 5.13  | 5.12  | 0.02 | 0.08 | 1     | 0.494701 | 0.945325 | 0.779514 | 0.968942 |
| MmugDNA.1683.1.S1_at    | MmugDNA.1683.1  | 5.18  | 5.1   | 0.36 | 0.35 | 1.05  | 0.563344 | 0.800502 | 0.818186 | 0.885198 |

|                         |                 |       |       |      |      |       |          |          |          |          |
|-------------------------|-----------------|-------|-------|------|------|-------|----------|----------|----------|----------|
| MmugDNA.16830.1.S1_at   | MmugDNA.16830.1 | 3.38  | 3.38  | 0.1  | 0.02 | 1     | 0.701093 | 0.630671 | 0.883764 | 0.782345 |
| MmugDNA.16831.1.S1_s_at | MmugDNA.16831.1 | 7.88  | 7.56  | 0.35 | 0.04 | 1.25  | 0.182849 | 0.194361 | 0.555631 | 0.469464 |
| MmugDNA.16832.1.S1_s_at | MmugDNA.16832.1 | 4.05  | 3.69  | 0.36 | 0.31 | 1.28  | 0.232519 | 0.132272 | 0.600124 | 0.404294 |
| MmugDNA.16834.1.S1_at   | MmugDNA.16834.1 | 2.94  | 3.21  | 0.04 | 0.1  | -1.21 | 0.030328 | 0.522791 | 0.33739  | 0.713388 |
| MmugDNA.16835.1.S1_at   | MmugDNA.16835.1 | 7.22  | 6.91  | 0.25 | 0.13 | 1.24  | 0.128633 | 0.075312 | 0.503433 | 0.319475 |
| MmugDNA.16836.1.S1_at   | MmugDNA.16836.1 | 10.41 | 10.55 | 0.37 | 0.08 | -1.1  | 0.809227 | 0.292246 | 0.93104  | 0.552363 |
| MmugDNA.16837.1.S1_at   | MmugDNA.16837.1 | 12.76 | 12.35 | 0.15 | 0.02 | 1.34  | 0.019926 | 0.017984 | 0.302615 | 0.169137 |
| MmugDNA.16838.1.S1_at   | MmugDNA.16838.1 | 4.14  | 4.15  | 0.07 | 0.16 | -1.01 | 0.35499  | 0.518099 | 0.69464  | 0.710138 |
| MmugDNA.16839.1.S1_at   | MmugDNA.16839.1 | 9.36  | 9.3   | 0.27 | 0.28 | 1.05  | 0.368065 | 0.87657  | 0.703497 | 0.929709 |
| MmugDNA.1684.1.S1_at    | MmugDNA.1684.1  | 6.97  | 6.63  | 0.14 | 0.1  | 1.27  | 0.030353 | 0.036843 | 0.337461 | 0.236451 |
| MmugDNA.16841.1.S1_at   | MmugDNA.16841.1 | 4.54  | 4.53  | 0.05 | 0.15 | 1.01  | 0.48016  | 0.539293 | 0.771113 | 0.723688 |
| MmugDNA.16843.1.S1_at   | MmugDNA.16843.1 | 5.82  | 5.66  | 0.12 | 0.12 | 1.12  | 0.226448 | 0.407076 | 0.595671 | 0.634722 |
| MmugDNA.16844.1.S1_at   | MmugDNA.16844.1 | 4.68  | 4.54  | 0.23 | 0.2  | 1.1   | 0.581906 | 0.750382 | 0.827791 | 0.854787 |
| MmugDNA.16845.1.S1_at   | MmugDNA.16845.1 | 5.71  | 5.75  | 0.33 | 0.22 | -1.03 | 0.680671 | 0.253997 | 0.87477  | 0.522371 |
| MmugDNA.16846.1.S1_at   | MmugDNA.16846.1 | 6.09  | 5.68  | 0.49 | 0.22 | 1.33  | 0.379003 | 0.597213 | 0.708548 | 0.760127 |
| MmugDNA.16847.1.S1_at   | MmugDNA.16847.1 | 6.24  | 6.29  | 0.51 | 0.1  | -1.04 | 0.966256 | 0.847476 | 0.988967 | 0.913316 |
| MmugDNA.16848.1.S1_at   | MmugDNA.16848.1 | 5.71  | 5.72  | 0.09 | 0.12 | -1    | 0.923559 | 0.919529 | 0.97437  | 0.954822 |
| MmugDNA.16848.1.S1_s_at | MmugDNA.16848.1 | 7.36  | 7.38  | 0.08 | 0.04 | -1.01 | 0.961582 | 0.001166 | 0.987441 | 0.053615 |
| MmugDNA.1685.1.S1_at    | MmugDNA.1685.1  | 5.13  | 5.91  | 1.02 | 0.08 | -1.72 | 0.256358 | 0.080894 | 0.620399 | 0.328864 |
| MmugDNA.16851.1.S1_at   | MmugDNA.16851.1 | 4.68  | 5.2   | 0.22 | 0.6  | -1.44 | 0.207565 | 0.520616 | 0.579194 | 0.711831 |
| MmugDNA.16853.1.S1_at   | MmugDNA.16853.1 | 5.87  | 5.87  | 0.11 | 0.02 | 1     | 0.28515  | 0.358217 | 0.643069 | 0.599754 |
| MmugDNA.16854.1.S1_at   | MmugDNA.16854.1 | 6.78  | 6.97  | 0.48 | 0.25 | -1.14 | 0.84382  | 0.56157  | 0.944956 | 0.737502 |
| MmugDNA.16856.1.S1_at   | MmugDNA.16856.1 | 7.66  | 7.4   | 0.33 | 0.12 | 1.2   | 0.095198 | 0.090423 | 0.464131 | 0.344916 |
| MmugDNA.16858.1.S1_at   | MmugDNA.16858.1 | 8.03  | 8.47  | 0.42 | 0.13 | -1.35 | 0.144746 | 0.329928 | 0.520103 | 0.578874 |
| MmugDNA.16858.1.S1_s_at | MmugDNA.16858.1 | 9.67  | 9.8   | 0.48 | 0.06 | -1.1  | 0.296522 | 0.471744 | 0.652168 | 0.679641 |
| MmugDNA.16859.1.S1_at   | MmugDNA.16859.1 | 6.6   | 7.01  | 0.71 | 0.33 | -1.32 | 0.334305 | 0.115582 | 0.680268 | 0.382674 |
| MmugDNA.1686.1.S1_at    | MmugDNA.1686.1  | 3.72  | 3.72  | 0.07 | 0.06 | 1.01  | 0.730232 | 0.49046  | 0.896031 | 0.69247  |
| MmugDNA.16860.1.S1_at   | MmugDNA.16860.1 | 3.32  | 3.24  | 0.15 | 0.02 | 1.06  | 0.426423 | 0.349695 | 0.740469 | 0.593566 |
| MmugDNA.16861.1.S1_at   | MmugDNA.16861.1 | 6.95  | 6.76  | 0.19 | 0.1  | 1.14  | 0.162693 | 0.019095 | 0.535867 | 0.173864 |
| MmugDNA.16862.1.S1_at   | MmugDNA.16862.1 | 9.24  | 9.03  | 0.11 | 0.08 | 1.16  | 0.040623 | 0.014225 | 0.364613 | 0.152285 |
| MmugDNA.16864.1.S1_at   | MmugDNA.16864.1 | 9.83  | 9.48  | 0.31 | 0.11 | 1.27  | 0.085257 | 0.082476 | 0.452338 | 0.331542 |
| MmugDNA.16865.1.S1_at   | MmugDNA.16865.1 | 9     | 9.74  | 0.14 | 0.02 | -1.68 | 0.001163 | 0.000104 | 0.156386 | 0.028099 |
| MmugDNA.16866.1.S1_at   | MmugDNA.16866.1 | 7.94  | 8.71  | 0.48 | 0.24 | -1.7  | 0.084994 | 0.005749 | 0.45159  | 0.104378 |
| MmugDNA.9610.1.S1_s_at  | MmugDNA.9610.1  | 5.38  | 4.74  | 0.24 | 0.18 | 1.56  | 0.026295 | 0.013182 | 0.323826 | 0.14735  |
| MmugDNA.16868.1.S1_at   | MmugDNA.16868.1 | 5.33  | 6.39  | 1.04 | 0.7  | -2.09 | 0.688058 | 0.117643 | 0.878062 | 0.385352 |
| MmugDNA.1687.1.S1_at    | MmugDNA.1687.1  | 2.68  | 2.9   | 0.13 | 0.11 | -1.16 | 0.057744 | 0.153772 | 0.402776 | 0.42848  |
| MmugDNA.16870.1.S1_at   | MmugDNA.16870.1 | 7.92  | 7.99  | 0.09 | 0.13 | -1.05 | 0.174869 | 0.219083 | 0.548031 | 0.49285  |
| MmugDNA.16871.1.S1_at   | MmugDNA.16871.1 | 3.46  | 3.46  | 0.29 | 0.03 | 1     | 0.336863 | 0.402545 | 0.682166 | 0.631481 |
| MmugDNA.34483.1.S1_s_at | MmugDNA.34483.1 | 4.21  | 4.21  | 0.05 | 0.02 | -1    | 0.853606 | 0.2624   | 0.948299 | 0.528655 |
| MmugDNA.16875.1.S1_at   | MmugDNA.16875.1 | 5.76  | 5.59  | 0.13 | 0.08 | 1.13  | 0.058486 | 0.05793  | 0.404566 | 0.287149 |
| MmugDNA.16877.1.S1_at   | MmugDNA.16877.1 | 9.74  | 9.53  | 0.34 | 0.03 | 1.16  | 0.539092 | 0.654593 | 0.803644 | 0.798087 |
| MmugDNA.16879.1.S1_at   | MmugDNA.16879.1 | 5.16  | 5.09  | 0.3  | 0.02 | 1.05  | 0.937469 | 0.356025 | 0.978968 | 0.598012 |
| MmugDNA.1688.1.S1_at    | MmugDNA.1688.1  | 4.57  | 5.02  | 0.72 | 0.37 | -1.37 | 0.78591  | 0.078784 | 0.921241 | 0.325742 |

|                       |                 |       |       |      |      |       |          |          |          |          |
|-----------------------|-----------------|-------|-------|------|------|-------|----------|----------|----------|----------|
| MmugDNA.16880.1.S1_at | MmugDNA.16880.1 | 7.13  | 7.12  | 0.09 | 0.04 | 1.01  | 0.421029 | 0.771178 | 0.737205 | 0.866992 |
| MmugDNA.16881.1.S1_at | MmugDNA.16881.1 | 5.74  | 5.27  | 0.65 | 0.26 | 1.38  | 0.178094 | 0.054916 | 0.551193 | 0.279778 |
| MmugDNA.16882.1.S1_at | MmugDNA.16882.1 | 5.92  | 5.49  | 0.44 | 0.38 | 1.34  | 0.311904 | 0.389587 | 0.663542 | 0.623668 |
| MmugDNA.16886.1.S1_at | MmugDNA.16886.1 | 6.58  | 6.52  | 0.69 | 0.38 | 1.04  | 0.813044 | 0.366392 | 0.932335 | 0.606087 |
| MmugDNA.16887.1.S1_at | MmugDNA.16887.1 | 5.13  | 5.15  | 0.25 | 0.12 | -1.02 | 0.300795 | 0.708661 | 0.65518  | 0.831    |
| MmugDNA.16888.1.S1_at | MmugDNA.16888.1 | 4.55  | 4.66  | 0.1  | 0.21 | -1.08 | 0.649538 | 0.845016 | 0.860382 | 0.911799 |
| MmugDNA.16889.1.S1_at | MmugDNA.16889.1 | 7.3   | 8.15  | 0.1  | 0.2  | -1.8  | 0.003553 | 0.002047 | 0.196915 | 0.066887 |
| MmugDNA.1689.1.S1_at  | MmugDNA.1689.1  | 3.38  | 3.35  | 0.31 | 0.08 | 1.03  | 0.593271 | 0.660452 | 0.834114 | 0.80135  |
| MmugDNA.16890.1.S1_at | MmugDNA.16890.1 | 5.68  | 5.44  | 0.15 | 0.14 | 1.18  | 0.249679 | 0.286954 | 0.615093 | 0.548246 |
| MmugDNA.16891.1.S1_at | MmugDNA.16891.1 | 12.17 | 11.64 | 0.91 | 0.26 | 1.44  | 0.806208 | 0.128387 | 0.929632 | 0.399645 |
| MmugDNA.16892.1.S1_at | MmugDNA.16892.1 | 4.44  | 4.33  | 0.06 | 0.06 | 1.08  | 0.150596 | 0.368545 | 0.524209 | 0.608079 |
| MmugDNA.16893.1.S1_at | MmugDNA.16893.1 | 6.68  | 6.2   | 0.38 | 0.47 | 1.39  | 0.303223 | 0.882757 | 0.657124 | 0.93317  |
| MmugDNA.16894.1.S1_at | MmugDNA.16894.1 | 3.39  | 3.38  | 0.03 | 0.11 | 1.01  | 0.806704 | 0.294604 | 0.929844 | 0.554282 |
| MmugDNA.16898.1.S1_at | MmugDNA.16898.1 | 5.93  | 5.83  | 0.1  | 0.02 | 1.07  | 0.20696  | 0.816061 | 0.578774 | 0.893893 |
| MmugDNA.16899.1.S1_at | MmugDNA.16899.1 | 8.51  | 9.21  | 0.16 | 0.13 | -1.63 | 0.00713  | 0.143012 | 0.225651 | 0.41689  |
| MmugDNA.169.1.S1_at   | MmugDNA.169.1   | 3.37  | 3.38  | 0.12 | 0.1  | -1    | 0.483161 | 0.157293 | 0.772886 | 0.432782 |
| MmugDNA.1690.1.S1_at  | MmugDNA.1690.1  | 6.09  | 6.35  | 0.37 | 0.18 | -1.2  | 0.45523  | 0.035292 | 0.757332 | 0.232143 |
| MmugDNA.16900.1.S1_at | MmugDNA.16900.1 | 10.73 | 10.88 | 0.6  | 0.01 | -1.11 | 0.708753 | 0.314552 | 0.886591 | 0.568389 |
| MmugDNA.16901.1.S1_at | MmugDNA.16901.1 | 6.89  | 6.57  | 0.42 | 0.15 | 1.25  | 0.169992 | 0.307572 | 0.542967 | 0.563785 |
| MmugDNA.16903.1.S1_at | MmugDNA.16903.1 | 11.26 | 10.6  | 0.68 | 0.06 | 1.58  | 0.532523 | 0.569652 | 0.800337 | 0.742564 |
| MmugDNA.16907.1.S1_at | MmugDNA.16907.1 | 6.78  | 7.06  | 0.61 | 0.26 | -1.22 | 0.775205 | 0.495512 | 0.916671 | 0.695527 |
| MmugDNA.1691.1.S1_at  | MmugDNA.1691.1  | 9.94  | 9.24  | 1.06 | 0.16 | 1.63  | 0.770822 | 0.920199 | 0.914237 | 0.95511  |
| MmugDNA.16911.1.S1_at | MmugDNA.16911.1 | 4.36  | 4.38  | 0.16 | 0.16 | -1.01 | 0.645762 | 0.855716 | 0.858801 | 0.917688 |
| MmugDNA.16914.1.S1_at | MmugDNA.16914.1 | 11    | 11.75 | 0.43 | 0.04 | -1.69 | 0.03693  | 0.033889 | 0.356221 | 0.227771 |
| MmugDNA.16915.1.S1_at | MmugDNA.16915.1 | 4.38  | 3.18  | 1.01 | 0.17 | 2.3   | 0.116203 | 0.124559 | 0.489568 | 0.394987 |
| MmugDNA.16916.1.S1_at | MmugDNA.16916.1 | 5.83  | 5.84  | 0.57 | 0.05 | -1.01 | 0.992833 | 0.976521 | 0.997353 | 0.987202 |
| MmugDNA.16917.1.S1_at | MmugDNA.16917.1 | 6.42  | 6.33  | 0.19 | 0.02 | 1.06  | 0.376601 | 0.287942 | 0.706946 | 0.549227 |
| MmugDNA.16918.1.S1_at | MmugDNA.16918.1 | 12.14 | 11.89 | 0.21 | 0.11 | 1.19  | 0.33383  | 0.009883 | 0.67989  | 0.130618 |
| MmugDNA.16919.1.S1_at | MmugDNA.16919.1 | 3.89  | 3.9   | 0.15 | 0.09 | -1.01 | 0.877694 | 0.795613 | 0.957399 | 0.882244 |
| MmugDNA.1692.1.S1_at  | MmugDNA.1692.1  | 3.02  | 3.03  | 0.11 | 0    | -1.01 | 0.547775 | 0.598453 | 0.809225 | 0.760839 |
| MmugDNA.16922.1.S1_at | MmugDNA.16922.1 | 4.61  | 4.62  | 0.2  | 0.18 | -1    | 0.50574  | 0.105176 | 0.785398 | 0.366971 |
| MmugDNA.16924.1.S1_at | MmugDNA.16924.1 | 5.04  | 5.14  | 0.11 | 0.09 | -1.07 | 0.123549 | 0.630052 | 0.497016 | 0.782128 |
| MmugDNA.16925.1.S1_at | MmugDNA.16925.1 | 5.46  | 5.6   | 0.12 | 0.15 | -1.1  | 0.157045 | 0.701357 | 0.530266 | 0.826814 |
| MmugDNA.16926.1.S1_at | MmugDNA.16926.1 | 3.26  | 3.26  | 0.19 | 0.2  | -1    | 0.24361  | 0.330577 | 0.609531 | 0.579307 |
| MmugDNA.16927.1.S1_at | MmugDNA.16927.1 | 10.82 | 10.22 | 0.29 | 0.3  | 1.52  | 0.09491  | 0.020587 | 0.464131 | 0.180009 |
| MmugDNA.16928.1.S1_at | MmugDNA.16928.1 | 11.47 | 11.22 | 0.23 | 0.07 | 1.19  | 0.110361 | 0.101392 | 0.483363 | 0.36112  |
| MmugDNA.16929.1.S1_at | MmugDNA.16929.1 | 8.99  | 8.84  | 0.06 | 0.16 | 1.1   | 0.235038 | 0.035891 | 0.602266 | 0.233956 |
| MmugDNA.1693.1.S1_at  | MmugDNA.1693.1  | 4.23  | 4.67  | 0.15 | 0.41 | -1.36 | 0.064632 | 0.164479 | 0.418466 | 0.440679 |
| MmugDNA.16931.1.S1_at | MmugDNA.16931.1 | 4.88  | 4.99  | 0.22 | 0.13 | -1.08 | 0.539276 | 0.161105 | 0.803699 | 0.437279 |
| MmugDNA.16932.1.S1_at | MmugDNA.16932.1 | 3.94  | 3.83  | 0.17 | 0.23 | 1.08  | 0.762371 | 0.357567 | 0.910879 | 0.599214 |
| MmugDNA.16933.1.S1_at | MmugDNA.16933.1 | 4.54  | 4.39  | 0.14 | 0.08 | 1.11  | 0.524643 | 0.281096 | 0.795983 | 0.544228 |
| MmugDNA.16934.1.S1_at | MmugDNA.16934.1 | 6.66  | 6.85  | 0.35 | 0.38 | -1.14 | 0.940634 | 0.780829 | 0.979797 | 0.872833 |
| MmugDNA.16935.1.S1_at | MmugDNA.16935.1 | 5.5   | 7.21  | 1.37 | 0.34 | -3.28 | 0.360581 | 0.499743 | 0.697965 | 0.698494 |

|                         |                 |       |       |      |      |       |          |          |          |          |
|-------------------------|-----------------|-------|-------|------|------|-------|----------|----------|----------|----------|
| MmugDNA.16936.1.S1_at   | MmugDNA.16936.1 | 3.68  | 3.77  | 0.05 | 0.08 | -1.07 | 0.460295 | 0.335165 | 0.760108 | 0.582938 |
| MmugDNA.16937.1.S1_at   | MmugDNA.16937.1 | 10.43 | 10.06 | 0.16 | 0.08 | 1.3   | 0.019725 | 0.000566 | 0.302296 | 0.041049 |
| MmugDNA.16938.1.S1_at   | MmugDNA.16938.1 | 5.66  | 5.21  | 0.1  | 0.41 | 1.37  | 0.522214 | 0.708529 | 0.795143 | 0.830943 |
| MmugDNA.16939.1.S1_at   | MmugDNA.16939.1 | 3.77  | 3.85  | 0.02 | 0.06 | -1.05 | 0.177784 | 0.016412 | 0.550946 | 0.162199 |
| MmugDNA.1694.1.S1_at    | MmugDNA.1694.1  | 12.51 | 12.47 | 0.07 | 0.08 | 1.03  | 0.117695 | 0.195845 | 0.491034 | 0.470737 |
| MmugDNA.16940.1.S1_at   | MmugDNA.16940.1 | 11.16 | 11.06 | 0.17 | 0.16 | 1.07  | 0.238495 | 0.131613 | 0.605359 | 0.403716 |
| MmugDNA.16941.1.S1_at   | MmugDNA.16941.1 | 4.33  | 3.7   | 0.35 | 0.12 | 1.55  | 0.160687 | 0.349387 | 0.533821 | 0.593405 |
| MmugDNA.16942.1.S1_at   | MmugDNA.16942.1 | 4.3   | 5.77  | 0.84 | 0.21 | -2.77 | 0.106411 | 0.142975 | 0.478838 | 0.416854 |
| MmugDNA.16943.1.S1_at   | MmugDNA.16943.1 | 7.74  | 7.89  | 1.15 | 0.29 | -1.11 | 0.732785 | 0.121513 | 0.897352 | 0.39064  |
| MmugDNA.16944.1.S1_at   | MmugDNA.16944.1 | 9.97  | 10.03 | 0.21 | 0.19 | -1.04 | 0.63381  | 0.634436 | 0.853666 | 0.784787 |
| MmugDNA.16945.1.S1_at   | MmugDNA.16945.1 | 3.27  | 3.21  | 0.07 | 0.14 | 1.04  | 0.424844 | 0.279333 | 0.739695 | 0.542962 |
| MmugDNA.16946.1.S1_at   | MmugDNA.16946.1 | 6.79  | 6.79  | 0.16 | 0.07 | 1     | 0.963042 | 0.932501 | 0.988107 | 0.961723 |
| MmugDNA.16947.1.S1_at   | MmugDNA.16947.1 | 6.14  | 5.95  | 0    | 0.13 | 1.13  | 0.071435 | 0.026746 | 0.431049 | 0.204493 |
| MmugDNA.16948.1.S1_at   | MmugDNA.16948.1 | 4.08  | 4.42  | 0.33 | 0.28 | -1.26 | 0.273025 | 0.38257  | 0.632603 | 0.61876  |
| MmugDNA.16949.1.S1_at   | MmugDNA.16949.1 | 6.32  | 5.95  | 0.14 | 0.16 | 1.29  | 0.046699 | 0.036273 | 0.378526 | 0.235    |
| MmugDNA.1695.1.S1_at    | MmugDNA.1695.1  | 5.37  | 5.34  | 0.34 | 0.09 | 1.03  | 0.553117 | 0.65728  | 0.811981 | 0.799611 |
| MmugDNA.16951.1.S1_at   | MmugDNA.16951.1 | 6.52  | 6.25  | 0.22 | 0.1  | 1.21  | 0.319618 | 0.412008 | 0.668882 | 0.638434 |
| MmugDNA.16952.1.S1_at   | MmugDNA.16952.1 | 10.05 | 9.49  | 0.33 | 0.1  | 1.47  | 0.064172 | 0.025164 | 0.41772  | 0.198794 |
| MmugDNA.16954.1.S1_at   | MmugDNA.16954.1 | 8.14  | 8.15  | 0.25 | 0.24 | -1    | 0.671769 | 0.491664 | 0.87055  | 0.69317  |
| MmugDNA.16955.1.S1_at   | MmugDNA.16955.1 | 9.78  | 9.49  | 0.22 | 0.06 | 1.22  | 0.115362 | 0.022815 | 0.488677 | 0.189214 |
| MmugDNA.16955.1.S1_s_at | MmugDNA.16955.1 | 9.95  | 9.53  | 0.24 | 0.15 | 1.34  | 0.060694 | 0.072221 | 0.408585 | 0.31478  |
| MmugDNA.16956.1.S1_at   | MmugDNA.16956.1 | 8.55  | 9.33  | 1.91 | 0.25 | -1.72 | 0.372089 | 0.505763 | 0.705567 | 0.702218 |
| MmugDNA.16956.1.S1_s_at | MmugDNA.16956.1 | 9.61  | 10.65 | 1.78 | 0.22 | -2.07 | 0.294132 | 0.405555 | 0.650324 | 0.633804 |
| MmugDNA.16957.1.S1_at   | MmugDNA.16957.1 | 12.05 | 12.15 | 0.43 | 0.06 | -1.08 | 0.735074 | 0.145433 | 0.898576 | 0.419421 |
| MmugDNA.1696.1.S1_at    | MmugDNA.1696.1  | 8.61  | 9.22  | 1.05 | 0.32 | -1.53 | 0.81222  | 0.579517 | 0.932076 | 0.74918  |
| MmugDNA.16960.1.S1_at   | MmugDNA.16960.1 | 7.11  | 7.39  | 0.25 | 0.22 | -1.21 | 0.269285 | 0.643993 | 0.629582 | 0.791265 |
| MmugDNA.16961.1.S1_at   | MmugDNA.16961.1 | 6     | 5.87  | 0.11 | 0.08 | 1.09  | 0.182265 | 0.375321 | 0.555371 | 0.613336 |
| MmugDNA.16962.1.S1_at   | MmugDNA.16962.1 | 8.28  | 8.52  | 0.57 | 0.14 | -1.18 | 0.646398 | 0.687497 | 0.859027 | 0.817606 |
| MmugDNA.16963.1.S1_at   | MmugDNA.16963.1 | 4.26  | 4.06  | 0.42 | 0.83 | 1.15  | 0.947191 | 0.390097 | 0.981674 | 0.624002 |
| MmugDNA.16964.1.S1_at   | MmugDNA.16964.1 | 3.35  | 3.13  | 0.16 | 0.08 | 1.17  | 0.099153 | 0.283091 | 0.468557 | 0.545692 |
| MmugDNA.16966.1.S1_at   | MmugDNA.16966.1 | 4.63  | 4.64  | 0.02 | 0.27 | -1.01 | 0.90285  | 0.929231 | 0.967218 | 0.959644 |
| MmugDNA.16967.1.S1_at   | MmugDNA.16967.1 | 3.01  | 3.02  | 0.03 | 0.08 | -1.01 | 0.484729 | 0.58583  | 0.773772 | 0.753068 |
| MmugDNA.16968.1.S1_at   | MmugDNA.16968.1 | 6.72  | 6.57  | 0.1  | 0.06 | 1.11  | 0.196433 | 0.464275 | 0.567083 | 0.674987 |
| MmugDNA.16969.1.S1_at   | MmugDNA.16969.1 | 10.01 | 9.54  | 0.48 | 0.09 | 1.39  | 0.284954 | 0.38105  | 0.642831 | 0.617478 |
| MmugDNA.1697.1.S1_at    | MmugDNA.1697.1  | 12.26 | 11.89 | 0.55 | 0.18 | 1.29  | 0.644695 | 0.248495 | 0.858593 | 0.517769 |
| MmugDNA.16970.1.S1_at   | MmugDNA.16970.1 | 10.49 | 9.64  | 1.12 | 0.22 | 1.8   | 0.565672 | 0.056467 | 0.819429 | 0.283516 |
| MmugDNA.16973.1.S1_at   | MmugDNA.16973.1 | 4.37  | 4.27  | 0.14 | 0.13 | 1.07  | 0.714691 | 0.166264 | 0.888892 | 0.442798 |
| MmugDNA.16974.1.S1_at   | MmugDNA.16974.1 | 5.24  | 5.04  | 0.24 | 0.26 | 1.15  | 0.162088 | 0.129938 | 0.535244 | 0.401515 |
| MmugDNA.16975.1.S1_at   | MmugDNA.16975.1 | 8.31  | 8.39  | 0.21 | 0.25 | -1.06 | 0.505295 | 0.284822 | 0.785248 | 0.546966 |
| MmugDNA.16976.1.S1_at   | MmugDNA.16976.1 | 3.49  | 3.26  | 0.26 | 0.44 | 1.18  | 0.964893 | 0.854339 | 0.988452 | 0.91703  |
| MmugDNA.16977.1.S1_at   | MmugDNA.16977.1 | 5.1   | 4.68  | 0.19 | 0.14 | 1.33  | 0.171054 | 0.189666 | 0.54417  | 0.465297 |
| MmugDNA.16978.1.S1_at   | MmugDNA.16978.1 | 6.35  | 7.71  | 1.46 | 0.68 | -2.55 | 0.1249   | 0.099389 | 0.498917 | 0.357673 |
| MmugDNA.16979.1.S1_at   | MmugDNA.16979.1 | 5.06  | 4.8   | 0.21 | 0.25 | 1.2   | 0.202755 | 0.037316 | 0.574251 | 0.237622 |



|                         |                 |       |       |      |      |       |          |          |          |          |
|-------------------------|-----------------|-------|-------|------|------|-------|----------|----------|----------|----------|
| MmugDNA.1698.1.S1_at    | MmugDNA.1698.1  | 8.54  | 8.9   | 0.42 | 0.24 | -1.28 | 0.544726 | 0.498474 | 0.807451 | 0.697581 |
| MmugDNA.16981.1.S1_at   | MmugDNA.16981.1 | 3.4   | 3.5   | 0.13 | 0.11 | -1.07 | 0.82678  | 0.422724 | 0.938035 | 0.645895 |
| MmugDNA.16985.1.S1_at   | MmugDNA.16985.1 | 6.05  | 6.39  | 0.55 | 0.15 | -1.26 | 0.364014 | 0.055891 | 0.700379 | 0.282185 |
| MmugDNA.16986.1.S1_at   | MmugDNA.16986.1 | 2.98  | 2.98  | 0.1  | 0.08 | 1.01  | 0.35111  | 0.305278 | 0.691852 | 0.562255 |
| MmugDNA.16988.1.S1_at   | MmugDNA.16988.1 | 10.84 | 10.74 | 0.03 | 0.03 | 1.07  | 0.008272 | 0.240217 | 0.232167 | 0.510844 |
| MmugDNA.16989.1.S1_at   | MmugDNA.16989.1 | 5.67  | 6.74  | 0.5  | 0.64 | -2.1  | 0.02707  | 0.05751  | 0.327141 | 0.285898 |
| MmugDNA.16990.1.S1_at   | MmugDNA.16990.1 | 7.03  | 7.33  | 0.38 | 0.21 | -1.23 | 0.481018 | 0.065447 | 0.771639 | 0.301415 |
| MmugDNA.16991.1.S1_at   | MmugDNA.16991.1 | 5.97  | 6.22  | 0.24 | 0.05 | -1.18 | 0.484128 | 0.483384 | 0.773472 | 0.687904 |
| MmugDNA.16992.1.S1_at   | MmugDNA.16992.1 | 4.74  | 3.95  | 0.49 | 0.49 | 1.73  | 0.272223 | 0.215899 | 0.631964 | 0.489536 |
| MmugDNA.16993.1.S1_at   | MmugDNA.16993.1 | 9.84  | 9.83  | 0.23 | 0.01 | 1.01  | 0.463299 | 0.794359 | 0.762124 | 0.881371 |
| MmugDNA.16994.1.S1_at   | MmugDNA.16994.1 | 7.16  | 7.08  | 0.14 | 0.15 | -1.05 | 0.30829  | 0.353671 | 0.660925 | 0.596752 |
| MmugDNA.16995.1.S1_at   | MmugDNA.16995.1 | 4.77  | 4.58  | 0.02 | 0.17 | 1.14  | 0.130282 | 0.369197 | 0.504682 | 0.608669 |
| MmugDNA.16996.1.S1_at   | MmugDNA.16996.1 | 6.23  | 5.99  | 0.26 | 0.69 | 1.18  | 0.506974 | 0.845772 | 0.786064 | 0.912243 |
| MmugDNA.16997.1.S1_at   | MmugDNA.16997.1 | 5.03  | 5.11  | 0.42 | 0.85 | -1.06 | 0.52293  | 0.368089 | 0.79537  | 0.607669 |
| MmugDNA.16998.1.S1_at   | MmugDNA.16998.1 | 6.43  | 6.26  | 0.03 | 0.05 | 1.13  | 0.004339 | 0.291778 | 0.198874 | 0.552054 |
| MmugDNA.16999.1.S1_at   | MmugDNA.16999.1 | 4.83  | 4.69  | 0.04 | 0.05 | 1.1   | 0.007502 | 0.095137 | 0.229281 | 0.352151 |
| MmugDNA.17.1.S1_at      | MmugDNA.17.1    | 9.47  | 9.16  | 0.21 | 0.19 | 1.24  | 0.245617 | 0.51802  | 0.611181 | 0.710089 |
| MmugDNA.1700.1.S1_at    | MmugDNA.1700.1  | 11.78 | 11.92 | 0.21 | 0.07 | -1.1  | 0.14726  | 0.198714 | 0.521578 | 0.473391 |
| MmugDNA.17000.1.S1_at   | MmugDNA.17000.1 | 5.45  | 5.52  | 0.05 | 0.45 | -1.05 | 0.596806 | 0.197187 | 0.836126 | 0.472213 |
| MmugDNA.17001.1.S1_at   | MmugDNA.17001.1 | 9.05  | 8.87  | 0.3  | 0.24 | 1.13  | 0.176437 | 0.203544 | 0.549443 | 0.477767 |
| MmugDNA.17003.1.S1_at   | MmugDNA.17003.1 | 6.98  | 6.77  | 0.08 | 0.15 | 1.16  | 0.0837   | 0.085969 | 0.449639 | 0.338116 |
| MmugDNA.17007.1.S1_at   | MmugDNA.17007.1 | 4.05  | 4.06  | 0.06 | 0.12 | -1    | 0.952555 | 0.884729 | 0.98407  | 0.934321 |
| MmugDNA.17008.1.S1_at   | MmugDNA.17008.1 | 5.53  | 5.47  | 0.1  | 0.07 | 1.04  | 0.469608 | 0.461582 | 0.765623 | 0.673165 |
| MmugDNA.17009.1.S1_at   | MmugDNA.17009.1 | 11.47 | 12    | 0.12 | 0.03 | -1.44 | 0.001735 | 0.000146 | 0.166454 | 0.029509 |
| MmugDNA.17010.1.S1_at   | MmugDNA.17010.1 | 11.41 | 10.59 | 0.26 | 0.19 | 1.76  | 0.013988 | 0.007427 | 0.273301 | 0.115849 |
| MmugDNA.17011.1.S1_at   | MmugDNA.17011.1 | 2.96  | 2.98  | 0.07 | 0.19 | -1.01 | 0.44289  | 0.686911 | 0.750405 | 0.817365 |
| MmugDNA.17012.1.S1_at   | MmugDNA.17012.1 | 7.54  | 7     | 0.83 | 0.19 | 1.45  | 0.317947 | 0.18257  | 0.667635 | 0.459065 |
| MmugDNA.17014.1.S1_at   | MmugDNA.17014.1 | 3.17  | 2.99  | 0.11 | 0.21 | 1.13  | 0.989414 | 0.718553 | 0.996046 | 0.837072 |
| MmugDNA.17015.1.S1_at   | MmugDNA.17015.1 | 4.3   | 4.62  | 0.18 | 0.61 | -1.25 | 0.180429 | 0.316242 | 0.553635 | 0.56973  |
| MmugDNA.17019.1.S1_at   | MmugDNA.17019.1 | 4.9   | 4.66  | 0.32 | 0.35 | 1.18  | 0.333057 | 0.572585 | 0.679468 | 0.744568 |
| MmugDNA.17020.1.S1_at   | MmugDNA.17020.1 | 5.93  | 5.76  | 0.12 | 0.25 | 1.13  | 0.071307 | 0.062295 | 0.43069  | 0.296419 |
| MmugDNA.17022.1.S1_at   | MmugDNA.17022.1 | 6.55  | 7.44  | 0.51 | 0.11 | -1.86 | 0.076393 | 0.42066  | 0.437977 | 0.644323 |
| MmugDNA.17023.1.S1_at   | MmugDNA.17023.1 | 2.85  | 2.77  | 0.14 | 0.07 | 1.06  | 0.179931 | 0.21831  | 0.553155 | 0.491857 |
| MmugDNA.17024.1.S1_at   | MmugDNA.17024.1 | 3.59  | 3.57  | 0.72 | 0.15 | 1.02  | 0.623486 | 0.741184 | 0.848264 | 0.850135 |
| MmugDNA.17026.1.S1_at   | MmugDNA.17026.1 | 4.56  | 4.37  | 0.23 | 0.06 | 1.14  | 0.729922 | 0.877505 | 0.8959   | 0.930162 |
| MmugDNA.17027.1.S1_at   | MmugDNA.17027.1 | 11.83 | 11.76 | 0.3  | 0.05 | 1.05  | 0.355605 | 0.029642 | 0.694743 | 0.213852 |
| MmugDNA.17028.1.S1_s_at | MmugDNA.17028.1 | 8.44  | 8.96  | 0.11 | 0.01 | -1.44 | 0.001719 | 0.0099   | 0.166176 | 0.130713 |
| MmugDNA.1703.1.S1_at    | MmugDNA.1703.1  | 8.68  | 8.64  | 0.55 | 0.24 | 1.03  | 0.337448 | 0.439471 | 0.682344 | 0.6582   |
| MmugDNA.17030.1.S1_at   | MmugDNA.17030.1 | 6.83  | 6.78  | 0.24 | 0.12 | 1.04  | 0.937833 | 0.994418 | 0.979097 | 0.996586 |
| MmugDNA.17032.1.S1_at   | MmugDNA.17032.1 | 12.18 | 12.29 | 0.08 | 0.09 | -1.08 | 0.1862   | 0.236971 | 0.559101 | 0.507675 |
| MmugDNA.17033.1.S1_at   | MmugDNA.17033.1 | 9.28  | 8.67  | 0.24 | 0.16 | 1.52  | 0.039489 | 0.029314 | 0.362034 | 0.21321  |
| MmugDNA.17035.1.S1_at   | MmugDNA.17035.1 | 4.58  | 4.2   | 0.3  | 0.22 | 1.3   | 0.188145 | 0.35823  | 0.56029  | 0.599754 |
| MmugDNA.17037.1.S1_at   | MmugDNA.17037.1 | 3.11  | 3.01  | 0.08 | 0.03 | 1.07  | 0.394022 | 0.061282 | 0.719591 | 0.294247 |

|                         |                 |       |       |      |      |       |          |          |          |          |
|-------------------------|-----------------|-------|-------|------|------|-------|----------|----------|----------|----------|
| MmugDNA.1704.1.S1_at    | MmugDNA.1704.1  | 12.15 | 11.23 | 2.67 | 0.17 | 1.9   | 0.835229 | 0.540095 | 0.940896 | 0.724122 |
| MmugDNA.17040.1.S1_at   | MmugDNA.17040.1 | 7.21  | 7.39  | 0.81 | 0.16 | -1.13 | 0.99996  | 0.745374 | 1        | 0.852384 |
| MmugDNA.17041.1.S1_at   | MmugDNA.17041.1 | 3.64  | 3.62  | 0.25 | 0.3  | 1.01  | 0.793352 | 0.953921 | 0.92426  | 0.97374  |
| MmugDNA.17042.1.S1_at   | MmugDNA.17042.1 | 8     | 8.8   | 0.77 | 0.12 | -1.74 | 0.161509 | 0.081767 | 0.534843 | 0.330121 |
| MmugDNA.17043.1.S1_at   | MmugDNA.17043.1 | 3.95  | 4.08  | 0.21 | 0.06 | -1.1  | 0.501132 | 0.637948 | 0.783101 | 0.787234 |
| MmugDNA.17045.1.S1_at   | MmugDNA.17045.1 | 5.01  | 4.69  | 0.1  | 0.15 | 1.25  | 0.087806 | 0.352232 | 0.455668 | 0.595568 |
| MmugDNA.17046.1.S1_at   | MmugDNA.17046.1 | 4.77  | 4.74  | 0.13 | 0.03 | 1.03  | 0.309091 | 0.217754 | 0.661444 | 0.491309 |
| MmugDNA.17047.1.S1_at   | MmugDNA.17047.1 | 4.5   | 4.49  | 0.13 | 0.21 | 1.01  | 0.934353 | 0.964368 | 0.977762 | 0.980183 |
| MmugDNA.1705.1.S1_at    | MmugDNA.1705.1  | 3.16  | 2.89  | 0.13 | 0.1  | 1.2   | 0.036391 | 0.052768 | 0.35477  | 0.275325 |
| MmugDNA.17050.1.S1_at   | MmugDNA.17050.1 | 7.16  | 6.91  | 0.49 | 0.27 | 1.19  | 0.360109 | 0.523248 | 0.697741 | 0.713624 |
| MmugDNA.17054.1.S1_at   | MmugDNA.17054.1 | 4.24  | 4.13  | 0.11 | 0.06 | 1.08  | 0.134498 | 0.336326 | 0.508462 | 0.583813 |
| MmugDNA.17055.1.S1_at   | MmugDNA.17055.1 | 6.76  | 6.57  | 0.13 | 0.21 | 1.14  | 0.19161  | 0.3764   | 0.562859 | 0.614243 |
| MmugDNA.17057.1.S1_at   | MmugDNA.17057.1 | 10.09 | 9.93  | 0.74 | 0.07 | 1.11  | 0.609643 | 0.529769 | 0.841773 | 0.717498 |
| MmugDNA.17057.1.S1_s_at | MmugDNA.17057.1 | 10.7  | 10.84 | 0.6  | 0.04 | -1.1  | 0.787137 | 0.663601 | 0.92182  | 0.803032 |
| MmugDNA.17058.1.S1_at   | MmugDNA.17058.1 | 4.78  | 4.78  | 0.03 | 0.05 | 1     | 0.243899 | 0.448734 | 0.609715 | 0.664584 |
| MmugDNA.1706.1.S1_at    | MmugDNA.1706.1  | 6.08  | 6.07  | 0.35 | 0.36 | 1.01  | 0.529232 | 0.284345 | 0.798227 | 0.54659  |
| MmugDNA.17060.1.S1_s_at | MmugDNA.17060.1 | 8.44  | 8.39  | 0.3  | 0.05 | 1.04  | 0.926012 | 0.577954 | 0.975377 | 0.748185 |
| MmugDNA.17061.1.S1_at   | MmugDNA.17061.1 | 4.52  | 4.45  | 0.16 | 0.19 | 1.05  | 0.429241 | 0.722431 | 0.742138 | 0.839239 |
| MmugDNA.17062.1.S1_at   | MmugDNA.17062.1 | 6.6   | 6.59  | 0.04 | 0.07 | 1.01  | 0.732296 | 0.939503 | 0.897044 | 0.965642 |
| MmugDNA.17063.1.S1_at   | MmugDNA.17063.1 | 3.35  | 3.4   | 0.19 | 0.13 | -1.03 | 0.765566 | 0.134628 | 0.911862 | 0.406629 |
| MmugDNA.17064.1.S1_at   | MmugDNA.17064.1 | 5.02  | 4.92  | 0.15 | 0.22 | 1.07  | 0.782216 | 0.682433 | 0.919732 | 0.814526 |
| MmugDNA.17066.1.S1_at   | MmugDNA.17066.1 | 7.46  | 7.26  | 0.3  | 0.12 | 1.15  | 0.344287 | 0.175606 | 0.686913 | 0.45218  |
| MmugDNA.17067.1.S1_at   | MmugDNA.17067.1 | 4.79  | 4.94  | 0.36 | 0.29 | -1.11 | 0.923939 | 0.040493 | 0.974539 | 0.246264 |
| MmugDNA.1707.1.S1_at    | MmugDNA.1707.1  | 12.8  | 12.81 | 0.06 | 0.09 | -1    | 0.687741 | 0.028566 | 0.877924 | 0.210791 |
| MmugDNA.17070.1.S1_at   | MmugDNA.17070.1 | 4.21  | 3.91  | 0.61 | 0.31 | 1.23  | 0.499126 | 0.635258 | 0.781962 | 0.78529  |
| MmugDNA.17071.1.S1_at   | MmugDNA.17071.1 | 4.49  | 4.46  | 0.01 | 0.1  | 1.02  | 0.811062 | 0.729945 | 0.931578 | 0.843733 |
| MmugDNA.17074.1.S1_at   | MmugDNA.17074.1 | 4.46  | 4.35  | 0.26 | 0.11 | 1.08  | 0.274933 | 0.438035 | 0.634221 | 0.657058 |
| MmugDNA.17077.1.S1_at   | MmugDNA.17077.1 | 3.43  | 3.43  | 0.2  | 0.49 | 1     | 0.69625  | 0.723103 | 0.882048 | 0.839592 |
| MmugDNA.17078.1.S1_at   | MmugDNA.17078.1 | 3.53  | 3.22  | 0.12 | 0.11 | 1.24  | 0.02551  | 0.124731 | 0.322263 | 0.39513  |
| MmugDNA.17079.1.S1_at   | MmugDNA.17079.1 | 3.4   | 3.41  | 0.08 | 0.11 | -1.01 | 0.426162 | 0.304848 | 0.740376 | 0.561994 |
| MmugDNA.1708.1.S1_at    | MmugDNA.1708.1  | 7.05  | 6.96  | 0.23 | 0.03 | 1.06  | 0.380998 | 0.541767 | 0.709857 | 0.725057 |
| MmugDNA.17080.1.S1_at   | MmugDNA.17080.1 | 4.77  | 4.5   | 0.08 | 0.23 | 1.21  | 0.09773  | 0.09791  | 0.466712 | 0.355715 |
| MmugDNA.17081.1.S1_at   | MmugDNA.17081.1 | 6.23  | 5.87  | 0.42 | 0.21 | 1.29  | 0.15822  | 0.375011 | 0.531211 | 0.613186 |
| MmugDNA.17082.1.S1_at   | MmugDNA.17082.1 | 6.25  | 5.51  | 0.27 | 0.22 | 1.67  | 0.084909 | 0.031898 | 0.451489 | 0.220981 |
| MmugDNA.17085.1.S1_at   | MmugDNA.17085.1 | 6.29  | 6.43  | 0.41 | 0.05 | -1.1  | 0.707724 | 0.784383 | 0.88624  | 0.87518  |
| MmugDNA.17086.1.S1_at   | MmugDNA.17086.1 | 8.07  | 9.24  | 0.28 | 0.06 | -2.25 | 0.001282 | 0.000229 | 0.157784 | 0.032385 |
| MmugDNA.17087.1.S1_at   | MmugDNA.17087.1 | 4.93  | 4.62  | 0.23 | 0.07 | 1.24  | 0.149348 | 0.036231 | 0.523197 | 0.234925 |
| MmugDNA.17089.1.S1_at   | MmugDNA.17089.1 | 5.26  | 5.44  | 0.05 | 0.26 | -1.13 | 0.239341 | 0.30546  | 0.605829 | 0.562418 |
| MmugDNA.1709.1.S1_at    | MmugDNA.1709.1  | 4.01  | 3.86  | 0.03 | 0.23 | 1.1   | 0.462295 | 0.324537 | 0.761528 | 0.57507  |
| MmugDNA.17090.1.S1_at   | MmugDNA.17090.1 | 4.94  | 6.07  | 0.3  | 0.3  | -2.19 | 0.006037 | 0.136726 | 0.214344 | 0.409287 |
| MmugDNA.17091.1.S1_at   | MmugDNA.17091.1 | 3.28  | 3.24  | 0.1  | 0.05 | 1.03  | 0.131643 | 0.1688   | 0.506094 | 0.445458 |
| MmugDNA.17092.1.S1_at   | MmugDNA.17092.1 | 6.95  | 7.82  | 1    | 0.23 | -1.82 | 0.652215 | 0.78744  | 0.862004 | 0.877025 |
| MmugDNA.17094.1.S1_at   | MmugDNA.17094.1 | 8.28  | 8.42  | 0.09 | 0.04 | -1.1  | 0.050158 | 0.411382 | 0.386848 | 0.638119 |

|                         |                 |       |       |      |      |       |          |          |          |          |
|-------------------------|-----------------|-------|-------|------|------|-------|----------|----------|----------|----------|
| MmugDNA.17095.1.S1_at   | MmugDNA.17095.1 | 4.19  | 4.24  | 0.43 | 0.1  | -1.04 | 0.873853 | 0.549077 | 0.956325 | 0.729559 |
| MmugDNA.17096.1.S1_at   | MmugDNA.17096.1 | 3.76  | 3.74  | 0.34 | 0.36 | 1.01  | 0.865365 | 0.960457 | 0.952616 | 0.977507 |
| MmugDNA.17098.1.S1_at   | MmugDNA.17098.1 | 5.93  | 5.5   | 0.13 | 0.24 | 1.35  | 0.249124 | 0.311954 | 0.614413 | 0.566833 |
| MmugDNA.171.1.S1_at     | MmugDNA.171.1   | 4.24  | 3.96  | 0.3  | 0.04 | 1.21  | 0.1619   | 0.370755 | 0.535244 | 0.609736 |
| MmugDNA.1710.1.S1_at    | MmugDNA.1710.1  | 5.79  | 5.55  | 0.58 | 0.16 | 1.18  | 0.575484 | 0.37819  | 0.824671 | 0.615438 |
| MmugDNA.17101.1.S1_at   | MmugDNA.17101.1 | 5.59  | 5.19  | 0.29 | 0.22 | 1.33  | 0.616211 | 0.380905 | 0.844769 | 0.617426 |
| MmugDNA.17102.1.S1_s_at | MmugDNA.17102.1 | 8.77  | 8.77  | 0.19 | 0.23 | -1.01 | 0.525904 | 0.061206 | 0.796442 | 0.294035 |
| MmugDNA.17104.1.S1_at   | MmugDNA.17104.1 | 6.26  | 6.6   | 0.45 | 0.13 | -1.27 | 0.320816 | 0.198559 | 0.669445 | 0.473391 |
| MmugDNA.17106.1.S1_s_at | MmugDNA.17106.1 | 10.81 | 10.98 | 0.84 | 0.2  | -1.13 | 0.924081 | 0.161545 | 0.974613 | 0.43767  |
| MmugDNA.17107.1.S1_at   | MmugDNA.17107.1 | 7.23  | 8.02  | 0.48 | 0.15 | -1.73 | 0.093538 | 0.056361 | 0.462739 | 0.283382 |
| MmugDNA.17108.1.S1_at   | MmugDNA.17108.1 | 4.86  | 4.91  | 0.3  | 0.06 | -1.03 | 0.850047 | 0.965351 | 0.947281 | 0.980657 |
| MmugDNA.17110.1.S1_at   | MmugDNA.17110.1 | 3.68  | 3.7   | 0.06 | 0.14 | -1.01 | 0.94424  | 0.996861 | 0.980653 | 0.998202 |
| MmugDNA.17112.1.S1_at   | MmugDNA.17112.1 | 3.65  | 3.64  | 0.1  | 0.21 | 1.01  | 0.28602  | 0.87752  | 0.64358  | 0.930162 |
| MmugDNA.17114.1.S1_at   | MmugDNA.17114.1 | 4.35  | 4.2   | 0.15 | 0.06 | 1.1   | 0.629633 | 0.611406 | 0.851663 | 0.769296 |
| MmugDNA.17115.1.S1_at   | MmugDNA.17115.1 | 7.32  | 7.57  | 1.2  | 0.1  | -1.19 | 0.693391 | 0.659267 | 0.880606 | 0.80063  |
| MmugDNA.17116.1.S1_at   | MmugDNA.17116.1 | 7.77  | 7.71  | 0.64 | 0.2  | 1.04  | 0.712585 | 0.230168 | 0.887961 | 0.502015 |
| MmugDNA.17117.1.S1_at   | MmugDNA.17117.1 | 2.87  | 2.85  | 0.09 | 0.13 | 1.01  | 0.287981 | 0.208418 | 0.645144 | 0.482316 |
| MmugDNA.17119.1.S1_at   | MmugDNA.17119.1 | 3.26  | 3.18  | 0.16 | 0.06 | 1.06  | 0.34385  | 0.555319 | 0.686882 | 0.733767 |
| MmugDNA.1712.1.S1_at    | MmugDNA.1712.1  | 3.68  | 4.09  | 0.24 | 0.26 | -1.32 | 0.103806 | 0.326141 | 0.47451  | 0.576328 |
| MmugDNA.17120.1.S1_at   | MmugDNA.17120.1 | 7.13  | 6.84  | 0.79 | 0.15 | 1.23  | 0.679874 | 0.322032 | 0.874376 | 0.57365  |
| MmugDNA.17121.1.S1_at   | MmugDNA.17121.1 | 13.03 | 13.07 | 0.14 | 0.06 | -1.03 | 0.96389  | 0.426087 | 0.988182 | 0.648279 |
| MmugDNA.17123.1.S1_at   | MmugDNA.17123.1 | 4.06  | 4.08  | 0.16 | 0.21 | -1.01 | 0.533771 | 0.63783  | 0.800983 | 0.787216 |
| MmugDNA.17124.1.S1_at   | MmugDNA.17124.1 | 6.27  | 6.24  | 0.24 | 0.31 | 1.02  | 0.905855 | 0.072673 | 0.968196 | 0.31561  |
| MmugDNA.17126.1.S1_at   | MmugDNA.17126.1 | 4.88  | 5.93  | 0.32 | 0.65 | -2.07 | 0.028398 | 0.053822 | 0.332362 | 0.277535 |
| MmugDNA.17127.1.S1_at   | MmugDNA.17127.1 | 6.48  | 6.83  | 0.61 | 0.52 | -1.27 | 0.863812 | 0.56083  | 0.952043 | 0.736987 |
| MmugDNA.17127.1.S1_s_at | MmugDNA.17127.1 | 6.78  | 6.98  | 0.45 | 0.11 | -1.15 | 0.810906 | 0.086372 | 0.931466 | 0.338805 |
| MmugDNA.17128.1.S1_at   | MmugDNA.17128.1 | 3.48  | 3.66  | 0.15 | 0.01 | -1.14 | 0.120515 | 0.183253 | 0.493916 | 0.459553 |
| MmugDNA.17129.1.S1_at   | MmugDNA.17129.1 | 6.81  | 7.34  | 1.59 | 0.23 | -1.44 | 0.635491 | 0.270198 | 0.854585 | 0.535543 |
| MmugDNA.1713.1.S1_at    | MmugDNA.1713.1  | 3.78  | 4.45  | 0.14 | 0.5  | -1.59 | 0.285204 | 0.559467 | 0.643069 | 0.736301 |
| MmugDNA.17130.1.S1_at   | MmugDNA.17130.1 | 6.05  | 5.78  | 0.09 | 0.21 | 1.2   | 0.134465 | 0.131738 | 0.508462 | 0.40387  |
| MmugDNA.17131.1.S1_at   | MmugDNA.17131.1 | 6.8   | 6.03  | 0.67 | 0.18 | 1.71  | 0.132531 | 0.070614 | 0.506856 | 0.311913 |
| MmugDNA.17132.1.S1_at   | MmugDNA.17132.1 | 5.2   | 5.47  | 0.01 | 0.25 | -1.2  | 0.138451 | 0.068789 | 0.513846 | 0.308711 |
| MmugDNA.17133.1.S1_at   | MmugDNA.17133.1 | 4.55  | 4.57  | 0.15 | 0.21 | -1.02 | 0.976048 | 0.322412 | 0.992259 | 0.573972 |
| MmugDNA.17134.1.S1_at   | MmugDNA.17134.1 | 6.35  | 6.36  | 0.34 | 0.17 | -1    | 0.947158 | 0.789732 | 0.981659 | 0.878519 |
| MmugDNA.17136.1.S1_at   | MmugDNA.17136.1 | 5.77  | 6.12  | 0.62 | 0.44 | -1.27 | 0.589949 | 0.321719 | 0.832714 | 0.573355 |
| MmugDNA.17137.1.S1_at   | MmugDNA.17137.1 | 10.97 | 8.57  | 0.94 | 0.12 | 5.28  | 0.02404  | 0.009367 | 0.317529 | 0.127634 |
| MmugDNA.17138.1.S1_at   | MmugDNA.17138.1 | 3.5   | 3.43  | 0.32 | 0.21 | 1.05  | 0.587307 | 0.750088 | 0.831578 | 0.854691 |
| MmugDNA.17141.1.S1_at   | MmugDNA.17141.1 | 2.93  | 2.94  | 0.21 | 0.08 | -1.01 | 0.892857 | 0.760856 | 0.963323 | 0.86105  |
| MmugDNA.17144.1.S1_at   | MmugDNA.17144.1 | 3.09  | 3.07  | 0.05 | 0.11 | 1.01  | 0.353372 | 0.697328 | 0.693234 | 0.824132 |
| MmugDNA.17146.1.S1_at   | MmugDNA.17146.1 | 5.39  | 5.5   | 0.29 | 0.37 | -1.07 | 0.950534 | 0.997299 | 0.983327 | 0.998549 |
| MmugDNA.17147.1.S1_at   | MmugDNA.17147.1 | 6.74  | 6.73  | 0.13 | 0.22 | 1     | 0.702314 | 0.862066 | 0.884197 | 0.921619 |
| MmugDNA.17148.1.S1_at   | MmugDNA.17148.1 | 5.65  | 5.66  | 0.47 | 0.05 | -1.01 | 0.793142 | 0.353352 | 0.924208 | 0.596477 |
| MmugDNA.17149.1.S1_at   | MmugDNA.17149.1 | 3.89  | 3.59  | 0.24 | 0.12 | 1.23  | 0.269149 | 0.213933 | 0.629522 | 0.487596 |

|                         |                 |       |       |      |      |       |          |          |          |          |
|-------------------------|-----------------|-------|-------|------|------|-------|----------|----------|----------|----------|
| MmugDNA.17150.1.S1_at   | MmugDNA.17150.1 | 6.26  | 6.47  | 0.24 | 0.06 | -1.15 | 0.207328 | 0.072695 | 0.578933 | 0.31561  |
| MmugDNA.17151.1.S1_at   | MmugDNA.17151.1 | 4.66  | 4.61  | 0.09 | 0.15 | 1.03  | 0.947974 | 0.479165 | 0.98212  | 0.684975 |
| MmugDNA.17152.1.S1_at   | MmugDNA.17152.1 | 3.98  | 3.72  | 0.03 | 0.19 | 1.2   | 0.093612 | 0.019017 | 0.462863 | 0.173605 |
| MmugDNA.17153.1.S1_at   | MmugDNA.17153.1 | 5     | 5.01  | 0.02 | 0.08 | -1    | 0.714055 | 0.410363 | 0.888579 | 0.637229 |
| MmugDNA.17154.1.S1_at   | MmugDNA.17154.1 | 5.94  | 6.03  | 0.19 | 0.07 | -1.06 | 0.659864 | 0.498844 | 0.865465 | 0.697821 |
| MmugDNA.17155.1.S1_at   | MmugDNA.17155.1 | 2.96  | 2.96  | 0.02 | 0.09 | 1     | 0.524888 | 0.344762 | 0.796154 | 0.590101 |
| MmugDNA.17156.1.S1_at   | MmugDNA.17156.1 | 4.57  | 4.48  | 0.17 | 0.07 | 1.06  | 0.894271 | 0.110268 | 0.96378  | 0.374403 |
| MmugDNA.17157.1.S1_at   | MmugDNA.17157.1 | 7.52  | 7.5   | 0.05 | 0.11 | 1.02  | 0.223228 | 0.386108 | 0.592569 | 0.621345 |
| MmugDNA.17157.1.S1_x_at | MmugDNA.17157.1 | 7.72  | 7.67  | 0.15 | 0.1  | 1.03  | 0.57888  | 0.777908 | 0.826338 | 0.870964 |
| MmugDNA.1716.1.S1_at    | MmugDNA.1716.1  | 7.18  | 7.32  | 0.15 | 0.17 | -1.1  | 0.214271 | 0.43618  | 0.584673 | 0.655879 |
| MmugDNA.17160.1.S1_at   | MmugDNA.17160.1 | 9.11  | 9.02  | 0.16 | 0.22 | -1.06 | 0.462457 | 0.355851 | 0.761639 | 0.597864 |
| MmugDNA.17161.1.S1_at   | MmugDNA.17161.1 | 3.22  | 3.2   | 0.09 | 0.09 | 1.01  | 0.363266 | 0.52779  | 0.699934 | 0.716271 |
| MmugDNA.17162.1.S1_at   | MmugDNA.17162.1 | 6.52  | 7.91  | 0.74 | 0.03 | -2.62 | 0.025023 | 0.0095   | 0.320402 | 0.128375 |
| MmugDNA.17163.1.S1_at   | MmugDNA.17163.1 | 7.34  | 7.21  | 0.14 | 0.12 | 1.1   | 0.274179 | 0.064719 | 0.633792 | 0.300314 |
| MmugDNA.17165.1.S1_at   | MmugDNA.17165.1 | 4.93  | 5.02  | 0.29 | 0.09 | -1.06 | 0.216009 | 0.101478 | 0.586116 | 0.361278 |
| MmugDNA.17167.1.S1_at   | MmugDNA.17167.1 | 5.77  | 6.03  | 0.41 | 0.06 | -1.2  | 0.526021 | 0.336918 | 0.796442 | 0.584156 |
| MmugDNA.17168.1.S1_at   | MmugDNA.17168.1 | 3.53  | 3.47  | 0.18 | 0.04 | 1.04  | 0.603943 | 0.801709 | 0.8394   | 0.885902 |
| MmugDNA.17169.1.S1_at   | MmugDNA.17169.1 | 7.94  | 7.51  | 0.23 | 0.13 | 1.34  | 0.084471 | 0.081583 | 0.451025 | 0.329808 |
| MmugDNA.1717.1.S1_at    | MmugDNA.1717.1  | 11.05 | 11.02 | 1.05 | 0.06 | 1.02  | 0.942529 | 0.541888 | 0.98031  | 0.725146 |
| MmugDNA.17170.1.S1_at   | MmugDNA.17170.1 | 6.07  | 5.98  | 0.05 | 0.05 | 1.06  | 0.032847 | 0.516798 | 0.345393 | 0.70925  |
| MmugDNA.17171.1.S1_at   | MmugDNA.17171.1 | 8.63  | 8.1   | 0.63 | 0.2  | 1.44  | 0.258281 | 0.483505 | 0.622127 | 0.687943 |
| MmugDNA.17172.1.S1_at   | MmugDNA.17172.1 | 7.89  | 9.15  | 0.27 | 0.25 | -2.41 | 0.006003 | 0.001929 | 0.21386  | 0.065719 |
| MmugDNA.17173.1.S1_at   | MmugDNA.17173.1 | 3.42  | 3.3   | 0    | 0.11 | 1.09  | 0.425335 | 0.527233 | 0.739988 | 0.715896 |
| MmugDNA.17175.1.S1_at   | MmugDNA.17175.1 | 8.12  | 8.4   | 0.57 | 0.49 | -1.22 | 0.260373 | 0.50854  | 0.623265 | 0.703695 |
| MmugDNA.17176.1.S1_at   | MmugDNA.17176.1 | 3.7   | 3.58  | 0.05 | 0.05 | 1.09  | 0.094919 | 0.273286 | 0.464131 | 0.537788 |
| MmugDNA.17177.1.S1_at   | MmugDNA.17177.1 | 5.32  | 5.24  | 0.52 | 0.55 | 1.06  | 0.89749  | 0.985517 | 0.965207 | 0.991808 |
| MmugDNA.17178.1.S1_at   | MmugDNA.17178.1 | 8.87  | 8.6   | 0.07 | 0.12 | 1.21  | 0.026486 | 0.027761 | 0.325143 | 0.208034 |
| MmugDNA.17179.1.S1_at   | MmugDNA.17179.1 | 4.58  | 4.68  | 0.37 | 0.1  | -1.07 | 0.488834 | 0.525771 | 0.775818 | 0.715217 |
| MmugDNA.1718.1.S1_at    | MmugDNA.1718.1  | 10.98 | 10.35 | 0.36 | 0.11 | 1.55  | 0.054828 | 0.064555 | 0.397122 | 0.300255 |
| MmugDNA.17180.1.S1_at   | MmugDNA.17180.1 | 10.75 | 10.85 | 0.15 | 0.04 | -1.07 | 0.094704 | 0.062183 | 0.46387  | 0.296296 |
| MmugDNA.17181.1.S1_at   | MmugDNA.17181.1 | 3.77  | 3.56  | 0.06 | 0.12 | 1.16  | 0.089795 | 0.311485 | 0.457893 | 0.566468 |
| MmugDNA.17183.1.S1_at   | MmugDNA.17183.1 | 11.93 | 12.12 | 0.22 | 0.06 | -1.14 | 0.097492 | 0.036023 | 0.466487 | 0.234255 |
| MmugDNA.17184.1.S1_at   | MmugDNA.17184.1 | 5.36  | 5.27  | 0.08 | 0.1  | 1.07  | 0.069166 | 0.217205 | 0.426656 | 0.490853 |
| MmugDNA.17185.1.S1_at   | MmugDNA.17185.1 | 10    | 9.9   | 0.29 | 0.09 | 1.07  | 0.562683 | 0.325095 | 0.817789 | 0.575545 |
| MmugDNA.17186.1.S1_at   | MmugDNA.17186.1 | 9.9   | 10.04 | 0.35 | 0.19 | -1.1  | 0.209232 | 0.310235 | 0.580725 | 0.56542  |
| MmugDNA.17187.1.S1_at   | MmugDNA.17187.1 | 9.08  | 8.89  | 0.09 | 0.07 | 1.14  | 0.099498 | 0.644866 | 0.469245 | 0.791927 |
| MmugDNA.1719.1.S1_at    | MmugDNA.1719.1  | 4.85  | 4.63  | 0.07 | 0.08 | 1.17  | 0.035954 | 0.132047 | 0.353759 | 0.404043 |
| MmugDNA.17190.1.S1_at   | MmugDNA.17190.1 | 5.94  | 6.03  | 1.41 | 0.37 | -1.07 | 0.942938 | 0.356806 | 0.980374 | 0.598603 |
| MmugDNA.17191.1.S1_at   | MmugDNA.17191.1 | 6.47  | 6.96  | 0.84 | 0.37 | -1.41 | 0.691364 | 0.06326  | 0.879786 | 0.298244 |
| MmugDNA.17192.1.S1_at   | MmugDNA.17192.1 | 10.31 | 9.16  | 0.32 | 0.12 | 2.22  | 0.003982 | 0.000257 | 0.198571 | 0.033501 |
| MmugDNA.17192.1.S1_s_at | MmugDNA.17192.1 | 8.36  | 7.73  | 0.21 | 0.21 | 1.55  | 0.011534 | 0.000592 | 0.255545 | 0.041912 |
| MmugDNA.17194.1.S1_at   | MmugDNA.17194.1 | 6.76  | 6.97  | 0.24 | 0.24 | -1.16 | 0.737749 | 0.131232 | 0.899629 | 0.403252 |
| MmugDNA.17195.1.S1_at   | MmugDNA.17195.1 | 8.29  | 7.71  | 0.47 | 0.16 | 1.5   | 0.103491 | 0.038523 | 0.474257 | 0.241267 |

|                         |                 |       |       |      |      |       |          |          |          |          |
|-------------------------|-----------------|-------|-------|------|------|-------|----------|----------|----------|----------|
| MmugDNA.17197.1.S1_at   | MmugDNA.17197.1 | 10.45 | 10.85 | 0.19 | 0.15 | -1.32 | 0.036257 | 0.167844 | 0.35477  | 0.444426 |
| MmugDNA.17199.1.S1_at   | MmugDNA.17199.1 | 4.85  | 5.3   | 0.24 | 0.21 | -1.36 | 0.100903 | 0.24588  | 0.47159  | 0.51552  |
| MmugDNA.172.1.S1_s_at   | MmugDNA.172.1   | 8.9   | 8.98  | 0.7  | 0.13 | -1.06 | 0.669513 | 0.777006 | 0.869627 | 0.870467 |
| MmugDNA.1720.1.S1_at    | MmugDNA.1720.1  | 4.36  | 4.06  | 0.89 | 0.21 | 1.23  | 0.260001 | 0.368709 | 0.622946 | 0.608226 |
| MmugDNA.17200.1.S1_at   | MmugDNA.17200.1 | 6.63  | 6.72  | 1.16 | 0.09 | -1.06 | 0.976011 | 0.654676 | 0.992259 | 0.798114 |
| MmugDNA.17202.1.S1_at   | MmugDNA.17202.1 | 6.73  | 6.72  | 0.05 | 0.04 | 1     | 0.200242 | 0.448465 | 0.572075 | 0.664297 |
| MmugDNA.17204.1.S1_at   | MmugDNA.17204.1 | 2.96  | 3.02  | 0.05 | 0.35 | -1.05 | 0.741077 | 0.948894 | 0.901119 | 0.97078  |
| MmugDNA.17206.1.S1_at   | MmugDNA.17206.1 | 3.65  | 3.5   | 0.55 | 0.07 | 1.11  | 0.189329 | 0.312028 | 0.560894 | 0.56685  |
| MmugDNA.17207.1.S1_at   | MmugDNA.17207.1 | 5.37  | 5.13  | 0.02 | 0.05 | 1.18  | 0.002521 | 0.10897  | 0.179396 | 0.37269  |
| MmugDNA.17210.1.S1_at   | MmugDNA.17210.1 | 6.23  | 6.1   | 0.65 | 0.18 | 1.1   | 0.844809 | 0.172196 | 0.94551  | 0.448608 |
| MmugDNA.17211.1.S1_at   | MmugDNA.17211.1 | 4.29  | 4.24  | 0.57 | 0.22 | -1.03 | 0.432117 | 0.389188 | 0.743709 | 0.623403 |
| MmugDNA.17214.1.S1_at   | MmugDNA.17214.1 | 3.31  | 3.59  | 0.17 | 0.35 | -1.21 | 0.949358 | 0.989523 | 0.982855 | 0.994037 |
| MmugDNA.17215.1.S1_at   | MmugDNA.17215.1 | 6.45  | 6.28  | 0.21 | 0.13 | 1.12  | 0.31255  | 0.351594 | 0.664138 | 0.595109 |
| MmugDNA.17217.1.S1_at   | MmugDNA.17217.1 | 7.92  | 7.78  | 0.24 | 0.06 | 1.1   | 0.302782 | 0.720712 | 0.656669 | 0.838368 |
| MmugDNA.1722.1.S1_at    | MmugDNA.1722.1  | 4.78  | 4.67  | 0.16 | 0.03 | 1.08  | 0.248267 | 0.365357 | 0.613822 | 0.605473 |
| MmugDNA.17222.1.S1_at   | MmugDNA.17222.1 | 5.33  | 5.09  | 0.15 | 0.11 | 1.18  | 0.122276 | 0.35938  | 0.495677 | 0.600671 |
| MmugDNA.17223.1.S1_at   | MmugDNA.17223.1 | 9.12  | 8.55  | 0.19 | 0.08 | 1.49  | 0.009751 | 0.007544 | 0.243347 | 0.116437 |
| MmugDNA.17226.1.S1_at   | MmugDNA.17226.1 | 4.65  | 4.23  | 0.23 | 0.19 | 1.34  | 0.038623 | 0.0293   | 0.359972 | 0.21321  |
| MmugDNA.17228.1.S1_at   | MmugDNA.17228.1 | 6.09  | 6.01  | 0.25 | 0.1  | 1.05  | 0.20377  | 0.30502  | 0.57513  | 0.562176 |
| MmugDNA.1723.1.S1_at    | MmugDNA.1723.1  | 8.07  | 8.22  | 1.01 | 0.16 | -1.12 | 0.608443 | 0.116486 | 0.841222 | 0.383671 |
| MmugDNA.17230.1.S1_at   | MmugDNA.17230.1 | 5.83  | 4.73  | 1.14 | 0.21 | 2.14  | 0.502875 | 0.733872 | 0.783949 | 0.845895 |
| MmugDNA.17231.1.S1_at   | MmugDNA.17231.1 | 5     | 4.84  | 0.06 | 0.06 | 1.12  | 0.013606 | 0.061778 | 0.269894 | 0.295327 |
| MmugDNA.17232.1.S1_at   | MmugDNA.17232.1 | 9.15  | 9.14  | 0.13 | 0.2  | 1     | 0.80298  | 0.242797 | 0.928167 | 0.513151 |
| MmugDNA.17233.1.S1_at   | MmugDNA.17233.1 | 7.46  | 7.08  | 0.86 | 0.23 | 1.3   | 0.458954 | 0.590864 | 0.759226 | 0.75649  |
| MmugDNA.17234.1.S1_at   | MmugDNA.17234.1 | 4.13  | 4.12  | 0.12 | 0.19 | 1     | 0.345332 | 0.391658 | 0.687477 | 0.625282 |
| MmugDNA.17235.1.S1_at   | MmugDNA.17235.1 | 4.07  | 3.82  | 0.24 | 0.22 | 1.18  | 0.114454 | 0.490936 | 0.487606 | 0.692666 |
| MmugDNA.17236.1.S1_at   | MmugDNA.17236.1 | 7.44  | 7.52  | 0.14 | 0.07 | -1.06 | 0.663278 | 0.840531 | 0.867106 | 0.909112 |
| MmugDNA.17237.1.S1_at   | MmugDNA.17237.1 | 6.08  | 6.31  | 0.32 | 0.19 | -1.18 | 0.334188 | 0.286779 | 0.680121 | 0.548145 |
| MmugDNA.17239.1.S1_at   | MmugDNA.17239.1 | 5.39  | 5.58  | 0.18 | 0.02 | -1.14 | 0.178093 | 0.346618 | 0.551193 | 0.591439 |
| MmugDNA.1724.1.S1_at    | MmugDNA.1724.1  | 5.58  | 5.5   | 0.11 | 0.06 | 1.06  | 0.122329 | 0.133598 | 0.495694 | 0.40555  |
| MmugDNA.17240.1.S1_at   | MmugDNA.17240.1 | 10.13 | 11.08 | 0.29 | 0.18 | -1.94 | 0.010437 | 0.005988 | 0.247969 | 0.1058   |
| MmugDNA.17243.1.S1_at   | MmugDNA.17243.1 | 5.99  | 6.16  | 0    | 0.13 | -1.12 | 0.2717   | 0.124546 | 0.631506 | 0.394987 |
| MmugDNA.17244.1.S1_at   | MmugDNA.17244.1 | 5.4   | 5.39  | 0.03 | 0.14 | 1     | 0.495623 | 0.539924 | 0.780125 | 0.723995 |
| MmugDNA.17245.1.S1_at   | MmugDNA.17245.1 | 3.39  | 3.34  | 0.05 | 0.13 | 1.03  | 0.187638 | 0.339058 | 0.559909 | 0.585891 |
| MmugDNA.23475.1.S1_s_at | MmugDNA.23475.1 | 12.4  | 12.46 | 0.21 | 0.02 | -1.05 | 0.585065 | 0.021367 | 0.83021  | 0.183015 |
| MmugDNA.17247.1.S1_at   | MmugDNA.17247.1 | 4.85  | 5.04  | 0.23 | 0.05 | -1.14 | 0.432576 | 0.075745 | 0.743936 | 0.32034  |
| MmugDNA.17248.1.S1_at   | MmugDNA.17248.1 | 5.44  | 5.38  | 0.32 | 0.27 | 1.05  | 0.757914 | 0.493146 | 0.908882 | 0.694001 |
| MmugDNA.17249.1.S1_at   | MmugDNA.17249.1 | 7.64  | 7.63  | 0.35 | 0.3  | 1.01  | 0.706426 | 0.192595 | 0.885755 | 0.468095 |
| MmugDNA.1725.1.S1_at    | MmugDNA.1725.1  | 3.84  | 3.46  | 0.26 | 0.15 | 1.3   | 0.21666  | 0.355447 | 0.586753 | 0.597738 |
| MmugDNA.17251.1.S1_at   | MmugDNA.17251.1 | 12.7  | 12.23 | 0.25 | 0.11 | 1.39  | 0.034922 | 0.007943 | 0.350632 | 0.118702 |
| MmugDNA.17252.1.S1_at   | MmugDNA.17252.1 | 3.22  | 3.22  | 0.07 | 0.03 | 1     | 0.608262 | 0.989479 | 0.841093 | 0.994037 |
| MmugDNA.17255.1.S1_at   | MmugDNA.17255.1 | 9.85  | 9.95  | 0.22 | 0.07 | -1.07 | 0.389509 | 0.327255 | 0.716173 | 0.577173 |
| MmugDNA.17257.1.S1_at   | MmugDNA.17257.1 | 5.3   | 5.51  | 0.36 | 0.03 | -1.16 | 0.905759 | 0.970621 | 0.968196 | 0.984019 |

|                         |                 |       |       |      |      |       |          |          |          |          |
|-------------------------|-----------------|-------|-------|------|------|-------|----------|----------|----------|----------|
| MmugDNA.17258.1.S1_at   | MmugDNA.17258.1 | 6.91  | 6.78  | 0.07 | 0.19 | 1.1   | 0.333536 | 0.560663 | 0.679711 | 0.736915 |
| MmugDNA.1726.1.S1_at    | MmugDNA.1726.1  | 5.85  | 5.78  | 0.04 | 0.03 | 1.05  | 0.017595 | 0.520875 | 0.292878 | 0.711968 |
| MmugDNA.17260.1.S1_at   | MmugDNA.17260.1 | 5.48  | 5.42  | 0.14 | 0.03 | 1.05  | 0.991203 | 0.997617 | 0.996655 | 0.998769 |
| MmugDNA.17261.1.S1_at   | MmugDNA.17261.1 | 7.49  | 7.52  | 0.05 | 0.16 | -1.02 | 0.47961  | 0.204637 | 0.77082  | 0.478995 |
| MmugDNA.17262.1.S1_at   | MmugDNA.17262.1 | 11.14 | 11.2  | 0.61 | 0.15 | -1.04 | 0.930098 | 0.976517 | 0.976623 | 0.987202 |
| MmugDNA.17263.1.S1_at   | MmugDNA.17263.1 | 6.2   | 6.01  | 0.05 | 0.13 | 1.14  | 0.028008 | 0.041052 | 0.330017 | 0.247372 |
| MmugDNA.17264.1.S1_at   | MmugDNA.17264.1 | 5.16  | 5.28  | 0.1  | 0.13 | -1.09 | 0.345833 | 0.154656 | 0.687801 | 0.429564 |
| MmugDNA.17265.1.S1_at   | MmugDNA.17265.1 | 3.82  | 3.69  | 0.18 | 0.19 | 1.09  | 0.185152 | 0.248835 | 0.558161 | 0.517951 |
| MmugDNA.17266.1.S1_at   | MmugDNA.17266.1 | 3.95  | 4.46  | 0.11 | 0.93 | -1.42 | 0.264379 | 0.301306 | 0.626029 | 0.559356 |
| MmugDNA.17267.1.S1_at   | MmugDNA.17267.1 | 6.55  | 6.93  | 0.39 | 0.22 | -1.3  | 0.348727 | 0.137964 | 0.689979 | 0.410912 |
| MmugDNA.17267.1.S1_s_at | MmugDNA.17267.1 | 6.75  | 7.06  | 0.14 | 0.02 | -1.24 | 0.022032 | 0.013231 | 0.309781 | 0.147534 |
| MmugDNA.17268.1.S1_at   | MmugDNA.17268.1 | 4.59  | 4.59  | 0.22 | 0.06 | -1    | 0.946454 | 0.152749 | 0.98143  | 0.427571 |
| MmugDNA.1727.1.S1_at    | MmugDNA.1727.1  | 7.55  | 7.13  | 0.58 | 0.09 | 1.33  | 0.709037 | 0.457517 | 0.886611 | 0.670864 |
| MmugDNA.17270.1.S1_at   | MmugDNA.17270.1 | 5.79  | 6.4   | 0.43 | 0.39 | -1.53 | 0.313674 | 0.131394 | 0.664799 | 0.403563 |
| MmugDNA.17271.1.S1_at   | MmugDNA.17271.1 | 5.87  | 5.88  | 0.12 | 0.11 | -1    | 0.52219  | 0.132218 | 0.795137 | 0.404274 |
| MmugDNA.17272.1.S1_at   | MmugDNA.17272.1 | 6.25  | 6.16  | 0.36 | 0    | 1.07  | 0.595742 | 0.347276 | 0.835605 | 0.591911 |
| MmugDNA.17273.1.S1_at   | MmugDNA.17273.1 | 6.97  | 6.7   | 0.1  | 0.09 | 1.21  | 0.054355 | 0.118167 | 0.39629  | 0.386086 |
| MmugDNA.17274.1.S1_at   | MmugDNA.17274.1 | 7.78  | 5.9   | 0.22 | 0.41 | 3.66  | 0.00222  | 0.001622 | 0.174757 | 0.060897 |
| MmugDNA.17275.1.S1_s_at | MmugDNA.17275.1 | 7.64  | 7.44  | 0.08 | 0.1  | 1.14  | 0.064523 | 0.126904 | 0.418343 | 0.397605 |
| MmugDNA.17276.1.S1_at   | MmugDNA.17276.1 | 6.48  | 6.88  | 0.66 | 0.17 | -1.32 | 0.766994 | 0.78044  | 0.912422 | 0.872614 |
| MmugDNA.17278.1.S1_at   | MmugDNA.17278.1 | 4.05  | 4.05  | 0.14 | 0.02 | 1     | 0.45315  | 0.513241 | 0.755962 | 0.706851 |
| MmugDNA.17279.1.S1_at   | MmugDNA.17279.1 | 9.13  | 10.21 | 1.03 | 0.35 | -2.12 | 0.255684 | 0.227392 | 0.619741 | 0.499659 |
| MmugDNA.1728.1.S1_at    | MmugDNA.1728.1  | 5.85  | 5.6   | 0.13 | 0.1  | 1.19  | 0.119879 | 0.061771 | 0.493259 | 0.295327 |
| MmugDNA.17280.1.S1_at   | MmugDNA.17280.1 | 5.12  | 4.99  | 0.58 | 0.03 | 1.09  | 0.508496 | 0.549782 | 0.787048 | 0.730055 |
| MmugDNA.17281.1.S1_at   | MmugDNA.17281.1 | 3.97  | 3.83  | 0.11 | 0.1  | 1.1   | 0.319265 | 0.385247 | 0.668689 | 0.620709 |
| MmugDNA.17282.1.S1_at   | MmugDNA.17282.1 | 9.54  | 9.18  | 0.64 | 0.19 | 1.28  | 0.525168 | 0.773631 | 0.796179 | 0.868415 |
| MmugDNA.17283.1.S1_at   | MmugDNA.17283.1 | 4.15  | 4.01  | 0.21 | 0.09 | 1.11  | 0.404998 | 0.787898 | 0.727065 | 0.877314 |
| MmugDNA.17284.1.S1_at   | MmugDNA.17284.1 | 8.93  | 9.07  | 0.26 | 0.17 | -1.1  | 0.649109 | 0.505222 | 0.86022  | 0.702062 |
| MmugDNA.17285.1.S1_at   | MmugDNA.17285.1 | 3.16  | 3.3   | 0.07 | 0.21 | -1.1  | 0.157505 | 0.254585 | 0.530588 | 0.522869 |
| MmugDNA.17287.1.S1_at   | MmugDNA.17287.1 | 6.72  | 6.62  | 0.33 | 0.1  | 1.07  | 0.218019 | 0.331231 | 0.587987 | 0.579978 |
| MmugDNA.17288.1.S1_at   | MmugDNA.17288.1 | 3.79  | 3.71  | 0.08 | 0.02 | 1.05  | 0.147708 | 0.171316 | 0.521824 | 0.447809 |
| MmugDNA.17289.1.S1_at   | MmugDNA.17289.1 | 4.31  | 4.42  | 0.15 | 0    | -1.08 | 0.727299 | 0.79065  | 0.894648 | 0.878957 |
| MmugDNA.17290.1.S1_at   | MmugDNA.17290.1 | 6.01  | 6.02  | 0.79 | 0.31 | -1.01 | 0.589772 | 0.197403 | 0.832642 | 0.472311 |
| MmugDNA.17291.1.S1_at   | MmugDNA.17291.1 | 4.98  | 4.99  | 0.22 | 0.3  | -1    | 0.560221 | 0.467271 | 0.816546 | 0.677016 |
| MmugDNA.17293.1.S1_s_at | MmugDNA.17293.1 | 9.18  | 9.2   | 0.83 | 0.2  | -1.02 | 0.917171 | 0.138655 | 0.97197  | 0.411705 |
| MmugDNA.17296.1.S1_at   | MmugDNA.17296.1 | 4.26  | 4.4   | 0.28 | 0.1  | -1.1  | 0.333893 | 0.642331 | 0.679922 | 0.790154 |
| MmugDNA.17297.1.S1_at   | MmugDNA.17297.1 | 4.12  | 3.96  | 0.1  | 0.09 | 1.12  | 0.145108 | 0.082037 | 0.520309 | 0.330756 |
| MmugDNA.17298.1.S1_at   | MmugDNA.17298.1 | 4.45  | 4.88  | 0.6  | 0.24 | -1.35 | 0.833242 | 0.798145 | 0.940181 | 0.883809 |
| MmugDNA.1730.1.S1_at    | MmugDNA.1730.1  | 7.44  | 6.86  | 0.24 | 0.19 | 1.5   | 0.028893 | 0.064235 | 0.333062 | 0.299668 |
| MmugDNA.17301.1.S1_at   | MmugDNA.17301.1 | 7.53  | 7.18  | 0.26 | 0.06 | 1.27  | 0.204992 | 0.295086 | 0.576643 | 0.554551 |
| MmugDNA.37783.1.S1_x_at | MmugDNA.37783.1 | 3.17  | 3.08  | 0.22 | 0.09 | 1.07  | 0.831278 | 0.800387 | 0.939628 | 0.885129 |
| MmugDNA.17303.1.S1_at   | MmugDNA.17303.1 | 4.39  | 4.27  | 0.31 | 0.06 | 1.08  | 0.216511 | 0.309492 | 0.586605 | 0.564987 |
| MmugDNA.17304.1.S1_at   | MmugDNA.17304.1 | 9.94  | 9.61  | 0.5  | 0.38 | 1.26  | 0.206972 | 0.354148 | 0.578774 | 0.597059 |

|                         |                 |       |       |      |      |       |          |          |          |          |
|-------------------------|-----------------|-------|-------|------|------|-------|----------|----------|----------|----------|
| MmugDNA.17305.1.S1_at   | MmugDNA.17305.1 | 6.43  | 6.23  | 0.1  | 0.04 | 1.15  | 0.052462 | 0.018719 | 0.392511 | 0.171803 |
| MmugDNA.17306.1.S1_at   | MmugDNA.17306.1 | 6.13  | 5.49  | 0.1  | 0.13 | 1.56  | 0.00266  | 0.273702 | 0.182785 | 0.53817  |
| MmugDNA.17307.1.S1_at   | MmugDNA.17307.1 | 4.16  | 4.15  | 0.05 | 0.07 | 1     | 0.605806 | 0.764138 | 0.840193 | 0.862852 |
| MmugDNA.17308.1.S1_at   | MmugDNA.17308.1 | 7.61  | 7.76  | 0.28 | 0.2  | -1.11 | 0.554163 | 0.159309 | 0.812456 | 0.43531  |
| MmugDNA.17309.1.S1_at   | MmugDNA.17309.1 | 4.42  | 4.37  | 0.18 | 0.14 | 1.04  | 0.83868  | 0.277185 | 0.942303 | 0.541154 |
| MmugDNA.1731.1.S1_at    | MmugDNA.1731.1  | 7.85  | 8.1   | 0.34 | 0.05 | -1.19 | 0.396876 | 0.154869 | 0.721565 | 0.429849 |
| MmugDNA.17310.1.S1_at   | MmugDNA.17310.1 | 9.17  | 9.21  | 0.13 | 0.03 | -1.02 | 0.403244 | 0.002273 | 0.725542 | 0.070312 |
| MmugDNA.17311.1.S1_at   | MmugDNA.17311.1 | 5.78  | 5.69  | 0.73 | 0.13 | 1.07  | 0.309406 | 0.398402 | 0.661718 | 0.629374 |
| MmugDNA.17312.1.S1_at   | MmugDNA.17312.1 | 7.11  | 6.93  | 0.05 | 0.27 | 1.13  | 0.26892  | 0.238323 | 0.629195 | 0.508904 |
| MmugDNA.17313.1.S1_at   | MmugDNA.17313.1 | 4.31  | 4.31  | 0.15 | 0.14 | 1     | 0.230389 | 0.515145 | 0.598513 | 0.708126 |
| MmugDNA.17314.1.S1_at   | MmugDNA.17314.1 | 7.5   | 6.56  | 0.77 | 0.38 | -1.92 | 0.222619 | 0.472189 | 0.592081 | 0.679876 |
| MmugDNA.17315.1.S1_at   | MmugDNA.17315.1 | 5.99  | 7.03  | 0.09 | 0.18 | -2.06 | 0.001252 | 0.00068  | 0.157254 | 0.04413  |
| MmugDNA.17316.1.S1_at   | MmugDNA.17316.1 | 11.24 | 11.22 | 0.17 | 0.06 | 1.02  | 0.872764 | 0.982852 | 0.955838 | 0.990596 |
| MmugDNA.17317.1.S1_at   | MmugDNA.17317.1 | 4     | 3.82  | 0.16 | 0.21 | 1.14  | 0.375376 | 0.455593 | 0.706463 | 0.669584 |
| MmugDNA.17318.1.S1_at   | MmugDNA.17318.1 | 9.23  | 9.52  | 0.45 | 0.15 | -1.22 | 0.082171 | 0.155079 | 0.447048 | 0.430197 |
| MmugDNA.1732.1.S1_at    | MmugDNA.1732.1  | 6.18  | 6.15  | 0.2  | 0.05 | 1.02  | 0.819663 | 0.796816 | 0.935037 | 0.882803 |
| MmugDNA.17320.1.S1_at   | MmugDNA.17320.1 | 4.36  | 4.46  | 0.13 | 0.35 | -1.07 | 0.431253 | 0.707025 | 0.743363 | 0.830116 |
| MmugDNA.17321.1.S1_at   | MmugDNA.17321.1 | 3.33  | 3.31  | 0.06 | 0.02 | 1.01  | 0.257473 | 0.188941 | 0.621236 | 0.464854 |
| MmugDNA.17323.1.S1_at   | MmugDNA.17323.1 | 2.86  | 2.97  | 0.18 | 0.19 | -1.08 | 0.542775 | 0.736772 | 0.805983 | 0.847693 |
| MmugDNA.17324.1.S1_at   | MmugDNA.17324.1 | 5.52  | 5.62  | 0.15 | 0.07 | -1.07 | 0.327654 | 0.193126 | 0.675137 | 0.468554 |
| MmugDNA.17325.1.S1_at   | MmugDNA.17325.1 | 8.25  | 8.05  | 0.23 | 0.12 | 1.15  | 0.6663   | 0.224638 | 0.868243 | 0.497613 |
| MmugDNA.17326.1.S1_at   | MmugDNA.17326.1 | 5.01  | 5.05  | 0.11 | 0.05 | -1.02 | 0.97307  | 0.465969 | 0.99122  | 0.676055 |
| MmugDNA.17327.1.S1_at   | MmugDNA.17327.1 | 8.01  | 8.04  | 0.39 | 0.14 | -1.02 | 0.314863 | 0.74629  | 0.66557  | 0.85272  |
| MmugDNA.17328.1.S1_at   | MmugDNA.17328.1 | 5.99  | 5.93  | 0.14 | 0.13 | 1.04  | 0.874823 | 0.410203 | 0.956568 | 0.637131 |
| MmugDNA.1733.1.S1_at    | MmugDNA.1733.1  | 5.7   | 5.2   | 0.41 | 0.58 | 1.41  | 0.12082  | 0.029317 | 0.49436  | 0.21321  |
| MmugDNA.1733.1.S1_s_at  | MmugDNA.1733.1  | 9.82  | 9.28  | 0.91 | 0.29 | 1.45  | 0.507157 | 0.187662 | 0.78619  | 0.463673 |
| MmugDNA.17330.1.S1_at   | MmugDNA.17330.1 | 4.53  | 4.37  | 0.1  | 0.03 | 1.12  | 0.182924 | 0.150788 | 0.555763 | 0.425322 |
| MmugDNA.17331.1.S1_s_at | MmugDNA.17331.1 | 9.63  | 9.44  | 0.46 | 0.37 | 1.14  | 0.254038 | 0.025723 | 0.618635 | 0.201029 |
| MmugDNA.17332.1.S1_at   | MmugDNA.17332.1 | 5.23  | 5     | 0.05 | 0.1  | 1.17  | 0.031419 | 0.054777 | 0.341227 | 0.279545 |
| MmugDNA.17333.1.S1_x_at | MmugDNA.17333.1 | 4.07  | 4.36  | 0.19 | 0.45 | -1.22 | 0.863505 | 0.353747 | 0.952018 | 0.596815 |
| MmugDNA.17334.1.S1_at   | MmugDNA.17334.1 | 3.46  | 3.45  | 0.04 | 0.1  | 1.01  | 0.341436 | 0.480869 | 0.685061 | 0.686    |
| MmugDNA.17335.1.S1_at   | MmugDNA.17335.1 | 7.6   | 7.6   | 0.06 | 0.12 | -1    | 0.823751 | 0.916607 | 0.936367 | 0.953322 |
| MmugDNA.17336.1.S1_s_at | MmugDNA.17336.1 | 12.42 | 12.41 | 0.04 | 0.12 | 1.01  | 0.468827 | 0.148937 | 0.765126 | 0.423294 |
| MmugDNA.17337.1.S1_at   | MmugDNA.17337.1 | 10.98 | 11.24 | 0.09 | 0.07 | -1.2  | 0.034403 | 0.072714 | 0.349795 | 0.31565  |
| MmugDNA.17338.1.S1_at   | MmugDNA.17338.1 | 2.85  | 2.88  | 0.11 | 0.1  | -1.02 | 0.417437 | 0.593103 | 0.734957 | 0.758067 |
| MmugDNA.17339.1.S1_at   | MmugDNA.17339.1 | 5.02  | 5.44  | 0.16 | 0.35 | -1.35 | 0.091694 | 0.219456 | 0.45996  | 0.493156 |
| MmugDNA.17339.1.S1_s_at | MmugDNA.17339.1 | 5.66  | 5.65  | 0.53 | 0.37 | 1.01  | 0.954986 | 0.997663 | 0.985066 | 0.998797 |
| MmugDNA.17340.1.S1_at   | MmugDNA.17340.1 | 3.21  | 3.21  | 0.01 | 0.01 | 1     | 0.971096 | 0.994213 | 0.990583 | 0.99645  |
| MmugDNA.17341.1.S1_at   | MmugDNA.17341.1 | 4.43  | 4.26  | 0.95 | 0.15 | 1.13  | 0.625988 | 0.787821 | 0.849667 | 0.877302 |
| MmugDNA.17342.1.S1_s_at | MmugDNA.17342.1 | 10.26 | 10.96 | 0.17 | 0.04 | -1.63 | 0.004417 | 0.0032   | 0.198874 | 0.082002 |
| MmugDNA.17343.1.S1_at   | MmugDNA.17343.1 | 3.08  | 3.05  | 0.04 | 0.07 | 1.02  | 0.364313 | 0.702103 | 0.700517 | 0.827304 |
| MmugDNA.17345.1.S1_s_at | MmugDNA.17345.1 | 9.7   | 9.65  | 0.98 | 0.28 | 1.04  | 0.93964  | 0.80785  | 0.979532 | 0.8894   |
| MmugDNA.17346.1.S1_at   | MmugDNA.17346.1 | 3.63  | 3.48  | 0.14 | 0.35 | 1.1   | 0.805734 | 0.64652  | 0.929456 | 0.792953 |

|                         |                 |       |       |      |      |       |          |          |          |          |
|-------------------------|-----------------|-------|-------|------|------|-------|----------|----------|----------|----------|
| MmugDNA.17347.1.S1_at   | MmugDNA.17347.1 | 11.86 | 11.92 | 0.38 | 0.08 | -1.05 | 0.534413 | 0.524049 | 0.801399 | 0.714164 |
| MmugDNA.17349.1.S1_at   | MmugDNA.17349.1 | 6.32  | 6.75  | 0.93 | 0.33 | -1.34 | 0.502788 | 0.749446 | 0.783883 | 0.85442  |
| MmugDNA.1735.1.S1_at    | MmugDNA.1735.1  | 3.71  | 3.21  | 0.14 | 0.2  | 1.41  | 0.028844 | 0.0407   | 0.333062 | 0.246689 |
| MmugDNA.17351.1.S1_at   | MmugDNA.17351.1 | 4.8   | 4.99  | 0.33 | 0.2  | -1.14 | 0.607079 | 0.59302  | 0.840743 | 0.758    |
| MmugDNA.17352.1.S1_at   | MmugDNA.17352.1 | 4.23  | 4.42  | 0.14 | 0.05 | -1.14 | 0.169219 | 0.129273 | 0.542076 | 0.400682 |
| MmugDNA.17353.1.S1_at   | MmugDNA.17353.1 | 3.86  | 3.57  | 0.21 | 0    | 1.22  | 0.11185  | 0.117146 | 0.48497  | 0.384582 |
| MmugDNA.17354.1.S1_at   | MmugDNA.17354.1 | 6.83  | 6.7   | 0.07 | 0.03 | 1.09  | 0.091096 | 0.168812 | 0.458955 | 0.445458 |
| MmugDNA.17355.1.S1_at   | MmugDNA.17355.1 | 6.79  | 5.98  | 1.89 | 0.24 | 1.75  | 0.813897 | 0.28407  | 0.932828 | 0.546307 |
| MmugDNA.17356.1.S1_x_at | MmugDNA.17356.1 | 8.48  | 8.66  | 0.1  | 0.06 | -1.13 | 0.069919 | 0.064435 | 0.428109 | 0.300008 |
| MmugDNA.17357.1.S1_at   | MmugDNA.17357.1 | 8.38  | 8.89  | 0.31 | 0.12 | -1.42 | 0.187996 | 0.209383 | 0.560129 | 0.483069 |
| MmugDNA.17358.1.S1_at   | MmugDNA.17358.1 | 5.58  | 5.42  | 0.2  | 0.14 | -1.11 | 0.170321 | 0.17667  | 0.543379 | 0.453138 |
| MmugDNA.17359.1.S1_at   | MmugDNA.17359.1 | 7.95  | 7.8   | 0.37 | 0.37 | 1.12  | 0.952899 | 0.965134 | 0.984222 | 0.980605 |
| MmugDNA.1736.1.S1_at    | MmugDNA.1736.1  | 7.43  | 8.18  | 0.76 | 0.32 | -1.68 | 0.497143 | 0.209806 | 0.781055 | 0.483538 |
| MmugDNA.17361.1.S1_at   | MmugDNA.17361.1 | 3.04  | 3.05  | 0.13 | 0.05 | -1    | 0.924993 | 0.882857 | 0.974934 | 0.933206 |
| MmugDNA.17363.1.S1_at   | MmugDNA.17363.1 | 8.57  | 8.86  | 1.71 | 0.12 | -1.22 | 0.732569 | 0.198349 | 0.897275 | 0.473267 |
| MmugDNA.17364.1.S1_at   | MmugDNA.17364.1 | 5.26  | 5.13  | 0.12 | 0.19 | 1.09  | 0.401097 | 0.26308  | 0.724131 | 0.529402 |
| MmugDNA.17367.1.S1_at   | MmugDNA.17367.1 | 7.01  | 6.87  | 0.1  | 0.29 | 1.1   | 0.166802 | 0.367701 | 0.539457 | 0.607374 |
| MmugDNA.17368.1.S1_at   | MmugDNA.17368.1 | 5.31  | 5.52  | 0.28 | 0.35 | -1.16 | 0.428752 | 0.91914  | 0.742032 | 0.954586 |
| MmugDNA.1737.1.S1_at    | MmugDNA.1737.1  | 3.41  | 4.53  | 0.16 | 0.25 | -2.18 | 0.004875 | 0.001898 | 0.203301 | 0.065035 |
| MmugDNA.17370.1.S1_at   | MmugDNA.17370.1 | 12.15 | 11.85 | 1.06 | 0.18 | 1.22  | 0.645392 | 0.066705 | 0.858763 | 0.304114 |
| MmugDNA.17370.1.S1_s_at | MmugDNA.17370.1 | 13.1  | 12.83 | 0.74 | 0.13 | 1.21  | 0.612159 | 0.059298 | 0.842909 | 0.290528 |
| MmugDNA.17371.1.S1_at   | MmugDNA.17371.1 | 5.48  | 5.18  | 0.39 | 0.15 | 1.24  | 0.999211 | 0.007851 | 0.999788 | 0.118059 |
| MmugDNA.17372.1.S1_at   | MmugDNA.17372.1 | 5.41  | 5.92  | 0.21 | 0.33 | -1.43 | 0.122682 | 0.417664 | 0.496146 | 0.642365 |
| MmugDNA.17374.1.S1_at   | MmugDNA.17374.1 | 5.47  | 5.49  | 0.04 | 0.17 | -1.02 | 0.695169 | 0.860085 | 0.881339 | 0.920245 |
| MmugDNA.17375.1.S1_at   | MmugDNA.17375.1 | 6.9   | 6.69  | 0.33 | 0.11 | 1.16  | 0.86552  | 0.788424 | 0.95264  | 0.877622 |
| MmugDNA.17376.1.S1_at   | MmugDNA.17376.1 | 8.32  | 8.78  | 3.17 | 0.21 | -1.37 | 0.627965 | 0.358902 | 0.85084  | 0.600291 |
| MmugDNA.17377.1.S1_s_at | MmugDNA.17377.1 | 11.62 | 11.8  | 0.22 | 0.14 | -1.13 | 0.464765 | 0.193469 | 0.762686 | 0.468739 |
| MmugDNA.17378.1.S1_at   | MmugDNA.17378.1 | 10.53 | 10.65 | 0.52 | 0.2  | -1.08 | 0.861524 | 0.979695 | 0.951267 | 0.989107 |
| MmugDNA.17379.1.S1_at   | MmugDNA.17379.1 | 7.5   | 7.05  | 0.43 | 0.17 | 1.37  | 0.22112  | 0.034467 | 0.590409 | 0.229717 |
| MmugDNA.1738.1.S1_at    | MmugDNA.1738.1  | 6.02  | 6     | 0.07 | 0.07 | 1.01  | 0.315156 | 0.446418 | 0.665641 | 0.662842 |
| MmugDNA.17380.1.S1_at   | MmugDNA.17380.1 | 6.85  | 6.82  | 0.5  | 0.37 | 1.02  | 0.792746 | 0.286292 | 0.924072 | 0.547784 |
| MmugDNA.17381.1.S1_at   | MmugDNA.17381.1 | 7.54  | 7.54  | 0.15 | 0.21 | -1    | 0.662138 | 0.08282  | 0.866635 | 0.332331 |
| MmugDNA.17382.1.S1_at   | MmugDNA.17382.1 | 3.6   | 3.61  | 0.11 | 0.15 | -1.01 | 0.493676 | 0.472592 | 0.77903  | 0.68007  |
| MmugDNA.17383.1.S1_at   | MmugDNA.17383.1 | 6.11  | 6.07  | 0.31 | 0.04 | 1.03  | 0.288658 | 0.134491 | 0.645686 | 0.406626 |
| MmugDNA.17385.1.S1_at   | MmugDNA.17385.1 | 6.15  | 6.41  | 0.32 | 0.27 | -1.2  | 0.180475 | 0.234915 | 0.553635 | 0.506125 |
| MmugDNA.17386.1.S1_at   | MmugDNA.17386.1 | 5.01  | 5.02  | 0.05 | 0.12 | -1.01 | 0.513561 | 0.180176 | 0.789984 | 0.456751 |
| MmugDNA.17387.1.S1_at   | MmugDNA.17387.1 | 6.31  | 5.8   | 0.07 | 0.09 | 1.42  | 0.001633 | 0.056432 | 0.162459 | 0.283516 |
| MmugDNA.17388.1.S1_at   | MmugDNA.17388.1 | 9.48  | 9.36  | 0.16 | 0.11 | 1.09  | 0.594263 | 0.913876 | 0.834659 | 0.951561 |
| MmugDNA.17389.1.S1_at   | MmugDNA.17389.1 | 3.63  | 3.77  | 0.09 | 0.17 | -1.1  | 0.290467 | 0.124185 | 0.64704  | 0.394496 |
| MmugDNA.1739.1.S1_at    | MmugDNA.1739.1  | 4.12  | 3.82  | 0.2  | 0.15 | 1.23  | 0.095879 | 0.207853 | 0.46445  | 0.482049 |
| MmugDNA.17391.1.S1_at   | MmugDNA.17391.1 | 12.28 | 12.34 | 0.24 | 0.22 | -1.04 | 0.401037 | 0.50441  | 0.724096 | 0.701557 |
| MmugDNA.17392.1.S1_at   | MmugDNA.17392.1 | 3.95  | 4.12  | 0.17 | 0.01 | -1.12 | 0.311414 | 0.264044 | 0.663221 | 0.530185 |
| MmugDNA.17394.1.S1_at   | MmugDNA.17394.1 | 4.04  | 4     | 0.05 | 0.12 | 1.03  | 0.1377   | 0.258613 | 0.51342  | 0.52584  |



|                         |                 |      |      |      |      |       |          |          |          |          |
|-------------------------|-----------------|------|------|------|------|-------|----------|----------|----------|----------|
| MmugDNA.17396.1.S1_at   | MmugDNA.17396.1 | 3.77 | 3.66 | 0.11 | 0.05 | 1.08  | 0.730727 | 0.976895 | 0.896248 | 0.987434 |
| MmugDNA.17398.1.S1_at   | MmugDNA.17398.1 | 3.05 | 3.09 | 0.19 | 0.1  | -1.03 | 0.724431 | 0.59633  | 0.893143 | 0.759474 |
| MmugDNA.17399.1.S1_at   | MmugDNA.17399.1 | 3.68 | 3.87 | 0.15 | 0.37 | -1.14 | 0.503162 | 0.398651 | 0.78406  | 0.629458 |
| MmugDNA.174.1.S1_at     | MmugDNA.174.1   | 7.98 | 8.2  | 0.17 | 0.2  | -1.16 | 0.122683 | 0.090035 | 0.496146 | 0.344402 |
| MmugDNA.1740.1.S1_at    | MmugDNA.1740.1  | 4.86 | 4.92 | 1.4  | 0.27 | -1.04 | 0.826753 | 0.480946 | 0.938024 | 0.686018 |
| MmugDNA.17401.1.S1_at   | MmugDNA.17401.1 | 4.07 | 4.09 | 0.21 | 0.07 | -1.02 | 0.471679 | 0.045021 | 0.76658  | 0.256691 |
| MmugDNA.17402.1.S1_at   | MmugDNA.17402.1 | 6.07 | 6.06 | 0.36 | 0.09 | 1.01  | 0.451131 | 0.574177 | 0.755027 | 0.745679 |
| MmugDNA.17403.1.S1_at   | MmugDNA.17403.1 | 4.43 | 4.41 | 0.24 | 0.04 | 1.01  | 0.922347 | 0.3814   | 0.973786 | 0.617681 |
| MmugDNA.17404.1.S1_s_at | MmugDNA.17404.1 | 8.4  | 7.9  | 0.75 | 0.24 | 1.42  | 0.90481  | 0.013974 | 0.968042 | 0.151567 |
| MmugDNA.17405.1.S1_at   | MmugDNA.17405.1 | 7.97 | 7.49 | 0.13 | 0.34 | 1.4   | 0.082835 | 0.080028 | 0.44803  | 0.327429 |
| MmugDNA.17408.1.S1_at   | MmugDNA.17408.1 | 6.46 | 6.4  | 0.05 | 0.07 | -1.04 | 0.152327 | 0.515426 | 0.525296 | 0.708291 |
| MmugDNA.1741.1.S1_at    | MmugDNA.1741.1  | 7.92 | 7.82 | 0.13 | 0.01 | 1.08  | 0.081322 | 0.286366 | 0.445406 | 0.547791 |
| MmugDNA.17410.1.S1_at   | MmugDNA.17410.1 | 6.17 | 6.16 | 0.03 | 0.1  | 1.01  | 0.235349 | 0.272131 | 0.602417 | 0.536939 |
| MmugDNA.17411.1.S1_at   | MmugDNA.17411.1 | 6.71 | 7.31 | 0.45 | 0.09 | -1.52 | 0.230904 | 0.547494 | 0.599045 | 0.728479 |
| MmugDNA.17412.1.S1_at   | MmugDNA.17412.1 | 4.21 | 4.34 | 0.16 | 0.62 | -1.09 | 0.262405 | 0.162463 | 0.624643 | 0.438575 |
| MmugDNA.17414.1.S1_at   | MmugDNA.17414.1 | 8.12 | 8.01 | 0    | 0.03 | 1.08  | 0.00216  | 0.272682 | 0.174757 | 0.537433 |
| MmugDNA.17414.1.S1_s_at | MmugDNA.17414.1 | 6.59 | 6.52 | 0.61 | 0.07 | 1.05  | 0.821823 | 0.856715 | 0.935673 | 0.918126 |
| MmugDNA.17415.1.S1_at   | MmugDNA.17415.1 | 3.04 | 2.98 | 0.21 | 0.19 | 1.04  | 0.306752 | 0.129157 | 0.659706 | 0.400611 |
| MmugDNA.17416.1.S1_at   | MmugDNA.17416.1 | 6.33 | 6.14 | 0.06 | 0.04 | 1.14  | 0.019498 | 0.017994 | 0.301444 | 0.169171 |
| MmugDNA.17417.1.S1_at   | MmugDNA.17417.1 | 6.24 | 6.2  | 0    | 0.3  | 1.03  | 0.285798 | 0.273447 | 0.643438 | 0.537868 |
| MmugDNA.17418.1.S1_at   | MmugDNA.17418.1 | 3.81 | 3.81 | 0.06 | 0.12 | -1    | 0.801812 | 0.981763 | 0.927766 | 0.989984 |
| MmugDNA.17420.1.S1_at   | MmugDNA.17420.1 | 3.63 | 3.69 | 0.25 | 0.27 | -1.04 | 0.311331 | 0.374298 | 0.663194 | 0.612779 |
| MmugDNA.17421.1.S1_at   | MmugDNA.17421.1 | 6.64 | 6.47 | 0.33 | 0.13 | 1.12  | 0.310033 | 0.091905 | 0.661926 | 0.347243 |
| MmugDNA.17423.1.S1_at   | MmugDNA.17423.1 | 3.4  | 3.27 | 0.12 | 0.09 | 1.1   | 0.172077 | 0.18255  | 0.545406 | 0.459065 |
| MmugDNA.17424.1.S1_at   | MmugDNA.17424.1 | 4.51 | 4.47 | 0.04 | 0.01 | 1.03  | 0.770396 | 0.085348 | 0.913946 | 0.337226 |
| MmugDNA.17425.1.S1_at   | MmugDNA.17425.1 | 8.5  | 8.48 | 1.34 | 0.11 | 1.02  | 0.438617 | 0.203436 | 0.747368 | 0.477634 |
| MmugDNA.17427.1.S1_at   | MmugDNA.17427.1 | 6.63 | 7.73 | 0.38 | 0.08 | -2.15 | 0.020637 | 0.051865 | 0.305121 | 0.273151 |
| MmugDNA.17428.1.S1_at   | MmugDNA.17428.1 | 7.06 | 6.71 | 0.41 | 0.35 | 1.27  | 0.306216 | 0.421744 | 0.659287 | 0.645254 |
| MmugDNA.17429.1.S1_at   | MmugDNA.17429.1 | 3.11 | 3.21 | 0.37 | 0.05 | -1.07 | 0.635235 | 0.810864 | 0.854522 | 0.890858 |
| MmugDNA.1743.1.S1_at    | MmugDNA.1743.1  | 6.25 | 6.31 | 0.05 | 0.06 | -1.04 | 0.274627 | 0.103323 | 0.633979 | 0.364168 |
| MmugDNA.17431.1.S1_at   | MmugDNA.17431.1 | 4.48 | 4.25 | 0.24 | 0.59 | 1.17  | 0.761292 | 0.927954 | 0.910434 | 0.959116 |
| MmugDNA.17432.1.S1_at   | MmugDNA.17432.1 | 3.57 | 3.49 | 0.07 | 0.15 | 1.06  | 0.297199 | 0.370488 | 0.652609 | 0.609544 |
| MmugDNA.17434.1.S1_at   | MmugDNA.17434.1 | 3.16 | 3.13 | 0.11 | 0.11 | 1.02  | 0.732265 | 0.525846 | 0.897044 | 0.715222 |
| MmugDNA.17435.1.S1_at   | MmugDNA.17435.1 | 3.28 | 3.14 | 0.08 | 0.04 | 1.1   | 0.10219  | 0.141241 | 0.472516 | 0.414749 |
| MmugDNA.17436.1.S1_at   | MmugDNA.17436.1 | 4.1  | 4.27 | 0.24 | 0.27 | -1.12 | 0.474361 | 0.686927 | 0.767951 | 0.817365 |
| MmugDNA.17437.1.S1_at   | MmugDNA.17437.1 | 6.78 | 6.78 | 0.02 | 0.03 | -1    | 0.412322 | 0.566508 | 0.731945 | 0.74062  |
| MmugDNA.17438.1.S1_at   | MmugDNA.17438.1 | 4.16 | 4.03 | 0.48 | 0.33 | 1.09  | 0.432619 | 0.660585 | 0.743962 | 0.801437 |
| MmugDNA.17439.1.S1_at   | MmugDNA.17439.1 | 4.24 | 4.21 | 0.07 | 0.14 | 1.02  | 0.611241 | 0.002699 | 0.842397 | 0.076461 |
| MmugDNA.1744.1.S1_at    | MmugDNA.1744.1  | 3.26 | 3.18 | 0.17 | 0.21 | 1.06  | 0.545863 | 0.644884 | 0.808207 | 0.791927 |
| MmugDNA.17440.1.S1_at   | MmugDNA.17440.1 | 4.86 | 4.57 | 0.34 | 0.04 | 1.23  | 0.618411 | 0.680341 | 0.845964 | 0.813384 |
| MmugDNA.17441.1.S1_at   | MmugDNA.17441.1 | 3.21 | 3.14 | 0.16 | 0.12 | 1.06  | 0.98785  | 0.080502 | 0.995831 | 0.328159 |
| MmugDNA.17442.1.S1_at   | MmugDNA.17442.1 | 8.09 | 8.96 | 0.45 | 0.03 | -1.83 | 0.071548 | 0.006842 | 0.431049 | 0.111782 |
| MmugDNA.17443.1.S1_at   | MmugDNA.17443.1 | 3.66 | 3.67 | 0.24 | 0.13 | -1.01 | 0.903583 | 0.985942 | 0.967608 | 0.99201  |

|                         |                 |       |       |      |      |       |          |          |          |          |
|-------------------------|-----------------|-------|-------|------|------|-------|----------|----------|----------|----------|
| MmugDNA.17445.1.S1_at   | MmugDNA.17445.1 | 2.9   | 2.82  | 0.07 | 0.14 | 1.06  | 0.251066 | 0.492359 | 0.616212 | 0.693485 |
| MmugDNA.17446.1.S1_at   | MmugDNA.17446.1 | 3.78  | 3.66  | 0.04 | 0.07 | 1.09  | 0.079431 | 0.125661 | 0.442296 | 0.396249 |
| MmugDNA.17447.1.S1_at   | MmugDNA.17447.1 | 8.82  | 8.19  | 0.29 | 0.12 | 1.54  | 0.043041 | 0.046918 | 0.371135 | 0.261301 |
| MmugDNA.17449.1.S1_at   | MmugDNA.17449.1 | 8.95  | 9.18  | 3.04 | 0.19 | -1.18 | 0.51035  | 0.273262 | 0.788164 | 0.537788 |
| MmugDNA.1745.1.S1_at    | MmugDNA.1745.1  | 10    | 9.27  | 0.43 | 0.1  | 1.65  | 0.080459 | 0.206581 | 0.444133 | 0.480619 |
| MmugDNA.17455.1.S1_at   | MmugDNA.17455.1 | 5.01  | 4.95  | 0.18 | 0.13 | 1.04  | 0.642303 | 0.803039 | 0.857718 | 0.886557 |
| MmugDNA.17456.1.S1_at   | MmugDNA.17456.1 | 3.25  | 3.26  | 0.1  | 0.09 | -1.01 | 0.380435 | 0.507897 | 0.709387 | 0.703358 |
| MmugDNA.17457.1.S1_at   | MmugDNA.17457.1 | 6.61  | 6.52  | 0.41 | 0.25 | 1.06  | 0.76753  | 0.941966 | 0.912495 | 0.96711  |
| MmugDNA.17458.1.S1_at   | MmugDNA.17458.1 | 5.71  | 5.82  | 0.26 | 0.09 | -1.08 | 0.762695 | 0.718941 | 0.91092  | 0.83732  |
| MmugDNA.17458.1.S1_s_at | MmugDNA.17458.1 | 6.41  | 6.42  | 0.25 | 0.09 | -1.01 | 0.867537 | 0.653963 | 0.953578 | 0.797743 |
| MmugDNA.17459.1.S1_at   | MmugDNA.17459.1 | 4.93  | 4.87  | 0.36 | 0.27 | 1.04  | 0.247966 | 0.094332 | 0.613615 | 0.350889 |
| MmugDNA.1746.1.S1_at    | MmugDNA.1746.1  | 4.78  | 4.66  | 0.85 | 0.19 | 1.09  | 0.455873 | 0.275677 | 0.75759  | 0.539923 |
| MmugDNA.17460.1.S1_at   | MmugDNA.17460.1 | 5.79  | 6.23  | 0.48 | 0.27 | -1.36 | 0.293363 | 0.485288 | 0.649768 | 0.689049 |
| MmugDNA.17461.1.S1_at   | MmugDNA.17461.1 | 5.48  | 5.49  | 0.45 | 0.33 | -1.01 | 0.844758 | 0.150931 | 0.945495 | 0.425523 |
| MmugDNA.17462.1.S1_at   | MmugDNA.17462.1 | 10.87 | 11.17 | 0.18 | 0.13 | -1.23 | 0.156322 | 0.106552 | 0.529536 | 0.369099 |
| MmugDNA.17464.1.S1_at   | MmugDNA.17464.1 | 6.26  | 6.26  | 0.54 | 0.04 | -1    | 0.84183  | 0.14939  | 0.943937 | 0.423821 |
| MmugDNA.17465.1.S1_s_at | MmugDNA.17465.1 | 13.46 | 13.32 | 0.1  | 0.08 | 1.1   | 0.06144  | 0.064121 | 0.410677 | 0.299475 |
| MmugDNA.17466.1.S1_at   | MmugDNA.17466.1 | 4.43  | 4.46  | 0.05 | 0.02 | -1.02 | 0.179983 | 0.825547 | 0.553155 | 0.899762 |
| MmugDNA.1747.1.S1_at    | MmugDNA.1747.1  | 3.62  | 3.58  | 0.27 | 0.19 | 1.03  | 0.638628 | 0.853253 | 0.856032 | 0.916534 |
| MmugDNA.17471.1.S1_at   | MmugDNA.17471.1 | 9.32  | 9.94  | 1.47 | 0.13 | -1.53 | 0.147332 | 0.173289 | 0.521578 | 0.449791 |
| MmugDNA.17472.1.S1_at   | MmugDNA.17472.1 | 6.24  | 6.16  | 0.11 | 0.22 | 1.06  | 0.80127  | 0.484958 | 0.927465 | 0.688893 |
| MmugDNA.17473.1.S1_x_at | MmugDNA.17473.1 | 3.06  | 3.1   | 0.23 | 0.27 | -1.03 | 0.764746 | 0.352072 | 0.911553 | 0.595431 |
| MmugDNA.17474.1.S1_at   | MmugDNA.17474.1 | 7.4   | 7.63  | 0.55 | 0.28 | -1.17 | 0.632129 | 0.780426 | 0.852771 | 0.872614 |
| MmugDNA.17475.1.S1_s_at | MmugDNA.17475.1 | 6.82  | 7.01  | 0.69 | 0.19 | -1.15 | 0.377468 | 0.518409 | 0.707543 | 0.71038  |
| MmugDNA.17476.1.S1_at   | MmugDNA.17476.1 | 10.6  | 10.42 | 0.39 | 0.24 | 1.13  | 0.355397 | 0.40798  | 0.694724 | 0.635339 |
| MmugDNA.17477.1.S1_at   | MmugDNA.17477.1 | 4.96  | 4.96  | 0.13 | 0.05 | 1.01  | 0.908918 | 0.992125 | 0.969277 | 0.995515 |
| MmugDNA.17478.1.S1_at   | MmugDNA.17478.1 | 6.39  | 7.6   | 1.03 | 0.12 | -2.31 | 0.324354 | 0.350492 | 0.672562 | 0.594195 |
| MmugDNA.17479.1.S1_at   | MmugDNA.17479.1 | 10.88 | 11.03 | 0.64 | 0.07 | -1.11 | 0.674762 | 0.865299 | 0.872212 | 0.923554 |
| MmugDNA.17480.1.S1_at   | MmugDNA.17480.1 | 7.58  | 8.91  | 2.7  | 0.4  | -2.51 | 0.175869 | 0.194178 | 0.549032 | 0.469267 |
| MmugDNA.17481.1.S1_at   | MmugDNA.17481.1 | 5.97  | 5.96  | 0.11 | 0.01 | 1.01  | 0.516983 | 0.541557 | 0.791672 | 0.725015 |
| MmugDNA.33838.1.S1_at   | MmugDNA.33838.1 | 5.91  | 5.72  | 0.09 | 0.14 | 1.15  | 0.070923 | 0.070903 | 0.430067 | 0.312437 |
| MmugDNA.33838.1.S1_s_at | MmugDNA.33838.1 | 4.81  | 4.71  | 0.08 | 0.08 | 1.07  | 0.072874 | 0.087716 | 0.433594 | 0.340964 |
| MmugDNA.17483.1.S1_at   | MmugDNA.17483.1 | 5.99  | 5.98  | 0.05 | 0.11 | 1.01  | 0.885169 | 0.769343 | 0.96026  | 0.866048 |
| MmugDNA.1473.1.S1_s_at  | MmugDNA.1473.1  | 3.65  | 3.4   | 0.14 | 0.2  | 1.19  | 0.14264  | 0.152749 | 0.517642 | 0.427571 |
| MmugDNA.17486.1.S1_at   | MmugDNA.17486.1 | 5.85  | 5.56  | 0.2  | 0.06 | 1.23  | 0.136916 | 0.178289 | 0.511963 | 0.454627 |
| MmugDNA.17487.1.S1_at   | MmugDNA.17487.1 | 4.01  | 4.01  | 0.16 | 0.25 | 1     | 0.238872 | 0.28003  | 0.60547  | 0.543369 |
| MmugDNA.17488.1.S1_at   | MmugDNA.17488.1 | 6.65  | 6.68  | 0.35 | 0.21 | -1.02 | 0.328304 | 0.545005 | 0.675717 | 0.727256 |
| MmugDNA.356.1.S1_s_at   | MmugDNA.356.1   | 13.33 | 13.36 | 0.03 | 0.03 | -1.02 | 0.42399  | 0.869554 | 0.739366 | 0.925994 |
| MmugDNA.1749.1.S1_at    | MmugDNA.1749.1  | 3.65  | 3.51  | 0.14 | 0.29 | 1.1   | 0.601109 | 0.340596 | 0.838101 | 0.586789 |
| MmugDNA.17490.1.S1_at   | MmugDNA.17490.1 | 2.62  | 2.63  | 0.03 | 0.11 | -1.01 | 0.690459 | 0.864761 | 0.879504 | 0.923286 |
| MmugDNA.17491.1.S1_at   | MmugDNA.17491.1 | 4.11  | 4.09  | 0.18 | 0.12 | 1.01  | 0.665295 | 0.771457 | 0.867901 | 0.86719  |
| MmugDNA.17493.1.S1_at   | MmugDNA.17493.1 | 5.14  | 5.14  | 0.34 | 0.07 | 1     | 0.428001 | 0.353475 | 0.74152  | 0.596547 |
| MmugDNA.17494.1.S1_at   | MmugDNA.17494.1 | 12.73 | 12.28 | 0.16 | 0.17 | 1.36  | 0.015142 | 0.006979 | 0.2796   | 0.112771 |

|                         |                 |       |       |      |      |       |          |          |          |          |
|-------------------------|-----------------|-------|-------|------|------|-------|----------|----------|----------|----------|
| MmugDNA.17495.1.S1_at   | MmugDNA.17495.1 | 4.63  | 4.64  | 0.44 | 0.08 | -1    | 0.507877 | 0.604794 | 0.786553 | 0.764799 |
| MmugDNA.17496.1.S1_at   | MmugDNA.17496.1 | 10.37 | 9.75  | 0.26 | 0.14 | 1.54  | 0.015063 | 0.001507 | 0.2796   | 0.0591   |
| MmugDNA.17498.1.S1_at   | MmugDNA.17498.1 | 4.22  | 5.36  | 0.58 | 0.44 | -2.19 | 0.108212 | 0.008558 | 0.480628 | 0.122746 |
| MmugDNA.175.1.S1_at     | MmugDNA.175.1   | 6.28  | 6.31  | 0.47 | 0.13 | -1.02 | 0.586516 | 0.927566 | 0.831386 | 0.958853 |
| MmugDNA.1750.1.S1_at    | MmugDNA.1750.1  | 3.62  | 4.57  | 1.72 | 0.55 | -1.93 | 0.800989 | 0.7475   | 0.927281 | 0.853149 |
| MmugDNA.17501.1.S1_at   | MmugDNA.17501.1 | 6.14  | 6.01  | 0.2  | 0.03 | 1.09  | 0.296732 | 0.237954 | 0.65239  | 0.508495 |
| MmugDNA.17502.1.S1_at   | MmugDNA.17502.1 | 8.91  | 9.25  | 0.54 | 0.06 | -1.27 | 0.108238 | 0.037956 | 0.480677 | 0.239302 |
| MmugDNA.17504.1.S1_at   | MmugDNA.17504.1 | 6.95  | 7.22  | 0.15 | 0.11 | -1.2  | 0.053906 | 0.018073 | 0.395633 | 0.169379 |
| MmugDNA.17507.1.S1_at   | MmugDNA.17507.1 | 6.69  | 7.03  | 1.21 | 0.44 | -1.27 | 0.634461 | 0.66572  | 0.854063 | 0.804156 |
| MmugDNA.17508.1.S1_at   | MmugDNA.17508.1 | 7.32  | 7.35  | 0.2  | 0.26 | -1.02 | 0.272545 | 0.332582 | 0.632303 | 0.580972 |
| MmugDNA.17509.1.S1_at   | MmugDNA.17509.1 | 4.07  | 4.15  | 0.35 | 0.14 | -1.06 | 0.978528 | 0.14013  | 0.993032 | 0.413394 |
| MmugDNA.1751.1.S1_at    | MmugDNA.1751.1  | 6.52  | 6.73  | 0.29 | 0.26 | -1.15 | 0.654009 | 0.753761 | 0.862543 | 0.856661 |
| MmugDNA.17510.1.S1_at   | MmugDNA.17510.1 | 4.61  | 4.42  | 0.11 | 0.17 | 1.14  | 0.070845 | 0.065585 | 0.430067 | 0.301476 |
| MmugDNA.17512.1.S1_at   | MmugDNA.17512.1 | 4.99  | 4.49  | 0.08 | 0.71 | 1.42  | 0.774347 | 0.706872 | 0.916259 | 0.829968 |
| MmugDNA.17514.1.S1_at   | MmugDNA.17514.1 | 4.29  | 4.39  | 0.14 | 0.19 | -1.07 | 0.42481  | 0.509666 | 0.739695 | 0.704276 |
| MmugDNA.17515.1.S1_at   | MmugDNA.17515.1 | 7.53  | 7.14  | 0.37 | 0.32 | 1.32  | 0.105701 | 0.108261 | 0.477409 | 0.371557 |
| MmugDNA.17516.1.S1_at   | MmugDNA.17516.1 | 3.15  | 3.17  | 0.17 | 0.16 | -1.01 | 0.991275 | 0.3796   | 0.996655 | 0.616523 |
| MmugDNA.17517.1.S1_at   | MmugDNA.17517.1 | 8.41  | 8.1   | 0.41 | 0.32 | 1.24  | 0.876145 | 0.222115 | 0.956886 | 0.495113 |
| MmugDNA.17520.1.S1_at   | MmugDNA.17520.1 | 4.22  | 4.03  | 0    | 0.15 | 1.14  | 0.100096 | 0.035758 | 0.470321 | 0.233437 |
| MmugDNA.17521.1.S1_at   | MmugDNA.17521.1 | 4.72  | 4.64  | 0.13 | 0.07 | 1.06  | 0.448913 | 0.61097  | 0.754037 | 0.768967 |
| MmugDNA.17522.1.S1_at   | MmugDNA.17522.1 | 3.67  | 3.67  | 0.06 | 0.09 | 1     | 0.43018  | 0.501971 | 0.742602 | 0.699986 |
| MmugDNA.17524.1.S1_at   | MmugDNA.17524.1 | 4.11  | 4     | 0.1  | 0.3  | 1.08  | 0.870782 | 0.964084 | 0.955116 | 0.980052 |
| MmugDNA.17525.1.S1_s_at | MmugDNA.17525.1 | 10.94 | 10.89 | 0.38 | 0.12 | 1.03  | 0.934266 | 0.346029 | 0.977732 | 0.59115  |
| MmugDNA.17528.1.S1_at   | MmugDNA.17528.1 | 3.79  | 3.84  | 0.14 | 0.03 | -1.04 | 0.469441 | 0.825678 | 0.76556  | 0.899784 |
| MmugDNA.17529.1.S1_at   | MmugDNA.17529.1 | 3.2   | 3.25  | 0.16 | 0.05 | -1.04 | 0.876261 | 0.459744 | 0.956886 | 0.671948 |
| MmugDNA.1753.1.S1_at    | MmugDNA.1753.1  | 5.21  | 5.02  | 0.03 | 0.14 | 1.14  | 0.182349 | 0.053693 | 0.555371 | 0.277304 |
| MmugDNA.17532.1.S1_at   | MmugDNA.17532.1 | 5.23  | 5.58  | 0.19 | 0.45 | -1.27 | 0.551963 | 0.925494 | 0.811556 | 0.957833 |
| MmugDNA.17534.1.S1_at   | MmugDNA.17534.1 | 10.41 | 10.21 | 0.34 | 0.02 | 1.15  | 0.990421 | 0.987611 | 0.996425 | 0.993078 |
| MmugDNA.17534.1.S1_s_at | MmugDNA.17534.1 | 11.25 | 11.12 | 0.36 | 0.03 | 1.1   | 0.794784 | 0.950238 | 0.924682 | 0.971666 |
| MmugDNA.17535.1.S1_at   | MmugDNA.17535.1 | 12.88 | 13.08 | 0.04 | 0    | -1.15 | 0.001001 | 0.001999 | 0.155374 | 0.066331 |
| MmugDNA.17536.1.S1_at   | MmugDNA.17536.1 | 3.34  | 3.21  | 0.06 | 0.07 | 1.09  | 0.040056 | 0.151767 | 0.36309  | 0.426413 |
| MmugDNA.1754.1.S1_at    | MmugDNA.1754.1  | 6.5   | 6.43  | 0.04 | 0.08 | 1.05  | 0.142013 | 0.076242 | 0.516979 | 0.321157 |
| MmugDNA.17540.1.S1_at   | MmugDNA.17540.1 | 12.24 | 12.2  | 0.08 | 0.02 | 1.03  | 0.860177 | 0.267167 | 0.950679 | 0.532773 |
| MmugDNA.17541.1.S1_at   | MmugDNA.17541.1 | 4.36  | 4.92  | 0.47 | 0.57 | -1.47 | 0.471039 | 0.501701 | 0.766294 | 0.6998   |
| MmugDNA.17543.1.S1_at   | MmugDNA.17543.1 | 6.92  | 7.37  | 0.12 | 0.14 | -1.37 | 0.024426 | 0.013672 | 0.31876  | 0.14967  |
| MmugDNA.17544.1.S1_at   | MmugDNA.17544.1 | 6.59  | 6.45  | 0.17 | 0.02 | 1.1   | 0.077315 | 0.182001 | 0.439109 | 0.458537 |
| MmugDNA.17545.1.S1_at   | MmugDNA.17545.1 | 6.39  | 6.39  | 0.21 | 0.02 | 1     | 0.838691 | 0.344316 | 0.942303 | 0.589762 |
| MmugDNA.17546.1.S1_at   | MmugDNA.17546.1 | 8.05  | 9.08  | 0.16 | 0.07 | -2.04 | 0.000485 | 0.000006 | 0.143137 | 0.016421 |
| MmugDNA.11755.1.S1_s_at | MmugDNA.11755.1 | 7.95  | 8.77  | 0.19 | 0.01 | -1.76 | 0.001917 | 0.000059 | 0.170174 | 0.025666 |
| MmugDNA.17548.1.S1_at   | MmugDNA.17548.1 | 9.1   | 8.64  | 0.53 | 0.21 | 1.37  | 0.069391 | 0.042154 | 0.426951 | 0.249773 |
| MmugDNA.17549.1.S1_s_at | MmugDNA.17549.1 | 10.73 | 10.57 | 0.19 | 0.05 | 1.12  | 0.514472 | 0.854046 | 0.790351 | 0.91692  |
| MmugDNA.1755.1.S1_at    | MmugDNA.1755.1  | 5.37  | 5.05  | 0.1  | 0.1  | 1.25  | 0.02352  | 0.016115 | 0.316066 | 0.160891 |
| MmugDNA.17550.1.S1_at   | MmugDNA.17550.1 | 5.35  | 5.52  | 0.2  | 0.13 | -1.13 | 0.136715 | 0.320419 | 0.511963 | 0.572648 |

|                         |                 |       |       |      |      |       |          |          |          |          |
|-------------------------|-----------------|-------|-------|------|------|-------|----------|----------|----------|----------|
| MmugDNA.17551.1.S1_at   | MmugDNA.17551.1 | 6.85  | 7.46  | 1.61 | 0.31 | -1.53 | 0.550489 | 0.559793 | 0.810833 | 0.736394 |
| MmugDNA.17552.1.S1_at   | MmugDNA.17552.1 | 6.01  | 5.9   | 0.19 | 0.08 | 1.08  | 0.535983 | 0.722821 | 0.802014 | 0.839457 |
| MmugDNA.17553.1.S1_at   | MmugDNA.17553.1 | 10.96 | 10.93 | 2.12 | 0.32 | 1.02  | 0.825975 | 0.314725 | 0.937613 | 0.568449 |
| MmugDNA.17556.1.S1_at   | MmugDNA.17556.1 | 12.14 | 12.24 | 0.04 | 0.11 | -1.08 | 0.120929 | 0.596138 | 0.494576 | 0.759357 |
| MmugDNA.17557.1.S1_at   | MmugDNA.17557.1 | 7.5   | 7.35  | 0.11 | 0.05 | 1.11  | 0.060194 | 0.051854 | 0.407653 | 0.273151 |
| MmugDNA.17558.1.S1_at   | MmugDNA.17558.1 | 10.91 | 10.76 | 0.23 | 0.08 | 1.11  | 0.247752 | 0.264766 | 0.613319 | 0.530791 |
| MmugDNA.17559.1.S1_at   | MmugDNA.17559.1 | 4.08  | 4.07  | 0.12 | 0.14 | 1     | 0.247635 | 0.343115 | 0.613245 | 0.588883 |
| MmugDNA.1756.1.S1_at    | MmugDNA.1756.1  | 5.22  | 4.88  | 0.63 | 0.09 | 1.26  | 0.340547 | 0.236864 | 0.684552 | 0.507587 |
| MmugDNA.17560.1.S1_at   | MmugDNA.17560.1 | 6.53  | 6.34  | 0.09 | 0.02 | 1.15  | 0.023192 | 0.040098 | 0.314809 | 0.245388 |
| MmugDNA.17561.1.S1_at   | MmugDNA.17561.1 | 4.18  | 4.12  | 0.11 | 0.38 | 1.05  | 0.561923 | 0.720843 | 0.817493 | 0.838368 |
| MmugDNA.17563.1.S1_at   | MmugDNA.17563.1 | 6.54  | 6.51  | 0    | 0.11 | 1.02  | 0.541209 | 0.742083 | 0.805026 | 0.850611 |
| MmugDNA.17564.1.S1_at   | MmugDNA.17564.1 | 10.74 | 9.82  | 0.26 | 0.06 | 1.88  | 0.004947 | 0.179105 | 0.20384  | 0.455436 |
| MmugDNA.17565.1.S1_at   | MmugDNA.17565.1 | 9.83  | 9.63  | 1.31 | 0.14 | 1.15  | 0.578903 | 0.617386 | 0.826338 | 0.773397 |
| MmugDNA.17566.1.S1_at   | MmugDNA.17566.1 | 10.9  | 10.85 | 0.93 | 0.06 | 1.04  | 0.450976 | 0.435064 | 0.755    | 0.655    |
| MmugDNA.17569.1.S1_at   | MmugDNA.17569.1 | 5.66  | 5.97  | 0.24 | 0.07 | -1.24 | 0.194701 | 0.176812 | 0.565144 | 0.453219 |
| MmugDNA.1757.1.S1_at    | MmugDNA.1757.1  | 6.16  | 6.34  | 0.53 | 0.48 | -1.13 | 0.38439  | 0.508653 | 0.711986 | 0.703759 |
| MmugDNA.17570.1.S1_at   | MmugDNA.17570.1 | 6.97  | 6.64  | 0.4  | 0.21 | 1.26  | 0.25633  | 0.060827 | 0.620399 | 0.293348 |
| MmugDNA.17572.1.S1_s_at | MmugDNA.17572.1 | 9.19  | 9.75  | 0.73 | 0.12 | -1.47 | 0.212367 | 0.1706   | 0.582875 | 0.447204 |
| MmugDNA.17576.1.S1_at   | MmugDNA.17576.1 | 9.21  | 8.67  | 0.6  | 0.12 | 1.46  | 0.183584 | 0.226441 | 0.55651  | 0.498888 |
| MmugDNA.17577.1.S1_at   | MmugDNA.17577.1 | 5     | 4.92  | 0.76 | 0.05 | 1.05  | 0.98535  | 0.374784 | 0.995405 | 0.613081 |
| MmugDNA.17578.1.S1_at   | MmugDNA.17578.1 | 5.11  | 5.03  | 0.03 | 0.24 | 1.06  | 0.787272 | 0.555148 | 0.921858 | 0.733715 |
| MmugDNA.1758.1.S1_at    | MmugDNA.1758.1  | 4.23  | 4.68  | 0.62 | 0.04 | -1.37 | 0.807887 | 0.828671 | 0.930332 | 0.901558 |
| MmugDNA.17580.1.S1_at   | MmugDNA.17580.1 | 4.2   | 4.59  | 0.23 | 0.47 | -1.3  | 0.96993  | 0.755931 | 0.990053 | 0.8579   |
| MmugDNA.17581.1.S1_at   | MmugDNA.17581.1 | 10.7  | 11.13 | 1.08 | 0.03 | -1.35 | 0.555825 | 0.522627 | 0.813727 | 0.713274 |
| MmugDNA.17582.1.S1_at   | MmugDNA.17582.1 | 4.42  | 4.3   | 0.07 | 0.2  | 1.09  | 0.380745 | 0.62455  | 0.709609 | 0.778718 |
| MmugDNA.17584.1.S1_s_at | MmugDNA.17584.1 | 7.92  | 8.09  | 0.21 | 0.15 | -1.13 | 0.274898 | 0.073981 | 0.63419  | 0.317505 |
| MmugDNA.17586.1.S1_s_at | MmugDNA.17586.1 | 10.24 | 10.32 | 0.76 | 0.25 | -1.06 | 0.631479 | 0.474957 | 0.852417 | 0.681837 |
| MmugDNA.17588.1.S1_at   | MmugDNA.17588.1 | 6.7   | 6.41  | 0.14 | 0.05 | 1.22  | 0.051288 | 0.047999 | 0.389613 | 0.264109 |
| MmugDNA.17589.1.S1_at   | MmugDNA.17589.1 | 5.2   | 5.18  | 0.13 | 0.01 | 1.02  | 0.295    | 0.637333 | 0.650971 | 0.786824 |
| MmugDNA.1759.1.S1_at    | MmugDNA.1759.1  | 4.31  | 4.32  | 0.06 | 0.04 | -1.01 | 0.358415 | 0.01536  | 0.696372 | 0.157392 |
| MmugDNA.1759.1.S1_s_at  | MmugDNA.1759.1  | 6.9   | 6.87  | 0.11 | 0.1  | 1.02  | 0.568578 | 0.696534 | 0.820917 | 0.823764 |
| MmugDNA.17590.1.S1_at   | MmugDNA.17590.1 | 7.79  | 7.45  | 0.15 | 0.1  | 1.26  | 0.05922  | 0.001443 | 0.406296 | 0.057912 |
| MmugDNA.17591.1.S1_at   | MmugDNA.17591.1 | 4.95  | 4.91  | 0    | 0.2  | 1.03  | 0.250655 | 0.335305 | 0.615805 | 0.58305  |
| MmugDNA.17592.1.S1_at   | MmugDNA.17592.1 | 6.42  | 6.4   | 0.09 | 0.02 | 1.01  | 0.72061  | 0.725989 | 0.891635 | 0.84134  |
| MmugDNA.17593.1.S1_at   | MmugDNA.17593.1 | 10.29 | 9.92  | 0.11 | 0.03 | 1.29  | 0.010225 | 0.001397 | 0.246929 | 0.057005 |
| MmugDNA.17593.1.S1_s_at | MmugDNA.17593.1 | 10.68 | 10.44 | 0.15 | 0.03 | 1.18  | 0.157651 | 0.010538 | 0.530626 | 0.134072 |
| MmugDNA.17594.1.S1_at   | MmugDNA.17594.1 | 4.84  | 4.58  | 0.45 | 0.32 | 1.2   | 0.33706  | 0.546812 | 0.682212 | 0.728203 |
| MmugDNA.17595.1.S1_at   | MmugDNA.17595.1 | 5.62  | 5.36  | 0.04 | 0.05 | 1.2   | 0.003429 | 0.031862 | 0.194985 | 0.220909 |
| MmugDNA.17596.1.S1_at   | MmugDNA.17596.1 | 4.33  | 4.22  | 0.5  | 0.42 | 1.08  | 0.477351 | 0.509556 | 0.769812 | 0.704254 |
| MmugDNA.17597.1.S1_at   | MmugDNA.17597.1 | 8.75  | 7.44  | 0.53 | 0.26 | 2.47  | 0.057244 | 0.060652 | 0.401565 | 0.292871 |
| MmugDNA.17598.1.S1_at   | MmugDNA.17598.1 | 5.72  | 5.84  | 0.89 | 0.26 | -1.09 | 0.797333 | 0.91152  | 0.92544  | 0.950138 |
| MmugDNA.17600.1.S1_at   | MmugDNA.17600.1 | 5.31  | 5.34  | 0.04 | 0.07 | -1.02 | 0.280483 | 0.661603 | 0.639288 | 0.801881 |
| MmugDNA.17602.1.S1_at   | MmugDNA.17602.1 | 5.8   | 6.04  | 0.24 | 0.04 | -1.18 | 0.190464 | 0.048867 | 0.561786 | 0.265858 |

|                         |                 |       |       |      |      |       |          |          |          |          |
|-------------------------|-----------------|-------|-------|------|------|-------|----------|----------|----------|----------|
| MmugDNA.17605.1.S1_at   | MmugDNA.17605.1 | 7.05  | 6.12  | 0.44 | 0.11 | 1.92  | 0.072994 | 0.109381 | 0.433769 | 0.373156 |
| MmugDNA.17607.1.S1_at   | MmugDNA.17607.1 | 10.83 | 10.47 | 0.8  | 0.17 | 1.28  | 0.700755 | 0.471421 | 0.883612 | 0.679435 |
| MmugDNA.17608.1.S1_at   | MmugDNA.17608.1 | 7.22  | 7.06  | 0.18 | 0.11 | 1.12  | 0.372911 | 0.489328 | 0.705567 | 0.691792 |
| MmugDNA.17609.1.S1_at   | MmugDNA.17609.1 | 3.96  | 3.71  | 0.01 | 0.1  | 1.18  | 0.015273 | 0.098842 | 0.280663 | 0.357002 |
| MmugDNA.17610.1.S1_at   | MmugDNA.17610.1 | 4.73  | 4.6   | 0.14 | 0.07 | 1.1   | 0.311104 | 0.348304 | 0.662843 | 0.592478 |
| MmugDNA.17611.1.S1_at   | MmugDNA.17611.1 | 4.82  | 4.87  | 0.14 | 0.02 | -1.03 | 0.615453 | 0.791968 | 0.844453 | 0.879808 |
| MmugDNA.17613.1.S1_at   | MmugDNA.17613.1 | 3.8   | 3.39  | 0.56 | 0.09 | 1.32  | 0.213972 | 0.29733  | 0.584533 | 0.556071 |
| MmugDNA.17615.1.S1_at   | MmugDNA.17615.1 | 5.84  | 5.62  | 0.08 | 0.04 | 1.16  | 0.016183 | 0.266817 | 0.286419 | 0.53241  |
| MmugDNA.17616.1.S1_at   | MmugDNA.17616.1 | 4.64  | 4.55  | 0.1  | 0    | 1.07  | 0.160597 | 0.565276 | 0.533821 | 0.739795 |
| MmugDNA.17618.1.S1_at   | MmugDNA.17618.1 | 4.16  | 3.91  | 0.28 | 0.12 | 1.19  | 0.419968 | 0.486623 | 0.736634 | 0.689946 |
| MmugDNA.17619.1.S1_at   | MmugDNA.17619.1 | 6.42  | 6.61  | 0.16 | 0.09 | -1.14 | 0.034812 | 0.069766 | 0.350422 | 0.310269 |
| MmugDNA.1762.1.S1_at    | MmugDNA.1762.1  | 3.1   | 3.01  | 0.09 | 0.19 | 1.06  | 0.51993  | 0.65475  | 0.793377 | 0.798154 |
| MmugDNA.17620.1.S1_at   | MmugDNA.17620.1 | 7.15  | 6.68  | 0.53 | 0.25 | 1.39  | 0.150787 | 0.175449 | 0.524367 | 0.452157 |
| MmugDNA.17621.1.S1_at   | MmugDNA.17621.1 | 6.57  | 6.46  | 0.1  | 0.02 | 1.08  | 0.109361 | 0.001774 | 0.482257 | 0.0634   |
| MmugDNA.17622.1.S1_at   | MmugDNA.17622.1 | 7.32  | 7.22  | 0.21 | 0.22 | 1.07  | 0.890172 | 0.996018 | 0.962232 | 0.997565 |
| MmugDNA.17623.1.S1_at   | MmugDNA.17623.1 | 3.42  | 3.46  | 0.15 | 0    | -1.03 | 0.971431 | 0.565418 | 0.990664 | 0.739886 |
| MmugDNA.17626.1.S1_at   | MmugDNA.17626.1 | 4.18  | 3.88  | 0.31 | 0.31 | 1.23  | 0.683896 | 0.883356 | 0.876251 | 0.933542 |
| MmugDNA.17627.1.S1_at   | MmugDNA.17627.1 | 3.51  | 3.54  | 0.18 | 0.22 | -1.02 | 0.296129 | 0.394749 | 0.651769 | 0.627208 |
| MmugDNA.17628.1.S1_at   | MmugDNA.17628.1 | 3.42  | 3.29  | 0.11 | 0.08 | 1.09  | 0.229456 | 0.46522  | 0.598339 | 0.675638 |
| MmugDNA.17629.1.S1_at   | MmugDNA.17629.1 | 9.04  | 9.14  | 0.57 | 0.04 | -1.07 | 0.725483 | 0.875138 | 0.893668 | 0.929167 |
| MmugDNA.17630.1.S1_at   | MmugDNA.17630.1 | 8.8   | 9.12  | 0.48 | 0.28 | -1.25 | 0.917317 | 0.948567 | 0.97197  | 0.970655 |
| MmugDNA.17631.1.S1_at   | MmugDNA.17631.1 | 3.06  | 3     | 0.22 | 0.08 | 1.05  | 0.640281 | 0.423084 | 0.856637 | 0.646145 |
| MmugDNA.17633.1.S1_at   | MmugDNA.17633.1 | 3.76  | 3.83  | 1.04 | 0.74 | -1.05 | 0.639818 | 0.67667  | 0.856331 | 0.811032 |
| MmugDNA.17634.1.S1_at   | MmugDNA.17634.1 | 11.5  | 11.56 | 0.23 | 0.17 | -1.04 | 0.286903 | 0.109353 | 0.643994 | 0.373154 |
| MmugDNA.17635.1.S1_at   | MmugDNA.17635.1 | 5.49  | 5.5   | 0.07 | 0.08 | -1    | 0.266818 | 0.374467 | 0.627644 | 0.6129   |
| MmugDNA.17637.1.S1_at   | MmugDNA.17637.1 | 7.77  | 7.81  | 0.05 | 0.04 | -1.03 | 0.97516  | 0.266003 | 0.991912 | 0.531815 |
| MmugDNA.17637.1.S1_s_at | MmugDNA.17637.1 | 11.74 | 11.1  | 0.31 | 0.71 | 1.57  | 0.586961 | 0.821958 | 0.831568 | 0.897581 |
| MmugDNA.17638.1.S1_at   | MmugDNA.17638.1 | 10.83 | 11.21 | 0.13 | 0.04 | -1.31 | 0.009147 | 0.027364 | 0.241781 | 0.206695 |
| MmugDNA.17639.1.S1_at   | MmugDNA.17639.1 | 3.45  | 3.41  | 0.1  | 0.12 | 1.03  | 0.395331 | 0.523541 | 0.720437 | 0.713784 |
| MmugDNA.1764.1.S1_at    | MmugDNA.1764.1  | 7.17  | 7.4   | 0.52 | 0.26 | -1.17 | 0.4307   | 0.512689 | 0.742996 | 0.706478 |
| MmugDNA.17641.1.S1_at   | MmugDNA.17641.1 | 7.32  | 7.09  | 0.12 | 0.04 | 1.17  | 0.06227  | 0.31241  | 0.412841 | 0.567174 |
| MmugDNA.17645.1.S1_at   | MmugDNA.17645.1 | 5.37  | 5.18  | 0.04 | 0.06 | 1.14  | 0.015934 | 0.019177 | 0.284606 | 0.1742   |
| MmugDNA.17646.1.S1_at   | MmugDNA.17646.1 | 4.42  | 3.91  | 0.55 | 0.19 | 1.42  | 0.266179 | 0.312133 | 0.627106 | 0.566904 |
| MmugDNA.17647.1.S1_at   | MmugDNA.17647.1 | 5.72  | 5.5   | 0.2  | 0.15 | 1.17  | 0.449627 | 0.496552 | 0.754534 | 0.696119 |
| MmugDNA.17648.1.S1_at   | MmugDNA.17648.1 | 5.38  | 5.46  | 0.17 | 0.07 | -1.06 | 0.685362 | 0.340522 | 0.876813 | 0.586776 |
| MmugDNA.17649.1.S1_at   | MmugDNA.17649.1 | 7.74  | 7.33  | 0.22 | 0.19 | 1.33  | 0.070122 | 0.061515 | 0.428522 | 0.294835 |
| MmugDNA.1765.1.S1_at    | MmugDNA.1765.1  | 7.25  | 7.1   | 0.62 | 0.23 | 1.11  | 0.634559 | 0.552181 | 0.854096 | 0.73155  |
| MmugDNA.17650.1.S1_at   | MmugDNA.17650.1 | 5.27  | 5.27  | 0    | 0.15 | -1    | 0.414721 | 0.29516  | 0.733276 | 0.55456  |
| MmugDNA.17651.1.S1_at   | MmugDNA.17651.1 | 5.28  | 4.98  | 0.14 | 0.12 | 1.23  | 0.035615 | 0.036329 | 0.352583 | 0.235105 |
| MmugDNA.17652.1.S1_at   | MmugDNA.17652.1 | 3.13  | 2.94  | 0.02 | 0.14 | 1.14  | 0.275706 | 0.721219 | 0.635169 | 0.838628 |
| MmugDNA.17652.1.S1_x_at | MmugDNA.17652.1 | 2.99  | 3.02  | 0.17 | 0.22 | -1.02 | 0.702669 | 0.806506 | 0.884378 | 0.888656 |
| MmugDNA.17653.1.S1_at   | MmugDNA.17653.1 | 6.09  | 6.49  | 0.46 | 0.33 | -1.32 | 0.745384 | 0.38325  | 0.902991 | 0.619246 |
| MmugDNA.17654.1.S1_at   | MmugDNA.17654.1 | 9.7   | 9.69  | 0.24 | 0.04 | 1.01  | 0.925814 | 0.263191 | 0.975294 | 0.529498 |

|                         |                 |       |       |      |      |       |          |          |          |          |
|-------------------------|-----------------|-------|-------|------|------|-------|----------|----------|----------|----------|
| MmugDNA.17656.1.S1_at   | MmugDNA.17656.1 | 8.07  | 9.28  | 0.61 | 0.14 | -2.32 | 0.028733 | 0.044982 | 0.333062 | 0.256531 |
| MmugDNA.1766.1.S1_at    | MmugDNA.1766.1  | 6.66  | 6.64  | 0.19 | 0.08 | 1.01  | 0.851444 | 0.308429 | 0.947639 | 0.564482 |
| MmugDNA.17660.1.S1_at   | MmugDNA.17660.1 | 6.95  | 7.13  | 0.34 | 0.04 | -1.13 | 0.919307 | 0.381474 | 0.972508 | 0.617691 |
| MmugDNA.17660.1.S1_s_at | MmugDNA.17660.1 | 7.44  | 7.85  | 0.51 | 0.21 | -1.33 | 0.948984 | 0.364646 | 0.982704 | 0.604978 |
| MmugDNA.17661.1.S1_at   | MmugDNA.17661.1 | 7.75  | 6.98  | 0.47 | 0.02 | 1.71  | 0.100283 | 0.129935 | 0.470823 | 0.401515 |
| MmugDNA.17665.1.S1_s_at | MmugDNA.17665.1 | 6.64  | 6.59  | 0.4  | 0.11 | 1.03  | 0.555592 | 0.620867 | 0.813597 | 0.775643 |
| MmugDNA.17666.1.S1_at   | MmugDNA.17666.1 | 3.56  | 3.39  | 0.08 | 0.17 | 1.13  | 0.800263 | 0.220026 | 0.926846 | 0.49344  |
| MmugDNA.17667.1.S1_at   | MmugDNA.17667.1 | 3.15  | 3.16  | 0.08 | 0.12 | -1.01 | 0.580607 | 0.41672  | 0.827245 | 0.641672 |
| MmugDNA.17668.1.S1_at   | MmugDNA.17668.1 | 4.84  | 4.26  | 0.28 | 0.2  | 1.5   | 0.081534 | 0.114726 | 0.445497 | 0.381279 |
| MmugDNA.17669.1.S1_s_at | MmugDNA.17669.1 | 3.19  | 3.02  | 0.15 | 0.11 | 1.12  | 0.208175 | 0.263555 | 0.579837 | 0.529826 |
| MmugDNA.1767.1.S1_at    | MmugDNA.1767.1  | 4.18  | 4.09  | 0.18 | 0.02 | -1.06 | 0.850158 | 0.702982 | 0.947298 | 0.827866 |
| MmugDNA.17670.1.S1_at   | MmugDNA.17670.1 | 3.27  | 3.27  | 0.11 | 0.19 | 1     | 0.241927 | 0.644731 | 0.607952 | 0.791816 |
| MmugDNA.17672.1.S1_at   | MmugDNA.17672.1 | 7.75  | 8.07  | 0.74 | 0.21 | -1.25 | 0.628943 | 0.45068  | 0.851379 | 0.665844 |
| MmugDNA.17673.1.S1_at   | MmugDNA.17673.1 | 10.47 | 10.21 | 0.23 | 0.2  | 1.2   | 0.09944  | 0.075285 | 0.469114 | 0.319441 |
| MmugDNA.17674.1.S1_at   | MmugDNA.17674.1 | 3.71  | 3.45  | 0.11 | 0.04 | 1.2   | 0.027305 | 0.012154 | 0.327322 | 0.142648 |
| MmugDNA.17675.1.S1_at   | MmugDNA.17675.1 | 2.92  | 3.04  | 0.22 | 0.04 | -1.09 | 0.929154 | 0.994663 | 0.976333 | 0.996682 |
| MmugDNA.17677.1.S1_at   | MmugDNA.17677.1 | 5.27  | 5.25  | 0.19 | 0.02 | 1.01  | 0.505541 | 0.373246 | 0.785389 | 0.612061 |
| MmugDNA.17679.1.S1_at   | MmugDNA.17679.1 | 4.77  | 4.64  | 0.05 | 0.11 | 1.09  | 0.304699 | 0.44529  | 0.658298 | 0.662338 |
| MmugDNA.1768.1.S1_at    | MmugDNA.1768.1  | 5     | 4.87  | 0.08 | 0.15 | 1.1   | 0.110371 | 0.092783 | 0.483363 | 0.348989 |
| MmugDNA.17680.1.S1_at   | MmugDNA.17680.1 | 9.05  | 8.39  | 0.44 | 0.43 | 1.59  | 0.284658 | 0.013934 | 0.642354 | 0.151384 |
| MmugDNA.17683.1.S1_at   | MmugDNA.17683.1 | 6.26  | 6.04  | 0.07 | 0.04 | 1.17  | 0.007954 | 0.001636 | 0.232005 | 0.061167 |
| MmugDNA.17685.1.S1_at   | MmugDNA.17685.1 | 4.12  | 3.92  | 0.05 | 0.29 | 1.15  | 0.854493 | 0.97094  | 0.94853  | 0.984138 |
| MmugDNA.17687.1.S1_at   | MmugDNA.17687.1 | 4.22  | 4.9   | 0.47 | 0.67 | -1.6  | 0.430221 | 0.594124 | 0.742602 | 0.758517 |
| MmugDNA.17688.1.S1_at   | MmugDNA.17688.1 | 4.76  | 4.77  | 0.03 | 0.19 | -1    | 0.311012 | 0.575872 | 0.66281  | 0.746841 |
| MmugDNA.1769.1.S1_at    | MmugDNA.1769.1  | 5.29  | 5.64  | 0.35 | 0.23 | -1.28 | 0.319456 | 0.09577  | 0.668733 | 0.352753 |
| MmugDNA.17691.1.S1_at   | MmugDNA.17691.1 | 4.59  | 3.69  | 0.88 | 0.85 | 1.87  | 0.551706 | 0.508981 | 0.81144  | 0.703967 |
| MmugDNA.17692.1.S1_at   | MmugDNA.17692.1 | 11.85 | 11.81 | 0.27 | 0.06 | 1.02  | 0.786349 | 0.765836 | 0.921411 | 0.863939 |
| MmugDNA.17692.1.S1_s_at | MmugDNA.17692.1 | 11.64 | 11.54 | 0.34 | 0.09 | 1.07  | 0.600766 | 0.359044 | 0.837959 | 0.600414 |
| MmugDNA.17694.1.S1_at   | MmugDNA.17694.1 | 10.02 | 10.44 | 0.33 | 0.15 | -1.33 | 0.124943 | 0.061802 | 0.498917 | 0.295352 |
| MmugDNA.17695.1.S1_at   | MmugDNA.17695.1 | 3.23  | 3.17  | 0.15 | 0.23 | 1.05  | 0.906283 | 0.24511  | 0.968295 | 0.514861 |
| MmugDNA.17697.1.S1_at   | MmugDNA.17697.1 | 10.21 | 10.08 | 0.39 | 0.17 | 1.1   | 0.751696 | 0.627384 | 0.906131 | 0.780374 |
| MmugDNA.17698.1.S1_at   | MmugDNA.17698.1 | 4.02  | 4.01  | 0.17 | 0.06 | 1.01  | 0.733132 | 0.917351 | 0.897503 | 0.953807 |
| MmugDNA.177.1.S1_at     | MmugDNA.177.1   | 4.64  | 4.64  | 0.07 | 0.04 | 1     | 0.786426 | 0.919688 | 0.921439 | 0.954878 |
| MmugDNA.1770.1.S1_at    | MmugDNA.1770.1  | 3.05  | 3.15  | 0.19 | 0.07 | -1.07 | 0.50772  | 0.417995 | 0.786553 | 0.642531 |
| MmugDNA.17700.1.S1_at   | MmugDNA.17700.1 | 5.34  | 5.25  | 0.27 | 0.06 | 1.07  | 0.530014 | 0.687544 | 0.798631 | 0.817614 |
| MmugDNA.17701.1.S1_at   | MmugDNA.17701.1 | 4.19  | 4.12  | 0.06 | 0.26 | 1.06  | 0.737665 | 0.222465 | 0.899619 | 0.495518 |
| MmugDNA.17702.1.S1_at   | MmugDNA.17702.1 | 6.99  | 6.89  | 0.21 | 0.06 | 1.07  | 0.49581  | 0.408313 | 0.780125 | 0.635596 |
| MmugDNA.17703.1.S1_at   | MmugDNA.17703.1 | 9.17  | 9.49  | 1.39 | 0.07 | -1.25 | 0.596968 | 0.780268 | 0.83613  | 0.872567 |
| MmugDNA.17703.1.S1_x_at | MmugDNA.17703.1 | 9.47  | 9.7   | 1.44 | 0.08 | -1.18 | 0.600973 | 0.789892 | 0.838005 | 0.878631 |
| MmugDNA.17706.1.S1_at   | MmugDNA.17706.1 | 6.35  | 6.2   | 0.35 | 0.3  | 1.11  | 0.650829 | 0.54971  | 0.861228 | 0.730002 |
| MmugDNA.17707.1.S1_at   | MmugDNA.17707.1 | 6.22  | 6.48  | 1.49 | 0.36 | -1.19 | 0.745752 | 0.864052 | 0.903099 | 0.922865 |
| MmugDNA.17708.1.S1_at   | MmugDNA.17708.1 | 9.55  | 9.69  | 0.35 | 0.09 | -1.1  | 0.532052 | 0.039536 | 0.799992 | 0.243767 |
| MmugDNA.1771.1.S1_at    | MmugDNA.1771.1  | 5.36  | 5.16  | 0.19 | 0.37 | 1.15  | 0.484082 | 0.029363 | 0.773472 | 0.213234 |

|                         |                 |       |       |      |      |       |          |          |          |          |
|-------------------------|-----------------|-------|-------|------|------|-------|----------|----------|----------|----------|
| MmugDNA.17710.1.S1_at   | MmugDNA.17710.1 | 5.69  | 5.52  | 0.09 | 0.09 | 1.13  | 0.084642 | 0.320481 | 0.451162 | 0.572648 |
| MmugDNA.17711.1.S1_at   | MmugDNA.17711.1 | 3.35  | 3.31  | 0.01 | 0.28 | 1.03  | 0.731859 | 0.678212 | 0.896927 | 0.812051 |
| MmugDNA.17712.1.S1_at   | MmugDNA.17712.1 | 9.41  | 9.64  | 0.23 | 0.09 | -1.18 | 0.239756 | 0.037707 | 0.606154 | 0.23859  |
| MmugDNA.17713.1.S1_at   | MmugDNA.17713.1 | 5.75  | 6.58  | 0.12 | 0.18 | -1.77 | 0.003837 | 0.000806 | 0.198541 | 0.04607  |
| MmugDNA.17714.1.S1_at   | MmugDNA.17714.1 | 7.02  | 7.39  | 0.75 | 0.22 | -1.29 | 0.488919 | 0.688092 | 0.775874 | 0.817914 |
| MmugDNA.17716.1.S1_at   | MmugDNA.17716.1 | 7.01  | 6.77  | 1.04 | 0.12 | 1.18  | 0.684256 | 0.134797 | 0.876373 | 0.406854 |
| MmugDNA.17716.1.S1_s_at | MmugDNA.17716.1 | 7.01  | 7.49  | 2.58 | 0.22 | -1.4  | 0.683433 | 0.443075 | 0.876105 | 0.660962 |
| MmugDNA.17717.1.S1_at   | MmugDNA.17717.1 | 7.23  | 7.16  | 0.17 | 0.09 | 1.05  | 0.213993 | 0.31271  | 0.584533 | 0.567299 |
| MmugDNA.17718.1.S1_at   | MmugDNA.17718.1 | 4.21  | 4.23  | 0.02 | 0.09 | -1.01 | 0.751021 | 0.667997 | 0.905732 | 0.8057   |
| MmugDNA.17719.1.S1_x_at | MmugDNA.17719.1 | 12.61 | 12.84 | 0.22 | 0.18 | -1.17 | 0.2806   | 0.200375 | 0.639366 | 0.47478  |
| MmugDNA.1772.1.S1_at    | MmugDNA.1772.1  | 4.63  | 4.6   | 0.36 | 0.02 | 1.03  | 0.8607   | 0.742264 | 0.950868 | 0.850709 |
| MmugDNA.33829.1.S1_s_at | MmugDNA.33829.1 | 14.4  | 14.4  | 0.05 | 0.02 | -1    | 0.997482 | 0.833883 | 0.999169 | 0.904791 |
| MmugDNA.17721.1.S1_at   | MmugDNA.17721.1 | 6.01  | 5.93  | 0.52 | 0.14 | 1.06  | 0.975257 | 0.387135 | 0.991912 | 0.621935 |
| MmugDNA.17722.1.S1_at   | MmugDNA.17722.1 | 2.76  | 2.71  | 0.06 | 0.04 | 1.03  | 0.855012 | 0.213035 | 0.948681 | 0.487005 |
| MmugDNA.17723.1.S1_at   | MmugDNA.17723.1 | 4.35  | 3.99  | 0.14 | 0.18 | 1.28  | 0.076027 | 0.076024 | 0.437231 | 0.320716 |
| MmugDNA.17724.1.S1_at   | MmugDNA.17724.1 | 5.91  | 6.04  | 0.48 | 0.08 | -1.09 | 0.700956 | 0.306087 | 0.883717 | 0.562804 |
| MmugDNA.17725.1.S1_at   | MmugDNA.17725.1 | 6.92  | 6.46  | 0.87 | 0.23 | 1.38  | 0.429805 | 0.295934 | 0.742367 | 0.555241 |
| MmugDNA.17726.1.S1_at   | MmugDNA.17726.1 | 5.42  | 5.49  | 0.16 | 0.03 | -1.05 | 0.762225 | 0.679467 | 0.910836 | 0.812835 |
| MmugDNA.17726.1.S1_x_at | MmugDNA.17726.1 | 6.87  | 6.77  | 0.11 | 0.25 | 1.07  | 0.656521 | 0.810035 | 0.863636 | 0.890518 |
| MmugDNA.17729.1.S1_at   | MmugDNA.17729.1 | 4.06  | 4.12  | 0.17 | 0.11 | -1.05 | 0.718144 | 0.469645 | 0.890613 | 0.678318 |
| MmugDNA.1773.1.S1_at    | MmugDNA.1773.1  | 8.9   | 9.57  | 0.09 | 0.12 | -1.59 | 0.001601 | 0.000051 | 0.162459 | 0.025273 |
| MmugDNA.17731.1.S1_at   | MmugDNA.17731.1 | 5.66  | 5.55  | 0.18 | 0.1  | 1.08  | 0.680612 | 0.875422 | 0.874731 | 0.929245 |
| MmugDNA.17732.1.S1_at   | MmugDNA.17732.1 | 2.95  | 2.95  | 0.11 | 0.05 | 1     | 0.433485 | 0.898924 | 0.744491 | 0.942467 |
| MmugDNA.17733.1.S1_at   | MmugDNA.17733.1 | 10.19 | 8.77  | 0.17 | 0.21 | 2.67  | 0.000532 | 0.003119 | 0.143137 | 0.081345 |
| MmugDNA.17739.1.S1_at   | MmugDNA.17739.1 | 4.91  | 4.94  | 0.1  | 0    | -1.03 | 0.565631 | 0.926846 | 0.819415 | 0.958409 |
| MmugDNA.1774.1.S1_at    | MmugDNA.1774.1  | 3.64  | 3.53  | 0.23 | 0.05 | 1.08  | 0.339867 | 0.286275 | 0.684042 | 0.547784 |
| MmugDNA.17740.1.S1_at   | MmugDNA.17740.1 | 3.68  | 3.94  | 0.23 | 0.3  | -1.19 | 0.53571  | 0.400664 | 0.801881 | 0.630467 |
| MmugDNA.17741.1.S1_at   | MmugDNA.17741.1 | 5.74  | 5.62  | 0.3  | 0.07 | 1.09  | 0.415294 | 0.225775 | 0.733613 | 0.498159 |
| MmugDNA.17742.1.S1_at   | MmugDNA.17742.1 | 3.69  | 3.51  | 0.08 | 0.05 | 1.13  | 0.070183 | 0.441958 | 0.428682 | 0.660058 |
| MmugDNA.17743.1.S1_at   | MmugDNA.17743.1 | 7.37  | 8.65  | 0.39 | 0.56 | -2.43 | 0.039701 | 0.183141 | 0.362432 | 0.459531 |
| MmugDNA.17745.1.S1_at   | MmugDNA.17745.1 | 5.73  | 5.93  | 0.18 | 0.34 | -1.15 | 0.157658 | 0.094607 | 0.530626 | 0.351371 |
| MmugDNA.17746.1.S1_at   | MmugDNA.17746.1 | 7.01  | 7.32  | 1.75 | 0.12 | -1.24 | 0.794209 | 0.345699 | 0.924511 | 0.590854 |
| MmugDNA.17747.1.S1_at   | MmugDNA.17747.1 | 6.98  | 8.05  | 0.33 | 0.23 | -2.09 | 0.009991 | 0.026668 | 0.245197 | 0.20423  |
| MmugDNA.17748.1.S1_at   | MmugDNA.17748.1 | 4.48  | 4.5   | 0.1  | 0.43 | -1.02 | 0.939614 | 0.511803 | 0.979532 | 0.705797 |
| MmugDNA.17749.1.S1_at   | MmugDNA.17749.1 | 4.88  | 4.66  | 0.18 | 0.13 | 1.16  | 0.059704 | 0.043723 | 0.406734 | 0.253809 |
| MmugDNA.1775.1.S1_at    | MmugDNA.1775.1  | 5     | 5.03  | 0.23 | 0.13 | -1.02 | 0.796783 | 0.767286 | 0.92533  | 0.864856 |
| MmugDNA.17751.1.S1_at   | MmugDNA.17751.1 | 3.19  | 3.12  | 0.07 | 0.02 | 1.05  | 0.281007 | 0.027857 | 0.639604 | 0.208453 |
| MmugDNA.17753.1.S1_at   | MmugDNA.17753.1 | 2.92  | 2.93  | 0.07 | 0.07 | -1    | 0.346184 | 0.392417 | 0.687873 | 0.625813 |
| MmugDNA.17754.1.S1_at   | MmugDNA.17754.1 | 6.87  | 7.3   | 0.52 | 0.16 | -1.34 | 0.069222 | 0.00758  | 0.426664 | 0.116553 |
| MmugDNA.17755.1.S1_at   | MmugDNA.17755.1 | 4.42  | 4.49  | 0.13 | 0.21 | -1.05 | 0.652696 | 0.381609 | 0.86202  | 0.617822 |
| MmugDNA.17756.1.S1_at   | MmugDNA.17756.1 | 4.78  | 4.78  | 0.05 | 0.22 | -1    | 0.303526 | 0.187639 | 0.65735  | 0.463663 |
| MmugDNA.17757.1.S1_at   | MmugDNA.17757.1 | 6.22  | 6.06  | 0.25 | 0.21 | 1.11  | 0.526852 | 0.620284 | 0.796797 | 0.775303 |
| MmugDNA.17759.1.S1_at   | MmugDNA.17759.1 | 6.58  | 6.98  | 0.07 | 0.27 | -1.32 | 0.021803 | 0.007842 | 0.309672 | 0.118014 |

|                         |                 |       |       |      |      |       |          |          |          |          |
|-------------------------|-----------------|-------|-------|------|------|-------|----------|----------|----------|----------|
| MmugDNA.17761.1.S1_at   | MmugDNA.17761.1 | 3.74  | 3.81  | 1.52 | 0.86 | -1.05 | 0.766197 | 0.783641 | 0.912101 | 0.874711 |
| MmugDNA.17763.1.S1_at   | MmugDNA.17763.1 | 4.63  | 6.82  | 0.37 | 0.29 | -4.56 | 0.001174 | 0.143781 | 0.156386 | 0.41759  |
| MmugDNA.17765.1.S1_at   | MmugDNA.17765.1 | 7.63  | 8.26  | 0.16 | 0.2  | -1.55 | 0.009122 | 0.001611 | 0.241574 | 0.060665 |
| MmugDNA.17766.1.S1_at   | MmugDNA.17766.1 | 4.74  | 4.77  | 0.09 | 0.04 | -1.02 | 0.459638 | 0.066392 | 0.759696 | 0.303314 |
| MmugDNA.17767.1.S1_s_at | MmugDNA.17767.1 | 8.97  | 9.77  | 0.47 | 0.1  | -1.74 | 0.049792 | 0.005327 | 0.386252 | 0.100928 |
| MmugDNA.17768.1.S1_at   | MmugDNA.17768.1 | 5.54  | 6.95  | 0.27 | 0.05 | -2.66 | 0.000562 | 0.001838 | 0.143137 | 0.064374 |
| MmugDNA.1777.1.S1_at    | MmugDNA.1777.1  | 4.02  | 4.02  | 0.02 | 0.18 | 1     | 0.864448 | 0.626914 | 0.952385 | 0.780046 |
| MmugDNA.17770.1.S1_at   | MmugDNA.17770.1 | 4     | 3.82  | 0.03 | 0.15 | 1.13  | 0.129438 | 0.141204 | 0.504211 | 0.414709 |
| MmugDNA.17771.1.S1_at   | MmugDNA.17771.1 | 10.38 | 10.29 | 0.1  | 0.11 | 1.06  | 0.470422 | 0.634255 | 0.766162 | 0.784729 |
| MmugDNA.42843.1.S1_s_at | MmugDNA.42843.1 | 12.27 | 12.08 | 0.34 | 0.03 | 1.14  | 0.99623  | 0.712922 | 0.998554 | 0.833561 |
| MmugDNA.17774.1.S1_at   | MmugDNA.17774.1 | 7.08  | 7     | 0.14 | 0.23 | -1.06 | 0.731142 | 0.935579 | 0.89641  | 0.963632 |
| MmugDNA.17775.1.S1_s_at | MmugDNA.17775.1 | 8.85  | 8.93  | 0.39 | 0.3  | -1.06 | 0.980426 | 0.118583 | 0.993785 | 0.38654  |
| MmugDNA.17776.1.S1_at   | MmugDNA.17776.1 | 6.53  | 6.3   | 0.1  | 0.14 | 1.17  | 0.128898 | 0.097774 | 0.503626 | 0.355638 |
| MmugDNA.17777.1.S1_at   | MmugDNA.17777.1 | 5.91  | 5.74  | 0.4  | 0.36 | 1.13  | 0.756885 | 0.105038 | 0.908337 | 0.366736 |
| MmugDNA.17778.1.S1_at   | MmugDNA.17778.1 | 5.79  | 6.38  | 0.61 | 0.47 | -1.51 | 0.335326 | 0.848608 | 0.680891 | 0.914061 |
| MmugDNA.1778.1.S1_at    | MmugDNA.1778.1  | 8.58  | 8.65  | 0.28 | 0.25 | -1.05 | 0.713894 | 0.083311 | 0.88857  | 0.333375 |
| MmugDNA.17780.1.S1_at   | MmugDNA.17780.1 | 4.02  | 4.09  | 0.03 | 0.11 | -1.05 | 0.826248 | 0.959739 | 0.937734 | 0.977189 |
| MmugDNA.17783.1.S1_at   | MmugDNA.17783.1 | 3.13  | 3.06  | 0.18 | 0.07 | 1.04  | 0.189826 | 0.577842 | 0.561186 | 0.748148 |
| MmugDNA.17784.1.S1_at   | MmugDNA.17784.1 | 6.2   | 6.51  | 0.21 | 0.15 | -1.24 | 0.068974 | 0.741441 | 0.426361 | 0.850285 |
| MmugDNA.17785.1.S1_at   | MmugDNA.17785.1 | 5.97  | 5.92  | 1.02 | 0.22 | 1.03  | 0.818976 | 0.59417  | 0.934641 | 0.758517 |
| MmugDNA.17786.1.S1_at   | MmugDNA.17786.1 | 3.68  | 3.54  | 0.09 | 0.22 | 1.1   | 0.890455 | 0.131022 | 0.96231  | 0.403053 |
| MmugDNA.17787.1.S1_at   | MmugDNA.17787.1 | 8.08  | 8.53  | 0.92 | 0.05 | -1.36 | 0.906773 | 0.583937 | 0.968356 | 0.75206  |
| MmugDNA.17788.1.S1_at   | MmugDNA.17788.1 | 6.83  | 6.8   | 0.18 | 0.03 | 1.02  | 0.405487 | 0.57359  | 0.727426 | 0.745228 |
| MmugDNA.17789.1.S1_at   | MmugDNA.17789.1 | 7.76  | 7.92  | 0.88 | 0.03 | -1.12 | 0.75618  | 0.852595 | 0.90814  | 0.916218 |
| MmugDNA.17790.1.S1_at   | MmugDNA.17790.1 | 8.9   | 8.88  | 0.52 | 0.27 | 1.01  | 0.940953 | 0.084417 | 0.979891 | 0.335713 |
| MmugDNA.17792.1.S1_at   | MmugDNA.17792.1 | 7.08  | 7.25  | 0.22 | 0.11 | -1.13 | 0.471314 | 0.626238 | 0.766509 | 0.779684 |
| MmugDNA.17794.1.S1_at   | MmugDNA.17794.1 | 4.65  | 3.76  | 0.64 | 0.27 | 1.86  | 0.401029 | 0.00221  | 0.724096 | 0.069408 |
| MmugDNA.17795.1.S1_at   | MmugDNA.17795.1 | 8.62  | 8.06  | 0.41 | 0.22 | 1.47  | 0.05264  | 0.029373 | 0.392806 | 0.213239 |
| MmugDNA.17796.1.S1_at   | MmugDNA.17796.1 | 6.12  | 7.27  | 0.54 | 0.2  | -2.21 | 0.036547 | 0.025887 | 0.355049 | 0.2017   |
| MmugDNA.17797.1.S1_at   | MmugDNA.17797.1 | 10.62 | 10.61 | 0.16 | 0.04 | 1.01  | 0.796804 | 0.788973 | 0.925334 | 0.878011 |
| MmugDNA.17799.1.S1_at   | MmugDNA.17799.1 | 5.16  | 5.29  | 0.32 | 0.03 | -1.1  | 0.157437 | 0.32069  | 0.530565 | 0.572784 |
| MmugDNA.178.1.S1_at     | MmugDNA.178.1   | 6.37  | 6.9   | 0.73 | 0.22 | -1.45 | 0.279918 | 0.330974 | 0.638821 | 0.579657 |
| MmugDNA.1780.1.S1_at    | MmugDNA.1780.1  | 9.84  | 9.64  | 0.12 | 0.12 | 1.15  | 0.053677 | 0.007043 | 0.39535  | 0.113131 |
| MmugDNA.17800.1.S1_at   | MmugDNA.17800.1 | 6.92  | 7.09  | 0.12 | 0.42 | -1.13 | 0.502381 | 0.379218 | 0.783594 | 0.616197 |
| MmugDNA.17801.1.S1_at   | MmugDNA.17801.1 | 11.56 | 11.52 | 0.46 | 0.1  | 1.03  | 0.294636 | 0.204804 | 0.650731 | 0.479209 |
| MmugDNA.17802.1.S1_at   | MmugDNA.17802.1 | 11.31 | 11.61 | 0.11 | 0.07 | -1.23 | 0.023647 | 0.012412 | 0.316279 | 0.144066 |
| MmugDNA.17802.1.S1_s_at | MmugDNA.17802.1 | 12.05 | 12.27 | 0.06 | 0.08 | -1.17 | 0.01052  | 0.008502 | 0.248118 | 0.1223   |
| MmugDNA.17803.1.S1_at   | MmugDNA.17803.1 | 8.98  | 9.34  | 0.34 | 0.07 | -1.28 | 0.186291 | 0.096467 | 0.559101 | 0.35409  |
| MmugDNA.17804.1.S1_at   | MmugDNA.17804.1 | 5.2   | 5.03  | 0.32 | 0.11 | 1.13  | 0.329167 | 0.824776 | 0.676252 | 0.89939  |
| MmugDNA.17806.1.S1_at   | MmugDNA.17806.1 | 5.59  | 5.66  | 0.21 | 0.15 | -1.05 | 0.763181 | 0.757525 | 0.911064 | 0.858852 |
| MmugDNA.17807.1.S1_at   | MmugDNA.17807.1 | 6.54  | 6.56  | 0.07 | 0.07 | -1.01 | 0.925176 | 0.139519 | 0.975107 | 0.412743 |
| MmugDNA.17808.1.S1_at   | MmugDNA.17808.1 | 7.47  | 7.47  | 0.51 | 0.03 | 1     | 0.37641  | 0.232751 | 0.706889 | 0.504385 |
| MmugDNA.17809.1.S1_at   | MmugDNA.17809.1 | 9.72  | 9.79  | 0.43 | 0.07 | -1.06 | 0.839753 | 0.842608 | 0.942998 | 0.910315 |



|                         |                 |       |       |      |      |       |          |          |          |          |
|-------------------------|-----------------|-------|-------|------|------|-------|----------|----------|----------|----------|
| MmugDNA.1781.1.S1_at    | MmugDNA.1781.1  | 2.56  | 2.61  | 0.01 | 0.09 | -1.03 | 0.29763  | 0.095929 | 0.652791 | 0.353204 |
| MmugDNA.17810.1.S1_at   | MmugDNA.17810.1 | 4.87  | 4.76  | 0.01 | 0.06 | 1.08  | 0.039909 | 0.419789 | 0.362952 | 0.643717 |
| MmugDNA.17811.1.S1_at   | MmugDNA.17811.1 | 10.04 | 9.22  | 0.52 | 0.18 | 1.77  | 0.027132 | 0.007926 | 0.327173 | 0.11857  |
| MmugDNA.17812.1.S1_at   | MmugDNA.17812.1 | 9.36  | 8.74  | 2.09 | 0.26 | 1.53  | 0.736874 | 0.193814 | 0.899286 | 0.468847 |
| MmugDNA.17813.1.S1_at   | MmugDNA.17813.1 | 5.1   | 5.26  | 0.19 | 0.08 | -1.11 | 0.397145 | 0.323683 | 0.721708 | 0.574558 |
| MmugDNA.17814.1.S1_at   | MmugDNA.17814.1 | 4.54  | 4.84  | 0.13 | 0.24 | -1.24 | 0.182823 | 0.193816 | 0.555631 | 0.468847 |
| MmugDNA.17815.1.S1_at   | MmugDNA.17815.1 | 9.06  | 8.55  | 0.14 | 0.37 | 1.43  | 0.057476 | 0.109359 | 0.40213  | 0.373154 |
| MmugDNA.17816.1.S1_at   | MmugDNA.17816.1 | 3.03  | 3.03  | 0.08 | 0.11 | 1     | 0.370768 | 0.641061 | 0.704995 | 0.789381 |
| MmugDNA.17817.1.S1_at   | MmugDNA.17817.1 | 8.3   | 8.12  | 0.3  | 0.34 | 1.14  | 0.572551 | 0.858159 | 0.823222 | 0.919096 |
| MmugDNA.17818.1.S1_at   | MmugDNA.17818.1 | 6.31  | 6.31  | 0.01 | 0.31 | 1     | 0.767488 | 0.920312 | 0.912495 | 0.95511  |
| MmugDNA.1782.1.S1_at    | MmugDNA.1782.1  | 4.35  | 3.95  | 0.08 | 0.15 | -1.32 | 0.005833 | 0.011503 | 0.211798 | 0.138705 |
| MmugDNA.17820.1.S1_at   | MmugDNA.17820.1 | 8.27  | 7.42  | 0.25 | 0.46 | 1.8   | 0.049463 | 0.045935 | 0.385474 | 0.258774 |
| MmugDNA.17821.1.S1_at   | MmugDNA.17821.1 | 9.9   | 9.77  | 0.81 | 0.18 | 1.09  | 0.813637 | 0.635135 | 0.93266  | 0.785229 |
| MmugDNA.17822.1.S1_at   | MmugDNA.17822.1 | 4     | 3.82  | 0.07 | 0.12 | 1.13  | 0.094075 | 0.342251 | 0.463389 | 0.588375 |
| MmugDNA.17823.1.S1_at   | MmugDNA.17823.1 | 5.54  | 5.53  | 0.18 | 0.22 | 1.01  | 0.210118 | 0.37276  | 0.581555 | 0.611661 |
| MmugDNA.17824.1.S1_at   | MmugDNA.17824.1 | 6.3   | 6.42  | 0.37 | 0.16 | -1.09 | 0.607095 | 0.192708 | 0.840743 | 0.468219 |
| MmugDNA.17825.1.S1_at   | MmugDNA.17825.1 | 4.03  | 4.13  | 0.24 | 0.16 | -1.07 | 0.67259  | 0.47759  | 0.871034 | 0.68363  |
| MmugDNA.17827.1.S1_at   | MmugDNA.17827.1 | 8.8   | 9.18  | 0.23 | 0.04 | -1.31 | 0.147535 | 0.001057 | 0.521578 | 0.05169  |
| MmugDNA.1783.1.S1_s_at  | MmugDNA.1783.1  | 7.84  | 7.73  | 0.02 | 0.1  | 1.08  | 0.134119 | 0.109827 | 0.508395 | 0.373762 |
| MmugDNA.17830.1.S1_at   | MmugDNA.17830.1 | 5.82  | 5.72  | 0.15 | 0.34 | 1.07  | 0.555434 | 0.554947 | 0.813492 | 0.733559 |
| MmugDNA.17831.1.S1_at   | MmugDNA.17831.1 | 4.95  | 5.28  | 0.58 | 0.42 | -1.26 | 0.755542 | 0.431619 | 0.907952 | 0.652439 |
| MmugDNA.17833.1.S1_at   | MmugDNA.17833.1 | 3.35  | 3.32  | 0.17 | 0.16 | 1.02  | 0.650877 | 0.815559 | 0.861248 | 0.893609 |
| MmugDNA.17836.1.S1_at   | MmugDNA.17836.1 | 6.45  | 6.69  | 0.39 | 0.22 | -1.18 | 0.720843 | 0.506165 | 0.891811 | 0.702359 |
| MmugDNA.17839.1.S1_at   | MmugDNA.17839.1 | 4.97  | 4.99  | 0.17 | 0.07 | -1.01 | 0.883701 | 0.984962 | 0.959751 | 0.991478 |
| MmugDNA.1784.1.S1_at    | MmugDNA.1784.1  | 6.8   | 6.34  | 0.83 | 1.01 | 1.37  | 0.543192 | 0.19577  | 0.806262 | 0.470637 |
| MmugDNA.17841.1.S1_at   | MmugDNA.17841.1 | 5.49  | 5.55  | 0.56 | 0.04 | -1.04 | 0.425716 | 0.825496 | 0.740112 | 0.899753 |
| MmugDNA.17844.1.S1_at   | MmugDNA.17844.1 | 6.03  | 5.8   | 0.19 | 0.15 | 1.17  | 0.127946 | 0.486826 | 0.502422 | 0.690091 |
| MmugDNA.17845.1.S1_at   | MmugDNA.17845.1 | 3.77  | 4.12  | 1.15 | 0.33 | -1.28 | 0.665765 | 0.80679  | 0.868043 | 0.888839 |
| MmugDNA.17846.1.S1_at   | MmugDNA.17846.1 | 6.94  | 6.37  | 0.29 | 0.17 | 1.48  | 0.036057 | 0.308333 | 0.354225 | 0.564425 |
| MmugDNA.17847.1.S1_at   | MmugDNA.17847.1 | 5.88  | 7.36  | 0.55 | 0.16 | -2.78 | 0.009554 | 0.001377 | 0.242426 | 0.056928 |
| MmugDNA.17849.1.S1_at   | MmugDNA.17849.1 | 8.05  | 8.19  | 0.23 | 0.12 | -1.1  | 0.211229 | 0.302935 | 0.582141 | 0.560383 |
| MmugDNA.1785.1.S1_at    | MmugDNA.1785.1  | 3.64  | 3.65  | 0.18 | 0.09 | -1.01 | 0.9869   | 0.994665 | 0.995774 | 0.996682 |
| MmugDNA.17850.1.S1_at   | MmugDNA.17850.1 | 4.44  | 4.63  | 0.13 | 0.32 | -1.14 | 0.942316 | 0.26167  | 0.980289 | 0.528129 |
| MmugDNA.17852.1.S1_at   | MmugDNA.17852.1 | 6.43  | 6.19  | 0.1  | 0.19 | 1.19  | 0.242187 | 0.388244 | 0.608342 | 0.622692 |
| MmugDNA.17853.1.S1_at   | MmugDNA.17853.1 | 5.93  | 5.73  | 0.06 | 0.06 | 1.14  | 0.013162 | 0.28909  | 0.266951 | 0.550254 |
| MmugDNA.17854.1.S1_at   | MmugDNA.17854.1 | 6.34  | 6.08  | 0.18 | 0.08 | 1.2   | 0.128493 | 0.142857 | 0.503216 | 0.416786 |
| MmugDNA.17856.1.S1_at   | MmugDNA.17856.1 | 11.31 | 11.38 | 0.25 | 0.17 | -1.05 | 0.867414 | 0.071464 | 0.953499 | 0.313678 |
| MmugDNA.17857.1.S1_at   | MmugDNA.17857.1 | 6.61  | 6.58  | 0.42 | 0.25 | 1.02  | 0.871393 | 0.433787 | 0.955393 | 0.653992 |
| MmugDNA.1786.1.S1_at    | MmugDNA.1786.1  | 9.44  | 9.58  | 0.23 | 0.23 | -1.1  | 0.532936 | 0.25713  | 0.800589 | 0.524854 |
| MmugDNA.17861.1.S1_at   | MmugDNA.17861.1 | 5.85  | 5.52  | 0.19 | 0.1  | 1.25  | 0.258416 | 0.162991 | 0.622212 | 0.439145 |
| MmugDNA.17863.1.S1_at   | MmugDNA.17863.1 | 4.59  | 4.59  | 0.15 | 0.07 | 1     | 0.416636 | 0.768926 | 0.734439 | 0.865762 |
| MmugDNA.18234.1.S1_at   | MmugDNA.18234.1 | 6.8   | 6.7   | 0.21 | 0.06 | 1.07  | 0.848703 | 0.897906 | 0.946817 | 0.941859 |
| MmugDNA.18234.1.S1_s_at | MmugDNA.18234.1 | 4.94  | 4.84  | 0.12 | 0.11 | 1.07  | 0.543812 | 0.332686 | 0.806798 | 0.581058 |

|                         |                 |       |       |      |      |       |          |          |          |          |
|-------------------------|-----------------|-------|-------|------|------|-------|----------|----------|----------|----------|
| MmugDNA.17864.1.S1_at   | MmugDNA.17864.1 | 5.66  | 4.57  | 0.29 | 0.3  | 2.12  | 0.019498 | 0.024806 | 0.301444 | 0.197344 |
| MmugDNA.17866.1.S1_at   | MmugDNA.17866.1 | 9.2   | 9.26  | 0.73 | 0.61 | -1.04 | 0.503517 | 0.687073 | 0.784372 | 0.817434 |
| MmugDNA.17868.1.S1_at   | MmugDNA.17868.1 | 10.07 | 9.56  | 0.44 | 0.22 | 1.42  | 0.250225 | 0.004626 | 0.615548 | 0.094988 |
| MmugDNA.17869.1.S1_at   | MmugDNA.17869.1 | 3.34  | 3.25  | 0.12 | 0.09 | 1.07  | 0.132775 | 0.106183 | 0.506999 | 0.36856  |
| MmugDNA.1787.1.S1_at    | MmugDNA.1787.1  | 6.56  | 6.49  | 0.07 | 0.03 | 1.05  | 0.075907 | 0.005601 | 0.436934 | 0.10339  |
| MmugDNA.17870.1.S1_at   | MmugDNA.17870.1 | 4.45  | 4.21  | 0.26 | 0.08 | 1.18  | 0.142837 | 0.163612 | 0.517926 | 0.439768 |
| MmugDNA.17871.1.S1_at   | MmugDNA.17871.1 | 3.69  | 3.6   | 0.03 | 0.05 | 1.06  | 0.323877 | 0.01555  | 0.672332 | 0.158118 |
| MmugDNA.17872.1.S1_at   | MmugDNA.17872.1 | 5.59  | 5.62  | 0.1  | 0.1  | -1.02 | 0.393409 | 0.537702 | 0.71919  | 0.722661 |
| MmugDNA.17873.1.S1_at   | MmugDNA.17873.1 | 7.65  | 7.23  | 0.45 | 0.09 | 1.34  | 0.235754 | 0.378416 | 0.602824 | 0.615443 |
| MmugDNA.17874.1.S1_at   | MmugDNA.17874.1 | 6.09  | 5.76  | 0.22 | 0.05 | 1.26  | 0.116698 | 0.251936 | 0.489934 | 0.520632 |
| MmugDNA.17875.1.S1_at   | MmugDNA.17875.1 | 9.65  | 10.27 | 0.25 | 0.13 | -1.54 | 0.01545  | 0.010005 | 0.281835 | 0.131262 |
| MmugDNA.17876.1.S1_at   | MmugDNA.17876.1 | 3.71  | 3.65  | 0.49 | 0.2  | 1.05  | 0.603536 | 0.689875 | 0.839251 | 0.819167 |
| MmugDNA.17877.1.S1_at   | MmugDNA.17877.1 | 8.57  | 8.22  | 0.11 | 0.16 | 1.27  | 0.01079  | 0.015155 | 0.250302 | 0.156391 |
| MmugDNA.17877.1.S1_s_at | MmugDNA.17877.1 | 9.71  | 9.39  | 0.14 | 0.05 | 1.25  | 0.038846 | 0.01339  | 0.360395 | 0.14827  |
| MmugDNA.17878.1.S1_at   | MmugDNA.17878.1 | 10.89 | 11.01 | 0.19 | 0.21 | -1.09 | 0.102835 | 0.202882 | 0.473259 | 0.477312 |
| MmugDNA.1788.1.S1_at    | MmugDNA.1788.1  | 9.16  | 9.82  | 0.29 | 0.24 | -1.58 | 0.180871 | 0.031321 | 0.554239 | 0.218936 |
| MmugDNA.17882.1.S1_at   | MmugDNA.17882.1 | 4.07  | 3.94  | 0.18 | 0.07 | 1.09  | 0.224094 | 0.206924 | 0.593226 | 0.481052 |
| MmugDNA.17883.1.S1_at   | MmugDNA.17883.1 | 4.95  | 5.03  | 0.09 | 0.06 | -1.05 | 0.365418 | 0.212584 | 0.701065 | 0.486525 |
| MmugDNA.17886.1.S1_at   | MmugDNA.17886.1 | 4.74  | 4.97  | 0.12 | 0.24 | -1.17 | 0.609905 | 0.195387 | 0.841821 | 0.470253 |
| MmugDNA.17888.1.S1_at   | MmugDNA.17888.1 | 5.5   | 5.28  | 0.08 | 0.18 | 1.16  | 0.274965 | 0.363134 | 0.634249 | 0.60356  |
| MmugDNA.17889.1.S1_at   | MmugDNA.17889.1 | 9.42  | 8.34  | 1.24 | 0.06 | 2.12  | 0.623185 | 0.078725 | 0.848128 | 0.325673 |
| MmugDNA.1789.1.S1_at    | MmugDNA.1789.1  | 3.83  | 3.84  | 0.18 | 0.03 | -1.01 | 0.490132 | 0.246557 | 0.776766 | 0.515917 |
| MmugDNA.17890.1.S1_at   | MmugDNA.17890.1 | 7.46  | 7.62  | 0.59 | 0.12 | -1.12 | 0.678108 | 0.34848  | 0.873899 | 0.592593 |
| MmugDNA.17891.1.S1_at   | MmugDNA.17891.1 | 11.38 | 11.17 | 0.18 | 0.1  | 1.16  | 0.17607  | 0.165025 | 0.549159 | 0.44123  |
| MmugDNA.17892.1.S1_at   | MmugDNA.17892.1 | 8.06  | 7.5   | 0.31 | 0.19 | 1.46  | 0.032842 | 0.075111 | 0.345393 | 0.319301 |
| MmugDNA.17894.1.S1_at   | MmugDNA.17894.1 | 6.6   | 6.14  | 0.05 | 0.09 | 1.37  | 0.001297 | 0.001546 | 0.158014 | 0.05949  |
| MmugDNA.17895.1.S1_at   | MmugDNA.17895.1 | 3.2   | 3.2   | 0.01 | 0    | 1     | 0.281402 | 0.646195 | 0.639917 | 0.792676 |
| MmugDNA.17896.1.S1_s_at | MmugDNA.17896.1 | 6.71  | 6.64  | 0.14 | 0.09 | 1.05  | 0.15321  | 0.266033 | 0.526374 | 0.531815 |
| MmugDNA.17897.1.S1_at   | MmugDNA.17897.1 | 4.38  | 4.23  | 0.19 | 0.18 | 1.11  | 0.398231 | 0.398201 | 0.722411 | 0.629257 |
| MmugDNA.17898.1.S1_at   | MmugDNA.17898.1 | 6.86  | 6.74  | 0.46 | 0.25 | 1.09  | 0.629065 | 0.476426 | 0.851386 | 0.682725 |
| MmugDNA.17899.1.S1_at   | MmugDNA.17899.1 | 7.3   | 6.94  | 0.41 | 0.06 | 1.28  | 0.344079 | 0.00928  | 0.686913 | 0.127101 |
| MmugDNA.17900.1.S1_at   | MmugDNA.17900.1 | 7.01  | 6.96  | 0.24 | 0.1  | 1.04  | 0.741616 | 0.42732  | 0.90146  | 0.649175 |
| MmugDNA.17901.1.S1_at   | MmugDNA.17901.1 | 3.84  | 3.89  | 0.11 | 0.15 | -1.04 | 0.328955 | 0.244485 | 0.676135 | 0.514295 |
| MmugDNA.17902.1.S1_at   | MmugDNA.17902.1 | 6.95  | 6.94  | 0.27 | 0.14 | 1.01  | 0.944352 | 0.947342 | 0.980655 | 0.970134 |
| MmugDNA.17903.1.S1_at   | MmugDNA.17903.1 | 5.04  | 4.77  | 0.05 | 0.12 | 1.2   | 0.037984 | 0.075273 | 0.358308 | 0.319441 |
| MmugDNA.17904.1.S1_at   | MmugDNA.17904.1 | 6.6   | 6.31  | 0.28 | 0.25 | 1.22  | 0.117451 | 0.40707  | 0.490925 | 0.634722 |
| MmugDNA.17905.1.S1_at   | MmugDNA.17905.1 | 4.13  | 3.96  | 0.05 | 0.15 | 1.13  | 0.230908 | 0.440176 | 0.599045 | 0.658775 |
| MmugDNA.17908.1.S1_at   | MmugDNA.17908.1 | 10.09 | 10.19 | 0.05 | 0.11 | -1.08 | 0.286419 | 0.006922 | 0.643673 | 0.112445 |
| MmugDNA.1791.1.S1_at    | MmugDNA.1791.1  | 3.68  | 3.88  | 0.03 | 0.11 | -1.15 | 0.116303 | 0.428363 | 0.489568 | 0.649908 |
| MmugDNA.17911.1.S1_at   | MmugDNA.17911.1 | 13.47 | 13.31 | 0.08 | 0.02 | 1.11  | 0.076034 | 0.024074 | 0.437231 | 0.194476 |
| MmugDNA.3786.1.S1_s_at  | MmugDNA.3786.1  | 13.88 | 13.79 | 0.02 | 0.03 | 1.06  | 0.059775 | 0.006682 | 0.40703  | 0.110612 |
| MmugDNA.17912.1.S1_at   | MmugDNA.17912.1 | 3.31  | 3.38  | 0.08 | 0.15 | -1.05 | 0.538996 | 0.598199 | 0.803644 | 0.760681 |
| MmugDNA.17913.1.S1_at   | MmugDNA.17913.1 | 5.61  | 5.26  | 0.48 | 0.33 | 1.28  | 0.129746 | 0.413545 | 0.504468 | 0.639648 |

|                         |                 |       |       |      |      |       |          |          |          |          |
|-------------------------|-----------------|-------|-------|------|------|-------|----------|----------|----------|----------|
| MmugDNA.17914.1.S1_at   | MmugDNA.17914.1 | 3.08  | 3.01  | 0.07 | 0.02 | 1.05  | 0.191372 | 0.103513 | 0.56283  | 0.364346 |
| MmugDNA.17915.1.S1_at   | MmugDNA.17915.1 | 6.54  | 6.47  | 0.2  | 0.11 | 1.05  | 0.372285 | 0.333627 | 0.705567 | 0.581808 |
| MmugDNA.31853.1.S1_s_at | MmugDNA.31853.1 | 3.4   | 3.59  | 0.29 | 0.18 | -1.14 | 0.936223 | 0.953088 | 0.978537 | 0.973379 |
| MmugDNA.17916.1.S1_at   | MmugDNA.17916.1 | 9.8   | 9.54  | 0.42 | 0.2  | 1.2   | 0.36963  | 0.213154 | 0.704264 | 0.487068 |
| MmugDNA.19343.1.S1_s_at | MmugDNA.19343.1 | 5.09  | 4.93  | 0.02 | 0.11 | 1.11  | 0.070672 | 0.119948 | 0.42977  | 0.388671 |
| MmugDNA.17918.1.S1_at   | MmugDNA.17918.1 | 4.62  | 4.32  | 0.19 | 0.13 | 1.23  | 0.088644 | 0.048669 | 0.456387 | 0.265629 |
| MmugDNA.1792.1.S1_at    | MmugDNA.1792.1  | 11.17 | 11.16 | 0.13 | 0.1  | 1.01  | 0.499981 | 0.457987 | 0.782311 | 0.670999 |
| MmugDNA.17920.1.S1_at   | MmugDNA.17920.1 | 10.81 | 10.86 | 0.24 | 0.04 | -1.04 | 0.588989 | 0.202552 | 0.832093 | 0.476882 |
| MmugDNA.17921.1.S1_at   | MmugDNA.17921.1 | 4.55  | 4.55  | 0.05 | 0.27 | -1    | 0.935484 | 0.878256 | 0.978197 | 0.930529 |
| MmugDNA.17922.1.S1_at   | MmugDNA.17922.1 | 7.57  | 7.49  | 0.03 | 0.06 | 1.05  | 0.164228 | 0.634124 | 0.537214 | 0.784644 |
| MmugDNA.17923.1.S1_at   | MmugDNA.17923.1 | 4.95  | 4.96  | 0.04 | 0.12 | -1    | 0.906736 | 0.987868 | 0.968356 | 0.993223 |
| MmugDNA.17924.1.S1_at   | MmugDNA.17924.1 | 3.48  | 3.58  | 0.23 | 0.06 | -1.07 | 0.736124 | 0.972634 | 0.899004 | 0.98528  |
| MmugDNA.17926.1.S1_at   | MmugDNA.17926.1 | 5.55  | 5.45  | 0.04 | 0.07 | 1.07  | 0.195092 | 0.268335 | 0.565513 | 0.534041 |
| MmugDNA.17927.1.S1_at   | MmugDNA.17927.1 | 3.37  | 3.23  | 0.09 | 0.06 | 1.1   | 0.10292  | 0.123037 | 0.473381 | 0.392988 |
| MmugDNA.17928.1.S1_at   | MmugDNA.17928.1 | 7.49  | 7.49  | 0.96 | 0.37 | -1    | 0.61886  | 0.261836 | 0.846305 | 0.528265 |
| MmugDNA.17929.1.S1_at   | MmugDNA.17929.1 | 3.77  | 3.29  | 0.14 | 0.13 | 1.39  | 0.048432 | 0.191069 | 0.383306 | 0.466358 |
| MmugDNA.1793.1.S1_at    | MmugDNA.1793.1  | 8.69  | 9.11  | 0.55 | 0.1  | -1.33 | 0.195002 | 0.264385 | 0.565435 | 0.530385 |
| MmugDNA.17930.1.S1_at   | MmugDNA.17930.1 | 4     | 3.96  | 0.09 | 0.07 | 1.03  | 0.829326 | 0.968321 | 0.938768 | 0.982558 |
| MmugDNA.17932.1.S1_at   | MmugDNA.17932.1 | 3.64  | 5.67  | 0.6  | 0.51 | -4.08 | 0.019245 | 0.012954 | 0.300345 | 0.146485 |
| MmugDNA.17933.1.S1_at   | MmugDNA.17933.1 | 5.18  | 4.95  | 0.18 | 0.14 | 1.17  | 0.341853 | 0.278942 | 0.685457 | 0.542661 |
| MmugDNA.17934.1.S1_at   | MmugDNA.17934.1 | 5.34  | 6.45  | 0.24 | 0.2  | -2.16 | 0.002215 | 0.006112 | 0.174757 | 0.10649  |
| MmugDNA.17935.1.S1_at   | MmugDNA.17935.1 | 11.14 | 11.49 | 0.25 | 0.04 | -1.28 | 0.079781 | 0.025402 | 0.442778 | 0.199747 |
| MmugDNA.17936.1.S1_at   | MmugDNA.17936.1 | 3.13  | 3.09  | 0.11 | 0.13 | 1.03  | 0.150978 | 0.329576 | 0.52444  | 0.578781 |
| MmugDNA.17937.1.S1_at   | MmugDNA.17937.1 | 4.96  | 4.9   | 0.03 | 0.04 | 1.04  | 0.106477 | 0.028877 | 0.478853 | 0.211763 |
| MmugDNA.1794.1.S1_at    | MmugDNA.1794.1  | 5.08  | 5.02  | 0.11 | 0.15 | 1.04  | 0.60982  | 0.773818 | 0.841773 | 0.868485 |
| MmugDNA.17942.1.S1_at   | MmugDNA.17942.1 | 4.49  | 4.71  | 0.23 | 0.12 | -1.16 | 0.217212 | 0.024509 | 0.587151 | 0.195985 |
| MmugDNA.17944.1.S1_at   | MmugDNA.17944.1 | 5.91  | 5.95  | 0.49 | 0.17 | -1.03 | 0.335027 | 0.364928 | 0.680736 | 0.60517  |
| MmugDNA.17945.1.S1_at   | MmugDNA.17945.1 | 11.08 | 10.65 | 0.48 | 0.06 | 1.35  | 0.180031 | 0.053734 | 0.553172 | 0.277384 |
| MmugDNA.17948.1.S1_at   | MmugDNA.17948.1 | 4.61  | 4.55  | 0.11 | 0.13 | 1.05  | 0.190291 | 0.146116 | 0.561558 | 0.420099 |
| MmugDNA.17949.1.S1_at   | MmugDNA.17949.1 | 4.76  | 4.68  | 0.43 | 0.18 | 1.06  | 0.188134 | 0.344758 | 0.56029  | 0.590101 |
| MmugDNA.1795.1.S1_at    | MmugDNA.1795.1  | 4.42  | 4.44  | 0.08 | 0.22 | -1.01 | 0.89692  | 0.823392 | 0.964969 | 0.898498 |
| MmugDNA.17953.1.S1_at   | MmugDNA.17953.1 | 6.97  | 6.34  | 0.64 | 0.19 | 1.55  | 0.236042 | 0.132526 | 0.603096 | 0.404544 |
| MmugDNA.17954.1.S1_at   | MmugDNA.17954.1 | 3.92  | 3.71  | 0.11 | 0.11 | 1.16  | 0.176934 | 0.257887 | 0.549992 | 0.525467 |
| MmugDNA.17955.1.S1_at   | MmugDNA.17955.1 | 4.07  | 3.99  | 0.11 | 0.21 | 1.06  | 0.271375 | 0.41656  | 0.631217 | 0.641647 |
| MmugDNA.42536.1.S1_s_at | MmugDNA.42536.1 | 14.15 | 14.21 | 0.12 | 0.05 | -1.05 | 0.319282 | 0.402083 | 0.668689 | 0.631176 |
| MmugDNA.17957.1.S1_at   | MmugDNA.17957.1 | 4.08  | 4.11  | 0.38 | 0.13 | -1.02 | 0.352151 | 0.463074 | 0.692649 | 0.674206 |
| MmugDNA.17958.1.S1_at   | MmugDNA.17958.1 | 5.64  | 5.52  | 0.79 | 0.18 | 1.08  | 0.447657 | 0.353898 | 0.753435 | 0.596886 |
| MmugDNA.17959.1.S1_at   | MmugDNA.17959.1 | 8.03  | 8.11  | 0.2  | 0.08 | -1.06 | 0.335575 | 0.220653 | 0.681162 | 0.494069 |
| MmugDNA.1796.1.S1_at    | MmugDNA.1796.1  | 3.51  | 3.52  | 0.04 | 0.02 | -1    | 0.87725  | 0.692129 | 0.957209 | 0.82091  |
| MmugDNA.24774.1.S1_s_at | MmugDNA.24774.1 | 10.91 | 10.87 | 0.45 | 0.08 | 1.03  | 0.945195 | 0.514274 | 0.980914 | 0.707592 |
| MmugDNA.17961.1.S1_at   | MmugDNA.17961.1 | 12.73 | 12.68 | 0.44 | 0.05 | 1.03  | 0.904551 | 0.845852 | 0.967857 | 0.912246 |
| MmugDNA.17962.1.S1_at   | MmugDNA.17962.1 | 7.54  | 7.82  | 0.4  | 0.37 | -1.21 | 0.194332 | 0.0992   | 0.564869 | 0.357381 |
| MmugDNA.17964.1.S1_at   | MmugDNA.17964.1 | 5.71  | 6.35  | 0.06 | 0.19 | -1.55 | 0.005254 | 0.04562  | 0.206812 | 0.257766 |

|                         |                 |       |       |      |      |       |          |          |          |          |
|-------------------------|-----------------|-------|-------|------|------|-------|----------|----------|----------|----------|
| MmugDNA.17964.1.S1_s_at | MmugDNA.17964.1 | 5.31  | 5.25  | 0.07 | 0.05 | 1.04  | 0.289211 | 0.583886 | 0.645901 | 0.752043 |
| MmugDNA.17966.1.S1_x_at | MmugDNA.17966.1 | 10.99 | 11.41 | 0.45 | 0.08 | -1.34 | 0.471979 | 0.071164 | 0.766784 | 0.313063 |
| MmugDNA.1797.1.S1_at    | MmugDNA.1797.1  | 8.78  | 9.5   | 0.51 | 0.26 | -1.64 | 0.162852 | 0.193375 | 0.535867 | 0.468698 |
| MmugDNA.17970.1.S1_at   | MmugDNA.17970.1 | 8.77  | 8.64  | 0.2  | 0.08 | 1.09  | 0.214064 | 0.042057 | 0.584621 | 0.249589 |
| MmugDNA.17971.1.S1_at   | MmugDNA.17971.1 | 3.69  | 3.69  | 0.04 | 0.15 | 1     | 0.32217  | 0.158692 | 0.670822 | 0.434745 |
| MmugDNA.17972.1.S1_at   | MmugDNA.17972.1 | 5.62  | 6.31  | 0.57 | 0.17 | -1.61 | 0.184745 | 0.400364 | 0.557496 | 0.630177 |
| MmugDNA.17974.1.S1_at   | MmugDNA.17974.1 | 5.93  | 6.16  | 0.24 | 0.04 | -1.17 | 0.171104 | 0.128114 | 0.544246 | 0.399126 |
| MmugDNA.17975.1.S1_s_at | MmugDNA.17975.1 | 11.78 | 11.38 | 0.94 | 0.22 | 1.32  | 0.972819 | 0.745481 | 0.991136 | 0.852409 |
| MmugDNA.17976.1.S1_at   | MmugDNA.17976.1 | 5.8   | 5.04  | 0.32 | 0.25 | 1.68  | 0.145549 | 0.0814   | 0.520527 | 0.329571 |
| MmugDNA.17978.1.S1_at   | MmugDNA.17978.1 | 5.2   | 4.97  | 0.5  | 0.21 | 1.17  | 0.202787 | 0.406072 | 0.574251 | 0.634197 |
| MmugDNA.17979.1.S1_at   | MmugDNA.17979.1 | 8.44  | 7.41  | 0.41 | 0.12 | 2.05  | 0.031651 | 0.042258 | 0.341694 | 0.250023 |
| MmugDNA.17980.1.S1_at   | MmugDNA.17980.1 | 7.29  | 6.75  | 0.53 | 0.23 | 1.46  | 0.112557 | 0.138477 | 0.485877 | 0.411453 |
| MmugDNA.17981.1.S1_at   | MmugDNA.17981.1 | 7.12  | 7.04  | 0.64 | 0.03 | 1.06  | 0.800208 | 0.592648 | 0.92683  | 0.757854 |
| MmugDNA.17982.1.S1_at   | MmugDNA.17982.1 | 6.26  | 6.12  | 0.09 | 0.04 | 1.1   | 0.034863 | 0.05054  | 0.350453 | 0.270205 |
| MmugDNA.17983.1.S1_at   | MmugDNA.17983.1 | 3.9   | 4.17  | 0.27 | 0.69 | -1.21 | 0.482062 | 0.412173 | 0.772274 | 0.638576 |
| MmugDNA.17984.1.S1_at   | MmugDNA.17984.1 | 4.58  | 4.49  | 0.14 | 0.06 | 1.06  | 0.261824 | 0.47315  | 0.62407  | 0.68048  |
| MmugDNA.17985.1.S1_at   | MmugDNA.17985.1 | 12.6  | 12.69 | 0.88 | 0.01 | -1.06 | 0.444103 | 0.539499 | 0.751101 | 0.723763 |
| MmugDNA.17987.1.S1_at   | MmugDNA.17987.1 | 4.82  | 4.6   | 0.45 | 0.22 | 1.17  | 0.490088 | 0.262825 | 0.776766 | 0.529164 |
| MmugDNA.17988.1.S1_at   | MmugDNA.17988.1 | 6.1   | 5.8   | 0.3  | 0.22 | 1.23  | 0.121632 | 0.377138 | 0.495271 | 0.614819 |
| MmugDNA.1799.1.S1_at    | MmugDNA.1799.1  | 4.89  | 4.59  | 0.16 | 0.16 | 1.23  | 0.119722 | 0.134137 | 0.493259 | 0.406393 |
| MmugDNA.17990.1.S1_at   | MmugDNA.17990.1 | 6.22  | 6.16  | 0.12 | 0.05 | 1.05  | 0.482682 | 0.816814 | 0.772527 | 0.894329 |
| MmugDNA.17993.1.S1_at   | MmugDNA.17993.1 | 4.76  | 5.16  | 0.11 | 0.19 | -1.32 | 0.067129 | 0.039378 | 0.423177 | 0.243406 |
| MmugDNA.17999.1.S1_at   | MmugDNA.17999.1 | 5.88  | 5.79  | 0.25 | 0.02 | 1.06  | 0.564138 | 0.777091 | 0.81857  | 0.870506 |
| MmugDNA.18.1.S1_at      | MmugDNA.18.1    | 4     | 4.13  | 0.24 | 0.32 | -1.1  | 0.240337 | 0.089808 | 0.60669  | 0.34404  |
| MmugDNA.18000.1.S1_at   | MmugDNA.18000.1 | 3.9   | 5.19  | 1.07 | 0.36 | -2.45 | 0.35734  | 0.488581 | 0.695717 | 0.691222 |
| MmugDNA.18002.1.S1_at   | MmugDNA.18002.1 | 3.16  | 3.26  | 0.22 | 0.1  | -1.08 | 0.787502 | 0.953064 | 0.921953 | 0.973379 |
| MmugDNA.18003.1.S1_at   | MmugDNA.18003.1 | 6.02  | 5.94  | 0.23 | 0.03 | 1.06  | 0.899262 | 0.827664 | 0.965794 | 0.901081 |
| MmugDNA.18004.1.S1_at   | MmugDNA.18004.1 | 9.75  | 9.88  | 0.37 | 0.12 | -1.09 | 0.62559  | 0.337918 | 0.849478 | 0.585111 |
| MmugDNA.18007.1.S1_at   | MmugDNA.18007.1 | 8.01  | 7.74  | 0.69 | 0.26 | 1.21  | 0.77931  | 0.040976 | 0.918638 | 0.247202 |
| MmugDNA.18007.1.S1_s_at | MmugDNA.18007.1 | 9.3   | 9.03  | 0.72 | 0.34 | 1.2   | 0.629781 | 0.062207 | 0.851714 | 0.296296 |
| MmugDNA.18008.1.S1_at   | MmugDNA.18008.1 | 5.65  | 5.77  | 0.1  | 0.06 | -1.09 | 0.264622 | 0.264406 | 0.626029 | 0.530385 |
| MmugDNA.18009.1.S1_at   | MmugDNA.18009.1 | 5.44  | 4.52  | 0.51 | 0.18 | 1.9   | 0.042314 | 0.201817 | 0.368868 | 0.476367 |
| MmugDNA.1801.1.S1_at    | MmugDNA.1801.1  | 3.39  | 3.23  | 0.19 | 0.08 | 1.12  | 0.379536 | 0.110101 | 0.709048 | 0.374235 |
| MmugDNA.18012.1.S1_at   | MmugDNA.18012.1 | 6.9   | 6.91  | 0.12 | 0.06 | -1.01 | 0.68335  | 0.284762 | 0.876089 | 0.546966 |
| MmugDNA.18014.1.S1_at   | MmugDNA.18014.1 | 3.94  | 3.89  | 0.29 | 0.24 | 1.04  | 0.464319 | 0.15585  | 0.762534 | 0.431223 |
| MmugDNA.18016.1.S1_at   | MmugDNA.18016.1 | 6.17  | 5.89  | 0.16 | 0.19 | 1.21  | 0.288937 | 0.428045 | 0.645891 | 0.649619 |
| MmugDNA.18017.1.S1_at   | MmugDNA.18017.1 | 10.01 | 9.66  | 0.22 | 0.13 | 1.28  | 0.045384 | 0.048608 | 0.376374 | 0.265596 |
| MmugDNA.18018.1.S1_at   | MmugDNA.18018.1 | 5.19  | 5.07  | 0.17 | 0.16 | 1.09  | 0.197572 | 0.126808 | 0.568541 | 0.397446 |
| MmugDNA.18019.1.S1_at   | MmugDNA.18019.1 | 4.19  | 4.29  | 0.07 | 0.12 | -1.07 | 0.67305  | 0.074627 | 0.87116  | 0.318313 |
| MmugDNA.18020.1.S1_at   | MmugDNA.18020.1 | 3.63  | 3.73  | 0.67 | 0.06 | -1.08 | 0.465306 | 0.643489 | 0.763035 | 0.790956 |
| MmugDNA.18021.1.S1_at   | MmugDNA.18021.1 | 4.85  | 4     | 0.28 | 0.32 | 1.8   | 0.053066 | 0.219171 | 0.393954 | 0.492915 |
| MmugDNA.18022.1.S1_at   | MmugDNA.18022.1 | 3.65  | 3.46  | 0.51 | 0.17 | 1.14  | 0.510933 | 0.5286   | 0.788419 | 0.71669  |
| MmugDNA.18023.1.S1_at   | MmugDNA.18023.1 | 6.39  | 6.3   | 0.14 | 0.05 | 1.06  | 0.180962 | 0.398855 | 0.554261 | 0.629585 |

|                         |                 |       |       |      |      |       |          |          |          |          |
|-------------------------|-----------------|-------|-------|------|------|-------|----------|----------|----------|----------|
| MmugDNA.18024.1.S1_at   | MmugDNA.18024.1 | 6.15  | 6.73  | 1.24 | 0.27 | -1.5  | 0.572128 | 0.781145 | 0.823145 | 0.873038 |
| MmugDNA.18025.1.S1_at   | MmugDNA.18025.1 | 3.2   | 3.29  | 0.05 | 0.09 | -1.06 | 0.926699 | 0.325651 | 0.97568  | 0.575963 |
| MmugDNA.18027.1.S1_at   | MmugDNA.18027.1 | 5.79  | 5.37  | 0.43 | 0.22 | 1.33  | 0.335056 | 0.366349 | 0.680736 | 0.606087 |
| MmugDNA.18029.1.S1_at   | MmugDNA.18029.1 | 6.48  | 6.29  | 0.12 | 0.11 | 1.14  | 0.049936 | 0.123169 | 0.386663 | 0.39322  |
| MmugDNA.1803.1.S1_at    | MmugDNA.1803.1  | 3.61  | 3.75  | 0.06 | 0.14 | -1.11 | 0.469589 | 0.668362 | 0.765623 | 0.805934 |
| MmugDNA.18030.1.S1_at   | MmugDNA.18030.1 | 5.54  | 5.33  | 0.23 | 0.1  | 1.16  | 0.604996 | 0.863296 | 0.839761 | 0.922356 |
| MmugDNA.18033.1.S1_at   | MmugDNA.18033.1 | 5.11  | 5.11  | 0.08 | 0.07 | 1     | 0.876321 | 0.368596 | 0.956886 | 0.608098 |
| MmugDNA.18034.1.S1_at   | MmugDNA.18034.1 | 8.51  | 8.05  | 0.15 | 0.05 | 1.38  | 0.006906 | 0.007884 | 0.224141 | 0.118304 |
| MmugDNA.18035.1.S1_at   | MmugDNA.18035.1 | 3.47  | 3.44  | 0.17 | 0.19 | 1.03  | 0.355558 | 0.516896 | 0.694743 | 0.709316 |
| MmugDNA.18036.1.S1_at   | MmugDNA.18036.1 | 3.05  | 3.01  | 0.41 | 0.02 | 1.03  | 0.598863 | 0.856886 | 0.837129 | 0.918235 |
| MmugDNA.18037.1.S1_at   | MmugDNA.18037.1 | 10.29 | 9.01  | 1.61 | 0.37 | 2.42  | 0.293065 | 0.244581 | 0.649405 | 0.514387 |
| MmugDNA.18038.1.S1_at   | MmugDNA.18038.1 | 5.67  | 6.25  | 0.13 | 0.14 | -1.5  | 0.005824 | 0.001066 | 0.211798 | 0.051835 |
| MmugDNA.1804.1.S1_at    | MmugDNA.1804.1  | 4.56  | 4.21  | 0.63 | 0.38 | 1.28  | 0.180426 | 0.271636 | 0.553635 | 0.536577 |
| MmugDNA.18040.1.S1_at   | MmugDNA.18040.1 | 4.51  | 4.25  | 0.04 | 0.43 | 1.19  | 0.776917 | 0.768031 | 0.917413 | 0.865326 |
| MmugDNA.18040.1.S1_s_at | MmugDNA.18040.1 | 3.88  | 3.87  | 0.12 | 0.09 | 1.01  | 0.339434 | 0.49976  | 0.683826 | 0.698494 |
| MmugDNA.18041.1.S1_at   | MmugDNA.18041.1 | 8.42  | 8.05  | 0.06 | 0.08 | 1.29  | 0.002669 | 0.029457 | 0.182785 | 0.213368 |
| MmugDNA.18042.1.S1_at   | MmugDNA.18042.1 | 4.76  | 4.76  | 0.12 | 0.05 | -1    | 0.444073 | 0.833449 | 0.751101 | 0.904502 |
| MmugDNA.18043.1.S1_at   | MmugDNA.18043.1 | 8.06  | 7.27  | 0.3  | 0.22 | 1.73  | 0.029296 | 0.119822 | 0.334049 | 0.388577 |
| MmugDNA.18044.1.S1_at   | MmugDNA.18044.1 | 5.29  | 5.23  | 0.14 | 0.12 | 1.04  | 0.586561 | 0.829256 | 0.831389 | 0.901825 |
| MmugDNA.18045.1.S1_at   | MmugDNA.18045.1 | 11.09 | 10.96 | 0.53 | 0.06 | 1.09  | 0.602625 | 0.613528 | 0.838892 | 0.770578 |
| MmugDNA.18047.1.S1_at   | MmugDNA.18047.1 | 4.26  | 4.35  | 0.2  | 0.18 | -1.06 | 0.872014 | 0.979034 | 0.955658 | 0.988665 |
| MmugDNA.18048.1.S1_at   | MmugDNA.18048.1 | 3.84  | 4.01  | 0.27 | 0.13 | -1.12 | 0.309107 | 0.308917 | 0.661444 | 0.564656 |
| MmugDNA.18049.1.S1_s_at | MmugDNA.18049.1 | 3.37  | 3.36  | 0.35 | 0.41 | 1.01  | 0.563673 | 0.517327 | 0.818336 | 0.709435 |
| MmugDNA.1805.1.S1_at    | MmugDNA.1805.1  | 8.45  | 7.77  | 0.58 | 0.2  | 1.6   | 0.193683 | 0.053978 | 0.564275 | 0.27777  |
| MmugDNA.18050.1.S1_at   | MmugDNA.18050.1 | 3.09  | 3.1   | 0.46 | 0.06 | -1    | 0.376125 | 0.504713 | 0.706657 | 0.70178  |
| MmugDNA.18051.1.S1_at   | MmugDNA.18051.1 | 8.58  | 9.23  | 0.35 | 0.07 | -1.57 | 0.069152 | 0.128717 | 0.426656 | 0.400135 |
| MmugDNA.18052.1.S1_at   | MmugDNA.18052.1 | 4.8   | 4.71  | 0.02 | 0.06 | 1.06  | 0.12189  | 0.065447 | 0.495636 | 0.301415 |
| MmugDNA.18053.1.S1_at   | MmugDNA.18053.1 | 7.52  | 7.02  | 0.74 | 0.29 | 1.41  | 0.945537 | 0.976513 | 0.981018 | 0.987202 |
| MmugDNA.18054.1.S1_at   | MmugDNA.18054.1 | 3.45  | 3.4   | 0.02 | 0.08 | 1.04  | 0.166816 | 0.184694 | 0.539457 | 0.460645 |
| MmugDNA.18056.1.S1_at   | MmugDNA.18056.1 | 4.13  | 4.5   | 0.32 | 0.12 | -1.29 | 0.52362  | 0.16467  | 0.795656 | 0.440974 |
| MmugDNA.18057.1.S1_at   | MmugDNA.18057.1 | 5.88  | 5.78  | 0.09 | 0.05 | 1.07  | 0.23844  | 0.712567 | 0.605341 | 0.833385 |
| MmugDNA.18058.1.S1_at   | MmugDNA.18058.1 | 5.95  | 5.95  | 0.07 | 0.03 | 1.01  | 0.311305 | 0.683738 | 0.663166 | 0.815491 |
| MmugDNA.18059.1.S1_at   | MmugDNA.18059.1 | 5.04  | 5.04  | 0.14 | 0.15 | -1    | 0.981933 | 0.977828 | 0.994301 | 0.9879   |
| MmugDNA.1806.1.S1_at    | MmugDNA.1806.1  | 10.82 | 11    | 0.15 | 0.21 | -1.14 | 0.561611 | 0.180452 | 0.817232 | 0.457115 |
| MmugDNA.18061.1.S1_a_at | MmugDNA.18061.1 | 7.04  | 7     | 0.17 | 0.08 | 1.03  | 0.546997 | 0.422506 | 0.808912 | 0.645729 |
| MmugDNA.18061.1.S1_at   | MmugDNA.18061.1 | 5.12  | 4.94  | 0.3  | 0.1  | 1.14  | 0.31468  | 0.321254 | 0.665396 | 0.573153 |
| MmugDNA.18062.1.S1_at   | MmugDNA.18062.1 | 4.54  | 4.82  | 0.26 | 0.06 | -1.22 | 0.128268 | 0.501764 | 0.502907 | 0.699813 |
| MmugDNA.18063.1.S1_at   | MmugDNA.18063.1 | 4.59  | 4.37  | 0.05 | 0.27 | 1.17  | 0.712257 | 0.739452 | 0.887927 | 0.848995 |
| MmugDNA.18064.1.S1_at   | MmugDNA.18064.1 | 5.39  | 5.34  | 0.12 | 0.01 | 1.03  | 0.417616 | 0.521849 | 0.735015 | 0.712654 |
| MmugDNA.18066.1.S1_at   | MmugDNA.18066.1 | 12.65 | 12.2  | 0.61 | 0.14 | 1.36  | 0.793328 | 0.347325 | 0.92426  | 0.591939 |
| MmugDNA.18067.1.S1_at   | MmugDNA.18067.1 | 6.01  | 6     | 0.14 | 0.37 | 1.01  | 0.444451 | 0.287484 | 0.751266 | 0.548718 |
| MmugDNA.18068.1.S1_at   | MmugDNA.18068.1 | 3.38  | 3.39  | 0.13 | 0.19 | -1.01 | 0.846678 | 0.630203 | 0.94629  | 0.782181 |
| MmugDNA.1807.1.S1_at    | MmugDNA.1807.1  | 4.81  | 5.56  | 0.56 | 0.57 | -1.67 | 0.232702 | 0.291715 | 0.600193 | 0.552054 |

|                         |                 |       |       |      |      |       |          |          |          |          |
|-------------------------|-----------------|-------|-------|------|------|-------|----------|----------|----------|----------|
| MmugDNA.18071.1.S1_at   | MmugDNA.18071.1 | 3.92  | 4.12  | 0.34 | 0.15 | -1.15 | 0.373313 | 0.52139  | 0.705567 | 0.712376 |
| MmugDNA.18072.1.S1_s_at | MmugDNA.18072.1 | 7.27  | 6.96  | 0.12 | 0.06 | 1.24  | 0.056278 | 0.385176 | 0.399721 | 0.62067  |
| MmugDNA.18073.1.S1_at   | MmugDNA.18073.1 | 5.2   | 6.15  | 0.42 | 0.06 | -1.93 | 0.013426 | 0.298728 | 0.268462 | 0.557321 |
| MmugDNA.18074.1.S1_at   | MmugDNA.18074.1 | 7.09  | 6.92  | 0.09 | 0.01 | 1.12  | 0.126231 | 0.043341 | 0.499941 | 0.252853 |
| MmugDNA.18075.1.S1_at   | MmugDNA.18075.1 | 3.44  | 3.46  | 0.02 | 0    | -1.01 | 0.164029 | 0.804492 | 0.536763 | 0.887566 |
| MmugDNA.18076.1.S1_at   | MmugDNA.18076.1 | 3.72  | 3.81  | 0.09 | 0.01 | -1.06 | 0.157123 | 0.568419 | 0.530266 | 0.741962 |
| MmugDNA.18077.1.S1_at   | MmugDNA.18077.1 | 4.32  | 4.34  | 0.18 | 0.08 | -1.01 | 0.419588 | 0.733623 | 0.736366 | 0.845775 |
| MmugDNA.18078.1.S1_at   | MmugDNA.18078.1 | 5.41  | 5.42  | 0.29 | 0.2  | -1.01 | 0.629714 | 0.45251  | 0.851663 | 0.667112 |
| MmugDNA.18079.1.S1_at   | MmugDNA.18079.1 | 3.9   | 3.9   | 0.17 | 0.12 | -1    | 0.252339 | 0.379622 | 0.617313 | 0.616523 |
| MmugDNA.1808.1.S1_at    | MmugDNA.1808.1  | 5.62  | 5.6   | 0.02 | 0.23 | 1.01  | 0.552884 | 0.755381 | 0.811917 | 0.857562 |
| MmugDNA.18080.1.S1_at   | MmugDNA.18080.1 | 7.25  | 7.46  | 0.14 | 0.09 | -1.16 | 0.05717  | 0.08341  | 0.401473 | 0.333699 |
| MmugDNA.18081.1.S1_at   | MmugDNA.18081.1 | 8.3   | 8.78  | 0.22 | 0.22 | -1.39 | 0.057358 | 0.072028 | 0.402043 | 0.314459 |
| MmugDNA.18082.1.S1_at   | MmugDNA.18082.1 | 6.67  | 6.4   | 0.2  | 0.14 | 1.2   | 0.128276 | 0.240991 | 0.502907 | 0.511657 |
| MmugDNA.18084.1.S1_at   | MmugDNA.18084.1 | 6.64  | 7.02  | 0.29 | 0.19 | -1.3  | 0.107599 | 0.046375 | 0.480138 | 0.259844 |
| MmugDNA.18085.1.S1_at   | MmugDNA.18085.1 | 6.1   | 5.98  | 0.63 | 0.42 | 1.09  | 0.637172 | 0.826229 | 0.855394 | 0.900203 |
| MmugDNA.18086.1.S1_at   | MmugDNA.18086.1 | 6.32  | 6.2   | 0.11 | 0.05 | 1.09  | 0.628818 | 0.397675 | 0.851302 | 0.629038 |
| MmugDNA.18088.1.S1_at   | MmugDNA.18088.1 | 4.08  | 3.91  | 0.23 | 0.38 | 1.13  | 0.950941 | 0.569697 | 0.983356 | 0.742585 |
| MmugDNA.18089.1.S1_at   | MmugDNA.18089.1 | 10.45 | 10.65 | 0.25 | 0.07 | -1.14 | 0.328147 | 0.041587 | 0.675658 | 0.248831 |
| MmugDNA.1809.1.S1_at    | MmugDNA.1809.1  | 3.84  | 3.88  | 0.59 | 0.2  | -1.02 | 0.310824 | 0.688637 | 0.662677 | 0.818251 |
| MmugDNA.18090.1.S1_at   | MmugDNA.18090.1 | 3.83  | 3.8   | 0.15 | 0.11 | 1.02  | 0.949817 | 0.995207 | 0.983047 | 0.996999 |
| MmugDNA.18091.1.S1_at   | MmugDNA.18091.1 | 5.58  | 5.6   | 0.32 | 0.49 | -1.01 | 0.985449 | 0.974867 | 0.995448 | 0.986264 |
| MmugDNA.18092.1.S1_at   | MmugDNA.18092.1 | 7.58  | 8.68  | 0.84 | 0.07 | -2.15 | 0.266897 | 0.085477 | 0.627652 | 0.337473 |
| MmugDNA.18093.1.S1_at   | MmugDNA.18093.1 | 11.23 | 10.62 | 0.34 | 0.17 | 1.53  | 0.037354 | 0.005041 | 0.357066 | 0.098963 |
| MmugDNA.18094.1.S1_at   | MmugDNA.18094.1 | 3.55  | 3.7   | 0.02 | 0.03 | -1.11 | 0.002666 | 0.242946 | 0.182785 | 0.513319 |
| MmugDNA.18097.1.S1_at   | MmugDNA.18097.1 | 5.23  | 5.06  | 0.1  | 0.17 | 1.13  | 0.131597 | 0.148435 | 0.505989 | 0.423007 |
| MmugDNA.18098.1.S1_s_at | MmugDNA.18098.1 | 5.67  | 5.63  | 0.06 | 0.1  | 1.03  | 0.552692 | 0.664039 | 0.811917 | 0.803247 |
| MmugDNA.181.1.S1_at     | MmugDNA.181.1   | 11.56 | 12.16 | 0.04 | 0.03 | -1.51 | 0.000043 | 0.000001 | 0.108151 | 0.007307 |
| MmugDNA.1810.1.S1_at    | MmugDNA.1810.1  | 4.96  | 4.84  | 0.09 | 0.16 | 1.09  | 0.126465 | 0.093818 | 0.500304 | 0.350281 |
| MmugDNA.18101.1.S1_at   | MmugDNA.18101.1 | 6.4   | 6.83  | 1.98 | 0.61 | -1.35 | 0.646767 | 0.049994 | 0.859251 | 0.268839 |
| MmugDNA.18102.1.S1_at   | MmugDNA.18102.1 | 4.38  | 3.97  | 0.06 | 0.09 | 1.33  | 0.005083 | 0.003284 | 0.204981 | 0.082541 |
| MmugDNA.18103.1.S1_at   | MmugDNA.18103.1 | 5.45  | 5.26  | 0.13 | 0.1  | 1.14  | 0.108152 | 0.279623 | 0.480558 | 0.543186 |
| MmugDNA.18103.1.S1_x_at | MmugDNA.18103.1 | 5.05  | 4.93  | 0.09 | 0.12 | 1.09  | 0.088263 | 0.060457 | 0.45606  | 0.292547 |
| MmugDNA.18104.1.S1_at   | MmugDNA.18104.1 | 3.96  | 3.73  | 0.23 | 0.21 | 1.17  | 0.274142 | 0.32009  | 0.633792 | 0.572459 |
| MmugDNA.18106.1.S1_at   | MmugDNA.18106.1 | 6.49  | 5.61  | 0.49 | 0.21 | 1.84  | 0.049948 | 0.061967 | 0.386663 | 0.295763 |
| MmugDNA.18107.1.S1_at   | MmugDNA.18107.1 | 6.92  | 6.8   | 0.15 | 0.15 | 1.08  | 0.73171  | 0.901667 | 0.896887 | 0.944043 |
| MmugDNA.18108.1.S1_at   | MmugDNA.18108.1 | 9.15  | 9.51  | 0.54 | 0.18 | -1.28 | 0.26599  | 0.05227  | 0.627047 | 0.274146 |
| MmugDNA.18109.1.S1_at   | MmugDNA.18109.1 | 3.78  | 3.87  | 0.17 | 0.12 | -1.07 | 0.428692 | 0.693887 | 0.74202  | 0.821989 |
| MmugDNA.1811.1.S1_at    | MmugDNA.1811.1  | 9.7   | 9.82  | 0.85 | 0.1  | -1.09 | 0.868206 | 0.191227 | 0.953843 | 0.466553 |
| MmugDNA.18110.1.S1_at   | MmugDNA.18110.1 | 6.62  | 6.6   | 0.08 | 0.08 | 1.02  | 0.871691 | 0.47671  | 0.955537 | 0.682871 |
| MmugDNA.18115.1.S1_at   | MmugDNA.18115.1 | 5.67  | 5.57  | 0.24 | 0.06 | 1.07  | 0.432883 | 0.412153 | 0.744141 | 0.638565 |
| MmugDNA.18116.1.S1_s_at | MmugDNA.18116.1 | 3.64  | 3.62  | 0.07 | 0.13 | 1.01  | 0.485644 | 0.686435 | 0.774411 | 0.817012 |
| MmugDNA.18117.1.S1_at   | MmugDNA.18117.1 | 4.48  | 4.47  | 0.09 | 0.04 | 1.01  | 0.737397 | 0.643493 | 0.899479 | 0.790956 |
| MmugDNA.18118.1.S1_at   | MmugDNA.18118.1 | 2.86  | 2.99  | 0.08 | 0.14 | -1.09 | 0.219979 | 0.336144 | 0.589114 | 0.583675 |

|                         |                 |       |       |      |      |       |          |          |          |          |
|-------------------------|-----------------|-------|-------|------|------|-------|----------|----------|----------|----------|
| MmugDNA.18119.1.S1_at   | MmugDNA.18119.1 | 3.64  | 3.88  | 0.13 | 0.18 | -1.18 | 0.039625 | 0.027627 | 0.362432 | 0.207522 |
| MmugDNA.18120.1.S1_at   | MmugDNA.18120.1 | 5.18  | 5.18  | 0.08 | 0.09 | -1    | 0.9725   | 0.146764 | 0.991098 | 0.420799 |
| MmugDNA.18121.1.S1_at   | MmugDNA.18121.1 | 9.65  | 8.55  | 0.72 | 0.5  | 2.14  | 0.071993 | 0.001214 | 0.431899 | 0.054455 |
| MmugDNA.18125.1.S1_at   | MmugDNA.18125.1 | 3.71  | 3.48  | 0.14 | 0.19 | 1.17  | 0.525178 | 0.194144 | 0.796179 | 0.469266 |
| MmugDNA.18126.1.S1_at   | MmugDNA.18126.1 | 8.27  | 9.15  | 0.64 | 0.05 | -1.84 | 0.049179 | 0.015865 | 0.385392 | 0.159789 |
| MmugDNA.18129.1.S1_at   | MmugDNA.18129.1 | 6.7   | 7.41  | 0.13 | 0.07 | -1.63 | 0.000999 | 0.015062 | 0.155374 | 0.155853 |
| MmugDNA.1813.1.S1_at    | MmugDNA.1813.1  | 3.66  | 3.66  | 0.03 | 0.08 | -1    | 0.285789 | 0.516573 | 0.643438 | 0.709034 |
| MmugDNA.18131.1.S1_at   | MmugDNA.18131.1 | 5.77  | 5.75  | 0.03 | 0.02 | 1.01  | 0.212009 | 0.940935 | 0.582772 | 0.966553 |
| MmugDNA.18132.1.S1_at   | MmugDNA.18132.1 | 5     | 4.76  | 0.18 | 0.08 | 1.18  | 0.272641 | 0.11241  | 0.632433 | 0.377784 |
| MmugDNA.31631.1.S1_s_at | MmugDNA.31631.1 | 6.98  | 6.83  | 0.07 | 0.08 | 1.11  | 0.182785 | 0.098781 | 0.555631 | 0.356894 |
| MmugDNA.18135.1.S1_at   | MmugDNA.18135.1 | 7.89  | 7.83  | 0.32 | 0.15 | -1.04 | 0.365353 | 0.762527 | 0.701002 | 0.86188  |
| MmugDNA.18137.1.S1_at   | MmugDNA.18137.1 | 7.8   | 7.82  | 0.21 | 0.35 | -1.01 | 0.846211 | 0.164644 | 0.94609  | 0.44095  |
| MmugDNA.18139.1.S1_at   | MmugDNA.18139.1 | 6.38  | 6.37  | 0.12 | 0.1  | 1.01  | 0.461419 | 0.404994 | 0.760917 | 0.633428 |
| MmugDNA.1814.1.S1_at    | MmugDNA.1814.1  | 6.82  | 6.47  | 0.24 | 0.1  | 1.28  | 0.041193 | 0.109073 | 0.365734 | 0.372869 |
| MmugDNA.18140.1.S1_at   | MmugDNA.18140.1 | 11.39 | 11.79 | 0.17 | 0.06 | -1.32 | 0.033932 | 0.007171 | 0.347468 | 0.113839 |
| MmugDNA.18142.1.S1_at   | MmugDNA.18142.1 | 5.68  | 5.38  | 0.37 | 0.25 | 1.23  | 0.493124 | 0.588915 | 0.778737 | 0.75527  |
| MmugDNA.18143.1.S1_at   | MmugDNA.18143.1 | 5.68  | 5.52  | 0.18 | 0.29 | 1.12  | 0.765876 | 0.590755 | 0.91197  | 0.756437 |
| MmugDNA.18144.1.S1_at   | MmugDNA.18144.1 | 5.85  | 5.51  | 0.52 | 0.03 | 1.26  | 0.389895 | 0.570937 | 0.716422 | 0.743422 |
| MmugDNA.18145.1.S1_at   | MmugDNA.18145.1 | 5     | 4.9   | 0.14 | 0.09 | 1.08  | 0.131853 | 0.393154 | 0.506276 | 0.626102 |
| MmugDNA.18146.1.S1_at   | MmugDNA.18146.1 | 3.13  | 3.13  | 0.13 | 0.01 | 1     | 0.33228  | 0.319807 | 0.678748 | 0.572154 |
| MmugDNA.18147.1.S1_at   | MmugDNA.18147.1 | 5.64  | 5.54  | 0.54 | 0.23 | 1.07  | 0.628819 | 0.373711 | 0.851302 | 0.612403 |
| MmugDNA.18148.1.S1_at   | MmugDNA.18148.1 | 8.73  | 9.12  | 2.08 | 0.43 | -1.31 | 0.579138 | 0.404564 | 0.826431 | 0.63306  |
| MmugDNA.18149.1.S1_at   | MmugDNA.18149.1 | 7.22  | 7.01  | 0.1  | 0.29 | 1.16  | 0.096238 | 0.427945 | 0.464755 | 0.649602 |
| MmugDNA.1815.1.S1_at    | MmugDNA.1815.1  | 5.39  | 5.36  | 0.16 | 0.17 | 1.02  | 0.258731 | 0.208322 | 0.622286 | 0.482199 |
| MmugDNA.18151.1.S1_at   | MmugDNA.18151.1 | 5.27  | 5.29  | 0.3  | 0.09 | -1.02 | 0.802025 | 0.666795 | 0.92785  | 0.804789 |
| MmugDNA.18152.1.S1_at   | MmugDNA.18152.1 | 7.19  | 7.04  | 0.09 | 0.08 | 1.11  | 0.221412 | 0.440845 | 0.591009 | 0.659138 |
| MmugDNA.18153.1.S1_at   | MmugDNA.18153.1 | 4.27  | 3.92  | 0.24 | 0.08 | 1.28  | 0.077499 | 0.000328 | 0.439545 | 0.035797 |
| MmugDNA.18154.1.S1_at   | MmugDNA.18154.1 | 6.39  | 6.62  | 0.23 | 0.08 | -1.17 | 0.213637 | 0.348459 | 0.58427  | 0.592593 |
| MmugDNA.18155.1.S1_at   | MmugDNA.18155.1 | 9.36  | 9.31  | 0.2  | 0.18 | 1.04  | 0.985102 | 0.99993  | 0.995311 | 0.999968 |
| MmugDNA.18156.1.S1_at   | MmugDNA.18156.1 | 9.59  | 9.94  | 0.49 | 0.19 | -1.28 | 0.326242 | 0.387122 | 0.673788 | 0.621935 |
| MmugDNA.18157.1.S1_at   | MmugDNA.18157.1 | 6.11  | 5.92  | 0.11 | 0.14 | 1.14  | 0.372626 | 0.604743 | 0.705567 | 0.764797 |
| MmugDNA.18159.1.S1_at   | MmugDNA.18159.1 | 12.53 | 11.96 | 0.26 | 0.16 | 1.48  | 0.041715 | 0.011264 | 0.36716  | 0.138076 |
| MmugDNA.1816.1.S1_at    | MmugDNA.1816.1  | 8.39  | 7.96  | 0.72 | 0.13 | 1.34  | 0.190113 | 0.134636 | 0.561346 | 0.406629 |
| MmugDNA.18160.1.S1_at   | MmugDNA.18160.1 | 9.41  | 9.5   | 0.15 | 0.03 | -1.07 | 0.092865 | 0.084189 | 0.461489 | 0.335266 |
| MmugDNA.18161.1.S1_at   | MmugDNA.18161.1 | 7.05  | 9.11  | 0.31 | 0.41 | -4.16 | 0.00373  | 0.009293 | 0.197739 | 0.127142 |
| MmugDNA.18162.1.S1_at   | MmugDNA.18162.1 | 4.6   | 4.7   | 0.16 | 0.39 | -1.08 | 0.81029  | 0.816732 | 0.931318 | 0.894294 |
| MmugDNA.18164.1.S1_at   | MmugDNA.18164.1 | 7.9   | 7.24  | 0.15 | 0.32 | 1.59  | 0.029261 | 0.002584 | 0.333974 | 0.075213 |
| MmugDNA.18165.1.S1_at   | MmugDNA.18165.1 | 5.58  | 6.34  | 0.35 | 0.19 | -1.69 | 0.124137 | 0.33035  | 0.498178 | 0.579112 |
| MmugDNA.18166.1.S1_at   | MmugDNA.18166.1 | 10.78 | 10.5  | 0.3  | 0.26 | 1.21  | 0.27382  | 0.013505 | 0.633464 | 0.148824 |
| MmugDNA.18167.1.S1_at   | MmugDNA.18167.1 | 4.46  | 4.44  | 0.07 | 0.26 | 1.02  | 0.871775 | 0.466407 | 0.955537 | 0.676284 |
| MmugDNA.18168.1.S1_at   | MmugDNA.18168.1 | 9.19  | 9.31  | 0.25 | 0.14 | -1.08 | 0.344558 | 0.187178 | 0.686997 | 0.463149 |
| MmugDNA.1817.1.S1_at    | MmugDNA.1817.1  | 5.94  | 5.72  | 0.34 | 0.17 | 1.16  | 0.135219 | 0.170735 | 0.509216 | 0.447316 |
| MmugDNA.18170.1.S1_at   | MmugDNA.18170.1 | 3.97  | 3.74  | 0.15 | 0.17 | 1.18  | 0.165004 | 0.216897 | 0.537704 | 0.490515 |

|                         |                 |       |       |      |      |       |          |          |          |          |
|-------------------------|-----------------|-------|-------|------|------|-------|----------|----------|----------|----------|
| MmugDNA.18171.1.S1_at   | MmugDNA.18171.1 | 5.21  | 4.91  | 0.36 | 0.1  | 1.23  | 0.208546 | 0.137804 | 0.580248 | 0.410769 |
| MmugDNA.18172.1.S1_at   | MmugDNA.18172.1 | 4.82  | 4.59  | 0.1  | 0.1  | 1.17  | 0.045635 | 0.022268 | 0.376875 | 0.1867   |
| MmugDNA.18173.1.S1_at   | MmugDNA.18173.1 | 7.42  | 7.83  | 0.9  | 0.08 | -1.33 | 0.363439 | 0.445969 | 0.700102 | 0.662623 |
| MmugDNA.18174.1.S1_at   | MmugDNA.18174.1 | 8.15  | 8.5   | 0.35 | 0.17 | -1.27 | 0.156123 | 0.064264 | 0.529456 | 0.299692 |
| MmugDNA.18175.1.S1_at   | MmugDNA.18175.1 | 10.73 | 11.4  | 0.5  | 0.03 | -1.6  | 0.077027 | 0.096633 | 0.438911 | 0.354145 |
| MmugDNA.18176.1.S1_at   | MmugDNA.18176.1 | 8.39  | 8.97  | 0.26 | 0.15 | -1.5  | 0.039282 | 0.054504 | 0.361498 | 0.278959 |
| MmugDNA.18177.1.S1_at   | MmugDNA.18177.1 | 8.04  | 8.21  | 0.19 | 0.14 | -1.13 | 0.526209 | 0.011379 | 0.796462 | 0.138214 |
| MmugDNA.18178.1.S1_at   | MmugDNA.18178.1 | 8.29  | 8.41  | 0.8  | 0.13 | -1.09 | 0.430773 | 0.054974 | 0.743048 | 0.279898 |
| MmugDNA.18178.1.S1_x_at | MmugDNA.18178.1 | 8.49  | 8.62  | 0.84 | 0.1  | -1.1  | 0.459257 | 0.039483 | 0.759371 | 0.243642 |
| MmugDNA.1818.1.S1_at    | MmugDNA.1818.1  | 7.87  | 7.72  | 0.1  | 0.05 | 1.11  | 0.075991 | 0.579801 | 0.437137 | 0.749289 |
| MmugDNA.18180.1.S1_at   | MmugDNA.18180.1 | 6.32  | 6.19  | 0.05 | 0.09 | 1.1   | 0.085294 | 0.53206  | 0.452447 | 0.718995 |
| MmugDNA.18182.1.S1_at   | MmugDNA.18182.1 | 5.36  | 4.98  | 0.82 | 0.17 | 1.3   | 0.361608 | 0.615597 | 0.698663 | 0.772101 |
| MmugDNA.18183.1.S1_at   | MmugDNA.18183.1 | 8.6   | 7.82  | 0.28 | 0.11 | 1.72  | 0.010067 | 0.012459 | 0.246058 | 0.14417  |
| MmugDNA.18184.1.S1_at   | MmugDNA.18184.1 | 7.85  | 6.66  | 0.77 | 0.37 | 2.29  | 0.264644 | 0.135303 | 0.626029 | 0.407381 |
| MmugDNA.18188.1.S1_at   | MmugDNA.18188.1 | 3.2   | 3.3   | 0.04 | 0.05 | -1.07 | 0.059207 | 0.062442 | 0.406296 | 0.296717 |
| MmugDNA.1819.1.S1_at    | MmugDNA.1819.1  | 3.82  | 4.51  | 0.34 | 0.22 | -1.62 | 0.032267 | 0.010328 | 0.343536 | 0.13301  |
| MmugDNA.18190.1.S1_at   | MmugDNA.18190.1 | 12.43 | 12.26 | 0.15 | 0.02 | 1.13  | 0.453987 | 0.630269 | 0.756455 | 0.782195 |
| MmugDNA.18194.1.S1_at   | MmugDNA.18194.1 | 7.71  | 7.72  | 0.5  | 0.11 | -1.01 | 0.41341  | 0.012013 | 0.732232 | 0.141846 |
| MmugDNA.18196.1.S1_at   | MmugDNA.18196.1 | 3.53  | 3.51  | 0.13 | 0.07 | 1.01  | 0.663811 | 0.032183 | 0.867421 | 0.222111 |
| MmugDNA.18197.1.S1_at   | MmugDNA.18197.1 | 4.03  | 3.74  | 0.21 | 0.16 | 1.22  | 0.231171 | 0.235238 | 0.599091 | 0.50629  |
| MmugDNA.18198.1.S1_at   | MmugDNA.18198.1 | 3.67  | 3.67  | 0.16 | 0.09 | -1    | 0.236224 | 0.44928  | 0.603256 | 0.664983 |
| MmugDNA.18200.1.S1_at   | MmugDNA.18200.1 | 8.56  | 8.72  | 0.05 | 0.07 | -1.12 | 0.01861  | 0.005176 | 0.298116 | 0.099727 |
| MmugDNA.18201.1.S1_at   | MmugDNA.18201.1 | 6.1   | 6.08  | 0    | 0.21 | 1.01  | 0.8281   | 0.880013 | 0.938183 | 0.93148  |
| MmugDNA.18202.1.S1_at   | MmugDNA.18202.1 | 3.14  | 3.17  | 0.12 | 0.07 | -1.02 | 0.376866 | 0.225055 | 0.707144 | 0.49773  |
| MmugDNA.18203.1.S1_at   | MmugDNA.18203.1 | 10.32 | 10.3  | 0.43 | 0.25 | 1.01  | 0.227676 | 0.027244 | 0.596693 | 0.206279 |
| MmugDNA.18204.1.S1_s_at | MmugDNA.18204.1 | 5.71  | 5.85  | 0.49 | 0.09 | -1.1  | 0.54037  | 0.734149 | 0.804374 | 0.845901 |
| MmugDNA.18205.1.S1_at   | MmugDNA.18205.1 | 7.24  | 7.43  | 0.22 | 0.04 | -1.14 | 0.163719 | 0.79188  | 0.536523 | 0.87976  |
| MmugDNA.18206.1.S1_at   | MmugDNA.18206.1 | 3.91  | 3.76  | 0.18 | 0.02 | 1.11  | 0.551664 | 0.80685  | 0.81144  | 0.888868 |
| MmugDNA.18207.1.S1_at   | MmugDNA.18207.1 | 3.46  | 3.64  | 0.15 | 0.14 | -1.13 | 0.474212 | 0.550755 | 0.767936 | 0.730611 |
| MmugDNA.18208.1.S1_at   | MmugDNA.18208.1 | 3.51  | 3.53  | 0.06 | 0.16 | -1.02 | 0.589042 | 0.288471 | 0.832123 | 0.54977  |
| MmugDNA.18209.1.S1_at   | MmugDNA.18209.1 | 8.9   | 9.34  | 0.96 | 0.2  | -1.36 | 0.314212 | 0.433605 | 0.665097 | 0.653865 |
| MmugDNA.1821.1.S1_at    | MmugDNA.1821.1  | 13.08 | 13.3  | 0.2  | 0.08 | -1.16 | 0.128435 | 0.235934 | 0.50309  | 0.507056 |
| MmugDNA.1821.1.S1_s_at  | MmugDNA.1821.1  | 13.36 | 13.54 | 0.18 | 0.09 | -1.13 | 0.13984  | 0.2725   | 0.515319 | 0.537245 |
| MmugDNA.18210.1.S1_at   | MmugDNA.18210.1 | 6.14  | 6.5   | 0.76 | 0.49 | -1.28 | 0.329504 | 0.480292 | 0.676395 | 0.68574  |
| MmugDNA.18211.1.S1_at   | MmugDNA.18211.1 | 3.16  | 2.94  | 0.11 | 0.19 | 1.16  | 0.416864 | 0.567161 | 0.734559 | 0.74107  |
| MmugDNA.18212.1.S1_at   | MmugDNA.18212.1 | 8.96  | 9.26  | 0.17 | 0.03 | -1.23 | 0.031069 | 0.037188 | 0.339566 | 0.237285 |
| MmugDNA.18213.1.S1_at   | MmugDNA.18213.1 | 3.25  | 3.31  | 0.13 | 0.16 | -1.04 | 0.988034 | 0.979286 | 0.995831 | 0.988845 |
| MmugDNA.18214.1.S1_at   | MmugDNA.18214.1 | 4.62  | 4.5   | 0.17 | 0.31 | 1.09  | 0.425362 | 0.541245 | 0.739988 | 0.724781 |
| MmugDNA.18217.1.S1_at   | MmugDNA.18217.1 | 5.02  | 4.95  | 0.01 | 0.42 | 1.05  | 0.599099 | 0.267887 | 0.837258 | 0.533607 |
| MmugDNA.18218.1.S1_at   | MmugDNA.18218.1 | 8.73  | 8.92  | 0.39 | 0.1  | -1.15 | 0.913229 | 0.661584 | 0.970487 | 0.801876 |
| MmugDNA.18219.1.S1_at   | MmugDNA.18219.1 | 10.96 | 10.72 | 0.8  | 0.06 | 1.17  | 0.601826 | 0.794117 | 0.838575 | 0.881296 |
| MmugDNA.1822.1.S1_at    | MmugDNA.1822.1  | 5.64  | 6.93  | 0.96 | 0.18 | -2.45 | 0.256884 | 0.372203 | 0.620749 | 0.61109  |
| MmugDNA.18220.1.S1_at   | MmugDNA.18220.1 | 4.81  | 4.71  | 0.17 | 0.16 | 1.08  | 0.50623  | 0.430187 | 0.785704 | 0.651255 |



|                         |                 |       |       |      |      |       |          |          |          |          |
|-------------------------|-----------------|-------|-------|------|------|-------|----------|----------|----------|----------|
| MmugDNA.18221.1.S1_at   | MmugDNA.18221.1 | 5.68  | 5.53  | 0.54 | 0.47 | 1.11  | 0.855552 | 0.5226   | 0.948948 | 0.713255 |
| MmugDNA.18222.1.S1_at   | MmugDNA.18222.1 | 5     | 4.84  | 0.09 | 0.21 | 1.11  | 0.288258 | 0.490791 | 0.645355 | 0.692666 |
| MmugDNA.18223.1.S1_at   | MmugDNA.18223.1 | 5.97  | 5.92  | 0.08 | 0.03 | 1.04  | 0.892757 | 0.806357 | 0.963274 | 0.888642 |
| MmugDNA.18225.1.S1_at   | MmugDNA.18225.1 | 4.73  | 4.81  | 0.03 | 0.13 | -1.06 | 0.95857  | 0.594824 | 0.986368 | 0.758675 |
| MmugDNA.18226.1.S1_at   | MmugDNA.18226.1 | 2.98  | 3.02  | 0.25 | 0.12 | -1.03 | 0.562722 | 0.747557 | 0.81781  | 0.853168 |
| MmugDNA.18229.1.S1_at   | MmugDNA.18229.1 | 4.63  | 4.2   | 0.2  | 0.19 | 1.34  | 0.049971 | 0.047032 | 0.386663 | 0.261469 |
| MmugDNA.5447.1.S1_s_at  | MmugDNA.5447.1  | 4.15  | 3.87  | 0.22 | 0.16 | 1.22  | 0.320507 | 0.198864 | 0.669365 | 0.473475 |
| MmugDNA.18230.1.S1_at   | MmugDNA.18230.1 | 3.09  | 3.06  | 0.03 | 0.13 | 1.02  | 0.782839 | 0.103762 | 0.920092 | 0.364519 |
| MmugDNA.18231.1.S1_at   | MmugDNA.18231.1 | 3.61  | 3.61  | 0    | 0.05 | 1     | 0.373901 | 0.936831 | 0.705567 | 0.964385 |
| MmugDNA.18232.1.S1_at   | MmugDNA.18232.1 | 12.73 | 12.7  | 0.17 | 0.02 | 1.02  | 0.794466 | 0.932441 | 0.924569 | 0.961712 |
| MmugDNA.18237.1.S1_at   | MmugDNA.18237.1 | 9.6   | 9.31  | 0.7  | 0.13 | -1.23 | 0.552597 | 0.603143 | 0.811888 | 0.763963 |
| MmugDNA.18238.1.S1_at   | MmugDNA.18238.1 | 5.35  | 5.1   | 0.85 | 0.37 | 1.18  | 0.247495 | 0.489775 | 0.613141 | 0.691918 |
| MmugDNA.18239.1.S1_at   | MmugDNA.18239.1 | 5.62  | 6.21  | 0.04 | 0.13 | -1.51 | 0.001668 | 0.027092 | 0.164008 | 0.205797 |
| MmugDNA.18240.1.S1_at   | MmugDNA.18240.1 | 5.27  | 4.74  | 0.53 | 0.27 | 1.44  | 0.312094 | 0.485864 | 0.66374  | 0.689443 |
| MmugDNA.18242.1.S1_at   | MmugDNA.18242.1 | 5.23  | 5.09  | 0.51 | 0.15 | 1.11  | 0.457668 | 0.226969 | 0.758364 | 0.49928  |
| MmugDNA.18243.1.S1_at   | MmugDNA.18243.1 | 3.9   | 3.9   | 0.14 | 0.02 | -1    | 0.799027 | 0.720432 | 0.92641  | 0.838261 |
| MmugDNA.18244.1.S1_at   | MmugDNA.18244.1 | 4.26  | 4.16  | 0.06 | 0.09 | 1.07  | 0.120711 | 0.479082 | 0.494183 | 0.684931 |
| MmugDNA.18245.1.S1_at   | MmugDNA.18245.1 | 9.29  | 8.85  | 0.3  | 0.16 | 1.35  | 0.053836 | 0.007753 | 0.39556  | 0.117622 |
| MmugDNA.18245.1.S1_s_at | MmugDNA.18245.1 | 9.37  | 8.74  | 0.26 | 0.28 | 1.56  | 0.029277 | 0.006397 | 0.334049 | 0.108738 |
| MmugDNA.18246.1.S1_at   | MmugDNA.18246.1 | 3.65  | 3.65  | 0.15 | 0.12 | 1     | 0.232656 | 0.356531 | 0.600181 | 0.598459 |
| MmugDNA.18247.1.S1_at   | MmugDNA.18247.1 | 9.87  | 9.62  | 0.37 | 0.05 | 1.19  | 0.483365 | 0.119984 | 0.773041 | 0.388672 |
| MmugDNA.18248.1.S1_s_at | MmugDNA.18248.1 | 7.85  | 7.43  | 0.18 | 0    | 1.33  | 0.044582 | 0.005842 | 0.374916 | 0.10467  |
| MmugDNA.18249.1.S1_at   | MmugDNA.18249.1 | 5.78  | 5.78  | 0.06 | 0.01 | 1     | 0.310396 | 0.296529 | 0.662171 | 0.555531 |
| MmugDNA.1825.1.S1_at    | MmugDNA.1825.1  | 2.69  | 2.7   | 0.1  | 0    | -1.01 | 0.31796  | 0.197439 | 0.667635 | 0.472375 |
| MmugDNA.18250.1.S1_at   | MmugDNA.18250.1 | 5.15  | 5.08  | 0.14 | 0.17 | 1.05  | 0.47269  | 0.501721 | 0.767224 | 0.69981  |
| MmugDNA.18251.1.S1_at   | MmugDNA.18251.1 | 11.33 | 11.13 | 0.41 | 0.18 | 1.15  | 0.127376 | 0.010581 | 0.501548 | 0.134213 |
| MmugDNA.18251.1.S1_s_at | MmugDNA.18251.1 | 11.15 | 11.01 | 0.5  | 0.19 | 1.1   | 0.194722 | 0.014254 | 0.565144 | 0.152411 |
| MmugDNA.18252.1.S1_at   | MmugDNA.18252.1 | 4.02  | 3.86  | 0.07 | 0.21 | 1.12  | 0.289277 | 0.065627 | 0.645968 | 0.301554 |
| MmugDNA.18253.1.S1_at   | MmugDNA.18253.1 | 5.83  | 5.82  | 0.16 | 0    | 1     | 0.349194 | 0.499141 | 0.690261 | 0.698006 |
| MmugDNA.18255.1.S1_at   | MmugDNA.18255.1 | 4.13  | 4.31  | 0.35 | 0.2  | -1.13 | 0.245702 | 0.234855 | 0.611181 | 0.506125 |
| MmugDNA.37499.1.S1_s_at | MmugDNA.37499.1 | 7.69  | 7.66  | 0.15 | 0.09 | 1.02  | 0.623932 | 0.450204 | 0.848424 | 0.665549 |
| MmugDNA.18257.1.S1_at   | MmugDNA.18257.1 | 3.16  | 3.05  | 0.27 | 0.41 | 1.08  | 0.923296 | 0.993637 | 0.974244 | 0.996218 |
| MmugDNA.18258.1.S1_at   | MmugDNA.18258.1 | 5.12  | 5.37  | 0.17 | 0.29 | -1.19 | 0.226433 | 0.146269 | 0.595662 | 0.420267 |
| MmugDNA.1826.1.S1_at    | MmugDNA.1826.1  | 3.23  | 2.97  | 0.3  | 0.08 | 1.2   | 0.212341 | 0.284109 | 0.582875 | 0.546319 |
| MmugDNA.18260.1.S1_at   | MmugDNA.18260.1 | 5.83  | 5.66  | 0    | 0.79 | 1.13  | 0.240794 | 0.036351 | 0.607067 | 0.235105 |
| MmugDNA.18261.1.S1_at   | MmugDNA.18261.1 | 12.35 | 11.72 | 0.07 | 0.03 | 1.55  | 0.00014  | 0.000014 | 0.111942 | 0.017682 |
| MmugDNA.18262.1.S1_at   | MmugDNA.18262.1 | 5.87  | 6.02  | 0.46 | 0.02 | -1.1  | 0.204036 | 0.122681 | 0.5753   | 0.392657 |
| MmugDNA.18264.1.S1_at   | MmugDNA.18264.1 | 11.1  | 11.15 | 0.18 | 0.08 | -1.04 | 0.865344 | 0.151372 | 0.952614 | 0.426104 |
| MmugDNA.18265.1.S1_at   | MmugDNA.18265.1 | 5.16  | 5.31  | 0.67 | 0.21 | -1.11 | 0.580092 | 0.598027 | 0.826842 | 0.760536 |
| MmugDNA.18266.1.S1_at   | MmugDNA.18266.1 | 8.3   | 8.31  | 0.5  | 0.26 | -1    | 0.432353 | 0.236871 | 0.74389  | 0.507587 |
| MmugDNA.18267.1.S1_at   | MmugDNA.18267.1 | 11.19 | 11.06 | 0.15 | 0.05 | 1.1   | 0.208825 | 0.440889 | 0.580477 | 0.659138 |
| MmugDNA.18268.1.S1_at   | MmugDNA.18268.1 | 4.95  | 4.78  | 0.14 | 0.21 | 1.12  | 0.1827   | 0.213664 | 0.555631 | 0.487441 |
| MmugDNA.18269.1.S1_at   | MmugDNA.18269.1 | 3.61  | 3.6   | 0.4  | 0.11 | 1.01  | 0.499858 | 0.355937 | 0.782239 | 0.597902 |

|                         |                 |       |       |      |      |       |          |          |          |          |
|-------------------------|-----------------|-------|-------|------|------|-------|----------|----------|----------|----------|
| MmugDNA.1827.1.S1_at    | MmugDNA.1827.1  | 5.67  | 6.31  | 0.27 | 0.51 | -1.56 | 0.159582 | 0.167871 | 0.532526 | 0.444458 |
| MmugDNA.18271.1.S1_at   | MmugDNA.18271.1 | 8.55  | 9.26  | 0.35 | 0.36 | -1.63 | 0.168838 | 0.002098 | 0.541688 | 0.067756 |
| MmugDNA.18272.1.S1_at   | MmugDNA.18272.1 | 6.08  | 6.13  | 0.54 | 0.25 | -1.04 | 0.781227 | 0.819709 | 0.919541 | 0.896133 |
| MmugDNA.18273.1.S1_at   | MmugDNA.18273.1 | 3.9   | 3.93  | 0.06 | 0.3  | -1.02 | 0.834083 | 0.703027 | 0.940502 | 0.827866 |
| MmugDNA.18274.1.S1_at   | MmugDNA.18274.1 | 4.39  | 5.22  | 0.3  | 0.01 | -1.79 | 0.008934 | 0.004036 | 0.238998 | 0.090281 |
| MmugDNA.18275.1.S1_at   | MmugDNA.18275.1 | 3.66  | 3.51  | 0.16 | 0.09 | 1.11  | 0.428206 | 0.73867  | 0.741666 | 0.848486 |
| MmugDNA.18276.1.S1_at   | MmugDNA.18276.1 | 3.69  | 3.66  | 0.28 | 0.09 | 1.02  | 0.841127 | 0.880597 | 0.943619 | 0.9318   |
| MmugDNA.18277.1.S1_at   | MmugDNA.18277.1 | 3.51  | 3.53  | 0.13 | 0.09 | -1.01 | 0.750132 | 0.889405 | 0.905347 | 0.936977 |
| MmugDNA.18282.1.S1_at   | MmugDNA.18282.1 | 6.14  | 6.52  | 0.22 | 0.47 | -1.31 | 0.173883 | 0.120251 | 0.546898 | 0.389181 |
| MmugDNA.18283.1.S1_at   | MmugDNA.18283.1 | 3.54  | 4.54  | 0    | 0.89 | -2    | 0.391234 | 0.40356  | 0.717502 | 0.632215 |
| MmugDNA.18284.1.S1_at   | MmugDNA.18284.1 | 4.49  | 4.37  | 0.13 | 0.07 | -1.09 | 0.206427 | 0.067593 | 0.57822  | 0.306076 |
| MmugDNA.18285.1.S1_at   | MmugDNA.18285.1 | 6.99  | 6.62  | 0.55 | 0.17 | 1.29  | 0.356401 | 0.099171 | 0.695154 | 0.357379 |
| MmugDNA.18286.1.S1_at   | MmugDNA.18286.1 | 11.11 | 10.43 | 0.06 | 0.14 | 1.6   | 0.001326 | 0.004167 | 0.158997 | 0.091036 |
| MmugDNA.18287.1.S1_at   | MmugDNA.18287.1 | 8.14  | 9.28  | 0.17 | 0.07 | -2.2  | 0.000367 | 0.000141 | 0.137028 | 0.029307 |
| MmugDNA.18288.1.S1_at   | MmugDNA.18288.1 | 5.28  | 5.29  | 0.24 | 0.02 | -1.01 | 0.472758 | 0.520403 | 0.767224 | 0.711727 |
| MmugDNA.18289.1.S1_at   | MmugDNA.18289.1 | 5.63  | 5.57  | 0.02 | 0.06 | 1.04  | 0.289769 | 0.339125 | 0.646411 | 0.585891 |
| MmugDNA.1829.1.S1_at    | MmugDNA.1829.1  | 6.09  | 6.28  | 0.36 | 0.25 | -1.14 | 0.309741 | 0.03704  | 0.661815 | 0.236886 |
| MmugDNA.18291.1.S1_at   | MmugDNA.18291.1 | 9.65  | 9.47  | 0.46 | 0.13 | 1.13  | 0.537217 | 0.405651 | 0.80265  | 0.633894 |
| MmugDNA.18292.1.S1_at   | MmugDNA.18292.1 | 2.93  | 2.89  | 0.02 | 0.11 | 1.03  | 0.821487 | 0.074503 | 0.935582 | 0.318173 |
| MmugDNA.18293.1.S1_at   | MmugDNA.18293.1 | 6.12  | 6.09  | 0.03 | 0.11 | 1.02  | 0.927479 | 0.935654 | 0.97593  | 0.963691 |
| MmugDNA.18295.1.S1_at   | MmugDNA.18295.1 | 7.44  | 7.72  | 1.69 | 0.19 | -1.22 | 0.745694 | 0.332902 | 0.903099 | 0.581281 |
| MmugDNA.18296.1.S1_at   | MmugDNA.18296.1 | 10.7  | 10.16 | 0.16 | 0.17 | 1.45  | 0.017022 | 0.019161 | 0.288969 | 0.1742   |
| MmugDNA.18298.1.S1_at   | MmugDNA.18298.1 | 5.57  | 5.34  | 0.04 | 0.2  | 1.17  | 0.1219   | 0.053256 | 0.495636 | 0.276449 |
| MmugDNA.18299.1.S1_at   | MmugDNA.18299.1 | 3.79  | 3.88  | 0.08 | 0.13 | -1.07 | 0.811462 | 0.125436 | 0.931794 | 0.396079 |
| MmugDNA.183.1.S1_at     | MmugDNA.183.1   | 3.76  | 3.74  | 0.07 | 0.08 | 1.02  | 0.352434 | 0.480349 | 0.692649 | 0.68574  |
| MmugDNA.18300.1.S1_at   | MmugDNA.18300.1 | 5.2   | 5.03  | 0.11 | 0.22 | 1.13  | 0.175785 | 0.212527 | 0.548999 | 0.486502 |
| MmugDNA.18302.1.S1_at   | MmugDNA.18302.1 | 11.13 | 10.91 | 0.31 | 0.09 | 1.17  | 0.647702 | 0.664494 | 0.859393 | 0.803396 |
| MmugDNA.18303.1.S1_at   | MmugDNA.18303.1 | 4.41  | 4.34  | 0.11 | 0.09 | 1.05  | 0.52354  | 0.71867  | 0.795656 | 0.837178 |
| MmugDNA.18304.1.S1_at   | MmugDNA.18304.1 | 5.21  | 5.73  | 0.13 | 0.19 | -1.43 | 0.032697 | 0.206935 | 0.345219 | 0.481052 |
| MmugDNA.18305.1.S1_at   | MmugDNA.18305.1 | 8.96  | 7.68  | 0.7  | 0.03 | 2.43  | 0.032825 | 0.001231 | 0.345393 | 0.05478  |
| MmugDNA.18306.1.S1_at   | MmugDNA.18306.1 | 6.48  | 6.53  | 0.26 | 0.12 | -1.04 | 0.530904 | 0.712523 | 0.799314 | 0.833383 |
| MmugDNA.18308.1.S1_at   | MmugDNA.18308.1 | 9.63  | 8.92  | 0.71 | 0.13 | 1.64  | 0.410256 | 0.545798 | 0.730705 | 0.727653 |
| MmugDNA.1831.1.S1_at    | MmugDNA.1831.1  | 6.89  | 7.42  | 0.37 | 0.6  | -1.45 | 0.528017 | 0.209267 | 0.79742  | 0.48303  |
| MmugDNA.18311.1.S1_at   | MmugDNA.18311.1 | 9.86  | 9.98  | 0.34 | 0.08 | -1.08 | 0.688743 | 0.336361 | 0.878545 | 0.58383  |
| MmugDNA.18312.1.S1_at   | MmugDNA.18312.1 | 4.21  | 4.64  | 0.33 | 0.03 | -1.35 | 0.291672 | 0.293574 | 0.648031 | 0.553567 |
| MmugDNA.18313.1.S1_at   | MmugDNA.18313.1 | 8.22  | 8.51  | 0.78 | 0.11 | -1.22 | 0.740198 | 0.093973 | 0.90073  | 0.350467 |
| MmugDNA.18314.1.S1_at   | MmugDNA.18314.1 | 8.43  | 8.28  | 0.25 | 0.09 | 1.11  | 0.997568 | 0.99752  | 0.999184 | 0.99871  |
| MmugDNA.18315.1.S1_at   | MmugDNA.18315.1 | 8.72  | 9.76  | 1.04 | 0.21 | -2.06 | 0.172333 | 0.074353 | 0.545696 | 0.318046 |
| MmugDNA.18316.1.S1_at   | MmugDNA.18316.1 | 10.93 | 11.43 | 0.44 | 0.19 | -1.41 | 0.631874 | 0.229499 | 0.85263  | 0.501527 |
| MmugDNA.18317.1.S1_at   | MmugDNA.18317.1 | 3.47  | 3.44  | 0.17 | 0.18 | 1.02  | 0.301957 | 0.350832 | 0.655989 | 0.594561 |
| MmugDNA.18318.1.S1_at   | MmugDNA.18318.1 | 3.28  | 3.21  | 0.08 | 0.06 | 1.05  | 0.529109 | 0.755211 | 0.798106 | 0.857498 |
| MmugDNA.41120.1.S1_x_at | MmugDNA.41120.1 | 12.57 | 12.76 | 0.16 | 0.15 | -1.14 | 0.222801 | 0.216719 | 0.592343 | 0.490311 |
| MmugDNA.18320.1.S1_at   | MmugDNA.18320.1 | 7.6   | 7.57  | 0.47 | 0.04 | 1.02  | 0.51882  | 0.402144 | 0.792883 | 0.631235 |

|                         |                 |       |       |      |      |       |          |          |          |          |
|-------------------------|-----------------|-------|-------|------|------|-------|----------|----------|----------|----------|
| MmugDNA.18321.1.S1_at   | MmugDNA.18321.1 | 8.09  | 8.34  | 1.07 | 0.22 | -1.19 | 0.736223 | 0.499734 | 0.899063 | 0.698494 |
| MmugDNA.18322.1.S1_at   | MmugDNA.18322.1 | 5.25  | 5.14  | 0.36 | 0.34 | 1.08  | 0.798525 | 0.761115 | 0.926173 | 0.861205 |
| MmugDNA.18324.1.S1_at   | MmugDNA.18324.1 | 12.46 | 12.38 | 0.37 | 0.16 | 1.05  | 0.428129 | 0.331798 | 0.741605 | 0.580389 |
| MmugDNA.18325.1.S1_at   | MmugDNA.18325.1 | 6.04  | 5.84  | 0.09 | 0.16 | 1.15  | 0.095048 | 0.128861 | 0.464131 | 0.400277 |
| MmugDNA.18327.1.S1_at   | MmugDNA.18327.1 | 10.87 | 11.09 | 0.13 | 0.13 | -1.17 | 0.088161 | 0.001156 | 0.45606  | 0.053615 |
| MmugDNA.18328.1.S1_at   | MmugDNA.18328.1 | 4.19  | 4.18  | 0.2  | 0.04 | 1.01  | 0.349952 | 0.444794 | 0.69105  | 0.662072 |
| MmugDNA.18329.1.S1_at   | MmugDNA.18329.1 | 2.98  | 2.91  | 0.24 | 0    | 1.05  | 0.575145 | 0.70039  | 0.824588 | 0.826107 |
| MmugDNA.18330.1.S1_at   | MmugDNA.18330.1 | 8.91  | 8.73  | 0.19 | 0.02 | 1.13  | 0.257375 | 0.331402 | 0.621083 | 0.580076 |
| MmugDNA.18330.1.S1_x_at | MmugDNA.18330.1 | 8.85  | 8.73  | 0.2  | 0.03 | 1.09  | 0.331562 | 0.42242  | 0.678103 | 0.645722 |
| MmugDNA.18331.1.S1_at   | MmugDNA.18331.1 | 4.29  | 4.36  | 0.15 | 0.03 | -1.05 | 0.303429 | 0.237188 | 0.657314 | 0.507918 |
| MmugDNA.18334.1.S1_at   | MmugDNA.18334.1 | 9.13  | 8.88  | 0.14 | 0.15 | -1.19 | 0.092921 | 0.117947 | 0.461635 | 0.385845 |
| MmugDNA.18336.1.S1_at   | MmugDNA.18336.1 | 3.92  | 4.29  | 0.15 | 0.26 | -1.29 | 0.185277 | 0.212774 | 0.558325 | 0.486769 |
| MmugDNA.18338.1.S1_at   | MmugDNA.18338.1 | 5.67  | 6.07  | 0.67 | 0.08 | -1.33 | 0.258773 | 0.065279 | 0.622286 | 0.301239 |
| MmugDNA.18339.1.S1_at   | MmugDNA.18339.1 | 5.72  | 7.31  | 2.72 | 0.67 | -3.01 | 0.584463 | 0.259989 | 0.829711 | 0.52675  |
| MmugDNA.1834.1.S1_at    | MmugDNA.1834.1  | 10.59 | 10.32 | 0.32 | 0.28 | 1.2   | 0.194894 | 0.391128 | 0.565263 | 0.624833 |
| MmugDNA.18340.1.S1_at   | MmugDNA.18340.1 | 12.3  | 12.45 | 0.3  | 0.09 | -1.11 | 0.723687 | 0.035388 | 0.892847 | 0.232427 |
| MmugDNA.18341.1.S1_at   | MmugDNA.18341.1 | 6.55  | 6.52  | 0.13 | 0.08 | 1.02  | 0.824144 | 0.398656 | 0.936573 | 0.629458 |
| MmugDNA.18342.1.S1_at   | MmugDNA.18342.1 | 3.82  | 3.78  | 0.36 | 0.03 | 1.03  | 0.328529 | 0.255405 | 0.67577  | 0.523445 |
| MmugDNA.18343.1.S1_at   | MmugDNA.18343.1 | 2.9   | 2.72  | 0.08 | 0.1  | 1.13  | 0.160498 | 0.263785 | 0.533733 | 0.530066 |
| MmugDNA.18343.1.S1_x_at | MmugDNA.18343.1 | 3.07  | 2.91  | 0.18 | 0.12 | 1.11  | 0.414046 | 0.454396 | 0.732753 | 0.668576 |
| MmugDNA.18344.1.S1_at   | MmugDNA.18344.1 | 6.94  | 6.24  | 0.24 | 0.18 | 1.62  | 0.011881 | 0.011076 | 0.257858 | 0.137002 |
| MmugDNA.18345.1.S1_at   | MmugDNA.18345.1 | 6.47  | 6.24  | 0.11 | 0.13 | 1.18  | 0.169385 | 0.203073 | 0.542311 | 0.477343 |
| MmugDNA.1835.1.S1_at    | MmugDNA.1835.1  | 6.95  | 8.5   | 0.62 | 0.07 | -2.92 | 0.032817 | 0.014605 | 0.345393 | 0.15408  |
| MmugDNA.18352.1.S1_s_at | MmugDNA.18352.1 | 8.94  | 8.84  | 0.21 | 0.1  | 1.08  | 0.487061 | 0.206145 | 0.774859 | 0.480348 |
| MmugDNA.18356.1.S1_at   | MmugDNA.18356.1 | 6.07  | 6.62  | 0.11 | 0.16 | -1.47 | 0.010286 | 0.199925 | 0.246929 | 0.474603 |
| MmugDNA.1836.1.S1_at    | MmugDNA.1836.1  | 10.33 | 9.2   | 0.39 | 0.31 | 2.2   | 0.022848 | 0.025537 | 0.312704 | 0.200461 |
| MmugDNA.18360.1.S1_at   | MmugDNA.18360.1 | 3.41  | 3.33  | 0.19 | 0.24 | 1.05  | 0.863706 | 0.313615 | 0.952043 | 0.567977 |
| MmugDNA.18362.1.S1_at   | MmugDNA.18362.1 | 8.53  | 8.71  | 0.09 | 0.16 | -1.14 | 0.178417 | 0.25945  | 0.551369 | 0.526418 |
| MmugDNA.18364.1.S1_at   | MmugDNA.18364.1 | 5.53  | 5.53  | 0.11 | 0.05 | 1     | 0.623828 | 0.599905 | 0.848386 | 0.761677 |
| MmugDNA.18365.1.S1_at   | MmugDNA.18365.1 | 4.26  | 4.23  | 0.14 | 0.26 | 1.02  | 0.712409 | 0.499788 | 0.887958 | 0.698515 |
| MmugDNA.18367.1.S1_at   | MmugDNA.18367.1 | 3.35  | 3.15  | 0.21 | 0    | 1.14  | 0.579357 | 0.707544 | 0.82645  | 0.830395 |
| MmugDNA.18368.1.S1_at   | MmugDNA.18368.1 | 6.17  | 5.88  | 0.08 | 0.21 | 1.22  | 0.13044  | 0.009474 | 0.504738 | 0.128164 |
| MmugDNA.18369.1.S1_at   | MmugDNA.18369.1 | 3.88  | 3.79  | 0.08 | 0.08 | 1.06  | 0.101387 | 0.09352  | 0.471667 | 0.349846 |
| MmugDNA.18370.1.S1_at   | MmugDNA.18370.1 | 8.36  | 8.69  | 1.95 | 0.11 | -1.26 | 0.789514 | 0.733187 | 0.92257  | 0.845567 |
| MmugDNA.18371.1.S1_at   | MmugDNA.18371.1 | 12.19 | 12.1  | 0.27 | 0.03 | 1.06  | 0.864726 | 0.964452 | 0.952416 | 0.980225 |
| MmugDNA.18372.1.S1_at   | MmugDNA.18372.1 | 3.95  | 3.96  | 0.39 | 0.14 | -1.01 | 0.360223 | 0.313355 | 0.697783 | 0.567811 |
| MmugDNA.18375.1.S1_at   | MmugDNA.18375.1 | 5.59  | 6.71  | 0.93 | 0.39 | -2.18 | 0.094665 | 0.245164 | 0.463796 | 0.514922 |
| MmugDNA.18377.1.S1_at   | MmugDNA.18377.1 | 3.54  | 3.51  | 0.38 | 0.5  | 1.02  | 0.519384 | 0.754787 | 0.79315  | 0.857323 |
| MmugDNA.18379.1.S1_at   | MmugDNA.18379.1 | 6.85  | 6.44  | 0.17 | 0.28 | 1.33  | 0.116488 | 0.351932 | 0.489676 | 0.595335 |
| MmugDNA.1838.1.S1_at    | MmugDNA.1838.1  | 2.77  | 2.52  | 0.11 | 0.14 | 1.19  | 0.167331 | 0.104694 | 0.539914 | 0.366073 |
| MmugDNA.18380.1.S1_at   | MmugDNA.18380.1 | 5.68  | 5.51  | 0.19 | 0.22 | 1.12  | 0.674881 | 0.179456 | 0.872248 | 0.455929 |
| MmugDNA.18381.1.S1_at   | MmugDNA.18381.1 | 4     | 4.59  | 0.39 | 0.55 | -1.5  | 0.883388 | 0.197068 | 0.95964  | 0.472213 |
| MmugDNA.18383.1.S1_at   | MmugDNA.18383.1 | 5.73  | 5.79  | 0.08 | 0.06 | -1.04 | 0.194277 | 0.546186 | 0.564864 | 0.727803 |

|                         |                 |       |       |      |      |       |          |          |          |          |
|-------------------------|-----------------|-------|-------|------|------|-------|----------|----------|----------|----------|
| MmugDNA.18384.1.S1_at   | MmugDNA.18384.1 | 5.93  | 5.92  | 0.32 | 0.12 | 1     | 0.400408 | 0.597098 | 0.723814 | 0.760085 |
| MmugDNA.18386.1.S1_at   | MmugDNA.18386.1 | 3.24  | 3.12  | 0.08 | 0.26 | 1.08  | 0.816254 | 0.879657 | 0.933457 | 0.931253 |
| MmugDNA.18387.1.S1_at   | MmugDNA.18387.1 | 5.67  | 5.68  | 0.26 | 0.06 | -1    | 0.764254 | 0.629505 | 0.911428 | 0.781907 |
| MmugDNA.18388.1.S1_at   | MmugDNA.18388.1 | 3.26  | 3.17  | 0.09 | 0.06 | 1.07  | 0.154633 | 0.175479 | 0.527914 | 0.452157 |
| MmugDNA.18389.1.S1_at   | MmugDNA.18389.1 | 3.23  | 3.18  | 0.06 | 0.15 | 1.03  | 0.939846 | 0.388896 | 0.979544 | 0.623208 |
| MmugDNA.1839.1.S1_at    | MmugDNA.1839.1  | 10.54 | 10.53 | 0.42 | 0.09 | 1     | 0.993369 | 0.999859 | 0.997445 | 0.999954 |
| MmugDNA.18390.1.S1_at   | MmugDNA.18390.1 | 9.55  | 9.33  | 0.1  | 0.17 | 1.17  | 0.054685 | 0.038494 | 0.397122 | 0.241138 |
| MmugDNA.18392.1.S1_at   | MmugDNA.18392.1 | 4.38  | 4.31  | 0.11 | 0.04 | 1.05  | 0.390126 | 0.20136  | 0.71651  | 0.47589  |
| MmugDNA.18393.1.S1_at   | MmugDNA.18393.1 | 9.75  | 9.26  | 0.53 | 0.15 | 1.4   | 0.15034  | 0.153457 | 0.523947 | 0.42827  |
| MmugDNA.18394.1.S1_at   | MmugDNA.18394.1 | 5.29  | 5.48  | 0.41 | 0.03 | -1.14 | 0.817872 | 0.826525 | 0.93417  | 0.900356 |
| MmugDNA.18395.1.S1_at   | MmugDNA.18395.1 | 5.62  | 5.46  | 0.17 | 0.01 | -1.12 | 0.137824 | 0.059508 | 0.513584 | 0.290548 |
| MmugDNA.18396.1.S1_at   | MmugDNA.18396.1 | 6.31  | 6.07  | 0.13 | 0.11 | 1.18  | 0.215949 | 0.555518 | 0.586043 | 0.733893 |
| MmugDNA.18397.1.S1_at   | MmugDNA.18397.1 | 8.58  | 7.85  | 0.99 | 0.23 | 1.66  | 0.770393 | 0.708718 | 0.913946 | 0.831054 |
| MmugDNA.184.1.S1_at     | MmugDNA.184.1   | 3.93  | 4.05  | 0.18 | 0.14 | -1.08 | 0.44995  | 0.715437 | 0.754621 | 0.835033 |
| MmugDNA.1840.1.S1_at    | MmugDNA.1840.1  | 10.1  | 10.68 | 0.2  | 0.04 | -1.5  | 0.006726 | 0.001337 | 0.223059 | 0.056366 |
| MmugDNA.18400.1.S1_at   | MmugDNA.18400.1 | 9.02  | 7.53  | 0.89 | 0.46 | 2.81  | 0.053461 | 0.064228 | 0.394724 | 0.299668 |
| MmugDNA.18402.1.S1_at   | MmugDNA.18402.1 | 4.52  | 4.68  | 0.27 | 0.15 | -1.12 | 0.301559 | 0.507578 | 0.6558   | 0.703118 |
| MmugDNA.18403.1.S1_at   | MmugDNA.18403.1 | 4.17  | 4.02  | 0.17 | 0.04 | 1.11  | 0.133467 | 0.132993 | 0.507931 | 0.404666 |
| MmugDNA.18404.1.S1_at   | MmugDNA.18404.1 | 10.15 | 9.89  | 0.29 | 0.25 | 1.2   | 0.061417 | 0.043356 | 0.410677 | 0.252896 |
| MmugDNA.18405.1.S1_s_at | MmugDNA.18405.1 | 7.52  | 8.37  | 0.4  | 0.1  | -1.79 | 0.020075 | 0.028801 | 0.303364 | 0.211552 |
| MmugDNA.18406.1.S1_at   | MmugDNA.18406.1 | 3.31  | 3.26  | 0.11 | 0.06 | 1.04  | 0.262982 | 0.273651 | 0.625031 | 0.538093 |
| MmugDNA.18408.1.S1_at   | MmugDNA.18408.1 | 8.49  | 8.59  | 0.15 | 0.11 | -1.07 | 0.205163 | 0.116523 | 0.576911 | 0.383679 |
| MmugDNA.18409.1.S1_at   | MmugDNA.18409.1 | 4.88  | 4.87  | 0.17 | 0.28 | 1     | 0.488123 | 0.861146 | 0.775435 | 0.920989 |
| MmugDNA.18411.1.S1_at   | MmugDNA.18411.1 | 10.59 | 10.43 | 0.22 | 0.21 | 1.12  | 0.200544 | 0.1627   | 0.572378 | 0.43882  |
| MmugDNA.18416.1.S1_at   | MmugDNA.18416.1 | 4.91  | 4.95  | 0.14 | 0.16 | -1.03 | 0.427189 | 0.50222  | 0.740948 | 0.70006  |
| MmugDNA.18417.1.S1_at   | MmugDNA.18417.1 | 3.54  | 3.4   | 0.13 | 0.12 | 1.11  | 0.957226 | 0.107639 | 0.985871 | 0.370586 |
| MmugDNA.18418.1.S1_at   | MmugDNA.18418.1 | 4.82  | 4.64  | 0.16 | 0.16 | 1.13  | 0.265734 | 0.270904 | 0.626849 | 0.536026 |
| MmugDNA.18419.1.S1_at   | MmugDNA.18419.1 | 2.83  | 2.83  | 0.13 | 0.24 | -1.01 | 0.524618 | 0.370857 | 0.795975 | 0.609828 |
| MmugDNA.1842.1.S1_at    | MmugDNA.1842.1  | 5.27  | 5.5   | 0.31 | 0.54 | -1.18 | 0.506938 | 0.241348 | 0.786064 | 0.511952 |
| MmugDNA.1842.1.S1_s_at  | MmugDNA.1842.1  | 12.58 | 12.14 | 0.19 | 0.26 | 1.36  | 0.04278  | 0.045795 | 0.370349 | 0.258337 |
| MmugDNA.36421.1.S1_s_at | MmugDNA.36421.1 | 6.56  | 6.3   | 0.2  | 0.03 | 1.19  | 0.111936 | 0.187986 | 0.484976 | 0.464083 |
| MmugDNA.18421.1.S1_at   | MmugDNA.18421.1 | 9.51  | 8.89  | 0.45 | 0.01 | 1.53  | 0.242569 | 0.235181 | 0.608517 | 0.50629  |
| MmugDNA.18422.1.S1_at   | MmugDNA.18422.1 | 5.15  | 5.22  | 0.06 | 0.12 | -1.05 | 0.494498 | 0.153556 | 0.779472 | 0.428309 |
| MmugDNA.18424.1.S1_at   | MmugDNA.18424.1 | 3.66  | 3.66  | 0.1  | 0.04 | 1     | 0.639024 | 0.850241 | 0.856151 | 0.914842 |
| MmugDNA.18427.1.S1_at   | MmugDNA.18427.1 | 6.3   | 5.88  | 0.84 | 0.23 | 1.34  | 0.705215 | 0.440791 | 0.885355 | 0.659136 |
| MmugDNA.18428.1.S1_at   | MmugDNA.18428.1 | 5.03  | 4.91  | 0.11 | 0.13 | 1.09  | 0.073379 | 0.144931 | 0.434422 | 0.418859 |
| MmugDNA.18429.1.S1_at   | MmugDNA.18429.1 | 8.41  | 8.4   | 0.46 | 0.12 | 1.01  | 0.278075 | 0.068179 | 0.637354 | 0.307314 |
| MmugDNA.1843.1.S1_at    | MmugDNA.1843.1  | 7.53  | 6.96  | 0.71 | 0.6  | 1.49  | 0.249052 | 0.315015 | 0.614378 | 0.568759 |
| MmugDNA.18430.1.S1_at   | MmugDNA.18430.1 | 4.53  | 4.49  | 0.05 | 0.13 | 1.03  | 0.468566 | 0.457744 | 0.764997 | 0.670897 |
| MmugDNA.18433.1.S1_at   | MmugDNA.18433.1 | 6     | 5.9   | 0.15 | 0.09 | 1.07  | 0.975642 | 0.544193 | 0.992157 | 0.726643 |
| MmugDNA.18436.1.S1_at   | MmugDNA.18436.1 | 4.45  | 4.3   | 0.2  | 0.1  | 1.11  | 0.583401 | 0.459306 | 0.82905  | 0.671698 |
| MmugDNA.18437.1.S1_at   | MmugDNA.18437.1 | 7.8   | 7.45  | 0.75 | 0.23 | 1.28  | 0.581686 | 0.251442 | 0.827791 | 0.520175 |
| MmugDNA.18438.1.S1_at   | MmugDNA.18438.1 | 8.07  | 7.62  | 0.19 | 0.32 | 1.37  | 0.062504 | 0.046498 | 0.413307 | 0.260176 |

|                         |                 |       |       |      |      |       |          |          |          |          |
|-------------------------|-----------------|-------|-------|------|------|-------|----------|----------|----------|----------|
| MmugDNA.18439.1.S1_at   | MmugDNA.18439.1 | 12.16 | 12.13 | 0.14 | 0.03 | 1.02  | 0.227694 | 0.170715 | 0.596693 | 0.447316 |
| MmugDNA.1844.1.S1_at    | MmugDNA.1844.1  | 6.38  | 5.91  | 0.27 | 0.37 | 1.39  | 0.368509 | 0.205181 | 0.703675 | 0.47957  |
| MmugDNA.18440.1.S1_at   | MmugDNA.18440.1 | 10.85 | 10.17 | 0.34 | 0.03 | 1.6   | 0.056702 | 0.00583  | 0.401061 | 0.104661 |
| MmugDNA.18442.1.S1_at   | MmugDNA.18442.1 | 4.07  | 4.15  | 0.22 | 0.25 | -1.06 | 0.155902 | 0.274524 | 0.529116 | 0.538987 |
| MmugDNA.18443.1.S1_at   | MmugDNA.18443.1 | 6.94  | 5.86  | 0.67 | 0.3  | 2.12  | 0.070873 | 0.018124 | 0.430067 | 0.169609 |
| MmugDNA.18444.1.S1_at   | MmugDNA.18444.1 | 7.82  | 7.38  | 0.02 | 0.06 | 1.36  | 0.000504 | 0.000133 | 0.143137 | 0.029087 |
| MmugDNA.18447.1.S1_at   | MmugDNA.18447.1 | 4.38  | 4.72  | 0.3  | 0.08 | -1.27 | 0.380865 | 0.194596 | 0.70974  | 0.469707 |
| MmugDNA.18448.1.S1_at   | MmugDNA.18448.1 | 6.46  | 6.47  | 0.1  | 0.03 | -1    | 0.705488 | 0.907934 | 0.885355 | 0.947889 |
| MmugDNA.43373.1.S1_s_at | MmugDNA.43373.1 | 5.85  | 5.95  | 0.19 | 0.1  | -1.08 | 0.883575 | 0.7368   | 0.95964  | 0.847693 |
| MmugDNA.18449.1.S1_s_at | MmugDNA.18449.1 | 8.76  | 9.34  | 0.59 | 0.13 | -1.49 | 0.185656 | 0.008893 | 0.558625 | 0.124737 |
| MmugDNA.1845.1.S1_at    | MmugDNA.1845.1  | 7.16  | 7.21  | 0.19 | 0.05 | -1.03 | 0.323772 | 0.406948 | 0.672332 | 0.634629 |
| MmugDNA.18450.1.S1_s_at | MmugDNA.18450.1 | 8.51  | 8.6   | 0.57 | 0.12 | -1.07 | 0.538373 | 0.626564 | 0.803237 | 0.779867 |
| MmugDNA.18452.1.S1_at   | MmugDNA.18452.1 | 2.98  | 2.91  | 0.24 | 0.13 | 1.05  | 0.608161 | 0.815275 | 0.84104  | 0.89344  |
| MmugDNA.18454.1.S1_at   | MmugDNA.18454.1 | 5.87  | 5.67  | 0.6  | 0.44 | 1.15  | 0.696381 | 0.111895 | 0.882093 | 0.377006 |
| MmugDNA.18456.1.S1_at   | MmugDNA.18456.1 | 7     | 7.87  | 0.45 | 0.24 | -1.83 | 0.066977 | 0.154942 | 0.422979 | 0.42993  |
| MmugDNA.18459.1.S1_at   | MmugDNA.18459.1 | 8.37  | 8.28  | 0.26 | 0.09 | 1.06  | 0.455315 | 0.487712 | 0.757353 | 0.690656 |
| MmugDNA.1846.1.S1_at    | MmugDNA.1846.1  | 3.15  | 2.97  | 0.09 | 0.17 | 1.13  | 0.636175 | 0.4167   | 0.854813 | 0.64167  |
| MmugDNA.18460.1.S1_at   | MmugDNA.18460.1 | 8.12  | 7.88  | 0.16 | 0.12 | 1.18  | 0.136887 | 0.22554  | 0.511963 | 0.498155 |
| MmugDNA.18462.1.S1_at   | MmugDNA.18462.1 | 4.04  | 4.04  | 0.03 | 0.1  | 1     | 0.548902 | 0.102639 | 0.810008 | 0.362991 |
| MmugDNA.18464.1.S1_at   | MmugDNA.18464.1 | 2.96  | 2.98  | 0.09 | 0.1  | -1.01 | 0.474708 | 0.553219 | 0.768196 | 0.73239  |
| MmugDNA.18466.1.S1_at   | MmugDNA.18466.1 | 4.46  | 4.27  | 0.12 | 0.1  | 1.14  | 0.065585 | 0.059542 | 0.420827 | 0.290548 |
| MmugDNA.18467.1.S1_at   | MmugDNA.18467.1 | 9.3   | 9.55  | 0.56 | 0.06 | -1.19 | 0.764639 | 0.420296 | 0.911553 | 0.644084 |
| MmugDNA.18468.1.S1_at   | MmugDNA.18468.1 | 4.99  | 4.93  | 0.17 | 0.03 | 1.05  | 0.750141 | 0.932548 | 0.905347 | 0.961739 |
| MmugDNA.18469.1.S1_at   | MmugDNA.18469.1 | 6.76  | 7.22  | 0.83 | 0.19 | -1.38 | 0.626579 | 0.809056 | 0.849991 | 0.889981 |
| MmugDNA.18470.1.S1_at   | MmugDNA.18470.1 | 10    | 9.95  | 0.52 | 0.06 | 1.04  | 0.787536 | 0.297682 | 0.921953 | 0.556351 |
| MmugDNA.18471.1.S1_at   | MmugDNA.18471.1 | 8.77  | 8.69  | 0.2  | 0.08 | 1.06  | 0.130631 | 0.111575 | 0.50503  | 0.376407 |
| MmugDNA.18472.1.S1_at   | MmugDNA.18472.1 | 6.52  | 6.69  | 0.8  | 0.18 | -1.12 | 0.458789 | 0.479149 | 0.759072 | 0.68497  |
| MmugDNA.18475.1.S1_at   | MmugDNA.18475.1 | 5.81  | 6.63  | 0.23 | 0.05 | -1.77 | 0.003387 | 0.018415 | 0.194985 | 0.170755 |
| MmugDNA.18476.1.S1_at   | MmugDNA.18476.1 | 6.16  | 6.03  | 0.09 | 0.1  | 1.1   | 0.052141 | 0.268133 | 0.392084 | 0.533873 |
| MmugDNA.18478.1.S1_at   | MmugDNA.18478.1 | 6.08  | 6.06  | 0.04 | 0.13 | 1.01  | 0.607772 | 0.486001 | 0.840971 | 0.689551 |
| MmugDNA.18479.1.S1_at   | MmugDNA.18479.1 | 2.86  | 2.97  | 0.06 | 0.17 | -1.08 | 0.179786 | 0.440475 | 0.553052 | 0.658967 |
| MmugDNA.1848.1.S1_at    | MmugDNA.1848.1  | 5.11  | 5.06  | 0.28 | 0.04 | 1.04  | 0.861982 | 0.651405 | 0.951336 | 0.796212 |
| MmugDNA.18480.1.S1_at   | MmugDNA.18480.1 | 6.79  | 6.66  | 0.48 | 0.16 | 1.1   | 0.659342 | 0.765248 | 0.865173 | 0.863535 |
| MmugDNA.18482.1.S1_at   | MmugDNA.18482.1 | 6.02  | 6.01  | 0.07 | 0.13 | 1.01  | 0.423986 | 0.274313 | 0.739366 | 0.538751 |
| MmugDNA.18484.1.S1_at   | MmugDNA.18484.1 | 6.41  | 6.25  | 0.21 | 0.09 | 1.11  | 0.127796 | 0.31249  | 0.502223 | 0.567211 |
| MmugDNA.18485.1.S1_at   | MmugDNA.18485.1 | 5.28  | 4.83  | 0.14 | 0.51 | 1.36  | 0.34209  | 0.243806 | 0.685569 | 0.513949 |
| MmugDNA.18487.1.S1_at   | MmugDNA.18487.1 | 5.67  | 5.7   | 0.1  | 0.22 | -1.02 | 0.572255 | 0.825909 | 0.823212 | 0.899981 |
| MmugDNA.18489.1.S1_at   | MmugDNA.18489.1 | 3.85  | 3.48  | 0.11 | 0.44 | 1.29  | 0.849646 | 0.305258 | 0.947112 | 0.562255 |
| MmugDNA.1849.1.S1_at    | MmugDNA.1849.1  | 4.65  | 4.42  | 0.35 | 0.06 | 1.17  | 0.191016 | 0.15753  | 0.562254 | 0.433108 |
| MmugDNA.18491.1.S1_at   | MmugDNA.18491.1 | 5.57  | 5.51  | 0.2  | 0.03 | 1.04  | 0.253935 | 0.474293 | 0.618601 | 0.68135  |
| MmugDNA.18491.1.S1_s_at | MmugDNA.18491.1 | 5.35  | 5.24  | 0.18 | 0.09 | 1.08  | 0.226826 | 0.029743 | 0.596222 | 0.214138 |
| MmugDNA.18492.1.S1_at   | MmugDNA.18492.1 | 5.07  | 3.34  | 0.57 | 0.19 | 3.31  | 0.015775 | 0.012331 | 0.283742 | 0.143659 |
| MmugDNA.18493.1.S1_at   | MmugDNA.18493.1 | 5.72  | 5.53  | 0.07 | 0.01 | 1.14  | 0.005676 | 0.024127 | 0.21011  | 0.1945   |

|                         |                 |       |       |      |      |       |          |          |          |          |
|-------------------------|-----------------|-------|-------|------|------|-------|----------|----------|----------|----------|
| MmugDNA.18494.1.S1_at   | MmugDNA.18494.1 | 4.39  | 4.17  | 0.21 | 0.01 | 1.16  | 0.444523 | 0.696871 | 0.751294 | 0.823978 |
| MmugDNA.18497.1.S1_at   | MmugDNA.18497.1 | 4.81  | 5.24  | 0.22 | 0.2  | -1.34 | 0.217071 | 0.702254 | 0.58704  | 0.827401 |
| MmugDNA.18497.1.S1_s_at | MmugDNA.18497.1 | 5.73  | 6.19  | 0.38 | 0.33 | -1.37 | 0.350981 | 0.075878 | 0.691768 | 0.320523 |
| MmugDNA.185.1.S1_at     | MmugDNA.185.1   | 9.87  | 9.52  | 0.47 | 0.06 | 1.27  | 0.292741 | 0.135111 | 0.649033 | 0.407128 |
| MmugDNA.1850.1.S1_s_at  | MmugDNA.1850.1  | 5.96  | 5.32  | 0.39 | 0.18 | 1.55  | 0.047293 | 0.119318 | 0.379841 | 0.387834 |
| MmugDNA.18501.1.S1_at   | MmugDNA.18501.1 | 7.68  | 7.76  | 0.62 | 0.52 | -1.06 | 0.899854 | 0.506151 | 0.965989 | 0.702359 |
| MmugDNA.18503.1.S1_at   | MmugDNA.18503.1 | 4.37  | 4     | 1.12 | 0.65 | 1.29  | 0.599482 | 0.546425 | 0.837382 | 0.728034 |
| MmugDNA.18504.1.S1_at   | MmugDNA.18504.1 | 5.79  | 5.94  | 0.12 | 0.11 | -1.11 | 0.041388 | 0.005486 | 0.366275 | 0.102081 |
| MmugDNA.18505.1.S1_at   | MmugDNA.18505.1 | 3.57  | 3.58  | 0.1  | 0.07 | -1    | 0.488129 | 0.300515 | 0.775435 | 0.558841 |
| MmugDNA.18506.1.S1_at   | MmugDNA.18506.1 | 11.4  | 11.56 | 0.15 | 0.07 | -1.11 | 0.563002 | 0.511176 | 0.817962 | 0.705422 |
| MmugDNA.18507.1.S1_at   | MmugDNA.18507.1 | 3.48  | 3.48  | 0.09 | 0    | 1     | 0.94499  | 0.87659  | 0.980852 | 0.929709 |
| MmugDNA.18509.1.S1_at   | MmugDNA.18509.1 | 7.33  | 7.21  | 0.66 | 0.62 | 1.08  | 0.666482 | 0.876573 | 0.868243 | 0.929709 |
| MmugDNA.1851.1.S1_at    | MmugDNA.1851.1  | 6.03  | 5.91  | 0.19 | 0.17 | 1.09  | 0.683577 | 0.684781 | 0.876134 | 0.816146 |
| MmugDNA.18512.1.S1_at   | MmugDNA.18512.1 | 4.22  | 4.03  | 0.04 | 0.11 | 1.14  | 0.092328 | 0.057492 | 0.460762 | 0.285856 |
| MmugDNA.18514.1.S1_at   | MmugDNA.18514.1 | 6.87  | 6.85  | 0.25 | 0.19 | 1.01  | 0.939769 | 0.027545 | 0.979532 | 0.207227 |
| MmugDNA.18517.1.S1_at   | MmugDNA.18517.1 | 2.98  | 2.83  | 0.07 | 0.1  | 1.11  | 0.090178 | 0.109253 | 0.458083 | 0.37308  |
| MmugDNA.18518.1.S1_at   | MmugDNA.18518.1 | 6.22  | 6.22  | 0.09 | 0.03 | -1    | 0.823642 | 0.393812 | 0.936364 | 0.626565 |
| MmugDNA.1852.1.S1_at    | MmugDNA.1852.1  | 4.32  | 4.63  | 0.25 | 0.14 | -1.23 | 0.25847  | 0.084672 | 0.622213 | 0.33618  |
| MmugDNA.18521.1.S1_at   | MmugDNA.18521.1 | 5.37  | 5.17  | 1.47 | 0.51 | 1.15  | 0.717441 | 0.778208 | 0.890421 | 0.871222 |
| MmugDNA.18523.1.S1_at   | MmugDNA.18523.1 | 7.39  | 6.94  | 0.76 | 0.28 | 1.37  | 0.645938 | 0.02628  | 0.858905 | 0.203051 |
| MmugDNA.18524.1.S1_at   | MmugDNA.18524.1 | 10.39 | 10.92 | 0.97 | 0.29 | -1.45 | 0.564215 | 0.093901 | 0.81857  | 0.350423 |
| MmugDNA.18525.1.S1_at   | MmugDNA.18525.1 | 4.81  | 4.69  | 0.25 | 0.27 | 1.08  | 0.832803 | 0.59818  | 0.940026 | 0.760675 |
| MmugDNA.18526.1.S1_at   | MmugDNA.18526.1 | 6.3   | 6.34  | 0.33 | 0.12 | -1.03 | 0.884599 | 0.90399  | 0.96011  | 0.945483 |
| MmugDNA.18527.1.S1_at   | MmugDNA.18527.1 | 8.32  | 8.33  | 0.07 | 0.03 | -1.01 | 0.55729  | 0.882267 | 0.814609 | 0.932845 |
| MmugDNA.18529.1.S1_at   | MmugDNA.18529.1 | 7.23  | 7.26  | 0.24 | 0.09 | -1.02 | 0.467066 | 0.468155 | 0.764099 | 0.677624 |
| MmugDNA.1853.1.S1_at    | MmugDNA.1853.1  | 3.17  | 3.11  | 0.22 | 0.23 | 1.05  | 0.599354 | 0.31403  | 0.837382 | 0.568178 |
| MmugDNA.18530.1.S1_at   | MmugDNA.18530.1 | 6.45  | 6.53  | 0.45 | 0.39 | -1.06 | 0.389465 | 0.729908 | 0.716166 | 0.843733 |
| MmugDNA.18531.1.S1_at   | MmugDNA.18531.1 | 3.85  | 3.85  | 0.12 | 0    | -1    | 0.403331 | 0.631178 | 0.725661 | 0.782716 |
| MmugDNA.18532.1.S1_at   | MmugDNA.18532.1 | 7.93  | 7.81  | 0.11 | 0.07 | 1.08  | 0.118462 | 0.151597 | 0.491933 | 0.426333 |
| MmugDNA.18533.1.S1_at   | MmugDNA.18533.1 | 5.49  | 5.04  | 0.42 | 0.44 | 1.36  | 0.115339 | 0.025668 | 0.488677 | 0.200834 |
| MmugDNA.18534.1.S1_at   | MmugDNA.18534.1 | 8.24  | 8.18  | 0.44 | 0.16 | 1.04  | 0.30157  | 0.157061 | 0.6558   | 0.432547 |
| MmugDNA.18535.1.S1_at   | MmugDNA.18535.1 | 7.96  | 8.01  | 0.07 | 0.3  | -1.04 | 0.666971 | 0.107891 | 0.868458 | 0.370945 |
| MmugDNA.18536.1.S1_at   | MmugDNA.18536.1 | 4.82  | 4.76  | 0.24 | 0.39 | 1.04  | 0.881062 | 0.418797 | 0.958934 | 0.643118 |
| MmugDNA.18537.1.S1_at   | MmugDNA.18537.1 | 5.64  | 5.41  | 0.02 | 0.28 | 1.17  | 0.272282 | 0.286389 | 0.632045 | 0.547815 |
| MmugDNA.1854.1.S1_at    | MmugDNA.1854.1  | 5     | 5.55  | 0.65 | 0.16 | -1.47 | 0.152288 | 0.161398 | 0.52528  | 0.437598 |
| MmugDNA.18540.1.S1_at   | MmugDNA.18540.1 | 9.13  | 9     | 0.47 | 0.2  | 1.09  | 0.384927 | 0.434829 | 0.712306 | 0.654843 |
| MmugDNA.18542.1.S1_at   | MmugDNA.18542.1 | 5.95  | 5.73  | 0.08 | 0.06 | 1.17  | 0.021004 | 0.033064 | 0.306313 | 0.225068 |
| MmugDNA.18543.1.S1_at   | MmugDNA.18543.1 | 3.12  | 3.15  | 0.14 | 0.27 | -1.02 | 0.334947 | 0.525535 | 0.680734 | 0.715101 |
| MmugDNA.18545.1.S1_at   | MmugDNA.18545.1 | 3.71  | 3.58  | 0.12 | 0.12 | 1.1   | 0.528753 | 0.862851 | 0.798051 | 0.922029 |
| MmugDNA.18546.1.S1_at   | MmugDNA.18546.1 | 8.24  | 7.85  | 0.02 | 0.11 | 1.31  | 0.002428 | 0.034176 | 0.177075 | 0.228728 |
| MmugDNA.18547.1.S1_at   | MmugDNA.18547.1 | 6.37  | 6.19  | 0.37 | 0.22 | 1.14  | 0.331263 | 0.261722 | 0.677942 | 0.528157 |
| MmugDNA.18549.1.S1_at   | MmugDNA.18549.1 | 4.62  | 4.46  | 0.21 | 0.11 | 1.12  | 0.28689  | 0.051791 | 0.643994 | 0.273131 |
| MmugDNA.1855.1.S1_at    | MmugDNA.1855.1  | 10.91 | 10.67 | 0.11 | 0.06 | 1.18  | 0.043714 | 0.094296 | 0.372554 | 0.350889 |

|                         |                 |       |       |      |      |        |          |          |          |          |
|-------------------------|-----------------|-------|-------|------|------|--------|----------|----------|----------|----------|
| MmugDNA.18550.1.S1_at   | MmugDNA.18550.1 | 6.64  | 6.48  | 0.27 | 0    | 1.12   | 0.943014 | 0.762734 | 0.980374 | 0.862004 |
| MmugDNA.18553.1.S1_at   | MmugDNA.18553.1 | 12.59 | 12.73 | 0.12 | 0.07 | -1.11  | 0.270621 | 0.168562 | 0.630519 | 0.445172 |
| MmugDNA.18553.1.S1_s_at | MmugDNA.18553.1 | 11.89 | 11.92 | 0.19 | 0.05 | -1.02  | 0.560976 | 0.258172 | 0.817    | 0.525574 |
| MmugDNA.18554.1.S1_at   | MmugDNA.18554.1 | 8.32  | 8.84  | 0.4  | 0.07 | -1.43  | 0.162559 | 0.011307 | 0.535667 | 0.138076 |
| MmugDNA.16984.1.S1_at   | MmugDNA.16984.1 | 7.6   | 7.22  | 0.07 | 0.1  | 1.3    | 0.005605 | 0.005766 | 0.209258 | 0.104378 |
| MmugDNA.16984.1.S1_s_at | MmugDNA.16984.1 | 4.68  | 4.26  | 0.16 | 0.22 | 1.34   | 0.054932 | 0.013392 | 0.397373 | 0.14827  |
| MmugDNA.1856.1.S1_at    | MmugDNA.1856.1  | 5.27  | 5.2   | 0.38 | 0.14 | 1.05   | 0.643081 | 0.205872 | 0.85802  | 0.480109 |
| MmugDNA.18560.1.S1_at   | MmugDNA.18560.1 | 5.09  | 5.09  | 0.21 | 0.03 | 1      | 0.320496 | 0.588288 | 0.669365 | 0.754859 |
| MmugDNA.18561.1.S1_at   | MmugDNA.18561.1 | 5.82  | 5.83  | 0.06 | 0.07 | -1     | 0.450417 | 0.172973 | 0.754829 | 0.449611 |
| MmugDNA.18562.1.S1_at   | MmugDNA.18562.1 | 5.81  | 5.14  | 0.54 | 0.22 | 1.59   | 0.101636 | 0.123993 | 0.47191  | 0.394262 |
| MmugDNA.18564.1.S1_at   | MmugDNA.18564.1 | 7.29  | 7.18  | 0.04 | 0.07 | 1.08   | 0.083769 | 0.015258 | 0.449639 | 0.15693  |
| MmugDNA.18565.1.S1_at   | MmugDNA.18565.1 | 4.11  | 3.75  | 0.76 | 0.42 | 1.29   | 0.74343  | 0.182569 | 0.902124 | 0.459065 |
| MmugDNA.18567.1.S1_at   | MmugDNA.18567.1 | 6.85  | 6.86  | 0.1  | 0.08 | -1.01  | 0.309849 | 0.696158 | 0.661839 | 0.823455 |
| MmugDNA.18568.1.S1_at   | MmugDNA.18568.1 | 7.19  | 6.73  | 0.42 | 0.25 | 1.37   | 0.099589 | 0.055774 | 0.469263 | 0.282044 |
| MmugDNA.18568.1.S1_s_at | MmugDNA.18568.1 | 5.76  | 5.47  | 0.19 | 0.16 | 1.23   | 0.065153 | 0.052514 | 0.419835 | 0.274757 |
| MmugDNA.18570.1.S1_at   | MmugDNA.18570.1 | 7.79  | 7.99  | 0.71 | 0.1  | -1.14  | 0.667306 | 0.839541 | 0.868553 | 0.90858  |
| MmugDNA.18571.1.S1_at   | MmugDNA.18571.1 | 5.04  | 4.81  | 0.17 | 0.04 | 1.17   | 0.237178 | 0.226821 | 0.604099 | 0.499232 |
| MmugDNA.18572.1.S1_at   | MmugDNA.18572.1 | 5.45  | 5.46  | 0.03 | 0.04 | -1     | 0.739891 | 0.670533 | 0.900699 | 0.807399 |
| MmugDNA.18575.1.S1_at   | MmugDNA.18575.1 | 3.75  | 3.41  | 0.04 | 0.09 | 1.26   | 0.004839 | 0.003543 | 0.202685 | 0.085371 |
| MmugDNA.18576.1.S1_at   | MmugDNA.18576.1 | 4.91  | 4.77  | 0.09 | 0.03 | 1.1    | 0.250762 | 0.421324 | 0.615913 | 0.644968 |
| MmugDNA.18577.1.S1_at   | MmugDNA.18577.1 | 3.92  | 3.77  | 0.1  | 0.05 | 1.11   | 0.035151 | 0.024427 | 0.351215 | 0.195598 |
| MmugDNA.18579.1.S1_at   | MmugDNA.18579.1 | 5.54  | 5.56  | 0.19 | 0.14 | -1.01  | 0.712482 | 0.575466 | 0.887958 | 0.746538 |
| MmugDNA.1858.1.S1_at    | MmugDNA.1858.1  | 3.57  | 3.33  | 0.15 | 0.07 | 1.18   | 0.141604 | 0.103259 | 0.516482 | 0.364143 |
| MmugDNA.18580.1.S1_at   | MmugDNA.18580.1 | 11.1  | 10.35 | 1.38 | 0.09 | 1.69   | 0.982068 | 0.55932  | 0.994358 | 0.736241 |
| MmugDNA.18581.1.S1_at   | MmugDNA.18581.1 | 4.93  | 4.77  | 0.09 | 0.25 | 1.12   | 0.516406 | 0.806586 | 0.791459 | 0.888726 |
| MmugDNA.18582.1.S1_at   | MmugDNA.18582.1 | 8.01  | 7.31  | 0.32 | 0.17 | 1.63   | 0.058371 | 0.124585 | 0.404238 | 0.394995 |
| MmugDNA.18583.1.S1_at   | MmugDNA.18583.1 | 7.46  | 7.24  | 0.44 | 0.18 | 1.17   | 0.159581 | 0.197672 | 0.532526 | 0.472633 |
| MmugDNA.18587.1.S1_at   | MmugDNA.18587.1 | 5.99  | 5.2   | 1.12 | 0.07 | 1.73   | 0.173066 | 0.126273 | 0.546142 | 0.39678  |
| MmugDNA.18589.1.S1_at   | MmugDNA.18589.1 | 10.18 | 10.16 | 0.89 | 0.05 | 1.01   | 0.370023 | 0.033472 | 0.704454 | 0.226577 |
| MmugDNA.1859.1.S1_at    | MmugDNA.1859.1  | 3.44  | 3.45  | 0.1  | 0.02 | -1.01  | 0.587959 | 0.817399 | 0.83181  | 0.894691 |
| MmugDNA.18591.1.S1_at   | MmugDNA.18591.1 | 6.34  | 6.88  | 0.45 | 0.17 | -1.46  | 0.185419 | 0.210688 | 0.55849  | 0.484747 |
| MmugDNA.18594.1.S1_at   | MmugDNA.18594.1 | 11.38 | 11.38 | 0.06 | 0.05 | -1     | 0.224644 | 0.147074 | 0.593878 | 0.421208 |
| MmugDNA.18596.1.S1_at   | MmugDNA.18596.1 | 7.09  | 6.97  | 0.21 | 0.04 | 1.09   | 0.997883 | 0.971209 | 0.999314 | 0.984355 |
| MmugDNA.18598.1.S1_at   | MmugDNA.18598.1 | 4.3   | 3.99  | 0.13 | 0.14 | 1.25   | 0.173536 | 0.118038 | 0.546692 | 0.385881 |
| MmugDNA.18599.1.S1_at   | MmugDNA.18599.1 | 5.12  | 4.98  | 0.34 | 0.07 | 1.11   | 0.444424 | 0.519483 | 0.751266 | 0.711062 |
| MmugDNA.186.1.S1_at     | MmugDNA.186.1   | 7.6   | 7.62  | 0.11 | 0.09 | -1.01  | 0.73867  | 0.651512 | 0.900053 | 0.796241 |
| MmugDNA.18601.1.S1_at   | MmugDNA.18601.1 | 12.77 | 12.82 | 1.57 | 0.15 | -1.03  | 0.670643 | 0.117524 | 0.869999 | 0.385295 |
| MmugDNA.18602.1.S1_s_at | MmugDNA.18602.1 | 8.63  | 7.05  | 1.42 | 0.67 | 2.99   | 0.063629 | 0.024702 | 0.416123 | 0.196795 |
| MmugDNA.18603.1.S1_at   | MmugDNA.18603.1 | 5.97  | 9.4   | 2.16 | 0.29 | -10.78 | 0.044247 | 0.008887 | 0.374279 | 0.124698 |
| MmugDNA.18604.1.S1_at   | MmugDNA.18604.1 | 7.42  | 8.14  | 0.11 | 0.08 | -1.65  | 0.00088  | 0.234124 | 0.153739 | 0.505319 |
| MmugDNA.18605.1.S1_at   | MmugDNA.18605.1 | 5.6   | 5.3   | 0.24 | 0.07 | 1.23   | 0.228021 | 0.524134 | 0.596866 | 0.714207 |
| MmugDNA.18608.1.S1_at   | MmugDNA.18608.1 | 4.89  | 4.76  | 0.13 | 0.16 | 1.1    | 0.12562  | 0.188444 | 0.499523 | 0.464433 |
| MmugDNA.18609.1.S1_at   | MmugDNA.18609.1 | 5.34  | 5.13  | 0.09 | 0.04 | 1.15   | 0.02598  | 0.571324 | 0.322777 | 0.743642 |

|                         |                 |       |       |      |      |       |          |          |          |          |
|-------------------------|-----------------|-------|-------|------|------|-------|----------|----------|----------|----------|
| MmugDNA.1861.1.S1_at    | MmugDNA.1861.1  | 11.66 | 11.57 | 0.08 | 0.04 | 1.07  | 0.172414 | 0.541001 | 0.545696 | 0.724694 |
| MmugDNA.18610.1.S1_at   | MmugDNA.18610.1 | 6.45  | 6.34  | 0.17 | 0.05 | 1.08  | 0.116835 | 0.471111 | 0.490029 | 0.679173 |
| MmugDNA.18613.1.S1_at   | MmugDNA.18613.1 | 8.65  | 9.3   | 0.18 | 0.03 | -1.57 | 0.007331 | 0.000173 | 0.227558 | 0.030511 |
| MmugDNA.18616.1.S1_at   | MmugDNA.18616.1 | 8.41  | 7.85  | 0.9  | 0.06 | 1.48  | 0.92787  | 0.378419 | 0.976185 | 0.615443 |
| MmugDNA.18617.1.S1_at   | MmugDNA.18617.1 | 10.6  | 10.91 | 0.41 | 0.22 | -1.24 | 0.248406 | 0.238263 | 0.613851 | 0.508825 |
| MmugDNA.18618.1.S1_at   | MmugDNA.18618.1 | 7.8   | 8.08  | 0.16 | 0.03 | -1.21 | 0.164677 | 0.000132 | 0.537466 | 0.029087 |
| MmugDNA.1862.1.S1_at    | MmugDNA.1862.1  | 9.32  | 8.96  | 0.45 | 0.2  | 1.29  | 0.140869 | 0.020207 | 0.516345 | 0.178561 |
| MmugDNA.18620.1.S1_at   | MmugDNA.18620.1 | 4.36  | 4.23  | 0.05 | 0.18 | 1.09  | 0.879073 | 0.470306 | 0.957953 | 0.678599 |
| MmugDNA.18622.1.S1_at   | MmugDNA.18622.1 | 10.48 | 10.88 | 0.18 | 0.18 | -1.32 | 0.112408 | 0.094669 | 0.485692 | 0.351481 |
| MmugDNA.18622.1.S1_s_at | MmugDNA.18622.1 | 10.3  | 10.68 | 0.17 | 0.13 | -1.3  | 0.023579 | 0.027529 | 0.31615  | 0.207161 |
| MmugDNA.18623.1.S1_at   | MmugDNA.18623.1 | 2.78  | 2.81  | 0.04 | 0.03 | -1.02 | 0.518431 | 0.497123 | 0.792692 | 0.696465 |
| MmugDNA.18624.1.S1_at   | MmugDNA.18624.1 | 7.85  | 7.86  | 0.56 | 0.33 | -1.01 | 0.688311 | 0.411559 | 0.878257 | 0.638261 |
| MmugDNA.18625.1.S1_s_at | MmugDNA.18625.1 | 3.16  | 2.97  | 0.07 | 0.13 | 1.14  | 0.10751  | 0.282173 | 0.480018 | 0.544937 |
| MmugDNA.18626.1.S1_at   | MmugDNA.18626.1 | 7.35  | 7.38  | 0.71 | 0.23 | -1.02 | 0.508618 | 0.213654 | 0.787118 | 0.487441 |
| MmugDNA.18627.1.S1_at   | MmugDNA.18627.1 | 5.88  | 5.81  | 0.05 | 0.05 | 1.05  | 0.063137 | 0.033586 | 0.415058 | 0.226848 |
| MmugDNA.18628.1.S1_at   | MmugDNA.18628.1 | 5.5   | 5.53  | 0.22 | 0.14 | -1.02 | 0.932704 | 0.785499 | 0.977227 | 0.875823 |
| MmugDNA.18629.1.S1_at   | MmugDNA.18629.1 | 3.82  | 3.78  | 0.26 | 0.02 | 1.02  | 0.303276 | 0.371328 | 0.65718  | 0.610172 |
| MmugDNA.1863.1.S1_at    | MmugDNA.1863.1  | 3.56  | 3.55  | 0.07 | 0.14 | 1.01  | 0.863389 | 0.879935 | 0.952018 | 0.931461 |
| MmugDNA.18632.1.S1_at   | MmugDNA.18632.1 | 5.28  | 5.21  | 0.06 | 0.09 | 1.05  | 0.146488 | 0.247784 | 0.520749 | 0.517199 |
| MmugDNA.18634.1.S1_at   | MmugDNA.18634.1 | 7.55  | 8.13  | 0.98 | 0.22 | -1.5  | 0.519283 | 0.378667 | 0.793113 | 0.615681 |
| MmugDNA.18634.1.S1_s_at | MmugDNA.18634.1 | 7.41  | 8.3   | 0.95 | 0.24 | -1.86 | 0.425247 | 0.3142   | 0.739948 | 0.568185 |
| MmugDNA.18636.1.S1_s_at | MmugDNA.18636.1 | 10.83 | 10.86 | 0.2  | 0.13 | -1.02 | 0.762162 | 0.793842 | 0.910794 | 0.881112 |
| MmugDNA.18637.1.S1_at   | MmugDNA.18637.1 | 4.32  | 3.84  | 0.25 | 0.05 | 1.39  | 0.100147 | 0.087412 | 0.470393 | 0.340589 |
| MmugDNA.18639.1.S1_at   | MmugDNA.18639.1 | 4.15  | 3.99  | 0.08 | 0.06 | 1.12  | 0.068674 | 0.131462 | 0.426    | 0.403584 |
| MmugDNA.1864.1.S1_at    | MmugDNA.1864.1  | 4.86  | 4.76  | 0.57 | 0.07 | 1.07  | 0.67286  | 0.66164  | 0.871072 | 0.801903 |
| MmugDNA.18640.1.S1_at   | MmugDNA.18640.1 | 3.21  | 3.34  | 0.37 | 0.12 | -1.1  | 0.599187 | 0.276646 | 0.837299 | 0.540596 |
| MmugDNA.27602.1.S1_at   | MmugDNA.27602.1 | 12.71 | 12.28 | 0.17 | 0.1  | 1.34  | 0.01997  | 0.011418 | 0.303098 | 0.138384 |
| MmugDNA.27602.1.S1_s_at | MmugDNA.27602.1 | 11.74 | 11.13 | 0.16 | 0.17 | 1.53  | 0.008054 | 0.003328 | 0.232005 | 0.083001 |
| MmugDNA.18641.1.S1_at   | MmugDNA.18641.1 | 3.57  | 3.57  | 0.18 | 0.28 | 1     | 0.978143 | 0.875282 | 0.992929 | 0.929211 |
| MmugDNA.18642.1.S1_at   | MmugDNA.18642.1 | 3.24  | 3.14  | 0.18 | 0.07 | 1.07  | 0.446676 | 0.528703 | 0.752779 | 0.716773 |
| MmugDNA.18644.1.S1_at   | MmugDNA.18644.1 | 8.47  | 8.29  | 0.28 | 0.08 | 1.14  | 0.324309 | 0.126777 | 0.672562 | 0.397446 |
| MmugDNA.18646.1.S1_at   | MmugDNA.18646.1 | 4.38  | 4.37  | 0.14 | 0.05 | 1.01  | 0.530547 | 0.574673 | 0.799115 | 0.746072 |
| MmugDNA.18646.1.S1_s_at | MmugDNA.18646.1 | 3.5   | 3.5   | 0.23 | 0.26 | -1    | 0.615367 | 0.380893 | 0.844445 | 0.617426 |
| MmugDNA.18649.1.S1_at   | MmugDNA.18649.1 | 4.08  | 3.84  | 0    | 0.22 | 1.18  | 0.444216 | 0.407632 | 0.751134 | 0.635077 |
| MmugDNA.18651.1.S1_at   | MmugDNA.18651.1 | 7.61  | 6.32  | 0.49 | 0.31 | 2.45  | 0.014026 | 0.003739 | 0.273301 | 0.08718  |
| MmugDNA.18654.1.S1_at   | MmugDNA.18654.1 | 6.42  | 6.33  | 0.09 | 0.07 | 1.06  | 0.18706  | 0.07746  | 0.559702 | 0.323279 |
| MmugDNA.18656.1.S1_at   | MmugDNA.18656.1 | 6.98  | 6.98  | 0.1  | 0.01 | 1     | 0.539116 | 0.559659 | 0.803644 | 0.736365 |
| MmugDNA.18658.1.S1_at   | MmugDNA.18658.1 | 11.41 | 11.73 | 0.48 | 0.07 | -1.24 | 0.337997 | 0.224237 | 0.682728 | 0.497164 |
| MmugDNA.18660.1.S1_at   | MmugDNA.18660.1 | 6.81  | 6.7   | 0.65 | 0.18 | 1.08  | 0.28557  | 0.143643 | 0.643438 | 0.417555 |
| MmugDNA.18661.1.S1_at   | MmugDNA.18661.1 | 6.9   | 6.94  | 0.08 | 0.09 | -1.03 | 0.294414 | 0.076982 | 0.650595 | 0.322421 |
| MmugDNA.18663.1.S1_at   | MmugDNA.18663.1 | 7.5   | 9.08  | 0.41 | 0.25 | -2.99 | 0.004742 | 0.020457 | 0.201699 | 0.179597 |
| MmugDNA.18666.1.S1_at   | MmugDNA.18666.1 | 3.94  | 3.91  | 0.15 | 0.12 | 1.02  | 0.524503 | 0.205929 | 0.795908 | 0.48015  |
| MmugDNA.18669.1.S1_at   | MmugDNA.18669.1 | 4.56  | 4.73  | 1.13 | 0.25 | -1.13 | 0.791409 | 0.808515 | 0.923383 | 0.889757 |



|                         |                 |       |       |      |      |       |          |          |          |          |
|-------------------------|-----------------|-------|-------|------|------|-------|----------|----------|----------|----------|
| MmugDNA.1867.1.S1_at    | MmugDNA.1867.1  | 7.12  | 6.82  | 0.44 | 0.05 | 1.23  | 0.342439 | 0.069397 | 0.685799 | 0.30962  |
| MmugDNA.18671.1.S1_at   | MmugDNA.18671.1 | 10.48 | 10.19 | 0.05 | 0.11 | 1.22  | 0.005838 | 0.000644 | 0.211798 | 0.042928 |
| MmugDNA.18672.1.S1_at   | MmugDNA.18672.1 | 6.56  | 6.44  | 0.14 | 0.15 | 1.09  | 0.182377 | 0.263315 | 0.555371 | 0.529582 |
| MmugDNA.18675.1.S1_at   | MmugDNA.18675.1 | 2.91  | 2.91  | 0.01 | 0.05 | 1     | 0.488187 | 0.322816 | 0.775435 | 0.574157 |
| MmugDNA.18676.1.S1_at   | MmugDNA.18676.1 | 3.35  | 3.66  | 0.21 | 0.27 | -1.24 | 0.246436 | 0.301236 | 0.611924 | 0.559356 |
| MmugDNA.18677.1.S1_at   | MmugDNA.18677.1 | 4.62  | 4.47  | 0.18 | 0.17 | 1.11  | 0.155905 | 0.126078 | 0.529116 | 0.39672  |
| MmugDNA.18678.1.S1_at   | MmugDNA.18678.1 | 6.55  | 6.48  | 0.02 | 0.13 | 1.05  | 0.434284 | 0.382533 | 0.744987 | 0.618735 |
| MmugDNA.18679.1.S1_at   | MmugDNA.18679.1 | 3.25  | 3.19  | 0.03 | 0.06 | 1.04  | 0.12231  | 0.204699 | 0.495694 | 0.479056 |
| MmugDNA.1868.1.S1_at    | MmugDNA.1868.1  | 6.41  | 6.08  | 0.24 | 0.32 | 1.26  | 0.233722 | 0.053112 | 0.60129  | 0.276193 |
| MmugDNA.18680.1.S1_at   | MmugDNA.18680.1 | 2.82  | 2.76  | 0.1  | 0.05 | 1.05  | 0.642147 | 0.283375 | 0.857628 | 0.545922 |
| MmugDNA.18683.1.S1_at   | MmugDNA.18683.1 | 10.2  | 9.83  | 0.29 | 0.11 | 1.29  | 0.127125 | 0.234614 | 0.501114 | 0.505828 |
| MmugDNA.18686.1.S1_at   | MmugDNA.18686.1 | 6.55  | 6.46  | 0.03 | 0.06 | 1.06  | 0.152717 | 0.24944  | 0.525612 | 0.518532 |
| MmugDNA.18689.1.S1_at   | MmugDNA.18689.1 | 5.47  | 5.26  | 0.1  | 0.13 | 1.16  | 0.132026 | 0.269806 | 0.506472 | 0.535088 |
| MmugDNA.1869.1.S1_at    | MmugDNA.1869.1  | 10.92 | 10.8  | 0.48 | 0.08 | 1.09  | 0.746825 | 0.887051 | 0.903743 | 0.935666 |
| MmugDNA.18691.1.S1_at   | MmugDNA.18691.1 | 8.53  | 8.29  | 0.5  | 0.16 | 1.18  | 0.848121 | 0.861314 | 0.946664 | 0.921113 |
| MmugDNA.18691.1.S1_x_at | MmugDNA.18691.1 | 8.46  | 8.4   | 0.44 | 0.09 | 1.04  | 0.951286 | 0.811046 | 0.983558 | 0.890966 |
| MmugDNA.18692.1.S1_at   | MmugDNA.18692.1 | 2.9   | 2.84  | 0.17 | 0.12 | 1.05  | 0.216107 | 0.31201  | 0.586262 | 0.566838 |
| MmugDNA.18692.1.S1_x_at | MmugDNA.18692.1 | 2.64  | 2.81  | 0.16 | 0.06 | -1.13 | 0.492928 | 0.427046 | 0.778657 | 0.649087 |
| MmugDNA.18693.1.S1_at   | MmugDNA.18693.1 | 4.94  | 4.81  | 0.13 | 0.06 | 1.1   | 0.117637 | 0.398721 | 0.49103  | 0.629464 |
| MmugDNA.18694.1.S1_at   | MmugDNA.18694.1 | 4.16  | 4.04  | 0.09 | 0    | 1.09  | 0.125582 | 0.124008 | 0.499523 | 0.394273 |
| MmugDNA.18695.1.S1_at   | MmugDNA.18695.1 | 10.13 | 9.97  | 0.3  | 0.06 | 1.12  | 0.278198 | 0.361001 | 0.637417 | 0.60201  |
| MmugDNA.18696.1.S1_at   | MmugDNA.18696.1 | 13.39 | 13.34 | 0.09 | 0.03 | 1.04  | 0.884096 | 0.017624 | 0.959791 | 0.167839 |
| MmugDNA.18697.1.S1_at   | MmugDNA.18697.1 | 6.31  | 6.45  | 0.33 | 0.21 | -1.1  | 0.491887 | 0.213533 | 0.778032 | 0.48741  |
| MmugDNA.187.1.S1_at     | MmugDNA.187.1   | 6.8   | 6.85  | 0.19 | 0.16 | -1.04 | 0.816799 | 0.775147 | 0.933725 | 0.869083 |
| MmugDNA.21327.1.S1_s_at | MmugDNA.21327.1 | 5.58  | 4.89  | 0.47 | 0.72 | 1.61  | 0.609492 | 0.541409 | 0.841773 | 0.724909 |
| MmugDNA.18700.1.S1_at   | MmugDNA.18700.1 | 4.16  | 4.26  | 0    | 0.13 | -1.07 | 0.201782 | 0.226295 | 0.573323 | 0.498753 |
| MmugDNA.18702.1.S1_at   | MmugDNA.18702.1 | 6.51  | 6.68  | 0.63 | 0.25 | -1.13 | 0.846631 | 0.042797 | 0.94629  | 0.251394 |
| MmugDNA.18703.1.S1_at   | MmugDNA.18703.1 | 6.1   | 5.99  | 0.24 | 0.06 | 1.08  | 0.352415 | 0.71246  | 0.692649 | 0.833371 |
| MmugDNA.18705.1.S1_at   | MmugDNA.18705.1 | 6.33  | 6.28  | 1    | 0.31 | 1.04  | 0.721339 | 0.135618 | 0.891996 | 0.407744 |
| MmugDNA.18706.1.S1_at   | MmugDNA.18706.1 | 8.28  | 7.8   | 0.72 | 0.24 | 1.4   | 0.43527  | 0.450913 | 0.745618 | 0.66589  |
| MmugDNA.18706.1.S1_s_at | MmugDNA.18706.1 | 7.29  | 6.95  | 0.8  | 0.17 | 1.26  | 0.519535 | 0.656462 | 0.793229 | 0.799097 |
| MmugDNA.18708.1.S1_at   | MmugDNA.18708.1 | 4.08  | 4.03  | 0.38 | 0.06 | 1.04  | 0.842718 | 0.664995 | 0.944281 | 0.803726 |
| MmugDNA.18709.1.S1_at   | MmugDNA.18709.1 | 10.36 | 10.44 | 0.28 | 0    | -1.06 | 0.643011 | 0.59964  | 0.857999 | 0.761524 |
| MmugDNA.1871.1.S1_at    | MmugDNA.1871.1  | 3.41  | 3.39  | 0.09 | 0.08 | 1.01  | 0.446591 | 0.279059 | 0.752779 | 0.542782 |
| MmugDNA.16218.1.S1_s_at | MmugDNA.16218.1 | 5.99  | 5.86  | 0.24 | 0.05 | 1.1   | 0.842546 | 0.908689 | 0.944281 | 0.948291 |
| MmugDNA.18711.1.S1_at   | MmugDNA.18711.1 | 3.8   | 4.12  | 1.67 | 0.17 | -1.25 | 0.559267 | 0.637522 | 0.816044 | 0.787003 |
| MmugDNA.18712.1.S1_at   | MmugDNA.18712.1 | 9.3   | 9.05  | 0.84 | 0.23 | 1.19  | 0.647623 | 0.743259 | 0.859364 | 0.851277 |
| MmugDNA.18713.1.S1_at   | MmugDNA.18713.1 | 4.22  | 4.23  | 0.07 | 0.16 | -1.01 | 0.569696 | 0.577873 | 0.821593 | 0.748169 |
| MmugDNA.18714.1.S1_at   | MmugDNA.18714.1 | 6.87  | 6.36  | 0.31 | 0.17 | 1.42  | 0.04242  | 0.006654 | 0.369024 | 0.110505 |
| MmugDNA.18716.1.S1_at   | MmugDNA.18716.1 | 11.61 | 11.46 | 0.39 | 0.04 | 1.11  | 0.980208 | 0.550584 | 0.993785 | 0.730588 |
| MmugDNA.18718.1.S1_at   | MmugDNA.18718.1 | 4.08  | 4.15  | 0.18 | 0.32 | -1.05 | 0.886261 | 0.70444  | 0.960501 | 0.828481 |
| MmugDNA.18719.1.S1_at   | MmugDNA.18719.1 | 4.61  | 4.6   | 0.12 | 0.04 | 1.01  | 0.630625 | 0.77682  | 0.852018 | 0.870313 |
| MmugDNA.1872.1.S1_at    | MmugDNA.1872.1  | 3.56  | 3.35  | 0.38 | 0.13 | 1.16  | 0.165491 | 0.27119  | 0.538324 | 0.536264 |

|                         |                 |       |       |      |      |       |          |          |          |          |
|-------------------------|-----------------|-------|-------|------|------|-------|----------|----------|----------|----------|
| MmugDNA.18721.1.S1_at   | MmugDNA.18721.1 | 7.52  | 7.69  | 1.04 | 0.13 | -1.13 | 0.819454 | 0.59959  | 0.93492  | 0.761524 |
| MmugDNA.18723.1.S1_at   | MmugDNA.18723.1 | 5.05  | 4.82  | 0.07 | 0.04 | 1.17  | 0.007774 | 0.025569 | 0.230997 | 0.200613 |
| MmugDNA.18725.1.S1_at   | MmugDNA.18725.1 | 6.15  | 7.36  | 0.48 | 0.37 | -2.31 | 0.10694  | 0.062795 | 0.479433 | 0.297193 |
| MmugDNA.18726.1.S1_at   | MmugDNA.18726.1 | 3.88  | 3.82  | 0.07 | 0.16 | 1.04  | 0.594692 | 0.262691 | 0.834885 | 0.529054 |
| MmugDNA.18727.1.S1_at   | MmugDNA.18727.1 | 5.25  | 4.79  | 0.28 | 0.27 | 1.38  | 0.556454 | 0.06504  | 0.814119 | 0.301009 |
| MmugDNA.18728.1.S1_at   | MmugDNA.18728.1 | 10.09 | 10.78 | 0.52 | 0.05 | -1.61 | 0.087253 | 0.121644 | 0.454785 | 0.39083  |
| MmugDNA.18729.1.S1_at   | MmugDNA.18729.1 | 7.11  | 5.81  | 0.45 | 0.4  | 2.46  | 0.029993 | 0.013669 | 0.336449 | 0.14967  |
| MmugDNA.18731.1.S1_at   | MmugDNA.18731.1 | 7.56  | 8.22  | 1.29 | 0.23 | -1.58 | 0.439401 | 0.43907  | 0.748153 | 0.657845 |
| MmugDNA.18732.1.S1_at   | MmugDNA.18732.1 | 7.07  | 6.99  | 0.15 | 0.1  | 1.06  | 0.412136 | 0.295787 | 0.73192  | 0.555196 |
| MmugDNA.18733.1.S1_at   | MmugDNA.18733.1 | 11.62 | 11.4  | 0.27 | 0.06 | 1.17  | 0.412928 | 0.526855 | 0.732114 | 0.715627 |
| MmugDNA.7472.1.S1_s_at  | MmugDNA.7472.1  | 2.78  | 2.65  | 0.18 | 0.06 | 1.09  | 0.199786 | 0.401692 | 0.571534 | 0.631068 |
| MmugDNA.18737.1.S1_at   | MmugDNA.18737.1 | 4.07  | 3.97  | 0.87 | 0.12 | 1.07  | 0.305994 | 0.407202 | 0.659264 | 0.634801 |
| MmugDNA.18738.1.S1_at   | MmugDNA.18738.1 | 3.59  | 3.45  | 0.4  | 0.12 | 1.1   | 0.770018 | 0.147427 | 0.913889 | 0.421669 |
| MmugDNA.18739.1.S1_at   | MmugDNA.18739.1 | 8.66  | 8.68  | 0.24 | 0.26 | -1.01 | 0.27439  | 0.005882 | 0.633792 | 0.104899 |
| MmugDNA.1874.1.S1_at    | MmugDNA.1874.1  | 10.85 | 10.19 | 0.24 | 0.2  | 1.59  | 0.039808 | 0.030447 | 0.362691 | 0.216485 |
| MmugDNA.1874.1.S1_s_at  | MmugDNA.1874.1  | 9.28  | 8.68  | 0.28 | 0.16 | 1.52  | 0.073927 | 0.065672 | 0.434623 | 0.301631 |
| MmugDNA.18740.1.S1_at   | MmugDNA.18740.1 | 12.11 | 11.57 | 0.19 | 0.18 | 1.44  | 0.020098 | 0.00063  | 0.303561 | 0.042867 |
| MmugDNA.18740.1.S1_s_at | MmugDNA.18740.1 | 10.99 | 10.45 | 0.26 | 0.19 | 1.46  | 0.020009 | 0.00085  | 0.303174 | 0.047089 |
| MmugDNA.18742.1.S1_at   | MmugDNA.18742.1 | 3.38  | 3.44  | 0.14 | 0.09 | -1.04 | 0.230242 | 0.258162 | 0.598481 | 0.525574 |
| MmugDNA.19469.1.S1_at   | MmugDNA.19469.1 | 3.03  | 3.07  | 0.11 | 0.1  | -1.03 | 0.440997 | 0.735577 | 0.748925 | 0.846993 |
| MmugDNA.19469.1.S1_s_at | MmugDNA.19469.1 | 6.73  | 7.86  | 0.84 | 0.32 | -2.19 | 0.082038 | 0.172492 | 0.446738 | 0.448864 |
| MmugDNA.18745.1.S1_at   | MmugDNA.18745.1 | 5.12  | 4.98  | 0.03 | 0.12 | 1.1   | 0.074837 | 0.098582 | 0.435313 | 0.356709 |
| MmugDNA.18746.1.S1_at   | MmugDNA.18746.1 | 3.78  | 3.81  | 0.12 | 0.13 | -1.02 | 0.852328 | 0.034937 | 0.947963 | 0.231062 |
| MmugDNA.18747.1.S1_at   | MmugDNA.18747.1 | 12.46 | 12.03 | 2.89 | 0.25 | 1.35  | 0.539387 | 0.307219 | 0.803764 | 0.563499 |
| MmugDNA.18749.1.S1_at   | MmugDNA.18749.1 | 7.58  | 6.86  | 1.24 | 0.2  | 1.65  | 0.988681 | 0.647473 | 0.995877 | 0.793487 |
| MmugDNA.18750.1.S1_at   | MmugDNA.18750.1 | 3.95  | 3.9   | 0.06 | 0.02 | 1.04  | 0.075752 | 0.002685 | 0.436784 | 0.076408 |
| MmugDNA.18753.1.S1_s_at | MmugDNA.18753.1 | 10.82 | 11    | 0.43 | 0.05 | -1.14 | 0.594026 | 0.793613 | 0.83457  | 0.88095  |
| MmugDNA.18754.1.S1_at   | MmugDNA.18754.1 | 9.29  | 8.72  | 1.15 | 0.2  | 1.48  | 0.827978 | 0.668258 | 0.938183 | 0.805864 |
| MmugDNA.18758.1.S1_at   | MmugDNA.18758.1 | 2.69  | 2.6   | 0.04 | 0.01 | 1.06  | 0.111671 | 0.662314 | 0.484896 | 0.802245 |
| MmugDNA.18761.1.S1_at   | MmugDNA.18761.1 | 10.96 | 11    | 0.17 | 0.16 | -1.02 | 0.74755  | 0.899468 | 0.90404  | 0.942861 |
| MmugDNA.18762.1.S1_at   | MmugDNA.18762.1 | 7.16  | 7.17  | 0.6  | 0.27 | -1.01 | 0.912114 | 0.990047 | 0.970255 | 0.994314 |
| MmugDNA.18763.1.S1_at   | MmugDNA.18763.1 | 3.48  | 3.26  | 0.07 | 0.12 | 1.17  | 0.054164 | 0.085351 | 0.396099 | 0.337226 |
| MmugDNA.18764.1.S1_at   | MmugDNA.18764.1 | 6.38  | 6.54  | 0.17 | 0.08 | -1.12 | 0.552854 | 0.51601  | 0.811917 | 0.70867  |
| MmugDNA.18765.1.S1_at   | MmugDNA.18765.1 | 3.32  | 3.41  | 0.44 | 0.26 | -1.06 | 0.589493 | 0.513328 | 0.832373 | 0.706881 |
| MmugDNA.18766.1.S1_at   | MmugDNA.18766.1 | 6.95  | 6.94  | 0.02 | 0.15 | 1.01  | 0.936623 | 0.337201 | 0.978723 | 0.584418 |
| MmugDNA.18767.1.S1_at   | MmugDNA.18767.1 | 3.49  | 3.16  | 0.42 | 0.12 | 1.26  | 0.407512 | 0.394347 | 0.728656 | 0.626944 |
| MmugDNA.18768.1.S1_at   | MmugDNA.18768.1 | 7.11  | 6.98  | 0.28 | 0.31 | 1.1   | 0.155667 | 0.190831 | 0.528929 | 0.466228 |
| MmugDNA.18769.1.S1_at   | MmugDNA.18769.1 | 12.35 | 11.97 | 0.4  | 0.04 | 1.3   | 0.533591 | 0.198866 | 0.80084  | 0.473475 |
| MmugDNA.1877.1.S1_at    | MmugDNA.1877.1  | 8.29  | 8.1   | 0.02 | 0.05 | 1.14  | 0.004047 | 0.041357 | 0.198571 | 0.247995 |
| MmugDNA.18771.1.S1_at   | MmugDNA.18771.1 | 4.61  | 4.45  | 0.35 | 0.21 | 1.12  | 0.526039 | 0.001877 | 0.796442 | 0.064979 |
| MmugDNA.18772.1.S1_at   | MmugDNA.18772.1 | 6.38  | 6.23  | 0.21 | 0.07 | 1.11  | 0.246472 | 0.524259 | 0.611952 | 0.714248 |
| MmugDNA.18773.1.S1_at   | MmugDNA.18773.1 | 7.29  | 7.15  | 0.09 | 0.07 | 1.1   | 0.058201 | 0.078555 | 0.403804 | 0.325285 |
| MmugDNA.18775.1.S1_at   | MmugDNA.18775.1 | 8.16  | 8.21  | 0.62 | 0.12 | -1.04 | 0.467783 | 0.704286 | 0.764607 | 0.828392 |

|                         |                 |       |       |      |      |       |          |          |          |          |
|-------------------------|-----------------|-------|-------|------|------|-------|----------|----------|----------|----------|
| MmugDNA.18779.1.S1_at   | MmugDNA.18779.1 | 6.03  | 6.23  | 0.08 | 0.02 | -1.14 | 0.014022 | 0.006265 | 0.273301 | 0.107376 |
| MmugDNA.1878.1.S1_at    | MmugDNA.1878.1  | 11.39 | 11.47 | 0.17 | 0.02 | -1.06 | 0.691204 | 0.103811 | 0.879715 | 0.364519 |
| MmugDNA.18780.1.S1_at   | MmugDNA.18780.1 | 4.45  | 4.36  | 0.18 | 0.16 | 1.06  | 0.162777 | 0.468359 | 0.535867 | 0.677714 |
| MmugDNA.18781.1.S1_at   | MmugDNA.18781.1 | 6.51  | 6.48  | 0.23 | 0.24 | 1.02  | 0.943721 | 0.924401 | 0.98057  | 0.95736  |
| MmugDNA.18782.1.S1_at   | MmugDNA.18782.1 | 6.46  | 6.42  | 0.06 | 0.1  | 1.03  | 0.227228 | 0.217423 | 0.596459 | 0.491035 |
| MmugDNA.18784.1.S1_at   | MmugDNA.18784.1 | 3.58  | 3.88  | 0.01 | 0.22 | -1.23 | 0.085846 | 0.066719 | 0.453025 | 0.304114 |
| MmugDNA.18785.1.S1_at   | MmugDNA.18785.1 | 10.44 | 9.58  | 0.44 | 0.07 | 1.81  | 0.0939   | 0.126311 | 0.463304 | 0.396786 |
| MmugDNA.18786.1.S1_at   | MmugDNA.18786.1 | 9.01  | 8.7   | 0.2  | 0.27 | 1.24  | 0.335127 | 0.005508 | 0.680744 | 0.102269 |
| MmugDNA.18787.1.S1_at   | MmugDNA.18787.1 | 4.03  | 4.06  | 0.04 | 0.15 | -1.02 | 0.555349 | 0.849312 | 0.813436 | 0.914475 |
| MmugDNA.18788.1.S1_at   | MmugDNA.18788.1 | 5.78  | 5.9   | 0.13 | 0.27 | -1.08 | 0.536006 | 0.479774 | 0.802014 | 0.68541  |
| MmugDNA.18789.1.S1_at   | MmugDNA.18789.1 | 3.82  | 3.76  | 0.26 | 0.22 | -1.04 | 0.723213 | 0.882475 | 0.892777 | 0.933022 |
| MmugDNA.18790.1.S1_at   | MmugDNA.18790.1 | 5.85  | 5.61  | 0.18 | 0.03 | 1.18  | 0.168483 | 0.471251 | 0.541113 | 0.679282 |
| MmugDNA.18791.1.S1_at   | MmugDNA.18791.1 | 8.45  | 8.07  | 0.93 | 0.69 | 1.31  | 0.985448 | 0.392071 | 0.995448 | 0.625583 |
| MmugDNA.18792.1.S1_at   | MmugDNA.18792.1 | 4.54  | 4.42  | 0.05 | 0.03 | 1.09  | 0.015198 | 0.123367 | 0.280039 | 0.393391 |
| MmugDNA.18797.1.S1_at   | MmugDNA.18797.1 | 3.27  | 3.3   | 0.15 | 0.23 | -1.03 | 0.582692 | 0.10649  | 0.82851  | 0.369078 |
| MmugDNA.18798.1.S1_at   | MmugDNA.18798.1 | 5.66  | 5.33  | 0.19 | 0.16 | 1.26  | 0.107951 | 0.144612 | 0.480459 | 0.418466 |
| MmugDNA.188.1.S1_at     | MmugDNA.188.1   | 6.66  | 6.66  | 0.14 | 0.13 | 1     | 0.23975  | 0.099543 | 0.606154 | 0.357959 |
| MmugDNA.18800.1.S1_at   | MmugDNA.18800.1 | 3.48  | 3.05  | 0.09 | 0.14 | 1.34  | 0.015399 | 0.020572 | 0.281461 | 0.179964 |
| MmugDNA.18801.1.S1_at   | MmugDNA.18801.1 | 5.88  | 6.77  | 0.52 | 0.17 | -1.85 | 0.183475 | 0.039244 | 0.55651  | 0.243274 |
| MmugDNA.18803.1.S1_at   | MmugDNA.18803.1 | 4.12  | 4.3   | 0.17 | 0    | -1.13 | 0.152042 | 0.085552 | 0.525134 | 0.337567 |
| MmugDNA.18805.1.S1_at   | MmugDNA.18805.1 | 4.66  | 4.39  | 0.08 | 0.02 | 1.21  | 0.004741 | 0.001734 | 0.201699 | 0.062895 |
| MmugDNA.18806.1.S1_at   | MmugDNA.18806.1 | 5.89  | 5.78  | 0.09 | 0.1  | 1.07  | 0.053375 | 0.190124 | 0.394644 | 0.465774 |
| MmugDNA.18808.1.S1_at   | MmugDNA.18808.1 | 5.46  | 5.29  | 0.26 | 0.22 | 1.13  | 0.435872 | 0.527603 | 0.745949 | 0.716154 |
| MmugDNA.18809.1.S1_at   | MmugDNA.18809.1 | 3.9   | 3.87  | 0.12 | 0.19 | 1.02  | 0.951876 | 0.705167 | 0.983817 | 0.829041 |
| MmugDNA.1881.1.S1_at    | MmugDNA.1881.1  | 5.15  | 4.64  | 0.39 | 0.58 | 1.42  | 0.602372 | 0.288266 | 0.838783 | 0.549535 |
| MmugDNA.18810.1.S1_at   | MmugDNA.18810.1 | 4.39  | 4.14  | 0.12 | 0.01 | 1.2   | 0.010144 | 0.057824 | 0.246892 | 0.286866 |
| MmugDNA.18811.1.S1_at   | MmugDNA.18811.1 | 10.87 | 11.31 | 0.39 | 0.04 | -1.36 | 0.139448 | 0.056238 | 0.514872 | 0.283092 |
| MmugDNA.18812.1.S1_at   | MmugDNA.18812.1 | 11.17 | 11.46 | 0.33 | 0.09 | -1.22 | 0.069569 | 0.041753 | 0.427443 | 0.248933 |
| MmugDNA.18813.1.S1_at   | MmugDNA.18813.1 | 10.87 | 8.36  | 1.09 | 1.2  | 5.73  | 0.061107 | 0.058648 | 0.410057 | 0.288897 |
| MmugDNA.18815.1.S1_at   | MmugDNA.18815.1 | 7.34  | 7.67  | 0.43 | 0.25 | -1.25 | 0.346485 | 0.490816 | 0.688289 | 0.692666 |
| MmugDNA.18816.1.S1_at   | MmugDNA.18816.1 | 4.55  | 4.55  | 0.32 | 0.32 | 1     | 0.321736 | 0.399741 | 0.670529 | 0.629951 |
| MmugDNA.18818.1.S1_at   | MmugDNA.18818.1 | 4.72  | 4.41  | 0.14 | 0.09 | 1.24  | 0.046126 | 0.133052 | 0.377411 | 0.404726 |
| MmugDNA.18819.1.S1_at   | MmugDNA.18819.1 | 8.35  | 8.2   | 0.65 | 0.27 | 1.11  | 0.549849 | 0.104231 | 0.810447 | 0.365373 |
| MmugDNA.18820.1.S1_at   | MmugDNA.18820.1 | 7.58  | 7.41  | 0.14 | 0.04 | 1.13  | 0.112589 | 0.17433  | 0.485877 | 0.450745 |
| MmugDNA.18821.1.S1_at   | MmugDNA.18821.1 | 4.29  | 4.28  | 0.02 | 0.08 | 1.01  | 0.21799  | 0.28697  | 0.587987 | 0.548246 |
| MmugDNA.18822.1.S1_at   | MmugDNA.18822.1 | 4.55  | 4.41  | 0.16 | 0.16 | 1.1   | 0.853531 | 0.051866 | 0.948299 | 0.273151 |
| MmugDNA.29296.1.S1_s_at | MmugDNA.29296.1 | 11.88 | 12.11 | 0.11 | 0.11 | -1.17 | 0.064873 | 0.028313 | 0.419075 | 0.21008  |
| MmugDNA.18825.1.S1_at   | MmugDNA.18825.1 | 3.27  | 3.3   | 0.04 | 0.05 | -1.02 | 0.149085 | 0.589445 | 0.523002 | 0.755656 |
| MmugDNA.18829.1.S1_at   | MmugDNA.18829.1 | 3.25  | 3.09  | 0.15 | 0    | 1.11  | 0.460051 | 0.545335 | 0.759901 | 0.727505 |
| MmugDNA.18829.1.S1_s_at | MmugDNA.18829.1 | 5.12  | 5.18  | 0.25 | 0.24 | -1.04 | 0.983657 | 0.903496 | 0.995094 | 0.945191 |
| MmugDNA.1883.1.S1_at    | MmugDNA.1883.1  | 12.73 | 12.5  | 0.37 | 0.06 | 1.17  | 0.822998 | 0.684001 | 0.936175 | 0.81565  |
| MmugDNA.18831.1.S1_at   | MmugDNA.18831.1 | 10.33 | 10.37 | 0.4  | 0.05 | -1.03 | 0.724459 | 0.939589 | 0.893143 | 0.965668 |
| MmugDNA.18832.1.S1_at   | MmugDNA.18832.1 | 10.39 | 10.6  | 0.42 | 0.1  | -1.15 | 0.315913 | 0.433332 | 0.666243 | 0.653652 |

|                         |                 |       |       |      |      |       |          |          |          |          |
|-------------------------|-----------------|-------|-------|------|------|-------|----------|----------|----------|----------|
| MmugDNA.18833.1.S1_at   | MmugDNA.18833.1 | 8.32  | 8.49  | 0.36 | 0.47 | -1.13 | 0.89757  | 0.93843  | 0.965207 | 0.965059 |
| MmugDNA.18835.1.S1_at   | MmugDNA.18835.1 | 7.38  | 8.26  | 0.4  | 0.14 | -1.83 | 0.028353 | 0.003722 | 0.332311 | 0.086946 |
| MmugDNA.18836.1.S1_at   | MmugDNA.18836.1 | 8.95  | 10.14 | 0.3  | 0.22 | -2.28 | 0.0092   | 0.001298 | 0.241866 | 0.055585 |
| MmugDNA.18837.1.S1_at   | MmugDNA.18837.1 | 4.08  | 4.29  | 0.3  | 0.44 | -1.15 | 0.701723 | 0.355789 | 0.883974 | 0.597864 |
| MmugDNA.18838.1.S1_at   | MmugDNA.18838.1 | 8.24  | 7.16  | 2.13 | 0.28 | 2.11  | 0.860672 | 0.980939 | 0.950856 | 0.989478 |
| MmugDNA.18839.1.S1_at   | MmugDNA.18839.1 | 3.46  | 3.55  | 0.06 | 0.23 | -1.07 | 0.169645 | 0.4634   | 0.542643 | 0.674383 |
| MmugDNA.1884.1.S1_at    | MmugDNA.1884.1  | 6.09  | 5.79  | 0.21 | 0.5  | 1.23  | 0.69679  | 0.235909 | 0.882175 | 0.507056 |
| MmugDNA.18841.1.S1_at   | MmugDNA.18841.1 | 3.3   | 3.59  | 0.08 | 0.36 | -1.22 | 0.588572 | 0.802874 | 0.831968 | 0.886465 |
| MmugDNA.18842.1.S1_at   | MmugDNA.18842.1 | 2.64  | 2.68  | 0.06 | 0.08 | -1.03 | 0.421539 | 0.581416 | 0.737563 | 0.750451 |
| MmugDNA.18847.1.S1_at   | MmugDNA.18847.1 | 5.7   | 5.7   | 0.13 | 0.19 | 1     | 0.928315 | 0.544091 | 0.976259 | 0.726614 |
| MmugDNA.18848.1.S1_at   | MmugDNA.18848.1 | 3.9   | 3.69  | 0.28 | 0.33 | -1.15 | 0.650011 | 0.615959 | 0.860714 | 0.772359 |
| MmugDNA.18849.1.S1_at   | MmugDNA.18849.1 | 4.87  | 5.7   | 0.59 | 0.45 | -1.78 | 0.256451 | 0.475274 | 0.620443 | 0.682031 |
| MmugDNA.34587.1.S1_s_at | MmugDNA.34587.1 | 12.59 | 12.39 | 0.21 | 0.02 | 1.14  | 0.111531 | 0.027377 | 0.484795 | 0.206695 |
| MmugDNA.18850.1.S1_at   | MmugDNA.18850.1 | 10.08 | 9.83  | 0.16 | 0.21 | 1.19  | 0.172426 | 0.446517 | 0.545696 | 0.662842 |
| MmugDNA.18851.1.S1_at   | MmugDNA.18851.1 | 10.26 | 9.74  | 0.67 | 0.18 | 1.42  | 0.284199 | 0.051315 | 0.642087 | 0.271959 |
| MmugDNA.18852.1.S1_at   | MmugDNA.18852.1 | 3.11  | 3.05  | 0.08 | 0.09 | 1.04  | 0.207463 | 0.153864 | 0.578993 | 0.428509 |
| MmugDNA.18853.1.S1_at   | MmugDNA.18853.1 | 10.35 | 11.06 | 0.4  | 0.07 | -1.64 | 0.107293 | 0.13851  | 0.47976  | 0.411492 |
| MmugDNA.18854.1.S1_at   | MmugDNA.18854.1 | 7.41  | 6.2   | 1.05 | 0.27 | 2.32  | 0.361453 | 0.229896 | 0.698655 | 0.501802 |
| MmugDNA.18855.1.S1_at   | MmugDNA.18855.1 | 4.99  | 4.91  | 0.17 | 0.02 | 1.06  | 0.454113 | 0.116923 | 0.756545 | 0.384297 |
| MmugDNA.18856.1.S1_at   | MmugDNA.18856.1 | 8.72  | 9.07  | 0.06 | 0.01 | -1.27 | 0.000791 | 0.000134 | 0.15004  | 0.029087 |
| MmugDNA.18858.1.S1_at   | MmugDNA.18858.1 | 6.04  | 6.72  | 1.32 | 0.14 | -1.59 | 0.379589 | 0.228976 | 0.709065 | 0.501254 |
| MmugDNA.18859.1.S1_at   | MmugDNA.18859.1 | 10.15 | 10.12 | 0.46 | 0.21 | 1.02  | 0.334585 | 0.625646 | 0.680478 | 0.779265 |
| MmugDNA.1886.1.S1_at    | MmugDNA.1886.1  | 8.35  | 8.22  | 0.71 | 0.16 | 1.09  | 0.69646  | 0.287945 | 0.882142 | 0.549227 |
| MmugDNA.18861.1.S1_at   | MmugDNA.18861.1 | 7.78  | 7.06  | 0.58 | 0.41 | 1.65  | 0.306116 | 0.221211 | 0.659271 | 0.494537 |
| MmugDNA.18862.1.S1_at   | MmugDNA.18862.1 | 3.36  | 3.43  | 0.13 | 0.07 | -1.05 | 0.735712 | 0.580854 | 0.898935 | 0.749953 |
| MmugDNA.18865.1.S1_at   | MmugDNA.18865.1 | 5.73  | 5.74  | 0.13 | 0.02 | -1.01 | 0.945168 | 0.572732 | 0.980905 | 0.744687 |
| MmugDNA.18868.1.S1_at   | MmugDNA.18868.1 | 7.92  | 7.74  | 0.38 | 0.04 | 1.14  | 0.985996 | 0.346754 | 0.995501 | 0.591536 |
| MmugDNA.18870.1.S1_at   | MmugDNA.18870.1 | 4.08  | 3.93  | 0.05 | 0.69 | 1.11  | 0.716957 | 0.925348 | 0.890136 | 0.957778 |
| MmugDNA.18871.1.S1_at   | MmugDNA.18871.1 | 6.45  | 6.62  | 0.32 | 0.27 | -1.13 | 0.907523 | 0.98249  | 0.968649 | 0.99036  |
| MmugDNA.18874.1.S1_at   | MmugDNA.18874.1 | 9.65  | 9.28  | 0.35 | 0.24 | 1.29  | 0.086635 | 0.084416 | 0.454519 | 0.335713 |
| MmugDNA.18875.1.S1_at   | MmugDNA.18875.1 | 5.94  | 5.71  | 0.21 | 0.1  | 1.17  | 0.660017 | 0.844622 | 0.865536 | 0.91156  |
| MmugDNA.18876.1.S1_at   | MmugDNA.18876.1 | 5.31  | 5.44  | 0.12 | 0.07 | -1.09 | 0.653348 | 0.736127 | 0.86233  | 0.84733  |
| MmugDNA.18877.1.S1_at   | MmugDNA.18877.1 | 3.98  | 3.99  | 0.2  | 0.37 | -1.01 | 0.981072 | 0.843493 | 0.993962 | 0.910881 |
| MmugDNA.18879.1.S1_at   | MmugDNA.18879.1 | 8.21  | 7.99  | 0.3  | 0.12 | 1.16  | 0.490519 | 0.614943 | 0.77713  | 0.771635 |
| MmugDNA.1888.1.S1_at    | MmugDNA.1888.1  | 5.11  | 4.63  | 0.53 | 0.06 | 1.4   | 0.190064 | 0.246257 | 0.561346 | 0.515889 |
| MmugDNA.18881.1.S1_at   | MmugDNA.18881.1 | 6.41  | 6.43  | 0.27 | 0.05 | -1.01 | 0.952966 | 0.595577 | 0.984244 | 0.759091 |
| MmugDNA.18882.1.S1_at   | MmugDNA.18882.1 | 5.62  | 5.49  | 0.23 | 0.09 | 1.1   | 0.816549 | 0.719023 | 0.933641 | 0.83736  |
| MmugDNA.18883.1.S1_at   | MmugDNA.18883.1 | 6.43  | 6.17  | 0.03 | 0.07 | 1.2   | 0.003757 | 0.075978 | 0.197739 | 0.320676 |
| MmugDNA.18884.1.S1_at   | MmugDNA.18884.1 | 7.09  | 6.88  | 0.38 | 0.16 | 1.16  | 0.414361 | 0.48306  | 0.733031 | 0.687687 |
| MmugDNA.18885.1.S1_at   | MmugDNA.18885.1 | 8.7   | 8.37  | 0.4  | 0.34 | 1.26  | 0.36916  | 0.21991  | 0.704181 | 0.493423 |
| MmugDNA.18886.1.S1_at   | MmugDNA.18886.1 | 3.15  | 3.15  | 0.13 | 0.05 | 1     | 0.670157 | 0.840694 | 0.869829 | 0.909196 |
| MmugDNA.18887.1.S1_at   | MmugDNA.18887.1 | 4.42  | 4.35  | 0.04 | 0.38 | 1.05  | 0.611245 | 0.346035 | 0.842397 | 0.59115  |
| MmugDNA.18888.1.S1_at   | MmugDNA.18888.1 | 4.05  | 3.98  | 0.16 | 0.24 | 1.05  | 0.724229 | 0.410961 | 0.893122 | 0.63782  |

|                         |                 |       |       |      |      |       |          |          |          |          |
|-------------------------|-----------------|-------|-------|------|------|-------|----------|----------|----------|----------|
| MmugDNA.18889.1.S1_s_at | MmugDNA.18889.1 | 9.42  | 9.12  | 0.1  | 0.17 | 1.23  | 0.08167  | 0.406149 | 0.445835 | 0.634211 |
| MmugDNA.1889.1.S1_at    | MmugDNA.1889.1  | 7.44  | 8.23  | 0.37 | 0.12 | -1.73 | 0.020058 | 0.005744 | 0.303343 | 0.104342 |
| MmugDNA.18891.1.S1_s_at | MmugDNA.18891.1 | 8.01  | 7.28  | 1.24 | 0.15 | 1.66  | 0.493946 | 0.599015 | 0.779161 | 0.761257 |
| MmugDNA.18893.1.S1_at   | MmugDNA.18893.1 | 5.22  | 5.07  | 0.04 | 0.15 | 1.11  | 0.162058 | 0.266489 | 0.535244 | 0.532235 |
| MmugDNA.18894.1.S1_at   | MmugDNA.18894.1 | 7.37  | 7.96  | 0.32 | 0.14 | -1.5  | 0.045429 | 0.057716 | 0.376488 | 0.2866   |
| MmugDNA.18895.1.S1_at   | MmugDNA.18895.1 | 4.74  | 4.76  | 0.08 | 0.23 | -1.01 | 0.335717 | 0.46113  | 0.681188 | 0.672857 |
| MmugDNA.18896.1.S1_at   | MmugDNA.18896.1 | 10.74 | 10.12 | 0.16 | 0.12 | 1.53  | 0.004343 | 0.006054 | 0.198874 | 0.106152 |
| MmugDNA.18898.1.S1_at   | MmugDNA.18898.1 | 4.5   | 4.5   | 0.01 | 0.08 | -1    | 0.64359  | 0.790147 | 0.858218 | 0.878708 |
| MmugDNA.18899.1.S1_at   | MmugDNA.18899.1 | 4.02  | 4.21  | 0.03 | 0.22 | -1.14 | 0.664822 | 0.644447 | 0.867712 | 0.791578 |
| MmugDNA.189.1.S1_at     | MmugDNA.189.1   | 10.32 | 11.57 | 0.59 | 0.11 | -2.38 | 0.049861 | 0.009727 | 0.386432 | 0.129723 |
| MmugDNA.1890.1.S1_at    | MmugDNA.1890.1  | 5.49  | 5.71  | 0.29 | 0.35 | -1.17 | 0.951937 | 0.99787  | 0.983822 | 0.998947 |
| MmugDNA.18900.1.S1_at   | MmugDNA.18900.1 | 12.08 | 11.19 | 0.2  | 0.09 | 1.86  | 0.001554 | 0.001136 | 0.161959 | 0.053082 |
| MmugDNA.18901.1.S1_at   | MmugDNA.18901.1 | 6.81  | 7.06  | 0.13 | 0.31 | -1.19 | 0.072327 | 0.165597 | 0.432139 | 0.44189  |
| MmugDNA.18902.1.S1_at   | MmugDNA.18902.1 | 4.41  | 4.39  | 0.21 | 0.31 | 1.01  | 0.935299 | 0.884343 | 0.978129 | 0.9341   |
| MmugDNA.18904.1.S1_s_at | MmugDNA.18904.1 | 3.44  | 3.45  | 0.09 | 0.03 | -1    | 0.848943 | 0.618308 | 0.946892 | 0.774002 |
| MmugDNA.18906.1.S1_at   | MmugDNA.18906.1 | 7.21  | 6     | 0.95 | 0.25 | 2.31  | 0.097057 | 0.041294 | 0.46573  | 0.247995 |
| MmugDNA.18908.1.S1_at   | MmugDNA.18908.1 | 5.3   | 5.08  | 0.08 | 0.14 | 1.17  | 0.183239 | 0.102838 | 0.556197 | 0.363428 |
| MmugDNA.1891.1.S1_at    | MmugDNA.1891.1  | 6.11  | 6.12  | 0.1  | 0.03 | -1    | 0.998598 | 0.927195 | 0.9996   | 0.958627 |
| MmugDNA.18910.1.S1_at   | MmugDNA.18910.1 | 7.34  | 6.99  | 0.21 | 0.04 | 1.27  | 0.142625 | 0.009754 | 0.517642 | 0.129954 |
| MmugDNA.18911.1.S1_at   | MmugDNA.18911.1 | 2.59  | 2.57  | 0.06 | 0.05 | 1.01  | 0.682314 | 0.85784  | 0.875741 | 0.918921 |
| MmugDNA.18912.1.S1_at   | MmugDNA.18912.1 | 9.24  | 9.18  | 0.96 | 0.22 | 1.04  | 0.866152 | 0.435997 | 0.95294  | 0.655713 |
| MmugDNA.18914.1.S1_at   | MmugDNA.18914.1 | 6.79  | 6.6   | 0.08 | 0.12 | 1.14  | 0.162035 | 0.04089  | 0.535244 | 0.247132 |
| MmugDNA.18915.1.S1_at   | MmugDNA.18915.1 | 8.09  | 7.99  | 0.76 | 0.13 | 1.08  | 0.445138 | 0.482936 | 0.751905 | 0.687681 |
| MmugDNA.18916.1.S1_at   | MmugDNA.18916.1 | 13.12 | 13.2  | 0.23 | 0.1  | -1.05 | 0.448827 | 0.12823  | 0.754037 | 0.399322 |
| MmugDNA.18916.1.S1_s_at | MmugDNA.18916.1 | 12.71 | 12.82 | 0.23 | 0.05 | -1.08 | 0.464747 | 0.129995 | 0.762686 | 0.401576 |
| MmugDNA.18918.1.S1_at   | MmugDNA.18918.1 | 4.48  | 4.3   | 0.12 | 0.07 | 1.13  | 0.086192 | 0.59543  | 0.453748 | 0.759091 |
| MmugDNA.18919.1.S1_at   | MmugDNA.18919.1 | 5.72  | 5.84  | 0.24 | 0.05 | -1.09 | 0.156972 | 0.50696  | 0.530209 | 0.702692 |
| MmugDNA.1892.1.S1_at    | MmugDNA.1892.1  | 6.58  | 6.46  | 0.19 | 0.37 | 1.09  | 0.638748 | 0.46317  | 0.856034 | 0.674261 |
| MmugDNA.18920.1.S1_at   | MmugDNA.18920.1 | 6.37  | 6.35  | 0.09 | 0.12 | 1.01  | 0.981886 | 0.302573 | 0.994301 | 0.560201 |
| MmugDNA.19032.1.S1_s_at | MmugDNA.19032.1 | 6.33  | 6     | 0.23 | 0.2  | 1.26  | 0.375413 | 0.673937 | 0.706463 | 0.809483 |
| MmugDNA.18922.1.S1_at   | MmugDNA.18922.1 | 5.3   | 4.71  | 0.26 | 0.61 | 1.5   | 0.317511 | 0.084939 | 0.667356 | 0.336554 |
| MmugDNA.18924.1.S1_at   | MmugDNA.18924.1 | 10.12 | 10.15 | 0.12 | 0.03 | -1.02 | 0.902087 | 0.095454 | 0.966869 | 0.352482 |
| MmugDNA.18926.1.S1_at   | MmugDNA.18926.1 | 8.64  | 8.47  | 0.25 | 0.18 | 1.12  | 0.442715 | 0.659272 | 0.750324 | 0.80063  |
| MmugDNA.18927.1.S1_at   | MmugDNA.18927.1 | 8.4   | 8.46  | 0.08 | 0.27 | -1.04 | 0.942565 | 0.337833 | 0.98031  | 0.585027 |
| MmugDNA.18929.1.S1_at   | MmugDNA.18929.1 | 6.75  | 7.45  | 0.48 | 0.16 | -1.62 | 0.114424 | 0.14925  | 0.487606 | 0.42373  |
| MmugDNA.1893.1.S1_at    | MmugDNA.1893.1  | 7.83  | 7.98  | 0.26 | 0.25 | -1.11 | 0.422039 | 0.135276 | 0.737948 | 0.40737  |
| MmugDNA.18930.1.S1_at   | MmugDNA.18930.1 | 5.51  | 5.47  | 0.13 | 0.09 | 1.02  | 0.52963  | 0.342341 | 0.798376 | 0.588413 |
| MmugDNA.18931.1.S1_at   | MmugDNA.18931.1 | 6.68  | 6.54  | 1.39 | 0.53 | 1.1   | 0.633883 | 0.21335  | 0.853698 | 0.487225 |
| MmugDNA.18933.1.S1_at   | MmugDNA.18933.1 | 5.76  | 5.96  | 0.12 | 0.03 | -1.14 | 0.095617 | 0.01885  | 0.464229 | 0.172706 |
| MmugDNA.18934.1.S1_at   | MmugDNA.18934.1 | 7.12  | 7.14  | 0.08 | 0.02 | -1.01 | 0.512976 | 0.67284  | 0.789613 | 0.808824 |
| MmugDNA.18935.1.S1_at   | MmugDNA.18935.1 | 4.59  | 4.49  | 0.34 | 0.34 | 1.07  | 0.751899 | 0.074866 | 0.906228 | 0.31874  |
| MmugDNA.18936.1.S1_at   | MmugDNA.18936.1 | 6.21  | 5.72  | 0.2  | 0.19 | 1.4   | 0.063376 | 0.672528 | 0.415687 | 0.808615 |
| MmugDNA.18939.1.S1_at   | MmugDNA.18939.1 | 3.85  | 3.77  | 0.16 | 0.09 | 1.06  | 0.534641 | 0.766204 | 0.801404 | 0.864166 |

|                         |                 |       |       |      |      |       |          |          |          |          |
|-------------------------|-----------------|-------|-------|------|------|-------|----------|----------|----------|----------|
| MmugDNA.1894.1.S1_s_at  | MmugDNA.1894.1  | 9.02  | 9.26  | 0.6  | 0.48 | -1.18 | 0.735573 | 0.052625 | 0.898829 | 0.274903 |
| MmugDNA.18941.1.S1_at   | MmugDNA.18941.1 | 7.03  | 6.68  | 0.38 | 0.3  | 1.28  | 0.588467 | 0.34848  | 0.831946 | 0.592593 |
| MmugDNA.18943.1.S1_at   | MmugDNA.18943.1 | 4.1   | 3.78  | 0.12 | 0.09 | 1.25  | 0.015874 | 0.032925 | 0.284461 | 0.22466  |
| MmugDNA.18944.1.S1_at   | MmugDNA.18944.1 | 5.77  | 5.62  | 0.28 | 0.12 | 1.11  | 0.886774 | 0.975883 | 0.96068  | 0.986856 |
| MmugDNA.18945.1.S1_at   | MmugDNA.18945.1 | 7.57  | 7.76  | 0.42 | 0.07 | -1.14 | 0.524891 | 0.223146 | 0.796154 | 0.495907 |
| MmugDNA.18946.1.S1_at   | MmugDNA.18946.1 | 7.11  | 7.04  | 0.1  | 0.1  | 1.05  | 0.231068 | 0.486018 | 0.599059 | 0.689551 |
| MmugDNA.18947.1.S1_at   | MmugDNA.18947.1 | 5.01  | 5.46  | 0.57 | 0.15 | -1.37 | 0.914014 | 0.33261  | 0.970812 | 0.580982 |
| MmugDNA.18949.1.S1_at   | MmugDNA.18949.1 | 7.76  | 6.5   | 0.35 | 0.13 | 2.39  | 0.005036 | 0.00326  | 0.204763 | 0.082278 |
| MmugDNA.1895.1.S1_at    | MmugDNA.1895.1  | 5.65  | 6.41  | 0.35 | 0.4  | -1.69 | 0.081569 | 0.057135 | 0.445514 | 0.284945 |
| MmugDNA.18950.1.S1_at   | MmugDNA.18950.1 | 10.3  | 10.47 | 0.2  | 0.07 | -1.13 | 0.215445 | 0.022936 | 0.585748 | 0.189455 |
| MmugDNA.18950.1.S1_s_at | MmugDNA.18950.1 | 9.07  | 9.08  | 0.29 | 0.16 | -1.01 | 0.858735 | 0.158181 | 0.950093 | 0.433986 |
| MmugDNA.18951.1.S1_at   | MmugDNA.18951.1 | 6.39  | 6.36  | 0.33 | 0.21 | 1.02  | 0.72934  | 0.15634  | 0.895742 | 0.43161  |
| MmugDNA.18952.1.S1_at   | MmugDNA.18952.1 | 3.59  | 3.77  | 0.22 | 0.26 | -1.13 | 0.39906  | 0.3114   | 0.722883 | 0.566451 |
| MmugDNA.18954.1.S1_at   | MmugDNA.18954.1 | 5.98  | 6.15  | 0.06 | 0.1  | -1.12 | 0.083685 | 0.486198 | 0.449639 | 0.689643 |
| MmugDNA.18954.1.S1_x_at | MmugDNA.18954.1 | 6.1   | 6.12  | 0.08 | 0.17 | -1.01 | 0.552162 | 0.879284 | 0.811692 | 0.931101 |
| MmugDNA.18957.1.S1_at   | MmugDNA.18957.1 | 8.16  | 7.97  | 0.97 | 0.22 | 1.15  | 0.624679 | 0.304413 | 0.848871 | 0.561712 |
| MmugDNA.18959.1.S1_at   | MmugDNA.18959.1 | 2.63  | 2.7   | 0.39 | 0.13 | -1.05 | 0.525404 | 0.821652 | 0.796198 | 0.897303 |
| MmugDNA.1896.1.S1_at    | MmugDNA.1896.1  | 5.24  | 5.2   | 0.28 | 0.11 | 1.03  | 0.94224  | 0.107964 | 0.980283 | 0.37105  |
| MmugDNA.18960.1.S1_at   | MmugDNA.18960.1 | 6.62  | 6.59  | 0.01 | 0.12 | 1.02  | 0.511502 | 0.283461 | 0.78871  | 0.545959 |
| MmugDNA.18961.1.S1_at   | MmugDNA.18961.1 | 5.26  | 5.29  | 0.22 | 0.03 | -1.02 | 0.713755 | 0.932507 | 0.888497 | 0.961723 |
| MmugDNA.18962.1.S1_at   | MmugDNA.18962.1 | 7.34  | 7.29  | 0.15 | 0.06 | 1.03  | 0.260903 | 0.265413 | 0.623391 | 0.531363 |
| MmugDNA.18963.1.S1_at   | MmugDNA.18963.1 | 8.78  | 9.13  | 1.05 | 0.08 | -1.27 | 0.598526 | 0.813986 | 0.836974 | 0.892693 |
| MmugDNA.18964.1.S1_at   | MmugDNA.18964.1 | 8.68  | 9.25  | 0.65 | 0.2  | -1.48 | 0.229136 | 0.024001 | 0.598088 | 0.194183 |
| MmugDNA.18965.1.S1_at   | MmugDNA.18965.1 | 3.8   | 3.68  | 0.19 | 0.09 | 1.08  | 0.180927 | 0.124592 | 0.554261 | 0.394995 |
| MmugDNA.18966.1.S1_at   | MmugDNA.18966.1 | 6.13  | 5.62  | 0.23 | 0.07 | 1.42  | 0.016653 | 0.02002  | 0.287478 | 0.177698 |
| MmugDNA.18967.1.S1_at   | MmugDNA.18967.1 | 5.33  | 5.28  | 0.16 | 0.27 | 1.03  | 0.866163 | 0.88847  | 0.95294  | 0.936383 |
| MmugDNA.18968.1.S1_at   | MmugDNA.18968.1 | 9.87  | 8.11  | 0.56 | 0.26 | 3.39  | 0.016542 | 0.005288 | 0.287478 | 0.100736 |
| MmugDNA.1897.1.S1_at    | MmugDNA.1897.1  | 5.74  | 5.68  | 0.08 | 0.18 | 1.04  | 0.438402 | 0.614512 | 0.747328 | 0.771283 |
| MmugDNA.18972.1.S1_at   | MmugDNA.18972.1 | 4.16  | 4.19  | 0.01 | 0.26 | -1.02 | 0.680831 | 0.856998 | 0.874848 | 0.918317 |
| MmugDNA.18974.1.S1_at   | MmugDNA.18974.1 | 6.39  | 6.6   | 0.15 | 0.19 | -1.15 | 0.508771 | 0.074341 | 0.787246 | 0.318046 |
| MmugDNA.18975.1.S1_at   | MmugDNA.18975.1 | 9.3   | 10.27 | 0.23 | 0.12 | -1.96 | 0.005674 | 0.001239 | 0.21011  | 0.054781 |
| MmugDNA.18977.1.S1_at   | MmugDNA.18977.1 | 4.01  | 3.96  | 0.09 | 0.15 | 1.04  | 0.355776 | 0.470106 | 0.694889 | 0.678572 |
| MmugDNA.18978.1.S1_at   | MmugDNA.18978.1 | 8.79  | 9.32  | 0.2  | 0.05 | -1.44 | 0.00776  | 0.034821 | 0.230997 | 0.230811 |
| MmugDNA.18979.1.S1_at   | MmugDNA.18979.1 | 8.32  | 8.06  | 0.37 | 0.1  | 1.2   | 0.298915 | 0.426684 | 0.653465 | 0.648796 |
| MmugDNA.1898.1.S1_at    | MmugDNA.1898.1  | 7.74  | 7.74  | 0.02 | 0.04 | -1    | 0.665052 | 0.294326 | 0.867733 | 0.55407  |
| MmugDNA.18981.1.S1_at   | MmugDNA.18981.1 | 6.33  | 6.37  | 0.32 | 0.1  | -1.03 | 0.940028 | 0.556319 | 0.979628 | 0.734492 |
| MmugDNA.18982.1.S1_s_at | MmugDNA.18982.1 | 12.41 | 12.53 | 0.25 | 0.23 | -1.09 | 0.29664  | 0.224026 | 0.652325 | 0.497046 |
| MmugDNA.18983.1.S1_at   | MmugDNA.18983.1 | 5.7   | 5.51  | 0.25 | 0.03 | 1.14  | 0.714199 | 0.599018 | 0.888672 | 0.761257 |
| MmugDNA.18984.1.S1_s_at | MmugDNA.18984.1 | 6.72  | 6.76  | 0.07 | 0.05 | -1.02 | 0.205504 | 0.278602 | 0.577367 | 0.542329 |
| MmugDNA.18985.1.S1_at   | MmugDNA.18985.1 | 3.98  | 4     | 0.11 | 0    | -1.01 | 0.29048  | 0.114541 | 0.647041 | 0.381098 |
| MmugDNA.18986.1.S1_at   | MmugDNA.18986.1 | 5.09  | 5.29  | 0.73 | 0.43 | -1.15 | 0.903527 | 0.966683 | 0.967608 | 0.98148  |
| MmugDNA.18987.1.S1_at   | MmugDNA.18987.1 | 3.47  | 3.82  | 0.1  | 0.33 | -1.28 | 0.614567 | 0.592378 | 0.843991 | 0.757744 |
| MmugDNA.18988.1.S1_at   | MmugDNA.18988.1 | 4.49  | 4.37  | 0.17 | 0.12 | 1.08  | 0.252245 | 0.263212 | 0.617215 | 0.52952  |

|                         |                 |       |       |      |      |       |          |          |          |          |
|-------------------------|-----------------|-------|-------|------|------|-------|----------|----------|----------|----------|
| MmugDNA.18989.1.S1_at   | MmugDNA.18989.1 | 6.52  | 6.61  | 0.46 | 0.14 | -1.07 | 0.974318 | 0.669984 | 0.991855 | 0.806988 |
| MmugDNA.1899.1.S1_at    | MmugDNA.1899.1  | 3.86  | 3.75  | 0.13 | 0.16 | 1.08  | 0.334871 | 0.211065 | 0.68066  | 0.485086 |
| MmugDNA.18994.1.S1_at   | MmugDNA.18994.1 | 5.64  | 5.39  | 0.51 | 0.09 | 1.19  | 0.385885 | 0.540624 | 0.713105 | 0.724463 |
| MmugDNA.18995.1.S1_at   | MmugDNA.18995.1 | 4.97  | 4.7   | 0.17 | 0.15 | 1.2   | 0.136179 | 0.233079 | 0.510791 | 0.50445  |
| MmugDNA.18997.1.S1_at   | MmugDNA.18997.1 | 5.12  | 5.21  | 0.28 | 0.18 | -1.07 | 0.436028 | 0.040806 | 0.746002 | 0.246935 |
| MmugDNA.19.1.S1_at      | MmugDNA.19.1    | 7.95  | 7.14  | 1.81 | 0.36 | 1.75  | 0.563106 | 0.528865 | 0.818043 | 0.71692  |
| MmugDNA.190.1.S1_at     | MmugDNA.190.1   | 11.44 | 11.56 | 0.27 | 0.04 | -1.09 | 0.344412 | 0.307522 | 0.686913 | 0.563781 |
| MmugDNA.19001.1.S1_at   | MmugDNA.19001.1 | 4.87  | 4.73  | 0.18 | 0.12 | 1.11  | 0.23497  | 0.197192 | 0.602251 | 0.472213 |
| MmugDNA.19002.1.S1_at   | MmugDNA.19002.1 | 3.69  | 3.64  | 0.12 | 0.09 | 1.04  | 0.402081 | 0.684211 | 0.724818 | 0.815834 |
| MmugDNA.19003.1.S1_at   | MmugDNA.19003.1 | 4.24  | 4.2   | 0.12 | 0.05 | 1.02  | 0.271492 | 0.551301 | 0.631443 | 0.730915 |
| MmugDNA.19004.1.S1_at   | MmugDNA.19004.1 | 3.06  | 3.11  | 0.08 | 0.03 | -1.03 | 0.324932 | 0.501749 | 0.672925 | 0.699813 |
| MmugDNA.19006.1.S1_at   | MmugDNA.19006.1 | 4.76  | 4.81  | 0.31 | 0.09 | -1.03 | 0.690593 | 0.24541  | 0.879504 | 0.515213 |
| MmugDNA.19007.1.S1_at   | MmugDNA.19007.1 | 11.04 | 10.66 | 0.81 | 0.21 | 1.3   | 0.415738 | 0.210537 | 0.73381  | 0.484477 |
| MmugDNA.19009.1.S1_at   | MmugDNA.19009.1 | 6.96  | 7.79  | 0.34 | 0.29 | -1.78 | 0.138074 | 0.156651 | 0.513671 | 0.432153 |
| MmugDNA.1901.1.S1_at    | MmugDNA.1901.1  | 10.03 | 10.63 | 0.49 | 0.05 | -1.51 | 0.228769 | 0.191515 | 0.59773  | 0.466833 |
| MmugDNA.19010.1.S1_at   | MmugDNA.19010.1 | 6.19  | 6.27  | 0.05 | 0.03 | -1.06 | 0.056219 | 0.703361 | 0.399676 | 0.828004 |
| MmugDNA.19011.1.S1_at   | MmugDNA.19011.1 | 3.77  | 3.67  | 0.14 | 0.11 | 1.08  | 0.070032 | 0.110572 | 0.428436 | 0.374848 |
| MmugDNA.19012.1.S1_a_at | MmugDNA.19012.1 | 3.4   | 3.27  | 0.1  | 0.13 | 1.09  | 0.11803  | 0.144087 | 0.491371 | 0.417974 |
| MmugDNA.19012.1.S1_at   | MmugDNA.19012.1 | 6.25  | 6.24  | 0.18 | 0.07 | 1.01  | 0.456092 | 0.655898 | 0.757717 | 0.798739 |
| MmugDNA.19014.1.S1_at   | MmugDNA.19014.1 | 7.79  | 8.23  | 1    | 0.13 | -1.35 | 0.162111 | 0.085694 | 0.535244 | 0.337761 |
| MmugDNA.19015.1.S1_at   | MmugDNA.19015.1 | 6.27  | 6.17  | 0.05 | 0.08 | 1.07  | 0.158094 | 0.223433 | 0.531053 | 0.49623  |
| MmugDNA.29089.1.S1_at   | MmugDNA.29089.1 | 2.88  | 3.01  | 0.11 | 0.12 | -1.1  | 0.346544 | 0.3567   | 0.68831  | 0.598516 |
| MmugDNA.29089.1.S1_s_at | MmugDNA.29089.1 | 4.09  | 3.96  | 0.09 | 0.05 | 1.09  | 0.339488 | 0.241016 | 0.683827 | 0.511657 |
| MmugDNA.19018.1.S1_at   | MmugDNA.19018.1 | 8.91  | 9.25  | 0.22 | 0.11 | -1.27 | 0.342215 | 0.008426 | 0.685663 | 0.121867 |
| MmugDNA.19020.1.S1_at   | MmugDNA.19020.1 | 4.18  | 4.27  | 0.38 | 0.21 | -1.06 | 0.711763 | 0.838157 | 0.887709 | 0.907587 |
| MmugDNA.19021.1.S1_at   | MmugDNA.19021.1 | 10.85 | 11.31 | 0.15 | 0.02 | -1.38 | 0.00724  | 0.00081  | 0.226509 | 0.046161 |
| MmugDNA.19023.1.S1_at   | MmugDNA.19023.1 | 4.78  | 4.73  | 0.16 | 0.11 | 1.04  | 0.902835 | 0.653558 | 0.967218 | 0.797506 |
| MmugDNA.19024.1.S1_at   | MmugDNA.19024.1 | 10.13 | 9.93  | 0.24 | 0.1  | 1.14  | 0.44993  | 0.793723 | 0.754621 | 0.881035 |
| MmugDNA.19025.1.S1_at   | MmugDNA.19025.1 | 4.71  | 4.66  | 0.12 | 0.11 | 1.04  | 0.186893 | 0.419945 | 0.5594   | 0.643765 |
| MmugDNA.19027.1.S1_at   | MmugDNA.19027.1 | 3.58  | 3.53  | 0.12 | 0.16 | 1.04  | 0.203833 | 0.424116 | 0.57513  | 0.646737 |
| MmugDNA.19028.1.S1_at   | MmugDNA.19028.1 | 12.12 | 11.94 | 0.17 | 0.1  | 1.13  | 0.391399 | 0.6434   | 0.71755  | 0.790897 |
| MmugDNA.19029.1.S1_at   | MmugDNA.19029.1 | 3.75  | 3.43  | 0.18 | 0.16 | 1.25  | 0.078075 | 0.113033 | 0.440121 | 0.378888 |
| MmugDNA.1903.1.S1_at    | MmugDNA.1903.1  | 9.8   | 9.64  | 0.23 | 0.22 | 1.12  | 0.422365 | 0.096202 | 0.738123 | 0.353519 |
| MmugDNA.1903.1.S1_s_at  | MmugDNA.1903.1  | 8.74  | 8.48  | 0.33 | 0.11 | 1.2   | 0.126138 | 0.049417 | 0.499873 | 0.267237 |
| MmugDNA.19030.1.S1_at   | MmugDNA.19030.1 | 6.05  | 5.82  | 0.19 | 0.04 | 1.17  | 0.120099 | 0.140723 | 0.493434 | 0.414079 |
| MmugDNA.19031.1.S1_at   | MmugDNA.19031.1 | 5.94  | 5.88  | 0.13 | 0.12 | 1.04  | 0.172016 | 0.324426 | 0.545311 | 0.575042 |
| MmugDNA.19034.1.S1_at   | MmugDNA.19034.1 | 3.66  | 3.77  | 0.03 | 0.07 | -1.08 | 0.037372 | 0.349646 | 0.357066 | 0.593541 |
| MmugDNA.19035.1.S1_at   | MmugDNA.19035.1 | 5.57  | 5.38  | 0.11 | 0.02 | 1.14  | 0.095568 | 0.06678  | 0.464229 | 0.304293 |
| MmugDNA.19037.1.S1_at   | MmugDNA.19037.1 | 7.38  | 7.38  | 0.21 | 0.08 | -1    | 0.416207 | 0.116565 | 0.734136 | 0.383705 |
| MmugDNA.16452.1.S1_s_at | MmugDNA.16452.1 | 10.11 | 11.14 | 0.29 | 0.23 | -2.04 | 0.007578 | 0.007516 | 0.229596 | 0.116291 |
| MmugDNA.1904.1.S1_at    | MmugDNA.1904.1  | 3.1   | 3.1   | 0.04 | 0.06 | -1    | 0.669066 | 0.954721 | 0.869345 | 0.974331 |
| MmugDNA.19041.1.S1_at   | MmugDNA.19041.1 | 7.19  | 7.33  | 0.06 | 0.11 | -1.1  | 0.476439 | 0.043889 | 0.769113 | 0.254098 |
| MmugDNA.19042.1.S1_at   | MmugDNA.19042.1 | 7.44  | 7.26  | 0.3  | 0.18 | 1.14  | 0.309491 | 0.108528 | 0.661766 | 0.37207  |

|                         |                 |       |       |      |      |       |          |          |          |          |
|-------------------------|-----------------|-------|-------|------|------|-------|----------|----------|----------|----------|
| MmugDNA.19044.1.S1_at   | MmugDNA.19044.1 | 10.26 | 10.76 | 0.22 | 0.11 | -1.41 | 0.022617 | 0.025269 | 0.311523 | 0.199443 |
| MmugDNA.19044.1.S1_s_at | MmugDNA.19044.1 | 9.56  | 9.92  | 0.21 | 0.13 | -1.28 | 0.067921 | 0.031438 | 0.42451  | 0.219107 |
| MmugDNA.19045.1.S1_at   | MmugDNA.19045.1 | 11.47 | 11.32 | 0.09 | 0.08 | 1.11  | 0.298766 | 0.336884 | 0.653263 | 0.584144 |
| MmugDNA.19046.1.S1_at   | MmugDNA.19046.1 | 10.2  | 10.35 | 0.23 | 0.09 | -1.1  | 0.259396 | 0.355693 | 0.622607 | 0.597864 |
| MmugDNA.19048.1.S1_at   | MmugDNA.19048.1 | 10.49 | 10.29 | 0.37 | 0.02 | 1.15  | 0.361993 | 0.332015 | 0.698907 | 0.580557 |
| MmugDNA.1905.1.S1_at    | MmugDNA.1905.1  | 10.56 | 10.57 | 0.31 | 0.16 | -1.01 | 0.664715 | 0.793515 | 0.867683 | 0.880859 |
| MmugDNA.19052.1.S1_at   | MmugDNA.19052.1 | 5.42  | 5.54  | 0.05 | 0.12 | -1.08 | 0.352993 | 0.287246 | 0.692969 | 0.548526 |
| MmugDNA.19053.1.S1_at   | MmugDNA.19053.1 | 4.28  | 4.14  | 0.24 | 0.04 | 1.11  | 0.938669 | 0.744583 | 0.979343 | 0.852091 |
| MmugDNA.19054.1.S1_at   | MmugDNA.19054.1 | 4.62  | 4.81  | 0.18 | 0.69 | -1.14 | 0.455752 | 0.722922 | 0.757582 | 0.839489 |
| MmugDNA.19055.1.S1_at   | MmugDNA.19055.1 | 7.43  | 7.06  | 0.18 | 0.02 | 1.29  | 0.020155 | 0.004679 | 0.303673 | 0.095361 |
| MmugDNA.19057.1.S1_at   | MmugDNA.19057.1 | 7.17  | 7.04  | 0.15 | 0.05 | -1.09 | 0.116452 | 0.192471 | 0.489647 | 0.467952 |
| MmugDNA.19058.1.S1_at   | MmugDNA.19058.1 | 3.99  | 3.94  | 0.12 | 0.04 | 1.04  | 0.164946 | 0.216222 | 0.537666 | 0.489784 |
| MmugDNA.19059.1.S1_at   | MmugDNA.19059.1 | 3.33  | 3.38  | 0.29 | 0.04 | -1.03 | 0.493491 | 0.70598  | 0.778977 | 0.829628 |
| MmugDNA.1906.1.S1_at    | MmugDNA.1906.1  | 10.34 | 11.01 | 0.32 | 0.07 | -1.59 | 0.017664 | 0.005773 | 0.293    | 0.104378 |
| MmugDNA.19060.1.S1_at   | MmugDNA.19060.1 | 6.76  | 6.51  | 0.06 | 0.1  | 1.18  | 0.055435 | 0.473777 | 0.398621 | 0.68101  |
| MmugDNA.19061.1.S1_at   | MmugDNA.19061.1 | 4.72  | 4.57  | 0.25 | 0.08 | 1.11  | 0.437204 | 0.591417 | 0.746719 | 0.756977 |
| MmugDNA.19062.1.S1_at   | MmugDNA.19062.1 | 7.77  | 8.06  | 0.29 | 0.15 | -1.22 | 0.29733  | 0.018344 | 0.652737 | 0.170313 |
| MmugDNA.19063.1.S1_at   | MmugDNA.19063.1 | 3.9   | 3.72  | 0.21 | 0.1  | 1.13  | 0.149522 | 0.69504  | 0.523226 | 0.822716 |
| MmugDNA.19064.1.S1_at   | MmugDNA.19064.1 | 4.24  | 4.02  | 0.14 | 0.14 | 1.17  | 0.297375 | 0.370781 | 0.652737 | 0.60976  |
| MmugDNA.19065.1.S1_at   | MmugDNA.19065.1 | 4.93  | 4.81  | 0.07 | 0.07 | 1.09  | 0.159973 | 0.063134 | 0.533013 | 0.29795  |
| MmugDNA.19067.1.S1_at   | MmugDNA.19067.1 | 3.39  | 3.33  | 0.1  | 0.11 | 1.04  | 0.834365 | 0.045262 | 0.940622 | 0.257084 |
| MmugDNA.33637.1.S1_s_at | MmugDNA.33637.1 | 10.29 | 10.17 | 0.41 | 0.07 | 1.09  | 0.605784 | 0.332168 | 0.840193 | 0.580593 |
| MmugDNA.19071.1.S1_at   | MmugDNA.19071.1 | 7.91  | 8.22  | 1.02 | 0.16 | -1.24 | 0.699787 | 0.045077 | 0.883309 | 0.256789 |
| MmugDNA.19072.1.S1_at   | MmugDNA.19072.1 | 3.89  | 4.97  | 0.3  | 0.16 | -2.11 | 0.006555 | 0.011383 | 0.219791 | 0.138214 |
| MmugDNA.19073.1.S1_at   | MmugDNA.19073.1 | 7.79  | 7.79  | 0.17 | 0.04 | 1     | 0.70924  | 0.899296 | 0.88678  | 0.942757 |
| MmugDNA.19076.1.S1_at   | MmugDNA.19076.1 | 12.04 | 11.5  | 0.14 | 0.15 | 1.45  | 0.003787 | 0.000385 | 0.198209 | 0.037273 |
| MmugDNA.19076.1.S1_s_at | MmugDNA.19076.1 | 12.5  | 11.86 | 0.05 | 0.13 | 1.55  | 0.001187 | 0.000052 | 0.156386 | 0.025333 |
| MmugDNA.19077.1.S1_at   | MmugDNA.19077.1 | 6.88  | 6.88  | 0.04 | 0.11 | 1     | 0.826954 | 0.980374 | 0.938039 | 0.989333 |
| MmugDNA.19078.1.S1_at   | MmugDNA.19078.1 | 5.23  | 4.78  | 0.26 | 0.18 | 1.36  | 0.133745 | 0.328884 | 0.508012 | 0.578452 |
| MmugDNA.19079.1.S1_at   | MmugDNA.19079.1 | 11.06 | 10.89 | 0.13 | 0.07 | 1.13  | 0.059369 | 0.115796 | 0.406303 | 0.382835 |
| MmugDNA.19079.1.S1_s_at | MmugDNA.19079.1 | 10.47 | 10.23 | 0.15 | 0.06 | 1.18  | 0.045867 | 0.173984 | 0.37735  | 0.450247 |
| MmugDNA.1908.1.S1_at    | MmugDNA.1908.1  | 7.48  | 7.34  | 0.03 | 0.02 | 1.11  | 0.004937 | 0.168018 | 0.203775 | 0.444641 |
| MmugDNA.1908.1.S1_s_at  | MmugDNA.1908.1  | 5.82  | 5.82  | 0.05 | 0.05 | -1    | 0.575433 | 0.900183 | 0.824665 | 0.943311 |
| MmugDNA.19080.1.S1_at   | MmugDNA.19080.1 | 4.98  | 5.12  | 0.17 | 0.18 | -1.1  | 0.561534 | 0.517648 | 0.817232 | 0.70974  |
| MmugDNA.19081.1.S1_at   | MmugDNA.19081.1 | 5.24  | 5.28  | 0.19 | 0.06 | -1.03 | 0.59012  | 0.457908 | 0.832832 | 0.670999 |
| MmugDNA.19082.1.S1_at   | MmugDNA.19082.1 | 5.5   | 5.35  | 0.15 | 0.14 | 1.12  | 0.253203 | 0.560937 | 0.617925 | 0.737054 |
| MmugDNA.19083.1.S1_at   | MmugDNA.19083.1 | 4.9   | 3.88  | 1.63 | 0.18 | 2.03  | 0.29029  | 0.274686 | 0.646889 | 0.539162 |
| MmugDNA.19084.1.S1_at   | MmugDNA.19084.1 | 5.01  | 5.01  | 0.08 | 0.07 | -1    | 0.978058 | 0.579035 | 0.992929 | 0.74883  |
| MmugDNA.19085.1.S1_at   | MmugDNA.19085.1 | 8.64  | 8.96  | 0.16 | 0.1  | -1.25 | 0.029981 | 0.049964 | 0.336449 | 0.268752 |
| MmugDNA.19087.1.S1_at   | MmugDNA.19087.1 | 5.5   | 4.73  | 0.68 | 0.29 | 1.71  | 0.145009 | 0.089869 | 0.520238 | 0.344073 |
| MmugDNA.19088.1.S1_at   | MmugDNA.19088.1 | 5.6   | 4.78  | 0.49 | 0.31 | 1.76  | 0.117232 | 0.13482  | 0.49089  | 0.406878 |
| MmugDNA.19089.1.S1_s_at | MmugDNA.19089.1 | 11.78 | 12.28 | 0.47 | 0.08 | -1.41 | 0.157602 | 0.0636   | 0.530588 | 0.29873  |
| MmugDNA.1909.1.S1_at    | MmugDNA.1909.1  | 5.7   | 5.65  | 0.18 | 0.28 | 1.04  | 0.465366 | 0.607634 | 0.763035 | 0.766457 |



|                         |                 |       |       |      |      |       |          |          |          |          |
|-------------------------|-----------------|-------|-------|------|------|-------|----------|----------|----------|----------|
| MmugDNA.19090.1.S1_at   | MmugDNA.19090.1 | 6.58  | 6.12  | 0.08 | 0.05 | 1.37  | 0.001355 | 0.004634 | 0.159096 | 0.094988 |
| MmugDNA.19091.1.S1_at   | MmugDNA.19091.1 | 11.09 | 11.33 | 0.15 | 0.05 | -1.17 | 0.04622  | 0.010772 | 0.377596 | 0.135471 |
| MmugDNA.19093.1.S1_at   | MmugDNA.19093.1 | 2.97  | 2.91  | 0.1  | 0.09 | 1.04  | 0.565485 | 0.094954 | 0.819292 | 0.352054 |
| MmugDNA.19094.1.S1_at   | MmugDNA.19094.1 | 4.04  | 4.07  | 0.09 | 0.07 | -1.02 | 0.430135 | 0.291148 | 0.742602 | 0.551652 |
| MmugDNA.19095.1.S1_at   | MmugDNA.19095.1 | 4.72  | 4.56  | 0.02 | 0.05 | 1.12  | 0.007072 | 0.038915 | 0.225425 | 0.242288 |
| MmugDNA.19098.1.S1_at   | MmugDNA.19098.1 | 3.28  | 3.05  | 0.17 | 0.07 | 1.18  | 0.278948 | 0.411182 | 0.637923 | 0.637937 |
| MmugDNA.19099.1.S1_at   | MmugDNA.19099.1 | 4.9   | 5.16  | 0.17 | 0.09 | -1.2  | 0.079948 | 0.058373 | 0.443024 | 0.288369 |
| MmugDNA.191.1.S1_at     | MmugDNA.191.1   | 6.01  | 5.95  | 0.2  | 0.04 | 1.04  | 0.433793 | 0.384104 | 0.744634 | 0.619926 |
| MmugDNA.19100.1.S1_at   | MmugDNA.19100.1 | 8.44  | 8.49  | 0.2  | 0.06 | -1.04 | 0.217395 | 0.313475 | 0.587269 | 0.567926 |
| MmugDNA.19101.1.S1_at   | MmugDNA.19101.1 | 6.05  | 6.98  | 0.26 | 0.35 | -1.9  | 0.037008 | 0.192262 | 0.356628 | 0.467715 |
| MmugDNA.19102.1.S1_at   | MmugDNA.19102.1 | 10.69 | 10.76 | 0.58 | 0.07 | -1.05 | 0.752169 | 0.917944 | 0.906315 | 0.954037 |
| MmugDNA.19103.1.S1_at   | MmugDNA.19103.1 | 3.13  | 2.97  | 0.07 | 0.06 | 1.11  | 0.059284 | 0.344703 | 0.406296 | 0.59007  |
| MmugDNA.19104.1.S1_at   | MmugDNA.19104.1 | 10.38 | 10.8  | 0.31 | 0.1  | -1.34 | 0.115325 | 0.143971 | 0.488677 | 0.41789  |
| MmugDNA.19105.1.S1_at   | MmugDNA.19105.1 | 12.42 | 12.83 | 0.17 | 0.2  | -1.33 | 0.041942 | 0.024596 | 0.367945 | 0.196239 |
| MmugDNA.19106.1.S1_at   | MmugDNA.19106.1 | 7.24  | 7.8   | 0.51 | 0.2  | -1.48 | 0.147972 | 0.092926 | 0.522184 | 0.349024 |
| MmugDNA.19106.1.S1_x_at | MmugDNA.19106.1 | 6.98  | 7.62  | 0.35 | 0.19 | -1.55 | 0.149486 | 0.100716 | 0.523226 | 0.360108 |
| MmugDNA.19108.1.S1_at   | MmugDNA.19108.1 | 4.54  | 4.58  | 0.08 | 0.09 | -1.03 | 0.582206 | 0.452419 | 0.827998 | 0.667088 |
| MmugDNA.19110.1.S1_at   | MmugDNA.19110.1 | 9.41  | 9.74  | 0.28 | 0.07 | -1.26 | 0.0502   | 0.009128 | 0.386852 | 0.125994 |
| MmugDNA.19114.1.S1_at   | MmugDNA.19114.1 | 5.66  | 5.65  | 0.15 | 0.1  | 1.01  | 0.212122 | 0.470114 | 0.582812 | 0.678572 |
| MmugDNA.19115.1.S1_at   | MmugDNA.19115.1 | 6.21  | 6.16  | 0.03 | 0.08 | 1.03  | 0.209233 | 0.237771 | 0.580725 | 0.50826  |
| MmugDNA.19116.1.S1_at   | MmugDNA.19116.1 | 6.49  | 6.42  | 0.28 | 0.14 | 1.05  | 0.418299 | 0.518359 | 0.73547  | 0.71038  |
| MmugDNA.19117.1.S1_at   | MmugDNA.19117.1 | 5.01  | 4.98  | 0.74 | 0.09 | 1.02  | 0.881794 | 0.8388   | 0.95911  | 0.908076 |
| MmugDNA.19118.1.S1_at   | MmugDNA.19118.1 | 10.64 | 10.02 | 0.5  | 0.25 | 1.54  | 0.172131 | 0.137064 | 0.545447 | 0.409836 |
| MmugDNA.19119.1.S1_at   | MmugDNA.19119.1 | 12.33 | 12.42 | 0.12 | 0.04 | -1.06 | 0.21091  | 0.005455 | 0.582007 | 0.101952 |
| MmugDNA.19119.1.S1_s_at | MmugDNA.19119.1 | 11.72 | 11.8  | 0.13 | 0.08 | -1.06 | 0.216753 | 0.001952 | 0.586817 | 0.065813 |
| MmugDNA.1912.1.S1_at    | MmugDNA.1912.1  | 6.99  | 6.95  | 0.34 | 0.16 | 1.03  | 0.852476 | 0.969443 | 0.947963 | 0.983275 |
| MmugDNA.19121.1.S1_at   | MmugDNA.19121.1 | 5.72  | 5.71  | 0.03 | 0.09 | 1.01  | 0.454392 | 0.110313 | 0.756748 | 0.374403 |
| MmugDNA.19122.1.S1_at   | MmugDNA.19122.1 | 7.05  | 6.75  | 0.04 | 0.15 | 1.24  | 0.020923 | 0.012606 | 0.306056 | 0.144807 |
| MmugDNA.19124.1.S1_at   | MmugDNA.19124.1 | 5.05  | 5.05  | 0.1  | 0.09 | -1    | 0.90554  | 0.979016 | 0.968177 | 0.988665 |
| MmugDNA.19128.1.S1_at   | MmugDNA.19128.1 | 4.01  | 4.04  | 0.21 | 0.07 | -1.02 | 0.48021  | 0.771398 | 0.771116 | 0.867177 |
| MmugDNA.19129.1.S1_at   | MmugDNA.19129.1 | 8.43  | 8.1   | 0.03 | 0.15 | 1.25  | 0.020447 | 0.000225 | 0.303985 | 0.032385 |
| MmugDNA.1913.1.S1_at    | MmugDNA.1913.1  | 10.11 | 10.84 | 0.53 | 0.05 | -1.66 | 0.0846   | 0.031195 | 0.451141 | 0.218399 |
| MmugDNA.19130.1.S1_at   | MmugDNA.19130.1 | 4.44  | 4.09  | 0.12 | 0.23 | 1.28  | 0.206733 | 0.600174 | 0.578729 | 0.761928 |
| MmugDNA.19131.1.S1_at   | MmugDNA.19131.1 | 6.3   | 6.93  | 0.43 | 0.09 | -1.54 | 0.276358 | 0.630481 | 0.635937 | 0.782239 |
| MmugDNA.19133.1.S1_at   | MmugDNA.19133.1 | 3.51  | 3.42  | 0.09 | 0.06 | 1.07  | 0.187059 | 0.670277 | 0.559702 | 0.807201 |
| MmugDNA.19134.1.S1_at   | MmugDNA.19134.1 | 12.1  | 12.11 | 0.1  | 0.12 | -1    | 0.910293 | 0.469196 | 0.969563 | 0.678155 |
| MmugDNA.19135.1.S1_at   | MmugDNA.19135.1 | 13.11 | 13.01 | 0.04 | 0.06 | 1.07  | 0.166085 | 0.472423 | 0.538888 | 0.67999  |
| MmugDNA.19136.1.S1_at   | MmugDNA.19136.1 | 10.35 | 10.95 | 0.23 | 0.08 | -1.52 | 0.014895 | 0.006474 | 0.278597 | 0.109314 |
| MmugDNA.19137.1.S1_at   | MmugDNA.19137.1 | 4.13  | 4.15  | 0.09 | 0.08 | -1.01 | 0.716099 | 0.974398 | 0.889675 | 0.986069 |
| MmugDNA.19139.1.S1_at   | MmugDNA.19139.1 | 4.38  | 4.33  | 0.16 | 0.26 | 1.03  | 0.680384 | 0.871389 | 0.874646 | 0.926844 |
| MmugDNA.1914.1.S1_at    | MmugDNA.1914.1  | 3.77  | 3.7   | 0.15 | 0.05 | 1.06  | 0.493895 | 0.401288 | 0.779139 | 0.630903 |
| MmugDNA.19140.1.S1_at   | MmugDNA.19140.1 | 6.4   | 6.07  | 0.05 | 0.04 | 1.26  | 0.00149  | 0.004044 | 0.161549 | 0.090281 |
| MmugDNA.19141.1.S1_at   | MmugDNA.19141.1 | 6.88  | 6.85  | 0.04 | 0.2  | 1.02  | 0.49881  | 0.677449 | 0.781838 | 0.81167  |

|                         |                 |       |       |      |      |       |          |          |          |          |
|-------------------------|-----------------|-------|-------|------|------|-------|----------|----------|----------|----------|
| MmugDNA.19142.1.S1_at   | MmugDNA.19142.1 | 3.44  | 3.54  | 0.03 | 0.09 | -1.08 | 0.060628 | 0.230424 | 0.408574 | 0.502199 |
| MmugDNA.19143.1.S1_at   | MmugDNA.19143.1 | 8.22  | 7.21  | 0.51 | 0.12 | 2.02  | 0.024242 | 0.029492 | 0.317812 | 0.213423 |
| MmugDNA.19144.1.S1_at   | MmugDNA.19144.1 | 3.7   | 4.18  | 0.23 | 0.3  | -1.4  | 0.231825 | 0.275128 | 0.599694 | 0.539542 |
| MmugDNA.19146.1.S1_at   | MmugDNA.19146.1 | 4.33  | 4.73  | 0.22 | 0.26 | -1.32 | 0.075585 | 0.00226  | 0.436722 | 0.070029 |
| MmugDNA.19147.1.S1_at   | MmugDNA.19147.1 | 3.82  | 3.77  | 0.1  | 0.02 | 1.03  | 0.983248 | 0.007121 | 0.994908 | 0.113654 |
| MmugDNA.19148.1.S1_at   | MmugDNA.19148.1 | 6.35  | 6.13  | 0.23 | 0.2  | 1.17  | 0.339487 | 0.116124 | 0.683827 | 0.383464 |
| MmugDNA.19149.1.S1_at   | MmugDNA.19149.1 | 5.91  | 5.91  | 0.22 | 0.12 | 1     | 0.795502 | 0.883625 | 0.924888 | 0.93366  |
| MmugDNA.1915.1.S1_at    | MmugDNA.1915.1  | 9.19  | 9.25  | 0.12 | 0.11 | -1.05 | 0.605818 | 0.801373 | 0.840193 | 0.885714 |
| MmugDNA.19150.1.S1_at   | MmugDNA.19150.1 | 5.03  | 5.52  | 0.62 | 0.19 | -1.41 | 0.256317 | 0.046573 | 0.620399 | 0.260267 |
| MmugDNA.19151.1.S1_at   | MmugDNA.19151.1 | 7.71  | 7.15  | 0.76 | 0.02 | 1.47  | 0.799483 | 0.905875 | 0.926552 | 0.946743 |
| MmugDNA.19152.1.S1_at   | MmugDNA.19152.1 | 7.59  | 6.52  | 0.75 | 0.27 | 2.1   | 0.032616 | 0.017025 | 0.345041 | 0.165384 |
| MmugDNA.19154.1.S1_at   | MmugDNA.19154.1 | 4.22  | 4.12  | 0.09 | 0.1  | 1.08  | 0.563019 | 0.275251 | 0.817962 | 0.53963  |
| MmugDNA.19155.1.S1_at   | MmugDNA.19155.1 | 5.82  | 7.13  | 1.16 | 0.07 | -2.47 | 0.123681 | 0.140751 | 0.49721  | 0.414115 |
| MmugDNA.19156.1.S1_s_at | MmugDNA.19156.1 | 10.81 | 10.42 | 0.09 | 0.12 | 1.31  | 0.017249 | 0.342321 | 0.290207 | 0.588413 |
| MmugDNA.19157.1.S1_at   | MmugDNA.19157.1 | 5.02  | 4.85  | 0.01 | 0.08 | 1.12  | 0.010353 | 0.009519 | 0.246974 | 0.1285   |
| MmugDNA.19158.1.S1_at   | MmugDNA.19158.1 | 12.15 | 11.77 | 0.47 | 0.1  | 1.3   | 0.706369 | 0.627645 | 0.885746 | 0.780625 |
| MmugDNA.19159.1.S1_at   | MmugDNA.19159.1 | 3.76  | 3.94  | 0.34 | 0.2  | -1.13 | 0.955036 | 0.273286 | 0.985067 | 0.537788 |
| MmugDNA.19160.1.S1_at   | MmugDNA.19160.1 | 3.64  | 3.42  | 0.13 | 0.33 | 1.17  | 0.684154 | 0.303295 | 0.876349 | 0.560748 |
| MmugDNA.19163.1.S1_at   | MmugDNA.19163.1 | 8.06  | 8.76  | 0.31 | 0.16 | -1.62 | 0.026439 | 0.005113 | 0.324765 | 0.099199 |
| MmugDNA.19164.1.S1_at   | MmugDNA.19164.1 | 8.81  | 9.34  | 0.28 | 0.06 | -1.44 | 0.092266 | 0.064555 | 0.460762 | 0.300255 |
| MmugDNA.19165.1.S1_at   | MmugDNA.19165.1 | 5.56  | 5.15  | 0.12 | 0.06 | 1.33  | 0.017926 | 0.147153 | 0.294439 | 0.421376 |
| MmugDNA.19169.1.S1_at   | MmugDNA.19169.1 | 8.16  | 8.07  | 0.03 | 0    | 1.06  | 0.004496 | 0.173652 | 0.200185 | 0.450003 |
| MmugDNA.19171.1.S1_at   | MmugDNA.19171.1 | 5.51  | 5.51  | 0.03 | 0.01 | 1     | 0.295802 | 0.355291 | 0.651429 | 0.597653 |
| MmugDNA.19172.1.S1_at   | MmugDNA.19172.1 | 6.1   | 6.4   | 0.52 | 0.19 | -1.24 | 0.49374  | 0.607582 | 0.77903  | 0.766437 |
| MmugDNA.19173.1.S1_at   | MmugDNA.19173.1 | 7.78  | 7.67  | 0.18 | 0.07 | 1.08  | 0.136029 | 0.183771 | 0.510556 | 0.459871 |
| MmugDNA.19174.1.S1_at   | MmugDNA.19174.1 | 2.86  | 2.91  | 0.1  | 0.04 | -1.03 | 0.82404  | 0.655797 | 0.936554 | 0.798709 |
| MmugDNA.19175.1.S1_at   | MmugDNA.19175.1 | 4.1   | 3.96  | 0.24 | 0.12 | 1.1   | 0.769311 | 0.883645 | 0.913562 | 0.933662 |
| MmugDNA.19176.1.S1_at   | MmugDNA.19176.1 | 5.36  | 5.38  | 0.14 | 0.01 | -1.01 | 0.701122 | 0.244144 | 0.883779 | 0.514148 |
| MmugDNA.19177.1.S1_at   | MmugDNA.19177.1 | 5.43  | 5.38  | 0.12 | 0.08 | 1.04  | 0.207164 | 0.611895 | 0.578774 | 0.769622 |
| MmugDNA.19178.1.S1_at   | MmugDNA.19178.1 | 9.28  | 9.59  | 0.67 | 0.08 | -1.24 | 0.195651 | 0.145117 | 0.565981 | 0.419075 |
| MmugDNA.19179.1.S1_at   | MmugDNA.19179.1 | 4.67  | 4.3   | 0.51 | 0.19 | 1.29  | 0.210736 | 0.252849 | 0.582002 | 0.521174 |
| MmugDNA.1918.1.S1_at    | MmugDNA.1918.1  | 4.01  | 4.04  | 0.19 | 0.07 | -1.02 | 0.790755 | 0.941887 | 0.922991 | 0.967077 |
| MmugDNA.19180.1.S1_at   | MmugDNA.19180.1 | 4.34  | 5.49  | 0.33 | 0.16 | -2.23 | 0.009091 | 0.126859 | 0.241233 | 0.397534 |
| MmugDNA.2125.1.S1_s_at  | MmugDNA.2125.1  | 13.17 | 13.09 | 0.08 | 0.03 | 1.06  | 0.225159 | 0.011318 | 0.59441  | 0.138076 |
| MmugDNA.19182.1.S1_at   | MmugDNA.19182.1 | 5.42  | 5.48  | 0.28 | 0.25 | -1.04 | 0.516499 | 0.398339 | 0.791464 | 0.629355 |
| MmugDNA.19184.1.S1_at   | MmugDNA.19184.1 | 3.75  | 3.56  | 0.24 | 0.12 | 1.14  | 0.089959 | 0.505001 | 0.457959 | 0.70197  |
| MmugDNA.19185.1.S1_at   | MmugDNA.19185.1 | 6.4   | 5.54  | 0.24 | 0.23 | 1.81  | 0.011526 | 0.047907 | 0.255545 | 0.263765 |
| MmugDNA.19186.1.S1_at   | MmugDNA.19186.1 | 4.7   | 3.47  | 0.77 | 1.11 | 2.33  | 0.474137 | 0.273215 | 0.767936 | 0.537788 |
| MmugDNA.19187.1.S1_at   | MmugDNA.19187.1 | 5.58  | 6.39  | 0.31 | 0.36 | -1.76 | 0.089376 | 0.12124  | 0.457564 | 0.390351 |
| MmugDNA.19188.1.S1_at   | MmugDNA.19188.1 | 6.12  | 6.06  | 0.74 | 0.22 | 1.04  | 0.906726 | 0.157597 | 0.968356 | 0.433131 |
| MmugDNA.19189.1.S1_at   | MmugDNA.19189.1 | 6.72  | 6.15  | 0.56 | 0.13 | 1.49  | 0.369255 | 0.582817 | 0.704181 | 0.751399 |
| MmugDNA.1919.1.S1_at    | MmugDNA.1919.1  | 7.23  | 7.18  | 0.01 | 0.01 | 1.04  | 0.001914 | 0.601786 | 0.170174 | 0.763113 |
| MmugDNA.19190.1.S1_at   | MmugDNA.19190.1 | 4.29  | 4.29  | 0.13 | 0.14 | 1     | 0.320245 | 0.248749 | 0.669207 | 0.517931 |

|                         |                 |       |       |      |      |       |          |          |          |          |
|-------------------------|-----------------|-------|-------|------|------|-------|----------|----------|----------|----------|
| MmugDNA.19191.1.S1_at   | MmugDNA.19191.1 | 6.42  | 6.04  | 0.18 | 0.12 | 1.3   | 0.049801 | 0.020172 | 0.386252 | 0.178414 |
| MmugDNA.19192.1.S1_at   | MmugDNA.19192.1 | 11.01 | 9.69  | 2.23 | 0.68 | 2.49  | 0.991284 | 0.882558 | 0.996655 | 0.933072 |
| MmugDNA.19193.1.S1_at   | MmugDNA.19193.1 | 5.16  | 5.18  | 0.21 | 0.02 | -1.01 | 0.330939 | 0.085438 | 0.67754  | 0.337416 |
| MmugDNA.19194.1.S1_at   | MmugDNA.19194.1 | 7.18  | 7.17  | 0.02 | 0.04 | 1.01  | 0.193897 | 0.714053 | 0.564486 | 0.834108 |
| MmugDNA.19195.1.S1_at   | MmugDNA.19195.1 | 8.91  | 8.54  | 0.16 | 0.14 | 1.29  | 0.038011 | 0.002319 | 0.358387 | 0.071105 |
| MmugDNA.19196.1.S1_at   | MmugDNA.19196.1 | 3.74  | 3.67  | 0.32 | 0.14 | 1.05  | 0.909734 | 0.114874 | 0.96945  | 0.381554 |
| MmugDNA.19197.1.S1_at   | MmugDNA.19197.1 | 3.1   | 3.1   | 0.14 | 0.05 | 1     | 0.430885 | 0.704851 | 0.74319  | 0.828846 |
| MmugDNA.19198.1.S1_at   | MmugDNA.19198.1 | 10    | 9.78  | 1.29 | 0.05 | 1.17  | 0.51309  | 0.663136 | 0.789651 | 0.80284  |
| MmugDNA.19199.1.S1_at   | MmugDNA.19199.1 | 4.97  | 4.91  | 0.33 | 0.29 | 1.04  | 0.851158 | 0.139183 | 0.947553 | 0.412324 |
| MmugDNA.192.1.S1_at     | MmugDNA.192.1   | 5.17  | 5.64  | 0.54 | 0.13 | -1.39 | 0.263091 | 0.048908 | 0.625101 | 0.265919 |
| MmugDNA.19200.1.S1_at   | MmugDNA.19200.1 | 5.01  | 4.96  | 0.31 | 0.17 | -1.03 | 0.362788 | 0.497207 | 0.699596 | 0.696514 |
| MmugDNA.19201.1.S1_at   | MmugDNA.19201.1 | 8.42  | 8.45  | 0.29 | 0.26 | -1.02 | 0.274539 | 0.502612 | 0.633927 | 0.700236 |
| MmugDNA.19202.1.S1_at   | MmugDNA.19202.1 | 4.98  | 5.69  | 0.19 | 0.37 | -1.64 | 0.051496 | 0.182923 | 0.390242 | 0.45941  |
| MmugDNA.19205.1.S1_at   | MmugDNA.19205.1 | 2.81  | 2.8   | 0.28 | 0.19 | 1     | 0.794432 | 0.425529 | 0.924569 | 0.647884 |
| MmugDNA.19206.1.S1_at   | MmugDNA.19206.1 | 3.2   | 3.06  | 0.07 | 0.06 | 1.1   | 0.220919 | 0.369462 | 0.590217 | 0.60886  |
| MmugDNA.1921.1.S1_at    | MmugDNA.1921.1  | 6.95  | 8.64  | 0.41 | 0.34 | -3.23 | 0.005174 | 0.009016 | 0.205958 | 0.125499 |
| MmugDNA.19210.1.S1_at   | MmugDNA.19210.1 | 8.42  | 10.06 | 0.24 | 0.09 | -3.12 | 0.000266 | 0.000009 | 0.130979 | 0.016421 |
| MmugDNA.19211.1.S1_at   | MmugDNA.19211.1 | 5.45  | 5.28  | 0.07 | 0.16 | 1.13  | 0.072414 | 0.264304 | 0.432302 | 0.530366 |
| MmugDNA.33352.1.S1_s_at | MmugDNA.33352.1 | 10.93 | 10.64 | 0.15 | 0.04 | 1.22  | 0.026911 | 0.001049 | 0.326584 | 0.051466 |
| MmugDNA.19213.1.S1_at   | MmugDNA.19213.1 | 7.46  | 7.39  | 0.06 | 0.06 | 1.05  | 0.376455 | 0.157385 | 0.706899 | 0.432859 |
| MmugDNA.19215.1.S1_at   | MmugDNA.19215.1 | 7.31  | 7.01  | 0.46 | 0.3  | 1.23  | 0.504049 | 0.608865 | 0.784489 | 0.76736  |
| MmugDNA.19216.1.S1_at   | MmugDNA.19216.1 | 7.25  | 6.68  | 0.92 | 0.17 | 1.49  | 0.390576 | 0.048219 | 0.716814 | 0.264675 |
| MmugDNA.19218.1.S1_at   | MmugDNA.19218.1 | 2.87  | 2.84  | 0.17 | 0.01 | 1.01  | 0.818476 | 0.961822 | 0.934409 | 0.978471 |
| MmugDNA.1922.1.S1_at    | MmugDNA.1922.1  | 9.76  | 9.69  | 0.09 | 0.06 | 1.05  | 0.9359   | 0.483336 | 0.978432 | 0.687887 |
| MmugDNA.19223.1.S1_at   | MmugDNA.19223.1 | 4.01  | 3.94  | 0.97 | 0.1  | 1.05  | 0.559517 | 0.458288 | 0.816216 | 0.671096 |
| MmugDNA.19226.1.S1_at   | MmugDNA.19226.1 | 5.49  | 5.42  | 0.46 | 0.07 | 1.05  | 0.742582 | 0.827795 | 0.901849 | 0.901152 |
| MmugDNA.19227.1.S1_at   | MmugDNA.19227.1 | 10.1  | 9.77  | 0.17 | 0.04 | 1.27  | 0.013312 | 0.02567  | 0.26777  | 0.200834 |
| MmugDNA.19228.1.S1_at   | MmugDNA.19228.1 | 5.75  | 5.57  | 0.21 | 0.21 | 1.13  | 0.457725 | 0.678643 | 0.758404 | 0.81231  |
| MmugDNA.26886.1.S1_at   | MmugDNA.26886.1 | 9.36  | 9.25  | 0.33 | 0.12 | 1.07  | 0.886597 | 0.763927 | 0.960667 | 0.862744 |
| MmugDNA.26886.1.S1_s_at | MmugDNA.26886.1 | 11.44 | 11.37 | 0.16 | 0.06 | 1.05  | 0.449816 | 0.849925 | 0.754621 | 0.914673 |
| MmugDNA.19232.1.S1_at   | MmugDNA.19232.1 | 4.7   | 4.79  | 0.04 | 0.15 | -1.07 | 0.649396 | 0.192787 | 0.860289 | 0.468274 |
| MmugDNA.19234.1.S1_at   | MmugDNA.19234.1 | 5.47  | 5.36  | 0.17 | 0.12 | 1.08  | 0.081422 | 0.018299 | 0.445406 | 0.17013  |
| MmugDNA.19235.1.S1_at   | MmugDNA.19235.1 | 5.42  | 5.28  | 0.21 | 0.09 | 1.11  | 0.547095 | 0.17768  | 0.808925 | 0.454073 |
| MmugDNA.19237.1.S1_at   | MmugDNA.19237.1 | 3.84  | 4.09  | 0.05 | 0.28 | -1.19 | 0.15896  | 0.273755 | 0.531703 | 0.538254 |
| MmugDNA.19239.1.S1_at   | MmugDNA.19239.1 | 4.7   | 5.11  | 0.18 | 0.21 | -1.33 | 0.081132 | 0.004728 | 0.445139 | 0.095802 |
| MmugDNA.1924.1.S1_at    | MmugDNA.1924.1  | 5.92  | 6.89  | 0.5  | 0.42 | -1.96 | 0.117598 | 0.084381 | 0.490984 | 0.335713 |
| MmugDNA.19240.1.S1_at   | MmugDNA.19240.1 | 5.24  | 5.24  | 0.15 | 0.22 | 1     | 0.913893 | 0.840429 | 0.970802 | 0.90902  |
| MmugDNA.19241.1.S1_at   | MmugDNA.19241.1 | 5.96  | 6.23  | 0.18 | 0.4  | -1.2  | 0.547027 | 0.115996 | 0.808912 | 0.383164 |
| MmugDNA.19243.1.S1_at   | MmugDNA.19243.1 | 7.17  | 7.34  | 0.17 | 0.09 | -1.12 | 0.125467 | 0.329921 | 0.499523 | 0.578874 |
| MmugDNA.19244.1.S1_at   | MmugDNA.19244.1 | 5.73  | 6.23  | 0.23 | 0.33 | -1.41 | 0.040459 | 0.011    | 0.364432 | 0.136623 |
| MmugDNA.19245.1.S1_at   | MmugDNA.19245.1 | 10.2  | 9.76  | 2.88 | 0.48 | 1.35  | 0.857494 | 0.202092 | 0.949729 | 0.476545 |
| MmugDNA.19247.1.S1_at   | MmugDNA.19247.1 | 4.6   | 4.58  | 0.21 | 0.05 | 1.01  | 0.908857 | 0.763928 | 0.969277 | 0.862744 |
| MmugDNA.19248.1.S1_at   | MmugDNA.19248.1 | 6.61  | 6.52  | 0.15 | 0.09 | 1.06  | 0.244289 | 0.618721 | 0.60991  | 0.774185 |

|                         |                 |       |       |      |      |       |          |          |          |          |
|-------------------------|-----------------|-------|-------|------|------|-------|----------|----------|----------|----------|
| MmugDNA.19249.1.S1_at   | MmugDNA.19249.1 | 5.11  | 4.66  | 0.14 | 0.09 | 1.36  | 0.018822 | 0.009962 | 0.298593 | 0.131094 |
| MmugDNA.1925.1.S1_at    | MmugDNA.1925.1  | 11.65 | 10.23 | 1.24 | 0.39 | 2.68  | 0.549874 | 0.148413 | 0.810447 | 0.423003 |
| MmugDNA.19251.1.S1_at   | MmugDNA.19251.1 | 4.88  | 4.53  | 0.41 | 0.22 | 1.28  | 0.456849 | 0.241125 | 0.758051 | 0.511749 |
| MmugDNA.19253.1.S1_at   | MmugDNA.19253.1 | 3.71  | 3.72  | 0.07 | 0.1  | -1.01 | 0.776117 | 0.104246 | 0.917022 | 0.365376 |
| MmugDNA.19256.1.S1_s_at | MmugDNA.19256.1 | 10.91 | 11.59 | 2.56 | 0.19 | -1.6  | 0.379738 | 0.110608 | 0.709128 | 0.374854 |
| MmugDNA.19257.1.S1_at   | MmugDNA.19257.1 | 11.41 | 11.29 | 0.6  | 0.08 | 1.09  | 0.973633 | 0.428055 | 0.991431 | 0.649619 |
| MmugDNA.19259.1.S1_at   | MmugDNA.19259.1 | 5.8   | 5.63  | 0.13 | 0.07 | 1.12  | 0.203387 | 0.437833 | 0.574902 | 0.656977 |
| MmugDNA.1926.1.S1_at    | MmugDNA.1926.1  | 3.52  | 3.52  | 0.08 | 0.23 | -1    | 0.286082 | 0.462842 | 0.64358  | 0.674149 |
| MmugDNA.19260.1.S1_at   | MmugDNA.19260.1 | 10.66 | 10.89 | 0.38 | 0.08 | -1.17 | 0.434537 | 0.674524 | 0.745208 | 0.809854 |
| MmugDNA.19261.1.S1_at   | MmugDNA.19261.1 | 6.27  | 6.19  | 0.23 | 0.18 | 1.05  | 0.262001 | 0.387865 | 0.62421  | 0.622486 |
| MmugDNA.19263.1.S1_at   | MmugDNA.19263.1 | 9.26  | 9.43  | 0.17 | 0.17 | -1.12 | 0.659756 | 0.060168 | 0.865416 | 0.291882 |
| MmugDNA.19267.1.S1_at   | MmugDNA.19267.1 | 3.94  | 3.82  | 0.3  | 0.08 | 1.08  | 0.451179 | 0.368468 | 0.755046 | 0.60798  |
| MmugDNA.19268.1.S1_at   | MmugDNA.19268.1 | 9.96  | 9.7   | 0.32 | 0.12 | 1.2   | 0.91405  | 0.179878 | 0.970812 | 0.456429 |
| MmugDNA.19270.1.S1_at   | MmugDNA.19270.1 | 4.58  | 5.08  | 0.17 | 0.3  | -1.41 | 0.053805 | 0.048072 | 0.395442 | 0.26428  |
| MmugDNA.19271.1.S1_s_at | MmugDNA.19271.1 | 13.22 | 12.81 | 0.59 | 0.16 | 1.33  | 0.902585 | 0.547085 | 0.967108 | 0.728283 |
| MmugDNA.19273.1.S1_at   | MmugDNA.19273.1 | 11.33 | 11.35 | 0.07 | 0.08 | -1.01 | 0.84737  | 0.120658 | 0.946525 | 0.389476 |
| MmugDNA.19274.1.S1_at   | MmugDNA.19274.1 | 5.21  | 5.01  | 0.28 | 0.21 | 1.15  | 0.394122 | 0.654481 | 0.719612 | 0.79808  |
| MmugDNA.19275.1.S1_at   | MmugDNA.19275.1 | 5.56  | 5.12  | 0.45 | 0.27 | 1.36  | 0.157811 | 0.206907 | 0.53073  | 0.481052 |
| MmugDNA.19277.1.S1_at   | MmugDNA.19277.1 | 9.16  | 9.3   | 0.54 | 0.08 | -1.1  | 0.789711 | 0.317208 | 0.922635 | 0.570458 |
| MmugDNA.19278.1.S1_at   | MmugDNA.19278.1 | 11.64 | 11.98 | 0.5  | 0.15 | -1.26 | 0.464515 | 0.288914 | 0.762534 | 0.550032 |
| MmugDNA.19279.1.S1_at   | MmugDNA.19279.1 | 11.32 | 11.52 | 0.26 | 0.01 | -1.14 | 0.727159 | 0.780866 | 0.894637 | 0.872849 |
| MmugDNA.1928.1.S1_at    | MmugDNA.1928.1  | 5.82  | 5.67  | 0.03 | 0.14 | 1.11  | 0.043499 | 0.039242 | 0.372168 | 0.243274 |
| MmugDNA.19280.1.S1_at   | MmugDNA.19280.1 | 7.02  | 7.61  | 0.45 | 0.13 | -1.51 | 0.300694 | 0.346292 | 0.655174 | 0.59124  |
| MmugDNA.19281.1.S1_at   | MmugDNA.19281.1 | 6.05  | 5.76  | 0.14 | 0.22 | 1.22  | 0.226524 | 0.339622 | 0.595809 | 0.586217 |
| MmugDNA.19283.1.S1_at   | MmugDNA.19283.1 | 7.02  | 7.04  | 0.05 | 0.07 | -1.01 | 0.303983 | 0.189313 | 0.657774 | 0.465078 |
| MmugDNA.19285.1.S1_s_at | MmugDNA.19285.1 | 11.89 | 11.4  | 0.39 | 0.04 | 1.4   | 0.330866 | 0.430876 | 0.677482 | 0.651894 |
| MmugDNA.19288.1.S1_at   | MmugDNA.19288.1 | 3.35  | 3.49  | 0.46 | 0.38 | -1.1  | 0.777795 | 0.870405 | 0.917816 | 0.926446 |
| MmugDNA.19289.1.S1_at   | MmugDNA.19289.1 | 12.42 | 12.57 | 0.2  | 0.09 | -1.11 | 0.412087 | 0.490908 | 0.73192  | 0.692666 |
| MmugDNA.19290.1.S1_at   | MmugDNA.19290.1 | 4.78  | 4.64  | 0.06 | 0.04 | 1.11  | 0.02977  | 0.104457 | 0.335925 | 0.365719 |
| MmugDNA.19291.1.S1_x_at | MmugDNA.19291.1 | 11.2  | 11.33 | 0.14 | 0.12 | -1.09 | 0.243106 | 0.1835   | 0.608941 | 0.459641 |
| MmugDNA.19292.1.S1_at   | MmugDNA.19292.1 | 3.31  | 3.2   | 0.09 | 0.1  | 1.08  | 0.104704 | 0.522925 | 0.475918 | 0.713429 |
| MmugDNA.19293.1.S1_at   | MmugDNA.19293.1 | 5.4   | 5.31  | 0.61 | 0.24 | 1.07  | 0.326593 | 0.506256 | 0.674163 | 0.702368 |
| MmugDNA.19294.1.S1_at   | MmugDNA.19294.1 | 3.25  | 3.15  | 0.05 | 0.1  | 1.08  | 0.111086 | 0.174478 | 0.484303 | 0.450952 |
| MmugDNA.19296.1.S1_at   | MmugDNA.19296.1 | 5.36  | 5.29  | 0.14 | 0.24 | 1.05  | 0.810019 | 0.204453 | 0.931255 | 0.478821 |
| MmugDNA.19297.1.S1_at   | MmugDNA.19297.1 | 8.91  | 8.08  | 0.45 | 0.11 | 1.78  | 0.119523 | 0.236787 | 0.49288  | 0.50753  |
| MmugDNA.19299.1.S1_s_at | MmugDNA.19299.1 | 11.19 | 11.23 | 0.33 | 0.01 | -1.03 | 0.598917 | 0.567189 | 0.837151 | 0.741088 |
| MmugDNA.193.1.S1_at     | MmugDNA.193.1   | 5.44  | 5.17  | 0.07 | 0.09 | 1.2   | 0.009398 | 0.070542 | 0.241869 | 0.311777 |
| MmugDNA.1930.1.S1_at    | MmugDNA.1930.1  | 6.1   | 5.26  | 0.59 | 0.19 | 1.78  | 0.204279 | 0.406393 | 0.575652 | 0.634305 |
| MmugDNA.19303.1.S1_at   | MmugDNA.19303.1 | 7.07  | 6.87  | 0.12 | 0.01 | 1.15  | 0.106222 | 0.793303 | 0.47852  | 0.880679 |
| MmugDNA.19304.1.S1_at   | MmugDNA.19304.1 | 9.49  | 10    | 0.39 | 0.34 | -1.42 | 0.192296 | 0.231594 | 0.563473 | 0.503379 |
| MmugDNA.19305.1.S1_at   | MmugDNA.19305.1 | 5.58  | 6.42  | 0.25 | 0.48 | -1.79 | 0.087844 | 0.022679 | 0.455734 | 0.188657 |
| MmugDNA.16930.1.S1_x_at | MmugDNA.16930.1 | 4.89  | 4.49  | 0.56 | 0.1  | 1.32  | 0.250898 | 0.136152 | 0.615977 | 0.408473 |
| MmugDNA.19307.1.S1_at   | MmugDNA.19307.1 | 10.25 | 10.6  | 0.25 | 0.19 | -1.27 | 0.073805 | 0.04802  | 0.434623 | 0.264118 |

|                         |                 |       |       |      |      |       |          |          |          |          |
|-------------------------|-----------------|-------|-------|------|------|-------|----------|----------|----------|----------|
| MmugDNA.19308.1.S1_at   | MmugDNA.19308.1 | 11.15 | 11.33 | 0.2  | 0.04 | -1.13 | 0.227333 | 0.128894 | 0.596459 | 0.400327 |
| MmugDNA.19309.1.S1_at   | MmugDNA.19309.1 | 4.99  | 4.87  | 0.16 | 0.04 | 1.09  | 0.210925 | 0.194965 | 0.582007 | 0.470117 |
| MmugDNA.1931.1.S1_at    | MmugDNA.1931.1  | 6.67  | 6.71  | 0.19 | 0.29 | -1.03 | 0.812504 | 0.367256 | 0.932099 | 0.606869 |
| MmugDNA.19310.1.S1_at   | MmugDNA.19310.1 | 8.09  | 8.2   | 0.68 | 0.06 | -1.08 | 0.859977 | 0.844561 | 0.950535 | 0.911531 |
| MmugDNA.19312.1.S1_at   | MmugDNA.19312.1 | 7.69  | 7.68  | 0.55 | 0.12 | 1.01  | 0.96322  | 0.948988 | 0.988152 | 0.970785 |
| MmugDNA.19313.1.S1_at   | MmugDNA.19313.1 | 13.31 | 13.13 | 0.19 | 0.01 | 1.14  | 0.537081 | 0.402251 | 0.802624 | 0.631271 |
| MmugDNA.19314.1.S1_at   | MmugDNA.19314.1 | 7.08  | 6.51  | 0.31 | 0.18 | 1.48  | 0.044259 | 0.004064 | 0.374279 | 0.090288 |
| MmugDNA.19317.1.S1_at   | MmugDNA.19317.1 | 8.4   | 8.29  | 0.13 | 0.07 | 1.07  | 0.287397 | 0.376244 | 0.644533 | 0.614089 |
| MmugDNA.19319.1.S1_at   | MmugDNA.19319.1 | 7.24  | 6.57  | 0.51 | 0.26 | 1.59  | 0.043731 | 0.023112 | 0.372554 | 0.190371 |
| MmugDNA.1932.1.S1_at    | MmugDNA.1932.1  | 6.8   | 6.65  | 0.44 | 0.07 | 1.11  | 0.641057 | 0.039583 | 0.857072 | 0.244002 |
| MmugDNA.19321.1.S1_at   | MmugDNA.19321.1 | 10.44 | 9.65  | 0.35 | 0.27 | -1.73 | 0.019676 | 0.006178 | 0.302208 | 0.106774 |
| MmugDNA.19322.1.S1_at   | MmugDNA.19322.1 | 5.96  | 5.44  | 0.29 | 0.23 | 1.44  | 0.159771 | 0.023131 | 0.532756 | 0.190443 |
| MmugDNA.19323.1.S1_at   | MmugDNA.19323.1 | 4.47  | 4.41  | 0.1  | 0.06 | 1.04  | 0.577596 | 0.400942 | 0.825827 | 0.630658 |
| MmugDNA.19325.1.S1_at   | MmugDNA.19325.1 | 4.55  | 4.46  | 0.27 | 0.09 | 1.06  | 0.297836 | 0.264082 | 0.652791 | 0.530214 |
| MmugDNA.19326.1.S1_at   | MmugDNA.19326.1 | 12.36 | 11.34 | 0.38 | 0.09 | 2.03  | 0.023622 | 0.013314 | 0.316279 | 0.148042 |
| MmugDNA.19327.1.S1_at   | MmugDNA.19327.1 | 4.61  | 4.21  | 0.15 | 0.04 | 1.32  | 0.013611 | 0.005092 | 0.269894 | 0.099108 |
| MmugDNA.19328.1.S1_at   | MmugDNA.19328.1 | 9.66  | 9.24  | 0.08 | 0.41 | 1.34  | 0.089119 | 0.039043 | 0.456902 | 0.242798 |
| MmugDNA.19329.1.S1_at   | MmugDNA.19329.1 | 10.31 | 10.37 | 0.23 | -0.2 | -1.05 | 0.364725 | 0.009822 | 0.700726 | 0.130205 |
| MmugDNA.1933.1.S1_at    | MmugDNA.1933.1  | 9.19  | 9.62  | 0.1  | 0.2  | -1.35 | 0.030913 | 0.001237 | 0.339244 | 0.05478  |
| MmugDNA.19330.1.S1_at   | MmugDNA.19330.1 | 6.02  | 6.45  | 0.55 | 0.33 | -1.35 | 0.4224   | 0.288016 | 0.738123 | 0.549277 |
| MmugDNA.19333.1.S1_at   | MmugDNA.19333.1 | 4.58  | 4.53  | 0.11 | 0.01 | 1.04  | 0.519421 | 0.883546 | 0.793172 | 0.933618 |
| MmugDNA.19334.1.S1_at   | MmugDNA.19334.1 | 7.86  | 8.16  | 0.19 | 0.11 | -1.23 | 0.046987 | 0.107407 | 0.379253 | 0.370219 |
| MmugDNA.19335.1.S1_at   | MmugDNA.19335.1 | 4.4   | 4.35  | 0.07 | 0.09 | 1.03  | 0.615656 | 0.271751 | 0.844574 | 0.536577 |
| MmugDNA.19336.1.S1_at   | MmugDNA.19336.1 | 4.51  | 4.5   | 0.17 | 0.09 | 1.01  | 0.512345 | 0.324885 | 0.789309 | 0.575416 |
| MmugDNA.19337.1.S1_at   | MmugDNA.19337.1 | 4.88  | 4.69  | 0.43 | 0.08 | 1.14  | 0.164376 | 0.079686 | 0.537322 | 0.326981 |
| MmugDNA.32562.1.S1_s_at | MmugDNA.32562.1 | 8.22  | 7.91  | 0.12 | 0.14 | 1.24  | 0.092137 | 0.124108 | 0.460688 | 0.394389 |
| MmugDNA.19339.1.S1_at   | MmugDNA.19339.1 | 7.96  | 8.9   | 2.14 | 0.19 | -1.93 | 0.158095 | 0.137593 | 0.531053 | 0.410558 |
| MmugDNA.19340.1.S1_at   | MmugDNA.19340.1 | 3.21  | 3.21  | 0.26 | 0.09 | -1    | 0.757369 | 0.888854 | 0.908621 | 0.936694 |
| MmugDNA.19344.1.S1_at   | MmugDNA.19344.1 | 4.79  | 4.79  | 0.1  | 0.13 | 1     | 0.545425 | 0.890322 | 0.807818 | 0.937508 |
| MmugDNA.27164.1.S1_s_at | MmugDNA.27164.1 | 10.05 | 10.15 | 0.73 | 0.11 | -1.07 | 0.730004 | 0.359633 | 0.895939 | 0.600904 |
| MmugDNA.19346.1.S1_at   | MmugDNA.19346.1 | 10.26 | 10.28 | 0.25 | 0.04 | -1.02 | 0.712248 | 0.888158 | 0.887927 | 0.936222 |
| MmugDNA.1935.1.S1_at    | MmugDNA.1935.1  | 6.57  | 6.47  | 0.13 | 0.15 | 1.07  | 0.427004 | 0.145765 | 0.74088  | 0.419756 |
| MmugDNA.19350.1.S1_at   | MmugDNA.19350.1 | 6.15  | 6.18  | 0.06 | 0.17 | -1.02 | 0.280822 | 0.245032 | 0.639467 | 0.514813 |
| MmugDNA.19351.1.S1_at   | MmugDNA.19351.1 | 10.54 | 10.48 | 0.58 | 0.08 | 1.04  | 0.981209 | 0.812909 | 0.993962 | 0.891875 |
| MmugDNA.19354.1.S1_at   | MmugDNA.19354.1 | 5.35  | 5.22  | 0.19 | 0.03 | 1.1   | 0.260557 | 0.387181 | 0.623301 | 0.621949 |
| MmugDNA.19355.1.S1_at   | MmugDNA.19355.1 | 6.46  | 6.79  | 0.82 | 0.4  | -1.26 | 0.36375  | 0.495602 | 0.700278 | 0.695576 |
| MmugDNA.19356.1.S1_at   | MmugDNA.19356.1 | 9.94  | 9.9   | 0.57 | 0.34 | 1.03  | 0.275474 | 0.007155 | 0.634965 | 0.113788 |
| MmugDNA.19357.1.S1_at   | MmugDNA.19357.1 | 10.15 | 10.49 | 0.72 | 0.34 | -1.26 | 0.166588 | 0.007685 | 0.539239 | 0.117153 |
| MmugDNA.19359.1.S1_at   | MmugDNA.19359.1 | 7.51  | 6.65  | 0.71 | 0.14 | 1.82  | 0.104448 | 0.082225 | 0.475473 | 0.331091 |
| MmugDNA.1936.1.S1_at    | MmugDNA.1936.1  | 8.15  | 8     | 0.27 | 0.08 | 1.11  | 0.951511 | 0.911062 | 0.983683 | 0.949838 |
| MmugDNA.19360.1.S1_at   | MmugDNA.19360.1 | 5.67  | 5.72  | 0.18 | 0.24 | -1.03 | 0.934102 | 0.581321 | 0.977721 | 0.75041  |
| MmugDNA.19363.1.S1_at   | MmugDNA.19363.1 | 7.61  | 7.43  | 0.45 | 0.17 | 1.13  | 0.172936 | 0.145914 | 0.546101 | 0.419892 |
| MmugDNA.19364.1.S1_at   | MmugDNA.19364.1 | 5.24  | 4.8   | 0.15 | 0.43 | 1.35  | 0.257032 | 0.027973 | 0.620913 | 0.208777 |

|                         |                 |       |       |      |      |       |          |          |          |          |
|-------------------------|-----------------|-------|-------|------|------|-------|----------|----------|----------|----------|
| MmugDNA.19365.1.S1_at   | MmugDNA.19365.1 | 5     | 5.23  | 0.27 | 0.3  | -1.17 | 0.845215 | 0.41619  | 0.945709 | 0.641398 |
| MmugDNA.19366.1.S1_at   | MmugDNA.19366.1 | 8.3   | 8.75  | 0.68 | 0.21 | -1.37 | 0.105564 | 0.135239 | 0.477305 | 0.407303 |
| MmugDNA.19367.1.S1_at   | MmugDNA.19367.1 | 4.31  | 4.3   | 0.09 | 0.06 | 1     | 0.399453 | 0.887666 | 0.723131 | 0.93601  |
| MmugDNA.19368.1.S1_at   | MmugDNA.19368.1 | 7.14  | 7     | 0.08 | 0.03 | 1.1   | 0.054521 | 0.427502 | 0.396542 | 0.649302 |
| MmugDNA.19369.1.S1_at   | MmugDNA.19369.1 | 6.45  | 6.78  | 0.17 | 0.19 | -1.26 | 0.196634 | 0.14441  | 0.567291 | 0.418323 |
| MmugDNA.19369.1.S1_s_at | MmugDNA.19369.1 | 5.5   | 5.91  | 0.24 | 0.08 | -1.32 | 0.148859 | 0.070395 | 0.522782 | 0.311676 |
| MmugDNA.1937.1.S1_at    | MmugDNA.1937.1  | 3.33  | 3.29  | 0.12 | 0.06 | 1.03  | 0.174386 | 0.211612 | 0.547573 | 0.485681 |
| MmugDNA.19371.1.S1_at   | MmugDNA.19371.1 | 4.35  | 4.41  | 0.27 | 0.48 | -1.04 | 0.623675 | 0.069143 | 0.848306 | 0.30917  |
| MmugDNA.19372.1.S1_at   | MmugDNA.19372.1 | 5.78  | 5.9   | 0.17 | 0.1  | -1.08 | 0.207044 | 0.321967 | 0.578774 | 0.573575 |
| MmugDNA.19373.1.S1_at   | MmugDNA.19373.1 | 3.46  | 3.34  | 0.09 | 0.15 | 1.08  | 0.410969 | 0.42721  | 0.731038 | 0.649175 |
| MmugDNA.19374.1.S1_at   | MmugDNA.19374.1 | 3.46  | 3.43  | 0.09 | 0.02 | -1.02 | 0.215137 | 0.75117  | 0.585748 | 0.855371 |
| MmugDNA.19375.1.S1_at   | MmugDNA.19375.1 | 5.81  | 5.8   | 0.03 | 0.02 | 1     | 0.472532 | 0.602982 | 0.767074 | 0.763857 |
| MmugDNA.19376.1.S1_at   | MmugDNA.19376.1 | 6.53  | 5.73  | 0.48 | 0.19 | 1.73  | 0.081475 | 0.211039 | 0.445415 | 0.485047 |
| MmugDNA.19378.1.S1_at   | MmugDNA.19378.1 | 8.21  | 7.84  | 0.44 | 0.16 | 1.29  | 0.226395 | 0.044336 | 0.595618 | 0.255042 |
| MmugDNA.19379.1.S1_at   | MmugDNA.19379.1 | 4.54  | 4.34  | 0.12 | 0.21 | 1.16  | 0.208786 | 0.336849 | 0.580477 | 0.584113 |
| MmugDNA.1938.1.S1_at    | MmugDNA.1938.1  | 6.79  | 6.9   | 1.55 | 0.21 | -1.08 | 0.811308 | 0.472613 | 0.931713 | 0.68007  |
| MmugDNA.19381.1.S1_at   | MmugDNA.19381.1 | 7.57  | 7.36  | 1.3  | 0.09 | 1.16  | 0.869628 | 0.235241 | 0.954469 | 0.50629  |
| MmugDNA.19384.1.S1_at   | MmugDNA.19384.1 | 5.26  | 5.12  | 0.33 | 0.11 | 1.11  | 0.170479 | 0.028979 | 0.543539 | 0.212129 |
| MmugDNA.19386.1.S1_at   | MmugDNA.19386.1 | 4.97  | 4.96  | 0.22 | 0.28 | 1.01  | 0.951735 | 0.981979 | 0.9838   | 0.990145 |
| MmugDNA.19387.1.S1_at   | MmugDNA.19387.1 | 8.84  | 8.62  | 0.47 | 0.01 | 1.17  | 0.471546 | 0.567064 | 0.76658  | 0.740985 |
| MmugDNA.19389.1.S1_at   | MmugDNA.19389.1 | 8.83  | 8.79  | 0.56 | 0.37 | 1.03  | 0.275637 | 0.710676 | 0.63512  | 0.83219  |
| MmugDNA.19391.1.S1_at   | MmugDNA.19391.1 | 5.73  | 6.06  | 0.53 | 0.1  | -1.26 | 0.314417 | 0.09829  | 0.665151 | 0.356337 |
| MmugDNA.19392.1.S1_at   | MmugDNA.19392.1 | 12.19 | 12.37 | 0.06 | 0.09 | -1.13 | 0.113151 | 0.00216  | 0.486619 | 0.068763 |
| MmugDNA.19393.1.S1_at   | MmugDNA.19393.1 | 3.62  | 3.77  | 0.34 | 0.17 | -1.11 | 0.85222  | 0.958898 | 0.947936 | 0.976709 |
| MmugDNA.19395.1.S1_at   | MmugDNA.19395.1 | 4.9   | 4.93  | 0.21 | 0.1  | -1.02 | 0.944475 | 0.806833 | 0.980724 | 0.888868 |
| MmugDNA.19396.1.S1_at   | MmugDNA.19396.1 | 3.8   | 3.72  | 0.1  | 0.11 | 1.05  | 0.363429 | 0.209784 | 0.700102 | 0.483538 |
| MmugDNA.19397.1.S1_at   | MmugDNA.19397.1 | 5.6   | 5.58  | 0.39 | 0.14 | 1.01  | 0.436664 | 0.709339 | 0.746387 | 0.831579 |
| MmugDNA.19398.1.S1_at   | MmugDNA.19398.1 | 3.96  | 4.06  | 0.28 | 0.19 | -1.07 | 0.857378 | 0.94237  | 0.949698 | 0.967292 |
| MmugDNA.19399.1.S1_at   | MmugDNA.19399.1 | 9.14  | 8.99  | 1.09 | 0.15 | 1.11  | 0.80048  | 0.039799 | 0.926981 | 0.244507 |
| MmugDNA.194.1.S1_at     | MmugDNA.194.1   | 3.1   | 3.07  | 0.07 | 0.15 | 1.02  | 0.859676 | 0.695248 | 0.9504   | 0.822869 |
| MmugDNA.1940.1.S1_at    | MmugDNA.1940.1  | 7.58  | 8.01  | 0.16 | 0.29 | -1.35 | 0.144366 | 0.034049 | 0.519769 | 0.22837  |
| MmugDNA.19400.1.S1_at   | MmugDNA.19400.1 | 4.43  | 4.58  | 0.08 | 0.06 | -1.11 | 0.188635 | 0.883767 | 0.560518 | 0.933691 |
| MmugDNA.19401.1.S1_at   | MmugDNA.19401.1 | 3.87  | 3.9   | 0.18 | 0.04 | -1.02 | 0.429603 | 0.688106 | 0.74228  | 0.817914 |
| MmugDNA.19403.1.S1_at   | MmugDNA.19403.1 | 4.22  | 4.26  | 0.04 | 0.15 | -1.03 | 0.887669 | 0.751938 | 0.961096 | 0.855729 |
| MmugDNA.19404.1.S1_at   | MmugDNA.19404.1 | 3.75  | 3.52  | 0.04 | 0.12 | 1.17  | 0.073431 | 0.088545 | 0.434463 | 0.341972 |
| MmugDNA.19405.1.S1_at   | MmugDNA.19405.1 | 5.41  | 5.29  | 0.18 | 0.13 | 1.09  | 0.443106 | 0.296953 | 0.75053  | 0.555895 |
| MmugDNA.19406.1.S1_at   | MmugDNA.19406.1 | 3.63  | 3.65  | 0.18 | 0.15 | -1.01 | 0.952362 | 0.6106   | 0.984024 | 0.76874  |
| MmugDNA.19407.1.S1_at   | MmugDNA.19407.1 | 6.51  | 6.35  | 0.3  | 0.13 | 1.12  | 0.171122 | 0.124203 | 0.544246 | 0.394496 |
| MmugDNA.19409.1.S1_at   | MmugDNA.19409.1 | 5.07  | 5.06  | 0.25 | 0.11 | 1     | 0.397158 | 0.671965 | 0.721708 | 0.808177 |
| MmugDNA.19410.1.S1_at   | MmugDNA.19410.1 | 8.29  | 8.22  | 0.23 | 0.23 | 1.05  | 0.410235 | 0.697092 | 0.730705 | 0.824045 |
| MmugDNA.19412.1.S1_at   | MmugDNA.19412.1 | 7.42  | 7.66  | 0.33 | 0.08 | -1.18 | 0.280983 | 0.545771 | 0.639604 | 0.727653 |
| MmugDNA.19413.1.S1_at   | MmugDNA.19413.1 | 5.53  | 6.62  | 1.23 | 0.39 | -2.13 | 0.546359 | 0.691349 | 0.808448 | 0.820406 |
| MmugDNA.19414.1.S1_at   | MmugDNA.19414.1 | 4.99  | 4.96  | 0.12 | 0.24 | 1.02  | 0.90974  | 0.500799 | 0.96945  | 0.699278 |

|                         |                 |       |       |      |      |       |          |          |          |          |
|-------------------------|-----------------|-------|-------|------|------|-------|----------|----------|----------|----------|
| MmugDNA.19415.1.S1_at   | MmugDNA.19415.1 | 5.7   | 5.61  | 0.11 | 0.04 | 1.06  | 0.84973  | 0.935507 | 0.947141 | 0.96359  |
| MmugDNA.19415.1.S1_x_at | MmugDNA.19415.1 | 5.73  | 5.72  | 0.02 | 0.04 | 1     | 0.576617 | 0.827118 | 0.825166 | 0.900723 |
| MmugDNA.19416.1.S1_at   | MmugDNA.19416.1 | 4.13  | 4.34  | 0.24 | 0.08 | -1.16 | 0.499475 | 0.744869 | 0.782084 | 0.852198 |
| MmugDNA.19419.1.S1_at   | MmugDNA.19419.1 | 4.42  | 4.52  | 0.26 | 0.19 | -1.07 | 0.493612 | 0.497765 | 0.779001 | 0.697059 |
| MmugDNA.19421.1.S1_at   | MmugDNA.19421.1 | 5.65  | 6.36  | 0.73 | 0.12 | -1.64 | 0.196902 | 0.068356 | 0.567663 | 0.307912 |
| MmugDNA.19422.1.S1_s_at | MmugDNA.19422.1 | 7.46  | 7.31  | 0.05 | 0.09 | 1.11  | 0.308659 | 0.127411 | 0.661287 | 0.398249 |
| MmugDNA.19423.1.S1_at   | MmugDNA.19423.1 | 4.5   | 4.17  | 0.18 | 0.15 | 1.26  | 0.067799 | 0.403378 | 0.42446  | 0.632083 |
| MmugDNA.19424.1.S1_at   | MmugDNA.19424.1 | 4.27  | 4.37  | 0.09 | 0.05 | -1.07 | 0.621084 | 0.03885  | 0.847506 | 0.242022 |
| MmugDNA.19425.1.S1_at   | MmugDNA.19425.1 | 12.03 | 11.56 | 0.37 | 0.1  | 1.38  | 0.140917 | 0.036048 | 0.516345 | 0.234272 |
| MmugDNA.19426.1.S1_at   | MmugDNA.19426.1 | 6.55  | 6.48  | 0.27 | 0.1  | 1.05  | 0.612546 | 0.657448 | 0.843094 | 0.799704 |
| MmugDNA.19427.1.S1_at   | MmugDNA.19427.1 | 8.84  | 9.28  | 0.26 | 0.13 | -1.36 | 0.037835 | 0.023635 | 0.358028 | 0.192555 |
| MmugDNA.19429.1.S1_at   | MmugDNA.19429.1 | 4.05  | 4.31  | 0.12 | 0.24 | -1.2  | 0.339132 | 0.460154 | 0.683572 | 0.672064 |
| MmugDNA.1943.1.S1_at    | MmugDNA.1943.1  | 4.11  | 4.06  | 0.11 | 0.06 | 1.03  | 0.391332 | 0.629708 | 0.717502 | 0.781989 |
| MmugDNA.19431.1.S1_at   | MmugDNA.19431.1 | 7.58  | 8.27  | 0.29 | 0.15 | -1.62 | 0.01336  | 0.01001  | 0.268147 | 0.131262 |
| MmugDNA.19432.1.S1_at   | MmugDNA.19432.1 | 4.93  | 4.66  | 0.25 | 0.17 | 1.2   | 0.416741 | 0.074535 | 0.734506 | 0.318173 |
| MmugDNA.19433.1.S1_at   | MmugDNA.19433.1 | 4.58  | 4.59  | 0.03 | 0.04 | -1    | 0.267    | 0.394213 | 0.627652 | 0.626807 |
| MmugDNA.19434.1.S1_at   | MmugDNA.19434.1 | 5.25  | 5.24  | 0.09 | 0.05 | 1.01  | 0.338488 | 0.855339 | 0.682988 | 0.917526 |
| MmugDNA.31007.1.S1_s_at | MmugDNA.31007.1 | 12.96 | 13.12 | 0.77 | 0.08 | -1.12 | 0.581154 | 0.568296 | 0.827417 | 0.741876 |
| MmugDNA.19437.1.S1_at   | MmugDNA.19437.1 | 6.07  | 6.35  | 0.3  | 0.11 | -1.22 | 0.068879 | 0.318284 | 0.426231 | 0.571151 |
| MmugDNA.19439.1.S1_at   | MmugDNA.19439.1 | 5.49  | 5.39  | 0.15 | 0.01 | 1.07  | 0.208507 | 0.322192 | 0.580248 | 0.573769 |
| MmugDNA.1944.1.S1_at    | MmugDNA.1944.1  | 4.56  | 4.38  | 0.78 | 0.19 | 1.13  | 0.656344 | 0.880115 | 0.863538 | 0.931533 |
| MmugDNA.19440.1.S1_at   | MmugDNA.19440.1 | 9.17  | 8.96  | 0.14 | 0.23 | 1.15  | 0.527943 | 0.597266 | 0.79742  | 0.76013  |
| MmugDNA.19440.1.S1_x_at | MmugDNA.19440.1 | 8.51  | 8.35  | 0.16 | 0.19 | 1.11  | 0.708968 | 0.243274 | 0.886591 | 0.513356 |
| MmugDNA.19441.1.S1_at   | MmugDNA.19441.1 | 5.67  | 5.65  | 0.02 | 0    | 1.02  | 0.127494 | 0.886665 | 0.501664 | 0.935519 |
| MmugDNA.19442.1.S1_at   | MmugDNA.19442.1 | 4.25  | 4.18  | 0.37 | 0.29 | 1.05  | 0.840668 | 0.591025 | 0.943406 | 0.756581 |
| MmugDNA.19444.1.S1_at   | MmugDNA.19444.1 | 10.13 | 10.8  | 0.37 | 0.14 | -1.59 | 0.021652 | 0.004666 | 0.309241 | 0.095314 |
| MmugDNA.19445.1.S1_at   | MmugDNA.19445.1 | 5.31  | 5.38  | 0.1  | 0.15 | -1.05 | 0.497356 | 0.094358 | 0.781071 | 0.350889 |
| MmugDNA.19446.1.S1_s_at | MmugDNA.19446.1 | 5.58  | 5.2   | 0.59 | 0.13 | 1.31  | 0.178422 | 0.383862 | 0.551369 | 0.61978  |
| MmugDNA.19447.1.S1_at   | MmugDNA.19447.1 | 7.02  | 7.06  | 0.62 | 0.21 | -1.03 | 0.626773 | 0.422284 | 0.850165 | 0.645637 |
| MmugDNA.19448.1.S1_at   | MmugDNA.19448.1 | 3.71  | 3.51  | 0.34 | 0.03 | 1.15  | 0.128327 | 0.224267 | 0.50293  | 0.497164 |
| MmugDNA.1945.1.S1_at    | MmugDNA.1945.1  | 4.5   | 4.5   | 0.25 | 0.07 | 1     | 0.665969 | 0.44609  | 0.868171 | 0.662692 |
| MmugDNA.19450.1.S1_at   | MmugDNA.19450.1 | 5.52  | 6.72  | 1.06 | 0.09 | -2.3  | 0.167971 | 0.395219 | 0.540527 | 0.62738  |
| MmugDNA.19451.1.S1_at   | MmugDNA.19451.1 | 3.41  | 3.55  | 0.2  | 0.43 | -1.1  | 0.363897 | 0.487933 | 0.700307 | 0.690787 |
| MmugDNA.19452.1.S1_at   | MmugDNA.19452.1 | 5.57  | 5.5   | 0.15 | 0.14 | 1.05  | 0.187614 | 0.237696 | 0.559902 | 0.50826  |
| MmugDNA.19453.1.S1_at   | MmugDNA.19453.1 | 10.23 | 10.17 | 0.16 | 0.06 | 1.04  | 0.772591 | 0.069351 | 0.915396 | 0.309558 |
| MmugDNA.19454.1.S1_at   | MmugDNA.19454.1 | 7.13  | 6.91  | 0.15 | 0.13 | 1.17  | 0.088724 | 0.145916 | 0.456425 | 0.419892 |
| MmugDNA.19458.1.S1_at   | MmugDNA.19458.1 | 6.66  | 6.11  | 1.2  | 0.21 | 1.46  | 0.482696 | 0.430726 | 0.772527 | 0.651717 |
| MmugDNA.19459.1.S1_at   | MmugDNA.19459.1 | 5.12  | 4.7   | 0.22 | 0.13 | 1.34  | 0.076683 | 0.450511 | 0.438075 | 0.665705 |
| MmugDNA.1946.1.S1_at    | MmugDNA.1946.1  | 6.04  | 5.28  | 0.08 | 0.54 | 1.69  | 0.071118 | 0.161245 | 0.430341 | 0.437386 |
| MmugDNA.19460.1.S1_at   | MmugDNA.19460.1 | 6.83  | 6.31  | 0.24 | 0.32 | 1.44  | 0.028514 | 0.017871 | 0.332598 | 0.168774 |
| MmugDNA.19461.1.S1_at   | MmugDNA.19461.1 | 5.04  | 5.05  | 0.12 | 0.09 | -1.01 | 0.449013 | 0.74211  | 0.754037 | 0.850618 |
| MmugDNA.19462.1.S1_at   | MmugDNA.19462.1 | 5.5   | 5.31  | 0.15 | 0.13 | 1.14  | 0.229753 | 0.422099 | 0.598481 | 0.645462 |
| MmugDNA.19465.1.S1_at   | MmugDNA.19465.1 | 4.71  | 5.05  | 0.34 | 0.3  | -1.27 | 0.086673 | 0.029222 | 0.454604 | 0.212898 |

|                         |                 |       |       |      |      |       |          |          |          |          |
|-------------------------|-----------------|-------|-------|------|------|-------|----------|----------|----------|----------|
| MmugDNA.19466.1.S1_at   | MmugDNA.19466.1 | 5.7   | 5.55  | 0.47 | 0.18 | 1.11  | 0.837252 | 0.160166 | 0.94155  | 0.436296 |
| MmugDNA.19467.1.S1_at   | MmugDNA.19467.1 | 5.1   | 5.23  | 0.35 | 0.15 | -1.1  | 0.448455 | 0.711554 | 0.753886 | 0.832754 |
| MmugDNA.19468.1.S1_at   | MmugDNA.19468.1 | 13.94 | 13.84 | 0.2  | 0.06 | 1.08  | 0.754325 | 0.887364 | 0.907331 | 0.935852 |
| MmugDNA.19468.1.S1_s_at | MmugDNA.19468.1 | 14.62 | 14.6  | 0.07 | 0.01 | 1.01  | 0.894459 | 0.956933 | 0.963846 | 0.975609 |
| MmugDNA.1947.1.S1_at    | MmugDNA.1947.1  | 3.21  | 3.03  | 0.18 | 0.06 | 1.13  | 0.154644 | 0.336855 | 0.527914 | 0.584113 |
| MmugDNA.19470.1.S1_at   | MmugDNA.19470.1 | 4.14  | 4.48  | 0.29 | 0.12 | -1.26 | 0.163146 | 0.035714 | 0.536035 | 0.233368 |
| MmugDNA.19471.1.S1_at   | MmugDNA.19471.1 | 6.33  | 6.25  | 0.08 | 0.14 | 1.06  | 0.535276 | 0.581837 | 0.801636 | 0.750784 |
| MmugDNA.19472.1.S1_at   | MmugDNA.19472.1 | 7.52  | 8.02  | 0.79 | 0.1  | -1.41 | 0.200792 | 0.130254 | 0.572488 | 0.402007 |
| MmugDNA.19473.1.S1_at   | MmugDNA.19473.1 | 9.89  | 9.72  | 0.03 | 0.18 | 1.12  | 0.114566 | 0.005306 | 0.48763  | 0.10082  |
| MmugDNA.19474.1.S1_at   | MmugDNA.19474.1 | 12.05 | 11.9  | 0.15 | 0.1  | 1.11  | 0.462994 | 0.670066 | 0.761921 | 0.807031 |
| MmugDNA.19474.1.S1_s_at | MmugDNA.19474.1 | 10.84 | 10.76 | 0.06 | 0.1  | -1.06 | 0.311082 | 0.388107 | 0.662904 | 0.622607 |
| MmugDNA.38013.1.S1_at   | MmugDNA.38013.1 | 3     | 3.01  | 0.12 | 0.12 | -1.01 | 0.289204 | 0.492052 | 0.645901 | 0.693403 |
| MmugDNA.38013.1.S1_s_at | MmugDNA.38013.1 | 10.6  | 8.94  | 0.61 | 0.61 | 3.17  | 0.027007 | 0.015646 | 0.327141 | 0.158546 |
| MmugDNA.19477.1.S1_at   | MmugDNA.19477.1 | 4.15  | 3.96  | 0.09 | 0.1  | 1.14  | 0.192924 | 0.128106 | 0.56375  | 0.399122 |
| MmugDNA.19478.1.S1_at   | MmugDNA.19478.1 | 6.28  | 6.16  | 0.14 | 0.16 | 1.09  | 0.443369 | 0.330466 | 0.750691 | 0.579193 |
| MmugDNA.19479.1.S1_at   | MmugDNA.19479.1 | 4.67  | 4.72  | 0.17 | 0.15 | -1.03 | 0.765279 | 0.889129 | 0.911736 | 0.936796 |
| MmugDNA.1948.1.S1_at    | MmugDNA.1948.1  | 8.3   | 8.11  | 0.17 | 0.07 | 1.14  | 0.055173 | 0.084672 | 0.398095 | 0.33618  |
| MmugDNA.19480.1.S1_at   | MmugDNA.19480.1 | 6.15  | 6.09  | 0.36 | 0.1  | 1.05  | 0.97434  | 0.152596 | 0.991855 | 0.427435 |
| MmugDNA.19482.1.S1_at   | MmugDNA.19482.1 | 9.89  | 9.67  | 0.38 | 0.17 | 1.16  | 0.995598 | 0.231844 | 0.998302 | 0.503592 |
| MmugDNA.19483.1.S1_at   | MmugDNA.19483.1 | 12.64 | 12.52 | 0.19 | 0.04 | 1.09  | 0.328481 | 0.487658 | 0.67577  | 0.690634 |
| MmugDNA.19485.1.S1_s_at | MmugDNA.19485.1 | 11.61 | 11.25 | 1.28 | 0.25 | 1.29  | 0.638037 | 0.068402 | 0.855783 | 0.307955 |
| MmugDNA.19487.1.S1_at   | MmugDNA.19487.1 | 6.88  | 6.77  | 0.03 | 0.02 | 1.08  | 0.008744 | 0.22989  | 0.236496 | 0.501802 |
| MmugDNA.19489.1.S1_at   | MmugDNA.19489.1 | 4.24  | 3.72  | 0.23 | 0.21 | 1.43  | 0.172211 | 0.330921 | 0.545571 | 0.579609 |
| MmugDNA.1949.1.S1_at    | MmugDNA.1949.1  | 3.13  | 3.13  | 0.14 | 0.03 | 1     | 0.308833 | 0.722511 | 0.661293 | 0.839261 |
| MmugDNA.19490.1.S1_at   | MmugDNA.19490.1 | 11.52 | 11.55 | 0.11 | 0.05 | -1.02 | 0.780024 | 0.927617 | 0.918949 | 0.958869 |
| MmugDNA.19491.1.S1_at   | MmugDNA.19491.1 | 5.69  | 5.73  | 0.16 | 0.22 | -1.02 | 0.600927 | 0.339453 | 0.838005 | 0.586093 |
| MmugDNA.19493.1.S1_at   | MmugDNA.19493.1 | 6.38  | 6.96  | 0.6  | 0.05 | -1.49 | 0.453229 | 0.202959 | 0.755962 | 0.477343 |
| MmugDNA.19494.1.S1_s_at | MmugDNA.19494.1 | 7.57  | 7.92  | 0.21 | 0.1  | -1.27 | 0.052068 | 0.047125 | 0.391881 | 0.261659 |
| MmugDNA.19495.1.S1_at   | MmugDNA.19495.1 | 3.21  | 3.11  | 0.13 | 0.06 | 1.06  | 0.376723 | 0.091739 | 0.706973 | 0.346977 |
| MmugDNA.19496.1.S1_at   | MmugDNA.19496.1 | 3.65  | 3.03  | 0.69 | 0.15 | 1.54  | 0.184458 | 0.248831 | 0.557285 | 0.517951 |
| MmugDNA.19497.1.S1_at   | MmugDNA.19497.1 | 4.69  | 4.68  | 0.51 | 0.25 | 1.01  | 0.923307 | 0.393574 | 0.974244 | 0.626497 |
| MmugDNA.19498.1.S1_at   | MmugDNA.19498.1 | 10.9  | 11.3  | 0.37 | 0.08 | -1.32 | 0.119032 | 0.031258 | 0.492539 | 0.218668 |
| MmugDNA.19499.1.S1_at   | MmugDNA.19499.1 | 9.91  | 10.68 | 0.5  | 0.04 | -1.7  | 0.056066 | 0.009318 | 0.399441 | 0.127446 |
| MmugDNA.1950.1.S1_at    | MmugDNA.1950.1  | 7.61  | 6.29  | 1.24 | 0.09 | 2.5   | 0.479294 | 0.275963 | 0.770691 | 0.540057 |
| MmugDNA.19500.1.S1_at   | MmugDNA.19500.1 | 7.9   | 7.98  | 1.35 | 0.29 | -1.06 | 0.578626 | 0.353069 | 0.826218 | 0.596363 |
| MmugDNA.19501.1.S1_at   | MmugDNA.19501.1 | 5.53  | 5.53  | 0.25 | 0.12 | 1     | 0.478289 | 0.401788 | 0.770076 | 0.631068 |
| MmugDNA.19502.1.S1_at   | MmugDNA.19502.1 | 9.25  | 8.59  | 0.3  | 0.2  | 1.58  | 0.021577 | 0.003108 | 0.309241 | 0.081305 |
| MmugDNA.19503.1.S1_at   | MmugDNA.19503.1 | 5.36  | 5.01  | 0.25 | 0.08 | 1.28  | 0.129449 | 0.280835 | 0.504211 | 0.544021 |
| MmugDNA.19504.1.S1_at   | MmugDNA.19504.1 | 8.21  | 9.08  | 0.53 | 0.1  | -1.83 | 0.050274 | 0.030859 | 0.386954 | 0.217427 |
| MmugDNA.19505.1.S1_at   | MmugDNA.19505.1 | 6.13  | 6.08  | 0.18 | 0.03 | 1.03  | 0.232979 | 0.232064 | 0.600437 | 0.503781 |
| MmugDNA.19507.1.S1_at   | MmugDNA.19507.1 | 5.28  | 4.9   | 0.12 | 0.08 | 1.3   | 0.018937 | 0.041291 | 0.299009 | 0.247995 |
| MmugDNA.19508.1.S1_at   | MmugDNA.19508.1 | 7.25  | 6.16  | 0.55 | 0.26 | 2.13  | 0.053799 | 0.374292 | 0.395442 | 0.612779 |
| MmugDNA.19509.1.S1_at   | MmugDNA.19509.1 | 3.17  | 2.93  | 0.21 | 0.12 | 1.18  | 0.510423 | 0.027809 | 0.788228 | 0.208293 |



|                         |                 |       |       |      |      |       |          |          |          |          |
|-------------------------|-----------------|-------|-------|------|------|-------|----------|----------|----------|----------|
| MmugDNA.1951.1.S1_at    | MmugDNA.1951.1  | 4.76  | 5.33  | 0.78 | 0.26 | -1.48 | 0.832734 | 0.755843 | 0.940026 | 0.857865 |
| MmugDNA.19510.1.S1_at   | MmugDNA.19510.1 | 5.81  | 6.13  | 0.47 | 0.43 | -1.25 | 0.142383 | 0.002511 | 0.517538 | 0.074158 |
| MmugDNA.19511.1.S1_at   | MmugDNA.19511.1 | 5.62  | 6.08  | 0.59 | 0.04 | -1.37 | 0.784093 | 0.724262 | 0.920623 | 0.840433 |
| MmugDNA.19514.1.S1_at   | MmugDNA.19514.1 | 8.2   | 7.8   | 0.29 | 0.23 | 1.32  | 0.202865 | 0.091241 | 0.574251 | 0.346216 |
| MmugDNA.19516.1.S1_at   | MmugDNA.19516.1 | 4.58  | 4.51  | 0.08 | 0.13 | 1.05  | 0.838059 | 0.675668 | 0.941963 | 0.810429 |
| MmugDNA.19517.1.S1_at   | MmugDNA.19517.1 | 3.85  | 3.84  | 0.2  | 0.03 | 1.01  | 0.732607 | 0.592594 | 0.897283 | 0.757847 |
| MmugDNA.25286.1.S1_s_at | MmugDNA.25286.1 | 7.29  | 7.43  | 0.21 | 0.02 | -1.1  | 0.46517  | 0.577049 | 0.762974 | 0.747634 |
| MmugDNA.19519.1.S1_at   | MmugDNA.19519.1 | 4.45  | 4.57  | 0.29 | 0.16 | -1.09 | 0.978396 | 0.094607 | 0.99301  | 0.351371 |
| MmugDNA.1952.1.S1_at    | MmugDNA.1952.1  | 6.63  | 6.61  | 0.54 | 0.22 | 1.01  | 0.75596  | 0.924004 | 0.90805  | 0.957162 |
| MmugDNA.19521.1.S1_at   | MmugDNA.19521.1 | 3.46  | 3.58  | 0.15 | 0.19 | -1.09 | 0.604974 | 0.367348 | 0.839761 | 0.607004 |
| MmugDNA.19522.1.S1_at   | MmugDNA.19522.1 | 10.63 | 10    | 0.15 | 0.19 | -1.55 | 0.006169 | 0.009282 | 0.216833 | 0.127101 |
| MmugDNA.19523.1.S1_at   | MmugDNA.19523.1 | 11.17 | 10.72 | 0.81 | 0.3  | 1.37  | 0.290844 | 0.063498 | 0.647362 | 0.298444 |
| MmugDNA.19523.1.S1_s_at | MmugDNA.19523.1 | 10.41 | 9.86  | 0.73 | 0.26 | 1.47  | 0.214633 | 0.037968 | 0.585085 | 0.239302 |
| MmugDNA.19524.1.S1_at   | MmugDNA.19524.1 | 9.18  | 9.26  | 0.09 | 0.19 | -1.05 | 0.914618 | 0.05005  | 0.97089  | 0.268916 |
| MmugDNA.19525.1.S1_at   | MmugDNA.19525.1 | 5.33  | 5.38  | 0.12 | 0.16 | -1.04 | 0.536121 | 0.754132 | 0.802118 | 0.856862 |
| MmugDNA.19526.1.S1_at   | MmugDNA.19526.1 | 12.49 | 12.39 | 0.06 | 0.06 | 1.07  | 0.190095 | 0.005725 | 0.561346 | 0.104271 |
| MmugDNA.19527.1.S1_at   | MmugDNA.19527.1 | 5.66  | 4.91  | 0.36 | 0.61 | 1.68  | 0.311438 | 0.379869 | 0.663221 | 0.616629 |
| MmugDNA.19527.1.S1_s_at | MmugDNA.19527.1 | 4.6   | 4.87  | 0.46 | 0.44 | -1.21 | 0.922917 | 0.307884 | 0.974036 | 0.563992 |
| MmugDNA.19529.1.S1_at   | MmugDNA.19529.1 | 4.35  | 4.36  | 0.14 | 0.06 | -1.01 | 0.787576 | 0.939881 | 0.921953 | 0.96581  |
| MmugDNA.1953.1.S1_at    | MmugDNA.1953.1  | 7.15  | 7.21  | 0.24 | 0.09 | -1.04 | 0.944006 | 0.071729 | 0.980618 | 0.313981 |
| MmugDNA.19531.1.S1_at   | MmugDNA.19531.1 | 4.75  | 4.74  | 0.09 | 0.09 | 1.01  | 0.198478 | 0.371    | 0.569807 | 0.609964 |
| MmugDNA.19532.1.S1_at   | MmugDNA.19532.1 | 6.54  | 6.1   | 1.46 | 0.11 | 1.36  | 0.765362 | 0.552958 | 0.911776 | 0.732213 |
| MmugDNA.19535.1.S1_at   | MmugDNA.19535.1 | 6.64  | 6.71  | 0.86 | 0.28 | -1.05 | 0.969741 | 0.637236 | 0.990053 | 0.786759 |
| MmugDNA.19536.1.S1_at   | MmugDNA.19536.1 | 4.4   | 5     | 0.19 | 0.13 | -1.52 | 0.018724 | 0.000498 | 0.298184 | 0.038955 |
| MmugDNA.19537.1.S1_at   | MmugDNA.19537.1 | 4.7   | 4.7   | 0.91 | 0.12 | 1     | 0.899504 | 0.970176 | 0.965803 | 0.983723 |
| MmugDNA.19539.1.S1_at   | MmugDNA.19539.1 | 4.93  | 5.58  | 0.33 | 0.2  | -1.57 | 0.056047 | 0.051443 | 0.399441 | 0.272231 |
| MmugDNA.1954.1.S1_at    | MmugDNA.1954.1  | 8.32  | 8.59  | 0.83 | 0.16 | -1.21 | 0.599619 | 0.760084 | 0.837495 | 0.86059  |
| MmugDNA.19541.1.S1_at   | MmugDNA.19541.1 | 7.08  | 6.08  | 0.77 | 0.62 | 1.99  | 0.527077 | 0.751992 | 0.796919 | 0.855739 |
| MmugDNA.19542.1.S1_at   | MmugDNA.19542.1 | 6.64  | 6.5   | 0.06 | 0.04 | 1.1   | 0.05044  | 0.033746 | 0.387138 | 0.227391 |
| MmugDNA.19544.1.S1_at   | MmugDNA.19544.1 | 6.29  | 7.76  | 0.52 | 0.73 | -2.78 | 0.216246 | 0.26826  | 0.586368 | 0.533981 |
| MmugDNA.19547.1.S1_at   | MmugDNA.19547.1 | 4.97  | 4.96  | 0.06 | 0.14 | 1.01  | 0.337236 | 0.610929 | 0.682275 | 0.768948 |
| MmugDNA.19548.1.S1_at   | MmugDNA.19548.1 | 5.63  | 5.1   | 0.59 | 0.14 | 1.45  | 0.177446 | 0.17564  | 0.550585 | 0.452208 |
| MmugDNA.19549.1.S1_at   | MmugDNA.19549.1 | 9.11  | 9.73  | 0.27 | 0.15 | -1.53 | 0.018551 | 0.145699 | 0.297536 | 0.419653 |
| MmugDNA.1955.1.S1_at    | MmugDNA.1955.1  | 4.73  | 4.6   | 0.02 | 0.14 | 1.1   | 0.147336 | 0.09961  | 0.521578 | 0.358095 |
| MmugDNA.19550.1.S1_at   | MmugDNA.19550.1 | 8.42  | 7.71  | 0.25 | 0.25 | 1.64  | 0.024539 | 0.012669 | 0.319083 | 0.145097 |
| MmugDNA.19554.1.S1_at   | MmugDNA.19554.1 | 6.09  | 5.86  | 0.14 | 0.11 | 1.18  | 0.047522 | 0.189845 | 0.380487 | 0.465403 |
| MmugDNA.19555.1.S1_at   | MmugDNA.19555.1 | 6.74  | 6.75  | 0.09 | 0.02 | -1.01 | 0.255898 | 0.389234 | 0.61987  | 0.623403 |
| MmugDNA.19557.1.S1_at   | MmugDNA.19557.1 | 11.77 | 11.4  | 0.44 | 0.03 | 1.29  | 0.102771 | 0.072262 | 0.473133 | 0.314904 |
| MmugDNA.19558.1.S1_at   | MmugDNA.19558.1 | 5.84  | 5.69  | 0.24 | 0.05 | 1.11  | 0.26607  | 0.315896 | 0.627106 | 0.569327 |
| MmugDNA.19559.1.S1_at   | MmugDNA.19559.1 | 5.97  | 6.2   | 0.31 | 0.03 | -1.17 | 0.259997 | 0.298061 | 0.622946 | 0.556707 |
| MmugDNA.1956.1.S1_at    | MmugDNA.1956.1  | 5.74  | 5.76  | 0.11 | 0.12 | -1.01 | 0.874369 | 0.89461  | 0.956448 | 0.939853 |
| MmugDNA.19560.1.S1_at   | MmugDNA.19560.1 | 5.87  | 5.75  | 0.05 | 0.1  | 1.08  | 0.087635 | 0.495258 | 0.455349 | 0.695411 |
| MmugDNA.19563.1.S1_at   | MmugDNA.19563.1 | 3.03  | 3.12  | 0.11 | 0.02 | -1.06 | 0.296921 | 0.090261 | 0.652525 | 0.344673 |

|                         |                 |       |       |      |      |       |          |          |          |          |
|-------------------------|-----------------|-------|-------|------|------|-------|----------|----------|----------|----------|
| MmugDNA.19564.1.S1_s_at | MmugDNA.19564.1 | 11.28 | 11.5  | 0.11 | 0.16 | -1.16 | 0.3616   | 0.003297 | 0.698663 | 0.082571 |
| MmugDNA.19565.1.S1_at   | MmugDNA.19565.1 | 6.44  | 6.43  | 0.15 | 0.19 | 1     | 0.941262 | 0.94484  | 0.980045 | 0.968794 |
| MmugDNA.19569.1.S1_at   | MmugDNA.19569.1 | 5.1   | 5.2   | 0.2  | 0.15 | -1.07 | 0.392257 | 0.832926 | 0.718223 | 0.904143 |
| MmugDNA.1957.1.S1_at    | MmugDNA.1957.1  | 4.73  | 4.61  | 1.09 | 0.03 | 1.09  | 0.647602 | 0.737293 | 0.859364 | 0.847869 |
| MmugDNA.19570.1.S1_at   | MmugDNA.19570.1 | 3.39  | 3.39  | 0.04 | 0.08 | 1     | 0.227744 | 0.285166 | 0.596693 | 0.547098 |
| MmugDNA.19571.1.S1_at   | MmugDNA.19571.1 | 6.42  | 6.39  | 0.22 | 0.02 | 1.02  | 0.772723 | 0.815131 | 0.915488 | 0.893355 |
| MmugDNA.19572.1.S1_at   | MmugDNA.19572.1 | 6.8   | 6.77  | 0.09 | 0.08 | 1.02  | 0.153961 | 0.37796  | 0.527283 | 0.615264 |
| MmugDNA.19573.1.S1_at   | MmugDNA.19573.1 | 8.54  | 9.3   | 0.65 | 0.07 | -1.69 | 0.368713 | 0.121755 | 0.703807 | 0.391043 |
| MmugDNA.1958.1.S1_at    | MmugDNA.1958.1  | 4.74  | 4.67  | 0.14 | 0.28 | 1.05  | 0.469732 | 0.724447 | 0.765623 | 0.840485 |
| MmugDNA.19582.1.S1_at   | MmugDNA.19582.1 | 7.25  | 7.16  | 0.03 | 0.13 | 1.06  | 0.08408  | 0.481783 | 0.450344 | 0.686748 |
| MmugDNA.19582.1.S1_x_at | MmugDNA.19582.1 | 7.06  | 7.03  | 0.01 | 0.02 | -1.02 | 0.029411 | 0.962306 | 0.334078 | 0.978822 |
| MmugDNA.19583.1.S1_at   | MmugDNA.19583.1 | 6.59  | 8.5   | 1.12 | 0.12 | -3.74 | 0.045069 | 0.017562 | 0.375796 | 0.167672 |
| MmugDNA.19584.1.S1_at   | MmugDNA.19584.1 | 4.26  | 4.25  | 0.2  | 0.15 | 1     | 0.952755 | 0.985545 | 0.9842   | 0.991808 |
| MmugDNA.19585.1.S1_at   | MmugDNA.19585.1 | 4.1   | 4.1   | 0.05 | 0.05 | -1    | 0.614308 | 0.344048 | 0.843887 | 0.58962  |
| MmugDNA.19587.1.S1_at   | MmugDNA.19587.1 | 12.07 | 12.46 | 0.44 | 0.12 | -1.31 | 0.446459 | 0.095313 | 0.752767 | 0.35236  |
| MmugDNA.5697.1.S1_s_at  | MmugDNA.5697.1  | 12.78 | 13.05 | 0.39 | 0.1  | -1.2  | 0.472147 | 0.132695 | 0.766889 | 0.404544 |
| MmugDNA.19589.1.S1_at   | MmugDNA.19589.1 | 9.45  | 9.53  | 0.28 | 0.09 | -1.05 | 0.282916 | 0.68397  | 0.641134 | 0.81565  |
| MmugDNA.1959.1.S1_at    | MmugDNA.1959.1  | 3.46  | 3.46  | 0.02 | 0.02 | -1.01 | 0.871777 | 0.32466  | 0.955537 | 0.575208 |
| MmugDNA.19590.1.S1_at   | MmugDNA.19590.1 | 5.78  | 5.64  | 0.18 | 0.07 | 1.1   | 0.143076 | 0.194375 | 0.518366 | 0.469464 |
| MmugDNA.19591.1.S1_at   | MmugDNA.19591.1 | 6.75  | 6.97  | 1.03 | 0.19 | -1.17 | 0.39782  | 0.500811 | 0.722112 | 0.699278 |
| MmugDNA.19592.1.S1_at   | MmugDNA.19592.1 | 7.84  | 7.69  | 0.05 | 0.06 | 1.11  | 0.052409 | 0.091777 | 0.392384 | 0.346977 |
| MmugDNA.19593.1.S1_at   | MmugDNA.19593.1 | 4.02  | 3.9   | 0.03 | 0.08 | 1.08  | 0.133594 | 0.571243 | 0.508012 | 0.743629 |
| MmugDNA.19595.1.S1_at   | MmugDNA.19595.1 | 7.55  | 7.22  | 0.24 | 0.09 | 1.25  | 0.091202 | 0.050913 | 0.459035 | 0.270955 |
| MmugDNA.19596.1.S1_at   | MmugDNA.19596.1 | 3.41  | 3.32  | 0.11 | 0.06 | 1.07  | 0.156503 | 0.158521 | 0.529581 | 0.434442 |
| MmugDNA.19597.1.S1_at   | MmugDNA.19597.1 | 3.53  | 3.31  | 0.21 | 0.25 | 1.17  | 0.352346 | 0.698886 | 0.692649 | 0.825026 |
| MmugDNA.196.1.S1_at     | MmugDNA.196.1   | 4.23  | 5     | 0.02 | 0.45 | -1.71 | 0.036925 | 0.02482  | 0.356221 | 0.197372 |
| MmugDNA.1960.1.S1_at    | MmugDNA.1960.1  | 5.78  | 5.87  | 0.17 | 0.01 | -1.06 | 0.958445 | 0.25542  | 0.986346 | 0.523445 |
| MmugDNA.19600.1.S1_at   | MmugDNA.19600.1 | 4.48  | 4.23  | 0.32 | 0.17 | 1.2   | 0.448977 | 0.269928 | 0.754037 | 0.535208 |
| MmugDNA.19602.1.S1_at   | MmugDNA.19602.1 | 4.83  | 4.96  | 0.76 | 0.5  | -1.09 | 0.575561 | 0.394691 | 0.824671 | 0.627208 |
| MmugDNA.19603.1.S1_at   | MmugDNA.19603.1 | 3.52  | 3.45  | 0.22 | 0.23 | 1.04  | 0.911865 | 0.506735 | 0.970171 | 0.702575 |
| MmugDNA.19606.1.S1_at   | MmugDNA.19606.1 | 7.83  | 8.01  | 0.5  | 0.21 | -1.13 | 0.349211 | 0.021204 | 0.690261 | 0.182326 |
| MmugDNA.19607.1.S1_at   | MmugDNA.19607.1 | 4.9   | 4.94  | 0.03 | 0.04 | -1.03 | 0.3699   | 0.628758 | 0.704423 | 0.781403 |
| MmugDNA.19608.1.S1_at   | MmugDNA.19608.1 | 3.4   | 3.45  | 0.14 | 0.06 | -1.04 | 0.566393 | 0.209999 | 0.819997 | 0.48375  |
| MmugDNA.19609.1.S1_at   | MmugDNA.19609.1 | 4.85  | 5.1   | 0.35 | 0.15 | -1.19 | 0.496074 | 0.851147 | 0.780189 | 0.91535  |
| MmugDNA.19610.1.S1_at   | MmugDNA.19610.1 | 4.1   | 3.61  | 0.36 | 0.2  | 1.41  | 0.093073 | 0.12867  | 0.461741 | 0.400083 |
| MmugDNA.19611.1.S1_at   | MmugDNA.19611.1 | 3.61  | 3.42  | 0.2  | 0.38 | 1.14  | 0.755827 | 0.750771 | 0.90805  | 0.855064 |
| MmugDNA.19612.1.S1_at   | MmugDNA.19612.1 | 7.61  | 7.23  | 0.59 | 0.13 | 1.31  | 0.314387 | 0.086579 | 0.665149 | 0.33911  |
| MmugDNA.19616.1.S1_at   | MmugDNA.19616.1 | 4.55  | 4.59  | 0.12 | 0.05 | -1.03 | 0.47709  | 0.027501 | 0.769695 | 0.207161 |
| MmugDNA.19617.1.S1_at   | MmugDNA.19617.1 | 4.14  | 4.05  | 0.18 | 0.09 | 1.07  | 0.492592 | 0.171483 | 0.778396 | 0.447895 |
| MmugDNA.19618.1.S1_at   | MmugDNA.19618.1 | 4.17  | 4.07  | 0.19 | 0.08 | 1.08  | 0.575236 | 0.71327  | 0.824607 | 0.833666 |
| MmugDNA.19619.1.S1_at   | MmugDNA.19619.1 | 11.97 | 12.29 | 0.25 | 0.07 | -1.25 | 0.085814 | 0.051608 | 0.453025 | 0.272636 |
| MmugDNA.1962.1.S1_at    | MmugDNA.1962.1  | 3.85  | 4.22  | 0.3  | 0.23 | -1.3  | 0.307502 | 0.371266 | 0.660255 | 0.610135 |
| MmugDNA.19620.1.S1_at   | MmugDNA.19620.1 | 3.47  | 3.53  | 0.11 | 1.1  | -1.04 | 0.308503 | 0.310019 | 0.661194 | 0.565253 |

|                         |                 |       |       |      |      |       |          |          |          |          |
|-------------------------|-----------------|-------|-------|------|------|-------|----------|----------|----------|----------|
| MmugDNA.19621.1.S1_at   | MmugDNA.19621.1 | 10.26 | 9.79  | 0.41 | 0.26 | 1.39  | 0.279958 | 0.229355 | 0.638821 | 0.501527 |
| MmugDNA.19623.1.S1_at   | MmugDNA.19623.1 | 7.54  | 6.63  | 0.24 | 0.18 | 1.88  | 0.004626 | 0.000736 | 0.201101 | 0.044846 |
| MmugDNA.19623.1.S1_s_at | MmugDNA.19623.1 | 10.1  | 9.22  | 0.04 | 0.21 | 1.85  | 0.001326 | 0.000356 | 0.158997 | 0.037229 |
| MmugDNA.19624.1.S1_at   | MmugDNA.19624.1 | 6.1   | 5.97  | 0.2  | 0.21 | 1.09  | 0.940404 | 0.007084 | 0.979711 | 0.113353 |
| MmugDNA.19625.1.S1_at   | MmugDNA.19625.1 | 8.57  | 8.46  | 1.02 | 0.18 | 1.08  | 0.818102 | 0.058067 | 0.934249 | 0.28759  |
| MmugDNA.19626.1.S1_at   | MmugDNA.19626.1 | 6.78  | 6.61  | 0.6  | 0.2  | 1.12  | 0.665757 | 0.059354 | 0.868043 | 0.29054  |
| MmugDNA.19627.1.S1_at   | MmugDNA.19627.1 | 12.41 | 12.28 | 0    | 0.03 | 1.09  | 0.001078 | 0.047025 | 0.156106 | 0.261469 |
| MmugDNA.19628.1.S1_at   | MmugDNA.19628.1 | 4.18  | 4.89  | 0.37 | 0.53 | -1.63 | 0.304199 | 0.271459 | 0.657892 | 0.536512 |
| MmugDNA.19629.1.S1_at   | MmugDNA.19629.1 | 5.95  | 5.99  | 0.11 | 0.02 | -1.03 | 0.820322 | 0.634784 | 0.935289 | 0.785035 |
| MmugDNA.1963.1.S1_at    | MmugDNA.1963.1  | 5.56  | 4.94  | 0.41 | 0.21 | 1.53  | 0.131678 | 0.153506 | 0.506119 | 0.42827  |
| MmugDNA.19630.1.S1_at   | MmugDNA.19630.1 | 7.23  | 6.93  | 0.19 | 0.04 | -1.22 | 0.074843 | 0.109438 | 0.435313 | 0.373277 |
| MmugDNA.19631.1.S1_at   | MmugDNA.19631.1 | 6.62  | 6.56  | 0.2  | 0.04 | 1.04  | 0.172591 | 0.132336 | 0.545826 | 0.404294 |
| MmugDNA.6510.1.S1_s_at  | MmugDNA.6510.1  | 11.11 | 10.04 | 0.5  | 0.21 | 2.11  | 0.041922 | 0.004163 | 0.367838 | 0.091036 |
| MmugDNA.19633.1.S1_at   | MmugDNA.19633.1 | 6.34  | 6.65  | 0.43 | 0.68 | -1.24 | 0.587838 | 0.00249  | 0.83181  | 0.073794 |
| MmugDNA.19634.1.S1_at   | MmugDNA.19634.1 | 5.07  | 4.83  | 0.2  | 0.18 | 1.17  | 0.419455 | 0.641714 | 0.736296 | 0.789688 |
| MmugDNA.19635.1.S1_at   | MmugDNA.19635.1 | 7.45  | 7.12  | 0.31 | 0.02 | 1.26  | 0.101067 | 0.04694  | 0.471606 | 0.261301 |
| MmugDNA.19636.1.S1_at   | MmugDNA.19636.1 | 5.88  | 5.83  | 0.18 | 0.1  | 1.03  | 0.179323 | 0.265075 | 0.552525 | 0.531    |
| MmugDNA.19637.1.S1_at   | MmugDNA.19637.1 | 6.74  | 6.5   | 0.09 | 0.25 | 1.18  | 0.21732  | 0.351446 | 0.587233 | 0.595067 |
| MmugDNA.19638.1.S1_at   | MmugDNA.19638.1 | 3.68  | 3.93  | 0.3  | 0.18 | -1.19 | 0.144608 | 0.191793 | 0.519872 | 0.467133 |
| MmugDNA.19639.1.S1_at   | MmugDNA.19639.1 | 3.67  | 3.71  | 0.18 | 0.08 | -1.02 | 0.985829 | 0.895686 | 0.995489 | 0.940369 |
| MmugDNA.1964.1.S1_at    | MmugDNA.1964.1  | 7.87  | 7.8   | 0.06 | 0.08 | 1.05  | 0.120253 | 0.615078 | 0.493545 | 0.771731 |
| MmugDNA.1964.1.S1_s_at  | MmugDNA.1964.1  | 7.83  | 7.9   | 0.07 | 0.15 | -1.05 | 0.288726 | 0.853941 | 0.645736 | 0.916872 |
| MmugDNA.19640.1.S1_at   | MmugDNA.19640.1 | 7.45  | 8.74  | 0.26 | 0.08 | -2.44 | 0.002337 | 0.026445 | 0.176234 | 0.203765 |
| MmugDNA.19641.1.S1_at   | MmugDNA.19641.1 | 5.97  | 6.15  | 0.38 | 0.42 | -1.13 | 0.889115 | 0.030026 | 0.96181  | 0.215056 |
| MmugDNA.19642.1.S1_s_at | MmugDNA.19642.1 | 8.03  | 7.69  | 0.2  | 0.22 | 1.26  | 0.201359 | 0.001922 | 0.57304  | 0.06556  |
| MmugDNA.19646.1.S1_at   | MmugDNA.19646.1 | 5.28  | 5.12  | 0.14 | 0.18 | 1.11  | 0.137764 | 0.226936 | 0.513532 | 0.499276 |
| MmugDNA.19647.1.S1_at   | MmugDNA.19647.1 | 4.71  | 4.64  | 0.19 | 0.12 | 1.05  | 0.592034 | 0.246912 | 0.833648 | 0.516238 |
| MmugDNA.19648.1.S1_at   | MmugDNA.19648.1 | 8.74  | 8.63  | 0.41 | 0.11 | 1.08  | 0.482467 | 0.037926 | 0.772474 | 0.239302 |
| MmugDNA.19649.1.S1_at   | MmugDNA.19649.1 | 6.34  | 6.98  | 0.92 | 0.59 | -1.57 | 0.475795 | 0.870514 | 0.768685 | 0.926446 |
| MmugDNA.1965.1.S1_at    | MmugDNA.1965.1  | 5.44  | 5.78  | 0.43 | 0.25 | -1.26 | 0.260185 | 0.738672 | 0.623089 | 0.848486 |
| MmugDNA.19650.1.S1_at   | MmugDNA.19650.1 | 8.52  | 8.39  | 0.15 | 0.12 | 1.1   | 0.183587 | 0.459706 | 0.55651  | 0.671948 |
| MmugDNA.19652.1.S1_at   | MmugDNA.19652.1 | 5.1   | 5.03  | 0.12 | 0    | 1.05  | 0.346159 | 0.59717  | 0.687873 | 0.760104 |
| MmugDNA.19654.1.S1_at   | MmugDNA.19654.1 | 7.18  | 7.54  | 0.17 | 0.03 | -1.29 | 0.063828 | 0.17045  | 0.416646 | 0.447103 |
| MmugDNA.19656.1.S1_at   | MmugDNA.19656.1 | 12.23 | 11.7  | 0.08 | 0.11 | 1.44  | 0.00214  | 0.000059 | 0.174757 | 0.025666 |
| MmugDNA.19657.1.S1_at   | MmugDNA.19657.1 | 4.39  | 4.93  | 0.29 | 0.23 | -1.45 | 0.017497 | 0.05207  | 0.292066 | 0.273761 |
| MmugDNA.19658.1.S1_at   | MmugDNA.19658.1 | 12.83 | 12.53 | 0.29 | 0.03 | 1.23  | 0.483523 | 0.468271 | 0.773136 | 0.6777   |
| MmugDNA.19659.1.S1_at   | MmugDNA.19659.1 | 9.22  | 10.05 | 0.29 | 0.02 | -1.77 | 0.004529 | 0.008114 | 0.200705 | 0.119642 |
| MmugDNA.1966.1.S1_at    | MmugDNA.1966.1  | 3.52  | 3.54  | 0.09 | 0.29 | -1.02 | 0.711173 | 0.278314 | 0.88756  | 0.542037 |
| MmugDNA.19661.1.S1_at   | MmugDNA.19661.1 | 5.68  | 5.58  | 0.06 | 0    | 1.08  | 0.036222 | 0.051406 | 0.354703 | 0.272192 |
| MmugDNA.19662.1.S1_at   | MmugDNA.19662.1 | 4.03  | 3.94  | 0.14 | 0.05 | 1.06  | 0.212672 | 0.192811 | 0.583202 | 0.468296 |
| MmugDNA.19664.1.S1_at   | MmugDNA.19664.1 | 11.75 | 11.85 | 0.03 | 0.01 | -1.08 | 0.0069   | 0.105438 | 0.224141 | 0.367279 |
| MmugDNA.19665.1.S1_at   | MmugDNA.19665.1 | 8.17  | 8.6   | 0.43 | 0.13 | -1.35 | 0.067847 | 0.047014 | 0.42451  | 0.261469 |
| MmugDNA.19667.1.S1_at   | MmugDNA.19667.1 | 4.12  | 4.14  | 0.25 | 0.11 | -1.01 | 0.641192 | 0.696852 | 0.857187 | 0.823975 |

|                         |                 |       |       |      |      |       |          |          |          |          |
|-------------------------|-----------------|-------|-------|------|------|-------|----------|----------|----------|----------|
| MmugDNA.19668.1.S1_at   | MmugDNA.19668.1 | 6.8   | 6.75  | 0.32 | 0.22 | 1.03  | 0.854527 | 0.36311  | 0.948538 | 0.60356  |
| MmugDNA.19669.1.S1_at   | MmugDNA.19669.1 | 3.74  | 3.92  | 0.07 | 0.07 | -1.14 | 0.073851 | 0.433186 | 0.434623 | 0.653513 |
| MmugDNA.19670.1.S1_at   | MmugDNA.19670.1 | 8.98  | 9.17  | 0.19 | 0.15 | -1.14 | 0.24698  | 0.240628 | 0.612582 | 0.511328 |
| MmugDNA.19672.1.S1_at   | MmugDNA.19672.1 | 3.26  | 3.09  | 0.11 | 0.07 | 1.13  | 0.059142 | 0.178786 | 0.406096 | 0.455095 |
| MmugDNA.19673.1.S1_at   | MmugDNA.19673.1 | 5.17  | 5.17  | 0.23 | 0.11 | 1     | 0.657442 | 0.834712 | 0.864074 | 0.905374 |
| MmugDNA.19675.1.S1_at   | MmugDNA.19675.1 | 4.56  | 3.96  | 0.24 | 0.04 | 1.51  | 0.030687 | 0.245803 | 0.338263 | 0.515519 |
| MmugDNA.19676.1.S1_at   | MmugDNA.19676.1 | 3.87  | 4.11  | 0.25 | 0.09 | -1.18 | 0.266973 | 0.069349 | 0.627652 | 0.309558 |
| MmugDNA.19678.1.S1_at   | MmugDNA.19678.1 | 2.84  | 2.79  | 0.17 | 0.05 | 1.03  | 0.633007 | 0.058353 | 0.853404 | 0.288356 |
| MmugDNA.1968.1.S1_at    | MmugDNA.1968.1  | 6.84  | 6.44  | 0.2  | 0.14 | 1.32  | 0.029239 | 0.004231 | 0.333974 | 0.091435 |
| MmugDNA.1968.1.S1_s_at  | MmugDNA.1968.1  | 6.96  | 6.86  | 0.4  | 0.33 | 1.07  | 0.159094 | 0.021298 | 0.531772 | 0.182706 |
| MmugDNA.19680.1.S1_at   | MmugDNA.19680.1 | 5.84  | 5.8   | 0.05 | 0.03 | -1.03 | 0.815785 | 0.98014  | 0.933242 | 0.989236 |
| MmugDNA.19681.1.S1_at   | MmugDNA.19681.1 | 4.2   | 3.72  | 0.18 | 0.12 | 1.4   | 0.037337 | 0.092214 | 0.357066 | 0.347969 |
| MmugDNA.19683.1.S1_at   | MmugDNA.19683.1 | 5.7   | 5.7   | 0.09 | 0.02 | -1    | 0.313002 | 0.543415 | 0.664399 | 0.726105 |
| MmugDNA.19684.1.S1_at   | MmugDNA.19684.1 | 8.05  | 8.82  | 0.22 | 0.12 | -1.71 | 0.005847 | 0.011247 | 0.211798 | 0.138014 |
| MmugDNA.19687.1.S1_at   | MmugDNA.19687.1 | 4.01  | 3.62  | 0.43 | 0    | 1.31  | 0.40241  | 0.399768 | 0.724848 | 0.629973 |
| MmugDNA.19688.1.S1_at   | MmugDNA.19688.1 | 8.56  | 9     | 0.17 | 0.24 | -1.36 | 0.161727 | 0.003659 | 0.535125 | 0.086526 |
| MmugDNA.1969.1.S1_at    | MmugDNA.1969.1  | 10.4  | 9.8   | 0.26 | 0.14 | 1.52  | 0.011478 | 0.000729 | 0.255267 | 0.044699 |
| MmugDNA.19690.1.S1_at   | MmugDNA.19690.1 | 5.93  | 5.11  | 0.1  | 0.44 | 1.77  | 0.012123 | 0.005054 | 0.25967  | 0.099022 |
| MmugDNA.19692.1.S1_at   | MmugDNA.19692.1 | 5.6   | 5.61  | 0.07 | 0.19 | -1.01 | 0.723161 | 0.868008 | 0.892777 | 0.925053 |
| MmugDNA.19693.1.S1_at   | MmugDNA.19693.1 | 6.95  | 7.54  | 0.38 | 0.48 | -1.5  | 0.210072 | 0.099378 | 0.581555 | 0.357673 |
| MmugDNA.19694.1.S1_at   | MmugDNA.19694.1 | 6.28  | 6.12  | 0.09 | 0.19 | 1.12  | 0.141441 | 0.225311 | 0.516365 | 0.497892 |
| MmugDNA.19696.1.S1_at   | MmugDNA.19696.1 | 3.45  | 3.46  | 0.09 | 0.04 | -1.01 | 0.363266 | 0.684782 | 0.699934 | 0.816146 |
| MmugDNA.19697.1.S1_x_at | MmugDNA.19697.1 | 10.23 | 10.59 | 0.17 | 0.22 | -1.28 | 0.090561 | 0.280311 | 0.458835 | 0.543544 |
| MmugDNA.19698.1.S1_at   | MmugDNA.19698.1 | 10.83 | 10.51 | 0.23 | 0.07 | 1.25  | 0.176312 | 0.008093 | 0.549336 | 0.119551 |
| MmugDNA.38719.1.S1_s_at | MmugDNA.38719.1 | 9.55  | 9.08  | 0.18 | 0.06 | 1.38  | 0.030215 | 0.001534 | 0.336989 | 0.059437 |
| MmugDNA.19699.1.S1_at   | MmugDNA.19699.1 | 8.88  | 8.68  | 0.09 | 0.07 | 1.14  | 0.028429 | 0.069272 | 0.332503 | 0.309468 |
| MmugDNA.1970.1.S1_at    | MmugDNA.1970.1  | 3.77  | 3.71  | 0.05 | 0.06 | 1.05  | 0.113498 | 0.622391 | 0.486822 | 0.776887 |
| MmugDNA.19700.1.S1_at   | MmugDNA.19700.1 | 3.94  | 3.99  | 0.2  | 0.05 | -1.04 | 0.705709 | 0.880934 | 0.885355 | 0.932026 |
| MmugDNA.19702.1.S1_at   | MmugDNA.19702.1 | 9.9   | 9.94  | 0.14 | 0.07 | -1.03 | 0.857761 | 0.02973  | 0.94975  | 0.214096 |
| MmugDNA.19703.1.S1_at   | MmugDNA.19703.1 | 4.99  | 5.19  | 0.19 | 0.2  | -1.15 | 0.563215 | 0.367368 | 0.818148 | 0.607012 |
| MmugDNA.19705.1.S1_at   | MmugDNA.19705.1 | 4.92  | 4.97  | 0.17 | 0.1  | -1.04 | 0.737002 | 0.920283 | 0.899286 | 0.95511  |
| MmugDNA.19707.1.S1_at   | MmugDNA.19707.1 | 6.77  | 6.74  | 0.21 | 0.07 | 1.02  | 0.496924 | 0.333607 | 0.780982 | 0.581808 |
| MmugDNA.19708.1.S1_at   | MmugDNA.19708.1 | 6.84  | 6.68  | 1.07 | 0.41 | 1.11  | 0.827343 | 0.610622 | 0.938039 | 0.76874  |
| MmugDNA.19708.1.S1_s_at | MmugDNA.19708.1 | 6.61  | 6.75  | 1.22 | 0.34 | -1.11 | 0.849183 | 0.377957 | 0.94697  | 0.615264 |
| MmugDNA.19709.1.S1_x_at | MmugDNA.19709.1 | 4.97  | 4.9   | 0.29 | 0.13 | 1.04  | 0.962198 | 0.219736 | 0.987708 | 0.493388 |
| MmugDNA.1971.1.S1_at    | MmugDNA.1971.1  | 6.54  | 6.66  | 0.04 | 0.25 | -1.09 | 0.747038 | 0.828567 | 0.90386  | 0.901537 |
| MmugDNA.19710.1.S1_at   | MmugDNA.19710.1 | 9.01  | 7.72  | 0.63 | 0.16 | 2.43  | 0.044633 | 0.050766 | 0.374916 | 0.270457 |
| MmugDNA.19711.1.S1_at   | MmugDNA.19711.1 | 6.44  | 6.39  | 0.3  | 0.19 | 1.03  | 0.99149  | 0.835812 | 0.996693 | 0.906066 |
| MmugDNA.19713.1.S1_at   | MmugDNA.19713.1 | 5.2   | 4.75  | 0.32 | 0.14 | 1.37  | 0.09766  | 0.105562 | 0.466607 | 0.367526 |
| MmugDNA.19715.1.S1_at   | MmugDNA.19715.1 | 2.74  | 2.76  | 0.18 | 0.04 | -1.02 | 0.644465 | 0.636089 | 0.858526 | 0.785876 |
| MmugDNA.19716.1.S1_at   | MmugDNA.19716.1 | 5.92  | 6.58  | 0.66 | 0.89 | -1.58 | 0.28316  | 0.162144 | 0.641313 | 0.438282 |
| MmugDNA.19717.1.S1_at   | MmugDNA.19717.1 | 4.25  | 4.4   | 0.1  | 0.24 | -1.11 | 0.622078 | 0.918994 | 0.847666 | 0.95449  |
| MmugDNA.19719.1.S1_at   | MmugDNA.19719.1 | 9.46  | 7.62  | 0.39 | 0.37 | 3.57  | 0.003571 | 0.00352  | 0.197033 | 0.085137 |

|                         |                 |       |       |      |      |       |          |          |          |          |
|-------------------------|-----------------|-------|-------|------|------|-------|----------|----------|----------|----------|
| MmugDNA.1972.1.S1_at    | MmugDNA.1972.1  | 7.26  | 7.26  | 0.03 | 0.02 | -1    | 0.514443 | 0.952172 | 0.790351 | 0.972894 |
| MmugDNA.19720.1.S1_at   | MmugDNA.19720.1 | 10.24 | 10.17 | 0.3  | 0.11 | 1.05  | 0.91796  | 0.040997 | 0.972062 | 0.247202 |
| MmugDNA.19721.1.S1_at   | MmugDNA.19721.1 | 3.76  | 3.9   | 0.03 | 0.15 | -1.1  | 0.140809 | 0.23644  | 0.516316 | 0.507314 |
| MmugDNA.19722.1.S1_at   | MmugDNA.19722.1 | 11.89 | 12.36 | 0.14 | 0.03 | -1.39 | 0.011576 | 0.02073  | 0.255545 | 0.180654 |
| MmugDNA.19723.1.S1_at   | MmugDNA.19723.1 | 5.86  | 5.66  | 0.12 | 0.11 | 1.14  | 0.130021 | 0.282394 | 0.504648 | 0.545076 |
| MmugDNA.19724.1.S1_at   | MmugDNA.19724.1 | 12.83 | 13.15 | 0.18 | 0.03 | -1.25 | 0.048192 | 0.053746 | 0.382571 | 0.277384 |
| MmugDNA.19726.1.S1_at   | MmugDNA.19726.1 | 3.49  | 3.33  | 0.12 | 0.08 | 1.12  | 0.23888  | 0.236533 | 0.60547  | 0.507364 |
| MmugDNA.19728.1.S1_at   | MmugDNA.19728.1 | 6.68  | 7.19  | 0.48 | 0.2  | -1.42 | 0.565442 | 0.886803 | 0.819276 | 0.935553 |
| MmugDNA.19728.1.S1_x_at | MmugDNA.19728.1 | 6.5   | 7.25  | 0.44 | 0.17 | -1.68 | 0.217423 | 0.481622 | 0.587269 | 0.686557 |
| MmugDNA.1973.1.S1_at    | MmugDNA.1973.1  | 3.13  | 3.25  | 0.35 | 0.16 | -1.08 | 0.98317  | 0.947567 | 0.994889 | 0.970252 |
| MmugDNA.19730.1.S1_at   | MmugDNA.19730.1 | 9.29  | 9.19  | 0.16 | 0.21 | 1.08  | 0.633797 | 0.602175 | 0.853666 | 0.763204 |
| MmugDNA.19731.1.S1_at   | MmugDNA.19731.1 | 10.56 | 10.25 | 0.76 | 0.19 | 1.24  | 0.396973 | 0.383459 | 0.721621 | 0.619433 |
| MmugDNA.19732.1.S1_at   | MmugDNA.19732.1 | 4.03  | 3.64  | 0.41 | 0.04 | 1.31  | 0.091845 | 0.108296 | 0.460177 | 0.371557 |
| MmugDNA.19732.1.S1_s_at | MmugDNA.19732.1 | 5.95  | 6.82  | 0.84 | 0.07 | -1.82 | 0.175788 | 0.397322 | 0.548999 | 0.628781 |
| MmugDNA.19733.1.S1_at   | MmugDNA.19733.1 | 3.62  | 3.3   | 0.2  | 0.19 | 1.25  | 0.181285 | 0.252629 | 0.554504 | 0.521174 |
| MmugDNA.19734.1.S1_at   | MmugDNA.19734.1 | 4.84  | 4.62  | 0.23 | 0.09 | 1.16  | 0.248486 | 0.275885 | 0.613851 | 0.540035 |
| MmugDNA.19735.1.S1_at   | MmugDNA.19735.1 | 5.04  | 5.07  | 0.1  | 0.14 | -1.02 | 0.190005 | 0.219891 | 0.561309 | 0.493401 |
| MmugDNA.19737.1.S1_at   | MmugDNA.19737.1 | 4     | 4     | 0.07 | 0.11 | 1     | 0.395256 | 0.037152 | 0.720403 | 0.237229 |
| MmugDNA.19739.1.S1_at   | MmugDNA.19739.1 | 6.36  | 6.15  | 0.05 | 0.17 | 1.15  | 0.140891 | 0.557866 | 0.516345 | 0.735286 |
| MmugDNA.1974.1.S1_at    | MmugDNA.1974.1  | 6.99  | 6.8   | 0.18 | 0.04 | 1.14  | 0.357985 | 0.0705   | 0.695993 | 0.311777 |
| MmugDNA.19740.1.S1_at   | MmugDNA.19740.1 | 4.63  | 4.64  | 0.1  | 0.08 | -1.01 | 0.806968 | 0.666474 | 0.930007 | 0.804596 |
| MmugDNA.19741.1.S1_at   | MmugDNA.19741.1 | 3.11  | 3.1   | 0.14 | 0.03 | 1     | 0.852757 | 0.924467 | 0.94811  | 0.957385 |
| MmugDNA.19742.1.S1_at   | MmugDNA.19742.1 | 2.84  | 2.75  | 0.05 | 0.06 | 1.06  | 0.086158 | 0.179094 | 0.453748 | 0.455436 |
| MmugDNA.19743.1.S1_at   | MmugDNA.19743.1 | 6.29  | 6.28  | 0.16 | 0.2  | 1     | 0.224461 | 0.577469 | 0.593643 | 0.747923 |
| MmugDNA.19744.1.S1_at   | MmugDNA.19744.1 | 7.72  | 7.74  | 0.41 | 0.19 | -1.01 | 0.735856 | 0.318795 | 0.89895  | 0.571379 |
| MmugDNA.19745.1.S1_at   | MmugDNA.19745.1 | 5.65  | 5.04  | 0.22 | 0.11 | 1.53  | 0.02112  | 0.467972 | 0.306884 | 0.677457 |
| MmugDNA.19746.1.S1_at   | MmugDNA.19746.1 | 8.77  | 8.19  | 1.69 | 0.33 | 1.49  | 0.6402   | 0.519562 | 0.856628 | 0.711134 |
| MmugDNA.19747.1.S1_at   | MmugDNA.19747.1 | 11.87 | 11.52 | 1.5  | 0.27 | 1.27  | 0.82914  | 0.530725 | 0.938698 | 0.718104 |
| MmugDNA.19749.1.S1_at   | MmugDNA.19749.1 | 9.99  | 10.26 | 0.19 | 0.29 | -1.21 | 0.110364 | 0.029652 | 0.483363 | 0.213852 |
| MmugDNA.19750.1.S1_x_at | MmugDNA.19750.1 | 8.87  | 8.86  | 0.98 | 0.02 | 1     | 0.984497 | 0.085049 | 0.995256 | 0.336812 |
| MmugDNA.19753.1.S1_at   | MmugDNA.19753.1 | 4.46  | 4.59  | 0.13 | 0.09 | -1.09 | 0.30597  | 0.103301 | 0.659264 | 0.364143 |
| MmugDNA.19757.1.S1_at   | MmugDNA.19757.1 | 5.15  | 5.15  | 0.07 | 0.08 | -1    | 0.826924 | 0.992554 | 0.938039 | 0.995715 |
| MmugDNA.19758.1.S1_at   | MmugDNA.19758.1 | 5.03  | 4.61  | 0.22 | 0.05 | 1.34  | 0.082495 | 0.023638 | 0.447377 | 0.192555 |
| MmugDNA.1976.1.S1_s_at  | MmugDNA.1976.1  | 10.39 | 10.98 | 0.37 | 0.03 | -1.51 | 0.139709 | 0.177395 | 0.515168 | 0.453745 |
| MmugDNA.19761.1.S1_at   | MmugDNA.19761.1 | 4.17  | 4.07  | 0.15 | 0.11 | 1.08  | 0.708844 | 0.089763 | 0.886591 | 0.34404  |
| MmugDNA.19762.1.S1_at   | MmugDNA.19762.1 | 9.81  | 10.58 | 0.14 | 0.06 | -1.71 | 0.001157 | 0.000334 | 0.156386 | 0.036179 |
| MmugDNA.19763.1.S1_at   | MmugDNA.19763.1 | 4.54  | 4.58  | 0.22 | 0.07 | -1.03 | 0.229262 | 0.294763 | 0.59818  | 0.554345 |
| MmugDNA.19764.1.S1_at   | MmugDNA.19764.1 | 7.73  | 8.15  | 0.2  | 0.07 | -1.34 | 0.028473 | 0.002122 | 0.332568 | 0.068137 |
| MmugDNA.19766.1.S1_at   | MmugDNA.19766.1 | 7.6   | 7.04  | 0.3  | 0.13 | 1.48  | 0.040215 | 0.038543 | 0.36348  | 0.241322 |
| MmugDNA.19767.1.S1_s_at | MmugDNA.19767.1 | 6.58  | 6.52  | 0.22 | 0.15 | 1.04  | 0.430622 | 0.353042 | 0.742928 | 0.596356 |
| MmugDNA.1977.1.S1_at    | MmugDNA.1977.1  | 5.05  | 4.93  | 0.01 | 0.15 | 1.09  | 0.189209 | 0.639055 | 0.560824 | 0.788038 |
| MmugDNA.19771.1.S1_at   | MmugDNA.19771.1 | 7.34  | 8.17  | 0.84 | 0.09 | -1.78 | 0.18926  | 0.169054 | 0.560874 | 0.445593 |
| MmugDNA.19772.1.S1_at   | MmugDNA.19772.1 | 3.63  | 3.64  | 0.02 | 0.11 | -1    | 0.814566 | 0.927048 | 0.933055 | 0.958505 |

|                         |                 |       |       |      |      |       |          |          |          |          |
|-------------------------|-----------------|-------|-------|------|------|-------|----------|----------|----------|----------|
| MmugDNA.19773.1.S1_at   | MmugDNA.19773.1 | 12.32 | 12    | 0.35 | 0.15 | 1.25  | 0.598792 | 0.315311 | 0.837129 | 0.568939 |
| MmugDNA.19775.1.S1_at   | MmugDNA.19775.1 | 10.05 | 9.95  | 0.05 | 0.04 | 1.07  | 0.039904 | 0.253965 | 0.362952 | 0.522345 |
| MmugDNA.19776.1.S1_at   | MmugDNA.19776.1 | 3.69  | 3.63  | 0.03 | 0.22 | 1.05  | 0.989287 | 0.937658 | 0.995994 | 0.964687 |
| MmugDNA.19778.1.S1_at   | MmugDNA.19778.1 | 6.8   | 6.72  | 0.08 | 0.22 | 1.06  | 0.332595 | 0.238232 | 0.678996 | 0.508825 |
| MmugDNA.19779.1.S1_at   | MmugDNA.19779.1 | 6.35  | 6.53  | 0.28 | 0.42 | -1.13 | 0.951212 | 0.187023 | 0.983528 | 0.462938 |
| MmugDNA.19779.1.S1_s_at | MmugDNA.19779.1 | 9.05  | 8.95  | 0.22 | 0.2  | 1.08  | 0.597552 | 0.009063 | 0.836411 | 0.125855 |
| MmugDNA.1978.1.S1_at    | MmugDNA.1978.1  | 6.86  | 6.6   | 0.55 | 0.42 | 1.2   | 0.895276 | 0.964013 | 0.964244 | 0.980031 |
| MmugDNA.19780.1.S1_at   | MmugDNA.19780.1 | 3.36  | 3.3   | 0.05 | 0.12 | 1.04  | 0.512027 | 0.314116 | 0.789065 | 0.568185 |
| MmugDNA.19781.1.S1_at   | MmugDNA.19781.1 | 11.87 | 11.74 | 0.35 | 0.06 | 1.09  | 0.64614  | 0.103194 | 0.859027 | 0.364123 |
| MmugDNA.19782.1.S1_at   | MmugDNA.19782.1 | 5.32  | 5.41  | 0.05 | 0.06 | -1.07 | 0.08958  | 0.785725 | 0.457723 | 0.875928 |
| MmugDNA.19783.1.S1_at   | MmugDNA.19783.1 | 6.53  | 6.53  | 0.15 | 0.05 | -1    | 0.306078 | 0.350148 | 0.659271 | 0.593918 |
| MmugDNA.19785.1.S1_at   | MmugDNA.19785.1 | 3.93  | 3.78  | 0.1  | 0.15 | 1.12  | 0.173801 | 0.200638 | 0.546871 | 0.475191 |
| MmugDNA.19787.1.S1_at   | MmugDNA.19787.1 | 7.45  | 7.24  | 0.58 | 0.28 | 1.16  | 0.345893 | 0.587643 | 0.68787  | 0.754408 |
| MmugDNA.19788.1.S1_at   | MmugDNA.19788.1 | 10.26 | 10.49 | 0.41 | 0.14 | -1.17 | 0.416273 | 0.660899 | 0.734198 | 0.801634 |
| MmugDNA.19788.1.S1_s_at | MmugDNA.19788.1 | 9.84  | 9.38  | 0.36 | 0.16 | 1.37  | 0.347252 | 0.189388 | 0.688577 | 0.465117 |
| MmugDNA.19789.1.S1_at   | MmugDNA.19789.1 | 4.62  | 4.66  | 0.08 | 0.06 | -1.03 | 0.553386 | 0.118389 | 0.812135 | 0.3864   |
| MmugDNA.1979.1.S1_at    | MmugDNA.1979.1  | 5.9   | 6.35  | 0.48 | 0.24 | -1.36 | 0.2392   | 0.791997 | 0.605741 | 0.879813 |
| MmugDNA.19790.1.S1_at   | MmugDNA.19790.1 | 5.5   | 5.53  | 0.39 | 0.2  | -1.02 | 0.632832 | 0.920954 | 0.853349 | 0.955491 |
| MmugDNA.19792.1.S1_at   | MmugDNA.19792.1 | 6.97  | 6.96  | 0.22 | 0    | 1.01  | 0.838594 | 0.810593 | 0.942303 | 0.890812 |
| MmugDNA.19793.1.S1_at   | MmugDNA.19793.1 | 3.28  | 3.05  | 0.35 | 0.16 | 1.17  | 0.207789 | 0.184008 | 0.579372 | 0.460195 |
| MmugDNA.19794.1.S1_at   | MmugDNA.19794.1 | 3.34  | 3.44  | 0.08 | 0.13 | -1.07 | 0.471175 | 0.134748 | 0.766384 | 0.40678  |
| MmugDNA.19795.1.S1_at   | MmugDNA.19795.1 | 7.11  | 6.92  | 0.1  | 0.1  | 1.14  | 0.113952 | 0.028636 | 0.487339 | 0.210901 |
| MmugDNA.19796.1.S1_s_at | MmugDNA.19796.1 | 6.07  | 5.88  | 0.31 | 0.1  | 1.14  | 0.437141 | 0.329765 | 0.746719 | 0.578874 |
| MmugDNA.19797.1.S1_at   | MmugDNA.19797.1 | 8.68  | 8.68  | 0.17 | 0.18 | 1.01  | 0.73791  | 0.222095 | 0.899668 | 0.495113 |
| MmugDNA.19798.1.S1_at   | MmugDNA.19798.1 | 8.74  | 8.18  | 0.88 | 0.29 | 1.47  | 0.392755 | 0.012077 | 0.718592 | 0.14216  |
| MmugDNA.1980.1.S1_at    | MmugDNA.1980.1  | 6.37  | 6.31  | 0.36 | 0.06 | 1.04  | 0.326933 | 0.396269 | 0.674603 | 0.628074 |
| MmugDNA.19800.1.S1_at   | MmugDNA.19800.1 | 9.2   | 9.19  | 0.21 | 0.16 | 1.01  | 0.501053 | 0.434947 | 0.783101 | 0.654901 |
| MmugDNA.19804.1.S1_s_at | MmugDNA.19804.1 | 4.58  | 4.46  | 0.31 | 0.09 | 1.09  | 0.250376 | 0.378332 | 0.615561 | 0.615443 |
| MmugDNA.19805.1.S1_at   | MmugDNA.19805.1 | 5.04  | 5.04  | 0.01 | 0.13 | 1     | 0.856037 | 0.995932 | 0.949177 | 0.997533 |
| MmugDNA.19806.1.S1_s_at | MmugDNA.19806.1 | 8.72  | 8.39  | 0.43 | 0.15 | 1.26  | 0.696675 | 0.339815 | 0.882169 | 0.586394 |
| MmugDNA.19807.1.S1_at   | MmugDNA.19807.1 | 5.54  | 5.51  | 0.23 | 0.03 | 1.02  | 0.2861   | 0.339875 | 0.64358  | 0.586417 |
| MmugDNA.19808.1.S1_at   | MmugDNA.19808.1 | 5.39  | 5.47  | 0.11 | 0.11 | -1.06 | 0.937605 | 0.732357 | 0.979038 | 0.844986 |
| MmugDNA.1981.1.S1_at    | MmugDNA.1981.1  | 3.19  | 3.22  | 0.11 | 0.2  | -1.02 | 0.754729 | 0.252239 | 0.907491 | 0.520924 |
| MmugDNA.19812.1.S1_at   | MmugDNA.19812.1 | 6.57  | 6.33  | 0.92 | 0.14 | 1.18  | 0.512615 | 0.605845 | 0.789481 | 0.765513 |
| MmugDNA.19813.1.S1_at   | MmugDNA.19813.1 | 10.52 | 10.16 | 0.74 | 0.16 | 1.28  | 0.430789 | 0.198395 | 0.743048 | 0.473292 |
| MmugDNA.19814.1.S1_at   | MmugDNA.19814.1 | 4.31  | 4.1   | 0.14 | 0.14 | 1.15  | 0.105898 | 0.103149 | 0.47774  | 0.364041 |
| MmugDNA.19815.1.S1_at   | MmugDNA.19815.1 | 4.32  | 4.38  | 0.04 | 0.01 | -1.04 | 0.095939 | 0.110263 | 0.464469 | 0.374403 |
| MmugDNA.19816.1.S1_at   | MmugDNA.19816.1 | 8.38  | 9.56  | 0.65 | 0.07 | -2.26 | 0.033131 | 0.204828 | 0.346294 | 0.479209 |
| MmugDNA.19817.1.S1_at   | MmugDNA.19817.1 | 4.26  | 4.22  | 0.24 | 0.3  | 1.03  | 0.284624 | 0.385599 | 0.642354 | 0.621049 |
| MmugDNA.19818.1.S1_at   | MmugDNA.19818.1 | 4.22  | 4.13  | 0.16 | 0.12 | 1.06  | 0.154504 | 0.383916 | 0.52764  | 0.61978  |
| MmugDNA.19819.1.S1_at   | MmugDNA.19819.1 | 8.82  | 9.27  | 0.86 | 0.03 | -1.37 | 0.453395 | 0.257567 | 0.75608  | 0.525302 |
| MmugDNA.1982.1.S1_at    | MmugDNA.1982.1  | 3.9   | 3.91  | 0.14 | 0.08 | -1.01 | 0.53258  | 0.315273 | 0.800376 | 0.568939 |
| MmugDNA.19821.1.S1_at   | MmugDNA.19821.1 | 5.98  | 5.89  | 0.1  | 0.14 | 1.07  | 0.382677 | 0.23907  | 0.710805 | 0.509827 |

|                         |                 |       |       |      |      |       |          |          |          |          |
|-------------------------|-----------------|-------|-------|------|------|-------|----------|----------|----------|----------|
| MmugDNA.19822.1.S1_at   | MmugDNA.19822.1 | 3.33  | 3.09  | 0.1  | 0.13 | 1.18  | 0.155106 | 0.294737 | 0.528501 | 0.554345 |
| MmugDNA.19828.1.S1_at   | MmugDNA.19828.1 | 9.37  | 9.85  | 0.07 | 0.2  | -1.39 | 0.007602 | 0.021487 | 0.22979  | 0.183659 |
| MmugDNA.19829.1.S1_at   | MmugDNA.19829.1 | 5.53  | 5.54  | 0.03 | 0.16 | -1.01 | 0.46571  | 0.878286 | 0.763142 | 0.930529 |
| MmugDNA.1983.1.S1_at    | MmugDNA.1983.1  | 8.8   | 9.05  | 0.18 | 0.24 | -1.19 | 0.080697 | 0.15911  | 0.444798 | 0.435217 |
| MmugDNA.19831.1.S1_at   | MmugDNA.19831.1 | 9.85  | 9.86  | 0.38 | 0.11 | -1.01 | 0.735835 | 0.051361 | 0.89895  | 0.272082 |
| MmugDNA.19832.1.S1_at   | MmugDNA.19832.1 | 4.86  | 4.76  | 0.14 | 0.04 | 1.07  | 0.544335 | 0.422965 | 0.807196 | 0.646141 |
| MmugDNA.19833.1.S1_at   | MmugDNA.19833.1 | 3.69  | 3.72  | 0.18 | 0.26 | -1.02 | 0.40187  | 0.447318 | 0.724759 | 0.663434 |
| MmugDNA.19834.1.S1_at   | MmugDNA.19834.1 | 4.52  | 4.51  | 0.21 | 0.28 | 1.01  | 0.6029   | 0.825672 | 0.839074 | 0.899784 |
| MmugDNA.1984.1.S1_at    | MmugDNA.1984.1  | 4.39  | 4.42  | 0.17 | 0.13 | -1.02 | 0.645459 | 0.582877 | 0.858779 | 0.751428 |
| MmugDNA.19843.1.S1_at   | MmugDNA.19843.1 | 11.63 | 11.67 | 0.09 | 0.05 | -1.03 | 0.494714 | 0.024855 | 0.779514 | 0.197532 |
| MmugDNA.19844.1.S1_at   | MmugDNA.19844.1 | 3.13  | 3.15  | 0.07 | 0.06 | -1.01 | 0.687443 | 0.167018 | 0.877778 | 0.443466 |
| MmugDNA.19845.1.S1_at   | MmugDNA.19845.1 | 5.47  | 5.48  | 0.13 | 0.13 | -1.01 | 0.469361 | 0.640341 | 0.765531 | 0.788874 |
| MmugDNA.19846.1.S1_at   | MmugDNA.19846.1 | 4.16  | 4.28  | 0.49 | 0.54 | -1.08 | 0.767301 | 0.285082 | 0.912495 | 0.547096 |
| MmugDNA.19847.1.S1_at   | MmugDNA.19847.1 | 8.61  | 8.82  | 0.24 | 0.04 | -1.16 | 0.234556 | 0.329524 | 0.601837 | 0.578781 |
| MmugDNA.19848.1.S1_at   | MmugDNA.19848.1 | 10.37 | 10.05 | 0.06 | 0.06 | 1.25  | 0.001604 | 0.011378 | 0.162459 | 0.138214 |
| MmugDNA.19849.1.S1_at   | MmugDNA.19849.1 | 6.22  | 6.11  | 0.79 | 0.31 | 1.07  | 0.384734 | 0.223338 | 0.712173 | 0.49612  |
| MmugDNA.1985.1.S1_at    | MmugDNA.1985.1  | 2.99  | 3.04  | 0.02 | 0.08 | -1.03 | 0.166318 | 0.192785 | 0.538998 | 0.468274 |
| MmugDNA.19850.1.S1_at   | MmugDNA.19850.1 | 8.98  | 9.04  | 0.1  | 0.26 | -1.04 | 0.842547 | 0.866589 | 0.944281 | 0.924174 |
| MmugDNA.19851.1.S1_at   | MmugDNA.19851.1 | 10.57 | 10.13 | 0.48 | 0.23 | 1.35  | 0.217163 | 0.290109 | 0.587139 | 0.551128 |
| MmugDNA.19852.1.S1_at   | MmugDNA.19852.1 | 8.59  | 8.38  | 0.48 | 0.27 | 1.15  | 0.268685 | 0.131887 | 0.628969 | 0.403906 |
| MmugDNA.19853.1.S1_at   | MmugDNA.19853.1 | 6.61  | 6.49  | 0.04 | 0.07 | 1.09  | 0.148851 | 0.358827 | 0.522782 | 0.600291 |
| MmugDNA.19854.1.S1_at   | MmugDNA.19854.1 | 5.45  | 5.26  | 0.05 | 0.18 | 1.14  | 0.129993 | 0.230818 | 0.504648 | 0.502498 |
| MmugDNA.19855.1.S1_at   | MmugDNA.19855.1 | 6.45  | 6.46  | 0.11 | 0.08 | -1.01 | 0.598816 | 0.986645 | 0.837129 | 0.992465 |
| MmugDNA.19856.1.S1_at   | MmugDNA.19856.1 | 5.62  | 5.6   | 0.07 | 0.19 | 1.01  | 0.811984 | 0.59725  | 0.932004 | 0.76013  |
| MmugDNA.19859.1.S1_at   | MmugDNA.19859.1 | 10.53 | 10.47 | 0.33 | 0.18 | 1.04  | 0.449407 | 0.014431 | 0.754363 | 0.153335 |
| MmugDNA.1986.1.S1_at    | MmugDNA.1986.1  | 10.09 | 9.62  | 0.53 | 0.13 | 1.39  | 0.163144 | 0.060314 | 0.536035 | 0.292254 |
| MmugDNA.19860.1.S1_s_at | MmugDNA.19860.1 | 10.21 | 10.44 | 1.3  | 0.22 | -1.17 | 0.769025 | 0.430266 | 0.913416 | 0.651316 |
| MmugDNA.19861.1.S1_at   | MmugDNA.19861.1 | 5.29  | 5.23  | 0.12 | 0.03 | 1.04  | 0.420823 | 0.412522 | 0.737113 | 0.63893  |
| MmugDNA.19862.1.S1_at   | MmugDNA.19862.1 | 8.81  | 8.26  | 0.48 | 0.1  | 1.46  | 0.139077 | 0.210319 | 0.514459 | 0.484192 |
| MmugDNA.19863.1.S1_at   | MmugDNA.19863.1 | 3.97  | 3.88  | 0.12 | 0    | 1.06  | 0.22112  | 0.064969 | 0.590409 | 0.300855 |
| MmugDNA.19866.1.S1_at   | MmugDNA.19866.1 | 4.82  | 4.8   | 0.03 | 0.13 | 1.01  | 0.917794 | 0.81297  | 0.972062 | 0.891895 |
| MmugDNA.19868.1.S1_at   | MmugDNA.19868.1 | 8.74  | 8.71  | 0.34 | 0.34 | 1.02  | 0.317977 | 0.159795 | 0.667635 | 0.435871 |
| MmugDNA.19869.1.S1_at   | MmugDNA.19869.1 | 7.57  | 7.37  | 0.15 | 0.16 | 1.15  | 0.167554 | 0.347115 | 0.540101 | 0.591815 |
| MmugDNA.19870.1.S1_at   | MmugDNA.19870.1 | 11.65 | 11.66 | 0.35 | 0    | -1    | 0.383231 | 0.334399 | 0.711259 | 0.582387 |
| MmugDNA.19870.1.S1_s_at | MmugDNA.19870.1 | 12.01 | 12.02 | 0.3  | 0.02 | -1    | 0.394773 | 0.393956 | 0.720041 | 0.6267   |
| MmugDNA.506.1.S1_s_at   | MmugDNA.506.1   | 10.76 | 10.59 | 0.25 | 0.11 | 1.12  | 0.277254 | 0.286661 | 0.636787 | 0.548077 |
| MmugDNA.19873.1.S1_at   | MmugDNA.19873.1 | 4.48  | 4.48  | 0.09 | 0.04 | -1    | 0.402302 | 0.461567 | 0.724848 | 0.673162 |
| MmugDNA.19874.1.S1_at   | MmugDNA.19874.1 | 7.21  | 7.15  | 0.16 | 0.06 | 1.04  | 0.655257 | 0.813096 | 0.863101 | 0.891939 |
| MmugDNA.19876.1.S1_at   | MmugDNA.19876.1 | 4.51  | 4.52  | 0.03 | 0.18 | -1.01 | 0.365555 | 0.505572 | 0.701174 | 0.702218 |
| MmugDNA.19877.1.S1_at   | MmugDNA.19877.1 | 6     | 6.21  | 0.36 | 0.24 | -1.16 | 0.380705 | 0.436785 | 0.70956  | 0.65629  |
| MmugDNA.19878.1.S1_at   | MmugDNA.19878.1 | 3.42  | 3.4   | 0.13 | 0.06 | 1.01  | 0.752982 | 0.179531 | 0.906896 | 0.456008 |
| MmugDNA.19879.1.S1_at   | MmugDNA.19879.1 | 6.27  | 6.26  | 0.06 | 0.14 | 1     | 0.755664 | 0.966673 | 0.908037 | 0.98148  |
| MmugDNA.1988.1.S1_at    | MmugDNA.1988.1  | 11.07 | 10.8  | 0.67 | 0.27 | 1.2   | 0.514124 | 0.6835   | 0.790322 | 0.815372 |

|                         |                 |       |       |      |      |       |          |          |          |          |
|-------------------------|-----------------|-------|-------|------|------|-------|----------|----------|----------|----------|
| MmugDNA.19880.1.S1_at   | MmugDNA.19880.1 | 5.3   | 5.27  | 0.18 | 0.2  | 1.02  | 0.682396 | 0.629699 | 0.875741 | 0.781989 |
| MmugDNA.19882.1.S1_at   | MmugDNA.19882.1 | 7.89  | 8.12  | 0.73 | 0.3  | -1.17 | 0.736469 | 0.902255 | 0.899136 | 0.944435 |
| MmugDNA.19885.1.S1_at   | MmugDNA.19885.1 | 6.46  | 5.98  | 0.23 | 0.35 | 1.39  | 0.307792 | 0.452307 | 0.660653 | 0.667046 |
| MmugDNA.19886.1.S1_at   | MmugDNA.19886.1 | 9.56  | 9.46  | 0.28 | 0.05 | 1.07  | 0.15195  | 0.112749 | 0.525094 | 0.378404 |
| MmugDNA.19887.1.S1_at   | MmugDNA.19887.1 | 3.79  | 3.72  | 0.19 | 0.36 | 1.05  | 0.80214  | 0.252584 | 0.927856 | 0.521145 |
| MmugDNA.19889.1.S1_at   | MmugDNA.19889.1 | 8.2   | 7.98  | 0.45 | 0.02 | 1.16  | 0.428058 | 0.407183 | 0.741555 | 0.634794 |
| MmugDNA.1989.1.S1_at    | MmugDNA.1989.1  | 5.68  | 5.53  | 0.15 | 0.04 | 1.11  | 0.168831 | 0.113219 | 0.541688 | 0.379229 |
| MmugDNA.19890.1.S1_at   | MmugDNA.19890.1 | 12.17 | 11.99 | 0.32 | 0.04 | 1.13  | 0.96268  | 0.169196 | 0.987962 | 0.445812 |
| MmugDNA.19891.1.S1_at   | MmugDNA.19891.1 | 4.02  | 3.97  | 0.1  | 0.27 | 1.04  | 0.698706 | 0.689164 | 0.882848 | 0.818618 |
| MmugDNA.19892.1.S1_s_at | MmugDNA.19892.1 | 7     | 6.63  | 0.48 | 0.45 | 1.29  | 0.371883 | 0.144767 | 0.705567 | 0.418614 |
| MmugDNA.19893.1.S1_at   | MmugDNA.19893.1 | 3.82  | 4.01  | 0.37 | 0.07 | -1.14 | 0.637613 | 0.849651 | 0.855587 | 0.914616 |
| MmugDNA.19894.1.S1_at   | MmugDNA.19894.1 | 4.34  | 4.31  | 0.09 | 0.2  | 1.02  | 0.915057 | 0.874367 | 0.971014 | 0.928629 |
| MmugDNA.19895.1.S1_at   | MmugDNA.19895.1 | 9.06  | 9.08  | 0.25 | 0.13 | -1.02 | 0.976679 | 0.013045 | 0.99241  | 0.14696  |
| MmugDNA.19896.1.S1_at   | MmugDNA.19896.1 | 3.32  | 3.39  | 0.08 | 0.28 | -1.04 | 0.679592 | 0.695601 | 0.87431  | 0.823073 |
| MmugDNA.19897.1.S1_at   | MmugDNA.19897.1 | 4.79  | 5.9   | 1.02 | 0.21 | -2.17 | 0.279913 | 0.46934  | 0.638821 | 0.678197 |
| MmugDNA.19898.1.S1_at   | MmugDNA.19898.1 | 5.91  | 5.78  | 0.14 | 0.23 | 1.09  | 0.215645 | 0.165701 | 0.585748 | 0.441982 |
| MmugDNA.199.1.S1_at     | MmugDNA.199.1   | 7.12  | 7.19  | 0.06 | 0.08 | -1.05 | 0.270201 | 0.205028 | 0.630252 | 0.479318 |
| MmugDNA.1990.1.S1_s_at  | MmugDNA.1990.1  | 10.15 | 9.68  | 0.85 | 0.28 | 1.38  | 0.419025 | 0.022589 | 0.73604  | 0.188092 |
| MmugDNA.19900.1.S1_at   | MmugDNA.19900.1 | 6.65  | 6.97  | 0.91 | 0.69 | -1.25 | 0.664423 | 0.236518 | 0.867683 | 0.507364 |
| MmugDNA.19901.1.S1_at   | MmugDNA.19901.1 | 5.21  | 5.21  | 0.3  | 0.09 | 1     | 0.285774 | 0.592522 | 0.643438 | 0.757844 |
| MmugDNA.19903.1.S1_at   | MmugDNA.19903.1 | 4.45  | 4.6   | 0.09 | 0.09 | -1.11 | 0.092138 | 0.436344 | 0.460688 | 0.655923 |
| MmugDNA.19904.1.S1_at   | MmugDNA.19904.1 | 4.49  | 4.32  | 0.17 | 0.12 | 1.13  | 0.747288 | 0.107195 | 0.903943 | 0.36989  |
| MmugDNA.19905.1.S1_at   | MmugDNA.19905.1 | 11.7  | 11.48 | 0.2  | 0.06 | 1.17  | 0.065996 | 0.005346 | 0.421463 | 0.101089 |
| MmugDNA.19906.1.S1_at   | MmugDNA.19906.1 | 8.13  | 7.28  | 0.44 | 0.44 | 1.81  | 0.101466 | 0.184023 | 0.471735 | 0.460209 |
| MmugDNA.19907.1.S1_at   | MmugDNA.19907.1 | 4.99  | 4.72  | 0.12 | 0.06 | 1.2   | 0.03813  | 0.416914 | 0.358577 | 0.641838 |
| MmugDNA.1991.1.S1_at    | MmugDNA.1991.1  | 5.61  | 5.67  | 0.18 | 0.25 | -1.04 | 0.962905 | 0.442852 | 0.98807  | 0.660759 |
| MmugDNA.19911.1.S1_at   | MmugDNA.19911.1 | 7.35  | 7.74  | 0.17 | 0.06 | -1.31 | 0.038597 | 0.099643 | 0.359972 | 0.358128 |
| MmugDNA.19912.1.S1_at   | MmugDNA.19912.1 | 3.74  | 3.58  | 0.07 | 0.01 | 1.11  | 0.016459 | 0.416589 | 0.287478 | 0.641647 |
| MmugDNA.19913.1.S1_at   | MmugDNA.19913.1 | 7.16  | 7.2   | 0.23 | 0.23 | -1.03 | 0.544853 | 0.895478 | 0.807495 | 0.940264 |
| MmugDNA.19914.1.S1_at   | MmugDNA.19914.1 | 3.64  | 4.14  | 0.22 | 0.23 | -1.41 | 0.267408 | 0.231163 | 0.628121 | 0.5029   |
| MmugDNA.19916.1.S1_at   | MmugDNA.19916.1 | 10.43 | 10.69 | 0.35 | 0.03 | -1.2  | 0.766902 | 0.051732 | 0.912422 | 0.272993 |
| MmugDNA.19917.1.S1_at   | MmugDNA.19917.1 | 5.46  | 5.56  | 0.25 | 0.15 | -1.07 | 0.514202 | 0.39778  | 0.790322 | 0.629114 |
| MmugDNA.19918.1.S1_at   | MmugDNA.19918.1 | 4.7   | 4.71  | 0.09 | 0.15 | -1    | 0.654994 | 0.362013 | 0.863003 | 0.602727 |
| MmugDNA.19919.1.S1_at   | MmugDNA.19919.1 | 3.26  | 3.31  | 0.4  | 0.22 | -1.04 | 0.53379  | 0.74108  | 0.800989 | 0.850126 |
| MmugDNA.1992.1.S1_at    | MmugDNA.1992.1  | 6.75  | 6.73  | 0.19 | 0.03 | 1.02  | 0.448557 | 0.76909  | 0.753918 | 0.865855 |
| MmugDNA.19920.1.S1_at   | MmugDNA.19920.1 | 6.7   | 6.68  | 0.35 | 0.04 | 1.01  | 0.86429  | 0.978101 | 0.952286 | 0.988066 |
| MmugDNA.19925.1.S1_at   | MmugDNA.19925.1 | 4.32  | 4.36  | 0.2  | 0.1  | -1.03 | 0.921504 | 0.31663  | 0.97341  | 0.569963 |
| MmugDNA.19926.1.S1_at   | MmugDNA.19926.1 | 9.61  | 9.54  | 0.22 | 0.14 | 1.05  | 0.721213 | 0.668725 | 0.891962 | 0.806133 |
| MmugDNA.19927.1.S1_at   | MmugDNA.19927.1 | 6.7   | 6.64  | 0.06 | 0.19 | 1.04  | 0.330264 | 0.13103  | 0.676941 | 0.403053 |
| MmugDNA.19928.1.S1_at   | MmugDNA.19928.1 | 3.58  | 3.65  | 0.34 | 0.16 | -1.05 | 0.719043 | 0.752539 | 0.890853 | 0.855916 |
| MmugDNA.19929.1.S1_at   | MmugDNA.19929.1 | 3.75  | 3.79  | 0.2  | 0    | -1.03 | 0.781424 | 0.505129 | 0.919573 | 0.70197  |
| MmugDNA.19930.1.S1_at   | MmugDNA.19930.1 | 3.03  | 3.11  | 0.12 | 0.17 | -1.05 | 0.815467 | 0.001938 | 0.933137 | 0.065795 |
| MmugDNA.19931.1.S1_at   | MmugDNA.19931.1 | 6.78  | 6.7   | 0.01 | 0.09 | 1.06  | 0.072935 | 0.446697 | 0.433769 | 0.662885 |



|                         |                 |       |       |      |      |       |          |          |          |          |
|-------------------------|-----------------|-------|-------|------|------|-------|----------|----------|----------|----------|
| MmugDNA.19932.1.S1_at   | MmugDNA.19932.1 | 4.06  | 3.73  | 0.33 | 0.16 | 1.26  | 0.093192 | 0.116318 | 0.46207  | 0.383671 |
| MmugDNA.19933.1.S1_at   | MmugDNA.19933.1 | 4.88  | 4.81  | 0.07 | 0.06 | 1.05  | 0.288138 | 0.623682 | 0.645269 | 0.778057 |
| MmugDNA.19934.1.S1_at   | MmugDNA.19934.1 | 4.13  | 4.2   | 0.23 | 0.01 | -1.05 | 0.633296 | 0.663221 | 0.853409 | 0.802867 |
| MmugDNA.19935.1.S1_at   | MmugDNA.19935.1 | 7.66  | 7.62  | 0.55 | 0.29 | 1.03  | 0.322132 | 0.173201 | 0.670797 | 0.449779 |
| MmugDNA.19936.1.S1_at   | MmugDNA.19936.1 | 4.68  | 4.58  | 0.42 | 0.26 | 1.07  | 0.538975 | 0.710069 | 0.803644 | 0.831904 |
| MmugDNA.19939.1.S1_at   | MmugDNA.19939.1 | 7.69  | 7.89  | 0.64 | 0.08 | -1.15 | 0.91599  | 0.831188 | 0.97133  | 0.903172 |
| MmugDNA.19939.1.S1_s_at | MmugDNA.19939.1 | 7.26  | 7.84  | 0.84 | 0.06 | -1.49 | 0.827033 | 0.910369 | 0.938039 | 0.949414 |
| MmugDNA.19942.1.S1_at   | MmugDNA.19942.1 | 3.43  | 3.58  | 0.26 | 0.05 | -1.11 | 0.446844 | 0.599815 | 0.752889 | 0.7616   |
| MmugDNA.19943.1.S1_s_at | MmugDNA.19943.1 | 11.62 | 11.63 | 0.03 | 0.13 | -1.01 | 0.835634 | 0.974982 | 0.941057 | 0.986326 |
| MmugDNA.19944.1.S1_at   | MmugDNA.19944.1 | 5.39  | 5.39  | 0.19 | 0.02 | 1     | 0.396809 | 0.261681 | 0.721565 | 0.528129 |
| MmugDNA.19945.1.S1_at   | MmugDNA.19945.1 | 6.74  | 6.09  | 0.6  | 0.26 | -1.57 | 0.291563 | 0.409502 | 0.647943 | 0.636528 |
| MmugDNA.19946.1.S1_at   | MmugDNA.19946.1 | 3.94  | 3.9   | 0.25 | 0    | 1.03  | 0.931957 | 0.799287 | 0.977118 | 0.884463 |
| MmugDNA.19949.1.S1_at   | MmugDNA.19949.1 | 5.92  | 5.91  | 0.27 | 0.12 | 1.01  | 0.822734 | 0.449584 | 0.936084 | 0.665135 |
| MmugDNA.1995.1.S1_at    | MmugDNA.1995.1  | 7.65  | 8.13  | 0.37 | 0.15 | -1.4  | 0.10683  | 0.780236 | 0.479384 | 0.87255  |
| MmugDNA.19951.1.S1_s_at | MmugDNA.19951.1 | 6.8   | 6.36  | 0.35 | 0.25 | 1.36  | 0.283019 | 0.272497 | 0.641193 | 0.537245 |
| MmugDNA.19952.1.S1_at   | MmugDNA.19952.1 | 3.78  | 3.78  | 0    | 0.02 | 1     | 0.373901 | 0.591722 | 0.705567 | 0.757198 |
| MmugDNA.19957.1.S1_at   | MmugDNA.19957.1 | 9.07  | 8.89  | 0.44 | 0.18 | 1.13  | 0.623533 | 0.107382 | 0.848274 | 0.370219 |
| MmugDNA.19958.1.S1_at   | MmugDNA.19958.1 | 9.34  | 9.68  | 0.58 | 0.1  | -1.27 | 0.202646 | 0.150776 | 0.5742   | 0.425322 |
| MmugDNA.19959.1.S1_at   | MmugDNA.19959.1 | 8.59  | 8.89  | 0.49 | 0.12 | -1.23 | 0.450217 | 0.061429 | 0.754757 | 0.294704 |
| MmugDNA.1996.1.S1_at    | MmugDNA.1996.1  | 9.34  | 9.29  | 0.11 | 0.06 | 1.03  | 0.854465 | 0.013335 | 0.948527 | 0.148042 |
| MmugDNA.19960.1.S1_at   | MmugDNA.19960.1 | 12.43 | 12.57 | 0.64 | 0.04 | -1.1  | 0.418323 | 0.506786 | 0.735488 | 0.702575 |
| MmugDNA.19962.1.S1_at   | MmugDNA.19962.1 | 7.25  | 7.29  | 0.16 | 0.04 | -1.03 | 0.733128 | 0.845986 | 0.897503 | 0.912303 |
| MmugDNA.19962.1.S1_s_at | MmugDNA.19962.1 | 7.53  | 7.37  | 0.11 | 0.02 | 1.12  | 0.187069 | 0.075371 | 0.559702 | 0.319655 |
| MmugDNA.19963.1.S1_at   | MmugDNA.19963.1 | 4.65  | 4.87  | 0.17 | 0.27 | -1.17 | 0.210437 | 0.252016 | 0.581688 | 0.520646 |
| MmugDNA.19964.1.S1_at   | MmugDNA.19964.1 | 6.11  | 6.04  | 0.07 | 0.12 | 1.05  | 0.159849 | 0.285061 | 0.532881 | 0.547095 |
| MmugDNA.19967.1.S1_at   | MmugDNA.19967.1 | 3.9   | 4.17  | 0.08 | 0.16 | -1.2  | 0.042409 | 0.02444  | 0.369024 | 0.19564  |
| MmugDNA.19968.1.S1_at   | MmugDNA.19968.1 | 6.17  | 6.18  | 0.18 | 0.03 | -1.01 | 0.378417 | 0.776585 | 0.708317 | 0.870105 |
| MmugDNA.19969.1.S1_at   | MmugDNA.19969.1 | 6.74  | 6.86  | 0.63 | 0.09 | -1.08 | 0.571912 | 0.649016 | 0.823056 | 0.794525 |
| MmugDNA.19970.1.S1_at   | MmugDNA.19970.1 | 8.16  | 8.47  | 0.53 | 0.12 | -1.24 | 0.738743 | 0.635566 | 0.900061 | 0.785437 |
| MmugDNA.19971.1.S1_at   | MmugDNA.19971.1 | 4.75  | 4.68  | 0.22 | 0.14 | 1.05  | 0.847495 | 0.961711 | 0.946572 | 0.978408 |
| MmugDNA.19973.1.S1_at   | MmugDNA.19973.1 | 9.97  | 10.18 | 0.37 | 0.12 | -1.15 | 0.76182  | 0.045309 | 0.910698 | 0.257167 |
| MmugDNA.571.1.S1_s_at   | MmugDNA.571.1   | 7.52  | 7.48  | 0.43 | 0.07 | 1.03  | 0.415812 | 0.439337 | 0.73381  | 0.658078 |
| MmugDNA.19976.1.S1_at   | MmugDNA.19976.1 | 3.3   | 3.32  | 0.1  | 0.21 | -1.01 | 0.46216  | 0.73924  | 0.761457 | 0.848883 |
| MmugDNA.19977.1.S1_at   | MmugDNA.19977.1 | 7.09  | 7.39  | 0.23 | 0.13 | -1.23 | 0.236406 | 0.121325 | 0.603291 | 0.390351 |
| MmugDNA.19978.1.S1_at   | MmugDNA.19978.1 | 8.95  | 9.37  | 0.54 | 0.05 | -1.33 | 0.46936  | 0.592869 | 0.765531 | 0.757932 |
| MmugDNA.1998.1.S1_at    | MmugDNA.1998.1  | 8.72  | 9.66  | 0.04 | 0.03 | -1.92 | 0.000006 | 0.000892 | 0.057225 | 0.047789 |
| MmugDNA.1998.1.S1_s_at  | MmugDNA.1998.1  | 10.62 | 10.7  | 0.26 | 0.04 | -1.06 | 0.21561  | 0.123215 | 0.585748 | 0.393273 |
| MmugDNA.19980.1.S1_at   | MmugDNA.19980.1 | 3.83  | 4.84  | 0.12 | 0.42 | -2.01 | 0.013519 | 0.034982 | 0.269448 | 0.231166 |
| MmugDNA.19981.1.S1_at   | MmugDNA.19981.1 | 6     | 5.98  | 0.11 | 0.19 | 1.01  | 0.929793 | 0.479969 | 0.976518 | 0.685569 |
| MmugDNA.19982.1.S1_at   | MmugDNA.19982.1 | 8.39  | 8.66  | 0.27 | 0.08 | -1.21 | 0.296081 | 0.376812 | 0.651722 | 0.614593 |
| MmugDNA.19983.1.S1_at   | MmugDNA.19983.1 | 13.49 | 13.33 | 0.2  | 0.03 | 1.12  | 0.26155  | 0.001238 | 0.62388  | 0.05478  |
| MmugDNA.19983.1.S1_s_at | MmugDNA.19983.1 | 12.32 | 11.67 | 0.49 | 0.07 | 1.57  | 0.095595 | 0.003155 | 0.464229 | 0.081739 |
| MmugDNA.19984.1.S1_at   | MmugDNA.19984.1 | 3.8   | 3.83  | 0.14 | 0.12 | -1.02 | 0.911763 | 0.992928 | 0.970168 | 0.995829 |

|                         |                 |       |       |      |      |       |          |          |          |          |
|-------------------------|-----------------|-------|-------|------|------|-------|----------|----------|----------|----------|
| MmugDNA.19985.1.S1_at   | MmugDNA.19985.1 | 6.21  | 6.04  | 0.06 | 0.12 | 1.13  | 0.068087 | 0.187973 | 0.424723 | 0.464078 |
| MmugDNA.19986.1.S1_at   | MmugDNA.19986.1 | 3.39  | 3.35  | 0.11 | 0.1  | 1.03  | 0.70596  | 0.456938 | 0.885486 | 0.670591 |
| MmugDNA.19987.1.S1_at   | MmugDNA.19987.1 | 10.57 | 9.55  | 0.16 | 0.22 | 2.03  | 0.003163 | 0.006926 | 0.191107 | 0.112445 |
| MmugDNA.19987.1.S1_s_at | MmugDNA.19987.1 | 11.58 | 10.97 | 0.13 | 0.26 | 1.52  | 0.015245 | 0.002036 | 0.280527 | 0.066885 |
| MmugDNA.19989.1.S1_at   | MmugDNA.19989.1 | 9.89  | 9.12  | 0.32 | 0.35 | 1.71  | 0.232603 | 0.002049 | 0.600124 | 0.066887 |
| MmugDNA.1999.1.S1_at    | MmugDNA.1999.1  | 11.83 | 12.04 | 0.8  | 0.17 | -1.16 | 0.807501 | 0.199445 | 0.930185 | 0.474035 |
| MmugDNA.19990.1.S1_s_at | MmugDNA.19990.1 | 13.56 | 13.03 | 0.51 | 0.03 | 1.45  | 0.4397   | 0.064799 | 0.748282 | 0.300493 |
| MmugDNA.19991.1.S1_at   | MmugDNA.19991.1 | 5.87  | 6.18  | 0.15 | 0.11 | -1.24 | 0.1082   | 0.363855 | 0.480628 | 0.604215 |
| MmugDNA.19993.1.S1_at   | MmugDNA.19993.1 | 8.16  | 8.08  | 0.05 | 0.33 | 1.05  | 0.658168 | 0.120641 | 0.864461 | 0.389476 |
| MmugDNA.19994.1.S1_at   | MmugDNA.19994.1 | 8.51  | 8.7   | 0.42 | 0.07 | -1.14 | 0.581373 | 0.223346 | 0.82757  | 0.49612  |
| MmugDNA.19995.1.S1_at   | MmugDNA.19995.1 | 4.29  | 3.76  | 0.18 | 0.18 | 1.45  | 0.051533 | 0.320003 | 0.390466 | 0.57237  |
| MmugDNA.19996.1.S1_at   | MmugDNA.19996.1 | 6.23  | 5.57  | 0.79 | 0.53 | 1.58  | 0.87081  | 0.990712 | 0.955116 | 0.994757 |
| MmugDNA.2.1.S1_at       | MmugDNA.2.1     | 4.46  | 4.12  | 0.2  | 0.18 | 1.26  | 0.099274 | 0.102634 | 0.468747 | 0.362991 |
| MmugDNA.20.1.S1_at      | MmugDNA.20.1    | 6.09  | 6.08  | 0.01 | 0.01 | 1.01  | 0.09293  | 0.272793 | 0.461635 | 0.537505 |
| MmugDNA.200.1.S1_at     | MmugDNA.200.1   | 4.93  | 4.76  | 0.14 | 0.08 | 1.13  | 0.099517 | 0.461142 | 0.469245 | 0.672857 |
| MmugDNA.2000.1.S1_at    | MmugDNA.2000.1  | 5.9   | 5.69  | 0.15 | 0.11 | 1.15  | 0.06969  | 0.227209 | 0.427525 | 0.49956  |
| MmugDNA.20001.1.S1_at   | MmugDNA.20001.1 | 6.7   | 6.62  | 0.1  | 0.09 | 1.05  | 0.159464 | 0.445535 | 0.532334 | 0.662445 |
| MmugDNA.20002.1.S1_at   | MmugDNA.20002.1 | 10.85 | 10.33 | 0.2  | 0.09 | 1.43  | 0.010299 | 0.018103 | 0.246929 | 0.169534 |
| MmugDNA.20006.1.S1_at   | MmugDNA.20006.1 | 9.59  | 9.53  | 0.23 | 0.15 | 1.04  | 0.456704 | 0.009013 | 0.758051 | 0.125499 |
| MmugDNA.20007.1.S1_at   | MmugDNA.20007.1 | 4.48  | 4.42  | 0.1  | 0.05 | 1.04  | 0.154008 | 0.236629 | 0.527325 | 0.50743  |
| MmugDNA.20008.1.S1_at   | MmugDNA.20008.1 | 7.21  | 7.38  | 0.33 | 0.37 | -1.12 | 0.985033 | 0.972644 | 0.995293 | 0.98528  |
| MmugDNA.20009.1.S1_at   | MmugDNA.20009.1 | 9.4   | 9.11  | 0.15 | 0.07 | 1.22  | 0.022942 | 0.031598 | 0.313473 | 0.219905 |
| MmugDNA.2001.1.S1_at    | MmugDNA.2001.1  | 6     | 5.25  | 0.11 | 0.38 | 1.69  | 0.065654 | 0.028637 | 0.420827 | 0.210901 |
| MmugDNA.20010.1.S1_at   | MmugDNA.20010.1 | 6.53  | 6.57  | 0.58 | 0.36 | -1.03 | 0.562413 | 0.287149 | 0.817688 | 0.548447 |
| MmugDNA.20011.1.S1_at   | MmugDNA.20011.1 | 4.07  | 3.89  | 0.27 | 0.16 | 1.13  | 0.179687 | 0.29492  | 0.553015 | 0.554462 |
| MmugDNA.20013.1.S1_at   | MmugDNA.20013.1 | 4.61  | 4.52  | 0.15 | 0.13 | 1.07  | 0.190532 | 0.685453 | 0.561786 | 0.816523 |
| MmugDNA.20014.1.S1_at   | MmugDNA.20014.1 | 3.05  | 2.95  | 0.08 | 0.02 | 1.07  | 0.097864 | 0.190531 | 0.46697  | 0.465906 |
| MmugDNA.20015.1.S1_at   | MmugDNA.20015.1 | 11.33 | 11.26 | 0.24 | 0.14 | 1.05  | 0.91483  | 0.984158 | 0.970941 | 0.991189 |
| MmugDNA.20016.1.S1_at   | MmugDNA.20016.1 | 3.78  | 3.58  | 0.12 | 0.13 | 1.15  | 0.106583 | 0.263978 | 0.479    | 0.530153 |
| MmugDNA.20017.1.S1_at   | MmugDNA.20017.1 | 10.32 | 10.91 | 0.15 | 0.07 | -1.5  | 0.006415 | 0.000193 | 0.219106 | 0.030888 |
| MmugDNA.20018.1.S1_at   | MmugDNA.20018.1 | 5.75  | 5.62  | 0.1  | 0.19 | 1.09  | 0.078048 | 0.071068 | 0.440107 | 0.312745 |
| MmugDNA.20019.1.S1_at   | MmugDNA.20019.1 | 4.23  | 4.01  | 0.11 | 0.05 | 1.17  | 0.112917 | 0.636844 | 0.486223 | 0.786404 |
| MmugDNA.2002.1.S1_at    | MmugDNA.2002.1  | 7.34  | 5.7   | 0.63 | 0.13 | 3.13  | 0.006562 | 0.006311 | 0.219832 | 0.107847 |
| MmugDNA.20023.1.S1_at   | MmugDNA.20023.1 | 4.08  | 3.63  | 0.24 | 0.12 | 1.36  | 0.073641 | 0.119786 | 0.434623 | 0.388567 |
| MmugDNA.20024.1.S1_at   | MmugDNA.20024.1 | 5.69  | 5.73  | 0.32 | 0.13 | -1.03 | 0.967402 | 0.988388 | 0.989259 | 0.993461 |
| MmugDNA.20025.1.S1_at   | MmugDNA.20025.1 | 4.48  | 4.12  | 0.12 | 0.23 | 1.28  | 0.207973 | 0.252959 | 0.579653 | 0.521261 |
| MmugDNA.20026.1.S1_at   | MmugDNA.20026.1 | 10.75 | 10.52 | 0.44 | 0.06 | 1.17  | 0.49461  | 0.211737 | 0.779478 | 0.485757 |
| MmugDNA.20027.1.S1_s_at | MmugDNA.20027.1 | 12.25 | 12.09 | 0.26 | 0.08 | 1.12  | 0.4085   | 0.013451 | 0.72935  | 0.148623 |
| MmugDNA.20028.1.S1_at   | MmugDNA.20028.1 | 11.44 | 11.47 | 0.09 | 0.02 | -1.02 | 0.512859 | 0.289873 | 0.789522 | 0.550831 |
| MmugDNA.20029.1.S1_at   | MmugDNA.20029.1 | 6.16  | 6.16  | 0.14 | 0    | 1     | 0.386339 | 0.707331 | 0.71352  | 0.830238 |
| MmugDNA.2003.1.S1_at    | MmugDNA.2003.1  | 9.62  | 9.18  | 0.95 | 0.15 | 1.36  | 0.354041 | 0.159895 | 0.69361  | 0.435987 |
| MmugDNA.20030.1.S1_at   | MmugDNA.20030.1 | 7.57  | 7.83  | 0.17 | 0.18 | -1.2  | 0.301438 | 0.62593  | 0.655772 | 0.7794   |
| MmugDNA.20032.1.S1_at   | MmugDNA.20032.1 | 5.07  | 4.82  | 0.2  | 0.18 | 1.19  | 0.173217 | 0.221184 | 0.546368 | 0.494511 |

|                         |                 |       |       |      |      |       |          |          |          |          |
|-------------------------|-----------------|-------|-------|------|------|-------|----------|----------|----------|----------|
| MmugDNA.20033.1.S1_at   | MmugDNA.20033.1 | 7.89  | 7.91  | 0.42 | 0.02 | -1.01 | 0.752955 | 0.45986  | 0.906896 | 0.671989 |
| MmugDNA.20033.1.S1_x_at | MmugDNA.20033.1 | 8.08  | 8.18  | 0.48 | 0.05 | -1.07 | 0.655587 | 0.544322 | 0.863204 | 0.726748 |
| MmugDNA.20034.1.S1_at   | MmugDNA.20034.1 | 11.52 | 12.13 | 0.39 | 0.21 | -1.53 | 0.05719  | 0.052992 | 0.401473 | 0.275841 |
| MmugDNA.20035.1.S1_at   | MmugDNA.20035.1 | 8.47  | 8.79  | 0.65 | 0.07 | -1.25 | 0.267367 | 0.019294 | 0.628121 | 0.174723 |
| MmugDNA.20036.1.S1_at   | MmugDNA.20036.1 | 8.9   | 8.72  | 0.21 | 0.11 | 1.13  | 0.184058 | 0.226096 | 0.55696  | 0.498585 |
| MmugDNA.20038.1.S1_at   | MmugDNA.20038.1 | 6.4   | 5.99  | 0.09 | 0.09 | 1.33  | 0.004623 | 0.001954 | 0.201101 | 0.065813 |
| MmugDNA.20039.1.S1_at   | MmugDNA.20039.1 | 6.06  | 5.87  | 0.09 | 0.1  | 1.14  | 0.073698 | 0.27189  | 0.434623 | 0.536644 |
| MmugDNA.2004.1.S1_at    | MmugDNA.2004.1  | 6.3   | 6.2   | 0.11 | 0.04 | 1.07  | 0.168405 | 0.680215 | 0.541035 | 0.813309 |
| MmugDNA.20040.1.S1_at   | MmugDNA.20040.1 | 3.01  | 3.03  | 0.04 | 0.13 | -1.01 | 0.786305 | 0.830741 | 0.921403 | 0.902874 |
| MmugDNA.20041.1.S1_at   | MmugDNA.20041.1 | 5.13  | 5.12  | 0.09 | 0.09 | 1     | 0.331729 | 0.461649 | 0.678207 | 0.673228 |
| MmugDNA.35850.1.S1_s_at | MmugDNA.35850.1 | 5.68  | 5.72  | 0.34 | 0.1  | -1.03 | 0.686069 | 0.458885 | 0.877083 | 0.671498 |
| MmugDNA.20043.1.S1_at   | MmugDNA.20043.1 | 6.33  | 6.31  | 0.11 | 0.14 | 1.01  | 0.923183 | 0.041327 | 0.974166 | 0.247995 |
| MmugDNA.20044.1.S1_at   | MmugDNA.20044.1 | 7.13  | 7.45  | 0.24 | 0.11 | -1.25 | 0.315162 | 0.135299 | 0.665641 | 0.407381 |
| MmugDNA.20044.1.S1_s_at | MmugDNA.20044.1 | 7.42  | 7.3   | 0.09 | 0.35 | 1.08  | 0.434594 | 0.045467 | 0.745233 | 0.2575   |
| MmugDNA.20045.1.S1_at   | MmugDNA.20045.1 | 9.24  | 9.35  | 0.09 | 0.07 | -1.08 | 0.080823 | 0.206853 | 0.444846 | 0.481011 |
| MmugDNA.20048.1.S1_at   | MmugDNA.20048.1 | 5.31  | 5.28  | 0.16 | 0.02 | 1.02  | 0.666248 | 0.625686 | 0.868243 | 0.779265 |
| MmugDNA.20049.1.S1_at   | MmugDNA.20049.1 | 5.73  | 5.58  | 0.17 | 0.34 | 1.11  | 0.616367 | 0.941448 | 0.84491  | 0.966805 |
| MmugDNA.2005.1.S1_at    | MmugDNA.2005.1  | 3.43  | 3.2   | 0.27 | 0.1  | 1.17  | 0.121753 | 0.159289 | 0.495432 | 0.43531  |
| MmugDNA.20052.1.S1_at   | MmugDNA.20052.1 | 8.8   | 9.52  | 0.92 | 0.2  | -1.64 | 0.313498 | 0.141963 | 0.664784 | 0.415505 |
| MmugDNA.20056.1.S1_at   | MmugDNA.20056.1 | 9.45  | 9.25  | 0.17 | 0.09 | 1.15  | 0.167437 | 0.371201 | 0.540065 | 0.610135 |
| MmugDNA.20057.1.S1_s_at | MmugDNA.20057.1 | 6.19  | 5.99  | 0.25 | 0.36 | 1.15  | 0.183632 | 0.164326 | 0.55651  | 0.440566 |
| MmugDNA.20058.1.S1_at   | MmugDNA.20058.1 | 4.82  | 5.01  | 0.24 | 0.23 | -1.14 | 0.223675 | 0.41473  | 0.592842 | 0.640456 |
| MmugDNA.20059.1.S1_at   | MmugDNA.20059.1 | 3.68  | 3.55  | 0.11 | 0.02 | 1.09  | 0.241514 | 0.329384 | 0.60766  | 0.578733 |
| MmugDNA.2006.1.S1_at    | MmugDNA.2006.1  | 7.55  | 7.07  | 0.32 | 0.18 | 1.39  | 0.059585 | 0.01176  | 0.406669 | 0.140492 |
| MmugDNA.20060.1.S1_at   | MmugDNA.20060.1 | 11.84 | 11.59 | 0.28 | 0.03 | 1.19  | 0.587287 | 0.555017 | 0.831578 | 0.733598 |
| MmugDNA.20061.1.S1_at   | MmugDNA.20061.1 | 3.77  | 3.64  | 0.14 | 0.21 | 1.09  | 0.707203 | 0.801205 | 0.88608  | 0.885679 |
| MmugDNA.20062.1.S1_at   | MmugDNA.20062.1 | 5.75  | 5.42  | 0.17 | 0.01 | 1.26  | 0.07929  | 0.060075 | 0.442056 | 0.291767 |
| MmugDNA.20063.1.S1_at   | MmugDNA.20063.1 | 11.08 | 10.69 | 0.26 | 0.04 | 1.31  | 0.072498 | 0.003    | 0.432598 | 0.079958 |
| MmugDNA.20064.1.S1_at   | MmugDNA.20064.1 | 10.17 | 9.4   | 0.14 | 0.09 | 1.72  | 0.001375 | 0.000032 | 0.159096 | 0.022097 |
| MmugDNA.20065.1.S1_at   | MmugDNA.20065.1 | 6.29  | 5.66  | 0.31 | 0.19 | 1.55  | 0.063656 | 0.052235 | 0.416123 | 0.274065 |
| MmugDNA.20068.1.S1_at   | MmugDNA.20068.1 | 7.19  | 7.32  | 0.58 | 0.12 | -1.09 | 0.937617 | 0.226151 | 0.979038 | 0.498644 |
| MmugDNA.20069.1.S1_at   | MmugDNA.20069.1 | 10.01 | 10.91 | 0.53 | 0.27 | -1.87 | 0.035851 | 0.009895 | 0.35366  | 0.13068  |
| MmugDNA.2007.1.S1_at    | MmugDNA.2007.1  | 5.88  | 5.76  | 0.03 | 0.08 | 1.09  | 0.088644 | 0.133627 | 0.456387 | 0.40557  |
| MmugDNA.20070.1.S1_at   | MmugDNA.20070.1 | 4.7   | 4.73  | 0.07 | 0.09 | -1.01 | 0.649246 | 0.211767 | 0.860245 | 0.485757 |
| MmugDNA.20071.1.S1_at   | MmugDNA.20071.1 | 4.99  | 4.84  | 1.06 | 0.1  | 1.11  | 0.883506 | 0.894307 | 0.95964  | 0.939697 |
| MmugDNA.20072.1.S1_at   | MmugDNA.20072.1 | 4.69  | 4.95  | 0.14 | 0.02 | -1.19 | 0.035778 | 0.658517 | 0.353107 | 0.800401 |
| MmugDNA.20072.1.S1_s_at | MmugDNA.20072.1 | 7.13  | 7.73  | 0.13 | 0.07 | -1.51 | 0.002052 | 0.001092 | 0.173807 | 0.052283 |
| MmugDNA.20074.1.S1_at   | MmugDNA.20074.1 | 9.16  | 9.78  | 0.21 | 0.08 | -1.54 | 0.00752  | 0.004631 | 0.229281 | 0.094988 |
| MmugDNA.20075.1.S1_at   | MmugDNA.20075.1 | 7.46  | 7.5   | 0.74 | 0.23 | -1.03 | 0.749674 | 0.469198 | 0.905264 | 0.678155 |
| MmugDNA.20076.1.S1_at   | MmugDNA.20076.1 | 5.55  | 5.72  | 0.6  | 0.31 | -1.13 | 0.569725 | 0.868789 | 0.821593 | 0.925437 |
| MmugDNA.20077.1.S1_at   | MmugDNA.20077.1 | 7.48  | 7.33  | 0.66 | 0.2  | 1.11  | 0.636453 | 0.299569 | 0.855006 | 0.557945 |
| MmugDNA.20078.1.S1_at   | MmugDNA.20078.1 | 5.79  | 5.64  | 0.15 | 0.11 | 1.11  | 0.945431 | 0.200904 | 0.980928 | 0.475395 |
| MmugDNA.2008.1.S1_at    | MmugDNA.2008.1  | 8.63  | 8.71  | 0.14 | 0.07 | -1.06 | 0.211559 | 0.014354 | 0.582565 | 0.152926 |

|                         |                 |       |       |      |      |       |          |          |          |          |
|-------------------------|-----------------|-------|-------|------|------|-------|----------|----------|----------|----------|
| MmugDNA.20080.1.S1_at   | MmugDNA.20080.1 | 6.57  | 6.37  | 0.01 | 0.06 | 1.15  | 0.004589 | 0.004124 | 0.201051 | 0.090887 |
| MmugDNA.20081.1.S1_at   | MmugDNA.20081.1 | 4.9   | 4.87  | 0.04 | 0.13 | 1.02  | 0.812886 | 0.54206  | 0.932245 | 0.725196 |
| MmugDNA.20082.1.S1_at   | MmugDNA.20082.1 | 4.83  | 5.53  | 0.61 | 0.32 | -1.63 | 0.39755  | 0.43509  | 0.721771 | 0.655005 |
| MmugDNA.20083.1.S1_at   | MmugDNA.20083.1 | 3.84  | 3.66  | 0.26 | 0.06 | 1.13  | 0.175004 | 0.146956 | 0.548031 | 0.421011 |
| MmugDNA.20084.1.S1_at   | MmugDNA.20084.1 | 6.06  | 6.71  | 0.2  | 0.2  | -1.57 | 0.016637 | 0.058623 | 0.287478 | 0.288825 |
| MmugDNA.20086.1.S1_at   | MmugDNA.20086.1 | 3.8   | 3.84  | 0.26 | 0.16 | -1.03 | 0.810381 | 0.819456 | 0.931335 | 0.895996 |
| MmugDNA.20087.1.S1_at   | MmugDNA.20087.1 | 9.01  | 8.36  | 0.08 | 0.18 | 1.57  | 0.005093 | 0.005918 | 0.204981 | 0.105276 |
| MmugDNA.20088.1.S1_at   | MmugDNA.20088.1 | 8.65  | 8.88  | 0.22 | 0.29 | -1.17 | 0.909509 | 0.15693  | 0.969434 | 0.432372 |
| MmugDNA.20089.1.S1_at   | MmugDNA.20089.1 | 11.89 | 11.06 | 1.48 | 0.32 | 1.77  | 0.988541 | 0.1027   | 0.995877 | 0.363111 |
| MmugDNA.2009.1.S1_at    | MmugDNA.2009.1  | 5.09  | 5.96  | 0.85 | 0.54 | -1.83 | 0.275608 | 0.046139 | 0.635081 | 0.259209 |
| MmugDNA.20091.1.S1_at   | MmugDNA.20091.1 | 4.42  | 4.33  | 0    | 0.15 | 1.07  | 0.424671 | 0.05494  | 0.739622 | 0.279837 |
| MmugDNA.20092.1.S1_at   | MmugDNA.20092.1 | 2.92  | 2.78  | 0.18 | 0.03 | 1.1   | 0.169991 | 0.246268 | 0.542967 | 0.515889 |
| MmugDNA.20093.1.S1_at   | MmugDNA.20093.1 | 6.52  | 6.96  | 0.94 | 0.3  | -1.36 | 0.4718   | 0.457221 | 0.766635 | 0.670746 |
| MmugDNA.20094.1.S1_at   | MmugDNA.20094.1 | 4.57  | 4.51  | 0.36 | 0.34 | 1.05  | 0.369973 | 0.044652 | 0.704429 | 0.255716 |
| MmugDNA.20096.1.S1_at   | MmugDNA.20096.1 | 9.88  | 10.01 | 0.71 | 0.22 | -1.09 | 0.763003 | 0.907553 | 0.910975 | 0.947728 |
| MmugDNA.20097.1.S1_at   | MmugDNA.20097.1 | 8.49  | 8.53  | 0.11 | 0.15 | -1.03 | 0.898838 | 0.618525 | 0.965643 | 0.774147 |
| MmugDNA.20098.1.S1_at   | MmugDNA.20098.1 | 3.99  | 3.82  | 0.69 | 0.14 | 1.12  | 0.300912 | 0.272882 | 0.655213 | 0.537598 |
| MmugDNA.20099.1.S1_at   | MmugDNA.20099.1 | 3.25  | 3.26  | 0.04 | 0.15 | -1.01 | 0.761837 | 0.311933 | 0.910698 | 0.566833 |
| MmugDNA.20101.1.S1_at   | MmugDNA.20101.1 | 7.74  | 6.97  | 0.44 | 0.37 | 1.7   | 0.142493 | 0.141101 | 0.517603 | 0.414602 |
| MmugDNA.20102.1.S1_at   | MmugDNA.20102.1 | 4.64  | 4.77  | 0.76 | 0.59 | -1.1  | 0.803835 | 0.598259 | 0.928583 | 0.760715 |
| MmugDNA.20103.1.S1_at   | MmugDNA.20103.1 | 3.63  | 3.66  | 0.3  | 0.03 | -1.02 | 0.689002 | 0.861817 | 0.878634 | 0.92146  |
| MmugDNA.20104.1.S1_at   | MmugDNA.20104.1 | 4.73  | 4.63  | 0.18 | 0.09 | 1.07  | 0.713624 | 0.855621 | 0.888497 | 0.917679 |
| MmugDNA.20105.1.S1_at   | MmugDNA.20105.1 | 4.43  | 4.45  | 0    | 0.27 | -1.02 | 0.634482 | 0.744419 | 0.854071 | 0.852014 |
| MmugDNA.20107.1.S1_at   | MmugDNA.20107.1 | 5.14  | 5.11  | 0.11 | 0.13 | 1.02  | 0.356141 | 0.185893 | 0.69508  | 0.461752 |
| MmugDNA.20108.1.S1_at   | MmugDNA.20108.1 | 6.72  | 6.37  | 0.89 | 0.78 | 1.27  | 0.938379 | 0.578723 | 0.979268 | 0.748611 |
| MmugDNA.20109.1.S1_at   | MmugDNA.20109.1 | 5.99  | 5.78  | 0.22 | 0.14 | 1.15  | 0.092978 | 0.102118 | 0.46164  | 0.362168 |
| MmugDNA.2011.1.S1_at    | MmugDNA.2011.1  | 9.63  | 8.97  | 0.58 | 0.28 | 1.59  | 0.162038 | 0.174569 | 0.535244 | 0.451078 |
| MmugDNA.2011.1.S1_s_at  | MmugDNA.2011.1  | 11.14 | 10.23 | 0.57 | 0.13 | 1.88  | 0.122923 | 0.100465 | 0.496358 | 0.359612 |
| MmugDNA.20112.1.S1_at   | MmugDNA.20112.1 | 3.32  | 3.7   | 0.44 | 0.16 | -1.29 | 0.410244 | 0.60315  | 0.730705 | 0.763963 |
| MmugDNA.20113.1.S1_at   | MmugDNA.20113.1 | 3.95  | 3.96  | 0.11 | 0.05 | -1    | 0.650321 | 0.335103 | 0.86087  | 0.582853 |
| MmugDNA.20114.1.S1_at   | MmugDNA.20114.1 | 11.28 | 11.02 | 0.27 | 0.19 | 1.19  | 0.114823 | 0.113975 | 0.487957 | 0.380304 |
| MmugDNA.20114.1.S1_s_at | MmugDNA.20114.1 | 11.79 | 11.63 | 0.24 | 0.09 | 1.12  | 0.207145 | 0.064231 | 0.578774 | 0.299668 |
| MmugDNA.20115.1.S1_at   | MmugDNA.20115.1 | 6.26  | 6.3   | 0.06 | 0.05 | -1.03 | 0.161779 | 0.701492 | 0.535175 | 0.826875 |
| MmugDNA.20116.1.S1_at   | MmugDNA.20116.1 | 7.94  | 7.68  | 0.28 | 0.07 | 1.2   | 0.120084 | 0.05349  | 0.493412 | 0.276963 |
| MmugDNA.41342.1.S1_at   | MmugDNA.41342.1 | 8.25  | 8.62  | 0.44 | 0.46 | -1.29 | 0.358905 | 0.19623  | 0.696813 | 0.471236 |
| MmugDNA.41342.1.S1_s_at | MmugDNA.41342.1 | 7.82  | 7.86  | 0.27 | 0.23 | -1.02 | 0.835183 | 0.195665 | 0.940884 | 0.470495 |
| MmugDNA.20118.1.S1_at   | MmugDNA.20118.1 | 9.72  | 9.55  | 0.11 | 0.12 | 1.13  | 0.066698 | 0.026493 | 0.422542 | 0.203897 |
| MmugDNA.20119.1.S1_at   | MmugDNA.20119.1 | 3.65  | 3.65  | 0.08 | 0.01 | 1     | 0.368417 | 0.937731 | 0.703625 | 0.964687 |
| MmugDNA.2012.1.S1_at    | MmugDNA.2012.1  | 3.73  | 3.78  | 0.13 | 0.09 | -1.03 | 0.633611 | 0.235383 | 0.853619 | 0.506431 |
| MmugDNA.20120.1.S1_at   | MmugDNA.20120.1 | 11.04 | 10.71 | 0.41 | 0.03 | 1.26  | 0.221399 | 0.025901 | 0.591006 | 0.201714 |
| MmugDNA.20121.1.S1_at   | MmugDNA.20121.1 | 8.27  | 8.19  | 0.22 | 0.17 | 1.06  | 0.8922   | 0.195624 | 0.962988 | 0.470481 |
| MmugDNA.20122.1.S1_at   | MmugDNA.20122.1 | 5.64  | 5.45  | 0.34 | 0.32 | 1.14  | 0.524622 | 0.153135 | 0.795975 | 0.428011 |
| MmugDNA.20123.1.S1_at   | MmugDNA.20123.1 | 3.04  | 3.04  | 0    | 0.05 | -1    | 0.849085 | 0.997404 | 0.946949 | 0.998632 |

|                         |                 |       |       |      |      |       |          |          |          |          |
|-------------------------|-----------------|-------|-------|------|------|-------|----------|----------|----------|----------|
| MmugDNA.20124.1.S1_at   | MmugDNA.20124.1 | 6.09  | 6.2   | 0.27 | 0.1  | -1.07 | 0.859127 | 0.335679 | 0.950315 | 0.583441 |
| MmugDNA.20125.1.S1_at   | MmugDNA.20125.1 | 4.14  | 3.97  | 0.11 | 0.17 | 1.12  | 0.292856 | 0.390082 | 0.649133 | 0.624002 |
| MmugDNA.20130.1.S1_at   | MmugDNA.20130.1 | 8.44  | 9.51  | 0.62 | 0.22 | -2.1  | 0.032339 | 0.008099 | 0.343902 | 0.119551 |
| MmugDNA.20132.1.S1_at   | MmugDNA.20132.1 | 9.26  | 9.14  | 0.15 | 0.11 | 1.09  | 0.629952 | 0.322655 | 0.851781 | 0.574024 |
| MmugDNA.20133.1.S1_at   | MmugDNA.20133.1 | 9.78  | 9.67  | 0.24 | 0.05 | 1.08  | 0.578775 | 0.159772 | 0.826297 | 0.435871 |
| MmugDNA.20135.1.S1_at   | MmugDNA.20135.1 | 10.68 | 10.36 | 0.1  | 0.22 | 1.25  | 0.041112 | 0.010512 | 0.365675 | 0.133936 |
| MmugDNA.20136.1.S1_at   | MmugDNA.20136.1 | 6.45  | 7.09  | 0.15 | 0.2  | -1.55 | 0.010515 | 0.075172 | 0.248118 | 0.319373 |
| MmugDNA.20137.1.S1_at   | MmugDNA.20137.1 | 7.47  | 7.77  | 0.23 | 0.61 | -1.23 | 0.17368  | 0.425859 | 0.546749 | 0.6481   |
| MmugDNA.20138.1.S1_at   | MmugDNA.20138.1 | 10.08 | 9.34  | 0.21 | 0.09 | 1.67  | 0.005045 | 0.00063  | 0.204763 | 0.042867 |
| MmugDNA.20139.1.S1_s_at | MmugDNA.20139.1 | 3.87  | 4.41  | 0.21 | 0.11 | -1.45 | 0.054277 | 0.126607 | 0.396159 | 0.397214 |
| MmugDNA.20140.1.S1_at   | MmugDNA.20140.1 | 7.71  | 8.15  | 0.5  | 0.14 | -1.35 | 0.669954 | 0.433721 | 0.869803 | 0.653946 |
| MmugDNA.20141.1.S1_at   | MmugDNA.20141.1 | 4.53  | 4.5   | 0.19 | 0.14 | 1.02  | 0.634794 | 0.637081 | 0.854272 | 0.786624 |
| MmugDNA.20142.1.S1_at   | MmugDNA.20142.1 | 6.75  | 6.81  | 0.46 | 0.15 | -1.04 | 0.953547 | 0.840407 | 0.98451  | 0.909015 |
| MmugDNA.20143.1.S1_at   | MmugDNA.20143.1 | 6.76  | 7.03  | 0.39 | 0.25 | -1.21 | 0.477492 | 0.137737 | 0.769855 | 0.410738 |
| MmugDNA.20147.1.S1_at   | MmugDNA.20147.1 | 5.26  | 6.37  | 0.31 | 0.28 | -2.17 | 0.010326 | 0.331986 | 0.246929 | 0.580544 |
| MmugDNA.20148.1.S1_at   | MmugDNA.20148.1 | 5.78  | 6.92  | 0.7  | 0.24 | -2.19 | 0.062095 | 0.121415 | 0.412245 | 0.390499 |
| MmugDNA.20149.1.S1_at   | MmugDNA.20149.1 | 6.16  | 6.33  | 0.26 | 0.32 | -1.12 | 0.238083 | 0.383222 | 0.605216 | 0.61922  |
| MmugDNA.2015.1.S1_at    | MmugDNA.2015.1  | 9.43  | 9.34  | 0.2  | 0.14 | 1.06  | 0.665765 | 0.107864 | 0.868043 | 0.370945 |
| MmugDNA.20151.1.S1_at   | MmugDNA.20151.1 | 10.11 | 9.35  | 0.51 | 0.09 | 1.69  | 0.18974  | 0.249258 | 0.561075 | 0.518332 |
| MmugDNA.20151.1.S1_x_at | MmugDNA.20151.1 | 10.18 | 9.49  | 0.52 | 0.03 | 1.61  | 0.266412 | 0.34051  | 0.627329 | 0.586776 |
| MmugDNA.20152.1.S1_at   | MmugDNA.20152.1 | 5.95  | 5.89  | 0.14 | 0.15 | 1.04  | 0.231293 | 0.299089 | 0.599266 | 0.557663 |
| MmugDNA.20153.1.S1_at   | MmugDNA.20153.1 | 3.88  | 3.98  | 0.08 | 0.37 | -1.06 | 0.184238 | 0.225204 | 0.55696  | 0.497865 |
| MmugDNA.20154.1.S1_at   | MmugDNA.20154.1 | 7.11  | 7.03  | 0.19 | 0.18 | 1.06  | 0.59051  | 0.722711 | 0.832911 | 0.839378 |
| MmugDNA.20155.1.S1_at   | MmugDNA.20155.1 | 8.03  | 7.42  | 0.28 | 0.16 | 1.52  | 0.024679 | 0.014111 | 0.319449 | 0.15195  |
| MmugDNA.31444.1.S1_s_at | MmugDNA.31444.1 | 7.5   | 7.51  | 0.08 | 0.03 | -1.01 | 0.738697 | 0.518803 | 0.900053 | 0.710724 |
| MmugDNA.31444.1.S1_x_at | MmugDNA.31444.1 | 6.48  | 6.39  | 0.12 | 0.06 | 1.06  | 0.17031  | 0.577906 | 0.543379 | 0.748185 |
| MmugDNA.2016.1.S1_at    | MmugDNA.2016.1  | 5.32  | 5.24  | 0.14 | 0.13 | 1.06  | 0.203209 | 0.142907 | 0.574732 | 0.416854 |
| MmugDNA.20160.1.S1_at   | MmugDNA.20160.1 | 7.07  | 7.12  | 1.41 | 0.26 | -1.03 | 0.827547 | 0.118736 | 0.938039 | 0.386775 |
| MmugDNA.20161.1.S1_at   | MmugDNA.20161.1 | 5.83  | 5.93  | 0.06 | 0.31 | -1.07 | 0.48949  | 0.764781 | 0.776198 | 0.863209 |
| MmugDNA.20162.1.S1_at   | MmugDNA.20162.1 | 5.56  | 5.68  | 0.36 | 0.59 | -1.09 | 0.622366 | 0.151714 | 0.847755 | 0.426383 |
| MmugDNA.20163.1.S1_at   | MmugDNA.20163.1 | 3.82  | 3.82  | 0.07 | 0.02 | 1     | 0.424911 | 0.934557 | 0.739715 | 0.962917 |
| MmugDNA.20166.1.S1_at   | MmugDNA.20166.1 | 4.9   | 5.14  | 0.15 | 0.13 | -1.18 | 0.098313 | 0.072134 | 0.467704 | 0.314635 |
| MmugDNA.20167.1.S1_at   | MmugDNA.20167.1 | 11.71 | 11.84 | 0.05 | 0.11 | -1.09 | 0.110221 | 0.140198 | 0.483363 | 0.413405 |
| MmugDNA.20168.1.S1_at   | MmugDNA.20168.1 | 2.89  | 2.8   | 0.03 | 0.1  | 1.06  | 0.576729 | 0.064727 | 0.825166 | 0.300314 |
| MmugDNA.20169.1.S1_at   | MmugDNA.20169.1 | 5.58  | 5.57  | 0.13 | 0.07 | 1     | 0.960861 | 0.89847  | 0.987225 | 0.942214 |
| MmugDNA.2017.1.S1_at    | MmugDNA.2017.1  | 3.61  | 3.63  | 0.25 | 0.12 | -1.01 | 0.555413 | 0.255721 | 0.813492 | 0.523675 |
| MmugDNA.20171.1.S1_at   | MmugDNA.20171.1 | 5.11  | 5.34  | 0.41 | 0.24 | -1.17 | 0.918026 | 0.42199  | 0.972062 | 0.645406 |
| MmugDNA.20172.1.S1_at   | MmugDNA.20172.1 | 6.88  | 6.71  | 0.47 | 0.33 | 1.12  | 0.868435 | 0.225009 | 0.953968 | 0.49773  |
| MmugDNA.20173.1.S1_at   | MmugDNA.20173.1 | 7.14  | 6.86  | 0.47 | 0.12 | 1.22  | 0.954015 | 0.942032 | 0.984675 | 0.967113 |
| MmugDNA.20176.1.S1_at   | MmugDNA.20176.1 | 5.99  | 6.16  | 0.07 | 0.12 | -1.13 | 0.056069 | 0.403392 | 0.399441 | 0.632085 |
| MmugDNA.20178.1.S1_at   | MmugDNA.20178.1 | 4.46  | 3.96  | 0.38 | 0.58 | 1.41  | 0.659782 | 0.74633  | 0.865429 | 0.85272  |
| MmugDNA.20180.1.S1_at   | MmugDNA.20180.1 | 9.68  | 9.33  | 0.06 | 0.04 | 1.28  | 0.001192 | 0.001195 | 0.156386 | 0.05421  |
| MmugDNA.20181.1.S1_at   | MmugDNA.20181.1 | 4.66  | 4.64  | 0.29 | 0.18 | 1.02  | 0.65086  | 0.89587  | 0.861248 | 0.940488 |

|                         |                 |       |       |      |      |       |          |          |          |          |
|-------------------------|-----------------|-------|-------|------|------|-------|----------|----------|----------|----------|
| MmugDNA.20183.1.S1_at   | MmugDNA.20183.1 | 3.46  | 3.39  | 0.07 | 0.16 | 1.05  | 0.577629 | 0.489861 | 0.825827 | 0.691972 |
| MmugDNA.20185.1.S1_at   | MmugDNA.20185.1 | 3.81  | 3.77  | 0.15 | 0.07 | 1.03  | 0.587337 | 0.160902 | 0.831578 | 0.437116 |
| MmugDNA.20186.1.S1_at   | MmugDNA.20186.1 | 4.94  | 4.94  | 0.12 | 0.12 | -1.01 | 0.981224 | 0.967251 | 0.993962 | 0.981908 |
| MmugDNA.20187.1.S1_at   | MmugDNA.20187.1 | 7.3   | 7.29  | 0.11 | 0.04 | 1.01  | 0.882242 | 0.88795  | 0.959161 | 0.936115 |
| MmugDNA.20188.1.S1_at   | MmugDNA.20188.1 | 4.98  | 4.6   | 0.43 | 0.33 | 1.3   | 0.493224 | 0.000466 | 0.778778 | 0.038572 |
| MmugDNA.20189.1.S1_at   | MmugDNA.20189.1 | 6.39  | 6.21  | 0.18 | 0.18 | 1.13  | 0.126823 | 0.028188 | 0.500609 | 0.2095   |
| MmugDNA.2019.1.S1_at    | MmugDNA.2019.1  | 12.08 | 11.97 | 0.68 | 0.04 | 1.08  | 0.953443 | 0.490939 | 0.984468 | 0.692666 |
| MmugDNA.20190.1.S1_at   | MmugDNA.20190.1 | 6.92  | 7.4   | 0.06 | 0.04 | -1.4  | 0.000641 | 5.42E-07 | 0.144177 | 0.005999 |
| MmugDNA.20191.1.S1_at   | MmugDNA.20191.1 | 6.71  | 6.71  | 0.06 | 0.01 | 1     | 0.309703 | 0.320867 | 0.661815 | 0.572849 |
| MmugDNA.20194.1.S1_at   | MmugDNA.20194.1 | 6.48  | 5.87  | 1.55 | 0.46 | 1.52  | 0.478662 | 0.190468 | 0.770122 | 0.465906 |
| MmugDNA.20196.1.S1_at   | MmugDNA.20196.1 | 9.56  | 9.45  | 0.53 | 0.07 | -1.07 | 0.737469 | 0.409294 | 0.89952  | 0.63643  |
| MmugDNA.20199.1.S1_at   | MmugDNA.20199.1 | 7.05  | 7.4   | 0.39 | 0.44 | -1.27 | 0.152499 | 0.212989 | 0.525558 | 0.486926 |
| MmugDNA.2020.1.S1_at    | MmugDNA.2020.1  | 3.43  | 3.53  | 0.22 | 0.14 | -1.07 | 0.880141 | 0.3896   | 0.958484 | 0.623668 |
| MmugDNA.20200.1.S1_at   | MmugDNA.20200.1 | 4.38  | 4.35  | 0.18 | 0.1  | 1.02  | 0.986416 | 0.536842 | 0.995654 | 0.722119 |
| MmugDNA.20202.1.S1_at   | MmugDNA.20202.1 | 8.87  | 8.99  | 0.26 | 0.03 | -1.09 | 0.545341 | 0.15915  | 0.807751 | 0.435217 |
| MmugDNA.20204.1.S1_at   | MmugDNA.20204.1 | 5.42  | 5.22  | 0.13 | 0.07 | 1.15  | 0.084996 | 0.335556 | 0.45159  | 0.583326 |
| MmugDNA.20205.1.S1_at   | MmugDNA.20205.1 | 6.93  | 6.83  | 0.11 | 0.08 | 1.07  | 0.170751 | 0.229353 | 0.543739 | 0.501527 |
| MmugDNA.20207.1.S1_at   | MmugDNA.20207.1 | 9.79  | 9.12  | 0.81 | 0.18 | 1.59  | 0.559038 | 0.739783 | 0.815877 | 0.849224 |
| MmugDNA.20208.1.S1_at   | MmugDNA.20208.1 | 6.96  | 6.28  | 0.35 | 0.29 | 1.61  | 0.055186 | 0.395967 | 0.398095 | 0.627802 |
| MmugDNA.20209.1.S1_at   | MmugDNA.20209.1 | 4.98  | 4.95  | 0.04 | 0.09 | 1.02  | 0.239896 | 0.427952 | 0.606208 | 0.649602 |
| MmugDNA.20210.1.S1_at   | MmugDNA.20210.1 | 9.01  | 9.09  | 0.21 | 0.11 | -1.05 | 0.629529 | 0.024405 | 0.851663 | 0.19551  |
| MmugDNA.20211.1.S1_at   | MmugDNA.20211.1 | 3.43  | 3.05  | 0.22 | 0.05 | 1.31  | 0.144582 | 0.349434 | 0.519872 | 0.593409 |
| MmugDNA.20212.1.S1_at   | MmugDNA.20212.1 | 2.66  | 2.66  | 0    | 0.02 | 1     | 0.373901 | 0.344403 | 0.705567 | 0.58981  |
| MmugDNA.20213.1.S1_at   | MmugDNA.20213.1 | 7.64  | 7.6   | 0.51 | 0.08 | 1.03  | 0.457762 | 0.559926 | 0.758442 | 0.736439 |
| MmugDNA.20214.1.S1_at   | MmugDNA.20214.1 | 3.67  | 3.72  | 0.13 | 0.05 | -1.03 | 0.75826  | 0.197299 | 0.909029 | 0.472213 |
| MmugDNA.20215.1.S1_at   | MmugDNA.20215.1 | 5.52  | 5.49  | 0.22 | 0.06 | 1.02  | 0.635333 | 0.851307 | 0.854522 | 0.915393 |
| MmugDNA.20216.1.S1_at   | MmugDNA.20216.1 | 3.82  | 4.26  | 0.17 | 0.55 | -1.36 | 0.273276 | 0.20323  | 0.632963 | 0.477415 |
| MmugDNA.20217.1.S1_at   | MmugDNA.20217.1 | 6.47  | 6.66  | 0.46 | 0.1  | -1.14 | 0.628424 | 0.718202 | 0.851106 | 0.836902 |
| MmugDNA.20218.1.S1_at   | MmugDNA.20218.1 | 6.2   | 7     | 1.49 | 0.1  | -1.74 | 0.387284 | 0.191691 | 0.714163 | 0.46695  |
| MmugDNA.2022.1.S1_at    | MmugDNA.2022.1  | 5.94  | 5.82  | 0.19 | 0.22 | 1.08  | 0.3358   | 0.113409 | 0.681226 | 0.379509 |
| MmugDNA.20222.1.S1_at   | MmugDNA.20222.1 | 9.51  | 10.29 | 0.54 | 0.32 | -1.71 | 0.044282 | 0.034246 | 0.374279 | 0.228903 |
| MmugDNA.20222.1.S1_s_at | MmugDNA.20222.1 | 12.54 | 12.8  | 0.25 | 0.23 | -1.2  | 0.052548 | 0.052316 | 0.392658 | 0.274201 |
| MmugDNA.20223.1.S1_at   | MmugDNA.20223.1 | 4.49  | 4.51  | 0.24 | 0.35 | -1.02 | 0.888147 | 0.207808 | 0.96126  | 0.482031 |
| MmugDNA.20224.1.S1_at   | MmugDNA.20224.1 | 9.44  | 10.02 | 0.07 | 0.12 | -1.5  | 0.001067 | 0.000194 | 0.155464 | 0.030888 |
| MmugDNA.20225.1.S1_at   | MmugDNA.20225.1 | 3.17  | 3.3   | 0.33 | 0.24 | -1.09 | 0.439577 | 0.29469  | 0.748221 | 0.554326 |
| MmugDNA.20226.1.S1_at   | MmugDNA.20226.1 | 3.97  | 4.01  | 0.5  | 0.2  | -1.03 | 0.984556 | 0.928759 | 0.995256 | 0.959449 |
| MmugDNA.20228.1.S1_at   | MmugDNA.20228.1 | 4.77  | 4.65  | 0.07 | 0.06 | 1.08  | 0.058443 | 0.05398  | 0.404396 | 0.27777  |
| MmugDNA.20229.1.S1_at   | MmugDNA.20229.1 | 6.45  | 7.16  | 0.91 | 0.07 | -1.63 | 0.762691 | 0.878616 | 0.91092  | 0.930729 |
| MmugDNA.2023.1.S1_at    | MmugDNA.2023.1  | 3.95  | 3.9   | 0.27 | 0    | 1.04  | 0.718053 | 0.822106 | 0.890613 | 0.897658 |
| MmugDNA.20230.1.S1_at   | MmugDNA.20230.1 | 7.76  | 7.7   | 0.71 | 0.13 | 1.04  | 0.956146 | 0.656708 | 0.985451 | 0.79927  |
| MmugDNA.20231.1.S1_at   | MmugDNA.20231.1 | 10.78 | 10.75 | 0.65 | 0.03 | 1.02  | 0.946245 | 0.539819 | 0.981367 | 0.723976 |
| MmugDNA.20232.1.S1_at   | MmugDNA.20232.1 | 3.55  | 3.75  | 0.33 | 0.56 | -1.15 | 0.470907 | 0.651361 | 0.766231 | 0.796212 |
| MmugDNA.20233.1.S1_at   | MmugDNA.20233.1 | 4.1   | 4.26  | 0.45 | 0.25 | -1.12 | 0.675663 | 0.872355 | 0.872698 | 0.927442 |

|                         |                 |       |       |      |      |       |          |          |          |          |
|-------------------------|-----------------|-------|-------|------|------|-------|----------|----------|----------|----------|
| MmugDNA.20235.1.S1_at   | MmugDNA.20235.1 | 3.46  | 3.48  | 0.1  | 0.08 | -1.01 | 0.717984 | 0.104527 | 0.890594 | 0.365803 |
| MmugDNA.20236.1.S1_at   | MmugDNA.20236.1 | 9.96  | 10.01 | 0.31 | 0.05 | -1.03 | 0.874815 | 0.666661 | 0.956568 | 0.804716 |
| MmugDNA.20237.1.S1_at   | MmugDNA.20237.1 | 6.2   | 5.96  | 0.1  | 0.08 | 1.17  | 0.049867 | 0.048907 | 0.386432 | 0.265919 |
| MmugDNA.20238.1.S1_at   | MmugDNA.20238.1 | 10.7  | 10.46 | 0.28 | 0.15 | 1.18  | 0.114896 | 0.130383 | 0.488067 | 0.402234 |
| MmugDNA.20239.1.S1_at   | MmugDNA.20239.1 | 5.13  | 5.33  | 0.32 | 0.01 | -1.15 | 0.865113 | 0.970325 | 0.952585 | 0.983836 |
| MmugDNA.2024.1.S1_at    | MmugDNA.2024.1  | 9.99  | 11.06 | 1.44 | 0.1  | -2.09 | 0.38382  | 0.641083 | 0.711503 | 0.78939  |
| MmugDNA.20240.1.S1_s_at | MmugDNA.20240.1 | 5.5   | 5.53  | 0.23 | 0.13 | -1.02 | 0.590061 | 0.481118 | 0.832806 | 0.686152 |
| MmugDNA.20242.1.S1_at   | MmugDNA.20242.1 | 5.63  | 5.81  | 0.18 | 0.09 | -1.13 | 0.670764 | 0.495631 | 0.870072 | 0.695576 |
| MmugDNA.20243.1.S1_at   | MmugDNA.20243.1 | 4.56  | 4.69  | 0.87 | 0.46 | -1.1  | 0.709565 | 0.306465 | 0.88699  | 0.563029 |
| MmugDNA.20244.1.S1_at   | MmugDNA.20244.1 | 8.67  | 9.12  | 0.14 | 0.13 | -1.36 | 0.02397  | 0.003332 | 0.317529 | 0.083001 |
| MmugDNA.20245.1.S1_at   | MmugDNA.20245.1 | 6.95  | 6.23  | 0.21 | 0.31 | 1.65  | 0.037232 | 0.020359 | 0.356955 | 0.17912  |
| MmugDNA.20246.1.S1_at   | MmugDNA.20246.1 | 5.23  | 4.85  | 0.1  | 0.21 | 1.29  | 0.065085 | 0.005443 | 0.419756 | 0.101853 |
| MmugDNA.20247.1.S1_at   | MmugDNA.20247.1 | 9.91  | 10.45 | 0.59 | 0.2  | -1.45 | 0.146053 | 0.019642 | 0.520572 | 0.176149 |
| MmugDNA.20248.1.S1_at   | MmugDNA.20248.1 | 6.22  | 5.42  | 0.48 | 0.16 | 1.74  | 0.040038 | 0.029168 | 0.362993 | 0.212798 |
| MmugDNA.20249.1.S1_at   | MmugDNA.20249.1 | 9.5   | 9.84  | 0.28 | 0.08 | -1.26 | 0.15713  | 0.027744 | 0.530266 | 0.208003 |
| MmugDNA.2025.1.S1_at    | MmugDNA.2025.1  | 3.59  | 3.73  | 0.06 | 0.04 | -1.1  | 0.035491 | 0.102618 | 0.35215  | 0.362991 |
| MmugDNA.20250.1.S1_at   | MmugDNA.20250.1 | 2.9   | 2.78  | 0.06 | 0.07 | 1.09  | 0.095654 | 0.15609  | 0.4643   | 0.431551 |
| MmugDNA.20251.1.S1_at   | MmugDNA.20251.1 | 3.62  | 5.64  | 0.59 | 0.13 | -4.05 | 0.007831 | 0.001225 | 0.231004 | 0.054593 |
| MmugDNA.20252.1.S1_at   | MmugDNA.20252.1 | 10.51 | 10.3  | 0.21 | 0.39 | 1.15  | 0.559427 | 0.518889 | 0.816154 | 0.710789 |
| MmugDNA.20252.1.S1_x_at | MmugDNA.20252.1 | 10.5  | 10.28 | 0.22 | 0.42 | 1.17  | 0.500101 | 0.411274 | 0.78233  | 0.637991 |
| MmugDNA.20253.1.S1_at   | MmugDNA.20253.1 | 4.49  | 4.16  | 0.31 | 0.08 | 1.25  | 0.152224 | 0.159092 | 0.525262 | 0.435217 |
| MmugDNA.20254.1.S1_at   | MmugDNA.20254.1 | 4.79  | 4.58  | 0.04 | 0.09 | 1.15  | 0.063719 | 0.041582 | 0.416377 | 0.248831 |
| MmugDNA.20255.1.S1_at   | MmugDNA.20255.1 | 4.61  | 4.65  | 0.19 | 0.31 | -1.03 | 0.736567 | 0.93265  | 0.899213 | 0.961739 |
| MmugDNA.20256.1.S1_at   | MmugDNA.20256.1 | 11.18 | 10.92 | 1    | 0.25 | 1.2   | 0.678074 | 0.074097 | 0.873899 | 0.317745 |
| MmugDNA.20257.1.S1_at   | MmugDNA.20257.1 | 10.67 | 9.41  | 0.29 | 0.26 | 2.39  | 0.009402 | 0.051795 | 0.241869 | 0.273131 |
| MmugDNA.20258.1.S1_at   | MmugDNA.20258.1 | 3.17  | 2.9   | 0.26 | 0.07 | 1.21  | 0.450387 | 0.51157  | 0.754829 | 0.705677 |
| MmugDNA.20259.1.S1_at   | MmugDNA.20259.1 | 3.85  | 3.97  | 0.08 | 0.19 | -1.09 | 0.343426 | 0.458058 | 0.686631 | 0.671038 |
| MmugDNA.20260.1.S1_at   | MmugDNA.20260.1 | 6.07  | 6.05  | 0.12 | 0.05 | 1.01  | 0.279352 | 0.388381 | 0.63831  | 0.622797 |
| MmugDNA.20261.1.S1_at   | MmugDNA.20261.1 | 4.35  | 4.84  | 0.3  | 0.33 | -1.4  | 0.325529 | 0.771579 | 0.673335 | 0.86729  |
| MmugDNA.20262.1.S1_at   | MmugDNA.20262.1 | 3.16  | 3.03  | 0.02 | 0.03 | 1.1   | 0.004391 | 0.012777 | 0.198874 | 0.145663 |
| MmugDNA.20263.1.S1_at   | MmugDNA.20263.1 | 4.36  | 4.14  | 0.04 | 0.2  | 1.17  | 0.303561 | 0.284445 | 0.657399 | 0.546637 |
| MmugDNA.20264.1.S1_at   | MmugDNA.20264.1 | 3.55  | 3.47  | 0.2  | 0.14 | 1.06  | 0.488405 | 0.656272 | 0.775548 | 0.798992 |
| MmugDNA.20265.1.S1_at   | MmugDNA.20265.1 | 5.48  | 5.17  | 0.71 | 0.26 | 1.24  | 0.394771 | 0.292072 | 0.720041 | 0.552232 |
| MmugDNA.20266.1.S1_at   | MmugDNA.20266.1 | 3.68  | 3.7   | 0.03 | 0.05 | -1.01 | 0.465774 | 0.833097 | 0.763177 | 0.90427  |
| MmugDNA.20267.1.S1_at   | MmugDNA.20267.1 | 10.9  | 10.1  | 0.27 | 0.03 | 1.74  | 0.007039 | 0.005255 | 0.225336 | 0.100401 |
| MmugDNA.20267.1.S1_s_at | MmugDNA.20267.1 | 12    | 11.3  | 0.19 | 0.06 | 1.62  | 0.003565 | 0.001597 | 0.196915 | 0.060468 |
| MmugDNA.20268.1.S1_at   | MmugDNA.20268.1 | 6.22  | 5.93  | 0.2  | 0.1  | 1.23  | 0.203811 | 0.376946 | 0.57513  | 0.614678 |
| MmugDNA.20269.1.S1_at   | MmugDNA.20269.1 | 4.94  | 4.67  | 0.18 | 0.11 | 1.2   | 0.199052 | 0.260271 | 0.570667 | 0.526809 |
| MmugDNA.20270.1.S1_at   | MmugDNA.20270.1 | 4.65  | 4.92  | 0.45 | 0.11 | -1.21 | 0.091681 | 0.521309 | 0.45996  | 0.712346 |
| MmugDNA.20273.1.S1_at   | MmugDNA.20273.1 | 3.63  | 3.67  | 0.08 | 0.03 | -1.03 | 0.781789 | 0.982537 | 0.919573 | 0.99036  |
| MmugDNA.20274.1.S1_at   | MmugDNA.20274.1 | 3.7   | 3.58  | 0.15 | 0.05 | 1.08  | 0.531574 | 0.589968 | 0.799779 | 0.756034 |
| MmugDNA.20276.1.S1_at   | MmugDNA.20276.1 | 4.87  | 4.88  | 0.13 | 0.09 | -1    | 0.979459 | 0.627001 | 0.993497 | 0.780117 |
| MmugDNA.20279.1.S1_at   | MmugDNA.20279.1 | 4.15  | 3.67  | 0.27 | 0.8  | 1.39  | 0.577956 | 0.742226 | 0.82603  | 0.850683 |

|                         |                 |       |       |      |      |       |          |          |          |          |
|-------------------------|-----------------|-------|-------|------|------|-------|----------|----------|----------|----------|
| MmugDNA.2028.1.S1_at    | MmugDNA.2028.1  | 5.13  | 5.97  | 0.64 | 0.24 | -1.79 | 0.053835 | 0.109498 | 0.39556  | 0.373339 |
| MmugDNA.20280.1.S1_at   | MmugDNA.20280.1 | 12.03 | 12.11 | 0.01 | 0.15 | -1.06 | 0.963538 | 0.929438 | 0.988152 | 0.959707 |
| MmugDNA.20281.1.S1_at   | MmugDNA.20281.1 | 11.45 | 11.57 | 0.12 | 0.03 | -1.09 | 0.382965 | 0.84516  | 0.711067 | 0.911899 |
| MmugDNA.20282.1.S1_at   | MmugDNA.20282.1 | 5.01  | 5.09  | 0.04 | 0.1  | -1.06 | 0.257063 | 0.131601 | 0.620945 | 0.403716 |
| MmugDNA.20283.1.S1_at   | MmugDNA.20283.1 | 3.2   | 3.15  | 0.15 | 0.17 | 1.03  | 0.738722 | 0.197582 | 0.900057 | 0.472564 |
| MmugDNA.20284.1.S1_at   | MmugDNA.20284.1 | 8.32  | 8.08  | 0.25 | 0.16 | 1.19  | 0.222968 | 0.0655   | 0.59253  | 0.301415 |
| MmugDNA.39169.1.S1_at   | MmugDNA.39169.1 | 4.07  | 4.07  | 0.1  | 0.19 | -1    | 0.357783 | 0.446697 | 0.695993 | 0.662885 |
| MmugDNA.39169.1.S1_s_at | MmugDNA.39169.1 | 11.33 | 11.82 | 0.43 | 0.17 | -1.4  | 0.126352 | 0.428852 | 0.50012  | 0.650408 |
| MmugDNA.20286.1.S1_at   | MmugDNA.20286.1 | 4.28  | 4.14  | 0.1  | 0.14 | 1.1   | 0.079049 | 0.061406 | 0.441739 | 0.294656 |
| MmugDNA.20288.1.S1_at   | MmugDNA.20288.1 | 3.35  | 3.32  | 0.07 | 0.18 | 1.02  | 0.949344 | 0.403744 | 0.982855 | 0.632356 |
| MmugDNA.20289.1.S1_at   | MmugDNA.20289.1 | 7.18  | 7.11  | 0.45 | 0.07 | -1.05 | 0.78536  | 0.769879 | 0.921121 | 0.866376 |
| MmugDNA.20290.1.S1_at   | MmugDNA.20290.1 | 3.46  | 3.04  | 0.14 | 0.08 | 1.33  | 0.008163 | 0.005962 | 0.232005 | 0.105589 |
| MmugDNA.20293.1.S1_at   | MmugDNA.20293.1 | 7.08  | 6.87  | 0.11 | 0.02 | 1.16  | 0.071457 | 0.013497 | 0.431049 | 0.148777 |
| MmugDNA.20294.1.S1_at   | MmugDNA.20294.1 | 7.95  | 7.92  | 0.36 | 0.41 | 1.02  | 0.356099 | 0.084709 | 0.695045 | 0.336196 |
| MmugDNA.20296.1.S1_at   | MmugDNA.20296.1 | 10.81 | 11.05 | 0.05 | 0.07 | -1.18 | 0.008974 | 0.000581 | 0.239728 | 0.041459 |
| MmugDNA.20297.1.S1_at   | MmugDNA.20297.1 | 4.95  | 5.22  | 0.64 | 0.37 | -1.21 | 0.564142 | 0.654786 | 0.81857  | 0.798154 |
| MmugDNA.20298.1.S1_at   | MmugDNA.20298.1 | 4.31  | 4.66  | 0.64 | 0.34 | -1.28 | 0.692851 | 0.091339 | 0.880305 | 0.346281 |
| MmugDNA.203.1.S1_at     | MmugDNA.203.1   | 3.3   | 3.31  | 0.05 | 0.09 | -1.01 | 0.311956 | 0.558808 | 0.663542 | 0.735887 |
| MmugDNA.2030.1.S1_at    | MmugDNA.2030.1  | 6.69  | 6.5   | 0.1  | 0.15 | 1.14  | 0.141322 | 0.189781 | 0.516365 | 0.465403 |
| MmugDNA.20300.1.S1_at   | MmugDNA.20300.1 | 12.72 | 12.96 | 0.57 | 0.1  | -1.18 | 0.428308 | 0.565965 | 0.741769 | 0.740174 |
| MmugDNA.20301.1.S1_at   | MmugDNA.20301.1 | 4.12  | 4.29  | 0.09 | 0.16 | -1.13 | 0.102919 | 0.398684 | 0.473381 | 0.629458 |
| MmugDNA.20305.1.S1_at   | MmugDNA.20305.1 | 4.68  | 4.46  | 0.27 | 0.08 | 1.17  | 0.24266  | 0.303857 | 0.608692 | 0.561225 |
| MmugDNA.20307.1.S1_at   | MmugDNA.20307.1 | 3.14  | 3.26  | 0.05 | 0.06 | -1.09 | 0.059563 | 0.089846 | 0.406669 | 0.344058 |
| MmugDNA.20309.1.S1_at   | MmugDNA.20309.1 | 4.26  | 4.23  | 0.1  | 0.04 | 1.03  | 0.512637 | 0.452652 | 0.789481 | 0.667247 |
| MmugDNA.2031.1.S1_s_at  | MmugDNA.2031.1  | 11.42 | 11.13 | 0.17 | 0.23 | 1.22  | 0.061551 | 0.063815 | 0.411001 | 0.29906  |
| MmugDNA.20310.1.S1_at   | MmugDNA.20310.1 | 7.91  | 8.97  | 0.47 | 0.07 | -2.08 | 0.039244 | 0.015214 | 0.361498 | 0.156741 |
| MmugDNA.20312.1.S1_at   | MmugDNA.20312.1 | 8.82  | 8.12  | 0.38 | 0.15 | 1.63  | 0.165284 | 0.121079 | 0.538018 | 0.390082 |
| MmugDNA.20314.1.S1_at   | MmugDNA.20314.1 | 4.01  | 3.89  | 0.17 | 0.22 | 1.08  | 0.225723 | 0.300973 | 0.594916 | 0.559198 |
| MmugDNA.20315.1.S1_at   | MmugDNA.20315.1 | 5.04  | 5.04  | 0.09 | 0.03 | 1     | 0.965356 | 0.953744 | 0.988598 | 0.973663 |
| MmugDNA.20316.1.S1_at   | MmugDNA.20316.1 | 10.56 | 10.41 | 0.62 | 0.31 | 1.11  | 0.452438 | 0.318984 | 0.755806 | 0.571552 |
| MmugDNA.20317.1.S1_at   | MmugDNA.20317.1 | 10.57 | 10.43 | 0.26 | 0.14 | 1.1   | 0.278102 | 0.200384 | 0.637354 | 0.47478  |
| MmugDNA.20318.1.S1_at   | MmugDNA.20318.1 | 5.09  | 5.09  | 0.03 | 0.11 | -1    | 0.318877 | 0.63627  | 0.668441 | 0.786026 |
| MmugDNA.2032.1.S1_at    | MmugDNA.2032.1  | 7.74  | 8.4   | 0.23 | 0.19 | -1.59 | 0.014153 | 0.161418 | 0.274019 | 0.437604 |
| MmugDNA.20320.1.S1_at   | MmugDNA.20320.1 | 11.91 | 12.12 | 0.16 | 0.04 | -1.16 | 0.035823 | 0.059642 | 0.35345  | 0.290838 |
| MmugDNA.20322.1.S1_at   | MmugDNA.20322.1 | 5.59  | 5.44  | 0.13 | 0.2  | 1.11  | 0.130413 | 0.279086 | 0.504689 | 0.542782 |
| MmugDNA.20323.1.S1_at   | MmugDNA.20323.1 | 7.05  | 7.72  | 0.17 | 0.11 | -1.59 | 0.004733 | 0.000087 | 0.201699 | 0.027016 |
| MmugDNA.20324.1.S1_at   | MmugDNA.20324.1 | 7.81  | 8.47  | 0.68 | 0.52 | -1.58 | 0.971242 | 0.240205 | 0.990583 | 0.51084  |
| MmugDNA.20326.1.S1_at   | MmugDNA.20326.1 | 11.64 | 11.4  | 0.18 | 0.05 | 1.18  | 0.095714 | 0.000393 | 0.4643   | 0.037471 |
| MmugDNA.20329.1.S1_at   | MmugDNA.20329.1 | 5.88  | 5.72  | 0.16 | 0.11 | 1.12  | 0.310797 | 0.219431 | 0.662672 | 0.493156 |
| MmugDNA.2033.1.S1_at    | MmugDNA.2033.1  | 6.46  | 6.61  | 0.36 | 0.13 | -1.11 | 0.723648 | 0.136485 | 0.892847 | 0.408936 |
| MmugDNA.20330.1.S1_at   | MmugDNA.20330.1 | 5.05  | 4.98  | 0.1  | 0.06 | 1.04  | 0.514906 | 0.472963 | 0.790695 | 0.680272 |
| MmugDNA.20331.1.S1_at   | MmugDNA.20331.1 | 2.95  | 2.94  | 0.03 | 0.11 | 1.01  | 0.336496 | 0.265968 | 0.681906 | 0.531796 |
| MmugDNA.20332.1.S1_at   | MmugDNA.20332.1 | 3.55  | 3.51  | 0.11 | 0.09 | 1.03  | 0.398836 | 0.481906 | 0.722745 | 0.68685  |



|                         |                 |       |       |      |      |       |          |          |          |          |
|-------------------------|-----------------|-------|-------|------|------|-------|----------|----------|----------|----------|
| MmugDNA.20334.1.S1_at   | MmugDNA.20334.1 | 13.17 | 13.31 | 0.27 | 0.09 | -1.1  | 0.416843 | 0.021958 | 0.734559 | 0.185407 |
| MmugDNA.20335.1.S1_at   | MmugDNA.20335.1 | 5.07  | 5.14  | 0.1  | 0.03 | -1.05 | 0.579362 | 0.759983 | 0.82645  | 0.860514 |
| MmugDNA.20336.1.S1_at   | MmugDNA.20336.1 | 3.53  | 3.38  | 0.12 | 0.09 | 1.11  | 0.158654 | 0.106939 | 0.531588 | 0.369499 |
| MmugDNA.20337.1.S1_at   | MmugDNA.20337.1 | 6.67  | 7.25  | 0.22 | 0.25 | -1.49 | 0.099667 | 0.692296 | 0.469347 | 0.820975 |
| MmugDNA.20338.1.S1_at   | MmugDNA.20338.1 | 9.24  | 8.46  | 1.24 | 0.24 | 1.71  | 0.82393  | 0.136187 | 0.936502 | 0.408517 |
| MmugDNA.20339.1.S1_at   | MmugDNA.20339.1 | 8.2   | 8.15  | 0.41 | 0.3  | 1.04  | 0.517264 | 0.705892 | 0.791957 | 0.829555 |
| MmugDNA.2034.1.S1_at    | MmugDNA.2034.1  | 7.02  | 7.17  | 0.48 | 0.1  | -1.11 | 0.752108 | 0.557387 | 0.906281 | 0.735031 |
| MmugDNA.20340.1.S1_at   | MmugDNA.20340.1 | 2.97  | 2.92  | 0.06 | 0.12 | 1.03  | 0.685044 | 0.310608 | 0.876682 | 0.565787 |
| MmugDNA.20341.1.S1_at   | MmugDNA.20341.1 | 4.42  | 4.35  | 0.44 | 0.05 | 1.05  | 0.82967  | 0.211158 | 0.938862 | 0.485194 |
| MmugDNA.20343.1.S1_at   | MmugDNA.20343.1 | 5.09  | 4.89  | 0.29 | 0.2  | 1.15  | 0.153988 | 0.237234 | 0.527325 | 0.507954 |
| MmugDNA.20344.1.S1_at   | MmugDNA.20344.1 | 8.35  | 8.24  | 0.09 | 0.02 | -1.08 | 0.257743 | 0.868689 | 0.621456 | 0.925405 |
| MmugDNA.20345.1.S1_at   | MmugDNA.20345.1 | 4.67  | 4.75  | 0.1  | 0.25 | -1.06 | 0.218911 | 0.494089 | 0.588341 | 0.694663 |
| MmugDNA.20346.1.S1_at   | MmugDNA.20346.1 | 3.11  | 3.13  | 0.16 | 0.09 | -1.01 | 0.768986 | 0.239455 | 0.9134   | 0.510147 |
| MmugDNA.20347.1.S1_at   | MmugDNA.20347.1 | 3.81  | 3.39  | 0.11 | 0.16 | 1.33  | 0.038066 | 0.028438 | 0.358549 | 0.210443 |
| MmugDNA.2035.1.S1_at    | MmugDNA.2035.1  | 3.45  | 3.43  | 0.15 | 0.03 | 1.02  | 0.419113 | 0.472085 | 0.736142 | 0.679861 |
| MmugDNA.20351.1.S1_at   | MmugDNA.20351.1 | 6.21  | 5.93  | 0.08 | 0.14 | 1.22  | 0.052203 | 0.035747 | 0.392084 | 0.233437 |
| MmugDNA.20352.1.S1_at   | MmugDNA.20352.1 | 5.27  | 5.49  | 0.61 | 0.36 | -1.16 | 0.880678 | 0.209132 | 0.958714 | 0.482939 |
| MmugDNA.20353.1.S1_at   | MmugDNA.20353.1 | 7.13  | 7.95  | 0.3  | 0.07 | -1.76 | 0.011812 | 0.005136 | 0.257504 | 0.099462 |
| MmugDNA.20355.1.S1_at   | MmugDNA.20355.1 | 5.19  | 5.35  | 0.08 | 0.2  | -1.11 | 0.249656 | 0.180155 | 0.615064 | 0.456751 |
| MmugDNA.20356.1.S1_at   | MmugDNA.20356.1 | 6.6   | 7.16  | 0.46 | 0.17 | -1.47 | 0.160815 | 0.007251 | 0.534047 | 0.114309 |
| MmugDNA.2036.1.S1_at    | MmugDNA.2036.1  | 6.86  | 6.86  | 0.6  | 0.11 | -1    | 0.398156 | 0.394431 | 0.722324 | 0.626982 |
| MmugDNA.20360.1.S1_at   | MmugDNA.20360.1 | 4.83  | 4.81  | 0.07 | 0.03 | 1.02  | 0.128725 | 0.141379 | 0.503453 | 0.414874 |
| MmugDNA.20361.1.S1_at   | MmugDNA.20361.1 | 3.08  | 3.1   | 0.27 | 0.16 | -1.01 | 0.99112  | 0.81144  | 0.996655 | 0.891158 |
| MmugDNA.20363.1.S1_at   | MmugDNA.20363.1 | 6.32  | 5.84  | 0.33 | 0.11 | 1.4   | 0.066205 | 0.038445 | 0.421918 | 0.240974 |
| MmugDNA.25887.1.S1_s_at | MmugDNA.25887.1 | 12.15 | 12.28 | 0.09 | 0.01 | -1.09 | 0.065011 | 0.029567 | 0.419632 | 0.213618 |
| MmugDNA.20366.1.S1_at   | MmugDNA.20366.1 | 3.46  | 3.31  | 0.05 | 0.12 | 1.11  | 0.057514 | 0.134974 | 0.402283 | 0.406951 |
| MmugDNA.20367.1.S1_at   | MmugDNA.20367.1 | 3.71  | 3.78  | 0.08 | 0.07 | -1.05 | 0.149151 | 0.142194 | 0.523037 | 0.415754 |
| MmugDNA.20368.1.S1_at   | MmugDNA.20368.1 | 13.08 | 13.1  | 0.14 | 0.07 | -1.02 | 0.372966 | 0.560234 | 0.705567 | 0.736553 |
| MmugDNA.20369.1.S1_at   | MmugDNA.20369.1 | 3.93  | 3.78  | 0.18 | 0.06 | 1.11  | 0.195017 | 0.360537 | 0.565435 | 0.601613 |
| MmugDNA.2037.1.S1_at    | MmugDNA.2037.1  | 10.07 | 9.7   | 0.25 | 0.13 | 1.3   | 0.152262 | 0.080346 | 0.52528  | 0.327965 |
| MmugDNA.20370.1.S1_at   | MmugDNA.20370.1 | 3.84  | 3.82  | 0.14 | 0.2  | 1.01  | 0.874469 | 0.865105 | 0.956448 | 0.923484 |
| MmugDNA.20371.1.S1_at   | MmugDNA.20371.1 | 6.51  | 6.6   | 0.33 | 0.16 | -1.06 | 0.87019  | 0.369646 | 0.954781 | 0.608957 |
| MmugDNA.20372.1.S1_s_at | MmugDNA.20372.1 | 6.58  | 6.41  | 0.07 | 0.07 | 1.12  | 0.027632 | 0.070687 | 0.328402 | 0.312056 |
| MmugDNA.20374.1.S1_at   | MmugDNA.20374.1 | 6.03  | 5.12  | 0.53 | 0.35 | 1.88  | 0.062289 | 0.022172 | 0.412841 | 0.186409 |
| MmugDNA.20375.1.S1_at   | MmugDNA.20375.1 | 8.19  | 7.81  | 0.47 | 0.08 | 1.3   | 0.257548 | 0.256133 | 0.621333 | 0.524069 |
| MmugDNA.20376.1.S1_at   | MmugDNA.20376.1 | 5.54  | 5.36  | 0.1  | 0.11 | 1.13  | 0.102351 | 0.153726 | 0.472589 | 0.428413 |
| MmugDNA.20382.1.S1_at   | MmugDNA.20382.1 | 5.78  | 5.99  | 0.33 | 0.45 | -1.15 | 0.889745 | 0.289481 | 0.961988 | 0.550495 |
| MmugDNA.20383.1.S1_at   | MmugDNA.20383.1 | 7.78  | 8.02  | 0.37 | 0.15 | -1.18 | 0.232877 | 0.034663 | 0.600333 | 0.230352 |
| MmugDNA.20384.1.S1_at   | MmugDNA.20384.1 | 7.15  | 7.04  | 0.23 | 0.05 | 1.08  | 0.767547 | 0.85735  | 0.912495 | 0.918545 |
| MmugDNA.20385.1.S1_at   | MmugDNA.20385.1 | 5.8   | 5.5   | 0.31 | 0.21 | 1.23  | 0.184428 | 0.037467 | 0.557285 | 0.237837 |
| MmugDNA.20387.1.S1_at   | MmugDNA.20387.1 | 10.32 | 11.05 | 0.67 | 0.23 | -1.66 | 0.477787 | 0.483771 | 0.76987  | 0.688117 |
| MmugDNA.20388.1.S1_at   | MmugDNA.20388.1 | 3.18  | 3.48  | 0.26 | 0.12 | -1.23 | 0.26247  | 0.269278 | 0.624678 | 0.534534 |
| MmugDNA.20389.1.S1_at   | MmugDNA.20389.1 | 7.82  | 8.64  | 0.52 | 0.06 | -1.77 | 0.156352 | 0.013464 | 0.529536 | 0.148626 |

|                         |                 |       |       |      |      |       |          |          |          |          |
|-------------------------|-----------------|-------|-------|------|------|-------|----------|----------|----------|----------|
| MmugDNA.2039.1.S1_s_at  | MmugDNA.2039.1  | 5.8   | 6.43  | 0.28 | 0.26 | -1.54 | 0.056122 | 0.050328 | 0.399523 | 0.269595 |
| MmugDNA.20390.1.S1_at   | MmugDNA.20390.1 | 4.43  | 4.57  | 0.3  | 0.28 | -1.1  | 0.623327 | 0.10574  | 0.848224 | 0.367881 |
| MmugDNA.20391.1.S1_at   | MmugDNA.20391.1 | 4.53  | 4.26  | 0.18 | 0.01 | 1.21  | 0.11489  | 0.083563 | 0.488067 | 0.334152 |
| MmugDNA.20392.1.S1_at   | MmugDNA.20392.1 | 4.58  | 4.5   | 0.13 | 0.23 | 1.05  | 0.967212 | 0.570238 | 0.989205 | 0.743016 |
| MmugDNA.20393.1.S1_at   | MmugDNA.20393.1 | 5.13  | 5.18  | 0.04 | 0.09 | -1.03 | 0.477176 | 0.433948 | 0.769763 | 0.65412  |
| MmugDNA.20394.1.S1_at   | MmugDNA.20394.1 | 9.57  | 8.92  | 0.41 | 0.14 | 1.57  | 0.210318 | 0.117989 | 0.581649 | 0.385881 |
| MmugDNA.20395.1.S1_at   | MmugDNA.20395.1 | 5.9   | 5.77  | 0.21 | 0.03 | 1.09  | 0.130704 | 0.17101  | 0.505202 | 0.447561 |
| MmugDNA.20396.1.S1_at   | MmugDNA.20396.1 | 6.18  | 5.94  | 0.2  | 0.13 | 1.18  | 0.282877 | 0.471104 | 0.641073 | 0.679173 |
| MmugDNA.20398.1.S1_s_at | MmugDNA.20398.1 | 11.05 | 10.85 | 0.43 | 0.07 | 1.15  | 0.995093 | 0.981256 | 0.99815  | 0.989643 |
| MmugDNA.2040.1.S1_at    | MmugDNA.2040.1  | 6.36  | 5.91  | 0.29 | 0.17 | 1.37  | 0.236349 | 0.478895 | 0.603291 | 0.684774 |
| MmugDNA.2040.1.S1_s_at  | MmugDNA.2040.1  | 6.91  | 6.4   | 0.3  | 0.1  | -1.43 | 0.059538 | 0.225007 | 0.406669 | 0.49773  |
| MmugDNA.20400.1.S1_at   | MmugDNA.20400.1 | 7.1   | 6.55  | 0.27 | 0.27 | 1.46  | 0.15394  | 0.131564 | 0.527271 | 0.403665 |
| MmugDNA.20401.1.S1_at   | MmugDNA.20401.1 | 8.23  | 7.77  | 0.33 | 0.01 | 1.38  | 0.160957 | 0.151846 | 0.534282 | 0.42651  |
| MmugDNA.20402.1.S1_at   | MmugDNA.20402.1 | 3.4   | 3.61  | 0.31 | 0.22 | -1.16 | 0.306818 | 0.145959 | 0.659723 | 0.41997  |
| MmugDNA.20403.1.S1_at   | MmugDNA.20403.1 | 10.17 | 10.52 | 0.63 | 0.09 | -1.27 | 0.266643 | 0.139932 | 0.627504 | 0.413293 |
| MmugDNA.20404.1.S1_at   | MmugDNA.20404.1 | 10.83 | 9.78  | 0.3  | 0.17 | 2.07  | 0.00659  | 0.002866 | 0.220082 | 0.078799 |
| MmugDNA.20406.1.S1_at   | MmugDNA.20406.1 | 6.21  | 6.81  | 0.38 | 0.23 | -1.51 | 0.05003  | 0.121984 | 0.386663 | 0.391416 |
| MmugDNA.20407.1.S1_at   | MmugDNA.20407.1 | 11.72 | 11.08 | 0.38 | 0.21 | 1.56  | 0.103833 | 0.095152 | 0.474551 | 0.35218  |
| MmugDNA.20408.1.S1_at   | MmugDNA.20408.1 | 3.07  | 3.09  | 0.12 | 0.11 | -1.01 | 0.565356 | 0.76761  | 0.819183 | 0.865109 |
| MmugDNA.20409.1.S1_at   | MmugDNA.20409.1 | 4.01  | 3.77  | 0.08 | 0.18 | 1.17  | 0.283219 | 0.377699 | 0.641313 | 0.615086 |
| MmugDNA.2041.1.S1_at    | MmugDNA.2041.1  | 4.87  | 4.9   | 0.17 | 0.22 | -1.02 | 0.980762 | 0.320601 | 0.993904 | 0.572702 |
| MmugDNA.2041.1.S1_s_at  | MmugDNA.2041.1  | 3.17  | 2.91  | 0.06 | 0.15 | 1.2   | 0.085037 | 0.223446 | 0.451642 | 0.496239 |
| MmugDNA.20410.1.S1_at   | MmugDNA.20410.1 | 5.04  | 5.17  | 0.14 | 0.08 | -1.1  | 0.937337 | 0.112405 | 0.978916 | 0.377784 |
| MmugDNA.20411.1.S1_at   | MmugDNA.20411.1 | 5.39  | 5.4   | 0.11 | 0.55 | -1.01 | 0.463874 | 0.859057 | 0.762285 | 0.919754 |
| MmugDNA.20412.1.S1_at   | MmugDNA.20412.1 | 4.48  | 4.18  | 0.25 | 0.1  | 1.23  | 0.087101 | 0.248086 | 0.454785 | 0.517567 |
| MmugDNA.20413.1.S1_s_at | MmugDNA.20413.1 | 11.07 | 11.25 | 0.21 | 0.06 | -1.13 | 0.674265 | 0.004937 | 0.871872 | 0.097906 |
| MmugDNA.20414.1.S1_at   | MmugDNA.20414.1 | 5.95  | 5.91  | 0.26 | 0.09 | 1.03  | 0.754857 | 0.341774 | 0.907518 | 0.587862 |
| MmugDNA.20417.1.S1_s_at | MmugDNA.20417.1 | 12.15 | 11.43 | 0.14 | 0.2  | 1.65  | 0.007245 | 0.004363 | 0.226509 | 0.092486 |
| MmugDNA.20419.1.S1_at   | MmugDNA.20419.1 | 11.89 | 11.72 | 0.15 | 0.04 | 1.12  | 0.116518 | 0.05603  | 0.489684 | 0.2826   |
| MmugDNA.2042.1.S1_at    | MmugDNA.2042.1  | 5.73  | 5.76  | 0.2  | 0.32 | -1.02 | 0.448914 | 0.666284 | 0.754037 | 0.804419 |
| MmugDNA.20422.1.S1_at   | MmugDNA.20422.1 | 7.44  | 7.85  | 0.09 | 0.07 | -1.33 | 0.002797 | 0.002168 | 0.185521 | 0.068824 |
| MmugDNA.20424.1.S1_at   | MmugDNA.20424.1 | 8.19  | 8.92  | 0.3  | 0.15 | -1.66 | 0.047202 | 0.11203  | 0.379749 | 0.377203 |
| MmugDNA.20426.1.S1_at   | MmugDNA.20426.1 | 6.09  | 5.8   | 0.53 | 0.16 | 1.22  | 0.325184 | 0.7816   | 0.673069 | 0.87341  |
| MmugDNA.20428.1.S1_at   | MmugDNA.20428.1 | 6.9   | 6.71  | 0.19 | 0.07 | 1.15  | 0.121751 | 0.432201 | 0.495432 | 0.652775 |
| MmugDNA.20429.1.S1_at   | MmugDNA.20429.1 | 3.36  | 3.32  | 0.1  | 0.06 | 1.02  | 0.593263 | 0.235923 | 0.834114 | 0.507056 |
| MmugDNA.2043.1.S1_at    | MmugDNA.2043.1  | 3.2   | 3.06  | 0.16 | 0.08 | 1.1   | 0.191635 | 0.428145 | 0.562859 | 0.649689 |
| MmugDNA.20431.1.S1_at   | MmugDNA.20431.1 | 7.12  | 7.08  | 0.05 | 0.03 | 1.03  | 0.13281  | 0.862017 | 0.507035 | 0.921585 |
| MmugDNA.20432.1.S1_at   | MmugDNA.20432.1 | 10.42 | 11.45 | 0.15 | 0.12 | -2.05 | 0.000596 | 0.000597 | 0.143137 | 0.041941 |
| MmugDNA.20433.1.S1_at   | MmugDNA.20433.1 | 6.48  | 6.42  | 0.87 | 0.34 | 1.04  | 0.746093 | 0.117398 | 0.903229 | 0.38505  |
| MmugDNA.20434.1.S1_at   | MmugDNA.20434.1 | 4.52  | 4.35  | 0.22 | 0.12 | 1.13  | 0.305354 | 0.030545 | 0.658799 | 0.216711 |
| MmugDNA.20435.1.S1_at   | MmugDNA.20435.1 | 5.91  | 6.23  | 0.74 | 0.05 | -1.24 | 0.48743  | 0.507365 | 0.775077 | 0.702917 |
| MmugDNA.20436.1.S1_at   | MmugDNA.20436.1 | 10.99 | 11.22 | 0.53 | 0.07 | -1.18 | 0.181942 | 0.211945 | 0.555022 | 0.48595  |
| MmugDNA.20437.1.S1_at   | MmugDNA.20437.1 | 5.28  | 5.13  | 0.1  | 0.18 | 1.11  | 0.882232 | 0.442065 | 0.959161 | 0.660148 |

|                         |                 |       |       |      |      |       |          |          |          |          |
|-------------------------|-----------------|-------|-------|------|------|-------|----------|----------|----------|----------|
| MmugDNA.20438.1.S1_at   | MmugDNA.20438.1 | 8.86  | 8.77  | 0.12 | 0.03 | 1.06  | 0.869232 | 0.360383 | 0.95427  | 0.601434 |
| MmugDNA.20439.1.S1_at   | MmugDNA.20439.1 | 3.63  | 3.92  | 0.42 | 0.29 | -1.22 | 0.138035 | 0.38414  | 0.513671 | 0.619927 |
| MmugDNA.20441.1.S1_at   | MmugDNA.20441.1 | 7.58  | 7.16  | 0.33 | 0.1  | 1.33  | 0.037887 | 0.020285 | 0.358192 | 0.178761 |
| MmugDNA.20443.1.S1_at   | MmugDNA.20443.1 | 3.16  | 3.05  | 0.03 | 0.07 | 1.08  | 0.084304 | 0.079066 | 0.45095  | 0.32614  |
| MmugDNA.20444.1.S1_at   | MmugDNA.20444.1 | 4.66  | 5.59  | 1.04 | 0.25 | -1.9  | 0.487951 | 0.675076 | 0.775315 | 0.810146 |
| MmugDNA.20445.1.S1_at   | MmugDNA.20445.1 | 11.15 | 10.6  | 0.88 | 0.08 | 1.46  | 0.339535 | 0.050148 | 0.68383  | 0.269087 |
| MmugDNA.20446.1.S1_at   | MmugDNA.20446.1 | 3.51  | 3.47  | 0.08 | 0.05 | 1.03  | 0.096839 | 0.184431 | 0.465555 | 0.460468 |
| MmugDNA.20448.1.S1_at   | MmugDNA.20448.1 | 9.5   | 9.11  | 0.3  | 0.21 | 1.31  | 0.120161 | 0.148888 | 0.493466 | 0.42326  |
| MmugDNA.2045.1.S1_at    | MmugDNA.2045.1  | 4.52  | 4.66  | 0.27 | 0.15 | -1.1  | 0.694179 | 0.208925 | 0.880993 | 0.482749 |
| MmugDNA.20450.1.S1_at   | MmugDNA.20450.1 | 7.55  | 7.78  | 0.39 | 0.06 | -1.18 | 0.965722 | 0.487799 | 0.988741 | 0.690669 |
| MmugDNA.20452.1.S1_at   | MmugDNA.20452.1 | 4     | 4     | 0.13 | 0.17 | 1     | 0.23348  | 0.293883 | 0.601071 | 0.553872 |
| MmugDNA.20456.1.S1_at   | MmugDNA.20456.1 | 13.08 | 13.13 | 0.19 | 0.15 | -1.04 | 0.474921 | 0.761514 | 0.768236 | 0.861416 |
| MmugDNA.20458.1.S1_at   | MmugDNA.20458.1 | 5.32  | 5.01  | 0.28 | 0.08 | 1.24  | 0.098196 | 0.104753 | 0.467651 | 0.366183 |
| MmugDNA.2046.1.S1_s_at  | MmugDNA.2046.1  | 12.16 | 12.51 | 0.23 | 0.03 | -1.28 | 0.025678 | 0.009196 | 0.322444 | 0.126573 |
| MmugDNA.20460.1.S1_at   | MmugDNA.20460.1 | 3.95  | 4     | 0.26 | 0.01 | -1.03 | 0.807001 | 0.910263 | 0.930025 | 0.949391 |
| MmugDNA.20461.1.S1_at   | MmugDNA.20461.1 | 5.11  | 4.88  | 0.08 | 0.09 | 1.17  | 0.066242 | 0.168733 | 0.421918 | 0.445379 |
| MmugDNA.20462.1.S1_at   | MmugDNA.20462.1 | 8.17  | 7.81  | 1.41 | 0.33 | 1.28  | 0.659875 | 0.668334 | 0.865465 | 0.805919 |
| MmugDNA.20463.1.S1_at   | MmugDNA.20463.1 | 6.76  | 7.63  | 0.41 | 0.04 | -1.84 | 0.058625 | 0.072106 | 0.404912 | 0.314595 |
| MmugDNA.20464.1.S1_at   | MmugDNA.20464.1 | 5.54  | 5.57  | 0.12 | 0.18 | -1.01 | 0.648982 | 0.290301 | 0.860183 | 0.551169 |
| MmugDNA.20466.1.S1_at   | MmugDNA.20466.1 | 4.58  | 4.62  | 0.13 | 0.15 | -1.03 | 0.738061 | 0.892752 | 0.899775 | 0.938818 |
| MmugDNA.20468.1.S1_at   | MmugDNA.20468.1 | 4.15  | 4.06  | 0.12 | 0.07 | 1.07  | 0.139602 | 0.199072 | 0.515028 | 0.473647 |
| MmugDNA.20469.1.S1_at   | MmugDNA.20469.1 | 8.48  | 7.96  | 0.63 | 0.03 | 1.44  | 0.072035 | 0.076401 | 0.431899 | 0.321372 |
| MmugDNA.2047.1.S1_at    | MmugDNA.2047.1  | 7.53  | 7.66  | 0.82 | 0.71 | -1.09 | 0.929304 | 0.317994 | 0.976333 | 0.571046 |
| MmugDNA.20471.1.S1_at   | MmugDNA.20471.1 | 11.97 | 11.98 | 0.51 | 0.09 | -1.01 | 0.734129 | 0.905898 | 0.898145 | 0.946748 |
| MmugDNA.20472.1.S1_at   | MmugDNA.20472.1 | 3.33  | 3.46  | 0.15 | 0    | -1.09 | 0.25407  | 0.161984 | 0.618638 | 0.438108 |
| MmugDNA.20472.1.S1_x_at | MmugDNA.20472.1 | 4.85  | 4.91  | 0.14 | 0.12 | -1.05 | 0.277952 | 0.064961 | 0.637256 | 0.300855 |
| MmugDNA.20474.1.S1_at   | MmugDNA.20474.1 | 3.67  | 3.73  | 0.07 | 0.11 | -1.05 | 0.96002  | 0.149018 | 0.986981 | 0.423337 |
| MmugDNA.20475.1.S1_at   | MmugDNA.20475.1 | 7.41  | 7.26  | 0.21 | 0.14 | 1.11  | 0.6631   | 0.529934 | 0.867092 | 0.71758  |
| MmugDNA.20476.1.S1_at   | MmugDNA.20476.1 | 4.06  | 5.01  | 0.88 | 0.16 | -1.92 | 0.529041 | 0.470095 | 0.798106 | 0.678572 |
| MmugDNA.20477.1.S1_at   | MmugDNA.20477.1 | 4.71  | 4.64  | 0.13 | 0.07 | 1.05  | 0.238845 | 0.374708 | 0.605452 | 0.613037 |
| MmugDNA.20478.1.S1_at   | MmugDNA.20478.1 | 11.09 | 11.21 | 0.37 | 0.06 | -1.09 | 0.550242 | 0.266743 | 0.810707 | 0.53241  |
| MmugDNA.20478.1.S1_s_at | MmugDNA.20478.1 | 12.33 | 12.47 | 0.28 | 0.04 | -1.1  | 0.516542 | 0.170371 | 0.791507 | 0.447103 |
| MmugDNA.20479.1.S1_at   | MmugDNA.20479.1 | 9.39  | 9.51  | 0.32 | 0.06 | -1.09 | 0.579208 | 0.291995 | 0.826446 | 0.552163 |
| MmugDNA.2048.1.S1_at    | MmugDNA.2048.1  | 6.41  | 6.3   | 0.99 | 0.17 | 1.08  | 0.964511 | 0.917861 | 0.988371 | 0.954026 |
| MmugDNA.20480.1.S1_at   | MmugDNA.20480.1 | 8.26  | 8.09  | 0.05 | 0.08 | 1.12  | 0.068557 | 0.428167 | 0.425885 | 0.649705 |
| MmugDNA.20481.1.S1_at   | MmugDNA.20481.1 | 7.39  | 7.47  | 0.31 | 0.29 | -1.06 | 0.866036 | 0.349126 | 0.9529   | 0.593178 |
| MmugDNA.20483.1.S1_at   | MmugDNA.20483.1 | 8.29  | 7.95  | 0.4  | 0.06 | 1.27  | 0.644013 | 0.737646 | 0.858375 | 0.848008 |
| MmugDNA.20484.1.S1_at   | MmugDNA.20484.1 | 6.12  | 6.17  | 0.27 | 0.12 | -1.04 | 0.450518 | 0.67887  | 0.754829 | 0.812474 |
| MmugDNA.20485.1.S1_at   | MmugDNA.20485.1 | 4.94  | 4.79  | 0.2  | 0.09 | 1.11  | 0.152652 | 0.301855 | 0.525558 | 0.559788 |
| MmugDNA.20486.1.S1_at   | MmugDNA.20486.1 | 4.96  | 4.98  | 0.09 | 0.16 | -1.02 | 0.376095 | 0.272734 | 0.706657 | 0.537479 |
| MmugDNA.20488.1.S1_at   | MmugDNA.20488.1 | 3.61  | 3.44  | 0.24 | 0.39 | 1.12  | 0.644334 | 0.867457 | 0.858491 | 0.924699 |
| MmugDNA.2049.1.S1_at    | MmugDNA.2049.1  | 5.88  | 5.82  | 0.09 | 0.13 | 1.04  | 0.797825 | 0.949178 | 0.925747 | 0.970886 |
| MmugDNA.20490.1.S1_at   | MmugDNA.20490.1 | 7.6   | 7.45  | 0.04 | 0.12 | 1.11  | 0.09557  | 0.212649 | 0.464229 | 0.48659  |

|                         |                 |       |       |      |      |       |          |          |          |          |
|-------------------------|-----------------|-------|-------|------|------|-------|----------|----------|----------|----------|
| MmugDNA.20491.1.S1_s_at | MmugDNA.20491.1 | 3.13  | 3.13  | 0    | 0.07 | -1.01 | 0.695118 | 0.820741 | 0.881302 | 0.896776 |
| MmugDNA.20495.1.S1_at   | MmugDNA.20495.1 | 5.49  | 4.69  | 1.38 | 0.72 | 1.74  | 0.693134 | 0.062284 | 0.880472 | 0.296416 |
| MmugDNA.20497.1.S1_at   | MmugDNA.20497.1 | 11.55 | 11.81 | 0.33 | 0.11 | -1.2  | 0.926778 | 0.007661 | 0.975726 | 0.117089 |
| MmugDNA.20498.1.S1_at   | MmugDNA.20498.1 | 3.49  | 3.26  | 0.09 | 0.45 | 1.17  | 0.931699 | 0.928765 | 0.977114 | 0.959449 |
| MmugDNA.20499.1.S1_at   | MmugDNA.20499.1 | 5.49  | 5.33  | 0.09 | 0.11 | 1.12  | 0.140616 | 0.37066  | 0.51604  | 0.609675 |
| MmugDNA.205.1.S1_at     | MmugDNA.205.1   | 5.43  | 5.62  | 0.23 | 0.12 | -1.14 | 0.309197 | 0.677898 | 0.661582 | 0.811841 |
| MmugDNA.20500.1.S1_at   | MmugDNA.20500.1 | 3.54  | 3.53  | 0    | 0.02 | 1.01  | 0.374831 | 0.365286 | 0.706109 | 0.605413 |
| MmugDNA.20501.1.S1_at   | MmugDNA.20501.1 | 10.43 | 10.93 | 0.3  | 0.12 | -1.41 | 0.241752 | 0.129447 | 0.607916 | 0.400867 |
| MmugDNA.20502.1.S1_at   | MmugDNA.20502.1 | 5.27  | 5.09  | 0.05 | 0.09 | 1.13  | 0.034355 | 0.041699 | 0.349732 | 0.24887  |
| MmugDNA.20503.1.S1_at   | MmugDNA.20503.1 | 5.3   | 5.33  | 0.32 | 0.1  | -1.02 | 0.524081 | 0.71694  | 0.795719 | 0.836151 |
| MmugDNA.20504.1.S1_at   | MmugDNA.20504.1 | 8.54  | 9.36  | 0.92 | 0.17 | -1.77 | 0.124552 | 0.375017 | 0.49855  | 0.613186 |
| MmugDNA.20506.1.S1_at   | MmugDNA.20506.1 | 10.33 | 10.2  | 0.2  | 0.16 | 1.1   | 0.819984 | 0.683007 | 0.935242 | 0.815061 |
| MmugDNA.20507.1.S1_at   | MmugDNA.20507.1 | 11.89 | 8.28  | 0.46 | 0.75 | 12.19 | 0.00201  | 0.000361 | 0.173306 | 0.037273 |
| MmugDNA.20508.1.S1_at   | MmugDNA.20508.1 | 3.04  | 3.01  | 0.13 | 0.01 | 1.02  | 0.356735 | 0.386709 | 0.69523  | 0.62187  |
| MmugDNA.20509.1.S1_at   | MmugDNA.20509.1 | 3.71  | 3.74  | 0.2  | 0.16 | -1.02 | 0.692783 | 0.819103 | 0.880299 | 0.895759 |
| MmugDNA.2051.1.S1_at    | MmugDNA.2051.1  | 6.11  | 5.89  | 0.29 | 0.1  | 1.16  | 0.557728 | 0.744862 | 0.815038 | 0.852198 |
| MmugDNA.20510.1.S1_at   | MmugDNA.20510.1 | 5.13  | 5.13  | 0.08 | 0.25 | 1     | 0.718287 | 0.427956 | 0.890613 | 0.649602 |
| MmugDNA.20511.1.S1_at   | MmugDNA.20511.1 | 3.33  | 3.32  | 0.13 | 0.01 | 1     | 0.33694  | 0.407971 | 0.682166 | 0.635339 |
| MmugDNA.20513.1.S1_at   | MmugDNA.20513.1 | 8.28  | 6.72  | 1.4  | 0.08 | 2.93  | 0.1352   | 0.339823 | 0.50918  | 0.586394 |
| MmugDNA.20514.1.S1_at   | MmugDNA.20514.1 | 6     | 5.96  | 0.05 | 0.07 | 1.03  | 0.941285 | 0.524506 | 0.98005  | 0.714395 |
| MmugDNA.20515.1.S1_at   | MmugDNA.20515.1 | 4.9   | 4.87  | 0.11 | 0.1  | 1.02  | 0.761036 | 0.119999 | 0.910284 | 0.388672 |
| MmugDNA.20517.1.S1_at   | MmugDNA.20517.1 | 6.68  | 6.39  | 0.12 | 0.06 | 1.23  | 0.034192 | 0.040347 | 0.348641 | 0.245984 |
| MmugDNA.20519.1.S1_at   | MmugDNA.20519.1 | 7.87  | 7.34  | 0.16 | 0.34 | 1.44  | 0.200131 | 0.041665 | 0.571887 | 0.24887  |
| MmugDNA.2052.1.S1_at    | MmugDNA.2052.1  | 4.93  | 4.75  | 0.11 | 0.06 | 1.13  | 0.070892 | 0.29353  | 0.430067 | 0.553502 |
| MmugDNA.20522.1.S1_at   | MmugDNA.20522.1 | 5.79  | 5.79  | 0.07 | 0.03 | 1     | 0.268675 | 0.791294 | 0.628969 | 0.879433 |
| MmugDNA.20523.1.S1_at   | MmugDNA.20523.1 | 6.73  | 6.4   | 0.16 | 0.12 | 1.26  | 0.056264 | 0.424049 | 0.399708 | 0.646666 |
| MmugDNA.20523.1.S1_s_at | MmugDNA.20523.1 | 8.24  | 7.78  | 0.47 | 0.29 | 1.37  | 0.184627 | 0.050729 | 0.557393 | 0.270368 |
| MmugDNA.20524.1.S1_at   | MmugDNA.20524.1 | 3.2   | 3.18  | 0.15 | 0.03 | 1.01  | 0.290842 | 0.327241 | 0.647362 | 0.577173 |
| MmugDNA.20525.1.S1_at   | MmugDNA.20525.1 | 11.48 | 11.33 | 0.19 | 0.14 | 1.11  | 0.303996 | 0.071987 | 0.657774 | 0.314305 |
| MmugDNA.20526.1.S1_at   | MmugDNA.20526.1 | 5.82  | 5.38  | 0.35 | 0.21 | 1.36  | 0.102346 | 0.117359 | 0.472589 | 0.384998 |
| MmugDNA.20527.1.S1_at   | MmugDNA.20527.1 | 4.17  | 4.18  | 0.15 | 0.05 | -1.01 | 0.676402 | 0.752468 | 0.873062 | 0.855897 |
| MmugDNA.20528.1.S1_at   | MmugDNA.20528.1 | 5.57  | 5.27  | 0.17 | 0.09 | 1.23  | 0.041374 | 0.03782  | 0.366275 | 0.238869 |
| MmugDNA.20529.1.S1_at   | MmugDNA.20529.1 | 4.98  | 6.27  | 0.71 | 0.37 | -2.44 | 0.141097 | 0.285287 | 0.516345 | 0.547192 |
| MmugDNA.2053.1.S1_at    | MmugDNA.2053.1  | 4.11  | 4.18  | 0.12 | 0.04 | -1.05 | 0.378868 | 0.641682 | 0.708471 | 0.789672 |
| MmugDNA.20530.1.S1_at   | MmugDNA.20530.1 | 3.03  | 2.81  | 0.16 | 0.06 | 1.16  | 0.116333 | 0.079887 | 0.489568 | 0.327207 |
| MmugDNA.20531.1.S1_at   | MmugDNA.20531.1 | 5.28  | 5.18  | 0.3  | 0.14 | 1.07  | 0.21124  | 0.449547 | 0.582141 | 0.665113 |
| MmugDNA.20532.1.S1_at   | MmugDNA.20532.1 | 9.44  | 9.45  | 0.3  | 0.15 | -1    | 0.798471 | 0.240503 | 0.926171 | 0.511123 |
| MmugDNA.20533.1.S1_at   | MmugDNA.20533.1 | 5.06  | 5.28  | 0.26 | 0.61 | -1.17 | 0.811538 | 0.970023 | 0.931835 | 0.983605 |
| MmugDNA.20534.1.S1_at   | MmugDNA.20534.1 | 10.91 | 11.21 | 0.05 | 0.06 | -1.23 | 0.00365  | 0.000209 | 0.197111 | 0.032262 |
| MmugDNA.20536.1.S1_at   | MmugDNA.20536.1 | 9.04  | 9.43  | 0.27 | 0.17 | -1.32 | 0.105445 | 0.06242  | 0.477116 | 0.296669 |
| MmugDNA.20537.1.S1_at   | MmugDNA.20537.1 | 10.68 | 10.33 | 0.36 | 0.15 | 1.27  | 0.211244 | 0.058719 | 0.582141 | 0.289005 |
| MmugDNA.20538.1.S1_at   | MmugDNA.20538.1 | 4.78  | 4.83  | 0.48 | 0.15 | -1.04 | 0.989639 | 0.16445  | 0.996121 | 0.440678 |
| MmugDNA.20539.1.S1_at   | MmugDNA.20539.1 | 4.38  | 4.31  | 0.15 | 0.04 | 1.05  | 0.474023 | 0.104808 | 0.767923 | 0.366313 |

|                         |                 |       |       |      |      |       |          |          |          |          |
|-------------------------|-----------------|-------|-------|------|------|-------|----------|----------|----------|----------|
| MmugDNA.20541.1.S1_at   | MmugDNA.20541.1 | 3.82  | 3.83  | 0.29 | 0.05 | -1.01 | 0.476436 | 0.546429 | 0.769113 | 0.728034 |
| MmugDNA.20543.1.S1_at   | MmugDNA.20543.1 | 3.08  | 3.12  | 0.19 | 0.18 | -1.02 | 0.754266 | 0.316945 | 0.907331 | 0.570275 |
| MmugDNA.20544.1.S1_at   | MmugDNA.20544.1 | 6.3   | 6.21  | 0    | 0.09 | 1.06  | 0.533569 | 0.391115 | 0.80084  | 0.624833 |
| MmugDNA.20545.1.S1_s_at | MmugDNA.20545.1 | 5.62  | 5.57  | 0.14 | 0.07 | 1.03  | 0.308043 | 0.320855 | 0.660862 | 0.572849 |
| MmugDNA.20546.1.S1_at   | MmugDNA.20546.1 | 4.51  | 4.46  | 0.13 | 0.06 | 1.04  | 0.82577  | 0.432235 | 0.937452 | 0.652776 |
| MmugDNA.20547.1.S1_at   | MmugDNA.20547.1 | 6.93  | 8.03  | 1.12 | 0.24 | -2.13 | 0.319975 | 0.348908 | 0.669028 | 0.592939 |
| MmugDNA.20548.1.S1_at   | MmugDNA.20548.1 | 4.54  | 5.27  | 0.16 | 0.35 | -1.65 | 0.030844 | 0.025987 | 0.338919 | 0.202122 |
| MmugDNA.20550.1.S1_at   | MmugDNA.20550.1 | 4.86  | 4.49  | 0.25 | 0.09 | 1.29  | 0.098805 | 0.190812 | 0.468167 | 0.466228 |
| MmugDNA.20551.1.S1_at   | MmugDNA.20551.1 | 9.65  | 9.99  | 0.77 | 0.13 | -1.27 | 0.79428  | 0.768754 | 0.924532 | 0.865653 |
| MmugDNA.20552.1.S1_at   | MmugDNA.20552.1 | 6.15  | 5.99  | 0.29 | 0.06 | 1.12  | 0.182832 | 0.318217 | 0.555631 | 0.571088 |
| MmugDNA.20553.1.S1_at   | MmugDNA.20553.1 | 11.04 | 10.85 | 0.62 | 0.18 | -1.14 | 0.485942 | 0.442389 | 0.774427 | 0.660386 |
| MmugDNA.20554.1.S1_at   | MmugDNA.20554.1 | 8.47  | 7.96  | 2.17 | 0.19 | 1.42  | 0.850805 | 0.364915 | 0.94746  | 0.60517  |
| MmugDNA.20555.1.S1_at   | MmugDNA.20555.1 | 5.06  | 5.06  | 0.32 | 0.12 | -1    | 0.812406 | 0.825589 | 0.932076 | 0.89978  |
| MmugDNA.20556.1.S1_at   | MmugDNA.20556.1 | 7.59  | 7.46  | 0.08 | 0.48 | 1.1   | 0.570797 | 0.628759 | 0.822287 | 0.781403 |
| MmugDNA.20557.1.S1_at   | MmugDNA.20557.1 | 9.56  | 9.72  | 0.71 | 0.1  | -1.12 | 0.329046 | 0.324507 | 0.676164 | 0.57507  |
| MmugDNA.20558.1.S1_at   | MmugDNA.20558.1 | 6.25  | 6.8   | 1.01 | 0.37 | -1.46 | 0.622092 | 0.532331 | 0.847666 | 0.719017 |
| MmugDNA.20559.1.S1_at   | MmugDNA.20559.1 | 11.34 | 11.25 | 0.04 | 0.03 | 1.06  | 0.012277 | 0.001689 | 0.260951 | 0.062186 |
| MmugDNA.2056.1.S1_at    | MmugDNA.2056.1  | 3.74  | 3.72  | 0.17 | 0.09 | 1.01  | 0.78178  | 0.814377 | 0.919573 | 0.892923 |
| MmugDNA.20562.1.S1_at   | MmugDNA.20562.1 | 3.41  | 3.44  | 0.44 | 0.22 | -1.02 | 0.734278 | 0.401202 | 0.898229 | 0.630823 |
| MmugDNA.20563.1.S1_at   | MmugDNA.20563.1 | 9.04  | 8.95  | 0.22 | 0.06 | 1.07  | 0.217903 | 0.618967 | 0.587906 | 0.774229 |
| MmugDNA.20564.1.S1_s_at | MmugDNA.20564.1 | 10.91 | 10.94 | 0.11 | 0.07 | -1.02 | 0.14023  | 0.163672 | 0.515581 | 0.439841 |
| MmugDNA.20565.1.S1_at   | MmugDNA.20565.1 | 8.77  | 7.75  | 0.23 | 0.13 | 2.03  | 0.003013 | 0.004393 | 0.19086  | 0.092744 |
| MmugDNA.20566.1.S1_at   | MmugDNA.20566.1 | 3.95  | 4.22  | 0.16 | 0.12 | -1.2  | 0.246599 | 0.747553 | 0.61204  | 0.853168 |
| MmugDNA.20567.1.S1_at   | MmugDNA.20567.1 | 8.8   | 8.92  | 0.48 | 0.06 | -1.09 | 0.616909 | 0.470722 | 0.845163 | 0.67902  |
| MmugDNA.20568.1.S1_s_at | MmugDNA.20568.1 | 3.24  | 3.26  | 0.43 | 0.22 | -1.01 | 0.656178 | 0.500863 | 0.863485 | 0.699296 |
| MmugDNA.20569.1.S1_at   | MmugDNA.20569.1 | 5.46  | 6.55  | 0.54 | 0.26 | -2.12 | 0.023083 | 0.012586 | 0.314591 | 0.144644 |
| MmugDNA.2057.1.S1_at    | MmugDNA.2057.1  | 5.15  | 4.9   | 0.32 | 0.11 | 1.19  | 0.093958 | 0.071047 | 0.463304 | 0.312704 |
| MmugDNA.20571.1.S1_at   | MmugDNA.20571.1 | 5.98  | 6.11  | 0.29 | 0.24 | -1.1  | 0.888812 | 0.477736 | 0.961633 | 0.683745 |
| MmugDNA.20572.1.S1_at   | MmugDNA.20572.1 | 9.37  | 8.82  | 0.36 | 0.41 | 1.46  | 0.462153 | 0.09241  | 0.761457 | 0.348296 |
| MmugDNA.20575.1.S1_at   | MmugDNA.20575.1 | 4.98  | 5.15  | 0.19 | 0.12 | -1.13 | 0.153119 | 0.561515 | 0.526207 | 0.737449 |
| MmugDNA.20576.1.S1_at   | MmugDNA.20576.1 | 5.04  | 5     | 0.23 | 0.14 | 1.03  | 0.709501 | 0.855925 | 0.886953 | 0.917744 |
| MmugDNA.20578.1.S1_at   | MmugDNA.20578.1 | 4.89  | 4.62  | 0.1  | 0.21 | 1.21  | 0.18189  | 0.484314 | 0.55498  | 0.688463 |
| MmugDNA.20579.1.S1_at   | MmugDNA.20579.1 | 9.49  | 9.46  | 0.21 | 0.02 | 1.02  | 0.930755 | 0.398036 | 0.97692  | 0.629138 |
| MmugDNA.2058.1.S1_at    | MmugDNA.2058.1  | 13.01 | 13.05 | 0.18 | 0.08 | -1.03 | 0.703724 | 0.576784 | 0.884872 | 0.747419 |
| MmugDNA.2058.1.S1_s_at  | MmugDNA.2058.1  | 13.21 | 13.24 | 0.14 | 0.05 | -1.02 | 0.643292 | 0.473751 | 0.858192 | 0.68101  |
| MmugDNA.20580.1.S1_at   | MmugDNA.20580.1 | 8.89  | 6.87  | 1.16 | 0.15 | 4.06  | 0.115452 | 0.081238 | 0.488779 | 0.329351 |
| MmugDNA.20582.1.S1_at   | MmugDNA.20582.1 | 10.93 | 6.44  | 0.86 | 1.39 | 22.41 | 0.027099 | 0.004613 | 0.327146 | 0.094882 |
| MmugDNA.20583.1.S1_at   | MmugDNA.20583.1 | 4.63  | 4.61  | 0.2  | 0.2  | 1.02  | 0.827207 | 0.286844 | 0.938039 | 0.548162 |
| MmugDNA.20584.1.S1_at   | MmugDNA.20584.1 | 6.38  | 6.36  | 0.22 | 0.03 | 1.01  | 0.665033 | 0.675318 | 0.867733 | 0.81026  |
| MmugDNA.20585.1.S1_s_at | MmugDNA.20585.1 | 8.57  | 8.18  | 0.08 | 0.1  | 1.3   | 0.006545 | 0.007329 | 0.219791 | 0.115015 |
| MmugDNA.20587.1.S1_at   | MmugDNA.20587.1 | 4.92  | 4.87  | 0.1  | 0.13 | 1.04  | 0.470699 | 0.623866 | 0.766173 | 0.778232 |
| MmugDNA.20589.1.S1_at   | MmugDNA.20589.1 | 7.81  | 7.8   | 0.01 | 0.03 | 1     | 0.578234 | 0.308945 | 0.826177 | 0.564656 |
| MmugDNA.2059.1.S1_at    | MmugDNA.2059.1  | 4.37  | 4.31  | 0.05 | 0.14 | 1.04  | 0.129348 | 0.199711 | 0.504178 | 0.474335 |

|                         |                 |       |       |      |      |       |          |          |          |          |
|-------------------------|-----------------|-------|-------|------|------|-------|----------|----------|----------|----------|
| MmugDNA.20590.1.S1_at   | MmugDNA.20590.1 | 6.4   | 7.17  | 0.4  | 0.16 | -1.71 | 0.092245 | 0.048032 | 0.460762 | 0.264118 |
| MmugDNA.20591.1.S1_at   | MmugDNA.20591.1 | 4.39  | 4.74  | 0.21 | 0.16 | -1.28 | 0.053888 | 0.520551 | 0.395633 | 0.711831 |
| MmugDNA.20592.1.S1_at   | MmugDNA.20592.1 | 7.08  | 6.72  | 0.1  | 0.05 | 1.28  | 0.006518 | 0.353537 | 0.219791 | 0.596602 |
| MmugDNA.20593.1.S1_at   | MmugDNA.20593.1 | 5.85  | 5.69  | 0.17 | 0.11 | 1.12  | 0.100975 | 0.153302 | 0.47159  | 0.428139 |
| MmugDNA.20594.1.S1_at   | MmugDNA.20594.1 | 7.19  | 7.15  | 0.09 | 0.05 | 1.03  | 0.508867 | 0.027163 | 0.787315 | 0.205893 |
| MmugDNA.20595.1.S1_at   | MmugDNA.20595.1 | 3.58  | 3.38  | 0.03 | 0.11 | 1.15  | 0.09399  | 0.039329 | 0.463368 | 0.243406 |
| MmugDNA.20596.1.S1_s_at | MmugDNA.20596.1 | 3.97  | 4.11  | 0.02 | 0.22 | -1.1  | 0.335493 | 0.063481 | 0.681074 | 0.298441 |
| MmugDNA.20597.1.S1_at   | MmugDNA.20597.1 | 7.93  | 7.8   | 0.15 | 0.1  | 1.1   | 0.061766 | 0.291996 | 0.41145  | 0.552163 |
| MmugDNA.20599.1.S1_at   | MmugDNA.20599.1 | 11.24 | 10.94 | 0.1  | 0.12 | 1.23  | 0.014021 | 0.002923 | 0.273301 | 0.079414 |
| MmugDNA.206.1.S1_at     | MmugDNA.206.1   | 2.64  | 2.64  | 0.02 | 0.02 | 1     | 0.812839 | 0.448922 | 0.932245 | 0.664695 |
| MmugDNA.2060.1.S1_at    | MmugDNA.2060.1  | 6.48  | 5.24  | 0.92 | 0.13 | 2.37  | 0.079465 | 0.043742 | 0.442306 | 0.253863 |
| MmugDNA.20600.1.S1_at   | MmugDNA.20600.1 | 8.4   | 8.72  | 0.13 | 0.15 | -1.25 | 0.091851 | 0.264305 | 0.460177 | 0.530366 |
| MmugDNA.20603.1.S1_at   | MmugDNA.20603.1 | 5.37  | 5.44  | 0.21 | 0.07 | -1.05 | 0.99289  | 0.759692 | 0.997361 | 0.860313 |
| MmugDNA.20605.1.S1_at   | MmugDNA.20605.1 | 5.16  | 5.25  | 0.06 | 0.31 | -1.06 | 0.631165 | 0.817318 | 0.852393 | 0.89464  |
| MmugDNA.20606.1.S1_at   | MmugDNA.20606.1 | 6.89  | 6.64  | 0.04 | 0.12 | 1.19  | 0.066037 | 0.054127 | 0.421613 | 0.277968 |
| MmugDNA.20607.1.S1_at   | MmugDNA.20607.1 | 4.81  | 4.5   | 0.08 | 0.02 | 1.24  | 0.002795 | 0.396868 | 0.185521 | 0.62846  |
| MmugDNA.20608.1.S1_at   | MmugDNA.20608.1 | 9.44  | 8.83  | 0.41 | 0.14 | 1.52  | 0.077638 | 0.09472  | 0.439716 | 0.351535 |
| MmugDNA.20609.1.S1_at   | MmugDNA.20609.1 | 7.16  | 6.94  | 0.77 | 0.13 | 1.16  | 0.648603 | 0.22139  | 0.859988 | 0.494644 |
| MmugDNA.2061.1.S1_at    | MmugDNA.2061.1  | 6.76  | 6.77  | 0.8  | 0.19 | -1.01 | 0.848479 | 0.966746 | 0.946776 | 0.981494 |
| MmugDNA.20613.1.S1_at   | MmugDNA.20613.1 | 11.42 | 10.88 | 0.05 | 0.15 | 1.46  | 0.004981 | 0.001594 | 0.204144 | 0.06044  |
| MmugDNA.20614.1.S1_at   | MmugDNA.20614.1 | 4.65  | 4.66  | 0.14 | 0.31 | -1.01 | 0.429357 | 0.162056 | 0.742161 | 0.43817  |
| MmugDNA.20615.1.S1_at   | MmugDNA.20615.1 | 9.82  | 9.67  | 0.36 | 0.08 | 1.11  | 0.654131 | 0.84297  | 0.862576 | 0.910558 |
| MmugDNA.20617.1.S1_at   | MmugDNA.20617.1 | 3.67  | 3.78  | 0.43 | 0.56 | -1.08 | 0.432807 | 0.630622 | 0.744125 | 0.782345 |
| MmugDNA.20618.1.S1_s_at | MmugDNA.20618.1 | 10.1  | 10.04 | 0.33 | 0.07 | 1.04  | 0.82856  | 0.631672 | 0.938342 | 0.782925 |
| MmugDNA.20619.1.S1_at   | MmugDNA.20619.1 | 7.75  | 7.67  | 0.08 | 0.04 | 1.06  | 0.127225 | 0.258704 | 0.501431 | 0.525949 |
| MmugDNA.20619.1.S1_x_at | MmugDNA.20619.1 | 7.29  | 7.39  | 0.06 | 0.13 | -1.06 | 0.793024 | 0.171077 | 0.924203 | 0.447611 |
| MmugDNA.2062.1.S1_at    | MmugDNA.2062.1  | 3.31  | 3.33  | 0.1  | 0.05 | -1.02 | 0.978583 | 0.91774  | 0.993032 | 0.954011 |
| MmugDNA.20620.1.S1_at   | MmugDNA.20620.1 | 8.07  | 7.88  | 0.48 | 0.12 | 1.14  | 0.238398 | 0.134401 | 0.605341 | 0.406603 |
| MmugDNA.20621.1.S1_at   | MmugDNA.20621.1 | 4.43  | 4.48  | 0.44 | 0.09 | -1.04 | 0.836233 | 0.850312 | 0.941202 | 0.914874 |
| MmugDNA.20622.1.S1_at   | MmugDNA.20622.1 | 5.71  | 5.68  | 0.14 | 0.04 | 1.02  | 0.354329 | 0.256143 | 0.693914 | 0.524069 |
| MmugDNA.20623.1.S1_at   | MmugDNA.20623.1 | 2.71  | 2.66  | 0.16 | 0.02 | 1.03  | 0.706477 | 0.789792 | 0.885774 | 0.878553 |
| MmugDNA.20624.1.S1_at   | MmugDNA.20624.1 | 4.52  | 5.05  | 0.05 | 0.77 | -1.44 | 0.169575 | 0.19693  | 0.542584 | 0.472072 |
| MmugDNA.20625.1.S1_at   | MmugDNA.20625.1 | 2.96  | 2.95  | 0.04 | 0.06 | 1.01  | 0.842735 | 0.675929 | 0.944281 | 0.810621 |
| MmugDNA.20626.1.S1_at   | MmugDNA.20626.1 | 6.63  | 6.22  | 0.53 | 0.06 | 1.33  | 0.203515 | 0.344043 | 0.57497  | 0.58962  |
| MmugDNA.20627.1.S1_at   | MmugDNA.20627.1 | 6.84  | 6.84  | 0.18 | 0.1  | -1    | 0.673513 | 0.724867 | 0.871397 | 0.840716 |
| MmugDNA.20628.1.S1_at   | MmugDNA.20628.1 | 11.06 | 11.06 | 0.06 | 0.01 | -1    | 0.894202 | 0.80741  | 0.963751 | 0.889121 |
| MmugDNA.20629.1.S1_at   | MmugDNA.20629.1 | 4.9   | 4.69  | 0.2  | 0.13 | 1.16  | 0.151894 | 0.131725 | 0.525001 | 0.403854 |
| MmugDNA.20630.1.S1_at   | MmugDNA.20630.1 | 10.95 | 10.96 | 0.17 | 0.19 | -1    | 0.499266 | 0.22473  | 0.781984 | 0.497614 |
| MmugDNA.20631.1.S1_at   | MmugDNA.20631.1 | 6.98  | 6.95  | 0.31 | 0.25 | 1.02  | 0.793739 | 0.519473 | 0.924414 | 0.711062 |
| MmugDNA.20632.1.S1_at   | MmugDNA.20632.1 | 3.82  | 3.84  | 0.31 | 0.36 | -1.02 | 0.924633 | 0.425845 | 0.974823 | 0.6481   |
| MmugDNA.20633.1.S1_at   | MmugDNA.20633.1 | 8.7   | 8.45  | 0.34 | 0.27 | 1.19  | 0.928632 | 0.098308 | 0.976317 | 0.356377 |
| MmugDNA.20634.1.S1_at   | MmugDNA.20634.1 | 6.91  | 7.2   | 0.27 | 0.06 | -1.22 | 0.167774 | 0.20987  | 0.540451 | 0.483643 |
| MmugDNA.20635.1.S1_at   | MmugDNA.20635.1 | 5.05  | 4.95  | 0.14 | 0.32 | 1.07  | 0.23904  | 0.107911 | 0.605503 | 0.370945 |

|                         |                 |       |       |      |      |       |          |          |          |          |
|-------------------------|-----------------|-------|-------|------|------|-------|----------|----------|----------|----------|
| MmugDNA.20637.1.S1_at   | MmugDNA.20637.1 | 5.25  | 5.2   | 0.04 | 0.07 | 1.04  | 0.431083 | 0.223324 | 0.74323  | 0.49612  |
| MmugDNA.20638.1.S1_at   | MmugDNA.20638.1 | 3.71  | 3.54  | 0.24 | 0.08 | 1.12  | 0.330327 | 0.272102 | 0.676941 | 0.536923 |
| MmugDNA.20639.1.S1_at   | MmugDNA.20639.1 | 6.73  | 6.71  | 0.14 | 0.04 | 1.01  | 0.81813  | 0.729393 | 0.934249 | 0.843541 |
| MmugDNA.2064.1.S1_at    | MmugDNA.2064.1  | 9.11  | 9.39  | 1.48 | 0.18 | -1.22 | 0.587079 | 0.588179 | 0.831568 | 0.754803 |
| MmugDNA.20640.1.S1_at   | MmugDNA.20640.1 | 8.99  | 8.91  | 0.09 | 0.05 | 1.06  | 0.572797 | 0.076265 | 0.823366 | 0.321227 |
| MmugDNA.20641.1.S1_at   | MmugDNA.20641.1 | 5.95  | 5.81  | 0.19 | 0.23 | 1.1   | 0.453466 | 0.50581  | 0.75608  | 0.702218 |
| MmugDNA.20643.1.S1_at   | MmugDNA.20643.1 | 10.19 | 9.54  | 0.19 | 0.04 | 1.56  | 0.008007 | 0.004306 | 0.232005 | 0.092019 |
| MmugDNA.20644.1.S1_at   | MmugDNA.20644.1 | 2.76  | 2.81  | 0.04 | 0.02 | -1.03 | 0.473315 | 0.004346 | 0.767506 | 0.092371 |
| MmugDNA.20645.1.S1_s_at | MmugDNA.20645.1 | 11.91 | 12.2  | 0.28 | 0.06 | -1.22 | 0.056333 | 0.038154 | 0.399925 | 0.239949 |
| MmugDNA.20646.1.S1_at   | MmugDNA.20646.1 | 9.2   | 9.44  | 0.16 | 0.06 | -1.18 | 0.212173 | 0.206853 | 0.582812 | 0.481011 |
| MmugDNA.20647.1.S1_at   | MmugDNA.20647.1 | 4.34  | 4.41  | 0.75 | 0.17 | -1.05 | 0.853563 | 0.384993 | 0.948299 | 0.620583 |
| MmugDNA.20648.1.S1_at   | MmugDNA.20648.1 | 7.79  | 7.98  | 0.45 | 0.17 | -1.14 | 0.543804 | 0.197542 | 0.806798 | 0.472537 |
| MmugDNA.20649.1.S1_at   | MmugDNA.20649.1 | 4.7   | 4.38  | 0.18 | 0.18 | 1.25  | 0.111443 | 0.243763 | 0.484572 | 0.513899 |
| MmugDNA.2065.1.S1_at    | MmugDNA.2065.1  | 2.86  | 2.91  | 0.12 | 0.14 | -1.03 | 0.776908 | 0.769875 | 0.917413 | 0.866376 |
| MmugDNA.20651.1.S1_at   | MmugDNA.20651.1 | 5.32  | 4.96  | 0.25 | 0.19 | 1.28  | 0.160339 | 0.238267 | 0.533335 | 0.508825 |
| MmugDNA.20652.1.S1_at   | MmugDNA.20652.1 | 4.55  | 4.61  | 0.12 | 0.2  | -1.04 | 0.721848 | 0.848695 | 0.892101 | 0.914071 |
| MmugDNA.20653.1.S1_at   | MmugDNA.20653.1 | 4.66  | 4.64  | 0.36 | 0.23 | 1.01  | 0.987776 | 0.681093 | 0.995831 | 0.813786 |
| MmugDNA.20654.1.S1_x_at | MmugDNA.20654.1 | 12.78 | 12.7  | 0.08 | 0.15 | 1.06  | 0.547026 | 0.862179 | 0.808912 | 0.921663 |
| MmugDNA.20655.1.S1_at   | MmugDNA.20655.1 | 6.24  | 6.2   | 0.56 | 0.18 | 1.03  | 0.883996 | 0.967172 | 0.959789 | 0.981863 |
| MmugDNA.20656.1.S1_at   | MmugDNA.20656.1 | 4.66  | 4.75  | 0.1  | 0.08 | -1.06 | 0.219919 | 0.09425  | 0.589114 | 0.350889 |
| MmugDNA.20657.1.S1_at   | MmugDNA.20657.1 | 3.75  | 3.55  | 0.16 | 0.1  | 1.15  | 0.07651  | 0.129815 | 0.437977 | 0.40147  |
| MmugDNA.20658.1.S1_at   | MmugDNA.20658.1 | 6.19  | 6.55  | 0.27 | 0.26 | -1.28 | 0.157136 | 0.183164 | 0.530266 | 0.459531 |
| MmugDNA.20659.1.S1_at   | MmugDNA.20659.1 | 4.59  | 4.55  | 0.26 | 0.07 | 1.03  | 0.758953 | 0.051348 | 0.909414 | 0.272052 |
| MmugDNA.20661.1.S1_at   | MmugDNA.20661.1 | 9.82  | 9.93  | 0.3  | 0.03 | -1.08 | 0.470205 | 0.008853 | 0.76595  | 0.12451  |
| MmugDNA.20662.1.S1_at   | MmugDNA.20662.1 | 11.31 | 11.24 | 0.22 | 0.1  | 1.05  | 0.747009 | 0.782318 | 0.90386  | 0.873935 |
| MmugDNA.20663.1.S1_at   | MmugDNA.20663.1 | 6.56  | 6.74  | 0.15 | 0.24 | -1.14 | 0.115636 | 0.243072 | 0.488896 | 0.513356 |
| MmugDNA.20664.1.S1_at   | MmugDNA.20664.1 | 7.89  | 7.2   | 0.54 | 0.18 | 1.61  | 0.306043 | 0.227988 | 0.659264 | 0.500211 |
| MmugDNA.20665.1.S1_at   | MmugDNA.20665.1 | 5.2   | 5.03  | 0.03 | 0.07 | 1.12  | 0.02751  | 0.344615 | 0.327829 | 0.589982 |
| MmugDNA.20667.1.S1_at   | MmugDNA.20667.1 | 6.42  | 5.32  | 0.86 | 0.55 | 2.15  | 0.112485 | 0.144999 | 0.485828 | 0.418938 |
| MmugDNA.20668.1.S1_at   | MmugDNA.20668.1 | 12.14 | 12.12 | 0.03 | 0.05 | 1.02  | 0.095919 | 0.434877 | 0.464469 | 0.654867 |
| MmugDNA.2067.1.S1_at    | MmugDNA.2067.1  | 6.66  | 6.63  | 0.13 | 0.14 | 1.02  | 0.191825 | 0.193441 | 0.56298  | 0.468711 |
| MmugDNA.20673.1.S1_at   | MmugDNA.20673.1 | 4.94  | 4.73  | 1.04 | 0.08 | 1.16  | 0.32151  | 0.490102 | 0.670266 | 0.692168 |
| MmugDNA.20674.1.S1_at   | MmugDNA.20674.1 | 3.06  | 3.06  | 0.03 | 0.03 | -1    | 0.236765 | 0.354605 | 0.603719 | 0.597297 |
| MmugDNA.20676.1.S1_at   | MmugDNA.20676.1 | 11.9  | 12.53 | 0.23 | 0.1  | -1.55 | 0.040427 | 0.027014 | 0.364378 | 0.205513 |
| MmugDNA.20677.1.S1_at   | MmugDNA.20677.1 | 3.57  | 3.61  | 1.16 | 0.17 | -1.03 | 0.416919 | 0.589005 | 0.734593 | 0.755312 |
| MmugDNA.20678.1.S1_at   | MmugDNA.20678.1 | 5.5   | 5.5   | 0.12 | 0.04 | 1     | 0.267904 | 0.33491  | 0.628278 | 0.58275  |
| MmugDNA.20679.1.S1_at   | MmugDNA.20679.1 | 2.93  | 2.84  | 0.17 | 0.11 | 1.06  | 0.930124 | 0.13823  | 0.976623 | 0.411198 |
| MmugDNA.2068.1.S1_at    | MmugDNA.2068.1  | 6.65  | 5.9   | 0.8  | 0.23 | 1.69  | 0.167511 | 0.224733 | 0.540065 | 0.497614 |
| MmugDNA.20680.1.S1_at   | MmugDNA.20680.1 | 7.77  | 7.68  | 0.17 | 0.08 | 1.06  | 0.120317 | 0.193103 | 0.493602 | 0.468554 |
| MmugDNA.20680.1.S1_s_at | MmugDNA.20680.1 | 9.38  | 9.46  | 0.49 | 0.11 | -1.06 | 0.440129 | 0.168829 | 0.748349 | 0.445458 |
| MmugDNA.20681.1.S1_at   | MmugDNA.20681.1 | 6.03  | 6.14  | 0.06 | 0.08 | -1.08 | 0.132721 | 0.409813 | 0.506993 | 0.636825 |
| MmugDNA.20682.1.S1_s_at | MmugDNA.20682.1 | 7.52  | 7.59  | 0.23 | 0.04 | -1.05 | 0.618455 | 0.488877 | 0.845965 | 0.691436 |
| MmugDNA.20684.1.S1_at   | MmugDNA.20684.1 | 4.47  | 4.26  | 0.16 | 0.26 | 1.16  | 0.200476 | 0.249229 | 0.572371 | 0.518313 |

|                         |                 |       |       |      |      |       |          |          |          |          |
|-------------------------|-----------------|-------|-------|------|------|-------|----------|----------|----------|----------|
| MmugDNA.20688.1.S1_at   | MmugDNA.20688.1 | 2.95  | 2.95  | 0.06 | 0.05 | 1     | 0.232564 | 0.767114 | 0.600124 | 0.864712 |
| MmugDNA.20689.1.S1_at   | MmugDNA.20689.1 | 8.65  | 7.79  | 0.21 | 0.24 | 1.82  | 0.015844 | 0.030005 | 0.284408 | 0.214994 |
| MmugDNA.2069.1.S1_at    | MmugDNA.2069.1  | 8.44  | 7.99  | 0.53 | 1.03 | 1.36  | 0.897016 | 0.791601 | 0.964979 | 0.879621 |
| MmugDNA.20690.1.S1_at   | MmugDNA.20690.1 | 3.4   | 3.29  | 0.11 | 0.15 | 1.08  | 0.915732 | 0.75681  | 0.971302 | 0.858443 |
| MmugDNA.20691.1.S1_at   | MmugDNA.20691.1 | 7.92  | 7.55  | 0.07 | 0.08 | 1.29  | 0.009173 | 0.15354  | 0.241866 | 0.428309 |
| MmugDNA.20692.1.S1_at   | MmugDNA.20692.1 | 5.82  | 5.85  | 0.17 | 0.04 | -1.02 | 0.54726  | 0.794243 | 0.808984 | 0.881316 |
| MmugDNA.20695.1.S1_at   | MmugDNA.20695.1 | 7.84  | 8.24  | 0.32 | 0.75 | -1.32 | 0.243529 | 0.161704 | 0.609448 | 0.437771 |
| MmugDNA.29371.1.S1_at   | MmugDNA.29371.1 | 8.08  | 8.03  | 0.12 | 0.23 | 1.04  | 0.867931 | 0.956304 | 0.953793 | 0.975137 |
| MmugDNA.29371.1.S1_s_at | MmugDNA.29371.1 | 7.68  | 7.95  | 0.35 | 0.74 | -1.2  | 0.272719 | 0.146678 | 0.632448 | 0.420711 |
| MmugDNA.20696.1.S1_at   | MmugDNA.20696.1 | 5.64  | 5.79  | 0.23 | 0.04 | -1.11 | 0.319407 | 0.677439 | 0.668706 | 0.81167  |
| MmugDNA.20697.1.S1_at   | MmugDNA.20697.1 | 5.07  | 4.96  | 0.06 | 0.03 | 1.08  | 0.06426  | 0.046529 | 0.417897 | 0.260221 |
| MmugDNA.20699.1.S1_at   | MmugDNA.20699.1 | 8.65  | 7.69  | 1    | 0.3  | 1.95  | 0.166334 | 0.039296 | 0.538998 | 0.243338 |
| MmugDNA.207.1.S1_at     | MmugDNA.207.1   | 8.33  | 8.51  | 2.18 | 0.23 | -1.13 | 0.842575 | 0.214264 | 0.944281 | 0.487891 |
| MmugDNA.2070.1.S1_at    | MmugDNA.2070.1  | 5.8   | 5.61  | 0.12 | 0.34 | 1.14  | 0.588809 | 0.770803 | 0.831968 | 0.866807 |
| MmugDNA.20700.1.S1_at   | MmugDNA.20700.1 | 5.28  | 5.11  | 0.14 | 0.08 | 1.13  | 0.164599 | 0.210312 | 0.537466 | 0.484192 |
| MmugDNA.20701.1.S1_at   | MmugDNA.20701.1 | 6.99  | 6.98  | 0.11 | 0.12 | 1.01  | 0.779157 | 0.629344 | 0.918608 | 0.781818 |
| MmugDNA.20703.1.S1_at   | MmugDNA.20703.1 | 5.89  | 6.02  | 0.18 | 0.16 | -1.09 | 0.793033 | 0.221081 | 0.924203 | 0.494477 |
| MmugDNA.20704.1.S1_at   | MmugDNA.20704.1 | 5.43  | 6.06  | 0.12 | 0.16 | -1.54 | 0.008235 | 0.007555 | 0.232164 | 0.116437 |
| MmugDNA.20705.1.S1_at   | MmugDNA.20705.1 | 11.16 | 10.73 | 0.19 | 0.25 | 1.34  | 0.354542 | 0.009821 | 0.694078 | 0.130205 |
| MmugDNA.20707.1.S1_at   | MmugDNA.20707.1 | 11.39 | 12.41 | 0.11 | 0.03 | -2.03 | 0.000086 | 0.000015 | 0.108151 | 0.018351 |
| MmugDNA.20708.1.S1_at   | MmugDNA.20708.1 | 6.12  | 6.03  | 0.12 | 0.08 | 1.06  | 0.197609 | 0.341184 | 0.568584 | 0.587303 |
| MmugDNA.20709.1.S1_at   | MmugDNA.20709.1 | 3.77  | 3.58  | 0.12 | 0.08 | 1.14  | 0.094115 | 0.158945 | 0.463389 | 0.435111 |
| MmugDNA.20710.1.S1_at   | MmugDNA.20710.1 | 6.92  | 6.81  | 0.08 | 0.16 | 1.08  | 0.261412 | 0.313737 | 0.623819 | 0.568083 |
| MmugDNA.25418.1.S1_s_at | MmugDNA.25418.1 | 10.79 | 10.36 | 0.12 | 0.16 | 1.35  | 0.021546 | 0.024984 | 0.309241 | 0.19808  |
| MmugDNA.20713.1.S1_at   | MmugDNA.20713.1 | 5.23  | 5.23  | 0.12 | 0.1  | 1     | 0.446857 | 0.603733 | 0.752889 | 0.764262 |
| MmugDNA.20715.1.S1_at   | MmugDNA.20715.1 | 4.78  | 4.58  | 0.19 | 0.07 | 1.15  | 0.171099 | 0.200931 | 0.544246 | 0.475426 |
| MmugDNA.20716.1.S1_at   | MmugDNA.20716.1 | 11.64 | 11.26 | 0.43 | 0.02 | 1.31  | 0.192925 | 0.119355 | 0.56375  | 0.387887 |
| MmugDNA.20717.1.S1_s_at | MmugDNA.20717.1 | 13.09 | 12.79 | 0.05 | 0.12 | 1.23  | 0.01263  | 0.005753 | 0.263441 | 0.104378 |
| MmugDNA.20718.1.S1_at   | MmugDNA.20718.1 | 11.8  | 11.7  | 0.08 | 0.02 | 1.07  | 0.147519 | 0.018612 | 0.521578 | 0.171539 |
| MmugDNA.20720.1.S1_at   | MmugDNA.20720.1 | 10.85 | 10.65 | 0.64 | 0.08 | 1.15  | 0.619658 | 0.272739 | 0.84683  | 0.537479 |
| MmugDNA.20721.1.S1_at   | MmugDNA.20721.1 | 12.03 | 12.13 | 0.55 | 0.02 | -1.07 | 0.745751 | 0.393401 | 0.903099 | 0.626287 |
| MmugDNA.20722.1.S1_at   | MmugDNA.20722.1 | 3.01  | 2.96  | 0.05 | 0.07 | 1.03  | 0.146253 | 0.169268 | 0.52059  | 0.44588  |
| MmugDNA.20723.1.S1_s_at | MmugDNA.20723.1 | 2.89  | 2.87  | 0.01 | 0.12 | 1.01  | 0.751449 | 0.908657 | 0.906    | 0.948282 |
| MmugDNA.20724.1.S1_at   | MmugDNA.20724.1 | 3.12  | 3.15  | 0.12 | 0.08 | -1.02 | 0.923523 | 0.815816 | 0.97437  | 0.893773 |
| MmugDNA.33850.1.S1_s_at | MmugDNA.33850.1 | 3.58  | 3.45  | 0.14 | 0.15 | 1.09  | 0.873586 | 0.770808 | 0.956238 | 0.866807 |
| MmugDNA.20729.1.S1_at   | MmugDNA.20729.1 | 3.07  | 2.85  | 0.1  | 0.09 | 1.16  | 0.091455 | 0.079618 | 0.45936  | 0.326981 |
| MmugDNA.2073.1.S1_at    | MmugDNA.2073.1  | 5.68  | 5.64  | 0.16 | 0.02 | 1.02  | 0.301175 | 0.31279  | 0.655426 | 0.567319 |
| MmugDNA.20733.1.S1_at   | MmugDNA.20733.1 | 10.66 | 10.44 | 0.17 | 0.08 | 1.17  | 0.258839 | 0.539579 | 0.622286 | 0.723833 |
| MmugDNA.20735.1.S1_at   | MmugDNA.20735.1 | 11.58 | 11.75 | 0.1  | 0.03 | -1.12 | 0.054774 | 0.271626 | 0.397122 | 0.536577 |
| MmugDNA.20736.1.S1_at   | MmugDNA.20736.1 | 10.08 | 10.14 | 0.18 | 0.07 | -1.04 | 0.441382 | 0.689264 | 0.74926  | 0.818665 |
| MmugDNA.12659.1.S1_s_at | MmugDNA.12659.1 | 6.21  | 5.82  | 0.18 | 0.43 | 1.31  | 0.653514 | 0.739578 | 0.862428 | 0.849084 |
| MmugDNA.20739.1.S1_at   | MmugDNA.20739.1 | 4.89  | 4.88  | 0.06 | 0.18 | 1.01  | 0.373863 | 0.343496 | 0.705567 | 0.58925  |
| MmugDNA.2074.1.S1_at    | MmugDNA.2074.1  | 4.37  | 4.38  | 0.07 | 0.08 | -1.01 | 0.798035 | 0.698566 | 0.925892 | 0.824875 |



|                         |                 |       |       |      |      |       |          |          |          |          |
|-------------------------|-----------------|-------|-------|------|------|-------|----------|----------|----------|----------|
| MmugDNA.20740.1.S1_at   | MmugDNA.20740.1 | 3.6   | 3.69  | 0.02 | 0.11 | -1.07 | 0.212225 | 0.075721 | 0.582812 | 0.320317 |
| MmugDNA.20741.1.S1_at   | MmugDNA.20741.1 | 8.68  | 8.42  | 0.42 | 0.14 | 1.2   | 0.085034 | 0.065519 | 0.451642 | 0.301415 |
| MmugDNA.20742.1.S1_at   | MmugDNA.20742.1 | 3.96  | 3.99  | 0.45 | 0.03 | -1.02 | 0.447591 | 0.257071 | 0.753399 | 0.524783 |
| MmugDNA.20743.1.S1_at   | MmugDNA.20743.1 | 6.59  | 8.02  | 1.1  | 0.05 | -2.7  | 0.271641 | 0.164739 | 0.631445 | 0.441047 |
| MmugDNA.20744.1.S1_at   | MmugDNA.20744.1 | 6.6   | 6.7   | 0.25 | 0.39 | -1.07 | 0.188903 | 0.354702 | 0.560718 | 0.597404 |
| MmugDNA.20745.1.S1_s_at | MmugDNA.20745.1 | 12    | 11.46 | 0.63 | 0.16 | 1.45  | 0.718989 | 0.727848 | 0.890843 | 0.842701 |
| MmugDNA.20746.1.S1_at   | MmugDNA.20746.1 | 5.27  | 5.22  | 0.2  | 0.29 | 1.03  | 0.618981 | 0.517746 | 0.846305 | 0.709857 |
| MmugDNA.20747.1.S1_at   | MmugDNA.20747.1 | 10.11 | 9.02  | 0.25 | 0.12 | 2.13  | 0.001874 | 0.000095 | 0.168981 | 0.027665 |
| MmugDNA.20747.1.S1_x_at | MmugDNA.20747.1 | 9.81  | 8.95  | 0.17 | 0.06 | 1.81  | 0.000808 | 0.000023 | 0.15004  | 0.019635 |
| MmugDNA.20748.1.S1_at   | MmugDNA.20748.1 | 4.75  | 4.75  | 0.11 | 0.01 | 1     | 0.334968 | 0.818715 | 0.680736 | 0.895529 |
| MmugDNA.20749.1.S1_at   | MmugDNA.20749.1 | 3.62  | 3.73  | 0.13 | 0.07 | -1.08 | 0.722608 | 0.580466 | 0.892352 | 0.749728 |
| MmugDNA.2075.1.S1_at    | MmugDNA.2075.1  | 8.36  | 8.34  | 0.04 | 0.08 | 1.01  | 0.468479 | 0.002859 | 0.764997 | 0.078756 |
| MmugDNA.20750.1.S1_at   | MmugDNA.20750.1 | 5.74  | 6.4   | 0.1  | 0.31 | -1.58 | 0.084906 | 0.367805 | 0.451489 | 0.607466 |
| MmugDNA.20751.1.S1_at   | MmugDNA.20751.1 | 11.28 | 10.92 | 0.21 | 0.1  | 1.29  | 0.04897  | 0.008633 | 0.385064 | 0.123154 |
| MmugDNA.20752.1.S1_at   | MmugDNA.20752.1 | 11.99 | 11.89 | 0.17 | 0.17 | 1.07  | 0.944998 | 0.102782 | 0.980852 | 0.363305 |
| MmugDNA.20753.1.S1_at   | MmugDNA.20753.1 | 5.52  | 5.53  | 0.18 | 0.11 | -1.01 | 0.891343 | 0.783767 | 0.962572 | 0.874778 |
| MmugDNA.20754.1.S1_at   | MmugDNA.20754.1 | 3     | 3.01  | 0.13 | 0.16 | -1.01 | 0.796286 | 0.675491 | 0.925098 | 0.810353 |
| MmugDNA.20755.1.S1_at   | MmugDNA.20755.1 | 4.78  | 5.01  | 0.42 | 0.27 | -1.17 | 0.569921 | 0.75069  | 0.821803 | 0.855009 |
| MmugDNA.20756.1.S1_at   | MmugDNA.20756.1 | 6.47  | 6.39  | 0.5  | 0.21 | 1.05  | 0.35517  | 0.620356 | 0.69464  | 0.775353 |
| MmugDNA.20757.1.S1_at   | MmugDNA.20757.1 | 6.61  | 6.71  | 0.83 | 0.3  | -1.07 | 0.874313 | 0.3384   | 0.956448 | 0.585432 |
| MmugDNA.20758.1.S1_at   | MmugDNA.20758.1 | 8.23  | 6.92  | 0.61 | 0.09 | 2.48  | 0.053156 | 0.531089 | 0.394123 | 0.718415 |
| MmugDNA.20759.1.S1_at   | MmugDNA.20759.1 | 5.44  | 5.39  | 0.25 | 0.34 | 1.04  | 0.776737 | 0.192776 | 0.917412 | 0.468274 |
| MmugDNA.2076.1.S1_at    | MmugDNA.2076.1  | 5     | 4.99  | 0.2  | 0.03 | 1.01  | 0.318583 | 0.290979 | 0.668228 | 0.551525 |
| MmugDNA.20760.1.S1_at   | MmugDNA.20760.1 | 8.99  | 9.69  | 1.77 | 0.24 | -1.63 | 0.510592 | 0.140147 | 0.788228 | 0.413394 |
| MmugDNA.20761.1.S1_at   | MmugDNA.20761.1 | 6.16  | 6.08  | 0.08 | 0.09 | 1.06  | 0.138139 | 0.365056 | 0.513671 | 0.605259 |
| MmugDNA.20761.1.S1_x_at | MmugDNA.20761.1 | 6.36  | 6.34  | 0.11 | 0.15 | 1.01  | 0.399739 | 0.158791 | 0.723309 | 0.434881 |
| MmugDNA.20762.1.S1_at   | MmugDNA.20762.1 | 12.09 | 12.06 | 0.25 | 0.08 | 1.02  | 0.865902 | 0.491034 | 0.952831 | 0.692751 |
| MmugDNA.20763.1.S1_at   | MmugDNA.20763.1 | 3.7   | 3.74  | 0.27 | 0.27 | -1.03 | 0.875241 | 0.560004 | 0.956676 | 0.736439 |
| MmugDNA.20765.1.S1_at   | MmugDNA.20765.1 | 7.08  | 6.72  | 0.55 | 0.08 | 1.29  | 0.886283 | 0.197721 | 0.960501 | 0.472633 |
| MmugDNA.20766.1.S1_at   | MmugDNA.20766.1 | 6.78  | 7.51  | 0.13 | 0.09 | -1.67 | 0.000772 | 0.000112 | 0.15004  | 0.028233 |
| MmugDNA.20767.1.S1_at   | MmugDNA.20767.1 | 4.91  | 4.82  | 0.21 | 0.01 | 1.07  | 0.461015 | 0.250682 | 0.760738 | 0.51941  |
| MmugDNA.1306.1.S1_s_at  | MmugDNA.1306.1  | 6.19  | 6.19  | 0.1  | 0.22 | -1    | 0.425583 | 0.624883 | 0.740112 | 0.778939 |
| MmugDNA.20769.1.S1_at   | MmugDNA.20769.1 | 13.45 | 13.61 | 0.8  | 0.04 | -1.12 | 0.260685 | 0.308774 | 0.623301 | 0.56463  |
| MmugDNA.2077.1.S1_at    | MmugDNA.2077.1  | 10.39 | 10.64 | 0.15 | 0.03 | -1.19 | 0.086566 | 0.0199   | 0.454436 | 0.177357 |
| MmugDNA.20771.1.S1_at   | MmugDNA.20771.1 | 3.59  | 3.5   | 0.24 | 0.19 | 1.06  | 0.270998 | 0.32243  | 0.630919 | 0.573972 |
| MmugDNA.20772.1.S1_s_at | MmugDNA.20772.1 | 10.31 | 10.7  | 0.95 | 0.21 | -1.31 | 0.396865 | 0.53166  | 0.721565 | 0.718819 |
| MmugDNA.20773.1.S1_at   | MmugDNA.20773.1 | 3.39  | 3.39  | 0.21 | 0.07 | -1    | 0.56973  | 0.346736 | 0.821593 | 0.591536 |
| MmugDNA.20774.1.S1_at   | MmugDNA.20774.1 | 11.72 | 10.98 | 2.61 | 0.29 | 1.67  | 0.85927  | 0.102158 | 0.950341 | 0.362212 |
| MmugDNA.20775.1.S1_at   | MmugDNA.20775.1 | 11.21 | 11.36 | 0.03 | 0.09 | -1.12 | 0.069532 | 0.078547 | 0.427368 | 0.325285 |
| MmugDNA.20777.1.S1_at   | MmugDNA.20777.1 | 4.95  | 4.98  | 0.03 | 0.17 | -1.02 | 0.313446 | 0.821598 | 0.664763 | 0.897299 |
| MmugDNA.20778.1.S1_at   | MmugDNA.20778.1 | 8.48  | 8.4   | 0.21 | 0.09 | 1.05  | 0.403879 | 0.521978 | 0.726029 | 0.712775 |
| MmugDNA.20779.1.S1_at   | MmugDNA.20779.1 | 3.4   | 3.31  | 0.38 | 0.19 | 1.06  | 0.873539 | 0.94115  | 0.956238 | 0.966652 |
| MmugDNA.2078.1.S1_at    | MmugDNA.2078.1  | 9.52  | 9.83  | 0.32 | 0.04 | -1.24 | 0.162189 | 0.100989 | 0.535244 | 0.360558 |

|                         |                 |       |       |      |      |       |          |          |          |          |
|-------------------------|-----------------|-------|-------|------|------|-------|----------|----------|----------|----------|
| MmugDNA.20781.1.S1_at   | MmugDNA.20781.1 | 10.85 | 9.72  | 0.27 | 0.28 | 2.2   | 0.006554 | 0.004301 | 0.219791 | 0.092019 |
| MmugDNA.20782.1.S1_at   | MmugDNA.20782.1 | 4.33  | 3.98  | 0.45 | 0.81 | 1.28  | 0.526062 | 0.233292 | 0.796442 | 0.50468  |
| MmugDNA.20783.1.S1_at   | MmugDNA.20783.1 | 4.65  | 4.48  | 0.1  | 0.04 | 1.12  | 0.209823 | 0.032662 | 0.581324 | 0.223791 |
| MmugDNA.20786.1.S1_at   | MmugDNA.20786.1 | 6.65  | 6.64  | 0.1  | 0.05 | 1.01  | 0.359801 | 0.897535 | 0.697545 | 0.941525 |
| MmugDNA.20787.1.S1_at   | MmugDNA.20787.1 | 3.2   | 3.3   | 0.12 | 0.04 | -1.07 | 0.172905 | 0.104716 | 0.546034 | 0.3661   |
| MmugDNA.20788.1.S1_at   | MmugDNA.20788.1 | 5.93  | 6.77  | 0.56 | 0.35 | -1.79 | 0.064877 | 0.037106 | 0.419075 | 0.237165 |
| MmugDNA.20789.1.S1_at   | MmugDNA.20789.1 | 6     | 6.08  | 0.1  | 0.02 | -1.06 | 0.319632 | 0.285911 | 0.668882 | 0.547484 |
| MmugDNA.2079.1.S1_at    | MmugDNA.2079.1  | 4.16  | 5.08  | 0.17 | 0.11 | -1.88 | 0.002417 | 0.10812  | 0.177075 | 0.371347 |
| MmugDNA.20791.1.S1_at   | MmugDNA.20791.1 | 6.05  | 5.81  | 0.44 | 0.1  | 1.18  | 0.529981 | 0.55462  | 0.798627 | 0.73333  |
| MmugDNA.20792.1.S1_at   | MmugDNA.20792.1 | 7.94  | 8.66  | 0.43 | 0.22 | -1.65 | 0.098647 | 0.070831 | 0.468025 | 0.31231  |
| MmugDNA.20793.1.S1_at   | MmugDNA.20793.1 | 5.04  | 5.67  | 0.52 | 0.25 | -1.55 | 0.119409 | 0.306243 | 0.492862 | 0.562907 |
| MmugDNA.20795.1.S1_at   | MmugDNA.20795.1 | 5.86  | 5.87  | 0.04 | 0.25 | -1.01 | 0.985797 | 0.632839 | 0.995476 | 0.783788 |
| MmugDNA.20796.1.S1_at   | MmugDNA.20796.1 | 4.08  | 3.93  | 0.55 | 0.23 | 1.11  | 0.369162 | 0.666033 | 0.704181 | 0.804374 |
| MmugDNA.20797.1.S1_at   | MmugDNA.20797.1 | 3.59  | 3.71  | 0.07 | 0.27 | -1.09 | 0.934779 | 0.770171 | 0.977918 | 0.866555 |
| MmugDNA.20798.1.S1_at   | MmugDNA.20798.1 | 9.39  | 9.05  | 0.47 | 0.07 | 1.26  | 0.226512 | 0.149192 | 0.595809 | 0.423692 |
| MmugDNA.20799.1.S1_at   | MmugDNA.20799.1 | 5.83  | 5.74  | 0.4  | 0.1  | 1.07  | 0.670726 | 0.833651 | 0.870059 | 0.904613 |
| MmugDNA.2080.1.S1_at    | MmugDNA.2080.1  | 4.93  | 4.85  | 0.04 | 0.09 | 1.05  | 0.124379 | 0.414802 | 0.498504 | 0.640456 |
| MmugDNA.20801.1.S1_at   | MmugDNA.20801.1 | 7.57  | 7.99  | 0.7  | 0.17 | -1.33 | 0.963632 | 0.309027 | 0.988152 | 0.564721 |
| MmugDNA.20803.1.S1_s_at | MmugDNA.20803.1 | 5.55  | 5.61  | 0.15 | 0.04 | -1.04 | 0.59421  | 0.383477 | 0.834629 | 0.619444 |
| MmugDNA.20804.1.S1_at   | MmugDNA.20804.1 | 4.26  | 4.04  | 0.06 | 0.17 | 1.16  | 0.099535 | 0.165209 | 0.469263 | 0.441389 |
| MmugDNA.20805.1.S1_at   | MmugDNA.20805.1 | 3.51  | 3.51  | 0.39 | 0.13 | -1    | 0.279418 | 0.336405 | 0.638319 | 0.583831 |
| MmugDNA.20806.1.S1_at   | MmugDNA.20806.1 | 10.17 | 10.39 | 0.38 | 0.08 | -1.17 | 0.995139 | 0.656963 | 0.99816  | 0.799401 |
| MmugDNA.20807.1.S1_at   | MmugDNA.20807.1 | 9.11  | 9.04  | 0.73 | 0.17 | 1.05  | 0.866646 | 0.904773 | 0.953134 | 0.946059 |
| MmugDNA.20808.1.S1_at   | MmugDNA.20808.1 | 3.65  | 3.45  | 0.23 | 0.2  | 1.16  | 0.060944 | 0.048052 | 0.409371 | 0.264201 |
| MmugDNA.2081.1.S1_at    | MmugDNA.2081.1  | 3.1   | 3.2   | 0.17 | 0.11 | -1.07 | 0.432296 | 0.645597 | 0.743876 | 0.792428 |
| MmugDNA.20811.1.S1_at   | MmugDNA.20811.1 | 7.46  | 7.36  | 0.09 | 0.05 | 1.07  | 0.067861 | 0.065544 | 0.42451  | 0.301415 |
| MmugDNA.20812.1.S1_at   | MmugDNA.20812.1 | 9.78  | 10.02 | 0.26 | 0.14 | -1.18 | 0.35422  | 0.0541   | 0.6938   | 0.277914 |
| MmugDNA.20813.1.S1_at   | MmugDNA.20813.1 | 3.85  | 3.86  | 0.31 | 0.13 | -1.01 | 0.443852 | 0.437016 | 0.751068 | 0.656424 |
| MmugDNA.20814.1.S1_at   | MmugDNA.20814.1 | 3.9   | 4.37  | 0.69 | 0.21 | -1.38 | 0.892228 | 0.453892 | 0.962988 | 0.668329 |
| MmugDNA.20815.1.S1_at   | MmugDNA.20815.1 | 2.95  | 2.98  | 0.13 | 0.08 | -1.02 | 0.660288 | 0.455822 | 0.865556 | 0.669659 |
| MmugDNA.20816.1.S1_at   | MmugDNA.20816.1 | 3.54  | 3.55  | 0.13 | 0.16 | -1.01 | 0.722224 | 0.177805 | 0.892211 | 0.454111 |
| MmugDNA.20817.1.S1_at   | MmugDNA.20817.1 | 5.4   | 5.23  | 0.14 | 0.08 | 1.13  | 0.262673 | 0.556716 | 0.624914 | 0.734725 |
| MmugDNA.2082.1.S1_at    | MmugDNA.2082.1  | 6.21  | 6.36  | 0.38 | 0.11 | -1.11 | 0.989531 | 0.494351 | 0.996071 | 0.694829 |
| MmugDNA.20820.1.S1_at   | MmugDNA.20820.1 | 4.61  | 4.33  | 0.15 | 0.39 | 1.22  | 0.426411 | 0.296954 | 0.740469 | 0.555895 |
| MmugDNA.20821.1.S1_at   | MmugDNA.20821.1 | 3.4   | 3.51  | 0.1  | 0.17 | -1.08 | 0.265254 | 0.569429 | 0.626397 | 0.742382 |
| MmugDNA.20822.1.S1_at   | MmugDNA.20822.1 | 6.3   | 6.24  | 0.06 | 0.05 | 1.04  | 0.116869 | 0.132483 | 0.490029 | 0.404534 |
| MmugDNA.20823.1.S1_at   | MmugDNA.20823.1 | 8.38  | 9.83  | 0.65 | 0.08 | -2.74 | 0.038211 | 0.028532 | 0.358577 | 0.210754 |
| MmugDNA.20824.1.S1_at   | MmugDNA.20824.1 | 4.3   | 4.34  | 0.24 | 0.09 | -1.02 | 0.679867 | 0.448771 | 0.874376 | 0.664601 |
| MmugDNA.20826.1.S1_at   | MmugDNA.20826.1 | 3.54  | 3.39  | 0.09 | 0.07 | 1.11  | 0.044627 | 0.344936 | 0.374916 | 0.590239 |
| MmugDNA.20827.1.S1_at   | MmugDNA.20827.1 | 4.49  | 4.54  | 0.17 | 0.07 | -1.04 | 0.646037 | 0.636649 | 0.858993 | 0.786329 |
| MmugDNA.20828.1.S1_at   | MmugDNA.20828.1 | 9.05  | 8.16  | 0.58 | 0.21 | 1.85  | 0.052974 | 0.026357 | 0.39366  | 0.203321 |
| MmugDNA.20829.1.S1_at   | MmugDNA.20829.1 | 3.52  | 3.58  | 0.17 | 0.6  | -1.04 | 0.243719 | 0.344355 | 0.609644 | 0.589762 |
| MmugDNA.20830.1.S1_at   | MmugDNA.20830.1 | 9.75  | 10.34 | 0.52 | 0.07 | -1.51 | 0.331465 | 0.087764 | 0.678103 | 0.341027 |

|                         |                 |       |       |      |      |       |          |          |          |          |
|-------------------------|-----------------|-------|-------|------|------|-------|----------|----------|----------|----------|
| MmugDNA.20831.1.S1_at   | MmugDNA.20831.1 | 6.72  | 6.52  | 0.07 | 0.1  | 1.15  | 0.119599 | 0.196273 | 0.492992 | 0.471236 |
| MmugDNA.20831.1.S1_s_at | MmugDNA.20831.1 | 8.91  | 9.56  | 0.09 | 0.24 | -1.57 | 0.011749 | 0.000456 | 0.257187 | 0.038572 |
| MmugDNA.20832.1.S1_at   | MmugDNA.20832.1 | 7.2   | 7.21  | 0.16 | 0.05 | -1.01 | 0.488585 | 0.235609 | 0.775646 | 0.506671 |
| MmugDNA.20833.1.S1_at   | MmugDNA.20833.1 | 3.95  | 3.89  | 0.21 | 0.06 | 1.04  | 0.224361 | 0.322889 | 0.593546 | 0.574228 |
| MmugDNA.20836.1.S1_at   | MmugDNA.20836.1 | 4.79  | 4.84  | 0.05 | 0.17 | -1.04 | 0.300927 | 0.330453 | 0.655213 | 0.579193 |
| MmugDNA.20837.1.S1_at   | MmugDNA.20837.1 | 3.29  | 3.36  | 0.11 | 0.09 | -1.05 | 0.823463 | 0.967352 | 0.936294 | 0.98199  |
| MmugDNA.20838.1.S1_at   | MmugDNA.20838.1 | 5.08  | 5.11  | 0.17 | 0.24 | -1.02 | 0.885455 | 0.962377 | 0.960367 | 0.978876 |
| MmugDNA.2084.1.S1_at    | MmugDNA.2084.1  | 3.61  | 3.15  | 0.25 | 0.05 | 1.38  | 0.079259 | 0.223597 | 0.442056 | 0.496451 |
| MmugDNA.20841.1.S1_at   | MmugDNA.20841.1 | 5.04  | 4.92  | 0.13 | 0.06 | 1.08  | 0.131172 | 0.173756 | 0.5054   | 0.450128 |
| MmugDNA.20844.1.S1_at   | MmugDNA.20844.1 | 3.42  | 3.46  | 0.23 | 0.03 | -1.03 | 0.621028 | 0.815478 | 0.847482 | 0.893588 |
| MmugDNA.20845.1.S1_at   | MmugDNA.20845.1 | 7.9   | 8.54  | 0.52 | 0.44 | -1.56 | 0.47859  | 0.268705 | 0.770117 | 0.534138 |
| MmugDNA.20847.1.S1_at   | MmugDNA.20847.1 | 5.27  | 5.29  | 0.34 | 0.03 | -1.01 | 0.800318 | 0.097956 | 0.92687  | 0.355858 |
| MmugDNA.20849.1.S1_at   | MmugDNA.20849.1 | 7.39  | 7.76  | 0.43 | 0.47 | -1.29 | 0.096134 | 0.011654 | 0.46463  | 0.139826 |
| MmugDNA.2085.1.S1_at    | MmugDNA.2085.1  | 7.06  | 7.12  | 0.55 | 0.11 | -1.04 | 0.779331 | 0.937421 | 0.918638 | 0.964687 |
| MmugDNA.20850.1.S1_s_at | MmugDNA.20850.1 | 10.67 | 10.61 | 0.68 | 0.1  | 1.04  | 0.766547 | 0.88564  | 0.912198 | 0.934982 |
| MmugDNA.20851.1.S1_at   | MmugDNA.20851.1 | 4.05  | 4.13  | 0.29 | 0.08 | -1.05 | 0.603096 | 0.800777 | 0.83911  | 0.885425 |
| MmugDNA.20852.1.S1_at   | MmugDNA.20852.1 | 4.98  | 4.89  | 0.95 | 0.77 | 1.06  | 0.764783 | 0.944557 | 0.911557 | 0.968614 |
| MmugDNA.20853.1.S1_at   | MmugDNA.20853.1 | 4.72  | 4.68  | 0.03 | 0.08 | 1.03  | 0.157569 | 0.250882 | 0.530588 | 0.51958  |
| MmugDNA.20854.1.S1_at   | MmugDNA.20854.1 | 4.72  | 4.64  | 0.19 | 0.06 | 1.06  | 0.310447 | 0.70331  | 0.662193 | 0.827962 |
| MmugDNA.20856.1.S1_at   | MmugDNA.20856.1 | 3.68  | 3.71  | 0.23 | 0.24 | -1.02 | 0.624665 | 0.465746 | 0.848871 | 0.6759   |
| MmugDNA.20857.1.S1_at   | MmugDNA.20857.1 | 3.78  | 3.63  | 0.13 | 0.22 | 1.11  | 0.138725 | 0.571559 | 0.514139 | 0.743837 |
| MmugDNA.20858.1.S1_at   | MmugDNA.20858.1 | 3.81  | 3.84  | 0.1  | 0.19 | -1.02 | 0.559851 | 0.109088 | 0.816426 | 0.372869 |
| MmugDNA.20859.1.S1_at   | MmugDNA.20859.1 | 3.36  | 3.26  | 0.15 | 0.14 | 1.07  | 0.721936 | 0.37991  | 0.892112 | 0.616659 |
| MmugDNA.20860.1.S1_at   | MmugDNA.20860.1 | 6.96  | 6.91  | 0.56 | 0.03 | 1.03  | 0.925358 | 0.673805 | 0.975163 | 0.80947  |
| MmugDNA.20862.1.S1_at   | MmugDNA.20862.1 | 7.15  | 7.02  | 0.04 | 0.02 | 1.09  | 0.007049 | 0.070599 | 0.225384 | 0.311901 |
| MmugDNA.20862.1.S1_s_at | MmugDNA.20862.1 | 9.19  | 8.65  | 0.59 | 0.05 | 1.46  | 0.21576  | 0.315311 | 0.585813 | 0.568939 |
| MmugDNA.9246.1.S1_s_at  | MmugDNA.9246.1  | 11.05 | 11.28 | 0.48 | 0.04 | -1.18 | 0.830926 | 0.943255 | 0.939533 | 0.967814 |
| MmugDNA.20864.1.S1_at   | MmugDNA.20864.1 | 7.74  | 7.86  | 0.04 | 0.06 | -1.08 | 0.039004 | 0.309221 | 0.36091  | 0.564807 |
| MmugDNA.20866.1.S1_at   | MmugDNA.20866.1 | 11.39 | 11.51 | 0.07 | 0.03 | -1.08 | 0.044474 | 0.318809 | 0.374916 | 0.571379 |
| MmugDNA.20867.1.S1_at   | MmugDNA.20867.1 | 4.21  | 4.21  | 0.15 | 0.13 | -1    | 0.540525 | 0.56846  | 0.804382 | 0.741979 |
| MmugDNA.20868.1.S1_at   | MmugDNA.20868.1 | 6.55  | 6.26  | 0.16 | 0.19 | 1.22  | 0.244321 | 0.116782 | 0.60991  | 0.38408  |
| MmugDNA.20869.1.S1_at   | MmugDNA.20869.1 | 3.17  | 4.21  | 0.61 | 0.29 | -2.06 | 0.148176 | 0.280569 | 0.522429 | 0.543746 |
| MmugDNA.2087.1.S1_at    | MmugDNA.2087.1  | 7.49  | 7.95  | 0.39 | 0.02 | -1.37 | 0.343844 | 0.1973   | 0.686882 | 0.472213 |
| MmugDNA.20870.1.S1_at   | MmugDNA.20870.1 | 8.77  | 8.5   | 0.22 | 0.07 | 1.21  | 0.057373 | 0.033432 | 0.402043 | 0.226501 |
| MmugDNA.20872.1.S1_at   | MmugDNA.20872.1 | 8.25  | 8.17  | 0.57 | 0.18 | 1.06  | 0.649558 | 0.50873  | 0.860386 | 0.703792 |
| MmugDNA.20873.1.S1_at   | MmugDNA.20873.1 | 4.3   | 4.1   | 0.09 | 0.15 | 1.15  | 0.218891 | 0.407721 | 0.588341 | 0.635141 |
| MmugDNA.20874.1.S1_at   | MmugDNA.20874.1 | 3.51  | 3.43  | 0.11 | 0.16 | 1.06  | 0.653995 | 0.89368  | 0.862543 | 0.939323 |
| MmugDNA.20875.1.S1_at   | MmugDNA.20875.1 | 3.8   | 3.35  | 0.43 | 0.22 | 1.36  | 0.184778 | 0.485851 | 0.557519 | 0.689442 |
| MmugDNA.20876.1.S1_at   | MmugDNA.20876.1 | 5.18  | 5.24  | 0.16 | 0.25 | -1.04 | 0.592509 | 0.394419 | 0.833921 | 0.626982 |
| MmugDNA.20877.1.S1_at   | MmugDNA.20877.1 | 6.45  | 6.21  | 0.26 | 0.17 | 1.18  | 0.592434 | 0.259476 | 0.833893 | 0.526418 |
| MmugDNA.20878.1.S1_at   | MmugDNA.20878.1 | 4.36  | 4.39  | 0.17 | 0.21 | -1.02 | 0.575775 | 0.739889 | 0.824888 | 0.849294 |
| MmugDNA.20879.1.S1_at   | MmugDNA.20879.1 | 6.9   | 6.83  | 0.15 | 0.02 | 1.05  | 0.321762 | 0.33348  | 0.670529 | 0.581694 |
| MmugDNA.2088.1.S1_at    | MmugDNA.2088.1  | 9.68  | 9.69  | 0.38 | 0.11 | -1.01 | 0.621621 | 0.030218 | 0.847604 | 0.21576  |

|                         |                 |       |       |      |      |       |          |          |          |          |
|-------------------------|-----------------|-------|-------|------|------|-------|----------|----------|----------|----------|
| MmugDNA.20881.1.S1_at   | MmugDNA.20881.1 | 3.14  | 3.05  | 0.05 | 0.02 | 1.06  | 0.05873  | 0.367034 | 0.405368 | 0.606673 |
| MmugDNA.20882.1.S1_at   | MmugDNA.20882.1 | 10.83 | 10.7  | 0.33 | 0.21 | 1.09  | 0.45305  | 0.093399 | 0.755962 | 0.349611 |
| MmugDNA.20883.1.S1_at   | MmugDNA.20883.1 | 7.89  | 8.37  | 0.32 | 0.22 | -1.39 | 0.152614 | 0.204292 | 0.525558 | 0.478541 |
| MmugDNA.20884.1.S1_at   | MmugDNA.20884.1 | 3.09  | 2.96  | 0.11 | 0.06 | 1.09  | 0.216443 | 0.436384 | 0.586564 | 0.655959 |
| MmugDNA.20886.1.S1_at   | MmugDNA.20886.1 | 3.4   | 3.15  | 0.12 | 0.11 | 1.19  | 0.080539 | 0.077393 | 0.444394 | 0.323204 |
| MmugDNA.20887.1.S1_at   | MmugDNA.20887.1 | 5.16  | 5.21  | 0.15 | 0.18 | -1.03 | 0.356173 | 0.424725 | 0.69508  | 0.647239 |
| MmugDNA.20888.1.S1_at   | MmugDNA.20888.1 | 5.12  | 4.96  | 0.17 | 0.41 | 1.12  | 0.788541 | 0.659609 | 0.922384 | 0.800804 |
| MmugDNA.20889.1.S1_at   | MmugDNA.20889.1 | 10.54 | 10.42 | 0.07 | 0.27 | 1.09  | 0.117482 | 0.081103 | 0.490925 | 0.329276 |
| MmugDNA.2089.1.S1_at    | MmugDNA.2089.1  | 3.76  | 3.73  | 0.09 | 0.12 | 1.02  | 0.236286 | 0.265288 | 0.603291 | 0.53127  |
| MmugDNA.20890.1.S1_at   | MmugDNA.20890.1 | 3.98  | 3.83  | 0.12 | 0.09 | 1.11  | 0.755659 | 0.188238 | 0.908037 | 0.464251 |
| MmugDNA.20891.1.S1_at   | MmugDNA.20891.1 | 7.65  | 7.16  | 0.15 | 0.16 | -1.41 | 0.041146 | 0.026559 | 0.365675 | 0.203915 |
| MmugDNA.20892.1.S1_at   | MmugDNA.20892.1 | 9.35  | 9.13  | 0.39 | 0.11 | 1.17  | 0.396767 | 0.046581 | 0.721565 | 0.260267 |
| MmugDNA.20892.1.S1_s_at | MmugDNA.20892.1 | 10.16 | 9.81  | 0.3  | 0.11 | 1.28  | 0.373391 | 0.013798 | 0.705567 | 0.150555 |
| MmugDNA.20893.1.S1_at   | MmugDNA.20893.1 | 5.27  | 4.92  | 0.38 | 0.26 | 1.27  | 0.14992  | 0.220219 | 0.523408 | 0.493655 |
| MmugDNA.20894.1.S1_at   | MmugDNA.20894.1 | 4.86  | 4.74  | 1.23 | 0.55 | 1.08  | 0.909796 | 0.835219 | 0.96945  | 0.905645 |
| MmugDNA.20895.1.S1_at   | MmugDNA.20895.1 | 6.17  | 6.08  | 0.18 | 0.14 | 1.07  | 0.887149 | 0.932635 | 0.960831 | 0.961739 |
| MmugDNA.20896.1.S1_at   | MmugDNA.20896.1 | 6.07  | 6.02  | 0.14 | 0.03 | 1.04  | 0.212233 | 0.12566  | 0.582812 | 0.396249 |
| MmugDNA.20897.1.S1_at   | MmugDNA.20897.1 | 6.01  | 6.44  | 0.06 | 0.26 | -1.35 | 0.152947 | 0.121146 | 0.525888 | 0.390217 |
| MmugDNA.20898.1.S1_at   | MmugDNA.20898.1 | 12.41 | 12.12 | 3.08 | 0.21 | 1.22  | 0.511205 | 0.264215 | 0.78856  | 0.530286 |
| MmugDNA.2090.1.S1_at    | MmugDNA.2090.1  | 4.48  | 4.47  | 0.06 | 0.06 | 1.01  | 0.176431 | 0.624919 | 0.549443 | 0.778939 |
| MmugDNA.20900.1.S1_at   | MmugDNA.20900.1 | 2.58  | 2.52  | 0.07 | 0.06 | 1.04  | 0.545972 | 0.653814 | 0.808278 | 0.79769  |
| MmugDNA.20901.1.S1_at   | MmugDNA.20901.1 | 8.22  | 8.38  | 0.65 | 0.19 | -1.12 | 0.642096 | 0.177355 | 0.857628 | 0.453742 |
| MmugDNA.20902.1.S1_at   | MmugDNA.20902.1 | 9.56  | 9.93  | 0.66 | 0.19 | -1.29 | 0.836286 | 0.241792 | 0.941202 | 0.51238  |
| MmugDNA.20903.1.S1_at   | MmugDNA.20903.1 | 2.99  | 3.12  | 0.06 | 0.08 | -1.09 | 0.120976 | 0.145806 | 0.494694 | 0.419833 |
| MmugDNA.20904.1.S1_at   | MmugDNA.20904.1 | 8.39  | 8.79  | 0.73 | 0.12 | -1.32 | 0.960327 | 0.24716  | 0.987161 | 0.516341 |
| MmugDNA.20905.1.S1_at   | MmugDNA.20905.1 | 9.16  | 8.95  | 0.36 | 0.3  | 1.16  | 0.572359 | 0.131942 | 0.823212 | 0.404002 |
| MmugDNA.20908.1.S1_at   | MmugDNA.20908.1 | 12.09 | 12.01 | 0.31 | 0.09 | 1.05  | 0.52247  | 0.443151 | 0.795143 | 0.661011 |
| MmugDNA.20909.1.S1_at   | MmugDNA.20909.1 | 7.49  | 7.63  | 0.71 | 0.23 | -1.11 | 0.790538 | 0.805909 | 0.922954 | 0.888395 |
| MmugDNA.2091.1.S1_at    | MmugDNA.2091.1  | 3     | 2.98  | 0.14 | 0.07 | 1.01  | 0.355735 | 0.58876  | 0.694868 | 0.755137 |
| MmugDNA.20910.1.S1_at   | MmugDNA.20910.1 | 6.75  | 6.58  | 0.1  | 0.07 | 1.12  | 0.035519 | 0.009266 | 0.352182 | 0.127089 |
| MmugDNA.20911.1.S1_at   | MmugDNA.20911.1 | 3.09  | 3.09  | 0.07 | 0.26 | 1     | 0.300038 | 0.456985 | 0.654515 | 0.670592 |
| MmugDNA.20912.1.S1_at   | MmugDNA.20912.1 | 12.32 | 12.52 | 0.15 | 0.05 | -1.15 | 0.128665 | 0.149543 | 0.503433 | 0.424095 |
| MmugDNA.20913.1.S1_at   | MmugDNA.20913.1 | 5.22  | 4.86  | 0.6  | 0.38 | 1.29  | 0.354223 | 0.47284  | 0.6938   | 0.680163 |
| MmugDNA.20914.1.S1_at   | MmugDNA.20914.1 | 3.42  | 3.38  | 0.25 | 0.22 | 1.03  | 0.455979 | 0.483387 | 0.757624 | 0.687904 |
| MmugDNA.20915.1.S1_at   | MmugDNA.20915.1 | 4.51  | 4.55  | 0.24 | 0.66 | -1.03 | 0.525045 | 0.441433 | 0.796179 | 0.659611 |
| MmugDNA.20917.1.S1_at   | MmugDNA.20917.1 | 7.2   | 7.38  | 0.46 | 0.35 | -1.14 | 0.934217 | 0.162265 | 0.977732 | 0.438447 |
| MmugDNA.20918.1.S1_at   | MmugDNA.20918.1 | 3.31  | 3.26  | 0.07 | 0.07 | 1.04  | 0.37328  | 0.193135 | 0.705567 | 0.468554 |
| MmugDNA.20919.1.S1_at   | MmugDNA.20919.1 | 4.85  | 4.72  | 0.09 | 0.08 | 1.09  | 0.167802 | 0.534639 | 0.540451 | 0.720477 |
| MmugDNA.2092.1.S1_at    | MmugDNA.2092.1  | 5.3   | 5.3   | 0.12 | 0.06 | 1     | 0.677646 | 0.876386 | 0.873601 | 0.929683 |
| MmugDNA.20922.1.S1_at   | MmugDNA.20922.1 | 4.33  | 3.99  | 0.08 | 0.1  | 1.26  | 0.017996 | 0.306961 | 0.294714 | 0.563427 |
| MmugDNA.20923.1.S1_at   | MmugDNA.20923.1 | 4.16  | 3.93  | 0.39 | 0.18 | 1.17  | 0.360475 | 0.410106 | 0.697914 | 0.637065 |
| MmugDNA.20924.1.S1_at   | MmugDNA.20924.1 | 7.63  | 4.63  | 1.6  | 0.36 | 7.98  | 0.092107 | 0.028886 | 0.460688 | 0.211763 |
| MmugDNA.20925.1.S1_at   | MmugDNA.20925.1 | 5.98  | 6.11  | 0.27 | 0.1  | -1.1  | 0.189463 | 0.2619   | 0.560917 | 0.528287 |

|                         |                 |       |       |      |      |       |          |          |          |          |
|-------------------------|-----------------|-------|-------|------|------|-------|----------|----------|----------|----------|
| MmugDNA.20926.1.S1_at   | MmugDNA.20926.1 | 4.67  | 4.89  | 0.72 | 0.79 | -1.17 | 0.842699 | 0.214064 | 0.944281 | 0.487645 |
| MmugDNA.20927.1.S1_at   | MmugDNA.20927.1 | 8.74  | 8.59  | 0.07 | 0.06 | 1.11  | 0.12613  | 0.093973 | 0.499873 | 0.350467 |
| MmugDNA.20929.1.S1_at   | MmugDNA.20929.1 | 4.23  | 4.37  | 0.18 | 0.04 | -1.1  | 0.351681 | 0.397898 | 0.692452 | 0.629138 |
| MmugDNA.32454.1.S1_s_at | MmugDNA.32454.1 | 4.23  | 3.94  | 0.19 | 0.04 | 1.23  | 0.087527 | 0.07264  | 0.455244 | 0.315579 |
| MmugDNA.20931.1.S1_at   | MmugDNA.20931.1 | 4.52  | 4.58  | 0.13 | 0.26 | -1.04 | 0.482127 | 0.660021 | 0.772274 | 0.801028 |
| MmugDNA.20933.1.S1_at   | MmugDNA.20933.1 | 4.99  | 5.27  | 0.14 | 0.4  | -1.22 | 0.294686 | 0.349608 | 0.650816 | 0.593539 |
| MmugDNA.20934.1.S1_at   | MmugDNA.20934.1 | 9.88  | 9.88  | 0.08 | 0.22 | 1     | 0.286499 | 0.333384 | 0.643761 | 0.581668 |
| MmugDNA.20935.1.S1_at   | MmugDNA.20935.1 | 3.79  | 3.68  | 0.21 | 0.06 | 1.08  | 0.311905 | 0.729967 | 0.663542 | 0.843733 |
| MmugDNA.20938.1.S1_at   | MmugDNA.20938.1 | 5.9   | 6.33  | 0.25 | 0.08 | -1.35 | 0.044264 | 0.092301 | 0.374279 | 0.348137 |
| MmugDNA.20939.1.S1_at   | MmugDNA.20939.1 | 7.27  | 7.3   | 0.35 | 0.3  | -1.03 | 0.407915 | 0.285135 | 0.729046 | 0.547098 |
| MmugDNA.2094.1.S1_s_at  | MmugDNA.2094.1  | 7.99  | 8.37  | 0.46 | 0.18 | -1.3  | 0.25664  | 0.227368 | 0.620603 | 0.499659 |
| MmugDNA.20940.1.S1_at   | MmugDNA.20940.1 | 4.29  | 4.15  | 0.17 | 0.26 | 1.1   | 0.724808 | 0.159798 | 0.893274 | 0.435871 |
| MmugDNA.20941.1.S1_s_at | MmugDNA.20941.1 | 5.55  | 5.58  | 0.21 | 0.02 | -1.02 | 0.448593 | 0.679721 | 0.753954 | 0.812998 |
| MmugDNA.20942.1.S1_at   | MmugDNA.20942.1 | 3.73  | 3.69  | 0.03 | 0.23 | 1.03  | 0.28954  | 0.493847 | 0.646199 | 0.694433 |
| MmugDNA.20943.1.S1_at   | MmugDNA.20943.1 | 5.7   | 5.85  | 0.13 | 0.33 | -1.12 | 0.642452 | 0.849806 | 0.857755 | 0.914673 |
| MmugDNA.20944.1.S1_at   | MmugDNA.20944.1 | 2.75  | 2.89  | 0.19 | 0.04 | -1.1  | 0.670903 | 0.800307 | 0.870106 | 0.885129 |
| MmugDNA.20945.1.S1_at   | MmugDNA.20945.1 | 6.65  | 6.52  | 0.09 | 0.07 | 1.09  | 0.094347 | 0.471412 | 0.463787 | 0.679435 |
| MmugDNA.20946.1.S1_at   | MmugDNA.20946.1 | 6.58  | 6.98  | 0.31 | 0.21 | -1.32 | 0.116454 | 0.021687 | 0.489647 | 0.184333 |
| MmugDNA.20947.1.S1_at   | MmugDNA.20947.1 | 3.43  | 3.42  | 0.19 | 0.5  | 1.01  | 0.473633 | 0.405082 | 0.767656 | 0.633481 |
| MmugDNA.20948.1.S1_at   | MmugDNA.20948.1 | 5.76  | 5.61  | 0.18 | 0.15 | 1.1   | 0.384665 | 0.333101 | 0.712173 | 0.581387 |
| MmugDNA.20949.1.S1_at   | MmugDNA.20949.1 | 3.98  | 4.23  | 0.14 | 0.29 | -1.19 | 0.382628 | 0.562419 | 0.710805 | 0.738025 |
| MmugDNA.2095.1.S1_at    | MmugDNA.2095.1  | 5.23  | 5.77  | 0.85 | 0.26 | -1.45 | 0.713436 | 0.266107 | 0.88844  | 0.531943 |
| MmugDNA.20950.1.S1_at   | MmugDNA.20950.1 | 11.54 | 11.63 | 0.44 | 0.14 | -1.07 | 0.916809 | 0.840712 | 0.971796 | 0.909196 |
| MmugDNA.20951.1.S1_at   | MmugDNA.20951.1 | 5.77  | 5.64  | 0.03 | 0.04 | 1.09  | 0.017295 | 0.745309 | 0.290536 | 0.852351 |
| MmugDNA.20952.1.S1_at   | MmugDNA.20952.1 | 7.05  | 6.94  | 0.21 | 0    | 1.08  | 0.324318 | 0.66947  | 0.672562 | 0.806626 |
| MmugDNA.20953.1.S1_at   | MmugDNA.20953.1 | 5.16  | 5.01  | 0.06 | 0.07 | 1.11  | 0.033515 | 0.002802 | 0.346442 | 0.078041 |
| MmugDNA.20954.1.S1_at   | MmugDNA.20954.1 | 4.1   | 4.03  | 0.2  | 0.24 | 1.05  | 0.550935 | 0.046068 | 0.811083 | 0.258977 |
| MmugDNA.20955.1.S1_at   | MmugDNA.20955.1 | 5.65  | 5.37  | 0.1  | 0.19 | 1.21  | 0.251706 | 0.469456 | 0.616896 | 0.678248 |
| MmugDNA.20956.1.S1_at   | MmugDNA.20956.1 | 7.8   | 8.36  | 0.22 | 0.1  | -1.47 | 0.022562 | 0.010807 | 0.311408 | 0.135636 |
| MmugDNA.20959.1.S1_at   | MmugDNA.20959.1 | 3.27  | 3.15  | 0.06 | 0.08 | 1.09  | 0.17199  | 0.224188 | 0.545311 | 0.497164 |
| MmugDNA.2096.1.S1_at    | MmugDNA.2096.1  | 9.54  | 8.8   | 0.31 | 0.07 | 1.67  | 0.014971 | 0.002692 | 0.279083 | 0.076455 |
| MmugDNA.20960.1.S1_at   | MmugDNA.20960.1 | 6.55  | 5.12  | 1.14 | 0.19 | 2.69  | 0.306448 | 0.028991 | 0.659434 | 0.212154 |
| MmugDNA.20961.1.S1_at   | MmugDNA.20961.1 | 5.84  | 4.87  | 0.6  | 0.28 | 1.96  | 0.283957 | 0.401256 | 0.641841 | 0.63089  |
| MmugDNA.20962.1.S1_at   | MmugDNA.20962.1 | 3.46  | 3.38  | 0.04 | 0.09 | 1.05  | 0.151084 | 0.169634 | 0.52444  | 0.446221 |
| MmugDNA.20965.1.S1_at   | MmugDNA.20965.1 | 4.9   | 4.74  | 0.45 | 0.15 | 1.11  | 0.662312 | 0.858883 | 0.866704 | 0.919647 |
| MmugDNA.20966.1.S1_at   | MmugDNA.20966.1 | 13.4  | 13.2  | 0.11 | 0.04 | 1.15  | 0.157219 | 0.190476 | 0.530382 | 0.465906 |
| MmugDNA.20966.1.S1_s_at | MmugDNA.20966.1 | 13.57 | 13.39 | 0.12 | 0.04 | 1.13  | 0.292133 | 0.369585 | 0.648427 | 0.608948 |
| MmugDNA.20967.1.S1_at   | MmugDNA.20967.1 | 7.63  | 7.56  | 0.38 | 0.23 | 1.05  | 0.83502  | 0.950512 | 0.940832 | 0.971855 |
| MmugDNA.20968.1.S1_at   | MmugDNA.20968.1 | 3.45  | 3.33  | 0.15 | 0.01 | 1.09  | 0.653712 | 0.781778 | 0.862462 | 0.873516 |
| MmugDNA.20969.1.S1_at   | MmugDNA.20969.1 | 4.78  | 5.57  | 0.05 | 0.14 | -1.73 | 0.000951 | 0.007972 | 0.154251 | 0.118702 |
| MmugDNA.2097.1.S1_at    | MmugDNA.2097.1  | 4.23  | 4.13  | 0.18 | 0.09 | 1.07  | 0.269446 | 0.259164 | 0.62965  | 0.526264 |
| MmugDNA.33235.1.S1_s_at | MmugDNA.33235.1 | 7.2   | 6.81  | 0.1  | 0.34 | 1.32  | 0.04519  | 0.010664 | 0.376019 | 0.13482  |
| MmugDNA.20971.1.S1_at   | MmugDNA.20971.1 | 4.37  | 4.23  | 0.21 | 0.21 | 1.1   | 0.976862 | 0.342697 | 0.992494 | 0.588666 |

|                         |                 |       |       |      |      |       |          |          |          |          |
|-------------------------|-----------------|-------|-------|------|------|-------|----------|----------|----------|----------|
| MmugDNA.20972.1.S1_at   | MmugDNA.20972.1 | 4.96  | 4.95  | 0.01 | 0.17 | 1.01  | 0.964488 | 0.984005 | 0.988371 | 0.991111 |
| MmugDNA.20973.1.S1_at   | MmugDNA.20973.1 | 3.49  | 3.07  | 0.13 | 0.26 | 1.34  | 0.127871 | 0.317187 | 0.502371 | 0.570458 |
| MmugDNA.20974.1.S1_at   | MmugDNA.20974.1 | 6.77  | 6.75  | 0.15 | 0.07 | 1.01  | 0.386084 | 0.592695 | 0.713295 | 0.757854 |
| MmugDNA.20975.1.S1_at   | MmugDNA.20975.1 | 9.15  | 8.84  | 0.57 | 0.2  | 1.24  | 0.208397 | 0.076143 | 0.580083 | 0.320969 |
| MmugDNA.20976.1.S1_at   | MmugDNA.20976.1 | 4.09  | 4.08  | 0.16 | 0.13 | 1     | 0.826547 | 0.984448 | 0.937871 | 0.991287 |
| MmugDNA.20977.1.S1_at   | MmugDNA.20977.1 | 7.1   | 8.24  | 0.72 | 0.11 | -2.21 | 0.185195 | 0.07025  | 0.558235 | 0.311287 |
| MmugDNA.20978.1.S1_at   | MmugDNA.20978.1 | 5.92  | 5.83  | 0.2  | 0.06 | 1.06  | 0.587793 | 0.485637 | 0.83181  | 0.68924  |
| MmugDNA.2098.1.S1_at    | MmugDNA.2098.1  | 4.22  | 3.98  | 0.18 | 0.07 | 1.19  | 0.050474 | 0.138873 | 0.387218 | 0.412037 |
| MmugDNA.20980.1.S1_at   | MmugDNA.20980.1 | 9.46  | 8.71  | 0.73 | 0.23 | 1.67  | 0.360542 | 0.604486 | 0.697965 | 0.764647 |
| MmugDNA.20980.1.S1_s_at | MmugDNA.20980.1 | 7.15  | 6.81  | 0.34 | 0.14 | 1.27  | 0.073599 | 0.009807 | 0.434623 | 0.130166 |
| MmugDNA.20981.1.S1_at   | MmugDNA.20981.1 | 6.91  | 6.58  | 0.51 | 0.11 | -1.25 | 0.610644 | 0.811586 | 0.841982 | 0.891244 |
| MmugDNA.20982.1.S1_at   | MmugDNA.20982.1 | 3.27  | 3.28  | 0.22 | 0.02 | -1    | 0.867968 | 0.48407  | 0.953795 | 0.688318 |
| MmugDNA.20984.1.S1_at   | MmugDNA.20984.1 | 9.03  | 8.66  | 0.41 | 0.02 | 1.29  | 0.588198 | 0.168706 | 0.83181  | 0.445379 |
| MmugDNA.20985.1.S1_at   | MmugDNA.20985.1 | 9.68  | 9.58  | 0.32 | 0.07 | 1.07  | 0.748732 | 0.709411 | 0.904588 | 0.831622 |
| MmugDNA.20987.1.S1_at   | MmugDNA.20987.1 | 10.66 | 11.11 | 0.14 | 0.12 | -1.37 | 0.022451 | 0.004094 | 0.310698 | 0.090584 |
| MmugDNA.20988.1.S1_at   | MmugDNA.20988.1 | 8.82  | 9.04  | 0.62 | 0.16 | -1.17 | 0.411578 | 0.255122 | 0.731543 | 0.52317  |
| MmugDNA.20989.1.S1_at   | MmugDNA.20989.1 | 6.88  | 6.93  | 0.52 | 0.19 | -1.04 | 0.331601 | 0.072988 | 0.678109 | 0.315986 |
| MmugDNA.2099.1.S1_at    | MmugDNA.2099.1  | 12.22 | 12.46 | 0.21 | 0.07 | -1.18 | 0.467338 | 0.812759 | 0.764294 | 0.891794 |
| MmugDNA.20990.1.S1_at   | MmugDNA.20990.1 | 4.69  | 4.55  | 0.13 | 0.17 | 1.09  | 0.182421 | 0.209144 | 0.555415 | 0.482939 |
| MmugDNA.20991.1.S1_at   | MmugDNA.20991.1 | 5.97  | 5.97  | 0.13 | 0.02 | -1    | 0.326271 | 0.33741  | 0.673797 | 0.58462  |
| MmugDNA.20992.1.S1_at   | MmugDNA.20992.1 | 3.87  | 3.7   | 0.2  | 0.18 | 1.13  | 0.159994 | 0.268666 | 0.533013 | 0.534138 |
| MmugDNA.20993.1.S1_at   | MmugDNA.20993.1 | 11.1  | 12.05 | 0.66 | 0.19 | -1.93 | 0.212047 | 0.210397 | 0.582812 | 0.484267 |
| MmugDNA.20994.1.S1_at   | MmugDNA.20994.1 | 4.16  | 4.16  | 0.04 | 0.09 | -1    | 0.707106 | 0.812372 | 0.88604  | 0.891607 |
| MmugDNA.20996.1.S1_at   | MmugDNA.20996.1 | 4.24  | 4.23  | 0.04 | 0.2  | 1.01  | 0.560891 | 0.406057 | 0.816958 | 0.634197 |
| MmugDNA.20997.1.S1_at   | MmugDNA.20997.1 | 3.26  | 2.92  | 0.17 | 0.17 | 1.27  | 0.070947 | 0.065941 | 0.430067 | 0.302161 |
| MmugDNA.20998.1.S1_at   | MmugDNA.20998.1 | 7.89  | 8.09  | 0.58 | 0.16 | -1.14 | 0.795616 | 0.629649 | 0.924888 | 0.781989 |
| MmugDNA.20999.1.S1_at   | MmugDNA.20999.1 | 7.12  | 6.83  | 0.02 | 0.29 | 1.23  | 0.334157 | 0.451273 | 0.680111 | 0.666113 |
| MmugDNA.2100.1.S1_at    | MmugDNA.2100.1  | 10.41 | 10.75 | 0.47 | 0.11 | -1.26 | 0.831751 | 0.173541 | 0.939628 | 0.449938 |
| MmugDNA.21000.1.S1_at   | MmugDNA.21000.1 | 5.78  | 5.5   | 0.07 | 0.14 | 1.22  | 0.048918 | 0.043325 | 0.384943 | 0.252847 |
| MmugDNA.21001.1.S1_at   | MmugDNA.21001.1 | 8.06  | 7.06  | 0.45 | 0.12 | 2     | 0.053707 | 0.05466  | 0.39535  | 0.279311 |
| MmugDNA.21003.1.S1_at   | MmugDNA.21003.1 | 7.22  | 7.32  | 0.65 | 0.12 | -1.07 | 0.943176 | 0.80574  | 0.980425 | 0.888331 |
| MmugDNA.21006.1.S1_at   | MmugDNA.21006.1 | 4.06  | 4.27  | 0.08 | 0.21 | -1.16 | 0.202178 | 0.335203 | 0.573629 | 0.582968 |
| MmugDNA.21008.1.S1_at   | MmugDNA.21008.1 | 11.38 | 11.32 | 0.18 | 0.02 | 1.05  | 0.520007 | 0.751382 | 0.793413 | 0.855447 |
| MmugDNA.21010.1.S1_at   | MmugDNA.21010.1 | 8.42  | 8.55  | 0.24 | 0.18 | -1.09 | 0.182725 | 0.421003 | 0.555631 | 0.644662 |
| MmugDNA.21010.1.S1_s_at | MmugDNA.21010.1 | 7.81  | 7.93  | 0.3  | 0.32 | -1.08 | 0.697602 | 0.571997 | 0.882372 | 0.744171 |
| MmugDNA.21011.1.S1_at   | MmugDNA.21011.1 | 7.05  | 7.62  | 0.72 | 0.2  | -1.49 | 0.177537 | 0.171349 | 0.55065  | 0.447813 |
| MmugDNA.21012.1.S1_at   | MmugDNA.21012.1 | 5.14  | 5.27  | 0.22 | 0.12 | -1.09 | 0.765135 | 0.888089 | 0.911696 | 0.936183 |
| MmugDNA.21014.1.S1_at   | MmugDNA.21014.1 | 5.19  | 5.11  | 0.21 | 0.04 | 1.06  | 0.659183 | 0.799837 | 0.865093 | 0.884906 |
| MmugDNA.21015.1.S1_at   | MmugDNA.21015.1 | 6.21  | 6.28  | 0.51 | 0.29 | -1.06 | 0.475824 | 0.727266 | 0.768708 | 0.84224  |
| MmugDNA.21016.1.S1_at   | MmugDNA.21016.1 | 3.92  | 4.36  | 0.46 | 0.45 | -1.35 | 0.617507 | 0.176245 | 0.845444 | 0.452718 |
| MmugDNA.21017.1.S1_at   | MmugDNA.21017.1 | 8.42  | 8.54  | 0.44 | 0.26 | -1.09 | 0.89113  | 0.997303 | 0.962566 | 0.998549 |
| MmugDNA.21018.1.S1_at   | MmugDNA.21018.1 | 3.08  | 3.02  | 0.07 | 0.07 | 1.04  | 0.604521 | 0.198003 | 0.83963  | 0.472955 |
| MmugDNA.21019.1.S1_at   | MmugDNA.21019.1 | 9.25  | 7.37  | 1.23 | 0.13 | 3.69  | 0.165759 | 0.179277 | 0.538623 | 0.455692 |

|                         |                 |       |       |      |      |       |          |          |          |          |
|-------------------------|-----------------|-------|-------|------|------|-------|----------|----------|----------|----------|
| MmugDNA.2102.1.S1_at    | MmugDNA.2102.1  | 6.05  | 5.92  | 0.25 | 0.09 | 1.1   | 0.912119 | 0.599324 | 0.970255 | 0.761415 |
| MmugDNA.21020.1.S1_at   | MmugDNA.21020.1 | 6.03  | 5.97  | 0.19 | 0.04 | 1.04  | 0.693096 | 0.751995 | 0.880472 | 0.855739 |
| MmugDNA.21021.1.S1_at   | MmugDNA.21021.1 | 4.54  | 4.43  | 0.13 | 0.24 | 1.08  | 0.417286 | 0.46305  | 0.734845 | 0.674193 |
| MmugDNA.21022.1.S1_at   | MmugDNA.21022.1 | 3.36  | 3.9   | 0.75 | 0.38 | -1.45 | 0.353284 | 0.525134 | 0.693208 | 0.714766 |
| MmugDNA.21024.1.S1_at   | MmugDNA.21024.1 | 5.6   | 5.87  | 0.19 | 0.05 | -1.21 | 0.265239 | 0.33711  | 0.626397 | 0.584337 |
| MmugDNA.21025.1.S1_at   | MmugDNA.21025.1 | 7.61  | 7.9   | 0.17 | 0.13 | -1.22 | 0.031597 | 0.035683 | 0.341627 | 0.233314 |
| MmugDNA.21027.1.S1_at   | MmugDNA.21027.1 | 5.05  | 4.9   | 0.42 | 0.13 | 1.11  | 0.731878 | 0.654539 | 0.896927 | 0.798087 |
| MmugDNA.21028.1.S1_at   | MmugDNA.21028.1 | 3.37  | 3.57  | 0.13 | 0.01 | -1.15 | 0.154801 | 0.103662 | 0.528131 | 0.364465 |
| MmugDNA.21029.1.S1_at   | MmugDNA.21029.1 | 6.64  | 6.84  | 0.2  | 0.23 | -1.15 | 0.282312 | 0.157141 | 0.640891 | 0.432616 |
| MmugDNA.2103.1.S1_at    | MmugDNA.2103.1  | 4.23  | 4.34  | 0.35 | 0.4  | -1.08 | 0.592359 | 0.723201 | 0.833845 | 0.839645 |
| MmugDNA.21030.1.S1_at   | MmugDNA.21030.1 | 6.03  | 6.29  | 0.25 | 0.21 | -1.2  | 0.454758 | 0.016786 | 0.757    | 0.164091 |
| MmugDNA.21031.1.S1_at   | MmugDNA.21031.1 | 6.83  | 6.83  | 0.04 | 0.11 | 1     | 0.387312 | 0.07043  | 0.714163 | 0.311729 |
| MmugDNA.21033.1.S1_at   | MmugDNA.21033.1 | 3.7   | 3.56  | 0.07 | 0.58 | 1.1   | 0.885571 | 0.813283 | 0.96038  | 0.892071 |
| MmugDNA.21034.1.S1_at   | MmugDNA.21034.1 | 6.89  | 6.64  | 0.18 | 0.09 | 1.19  | 0.318281 | 0.496873 | 0.667975 | 0.696265 |
| MmugDNA.21035.1.S1_s_at | MmugDNA.21035.1 | 9.37  | 9.38  | 0.32 | 0.14 | -1.01 | 0.782738 | 0.939148 | 0.920013 | 0.965446 |
| MmugDNA.21036.1.S1_at   | MmugDNA.21036.1 | 5.25  | 5.09  | 0.09 | 0.03 | 1.11  | 0.107746 | 0.161711 | 0.480288 | 0.437771 |
| MmugDNA.21037.1.S1_at   | MmugDNA.21037.1 | 6.83  | 6.78  | 0.27 | 0.12 | 1.03  | 0.297974 | 0.102268 | 0.652803 | 0.36236  |
| MmugDNA.21039.1.S1_at   | MmugDNA.21039.1 | 5.62  | 5.61  | 0.01 | 0.09 | 1     | 0.875523 | 0.826704 | 0.956756 | 0.900485 |
| MmugDNA.2104.1.S1_at    | MmugDNA.2104.1  | 4.75  | 5.08  | 0.1  | 0.27 | -1.26 | 0.376255 | 0.03775  | 0.70673  | 0.238716 |
| MmugDNA.21040.1.S1_at   | MmugDNA.21040.1 | 6.14  | 6.12  | 0.19 | 0.19 | 1.01  | 0.373563 | 0.337535 | 0.705567 | 0.584716 |
| MmugDNA.21043.1.S1_at   | MmugDNA.21043.1 | 7.18  | 7.17  | 0.4  | 0.26 | 1     | 0.925892 | 0.956129 | 0.975337 | 0.975053 |
| MmugDNA.21044.1.S1_at   | MmugDNA.21044.1 | 7.26  | 7.41  | 0.16 | 0.23 | -1.11 | 0.269754 | 0.331258 | 0.62995  | 0.579981 |
| MmugDNA.21045.1.S1_at   | MmugDNA.21045.1 | 5     | 4.76  | 0.86 | 0.42 | 1.18  | 0.888307 | 0.558815 | 0.961318 | 0.735887 |
| MmugDNA.21046.1.S1_at   | MmugDNA.21046.1 | 12.41 | 12.57 | 0.09 | 0.03 | -1.12 | 0.05155  | 0.474984 | 0.390537 | 0.681837 |
| MmugDNA.21049.1.S1_at   | MmugDNA.21049.1 | 4.18  | 4.57  | 0.33 | 0.16 | -1.31 | 0.151728 | 0.033445 | 0.524666 | 0.226517 |
| MmugDNA.2105.1.S1_at    | MmugDNA.2105.1  | 5.06  | 5.03  | 0.12 | 0.06 | 1.02  | 0.589124 | 0.514547 | 0.832195 | 0.707765 |
| MmugDNA.21050.1.S1_at   | MmugDNA.21050.1 | 7.78  | 6.18  | 0.82 | 0.26 | 3.01  | 0.012382 | 0.006054 | 0.262097 | 0.106152 |
| MmugDNA.21052.1.S1_at   | MmugDNA.21052.1 | 9.78  | 9.56  | 1.39 | 0.17 | 1.17  | 0.757724 | 0.043784 | 0.908798 | 0.25387  |
| MmugDNA.21053.1.S1_at   | MmugDNA.21053.1 | 3.11  | 3.31  | 0.17 | 0.05 | -1.15 | 0.065771 | 0.279657 | 0.420964 | 0.543212 |
| MmugDNA.21054.1.S1_at   | MmugDNA.21054.1 | 4.16  | 3.97  | 0.18 | 0.11 | 1.14  | 0.316371 | 0.391788 | 0.666473 | 0.625301 |
| MmugDNA.21055.1.S1_at   | MmugDNA.21055.1 | 4.78  | 6.34  | 1.05 | 0.57 | -2.93 | 0.300374 | 0.0503   | 0.65495  | 0.269573 |
| MmugDNA.21056.1.S1_at   | MmugDNA.21056.1 | 6.41  | 6.42  | 0.19 | 0.05 | -1.01 | 0.837418 | 0.255754 | 0.941594 | 0.523692 |
| MmugDNA.21057.1.S1_at   | MmugDNA.21057.1 | 4.62  | 4.44  | 0.07 | 0.4  | 1.13  | 0.694577 | 0.655066 | 0.881132 | 0.798277 |
| MmugDNA.2106.1.S1_at    | MmugDNA.2106.1  | 6.82  | 6.66  | 0.06 | 0.09 | 1.12  | 0.062413 | 0.055632 | 0.413105 | 0.281649 |
| MmugDNA.21060.1.S1_at   | MmugDNA.21060.1 | 7.97  | 7.88  | 0.38 | 0.05 | 1.06  | 0.453092 | 0.250843 | 0.755962 | 0.51956  |
| MmugDNA.21061.1.S1_s_at | MmugDNA.21061.1 | 10.22 | 10.08 | 0.58 | 0.07 | 1.1   | 0.545008 | 0.104282 | 0.807571 | 0.365479 |
| MmugDNA.21062.1.S1_at   | MmugDNA.21062.1 | 8.81  | 8.39  | 0.15 | 0.04 | 1.34  | 0.011759 | 0.054638 | 0.257281 | 0.279266 |
| MmugDNA.21063.1.S1_at   | MmugDNA.21063.1 | 11.55 | 11.56 | 0.47 | 0.05 | -1.01 | 0.96694  | 0.059971 | 0.989092 | 0.291581 |
| MmugDNA.21064.1.S1_at   | MmugDNA.21064.1 | 7.94  | 7.74  | 0.31 | 0.16 | 1.15  | 0.553321 | 0.00887  | 0.812105 | 0.12465  |
| MmugDNA.21066.1.S1_at   | MmugDNA.21066.1 | 11.43 | 11.41 | 0.11 | 0.03 | 1.01  | 0.254172 | 0.278703 | 0.61872  | 0.542416 |
| MmugDNA.21068.1.S1_at   | MmugDNA.21068.1 | 4.48  | 4.48  | 0.1  | 0.28 | -1    | 0.684121 | 0.839663 | 0.876332 | 0.908582 |
| MmugDNA.21068.1.S1_s_at | MmugDNA.21068.1 | 2.95  | 3.03  | 0.07 | 0.08 | -1.05 | 0.141111 | 0.187359 | 0.516345 | 0.463379 |
| MmugDNA.21069.1.S1_at   | MmugDNA.21069.1 | 10.04 | 8.88  | 1.84 | 0.23 | 2.23  | 0.312146 | 0.186654 | 0.66374  | 0.462457 |

|                         |                 |       |       |      |      |       |          |          |          |          |
|-------------------------|-----------------|-------|-------|------|------|-------|----------|----------|----------|----------|
| MmugDNA.2107.1.S1_at    | MmugDNA.2107.1  | 3.63  | 4.41  | 0.37 | 0.36 | -1.72 | 0.02908  | 0.167135 | 0.333761 | 0.443621 |
| MmugDNA.21070.1.S1_at   | MmugDNA.21070.1 | 9.11  | 10.07 | 0.77 | 0.23 | -1.94 | 0.411417 | 0.004641 | 0.731421 | 0.095    |
| MmugDNA.21072.1.S1_at   | MmugDNA.21072.1 | 6.09  | 6.11  | 0.41 | 0.14 | -1.02 | 0.655194 | 0.807113 | 0.86308  | 0.888946 |
| MmugDNA.21073.1.S1_at   | MmugDNA.21073.1 | 4.43  | 4.29  | 0    | 0.08 | 1.1   | 0.118298 | 0.16179  | 0.491808 | 0.437876 |
| MmugDNA.21075.1.S1_at   | MmugDNA.21075.1 | 9.4   | 8.87  | 0.45 | 0.02 | 1.44  | 0.367577 | 0.402875 | 0.703069 | 0.631631 |
| MmugDNA.21076.1.S1_at   | MmugDNA.21076.1 | 10.17 | 10.38 | 1.02 | 0.1  | -1.16 | 0.638043 | 0.223967 | 0.855783 | 0.497019 |
| MmugDNA.21078.1.S1_at   | MmugDNA.21078.1 | 2.71  | 2.66  | 0.11 | 0.04 | 1.03  | 0.183366 | 0.221381 | 0.556401 | 0.494644 |
| MmugDNA.21079.1.S1_at   | MmugDNA.21079.1 | 4.84  | 4.81  | 0.11 | 0.03 | 1.01  | 0.998954 | 0.553717 | 0.999768 | 0.732777 |
| MmugDNA.21081.1.S1_at   | MmugDNA.21081.1 | 4.11  | 4.11  | 0.29 | 0.18 | 1     | 0.55784  | 0.594842 | 0.815043 | 0.758675 |
| MmugDNA.21087.1.S1_at   | MmugDNA.21087.1 | 11.49 | 10.82 | 0.84 | 0.18 | 1.59  | 0.175664 | 0.050417 | 0.548781 | 0.269746 |
| MmugDNA.21089.1.S1_at   | MmugDNA.21089.1 | 9.12  | 9.68  | 0.2  | 0.05 | -1.47 | 0.018656 | 0.001674 | 0.298184 | 0.061979 |
| MmugDNA.13762.1.S1_at   | MmugDNA.13762.1 | 10.16 | 10.35 | 1.02 | 0.15 | -1.14 | 0.883223 | 0.694897 | 0.95964  | 0.822638 |
| MmugDNA.13762.1.S1_s_at | MmugDNA.13762.1 | 10.76 | 10.76 | 1.05 | 0.02 | -1    | 0.989468 | 0.858008 | 0.996071 | 0.919035 |
| MmugDNA.21092.1.S1_at   | MmugDNA.21092.1 | 4.47  | 4.57  | 0.35 | 0.16 | -1.07 | 0.606614 | 0.560008 | 0.840563 | 0.736439 |
| MmugDNA.21093.1.S1_at   | MmugDNA.21093.1 | 4.41  | 3.94  | 0.05 | 0.04 | 1.38  | 0.000339 | 0.062962 | 0.137028 | 0.297586 |
| MmugDNA.21094.1.S1_at   | MmugDNA.21094.1 | 3.21  | 3.19  | 0.15 | 0.11 | 1.01  | 0.759582 | 0.200995 | 0.909706 | 0.475442 |
| MmugDNA.21096.1.S1_at   | MmugDNA.21096.1 | 12.78 | 12.7  | 0.59 | 0.06 | 1.05  | 0.481556 | 0.309348 | 0.772225 | 0.564912 |
| MmugDNA.21097.1.S1_at   | MmugDNA.21097.1 | 6.11  | 6.07  | 0.18 | 0.04 | 1.03  | 0.333938 | 0.561825 | 0.679954 | 0.737654 |
| MmugDNA.21099.1.S1_at   | MmugDNA.21099.1 | 3.77  | 3.81  | 0.11 | 0.13 | -1.03 | 0.999715 | 0.51841  | 0.999942 | 0.71038  |
| MmugDNA.2110.1.S1_at    | MmugDNA.2110.1  | 3.72  | 3.84  | 0.11 | 0.03 | -1.09 | 0.112528 | 0.217473 | 0.485852 | 0.491035 |
| MmugDNA.21101.1.S1_s_at | MmugDNA.21101.1 | 5.75  | 6.63  | 0.44 | 0.24 | -1.83 | 0.026234 | 0.047722 | 0.323734 | 0.263325 |
| MmugDNA.21102.1.S1_at   | MmugDNA.21102.1 | 6.6   | 6.81  | 0.42 | 0.56 | -1.16 | 0.799354 | 0.3391   | 0.926464 | 0.585891 |
| MmugDNA.21103.1.S1_at   | MmugDNA.21103.1 | 6.32  | 7.08  | 0.37 | 0.21 | -1.7  | 0.029103 | 0.021914 | 0.333841 | 0.185265 |
| MmugDNA.21106.1.S1_at   | MmugDNA.21106.1 | 6.28  | 6.76  | 0.24 | 0.22 | -1.4  | 0.047771 | 0.023311 | 0.381152 | 0.191355 |
| MmugDNA.21107.1.S1_at   | MmugDNA.21107.1 | 5.84  | 5.87  | 0.05 | 0.08 | -1.02 | 0.81949  | 0.168553 | 0.934935 | 0.445172 |
| MmugDNA.2111.1.S1_at    | MmugDNA.2111.1  | 3.64  | 3.68  | 0.12 | 0.05 | -1.02 | 0.443697 | 0.807029 | 0.750982 | 0.888946 |
| MmugDNA.21110.1.S1_at   | MmugDNA.21110.1 | 9.49  | 9.86  | 0.48 | 0.06 | -1.29 | 0.59118  | 0.816548 | 0.83329  | 0.894202 |
| MmugDNA.21111.1.S1_at   | MmugDNA.21111.1 | 4.89  | 4.9   | 0.07 | 0.25 | -1.01 | 0.708826 | 0.820112 | 0.886591 | 0.896336 |
| MmugDNA.21112.1.S1_at   | MmugDNA.21112.1 | 6.85  | 8.25  | 0.85 | 0.3  | -2.64 | 0.016657 | 0.002734 | 0.287478 | 0.07708  |
| MmugDNA.21113.1.S1_at   | MmugDNA.21113.1 | 4.65  | 4.57  | 0.19 | 0.15 | 1.06  | 0.252392 | 0.112261 | 0.617375 | 0.37755  |
| MmugDNA.21114.1.S1_at   | MmugDNA.21114.1 | 5.81  | 5.83  | 0.06 | 0.13 | -1.02 | 0.192735 | 0.664218 | 0.563577 | 0.803247 |
| MmugDNA.21115.1.S1_at   | MmugDNA.21115.1 | 8.24  | 8.66  | 0.32 | 0.05 | -1.34 | 0.108147 | 0.0208   | 0.480558 | 0.180908 |
| MmugDNA.21116.1.S1_at   | MmugDNA.21116.1 | 8     | 7.62  | 0.06 | 0.14 | 1.3   | 0.025223 | 0.003845 | 0.320761 | 0.088232 |
| MmugDNA.21117.1.S1_at   | MmugDNA.21117.1 | 11.89 | 11.92 | 0.2  | 0.02 | -1.02 | 0.949372 | 0.687267 | 0.982855 | 0.817523 |
| MmugDNA.21117.1.S1_s_at | MmugDNA.21117.1 | 12.29 | 12.34 | 0.21 | 0.01 | -1.04 | 0.976154 | 0.620105 | 0.992259 | 0.775227 |
| MmugDNA.21119.1.S1_at   | MmugDNA.21119.1 | 11.26 | 11.26 | 0.2  | 0.05 | 1     | 0.791497 | 0.069968 | 0.923399 | 0.31072  |
| MmugDNA.21121.1.S1_at   | MmugDNA.21121.1 | 10.13 | 9.95  | 0.71 | 0.08 | 1.14  | 0.798448 | 0.434836 | 0.926165 | 0.654843 |
| MmugDNA.21123.1.S1_at   | MmugDNA.21123.1 | 11.26 | 11.02 | 0.57 | 0.04 | 1.17  | 0.79983  | 0.943828 | 0.926711 | 0.96811  |
| MmugDNA.21124.1.S1_at   | MmugDNA.21124.1 | 3.08  | 3.12  | 0.13 | 0.9  | -1.03 | 0.295189 | 0.277168 | 0.651026 | 0.541154 |
| MmugDNA.21129.1.S1_at   | MmugDNA.21129.1 | 8     | 7.96  | 0.08 | 0.07 | 1.03  | 0.87884  | 0.000731 | 0.95792  | 0.044701 |
| MmugDNA.2113.1.S1_at    | MmugDNA.2113.1  | 9.24  | 9.95  | 0.36 | 0.2  | -1.64 | 0.036874 | 0.050704 | 0.356113 | 0.270338 |
| MmugDNA.21130.1.S1_at   | MmugDNA.21130.1 | 7.13  | 6.73  | 0.77 | 0.23 | 1.32  | 0.556675 | 0.71637  | 0.814296 | 0.835633 |
| MmugDNA.21131.1.S1_at   | MmugDNA.21131.1 | 2.88  | 2.91  | 0.25 | 0.03 | -1.02 | 0.467269 | 0.713627 | 0.764285 | 0.833863 |



|                         |                 |       |       |      |      |       |          |          |          |          |
|-------------------------|-----------------|-------|-------|------|------|-------|----------|----------|----------|----------|
| MmugDNA.21132.1.S1_at   | MmugDNA.21132.1 | 7.85  | 7.15  | 0.55 | 0.17 | 1.63  | 0.040549 | 0.086419 | 0.364613 | 0.338882 |
| MmugDNA.21133.1.S1_at   | MmugDNA.21133.1 | 5.62  | 6.22  | 0.67 | 0.14 | -1.51 | 0.631494 | 0.772222 | 0.852417 | 0.867607 |
| MmugDNA.21134.1.S1_at   | MmugDNA.21134.1 | 3.77  | 3.66  | 0.01 | 0.06 | 1.08  | 0.033726 | 0.250285 | 0.347257 | 0.519282 |
| MmugDNA.21135.1.S1_at   | MmugDNA.21135.1 | 3.36  | 3.38  | 0.16 | 0.05 | -1.02 | 0.950703 | 0.218277 | 0.983335 | 0.491804 |
| MmugDNA.21137.1.S1_at   | MmugDNA.21137.1 | 5.58  | 5.22  | 0.05 | 0.12 | 1.28  | 0.011621 | 0.025816 | 0.255776 | 0.201408 |
| MmugDNA.21139.1.S1_at   | MmugDNA.21139.1 | 3.75  | 4.08  | 1.48 | 0.62 | -1.26 | 0.696255 | 0.774883 | 0.882048 | 0.868962 |
| MmugDNA.2114.1.S1_at    | MmugDNA.2114.1  | 4.03  | 3.82  | 0.29 | 0.56 | 1.16  | 0.609834 | 0.589427 | 0.841773 | 0.755652 |
| MmugDNA.21140.1.S1_at   | MmugDNA.21140.1 | 8.88  | 8.39  | 1.29 | 0.15 | 1.4   | 0.835314 | 0.318036 | 0.940952 | 0.571046 |
| MmugDNA.21141.1.S1_at   | MmugDNA.21141.1 | 5.89  | 6.18  | 0.29 | 0.22 | -1.22 | 0.189764 | 0.078505 | 0.561075 | 0.325285 |
| MmugDNA.21142.1.S1_at   | MmugDNA.21142.1 | 7.96  | 8.78  | 0.69 | 0.15 | -1.76 | 0.148109 | 0.058454 | 0.522369 | 0.288529 |
| MmugDNA.21143.1.S1_at   | MmugDNA.21143.1 | 10.84 | 10.66 | 0.36 | 0.13 | -1.13 | 0.144539 | 0.078303 | 0.519872 | 0.324949 |
| MmugDNA.21147.1.S1_at   | MmugDNA.21147.1 | 3.67  | 3.54  | 0.39 | 0.34 | 1.09  | 0.347359 | 0.298345 | 0.68869  | 0.55702  |
| MmugDNA.21149.1.S1_at   | MmugDNA.21149.1 | 11.11 | 11.24 | 0.27 | 0.03 | -1.09 | 0.321413 | 0.020048 | 0.670091 | 0.177855 |
| MmugDNA.21151.1.S1_at   | MmugDNA.21151.1 | 3.73  | 3.52  | 0.12 | 0.3  | 1.16  | 0.871123 | 0.540176 | 0.955216 | 0.724194 |
| MmugDNA.21152.1.S1_at   | MmugDNA.21152.1 | 7.22  | 6.02  | 0.9  | 0.37 | 2.3   | 0.427835 | 0.096754 | 0.741445 | 0.354171 |
| MmugDNA.21153.1.S1_at   | MmugDNA.21153.1 | 2.97  | 3.04  | 0.08 | 0.2  | -1.05 | 0.545964 | 0.683099 | 0.808278 | 0.815134 |
| MmugDNA.21154.1.S1_at   | MmugDNA.21154.1 | 3.76  | 3.85  | 0.12 | 0.07 | -1.06 | 0.852434 | 0.590695 | 0.947963 | 0.756416 |
| MmugDNA.24977.1.S1_s_at | MmugDNA.24977.1 | 8.56  | 8.78  | 0.04 | 0.15 | -1.16 | 0.272922 | 0.816179 | 0.632536 | 0.893967 |
| MmugDNA.21156.1.S1_at   | MmugDNA.21156.1 | 8.61  | 9.34  | 0.93 | 0.14 | -1.66 | 0.763352 | 0.911828 | 0.911165 | 0.950281 |
| MmugDNA.21157.1.S1_at   | MmugDNA.21157.1 | 5.15  | 4.78  | 0.26 | 0.19 | 1.29  | 0.177685 | 0.153305 | 0.550864 | 0.428139 |
| MmugDNA.21159.1.S1_at   | MmugDNA.21159.1 | 4.57  | 4.05  | 0.49 | 0.47 | 1.44  | 0.976798 | 0.972845 | 0.992455 | 0.985352 |
| MmugDNA.2116.1.S1_at    | MmugDNA.2116.1  | 11.85 | 11.03 | 0.78 | 0.07 | 1.76  | 0.131606 | 0.177235 | 0.505989 | 0.453664 |
| MmugDNA.21161.1.S1_at   | MmugDNA.21161.1 | 5.24  | 5.29  | 0.08 | 0.49 | -1.03 | 0.638824 | 0.666178 | 0.856034 | 0.804415 |
| MmugDNA.21163.1.S1_at   | MmugDNA.21163.1 | 7.23  | 7.17  | 0.24 | 0.1  | 1.04  | 0.459169 | 0.340456 | 0.759297 | 0.586776 |
| MmugDNA.21165.1.S1_at   | MmugDNA.21165.1 | 5.98  | 5.98  | 0.21 | 0.14 | -1    | 0.243017 | 0.417899 | 0.608888 | 0.642478 |
| MmugDNA.21167.1.S1_at   | MmugDNA.21167.1 | 6.13  | 6.37  | 0.49 | 0.17 | -1.18 | 0.88565  | 0.851299 | 0.96038  | 0.915393 |
| MmugDNA.21168.1.S1_at   | MmugDNA.21168.1 | 6.38  | 6.3   | 0.01 | 0.16 | 1.06  | 0.128813 | 0.156144 | 0.503567 | 0.43161  |
| MmugDNA.21169.1.S1_at   | MmugDNA.21169.1 | 10.05 | 9.08  | 0.2  | 0.15 | 1.96  | 0.002477 | 0.004679 | 0.177691 | 0.095361 |
| MmugDNA.34148.1.S1_s_at | MmugDNA.34148.1 | 10.16 | 10.02 | 0.15 | 0.09 | 1.1   | 0.325663 | 0.223598 | 0.673403 | 0.496451 |
| MmugDNA.2117.1.S1_at    | MmugDNA.2117.1  | 5.25  | 5.26  | 0    | 0.05 | -1    | 0.344948 | 0.120978 | 0.687232 | 0.38997  |
| MmugDNA.21170.1.S1_at   | MmugDNA.21170.1 | 4.62  | 4.63  | 0.13 | 0.16 | -1.01 | 0.255145 | 0.316316 | 0.619267 | 0.569809 |
| MmugDNA.21172.1.S1_at   | MmugDNA.21172.1 | 12.85 | 12.84 | 0.08 | 0.05 | 1.01  | 0.54502  | 0.759504 | 0.807571 | 0.860136 |
| MmugDNA.21173.1.S1_at   | MmugDNA.21173.1 | 4.96  | 6.52  | 0.54 | 0.05 | -2.96 | 0.008019 | 0.023539 | 0.232005 | 0.192231 |
| MmugDNA.21174.1.S1_at   | MmugDNA.21174.1 | 5.34  | 5.12  | 0.16 | 0.09 | 1.17  | 0.15881  | 0.276419 | 0.531595 | 0.540378 |
| MmugDNA.21175.1.S1_at   | MmugDNA.21175.1 | 6.05  | 5.83  | 0.23 | 0.1  | 1.17  | 0.189616 | 0.175924 | 0.561075 | 0.452486 |
| MmugDNA.21176.1.S1_at   | MmugDNA.21176.1 | 9.31  | 9.16  | 0.41 | 0.14 | 1.11  | 0.965723 | 0.447098 | 0.988741 | 0.663294 |
| MmugDNA.21177.1.S1_at   | MmugDNA.21177.1 | 4.69  | 4.97  | 0.59 | 0.25 | -1.21 | 0.893221 | 0.16909  | 0.963441 | 0.44561  |
| MmugDNA.21178.1.S1_at   | MmugDNA.21178.1 | 3.94  | 3.85  | 0.16 | 0.08 | 1.07  | 0.25304  | 0.059872 | 0.617861 | 0.291315 |
| MmugDNA.21179.1.S1_at   | MmugDNA.21179.1 | 8.75  | 9.04  | 0.23 | 0.06 | -1.23 | 0.151215 | 0.043945 | 0.52444  | 0.254098 |
| MmugDNA.2118.1.S1_at    | MmugDNA.2118.1  | 6.7   | 6.95  | 0.4  | 0.23 | -1.19 | 0.145626 | 0.719782 | 0.520555 | 0.837888 |
| MmugDNA.21180.1.S1_at   | MmugDNA.21180.1 | 9.29  | 10.03 | 0.58 | 0.11 | -1.67 | 0.156282 | 0.095124 | 0.529536 | 0.352151 |
| MmugDNA.21181.1.S1_at   | MmugDNA.21181.1 | 5.24  | 5.06  | 0.17 | 0.31 | 1.13  | 0.259207 | 0.362126 | 0.622592 | 0.602821 |
| MmugDNA.21182.1.S1_at   | MmugDNA.21182.1 | 5.25  | 5.25  | 0.02 | 0.05 | 1     | 0.83509  | 0.833112 | 0.94088  | 0.90427  |

|                         |                 |       |       |      |      |       |          |          |          |          |
|-------------------------|-----------------|-------|-------|------|------|-------|----------|----------|----------|----------|
| MmugDNA.21183.1.S1_at   | MmugDNA.21183.1 | 6.47  | 6.49  | 0.18 | 0.04 | -1.02 | 0.642764 | 0.618988 | 0.857894 | 0.774229 |
| MmugDNA.21184.1.S1_at   | MmugDNA.21184.1 | 6.5   | 6.73  | 0.55 | 0.12 | -1.18 | 0.151991 | 0.348206 | 0.525094 | 0.592413 |
| MmugDNA.21185.1.S1_at   | MmugDNA.21185.1 | 8.04  | 8.18  | 0.35 | 0.18 | -1.11 | 0.683893 | 0.51186  | 0.876251 | 0.705797 |
| MmugDNA.21186.1.S1_at   | MmugDNA.21186.1 | 4.15  | 4.02  | 0.17 | 0.25 | 1.1   | 0.729785 | 0.297697 | 0.895824 | 0.556361 |
| MmugDNA.21187.1.S1_at   | MmugDNA.21187.1 | 5.17  | 5.16  | 0.16 | 0.25 | 1.01  | 0.584923 | 0.682115 | 0.830142 | 0.814349 |
| MmugDNA.2119.1.S1_at    | MmugDNA.2119.1  | 5.66  | 5.76  | 0.25 | 0.02 | -1.07 | 0.725815 | 0.358259 | 0.89389  | 0.599765 |
| MmugDNA.21190.1.S1_at   | MmugDNA.21190.1 | 10.2  | 10.58 | 0.51 | 0.2  | -1.3  | 0.31904  | 0.501127 | 0.668492 | 0.699443 |
| MmugDNA.21192.1.S1_at   | MmugDNA.21192.1 | 6.68  | 6.69  | 0.09 | 0.05 | -1.01 | 0.701503 | 0.960787 | 0.883922 | 0.97771  |
| MmugDNA.21193.1.S1_at   | MmugDNA.21193.1 | 12.24 | 12.73 | 0.02 | 0.07 | -1.41 | 0.000291 | 0.017706 | 0.132733 | 0.168321 |
| MmugDNA.21194.1.S1_at   | MmugDNA.21194.1 | 4.91  | 5.1   | 0.67 | 0.22 | -1.14 | 0.481001 | 0.210623 | 0.771639 | 0.484617 |
| MmugDNA.21196.1.S1_at   | MmugDNA.21196.1 | 4.65  | 4.62  | 0.18 | 0.11 | -1.03 | 0.455078 | 0.806887 | 0.75733  | 0.888872 |
| MmugDNA.21197.1.S1_at   | MmugDNA.21197.1 | 4.12  | 4.08  | 0.2  | 0.22 | 1.03  | 0.209163 | 0.301294 | 0.580715 | 0.559356 |
| MmugDNA.21198.1.S1_at   | MmugDNA.21198.1 | 5.25  | 4.55  | 0.68 | 0.81 | 1.62  | 0.633715 | 0.395627 | 0.853646 | 0.627583 |
| MmugDNA.212.1.S1_s_at   | MmugDNA.212.1   | 4.25  | 3.96  | 0.3  | 0.23 | 1.23  | 0.654431 | 0.853609 | 0.862819 | 0.91673  |
| MmugDNA.2120.1.S1_at    | MmugDNA.2120.1  | 7.2   | 7.65  | 0.55 | 0.2  | -1.37 | 0.60502  | 0.731654 | 0.839761 | 0.844499 |
| MmugDNA.21200.1.S1_at   | MmugDNA.21200.1 | 3.01  | 2.96  | 0.15 | 0.09 | 1.04  | 0.557115 | 0.719326 | 0.814507 | 0.837566 |
| MmugDNA.21201.1.S1_at   | MmugDNA.21201.1 | 4.67  | 4.65  | 0.18 | 0.11 | 1.01  | 0.20377  | 0.554429 | 0.57513  | 0.733205 |
| MmugDNA.21202.1.S1_at   | MmugDNA.21202.1 | 3.25  | 3.22  | 0.07 | 0.15 | 1.01  | 0.900192 | 0.121558 | 0.966012 | 0.390683 |
| MmugDNA.21203.1.S1_x_at | MmugDNA.21203.1 | 6.37  | 6.21  | 0.29 | 0.06 | 1.12  | 0.817826 | 0.928808 | 0.93417  | 0.959449 |
| MmugDNA.21204.1.S1_at   | MmugDNA.21204.1 | 2.78  | 2.91  | 0.12 | 0.13 | -1.1  | 0.561984 | 0.423657 | 0.817542 | 0.646464 |
| MmugDNA.21205.1.S1_at   | MmugDNA.21205.1 | 5.12  | 5.12  | 0.26 | 0    | -1    | 0.965065 | 0.997832 | 0.988532 | 0.998927 |
| MmugDNA.21206.1.S1_at   | MmugDNA.21206.1 | 8.23  | 7.47  | 0.79 | 0.19 | 1.7   | 0.182377 | 0.283292 | 0.555371 | 0.545836 |
| MmugDNA.21207.1.S1_at   | MmugDNA.21207.1 | 6.72  | 7.31  | 0.7  | 0.06 | -1.51 | 0.384404 | 0.773674 | 0.711987 | 0.868427 |
| MmugDNA.21208.1.S1_at   | MmugDNA.21208.1 | 5.29  | 5.53  | 0.26 | 0.31 | -1.17 | 0.147962 | 0.465097 | 0.522184 | 0.67557  |
| MmugDNA.21209.1.S1_at   | MmugDNA.21209.1 | 8.01  | 9.05  | 1.04 | 0.08 | -2.06 | 0.09517  | 0.10331  | 0.464131 | 0.364146 |
| MmugDNA.2121.1.S1_at    | MmugDNA.2121.1  | 9.39  | 10.38 | 0.29 | 0.16 | -1.98 | 0.012942 | 0.008418 | 0.266025 | 0.121839 |
| MmugDNA.21210.1.S1_at   | MmugDNA.21210.1 | 4.62  | 4.07  | 0.27 | 0.26 | 1.46  | 0.129415 | 0.163217 | 0.504211 | 0.439324 |
| MmugDNA.21212.1.S1_at   | MmugDNA.21212.1 | 3.79  | 3.82  | 0.28 | 0.09 | -1.03 | 0.504267 | 0.702761 | 0.784627 | 0.827685 |
| MmugDNA.21213.1.S1_at   | MmugDNA.21213.1 | 4.81  | 4.97  | 0.44 | 0.33 | -1.12 | 0.609951 | 0.288087 | 0.841827 | 0.549319 |
| MmugDNA.21215.1.S1_at   | MmugDNA.21215.1 | 6.02  | 5.86  | 0.16 | 0.16 | 1.12  | 0.598582 | 0.295831 | 0.836987 | 0.555208 |
| MmugDNA.21217.1.S1_at   | MmugDNA.21217.1 | 3.3   | 3.51  | 0.16 | 0.03 | -1.16 | 0.275576 | 0.144314 | 0.635035 | 0.418196 |
| MmugDNA.21218.1.S1_at   | MmugDNA.21218.1 | 6.08  | 6.37  | 0.33 | 0.14 | -1.23 | 0.100235 | 0.094294 | 0.470696 | 0.350889 |
| MmugDNA.21219.1.S1_at   | MmugDNA.21219.1 | 4.35  | 4.2   | 0.07 | 0.28 | 1.11  | 0.570971 | 0.605904 | 0.822371 | 0.765543 |
| MmugDNA.2122.1.S1_at    | MmugDNA.2122.1  | 12.78 | 12.79 | 0.3  | 0.07 | -1.01 | 0.327753 | 0.492225 | 0.675226 | 0.693477 |
| MmugDNA.21220.1.S1_at   | MmugDNA.21220.1 | 3.67  | 3.69  | 0.08 | 0.04 | -1.01 | 0.289114 | 0.445003 | 0.645892 | 0.662212 |
| MmugDNA.21221.1.S1_at   | MmugDNA.21221.1 | 4.19  | 4.17  | 0.15 | 0.05 | 1.01  | 0.670036 | 0.394622 | 0.869803 | 0.627137 |
| MmugDNA.21222.1.S1_at   | MmugDNA.21222.1 | 3.69  | 3.65  | 0.04 | 0.04 | 1.03  | 0.628677 | 0.796713 | 0.851223 | 0.882782 |
| MmugDNA.21223.1.S1_at   | MmugDNA.21223.1 | 7.13  | 7.15  | 0.34 | 0.31 | -1.01 | 0.461868 | 0.611478 | 0.761308 | 0.769353 |
| MmugDNA.21224.1.S1_at   | MmugDNA.21224.1 | 7.73  | 7.61  | 0.34 | 0.08 | 1.09  | 0.668167 | 0.509615 | 0.868924 | 0.704267 |
| MmugDNA.21225.1.S1_at   | MmugDNA.21225.1 | 5.08  | 5.22  | 0.15 | 0.2  | -1.1  | 0.307994 | 0.338318 | 0.660838 | 0.585417 |
| MmugDNA.21226.1.S1_at   | MmugDNA.21226.1 | 6.05  | 5.76  | 0.29 | 0.05 | 1.23  | 0.128984 | 0.093134 | 0.503646 | 0.349303 |
| MmugDNA.21228.1.S1_at   | MmugDNA.21228.1 | 4.76  | 4.59  | 0.06 | 0.09 | 1.12  | 0.0661   | 0.117802 | 0.421668 | 0.385702 |
| MmugDNA.8392.1.S1_s_at  | MmugDNA.8392.1  | 11.31 | 11.16 | 0.13 | 0.09 | 1.11  | 0.03838  | 0.033416 | 0.359112 | 0.22646  |

|                         |                 |       |       |      |      |       |          |          |          |          |
|-------------------------|-----------------|-------|-------|------|------|-------|----------|----------|----------|----------|
| MmugDNA.21231.1.S1_at   | MmugDNA.21231.1 | 5.63  | 5.59  | 0.13 | 0.07 | 1.03  | 0.616365 | 0.588127 | 0.84491  | 0.754761 |
| MmugDNA.21232.1.S1_at   | MmugDNA.21232.1 | 6.74  | 6.78  | 0.69 | 0.15 | -1.03 | 0.95662  | 0.258356 | 0.985575 | 0.525631 |
| MmugDNA.21232.1.S1_s_at | MmugDNA.21232.1 | 8.02  | 8.31  | 2.3  | 0.35 | -1.23 | 0.685489 | 0.270755 | 0.876846 | 0.536024 |
| MmugDNA.21233.1.S1_at   | MmugDNA.21233.1 | 6.39  | 6.43  | 0.15 | 0.05 | -1.03 | 0.636666 | 0.41686  | 0.855202 | 0.641776 |
| MmugDNA.21235.1.S1_s_at | MmugDNA.21235.1 | 11.67 | 11.63 | 0.35 | 0.03 | 1.03  | 0.898299 | 0.528976 | 0.965455 | 0.71703  |
| MmugDNA.21237.1.S1_at   | MmugDNA.21237.1 | 4.59  | 4.67  | 0.14 | 0.12 | -1.06 | 0.76184  | 0.41496  | 0.910698 | 0.640553 |
| MmugDNA.21238.1.S1_at   | MmugDNA.21238.1 | 3.51  | 3.51  | 0.02 | 0    | 1     | 0.373901 | 0.430393 | 0.705567 | 0.651399 |
| MmugDNA.21239.1.S1_at   | MmugDNA.21239.1 | 4.04  | 4.16  | 0.19 | 0.31 | -1.09 | 0.703102 | 0.283986 | 0.884538 | 0.546237 |
| MmugDNA.21241.1.S1_at   | MmugDNA.21241.1 | 5.64  | 5.37  | 0.27 | 0.05 | 1.2   | 0.184375 | 0.127104 | 0.557226 | 0.397922 |
| MmugDNA.21243.1.S1_at   | MmugDNA.21243.1 | 6.09  | 6.04  | 0.11 | 0.03 | 1.04  | 0.503231 | 0.554056 | 0.784127 | 0.73295  |
| MmugDNA.21244.1.S1_at   | MmugDNA.21244.1 | 4.25  | 4.35  | 0.43 | 0.07 | -1.08 | 0.622298 | 0.007088 | 0.847684 | 0.113367 |
| MmugDNA.21245.1.S1_at   | MmugDNA.21245.1 | 4.64  | 4.7   | 0.17 | 0.18 | -1.04 | 0.753288 | 0.560876 | 0.907008 | 0.736993 |
| MmugDNA.21247.1.S1_s_at | MmugDNA.21247.1 | 6.74  | 6.73  | 0.09 | 0.23 | 1.01  | 0.733067 | 0.642248 | 0.897503 | 0.790088 |
| MmugDNA.21248.1.S1_at   | MmugDNA.21248.1 | 4.81  | 4.7   | 0.03 | 0.09 | 1.08  | 0.102511 | 0.048697 | 0.472762 | 0.265699 |
| MmugDNA.21251.1.S1_at   | MmugDNA.21251.1 | 3.94  | 3.97  | 0.17 | 0.09 | -1.02 | 0.611164 | 0.900793 | 0.842394 | 0.943558 |
| MmugDNA.21253.1.S1_at   | MmugDNA.21253.1 | 3.96  | 3.97  | 0.2  | 0.12 | -1.01 | 0.588513 | 0.749599 | 0.831953 | 0.854505 |
| MmugDNA.21254.1.S1_at   | MmugDNA.21254.1 | 7.96  | 6.12  | 1.19 | 0.3  | 3.58  | 0.209266 | 0.279319 | 0.580757 | 0.542962 |
| MmugDNA.21255.1.S1_at   | MmugDNA.21255.1 | 8.14  | 8.3   | 1.43 | 0.22 | -1.12 | 0.923955 | 0.240979 | 0.974539 | 0.511657 |
| MmugDNA.6929.1.S1_at    | MmugDNA.6929.1  | 7.82  | 7.87  | 0.37 | 0.14 | -1.04 | 0.717342 | 0.181131 | 0.890353 | 0.457582 |
| MmugDNA.6929.1.S1_s_at  | MmugDNA.6929.1  | 7.77  | 7.82  | 1.19 | 0.24 | -1.04 | 0.946018 | 0.239895 | 0.981266 | 0.510627 |
| MmugDNA.21256.1.S1_at   | MmugDNA.21256.1 | 6.63  | 6.34  | 0.11 | 0.1  | 1.22  | 0.055814 | 0.088054 | 0.399433 | 0.341547 |
| MmugDNA.21257.1.S1_at   | MmugDNA.21257.1 | 6.52  | 6.51  | 0.17 | 0.07 | 1     | 0.524669 | 0.80892  | 0.796    | 0.889962 |
| MmugDNA.21258.1.S1_at   | MmugDNA.21258.1 | 7.04  | 6.89  | 0.82 | 0.29 | 1.11  | 0.555314 | 0.737594 | 0.813407 | 0.847993 |
| MmugDNA.21259.1.S1_at   | MmugDNA.21259.1 | 6.17  | 6.19  | 0.26 | 0.07 | -1.01 | 0.638796 | 0.418648 | 0.856034 | 0.643031 |
| MmugDNA.2126.1.S1_at    | MmugDNA.2126.1  | 4.91  | 5.01  | 0.34 | 0.35 | -1.07 | 0.740616 | 0.882879 | 0.900871 | 0.933206 |
| MmugDNA.21260.1.S1_at   | MmugDNA.21260.1 | 4.15  | 4.15  | 0.06 | 0.07 | -1    | 0.551639 | 0.145143 | 0.81144  | 0.419105 |
| MmugDNA.21261.1.S1_at   | MmugDNA.21261.1 | 9.79  | 9.8   | 0.39 | 0.03 | -1.01 | 0.388037 | 0.279998 | 0.714958 | 0.543369 |
| MmugDNA.21262.1.S1_at   | MmugDNA.21262.1 | 3.4   | 3.21  | 0.25 | 0.28 | 1.14  | 0.615127 | 0.780484 | 0.844202 | 0.872614 |
| MmugDNA.21263.1.S1_at   | MmugDNA.21263.1 | 6.97  | 6.73  | 0.1  | 0.05 | 1.18  | 0.045297 | 0.413216 | 0.376169 | 0.639484 |
| MmugDNA.21264.1.S1_at   | MmugDNA.21264.1 | 4.87  | 4.79  | 0.31 | 0.06 | 1.06  | 0.253203 | 0.197905 | 0.617925 | 0.472828 |
| MmugDNA.21265.1.S1_at   | MmugDNA.21265.1 | 5.44  | 5.39  | 0.45 | 0.04 | 1.04  | 0.626146 | 0.750703 | 0.849817 | 0.855009 |
| MmugDNA.21267.1.S1_at   | MmugDNA.21267.1 | 5.14  | 4.87  | 0.02 | 0.07 | 1.21  | 0.005726 | 0.076372 | 0.210666 | 0.321368 |
| MmugDNA.21268.1.S1_at   | MmugDNA.21268.1 | 7.29  | 7.16  | 0.2  | 0.52 | 1.09  | 0.182012 | 0.193056 | 0.555125 | 0.468554 |
| MmugDNA.2127.1.S1_at    | MmugDNA.2127.1  | 12.49 | 12.52 | 0.19 | 0.14 | -1.02 | 0.930122 | 0.970829 | 0.976623 | 0.984101 |
| MmugDNA.21271.1.S1_at   | MmugDNA.21271.1 | 3.97  | 3.89  | 0.1  | 0.18 | 1.06  | 0.107483 | 0.285913 | 0.479945 | 0.547484 |
| MmugDNA.21272.1.S1_at   | MmugDNA.21272.1 | 9.8   | 9.36  | 0.23 | 0.12 | 1.35  | 0.117964 | 0.122221 | 0.491346 | 0.391921 |
| MmugDNA.21277.1.S1_at   | MmugDNA.21277.1 | 6.12  | 6.15  | 0.12 | 0.13 | -1.02 | 0.623488 | 0.764678 | 0.848264 | 0.863167 |
| MmugDNA.21278.1.S1_at   | MmugDNA.21278.1 | 3.84  | 3.76  | 0.05 | 0.1  | 1.06  | 0.186695 | 0.135624 | 0.559225 | 0.407744 |
| MmugDNA.21278.1.S1_s_at | MmugDNA.21278.1 | 3.25  | 3.26  | 0.12 | 0.11 | -1    | 0.890564 | 0.951341 | 0.962401 | 0.972417 |
| MmugDNA.21279.1.S1_at   | MmugDNA.21279.1 | 4.8   | 4.78  | 1.09 | 0.23 | 1.01  | 0.805349 | 0.195654 | 0.929214 | 0.470491 |
| MmugDNA.2128.1.S1_at    | MmugDNA.2128.1  | 8.9   | 8.85  | 0.73 | 0.04 | 1.03  | 0.461685 | 0.058704 | 0.761152 | 0.288956 |
| MmugDNA.21280.1.S1_at   | MmugDNA.21280.1 | 9.15  | 9.75  | 0.72 | 0.16 | -1.52 | 0.295915 | 0.352623 | 0.65162  | 0.595866 |
| MmugDNA.21281.1.S1_at   | MmugDNA.21281.1 | 12.06 | 11.74 | 0.02 | 0.11 | 1.25  | 0.004573 | 0.004289 | 0.201051 | 0.091951 |

|                         |                 |       |       |      |      |       |          |          |          |          |
|-------------------------|-----------------|-------|-------|------|------|-------|----------|----------|----------|----------|
| MmugDNA.21282.1.S1_at   | MmugDNA.21282.1 | 5.72  | 5.85  | 0.25 | 0.05 | -1.09 | 0.751045 | 0.853879 | 0.905739 | 0.916852 |
| MmugDNA.21284.1.S1_at   | MmugDNA.21284.1 | 3.01  | 3     | 0.14 | 0.02 | 1.01  | 0.886315 | 0.586417 | 0.960501 | 0.753459 |
| MmugDNA.21285.1.S1_at   | MmugDNA.21285.1 | 2.83  | 2.77  | 0.1  | 0.03 | 1.04  | 0.811146 | 0.17063  | 0.93165  | 0.447219 |
| MmugDNA.21286.1.S1_at   | MmugDNA.21286.1 | 7.08  | 7.2   | 0.44 | 0.13 | -1.09 | 0.500304 | 0.75566  | 0.782456 | 0.85776  |
| MmugDNA.21288.1.S1_at   | MmugDNA.21288.1 | 3.07  | 2.95  | 0.06 | 0.56 | 1.08  | 0.573468 | 0.552044 | 0.823614 | 0.731461 |
| MmugDNA.2129.1.S1_at    | MmugDNA.2129.1  | 8.82  | 9.88  | 1.41 | 0.1  | -2.08 | 0.232891 | 0.198543 | 0.600341 | 0.473391 |
| MmugDNA.21290.1.S1_at   | MmugDNA.21290.1 | 6.22  | 6.45  | 0.5  | 0.22 | -1.17 | 0.29825  | 0.379784 | 0.653093 | 0.616576 |
| MmugDNA.21291.1.S1_at   | MmugDNA.21291.1 | 5.78  | 5.14  | 0.5  | 0.07 | 1.56  | 0.14518  | 0.186547 | 0.520309 | 0.462364 |
| MmugDNA.21292.1.S1_at   | MmugDNA.21292.1 | 6.73  | 6.77  | 0.08 | 0.11 | -1.03 | 0.874152 | 0.991153 | 0.956448 | 0.99503  |
| MmugDNA.21293.1.S1_at   | MmugDNA.21293.1 | 5.5   | 5.97  | 0.46 | 0.44 | -1.38 | 0.120811 | 0.336114 | 0.49436  | 0.583652 |
| MmugDNA.21294.1.S1_at   | MmugDNA.21294.1 | 3.91  | 3.79  | 0.24 | 0.05 | 1.09  | 0.281383 | 0.272768 | 0.639917 | 0.537505 |
| MmugDNA.21295.1.S1_at   | MmugDNA.21295.1 | 12.39 | 11.93 | 0.19 | 0.04 | 1.37  | 0.028461 | 0.023536 | 0.332568 | 0.192231 |
| MmugDNA.21296.1.S1_at   | MmugDNA.21296.1 | 5.62  | 8.72  | 1.49 | 0.14 | -8.58 | 0.057052 | 0.210187 | 0.401454 | 0.484033 |
| MmugDNA.21297.1.S1_at   | MmugDNA.21297.1 | 5.29  | 5.35  | 0.41 | 0.01 | -1.04 | 0.957462 | 0.983645 | 0.985977 | 0.990902 |
| MmugDNA.21298.1.S1_at   | MmugDNA.21298.1 | 10.4  | 10.08 | 0.46 | 0.1  | 1.25  | 0.846316 | 0.678487 | 0.946139 | 0.81221  |
| MmugDNA.21299.1.S1_at   | MmugDNA.21299.1 | 9.04  | 8.92  | 0.13 | 0.18 | 1.09  | 0.158655 | 0.034554 | 0.531588 | 0.229979 |
| MmugDNA.21301.1.S1_at   | MmugDNA.21301.1 | 6     | 5.96  | 0.08 | 0.08 | 1.02  | 0.396867 | 0.230787 | 0.721565 | 0.502452 |
| MmugDNA.21302.1.S1_at   | MmugDNA.21302.1 | 8.42  | 7.62  | 0.39 | 0.3  | 1.74  | 0.0159   | 0.006765 | 0.284532 | 0.111315 |
| MmugDNA.21303.1.S1_at   | MmugDNA.21303.1 | 4.16  | 4.21  | 0.13 | 0.33 | -1.04 | 0.569548 | 0.68048  | 0.82149  | 0.813477 |
| MmugDNA.21304.1.S1_s_at | MmugDNA.21304.1 | 8.48  | 8.47  | 0.56 | 0.07 | 1.01  | 0.940372 | 0.821116 | 0.97971  | 0.897052 |
| MmugDNA.21305.1.S1_at   | MmugDNA.21305.1 | 4.4   | 4.37  | 0.24 | 0.02 | 1.03  | 0.743539 | 0.86421  | 0.902179 | 0.922972 |
| MmugDNA.21306.1.S1_at   | MmugDNA.21306.1 | 3.99  | 3.74  | 0.23 | 0.17 | 1.19  | 0.466727 | 0.241588 | 0.763863 | 0.512194 |
| MmugDNA.21307.1.S1_at   | MmugDNA.21307.1 | 13.43 | 13.56 | 0.13 | 0.05 | -1.09 | 0.189469 | 0.117992 | 0.560917 | 0.385881 |
| MmugDNA.21308.1.S1_at   | MmugDNA.21308.1 | 5.14  | 5.31  | 0.62 | 0.38 | -1.12 | 0.402636 | 0.224607 | 0.725018 | 0.497613 |
| MmugDNA.21309.1.S1_at   | MmugDNA.21309.1 | 4.71  | 4.54  | 0.26 | 0.06 | 1.12  | 0.193779 | 0.248031 | 0.564353 | 0.517532 |
| MmugDNA.2131.1.S1_at    | MmugDNA.2131.1  | 3.42  | 3.44  | 0.4  | 0.02 | -1.01 | 0.402381 | 0.470881 | 0.724848 | 0.679128 |
| MmugDNA.21310.1.S1_at   | MmugDNA.21310.1 | 4.48  | 4.32  | 0.13 | 0.12 | 1.11  | 0.100796 | 0.212087 | 0.47159  | 0.486036 |
| MmugDNA.21311.1.S1_at   | MmugDNA.21311.1 | 5.92  | 4.66  | 0.27 | 0.52 | 2.4   | 0.021713 | 0.008072 | 0.309332 | 0.119402 |
| MmugDNA.21312.1.S1_at   | MmugDNA.21312.1 | 5.81  | 5.81  | 0.03 | 0.02 | 1     | 0.87626  | 0.483046 | 0.956886 | 0.687687 |
| MmugDNA.21313.1.S1_at   | MmugDNA.21313.1 | 9.57  | 9.16  | 0.16 | 0.2  | 1.33  | 0.05273  | 0.143492 | 0.39295  | 0.417442 |
| MmugDNA.21314.1.S1_at   | MmugDNA.21314.1 | 9.25  | 9.88  | 0.3  | 0.19 | -1.55 | 0.059969 | 0.088343 | 0.407399 | 0.341767 |
| MmugDNA.21316.1.S1_at   | MmugDNA.21316.1 | 10.68 | 10.86 | 0.58 | 0.03 | -1.13 | 0.806057 | 0.61633  | 0.929569 | 0.772571 |
| MmugDNA.21318.1.S1_at   | MmugDNA.21318.1 | 3.93  | 3.77  | 0.25 | 0.08 | 1.12  | 0.164092 | 0.397128 | 0.536892 | 0.628653 |
| MmugDNA.21319.1.S1_at   | MmugDNA.21319.1 | 4.13  | 4.34  | 0.14 | 0.45 | -1.16 | 0.384337 | 0.095631 | 0.711951 | 0.35267  |
| MmugDNA.2132.1.S1_at    | MmugDNA.2132.1  | 8.57  | 8.39  | 0.43 | 0.06 | 1.13  | 0.509749 | 0.832435 | 0.787834 | 0.903893 |
| MmugDNA.21320.1.S1_at   | MmugDNA.21320.1 | 5.73  | 5.6   | 0.17 | 0.01 | 1.09  | 0.130173 | 0.076897 | 0.504663 | 0.322402 |
| MmugDNA.21321.1.S1_at   | MmugDNA.21321.1 | 6.72  | 7.52  | 0.59 | 0.19 | -1.75 | 0.102762 | 0.127099 | 0.473133 | 0.397922 |
| MmugDNA.21322.1.S1_at   | MmugDNA.21322.1 | 7.2   | 7.28  | 1.01 | 0.41 | -1.06 | 0.931454 | 0.307087 | 0.97706  | 0.563432 |
| MmugDNA.21323.1.S1_at   | MmugDNA.21323.1 | 4.84  | 4.68  | 0.28 | 0.24 | 1.12  | 0.412923 | 0.338981 | 0.732114 | 0.585891 |
| MmugDNA.21324.1.S1_at   | MmugDNA.21324.1 | 3.65  | 3.51  | 0.09 | 0.06 | 1.1   | 0.122482 | 0.032543 | 0.495926 | 0.223428 |
| MmugDNA.21325.1.S1_at   | MmugDNA.21325.1 | 6.06  | 6.36  | 0.69 | 0.41 | -1.23 | 0.679409 | 0.679538 | 0.874274 | 0.812884 |
| MmugDNA.21326.1.S1_at   | MmugDNA.21326.1 | 5.66  | 5.68  | 0.11 | 0.03 | -1.01 | 0.732701 | 0.642959 | 0.89733  | 0.79055  |
| MmugDNA.21328.1.S1_at   | MmugDNA.21328.1 | 3.91  | 3.72  | 0.24 | 0.33 | 1.14  | 0.452145 | 0.520136 | 0.755619 | 0.711472 |

|                         |                 |       |       |      |      |       |          |          |          |          |
|-------------------------|-----------------|-------|-------|------|------|-------|----------|----------|----------|----------|
| MmugDNA.21329.1.S1_at   | MmugDNA.21329.1 | 7.13  | 7.24  | 0.25 | 0.09 | -1.08 | 0.69302  | 0.230257 | 0.880431 | 0.502102 |
| MmugDNA.2133.1.S1_at    | MmugDNA.2133.1  | 5.7   | 5.34  | 0.56 | 0.35 | 1.29  | 0.356761 | 0.335869 | 0.695253 | 0.583533 |
| MmugDNA.21330.1.S1_at   | MmugDNA.21330.1 | 7.39  | 7.67  | 0.69 | 0.11 | -1.21 | 0.476717 | 0.649309 | 0.769364 | 0.794742 |
| MmugDNA.21331.1.S1_at   | MmugDNA.21331.1 | 6.12  | 6.18  | 0.07 | 0.03 | -1.04 | 0.237882 | 0.109766 | 0.605005 | 0.373701 |
| MmugDNA.21332.1.S1_at   | MmugDNA.21332.1 | 5.99  | 5.94  | 0.03 | 0.07 | 1.04  | 0.163973 | 0.530215 | 0.536696 | 0.717793 |
| MmugDNA.21333.1.S1_s_at | MmugDNA.21333.1 | 10.18 | 10.56 | 0.21 | 0    | -1.3  | 0.033673 | 0.005249 | 0.34712  | 0.100352 |
| MmugDNA.21334.1.S1_at   | MmugDNA.21334.1 | 6.8   | 6.46  | 0.46 | 0.26 | 1.27  | 0.787573 | 0.847039 | 0.921953 | 0.913065 |
| MmugDNA.21335.1.S1_at   | MmugDNA.21335.1 | 3.97  | 4.41  | 0.77 | 0.75 | -1.36 | 0.344724 | 0.360018 | 0.687017 | 0.601198 |
| MmugDNA.21336.1.S1_at   | MmugDNA.21336.1 | 9.45  | 8.35  | 0.35 | 0.42 | 2.14  | 0.022856 | 0.013605 | 0.312704 | 0.149283 |
| MmugDNA.21337.1.S1_at   | MmugDNA.21337.1 | 4.73  | 4.62  | 0.14 | 0.14 | 1.08  | 0.807019 | 0.379473 | 0.930025 | 0.616406 |
| MmugDNA.21340.1.S1_at   | MmugDNA.21340.1 | 6.04  | 5.81  | 0.18 | 0.03 | -1.18 | 0.244862 | 0.520723 | 0.610395 | 0.711925 |
| MmugDNA.21341.1.S1_at   | MmugDNA.21341.1 | 8.59  | 7.92  | 0.66 | 0.29 | 1.59  | 0.263088 | 0.315119 | 0.625101 | 0.568849 |
| MmugDNA.21342.1.S1_at   | MmugDNA.21342.1 | 3.98  | 3.92  | 0.14 | 0.01 | 1.04  | 0.46446  | 0.50567  | 0.762534 | 0.702218 |
| MmugDNA.21343.1.S1_at   | MmugDNA.21343.1 | 12.37 | 12.06 | 0.54 | 0.15 | 1.24  | 0.65269  | 0.044284 | 0.86202  | 0.254966 |
| MmugDNA.21344.1.S1_at   | MmugDNA.21344.1 | 11.58 | 11.56 | 0.27 | 0.08 | 1.01  | 0.586269 | 0.698679 | 0.831211 | 0.824936 |
| MmugDNA.21348.1.S1_at   | MmugDNA.21348.1 | 4.82  | 4.8   | 0.17 | 0.22 | 1.01  | 0.883491 | 0.272687 | 0.95964  | 0.537433 |
| MmugDNA.2135.1.S1_at    | MmugDNA.2135.1  | 4.22  | 4.03  | 0.08 | 0.13 | 1.15  | 0.148249 | 0.251368 | 0.522535 | 0.5201   |
| MmugDNA.21350.1.S1_at   | MmugDNA.21350.1 | 5.16  | 4.67  | 0.14 | 0.19 | 1.41  | 0.053849 | 0.098905 | 0.395598 | 0.357049 |
| MmugDNA.21351.1.S1_at   | MmugDNA.21351.1 | 7.05  | 7.24  | 0.5  | 0.2  | -1.14 | 0.381967 | 0.084038 | 0.710335 | 0.334991 |
| MmugDNA.21352.1.S1_at   | MmugDNA.21352.1 | 6.52  | 6.5   | 0.07 | 0.17 | 1.01  | 0.497586 | 0.611131 | 0.781215 | 0.769079 |
| MmugDNA.21354.1.S1_at   | MmugDNA.21354.1 | 3.28  | 3.09  | 0.32 | 0.09 | 1.14  | 0.370547 | 0.414627 | 0.704892 | 0.640456 |
| MmugDNA.21355.1.S1_at   | MmugDNA.21355.1 | 6.93  | 6.97  | 0.43 | 0.03 | -1.02 | 0.434653 | 0.269088 | 0.745238 | 0.534445 |
| MmugDNA.21356.1.S1_at   | MmugDNA.21356.1 | 3.73  | 3.73  | 0.07 | 0.02 | -1    | 0.77026  | 0.414221 | 0.913936 | 0.640137 |
| MmugDNA.21357.1.S1_at   | MmugDNA.21357.1 | 12.3  | 12.28 | 0.41 | 0.14 | 1.01  | 0.709237 | 0.061722 | 0.88678  | 0.29518  |
| MmugDNA.21357.1.S1_s_at | MmugDNA.21357.1 | 11.27 | 11.17 | 0.77 | 0.25 | 1.08  | 0.583921 | 0.111307 | 0.829388 | 0.375989 |
| MmugDNA.21358.1.S1_at   | MmugDNA.21358.1 | 7.19  | 7.58  | 0.41 | 0.4  | -1.31 | 0.136655 | 0.102069 | 0.511816 | 0.362122 |
| MmugDNA.21360.1.S1_at   | MmugDNA.21360.1 | 5.31  | 5.3   | 0.13 | 0.05 | 1     | 0.886408 | 0.681612 | 0.960501 | 0.814092 |
| MmugDNA.21361.1.S1_at   | MmugDNA.21361.1 | 12.06 | 12.22 | 0.35 | 0.18 | -1.12 | 0.554114 | 0.060519 | 0.812456 | 0.292656 |
| MmugDNA.21362.1.S1_at   | MmugDNA.21362.1 | 3.64  | 3.73  | 0.29 | 0.02 | -1.07 | 0.64825  | 0.876219 | 0.859825 | 0.929606 |
| MmugDNA.21363.1.S1_at   | MmugDNA.21363.1 | 6.76  | 6.26  | 0.15 | 0.3  | 1.42  | 0.049263 | 0.101118 | 0.385423 | 0.360749 |
| MmugDNA.21364.1.S1_at   | MmugDNA.21364.1 | 5.94  | 5.61  | 0.02 | 0.26 | 1.25  | 0.15745  | 0.120442 | 0.530565 | 0.38925  |
| MmugDNA.21365.1.S1_at   | MmugDNA.21365.1 | 9.72  | 9.85  | 0.24 | 0.09 | -1.09 | 0.099072 | 0.068617 | 0.468463 | 0.308486 |
| MmugDNA.21366.1.S1_at   | MmugDNA.21366.1 | 5.88  | 5.58  | 0.3  | 0.25 | 1.23  | 0.120158 | 0.12123  | 0.493466 | 0.390351 |
| MmugDNA.21367.1.S1_at   | MmugDNA.21367.1 | 6.34  | 6.16  | 0.15 | 0.04 | 1.13  | 0.102606 | 0.196236 | 0.472867 | 0.471236 |
| MmugDNA.21368.1.S1_at   | MmugDNA.21368.1 | 4.58  | 4.57  | 0.01 | 0.1  | 1.01  | 0.806721 | 0.932626 | 0.929844 | 0.961739 |
| MmugDNA.21369.1.S1_at   | MmugDNA.21369.1 | 5.66  | 5.49  | 0.12 | 0.05 | 1.12  | 0.087082 | 0.534471 | 0.454785 | 0.720382 |
| MmugDNA.2137.1.S1_at    | MmugDNA.2137.1  | 6.8   | 8.22  | 0.57 | 0.32 | -2.68 | 0.070755 | 0.449987 | 0.429834 | 0.665414 |
| MmugDNA.21370.1.S1_at   | MmugDNA.21370.1 | 3.87  | 3.85  | 0.13 | 0.07 | 1.01  | 0.931125 | 0.89563  | 0.976966 | 0.940329 |
| MmugDNA.21372.1.S1_at   | MmugDNA.21372.1 | 10.26 | 10.22 | 0.49 | 0.02 | 1.02  | 0.327049 | 0.277804 | 0.674699 | 0.541664 |
| MmugDNA.21373.1.S1_at   | MmugDNA.21373.1 | 4.12  | 3.98  | 0.09 | 0.05 | 1.1   | 0.052291 | 0.114459 | 0.392084 | 0.381021 |
| MmugDNA.21374.1.S1_at   | MmugDNA.21374.1 | 3.34  | 3.3   | 0.04 | 0.13 | 1.03  | 0.207049 | 0.160948 | 0.578774 | 0.437116 |
| MmugDNA.21375.1.S1_at   | MmugDNA.21375.1 | 11.68 | 11.47 | 0.26 | 0.05 | 1.16  | 0.656885 | 0.823072 | 0.86375  | 0.898353 |
| MmugDNA.21378.1.S1_at   | MmugDNA.21378.1 | 5.43  | 5.23  | 0.09 | 0.24 | 1.15  | 0.375491 | 0.265603 | 0.706517 | 0.531449 |

|                         |                 |       |       |      |      |       |          |          |          |          |
|-------------------------|-----------------|-------|-------|------|------|-------|----------|----------|----------|----------|
| MmugDNA.21379.1.S1_at   | MmugDNA.21379.1 | 9.53  | 8.29  | 0.58 | 0.27 | 2.36  | 0.045893 | 0.0444   | 0.37735  | 0.255192 |
| MmugDNA.2138.1.S1_at    | MmugDNA.2138.1  | 7.54  | 7.01  | 0.69 | 0.18 | 1.44  | 0.241444 | 0.076989 | 0.607603 | 0.322421 |
| MmugDNA.2138.1.S1_s_at  | MmugDNA.2138.1  | 8.08  | 7.34  | 0.74 | 0.03 | 1.67  | 0.16489  | 0.09054  | 0.537617 | 0.345015 |
| MmugDNA.21381.1.S1_at   | MmugDNA.21381.1 | 9.78  | 10.11 | 0.21 | 0.05 | -1.25 | 0.050102 | 0.084161 | 0.386718 | 0.335181 |
| MmugDNA.21383.1.S1_at   | MmugDNA.21383.1 | 4.91  | 5.21  | 0.16 | 0.1  | -1.23 | 0.118763 | 0.111448 | 0.492161 | 0.376126 |
| MmugDNA.21384.1.S1_at   | MmugDNA.21384.1 | 6.1   | 6.72  | 0.62 | 0.28 | -1.53 | 0.352893 | 0.384983 | 0.692895 | 0.620583 |
| MmugDNA.21385.1.S1_at   | MmugDNA.21385.1 | 5.19  | 4.82  | 0.29 | 0.35 | 1.29  | 0.129453 | 0.231215 | 0.504211 | 0.5029   |
| MmugDNA.21388.1.S1_at   | MmugDNA.21388.1 | 3.9   | 3.8   | 0.17 | 0.12 | 1.07  | 0.417321 | 0.385922 | 0.734845 | 0.621161 |
| MmugDNA.21388.1.S1_s_at | MmugDNA.21388.1 | 5.6   | 5.59  | 0.12 | 0.08 | 1     | 0.428179 | 0.634127 | 0.741644 | 0.784644 |
| MmugDNA.21389.1.S1_at   | MmugDNA.21389.1 | 7.82  | 7.89  | 0.64 | 0.22 | -1.05 | 0.506865 | 0.700826 | 0.786064 | 0.826511 |
| MmugDNA.2139.1.S1_at    | MmugDNA.2139.1  | 10.65 | 10.18 | 0.39 | 0.08 | -1.39 | 0.259387 | 0.384312 | 0.622607 | 0.619996 |
| MmugDNA.21390.1.S1_at   | MmugDNA.21390.1 | 3.79  | 3.72  | 0.2  | 0.04 | 1.05  | 0.37254  | 0.495825 | 0.705567 | 0.695746 |
| MmugDNA.21392.1.S1_at   | MmugDNA.21392.1 | 4.53  | 5.3   | 0.26 | 0.25 | -1.7  | 0.08079  | 0.096058 | 0.444846 | 0.353319 |
| MmugDNA.21393.1.S1_at   | MmugDNA.21393.1 | 4.95  | 4.93  | 0.1  | 0.12 | 1.01  | 0.666088 | 0.718418 | 0.868229 | 0.837032 |
| MmugDNA.21394.1.S1_at   | MmugDNA.21394.1 | 5.35  | 5.3   | 0.09 | 0.1  | 1.03  | 0.253009 | 0.081342 | 0.617861 | 0.329437 |
| MmugDNA.21395.1.S1_at   | MmugDNA.21395.1 | 2.99  | 2.94  | 0.04 | 0.07 | 1.04  | 0.267628 | 0.611817 | 0.62827  | 0.769593 |
| MmugDNA.21396.1.S1_at   | MmugDNA.21396.1 | 3.33  | 3.25  | 0.26 | 0.03 | 1.05  | 0.733761 | 0.834173 | 0.897902 | 0.904977 |
| MmugDNA.21397.1.S1_at   | MmugDNA.21397.1 | 5.1   | 5.22  | 0.19 | 0.25 | -1.09 | 0.80199  | 0.909584 | 0.92785  | 0.94895  |
| MmugDNA.21398.1.S1_at   | MmugDNA.21398.1 | 3.02  | 2.81  | 0.07 | 0.05 | 1.15  | 0.007794 | 0.030171 | 0.230997 | 0.215629 |
| MmugDNA.21399.1.S1_at   | MmugDNA.21399.1 | 3.48  | 3.39  | 0.41 | 0.07 | 1.06  | 0.787356 | 0.782958 | 0.921895 | 0.87441  |
| MmugDNA.214.1.S1_at     | MmugDNA.214.1   | 10.68 | 10.75 | 0.26 | 0.13 | -1.05 | 0.950772 | 0.80878  | 0.983338 | 0.889895 |
| MmugDNA.21400.1.S1_at   | MmugDNA.21400.1 | 3.55  | 3.53  | 0.09 | 0.13 | 1.02  | 0.245986 | 0.319706 | 0.611421 | 0.572051 |
| MmugDNA.21401.1.S1_at   | MmugDNA.21401.1 | 5.13  | 5.08  | 0.36 | 0.16 | 1.03  | 0.500233 | 0.095962 | 0.78239  | 0.353252 |
| MmugDNA.21402.1.S1_at   | MmugDNA.21402.1 | 9.18  | 9.14  | 0.1  | 0.2  | 1.03  | 0.830002 | 0.849953 | 0.93901  | 0.914673 |
| MmugDNA.21405.1.S1_at   | MmugDNA.21405.1 | 8.13  | 8.07  | 1.15 | 0.12 | 1.04  | 0.888687 | 0.376267 | 0.96159  | 0.614101 |
| MmugDNA.21406.1.S1_at   | MmugDNA.21406.1 | 8.02  | 7.85  | 0.37 | 0.39 | 1.12  | 0.89322  | 0.217101 | 0.963441 | 0.490681 |
| MmugDNA.21408.1.S1_at   | MmugDNA.21408.1 | 5.35  | 5.72  | 0.35 | 0.42 | -1.3  | 0.653171 | 0.465424 | 0.862212 | 0.675748 |
| MmugDNA.21409.1.S1_at   | MmugDNA.21409.1 | 9.84  | 8.46  | 1.38 | 0.07 | 2.6   | 0.530157 | 0.231643 | 0.798756 | 0.503446 |
| MmugDNA.2141.1.S1_at    | MmugDNA.2141.1  | 4.98  | 5.46  | 0.11 | 0.26 | -1.39 | 0.115495 | 0.416781 | 0.488793 | 0.64171  |
| MmugDNA.21411.1.S1_at   | MmugDNA.21411.1 | 6.12  | 6.07  | 0.16 | 0.03 | 1.04  | 0.194053 | 0.250935 | 0.564621 | 0.519612 |
| MmugDNA.21412.1.S1_at   | MmugDNA.21412.1 | 5.31  | 4.41  | 0.65 | 0.47 | 1.87  | 0.220579 | 0.138129 | 0.5898   | 0.411042 |
| MmugDNA.21413.1.S1_at   | MmugDNA.21413.1 | 6.04  | 6.22  | 0.15 | 0.13 | -1.14 | 0.194336 | 0.15918  | 0.564869 | 0.435217 |
| MmugDNA.21415.1.S1_at   | MmugDNA.21415.1 | 12.05 | 11.69 | 0.22 | 0.17 | 1.29  | 0.027055 | 0.013426 | 0.327141 | 0.148459 |
| MmugDNA.21416.1.S1_at   | MmugDNA.21416.1 | 4.66  | 5.25  | 0.49 | 0.2  | -1.51 | 0.413176 | 0.106796 | 0.732218 | 0.369391 |
| MmugDNA.21417.1.S1_at   | MmugDNA.21417.1 | 5.28  | 4.86  | 0.37 | 0    | 1.34  | 0.366874 | 0.308666 | 0.702346 | 0.56461  |
| MmugDNA.21418.1.S1_at   | MmugDNA.21418.1 | 6.81  | 6.82  | 0.15 | 0.09 | -1.01 | 0.344411 | 0.478831 | 0.686913 | 0.684739 |
| MmugDNA.21419.1.S1_at   | MmugDNA.21419.1 | 7.64  | 7.69  | 0.31 | 0.2  | -1.04 | 0.701182 | 0.48891  | 0.883834 | 0.691464 |
| MmugDNA.21420.1.S1_at   | MmugDNA.21420.1 | 3.18  | 3.59  | 0.21 | 0.26 | -1.33 | 0.259469 | 0.080863 | 0.622626 | 0.328831 |
| MmugDNA.21421.1.S1_at   | MmugDNA.21421.1 | 9.72  | 9.52  | 0.68 | 0.25 | 1.15  | 0.21679  | 0.388318 | 0.586817 | 0.62274  |
| MmugDNA.21422.1.S1_at   | MmugDNA.21422.1 | 7.64  | 7.75  | 0.11 | 0.08 | -1.08 | 0.745027 | 0.067412 | 0.902839 | 0.305664 |
| MmugDNA.21422.1.S1_s_at | MmugDNA.21422.1 | 7.29  | 7.44  | 0.08 | 0.03 | -1.11 | 0.017739 | 0.240047 | 0.293545 | 0.510742 |
| MmugDNA.21424.1.S1_at   | MmugDNA.21424.1 | 4.98  | 4.81  | 0.18 | 0.18 | 1.12  | 0.931499 | 0.250378 | 0.97706  | 0.519391 |
| MmugDNA.21425.1.S1_at   | MmugDNA.21425.1 | 8.25  | 8.56  | 0.1  | 0.11 | -1.25 | 0.04448  | 0.000955 | 0.374916 | 0.049326 |

|                         |                 |       |       |      |      |       |          |          |          |          |
|-------------------------|-----------------|-------|-------|------|------|-------|----------|----------|----------|----------|
| MmugDNA.21426.1.S1_at   | MmugDNA.21426.1 | 5.31  | 4.97  | 0.19 | 0.01 | 1.26  | 0.034199 | 0.028365 | 0.348641 | 0.21025  |
| MmugDNA.21427.1.S1_at   | MmugDNA.21427.1 | 11.68 | 11.37 | 0.16 | 0.11 | 1.24  | 0.066214 | 0.006807 | 0.421918 | 0.111444 |
| MmugDNA.21428.1.S1_at   | MmugDNA.21428.1 | 4.61  | 4.23  | 0.41 | 0.31 | 1.3   | 0.238933 | 0.150012 | 0.60548  | 0.424621 |
| MmugDNA.21429.1.S1_at   | MmugDNA.21429.1 | 3.35  | 3.33  | 0.02 | 0.17 | 1.01  | 0.763607 | 0.991883 | 0.911265 | 0.995442 |
| MmugDNA.21429.1.S1_s_at | MmugDNA.21429.1 | 6.62  | 6.61  | 0.21 | 0.25 | 1.01  | 0.866327 | 0.989163 | 0.953052 | 0.993825 |
| MmugDNA.2143.1.S1_at    | MmugDNA.2143.1  | 10.29 | 10.34 | 0.62 | 0.04 | -1.03 | 0.93485  | 0.98893  | 0.977924 | 0.993666 |
| MmugDNA.21430.1.S1_at   | MmugDNA.21430.1 | 2.65  | 2.58  | 0    | 0.1  | 1.05  | 0.851553 | 0.60114  | 0.947639 | 0.762532 |
| MmugDNA.21432.1.S1_at   | MmugDNA.21432.1 | 6.48  | 6.89  | 0.4  | 0.15 | -1.33 | 0.12976  | 0.340211 | 0.504468 | 0.586637 |
| MmugDNA.21433.1.S1_at   | MmugDNA.21433.1 | 5.05  | 5.05  | 0.03 | 0.01 | 1     | 0.942097 | 0.01054  | 0.980258 | 0.134072 |
| MmugDNA.21434.1.S1_at   | MmugDNA.21434.1 | 7.1   | 6.94  | 0.17 | 0    | 1.12  | 0.586644 | 0.661278 | 0.831402 | 0.801687 |
| MmugDNA.21437.1.S1_at   | MmugDNA.21437.1 | 5.89  | 5.88  | 0.04 | 0.06 | -1.01 | 0.672944 | 0.936161 | 0.871072 | 0.963987 |
| MmugDNA.21438.1.S1_at   | MmugDNA.21438.1 | 3.68  | 3.84  | 0.12 | 0.12 | -1.12 | 0.200658 | 0.584908 | 0.572447 | 0.75256  |
| MmugDNA.21440.1.S1_at   | MmugDNA.21440.1 | 11.88 | 11.98 | 0.05 | 0.07 | -1.07 | 0.163548 | 0.259115 | 0.536326 | 0.526263 |
| MmugDNA.21442.1.S1_at   | MmugDNA.21442.1 | 5.07  | 5.7   | 0.1  | 0.55 | -1.55 | 0.108652 | 0.151723 | 0.480791 | 0.426383 |
| MmugDNA.21443.1.S1_at   | MmugDNA.21443.1 | 4.16  | 4.71  | 0.05 | 0.19 | -1.46 | 0.004573 | 0.008352 | 0.201051 | 0.121226 |
| MmugDNA.21444.1.S1_at   | MmugDNA.21444.1 | 7.59  | 7.44  | 0.17 | 0.04 | 1.11  | 0.317021 | 0.485992 | 0.666916 | 0.689551 |
| MmugDNA.21445.1.S1_at   | MmugDNA.21445.1 | 10.53 | 10.96 | 0.65 | 0.03 | -1.34 | 0.289386 | 0.319066 | 0.646114 | 0.571622 |
| MmugDNA.21447.1.S1_at   | MmugDNA.21447.1 | 8.69  | 8.82  | 0.3  | 0.15 | -1.09 | 0.199744 | 0.05553  | 0.571494 | 0.281454 |
| MmugDNA.21448.1.S1_at   | MmugDNA.21448.1 | 7.78  | 7.39  | 1.68 | 0.35 | 1.31  | 0.702375 | 0.807999 | 0.88422  | 0.889467 |
| MmugDNA.21449.1.S1_at   | MmugDNA.21449.1 | 3.51  | 3.54  | 0.02 | 0.2  | -1.02 | 0.274625 | 0.263517 | 0.633979 | 0.529826 |
| MmugDNA.21449.1.S1_s_at | MmugDNA.21449.1 | 9.14  | 9.16  | 0.41 | 0.01 | -1.01 | 0.930016 | 0.320589 | 0.976587 | 0.572701 |
| MmugDNA.21450.1.S1_at   | MmugDNA.21450.1 | 7.05  | 7.53  | 0.45 | 0.06 | -1.39 | 0.339142 | 0.810112 | 0.683572 | 0.890539 |
| MmugDNA.21451.1.S1_at   | MmugDNA.21451.1 | 8.64  | 8.78  | 0.73 | 0.16 | -1.1  | 0.54396  | 0.106651 | 0.806882 | 0.369205 |
| MmugDNA.21452.1.S1_s_at | MmugDNA.21452.1 | 12.17 | 11.81 | 0.28 | 0.11 | 1.29  | 0.153626 | 0.263628 | 0.526757 | 0.529913 |
| MmugDNA.21453.1.S1_at   | MmugDNA.21453.1 | 6.59  | 6.63  | 0.34 | 0.08 | -1.03 | 0.345104 | 0.739786 | 0.68735  | 0.849224 |
| MmugDNA.21454.1.S1_at   | MmugDNA.21454.1 | 4.48  | 4.57  | 0.57 | 0.26 | -1.06 | 0.706539 | 0.790567 | 0.885774 | 0.878916 |
| MmugDNA.21455.1.S1_at   | MmugDNA.21455.1 | 3.57  | 3.7   | 0.07 | 0.09 | -1.09 | 0.210109 | 0.868419 | 0.581555 | 0.925323 |
| MmugDNA.21456.1.S1_at   | MmugDNA.21456.1 | 9.93  | 10.14 | 0.3  | 0.12 | -1.16 | 0.255108 | 0.249423 | 0.619267 | 0.518532 |
| MmugDNA.21457.1.S1_at   | MmugDNA.21457.1 | 5.67  | 5.7   | 0.18 | 0.13 | -1.02 | 0.958382 | 0.394082 | 0.986346 | 0.626734 |
| MmugDNA.21458.1.S1_at   | MmugDNA.21458.1 | 3.71  | 3.38  | 0.21 | 0.11 | 1.26  | 0.215477 | 0.361227 | 0.585748 | 0.602104 |
| MmugDNA.21459.1.S1_at   | MmugDNA.21459.1 | 5.26  | 5.46  | 0.57 | 0.4  | -1.14 | 0.670248 | 0.795106 | 0.86987  | 0.881926 |
| MmugDNA.2146.1.S1_at    | MmugDNA.2146.1  | 4.66  | 4.64  | 0.05 | 0.02 | 1.01  | 0.646099 | 0.805224 | 0.859027 | 0.888036 |
| MmugDNA.21460.1.S1_at   | MmugDNA.21460.1 | 4.41  | 4.3   | 0.27 | 0.12 | 1.08  | 0.543445 | 0.648142 | 0.806503 | 0.794002 |
| MmugDNA.21461.1.S1_at   | MmugDNA.21461.1 | 8.01  | 9.6   | 0.81 | 0.03 | -3.01 | 0.071033 | 0.055503 | 0.430294 | 0.281404 |
| MmugDNA.21463.1.S1_at   | MmugDNA.21463.1 | 9.49  | 9.54  | 0.85 | 0.09 | -1.04 | 0.78518  | 0.828037 | 0.921034 | 0.901214 |
| MmugDNA.21464.1.S1_at   | MmugDNA.21464.1 | 9.17  | 9.41  | 0.42 | 0.07 | -1.18 | 0.998429 | 0.694181 | 0.999526 | 0.822159 |
| MmugDNA.21464.1.S1_s_at | MmugDNA.21464.1 | 10.09 | 10.37 | 0.35 | 0.04 | -1.21 | 0.771039 | 0.311419 | 0.91436  | 0.566456 |
| MmugDNA.21465.1.S1_at   | MmugDNA.21465.1 | 4.72  | 4.98  | 0.16 | 0.19 | -1.19 | 0.712427 | 0.094946 | 0.887958 | 0.352054 |
| MmugDNA.21466.1.S1_at   | MmugDNA.21466.1 | 3.69  | 3.66  | 0.11 | 0.26 | 1.02  | 0.90288  | 0.786818 | 0.967227 | 0.876684 |
| MmugDNA.21468.1.S1_at   | MmugDNA.21468.1 | 4.3   | 4.42  | 0.21 | 0.12 | -1.08 | 0.822737 | 0.222413 | 0.936084 | 0.495479 |
| MmugDNA.21469.1.S1_at   | MmugDNA.21469.1 | 12.99 | 13.15 | 0.15 | 0.01 | -1.12 | 0.068544 | 0.474414 | 0.425885 | 0.681427 |
| MmugDNA.2147.1.S1_at    | MmugDNA.2147.1  | 4     | 3.99  | 0.11 | 0.06 | 1.01  | 0.523201 | 0.501188 | 0.795463 | 0.699449 |
| MmugDNA.21470.1.S1_at   | MmugDNA.21470.1 | 4.58  | 4.58  | 0.12 | 0.21 | 1     | 0.243329 | 0.326112 | 0.609245 | 0.576315 |

|                         |                 |       |       |      |      |       |          |          |          |          |
|-------------------------|-----------------|-------|-------|------|------|-------|----------|----------|----------|----------|
| MmugDNA.21471.1.S1_at   | MmugDNA.21471.1 | 7.1   | 7.42  | 1.26 | 0.11 | -1.24 | 0.675103 | 0.590422 | 0.872479 | 0.756223 |
| MmugDNA.21473.1.S1_at   | MmugDNA.21473.1 | 4.88  | 4.9   | 0.24 | 0    | -1.02 | 0.687952 | 0.877729 | 0.878045 | 0.930219 |
| MmugDNA.21474.1.S1_at   | MmugDNA.21474.1 | 4.59  | 4.29  | 0.09 | 0.17 | 1.23  | 0.152203 | 0.13624  | 0.525262 | 0.408621 |
| MmugDNA.21475.1.S1_at   | MmugDNA.21475.1 | 3.77  | 3.71  | 0.53 | 0.26 | 1.04  | 0.657272 | 0.614068 | 0.863937 | 0.771067 |
| MmugDNA.21477.1.S1_at   | MmugDNA.21477.1 | 3.59  | 3.51  | 0.09 | 0.13 | 1.06  | 0.948125 | 0.700094 | 0.98218  | 0.825946 |
| MmugDNA.21478.1.S1_at   | MmugDNA.21478.1 | 12.18 | 12.35 | 0.7  | 0.04 | -1.12 | 0.250769 | 0.267861 | 0.615913 | 0.533607 |
| MmugDNA.21479.1.S1_at   | MmugDNA.21479.1 | 8.43  | 8.1   | 0.3  | 0.08 | 1.25  | 0.096248 | 0.033812 | 0.464755 | 0.227489 |
| MmugDNA.2148.1.S1_at    | MmugDNA.2148.1  | 3.5   | 3.52  | 0.12 | 0.13 | -1.01 | 0.717919 | 0.792889 | 0.890572 | 0.880387 |
| MmugDNA.21480.1.S1_at   | MmugDNA.21480.1 | 5.44  | 5.73  | 0.64 | 0.25 | -1.22 | 0.842716 | 0.436201 | 0.944281 | 0.655879 |
| MmugDNA.21481.1.S1_at   | MmugDNA.21481.1 | 5.95  | 5.96  | 0.81 | 0.11 | -1.01 | 0.463729 | 0.396946 | 0.762278 | 0.628506 |
| MmugDNA.21482.1.S1_at   | MmugDNA.21482.1 | 11.83 | 10.96 | 0.58 | 0.16 | -1.83 | 0.189045 | 0.144546 | 0.560728 | 0.418409 |
| MmugDNA.21484.1.S1_at   | MmugDNA.21484.1 | 3.22  | 3.11  | 0.1  | 0.07 | 1.08  | 0.281404 | 0.057114 | 0.639917 | 0.284945 |
| MmugDNA.21485.1.S1_at   | MmugDNA.21485.1 | 5.22  | 4.81  | 0.64 | 0.32 | 1.33  | 0.918102 | 0.977248 | 0.972062 | 0.987636 |
| MmugDNA.21486.1.S1_at   | MmugDNA.21486.1 | 6.56  | 7.69  | 0.32 | 0.39 | -2.19 | 0.039374 | 0.002484 | 0.361626 | 0.073652 |
| MmugDNA.21488.1.S1_at   | MmugDNA.21488.1 | 4.63  | 4.66  | 0.49 | 0.14 | -1.02 | 0.909096 | 0.414263 | 0.969287 | 0.640164 |
| MmugDNA.2149.1.S1_at    | MmugDNA.2149.1  | 8.97  | 9.19  | 0.47 | 0.07 | -1.17 | 0.405036 | 0.101176 | 0.72707  | 0.360831 |
| MmugDNA.21490.1.S1_at   | MmugDNA.21490.1 | 3.93  | 3.81  | 0.11 | 0.05 | 1.09  | 0.062386 | 0.257983 | 0.413027 | 0.525559 |
| MmugDNA.21491.1.S1_at   | MmugDNA.21491.1 | 7.22  | 6.92  | 0.33 | 0.49 | 1.23  | 0.480064 | 0.014557 | 0.771035 | 0.153907 |
| MmugDNA.21493.1.S1_at   | MmugDNA.21493.1 | 5.18  | 4.47  | 0.33 | 0.05 | 1.63  | 0.053979 | 0.160936 | 0.395633 | 0.437116 |
| MmugDNA.21494.1.S1_at   | MmugDNA.21494.1 | 2.95  | 3     | 0.03 | 0.03 | -1.03 | 0.030845 | 0.05099  | 0.338919 | 0.271078 |
| MmugDNA.21495.1.S1_at   | MmugDNA.21495.1 | 3.19  | 3.1   | 0.38 | 0.09 | 1.07  | 0.232427 | 0.504215 | 0.600124 | 0.701456 |
| MmugDNA.21496.1.S1_at   | MmugDNA.21496.1 | 4.87  | 4.87  | 0.05 | 0.14 | -1    | 0.3293   | 0.462228 | 0.676319 | 0.673604 |
| MmugDNA.21497.1.S1_at   | MmugDNA.21497.1 | 10.61 | 10.59 | 0.5  | 0.18 | 1.01  | 0.715622 | 0.090675 | 0.889404 | 0.345151 |
| MmugDNA.21498.1.S1_at   | MmugDNA.21498.1 | 4.19  | 3.93  | 0.08 | 0.54 | 1.2   | 0.831401 | 0.956171 | 0.939628 | 0.975058 |
| MmugDNA.21499.1.S1_at   | MmugDNA.21499.1 | 10.9  | 11.07 | 0.36 | 0.14 | -1.13 | 0.559448 | 0.509959 | 0.816154 | 0.704535 |
| MmugDNA.215.1.S1_at     | MmugDNA.215.1   | 11.14 | 11.01 | 0.29 | 0.03 | 1.1   | 0.146071 | 0.24793  | 0.520572 | 0.517401 |
| MmugDNA.21500.1.S1_at   | MmugDNA.21500.1 | 5.55  | 5.41  | 0.06 | 0.12 | 1.1   | 0.3655   | 0.43726  | 0.70117  | 0.656613 |
| MmugDNA.21501.1.S1_at   | MmugDNA.21501.1 | 12.69 | 12.73 | 0.54 | 0.01 | -1.03 | 0.83082  | 0.448873 | 0.939469 | 0.664672 |
| MmugDNA.21503.1.S1_at   | MmugDNA.21503.1 | 4.53  | 4.5   | 0.07 | 0.03 | 1.03  | 0.154273 | 0.208041 | 0.527483 | 0.482049 |
| MmugDNA.21504.1.S1_at   | MmugDNA.21504.1 | 3.85  | 3.87  | 0.34 | 0.03 | -1.02 | 0.392334 | 0.401749 | 0.718269 | 0.631068 |
| MmugDNA.21505.1.S1_at   | MmugDNA.21505.1 | 5.28  | 5.27  | 0.09 | 0.1  | 1.01  | 0.756651 | 0.972216 | 0.908337 | 0.985011 |
| MmugDNA.21506.1.S1_at   | MmugDNA.21506.1 | 5.89  | 5.75  | 0.15 | 0.13 | 1.1   | 0.875435 | 0.053396 | 0.956729 | 0.27666  |
| MmugDNA.21507.1.S1_at   | MmugDNA.21507.1 | 7.24  | 7.15  | 0.26 | 0.12 | 1.07  | 0.91866  | 0.330203 | 0.972234 | 0.579016 |
| MmugDNA.21508.1.S1_at   | MmugDNA.21508.1 | 4.76  | 5.17  | 0.15 | 0.04 | -1.33 | 0.011106 | 0.077547 | 0.252486 | 0.323421 |
| MmugDNA.21509.1.S1_at   | MmugDNA.21509.1 | 8.55  | 7.68  | 0.41 | 0.09 | 1.83  | 0.016633 | 0.014512 | 0.287478 | 0.153682 |
| MmugDNA.2151.1.S1_at    | MmugDNA.2151.1  | 6.07  | 6.28  | 0.82 | 0.06 | -1.16 | 0.603842 | 0.651144 | 0.839371 | 0.796048 |
| MmugDNA.24188.1.S1_s_at | MmugDNA.24188.1 | 10.76 | 10.83 | 0.31 | 0.04 | -1.05 | 0.600162 | 0.018528 | 0.837736 | 0.171243 |
| MmugDNA.21512.1.S1_at   | MmugDNA.21512.1 | 6.42  | 6.58  | 0.19 | 0.19 | -1.12 | 0.982816 | 0.900565 | 0.994764 | 0.943469 |
| MmugDNA.21513.1.S1_at   | MmugDNA.21513.1 | 4.75  | 4.59  | 0.13 | 0.14 | 1.12  | 0.173856 | 0.257181 | 0.546898 | 0.524938 |
| MmugDNA.21514.1.S1_at   | MmugDNA.21514.1 | 7.08  | 7.97  | 0.19 | 0.18 | -1.85 | 0.004978 | 0.000693 | 0.204144 | 0.044166 |
| MmugDNA.21517.1.S1_at   | MmugDNA.21517.1 | 6.17  | 6.07  | 0.2  | 0.28 | 1.07  | 0.441345 | 0.648688 | 0.749251 | 0.794407 |
| MmugDNA.21519.1.S1_at   | MmugDNA.21519.1 | 12.42 | 12.59 | 0.21 | 0.06 | -1.13 | 0.232547 | 0.29002  | 0.600124 | 0.551016 |
| MmugDNA.2152.1.S1_at    | MmugDNA.2152.1  | 2.9   | 2.93  | 0    | 0.04 | -1.02 | 0.148644 | 0.327082 | 0.522686 | 0.577104 |



|                         |                 |       |       |      |      |       |          |          |          |          |
|-------------------------|-----------------|-------|-------|------|------|-------|----------|----------|----------|----------|
| MmugDNA.21520.1.S1_at   | MmugDNA.21520.1 | 4.43  | 4.34  | 0.08 | 0.76 | 1.07  | 0.543589 | 0.307536 | 0.806647 | 0.563781 |
| MmugDNA.21521.1.S1_at   | MmugDNA.21521.1 | 5.83  | 5.83  | 0.04 | 0.03 | -1    | 0.455807 | 0.473438 | 0.757582 | 0.680697 |
| MmugDNA.21522.1.S1_at   | MmugDNA.21522.1 | 3.87  | 3.83  | 0.55 | 0.13 | 1.03  | 0.688082 | 0.75911  | 0.878062 | 0.859979 |
| MmugDNA.21527.1.S1_at   | MmugDNA.21527.1 | 3.45  | 3.28  | 0.03 | 0.1  | 1.13  | 0.105227 | 0.053227 | 0.477044 | 0.276445 |
| MmugDNA.2153.1.S1_at    | MmugDNA.2153.1  | 3.52  | 3.6   | 0.16 | 0.14 | -1.05 | 0.694542 | 0.310335 | 0.881132 | 0.565544 |
| MmugDNA.21531.1.S1_at   | MmugDNA.21531.1 | 3.45  | 3.65  | 0.43 | 0.48 | -1.15 | 0.793999 | 0.203552 | 0.924489 | 0.477767 |
| MmugDNA.21532.1.S1_at   | MmugDNA.21532.1 | 3.4   | 3.26  | 0.08 | 0.1  | 1.1   | 0.086925 | 0.144989 | 0.454785 | 0.418937 |
| MmugDNA.21533.1.S1_at   | MmugDNA.21533.1 | 6.92  | 7.73  | 0.41 | 0.15 | -1.76 | 0.043364 | 0.040922 | 0.371964 | 0.247161 |
| MmugDNA.21535.1.S1_at   | MmugDNA.21535.1 | 6.28  | 6.64  | 0.4  | 0.17 | -1.29 | 0.895798 | 0.875258 | 0.964355 | 0.929211 |
| MmugDNA.21536.1.S1_at   | MmugDNA.21536.1 | 9.6   | 9.84  | 0.88 | 0.03 | -1.18 | 0.646184 | 0.841968 | 0.859027 | 0.909959 |
| MmugDNA.21537.1.S1_at   | MmugDNA.21537.1 | 8.78  | 8.96  | 0.18 | 0.1  | -1.14 | 0.566705 | 0.59831  | 0.820086 | 0.76073  |
| MmugDNA.21538.1.S1_at   | MmugDNA.21538.1 | 4.24  | 4.18  | 0.19 | 0.06 | 1.04  | 0.713492 | 0.878547 | 0.88844  | 0.930686 |
| MmugDNA.2154.1.S1_at    | MmugDNA.2154.1  | 6.63  | 7.04  | 0.39 | 0.18 | -1.33 | 0.147958 | 0.162285 | 0.522184 | 0.438447 |
| MmugDNA.21541.1.S1_at   | MmugDNA.21541.1 | 3.25  | 3.22  | 0.11 | 0.08 | 1.02  | 0.861625 | 0.819148 | 0.951267 | 0.89579  |
| MmugDNA.21542.1.S1_at   | MmugDNA.21542.1 | 12.22 | 12.31 | 1.06 | 0.06 | -1.07 | 0.46129  | 0.595624 | 0.760872 | 0.759123 |
| MmugDNA.21544.1.S1_at   | MmugDNA.21544.1 | 4.76  | 4.68  | 0.03 | 0.25 | 1.06  | 0.177101 | 0.223389 | 0.550212 | 0.496174 |
| MmugDNA.21545.1.S1_at   | MmugDNA.21545.1 | 6.29  | 6.03  | 0.07 | 0.05 | 1.2   | 0.010483 | 0.000822 | 0.24804  | 0.046584 |
| MmugDNA.21547.1.S1_at   | MmugDNA.21547.1 | 6.36  | 6.44  | 0.24 | 0.24 | -1.06 | 0.372545 | 0.657693 | 0.705567 | 0.799912 |
| MmugDNA.21548.1.S1_s_at | MmugDNA.21548.1 | 8.81  | 9.05  | 0.37 | 0.03 | -1.18 | 0.837415 | 0.01478  | 0.941594 | 0.154626 |
| MmugDNA.21549.1.S1_at   | MmugDNA.21549.1 | 8.5   | 8.49  | 0.3  | 0.31 | 1.01  | 0.962036 | 0.008069 | 0.987644 | 0.119402 |
| MmugDNA.2155.1.S1_at    | MmugDNA.2155.1  | 4.29  | 3.9   | 0.1  | 0.29 | 1.32  | 0.188881 | 0.136607 | 0.560718 | 0.409115 |
| MmugDNA.21550.1.S1_at   | MmugDNA.21550.1 | 3.13  | 3.27  | 0.08 | 0.18 | -1.1  | 0.942288 | 0.303996 | 0.980283 | 0.561344 |
| MmugDNA.21553.1.S1_at   | MmugDNA.21553.1 | 7.19  | 7.15  | 0.12 | 0.19 | 1.03  | 0.315539 | 0.389977 | 0.666002 | 0.624002 |
| MmugDNA.21554.1.S1_at   | MmugDNA.21554.1 | 6.31  | 6.49  | 0.25 | 0.27 | -1.13 | 0.472085 | 0.05724  | 0.766862 | 0.285059 |
| MmugDNA.21557.1.S1_at   | MmugDNA.21557.1 | 10.21 | 10.58 | 0.26 | 0.02 | -1.3  | 0.062468 | 0.065921 | 0.413261 | 0.302141 |
| MmugDNA.21558.1.S1_at   | MmugDNA.21558.1 | 6.17  | 5.95  | 0.07 | 0.04 | 1.17  | 0.008761 | 0.033561 | 0.236545 | 0.226764 |
| MmugDNA.21559.1.S1_at   | MmugDNA.21559.1 | 10.33 | 10.79 | 0.41 | 0.12 | -1.38 | 0.394406 | 0.175562 | 0.719752 | 0.45218  |
| MmugDNA.2156.1.S1_at    | MmugDNA.2156.1  | 3.84  | 3.85  | 0.14 | 0.14 | -1.01 | 0.63111  | 0.307032 | 0.852361 | 0.563427 |
| MmugDNA.21560.1.S1_at   | MmugDNA.21560.1 | 6.76  | 5.97  | 0.67 | 0.13 | 1.74  | 0.425663 | 0.589259 | 0.740112 | 0.755509 |
| MmugDNA.21560.1.S1_s_at | MmugDNA.21560.1 | 10.34 | 11.44 | 1.16 | 0.16 | -2.15 | 0.629189 | 0.179422 | 0.851418 | 0.455908 |
| MmugDNA.21563.1.S1_at   | MmugDNA.21563.1 | 5.95  | 6.15  | 0.27 | 0.12 | -1.15 | 0.333458 | 0.457978 | 0.679631 | 0.670999 |
| MmugDNA.21564.1.S1_at   | MmugDNA.21564.1 | 5.1   | 5.03  | 0.18 | 0.16 | 1.05  | 0.851611 | 0.890693 | 0.947639 | 0.937697 |
| MmugDNA.21565.1.S1_at   | MmugDNA.21565.1 | 5.85  | 6.17  | 0.71 | 0.19 | -1.24 | 0.651851 | 0.664095 | 0.86186  | 0.803247 |
| MmugDNA.21568.1.S1_at   | MmugDNA.21568.1 | 5.96  | 6.34  | 0.18 | 0.35 | -1.3  | 0.172769 | 0.324314 | 0.545887 | 0.574924 |
| MmugDNA.21569.1.S1_at   | MmugDNA.21569.1 | 9.72  | 9.23  | 0.34 | 0.06 | 1.41  | 0.050797 | 0.140267 | 0.388085 | 0.413448 |
| MmugDNA.21570.1.S1_at   | MmugDNA.21570.1 | 3.33  | 3.25  | 0.09 | 0.15 | 1.05  | 0.251754 | 0.202847 | 0.61695  | 0.477312 |
| MmugDNA.21571.1.S1_at   | MmugDNA.21571.1 | 6.56  | 6.35  | 0.12 | 0.01 | 1.16  | 0.068033 | 0.020175 | 0.42451  | 0.178414 |
| MmugDNA.21572.1.S1_at   | MmugDNA.21572.1 | 5.11  | 5.12  | 0.15 | 0.12 | -1.01 | 0.633196 | 0.714428 | 0.853404 | 0.834313 |
| MmugDNA.21573.1.S1_at   | MmugDNA.21573.1 | 7.54  | 7.27  | 0.23 | 0.09 | 1.21  | 0.049725 | 0.123995 | 0.386175 | 0.394262 |
| MmugDNA.21574.1.S1_at   | MmugDNA.21574.1 | 3.64  | 3.67  | 0.16 | 0.11 | -1.02 | 0.845623 | 0.6042   | 0.945907 | 0.764542 |
| MmugDNA.21576.1.S1_at   | MmugDNA.21576.1 | 4.84  | 4.7   | 0.07 | 0.07 | 1.11  | 0.140252 | 0.484404 | 0.515581 | 0.688478 |
| MmugDNA.21577.1.S1_at   | MmugDNA.21577.1 | 4.96  | 4.72  | 0.33 | 0.35 | 1.19  | 0.326823 | 0.484602 | 0.674453 | 0.688576 |
| MmugDNA.21578.1.S1_at   | MmugDNA.21578.1 | 5.91  | 6.51  | 0.35 | 0.38 | -1.51 | 0.318122 | 0.119391 | 0.667759 | 0.387887 |

|                         |                 |       |       |      |      |       |          |          |          |          |
|-------------------------|-----------------|-------|-------|------|------|-------|----------|----------|----------|----------|
| MmugDNA.21579.1.S1_at   | MmugDNA.21579.1 | 6.75  | 7.57  | 0.35 | 0.4  | -1.77 | 0.056337 | 0.026602 | 0.399925 | 0.204008 |
| MmugDNA.2158.1.S1_at    | MmugDNA.2158.1  | 3.83  | 3.62  | 0.15 | 0.48 | 1.16  | 0.862985 | 0.966753 | 0.951821 | 0.981494 |
| MmugDNA.21580.1.S1_at   | MmugDNA.21580.1 | 4.66  | 4.89  | 0.26 | 0.46 | -1.17 | 0.103347 | 0.229861 | 0.474122 | 0.501802 |
| MmugDNA.21581.1.S1_at   | MmugDNA.21581.1 | 5.49  | 5.13  | 0.51 | 0.16 | 1.28  | 0.199791 | 0.188849 | 0.571534 | 0.464789 |
| MmugDNA.21582.1.S1_at   | MmugDNA.21582.1 | 7     | 7.05  | 0.08 | 0.34 | -1.04 | 0.541727 | 0.576336 | 0.805219 | 0.747186 |
| MmugDNA.21583.1.S1_at   | MmugDNA.21583.1 | 13.01 | 12.94 | 0.09 | 0.04 | 1.05  | 0.333101 | 0.543339 | 0.679469 | 0.726059 |
| MmugDNA.21584.1.S1_at   | MmugDNA.21584.1 | 7.97  | 7.52  | 0.17 | 0.03 | 1.37  | 0.025871 | 0.041187 | 0.32273  | 0.247733 |
| MmugDNA.21584.1.S1_s_at | MmugDNA.21584.1 | 6.99  | 6.96  | 0.11 | 0.16 | 1.02  | 0.327584 | 0.646196 | 0.675137 | 0.792676 |
| MmugDNA.21585.1.S1_at   | MmugDNA.21585.1 | 4.21  | 4.33  | 0.12 | 0.36 | -1.08 | 0.535027 | 0.437761 | 0.801404 | 0.656927 |
| MmugDNA.21587.1.S1_at   | MmugDNA.21587.1 | 10.2  | 10.75 | 0.37 | 0.06 | -1.47 | 0.061438 | 0.04066  | 0.410677 | 0.246578 |
| MmugDNA.21588.1.S1_at   | MmugDNA.21588.1 | 10.37 | 9.36  | 3.52 | 0.29 | 2.01  | 0.677237 | 0.339557 | 0.873403 | 0.586165 |
| MmugDNA.21591.1.S1_at   | MmugDNA.21591.1 | 3.42  | 3.44  | 0.13 | 0.33 | -1.01 | 0.69466  | 0.677659 | 0.881132 | 0.811756 |
| MmugDNA.21592.1.S1_at   | MmugDNA.21592.1 | 4.22  | 3.87  | 0.38 | 0.1  | 1.27  | 0.124438 | 0.081248 | 0.498516 | 0.329351 |
| MmugDNA.21594.1.S1_at   | MmugDNA.21594.1 | 4.01  | 4     | 0.12 | 0.12 | 1.01  | 0.358806 | 0.385562 | 0.69668  | 0.621027 |
| MmugDNA.21595.1.S1_at   | MmugDNA.21595.1 | 3.63  | 3.65  | 0.09 | 0.11 | -1.02 | 0.325505 | 0.19049  | 0.673335 | 0.465906 |
| MmugDNA.21596.1.S1_at   | MmugDNA.21596.1 | 5.63  | 5.63  | 0.06 | 0.13 | -1    | 0.457149 | 0.223339 | 0.758187 | 0.49612  |
| MmugDNA.21597.1.S1_at   | MmugDNA.21597.1 | 10.05 | 9.98  | 0.33 | 0.11 | 1.05  | 0.721775 | 0.898459 | 0.892101 | 0.942214 |
| MmugDNA.21597.1.S1_s_at | MmugDNA.21597.1 | 11.23 | 11.23 | 0.37 | 0.1  | -1    | 0.800059 | 0.957517 | 0.926794 | 0.975944 |
| MmugDNA.21598.1.S1_at   | MmugDNA.21598.1 | 5.31  | 5.25  | 0.05 | 0.03 | 1.04  | 0.306862 | 0.309848 | 0.659764 | 0.565046 |
| MmugDNA.216.1.S1_at     | MmugDNA.216.1   | 9.87  | 10.02 | 0.13 | 0.08 | -1.11 | 0.246582 | 0.558222 | 0.61204  | 0.735467 |
| MmugDNA.2160.1.S1_at    | MmugDNA.2160.1  | 5.4   | 4.27  | 0.8  | 0.3  | 2.19  | 0.109401 | 0.159448 | 0.482257 | 0.435568 |
| MmugDNA.21600.1.S1_at   | MmugDNA.21600.1 | 5.99  | 5.82  | 0.09 | 0.16 | 1.12  | 0.485943 | 0.66151  | 0.774427 | 0.801842 |
| MmugDNA.21601.1.S1_at   | MmugDNA.21601.1 | 3.57  | 3.53  | 0.04 | 0    | 1.03  | 0.175891 | 0.051585 | 0.549037 | 0.272597 |
| MmugDNA.21604.1.S1_at   | MmugDNA.21604.1 | 3.89  | 3.95  | 0.06 | 0.05 | -1.05 | 0.519347 | 0.187686 | 0.793138 | 0.46368  |
| MmugDNA.21605.1.S1_at   | MmugDNA.21605.1 | 4.28  | 4.55  | 0.21 | 0.35 | -1.21 | 0.206988 | 0.25779  | 0.578774 | 0.52542  |
| MmugDNA.21606.1.S1_at   | MmugDNA.21606.1 | 5.24  | 5.25  | 0.11 | 0.05 | -1.01 | 0.31278  | 0.903455 | 0.664221 | 0.945185 |
| MmugDNA.21609.1.S1_at   | MmugDNA.21609.1 | 4.39  | 4.21  | 0.12 | 0.5  | 1.13  | 0.886683 | 0.857516 | 0.96068  | 0.918676 |
| MmugDNA.21610.1.S1_at   | MmugDNA.21610.1 | 7     | 6.68  | 0.43 | 0.06 | 1.25  | 0.304337 | 0.240125 | 0.657987 | 0.510813 |
| MmugDNA.21611.1.S1_at   | MmugDNA.21611.1 | 7.02  | 6.65  | 0.24 | 0.34 | 1.29  | 0.163942 | 0.162308 | 0.536665 | 0.438447 |
| MmugDNA.21613.1.S1_at   | MmugDNA.21613.1 | 11.01 | 11.09 | 0.43 | 0.09 | -1.05 | 0.869807 | 0.738049 | 0.954581 | 0.848158 |
| MmugDNA.21614.1.S1_at   | MmugDNA.21614.1 | 7.11  | 7.78  | 0.52 | 0.37 | -1.59 | 0.110484 | 0.624165 | 0.483546 | 0.778457 |
| MmugDNA.21615.1.S1_at   | MmugDNA.21615.1 | 8.43  | 7.57  | 0.89 | 0.41 | 1.82  | 0.120573 | 0.13208  | 0.494002 | 0.404051 |
| MmugDNA.21616.1.S1_at   | MmugDNA.21616.1 | 4.94  | 4.64  | 0.12 | 0.14 | 1.23  | 0.036352 | 0.071192 | 0.35477  | 0.31311  |
| MmugDNA.21617.1.S1_at   | MmugDNA.21617.1 | 9.31  | 9.52  | 0.16 | 0.12 | -1.16 | 0.14292  | 0.004684 | 0.518135 | 0.095363 |
| MmugDNA.21618.1.S1_at   | MmugDNA.21618.1 | 9.06  | 9.09  | 0.04 | 0.17 | -1.02 | 0.80822  | 0.992537 | 0.930534 | 0.995715 |
| MmugDNA.21619.1.S1_at   | MmugDNA.21619.1 | 5.06  | 5.09  | 0.32 | 0.07 | -1.02 | 0.922096 | 0.39887  | 0.973725 | 0.629591 |
| MmugDNA.21623.1.S1_at   | MmugDNA.21623.1 | 4.78  | 4.77  | 0.11 | 0.07 | 1     | 0.828342 | 0.715886 | 0.938275 | 0.83531  |
| MmugDNA.21624.1.S1_at   | MmugDNA.21624.1 | 3.91  | 3.99  | 0.08 | 0.39 | -1.06 | 0.70982  | 0.632836 | 0.887084 | 0.783788 |
| MmugDNA.21625.1.S1_at   | MmugDNA.21625.1 | 4.14  | 4.15  | 0.15 | 0.01 | -1.01 | 0.758167 | 0.509169 | 0.908979 | 0.704028 |
| MmugDNA.21626.1.S1_at   | MmugDNA.21626.1 | 3.23  | 3.27  | 0.06 | 0    | -1.03 | 0.267295 | 0.541757 | 0.628081 | 0.725057 |
| MmugDNA.21627.1.S1_at   | MmugDNA.21627.1 | 4.92  | 4.93  | 0.26 | 0.09 | -1    | 0.922448 | 0.253337 | 0.973805 | 0.521662 |
| MmugDNA.21628.1.S1_at   | MmugDNA.21628.1 | 4.54  | 4.3   | 0.24 | 0.16 | 1.18  | 0.219445 | 0.238248 | 0.588927 | 0.508825 |
| MmugDNA.2163.1.S1_s_at  | MmugDNA.2163.1  | 3.08  | 3.12  | 0.04 | 0.06 | -1.03 | 0.437891 | 0.156201 | 0.747043 | 0.43161  |

|                         |                 |       |       |      |      |       |          |          |          |          |
|-------------------------|-----------------|-------|-------|------|------|-------|----------|----------|----------|----------|
| MmugDNA.21631.1.S1_at   | MmugDNA.21631.1 | 5.83  | 5.43  | 0.1  | 0.32 | 1.32  | 0.309301 | 0.518802 | 0.661672 | 0.710724 |
| MmugDNA.21632.1.S1_at   | MmugDNA.21632.1 | 11.97 | 12.36 | 0.23 | 0.05 | -1.31 | 0.037555 | 0.037437 | 0.35733  | 0.237777 |
| MmugDNA.21635.1.S1_at   | MmugDNA.21635.1 | 3.52  | 3.43  | 0.19 | 0.07 | 1.06  | 0.610107 | 0.204178 | 0.841839 | 0.478507 |
| MmugDNA.21637.1.S1_at   | MmugDNA.21637.1 | 4.3   | 4.03  | 0.07 | 0.09 | 1.21  | 0.011132 | 0.118253 | 0.252486 | 0.386244 |
| MmugDNA.21638.1.S1_at   | MmugDNA.21638.1 | 9.21  | 8.98  | 0.25 | 0.17 | 1.17  | 0.228809 | 0.008924 | 0.597804 | 0.124951 |
| MmugDNA.21639.1.S1_at   | MmugDNA.21639.1 | 6.89  | 6.82  | 0.07 | 0.03 | 1.05  | 0.077324 | 0.096689 | 0.439109 | 0.35417  |
| MmugDNA.2164.1.S1_at    | MmugDNA.2164.1  | 3.2   | 3.19  | 0.06 | 0.08 | 1.01  | 0.408466 | 0.796716 | 0.729314 | 0.882782 |
| MmugDNA.21640.1.S1_at   | MmugDNA.21640.1 | 9.68  | 9.56  | 0.19 | 0.15 | 1.09  | 0.436434 | 0.611252 | 0.746319 | 0.769195 |
| MmugDNA.21641.1.S1_at   | MmugDNA.21641.1 | 9.89  | 10.35 | 0.2  | 0.08 | -1.37 | 0.016482 | 0.017546 | 0.287478 | 0.167632 |
| MmugDNA.21642.1.S1_at   | MmugDNA.21642.1 | 3.34  | 3.25  | 0.14 | 0.13 | 1.07  | 0.508121 | 0.186166 | 0.786675 | 0.462007 |
| MmugDNA.21643.1.S1_at   | MmugDNA.21643.1 | 9.94  | 10.69 | 0.76 | 0.04 | -1.68 | 0.161436 | 0.044908 | 0.534763 | 0.256424 |
| MmugDNA.21644.1.S1_at   | MmugDNA.21644.1 | 7.9   | 7.82  | 0.09 | 0.16 | 1.06  | 0.530645 | 0.573931 | 0.799173 | 0.745476 |
| MmugDNA.21645.1.S1_at   | MmugDNA.21645.1 | 3.83  | 3.81  | 0.07 | 0.06 | 1.01  | 0.683857 | 0.019965 | 0.876251 | 0.17752  |
| MmugDNA.21647.1.S1_at   | MmugDNA.21647.1 | 9.35  | 8.6   | 0.11 | 0.18 | 1.69  | 0.006014 | 0.013964 | 0.213939 | 0.151509 |
| MmugDNA.21648.1.S1_at   | MmugDNA.21648.1 | 5.79  | 5.57  | 0.18 | 0.02 | 1.16  | 0.086468 | 0.095198 | 0.454228 | 0.35218  |
| MmugDNA.21649.1.S1_at   | MmugDNA.21649.1 | 5.05  | 4.9   | 0.41 | 0.27 | 1.11  | 0.97959  | 0.528721 | 0.993516 | 0.71678  |
| MmugDNA.2165.1.S1_at    | MmugDNA.2165.1  | 8.12  | 8.03  | 0.99 | 0.16 | 1.06  | 0.746977 | 0.916545 | 0.903844 | 0.953277 |
| MmugDNA.21650.1.S1_at   | MmugDNA.21650.1 | 7.59  | 7.94  | 0.7  | 0.56 | -1.27 | 0.361248 | 0.328308 | 0.698432 | 0.578012 |
| MmugDNA.21652.1.S1_at   | MmugDNA.21652.1 | 10.21 | 9.52  | 0.4  | 0.16 | 1.62  | 0.017206 | 0.012381 | 0.289858 | 0.143958 |
| MmugDNA.21653.1.S1_at   | MmugDNA.21653.1 | 8.61  | 9.06  | 0.13 | 0.06 | -1.37 | 0.008001 | 0.002631 | 0.232005 | 0.075845 |
| MmugDNA.21654.1.S1_at   | MmugDNA.21654.1 | 7.83  | 6.96  | 0.25 | 0.21 | 1.82  | 0.014871 | 0.002688 | 0.278597 | 0.076436 |
| MmugDNA.21656.1.S1_at   | MmugDNA.21656.1 | 8.97  | 8.72  | 0.23 | 0.2  | 1.18  | 0.094672 | 0.004277 | 0.463796 | 0.091847 |
| MmugDNA.21657.1.S1_at   | MmugDNA.21657.1 | 9.37  | 8.5   | 0.26 | 0.12 | 1.83  | 0.006793 | 0.008405 | 0.223856 | 0.121726 |
| MmugDNA.21658.1.S1_at   | MmugDNA.21658.1 | 6.06  | 6.05  | 0.13 | 0.11 | 1.01  | 0.821741 | 0.745988 | 0.935673 | 0.852688 |
| MmugDNA.21659.1.S1_at   | MmugDNA.21659.1 | 6.23  | 6.98  | 0.61 | 0.37 | -1.69 | 0.243281 | 0.641274 | 0.609182 | 0.789506 |
| MmugDNA.2166.1.S1_at    | MmugDNA.2166.1  | 3.67  | 3.14  | 0.33 | 0.12 | 1.44  | 0.249483 | 0.429489 | 0.61481  | 0.650934 |
| MmugDNA.21660.1.S1_at   | MmugDNA.21660.1 | 2.99  | 2.87  | 0.11 | 0.06 | 1.08  | 0.341499 | 0.078539 | 0.685061 | 0.325285 |
| MmugDNA.21662.1.S1_at   | MmugDNA.21662.1 | 4.34  | 4.14  | 0.32 | 0.1  | 1.15  | 0.424161 | 0.514402 | 0.739432 | 0.707675 |
| MmugDNA.21663.1.S1_at   | MmugDNA.21663.1 | 4.58  | 4.35  | 0.09 | 0.09 | 1.17  | 0.089789 | 0.074354 | 0.457893 | 0.318046 |
| MmugDNA.21664.1.S1_at   | MmugDNA.21664.1 | 3.04  | 3.25  | 1.45 | 0.46 | -1.15 | 0.704901 | 0.03505  | 0.88525  | 0.231385 |
| MmugDNA.21666.1.S1_at   | MmugDNA.21666.1 | 6.11  | 6.88  | 0.91 | 0.25 | -1.7  | 0.260038 | 0.431264 | 0.622946 | 0.652249 |
| MmugDNA.21667.1.S1_s_at | MmugDNA.21667.1 | 7.91  | 7.5   | 0.57 | 0.23 | 1.33  | 0.127044 | 0.012854 | 0.500933 | 0.145997 |
| MmugDNA.21668.1.S1_at   | MmugDNA.21668.1 | 3.08  | 3.06  | 0.13 | 0.11 | 1.01  | 0.853225 | 0.12465  | 0.948299 | 0.395085 |
| MmugDNA.21669.1.S1_at   | MmugDNA.21669.1 | 5.63  | 5.79  | 0.13 | 0.24 | -1.12 | 0.814373 | 0.413324 | 0.932969 | 0.639596 |
| MmugDNA.21670.1.S1_at   | MmugDNA.21670.1 | 3.59  | 3.67  | 0.06 | 0.03 | -1.06 | 0.097218 | 0.53827  | 0.465967 | 0.723014 |
| MmugDNA.21672.1.S1_at   | MmugDNA.21672.1 | 5.95  | 5.95  | 0.14 | 0.3  | 1     | 0.755892 | 0.705898 | 0.90805  | 0.829555 |
| MmugDNA.21673.1.S1_at   | MmugDNA.21673.1 | 5.02  | 4.93  | 0.13 | 0.14 | 1.07  | 0.42784  | 0.2506   | 0.741445 | 0.51941  |
| MmugDNA.21674.1.S1_at   | MmugDNA.21674.1 | 3.47  | 3.56  | 0.11 | 0.12 | -1.06 | 0.86488  | 0.217277 | 0.952499 | 0.490911 |
| MmugDNA.21675.1.S1_at   | MmugDNA.21675.1 | 5.89  | 6.26  | 1.01 | 0.34 | -1.29 | 0.753298 | 0.249883 | 0.907008 | 0.518876 |
| MmugDNA.21676.1.S1_at   | MmugDNA.21676.1 | 5.68  | 5.5   | 0.25 | 0.81 | 1.14  | 0.595598 | 0.85004  | 0.835513 | 0.914681 |
| MmugDNA.21677.1.S1_at   | MmugDNA.21677.1 | 3.51  | 3.38  | 0.14 | 0.03 | 1.09  | 0.153763 | 0.327787 | 0.527051 | 0.577604 |
| MmugDNA.21678.1.S1_at   | MmugDNA.21678.1 | 3.98  | 4.33  | 0.23 | 0.18 | -1.27 | 0.25721  | 0.051529 | 0.621021 | 0.27241  |
| MmugDNA.21679.1.S1_at   | MmugDNA.21679.1 | 3.58  | 3.48  | 0.07 | 0.06 | 1.07  | 0.168495 | 0.349239 | 0.541113 | 0.593267 |

|                        |                 |       |       |      |      |       |          |          |          |          |
|------------------------|-----------------|-------|-------|------|------|-------|----------|----------|----------|----------|
| MmugDNA.21680.1.S1_at  | MmugDNA.21680.1 | 6.4   | 6.22  | 0.45 | 0.5  | 1.14  | 0.622487 | 0.904997 | 0.847811 | 0.946165 |
| MmugDNA.21681.1.S1_at  | MmugDNA.21681.1 | 10.32 | 11.11 | 0.18 | 0.16 | -1.73 | 0.003509 | 0.001554 | 0.195871 | 0.059629 |
| MmugDNA.21683.1.S1_at  | MmugDNA.21683.1 | 4.11  | 4.88  | 0.35 | 0.25 | -1.71 | 0.093881 | 0.178195 | 0.463304 | 0.454531 |
| MmugDNA.21685.1.S1_at  | MmugDNA.21685.1 | 3.69  | 3.66  | 0.24 | 0.07 | 1.02  | 0.458375 | 0.298093 | 0.758768 | 0.556726 |
| MmugDNA.21686.1.S1_at  | MmugDNA.21686.1 | 8.32  | 7.66  | 0.14 | 0.14 | 1.58  | 0.007181 | 0.002893 | 0.226471 | 0.079107 |
| MmugDNA.21687.1.S1_at  | MmugDNA.21687.1 | 6.25  | 6.28  | 0.16 | 0.05 | -1.02 | 0.913035 | 0.800224 | 0.970415 | 0.885129 |
| MmugDNA.21688.1.S1_at  | MmugDNA.21688.1 | 5.62  | 5.46  | 0.16 | 0.11 | 1.11  | 0.255728 | 0.208653 | 0.619741 | 0.482544 |
| MmugDNA.21689.1.S1_at  | MmugDNA.21689.1 | 8.91  | 8.38  | 1.83 | 0.26 | 1.45  | 0.604044 | 0.202171 | 0.839485 | 0.476559 |
| MmugDNA.2169.1.S1_at   | MmugDNA.2169.1  | 7.1   | 7.13  | 0.24 | 0.11 | -1.02 | 0.740312 | 0.809729 | 0.900769 | 0.890333 |
| MmugDNA.21690.1.S1_at  | MmugDNA.21690.1 | 7.49  | 7.85  | 0.57 | 0.2  | -1.28 | 0.41572  | 0.506822 | 0.73381  | 0.702605 |
| MmugDNA.21693.1.S1_at  | MmugDNA.21693.1 | 4.77  | 4.77  | 0.1  | 0.01 | 1     | 0.402689 | 0.704901 | 0.725049 | 0.828857 |
| MmugDNA.21694.1.S1_at  | MmugDNA.21694.1 | 3.35  | 3.45  | 0.68 | 0.44 | -1.07 | 0.81057  | 0.645055 | 0.931338 | 0.791993 |
| MmugDNA.21696.1.S1_at  | MmugDNA.21696.1 | 10.04 | 9.92  | 1.41 | 0.39 | 1.09  | 0.9414   | 0.703986 | 0.980073 | 0.828326 |
| MmugDNA.21698.1.S1_at  | MmugDNA.21698.1 | 5.95  | 6.74  | 0.19 | 0.13 | -1.72 | 0.002642 | 0.001934 | 0.18209  | 0.065795 |
| MmugDNA.217.1.S1_at    | MmugDNA.217.1   | 4.28  | 3.95  | 0.38 | 0.32 | 1.26  | 0.174875 | 0.232913 | 0.548031 | 0.50445  |
| MmugDNA.21700.1.S1_at  | MmugDNA.21700.1 | 3.68  | 3.66  | 0.02 | 0.09 | 1.02  | 0.218928 | 0.665175 | 0.588341 | 0.803767 |
| MmugDNA.21703.1.S1_at  | MmugDNA.21703.1 | 3.15  | 3.46  | 0.2  | 0.43 | -1.24 | 0.545764 | 0.057407 | 0.808169 | 0.285608 |
| MmugDNA.21704.1.S1_at  | MmugDNA.21704.1 | 7.56  | 6.76  | 0.38 | 0.16 | 1.73  | 0.064087 | 0.188063 | 0.417391 | 0.464164 |
| MmugDNA.21707.1.S1_at  | MmugDNA.21707.1 | 4.16  | 4.26  | 0.26 | 0.05 | -1.07 | 0.592195 | 0.362643 | 0.83377  | 0.603188 |
| MmugDNA.21709.1.S1_at  | MmugDNA.21709.1 | 2.99  | 3.22  | 0.08 | 0.14 | -1.18 | 0.233166 | 0.27171  | 0.600697 | 0.536577 |
| MmugDNA.2171.1.S1_at   | MmugDNA.2171.1  | 6.09  | 5.79  | 0.11 | 0.38 | 1.24  | 0.179745 | 0.528156 | 0.553052 | 0.716456 |
| MmugDNA.21710.1.S1_at  | MmugDNA.21710.1 | 8.97  | 10.04 | 0.57 | 0.23 | -2.1  | 0.05739  | 0.069384 | 0.402059 | 0.309615 |
| MmugDNA.21711.1.S1_at  | MmugDNA.21711.1 | 4.72  | 4.37  | 0.25 | 0.18 | 1.28  | 0.314595 | 0.125652 | 0.665242 | 0.396249 |
| MmugDNA.21712.1.S1_at  | MmugDNA.21712.1 | 8.78  | 8.71  | 0.35 | 0.07 | 1.05  | 0.419224 | 0.313079 | 0.736167 | 0.567649 |
| MmugDNA.21713.1.S1_at  | MmugDNA.21713.1 | 3.95  | 4.07  | 0.09 | 0.14 | -1.09 | 0.188628 | 0.461498 | 0.560518 | 0.673152 |
| MmugDNA.21715.1.S1_at  | MmugDNA.21715.1 | 8.79  | 8.54  | 0.09 | 0.32 | 1.19  | 0.171441 | 0.016841 | 0.5447   | 0.164506 |
| MmugDNA.21716.1.S1_at  | MmugDNA.21716.1 | 11.06 | 11.4  | 0.2  | 0.08 | -1.27 | 0.074947 | 0.053657 | 0.435653 | 0.277225 |
| MmugDNA.21717.1.S1_at  | MmugDNA.21717.1 | 3.96  | 4.09  | 0.17 | 0.27 | -1.09 | 0.575411 | 0.226919 | 0.824662 | 0.499276 |
| MmugDNA.21718.1.S1_at  | MmugDNA.21718.1 | 4.35  | 4.19  | 0.13 | 0.19 | 1.12  | 0.217606 | 0.243354 | 0.587515 | 0.513384 |
| MmugDNA.21720.1.S1_at  | MmugDNA.21720.1 | 5.47  | 5.2   | 0.16 | 0.17 | 1.21  | 0.158115 | 0.145304 | 0.531066 | 0.41934  |
| MmugDNA.21721.1.S1_at  | MmugDNA.21721.1 | 9.97  | 10.01 | 0.18 | 0.13 | -1.03 | 0.296187 | 0.215147 | 0.651871 | 0.488943 |
| MmugDNA.21724.1.S1_at  | MmugDNA.21724.1 | 5.08  | 5.12  | 0.2  | 0.57 | -1.03 | 0.272529 | 0.317303 | 0.632303 | 0.570532 |
| MmugDNA.21727.1.S1_at  | MmugDNA.21727.1 | 5.85  | 5.32  | 0.29 | 0.23 | 1.44  | 0.108514 | 0.253513 | 0.480777 | 0.521823 |
| MmugDNA.21728.1.S1_at  | MmugDNA.21728.1 | 5.96  | 5.79  | 0.42 | 0.24 | 1.13  | 0.810063 | 0.964164 | 0.931255 | 0.980052 |
| MmugDNA.21729.1.S1_at  | MmugDNA.21729.1 | 6.28  | 6.11  | 0.04 | 0.08 | 1.13  | 0.033432 | 0.022763 | 0.346442 | 0.188931 |
| MmugDNA.21730.1.S1_at  | MmugDNA.21730.1 | 7.42  | 7.29  | 0.09 | 0.05 | 1.09  | 0.093605 | 0.143675 | 0.462863 | 0.417555 |
| MmugDNA.21731.1.S1_at  | MmugDNA.21731.1 | 4.41  | 4.1   | 0.24 | 0.15 | 1.24  | 0.090417 | 0.043168 | 0.458677 | 0.252528 |
| MmugDNA.21732.1.S1_at  | MmugDNA.21732.1 | 9.66  | 8.63  | 0.41 | 0.16 | 2.04  | 0.020388 | 0.025682 | 0.303945 | 0.200834 |
| MmugDNA.21733.1.S1_at  | MmugDNA.21733.1 | 4.67  | 4.94  | 0.17 | 0.2  | -1.21 | 0.039825 | 0.432119 | 0.362691 | 0.652775 |
| MmugDNA.9679.1.S1_s_at | MmugDNA.9679.1  | 10.44 | 10.26 | 0.35 | 0.02 | 1.13  | 0.405652 | 0.06859  | 0.727426 | 0.308466 |
| MmugDNA.21736.1.S1_at  | MmugDNA.21736.1 | 2.81  | 2.78  | 0.29 | 0.62 | 1.02  | 0.451995 | 0.546911 | 0.755619 | 0.728281 |
| MmugDNA.21739.1.S1_at  | MmugDNA.21739.1 | 4.79  | 4.82  | 0.13 | 0.01 | -1.02 | 0.762113 | 0.703738 | 0.910776 | 0.828214 |
| MmugDNA.2174.1.S1_at   | MmugDNA.2174.1  | 5.07  | 5.59  | 1.05 | 0.27 | -1.43 | 0.941929 | 0.59549  | 0.980221 | 0.759091 |

|                         |                 |       |       |      |      |       |          |          |          |          |
|-------------------------|-----------------|-------|-------|------|------|-------|----------|----------|----------|----------|
| MmugDNA.21741.1.S1_at   | MmugDNA.21741.1 | 8.94  | 8.92  | 0.18 | 0.07 | 1.01  | 0.639606 | 0.335378 | 0.85626  | 0.583158 |
| MmugDNA.21742.1.S1_at   | MmugDNA.21742.1 | 4.84  | 4.85  | 0.32 | 0.07 | -1    | 0.840777 | 0.951265 | 0.943429 | 0.972381 |
| MmugDNA.21743.1.S1_at   | MmugDNA.21743.1 | 3.53  | 3.55  | 0.12 | 0.06 | -1.01 | 0.775545 | 0.503049 | 0.916777 | 0.700559 |
| MmugDNA.21744.1.S1_at   | MmugDNA.21744.1 | 5.41  | 5.33  | 0.31 | 0.16 | 1.06  | 0.557    | 0.702804 | 0.814433 | 0.827716 |
| MmugDNA.21746.1.S1_at   | MmugDNA.21746.1 | 9.51  | 9.81  | 0.61 | 0.07 | -1.23 | 0.879821 | 0.110186 | 0.958318 | 0.374331 |
| MmugDNA.21747.1.S1_at   | MmugDNA.21747.1 | 5.05  | 5.07  | 0    | 0.13 | -1.01 | 0.457992 | 0.730695 | 0.758638 | 0.844055 |
| MmugDNA.21750.1.S1_at   | MmugDNA.21750.1 | 5.47  | 5.42  | 0.04 | 0.16 | 1.03  | 0.754048 | 0.859573 | 0.907295 | 0.919999 |
| MmugDNA.21751.1.S1_at   | MmugDNA.21751.1 | 6.93  | 6.72  | 0.22 | 0.29 | 1.16  | 0.372474 | 0.219182 | 0.705567 | 0.492919 |
| MmugDNA.21752.1.S1_at   | MmugDNA.21752.1 | 3.37  | 3.47  | 0.1  | 0.07 | -1.07 | 0.04946  | 0.46208  | 0.385474 | 0.673537 |
| MmugDNA.21753.1.S1_at   | MmugDNA.21753.1 | 8.4   | 9.01  | 0.83 | 0.17 | -1.53 | 0.529292 | 0.625054 | 0.798256 | 0.778973 |
| MmugDNA.21754.1.S1_s_at | MmugDNA.21754.1 | 6.94  | 6.82  | 0.32 | 0.18 | -1.08 | 0.633195 | 0.852664 | 0.853404 | 0.916254 |
| MmugDNA.21755.1.S1_at   | MmugDNA.21755.1 | 5.74  | 5.41  | 0.21 | 0.05 | 1.26  | 0.199343 | 0.089558 | 0.571138 | 0.343811 |
| MmugDNA.21757.1.S1_at   | MmugDNA.21757.1 | 4.29  | 4.15  | 0.17 | 0    | 1.1   | 0.212684 | 0.14156  | 0.583202 | 0.415063 |
| MmugDNA.21758.1.S1_at   | MmugDNA.21758.1 | 7.06  | 6.92  | 0.6  | 0.2  | 1.1   | 0.497656 | 0.142406 | 0.78125  | 0.415965 |
| MmugDNA.21759.1.S1_at   | MmugDNA.21759.1 | 7.06  | 7.05  | 0.18 | 0.07 | 1     | 0.492304 | 0.523871 | 0.77824  | 0.714052 |
| MmugDNA.21760.1.S1_at   | MmugDNA.21760.1 | 4.19  | 4.28  | 0.32 | 0.1  | -1.06 | 0.993235 | 0.925959 | 0.997423 | 0.958059 |
| MmugDNA.21761.1.S1_at   | MmugDNA.21761.1 | 5.6   | 5.62  | 0.4  | 0.14 | -1.02 | 0.883825 | 0.631561 | 0.959789 | 0.782845 |
| MmugDNA.21763.1.S1_at   | MmugDNA.21763.1 | 3.69  | 3.6   | 0.23 | 0.02 | 1.07  | 0.486643 | 0.649942 | 0.774667 | 0.795295 |
| MmugDNA.21764.1.S1_at   | MmugDNA.21764.1 | 4.99  | 4.79  | 0.09 | 0.04 | 1.15  | 0.026238 | 0.494663 | 0.323734 | 0.69497  |
| MmugDNA.21765.1.S1_at   | MmugDNA.21765.1 | 3.06  | 3.13  | 0.19 | 0.05 | -1.05 | 0.615627 | 0.732374 | 0.844574 | 0.844986 |
| MmugDNA.21766.1.S1_at   | MmugDNA.21766.1 | 5.76  | 5.41  | 0.05 | 0.15 | 1.27  | 0.017264 | 0.321699 | 0.290282 | 0.573346 |
| MmugDNA.21767.1.S1_at   | MmugDNA.21767.1 | 3.99  | 4.94  | 0.57 | 0.33 | -1.92 | 0.327538 | 0.371385 | 0.675137 | 0.610177 |
| MmugDNA.21769.1.S1_at   | MmugDNA.21769.1 | 8.73  | 8.99  | 0.25 | 0.69 | -1.2  | 0.201374 | 0.433556 | 0.57304  | 0.653828 |
| MmugDNA.2177.1.S1_at    | MmugDNA.2177.1  | 5.97  | 5.87  | 0.08 | 0.08 | 1.07  | 0.894509 | 0.233306 | 0.963846 | 0.50468  |
| MmugDNA.21770.1.S1_at   | MmugDNA.21770.1 | 9.93  | 10.05 | 0.43 | 0.34 | -1.08 | 0.682369 | 0.772599 | 0.875741 | 0.867785 |
| MmugDNA.21771.1.S1_at   | MmugDNA.21771.1 | 7.19  | 7.48  | 0.28 | 0.16 | -1.23 | 0.26372  | 0.068725 | 0.625638 | 0.308711 |
| MmugDNA.21772.1.S1_at   | MmugDNA.21772.1 | 4.18  | 3.97  | 0.09 | 0.14 | 1.16  | 0.088329 | 0.297879 | 0.45606  | 0.556563 |
| MmugDNA.21773.1.S1_at   | MmugDNA.21773.1 | 6.87  | 6.9   | 0.18 | 0.21 | -1.02 | 0.578524 | 0.361657 | 0.826206 | 0.602408 |
| MmugDNA.21774.1.S1_at   | MmugDNA.21774.1 | 4.58  | 4.23  | 0.12 | 0.34 | 1.28  | 0.323871 | 0.497991 | 0.672332 | 0.697181 |
| MmugDNA.21775.1.S1_at   | MmugDNA.21775.1 | 5.16  | 4.41  | 0.44 | 0.11 | 1.68  | 0.059209 | 0.06958  | 0.406296 | 0.309848 |
| MmugDNA.21776.1.S1_at   | MmugDNA.21776.1 | 8.62  | 7.6   | 0.33 | 0.26 | 2.03  | 0.017848 | 0.093798 | 0.294096 | 0.350281 |
| MmugDNA.21777.1.S1_at   | MmugDNA.21777.1 | 3.46  | 3.29  | 0.11 | 0.17 | 1.13  | 0.102109 | 0.222599 | 0.472436 | 0.495617 |
| MmugDNA.21778.1.S1_at   | MmugDNA.21778.1 | 8.73  | 9.38  | 0.74 | 0.1  | -1.57 | 0.20515  | 0.253197 | 0.576906 | 0.521578 |
| MmugDNA.21779.1.S1_at   | MmugDNA.21779.1 | 4.75  | 4.89  | 0.41 | 0.17 | -1.11 | 0.515744 | 0.121317 | 0.791016 | 0.390351 |
| MmugDNA.2178.1.S1_s_at  | MmugDNA.2178.1  | 11.62 | 10.49 | 0.75 | 0.18 | 2.19  | 0.105397 | 0.317257 | 0.477051 | 0.570489 |
| MmugDNA.21780.1.S1_at   | MmugDNA.21780.1 | 8.84  | 8.97  | 0.17 | 0.05 | -1.09 | 0.162914 | 0.047114 | 0.535867 | 0.261624 |
| MmugDNA.21781.1.S1_at   | MmugDNA.21781.1 | 9.13  | 10.1  | 0.5  | 0.18 | -1.97 | 0.061349 | 0.030812 | 0.410536 | 0.217376 |
| MmugDNA.21782.1.S1_at   | MmugDNA.21782.1 | 9.99  | 10.28 | 0.3  | 0.1  | -1.22 | 0.200329 | 0.596673 | 0.572164 | 0.75976  |
| MmugDNA.21783.1.S1_at   | MmugDNA.21783.1 | 9.89  | 9.5   | 0.54 | 0.08 | 1.32  | 0.332473 | 0.073211 | 0.678846 | 0.316124 |
| MmugDNA.21784.1.S1_at   | MmugDNA.21784.1 | 3.46  | 3.52  | 0.09 | 0.14 | -1.04 | 0.900058 | 0.008028 | 0.966011 | 0.119047 |
| MmugDNA.21785.1.S1_at   | MmugDNA.21785.1 | 4.56  | 4.3   | 0.21 | 0.06 | 1.2   | 0.297835 | 0.347303 | 0.652791 | 0.59192  |
| MmugDNA.21786.1.S1_at   | MmugDNA.21786.1 | 4.08  | 4.04  | 0.02 | 0.11 | 1.03  | 0.449945 | 0.502854 | 0.754621 | 0.700392 |
| MmugDNA.21788.1.S1_at   | MmugDNA.21788.1 | 5.27  | 5.29  | 0.17 | 0.01 | -1.01 | 0.784846 | 0.189283 | 0.920956 | 0.465059 |

|                         |                 |       |       |      |      |       |          |          |          |          |
|-------------------------|-----------------|-------|-------|------|------|-------|----------|----------|----------|----------|
| MmugDNA.21789.1.S1_at   | MmugDNA.21789.1 | 5.19  | 5.08  | 0.22 | 0.04 | 1.07  | 0.156565 | 0.153599 | 0.529581 | 0.428341 |
| MmugDNA.2179.1.S1_at    | MmugDNA.2179.1  | 4.6   | 4.32  | 0.24 | 0.1  | 1.21  | 0.104536 | 0.152958 | 0.475627 | 0.42777  |
| MmugDNA.21790.1.S1_at   | MmugDNA.21790.1 | 7.77  | 6.43  | 1.73 | 0.43 | 2.54  | 0.325879 | 0.191396 | 0.67351  | 0.466769 |
| MmugDNA.21791.1.S1_at   | MmugDNA.21791.1 | 5.24  | 5.32  | 0.12 | 0.05 | -1.06 | 0.319167 | 0.809886 | 0.668626 | 0.89045  |
| MmugDNA.21792.1.S1_at   | MmugDNA.21792.1 | 4.22  | 4.18  | 0.12 | 0.1  | 1.03  | 0.630241 | 0.612423 | 0.851919 | 0.770044 |
| MmugDNA.21793.1.S1_at   | MmugDNA.21793.1 | 4.26  | 4.03  | 0.05 | 0.08 | 1.17  | 0.006239 | 0.074229 | 0.21769  | 0.318046 |
| MmugDNA.21794.1.S1_at   | MmugDNA.21794.1 | 8.23  | 8.11  | 0.14 | 0.08 | 1.09  | 0.069733 | 0.163422 | 0.427657 | 0.439629 |
| MmugDNA.21796.1.S1_at   | MmugDNA.21796.1 | 5.77  | 6.13  | 0.14 | 0.44 | -1.28 | 0.182686 | 0.308656 | 0.555631 | 0.56461  |
| MmugDNA.21797.1.S1_at   | MmugDNA.21797.1 | 5.23  | 5.41  | 0.22 | 0.49 | -1.13 | 0.336995 | 0.517246 | 0.682166 | 0.709435 |
| MmugDNA.21798.1.S1_at   | MmugDNA.21798.1 | 3.78  | 4.14  | 0.17 | 0.22 | -1.28 | 0.050248 | 0.130819 | 0.386954 | 0.403015 |
| MmugDNA.21799.1.S1_at   | MmugDNA.21799.1 | 4.51  | 4.54  | 0.23 | 0.08 | -1.02 | 0.509824 | 0.360867 | 0.787835 | 0.601938 |
| MmugDNA.218.1.S1_at     | MmugDNA.218.1   | 5.21  | 5.4   | 0.29 | 0.34 | -1.14 | 0.435583 | 0.169065 | 0.745762 | 0.445593 |
| MmugDNA.2180.1.S1_at    | MmugDNA.2180.1  | 4.43  | 3.97  | 1.75 | 0.17 | 1.37  | 0.206997 | 0.265962 | 0.578774 | 0.531796 |
| MmugDNA.21800.1.S1_at   | MmugDNA.21800.1 | 6.13  | 6.29  | 0.32 | 0.14 | -1.11 | 0.468913 | 0.054858 | 0.765214 | 0.279693 |
| MmugDNA.21801.1.S1_at   | MmugDNA.21801.1 | 3.9   | 4.17  | 0.11 | 0.41 | -1.21 | 0.352088 | 0.376662 | 0.692649 | 0.614483 |
| MmugDNA.21802.1.S1_at   | MmugDNA.21802.1 | 4.33  | 4.75  | 0.21 | 0    | -1.34 | 0.025675 | 0.002977 | 0.322444 | 0.079958 |
| MmugDNA.21804.1.S1_at   | MmugDNA.21804.1 | 4.14  | 4.11  | 0.03 | 0.04 | 1.02  | 0.14622  | 0.73326  | 0.520572 | 0.845573 |
| MmugDNA.21805.1.S1_at   | MmugDNA.21805.1 | 4.82  | 4.92  | 0.39 | 0.23 | -1.08 | 0.738205 | 0.258365 | 0.8998   | 0.525631 |
| MmugDNA.2181.1.S1_at    | MmugDNA.2181.1  | 4.42  | 4.41  | 0.3  | 0.07 | 1     | 0.483439 | 0.203008 | 0.773072 | 0.477343 |
| MmugDNA.21810.1.S1_at   | MmugDNA.21810.1 | 4.92  | 4.75  | 0.07 | 0.11 | 1.13  | 0.073908 | 0.044962 | 0.434623 | 0.256489 |
| MmugDNA.21812.1.S1_at   | MmugDNA.21812.1 | 6.48  | 6.59  | 0.52 | 0.51 | -1.07 | 0.403987 | 0.350178 | 0.726125 | 0.593948 |
| MmugDNA.21813.1.S1_at   | MmugDNA.21813.1 | 3.98  | 3.96  | 0.31 | 0.07 | 1.02  | 0.889177 | 0.98869  | 0.96181  | 0.993595 |
| MmugDNA.21815.1.S1_x_at | MmugDNA.21815.1 | 7.45  | 7.24  | 0.17 | 0.12 | 1.16  | 0.172194 | 0.772704 | 0.54555  | 0.867816 |
| MmugDNA.21816.1.S1_at   | MmugDNA.21816.1 | 4.54  | 4.54  | 0.07 | 0.06 | 1     | 0.860642 | 0.493673 | 0.950856 | 0.694288 |
| MmugDNA.21819.1.S1_at   | MmugDNA.21819.1 | 5     | 5.12  | 0.13 | 0.14 | -1.09 | 0.068237 | 0.08374  | 0.425017 | 0.334485 |
| MmugDNA.2182.1.S1_at    | MmugDNA.2182.1  | 4.31  | 4.19  | 0.14 | 0.24 | 1.08  | 0.974896 | 0.427072 | 0.991912 | 0.649087 |
| MmugDNA.21820.1.S1_at   | MmugDNA.21820.1 | 9.99  | 10.09 | 3.3  | 0.29 | -1.08 | 0.512496 | 0.349409 | 0.789449 | 0.593406 |
| MmugDNA.21821.1.S1_at   | MmugDNA.21821.1 | 5.23  | 5.32  | 0.27 | 0.01 | -1.06 | 0.34264  | 0.109739 | 0.686019 | 0.373701 |
| MmugDNA.21822.1.S1_at   | MmugDNA.21822.1 | 5.9   | 5.69  | 0.18 | 0.09 | 1.16  | 0.129962 | 0.195895 | 0.504648 | 0.470812 |
| MmugDNA.21823.1.S1_at   | MmugDNA.21823.1 | 12.91 | 13.15 | 0.28 | 0    | -1.18 | 0.218287 | 0.136064 | 0.58818  | 0.408363 |
| MmugDNA.21824.1.S1_at   | MmugDNA.21824.1 | 3.37  | 3.43  | 0.19 | 0.31 | -1.04 | 0.287624 | 0.222741 | 0.644777 | 0.49569  |
| MmugDNA.21825.1.S1_at   | MmugDNA.21825.1 | 9.93  | 10.51 | 0.58 | 0.18 | -1.49 | 0.369709 | 0.01022  | 0.704294 | 0.132544 |
| MmugDNA.21827.1.S1_at   | MmugDNA.21827.1 | 11.02 | 10.77 | 0.2  | 0.1  | 1.18  | 0.229724 | 0.028851 | 0.59847  | 0.211661 |
| MmugDNA.21828.1.S1_at   | MmugDNA.21828.1 | 8.86  | 9.77  | 0.57 | 0.06 | -1.89 | 0.073118 | 0.145074 | 0.434019 | 0.419047 |
| MmugDNA.2183.1.S1_at    | MmugDNA.2183.1  | 7.59  | 7.43  | 0.4  | 0.03 | 1.12  | 0.160587 | 0.341751 | 0.533821 | 0.587862 |
| MmugDNA.21830.1.S1_at   | MmugDNA.21830.1 | 8.98  | 9.97  | 0.88 | 0.28 | -1.98 | 0.261632 | 0.430905 | 0.62388  | 0.651894 |
| MmugDNA.21831.1.S1_at   | MmugDNA.21831.1 | 4.48  | 4.47  | 0.11 | 0.03 | 1.01  | 0.955803 | 0.920269 | 0.985346 | 0.95511  |
| MmugDNA.21832.1.S1_at   | MmugDNA.21832.1 | 6.53  | 5.8   | 0.72 | 0.07 | 1.67  | 0.502244 | 0.310451 | 0.783497 | 0.565661 |
| MmugDNA.21833.1.S1_at   | MmugDNA.21833.1 | 8.07  | 8.47  | 0.49 | 0.03 | -1.32 | 0.643889 | 0.841254 | 0.858276 | 0.909576 |
| MmugDNA.21834.1.S1_at   | MmugDNA.21834.1 | 3.9   | 3.91  | 0.15 | 0.1  | -1.01 | 0.27623  | 0.613863 | 0.635878 | 0.770884 |
| MmugDNA.21836.1.S1_at   | MmugDNA.21836.1 | 6.34  | 6.81  | 0.32 | 0.47 | -1.38 | 0.258703 | 0.165057 | 0.622286 | 0.441242 |
| MmugDNA.21837.1.S1_at   | MmugDNA.21837.1 | 10    | 9.81  | 0.3  | 0.06 | 1.14  | 0.346893 | 0.125462 | 0.688435 | 0.396116 |
| MmugDNA.21837.1.S1_s_at | MmugDNA.21837.1 | 9.82  | 9.48  | 0.27 | 0.07 | 1.27  | 0.111139 | 0.100673 | 0.484548 | 0.360037 |

|                         |                 |       |       |      |      |       |          |          |          |          |
|-------------------------|-----------------|-------|-------|------|------|-------|----------|----------|----------|----------|
| MmugDNA.21838.1.S1_s_at | MmugDNA.21838.1 | 7.28  | 6.98  | 0.65 | 0.43 | 1.23  | 0.680987 | 0.655715 | 0.874921 | 0.7987   |
| MmugDNA.21841.1.S1_s_at | MmugDNA.21841.1 | 7.2   | 6.94  | 0.14 | 0.06 | 1.19  | 0.056102 | 0.081562 | 0.399441 | 0.329764 |
| MmugDNA.33727.1.S1_s_at | MmugDNA.33727.1 | 7.68  | 7.56  | 0.51 | 0.21 | 1.09  | 0.438291 | 0.311867 | 0.747277 | 0.56683  |
| MmugDNA.21843.1.S1_at   | MmugDNA.21843.1 | 8.1   | 8.02  | 0.45 | 0.18 | 1.05  | 0.191672 | 0.199494 | 0.562859 | 0.474096 |
| MmugDNA.21845.1.S1_at   | MmugDNA.21845.1 | 6.74  | 6.73  | 0.37 | 0.23 | 1     | 0.629816 | 0.90502  | 0.851714 | 0.946165 |
| MmugDNA.21846.1.S1_at   | MmugDNA.21846.1 | 5.77  | 5.84  | 0.4  | 0.24 | -1.05 | 0.925444 | 0.631919 | 0.975188 | 0.78303  |
| MmugDNA.21848.1.S1_at   | MmugDNA.21848.1 | 8.01  | 8.63  | 0.38 | 0.08 | -1.53 | 0.102243 | 0.060899 | 0.472552 | 0.293504 |
| MmugDNA.21849.1.S1_at   | MmugDNA.21849.1 | 3.25  | 3.28  | 0.13 | 0.2  | -1.02 | 0.469277 | 0.221528 | 0.765531 | 0.494849 |
| MmugDNA.21850.1.S1_at   | MmugDNA.21850.1 | 3.78  | 3.75  | 0    | 0.16 | 1.02  | 0.78905  | 0.684327 | 0.922489 | 0.815899 |
| MmugDNA.21851.1.S1_at   | MmugDNA.21851.1 | 6.08  | 6.13  | 0.19 | 0.08 | -1.03 | 0.671413 | 0.866106 | 0.870346 | 0.923808 |
| MmugDNA.21853.1.S1_at   | MmugDNA.21853.1 | 3.08  | 3.08  | 0.03 | 0.03 | -1    | 0.85956  | 0.921488 | 0.9504   | 0.955761 |
| MmugDNA.21854.1.S1_at   | MmugDNA.21854.1 | 4.03  | 3.74  | 0.14 | 0.11 | 1.23  | 0.040701 | 0.045467 | 0.364778 | 0.2575   |
| MmugDNA.21855.1.S1_s_at | MmugDNA.21855.1 | 6.21  | 5.8   | 0.14 | 0.12 | 1.33  | 0.049961 | 0.039762 | 0.386663 | 0.244402 |
| MmugDNA.21857.1.S1_at   | MmugDNA.21857.1 | 4.27  | 4.19  | 0.19 | 0.05 | 1.06  | 0.284154 | 0.133579 | 0.642084 | 0.405542 |
| MmugDNA.21858.1.S1_at   | MmugDNA.21858.1 | 10.58 | 10.58 | 0.12 | 0.32 | -1    | 0.932991 | 0.796111 | 0.977247 | 0.882495 |
| MmugDNA.21858.1.S1_s_at | MmugDNA.21858.1 | 10.2  | 10.07 | 0.12 | 0.05 | 1.1   | 0.062476 | 0.060693 | 0.413261 | 0.292935 |
| MmugDNA.21859.1.S1_at   | MmugDNA.21859.1 | 4.18  | 4.2   | 0.09 | 0.1  | -1.02 | 0.374936 | 0.324663 | 0.706228 | 0.575208 |
| MmugDNA.21860.1.S1_at   | MmugDNA.21860.1 | 5.46  | 5.17  | 0.27 | 0.05 | 1.22  | 0.092384 | 0.095686 | 0.460833 | 0.3527   |
| MmugDNA.21861.1.S1_at   | MmugDNA.21861.1 | 5.48  | 5.34  | 0.26 | 0.2  | 1.1   | 0.589857 | 0.46372  | 0.832674 | 0.674626 |
| MmugDNA.21862.1.S1_at   | MmugDNA.21862.1 | 6.44  | 6.41  | 0.13 | 0.03 | 1.02  | 0.65434  | 0.557103 | 0.862772 | 0.73494  |
| MmugDNA.21863.1.S1_at   | MmugDNA.21863.1 | 3.49  | 3.38  | 0.27 | 0.21 | 1.08  | 0.738816 | 0.919918 | 0.900108 | 0.954962 |
| MmugDNA.21864.1.S1_at   | MmugDNA.21864.1 | 6.08  | 6.08  | 0.09 | 0.07 | -1    | 0.327441 | 0.854714 | 0.675118 | 0.91719  |
| MmugDNA.21869.1.S1_at   | MmugDNA.21869.1 | 7.51  | 7.35  | 0.25 | 0.07 | 1.11  | 0.358657 | 0.000938 | 0.696531 | 0.049026 |
| MmugDNA.21871.1.S1_at   | MmugDNA.21871.1 | 4.22  | 4.23  | 0.36 | 0.14 | -1.01 | 0.771871 | 0.950361 | 0.914891 | 0.971738 |
| MmugDNA.21872.1.S1_at   | MmugDNA.21872.1 | 6.64  | 7.66  | 0.51 | 0.25 | -2.03 | 0.094521 | 0.07702  | 0.463794 | 0.32248  |
| MmugDNA.21874.1.S1_at   | MmugDNA.21874.1 | 5.48  | 5.57  | 0.17 | 0.19 | -1.06 | 0.750951 | 0.908011 | 0.905667 | 0.947889 |
| MmugDNA.21877.1.S1_at   | MmugDNA.21877.1 | 5.68  | 5.81  | 0.07 | 0.02 | -1.09 | 0.069227 | 0.018603 | 0.426664 | 0.171539 |
| MmugDNA.21879.1.S1_at   | MmugDNA.21879.1 | 7.6   | 7.27  | 0.8  | 0.35 | 1.26  | 0.555434 | 0.147477 | 0.813492 | 0.421765 |
| MmugDNA.2188.1.S1_at    | MmugDNA.2188.1  | 11.12 | 10.64 | 0.34 | 0.07 | 1.39  | 0.096387 | 0.094449 | 0.4651   | 0.351129 |
| MmugDNA.21880.1.S1_at   | MmugDNA.21880.1 | 5.28  | 4.88  | 0.74 | 0.04 | 1.32  | 0.333413 | 0.568812 | 0.679618 | 0.74211  |
| MmugDNA.21881.1.S1_at   | MmugDNA.21881.1 | 3.19  | 3.14  | 0.09 | 0.09 | 1.04  | 0.920315 | 0.559672 | 0.972913 | 0.736365 |
| MmugDNA.21882.1.S1_at   | MmugDNA.21882.1 | 5.93  | 5.79  | 0.08 | 0.07 | 1.1   | 0.078513 | 0.184344 | 0.441146 | 0.460458 |
| MmugDNA.21883.1.S1_at   | MmugDNA.21883.1 | 2.81  | 2.77  | 0.02 | 0.08 | 1.03  | 0.602173 | 0.791849 | 0.838766 | 0.87976  |
| MmugDNA.21884.1.S1_at   | MmugDNA.21884.1 | 4.07  | 3.57  | 0.75 | 0.03 | 1.41  | 0.313682 | 0.260075 | 0.664799 | 0.52675  |
| MmugDNA.21885.1.S1_s_at | MmugDNA.21885.1 | 11.82 | 11.32 | 0.31 | 0.03 | 1.42  | 0.127377 | 0.123211 | 0.501548 | 0.393273 |
| MmugDNA.21886.1.S1_at   | MmugDNA.21886.1 | 2.8   | 2.88  | 0.13 | 0.08 | -1.06 | 0.452072 | 0.132829 | 0.755619 | 0.404544 |
| MmugDNA.21888.1.S1_at   | MmugDNA.21888.1 | 3.13  | 3.21  | 0.09 | 0.05 | -1.05 | 0.754131 | 0.259165 | 0.907331 | 0.526264 |
| MmugDNA.2189.1.S1_at    | MmugDNA.2189.1  | 6.75  | 6.69  | 0.1  | 0.03 | 1.04  | 0.453769 | 0.259434 | 0.756276 | 0.526418 |
| MmugDNA.21890.1.S1_s_at | MmugDNA.21890.1 | 8.84  | 9.07  | 0.13 | 0.12 | -1.17 | 0.171774 | 0.010133 | 0.545121 | 0.131974 |
| MmugDNA.21891.1.S1_at   | MmugDNA.21891.1 | 5.98  | 5.96  | 0.18 | 0.1  | 1.02  | 0.655006 | 0.770009 | 0.863003 | 0.866428 |
| MmugDNA.21892.1.S1_at   | MmugDNA.21892.1 | 5.54  | 5.53  | 0.21 | 0.09 | 1.01  | 0.67108  | 0.924607 | 0.870229 | 0.957386 |
| MmugDNA.21893.1.S1_at   | MmugDNA.21893.1 | 5.77  | 5.58  | 0.21 | 0.18 | 1.14  | 0.133103 | 0.179556 | 0.507433 | 0.456011 |
| MmugDNA.21896.1.S1_at   | MmugDNA.21896.1 | 4.95  | 4.99  | 0.27 | 0.05 | -1.03 | 0.369591 | 0.525221 | 0.704264 | 0.714809 |

|                         |                 |       |       |      |      |       |          |          |          |          |
|-------------------------|-----------------|-------|-------|------|------|-------|----------|----------|----------|----------|
| MmugDNA.21897.1.S1_at   | MmugDNA.21897.1 | 4.04  | 4.05  | 0.12 | 0.13 | -1.01 | 0.364999 | 0.436104 | 0.700775 | 0.655802 |
| MmugDNA.21898.1.S1_at   | MmugDNA.21898.1 | 10.21 | 10.49 | 0.53 | 0.04 | -1.21 | 0.918112 | 0.55579  | 0.972062 | 0.734106 |
| MmugDNA.2190.1.S1_at    | MmugDNA.2190.1  | 6.72  | 6.28  | 0.25 | 0.1  | 1.36  | 0.126976 | 0.238418 | 0.500834 | 0.50907  |
| MmugDNA.21900.1.S1_at   | MmugDNA.21900.1 | 5.42  | 5.41  | 0.01 | 0.12 | 1.01  | 0.860631 | 0.955211 | 0.950856 | 0.97461  |
| MmugDNA.21901.1.S1_at   | MmugDNA.21901.1 | 9.69  | 9.47  | 0.44 | 0.15 | 1.16  | 0.4664   | 0.236755 | 0.76354  | 0.507512 |
| MmugDNA.21902.1.S1_at   | MmugDNA.21902.1 | 4.86  | 4.96  | 0.3  | 0.23 | -1.08 | 0.94297  | 0.015079 | 0.980374 | 0.155923 |
| MmugDNA.21903.1.S1_at   | MmugDNA.21903.1 | 6.93  | 6.46  | 0.21 | 0.34 | 1.39  | 0.156494 | 0.556053 | 0.529581 | 0.734325 |
| MmugDNA.21905.1.S1_at   | MmugDNA.21905.1 | 9.51  | 9.78  | 0.37 | 0.18 | -1.2  | 0.614197 | 0.007438 | 0.843828 | 0.115858 |
| MmugDNA.21906.1.S1_at   | MmugDNA.21906.1 | 12.6  | 12.68 | 0.35 | 0.1  | -1.06 | 0.55564  | 0.628806 | 0.813597 | 0.781444 |
| MmugDNA.21907.1.S1_at   | MmugDNA.21907.1 | 3.68  | 3.87  | 0.29 | 0.29 | -1.14 | 0.943194 | 0.454102 | 0.980425 | 0.668398 |
| MmugDNA.21908.1.S1_at   | MmugDNA.21908.1 | 4.68  | 4.54  | 0.31 | 0.07 | 1.1   | 0.376489 | 0.582025 | 0.706899 | 0.750784 |
| MmugDNA.21909.1.S1_at   | MmugDNA.21909.1 | 5.24  | 5.19  | 0.33 | 0.11 | 1.03  | 0.966868 | 0.995057 | 0.989076 | 0.996929 |
| MmugDNA.2191.1.S1_at    | MmugDNA.2191.1  | 3.74  | 3.46  | 0.16 | 0.12 | 1.22  | 0.072263 | 0.286688 | 0.432116 | 0.548077 |
| MmugDNA.21910.1.S1_at   | MmugDNA.21910.1 | 4.58  | 4.53  | 0.09 | 0.14 | 1.04  | 0.125112 | 0.199155 | 0.499137 | 0.473759 |
| MmugDNA.21911.1.S1_at   | MmugDNA.21911.1 | 6.72  | 6.55  | 0.05 | 0.08 | 1.13  | 0.067748 | 0.018269 | 0.424449 | 0.169975 |
| MmugDNA.21913.1.S1_at   | MmugDNA.21913.1 | 9.43  | 9.58  | 0.16 | 0.06 | -1.1  | 0.917278 | 0.040505 | 0.97197  | 0.246264 |
| MmugDNA.21914.1.S1_at   | MmugDNA.21914.1 | 6.93  | 7.79  | 0.84 | 0.28 | -1.82 | 0.34661  | 0.28023  | 0.688361 | 0.543487 |
| MmugDNA.21915.1.S1_at   | MmugDNA.21915.1 | 7.16  | 5.93  | 0.62 | 0.11 | 2.35  | 0.020604 | 0.012518 | 0.304935 | 0.144362 |
| MmugDNA.21916.1.S1_at   | MmugDNA.21916.1 | 3.17  | 3.05  | 0.02 | 0.06 | 1.09  | 0.10312  | 0.007369 | 0.473929 | 0.115284 |
| MmugDNA.21917.1.S1_at   | MmugDNA.21917.1 | 5.96  | 5.83  | 0.16 | 0.08 | 1.1   | 0.09892  | 0.125675 | 0.468321 | 0.396249 |
| MmugDNA.21918.1.S1_at   | MmugDNA.21918.1 | 5.74  | 5.57  | 0.37 | 0.19 | 1.12  | 0.425347 | 0.496804 | 0.739988 | 0.696208 |
| MmugDNA.21919.1.S1_s_at | MmugDNA.21919.1 | 9.07  | 9.46  | 0.92 | 0.39 | -1.31 | 0.3501   | 0.382232 | 0.691084 | 0.618433 |
| MmugDNA.2192.1.S1_at    | MmugDNA.2192.1  | 4.13  | 3.96  | 0.11 | 0.08 | 1.13  | 0.210987 | 0.347287 | 0.582056 | 0.591911 |
| MmugDNA.21921.1.S1_at   | MmugDNA.21921.1 | 3.94  | 3.74  | 0.12 | 0.02 | 1.15  | 0.051388 | 0.093418 | 0.390032 | 0.349657 |
| MmugDNA.21922.1.S1_at   | MmugDNA.21922.1 | 3.64  | 3.58  | 0.06 | 0.06 | 1.04  | 0.1241   | 0.569725 | 0.498067 | 0.742604 |
| MmugDNA.21923.1.S1_at   | MmugDNA.21923.1 | 5.32  | 5.21  | 0.23 | 0.03 | 1.08  | 0.245819 | 0.505926 | 0.611231 | 0.702265 |
| MmugDNA.21923.1.S1_s_at | MmugDNA.21923.1 | 2.86  | 2.78  | 0.16 | 0.09 | 1.05  | 0.202744 | 0.476154 | 0.574251 | 0.682535 |
| MmugDNA.21925.1.S1_at   | MmugDNA.21925.1 | 6.44  | 6.87  | 0.7  | 0.07 | -1.34 | 0.975065 | 0.987849 | 0.991912 | 0.993223 |
| MmugDNA.21926.1.S1_at   | MmugDNA.21926.1 | 4.36  | 4.25  | 0.04 | 0.15 | 1.09  | 0.329359 | 0.280548 | 0.676319 | 0.543725 |
| MmugDNA.21927.1.S1_at   | MmugDNA.21927.1 | 6.14  | 6.25  | 0.15 | 0.18 | -1.08 | 0.515238 | 0.096581 | 0.790885 | 0.354126 |
| MmugDNA.21929.1.S1_at   | MmugDNA.21929.1 | 4.98  | 4.99  | 0.08 | 0.04 | -1.01 | 0.793333 | 0.663737 | 0.92426  | 0.803123 |
| MmugDNA.2193.1.S1_at    | MmugDNA.2193.1  | 4.96  | 5.12  | 0.02 | 0.07 | -1.11 | 0.068596 | 0.183256 | 0.425941 | 0.459553 |
| MmugDNA.21930.1.S1_at   | MmugDNA.21930.1 | 6.63  | 6.49  | 0.02 | 0.03 | 1.11  | 0.004157 | 0.020496 | 0.198874 | 0.179723 |
| MmugDNA.21931.1.S1_at   | MmugDNA.21931.1 | 12.2  | 12.1  | 0.23 | 0.1  | 1.07  | 0.347066 | 0.101916 | 0.68852  | 0.361927 |
| MmugDNA.21932.1.S1_at   | MmugDNA.21932.1 | 10.25 | 10.64 | 0.21 | 0.07 | -1.31 | 0.035322 | 0.031944 | 0.351731 | 0.221125 |
| MmugDNA.21933.1.S1_at   | MmugDNA.21933.1 | 6.62  | 6.63  | 0.28 | 0.24 | -1.01 | 0.531634 | 0.253102 | 0.799819 | 0.521426 |
| MmugDNA.21935.1.S1_at   | MmugDNA.21935.1 | 5.26  | 5.5   | 0.13 | 0.34 | -1.18 | 0.225271 | 0.654413 | 0.594525 | 0.798021 |
| MmugDNA.21936.1.S1_at   | MmugDNA.21936.1 | 3.66  | 3.56  | 0.27 | 0.06 | 1.07  | 0.183467 | 0.266804 | 0.55651  | 0.53241  |
| MmugDNA.21937.1.S1_at   | MmugDNA.21937.1 | 5.32  | 5.29  | 0.27 | 0.04 | 1.02  | 0.858722 | 0.985674 | 0.950093 | 0.991846 |
| MmugDNA.21939.1.S1_at   | MmugDNA.21939.1 | 6.75  | 6.6   | 0.23 | 0.22 | 1.11  | 0.297147 | 0.422877 | 0.652609 | 0.646054 |
| MmugDNA.2194.1.S1_at    | MmugDNA.2194.1  | 3.04  | 2.95  | 0.06 | 0.17 | 1.07  | 0.487586 | 0.576882 | 0.775104 | 0.747519 |
| MmugDNA.21940.1.S1_at   | MmugDNA.21940.1 | 3.29  | 3.22  | 0.16 | 0.03 | 1.06  | 0.84002  | 0.931248 | 0.943103 | 0.96095  |
| MmugDNA.21941.1.S1_at   | MmugDNA.21941.1 | 10.09 | 10.32 | 0.13 | 0.06 | -1.17 | 0.054237 | 0.025326 | 0.396159 | 0.199522 |



|                         |                 |       |       |      |      |       |          |          |          |          |
|-------------------------|-----------------|-------|-------|------|------|-------|----------|----------|----------|----------|
| MmugDNA.21942.1.S1_at   | MmugDNA.21942.1 | 5.33  | 4.8   | 0.14 | 0.22 | 1.45  | 0.024279 | 0.028635 | 0.317812 | 0.210901 |
| MmugDNA.21943.1.S1_at   | MmugDNA.21943.1 | 6.57  | 7.07  | 0.35 | 0.32 | -1.42 | 0.325406 | 0.515534 | 0.673233 | 0.708385 |
| MmugDNA.21944.1.S1_at   | MmugDNA.21944.1 | 11.58 | 11.74 | 0.09 | 0.06 | -1.11 | 0.130516 | 0.460017 | 0.504876 | 0.671989 |
| MmugDNA.21944.1.S1_s_at | MmugDNA.21944.1 | 9.96  | 9.76  | 0.1  | 0.08 | 1.14  | 0.075602 | 0.003504 | 0.436722 | 0.08503  |
| MmugDNA.21946.1.S1_at   | MmugDNA.21946.1 | 7.07  | 7.26  | 0.29 | 0.13 | -1.14 | 0.497053 | 0.734492 | 0.781055 | 0.846185 |
| MmugDNA.21949.1.S1_at   | MmugDNA.21949.1 | 6.66  | 6.59  | 0.09 | 0.02 | 1.05  | 0.183848 | 0.554914 | 0.556716 | 0.733553 |
| MmugDNA.2195.1.S1_at    | MmugDNA.2195.1  | 4.23  | 4.11  | 0.25 | 0.02 | 1.09  | 0.149928 | 0.28353  | 0.523408 | 0.54596  |
| MmugDNA.21950.1.S1_at   | MmugDNA.21950.1 | 10.44 | 11.72 | 0.37 | 0.09 | -2.43 | 0.007297 | 0.002513 | 0.227049 | 0.074158 |
| MmugDNA.21951.1.S1_at   | MmugDNA.21951.1 | 9.58  | 10.08 | 0.47 | 0.16 | -1.42 | 0.465515 | 0.097169 | 0.763035 | 0.354801 |
| MmugDNA.21952.1.S1_at   | MmugDNA.21952.1 | 6.06  | 6.03  | 0.41 | 0.19 | 1.02  | 0.495818 | 0.027007 | 0.780125 | 0.205501 |
| MmugDNA.21956.1.S1_at   | MmugDNA.21956.1 | 12.52 | 12.43 | 0.29 | 0.09 | -1.07 | 0.396606 | 0.035446 | 0.721517 | 0.232564 |
| MmugDNA.21957.1.S1_at   | MmugDNA.21957.1 | 6.39  | 6.72  | 0.25 | 0.1  | -1.26 | 0.057252 | 0.022183 | 0.401572 | 0.186422 |
| MmugDNA.21958.1.S1_at   | MmugDNA.21958.1 | 7.22  | 7.01  | 0.67 | 0.11 | 1.16  | 0.625905 | 0.550271 | 0.849643 | 0.730374 |
| MmugDNA.21959.1.S1_at   | MmugDNA.21959.1 | 5.86  | 5.8   | 0.12 | 0.03 | 1.04  | 0.245947 | 0.131515 | 0.611421 | 0.403658 |
| MmugDNA.2196.1.S1_at    | MmugDNA.2196.1  | 8.12  | 7.69  | 0.53 | 0.31 | 1.34  | 0.062362 | 0.011946 | 0.413023 | 0.141411 |
| MmugDNA.21960.1.S1_at   | MmugDNA.21960.1 | 3.08  | 3.5   | 0.16 | 0.2  | -1.33 | 0.117334 | 0.145165 | 0.490925 | 0.419147 |
| MmugDNA.21961.1.S1_at   | MmugDNA.21961.1 | 2.95  | 2.96  | 0.07 | 0.09 | -1    | 0.337948 | 0.640361 | 0.682728 | 0.788874 |
| MmugDNA.21962.1.S1_at   | MmugDNA.21962.1 | 12.79 | 12.49 | 0.29 | 0.18 | 1.24  | 0.183595 | 0.03321  | 0.55651  | 0.225663 |
| MmugDNA.21963.1.S1_at   | MmugDNA.21963.1 | 6.55  | 6.49  | 0.41 | 0.21 | 1.05  | 0.834609 | 0.586078 | 0.94072  | 0.75324  |
| MmugDNA.21964.1.S1_at   | MmugDNA.21964.1 | 4.31  | 4.29  | 0.08 | 0.17 | 1.01  | 0.788652 | 0.849572 | 0.922452 | 0.914595 |
| MmugDNA.21965.1.S1_at   | MmugDNA.21965.1 | 3.83  | 3.81  | 0.03 | 0.06 | 1.02  | 0.794808 | 0.128811 | 0.924682 | 0.400277 |
| MmugDNA.21966.1.S1_at   | MmugDNA.21966.1 | 6.2   | 6.46  | 0.31 | 0.16 | -1.2  | 0.14772  | 0.277393 | 0.521832 | 0.541326 |
| MmugDNA.21967.1.S1_at   | MmugDNA.21967.1 | 6.21  | 5.93  | 0.13 | 0.09 | 1.21  | 0.06542  | 0.109861 | 0.420625 | 0.373829 |
| MmugDNA.21968.1.S1_at   | MmugDNA.21968.1 | 8.53  | 8.73  | 0.25 | 0.27 | -1.15 | 0.483997 | 0.425702 | 0.773436 | 0.648009 |
| MmugDNA.21969.1.S1_at   | MmugDNA.21969.1 | 4.46  | 4.47  | 0.11 | 0.15 | -1.01 | 0.37432  | 0.758198 | 0.705837 | 0.859308 |
| MmugDNA.2197.1.S1_at    | MmugDNA.2197.1  | 7.03  | 6.84  | 0.08 | 0.03 | 1.14  | 0.006807 | 0.045977 | 0.223918 | 0.258818 |
| MmugDNA.21970.1.S1_at   | MmugDNA.21970.1 | 5.85  | 5.65  | 0.19 | 0.17 | 1.15  | 0.106199 | 0.169139 | 0.478497 | 0.445716 |
| MmugDNA.21971.1.S1_at   | MmugDNA.21971.1 | 13.13 | 13.27 | 0.37 | 0.1  | -1.1  | 0.458174 | 0.198622 | 0.758668 | 0.473391 |
| MmugDNA.13035.1.S1_s_at | MmugDNA.13035.1 | 12.96 | 13.04 | 0.4  | 0.07 | -1.06 | 0.623463 | 0.195406 | 0.848264 | 0.470253 |
| MmugDNA.21972.1.S1_at   | MmugDNA.21972.1 | 7.82  | 8.73  | 0.8  | 0.04 | -1.87 | 0.109468 | 0.046028 | 0.482287 | 0.258971 |
| MmugDNA.21973.1.S1_at   | MmugDNA.21973.1 | 9.34  | 9.36  | 0.8  | 0.13 | -1.01 | 0.366231 | 0.361185 | 0.701752 | 0.60207  |
| MmugDNA.21975.1.S1_at   | MmugDNA.21975.1 | 8.22  | 8.15  | 0.67 | 0.62 | 1.05  | 0.443943 | 0.600005 | 0.751068 | 0.761762 |
| MmugDNA.21976.1.S1_at   | MmugDNA.21976.1 | 3.7   | 3.71  | 0.14 | 0.06 | -1.01 | 0.460049 | 0.599691 | 0.759901 | 0.761534 |
| MmugDNA.21977.1.S1_at   | MmugDNA.21977.1 | 4.04  | 4.05  | 0.16 | 0.08 | -1.01 | 0.470675 | 0.376973 | 0.766172 | 0.614684 |
| MmugDNA.21978.1.S1_at   | MmugDNA.21978.1 | 12.3  | 11.92 | 0.07 | 0.13 | 1.3   | 0.005719 | 0.000192 | 0.210666 | 0.030888 |
| MmugDNA.21979.1.S1_at   | MmugDNA.21979.1 | 4.84  | 4.49  | 0.43 | 0.46 | 1.28  | 0.70082  | 0.102453 | 0.883629 | 0.362675 |
| MmugDNA.2198.1.S1_at    | MmugDNA.2198.1  | 6.39  | 5.87  | 1.37 | 0.3  | 1.43  | 0.648871 | 0.041966 | 0.860167 | 0.24943  |
| MmugDNA.21980.1.S1_at   | MmugDNA.21980.1 | 5.85  | 6.18  | 0.8  | 0.47 | -1.26 | 0.646377 | 0.379607 | 0.859027 | 0.616523 |
| MmugDNA.21981.1.S1_at   | MmugDNA.21981.1 | 6.47  | 6.36  | 0.15 | 0.05 | 1.08  | 0.33447  | 0.064795 | 0.680478 | 0.300493 |
| MmugDNA.21982.1.S1_at   | MmugDNA.21982.1 | 10.4  | 10.22 | 0.38 | 0.24 | 1.13  | 0.117871 | 0.048628 | 0.491287 | 0.265602 |
| MmugDNA.21983.1.S1_x_at | MmugDNA.21983.1 | 7.19  | 7.06  | 0.39 | 0.11 | 1.09  | 0.906451 | 0.296513 | 0.968353 | 0.555528 |
| MmugDNA.21984.1.S1_at   | MmugDNA.21984.1 | 6.25  | 5.95  | 0.37 | 0.27 | 1.23  | 0.137023 | 0.213551 | 0.511997 | 0.48741  |
| MmugDNA.21985.1.S1_at   | MmugDNA.21985.1 | 8.39  | 8.63  | 0.16 | 0.09 | -1.18 | 0.166165 | 0.177707 | 0.538903 | 0.454073 |

|                         |                 |       |       |      |      |       |          |          |          |          |
|-------------------------|-----------------|-------|-------|------|------|-------|----------|----------|----------|----------|
| MmugDNA.21986.1.S1_at   | MmugDNA.21986.1 | 7.9   | 8.72  | 0.23 | 0.23 | -1.76 | 0.009902 | 0.004784 | 0.244171 | 0.096484 |
| MmugDNA.21988.1.S1_at   | MmugDNA.21988.1 | 3.66  | 3.62  | 0.04 | 0.06 | 1.03  | 0.362102 | 0.519085 | 0.699036 | 0.710813 |
| MmugDNA.2199.1.S1_at    | MmugDNA.2199.1  | 9.76  | 9.81  | 0.68 | 0.29 | -1.03 | 0.830483 | 0.358119 | 0.939333 | 0.59966  |
| MmugDNA.569.1.S1_s_at   | MmugDNA.569.1   | 10.16 | 10.14 | 0.7  | 0.24 | 1.02  | 0.800231 | 0.356219 | 0.92683  | 0.598166 |
| MmugDNA.21990.1.S1_at   | MmugDNA.21990.1 | 4.18  | 4.35  | 0.27 | 0.35 | -1.12 | 0.662009 | 0.423905 | 0.866635 | 0.646571 |
| MmugDNA.21991.1.S1_at   | MmugDNA.21991.1 | 8.27  | 7.63  | 0.7  | 0.34 | 1.56  | 0.453692 | 0.294705 | 0.756276 | 0.554335 |
| MmugDNA.21992.1.S1_at   | MmugDNA.21992.1 | 8.51  | 6.84  | 0.35 | 0.36 | 3.17  | 0.004183 | 0.002843 | 0.198874 | 0.078566 |
| MmugDNA.21993.1.S1_at   | MmugDNA.21993.1 | 7.96  | 7.67  | 0.42 | 0.06 | 1.22  | 0.298506 | 0.335629 | 0.653176 | 0.583403 |
| MmugDNA.21996.1.S1_at   | MmugDNA.21996.1 | 5.53  | 5.26  | 0.08 | 0.08 | 1.21  | 0.016115 | 0.007341 | 0.285918 | 0.11509  |
| MmugDNA.21997.1.S1_at   | MmugDNA.21997.1 | 3.74  | 4.38  | 0.48 | 0.1  | -1.55 | 0.211379 | 0.112432 | 0.582342 | 0.377784 |
| MmugDNA.21999.1.S1_at   | MmugDNA.21999.1 | 7.42  | 7.35  | 0.09 | 0.04 | -1.05 | 0.151996 | 0.637726 | 0.525094 | 0.787114 |
| MmugDNA.22.1.S1_at      | MmugDNA.22.1    | 5.58  | 5.12  | 0.26 | 0.31 | 1.37  | 0.101584 | 0.126652 | 0.47185  | 0.39731  |
| MmugDNA.220.1.S1_at     | MmugDNA.220.1   | 3.32  | 3.61  | 0.13 | 0.46 | -1.22 | 0.313837 | 0.360303 | 0.664925 | 0.601339 |
| MmugDNA.22000.1.S1_at   | MmugDNA.22000.1 | 6.35  | 6.34  | 0.06 | 0.19 | 1.01  | 0.399526 | 0.390646 | 0.723131 | 0.624421 |
| MmugDNA.22002.1.S1_at   | MmugDNA.22002.1 | 5.19  | 5.18  | 0.09 | 0.15 | 1.01  | 0.660109 | 0.410251 | 0.865536 | 0.637167 |
| MmugDNA.22003.1.S1_at   | MmugDNA.22003.1 | 5.43  | 5.4   | 0.21 | 0.17 | 1.02  | 0.441098 | 0.532977 | 0.748993 | 0.71934  |
| MmugDNA.22004.1.S1_at   | MmugDNA.22004.1 | 7.14  | 9.31  | 0.99 | 0.12 | -4.49 | 0.049109 | 0.075115 | 0.385273 | 0.319301 |
| MmugDNA.22005.1.S1_s_at | MmugDNA.22005.1 | 4.69  | 4.51  | 0.09 | 0.08 | 1.13  | 0.066698 | 0.579698 | 0.422542 | 0.749267 |
| MmugDNA.22006.1.S1_at   | MmugDNA.22006.1 | 5.04  | 6.27  | 0.15 | 0.46 | -2.34 | 0.010943 | 0.004079 | 0.250796 | 0.090423 |
| MmugDNA.22007.1.S1_at   | MmugDNA.22007.1 | 9.17  | 9.36  | 1.15 | 0.26 | -1.15 | 0.72944  | 0.165369 | 0.895766 | 0.441544 |
| MmugDNA.22008.1.S1_at   | MmugDNA.22008.1 | 5.44  | 5.42  | 0.15 | 0.01 | 1.01  | 0.876316 | 0.862547 | 0.956886 | 0.921853 |
| MmugDNA.22009.1.S1_at   | MmugDNA.22009.1 | 3.04  | 3.04  | 0    | 0.03 | 1     | 0.373901 | 0.475463 | 0.705567 | 0.682155 |
| MmugDNA.22010.1.S1_at   | MmugDNA.22010.1 | 6.22  | 6.06  | 0.07 | 0.05 | 1.11  | 0.037774 | 0.047857 | 0.357997 | 0.263679 |
| MmugDNA.22011.1.S1_at   | MmugDNA.22011.1 | 3.09  | 3.28  | 0.05 | 0.18 | -1.14 | 0.161339 | 0.062432 | 0.534712 | 0.296699 |
| MmugDNA.22012.1.S1_at   | MmugDNA.22012.1 | 6.11  | 6.22  | 0.15 | 0.01 | -1.08 | 0.196196 | 0.063902 | 0.566678 | 0.29906  |
| MmugDNA.22013.1.S1_at   | MmugDNA.22013.1 | 6.16  | 6.1   | 0.21 | 0.05 | 1.04  | 0.343699 | 0.523261 | 0.686788 | 0.713624 |
| MmugDNA.22014.1.S1_at   | MmugDNA.22014.1 | 10.74 | 10.78 | 0.26 | 0.06 | -1.03 | 0.929309 | 0.315944 | 0.976333 | 0.569367 |
| MmugDNA.22015.1.S1_at   | MmugDNA.22015.1 | 4.8   | 4.71  | 0.29 | 0.07 | 1.07  | 0.485074 | 0.763095 | 0.774024 | 0.862257 |
| MmugDNA.22015.1.S1_x_at | MmugDNA.22015.1 | 4.77  | 4.7   | 0.13 | 0.2  | 1.05  | 0.968154 | 0.115963 | 0.989492 | 0.383164 |
| MmugDNA.22016.1.S1_at   | MmugDNA.22016.1 | 3.9   | 3.9   | 0.04 | 0.12 | -1    | 0.873133 | 0.548466 | 0.955992 | 0.729187 |
| MmugDNA.22017.1.S1_at   | MmugDNA.22017.1 | 4.75  | 4.84  | 0.03 | 0.24 | -1.06 | 0.968058 | 0.9769   | 0.989447 | 0.987434 |
| MmugDNA.22019.1.S1_at   | MmugDNA.22019.1 | 3.77  | 3.76  | 0.09 | 0.2  | 1.01  | 0.800764 | 0.708899 | 0.927161 | 0.831167 |
| MmugDNA.2202.1.S1_at    | MmugDNA.2202.1  | 3.7   | 3.62  | 0    | 0.06 | 1.06  | 0.111201 | 0.399634 | 0.484303 | 0.629912 |
| MmugDNA.22022.1.S1_at   | MmugDNA.22022.1 | 5.23  | 5.14  | 0.17 | 0.14 | 1.07  | 0.285944 | 0.276608 | 0.643508 | 0.540596 |
| MmugDNA.22023.1.S1_at   | MmugDNA.22023.1 | 4.31  | 5.05  | 0.31 | 0.53 | -1.68 | 0.136896 | 0.020883 | 0.511963 | 0.181338 |
| MmugDNA.22024.1.S1_at   | MmugDNA.22024.1 | 3.12  | 3.88  | 0.07 | 0.11 | -1.7  | 0.000465 | 0.004392 | 0.140406 | 0.092744 |
| MmugDNA.22025.1.S1_at   | MmugDNA.22025.1 | 5.33  | 5.44  | 0.14 | 0.19 | -1.08 | 0.565039 | 0.813039 | 0.819091 | 0.891895 |
| MmugDNA.22027.1.S1_at   | MmugDNA.22027.1 | 8.28  | 7.79  | 0.49 | 0.25 | 1.41  | 0.20717  | 0.175459 | 0.578774 | 0.452157 |
| MmugDNA.22028.1.S1_at   | MmugDNA.22028.1 | 2.9   | 2.71  | 0.55 | 0.03 | 1.15  | 0.375708 | 0.33337  | 0.7066   | 0.581668 |
| MmugDNA.22029.1.S1_at   | MmugDNA.22029.1 | 4.02  | 4.36  | 0.16 | 0.29 | -1.27 | 0.088119 | 0.040565 | 0.45606  | 0.246274 |
| MmugDNA.6145.1.S1_s_at  | MmugDNA.6145.1  | 12.54 | 12.4  | 0.15 | 0.22 | 1.1   | 0.810808 | 0.052982 | 0.931427 | 0.275815 |
| MmugDNA.22030.1.S1_at   | MmugDNA.22030.1 | 2.91  | 2.87  | 0.11 | 0.11 | 1.03  | 0.843189 | 0.561888 | 0.944529 | 0.737659 |
| MmugDNA.22031.1.S1_at   | MmugDNA.22031.1 | 5.01  | 5.05  | 0.27 | 0.15 | -1.03 | 0.87591  | 0.331629 | 0.956834 | 0.580208 |

|                         |                 |       |       |      |      |       |          |          |          |          |
|-------------------------|-----------------|-------|-------|------|------|-------|----------|----------|----------|----------|
| MmugDNA.22032.1.S1_at   | MmugDNA.22032.1 | 4.16  | 4.07  | 0.56 | 0.56 | 1.06  | 0.66728  | 0.808713 | 0.868553 | 0.889895 |
| MmugDNA.22033.1.S1_at   | MmugDNA.22033.1 | 3.53  | 3.19  | 0.17 | 0.07 | 1.27  | 0.046451 | 0.154974 | 0.377929 | 0.429973 |
| MmugDNA.22034.1.S1_at   | MmugDNA.22034.1 | 5.57  | 5.33  | 0.41 | 0.4  | 1.18  | 0.516745 | 0.088531 | 0.791667 | 0.341947 |
| MmugDNA.22035.1.S1_at   | MmugDNA.22035.1 | 6.84  | 8.31  | 0.24 | 0.19 | -2.77 | 0.001094 | 0.000788 | 0.156386 | 0.045969 |
| MmugDNA.22036.1.S1_at   | MmugDNA.22036.1 | 3.5   | 3.45  | 0.16 | 0.07 | 1.04  | 0.991072 | 0.763365 | 0.996653 | 0.862471 |
| MmugDNA.22037.1.S1_at   | MmugDNA.22037.1 | 11.83 | 11.69 | 0.29 | 0.1  | 1.1   | 0.868501 | 0.001429 | 0.953968 | 0.057607 |
| MmugDNA.22038.1.S1_at   | MmugDNA.22038.1 | 3.79  | 4.15  | 0.22 | 0.07 | -1.28 | 0.184529 | 0.237495 | 0.557319 | 0.508163 |
| MmugDNA.22039.1.S1_at   | MmugDNA.22039.1 | 3.73  | 3.72  | 0.22 | 0.02 | 1.01  | 0.963583 | 0.937148 | 0.988152 | 0.964571 |
| MmugDNA.2204.1.S1_at    | MmugDNA.2204.1  | 13.15 | 13.14 | 0.08 | 0.02 | 1.01  | 0.821813 | 0.936435 | 0.935673 | 0.964171 |
| MmugDNA.22041.1.S1_at   | MmugDNA.22041.1 | 4.86  | 5.14  | 0.12 | 0.41 | -1.21 | 0.440598 | 0.5869   | 0.748535 | 0.753893 |
| MmugDNA.22042.1.S1_at   | MmugDNA.22042.1 | 10.73 | 10.93 | 0.28 | 0.05 | -1.15 | 0.360444 | 0.514767 | 0.697914 | 0.707865 |
| MmugDNA.22043.1.S1_at   | MmugDNA.22043.1 | 10.9  | 10.55 | 0.22 | 0.04 | 1.28  | 0.149554 | 0.033499 | 0.523226 | 0.226577 |
| MmugDNA.22044.1.S1_at   | MmugDNA.22044.1 | 10.02 | 9.94  | 0.42 | 0.07 | 1.06  | 0.769072 | 0.121066 | 0.913435 | 0.390064 |
| MmugDNA.22045.1.S1_at   | MmugDNA.22045.1 | 10.3  | 10.51 | 0.34 | 0.18 | -1.15 | 0.518133 | 0.70796  | 0.792419 | 0.830569 |
| MmugDNA.22046.1.S1_at   | MmugDNA.22046.1 | 11.23 | 10.83 | 0.1  | 0.12 | 1.32  | 0.007445 | 0.028251 | 0.229238 | 0.209847 |
| MmugDNA.22047.1.S1_s_at | MmugDNA.22047.1 | 11.57 | 11.61 | 0.11 | 0.07 | -1.03 | 0.602612 | 0.475198 | 0.838892 | 0.682031 |
| MmugDNA.22048.1.S1_at   | MmugDNA.22048.1 | 4.41  | 4.42  | 0.08 | 0    | -1.01 | 0.302047 | 0.467651 | 0.655989 | 0.677207 |
| MmugDNA.22049.1.S1_at   | MmugDNA.22049.1 | 6.91  | 7.3   | 0.16 | 0.1  | -1.31 | 0.021455 | 0.00678  | 0.308795 | 0.111388 |
| MmugDNA.2205.1.S1_at    | MmugDNA.2205.1  | 4.12  | 3.97  | 0.34 | 0.06 | 1.11  | 0.395553 | 0.519353 | 0.720494 | 0.710998 |
| MmugDNA.22050.1.S1_at   | MmugDNA.22050.1 | 6.97  | 7.98  | 0.22 | 0.1  | -2.01 | 0.003049 | 0.011423 | 0.191107 | 0.138412 |
| MmugDNA.22051.1.S1_x_at | MmugDNA.22051.1 | 10.98 | 11.22 | 0.29 | 0.24 | -1.18 | 0.494486 | 0.189856 | 0.779472 | 0.465403 |
| MmugDNA.22053.1.S1_at   | MmugDNA.22053.1 | 9.21  | 9.15  | 0.42 | 0.11 | 1.04  | 0.643867 | 0.834979 | 0.858276 | 0.905534 |
| MmugDNA.22054.1.S1_at   | MmugDNA.22054.1 | 4.74  | 4.78  | 0.05 | 0.09 | -1.03 | 0.713928 | 0.395285 | 0.88857  | 0.62738  |
| MmugDNA.22056.1.S1_at   | MmugDNA.22056.1 | 4.64  | 4.37  | 0.16 | 0.15 | 1.21  | 0.33288  | 0.533219 | 0.679338 | 0.719483 |
| MmugDNA.22058.1.S1_at   | MmugDNA.22058.1 | 10.14 | 10.43 | 0.44 | 0.16 | -1.22 | 0.928684 | 0.201226 | 0.976332 | 0.475667 |
| MmugDNA.2206.1.S1_at    | MmugDNA.2206.1  | 5.22  | 4.4   | 0.54 | 0.8  | 1.76  | 0.502816 | 0.627977 | 0.783904 | 0.780909 |
| MmugDNA.22061.1.S1_at   | MmugDNA.22061.1 | 12.72 | 12.42 | 0.22 | 0.04 | 1.23  | 0.303599 | 0.001689 | 0.657406 | 0.062186 |
| MmugDNA.22062.1.S1_at   | MmugDNA.22062.1 | 13.15 | 13.39 | 0.25 | 0.03 | -1.18 | 0.490643 | 0.198616 | 0.777253 | 0.473391 |
| MmugDNA.22064.1.S1_at   | MmugDNA.22064.1 | 5.07  | 5.04  | 0.14 | 0.16 | 1.02  | 0.392502 | 0.731525 | 0.718452 | 0.844387 |
| MmugDNA.22065.1.S1_at   | MmugDNA.22065.1 | 3.58  | 3.68  | 0.21 | 0.54 | -1.07 | 0.415616 | 0.596178 | 0.733729 | 0.759371 |
| MmugDNA.22070.1.S1_at   | MmugDNA.22070.1 | 6.69  | 7.03  | 0.08 | 0.04 | -1.27 | 0.001812 | 0.000042 | 0.167444 | 0.025273 |
| MmugDNA.22071.1.S1_at   | MmugDNA.22071.1 | 6.69  | 6.55  | 0.03 | 0.06 | 1.11  | 0.028274 | 0.161673 | 0.331715 | 0.437771 |
| MmugDNA.22076.1.S1_at   | MmugDNA.22076.1 | 5.41  | 5.11  | 0.19 | 0.24 | 1.24  | 0.743251 | 0.668301 | 0.902055 | 0.805897 |
| MmugDNA.12895.1.S1_s_at | MmugDNA.12895.1 | 6.26  | 6.21  | 0.05 | 0.17 | 1.04  | 0.783495 | 0.313144 | 0.920309 | 0.567709 |
| MmugDNA.22078.1.S1_at   | MmugDNA.22078.1 | 5.45  | 5.01  | 0.58 | 0.08 | 1.36  | 0.261831 | 0.189819 | 0.62407  | 0.465403 |
| MmugDNA.2208.1.S1_at    | MmugDNA.2208.1  | 3.9   | 3.95  | 0.21 | 0.08 | -1.03 | 0.808275 | 0.828036 | 0.93054  | 0.901214 |
| MmugDNA.22080.1.S1_at   | MmugDNA.22080.1 | 5.33  | 5.17  | 0.03 | 0.16 | 1.12  | 0.152293 | 0.147899 | 0.52528  | 0.422265 |
| MmugDNA.22081.1.S1_at   | MmugDNA.22081.1 | 6.28  | 5.94  | 0.34 | 0.12 | 1.27  | 0.060013 | 0.659519 | 0.407399 | 0.800801 |
| MmugDNA.22082.1.S1_at   | MmugDNA.22082.1 | 3.88  | 3.74  | 0.16 | 0.16 | 1.1   | 0.140172 | 0.205988 | 0.515581 | 0.480224 |
| MmugDNA.22085.1.S1_at   | MmugDNA.22085.1 | 3.09  | 2.99  | 0.08 | 0.27 | 1.07  | 0.87786  | 0.632003 | 0.95748  | 0.783079 |
| MmugDNA.22086.1.S1_at   | MmugDNA.22086.1 | 5.96  | 6     | 0.25 | 0.03 | -1.03 | 0.644737 | 0.731425 | 0.858593 | 0.84431  |
| MmugDNA.22087.1.S1_at   | MmugDNA.22087.1 | 3.32  | 3.23  | 0.06 | 0.15 | 1.07  | 0.379449 | 0.230548 | 0.708981 | 0.50226  |
| MmugDNA.22088.1.S1_at   | MmugDNA.22088.1 | 3.39  | 3.31  | 0.02 | 0.07 | 1.05  | 0.116618 | 0.37416  | 0.489792 | 0.612678 |

|                         |                 |       |       |      |      |       |          |          |          |          |
|-------------------------|-----------------|-------|-------|------|------|-------|----------|----------|----------|----------|
| MmugDNA.22089.1.S1_at   | MmugDNA.22089.1 | 10.78 | 11.22 | 0.4  | 0.05 | -1.35 | 0.131867 | 0.078272 | 0.506278 | 0.32487  |
| MmugDNA.2209.1.S1_at    | MmugDNA.2209.1  | 5.78  | 5.54  | 0.18 | 0.19 | 1.18  | 0.131144 | 0.193416 | 0.5054   | 0.468711 |
| MmugDNA.22090.1.S1_at   | MmugDNA.22090.1 | 3.56  | 5.04  | 1.29 | 0.39 | -2.79 | 0.23428  | 0.151692 | 0.601579 | 0.426383 |
| MmugDNA.22092.1.S1_at   | MmugDNA.22092.1 | 5.9   | 5.48  | 0.1  | 0.15 | 1.33  | 0.051063 | 0.14461  | 0.38886  | 0.418466 |
| MmugDNA.22093.1.S1_at   | MmugDNA.22093.1 | 4.22  | 4.1   | 0.23 | 0.08 | 1.09  | 0.526296 | 0.67401  | 0.796483 | 0.809495 |
| MmugDNA.22100.1.S1_at   | MmugDNA.22100.1 | 8.66  | 7.86  | 0.35 | 0.44 | 1.74  | 0.352231 | 0.041969 | 0.692649 | 0.24943  |
| MmugDNA.22101.1.S1_at   | MmugDNA.22101.1 | 3.75  | 3.84  | 0.08 | 0.1  | -1.07 | 0.710227 | 0.639737 | 0.887263 | 0.78843  |
| MmugDNA.22102.1.S1_at   | MmugDNA.22102.1 | 8.9   | 8.82  | 0.15 | 0.1  | 1.06  | 0.579529 | 0.472698 | 0.826489 | 0.68007  |
| MmugDNA.22103.1.S1_at   | MmugDNA.22103.1 | 6.69  | 6.49  | 0.12 | 0.1  | 1.15  | 0.210787 | 0.1796   | 0.582007 | 0.45603  |
| MmugDNA.22104.1.S1_at   | MmugDNA.22104.1 | 6.62  | 6.49  | 0.01 | 0.02 | 1.09  | 0.000456 | 0.201868 | 0.140406 | 0.476373 |
| MmugDNA.22105.1.S1_at   | MmugDNA.22105.1 | 6.5   | 7.15  | 0.4  | 0.41 | -1.57 | 0.049794 | 0.15348  | 0.386252 | 0.42827  |
| MmugDNA.22106.1.S1_at   | MmugDNA.22106.1 | 8.3   | 7.2   | 0.49 | 0.21 | 2.14  | 0.01291  | 0.000481 | 0.265815 | 0.038665 |
| MmugDNA.22107.1.S1_at   | MmugDNA.22107.1 | 9.24  | 9.58  | 0.34 | 0.13 | -1.27 | 0.26619  | 0.359782 | 0.627106 | 0.601077 |
| MmugDNA.22108.1.S1_at   | MmugDNA.22108.1 | 5.62  | 5.3   | 0.05 | 0.11 | 1.25  | 0.012589 | 0.061633 | 0.263116 | 0.295095 |
| MmugDNA.22109.1.S1_at   | MmugDNA.22109.1 | 3.69  | 3.68  | 0.15 | 0.17 | 1.01  | 0.433763 | 0.203755 | 0.744621 | 0.478011 |
| MmugDNA.2211.1.S1_at    | MmugDNA.2211.1  | 4.68  | 4.51  | 0.14 | 0.1  | 1.12  | 0.108928 | 0.250348 | 0.48128  | 0.519362 |
| MmugDNA.22113.1.S1_at   | MmugDNA.22113.1 | 5.22  | 5.16  | 0.06 | 0.06 | 1.05  | 0.58022  | 0.266176 | 0.826923 | 0.532    |
| MmugDNA.22114.1.S1_at   | MmugDNA.22114.1 | 7.38  | 8.03  | 0.33 | 0.31 | -1.57 | 0.060809 | 0.007452 | 0.408904 | 0.115872 |
| MmugDNA.22117.1.S1_at   | MmugDNA.22117.1 | 6     | 5.81  | 0.59 | 0.17 | 1.14  | 0.69145  | 0.432358 | 0.879833 | 0.652794 |
| MmugDNA.2212.1.S1_at    | MmugDNA.2212.1  | 5.69  | 5.52  | 0.42 | 0.04 | 1.12  | 0.50009  | 0.56243  | 0.78233  | 0.738025 |
| MmugDNA.22120.1.S1_at   | MmugDNA.22120.1 | 5.17  | 5.19  | 0.11 | 0.17 | -1.01 | 0.791371 | 0.846558 | 0.923383 | 0.912681 |
| MmugDNA.22122.1.S1_at   | MmugDNA.22122.1 | 10.04 | 10.72 | 0.43 | 0.07 | -1.6  | 0.165889 | 0.105423 | 0.538623 | 0.367279 |
| MmugDNA.22123.1.S1_at   | MmugDNA.22123.1 | 5.61  | 5.75  | 0.22 | 0.08 | -1.11 | 0.51051  | 0.303959 | 0.788228 | 0.561344 |
| MmugDNA.22124.1.S1_at   | MmugDNA.22124.1 | 8.02  | 8.09  | 0.64 | 0.19 | -1.05 | 0.958042 | 0.605112 | 0.986201 | 0.764917 |
| MmugDNA.22126.1.S1_at   | MmugDNA.22126.1 | 9.32  | 9.26  | 0.73 | 0.02 | 1.04  | 0.326966 | 0.44063  | 0.674619 | 0.659029 |
| MmugDNA.22127.1.S1_x_at | MmugDNA.22127.1 | 10.64 | 11.11 | 0.28 | 0.21 | -1.38 | 0.225205 | 0.167526 | 0.594472 | 0.443968 |
| MmugDNA.22128.1.S1_at   | MmugDNA.22128.1 | 6.13  | 6     | 0.23 | 0.16 | 1.09  | 0.360109 | 0.519768 | 0.697741 | 0.711338 |
| MmugDNA.22129.1.S1_at   | MmugDNA.22129.1 | 4.18  | 4.03  | 0.22 | 0.11 | 1.11  | 0.92339  | 0.928843 | 0.974293 | 0.959449 |
| MmugDNA.2213.1.S1_at    | MmugDNA.2213.1  | 2.99  | 3.02  | 0.06 | 0.09 | -1.02 | 0.659008 | 0.270046 | 0.865035 | 0.535338 |
| MmugDNA.22130.1.S1_at   | MmugDNA.22130.1 | 10.78 | 10.75 | 0.09 | 0    | 1.02  | 0.561095 | 0.399072 | 0.817097 | 0.62969  |
| MmugDNA.22133.1.S1_at   | MmugDNA.22133.1 | 9.11  | 8.76  | 0.3  | 0.23 | 1.27  | 0.178217 | 0.056884 | 0.551301 | 0.284636 |
| MmugDNA.22135.1.S1_at   | MmugDNA.22135.1 | 3.84  | 3.84  | 0.07 | 0.09 | 1     | 0.933988 | 0.437597 | 0.977707 | 0.656798 |
| MmugDNA.22136.1.S1_at   | MmugDNA.22136.1 | 12.93 | 12.98 | 0.29 | 0.06 | -1.04 | 0.5689   | 0.685575 | 0.821082 | 0.816542 |
| MmugDNA.22137.1.S1_at   | MmugDNA.22137.1 | 5.3   | 5.41  | 0.16 | 0.07 | -1.08 | 0.621356 | 0.361454 | 0.847514 | 0.602215 |
| MmugDNA.22138.1.S1_s_at | MmugDNA.22138.1 | 8.94  | 9.36  | 0.27 | 0.16 | -1.33 | 0.022779 | 0.078772 | 0.312286 | 0.325725 |
| MmugDNA.22139.1.S1_at   | MmugDNA.22139.1 | 7.38  | 7.54  | 0.08 | 0.26 | -1.12 | 0.346174 | 0.187249 | 0.687873 | 0.463238 |
| MmugDNA.22141.1.S1_at   | MmugDNA.22141.1 | 5.75  | 5.69  | 0.37 | 0.72 | 1.04  | 0.469469 | 0.780686 | 0.76556  | 0.872739 |
| MmugDNA.22142.1.S1_at   | MmugDNA.22142.1 | 7.16  | 7.12  | 0.5  | 0.28 | 1.03  | 0.720239 | 0.761481 | 0.891467 | 0.861416 |
| MmugDNA.22144.1.S1_at   | MmugDNA.22144.1 | 3.49  | 3.52  | 0    | 0.11 | -1.02 | 0.78305  | 0.910659 | 0.920114 | 0.949583 |
| MmugDNA.22145.1.S1_at   | MmugDNA.22145.1 | 3.92  | 3.91  | 0.11 | 0.15 | 1     | 0.781667 | 0.967789 | 0.919573 | 0.982192 |
| MmugDNA.22146.1.S1_at   | MmugDNA.22146.1 | 5.26  | 5.18  | 0.08 | 0.16 | 1.06  | 0.763839 | 0.277363 | 0.911287 | 0.541302 |
| MmugDNA.22147.1.S1_at   | MmugDNA.22147.1 | 5.4   | 5.52  | 0.8  | 0.21 | -1.09 | 0.750052 | 0.336035 | 0.905347 | 0.583647 |
| MmugDNA.22149.1.S1_at   | MmugDNA.22149.1 | 9.9   | 9.04  | 2.27 | 0.03 | 1.81  | 0.720902 | 0.291839 | 0.891828 | 0.552086 |

|                         |                 |       |       |      |      |       |          |          |          |          |
|-------------------------|-----------------|-------|-------|------|------|-------|----------|----------|----------|----------|
| MmugDNA.22151.1.S1_at   | MmugDNA.22151.1 | 8.22  | 8.01  | 0.11 | 0.04 | 1.15  | 0.039711 | 0.018162 | 0.362432 | 0.169673 |
| MmugDNA.22152.1.S1_at   | MmugDNA.22152.1 | 5.77  | 5.63  | 0.14 | 0.02 | 1.1   | 0.125849 | 0.242877 | 0.49972  | 0.513274 |
| MmugDNA.22153.1.S1_at   | MmugDNA.22153.1 | 7.18  | 7.6   | 0.64 | 0.09 | -1.34 | 0.119855 | 0.086367 | 0.493259 | 0.338805 |
| MmugDNA.22155.1.S1_at   | MmugDNA.22155.1 | 11.08 | 10.62 | 0.41 | 0.12 | 1.37  | 0.120018 | 0.009404 | 0.493293 | 0.127832 |
| MmugDNA.22157.1.S1_at   | MmugDNA.22157.1 | 9.52  | 8.05  | 0.25 | 0.12 | 2.78  | 0.000684 | 0.000498 | 0.146957 | 0.038955 |
| MmugDNA.22158.1.S1_at   | MmugDNA.22158.1 | 12.27 | 12.22 | 0.47 | 0.19 | 1.04  | 0.546279 | 0.008792 | 0.808428 | 0.124117 |
| MmugDNA.22159.1.S1_at   | MmugDNA.22159.1 | 5.93  | 5.29  | 0.99 | 0.18 | 1.57  | 0.704752 | 0.692365 | 0.885183 | 0.820984 |
| MmugDNA.2216.1.S1_at    | MmugDNA.2216.1  | 3.51  | 3.52  | 0.03 | 0.1  | -1.01 | 0.677012 | 0.91206  | 0.873333 | 0.950407 |
| MmugDNA.22161.1.S1_at   | MmugDNA.22161.1 | 5.36  | 5.29  | 0.09 | 0.18 | 1.05  | 0.130944 | 0.068493 | 0.5054   | 0.308214 |
| MmugDNA.22163.1.S1_at   | MmugDNA.22163.1 | 4.22  | 4.27  | 0.13 | 0.24 | -1.04 | 0.508265 | 0.668676 | 0.786841 | 0.806111 |
| MmugDNA.22164.1.S1_at   | MmugDNA.22164.1 | 5.9   | 5.91  | 0.17 | 0.13 | -1.01 | 0.495555 | 0.526123 | 0.780125 | 0.715385 |
| MmugDNA.22166.1.S1_s_at | MmugDNA.22166.1 | 8.01  | 7.36  | 0.31 | 0.12 | 1.57  | 0.021566 | 0.012669 | 0.309241 | 0.145097 |
| MmugDNA.22166.1.S1_x_at | MmugDNA.22166.1 | 8.3   | 7.64  | 0.2  | 0.2  | 1.58  | 0.028812 | 0.070106 | 0.333062 | 0.310998 |
| MmugDNA.22168.1.S1_at   | MmugDNA.22168.1 | 5.66  | 5.73  | 0.58 | 0.38 | -1.05 | 0.877069 | 0.984537 | 0.957122 | 0.991307 |
| MmugDNA.22169.1.S1_at   | MmugDNA.22169.1 | 8     | 7.66  | 0.24 | 0.26 | 1.27  | 0.175067 | 0.268205 | 0.548031 | 0.533916 |
| MmugDNA.2217.1.S1_at    | MmugDNA.2217.1  | 3.54  | 3.45  | 0.29 | 0.13 | 1.07  | 0.573558 | 0.71398  | 0.823642 | 0.83406  |
| MmugDNA.22171.1.S1_at   | MmugDNA.22171.1 | 4.36  | 4.28  | 0.06 | 0.11 | 1.05  | 0.279668 | 0.609481 | 0.638619 | 0.767788 |
| MmugDNA.22173.1.S1_at   | MmugDNA.22173.1 | 4.82  | 3.79  | 0.78 | 0.25 | 2.04  | 0.100712 | 0.249371 | 0.471582 | 0.518496 |
| MmugDNA.22177.1.S1_at   | MmugDNA.22177.1 | 3.08  | 3.15  | 0.08 | 0.06 | -1.05 | 0.469179 | 0.227695 | 0.765521 | 0.499962 |
| MmugDNA.22179.1.S1_at   | MmugDNA.22179.1 | 8.59  | 8.27  | 0.8  | 0.09 | 1.25  | 0.540104 | 0.122333 | 0.804251 | 0.392032 |
| MmugDNA.22180.1.S1_at   | MmugDNA.22180.1 | 3.35  | 3.31  | 0.17 | 0.12 | 1.02  | 0.415969 | 0.189535 | 0.73395  | 0.465277 |
| MmugDNA.22181.1.S1_at   | MmugDNA.22181.1 | 3.37  | 3.29  | 0.11 | 0.1  | 1.06  | 0.344571 | 0.55546  | 0.686997 | 0.733834 |
| MmugDNA.22182.1.S1_at   | MmugDNA.22182.1 | 4.51  | 4.53  | 0.34 | 0.02 | -1.01 | 0.897078 | 0.398388 | 0.964979 | 0.629374 |
| MmugDNA.22183.1.S1_at   | MmugDNA.22183.1 | 8.52  | 8.45  | 0.47 | 0.18 | 1.05  | 0.84739  | 0.96938  | 0.946528 | 0.983237 |
| MmugDNA.22184.1.S1_at   | MmugDNA.22184.1 | 11.44 | 11.81 | 0.35 | 0.08 | -1.3  | 0.125966 | 0.01086  | 0.49972  | 0.13586  |
| MmugDNA.22185.1.S1_at   | MmugDNA.22185.1 | 5.93  | 5.88  | 0.11 | 0.07 | 1.03  | 0.231088 | 0.650111 | 0.599062 | 0.795406 |
| MmugDNA.22187.1.S1_at   | MmugDNA.22187.1 | 2.99  | 3.05  | 0.21 | 0.1  | -1.04 | 0.71021  | 0.665714 | 0.887263 | 0.804156 |
| MmugDNA.22188.1.S1_at   | MmugDNA.22188.1 | 5.84  | 5.95  | 0.35 | 0.49 | -1.07 | 0.502037 | 0.831701 | 0.783497 | 0.903453 |
| MmugDNA.22189.1.S1_at   | MmugDNA.22189.1 | 5.29  | 5.17  | 0.13 | 0.07 | 1.09  | 0.145713 | 0.28682  | 0.520555 | 0.548162 |
| MmugDNA.2219.1.S1_at    | MmugDNA.2219.1  | 4.92  | 4.76  | 0.17 | 0.17 | 1.11  | 0.671772 | 0.842549 | 0.87055  | 0.910315 |
| MmugDNA.22193.1.S1_at   | MmugDNA.22193.1 | 9.1   | 9.23  | 1.01 | 0.12 | -1.09 | 0.727626 | 0.336114 | 0.894744 | 0.583652 |
| MmugDNA.10744.1.S1_at   | MmugDNA.10744.1 | 12.03 | 11.78 | 3.6  | 0.11 | 1.19  | 0.437254 | 0.354106 | 0.746719 | 0.597048 |
| MmugDNA.10744.1.S1_s_at | MmugDNA.10744.1 | 10.03 | 10.15 | 2.56 | 0.14 | -1.09 | 0.553782 | 0.296781 | 0.812271 | 0.555779 |
| MmugDNA.22194.1.S1_at   | MmugDNA.22194.1 | 9.73  | 9.71  | 0.32 | 0.11 | 1.01  | 0.473975 | 0.427134 | 0.767923 | 0.649124 |
| MmugDNA.22196.1.S1_at   | MmugDNA.22196.1 | 7.03  | 7.58  | 0.91 | 0.25 | -1.46 | 0.829706 | 0.780492 | 0.938862 | 0.872614 |
| MmugDNA.22198.1.S1_at   | MmugDNA.22198.1 | 6.88  | 6.56  | 1.02 | 0.26 | 1.25  | 0.523569 | 0.653425 | 0.795656 | 0.797435 |
| MmugDNA.22198.1.S1_s_at | MmugDNA.22198.1 | 9.45  | 9.4   | 1.09 | 0.34 | 1.04  | 0.623374 | 0.822284 | 0.848224 | 0.89777  |
| MmugDNA.222.1.S1_at     | MmugDNA.222.1   | 9.39  | 8.59  | 0.64 | 0.3  | 1.74  | 0.058556 | 0.019686 | 0.404702 | 0.176286 |
| MmugDNA.22201.1.S1_at   | MmugDNA.22201.1 | 8.07  | 8.56  | 0.63 | 0.34 | -1.4  | 0.317813 | 0.03053  | 0.667596 | 0.216711 |
| MmugDNA.22202.1.S1_at   | MmugDNA.22202.1 | 5.75  | 4.91  | 0.64 | 0.25 | 1.79  | 0.258355 | 0.144144 | 0.622178 | 0.418024 |
| MmugDNA.22203.1.S1_at   | MmugDNA.22203.1 | 12.07 | 11.8  | 0.39 | 0.06 | 1.21  | 0.846772 | 0.577485 | 0.94629  | 0.747923 |
| MmugDNA.22204.1.S1_at   | MmugDNA.22204.1 | 5.11  | 5.2   | 0.02 | 0.18 | -1.06 | 0.452893 | 0.668104 | 0.755901 | 0.80577  |
| MmugDNA.22205.1.S1_at   | MmugDNA.22205.1 | 7.97  | 8.4   | 0.29 | 0.2  | -1.35 | 0.140236 | 0.109437 | 0.515581 | 0.373277 |

|                         |                 |       |       |      |      |       |          |          |          |          |
|-------------------------|-----------------|-------|-------|------|------|-------|----------|----------|----------|----------|
| MmugDNA.22206.1.S1_at   | MmugDNA.22206.1 | 8.1   | 8.3   | 0.16 | 0.18 | -1.15 | 0.691784 | 0.398296 | 0.880045 | 0.629324 |
| MmugDNA.22207.1.S1_at   | MmugDNA.22207.1 | 7.76  | 7.48  | 0.34 | 0.17 | 1.21  | 0.203335 | 0.190528 | 0.574892 | 0.465906 |
| MmugDNA.22208.1.S1_at   | MmugDNA.22208.1 | 3.84  | 3.84  | 0.03 | 0.16 | -1    | 0.961337 | 0.817058 | 0.98737  | 0.894492 |
| MmugDNA.22209.1.S1_at   | MmugDNA.22209.1 | 5.34  | 5.15  | 0.09 | 0.06 | 1.14  | 0.081419 | 0.081566 | 0.445406 | 0.329764 |
| MmugDNA.2221.1.S1_at    | MmugDNA.2221.1  | 4.7   | 3.88  | 0.99 | 0.25 | 1.77  | 0.226434 | 0.161272 | 0.595662 | 0.437434 |
| MmugDNA.22210.1.S1_at   | MmugDNA.22210.1 | 4.95  | 4.87  | 0.31 | 0.42 | 1.06  | 0.321626 | 0.37018  | 0.670429 | 0.609371 |
| MmugDNA.22211.1.S1_at   | MmugDNA.22211.1 | 6.8   | 6.87  | 0.47 | 0.19 | -1.05 | 0.314568 | 0.472694 | 0.665231 | 0.68007  |
| MmugDNA.22212.1.S1_at   | MmugDNA.22212.1 | 4.5   | 4.54  | 0.32 | 0.02 | -1.02 | 0.506773 | 0.84496  | 0.786015 | 0.911795 |
| MmugDNA.22213.1.S1_at   | MmugDNA.22213.1 | 3.36  | 2.77  | 0.16 | 0.23 | 1.51  | 0.080962 | 0.078701 | 0.445056 | 0.325673 |
| MmugDNA.22214.1.S1_at   | MmugDNA.22214.1 | 3.64  | 3.59  | 0.08 | 0.04 | 1.04  | 0.274463 | 0.624527 | 0.63386  | 0.778707 |
| MmugDNA.22215.1.S1_at   | MmugDNA.22215.1 | 5.23  | 5     | 0.79 | 0.14 | -1.17 | 0.188105 | 0.47474  | 0.56029  | 0.681695 |
| MmugDNA.22216.1.S1_at   | MmugDNA.22216.1 | 4.73  | 4.73  | 0.08 | 0.12 | 1     | 0.237058 | 0.228674 | 0.603903 | 0.500897 |
| MmugDNA.22217.1.S1_at   | MmugDNA.22217.1 | 6.44  | 6.41  | 0.17 | 0.04 | 1.02  | 0.634735 | 0.837102 | 0.854214 | 0.906887 |
| MmugDNA.6319.1.S1_s_at  | MmugDNA.6319.1  | 12.08 | 12.49 | 0.22 | 0.22 | -1.33 | 0.080288 | 0.197381 | 0.443795 | 0.472311 |
| MmugDNA.2222.1.S1_at    | MmugDNA.2222.1  | 5.68  | 7.39  | 0.76 | 0.27 | -3.28 | 0.052158 | 0.069481 | 0.392084 | 0.309802 |
| MmugDNA.22220.1.S1_at   | MmugDNA.22220.1 | 7.46  | 7.43  | 0.09 | 0.03 | 1.03  | 0.734218 | 0.144621 | 0.898192 | 0.418466 |
| MmugDNA.22222.1.S1_at   | MmugDNA.22222.1 | 9.21  | 9.3   | 0.29 | 0.09 | -1.06 | 0.499519 | 0.508259 | 0.7821   | 0.703491 |
| MmugDNA.22222.1.S1_s_at | MmugDNA.22222.1 | 9.6   | 9.48  | 0.25 | 0.02 | 1.09  | 0.469303 | 0.293036 | 0.765531 | 0.552978 |
| MmugDNA.22223.1.S1_at   | MmugDNA.22223.1 | 6.35  | 5.79  | 0.03 | 0.08 | 1.47  | 0.000323 | 0.000491 | 0.137028 | 0.038921 |
| MmugDNA.22225.1.S1_at   | MmugDNA.22225.1 | 6.71  | 6.26  | 0.23 | 0.12 | 1.36  | 0.169025 | 0.276716 | 0.541973 | 0.540618 |
| MmugDNA.22226.1.S1_at   | MmugDNA.22226.1 | 4.95  | 4.4   | 0.2  | 0.03 | 1.47  | 0.020453 | 0.018645 | 0.303985 | 0.171648 |
| MmugDNA.22227.1.S1_at   | MmugDNA.22227.1 | 5.51  | 5.22  | 0.03 | 0.3  | 1.22  | 0.579501 | 0.85692  | 0.826489 | 0.918253 |
| MmugDNA.22228.1.S1_at   | MmugDNA.22228.1 | 9.4   | 9.72  | 0.14 | 0.18 | -1.24 | 0.168573 | 0.302696 | 0.541277 | 0.560276 |
| MmugDNA.22230.1.S1_s_at | MmugDNA.22230.1 | 6.18  | 6.17  | 0.08 | 0.03 | 1.01  | 0.59981  | 0.471627 | 0.837575 | 0.679537 |
| MmugDNA.22232.1.S1_at   | MmugDNA.22232.1 | 3.81  | 4.75  | 0.2  | 0.41 | -1.92 | 0.088798 | 0.072553 | 0.456556 | 0.315511 |
| MmugDNA.22236.1.S1_at   | MmugDNA.22236.1 | 11.43 | 11.64 | 0.19 | 0.08 | -1.16 | 0.591985 | 0.068764 | 0.833648 | 0.308711 |
| MmugDNA.22237.1.S1_at   | MmugDNA.22237.1 | 3.79  | 3.66  | 0.07 | 0.1  | 1.09  | 0.771202 | 0.104386 | 0.914403 | 0.365672 |
| MmugDNA.22238.1.S1_at   | MmugDNA.22238.1 | 6.13  | 5.97  | 0.23 | 0.04 | 1.12  | 0.398572 | 0.780836 | 0.722558 | 0.872833 |
| MmugDNA.22239.1.S1_at   | MmugDNA.22239.1 | 4.1   | 4.27  | 0.07 | 0.29 | -1.12 | 0.876131 | 0.724003 | 0.956886 | 0.840254 |
| MmugDNA.2224.1.S1_at    | MmugDNA.2224.1  | 5.63  | 5.74  | 0.25 | 0.2  | -1.08 | 0.644064 | 0.70392  | 0.8584   | 0.828312 |
| MmugDNA.22242.1.S1_at   | MmugDNA.22242.1 | 3.72  | 3.74  | 0.43 | 0.06 | -1.01 | 0.811671 | 0.965214 | 0.931835 | 0.98061  |
| MmugDNA.22243.1.S1_at   | MmugDNA.22243.1 | 5.86  | 5.64  | 0.09 | 0.06 | 1.17  | 0.025073 | 0.014818 | 0.320402 | 0.154879 |
| MmugDNA.22245.1.S1_at   | MmugDNA.22245.1 | 3.39  | 3.4   | 0.04 | 0.05 | -1    | 0.411979 | 0.491303 | 0.73183  | 0.692931 |
| MmugDNA.22247.1.S1_at   | MmugDNA.22247.1 | 2.92  | 3.11  | 0.32 | 0.06 | -1.14 | 0.95184  | 0.92204  | 0.983817 | 0.956039 |
| MmugDNA.22249.1.S1_at   | MmugDNA.22249.1 | 10.36 | 11.5  | 0.63 | 0.05 | -2.21 | 0.090423 | 0.091421 | 0.458677 | 0.34639  |
| MmugDNA.22250.1.S1_at   | MmugDNA.22250.1 | 4.81  | 4.71  | 0.07 | 0.11 | 1.07  | 0.183704 | 0.48968  | 0.55651  | 0.691862 |
| MmugDNA.22254.1.S1_at   | MmugDNA.22254.1 | 11.09 | 11.39 | 0.29 | 0.08 | -1.23 | 0.203809 | 0.089528 | 0.57513  | 0.343811 |
| MmugDNA.22255.1.S1_at   | MmugDNA.22255.1 | 4.02  | 4.03  | 0.14 | 0.04 | -1    | 0.782955 | 0.403616 | 0.920107 | 0.63225  |
| MmugDNA.22256.1.S1_at   | MmugDNA.22256.1 | 3.83  | 3.57  | 0.19 | 0.09 | 1.19  | 0.063988 | 0.524633 | 0.417003 | 0.714463 |
| MmugDNA.22257.1.S1_at   | MmugDNA.22257.1 | 4.31  | 4.31  | 0.47 | 0.13 | 1     | 0.936406 | 0.110278 | 0.978573 | 0.374403 |
| MmugDNA.22258.1.S1_at   | MmugDNA.22258.1 | 3.72  | 3.7   | 0.58 | 0.15 | 1.02  | 0.362156 | 0.59388  | 0.699042 | 0.758418 |
| MmugDNA.22259.1.S1_at   | MmugDNA.22259.1 | 4.43  | 4.09  | 0.22 | 0.11 | 1.27  | 0.105519 | 0.328037 | 0.477143 | 0.577844 |
| MmugDNA.2226.1.S1_at    | MmugDNA.2226.1  | 6.73  | 6.65  | 0.17 | 0.03 | 1.06  | 0.203497 | 0.498511 | 0.57497  | 0.697582 |

|                         |                 |       |       |      |      |       |          |          |          |          |
|-------------------------|-----------------|-------|-------|------|------|-------|----------|----------|----------|----------|
| MmugDNA.22261.1.S1_at   | MmugDNA.22261.1 | 7.65  | 8.11  | 0.69 | 0.3  | -1.38 | 0.55133  | 0.065138 | 0.811314 | 0.301205 |
| MmugDNA.22265.1.S1_at   | MmugDNA.22265.1 | 6.2   | 5.74  | 0.17 | 0.43 | 1.38  | 0.161118 | 0.65893  | 0.534413 | 0.800473 |
| MmugDNA.22267.1.S1_at   | MmugDNA.22267.1 | 6.2   | 6.09  | 0.07 | 0.05 | 1.08  | 0.459105 | 0.006811 | 0.759258 | 0.111444 |
| MmugDNA.22268.1.S1_at   | MmugDNA.22268.1 | 5.59  | 5.64  | 0.31 | 0.16 | -1.04 | 0.915979 | 0.444791 | 0.97133  | 0.662072 |
| MmugDNA.24074.1.S1_at   | MmugDNA.24074.1 | 2.86  | 3.47  | 0.07 | 0.5  | -1.52 | 0.075255 | 0.224064 | 0.436118 | 0.497048 |
| MmugDNA.24074.1.S1_s_at | MmugDNA.24074.1 | 5     | 5.17  | 0.03 | 0.2  | -1.12 | 0.265115 | 0.20776  | 0.626397 | 0.482016 |
| MmugDNA.2227.1.S1_at    | MmugDNA.2227.1  | 7.96  | 8.34  | 0.09 | 0.08 | -1.3  | 0.016426 | 0.019452 | 0.287478 | 0.175136 |
| MmugDNA.22270.1.S1_at   | MmugDNA.22270.1 | 3.9   | 3.72  | 0.31 | 0.16 | 1.13  | 0.134165 | 0.228034 | 0.508395 | 0.500228 |
| MmugDNA.22271.1.S1_at   | MmugDNA.22271.1 | 5.86  | 6.57  | 0.5  | 0.1  | -1.64 | 0.100082 | 0.254179 | 0.470321 | 0.522481 |
| MmugDNA.22272.1.S1_at   | MmugDNA.22272.1 | 5.79  | 5.99  | 0.6  | 0.16 | -1.15 | 0.602393 | 0.533342 | 0.83879  | 0.719567 |
| MmugDNA.22273.1.S1_at   | MmugDNA.22273.1 | 3.75  | 3.68  | 0.07 | 0.1  | 1.05  | 0.074403 | 0.419881 | 0.435313 | 0.643733 |
| MmugDNA.22274.1.S1_at   | MmugDNA.22274.1 | 10.18 | 9.67  | 0.4  | 0.19 | 1.42  | 0.115715 | 0.023924 | 0.48899  | 0.19376  |
| MmugDNA.22275.1.S1_at   | MmugDNA.22275.1 | 8.32  | 8.26  | 0.54 | 0.31 | 1.04  | 0.333185 | 0.632204 | 0.679469 | 0.783289 |
| MmugDNA.22276.1.S1_at   | MmugDNA.22276.1 | 8.17  | 8.17  | 0.12 | 0.11 | -1    | 0.566642 | 0.242748 | 0.820086 | 0.5131   |
| MmugDNA.22277.1.S1_at   | MmugDNA.22277.1 | 3.23  | 3.11  | 0.24 | 0.12 | 1.09  | 0.170669 | 0.254807 | 0.543714 | 0.523051 |
| MmugDNA.22278.1.S1_at   | MmugDNA.22278.1 | 11.56 | 11.19 | 0.41 | 0.1  | 1.29  | 0.56233  | 0.557019 | 0.817686 | 0.734903 |
| MmugDNA.2228.1.S1_at    | MmugDNA.2228.1  | 3.32  | 3.29  | 0.1  | 0.13 | 1.03  | 0.858606 | 0.690548 | 0.950076 | 0.819619 |
| MmugDNA.22280.1.S1_at   | MmugDNA.22280.1 | 6.13  | 6.11  | 0.18 | 0.14 | 1.02  | 0.355968 | 0.257598 | 0.694982 | 0.525302 |
| MmugDNA.22281.1.S1_at   | MmugDNA.22281.1 | 5.93  | 5.86  | 0.05 | 0.07 | 1.05  | 0.157584 | 0.374553 | 0.530588 | 0.6129   |
| MmugDNA.22286.1.S1_at   | MmugDNA.22286.1 | 8.15  | 7.78  | 0.61 | 0.2  | 1.29  | 0.486565 | 0.583505 | 0.77465  | 0.751817 |
| MmugDNA.22286.1.S1_s_at | MmugDNA.22286.1 | 10.92 | 10.73 | 0.59 | 0.17 | 1.14  | 0.650406 | 0.733271 | 0.86091  | 0.845573 |
| MmugDNA.22288.1.S1_at   | MmugDNA.22288.1 | 7.7   | 7.13  | 0.35 | 0.11 | 1.49  | 0.145719 | 0.239787 | 0.520555 | 0.510505 |
| MmugDNA.22289.1.S1_at   | MmugDNA.22289.1 | 4.35  | 4.42  | 0.13 | 0.03 | -1.05 | 0.705077 | 0.904941 | 0.885355 | 0.946143 |
| MmugDNA.2229.1.S1_at    | MmugDNA.2229.1  | 8.07  | 7.55  | 0.32 | 0.06 | 1.44  | 0.18211  | 0.454401 | 0.555194 | 0.668576 |
| MmugDNA.22290.1.S1_at   | MmugDNA.22290.1 | 8.95  | 9.15  | 0.11 | 0.24 | -1.15 | 0.860235 | 0.641373 | 0.950711 | 0.789506 |
| MmugDNA.22291.1.S1_at   | MmugDNA.22291.1 | 5.24  | 4.98  | 0.24 | 0.14 | 1.19  | 0.543239 | 0.766961 | 0.806287 | 0.864663 |
| MmugDNA.22292.1.S1_at   | MmugDNA.22292.1 | 3.69  | 3.7   | 0.08 | 0.04 | -1    | 0.555563 | 0.810821 | 0.813591 | 0.890845 |
| MmugDNA.22293.1.S1_at   | MmugDNA.22293.1 | 4.93  | 5.07  | 0.16 | 0.21 | -1.1  | 0.405936 | 0.034529 | 0.727598 | 0.229979 |
| MmugDNA.22294.1.S1_at   | MmugDNA.22294.1 | 8.32  | 7.76  | 0.45 | 0.25 | 1.48  | 0.210055 | 0.131871 | 0.581555 | 0.403891 |
| MmugDNA.22296.1.S1_at   | MmugDNA.22296.1 | 3.75  | 3.51  | 0.05 | 0.06 | 1.18  | 0.0058   | 0.011927 | 0.211798 | 0.141312 |
| MmugDNA.22297.1.S1_at   | MmugDNA.22297.1 | 13.79 | 13.7  | 2.38 | 0.15 | 1.06  | 0.440415 | 0.21947  | 0.748466 | 0.493156 |
| MmugDNA.22299.1.S1_at   | MmugDNA.22299.1 | 7.28  | 7.72  | 0.43 | 0.09 | -1.36 | 0.173056 | 0.762169 | 0.546142 | 0.861664 |
| MmugDNA.22300.1.S1_at   | MmugDNA.22300.1 | 6.29  | 6.63  | 0.29 | 0.05 | -1.27 | 0.095473 | 0.127513 | 0.464229 | 0.398403 |
| MmugDNA.22302.1.S1_at   | MmugDNA.22302.1 | 3.07  | 3.16  | 0.12 | 0.38 | -1.06 | 0.549729 | 0.512765 | 0.810413 | 0.7065   |
| MmugDNA.22303.1.S1_at   | MmugDNA.22303.1 | 6.36  | 8.59  | 0.43 | 0.2  | -4.68 | 0.001194 | 0.000856 | 0.156386 | 0.047266 |
| MmugDNA.22304.1.S1_at   | MmugDNA.22304.1 | 8.02  | 7.86  | 0.36 | 0.17 | 1.12  | 0.248135 | 0.550761 | 0.613685 | 0.730611 |
| MmugDNA.22305.1.S1_at   | MmugDNA.22305.1 | 4.57  | 4.95  | 0.54 | 0.28 | -1.3  | 0.465034 | 0.44319  | 0.762863 | 0.661021 |
| MmugDNA.22306.1.S1_at   | MmugDNA.22306.1 | 4.74  | 5.38  | 0.26 | 0.48 | -1.55 | 0.043229 | 0.034927 | 0.371614 | 0.231062 |
| MmugDNA.22307.1.S1_at   | MmugDNA.22307.1 | 3.39  | 3.46  | 0.17 | 0.04 | -1.04 | 0.620495 | 0.586243 | 0.84711  | 0.7534   |
| MmugDNA.22308.1.S1_at   | MmugDNA.22308.1 | 5.04  | 4.93  | 0.1  | 0.06 | 1.08  | 0.105164 | 0.011066 | 0.476883 | 0.136934 |
| MmugDNA.2231.1.S1_at    | MmugDNA.2231.1  | 3.37  | 3.28  | 0.09 | 0    | 1.07  | 0.150524 | 0.237132 | 0.524173 | 0.507879 |
| MmugDNA.22310.1.S1_at   | MmugDNA.22310.1 | 12.59 | 12.68 | 0.25 | 0.08 | -1.07 | 0.55969  | 0.726736 | 0.816367 | 0.841963 |
| MmugDNA.22311.1.S1_at   | MmugDNA.22311.1 | 5.08  | 5.22  | 1.33 | 0.17 | -1.1  | 0.978352 | 0.017104 | 0.993001 | 0.165728 |

|                         |                 |       |       |      |      |       |          |          |          |          |
|-------------------------|-----------------|-------|-------|------|------|-------|----------|----------|----------|----------|
| MmugDNA.22313.1.S1_at   | MmugDNA.22313.1 | 7.63  | 8.03  | 0.27 | 0.23 | -1.32 | 0.124267 | 0.086967 | 0.498334 | 0.33984  |
| MmugDNA.22315.1.S1_at   | MmugDNA.22315.1 | 4.46  | 4.45  | 0.25 | 0.02 | 1     | 0.337123 | 0.397586 | 0.682235 | 0.628973 |
| MmugDNA.22316.1.S1_at   | MmugDNA.22316.1 | 5.02  | 4.96  | 0.12 | 0.23 | 1.04  | 0.447792 | 0.472163 | 0.753565 | 0.679874 |
| MmugDNA.22317.1.S1_at   | MmugDNA.22317.1 | 6.13  | 6.56  | 0.47 | 0.08 | -1.34 | 0.486718 | 0.737908 | 0.774667 | 0.848144 |
| MmugDNA.22318.1.S1_at   | MmugDNA.22318.1 | 5.26  | 5.79  | 0.36 | 0.18 | -1.45 | 0.038792 | 0.02693  | 0.36035  | 0.205254 |
| MmugDNA.2232.1.S1_s_at  | MmugDNA.2232.1  | 7.16  | 7.32  | 0.47 | 0.14 | -1.12 | 0.209013 | 0.008604 | 0.580603 | 0.123072 |
| MmugDNA.22321.1.S1_at   | MmugDNA.22321.1 | 4.49  | 5.03  | 0.58 | 0.32 | -1.45 | 0.500924 | 0.062113 | 0.78303  | 0.296141 |
| MmugDNA.22322.1.S1_at   | MmugDNA.22322.1 | 10.67 | 10.77 | 0.14 | 0.12 | -1.07 | 0.896718 | 0.935058 | 0.964869 | 0.963246 |
| MmugDNA.22323.1.S1_x_at | MmugDNA.22323.1 | 5.13  | 4.62  | 0.37 | 0.05 | 1.43  | 0.074186 | 0.064693 | 0.434946 | 0.300314 |
| MmugDNA.22324.1.S1_at   | MmugDNA.22324.1 | 4.44  | 4.37  | 0.2  | 0.03 | 1.05  | 0.723446 | 0.538513 | 0.892813 | 0.723211 |
| MmugDNA.22325.1.S1_at   | MmugDNA.22325.1 | 8.64  | 8.91  | 0.55 | 0.14 | -1.21 | 0.496372 | 0.320585 | 0.780393 | 0.572701 |
| MmugDNA.22326.1.S1_at   | MmugDNA.22326.1 | 6.51  | 6.53  | 0.28 | 0.58 | -1.01 | 0.45285  | 0.185264 | 0.755901 | 0.461194 |
| MmugDNA.22329.1.S1_at   | MmugDNA.22329.1 | 5.32  | 4.75  | 0.44 | 0.2  | 1.49  | 0.093859 | 0.021535 | 0.463304 | 0.183818 |
| MmugDNA.2233.1.S1_at    | MmugDNA.2233.1  | 11.53 | 11.42 | 0.55 | 0.09 | 1.08  | 0.634407 | 0.538824 | 0.854056 | 0.723368 |
| MmugDNA.22331.1.S1_s_at | MmugDNA.22331.1 | 7.28  | 8.37  | 1.26 | 0.24 | -2.14 | 0.231011 | 0.31539  | 0.599045 | 0.568939 |
| MmugDNA.22333.1.S1_at   | MmugDNA.22333.1 | 7.09  | 7.14  | 0.74 | 0.3  | -1.04 | 0.80512  | 0.866668 | 0.929133 | 0.924203 |
| MmugDNA.22334.1.S1_at   | MmugDNA.22334.1 | 9.78  | 9.05  | 0.67 | 0.18 | 1.66  | 0.428612 | 0.447741 | 0.741963 | 0.663819 |
| MmugDNA.22335.1.S1_at   | MmugDNA.22335.1 | 13.01 | 12.72 | 0.28 | 0.06 | 1.23  | 0.549338 | 0.609472 | 0.810299 | 0.767788 |
| MmugDNA.22336.1.S1_at   | MmugDNA.22336.1 | 4.38  | 4.29  | 0.03 | 0.07 | 1.07  | 0.323661 | 0.272379 | 0.672279 | 0.537122 |
| MmugDNA.22337.1.S1_at   | MmugDNA.22337.1 | 8.06  | 8.21  | 1.59 | 0.21 | -1.11 | 0.874489 | 0.336241 | 0.956448 | 0.583736 |
| MmugDNA.22338.1.S1_at   | MmugDNA.22338.1 | 5.79  | 5.77  | 0.14 | 0.13 | 1.02  | 0.80014  | 0.955513 | 0.926825 | 0.974745 |
| MmugDNA.22339.1.S1_at   | MmugDNA.22339.1 | 3.99  | 3.74  | 0.26 | 0.29 | 1.19  | 0.560438 | 0.51693  | 0.816681 | 0.709326 |
| MmugDNA.2234.1.S1_at    | MmugDNA.2234.1  | 4.37  | 4.33  | 0.07 | 0.08 | 1.03  | 0.971063 | 0.569609 | 0.990579 | 0.742525 |
| MmugDNA.22340.1.S1_at   | MmugDNA.22340.1 | 7.77  | 7.43  | 0.12 | 0.06 | 1.26  | 0.008898 | 0.00359  | 0.238532 | 0.085714 |
| MmugDNA.22341.1.S1_at   | MmugDNA.22341.1 | 10.02 | 10.2  | 0.39 | 0.01 | -1.13 | 0.452579 | 0.603336 | 0.755901 | 0.764052 |
| MmugDNA.22342.1.S1_at   | MmugDNA.22342.1 | 13.1  | 13.06 | 0.02 | 0.03 | 1.03  | 0.06335  | 0.346762 | 0.415687 | 0.591536 |
| MmugDNA.22348.1.S1_at   | MmugDNA.22348.1 | 7.75  | 6.86  | 0.4  | 0.13 | 1.86  | 0.024349 | 0.007676 | 0.317828 | 0.117153 |
| MmugDNA.22349.1.S1_at   | MmugDNA.22349.1 | 5.63  | 5.52  | 0.1  | 0.22 | 1.07  | 0.379411 | 0.238501 | 0.708973 | 0.5091   |
| MmugDNA.2235.1.S1_at    | MmugDNA.2235.1  | 5.66  | 5.88  | 0.23 | 0.12 | -1.16 | 0.07275  | 0.158291 | 0.433332 | 0.43403  |
| MmugDNA.22350.1.S1_at   | MmugDNA.22350.1 | 8.71  | 8.54  | 0.49 | 0.08 | 1.13  | 0.280746 | 0.387056 | 0.639467 | 0.621935 |
| MmugDNA.22351.1.S1_at   | MmugDNA.22351.1 | 13.31 | 13.51 | 0.2  | 0.06 | -1.15 | 0.075652 | 0.108328 | 0.436722 | 0.371601 |
| MmugDNA.22352.1.S1_at   | MmugDNA.22352.1 | 6.16  | 5.92  | 0.09 | 0.06 | 1.18  | 0.016008 | 0.017001 | 0.284833 | 0.165304 |
| MmugDNA.22353.1.S1_at   | MmugDNA.22353.1 | 6.08  | 5.22  | 0.42 | 0.21 | 1.81  | 0.013424 | 0.005458 | 0.268462 | 0.101952 |
| MmugDNA.22355.1.S1_at   | MmugDNA.22355.1 | 6.45  | 6.01  | 0.22 | 0.18 | 1.35  | 0.061887 | 0.076185 | 0.411683 | 0.321047 |
| MmugDNA.22356.1.S1_at   | MmugDNA.22356.1 | 3.73  | 3.66  | 0.06 | 0.1  | 1.05  | 0.897367 | 0.069831 | 0.965155 | 0.310353 |
| MmugDNA.22357.1.S1_at   | MmugDNA.22357.1 | 5.1   | 5.12  | 0.21 | 0.11 | -1.02 | 0.983357 | 0.802199 | 0.994928 | 0.886112 |
| MmugDNA.22358.1.S1_at   | MmugDNA.22358.1 | 4.05  | 3.96  | 0.06 | 0.06 | 1.06  | 0.252131 | 0.713415 | 0.617147 | 0.833698 |
| MmugDNA.2236.1.S1_at    | MmugDNA.2236.1  | 3.53  | 3.34  | 0.14 | 0.23 | 1.14  | 0.597229 | 0.787839 | 0.836158 | 0.877304 |
| MmugDNA.22361.1.S1_at   | MmugDNA.22361.1 | 8.18  | 7.92  | 0.48 | 0.15 | 1.19  | 0.534971 | 0.280415 | 0.801404 | 0.543648 |
| MmugDNA.22363.1.S1_at   | MmugDNA.22363.1 | 4.93  | 4.86  | 0.1  | 0.11 | 1.05  | 0.40486  | 0.400949 | 0.726978 | 0.630658 |
| MmugDNA.22365.1.S1_at   | MmugDNA.22365.1 | 4.48  | 4.23  | 0.11 | 0.09 | 1.19  | 0.069017 | 0.256873 | 0.426486 | 0.524698 |
| MmugDNA.22367.1.S1_at   | MmugDNA.22367.1 | 4.17  | 3.94  | 0    | 0.35 | 1.17  | 0.894624 | 0.43334  | 0.963936 | 0.653652 |
| MmugDNA.22368.1.S1_at   | MmugDNA.22368.1 | 3.11  | 3.15  | 0.24 | 0.04 | -1.03 | 0.822741 | 0.37947  | 0.936084 | 0.616406 |



|                       |                 |       |       |      |      |       |          |          |          |          |
|-----------------------|-----------------|-------|-------|------|------|-------|----------|----------|----------|----------|
| MmugDNA.22369.1.S1_at | MmugDNA.22369.1 | 7.76  | 8.2   | 1.12 | 0.26 | -1.35 | 0.773334 | 0.049187 | 0.915782 | 0.266611 |
| MmugDNA.2237.1.S1_at  | MmugDNA.2237.1  | 3.57  | 3.56  | 0.08 | 0.04 | 1.01  | 0.666444 | 0.967812 | 0.868243 | 0.982192 |
| MmugDNA.22370.1.S1_at | MmugDNA.22370.1 | 5.89  | 5.76  | 0.11 | 0.12 | 1.09  | 0.574998 | 0.726877 | 0.824422 | 0.842011 |
| MmugDNA.22372.1.S1_at | MmugDNA.22372.1 | 3.5   | 3.51  | 0.13 | 0.05 | -1.01 | 0.717925 | 0.268422 | 0.890572 | 0.534106 |
| MmugDNA.22374.1.S1_at | MmugDNA.22374.1 | 8.59  | 9.37  | 0.21 | 0.21 | -1.72 | 0.030545 | 0.044859 | 0.338095 | 0.256375 |
| MmugDNA.22375.1.S1_at | MmugDNA.22375.1 | 4.25  | 3.98  | 0.3  | 0.05 | 1.21  | 0.182279 | 0.369497 | 0.555371 | 0.608861 |
| MmugDNA.22377.1.S1_at | MmugDNA.22377.1 | 5.02  | 4.99  | 0.58 | 0.12 | 1.02  | 0.309573 | 0.40273  | 0.661771 | 0.631543 |
| MmugDNA.22378.1.S1_at | MmugDNA.22378.1 | 8.87  | 9.2   | 0.34 | 0.09 | -1.26 | 0.247985 | 0.592846 | 0.613615 | 0.757932 |
| MmugDNA.22379.1.S1_at | MmugDNA.22379.1 | 6.2   | 6.19  | 0.14 | 0    | 1     | 0.360567 | 0.081133 | 0.697965 | 0.32931  |
| MmugDNA.2238.1.S1_at  | MmugDNA.2238.1  | 5.85  | 5.81  | 0.09 | 0.15 | 1.03  | 0.987293 | 0.999809 | 0.995831 | 0.999948 |
| MmugDNA.22381.1.S1_at | MmugDNA.22381.1 | 6.24  | 6.13  | 0.21 | 0.17 | -1.08 | 0.517986 | 0.725115 | 0.792364 | 0.84088  |
| MmugDNA.22382.1.S1_at | MmugDNA.22382.1 | 9.63  | 8.38  | 1.08 | 0    | 2.38  | 0.121025 | 0.045867 | 0.494696 | 0.258448 |
| MmugDNA.22384.1.S1_at | MmugDNA.22384.1 | 7.13  | 7.07  | 0.08 | 0.06 | 1.05  | 0.107861 | 0.240922 | 0.480375 | 0.511624 |
| MmugDNA.22385.1.S1_at | MmugDNA.22385.1 | 3.84  | 3.83  | 0.07 | 0.14 | 1.01  | 0.94572  | 0.115748 | 0.981093 | 0.382814 |
| MmugDNA.22386.1.S1_at | MmugDNA.22386.1 | 4.05  | 3.97  | 0.18 | 0.49 | 1.06  | 0.47864  | 0.390318 | 0.770122 | 0.624142 |
| MmugDNA.2239.1.S1_at  | MmugDNA.2239.1  | 4.15  | 4     | 0.09 | 0.19 | 1.11  | 0.275743 | 0.294635 | 0.635198 | 0.554306 |
| MmugDNA.22390.1.S1_at | MmugDNA.22390.1 | 8.95  | 6.4   | 1.37 | 1.2  | 5.87  | 0.034507 | 0.009881 | 0.350124 | 0.130618 |
| MmugDNA.22391.1.S1_at | MmugDNA.22391.1 | 5.53  | 5.99  | 0.63 | 0.12 | -1.38 | 0.659961 | 0.549984 | 0.865514 | 0.730214 |
| MmugDNA.22393.1.S1_at | MmugDNA.22393.1 | 5.61  | 5.82  | 0.73 | 0.44 | -1.15 | 0.148808 | 0.372872 | 0.522743 | 0.611735 |
| MmugDNA.22394.1.S1_at | MmugDNA.22394.1 | 8.16  | 7.66  | 0.46 | 0.04 | 1.41  | 0.178668 | 0.071519 | 0.551451 | 0.313706 |
| MmugDNA.22395.1.S1_at | MmugDNA.22395.1 | 3.5   | 3.75  | 0.05 | 0.2  | -1.19 | 0.116404 | 0.165062 | 0.489622 | 0.441242 |
| MmugDNA.22396.1.S1_at | MmugDNA.22396.1 | 5.53  | 5.16  | 0.16 | 0.2  | 1.29  | 0.054335 | 0.056335 | 0.39629  | 0.283348 |
| MmugDNA.22397.1.S1_at | MmugDNA.22397.1 | 4.81  | 5.23  | 0.2  | 0.04 | -1.34 | 0.023939 | 0.019038 | 0.317529 | 0.173644 |
| MmugDNA.22398.1.S1_at | MmugDNA.22398.1 | 3.32  | 3.33  | 0.06 | 0.07 | -1    | 0.762751 | 0.257222 | 0.91092  | 0.525002 |
| MmugDNA.22399.1.S1_at | MmugDNA.22399.1 | 10.09 | 10.3  | 0.29 | 0.16 | -1.16 | 0.195867 | 0.681128 | 0.56627  | 0.813791 |
| MmugDNA.224.1.S1_at   | MmugDNA.224.1   | 3.84  | 3.62  | 0.18 | 0    | 1.16  | 0.097916 | 0.035705 | 0.467121 | 0.233368 |
| MmugDNA.22400.1.S1_at | MmugDNA.22400.1 | 10.55 | 10.43 | 0.14 | 0.09 | 1.09  | 0.445501 | 0.667893 | 0.752241 | 0.805681 |
| MmugDNA.22402.1.S1_at | MmugDNA.22402.1 | 9.73  | 10.84 | 0.46 | 0.02 | -2.16 | 0.019099 | 0.008795 | 0.299783 | 0.124117 |
| MmugDNA.22403.1.S1_at | MmugDNA.22403.1 | 11.55 | 11.49 | 0.74 | 0.08 | 1.05  | 0.868947 | 0.423534 | 0.954156 | 0.646441 |
| MmugDNA.22404.1.S1_at | MmugDNA.22404.1 | 3.87  | 3.64  | 0.63 | 0.08 | 1.17  | 0.217437 | 0.279077 | 0.587269 | 0.542782 |
| MmugDNA.22405.1.S1_at | MmugDNA.22405.1 | 10.51 | 10.91 | 0.48 | 0.05 | -1.31 | 0.204529 | 0.099797 | 0.575907 | 0.358407 |
| MmugDNA.22406.1.S1_at | MmugDNA.22406.1 | 6.8   | 6.93  | 0.15 | 0.1  | -1.1  | 0.132768 | 0.179717 | 0.506999 | 0.456204 |
| MmugDNA.22408.1.S1_at | MmugDNA.22408.1 | 10.5  | 10.68 | 0.42 | 0.03 | -1.13 | 0.385384 | 0.04323  | 0.712733 | 0.252677 |
| MmugDNA.22409.1.S1_at | MmugDNA.22409.1 | 7.79  | 7.94  | 0.31 | 0.36 | -1.11 | 0.492396 | 0.53374  | 0.778247 | 0.719857 |
| MmugDNA.2241.1.S1_at  | MmugDNA.2241.1  | 5.82  | 5.81  | 0.15 | 0.16 | 1.01  | 0.45235  | 0.285092 | 0.755778 | 0.547096 |
| MmugDNA.22410.1.S1_at | MmugDNA.22410.1 | 7.97  | 6.36  | 0.46 | 0.3  | 3.05  | 0.009185 | 0.003821 | 0.241866 | 0.08794  |
| MmugDNA.22411.1.S1_at | MmugDNA.22411.1 | 4.85  | 4.54  | 0.11 | 0.12 | 1.24  | 0.052432 | 0.121406 | 0.392384 | 0.390493 |
| MmugDNA.22412.1.S1_at | MmugDNA.22412.1 | 10.57 | 10.26 | 1.8  | 0.35 | 1.24  | 0.43808  | 0.563586 | 0.747178 | 0.738718 |
| MmugDNA.22413.1.S1_at | MmugDNA.22413.1 | 5.62  | 5.36  | 0.24 | 0.14 | 1.2   | 0.802177 | 0.180346 | 0.927856 | 0.456981 |
| MmugDNA.22414.1.S1_at | MmugDNA.22414.1 | 4.27  | 4.23  | 0.39 | 0.2  | 1.03  | 0.990356 | 0.046267 | 0.996406 | 0.259486 |
| MmugDNA.22415.1.S1_at | MmugDNA.22415.1 | 6.34  | 6.17  | 0.1  | 0.13 | 1.12  | 0.147295 | 0.274287 | 0.521578 | 0.538751 |
| MmugDNA.22416.1.S1_at | MmugDNA.22416.1 | 3.37  | 3.38  | 0.15 | 0.3  | -1    | 0.495646 | 0.76967  | 0.780125 | 0.86625  |
| MmugDNA.22417.1.S1_at | MmugDNA.22417.1 | 7.9   | 8.04  | 0.35 | 0.03 | -1.1  | 0.827124 | 0.138266 | 0.938039 | 0.411198 |

|                         |                 |       |       |      |      |       |          |          |          |          |
|-------------------------|-----------------|-------|-------|------|------|-------|----------|----------|----------|----------|
| MmugDNA.22419.1.S1_at   | MmugDNA.22419.1 | 7.79  | 6.87  | 1.74 | 0.25 | 1.9   | 0.430193 | 0.185117 | 0.742602 | 0.460962 |
| MmugDNA.22420.1.S1_at   | MmugDNA.22420.1 | 9.65  | 10.05 | 0.18 | 0.09 | -1.32 | 0.029179 | 0.005738 | 0.333974 | 0.104271 |
| MmugDNA.22423.1.S1_at   | MmugDNA.22423.1 | 10.87 | 11.16 | 0.56 | 0.06 | -1.23 | 0.386643 | 0.595874 | 0.713641 | 0.759258 |
| MmugDNA.22424.1.S1_at   | MmugDNA.22424.1 | 4.51  | 4.83  | 0.06 | 0.26 | -1.24 | 0.363057 | 0.352628 | 0.699794 | 0.595866 |
| MmugDNA.22425.1.S1_at   | MmugDNA.22425.1 | 3.7   | 3.67  | 0.05 | 0.1  | 1.02  | 0.638947 | 0.204919 | 0.856133 | 0.479254 |
| MmugDNA.22427.1.S1_at   | MmugDNA.22427.1 | 5.92  | 5.73  | 0.08 | 0.05 | 1.14  | 0.036214 | 0.161476 | 0.354703 | 0.437616 |
| MmugDNA.22428.1.S1_at   | MmugDNA.22428.1 | 11.41 | 11.65 | 0.41 | 0.16 | -1.18 | 0.150143 | 0.131539 | 0.523642 | 0.403658 |
| MmugDNA.2243.1.S1_at    | MmugDNA.2243.1  | 4.46  | 4.34  | 0.39 | 0.19 | 1.09  | 0.52034  | 0.214293 | 0.79367  | 0.487902 |
| MmugDNA.22430.1.S1_at   | MmugDNA.22430.1 | 9.29  | 8.41  | 0.5  | 0.17 | 1.84  | 0.044479 | 0.02359  | 0.374916 | 0.192389 |
| MmugDNA.28289.1.S1_s_at | MmugDNA.28289.1 | 12.59 | 12.47 | 0.04 | 0.04 | 1.09  | 0.016978 | 0.01099  | 0.288969 | 0.136575 |
| MmugDNA.22433.1.S1_at   | MmugDNA.22433.1 | 7.93  | 7.6   | 1    | 0.22 | -1.26 | 0.239237 | 0.465174 | 0.605741 | 0.675626 |
| MmugDNA.22434.1.S1_at   | MmugDNA.22434.1 | 5.93  | 6.12  | 0.13 | 0.18 | -1.14 | 0.114422 | 0.194663 | 0.487606 | 0.469765 |
| MmugDNA.22435.1.S1_at   | MmugDNA.22435.1 | 6.32  | 6.13  | 0.21 | 0.13 | 1.14  | 0.10129  | 0.169581 | 0.471667 | 0.446192 |
| MmugDNA.1042.1.S1_s_at  | MmugDNA.1042.1  | 7.12  | 6.88  | 0.48 | 0.05 | 1.18  | 0.397477 | 0.010726 | 0.721771 | 0.135271 |
| MmugDNA.22437.1.S1_at   | MmugDNA.22437.1 | 3.09  | 3.06  | 0.28 | 0.08 | 1.02  | 0.644999 | 0.51622  | 0.85869  | 0.708757 |
| MmugDNA.22438.1.S1_at   | MmugDNA.22438.1 | 5.97  | 5.96  | 0.01 | 0.15 | 1.01  | 0.305801 | 0.200018 | 0.659251 | 0.474603 |
| MmugDNA.22439.1.S1_at   | MmugDNA.22439.1 | 6     | 5.71  | 0.06 | 0.14 | 1.22  | 0.025321 | 0.04555  | 0.32131  | 0.257596 |
| MmugDNA.2244.1.S1_at    | MmugDNA.2244.1  | 6.24  | 6.05  | 0.23 | 0.05 | 1.14  | 0.36374  | 0.397058 | 0.700278 | 0.628607 |
| MmugDNA.22440.1.S1_at   | MmugDNA.22440.1 | 6.19  | 6.41  | 0.32 | 0.01 | -1.16 | 0.128525 | 0.123348 | 0.503256 | 0.393391 |
| MmugDNA.22441.1.S1_s_at | MmugDNA.22441.1 | 4.39  | 4.47  | 0.15 | 0.05 | -1.06 | 0.684516 | 0.48262  | 0.87645  | 0.687368 |
| MmugDNA.22442.1.S1_at   | MmugDNA.22442.1 | 5.75  | 6.67  | 0.63 | 0.23 | -1.9  | 0.083008 | 0.082509 | 0.44828  | 0.331625 |
| MmugDNA.22443.1.S1_at   | MmugDNA.22443.1 | 8.56  | 9.44  | 0.3  | 0.11 | -1.84 | 0.010193 | 0.003423 | 0.246929 | 0.084135 |
| MmugDNA.22444.1.S1_at   | MmugDNA.22444.1 | 10.61 | 11.39 | 0.42 | 0.04 | -1.72 | 0.052666 | 0.019508 | 0.392806 | 0.175439 |
| MmugDNA.22445.1.S1_at   | MmugDNA.22445.1 | 9.93  | 9.81  | 0.78 | 0.41 | 1.09  | 0.869274 | 0.131825 | 0.954297 | 0.403891 |
| MmugDNA.22447.1.S1_at   | MmugDNA.22447.1 | 3.89  | 3.54  | 0.47 | 0.14 | 1.28  | 0.264215 | 0.297063 | 0.626029 | 0.555996 |
| MmugDNA.22448.1.S1_at   | MmugDNA.22448.1 | 13.33 | 13.36 | 0.05 | 0.08 | -1.02 | 0.214817 | 0.33398  | 0.585236 | 0.582063 |
| MmugDNA.22449.1.S1_at   | MmugDNA.22449.1 | 7.64  | 7.3   | 0.43 | 0.19 | 1.27  | 0.9982   | 0.001761 | 0.999429 | 0.063161 |
| MmugDNA.22450.1.S1_at   | MmugDNA.22450.1 | 5.84  | 5.49  | 0.39 | 0.24 | 1.27  | 0.283453 | 0.197189 | 0.641407 | 0.472213 |
| MmugDNA.22451.1.S1_at   | MmugDNA.22451.1 | 3.34  | 3.51  | 0.08 | 0.14 | -1.13 | 0.411123 | 0.012914 | 0.731164 | 0.146309 |
| MmugDNA.22452.1.S1_at   | MmugDNA.22452.1 | 11.28 | 10.25 | 0.86 | 0.43 | 2.04  | 0.398799 | 0.084001 | 0.722745 | 0.3349   |
| MmugDNA.22454.1.S1_at   | MmugDNA.22454.1 | 5.02  | 4.83  | 1.03 | 0.14 | 1.14  | 0.312152 | 0.33587  | 0.66374  | 0.583533 |
| MmugDNA.22457.1.S1_at   | MmugDNA.22457.1 | 10    | 10.01 | 0.7  | 0.12 | -1    | 0.829161 | 0.563752 | 0.938701 | 0.738808 |
| MmugDNA.22458.1.S1_at   | MmugDNA.22458.1 | 4.99  | 4.74  | 0.22 | 0.2  | 1.19  | 0.329204 | 0.71021  | 0.676253 | 0.831904 |
| MmugDNA.22459.1.S1_at   | MmugDNA.22459.1 | 11.03 | 11.19 | 0.13 | 0.04 | -1.12 | 0.083868 | 0.212442 | 0.449936 | 0.486432 |
| MmugDNA.2246.1.S1_at    | MmugDNA.2246.1  | 3.96  | 3.95  | 0.18 | 0.12 | 1.01  | 0.306005 | 0.317421 | 0.659264 | 0.570627 |
| MmugDNA.22460.1.S1_at   | MmugDNA.22460.1 | 4.88  | 5.08  | 0.43 | 0.42 | -1.15 | 0.679444 | 0.877223 | 0.874274 | 0.930041 |
| MmugDNA.22461.1.S1_at   | MmugDNA.22461.1 | 3.12  | 3.1   | 0.16 | 0.05 | 1.01  | 0.685199 | 0.79465  | 0.87671  | 0.881638 |
| MmugDNA.22462.1.S1_at   | MmugDNA.22462.1 | 5.97  | 5.93  | 0.04 | 0.06 | 1.03  | 0.3339   | 0.269288 | 0.679922 | 0.534534 |
| MmugDNA.31457.1.S1_s_at | MmugDNA.31457.1 | 7     | 6.88  | 0.12 | 0.04 | 1.09  | 0.145561 | 0.633923 | 0.520527 | 0.784538 |
| MmugDNA.22465.1.S1_at   | MmugDNA.22465.1 | 6.57  | 6.55  | 0.05 | 0.17 | 1.01  | 0.617033 | 0.766653 | 0.845238 | 0.864438 |
| MmugDNA.22466.1.S1_at   | MmugDNA.22466.1 | 5.53  | 5.46  | 0.08 | 0.08 | 1.05  | 0.873226 | 0.43964  | 0.956075 | 0.658383 |
| MmugDNA.22468.1.S1_at   | MmugDNA.22468.1 | 4.31  | 3.55  | 0.23 | 0.22 | 1.7   | 0.050061 | 0.04821  | 0.386663 | 0.264671 |
| MmugDNA.22469.1.S1_at   | MmugDNA.22469.1 | 4.46  | 4.36  | 0.02 | 0.06 | 1.07  | 0.079638 | 0.465785 | 0.442511 | 0.675937 |

|                         |                 |       |       |      |      |       |          |          |          |          |
|-------------------------|-----------------|-------|-------|------|------|-------|----------|----------|----------|----------|
| MmugDNA.22470.1.S1_at   | MmugDNA.22470.1 | 3.17  | 3.09  | 0.09 | 0.1  | 1.06  | 0.144373 | 0.143798 | 0.519769 | 0.417593 |
| MmugDNA.22471.1.S1_at   | MmugDNA.22471.1 | 5.94  | 5.24  | 0.67 | 0.32 | 1.63  | 0.447304 | 0.564073 | 0.753177 | 0.738956 |
| MmugDNA.22472.1.S1_at   | MmugDNA.22472.1 | 8.96  | 9.4   | 0.41 | 0.2  | -1.36 | 0.498997 | 0.079879 | 0.781868 | 0.327207 |
| MmugDNA.22473.1.S1_at   | MmugDNA.22473.1 | 9.52  | 9.75  | 1.24 | 0.13 | -1.18 | 0.72958  | 0.118427 | 0.895824 | 0.386431 |
| MmugDNA.22475.1.S1_at   | MmugDNA.22475.1 | 8.66  | 9.02  | 0.77 | 0.1  | -1.28 | 0.855267 | 0.019061 | 0.948797 | 0.173688 |
| MmugDNA.22477.1.S1_at   | MmugDNA.22477.1 | 12.6  | 12.54 | 0.05 | 0.07 | 1.04  | 0.914223 | 0.000161 | 0.970825 | 0.030478 |
| MmugDNA.22477.1.S1_s_at | MmugDNA.22477.1 | 12.63 | 12.48 | 0.08 | 0.09 | 1.11  | 0.02351  | 0.000048 | 0.316014 | 0.025273 |
| MmugDNA.22478.1.S1_at   | MmugDNA.22478.1 | 4.14  | 4.22  | 0.09 | 0.03 | -1.06 | 0.717296 | 0.582736 | 0.890353 | 0.751337 |
| MmugDNA.2248.1.S1_at    | MmugDNA.2248.1  | 7.52  | 7.55  | 0.12 | 0.16 | -1.02 | 0.691296 | 0.253978 | 0.879785 | 0.522353 |
| MmugDNA.22480.1.S1_at   | MmugDNA.22480.1 | 3.67  | 3.79  | 0.73 | 0.24 | -1.09 | 0.592615 | 0.357803 | 0.833923 | 0.599418 |
| MmugDNA.22483.1.S1_at   | MmugDNA.22483.1 | 9.3   | 9.65  | 0.23 | 0.11 | -1.27 | 0.080351 | 0.006724 | 0.444007 | 0.110963 |
| MmugDNA.22484.1.S1_at   | MmugDNA.22484.1 | 5.99  | 5.93  | 0.39 | 0.08 | 1.04  | 0.747931 | 0.450728 | 0.904242 | 0.665844 |
| MmugDNA.22486.1.S1_at   | MmugDNA.22486.1 | 3.73  | 3.62  | 0.09 | 0.04 | 1.08  | 0.350463 | 0.394574 | 0.691263 | 0.627098 |
| MmugDNA.22488.1.S1_at   | MmugDNA.22488.1 | 8.59  | 8.17  | 0.85 | 0.34 | 1.34  | 0.314369 | 0.363245 | 0.665137 | 0.603657 |
| MmugDNA.22489.1.S1_at   | MmugDNA.22489.1 | 10.93 | 11.08 | 0.29 | 0.03 | -1.11 | 0.453233 | 0.267059 | 0.755962 | 0.532638 |
| MmugDNA.2249.1.S1_at    | MmugDNA.2249.1  | 5.84  | 6.13  | 0.14 | 0.22 | -1.22 | 0.323756 | 0.172421 | 0.672332 | 0.448837 |
| MmugDNA.22490.1.S1_at   | MmugDNA.22490.1 | 4.15  | 4.17  | 0.23 | 0.06 | -1.01 | 0.602204 | 0.392626 | 0.838769 | 0.625813 |
| MmugDNA.22491.1.S1_at   | MmugDNA.22491.1 | 3.88  | 3.9   | 0.31 | 0.07 | -1.01 | 0.439855 | 0.620184 | 0.748282 | 0.77525  |
| MmugDNA.22492.1.S1_at   | MmugDNA.22492.1 | 5.56  | 5.74  | 0.47 | 0.08 | -1.13 | 0.706421 | 0.691351 | 0.885755 | 0.820406 |
| MmugDNA.22493.1.S1_at   | MmugDNA.22493.1 | 3.64  | 3.57  | 0.12 | 0.03 | 1.05  | 0.380434 | 0.432809 | 0.709387 | 0.653151 |
| MmugDNA.22494.1.S1_at   | MmugDNA.22494.1 | 6.81  | 6.77  | 0.17 | 0.03 | 1.03  | 0.820749 | 0.979989 | 0.935289 | 0.989229 |
| MmugDNA.22496.1.S1_at   | MmugDNA.22496.1 | 7.46  | 6.82  | 0.81 | 0.17 | 1.56  | 0.080429 | 0.067898 | 0.444108 | 0.306745 |
| MmugDNA.22497.1.S1_at   | MmugDNA.22497.1 | 6.51  | 6.39  | 0.07 | 0.07 | 1.09  | 0.09583  | 0.141301 | 0.464449 | 0.414874 |
| MmugDNA.22498.1.S1_at   | MmugDNA.22498.1 | 6.26  | 6.38  | 1.62 | 0.49 | -1.09 | 0.68857  | 0.547752 | 0.878472 | 0.72866  |
| MmugDNA.22499.1.S1_at   | MmugDNA.22499.1 | 3.18  | 3.17  | 0.04 | 0.08 | 1.01  | 0.350707 | 0.739186 | 0.691563 | 0.848856 |
| MmugDNA.225.1.S1_at     | MmugDNA.225.1   | 6.61  | 6.5   | 0.48 | 0.44 | 1.08  | 0.780614 | 0.131445 | 0.919137 | 0.403584 |
| MmugDNA.2250.1.S1_at    | MmugDNA.2250.1  | 8.47  | 8.53  | 1.02 | 0.11 | -1.05 | 0.836344 | 0.938571 | 0.941209 | 0.965059 |
| MmugDNA.22501.1.S1_at   | MmugDNA.22501.1 | 3.53  | 4.33  | 0.39 | 0.35 | -1.73 | 0.130411 | 0.154808 | 0.504689 | 0.429828 |
| MmugDNA.22503.1.S1_at   | MmugDNA.22503.1 | 9.7   | 9.91  | 0.08 | 0.28 | -1.15 | 0.120357 | 0.089661 | 0.49361  | 0.343848 |
| MmugDNA.15819.1.S1_s_at | MmugDNA.15819.1 | 10.68 | 10.87 | 0.11 | 0.16 | -1.14 | 0.189058 | 0.063978 | 0.560735 | 0.299066 |
| MmugDNA.22504.1.S1_at   | MmugDNA.22504.1 | 6.49  | 8.04  | 1.17 | 0.03 | -2.92 | 0.27097  | 0.205465 | 0.630919 | 0.479764 |
| MmugDNA.22506.1.S1_at   | MmugDNA.22506.1 | 10.93 | 9.55  | 3.09 | 0.48 | 2.59  | 0.938883 | 0.573655 | 0.979343 | 0.745229 |
| MmugDNA.22506.1.S1_s_at | MmugDNA.22506.1 | 10.65 | 10.06 | 2.58 | 0.32 | 1.51  | 0.915109 | 0.501752 | 0.97103  | 0.699813 |
| MmugDNA.22507.1.S1_at   | MmugDNA.22507.1 | 7.73  | 7.41  | 0.09 | 0.09 | 1.25  | 0.017744 | 0.063823 | 0.293545 | 0.29906  |
| MmugDNA.22508.1.S1_at   | MmugDNA.22508.1 | 11.46 | 11.14 | 0.17 | 0.07 | 1.25  | 0.169554 | 0.233368 | 0.542559 | 0.504725 |
| MmugDNA.2251.1.S1_at    | MmugDNA.2251.1  | 6.33  | 6.33  | 0.04 | 0.05 | -1    | 0.258928 | 0.336092 | 0.622306 | 0.583652 |
| MmugDNA.22510.1.S1_at   | MmugDNA.22510.1 | 8.56  | 8.73  | 0.54 | 0.09 | -1.13 | 0.847781 | 0.565598 | 0.946572 | 0.739997 |
| MmugDNA.22511.1.S1_at   | MmugDNA.22511.1 | 5.57  | 5.55  | 0.25 | 0.15 | 1.02  | 0.216577 | 0.265438 | 0.586672 | 0.531363 |
| MmugDNA.22513.1.S1_at   | MmugDNA.22513.1 | 4.56  | 4.69  | 0.37 | 0.79 | -1.1  | 0.902551 | 0.535955 | 0.967108 | 0.721454 |
| MmugDNA.22514.1.S1_at   | MmugDNA.22514.1 | 3.84  | 3.63  | 0.07 | 0.06 | 1.16  | 0.049261 | 0.206247 | 0.385423 | 0.480404 |
| MmugDNA.22515.1.S1_at   | MmugDNA.22515.1 | 8.19  | 8.3   | 0.07 | 0.21 | -1.08 | 0.179028 | 0.291086 | 0.552029 | 0.551574 |
| MmugDNA.22516.1.S1_at   | MmugDNA.22516.1 | 4.58  | 4.38  | 0.16 | 0.18 | 1.15  | 0.213064 | 0.130226 | 0.583667 | 0.401961 |
| MmugDNA.22517.1.S1_at   | MmugDNA.22517.1 | 6.16  | 6.14  | 0.15 | 0    | 1.01  | 0.798181 | 0.754848 | 0.925957 | 0.857323 |

|                         |                 |       |       |      |      |       |          |          |          |          |
|-------------------------|-----------------|-------|-------|------|------|-------|----------|----------|----------|----------|
| MmugDNA.22519.1.S1_at   | MmugDNA.22519.1 | 10.7  | 10.7  | 0.13 | 0.05 | 1     | 0.832187 | 0.631454 | 0.939787 | 0.782839 |
| MmugDNA.22521.1.S1_at   | MmugDNA.22521.1 | 4.45  | 4.37  | 0.13 | 0.13 | 1.06  | 0.2712   | 0.361185 | 0.631112 | 0.60207  |
| MmugDNA.22522.1.S1_at   | MmugDNA.22522.1 | 5.01  | 4.96  | 0.19 | 0.11 | 1.04  | 0.153564 | 0.150064 | 0.526754 | 0.424698 |
| MmugDNA.22523.1.S1_at   | MmugDNA.22523.1 | 6.01  | 6.06  | 0    | 0.11 | -1.03 | 0.242698 | 0.193306 | 0.608703 | 0.468656 |
| MmugDNA.22524.1.S1_at   | MmugDNA.22524.1 | 3.75  | 3.58  | 0.14 | 0.09 | 1.12  | 0.238548 | 0.407537 | 0.605359 | 0.63505  |
| MmugDNA.22525.1.S1_at   | MmugDNA.22525.1 | 6     | 6.88  | 0.6  | 0.01 | -1.84 | 0.19056  | 0.106032 | 0.561786 | 0.368427 |
| MmugDNA.22527.1.S1_at   | MmugDNA.22527.1 | 4.49  | 4.35  | 0.29 | 0.22 | 1.11  | 0.437295 | 0.029904 | 0.746748 | 0.214615 |
| MmugDNA.22528.1.S1_at   | MmugDNA.22528.1 | 6.61  | 6.43  | 0.15 | 0.05 | 1.13  | 0.194733 | 0.166189 | 0.565144 | 0.442753 |
| MmugDNA.22529.1.S1_at   | MmugDNA.22529.1 | 10.81 | 10.86 | 0.28 | 0.05 | -1.04 | 0.967164 | 0.399374 | 0.989187 | 0.629776 |
| MmugDNA.2253.1.S1_at    | MmugDNA.2253.1  | 3.37  | 3.32  | 0.18 | 0.1  | 1.04  | 0.329178 | 0.770865 | 0.676252 | 0.866807 |
| MmugDNA.22530.1.S1_at   | MmugDNA.22530.1 | 4.95  | 4.94  | 0.07 | 0.01 | 1     | 0.45721  | 0.93298  | 0.758263 | 0.961911 |
| MmugDNA.22531.1.S1_s_at | MmugDNA.22531.1 | 8.05  | 9.02  | 0.16 | 0.34 | -1.96 | 0.011642 | 0.005995 | 0.256015 | 0.105892 |
| MmugDNA.22533.1.S1_at   | MmugDNA.22533.1 | 4.64  | 4.51  | 0.38 | 0.05 | 1.1   | 0.653845 | 0.344974 | 0.862462 | 0.590239 |
| MmugDNA.22534.1.S1_s_at | MmugDNA.22534.1 | 9.53  | 9.86  | 0.4  | 0.35 | -1.26 | 0.147214 | 0.587338 | 0.521578 | 0.754144 |
| MmugDNA.22535.1.S1_at   | MmugDNA.22535.1 | 8.5   | 8.68  | 0.26 | 0.18 | -1.13 | 0.918817 | 0.931428 | 0.972261 | 0.961034 |
| MmugDNA.22536.1.S1_at   | MmugDNA.22536.1 | 9.35  | 9.5   | 0.25 | 0.28 | -1.11 | 0.314074 | 0.211553 | 0.665    | 0.485658 |
| MmugDNA.22538.1.S1_at   | MmugDNA.22538.1 | 4.6   | 4.63  | 0.07 | 0.1  | -1.03 | 0.309932 | 0.565197 | 0.661902 | 0.739754 |
| MmugDNA.22539.1.S1_at   | MmugDNA.22539.1 | 5.49  | 5.49  | 0.15 | 0.15 | -1.01 | 0.524583 | 0.002596 | 0.795975 | 0.075412 |
| MmugDNA.2254.1.S1_at    | MmugDNA.2254.1  | 4.55  | 4.43  | 0.08 | 0.13 | 1.09  | 0.16801  | 0.057593 | 0.540587 | 0.286152 |
| MmugDNA.22540.1.S1_at   | MmugDNA.22540.1 | 6.02  | 6.03  | 0.08 | 0.12 | -1.01 | 0.393195 | 0.50618  | 0.719023 | 0.70236  |
| MmugDNA.22541.1.S1_at   | MmugDNA.22541.1 | 8.05  | 8.42  | 0.64 | 0.03 | -1.29 | 0.306645 | 0.323388 | 0.659591 | 0.574453 |
| MmugDNA.22542.1.S1_at   | MmugDNA.22542.1 | 4.08  | 4.17  | 0.47 | 0.06 | -1.07 | 0.511184 | 0.674648 | 0.78856  | 0.80993  |
| MmugDNA.22544.1.S1_at   | MmugDNA.22544.1 | 10.12 | 9.86  | 0.71 | 0.16 | 1.2   | 0.524276 | 0.105555 | 0.795835 | 0.367526 |
| MmugDNA.22547.1.S1_at   | MmugDNA.22547.1 | 6.03  | 6.58  | 0.29 | 0.08 | -1.46 | 0.05435  | 0.035511 | 0.39629  | 0.232714 |
| MmugDNA.22548.1.S1_at   | MmugDNA.22548.1 | 5.37  | 5.28  | 0.2  | 0.21 | 1.07  | 0.695817 | 0.067656 | 0.881741 | 0.306199 |
| MmugDNA.22550.1.S1_at   | MmugDNA.22550.1 | 2.82  | 2.95  | 0.02 | 0.15 | -1.09 | 0.565689 | 0.278089 | 0.819429 | 0.541754 |
| MmugDNA.22551.1.S1_at   | MmugDNA.22551.1 | 9.49  | 9.32  | 0.2  | 0.08 | 1.13  | 0.085552 | 0.314635 | 0.452672 | 0.568415 |
| MmugDNA.22552.1.S1_at   | MmugDNA.22552.1 | 4.7   | 4.36  | 0.46 | 0.18 | 1.26  | 0.53926  | 0.754812 | 0.803698 | 0.857323 |
| MmugDNA.22553.1.S1_at   | MmugDNA.22553.1 | 3.12  | 3.06  | 0.1  | 0.13 | 1.04  | 0.954477 | 0.37232  | 0.984894 | 0.611225 |
| MmugDNA.22555.1.S1_at   | MmugDNA.22555.1 | 6.24  | 6.29  | 0.12 | 0    | -1.04 | 0.861403 | 0.973651 | 0.951266 | 0.985648 |
| MmugDNA.22556.1.S1_at   | MmugDNA.22556.1 | 3.22  | 3.11  | 0.02 | 0.04 | 1.08  | 0.012107 | 0.240793 | 0.259438 | 0.511521 |
| MmugDNA.22557.1.S1_at   | MmugDNA.22557.1 | 6.32  | 6.34  | 0.19 | 0.14 | -1.01 | 0.532286 | 0.098731 | 0.800207 | 0.356811 |
| MmugDNA.22558.1.S1_at   | MmugDNA.22558.1 | 9.02  | 9.06  | 0.1  | 0.17 | -1.03 | 0.40808  | 0.580035 | 0.729179 | 0.749408 |
| MmugDNA.22559.1.S1_at   | MmugDNA.22559.1 | 6.29  | 5.92  | 0.38 | 0.26 | 1.29  | 0.510026 | 0.272944 | 0.787923 | 0.53761  |
| MmugDNA.2256.1.S1_at    | MmugDNA.2256.1  | 3.48  | 3.33  | 0.13 | 0.03 | 1.11  | 0.218474 | 0.263072 | 0.588306 | 0.529402 |
| MmugDNA.22561.1.S1_at   | MmugDNA.22561.1 | 3.61  | 3.93  | 0.15 | 0.12 | -1.25 | 0.046316 | 0.490859 | 0.377679 | 0.692666 |
| MmugDNA.22562.1.S1_at   | MmugDNA.22562.1 | 4.27  | 4.29  | 0.18 | 0.08 | -1.01 | 0.928286 | 0.19364  | 0.976259 | 0.468785 |
| MmugDNA.22563.1.S1_at   | MmugDNA.22563.1 | 4.74  | 4.52  | 0.26 | 0.07 | 1.17  | 0.290153 | 0.386184 | 0.646775 | 0.621435 |
| MmugDNA.22564.1.S1_at   | MmugDNA.22564.1 | 6.03  | 5.84  | 0.18 | 0.13 | 1.14  | 0.244485 | 0.163852 | 0.61     | 0.440054 |
| MmugDNA.22565.1.S1_at   | MmugDNA.22565.1 | 3.45  | 4.12  | 0.28 | 0.52 | -1.59 | 0.270388 | 0.263547 | 0.630298 | 0.529826 |
| MmugDNA.22566.1.S1_at   | MmugDNA.22566.1 | 3.39  | 3.4   | 0.04 | 0.16 | -1.01 | 0.43198  | 0.607581 | 0.743696 | 0.766437 |
| MmugDNA.22567.1.S1_at   | MmugDNA.22567.1 | 6.78  | 6.75  | 0.15 | 0.1  | 1.03  | 0.426794 | 0.534145 | 0.740725 | 0.720143 |
| MmugDNA.2257.1.S1_at    | MmugDNA.2257.1  | 7.57  | 7.62  | 0.26 | 0.06 | -1.04 | 0.558994 | 0.010612 | 0.815836 | 0.134345 |

|                         |                 |       |       |      |      |       |          |          |          |          |
|-------------------------|-----------------|-------|-------|------|------|-------|----------|----------|----------|----------|
| MmugDNA.22570.1.S1_at   | MmugDNA.22570.1 | 6.02  | 5.96  | 0.03 | 0.04 | 1.04  | 0.036315 | 0.002922 | 0.35477  | 0.079414 |
| MmugDNA.22571.1.S1_at   | MmugDNA.22571.1 | 10.16 | 11.09 | 0.76 | 0.13 | -1.91 | 0.259014 | 0.362198 | 0.622413 | 0.602845 |
| MmugDNA.22572.1.S1_at   | MmugDNA.22572.1 | 6.14  | 5.98  | 0.29 | 0.18 | 1.12  | 0.691443 | 0.901413 | 0.879833 | 0.943931 |
| MmugDNA.22574.1.S1_at   | MmugDNA.22574.1 | 7.1   | 7.14  | 0.14 | 0.03 | -1.03 | 0.643342 | 0.811942 | 0.858192 | 0.891493 |
| MmugDNA.22575.1.S1_at   | MmugDNA.22575.1 | 4.94  | 6.2   | 0.96 | 0.37 | -2.39 | 0.128677 | 0.081395 | 0.503433 | 0.329571 |
| MmugDNA.22576.1.S1_at   | MmugDNA.22576.1 | 4.13  | 4.1   | 0.14 | 0.26 | 1.02  | 0.526548 | 0.608507 | 0.79668  | 0.767091 |
| MmugDNA.22577.1.S1_at   | MmugDNA.22577.1 | 7.96  | 8.31  | 0.2  | 0.16 | -1.28 | 0.087283 | 0.051152 | 0.454785 | 0.271638 |
| MmugDNA.22578.1.S1_at   | MmugDNA.22578.1 | 7.32  | 6.7   | 0.18 | 0.22 | 1.54  | 0.023812 | 0.060657 | 0.316842 | 0.292871 |
| MmugDNA.22580.1.S1_at   | MmugDNA.22580.1 | 8.4   | 8.76  | 0.91 | 0.19 | -1.29 | 0.563259 | 0.542313 | 0.818148 | 0.725385 |
| MmugDNA.22581.1.S1_at   | MmugDNA.22581.1 | 4.28  | 4.82  | 0.27 | 0.78 | -1.45 | 0.193708 | 0.312777 | 0.564275 | 0.567314 |
| MmugDNA.22583.1.S1_at   | MmugDNA.22583.1 | 2.99  | 2.98  | 0.09 | 0.15 | 1.01  | 0.84394  | 0.751475 | 0.944991 | 0.855508 |
| MmugDNA.22584.1.S1_at   | MmugDNA.22584.1 | 4.4   | 4.41  | 0.07 | 0.09 | -1.01 | 0.671431 | 0.143065 | 0.870346 | 0.416953 |
| MmugDNA.1433.1.S1_at    | MmugDNA.1433.1  | 9.83  | 9.44  | 0.39 | 0.05 | 1.31  | 0.561122 | 0.67397  | 0.817114 | 0.809483 |
| MmugDNA.1433.1.S1_s_at  | MmugDNA.1433.1  | 11.14 | 10.6  | 0.46 | 0.05 | 1.45  | 0.341981 | 0.456255 | 0.685567 | 0.670036 |
| MmugDNA.22586.1.S1_at   | MmugDNA.22586.1 | 4.31  | 4.3   | 0.13 | 0.1  | 1.01  | 0.637682 | 0.589833 | 0.85561  | 0.755973 |
| MmugDNA.22587.1.S1_at   | MmugDNA.22587.1 | 4.43  | 3.94  | 0.41 | 0.04 | 1.41  | 0.096343 | 0.141589 | 0.46509  | 0.415102 |
| MmugDNA.22588.1.S1_at   | MmugDNA.22588.1 | 8.82  | 8.47  | 0.22 | 0.21 | 1.27  | 0.072832 | 0.066661 | 0.433499 | 0.303999 |
| MmugDNA.22589.1.S1_at   | MmugDNA.22589.1 | 3.76  | 3.75  | 0.19 | 0.23 | 1.01  | 0.622136 | 0.43397  | 0.847666 | 0.654135 |
| MmugDNA.22590.1.S1_at   | MmugDNA.22590.1 | 4.85  | 4.49  | 0.04 | 0.4  | 1.29  | 0.644751 | 0.711079 | 0.858593 | 0.8324   |
| MmugDNA.22591.1.S1_at   | MmugDNA.22591.1 | 11.3  | 11.31 | 0.4  | 0.01 | -1.01 | 0.984447 | 0.57547  | 0.995256 | 0.746538 |
| MmugDNA.22592.1.S1_at   | MmugDNA.22592.1 | 7.14  | 6.44  | 0.67 | 0.08 | 1.63  | 0.425709 | 0.080389 | 0.740112 | 0.328028 |
| MmugDNA.22593.1.S1_at   | MmugDNA.22593.1 | 4.82  | 4.72  | 0.07 | 0.11 | 1.07  | 0.17812  | 0.260092 | 0.551242 | 0.52675  |
| MmugDNA.22598.1.S1_at   | MmugDNA.22598.1 | 8.94  | 9.21  | 0.65 | 0.2  | -1.2  | 0.445155 | 0.195026 | 0.751905 | 0.470176 |
| MmugDNA.22599.1.S1_at   | MmugDNA.22599.1 | 5.32  | 5.21  | 0.52 | 0.34 | 1.08  | 0.425825 | 0.041625 | 0.740112 | 0.24887  |
| MmugDNA.2260.1.S1_s_at  | MmugDNA.2260.1  | 10.94 | 10.53 | 0.55 | 0.27 | 1.33  | 0.520963 | 0.626788 | 0.794207 | 0.779995 |
| MmugDNA.22600.1.S1_at   | MmugDNA.22600.1 | 3.64  | 3.59  | 0.2  | 0.17 | 1.03  | 0.736254 | 0.143652 | 0.899078 | 0.417555 |
| MmugDNA.22601.1.S1_at   | MmugDNA.22601.1 | 8.23  | 8.87  | 0.31 | 0.28 | -1.56 | 0.032163 | 0.003264 | 0.343212 | 0.082278 |
| MmugDNA.22602.1.S1_at   | MmugDNA.22602.1 | 12.09 | 12.26 | 0.2  | 0.1  | -1.12 | 0.269188 | 0.384243 | 0.629522 | 0.619994 |
| MmugDNA.22603.1.S1_at   | MmugDNA.22603.1 | 8.01  | 8.04  | 1.65 | 0.38 | -1.02 | 0.910059 | 0.197617 | 0.969453 | 0.472566 |
| MmugDNA.22604.1.S1_at   | MmugDNA.22604.1 | 7.91  | 7.41  | 0.47 | 0.21 | 1.41  | 0.261634 | 0.383682 | 0.62388  | 0.61968  |
| MmugDNA.22605.1.S1_at   | MmugDNA.22605.1 | 3     | 3.14  | 0.05 | 0.11 | -1.1  | 0.04378  | 0.107523 | 0.372554 | 0.370389 |
| MmugDNA.22606.1.S1_at   | MmugDNA.22606.1 | 5.35  | 5.39  | 0.56 | 0.19 | -1.02 | 0.793577 | 0.889576 | 0.924409 | 0.937097 |
| MmugDNA.22608.1.S1_at   | MmugDNA.22608.1 | 3.49  | 3.23  | 0.06 | 0.09 | 1.2   | 0.008135 | 0.045831 | 0.232005 | 0.258354 |
| MmugDNA.2261.1.S1_at    | MmugDNA.2261.1  | 6.95  | 7.14  | 0.81 | 0.26 | -1.14 | 0.896965 | 0.134975 | 0.964979 | 0.406951 |
| MmugDNA.22611.1.S1_at   | MmugDNA.22611.1 | 12.3  | 12.63 | 0.26 | 0.15 | -1.26 | 0.089536 | 0.237369 | 0.457672 | 0.508098 |
| MmugDNA.22612.1.S1_at   | MmugDNA.22612.1 | 5.06  | 4.93  | 0.08 | 0.13 | 1.1   | 0.183478 | 0.131987 | 0.55651  | 0.404024 |
| MmugDNA.22613.1.S1_at   | MmugDNA.22613.1 | 3.05  | 2.81  | 0.23 | 0.15 | 1.18  | 0.068547 | 0.051718 | 0.425885 | 0.272972 |
| MmugDNA.22614.1.S1_at   | MmugDNA.22614.1 | 5.97  | 5.5   | 0.54 | 0.11 | 1.38  | 0.133658 | 0.10236  | 0.508012 | 0.362527 |
| MmugDNA.22615.1.S1_at   | MmugDNA.22615.1 | 11.85 | 12.09 | 0.38 | 0.27 | -1.18 | 0.61063  | 0.171935 | 0.841982 | 0.448352 |
| MmugDNA.22615.1.S1_s_at | MmugDNA.22615.1 | 12.06 | 12.14 | 0.39 | 0.11 | -1.06 | 0.355651 | 0.511249 | 0.694781 | 0.705465 |
| MmugDNA.22616.1.S1_at   | MmugDNA.22616.1 | 7.28  | 7.17  | 0.09 | 0.05 | 1.08  | 0.107479 | 0.202118 | 0.479945 | 0.476557 |
| MmugDNA.22618.1.S1_at   | MmugDNA.22618.1 | 3.19  | 3.15  | 0.1  | 0.27 | 1.02  | 0.892819 | 0.633025 | 0.963301 | 0.783894 |
| MmugDNA.2262.1.S1_at    | MmugDNA.2262.1  | 12.74 | 12.59 | 0.28 | 0.18 | 1.11  | 0.571667 | 0.257816 | 0.822859 | 0.525442 |

|                         |                 |       |       |      |      |       |          |          |          |          |
|-------------------------|-----------------|-------|-------|------|------|-------|----------|----------|----------|----------|
| MmugDNA.22621.1.S1_at   | MmugDNA.22621.1 | 5.33  | 5.43  | 0.22 | 0.32 | -1.07 | 0.895535 | 0.990187 | 0.964244 | 0.9944   |
| MmugDNA.22623.1.S1_at   | MmugDNA.22623.1 | 8.04  | 7.42  | 0.7  | 0.47 | 1.54  | 0.842128 | 0.31464  | 0.944083 | 0.568415 |
| MmugDNA.22624.1.S1_at   | MmugDNA.22624.1 | 9.94  | 9.5   | 1.02 | 0.03 | 1.35  | 0.803479 | 0.17397  | 0.928415 | 0.450247 |
| MmugDNA.22625.1.S1_at   | MmugDNA.22625.1 | 7.47  | 7.43  | 0.09 | 0.03 | 1.03  | 0.503512 | 0.505167 | 0.784372 | 0.702005 |
| MmugDNA.22626.1.S1_at   | MmugDNA.22626.1 | 12.17 | 11.7  | 0.51 | 0.29 | 1.38  | 0.142738 | 0.073681 | 0.517867 | 0.317014 |
| MmugDNA.22628.1.S1_at   | MmugDNA.22628.1 | 8.6   | 7.93  | 0.13 | 0.32 | 1.6   | 0.030084 | 0.027575 | 0.336449 | 0.207355 |
| MmugDNA.2263.1.S1_at    | MmugDNA.2263.1  | 5.28  | 5.16  | 0.12 | 0.05 | 1.09  | 0.116284 | 0.527848 | 0.489568 | 0.71629  |
| MmugDNA.22630.1.S1_at   | MmugDNA.22630.1 | 3.5   | 3.39  | 0.04 | 0.09 | 1.08  | 0.148612 | 0.191514 | 0.522658 | 0.466833 |
| MmugDNA.22633.1.S1_at   | MmugDNA.22633.1 | 13.77 | 13.77 | 0.09 | 0.04 | 1     | 0.250379 | 0.396016 | 0.615561 | 0.627823 |
| MmugDNA.22635.1.S1_at   | MmugDNA.22635.1 | 3.58  | 3.55  | 0.01 | 0.05 | 1.02  | 0.112914 | 0.549618 | 0.486223 | 0.729956 |
| MmugDNA.22637.1.S1_at   | MmugDNA.22637.1 | 6.87  | 6.87  | 0.06 | 0.07 | -1    | 0.591233 | 0.508467 | 0.833304 | 0.70363  |
| MmugDNA.22638.1.S1_at   | MmugDNA.22638.1 | 8.56  | 8.68  | 0.12 | 0.36 | -1.08 | 0.435588 | 0.260769 | 0.745762 | 0.52721  |
| MmugDNA.22639.1.S1_at   | MmugDNA.22639.1 | 3.6   | 3.45  | 0.13 | 0.08 | 1.11  | 0.161701 | 0.14323  | 0.535125 | 0.417179 |
| MmugDNA.2264.1.S1_at    | MmugDNA.2264.1  | 6.54  | 6.59  | 0.5  | 0.33 | -1.03 | 0.971157 | 0.796314 | 0.990583 | 0.882625 |
| MmugDNA.22641.1.S1_at   | MmugDNA.22641.1 | 3.52  | 3.22  | 0.26 | 0.04 | 1.23  | 0.119454 | 0.325356 | 0.492875 | 0.575769 |
| MmugDNA.22643.1.S1_at   | MmugDNA.22643.1 | 11.67 | 11.51 | 0.46 | 0.19 | 1.12  | 0.45629  | 0.233292 | 0.757808 | 0.50468  |
| MmugDNA.22644.1.S1_at   | MmugDNA.22644.1 | 3.02  | 2.83  | 0.16 | 0.1  | 1.14  | 0.22615  | 0.2482   | 0.5953   | 0.517574 |
| MmugDNA.22644.1.S1_x_at | MmugDNA.22644.1 | 3.32  | 3.26  | 0.15 | 0.1  | 1.04  | 0.52809  | 0.112111 | 0.797476 | 0.377398 |
| MmugDNA.22645.1.S1_at   | MmugDNA.22645.1 | 4.22  | 4.09  | 0.11 | 0.38 | 1.09  | 0.78549  | 0.554879 | 0.921144 | 0.733544 |
| MmugDNA.22646.1.S1_at   | MmugDNA.22646.1 | 3.49  | 3.45  | 0.03 | 0.02 | 1.03  | 0.455489 | 0.048031 | 0.757444 | 0.264118 |
| MmugDNA.22647.1.S1_at   | MmugDNA.22647.1 | 4.82  | 5.26  | 0.41 | 0.31 | -1.35 | 0.593223 | 0.799504 | 0.834114 | 0.884661 |
| MmugDNA.22648.1.S1_at   | MmugDNA.22648.1 | 5.71  | 5.57  | 0.17 | 0.29 | 1.11  | 0.560432 | 0.860759 | 0.816681 | 0.920687 |
| MmugDNA.22649.1.S1_at   | MmugDNA.22649.1 | 6.61  | 5.86  | 0.64 | 0.3  | 1.68  | 0.147227 | 0.017944 | 0.521578 | 0.168998 |
| MmugDNA.22650.1.S1_at   | MmugDNA.22650.1 | 2.99  | 2.9   | 0.22 | 0.15 | 1.06  | 0.785626 | 0.406164 | 0.921215 | 0.634211 |
| MmugDNA.22651.1.S1_at   | MmugDNA.22651.1 | 5.28  | 5.29  | 0.23 | 0.12 | -1    | 0.265853 | 0.589872 | 0.626921 | 0.755987 |
| MmugDNA.22653.1.S1_at   | MmugDNA.22653.1 | 6.66  | 6.69  | 0.17 | 0.12 | -1.02 | 0.723784 | 0.92029  | 0.892865 | 0.95511  |
| MmugDNA.22654.1.S1_at   | MmugDNA.22654.1 | 6.57  | 6.41  | 0.02 | 0.17 | 1.12  | 0.203963 | 0.466341 | 0.575205 | 0.67624  |
| MmugDNA.22656.1.S1_at   | MmugDNA.22656.1 | 6.41  | 6.39  | 0.17 | 0.1  | 1.01  | 0.846978 | 0.365419 | 0.946375 | 0.605537 |
| MmugDNA.22657.1.S1_at   | MmugDNA.22657.1 | 9.55  | 9.7   | 0.52 | 0.17 | -1.11 | 0.764718 | 0.952379 | 0.911553 | 0.973038 |
| MmugDNA.22658.1.S1_at   | MmugDNA.22658.1 | 6.43  | 6.37  | 0.11 | 0.04 | 1.04  | 0.409771 | 0.900406 | 0.730334 | 0.94344  |
| MmugDNA.22661.1.S1_at   | MmugDNA.22661.1 | 7.06  | 7.63  | 0.26 | 0.1  | -1.48 | 0.049086 | 0.031654 | 0.385273 | 0.22018  |
| MmugDNA.22662.1.S1_at   | MmugDNA.22662.1 | 9.07  | 8.84  | 0.47 | 0.31 | 1.17  | 0.511368 | 0.532619 | 0.788654 | 0.719151 |
| MmugDNA.22664.1.S1_at   | MmugDNA.22664.1 | 4.15  | 4.07  | 0.19 | 0.08 | 1.06  | 0.831479 | 0.27591  | 0.939628 | 0.540035 |
| MmugDNA.22666.1.S1_at   | MmugDNA.22666.1 | 10.27 | 10    | 0.21 | 0.07 | 1.2   | 0.067288 | 0.051769 | 0.423412 | 0.273102 |
| MmugDNA.22667.1.S1_at   | MmugDNA.22667.1 | 3.92  | 3.9   | 0.02 | 0.03 | 1.02  | 0.146131 | 0.951603 | 0.520572 | 0.972522 |
| MmugDNA.22668.1.S1_at   | MmugDNA.22668.1 | 5.92  | 5.83  | 0.1  | 0.12 | 1.06  | 0.354208 | 0.443866 | 0.6938   | 0.661533 |
| MmugDNA.22669.1.S1_at   | MmugDNA.22669.1 | 5.33  | 5.36  | 0.07 | 0.1  | -1.03 | 0.633032 | 0.623455 | 0.853404 | 0.777793 |
| MmugDNA.2267.1.S1_at    | MmugDNA.2267.1  | 6.11  | 5.73  | 0.27 | 0.2  | 1.3   | 0.196728 | 0.120472 | 0.567378 | 0.38925  |
| MmugDNA.22670.1.S1_at   | MmugDNA.22670.1 | 7.01  | 7.14  | 0.15 | 0.15 | -1.09 | 0.394314 | 0.173085 | 0.7197   | 0.449765 |
| MmugDNA.22671.1.S1_at   | MmugDNA.22671.1 | 11.44 | 11.32 | 0.04 | 0.07 | 1.09  | 0.040695 | 0.067153 | 0.364778 | 0.305165 |
| MmugDNA.22671.1.S1_s_at | MmugDNA.22671.1 | 12.32 | 11.89 | 0.03 | 0.04 | 1.35  | 0.00016  | 0.00135  | 0.112332 | 0.056546 |
| MmugDNA.22672.1.S1_at   | MmugDNA.22672.1 | 5.53  | 5.56  | 0.06 | 0.07 | -1.02 | 0.82769  | 0.456778 | 0.938081 | 0.67045  |
| MmugDNA.22673.1.S1_at   | MmugDNA.22673.1 | 10.47 | 10.3  | 0.52 | 0.07 | 1.12  | 0.372335 | 0.598831 | 0.705567 | 0.761155 |

|                         |                 |       |       |      |      |       |          |          |          |          |
|-------------------------|-----------------|-------|-------|------|------|-------|----------|----------|----------|----------|
| MmugDNA.22674.1.S1_at   | MmugDNA.22674.1 | 11.41 | 12.06 | 0.44 | 0.04 | -1.57 | 0.047976 | 0.02615  | 0.381764 | 0.202721 |
| MmugDNA.22675.1.S1_at   | MmugDNA.22675.1 | 4.39  | 4.38  | 0.03 | 0.06 | 1.01  | 0.687235 | 0.615306 | 0.877656 | 0.771918 |
| MmugDNA.22676.1.S1_at   | MmugDNA.22676.1 | 6.95  | 6.06  | 0.56 | 0.09 | 1.85  | 0.080087 | 0.067293 | 0.44342  | 0.30541  |
| MmugDNA.22677.1.S1_at   | MmugDNA.22677.1 | 5.75  | 5.66  | 0.29 | 0.2  | 1.07  | 0.813625 | 0.329536 | 0.93266  | 0.578781 |
| MmugDNA.22678.1.S1_at   | MmugDNA.22678.1 | 10.89 | 11.06 | 0.07 | 0.04 | -1.13 | 0.023554 | 0.095172 | 0.31615  | 0.35218  |
| MmugDNA.2268.1.S1_at    | MmugDNA.2268.1  | 6.59  | 6.32  | 0.15 | 0.1  | 1.21  | 0.034617 | 0.027009 | 0.350134 | 0.205501 |
| MmugDNA.2268.1.S1_x_at  | MmugDNA.2268.1  | 6.5   | 6.22  | 0.01 | 0.11 | 1.21  | 0.029444 | 0.020008 | 0.334169 | 0.17768  |
| MmugDNA.22680.1.S1_at   | MmugDNA.22680.1 | 4.23  | 4.82  | 0.72 | 0.24 | -1.51 | 0.49729  | 0.573533 | 0.781055 | 0.745197 |
| MmugDNA.22681.1.S1_at   | MmugDNA.22681.1 | 3.75  | 3.76  | 0.08 | 0.04 | -1.01 | 0.815962 | 0.734062 | 0.933284 | 0.845896 |
| MmugDNA.22682.1.S1_at   | MmugDNA.22682.1 | 5.69  | 5.11  | 0.09 | 0.02 | 1.5   | 0.000433 | 0.000092 | 0.139393 | 0.027225 |
| MmugDNA.22683.1.S1_at   | MmugDNA.22683.1 | 5.69  | 5.62  | 0.55 | 0.15 | -1.05 | 0.316808 | 0.113787 | 0.666723 | 0.380021 |
| MmugDNA.22684.1.S1_at   | MmugDNA.22684.1 | 3.73  | 3.51  | 0.04 | 0.05 | 1.16  | 0.010336 | 0.236803 | 0.246929 | 0.507545 |
| MmugDNA.22685.1.S1_at   | MmugDNA.22685.1 | 3.64  | 3.64  | 0.14 | 0.17 | -1    | 0.866112 | 0.303266 | 0.95294  | 0.560748 |
| MmugDNA.22686.1.S1_at   | MmugDNA.22686.1 | 3.11  | 3.17  | 0.21 | 0.22 | -1.04 | 0.459775 | 0.095998 | 0.7598   | 0.353302 |
| MmugDNA.22687.1.S1_at   | MmugDNA.22687.1 | 8.03  | 6.81  | 0.62 | 0.12 | 2.32  | 0.032244 | 0.004899 | 0.34346  | 0.097632 |
| MmugDNA.22689.1.S1_at   | MmugDNA.22689.1 | 3.07  | 3.11  | 0.47 | 0.12 | -1.02 | 0.421769 | 0.250426 | 0.73772  | 0.519391 |
| MmugDNA.22690.1.S1_at   | MmugDNA.22690.1 | 5.28  | 5.42  | 0.28 | 0.26 | -1.1  | 0.588713 | 0.568895 | 0.831968 | 0.742129 |
| MmugDNA.22691.1.S1_at   | MmugDNA.22691.1 | 6.43  | 6.05  | 1.12 | 0.35 | 1.3   | 0.724721 | 0.226669 | 0.893271 | 0.499139 |
| MmugDNA.22694.1.S1_at   | MmugDNA.22694.1 | 5.36  | 5.28  | 0.11 | 0.15 | 1.06  | 0.379336 | 0.049564 | 0.708883 | 0.267592 |
| MmugDNA.22695.1.S1_at   | MmugDNA.22695.1 | 6.56  | 8.35  | 0.65 | 0.09 | -3.45 | 0.02064  | 0.015007 | 0.305121 | 0.155713 |
| MmugDNA.22696.1.S1_at   | MmugDNA.22696.1 | 4.61  | 4.47  | 0.1  | 0.2  | 1.1   | 0.192564 | 0.419228 | 0.563577 | 0.643398 |
| MmugDNA.22697.1.S1_at   | MmugDNA.22697.1 | 4.7   | 4.69  | 0.08 | 0    | 1.01  | 0.480871 | 0.8097   | 0.771638 | 0.890319 |
| MmugDNA.22698.1.S1_at   | MmugDNA.22698.1 | 6.53  | 6.5   | 0.1  | 0.14 | 1.02  | 0.503618 | 0.209978 | 0.784375 | 0.483744 |
| MmugDNA.22699.1.S1_at   | MmugDNA.22699.1 | 2.81  | 2.81  | 0.1  | 0.06 | 1     | 0.955655 | 0.867658 | 0.985346 | 0.924791 |
| MmugDNA.227.1.S1_at     | MmugDNA.227.1   | 5.07  | 5.12  | 0.1  | 0.11 | -1.04 | 0.855319 | 0.413724 | 0.948797 | 0.639742 |
| MmugDNA.2270.1.S1_at    | MmugDNA.2270.1  | 5.43  | 6.04  | 0.22 | 0.3  | -1.52 | 0.09642  | 0.285553 | 0.4651   | 0.547395 |
| MmugDNA.22700.1.S1_at   | MmugDNA.22700.1 | 12.31 | 12.61 | 0.37 | 0.12 | -1.23 | 0.254409 | 0.248348 | 0.618899 | 0.5176   |
| MmugDNA.22701.1.S1_at   | MmugDNA.22701.1 | 10.79 | 10.39 | 0.43 | 0.08 | 1.32  | 0.172553 | 0.217172 | 0.545793 | 0.490822 |
| MmugDNA.22702.1.S1_at   | MmugDNA.22702.1 | 5.32  | 5.26  | 0.09 | 0.23 | 1.04  | 0.727888 | 0.484832 | 0.894887 | 0.688773 |
| MmugDNA.22703.1.S1_at   | MmugDNA.22703.1 | 11.72 | 11.81 | 0.16 | 0.1  | -1.07 | 0.742122 | 0.883084 | 0.901638 | 0.933312 |
| MmugDNA.22704.1.S1_at   | MmugDNA.22704.1 | 5.02  | 4.91  | 0.2  | 0.11 | 1.08  | 0.821146 | 0.360576 | 0.935497 | 0.601624 |
| MmugDNA.22705.1.S1_at   | MmugDNA.22705.1 | 6.72  | 6.55  | 0.22 | 0.32 | 1.12  | 0.906064 | 0.071932 | 0.968218 | 0.314293 |
| MmugDNA.22706.1.S1_at   | MmugDNA.22706.1 | 5.64  | 5.55  | 1.05 | 0.4  | 1.07  | 0.464516 | 0.592082 | 0.762534 | 0.757476 |
| MmugDNA.22707.1.S1_at   | MmugDNA.22707.1 | 6.79  | 6.84  | 0.12 | 0.11 | -1.03 | 0.413751 | 0.323123 | 0.732521 | 0.574351 |
| MmugDNA.22708.1.S1_at   | MmugDNA.22708.1 | 11.84 | 12.05 | 0.17 | 0.02 | -1.16 | 0.208388 | 0.005153 | 0.580083 | 0.09964  |
| MmugDNA.22709.1.S1_at   | MmugDNA.22709.1 | 3.18  | 3.18  | 0.09 | 0.16 | -1    | 0.462443 | 0.662216 | 0.761639 | 0.802201 |
| MmugDNA.2271.1.S1_s_at  | MmugDNA.2271.1  | 6.16  | 4.76  | 1.33 | 1.07 | 2.63  | 0.488218 | 0.085813 | 0.775437 | 0.337901 |
| MmugDNA.22713.1.S1_s_at | MmugDNA.22713.1 | 5.47  | 5.45  | 0.08 | 0.04 | 1.01  | 0.535298 | 0.906025 | 0.801636 | 0.946832 |
| MmugDNA.22714.1.S1_at   | MmugDNA.22714.1 | 4.75  | 5.77  | 0.41 | 0.23 | -2.02 | 0.044559 | 0.036642 | 0.374916 | 0.235943 |
| MmugDNA.22715.1.S1_s_at | MmugDNA.22715.1 | 10.89 | 10.74 | 0.55 | 0.09 | 1.11  | 0.986278 | 0.752339 | 0.995581 | 0.855799 |
| MmugDNA.22716.1.S1_at   | MmugDNA.22716.1 | 10.57 | 10.26 | 0.76 | 0.04 | 1.24  | 0.494503 | 0.715293 | 0.779472 | 0.834966 |
| MmugDNA.22717.1.S1_at   | MmugDNA.22717.1 | 10.45 | 9.79  | 0.5  | 0.06 | 1.58  | 0.137894 | 0.153744 | 0.513654 | 0.428426 |
| MmugDNA.22718.1.S1_at   | MmugDNA.22718.1 | 11.21 | 10.64 | 0.4  | 0.12 | 1.49  | 0.151988 | 0.223685 | 0.525094 | 0.496603 |

|                         |                 |       |       |      |      |       |          |          |          |          |
|-------------------------|-----------------|-------|-------|------|------|-------|----------|----------|----------|----------|
| MmugDNA.22719.1.S1_at   | MmugDNA.22719.1 | 4.44  | 4.29  | 0.15 | 0.14 | 1.1   | 0.570293 | 0.322484 | 0.821978 | 0.573991 |
| MmugDNA.22719.1.S1_s_at | MmugDNA.22719.1 | 5.77  | 5.76  | 0.08 | 0.06 | 1.01  | 0.450919 | 0.730758 | 0.75496  | 0.844055 |
| MmugDNA.2272.1.S1_at    | MmugDNA.2272.1  | 5.89  | 5.68  | 0.29 | 0.29 | 1.15  | 0.303135 | 0.453656 | 0.657006 | 0.668074 |
| MmugDNA.22720.1.S1_at   | MmugDNA.22720.1 | 3.83  | 3.79  | 0.17 | 0.08 | 1.03  | 0.526069 | 0.718989 | 0.796442 | 0.83734  |
| MmugDNA.22721.1.S1_at   | MmugDNA.22721.1 | 5.85  | 5.85  | 0.14 | 0.15 | 1     | 0.230998 | 0.351027 | 0.599045 | 0.594737 |
| MmugDNA.22723.1.S1_at   | MmugDNA.22723.1 | 4.98  | 4.78  | 0.08 | 0.01 | 1.15  | 0.016542 | 0.150235 | 0.287478 | 0.42486  |
| MmugDNA.22724.1.S1_at   | MmugDNA.22724.1 | 6     | 6.07  | 0.04 | 0.08 | -1.05 | 0.388355 | 0.177211 | 0.715274 | 0.453647 |
| MmugDNA.22725.1.S1_at   | MmugDNA.22725.1 | 5.66  | 5.65  | 0.08 | 0.02 | 1.01  | 0.230567 | 0.394875 | 0.59872  | 0.627216 |
| MmugDNA.22727.1.S1_at   | MmugDNA.22727.1 | 3.53  | 3.39  | 0.07 | 0.04 | 1.11  | 0.055992 | 0.429885 | 0.399441 | 0.651109 |
| MmugDNA.22728.1.S1_at   | MmugDNA.22728.1 | 8.08  | 9.24  | 0.51 | 0.02 | -2.23 | 0.016152 | 0.005466 | 0.286239 | 0.102078 |
| MmugDNA.22729.1.S1_at   | MmugDNA.22729.1 | 4.04  | 4.05  | 0.02 | 0.05 | -1    | 0.278516 | 0.668    | 0.637722 | 0.8057   |
| MmugDNA.2273.1.S1_at    | MmugDNA.2273.1  | 12.31 | 12.53 | 0.17 | 0.05 | -1.17 | 0.08724  | 0.143778 | 0.454785 | 0.41759  |
| MmugDNA.22730.1.S1_at   | MmugDNA.22730.1 | 9.13  | 9.31  | 0.2  | 0.21 | -1.14 | 0.168319 | 0.299698 | 0.540932 | 0.558037 |
| MmugDNA.22732.1.S1_at   | MmugDNA.22732.1 | 7.45  | 7.61  | 0.26 | 0.1  | -1.12 | 0.862677 | 0.980199 | 0.951672 | 0.989257 |
| MmugDNA.22733.1.S1_at   | MmugDNA.22733.1 | 6.16  | 6.12  | 0.04 | 0.04 | 1.03  | 0.658669 | 0.803093 | 0.864805 | 0.886577 |
| MmugDNA.22734.1.S1_at   | MmugDNA.22734.1 | 9.78  | 9.46  | 0.28 | 0.19 | 1.25  | 0.249085 | 0.072119 | 0.614389 | 0.314611 |
| MmugDNA.4390.1.S1_at    | MmugDNA.4390.1  | 10.37 | 10.44 | 0.95 | 0.07 | -1.05 | 0.339958 | 0.421104 | 0.684096 | 0.644743 |
| MmugDNA.4390.1.S1_s_at  | MmugDNA.4390.1  | 11.54 | 11.27 | 1.02 | 0.09 | 1.21  | 0.591822 | 0.640396 | 0.833648 | 0.788874 |
| MmugDNA.22739.1.S1_at   | MmugDNA.22739.1 | 9.42  | 8.54  | 0.37 | 0.2  | 1.85  | 0.010671 | 0.004931 | 0.249231 | 0.097846 |
| MmugDNA.2274.1.S1_at    | MmugDNA.2274.1  | 6.67  | 6.59  | 0.08 | 0.05 | 1.06  | 0.047548 | 0.052491 | 0.380487 | 0.274693 |
| MmugDNA.22740.1.S1_at   | MmugDNA.22740.1 | 7.66  | 5.44  | 0.27 | 0.26 | 4.65  | 0.000519 | 0.000116 | 0.143137 | 0.028664 |
| MmugDNA.22741.1.S1_at   | MmugDNA.22741.1 | 5.5   | 5.44  | 0.63 | 0.55 | 1.05  | 0.621928 | 0.172409 | 0.847631 | 0.448837 |
| MmugDNA.22742.1.S1_at   | MmugDNA.22742.1 | 6.24  | 6.32  | 0.13 | 0.22 | -1.06 | 0.124865 | 0.10919  | 0.498917 | 0.37308  |
| MmugDNA.22743.1.S1_at   | MmugDNA.22743.1 | 3.08  | 2.95  | 0.1  | 0.03 | 1.1   | 0.101718 | 0.107435 | 0.471947 | 0.370267 |
| MmugDNA.22744.1.S1_at   | MmugDNA.22744.1 | 3.68  | 3.71  | 0.22 | 0.01 | -1.02 | 0.496008 | 0.058017 | 0.780178 | 0.287396 |
| MmugDNA.22744.1.S1_s_at | MmugDNA.22744.1 | 6.68  | 6.48  | 0.14 | 0.18 | 1.14  | 0.233544 | 0.053918 | 0.601115 | 0.277732 |
| MmugDNA.22744.1.S1_x_at | MmugDNA.22744.1 | 6.16  | 6.05  | 0.14 | 0.05 | 1.08  | 0.377564 | 0.008504 | 0.707557 | 0.1223   |
| MmugDNA.22745.1.S1_at   | MmugDNA.22745.1 | 8.3   | 8.22  | 0.34 | 0.06 | 1.06  | 0.984558 | 0.188834 | 0.995256 | 0.464789 |
| MmugDNA.22746.1.S1_at   | MmugDNA.22746.1 | 5.71  | 6.76  | 1.48 | 0.09 | -2.08 | 0.306816 | 0.348638 | 0.659723 | 0.592648 |
| MmugDNA.22747.1.S1_at   | MmugDNA.22747.1 | 8.78  | 8.35  | 0.68 | 0.07 | 1.34  | 0.857841 | 0.279312 | 0.94975  | 0.542962 |
| MmugDNA.22749.1.S1_at   | MmugDNA.22749.1 | 8.46  | 7.67  | 0.44 | 0.17 | 1.73  | 0.030346 | 0.020598 | 0.33745  | 0.180074 |
| MmugDNA.2275.1.S1_at    | MmugDNA.2275.1  | 7.73  | 7.73  | 0.04 | 0.04 | 1     | 0.99312  | 0.687721 | 0.997423 | 0.817664 |
| MmugDNA.22750.1.S1_at   | MmugDNA.22750.1 | 6.02  | 6.47  | 0.59 | 0.24 | -1.37 | 0.21186  | 0.242153 | 0.582715 | 0.512652 |
| MmugDNA.22751.1.S1_at   | MmugDNA.22751.1 | 3.67  | 3.39  | 0.18 | 0.23 | 1.21  | 0.532995 | 0.208543 | 0.800589 | 0.482453 |
| MmugDNA.22752.1.S1_at   | MmugDNA.22752.1 | 5.03  | 4.81  | 0.14 | 0.15 | 1.17  | 0.111938 | 0.13263  | 0.484976 | 0.404544 |
| MmugDNA.22753.1.S1_at   | MmugDNA.22753.1 | 4.65  | 4.5   | 0.1  | 0.08 | 1.11  | 0.052868 | 0.014247 | 0.393368 | 0.152403 |
| MmugDNA.22754.1.S1_at   | MmugDNA.22754.1 | 8.45  | 8.44  | 0.26 | 0.17 | 1     | 0.607692 | 0.805917 | 0.840969 | 0.888395 |
| MmugDNA.22755.1.S1_at   | MmugDNA.22755.1 | 3.44  | 3.36  | 0.06 | 0.34 | 1.06  | 0.494602 | 0.31932  | 0.779478 | 0.571724 |
| MmugDNA.22758.1.S1_at   | MmugDNA.22758.1 | 4.27  | 4.31  | 0.12 | 0.16 | -1.03 | 0.820925 | 0.896494 | 0.93538  | 0.940901 |
| MmugDNA.22759.1.S1_at   | MmugDNA.22759.1 | 5.87  | 5.89  | 0.25 | 0.25 | -1.01 | 0.928515 | 0.136862 | 0.976271 | 0.409568 |
| MmugDNA.2276.1.S1_at    | MmugDNA.2276.1  | 6.09  | 5.66  | 0.63 | 0.35 | 1.35  | 0.596753 | 0.210196 | 0.836122 | 0.484033 |
| MmugDNA.22760.1.S1_at   | MmugDNA.22760.1 | 9.46  | 8.89  | 0.57 | 0.12 | 1.48  | 0.128728 | 0.144309 | 0.503453 | 0.418196 |
| MmugDNA.22761.1.S1_at   | MmugDNA.22761.1 | 5.73  | 5.36  | 0.19 | 0.09 | 1.29  | 0.033716 | 0.031119 | 0.347243 | 0.218175 |



|                         |                 |       |       |      |      |       |          |          |          |          |
|-------------------------|-----------------|-------|-------|------|------|-------|----------|----------|----------|----------|
| MmugDNA.22763.1.S1_at   | MmugDNA.22763.1 | 4.11  | 3.9   | 0.38 | 0.08 | 1.16  | 0.294491 | 0.308728 | 0.650603 | 0.564619 |
| MmugDNA.22764.1.S1_at   | MmugDNA.22764.1 | 5.69  | 5.58  | 0.16 | 0.01 | 1.08  | 0.201434 | 0.815376 | 0.573072 | 0.893521 |
| MmugDNA.22765.1.S1_at   | MmugDNA.22765.1 | 4.28  | 3.82  | 0.22 | 0.34 | 1.38  | 0.237843 | 0.284444 | 0.604936 | 0.546637 |
| MmugDNA.22767.1.S1_at   | MmugDNA.22767.1 | 3.54  | 3.38  | 0.06 | 0.23 | 1.12  | 0.303463 | 0.447901 | 0.657314 | 0.663881 |
| MmugDNA.22768.1.S1_at   | MmugDNA.22768.1 | 5.53  | 5.34  | 0.42 | 0.55 | 1.14  | 0.366323 | 0.395745 | 0.701752 | 0.627639 |
| MmugDNA.2277.1.S1_at    | MmugDNA.2277.1  | 4.8   | 4.59  | 0.18 | 0.07 | 1.15  | 0.136905 | 0.247698 | 0.511963 | 0.517122 |
| MmugDNA.22770.1.S1_at   | MmugDNA.22770.1 | 3.51  | 2.92  | 0.46 | 0.25 | 1.5   | 0.357644 | 0.357666 | 0.695949 | 0.599285 |
| MmugDNA.22771.1.S1_s_at | MmugDNA.22771.1 | 7.87  | 7.99  | 0.34 | 0.14 | -1.09 | 0.849637 | 0.281474 | 0.947112 | 0.54458  |
| MmugDNA.22772.1.S1_at   | MmugDNA.22772.1 | 4.2   | 3.93  | 0.06 | 0.04 | 1.2   | 0.003168 | 0.002517 | 0.191107 | 0.074158 |
| MmugDNA.22774.1.S1_at   | MmugDNA.22774.1 | 7.47  | 7.56  | 0.18 | 0.03 | -1.06 | 0.418489 | 0.020733 | 0.735698 | 0.180654 |
| MmugDNA.22775.1.S1_at   | MmugDNA.22775.1 | 12.61 | 12.63 | 0.6  | 0.03 | -1.01 | 0.366782 | 0.111277 | 0.702305 | 0.375963 |
| MmugDNA.22776.1.S1_at   | MmugDNA.22776.1 | 3.34  | 3.38  | 0.05 | 0.06 | -1.03 | 0.900309 | 0.27718  | 0.966081 | 0.541154 |
| MmugDNA.22777.1.S1_at   | MmugDNA.22777.1 | 10.45 | 8.76  | 0.31 | 0.34 | 3.22  | 0.00483  | 0.00113  | 0.202685 | 0.053028 |
| MmugDNA.22778.1.S1_at   | MmugDNA.22778.1 | 4.49  | 4.46  | 0.09 | 0.03 | 1.02  | 0.420777 | 0.692112 | 0.737084 | 0.82091  |
| MmugDNA.22779.1.S1_at   | MmugDNA.22779.1 | 10.43 | 10.45 | 0.18 | 0.09 | -1.01 | 0.511514 | 0.491202 | 0.78871  | 0.692848 |
| MmugDNA.2278.1.S1_at    | MmugDNA.2278.1  | 8.68  | 7.62  | 1.31 | 0.3  | 2.08  | 0.453321 | 0.20109  | 0.756033 | 0.475515 |
| MmugDNA.22781.1.S1_at   | MmugDNA.22781.1 | 4.21  | 4.45  | 0.25 | 0.21 | -1.19 | 0.228258 | 0.198256 | 0.597168 | 0.473234 |
| MmugDNA.22784.1.S1_at   | MmugDNA.22784.1 | 8     | 8.01  | 0.25 | 0.24 | -1.01 | 0.501127 | 0.096184 | 0.783101 | 0.353501 |
| MmugDNA.22785.1.S1_at   | MmugDNA.22785.1 | 7.83  | 7.96  | 0.33 | 0.15 | -1.09 | 0.765709 | 0.552615 | 0.911899 | 0.731885 |
| MmugDNA.22789.1.S1_at   | MmugDNA.22789.1 | 10.57 | 10.81 | 0.08 | 0.12 | -1.19 | 0.039811 | 0.018434 | 0.362691 | 0.170756 |
| MmugDNA.22790.1.S1_at   | MmugDNA.22790.1 | 4.13  | 4.04  | 0.28 | 0    | 1.06  | 0.670044 | 0.805045 | 0.869803 | 0.887934 |
| MmugDNA.22791.1.S1_at   | MmugDNA.22791.1 | 6     | 5.96  | 0.04 | 0.1  | 1.02  | 0.14859  | 0.170435 | 0.522658 | 0.447103 |
| MmugDNA.22793.1.S1_at   | MmugDNA.22793.1 | 10.74 | 10.09 | 0.81 | 0.14 | 1.56  | 0.619688 | 0.684681 | 0.84683  | 0.8161   |
| MmugDNA.22793.1.S1_s_at | MmugDNA.22793.1 | 10.66 | 10.18 | 0.97 | 0.21 | 1.39  | 0.947531 | 0.801491 | 0.981931 | 0.885789 |
| MmugDNA.22794.1.S1_at   | MmugDNA.22794.1 | 3.42  | 3.3   | 0.08 | 0.12 | 1.09  | 0.929044 | 0.465941 | 0.976333 | 0.676055 |
| MmugDNA.22795.1.S1_at   | MmugDNA.22795.1 | 7.06  | 7.06  | 0.41 | 0.21 | -1    | 0.248144 | 0.340399 | 0.613685 | 0.586725 |
| MmugDNA.22796.1.S1_at   | MmugDNA.22796.1 | 6.99  | 7.07  | 0.16 | 0.05 | -1.06 | 0.359574 | 0.041351 | 0.697369 | 0.247995 |
| MmugDNA.22797.1.S1_at   | MmugDNA.22797.1 | 3.71  | 3.43  | 0.29 | 0.19 | 1.22  | 0.169165 | 0.133795 | 0.542061 | 0.405793 |
| MmugDNA.22799.1.S1_at   | MmugDNA.22799.1 | 5.72  | 6.71  | 0.39 | 0.16 | -1.99 | 0.021732 | 0.006946 | 0.309332 | 0.112568 |
| MmugDNA.22800.1.S1_at   | MmugDNA.22800.1 | 5.29  | 4.99  | 0.2  | 0.18 | 1.23  | 0.486142 | 0.112752 | 0.774427 | 0.378404 |
| MmugDNA.22801.1.S1_at   | MmugDNA.22801.1 | 4.38  | 4.46  | 0.31 | 0.09 | -1.06 | 0.705258 | 0.86846  | 0.885355 | 0.925329 |
| MmugDNA.22802.1.S1_at   | MmugDNA.22802.1 | 6.17  | 6.08  | 0.94 | 0.64 | 1.06  | 0.844043 | 0.405677 | 0.945026 | 0.633894 |
| MmugDNA.22803.1.S1_at   | MmugDNA.22803.1 | 7.57  | 8.95  | 0.48 | 0.12 | -2.6  | 0.014419 | 0.013485 | 0.27544  | 0.148703 |
| MmugDNA.22806.1.S1_at   | MmugDNA.22806.1 | 10.1  | 10.59 | 0.12 | 0.06 | -1.41 | 0.002495 | 0.022846 | 0.178226 | 0.189246 |
| MmugDNA.22808.1.S1_at   | MmugDNA.22808.1 | 4.57  | 4.5   | 0.14 | 0.03 | 1.05  | 0.417328 | 0.650466 | 0.734845 | 0.795661 |
| MmugDNA.22809.1.S1_at   | MmugDNA.22809.1 | 6.16  | 5.49  | 0.15 | 0.29 | 1.59  | 0.038003 | 0.03263  | 0.358368 | 0.223676 |
| MmugDNA.22812.1.S1_at   | MmugDNA.22812.1 | 4.3   | 4.12  | 0.24 | 0.07 | 1.14  | 0.260475 | 0.346032 | 0.623301 | 0.59115  |
| MmugDNA.22813.1.S1_at   | MmugDNA.22813.1 | 7.94  | 8.03  | 0.17 | 0.11 | -1.06 | 0.43054  | 0.006192 | 0.742836 | 0.106774 |
| MmugDNA.22814.1.S1_at   | MmugDNA.22814.1 | 7.64  | 8.5   | 0.38 | 0.2  | -1.81 | 0.0337   | 0.397134 | 0.347149 | 0.628653 |
| MmugDNA.22815.1.S1_at   | MmugDNA.22815.1 | 5.72  | 5.7   | 0.2  | 0.24 | 1.02  | 0.644291 | 0.776067 | 0.858491 | 0.869726 |
| MmugDNA.22816.1.S1_at   | MmugDNA.22816.1 | 7.63  | 7.68  | 0.62 | 0.17 | -1.04 | 0.895739 | 0.956038 | 0.964355 | 0.975043 |
| MmugDNA.22817.1.S1_at   | MmugDNA.22817.1 | 5.77  | 5.75  | 0.41 | 0.2  | 1.01  | 0.812703 | 0.570129 | 0.932167 | 0.74291  |
| MmugDNA.22818.1.S1_at   | MmugDNA.22818.1 | 7.63  | 7.63  | 0.17 | 0.21 | 1     | 0.406    | 0.060996 | 0.727638 | 0.293811 |

|                         |                 |       |       |      |      |       |          |          |          |          |
|-------------------------|-----------------|-------|-------|------|------|-------|----------|----------|----------|----------|
| MmugDNA.22819.1.S1_at   | MmugDNA.22819.1 | 11.46 | 11.72 | 0.97 | 0.01 | -1.2  | 0.639267 | 0.164876 | 0.856238 | 0.441191 |
| MmugDNA.22820.1.S1_at   | MmugDNA.22820.1 | 10.1  | 10.63 | 0.83 | 0.14 | -1.45 | 0.972084 | 0.215415 | 0.990913 | 0.489109 |
| MmugDNA.22820.1.S1_s_at | MmugDNA.22820.1 | 11.72 | 12.13 | 0.48 | 0.05 | -1.33 | 0.656524 | 0.118599 | 0.863636 | 0.386567 |
| MmugDNA.22823.1.S1_at   | MmugDNA.22823.1 | 6.27  | 6.21  | 0.25 | 0.12 | 1.04  | 0.296464 | 0.31647  | 0.652086 | 0.569888 |
| MmugDNA.22824.1.S1_at   | MmugDNA.22824.1 | 3.25  | 3.1   | 0.15 | 0.04 | 1.11  | 0.21929  | 0.208362 | 0.588795 | 0.482269 |
| MmugDNA.22826.1.S1_at   | MmugDNA.22826.1 | 3.83  | 3.77  | 0.03 | 0.53 | 1.05  | 0.86389  | 0.815577 | 0.952043 | 0.893609 |
| MmugDNA.22827.1.S1_at   | MmugDNA.22827.1 | 6     | 6.02  | 0.16 | 0.03 | -1.01 | 0.481784 | 0.83171  | 0.772225 | 0.903453 |
| MmugDNA.22828.1.S1_at   | MmugDNA.22828.1 | 6.28  | 6.36  | 0.21 | 0.03 | -1.06 | 0.881989 | 0.796804 | 0.95911  | 0.882803 |
| MmugDNA.22829.1.S1_at   | MmugDNA.22829.1 | 9.85  | 10.52 | 0.42 | 0.05 | -1.59 | 0.14703  | 0.062577 | 0.521545 | 0.297022 |
| MmugDNA.15639.1.S1_s_at | MmugDNA.15639.1 | 11.11 | 11.17 | 0.1  | 0.04 | -1.05 | 0.516706 | 0.411828 | 0.791667 | 0.638434 |
| MmugDNA.22830.1.S1_s_at | MmugDNA.22830.1 | 10.96 | 10.66 | 0.31 | 0.07 | -1.23 | 0.248798 | 0.238826 | 0.614173 | 0.509485 |
| MmugDNA.22831.1.S1_at   | MmugDNA.22831.1 | 5.28  | 5.22  | 0.21 | 0.01 | 1.04  | 0.773458 | 0.707733 | 0.915801 | 0.830472 |
| MmugDNA.22832.1.S1_at   | MmugDNA.22832.1 | 10.9  | 10.59 | 0.5  | 0.06 | 1.24  | 0.953245 | 0.332928 | 0.984409 | 0.581307 |
| MmugDNA.22833.1.S1_at   | MmugDNA.22833.1 | 3.47  | 3.36  | 0.06 | 0.06 | 1.08  | 0.318571 | 0.222853 | 0.668228 | 0.495769 |
| MmugDNA.22834.1.S1_at   | MmugDNA.22834.1 | 10.52 | 10.62 | 0.25 | 0.02 | -1.08 | 0.165427 | 0.011003 | 0.538206 | 0.136623 |
| MmugDNA.22835.1.S1_at   | MmugDNA.22835.1 | 10.83 | 10.53 | 0.3  | 0.13 | 1.23  | 0.18734  | 0.207808 | 0.559771 | 0.482031 |
| MmugDNA.22837.1.S1_at   | MmugDNA.22837.1 | 10.5  | 9.79  | 0.23 | 0.1  | 1.63  | 0.017962 | 0.002931 | 0.294714 | 0.079548 |
| MmugDNA.22838.1.S1_at   | MmugDNA.22838.1 | 5.61  | 5.74  | 0.04 | 0.23 | -1.09 | 0.969924 | 0.059776 | 0.990053 | 0.291114 |
| MmugDNA.22839.1.S1_at   | MmugDNA.22839.1 | 5.16  | 4.81  | 0.1  | 0.13 | 1.28  | 0.014556 | 0.013991 | 0.276396 | 0.151593 |
| MmugDNA.2284.1.S1_at    | MmugDNA.2284.1  | 12.44 | 12.17 | 0.17 | 0.14 | 1.21  | 0.164602 | 0.113217 | 0.537466 | 0.379229 |
| MmugDNA.22840.1.S1_at   | MmugDNA.22840.1 | 3.76  | 3.75  | 0.13 | 0.01 | 1.01  | 0.297461 | 0.032335 | 0.652772 | 0.222605 |
| MmugDNA.22841.1.S1_at   | MmugDNA.22841.1 | 11.06 | 10.87 | 0.78 | 0.27 | 1.14  | 0.87948  | 0.906365 | 0.958238 | 0.947011 |
| MmugDNA.22842.1.S1_at   | MmugDNA.22842.1 | 5.37  | 5.4   | 0.26 | 0.04 | -1.02 | 0.90698  | 0.401402 | 0.96848  | 0.631018 |
| MmugDNA.22843.1.S1_at   | MmugDNA.22843.1 | 5.26  | 5.16  | 0.11 | 0.1  | 1.07  | 0.064379 | 0.059548 | 0.418055 | 0.290548 |
| MmugDNA.22844.1.S1_at   | MmugDNA.22844.1 | 3.66  | 3.65  | 0.05 | 0.08 | 1.01  | 0.757374 | 0.491212 | 0.908621 | 0.692848 |
| MmugDNA.22845.1.S1_at   | MmugDNA.22845.1 | 6.87  | 6.66  | 0.17 | 0.1  | 1.16  | 0.092023 | 0.338931 | 0.460597 | 0.585891 |
| MmugDNA.22846.1.S1_at   | MmugDNA.22846.1 | 7.99  | 8.09  | 0.19 | 0.04 | -1.07 | 0.953996 | 0.975098 | 0.984675 | 0.986405 |
| MmugDNA.22847.1.S1_at   | MmugDNA.22847.1 | 4.98  | 4.99  | 0.02 | 0.13 | -1.01 | 0.935363 | 0.164205 | 0.978141 | 0.440466 |
| MmugDNA.22848.1.S1_at   | MmugDNA.22848.1 | 3.7   | 3.65  | 0.07 | 0.09 | 1.03  | 0.869558 | 0.937551 | 0.954469 | 0.964687 |
| MmugDNA.22849.1.S1_at   | MmugDNA.22849.1 | 12.29 | 12.21 | 0.15 | 0.03 | 1.06  | 0.238275 | 0.340629 | 0.605262 | 0.586801 |
| MmugDNA.22849.1.S1_s_at | MmugDNA.22849.1 | 11.72 | 11.56 | 0.19 | 0.09 | 1.12  | 0.150676 | 0.201671 | 0.524234 | 0.476208 |
| MmugDNA.2285.1.S1_at    | MmugDNA.2285.1  | 6.01  | 6.1   | 0.59 | 0.54 | -1.07 | 0.988014 | 0.183068 | 0.995831 | 0.459493 |
| MmugDNA.22852.1.S1_at   | MmugDNA.22852.1 | 3.71  | 3.74  | 0.19 | 0    | -1.02 | 0.487083 | 0.681813 | 0.774859 | 0.81415  |
| MmugDNA.22854.1.S1_at   | MmugDNA.22854.1 | 10.06 | 10.59 | 0.34 | 0.11 | -1.44 | 0.263221 | 0.47357  | 0.625234 | 0.680843 |
| MmugDNA.22855.1.S1_at   | MmugDNA.22855.1 | 5.62  | 5.67  | 0    | 0.19 | -1.04 | 0.657467 | 0.730114 | 0.864078 | 0.843808 |
| MmugDNA.22857.1.S1_at   | MmugDNA.22857.1 | 5.99  | 6.38  | 0.4  | 0.16 | -1.31 | 0.123323 | 0.160236 | 0.496589 | 0.436398 |
| MmugDNA.22858.1.S1_at   | MmugDNA.22858.1 | 4.43  | 4.65  | 0.6  | 0.16 | -1.16 | 0.576238 | 0.788828 | 0.825126 | 0.877997 |
| MmugDNA.22859.1.S1_at   | MmugDNA.22859.1 | 5.51  | 5.53  | 0.66 | 0.05 | -1.01 | 0.989051 | 0.993622 | 0.995916 | 0.996218 |
| MmugDNA.22861.1.S1_at   | MmugDNA.22861.1 | 3.13  | 3.02  | 0    | 0.07 | 1.08  | 0.033286 | 0.014199 | 0.346442 | 0.152173 |
| MmugDNA.22862.1.S1_at   | MmugDNA.22862.1 | 7.16  | 7.69  | 0.61 | 0.09 | -1.44 | 0.167452 | 0.228064 | 0.540065 | 0.500249 |
| MmugDNA.22864.1.S1_at   | MmugDNA.22864.1 | 10.04 | 10.71 | 0.41 | 0.14 | -1.59 | 0.067476 | 0.085205 | 0.423852 | 0.337096 |
| MmugDNA.22865.1.S1_at   | MmugDNA.22865.1 | 6.52  | 6.45  | 0.11 | 0.06 | 1.05  | 0.371325 | 0.093122 | 0.705454 | 0.349303 |
| MmugDNA.22868.1.S1_at   | MmugDNA.22868.1 | 4.02  | 3.53  | 0.3  | 0.17 | 1.4   | 0.198924 | 0.65459  | 0.570442 | 0.798087 |

|                         |                 |       |       |      |      |       |          |          |          |          |
|-------------------------|-----------------|-------|-------|------|------|-------|----------|----------|----------|----------|
| MmugDNA.22869.1.S1_at   | MmugDNA.22869.1 | 7.78  | 7.97  | 0.04 | 0.12 | -1.14 | 0.142474 | 0.006151 | 0.517603 | 0.106774 |
| MmugDNA.2287.1.S1_at    | MmugDNA.2287.1  | 5.44  | 5.29  | 0.24 | 0.13 | 1.11  | 0.138345 | 0.18559  | 0.51369  | 0.461566 |
| MmugDNA.22870.1.S1_at   | MmugDNA.22870.1 | 10.79 | 10.15 | 0.16 | 0.14 | 1.57  | 0.003665 | 0.000518 | 0.197111 | 0.039625 |
| MmugDNA.22872.1.S1_at   | MmugDNA.22872.1 | 3.21  | 3.16  | 0.13 | 0.25 | 1.03  | 0.457606 | 0.629065 | 0.758364 | 0.781597 |
| MmugDNA.22873.1.S1_at   | MmugDNA.22873.1 | 3.53  | 3.84  | 0.24 | 0.14 | -1.24 | 0.196142 | 0.138139 | 0.566645 | 0.411051 |
| MmugDNA.22874.1.S1_at   | MmugDNA.22874.1 | 7.28  | 6.71  | 1.31 | 0.19 | 1.48  | 0.465385 | 0.413551 | 0.763035 | 0.639648 |
| MmugDNA.22877.1.S1_at   | MmugDNA.22877.1 | 5.35  | 5.34  | 0.12 | 0.14 | 1.01  | 0.81401  | 0.180674 | 0.932856 | 0.457245 |
| MmugDNA.22879.1.S1_at   | MmugDNA.22879.1 | 3.93  | 3.69  | 0.72 | 0.48 | 1.18  | 0.656287 | 0.823345 | 0.863538 | 0.898479 |
| MmugDNA.22880.1.S1_at   | MmugDNA.22880.1 | 5.72  | 5.97  | 0.35 | 0.2  | -1.19 | 0.287067 | 0.26575  | 0.644189 | 0.531611 |
| MmugDNA.22881.1.S1_at   | MmugDNA.22881.1 | 4.6   | 4.78  | 0.03 | 0.1  | -1.13 | 0.019756 | 0.004115 | 0.302373 | 0.090887 |
| MmugDNA.22882.1.S1_at   | MmugDNA.22882.1 | 5.42  | 5.33  | 0.12 | 0.16 | -1.06 | 0.860188 | 0.978194 | 0.950679 | 0.98807  |
| MmugDNA.22883.1.S1_at   | MmugDNA.22883.1 | 3.15  | 3.15  | 0.14 | 0    | -1    | 0.983145 | 0.94637  | 0.994889 | 0.969598 |
| MmugDNA.22884.1.S1_at   | MmugDNA.22884.1 | 5.83  | 5.9   | 0.21 | 0.08 | -1.05 | 0.866561 | 0.806943 | 0.953134 | 0.888903 |
| MmugDNA.22885.1.S1_at   | MmugDNA.22885.1 | 3.27  | 3.46  | 0.5  | 0.11 | -1.13 | 0.881579 | 0.841666 | 0.959065 | 0.909744 |
| MmugDNA.22886.1.S1_at   | MmugDNA.22886.1 | 5.69  | 5.62  | 0.87 | 0.83 | 1.05  | 0.542771 | 0.459429 | 0.805983 | 0.671741 |
| MmugDNA.22887.1.S1_s_at | MmugDNA.22887.1 | 10.94 | 11.06 | 0.22 | 0.02 | -1.09 | 0.138941 | 0.02129  | 0.514459 | 0.182681 |
| MmugDNA.22889.1.S1_at   | MmugDNA.22889.1 | 3.58  | 3.59  | 0.17 | 0.17 | -1.01 | 0.797184 | 0.465538 | 0.925393 | 0.675802 |
| MmugDNA.22890.1.S1_at   | MmugDNA.22890.1 | 4     | 3.89  | 0.32 | 0.7  | 1.08  | 0.38219  | 0.503239 | 0.710505 | 0.700743 |
| MmugDNA.22891.1.S1_at   | MmugDNA.22891.1 | 7.55  | 7.64  | 0.03 | 0.15 | -1.06 | 0.1244   | 0.224658 | 0.498504 | 0.497613 |
| MmugDNA.22892.1.S1_at   | MmugDNA.22892.1 | 4     | 3.98  | 0.15 | 0.18 | 1.02  | 0.698145 | 0.387499 | 0.882657 | 0.622163 |
| MmugDNA.22893.1.S1_at   | MmugDNA.22893.1 | 7.78  | 7.4   | 0.97 | 0.93 | 1.3   | 0.861683 | 0.91744  | 0.951267 | 0.953833 |
| MmugDNA.22894.1.S1_at   | MmugDNA.22894.1 | 11.17 | 11.62 | 0.26 | 0.03 | -1.37 | 0.096476 | 0.07892  | 0.465152 | 0.325912 |
| MmugDNA.22895.1.S1_at   | MmugDNA.22895.1 | 5.5   | 5.88  | 0.06 | 0.14 | -1.3  | 0.022363 | 0.041635 | 0.310499 | 0.24887  |
| MmugDNA.22896.1.S1_at   | MmugDNA.22896.1 | 11.84 | 12.41 | 0.17 | 0.06 | -1.48 | 0.004241 | 0.001273 | 0.198874 | 0.055241 |
| MmugDNA.22898.1.S1_at   | MmugDNA.22898.1 | 5.25  | 5.21  | 0.05 | 0.17 | 1.03  | 0.563679 | 0.971365 | 0.818336 | 0.984419 |
| MmugDNA.22899.1.S1_at   | MmugDNA.22899.1 | 5.34  | 5.43  | 0.11 | 0.06 | -1.06 | 0.504966 | 0.198856 | 0.785092 | 0.473475 |
| MmugDNA.229.1.S1_at     | MmugDNA.229.1   | 7.68  | 7.7   | 0.39 | 0.03 | -1.01 | 0.319259 | 0.037435 | 0.668689 | 0.237777 |
| MmugDNA.22900.1.S1_at   | MmugDNA.22900.1 | 4.59  | 4.48  | 0.52 | 0.07 | 1.08  | 0.604569 | 0.731833 | 0.839653 | 0.844668 |
| MmugDNA.22902.1.S1_at   | MmugDNA.22902.1 | 5.87  | 6.06  | 0.2  | 0.06 | -1.14 | 0.73647  | 0.879423 | 0.899136 | 0.931144 |
| MmugDNA.22903.1.S1_at   | MmugDNA.22903.1 | 5.88  | 5.9   | 0.11 | 0.16 | -1.02 | 0.333351 | 0.834006 | 0.679591 | 0.904868 |
| MmugDNA.22904.1.S1_s_at | MmugDNA.22904.1 | 10.11 | 10    | 0.14 | 0.09 | 1.08  | 0.450043 | 0.604198 | 0.754663 | 0.764542 |
| MmugDNA.22905.1.S1_s_at | MmugDNA.22905.1 | 11.48 | 10.95 | 0.28 | 0.27 | 1.44  | 0.077227 | 0.117559 | 0.439109 | 0.38531  |
| MmugDNA.22906.1.S1_at   | MmugDNA.22906.1 | 6.02  | 6.11  | 0.2  | 0.2  | -1.06 | 0.650169 | 0.25497  | 0.860786 | 0.52317  |
| MmugDNA.22907.1.S1_at   | MmugDNA.22907.1 | 3.2   | 3.2   | 0.16 | 0.1  | 1.01  | 0.976955 | 0.83144  | 0.992518 | 0.903345 |
| MmugDNA.22908.1.S1_at   | MmugDNA.22908.1 | 11.13 | 11.02 | 0.02 | 0.03 | 1.08  | 0.003148 | 0.015278 | 0.191107 | 0.156987 |
| MmugDNA.22909.1.S1_at   | MmugDNA.22909.1 | 7.01  | 6.98  | 0.41 | 0.15 | 1.02  | 0.597024 | 0.784164 | 0.83613  | 0.875049 |
| MmugDNA.22910.1.S1_at   | MmugDNA.22910.1 | 4.95  | 4.48  | 1.01 | 0.19 | 1.38  | 0.379124 | 0.464937 | 0.708637 | 0.675523 |
| MmugDNA.26086.1.S1_s_at | MmugDNA.26086.1 | 8.75  | 9.23  | 0.25 | 0.28 | -1.4  | 0.049614 | 0.064236 | 0.385845 | 0.299668 |
| MmugDNA.22912.1.S1_s_at | MmugDNA.22912.1 | 10.11 | 9.22  | 0.73 | 0.14 | 1.86  | 0.184539 | 0.029136 | 0.557319 | 0.212747 |
| MmugDNA.22913.1.S1_at   | MmugDNA.22913.1 | 8.81  | 9.19  | 0.15 | 0.17 | -1.3  | 0.046497 | 0.020172 | 0.378053 | 0.178414 |
| MmugDNA.22914.1.S1_at   | MmugDNA.22914.1 | 6.17  | 6.69  | 0.67 | 0.17 | -1.44 | 0.196053 | 0.066868 | 0.566501 | 0.304529 |
| MmugDNA.22915.1.S1_at   | MmugDNA.22915.1 | 5.43  | 5.43  | 0.17 | 0.08 | -1.01 | 0.420257 | 0.210876 | 0.736853 | 0.484934 |
| MmugDNA.22916.1.S1_at   | MmugDNA.22916.1 | 9.33  | 8.92  | 0.83 | 0.13 | 1.32  | 0.773614 | 0.778373 | 0.915826 | 0.871278 |

|                         |                 |       |       |      |      |       |          |          |          |          |
|-------------------------|-----------------|-------|-------|------|------|-------|----------|----------|----------|----------|
| MmugDNA.22917.1.S1_at   | MmugDNA.22917.1 | 7.1   | 9.52  | 1.09 | 0.16 | -5.37 | 0.04557  | 0.044739 | 0.376875 | 0.256009 |
| MmugDNA.22918.1.S1_at   | MmugDNA.22918.1 | 4.94  | 5.02  | 0.28 | 0.12 | -1.06 | 0.663406 | 0.811179 | 0.867106 | 0.89102  |
| MmugDNA.22919.1.S1_at   | MmugDNA.22919.1 | 9.9   | 9.86  | 0.27 | 0.03 | 1.03  | 0.387405 | 0.491746 | 0.714242 | 0.693249 |
| MmugDNA.22920.1.S1_at   | MmugDNA.22920.1 | 4.22  | 3.85  | 0.3  | 0.21 | 1.29  | 0.22319  | 0.074532 | 0.592569 | 0.318173 |
| MmugDNA.22921.1.S1_at   | MmugDNA.22921.1 | 5.07  | 5.06  | 0.37 | 0.46 | 1.01  | 0.989748 | 0.849085 | 0.996193 | 0.914324 |
| MmugDNA.22922.1.S1_at   | MmugDNA.22922.1 | 2.99  | 2.93  | 0.2  | 0.4  | 1.04  | 0.832301 | 0.608267 | 0.93982  | 0.766971 |
| MmugDNA.22924.1.S1_at   | MmugDNA.22924.1 | 2.97  | 2.95  | 0.07 | 0.09 | 1.01  | 0.5769   | 0.804444 | 0.825252 | 0.887549 |
| MmugDNA.22924.1.S1_s_at | MmugDNA.22924.1 | 3.02  | 2.73  | 0.29 | 0.1  | 1.22  | 0.119944 | 0.270721 | 0.493259 | 0.53602  |
| MmugDNA.22925.1.S1_at   | MmugDNA.22925.1 | 7.12  | 7.82  | 0.47 | 0.06 | -1.62 | 0.065747 | 0.10012  | 0.420945 | 0.359055 |
| MmugDNA.22927.1.S1_at   | MmugDNA.22927.1 | 6.02  | 5.75  | 0.19 | 0.05 | 1.21  | 0.074814 | 0.056337 | 0.435313 | 0.283348 |
| MmugDNA.22928.1.S1_at   | MmugDNA.22928.1 | 7.01  | 7.47  | 0.45 | 0.5  | -1.37 | 0.381278 | 0.582977 | 0.709928 | 0.751492 |
| MmugDNA.2293.1.S1_at    | MmugDNA.2293.1  | 4.7   | 4.94  | 0.21 | 0.05 | -1.18 | 0.400567 | 0.296074 | 0.723841 | 0.555339 |
| MmugDNA.22930.1.S1_at   | MmugDNA.22930.1 | 4.16  | 4.17  | 0.09 | 0.1  | -1.01 | 0.977611 | 0.294792 | 0.992714 | 0.55437  |
| MmugDNA.22931.1.S1_at   | MmugDNA.22931.1 | 4.59  | 4.64  | 0.03 | 0.39 | -1.03 | 0.331287 | 0.212033 | 0.677949 | 0.486013 |
| MmugDNA.22933.1.S1_at   | MmugDNA.22933.1 | 9.96  | 9.64  | 0.49 | 0.08 | 1.25  | 0.333249 | 0.47144  | 0.679496 | 0.679444 |
| MmugDNA.22935.1.S1_at   | MmugDNA.22935.1 | 2.94  | 2.95  | 0.09 | 0.18 | -1.01 | 0.385844 | 0.31065  | 0.713055 | 0.565787 |
| MmugDNA.22937.1.S1_at   | MmugDNA.22937.1 | 4.86  | 4.89  | 0.24 | 0.24 | -1.02 | 0.839514 | 0.937669 | 0.942791 | 0.964687 |
| MmugDNA.22938.1.S1_at   | MmugDNA.22938.1 | 3.55  | 3.74  | 0.08 | 0.2  | -1.14 | 0.199088 | 0.16334  | 0.570667 | 0.43947  |
| MmugDNA.22939.1.S1_at   | MmugDNA.22939.1 | 4.59  | 4.37  | 0.4  | 0.19 | 1.17  | 0.343424 | 0.271459 | 0.686631 | 0.536512 |
| MmugDNA.22940.1.S1_at   | MmugDNA.22940.1 | 8.06  | 7.09  | 0.77 | 0.29 | 1.95  | 0.109504 | 0.044402 | 0.482292 | 0.255192 |
| MmugDNA.22943.1.S1_at   | MmugDNA.22943.1 | 7.3   | 7.83  | 0.63 | 0.17 | -1.44 | 0.371567 | 0.391921 | 0.705567 | 0.625419 |
| MmugDNA.22944.1.S1_at   | MmugDNA.22944.1 | 8.64  | 8.83  | 0.23 | 0.21 | -1.15 | 0.780953 | 0.062054 | 0.919347 | 0.29597  |
| MmugDNA.22945.1.S1_at   | MmugDNA.22945.1 | 7.94  | 7.79  | 0.11 | 0.12 | 1.12  | 0.03768  | 0.164934 | 0.35775  | 0.44123  |
| MmugDNA.22946.1.S1_at   | MmugDNA.22946.1 | 5.61  | 5.51  | 0.14 | 0.18 | 1.07  | 0.297875 | 0.450146 | 0.652791 | 0.665505 |
| MmugDNA.22948.1.S1_at   | MmugDNA.22948.1 | 7.17  | 7.37  | 0.2  | 0.15 | -1.15 | 0.173104 | 0.075892 | 0.546162 | 0.320523 |
| MmugDNA.22949.1.S1_at   | MmugDNA.22949.1 | 7.52  | 7.45  | 0.27 | 0.21 | 1.05  | 0.155793 | 0.185493 | 0.528999 | 0.461566 |
| MmugDNA.2295.1.S1_at    | MmugDNA.2295.1  | 6.14  | 6.47  | 0.66 | 0.12 | -1.26 | 0.286754 | 0.362984 | 0.643977 | 0.603471 |
| MmugDNA.22951.1.S1_at   | MmugDNA.22951.1 | 5.37  | 5.4   | 0.11 | 0.09 | -1.02 | 0.716537 | 0.399442 | 0.889906 | 0.629798 |
| MmugDNA.22952.1.S1_at   | MmugDNA.22952.1 | 6.69  | 6.89  | 0.31 | 0.15 | -1.14 | 0.175029 | 0.060046 | 0.548031 | 0.291714 |
| MmugDNA.22953.1.S1_at   | MmugDNA.22953.1 | 10.11 | 9.09  | 0.35 | 0.25 | 2.03  | 0.019878 | 0.023755 | 0.302615 | 0.192931 |
| MmugDNA.22954.1.S1_at   | MmugDNA.22954.1 | 3.55  | 3.45  | 0.2  | 0.02 | 1.07  | 0.578337 | 0.779696 | 0.826202 | 0.872303 |
| MmugDNA.22956.1.S1_x_at | MmugDNA.22956.1 | 13.02 | 13.18 | 0.18 | 0.1  | -1.11 | 0.186423 | 0.306779 | 0.559101 | 0.563337 |
| MmugDNA.22957.1.S1_at   | MmugDNA.22957.1 | 3.01  | 3.01  | 0.23 | 0.01 | 1     | 0.350964 | 0.571202 | 0.691768 | 0.743594 |
| MmugDNA.22959.1.S1_at   | MmugDNA.22959.1 | 5.77  | 5.81  | 0.13 | 0.29 | -1.02 | 0.637526 | 0.948562 | 0.855579 | 0.970655 |
| MmugDNA.2296.1.S1_at    | MmugDNA.2296.1  | 6.08  | 5.7   | 0.06 | 0.36 | 1.3   | 0.512302 | 0.733641 | 0.789265 | 0.845776 |
| MmugDNA.22960.1.S1_at   | MmugDNA.22960.1 | 8.58  | 8.95  | 2.07 | 0.33 | -1.29 | 0.672378 | 0.222795 | 0.870906 | 0.49573  |
| MmugDNA.22961.1.S1_at   | MmugDNA.22961.1 | 10.37 | 10.62 | 0.64 | 0.22 | -1.19 | 0.652116 | 0.787393 | 0.86196  | 0.876991 |
| MmugDNA.22962.1.S1_at   | MmugDNA.22962.1 | 6.42  | 6.55  | 0.1  | 0.16 | -1.1  | 0.211786 | 0.724676 | 0.582643 | 0.840629 |
| MmugDNA.23219.1.S1_at   | MmugDNA.23219.1 | 9.39  | 9.46  | 0.82 | 0.1  | -1.05 | 0.80663  | 0.053461 | 0.929839 | 0.276864 |
| MmugDNA.23219.1.S1_s_at | MmugDNA.23219.1 | 9.78  | 9.78  | 0.97 | 0.11 | -1    | 0.996589 | 0.07588  | 0.998707 | 0.320523 |
| MmugDNA.22964.1.S1_at   | MmugDNA.22964.1 | 4.15  | 4.15  | 0.21 | 0    | -1    | 0.357412 | 0.347519 | 0.695804 | 0.592019 |
| MmugDNA.22966.1.S1_at   | MmugDNA.22966.1 | 3.2   | 3.16  | 0.11 | 0.06 | 1.03  | 0.232979 | 0.120855 | 0.600437 | 0.38974  |
| MmugDNA.22968.1.S1_at   | MmugDNA.22968.1 | 6.62  | 6.82  | 0.47 | 0.18 | -1.15 | 0.89854  | 0.989739 | 0.965555 | 0.994108 |

|                         |                 |       |       |      |      |       |          |          |          |          |
|-------------------------|-----------------|-------|-------|------|------|-------|----------|----------|----------|----------|
| MmugDNA.22969.1.S1_at   | MmugDNA.22969.1 | 3.29  | 3.26  | 0.2  | 0.13 | 1.02  | 0.380917 | 0.457492 | 0.709779 | 0.670863 |
| MmugDNA.2297.1.S1_at    | MmugDNA.2297.1  | 6.94  | 7.03  | 0.34 | 0.31 | -1.06 | 0.893357 | 0.373377 | 0.963467 | 0.61221  |
| MmugDNA.22970.1.S1_at   | MmugDNA.22970.1 | 6.04  | 5.93  | 0.21 | 0.04 | 1.08  | 0.177597 | 0.236373 | 0.55065  | 0.507308 |
| MmugDNA.22971.1.S1_at   | MmugDNA.22971.1 | 8.43  | 8.07  | 0.33 | 0.01 | 1.28  | 0.133153 | 0.125358 | 0.507506 | 0.396001 |
| MmugDNA.22973.1.S1_at   | MmugDNA.22973.1 | 3.6   | 3.44  | 0.03 | 0.14 | 1.12  | 0.493045 | 0.433328 | 0.778657 | 0.653652 |
| MmugDNA.22974.1.S1_at   | MmugDNA.22974.1 | 3.5   | 3.54  | 0.09 | 0.18 | -1.03 | 0.97875  | 0.65636  | 0.993097 | 0.799062 |
| MmugDNA.22976.1.S1_s_at | MmugDNA.22976.1 | 10.98 | 11.08 | 0.07 | 0.16 | -1.07 | 0.689103 | 0.469481 | 0.878664 | 0.678248 |
| MmugDNA.22977.1.S1_at   | MmugDNA.22977.1 | 4.17  | 3.88  | 0.14 | 0.25 | 1.22  | 0.50666  | 0.688622 | 0.785932 | 0.818251 |
| MmugDNA.22978.1.S1_at   | MmugDNA.22978.1 | 3.84  | 4.25  | 0.22 | 0.06 | -1.33 | 0.081583 | 0.427675 | 0.445547 | 0.649406 |
| MmugDNA.22979.1.S1_at   | MmugDNA.22979.1 | 6.19  | 7.3   | 0.65 | 0.36 | -2.17 | 0.207663 | 0.221652 | 0.579288 | 0.494901 |
| MmugDNA.2298.1.S1_at    | MmugDNA.2298.1  | 3.19  | 3.09  | 0.06 | 0.15 | 1.07  | 0.246336 | 0.184318 | 0.611818 | 0.460458 |
| MmugDNA.22980.1.S1_at   | MmugDNA.22980.1 | 3.61  | 3.53  | 0.07 | 0.18 | 1.05  | 0.331662 | 0.685657 | 0.678153 | 0.816563 |
| MmugDNA.22981.1.S1_at   | MmugDNA.22981.1 | 5.96  | 5.91  | 0.13 | 0.04 | 1.03  | 0.193019 | 0.420263 | 0.563847 | 0.64407  |
| MmugDNA.22982.1.S1_at   | MmugDNA.22982.1 | 7.16  | 7.69  | 0.2  | 0.04 | -1.44 | 0.011555 | 0.261952 | 0.255545 | 0.528351 |
| MmugDNA.22983.1.S1_at   | MmugDNA.22983.1 | 4.46  | 4.12  | 0.14 | 0.1  | 1.26  | 0.014536 | 0.005758 | 0.276315 | 0.104378 |
| MmugDNA.22984.1.S1_at   | MmugDNA.22984.1 | 4.83  | 4.67  | 0.04 | 0.16 | 1.12  | 0.156499 | 0.085694 | 0.529581 | 0.337761 |
| MmugDNA.22987.1.S1_at   | MmugDNA.22987.1 | 3.8   | 3.96  | 0.11 | 0.22 | -1.12 | 0.312658 | 0.197107 | 0.664165 | 0.472213 |
| MmugDNA.22988.1.S1_at   | MmugDNA.22988.1 | 7.67  | 7.78  | 0.54 | 0.09 | -1.08 | 0.541509 | 0.330925 | 0.805165 | 0.579609 |
| MmugDNA.22988.1.S1_s_at | MmugDNA.22988.1 | 10.23 | 10.48 | 0.3  | 0.18 | -1.19 | 0.308148 | 0.717796 | 0.660917 | 0.836614 |
| MmugDNA.22989.1.S1_at   | MmugDNA.22989.1 | 4.49  | 4.02  | 0.25 | 0.26 | 1.38  | 0.101934 | 0.31379  | 0.472363 | 0.568083 |
| MmugDNA.22990.1.S1_at   | MmugDNA.22990.1 | 8.46  | 8.25  | 0.16 | 0.2  | 1.15  | 0.468593 | 0.4085   | 0.764997 | 0.635694 |
| MmugDNA.22992.1.S1_at   | MmugDNA.22992.1 | 5.81  | 5.81  | 0.48 | 0.09 | -1    | 0.99143  | 0.814258 | 0.99669  | 0.892898 |
| MmugDNA.22993.1.S1_at   | MmugDNA.22993.1 | 5.94  | 5.82  | 0.13 | 0    | 1.09  | 0.177467 | 0.258995 | 0.550585 | 0.526202 |
| MmugDNA.22994.1.S1_at   | MmugDNA.22994.1 | 3.99  | 4.02  | 0.09 | 0.15 | -1.02 | 0.613221 | 0.271655 | 0.843382 | 0.536577 |
| MmugDNA.22995.1.S1_at   | MmugDNA.22995.1 | 11.69 | 11.98 | 0.17 | 0.04 | -1.22 | 0.018271 | 0.013922 | 0.296007 | 0.151344 |
| MmugDNA.22996.1.S1_at   | MmugDNA.22996.1 | 10.74 | 10.74 | 0.05 | 0.07 | 1     | 0.597828 | 0.8632   | 0.836527 | 0.92229  |
| MmugDNA.22997.1.S1_at   | MmugDNA.22997.1 | 5.76  | 5.98  | 0.52 | 0.34 | -1.16 | 0.726716 | 0.876125 | 0.894416 | 0.92958  |
| MmugDNA.22998.1.S1_at   | MmugDNA.22998.1 | 4.71  | 4.34  | 0.11 | 0.17 | 1.3   | 0.02558  | 0.293029 | 0.322382 | 0.552978 |
| MmugDNA.22999.1.S1_at   | MmugDNA.22999.1 | 3.38  | 3.41  | 0.13 | 0.17 | -1.02 | 0.558711 | 0.537521 | 0.815626 | 0.722606 |
| MmugDNA.23.1.S1_at      | MmugDNA.23.1    | 5.52  | 5.08  | 0.23 | 0.1  | 1.35  | 0.06561  | 0.034761 | 0.420827 | 0.230665 |
| MmugDNA.230.1.S1_at     | MmugDNA.230.1   | 3.84  | 4.04  | 0.11 | 0.22 | -1.15 | 0.635864 | 0.238799 | 0.854799 | 0.509485 |
| MmugDNA.23000.1.S1_at   | MmugDNA.23000.1 | 10.69 | 11.04 | 0.53 | 0.06 | -1.27 | 0.561588 | 0.736709 | 0.817232 | 0.847693 |
| MmugDNA.23001.1.S1_at   | MmugDNA.23001.1 | 5.4   | 5.43  | 0.06 | 0.21 | -1.02 | 0.477813 | 0.711159 | 0.76987  | 0.832439 |
| MmugDNA.23002.1.S1_at   | MmugDNA.23002.1 | 3.54  | 3.91  | 0.09 | 0.24 | -1.29 | 0.284174 | 0.067648 | 0.642084 | 0.306199 |
| MmugDNA.23004.1.S1_at   | MmugDNA.23004.1 | 5.94  | 5.63  | 0.42 | 0.09 | 1.24  | 0.822643 | 0.85211  | 0.936084 | 0.915883 |
| MmugDNA.23005.1.S1_at   | MmugDNA.23005.1 | 7.37  | 6.99  | 0.45 | 0.47 | 1.31  | 0.43017  | 0.29558  | 0.742602 | 0.555053 |
| MmugDNA.23006.1.S1_at   | MmugDNA.23006.1 | 5.04  | 5.03  | 0.02 | 0.03 | 1     | 0.203297 | 0.945738 | 0.574813 | 0.969149 |
| MmugDNA.23008.1.S1_at   | MmugDNA.23008.1 | 5.58  | 5.52  | 0.11 | 0.18 | 1.04  | 0.757669 | 0.473253 | 0.908764 | 0.680582 |
| MmugDNA.23009.1.S1_at   | MmugDNA.23009.1 | 4.43  | 4.59  | 0.1  | 0.14 | -1.11 | 0.574839 | 0.217219 | 0.824329 | 0.490864 |
| MmugDNA.2301.1.S1_at    | MmugDNA.2301.1  | 8.09  | 7.93  | 0.74 | 0.13 | 1.12  | 0.568157 | 0.291483 | 0.820687 | 0.551848 |
| MmugDNA.23010.1.S1_x_at | MmugDNA.23010.1 | 9.61  | 9.82  | 0.18 | 0.2  | -1.16 | 0.355411 | 0.225401 | 0.694724 | 0.498035 |
| MmugDNA.23011.1.S1_at   | MmugDNA.23011.1 | 7.67  | 7.91  | 0.45 | 0.12 | -1.18 | 0.929952 | 0.182697 | 0.976539 | 0.459186 |
| MmugDNA.23012.1.S1_at   | MmugDNA.23012.1 | 7.86  | 7.48  | 0.53 | 0.2  | 1.3   | 0.671839 | 0.932975 | 0.870562 | 0.961911 |

|                         |                 |       |       |      |      |       |          |          |          |          |
|-------------------------|-----------------|-------|-------|------|------|-------|----------|----------|----------|----------|
| MmugDNA.23013.1.S1_at   | MmugDNA.23013.1 | 8.01  | 8.02  | 0.08 | 0.04 | -1    | 0.549205 | 0.527513 | 0.81025  | 0.716154 |
| MmugDNA.23014.1.S1_at   | MmugDNA.23014.1 | 3.51  | 3.48  | 0.04 | 0.22 | 1.02  | 0.710293 | 0.8943   | 0.887279 | 0.939697 |
| MmugDNA.23016.1.S1_at   | MmugDNA.23016.1 | 4.28  | 4.21  | 0.15 | 0.07 | 1.05  | 0.195507 | 0.759913 | 0.565944 | 0.860508 |
| MmugDNA.23017.1.S1_at   | MmugDNA.23017.1 | 4.9   | 4.91  | 0.42 | 0.5  | -1    | 0.872542 | 0.937135 | 0.955759 | 0.964571 |
| MmugDNA.23018.1.S1_at   | MmugDNA.23018.1 | 8.8   | 9.29  | 0.57 | 0.2  | -1.4  | 0.076557 | 0.015556 | 0.437977 | 0.158118 |
| MmugDNA.23019.1.S1_at   | MmugDNA.23019.1 | 7.99  | 9.25  | 0.53 | 0.13 | -2.39 | 0.028678 | 0.034825 | 0.332977 | 0.230811 |
| MmugDNA.2302.1.S1_at    | MmugDNA.2302.1  | 6.31  | 6.33  | 0.26 | 0    | -1.01 | 0.882678 | 0.848119 | 0.95933  | 0.913786 |
| MmugDNA.23020.1.S1_at   | MmugDNA.23020.1 | 12.17 | 12.22 | 0.39 | 0.04 | -1.04 | 0.96788  | 0.891617 | 0.989418 | 0.938242 |
| MmugDNA.23022.1.S1_s_at | MmugDNA.23022.1 | 11.52 | 11.56 | 0.14 | 0.1  | -1.03 | 0.724769 | 0.020215 | 0.893274 | 0.178591 |
| MmugDNA.23024.1.S1_at   | MmugDNA.23024.1 | 5.62  | 5.51  | 0.39 | 0.06 | 1.08  | 0.605607 | 0.190598 | 0.840096 | 0.465984 |
| MmugDNA.23026.1.S1_at   | MmugDNA.23026.1 | 3.22  | 3.14  | 0.22 | 0.12 | -1.06 | 0.278417 | 0.139033 | 0.637601 | 0.412159 |
| MmugDNA.23029.1.S1_at   | MmugDNA.23029.1 | 5.59  | 5.76  | 0.23 | 0.32 | -1.13 | 0.652987 | 0.562696 | 0.862124 | 0.7381   |
| MmugDNA.2303.1.S1_at    | MmugDNA.2303.1  | 6.73  | 7.72  | 0.5  | 0.34 | -1.98 | 0.027777 | 0.171566 | 0.329202 | 0.447981 |
| MmugDNA.23030.1.S1_at   | MmugDNA.23030.1 | 8.57  | 7.61  | 0.42 | 0.14 | 1.95  | 0.014854 | 0.005294 | 0.278597 | 0.100738 |
| MmugDNA.23031.1.S1_at   | MmugDNA.23031.1 | 3.41  | 3.31  | 0.05 | 0.22 | 1.07  | 0.79642  | 0.719561 | 0.925177 | 0.837728 |
| MmugDNA.23032.1.S1_at   | MmugDNA.23032.1 | 4.81  | 4.8   | 0.03 | 0.17 | 1.01  | 0.718836 | 0.356182 | 0.890773 | 0.598158 |
| MmugDNA.23033.1.S1_at   | MmugDNA.23033.1 | 4.05  | 4.01  | 0.23 | 0.11 | 1.03  | 0.903643 | 0.960534 | 0.967623 | 0.977546 |
| MmugDNA.23034.1.S1_at   | MmugDNA.23034.1 | 11.31 | 10.06 | 0.45 | 0.28 | 2.38  | 0.030116 | 0.003427 | 0.336589 | 0.084173 |
| MmugDNA.23035.1.S1_at   | MmugDNA.23035.1 | 4.15  | 4.14  | 0.24 | 0.01 | 1     | 0.369246 | 0.445453 | 0.704181 | 0.662388 |
| MmugDNA.23036.1.S1_s_at | MmugDNA.23036.1 | 12.66 | 12.46 | 0.07 | 0.15 | 1.15  | 0.030142 | 0.037359 | 0.336644 | 0.237723 |
| MmugDNA.23037.1.S1_at   | MmugDNA.23037.1 | 5.33  | 5.17  | 0.2  | 0.13 | 1.11  | 0.246359 | 0.332348 | 0.611834 | 0.580773 |
| MmugDNA.23038.1.S1_at   | MmugDNA.23038.1 | 8.29  | 7.89  | 0.51 | 0.14 | 1.32  | 0.166521 | 0.01942  | 0.539239 | 0.175117 |
| MmugDNA.23039.1.S1_at   | MmugDNA.23039.1 | 5.78  | 5.61  | 0.13 | 0.07 | 1.13  | 0.208337 | 0.400395 | 0.580006 | 0.630187 |
| MmugDNA.3986.1.S1_at    | MmugDNA.3986.1  | 10.08 | 10.01 | 0.31 | 0.06 | 1.05  | 0.549166 | 0.652018 | 0.810239 | 0.796529 |
| MmugDNA.3986.1.S1_s_at  | MmugDNA.3986.1  | 10.44 | 10.53 | 0.23 | 0.06 | -1.06 | 0.382353 | 0.51306  | 0.710606 | 0.706712 |
| MmugDNA.23044.1.S1_at   | MmugDNA.23044.1 | 6.67  | 6.56  | 0.15 | 0.05 | 1.08  | 0.073391 | 0.059265 | 0.434422 | 0.29047  |
| MmugDNA.23048.1.S1_at   | MmugDNA.23048.1 | 3.45  | 3.58  | 0.05 | 0.11 | -1.09 | 0.235668 | 0.232258 | 0.602783 | 0.503975 |
| MmugDNA.2305.1.S1_at    | MmugDNA.2305.1  | 5.13  | 5.08  | 0.01 | 0.08 | 1.04  | 0.946723 | 0.578272 | 0.981556 | 0.748372 |
| MmugDNA.23050.1.S1_at   | MmugDNA.23050.1 | 3.34  | 3.48  | 0.13 | 0.22 | -1.1  | 0.513444 | 0.583553 | 0.789843 | 0.751822 |
| MmugDNA.23051.1.S1_at   | MmugDNA.23051.1 | 10.48 | 10.9  | 0.89 | 0.03 | -1.34 | 0.309984 | 0.172962 | 0.661926 | 0.449606 |
| MmugDNA.23052.1.S1_at   | MmugDNA.23052.1 | 3.33  | 3.37  | 0    | 0.04 | -1.03 | 0.168531 | 0.610086 | 0.541177 | 0.768367 |
| MmugDNA.23054.1.S1_at   | MmugDNA.23054.1 | 6.98  | 6.69  | 0.66 | 0.07 | 1.22  | 0.797069 | 0.043364 | 0.925393 | 0.252916 |
| MmugDNA.23056.1.S1_at   | MmugDNA.23056.1 | 10.04 | 9.66  | 0.39 | 0.23 | 1.3   | 0.137539 | 0.128082 | 0.513081 | 0.399072 |
| MmugDNA.23057.1.S1_at   | MmugDNA.23057.1 | 7.29  | 7.48  | 0.34 | 0.23 | -1.14 | 0.266736 | 0.002622 | 0.627644 | 0.075772 |
| MmugDNA.23059.1.S1_at   | MmugDNA.23059.1 | 6.08  | 6.27  | 0.09 | 0.18 | -1.14 | 0.166237 | 0.154489 | 0.538973 | 0.429395 |
| MmugDNA.23061.1.S1_at   | MmugDNA.23061.1 | 10.38 | 10.69 | 0.6  | 0.04 | -1.24 | 0.416116 | 0.387504 | 0.734059 | 0.622163 |
| MmugDNA.23061.1.S1_s_at | MmugDNA.23061.1 | 9.4   | 9.69  | 0.71 | 0.04 | -1.22 | 0.523606 | 0.520635 | 0.795656 | 0.711831 |
| MmugDNA.23062.1.S1_at   | MmugDNA.23062.1 | 3.54  | 3.57  | 0.19 | 0.1  | -1.02 | 0.762018 | 0.614164 | 0.910776 | 0.771143 |
| MmugDNA.23063.1.S1_at   | MmugDNA.23063.1 | 6.24  | 6.23  | 0.36 | 0.23 | 1.01  | 0.944321 | 0.941515 | 0.980654 | 0.966846 |
| MmugDNA.23065.1.S1_at   | MmugDNA.23065.1 | 5.17  | 4.94  | 0.4  | 0.2  | 1.18  | 0.74646  | 0.816352 | 0.903467 | 0.894082 |
| MmugDNA.42207.1.S1_s_at | MmugDNA.42207.1 | 13.52 | 13.56 | 0.08 | 0.03 | -1.03 | 0.403985 | 0.382794 | 0.726125 | 0.618907 |
| MmugDNA.23067.1.S1_at   | MmugDNA.23067.1 | 6.09  | 6.43  | 0.3  | 0.18 | -1.26 | 0.129154 | 0.323928 | 0.503856 | 0.574466 |
| MmugDNA.23069.1.S1_at   | MmugDNA.23069.1 | 11.08 | 11.11 | 0.9  | 0.32 | -1.02 | 0.580777 | 0.161143 | 0.827254 | 0.437288 |

|                         |                 |       |       |      |      |       |          |          |          |          |
|-------------------------|-----------------|-------|-------|------|------|-------|----------|----------|----------|----------|
| MmugDNA.23071.1.S1_at   | MmugDNA.23071.1 | 5.19  | 4.65  | 0.12 | 0.16 | 1.45  | 0.016478 | 0.295232 | 0.287478 | 0.554615 |
| MmugDNA.23072.1.S1_at   | MmugDNA.23072.1 | 5.87  | 6.01  | 0.17 | 0.29 | -1.1  | 0.374429 | 0.319021 | 0.705852 | 0.571591 |
| MmugDNA.23073.1.S1_at   | MmugDNA.23073.1 | 5.96  | 5.85  | 0.08 | 0.06 | 1.07  | 0.190618 | 0.319109 | 0.561788 | 0.57166  |
| MmugDNA.23074.1.S1_at   | MmugDNA.23074.1 | 7.75  | 7.69  | 0.78 | 0.25 | 1.04  | 0.82568  | 0.086628 | 0.93741  | 0.339176 |
| MmugDNA.23076.1.S1_at   | MmugDNA.23076.1 | 9.67  | 8.32  | 0.67 | 0.25 | 2.55  | 0.055678 | 0.02081  | 0.399024 | 0.180917 |
| MmugDNA.23077.1.S1_at   | MmugDNA.23077.1 | 6.06  | 6     | 0.42 | 0.17 | 1.04  | 0.562369 | 0.732096 | 0.817686 | 0.844824 |
| MmugDNA.23077.1.S1_x_at | MmugDNA.23077.1 | 6.15  | 6.25  | 0.4  | 0.18 | -1.07 | 0.953843 | 0.959563 | 0.984675 | 0.977061 |
| MmugDNA.23078.1.S1_at   | MmugDNA.23078.1 | 4.97  | 5.25  | 0.05 | 0.2  | -1.21 | 0.098787 | 0.293306 | 0.468167 | 0.553239 |
| MmugDNA.23079.1.S1_at   | MmugDNA.23079.1 | 3.69  | 3.91  | 0.1  | 0.07 | -1.17 | 0.039165 | 0.030747 | 0.361205 | 0.217245 |
| MmugDNA.2308.1.S1_at    | MmugDNA.2308.1  | 3.82  | 4.64  | 0.33 | 0.69 | -1.77 | 0.046114 | 0.194404 | 0.377411 | 0.469481 |
| MmugDNA.23081.1.S1_at   | MmugDNA.23081.1 | 12.17 | 11.98 | 0.24 | 0.16 | -1.14 | 0.17853  | 0.097893 | 0.551383 | 0.355679 |
| MmugDNA.23083.1.S1_at   | MmugDNA.23083.1 | 9.43  | 9.39  | 0.1  | 0.06 | 1.03  | 0.264895 | 0.041135 | 0.626282 | 0.247659 |
| MmugDNA.23085.1.S1_at   | MmugDNA.23085.1 | 5.95  | 5.93  | 0.13 | 0.03 | 1.01  | 0.63299  | 0.465688 | 0.853404 | 0.675863 |
| MmugDNA.23086.1.S1_at   | MmugDNA.23086.1 | 4.83  | 5.29  | 0.11 | 0.33 | -1.38 | 0.238629 | 0.309778 | 0.605393 | 0.565044 |
| MmugDNA.23087.1.S1_at   | MmugDNA.23087.1 | 6.71  | 6.69  | 0.14 | 0.01 | 1.01  | 0.422747 | 0.781041 | 0.738477 | 0.87297  |
| MmugDNA.23089.1.S1_at   | MmugDNA.23089.1 | 5.44  | 5.08  | 0.36 | 0.03 | 1.28  | 0.169618 | 0.213162 | 0.542592 | 0.487068 |
| MmugDNA.23090.1.S1_at   | MmugDNA.23090.1 | 7.32  | 7.76  | 0.76 | 0.17 | -1.35 | 0.269097 | 0.459916 | 0.629488 | 0.671989 |
| MmugDNA.23091.1.S1_at   | MmugDNA.23091.1 | 6.2   | 5.27  | 0.89 | 0.47 | 1.9   | 0.808508 | 0.972814 | 0.930687 | 0.985352 |
| MmugDNA.23092.1.S1_at   | MmugDNA.23092.1 | 6.65  | 6.58  | 0.51 | 0.38 | 1.05  | 0.429142 | 0.679857 | 0.742138 | 0.8131   |
| MmugDNA.23093.1.S1_at   | MmugDNA.23093.1 | 5.94  | 5.9   | 0.11 | 0.01 | 1.03  | 0.213878 | 0.545845 | 0.584484 | 0.72769  |
| MmugDNA.23094.1.S1_at   | MmugDNA.23094.1 | 4.53  | 4.42  | 0.11 | 0.09 | 1.08  | 0.195649 | 0.448067 | 0.565981 | 0.663986 |
| MmugDNA.23096.1.S1_at   | MmugDNA.23096.1 | 6.58  | 6.33  | 0.16 | 0.06 | 1.19  | 0.251    | 0.387663 | 0.616109 | 0.622281 |
| MmugDNA.23097.1.S1_at   | MmugDNA.23097.1 | 5.65  | 5.65  | 0.13 | 0.15 | -1.01 | 0.370059 | 0.297111 | 0.704471 | 0.555996 |
| MmugDNA.23099.1.S1_at   | MmugDNA.23099.1 | 9.71  | 10.13 | 1.7  | 0.19 | -1.34 | 0.635335 | 0.243908 | 0.854522 | 0.514069 |
| MmugDNA.231.1.S1_x_at   | MmugDNA.231.1   | 5.28  | 5.07  | 0.23 | 0.05 | 1.16  | 0.145833 | 0.104034 | 0.520572 | 0.36495  |
| MmugDNA.2310.1.S1_at    | MmugDNA.2310.1  | 6.58  | 6.45  | 0.27 | 0.03 | 1.1   | 0.159417 | 0.031606 | 0.532266 | 0.219905 |
| MmugDNA.23100.1.S1_at   | MmugDNA.23100.1 | 3.69  | 3.68  | 0.13 | 0.18 | 1     | 0.990876 | 0.882917 | 0.996569 | 0.933228 |
| MmugDNA.23101.1.S1_s_at | MmugDNA.23101.1 | 6.95  | 6.85  | 0.2  | 0.14 | 1.07  | 0.494932 | 0.674547 | 0.779636 | 0.809864 |
| MmugDNA.23102.1.S1_at   | MmugDNA.23102.1 | 3.84  | 3.8   | 0.16 | 0.08 | 1.03  | 0.2076   | 0.378931 | 0.579205 | 0.615882 |
| MmugDNA.23103.1.S1_at   | MmugDNA.23103.1 | 8.37  | 8.76  | 0.21 | 0.14 | -1.31 | 0.045804 | 0.007471 | 0.377285 | 0.115888 |
| MmugDNA.23103.1.S1_x_at | MmugDNA.23103.1 | 9.04  | 9.41  | 0.21 | 0.12 | -1.3  | 0.038253 | 0.013993 | 0.358616 | 0.151593 |
| MmugDNA.23104.1.S1_at   | MmugDNA.23104.1 | 5.28  | 5.16  | 0.11 | 0.21 | 1.09  | 0.782084 | 0.756839 | 0.919732 | 0.858443 |
| MmugDNA.23105.1.S1_at   | MmugDNA.23105.1 | 3.63  | 3.72  | 0.14 | 0.47 | -1.06 | 0.600373 | 0.233157 | 0.837853 | 0.504458 |
| MmugDNA.23105.1.S1_s_at | MmugDNA.23105.1 | 7.04  | 6.94  | 0.07 | 0.15 | 1.07  | 0.383784 | 0.050945 | 0.711503 | 0.270968 |
| MmugDNA.23106.1.S1_at   | MmugDNA.23106.1 | 2.96  | 3.03  | 0.14 | 0.08 | -1.05 | 0.426758 | 0.879959 | 0.740724 | 0.931461 |
| MmugDNA.23107.1.S1_at   | MmugDNA.23107.1 | 3.69  | 3.69  | 0.27 | 0.14 | -1    | 0.44436  | 0.408794 | 0.751266 | 0.6359   |
| MmugDNA.23109.1.S1_at   | MmugDNA.23109.1 | 5.54  | 5.53  | 0.07 | 0.03 | 1.01  | 0.550584 | 0.239019 | 0.810883 | 0.509794 |
| MmugDNA.2311.1.S1_at    | MmugDNA.2311.1  | 10.22 | 10.5  | 0.14 | 0.04 | -1.22 | 0.043123 | 0.077562 | 0.371409 | 0.323421 |
| MmugDNA.23110.1.S1_at   | MmugDNA.23110.1 | 5.07  | 4.89  | 0.1  | 0.19 | 1.13  | 0.270497 | 0.229956 | 0.630366 | 0.501802 |
| MmugDNA.23111.1.S1_at   | MmugDNA.23111.1 | 3.65  | 4.13  | 0.11 | 0.09 | -1.4  | 0.00433  | 0.04433  | 0.198874 | 0.255035 |
| MmugDNA.23112.1.S1_at   | MmugDNA.23112.1 | 6.04  | 6.04  | 0.15 | 0.04 | -1    | 0.280816 | 0.493061 | 0.639467 | 0.693984 |
| MmugDNA.23113.1.S1_at   | MmugDNA.23113.1 | 3.62  | 3.89  | 0.25 | 0.06 | -1.2  | 0.350758 | 0.731143 | 0.691616 | 0.844204 |
| MmugDNA.23114.1.S1_at   | MmugDNA.23114.1 | 11.55 | 12.09 | 0.69 | 0.05 | -1.45 | 0.365846 | 0.561974 | 0.701377 | 0.737666 |

|                         |                 |       |       |      |      |       |          |          |          |          |
|-------------------------|-----------------|-------|-------|------|------|-------|----------|----------|----------|----------|
| MmugDNA.23116.1.S1_at   | MmugDNA.23116.1 | 4.95  | 4.97  | 0.1  | 0.23 | -1.02 | 0.505298 | 0.535609 | 0.785248 | 0.721162 |
| MmugDNA.23117.1.S1_at   | MmugDNA.23117.1 | 8.71  | 9.65  | 0.64 | 0.11 | -1.92 | 0.108869 | 0.07277  | 0.48125  | 0.315651 |
| MmugDNA.23118.1.S1_at   | MmugDNA.23118.1 | 5.8   | 5.91  | 0.18 | 0.16 | -1.08 | 0.342171 | 0.504307 | 0.685625 | 0.701474 |
| MmugDNA.23119.1.S1_at   | MmugDNA.23119.1 | 5.34  | 5.32  | 0.08 | 0.08 | 1.02  | 0.68806  | 0.938145 | 0.878062 | 0.964949 |
| MmugDNA.2312.1.S1_at    | MmugDNA.2312.1  | 4.35  | 4.3   | 0.05 | 0.07 | 1.04  | 0.281346 | 0.327673 | 0.639917 | 0.577472 |
| MmugDNA.23122.1.S1_at   | MmugDNA.23122.1 | 7.27  | 7.05  | 0.39 | 0.13 | 1.17  | 0.929579 | 0.007258 | 0.976476 | 0.114309 |
| MmugDNA.23123.1.S1_at   | MmugDNA.23123.1 | 9.82  | 9.78  | 0.26 | 0.15 | 1.03  | 0.641783 | 0.852829 | 0.857493 | 0.91634  |
| MmugDNA.23124.1.S1_at   | MmugDNA.23124.1 | 9.76  | 10.16 | 0.33 | 0.1  | -1.32 | 0.472985 | 0.156664 | 0.767358 | 0.432167 |
| MmugDNA.23125.1.S1_at   | MmugDNA.23125.1 | 6.7   | 6.72  | 0.18 | 0.11 | -1.01 | 0.79618  | 0.511227 | 0.925068 | 0.705455 |
| MmugDNA.23126.1.S1_at   | MmugDNA.23126.1 | 3.93  | 3.63  | 0.13 | 0.07 | 1.23  | 0.040261 | 0.1705   | 0.363641 | 0.447141 |
| MmugDNA.23127.1.S1_at   | MmugDNA.23127.1 | 4     | 3.77  | 0.11 | 0.19 | -1.17 | 0.132659 | 0.153616 | 0.506936 | 0.428341 |
| MmugDNA.2313.1.S1_at    | MmugDNA.2313.1  | 5.51  | 5.52  | 0.29 | 0.14 | -1.01 | 0.707449 | 0.856849 | 0.886113 | 0.918214 |
| MmugDNA.23130.1.S1_at   | MmugDNA.23130.1 | 3.21  | 3.26  | 0.17 | 0.06 | -1.04 | 0.730178 | 0.769487 | 0.895994 | 0.866136 |
| MmugDNA.23131.1.S1_at   | MmugDNA.23131.1 | 5.98  | 6.29  | 0.12 | 0.26 | -1.23 | 0.426116 | 0.093578 | 0.740376 | 0.349952 |
| MmugDNA.23132.1.S1_at   | MmugDNA.23132.1 | 8.05  | 8.22  | 0.71 | 0.19 | -1.13 | 0.545304 | 0.18005  | 0.807751 | 0.456601 |
| MmugDNA.23132.1.S1_s_at | MmugDNA.23132.1 | 10.37 | 10.53 | 0.81 | 0.23 | -1.11 | 0.581801 | 0.278761 | 0.827791 | 0.542468 |
| MmugDNA.23134.1.S1_at   | MmugDNA.23134.1 | 9.57  | 9.46  | 0.32 | 0.13 | 1.08  | 0.828962 | 0.966862 | 0.938657 | 0.981586 |
| MmugDNA.23138.1.S1_at   | MmugDNA.23138.1 | 12.84 | 12.81 | 0.24 | 0.13 | 1.02  | 0.515465 | 0.062418 | 0.79089  | 0.296669 |
| MmugDNA.23139.1.S1_at   | MmugDNA.23139.1 | 5.72  | 5.46  | 0.1  | 0.18 | 1.19  | 0.40519  | 0.168372 | 0.727249 | 0.445027 |
| MmugDNA.23140.1.S1_at   | MmugDNA.23140.1 | 3.21  | 3.34  | 0.17 | 0.07 | -1.09 | 0.458098 | 0.831503 | 0.758638 | 0.903392 |
| MmugDNA.23142.1.S1_at   | MmugDNA.23142.1 | 6.92  | 6.56  | 0.39 | 0.17 | 1.28  | 0.32788  | 0.44524  | 0.675371 | 0.662338 |
| MmugDNA.23145.1.S1_at   | MmugDNA.23145.1 | 5.19  | 6.51  | 1.09 | 0.52 | -2.5  | 0.19554  | 0.060444 | 0.565961 | 0.292512 |
| MmugDNA.23146.1.S1_at   | MmugDNA.23146.1 | 4.32  | 3.85  | 1.06 | 0.99 | 1.38  | 0.912619 | 0.383701 | 0.970287 | 0.61969  |
| MmugDNA.23147.1.S1_at   | MmugDNA.23147.1 | 3.04  | 3.06  | 0.09 | 0.1  | -1.01 | 0.698702 | 0.38842  | 0.882848 | 0.622841 |
| MmugDNA.23148.1.S1_at   | MmugDNA.23148.1 | 3.73  | 3.8   | 0.28 | 0.01 | -1.05 | 0.807166 | 0.840698 | 0.930053 | 0.909196 |
| MmugDNA.23150.1.S1_at   | MmugDNA.23150.1 | 6.75  | 6.4   | 0.69 | 0.66 | 1.27  | 0.861318 | 0.160774 | 0.951252 | 0.436897 |
| MmugDNA.23151.1.S1_at   | MmugDNA.23151.1 | 8.2   | 8.43  | 0.9  | 0.15 | -1.18 | 0.932134 | 0.295868 | 0.977159 | 0.555241 |
| MmugDNA.23152.1.S1_at   | MmugDNA.23152.1 | 12.01 | 12.42 | 0.33 | 0.03 | -1.33 | 0.291131 | 0.043853 | 0.647537 | 0.25403  |
| MmugDNA.23153.1.S1_at   | MmugDNA.23153.1 | 4.37  | 4.37  | 0.01 | 0.05 | 1     | 0.48921  | 0.332291 | 0.776032 | 0.580733 |
| MmugDNA.23154.1.S1_at   | MmugDNA.23154.1 | 4.66  | 4.35  | 0.3  | 0.19 | 1.24  | 0.191971 | 0.50059  | 0.563029 | 0.699154 |
| MmugDNA.23155.1.S1_at   | MmugDNA.23155.1 | 4.13  | 4.13  | 0.17 | 0.08 | 1     | 0.688987 | 0.056301 | 0.878634 | 0.283274 |
| MmugDNA.23156.1.S1_s_at | MmugDNA.23156.1 | 9.79  | 9.09  | 0.19 | 0.14 | 1.62  | 0.021366 | 0.112821 | 0.308025 | 0.37844  |
| MmugDNA.23157.1.S1_at   | MmugDNA.23157.1 | 3.39  | 3.43  | 0.24 | 0.16 | -1.03 | 0.756962 | 0.85441  | 0.908337 | 0.91705  |
| MmugDNA.23159.1.S1_at   | MmugDNA.23159.1 | 5.61  | 5.65  | 0.03 | 0.2  | -1.03 | 0.551366 | 0.460051 | 0.811333 | 0.671989 |
| MmugDNA.23161.1.S1_at   | MmugDNA.23161.1 | 4.59  | 4.37  | 0.09 | 0.09 | 1.17  | 0.04251  | 0.321511 | 0.369237 | 0.573226 |
| MmugDNA.23163.1.S1_at   | MmugDNA.23163.1 | 3.15  | 3.17  | 0.13 | 0.13 | -1.01 | 0.926484 | 0.253311 | 0.975571 | 0.521662 |
| MmugDNA.23164.1.S1_at   | MmugDNA.23164.1 | 6.89  | 6.5   | 1.24 | 0.4  | 1.31  | 0.507746 | 0.419377 | 0.786553 | 0.643466 |
| MmugDNA.23165.1.S1_at   | MmugDNA.23165.1 | 9.69  | 9.41  | 0.34 | 0.15 | 1.22  | 0.156559 | 0.160411 | 0.529581 | 0.436528 |
| MmugDNA.23166.1.S1_at   | MmugDNA.23166.1 | 7.04  | 5.88  | 1.27 | 0.29 | 2.23  | 0.578967 | 0.097616 | 0.826338 | 0.355473 |
| MmugDNA.23167.1.S1_x_at | MmugDNA.23167.1 | 9.17  | 9.21  | 0.26 | 0.16 | -1.03 | 0.791131 | 0.522885 | 0.923228 | 0.713429 |
| MmugDNA.23168.1.S1_at   | MmugDNA.23168.1 | 5.46  | 5.41  | 0.13 | 0.04 | 1.03  | 0.279069 | 0.410091 | 0.637997 | 0.673065 |
| MmugDNA.23169.1.S1_at   | MmugDNA.23169.1 | 7.41  | 7.32  | 0.52 | 0.07 | 1.06  | 0.606798 | 0.531248 | 0.840686 | 0.718529 |
| MmugDNA.23170.1.S1_at   | MmugDNA.23170.1 | 4.72  | 4.81  | 0.08 | 0.37 | -1.07 | 0.23482  | 0.387009 | 0.602132 | 0.621935 |



|                         |                 |       |       |      |      |       |          |          |          |          |
|-------------------------|-----------------|-------|-------|------|------|-------|----------|----------|----------|----------|
| MmugDNA.23171.1.S1_at   | MmugDNA.23171.1 | 5.49  | 6.03  | 0.37 | 0.32 | -1.46 | 0.128053 | 0.354201 | 0.502449 | 0.597105 |
| MmugDNA.23172.1.S1_at   | MmugDNA.23172.1 | 3.62  | 3.53  | 0.03 | 0.08 | 1.07  | 0.148426 | 0.515232 | 0.522567 | 0.70821  |
| MmugDNA.23175.1.S1_at   | MmugDNA.23175.1 | 5.58  | 5.45  | 0.25 | 0.05 | 1.09  | 0.988848 | 0.177283 | 0.995895 | 0.45372  |
| MmugDNA.23176.1.S1_at   | MmugDNA.23176.1 | 11.28 | 10.89 | 0.09 | 0.05 | 1.31  | 0.003828 | 0.000008 | 0.198541 | 0.016421 |
| MmugDNA.23178.1.S1_at   | MmugDNA.23178.1 | 7.92  | 8.81  | 0.33 | 0.17 | -1.85 | 0.021809 | 0.001068 | 0.309672 | 0.051862 |
| MmugDNA.2318.1.S1_at    | MmugDNA.2318.1  | 5.33  | 5.36  | 0.2  | 0.19 | -1.02 | 0.619042 | 0.570458 | 0.84633  | 0.743121 |
| MmugDNA.23180.1.S1_at   | MmugDNA.23180.1 | 6.71  | 6.15  | 0.13 | 0.21 | 1.48  | 0.048508 | 0.186301 | 0.38332  | 0.462168 |
| MmugDNA.23184.1.S1_at   | MmugDNA.23184.1 | 3.98  | 3.9   | 0.13 | 0.07 | 1.06  | 0.401649 | 0.430935 | 0.724554 | 0.651921 |
| MmugDNA.23185.1.S1_at   | MmugDNA.23185.1 | 7.3   | 7.29  | 0.23 | 0.24 | 1.01  | 0.913666 | 0.625659 | 0.970659 | 0.779265 |
| MmugDNA.23186.1.S1_at   | MmugDNA.23186.1 | 5.41  | 5.55  | 0.13 | 0.03 | -1.1  | 0.408948 | 0.569329 | 0.729658 | 0.742375 |
| MmugDNA.23188.1.S1_at   | MmugDNA.23188.1 | 6.49  | 5.77  | 0.9  | 1.23 | -1.65 | 0.970006 | 0.318404 | 0.990083 | 0.571239 |
| MmugDNA.23189.1.S1_at   | MmugDNA.23189.1 | 4.72  | 4.61  | 0.16 | 0.19 | 1.08  | 0.402403 | 0.540525 | 0.724848 | 0.724446 |
| MmugDNA.2319.1.S1_at    | MmugDNA.2319.1  | 6.29  | 6.88  | 0.06 | 0.26 | -1.5  | 0.021874 | 0.007059 | 0.309781 | 0.113278 |
| MmugDNA.23190.1.S1_at   | MmugDNA.23190.1 | 6.84  | 6.78  | 0.08 | 0.1  | 1.05  | 0.214221 | 0.459998 | 0.584673 | 0.671989 |
| MmugDNA.23191.1.S1_at   | MmugDNA.23191.1 | 3.11  | 2.9   | 0.1  | 0.17 | 1.16  | 0.212216 | 0.333106 | 0.582812 | 0.581387 |
| MmugDNA.23192.1.S1_at   | MmugDNA.23192.1 | 3.77  | 3.66  | 0.62 | 0.48 | 1.08  | 0.77048  | 0.269734 | 0.914019 | 0.53502  |
| MmugDNA.23193.1.S1_at   | MmugDNA.23193.1 | 3.92  | 3.93  | 0.29 | 0.03 | -1.01 | 0.399916 | 0.465402 | 0.723431 | 0.675748 |
| MmugDNA.23194.1.S1_at   | MmugDNA.23194.1 | 8.24  | 8.97  | 0.98 | 0.22 | -1.66 | 0.802611 | 0.061546 | 0.92802  | 0.294865 |
| MmugDNA.23196.1.S1_at   | MmugDNA.23196.1 | 6.84  | 5.85  | 0.79 | 0.36 | 1.98  | 0.091641 | 0.110678 | 0.45996  | 0.374854 |
| MmugDNA.23198.1.S1_at   | MmugDNA.23198.1 | 5.3   | 5.87  | 0.44 | 0.08 | -1.48 | 0.312628 | 0.404614 | 0.664138 | 0.6331   |
| MmugDNA.23199.1.S1_at   | MmugDNA.23199.1 | 3.66  | 3.49  | 0.1  | 0.1  | 1.13  | 0.259173 | 0.022846 | 0.622592 | 0.189246 |
| MmugDNA.23201.1.S1_at   | MmugDNA.23201.1 | 10.61 | 10.14 | 0.23 | 0.23 | 1.38  | 0.020968 | 0.037799 | 0.30624  | 0.238765 |
| MmugDNA.23203.1.S1_at   | MmugDNA.23203.1 | 7.92  | 8.21  | 0.15 | 0.2  | -1.22 | 0.117476 | 0.062202 | 0.490925 | 0.296296 |
| MmugDNA.23204.1.S1_at   | MmugDNA.23204.1 | 9.76  | 10    | 0.45 | 0.21 | -1.18 | 0.833649 | 0.875997 | 0.940366 | 0.929526 |
| MmugDNA.23205.1.S1_at   | MmugDNA.23205.1 | 9.51  | 9.15  | 0.17 | 0.16 | 1.28  | 0.054521 | 0.031717 | 0.396542 | 0.220503 |
| MmugDNA.23206.1.S1_at   | MmugDNA.23206.1 | 6.4   | 6.99  | 0.56 | 0.14 | -1.5  | 0.558137 | 0.744061 | 0.815182 | 0.851697 |
| MmugDNA.23208.1.S1_at   | MmugDNA.23208.1 | 4.75  | 4.75  | 0.62 | 0.46 | 1     | 0.401595 | 0.671693 | 0.724554 | 0.808089 |
| MmugDNA.23209.1.S1_at   | MmugDNA.23209.1 | 6.73  | 6.48  | 1.39 | 0.29 | 1.18  | 0.654682 | 0.221557 | 0.862882 | 0.494892 |
| MmugDNA.23210.1.S1_x_at | MmugDNA.23210.1 | 10.67 | 10.62 | 0.92 | 0.04 | 1.03  | 0.83978  | 0.503488 | 0.943009 | 0.700892 |
| MmugDNA.23212.1.S1_at   | MmugDNA.23212.1 | 4.19  | 4.36  | 0.13 | 0.1  | -1.12 | 0.211994 | 0.323265 | 0.582761 | 0.574408 |
| MmugDNA.23213.1.S1_at   | MmugDNA.23213.1 | 6.41  | 6.24  | 0.37 | 0.08 | 1.12  | 0.478305 | 0.796762 | 0.770076 | 0.882803 |
| MmugDNA.23214.1.S1_at   | MmugDNA.23214.1 | 4.15  | 3.92  | 0.17 | 0.11 | 1.18  | 0.244345 | 0.430097 | 0.60991  | 0.651143 |
| MmugDNA.23215.1.S1_at   | MmugDNA.23215.1 | 10.24 | 10.4  | 0.17 | 0.08 | -1.12 | 0.351845 | 0.34393  | 0.692553 | 0.589617 |
| MmugDNA.23218.1.S1_at   | MmugDNA.23218.1 | 4.45  | 4.55  | 0.22 | 0.22 | -1.07 | 0.749342 | 0.191262 | 0.90499  | 0.466553 |
| MmugDNA.2322.1.S1_at    | MmugDNA.2322.1  | 3.78  | 3.74  | 0.2  | 0    | 1.03  | 0.278214 | 0.28668  | 0.637417 | 0.548077 |
| MmugDNA.23220.1.S1_at   | MmugDNA.23220.1 | 6.15  | 6.35  | 0.07 | 0.14 | -1.15 | 0.102562 | 0.123381 | 0.472828 | 0.393391 |
| MmugDNA.23221.1.S1_at   | MmugDNA.23221.1 | 3.83  | 3.59  | 0.04 | 0.07 | 1.18  | 0.007064 | 0.03141  | 0.225384 | 0.219107 |
| MmugDNA.23223.1.S1_at   | MmugDNA.23223.1 | 11.43 | 11.56 | 0.2  | 0.04 | -1.09 | 0.428024 | 0.152434 | 0.74152  | 0.427274 |
| MmugDNA.23224.1.S1_at   | MmugDNA.23224.1 | 4.39  | 4.31  | 0.16 | 0.07 | 1.06  | 0.092632 | 0.152662 | 0.461192 | 0.427485 |
| MmugDNA.23225.1.S1_at   | MmugDNA.23225.1 | 7.96  | 6.68  | 0.87 | 0.34 | 2.42  | 0.060265 | 0.022184 | 0.407822 | 0.186422 |
| MmugDNA.23226.1.S1_at   | MmugDNA.23226.1 | 6.2   | 6.22  | 0.06 | 0.06 | -1.01 | 0.713983 | 0.512714 | 0.88857  | 0.706493 |
| MmugDNA.23227.1.S1_at   | MmugDNA.23227.1 | 5     | 4.61  | 0.93 | 0.56 | 1.31  | 0.249947 | 0.176888 | 0.615381 | 0.453303 |
| MmugDNA.23228.1.S1_at   | MmugDNA.23228.1 | 4.05  | 3.84  | 0.11 | 0.03 | 1.15  | 0.071655 | 0.191633 | 0.431242 | 0.466918 |

|                       |                 |       |       |      |      |       |          |          |          |          |
|-----------------------|-----------------|-------|-------|------|------|-------|----------|----------|----------|----------|
| MmugDNA.23229.1.S1_at | MmugDNA.23229.1 | 3.82  | 3.82  | 0.28 | 0    | 1     | 0.579202 | 0.790751 | 0.826446 | 0.878973 |
| MmugDNA.2323.1.S1_at  | MmugDNA.2323.1  | 3.09  | 2.97  | 0.26 | 0.22 | 1.09  | 0.466206 | 0.747824 | 0.763431 | 0.853252 |
| MmugDNA.23230.1.S1_at | MmugDNA.23230.1 | 9.24  | 9.13  | 0.35 | 0.04 | 1.08  | 0.711246 | 0.743066 | 0.887567 | 0.851135 |
| MmugDNA.23231.1.S1_at | MmugDNA.23231.1 | 3.91  | 4.05  | 0.1  | 0.29 | -1.11 | 0.726587 | 0.858855 | 0.894387 | 0.919637 |
| MmugDNA.23232.1.S1_at | MmugDNA.23232.1 | 5.94  | 5.53  | 0.2  | 0.08 | 1.33  | 0.073679 | 0.022068 | 0.434623 | 0.185927 |
| MmugDNA.23233.1.S1_at | MmugDNA.23233.1 | 5.51  | 5.34  | 0.1  | 0.05 | 1.13  | 0.090884 | 0.493019 | 0.458873 | 0.69397  |
| MmugDNA.23235.1.S1_at | MmugDNA.23235.1 | 11.39 | 11.47 | 0.18 | 0.08 | -1.06 | 0.599477 | 0.188165 | 0.837382 | 0.464251 |
| MmugDNA.23237.1.S1_at | MmugDNA.23237.1 | 3.94  | 4.01  | 0.2  | 0.08 | -1.05 | 0.833095 | 0.033898 | 0.940095 | 0.227771 |
| MmugDNA.23238.1.S1_at | MmugDNA.23238.1 | 13.05 | 12.76 | 0.11 | 0.06 | 1.22  | 0.028375 | 0.00603  | 0.332315 | 0.106089 |
| MmugDNA.23239.1.S1_at | MmugDNA.23239.1 | 10.6  | 10.33 | 0.25 | 0.11 | 1.21  | 0.054969 | 0.043468 | 0.397531 | 0.253142 |
| MmugDNA.23240.1.S1_at | MmugDNA.23240.1 | 8.95  | 9.03  | 0.25 | 0.05 | -1.06 | 0.274086 | 0.016081 | 0.633792 | 0.160703 |
| MmugDNA.23241.1.S1_at | MmugDNA.23241.1 | 6.93  | 4.41  | 0.39 | 0.78 | 5.71  | 0.010467 | 0.00133  | 0.24804  | 0.056205 |
| MmugDNA.23242.1.S1_at | MmugDNA.23242.1 | 5.13  | 4.83  | 0.04 | 0.13 | 1.23  | 0.049033 | 0.159624 | 0.385216 | 0.435785 |
| MmugDNA.23244.1.S1_at | MmugDNA.23244.1 | 3.63  | 3.64  | 0.05 | 0.07 | -1    | 0.460574 | 0.463795 | 0.760274 | 0.674656 |
| MmugDNA.23246.1.S1_at | MmugDNA.23246.1 | 6.09  | 6.06  | 0.12 | 0.15 | 1.03  | 0.262558 | 0.134177 | 0.624753 | 0.406421 |
| MmugDNA.23248.1.S1_at | MmugDNA.23248.1 | 5.63  | 5.64  | 0.83 | 0.14 | -1    | 0.35831  | 0.581111 | 0.696348 | 0.750212 |
| MmugDNA.23249.1.S1_at | MmugDNA.23249.1 | 8.09  | 7.62  | 0.36 | 0.21 | 1.38  | 0.131128 | 0.135745 | 0.5054   | 0.407925 |
| MmugDNA.2325.1.S1_at  | MmugDNA.2325.1  | 3.88  | 3.88  | 0.14 | 0.09 | 1     | 0.462038 | 0.346975 | 0.761421 | 0.591769 |
| MmugDNA.23252.1.S1_at | MmugDNA.23252.1 | 4.71  | 4.53  | 0.39 | 0.21 | 1.13  | 0.443087 | 0.667932 | 0.750523 | 0.805689 |
| MmugDNA.23253.1.S1_at | MmugDNA.23253.1 | 4.89  | 4.91  | 0.17 | 0.16 | -1.01 | 0.673731 | 0.467676 | 0.871542 | 0.677207 |
| MmugDNA.23255.1.S1_at | MmugDNA.23255.1 | 3.19  | 3.17  | 0.37 | 0.41 | 1.01  | 0.512729 | 0.167004 | 0.789486 | 0.443466 |
| MmugDNA.23257.1.S1_at | MmugDNA.23257.1 | 3.45  | 3.41  | 0.1  | 0.12 | 1.03  | 0.311123 | 0.434078 | 0.663114 | 0.654223 |
| MmugDNA.23258.1.S1_at | MmugDNA.23258.1 | 7.15  | 7.11  | 0.14 | 0.24 | 1.03  | 0.756992 | 0.336912 | 0.908344 | 0.584156 |
| MmugDNA.23259.1.S1_at | MmugDNA.23259.1 | 4.87  | 4.8   | 0.08 | 0.05 | 1.05  | 0.391264 | 0.133196 | 0.717502 | 0.404934 |
| MmugDNA.2326.1.S1_at  | MmugDNA.2326.1  | 5.55  | 5.63  | 0.04 | 0.05 | -1.06 | 0.218732 | 0.643338 | 0.588341 | 0.79084  |
| MmugDNA.23260.1.S1_at | MmugDNA.23260.1 | 5.97  | 5.72  | 0.63 | 0.35 | 1.19  | 0.180821 | 0.172224 | 0.554165 | 0.448609 |
| MmugDNA.23261.1.S1_at | MmugDNA.23261.1 | 4.77  | 4.58  | 0.12 | 0.05 | 1.14  | 0.071222 | 0.276848 | 0.430589 | 0.540757 |
| MmugDNA.23263.1.S1_at | MmugDNA.23263.1 | 5.04  | 4.95  | 0.09 | 0.13 | 1.06  | 0.173944 | 0.362145 | 0.546898 | 0.602827 |
| MmugDNA.23264.1.S1_at | MmugDNA.23264.1 | 7.39  | 6.87  | 0.14 | 0.11 | 1.43  | 0.011547 | 0.088393 | 0.255545 | 0.341877 |
| MmugDNA.23265.1.S1_at | MmugDNA.23265.1 | 6.07  | 6.03  | 0.15 | 0.16 | 1.03  | 0.515723 | 0.828764 | 0.791016 | 0.901565 |
| MmugDNA.23266.1.S1_at | MmugDNA.23266.1 | 9.62  | 9.54  | 0.15 | 0.13 | 1.06  | 0.201852 | 0.018387 | 0.573399 | 0.170558 |
| MmugDNA.23268.1.S1_at | MmugDNA.23268.1 | 5.06  | 6.3   | 0.26 | 0.19 | -2.37 | 0.002888 | 0.000297 | 0.187888 | 0.034892 |
| MmugDNA.23269.1.S1_at | MmugDNA.23269.1 | 2.85  | 2.87  | 0.01 | 0.01 | -1.01 | 0.044035 | 0.496262 | 0.373552 | 0.695931 |
| MmugDNA.2327.1.S1_at  | MmugDNA.2327.1  | 5.06  | 5.11  | 0.08 | 0.11 | -1.03 | 0.863988 | 0.970722 | 0.952093 | 0.98405  |
| MmugDNA.23270.1.S1_at | MmugDNA.23270.1 | 8.34  | 8.73  | 0.26 | 0.25 | -1.31 | 0.296342 | 0.0504   | 0.651995 | 0.269732 |
| MmugDNA.23272.1.S1_at | MmugDNA.23272.1 | 3.69  | 3.7   | 0.23 | 0.03 | -1    | 0.415331 | 0.593527 | 0.733613 | 0.758329 |
| MmugDNA.23273.1.S1_at | MmugDNA.23273.1 | 5.81  | 5.68  | 0.33 | 0.16 | 1.1   | 0.194861 | 0.141576 | 0.56526  | 0.415087 |
| MmugDNA.23274.1.S1_at | MmugDNA.23274.1 | 6.79  | 6.39  | 0.79 | 0.4  | 1.31  | 0.252223 | 0.400914 | 0.617215 | 0.630658 |
| MmugDNA.23275.1.S1_at | MmugDNA.23275.1 | 5.41  | 5.09  | 0.27 | 0.07 | 1.26  | 0.252839 | 0.319873 | 0.617841 | 0.572234 |
| MmugDNA.23276.1.S1_at | MmugDNA.23276.1 | 6.15  | 6.04  | 0.09 | 0.18 | 1.08  | 0.199362 | 0.143089 | 0.571138 | 0.416995 |
| MmugDNA.23277.1.S1_at | MmugDNA.23277.1 | 4.18  | 4.4   | 0.08 | 0.12 | -1.17 | 0.015725 | 0.028924 | 0.283432 | 0.211953 |
| MmugDNA.23278.1.S1_at | MmugDNA.23278.1 | 3.38  | 3.52  | 0.12 | 0.06 | -1.1  | 0.149159 | 0.110471 | 0.523037 | 0.374684 |
| MmugDNA.23279.1.S1_at | MmugDNA.23279.1 | 3.03  | 5.18  | 0.21 | 0.22 | -4.42 | 0.000326 | 0.000025 | 0.137028 | 0.020254 |

|                         |                 |       |       |      |      |       |          |          |          |          |
|-------------------------|-----------------|-------|-------|------|------|-------|----------|----------|----------|----------|
| MmugDNA.2328.1.S1_at    | MmugDNA.2328.1  | 6.22  | 6.18  | 0.57 | 0.46 | 1.03  | 0.963673 | 0.982548 | 0.988152 | 0.99036  |
| MmugDNA.23280.1.S1_at   | MmugDNA.23280.1 | 7.01  | 7.2   | 0.18 | 0.12 | -1.14 | 0.085078 | 0.007069 | 0.451798 | 0.113284 |
| MmugDNA.23281.1.S1_at   | MmugDNA.23281.1 | 10.01 | 10.85 | 1.28 | 0.16 | -1.79 | 0.269923 | 0.334292 | 0.630111 | 0.582323 |
| MmugDNA.23282.1.S1_s_at | MmugDNA.23282.1 | 11.44 | 11.39 | 0.15 | 0.27 | 1.04  | 0.596585 | 0.793892 | 0.83601  | 0.881131 |
| MmugDNA.23283.1.S1_at   | MmugDNA.23283.1 | 4.74  | 4.81  | 0.12 | 0.07 | -1.05 | 0.664635 | 0.07247  | 0.867683 | 0.315294 |
| MmugDNA.23284.1.S1_at   | MmugDNA.23284.1 | 6.21  | 6.2   | 0.15 | 0.22 | 1.01  | 0.587495 | 0.308005 | 0.831673 | 0.564176 |
| MmugDNA.23285.1.S1_at   | MmugDNA.23285.1 | 5.57  | 5.36  | 0.09 | 0.03 | 1.16  | 0.016032 | 0.010792 | 0.284981 | 0.135577 |
| MmugDNA.23286.1.S1_at   | MmugDNA.23286.1 | 3.22  | 3.25  | 0.13 | 0.02 | -1.02 | 0.398286 | 0.582826 | 0.722436 | 0.751399 |
| MmugDNA.23287.1.S1_at   | MmugDNA.23287.1 | 5.62  | 5.6   | 0.05 | 0.11 | 1.01  | 0.513069 | 0.568744 | 0.789641 | 0.742094 |
| MmugDNA.23288.1.S1_at   | MmugDNA.23288.1 | 4.45  | 4.45  | 0.14 | 0.22 | -1    | 0.874376 | 0.931701 | 0.956448 | 0.961211 |
| MmugDNA.2329.1.S1_at    | MmugDNA.2329.1  | 5.15  | 5.12  | 0.25 | 0.08 | -1.02 | 0.253465 | 0.270856 | 0.618227 | 0.536026 |
| MmugDNA.23291.1.S1_at   | MmugDNA.23291.1 | 3.15  | 3.12  | 0.31 | 0.07 | 1.02  | 0.60162  | 0.773445 | 0.838465 | 0.868298 |
| MmugDNA.23293.1.S1_at   | MmugDNA.23293.1 | 8.59  | 8.97  | 0.14 | 0.24 | -1.3  | 0.081399 | 0.080072 | 0.445406 | 0.327455 |
| MmugDNA.23294.1.S1_at   | MmugDNA.23294.1 | 2.79  | 2.81  | 0.1  | 0.06 | -1.02 | 0.821355 | 0.926823 | 0.935568 | 0.958404 |
| MmugDNA.23295.1.S1_at   | MmugDNA.23295.1 | 3.16  | 3.04  | 0.02 | 0.15 | 1.09  | 0.181169 | 0.259766 | 0.554414 | 0.526648 |
| MmugDNA.23296.1.S1_s_at | MmugDNA.23296.1 | 11.48 | 11.1  | 0.49 | 0.12 | 1.3   | 0.593438 | 0.778285 | 0.834186 | 0.871272 |
| MmugDNA.23297.1.S1_at   | MmugDNA.23297.1 | 6.45  | 6.47  | 0.1  | 0.03 | -1.02 | 0.220247 | 0.490851 | 0.589537 | 0.692666 |
| MmugDNA.23298.1.S1_at   | MmugDNA.23298.1 | 4.02  | 4.02  | 0.11 | 0.15 | 1     | 0.234074 | 0.351917 | 0.601531 | 0.595331 |
| MmugDNA.233.1.S1_at     | MmugDNA.233.1   | 6.08  | 5.75  | 0.07 | 0.17 | 1.25  | 0.040337 | 0.260402 | 0.364014 | 0.526975 |
| MmugDNA.23300.1.S1_at   | MmugDNA.23300.1 | 6.56  | 6.5   | 0.39 | 0.37 | 1.04  | 0.433502 | 0.570934 | 0.744491 | 0.743422 |
| MmugDNA.23301.1.S1_at   | MmugDNA.23301.1 | 7.14  | 7.16  | 0.08 | 0.11 | -1.01 | 0.721876 | 0.800489 | 0.892101 | 0.885198 |
| MmugDNA.23305.1.S1_at   | MmugDNA.23305.1 | 7.68  | 7.29  | 0.09 | 0.07 | 1.31  | 0.004825 | 0.005184 | 0.202685 | 0.099739 |
| MmugDNA.23306.1.S1_at   | MmugDNA.23306.1 | 8.94  | 8.84  | 0.31 | 0.12 | 1.07  | 0.181417 | 0.153511 | 0.554658 | 0.42827  |
| MmugDNA.23308.1.S1_at   | MmugDNA.23308.1 | 2.68  | 2.91  | 0.19 | 0.1  | -1.17 | 0.293179 | 0.346071 | 0.649549 | 0.591154 |
| MmugDNA.23309.1.S1_at   | MmugDNA.23309.1 | 12.74 | 12.95 | 0.16 | 0.05 | -1.16 | 0.033296 | 0.014509 | 0.346442 | 0.153682 |
| MmugDNA.23310.1.S1_at   | MmugDNA.23310.1 | 12.22 | 12.12 | 0.23 | 0.03 | 1.07  | 0.815396 | 0.528437 | 0.933137 | 0.716634 |
| MmugDNA.23311.1.S1_at   | MmugDNA.23311.1 | 12.53 | 12.15 | 0.51 | 0.07 | 1.3   | 0.273227 | 0.374557 | 0.632933 | 0.6129   |
| MmugDNA.23312.1.S1_at   | MmugDNA.23312.1 | 5.62  | 5.99  | 1.16 | 0.38 | -1.29 | 0.925537 | 0.142216 | 0.975188 | 0.415754 |
| MmugDNA.23313.1.S1_at   | MmugDNA.23313.1 | 8.77  | 8.44  | 0.26 | 0.27 | 1.26  | 0.765089 | 0.727438 | 0.911696 | 0.842336 |
| MmugDNA.23314.1.S1_at   | MmugDNA.23314.1 | 4.89  | 4.71  | 0.08 | 0.05 | 1.13  | 0.026242 | 0.003158 | 0.323734 | 0.081739 |
| MmugDNA.23315.1.S1_at   | MmugDNA.23315.1 | 9.38  | 9.33  | 0.52 | 0.28 | 1.03  | 0.424877 | 0.346598 | 0.739715 | 0.591427 |
| MmugDNA.16921.1.S1_s_at | MmugDNA.16921.1 | 10.04 | 9.87  | 0.11 | 0.11 | 1.12  | 0.079574 | 0.21416  | 0.442437 | 0.487789 |
| MmugDNA.23317.1.S1_at   | MmugDNA.23317.1 | 12.15 | 11.79 | 0.6  | 0.14 | 1.28  | 0.282423 | 0.040824 | 0.640907 | 0.246981 |
| MmugDNA.23318.1.S1_at   | MmugDNA.23318.1 | 3.2   | 3.13  | 0.15 | 0.1  | 1.05  | 0.612702 | 0.806337 | 0.843107 | 0.888642 |
| MmugDNA.23319.1.S1_at   | MmugDNA.23319.1 | 7.06  | 6.98  | 0.08 | 0.07 | 1.06  | 0.116006 | 0.281522 | 0.489515 | 0.54464  |
| MmugDNA.2332.1.S1_at    | MmugDNA.2332.1  | 5.73  | 5.85  | 0.23 | 0.28 | -1.09 | 0.834837 | 0.478713 | 0.940758 | 0.684691 |
| MmugDNA.23320.1.S1_at   | MmugDNA.23320.1 | 12.55 | 12.59 | 0.17 | 0.03 | -1.03 | 0.702541 | 0.811722 | 0.884281 | 0.891337 |
| MmugDNA.23321.1.S1_at   | MmugDNA.23321.1 | 6.53  | 7     | 0.15 | 0.06 | -1.39 | 0.004908 | 0.010866 | 0.203329 | 0.135879 |
| MmugDNA.23323.1.S1_at   | MmugDNA.23323.1 | 9.78  | 9.74  | 0.09 | 0.04 | 1.03  | 0.212083 | 0.000385 | 0.582812 | 0.037273 |
| MmugDNA.23324.1.S1_at   | MmugDNA.23324.1 | 5.57  | 5.93  | 0.28 | 0.36 | -1.28 | 0.119764 | 0.678968 | 0.493259 | 0.812533 |
| MmugDNA.23325.1.S1_at   | MmugDNA.23325.1 | 11.2  | 11.57 | 0.24 | 0.05 | -1.29 | 0.05371  | 0.030104 | 0.39535  | 0.215348 |
| MmugDNA.23327.1.S1_at   | MmugDNA.23327.1 | 7.85  | 7.81  | 0.45 | 0.33 | 1.03  | 0.750423 | 0.779162 | 0.905496 | 0.871904 |
| MmugDNA.23329.1.S1_at   | MmugDNA.23329.1 | 11.98 | 9.14  | 0.51 | 0.12 | 7.14  | 0.00091  | 0.000174 | 0.153739 | 0.030511 |

|                         |                 |       |       |      |      |       |          |          |          |          |
|-------------------------|-----------------|-------|-------|------|------|-------|----------|----------|----------|----------|
| MmugDNA.23330.1.S1_at   | MmugDNA.23330.1 | 3.84  | 3.75  | 0.07 | 0.05 | 1.06  | 0.120731 | 0.48809  | 0.49419  | 0.690896 |
| MmugDNA.23331.1.S1_at   | MmugDNA.23331.1 | 3.41  | 3.4   | 0.07 | 0.17 | 1.01  | 0.655076 | 0.628224 | 0.863003 | 0.781087 |
| MmugDNA.23332.1.S1_at   | MmugDNA.23332.1 | 7.54  | 8.21  | 0.11 | 0.34 | -1.58 | 0.034478 | 0.012499 | 0.350081 | 0.144302 |
| MmugDNA.23333.1.S1_at   | MmugDNA.23333.1 | 5.4   | 5.35  | 0.29 | 0.06 | 1.04  | 0.945325 | 0.04151  | 0.980927 | 0.24862  |
| MmugDNA.23335.1.S1_at   | MmugDNA.23335.1 | 2.77  | 2.88  | 0.05 | 0.17 | -1.07 | 0.311491 | 0.510295 | 0.663295 | 0.704814 |
| MmugDNA.23336.1.S1_s_at | MmugDNA.23336.1 | 9.58  | 9.85  | 0.44 | 0.13 | -1.21 | 0.495004 | 0.037085 | 0.77968  | 0.237117 |
| MmugDNA.23338.1.S1_at   | MmugDNA.23338.1 | 5.78  | 5.71  | 0.23 | 0.08 | 1.05  | 0.193748 | 0.556883 | 0.564323 | 0.734847 |
| MmugDNA.23339.1.S1_at   | MmugDNA.23339.1 | 10.15 | 10.2  | 0.14 | 0.1  | -1.04 | 0.963262 | 0.134493 | 0.988152 | 0.406626 |
| MmugDNA.23340.1.S1_at   | MmugDNA.23340.1 | 3.52  | 3.3   | 0.08 | 0.13 | 1.17  | 0.157065 | 0.319348 | 0.530266 | 0.571724 |
| MmugDNA.23341.1.S1_at   | MmugDNA.23341.1 | 7.33  | 7.19  | 0.19 | 0.02 | 1.1   | 0.189088 | 0.089196 | 0.560735 | 0.343259 |
| MmugDNA.23342.1.S1_at   | MmugDNA.23342.1 | 9.53  | 9.62  | 0.22 | 0.05 | -1.06 | 0.44409  | 0.274899 | 0.751101 | 0.53934  |
| MmugDNA.23343.1.S1_at   | MmugDNA.23343.1 | 4.25  | 4.37  | 0.1  | 0.36 | -1.08 | 0.532794 | 0.090662 | 0.800482 | 0.345151 |
| MmugDNA.23344.1.S1_at   | MmugDNA.23344.1 | 11.45 | 11.72 | 0.16 | 0.04 | -1.21 | 0.054863 | 0.163116 | 0.397122 | 0.43928  |
| MmugDNA.23345.1.S1_at   | MmugDNA.23345.1 | 3.16  | 3.04  | 0.08 | 0.11 | 1.08  | 0.331567 | 0.178589 | 0.678103 | 0.454817 |
| MmugDNA.23345.1.S1_s_at | MmugDNA.23345.1 | 5.74  | 5.69  | 0.16 | 0.14 | 1.03  | 0.676466 | 0.202165 | 0.873123 | 0.476559 |
| MmugDNA.23347.1.S1_at   | MmugDNA.23347.1 | 5.05  | 6.51  | 0.49 | 0.38 | -2.76 | 0.027527 | 0.015041 | 0.327829 | 0.155766 |
| MmugDNA.23348.1.S1_at   | MmugDNA.23348.1 | 2.94  | 2.81  | 0.05 | 0.04 | 1.09  | 0.051926 | 0.429769 | 0.3916   | 0.651032 |
| MmugDNA.23349.1.S1_at   | MmugDNA.23349.1 | 3.15  | 3.12  | 0.01 | 0.15 | 1.02  | 0.285781 | 0.128052 | 0.643438 | 0.399035 |
| MmugDNA.2335.1.S1_at    | MmugDNA.2335.1  | 4.56  | 4.48  | 0.15 | 0.07 | 1.06  | 0.15167  | 0.471045 | 0.524628 | 0.679172 |
| MmugDNA.23350.1.S1_at   | MmugDNA.23350.1 | 3.93  | 3.97  | 0.32 | 0.04 | -1.03 | 0.789147 | 0.942677 | 0.92249  | 0.967498 |
| MmugDNA.23351.1.S1_at   | MmugDNA.23351.1 | 4.82  | 4.83  | 0.14 | 0.25 | -1.01 | 0.76698  | 0.548677 | 0.912422 | 0.729318 |
| MmugDNA.23353.1.S1_at   | MmugDNA.23353.1 | 6.14  | 6.03  | 0.1  | 0.13 | 1.07  | 0.762657 | 0.960337 | 0.91092  | 0.977459 |
| MmugDNA.23354.1.S1_at   | MmugDNA.23354.1 | 11.69 | 11.4  | 0.16 | 0.07 | 1.22  | 0.052816 | 0.055328 | 0.393364 | 0.281024 |
| MmugDNA.23354.1.S1_s_at | MmugDNA.23354.1 | 12.11 | 12.02 | 0.1  | 0.07 | 1.07  | 0.335056 | 0.082238 | 0.680736 | 0.331091 |
| MmugDNA.23355.1.S1_at   | MmugDNA.23355.1 | 7.38  | 7.27  | 0.06 | 0.1  | 1.08  | 0.129647 | 0.488303 | 0.504468 | 0.691049 |
| MmugDNA.23357.1.S1_at   | MmugDNA.23357.1 | 4.68  | 4.51  | 0.38 | 0.04 | 1.13  | 0.821073 | 0.942892 | 0.93547  | 0.967564 |
| MmugDNA.23359.1.S1_x_at | MmugDNA.23359.1 | 9.34  | 9.42  | 0.28 | 0.08 | -1.06 | 0.846326 | 0.532899 | 0.946139 | 0.71929  |
| MmugDNA.2336.1.S1_at    | MmugDNA.2336.1  | 7.86  | 8.08  | 0.26 | 0.18 | -1.16 | 0.134457 | 0.004287 | 0.508462 | 0.091951 |
| MmugDNA.23360.1.S1_at   | MmugDNA.23360.1 | 3.76  | 3.55  | 0.39 | 0.17 | 1.16  | 0.338064 | 0.570403 | 0.682747 | 0.743103 |
| MmugDNA.23361.1.S1_at   | MmugDNA.23361.1 | 5.86  | 5.85  | 0.13 | 0.03 | 1.01  | 0.948215 | 0.35577  | 0.982204 | 0.597864 |
| MmugDNA.23362.1.S1_at   | MmugDNA.23362.1 | 2.78  | 2.77  | 0.09 | 0.06 | 1.01  | 0.390074 | 0.704053 | 0.716509 | 0.828326 |
| MmugDNA.23363.1.S1_at   | MmugDNA.23363.1 | 6.36  | 6.45  | 0.62 | 0.8  | -1.06 | 0.948125 | 0.721366 | 0.98218  | 0.838685 |
| MmugDNA.23364.1.S1_at   | MmugDNA.23364.1 | 3.17  | 3.23  | 0.24 | 0.01 | -1.04 | 0.580654 | 0.523736 | 0.827245 | 0.713976 |
| MmugDNA.23365.1.S1_at   | MmugDNA.23365.1 | 6.84  | 7.25  | 0.18 | 0.2  | -1.33 | 0.078233 | 0.265543 | 0.440443 | 0.531418 |
| MmugDNA.23366.1.S1_s_at | MmugDNA.23366.1 | 6.23  | 5.93  | 0.14 | 0.15 | 1.23  | 0.077551 | 0.219857 | 0.439648 | 0.493388 |
| MmugDNA.23367.1.S1_at   | MmugDNA.23367.1 | 7.29  | 6.66  | 0.48 | 0.2  | 1.55  | 0.288857 | 0.14179  | 0.645883 | 0.415331 |
| MmugDNA.23367.1.S1_s_at | MmugDNA.23367.1 | 7.31  | 6.96  | 0.32 | 0.16 | 1.27  | 0.723713 | 0.41852  | 0.892847 | 0.642927 |
| MmugDNA.23368.1.S1_at   | MmugDNA.23368.1 | 4.71  | 4.41  | 0.1  | 0.04 | 1.23  | 0.019254 | 0.080779 | 0.300345 | 0.328657 |
| MmugDNA.23369.1.S1_at   | MmugDNA.23369.1 | 3.32  | 3.21  | 0.03 | 0.08 | 1.08  | 0.105381 | 0.079741 | 0.477051 | 0.327009 |
| MmugDNA.23370.1.S1_at   | MmugDNA.23370.1 | 4.95  | 4.97  | 0.27 | 0.09 | -1.01 | 0.749788 | 0.495292 | 0.905303 | 0.695411 |
| MmugDNA.23371.1.S1_at   | MmugDNA.23371.1 | 11    | 10.21 | 0.31 | 0.12 | 1.72  | 0.006843 | 0.001238 | 0.224141 | 0.05478  |
| MmugDNA.23372.1.S1_at   | MmugDNA.23372.1 | 7.9   | 8.09  | 0.06 | 0.11 | -1.15 | 0.014514 | 0.174088 | 0.27627  | 0.450385 |
| MmugDNA.23374.1.S1_at   | MmugDNA.23374.1 | 8.14  | 7.79  | 0.42 | 0.08 | 1.27  | 0.076242 | 0.114219 | 0.437711 | 0.380761 |

|                         |                 |       |       |      |      |       |          |          |          |          |
|-------------------------|-----------------|-------|-------|------|------|-------|----------|----------|----------|----------|
| MmugDNA.23375.1.S1_at   | MmugDNA.23375.1 | 8.72  | 8.75  | 0.59 | 0.17 | -1.02 | 0.727026 | 0.003148 | 0.894589 | 0.081732 |
| MmugDNA.23376.1.S1_at   | MmugDNA.23376.1 | 3.71  | 3.61  | 0.22 | 0.16 | 1.07  | 0.431293 | 0.310088 | 0.743363 | 0.565307 |
| MmugDNA.23377.1.S1_at   | MmugDNA.23377.1 | 3.38  | 3.5   | 0.03 | 0.21 | -1.09 | 0.449539 | 0.440699 | 0.754489 | 0.659076 |
| MmugDNA.23380.1.S1_at   | MmugDNA.23380.1 | 11.31 | 10.57 | 0.32 | 0.09 | 1.68  | 0.041635 | 0.033644 | 0.367007 | 0.227006 |
| MmugDNA.23381.1.S1_at   | MmugDNA.23381.1 | 13.54 | 13.55 | 0.06 | 0.02 | -1.01 | 0.369276 | 0.084205 | 0.704181 | 0.33528  |
| MmugDNA.23382.1.S1_at   | MmugDNA.23382.1 | 5.64  | 5.89  | 0.36 | 0.08 | -1.19 | 0.450997 | 0.767876 | 0.755    | 0.865256 |
| MmugDNA.23383.1.S1_at   | MmugDNA.23383.1 | 8.32  | 8.22  | 0.35 | 0.12 | 1.07  | 0.158263 | 0.514464 | 0.531211 | 0.707693 |
| MmugDNA.23384.1.S1_at   | MmugDNA.23384.1 | 3.27  | 3.39  | 0.17 | 0.09 | -1.09 | 0.619385 | 0.191628 | 0.846602 | 0.466918 |
| MmugDNA.23385.1.S1_at   | MmugDNA.23385.1 | 7.47  | 8.45  | 0.16 | 0.39 | -1.97 | 0.022236 | 0.041697 | 0.310495 | 0.24887  |
| MmugDNA.23386.1.S1_at   | MmugDNA.23386.1 | 3.35  | 3.34  | 0.17 | 0.05 | 1.01  | 0.228859 | 0.23645  | 0.597876 | 0.507314 |
| MmugDNA.23389.1.S1_at   | MmugDNA.23389.1 | 7.58  | 7.97  | 0.53 | 0.33 | -1.31 | 0.568232 | 0.922408 | 0.820707 | 0.956308 |
| MmugDNA.2339.1.S1_at    | MmugDNA.2339.1  | 3.9   | 4.02  | 0    | 0.3  | -1.09 | 0.790689 | 0.810065 | 0.922991 | 0.890518 |
| MmugDNA.23390.1.S1_at   | MmugDNA.23390.1 | 4.15  | 4.19  | 0.06 | 0.11 | -1.02 | 0.256852 | 0.040266 | 0.620749 | 0.245902 |
| MmugDNA.23391.1.S1_at   | MmugDNA.23391.1 | 5.23  | 5.14  | 0.17 | 0.02 | 1.06  | 0.281696 | 0.082237 | 0.64018  | 0.331091 |
| MmugDNA.23393.1.S1_at   | MmugDNA.23393.1 | 5.95  | 4.54  | 0.58 | 0.81 | 2.66  | 0.053522 | 0.044493 | 0.394865 | 0.255279 |
| MmugDNA.23394.1.S1_at   | MmugDNA.23394.1 | 9.99  | 9.77  | 0.55 | 0.1  | 1.16  | 0.53572  | 0.432215 | 0.801881 | 0.652775 |
| MmugDNA.23395.1.S1_at   | MmugDNA.23395.1 | 5.71  | 5.75  | 0.12 | 0.04 | -1.03 | 0.741148 | 0.801686 | 0.901143 | 0.885902 |
| MmugDNA.23396.1.S1_at   | MmugDNA.23396.1 | 13.51 | 13.6  | 0.05 | 0.05 | -1.06 | 0.101895 | 0.015091 | 0.472267 | 0.155995 |
| MmugDNA.23397.1.S1_at   | MmugDNA.23397.1 | 4.28  | 4.22  | 0.05 | 0.08 | 1.04  | 0.738373 | 0.299479 | 0.89988  | 0.557916 |
| MmugDNA.23398.1.S1_at   | MmugDNA.23398.1 | 7.74  | 8.49  | 0.97 | 0.3  | -1.68 | 0.409484 | 0.182274 | 0.730096 | 0.458766 |
| MmugDNA.28352.1.S1_at   | MmugDNA.28352.1 | 12.12 | 11.95 | 0.07 | 0.04 | 1.12  | 0.018847 | 0.024175 | 0.298593 | 0.194641 |
| MmugDNA.28352.1.S1_s_at | MmugDNA.28352.1 | 12.27 | 12.19 | 0.13 | 0.01 | 1.05  | 0.429257 | 0.07499  | 0.742138 | 0.319038 |
| MmugDNA.234.1.S1_at     | MmugDNA.234.1   | 3.93  | 3.73  | 0.02 | 0.11 | 1.15  | 0.145713 | 0.03964  | 0.520555 | 0.244183 |
| MmugDNA.2340.1.S1_at    | MmugDNA.2340.1  | 6.2   | 6.21  | 0.14 | 0.07 | -1.01 | 0.523519 | 0.24067  | 0.795656 | 0.511396 |
| MmugDNA.23400.1.S1_at   | MmugDNA.23400.1 | 4.59  | 4.61  | 0.23 | 0.09 | -1.01 | 0.814409 | 0.96857  | 0.932969 | 0.982645 |
| MmugDNA.23401.1.S1_at   | MmugDNA.23401.1 | 7.29  | 6.9   | 0.16 | 0.3  | 1.3   | 0.096248 | 0.470605 | 0.464755 | 0.678925 |
| MmugDNA.23402.1.S1_at   | MmugDNA.23402.1 | 4.16  | 4.31  | 0.23 | 0.04 | -1.11 | 0.685998 | 0.399483 | 0.87707  | 0.629825 |
| MmugDNA.23404.1.S1_at   | MmugDNA.23404.1 | 5.5   | 5.44  | 0.11 | 0.02 | 1.05  | 0.185223 | 0.480089 | 0.558288 | 0.685659 |
| MmugDNA.23406.1.S1_at   | MmugDNA.23406.1 | 4.78  | 4.47  | 0.71 | 0.36 | 1.24  | 0.71746  | 0.57661  | 0.890424 | 0.747284 |
| MmugDNA.23408.1.S1_at   | MmugDNA.23408.1 | 4.45  | 4.35  | 0.17 | 0.14 | 1.07  | 0.250433 | 0.370485 | 0.61563  | 0.609544 |
| MmugDNA.23409.1.S1_at   | MmugDNA.23409.1 | 5.25  | 5.24  | 0.04 | 0.18 | 1.01  | 0.568289 | 0.844331 | 0.820707 | 0.911376 |
| MmugDNA.2341.1.S1_at    | MmugDNA.2341.1  | 5.78  | 5.52  | 0.02 | 0.07 | 1.2   | 0.004329 | 0.002239 | 0.198874 | 0.069669 |
| MmugDNA.23410.1.S1_at   | MmugDNA.23410.1 | 11.72 | 11.49 | 0.08 | 0.14 | 1.18  | 0.069618 | 0.136049 | 0.427443 | 0.408363 |
| MmugDNA.23411.1.S1_at   | MmugDNA.23411.1 | 3.27  | 3.23  | 0.07 | 0.02 | 1.03  | 0.178576 | 0.430339 | 0.551383 | 0.651374 |
| MmugDNA.23412.1.S1_at   | MmugDNA.23412.1 | 6.32  | 6.36  | 0    | 0.05 | -1.03 | 0.421616 | 0.678499 | 0.737563 | 0.81221  |
| MmugDNA.23412.1.S1_x_at | MmugDNA.23412.1 | 8.2   | 8.14  | 0.12 | 0.07 | 1.04  | 0.181803 | 0.427098 | 0.554854 | 0.649106 |
| MmugDNA.23413.1.S1_at   | MmugDNA.23413.1 | 10.49 | 10.54 | 0.14 | 0.03 | -1.03 | 0.676992 | 0.576598 | 0.873333 | 0.747284 |
| MmugDNA.23415.1.S1_at   | MmugDNA.23415.1 | 8.92  | 8.87  | 0.4  | 0.11 | 1.04  | 0.862345 | 0.360834 | 0.951531 | 0.601938 |
| MmugDNA.23416.1.S1_at   | MmugDNA.23416.1 | 9.28  | 9.04  | 0.45 | 0.06 | 1.18  | 0.509801 | 0.710292 | 0.787835 | 0.831912 |
| MmugDNA.23417.1.S1_at   | MmugDNA.23417.1 | 5.75  | 5.7   | 0.09 | 0.02 | 1.04  | 0.101925 | 0.156739 | 0.472363 | 0.432216 |
| MmugDNA.23418.1.S1_at   | MmugDNA.23418.1 | 7.47  | 7.16  | 0.24 | 0.21 | 1.23  | 0.43796  | 0.796932 | 0.747043 | 0.882822 |
| MmugDNA.23419.1.S1_at   | MmugDNA.23419.1 | 4.25  | 4.08  | 0.13 | 0.03 | 1.13  | 0.082602 | 0.517204 | 0.447644 | 0.709435 |
| MmugDNA.2342.1.S1_at    | MmugDNA.2342.1  | 2.84  | 2.81  | 0.12 | 0    | 1.02  | 0.721026 | 0.951514 | 0.891885 | 0.972522 |

|                       |                 |       |       |      |      |       |          |          |          |          |
|-----------------------|-----------------|-------|-------|------|------|-------|----------|----------|----------|----------|
| MmugDNA.23420.1.S1_at | MmugDNA.23420.1 | 4.53  | 4.31  | 0.2  | 0.11 | 1.17  | 0.227945 | 0.320802 | 0.596782 | 0.572849 |
| MmugDNA.23421.1.S1_at | MmugDNA.23421.1 | 3.86  | 3.72  | 0.15 | 0.12 | 1.1   | 0.477427 | 0.376429 | 0.769855 | 0.614271 |
| MmugDNA.23422.1.S1_at | MmugDNA.23422.1 | 10.62 | 10.4  | 0.09 | 0.08 | 1.17  | 0.058415 | 0.2082   | 0.404364 | 0.482086 |
| MmugDNA.23426.1.S1_at | MmugDNA.23426.1 | 3.21  | 3.22  | 0.06 | 0.03 | -1.01 | 0.33772  | 0.588366 | 0.682659 | 0.754874 |
| MmugDNA.23427.1.S1_at | MmugDNA.23427.1 | 7.5   | 7.35  | 0.14 | 0.04 | 1.11  | 0.049126 | 0.00491  | 0.385273 | 0.097662 |
| MmugDNA.23429.1.S1_at | MmugDNA.23429.1 | 6.3   | 5.76  | 0.19 | 0.21 | 1.45  | 0.027722 | 0.061705 | 0.328891 | 0.295166 |
| MmugDNA.2343.1.S1_at  | MmugDNA.2343.1  | 3.31  | 3.4   | 0.05 | 0.08 | -1.07 | 0.105471 | 0.077861 | 0.477122 | 0.324099 |
| MmugDNA.23430.1.S1_at | MmugDNA.23430.1 | 3.17  | 3.09  | 0.2  | 0.07 | 1.06  | 0.498829 | 0.457658 | 0.781838 | 0.670889 |
| MmugDNA.23432.1.S1_at | MmugDNA.23432.1 | 5.42  | 5.33  | 0.07 | 0.02 | 1.07  | 0.054675 | 0.018516 | 0.397122 | 0.171214 |
| MmugDNA.23433.1.S1_at | MmugDNA.23433.1 | 3.99  | 4.34  | 0.19 | 0.59 | -1.27 | 0.731839 | 0.06851  | 0.896927 | 0.308262 |
| MmugDNA.23435.1.S1_at | MmugDNA.23435.1 | 11.78 | 11.89 | 0.54 | 0.06 | -1.08 | 0.694216 | 0.674317 | 0.880999 | 0.809716 |
| MmugDNA.23437.1.S1_at | MmugDNA.23437.1 | 6.58  | 6.27  | 0.15 | 0.03 | 1.24  | 0.076549 | 0.28048  | 0.437977 | 0.543671 |
| MmugDNA.23438.1.S1_at | MmugDNA.23438.1 | 5.38  | 5.07  | 0.32 | 0.69 | 1.24  | 0.644788 | 0.892846 | 0.858593 | 0.93888  |
| MmugDNA.23439.1.S1_at | MmugDNA.23439.1 | 6.02  | 5.18  | 0.68 | 0.35 | 1.79  | 0.282997 | 0.57916  | 0.64118  | 0.748918 |
| MmugDNA.2344.1.S1_at  | MmugDNA.2344.1  | 5.42  | 5.46  | 0.35 | 0.39 | -1.03 | 0.79918  | 0.580644 | 0.926464 | 0.749827 |
| MmugDNA.23440.1.S1_at | MmugDNA.23440.1 | 4.08  | 4.09  | 0.24 | 0.07 | -1.01 | 0.306393 | 0.421192 | 0.659434 | 0.644807 |
| MmugDNA.23441.1.S1_at | MmugDNA.23441.1 | 5.79  | 5.77  | 0.39 | 0.1  | 1.01  | 0.903795 | 0.727904 | 0.967679 | 0.842707 |
| MmugDNA.23443.1.S1_at | MmugDNA.23443.1 | 5.1   | 5.36  | 0.24 | 0.13 | -1.21 | 0.30248  | 0.074749 | 0.656433 | 0.318471 |
| MmugDNA.23444.1.S1_at | MmugDNA.23444.1 | 6.26  | 6.53  | 0.72 | 0.16 | -1.2  | 0.966082 | 0.353877 | 0.988866 | 0.596873 |
| MmugDNA.23446.1.S1_at | MmugDNA.23446.1 | 6.09  | 6.9   | 0.5  | 0.15 | -1.76 | 0.213778 | 0.705828 | 0.584353 | 0.829542 |
| MmugDNA.23447.1.S1_at | MmugDNA.23447.1 | 3.24  | 3.2   | 0.04 | 0.06 | 1.03  | 0.773781 | 0.091735 | 0.915965 | 0.346977 |
| MmugDNA.23449.1.S1_at | MmugDNA.23449.1 | 4.1   | 4.18  | 0.12 | 0.21 | -1.06 | 0.351592 | 0.581434 | 0.692353 | 0.750451 |
| MmugDNA.2345.1.S1_at  | MmugDNA.2345.1  | 4.43  | 4.4   | 0.14 | 0.06 | 1.02  | 0.527    | 0.747354 | 0.79688  | 0.853149 |
| MmugDNA.23450.1.S1_at | MmugDNA.23450.1 | 3.26  | 3.04  | 0.17 | 0.35 | 1.17  | 0.495004 | 0.077371 | 0.77968  | 0.323177 |
| MmugDNA.23452.1.S1_at | MmugDNA.23452.1 | 10.13 | 9.54  | 0.3  | 0.05 | 1.51  | 0.020183 | 0.000602 | 0.303673 | 0.041985 |
| MmugDNA.23453.1.S1_at | MmugDNA.23453.1 | 4.93  | 4.93  | 0.23 | 0.24 | -1    | 0.492687 | 0.687975 | 0.778488 | 0.817831 |
| MmugDNA.23454.1.S1_at | MmugDNA.23454.1 | 10.24 | 8.17  | 0.87 | 0.35 | 4.21  | 0.041327 | 0.030427 | 0.366142 | 0.216377 |
| MmugDNA.23455.1.S1_at | MmugDNA.23455.1 | 3.45  | 3.47  | 0.05 | 0.09 | -1.01 | 0.611683 | 0.839533 | 0.842583 | 0.90858  |
| MmugDNA.23456.1.S1_at | MmugDNA.23456.1 | 6.3   | 5.84  | 0.37 | 0.15 | 1.37  | 0.169976 | 0.115355 | 0.542967 | 0.382394 |
| MmugDNA.23457.1.S1_at | MmugDNA.23457.1 | 4.82  | 4.66  | 0.1  | 0.13 | 1.12  | 0.236803 | 0.083309 | 0.603719 | 0.333375 |
| MmugDNA.23458.1.S1_at | MmugDNA.23458.1 | 6.17  | 5.71  | 0.6  | 0.23 | 1.37  | 0.193414 | 0.265089 | 0.564275 | 0.531    |
| MmugDNA.23459.1.S1_at | MmugDNA.23459.1 | 4.91  | 4.89  | 0.21 | 0.26 | 1.02  | 0.851525 | 0.704042 | 0.947639 | 0.828326 |
| MmugDNA.2346.1.S1_at  | MmugDNA.2346.1  | 5.03  | 4.92  | 0.17 | 0.08 | 1.08  | 0.374147 | 0.211379 | 0.705764 | 0.48553  |
| MmugDNA.23461.1.S1_at | MmugDNA.23461.1 | 9.73  | 9.5   | 0.6  | 0.09 | 1.17  | 0.74023  | 0.540985 | 0.90073  | 0.72469  |
| MmugDNA.23462.1.S1_at | MmugDNA.23462.1 | 4.83  | 4.81  | 0.15 | 0.03 | 1.01  | 0.575962 | 0.618649 | 0.825044 | 0.774185 |
| MmugDNA.23463.1.S1_at | MmugDNA.23463.1 | 4.1   | 3.85  | 0.23 | 0.16 | 1.19  | 0.20191  | 0.126807 | 0.573467 | 0.397446 |
| MmugDNA.23464.1.S1_at | MmugDNA.23464.1 | 7.02  | 6.6   | 0.51 | 0.21 | 1.34  | 0.351821 | 0.456725 | 0.692553 | 0.670428 |
| MmugDNA.23465.1.S1_at | MmugDNA.23465.1 | 9     | 9.9   | 0.32 | 0.15 | -1.86 | 0.013635 | 0.006524 | 0.270161 | 0.10961  |
| MmugDNA.23466.1.S1_at | MmugDNA.23466.1 | 6     | 5.36  | 0.49 | 0.6  | 1.56  | 0.463249 | 0.466588 | 0.762124 | 0.676398 |
| MmugDNA.23467.1.S1_at | MmugDNA.23467.1 | 5.83  | 6.38  | 0.58 | 0.32 | -1.46 | 0.20456  | 0.252887 | 0.575951 | 0.521223 |
| MmugDNA.23468.1.S1_at | MmugDNA.23468.1 | 10.03 | 9.71  | 0.19 | 0.05 | 1.25  | 0.052302 | 0.010765 | 0.392084 | 0.135471 |
| MmugDNA.23469.1.S1_at | MmugDNA.23469.1 | 6.2   | 5.85  | 0.37 | 0.54 | 1.28  | 0.330326 | 0.282078 | 0.676941 | 0.544937 |
| MmugDNA.23470.1.S1_at | MmugDNA.23470.1 | 7.84  | 7.7   | 0.38 | 0.12 | 1.11  | 0.191865 | 0.175489 | 0.56298  | 0.452157 |

|                         |                 |       |       |      |      |       |          |          |          |          |
|-------------------------|-----------------|-------|-------|------|------|-------|----------|----------|----------|----------|
| MmugDNA.23471.1.S1_at   | MmugDNA.23471.1 | 6.86  | 7.04  | 1.14 | 0.52 | -1.13 | 0.98523  | 0.978489 | 0.995359 | 0.988285 |
| MmugDNA.23472.1.S1_at   | MmugDNA.23472.1 | 9.37  | 8.91  | 0.26 | 0.15 | 1.38  | 0.056344 | 0.010258 | 0.399925 | 0.132655 |
| MmugDNA.23476.1.S1_at   | MmugDNA.23476.1 | 3.67  | 3.69  | 0.12 | 0.23 | -1.02 | 0.606374 | 0.792355 | 0.840481 | 0.880015 |
| MmugDNA.23477.1.S1_at   | MmugDNA.23477.1 | 6.13  | 6.19  | 0.32 | 0.18 | -1.04 | 0.82313  | 0.960592 | 0.936204 | 0.977548 |
| MmugDNA.23478.1.S1_at   | MmugDNA.23478.1 | 4.15  | 3.44  | 0.66 | 0.07 | 1.64  | 0.114209 | 0.130782 | 0.487585 | 0.402959 |
| MmugDNA.23479.1.S1_at   | MmugDNA.23479.1 | 6.45  | 6.43  | 0.42 | 0.01 | 1.01  | 0.614056 | 0.824541 | 0.843784 | 0.89925  |
| MmugDNA.2348.1.S1_at    | MmugDNA.2348.1  | 4.16  | 4.03  | 0.06 | 0.17 | 1.09  | 0.367195 | 0.684127 | 0.702778 | 0.81577  |
| MmugDNA.23480.1.S1_at   | MmugDNA.23480.1 | 6.24  | 6.17  | 0.01 | 0.11 | 1.05  | 0.327112 | 0.188683 | 0.674781 | 0.46461  |
| MmugDNA.23481.1.S1_at   | MmugDNA.23481.1 | 7.97  | 7.65  | 0.14 | 0.25 | 1.25  | 0.166853 | 0.159011 | 0.539457 | 0.435213 |
| MmugDNA.23482.1.S1_at   | MmugDNA.23482.1 | 5.14  | 4.98  | 0.08 | 0.12 | 1.11  | 0.08154  | 0.096033 | 0.445497 | 0.353302 |
| MmugDNA.23482.1.S1_s_at | MmugDNA.23482.1 | 8.77  | 8.14  | 0.3  | 0.1  | -1.54 | 0.094411 | 0.054668 | 0.463794 | 0.279311 |
| MmugDNA.23483.1.S1_at   | MmugDNA.23483.1 | 8.73  | 7.94  | 0.41 | 0.21 | 1.72  | 0.072064 | 0.399851 | 0.431937 | 0.630048 |
| MmugDNA.23484.1.S1_at   | MmugDNA.23484.1 | 4.88  | 5.19  | 0.44 | 0.15 | -1.23 | 0.147448 | 0.175934 | 0.521578 | 0.452486 |
| MmugDNA.23485.1.S1_at   | MmugDNA.23485.1 | 8.78  | 8.2   | 0.24 | 0.34 | 1.5   | 0.364489 | 0.000714 | 0.700603 | 0.044419 |
| MmugDNA.23512.1.S1_s_at | MmugDNA.23512.1 | 4.6   | 4.35  | 0.19 | 0.07 | 1.19  | 0.144045 | 0.338418 | 0.519438 | 0.585432 |
| MmugDNA.23488.1.S1_at   | MmugDNA.23488.1 | 3.29  | 3.49  | 0.12 | 0.76 | -1.15 | 0.270136 | 0.281873 | 0.630217 | 0.544844 |
| MmugDNA.2349.1.S1_at    | MmugDNA.2349.1  | 3.2   | 3.15  | 0.15 | 0.06 | 1.03  | 0.369961 | 0.3948   | 0.704429 | 0.627216 |
| MmugDNA.23490.1.S1_at   | MmugDNA.23490.1 | 4.98  | 4.92  | 0.18 | 0.12 | 1.05  | 0.768574 | 0.528541 | 0.913192 | 0.716664 |
| MmugDNA.23491.1.S1_at   | MmugDNA.23491.1 | 8.24  | 8.29  | 0.39 | 0.21 | -1.04 | 0.517665 | 0.437649 | 0.792232 | 0.656833 |
| MmugDNA.23493.1.S1_at   | MmugDNA.23493.1 | 4.58  | 4.55  | 0.27 | 0.04 | 1.02  | 0.71058  | 0.821302 | 0.887344 | 0.897125 |
| MmugDNA.23494.1.S1_at   | MmugDNA.23494.1 | 5.9   | 4.98  | 0.81 | 0.37 | 1.88  | 0.244615 | 0.338829 | 0.610181 | 0.585883 |
| MmugDNA.23495.1.S1_at   | MmugDNA.23495.1 | 6.02  | 6.02  | 0.44 | 0.05 | 1     | 0.425789 | 0.087513 | 0.740112 | 0.340677 |
| MmugDNA.23496.1.S1_at   | MmugDNA.23496.1 | 8.19  | 7.56  | 0.33 | 0.26 | 1.55  | 0.058266 | 0.002819 | 0.403916 | 0.078275 |
| MmugDNA.23497.1.S1_at   | MmugDNA.23497.1 | 9.42  | 8.72  | 0.61 | 0.19 | 1.63  | 0.274242 | 0.100698 | 0.633792 | 0.360078 |
| MmugDNA.23499.1.S1_at   | MmugDNA.23499.1 | 4.29  | 4.49  | 0.02 | 0.34 | -1.14 | 0.243549 | 0.559987 | 0.609448 | 0.736439 |
| MmugDNA.2350.1.S1_at    | MmugDNA.2350.1  | 6.37  | 6.24  | 0.27 | 0.03 | 1.09  | 0.206206 | 0.307392 | 0.578142 | 0.563638 |
| MmugDNA.23502.1.S1_at   | MmugDNA.23502.1 | 4.51  | 4.54  | 0.11 | 0.19 | -1.02 | 0.184635 | 0.689967 | 0.557393 | 0.819224 |
| MmugDNA.23503.1.S1_at   | MmugDNA.23503.1 | 3.58  | 3.36  | 0.13 | 0.06 | 1.16  | 0.049159 | 0.242399 | 0.385288 | 0.51282  |
| MmugDNA.23504.1.S1_s_at | MmugDNA.23504.1 | 8.14  | 9.77  | 1.97 | 0.32 | -3.09 | 0.152632 | 0.154068 | 0.525558 | 0.428867 |
| MmugDNA.23505.1.S1_at   | MmugDNA.23505.1 | 3.04  | 3.02  | 0.14 | 0.12 | 1.01  | 0.821108 | 0.870199 | 0.935475 | 0.926372 |
| MmugDNA.23506.1.S1_s_at | MmugDNA.23506.1 | 14.41 | 14.43 | 0.04 | 0.01 | -1.02 | 0.290211 | 0.694422 | 0.646851 | 0.822288 |
| MmugDNA.23507.1.S1_at   | MmugDNA.23507.1 | 4.42  | 4.38  | 0.05 | 0.11 | 1.03  | 0.729807 | 0.130845 | 0.895824 | 0.403037 |
| MmugDNA.23508.1.S1_at   | MmugDNA.23508.1 | 5.37  | 5.12  | 0.11 | 0.16 | 1.19  | 0.043231 | 0.221294 | 0.371614 | 0.494618 |
| MmugDNA.23509.1.S1_at   | MmugDNA.23509.1 | 12.13 | 11.75 | 0.08 | 0.07 | 1.3   | 0.003078 | 0.000758 | 0.191107 | 0.045403 |
| MmugDNA.2351.1.S1_at    | MmugDNA.2351.1  | 5.78  | 5.58  | 0.29 | 0.21 | 1.15  | 0.27435  | 0.268524 | 0.633792 | 0.534123 |
| MmugDNA.23516.1.S1_at   | MmugDNA.23516.1 | 13.14 | 12.82 | 0.21 | 0.04 | 1.25  | 0.19543  | 0.260959 | 0.565793 | 0.527351 |
| MmugDNA.23517.1.S1_at   | MmugDNA.23517.1 | 7.1   | 7.51  | 0.63 | 0.06 | -1.33 | 0.396694 | 0.244297 | 0.721542 | 0.514184 |
| MmugDNA.23518.1.S1_at   | MmugDNA.23518.1 | 6.75  | 6.83  | 0.52 | 0.62 | -1.06 | 0.704854 | 0.866531 | 0.885227 | 0.92415  |
| MmugDNA.23519.1.S1_at   | MmugDNA.23519.1 | 3.03  | 3.1   | 0.16 | 0.03 | -1.04 | 0.920288 | 0.413407 | 0.972913 | 0.639648 |
| MmugDNA.2352.1.S1_at    | MmugDNA.2352.1  | 7.09  | 7.7   | 0.26 | 0.24 | -1.52 | 0.072231 | 0.107393 | 0.432091 | 0.370219 |
| MmugDNA.23520.1.S1_at   | MmugDNA.23520.1 | 7.08  | 7.34  | 0.32 | 0.11 | -1.2  | 0.218711 | 0.177867 | 0.588341 | 0.454181 |
| MmugDNA.23521.1.S1_at   | MmugDNA.23521.1 | 8.31  | 8.22  | 0.53 | 0.1  | 1.07  | 0.899927 | 0.831962 | 0.965989 | 0.90356  |
| MmugDNA.23522.1.S1_at   | MmugDNA.23522.1 | 5.55  | 6.23  | 0.41 | 0.1  | -1.6  | 0.145028 | 0.201894 | 0.520238 | 0.476373 |

|                         |                 |       |       |      |      |       |          |          |          |          |
|-------------------------|-----------------|-------|-------|------|------|-------|----------|----------|----------|----------|
| MmugDNA.23524.1.S1_at   | MmugDNA.23524.1 | 5.86  | 5.73  | 0.1  | 0.03 | 1.09  | 0.072231 | 0.725556 | 0.432091 | 0.841059 |
| MmugDNA.23525.1.S1_at   | MmugDNA.23525.1 | 3.89  | 3.85  | 0.17 | 0.07 | 1.03  | 0.300754 | 0.277919 | 0.65518  | 0.541664 |
| MmugDNA.23526.1.S1_at   | MmugDNA.23526.1 | 3.3   | 3.46  | 0.2  | 0.14 | -1.11 | 0.234847 | 0.24996  | 0.602142 | 0.518974 |
| MmugDNA.23527.1.S1_at   | MmugDNA.23527.1 | 4.56  | 4.56  | 0.08 | 0.07 | 1     | 0.946329 | 0.083977 | 0.981401 | 0.3349   |
| MmugDNA.23528.1.S1_at   | MmugDNA.23528.1 | 12.35 | 12.24 | 0.28 | 0.05 | 1.08  | 0.573951 | 0.831262 | 0.823778 | 0.903226 |
| MmugDNA.23529.1.S1_at   | MmugDNA.23529.1 | 6.64  | 6.54  | 0.06 | 0.18 | 1.07  | 0.394582 | 0.52801  | 0.71989  | 0.716422 |
| MmugDNA.2353.1.S1_at    | MmugDNA.2353.1  | 5.67  | 5.64  | 0.02 | 0.06 | 1.02  | 0.642527 | 0.152844 | 0.8578   | 0.427654 |
| MmugDNA.23530.1.S1_at   | MmugDNA.23530.1 | 2.93  | 2.89  | 0.13 | 0.04 | 1.03  | 0.202081 | 0.359475 | 0.573629 | 0.600754 |
| MmugDNA.23531.1.S1_at   | MmugDNA.23531.1 | 4.33  | 4.5   | 0.32 | 0.17 | -1.13 | 0.693702 | 0.11888  | 0.880765 | 0.387068 |
| MmugDNA.23533.1.S1_at   | MmugDNA.23533.1 | 5.46  | 6.4   | 0.47 | 0.2  | -1.93 | 0.103266 | 0.41606  | 0.474048 | 0.641342 |
| MmugDNA.23534.1.S1_at   | MmugDNA.23534.1 | 9.57  | 9.38  | 0.29 | 0.16 | -1.14 | 0.314569 | 0.133411 | 0.665231 | 0.405246 |
| MmugDNA.23536.1.S1_at   | MmugDNA.23536.1 | 3.61  | 3.48  | 0.15 | 0.08 | 1.09  | 0.289094 | 0.366233 | 0.645892 | 0.606013 |
| MmugDNA.23537.1.S1_at   | MmugDNA.23537.1 | 2.99  | 3.05  | 0.13 | 0.08 | -1.04 | 0.909754 | 0.356699 | 0.96945  | 0.598516 |
| MmugDNA.23539.1.S1_at   | MmugDNA.23539.1 | 8.76  | 9.07  | 0.43 | 0.06 | -1.24 | 0.189702 | 0.463637 | 0.561075 | 0.67456  |
| MmugDNA.2354.1.S1_at    | MmugDNA.2354.1  | 4.53  | 4.53  | 0.28 | 0.02 | 1     | 0.716777 | 0.516985 | 0.890016 | 0.709346 |
| MmugDNA.23540.1.S1_at   | MmugDNA.23540.1 | 6.26  | 6.28  | 0.14 | 0.1  | -1.01 | 0.808374 | 0.961615 | 0.930633 | 0.978382 |
| MmugDNA.23541.1.S1_at   | MmugDNA.23541.1 | 10.99 | 11.2  | 0.88 | 0.1  | -1.16 | 0.783867 | 0.752311 | 0.920542 | 0.855787 |
| MmugDNA.23543.1.S1_s_at | MmugDNA.23543.1 | 10.88 | 10.94 | 0.36 | 0.25 | -1.05 | 0.859197 | 0.137497 | 0.950315 | 0.410458 |
| MmugDNA.23545.1.S1_at   | MmugDNA.23545.1 | 10.69 | 10.85 | 0.09 | 0.09 | -1.11 | 0.204944 | 0.268299 | 0.576619 | 0.534021 |
| MmugDNA.23546.1.S1_at   | MmugDNA.23546.1 | 2.9   | 3.02  | 0.07 | 0.08 | -1.09 | 0.178196 | 0.360721 | 0.551301 | 0.60179  |
| MmugDNA.23547.1.S1_at   | MmugDNA.23547.1 | 8.53  | 9.28  | 2.35 | 0.15 | -1.68 | 0.366318 | 0.465135 | 0.701752 | 0.675606 |
| MmugDNA.23549.1.S1_at   | MmugDNA.23549.1 | 4.37  | 4.36  | 0.12 | 0.07 | 1.01  | 0.538411 | 0.908028 | 0.803248 | 0.947889 |
| MmugDNA.2355.1.S1_at    | MmugDNA.2355.1  | 3.25  | 3.25  | 0.04 | 0    | -1    | 0.377397 | 0.284803 | 0.707543 | 0.546966 |
| MmugDNA.23550.1.S1_at   | MmugDNA.23550.1 | 4.83  | 4.77  | 0.11 | 0.02 | 1.04  | 0.372327 | 0.622564 | 0.705567 | 0.777066 |
| MmugDNA.23551.1.S1_at   | MmugDNA.23551.1 | 6.9   | 6.71  | 0.08 | 0.02 | 1.14  | 0.031035 | 0.037837 | 0.339397 | 0.238912 |
| MmugDNA.23552.1.S1_at   | MmugDNA.23552.1 | 4.2   | 4.19  | 0.05 | 0.13 | 1.01  | 0.892245 | 0.766047 | 0.962988 | 0.864085 |
| MmugDNA.23553.1.S1_at   | MmugDNA.23553.1 | 7.09  | 7.18  | 0.33 | 0.14 | -1.06 | 0.912393 | 0.006406 | 0.970266 | 0.108767 |
| MmugDNA.23554.1.S1_at   | MmugDNA.23554.1 | 6.74  | 6.74  | 0.05 | 0.18 | 1     | 0.387899 | 0.458188 | 0.714828 | 0.671077 |
| MmugDNA.23555.1.S1_at   | MmugDNA.23555.1 | 6.93  | 5.84  | 0.47 | 0.2  | 2.14  | 0.024996 | 0.01751  | 0.320402 | 0.167516 |
| MmugDNA.23557.1.S1_at   | MmugDNA.23557.1 | 5.34  | 5.15  | 0.03 | 0.04 | 1.14  | 0.002039 | 0.003355 | 0.173807 | 0.083359 |
| MmugDNA.23558.1.S1_at   | MmugDNA.23558.1 | 7.43  | 7.4   | 0.27 | 0.02 | 1.02  | 0.418942 | 0.546831 | 0.736038 | 0.728203 |
| MmugDNA.2356.1.S1_at    | MmugDNA.2356.1  | 3.46  | 3.86  | 0.73 | 0.28 | -1.32 | 0.580789 | 0.743617 | 0.827254 | 0.851428 |
| MmugDNA.23562.1.S1_at   | MmugDNA.23562.1 | 9.67  | 9.18  | 2.74 | 0.33 | 1.4   | 0.827033 | 0.284172 | 0.938039 | 0.546381 |
| MmugDNA.23563.1.S1_at   | MmugDNA.23563.1 | 5.67  | 5.88  | 0.19 | 0.12 | -1.15 | 0.435586 | 0.340952 | 0.745762 | 0.587051 |
| MmugDNA.23565.1.S1_at   | MmugDNA.23565.1 | 3.84  | 4     | 0.12 | 0.09 | -1.11 | 0.16385  | 0.027678 | 0.536659 | 0.207762 |
| MmugDNA.23566.1.S1_at   | MmugDNA.23566.1 | 7.13  | 7     | 0.12 | 0.1  | 1.09  | 0.112909 | 0.196451 | 0.486223 | 0.471483 |
| MmugDNA.23544.1.S1_s_at | MmugDNA.23544.1 | 11.76 | 10.53 | 3.7  | 0.24 | 2.34  | 0.749365 | 0.339132 | 0.904994 | 0.585891 |
| MmugDNA.23568.1.S1_at   | MmugDNA.23568.1 | 4.18  | 4.22  | 0.14 | 0.15 | -1.03 | 0.325884 | 0.407751 | 0.67351  | 0.635158 |
| MmugDNA.23569.1.S1_at   | MmugDNA.23569.1 | 5.39  | 5.18  | 0.18 | 0.2  | 1.16  | 0.457131 | 0.210071 | 0.75818  | 0.483853 |
| MmugDNA.2357.1.S1_at    | MmugDNA.2357.1  | 3.43  | 4.14  | 0.36 | 0.3  | -1.63 | 0.136573 | 0.104938 | 0.511723 | 0.366498 |
| MmugDNA.23570.1.S1_at   | MmugDNA.23570.1 | 5.61  | 5.47  | 0.24 | 0.23 | 1.1   | 0.389646 | 0.466013 | 0.716272 | 0.676083 |
| MmugDNA.23571.1.S1_at   | MmugDNA.23571.1 | 3.79  | 4     | 0.13 | 0.18 | -1.16 | 0.814246 | 0.005712 | 0.932949 | 0.104201 |
| MmugDNA.23573.1.S1_at   | MmugDNA.23573.1 | 11.45 | 11.57 | 0.21 | 0.07 | -1.09 | 0.177148 | 0.206514 | 0.550212 | 0.480571 |



|                         |                 |       |       |      |      |       |          |          |          |          |
|-------------------------|-----------------|-------|-------|------|------|-------|----------|----------|----------|----------|
| MmugDNA.23574.1.S1_at   | MmugDNA.23574.1 | 9     | 8.68  | 0.39 | 0.09 | 1.25  | 0.705854 | 0.018529 | 0.885404 | 0.171243 |
| MmugDNA.23576.1.S1_at   | MmugDNA.23576.1 | 10.29 | 10.37 | 0.15 | 0.06 | -1.06 | 0.161447 | 0.000495 | 0.534767 | 0.038955 |
| MmugDNA.23578.1.S1_at   | MmugDNA.23578.1 | 4.14  | 4.3   | 0.65 | 0.22 | -1.11 | 0.871714 | 0.256096 | 0.955537 | 0.524057 |
| MmugDNA.23579.1.S1_at   | MmugDNA.23579.1 | 7.82  | 7.8   | 0.34 | 0.1  | 1.02  | 0.60087  | 0.313809 | 0.838005 | 0.568083 |
| MmugDNA.2358.1.S1_at    | MmugDNA.2358.1  | 4.64  | 4.59  | 0.07 | 0.04 | 1.03  | 0.154814 | 0.717296 | 0.528131 | 0.836345 |
| MmugDNA.23580.1.S1_at   | MmugDNA.23580.1 | 11.53 | 12.03 | 0.81 | 0.28 | -1.41 | 0.588001 | 0.716205 | 0.83181  | 0.835515 |
| MmugDNA.23585.1.S1_at   | MmugDNA.23585.1 | 2.96  | 3.18  | 0.17 | 0.19 | -1.17 | 0.238764 | 0.173314 | 0.605393 | 0.449791 |
| MmugDNA.23587.1.S1_at   | MmugDNA.23587.1 | 4.92  | 4.7   | 0.65 | 0.02 | 1.17  | 0.456978 | 0.589933 | 0.758051 | 0.756007 |
| MmugDNA.23589.1.S1_at   | MmugDNA.23589.1 | 8.86  | 9.11  | 0.6  | 0    | -1.19 | 0.71863  | 0.905758 | 0.890764 | 0.946695 |
| MmugDNA.23590.1.S1_at   | MmugDNA.23590.1 | 5.72  | 5.8   | 0.08 | 0.08 | -1.05 | 0.404652 | 0.00299  | 0.726801 | 0.079958 |
| MmugDNA.23591.1.S1_at   | MmugDNA.23591.1 | 5.35  | 5.71  | 0.13 | 0.37 | -1.28 | 0.125025 | 0.180427 | 0.49897  | 0.457077 |
| MmugDNA.23594.1.S1_at   | MmugDNA.23594.1 | 5.14  | 5.21  | 0.32 | 0.32 | -1.05 | 0.721131 | 0.938675 | 0.891938 | 0.96511  |
| MmugDNA.23595.1.S1_at   | MmugDNA.23595.1 | 7.87  | 8.46  | 0.31 | 0.42 | -1.51 | 0.080386 | 0.135496 | 0.444007 | 0.407591 |
| MmugDNA.23597.1.S1_at   | MmugDNA.23597.1 | 3.41  | 3.43  | 0.15 | 0.03 | -1.01 | 0.867337 | 0.605298 | 0.953465 | 0.765071 |
| MmugDNA.23598.1.S1_at   | MmugDNA.23598.1 | 5.42  | 5.65  | 0.14 | 0.07 | -1.17 | 0.090748 | 0.07815  | 0.458873 | 0.324634 |
| MmugDNA.23599.1.S1_at   | MmugDNA.23599.1 | 9.15  | 9.35  | 0.32 | 0.15 | -1.15 | 0.260148 | 0.511428 | 0.623028 | 0.705549 |
| MmugDNA.236.1.S1_at     | MmugDNA.236.1   | 3.28  | 3.2   | 0.34 | 0.15 | 1.06  | 0.209392 | 0.310167 | 0.580868 | 0.565379 |
| MmugDNA.2360.1.S1_at    | MmugDNA.2360.1  | 8.09  | 7.58  | 1.03 | 0.2  | 1.42  | 0.886361 | 0.593553 | 0.960501 | 0.758329 |
| MmugDNA.23600.1.S1_at   | MmugDNA.23600.1 | 9.91  | 8.42  | 0.38 | 0.16 | 2.79  | 0.003103 | 0.000874 | 0.191107 | 0.047471 |
| MmugDNA.23601.1.S1_at   | MmugDNA.23601.1 | 7.32  | 7.28  | 1.07 | 0.32 | 1.03  | 0.951893 | 0.383997 | 0.983817 | 0.619866 |
| MmugDNA.23602.1.S1_at   | MmugDNA.23602.1 | 10.47 | 10.65 | 0.39 | 0.15 | -1.13 | 0.395051 | 0.396806 | 0.720303 | 0.628452 |
| MmugDNA.23604.1.S1_at   | MmugDNA.23604.1 | 6.73  | 6.52  | 0.1  | 0.12 | 1.16  | 0.048037 | 0.103549 | 0.38193  | 0.364346 |
| MmugDNA.13635.1.S1_at   | MmugDNA.13635.1 | 8.44  | 8.52  | 0.15 | 0.05 | -1.06 | 0.929705 | 0.850439 | 0.976518 | 0.914942 |
| MmugDNA.13635.1.S1_s_at | MmugDNA.13635.1 | 5.2   | 5.17  | 0.27 | 0.16 | 1.02  | 0.428297 | 0.56487  | 0.741769 | 0.739484 |
| MmugDNA.23606.1.S1_at   | MmugDNA.23606.1 | 4.06  | 3.92  | 0.16 | 0.03 | 1.1   | 0.072955 | 0.087934 | 0.433769 | 0.341336 |
| MmugDNA.23608.1.S1_at   | MmugDNA.23608.1 | 6.12  | 6.12  | 0.17 | 0.05 | -1    | 0.774775 | 0.346562 | 0.91642  | 0.591427 |
| MmugDNA.2361.1.S1_at    | MmugDNA.2361.1  | 7.97  | 7.25  | 0.27 | 0.4  | 1.65  | 0.102884 | 0.139443 | 0.473381 | 0.412743 |
| MmugDNA.23610.1.S1_at   | MmugDNA.23610.1 | 12.01 | 11.02 | 0.37 | 0.08 | 1.99  | 0.012018 | 0.004522 | 0.258642 | 0.093974 |
| MmugDNA.23611.1.S1_at   | MmugDNA.23611.1 | 7.36  | 8.06  | 1.97 | 0.62 | -1.62 | 0.733728 | 0.059919 | 0.897902 | 0.291408 |
| MmugDNA.23612.1.S1_at   | MmugDNA.23612.1 | 9.18  | 10.04 | 0.19 | 0.13 | -1.81 | 0.002145 | 0.001611 | 0.174757 | 0.060665 |
| MmugDNA.23613.1.S1_at   | MmugDNA.23613.1 | 7.36  | 7.1   | 1.04 | 0.21 | 1.2   | 0.623305 | 0.155132 | 0.848224 | 0.430275 |
| MmugDNA.23614.1.S1_at   | MmugDNA.23614.1 | 9.96  | 9.43  | 0.31 | 0.1  | 1.45  | 0.04933  | 0.010078 | 0.385474 | 0.13168  |
| MmugDNA.23616.1.S1_at   | MmugDNA.23616.1 | 10.82 | 10.82 | 0.49 | 0.04 | 1.01  | 0.411933 | 0.334353 | 0.731794 | 0.582352 |
| MmugDNA.23617.1.S1_at   | MmugDNA.23617.1 | 4.29  | 4.41  | 0.07 | 0.14 | -1.09 | 0.413263 | 0.692068 | 0.732218 | 0.82091  |
| MmugDNA.23618.1.S1_s_at | MmugDNA.23618.1 | 5.55  | 5.54  | 0.31 | 0.14 | 1.01  | 0.379663 | 0.584483 | 0.709082 | 0.752435 |
| MmugDNA.2362.1.S1_at    | MmugDNA.2362.1  | 3.63  | 3.54  | 0.03 | 0.09 | 1.07  | 0.061272 | 0.344254 | 0.410357 | 0.589762 |
| MmugDNA.23620.1.S1_at   | MmugDNA.23620.1 | 3.47  | 3.41  | 0.14 | 0.12 | 1.05  | 0.236171 | 0.179918 | 0.603177 | 0.456453 |
| MmugDNA.23621.1.S1_at   | MmugDNA.23621.1 | 8.11  | 8.08  | 0.35 | 0.46 | 1.02  | 0.435836 | 0.21824  | 0.745934 | 0.491764 |
| MmugDNA.23622.1.S1_at   | MmugDNA.23622.1 | 8.17  | 7.08  | 0.15 | 0.21 | 2.13  | 0.001953 | 0.006206 | 0.171474 | 0.106829 |
| MmugDNA.23623.1.S1_at   | MmugDNA.23623.1 | 4.08  | 4.08  | 0.03 | 0.13 | -1    | 0.936048 | 0.679281 | 0.97849  | 0.81275  |
| MmugDNA.23624.1.S1_at   | MmugDNA.23624.1 | 9.49  | 8.94  | 1.63 | 0.29 | 1.46  | 0.682781 | 0.332988 | 0.875926 | 0.581326 |
| MmugDNA.23625.1.S1_at   | MmugDNA.23625.1 | 3.4   | 3.46  | 0.04 | 0.14 | -1.04 | 0.527419 | 0.242094 | 0.797084 | 0.512652 |
| MmugDNA.23626.1.S1_at   | MmugDNA.23626.1 | 4.12  | 4.12  | 0.29 | 0.19 | -1.01 | 0.587391 | 0.716266 | 0.831578 | 0.835531 |

|                         |                 |       |       |      |      |       |          |          |          |          |
|-------------------------|-----------------|-------|-------|------|------|-------|----------|----------|----------|----------|
| MmugDNA.23627.1.S1_at   | MmugDNA.23627.1 | 10.12 | 10.96 | 0.37 | 0.1  | -1.78 | 0.049434 | 0.005382 | 0.385474 | 0.101199 |
| MmugDNA.23629.1.S1_at   | MmugDNA.23629.1 | 4.17  | 4.18  | 0.21 | 0.03 | -1.01 | 0.922238 | 0.463153 | 0.973786 | 0.674261 |
| MmugDNA.2363.1.S1_at    | MmugDNA.2363.1  | 8.35  | 8.77  | 0.91 | 0.09 | -1.34 | 0.466157 | 0.066984 | 0.763402 | 0.304846 |
| MmugDNA.23631.1.S1_at   | MmugDNA.23631.1 | 4.28  | 3.96  | 0.25 | 0.03 | 1.25  | 0.314263 | 0.177942 | 0.665103 | 0.454286 |
| MmugDNA.23632.1.S1_at   | MmugDNA.23632.1 | 4.81  | 4.81  | 0.07 | 0.06 | 1     | 0.470555 | 0.403375 | 0.766162 | 0.632083 |
| MmugDNA.23633.1.S1_at   | MmugDNA.23633.1 | 7.63  | 7.6   | 0.16 | 0.3  | 1.02  | 0.572926 | 0.070292 | 0.823428 | 0.31135  |
| MmugDNA.23635.1.S1_at   | MmugDNA.23635.1 | 3.03  | 3.05  | 0.1  | 0.07 | -1.01 | 0.53661  | 0.641374 | 0.802417 | 0.789506 |
| MmugDNA.23636.1.S1_at   | MmugDNA.23636.1 | 5.01  | 4.87  | 0.12 | 0.04 | 1.1   | 0.045709 | 0.125583 | 0.377029 | 0.396226 |
| MmugDNA.23637.1.S1_at   | MmugDNA.23637.1 | 9.72  | 9     | 0.29 | 0.1  | 1.65  | 0.015322 | 0.026024 | 0.281008 | 0.202199 |
| MmugDNA.23638.1.S1_at   | MmugDNA.23638.1 | 4.18  | 4.04  | 0.1  | 0.38 | 1.1   | 0.765571 | 0.955953 | 0.911862 | 0.975016 |
| MmugDNA.23640.1.S1_at   | MmugDNA.23640.1 | 7.67  | 7.7   | 0.06 | 0.04 | -1.02 | 0.665925 | 0.19296  | 0.868171 | 0.468455 |
| MmugDNA.23643.1.S1_at   | MmugDNA.23643.1 | 5.29  | 5     | 0.15 | 0.37 | 1.22  | 0.967124 | 0.99557  | 0.989187 | 0.997264 |
| MmugDNA.23644.1.S1_at   | MmugDNA.23644.1 | 11.88 | 11.96 | 0.08 | 0.09 | -1.06 | 0.325967 | 0.487521 | 0.673582 | 0.690559 |
| MmugDNA.12021.1.S1_s_at | MmugDNA.12021.1 | 3.4   | 3.3   | 0.15 | 0.06 | 1.08  | 0.614638 | 0.624232 | 0.843992 | 0.778505 |
| MmugDNA.23648.1.S1_at   | MmugDNA.23648.1 | 7.02  | 6.85  | 0.09 | 0.18 | 1.13  | 0.326163 | 0.422312 | 0.673733 | 0.645653 |
| MmugDNA.23649.1.S1_at   | MmugDNA.23649.1 | 6.29  | 6.25  | 0.67 | 0.25 | 1.03  | 0.461842 | 0.53241  | 0.761308 | 0.719052 |
| MmugDNA.2365.1.S1_at    | MmugDNA.2365.1  | 4.63  | 4.77  | 0.13 | 0.07 | -1.1  | 0.316239 | 0.004822 | 0.666364 | 0.096904 |
| MmugDNA.23650.1.S1_at   | MmugDNA.23650.1 | 7.59  | 7.57  | 0.02 | 0.02 | 1.01  | 0.238555 | 0.933171 | 0.605359 | 0.962032 |
| MmugDNA.23651.1.S1_at   | MmugDNA.23651.1 | 4.15  | 4.15  | 0.05 | 0.12 | 1     | 0.628584 | 0.887739 | 0.851159 | 0.936023 |
| MmugDNA.23652.1.S1_at   | MmugDNA.23652.1 | 12.35 | 12.22 | 0.03 | 0.1  | 1.1   | 0.083778 | 0.293638 | 0.449639 | 0.553638 |
| MmugDNA.23653.1.S1_at   | MmugDNA.23653.1 | 5.84  | 5.87  | 0.14 | 0.07 | -1.02 | 0.548473 | 0.707242 | 0.809804 | 0.830225 |
| MmugDNA.23654.1.S1_at   | MmugDNA.23654.1 | 3.75  | 4.97  | 0.18 | 0.79 | -2.32 | 0.058696 | 0.018237 | 0.405244 | 0.169844 |
| MmugDNA.23655.1.S1_at   | MmugDNA.23655.1 | 6.24  | 6.1   | 0.19 | 0.01 | 1.11  | 0.222231 | 0.518432 | 0.591828 | 0.710391 |
| MmugDNA.23656.1.S1_at   | MmugDNA.23656.1 | 2.66  | 2.65  | 0.08 | 0.02 | 1.01  | 0.378621 | 0.18796  | 0.708438 | 0.464078 |
| MmugDNA.23657.1.S1_at   | MmugDNA.23657.1 | 2.66  | 2.81  | 0.11 | 0.12 | -1.11 | 0.256501 | 0.282695 | 0.620507 | 0.545446 |
| MmugDNA.23658.1.S1_at   | MmugDNA.23658.1 | 3.35  | 3.39  | 0.1  | 0.01 | -1.03 | 0.819235 | 0.526676 | 0.93477  | 0.715627 |
| MmugDNA.23659.1.S1_at   | MmugDNA.23659.1 | 7.37  | 7.25  | 0.03 | 0.06 | 1.09  | 0.029112 | 0.318942 | 0.333841 | 0.571532 |
| MmugDNA.2366.1.S1_at    | MmugDNA.2366.1  | 5.12  | 4.92  | 0.2  | 0.17 | 1.15  | 0.152685 | 0.124359 | 0.525612 | 0.394826 |
| MmugDNA.23661.1.S1_at   | MmugDNA.23661.1 | 4.22  | 4.1   | 0.12 | 0    | 1.09  | 0.178442 | 0.212255 | 0.551369 | 0.486151 |
| MmugDNA.23663.1.S1_at   | MmugDNA.23663.1 | 4.23  | 4.25  | 0.24 | 0.03 | -1.02 | 0.739758 | 0.936462 | 0.900699 | 0.964171 |
| MmugDNA.23664.1.S1_at   | MmugDNA.23664.1 | 9.12  | 9.68  | 0.23 | 0.23 | -1.47 | 0.016226 | 0.121957 | 0.286783 | 0.391384 |
| MmugDNA.23666.1.S1_at   | MmugDNA.23666.1 | 5.2   | 5.15  | 0.26 | 0.05 | 1.03  | 0.70684  | 0.548675 | 0.885938 | 0.729318 |
| MmugDNA.23667.1.S1_at   | MmugDNA.23667.1 | 5.19  | 5.12  | 0.11 | 0.1  | 1.05  | 0.340982 | 0.704044 | 0.684816 | 0.828326 |
| MmugDNA.23669.1.S1_at   | MmugDNA.23669.1 | 3.15  | 3.15  | 0.22 | 0.08 | 1     | 0.268161 | 0.296837 | 0.628527 | 0.5558   |
| MmugDNA.2367.1.S1_at    | MmugDNA.2367.1  | 6.49  | 6.34  | 0.16 | 0.14 | 1.11  | 0.612811 | 0.825307 | 0.843192 | 0.899641 |
| MmugDNA.23671.1.S1_at   | MmugDNA.23671.1 | 3.41  | 3.48  | 0.31 | 0.03 | -1.05 | 0.952165 | 0.094305 | 0.983952 | 0.350889 |
| MmugDNA.23672.1.S1_at   | MmugDNA.23672.1 | 5.64  | 5.9   | 0.74 | 0.35 | -1.2  | 0.742453 | 0.70068  | 0.901796 | 0.826376 |
| MmugDNA.23673.1.S1_at   | MmugDNA.23673.1 | 4.68  | 4.66  | 0.07 | 0.12 | 1.01  | 0.593865 | 0.747459 | 0.834469 | 0.853149 |
| MmugDNA.23674.1.S1_at   | MmugDNA.23674.1 | 5.01  | 4.43  | 0.84 | 0.26 | 1.5   | 0.320035 | 0.643691 | 0.669117 | 0.791108 |
| MmugDNA.23675.1.S1_at   | MmugDNA.23675.1 | 6.68  | 6.21  | 0.49 | 0.41 | 1.38  | 0.480986 | 0.887798 | 0.771639 | 0.936048 |
| MmugDNA.23677.1.S1_at   | MmugDNA.23677.1 | 3.8   | 3.67  | 0.02 | 0.06 | 1.09  | 0.028841 | 0.032982 | 0.333062 | 0.224867 |
| MmugDNA.23679.1.S1_at   | MmugDNA.23679.1 | 3.67  | 3.5   | 0.13 | 0.18 | 1.13  | 0.586384 | 0.337517 | 0.831279 | 0.584716 |
| MmugDNA.2368.1.S1_at    | MmugDNA.2368.1  | 5.52  | 4.84  | 0.28 | 0.26 | 1.6   | 0.069117 | 0.268448 | 0.426556 | 0.534123 |

|                         |                 |       |       |      |      |       |          |          |          |          |
|-------------------------|-----------------|-------|-------|------|------|-------|----------|----------|----------|----------|
| MmugDNA.23680.1.S1_at   | MmugDNA.23680.1 | 4.25  | 4.2   | 0.1  | 0.15 | 1.03  | 0.599507 | 0.098769 | 0.837382 | 0.356875 |
| MmugDNA.23681.1.S1_at   | MmugDNA.23681.1 | 5.81  | 6     | 0.12 | 0.12 | -1.14 | 0.063495 | 0.161213 | 0.415717 | 0.437386 |
| MmugDNA.23682.1.S1_at   | MmugDNA.23682.1 | 6.21  | 6.74  | 0.4  | 0.07 | -1.44 | 0.251585 | 0.219468 | 0.616712 | 0.493156 |
| MmugDNA.23683.1.S1_at   | MmugDNA.23683.1 | 11.63 | 11.27 | 0.19 | 0.17 | 1.29  | 0.076904 | 0.058127 | 0.438758 | 0.287755 |
| MmugDNA.23684.1.S1_at   | MmugDNA.23684.1 | 9.7   | 9.01  | 0.59 | 0.16 | 1.62  | 0.118506 | 0.555323 | 0.491933 | 0.733767 |
| MmugDNA.23684.1.S1_x_at | MmugDNA.23684.1 | 9.45  | 8.82  | 0.66 | 0.15 | 1.55  | 0.167057 | 0.588377 | 0.539657 | 0.754874 |
| MmugDNA.23685.1.S1_at   | MmugDNA.23685.1 | 3.75  | 3.51  | 0.28 | 0.13 | 1.18  | 0.969924 | 0.127245 | 0.990053 | 0.397935 |
| MmugDNA.23686.1.S1_at   | MmugDNA.23686.1 | 8.05  | 8.29  | 0.2  | 0.1  | -1.19 | 0.232796 | 0.291803 | 0.600212 | 0.552063 |
| MmugDNA.23688.1.S1_at   | MmugDNA.23688.1 | 4.94  | 4.85  | 0.11 | 0.09 | 1.07  | 0.310403 | 0.226603 | 0.662171 | 0.499067 |
| MmugDNA.2369.1.S1_at    | MmugDNA.2369.1  | 4.45  | 4.16  | 0.06 | 0.09 | 1.22  | 0.011955 | 0.181925 | 0.257858 | 0.458456 |
| MmugDNA.23690.1.S1_at   | MmugDNA.23690.1 | 9.77  | 9.86  | 0.16 | 0.08 | -1.06 | 0.214214 | 0.452931 | 0.584673 | 0.667359 |
| MmugDNA.23691.1.S1_at   | MmugDNA.23691.1 | 4.85  | 4.82  | 0.35 | 0.15 | 1.02  | 0.92975  | 0.983794 | 0.976518 | 0.990974 |
| MmugDNA.23692.1.S1_at   | MmugDNA.23692.1 | 5.22  | 5.13  | 0.03 | 0.11 | 1.06  | 0.769471 | 0.847093 | 0.913662 | 0.91309  |
| MmugDNA.23696.1.S1_at   | MmugDNA.23696.1 | 4.11  | 4.01  | 0.2  | 0.13 | 1.07  | 0.550962 | 0.606279 | 0.8111   | 0.765727 |
| MmugDNA.23697.1.S1_at   | MmugDNA.23697.1 | 5.04  | 4.7   | 0.12 | 0.05 | 1.26  | 0.009532 | 0.013105 | 0.242426 | 0.147251 |
| MmugDNA.23698.1.S1_a_at | MmugDNA.23698.1 | 5.3   | 5.29  | 0.13 | 0.15 | 1.01  | 0.210989 | 0.366215 | 0.582056 | 0.606003 |
| MmugDNA.23698.1.S1_at   | MmugDNA.23698.1 | 3.48  | 3.4   | 0.19 | 0    | 1.06  | 0.307506 | 0.300059 | 0.660255 | 0.558262 |
| MmugDNA.23699.1.S1_at   | MmugDNA.23699.1 | 5.41  | 5.1   | 0.14 | 0.08 | 1.24  | 0.064373 | 0.057496 | 0.418055 | 0.285856 |
| MmugDNA.2370.1.S1_at    | MmugDNA.2370.1  | 3.29  | 3.35  | 0.34 | 0.27 | -1.04 | 0.506151 | 0.036749 | 0.785701 | 0.236287 |
| MmugDNA.23700.1.S1_at   | MmugDNA.23700.1 | 3.95  | 3.76  | 0.14 | 0.15 | 1.14  | 0.113261 | 0.267867 | 0.486648 | 0.533607 |
| MmugDNA.23701.1.S1_at   | MmugDNA.23701.1 | 11.3  | 10.86 | 1.01 | 0.06 | 1.36  | 0.931129 | 0.494236 | 0.976966 | 0.694758 |
| MmugDNA.23703.1.S1_at   | MmugDNA.23703.1 | 4.02  | 4.34  | 0.22 | 0.53 | -1.25 | 0.392547 | 0.445966 | 0.718456 | 0.662623 |
| MmugDNA.23705.1.S1_at   | MmugDNA.23705.1 | 3.17  | 2.96  | 0.09 | 0.03 | 1.16  | 0.053887 | 0.171428 | 0.395633 | 0.447886 |
| MmugDNA.23706.1.S1_at   | MmugDNA.23706.1 | 8.43  | 8.79  | 0.1  | 0.08 | -1.28 | 0.005829 | 0.005291 | 0.211798 | 0.100738 |
| MmugDNA.23706.1.S1_s_at | MmugDNA.23706.1 | 8.98  | 9.65  | 0.15 | 0.13 | -1.59 | 0.009664 | 0.031345 | 0.243152 | 0.219013 |
| MmugDNA.23707.1.S1_at   | MmugDNA.23707.1 | 7.88  | 7.51  | 1.24 | 0.35 | 1.29  | 0.654465 | 0.029155 | 0.862839 | 0.212767 |
| MmugDNA.23708.1.S1_at   | MmugDNA.23708.1 | 6.05  | 5.82  | 0.3  | 0.17 | 1.17  | 0.856333 | 0.948964 | 0.949323 | 0.97078  |
| MmugDNA.2371.1.S1_at    | MmugDNA.2371.1  | 8.23  | 7.94  | 0.37 | 0.2  | 1.22  | 0.786859 | 0.192492 | 0.921699 | 0.467952 |
| MmugDNA.23710.1.S1_at   | MmugDNA.23710.1 | 7.38  | 7.54  | 0.36 | 0.08 | -1.12 | 0.742123 | 0.042371 | 0.901638 | 0.250522 |
| MmugDNA.23711.1.S1_at   | MmugDNA.23711.1 | 3.61  | 3.56  | 0.09 | 0.07 | 1.03  | 0.539312 | 0.043556 | 0.803708 | 0.253261 |
| MmugDNA.23712.1.S1_at   | MmugDNA.23712.1 | 4.83  | 4.94  | 0.24 | 0.34 | -1.08 | 0.909968 | 0.602523 | 0.96945  | 0.763461 |
| MmugDNA.23713.1.S1_at   | MmugDNA.23713.1 | 7.32  | 7.48  | 0.07 | 0.05 | -1.12 | 0.01725  | 0.144282 | 0.290207 | 0.418196 |
| MmugDNA.23714.1.S1_at   | MmugDNA.23714.1 | 7.58  | 7.68  | 0.08 | 0.15 | -1.07 | 0.157034 | 0.127353 | 0.530266 | 0.398184 |
| MmugDNA.23715.1.S1_at   | MmugDNA.23715.1 | 7.38  | 7.3   | 0.1  | 0.07 | 1.05  | 0.362269 | 0.230467 | 0.699236 | 0.502232 |
| MmugDNA.23716.1.S1_at   | MmugDNA.23716.1 | 3.62  | 3.86  | 0.2  | 0.07 | -1.18 | 0.248559 | 0.000289 | 0.613851 | 0.034892 |
| MmugDNA.23717.1.S1_at   | MmugDNA.23717.1 | 5.13  | 5.23  | 0.45 | 0.35 | -1.08 | 0.52759  | 0.656167 | 0.797158 | 0.798919 |
| MmugDNA.2372.1.S1_at    | MmugDNA.2372.1  | 4.32  | 4.16  | 0.42 | 0.09 | 1.11  | 0.144896 | 0.218214 | 0.520198 | 0.491764 |
| MmugDNA.23720.1.S1_at   | MmugDNA.23720.1 | 7.07  | 7.69  | 2.3  | 0.38 | -1.53 | 0.561238 | 0.32586  | 0.817194 | 0.57614  |
| MmugDNA.23721.1.S1_at   | MmugDNA.23721.1 | 5.07  | 4.78  | 0.18 | 0.17 | 1.22  | 0.122157 | 0.119604 | 0.495677 | 0.388247 |
| MmugDNA.23723.1.S1_at   | MmugDNA.23723.1 | 3.94  | 3.58  | 0.13 | 0.17 | 1.28  | 0.095508 | 0.10195  | 0.464229 | 0.361984 |
| MmugDNA.23724.1.S1_at   | MmugDNA.23724.1 | 8.04  | 8.7   | 0.26 | 0.12 | -1.58 | 0.034739 | 0.008131 | 0.350358 | 0.11972  |
| MmugDNA.23726.1.S1_at   | MmugDNA.23726.1 | 5.62  | 5.6   | 0.07 | 0.05 | 1.01  | 0.91485  | 0.080266 | 0.970941 | 0.327882 |
| MmugDNA.23727.1.S1_at   | MmugDNA.23727.1 | 5.95  | 6.26  | 0.28 | 0.21 | -1.23 | 0.485185 | 0.109647 | 0.774109 | 0.373629 |

|                         |                 |       |       |      |      |       |          |          |          |          |
|-------------------------|-----------------|-------|-------|------|------|-------|----------|----------|----------|----------|
| MmugDNA.23728.1.S1_at   | MmugDNA.23728.1 | 10.42 | 10.56 | 0.44 | 0.08 | -1.1  | 0.690909 | 0.035752 | 0.879661 | 0.233437 |
| MmugDNA.23729.1.S1_at   | MmugDNA.23729.1 | 5.83  | 5.95  | 0.15 | 0.26 | -1.08 | 0.226885 | 0.267728 | 0.596276 | 0.533525 |
| MmugDNA.2373.1.S1_at    | MmugDNA.2373.1  | 7.27  | 7.71  | 1.24 | 0.14 | -1.35 | 0.588112 | 0.761702 | 0.83181  | 0.861459 |
| MmugDNA.23730.1.S1_at   | MmugDNA.23730.1 | 5.12  | 5.3   | 0.18 | 0.41 | -1.14 | 0.895753 | 0.21163  | 0.964355 | 0.485681 |
| MmugDNA.23731.1.S1_at   | MmugDNA.23731.1 | 8.77  | 9.16  | 0.57 | 0.18 | -1.3  | 0.917375 | 0.947789 | 0.971982 | 0.970347 |
| MmugDNA.23732.1.S1_at   | MmugDNA.23732.1 | 4     | 4.68  | 0.12 | 0.41 | -1.6  | 0.027161 | 0.020857 | 0.327322 | 0.181218 |
| MmugDNA.23733.1.S1_at   | MmugDNA.23733.1 | 7.19  | 7.55  | 0.26 | 0.22 | -1.29 | 0.109598 | 0.184779 | 0.482462 | 0.460661 |
| MmugDNA.23735.1.S1_at   | MmugDNA.23735.1 | 3.58  | 3.53  | 0.29 | 0.03 | 1.04  | 0.760569 | 0.696148 | 0.910074 | 0.823455 |
| MmugDNA.23736.1.S1_at   | MmugDNA.23736.1 | 4.35  | 4.27  | 0.04 | 0.06 | 1.06  | 0.260093 | 0.403184 | 0.623009 | 0.631984 |
| MmugDNA.23737.1.S1_at   | MmugDNA.23737.1 | 5.08  | 4.83  | 0.29 | 0.29 | 1.19  | 0.282733 | 0.512397 | 0.641027 | 0.706278 |
| MmugDNA.23738.1.S1_at   | MmugDNA.23738.1 | 5.59  | 5.3   | 0.51 | 0.06 | 1.23  | 0.346316 | 0.135725 | 0.688012 | 0.407917 |
| MmugDNA.23739.1.S1_at   | MmugDNA.23739.1 | 7.25  | 7.31  | 1.83 | 0.34 | -1.04 | 0.889271 | 0.132351 | 0.96181  | 0.404294 |
| MmugDNA.2374.1.S1_at    | MmugDNA.2374.1  | 3.7   | 3.61  | 0.13 | 0.08 | 1.07  | 0.833146 | 0.343675 | 0.940114 | 0.589384 |
| MmugDNA.23742.1.S1_at   | MmugDNA.23742.1 | 6.19  | 6.02  | 0.11 | 0.12 | 1.12  | 0.066417 | 0.070921 | 0.422255 | 0.312444 |
| MmugDNA.23743.1.S1_at   | MmugDNA.23743.1 | 11.15 | 11.41 | 0.19 | 0.07 | -1.2  | 0.227335 | 0.248191 | 0.596459 | 0.517574 |
| MmugDNA.23744.1.S1_at   | MmugDNA.23744.1 | 3.69  | 3.61  | 0.05 | 0.11 | 1.06  | 0.377453 | 0.37825  | 0.707543 | 0.615438 |
| MmugDNA.23745.1.S1_at   | MmugDNA.23745.1 | 11.44 | 11.53 | 0.08 | 0.04 | -1.07 | 0.149354 | 0.578284 | 0.523197 | 0.748372 |
| MmugDNA.23746.1.S1_at   | MmugDNA.23746.1 | 3.96  | 4.19  | 0.16 | 0.07 | -1.18 | 0.129499 | 0.293853 | 0.504238 | 0.553861 |
| MmugDNA.23747.1.S1_at   | MmugDNA.23747.1 | 4.98  | 6.13  | 0.73 | 0.85 | -2.21 | 0.493919 | 0.618196 | 0.779154 | 0.77393  |
| MmugDNA.23748.1.S1_at   | MmugDNA.23748.1 | 4.55  | 4.48  | 0.04 | 0.32 | 1.05  | 0.675645 | 0.342275 | 0.872698 | 0.588397 |
| MmugDNA.23749.1.S1_at   | MmugDNA.23749.1 | 5.62  | 5.44  | 0.02 | 0.03 | 1.13  | 0.000739 | 0.002805 | 0.148988 | 0.078098 |
| MmugDNA.23750.1.S1_at   | MmugDNA.23750.1 | 12.29 | 12.21 | 0.7  | 0.1  | 1.06  | 0.487065 | 0.225599 | 0.774859 | 0.498155 |
| MmugDNA.23751.1.S1_at   | MmugDNA.23751.1 | 5.98  | 5.89  | 0.2  | 0.05 | 1.07  | 0.21145  | 0.035122 | 0.582446 | 0.231645 |
| MmugDNA.23752.1.S1_at   | MmugDNA.23752.1 | 9.51  | 9.79  | 0.32 | 0.11 | -1.21 | 0.284724 | 0.0029   | 0.642476 | 0.079107 |
| MmugDNA.23753.1.S1_at   | MmugDNA.23753.1 | 4.87  | 4.82  | 0.18 | 0.07 | 1.04  | 0.858054 | 0.155929 | 0.949859 | 0.431331 |
| MmugDNA.23754.1.S1_at   | MmugDNA.23754.1 | 5.05  | 4.58  | 0.41 | 0.03 | 1.38  | 0.043555 | 0.231276 | 0.372168 | 0.502954 |
| MmugDNA.23755.1.S1_at   | MmugDNA.23755.1 | 6.63  | 7.33  | 0.36 | 0.76 | -1.62 | 0.166473 | 0.053849 | 0.539189 | 0.277598 |
| MmugDNA.23756.1.S1_at   | MmugDNA.23756.1 | 11.17 | 10.77 | 0.4  | 0.08 | 1.31  | 0.190108 | 0.150445 | 0.561346 | 0.424978 |
| MmugDNA.23759.1.S1_at   | MmugDNA.23759.1 | 6.16  | 6.14  | 0.12 | 0.09 | 1.01  | 0.491109 | 0.222783 | 0.777532 | 0.495724 |
| MmugDNA.23760.1.S1_at   | MmugDNA.23760.1 | 13.02 | 13.09 | 0.03 | 0.05 | -1.06 | 0.097748 | 0.204991 | 0.466724 | 0.479296 |
| MmugDNA.23761.1.S1_at   | MmugDNA.23761.1 | 8.79  | 8.96  | 0.14 | 0.26 | -1.12 | 0.226096 | 0.000129 | 0.595263 | 0.029087 |
| MmugDNA.23762.1.S1_at   | MmugDNA.23762.1 | 7.98  | 6.14  | 0.83 | 0.65 | 3.6   | 0.04485  | 0.012669 | 0.375225 | 0.145097 |
| MmugDNA.23763.1.S1_at   | MmugDNA.23763.1 | 4.04  | 4.5   | 1.06 | 0.33 | -1.37 | 0.788854 | 0.371764 | 0.922472 | 0.610541 |
| MmugDNA.23764.1.S1_at   | MmugDNA.23764.1 | 11.81 | 11.61 | 0.06 | 0.13 | 1.15  | 0.179665 | 0.000942 | 0.55298  | 0.049026 |
| MmugDNA.23766.1.S1_at   | MmugDNA.23766.1 | 9.04  | 9.3   | 1.26 | 0.28 | -1.2  | 0.22325  | 0.10612  | 0.592569 | 0.368498 |
| MmugDNA.23767.1.S1_at   | MmugDNA.23767.1 | 3.57  | 4.76  | 0.98 | 0.26 | -2.29 | 0.250305 | 0.235984 | 0.615561 | 0.507056 |
| MmugDNA.37120.1.S1_s_at | MmugDNA.37120.1 | 6.94  | 6.99  | 0.34 | 0.11 | -1.03 | 0.311671 | 0.416188 | 0.663441 | 0.641398 |
| MmugDNA.23769.1.S1_at   | MmugDNA.23769.1 | 6.25  | 6.4   | 0.23 | 0.22 | -1.11 | 0.453599 | 0.263765 | 0.756215 | 0.530066 |
| MmugDNA.2377.1.S1_at    | MmugDNA.2377.1  | 6.64  | 6.66  | 0.05 | 0    | -1.01 | 0.70742  | 0.296495 | 0.886113 | 0.555528 |
| MmugDNA.23770.1.S1_at   | MmugDNA.23770.1 | 3.97  | 4.02  | 0.17 | 0.14 | -1.04 | 0.63353  | 0.749799 | 0.853549 | 0.854601 |
| MmugDNA.23773.1.S1_at   | MmugDNA.23773.1 | 8.62  | 8.81  | 0.53 | 0.13 | -1.14 | 0.465306 | 0.552566 | 0.763035 | 0.73184  |
| MmugDNA.23774.1.S1_at   | MmugDNA.23774.1 | 4.04  | 3.89  | 0.08 | 0.09 | 1.11  | 0.041682 | 0.219317 | 0.367007 | 0.493094 |
| MmugDNA.23775.1.S1_at   | MmugDNA.23775.1 | 2.79  | 2.67  | 0.27 | 0.06 | 1.09  | 0.57908  | 0.162589 | 0.826398 | 0.43872  |

|                         |                 |       |       |      |      |       |          |          |          |          |
|-------------------------|-----------------|-------|-------|------|------|-------|----------|----------|----------|----------|
| MmugDNA.23776.1.S1_at   | MmugDNA.23776.1 | 5.06  | 5.42  | 0.49 | 0.04 | -1.28 | 0.700349 | 0.529805 | 0.883486 | 0.717498 |
| MmugDNA.23777.1.S1_at   | MmugDNA.23777.1 | 7.8   | 7.79  | 0.95 | 0.15 | 1.01  | 0.867315 | 0.439264 | 0.953465 | 0.658025 |
| MmugDNA.23778.1.S1_at   | MmugDNA.23778.1 | 3.13  | 3.28  | 0.31 | 0.02 | -1.11 | 0.924722 | 0.992745 | 0.974823 | 0.995715 |
| MmugDNA.23779.1.S1_at   | MmugDNA.23779.1 | 5.07  | 5.49  | 0.18 | 0.24 | -1.34 | 0.137456 | 0.020762 | 0.51292  | 0.180781 |
| MmugDNA.2378.1.S1_at    | MmugDNA.2378.1  | 8.15  | 8.39  | 0.11 | 0.03 | -1.18 | 0.027389 | 0.048024 | 0.327582 | 0.264118 |
| MmugDNA.23780.1.S1_at   | MmugDNA.23780.1 | 5.6   | 5.2   | 0.96 | 0.38 | 1.32  | 0.368673 | 0.26382  | 0.703807 | 0.530086 |
| MmugDNA.23782.1.S1_at   | MmugDNA.23782.1 | 5.54  | 5.4   | 0.15 | 0.2  | 1.1   | 0.432057 | 0.204971 | 0.743696 | 0.479296 |
| MmugDNA.23783.1.S1_at   | MmugDNA.23783.1 | 4.03  | 3.89  | 0    | 0.08 | 1.1   | 0.029172 | 0.012057 | 0.333974 | 0.142044 |
| MmugDNA.23784.1.S1_at   | MmugDNA.23784.1 | 4.92  | 4.9   | 0.2  | 0.2  | 1.02  | 0.295021 | 0.349644 | 0.650971 | 0.593541 |
| MmugDNA.23785.1.S1_at   | MmugDNA.23785.1 | 2.86  | 2.81  | 0.07 | 0.12 | 1.03  | 0.11873  | 0.429629 | 0.492161 | 0.650973 |
| MmugDNA.23786.1.S1_at   | MmugDNA.23786.1 | 3.84  | 3.84  | 0.02 | 0    | 1     | 0.373901 | 0.526409 | 0.705567 | 0.715557 |
| MmugDNA.23787.1.S1_at   | MmugDNA.23787.1 | 5.17  | 4.71  | 0.24 | 0.09 | 1.38  | 0.084367 | 0.084716 | 0.450953 | 0.336196 |
| MmugDNA.23789.1.S1_at   | MmugDNA.23789.1 | 3.52  | 3.56  | 0.11 | 0.07 | -1.03 | 0.360409 | 0.042505 | 0.697914 | 0.250786 |
| MmugDNA.2379.1.S1_at    | MmugDNA.2379.1  | 10.2  | 10.83 | 0.43 | 0.02 | -1.54 | 0.025217 | 0.00783  | 0.320761 | 0.117929 |
| MmugDNA.23791.1.S1_s_at | MmugDNA.23791.1 | 10.92 | 10.6  | 0.66 | 0.02 | 1.24  | 0.905143 | 0.423659 | 0.968109 | 0.646464 |
| MmugDNA.23794.1.S1_at   | MmugDNA.23794.1 | 2.65  | 2.71  | 0.06 | 0.03 | -1.05 | 0.118516 | 0.538617 | 0.491933 | 0.723301 |
| MmugDNA.23795.1.S1_at   | MmugDNA.23795.1 | 6.26  | 6.23  | 0.27 | 0.08 | 1.02  | 0.635097 | 0.886717 | 0.854519 | 0.935519 |
| MmugDNA.23796.1.S1_at   | MmugDNA.23796.1 | 7.09  | 6.25  | 0.36 | 0.14 | 1.79  | 0.025063 | 0.091422 | 0.320402 | 0.34639  |
| MmugDNA.23797.1.S1_at   | MmugDNA.23797.1 | 8.66  | 8.53  | 0.13 | 0.13 | 1.1   | 0.121252 | 0.095068 | 0.494848 | 0.352124 |
| MmugDNA.23798.1.S1_at   | MmugDNA.23798.1 | 6.29  | 6.04  | 0.24 | 0.01 | 1.19  | 0.137084 | 0.06185  | 0.512022 | 0.295524 |
| MmugDNA.23799.1.S1_at   | MmugDNA.23799.1 | 4.23  | 4.29  | 0.02 | 0.05 | -1.04 | 0.141143 | 0.46953  | 0.516345 | 0.678282 |
| MmugDNA.2380.1.S1_at    | MmugDNA.2380.1  | 3.92  | 3.67  | 0.43 | 0.1  | 1.19  | 0.824445 | 0.98311  | 0.936798 | 0.990726 |
| MmugDNA.23800.1.S1_at   | MmugDNA.23800.1 | 2.81  | 2.74  | 0.07 | 0.27 | 1.05  | 0.730736 | 0.689953 | 0.896248 | 0.819224 |
| MmugDNA.23801.1.S1_at   | MmugDNA.23801.1 | 4.2   | 3.92  | 0.12 | 0.14 | 1.22  | 0.099558 | 0.084507 | 0.469263 | 0.335901 |
| MmugDNA.23802.1.S1_at   | MmugDNA.23802.1 | 3.63  | 3.79  | 0.13 | 0.11 | -1.12 | 0.817295 | 0.209973 | 0.933935 | 0.483744 |
| MmugDNA.23803.1.S1_at   | MmugDNA.23803.1 | 12.66 | 12.89 | 0.13 | 0.03 | -1.17 | 0.059358 | 0.031427 | 0.406303 | 0.219107 |
| MmugDNA.23804.1.S1_at   | MmugDNA.23804.1 | 3.09  | 3.06  | 0.05 | 0.07 | 1.02  | 0.43127  | 0.451803 | 0.743363 | 0.66662  |
| MmugDNA.23805.1.S1_at   | MmugDNA.23805.1 | 12.42 | 12.05 | 0.33 | 0.12 | 1.29  | 0.098049 | 0.112208 | 0.46743  | 0.377537 |
| MmugDNA.23805.1.S1_x_at | MmugDNA.23805.1 | 12.36 | 12.04 | 0.32 | 0.11 | 1.25  | 0.086107 | 0.098222 | 0.453703 | 0.356262 |
| MmugDNA.23806.1.S1_at   | MmugDNA.23806.1 | 5.28  | 5.52  | 0.22 | 0.27 | -1.18 | 0.135184 | 0.152678 | 0.50918  | 0.427505 |
| MmugDNA.23807.1.S1_at   | MmugDNA.23807.1 | 4.67  | 4.32  | 0.21 | 0.05 | 1.28  | 0.129361 | 0.342479 | 0.504178 | 0.588536 |
| MmugDNA.23808.1.S1_at   | MmugDNA.23808.1 | 3.39  | 3.32  | 0.29 | 0.11 | 1.05  | 0.253186 | 0.365283 | 0.617925 | 0.605413 |
| MmugDNA.23809.1.S1_at   | MmugDNA.23809.1 | 2.88  | 2.71  | 0.28 | 0.12 | 1.13  | 0.372786 | 0.592522 | 0.705567 | 0.757844 |
| MmugDNA.2381.1.S1_at    | MmugDNA.2381.1  | 9.5   | 9.58  | 0.2  | 0.08 | -1.06 | 0.921169 | 0.01239  | 0.973328 | 0.144023 |
| MmugDNA.23810.1.S1_at   | MmugDNA.23810.1 | 3.22  | 3.15  | 0.4  | 0.13 | 1.05  | 0.421541 | 0.309317 | 0.737563 | 0.564912 |
| MmugDNA.23811.1.S1_at   | MmugDNA.23811.1 | 9.56  | 9.31  | 0.52 | 0.16 | 1.19  | 0.288988 | 0.438366 | 0.645892 | 0.65735  |
| MmugDNA.23813.1.S1_at   | MmugDNA.23813.1 | 4.81  | 4.88  | 0.04 | 0.07 | -1.05 | 0.264964 | 0.66944  | 0.62636  | 0.806626 |
| MmugDNA.23814.1.S1_at   | MmugDNA.23814.1 | 7.79  | 7.7   | 0.06 | 0.03 | 1.07  | 0.116022 | 0.906032 | 0.489543 | 0.946832 |
| MmugDNA.23815.1.S1_at   | MmugDNA.23815.1 | 9.34  | 8.95  | 0.49 | 1.4  | 1.32  | 0.470649 | 0.273416 | 0.766172 | 0.537863 |
| MmugDNA.23816.1.S1_at   | MmugDNA.23816.1 | 7.25  | 7.81  | 0.24 | 0.16 | -1.48 | 0.018972 | 0.015302 | 0.299397 | 0.157071 |
| MmugDNA.23818.1.S1_at   | MmugDNA.23818.1 | 2.96  | 3.18  | 0.13 | 0.3  | -1.17 | 0.44081  | 0.767756 | 0.748729 | 0.865182 |
| MmugDNA.23819.1.S1_at   | MmugDNA.23819.1 | 10.98 | 10.64 | 0.61 | 0.23 | 1.26  | 0.708799 | 0.217727 | 0.886591 | 0.491309 |
| MmugDNA.2382.1.S1_at    | MmugDNA.2382.1  | 4.74  | 4.45  | 0.07 | 0.11 | 1.22  | 0.025958 | 0.021104 | 0.322731 | 0.181869 |

|                         |                 |       |       |      |      |       |          |          |          |          |
|-------------------------|-----------------|-------|-------|------|------|-------|----------|----------|----------|----------|
| MmugDNA.23820.1.S1_at   | MmugDNA.23820.1 | 6.51  | 7.05  | 0.41 | 0.11 | -1.45 | 0.139268 | 0.268684 | 0.51471  | 0.534138 |
| MmugDNA.23821.1.S1_at   | MmugDNA.23821.1 | 5.22  | 4.71  | 0.26 | 0.12 | 1.42  | 0.063308 | 0.102083 | 0.415656 | 0.362122 |
| MmugDNA.23822.1.S1_s_at | MmugDNA.23822.1 | 8.01  | 7.78  | 0.24 | 0.1  | 1.17  | 0.286413 | 0.329627 | 0.643673 | 0.578813 |
| MmugDNA.23823.1.S1_at   | MmugDNA.23823.1 | 5.87  | 5.88  | 0.46 | 0.09 | -1.01 | 0.959754 | 0.818102 | 0.986938 | 0.89509  |
| MmugDNA.23825.1.S1_at   | MmugDNA.23825.1 | 13.6  | 13.7  | 0.09 | 0.03 | -1.07 | 0.152931 | 0.068476 | 0.525869 | 0.308214 |
| MmugDNA.23826.1.S1_at   | MmugDNA.23826.1 | 3.71  | 3.55  | 0.14 | 0.09 | 1.12  | 0.118283 | 0.08554  | 0.491784 | 0.337567 |
| MmugDNA.23827.1.S1_at   | MmugDNA.23827.1 | 13.23 | 13.65 | 0.82 | 0.07 | -1.34 | 0.1428   | 0.12274  | 0.517889 | 0.392729 |
| MmugDNA.23828.1.S1_at   | MmugDNA.23828.1 | 4.66  | 4.34  | 0.22 | 0.06 | 1.26  | 0.118887 | 0.294215 | 0.492396 | 0.554004 |
| MmugDNA.23829.1.S1_at   | MmugDNA.23829.1 | 6.22  | 6.26  | 0.49 | 0.4  | -1.03 | 0.859985 | 0.576555 | 0.950535 | 0.747267 |
| MmugDNA.2383.1.S1_x_at  | MmugDNA.2383.1  | 8.04  | 7.85  | 0.15 | 0.09 | 1.15  | 0.350858 | 0.496875 | 0.691733 | 0.696265 |
| MmugDNA.23830.1.S1_at   | MmugDNA.23830.1 | 7.33  | 8.38  | 0.63 | 0.18 | -2.07 | 0.13783  | 0.157342 | 0.513584 | 0.432821 |
| MmugDNA.23831.1.S1_at   | MmugDNA.23831.1 | 5.82  | 5.66  | 0.18 | 0.16 | 1.12  | 0.66071  | 0.058494 | 0.865819 | 0.288569 |
| MmugDNA.23832.1.S1_at   | MmugDNA.23832.1 | 3.64  | 3.65  | 0.07 | 0.18 | -1    | 0.660817 | 0.369108 | 0.865819 | 0.608618 |
| MmugDNA.23834.1.S1_at   | MmugDNA.23834.1 | 3.83  | 4.04  | 0.13 | 0.04 | -1.16 | 0.11091  | 0.077142 | 0.48424  | 0.322685 |
| MmugDNA.23835.1.S1_at   | MmugDNA.23835.1 | 6.55  | 7.37  | 0.36 | 0.19 | -1.76 | 0.046913 | 0.330794 | 0.37917  | 0.579563 |
| MmugDNA.23836.1.S1_at   | MmugDNA.23836.1 | 4.86  | 4.69  | 0.08 | 0.09 | 1.13  | 0.211768 | 0.238188 | 0.582625 | 0.508821 |
| MmugDNA.23837.1.S1_at   | MmugDNA.23837.1 | 3.2   | 3.18  | 0.06 | 0.02 | 1.01  | 0.695868 | 0.11796  | 0.88176  | 0.385858 |
| MmugDNA.23838.1.S1_at   | MmugDNA.23838.1 | 5.4   | 5.34  | 0.16 | 0.07 | 1.04  | 0.878271 | 0.978156 | 0.957601 | 0.988066 |
| MmugDNA.23839.1.S1_at   | MmugDNA.23839.1 | 9.13  | 9.63  | 0.38 | 0.09 | -1.42 | 0.092129 | 0.080262 | 0.460688 | 0.327882 |
| MmugDNA.2384.1.S1_at    | MmugDNA.2384.1  | 9.75  | 9.55  | 0.11 | 0.2  | 1.15  | 0.212926 | 0.330875 | 0.583514 | 0.57958  |
| MmugDNA.23840.1.S1_at   | MmugDNA.23840.1 | 5.52  | 5.51  | 0    | 0.05 | 1     | 0.922385 | 0.734999 | 0.973786 | 0.846622 |
| MmugDNA.23841.1.S1_at   | MmugDNA.23841.1 | 3.54  | 3.54  | 0.07 | 0.08 | 1     | 0.231633 | 0.620185 | 0.599611 | 0.77525  |
| MmugDNA.23842.1.S1_at   | MmugDNA.23842.1 | 5.27  | 5.08  | 0.13 | 0.36 | 1.13  | 0.163681 | 0.394872 | 0.536521 | 0.627216 |
| MmugDNA.23843.1.S1_at   | MmugDNA.23843.1 | 11.19 | 11.46 | 0.2  | 0.17 | -1.2  | 0.310767 | 0.332988 | 0.662635 | 0.581326 |
| MmugDNA.23844.1.S1_at   | MmugDNA.23844.1 | 3.61  | 3.67  | 0.16 | 0.17 | -1.04 | 0.835798 | 0.833602 | 0.941194 | 0.904597 |
| MmugDNA.23845.1.S1_at   | MmugDNA.23845.1 | 4.51  | 4.41  | 0.26 | 0.1  | 1.07  | 0.568652 | 0.6781   | 0.820935 | 0.811973 |
| MmugDNA.23846.1.S1_at   | MmugDNA.23846.1 | 12.72 | 12.77 | 0.06 | 0.03 | -1.03 | 0.185421 | 0.080571 | 0.55849  | 0.328327 |
| MmugDNA.23847.1.S1_at   | MmugDNA.23847.1 | 11.68 | 11.46 | 0.13 | 0.13 | 1.17  | 0.066906 | 0.001179 | 0.422979 | 0.05381  |
| MmugDNA.23848.1.S1_at   | MmugDNA.23848.1 | 3.33  | 3.51  | 0.18 | 0.09 | -1.14 | 0.110932 | 0.089019 | 0.48424  | 0.342876 |
| MmugDNA.23849.1.S1_at   | MmugDNA.23849.1 | 8.66  | 8.7   | 0.64 | 0.19 | -1.03 | 0.462722 | 0.637663 | 0.761741 | 0.787067 |
| MmugDNA.2385.1.S1_at    | MmugDNA.2385.1  | 4.15  | 4.51  | 0.22 | 0.5  | -1.28 | 0.175855 | 0.212142 | 0.549021 | 0.486036 |
| MmugDNA.23850.1.S1_at   | MmugDNA.23850.1 | 9.53  | 9.67  | 0.22 | 0.18 | -1.1  | 0.664766 | 0.046623 | 0.867683 | 0.260458 |
| MmugDNA.23851.1.S1_at   | MmugDNA.23851.1 | 5.28  | 5.11  | 0.3  | 0.08 | 1.13  | 0.456988 | 0.414815 | 0.758051 | 0.640456 |
| MmugDNA.23852.1.S1_at   | MmugDNA.23852.1 | 6.11  | 6.46  | 0.49 | 0.3  | -1.28 | 0.786061 | 0.079355 | 0.921297 | 0.326697 |
| MmugDNA.23853.1.S1_at   | MmugDNA.23853.1 | 6.51  | 6.59  | 0.22 | 0.23 | -1.05 | 0.825226 | 0.597154 | 0.937201 | 0.760102 |
| MmugDNA.23855.1.S1_at   | MmugDNA.23855.1 | 2.76  | 2.81  | 0.11 | 0.07 | -1.04 | 0.550373 | 0.30323  | 0.810769 | 0.560731 |
| MmugDNA.23856.1.S1_at   | MmugDNA.23856.1 | 10.8  | 9.5   | 0.29 | 0.15 | 2.46  | 0.001928 | 0.001077 | 0.170441 | 0.051912 |
| MmugDNA.23857.1.S1_at   | MmugDNA.23857.1 | 12.63 | 12.89 | 0.29 | 0.05 | -1.2  | 0.265555 | 0.218371 | 0.626748 | 0.491929 |
| MmugDNA.23858.1.S1_at   | MmugDNA.23858.1 | 9.24  | 9.76  | 0.2  | 0.22 | -1.44 | 0.074746 | 0.083672 | 0.435313 | 0.334346 |
| MmugDNA.23859.1.S1_at   | MmugDNA.23859.1 | 10.06 | 10.92 | 0.12 | 0.17 | -1.81 | 0.003311 | 0.000781 | 0.194511 | 0.045664 |
| MmugDNA.2386.1.S1_at    | MmugDNA.2386.1  | 4.95  | 4.85  | 0.41 | 0.21 | 1.07  | 0.708273 | 0.874093 | 0.886591 | 0.928468 |
| MmugDNA.23860.1.S1_at   | MmugDNA.23860.1 | 7.75  | 8.22  | 0.51 | 0.17 | -1.39 | 0.354264 | 0.502896 | 0.693841 | 0.700417 |
| MmugDNA.23861.1.S1_at   | MmugDNA.23861.1 | 5.15  | 4.65  | 0.25 | 0.15 | 1.41  | 0.017557 | 0.001299 | 0.292694 | 0.055585 |

|                         |                 |       |       |      |      |       |          |          |          |          |
|-------------------------|-----------------|-------|-------|------|------|-------|----------|----------|----------|----------|
| MmugDNA.23861.1.S1_s_at | MmugDNA.23861.1 | 7.52  | 6.27  | 0.23 | 0.07 | 2.38  | 0.00078  | 0.002908 | 0.15004  | 0.079157 |
| MmugDNA.23863.1.S1_at   | MmugDNA.23863.1 | 5.76  | 6.29  | 0.79 | 0.35 | -1.44 | 0.133932 | 0.423318 | 0.50813  | 0.646277 |
| MmugDNA.23864.1.S1_at   | MmugDNA.23864.1 | 5.93  | 5.92  | 0.4  | 0.43 | 1.01  | 0.393795 | 0.408757 | 0.719504 | 0.6359   |
| MmugDNA.23865.1.S1_at   | MmugDNA.23865.1 | 6.03  | 5.65  | 0.23 | 0.61 | 1.3   | 0.970544 | 0.526065 | 0.990362 | 0.715374 |
| MmugDNA.23866.1.S1_at   | MmugDNA.23866.1 | 4.48  | 4.28  | 0.29 | 0.13 | 1.14  | 0.144188 | 0.199687 | 0.519528 | 0.474335 |
| MmugDNA.23867.1.S1_at   | MmugDNA.23867.1 | 6.5   | 6.31  | 0.21 | 0.19 | 1.14  | 0.163982 | 0.605274 | 0.536696 | 0.765059 |
| MmugDNA.23868.1.S1_at   | MmugDNA.23868.1 | 7.56  | 7.5   | 0.09 | 0.05 | 1.04  | 0.377187 | 0.823207 | 0.707423 | 0.89837  |
| MmugDNA.23869.1.S1_at   | MmugDNA.23869.1 | 4.91  | 4.89  | 0.19 | 0.09 | 1.01  | 0.312525 | 0.540939 | 0.664134 | 0.724649 |
| MmugDNA.2387.1.S1_at    | MmugDNA.2387.1  | 2.76  | 2.69  | 0.03 | 0.24 | 1.05  | 0.743783 | 0.881172 | 0.90225  | 0.932188 |
| MmugDNA.23870.1.S1_at   | MmugDNA.23870.1 | 6.32  | 5.87  | 0.09 | 0.1  | 1.37  | 0.00702  | 0.021212 | 0.225062 | 0.182364 |
| MmugDNA.23871.1.S1_at   | MmugDNA.23871.1 | 3.98  | 3.91  | 0.05 | 0.12 | 1.05  | 0.645029 | 0.706093 | 0.85869  | 0.829633 |
| MmugDNA.23872.1.S1_at   | MmugDNA.23872.1 | 3.46  | 3.15  | 0.06 | 0.26 | 1.24  | 0.342658 | 0.039263 | 0.686031 | 0.243333 |
| MmugDNA.23873.1.S1_at   | MmugDNA.23873.1 | 9.97  | 9.78  | 0.29 | 0.15 | 1.14  | 0.544309 | 0.091348 | 0.807195 | 0.346281 |
| MmugDNA.23874.1.S1_at   | MmugDNA.23874.1 | 4.04  | 4.47  | 0.27 | 0.37 | -1.35 | 0.814846 | 0.14446  | 0.933137 | 0.418323 |
| MmugDNA.23875.1.S1_at   | MmugDNA.23875.1 | 3.62  | 3.98  | 0.13 | 0.19 | -1.28 | 0.235222 | 0.137885 | 0.602266 | 0.410846 |
| MmugDNA.39181.1.S1_at   | MmugDNA.39181.1 | 3.91  | 3.84  | 0.1  | 0.05 | 1.05  | 0.855336 | 0.986804 | 0.948797 | 0.992556 |
| MmugDNA.39181.1.S1_s_at | MmugDNA.39181.1 | 4.14  | 4.45  | 0.13 | 0.05 | -1.24 | 0.035782 | 0.090314 | 0.353107 | 0.3447   |
| MmugDNA.23877.1.S1_at   | MmugDNA.23877.1 | 5.47  | 5.52  | 0.16 | 0.07 | -1.04 | 0.94777  | 0.955355 | 0.982079 | 0.974645 |
| MmugDNA.23878.1.S1_at   | MmugDNA.23878.1 | 6.89  | 6.05  | 0.09 | 0.23 | 1.79  | 0.003457 | 0.002443 | 0.195142 | 0.073201 |
| MmugDNA.2388.1.S1_at    | MmugDNA.2388.1  | 4.08  | 3.95  | 0.22 | 0.03 | 1.1   | 0.440745 | 0.196663 | 0.748664 | 0.471715 |
| MmugDNA.23880.1.S1_at   | MmugDNA.23880.1 | 3.87  | 3.92  | 0.06 | 0.12 | -1.03 | 0.719647 | 0.686602 | 0.891153 | 0.81711  |
| MmugDNA.23881.1.S1_at   | MmugDNA.23881.1 | 6.12  | 5.84  | 0.17 | 0.1  | 1.21  | 0.125318 | 0.291408 | 0.499501 | 0.551823 |
| MmugDNA.23882.1.S1_at   | MmugDNA.23882.1 | 4.58  | 4.58  | 0.05 | 0.08 | 1.01  | 0.823016 | 0.891967 | 0.936176 | 0.938422 |
| MmugDNA.23883.1.S1_at   | MmugDNA.23883.1 | 5.62  | 5.32  | 0.36 | 0.03 | 1.23  | 0.176117 | 0.225294 | 0.549254 | 0.497892 |
| MmugDNA.23884.1.S1_at   | MmugDNA.23884.1 | 3.14  | 3.1   | 0.13 | 0.12 | 1.02  | 0.979539 | 0.972831 | 0.993506 | 0.985352 |
| MmugDNA.23885.1.S1_at   | MmugDNA.23885.1 | 7.6   | 7.93  | 0.49 | 0.07 | -1.26 | 0.887629 | 0.894549 | 0.961096 | 0.939811 |
| MmugDNA.23886.1.S1_at   | MmugDNA.23886.1 | 9.47  | 9.47  | 0.21 | 0.23 | 1     | 0.506716 | 0.639828 | 0.785973 | 0.788487 |
| MmugDNA.23888.1.S1_at   | MmugDNA.23888.1 | 3.31  | 3.4   | 0.66 | 0.18 | -1.06 | 0.468505 | 0.301734 | 0.764997 | 0.559671 |
| MmugDNA.2389.1.S1_at    | MmugDNA.2389.1  | 10.07 | 9.84  | 0.21 | 0.08 | 1.17  | 0.539193 | 0.478744 | 0.803644 | 0.684706 |
| MmugDNA.23890.1.S1_at   | MmugDNA.23890.1 | 4.57  | 4.93  | 0.32 | 0.07 | -1.28 | 0.112216 | 0.34432  | 0.485383 | 0.589762 |
| MmugDNA.23891.1.S1_at   | MmugDNA.23891.1 | 7.98  | 8.15  | 0.61 | 0.07 | -1.13 | 0.599719 | 0.212831 | 0.837539 | 0.486774 |
| MmugDNA.23892.1.S1_at   | MmugDNA.23892.1 | 11.63 | 11.82 | 0.38 | 0.17 | -1.14 | 0.365259 | 0.42604  | 0.700988 | 0.648241 |
| MmugDNA.23892.1.S1_s_at | MmugDNA.23892.1 | 10.61 | 10.87 | 0.52 | 0.13 | -1.19 | 0.681058 | 0.596888 | 0.874927 | 0.759909 |
| MmugDNA.23893.1.S1_at   | MmugDNA.23893.1 | 4.29  | 4.12  | 0.11 | 0.19 | 1.13  | 0.509377 | 0.147042 | 0.787587 | 0.421162 |
| MmugDNA.23895.1.S1_at   | MmugDNA.23895.1 | 4.57  | 5.28  | 0.24 | 0.15 | -1.64 | 0.013311 | 0.180954 | 0.26777  | 0.457426 |
| MmugDNA.23897.1.S1_at   | MmugDNA.23897.1 | 3.64  | 3.67  | 0.18 | 0.15 | -1.02 | 0.179369 | 0.362734 | 0.552583 | 0.603245 |
| MmugDNA.23898.1.S1_at   | MmugDNA.23898.1 | 10.23 | 10.17 | 0.37 | 0.08 | 1.04  | 0.744423 | 0.015529 | 0.90255  | 0.158053 |
| MmugDNA.23899.1.S1_at   | MmugDNA.23899.1 | 6     | 6.09  | 0.17 | 0.18 | -1.07 | 0.294992 | 0.097251 | 0.650971 | 0.354908 |
| MmugDNA.239.1.S1_at     | MmugDNA.239.1   | 11.61 | 11.86 | 0.09 | 0.11 | -1.19 | 0.076596 | 0.123722 | 0.437977 | 0.393867 |
| MmugDNA.2390.1.S1_at    | MmugDNA.2390.1  | 6.09  | 6.06  | 0.13 | 0.16 | 1.02  | 0.890279 | 0.98847  | 0.962263 | 0.993525 |
| MmugDNA.23900.1.S1_at   | MmugDNA.23900.1 | 4.51  | 4.54  | 0.14 | 0.66 | -1.02 | 0.977389 | 0.893081 | 0.992685 | 0.939015 |
| MmugDNA.23901.1.S1_at   | MmugDNA.23901.1 | 6.52  | 6.58  | 0.25 | 0.07 | -1.04 | 0.86664  | 0.832122 | 0.953134 | 0.903678 |
| MmugDNA.23902.1.S1_at   | MmugDNA.23902.1 | 7.15  | 6.64  | 0.87 | 0.09 | 1.42  | 0.297155 | 0.332111 | 0.652609 | 0.580584 |

|                         |                 |       |       |      |      |       |          |          |          |          |
|-------------------------|-----------------|-------|-------|------|------|-------|----------|----------|----------|----------|
| MmugDNA.23903.1.S1_at   | MmugDNA.23903.1 | 8.32  | 7.95  | 1.06 | 0.21 | 1.29  | 0.903257 | 0.945011 | 0.967455 | 0.968834 |
| MmugDNA.23904.1.S1_at   | MmugDNA.23904.1 | 7.15  | 7.31  | 0.13 | 0.15 | -1.11 | 0.214267 | 0.005015 | 0.584673 | 0.098672 |
| MmugDNA.23906.1.S1_at   | MmugDNA.23906.1 | 4.34  | 4.25  | 0.05 | 0.05 | 1.06  | 0.046956 | 0.180742 | 0.379253 | 0.457294 |
| MmugDNA.23907.1.S1_at   | MmugDNA.23907.1 | 6.59  | 6.45  | 0.23 | 0.1  | 1.1   | 0.560274 | 0.259426 | 0.816576 | 0.526418 |
| MmugDNA.23908.1.S1_at   | MmugDNA.23908.1 | 3.92  | 3.77  | 0.03 | 0.16 | 1.11  | 0.150424 | 0.147627 | 0.524009 | 0.421901 |
| MmugDNA.2391.1.S1_at    | MmugDNA.2391.1  | 5.42  | 5.42  | 0.04 | 0.05 | 1     | 0.209621 | 0.209687 | 0.581223 | 0.48341  |
| MmugDNA.23910.1.S1_at   | MmugDNA.23910.1 | 6.27  | 6.27  | 0.09 | 0.07 | -1    | 0.259097 | 0.349512 | 0.622485 | 0.593484 |
| MmugDNA.23911.1.S1_at   | MmugDNA.23911.1 | 8.68  | 8.23  | 0.59 | 0.28 | 1.36  | 0.371368 | 0.564248 | 0.705454 | 0.739128 |
| MmugDNA.23912.1.S1_at   | MmugDNA.23912.1 | 5.46  | 5.39  | 0.06 | 0.07 | 1.05  | 0.116005 | 0.434833 | 0.489515 | 0.654843 |
| MmugDNA.23913.1.S1_at   | MmugDNA.23913.1 | 6.52  | 6.51  | 0.13 | 0    | 1.01  | 0.664794 | 0.848319 | 0.867697 | 0.91389  |
| MmugDNA.23914.1.S1_at   | MmugDNA.23914.1 | 7.72  | 7.02  | 0.33 | 0.29 | 1.63  | 0.039404 | 0.072449 | 0.361771 | 0.315294 |
| MmugDNA.23915.1.S1_at   | MmugDNA.23915.1 | 6.64  | 6.29  | 0.88 | 0.19 | 1.27  | 0.594134 | 0.78789  | 0.834588 | 0.877314 |
| MmugDNA.23916.1.S1_at   | MmugDNA.23916.1 | 3.93  | 3.84  | 0.14 | 0.07 | 1.06  | 0.122715 | 0.075948 | 0.496146 | 0.320634 |
| MmugDNA.23917.1.S1_at   | MmugDNA.23917.1 | 6.86  | 6.89  | 0.02 | 0.08 | -1.02 | 0.807047 | 0.175034 | 0.930037 | 0.451682 |
| MmugDNA.23918.1.S1_at   | MmugDNA.23918.1 | 5.26  | 5.25  | 0.79 | 0.13 | 1.01  | 0.443872 | 0.679928 | 0.751068 | 0.8131   |
| MmugDNA.23919.1.S1_at   | MmugDNA.23919.1 | 7     | 6.36  | 1.62 | 0.06 | 1.56  | 0.974832 | 0.964165 | 0.991912 | 0.980052 |
| MmugDNA.2392.1.S1_at    | MmugDNA.2392.1  | 3.62  | 3.64  | 0.06 | 0.2  | -1.02 | 0.231295 | 0.545266 | 0.599266 | 0.727457 |
| MmugDNA.23920.1.S1_at   | MmugDNA.23920.1 | 3.33  | 3.38  | 0.23 | 0.15 | -1.03 | 0.694667 | 0.735228 | 0.881132 | 0.846794 |
| MmugDNA.23921.1.S1_at   | MmugDNA.23921.1 | 3.87  | 3.87  | 0.02 | 0.15 | 1     | 0.33116  | 0.815908 | 0.677861 | 0.893781 |
| MmugDNA.23922.1.S1_at   | MmugDNA.23922.1 | 5.27  | 5.27  | 0.21 | 0.14 | -1    | 0.772216 | 0.893247 | 0.915051 | 0.939152 |
| MmugDNA.23923.1.S1_at   | MmugDNA.23923.1 | 10.63 | 11.05 | 0.18 | 0.14 | -1.33 | 0.023349 | 0.048447 | 0.315046 | 0.26532  |
| MmugDNA.23924.1.S1_at   | MmugDNA.23924.1 | 6.4   | 6.52  | 0.13 | 0.18 | -1.09 | 0.17093  | 0.304733 | 0.544089 | 0.561921 |
| MmugDNA.23926.1.S1_s_at | MmugDNA.23926.1 | 9.38  | 9.1   | 0.24 | 0.17 | 1.21  | 0.164482 | 0.009996 | 0.537347 | 0.131262 |
| MmugDNA.23927.1.S1_at   | MmugDNA.23927.1 | 6.56  | 6.37  | 0.09 | 0.06 | 1.14  | 0.088931 | 0.125703 | 0.45672  | 0.396249 |
| MmugDNA.23930.1.S1_at   | MmugDNA.23930.1 | 6.1   | 5.95  | 0.2  | 0.16 | 1.11  | 0.743052 | 0.475865 | 0.901935 | 0.682387 |
| MmugDNA.23931.1.S1_at   | MmugDNA.23931.1 | 8.55  | 8.42  | 0.22 | 0.11 | 1.1   | 0.410527 | 0.55323  | 0.730749 | 0.73239  |
| MmugDNA.23934.1.S1_at   | MmugDNA.23934.1 | 5.19  | 5.23  | 0.16 | 0.1  | -1.02 | 0.895209 | 0.084082 | 0.964244 | 0.335065 |
| MmugDNA.23935.1.S1_at   | MmugDNA.23935.1 | 6.93  | 6.93  | 0.15 | 0.03 | 1     | 0.542034 | 0.724796 | 0.805464 | 0.840693 |
| MmugDNA.23936.1.S1_at   | MmugDNA.23936.1 | 8.37  | 8.22  | 0.36 | 0.14 | 1.11  | 0.663926 | 0.078947 | 0.867528 | 0.325957 |
| MmugDNA.23937.1.S1_at   | MmugDNA.23937.1 | 9.16  | 9.77  | 0.65 | 0.18 | -1.53 | 0.168287 | 0.070251 | 0.540913 | 0.311287 |
| MmugDNA.23939.1.S1_at   | MmugDNA.23939.1 | 8.62  | 8.62  | 0.02 | 0.09 | 1     | 0.290831 | 0.567994 | 0.647362 | 0.74176  |
| MmugDNA.23939.1.S1_s_at | MmugDNA.23939.1 | 9.28  | 8.97  | 0.23 | 0.07 | 1.24  | 0.085165 | 0.301029 | 0.45215  | 0.559198 |
| MmugDNA.23940.1.S1_at   | MmugDNA.23940.1 | 5.71  | 4.93  | 0.52 | 0.81 | 1.72  | 0.330852 | 0.800369 | 0.677482 | 0.885129 |
| MmugDNA.23941.1.S1_at   | MmugDNA.23941.1 | 4.19  | 4.22  | 0.46 | 0.46 | -1.02 | 0.797249 | 0.366256 | 0.925402 | 0.606019 |
| MmugDNA.23943.1.S1_at   | MmugDNA.23943.1 | 6.56  | 6.68  | 0.09 | 0.21 | -1.09 | 0.68097  | 0.26842  | 0.87492  | 0.534106 |
| MmugDNA.23944.1.S1_at   | MmugDNA.23944.1 | 5.28  | 5.18  | 0.2  | 0.13 | 1.08  | 0.257978 | 0.419619 | 0.62169  | 0.643568 |
| MmugDNA.23946.1.S1_at   | MmugDNA.23946.1 | 6.34  | 6.98  | 0.43 | 0.35 | -1.56 | 0.238984 | 0.306095 | 0.60548  | 0.562804 |
| MmugDNA.23947.1.S1_at   | MmugDNA.23947.1 | 6.5   | 6.34  | 0.03 | 0.03 | 1.12  | 0.003157 | 0.193187 | 0.191107 | 0.468578 |
| MmugDNA.23948.1.S1_at   | MmugDNA.23948.1 | 3.83  | 3.57  | 0.17 | 0.04 | 1.2   | 0.043896 | 0.020621 | 0.373038 | 0.180141 |
| MmugDNA.23949.1.S1_at   | MmugDNA.23949.1 | 4.54  | 4.49  | 0.14 | 0.09 | 1.03  | 0.184863 | 0.523965 | 0.557647 | 0.714099 |
| MmugDNA.23950.1.S1_at   | MmugDNA.23950.1 | 6.81  | 6.85  | 0.15 | 0.09 | -1.03 | 0.764991 | 0.286644 | 0.911696 | 0.548077 |
| MmugDNA.23951.1.S1_at   | MmugDNA.23951.1 | 6.43  | 5.58  | 0.65 | 0.31 | 1.8   | 0.150023 | 0.196959 | 0.52355  | 0.472072 |
| MmugDNA.23953.1.S1_at   | MmugDNA.23953.1 | 5.84  | 5.57  | 0.16 | 0.08 | 1.21  | 0.160956 | 0.144648 | 0.534282 | 0.418477 |



|                         |                 |       |       |      |      |       |          |          |          |          |
|-------------------------|-----------------|-------|-------|------|------|-------|----------|----------|----------|----------|
| MmugDNA.23955.1.S1_at   | MmugDNA.23955.1 | 7.83  | 8.32  | 0.44 | 0.12 | -1.41 | 0.212274 | 0.214227 | 0.582812 | 0.487856 |
| MmugDNA.23956.1.S1_at   | MmugDNA.23956.1 | 7.2   | 7.47  | 0.22 | 0.07 | -1.21 | 0.364077 | 0.685718 | 0.700445 | 0.816612 |
| MmugDNA.23957.1.S1_at   | MmugDNA.23957.1 | 5.79  | 4.99  | 1.06 | 0.15 | 1.74  | 0.237333 | 0.143484 | 0.604247 | 0.417442 |
| MmugDNA.23958.1.S1_at   | MmugDNA.23958.1 | 4.27  | 4.02  | 0.45 | 0.31 | 1.19  | 0.449952 | 0.22965  | 0.754621 | 0.50163  |
| MmugDNA.23959.1.S1_at   | MmugDNA.23959.1 | 5.94  | 5.82  | 0.51 | 0.34 | 1.09  | 0.826249 | 0.836307 | 0.937734 | 0.90636  |
| MmugDNA.2396.1.S1_at    | MmugDNA.2396.1  | 3.41  | 3.32  | 0.23 | 0.17 | 1.06  | 0.622568 | 0.821687 | 0.847855 | 0.897323 |
| MmugDNA.23960.1.S1_at   | MmugDNA.23960.1 | 6.33  | 6.26  | 0.1  | 0.09 | 1.05  | 0.223975 | 0.412965 | 0.593061 | 0.63928  |
| MmugDNA.23961.1.S1_at   | MmugDNA.23961.1 | 7.03  | 7.01  | 0.59 | 0.15 | 1.01  | 0.376867 | 0.489369 | 0.707144 | 0.691792 |
| MmugDNA.23962.1.S1_at   | MmugDNA.23962.1 | 9.31  | 8.59  | 0.15 | 0.15 | 1.64  | 0.007354 | 0.000375 | 0.228017 | 0.037273 |
| MmugDNA.23963.1.S1_at   | MmugDNA.23963.1 | 5.28  | 5.22  | 0.09 | 0.04 | 1.04  | 0.410405 | 0.02225  | 0.730749 | 0.186618 |
| MmugDNA.23964.1.S1_at   | MmugDNA.23964.1 | 6.94  | 7.43  | 0.51 | 0.22 | -1.41 | 0.393591 | 0.545984 | 0.719354 | 0.727708 |
| MmugDNA.23965.1.S1_at   | MmugDNA.23965.1 | 4.44  | 4.4   | 0.11 | 0.03 | 1.03  | 0.391319 | 0.259448 | 0.717502 | 0.526418 |
| MmugDNA.23966.1.S1_at   | MmugDNA.23966.1 | 5.78  | 5.61  | 0.13 | 0.13 | 1.12  | 0.079719 | 0.311101 | 0.442637 | 0.566159 |
| MmugDNA.23967.1.S1_at   | MmugDNA.23967.1 | 5.29  | 5.06  | 0.13 | 0.19 | 1.17  | 0.110119 | 0.203674 | 0.483108 | 0.477907 |
| MmugDNA.23968.1.S1_at   | MmugDNA.23968.1 | 5.05  | 4.94  | 0.13 | 0.22 | 1.08  | 0.470118 | 0.924698 | 0.76595  | 0.957442 |
| MmugDNA.23968.1.S1_s_at | MmugDNA.23968.1 | 7.01  | 6.95  | 0.44 | 0.18 | 1.05  | 0.823501 | 0.338876 | 0.936302 | 0.585891 |
| MmugDNA.23969.1.S1_at   | MmugDNA.23969.1 | 4.19  | 3.81  | 0.85 | 0.7  | 1.3   | 0.51193  | 0.265102 | 0.788945 | 0.531    |
| MmugDNA.23970.1.S1_at   | MmugDNA.23970.1 | 5.7   | 5.33  | 0.26 | 0.05 | 1.3   | 0.214202 | 0.047038 | 0.584673 | 0.261469 |
| MmugDNA.23971.1.S1_at   | MmugDNA.23971.1 | 10.62 | 10.62 | 0.49 | 0.13 | 1     | 0.996564 | 0.530685 | 0.998707 | 0.718104 |
| MmugDNA.23972.1.S1_at   | MmugDNA.23972.1 | 5.73  | 5.68  | 1.69 | 0.54 | 1.04  | 0.968576 | 0.185985 | 0.989723 | 0.461839 |
| MmugDNA.23972.1.S1_s_at | MmugDNA.23972.1 | 6.43  | 6.1   | 1.21 | 0.37 | 1.25  | 0.649458 | 0.078359 | 0.860318 | 0.325024 |
| MmugDNA.23973.1.S1_at   | MmugDNA.23973.1 | 6.16  | 6     | 0.14 | 0.13 | 1.12  | 0.096147 | 0.083682 | 0.46465  | 0.334355 |
| MmugDNA.23974.1.S1_at   | MmugDNA.23974.1 | 2.91  | 2.91  | 0.09 | 0.03 | 1     | 0.72207  | 0.159215 | 0.892187 | 0.435217 |
| MmugDNA.23975.1.S1_at   | MmugDNA.23975.1 | 5.03  | 5.26  | 0.45 | 0.02 | -1.18 | 0.940283 | 0.522683 | 0.979681 | 0.713295 |
| MmugDNA.23976.1.S1_at   | MmugDNA.23976.1 | 8.15  | 7.94  | 0.35 | 0.05 | 1.16  | 0.310701 | 0.491846 | 0.662616 | 0.693275 |
| MmugDNA.23977.1.S1_at   | MmugDNA.23977.1 | 6.53  | 6.51  | 0.11 | 0.07 | 1.01  | 0.679029 | 0.652181 | 0.874211 | 0.796592 |
| MmugDNA.23978.1.S1_at   | MmugDNA.23978.1 | 3.58  | 3.46  | 0.21 | 0.42 | 1.09  | 0.848085 | 0.912113 | 0.946644 | 0.950444 |
| MmugDNA.2398.1.S1_at    | MmugDNA.2398.1  | 4.32  | 4.3   | 0.04 | 0.15 | 1.02  | 0.655283 | 0.93158  | 0.863101 | 0.961152 |
| MmugDNA.23980.1.S1_at   | MmugDNA.23980.1 | 3.55  | 3.67  | 0.15 | 0.05 | -1.09 | 0.478814 | 0.560985 | 0.770267 | 0.737076 |
| MmugDNA.23981.1.S1_at   | MmugDNA.23981.1 | 7.89  | 7.78  | 0.47 | 0.19 | 1.08  | 0.443162 | 0.139069 | 0.750554 | 0.412165 |
| MmugDNA.23984.1.S1_at   | MmugDNA.23984.1 | 5.66  | 5.68  | 0.18 | 0.04 | -1.01 | 0.348679 | 0.520805 | 0.689977 | 0.711942 |
| MmugDNA.23985.1.S1_at   | MmugDNA.23985.1 | 10.51 | 9.27  | 0.54 | 0.13 | 2.36  | 0.03509  | 0.009495 | 0.35097  | 0.128349 |
| MmugDNA.23987.1.S1_at   | MmugDNA.23987.1 | 3.83  | 3.84  | 0.11 | 0.08 | -1.01 | 0.298164 | 0.532491 | 0.652987 | 0.719065 |
| MmugDNA.23988.1.S1_at   | MmugDNA.23988.1 | 5.78  | 3.93  | 0.8  | 0.59 | 3.6   | 0.059092 | 0.304698 | 0.406015 | 0.561914 |
| MmugDNA.23989.1.S1_s_at | MmugDNA.23989.1 | 3.86  | 3.58  | 0.11 | 0.07 | 1.21  | 0.014053 | 0.076302 | 0.273429 | 0.321334 |
| MmugDNA.23990.1.S1_at   | MmugDNA.23990.1 | 5.91  | 6.03  | 0.09 | 0.11 | -1.09 | 0.222958 | 0.079997 | 0.59253  | 0.327352 |
| MmugDNA.23991.1.S1_at   | MmugDNA.23991.1 | 3.84  | 3.83  | 0.08 | 0.14 | 1.01  | 0.884826 | 0.911775 | 0.960159 | 0.950259 |
| MmugDNA.23992.1.S1_at   | MmugDNA.23992.1 | 5.27  | 5.08  | 0.2  | 0.36 | 1.15  | 0.692105 | 0.324239 | 0.880095 | 0.57488  |
| MmugDNA.23993.1.S1_at   | MmugDNA.23993.1 | 6.46  | 6.17  | 0.13 | 0.35 | 1.23  | 0.174482 | 0.269532 | 0.547808 | 0.534806 |
| MmugDNA.23994.1.S1_at   | MmugDNA.23994.1 | 6.05  | 5.1   | 0.3  | 0.24 | 1.93  | 0.020827 | 0.020255 | 0.305672 | 0.178702 |
| MmugDNA.23996.1.S1_at   | MmugDNA.23996.1 | 12.72 | 12.92 | 0.48 | 0.01 | -1.15 | 0.683655 | 0.827307 | 0.876134 | 0.900836 |
| MmugDNA.23997.1.S1_at   | MmugDNA.23997.1 | 4.26  | 4.09  | 0.18 | 0.28 | 1.13  | 0.734547 | 0.429674 | 0.898442 | 0.650982 |
| MmugDNA.23999.1.S1_at   | MmugDNA.23999.1 | 4.15  | 4.14  | 0.05 | 0.07 | 1.01  | 0.999492 | 0.989677 | 0.999871 | 0.994108 |

|                         |                 |       |       |      |      |       |          |          |          |          |
|-------------------------|-----------------|-------|-------|------|------|-------|----------|----------|----------|----------|
| MmugDNA.24.1.S1_at      | MmugDNA.24.1    | 4.21  | 4.58  | 0.52 | 0.3  | -1.29 | 0.525214 | 0.006669 | 0.796191 | 0.110588 |
| MmugDNA.240.1.S1_at     | MmugDNA.240.1   | 4.27  | 4.36  | 0.16 | 0.16 | -1.06 | 0.394102 | 0.509798 | 0.719612 | 0.704385 |
| MmugDNA.2400.1.S1_at    | MmugDNA.2400.1  | 5.61  | 5.6   | 0.14 | 0.07 | 1.01  | 0.706152 | 0.943459 | 0.8856   | 0.967902 |
| MmugDNA.24000.1.S1_at   | MmugDNA.24000.1 | 5.6   | 5.55  | 0.09 | 0.26 | 1.03  | 0.887222 | 0.977222 | 0.960871 | 0.987628 |
| MmugDNA.24002.1.S1_at   | MmugDNA.24002.1 | 6.74  | 6.76  | 0.12 | 0.07 | -1.01 | 0.599626 | 0.945002 | 0.837495 | 0.968834 |
| MmugDNA.24008.1.S1_at   | MmugDNA.24008.1 | 3.99  | 3.85  | 0.1  | 0.1  | 1.1   | 0.148601 | 0.167613 | 0.522658 | 0.444043 |
| MmugDNA.24009.1.S1_at   | MmugDNA.24009.1 | 3.96  | 3.95  | 0.08 | 0.06 | 1.01  | 0.794242 | 0.021578 | 0.924511 | 0.18405  |
| MmugDNA.31059.1.S1_at   | MmugDNA.31059.1 | 13.31 | 12.7  | 0.14 | 0.2  | 1.53  | 0.020688 | 0.002862 | 0.305403 | 0.078756 |
| MmugDNA.31059.1.S1_s_at | MmugDNA.31059.1 | 12.02 | 11.3  | 0.2  | 0.08 | 1.65  | 0.006916 | 0.000806 | 0.224141 | 0.04607  |
| MmugDNA.24011.1.S1_at   | MmugDNA.24011.1 | 4.3   | 4.32  | 0.11 | 0.17 | -1.01 | 0.838075 | 0.899164 | 0.941963 | 0.942655 |
| MmugDNA.24012.1.S1_at   | MmugDNA.24012.1 | 3.94  | 3.89  | 0.15 | 0.02 | 1.04  | 0.168137 | 0.207172 | 0.540716 | 0.481307 |
| MmugDNA.24013.1.S1_at   | MmugDNA.24013.1 | 11.33 | 10.92 | 0.17 | 0.15 | 1.33  | 0.027005 | 0.065537 | 0.327141 | 0.301415 |
| MmugDNA.24014.1.S1_at   | MmugDNA.24014.1 | 11.99 | 12.12 | 0.27 | 0.03 | -1.1  | 0.44851  | 0.164803 | 0.753886 | 0.441106 |
| MmugDNA.24015.1.S1_at   | MmugDNA.24015.1 | 5.75  | 5.41  | 0.21 | 0.15 | 1.27  | 0.107908 | 0.08029  | 0.480423 | 0.327939 |
| MmugDNA.24016.1.S1_at   | MmugDNA.24016.1 | 3.71  | 3.7   | 0.15 | 0.05 | 1.01  | 0.730627 | 0.550095 | 0.896248 | 0.730241 |
| MmugDNA.24018.1.S1_at   | MmugDNA.24018.1 | 5.67  | 6.82  | 0.42 | 0.53 | -2.23 | 0.10101  | 0.034357 | 0.47159  | 0.229283 |
| MmugDNA.24019.1.S1_at   | MmugDNA.24019.1 | 3.29  | 3.27  | 0.09 | 0    | 1.02  | 0.703482 | 0.880628 | 0.88474  | 0.931813 |
| MmugDNA.2402.1.S1_at    | MmugDNA.2402.1  | 4.1   | 4.34  | 0.27 | 0.09 | -1.18 | 0.822548 | 0.852865 | 0.936084 | 0.916359 |
| MmugDNA.24020.1.S1_at   | MmugDNA.24020.1 | 3.5   | 3.91  | 0.2  | 0.33 | -1.33 | 0.054868 | 0.057161 | 0.397122 | 0.284972 |
| MmugDNA.24021.1.S1_at   | MmugDNA.24021.1 | 10.78 | 10.51 | 0.49 | 0.05 | 1.2   | 0.4655   | 0.012099 | 0.763035 | 0.142307 |
| MmugDNA.24022.1.S1_at   | MmugDNA.24022.1 | 5.52  | 5.39  | 0.02 | 0.05 | 1.1   | 0.018696 | 0.054472 | 0.298184 | 0.278959 |
| MmugDNA.24025.1.S1_at   | MmugDNA.24025.1 | 7.36  | 6.68  | 0.68 | 0.31 | 1.6   | 0.184979 | 0.087782 | 0.557837 | 0.341044 |
| MmugDNA.24029.1.S1_at   | MmugDNA.24029.1 | 5.78  | 5.79  | 0.08 | 0.1  | -1.01 | 0.285963 | 0.264033 | 0.643508 | 0.530183 |
| MmugDNA.24030.1.S1_at   | MmugDNA.24030.1 | 12.88 | 12.12 | 0.63 | 0.13 | 1.69  | 0.108326 | 0.056454 | 0.480747 | 0.283516 |
| MmugDNA.24031.1.S1_at   | MmugDNA.24031.1 | 5.85  | 5.76  | 0.02 | 0.18 | 1.06  | 0.43508  | 0.810817 | 0.745472 | 0.890845 |
| MmugDNA.24032.1.S1_at   | MmugDNA.24032.1 | 3.88  | 3.81  | 0.18 | 0.04 | 1.05  | 0.591124 | 0.789043 | 0.833275 | 0.878071 |
| MmugDNA.24033.1.S1_at   | MmugDNA.24033.1 | 6.03  | 5.82  | 0.65 | 0.37 | 1.15  | 0.876722 | 0.992644 | 0.957055 | 0.995715 |
| MmugDNA.24034.1.S1_at   | MmugDNA.24034.1 | 3.62  | 3.7   | 0.11 | 0.22 | -1.06 | 0.515487 | 0.10931  | 0.79089  | 0.373084 |
| MmugDNA.24035.1.S1_at   | MmugDNA.24035.1 | 7.82  | 8.11  | 0.15 | 0.16 | -1.22 | 0.081278 | 0.099109 | 0.445355 | 0.357246 |
| MmugDNA.24037.1.S1_at   | MmugDNA.24037.1 | 3.34  | 3.44  | 0.11 | 0.06 | -1.07 | 0.502135 | 0.213574 | 0.783497 | 0.48741  |
| MmugDNA.24038.1.S1_at   | MmugDNA.24038.1 | 4.13  | 4.24  | 0.18 | 0.48 | -1.08 | 0.682486 | 0.602045 | 0.875741 | 0.763167 |
| MmugDNA.2404.1.S1_at    | MmugDNA.2404.1  | 7.21  | 7.52  | 0.2  | 0.1  | -1.24 | 0.10931  | 0.188251 | 0.482239 | 0.464261 |
| MmugDNA.24040.1.S1_at   | MmugDNA.24040.1 | 4.03  | 3.87  | 0.47 | 0.53 | 1.12  | 0.7969   | 0.662243 | 0.925364 | 0.802209 |
| MmugDNA.24041.1.S1_at   | MmugDNA.24041.1 | 5.83  | 5.76  | 0.06 | 0.13 | 1.05  | 0.163509 | 0.463111 | 0.536321 | 0.67424  |
| MmugDNA.24042.1.S1_at   | MmugDNA.24042.1 | 11.39 | 11.27 | 0.44 | 0.09 | 1.09  | 0.206992 | 0.136548 | 0.578774 | 0.409055 |
| MmugDNA.24043.1.S1_at   | MmugDNA.24043.1 | 6.91  | 6.97  | 0.26 | 0.05 | -1.04 | 0.757532 | 0.61307  | 0.908649 | 0.770391 |
| MmugDNA.24045.1.S1_s_at | MmugDNA.24045.1 | 7.24  | 8.18  | 0.44 | 0.24 | -1.92 | 0.058064 | 0.029778 | 0.403678 | 0.214208 |
| MmugDNA.24046.1.S1_at   | MmugDNA.24046.1 | 6.39  | 6.25  | 0.19 | 0.26 | 1.1   | 0.33894  | 0.225654 | 0.683426 | 0.498155 |
| MmugDNA.24049.1.S1_at   | MmugDNA.24049.1 | 5.06  | 5.27  | 0.18 | 0.18 | -1.16 | 0.126059 | 0.536148 | 0.499796 | 0.721538 |
| MmugDNA.2405.1.S1_at    | MmugDNA.2405.1  | 5.88  | 5.48  | 0.26 | 0.16 | 1.32  | 0.107714 | 0.073855 | 0.480288 | 0.31722  |
| MmugDNA.24050.1.S1_at   | MmugDNA.24050.1 | 3.8   | 3.64  | 0.3  | 0.08 | 1.11  | 0.290929 | 0.446288 | 0.647441 | 0.662743 |
| MmugDNA.24051.1.S1_at   | MmugDNA.24051.1 | 9.09  | 8.45  | 2.09 | 0.23 | 1.55  | 0.965949 | 0.47251  | 0.988768 | 0.680025 |
| MmugDNA.24052.1.S1_at   | MmugDNA.24052.1 | 5.37  | 5.35  | 0.37 | 0.3  | 1.01  | 0.820049 | 0.961464 | 0.935275 | 0.978247 |

|                         |                 |       |       |      |      |       |          |          |          |          |
|-------------------------|-----------------|-------|-------|------|------|-------|----------|----------|----------|----------|
| MmugDNA.24053.1.S1_at   | MmugDNA.24053.1 | 4.18  | 3.84  | 0.18 | 0.16 | 1.26  | 0.209855 | 0.123394 | 0.581324 | 0.393391 |
| MmugDNA.24054.1.S1_at   | MmugDNA.24054.1 | 4.63  | 4.54  | 0.09 | 0.09 | 1.06  | 0.562881 | 0.673315 | 0.817877 | 0.809102 |
| MmugDNA.24055.1.S1_at   | MmugDNA.24055.1 | 6.7   | 6.81  | 0.2  | 0.05 | -1.08 | 0.788726 | 0.417109 | 0.922466 | 0.642022 |
| MmugDNA.24056.1.S1_at   | MmugDNA.24056.1 | 7.57  | 7.56  | 0.2  | 0.06 | 1.01  | 0.993507 | 0.711816 | 0.997488 | 0.832894 |
| MmugDNA.24057.1.S1_at   | MmugDNA.24057.1 | 5.52  | 5.52  | 0.05 | 0.02 | 1     | 0.412892 | 0.516518 | 0.732114 | 0.709034 |
| MmugDNA.24058.1.S1_at   | MmugDNA.24058.1 | 6.06  | 6.2   | 0.28 | 0.35 | -1.11 | 0.675421 | 0.399141 | 0.87269  | 0.62969  |
| MmugDNA.24059.1.S1_at   | MmugDNA.24059.1 | 8.58  | 7.76  | 1.06 | 0.09 | 1.77  | 0.801104 | 0.560736 | 0.927393 | 0.736921 |
| MmugDNA.2406.1.S1_at    | MmugDNA.2406.1  | 7.89  | 7.56  | 0.4  | 0.1  | 1.26  | 0.197194 | 0.215384 | 0.568195 | 0.489067 |
| MmugDNA.24060.1.S1_at   | MmugDNA.24060.1 | 5.64  | 6.6   | 0.41 | 0.25 | -1.95 | 0.02097  | 0.026864 | 0.30624  | 0.205049 |
| MmugDNA.24061.1.S1_at   | MmugDNA.24061.1 | 5.29  | 5.23  | 0.03 | 0.1  | 1.04  | 0.297733 | 0.117627 | 0.652791 | 0.385348 |
| MmugDNA.24062.1.S1_at   | MmugDNA.24062.1 | 6.12  | 6.77  | 0.91 | 0.17 | -1.57 | 0.283816 | 0.429287 | 0.641606 | 0.650754 |
| MmugDNA.24063.1.S1_at   | MmugDNA.24063.1 | 5.7   | 5.67  | 0.06 | 0.21 | 1.02  | 0.573347 | 0.783399 | 0.823551 | 0.874571 |
| MmugDNA.24064.1.S1_at   | MmugDNA.24064.1 | 8.09  | 8.02  | 0.43 | 0.07 | 1.05  | 0.74304  | 0.45793  | 0.901935 | 0.670999 |
| MmugDNA.24064.1.S1_x_at | MmugDNA.24064.1 | 8.27  | 8.14  | 0.52 | 0.05 | 1.1   | 0.955434 | 0.686734 | 0.985312 | 0.817214 |
| MmugDNA.24065.1.S1_at   | MmugDNA.24065.1 | 9.19  | 9.07  | 0.17 | 0.14 | 1.08  | 0.662011 | 0.895065 | 0.866635 | 0.940055 |
| MmugDNA.24066.1.S1_at   | MmugDNA.24066.1 | 5.83  | 6.19  | 0.26 | 0.4  | -1.29 | 0.512681 | 0.458607 | 0.789481 | 0.671246 |
| MmugDNA.24067.1.S1_at   | MmugDNA.24067.1 | 6.97  | 5.48  | 0.1  | 0.35 | 2.81  | 0.002287 | 0.005939 | 0.174757 | 0.105426 |
| MmugDNA.24068.1.S1_at   | MmugDNA.24068.1 | 6.01  | 6     | 0.17 | 0.2  | 1.01  | 0.39419  | 0.280213 | 0.719657 | 0.543487 |
| MmugDNA.2407.1.S1_at    | MmugDNA.2407.1  | 10.44 | 10.43 | 0.57 | 0.03 | 1     | 0.984113 | 0.883708 | 0.995199 | 0.933691 |
| MmugDNA.24070.1.S1_at   | MmugDNA.24070.1 | 6.22  | 5.97  | 0.15 | 0.16 | 1.19  | 0.192175 | 0.030424 | 0.563232 | 0.216377 |
| MmugDNA.24072.1.S1_at   | MmugDNA.24072.1 | 7.32  | 6.97  | 0.35 | 0.09 | 1.28  | 0.176817 | 0.17499  | 0.549945 | 0.451647 |
| MmugDNA.24073.1.S1_at   | MmugDNA.24073.1 | 4.33  | 4.34  | 0.25 | 0.3  | -1.01 | 0.223058 | 0.259581 | 0.592569 | 0.526502 |
| MmugDNA.24075.1.S1_at   | MmugDNA.24075.1 | 6.18  | 6.01  | 0.03 | 0.16 | 1.13  | 0.183953 | 0.069904 | 0.556904 | 0.310552 |
| MmugDNA.24077.1.S1_at   | MmugDNA.24077.1 | 6.59  | 7.21  | 0.47 | 0.08 | -1.54 | 0.096194 | 0.027679 | 0.464755 | 0.207762 |
| MmugDNA.24079.1.S1_s_at | MmugDNA.24079.1 | 10.91 | 10.72 | 0.49 | 0.17 | 1.14  | 0.613977 | 0.129391 | 0.843764 | 0.4008   |
| MmugDNA.2408.1.S1_at    | MmugDNA.2408.1  | 9.74  | 9.55  | 0.36 | 0.09 | 1.14  | 0.214255 | 0.213488 | 0.584673 | 0.487391 |
| MmugDNA.24080.1.S1_at   | MmugDNA.24080.1 | 5.09  | 4.99  | 0.13 | 0.02 | 1.07  | 0.827491 | 0.56744  | 0.938039 | 0.741344 |
| MmugDNA.24082.1.S1_at   | MmugDNA.24082.1 | 5.55  | 6.03  | 0.41 | 0.39 | -1.39 | 0.210955 | 0.235692 | 0.582052 | 0.506807 |
| MmugDNA.24083.1.S1_at   | MmugDNA.24083.1 | 6.12  | 6.49  | 0.36 | 0.24 | -1.29 | 0.111007 | 0.209887 | 0.484303 | 0.48366  |
| MmugDNA.24084.1.S1_at   | MmugDNA.24084.1 | 6.63  | 7.35  | 0.22 | 0.44 | -1.64 | 0.079847 | 0.03386  | 0.442789 | 0.227647 |
| MmugDNA.24085.1.S1_at   | MmugDNA.24085.1 | 8.01  | 8.64  | 0.18 | 0.09 | -1.55 | 0.008628 | 0.362384 | 0.236048 | 0.602965 |
| MmugDNA.24086.1.S1_at   | MmugDNA.24086.1 | 5.79  | 6     | 0.23 | 0.05 | -1.15 | 0.776072 | 0.606442 | 0.91701  | 0.765747 |
| MmugDNA.24087.1.S1_at   | MmugDNA.24087.1 | 5.83  | 5.71  | 0.96 | 0.18 | 1.09  | 0.79418  | 0.0787   | 0.924511 | 0.325673 |
| MmugDNA.24088.1.S1_at   | MmugDNA.24088.1 | 6.48  | 6.47  | 0.04 | 0.18 | 1.01  | 0.984604 | 0.290861 | 0.995256 | 0.551436 |
| MmugDNA.24089.1.S1_at   | MmugDNA.24089.1 | 8.57  | 8.54  | 0.29 | 0.12 | 1.02  | 0.31311  | 0.235042 | 0.664442 | 0.506255 |
| MmugDNA.24089.1.S1_s_at | MmugDNA.24089.1 | 6.17  | 6.24  | 0.08 | 0.04 | -1.05 | 0.408264 | 0.184067 | 0.729223 | 0.460277 |
| MmugDNA.2409.1.S1_at    | MmugDNA.2409.1  | 4.53  | 4.49  | 0.08 | 0.1  | 1.03  | 0.607351 | 0.25341  | 0.8408   | 0.521713 |
| MmugDNA.24090.1.S1_at   | MmugDNA.24090.1 | 6.04  | 5.99  | 0.14 | 0.12 | 1.04  | 0.760035 | 0.05251  | 0.909836 | 0.274757 |
| MmugDNA.24092.1.S1_at   | MmugDNA.24092.1 | 5.3   | 5.13  | 0.27 | 0.29 | 1.13  | 0.930896 | 0.684965 | 0.976933 | 0.816272 |
| MmugDNA.24093.1.S1_at   | MmugDNA.24093.1 | 4.51  | 4.42  | 1.01 | 0.64 | 1.06  | 0.907026 | 0.158051 | 0.968482 | 0.433821 |
| MmugDNA.24094.1.S1_at   | MmugDNA.24094.1 | 6.63  | 6.4   | 0.27 | 0.03 | 1.18  | 0.158467 | 0.255758 | 0.531551 | 0.523692 |
| MmugDNA.24095.1.S1_at   | MmugDNA.24095.1 | 12.28 | 12.54 | 0.26 | 0.08 | -1.19 | 0.317074 | 0.45577  | 0.666924 | 0.669659 |
| MmugDNA.24096.1.S1_at   | MmugDNA.24096.1 | 4.41  | 4.34  | 0.16 | 0.32 | 1.05  | 0.698985 | 0.726813 | 0.882981 | 0.841963 |

|                         |                 |       |       |      |      |       |          |          |          |          |
|-------------------------|-----------------|-------|-------|------|------|-------|----------|----------|----------|----------|
| MmugDNA.24097.1.S1_at   | MmugDNA.24097.1 | 3.55  | 3.55  | 0.24 | 0.03 | 1     | 0.368963 | 0.438031 | 0.703932 | 0.657058 |
| MmugDNA.24098.1.S1_at   | MmugDNA.24098.1 | 4.6   | 4.53  | 0.12 | 0.1  | 1.05  | 0.210158 | 0.505366 | 0.581555 | 0.702079 |
| MmugDNA.24099.1.S1_at   | MmugDNA.24099.1 | 8.8   | 8.49  | 0.64 | 0.12 | 1.24  | 0.606227 | 0.638923 | 0.840408 | 0.787922 |
| MmugDNA.24099.1.S1_s_at | MmugDNA.24099.1 | 9.33  | 9.19  | 0.65 | 0.09 | 1.1   | 0.969603 | 0.548661 | 0.990023 | 0.729318 |
| MmugDNA.2410.1.S1_at    | MmugDNA.2410.1  | 5.82  | 5.5   | 0.25 | 0.08 | 1.24  | 0.116681 | 0.273457 | 0.489901 | 0.537868 |
| MmugDNA.24101.1.S1_at   | MmugDNA.24101.1 | 3.76  | 3.77  | 0.14 | 0.11 | -1.01 | 0.434299 | 0.790705 | 0.744987 | 0.878973 |
| MmugDNA.24102.1.S1_at   | MmugDNA.24102.1 | 7.66  | 8.1   | 0.75 | 0.19 | -1.35 | 0.500584 | 0.62435  | 0.782726 | 0.778577 |
| MmugDNA.24103.1.S1_at   | MmugDNA.24103.1 | 8.49  | 7.95  | 0.4  | 0.21 | 1.46  | 0.334646 | 0.360217 | 0.680478 | 0.601275 |
| MmugDNA.24104.1.S1_at   | MmugDNA.24104.1 | 4     | 3.36  | 0.34 | 0.83 | 1.57  | 0.60813  | 0.400645 | 0.84104  | 0.630467 |
| MmugDNA.24105.1.S1_at   | MmugDNA.24105.1 | 3.27  | 3.12  | 0.26 | 0.05 | 1.11  | 0.179438 | 0.253782 | 0.552701 | 0.52217  |
| MmugDNA.24106.1.S1_at   | MmugDNA.24106.1 | 3.64  | 4.18  | 0.18 | 0.04 | -1.45 | 0.013833 | 0.001744 | 0.272555 | 0.062895 |
| MmugDNA.24107.1.S1_at   | MmugDNA.24107.1 | 6.97  | 6.77  | 0.07 | 0.05 | 1.15  | 0.027333 | 0.237708 | 0.327322 | 0.50826  |
| MmugDNA.24108.1.S1_at   | MmugDNA.24108.1 | 3.89  | 3.91  | 0.01 | 0.16 | -1.01 | 0.965769 | 0.728254 | 0.988741 | 0.842893 |
| MmugDNA.2411.1.S1_at    | MmugDNA.2411.1  | 6.44  | 6.69  | 0.5  | 0.2  | -1.19 | 0.958324 | 0.320402 | 0.986346 | 0.572648 |
| MmugDNA.24110.1.S1_at   | MmugDNA.24110.1 | 6.33  | 6.42  | 0.02 | 0.03 | -1.06 | 0.029916 | 0.002823 | 0.336273 | 0.078299 |
| MmugDNA.24111.1.S1_at   | MmugDNA.24111.1 | 3.59  | 3.73  | 0.03 | 0.09 | -1.1  | 0.050045 | 0.335074 | 0.386663 | 0.582853 |
| MmugDNA.24113.1.S1_at   | MmugDNA.24113.1 | 4.22  | 4.37  | 0.23 | 0.16 | -1.11 | 0.765219 | 0.156198 | 0.911729 | 0.43161  |
| MmugDNA.24114.1.S1_at   | MmugDNA.24114.1 | 12.81 | 12.73 | 0.34 | 0.15 | 1.06  | 0.849387 | 0.071558 | 0.947078 | 0.313714 |
| MmugDNA.24116.1.S1_at   | MmugDNA.24116.1 | 5.47  | 6.06  | 0.35 | 0.06 | -1.5  | 0.058274 | 0.016958 | 0.403916 | 0.165103 |
| MmugDNA.24117.1.S1_at   | MmugDNA.24117.1 | 4.11  | 4.18  | 0.33 | 0.16 | -1.04 | 0.814882 | 0.556845 | 0.933137 | 0.734831 |
| MmugDNA.24118.1.S1_at   | MmugDNA.24118.1 | 3.86  | 3.9   | 0.1  | 0.07 | -1.03 | 0.172285 | 0.198346 | 0.54564  | 0.473267 |
| MmugDNA.2412.1.S1_at    | MmugDNA.2412.1  | 5.02  | 4.91  | 0.28 | 0.2  | 1.08  | 0.315078 | 0.45381  | 0.665641 | 0.668264 |
| MmugDNA.24120.1.S1_at   | MmugDNA.24120.1 | 4.55  | 4.11  | 0.14 | 0.1  | 1.35  | 0.010656 | 0.005636 | 0.249034 | 0.10371  |
| MmugDNA.24121.1.S1_at   | MmugDNA.24121.1 | 5.8   | 5.66  | 0.08 | 0.09 | 1.1   | 0.056748 | 0.352078 | 0.401111 | 0.595431 |
| MmugDNA.24122.1.S1_at   | MmugDNA.24122.1 | 4.16  | 4.17  | 0.31 | 0.23 | -1.01 | 0.955049 | 0.104158 | 0.985067 | 0.365261 |
| MmugDNA.24123.1.S1_at   | MmugDNA.24123.1 | 12.62 | 12.58 | 0.04 | 0.14 | 1.03  | 0.515496 | 0.291874 | 0.79089  | 0.552094 |
| MmugDNA.24124.1.S1_at   | MmugDNA.24124.1 | 8.81  | 8.25  | 0.59 | 0.26 | 1.47  | 0.115637 | 0.116421 | 0.488896 | 0.383671 |
| MmugDNA.24125.1.S1_s_at | MmugDNA.24125.1 | 8.34  | 8.14  | 0.47 | 0.46 | 1.15  | 0.350968 | 0.021089 | 0.691768 | 0.181869 |
| MmugDNA.24126.1.S1_at   | MmugDNA.24126.1 | 5     | 5.07  | 0.28 | 0.03 | -1.05 | 0.996026 | 0.522265 | 0.998424 | 0.713019 |
| MmugDNA.24128.1.S1_at   | MmugDNA.24128.1 | 4.49  | 3.79  | 0.55 | 0.12 | 1.62  | 0.03551  | 0.011719 | 0.352182 | 0.140206 |
| MmugDNA.24129.1.S1_at   | MmugDNA.24129.1 | 7.22  | 7.19  | 0.45 | 0.09 | 1.02  | 0.905717 | 0.086415 | 0.968196 | 0.338882 |
| MmugDNA.24130.1.S1_at   | MmugDNA.24130.1 | 11.24 | 11.15 | 0.76 | 0.1  | 1.06  | 0.830718 | 0.959022 | 0.939399 | 0.976779 |
| MmugDNA.24131.1.S1_at   | MmugDNA.24131.1 | 9.74  | 10.15 | 0.18 | 0.1  | -1.33 | 0.030731 | 0.016298 | 0.338443 | 0.161803 |
| MmugDNA.24132.1.S1_at   | MmugDNA.24132.1 | 9.54  | 10.14 | 0.08 | 0.06 | -1.51 | 0.000517 | 0.001783 | 0.143137 | 0.063434 |
| MmugDNA.24133.1.S1_at   | MmugDNA.24133.1 | 3.72  | 3.63  | 0.18 | 0.15 | 1.07  | 0.533451 | 0.268052 | 0.80084  | 0.533832 |
| MmugDNA.24134.1.S1_at   | MmugDNA.24134.1 | 7.28  | 7.26  | 0.49 | 0.05 | 1.01  | 0.799355 | 0.638855 | 0.926464 | 0.787894 |
| MmugDNA.24136.1.S1_at   | MmugDNA.24136.1 | 5.58  | 5.46  | 0.45 | 0.09 | 1.09  | 0.271676 | 0.612712 | 0.631497 | 0.770151 |
| MmugDNA.24137.1.S1_at   | MmugDNA.24137.1 | 4.44  | 4.28  | 0.17 | 0.08 | 1.12  | 0.340884 | 0.469207 | 0.684799 | 0.678155 |
| MmugDNA.24138.1.S1_at   | MmugDNA.24138.1 | 4.86  | 4.96  | 0.41 | 0.45 | -1.07 | 0.341539 | 0.706795 | 0.685072 | 0.829922 |
| MmugDNA.24139.1.S1_at   | MmugDNA.24139.1 | 8.44  | 8.21  | 0.07 | 0.19 | 1.17  | 0.048202 | 0.130161 | 0.382571 | 0.401855 |
| MmugDNA.24140.1.S1_at   | MmugDNA.24140.1 | 6.51  | 7.25  | 0.38 | 0.48 | -1.68 | 0.239871 | 0.343602 | 0.606208 | 0.589322 |
| MmugDNA.24141.1.S1_at   | MmugDNA.24141.1 | 7.99  | 7.53  | 1.05 | 0.08 | 1.37  | 0.173371 | 0.120323 | 0.54656  | 0.38925  |
| MmugDNA.24142.1.S1_at   | MmugDNA.24142.1 | 4.63  | 4.54  | 0.1  | 0    | 1.07  | 0.343671 | 0.708467 | 0.686779 | 0.830919 |

|                         |                 |       |       |      |      |       |          |          |          |          |
|-------------------------|-----------------|-------|-------|------|------|-------|----------|----------|----------|----------|
| MmugDNA.24143.1.S1_at   | MmugDNA.24143.1 | 4.59  | 4.68  | 0.06 | 0.05 | -1.06 | 0.460052 | 0.870458 | 0.759901 | 0.926446 |
| MmugDNA.24143.1.S1_s_at | MmugDNA.24143.1 | 4.05  | 4.02  | 0.12 | 0.06 | 1.02  | 0.182307 | 0.13721  | 0.555371 | 0.410063 |
| MmugDNA.24145.1.S1_at   | MmugDNA.24145.1 | 3.5   | 3.47  | 0.09 | 0.1  | 1.02  | 0.150298 | 0.06884  | 0.523933 | 0.308714 |
| MmugDNA.24149.1.S1_at   | MmugDNA.24149.1 | 4.36  | 4.23  | 0.05 | 0.17 | 1.1   | 0.230285 | 0.192255 | 0.598481 | 0.467715 |
| MmugDNA.2415.1.S1_at    | MmugDNA.2415.1  | 7.5   | 8.15  | 0.31 | 0.13 | -1.58 | 0.048995 | 0.037514 | 0.385127 | 0.23801  |
| MmugDNA.24150.1.S1_at   | MmugDNA.24150.1 | 11.23 | 12.05 | 0.06 | 0.23 | -1.77 | 0.002614 | 0.071272 | 0.181779 | 0.313318 |
| MmugDNA.24152.1.S1_at   | MmugDNA.24152.1 | 8.87  | 9.6   | 0.09 | 0.12 | -1.66 | 0.001462 | 0.001966 | 0.161412 | 0.065838 |
| MmugDNA.24153.1.S1_at   | MmugDNA.24153.1 | 6.78  | 7.03  | 0.27 | 0.14 | -1.19 | 0.358644 | 0.097399 | 0.696531 | 0.355097 |
| MmugDNA.24154.1.S1_at   | MmugDNA.24154.1 | 6.07  | 6.05  | 0.34 | 0.9  | 1.01  | 0.381364 | 0.717688 | 0.710038 | 0.836543 |
| MmugDNA.24155.1.S1_at   | MmugDNA.24155.1 | 8.36  | 8.36  | 1.02 | 0.34 | -1    | 0.74448  | 0.150266 | 0.90255  | 0.424877 |
| MmugDNA.24156.1.S1_at   | MmugDNA.24156.1 | 3.59  | 3.57  | 0.19 | 0.11 | -1.01 | 0.30125  | 0.303027 | 0.655562 | 0.560475 |
| MmugDNA.24159.1.S1_at   | MmugDNA.24159.1 | 4     | 4.09  | 0.12 | 0.13 | -1.06 | 0.438569 | 0.16436  | 0.747368 | 0.440612 |
| MmugDNA.24162.1.S1_at   | MmugDNA.24162.1 | 3.57  | 3.55  | 0.21 | 0.15 | 1.02  | 0.199931 | 0.090465 | 0.571811 | 0.344952 |
| MmugDNA.24163.1.S1_at   | MmugDNA.24163.1 | 4.77  | 4.65  | 0.16 | 0.12 | 1.09  | 0.137403 | 0.134624 | 0.512836 | 0.406629 |
| MmugDNA.24164.1.S1_at   | MmugDNA.24164.1 | 7.46  | 7.15  | 0.9  | 0.29 | 1.24  | 0.774832 | 0.958096 | 0.916458 | 0.976277 |
| MmugDNA.24165.1.S1_at   | MmugDNA.24165.1 | 6.17  | 6.05  | 0.17 | 0.28 | 1.08  | 0.940385 | 0.011852 | 0.97971  | 0.140973 |
| MmugDNA.24166.1.S1_at   | MmugDNA.24166.1 | 11.93 | 11.52 | 0.3  | 0.05 | 1.33  | 0.073158 | 0.008755 | 0.434019 | 0.124009 |
| MmugDNA.23302.1.S1_s_at | MmugDNA.23302.1 | 14.31 | 14.27 | 0.07 | 0.02 | 1.03  | 0.786687 | 0.590554 | 0.921642 | 0.756311 |
| MmugDNA.24168.1.S1_at   | MmugDNA.24168.1 | 5.11  | 5.08  | 0.08 | 0.08 | 1.02  | 0.35965  | 0.357595 | 0.697491 | 0.599221 |
| MmugDNA.2417.1.S1_at    | MmugDNA.2417.1  | 8.86  | 9.24  | 0.56 | 0.01 | -1.31 | 0.304277 | 0.060554 | 0.657925 | 0.292748 |
| MmugDNA.24170.1.S1_at   | MmugDNA.24170.1 | 3.87  | 3.85  | 0.05 | 0.22 | 1.01  | 0.844952 | 0.956686 | 0.945583 | 0.975395 |
| MmugDNA.24171.1.S1_at   | MmugDNA.24171.1 | 3.19  | 3.14  | 0.09 | 0.06 | 1.04  | 0.138087 | 0.562241 | 0.513671 | 0.737898 |
| MmugDNA.24173.1.S1_at   | MmugDNA.24173.1 | 7.56  | 8.08  | 0.27 | 0.22 | -1.44 | 0.030767 | 0.422236 | 0.338524 | 0.645596 |
| MmugDNA.24175.1.S1_at   | MmugDNA.24175.1 | 4.13  | 4.2   | 0.08 | 0.26 | -1.05 | 0.611394 | 0.801247 | 0.842491 | 0.88568  |
| MmugDNA.24176.1.S1_at   | MmugDNA.24176.1 | 5.95  | 5.97  | 0.2  | 0.09 | -1.01 | 0.746814 | 0.337686 | 0.903743 | 0.584863 |
| MmugDNA.24177.1.S1_at   | MmugDNA.24177.1 | 5.65  | 5.02  | 0.45 | 0.28 | 1.54  | 0.04432  | 0.065874 | 0.374395 | 0.302111 |
| MmugDNA.24178.1.S1_at   | MmugDNA.24178.1 | 8.05  | 8.32  | 2.68 | 0.22 | -1.2  | 0.736996 | 0.922371 | 0.899286 | 0.956288 |
| MmugDNA.24179.1.S1_at   | MmugDNA.24179.1 | 10.72 | 10.17 | 0.43 | 0.22 | 1.47  | 0.209175 | 0.174732 | 0.580719 | 0.451299 |
| MmugDNA.2418.1.S1_at    | MmugDNA.2418.1  | 6.39  | 6.16  | 0.17 | 0.15 | 1.17  | 0.121244 | 0.14888  | 0.494848 | 0.42326  |
| MmugDNA.24182.1.S1_at   | MmugDNA.24182.1 | 5.46  | 5.46  | 0.11 | 0.06 | 1     | 0.245586 | 0.761478 | 0.611179 | 0.861416 |
| MmugDNA.24183.1.S1_at   | MmugDNA.24183.1 | 6.6   | 6.45  | 0.11 | 0.09 | 1.11  | 0.063385 | 0.04581  | 0.415687 | 0.258337 |
| MmugDNA.24184.1.S1_at   | MmugDNA.24184.1 | 5.46  | 5.45  | 0.43 | 0.14 | 1.01  | 0.393182 | 0.001376 | 0.719023 | 0.05691  |
| MmugDNA.24186.1.S1_at   | MmugDNA.24186.1 | 3.39  | 3.37  | 0.14 | 0.15 | 1.01  | 0.525522 | 0.719768 | 0.796198 | 0.837888 |
| MmugDNA.24189.1.S1_at   | MmugDNA.24189.1 | 6.02  | 6     | 0.14 | 0.17 | 1.02  | 0.584753 | 0.791554 | 0.829968 | 0.879606 |
| MmugDNA.24193.1.S1_at   | MmugDNA.24193.1 | 6.29  | 6.2   | 0.45 | 0.41 | 1.06  | 0.639434 | 0.314026 | 0.85626  | 0.568178 |
| MmugDNA.24194.1.S1_at   | MmugDNA.24194.1 | 5.6   | 5.18  | 0.23 | 0.12 | 1.34  | 0.212379 | 0.368338 | 0.58288  | 0.607917 |
| MmugDNA.24195.1.S1_at   | MmugDNA.24195.1 | 6.29  | 6.08  | 0.11 | 0.01 | 1.15  | 0.077472 | 0.087477 | 0.439436 | 0.340617 |
| MmugDNA.24196.1.S1_at   | MmugDNA.24196.1 | 8.83  | 8.8   | 0.14 | 0.03 | 1.02  | 0.243047 | 0.369726 | 0.608888 | 0.609048 |
| MmugDNA.24197.1.S1_at   | MmugDNA.24197.1 | 4.72  | 4.7   | 0.27 | 0.11 | 1.02  | 0.560715 | 0.131704 | 0.816958 | 0.403854 |
| MmugDNA.24199.1.S1_at   | MmugDNA.24199.1 | 10.57 | 10.4  | 1.13 | 0.32 | 1.13  | 0.681083 | 0.064076 | 0.874938 | 0.299311 |
| MmugDNA.242.1.S1_at     | MmugDNA.242.1   | 11.15 | 10.92 | 0.86 | 0.17 | 1.18  | 0.792835 | 0.298279 | 0.924133 | 0.556936 |
| MmugDNA.2420.1.S1_at    | MmugDNA.2420.1  | 7.3   | 7.42  | 0.32 | 0.29 | -1.08 | 0.138525 | 0.176535 | 0.513941 | 0.452925 |
| MmugDNA.24200.1.S1_at   | MmugDNA.24200.1 | 6.43  | 6.68  | 0.1  | 0.02 | -1.19 | 0.010596 | 0.218754 | 0.2485   | 0.492438 |

|                         |                 |       |       |      |      |       |          |          |          |          |
|-------------------------|-----------------|-------|-------|------|------|-------|----------|----------|----------|----------|
| MmugDNA.24201.1.S1_at   | MmugDNA.24201.1 | 5.24  | 5.24  | 0.06 | 0.07 | 1     | 0.845939 | 0.687216 | 0.945947 | 0.817518 |
| MmugDNA.24202.1.S1_at   | MmugDNA.24202.1 | 6.26  | 6.32  | 0.12 | 0.11 | -1.04 | 0.785523 | 0.972718 | 0.921157 | 0.985334 |
| MmugDNA.24204.1.S1_at   | MmugDNA.24204.1 | 7.51  | 7.37  | 0.88 | 0.15 | 1.1   | 0.947379 | 0.972002 | 0.981851 | 0.984884 |
| MmugDNA.24207.1.S1_at   | MmugDNA.24207.1 | 6.78  | 6.47  | 0.22 | 0.05 | 1.24  | 0.073646 | 0.13952  | 0.434623 | 0.412743 |
| MmugDNA.24209.1.S1_at   | MmugDNA.24209.1 | 4.62  | 4.93  | 0.1  | 0.43 | -1.24 | 0.122348 | 0.382487 | 0.495694 | 0.618714 |
| MmugDNA.2421.1.S1_at    | MmugDNA.2421.1  | 5.36  | 5.21  | 0.09 | 0.14 | 1.11  | 0.067174 | 0.260243 | 0.42323  | 0.526807 |
| MmugDNA.24211.1.S1_at   | MmugDNA.24211.1 | 2.85  | 2.83  | 0.05 | 0.1  | 1.02  | 0.18577  | 0.258439 | 0.558664 | 0.525699 |
| MmugDNA.24213.1.S1_at   | MmugDNA.24213.1 | 8.34  | 8.26  | 0.24 | 0.16 | 1.05  | 0.369464 | 0.083219 | 0.704236 | 0.333211 |
| MmugDNA.24214.1.S1_at   | MmugDNA.24214.1 | 7.27  | 7.06  | 0.8  | 0.13 | 1.16  | 0.265824 | 0.220364 | 0.626921 | 0.493783 |
| MmugDNA.24216.1.S1_at   | MmugDNA.24216.1 | 3.52  | 3.51  | 0.22 | 0.12 | 1.01  | 0.879868 | 0.903862 | 0.958318 | 0.945424 |
| MmugDNA.24217.1.S1_at   | MmugDNA.24217.1 | 8.09  | 8.15  | 0.37 | 0.2  | -1.04 | 0.921999 | 0.006472 | 0.973661 | 0.109304 |
| MmugDNA.24218.1.S1_at   | MmugDNA.24218.1 | 5.54  | 5.64  | 0.87 | 0.13 | -1.07 | 0.652184 | 0.158928 | 0.862004 | 0.435097 |
| MmugDNA.24219.1.S1_at   | MmugDNA.24219.1 | 5.26  | 6.35  | 0.32 | 0.35 | -2.13 | 0.009026 | 0.017936 | 0.240255 | 0.168998 |
| MmugDNA.2422.1.S1_at    | MmugDNA.2422.1  | 3.32  | 3.25  | 0.07 | 0.15 | 1.05  | 0.822891 | 0.89652  | 0.936102 | 0.940905 |
| MmugDNA.24220.1.S1_at   | MmugDNA.24220.1 | 4.29  | 3.9   | 0.29 | 0.03 | 1.31  | 0.213525 | 0.18423  | 0.584124 | 0.460382 |
| MmugDNA.24221.1.S1_at   | MmugDNA.24221.1 | 3.53  | 3.44  | 0.09 | 0.1  | 1.06  | 0.474248 | 0.332457 | 0.767938 | 0.58087  |
| MmugDNA.24222.1.S1_at   | MmugDNA.24222.1 | 11.22 | 11.13 | 0.25 | 0.03 | 1.06  | 0.594813 | 0.545517 | 0.834943 | 0.727564 |
| MmugDNA.24223.1.S1_at   | MmugDNA.24223.1 | 6.97  | 6.98  | 0.44 | 0.16 | -1    | 0.296771 | 0.754811 | 0.652405 | 0.857323 |
| MmugDNA.24225.1.S1_at   | MmugDNA.24225.1 | 12.33 | 12.12 | 0.2  | 0.05 | 1.16  | 0.267926 | 0.323768 | 0.628278 | 0.574609 |
| MmugDNA.24226.1.S1_at   | MmugDNA.24226.1 | 13.16 | 13.2  | 0.26 | 0.02 | -1.03 | 0.804127 | 0.28347  | 0.928758 | 0.545959 |
| MmugDNA.24227.1.S1_at   | MmugDNA.24227.1 | 10.36 | 10.18 | 0.23 | 0.1  | 1.13  | 0.064156 | 0.120491 | 0.417684 | 0.38925  |
| MmugDNA.24229.1.S1_at   | MmugDNA.24229.1 | 4.42  | 4.17  | 0.18 | 0.24 | 1.18  | 0.161905 | 0.209381 | 0.535244 | 0.483069 |
| MmugDNA.2423.1.S1_at    | MmugDNA.2423.1  | 3.39  | 3.47  | 0.22 | 0.11 | -1.05 | 0.461089 | 0.691027 | 0.760754 | 0.820095 |
| MmugDNA.24232.1.S1_s_at | MmugDNA.24232.1 | 8.74  | 8.71  | 0.03 | 0.06 | 1.02  | 0.129692 | 0.511539 | 0.504468 | 0.705677 |
| MmugDNA.24233.1.S1_at   | MmugDNA.24233.1 | 4.45  | 4.24  | 0.11 | 0.08 | 1.16  | 0.124681 | 0.135754 | 0.498771 | 0.407925 |
| MmugDNA.24234.1.S1_at   | MmugDNA.24234.1 | 6.59  | 6.78  | 0.25 | 0.16 | -1.14 | 0.102105 | 0.046194 | 0.472436 | 0.25935  |
| MmugDNA.24235.1.S1_at   | MmugDNA.24235.1 | 7.77  | 7.38  | 0.44 | 0.14 | 1.31  | 0.514468 | 0.132586 | 0.790351 | 0.404544 |
| MmugDNA.24236.1.S1_at   | MmugDNA.24236.1 | 8.43  | 7.6   | 0.75 | 0.08 | 1.77  | 0.043604 | 0.008419 | 0.372234 | 0.121839 |
| MmugDNA.24237.1.S1_at   | MmugDNA.24237.1 | 7.04  | 7.09  | 1.04 | 0.23 | -1.04 | 0.999268 | 0.218092 | 0.999797 | 0.491683 |
| MmugDNA.24239.1.S1_at   | MmugDNA.24239.1 | 3.27  | 3.27  | 0.14 | 0.13 | -1.01 | 0.456947 | 0.6653   | 0.758051 | 0.803874 |
| MmugDNA.2424.1.S1_at    | MmugDNA.2424.1  | 4.49  | 4.51  | 0.15 | 0.1  | -1.01 | 0.761561 | 0.058737 | 0.910578 | 0.28904  |
| MmugDNA.24240.1.S1_x_at | MmugDNA.24240.1 | 12.51 | 12.68 | 0.2  | 0.11 | -1.13 | 0.223747 | 0.180752 | 0.592903 | 0.457294 |
| MmugDNA.24241.1.S1_at   | MmugDNA.24241.1 | 3.67  | 3.41  | 0.21 | 0.03 | 1.2   | 0.035697 | 0.12974  | 0.352932 | 0.401362 |
| MmugDNA.24242.1.S1_at   | MmugDNA.24242.1 | 3.63  | 3.51  | 0.39 | 0.02 | 1.08  | 0.579205 | 0.723889 | 0.826446 | 0.840177 |
| MmugDNA.24244.1.S1_at   | MmugDNA.24244.1 | 5.47  | 5.73  | 0.23 | 0.15 | -1.19 | 0.097481 | 0.182575 | 0.466487 | 0.459065 |
| MmugDNA.24245.1.S1_at   | MmugDNA.24245.1 | 3.06  | 2.86  | 0.06 | 0.12 | 1.15  | 0.094915 | 0.185776 | 0.464131 | 0.461631 |
| MmugDNA.24247.1.S1_at   | MmugDNA.24247.1 | 8.73  | 7.76  | 0.33 | 0.17 | 1.96  | 0.010836 | 0.043477 | 0.250427 | 0.253152 |
| MmugDNA.24248.1.S1_at   | MmugDNA.24248.1 | 3.98  | 4.18  | 0.34 | 0.14 | -1.15 | 0.854028 | 0.466365 | 0.948436 | 0.67624  |
| MmugDNA.24249.1.S1_at   | MmugDNA.24249.1 | 6.78  | 6.55  | 0.03 | 0.19 | 1.18  | 0.11774  | 0.291546 | 0.491041 | 0.551927 |
| MmugDNA.24250.1.S1_at   | MmugDNA.24250.1 | 3.39  | 3.56  | 0.01 | 0.1  | -1.12 | 0.047306 | 0.232627 | 0.379841 | 0.504359 |
| MmugDNA.10242.1.S1_s_at | MmugDNA.10242.1 | 6.3   | 6.25  | 0.07 | 0.02 | 1.04  | 0.095844 | 0.542907 | 0.464449 | 0.725841 |
| MmugDNA.24253.1.S1_at   | MmugDNA.24253.1 | 10.4  | 10.81 | 0.39 | 0.09 | -1.33 | 0.171627 | 0.078797 | 0.544918 | 0.325757 |
| MmugDNA.24254.1.S1_at   | MmugDNA.24254.1 | 5.26  | 5.67  | 0.37 | 0.24 | -1.33 | 0.25284  | 0.642447 | 0.617841 | 0.790222 |

|                         |                 |       |       |      |      |       |          |          |          |          |
|-------------------------|-----------------|-------|-------|------|------|-------|----------|----------|----------|----------|
| MmugDNA.24255.1.S1_at   | MmugDNA.24255.1 | 8     | 6.51  | 0.22 | 0.36 | 2.81  | 0.006433 | 0.000776 | 0.219301 | 0.045626 |
| MmugDNA.24256.1.S1_at   | MmugDNA.24256.1 | 11.22 | 10.77 | 0.63 | 0.15 | 1.37  | 0.531052 | 0.738451 | 0.799399 | 0.848307 |
| MmugDNA.24257.1.S1_at   | MmugDNA.24257.1 | 8.59  | 8.68  | 0.43 | 0.14 | -1.06 | 0.364727 | 0.527813 | 0.700726 | 0.716283 |
| MmugDNA.24258.1.S1_at   | MmugDNA.24258.1 | 5.23  | 5.46  | 0.31 | 0.35 | -1.17 | 0.323093 | 0.145457 | 0.671951 | 0.419421 |
| MmugDNA.24259.1.S1_at   | MmugDNA.24259.1 | 7.71  | 8.15  | 0.28 | 0.06 | -1.36 | 0.07211  | 0.049904 | 0.432032 | 0.268519 |
| MmugDNA.2426.1.S1_at    | MmugDNA.2426.1  | 6.6   | 6.6   | 0.12 | 0.18 | 1     | 0.604504 | 0.326041 | 0.83963  | 0.576285 |
| MmugDNA.24260.1.S1_at   | MmugDNA.24260.1 | 12.08 | 12.21 | 0.33 | 0.01 | -1.09 | 0.635364 | 0.472749 | 0.854526 | 0.680089 |
| MmugDNA.24261.1.S1_at   | MmugDNA.24261.1 | 5.29  | 5.15  | 0.12 | 0.14 | 1.1   | 0.115587 | 0.137305 | 0.488841 | 0.410231 |
| MmugDNA.24262.1.S1_at   | MmugDNA.24262.1 | 5.15  | 4.84  | 0.62 | 0.03 | 1.23  | 0.190573 | 0.243364 | 0.561788 | 0.513385 |
| MmugDNA.24264.1.S1_at   | MmugDNA.24264.1 | 3.33  | 3.29  | 0.19 | 0.13 | 1.03  | 0.570191 | 0.338049 | 0.821921 | 0.585223 |
| MmugDNA.24265.1.S1_at   | MmugDNA.24265.1 | 2.98  | 3     | 0.07 | 0.04 | -1.01 | 0.660283 | 0.76197  | 0.865556 | 0.861597 |
| MmugDNA.24268.1.S1_at   | MmugDNA.24268.1 | 5.86  | 5.81  | 0.1  | 0.24 | 1.03  | 0.562664 | 0.267852 | 0.817783 | 0.533607 |
| MmugDNA.24269.1.S1_at   | MmugDNA.24269.1 | 10.92 | 11.23 | 0.27 | 0.03 | -1.24 | 0.302253 | 0.461829 | 0.656154 | 0.673361 |
| MmugDNA.24270.1.S1_at   | MmugDNA.24270.1 | 9.54  | 9.28  | 0.47 | 0.01 | 1.2   | 0.32567  | 0.359336 | 0.673403 | 0.600635 |
| MmugDNA.24271.1.S1_at   | MmugDNA.24271.1 | 3.46  | 3.53  | 0.16 | 0.18 | -1.05 | 0.318462 | 0.385912 | 0.668207 | 0.621161 |
| MmugDNA.24272.1.S1_at   | MmugDNA.24272.1 | 3.77  | 3.65  | 0.3  | 0.07 | 1.09  | 0.680624 | 0.795398 | 0.874731 | 0.882153 |
| MmugDNA.24273.1.S1_at   | MmugDNA.24273.1 | 5.08  | 5.29  | 0.26 | 0.18 | -1.16 | 0.165311 | 0.190968 | 0.538018 | 0.46629  |
| MmugDNA.24276.1.S1_at   | MmugDNA.24276.1 | 3.96  | 4.03  | 0.14 | 0.36 | -1.05 | 0.431012 | 0.673523 | 0.74323  | 0.809257 |
| MmugDNA.24277.1.S1_at   | MmugDNA.24277.1 | 8.37  | 8.17  | 0.35 | 0.03 | 1.15  | 0.117942 | 0.056883 | 0.491334 | 0.284636 |
| MmugDNA.24279.1.S1_at   | MmugDNA.24279.1 | 4.28  | 4.22  | 0.41 | 0.12 | 1.04  | 0.753764 | 0.920349 | 0.907201 | 0.95511  |
| MmugDNA.2428.1.S1_at    | MmugDNA.2428.1  | 5.59  | 5.56  | 0.21 | 0.02 | 1.02  | 0.46126  | 0.72871  | 0.760868 | 0.843181 |
| MmugDNA.24280.1.S1_at   | MmugDNA.24280.1 | 7.05  | 6.97  | 0.16 | 0.28 | 1.06  | 0.241779 | 0.23065  | 0.607952 | 0.502361 |
| MmugDNA.24281.1.S1_at   | MmugDNA.24281.1 | 5.34  | 5.13  | 0.05 | 0.09 | 1.16  | 0.02253  | 0.319275 | 0.311218 | 0.571722 |
| MmugDNA.24282.1.S1_at   | MmugDNA.24282.1 | 6.03  | 6.7   | 0.94 | 0.19 | -1.58 | 0.684199 | 0.651166 | 0.876357 | 0.796057 |
| MmugDNA.24283.1.S1_at   | MmugDNA.24283.1 | 9.27  | 9.39  | 0.37 | 0.16 | -1.09 | 0.721871 | 0.900479 | 0.892101 | 0.943447 |
| MmugDNA.24284.1.S1_at   | MmugDNA.24284.1 | 5.21  | 5.72  | 0.12 | 0.15 | -1.42 | 0.011128 | 0.002573 | 0.252486 | 0.075105 |
| MmugDNA.24285.1.S1_at   | MmugDNA.24285.1 | 5.64  | 5.5   | 0.18 | 0.07 | 1.1   | 0.224264 | 0.294102 | 0.593439 | 0.553936 |
| MmugDNA.24288.1.S1_s_at | MmugDNA.24288.1 | 7.03  | 7.21  | 0.19 | 0.04 | -1.13 | 0.191994 | 0.294061 | 0.563029 | 0.553912 |
| MmugDNA.24289.1.S1_at   | MmugDNA.24289.1 | 3.43  | 3.62  | 0.07 | 0.15 | -1.14 | 0.173688 | 0.096459 | 0.546749 | 0.35409  |
| MmugDNA.2429.1.S1_at    | MmugDNA.2429.1  | 6.52  | 6.13  | 1.1  | 0.03 | 1.31  | 0.590829 | 0.431325 | 0.833111 | 0.652268 |
| MmugDNA.24290.1.S1_at   | MmugDNA.24290.1 | 6.44  | 7.07  | 0.43 | 0.11 | -1.54 | 0.071736 | 0.061437 | 0.431388 | 0.294704 |
| MmugDNA.24292.1.S1_at   | MmugDNA.24292.1 | 4.7   | 4.71  | 0.01 | 0.01 | -1    | 0.936314 | 0.856708 | 0.978555 | 0.918126 |
| MmugDNA.24293.1.S1_at   | MmugDNA.24293.1 | 8.06  | 7.93  | 0.07 | 0.09 | 1.09  | 0.142645 | 0.029916 | 0.517642 | 0.214643 |
| MmugDNA.24294.1.S1_at   | MmugDNA.24294.1 | 6.72  | 6.38  | 0.13 | 0.04 | 1.27  | 0.026542 | 0.042239 | 0.325323 | 0.249997 |
| MmugDNA.24295.1.S1_at   | MmugDNA.24295.1 | 5.22  | 5.15  | 0.2  | 0.48 | 1.04  | 0.366047 | 0.505027 | 0.701533 | 0.70197  |
| MmugDNA.24296.1.S1_at   | MmugDNA.24296.1 | 8.56  | 8.6   | 0.43 | 0.19 | -1.03 | 0.821642 | 0.707154 | 0.935606 | 0.830195 |
| MmugDNA.24296.1.S1_s_at | MmugDNA.24296.1 | 8.44  | 8.31  | 0.42 | 0.24 | 1.09  | 0.267772 | 0.523449 | 0.62827  | 0.713714 |
| MmugDNA.24297.1.S1_at   | MmugDNA.24297.1 | 7.56  | 7.41  | 0.17 | 0.03 | 1.11  | 0.210179 | 0.259476 | 0.581583 | 0.526418 |
| MmugDNA.24297.1.S1_s_at | MmugDNA.24297.1 | 7.57  | 7.36  | 0.36 | 0.08 | 1.16  | 0.319216 | 0.495785 | 0.668673 | 0.695734 |
| MmugDNA.24298.1.S1_at   | MmugDNA.24298.1 | 3.79  | 3.96  | 0.24 | 0.14 | -1.12 | 0.420838 | 0.159774 | 0.737113 | 0.435871 |
| MmugDNA.24299.1.S1_at   | MmugDNA.24299.1 | 7.61  | 7.69  | 0.09 | 0.05 | -1.06 | 0.551247 | 0.170585 | 0.811314 | 0.447204 |
| MmugDNA.24299.1.S1_x_at | MmugDNA.24299.1 | 7.92  | 8.02  | 0.17 | 0.1  | -1.07 | 0.370344 | 0.179754 | 0.704574 | 0.456267 |
| MmugDNA.243.1.S1_at     | MmugDNA.243.1   | 3.72  | 3.7   | 0.03 | 0.03 | 1.02  | 0.74035  | 0.049565 | 0.900774 | 0.267592 |

|                         |                 |       |       |      |      |       |          |          |          |          |
|-------------------------|-----------------|-------|-------|------|------|-------|----------|----------|----------|----------|
| MmugDNA.2430.1.S1_at    | MmugDNA.2430.1  | 3.44  | 3.46  | 0.11 | 0.09 | -1.01 | 0.847805 | 0.454018 | 0.946572 | 0.668366 |
| MmugDNA.24300.1.S1_at   | MmugDNA.24300.1 | 11.16 | 11.48 | 0.84 | 0.04 | -1.24 | 0.182078 | 0.139575 | 0.555194 | 0.412837 |
| MmugDNA.24301.1.S1_at   | MmugDNA.24301.1 | 3.51  | 3.22  | 0.16 | 0.04 | 1.22  | 0.087858 | 0.096851 | 0.455758 | 0.354254 |
| MmugDNA.24302.1.S1_at   | MmugDNA.24302.1 | 10.09 | 9.38  | 0.41 | 0.21 | 1.64  | 0.023709 | 0.014836 | 0.316281 | 0.154918 |
| MmugDNA.24303.1.S1_at   | MmugDNA.24303.1 | 8.13  | 6.85  | 0.23 | 0.56 | 2.43  | 0.021966 | 0.025132 | 0.309781 | 0.198651 |
| MmugDNA.24304.1.S1_at   | MmugDNA.24304.1 | 5.8   | 5.79  | 0.14 | 0.27 | 1     | 0.987063 | 0.520295 | 0.995808 | 0.711612 |
| MmugDNA.24307.1.S1_s_at | MmugDNA.24307.1 | 9.8   | 10.4  | 0.32 | 0.15 | -1.52 | 0.06741  | 0.010889 | 0.423738 | 0.135939 |
| MmugDNA.24309.1.S1_at   | MmugDNA.24309.1 | 5.83  | 7.24  | 1.39 | 0.4  | -2.64 | 0.187888 | 0.035911 | 0.560014 | 0.234002 |
| MmugDNA.24310.1.S1_at   | MmugDNA.24310.1 | 5.55  | 5.43  | 0.23 | 0.18 | 1.08  | 0.338772 | 0.54808  | 0.683213 | 0.728874 |
| MmugDNA.24311.1.S1_at   | MmugDNA.24311.1 | 6.39  | 6.27  | 0    | 0.12 | 1.09  | 0.09428  | 0.008913 | 0.463769 | 0.12491  |
| MmugDNA.24312.1.S1_s_at | MmugDNA.24312.1 | 8.98  | 8.78  | 0.31 | 0.12 | -1.14 | 0.5235   | 0.401908 | 0.795656 | 0.63109  |
| MmugDNA.24313.1.S1_at   | MmugDNA.24313.1 | 4.32  | 4.35  | 0.06 | 0.03 | -1.03 | 0.372119 | 0.156936 | 0.705567 | 0.432372 |
| MmugDNA.24314.1.S1_at   | MmugDNA.24314.1 | 5.95  | 5.74  | 0.04 | 0.11 | 1.16  | 0.073078 | 0.057457 | 0.434019 | 0.285751 |
| MmugDNA.24315.1.S1_s_at | MmugDNA.24315.1 | 7.51  | 7.72  | 0.31 | 0.17 | -1.16 | 0.294761 | 0.339084 | 0.650873 | 0.585891 |
| MmugDNA.24316.1.S1_at   | MmugDNA.24316.1 | 4.97  | 4.5   | 0.13 | 0.24 | 1.39  | 0.037385 | 0.084077 | 0.357066 | 0.335065 |
| MmugDNA.24317.1.S1_at   | MmugDNA.24317.1 | 3.19  | 3.15  | 0    | 0.09 | 1.03  | 0.802461 | 0.97952  | 0.927969 | 0.988986 |
| MmugDNA.24318.1.S1_at   | MmugDNA.24318.1 | 11.54 | 11.22 | 0.31 | 0.02 | 1.25  | 0.097721 | 0.139142 | 0.466712 | 0.412266 |
| MmugDNA.24319.1.S1_at   | MmugDNA.24319.1 | 7.77  | 7.53  | 0.21 | 0.13 | 1.18  | 0.171238 | 0.137154 | 0.544413 | 0.410034 |
| MmugDNA.2432.1.S1_at    | MmugDNA.2432.1  | 5.65  | 5.59  | 0.07 | 0.07 | 1.04  | 0.141506 | 0.078562 | 0.516365 | 0.325285 |
| MmugDNA.24320.1.S1_at   | MmugDNA.24320.1 | 2.8   | 2.84  | 0.08 | 0.25 | -1.02 | 0.477968 | 0.693523 | 0.769901 | 0.82172  |
| MmugDNA.24321.1.S1_at   | MmugDNA.24321.1 | 3.69  | 3.54  | 0.04 | 0.13 | 1.11  | 0.088609 | 0.155305 | 0.456339 | 0.430664 |
| MmugDNA.24322.1.S1_at   | MmugDNA.24322.1 | 3.32  | 3.08  | 0.32 | 0.12 | 1.18  | 0.299162 | 0.28526  | 0.653536 | 0.54718  |
| MmugDNA.24323.1.S1_at   | MmugDNA.24323.1 | 3.92  | 3.71  | 0.1  | 0.27 | 1.16  | 0.538765 | 0.104243 | 0.803474 | 0.365376 |
| MmugDNA.24324.1.S1_at   | MmugDNA.24324.1 | 4.43  | 4.92  | 0.45 | 0.49 | -1.4  | 0.429524 | 0.655713 | 0.742215 | 0.7987   |
| MmugDNA.24326.1.S1_at   | MmugDNA.24326.1 | 3.41  | 3.75  | 0.43 | 0.26 | -1.27 | 0.861614 | 0.427752 | 0.951267 | 0.649503 |
| MmugDNA.24327.1.S1_at   | MmugDNA.24327.1 | 5.02  | 5.38  | 0.39 | 0.12 | -1.29 | 0.580902 | 0.097347 | 0.827317 | 0.355066 |
| MmugDNA.24329.1.S1_at   | MmugDNA.24329.1 | 7.9   | 7.92  | 0.27 | 0.03 | -1.02 | 0.351244 | 0.069782 | 0.691945 | 0.310316 |
| MmugDNA.2433.1.S1_at    | MmugDNA.2433.1  | 3.66  | 3.6   | 0.2  | 0.22 | 1.04  | 0.472534 | 0.736609 | 0.767074 | 0.847627 |
| MmugDNA.24331.1.S1_at   | MmugDNA.24331.1 | 10.67 | 10.21 | 0.17 | 0.06 | 1.37  | 0.010229 | 0.01721  | 0.246929 | 0.166206 |
| MmugDNA.24332.1.S1_at   | MmugDNA.24332.1 | 4.4   | 4.31  | 0.08 | 0.1  | 1.07  | 0.281916 | 0.279164 | 0.640377 | 0.542814 |
| MmugDNA.24334.1.S1_at   | MmugDNA.24334.1 | 4.91  | 4.88  | 0.09 | 0.04 | 1.02  | 0.278346 | 0.844126 | 0.637539 | 0.911248 |
| MmugDNA.24335.1.S1_at   | MmugDNA.24335.1 | 9.76  | 9.68  | 0.07 | 0.11 | 1.06  | 0.158697 | 0.052761 | 0.531588 | 0.275315 |
| MmugDNA.24336.1.S1_at   | MmugDNA.24336.1 | 3.55  | 3.56  | 0.1  | 0.14 | -1.01 | 0.395305 | 0.70704  | 0.720414 | 0.830116 |
| MmugDNA.24337.1.S1_at   | MmugDNA.24337.1 | 4.36  | 4.23  | 0.15 | 0.12 | 1.09  | 0.131369 | 0.207635 | 0.505699 | 0.481906 |
| MmugDNA.24338.1.S1_at   | MmugDNA.24338.1 | 11.45 | 11.15 | 0.11 | 0.23 | 1.24  | 0.100443 | 0.002719 | 0.471156 | 0.076776 |
| MmugDNA.24339.1.S1_at   | MmugDNA.24339.1 | 10.5  | 11.13 | 0.16 | 0.05 | -1.55 | 0.001845 | 0.000797 | 0.168185 | 0.046064 |
| MmugDNA.2434.1.S1_at    | MmugDNA.2434.1  | 2.84  | 2.85  | 0.14 | 0    | -1.01 | 0.652789 | 0.875964 | 0.86202  | 0.929526 |
| MmugDNA.24340.1.S1_at   | MmugDNA.24340.1 | 11.86 | 11.67 | 0.06 | 0.17 | 1.14  | 0.039188 | 0.000238 | 0.361298 | 0.032465 |
| MmugDNA.24344.1.S1_at   | MmugDNA.24344.1 | 4.92  | 4.84  | 0.25 | 0.44 | 1.06  | 0.622681 | 0.773052 | 0.847922 | 0.868023 |
| MmugDNA.24345.1.S1_at   | MmugDNA.24345.1 | 5.58  | 6.05  | 0.76 | 0.5  | -1.38 | 0.65693  | 0.307063 | 0.863788 | 0.563427 |
| MmugDNA.24346.1.S1_at   | MmugDNA.24346.1 | 7.44  | 7.44  | 0.17 | 0.06 | 1     | 0.704965 | 0.602546 | 0.885278 | 0.763472 |
| MmugDNA.24347.1.S1_s_at | MmugDNA.24347.1 | 6.95  | 7.62  | 1    | 0.28 | -1.6  | 0.763493 | 0.053412 | 0.911265 | 0.276707 |
| MmugDNA.24348.1.S1_at   | MmugDNA.24348.1 | 3.57  | 3.5   | 0.4  | 0.11 | 1.05  | 0.671469 | 0.894824 | 0.870372 | 0.939987 |



|                         |                 |       |       |      |      |       |          |          |          |          |
|-------------------------|-----------------|-------|-------|------|------|-------|----------|----------|----------|----------|
| MmugDNA.24349.1.S1_at   | MmugDNA.24349.1 | 5.59  | 5.58  | 0.23 | 0.06 | 1.01  | 0.33764  | 0.499351 | 0.682552 | 0.698217 |
| MmugDNA.2435.1.S1_at    | MmugDNA.2435.1  | 7.12  | 6.93  | 0.92 | 0.15 | 1.15  | 0.486428 | 0.681781 | 0.774573 | 0.81413  |
| MmugDNA.24351.1.S1_at   | MmugDNA.24351.1 | 9.49  | 9.65  | 0.25 | 0.03 | -1.12 | 0.797043 | 0.120401 | 0.925393 | 0.38925  |
| MmugDNA.24352.1.S1_at   | MmugDNA.24352.1 | 3.78  | 3.72  | 0.08 | 0.01 | 1.05  | 0.176904 | 0.068614 | 0.549959 | 0.308486 |
| MmugDNA.24353.1.S1_at   | MmugDNA.24353.1 | 8.26  | 9.36  | 2.22 | 0.2  | -2.15 | 0.308355 | 0.151065 | 0.660989 | 0.425719 |
| MmugDNA.24354.1.S1_at   | MmugDNA.24354.1 | 3.29  | 3.39  | 0.11 | 0.12 | -1.07 | 0.421579 | 0.637888 | 0.737563 | 0.787216 |
| MmugDNA.24355.1.S1_at   | MmugDNA.24355.1 | 4.48  | 4.44  | 0.51 | 1.24 | 1.02  | 0.483268 | 0.385933 | 0.772986 | 0.621161 |
| MmugDNA.24356.1.S1_at   | MmugDNA.24356.1 | 3.36  | 3.41  | 0.16 | 0.15 | -1.04 | 0.940055 | 0.967942 | 0.979637 | 0.982248 |
| MmugDNA.24357.1.S1_at   | MmugDNA.24357.1 | 13.35 | 13.34 | 0.26 | 0.06 | 1.01  | 0.767569 | 0.607031 | 0.912495 | 0.766185 |
| MmugDNA.24358.1.S1_at   | MmugDNA.24358.1 | 5.84  | 5.78  | 0.08 | 0.1  | 1.04  | 0.154818 | 0.137899 | 0.528131 | 0.410846 |
| MmugDNA.24359.1.S1_at   | MmugDNA.24359.1 | 3.22  | 2.89  | 0.19 | 0.08 | -1.26 | 0.089227 | 0.10387  | 0.457116 | 0.364519 |
| MmugDNA.24360.1.S1_at   | MmugDNA.24360.1 | 4.49  | 4.69  | 0.25 | 0.07 | -1.15 | 0.898366 | 0.448362 | 0.965455 | 0.664212 |
| MmugDNA.24361.1.S1_at   | MmugDNA.24361.1 | 5.34  | 4.94  | 0.32 | 0.24 | 1.32  | 0.274049 | 0.30629  | 0.633792 | 0.562919 |
| MmugDNA.24362.1.S1_at   | MmugDNA.24362.1 | 8.27  | 9.14  | 0.35 | 0.12 | -1.83 | 0.013606 | 0.003599 | 0.269894 | 0.085874 |
| MmugDNA.24365.1.S1_at   | MmugDNA.24365.1 | 3.82  | 4.02  | 0.44 | 0.45 | -1.15 | 0.54842  | 0.75331  | 0.809748 | 0.85647  |
| MmugDNA.24366.1.S1_at   | MmugDNA.24366.1 | 5.21  | 5.85  | 0.47 | 0.13 | -1.56 | 0.25283  | 0.019952 | 0.617841 | 0.177476 |
| MmugDNA.24367.1.S1_at   | MmugDNA.24367.1 | 8.37  | 8.2   | 0.16 | 0.19 | 1.13  | 0.278302 | 0.009384 | 0.637536 | 0.127665 |
| MmugDNA.24368.1.S1_at   | MmugDNA.24368.1 | 4.93  | 4.79  | 0.38 | 0.1  | 1.1   | 0.327847 | 0.462956 | 0.675355 | 0.674149 |
| MmugDNA.24369.1.S1_at   | MmugDNA.24369.1 | 9     | 8.06  | 0.78 | 0.06 | 1.93  | 0.364104 | 0.419874 | 0.700449 | 0.643733 |
| MmugDNA.2437.1.S1_at    | MmugDNA.2437.1  | 5.38  | 5.16  | 0.21 | 0.17 | 1.16  | 0.671851 | 0.607698 | 0.870562 | 0.766491 |
| MmugDNA.24370.1.S1_at   | MmugDNA.24370.1 | 8.07  | 8.21  | 1.82 | 0.38 | -1.1  | 0.588529 | 0.389285 | 0.831953 | 0.623403 |
| MmugDNA.24371.1.S1_at   | MmugDNA.24371.1 | 8.87  | 8.67  | 0.15 | 0.13 | 1.15  | 0.739639 | 0.760485 | 0.900699 | 0.860842 |
| MmugDNA.24372.1.S1_at   | MmugDNA.24372.1 | 8.37  | 8.01  | 0.26 | 0.06 | 1.28  | 0.120156 | 0.004606 | 0.493466 | 0.094858 |
| MmugDNA.24373.1.S1_at   | MmugDNA.24373.1 | 4.02  | 4.03  | 0.14 | 0.06 | -1    | 0.351145 | 0.746574 | 0.69186  | 0.852873 |
| MmugDNA.24374.1.S1_s_at | MmugDNA.24374.1 | 8.18  | 7.69  | 0.19 | 0.03 | 1.41  | 0.005314 | 0.002642 | 0.207623 | 0.076012 |
| MmugDNA.24375.1.S1_at   | MmugDNA.24375.1 | 3.45  | 3.61  | 0.22 | 0.16 | -1.12 | 0.698604 | 0.929341 | 0.882848 | 0.959675 |
| MmugDNA.24376.1.S1_at   | MmugDNA.24376.1 | 4.26  | 3.99  | 0.31 | 0.28 | 1.21  | 0.281393 | 0.224296 | 0.639917 | 0.497208 |
| MmugDNA.24377.1.S1_at   | MmugDNA.24377.1 | 3.38  | 3.31  | 0.09 | 0.13 | 1.05  | 0.455521 | 0.417757 | 0.757444 | 0.642391 |
| MmugDNA.24378.1.S1_at   | MmugDNA.24378.1 | 4.18  | 4.16  | 0.24 | 0.12 | 1.01  | 0.604329 | 0.106625 | 0.839628 | 0.36916  |
| MmugDNA.24381.1.S1_at   | MmugDNA.24381.1 | 4.63  | 4.35  | 0.11 | 0.09 | 1.21  | 0.051997 | 0.629092 | 0.391724 | 0.781597 |
| MmugDNA.24382.1.S1_at   | MmugDNA.24382.1 | 10.29 | 9.67  | 0.25 | 0.08 | 1.54  | 0.0463   | 0.037851 | 0.377679 | 0.238921 |
| MmugDNA.24383.1.S1_at   | MmugDNA.24383.1 | 4.61  | 4.29  | 0.26 | 0.12 | 1.25  | 0.147978 | 0.221059 | 0.522184 | 0.494471 |
| MmugDNA.24384.1.S1_at   | MmugDNA.24384.1 | 6.96  | 7.76  | 0.34 | 0.18 | -1.73 | 0.034513 | 0.007357 | 0.350124 | 0.115199 |
| MmugDNA.24385.1.S1_at   | MmugDNA.24385.1 | 5.49  | 5.45  | 0.25 | 0.07 | 1.03  | 0.349658 | 0.772657 | 0.690681 | 0.867785 |
| MmugDNA.24386.1.S1_at   | MmugDNA.24386.1 | 8.4   | 8.55  | 0.22 | 0.05 | -1.11 | 0.492036 | 0.583367 | 0.778088 | 0.751729 |
| MmugDNA.24387.1.S1_at   | MmugDNA.24387.1 | 6.44  | 6.95  | 1.73 | 0.27 | -1.43 | 0.698253 | 0.287984 | 0.882746 | 0.549255 |
| MmugDNA.24388.1.S1_at   | MmugDNA.24388.1 | 5.28  | 5.3   | 0.03 | 0.07 | -1.02 | 0.34882  | 0.918438 | 0.690077 | 0.95425  |
| MmugDNA.24389.1.S1_at   | MmugDNA.24389.1 | 4.47  | 4.52  | 0.05 | 0    | -1.04 | 0.156559 | 0.007924 | 0.529581 | 0.11857  |
| MmugDNA.24391.1.S1_at   | MmugDNA.24391.1 | 3.39  | 3.25  | 0.32 | 0.15 | 1.1   | 0.342747 | 0.201643 | 0.686105 | 0.476208 |
| MmugDNA.24392.1.S1_at   | MmugDNA.24392.1 | 3.96  | 3.91  | 0.17 | 0.18 | 1.03  | 0.832119 | 0.171317 | 0.939756 | 0.447809 |
| MmugDNA.24393.1.S1_at   | MmugDNA.24393.1 | 9.33  | 8.8   | 0.29 | 0.2  | 1.45  | 0.050684 | 0.056695 | 0.38765  | 0.284213 |
| MmugDNA.24394.1.S1_at   | MmugDNA.24394.1 | 4.49  | 4.76  | 0.14 | 0.09 | -1.2  | 0.099003 | 0.348875 | 0.468389 | 0.592917 |
| MmugDNA.24396.1.S1_at   | MmugDNA.24396.1 | 10.48 | 10.3  | 0.39 | 0.08 | 1.13  | 0.422498 | 0.60328  | 0.738218 | 0.764037 |

|                         |                 |       |       |      |      |       |          |          |          |          |
|-------------------------|-----------------|-------|-------|------|------|-------|----------|----------|----------|----------|
| MmugDNA.24398.1.S1_at   | MmugDNA.24398.1 | 4.81  | 4.33  | 0.29 | 0.19 | 1.39  | 0.355393 | 0.608024 | 0.694724 | 0.766737 |
| MmugDNA.24399.1.S1_at   | MmugDNA.24399.1 | 3.46  | 3.39  | 0.08 | 0.02 | 1.05  | 0.064234 | 0.010157 | 0.417874 | 0.132095 |
| MmugDNA.244.1.S1_at     | MmugDNA.244.1   | 4.6   | 4.48  | 0.25 | 0.06 | 1.09  | 0.435331 | 0.61671  | 0.745628 | 0.77288  |
| MmugDNA.2440.1.S1_at    | MmugDNA.2440.1  | 6.36  | 6.7   | 0.37 | 0.17 | -1.27 | 0.602018 | 0.178762 | 0.838675 | 0.455062 |
| MmugDNA.24400.1.S1_at   | MmugDNA.24400.1 | 6.38  | 6.09  | 0.11 | 0.21 | 1.22  | 0.296333 | 0.301581 | 0.651995 | 0.55955  |
| MmugDNA.24401.1.S1_at   | MmugDNA.24401.1 | 5.35  | 5.37  | 0.12 | 0.2  | -1.01 | 0.588761 | 0.761684 | 0.831968 | 0.861459 |
| MmugDNA.24402.1.S1_at   | MmugDNA.24402.1 | 7.06  | 7.21  | 0.27 | 0.07 | -1.11 | 0.178577 | 0.396882 | 0.551383 | 0.62846  |
| MmugDNA.24404.1.S1_at   | MmugDNA.24404.1 | 7.68  | 8.42  | 0.14 | 0.12 | -1.67 | 0.003622 | 0.001326 | 0.197111 | 0.056164 |
| MmugDNA.24404.1.S1_s_at | MmugDNA.24404.1 | 8.5   | 9.34  | 0.12 | 0.08 | -1.8  | 0.00047  | 0.000019 | 0.140406 | 0.019635 |
| MmugDNA.24405.1.S1_at   | MmugDNA.24405.1 | 3.39  | 3.42  | 0    | 0.23 | -1.02 | 0.489103 | 0.680445 | 0.775981 | 0.813453 |
| MmugDNA.24406.1.S1_at   | MmugDNA.24406.1 | 8.84  | 8.73  | 0.22 | 0.13 | 1.08  | 0.327988 | 0.146616 | 0.675501 | 0.420646 |
| MmugDNA.24407.1.S1_at   | MmugDNA.24407.1 | 4.07  | 4.05  | 0.35 | 0.01 | 1.01  | 0.903029 | 0.959965 | 0.967309 | 0.977362 |
| MmugDNA.24408.1.S1_at   | MmugDNA.24408.1 | 11    | 11.09 | 0.68 | 0.11 | -1.07 | 0.237052 | 0.300554 | 0.603903 | 0.558854 |
| MmugDNA.24409.1.S1_at   | MmugDNA.24409.1 | 3.8   | 3.68  | 0.28 | 0.47 | 1.09  | 0.392372 | 0.455189 | 0.71829  | 0.669157 |
| MmugDNA.2441.1.S1_at    | MmugDNA.2441.1  | 7.63  | 8.95  | 0.54 | 0.05 | -2.5  | 0.013382 | 0.000259 | 0.268216 | 0.033501 |
| MmugDNA.24410.1.S1_at   | MmugDNA.24410.1 | 8.37  | 8.73  | 0.2  | 0.28 | -1.28 | 0.146634 | 0.498641 | 0.520956 | 0.697648 |
| MmugDNA.24411.1.S1_at   | MmugDNA.24411.1 | 13.57 | 13.54 | 0.07 | 0.02 | 1.02  | 0.367301 | 0.018217 | 0.70279  | 0.169777 |
| MmugDNA.24412.1.S1_at   | MmugDNA.24412.1 | 3.23  | 3.27  | 0.17 | 0.2  | -1.03 | 0.711587 | 0.290619 | 0.887684 | 0.551363 |
| MmugDNA.24414.1.S1_at   | MmugDNA.24414.1 | 3.37  | 3.17  | 0.92 | 0.05 | 1.15  | 0.252616 | 0.259412 | 0.61758  | 0.526418 |
| MmugDNA.24415.1.S1_at   | MmugDNA.24415.1 | 4.92  | 4.87  | 0.63 | 0.2  | 1.03  | 0.537175 | 0.728937 | 0.802633 | 0.843315 |
| MmugDNA.24416.1.S1_at   | MmugDNA.24416.1 | 4.51  | 4.28  | 0.48 | 0.43 | 1.18  | 0.44518  | 0.583909 | 0.751923 | 0.752043 |
| MmugDNA.24417.1.S1_at   | MmugDNA.24417.1 | 5.51  | 5.79  | 0.21 | 0.09 | -1.21 | 0.123858 | 0.364475 | 0.497392 | 0.604845 |
| MmugDNA.24418.1.S1_at   | MmugDNA.24418.1 | 8.46  | 8.44  | 0.05 | 0.04 | 1.01  | 0.729775 | 0.017169 | 0.895824 | 0.16599  |
| MmugDNA.24419.1.S1_at   | MmugDNA.24419.1 | 6.71  | 6.07  | 0.26 | 0.34 | 1.56  | 0.055801 | 0.046233 | 0.399433 | 0.259397 |
| MmugDNA.2442.1.S1_at    | MmugDNA.2442.1  | 8.5   | 8.64  | 0.11 | 0.23 | -1.11 | 0.346745 | 0.226554 | 0.688361 | 0.499001 |
| MmugDNA.24420.1.S1_at   | MmugDNA.24420.1 | 4.38  | 4.19  | 0.32 | 0.15 | 1.14  | 0.149695 | 0.112306 | 0.523226 | 0.377592 |
| MmugDNA.24420.1.S1_s_at | MmugDNA.24420.1 | 10.51 | 10.22 | 0.68 | 0.07 | 1.22  | 0.474039 | 0.358568 | 0.767923 | 0.600072 |
| MmugDNA.24423.1.S1_at   | MmugDNA.24423.1 | 5.85  | 5.84  | 0.1  | 0.04 | 1.01  | 0.23986  | 0.387395 | 0.606208 | 0.622065 |
| MmugDNA.24424.1.S1_at   | MmugDNA.24424.1 | 6.26  | 5.88  | 0.28 | 0.04 | 1.3   | 0.080859 | 0.060009 | 0.444899 | 0.291649 |
| MmugDNA.24425.1.S1_at   | MmugDNA.24425.1 | 5.16  | 4.91  | 1.01 | 0.19 | 1.19  | 0.778107 | 0.447172 | 0.918101 | 0.663366 |
| MmugDNA.24427.1.S1_at   | MmugDNA.24427.1 | 11.1  | 10.6  | 0.37 | 0.05 | 1.41  | 0.272479 | 0.39107  | 0.632289 | 0.624817 |
| MmugDNA.24428.1.S1_at   | MmugDNA.24428.1 | 12.7  | 12.73 | 0.12 | 0.01 | -1.02 | 0.680797 | 0.005631 | 0.874832 | 0.103694 |
| MmugDNA.24429.1.S1_at   | MmugDNA.24429.1 | 3.97  | 3.9   | 0.13 | 0.06 | 1.05  | 0.42158  | 0.695361 | 0.737563 | 0.82295  |
| MmugDNA.2443.1.S1_at    | MmugDNA.2443.1  | 5.88  | 5.78  | 0.54 | 0.31 | 1.07  | 0.534864 | 0.649587 | 0.801404 | 0.795009 |
| MmugDNA.24430.1.S1_at   | MmugDNA.24430.1 | 8.84  | 8.73  | 0.4  | 0.12 | 1.08  | 0.573068 | 0.002573 | 0.823428 | 0.075105 |
| MmugDNA.24433.1.S1_at   | MmugDNA.24433.1 | 8.42  | 8.44  | 0.64 | 0.2  | -1.01 | 0.851506 | 0.312666 | 0.947639 | 0.567299 |
| MmugDNA.24434.1.S1_at   | MmugDNA.24434.1 | 7.97  | 7.6   | 0.19 | 0.19 | 1.29  | 0.170339 | 0.225276 | 0.543386 | 0.497892 |
| MmugDNA.24435.1.S1_at   | MmugDNA.24435.1 | 7.61  | 7.52  | 0.67 | 0.24 | 1.07  | 0.285519 | 0.377716 | 0.643438 | 0.615086 |
| MmugDNA.24436.1.S1_at   | MmugDNA.24436.1 | 4.54  | 4.19  | 0.52 | 0.24 | 1.28  | 0.78613  | 0.292839 | 0.921338 | 0.552832 |
| MmugDNA.24438.1.S1_at   | MmugDNA.24438.1 | 5.08  | 4.98  | 0.08 | 0.08 | 1.07  | 0.209762 | 0.215378 | 0.581302 | 0.489067 |
| MmugDNA.24439.1.S1_at   | MmugDNA.24439.1 | 3.91  | 3.78  | 0.19 | 0.12 | 1.09  | 0.35898  | 0.291607 | 0.696933 | 0.551985 |
| MmugDNA.2444.1.S1_at    | MmugDNA.2444.1  | 6.89  | 7.23  | 0.18 | 0.04 | -1.26 | 0.114981 | 0.10818  | 0.488167 | 0.371527 |
| MmugDNA.24440.1.S1_at   | MmugDNA.24440.1 | 6.98  | 6.72  | 0.05 | 0.12 | 1.2   | 0.022602 | 0.021059 | 0.311427 | 0.181869 |

|                         |                 |       |       |      |      |       |          |          |          |          |
|-------------------------|-----------------|-------|-------|------|------|-------|----------|----------|----------|----------|
| MmugDNA.24443.1.S1_at   | MmugDNA.24443.1 | 3.03  | 3.05  | 0.17 | 0.27 | -1.02 | 0.863353 | 0.879415 | 0.952018 | 0.931144 |
| MmugDNA.24444.1.S1_at   | MmugDNA.24444.1 | 6.46  | 6.47  | 0.1  | 0.01 | -1.01 | 0.984966 | 0.404186 | 0.995288 | 0.632691 |
| MmugDNA.24446.1.S1_at   | MmugDNA.24446.1 | 6.47  | 6.93  | 1.1  | 0.28 | -1.38 | 0.547708 | 0.360188 | 0.809225 | 0.601275 |
| MmugDNA.24447.1.S1_at   | MmugDNA.24447.1 | 7.15  | 8.59  | 0.8  | 0.06 | -2.72 | 0.090467 | 0.082662 | 0.458706 | 0.331987 |
| MmugDNA.24449.1.S1_at   | MmugDNA.24449.1 | 8.82  | 8.6   | 0.46 | 0.06 | 1.17  | 0.490713 | 0.676303 | 0.777256 | 0.810904 |
| MmugDNA.2445.1.S1_at    | MmugDNA.2445.1  | 4.96  | 6.26  | 0.49 | 0.33 | -2.46 | 0.046217 | 0.206539 | 0.377596 | 0.480577 |
| MmugDNA.24452.1.S1_at   | MmugDNA.24452.1 | 6.9   | 6.9   | 0.02 | 0.05 | -1    | 0.915452 | 0.440545 | 0.971229 | 0.65901  |
| MmugDNA.24453.1.S1_s_at | MmugDNA.24453.1 | 9.2   | 8.85  | 0.2  | 0.06 | 1.27  | 0.070516 | 0.043242 | 0.429474 | 0.252677 |
| MmugDNA.24455.1.S1_x_at | MmugDNA.24455.1 | 9.64  | 9.74  | 0.21 | 0.24 | -1.07 | 0.989571 | 0.466674 | 0.996091 | 0.676425 |
| MmugDNA.24457.1.S1_at   | MmugDNA.24457.1 | 10.33 | 10.14 | 0.66 | 0.08 | 1.14  | 0.578718 | 0.157602 | 0.826289 | 0.433131 |
| MmugDNA.24458.1.S1_at   | MmugDNA.24458.1 | 5.21  | 5.21  | 0.01 | 0.13 | -1    | 0.999159 | 0.779926 | 0.999788 | 0.872422 |
| MmugDNA.24459.1.S1_at   | MmugDNA.24459.1 | 4.86  | 4.7   | 0.24 | 0.04 | 1.11  | 0.412742 | 0.596121 | 0.732098 | 0.759357 |
| MmugDNA.24460.1.S1_at   | MmugDNA.24460.1 | 5.82  | 5.9   | 0.04 | 0.31 | -1.06 | 0.787713 | 0.148489 | 0.922045 | 0.423016 |
| MmugDNA.24461.1.S1_at   | MmugDNA.24461.1 | 4.61  | 4.57  | 0.09 | 0.09 | 1.03  | 0.316233 | 0.099058 | 0.666364 | 0.357208 |
| MmugDNA.24464.1.S1_at   | MmugDNA.24464.1 | 6.38  | 6.21  | 0.43 | 0.1  | 1.13  | 0.795064 | 0.250454 | 0.924794 | 0.519391 |
| MmugDNA.24465.1.S1_at   | MmugDNA.24465.1 | 3.72  | 3.9   | 0.17 | 0.24 | -1.14 | 0.132062 | 0.148803 | 0.506526 | 0.423201 |
| MmugDNA.24466.1.S1_at   | MmugDNA.24466.1 | 2.76  | 2.9   | 0.1  | 0.1  | -1.11 | 0.400235 | 0.146564 | 0.723621 | 0.420583 |
| MmugDNA.24467.1.S1_at   | MmugDNA.24467.1 | 12    | 12.05 | 0.09 | 0.05 | -1.03 | 0.2073   | 0.007221 | 0.578933 | 0.114121 |
| MmugDNA.24468.1.S1_at   | MmugDNA.24468.1 | 5.17  | 5     | 0.33 | 0.23 | 1.12  | 0.884944 | 0.832794 | 0.960159 | 0.904055 |
| MmugDNA.24469.1.S1_at   | MmugDNA.24469.1 | 4.18  | 4.35  | 0.34 | 0.23 | -1.12 | 0.782401 | 0.597624 | 0.919842 | 0.760279 |
| MmugDNA.2447.1.S1_at    | MmugDNA.2447.1  | 12.12 | 11.94 | 0.22 | 0.12 | 1.14  | 0.389505 | 0.130919 | 0.716173 | 0.403037 |
| MmugDNA.24470.1.S1_at   | MmugDNA.24470.1 | 6.61  | 5.64  | 0.94 | 0.39 | 1.95  | 0.175118 | 0.302247 | 0.548031 | 0.560092 |
| MmugDNA.24472.1.S1_at   | MmugDNA.24472.1 | 4.55  | 4.59  | 0.1  | 0.08 | -1.03 | 0.846806 | 0.30718  | 0.94629  | 0.563487 |
| MmugDNA.24473.1.S1_at   | MmugDNA.24473.1 | 5.02  | 5.06  | 0.28 | 0.09 | -1.03 | 0.527587 | 0.095729 | 0.797158 | 0.352735 |
| MmugDNA.24475.1.S1_at   | MmugDNA.24475.1 | 12    | 12.14 | 0.15 | 0.11 | -1.1  | 0.645738 | 0.566108 | 0.858801 | 0.740262 |
| MmugDNA.24479.1.S1_at   | MmugDNA.24479.1 | 7.49  | 8.32  | 1.3  | 0.46 | -1.78 | 0.47993  | 0.217002 | 0.770936 | 0.490626 |
| MmugDNA.2448.1.S1_at    | MmugDNA.2448.1  | 4.51  | 4.82  | 0.41 | 0.07 | -1.24 | 0.294121 | 0.623924 | 0.650324 | 0.77828  |
| MmugDNA.24480.1.S1_at   | MmugDNA.24480.1 | 12.03 | 11.52 | 0.5  | 0.07 | 1.43  | 0.431798 | 0.168772 | 0.743599 | 0.445439 |
| MmugDNA.24481.1.S1_at   | MmugDNA.24481.1 | 9.49  | 8.37  | 1.94 | 0.28 | 2.16  | 0.894643 | 0.809355 | 0.963936 | 0.890107 |
| MmugDNA.24482.1.S1_at   | MmugDNA.24482.1 | 8.15  | 7.32  | 0.26 | 0.15 | 1.78  | 0.009327 | 0.000619 | 0.241869 | 0.042444 |
| MmugDNA.24483.1.S1_at   | MmugDNA.24483.1 | 4.91  | 4.73  | 0.18 | 0.12 | 1.13  | 0.421527 | 0.304476 | 0.737563 | 0.561741 |
| MmugDNA.10687.1.S1_s_at | MmugDNA.10687.1 | 10.25 | 10.14 | 0.16 | 0.02 | 1.07  | 0.3904   | 0.573858 | 0.716734 | 0.745436 |
| MmugDNA.24485.1.S1_at   | MmugDNA.24485.1 | 4.88  | 4.59  | 0.1  | 0.1  | 1.22  | 0.051956 | 0.042385 | 0.391695 | 0.250533 |
| MmugDNA.24486.1.S1_at   | MmugDNA.24486.1 | 4.47  | 4.55  | 0.08 | 0.06 | -1.06 | 0.324851 | 0.596699 | 0.672925 | 0.75976  |
| MmugDNA.24487.1.S1_at   | MmugDNA.24487.1 | 4.09  | 4.3   | 0.17 | 0.08 | -1.15 | 0.074477 | 0.082717 | 0.435313 | 0.332171 |
| MmugDNA.24488.1.S1_at   | MmugDNA.24488.1 | 5.56  | 5.44  | 0.09 | 0.04 | 1.09  | 0.094656 | 0.550782 | 0.463796 | 0.730611 |
| MmugDNA.24489.1.S1_at   | MmugDNA.24489.1 | 4.42  | 4.48  | 0.11 | 0.03 | -1.04 | 0.309828 | 0.413995 | 0.661834 | 0.639979 |
| MmugDNA.24490.1.S1_at   | MmugDNA.24490.1 | 4.32  | 4.83  | 0.18 | 0.01 | -1.42 | 0.020075 | 0.048877 | 0.303364 | 0.265858 |
| MmugDNA.24491.1.S1_at   | MmugDNA.24491.1 | 3.61  | 3.45  | 0.14 | 0.21 | 1.12  | 0.310765 | 0.2408   | 0.662635 | 0.511521 |
| MmugDNA.24492.1.S1_at   | MmugDNA.24492.1 | 5.36  | 5.19  | 0.12 | 0.13 | 1.13  | 0.108573 | 0.17662  | 0.480777 | 0.453098 |
| MmugDNA.24493.1.S1_at   | MmugDNA.24493.1 | 4.72  | 4.48  | 0.01 | 0.1  | 1.18  | 0.016247 | 0.131847 | 0.286783 | 0.403891 |
| MmugDNA.24494.1.S1_at   | MmugDNA.24494.1 | 4.02  | 3.84  | 0.22 | 0.07 | 1.14  | 0.679617 | 0.841039 | 0.87431  | 0.909421 |
| MmugDNA.24495.1.S1_at   | MmugDNA.24495.1 | 5.88  | 5.68  | 0.25 | 0.17 | 1.15  | 0.988011 | 0.987917 | 0.995831 | 0.993253 |

|                         |                 |       |       |      |      |       |          |          |          |          |
|-------------------------|-----------------|-------|-------|------|------|-------|----------|----------|----------|----------|
| MmugDNA.24496.1.S1_at   | MmugDNA.24496.1 | 5.46  | 5.75  | 0.28 | 0.27 | -1.22 | 0.188135 | 0.063554 | 0.56029  | 0.298646 |
| MmugDNA.24497.1.S1_at   | MmugDNA.24497.1 | 6.07  | 6.3   | 0.27 | 0.37 | -1.17 | 0.673218 | 0.784162 | 0.871201 | 0.875049 |
| MmugDNA.24499.1.S1_at   | MmugDNA.24499.1 | 4.19  | 4.09  | 0.05 | 0.02 | 1.07  | 0.091473 | 0.688227 | 0.459409 | 0.818003 |
| MmugDNA.245.1.S1_at     | MmugDNA.245.1   | 9.63  | 8.86  | 0.18 | 0.08 | 1.71  | 0.004504 | 0.000054 | 0.200265 | 0.025666 |
| MmugDNA.24501.1.S1_at   | MmugDNA.24501.1 | 3.9   | 3.82  | 0.08 | 0.22 | 1.06  | 0.458269 | 0.553836 | 0.758668 | 0.732843 |
| MmugDNA.24502.1.S1_at   | MmugDNA.24502.1 | 6.11  | 5.89  | 0.14 | 0.13 | 1.17  | 0.20936  | 0.156738 | 0.580868 | 0.432216 |
| MmugDNA.24503.1.S1_at   | MmugDNA.24503.1 | 4.38  | 3.98  | 0.28 | 0.05 | 1.32  | 0.126733 | 0.237459 | 0.500599 | 0.508127 |
| MmugDNA.24504.1.S1_at   | MmugDNA.24504.1 | 10.09 | 10.65 | 0.04 | 0.14 | -1.48 | 0.001472 | 0.0005   | 0.16146  | 0.038996 |
| MmugDNA.24505.1.S1_at   | MmugDNA.24505.1 | 11.6  | 11.31 | 1.07 | 0    | 1.23  | 0.715591 | 0.568644 | 0.889404 | 0.742052 |
| MmugDNA.24506.1.S1_at   | MmugDNA.24506.1 | 6.79  | 6.25  | 0.94 | 0.12 | 1.46  | 0.446261 | 0.089017 | 0.75262  | 0.342876 |
| MmugDNA.24507.1.S1_at   | MmugDNA.24507.1 | 8.08  | 7.85  | 0.56 | 0.07 | -1.17 | 0.455606 | 0.17423  | 0.757493 | 0.450573 |
| MmugDNA.24508.1.S1_at   | MmugDNA.24508.1 | 6.07  | 5.9   | 0.42 | 0.21 | 1.12  | 0.662367 | 0.875308 | 0.866734 | 0.929211 |
| MmugDNA.2451.1.S1_at    | MmugDNA.2451.1  | 3.66  | 3.69  | 0.03 | 0    | -1.02 | 0.136224 | 0.268661 | 0.510926 | 0.534138 |
| MmugDNA.24511.1.S1_at   | MmugDNA.24511.1 | 5.46  | 5.73  | 0.14 | 0.19 | -1.2  | 0.105935 | 0.196274 | 0.477795 | 0.471236 |
| MmugDNA.24513.1.S1_at   | MmugDNA.24513.1 | 10.14 | 10.28 | 2.22 | 0.19 | -1.1  | 0.710496 | 0.170379 | 0.887305 | 0.447103 |
| MmugDNA.24513.1.S1_s_at | MmugDNA.24513.1 | 9.82  | 10.07 | 2.27 | 0.21 | -1.19 | 0.675155 | 0.168911 | 0.872479 | 0.445458 |
| MmugDNA.24514.1.S1_s_at | MmugDNA.24514.1 | 10.71 | 10.99 | 2.24 | 0.25 | -1.21 | 0.666421 | 0.184357 | 0.868243 | 0.460458 |
| MmugDNA.24516.1.S1_s_at | MmugDNA.24516.1 | 9.78  | 9.58  | 0.07 | 0.11 | 1.15  | 0.291461 | 0.009351 | 0.647943 | 0.127602 |
| MmugDNA.24517.1.S1_at   | MmugDNA.24517.1 | 13.16 | 12.79 | 0.15 | 0.05 | 1.29  | 0.008038 | 0.018603 | 0.232005 | 0.171539 |
| MmugDNA.24518.1.S1_at   | MmugDNA.24518.1 | 6.02  | 6.08  | 0.14 | 0.06 | -1.04 | 0.533543 | 0.550774 | 0.80084  | 0.730611 |
| MmugDNA.24519.1.S1_at   | MmugDNA.24519.1 | 7.47  | 7.23  | 0.39 | 0.31 | 1.18  | 0.162706 | 0.679391 | 0.535867 | 0.812799 |
| MmugDNA.2452.1.S1_at    | MmugDNA.2452.1  | 7.91  | 7.89  | 0.65 | 0.14 | 1.02  | 0.500336 | 0.194205 | 0.782483 | 0.469312 |
| MmugDNA.24520.1.S1_at   | MmugDNA.24520.1 | 5.53  | 5.25  | 0.45 | 0.35 | 1.22  | 0.597962 | 0.185998 | 0.836631 | 0.461851 |
| MmugDNA.24521.1.S1_at   | MmugDNA.24521.1 | 4.53  | 4.17  | 0.15 | 0.3  | 1.29  | 0.271353 | 0.396012 | 0.631217 | 0.627823 |
| MmugDNA.24522.1.S1_at   | MmugDNA.24522.1 | 6.88  | 6.88  | 0.2  | 0.02 | 1     | 0.563557 | 0.690045 | 0.818294 | 0.819235 |
| MmugDNA.24524.1.S1_at   | MmugDNA.24524.1 | 7.71  | 7.95  | 0.41 | 0.01 | -1.18 | 0.987443 | 0.887709 | 0.995831 | 0.93601  |
| MmugDNA.24525.1.S1_at   | MmugDNA.24525.1 | 4.66  | 4.79  | 0.19 | 0.17 | -1.09 | 0.441175 | 0.607136 | 0.749059 | 0.766223 |
| MmugDNA.24526.1.S1_at   | MmugDNA.24526.1 | 5.52  | 5.07  | 0.11 | 0.12 | 1.36  | 0.006579 | 0.017052 | 0.219977 | 0.165465 |
| MmugDNA.24527.1.S1_at   | MmugDNA.24527.1 | 9.12  | 10.01 | 0.34 | 0.06 | -1.86 | 0.010486 | 0.064322 | 0.24804  | 0.299804 |
| MmugDNA.24528.1.S1_at   | MmugDNA.24528.1 | 14.3  | 14.28 | 0.06 | 0.03 | 1.01  | 0.834029 | 0.86583  | 0.940492 | 0.923757 |
| MmugDNA.24529.1.S1_at   | MmugDNA.24529.1 | 7.06  | 6.86  | 0.15 | 0.16 | 1.15  | 0.082222 | 0.362169 | 0.447052 | 0.602827 |
| MmugDNA.2453.1.S1_at    | MmugDNA.2453.1  | 8.34  | 7.91  | 0.19 | 0.08 | 1.34  | 0.014678 | 0.11144  | 0.277052 | 0.376126 |
| MmugDNA.24530.1.S1_at   | MmugDNA.24530.1 | 4.26  | 4.19  | 0.07 | 0.04 | 1.05  | 0.27748  | 0.455252 | 0.636861 | 0.669198 |
| MmugDNA.24531.1.S1_at   | MmugDNA.24531.1 | 4.4   | 4.39  | 0.07 | 0    | 1     | 0.342254 | 0.095989 | 0.685714 | 0.353302 |
| MmugDNA.24532.1.S1_at   | MmugDNA.24532.1 | 4.21  | 4.24  | 0.2  | 0.15 | -1.02 | 0.79649  | 0.562735 | 0.925188 | 0.738115 |
| MmugDNA.24534.1.S1_at   | MmugDNA.24534.1 | 6.7   | 6.57  | 0.09 | 0.23 | 1.09  | 0.375995 | 0.370411 | 0.706657 | 0.609492 |
| MmugDNA.24535.1.S1_at   | MmugDNA.24535.1 | 5.67  | 5.43  | 0.13 | 0.22 | 1.18  | 0.225092 | 0.244323 | 0.594321 | 0.514184 |
| MmugDNA.24536.1.S1_at   | MmugDNA.24536.1 | 6.24  | 7.57  | 0.27 | 0.18 | -2.5  | 0.004265 | 0.306484 | 0.198874 | 0.563029 |
| MmugDNA.24537.1.S1_at   | MmugDNA.24537.1 | 4.78  | 4.83  | 0.34 | 0.08 | -1.03 | 0.866562 | 0.491097 | 0.953134 | 0.692777 |
| MmugDNA.24539.1.S1_at   | MmugDNA.24539.1 | 5.85  | 5.72  | 0.25 | 0.13 | 1.09  | 0.847064 | 0.697036 | 0.946415 | 0.824045 |
| MmugDNA.2454.1.S1_at    | MmugDNA.2454.1  | 3.27  | 3.37  | 0.09 | 0.31 | -1.07 | 0.303106 | 0.254547 | 0.657005 | 0.522863 |
| MmugDNA.24540.1.S1_at   | MmugDNA.24540.1 | 6.52  | 6.32  | 0.12 | 0.19 | 1.15  | 0.545195 | 0.49458  | 0.807687 | 0.694909 |
| MmugDNA.24541.1.S1_at   | MmugDNA.24541.1 | 3.53  | 3.55  | 0.07 | 0.15 | -1.02 | 0.845755 | 0.924771 | 0.945907 | 0.957465 |

|                       |                 |       |       |      |      |       |          |          |          |          |
|-----------------------|-----------------|-------|-------|------|------|-------|----------|----------|----------|----------|
| MmugDNA.24542.1.S1_at | MmugDNA.24542.1 | 5.35  | 5.39  | 0.14 | 0.19 | -1.02 | 0.929833 | 0.54655  | 0.976518 | 0.728079 |
| MmugDNA.24543.1.S1_at | MmugDNA.24543.1 | 3     | 2.82  | 0.24 | 0.09 | 1.13  | 0.187702 | 0.231218 | 0.559968 | 0.5029   |
| MmugDNA.24544.1.S1_at | MmugDNA.24544.1 | 8.59  | 8.28  | 0.36 | 0.08 | 1.24  | 0.291608 | 0.152822 | 0.647943 | 0.427616 |
| MmugDNA.24545.1.S1_at | MmugDNA.24545.1 | 6.3   | 6.52  | 0.48 | 0.23 | -1.16 | 0.180793 | 0.518983 | 0.554128 | 0.710813 |
| MmugDNA.24546.1.S1_at | MmugDNA.24546.1 | 7.15  | 6.95  | 0.31 | 0.13 | 1.15  | 0.377009 | 0.502649 | 0.707265 | 0.700236 |
| MmugDNA.24547.1.S1_at | MmugDNA.24547.1 | 7.42  | 7.22  | 0.03 | 0.12 | 1.15  | 0.139421 | 0.190396 | 0.514872 | 0.465906 |
| MmugDNA.24548.1.S1_at | MmugDNA.24548.1 | 4.62  | 4.78  | 0.24 | 0.37 | -1.12 | 0.540306 | 0.747621 | 0.804343 | 0.853205 |
| MmugDNA.24549.1.S1_at | MmugDNA.24549.1 | 3.88  | 3.66  | 0.47 | 0.12 | 1.16  | 0.228083 | 0.255633 | 0.59694  | 0.523617 |
| MmugDNA.2455.1.S1_at  | MmugDNA.2455.1  | 4.98  | 4.87  | 0.44 | 0.07 | 1.08  | 0.791424 | 0.772457 | 0.923383 | 0.867741 |
| MmugDNA.24550.1.S1_at | MmugDNA.24550.1 | 5.22  | 4.9   | 0.23 | 0.09 | 1.25  | 0.398147 | 0.548413 | 0.722324 | 0.729154 |
| MmugDNA.24552.1.S1_at | MmugDNA.24552.1 | 4.62  | 4.41  | 0.15 | 0.18 | -1.15 | 0.420712 | 0.374843 | 0.737059 | 0.613091 |
| MmugDNA.24553.1.S1_at | MmugDNA.24553.1 | 5.64  | 5.64  | 0.07 | 0.04 | 1     | 0.94195  | 0.993909 | 0.980221 | 0.996321 |
| MmugDNA.24554.1.S1_at | MmugDNA.24554.1 | 8     | 7.67  | 1.21 | 0.18 | 1.26  | 0.612482 | 0.221371 | 0.84309  | 0.494644 |
| MmugDNA.24556.1.S1_at | MmugDNA.24556.1 | 8.14  | 8.5   | 0.81 | 0.06 | -1.28 | 0.818562 | 0.96125  | 0.93444  | 0.978105 |
| MmugDNA.24557.1.S1_at | MmugDNA.24557.1 | 12.79 | 12.57 | 0.26 | 0.06 | 1.16  | 0.061176 | 0.269439 | 0.410204 | 0.534742 |
| MmugDNA.24558.1.S1_at | MmugDNA.24558.1 | 3.54  | 3.45  | 0.06 | 0.25 | 1.06  | 0.489206 | 0.470943 | 0.776032 | 0.679153 |
| MmugDNA.24559.1.S1_at | MmugDNA.24559.1 | 4.38  | 4.41  | 0.22 | 0.22 | -1.02 | 0.857925 | 0.982458 | 0.949754 | 0.99036  |
| MmugDNA.2456.1.S1_at  | MmugDNA.2456.1  | 6.16  | 5.95  | 0.15 | 0.09 | 1.15  | 0.089335 | 0.010861 | 0.45747  | 0.13586  |
| MmugDNA.24560.1.S1_at | MmugDNA.24560.1 | 3.94  | 3.89  | 0.07 | 0.24 | 1.04  | 0.772018 | 0.931367 | 0.915001 | 0.961034 |
| MmugDNA.24561.1.S1_at | MmugDNA.24561.1 | 5.59  | 6.15  | 0.22 | 0.68 | -1.47 | 0.149591 | 0.318281 | 0.523226 | 0.571151 |
| MmugDNA.24562.1.S1_at | MmugDNA.24562.1 | 7.71  | 7.39  | 0.58 | 0.19 | 1.24  | 0.574323 | 0.052978 | 0.824006 | 0.275815 |
| MmugDNA.24564.1.S1_at | MmugDNA.24564.1 | 5.9   | 5.96  | 0.31 | 0.02 | -1.05 | 0.60255  | 0.17303  | 0.838885 | 0.449673 |
| MmugDNA.24565.1.S1_at | MmugDNA.24565.1 | 3.23  | 3.15  | 0.27 | 0.03 | 1.06  | 0.610137 | 0.812745 | 0.841839 | 0.891794 |
| MmugDNA.24568.1.S1_at | MmugDNA.24568.1 | 9.56  | 8.96  | 0.1  | 0.19 | 1.52  | 0.01093  | 0.013102 | 0.250796 | 0.147241 |
| MmugDNA.24569.1.S1_at | MmugDNA.24569.1 | 5.14  | 5.18  | 0.12 | 0.29 | -1.03 | 0.788214 | 0.056398 | 0.922199 | 0.283382 |
| MmugDNA.2457.1.S1_at  | MmugDNA.2457.1  | 3.59  | 4.03  | 0.32 | 0.67 | -1.36 | 0.313846 | 0.234233 | 0.664925 | 0.505485 |
| MmugDNA.24571.1.S1_at | MmugDNA.24571.1 | 12.17 | 12.51 | 0.65 | 0.02 | -1.27 | 0.132844 | 0.075055 | 0.507035 | 0.31921  |
| MmugDNA.24572.1.S1_at | MmugDNA.24572.1 | 8.97  | 7.87  | 0.36 | 0.26 | 2.13  | 0.020341 | 0.003734 | 0.303839 | 0.087162 |
| MmugDNA.24573.1.S1_at | MmugDNA.24573.1 | 3.2   | 3.24  | 0.06 | 0.1  | -1.03 | 0.466262 | 0.384287 | 0.763448 | 0.619994 |
| MmugDNA.24574.1.S1_at | MmugDNA.24574.1 | 4.78  | 4.77  | 0.23 | 0.07 | 1.01  | 0.285902 | 0.449154 | 0.643508 | 0.664892 |
| MmugDNA.24576.1.S1_at | MmugDNA.24576.1 | 6.92  | 7.17  | 0.54 | 0.12 | -1.18 | 0.166602 | 0.646175 | 0.539239 | 0.792676 |
| MmugDNA.24577.1.S1_at | MmugDNA.24577.1 | 3.6   | 3.74  | 0.16 | 0.4  | -1.1  | 0.656647 | 0.851994 | 0.863636 | 0.915852 |
| MmugDNA.24578.1.S1_at | MmugDNA.24578.1 | 7.62  | 8.49  | 0.45 | 0.18 | -1.83 | 0.092708 | 0.116301 | 0.461192 | 0.383671 |
| MmugDNA.24579.1.S1_at | MmugDNA.24579.1 | 12.17 | 12.23 | 0.3  | 0.08 | -1.05 | 0.741457 | 0.005384 | 0.901406 | 0.101199 |
| MmugDNA.2458.1.S1_at  | MmugDNA.2458.1  | 4.11  | 4.08  | 0.61 | 0.64 | 1.02  | 0.895822 | 0.989073 | 0.964356 | 0.993772 |
| MmugDNA.24580.1.S1_at | MmugDNA.24580.1 | 4.47  | 4.27  | 0.27 | 0.18 | 1.14  | 0.349771 | 0.241541 | 0.690827 | 0.512152 |
| MmugDNA.24581.1.S1_at | MmugDNA.24581.1 | 5.03  | 5.02  | 0.16 | 0.06 | 1.01  | 0.725039 | 0.198056 | 0.89335  | 0.473041 |
| MmugDNA.24583.1.S1_at | MmugDNA.24583.1 | 4.29  | 3.99  | 0.18 | 0.17 | 1.23  | 0.55999  | 0.847473 | 0.816426 | 0.913316 |
| MmugDNA.24584.1.S1_at | MmugDNA.24584.1 | 4.25  | 4.66  | 0.14 | 0.16 | -1.33 | 0.066051 | 0.119827 | 0.421613 | 0.388577 |
| MmugDNA.24587.1.S1_at | MmugDNA.24587.1 | 9.63  | 9.94  | 0.27 | 0.15 | -1.24 | 0.328212 | 0.704215 | 0.675701 | 0.828375 |
| MmugDNA.24588.1.S1_at | MmugDNA.24588.1 | 3.03  | 3.02  | 0.42 | 0.03 | 1.01  | 0.652412 | 0.651973 | 0.862004 | 0.796529 |
| MmugDNA.24589.1.S1_at | MmugDNA.24589.1 | 3.36  | 3.27  | 0.1  | 0.02 | 1.07  | 0.131036 | 0.419857 | 0.5054   | 0.643733 |
| MmugDNA.2459.1.S1_at  | MmugDNA.2459.1  | 8.91  | 8.87  | 0.05 | 0.16 | 1.03  | 0.840494 | 0.873742 | 0.943326 | 0.928207 |

|                         |                 |       |       |      |      |       |          |          |          |          |
|-------------------------|-----------------|-------|-------|------|------|-------|----------|----------|----------|----------|
| MmugDNA.24590.1.S1_at   | MmugDNA.24590.1 | 3.26  | 3.32  | 0.07 | 0.12 | -1.04 | 0.848642 | 0.32599  | 0.946817 | 0.576235 |
| MmugDNA.24591.1.S1_at   | MmugDNA.24591.1 | 4.21  | 3.93  | 0.13 | 0.1  | 1.22  | 0.045851 | 0.151133 | 0.37735  | 0.425795 |
| MmugDNA.24592.1.S1_at   | MmugDNA.24592.1 | 8.56  | 7.86  | 0.22 | 0.29 | 1.63  | 0.020191 | 0.008747 | 0.303673 | 0.123975 |
| MmugDNA.24593.1.S1_at   | MmugDNA.24593.1 | 5.21  | 5.15  | 0.07 | 0.16 | 1.04  | 0.551664 | 0.246736 | 0.81144  | 0.51609  |
| MmugDNA.24594.1.S1_at   | MmugDNA.24594.1 | 9.14  | 9     | 0.42 | 0.23 | 1.1   | 0.937534 | 0.01456  | 0.978997 | 0.153907 |
| MmugDNA.24596.1.S1_s_at | MmugDNA.24596.1 | 11.35 | 11.04 | 0.16 | 0.13 | 1.24  | 0.092199 | 0.01659  | 0.460762 | 0.163051 |
| MmugDNA.24597.1.S1_at   | MmugDNA.24597.1 | 9.28  | 8.51  | 0.53 | 0.22 | 1.71  | 0.080798 | 0.070174 | 0.444846 | 0.311142 |
| MmugDNA.24599.1.S1_at   | MmugDNA.24599.1 | 5.63  | 5.28  | 0.29 | 0.08 | 1.28  | 0.10538  | 0.144299 | 0.477051 | 0.418196 |
| MmugDNA.246.1.S1_at     | MmugDNA.246.1   | 4.72  | 4.86  | 0.1  | 0.35 | -1.1  | 0.367186 | 0.424567 | 0.702778 | 0.647146 |
| MmugDNA.2460.1.S1_at    | MmugDNA.2460.1  | 5.68  | 5.4   | 0.04 | 0.16 | 1.21  | 0.094294 | 0.181806 | 0.463769 | 0.458382 |
| MmugDNA.24601.1.S1_at   | MmugDNA.24601.1 | 9.77  | 9.55  | 0.98 | 0.16 | -1.17 | 0.466876 | 0.641479 | 0.763921 | 0.789564 |
| MmugDNA.24603.1.S1_at   | MmugDNA.24603.1 | 6.49  | 6.34  | 0.11 | 0.14 | 1.11  | 0.088957 | 0.088324 | 0.456795 | 0.341743 |
| MmugDNA.22320.1.S1_at   | MmugDNA.22320.1 | 3.17  | 3.18  | 0.04 | 0.02 | -1.01 | 0.942078 | 0.10201  | 0.980258 | 0.362076 |
| MmugDNA.22320.1.S1_s_at | MmugDNA.22320.1 | 3.32  | 3.33  | 0.06 | 0.06 | -1.01 | 0.771935 | 0.983452 | 0.914924 | 0.99078  |
| MmugDNA.24626.1.S1_s_at | MmugDNA.24626.1 | 10.44 | 10.59 | 0.33 | 0.06 | -1.11 | 0.57556  | 0.332668 | 0.824671 | 0.581046 |
| MmugDNA.24606.1.S1_at   | MmugDNA.24606.1 | 3.56  | 3.58  | 0.13 | 0.04 | -1.01 | 0.925927 | 0.438288 | 0.975355 | 0.657289 |
| MmugDNA.24607.1.S1_at   | MmugDNA.24607.1 | 3.15  | 3.21  | 0.14 | 0.13 | -1.04 | 0.672617 | 0.476972 | 0.871048 | 0.683096 |
| MmugDNA.24608.1.S1_at   | MmugDNA.24608.1 | 5.64  | 6.25  | 0.15 | 0.22 | -1.53 | 0.029713 | 0.045187 | 0.335672 | 0.256979 |
| MmugDNA.24609.1.S1_at   | MmugDNA.24609.1 | 6.97  | 6.78  | 0.38 | 0.12 | 1.14  | 0.678399 | 0.198699 | 0.873975 | 0.473391 |
| MmugDNA.2461.1.S1_s_at  | MmugDNA.2461.1  | 8.07  | 7.93  | 0.08 | 0.07 | 1.1   | 0.030292 | 0.013216 | 0.337364 | 0.147492 |
| MmugDNA.18215.1.S1_s_at | MmugDNA.18215.1 | 6.37  | 6.7   | 0.09 | 0.11 | -1.26 | 0.033532 | 0.03932  | 0.346461 | 0.243401 |
| MmugDNA.24611.1.S1_at   | MmugDNA.24611.1 | 5.35  | 5.35  | 0.14 | 0.12 | 1     | 0.965114 | 0.998147 | 0.988542 | 0.999039 |
| MmugDNA.24612.1.S1_at   | MmugDNA.24612.1 | 10.53 | 10.82 | 0.17 | 0.06 | -1.22 | 0.04928  | 0.034979 | 0.385423 | 0.231166 |
| MmugDNA.24613.1.S1_at   | MmugDNA.24613.1 | 3.69  | 3.48  | 0.21 | 0.08 | 1.16  | 0.522764 | 0.557704 | 0.795324 | 0.735173 |
| MmugDNA.24615.1.S1_at   | MmugDNA.24615.1 | 4.99  | 5.13  | 0.45 | 0.3  | -1.1  | 0.401163 | 0.152951 | 0.724131 | 0.42777  |
| MmugDNA.24617.1.S1_at   | MmugDNA.24617.1 | 11.56 | 12.19 | 0.6  | 0.03 | -1.54 | 0.135944 | 0.014873 | 0.510454 | 0.155055 |
| MmugDNA.24618.1.S1_at   | MmugDNA.24618.1 | 6.13  | 5.4   | 0.66 | 0.13 | 1.66  | 0.12941  | 0.111653 | 0.504211 | 0.376592 |
| MmugDNA.24619.1.S1_at   | MmugDNA.24619.1 | 9.43  | 9.65  | 0.19 | 0.24 | -1.17 | 0.230222 | 0.112352 | 0.598481 | 0.377686 |
| MmugDNA.24620.1.S1_at   | MmugDNA.24620.1 | 6.24  | 6.13  | 1.12 | 0.23 | 1.08  | 0.878268 | 0.036096 | 0.957601 | 0.234417 |
| MmugDNA.24621.1.S1_at   | MmugDNA.24621.1 | 3.57  | 3.52  | 0.1  | 0.04 | 1.04  | 0.18061  | 0.103857 | 0.553824 | 0.364519 |
| MmugDNA.24622.1.S1_at   | MmugDNA.24622.1 | 6.77  | 6.67  | 0.06 | 0.08 | 1.07  | 0.179543 | 0.351664 | 0.552895 | 0.595164 |
| MmugDNA.24623.1.S1_at   | MmugDNA.24623.1 | 3.54  | 3.38  | 0.11 | 0.17 | 1.11  | 0.499792 | 0.408231 | 0.782211 | 0.635527 |
| MmugDNA.24627.1.S1_at   | MmugDNA.24627.1 | 4.77  | 4.94  | 1.3  | 0.55 | -1.13 | 0.613651 | 0.396994 | 0.843603 | 0.628563 |
| MmugDNA.24628.1.S1_at   | MmugDNA.24628.1 | 11.52 | 11.22 | 0.2  | 0.1  | 1.23  | 0.026288 | 0.018678 | 0.323826 | 0.171717 |
| MmugDNA.24629.1.S1_at   | MmugDNA.24629.1 | 6.84  | 6.13  | 0.16 | 0.44 | 1.63  | 0.109407 | 0.246405 | 0.482257 | 0.515899 |
| MmugDNA.2463.1.S1_at    | MmugDNA.2463.1  | 3.07  | 3.88  | 0.42 | 0.22 | -1.75 | 0.112432 | 0.435824 | 0.485757 | 0.65554  |
| MmugDNA.24632.1.S1_at   | MmugDNA.24632.1 | 3.24  | 3.25  | 0.24 | 0.06 | -1.01 | 0.646905 | 0.826232 | 0.85932  | 0.900203 |
| MmugDNA.24634.1.S1_at   | MmugDNA.24634.1 | 6.46  | 6.37  | 0.12 | 0    | 1.06  | 0.326073 | 0.309192 | 0.67367  | 0.564807 |
| MmugDNA.24637.1.S1_at   | MmugDNA.24637.1 | 9.92  | 10.52 | 0.23 | 0.1  | -1.52 | 0.006836 | 0.001624 | 0.224141 | 0.060918 |
| MmugDNA.24639.1.S1_at   | MmugDNA.24639.1 | 4.05  | 4.04  | 0.29 | 0.18 | 1.01  | 0.397663 | 0.119133 | 0.721925 | 0.387496 |
| MmugDNA.2464.1.S1_at    | MmugDNA.2464.1  | 6.56  | 6.48  | 0.08 | 0.05 | 1.05  | 0.151174 | 0.566002 | 0.52444  | 0.740179 |
| MmugDNA.24640.1.S1_at   | MmugDNA.24640.1 | 12.28 | 11.94 | 0.16 | 0.13 | 1.27  | 0.068233 | 0.067413 | 0.425017 | 0.305664 |
| MmugDNA.24641.1.S1_at   | MmugDNA.24641.1 | 3.8   | 3.91  | 0.21 | 0.01 | -1.08 | 0.953361 | 0.723425 | 0.984423 | 0.83986  |

|                         |                 |       |       |      |      |       |          |          |          |          |
|-------------------------|-----------------|-------|-------|------|------|-------|----------|----------|----------|----------|
| MmugDNA.24642.1.S1_at   | MmugDNA.24642.1 | 3.69  | 3.39  | 0.09 | 0.25 | 1.23  | 0.229256 | 0.259474 | 0.59818  | 0.526418 |
| MmugDNA.24643.1.S1_at   | MmugDNA.24643.1 | 5.25  | 5.26  | 0.15 | 0.06 | -1    | 0.627091 | 0.771786 | 0.850335 | 0.867347 |
| MmugDNA.24644.1.S1_at   | MmugDNA.24644.1 | 5.36  | 5.36  | 0.11 | 0.08 | -1    | 0.90872  | 0.626532 | 0.969262 | 0.779856 |
| MmugDNA.24647.1.S1_at   | MmugDNA.24647.1 | 7.1   | 7.17  | 0.03 | 0.13 | -1.05 | 0.501984 | 0.78753  | 0.783497 | 0.877072 |
| MmugDNA.24648.1.S1_at   | MmugDNA.24648.1 | 6.29  | 6.12  | 0.27 | 0.43 | 1.12  | 0.54097  | 0.658361 | 0.804803 | 0.8003   |
| MmugDNA.24649.1.S1_at   | MmugDNA.24649.1 | 4.59  | 4.84  | 0.48 | 0.78 | -1.19 | 0.54595  | 0.550862 | 0.808278 | 0.730625 |
| MmugDNA.24650.1.S1_at   | MmugDNA.24650.1 | 4.24  | 4.73  | 0.16 | 0.66 | -1.41 | 0.266998 | 0.582275 | 0.627652 | 0.750926 |
| MmugDNA.24650.1.S1_at   | MmugDNA.24650.1 | 5.25  | 5.24  | 0.1  | 0.08 | 1.01  | 0.531967 | 0.764116 | 0.799992 | 0.862852 |
| MmugDNA.24654.1.S1_at   | MmugDNA.24654.1 | 7     | 7.11  | 0.24 | 0.12 | -1.08 | 0.467925 | 0.511428 | 0.764607 | 0.705549 |
| MmugDNA.24655.1.S1_at   | MmugDNA.24655.1 | 10.34 | 10.29 | 0.16 | 0.11 | 1.03  | 0.529559 | 0.711647 | 0.798376 | 0.832789 |
| MmugDNA.24655.1.S1_s_at | MmugDNA.24655.1 | 10.31 | 10.2  | 0.22 | 0.15 | -1.08 | 0.537602 | 0.591093 | 0.802735 | 0.756649 |
| MmugDNA.24656.1.S1_at   | MmugDNA.24656.1 | 11.78 | 11.82 | 0.14 | 0.11 | -1.02 | 0.376672 | 0.119529 | 0.706953 | 0.388186 |
| MmugDNA.24657.1.S1_at   | MmugDNA.24657.1 | 3.72  | 3.79  | 0.71 | 0.18 | -1.05 | 0.664977 | 0.66378  | 0.867733 | 0.80314  |
| MmugDNA.24658.1.S1_at   | MmugDNA.24658.1 | 5.01  | 5     | 0.21 | 0.31 | 1.01  | 0.989533 | 0.928092 | 0.996071 | 0.959154 |
| MmugDNA.2466.1.S1_at    | MmugDNA.2466.1  | 4.96  | 4.92  | 0.26 | 0.11 | 1.03  | 0.300966 | 0.199326 | 0.655268 | 0.474002 |
| MmugDNA.24660.1.S1_at   | MmugDNA.24660.1 | 6.95  | 6.57  | 0.17 | 0.29 | 1.3   | 0.032969 | 0.063911 | 0.345601 | 0.29906  |
| MmugDNA.24661.1.S1_at   | MmugDNA.24661.1 | 5.18  | 5.11  | 0.61 | 0.7  | 1.05  | 0.925558 | 0.265822 | 0.975188 | 0.531695 |
| MmugDNA.24662.1.S1_at   | MmugDNA.24662.1 | 11.22 | 10.82 | 0.33 | 0.26 | 1.32  | 0.285946 | 0.044154 | 0.643508 | 0.254547 |
| MmugDNA.24663.1.S1_at   | MmugDNA.24663.1 | 3.2   | 3.2   | 0.64 | 0.24 | -1    | 0.407826 | 0.43313  | 0.728984 | 0.653502 |
| MmugDNA.24664.1.S1_at   | MmugDNA.24664.1 | 11.71 | 11.45 | 0.22 | 0.28 | 1.2   | 0.087633 | 0.008116 | 0.455349 | 0.119642 |
| MmugDNA.24665.1.S1_at   | MmugDNA.24665.1 | 5.07  | 5.09  | 0.22 | 0.13 | -1.02 | 0.452831 | 0.631494 | 0.755901 | 0.782845 |
| MmugDNA.24666.1.S1_at   | MmugDNA.24666.1 | 8.91  | 7.85  | 1.67 | 0.37 | 2.09  | 0.653714 | 0.828603 | 0.862462 | 0.901542 |
| MmugDNA.24669.1.S1_at   | MmugDNA.24669.1 | 12.38 | 12.38 | 0.03 | 0.07 | -1    | 0.722125 | 0.65027  | 0.892193 | 0.79555  |
| MmugDNA.24670.1.S1_at   | MmugDNA.24670.1 | 9.64  | 9.48  | 0.22 | 0.18 | 1.12  | 0.425825 | 0.338438 | 0.740112 | 0.585436 |
| MmugDNA.24670.1.S1_s_at | MmugDNA.24670.1 | 9.86  | 9.74  | 0.15 | 0.19 | 1.08  | 0.455186 | 0.149304 | 0.75733  | 0.423805 |
| MmugDNA.24672.1.S1_at   | MmugDNA.24672.1 | 5.57  | 5.4   | 0.12 | 0.03 | 1.13  | 0.098432 | 0.195584 | 0.467888 | 0.470441 |
| MmugDNA.24673.1.S1_at   | MmugDNA.24673.1 | 5.49  | 5.38  | 0.14 | 0.14 | 1.08  | 0.189572 | 0.585186 | 0.561064 | 0.752781 |
| MmugDNA.24675.1.S1_at   | MmugDNA.24675.1 | 5.13  | 5.21  | 0.46 | 0.12 | -1.06 | 0.523983 | 0.229486 | 0.795715 | 0.501527 |
| MmugDNA.24676.1.S1_at   | MmugDNA.24676.1 | 4.33  | 4.17  | 0.17 | 0.14 | 1.12  | 0.334678 | 0.686963 | 0.680517 | 0.817365 |
| MmugDNA.24677.1.S1_at   | MmugDNA.24677.1 | 3.71  | 3.76  | 0.06 | 0.07 | -1.04 | 0.371511 | 0.217082 | 0.705567 | 0.490668 |
| MmugDNA.24678.1.S1_at   | MmugDNA.24678.1 | 5.49  | 5.39  | 0.07 | 0.14 | 1.07  | 0.410053 | 0.721393 | 0.730568 | 0.838685 |
| MmugDNA.2468.1.S1_at    | MmugDNA.2468.1  | 6.64  | 7.08  | 0.14 | 0.14 | -1.35 | 0.03513  | 0.034785 | 0.351071 | 0.230686 |
| MmugDNA.24680.1.S1_at   | MmugDNA.24680.1 | 3.83  | 3.6   | 0.08 | 0.11 | 1.18  | 0.085203 | 0.114065 | 0.452236 | 0.380421 |
| MmugDNA.24683.1.S1_at   | MmugDNA.24683.1 | 10.77 | 9.91  | 0.84 | 0.08 | 1.82  | 0.12323  | 0.010481 | 0.496589 | 0.133867 |
| MmugDNA.24684.1.S1_at   | MmugDNA.24684.1 | 6.96  | 8.17  | 0.39 | 0.11 | -2.31 | 0.00648  | 0.090081 | 0.219462 | 0.344402 |
| MmugDNA.24686.1.S1_at   | MmugDNA.24686.1 | 6     | 5.97  | 0.14 | 0.17 | 1.01  | 0.385394 | 0.530175 | 0.712733 | 0.717775 |
| MmugDNA.24687.1.S1_at   | MmugDNA.24687.1 | 7.23  | 6.21  | 0.54 | 0.32 | 2.03  | 0.122905 | 0.189189 | 0.496324 | 0.464997 |
| MmugDNA.24688.1.S1_at   | MmugDNA.24688.1 | 12.54 | 9.97  | 0.23 | 0.56 | 5.93  | 0.002778 | 0.007013 | 0.185369 | 0.113029 |
| MmugDNA.24689.1.S1_at   | MmugDNA.24689.1 | 5.84  | 5.6   | 0.15 | 0.1  | 1.18  | 0.109875 | 0.052002 | 0.482728 | 0.273539 |
| MmugDNA.2469.1.S1_at    | MmugDNA.2469.1  | 4.97  | 5.77  | 0.2  | 0.37 | -1.74 | 0.049289 | 0.21172  | 0.385423 | 0.485746 |
| MmugDNA.24693.1.S1_at   | MmugDNA.24693.1 | 5.01  | 4.89  | 0.08 | 0.09 | 1.09  | 0.81213  | 0.624763 | 0.932076 | 0.77888  |
| MmugDNA.24694.1.S1_at   | MmugDNA.24694.1 | 7.5   | 7.42  | 0.55 | 0.1  | 1.05  | 0.343586 | 0.336951 | 0.686769 | 0.584184 |
| MmugDNA.24695.1.S1_at   | MmugDNA.24695.1 | 4.56  | 4.38  | 0.35 | 0.2  | 1.13  | 0.187042 | 0.243125 | 0.559702 | 0.513356 |

|                         |                 |       |       |      |      |       |          |          |          |          |
|-------------------------|-----------------|-------|-------|------|------|-------|----------|----------|----------|----------|
| MmugDNA.24696.1.S1_at   | MmugDNA.24696.1 | 4.18  | 4.15  | 0.63 | 0.11 | 1.02  | 0.34774  | 0.408597 | 0.688926 | 0.635757 |
| MmugDNA.24697.1.S1_at   | MmugDNA.24697.1 | 11.28 | 11.55 | 0.18 | 0.08 | -1.2  | 0.052519 | 0.023892 | 0.39261  | 0.193629 |
| MmugDNA.24698.1.S1_at   | MmugDNA.24698.1 | 4.16  | 4.15  | 0.22 | 0.28 | 1.01  | 0.654885 | 0.53515  | 0.862999 | 0.720819 |
| MmugDNA.24699.1.S1_at   | MmugDNA.24699.1 | 9.15  | 9.67  | 0.86 | 0.13 | -1.44 | 0.420554 | 0.526489 | 0.737009 | 0.715574 |
| MmugDNA.24700.1.S1_at   | MmugDNA.24700.1 | 9.5   | 9.39  | 0.19 | 0.03 | 1.08  | 0.406373 | 0.22751  | 0.727915 | 0.499805 |
| MmugDNA.24701.1.S1_at   | MmugDNA.24701.1 | 7.67  | 7.49  | 0.34 | 0.24 | 1.13  | 0.882307 | 0.045203 | 0.959179 | 0.256979 |
| MmugDNA.24702.1.S1_at   | MmugDNA.24702.1 | 11.74 | 12.64 | 0.52 | 0.04 | -1.87 | 0.039833 | 0.018075 | 0.362691 | 0.169379 |
| MmugDNA.24704.1.S1_at   | MmugDNA.24704.1 | 7.56  | 7.53  | 0.46 | 0.15 | 1.02  | 0.570612 | 0.178327 | 0.822247 | 0.454672 |
| MmugDNA.24706.1.S1_at   | MmugDNA.24706.1 | 3.37  | 3.18  | 0.17 | 0.08 | 1.14  | 0.31127  | 0.13599  | 0.663146 | 0.408287 |
| MmugDNA.24709.1.S1_at   | MmugDNA.24709.1 | 5.95  | 5.87  | 0.21 | 0.1  | 1.06  | 0.366008 | 0.417448 | 0.701483 | 0.64224  |
| MmugDNA.2471.1.S1_at    | MmugDNA.2471.1  | 5.62  | 5.3   | 0.04 | 0.09 | -1.25 | 0.003148 | 0.005702 | 0.191107 | 0.104102 |
| MmugDNA.24710.1.S1_s_at | MmugDNA.24710.1 | 11.94 | 12.17 | 0.17 | 0.05 | -1.17 | 0.23659  | 0.083637 | 0.603519 | 0.334255 |
| MmugDNA.24714.1.S1_at   | MmugDNA.24714.1 | 10.05 | 9.61  | 0.92 | 0.04 | 1.36  | 0.990441 | 0.838758 | 0.996425 | 0.908049 |
| MmugDNA.24716.1.S1_at   | MmugDNA.24716.1 | 5.91  | 5.69  | 0.08 | 0.14 | 1.16  | 0.087899 | 0.14504  | 0.455784 | 0.418994 |
| MmugDNA.24717.1.S1_at   | MmugDNA.24717.1 | 5.3   | 5.25  | 0.17 | 0.15 | 1.03  | 0.357895 | 0.383365 | 0.695993 | 0.619375 |
| MmugDNA.24719.1.S1_at   | MmugDNA.24719.1 | 5.18  | 4.94  | 0.08 | 0.26 | 1.18  | 0.308534 | 0.690054 | 0.661234 | 0.819235 |
| MmugDNA.2472.1.S1_at    | MmugDNA.2472.1  | 3.83  | 4.21  | 0.21 | 0.72 | -1.31 | 0.122215 | 0.329859 | 0.495677 | 0.578874 |
| MmugDNA.24720.1.S1_at   | MmugDNA.24720.1 | 3.56  | 3.62  | 0.08 | 0.18 | -1.04 | 0.601216 | 0.362381 | 0.838121 | 0.602965 |
| MmugDNA.24723.1.S1_at   | MmugDNA.24723.1 | 12.12 | 12.46 | 0.32 | 0.05 | -1.26 | 0.15111  | 0.085721 | 0.52444  | 0.337761 |
| MmugDNA.24725.1.S1_at   | MmugDNA.24725.1 | 3.76  | 3.84  | 0.09 | 0.04 | -1.05 | 0.316003 | 0.730225 | 0.666249 | 0.843882 |
| MmugDNA.24726.1.S1_at   | MmugDNA.24726.1 | 10.16 | 9.53  | 0.13 | 0.03 | 1.56  | 0.002278 | 0.029584 | 0.174757 | 0.213628 |
| MmugDNA.24729.1.S1_at   | MmugDNA.24729.1 | 7.82  | 8.56  | 0.74 | 0.12 | -1.68 | 0.189634 | 0.054918 | 0.561075 | 0.279778 |
| MmugDNA.24732.1.S1_at   | MmugDNA.24732.1 | 6.21  | 6.68  | 0.11 | 0.11 | -1.38 | 0.01011  | 0.001308 | 0.24663  | 0.055684 |
| MmugDNA.24732.1.S1_s_at | MmugDNA.24732.1 | 6.2   | 6.43  | 0.03 | 0.08 | -1.17 | 0.015051 | 0.00216  | 0.2796   | 0.068763 |
| MmugDNA.24733.1.S1_at   | MmugDNA.24733.1 | 4.38  | 4.31  | 0.06 | 0.22 | 1.05  | 0.21809  | 0.262127 | 0.588076 | 0.528402 |
| MmugDNA.24734.1.S1_at   | MmugDNA.24734.1 | 3.7   | 3.45  | 0.3  | 0.22 | 1.19  | 0.388473 | 0.559663 | 0.715363 | 0.736365 |
| MmugDNA.24735.1.S1_s_at | MmugDNA.24735.1 | 8.99  | 8.72  | 0.27 | 0.33 | 1.2   | 0.152164 | 0.075259 | 0.525249 | 0.319434 |
| MmugDNA.24738.1.S1_at   | MmugDNA.24738.1 | 6.22  | 6.08  | 0.18 | 0.17 | 1.11  | 0.671274 | 0.879265 | 0.870263 | 0.9311   |
| MmugDNA.2474.1.S1_at    | MmugDNA.2474.1  | 5.42  | 5.11  | 0.05 | 0.14 | 1.24  | 0.053194 | 0.158621 | 0.394158 | 0.434612 |
| MmugDNA.24741.1.S1_at   | MmugDNA.24741.1 | 3.5   | 3.19  | 0.09 | 0.02 | 1.23  | 0.008372 | 0.004225 | 0.233808 | 0.091435 |
| MmugDNA.24745.1.S1_at   | MmugDNA.24745.1 | 4.29  | 3.56  | 0.37 | 0.17 | 1.65  | 0.039988 | 0.101033 | 0.362955 | 0.360691 |
| MmugDNA.24748.1.S1_at   | MmugDNA.24748.1 | 8.83  | 7.99  | 0.02 | 0.23 | 1.79  | 0.001857 | 0.007493 | 0.168363 | 0.116204 |
| MmugDNA.2475.1.S1_at    | MmugDNA.2475.1  | 8.83  | 8.43  | 0.14 | 0.25 | 1.32  | 0.045517 | 0.015007 | 0.376595 | 0.155713 |
| MmugDNA.24750.1.S1_at   | MmugDNA.24750.1 | 5.35  | 5.59  | 0.23 | 0.1  | -1.19 | 0.266252 | 0.012959 | 0.627106 | 0.146501 |
| MmugDNA.24751.1.S1_at   | MmugDNA.24751.1 | 4.73  | 4.81  | 0.59 | 0    | -1.06 | 0.505005 | 0.649939 | 0.785092 | 0.795295 |
| MmugDNA.24752.1.S1_at   | MmugDNA.24752.1 | 5.41  | 5.41  | 0.12 | 0.07 | 1     | 0.638566 | 0.875172 | 0.855989 | 0.929179 |
| MmugDNA.24754.1.S1_at   | MmugDNA.24754.1 | 4.67  | 4.87  | 0.23 | 0.08 | -1.14 | 0.691353 | 0.8019   | 0.879786 | 0.885989 |
| MmugDNA.24755.1.S1_at   | MmugDNA.24755.1 | 5.82  | 5.76  | 0.24 | 0.09 | 1.04  | 0.556805 | 0.697979 | 0.814405 | 0.824551 |
| MmugDNA.24756.1.S1_at   | MmugDNA.24756.1 | 9.82  | 9.82  | 0.78 | 0.18 | -1    | 0.98255  | 0.929187 | 0.994572 | 0.959644 |
| MmugDNA.24757.1.S1_at   | MmugDNA.24757.1 | 4.94  | 6.25  | 0.2  | 0.06 | -2.48 | 0.000569 | 0.000084 | 0.143137 | 0.027016 |
| MmugDNA.24758.1.S1_at   | MmugDNA.24758.1 | 5.85  | 5.67  | 0.37 | 0.17 | 1.13  | 0.246712 | 0.063816 | 0.612234 | 0.29906  |
| MmugDNA.24759.1.S1_at   | MmugDNA.24759.1 | 6.67  | 6.55  | 0.26 | 0.1  | 1.09  | 0.190099 | 0.212878 | 0.561346 | 0.486798 |
| MmugDNA.24760.1.S1_at   | MmugDNA.24760.1 | 8.86  | 9.53  | 1.01 | 0.38 | -1.58 | 0.580707 | 0.438792 | 0.827245 | 0.657691 |



|                         |                 |       |       |      |      |       |          |          |          |          |
|-------------------------|-----------------|-------|-------|------|------|-------|----------|----------|----------|----------|
| MmugDNA.24762.1.S1_at   | MmugDNA.24762.1 | 12.31 | 11.77 | 0.19 | 0.08 | 1.45  | 0.011166 | 0.009699 | 0.252671 | 0.129542 |
| MmugDNA.24763.1.S1_at   | MmugDNA.24763.1 | 6.96  | 6.7   | 0.22 | 0.15 | 1.2   | 0.052472 | 0.152892 | 0.392511 | 0.427765 |
| MmugDNA.24764.1.S1_at   | MmugDNA.24764.1 | 8.06  | 8.44  | 0.15 | 0.2  | -1.3  | 0.07925  | 0.059364 | 0.442056 | 0.29054  |
| MmugDNA.24765.1.S1_at   | MmugDNA.24765.1 | 11.56 | 11.06 | 0.49 | 0.06 | 1.42  | 0.117258 | 0.090307 | 0.490908 | 0.3447   |
| MmugDNA.24766.1.S1_at   | MmugDNA.24766.1 | 12.07 | 12.05 | 0.2  | 0.02 | 1.01  | 0.89088  | 0.462791 | 0.962507 | 0.674127 |
| MmugDNA.24766.1.S1_s_at | MmugDNA.24766.1 | 12.56 | 12.54 | 0.21 | 0.03 | 1.01  | 0.857639 | 0.491374 | 0.949729 | 0.692976 |
| MmugDNA.24767.1.S1_at   | MmugDNA.24767.1 | 8.43  | 9.25  | 0.43 | 0.05 | -1.76 | 0.04817  | 0.034391 | 0.382528 | 0.229384 |
| MmugDNA.24768.1.S1_at   | MmugDNA.24768.1 | 7.27  | 8.46  | 0.95 | 0.24 | -2.27 | 0.093333 | 0.130079 | 0.462462 | 0.401724 |
| MmugDNA.24769.1.S1_at   | MmugDNA.24769.1 | 5.93  | 5.89  | 0.3  | 0.05 | 1.02  | 0.769113 | 0.402048 | 0.913441 | 0.631153 |
| MmugDNA.2477.1.S1_at    | MmugDNA.2477.1  | 5.24  | 5.58  | 0.52 | 0.38 | -1.27 | 0.694607 | 0.098911 | 0.881132 | 0.357049 |
| MmugDNA.2477.1.S1_x_at  | MmugDNA.2477.1  | 5.66  | 5.52  | 0.08 | 0.02 | 1.1   | 0.181638 | 0.034308 | 0.554854 | 0.229145 |
| MmugDNA.24770.1.S1_at   | MmugDNA.24770.1 | 7.6   | 7.49  | 0.16 | 0.18 | 1.08  | 0.499951 | 0.078167 | 0.782311 | 0.324661 |
| MmugDNA.24772.1.S1_at   | MmugDNA.24772.1 | 5.43  | 5.05  | 0.02 | 0.2  | 1.3   | 0.041679 | 0.059152 | 0.367007 | 0.290162 |
| MmugDNA.24775.1.S1_at   | MmugDNA.24775.1 | 2.9   | 2.98  | 0.03 | 0.11 | -1.06 | 0.087183 | 0.187277 | 0.454785 | 0.463284 |
| MmugDNA.24776.1.S1_at   | MmugDNA.24776.1 | 9.5   | 9.55  | 0.31 | 0.11 | -1.03 | 0.952828 | 0.658707 | 0.984203 | 0.800473 |
| MmugDNA.24777.1.S1_at   | MmugDNA.24777.1 | 4.89  | 4.88  | 0.1  | 0.13 | 1.01  | 0.535494 | 0.189658 | 0.801792 | 0.465297 |
| MmugDNA.24779.1.S1_at   | MmugDNA.24779.1 | 3.46  | 3.42  | 0.02 | 0.06 | 1.02  | 0.282373 | 0.601946 | 0.640907 | 0.763127 |
| MmugDNA.24781.1.S1_at   | MmugDNA.24781.1 | 4.24  | 4.31  | 0.06 | 0.33 | -1.05 | 0.262956 | 0.55004  | 0.624997 | 0.730241 |
| MmugDNA.24782.1.S1_at   | MmugDNA.24782.1 | 5.37  | 5.36  | 0.09 | 0.02 | 1.01  | 0.433612 | 0.676357 | 0.744539 | 0.810914 |
| MmugDNA.24785.1.S1_s_at | MmugDNA.24785.1 | 12.37 | 12.62 | 0.14 | 0.05 | -1.19 | 0.092294 | 0.004839 | 0.460762 | 0.097041 |
| MmugDNA.24786.1.S1_at   | MmugDNA.24786.1 | 4.17  | 4.12  | 0.27 | 0.15 | 1.03  | 0.383592 | 0.712345 | 0.71148  | 0.833347 |
| MmugDNA.24786.1.S1_s_at | MmugDNA.24786.1 | 5.08  | 4.9   | 0.08 | 0.03 | 1.13  | 0.024258 | 0.006381 | 0.317812 | 0.108551 |
| MmugDNA.24787.1.S1_at   | MmugDNA.24787.1 | 4.7   | 4.77  | 0.02 | 0.02 | -1.05 | 0.034605 | 0.157567 | 0.350124 | 0.433131 |
| MmugDNA.24788.1.S1_at   | MmugDNA.24788.1 | 4.36  | 4.54  | 0.31 | 0.06 | -1.13 | 0.850753 | 0.937979 | 0.94746  | 0.964856 |
| MmugDNA.2479.1.S1_at    | MmugDNA.2479.1  | 6.18  | 6.24  | 0.81 | 0.21 | -1.04 | 0.914573 | 0.936309 | 0.970887 | 0.964102 |
| MmugDNA.24790.1.S1_at   | MmugDNA.24790.1 | 6.2   | 6.2   | 0.22 | 0.2  | 1.01  | 0.928475 | 0.422876 | 0.976259 | 0.646054 |
| MmugDNA.24790.1.S1_x_at | MmugDNA.24790.1 | 6.89  | 6.89  | 0.16 | 0.16 | -1    | 0.664952 | 0.256262 | 0.867733 | 0.524079 |
| MmugDNA.24792.1.S1_at   | MmugDNA.24792.1 | 5.57  | 5.41  | 0.03 | 0.16 | 1.12  | 0.20816  | 0.120739 | 0.579837 | 0.389579 |
| MmugDNA.24795.1.S1_at   | MmugDNA.24795.1 | 6.19  | 6.3   | 0.4  | 0.22 | -1.08 | 0.687156 | 0.845569 | 0.877656 | 0.912145 |
| MmugDNA.24796.1.S1_at   | MmugDNA.24796.1 | 4.16  | 4.08  | 0.18 | 0.18 | 1.05  | 0.630248 | 0.49796  | 0.851919 | 0.697158 |
| MmugDNA.24799.1.S1_at   | MmugDNA.24799.1 | 4.37  | 4.39  | 0.14 | 0.21 | -1.01 | 0.282659 | 0.278469 | 0.641025 | 0.54224  |
| MmugDNA.248.1.S1_at     | MmugDNA.248.1   | 5.1   | 4.98  | 0.06 | 0.1  | 1.09  | 0.407904 | 0.882868 | 0.729046 | 0.933206 |
| MmugDNA.2480.1.S1_at    | MmugDNA.2480.1  | 6.16  | 5.82  | 0.39 | 0.49 | 1.27  | 0.862515 | 0.960578 | 0.951603 | 0.977548 |
| MmugDNA.24800.1.S1_at   | MmugDNA.24800.1 | 2.79  | 2.81  | 0.17 | 0.03 | -1.02 | 0.603445 | 0.746139 | 0.839251 | 0.852688 |
| MmugDNA.24801.1.S1_at   | MmugDNA.24801.1 | 5.08  | 5.9   | 0.09 | 0.26 | -1.77 | 0.004964 | 0.007796 | 0.204084 | 0.117765 |
| MmugDNA.24802.1.S1_at   | MmugDNA.24802.1 | 3.75  | 3.48  | 0.06 | 0.21 | 1.2   | 0.385037 | 0.394647 | 0.71236  | 0.627158 |
| MmugDNA.24805.1.S1_at   | MmugDNA.24805.1 | 8.81  | 8.64  | 0.08 | 0.11 | 1.13  | 0.037176 | 0.120255 | 0.356809 | 0.389181 |
| MmugDNA.24806.1.S1_at   | MmugDNA.24806.1 | 4.47  | 4.48  | 0.1  | 0.15 | -1.01 | 0.688638 | 0.814075 | 0.878496 | 0.892736 |
| MmugDNA.24807.1.S1_at   | MmugDNA.24807.1 | 6.51  | 6.28  | 0.33 | 0.04 | 1.17  | 0.09286  | 0.448416 | 0.461489 | 0.664262 |
| MmugDNA.24808.1.S1_at   | MmugDNA.24808.1 | 3.22  | 3.17  | 0.13 | 0.02 | 1.03  | 0.525466 | 0.495321 | 0.796198 | 0.695427 |
| MmugDNA.24808.1.S1_x_at | MmugDNA.24808.1 | 5.43  | 5.45  | 0.06 | 0.11 | -1.02 | 0.388217 | 0.293139 | 0.715159 | 0.553061 |
| MmugDNA.24811.1.S1_at   | MmugDNA.24811.1 | 12.76 | 12.75 | 0.2  | 0.03 | 1.01  | 0.923712 | 0.632962 | 0.974399 | 0.783881 |
| MmugDNA.24812.1.S1_at   | MmugDNA.24812.1 | 3.98  | 3.84  | 0.11 | 0.07 | 1.1   | 0.238333 | 0.014145 | 0.605308 | 0.15208  |

|                         |                 |       |       |      |      |       |          |          |          |          |
|-------------------------|-----------------|-------|-------|------|------|-------|----------|----------|----------|----------|
| MmugDNA.24813.1.S1_at   | MmugDNA.24813.1 | 6.52  | 7.08  | 0.45 | 0.21 | -1.48 | 0.072176 | 0.328051 | 0.432091 | 0.577849 |
| MmugDNA.24814.1.S1_at   | MmugDNA.24814.1 | 5.56  | 5.75  | 0.15 | 0.43 | -1.14 | 0.572304 | 0.877871 | 0.823212 | 0.93029  |
| MmugDNA.24815.1.S1_at   | MmugDNA.24815.1 | 3.55  | 3.65  | 0.04 | 0.33 | -1.08 | 0.659899 | 0.783014 | 0.865468 | 0.874447 |
| MmugDNA.24817.1.S1_at   | MmugDNA.24817.1 | 6.16  | 8.24  | 1.72 | 0.17 | -4.21 | 0.097795 | 0.098986 | 0.466795 | 0.357049 |
| MmugDNA.24818.1.S1_at   | MmugDNA.24818.1 | 7.38  | 9.57  | 1.9  | 0.14 | -4.56 | 0.145336 | 0.155439 | 0.520409 | 0.430802 |
| MmugDNA.2482.1.S1_at    | MmugDNA.2482.1  | 6.51  | 7.13  | 0.06 | 0.25 | -1.54 | 0.010861 | 0.266634 | 0.250539 | 0.532396 |
| MmugDNA.24821.1.S1_s_at | MmugDNA.24821.1 | 5.28  | 4.97  | 1.87 | 0.18 | 1.24  | 0.714309 | 0.351609 | 0.888728 | 0.595114 |
| MmugDNA.24822.1.S1_at   | MmugDNA.24822.1 | 5.04  | 5.01  | 0.08 | 0.24 | 1.02  | 0.515759 | 0.74214  | 0.791016 | 0.850621 |
| MmugDNA.24824.1.S1_at   | MmugDNA.24824.1 | 5.02  | 5.86  | 0.92 | 0.24 | -1.78 | 0.487511 | 0.579534 | 0.775077 | 0.749182 |
| MmugDNA.24825.1.S1_at   | MmugDNA.24825.1 | 10    | 10.06 | 0.35 | 0.09 | -1.04 | 0.638439 | 0.004414 | 0.855923 | 0.092896 |
| MmugDNA.24826.1.S1_at   | MmugDNA.24826.1 | 4.25  | 4.28  | 0.21 | 0.3  | -1.02 | 0.707277 | 0.001948 | 0.886085 | 0.065813 |
| MmugDNA.24827.1.S1_at   | MmugDNA.24827.1 | 4.92  | 5.35  | 0.76 | 0.39 | -1.35 | 0.696106 | 0.500375 | 0.881964 | 0.699024 |
| MmugDNA.24829.1.S1_at   | MmugDNA.24829.1 | 4.94  | 4.96  | 0.14 | 0.09 | -1.01 | 0.524493 | 0.348104 | 0.795908 | 0.592293 |
| MmugDNA.2483.1.S1_at    | MmugDNA.2483.1  | 5.06  | 5.86  | 0.73 | 0.26 | -1.75 | 0.440758 | 0.647138 | 0.748664 | 0.793279 |
| MmugDNA.24830.1.S1_at   | MmugDNA.24830.1 | 8.94  | 8.21  | 0.3  | 0.11 | 1.66  | 0.016333 | 0.005278 | 0.287435 | 0.100662 |
| MmugDNA.24831.1.S1_at   | MmugDNA.24831.1 | 6.36  | 6.5   | 0.44 | 0.21 | -1.1  | 0.263341 | 0.29617  | 0.625264 | 0.555371 |
| MmugDNA.24832.1.S1_at   | MmugDNA.24832.1 | 9.63  | 9.86  | 0.68 | 0.06 | -1.17 | 0.703597 | 0.870798 | 0.884789 | 0.926571 |
| MmugDNA.24834.1.S1_at   | MmugDNA.24834.1 | 4.44  | 4.62  | 0.31 | 0.27 | -1.13 | 0.479277 | 0.234546 | 0.770691 | 0.505741 |
| MmugDNA.24835.1.S1_at   | MmugDNA.24835.1 | 12.77 | 12.71 | 0.22 | 0.06 | 1.05  | 0.517975 | 0.005772 | 0.792364 | 0.104378 |
| MmugDNA.24836.1.S1_at   | MmugDNA.24836.1 | 11.63 | 11.59 | 0.04 | 0.11 | 1.03  | 0.514812 | 0.014877 | 0.790654 | 0.155055 |
| MmugDNA.24837.1.S1_s_at | MmugDNA.24837.1 | 12.07 | 12.08 | 0.14 | 0.05 | -1    | 0.986129 | 0.938161 | 0.995541 | 0.964949 |
| MmugDNA.2484.1.S1_at    | MmugDNA.2484.1  | 3.82  | 4.14  | 0.24 | 0.2  | -1.25 | 0.144556 | 0.161701 | 0.519872 | 0.437771 |
| MmugDNA.24840.1.S1_at   | MmugDNA.24840.1 | 8.2   | 8.35  | 0.57 | 0.05 | -1.11 | 0.646738 | 0.581999 | 0.859235 | 0.750784 |
| MmugDNA.24842.1.S1_at   | MmugDNA.24842.1 | 12.02 | 11.98 | 0.4  | 0.13 | 1.03  | 0.649811 | 0.076329 | 0.860614 | 0.321368 |
| MmugDNA.24843.1.S1_at   | MmugDNA.24843.1 | 7.59  | 7.58  | 0.5  | 0.03 | 1.01  | 0.869795 | 0.651753 | 0.954581 | 0.796356 |
| MmugDNA.24843.1.S1_s_at | MmugDNA.24843.1 | 9.22  | 9.6   | 0.4  | 0.02 | -1.31 | 0.15908  | 0.131451 | 0.531772 | 0.403584 |
| MmugDNA.24843.1.S1_x_at | MmugDNA.24843.1 | 9.36  | 9.41  | 0.47 | 0.07 | -1.03 | 0.918971 | 0.389727 | 0.972329 | 0.623783 |
| MmugDNA.24844.1.S1_at   | MmugDNA.24844.1 | 9.86  | 10.18 | 0.55 | 0.13 | -1.24 | 0.393375 | 0.306041 | 0.71919  | 0.562782 |
| MmugDNA.24845.1.S1_at   | MmugDNA.24845.1 | 6.76  | 7     | 0.06 | 0.21 | -1.18 | 0.112454 | 0.107455 | 0.485808 | 0.370311 |
| MmugDNA.24846.1.S1_at   | MmugDNA.24846.1 | 9.58  | 9.77  | 0.1  | 0.02 | -1.14 | 0.024861 | 0.010351 | 0.320135 | 0.133191 |
| MmugDNA.24847.1.S1_at   | MmugDNA.24847.1 | 5.02  | 5.1   | 0.19 | 0.13 | -1.06 | 0.329765 | 0.274978 | 0.676511 | 0.539402 |
| MmugDNA.24848.1.S1_at   | MmugDNA.24848.1 | 5.65  | 5.85  | 0.29 | 0.26 | -1.15 | 0.129786 | 0.260964 | 0.504468 | 0.527351 |
| MmugDNA.24849.1.S1_at   | MmugDNA.24849.1 | 7.63  | 7.59  | 0.49 | 0.55 | 1.02  | 0.44938  | 0.271045 | 0.754342 | 0.536178 |
| MmugDNA.2485.1.S1_at    | MmugDNA.2485.1  | 6.57  | 6.41  | 0.25 | 0.12 | 1.12  | 0.152589 | 0.328938 | 0.525558 | 0.578482 |
| MmugDNA.24850.1.S1_at   | MmugDNA.24850.1 | 3.19  | 3.2   | 0.13 | 0.03 | -1.01 | 0.628976 | 0.8939   | 0.851379 | 0.939452 |
| MmugDNA.24851.1.S1_at   | MmugDNA.24851.1 | 4.7   | 4.57  | 0.18 | 0.1  | 1.09  | 0.12237  | 0.125803 | 0.495694 | 0.396313 |
| MmugDNA.24852.1.S1_at   | MmugDNA.24852.1 | 5.2   | 5.14  | 0.06 | 0.09 | 1.05  | 0.312082 | 0.09029  | 0.66374  | 0.3447   |
| MmugDNA.24853.1.S1_at   | MmugDNA.24853.1 | 3.25  | 3.24  | 0.01 | 0.14 | 1.01  | 0.856274 | 0.814583 | 0.949311 | 0.892959 |
| MmugDNA.24854.1.S1_at   | MmugDNA.24854.1 | 3.71  | 3.75  | 0.13 | 0.11 | -1.02 | 0.847268 | 0.973582 | 0.946516 | 0.985645 |
| MmugDNA.24855.1.S1_at   | MmugDNA.24855.1 | 3.84  | 4.11  | 0.04 | 0.05 | -1.2  | 0.001403 | 0.001094 | 0.160065 | 0.052283 |
| MmugDNA.24856.1.S1_at   | MmugDNA.24856.1 | 9.31  | 9.54  | 0.29 | 0.23 | -1.17 | 0.812562 | 0.816146 | 0.932103 | 0.893955 |
| MmugDNA.24857.1.S1_at   | MmugDNA.24857.1 | 7.19  | 6.75  | 0.53 | 0.17 | 1.35  | 0.208255 | 0.244058 | 0.579938 | 0.514111 |
| MmugDNA.24858.1.S1_at   | MmugDNA.24858.1 | 6.6   | 7.77  | 0.53 | 0.04 | -2.26 | 0.014167 | 0.029574 | 0.274019 | 0.213628 |

|                         |                 |       |       |      |      |       |          |          |          |          |
|-------------------------|-----------------|-------|-------|------|------|-------|----------|----------|----------|----------|
| MmugDNA.24859.1.S1_at   | MmugDNA.24859.1 | 4.1   | 4.26  | 0.17 | 0.25 | -1.12 | 0.959059 | 0.965669 | 0.986548 | 0.980751 |
| MmugDNA.2486.1.S1_at    | MmugDNA.2486.1  | 3.4   | 3.68  | 1.11 | 0.19 | -1.21 | 0.574274 | 0.773402 | 0.823965 | 0.868269 |
| MmugDNA.24860.1.S1_at   | MmugDNA.24860.1 | 5.68  | 5.67  | 0.08 | 0.12 | 1.01  | 0.506352 | 0.574839 | 0.785754 | 0.746142 |
| MmugDNA.24863.1.S1_at   | MmugDNA.24863.1 | 13.44 | 12.63 | 2.29 | 0.19 | 1.75  | 0.797791 | 0.151824 | 0.925728 | 0.426505 |
| MmugDNA.24864.1.S1_at   | MmugDNA.24864.1 | 4     | 3.81  | 0.04 | 0.12 | 1.14  | 0.181286 | 0.223085 | 0.554504 | 0.49588  |
| MmugDNA.24866.1.S1_at   | MmugDNA.24866.1 | 9.48  | 8.86  | 0.7  | 0.51 | 1.53  | 0.11485  | 0.017239 | 0.487957 | 0.166344 |
| MmugDNA.24867.1.S1_at   | MmugDNA.24867.1 | 4.58  | 4.44  | 0.48 | 0.35 | 1.1   | 0.966915 | 0.5133   | 0.989086 | 0.706881 |
| MmugDNA.24868.1.S1_at   | MmugDNA.24868.1 | 6.4   | 6.16  | 0.06 | 0.15 | 1.18  | 0.019159 | 0.005532 | 0.299936 | 0.102614 |
| MmugDNA.24869.1.S1_at   | MmugDNA.24869.1 | 4.45  | 4.35  | 0.23 | 0.07 | 1.07  | 0.484268 | 0.034035 | 0.773506 | 0.228307 |
| MmugDNA.2487.1.S1_at    | MmugDNA.2487.1  | 7.23  | 7.19  | 0.21 | 0.02 | 1.03  | 0.530644 | 0.240813 | 0.799173 | 0.511521 |
| MmugDNA.24870.1.S1_at   | MmugDNA.24870.1 | 5.7   | 5.93  | 0.08 | 0.26 | -1.18 | 0.143184 | 0.290506 | 0.518488 | 0.55123  |
| MmugDNA.24871.1.S1_at   | MmugDNA.24871.1 | 5.09  | 5.41  | 0.11 | 0.14 | -1.24 | 0.069056 | 0.64835  | 0.426529 | 0.794176 |
| MmugDNA.24872.1.S1_at   | MmugDNA.24872.1 | 8.43  | 8.37  | 0.12 | 0.24 | 1.05  | 0.609444 | 0.130961 | 0.841773 | 0.403037 |
| MmugDNA.24873.1.S1_at   | MmugDNA.24873.1 | 6.55  | 6.33  | 0.11 | 0.16 | 1.17  | 0.116574 | 0.939272 | 0.489684 | 0.965536 |
| MmugDNA.24874.1.S1_at   | MmugDNA.24874.1 | 4.08  | 3.91  | 0.26 | 0.01 | 1.13  | 0.857931 | 0.708909 | 0.949754 | 0.831167 |
| MmugDNA.24875.1.S1_at   | MmugDNA.24875.1 | 3.9   | 3.54  | 0.14 | 0.14 | 1.28  | 0.037048 | 0.041522 | 0.356628 | 0.24862  |
| MmugDNA.24876.1.S1_at   | MmugDNA.24876.1 | 4.1   | 4.33  | 0.24 | 0.49 | -1.17 | 0.22508  | 0.37277  | 0.594321 | 0.611661 |
| MmugDNA.24877.1.S1_at   | MmugDNA.24877.1 | 8.85  | 8.75  | 0.66 | 0.13 | 1.07  | 0.780612 | 0.841267 | 0.919137 | 0.909576 |
| MmugDNA.2488.1.S1_at    | MmugDNA.2488.1  | 4.19  | 4.16  | 0.25 | 0.1  | 1.03  | 0.346178 | 0.468557 | 0.687873 | 0.677755 |
| MmugDNA.24881.1.S1_at   | MmugDNA.24881.1 | 7.2   | 7.19  | 0.05 | 0.06 | 1     | 0.653455 | 0.953351 | 0.86241  | 0.97351  |
| MmugDNA.24882.1.S1_at   | MmugDNA.24882.1 | 8.72  | 8.99  | 0.65 | 0.15 | -1.2  | 0.738508 | 0.839191 | 0.899959 | 0.908339 |
| MmugDNA.24883.1.S1_at   | MmugDNA.24883.1 | 5.9   | 6.04  | 0.33 | 0.26 | -1.11 | 0.602301 | 0.546658 | 0.838783 | 0.728135 |
| MmugDNA.24884.1.S1_at   | MmugDNA.24884.1 | 3.96  | 3.9   | 0.1  | 0.03 | 1.04  | 0.333199 | 0.688297 | 0.679469 | 0.818012 |
| MmugDNA.24885.1.S1_at   | MmugDNA.24885.1 | 2.6   | 2.67  | 0.1  | 0.03 | -1.05 | 0.91491  | 0.327816 | 0.970985 | 0.577604 |
| MmugDNA.24886.1.S1_x_at | MmugDNA.24886.1 | 8.58  | 8.77  | 0.31 | 0.21 | -1.14 | 0.265469 | 0.379937 | 0.626631 | 0.616659 |
| MmugDNA.24889.1.S1_at   | MmugDNA.24889.1 | 4.28  | 4.3   | 0.61 | 0.64 | -1.01 | 0.766178 | 0.94279  | 0.912101 | 0.967515 |
| MmugDNA.2489.1.S1_at    | MmugDNA.2489.1  | 6.44  | 7.06  | 0.44 | 0.24 | -1.54 | 0.433815 | 0.447444 | 0.744646 | 0.663509 |
| MmugDNA.24890.1.S1_at   | MmugDNA.24890.1 | 5.83  | 6.71  | 0.82 | 0.33 | -1.83 | 0.267916 | 0.33203  | 0.628278 | 0.580563 |
| MmugDNA.24891.1.S1_at   | MmugDNA.24891.1 | 9.74  | 9.27  | 0.24 | 0.13 | 1.38  | 0.042927 | 0.104369 | 0.371035 | 0.365636 |
| MmugDNA.24892.1.S1_at   | MmugDNA.24892.1 | 10.19 | 9.96  | 0.2  | 0.02 | 1.18  | 0.122324 | 0.045302 | 0.495694 | 0.257157 |
| MmugDNA.24893.1.S1_at   | MmugDNA.24893.1 | 4.25  | 4.21  | 0.14 | 0.12 | 1.03  | 0.603566 | 0.642212 | 0.839251 | 0.79008  |
| MmugDNA.24894.1.S1_at   | MmugDNA.24894.1 | 5.85  | 6.28  | 0.09 | 0.32 | -1.34 | 0.082586 | 0.096807 | 0.4476   | 0.354207 |
| MmugDNA.24895.1.S1_at   | MmugDNA.24895.1 | 2.83  | 2.94  | 0.12 | 0.02 | -1.08 | 0.642346 | 0.722307 | 0.857724 | 0.83917  |
| MmugDNA.24896.1.S1_at   | MmugDNA.24896.1 | 13.26 | 13.36 | 0.1  | 0.03 | -1.07 | 0.213585 | 0.178939 | 0.584248 | 0.455243 |
| MmugDNA.24897.1.S1_at   | MmugDNA.24897.1 | 3.03  | 3.03  | 0.06 | 0.05 | -1    | 0.483995 | 0.484547 | 0.773436 | 0.688536 |
| MmugDNA.24898.1.S1_at   | MmugDNA.24898.1 | 4.8   | 4.76  | 0.21 | 0.25 | 1.03  | 0.364958 | 0.373628 | 0.700775 | 0.612389 |
| MmugDNA.24899.1.S1_at   | MmugDNA.24899.1 | 3.78  | 3.62  | 0.28 | 0.16 | 1.12  | 0.34468  | 0.259778 | 0.686997 | 0.526648 |
| MmugDNA.249.1.S1_at     | MmugDNA.249.1   | 7.43  | 7.34  | 0.11 | 0.34 | 1.06  | 0.716157 | 0.135556 | 0.889685 | 0.407655 |
| MmugDNA.24900.1.S1_at   | MmugDNA.24900.1 | 7.53  | 7.25  | 0.55 | 0.11 | 1.22  | 0.850492 | 0.093814 | 0.947381 | 0.350281 |
| MmugDNA.24901.1.S1_at   | MmugDNA.24901.1 | 7.19  | 7.45  | 0.39 | 0.13 | -1.2  | 0.263704 | 0.066215 | 0.625638 | 0.302858 |
| MmugDNA.24902.1.S1_at   | MmugDNA.24902.1 | 5.49  | 5.46  | 0.22 | 0.13 | 1.02  | 0.699713 | 0.924676 | 0.883309 | 0.957439 |
| MmugDNA.24903.1.S1_at   | MmugDNA.24903.1 | 3.96  | 3.15  | 0.96 | 0.13 | 1.76  | 0.180179 | 0.243222 | 0.553357 | 0.513356 |
| MmugDNA.24904.1.S1_at   | MmugDNA.24904.1 | 4.31  | 4.29  | 0.29 | 0.2  | 1.01  | 0.451388 | 0.460895 | 0.755167 | 0.672763 |

|                         |                 |       |       |      |      |       |          |          |          |          |
|-------------------------|-----------------|-------|-------|------|------|-------|----------|----------|----------|----------|
| MmugDNA.24905.1.S1_s_at | MmugDNA.24905.1 | 11.45 | 11.65 | 1.18 | 0.18 | -1.15 | 0.744319 | 0.197162 | 0.902542 | 0.472213 |
| MmugDNA.24906.1.S1_at   | MmugDNA.24906.1 | 2.73  | 2.8   | 0.19 | 0.18 | -1.05 | 0.739721 | 0.19097  | 0.900699 | 0.46629  |
| MmugDNA.24908.1.S1_at   | MmugDNA.24908.1 | 4.93  | 4.94  | 0.11 | 0.07 | -1.01 | 0.270312 | 0.275851 | 0.630253 | 0.540035 |
| MmugDNA.24909.1.S1_at   | MmugDNA.24909.1 | 12.71 | 13.42 | 0.23 | 0.07 | -1.64 | 0.014171 | 0.01082  | 0.274019 | 0.135641 |
| MmugDNA.24909.1.S1_s_at | MmugDNA.24909.1 | 11.95 | 12.7  | 0.25 | 0.1  | -1.68 | 0.018612 | 0.011378 | 0.298116 | 0.138214 |
| MmugDNA.2491.1.S1_at    | MmugDNA.2491.1  | 3.34  | 3.47  | 0.1  | 0.13 | -1.09 | 0.969453 | 0.340195 | 0.989952 | 0.586637 |
| MmugDNA.24910.1.S1_at   | MmugDNA.24910.1 | 4.45  | 4.31  | 0.06 | 0.08 | 1.1   | 0.068662 | 0.089348 | 0.426    | 0.343595 |
| MmugDNA.24912.1.S1_at   | MmugDNA.24912.1 | 3.36  | 3.4   | 0.22 | 0.13 | -1.03 | 0.51867  | 0.694224 | 0.792794 | 0.822191 |
| MmugDNA.24913.1.S1_at   | MmugDNA.24913.1 | 4.44  | 5.1   | 0.85 | 0.26 | -1.57 | 0.349174 | 0.039852 | 0.690261 | 0.244748 |
| MmugDNA.24914.1.S1_at   | MmugDNA.24914.1 | 3.55  | 3.46  | 0.17 | 0.04 | 1.07  | 0.696135 | 0.210213 | 0.881973 | 0.484033 |
| MmugDNA.24915.1.S1_at   | MmugDNA.24915.1 | 4.94  | 5.09  | 1.03 | 0.51 | -1.11 | 0.805776 | 0.207053 | 0.929464 | 0.481115 |
| MmugDNA.24916.1.S1_at   | MmugDNA.24916.1 | 8.1   | 7.1   | 0.81 | 0.28 | 2     | 0.479776 | 0.711593 | 0.770896 | 0.832761 |
| MmugDNA.24917.1.S1_at   | MmugDNA.24917.1 | 5.56  | 5.39  | 0.22 | 0.04 | 1.12  | 0.240933 | 0.160604 | 0.607226 | 0.436745 |
| MmugDNA.24919.1.S1_at   | MmugDNA.24919.1 | 4.54  | 4.36  | 0.09 | 0.18 | 1.14  | 0.308055 | 0.42796  | 0.660862 | 0.649602 |
| MmugDNA.2492.1.S1_at    | MmugDNA.2492.1  | 4.14  | 3.95  | 0.22 | 0.09 | 1.14  | 0.254218 | 0.187495 | 0.618722 | 0.463586 |
| MmugDNA.24920.1.S1_at   | MmugDNA.24920.1 | 5.34  | 5.48  | 0.09 | 0.17 | -1.1  | 0.196339 | 0.451126 | 0.566905 | 0.666073 |
| MmugDNA.24921.1.S1_at   | MmugDNA.24921.1 | 3.57  | 3.55  | 0.19 | 0.15 | 1.01  | 0.623855 | 0.926954 | 0.848386 | 0.958446 |
| MmugDNA.24922.1.S1_at   | MmugDNA.24922.1 | 7.45  | 7.8   | 0.83 | 0.08 | -1.28 | 0.536652 | 0.473603 | 0.802434 | 0.680872 |
| MmugDNA.24923.1.S1_at   | MmugDNA.24923.1 | 3.97  | 4.03  | 0.17 | 0.19 | -1.04 | 0.535512 | 0.446679 | 0.801797 | 0.662885 |
| MmugDNA.24924.1.S1_at   | MmugDNA.24924.1 | 4.69  | 4.98  | 0.33 | 0.24 | -1.22 | 0.948044 | 0.070862 | 0.982173 | 0.312357 |
| MmugDNA.24925.1.S1_at   | MmugDNA.24925.1 | 3.76  | 3.91  | 0.52 | 0.12 | -1.11 | 0.736218 | 0.217232 | 0.899063 | 0.490872 |
| MmugDNA.24926.1.S1_at   | MmugDNA.24926.1 | 5     | 5.12  | 0.48 | 0.19 | -1.08 | 0.809361 | 0.598971 | 0.93104  | 0.761244 |
| MmugDNA.24929.1.S1_at   | MmugDNA.24929.1 | 5.93  | 5.92  | 0.14 | 0.09 | 1.01  | 0.536912 | 0.08023  | 0.802544 | 0.32783  |
| MmugDNA.2493.1.S1_at    | MmugDNA.2493.1  | 6.58  | 6.74  | 0.18 | 0.16 | -1.12 | 0.482813 | 0.616918 | 0.772585 | 0.77303  |
| MmugDNA.24930.1.S1_at   | MmugDNA.24930.1 | 5.57  | 6.59  | 0.13 | 0.72 | -2.02 | 0.064005 | 0.008939 | 0.417065 | 0.125013 |
| MmugDNA.24931.1.S1_s_at | MmugDNA.24931.1 | 3.27  | 3.21  | 0.04 | 0.08 | 1.04  | 0.190695 | 0.354376 | 0.561788 | 0.597166 |
| MmugDNA.24932.1.S1_at   | MmugDNA.24932.1 | 11.56 | 10.89 | 0.49 | 0.12 | 1.59  | 0.190533 | 0.326574 | 0.561786 | 0.576612 |
| MmugDNA.24932.1.S1_s_at | MmugDNA.24932.1 | 10.94 | 9.88  | 0.47 | 0.18 | 2.1   | 0.054495 | 0.094309 | 0.396542 | 0.350889 |
| MmugDNA.24933.1.S1_at   | MmugDNA.24933.1 | 9.46  | 9.71  | 0.2  | 0.21 | -1.19 | 0.406858 | 0.087513 | 0.72838  | 0.340677 |
| MmugDNA.24934.1.S1_at   | MmugDNA.24934.1 | 8.98  | 9.16  | 0.11 | 0.22 | -1.13 | 0.208819 | 0.529542 | 0.580477 | 0.717341 |
| MmugDNA.24935.1.S1_at   | MmugDNA.24935.1 | 9.22  | 8.64  | 0.31 | 0.25 | 1.49  | 0.144972 | 0.02815  | 0.520238 | 0.209306 |
| MmugDNA.24937.1.S1_at   | MmugDNA.24937.1 | 8.61  | 8.98  | 0.2  | 0.09 | -1.3  | 0.112858 | 0.355231 | 0.486223 | 0.597576 |
| MmugDNA.24938.1.S1_at   | MmugDNA.24938.1 | 11.64 | 11.37 | 0.18 | 0.08 | 1.2   | 0.029245 | 0.00769  | 0.333974 | 0.117153 |
| MmugDNA.24939.1.S1_at   | MmugDNA.24939.1 | 5.77  | 6.79  | 0.54 | 0.13 | -2.04 | 0.03607  | 0.024895 | 0.354225 | 0.197685 |
| MmugDNA.2494.1.S1_at    | MmugDNA.2494.1  | 4.78  | 4.61  | 0.25 | 0.13 | 1.12  | 0.15656  | 0.094621 | 0.529581 | 0.351374 |
| MmugDNA.24940.1.S1_at   | MmugDNA.24940.1 | 8.54  | 9.35  | 1.43 | 0.17 | -1.76 | 0.339517 | 0.34016  | 0.68383  | 0.58661  |
| MmugDNA.24941.1.S1_at   | MmugDNA.24941.1 | 3.84  | 3.84  | 0.03 | 0.05 | 1     | 0.25049  | 0.710911 | 0.615697 | 0.832314 |
| MmugDNA.24942.1.S1_at   | MmugDNA.24942.1 | 5.51  | 5.34  | 0.07 | 0.15 | 1.12  | 0.203067 | 0.32311  | 0.574532 | 0.574351 |
| MmugDNA.24943.1.S1_at   | MmugDNA.24943.1 | 4.75  | 4.66  | 0.3  | 0.39 | 1.07  | 0.341071 | 0.329796 | 0.684841 | 0.578874 |
| MmugDNA.24944.1.S1_at   | MmugDNA.24944.1 | 8.67  | 8.07  | 0.42 | 0.2  | 1.51  | 0.208256 | 0.781813 | 0.579938 | 0.873524 |
| MmugDNA.24947.1.S1_at   | MmugDNA.24947.1 | 7.42  | 6.89  | 0.16 | 0.09 | 1.44  | 0.004755 | 0.020663 | 0.202055 | 0.180392 |
| MmugDNA.24948.1.S1_at   | MmugDNA.24948.1 | 5.91  | 5.92  | 0.54 | 0.47 | -1.01 | 0.557337 | 0.089722 | 0.814655 | 0.34398  |
| MmugDNA.24949.1.S1_at   | MmugDNA.24949.1 | 4.29  | 4.38  | 0.03 | 0.11 | -1.07 | 0.2551   | 0.166615 | 0.619267 | 0.443115 |

|                         |                 |       |       |      |      |       |          |          |          |          |
|-------------------------|-----------------|-------|-------|------|------|-------|----------|----------|----------|----------|
| MmugDNA.2495.1.S1_at    | MmugDNA.2495.1  | 4.38  | 4.11  | 0.15 | 0.02 | 1.21  | 0.028127 | 0.029478 | 0.33065  | 0.213368 |
| MmugDNA.24952.1.S1_at   | MmugDNA.24952.1 | 8.03  | 8.1   | 0.39 | 0.19 | -1.05 | 0.548587 | 0.291697 | 0.809836 | 0.552054 |
| MmugDNA.24953.1.S1_at   | MmugDNA.24953.1 | 6.75  | 6.83  | 0    | 0.1  | -1.06 | 0.307941 | 0.146296 | 0.660794 | 0.420301 |
| MmugDNA.24954.1.S1_at   | MmugDNA.24954.1 | 7.29  | 7.66  | 0.14 | 0.05 | -1.28 | 0.033274 | 0.023151 | 0.346442 | 0.190549 |
| MmugDNA.24955.1.S1_at   | MmugDNA.24955.1 | 3.67  | 3.41  | 0.15 | 0.25 | 1.2   | 0.292378 | 0.019531 | 0.648786 | 0.175505 |
| MmugDNA.24956.1.S1_at   | MmugDNA.24956.1 | 7.56  | 7.22  | 0.63 | 0.39 | 1.27  | 0.310342 | 0.013563 | 0.662102 | 0.149001 |
| MmugDNA.24958.1.S1_at   | MmugDNA.24958.1 | 3.44  | 3.79  | 0.22 | 0.14 | -1.27 | 0.219809 | 0.290279 | 0.589114 | 0.551169 |
| MmugDNA.2496.1.S1_at    | MmugDNA.2496.1  | 8.83  | 9.29  | 0.11 | 0.09 | -1.37 | 0.006822 | 0.0051   | 0.224141 | 0.099108 |
| MmugDNA.24961.1.S1_at   | MmugDNA.24961.1 | 3.63  | 3.62  | 0.06 | 0.08 | 1.01  | 0.670419 | 0.340133 | 0.869943 | 0.586602 |
| MmugDNA.24962.1.S1_at   | MmugDNA.24962.1 | 11.21 | 11.28 | 0.17 | 0.08 | -1.05 | 0.325713 | 0.004675 | 0.673403 | 0.095353 |
| MmugDNA.24963.1.S1_at   | MmugDNA.24963.1 | 12.18 | 12.21 | 0.12 | 0.1  | -1.02 | 0.902541 | 0.828905 | 0.967108 | 0.901662 |
| MmugDNA.24965.1.S1_at   | MmugDNA.24965.1 | 4.01  | 4.81  | 0.26 | 0.02 | -1.74 | 0.005541 | 0.02842  | 0.208157 | 0.210385 |
| MmugDNA.24966.1.S1_at   | MmugDNA.24966.1 | 5.3   | 5.24  | 0.18 | 0.16 | 1.04  | 0.793193 | 0.953888 | 0.924226 | 0.973725 |
| MmugDNA.24967.1.S1_at   | MmugDNA.24967.1 | 4.47  | 4.5   | 0.06 | 0.18 | -1.02 | 0.482524 | 0.066106 | 0.772474 | 0.302572 |
| MmugDNA.24969.1.S1_at   | MmugDNA.24969.1 | 5.44  | 5.54  | 0.29 | 0.1  | -1.07 | 0.668719 | 0.252559 | 0.869151 | 0.521128 |
| MmugDNA.24969.1.S1_x_at | MmugDNA.24969.1 | 4.99  | 5.03  | 0.06 | 0.19 | -1.03 | 0.926153 | 0.221374 | 0.975417 | 0.494644 |
| MmugDNA.24971.1.S1_at   | MmugDNA.24971.1 | 7.73  | 7.59  | 0.21 | 0.12 | 1.1   | 0.299786 | 0.491863 | 0.654235 | 0.693275 |
| MmugDNA.24973.1.S1_at   | MmugDNA.24973.1 | 3.41  | 3.42  | 0.12 | 0.04 | -1.01 | 0.872643 | 0.574763 | 0.955797 | 0.746142 |
| MmugDNA.24974.1.S1_at   | MmugDNA.24974.1 | 4.47  | 4.57  | 0.03 | 0.34 | -1.07 | 0.58666  | 0.695248 | 0.831402 | 0.822869 |
| MmugDNA.24975.1.S1_at   | MmugDNA.24975.1 | 3.02  | 3.15  | 0.07 | 0.16 | -1.09 | 0.156281 | 0.339007 | 0.529536 | 0.585891 |
| MmugDNA.2498.1.S1_at    | MmugDNA.2498.1  | 4.21  | 4.2   | 0.15 | 0.06 | 1.01  | 0.642809 | 0.942939 | 0.857894 | 0.967574 |
| MmugDNA.24980.1.S1_at   | MmugDNA.24980.1 | 3.21  | 3.05  | 0.06 | 0.09 | 1.12  | 0.124788 | 0.231593 | 0.49891  | 0.503379 |
| MmugDNA.24981.1.S1_at   | MmugDNA.24981.1 | 6.2   | 5.73  | 0.06 | 0.1  | 1.38  | 0.002283 | 0.00094  | 0.174757 | 0.049026 |
| MmugDNA.24982.1.S1_at   | MmugDNA.24982.1 | 5.04  | 5.06  | 0.1  | 0.08 | -1.01 | 0.764643 | 0.901448 | 0.911553 | 0.943931 |
| MmugDNA.24983.1.S1_at   | MmugDNA.24983.1 | 3.71  | 3.67  | 0.06 | 0.03 | 1.02  | 0.705996 | 0.084866 | 0.88551  | 0.336416 |
| MmugDNA.24985.1.S1_at   | MmugDNA.24985.1 | 4.05  | 4.06  | 0.06 | 0.02 | -1.01 | 0.566767 | 0.701645 | 0.820086 | 0.826974 |
| MmugDNA.24986.1.S1_at   | MmugDNA.24986.1 | 3.2   | 2.98  | 0.13 | 0.19 | 1.17  | 0.427175 | 0.404734 | 0.740947 | 0.633231 |
| MmugDNA.24987.1.S1_at   | MmugDNA.24987.1 | 8.18  | 7.7   | 0.35 | 0.36 | 1.4   | 0.163375 | 0.489368 | 0.536182 | 0.691792 |
| MmugDNA.24988.1.S1_at   | MmugDNA.24988.1 | 5.89  | 5.87  | 0.01 | 0.2  | 1.02  | 0.551427 | 0.824713 | 0.811378 | 0.899382 |
| MmugDNA.24989.1.S1_at   | MmugDNA.24989.1 | 4.27  | 3.95  | 0.15 | 0.52 | 1.25  | 0.312355 | 0.258103 | 0.663932 | 0.525574 |
| MmugDNA.2499.1.S1_at    | MmugDNA.2499.1  | 10.18 | 10.55 | 0.68 | 0.16 | -1.3  | 0.379781 | 0.379475 | 0.709137 | 0.616406 |
| MmugDNA.24990.1.S1_at   | MmugDNA.24990.1 | 6.75  | 6.71  | 0.1  | 0.14 | 1.02  | 0.934221 | 0.837515 | 0.977732 | 0.907127 |
| MmugDNA.24991.1.S1_at   | MmugDNA.24991.1 | 4.85  | 4.6   | 0.11 | 0.62 | 1.19  | 0.778928 | 0.938567 | 0.918476 | 0.965059 |
| MmugDNA.24992.1.S1_at   | MmugDNA.24992.1 | 4.53  | 4.11  | 0.52 | 0.07 | 1.34  | 0.261368 | 0.085533 | 0.623819 | 0.337566 |
| MmugDNA.24993.1.S1_at   | MmugDNA.24993.1 | 3.04  | 2.97  | 0.09 | 0.1  | 1.05  | 0.717398 | 0.027054 | 0.890389 | 0.205689 |
| MmugDNA.24994.1.S1_at   | MmugDNA.24994.1 | 9.84  | 9.39  | 0.48 | 0.24 | 1.36  | 0.160591 | 0.002063 | 0.533821 | 0.06723  |
| MmugDNA.24995.1.S1_at   | MmugDNA.24995.1 | 10    | 10.55 | 0.51 | 0.05 | -1.46 | 0.135779 | 0.019978 | 0.510277 | 0.177532 |
| MmugDNA.24996.1.S1_at   | MmugDNA.24996.1 | 7.76  | 7.27  | 0.49 | 0.04 | 1.41  | 0.494611 | 0.363987 | 0.779478 | 0.60434  |
| MmugDNA.24997.1.S1_at   | MmugDNA.24997.1 | 7.38  | 6.83  | 1.47 | 0.15 | 1.46  | 0.707044 | 0.870655 | 0.886005 | 0.926473 |
| MmugDNA.24999.1.S1_at   | MmugDNA.24999.1 | 8.07  | 8.49  | 1.95 | 0.38 | -1.34 | 0.710904 | 0.125804 | 0.88743  | 0.396313 |
| MmugDNA.250.1.S1_at     | MmugDNA.250.1   | 6.53  | 5.95  | 0.07 | 0.47 | 1.5   | 0.364341 | 0.383148 | 0.700523 | 0.619153 |
| MmugDNA.2500.1.S1_x_at  | MmugDNA.2500.1  | 5.1   | 5.19  | 0.15 | 0.23 | -1.07 | 0.542837 | 0.377816 | 0.805988 | 0.615206 |
| MmugDNA.25000.1.S1_at   | MmugDNA.25000.1 | 9.89  | 9.53  | 0.31 | 0.07 | 1.29  | 0.086871 | 0.161765 | 0.454785 | 0.437853 |

|                         |                 |       |       |      |      |       |          |          |          |          |
|-------------------------|-----------------|-------|-------|------|------|-------|----------|----------|----------|----------|
| MmugDNA.25001.1.S1_at   | MmugDNA.25001.1 | 6.59  | 6.5   | 0.1  | 0    | 1.07  | 0.274618 | 0.590255 | 0.633979 | 0.756124 |
| MmugDNA.25004.1.S1_at   | MmugDNA.25004.1 | 4.18  | 3.86  | 0.15 | 0.14 | 1.25  | 0.055901 | 0.00488  | 0.399441 | 0.097538 |
| MmugDNA.25005.1.S1_at   | MmugDNA.25005.1 | 9.5   | 10.01 | 0.25 | 0.03 | -1.42 | 0.011802 | 0.001546 | 0.257504 | 0.05949  |
| MmugDNA.25006.1.S1_x_at | MmugDNA.25006.1 | 5.5   | 5.33  | 0.29 | 0.22 | 1.13  | 0.444673 | 0.21154  | 0.75145  | 0.485658 |
| MmugDNA.25008.1.S1_at   | MmugDNA.25008.1 | 4.67  | 4.42  | 0.54 | 0.37 | 1.18  | 0.40527  | 0.260068 | 0.727293 | 0.52675  |
| MmugDNA.25009.1.S1_at   | MmugDNA.25009.1 | 4.27  | 4.08  | 0.29 | 0.11 | 1.14  | 0.161896 | 0.298446 | 0.535244 | 0.557143 |
| MmugDNA.2501.1.S1_at    | MmugDNA.2501.1  | 7.38  | 8.34  | 1.32 | 0.23 | -1.95 | 0.109751 | 0.145533 | 0.482577 | 0.419442 |
| MmugDNA.25010.1.S1_at   | MmugDNA.25010.1 | 3.55  | 3.54  | 0.12 | 0.03 | 1.01  | 0.432369 | 0.629897 | 0.74389  | 0.782009 |
| MmugDNA.25011.1.S1_at   | MmugDNA.25011.1 | 3.44  | 3.39  | 0.04 | 0.08 | 1.03  | 0.160021 | 0.232202 | 0.533049 | 0.503915 |
| MmugDNA.25014.1.S1_at   | MmugDNA.25014.1 | 9.76  | 8.49  | 0.6  | 0.23 | 2.41  | 0.065463 | 0.051599 | 0.420804 | 0.272617 |
| MmugDNA.25015.1.S1_at   | MmugDNA.25015.1 | 6.68  | 5.26  | 0.73 | 0.19 | 2.68  | 0.031181 | 0.011882 | 0.340278 | 0.141097 |
| MmugDNA.25016.1.S1_at   | MmugDNA.25016.1 | 5.47  | 5.59  | 0.42 | 0.27 | -1.09 | 0.450758 | 0.059543 | 0.754859 | 0.290548 |
| MmugDNA.25017.1.S1_at   | MmugDNA.25017.1 | 7.26  | 6.97  | 0.36 | 0.4  | 1.21  | 0.801193 | 0.227186 | 0.927395 | 0.499529 |
| MmugDNA.25019.1.S1_at   | MmugDNA.25019.1 | 7.81  | 7.94  | 0.96 | 0.15 | -1.09 | 0.853592 | 0.120473 | 0.948299 | 0.38925  |
| MmugDNA.2502.1.S1_at    | MmugDNA.2502.1  | 6.94  | 7.25  | 1.04 | 0.2  | -1.24 | 0.85197  | 0.807039 | 0.947839 | 0.888946 |
| MmugDNA.25021.1.S1_at   | MmugDNA.25021.1 | 5.46  | 5.39  | 0.09 | 0.1  | 1.04  | 0.633664 | 0.850527 | 0.853643 | 0.914981 |
| MmugDNA.25022.1.S1_at   | MmugDNA.25022.1 | 4.02  | 3.71  | 0.27 | 0.12 | 1.24  | 0.049694 | 0.102789 | 0.38604  | 0.363305 |
| MmugDNA.25023.1.S1_at   | MmugDNA.25023.1 | 4.56  | 4.42  | 0.61 | 0.15 | 1.1   | 0.245762 | 0.304905 | 0.611196 | 0.562044 |
| MmugDNA.25025.1.S1_at   | MmugDNA.25025.1 | 3.45  | 3.46  | 0.04 | 0.05 | -1    | 0.577759 | 0.784174 | 0.825932 | 0.875049 |
| MmugDNA.25026.1.S1_at   | MmugDNA.25026.1 | 7.27  | 7.08  | 0.19 | 0.11 | 1.14  | 0.502406 | 0.684671 | 0.783594 | 0.8161   |
| MmugDNA.25029.1.S1_at   | MmugDNA.25029.1 | 3.51  | 3.56  | 0.89 | 0.18 | -1.03 | 0.689669 | 0.91742  | 0.879045 | 0.95383  |
| MmugDNA.25030.1.S1_at   | MmugDNA.25030.1 | 8.44  | 8.64  | 0.17 | 0.13 | -1.15 | 0.227499 | 0.096017 | 0.596631 | 0.353302 |
| MmugDNA.25031.1.S1_at   | MmugDNA.25031.1 | 10.13 | 10.33 | 0.37 | 0.04 | -1.15 | 0.421395 | 0.657031 | 0.737563 | 0.799401 |
| MmugDNA.25032.1.S1_at   | MmugDNA.25032.1 | 5.69  | 5.15  | 0.43 | 0.07 | 1.45  | 0.108742 | 0.004539 | 0.481016 | 0.094138 |
| MmugDNA.25037.1.S1_at   | MmugDNA.25037.1 | 9.89  | 10.07 | 1.53 | 0.34 | -1.13 | 0.539011 | 0.7368   | 0.803644 | 0.847693 |
| MmugDNA.25039.1.S1_at   | MmugDNA.25039.1 | 4.71  | 4.57  | 0.29 | 0.4  | 1.1   | 0.50161  | 0.091939 | 0.783364 | 0.347267 |
| MmugDNA.18410.1.S1_s_at | MmugDNA.18410.1 | 6.11  | 6.26  | 0.54 | 0.21 | -1.11 | 0.736913 | 0.248813 | 0.899286 | 0.517951 |
| MmugDNA.25040.1.S1_at   | MmugDNA.25040.1 | 12.21 | 12.63 | 0.19 | 0.03 | -1.34 | 0.013191 | 0.270528 | 0.266951 | 0.535835 |
| MmugDNA.25041.1.S1_at   | MmugDNA.25041.1 | 4.81  | 4.74  | 0.2  | 0.05 | 1.05  | 0.321314 | 0.307245 | 0.670027 | 0.563506 |
| MmugDNA.25042.1.S1_at   | MmugDNA.25042.1 | 6.64  | 6.36  | 0.29 | 0.06 | 1.21  | 0.266627 | 0.04443  | 0.627504 | 0.25521  |
| MmugDNA.25043.1.S1_at   | MmugDNA.25043.1 | 4.54  | 4.1   | 0.14 | 0.1  | 1.36  | 0.016668 | 0.019808 | 0.287478 | 0.177036 |
| MmugDNA.25046.1.S1_at   | MmugDNA.25046.1 | 6.06  | 6.01  | 0.12 | 0.1  | 1.04  | 0.210893 | 0.318062 | 0.582007 | 0.571046 |
| MmugDNA.25047.1.S1_at   | MmugDNA.25047.1 | 8.59  | 9.25  | 0.47 | 0.16 | -1.58 | 0.142813 | 0.160584 | 0.517889 | 0.436745 |
| MmugDNA.25048.1.S1_at   | MmugDNA.25048.1 | 3.48  | 3.39  | 0.23 | 0.08 | 1.07  | 0.47032  | 0.471223 | 0.766091 | 0.679261 |
| MmugDNA.25049.1.S1_at   | MmugDNA.25049.1 | 8.2   | 8.15  | 0.16 | 0.05 | 1.04  | 0.51774  | 0.170719 | 0.792263 | 0.447316 |
| MmugDNA.25050.1.S1_at   | MmugDNA.25050.1 | 10.29 | 9.84  | 0.39 | 0.22 | 1.37  | 0.144528 | 0.037475 | 0.519872 | 0.237853 |
| MmugDNA.25051.1.S1_at   | MmugDNA.25051.1 | 12.05 | 12.27 | 0.1  | 0.06 | -1.16 | 0.039522 | 0.026782 | 0.362038 | 0.20472  |
| MmugDNA.25052.1.S1_at   | MmugDNA.25052.1 | 5.63  | 5.64  | 0.62 | 0.08 | -1.01 | 0.997966 | 0.994486 | 0.999327 | 0.996631 |
| MmugDNA.25054.1.S1_at   | MmugDNA.25054.1 | 3.45  | 3.09  | 0.29 | 0.22 | 1.28  | 0.134411 | 0.389236 | 0.508462 | 0.623403 |
| MmugDNA.25055.1.S1_at   | MmugDNA.25055.1 | 4     | 3.76  | 0.16 | 0.11 | 1.18  | 0.336114 | 0.486166 | 0.681496 | 0.689643 |
| MmugDNA.25056.1.S1_at   | MmugDNA.25056.1 | 8.41  | 8.35  | 0.34 | 0.04 | 1.04  | 0.526255 | 0.70161  | 0.796483 | 0.826955 |
| MmugDNA.25057.1.S1_s_at | MmugDNA.25057.1 | 7.85  | 7.76  | 0.45 | 0.1  | 1.06  | 0.79137  | 0.779315 | 0.923383 | 0.872047 |
| MmugDNA.25059.1.S1_at   | MmugDNA.25059.1 | 3.49  | 3.6   | 0.06 | 0.11 | -1.08 | 0.136304 | 0.172426 | 0.511081 | 0.448837 |

|                         |                 |       |       |      |      |       |          |          |          |          |
|-------------------------|-----------------|-------|-------|------|------|-------|----------|----------|----------|----------|
| MmugDNA.2506.1.S1_at    | MmugDNA.2506.1  | 4.41  | 5     | 0.3  | 0.59 | -1.5  | 0.187043 | 0.229346 | 0.559702 | 0.501527 |
| MmugDNA.25062.1.S1_at   | MmugDNA.25062.1 | 9.25  | 8.85  | 0.38 | 0.12 | 1.32  | 0.055906 | 0.003188 | 0.399441 | 0.08199  |
| MmugDNA.25063.1.S1_at   | MmugDNA.25063.1 | 9.88  | 10.61 | 0.41 | 0.06 | -1.66 | 0.03815  | 0.015318 | 0.358577 | 0.157152 |
| MmugDNA.25064.1.S1_at   | MmugDNA.25064.1 | 3.49  | 3.42  | 0.12 | 0.03 | 1.05  | 0.562183 | 0.785183 | 0.817608 | 0.875656 |
| MmugDNA.25065.1.S1_at   | MmugDNA.25065.1 | 5.03  | 4.67  | 0.94 | 0.38 | 1.28  | 0.475109 | 0.493662 | 0.768373 | 0.694288 |
| MmugDNA.25066.1.S1_at   | MmugDNA.25066.1 | 5.48  | 5.56  | 0.06 | 0.05 | -1.06 | 0.189149 | 0.266412 | 0.560784 | 0.532211 |
| MmugDNA.25067.1.S1_at   | MmugDNA.25067.1 | 11.85 | 11.93 | 0.3  | 0.16 | -1.06 | 0.155803 | 0.010526 | 0.528999 | 0.134019 |
| MmugDNA.25067.1.S1_x_at | MmugDNA.25067.1 | 11.83 | 11.89 | 0.32 | 0.16 | -1.04 | 0.1803   | 0.012319 | 0.553467 | 0.143659 |
| MmugDNA.25069.1.S1_at   | MmugDNA.25069.1 | 5.64  | 6.36  | 0.93 | 0.23 | -1.64 | 0.585535 | 0.394963 | 0.830549 | 0.627216 |
| MmugDNA.2507.1.S1_at    | MmugDNA.2507.1  | 6.58  | 6.47  | 0.95 | 0.32 | 1.08  | 0.625767 | 0.580302 | 0.849586 | 0.749618 |
| MmugDNA.25070.1.S1_at   | MmugDNA.25070.1 | 3.47  | 3.48  | 0.2  | 0    | -1.01 | 0.619389 | 0.527149 | 0.846602 | 0.715861 |
| MmugDNA.25073.1.S1_at   | MmugDNA.25073.1 | 5.25  | 5.22  | 0.16 | 0.03 | 1.02  | 0.404148 | 0.123645 | 0.726203 | 0.393692 |
| MmugDNA.25074.1.S1_at   | MmugDNA.25074.1 | 9.87  | 9.6   | 0.87 | 0.2  | 1.21  | 0.630565 | 0.287977 | 0.852008 | 0.549255 |
| MmugDNA.25075.1.S1_at   | MmugDNA.25075.1 | 8.28  | 8.27  | 0.27 | 0.14 | 1     | 0.89356  | 0.330257 | 0.963471 | 0.579044 |
| MmugDNA.25077.1.S1_at   | MmugDNA.25077.1 | 8.12  | 8.51  | 0.08 | 0.04 | -1.31 | 0.003236 | 0.000968 | 0.192624 | 0.049591 |
| MmugDNA.25078.1.S1_at   | MmugDNA.25078.1 | 4.07  | 3.88  | 0.06 | 0.02 | 1.14  | 0.009906 | 0.447124 | 0.244171 | 0.663315 |
| MmugDNA.2508.1.S1_at    | MmugDNA.2508.1  | 3.06  | 2.97  | 0.06 | 0.1  | 1.06  | 0.882213 | 0.483725 | 0.959161 | 0.688112 |
| MmugDNA.25080.1.S1_at   | MmugDNA.25080.1 | 4.55  | 4.47  | 0.64 | 0.11 | 1.06  | 0.707292 | 0.960659 | 0.886085 | 0.977598 |
| MmugDNA.25082.1.S1_at   | MmugDNA.25082.1 | 5.62  | 5.54  | 0.2  | 0.14 | 1.06  | 0.546291 | 0.405996 | 0.808428 | 0.634136 |
| MmugDNA.5329.1.S1_s_at  | MmugDNA.5329.1  | 9.62  | 9.94  | 0.13 | 0.06 | -1.25 | 0.044228 | 0.006147 | 0.374279 | 0.106774 |
| MmugDNA.25084.1.S1_at   | MmugDNA.25084.1 | 9.38  | 9.5   | 0.06 | 0.03 | -1.08 | 0.015571 | 0.101544 | 0.282681 | 0.361393 |
| MmugDNA.25085.1.S1_at   | MmugDNA.25085.1 | 4.2   | 4.53  | 0.3  | 0.22 | -1.25 | 0.122374 | 0.036114 | 0.495694 | 0.234485 |
| MmugDNA.25086.1.S1_at   | MmugDNA.25086.1 | 9.06  | 8.42  | 0.46 | 0.04 | 1.56  | 0.067082 | 0.194287 | 0.423132 | 0.469384 |
| MmugDNA.25087.1.S1_at   | MmugDNA.25087.1 | 3.39  | 3.55  | 0.06 | 0.08 | -1.12 | 0.052203 | 0.055631 | 0.392084 | 0.281649 |
| MmugDNA.25089.1.S1_at   | MmugDNA.25089.1 | 10.13 | 9.9   | 0.17 | 0.19 | 1.17  | 0.214257 | 0.111922 | 0.584673 | 0.377007 |
| MmugDNA.2509.1.S1_at    | MmugDNA.2509.1  | 8.08  | 8.42  | 0.53 | 0.08 | -1.26 | 0.296966 | 0.105708 | 0.652525 | 0.3678   |
| MmugDNA.25091.1.S1_at   | MmugDNA.25091.1 | 5.25  | 5.15  | 0.17 | 0.03 | 1.07  | 0.122089 | 0.313666 | 0.495677 | 0.568012 |
| MmugDNA.25092.1.S1_at   | MmugDNA.25092.1 | 6.35  | 6.35  | 0.01 | 0.06 | 1     | 0.298528 | 0.13736  | 0.653176 | 0.41029  |
| MmugDNA.25093.1.S1_at   | MmugDNA.25093.1 | 5.65  | 5.29  | 0.09 | 0.18 | 1.29  | 0.146438 | 0.051453 | 0.520747 | 0.272242 |
| MmugDNA.25095.1.S1_at   | MmugDNA.25095.1 | 4.04  | 4.69  | 0.19 | 0.56 | -1.57 | 0.563742 | 0.597217 | 0.818372 | 0.760127 |
| MmugDNA.25096.1.S1_at   | MmugDNA.25096.1 | 8.76  | 8.8   | 0.31 | 0.03 | -1.03 | 0.784708 | 0.456431 | 0.920937 | 0.670188 |
| MmugDNA.25097.1.S1_at   | MmugDNA.25097.1 | 3.23  | 3.21  | 0.06 | 0.04 | 1.02  | 0.324171 | 0.7346   | 0.672526 | 0.846255 |
| MmugDNA.25098.1.S1_at   | MmugDNA.25098.1 | 4.2   | 4.15  | 0.11 | 0.07 | 1.03  | 0.533342 | 0.355196 | 0.80084  | 0.59757  |
| MmugDNA.25099.1.S1_at   | MmugDNA.25099.1 | 9.35  | 9.29  | 1    | 0.13 | 1.05  | 0.795536 | 0.95423  | 0.924888 | 0.973995 |
| MmugDNA.251.1.S1_at     | MmugDNA.251.1   | 5.08  | 4.93  | 0.26 | 0.09 | 1.11  | 0.602015 | 0.677931 | 0.838675 | 0.811843 |
| MmugDNA.2510.1.S1_at    | MmugDNA.2510.1  | 7.85  | 8.13  | 0.41 | 0.08 | -1.22 | 0.395872 | 0.081339 | 0.720803 | 0.329437 |
| MmugDNA.25100.1.S1_at   | MmugDNA.25100.1 | 12.15 | 11.85 | 0.07 | 0.05 | 1.23  | 0.007526 | 0.006855 | 0.229281 | 0.11185  |
| MmugDNA.25101.1.S1_at   | MmugDNA.25101.1 | 8.06  | 7.71  | 1.02 | 0.32 | 1.27  | 0.536209 | 0.088166 | 0.802181 | 0.341721 |
| MmugDNA.25102.1.S1_at   | MmugDNA.25102.1 | 10.81 | 11.04 | 0.5  | 0.09 | -1.17 | 0.473622 | 0.59369  | 0.767656 | 0.758395 |
| MmugDNA.25104.1.S1_at   | MmugDNA.25104.1 | 5.23  | 4.96  | 0.3  | 0.25 | 1.2   | 0.265693 | 0.341597 | 0.626823 | 0.587795 |
| MmugDNA.25105.1.S1_at   | MmugDNA.25105.1 | 12.42 | 12.36 | 0.25 | 0.04 | 1.04  | 0.525058 | 0.410149 | 0.796179 | 0.637086 |
| MmugDNA.25106.1.S1_at   | MmugDNA.25106.1 | 11.97 | 11.85 | 0.13 | 0.07 | 1.09  | 0.172425 | 0.092116 | 0.545696 | 0.34776  |
| MmugDNA.25107.1.S1_at   | MmugDNA.25107.1 | 4.65  | 4.78  | 0.12 | 0.15 | -1.09 | 0.306637 | 0.000032 | 0.659591 | 0.022097 |

|                         |                 |       |       |      |      |       |          |          |          |          |
|-------------------------|-----------------|-------|-------|------|------|-------|----------|----------|----------|----------|
| MmugDNA.25108.1.S1_at   | MmugDNA.25108.1 | 11    | 10.9  | 0.43 | 0.28 | 1.07  | 0.816174 | 0.01103  | 0.933414 | 0.136793 |
| MmugDNA.25109.1.S1_at   | MmugDNA.25109.1 | 5.92  | 5.77  | 0.07 | 0.12 | 1.11  | 0.306123 | 0.512131 | 0.659271 | 0.706076 |
| MmugDNA.25109.1.S1_s_at | MmugDNA.25109.1 | 5.85  | 5.77  | 0.25 | 0.15 | 1.06  | 0.308227 | 0.428993 | 0.660917 | 0.650509 |
| MmugDNA.2511.1.S1_at    | MmugDNA.2511.1  | 6.02  | 7.06  | 1.23 | 0.05 | -2.05 | 0.362472 | 0.436507 | 0.699302 | 0.656032 |
| MmugDNA.25110.1.S1_at   | MmugDNA.25110.1 | 4.72  | 4.61  | 0.21 | 0.09 | 1.07  | 0.452147 | 0.552079 | 0.755619 | 0.73147  |
| MmugDNA.25112.1.S1_at   | MmugDNA.25112.1 | 6.82  | 8.18  | 0.67 | 0.23 | -2.57 | 0.073625 | 0.027953 | 0.434623 | 0.208689 |
| MmugDNA.25113.1.S1_at   | MmugDNA.25113.1 | 5.65  | 5.69  | 1.02 | 0.22 | -1.03 | 0.728095 | 0.472365 | 0.894967 | 0.67998  |
| MmugDNA.25116.1.S1_at   | MmugDNA.25116.1 | 8.42  | 8.91  | 0.45 | 0.22 | -1.4  | 0.091577 | 0.022254 | 0.459796 | 0.186618 |
| MmugDNA.25117.1.S1_at   | MmugDNA.25117.1 | 3.59  | 4.16  | 0.16 | 0.19 | -1.48 | 0.009575 | 0.007846 | 0.242537 | 0.118032 |
| MmugDNA.25118.1.S1_at   | MmugDNA.25118.1 | 9.12  | 8.72  | 1.66 | 0.11 | 1.32  | 0.756777 | 0.318787 | 0.908337 | 0.571379 |
| MmugDNA.25119.1.S1_at   | MmugDNA.25119.1 | 4.65  | 4.62  | 0.13 | 0.15 | -1.02 | 0.331597 | 0.698966 | 0.678109 | 0.825058 |
| MmugDNA.25120.1.S1_at   | MmugDNA.25120.1 | 4.39  | 4.23  | 0.03 | 0.26 | 1.12  | 0.235108 | 0.182885 | 0.602266 | 0.459362 |
| MmugDNA.25122.1.S1_at   | MmugDNA.25122.1 | 6.99  | 6.32  | 0.33 | 0.4  | 1.59  | 0.120278 | 0.130398 | 0.493558 | 0.402257 |
| MmugDNA.25124.1.S1_at   | MmugDNA.25124.1 | 5.01  | 5.03  | 0.07 | 0.17 | -1.01 | 0.467444 | 0.383452 | 0.76435  | 0.619433 |
| MmugDNA.25125.1.S1_at   | MmugDNA.25125.1 | 6.09  | 6.17  | 0.94 | 0.41 | -1.06 | 0.848627 | 0.855836 | 0.946817 | 0.917723 |
| MmugDNA.25126.1.S1_at   | MmugDNA.25126.1 | 3.12  | 3.5   | 0.23 | 0.04 | -1.3  | 0.04654  | 0.053683 | 0.378225 | 0.277304 |
| MmugDNA.25127.1.S1_at   | MmugDNA.25127.1 | 6.04  | 5.98  | 0.13 | 0.04 | 1.04  | 0.210016 | 0.347642 | 0.581527 | 0.592039 |
| MmugDNA.25128.1.S1_at   | MmugDNA.25128.1 | 7.39  | 7.39  | 0.23 | 0.16 | -1    | 0.640611 | 0.726099 | 0.856909 | 0.841422 |
| MmugDNA.25129.1.S1_at   | MmugDNA.25129.1 | 4.39  | 4.38  | 0.07 | 0.4  | 1.01  | 0.996403 | 0.999954 | 0.998682 | 0.999973 |
| MmugDNA.2513.1.S1_at    | MmugDNA.2513.1  | 9.25  | 9.32  | 0.45 | 0.27 | -1.05 | 0.301798 | 0.309818 | 0.655978 | 0.565044 |
| MmugDNA.25130.1.S1_at   | MmugDNA.25130.1 | 4.27  | 4.16  | 0.01 | 0.06 | 1.08  | 0.0338   | 0.79075  | 0.347296 | 0.878973 |
| MmugDNA.25131.1.S1_at   | MmugDNA.25131.1 | 6.99  | 6.31  | 1.01 | 0.24 | 1.61  | 0.130854 | 0.076655 | 0.505266 | 0.32195  |
| MmugDNA.25132.1.S1_at   | MmugDNA.25132.1 | 3.17  | 3.43  | 0.17 | 0.24 | -1.2  | 0.533305 | 0.312143 | 0.80084  | 0.566904 |
| MmugDNA.25133.1.S1_at   | MmugDNA.25133.1 | 4.49  | 4.46  | 0.04 | 0.09 | 1.02  | 0.424631 | 0.326732 | 0.739618 | 0.576725 |
| MmugDNA.25134.1.S1_at   | MmugDNA.25134.1 | 3.66  | 3.64  | 0.09 | 0.21 | 1.01  | 0.85857  | 0.978634 | 0.950074 | 0.988411 |
| MmugDNA.25135.1.S1_at   | MmugDNA.25135.1 | 5.62  | 5.45  | 0.15 | 0.08 | 1.13  | 0.250923 | 0.136874 | 0.616004 | 0.409568 |
| MmugDNA.25136.1.S1_at   | MmugDNA.25136.1 | 4.4   | 4.27  | 0.19 | 0.26 | 1.09  | 0.188359 | 0.476133 | 0.560439 | 0.682524 |
| MmugDNA.25138.1.S1_at   | MmugDNA.25138.1 | 6.8   | 6.6   | 0.16 | 0.06 | 1.15  | 0.100515 | 0.157903 | 0.471309 | 0.433583 |
| MmugDNA.25139.1.S1_at   | MmugDNA.25139.1 | 10.2  | 10.12 | 0.31 | 0.08 | 1.05  | 0.440844 | 0.423291 | 0.748762 | 0.646277 |
| MmugDNA.2514.1.S1_at    | MmugDNA.2514.1  | 5.57  | 5.85  | 0.07 | 0.2  | -1.21 | 0.361511 | 0.109346 | 0.698663 | 0.373154 |
| MmugDNA.25141.1.S1_at   | MmugDNA.25141.1 | 11.33 | 10.96 | 0.26 | 0.11 | 1.29  | 0.086705 | 0.080525 | 0.454684 | 0.328189 |
| MmugDNA.25142.1.S1_at   | MmugDNA.25142.1 | 8.21  | 8.44  | 0.41 | 0.07 | -1.17 | 0.445511 | 0.129644 | 0.752241 | 0.401242 |
| MmugDNA.25143.1.S1_at   | MmugDNA.25143.1 | 10.91 | 10.19 | 0.83 | 0.11 | 1.64  | 0.20688  | 0.245254 | 0.578774 | 0.515049 |
| MmugDNA.25144.1.S1_at   | MmugDNA.25144.1 | 5.71  | 5.51  | 0.4  | 0.1  | 1.14  | 0.562294 | 0.532791 | 0.817686 | 0.719235 |
| MmugDNA.25145.1.S1_at   | MmugDNA.25145.1 | 4.4   | 3.88  | 0.98 | 0.42 | 1.43  | 0.410332 | 0.288911 | 0.730749 | 0.550032 |
| MmugDNA.25148.1.S1_at   | MmugDNA.25148.1 | 10.36 | 10.79 | 0.17 | 0.24 | -1.35 | 0.090372 | 0.093217 | 0.458536 | 0.34931  |
| MmugDNA.25149.1.S1_at   | MmugDNA.25149.1 | 7.42  | 8.26  | 0.32 | 0.47 | -1.8  | 0.028247 | 0.009095 | 0.33163  | 0.125944 |
| MmugDNA.2515.1.S1_at    | MmugDNA.2515.1  | 12.5  | 12.55 | 0.26 | 0.19 | -1.04 | 0.585555 | 0.219384 | 0.830549 | 0.493156 |
| MmugDNA.25150.1.S1_at   | MmugDNA.25150.1 | 10.98 | 10    | 0.48 | 0.06 | 1.97  | 0.037835 | 0.002592 | 0.358028 | 0.075326 |
| MmugDNA.25151.1.S1_at   | MmugDNA.25151.1 | 5.6   | 5.67  | 0.6  | 0.14 | -1.04 | 0.580888 | 0.636835 | 0.827317 | 0.786404 |
| MmugDNA.25152.1.S1_at   | MmugDNA.25152.1 | 9.07  | 9.13  | 0.56 | 0.11 | -1.04 | 0.932849 | 0.87647  | 0.977227 | 0.929683 |
| MmugDNA.25154.1.S1_at   | MmugDNA.25154.1 | 10.2  | 10.4  | 0.2  | 0.04 | -1.15 | 0.206071 | 0.062186 | 0.57808  | 0.296296 |
| MmugDNA.25155.1.S1_at   | MmugDNA.25155.1 | 12.52 | 12.52 | 0.3  | 0.09 | 1     | 0.785242 | 0.017259 | 0.921072 | 0.166393 |



|                         |                 |       |       |      |      |       |          |          |          |          |
|-------------------------|-----------------|-------|-------|------|------|-------|----------|----------|----------|----------|
| MmugDNA.25156.1.S1_at   | MmugDNA.25156.1 | 13.49 | 13.44 | 0.18 | 0.02 | 1.04  | 0.963938 | 0.020615 | 0.988182 | 0.180141 |
| MmugDNA.25157.1.S1_at   | MmugDNA.25157.1 | 11.11 | 11.31 | 0.26 | 0.23 | -1.15 | 0.785177 | 0.770659 | 0.921034 | 0.866801 |
| MmugDNA.25157.1.S1_s_at | MmugDNA.25157.1 | 10.64 | 11.02 | 0.32 | 0.25 | -1.3  | 0.539883 | 0.739368 | 0.80406  | 0.848935 |
| MmugDNA.25158.1.S1_at   | MmugDNA.25158.1 | 3.88  | 3.69  | 0.06 | 0.08 | 1.14  | 0.027342 | 0.46946  | 0.327322 | 0.678248 |
| MmugDNA.2516.1.S1_at    | MmugDNA.2516.1  | 7.29  | 6.98  | 0.32 | 0.01 | 1.24  | 0.175141 | 0.125275 | 0.548031 | 0.395832 |
| MmugDNA.25160.1.S1_at   | MmugDNA.25160.1 | 4.4   | 4.21  | 0.21 | 0.17 | 1.13  | 0.70877  | 0.139525 | 0.886591 | 0.412743 |
| MmugDNA.25161.1.S1_at   | MmugDNA.25161.1 | 3.96  | 3.83  | 0.38 | 0.04 | 1.09  | 0.220827 | 0.315076 | 0.590135 | 0.56883  |
| MmugDNA.25162.1.S1_at   | MmugDNA.25162.1 | 8.89  | 9.4   | 0.59 | 0.06 | -1.43 | 0.120114 | 0.063345 | 0.493459 | 0.29838  |
| MmugDNA.25163.1.S1_at   | MmugDNA.25163.1 | 5.9   | 6.52  | 0.41 | 0.14 | -1.53 | 0.046793 | 0.046025 | 0.37872  | 0.258971 |
| MmugDNA.25166.1.S1_at   | MmugDNA.25166.1 | 8.7   | 9.24  | 0.54 | 0.08 | -1.46 | 0.417893 | 0.399308 | 0.735196 | 0.629737 |
| MmugDNA.25167.1.S1_at   | MmugDNA.25167.1 | 4.85  | 4.7   | 0.22 | 0.14 | -1.11 | 0.191748 | 0.594748 | 0.562871 | 0.758628 |
| MmugDNA.25168.1.S1_at   | MmugDNA.25168.1 | 3.08  | 3.02  | 0.16 | 0.09 | 1.04  | 0.847775 | 0.928496 | 0.946572 | 0.95936  |
| MmugDNA.2517.1.S1_at    | MmugDNA.2517.1  | 7.6   | 8.22  | 0.26 | 0.34 | -1.53 | 0.036503 | 0.066654 | 0.355049 | 0.303999 |
| MmugDNA.25170.1.S1_at   | MmugDNA.25170.1 | 3.47  | 3.37  | 0.1  | 0.18 | 1.07  | 0.153346 | 0.221147 | 0.526421 | 0.494498 |
| MmugDNA.25171.1.S1_at   | MmugDNA.25171.1 | 3.75  | 3.76  | 0.11 | 0.19 | -1.01 | 0.598472 | 0.620378 | 0.836974 | 0.775363 |
| MmugDNA.25172.1.S1_at   | MmugDNA.25172.1 | 3.67  | 3.67  | 0.28 | 0.06 | 1     | 0.297077 | 0.355437 | 0.652603 | 0.597738 |
| MmugDNA.25174.1.S1_at   | MmugDNA.25174.1 | 6.09  | 6.97  | 0.33 | 0.09 | -1.84 | 0.011854 | 0.002235 | 0.257666 | 0.069621 |
| MmugDNA.25175.1.S1_at   | MmugDNA.25175.1 | 2.64  | 2.66  | 0.18 | 0.04 | -1.01 | 0.43004  | 0.387121 | 0.742555 | 0.621935 |
| MmugDNA.25177.1.S1_at   | MmugDNA.25177.1 | 4.91  | 4.89  | 0.07 | 0.37 | 1.01  | 0.412501 | 0.839643 | 0.73202  | 0.908582 |
| MmugDNA.25178.1.S1_at   | MmugDNA.25178.1 | 4.13  | 3.75  | 0.1  | 0.22 | 1.31  | 0.053362 | 0.04566  | 0.394644 | 0.25794  |
| MmugDNA.25179.1.S1_s_at | MmugDNA.25179.1 | 13.58 | 13.45 | 0.11 | 0.07 | 1.1   | 0.424618 | 0.005095 | 0.739618 | 0.099108 |
| MmugDNA.2518.1.S1_at    | MmugDNA.2518.1  | 3.83  | 3.58  | 0.15 | 0.33 | 1.18  | 0.506945 | 0.364087 | 0.786064 | 0.604449 |
| MmugDNA.25180.1.S1_at   | MmugDNA.25180.1 | 3.57  | 3.58  | 0    | 0.24 | -1.01 | 0.350291 | 0.284776 | 0.691193 | 0.546966 |
| MmugDNA.25183.1.S1_at   | MmugDNA.25183.1 | 6.63  | 6.75  | 0.41 | 0.49 | -1.09 | 0.649126 | 0.05389  | 0.86022  | 0.277685 |
| MmugDNA.25185.1.S1_at   | MmugDNA.25185.1 | 10.6  | 10.52 | 0.51 | 0.04 | 1.06  | 0.461689 | 0.096471 | 0.761152 | 0.35409  |
| MmugDNA.25186.1.S1_at   | MmugDNA.25186.1 | 6.79  | 6.69  | 2.62 | 0.39 | 1.08  | 0.819756 | 0.256291 | 0.935061 | 0.524079 |
| MmugDNA.25187.1.S1_at   | MmugDNA.25187.1 | 9.68  | 9.91  | 0.3  | 0.15 | -1.17 | 0.896383 | 0.000295 | 0.964607 | 0.034892 |
| MmugDNA.25188.1.S1_at   | MmugDNA.25188.1 | 4.87  | 4.62  | 0    | 0.31 | 1.19  | 0.217303 | 0.038973 | 0.587227 | 0.24253  |
| MmugDNA.25189.1.S1_at   | MmugDNA.25189.1 | 5.46  | 5.32  | 0.29 | 0.14 | 1.11  | 0.535957 | 0.461172 | 0.802014 | 0.67288  |
| MmugDNA.25190.1.S1_at   | MmugDNA.25190.1 | 6.29  | 6.08  | 0.25 | 0.05 | 1.15  | 0.594169 | 0.723792 | 0.834593 | 0.840126 |
| MmugDNA.25191.1.S1_at   | MmugDNA.25191.1 | 6.74  | 6.75  | 0.15 | 0.16 | -1.01 | 0.943945 | 0.795081 | 0.980618 | 0.881926 |
| MmugDNA.25191.1.S1_s_at | MmugDNA.25191.1 | 9.38  | 9.81  | 0.32 | 0.12 | -1.34 | 0.191966 | 0.340525 | 0.563029 | 0.586776 |
| MmugDNA.25192.1.S1_at   | MmugDNA.25192.1 | 10.71 | 10.73 | 0.38 | 0.04 | -1.01 | 0.840201 | 0.724097 | 0.943141 | 0.840308 |
| MmugDNA.25193.1.S1_at   | MmugDNA.25193.1 | 9.26  | 9.57  | 0.4  | 0.07 | -1.23 | 0.646874 | 0.785377 | 0.85932  | 0.875742 |
| MmugDNA.25194.1.S1_at   | MmugDNA.25194.1 | 3.2   | 3.46  | 0.03 | 0.25 | -1.2  | 0.540446 | 0.783057 | 0.804382 | 0.874447 |
| MmugDNA.25195.1.S1_at   | MmugDNA.25195.1 | 7.17  | 7.26  | 0.11 | 0.28 | -1.06 | 0.469141 | 0.612206 | 0.765491 | 0.769863 |
| MmugDNA.25196.1.S1_at   | MmugDNA.25196.1 | 8.03  | 7.84  | 0.42 | 0.25 | 1.14  | 0.995166 | 0.348121 | 0.998168 | 0.592302 |
| MmugDNA.25196.1.S1_x_at | MmugDNA.25196.1 | 8     | 7.72  | 0.47 | 0.38 | 1.21  | 0.999214 | 0.498923 | 0.999788 | 0.697877 |
| MmugDNA.25197.1.S1_at   | MmugDNA.25197.1 | 8.22  | 8.18  | 0.45 | 0.34 | 1.03  | 0.988082 | 0.002811 | 0.995831 | 0.078181 |
| MmugDNA.25199.1.S1_at   | MmugDNA.25199.1 | 11.74 | 12.08 | 0.4  | 0.11 | -1.27 | 0.304486 | 0.254236 | 0.658134 | 0.522538 |
| MmugDNA.2520.1.S1_at    | MmugDNA.2520.1  | 4.17  | 4.02  | 0.04 | 0.04 | 1.11  | 0.021477 | 0.277313 | 0.30887  | 0.541265 |
| MmugDNA.25200.1.S1_at   | MmugDNA.25200.1 | 8.84  | 8.33  | 0.37 | 0.13 | 1.43  | 0.238461 | 0.126203 | 0.605341 | 0.396748 |
| MmugDNA.25201.1.S1_at   | MmugDNA.25201.1 | 4.28  | 4.18  | 0.11 | 0.05 | 1.08  | 0.237524 | 0.349554 | 0.604473 | 0.593537 |

|                         |                 |       |       |      |      |       |          |          |          |          |
|-------------------------|-----------------|-------|-------|------|------|-------|----------|----------|----------|----------|
| MmugDNA.25202.1.S1_at   | MmugDNA.25202.1 | 7.25  | 7.43  | 0.37 | 0.26 | -1.13 | 0.269789 | 0.57761  | 0.62995  | 0.748013 |
| MmugDNA.25206.1.S1_at   | MmugDNA.25206.1 | 8.5   | 8.32  | 0.36 | 0.01 | 1.13  | 0.898699 | 0.005073 | 0.965615 | 0.09907  |
| MmugDNA.25207.1.S1_at   | MmugDNA.25207.1 | 4.99  | 4.96  | 0.11 | 0.41 | 1.02  | 0.439797 | 0.386466 | 0.748282 | 0.621593 |
| MmugDNA.25209.1.S1_at   | MmugDNA.25209.1 | 10.04 | 10.27 | 0.15 | 0.08 | -1.18 | 0.056129 | 0.066881 | 0.399523 | 0.304535 |
| MmugDNA.25210.1.S1_at   | MmugDNA.25210.1 | 5.88  | 5.86  | 0.23 | 0.06 | 1.01  | 0.887659 | 0.51098  | 0.961096 | 0.705318 |
| MmugDNA.25212.1.S1_at   | MmugDNA.25212.1 | 7.31  | 8.13  | 0.36 | 0.35 | -1.76 | 0.092413 | 0.541097 | 0.46089  | 0.72475  |
| MmugDNA.25214.1.S1_at   | MmugDNA.25214.1 | 4.03  | 3.89  | 0.28 | 0.21 | 1.1   | 0.555684 | 0.18025  | 0.813597 | 0.456804 |
| MmugDNA.25215.1.S1_at   | MmugDNA.25215.1 | 3.63  | 3.45  | 0.12 | 0.05 | 1.13  | 0.231123 | 0.296213 | 0.599078 | 0.555413 |
| MmugDNA.25216.1.S1_at   | MmugDNA.25216.1 | 8.07  | 7.87  | 0.76 | 0.19 | 1.15  | 0.531291 | 0.692863 | 0.799582 | 0.821279 |
| MmugDNA.25217.1.S1_at   | MmugDNA.25217.1 | 4.31  | 3.52  | 0.43 | 0.22 | 1.73  | 0.201176 | 0.248137 | 0.573015 | 0.517567 |
| MmugDNA.25219.1.S1_at   | MmugDNA.25219.1 | 6.77  | 6.58  | 0.05 | 0.17 | -1.15 | 0.383669 | 0.216041 | 0.711503 | 0.48965  |
| MmugDNA.25222.1.S1_at   | MmugDNA.25222.1 | 4.29  | 4.26  | 0.07 | 0.04 | 1.02  | 0.183474 | 0.512942 | 0.55651  | 0.706623 |
| MmugDNA.25224.1.S1_at   | MmugDNA.25224.1 | 11.52 | 11.83 | 0.2  | 0.06 | -1.23 | 0.045381 | 0.006506 | 0.376374 | 0.109521 |
| MmugDNA.7346.1.S1_s_at  | MmugDNA.7346.1  | 13.53 | 13.55 | 0.13 | 0.06 | -1.01 | 0.67281  | 0.826751 | 0.871072 | 0.900506 |
| MmugDNA.25227.1.S1_at   | MmugDNA.25227.1 | 5.09  | 5.16  | 0.14 | 0.14 | -1.05 | 0.986128 | 0.766027 | 0.995541 | 0.864085 |
| MmugDNA.25228.1.S1_at   | MmugDNA.25228.1 | 5.23  | 5.24  | 0.4  | 0.02 | -1    | 0.957401 | 0.794184 | 0.985974 | 0.881296 |
| MmugDNA.2523.1.S1_at    | MmugDNA.2523.1  | 3.22  | 3.15  | 0.19 | 0.04 | 1.05  | 0.251895 | 0.407533 | 0.616976 | 0.63505  |
| MmugDNA.25230.1.S1_at   | MmugDNA.25230.1 | 5.43  | 5.28  | 0.1  | 0.08 | 1.11  | 0.095035 | 0.088928 | 0.464131 | 0.34275  |
| MmugDNA.25231.1.S1_at   | MmugDNA.25231.1 | 11.75 | 11.81 | 0.16 | 0.13 | -1.05 | 0.965499 | 0.6148   | 0.988632 | 0.771546 |
| MmugDNA.25232.1.S1_at   | MmugDNA.25232.1 | 5.49  | 5.42  | 0.11 | 0.04 | 1.05  | 0.655382 | 0.908702 | 0.863101 | 0.948291 |
| MmugDNA.25233.1.S1_at   | MmugDNA.25233.1 | 4     | 3.89  | 0.22 | 0.29 | 1.08  | 0.236389 | 0.639583 | 0.603291 | 0.788351 |
| MmugDNA.25234.1.S1_at   | MmugDNA.25234.1 | 4.47  | 4.21  | 0.21 | 0.24 | 1.2   | 0.515913 | 0.655705 | 0.791185 | 0.7987   |
| MmugDNA.25236.1.S1_at   | MmugDNA.25236.1 | 6.28  | 6.25  | 0.27 | 0.04 | 1.02  | 0.495251 | 0.65018  | 0.779907 | 0.795459 |
| MmugDNA.25238.1.S1_at   | MmugDNA.25238.1 | 6.68  | 6.16  | 0.11 | 0.07 | 1.43  | 0.002922 | 0.000954 | 0.188584 | 0.049326 |
| MmugDNA.25239.1.S1_at   | MmugDNA.25239.1 | 5.09  | 5.67  | 0.34 | 0.16 | -1.49 | 0.105967 | 0.064678 | 0.477816 | 0.300314 |
| MmugDNA.2524.1.S1_at    | MmugDNA.2524.1  | 3.85  | 3.72  | 0.18 | 0.06 | 1.09  | 0.82914  | 0.279777 | 0.938698 | 0.543246 |
| MmugDNA.25240.1.S1_at   | MmugDNA.25240.1 | 10.66 | 10.11 | 0.45 | 0.04 | 1.47  | 0.114458 | 0.046478 | 0.487606 | 0.260115 |
| MmugDNA.25241.1.S1_at   | MmugDNA.25241.1 | 6.49  | 6.56  | 0.27 | 0.22 | -1.05 | 0.649578 | 0.823793 | 0.860391 | 0.898803 |
| MmugDNA.25242.1.S1_at   | MmugDNA.25242.1 | 7.55  | 8.25  | 0.47 | 0.08 | -1.63 | 0.06017  | 0.10042  | 0.407653 | 0.359541 |
| MmugDNA.25244.1.S1_at   | MmugDNA.25244.1 | 2.96  | 3.26  | 0.11 | 0.06 | -1.23 | 0.028016 | 0.064483 | 0.330017 | 0.300133 |
| MmugDNA.25245.1.S1_at   | MmugDNA.25245.1 | 6.76  | 6.49  | 0.09 | 0.03 | 1.2   | 0.005473 | 0.001736 | 0.208157 | 0.062895 |
| MmugDNA.25246.1.S1_at   | MmugDNA.25246.1 | 7.35  | 8.33  | 0.23 | 0.12 | -1.97 | 0.003851 | 0.000355 | 0.198541 | 0.037229 |
| MmugDNA.25247.1.S1_at   | MmugDNA.25247.1 | 3.33  | 3.34  | 0.01 | 0.09 | -1.01 | 0.80469  | 0.902097 | 0.929002 | 0.944306 |
| MmugDNA.25248.1.S1_at   | MmugDNA.25248.1 | 3.33  | 3.33  | 0.22 | 0.28 | 1.01  | 0.393956 | 0.493068 | 0.719549 | 0.693984 |
| MmugDNA.25249.1.S1_s_at | MmugDNA.25249.1 | 5.37  | 5.29  | 0.1  | 0.05 | 1.06  | 0.21541  | 0.353003 | 0.585748 | 0.596329 |
| MmugDNA.25251.1.S1_at   | MmugDNA.25251.1 | 4.65  | 4.65  | 0.16 | 0.18 | -1    | 0.236052 | 0.444904 | 0.603096 | 0.662121 |
| MmugDNA.25252.1.S1_at   | MmugDNA.25252.1 | 4.71  | 4.7   | 0.16 | 0.05 | 1     | 0.273422 | 0.387261 | 0.633189 | 0.62202  |
| MmugDNA.25253.1.S1_at   | MmugDNA.25253.1 | 4.45  | 4.6   | 0.06 | 0.1  | -1.11 | 0.049247 | 0.16031  | 0.385423 | 0.43644  |
| MmugDNA.25254.1.S1_at   | MmugDNA.25254.1 | 2.75  | 2.82  | 0.08 | 0.07 | -1.05 | 0.254464 | 0.365557 | 0.618957 | 0.605602 |
| MmugDNA.25254.1.S1_s_at | MmugDNA.25254.1 | 4.83  | 4.71  | 0.04 | 0.07 | 1.09  | 0.090294 | 0.476711 | 0.458493 | 0.682871 |
| MmugDNA.25256.1.S1_s_at | MmugDNA.25256.1 | 4.74  | 4.74  | 0.46 | 0.27 | -1    | 0.327391 | 0.091554 | 0.675065 | 0.346652 |
| MmugDNA.25259.1.S1_at   | MmugDNA.25259.1 | 10.85 | 11.3  | 0.4  | 0.09 | -1.37 | 0.414913 | 0.144235 | 0.733395 | 0.418146 |
| MmugDNA.25259.1.S1_s_at | MmugDNA.25259.1 | 8.99  | 9.12  | 0.39 | 0.01 | -1.09 | 0.655086 | 0.090133 | 0.863003 | 0.344432 |

|                         |                 |       |       |      |      |       |          |          |          |          |
|-------------------------|-----------------|-------|-------|------|------|-------|----------|----------|----------|----------|
| MmugDNA.2526.1.S1_at    | MmugDNA.2526.1  | 3.98  | 4.01  | 0.19 | 0.16 | -1.02 | 0.829039 | 0.047389 | 0.938657 | 0.262438 |
| MmugDNA.25260.1.S1_at   | MmugDNA.25260.1 | 4.61  | 4.53  | 0.15 | 0.07 | 1.06  | 0.459334 | 0.15021  | 0.759428 | 0.42486  |
| MmugDNA.25261.1.S1_at   | MmugDNA.25261.1 | 6.03  | 6.03  | 0.07 | 0.04 | -1    | 0.352238 | 0.617417 | 0.692649 | 0.773417 |
| MmugDNA.25262.1.S1_at   | MmugDNA.25262.1 | 5.98  | 6.38  | 0.54 | 0.14 | -1.31 | 0.802385 | 0.405003 | 0.927941 | 0.633428 |
| MmugDNA.25264.1.S1_at   | MmugDNA.25264.1 | 4.72  | 4.51  | 0.15 | 0.25 | 1.16  | 0.178038 | 0.530332 | 0.551187 | 0.717877 |
| MmugDNA.25265.1.S1_at   | MmugDNA.25265.1 | 10.75 | 12.18 | 0.37 | 0.06 | -2.68 | 0.004268 | 0.005776 | 0.198874 | 0.104378 |
| MmugDNA.25266.1.S1_at   | MmugDNA.25266.1 | 4.12  | 4.07  | 0.05 | 0.1  | 1.04  | 0.174019 | 0.095214 | 0.546993 | 0.35218  |
| MmugDNA.25268.1.S1_at   | MmugDNA.25268.1 | 5.92  | 6.16  | 0.13 | 0.19 | -1.18 | 0.459928 | 0.079444 | 0.759871 | 0.326766 |
| MmugDNA.25269.1.S1_at   | MmugDNA.25269.1 | 10.6  | 10.51 | 0.07 | 0.13 | 1.06  | 0.748194 | 0.052049 | 0.904327 | 0.273735 |
| MmugDNA.25270.1.S1_at   | MmugDNA.25270.1 | 7.85  | 7.85  | 0.08 | 0.12 | 1.01  | 0.553677 | 0.572568 | 0.812271 | 0.744566 |
| MmugDNA.25270.1.S1_s_at | MmugDNA.25270.1 | 6.05  | 6.06  | 0.22 | 0.13 | -1.01 | 0.983973 | 0.885869 | 0.99515  | 0.935095 |
| MmugDNA.25271.1.S1_at   | MmugDNA.25271.1 | 4.48  | 4.24  | 0.13 | 0.55 | 1.18  | 0.993755 | 0.968692 | 0.997606 | 0.982746 |
| MmugDNA.25273.1.S1_at   | MmugDNA.25273.1 | 6.85  | 7.05  | 0.12 | 0.17 | -1.14 | 0.178999 | 0.330313 | 0.552029 | 0.579074 |
| MmugDNA.25274.1.S1_at   | MmugDNA.25274.1 | 4.91  | 4.79  | 0.28 | 0.29 | 1.09  | 0.534067 | 0.615394 | 0.801189 | 0.771962 |
| MmugDNA.25275.1.S1_at   | MmugDNA.25275.1 | 4.68  | 4.63  | 0    | 0.12 | 1.03  | 0.492989 | 0.310735 | 0.778657 | 0.565809 |
| MmugDNA.25276.1.S1_at   | MmugDNA.25276.1 | 8.66  | 8.47  | 0.24 | 0.07 | 1.14  | 0.54427  | 0.447402 | 0.807169 | 0.66348  |
| MmugDNA.25278.1.S1_at   | MmugDNA.25278.1 | 3.81  | 3.73  | 0.36 | 0.11 | 1.06  | 0.61061  | 0.268912 | 0.841982 | 0.534356 |
| MmugDNA.25279.1.S1_at   | MmugDNA.25279.1 | 4.78  | 4.66  | 0.29 | 0.08 | 1.09  | 0.518324 | 0.109543 | 0.792606 | 0.373395 |
| MmugDNA.2528.1.S1_at    | MmugDNA.2528.1  | 5.43  | 5.2   | 0.11 | 0.38 | 1.18  | 0.526414 | 0.045624 | 0.796544 | 0.257766 |
| MmugDNA.25280.1.S1_at   | MmugDNA.25280.1 | 7.32  | 8.39  | 0.47 | 0.28 | -2.1  | 0.030265 | 0.014407 | 0.337191 | 0.153215 |
| MmugDNA.25282.1.S1_at   | MmugDNA.25282.1 | 5.14  | 5.16  | 0.21 | 0.04 | -1.02 | 0.94398  | 0.378537 | 0.980618 | 0.615564 |
| MmugDNA.25283.1.S1_at   | MmugDNA.25283.1 | 11.18 | 11.29 | 0.6  | 0.11 | -1.08 | 0.848747 | 0.52823  | 0.946844 | 0.716462 |
| MmugDNA.25284.1.S1_at   | MmugDNA.25284.1 | 4.27  | 4.1   | 0.12 | 0.33 | 1.13  | 0.789124 | 0.125707 | 0.92249  | 0.396249 |
| MmugDNA.25287.1.S1_at   | MmugDNA.25287.1 | 4.32  | 4.14  | 0.09 | 0.07 | 1.13  | 0.126865 | 0.5426   | 0.500688 | 0.725615 |
| MmugDNA.25288.1.S1_at   | MmugDNA.25288.1 | 3.57  | 3.57  | 0.03 | 0    | 1     | 0.373901 | 0.724316 | 0.705567 | 0.840433 |
| MmugDNA.25289.1.S1_at   | MmugDNA.25289.1 | 4.44  | 4     | 0.27 | 0.27 | 1.35  | 0.579233 | 0.442606 | 0.82645  | 0.660578 |
| MmugDNA.2529.1.S1_at    | MmugDNA.2529.1  | 3.31  | 3.2   | 0.08 | 0.07 | 1.08  | 0.09136  | 0.146842 | 0.459181 | 0.42088  |
| MmugDNA.25290.1.S1_at   | MmugDNA.25290.1 | 2.99  | 2.89  | 0.04 | 0.05 | 1.08  | 0.032509 | 0.173129 | 0.344478 | 0.449765 |
| MmugDNA.25291.1.S1_at   | MmugDNA.25291.1 | 8.41  | 8.36  | 0.21 | 0.09 | 1.04  | 0.795341 | 0.880644 | 0.92485  | 0.931813 |
| MmugDNA.25293.1.S1_at   | MmugDNA.25293.1 | 3.84  | 3.86  | 0.08 | 0.15 | -1.01 | 0.854289 | 0.980411 | 0.948462 | 0.989333 |
| MmugDNA.25294.1.S1_at   | MmugDNA.25294.1 | 4.83  | 4.81  | 0.04 | 0.1  | 1.01  | 0.287785 | 0.395463 | 0.644849 | 0.627492 |
| MmugDNA.25296.1.S1_at   | MmugDNA.25296.1 | 5.96  | 7.23  | 0.73 | 0.26 | -2.41 | 0.122213 | 0.07675  | 0.495677 | 0.322168 |
| MmugDNA.25297.1.S1_at   | MmugDNA.25297.1 | 5.26  | 5.17  | 0.06 | 0.06 | 1.07  | 0.312886 | 0.712331 | 0.664287 | 0.833347 |
| MmugDNA.25298.1.S1_at   | MmugDNA.25298.1 | 6.05  | 5.64  | 0.22 | 0.33 | 1.33  | 0.145354 | 0.212952 | 0.520409 | 0.4869   |
| MmugDNA.253.1.S1_at     | MmugDNA.253.1   | 6.09  | 6.38  | 0.33 | 0.21 | -1.22 | 0.876877 | 0.753518 | 0.95711  | 0.856527 |
| MmugDNA.2530.1.S1_x_at  | MmugDNA.2530.1  | 5.98  | 5.75  | 0.11 | 0.19 | 1.18  | 0.139921 | 0.193191 | 0.515501 | 0.468578 |
| MmugDNA.25300.1.S1_at   | MmugDNA.25300.1 | 3.68  | 3.48  | 0.1  | 0.11 | 1.14  | 0.440019 | 0.550186 | 0.748282 | 0.730298 |
| MmugDNA.25301.1.S1_at   | MmugDNA.25301.1 | 9.39  | 9.17  | 0.24 | 0.07 | 1.16  | 0.215901 | 0.213781 | 0.586043 | 0.487564 |
| MmugDNA.25303.1.S1_at   | MmugDNA.25303.1 | 7.96  | 8.66  | 0.49 | 0.27 | -1.63 | 0.064309 | 0.12214  | 0.418034 | 0.39178  |
| MmugDNA.25304.1.S1_at   | MmugDNA.25304.1 | 4.05  | 4.08  | 0.08 | 0.15 | -1.02 | 0.968042 | 0.985072 | 0.989447 | 0.991524 |
| MmugDNA.25306.1.S1_at   | MmugDNA.25306.1 | 7.73  | 7.91  | 0.55 | 0.08 | -1.13 | 0.25015  | 0.012533 | 0.615476 | 0.144417 |
| MmugDNA.25308.1.S1_at   | MmugDNA.25308.1 | 7.61  | 7.85  | 0.9  | 0.3  | -1.18 | 0.344298 | 0.098802 | 0.686913 | 0.356945 |
| MmugDNA.25309.1.S1_at   | MmugDNA.25309.1 | 6.6   | 6.53  | 0.59 | 0.49 | 1.05  | 0.371225 | 0.530313 | 0.705454 | 0.71787  |

|                         |                 |       |       |      |      |       |          |          |          |          |
|-------------------------|-----------------|-------|-------|------|------|-------|----------|----------|----------|----------|
| MmugDNA.2531.1.S1_at    | MmugDNA.2531.1  | 5.3   | 5.09  | 0.1  | 0.07 | 1.15  | 0.033448 | 0.039404 | 0.346442 | 0.243495 |
| MmugDNA.25310.1.S1_at   | MmugDNA.25310.1 | 6.07  | 5.91  | 0.05 | 0.16 | 1.11  | 0.184489 | 0.507802 | 0.557285 | 0.703336 |
| MmugDNA.25311.1.S1_at   | MmugDNA.25311.1 | 4.63  | 4.69  | 0.25 | 0.09 | -1.04 | 0.881497 | 0.468427 | 0.959052 | 0.677714 |
| MmugDNA.25312.1.S1_at   | MmugDNA.25312.1 | 10.24 | 9.12  | 0.33 | 0.22 | 2.17  | 0.012376 | 0.010007 | 0.262097 | 0.131262 |
| MmugDNA.25313.1.S1_at   | MmugDNA.25313.1 | 10.05 | 9.99  | 0.16 | 0.03 | 1.04  | 0.463048 | 0.767874 | 0.761921 | 0.865256 |
| MmugDNA.25314.1.S1_at   | MmugDNA.25314.1 | 6.32  | 6.16  | 0.18 | 0.05 | 1.12  | 0.592832 | 0.70728  | 0.833974 | 0.83023  |
| MmugDNA.25316.1.S1_at   | MmugDNA.25316.1 | 2.73  | 2.84  | 0.06 | 0.12 | -1.08 | 0.621192 | 0.798592 | 0.847514 | 0.884032 |
| MmugDNA.25317.1.S1_at   | MmugDNA.25317.1 | 5.94  | 6.45  | 0.22 | 0.26 | -1.42 | 0.125523 | 0.264358 | 0.499523 | 0.530385 |
| MmugDNA.25319.1.S1_at   | MmugDNA.25319.1 | 6.8   | 6.25  | 0.55 | 0.37 | 1.47  | 0.385778 | 0.246567 | 0.713049 | 0.515917 |
| MmugDNA.2532.1.S1_at    | MmugDNA.2532.1  | 3.85  | 3.85  | 0.14 | 0.23 | -1    | 0.436315 | 0.647161 | 0.746272 | 0.793288 |
| MmugDNA.25320.1.S1_at   | MmugDNA.25320.1 | 3.97  | 4.09  | 0.25 | 0.6  | -1.09 | 0.965298 | 0.683298 | 0.988598 | 0.815238 |
| MmugDNA.25323.1.S1_x_at | MmugDNA.25323.1 | 7.98  | 7.84  | 0.19 | 0.04 | 1.1   | 0.255489 | 0.296895 | 0.619588 | 0.555864 |
| MmugDNA.25324.1.S1_at   | MmugDNA.25324.1 | 9.4   | 7.4   | 0.52 | 0.45 | 4     | 0.007993 | 0.003494 | 0.232005 | 0.084997 |
| MmugDNA.25325.1.S1_at   | MmugDNA.25325.1 | 7.93  | 7.6   | 0.54 | 0.12 | 1.26  | 0.108346 | 0.110009 | 0.480755 | 0.374138 |
| MmugDNA.25326.1.S1_at   | MmugDNA.25326.1 | 4.03  | 4.01  | 0.15 | 0.04 | 1.01  | 0.946873 | 0.816693 | 0.981556 | 0.89427  |
| MmugDNA.25328.1.S1_at   | MmugDNA.25328.1 | 3.43  | 3.34  | 0.2  | 0.16 | 1.07  | 0.774859 | 0.919496 | 0.916458 | 0.954822 |
| MmugDNA.25329.1.S1_at   | MmugDNA.25329.1 | 5.42  | 4.87  | 0.53 | 0.21 | 1.46  | 0.158914 | 0.198174 | 0.531703 | 0.473148 |
| MmugDNA.25330.1.S1_at   | MmugDNA.25330.1 | 3.29  | 3.16  | 0.07 | 0.09 | 1.1   | 0.221889 | 0.682633 | 0.591447 | 0.814669 |
| MmugDNA.25331.1.S1_at   | MmugDNA.25331.1 | 10.81 | 11.37 | 0.45 | 0.04 | -1.48 | 0.068658 | 0.079895 | 0.426    | 0.327207 |
| MmugDNA.25332.1.S1_at   | MmugDNA.25332.1 | 3.47  | 3.47  | 0.12 | 0.15 | -1    | 0.931694 | 0.543782 | 0.977114 | 0.726357 |
| MmugDNA.25333.1.S1_at   | MmugDNA.25333.1 | 3.47  | 3.33  | 0.21 | 0.09 | 1.11  | 0.17228  | 0.432213 | 0.54564  | 0.652775 |
| MmugDNA.25334.1.S1_at   | MmugDNA.25334.1 | 6.21  | 6.26  | 1.11 | 0.31 | -1.04 | 0.901758 | 0.243284 | 0.966731 | 0.513356 |
| MmugDNA.25335.1.S1_at   | MmugDNA.25335.1 | 5.66  | 5.64  | 0.21 | 0.05 | 1.02  | 0.893771 | 0.699124 | 0.963542 | 0.825184 |
| MmugDNA.25336.1.S1_at   | MmugDNA.25336.1 | 6     | 7.35  | 0.27 | 0.47 | -2.54 | 0.010446 | 0.011453 | 0.247969 | 0.13846  |
| MmugDNA.25339.1.S1_at   | MmugDNA.25339.1 | 7.33  | 6.66  | 0.59 | 0.27 | 1.6   | 0.175994 | 0.172375 | 0.549155 | 0.448831 |
| MmugDNA.2534.1.S1_at    | MmugDNA.2534.1  | 5.23  | 5.09  | 0.25 | 0.79 | 1.1   | 0.714196 | 0.907354 | 0.888672 | 0.947602 |
| MmugDNA.25340.1.S1_at   | MmugDNA.25340.1 | 9.59  | 8.59  | 0.44 | 0.18 | 1.99  | 0.014291 | 0.006786 | 0.274633 | 0.111388 |
| MmugDNA.25344.1.S1_at   | MmugDNA.25344.1 | 8.7   | 8.86  | 0.11 | 0.05 | -1.12 | 0.044161 | 0.000637 | 0.374157 | 0.042882 |
| MmugDNA.25345.1.S1_at   | MmugDNA.25345.1 | 4.96  | 4.76  | 0.05 | 0.11 | 1.15  | 0.1056   | 0.281962 | 0.477345 | 0.544868 |
| MmugDNA.25346.1.S1_at   | MmugDNA.25346.1 | 5.54  | 5.81  | 0.38 | 0.42 | -1.21 | 0.305696 | 0.433745 | 0.65908  | 0.653964 |
| MmugDNA.25349.1.S1_at   | MmugDNA.25349.1 | 4.86  | 4.72  | 0.04 | 0.04 | 1.1   | 0.013579 | 0.126702 | 0.269894 | 0.397372 |
| MmugDNA.2535.1.S1_at    | MmugDNA.2535.1  | 4.17  | 4.2   | 0.39 | 0.16 | -1.02 | 0.789533 | 0.687254 | 0.92257  | 0.817523 |
| MmugDNA.25350.1.S1_at   | MmugDNA.25350.1 | 3.89  | 3.84  | 0.12 | 0.04 | 1.04  | 0.95849  | 0.666712 | 0.986346 | 0.804734 |
| MmugDNA.25351.1.S1_at   | MmugDNA.25351.1 | 4.52  | 4.37  | 0.2  | 0.17 | 1.11  | 0.44721  | 0.375827 | 0.753177 | 0.613706 |
| MmugDNA.25352.1.S1_at   | MmugDNA.25352.1 | 3.46  | 3.43  | 0.04 | 0.1  | 1.02  | 0.191453 | 0.01724  | 0.562859 | 0.166344 |
| MmugDNA.25355.1.S1_at   | MmugDNA.25355.1 | 3.99  | 3.97  | 0.15 | 0.03 | 1.01  | 0.923181 | 0.883264 | 0.974166 | 0.933464 |
| MmugDNA.25356.1.S1_at   | MmugDNA.25356.1 | 4.74  | 4.53  | 0.22 | 0.09 | 1.16  | 0.175108 | 0.065587 | 0.548031 | 0.301476 |
| MmugDNA.25357.1.S1_at   | MmugDNA.25357.1 | 10.32 | 10.49 | 0.03 | 0.05 | -1.12 | 0.003767 | 0.061686 | 0.197739 | 0.295135 |
| MmugDNA.25358.1.S1_at   | MmugDNA.25358.1 | 9.75  | 8.17  | 1.04 | 0.13 | 3.01  | 0.066676 | 0.134894 | 0.422542 | 0.406878 |
| MmugDNA.2536.1.S1_at    | MmugDNA.2536.1  | 6.02  | 5.85  | 0.25 | 0.15 | 1.13  | 0.133656 | 0.24017  | 0.508012 | 0.51084  |
| MmugDNA.25360.1.S1_at   | MmugDNA.25360.1 | 4.3   | 4.26  | 0.14 | 0.1  | 1.03  | 0.744208 | 0.915012 | 0.902479 | 0.952293 |
| MmugDNA.25361.1.S1_at   | MmugDNA.25361.1 | 10.84 | 11.45 | 0.09 | 0.02 | -1.52 | 0.000447 | 0.000728 | 0.139858 | 0.044699 |
| MmugDNA.25363.1.S1_at   | MmugDNA.25363.1 | 7     | 7.06  | 0.42 | 0.52 | -1.04 | 0.289428 | 0.246874 | 0.646114 | 0.516237 |

|                         |                 |       |       |      |      |       |          |          |          |          |
|-------------------------|-----------------|-------|-------|------|------|-------|----------|----------|----------|----------|
| MmugDNA.25364.1.S1_at   | MmugDNA.25364.1 | 6.66  | 7.14  | 0.26 | 0.3  | -1.4  | 0.07461  | 0.109507 | 0.435313 | 0.373339 |
| MmugDNA.31429.1.S1_at   | MmugDNA.31429.1 | 12.78 | 12.78 | 0.17 | 0.05 | 1     | 0.820968 | 0.63387  | 0.93538  | 0.784509 |
| MmugDNA.31429.1.S1_s_at | MmugDNA.31429.1 | 12.7  | 12.69 | 0.14 | 0.04 | 1.01  | 0.878948 | 0.395751 | 0.95792  | 0.627639 |
| MmugDNA.25366.1.S1_at   | MmugDNA.25366.1 | 4.68  | 4.26  | 0.3  | 0.16 | 1.34  | 0.085193 | 0.066561 | 0.452227 | 0.303733 |
| MmugDNA.25368.1.S1_at   | MmugDNA.25368.1 | 5.58  | 5.47  | 0.21 | 0.06 | 1.08  | 0.34059  | 0.22958  | 0.684563 | 0.501574 |
| MmugDNA.2537.1.S1_at    | MmugDNA.2537.1  | 11.41 | 11.88 | 0.12 | 0.01 | -1.39 | 0.002237 | 0.003155 | 0.174757 | 0.081739 |
| MmugDNA.25371.1.S1_at   | MmugDNA.25371.1 | 4.94  | 5.15  | 0.2  | 0.09 | -1.16 | 0.164864 | 0.221954 | 0.537595 | 0.495044 |
| MmugDNA.25372.1.S1_at   | MmugDNA.25372.1 | 6.21  | 6.17  | 0.08 | 0.1  | 1.03  | 0.709609 | 0.815563 | 0.88699  | 0.893609 |
| MmugDNA.25373.1.S1_at   | MmugDNA.25373.1 | 10.73 | 11.06 | 0.29 | 0.14 | -1.25 | 0.045101 | 0.025583 | 0.375796 | 0.200662 |
| MmugDNA.25374.1.S1_at   | MmugDNA.25374.1 | 5.95  | 5.72  | 0.28 | 0.08 | 1.17  | 0.232336 | 0.39519  | 0.600124 | 0.627379 |
| MmugDNA.25375.1.S1_at   | MmugDNA.25375.1 | 7.08  | 7.44  | 0.34 | 0.28 | -1.28 | 0.674276 | 0.018775 | 0.871872 | 0.172226 |
| MmugDNA.25377.1.S1_at   | MmugDNA.25377.1 | 9.91  | 9.23  | 0.49 | 0.15 | 1.59  | 0.124826 | 0.096101 | 0.498917 | 0.353322 |
| MmugDNA.25378.1.S1_at   | MmugDNA.25378.1 | 4.92  | 4.91  | 0.14 | 0.01 | 1.01  | 0.513702 | 0.299076 | 0.790087 | 0.557663 |
| MmugDNA.25379.1.S1_at   | MmugDNA.25379.1 | 12.58 | 12.58 | 0.2  | 0.09 | 1     | 0.980233 | 0.140751 | 0.993785 | 0.414115 |
| MmugDNA.2538.1.S1_at    | MmugDNA.2538.1  | 8.91  | 9.92  | 0.45 | 0.17 | -2.02 | 0.009736 | 0.002664 | 0.243347 | 0.076299 |
| MmugDNA.34811.1.S1_at   | MmugDNA.34811.1 | 10.7  | 10.48 | 0.1  | 0.07 | 1.17  | 0.020628 | 0.011986 | 0.305121 | 0.141658 |
| MmugDNA.34811.1.S1_s_at | MmugDNA.34811.1 | 11.86 | 11.68 | 0.05 | 0.05 | 1.13  | 0.00655  | 0.013741 | 0.219791 | 0.150134 |
| MmugDNA.25382.1.S1_at   | MmugDNA.25382.1 | 8.67  | 8.38  | 0.33 | 0.07 | 1.22  | 0.091626 | 0.121562 | 0.459957 | 0.390683 |
| MmugDNA.25383.1.S1_at   | MmugDNA.25383.1 | 4.66  | 4.94  | 0.39 | 0.49 | -1.21 | 0.485475 | 0.789526 | 0.774354 | 0.878424 |
| MmugDNA.25385.1.S1_s_at | MmugDNA.25385.1 | 10.12 | 9.8   | 0.36 | 0.2  | 1.25  | 0.068307 | 0.064609 | 0.425182 | 0.300314 |
| MmugDNA.25387.1.S1_at   | MmugDNA.25387.1 | 4.2   | 4.2   | 0.09 | 0.03 | 1     | 0.59318  | 0.079267 | 0.834113 | 0.326444 |
| MmugDNA.25388.1.S1_at   | MmugDNA.25388.1 | 5.93  | 6.79  | 0.59 | 0.38 | -1.81 | 0.388998 | 0.541126 | 0.715919 | 0.72475  |
| MmugDNA.2539.1.S1_at    | MmugDNA.2539.1  | 3.33  | 3.33  | 0.06 | 0    | 1     | 0.373901 | 0.911065 | 0.705567 | 0.949838 |
| MmugDNA.25390.1.S1_at   | MmugDNA.25390.1 | 3.64  | 3.55  | 0.26 | 0.15 | 1.06  | 0.444759 | 0.132599 | 0.751542 | 0.404544 |
| MmugDNA.25391.1.S1_at   | MmugDNA.25391.1 | 6.88  | 6.75  | 0.07 | 0.03 | 1.1   | 0.053249 | 0.421734 | 0.394368 | 0.645254 |
| MmugDNA.25391.1.S1_x_at | MmugDNA.25391.1 | 6.8   | 6.79  | 0.05 | 0.06 | 1.01  | 0.473685 | 0.353327 | 0.767701 | 0.596477 |
| MmugDNA.25393.1.S1_at   | MmugDNA.25393.1 | 4.36  | 4.31  | 0.03 | 0.19 | 1.04  | 0.705446 | 0.78157  | 0.885355 | 0.873395 |
| MmugDNA.25394.1.S1_at   | MmugDNA.25394.1 | 3.78  | 3.84  | 0.11 | 0.03 | -1.04 | 0.392801 | 0.813034 | 0.718623 | 0.891895 |
| MmugDNA.25395.1.S1_at   | MmugDNA.25395.1 | 5.47  | 5.29  | 0.14 | 0.13 | 1.13  | 0.654495 | 0.470968 | 0.862839 | 0.679162 |
| MmugDNA.25397.1.S1_at   | MmugDNA.25397.1 | 7.74  | 8.41  | 0.4  | 0.05 | -1.6  | 0.039861 | 0.046028 | 0.362793 | 0.258971 |
| MmugDNA.25398.1.S1_at   | MmugDNA.25398.1 | 10.35 | 10.17 | 0.13 | 0.12 | 1.14  | 0.142055 | 0.427405 | 0.517023 | 0.649237 |
| MmugDNA.25398.1.S1_s_at | MmugDNA.25398.1 | 10.05 | 9.87  | 0.13 | 0.08 | 1.13  | 0.132764 | 0.210894 | 0.506999 | 0.484934 |
| MmugDNA.2540.1.S1_at    | MmugDNA.2540.1  | 5.32  | 5.14  | 0.01 | 0.26 | 1.13  | 0.921938 | 0.566671 | 0.973655 | 0.740723 |
| MmugDNA.2540.1.S1_s_at  | MmugDNA.2540.1  | 7.19  | 6.27  | 0.17 | 0.37 | 1.89  | 0.03518  | 0.010074 | 0.351216 | 0.13168  |
| MmugDNA.25401.1.S1_at   | MmugDNA.25401.1 | 9.82  | 10.06 | 0.69 | 0.01 | -1.18 | 0.618135 | 0.74599  | 0.845802 | 0.852688 |
| MmugDNA.25402.1.S1_at   | MmugDNA.25402.1 | 5.33  | 4.91  | 0.25 | 0.11 | 1.34  | 0.190705 | 0.184728 | 0.561788 | 0.460645 |
| MmugDNA.25403.1.S1_at   | MmugDNA.25403.1 | 3.14  | 3.28  | 0.14 | 0.28 | -1.1  | 0.784312 | 0.586135 | 0.920715 | 0.753294 |
| MmugDNA.25405.1.S1_at   | MmugDNA.25405.1 | 6.06  | 6.03  | 0.17 | 0.28 | 1.02  | 0.988506 | 0.048873 | 0.995877 | 0.265858 |
| MmugDNA.25406.1.S1_at   | MmugDNA.25406.1 | 5.45  | 5.4   | 0.1  | 0.11 | 1.04  | 0.393775 | 0.546135 | 0.719504 | 0.727787 |
| MmugDNA.25407.1.S1_at   | MmugDNA.25407.1 | 11.49 | 10.52 | 3.13 | 0.28 | 1.95  | 0.686382 | 0.860731 | 0.877356 | 0.920675 |
| MmugDNA.25408.1.S1_at   | MmugDNA.25408.1 | 6.61  | 7.57  | 0.42 | 0.41 | -1.94 | 0.097831 | 0.160527 | 0.466857 | 0.436692 |
| MmugDNA.2541.1.S1_at    | MmugDNA.2541.1  | 12.65 | 12.53 | 0.04 | 0.04 | 1.08  | 0.02217  | 0.000128 | 0.31038  | 0.029087 |
| MmugDNA.25410.1.S1_at   | MmugDNA.25410.1 | 3.57  | 3.47  | 0.31 | 0.04 | 1.07  | 0.517728 | 0.568477 | 0.792263 | 0.741983 |

|                         |                 |       |       |      |      |       |          |          |          |          |
|-------------------------|-----------------|-------|-------|------|------|-------|----------|----------|----------|----------|
| MmugDNA.25411.1.S1_at   | MmugDNA.25411.1 | 9.31  | 9.14  | 1.94 | 0.28 | 1.13  | 0.917699 | 0.100074 | 0.97205  | 0.358965 |
| MmugDNA.25412.1.S1_at   | MmugDNA.25412.1 | 5.26  | 5.11  | 0.05 | 0.04 | 1.11  | 0.018865 | 0.452828 | 0.298593 | 0.667356 |
| MmugDNA.25413.1.S1_at   | MmugDNA.25413.1 | 9.34  | 9.32  | 0.62 | 0.12 | 1.02  | 0.829924 | 0.740599 | 0.938961 | 0.849805 |
| MmugDNA.25414.1.S1_at   | MmugDNA.25414.1 | 5.9   | 5.83  | 0.05 | 0.16 | 1.05  | 0.338105 | 0.116628 | 0.682759 | 0.383829 |
| MmugDNA.25415.1.S1_at   | MmugDNA.25415.1 | 3.36  | 3.51  | 0.24 | 0.03 | -1.11 | 0.638396 | 0.419675 | 0.855923 | 0.643599 |
| MmugDNA.25417.1.S1_at   | MmugDNA.25417.1 | 3.91  | 3.92  | 0.1  | 0.2  | -1.01 | 0.378115 | 0.462432 | 0.708016 | 0.673754 |
| MmugDNA.25419.1.S1_at   | MmugDNA.25419.1 | 3.65  | 3.59  | 0.09 | 0.02 | 1.04  | 0.339854 | 0.242553 | 0.684042 | 0.512882 |
| MmugDNA.25420.1.S1_at   | MmugDNA.25420.1 | 3.6   | 3.28  | 0.28 | 0.08 | 1.25  | 0.268935 | 0.302622 | 0.629195 | 0.560201 |
| MmugDNA.25421.1.S1_at   | MmugDNA.25421.1 | 5.98  | 5.96  | 0.19 | 0.07 | 1.01  | 0.943096 | 0.859735 | 0.980374 | 0.920075 |
| MmugDNA.25422.1.S1_at   | MmugDNA.25422.1 | 7.44  | 7.43  | 1.01 | 0.07 | 1.01  | 0.352442 | 0.380885 | 0.692649 | 0.617426 |
| MmugDNA.25423.1.S1_at   | MmugDNA.25423.1 | 4.6   | 4.49  | 0.07 | 0.06 | 1.08  | 0.218202 | 0.180183 | 0.588113 | 0.456751 |
| MmugDNA.25424.1.S1_at   | MmugDNA.25424.1 | 3.89  | 3.84  | 0.07 | 0.04 | 1.03  | 0.266504 | 0.651605 | 0.627366 | 0.796299 |
| MmugDNA.25425.1.S1_at   | MmugDNA.25425.1 | 5.76  | 5.78  | 0.16 | 0.08 | -1.01 | 0.983981 | 0.947074 | 0.99515  | 0.969997 |
| MmugDNA.25426.1.S1_at   | MmugDNA.25426.1 | 4.62  | 4.91  | 0.51 | 0.06 | -1.23 | 0.127091 | 0.123485 | 0.50102  | 0.393518 |
| MmugDNA.25427.1.S1_at   | MmugDNA.25427.1 | 4.78  | 4.86  | 0.16 | 0.1  | -1.05 | 0.904928 | 0.137436 | 0.968088 | 0.410368 |
| MmugDNA.25429.1.S1_at   | MmugDNA.25429.1 | 6.15  | 5.98  | 0.26 | 0.1  | 1.13  | 0.116898 | 0.108757 | 0.490067 | 0.372285 |
| MmugDNA.25430.1.S1_at   | MmugDNA.25430.1 | 5.4   | 5.1   | 0.16 | 0.08 | 1.23  | 0.031961 | 0.012464 | 0.342891 | 0.14417  |
| MmugDNA.25432.1.S1_at   | MmugDNA.25432.1 | 5.19  | 5.26  | 0.79 | 0.35 | -1.05 | 0.678891 | 0.356146 | 0.874204 | 0.59815  |
| MmugDNA.25434.1.S1_at   | MmugDNA.25434.1 | 8.95  | 8.8   | 0.08 | 0.12 | 1.11  | 0.165059 | 0.114486 | 0.537704 | 0.381041 |
| MmugDNA.25435.1.S1_at   | MmugDNA.25435.1 | 4.63  | 4.47  | 0.31 | 0.14 | 1.12  | 0.153341 | 0.48369  | 0.526421 | 0.688112 |
| MmugDNA.25437.1.S1_at   | MmugDNA.25437.1 | 10.8  | 10.43 | 0.27 | 0.24 | 1.29  | 0.357443 | 0.023265 | 0.695809 | 0.191218 |
| MmugDNA.25437.1.S1_s_at | MmugDNA.25437.1 | 10.26 | 10.87 | 0.23 | 0.34 | -1.52 | 0.017027 | 0.018213 | 0.288969 | 0.169777 |
| MmugDNA.25438.1.S1_at   | MmugDNA.25438.1 | 4.68  | 4.7   | 0.09 | 0.07 | -1.01 | 0.605484 | 0.116468 | 0.839993 | 0.383671 |
| MmugDNA.2544.1.S1_at    | MmugDNA.2544.1  | 3.38  | 3.02  | 0.17 | 0.08 | 1.29  | 0.038536 | 0.084422 | 0.359709 | 0.335713 |
| MmugDNA.25441.1.S1_at   | MmugDNA.25441.1 | 6.1   | 6.74  | 0.56 | 0.14 | -1.55 | 0.384693 | 0.414637 | 0.712173 | 0.640456 |
| MmugDNA.25442.1.S1_at   | MmugDNA.25442.1 | 9.4   | 9.33  | 0.46 | 0.06 | 1.05  | 0.295628 | 0.185897 | 0.651318 | 0.461752 |
| MmugDNA.25443.1.S1_at   | MmugDNA.25443.1 | 10.84 | 10.98 | 0.23 | 0.07 | -1.1  | 0.513975 | 0.625308 | 0.79023  | 0.779111 |
| MmugDNA.25445.1.S1_at   | MmugDNA.25445.1 | 4.73  | 4.37  | 0.41 | 0.12 | 1.29  | 0.170991 | 0.209696 | 0.544133 | 0.48341  |
| MmugDNA.25446.1.S1_at   | MmugDNA.25446.1 | 9.17  | 8.79  | 0.06 | 0.11 | 1.3   | 0.013264 | 0.001178 | 0.267226 | 0.05381  |
| MmugDNA.25447.1.S1_at   | MmugDNA.25447.1 | 3.77  | 3.51  | 0.31 | 0.06 | 1.2   | 0.193932 | 0.25066  | 0.564486 | 0.51941  |
| MmugDNA.25448.1.S1_at   | MmugDNA.25448.1 | 10.3  | 10.34 | 0.05 | 0.05 | -1.03 | 0.141308 | 0.000715 | 0.516365 | 0.044419 |
| MmugDNA.25449.1.S1_s_at | MmugDNA.25449.1 | 5.76  | 6.04  | 0.18 | 0.02 | -1.22 | 0.116631 | 0.127169 | 0.489805 | 0.397922 |
| MmugDNA.2545.1.S1_at    | MmugDNA.2545.1  | 6.56  | 6.52  | 0.48 | 0.14 | 1.03  | 0.543802 | 0.734007 | 0.806798 | 0.845896 |
| MmugDNA.25451.1.S1_at   | MmugDNA.25451.1 | 3.1   | 3.1   | 0.02 | 0.05 | -1    | 0.91929  | 0.919977 | 0.972508 | 0.954967 |
| MmugDNA.25453.1.S1_at   | MmugDNA.25453.1 | 9.5   | 9.07  | 0.16 | 0.12 | 1.35  | 0.020218 | 0.001827 | 0.303736 | 0.064165 |
| MmugDNA.25455.1.S1_at   | MmugDNA.25455.1 | 10.15 | 9.68  | 0.83 | 0.21 | 1.39  | 0.353452 | 0.096894 | 0.693252 | 0.354311 |
| MmugDNA.25456.1.S1_at   | MmugDNA.25456.1 | 7.91  | 8.24  | 0.81 | 0.13 | -1.25 | 0.450274 | 0.113833 | 0.754759 | 0.380062 |
| MmugDNA.25457.1.S1_at   | MmugDNA.25457.1 | 4.3   | 4.63  | 0.18 | 0.42 | -1.26 | 0.274265 | 0.666924 | 0.633792 | 0.804898 |
| MmugDNA.25458.1.S1_at   | MmugDNA.25458.1 | 3.65  | 3.62  | 0.18 | 0.11 | 1.02  | 0.492005 | 0.578447 | 0.778086 | 0.748527 |
| MmugDNA.25460.1.S1_x_at | MmugDNA.25460.1 | 5.54  | 5.33  | 0.76 | 0.15 | 1.15  | 0.825944 | 0.546499 | 0.937613 | 0.728079 |
| MmugDNA.25462.1.S1_at   | MmugDNA.25462.1 | 2.89  | 2.9   | 0.05 | 0.05 | -1    | 0.5011   | 0.706776 | 0.783101 | 0.829917 |
| MmugDNA.25464.1.S1_at   | MmugDNA.25464.1 | 7.02  | 7.37  | 0.31 | 0.16 | -1.27 | 0.197416 | 0.301312 | 0.568435 | 0.559356 |
| MmugDNA.25465.1.S1_at   | MmugDNA.25465.1 | 5.21  | 5.19  | 0.16 | 0.11 | 1.02  | 0.765485 | 0.864427 | 0.911838 | 0.923115 |

|                         |                 |       |       |      |      |       |          |          |          |          |
|-------------------------|-----------------|-------|-------|------|------|-------|----------|----------|----------|----------|
| MmugDNA.25466.1.S1_at   | MmugDNA.25466.1 | 9.09  | 9.13  | 0.12 | 0.17 | -1.03 | 0.63617  | 0.386323 | 0.854813 | 0.621534 |
| MmugDNA.25467.1.S1_at   | MmugDNA.25467.1 | 4.92  | 4.75  | 0.09 | 0.1  | 1.12  | 0.186655 | 0.272301 | 0.559223 | 0.537053 |
| MmugDNA.2547.1.S1_at    | MmugDNA.2547.1  | 5.4   | 5.25  | 0.05 | 0.09 | 1.11  | 0.042011 | 0.454004 | 0.368163 | 0.668362 |
| MmugDNA.25470.1.S1_at   | MmugDNA.25470.1 | 5.84  | 5.94  | 0.22 | 0.17 | -1.07 | 0.939271 | 0.394276 | 0.979532 | 0.626868 |
| MmugDNA.25473.1.S1_at   | MmugDNA.25473.1 | 3.56  | 3.67  | 0.1  | 0.1  | -1.08 | 0.22483  | 0.318164 | 0.594045 | 0.571046 |
| MmugDNA.25474.1.S1_at   | MmugDNA.25474.1 | 4.93  | 4.93  | 0.26 | 0.1  | 1.01  | 0.252581 | 0.331255 | 0.617552 | 0.579981 |
| MmugDNA.25475.1.S1_at   | MmugDNA.25475.1 | 6.4   | 6.46  | 0.06 | 0.12 | -1.04 | 0.840655 | 0.084318 | 0.943406 | 0.335576 |
| MmugDNA.25476.1.S1_at   | MmugDNA.25476.1 | 3.38  | 3.69  | 0.1  | 0.12 | -1.24 | 0.020129 | 0.036585 | 0.303673 | 0.235834 |
| MmugDNA.25479.1.S1_at   | MmugDNA.25479.1 | 7.22  | 7.15  | 0.35 | 0.08 | 1.05  | 0.431933 | 0.01052  | 0.743687 | 0.13398  |
| MmugDNA.2548.1.S1_at    | MmugDNA.2548.1  | 6.68  | 6.67  | 0.07 | 0.1  | 1     | 0.213707 | 0.767148 | 0.584304 | 0.864719 |
| MmugDNA.25480.1.S1_at   | MmugDNA.25480.1 | 5.75  | 5.81  | 0.08 | 0.1  | -1.04 | 0.305523 | 0.278853 | 0.658979 | 0.542599 |
| MmugDNA.25482.1.S1_at   | MmugDNA.25482.1 | 3.56  | 3.39  | 0.23 | 0.29 | 1.12  | 0.76621  | 0.809283 | 0.912101 | 0.890102 |
| MmugDNA.25483.1.S1_at   | MmugDNA.25483.1 | 4.04  | 4.21  | 0.23 | 0.3  | -1.13 | 0.689759 | 0.779862 | 0.879077 | 0.872389 |
| MmugDNA.25484.1.S1_at   | MmugDNA.25484.1 | 7.28  | 6.66  | 0.49 | 0    | 1.54  | 0.061447 | 0.007454 | 0.410677 | 0.115872 |
| MmugDNA.25485.1.S1_at   | MmugDNA.25485.1 | 9.77  | 9.94  | 0.18 | 0.15 | -1.12 | 0.367274 | 0.555363 | 0.702778 | 0.733767 |
| MmugDNA.25486.1.S1_at   | MmugDNA.25486.1 | 4.84  | 4.98  | 0.21 | 0.27 | -1.11 | 0.808865 | 0.494832 | 0.930844 | 0.695116 |
| MmugDNA.25488.1.S1_at   | MmugDNA.25488.1 | 5.67  | 5.55  | 0.33 | 0.2  | 1.08  | 0.607622 | 0.406794 | 0.840955 | 0.634501 |
| MmugDNA.25489.1.S1_at   | MmugDNA.25489.1 | 4.23  | 4.18  | 0.18 | 0.06 | 1.03  | 0.669659 | 0.881301 | 0.869663 | 0.932281 |
| MmugDNA.25490.1.S1_s_at | MmugDNA.25490.1 | 6.08  | 5.75  | 0.32 | 0.05 | 1.26  | 0.163873 | 0.449888 | 0.536665 | 0.665343 |
| MmugDNA.25491.1.S1_s_at | MmugDNA.25491.1 | 8.01  | 7.26  | 0.76 | 0.21 | 1.69  | 0.201828 | 0.295431 | 0.57339  | 0.554885 |
| MmugDNA.25493.1.S1_at   | MmugDNA.25493.1 | 8.81  | 8.87  | 0.58 | 0.15 | -1.04 | 0.8414   | 0.245448 | 0.943773 | 0.515213 |
| MmugDNA.25495.1.S1_at   | MmugDNA.25495.1 | 3.95  | 3.95  | 0.01 | 0.08 | 1     | 0.327534 | 0.336427 | 0.675137 | 0.583831 |
| MmugDNA.25497.1.S1_at   | MmugDNA.25497.1 | 6.39  | 6.34  | 0.1  | 0.1  | 1.03  | 0.588241 | 0.052201 | 0.83181  | 0.274044 |
| MmugDNA.25498.1.S1_at   | MmugDNA.25498.1 | 4.64  | 4.58  | 0.15 | 0.01 | 1.05  | 0.506326 | 0.706424 | 0.785754 | 0.829634 |
| MmugDNA.25499.1.S1_at   | MmugDNA.25499.1 | 4.35  | 4.37  | 0.16 | 0    | -1.01 | 0.441829 | 0.510226 | 0.749615 | 0.704755 |
| MmugDNA.255.1.S1_at     | MmugDNA.255.1   | 6.03  | 6.31  | 0.7  | 0.22 | -1.21 | 0.730567 | 0.079826 | 0.896248 | 0.327156 |
| MmugDNA.25500.1.S1_at   | MmugDNA.25500.1 | 6.5   | 6.37  | 0.07 | 0    | 1.09  | 0.110802 | 0.295756 | 0.484198 | 0.555186 |
| MmugDNA.25501.1.S1_at   | MmugDNA.25501.1 | 7.33  | 7.36  | 1.01 | 0.17 | -1.03 | 0.967601 | 0.892268 | 0.989309 | 0.938598 |
| MmugDNA.25502.1.S1_at   | MmugDNA.25502.1 | 5.78  | 5.41  | 0.49 | 0.12 | 1.3   | 0.922622 | 0.136329 | 0.973908 | 0.408746 |
| MmugDNA.25503.1.S1_at   | MmugDNA.25503.1 | 10.33 | 10.21 | 1.16 | 0.04 | 1.09  | 0.852921 | 0.788718 | 0.94811  | 0.877894 |
| MmugDNA.25505.1.S1_at   | MmugDNA.25505.1 | 6.95  | 6.8   | 0.09 | 0.05 | 1.11  | 0.081016 | 0.151227 | 0.445056 | 0.425924 |
| MmugDNA.25506.1.S1_at   | MmugDNA.25506.1 | 7.66  | 7.07  | 0.39 | 0.21 | 1.51  | 0.179482 | 0.129486 | 0.55277  | 0.400938 |
| MmugDNA.2551.1.S1_at    | MmugDNA.2551.1  | 3.89  | 3.89  | 0.23 | 0.09 | -1    | 0.976893 | 0.162705 | 0.992494 | 0.43882  |
| MmugDNA.25510.1.S1_s_at | MmugDNA.25510.1 | 4.38  | 4.7   | 0.27 | 0.3  | -1.25 | 0.143867 | 0.401963 | 0.519184 | 0.631137 |
| MmugDNA.25512.1.S1_at   | MmugDNA.25512.1 | 9.11  | 9.2   | 0.69 | 0.09 | -1.07 | 0.685661 | 0.437914 | 0.876883 | 0.657026 |
| MmugDNA.25514.1.S1_at   | MmugDNA.25514.1 | 4.51  | 4.48  | 0.31 | 0.06 | 1.02  | 0.256427 | 0.24418  | 0.620412 | 0.514164 |
| MmugDNA.25516.1.S1_at   | MmugDNA.25516.1 | 5.42  | 4.8   | 0.14 | 0.12 | 1.53  | 0.010232 | 0.010885 | 0.246929 | 0.135939 |
| MmugDNA.25517.1.S1_at   | MmugDNA.25517.1 | 3.9   | 3.78  | 0.06 | 0.09 | 1.09  | 0.117902 | 0.052869 | 0.491305 | 0.275522 |
| MmugDNA.25517.1.S1_s_at | MmugDNA.25517.1 | 5.12  | 4.9   | 0.21 | 0.17 | 1.17  | 0.243918 | 0.315129 | 0.609715 | 0.568849 |
| MmugDNA.25518.1.S1_at   | MmugDNA.25518.1 | 5.77  | 5.58  | 0.04 | 0.13 | 1.14  | 0.085395 | 0.200603 | 0.452653 | 0.47515  |
| MmugDNA.25519.1.S1_at   | MmugDNA.25519.1 | 3.68  | 3.56  | 0.26 | 0.11 | 1.09  | 0.174377 | 0.381478 | 0.547573 | 0.617691 |
| MmugDNA.2552.1.S1_at    | MmugDNA.2552.1  | 6.48  | 6.48  | 0.14 | 0.09 | 1     | 0.454203 | 0.422287 | 0.756647 | 0.645637 |
| MmugDNA.25520.1.S1_at   | MmugDNA.25520.1 | 3.93  | 3.93  | 0.13 | 0.1  | 1     | 0.509917 | 0.634013 | 0.787863 | 0.784594 |

|                         |                 |       |       |      |      |       |          |          |          |          |
|-------------------------|-----------------|-------|-------|------|------|-------|----------|----------|----------|----------|
| MmugDNA.25521.1.S1_at   | MmugDNA.25521.1 | 3.37  | 3.73  | 0.15 | 0.31 | -1.28 | 0.420299 | 0.61732  | 0.736876 | 0.773333 |
| MmugDNA.25522.1.S1_at   | MmugDNA.25522.1 | 3.62  | 3.66  | 0.09 | 0.04 | -1.03 | 0.885895 | 0.103577 | 0.960398 | 0.364346 |
| MmugDNA.25523.1.S1_at   | MmugDNA.25523.1 | 6.19  | 6.08  | 0.13 | 0.19 | 1.08  | 0.187772 | 0.55244  | 0.559968 | 0.731747 |
| MmugDNA.25524.1.S1_at   | MmugDNA.25524.1 | 5.16  | 5     | 0.05 | 0.12 | 1.12  | 0.063812 | 0.049819 | 0.416646 | 0.268305 |
| MmugDNA.25526.1.S1_at   | MmugDNA.25526.1 | 8.73  | 10.28 | 0.84 | 0.47 | -2.94 | 0.025672 | 0.00522  | 0.322444 | 0.100105 |
| MmugDNA.25528.1.S1_at   | MmugDNA.25528.1 | 4.94  | 5.11  | 0.64 | 0.27 | -1.13 | 0.759369 | 0.808755 | 0.909594 | 0.889895 |
| MmugDNA.2553.1.S1_at    | MmugDNA.2553.1  | 5.6   | 5.46  | 0.15 | 0.07 | 1.1   | 0.11394  | 0.31323  | 0.487339 | 0.567753 |
| MmugDNA.25531.1.S1_at   | MmugDNA.25531.1 | 9.89  | 10.54 | 0.55 | 0.03 | -1.57 | 0.098467 | 0.132966 | 0.467888 | 0.404626 |
| MmugDNA.25532.1.S1_s_at | MmugDNA.25532.1 | 9.21  | 9.17  | 0.11 | 0.06 | 1.03  | 0.122185 | 0.066027 | 0.495677 | 0.302361 |
| MmugDNA.25533.1.S1_at   | MmugDNA.25533.1 | 3.64  | 3.67  | 0.05 | 0.24 | -1.02 | 0.985107 | 0.486143 | 0.995311 | 0.689635 |
| MmugDNA.25534.1.S1_at   | MmugDNA.25534.1 | 9.29  | 10.1  | 0.48 | 0.07 | -1.76 | 0.101074 | 0.084503 | 0.471606 | 0.335901 |
| MmugDNA.25536.1.S1_at   | MmugDNA.25536.1 | 7.58  | 7.53  | 0.12 | 0.04 | 1.04  | 0.116923 | 0.063363 | 0.490067 | 0.298403 |
| MmugDNA.25537.1.S1_at   | MmugDNA.25537.1 | 5.04  | 4.87  | 0.15 | 0.3  | 1.12  | 0.279885 | 0.197068 | 0.638821 | 0.472213 |
| MmugDNA.25539.1.S1_at   | MmugDNA.25539.1 | 13.19 | 13.14 | 0.02 | 0.01 | 1.04  | 0.009753 | 0.358957 | 0.243347 | 0.600344 |
| MmugDNA.2554.1.S1_at    | MmugDNA.2554.1  | 5.87  | 6.16  | 0.14 | 0.05 | -1.22 | 0.03683  | 0.057985 | 0.355881 | 0.287289 |
| MmugDNA.25542.1.S1_at   | MmugDNA.25542.1 | 7.22  | 7.24  | 0.62 | 0.07 | -1.01 | 0.772972 | 0.166309 | 0.915578 | 0.442861 |
| MmugDNA.25543.1.S1_at   | MmugDNA.25543.1 | 3.03  | 3.04  | 0.07 | 0.09 | -1.01 | 0.71368  | 0.916287 | 0.888497 | 0.953121 |
| MmugDNA.25544.1.S1_at   | MmugDNA.25544.1 | 7.42  | 8.42  | 0.26 | 0.34 | -1.99 | 0.033545 | 0.113039 | 0.346489 | 0.378888 |
| MmugDNA.25545.1.S1_at   | MmugDNA.25545.1 | 11.38 | 11.94 | 0.42 | 0.14 | -1.47 | 0.06582  | 0.065056 | 0.421105 | 0.301009 |
| MmugDNA.25546.1.S1_at   | MmugDNA.25546.1 | 4.3   | 4.19  | 0.06 | 0.25 | 1.08  | 0.379843 | 0.245801 | 0.709229 | 0.515519 |
| MmugDNA.25547.1.S1_at   | MmugDNA.25547.1 | 6.52  | 6.26  | 0.29 | 0.06 | 1.2   | 0.343029 | 0.42617  | 0.686289 | 0.648368 |
| MmugDNA.25548.1.S1_at   | MmugDNA.25548.1 | 6.08  | 6.03  | 0.13 | 0.08 | 1.04  | 0.125928 | 0.134453 | 0.49972  | 0.406605 |
| MmugDNA.25549.1.S1_at   | MmugDNA.25549.1 | 6.95  | 7.06  | 0.26 | 0.15 | -1.08 | 0.863618 | 0.783246 | 0.952043 | 0.874547 |
| MmugDNA.2555.1.S1_at    | MmugDNA.2555.1  | 5.24  | 5.26  | 0.56 | 0.63 | -1.02 | 0.845929 | 0.216724 | 0.945947 | 0.490311 |
| MmugDNA.25550.1.S1_at   | MmugDNA.25550.1 | 7.47  | 7.27  | 0.12 | 0.09 | 1.15  | 0.063287 | 0.033769 | 0.415609 | 0.227414 |
| MmugDNA.25551.1.S1_at   | MmugDNA.25551.1 | 3.4   | 3.16  | 0.15 | 0.03 | 1.19  | 0.047645 | 0.111707 | 0.3809   | 0.376691 |
| MmugDNA.25554.1.S1_at   | MmugDNA.25554.1 | 8.55  | 10.07 | 1.45 | 0.1  | -2.86 | 0.224006 | 0.293712 | 0.593112 | 0.553707 |
| MmugDNA.25555.1.S1_at   | MmugDNA.25555.1 | 6.68  | 7.34  | 0.46 | 0.17 | -1.57 | 0.111145 | 0.035482 | 0.484303 | 0.232579 |
| MmugDNA.25556.1.S1_at   | MmugDNA.25556.1 | 3.66  | 3.66  | 0    | 0    | 1     | 1        | 0.421875 | 1        | 0.645369 |
| MmugDNA.25557.1.S1_at   | MmugDNA.25557.1 | 10.05 | 9.36  | 0.4  | 0.05 | 1.61  | 0.025475 | 0.008228 | 0.322259 | 0.120459 |
| MmugDNA.25558.1.S1_at   | MmugDNA.25558.1 | 4.52  | 4.08  | 0.49 | 0.1  | 1.36  | 0.353752 | 0.339853 | 0.693501 | 0.586417 |
| MmugDNA.25559.1.S1_at   | MmugDNA.25559.1 | 5.83  | 6.26  | 0.35 | 0.19 | -1.34 | 0.14127  | 0.31519  | 0.516365 | 0.568899 |
| MmugDNA.2556.1.S1_at    | MmugDNA.2556.1  | 8.41  | 8.84  | 0.29 | 0.09 | -1.34 | 0.29565  | 0.035124 | 0.651339 | 0.231645 |
| MmugDNA.25560.1.S1_at   | MmugDNA.25560.1 | 2.76  | 2.81  | 0.03 | 0.06 | -1.03 | 0.259347 | 0.670119 | 0.622607 | 0.807077 |
| MmugDNA.25562.1.S1_at   | MmugDNA.25562.1 | 4.85  | 4.38  | 0.34 | 0.05 | 1.39  | 0.159029 | 0.411867 | 0.531755 | 0.638434 |
| MmugDNA.25563.1.S1_at   | MmugDNA.25563.1 | 4.68  | 4.83  | 0.23 | 0.17 | -1.11 | 0.270463 | 0.445404 | 0.630338 | 0.662343 |
| MmugDNA.25564.1.S1_at   | MmugDNA.25564.1 | 8.94  | 9.07  | 0.96 | 0.3  | -1.1  | 0.218578 | 0.101611 | 0.588313 | 0.361509 |
| MmugDNA.25565.1.S1_at   | MmugDNA.25565.1 | 4.28  | 4.53  | 0.08 | 0.22 | -1.19 | 0.59783  | 0.405842 | 0.836527 | 0.634037 |
| MmugDNA.25566.1.S1_at   | MmugDNA.25566.1 | 4.46  | 4.32  | 0.08 | 0.12 | 1.1   | 0.197449 | 0.54174  | 0.568435 | 0.725057 |
| MmugDNA.25567.1.S1_at   | MmugDNA.25567.1 | 3.71  | 3.56  | 0.08 | 0.2  | 1.1   | 0.530311 | 0.134952 | 0.798942 | 0.406951 |
| MmugDNA.25568.1.S1_at   | MmugDNA.25568.1 | 7.12  | 7.27  | 0.17 | 0.08 | -1.11 | 0.397975 | 0.000302 | 0.722205 | 0.034907 |
| MmugDNA.25569.1.S1_at   | MmugDNA.25569.1 | 5.15  | 5.13  | 0.17 | 0.05 | 1.01  | 0.332854 | 0.087164 | 0.679338 | 0.340133 |
| MmugDNA.2557.1.S1_x_at  | MmugDNA.2557.1  | 11.38 | 11.56 | 0.29 | 0.21 | -1.13 | 0.403856 | 0.192355 | 0.726012 | 0.467834 |



|                         |                 |       |       |      |      |       |          |          |          |          |
|-------------------------|-----------------|-------|-------|------|------|-------|----------|----------|----------|----------|
| MmugDNA.25571.1.S1_at   | MmugDNA.25571.1 | 5.5   | 5.4   | 0.88 | 0.26 | 1.07  | 0.347186 | 0.042196 | 0.688563 | 0.24989  |
| MmugDNA.25574.1.S1_at   | MmugDNA.25574.1 | 8.79  | 8     | 0.43 | 0.16 | 1.73  | 0.059013 | 0.149749 | 0.405949 | 0.424364 |
| MmugDNA.25575.1.S1_at   | MmugDNA.25575.1 | 4.97  | 4.99  | 0.24 | 0.1  | -1.01 | 0.297664 | 0.572156 | 0.652791 | 0.744268 |
| MmugDNA.25576.1.S1_at   | MmugDNA.25576.1 | 10.02 | 10.32 | 0.28 | 0.24 | -1.23 | 0.468507 | 0.536058 | 0.764997 | 0.721454 |
| MmugDNA.25577.1.S1_at   | MmugDNA.25577.1 | 5.64  | 6.25  | 0.48 | 0.34 | -1.53 | 0.077079 | 0.093087 | 0.438911 | 0.349292 |
| MmugDNA.25578.1.S1_at   | MmugDNA.25578.1 | 6.89  | 6.67  | 0.3  | 0.1  | 1.17  | 0.223128 | 0.517325 | 0.592569 | 0.709435 |
| MmugDNA.25579.1.S1_at   | MmugDNA.25579.1 | 5.22  | 5.38  | 0.14 | 0.23 | -1.12 | 0.192065 | 0.194998 | 0.563147 | 0.470146 |
| MmugDNA.2558.1.S1_at    | MmugDNA.2558.1  | 2.6   | 2.63  | 0.16 | 0.06 | -1.02 | 0.623685 | 0.463536 | 0.848306 | 0.674489 |
| MmugDNA.25580.1.S1_at   | MmugDNA.25580.1 | 11.6  | 11.34 | 0.36 | 0.04 | 1.19  | 0.395928 | 0.058482 | 0.72083  | 0.288549 |
| MmugDNA.25581.1.S1_at   | MmugDNA.25581.1 | 4.95  | 4.66  | 0.25 | 0.15 | 1.22  | 0.155697 | 0.183094 | 0.528929 | 0.459493 |
| MmugDNA.25582.1.S1_at   | MmugDNA.25582.1 | 4.65  | 4.45  | 0.08 | 0.06 | -1.15 | 0.052554 | 0.069298 | 0.392658 | 0.309515 |
| MmugDNA.25584.1.S1_at   | MmugDNA.25584.1 | 11.71 | 11.23 | 0.36 | 0.02 | 1.39  | 0.249273 | 0.086486 | 0.614581 | 0.33905  |
| MmugDNA.25585.1.S1_at   | MmugDNA.25585.1 | 3.53  | 3.48  | 0.06 | 0.13 | 1.04  | 0.850687 | 0.244397 | 0.947412 | 0.514233 |
| MmugDNA.25586.1.S1_at   | MmugDNA.25586.1 | 6.41  | 6.44  | 0.43 | 0.15 | -1.03 | 0.556559 | 0.438842 | 0.814192 | 0.657715 |
| MmugDNA.25588.1.S1_at   | MmugDNA.25588.1 | 3.19  | 3.35  | 0.27 | 0.78 | -1.12 | 0.39664  | 0.577956 | 0.721525 | 0.748185 |
| MmugDNA.25589.1.S1_at   | MmugDNA.25589.1 | 7.66  | 7.51  | 0.06 | 0.12 | 1.11  | 0.04078  | 0.050032 | 0.365087 | 0.268904 |
| MmugDNA.2559.1.S1_at    | MmugDNA.2559.1  | 8.85  | 9.84  | 0.52 | 0.13 | -1.98 | 0.087686 | 0.073708 | 0.455349 | 0.317051 |
| MmugDNA.25591.1.S1_at   | MmugDNA.25591.1 | 5.75  | 5.68  | 0.14 | 0    | 1.05  | 0.386111 | 0.637331 | 0.713295 | 0.786824 |
| MmugDNA.25592.1.S1_at   | MmugDNA.25592.1 | 3.43  | 3.32  | 0.24 | 0.22 | 1.08  | 0.845187 | 0.597578 | 0.945709 | 0.760257 |
| MmugDNA.25593.1.S1_at   | MmugDNA.25593.1 | 5.58  | 5.51  | 0.57 | 0.22 | 1.05  | 0.441296 | 0.168359 | 0.749241 | 0.445015 |
| MmugDNA.25595.1.S1_at   | MmugDNA.25595.1 | 5.91  | 5.81  | 0.2  | 0.1  | 1.07  | 0.870887 | 0.40958  | 0.955149 | 0.636594 |
| MmugDNA.25596.1.S1_at   | MmugDNA.25596.1 | 9.92  | 9.15  | 0.95 | 0.28 | 1.71  | 0.222808 | 0.0652   | 0.592343 | 0.301239 |
| MmugDNA.25597.1.S1_at   | MmugDNA.25597.1 | 6.7   | 6.52  | 0.11 | 0.14 | 1.13  | 0.31262  | 0.459341 | 0.664138 | 0.671726 |
| MmugDNA.25598.1.S1_at   | MmugDNA.25598.1 | 6.92  | 7.32  | 0.19 | 0.25 | -1.32 | 0.245888 | 0.354998 | 0.611366 | 0.597466 |
| MmugDNA.25599.1.S1_at   | MmugDNA.25599.1 | 5.84  | 5.73  | 0.08 | 0.04 | 1.08  | 0.084432 | 0.39577  | 0.450991 | 0.627639 |
| MmugDNA.256.1.S1_at     | MmugDNA.256.1   | 2.55  | 2.54  | 0.09 | 0.03 | 1.01  | 0.424396 | 0.524574 | 0.739564 | 0.714424 |
| MmugDNA.2560.1.S1_s_at  | MmugDNA.2560.1  | 8.26  | 8.3   | 0.12 | 0.08 | -1.03 | 0.78626  | 0.445353 | 0.921403 | 0.662341 |
| MmugDNA.25600.1.S1_at   | MmugDNA.25600.1 | 5.97  | 5.89  | 0.17 | 0.02 | 1.06  | 0.831635 | 0.91862  | 0.939628 | 0.954356 |
| MmugDNA.25602.1.S1_at   | MmugDNA.25602.1 | 6.5   | 6.41  | 0.08 | 0.13 | 1.07  | 0.319408 | 0.395871 | 0.668706 | 0.627744 |
| MmugDNA.25603.1.S1_at   | MmugDNA.25603.1 | 11.37 | 10.82 | 0.72 | 0.31 | 1.46  | 0.564557 | 0.319473 | 0.818796 | 0.571823 |
| MmugDNA.25604.1.S1_at   | MmugDNA.25604.1 | 6.73  | 6.68  | 0.23 | 0.27 | 1.03  | 0.430982 | 0.47478  | 0.74323  | 0.681695 |
| MmugDNA.25605.1.S1_at   | MmugDNA.25605.1 | 5.83  | 5.86  | 0.16 | 0.44 | -1.02 | 0.401128 | 0.60907  | 0.724131 | 0.767545 |
| MmugDNA.25606.1.S1_at   | MmugDNA.25606.1 | 12.07 | 11.25 | 0.33 | 0.14 | 1.77  | 0.015884 | 0.010264 | 0.284461 | 0.132661 |
| MmugDNA.25606.1.S1_s_at | MmugDNA.25606.1 | 11.27 | 10.34 | 0.4  | 0.17 | 1.91  | 0.013903 | 0.008577 | 0.273229 | 0.122911 |
| MmugDNA.25607.1.S1_at   | MmugDNA.25607.1 | 3.86  | 3.57  | 0.09 | 0.14 | 1.22  | 0.089929 | 0.151394 | 0.457916 | 0.426104 |
| MmugDNA.25608.1.S1_at   | MmugDNA.25608.1 | 5.18  | 5.54  | 0.19 | 0.18 | -1.28 | 0.168069 | 0.414527 | 0.540683 | 0.640403 |
| MmugDNA.25609.1.S1_at   | MmugDNA.25609.1 | 4.5   | 4.84  | 0.26 | 0.23 | -1.27 | 0.678742 | 0.767909 | 0.874119 | 0.865256 |
| MmugDNA.2561.1.S1_at    | MmugDNA.2561.1  | 10.2  | 9.43  | 0.24 | 0.27 | 1.7   | 0.011952 | 0.010192 | 0.257858 | 0.132348 |
| MmugDNA.25610.1.S1_at   | MmugDNA.25610.1 | 3.29  | 3.17  | 0.32 | 0.44 | 1.09  | 0.880386 | 0.560224 | 0.958593 | 0.736553 |
| MmugDNA.25611.1.S1_at   | MmugDNA.25611.1 | 8.71  | 9.1   | 0.57 | 0.09 | -1.31 | 0.356094 | 0.474977 | 0.695045 | 0.681837 |
| MmugDNA.25612.1.S1_at   | MmugDNA.25612.1 | 4.09  | 3.94  | 0.23 | 0.18 | 1.11  | 0.221804 | 0.394442 | 0.591382 | 0.626982 |
| MmugDNA.25613.1.S1_at   | MmugDNA.25613.1 | 8.33  | 8.18  | 0.88 | 0.7  | 1.11  | 0.929676 | 0.452574 | 0.976518 | 0.667169 |
| MmugDNA.25614.1.S1_at   | MmugDNA.25614.1 | 6.87  | 6.76  | 0.11 | 0.3  | 1.08  | 0.199611 | 0.382085 | 0.571482 | 0.618309 |

|                         |                 |       |       |      |      |       |          |          |          |          |
|-------------------------|-----------------|-------|-------|------|------|-------|----------|----------|----------|----------|
| MmugDNA.25615.1.S1_at   | MmugDNA.25615.1 | 5.86  | 6.02  | 0.24 | 0.1  | -1.12 | 0.883874 | 0.211362 | 0.959789 | 0.48553  |
| MmugDNA.25618.1.S1_at   | MmugDNA.25618.1 | 9.19  | 9.22  | 0.49 | 0.06 | -1.02 | 0.297856 | 0.469252 | 0.652791 | 0.678175 |
| MmugDNA.2562.1.S1_at    | MmugDNA.2562.1  | 7.24  | 7.11  | 1.01 | 0.16 | 1.09  | 0.839851 | 0.829694 | 0.943069 | 0.902187 |
| MmugDNA.25620.1.S1_s_at | MmugDNA.25620.1 | 6.96  | 6.76  | 0.05 | 0.07 | 1.15  | 0.020785 | 0.024316 | 0.305611 | 0.195185 |
| MmugDNA.25623.1.S1_at   | MmugDNA.25623.1 | 5.1   | 4.99  | 0.6  | 0.33 | 1.08  | 0.458347 | 0.718111 | 0.758745 | 0.836865 |
| MmugDNA.25624.1.S1_at   | MmugDNA.25624.1 | 7.73  | 7.65  | 0.22 | 0.05 | 1.06  | 0.240306 | 0.480554 | 0.606675 | 0.685885 |
| MmugDNA.25625.1.S1_at   | MmugDNA.25625.1 | 8.04  | 9.09  | 2.57 | 0.26 | -2.06 | 0.401569 | 0.180425 | 0.724554 | 0.457077 |
| MmugDNA.25627.1.S1_at   | MmugDNA.25627.1 | 9.69  | 9.73  | 1.49 | 0.14 | -1.03 | 0.863697 | 0.453207 | 0.952043 | 0.66762  |
| MmugDNA.25628.1.S1_at   | MmugDNA.25628.1 | 7.87  | 7.53  | 0.13 | 0.33 | 1.27  | 0.048386 | 0.036032 | 0.38321  | 0.234255 |
| MmugDNA.25629.1.S1_at   | MmugDNA.25629.1 | 5.61  | 5.63  | 0.17 | 0.05 | -1.01 | 0.920981 | 0.359867 | 0.973247 | 0.601105 |
| MmugDNA.25630.1.S1_at   | MmugDNA.25630.1 | 7.94  | 7.85  | 0.32 | 0.04 | 1.06  | 0.472817 | 0.732897 | 0.767273 | 0.845436 |
| MmugDNA.25631.1.S1_at   | MmugDNA.25631.1 | 4.45  | 4.21  | 0.09 | 0.1  | 1.18  | 0.030238 | 0.194289 | 0.337034 | 0.469384 |
| MmugDNA.25632.1.S1_at   | MmugDNA.25632.1 | 9.64  | 9.47  | 0.3  | 0.06 | 1.12  | 0.43762  | 0.088208 | 0.746873 | 0.341721 |
| MmugDNA.25633.1.S1_at   | MmugDNA.25633.1 | 2.92  | 2.82  | 0.12 | 0.21 | 1.07  | 0.925666 | 0.654285 | 0.975188 | 0.797979 |
| MmugDNA.25635.1.S1_at   | MmugDNA.25635.1 | 3.41  | 3.39  | 0.25 | 0    | 1.01  | 0.322475 | 0.34999  | 0.67114  | 0.593743 |
| MmugDNA.25636.1.S1_at   | MmugDNA.25636.1 | 3.69  | 3.62  | 0.12 | 0.02 | 1.04  | 0.961133 | 0.394018 | 0.987225 | 0.626734 |
| MmugDNA.25637.1.S1_at   | MmugDNA.25637.1 | 12.16 | 12.61 | 0.5  | 0.1  | -1.37 | 0.713712 | 0.66927  | 0.888497 | 0.806514 |
| MmugDNA.25638.1.S1_at   | MmugDNA.25638.1 | 7.04  | 6.85  | 0.06 | 0.05 | 1.14  | 0.027716 | 0.378288 | 0.328891 | 0.615438 |
| MmugDNA.25639.1.S1_at   | MmugDNA.25639.1 | 4.74  | 4.55  | 0.28 | 0.2  | 1.14  | 0.324402 | 0.579743 | 0.672608 | 0.74927  |
| MmugDNA.25640.1.S1_at   | MmugDNA.25640.1 | 5.86  | 6.48  | 0.43 | 0.32 | -1.54 | 0.088333 | 0.540607 | 0.45606  | 0.724459 |
| MmugDNA.25641.1.S1_at   | MmugDNA.25641.1 | 5.99  | 5.7   | 0.26 | 0.07 | 1.22  | 0.131096 | 0.036138 | 0.5054   | 0.234582 |
| MmugDNA.25643.1.S1_at   | MmugDNA.25643.1 | 4.23  | 4.17  | 0.11 | 0.02 | 1.05  | 0.121947 | 0.578242 | 0.495655 | 0.748372 |
| MmugDNA.25644.1.S1_at   | MmugDNA.25644.1 | 10.83 | 11.25 | 0.15 | 0.08 | -1.33 | 0.018765 | 0.037567 | 0.298593 | 0.238211 |
| MmugDNA.25648.1.S1_at   | MmugDNA.25648.1 | 5.33  | 5.38  | 0.28 | 0.19 | -1.04 | 0.928336 | 0.80084  | 0.976259 | 0.885464 |
| MmugDNA.25650.1.S1_at   | MmugDNA.25650.1 | 3.98  | 3.81  | 0.12 | 0.19 | 1.12  | 0.181199 | 0.133087 | 0.554472 | 0.404734 |
| MmugDNA.25651.1.S1_at   | MmugDNA.25651.1 | 4.42  | 4.39  | 0.08 | 0.08 | 1.02  | 0.162799 | 0.271158 | 0.535867 | 0.536259 |
| MmugDNA.25654.1.S1_at   | MmugDNA.25654.1 | 6.92  | 7.28  | 0.13 | 0.19 | -1.28 | 0.037297 | 0.321941 | 0.357061 | 0.573573 |
| MmugDNA.25655.1.S1_at   | MmugDNA.25655.1 | 4.51  | 4.52  | 0.36 | 0.12 | -1.01 | 0.362716 | 0.445661 | 0.699596 | 0.662478 |
| MmugDNA.25657.1.S1_at   | MmugDNA.25657.1 | 10.83 | 10.66 | 4.43 | 0.29 | 1.13  | 0.426736 | 0.34676  | 0.740721 | 0.591536 |
| MmugDNA.25657.1.S1_s_at | MmugDNA.25657.1 | 10.73 | 10.58 | 3.96 | 0.32 | 1.1   | 0.440642 | 0.335782 | 0.748563 | 0.583515 |
| MmugDNA.25658.1.S1_at   | MmugDNA.25658.1 | 6.59  | 6.68  | 0.36 | 0.23 | -1.07 | 0.724748 | 0.208497 | 0.893274 | 0.482435 |
| MmugDNA.25659.1.S1_at   | MmugDNA.25659.1 | 6.03  | 6.02  | 0.1  | 0.03 | 1     | 0.457645 | 0.11881  | 0.758364 | 0.386946 |
| MmugDNA.25660.1.S1_at   | MmugDNA.25660.1 | 6.72  | 6.74  | 0.92 | 0.52 | -1.01 | 0.989991 | 0.36745  | 0.996285 | 0.607095 |
| MmugDNA.25661.1.S1_at   | MmugDNA.25661.1 | 6.71  | 6.82  | 0.46 | 0.81 | -1.08 | 0.270044 | 0.321919 | 0.630217 | 0.573567 |
| MmugDNA.25662.1.S1_at   | MmugDNA.25662.1 | 8.89  | 9.24  | 0.21 | 0.1  | -1.27 | 0.143733 | 0.274122 | 0.519054 | 0.538575 |
| MmugDNA.25663.1.S1_at   | MmugDNA.25663.1 | 6.26  | 6.34  | 0.27 | 0.1  | -1.06 | 0.734895 | 0.880024 | 0.8985   | 0.93148  |
| MmugDNA.25664.1.S1_at   | MmugDNA.25664.1 | 9.84  | 9.79  | 0.44 | 0.09 | 1.04  | 0.775513 | 0.047915 | 0.916777 | 0.26377  |
| MmugDNA.25665.1.S1_at   | MmugDNA.25665.1 | 3.76  | 3.89  | 0.14 | 0.13 | -1.09 | 0.525124 | 0.760613 | 0.796179 | 0.860949 |
| MmugDNA.25668.1.S1_at   | MmugDNA.25668.1 | 8.18  | 8.31  | 0.34 | 0.29 | -1.09 | 0.487729 | 0.484439 | 0.775172 | 0.688478 |
| MmugDNA.25668.1.S1_s_at | MmugDNA.25668.1 | 11.33 | 11.62 | 0.01 | 0.03 | -1.21 | 0.000082 | 0.000996 | 0.108151 | 0.050485 |
| MmugDNA.25669.1.S1_at   | MmugDNA.25669.1 | 4.8   | 4.98  | 0.09 | 0.03 | -1.13 | 0.032229 | 0.349986 | 0.343368 | 0.593743 |
| MmugDNA.2567.1.S1_at    | MmugDNA.2567.1  | 5.88  | 5.66  | 0.31 | 0.08 | 1.17  | 0.391487 | 0.534071 | 0.717597 | 0.720079 |
| MmugDNA.25670.1.S1_at   | MmugDNA.25670.1 | 6.88  | 6.22  | 0.55 | 0.14 | 1.58  | 0.366626 | 0.422988 | 0.702101 | 0.646145 |

|                         |                 |       |       |      |      |       |          |          |          |          |
|-------------------------|-----------------|-------|-------|------|------|-------|----------|----------|----------|----------|
| MmugDNA.24730.1.S1_at   | MmugDNA.24730.1 | 4.01  | 3.98  | 0.09 | 0.1  | 1.02  | 0.834386 | 0.953747 | 0.940622 | 0.973663 |
| MmugDNA.24730.1.S1_s_at | MmugDNA.24730.1 | 6.05  | 6.03  | 0.06 | 0.08 | 1.01  | 0.250252 | 0.403517 | 0.615557 | 0.632188 |
| MmugDNA.25672.1.S1_at   | MmugDNA.25672.1 | 4.64  | 4.64  | 0.07 | 0.03 | -1    | 0.30497  | 0.597485 | 0.658533 | 0.760211 |
| MmugDNA.25673.1.S1_at   | MmugDNA.25673.1 | 6.23  | 6.25  | 0.61 | 0.55 | -1.01 | 0.482912 | 0.630214 | 0.772697 | 0.782181 |
| MmugDNA.25675.1.S1_at   | MmugDNA.25675.1 | 7.34  | 6.65  | 0.52 | 0.76 | 1.61  | 0.340033 | 0.369204 | 0.684142 | 0.608669 |
| MmugDNA.25676.1.S1_at   | MmugDNA.25676.1 | 6.35  | 6.98  | 0.44 | 0.18 | -1.55 | 0.090708 | 0.025035 | 0.458873 | 0.198273 |
| MmugDNA.25676.1.S1_x_at | MmugDNA.25676.1 | 6.87  | 7.37  | 0.32 | 0.11 | -1.42 | 0.083956 | 0.007726 | 0.45018  | 0.117463 |
| MmugDNA.25677.1.S1_s_at | MmugDNA.25677.1 | 6.48  | 6.18  | 0.36 | 0.08 | 1.23  | 0.238137 | 0.096795 | 0.605254 | 0.354207 |
| MmugDNA.2568.1.S1_at    | MmugDNA.2568.1  | 11.84 | 12.71 | 1.3  | 0.05 | -1.82 | 0.180457 | 0.334054 | 0.553635 | 0.582104 |
| MmugDNA.25680.1.S1_at   | MmugDNA.25680.1 | 9.95  | 10.07 | 0.2  | 0.02 | -1.09 | 0.87429  | 0.777483 | 0.956448 | 0.870723 |
| MmugDNA.25682.1.S1_at   | MmugDNA.25682.1 | 8.06  | 8.05  | 0.28 | 0.05 | 1     | 0.35629  | 0.557429 | 0.69508  | 0.735031 |
| MmugDNA.25683.1.S1_at   | MmugDNA.25683.1 | 7.6   | 7.11  | 0.66 | 0.08 | 1.4   | 0.219571 | 0.111973 | 0.589062 | 0.37707  |
| MmugDNA.25684.1.S1_at   | MmugDNA.25684.1 | 9.78  | 9.77  | 0.24 | 0.07 | 1.01  | 0.374405 | 0.292739 | 0.705837 | 0.552783 |
| MmugDNA.25685.1.S1_at   | MmugDNA.25685.1 | 4.38  | 4.16  | 0.38 | 0.19 | 1.17  | 0.278425 | 0.036814 | 0.637601 | 0.236386 |
| MmugDNA.25686.1.S1_at   | MmugDNA.25686.1 | 3.59  | 3.51  | 0.16 | 0.28 | 1.05  | 0.835922 | 0.685073 | 0.941202 | 0.816309 |
| MmugDNA.25687.1.S1_at   | MmugDNA.25687.1 | 3.85  | 3.9   | 0.05 | 0    | -1.03 | 0.053908 | 0.25024  | 0.395633 | 0.519271 |
| MmugDNA.25688.1.S1_at   | MmugDNA.25688.1 | 2.88  | 2.9   | 0.08 | 0.15 | -1.01 | 0.907769 | 0.129644 | 0.968794 | 0.401242 |
| MmugDNA.25689.1.S1_at   | MmugDNA.25689.1 | 6.87  | 6.79  | 0.4  | 0.04 | 1.06  | 0.648386 | 0.438421 | 0.859825 | 0.657396 |
| MmugDNA.2569.1.S1_s_at  | MmugDNA.2569.1  | 11.82 | 11.36 | 0.14 | 0.15 | 1.37  | 0.030688 | 0.000509 | 0.338263 | 0.039357 |
| MmugDNA.25690.1.S1_at   | MmugDNA.25690.1 | 5.65  | 5.29  | 0.15 | 0.24 | 1.29  | 0.059342 | 0.19186  | 0.406303 | 0.467233 |
| MmugDNA.25691.1.S1_at   | MmugDNA.25691.1 | 10.77 | 10.4  | 1.14 | 0.27 | 1.29  | 0.500938 | 0.391464 | 0.78303  | 0.625086 |
| MmugDNA.25692.1.S1_at   | MmugDNA.25692.1 | 8.27  | 7.45  | 0.28 | 0.3  | 1.76  | 0.013184 | 0.025136 | 0.266951 | 0.198657 |
| MmugDNA.25694.1.S1_at   | MmugDNA.25694.1 | 7.08  | 6.45  | 0.22 | 0.12 | 1.55  | 0.009224 | 0.00863  | 0.241866 | 0.123154 |
| MmugDNA.25695.1.S1_at   | MmugDNA.25695.1 | 2.92  | 2.99  | 0.07 | 0.08 | -1.05 | 0.152717 | 0.22688  | 0.525612 | 0.499276 |
| MmugDNA.25696.1.S1_at   | MmugDNA.25696.1 | 6.52  | 6.34  | 0.04 | 0.26 | 1.14  | 0.265746 | 0.002549 | 0.626849 | 0.074581 |
| MmugDNA.25697.1.S1_at   | MmugDNA.25697.1 | 9.06  | 9.46  | 0.23 | 0.11 | -1.32 | 0.137445 | 0.024263 | 0.51292  | 0.194952 |
| MmugDNA.25699.1.S1_at   | MmugDNA.25699.1 | 5.11  | 5.03  | 0.02 | 0.13 | 1.06  | 0.561589 | 0.945757 | 0.817232 | 0.969149 |
| MmugDNA.257.1.S1_at     | MmugDNA.257.1   | 6.27  | 6.15  | 0.09 | 0.07 | 1.08  | 0.096083 | 0.081292 | 0.464614 | 0.329351 |
| MmugDNA.2570.1.S1_at    | MmugDNA.2570.1  | 3.86  | 3.84  | 0.14 | 0.07 | 1.02  | 0.719181 | 0.819188 | 0.890866 | 0.895796 |
| MmugDNA.25700.1.S1_at   | MmugDNA.25700.1 | 3.64  | 3.67  | 0.86 | 0.08 | -1.03 | 0.428658 | 0.58375  | 0.741987 | 0.751983 |
| MmugDNA.25701.1.S1_at   | MmugDNA.25701.1 | 4.1   | 3.73  | 0.28 | 0.62 | 1.29  | 0.736119 | 0.710908 | 0.899004 | 0.832314 |
| MmugDNA.25702.1.S1_at   | MmugDNA.25702.1 | 5.93  | 5.76  | 0.12 | 0.08 | 1.12  | 0.131056 | 0.315565 | 0.5054   | 0.569053 |
| MmugDNA.25705.1.S1_at   | MmugDNA.25705.1 | 4.34  | 4.31  | 0.25 | 0.16 | 1.02  | 0.613277 | 0.897151 | 0.843393 | 0.941309 |
| MmugDNA.25706.1.S1_at   | MmugDNA.25706.1 | 5.44  | 5.37  | 0.07 | 0.06 | 1.05  | 0.376362 | 0.556922 | 0.706849 | 0.734847 |
| MmugDNA.25707.1.S1_at   | MmugDNA.25707.1 | 11.71 | 12.11 | 0.14 | 0.13 | -1.32 | 0.030549 | 0.005826 | 0.338095 | 0.104661 |
| MmugDNA.25708.1.S1_at   | MmugDNA.25708.1 | 4.39  | 4.51  | 0.25 | 0.16 | -1.08 | 0.99814  | 0.149269 | 0.999407 | 0.42373  |
| MmugDNA.25709.1.S1_at   | MmugDNA.25709.1 | 6.4   | 7.09  | 0.43 | 0.32 | -1.62 | 0.110936 | 0.176635 | 0.48424  | 0.453117 |
| MmugDNA.25710.1.S1_at   | MmugDNA.25710.1 | 2.79  | 2.84  | 0.04 | 0.14 | -1.04 | 0.130192 | 0.238041 | 0.504663 | 0.50861  |
| MmugDNA.25711.1.S1_at   | MmugDNA.25711.1 | 5.32  | 5.27  | 0.1  | 0.18 | 1.04  | 0.683598 | 0.885785 | 0.876134 | 0.935063 |
| MmugDNA.25712.1.S1_at   | MmugDNA.25712.1 | 8.62  | 8.22  | 0.99 | 0.35 | 1.31  | 0.661745 | 0.252757 | 0.8665   | 0.521174 |
| MmugDNA.25713.1.S1_at   | MmugDNA.25713.1 | 9.33  | 8.88  | 0.28 | 0.16 | 1.36  | 0.066567 | 0.030737 | 0.422404 | 0.217205 |
| MmugDNA.25714.1.S1_at   | MmugDNA.25714.1 | 9.92  | 9.75  | 0.25 | 0.07 | 1.12  | 0.251627 | 0.36978  | 0.616729 | 0.609079 |
| MmugDNA.25715.1.S1_at   | MmugDNA.25715.1 | 4.19  | 4.12  | 0.28 | 0.23 | 1.05  | 0.931766 | 0.020268 | 0.977114 | 0.17872  |

|                         |                 |       |       |      |      |       |          |          |          |          |
|-------------------------|-----------------|-------|-------|------|------|-------|----------|----------|----------|----------|
| MmugDNA.25717.1.S1_s_at | MmugDNA.25717.1 | 9.4   | 9.49  | 0.34 | 0.01 | -1.06 | 0.63002  | 0.756386 | 0.851838 | 0.858223 |
| MmugDNA.25718.1.S1_at   | MmugDNA.25718.1 | 10.47 | 10.26 | 0.2  | 0.18 | 1.16  | 0.237653 | 0.810545 | 0.604643 | 0.890812 |
| MmugDNA.2572.1.S1_at    | MmugDNA.2572.1  | 8.74  | 8.06  | 0.52 | 0.21 | 1.6   | 0.054882 | 0.107602 | 0.397124 | 0.370497 |
| MmugDNA.25720.1.S1_at   | MmugDNA.25720.1 | 7.28  | 6.7   | 0.09 | 0.14 | 1.5   | 0.00343  | 0.012532 | 0.194985 | 0.144417 |
| MmugDNA.25721.1.S1_at   | MmugDNA.25721.1 | 5.03  | 5     | 0.53 | 0.21 | 1.02  | 0.654287 | 0.574838 | 0.862738 | 0.746142 |
| MmugDNA.25722.1.S1_at   | MmugDNA.25722.1 | 6.54  | 6.88  | 0.6  | 0.17 | -1.26 | 0.672506 | 0.856428 | 0.870989 | 0.917996 |
| MmugDNA.25723.1.S1_at   | MmugDNA.25723.1 | 5.7   | 5.71  | 0.52 | 0.27 | -1.01 | 0.72     | 0.914572 | 0.891311 | 0.951966 |
| MmugDNA.25724.1.S1_at   | MmugDNA.25724.1 | 11.93 | 12.15 | 0.08 | 0.02 | -1.16 | 0.008092 | 0.023556 | 0.232005 | 0.192238 |
| MmugDNA.25726.1.S1_at   | MmugDNA.25726.1 | 6.34  | 5.72  | 0.23 | 0.08 | 1.54  | 0.009162 | 0.001599 | 0.241866 | 0.060468 |
| MmugDNA.25727.1.S1_at   | MmugDNA.25727.1 | 11.27 | 11.52 | 0.66 | 0.17 | -1.19 | 0.289193 | 0.227642 | 0.645901 | 0.499898 |
| MmugDNA.25728.1.S1_at   | MmugDNA.25728.1 | 6.08  | 6.25  | 0.26 | 0.14 | -1.12 | 0.874165 | 0.001806 | 0.956448 | 0.063714 |
| MmugDNA.25731.1.S1_at   | MmugDNA.25731.1 | 8.79  | 9.19  | 0.39 | 0.24 | -1.32 | 0.172789 | 0.303344 | 0.545887 | 0.560808 |
| MmugDNA.25732.1.S1_at   | MmugDNA.25732.1 | 4     | 3.82  | 0.65 | 0.22 | 1.13  | 0.233202 | 0.196254 | 0.600731 | 0.471236 |
| MmugDNA.25733.1.S1_at   | MmugDNA.25733.1 | 5.61  | 5.53  | 0.21 | 0.08 | 1.06  | 0.813352 | 0.968899 | 0.932522 | 0.982889 |
| MmugDNA.25734.1.S1_at   | MmugDNA.25734.1 | 3.58  | 3.52  | 0.2  | 0.03 | 1.04  | 0.251994 | 0.234443 | 0.616976 | 0.505674 |
| MmugDNA.25735.1.S1_at   | MmugDNA.25735.1 | 5.19  | 5.22  | 0.22 | 0.14 | -1.02 | 0.912376 | 0.761284 | 0.970266 | 0.861304 |
| MmugDNA.25737.1.S1_at   | MmugDNA.25737.1 | 4.24  | 4.36  | 0.37 | 0.7  | -1.09 | 0.720095 | 0.910282 | 0.891372 | 0.949391 |
| MmugDNA.25738.1.S1_at   | MmugDNA.25738.1 | 6.62  | 6.31  | 0.33 | 0.24 | 1.24  | 0.053996 | 0.118622 | 0.395633 | 0.38662  |
| MmugDNA.25739.1.S1_at   | MmugDNA.25739.1 | 5.22  | 5.19  | 0.01 | 0.04 | 1.02  | 0.102664 | 0.589983 | 0.472935 | 0.756034 |
| MmugDNA.2574.1.S1_at    | MmugDNA.2574.1  | 8.16  | 7.55  | 0.23 | 0.17 | 1.53  | 0.013744 | 0.003178 | 0.271419 | 0.081873 |
| MmugDNA.25740.1.S1_at   | MmugDNA.25740.1 | 9.89  | 9.92  | 0.3  | 0.06 | -1.02 | 0.303483 | 0.014743 | 0.657314 | 0.15446  |
| MmugDNA.25741.1.S1_at   | MmugDNA.25741.1 | 4.88  | 4.8   | 0.26 | 0.19 | 1.06  | 0.146581 | 0.100093 | 0.520956 | 0.358984 |
| MmugDNA.25742.1.S1_at   | MmugDNA.25742.1 | 6.94  | 6.68  | 0.04 | 0.08 | 1.2   | 0.003871 | 0.00016  | 0.198571 | 0.030478 |
| MmugDNA.25744.1.S1_at   | MmugDNA.25744.1 | 3.77  | 3.78  | 0.26 | 0    | -1.01 | 0.896616 | 0.765031 | 0.964799 | 0.863388 |
| MmugDNA.25745.1.S1_at   | MmugDNA.25745.1 | 4.3   | 4.25  | 0.11 | 0.12 | 1.04  | 0.385737 | 0.855803 | 0.713032 | 0.917707 |
| MmugDNA.25747.1.S1_at   | MmugDNA.25747.1 | 4.05  | 3.96  | 0.13 | 0.11 | 1.07  | 0.337868 | 0.487743 | 0.682728 | 0.690658 |
| MmugDNA.25748.1.S1_at   | MmugDNA.25748.1 | 10.22 | 10.39 | 0.24 | 0.01 | -1.12 | 0.259416 | 0.115367 | 0.622607 | 0.382394 |
| MmugDNA.25749.1.S1_at   | MmugDNA.25749.1 | 6.12  | 6.12  | 0.16 | 0.02 | -1    | 0.895416 | 0.992034 | 0.964244 | 0.995515 |
| MmugDNA.2575.1.S1_at    | MmugDNA.2575.1  | 10.27 | 10.04 | 0.17 | 0.07 | 1.18  | 0.031834 | 0.01513  | 0.342545 | 0.156224 |
| MmugDNA.2575.1.S1_s_at  | MmugDNA.2575.1  | 10.08 | 9.61  | 0.23 | 0.11 | 1.38  | 0.028084 | 0.003345 | 0.330434 | 0.083256 |
| MmugDNA.25750.1.S1_at   | MmugDNA.25750.1 | 4.16  | 4.15  | 0.17 | 0.18 | 1.01  | 0.651926 | 0.912557 | 0.86189  | 0.950757 |
| MmugDNA.25751.1.S1_at   | MmugDNA.25751.1 | 4.65  | 4.86  | 0.16 | 0.29 | -1.16 | 0.14841  | 0.588674 | 0.522567 | 0.755137 |
| MmugDNA.25752.1.S1_at   | MmugDNA.25752.1 | 8.85  | 9.23  | 0.79 | 0.13 | -1.3  | 0.879467 | 0.313483 | 0.958238 | 0.567926 |
| MmugDNA.25752.1.S1_s_at | MmugDNA.25752.1 | 10.12 | 10.3  | 0.74 | 0.11 | -1.14 | 0.937046 | 0.507975 | 0.978859 | 0.703358 |
| MmugDNA.25754.1.S1_at   | MmugDNA.25754.1 | 4.17  | 3.83  | 0.07 | 0.1  | 1.26  | 0.008464 | 0.255197 | 0.234381 | 0.523252 |
| MmugDNA.25756.1.S1_at   | MmugDNA.25756.1 | 10.21 | 7.86  | 0.45 | 0.36 | 5.09  | 0.001515 | 0.000259 | 0.161549 | 0.033501 |
| MmugDNA.25757.1.S1_at   | MmugDNA.25757.1 | 5     | 4.97  | 0.29 | 0.46 | 1.02  | 0.692304 | 0.311573 | 0.880095 | 0.566537 |
| MmugDNA.25758.1.S1_at   | MmugDNA.25758.1 | 3.53  | 3.66  | 0.25 | 0.36 | -1.1  | 0.477883 | 0.515043 | 0.76987  | 0.708042 |
| MmugDNA.2576.1.S1_at    | MmugDNA.2576.1  | 6.16  | 6.07  | 0.09 | 0.09 | 1.06  | 0.194529 | 0.645306 | 0.565097 | 0.792172 |
| MmugDNA.25760.1.S1_at   | MmugDNA.25760.1 | 6.16  | 6.28  | 0.35 | 0.15 | -1.09 | 0.815779 | 0.030707 | 0.933242 | 0.217148 |
| MmugDNA.25761.1.S1_at   | MmugDNA.25761.1 | 2.87  | 2.85  | 0.08 | 0.08 | 1.01  | 0.41363  | 0.204298 | 0.732449 | 0.478541 |
| MmugDNA.25762.1.S1_at   | MmugDNA.25762.1 | 3.21  | 3.18  | 0.09 | 0.09 | 1.02  | 0.892249 | 0.720851 | 0.962988 | 0.838368 |
| MmugDNA.25763.1.S1_at   | MmugDNA.25763.1 | 4.77  | 4.87  | 0.26 | 0.15 | -1.07 | 0.174893 | 0.296761 | 0.548031 | 0.555779 |

|                         |                 |       |       |      |      |       |          |          |          |          |
|-------------------------|-----------------|-------|-------|------|------|-------|----------|----------|----------|----------|
| MmugDNA.25767.1.S1_at   | MmugDNA.25767.1 | 12.32 | 12.35 | 0.4  | 0.05 | -1.02 | 0.331872 | 0.044253 | 0.678336 | 0.25493  |
| MmugDNA.25769.1.S1_s_at | MmugDNA.25769.1 | 7.17  | 7.06  | 0.46 | 0.11 | 1.08  | 0.943344 | 0.644897 | 0.980475 | 0.791927 |
| MmugDNA.2577.1.S1_at    | MmugDNA.2577.1  | 2.92  | 2.87  | 0.06 | 0.13 | 1.03  | 0.790752 | 0.92008  | 0.922991 | 0.955037 |
| MmugDNA.25772.1.S1_at   | MmugDNA.25772.1 | 2.95  | 2.94  | 0.01 | 0.08 | 1.01  | 0.92647  | 0.692063 | 0.975571 | 0.82091  |
| MmugDNA.25773.1.S1_at   | MmugDNA.25773.1 | 4.94  | 4.82  | 0.07 | 0.13 | 1.08  | 0.145015 | 0.111371 | 0.520238 | 0.376087 |
| MmugDNA.25774.1.S1_at   | MmugDNA.25774.1 | 4.76  | 4.76  | 0.08 | 0.08 | 1     | 0.911282 | 0.629394 | 0.969919 | 0.781843 |
| MmugDNA.25775.1.S1_at   | MmugDNA.25775.1 | 7.44  | 7.46  | 0.25 | 0.33 | -1.01 | 0.640294 | 0.738032 | 0.856637 | 0.848158 |
| MmugDNA.25776.1.S1_at   | MmugDNA.25776.1 | 4.44  | 3.82  | 0.16 | 0.29 | 1.53  | 0.144562 | 0.160917 | 0.519872 | 0.437116 |
| MmugDNA.25778.1.S1_at   | MmugDNA.25778.1 | 5.35  | 5.29  | 0.12 | 0.24 | 1.04  | 0.991094 | 0.376551 | 0.996655 | 0.614375 |
| MmugDNA.2578.1.S1_at    | MmugDNA.2578.1  | 6.68  | 7.04  | 0.37 | 0.16 | -1.28 | 0.359101 | 0.679184 | 0.69708  | 0.812736 |
| MmugDNA.25780.1.S1_at   | MmugDNA.25780.1 | 4.17  | 3.98  | 0.23 | 0.17 | -1.14 | 0.188006 | 0.217284 | 0.560129 | 0.490911 |
| MmugDNA.25781.1.S1_at   | MmugDNA.25781.1 | 6.37  | 5.85  | 0.13 | 0.34 | 1.44  | 0.06693  | 0.058796 | 0.422979 | 0.289228 |
| MmugDNA.25782.1.S1_s_at | MmugDNA.25782.1 | 10.09 | 11.4  | 0.66 | 0.12 | -2.48 | 0.076461 | 0.049348 | 0.437977 | 0.267081 |
| MmugDNA.25783.1.S1_at   | MmugDNA.25783.1 | 3.1   | 3.05  | 0.16 | 0.09 | 1.04  | 0.817837 | 0.522471 | 0.93417  | 0.713153 |
| MmugDNA.25784.1.S1_at   | MmugDNA.25784.1 | 7.86  | 8     | 0.41 | 0.02 | -1.1  | 0.631103 | 0.810487 | 0.852361 | 0.890812 |
| MmugDNA.25785.1.S1_at   | MmugDNA.25785.1 | 8.35  | 9.16  | 0.9  | 0.45 | -1.76 | 0.075869 | 0.088975 | 0.436934 | 0.342831 |
| MmugDNA.25786.1.S1_at   | MmugDNA.25786.1 | 4.73  | 5.16  | 0.3  | 0.67 | -1.35 | 0.149731 | 0.122783 | 0.523238 | 0.392771 |
| MmugDNA.25787.1.S1_at   | MmugDNA.25787.1 | 4.65  | 4.57  | 0.22 | 0.07 | 1.06  | 0.574625 | 0.491153 | 0.824155 | 0.692801 |
| MmugDNA.25788.1.S1_at   | MmugDNA.25788.1 | 5     | 4.91  | 0.05 | 0.07 | 1.07  | 0.088475 | 0.171    | 0.45606  | 0.447561 |
| MmugDNA.2579.1.S1_at    | MmugDNA.2579.1  | 4.99  | 5     | 0.6  | 0.19 | -1.01 | 0.659861 | 0.853848 | 0.865465 | 0.916838 |
| MmugDNA.25791.1.S1_s_at | MmugDNA.25791.1 | 14.4  | 14.46 | 0.02 | 0.01 | -1.05 | 0.018507 | 0.156943 | 0.297536 | 0.432372 |
| MmugDNA.25792.1.S1_at   | MmugDNA.25792.1 | 6.72  | 6.21  | 0.39 | 0.2  | 1.42  | 0.090792 | 0.221139 | 0.458873 | 0.494498 |
| MmugDNA.25797.1.S1_at   | MmugDNA.25797.1 | 3.68  | 3.6   | 0.12 | 0.1  | 1.06  | 0.305224 | 0.328154 | 0.658726 | 0.577915 |
| MmugDNA.25798.1.S1_at   | MmugDNA.25798.1 | 5.5   | 6.69  | 0.09 | 0.18 | -2.27 | 0.000546 | 0.0001   | 0.143137 | 0.027996 |
| MmugDNA.25799.1.S1_at   | MmugDNA.25799.1 | 3.48  | 3.42  | 0.13 | 0.09 | 1.04  | 0.214388 | 0.361303 | 0.584751 | 0.602104 |
| MmugDNA.2580.1.S1_at    | MmugDNA.2580.1  | 9.01  | 8.78  | 0.46 | 0.24 | 1.17  | 0.422262 | 0.292574 | 0.738068 | 0.552628 |
| MmugDNA.25800.1.S1_at   | MmugDNA.25800.1 | 6.15  | 5.44  | 0.62 | 0.31 | 1.63  | 0.095018 | 0.067418 | 0.464131 | 0.305664 |
| MmugDNA.25801.1.S1_at   | MmugDNA.25801.1 | 4.76  | 4.15  | 0.68 | 0.18 | 1.52  | 0.228243 | 0.076177 | 0.597168 | 0.321047 |
| MmugDNA.25802.1.S1_at   | MmugDNA.25802.1 | 5.23  | 5.05  | 0.04 | 0.2  | 1.13  | 0.15386  | 0.011721 | 0.527213 | 0.140206 |
| MmugDNA.25803.1.S1_at   | MmugDNA.25803.1 | 9.08  | 8.94  | 0.05 | 0.05 | 1.1   | 0.019251 | 0.008759 | 0.300345 | 0.124009 |
| MmugDNA.25804.1.S1_at   | MmugDNA.25804.1 | 9.92  | 9     | 0.2  | 0.01 | 1.9   | 0.001399 | 0.00027  | 0.160065 | 0.033828 |
| MmugDNA.25806.1.S1_at   | MmugDNA.25806.1 | 4.89  | 4.96  | 0.19 | 0.03 | -1.05 | 0.612419 | 0.531303 | 0.843047 | 0.718555 |
| MmugDNA.25807.1.S1_at   | MmugDNA.25807.1 | 4.06  | 3.9   | 0.24 | 0.12 | 1.12  | 0.545174 | 0.505865 | 0.807687 | 0.702226 |
| MmugDNA.25808.1.S1_at   | MmugDNA.25808.1 | 3.59  | 3.5   | 0.09 | 0.42 | 1.06  | 0.535865 | 0.746882 | 0.801985 | 0.853023 |
| MmugDNA.25809.1.S1_at   | MmugDNA.25809.1 | 3.45  | 3.55  | 0.19 | 0.12 | -1.07 | 0.372058 | 0.400271 | 0.705567 | 0.630158 |
| MmugDNA.2581.1.S1_at    | MmugDNA.2581.1  | 5.08  | 5.16  | 0.18 | 0.06 | -1.06 | 0.818191 | 0.508126 | 0.934265 | 0.70337  |
| MmugDNA.25811.1.S1_at   | MmugDNA.25811.1 | 8.11  | 8.49  | 0.46 | 0.24 | -1.3  | 0.986378 | 0.035999 | 0.995644 | 0.234197 |
| MmugDNA.25812.1.S1_s_at | MmugDNA.25812.1 | 14.28 | 14.27 | 0.03 | 0.01 | 1     | 0.617854 | 0.93943  | 0.845661 | 0.965611 |
| MmugDNA.25815.1.S1_at   | MmugDNA.25815.1 | 9.2   | 8.78  | 0.4  | 0.03 | 1.34  | 0.413267 | 0.192457 | 0.732218 | 0.467952 |
| MmugDNA.25816.1.S1_s_at | MmugDNA.25816.1 | 9.56  | 9.19  | 0.24 | 0.11 | 1.29  | 0.180919 | 0.242954 | 0.554261 | 0.513319 |
| MmugDNA.25817.1.S1_at   | MmugDNA.25817.1 | 3.59  | 3.75  | 0.12 | 0.24 | -1.11 | 0.135191 | 0.181815 | 0.50918  | 0.458382 |
| MmugDNA.25818.1.S1_at   | MmugDNA.25818.1 | 4.01  | 4.02  | 0    | 0.14 | -1    | 0.412604 | 0.699299 | 0.732098 | 0.825318 |
| MmugDNA.15311.1.S1_x_at | MmugDNA.15311.1 | 5.12  | 4.07  | 1.26 | 0.12 | 2.07  | 0.228663 | 0.195726 | 0.597571 | 0.470621 |

|                         |                 |       |       |      |      |       |          |          |          |          |
|-------------------------|-----------------|-------|-------|------|------|-------|----------|----------|----------|----------|
| MmugDNA.2582.1.S1_at    | MmugDNA.2582.1  | 4.7   | 4.29  | 0.2  | 0    | 1.33  | 0.060554 | 0.045001 | 0.408416 | 0.256602 |
| MmugDNA.25820.1.S1_at   | MmugDNA.25820.1 | 7.43  | 7.27  | 0.06 | 0.01 | 1.11  | 0.009544 | 0.293321 | 0.242426 | 0.553239 |
| MmugDNA.25821.1.S1_at   | MmugDNA.25821.1 | 3.35  | 3.19  | 0.23 | 0.12 | 1.12  | 0.30912  | 0.412865 | 0.661444 | 0.639181 |
| MmugDNA.25822.1.S1_at   | MmugDNA.25822.1 | 2.97  | 2.99  | 0.15 | 0.13 | -1.01 | 0.685477 | 0.399629 | 0.876846 | 0.629912 |
| MmugDNA.25823.1.S1_at   | MmugDNA.25823.1 | 5.25  | 5.18  | 0.08 | 0.29 | 1.05  | 0.331167 | 0.052226 | 0.677861 | 0.274065 |
| MmugDNA.25825.1.S1_at   | MmugDNA.25825.1 | 7.33  | 6.76  | 0.87 | 0.35 | 1.48  | 0.89568  | 0.483646 | 0.964355 | 0.688088 |
| MmugDNA.25826.1.S1_at   | MmugDNA.25826.1 | 3.65  | 3.51  | 0.04 | 0.09 | 1.11  | 0.059786 | 0.409005 | 0.40703  | 0.636073 |
| MmugDNA.25827.1.S1_s_at | MmugDNA.25827.1 | 8.6   | 7.84  | 0.27 | 0.1  | 1.7   | 0.007074 | 0.000557 | 0.225425 | 0.041049 |
| MmugDNA.25828.1.S1_at   | MmugDNA.25828.1 | 12.45 | 12.42 | 0.1  | 0.02 | 1.02  | 0.568606 | 0.812645 | 0.820925 | 0.891778 |
| MmugDNA.25829.1.S1_at   | MmugDNA.25829.1 | 3.38  | 3.42  | 0.05 | 0.17 | -1.03 | 0.717352 | 0.899677 | 0.890353 | 0.942903 |
| MmugDNA.25832.1.S1_at   | MmugDNA.25832.1 | 3.56  | 3.34  | 0.24 | 0.18 | 1.16  | 0.909105 | 0.440491 | 0.969287 | 0.658967 |
| MmugDNA.25834.1.S1_at   | MmugDNA.25834.1 | 3.28  | 3.21  | 0.3  | 0.02 | 1.05  | 0.218885 | 0.546105 | 0.588341 | 0.727769 |
| MmugDNA.25835.1.S1_at   | MmugDNA.25835.1 | 7.35  | 6.97  | 0.04 | 0.29 | 1.31  | 0.220472 | 0.007144 | 0.589697 | 0.113735 |
| MmugDNA.25836.1.S1_at   | MmugDNA.25836.1 | 9.27  | 9.36  | 0.15 | 0.16 | -1.06 | 0.239443 | 0.113348 | 0.605885 | 0.379441 |
| MmugDNA.25838.1.S1_at   | MmugDNA.25838.1 | 5.57  | 5.54  | 0.13 | 0.07 | 1.02  | 0.470552 | 0.234126 | 0.766162 | 0.505319 |
| MmugDNA.25839.1.S1_at   | MmugDNA.25839.1 | 9.94  | 9.89  | 0.14 | 0.16 | 1.03  | 0.7081   | 0.137456 | 0.886529 | 0.41037  |
| MmugDNA.2584.1.S1_at    | MmugDNA.2584.1  | 10.73 | 8.62  | 0.43 | 0.16 | 4.3   | 0.002567 | 0.001336 | 0.180597 | 0.056352 |
| MmugDNA.25840.1.S1_at   | MmugDNA.25840.1 | 9.27  | 10.01 | 0.3  | 0.15 | -1.67 | 0.017    | 0.027117 | 0.288969 | 0.205797 |
| MmugDNA.25841.1.S1_at   | MmugDNA.25841.1 | 6.83  | 6.85  | 0.2  | 0.04 | -1.01 | 0.949009 | 0.750315 | 0.982711 | 0.854766 |
| MmugDNA.25842.1.S1_at   | MmugDNA.25842.1 | 8.13  | 7.62  | 0.66 | 0.16 | 1.42  | 0.352026 | 0.4313   | 0.692649 | 0.652249 |
| MmugDNA.25844.1.S1_at   | MmugDNA.25844.1 | 3.4   | 3.39  | 0.44 | 0.04 | 1.01  | 0.386254 | 0.607229 | 0.713414 | 0.766302 |
| MmugDNA.25847.1.S1_at   | MmugDNA.25847.1 | 6.44  | 6.17  | 0.3  | 0.23 | 1.2   | 0.20392  | 0.041705 | 0.57513  | 0.24887  |
| MmugDNA.25848.1.S1_at   | MmugDNA.25848.1 | 5.32  | 5.51  | 0.21 | 0.46 | -1.15 | 0.121918 | 0.37772  | 0.495636 | 0.615086 |
| MmugDNA.25849.1.S1_at   | MmugDNA.25849.1 | 10.86 | 10.77 | 0.09 | 0.12 | 1.07  | 0.1383   | 0.208853 | 0.51369  | 0.482717 |
| MmugDNA.2585.1.S1_at    | MmugDNA.2585.1  | 11.24 | 11.1  | 0.19 | 0.08 | 1.11  | 0.815704 | 0.2194   | 0.933219 | 0.493156 |
| MmugDNA.25850.1.S1_at   | MmugDNA.25850.1 | 12.24 | 12.28 | 0.13 | 0.07 | -1.03 | 0.64149  | 0.536438 | 0.857348 | 0.721763 |
| MmugDNA.25851.1.S1_at   | MmugDNA.25851.1 | 4.78  | 4.92  | 0.06 | 0.07 | -1.1  | 0.064673 | 0.628271 | 0.418501 | 0.781109 |
| MmugDNA.25852.1.S1_at   | MmugDNA.25852.1 | 5.46  | 5.94  | 0.25 | 0.15 | -1.4  | 0.065252 | 0.083182 | 0.420212 | 0.333113 |
| MmugDNA.25853.1.S1_at   | MmugDNA.25853.1 | 5.72  | 6.06  | 0.18 | 0.24 | -1.26 | 0.315947 | 0.164485 | 0.666243 | 0.440679 |
| MmugDNA.25854.1.S1_at   | MmugDNA.25854.1 | 5.18  | 5.75  | 0.16 | 0.32 | -1.48 | 0.06425  | 0.237729 | 0.417886 | 0.50826  |
| MmugDNA.25855.1.S1_at   | MmugDNA.25855.1 | 4.45  | 5.17  | 0.42 | 0.36 | -1.64 | 0.265679 | 0.138513 | 0.626818 | 0.411492 |
| MmugDNA.25856.1.S1_at   | MmugDNA.25856.1 | 2.72  | 2.8   | 0.28 | 0.08 | -1.06 | 0.632011 | 0.742746 | 0.852655 | 0.851023 |
| MmugDNA.25857.1.S1_at   | MmugDNA.25857.1 | 5.42  | 5.36  | 0.54 | 0.45 | 1.04  | 0.287141 | 0.254891 | 0.644253 | 0.523091 |
| MmugDNA.25858.1.S1_at   | MmugDNA.25858.1 | 5.31  | 5.24  | 0.24 | 0.14 | 1.05  | 0.314141 | 0.416749 | 0.665    | 0.641698 |
| MmugDNA.25859.1.S1_at   | MmugDNA.25859.1 | 5.09  | 4.87  | 0.74 | 0.16 | 1.16  | 0.70414  | 0.616141 | 0.884988 | 0.772496 |
| MmugDNA.25860.1.S1_at   | MmugDNA.25860.1 | 3.66  | 3.78  | 0.09 | 0.23 | -1.09 | 0.817976 | 0.949463 | 0.934212 | 0.971102 |
| MmugDNA.25862.1.S1_at   | MmugDNA.25862.1 | 6.89  | 6.91  | 0.35 | 0.39 | -1.02 | 0.578139 | 0.782705 | 0.826177 | 0.874202 |
| MmugDNA.25863.1.S1_at   | MmugDNA.25863.1 | 6.46  | 6.92  | 0.54 | 0.52 | -1.37 | 0.188398 | 0.017839 | 0.560439 | 0.168707 |
| MmugDNA.25865.1.S1_at   | MmugDNA.25865.1 | 10.7  | 10.88 | 0.05 | 0.22 | -1.13 | 0.108371 | 0.179339 | 0.480776 | 0.455805 |
| MmugDNA.25866.1.S1_at   | MmugDNA.25866.1 | 5.72  | 5.66  | 0.21 | 0.18 | 1.04  | 0.301892 | 0.405756 | 0.655988 | 0.633949 |
| MmugDNA.25868.1.S1_at   | MmugDNA.25868.1 | 14.52 | 14.54 | 0.02 | 0.01 | -1.01 | 0.231707 | 0.371018 | 0.599679 | 0.609964 |
| MmugDNA.2587.1.S1_at    | MmugDNA.2587.1  | 6.92  | 6.8   | 0.05 | 0.14 | 1.08  | 0.055343 | 0.01585  | 0.39842  | 0.15969  |
| MmugDNA.25871.1.S1_at   | MmugDNA.25871.1 | 5.13  | 4.91  | 0.15 | 0.07 | 1.16  | 0.088023 | 0.067045 | 0.456029 | 0.304872 |

|                         |                 |       |       |      |      |       |          |          |          |          |
|-------------------------|-----------------|-------|-------|------|------|-------|----------|----------|----------|----------|
| MmugDNA.25872.1.S1_at   | MmugDNA.25872.1 | 7.62  | 7.77  | 0.56 | 0.14 | -1.1  | 0.483099 | 0.673872 | 0.772862 | 0.809483 |
| MmugDNA.25873.1.S1_x_at | MmugDNA.25873.1 | 3.7   | 3.76  | 0.12 | 0.09 | -1.04 | 0.637529 | 0.365542 | 0.855579 | 0.605602 |
| MmugDNA.25874.1.S1_at   | MmugDNA.25874.1 | 4.1   | 4.28  | 0.34 | 0.81 | -1.13 | 0.635528 | 0.809409 | 0.854585 | 0.890131 |
| MmugDNA.25875.1.S1_at   | MmugDNA.25875.1 | 8.49  | 8.13  | 0.78 | 0.06 | 1.29  | 0.525492 | 0.432175 | 0.796198 | 0.652775 |
| MmugDNA.25876.1.S1_at   | MmugDNA.25876.1 | 6.36  | 6.14  | 0.16 | 0.09 | 1.16  | 0.0965   | 0.181999 | 0.465152 | 0.458537 |
| MmugDNA.25877.1.S1_at   | MmugDNA.25877.1 | 5.88  | 5.89  | 0.16 | 0.15 | -1.01 | 0.92466  | 0.036263 | 0.974823 | 0.235    |
| MmugDNA.25878.1.S1_at   | MmugDNA.25878.1 | 5.18  | 5.09  | 0.07 | 0.07 | 1.06  | 0.147815 | 0.283518 | 0.52196  | 0.545959 |
| MmugDNA.25880.1.S1_at   | MmugDNA.25880.1 | 3.25  | 3.25  | 0    | 0.13 | -1    | 0.392104 | 0.596564 | 0.718056 | 0.759662 |
| MmugDNA.25882.1.S1_at   | MmugDNA.25882.1 | 8.62  | 9.73  | 1.08 | 0.28 | -2.16 | 0.261308 | 0.225028 | 0.623819 | 0.49773  |
| MmugDNA.25883.1.S1_at   | MmugDNA.25883.1 | 9.06  | 9.29  | 0.32 | 0.19 | -1.17 | 0.473346 | 0.451825 | 0.767506 | 0.66662  |
| MmugDNA.25885.1.S1_at   | MmugDNA.25885.1 | 4.63  | 5.23  | 0.79 | 0.37 | -1.52 | 0.246003 | 0.375587 | 0.611421 | 0.613533 |
| MmugDNA.25886.1.S1_at   | MmugDNA.25886.1 | 6.18  | 7.02  | 0.86 | 0.38 | -1.79 | 0.824465 | 0.945408 | 0.936798 | 0.968942 |
| MmugDNA.25889.1.S1_at   | MmugDNA.25889.1 | 3.02  | 2.93  | 0.05 | 0.03 | 1.07  | 0.020704 | 0.437192 | 0.305555 | 0.656591 |
| MmugDNA.25890.1.S1_at   | MmugDNA.25890.1 | 12.04 | 9.37  | 0.8  | 0.57 | 6.34  | 0.017465 | 0.00231  | 0.291886 | 0.070884 |
| MmugDNA.25891.1.S1_at   | MmugDNA.25891.1 | 5.32  | 5     | 0.13 | 0.08 | 1.25  | 0.053533 | 0.063803 | 0.394865 | 0.29906  |
| MmugDNA.25892.1.S1_at   | MmugDNA.25892.1 | 3.59  | 3.45  | 0.28 | 0.15 | 1.1   | 0.377433 | 0.281333 | 0.707543 | 0.544391 |
| MmugDNA.25893.1.S1_at   | MmugDNA.25893.1 | 4.49  | 4.54  | 0.04 | 0.01 | -1.03 | 0.194927 | 0.096906 | 0.565296 | 0.354311 |
| MmugDNA.25894.1.S1_at   | MmugDNA.25894.1 | 4.2   | 4.01  | 0.16 | 0.05 | 1.14  | 0.123925 | 0.522396 | 0.497477 | 0.713139 |
| MmugDNA.25895.1.S1_at   | MmugDNA.25895.1 | 4.21  | 4.09  | 0.15 | 0.02 | 1.08  | 0.278351 | 0.404459 | 0.637539 | 0.632988 |
| MmugDNA.25898.1.S1_at   | MmugDNA.25898.1 | 3.93  | 3.81  | 0.14 | 0.24 | 1.09  | 0.82812  | 0.500481 | 0.938186 | 0.69907  |
| MmugDNA.25899.1.S1_at   | MmugDNA.25899.1 | 6.37  | 6.72  | 0.25 | 0.04 | -1.28 | 0.238664 | 0.05309  | 0.605393 | 0.276139 |
| MmugDNA.259.1.S1_at     | MmugDNA.259.1   | 2.92  | 2.92  | 0.09 | 0.07 | 1.01  | 0.881465 | 0.058703 | 0.959052 | 0.288956 |
| MmugDNA.2590.1.S1_at    | MmugDNA.2590.1  | 8.56  | 8.53  | 0.27 | 0.06 | 1.02  | 0.834208 | 0.085566 | 0.940528 | 0.337567 |
| MmugDNA.25901.1.S1_s_at | MmugDNA.25901.1 | 7.77  | 8.85  | 0.57 | 0.05 | -2.1  | 0.02172  | 0.128024 | 0.309332 | 0.398986 |
| MmugDNA.25902.1.S1_at   | MmugDNA.25902.1 | 9.24  | 9.86  | 0.15 | 0.04 | -1.53 | 0.002411 | 0.003165 | 0.177075 | 0.081793 |
| MmugDNA.25904.1.S1_at   | MmugDNA.25904.1 | 6.1   | 6.86  | 0.89 | 0.68 | -1.69 | 0.292792 | 0.421195 | 0.649072 | 0.644807 |
| MmugDNA.25905.1.S1_at   | MmugDNA.25905.1 | 10.08 | 9.77  | 0.09 | 0.19 | 1.24  | 0.025528 | 0.231699 | 0.322263 | 0.503526 |
| MmugDNA.12980.1.S1_s_at | MmugDNA.12980.1 | 14.47 | 14.48 | 0.06 | 0.01 | -1.01 | 0.303144 | 0.2045   | 0.657006 | 0.478845 |
| MmugDNA.12980.1.S1_x_at | MmugDNA.12980.1 | 13.63 | 13.58 | 0.13 | 0.03 | 1.04  | 0.695039 | 0.93028  | 0.881262 | 0.960382 |
| MmugDNA.25907.1.S1_at   | MmugDNA.25907.1 | 7.1   | 7.11  | 0.11 | 0.18 | -1.01 | 0.547189 | 0.017157 | 0.808925 | 0.16594  |
| MmugDNA.25908.1.S1_at   | MmugDNA.25908.1 | 14.14 | 14.08 | 0.08 | 0.08 | 1.04  | 0.943933 | 0.988579 | 0.980618 | 0.993572 |
| MmugDNA.25909.1.S1_at   | MmugDNA.25909.1 | 6.48  | 6.39  | 0.02 | 0.08 | 1.07  | 0.116278 | 0.049157 | 0.489568 | 0.266534 |
| MmugDNA.25910.1.S1_at   | MmugDNA.25910.1 | 2.86  | 2.95  | 0.06 | 0.26 | -1.07 | 0.439813 | 0.548555 | 0.748282 | 0.729268 |
| MmugDNA.25911.1.S1_at   | MmugDNA.25911.1 | 8.42  | 8.23  | 0.37 | 0.24 | 1.14  | 0.468731 | 0.181017 | 0.765079 | 0.457529 |
| MmugDNA.25912.1.S1_at   | MmugDNA.25912.1 | 6.77  | 6.79  | 0.91 | 0.2  | -1.02 | 0.344395 | 0.447238 | 0.686913 | 0.663409 |
| MmugDNA.25913.1.S1_at   | MmugDNA.25913.1 | 4.72  | 4.73  | 0.1  | 0.04 | -1.01 | 0.660793 | 0.314344 | 0.865819 | 0.568273 |
| MmugDNA.25914.1.S1_at   | MmugDNA.25914.1 | 10.25 | 10.27 | 0.52 | 0.23 | -1.02 | 0.585341 | 0.319036 | 0.830512 | 0.571591 |
| MmugDNA.25915.1.S1_at   | MmugDNA.25915.1 | 3.45  | 3.44  | 0.08 | 0.09 | 1.01  | 0.612607 | 0.122957 | 0.843101 | 0.392923 |
| MmugDNA.25916.1.S1_at   | MmugDNA.25916.1 | 9.86  | 8.33  | 0.25 | 0.34 | 2.89  | 0.004065 | 0.00153  | 0.198571 | 0.059426 |
| MmugDNA.25917.1.S1_at   | MmugDNA.25917.1 | 6.92  | 6.94  | 0.08 | 0.05 | -1.01 | 0.513261 | 0.474518 | 0.7898   | 0.681511 |
| MmugDNA.25918.1.S1_at   | MmugDNA.25918.1 | 3.54  | 3.54  | 0.02 | 0.03 | 1     | 0.662902 | 0.368096 | 0.866995 | 0.607669 |
| MmugDNA.25919.1.S1_at   | MmugDNA.25919.1 | 3.35  | 3.28  | 0.12 | 0.1  | 1.05  | 0.376496 | 0.654395 | 0.706899 | 0.798021 |
| MmugDNA.25920.1.S1_at   | MmugDNA.25920.1 | 3.49  | 3.25  | 0.18 | 0.09 | 1.18  | 0.136069 | 0.222462 | 0.510598 | 0.495518 |

|                         |                 |       |       |      |      |       |          |          |          |          |
|-------------------------|-----------------|-------|-------|------|------|-------|----------|----------|----------|----------|
| MmugDNA.25922.1.S1_at   | MmugDNA.25922.1 | 3.78  | 3.9   | 0.17 | 0.07 | -1.09 | 0.338013 | 0.312747 | 0.682728 | 0.567299 |
| MmugDNA.25926.1.S1_at   | MmugDNA.25926.1 | 5.74  | 5.81  | 0.11 | 0.07 | -1.05 | 0.519166 | 0.858699 | 0.793113 | 0.919548 |
| MmugDNA.25928.1.S1_at   | MmugDNA.25928.1 | 3.48  | 3.26  | 0.25 | 0.04 | 1.16  | 0.16344  | 0.197279 | 0.53621  | 0.472213 |
| MmugDNA.2593.1.S1_at    | MmugDNA.2593.1  | 6.17  | 6.03  | 0.98 | 0.18 | 1.1   | 0.295743 | 0.163681 | 0.651408 | 0.439841 |
| MmugDNA.25930.1.S1_at   | MmugDNA.25930.1 | 4.91  | 4.9   | 0.25 | 0.16 | 1.01  | 0.676665 | 0.211859 | 0.87321  | 0.485854 |
| MmugDNA.25930.1.S1_s_at | MmugDNA.25930.1 | 4.84  | 4.69  | 0.58 | 0.51 | 1.11  | 0.686071 | 0.522447 | 0.877083 | 0.713139 |
| MmugDNA.25932.1.S1_at   | MmugDNA.25932.1 | 5.69  | 5.65  | 0.13 | 0.21 | 1.03  | 0.412769 | 0.550307 | 0.732098 | 0.730382 |
| MmugDNA.25933.1.S1_at   | MmugDNA.25933.1 | 4.57  | 4.39  | 0.04 | 0.23 | 1.13  | 0.686919 | 0.905624 | 0.877571 | 0.946574 |
| MmugDNA.25934.1.S1_at   | MmugDNA.25934.1 | 5.93  | 5.86  | 0.11 | 0.06 | 1.05  | 0.082995 | 0.211549 | 0.44828  | 0.485658 |
| MmugDNA.25935.1.S1_at   | MmugDNA.25935.1 | 7.25  | 6.71  | 0.15 | 0.19 | 1.46  | 0.01863  | 0.003524 | 0.298174 | 0.085139 |
| MmugDNA.25937.1.S1_at   | MmugDNA.25937.1 | 6.52  | 6.61  | 0.69 | 0.28 | -1.07 | 0.850563 | 0.418313 | 0.947381 | 0.642707 |
| MmugDNA.25938.1.S1_at   | MmugDNA.25938.1 | 3.42  | 3.71  | 0.13 | 0.58 | -1.23 | 0.298764 | 0.464988 | 0.653263 | 0.675534 |
| MmugDNA.25939.1.S1_s_at | MmugDNA.25939.1 | 11.49 | 11.3  | 0.14 | 0.16 | 1.14  | 0.224115 | 0.280348 | 0.593251 | 0.543556 |
| MmugDNA.2594.1.S1_at    | MmugDNA.2594.1  | 6.22  | 6.17  | 0.02 | 0.13 | 1.03  | 0.642824 | 0.51841  | 0.857894 | 0.71038  |
| MmugDNA.25940.1.S1_at   | MmugDNA.25940.1 | 3.48  | 3.46  | 0.05 | 0.19 | 1.01  | 0.402547 | 0.30213  | 0.725006 | 0.560071 |
| MmugDNA.25942.1.S1_at   | MmugDNA.25942.1 | 6.23  | 6.39  | 0.38 | 0.18 | -1.12 | 0.369456 | 0.626074 | 0.704236 | 0.779551 |
| MmugDNA.25944.1.S1_at   | MmugDNA.25944.1 | 3.39  | 3.31  | 0.29 | 0.31 | 1.06  | 0.718648 | 0.894778 | 0.890764 | 0.939961 |
| MmugDNA.25945.1.S1_at   | MmugDNA.25945.1 | 6.68  | 6.61  | 0.05 | 0.09 | 1.05  | 0.36428  | 0.133618 | 0.700517 | 0.405565 |
| MmugDNA.25947.1.S1_at   | MmugDNA.25947.1 | 5.88  | 5.87  | 0.11 | 0    | 1.01  | 0.741068 | 0.860544 | 0.901119 | 0.920569 |
| MmugDNA.25948.1.S1_at   | MmugDNA.25948.1 | 4.75  | 4.65  | 0.11 | 0    | 1.07  | 0.17079  | 0.310279 | 0.54374  | 0.565461 |
| MmugDNA.25949.1.S1_at   | MmugDNA.25949.1 | 3.77  | 3.52  | 0.06 | 0.16 | 1.19  | 0.060291 | 0.122759 | 0.407914 | 0.39274  |
| MmugDNA.2595.1.S1_at    | MmugDNA.2595.1  | 7.4   | 7.19  | 0.15 | 0.03 | 1.16  | 0.04244  | 0.086083 | 0.369047 | 0.33835  |
| MmugDNA.25952.1.S1_at   | MmugDNA.25952.1 | 4.77  | 4.58  | 0.18 | 0.09 | 1.14  | 0.151555 | 0.188526 | 0.524628 | 0.464458 |
| MmugDNA.25953.1.S1_at   | MmugDNA.25953.1 | 6.09  | 6.4   | 0.54 | 0.23 | -1.24 | 0.428458 | 0.062777 | 0.741885 | 0.297193 |
| MmugDNA.25956.1.S1_at   | MmugDNA.25956.1 | 4.22  | 4.06  | 0.11 | 0.17 | 1.12  | 0.170752 | 0.109069 | 0.543739 | 0.372869 |
| MmugDNA.25957.1.S1_at   | MmugDNA.25957.1 | 5.8   | 5.8   | 0.66 | 0.11 | -1    | 0.885467 | 0.094093 | 0.960367 | 0.350744 |
| MmugDNA.25959.1.S1_at   | MmugDNA.25959.1 | 3.34  | 3.48  | 0.11 | 0.23 | -1.11 | 0.216456 | 0.305791 | 0.586564 | 0.562731 |
| MmugDNA.2596.1.S1_at    | MmugDNA.2596.1  | 4.26  | 4.18  | 0.12 | 0.02 | 1.06  | 0.277233 | 0.132349 | 0.636787 | 0.404294 |
| MmugDNA.25960.1.S1_at   | MmugDNA.25960.1 | 11.44 | 11.6  | 0.23 | 0.04 | -1.12 | 0.961552 | 0.162415 | 0.987441 | 0.438575 |
| MmugDNA.25961.1.S1_at   | MmugDNA.25961.1 | 6.68  | 6.59  | 0.44 | 0.37 | 1.07  | 0.685322 | 0.171588 | 0.8768   | 0.448017 |
| MmugDNA.25962.1.S1_at   | MmugDNA.25962.1 | 3.32  | 3.34  | 0.08 | 0.12 | -1.01 | 0.437238 | 0.491877 | 0.746719 | 0.693275 |
| MmugDNA.25965.1.S1_at   | MmugDNA.25965.1 | 11.29 | 11.23 | 0.13 | 0.17 | 1.04  | 0.447917 | 0.653988 | 0.75368  | 0.797755 |
| MmugDNA.25966.1.S1_at   | MmugDNA.25966.1 | 11.36 | 11.44 | 0.24 | 0.08 | -1.05 | 0.536624 | 0.770502 | 0.802417 | 0.866725 |
| MmugDNA.3279.1.S1_at    | MmugDNA.3279.1  | 11    | 10.77 | 0.24 | 0.04 | 1.17  | 0.433091 | 0.547098 | 0.744201 | 0.728283 |
| MmugDNA.3279.1.S1_s_at  | MmugDNA.3279.1  | 9.79  | 9.63  | 0.31 | 0.13 | 1.12  | 0.377569 | 0.479741 | 0.707557 | 0.685409 |
| MmugDNA.25967.1.S1_at   | MmugDNA.25967.1 | 3.76  | 4.24  | 0.2  | 0.21 | -1.4  | 0.044367 | 0.04111  | 0.374567 | 0.247611 |
| MmugDNA.25968.1.S1_at   | MmugDNA.25968.1 | 5.89  | 5.8   | 0.28 | 0.29 | 1.06  | 0.534123 | 0.808908 | 0.8012   | 0.889962 |
| MmugDNA.2597.1.S1_at    | MmugDNA.2597.1  | 3.27  | 3.25  | 0.12 | 0.03 | 1.01  | 0.959823 | 0.801806 | 0.986949 | 0.885933 |
| MmugDNA.25971.1.S1_at   | MmugDNA.25971.1 | 14.34 | 14.31 | 0.05 | 0.01 | 1.02  | 0.421274 | 0.022004 | 0.73746  | 0.18564  |
| MmugDNA.24445.1.S1_s_at | MmugDNA.24445.1 | 14.47 | 14.45 | 0.01 | 0.01 | 1.02  | 0.0722   | 0.400196 | 0.432091 | 0.630158 |
| MmugDNA.25972.1.S1_at   | MmugDNA.25972.1 | 7.12  | 7.96  | 0.22 | 0.11 | -1.78 | 0.002541 | 0.00073  | 0.179931 | 0.044701 |
| MmugDNA.25974.1.S1_at   | MmugDNA.25974.1 | 4.59  | 4.42  | 0.18 | 0.09 | 1.12  | 0.39046  | 0.413864 | 0.71675  | 0.639865 |
| MmugDNA.25975.1.S1_at   | MmugDNA.25975.1 | 7.89  | 7.98  | 0.55 | 0.02 | -1.06 | 0.827532 | 0.961268 | 0.938039 | 0.978105 |



|                         |                 |       |       |      |      |       |          |          |          |          |
|-------------------------|-----------------|-------|-------|------|------|-------|----------|----------|----------|----------|
| MmugDNA.25976.1.S1_at   | MmugDNA.25976.1 | 3.83  | 3.87  | 0.07 | 0    | -1.03 | 0.464341 | 0.920347 | 0.762534 | 0.95511  |
| MmugDNA.28095.1.S1_s_at | MmugDNA.28095.1 | 13.93 | 13.96 | 0.06 | 0.05 | -1.03 | 0.173869 | 0.368404 | 0.546898 | 0.607932 |
| MmugDNA.25979.1.S1_at   | MmugDNA.25979.1 | 3.49  | 3.53  | 0.06 | 0.12 | -1.03 | 0.77744  | 0.829846 | 0.9176   | 0.902225 |
| MmugDNA.2598.1.S1_at    | MmugDNA.2598.1  | 5.93  | 5.55  | 0.11 | 0.26 | 1.3   | 0.076105 | 0.072166 | 0.437449 | 0.314694 |
| MmugDNA.25980.1.S1_at   | MmugDNA.25980.1 | 7.07  | 7.01  | 0.28 | 0.01 | 1.04  | 0.244902 | 0.295651 | 0.610437 | 0.555108 |
| MmugDNA.25981.1.S1_at   | MmugDNA.25981.1 | 12.47 | 12.7  | 0.08 | 0.03 | -1.17 | 0.019358 | 0.006962 | 0.300575 | 0.112719 |
| MmugDNA.25982.1.S1_at   | MmugDNA.25982.1 | 6.94  | 6.67  | 0.26 | 0.04 | 1.2   | 0.181795 | 0.262151 | 0.554854 | 0.528414 |
| MmugDNA.25983.1.S1_at   | MmugDNA.25983.1 | 4.21  | 3.52  | 0.37 | 0.17 | 1.61  | 0.080162 | 0.051232 | 0.443513 | 0.271799 |
| MmugDNA.25984.1.S1_at   | MmugDNA.25984.1 | 3.39  | 3.49  | 0.01 | 0.2  | -1.08 | 0.420527 | 0.182301 | 0.737009 | 0.458768 |
| MmugDNA.25987.1.S1_at   | MmugDNA.25987.1 | 8.87  | 9.03  | 0.24 | 0.35 | -1.12 | 0.616081 | 0.124196 | 0.844731 | 0.394496 |
| MmugDNA.25988.1.S1_at   | MmugDNA.25988.1 | 6.49  | 7.28  | 0.9  | 0.17 | -1.74 | 0.231873 | 0.232882 | 0.599694 | 0.50445  |
| MmugDNA.25989.1.S1_at   | MmugDNA.25989.1 | 8.74  | 8.56  | 0.37 | 0.11 | 1.13  | 0.527753 | 0.243996 | 0.797225 | 0.514069 |
| MmugDNA.2599.1.S1_at    | MmugDNA.2599.1  | 6.77  | 6.68  | 0.17 | 0.08 | 1.06  | 0.175599 | 0.185228 | 0.548774 | 0.461174 |
| MmugDNA.25990.1.S1_at   | MmugDNA.25990.1 | 9.05  | 9.02  | 0.23 | 0.09 | 1.03  | 0.488278 | 0.070833 | 0.775462 | 0.31231  |
| MmugDNA.25991.1.S1_at   | MmugDNA.25991.1 | 6.44  | 6.27  | 0.3  | 0.06 | 1.13  | 0.784383 | 0.115503 | 0.920759 | 0.38267  |
| MmugDNA.25992.1.S1_at   | MmugDNA.25992.1 | 6.16  | 6.3   | 0.61 | 0.18 | -1.1  | 0.592891 | 0.446649 | 0.833994 | 0.66287  |
| MmugDNA.25994.1.S1_at   | MmugDNA.25994.1 | 11.08 | 11.42 | 0.44 | 0.11 | -1.27 | 0.196275 | 0.228245 | 0.566783 | 0.500443 |
| MmugDNA.25995.1.S1_at   | MmugDNA.25995.1 | 4.48  | 4.41  | 0.17 | 0.6  | 1.04  | 0.590546 | 0.485185 | 0.832911 | 0.688969 |
| MmugDNA.25996.1.S1_at   | MmugDNA.25996.1 | 6.23  | 6.09  | 0.04 | 0.1  | 1.1   | 0.164413 | 0.085233 | 0.537322 | 0.337096 |
| MmugDNA.25997.1.S1_at   | MmugDNA.25997.1 | 5.15  | 5.09  | 0.33 | 0.08 | 1.04  | 0.704736 | 0.400858 | 0.885183 | 0.630658 |
| MmugDNA.25998.1.S1_at   | MmugDNA.25998.1 | 5.45  | 5.14  | 0.12 | 0.1  | 1.24  | 0.115633 | 0.048457 | 0.488896 | 0.265349 |
| MmugDNA.25999.1.S1_at   | MmugDNA.25999.1 | 12.33 | 12.62 | 0.06 | 0.11 | -1.23 | 0.00844  | 0.001821 | 0.23396  | 0.063997 |
| MmugDNA.26.1.S1_at      | MmugDNA.26.1    | 4.51  | 4.17  | 0.41 | 0.17 | 1.27  | 0.186276 | 0.560384 | 0.559101 | 0.736645 |
| MmugDNA.260.1.S1_at     | MmugDNA.260.1   | 5.55  | 5.84  | 0.82 | 0.54 | -1.22 | 0.749915 | 0.907024 | 0.905306 | 0.947344 |
| MmugDNA.26000.1.S1_at   | MmugDNA.26000.1 | 6.68  | 6.2   | 0.14 | 0.13 | 1.39  | 0.032457 | 0.055222 | 0.344399 | 0.280676 |
| MmugDNA.26001.1.S1_at   | MmugDNA.26001.1 | 4.15  | 4.19  | 0.13 | 0.12 | -1.03 | 0.767373 | 0.546697 | 0.912495 | 0.728135 |
| MmugDNA.26002.1.S1_at   | MmugDNA.26002.1 | 5.95  | 5.72  | 0.38 | 0.05 | 1.17  | 0.951901 | 0.932825 | 0.983817 | 0.961845 |
| MmugDNA.26003.1.S1_at   | MmugDNA.26003.1 | 4.07  | 4.09  | 0.13 | 0.06 | -1.02 | 0.565766 | 0.85712  | 0.819476 | 0.918374 |
| MmugDNA.26004.1.S1_at   | MmugDNA.26004.1 | 4.65  | 3.99  | 0.45 | 0.29 | 1.58  | 0.149501 | 0.312242 | 0.523226 | 0.566963 |
| MmugDNA.26006.1.S1_at   | MmugDNA.26006.1 | 7.3   | 6.58  | 0.36 | 0.1  | 1.65  | 0.096046 | 0.006811 | 0.464614 | 0.111444 |
| MmugDNA.26007.1.S1_at   | MmugDNA.26007.1 | 9.39  | 9.09  | 0.68 | 0.31 | 1.23  | 0.358492 | 0.291805 | 0.696419 | 0.552063 |
| MmugDNA.26008.1.S1_at   | MmugDNA.26008.1 | 12.4  | 12.01 | 0.59 | 0.07 | 1.31  | 0.809628 | 0.548311 | 0.931084 | 0.729053 |
| MmugDNA.26009.1.S1_at   | MmugDNA.26009.1 | 8.84  | 8.56  | 0.62 | 0.11 | 1.21  | 0.688604 | 0.348868 | 0.878487 | 0.592917 |
| MmugDNA.2601.1.S1_at    | MmugDNA.2601.1  | 8.69  | 8.69  | 0.1  | 0.07 | 1     | 0.669193 | 0.872664 | 0.869403 | 0.927592 |
| MmugDNA.26010.1.S1_at   | MmugDNA.26010.1 | 6.57  | 6.23  | 0.66 | 0.02 | 1.26  | 0.545677 | 0.041176 | 0.808135 | 0.247733 |
| MmugDNA.26011.1.S1_at   | MmugDNA.26011.1 | 5.59  | 5.6   | 0.14 | 0.03 | -1    | 0.339744 | 0.565016 | 0.684031 | 0.739639 |
| MmugDNA.26012.1.S1_at   | MmugDNA.26012.1 | 6.25  | 5.38  | 1.08 | 0.19 | 1.83  | 0.249387 | 0.355505 | 0.614718 | 0.597777 |
| MmugDNA.26013.1.S1_at   | MmugDNA.26013.1 | 4.15  | 3.94  | 0.19 | 0.05 | 1.15  | 0.43648  | 0.598768 | 0.746319 | 0.761123 |
| MmugDNA.26014.1.S1_at   | MmugDNA.26014.1 | 6.97  | 6.9   | 0.08 | 0.03 | 1.05  | 0.593206 | 0.657337 | 0.834114 | 0.799643 |
| MmugDNA.26016.1.S1_at   | MmugDNA.26016.1 | 5.25  | 5.2   | 0.04 | 0.07 | 1.04  | 0.468218 | 0.286603 | 0.764811 | 0.548065 |
| MmugDNA.26017.1.S1_at   | MmugDNA.26017.1 | 10.7  | 10.61 | 0.22 | 0.19 | 1.06  | 0.200052 | 0.537088 | 0.571864 | 0.722271 |
| MmugDNA.26018.1.S1_at   | MmugDNA.26018.1 | 6.14  | 5.84  | 0.22 | 0.08 | 1.23  | 0.156546 | 0.035658 | 0.529581 | 0.233228 |
| MmugDNA.26019.1.S1_at   | MmugDNA.26019.1 | 6.31  | 5.93  | 0.42 | 0.21 | 1.3   | 0.087336 | 0.080963 | 0.454785 | 0.32901  |

|                         |                 |       |       |      |      |       |          |          |          |          |
|-------------------------|-----------------|-------|-------|------|------|-------|----------|----------|----------|----------|
| MmugDNA.2602.1.S1_at    | MmugDNA.2602.1  | 5.34  | 5.68  | 0.15 | 0.36 | -1.26 | 0.11429  | 0.17744  | 0.487606 | 0.453773 |
| MmugDNA.26020.1.S1_at   | MmugDNA.26020.1 | 6.59  | 6.89  | 0.14 | 0.05 | -1.23 | 0.026193 | 0.00422  | 0.323574 | 0.091392 |
| MmugDNA.26021.1.S1_at   | MmugDNA.26021.1 | 4.15  | 4.15  | 0.09 | 0.04 | -1    | 0.497088 | 0.660666 | 0.781055 | 0.801499 |
| MmugDNA.26023.1.S1_at   | MmugDNA.26023.1 | 7.37  | 6.92  | 1.77 | 0.41 | 1.36  | 0.732958 | 0.246585 | 0.897471 | 0.515917 |
| MmugDNA.26024.1.S1_at   | MmugDNA.26024.1 | 5.68  | 5.44  | 0.12 | 0.31 | 1.18  | 0.332907 | 0.216097 | 0.679346 | 0.489686 |
| MmugDNA.26025.1.S1_at   | MmugDNA.26025.1 | 7.2   | 7.15  | 0.48 | 0.25 | 1.03  | 0.859629 | 0.948387 | 0.9504   | 0.970565 |
| MmugDNA.26026.1.S1_at   | MmugDNA.26026.1 | 4.43  | 4.22  | 0.05 | 0.11 | 1.15  | 0.039315 | 0.139319 | 0.361498 | 0.412518 |
| MmugDNA.26027.1.S1_at   | MmugDNA.26027.1 | 11.04 | 10.67 | 0.83 | 0.05 | 1.29  | 0.818357 | 0.561676 | 0.934334 | 0.73751  |
| MmugDNA.26029.1.S1_at   | MmugDNA.26029.1 | 5.29  | 4.78  | 0.11 | 0.09 | 1.42  | 0.003386 | 0.000702 | 0.194985 | 0.04424  |
| MmugDNA.2603.1.S1_at    | MmugDNA.2603.1  | 3.44  | 3.34  | 0.1  | 0.05 | 1.07  | 0.230704 | 0.111852 | 0.598877 | 0.376915 |
| MmugDNA.26030.1.S1_at   | MmugDNA.26030.1 | 11.27 | 11.6  | 0.27 | 0.12 | -1.26 | 0.140974 | 0.089794 | 0.516345 | 0.34404  |
| MmugDNA.26031.1.S1_at   | MmugDNA.26031.1 | 4.76  | 4.72  | 0.19 | 0.17 | 1.03  | 0.937212 | 0.984765 | 0.978872 | 0.991423 |
| MmugDNA.26032.1.S1_at   | MmugDNA.26032.1 | 5.29  | 5.16  | 0.07 | 0.06 | 1.1   | 0.069876 | 0.508837 | 0.427911 | 0.703867 |
| MmugDNA.26033.1.S1_at   | MmugDNA.26033.1 | 10.34 | 9.83  | 0.31 | 0.29 | 1.43  | 0.121041 | 0.004586 | 0.494696 | 0.094513 |
| MmugDNA.26034.1.S1_at   | MmugDNA.26034.1 | 6.72  | 6.52  | 0.12 | 0.04 | 1.14  | 0.075624 | 0.07622  | 0.436722 | 0.321127 |
| MmugDNA.26035.1.S1_at   | MmugDNA.26035.1 | 4.24  | 4.28  | 0.47 | 0.62 | -1.03 | 0.991746 | 0.470661 | 0.996837 | 0.67895  |
| MmugDNA.26036.1.S1_at   | MmugDNA.26036.1 | 5.88  | 5.51  | 0.13 | 0.15 | 1.29  | 0.04226  | 0.02935  | 0.368858 | 0.213228 |
| MmugDNA.26037.1.S1_at   | MmugDNA.26037.1 | 4.98  | 4.99  | 0.06 | 0.22 | -1    | 0.413028 | 0.472261 | 0.732147 | 0.679922 |
| MmugDNA.26038.1.S1_at   | MmugDNA.26038.1 | 3.67  | 3.8   | 0.26 | 0.38 | -1.1  | 0.52369  | 0.721548 | 0.795656 | 0.838748 |
| MmugDNA.26039.1.S1_at   | MmugDNA.26039.1 | 6.06  | 5.76  | 0.17 | 0.16 | 1.23  | 0.141476 | 0.173576 | 0.516365 | 0.449956 |
| MmugDNA.2604.1.S1_at    | MmugDNA.2604.1  | 4.68  | 4.72  | 0.14 | 0.34 | -1.03 | 0.822803 | 0.075777 | 0.936094 | 0.320348 |
| MmugDNA.26040.1.S1_at   | MmugDNA.26040.1 | 6.92  | 7.02  | 0.35 | 0.02 | -1.07 | 0.591852 | 0.55803  | 0.833648 | 0.735346 |
| MmugDNA.26041.1.S1_at   | MmugDNA.26041.1 | 5.7   | 5.32  | 0.36 | 0.2  | 1.3   | 0.442146 | 0.536297 | 0.749866 | 0.721629 |
| MmugDNA.26042.1.S1_at   | MmugDNA.26042.1 | 6.69  | 6.71  | 0.24 | 0.1  | -1.01 | 0.775987 | 0.947137 | 0.916951 | 0.97002  |
| MmugDNA.26043.1.S1_at   | MmugDNA.26043.1 | 5.05  | 5.02  | 0.03 | 0.36 | 1.02  | 0.881885 | 0.770894 | 0.95911  | 0.866807 |
| MmugDNA.26046.1.S1_at   | MmugDNA.26046.1 | 4.46  | 4.28  | 0.17 | 0.1  | 1.13  | 0.469209 | 0.12459  | 0.765531 | 0.394995 |
| MmugDNA.26047.1.S1_at   | MmugDNA.26047.1 | 5.74  | 5.75  | 0.08 | 0.04 | -1    | 0.364361 | 0.634113 | 0.700536 | 0.784644 |
| MmugDNA.26048.1.S1_at   | MmugDNA.26048.1 | 3     | 2.98  | 0.2  | 0.25 | 1.01  | 0.542814 | 0.7255   | 0.805988 | 0.841043 |
| MmugDNA.26049.1.S1_at   | MmugDNA.26049.1 | 9.77  | 9.83  | 0.55 | 0.13 | -1.04 | 0.238958 | 0.204527 | 0.60548  | 0.478866 |
| MmugDNA.26050.1.S1_at   | MmugDNA.26050.1 | 5.55  | 5.56  | 0.29 | 0.06 | -1.01 | 0.6393   | 0.570568 | 0.856238 | 0.743175 |
| MmugDNA.26050.1.S1_s_at | MmugDNA.26050.1 | 5.83  | 5.76  | 0.33 | 0.11 | 1.05  | 0.598034 | 0.459695 | 0.836687 | 0.671948 |
| MmugDNA.26051.1.S1_at   | MmugDNA.26051.1 | 2.91  | 3.15  | 0.12 | 0.07 | -1.19 | 0.075282 | 0.227982 | 0.436118 | 0.500211 |
| MmugDNA.26052.1.S1_at   | MmugDNA.26052.1 | 6.34  | 6.23  | 0.13 | 0.05 | 1.08  | 0.23376  | 0.170639 | 0.60129  | 0.447219 |
| MmugDNA.26053.1.S1_at   | MmugDNA.26053.1 | 6.29  | 6.21  | 0.24 | 0    | 1.06  | 0.607517 | 0.878891 | 0.840946 | 0.930872 |
| MmugDNA.26054.1.S1_at   | MmugDNA.26054.1 | 6.37  | 6.21  | 0.04 | 0.05 | 1.12  | 0.013381 | 0.003907 | 0.268216 | 0.088806 |
| MmugDNA.26055.1.S1_at   | MmugDNA.26055.1 | 5.63  | 5.74  | 0.47 | 0.47 | -1.08 | 0.910447 | 0.346379 | 0.969634 | 0.59124  |
| MmugDNA.26056.1.S1_at   | MmugDNA.26056.1 | 5.5   | 5.45  | 0.14 | 0.06 | 1.03  | 0.221704 | 0.083276 | 0.591359 | 0.333372 |
| MmugDNA.26057.1.S1_at   | MmugDNA.26057.1 | 5.51  | 5.42  | 0.45 | 0.06 | 1.07  | 0.721469 | 0.680657 | 0.892029 | 0.813542 |
| MmugDNA.26058.1.S1_at   | MmugDNA.26058.1 | 3.79  | 3.84  | 0.66 | 0.44 | -1.03 | 0.873522 | 0.687503 | 0.956238 | 0.817606 |
| MmugDNA.26059.1.S1_at   | MmugDNA.26059.1 | 9.48  | 9.08  | 0.18 | 0.38 | 1.32  | 0.054682 | 0.002214 | 0.397122 | 0.069424 |
| MmugDNA.2606.1.S1_x_at  | MmugDNA.2606.1  | 3.05  | 2.98  | 0.15 | 0.07 | 1.05  | 0.777539 | 0.948841 | 0.917657 | 0.97077  |
| MmugDNA.26060.1.S1_at   | MmugDNA.26060.1 | 5.16  | 5.11  | 0.08 | 0.05 | 1.03  | 0.969919 | 0.34641  | 0.990053 | 0.591247 |
| MmugDNA.26061.1.S1_at   | MmugDNA.26061.1 | 7.55  | 7.44  | 1.35 | 0.39 | 1.08  | 0.766943 | 0.116038 | 0.912422 | 0.383257 |

|                         |                 |       |       |      |      |       |          |          |          |          |
|-------------------------|-----------------|-------|-------|------|------|-------|----------|----------|----------|----------|
| MmugDNA.26062.1.S1_at   | MmugDNA.26062.1 | 4.91  | 4.94  | 0.05 | 0.06 | -1.02 | 0.189019 | 0.230779 | 0.560718 | 0.502452 |
| MmugDNA.26063.1.S1_at   | MmugDNA.26063.1 | 3.97  | 3.89  | 0.04 | 0.1  | 1.06  | 0.257822 | 0.094038 | 0.621456 | 0.350662 |
| MmugDNA.26064.1.S1_at   | MmugDNA.26064.1 | 3.15  | 3.25  | 0.08 | 0.2  | -1.07 | 0.465909 | 0.421016 | 0.763256 | 0.644663 |
| MmugDNA.41422.1.S1_s_at | MmugDNA.41422.1 | 6.66  | 6.65  | 0.7  | 0.31 | 1     | 0.978633 | 0.365633 | 0.993045 | 0.605647 |
| MmugDNA.26066.1.S1_at   | MmugDNA.26066.1 | 6.22  | 4.01  | 1.03 | 0.48 | 4.65  | 0.068667 | 0.015909 | 0.426    | 0.160062 |
| MmugDNA.26067.1.S1_at   | MmugDNA.26067.1 | 5.45  | 5.09  | 0.3  | 0.13 | 1.28  | 0.341312 | 0.319284 | 0.685051 | 0.571722 |
| MmugDNA.26068.1.S1_at   | MmugDNA.26068.1 | 3.37  | 3.36  | 0.07 | 0.18 | 1     | 0.41681  | 0.722571 | 0.734537 | 0.839293 |
| MmugDNA.26070.1.S1_at   | MmugDNA.26070.1 | 8.11  | 8.05  | 0.95 | 0.26 | 1.04  | 0.756882 | 0.538934 | 0.908337 | 0.72339  |
| MmugDNA.26071.1.S1_s_at | MmugDNA.26071.1 | 7.82  | 8.4   | 0.28 | 0.24 | -1.49 | 0.078744 | 0.166916 | 0.441464 | 0.443394 |
| MmugDNA.26073.1.S1_at   | MmugDNA.26073.1 | 5.79  | 6.79  | 0.08 | 0.29 | -2    | 0.004518 | 0.003031 | 0.200561 | 0.080386 |
| MmugDNA.26074.1.S1_at   | MmugDNA.26074.1 | 5.68  | 5.64  | 0.42 | 0.11 | -1.03 | 0.436932 | 0.398339 | 0.746613 | 0.629355 |
| MmugDNA.26075.1.S1_at   | MmugDNA.26075.1 | 4.04  | 4     | 0.35 | 0.05 | 1.03  | 0.776823 | 0.953398 | 0.917412 | 0.97351  |
| MmugDNA.26078.1.S1_at   | MmugDNA.26078.1 | 7.22  | 7.28  | 1.17 | 0.26 | -1.05 | 0.824785 | 0.926109 | 0.937078 | 0.95813  |
| MmugDNA.26079.1.S1_at   | MmugDNA.26079.1 | 7.83  | 7.68  | 0.29 | 0.02 | 1.11  | 0.548675 | 0.41351  | 0.809852 | 0.639648 |
| MmugDNA.2608.1.S1_at    | MmugDNA.2608.1  | 5.87  | 5.67  | 0.24 | 0.02 | 1.15  | 0.148168 | 0.068589 | 0.522429 | 0.308466 |
| MmugDNA.26080.1.S1_at   | MmugDNA.26080.1 | 6.77  | 6.77  | 0.26 | 0.04 | 1     | 0.419908 | 0.830143 | 0.736584 | 0.902493 |
| MmugDNA.26081.1.S1_at   | MmugDNA.26081.1 | 5.43  | 5.44  | 0.11 | 0.08 | -1.01 | 0.619939 | 0.403251 | 0.846932 | 0.631996 |
| MmugDNA.26082.1.S1_at   | MmugDNA.26082.1 | 9.68  | 10.27 | 1.08 | 0.15 | -1.51 | 0.382593 | 0.37472  | 0.710805 | 0.613037 |
| MmugDNA.26083.1.S1_at   | MmugDNA.26083.1 | 2.89  | 2.81  | 0.05 | 0.04 | 1.06  | 0.086879 | 0.379452 | 0.454785 | 0.616406 |
| MmugDNA.26085.1.S1_at   | MmugDNA.26085.1 | 4.04  | 3.66  | 0.62 | 0.21 | 1.3   | 0.454227 | 0.681549 | 0.756657 | 0.814092 |
| MmugDNA.26087.1.S1_at   | MmugDNA.26087.1 | 5.5   | 5.43  | 0.13 | 0.1  | 1.05  | 0.18902  | 0.179922 | 0.560718 | 0.456453 |
| MmugDNA.26088.1.S1_at   | MmugDNA.26088.1 | 3.77  | 3.8   | 0.14 | 0.05 | -1.03 | 0.450763 | 0.62737  | 0.754859 | 0.780374 |
| MmugDNA.26089.1.S1_at   | MmugDNA.26089.1 | 3.45  | 3.46  | 0.1  | 0.11 | -1    | 0.45329  | 0.426325 | 0.756008 | 0.648491 |
| MmugDNA.2609.1.S1_at    | MmugDNA.2609.1  | 7.85  | 7.69  | 0.11 | 0.1  | 1.12  | 0.631037 | 0.007461 | 0.852361 | 0.115888 |
| MmugDNA.26090.1.S1_at   | MmugDNA.26090.1 | 4.21  | 4.09  | 0.1  | 0.08 | 1.09  | 0.165063 | 0.255611 | 0.537704 | 0.523608 |
| MmugDNA.26091.1.S1_at   | MmugDNA.26091.1 | 11.56 | 11.41 | 0.15 | 0.07 | 1.11  | 0.594067 | 0.149828 | 0.834583 | 0.424427 |
| MmugDNA.26092.1.S1_at   | MmugDNA.26092.1 | 3.97  | 4.17  | 0.31 | 0.23 | -1.15 | 0.823868 | 0.568452 | 0.936479 | 0.741979 |
| MmugDNA.26093.1.S1_at   | MmugDNA.26093.1 | 4.11  | 4.08  | 0.15 | 0.19 | 1.02  | 0.297745 | 0.546956 | 0.652791 | 0.728283 |
| MmugDNA.26096.1.S1_at   | MmugDNA.26096.1 | 4.62  | 4.42  | 0.24 | 0.16 | 1.15  | 0.533941 | 0.394442 | 0.801101 | 0.626982 |
| MmugDNA.26097.1.S1_at   | MmugDNA.26097.1 | 2.62  | 2.64  | 0.12 | 0.04 | -1.01 | 0.956185 | 0.674441 | 0.985451 | 0.809792 |
| MmugDNA.26098.1.S1_at   | MmugDNA.26098.1 | 5.17  | 4.75  | 0.52 | 0.21 | 1.34  | 0.283554 | 0.299606 | 0.641408 | 0.557956 |
| MmugDNA.26099.1.S1_at   | MmugDNA.26099.1 | 5.13  | 5.13  | 0.03 | 0.09 | 1     | 0.801753 | 0.897514 | 0.927739 | 0.941525 |
| MmugDNA.261.1.S1_at     | MmugDNA.261.1   | 4.16  | 4.36  | 0.38 | 0.02 | -1.15 | 0.924852 | 0.730224 | 0.974863 | 0.843882 |
| MmugDNA.2610.1.S1_at    | MmugDNA.2610.1  | 10.14 | 9.74  | 0.51 | 0.29 | 1.31  | 0.186168 | 0.040684 | 0.559096 | 0.246648 |
| MmugDNA.2610.1.S1_s_at  | MmugDNA.2610.1  | 8.49  | 7.71  | 0.64 | 0.21 | 1.71  | 0.17343  | 0.043877 | 0.546571 | 0.254088 |
| MmugDNA.26100.1.S1_at   | MmugDNA.26100.1 | 5.9   | 6.08  | 0.15 | 0.14 | -1.13 | 0.371047 | 0.241219 | 0.705285 | 0.511821 |
| MmugDNA.26101.1.S1_at   | MmugDNA.26101.1 | 9.18  | 8.7   | 0.69 | 0.58 | 1.4   | 0.686942 | 0.065942 | 0.877571 | 0.302161 |
| MmugDNA.26102.1.S1_at   | MmugDNA.26102.1 | 5.68  | 5.25  | 0.15 | 0.11 | 1.35  | 0.020322 | 0.046813 | 0.303816 | 0.261106 |
| MmugDNA.26103.1.S1_at   | MmugDNA.26103.1 | 6.25  | 6.36  | 0.05 | 0.07 | -1.08 | 0.292485 | 0.088403 | 0.648857 | 0.341877 |
| MmugDNA.26105.1.S1_at   | MmugDNA.26105.1 | 3.35  | 3.24  | 0.35 | 0.11 | 1.08  | 0.201211 | 0.499079 | 0.573015 | 0.697988 |
| MmugDNA.26106.1.S1_at   | MmugDNA.26106.1 | 6.24  | 6.37  | 0.21 | 0.07 | -1.09 | 0.194721 | 0.131868 | 0.565144 | 0.403891 |
| MmugDNA.26107.1.S1_s_at | MmugDNA.26107.1 | 14.59 | 14.66 | 0.02 | 0.01 | -1.05 | 0.022157 | 0.012499 | 0.31038  | 0.144302 |
| MmugDNA.26109.1.S1_at   | MmugDNA.26109.1 | 8.92  | 9.01  | 0.45 | 0.06 | -1.06 | 0.770357 | 0.853378 | 0.913946 | 0.916579 |

|                         |                 |       |       |      |      |       |          |          |          |          |
|-------------------------|-----------------|-------|-------|------|------|-------|----------|----------|----------|----------|
| MmugDNA.2611.1.S1_at    | MmugDNA.2611.1  | 7.27  | 7.21  | 0.07 | 0.04 | 1.04  | 0.194477 | 0.323729 | 0.565072 | 0.574587 |
| MmugDNA.26110.1.S1_at   | MmugDNA.26110.1 | 3.41  | 3.48  | 0.14 | 0.13 | -1.05 | 0.521236 | 0.90844  | 0.794371 | 0.948167 |
| MmugDNA.26111.1.S1_at   | MmugDNA.26111.1 | 6.56  | 7.26  | 0.51 | 0.15 | -1.62 | 0.25409  | 0.187042 | 0.618638 | 0.462965 |
| MmugDNA.26112.1.S1_at   | MmugDNA.26112.1 | 4.26  | 4.24  | 0.03 | 0.2  | 1.01  | 0.381313 | 0.08104  | 0.709967 | 0.329189 |
| MmugDNA.26113.1.S1_at   | MmugDNA.26113.1 | 5.55  | 5.51  | 0.03 | 0.08 | 1.03  | 0.38871  | 0.084664 | 0.715611 | 0.33618  |
| MmugDNA.26115.1.S1_at   | MmugDNA.26115.1 | 5.03  | 4.93  | 0.1  | 0.2  | 1.07  | 0.168206 | 0.322938 | 0.540823 | 0.574261 |
| MmugDNA.33058.1.S1_s_at | MmugDNA.33058.1 | 8.12  | 8.1   | 0.17 | 0.14 | 1.02  | 0.446736 | 0.378961 | 0.752819 | 0.615912 |
| MmugDNA.26117.1.S1_at   | MmugDNA.26117.1 | 5.48  | 5.42  | 0.17 | 0.24 | 1.04  | 0.743545 | 0.735151 | 0.902179 | 0.846742 |
| MmugDNA.26118.1.S1_at   | MmugDNA.26118.1 | 6.53  | 6.61  | 0.12 | 0.05 | -1.05 | 0.956965 | 0.262327 | 0.985736 | 0.528633 |
| MmugDNA.26119.1.S1_at   | MmugDNA.26119.1 | 7.5   | 7.15  | 0.41 | 0.11 | 1.27  | 0.219429 | 0.055864 | 0.588927 | 0.282172 |
| MmugDNA.26120.1.S1_at   | MmugDNA.26120.1 | 6.96  | 6.92  | 0.45 | 0.07 | -1.03 | 0.73563  | 0.804429 | 0.898879 | 0.887549 |
| MmugDNA.26121.1.S1_at   | MmugDNA.26121.1 | 4.62  | 4.02  | 0.22 | 0.13 | 1.51  | 0.01028  | 0.211629 | 0.246929 | 0.485681 |
| MmugDNA.26122.1.S1_at   | MmugDNA.26122.1 | 7.15  | 6.78  | 0.18 | 0.14 | 1.29  | 0.096772 | 0.218749 | 0.465459 | 0.492438 |
| MmugDNA.26123.1.S1_at   | MmugDNA.26123.1 | 6.81  | 5.66  | 0.38 | 1.14 | 2.22  | 0.69992  | 0.12444  | 0.883338 | 0.394865 |
| MmugDNA.26124.1.S1_at   | MmugDNA.26124.1 | 4.68  | 4.76  | 0.03 | 0.13 | -1.05 | 0.820655 | 0.866057 | 0.935289 | 0.923791 |
| MmugDNA.26125.1.S1_at   | MmugDNA.26125.1 | 7.62  | 6.7   | 0.64 | 0.16 | 1.89  | 0.107039 | 0.033309 | 0.47951  | 0.226131 |
| MmugDNA.26126.1.S1_at   | MmugDNA.26126.1 | 4.7   | 4.67  | 0.03 | 0.16 | 1.02  | 0.694485 | 0.761156 | 0.881128 | 0.86123  |
| MmugDNA.26127.1.S1_at   | MmugDNA.26127.1 | 5.86  | 5.75  | 0.09 | 0.05 | 1.08  | 0.042317 | 0.479323 | 0.368868 | 0.685088 |
| MmugDNA.26128.1.S1_at   | MmugDNA.26128.1 | 7.75  | 7.8   | 0.16 | 0.09 | -1.03 | 0.853621 | 0.092223 | 0.948299 | 0.347969 |
| MmugDNA.26129.1.S1_at   | MmugDNA.26129.1 | 5.79  | 5.76  | 0.14 | 0.03 | 1.02  | 0.815967 | 0.233144 | 0.933284 | 0.504458 |
| MmugDNA.2613.1.S1_at    | MmugDNA.2613.1  | 3.75  | 3.93  | 0.36 | 0.49 | -1.14 | 0.956419 | 0.265536 | 0.985548 | 0.531418 |
| MmugDNA.26130.1.S1_s_at | MmugDNA.26130.1 | 7.31  | 6.97  | 0.16 | 0.04 | 1.27  | 0.062669 | 0.041765 | 0.413501 | 0.248947 |
| MmugDNA.26131.1.S1_at   | MmugDNA.26131.1 | 8.25  | 8.42  | 0.83 | 0.23 | -1.13 | 0.628667 | 0.372895 | 0.851223 | 0.611752 |
| MmugDNA.26133.1.S1_at   | MmugDNA.26133.1 | 5.16  | 5.46  | 0.15 | 0.33 | -1.23 | 0.077929 | 0.351684 | 0.439987 | 0.595164 |
| MmugDNA.26134.1.S1_at   | MmugDNA.26134.1 | 5.15  | 4.92  | 0.13 | 0.08 | 1.18  | 0.039419 | 0.01066  | 0.361846 | 0.134819 |
| MmugDNA.26135.1.S1_at   | MmugDNA.26135.1 | 3.08  | 3.04  | 0.04 | 0.09 | 1.03  | 0.265233 | 0.344008 | 0.626397 | 0.58962  |
| MmugDNA.26136.1.S1_s_at | MmugDNA.26136.1 | 8.6   | 8.02  | 0.47 | 0.22 | 1.5   | 0.120331 | 0.191566 | 0.49361  | 0.466896 |
| MmugDNA.26137.1.S1_at   | MmugDNA.26137.1 | 3.23  | 3.29  | 0.09 | 0.1  | -1.04 | 0.172379 | 0.180684 | 0.545696 | 0.457245 |
| MmugDNA.26138.1.S1_at   | MmugDNA.26138.1 | 3.01  | 3.2   | 0.1  | 0.06 | -1.14 | 0.075321 | 0.684984 | 0.436226 | 0.816278 |
| MmugDNA.26139.1.S1_at   | MmugDNA.26139.1 | 6.85  | 6.7   | 0.53 | 0.57 | 1.11  | 0.876461 | 0.811401 | 0.956921 | 0.891158 |
| MmugDNA.26141.1.S1_at   | MmugDNA.26141.1 | 3.39  | 3.32  | 0.2  | 0.15 | 1.05  | 0.522257 | 0.168677 | 0.795143 | 0.445352 |
| MmugDNA.26142.1.S1_at   | MmugDNA.26142.1 | 8.91  | 9.15  | 0.23 | 0.19 | -1.18 | 0.075896 | 0.058579 | 0.436934 | 0.288743 |
| MmugDNA.26143.1.S1_at   | MmugDNA.26143.1 | 4.82  | 5.33  | 0.64 | 0.3  | -1.43 | 0.967343 | 0.155857 | 0.989256 | 0.431223 |
| MmugDNA.26144.1.S1_at   | MmugDNA.26144.1 | 2.92  | 3.04  | 0.03 | 0.15 | -1.08 | 0.075237 | 0.065212 | 0.436118 | 0.301239 |
| MmugDNA.26145.1.S1_at   | MmugDNA.26145.1 | 7.72  | 7.67  | 0.75 | 0.34 | 1.03  | 0.894434 | 0.979683 | 0.963846 | 0.989107 |
| MmugDNA.26146.1.S1_at   | MmugDNA.26146.1 | 8.53  | 8.22  | 0.39 | 0.03 | 1.23  | 0.227278 | 0.378854 | 0.596459 | 0.615818 |
| MmugDNA.26147.1.S1_at   | MmugDNA.26147.1 | 4.45  | 4.52  | 0.18 | 0.02 | -1.05 | 0.899337 | 0.269963 | 0.965794 | 0.535239 |
| MmugDNA.2615.1.S1_at    | MmugDNA.2615.1  | 10.2  | 10.12 | 0.09 | 0    | 1.05  | 0.184042 | 0.135215 | 0.55695  | 0.407277 |
| MmugDNA.26152.1.S1_at   | MmugDNA.26152.1 | 4.82  | 4.63  | 0.09 | 0.28 | 1.13  | 0.248185 | 0.191112 | 0.613701 | 0.466378 |
| MmugDNA.26153.1.S1_at   | MmugDNA.26153.1 | 5.89  | 5.96  | 0.83 | 0.19 | -1.05 | 0.99355  | 0.957202 | 0.997507 | 0.975789 |
| MmugDNA.26154.1.S1_at   | MmugDNA.26154.1 | 7.6   | 7.38  | 0.09 | 0.12 | 1.17  | 0.06067  | 0.38889  | 0.408583 | 0.623208 |
| MmugDNA.26156.1.S1_at   | MmugDNA.26156.1 | 10.04 | 10.21 | 0.57 | 0.23 | -1.12 | 0.836033 | 0.967729 | 0.941202 | 0.982165 |
| MmugDNA.26157.1.S1_at   | MmugDNA.26157.1 | 5.58  | 5.46  | 0.2  | 0.14 | 1.09  | 0.086487 | 0.039148 | 0.454228 | 0.243072 |

|                         |                 |       |       |      |      |       |          |          |          |          |
|-------------------------|-----------------|-------|-------|------|------|-------|----------|----------|----------|----------|
| MmugDNA.26159.1.S1_at   | MmugDNA.26159.1 | 7.33  | 7.35  | 0.76 | 0.58 | -1.02 | 0.704224 | 0.320538 | 0.885072 | 0.572648 |
| MmugDNA.2616.1.S1_at    | MmugDNA.2616.1  | 2.76  | 2.72  | 0.07 | 0.1  | 1.03  | 0.305291 | 0.236675 | 0.65878  | 0.507459 |
| MmugDNA.26160.1.S1_at   | MmugDNA.26160.1 | 11.62 | 11.43 | 0.28 | 0.07 | 1.14  | 0.574001 | 0.33194  | 0.823819 | 0.580503 |
| MmugDNA.26161.1.S1_at   | MmugDNA.26161.1 | 5.7   | 5.8   | 0.09 | 0.39 | -1.08 | 0.62389  | 0.252937 | 0.84841  | 0.521261 |
| MmugDNA.26162.1.S1_at   | MmugDNA.26162.1 | 7.12  | 7.16  | 0.04 | 0.09 | -1.03 | 0.735953 | 0.98497  | 0.898982 | 0.991478 |
| MmugDNA.26164.1.S1_at   | MmugDNA.26164.1 | 11.88 | 11.83 | 0.14 | 0.16 | 1.03  | 0.285179 | 0.008783 | 0.643069 | 0.124066 |
| MmugDNA.26166.1.S1_at   | MmugDNA.26166.1 | 7.14  | 8     | 0.63 | 0.19 | -1.81 | 0.183037 | 0.130516 | 0.555915 | 0.402373 |
| MmugDNA.26167.1.S1_at   | MmugDNA.26167.1 | 4.7   | 4.03  | 0.06 | 0.49 | 1.59  | 0.207469 | 0.094677 | 0.578993 | 0.351481 |
| MmugDNA.26168.1.S1_at   | MmugDNA.26168.1 | 5.25  | 5.17  | 0.13 | 0.09 | 1.06  | 0.577801 | 0.406779 | 0.825932 | 0.634497 |
| MmugDNA.2617.1.S1_at    | MmugDNA.2617.1  | 6.07  | 5.96  | 0.07 | 0.02 | 1.07  | 0.111102 | 0.415472 | 0.484303 | 0.64091  |
| MmugDNA.26172.1.S1_at   | MmugDNA.26172.1 | 10.29 | 10.36 | 0.21 | 0.08 | -1.05 | 0.599767 | 0.835035 | 0.837539 | 0.905549 |
| MmugDNA.26173.1.S1_at   | MmugDNA.26173.1 | 5.21  | 5.13  | 0.14 | 0.2  | 1.06  | 0.600424 | 0.423833 | 0.837867 | 0.646547 |
| MmugDNA.26175.1.S1_s_at | MmugDNA.26175.1 | 13.38 | 13.42 | 0.61 | 0.02 | -1.03 | 0.918871 | 0.236109 | 0.972281 | 0.507179 |
| MmugDNA.26176.1.S1_at   | MmugDNA.26176.1 | 9.19  | 8.71  | 0.56 | 0.12 | 1.39  | 0.361389 | 0.516206 | 0.698618 | 0.708757 |
| MmugDNA.26178.1.S1_at   | MmugDNA.26178.1 | 5.77  | 5.67  | 0.19 | 0.14 | 1.07  | 0.42946  | 0.489122 | 0.742163 | 0.691616 |
| MmugDNA.2618.1.S1_at    | MmugDNA.2618.1  | 5.46  | 5.52  | 0.32 | 0.23 | -1.04 | 0.949336 | 0.472133 | 0.982855 | 0.679868 |
| MmugDNA.26180.1.S1_at   | MmugDNA.26180.1 | 7.36  | 8.52  | 0.35 | 0.16 | -2.23 | 0.012016 | 0.010665 | 0.258642 | 0.13482  |
| MmugDNA.26181.1.S1_at   | MmugDNA.26181.1 | 4.99  | 5.23  | 0.34 | 0.41 | -1.18 | 0.825034 | 0.639824 | 0.937107 | 0.788487 |
| MmugDNA.26182.1.S1_at   | MmugDNA.26182.1 | 8.08  | 7.82  | 0.35 | 0.19 | 1.19  | 0.373271 | 0.887467 | 0.705567 | 0.935867 |
| MmugDNA.26183.1.S1_at   | MmugDNA.26183.1 | 6.41  | 6.61  | 0.63 | 0.18 | -1.15 | 0.161253 | 0.193057 | 0.534529 | 0.468554 |
| MmugDNA.26184.1.S1_at   | MmugDNA.26184.1 | 4.72  | 4.65  | 0.16 | 0.06 | 1.05  | 0.192817 | 0.283684 | 0.563577 | 0.546118 |
| MmugDNA.26185.1.S1_at   | MmugDNA.26185.1 | 6.59  | 6.67  | 0.07 | 0.04 | -1.05 | 0.357902 | 0.035563 | 0.695993 | 0.232813 |
| MmugDNA.26186.1.S1_at   | MmugDNA.26186.1 | 8.64  | 7.64  | 0.86 | 0.16 | 2     | 0.147024 | 0.034854 | 0.521545 | 0.230897 |
| MmugDNA.26189.1.S1_at   | MmugDNA.26189.1 | 11.91 | 12.02 | 0.32 | 0.26 | -1.08 | 0.334877 | 0.128432 | 0.68066  | 0.399714 |
| MmugDNA.2619.1.S1_at    | MmugDNA.2619.1  | 7.1   | 7.02  | 0.24 | 0.26 | 1.05  | 0.172999 | 0.284152 | 0.546137 | 0.546362 |
| MmugDNA.26190.1.S1_at   | MmugDNA.26190.1 | 3.65  | 3.44  | 0.01 | 0.18 | 1.16  | 0.071365 | 0.090904 | 0.43082  | 0.345537 |
| MmugDNA.26191.1.S1_at   | MmugDNA.26191.1 | 8.35  | 7.94  | 0.33 | 0.01 | 1.33  | 0.034934 | 0.0153   | 0.350632 | 0.157071 |
| MmugDNA.26192.1.S1_at   | MmugDNA.26192.1 | 4.6   | 4.47  | 0.07 | 0.07 | 1.09  | 0.090754 | 0.119355 | 0.458873 | 0.387887 |
| MmugDNA.26194.1.S1_at   | MmugDNA.26194.1 | 4.85  | 4.86  | 0.16 | 0.68 | -1.01 | 0.635147 | 0.641444 | 0.854522 | 0.78954  |
| MmugDNA.26196.1.S1_at   | MmugDNA.26196.1 | 5.55  | 5.25  | 0.31 | 0.14 | 1.23  | 0.494236 | 0.639625 | 0.779353 | 0.788365 |
| MmugDNA.26197.1.S1_at   | MmugDNA.26197.1 | 3.32  | 3.34  | 0.06 | 0.11 | -1.01 | 0.457672 | 0.410296 | 0.758364 | 0.637216 |
| MmugDNA.26198.1.S1_at   | MmugDNA.26198.1 | 4.84  | 4.84  | 0.05 | 0.01 | 1     | 0.502497 | 0.700968 | 0.783683 | 0.826604 |
| MmugDNA.26199.1.S1_at   | MmugDNA.26199.1 | 6.01  | 5.99  | 0.17 | 0.08 | 1.01  | 0.971941 | 0.713395 | 0.990867 | 0.833698 |
| MmugDNA.26200.1.S1_at   | MmugDNA.26200.1 | 4.4   | 4.56  | 0.16 | 0.15 | -1.12 | 0.539052 | 0.598792 | 0.803644 | 0.761124 |
| MmugDNA.26201.1.S1_at   | MmugDNA.26201.1 | 4.96  | 4.9   | 0.09 | 0    | 1.04  | 0.342583 | 0.191479 | 0.685984 | 0.466821 |
| MmugDNA.26202.1.S1_at   | MmugDNA.26202.1 | 3.93  | 3.71  | 0.22 | 0.24 | 1.16  | 0.431008 | 0.590892 | 0.74323  | 0.756503 |
| MmugDNA.26203.1.S1_at   | MmugDNA.26203.1 | 3.37  | 3.37  | 0.46 | 0.13 | 1     | 0.280383 | 0.417668 | 0.639232 | 0.642365 |
| MmugDNA.26205.1.S1_at   | MmugDNA.26205.1 | 4.8   | 4.84  | 0.34 | 0.21 | -1.02 | 0.577094 | 0.548211 | 0.825346 | 0.728958 |
| MmugDNA.26206.1.S1_at   | MmugDNA.26206.1 | 6.24  | 6.42  | 0.2  | 0.18 | -1.13 | 0.356798 | 0.001178 | 0.695276 | 0.05381  |
| MmugDNA.26207.1.S1_at   | MmugDNA.26207.1 | 5.28  | 5.24  | 0.25 | 0.07 | 1.03  | 0.819537 | 0.891273 | 0.934954 | 0.938047 |
| MmugDNA.26208.1.S1_at   | MmugDNA.26208.1 | 9.18  | 9.24  | 0.18 | 0.05 | -1.04 | 0.276406 | 0.576403 | 0.635968 | 0.747202 |
| MmugDNA.26210.1.S1_at   | MmugDNA.26210.1 | 6.33  | 6.19  | 0.13 | 0.03 | 1.1   | 0.135914 | 0.070304 | 0.510454 | 0.311377 |
| MmugDNA.26211.1.S1_at   | MmugDNA.26211.1 | 3.68  | 3.61  | 0.14 | 0.14 | 1.05  | 0.439929 | 0.232584 | 0.748282 | 0.504359 |

|                         |                 |       |       |      |      |       |          |          |          |          |
|-------------------------|-----------------|-------|-------|------|------|-------|----------|----------|----------|----------|
| MmugDNA.26213.1.S1_s_at | MmugDNA.26213.1 | 5.71  | 5.94  | 0.25 | 0.23 | -1.18 | 0.547751 | 0.01631  | 0.809225 | 0.161818 |
| MmugDNA.26214.1.S1_at   | MmugDNA.26214.1 | 13.03 | 13.28 | 0.24 | 0.14 | -1.19 | 0.342965 | 0.126397 | 0.686205 | 0.396917 |
| MmugDNA.26215.1.S1_at   | MmugDNA.26215.1 | 5.13  | 5.07  | 0.02 | 0.16 | 1.04  | 0.406326 | 0.780641 | 0.727915 | 0.872726 |
| MmugDNA.26216.1.S1_at   | MmugDNA.26216.1 | 5.2   | 5.22  | 0.24 | 0.1  | -1.01 | 0.305305 | 0.639155 | 0.65878  | 0.788117 |
| MmugDNA.26217.1.S1_at   | MmugDNA.26217.1 | 4.1   | 3.88  | 0.12 | 0.12 | 1.17  | 0.080832 | 0.098447 | 0.444846 | 0.356564 |
| MmugDNA.26218.1.S1_at   | MmugDNA.26218.1 | 5.98  | 6.22  | 0.38 | 0.3  | -1.18 | 0.224346 | 0.471175 | 0.593546 | 0.679213 |
| MmugDNA.26220.1.S1_at   | MmugDNA.26220.1 | 10.86 | 11.9  | 0.29 | 0.11 | -2.05 | 0.002916 | 0.001391 | 0.188421 | 0.057005 |
| MmugDNA.26221.1.S1_at   | MmugDNA.26221.1 | 5.98  | 5.85  | 0.11 | 0.17 | 1.09  | 0.166598 | 0.398685 | 0.539239 | 0.629458 |
| MmugDNA.26222.1.S1_at   | MmugDNA.26222.1 | 6.67  | 7.25  | 0.54 | 0.14 | -1.49 | 0.444916 | 0.158771 | 0.751669 | 0.434869 |
| MmugDNA.26223.1.S1_at   | MmugDNA.26223.1 | 3.31  | 3.35  | 0.11 | 0.19 | -1.02 | 0.667684 | 0.743165 | 0.868672 | 0.851188 |
| MmugDNA.26224.1.S1_at   | MmugDNA.26224.1 | 3.1   | 3.1   | 0.08 | 0.12 | -1.01 | 0.213163 | 0.439581 | 0.583803 | 0.658313 |
| MmugDNA.26224.1.S1_s_at | MmugDNA.26224.1 | 3.5   | 3.6   | 0.06 | 0.2  | -1.06 | 0.16773  | 0.18505  | 0.540411 | 0.460891 |
| MmugDNA.26225.1.S1_at   | MmugDNA.26225.1 | 7.83  | 8.03  | 2.96 | 0.2  | -1.15 | 0.632371 | 0.308669 | 0.852926 | 0.56461  |
| MmugDNA.26227.1.S1_at   | MmugDNA.26227.1 | 6.08  | 6.5   | 0.28 | 0.34 | -1.34 | 0.291974 | 0.450732 | 0.648347 | 0.665844 |
| MmugDNA.26228.1.S1_at   | MmugDNA.26228.1 | 3.17  | 3.06  | 0.15 | 0    | 1.08  | 0.288112 | 0.570876 | 0.645269 | 0.743422 |
| MmugDNA.26229.1.S1_at   | MmugDNA.26229.1 | 12.42 | 12.11 | 0.09 | 0.05 | 1.24  | 0.013433 | 0.004498 | 0.268462 | 0.093593 |
| MmugDNA.26230.1.S1_at   | MmugDNA.26230.1 | 5.84  | 6.51  | 0.35 | 0.21 | -1.6  | 0.11647  | 0.074016 | 0.489676 | 0.317579 |
| MmugDNA.26231.1.S1_at   | MmugDNA.26231.1 | 5.7   | 6.48  | 0.58 | 0.13 | -1.72 | 0.114788 | 0.146512 | 0.487957 | 0.420576 |
| MmugDNA.26232.1.S1_at   | MmugDNA.26232.1 | 3.64  | 3.74  | 0.13 | 0.12 | -1.08 | 0.831006 | 0.403269 | 0.939562 | 0.631998 |
| MmugDNA.26233.1.S1_at   | MmugDNA.26233.1 | 7.4   | 7.83  | 0.05 | 0.09 | -1.35 | 0.002381 | 0.17871  | 0.177065 | 0.454995 |
| MmugDNA.26234.1.S1_at   | MmugDNA.26234.1 | 3.54  | 3.53  | 0.3  | 0.18 | 1.01  | 0.522152 | 0.680822 | 0.795102 | 0.813597 |
| MmugDNA.26235.1.S1_at   | MmugDNA.26235.1 | 3.75  | 3.9   | 0.03 | 0.09 | -1.11 | 0.225861 | 0.10938  | 0.594935 | 0.373156 |
| MmugDNA.26236.1.S1_at   | MmugDNA.26236.1 | 4.31  | 4.5   | 0.16 | 0.18 | -1.15 | 0.158617 | 0.114965 | 0.531588 | 0.381719 |
| MmugDNA.26237.1.S1_at   | MmugDNA.26237.1 | 5.15  | 5.05  | 0.15 | 0.28 | 1.07  | 0.75925  | 0.705618 | 0.909584 | 0.829349 |
| MmugDNA.26238.1.S1_at   | MmugDNA.26238.1 | 5.54  | 5.31  | 0.13 | 0.02 | 1.18  | 0.036848 | 0.005066 | 0.355992 | 0.09907  |
| MmugDNA.26239.1.S1_at   | MmugDNA.26239.1 | 4.37  | 4.2   | 0.18 | 0.01 | 1.12  | 0.588766 | 0.625697 | 0.831968 | 0.779265 |
| MmugDNA.26240.1.S1_at   | MmugDNA.26240.1 | 4.42  | 5.19  | 0.32 | 0.27 | -1.7  | 0.037303 | 0.176056 | 0.357061 | 0.452526 |
| MmugDNA.26241.1.S1_at   | MmugDNA.26241.1 | 9.49  | 9.46  | 0.18 | 0.02 | 1.02  | 0.563825 | 0.021614 | 0.818386 | 0.184324 |
| MmugDNA.26241.1.S1_s_at | MmugDNA.26241.1 | 8.14  | 8.33  | 0.3  | 0.06 | -1.15 | 0.880329 | 0.204202 | 0.95859  | 0.478507 |
| MmugDNA.26242.1.S1_at   | MmugDNA.26242.1 | 4.62  | 4.68  | 0.16 | 0.22 | -1.04 | 0.717681 | 0.541356 | 0.890489 | 0.724874 |
| MmugDNA.26244.1.S1_at   | MmugDNA.26244.1 | 10.91 | 10.69 | 0.6  | 0.16 | 1.17  | 0.935491 | 0.211035 | 0.978197 | 0.485047 |
| MmugDNA.26245.1.S1_at   | MmugDNA.26245.1 | 8.77  | 9.59  | 0.83 | 0.27 | -1.77 | 0.512807 | 0.106301 | 0.789522 | 0.368766 |
| MmugDNA.26246.1.S1_at   | MmugDNA.26246.1 | 7.5   | 7.53  | 0.67 | 0.09 | -1.02 | 0.948347 | 0.203441 | 0.982226 | 0.477634 |
| MmugDNA.521.1.S1_s_at   | MmugDNA.521.1   | 9.26  | 10.34 | 0.15 | 0.21 | -2.11 | 0.003025 | 0.009578 | 0.19086  | 0.129001 |
| MmugDNA.26248.1.S1_at   | MmugDNA.26248.1 | 3.22  | 3.2   | 0.14 | 0.17 | 1.02  | 0.899334 | 0.732    | 0.965794 | 0.844751 |
| MmugDNA.26249.1.S1_at   | MmugDNA.26249.1 | 5.22  | 5.52  | 0.58 | 0.38 | -1.23 | 0.23864  | 0.099729 | 0.605393 | 0.358285 |
| MmugDNA.2625.1.S1_at    | MmugDNA.2625.1  | 3.38  | 3.71  | 0.12 | 0.3  | -1.26 | 0.300679 | 0.075138 | 0.655174 | 0.319331 |
| MmugDNA.26250.1.S1_at   | MmugDNA.26250.1 | 7.67  | 8.15  | 0.25 | 0.13 | -1.39 | 0.087688 | 0.09119  | 0.455349 | 0.346097 |
| MmugDNA.26252.1.S1_at   | MmugDNA.26252.1 | 8.39  | 8.17  | 0.11 | 0.07 | 1.16  | 0.057637 | 0.106425 | 0.402592 | 0.368978 |
| MmugDNA.26252.1.S1_s_at | MmugDNA.26252.1 | 8.35  | 8.08  | 0.24 | 0.04 | 1.2   | 0.326591 | 0.366381 | 0.674163 | 0.606087 |
| MmugDNA.26253.1.S1_at   | MmugDNA.26253.1 | 8.06  | 7.51  | 0.33 | 0.24 | 1.47  | 0.108314 | 0.009995 | 0.480733 | 0.131262 |
| MmugDNA.26254.1.S1_at   | MmugDNA.26254.1 | 9.99  | 8.69  | 1.18 | 0.27 | 2.46  | 0.204053 | 0.03108  | 0.5753   | 0.218117 |
| MmugDNA.26255.1.S1_at   | MmugDNA.26255.1 | 12.58 | 12.52 | 0.16 | 0.02 | 1.04  | 0.169387 | 0.377666 | 0.542311 | 0.615086 |

|                         |                 |       |       |      |      |       |          |          |          |          |
|-------------------------|-----------------|-------|-------|------|------|-------|----------|----------|----------|----------|
| MmugDNA.26257.1.S1_at   | MmugDNA.26257.1 | 8.5   | 8.31  | 0.37 | 0.24 | 1.14  | 0.606925 | 0.02426  | 0.840738 | 0.194952 |
| MmugDNA.26258.1.S1_at   | MmugDNA.26258.1 | 6.1   | 6.02  | 0.14 | 0.11 | 1.06  | 0.19037  | 0.310955 | 0.561665 | 0.565951 |
| MmugDNA.26259.1.S1_at   | MmugDNA.26259.1 | 3.62  | 3.6   | 0.07 | 0.17 | 1.02  | 0.984173 | 0.165136 | 0.995199 | 0.441373 |
| MmugDNA.2626.1.S1_at    | MmugDNA.2626.1  | 7.77  | 7.64  | 0.1  | 0.07 | 1.09  | 0.151403 | 0.144095 | 0.524547 | 0.417974 |
| MmugDNA.26260.1.S1_at   | MmugDNA.26260.1 | 3.9   | 4.02  | 0.26 | 0.07 | -1.09 | 0.918804 | 0.066665 | 0.972261 | 0.303999 |
| MmugDNA.26262.1.S1_at   | MmugDNA.26262.1 | 8.19  | 8.36  | 0.29 | 0.03 | -1.13 | 0.112263 | 0.009983 | 0.485461 | 0.131219 |
| MmugDNA.26263.1.S1_at   | MmugDNA.26263.1 | 6.13  | 5.24  | 0.6  | 1.16 | 1.84  | 0.822604 | 0.964744 | 0.936084 | 0.980422 |
| MmugDNA.26265.1.S1_at   | MmugDNA.26265.1 | 6.64  | 7.03  | 0.48 | 0.53 | -1.31 | 0.856866 | 0.128957 | 0.949589 | 0.400429 |
| MmugDNA.26266.1.S1_at   | MmugDNA.26266.1 | 10.92 | 11.39 | 0.38 | 0.06 | -1.39 | 0.27812  | 0.207542 | 0.637354 | 0.48185  |
| MmugDNA.26266.1.S1_s_at | MmugDNA.26266.1 | 9.58  | 9.96  | 0.37 | 0.1  | -1.3  | 0.461838 | 0.270573 | 0.761308 | 0.535837 |
| MmugDNA.26267.1.S1_at   | MmugDNA.26267.1 | 3.59  | 3.13  | 0.21 | 0.25 | -1.38 | 0.087063 | 0.350866 | 0.454785 | 0.594581 |
| MmugDNA.26268.1.S1_at   | MmugDNA.26268.1 | 5.71  | 5.86  | 0.14 | 0.22 | -1.11 | 0.322982 | 0.358782 | 0.671853 | 0.600242 |
| MmugDNA.26269.1.S1_at   | MmugDNA.26269.1 | 7.45  | 7.57  | 0.07 | 0.13 | -1.09 | 0.836581 | 0.011977 | 0.941274 | 0.14165  |
| MmugDNA.2627.1.S1_at    | MmugDNA.2627.1  | 5.57  | 5.46  | 0.32 | 0.25 | 1.08  | 0.53131  | 0.532367 | 0.799582 | 0.719017 |
| MmugDNA.26270.1.S1_at   | MmugDNA.26270.1 | 3.47  | 3.56  | 0.06 | 0.13 | -1.06 | 0.781005 | 0.64217  | 0.919366 | 0.790047 |
| MmugDNA.26271.1.S1_at   | MmugDNA.26271.1 | 4.23  | 4.41  | 0.24 | 0.1  | -1.13 | 0.338651 | 0.174001 | 0.683208 | 0.450247 |
| MmugDNA.26273.1.S1_at   | MmugDNA.26273.1 | 10.3  | 9.81  | 0.56 | 0.04 | 1.41  | 0.455872 | 0.63114  | 0.75759  | 0.782688 |
| MmugDNA.26274.1.S1_at   | MmugDNA.26274.1 | 5.21  | 5.13  | 0.35 | 0.02 | 1.05  | 0.847575 | 0.960253 | 0.946572 | 0.977459 |
| MmugDNA.26275.1.S1_at   | MmugDNA.26275.1 | 6.53  | 6.15  | 0.71 | 0.21 | 1.3   | 0.52505  | 0.4654   | 0.796179 | 0.675748 |
| MmugDNA.26276.1.S1_at   | MmugDNA.26276.1 | 5.92  | 5.9   | 0.1  | 0.06 | 1.01  | 0.490499 | 0.796145 | 0.777122 | 0.882501 |
| MmugDNA.26277.1.S1_at   | MmugDNA.26277.1 | 5.85  | 6.12  | 0.29 | 0.05 | -1.21 | 0.69133  | 0.101754 | 0.879786 | 0.361627 |
| MmugDNA.26278.1.S1_at   | MmugDNA.26278.1 | 7.14  | 7.16  | 0.13 | 0.1  | -1.01 | 0.331966 | 0.470259 | 0.678409 | 0.678575 |
| MmugDNA.26279.1.S1_at   | MmugDNA.26279.1 | 5.19  | 4.72  | 0.37 | 0.11 | 1.38  | 0.227332 | 0.355594 | 0.596459 | 0.597844 |
| MmugDNA.2628.1.S1_at    | MmugDNA.2628.1  | 6.07  | 6.04  | 0.14 | 0.26 | 1.02  | 0.591831 | 0.823595 | 0.833648 | 0.898664 |
| MmugDNA.26280.1.S1_at   | MmugDNA.26280.1 | 3.4   | 3.42  | 0.07 | 0.09 | -1.01 | 0.431058 | 0.012466 | 0.74323  | 0.14417  |
| MmugDNA.26282.1.S1_at   | MmugDNA.26282.1 | 4.46  | 4.08  | 0.68 | 0.11 | 1.3   | 0.183846 | 0.345472 | 0.556716 | 0.590746 |
| MmugDNA.26283.1.S1_at   | MmugDNA.26283.1 | 4.95  | 4.95  | 0.05 | 0.08 | 1     | 0.852207 | 0.973062 | 0.947936 | 0.985401 |
| MmugDNA.26284.1.S1_at   | MmugDNA.26284.1 | 5.4   | 5.4   | 0.09 | 0.16 | 1.01  | 0.223532 | 0.370336 | 0.592569 | 0.609407 |
| MmugDNA.26285.1.S1_at   | MmugDNA.26285.1 | 9.32  | 8.9   | 0.45 | 0.29 | 1.34  | 0.13034  | 0.012846 | 0.504682 | 0.14598  |
| MmugDNA.26287.1.S1_at   | MmugDNA.26287.1 | 4.99  | 5.15  | 0.05 | 0.19 | -1.11 | 0.434135 | 0.386781 | 0.744882 | 0.621895 |
| MmugDNA.2629.1.S1_at    | MmugDNA.2629.1  | 4.81  | 4.73  | 0.1  | 0.08 | 1.06  | 0.217126 | 0.323027 | 0.587097 | 0.57432  |
| MmugDNA.26290.1.S1_at   | MmugDNA.26290.1 | 4.99  | 5.4   | 0.55 | 0.15 | -1.33 | 0.754529 | 0.939455 | 0.907353 | 0.965611 |
| MmugDNA.26291.1.S1_at   | MmugDNA.26291.1 | 6.34  | 5.66  | 0.83 | 0.25 | 1.6   | 0.215781 | 0.039428 | 0.585825 | 0.243529 |
| MmugDNA.26292.1.S1_at   | MmugDNA.26292.1 | 7.77  | 6.89  | 0.64 | 0.26 | 1.84  | 0.071428 | 0.040856 | 0.431049 | 0.247004 |
| MmugDNA.26293.1.S1_at   | MmugDNA.26293.1 | 3.82  | 3.77  | 0.15 | 0.02 | 1.04  | 0.81528  | 0.862741 | 0.933137 | 0.921968 |
| MmugDNA.26294.1.S1_at   | MmugDNA.26294.1 | 4.58  | 4.48  | 0.19 | 0.16 | 1.07  | 0.539177 | 0.315053 | 0.803644 | 0.568808 |
| MmugDNA.26295.1.S1_at   | MmugDNA.26295.1 | 3.67  | 3.66  | 0.1  | 0.07 | 1.01  | 0.733744 | 0.984643 | 0.897902 | 0.991346 |
| MmugDNA.26296.1.S1_at   | MmugDNA.26296.1 | 9.22  | 9.1   | 0.19 | 0.04 | 1.09  | 0.320657 | 0.823703 | 0.669445 | 0.898726 |
| MmugDNA.26297.1.S1_at   | MmugDNA.26297.1 | 5.76  | 6.44  | 0.16 | 0.26 | -1.6  | 0.023996 | 0.323427 | 0.317529 | 0.574466 |
| MmugDNA.26299.1.S1_at   | MmugDNA.26299.1 | 6.63  | 6.5   | 0.18 | 0.04 | 1.1   | 0.775285 | 0.89157  | 0.916675 | 0.938242 |
| MmugDNA.263.1.S1_at     | MmugDNA.263.1   | 5.38  | 5.25  | 0.17 | 0.11 | 1.1   | 0.652778 | 0.814422 | 0.86202  | 0.892923 |
| MmugDNA.2630.1.S1_at    | MmugDNA.2630.1  | 5.17  | 5.15  | 0.07 | 0.27 | 1.02  | 0.493224 | 0.658085 | 0.778778 | 0.800181 |
| MmugDNA.26300.1.S1_at   | MmugDNA.26300.1 | 5.49  | 5.63  | 0.12 | 0.17 | -1.11 | 0.605175 | 0.511861 | 0.839833 | 0.705797 |

|                         |                 |       |       |      |      |       |          |          |          |          |
|-------------------------|-----------------|-------|-------|------|------|-------|----------|----------|----------|----------|
| MmugDNA.26301.1.S1_s_at | MmugDNA.26301.1 | 9.55  | 9.16  | 0.92 | 0.07 | 1.31  | 0.522253 | 0.165582 | 0.795143 | 0.44189  |
| MmugDNA.26302.1.S1_at   | MmugDNA.26302.1 | 11.44 | 11.66 | 0.24 | 0.1  | -1.16 | 0.346521 | 0.038795 | 0.68831  | 0.241916 |
| MmugDNA.26303.1.S1_at   | MmugDNA.26303.1 | 7.51  | 6.57  | 0.36 | 0.36 | 1.91  | 0.10136  | 0.276036 | 0.471667 | 0.540071 |
| MmugDNA.26304.1.S1_at   | MmugDNA.26304.1 | 6.98  | 7.34  | 0.17 | 0.18 | -1.29 | 0.073234 | 0.120017 | 0.434073 | 0.388672 |
| MmugDNA.26306.1.S1_at   | MmugDNA.26306.1 | 9.04  | 8.26  | 0.74 | 0.18 | 1.73  | 0.149094 | 0.133739 | 0.523002 | 0.40572  |
| MmugDNA.26308.1.S1_at   | MmugDNA.26308.1 | 4.28  | 4.08  | 0.04 | 0.3  | 1.15  | 0.796242 | 0.96501  | 0.925088 | 0.980553 |
| MmugDNA.26308.1.S1_s_at | MmugDNA.26308.1 | 3.6   | 3.58  | 0.16 | 0.07 | 1.01  | 0.209848 | 0.398378 | 0.581324 | 0.629374 |
| MmugDNA.26309.1.S1_at   | MmugDNA.26309.1 | 3.37  | 3.07  | 0.15 | 0.18 | 1.24  | 0.437299 | 0.153697 | 0.746748 | 0.428413 |
| MmugDNA.2631.1.S1_at    | MmugDNA.2631.1  | 13.57 | 12.83 | 0.88 | 0.07 | 1.68  | 0.658618 | 0.352447 | 0.864803 | 0.595723 |
| MmugDNA.26311.1.S1_s_at | MmugDNA.26311.1 | 9.83  | 10.65 | 0.02 | 0.16 | -1.76 | 0.000997 | 0.014462 | 0.155374 | 0.153457 |
| MmugDNA.26312.1.S1_at   | MmugDNA.26312.1 | 12.08 | 11.73 | 0.39 | 0.05 | 1.28  | 0.581933 | 0.305799 | 0.827791 | 0.562731 |
| MmugDNA.26313.1.S1_at   | MmugDNA.26313.1 | 7.5   | 7.28  | 0.55 | 0.22 | 1.16  | 0.587814 | 0.241233 | 0.83181  | 0.511831 |
| MmugDNA.26315.1.S1_at   | MmugDNA.26315.1 | 4.12  | 3.94  | 0.08 | 0.21 | 1.13  | 0.213294 | 0.367164 | 0.583815 | 0.606832 |
| MmugDNA.26319.1.S1_at   | MmugDNA.26319.1 | 4.77  | 4.46  | 0.39 | 0.07 | 1.24  | 0.212202 | 0.441851 | 0.582812 | 0.659939 |
| MmugDNA.2632.1.S1_at    | MmugDNA.2632.1  | 6.35  | 6.39  | 0.68 | 0.24 | -1.02 | 0.74062  | 0.899487 | 0.900871 | 0.942862 |
| MmugDNA.26320.1.S1_at   | MmugDNA.26320.1 | 3.64  | 4.43  | 0.09 | 0.35 | -1.73 | 0.018721 | 0.121712 | 0.298184 | 0.390956 |
| MmugDNA.26322.1.S1_s_at | MmugDNA.26322.1 | 10.87 | 10.55 | 0.69 | 0.24 | 1.24  | 0.432086 | 0.452096 | 0.743696 | 0.666799 |
| MmugDNA.26324.1.S1_at   | MmugDNA.26324.1 | 13.44 | 13.02 | 0.29 | 0.17 | 1.34  | 0.052473 | 0.052372 | 0.392511 | 0.274345 |
| MmugDNA.26325.1.S1_at   | MmugDNA.26325.1 | 4.59  | 4.67  | 0.01 | 0.17 | -1.05 | 0.47454  | 0.357938 | 0.768047 | 0.599532 |
| MmugDNA.26326.1.S1_at   | MmugDNA.26326.1 | 4.57  | 4.1   | 0.4  | 0.08 | 1.39  | 0.12664  | 0.177431 | 0.500599 | 0.453773 |
| MmugDNA.26327.1.S1_at   | MmugDNA.26327.1 | 3.51  | 3.51  | 0.03 | 0.01 | -1    | 0.393607 | 0.914806 | 0.719354 | 0.952124 |
| MmugDNA.26329.1.S1_at   | MmugDNA.26329.1 | 6.99  | 6.85  | 0.43 | 0.13 | 1.1   | 0.913402 | 0.071493 | 0.970574 | 0.313706 |
| MmugDNA.26330.1.S1_at   | MmugDNA.26330.1 | 8.07  | 7.32  | 0.18 | 0.3  | 1.69  | 0.016851 | 0.017594 | 0.288837 | 0.167721 |
| MmugDNA.26331.1.S1_at   | MmugDNA.26331.1 | 10.88 | 10.26 | 0.24 | 0.13 | 1.53  | 0.015546 | 0.010416 | 0.282681 | 0.133522 |
| MmugDNA.26332.1.S1_at   | MmugDNA.26332.1 | 5.37  | 5.32  | 0.09 | 0    | 1.03  | 0.461424 | 0.962449 | 0.760917 | 0.97891  |
| MmugDNA.26333.1.S1_at   | MmugDNA.26333.1 | 4.13  | 4.07  | 0.06 | 0.02 | 1.04  | 0.07304  | 0.055537 | 0.433915 | 0.281454 |
| MmugDNA.26334.1.S1_at   | MmugDNA.26334.1 | 3.61  | 3.62  | 0.13 | 0.28 | -1    | 0.569576 | 0.461515 | 0.82149  | 0.673152 |
| MmugDNA.26335.1.S1_at   | MmugDNA.26335.1 | 4.58  | 4.57  | 0.14 | 0.29 | 1.01  | 0.89349  | 0.603225 | 0.963469 | 0.764033 |
| MmugDNA.27336.1.S1_s_at | MmugDNA.27336.1 | 10.52 | 10.71 | 0.23 | 0.13 | -1.14 | 0.059474 | 0.035568 | 0.406526 | 0.232813 |
| MmugDNA.26337.1.S1_at   | MmugDNA.26337.1 | 6.19  | 6.1   | 0.12 | 0.07 | 1.07  | 0.295085 | 0.554693 | 0.651016 | 0.733408 |
| MmugDNA.26338.1.S1_at   | MmugDNA.26338.1 | 12.53 | 12.81 | 0.12 | 0.05 | -1.21 | 0.037969 | 0.108222 | 0.358308 | 0.371557 |
| MmugDNA.26339.1.S1_at   | MmugDNA.26339.1 | 4.57  | 4.5   | 0.16 | 0.04 | 1.05  | 0.128269 | 0.065402 | 0.502907 | 0.301415 |
| MmugDNA.2634.1.S1_at    | MmugDNA.2634.1  | 9.33  | 11.1  | 0.7  | 0.11 | -3.4  | 0.011147 | 0.012134 | 0.252629 | 0.142546 |
| MmugDNA.26340.1.S1_at   | MmugDNA.26340.1 | 8.24  | 8.72  | 2.77 | 0.42 | -1.39 | 0.599103 | 0.232662 | 0.837258 | 0.504359 |
| MmugDNA.26341.1.S1_at   | MmugDNA.26341.1 | 4.78  | 4.96  | 0.22 | 0.3  | -1.13 | 0.458059 | 0.3537   | 0.758638 | 0.596782 |
| MmugDNA.26342.1.S1_at   | MmugDNA.26342.1 | 4.37  | 4.26  | 0.24 | 0.08 | 1.08  | 0.845761 | 0.476071 | 0.945907 | 0.682475 |
| MmugDNA.26343.1.S1_at   | MmugDNA.26343.1 | 4.71  | 4.6   | 0.1  | 0.03 | 1.08  | 0.113467 | 0.030982 | 0.486767 | 0.21786  |
| MmugDNA.26344.1.S1_at   | MmugDNA.26344.1 | 6.12  | 6.33  | 0.09 | 0.04 | -1.16 | 0.030915 | 0.003883 | 0.339244 | 0.0887   |
| MmugDNA.26345.1.S1_at   | MmugDNA.26345.1 | 6.49  | 6.37  | 0.36 | 0.05 | 1.09  | 0.627961 | 0.099559 | 0.85084  | 0.35796  |
| MmugDNA.26346.1.S1_at   | MmugDNA.26346.1 | 7.18  | 6.67  | 0.55 | 0.22 | 1.42  | 0.2114   | 0.060586 | 0.58237  | 0.292769 |
| MmugDNA.26348.1.S1_at   | MmugDNA.26348.1 | 3.94  | 3.79  | 0.16 | 0.29 | 1.11  | 0.283526 | 0.565239 | 0.641408 | 0.739765 |
| MmugDNA.26349.1.S1_at   | MmugDNA.26349.1 | 10.99 | 11.54 | 0.15 | 0.07 | -1.46 | 0.004875 | 0.116594 | 0.203301 | 0.383771 |
| MmugDNA.26350.1.S1_at   | MmugDNA.26350.1 | 6.66  | 7.47  | 0.43 | 0.58 | -1.76 | 0.114591 | 0.20661  | 0.487638 | 0.480635 |



|                         |                 |       |       |      |      |       |          |          |          |          |
|-------------------------|-----------------|-------|-------|------|------|-------|----------|----------|----------|----------|
| MmugDNA.26351.1.S1_at   | MmugDNA.26351.1 | 3.37  | 3.24  | 0.09 | 0.09 | 1.09  | 0.389223 | 0.627212 | 0.715989 | 0.780325 |
| MmugDNA.26352.1.S1_at   | MmugDNA.26352.1 | 4.01  | 3.92  | 0.34 | 0.12 | 1.06  | 0.242435 | 0.312133 | 0.608517 | 0.566904 |
| MmugDNA.26354.1.S1_at   | MmugDNA.26354.1 | 9.55  | 10.92 | 0.76 | 0.37 | -2.57 | 0.210738 | 0.079853 | 0.582002 | 0.327179 |
| MmugDNA.26356.1.S1_at   | MmugDNA.26356.1 | 5.22  | 5.21  | 0.1  | 0.1  | 1     | 0.210146 | 0.264543 | 0.581555 | 0.53051  |
| MmugDNA.26359.1.S1_at   | MmugDNA.26359.1 | 5.41  | 6.54  | 0.59 | 0.41 | -2.19 | 0.170817 | 0.25768  | 0.543795 | 0.525332 |
| MmugDNA.2636.1.S1_at    | MmugDNA.2636.1  | 5.94  | 5.96  | 0.03 | 0.05 | -1.02 | 0.168341 | 0.163007 | 0.540932 | 0.439145 |
| MmugDNA.26360.1.S1_at   | MmugDNA.26360.1 | 10.6  | 9.88  | 0.27 | 0.19 | 1.64  | 0.015419 | 0.005721 | 0.281469 | 0.104271 |
| MmugDNA.26361.1.S1_at   | MmugDNA.26361.1 | 3.37  | 3.33  | 0.16 | 0.04 | 1.02  | 0.885443 | 0.985024 | 0.960367 | 0.991497 |
| MmugDNA.26362.1.S1_at   | MmugDNA.26362.1 | 6.32  | 6.03  | 0.32 | 0.08 | 1.22  | 0.088512 | 0.007832 | 0.45606  | 0.117929 |
| MmugDNA.26363.1.S1_s_at | MmugDNA.26363.1 | 11.56 | 11.59 | 0.2  | 0.13 | -1.02 | 0.84046  | 0.009656 | 0.943326 | 0.129267 |
| MmugDNA.26364.1.S1_at   | MmugDNA.26364.1 | 5.62  | 5.21  | 0.19 | 0.12 | 1.32  | 0.146466 | 0.093625 | 0.520749 | 0.349995 |
| MmugDNA.26365.1.S1_at   | MmugDNA.26365.1 | 13.06 | 12.82 | 0.1  | 0.01 | 1.18  | 0.015736 | 0.002291 | 0.283526 | 0.07045  |
| MmugDNA.26366.1.S1_at   | MmugDNA.26366.1 | 9.84  | 10.65 | 0.28 | 0.03 | -1.75 | 0.01771  | 0.001024 | 0.293353 | 0.051079 |
| MmugDNA.26368.1.S1_at   | MmugDNA.26368.1 | 6.28  | 6.23  | 0.05 | 0.36 | 1.04  | 0.342091 | 0.602495 | 0.685569 | 0.763444 |
| MmugDNA.26369.1.S1_at   | MmugDNA.26369.1 | 6.09  | 5.93  | 0.16 | 0.19 | 1.11  | 0.14382  | 0.071524 | 0.519104 | 0.313706 |
| MmugDNA.26369.1.S1_s_at | MmugDNA.26369.1 | 6.79  | 6.73  | 0.1  | 0.21 | 1.04  | 0.25135  | 0.331467 | 0.616622 | 0.580121 |
| MmugDNA.26370.1.S1_at   | MmugDNA.26370.1 | 6.9   | 6.73  | 0.43 | 0.35 | 1.12  | 0.704381 | 0.651485 | 0.885143 | 0.796226 |
| MmugDNA.26371.1.S1_at   | MmugDNA.26371.1 | 3.94  | 3.91  | 0.24 | 0.24 | 1.02  | 0.69921  | 0.21146  | 0.883094 | 0.485578 |
| MmugDNA.26372.1.S1_at   | MmugDNA.26372.1 | 11.73 | 11.47 | 0.12 | 0.02 | 1.19  | 0.028466 | 0.000942 | 0.332568 | 0.049026 |
| MmugDNA.26373.1.S1_at   | MmugDNA.26373.1 | 3.23  | 4.45  | 0.17 | 1.17 | -2.34 | 0.138548 | 0.274427 | 0.513952 | 0.538914 |
| MmugDNA.26374.1.S1_at   | MmugDNA.26374.1 | 3.34  | 3.38  | 0.34 | 0.11 | -1.02 | 0.62593  | 0.815383 | 0.849654 | 0.893521 |
| MmugDNA.26375.1.S1_s_at | MmugDNA.26375.1 | 3.36  | 3.15  | 0.18 | 0.05 | 1.15  | 0.046784 | 0.049829 | 0.37872  | 0.268305 |
| MmugDNA.26377.1.S1_at   | MmugDNA.26377.1 | 3.9   | 4.03  | 0.24 | 0.19 | -1.09 | 0.595199 | 0.684723 | 0.835241 | 0.816113 |
| MmugDNA.26378.1.S1_at   | MmugDNA.26378.1 | 6.17  | 6.18  | 0.24 | 0.07 | -1.01 | 0.930806 | 0.417474 | 0.97692  | 0.64224  |
| MmugDNA.26379.1.S1_at   | MmugDNA.26379.1 | 10.33 | 10.22 | 0.02 | 0.13 | 1.08  | 0.133066 | 0.16711  | 0.507432 | 0.4436   |
| MmugDNA.26379.1.S1_s_at | MmugDNA.26379.1 | 10.1  | 9.89  | 0.32 | 0.13 | 1.16  | 0.22165  | 0.055877 | 0.591315 | 0.282172 |
| MmugDNA.2638.1.S1_at    | MmugDNA.2638.1  | 5.03  | 5.05  | 0.17 | 0.1  | -1.01 | 0.579035 | 0.764346 | 0.826375 | 0.86305  |
| MmugDNA.26380.1.S1_at   | MmugDNA.26380.1 | 5.46  | 5.37  | 0.1  | 0.08 | 1.07  | 0.734026 | 0.53568  | 0.898081 | 0.72122  |
| MmugDNA.26381.1.S1_at   | MmugDNA.26381.1 | 5.24  | 4.98  | 0.11 | 0.11 | 1.2   | 0.070864 | 0.100865 | 0.430067 | 0.360398 |
| MmugDNA.26383.1.S1_at   | MmugDNA.26383.1 | 5.62  | 5.6   | 0.2  | 0.02 | 1.01  | 0.88237  | 0.932015 | 0.959193 | 0.961384 |
| MmugDNA.26384.1.S1_at   | MmugDNA.26384.1 | 6.53  | 6.53  | 0.07 | 0.13 | -1    | 0.441877 | 0.852674 | 0.749662 | 0.916254 |
| MmugDNA.26385.1.S1_x_at | MmugDNA.26385.1 | 7.97  | 7.97  | 0.57 | 0.49 | -1    | 0.960077 | 0.301522 | 0.986981 | 0.55955  |
| MmugDNA.26386.1.S1_at   | MmugDNA.26386.1 | 6.46  | 6.42  | 0.19 | 0.06 | 1.03  | 0.818981 | 0.857524 | 0.934641 | 0.918676 |
| MmugDNA.26387.1.S1_at   | MmugDNA.26387.1 | 3.89  | 3.67  | 0.18 | 0.1  | 1.17  | 0.18129  | 0.122913 | 0.554504 | 0.392923 |
| MmugDNA.26388.1.S1_at   | MmugDNA.26388.1 | 5.83  | 5.83  | 0.32 | 0.49 | -1    | 0.762335 | 0.974352 | 0.910879 | 0.986047 |
| MmugDNA.26389.1.S1_at   | MmugDNA.26389.1 | 7.36  | 7.36  | 0.2  | 0.23 | -1    | 0.90886  | 0.822621 | 0.969277 | 0.89799  |
| MmugDNA.26390.1.S1_x_at | MmugDNA.26390.1 | 8.18  | 8.37  | 0.21 | 0.31 | -1.14 | 0.383664 | 0.282443 | 0.711503 | 0.545139 |
| MmugDNA.26392.1.S1_at   | MmugDNA.26392.1 | 6.2   | 6.02  | 0.16 | 0.09 | 1.13  | 0.1221   | 0.030072 | 0.495677 | 0.215243 |
| MmugDNA.26393.1.S1_at   | MmugDNA.26393.1 | 10.79 | 11.49 | 0.1  | 0.05 | -1.62 | 0.000715 | 0.000306 | 0.147936 | 0.034907 |
| MmugDNA.26395.1.S1_at   | MmugDNA.26395.1 | 6.99  | 7.6   | 0.77 | 0.04 | -1.52 | 0.217021 | 0.416494 | 0.586964 | 0.641647 |
| MmugDNA.26398.1.S1_at   | MmugDNA.26398.1 | 9.84  | 10.04 | 0.31 | 0.08 | -1.15 | 0.511569 | 0.261921 | 0.78871  | 0.528309 |
| MmugDNA.264.1.S1_at     | MmugDNA.264.1   | 4.55  | 4.29  | 0.09 | 0.19 | 1.2   | 0.469968 | 0.84479  | 0.765824 | 0.911667 |
| MmugDNA.26400.1.S1_at   | MmugDNA.26400.1 | 5.43  | 5.46  | 0.06 | 0.26 | -1.02 | 0.931001 | 0.946795 | 0.976942 | 0.96978  |

|                         |                 |       |       |      |      |       |          |          |          |          |
|-------------------------|-----------------|-------|-------|------|------|-------|----------|----------|----------|----------|
| MmugDNA.26401.1.S1_at   | MmugDNA.26401.1 | 5.26  | 5.1   | 0.06 | 0.02 | 1.12  | 0.015653 | 0.123911 | 0.28333  | 0.394201 |
| MmugDNA.26402.1.S1_at   | MmugDNA.26402.1 | 4.27  | 4.08  | 0.06 | 0.06 | 1.14  | 0.049762 | 0.102244 | 0.386252 | 0.36236  |
| MmugDNA.26403.1.S1_at   | MmugDNA.26403.1 | 10.65 | 10.43 | 0.74 | 0.08 | 1.17  | 0.55016  | 0.223269 | 0.810664 | 0.496078 |
| MmugDNA.26404.1.S1_at   | MmugDNA.26404.1 | 3.93  | 3.82  | 0.14 | 0.08 | 1.08  | 0.861711 | 0.24886  | 0.951267 | 0.517951 |
| MmugDNA.26405.1.S1_at   | MmugDNA.26405.1 | 12.91 | 12.84 | 0.14 | 0.11 | 1.05  | 0.252741 | 0.386944 | 0.617744 | 0.621935 |
| MmugDNA.26405.1.S1_s_at | MmugDNA.26405.1 | 13.02 | 13.08 | 0.17 | 0.11 | -1.04 | 0.443385 | 0.475895 | 0.750691 | 0.682387 |
| MmugDNA.26406.1.S1_at   | MmugDNA.26406.1 | 11.12 | 10.99 | 0.67 | 0.06 | 1.09  | 0.623084 | 0.240684 | 0.8481   | 0.511405 |
| MmugDNA.26407.1.S1_at   | MmugDNA.26407.1 | 3.61  | 3.36  | 0.14 | 0.09 | 1.19  | 0.017027 | 0.120807 | 0.288969 | 0.389657 |
| MmugDNA.26409.1.S1_at   | MmugDNA.26409.1 | 5.69  | 7.53  | 0.49 | 0.2  | -3.57 | 0.006796 | 0.029401 | 0.223856 | 0.213352 |
| MmugDNA.27697.1.S1_s_at | MmugDNA.27697.1 | 3.28  | 3.31  | 0.13 | 0.17 | -1.02 | 0.748861 | 0.521237 | 0.904698 | 0.712315 |
| MmugDNA.26411.1.S1_at   | MmugDNA.26411.1 | 3.24  | 3.04  | 0.12 | 0.19 | -1.15 | 0.552027 | 0.708979 | 0.811583 | 0.831212 |
| MmugDNA.26412.1.S1_at   | MmugDNA.26412.1 | 11.4  | 11.25 | 0.26 | 0.15 | 1.11  | 0.241129 | 0.313291 | 0.60736  | 0.567753 |
| MmugDNA.26414.1.S1_at   | MmugDNA.26414.1 | 4.15  | 4.12  | 0.14 | 0.13 | 1.02  | 0.19345  | 0.120038 | 0.564275 | 0.388718 |
| MmugDNA.26415.1.S1_at   | MmugDNA.26415.1 | 4.32  | 4.23  | 0.15 | 0.09 | 1.06  | 0.225671 | 0.281893 | 0.59481  | 0.544852 |
| MmugDNA.26416.1.S1_at   | MmugDNA.26416.1 | 6.95  | 6.93  | 0.07 | 0.04 | 1.01  | 0.945401 | 0.979611 | 0.980927 | 0.989059 |
| MmugDNA.26417.1.S1_at   | MmugDNA.26417.1 | 3.95  | 3.94  | 0.06 | 0.13 | 1     | 0.375358 | 0.338081 | 0.706463 | 0.585259 |
| MmugDNA.26418.1.S1_at   | MmugDNA.26418.1 | 3.92  | 3.82  | 0.12 | 0.2  | 1.08  | 0.358368 | 0.659764 | 0.696372 | 0.800854 |
| MmugDNA.26419.1.S1_at   | MmugDNA.26419.1 | 6.65  | 6.6   | 0.07 | 0.15 | 1.03  | 0.783972 | 0.955377 | 0.920602 | 0.974645 |
| MmugDNA.2642.1.S1_at    | MmugDNA.2642.1  | 5.77  | 6.35  | 0.36 | 0.1  | -1.5  | 0.017231 | 0.016933 | 0.290096 | 0.165006 |
| MmugDNA.26420.1.S1_at   | MmugDNA.26420.1 | 4.73  | 4.64  | 0.25 | 0.16 | 1.07  | 0.243991 | 0.367214 | 0.609747 | 0.606858 |
| MmugDNA.26421.1.S1_at   | MmugDNA.26421.1 | 3.91  | 4     | 0.26 | 0.61 | -1.06 | 0.826594 | 0.970961 | 0.937904 | 0.984141 |
| MmugDNA.26422.1.S1_at   | MmugDNA.26422.1 | 5.26  | 5.17  | 0.04 | 0.1  | 1.06  | 0.085422 | 0.16991  | 0.452653 | 0.446569 |
| MmugDNA.26423.1.S1_at   | MmugDNA.26423.1 | 4.36  | 4.34  | 0.02 | 0.06 | 1.01  | 0.173943 | 0.673649 | 0.546898 | 0.809337 |
| MmugDNA.26424.1.S1_at   | MmugDNA.26424.1 | 4.58  | 4.65  | 0.24 | 0.04 | -1.05 | 0.734026 | 0.844502 | 0.898081 | 0.911523 |
| MmugDNA.26425.1.S1_at   | MmugDNA.26425.1 | 5.92  | 5.59  | 0.25 | 0.17 | 1.25  | 0.130198 | 0.188533 | 0.504663 | 0.464458 |
| MmugDNA.26427.1.S1_at   | MmugDNA.26427.1 | 6.33  | 5.81  | 0.44 | 0.13 | 1.43  | 0.041545 | 0.035959 | 0.366776 | 0.234139 |
| MmugDNA.26428.1.S1_at   | MmugDNA.26428.1 | 11.18 | 11.4  | 0.02 | 0.12 | -1.16 | 0.02804  | 0.002433 | 0.330072 | 0.073093 |
| MmugDNA.26429.1.S1_at   | MmugDNA.26429.1 | 4.24  | 4.3   | 0.31 | 0.62 | -1.05 | 0.225075 | 0.419406 | 0.594321 | 0.643466 |
| MmugDNA.2643.1.S1_at    | MmugDNA.2643.1  | 11.62 | 11.7  | 0.43 | 0.07 | -1.06 | 0.858154 | 0.663617 | 0.9499   | 0.803033 |
| MmugDNA.26431.1.S1_at   | MmugDNA.26431.1 | 7.05  | 7.16  | 0.08 | 0.1  | -1.08 | 0.10318  | 0.620083 | 0.473984 | 0.775227 |
| MmugDNA.26433.1.S1_at   | MmugDNA.26433.1 | 3.29  | 3.38  | 0.06 | 0.05 | -1.06 | 0.583592 | 0.09383  | 0.829134 | 0.350281 |
| MmugDNA.26434.1.S1_at   | MmugDNA.26434.1 | 4.36  | 4.41  | 0.1  | 0.05 | -1.04 | 0.168778 | 0.193307 | 0.541668 | 0.468656 |
| MmugDNA.26437.1.S1_at   | MmugDNA.26437.1 | 4.36  | 4.64  | 0.08 | 0.5  | -1.21 | 0.500514 | 0.639669 | 0.782691 | 0.788389 |
| MmugDNA.26438.1.S1_at   | MmugDNA.26438.1 | 4.92  | 5.11  | 0.24 | 0.17 | -1.14 | 0.31742  | 0.647423 | 0.667346 | 0.793471 |
| MmugDNA.26439.1.S1_at   | MmugDNA.26439.1 | 5.3   | 5.55  | 0.06 | 0.22 | -1.19 | 0.111705 | 0.079691 | 0.484896 | 0.326981 |
| MmugDNA.2644.1.S1_at    | MmugDNA.2644.1  | 8.05  | 7.64  | 0.27 | 0.24 | 1.33  | 0.319701 | 0.014567 | 0.668882 | 0.153907 |
| MmugDNA.26440.1.S1_at   | MmugDNA.26440.1 | 3.85  | 3.89  | 0.28 | 0.08 | -1.03 | 0.852343 | 0.157663 | 0.947963 | 0.433137 |
| MmugDNA.26441.1.S1_at   | MmugDNA.26441.1 | 8.15  | 8.41  | 0.91 | 0.08 | -1.2  | 0.590543 | 0.791215 | 0.832911 | 0.879378 |
| MmugDNA.26442.1.S1_at   | MmugDNA.26442.1 | 8.74  | 8.55  | 0.27 | 0.09 | 1.14  | 0.350788 | 0.084429 | 0.69162  | 0.335717 |
| MmugDNA.26443.1.S1_at   | MmugDNA.26443.1 | 3.4   | 3.24  | 0.22 | 0.19 | 1.11  | 0.772098 | 0.859576 | 0.91501  | 0.919999 |
| MmugDNA.26444.1.S1_at   | MmugDNA.26444.1 | 5.93  | 5.88  | 1.1  | 0.21 | 1.04  | 0.915853 | 0.321506 | 0.97133  | 0.573226 |
| MmugDNA.26445.1.S1_at   | MmugDNA.26445.1 | 12.87 | 13.09 | 0.66 | 0.01 | -1.16 | 0.647258 | 0.724369 | 0.859364 | 0.840457 |
| MmugDNA.26448.1.S1_at   | MmugDNA.26448.1 | 10.31 | 10.29 | 0.23 | 0.04 | 1.02  | 0.893664 | 0.501577 | 0.963491 | 0.699719 |

|                         |                 |       |       |      |      |       |          |          |          |          |
|-------------------------|-----------------|-------|-------|------|------|-------|----------|----------|----------|----------|
| MmugDNA.26449.1.S1_at   | MmugDNA.26449.1 | 8.87  | 9.21  | 0.76 | 0.11 | -1.26 | 0.573206 | 0.282807 | 0.823465 | 0.545524 |
| MmugDNA.2645.1.S1_at    | MmugDNA.2645.1  | 7.52  | 7.66  | 0.61 | 0.11 | -1.1  | 0.758048 | 0.175287 | 0.90896  | 0.452061 |
| MmugDNA.26450.1.S1_at   | MmugDNA.26450.1 | 5.19  | 5.2   | 0.03 | 0.12 | -1.01 | 0.369997 | 0.756507 | 0.704429 | 0.858223 |
| MmugDNA.26451.1.S1_at   | MmugDNA.26451.1 | 8.95  | 8.49  | 0.34 | 0.09 | 1.38  | 0.077312 | 0.031753 | 0.439109 | 0.22064  |
| MmugDNA.26452.1.S1_at   | MmugDNA.26452.1 | 8.12  | 7.89  | 0.28 | 0.14 | 1.17  | 0.107777 | 0.245695 | 0.480288 | 0.515484 |
| MmugDNA.26452.1.S1_s_at | MmugDNA.26452.1 | 7.37  | 7.3   | 0.21 | 0.01 | 1.05  | 0.201584 | 0.376726 | 0.573165 | 0.614539 |
| MmugDNA.26453.1.S1_at   | MmugDNA.26453.1 | 3.17  | 3.21  | 0.16 | 0    | -1.03 | 0.659434 | 0.855795 | 0.865216 | 0.917707 |
| MmugDNA.26454.1.S1_at   | MmugDNA.26454.1 | 3.55  | 3.57  | 0.1  | 0    | -1.01 | 0.293235 | 0.500227 | 0.64962  | 0.698951 |
| MmugDNA.26455.1.S1_at   | MmugDNA.26455.1 | 12.95 | 12.6  | 0.17 | 0.09 | 1.28  | 0.012329 | 0.002585 | 0.261538 | 0.075213 |
| MmugDNA.26456.1.S1_at   | MmugDNA.26456.1 | 5.55  | 5.21  | 0.47 | 0.15 | 1.27  | 0.262874 | 0.351276 | 0.624987 | 0.594937 |
| MmugDNA.26457.1.S1_at   | MmugDNA.26457.1 | 4.51  | 4.23  | 0.15 | 0.18 | 1.22  | 0.097314 | 0.163989 | 0.466155 | 0.440128 |
| MmugDNA.26458.1.S1_at   | MmugDNA.26458.1 | 10.77 | 10.73 | 0.19 | 0.06 | 1.03  | 0.777334 | 0.017055 | 0.917578 | 0.165465 |
| MmugDNA.26459.1.S1_at   | MmugDNA.26459.1 | 10.02 | 10.33 | 0.18 | 0.23 | -1.24 | 0.20544  | 0.276177 | 0.577261 | 0.540179 |
| MmugDNA.26460.1.S1_at   | MmugDNA.26460.1 | 7.08  | 6.92  | 0.36 | 0.34 | 1.12  | 0.165871 | 0.194542 | 0.538623 | 0.469632 |
| MmugDNA.26462.1.S1_at   | MmugDNA.26462.1 | 7.1   | 6.98  | 0.11 | 0.03 | 1.09  | 0.122659 | 0.560118 | 0.496146 | 0.73651  |
| MmugDNA.26463.1.S1_at   | MmugDNA.26463.1 | 6.75  | 6.75  | 0.25 | 0.08 | 1     | 0.784614 | 0.67851  | 0.920879 | 0.81221  |
| MmugDNA.26464.1.S1_at   | MmugDNA.26464.1 | 4.11  | 4.17  | 0.25 | 0.09 | -1.04 | 0.433587 | 0.574127 | 0.744536 | 0.745639 |
| MmugDNA.26465.1.S1_at   | MmugDNA.26465.1 | 4.44  | 4.45  | 0.5  | 0.27 | -1.01 | 0.344533 | 0.458569 | 0.686997 | 0.671232 |
| MmugDNA.26468.1.S1_at   | MmugDNA.26468.1 | 10.45 | 10.06 | 0.21 | 0.16 | 1.31  | 0.024257 | 0.00151  | 0.317812 | 0.059146 |
| MmugDNA.26469.1.S1_at   | MmugDNA.26469.1 | 5.42  | 6.39  | 0.5  | 0.14 | -1.95 | 0.024327 | 0.009165 | 0.317812 | 0.126331 |
| MmugDNA.26470.1.S1_at   | MmugDNA.26470.1 | 5.85  | 5.44  | 0.45 | 0.23 | 1.33  | 0.607851 | 0.299693 | 0.840979 | 0.558037 |
| MmugDNA.26471.1.S1_at   | MmugDNA.26471.1 | 8.2   | 8.54  | 0.31 | 0.13 | -1.26 | 0.286319 | 0.358021 | 0.64358  | 0.599604 |
| MmugDNA.26472.1.S1_at   | MmugDNA.26472.1 | 13.22 | 13.31 | 0.04 | 0.04 | -1.06 | 0.075745 | 0.236184 | 0.436784 | 0.507225 |
| MmugDNA.26473.1.S1_at   | MmugDNA.26473.1 | 3.56  | 4.02  | 0.38 | 0.31 | -1.38 | 0.586575 | 0.732022 | 0.831389 | 0.844757 |
| MmugDNA.26474.1.S1_at   | MmugDNA.26474.1 | 13.07 | 13.29 | 0.23 | 0.08 | -1.17 | 0.792421 | 0.062782 | 0.923885 | 0.297193 |
| MmugDNA.26475.1.S1_at   | MmugDNA.26475.1 | 4.82  | 4.72  | 0.07 | 0.09 | 1.07  | 0.205146 | 0.453941 | 0.576906 | 0.668338 |
| MmugDNA.26477.1.S1_at   | MmugDNA.26477.1 | 10.21 | 10.9  | 0.38 | 0.09 | -1.61 | 0.140567 | 0.014839 | 0.516012 | 0.154918 |
| MmugDNA.26478.1.S1_at   | MmugDNA.26478.1 | 10.41 | 9.8   | 0.15 | 0.13 | 1.52  | 0.005843 | 0.011764 | 0.211798 | 0.140492 |
| MmugDNA.26479.1.S1_at   | MmugDNA.26479.1 | 10.18 | 10.13 | 0.47 | 0.15 | 1.04  | 0.362713 | 0.214573 | 0.699596 | 0.488385 |
| MmugDNA.2648.1.S1_at    | MmugDNA.2648.1  | 3.7   | 3.51  | 0.2  | 0.02 | 1.14  | 0.59854  | 0.832474 | 0.836974 | 0.903893 |
| MmugDNA.26480.1.S1_at   | MmugDNA.26480.1 | 5.78  | 5.8   | 0.42 | 0.48 | -1.02 | 0.2629   | 0.310028 | 0.624987 | 0.565253 |
| MmugDNA.26481.1.S1_at   | MmugDNA.26481.1 | 13.87 | 13.91 | 0.06 | 0.01 | -1.03 | 0.693078 | 0.707775 | 0.880472 | 0.830472 |
| MmugDNA.26482.1.S1_at   | MmugDNA.26482.1 | 12.73 | 12.89 | 0.12 | 0.06 | -1.12 | 0.08656  | 0.095512 | 0.454436 | 0.352588 |
| MmugDNA.26483.1.S1_at   | MmugDNA.26483.1 | 3.39  | 3.39  | 0.01 | 0.44 | 1     | 0.384898 | 0.408029 | 0.712278 | 0.635378 |
| MmugDNA.26484.1.S1_x_at | MmugDNA.26484.1 | 7.64  | 7.95  | 0.17 | 0.23 | -1.24 | 0.154657 | 0.459026 | 0.527923 | 0.671535 |
| MmugDNA.26486.1.S1_at   | MmugDNA.26486.1 | 9.88  | 9.58  | 0.76 | 0.19 | 1.23  | 0.861315 | 0.376757 | 0.951252 | 0.614541 |
| MmugDNA.26487.1.S1_at   | MmugDNA.26487.1 | 4.28  | 3.91  | 0.53 | 0.07 | 1.29  | 0.145443 | 0.198881 | 0.52043  | 0.473482 |
| MmugDNA.26487.1.S1_x_at | MmugDNA.26487.1 | 4.74  | 4.21  | 0.43 | 0.13 | 1.44  | 0.043677 | 0.036423 | 0.372554 | 0.235375 |
| MmugDNA.26488.1.S1_at   | MmugDNA.26488.1 | 8.32  | 8.27  | 0.05 | 0.15 | 1.03  | 0.338763 | 0.229541 | 0.683213 | 0.501534 |
| MmugDNA.2649.1.S1_at    | MmugDNA.2649.1  | 2.96  | 2.77  | 0.14 | 0.09 | 1.14  | 0.153546 | 0.090684 | 0.526754 | 0.345151 |
| MmugDNA.26490.1.S1_at   | MmugDNA.26490.1 | 3.35  | 3.05  | 0.21 | 0.12 | 1.23  | 0.052249 | 0.078114 | 0.392084 | 0.324578 |
| MmugDNA.26492.1.S1_at   | MmugDNA.26492.1 | 6.32  | 6.92  | 0.6  | 0.16 | -1.52 | 0.280425 | 0.058237 | 0.639242 | 0.287992 |
| MmugDNA.26493.1.S1_at   | MmugDNA.26493.1 | 5.26  | 5.36  | 0.06 | 0.11 | -1.07 | 0.486459 | 0.198887 | 0.774578 | 0.473482 |

|                         |                 |       |       |      |      |       |          |          |          |          |
|-------------------------|-----------------|-------|-------|------|------|-------|----------|----------|----------|----------|
| MmugDNA.26494.1.S1_at   | MmugDNA.26494.1 | 7.03  | 7.37  | 0.3  | 0.13 | -1.26 | 0.136482 | 0.01037  | 0.511529 | 0.133236 |
| MmugDNA.26495.1.S1_at   | MmugDNA.26495.1 | 3.85  | 3.79  | 0.11 | 0.06 | 1.05  | 0.219133 | 0.323376 | 0.588525 | 0.574453 |
| MmugDNA.26496.1.S1_at   | MmugDNA.26496.1 | 8.68  | 9.16  | 1.52 | 0.08 | -1.4  | 0.65242  | 0.827617 | 0.862004 | 0.901081 |
| MmugDNA.26497.1.S1_at   | MmugDNA.26497.1 | 7.57  | 7.79  | 0.36 | 0.2  | -1.17 | 0.59162  | 0.308114 | 0.833604 | 0.564219 |
| MmugDNA.26497.1.S1_x_at | MmugDNA.26497.1 | 7.98  | 8.08  | 0.16 | 0.22 | -1.07 | 0.437101 | 0.236691 | 0.746719 | 0.507459 |
| MmugDNA.26498.1.S1_at   | MmugDNA.26498.1 | 4.14  | 4.15  | 0.23 | 0.03 | -1.01 | 0.946422 | 0.782189 | 0.981426 | 0.873828 |
| MmugDNA.26499.1.S1_at   | MmugDNA.26499.1 | 5.84  | 5.86  | 0.36 | 0.02 | -1.01 | 0.938288 | 0.93799  | 0.979247 | 0.964856 |
| MmugDNA.265.1.S1_at     | MmugDNA.265.1   | 8.88  | 9.73  | 1.04 | 0.48 | -1.8  | 0.416435 | 0.572234 | 0.734327 | 0.744313 |
| MmugDNA.2650.1.S1_at    | MmugDNA.2650.1  | 3.84  | 3.81  | 0.22 | 0.09 | 1.02  | 0.292175 | 0.418817 | 0.648495 | 0.643118 |
| MmugDNA.26501.1.S1_at   | MmugDNA.26501.1 | 10.96 | 10.67 | 0.24 | 0.24 | 1.22  | 0.293021 | 0.152034 | 0.649364 | 0.42681  |
| MmugDNA.26502.1.S1_at   | MmugDNA.26502.1 | 3.98  | 3.9   | 0.21 | 0.04 | -1.06 | 0.208015 | 0.598281 | 0.579658 | 0.760715 |
| MmugDNA.26503.1.S1_at   | MmugDNA.26503.1 | 6.7   | 6.08  | 0.4  | 0.11 | 1.53  | 0.076364 | 0.08806  | 0.437977 | 0.341547 |
| MmugDNA.26504.1.S1_at   | MmugDNA.26504.1 | 5.1   | 5.4   | 0.16 | 0.14 | -1.23 | 0.147958 | 0.392095 | 0.522184 | 0.625588 |
| MmugDNA.26507.1.S1_at   | MmugDNA.26507.1 | 5.84  | 6.05  | 0.07 | 0.14 | -1.15 | 0.04939  | 0.071955 | 0.385474 | 0.314293 |
| MmugDNA.26508.1.S1_at   | MmugDNA.26508.1 | 13.32 | 13.35 | 0.16 | 0.05 | -1.02 | 0.683373 | 0.41594  | 0.876089 | 0.641275 |
| MmugDNA.2651.1.S1_at    | MmugDNA.2651.1  | 7.13  | 7.33  | 0.41 | 0.17 | -1.15 | 0.771851 | 0.832322 | 0.914891 | 0.903821 |
| MmugDNA.2651.1.S1_s_at  | MmugDNA.2651.1  | 3.11  | 3.48  | 0.21 | 0.23 | -1.29 | 0.26038  | 0.340658 | 0.623265 | 0.586818 |
| MmugDNA.2651.1.S1_x_at  | MmugDNA.2651.1  | 5.46  | 5.8   | 0.33 | 0.13 | -1.27 | 0.320854 | 0.800504 | 0.669445 | 0.885198 |
| MmugDNA.26512.1.S1_at   | MmugDNA.26512.1 | 7.05  | 6.36  | 0.98 | 0.24 | 1.61  | 0.165657 | 0.012495 | 0.538504 | 0.144302 |
| MmugDNA.26513.1.S1_at   | MmugDNA.26513.1 | 3.09  | 3.12  | 0.04 | 0.1  | -1.02 | 0.412348 | 0.566216 | 0.731945 | 0.74033  |
| MmugDNA.26515.1.S1_at   | MmugDNA.26515.1 | 5.7   | 5.78  | 0.27 | 0.46 | -1.06 | 0.573906 | 0.571177 | 0.823778 | 0.743594 |
| MmugDNA.26516.1.S1_at   | MmugDNA.26516.1 | 5.91  | 5.75  | 0.18 | 0.05 | 1.12  | 0.231569 | 0.91504  | 0.599546 | 0.952293 |
| MmugDNA.26517.1.S1_at   | MmugDNA.26517.1 | 7.08  | 6.46  | 0.47 | 0.32 | 1.54  | 0.141504 | 0.139771 | 0.516365 | 0.413114 |
| MmugDNA.26518.1.S1_s_at | MmugDNA.26518.1 | 6.59  | 6.62  | 0.57 | 0.27 | -1.02 | 0.680213 | 0.184921 | 0.874564 | 0.460776 |
| MmugDNA.26519.1.S1_at   | MmugDNA.26519.1 | 3.56  | 3.26  | 0.1  | 0.02 | 1.23  | 0.011437 | 0.452355 | 0.254897 | 0.667046 |
| MmugDNA.2652.1.S1_at    | MmugDNA.2652.1  | 5.29  | 4.99  | 0.03 | 0.16 | 1.23  | 0.084877 | 0.060808 | 0.451489 | 0.293306 |
| MmugDNA.26521.1.S1_at   | MmugDNA.26521.1 | 4.51  | 4.37  | 0.2  | 0.18 | 1.1   | 0.319486 | 0.386093 | 0.668737 | 0.621345 |
| MmugDNA.26521.1.S1_x_at | MmugDNA.26521.1 | 5     | 4.99  | 0.09 | 0.18 | 1.01  | 0.781673 | 0.483021 | 0.919573 | 0.687687 |
| MmugDNA.26522.1.S1_at   | MmugDNA.26522.1 | 11.07 | 10.82 | 0.17 | 0.1  | 1.18  | 0.077198 | 0.00076  | 0.439109 | 0.04544  |
| MmugDNA.26523.1.S1_s_at | MmugDNA.26523.1 | 8.91  | 9.14  | 1.23 | 0.17 | -1.18 | 0.912364 | 0.98143  | 0.970266 | 0.989775 |
| MmugDNA.26524.1.S1_at   | MmugDNA.26524.1 | 4.34  | 4.16  | 0.12 | 0.02 | 1.14  | 0.053056 | 0.252987 | 0.393954 | 0.521279 |
| MmugDNA.26526.1.S1_at   | MmugDNA.26526.1 | 4.5   | 4.5   | 0.09 | 0.1  | -1    | 0.795423 | 0.878884 | 0.92485  | 0.930872 |
| MmugDNA.26527.1.S1_at   | MmugDNA.26527.1 | 11.07 | 11.79 | 0.53 | 0.09 | -1.66 | 0.205881 | 0.219003 | 0.577793 | 0.492768 |
| MmugDNA.26528.1.S1_at   | MmugDNA.26528.1 | 5.35  | 5.46  | 0.08 | 0.14 | -1.08 | 0.126654 | 0.259976 | 0.500599 | 0.52675  |
| MmugDNA.2653.1.S1_at    | MmugDNA.2653.1  | 4.65  | 4.88  | 0.14 | 0.1  | -1.18 | 0.183168 | 0.568648 | 0.556057 | 0.742052 |
| MmugDNA.26530.1.S1_at   | MmugDNA.26530.1 | 6.19  | 6.66  | 0.27 | 0.51 | -1.39 | 0.139755 | 0.244202 | 0.515285 | 0.514167 |
| MmugDNA.32549.1.S1_s_at | MmugDNA.32549.1 | 14.77 | 14.77 | 0    | 0    | -1    | 0.142557 | 0.012961 | 0.517603 | 0.146501 |
| MmugDNA.32549.1.S1_x_at | MmugDNA.32549.1 | 14.42 | 14.44 | 0.03 | 0.01 | -1.02 | 0.087266 | 0.078229 | 0.454785 | 0.324765 |
| MmugDNA.26534.1.S1_at   | MmugDNA.26534.1 | 10.64 | 10.72 | 0.11 | 0.08 | -1.05 | 0.739872 | 0.036675 | 0.900699 | 0.235973 |
| MmugDNA.26535.1.S1_at   | MmugDNA.26535.1 | 14.45 | 14.4  | 0.04 | 0.03 | 1.04  | 0.429798 | 0.415412 | 0.742367 | 0.640873 |
| MmugDNA.26536.1.S1_at   | MmugDNA.26536.1 | 4.94  | 4.63  | 0.19 | 0.02 | 1.24  | 0.152877 | 0.055403 | 0.525753 | 0.28129  |
| MmugDNA.26538.1.S1_at   | MmugDNA.26538.1 | 5.95  | 7.08  | 0.98 | 0.26 | -2.19 | 0.434212 | 0.661221 | 0.744893 | 0.801687 |
| MmugDNA.26539.1.S1_at   | MmugDNA.26539.1 | 6.94  | 6.59  | 0.15 | 0.15 | 1.27  | 0.144451 | 0.261625 | 0.519872 | 0.528095 |

|                         |                 |       |       |      |      |       |          |          |          |          |
|-------------------------|-----------------|-------|-------|------|------|-------|----------|----------|----------|----------|
| MmugDNA.2654.1.S1_at    | MmugDNA.2654.1  | 5.25  | 5.27  | 0.09 | 0.23 | -1.02 | 0.984393 | 0.734012 | 0.995256 | 0.845896 |
| MmugDNA.26540.1.S1_at   | MmugDNA.26540.1 | 4.48  | 4.57  | 0.33 | 0.28 | -1.07 | 0.904541 | 0.265037 | 0.967857 | 0.531    |
| MmugDNA.26542.1.S1_at   | MmugDNA.26542.1 | 3.81  | 3.52  | 0.16 | 0.12 | 1.22  | 0.182199 | 0.179994 | 0.555361 | 0.456552 |
| MmugDNA.26543.1.S1_at   | MmugDNA.26543.1 | 10.49 | 10.01 | 0.1  | 0.11 | 1.4   | 0.005456 | 0.002828 | 0.208157 | 0.078363 |
| MmugDNA.26544.1.S1_at   | MmugDNA.26544.1 | 2.95  | 2.88  | 0.11 | 0.09 | 1.05  | 0.264931 | 0.744964 | 0.626341 | 0.852232 |
| MmugDNA.26546.1.S1_at   | MmugDNA.26546.1 | 8.31  | 8.33  | 0.42 | 0.04 | -1.01 | 0.465476 | 0.643733 | 0.763035 | 0.791112 |
| MmugDNA.26548.1.S1_at   | MmugDNA.26548.1 | 7.62  | 8.05  | 0.23 | 0.03 | -1.35 | 0.083989 | 0.243751 | 0.450267 | 0.513899 |
| MmugDNA.26549.1.S1_at   | MmugDNA.26549.1 | 5.73  | 5.59  | 0.06 | 0.26 | 1.1   | 0.407406 | 0.687362 | 0.728597 | 0.817576 |
| MmugDNA.2655.1.S1_at    | MmugDNA.2655.1  | 6.76  | 6.74  | 0.21 | 0.3  | 1.01  | 0.798743 | 0.989284 | 0.926306 | 0.993909 |
| MmugDNA.36289.1.S1_s_at | MmugDNA.36289.1 | 9.35  | 9.8   | 0.64 | 0.49 | -1.37 | 0.550538 | 0.224016 | 0.810838 | 0.497045 |
| MmugDNA.26551.1.S1_at   | MmugDNA.26551.1 | 8.95  | 8.92  | 0.46 | 0.09 | 1.02  | 0.673227 | 0.212791 | 0.871201 | 0.486769 |
| MmugDNA.26554.1.S1_at   | MmugDNA.26554.1 | 4.03  | 3.96  | 0.15 | 0.07 | 1.04  | 0.936009 | 0.36097  | 0.978468 | 0.60201  |
| MmugDNA.26555.1.S1_at   | MmugDNA.26555.1 | 12.62 | 13.07 | 0.68 | 0.05 | -1.37 | 0.099434 | 0.04976  | 0.469114 | 0.268151 |
| MmugDNA.26558.1.S1_at   | MmugDNA.26558.1 | 9.61  | 9.72  | 0.09 | 0.05 | -1.08 | 0.414829 | 0.04851  | 0.733393 | 0.265472 |
| MmugDNA.26559.1.S1_at   | MmugDNA.26559.1 | 3.83  | 3.67  | 0.16 | 0.11 | 1.12  | 0.213418 | 0.132326 | 0.583973 | 0.404294 |
| MmugDNA.26560.1.S1_at   | MmugDNA.26560.1 | 6     | 6.37  | 0.58 | 0.06 | -1.29 | 0.651528 | 0.06892  | 0.861636 | 0.308874 |
| MmugDNA.26562.1.S1_at   | MmugDNA.26562.1 | 9.62  | 9.38  | 0.16 | 0.07 | 1.18  | 0.092564 | 0.82014  | 0.461192 | 0.896336 |
| MmugDNA.26562.1.S1_s_at | MmugDNA.26562.1 | 11.18 | 11.11 | 0.41 | 0.18 | 1.05  | 0.740765 | 0.928466 | 0.900905 | 0.959353 |
| MmugDNA.26563.1.S1_at   | MmugDNA.26563.1 | 5.48  | 5.56  | 0.12 | 0.29 | -1.05 | 0.805079 | 0.383391 | 0.929121 | 0.619384 |
| MmugDNA.26565.1.S1_at   | MmugDNA.26565.1 | 7.7   | 7.63  | 0.14 | 0.14 | 1.05  | 0.954709 | 0.066556 | 0.984967 | 0.303733 |
| MmugDNA.26566.1.S1_at   | MmugDNA.26566.1 | 3.2   | 3.14  | 0.11 | 0.26 | 1.04  | 0.790435 | 0.841509 | 0.922945 | 0.909663 |
| MmugDNA.26567.1.S1_at   | MmugDNA.26567.1 | 10.28 | 10.4  | 0.14 | 0.14 | -1.09 | 0.899368 | 0.682517 | 0.965794 | 0.814568 |
| MmugDNA.26567.1.S1_s_at | MmugDNA.26567.1 | 11.29 | 11.41 | 0.05 | 0.12 | -1.08 | 0.465503 | 0.526256 | 0.763035 | 0.715488 |
| MmugDNA.26569.1.S1_at   | MmugDNA.26569.1 | 3.27  | 3.18  | 0.11 | 0.14 | 1.07  | 0.252245 | 0.580311 | 0.617215 | 0.749618 |
| MmugDNA.2657.1.S1_at    | MmugDNA.2657.1  | 5.28  | 5.33  | 0.03 | 0.07 | -1.03 | 0.238273 | 0.703214 | 0.605262 | 0.827928 |
| MmugDNA.26570.1.S1_at   | MmugDNA.26570.1 | 3.01  | 2.98  | 0.15 | 0.28 | 1.02  | 0.474308 | 0.573278 | 0.767951 | 0.744994 |
| MmugDNA.26570.1.S1_x_at | MmugDNA.26570.1 | 2.78  | 2.68  | 0.06 | 0.38 | 1.07  | 0.627845 | 0.462276 | 0.850791 | 0.673638 |
| MmugDNA.26571.1.S1_at   | MmugDNA.26571.1 | 3.09  | 3.28  | 0.16 | 0.09 | -1.13 | 0.3295   | 0.706094 | 0.676395 | 0.829633 |
| MmugDNA.26572.1.S1_at   | MmugDNA.26572.1 | 6.35  | 6.22  | 0.34 | 0.08 | 1.09  | 0.220424 | 0.235177 | 0.589697 | 0.50629  |
| MmugDNA.26573.1.S1_at   | MmugDNA.26573.1 | 3.92  | 4.02  | 0.13 | 0.03 | -1.07 | 0.891023 | 0.608914 | 0.962566 | 0.767385 |
| MmugDNA.26574.1.S1_at   | MmugDNA.26574.1 | 8.95  | 9.16  | 0.23 | 0.1  | -1.16 | 0.870606 | 0.065931 | 0.955036 | 0.30216  |
| MmugDNA.26576.1.S1_at   | MmugDNA.26576.1 | 3.15  | 3.2   | 0.15 | 0.11 | -1.03 | 0.230771 | 0.237658 | 0.598993 | 0.50826  |
| MmugDNA.2658.1.S1_at    | MmugDNA.2658.1  | 7.68  | 7.63  | 0.45 | 0.11 | 1.04  | 0.345085 | 0.03021  | 0.68735  | 0.21576  |
| MmugDNA.26580.1.S1_at   | MmugDNA.26580.1 | 10.21 | 10.36 | 0.21 | 0.13 | -1.11 | 0.275983 | 0.500246 | 0.635532 | 0.698951 |
| MmugDNA.26581.1.S1_at   | MmugDNA.26581.1 | 4.33  | 4.37  | 0.61 | 0.14 | -1.03 | 0.511644 | 0.445789 | 0.78878  | 0.662505 |
| MmugDNA.26582.1.S1_at   | MmugDNA.26582.1 | 8.45  | 8.94  | 1.34 | 0.33 | -1.41 | 0.324198 | 0.53294  | 0.672526 | 0.719308 |
| MmugDNA.26583.1.S1_at   | MmugDNA.26583.1 | 6.2   | 6.37  | 0.44 | 0.3  | -1.12 | 0.590151 | 0.789652 | 0.832832 | 0.87847  |
| MmugDNA.31842.1.S1_s_at | MmugDNA.31842.1 | 3.39  | 3.81  | 0.14 | 0.61 | -1.34 | 0.13242  | 0.042459 | 0.506752 | 0.250702 |
| MmugDNA.26586.1.S1_at   | MmugDNA.26586.1 | 8.67  | 8.79  | 0.36 | 0.36 | -1.08 | 0.593056 | 0.67529  | 0.834049 | 0.81026  |
| MmugDNA.26587.1.S1_at   | MmugDNA.26587.1 | 7.58  | 7.59  | 0.09 | 0.12 | -1    | 0.25843  | 0.389834 | 0.622212 | 0.623878 |
| MmugDNA.26589.1.S1_x_at | MmugDNA.26589.1 | 7.4   | 7.46  | 0.07 | 0.07 | -1.05 | 0.304226 | 0.603512 | 0.657902 | 0.764189 |
| MmugDNA.2659.1.S1_at    | MmugDNA.2659.1  | 9.68  | 9.55  | 0.62 | 0.05 | 1.09  | 0.687189 | 0.926102 | 0.877656 | 0.95813  |
| MmugDNA.26590.1.S1_at   | MmugDNA.26590.1 | 9.65  | 9.55  | 0.86 | 0.04 | 1.07  | 0.791052 | 0.619506 | 0.923182 | 0.774712 |

|                       |                 |       |       |      |      |       |          |          |          |          |
|-----------------------|-----------------|-------|-------|------|------|-------|----------|----------|----------|----------|
| MmugDNA.26591.1.S1_at | MmugDNA.26591.1 | 7.76  | 7.5   | 0.69 | 0.28 | 1.2   | 0.130854 | 0.029445 | 0.505266 | 0.213368 |
| MmugDNA.26592.1.S1_at | MmugDNA.26592.1 | 7.58  | 7.59  | 0.08 | 0.1  | -1.01 | 0.80647  | 0.716485 | 0.929767 | 0.835749 |
| MmugDNA.26594.1.S1_at | MmugDNA.26594.1 | 4.22  | 4.17  | 0.04 | 0.11 | 1.03  | 0.266209 | 0.200785 | 0.627106 | 0.475282 |
| MmugDNA.26595.1.S1_at | MmugDNA.26595.1 | 9.75  | 9.74  | 0.1  | 0.12 | 1.01  | 0.995203 | 0.011937 | 0.998183 | 0.141357 |
| MmugDNA.26596.1.S1_at | MmugDNA.26596.1 | 8.52  | 8.64  | 0.29 | 0.12 | -1.09 | 0.579825 | 0.002429 | 0.826689 | 0.073093 |
| MmugDNA.26598.1.S1_at | MmugDNA.26598.1 | 10.54 | 10.47 | 0.25 | 0.11 | 1.05  | 0.229049 | 0.210388 | 0.59799  | 0.484266 |
| MmugDNA.26599.1.S1_at | MmugDNA.26599.1 | 5.81  | 5.68  | 0.21 | 0.07 | 1.09  | 0.179871 | 0.104455 | 0.553136 | 0.365719 |
| MmugDNA.266.1.S1_s_at | MmugDNA.266.1   | 3.2   | 3.16  | 0.21 | 0.05 | 1.03  | 0.228039 | 0.291296 | 0.596883 | 0.551803 |
| MmugDNA.26600.1.S1_at | MmugDNA.26600.1 | 5.16  | 4.98  | 0.06 | 0.16 | 1.13  | 0.096387 | 0.395672 | 0.4651   | 0.627623 |
| MmugDNA.26601.1.S1_at | MmugDNA.26601.1 | 4.91  | 4.99  | 1.13 | 0.05 | -1.06 | 0.559356 | 0.584897 | 0.816094 | 0.75256  |
| MmugDNA.26603.1.S1_at | MmugDNA.26603.1 | 4.82  | 4.87  | 0.14 | 0.05 | -1.03 | 0.724631 | 0.176008 | 0.893222 | 0.452526 |
| MmugDNA.26605.1.S1_at | MmugDNA.26605.1 | 9.54  | 10.27 | 0.1  | 0.17 | -1.65 | 0.005238 | 0.027767 | 0.206348 | 0.208035 |
| MmugDNA.26606.1.S1_at | MmugDNA.26606.1 | 8.31  | 7.85  | 0.37 | 0.15 | 1.37  | 0.105681 | 0.087073 | 0.477409 | 0.340038 |
| MmugDNA.26607.1.S1_at | MmugDNA.26607.1 | 4.17  | 3.96  | 0.15 | 0.09 | 1.16  | 0.066945 | 0.073364 | 0.422979 | 0.316469 |
| MmugDNA.26608.1.S1_at | MmugDNA.26608.1 | 11.32 | 11    | 0.19 | 0.02 | 1.25  | 0.109746 | 0.056343 | 0.482577 | 0.283351 |
| MmugDNA.26609.1.S1_at | MmugDNA.26609.1 | 7.92  | 9.01  | 1.29 | 0.13 | -2.12 | 0.192715 | 0.06474  | 0.563577 | 0.30035  |
| MmugDNA.26611.1.S1_at | MmugDNA.26611.1 | 6.5   | 6.67  | 0.53 | 0.18 | -1.12 | 0.41546  | 0.564318 | 0.733656 | 0.739165 |
| MmugDNA.26612.1.S1_at | MmugDNA.26612.1 | 7.79  | 8.61  | 0.32 | 0.18 | -1.76 | 0.016383 | 0.012812 | 0.287478 | 0.14584  |
| MmugDNA.26614.1.S1_at | MmugDNA.26614.1 | 10.85 | 11.53 | 0.19 | 0.07 | -1.6  | 0.005636 | 0.000798 | 0.209565 | 0.046064 |
| MmugDNA.26615.1.S1_at | MmugDNA.26615.1 | 6.77  | 6.33  | 0.12 | 0.29 | 1.36  | 0.051232 | 0.08514  | 0.38958  | 0.336972 |
| MmugDNA.26616.1.S1_at | MmugDNA.26616.1 | 5.79  | 5.7   | 0.05 | 0.07 | 1.06  | 0.117277 | 0.546532 | 0.490908 | 0.728079 |
| MmugDNA.26617.1.S1_at | MmugDNA.26617.1 | 3.98  | 4.01  | 0.38 | 0.26 | -1.02 | 0.917501 | 0.601989 | 0.972005 | 0.763151 |
| MmugDNA.26618.1.S1_at | MmugDNA.26618.1 | 5.53  | 5.22  | 0.14 | 0.19 | 1.24  | 0.28474  | 0.602033 | 0.642485 | 0.763167 |
| MmugDNA.26619.1.S1_at | MmugDNA.26619.1 | 4.3   | 4.09  | 0.29 | 0.12 | 1.15  | 0.125159 | 0.316159 | 0.499247 | 0.56963  |
| MmugDNA.26620.1.S1_at | MmugDNA.26620.1 | 6.58  | 7.89  | 0.72 | 0.13 | -2.47 | 0.09411  | 0.085576 | 0.463389 | 0.337567 |
| MmugDNA.26621.1.S1_at | MmugDNA.26621.1 | 3.78  | 3.76  | 0.07 | 0.19 | 1.01  | 0.985505 | 0.485008 | 0.995461 | 0.688893 |
| MmugDNA.26622.1.S1_at | MmugDNA.26622.1 | 3.69  | 3.68  | 0.2  | 0.04 | 1     | 0.938912 | 0.798642 | 0.979343 | 0.884045 |
| MmugDNA.26624.1.S1_at | MmugDNA.26624.1 | 6.43  | 6.29  | 0.11 | 0.12 | 1.1   | 0.204778 | 0.463997 | 0.576337 | 0.674769 |
| MmugDNA.26625.1.S1_at | MmugDNA.26625.1 | 3.37  | 3.09  | 0.2  | 0.05 | 1.21  | 0.332135 | 0.553223 | 0.678634 | 0.73239  |
| MmugDNA.26628.1.S1_at | MmugDNA.26628.1 | 4.71  | 5.18  | 0.2  | 0.25 | -1.38 | 0.110393 | 0.095692 | 0.483384 | 0.3527   |
| MmugDNA.2663.1.S1_at  | MmugDNA.2663.1  | 3.59  | 3.58  | 0.07 | 0.07 | 1     | 0.24289  | 0.315429 | 0.608808 | 0.568949 |
| MmugDNA.26630.1.S1_at | MmugDNA.26630.1 | 7.27  | 7.17  | 1.48 | 0.09 | 1.07  | 0.925314 | 0.178444 | 0.975138 | 0.454778 |
| MmugDNA.26631.1.S1_at | MmugDNA.26631.1 | 3.74  | 3.86  | 0.24 | 0.33 | -1.09 | 0.993333 | 0.809501 | 0.997445 | 0.890191 |
| MmugDNA.26632.1.S1_at | MmugDNA.26632.1 | 5     | 5.33  | 0.06 | 0.14 | -1.26 | 0.021154 | 0.008603 | 0.306888 | 0.123072 |
| MmugDNA.26633.1.S1_at | MmugDNA.26633.1 | 6.23  | 6.13  | 0.07 | 0.06 | 1.07  | 0.173451 | 0.631619 | 0.546571 | 0.782878 |
| MmugDNA.26634.1.S1_at | MmugDNA.26634.1 | 4.32  | 4.37  | 0.17 | 0.32 | -1.03 | 0.418456 | 0.635462 | 0.735673 | 0.785405 |
| MmugDNA.26635.1.S1_at | MmugDNA.26635.1 | 4.61  | 4.61  | 0.22 | 0.42 | 1     | 0.92929  | 0.746163 | 0.976333 | 0.852688 |
| MmugDNA.26636.1.S1_at | MmugDNA.26636.1 | 4.57  | 4.58  | 0.28 | 0.05 | -1    | 0.439246 | 0.337086 | 0.748019 | 0.584337 |
| MmugDNA.26638.1.S1_at | MmugDNA.26638.1 | 3.52  | 3.56  | 0.25 | 0    | -1.03 | 0.751263 | 0.887905 | 0.905878 | 0.936115 |
| MmugDNA.26639.1.S1_at | MmugDNA.26639.1 | 6.46  | 6.56  | 0.19 | 0.04 | -1.07 | 0.608042 | 0.451938 | 0.840979 | 0.666713 |
| MmugDNA.26640.1.S1_at | MmugDNA.26640.1 | 3.84  | 3.88  | 0.74 | 0.37 | -1.02 | 0.292839 | 0.528527 | 0.649123 | 0.716664 |
| MmugDNA.26641.1.S1_at | MmugDNA.26641.1 | 7.96  | 7.73  | 0.28 | 0.24 | 1.18  | 0.233313 | 0.098021 | 0.600783 | 0.355964 |
| MmugDNA.26644.1.S1_at | MmugDNA.26644.1 | 6.33  | 6.53  | 0.08 | 0.44 | -1.15 | 0.885682 | 0.672777 | 0.96038  | 0.808768 |

|                         |                 |       |       |      |      |       |          |          |          |          |
|-------------------------|-----------------|-------|-------|------|------|-------|----------|----------|----------|----------|
| MmugDNA.26647.1.S1_at   | MmugDNA.26647.1 | 7.04  | 6.72  | 0.11 | 0.07 | 1.25  | 0.008992 | 0.023089 | 0.239963 | 0.190213 |
| MmugDNA.26649.1.S1_at   | MmugDNA.26649.1 | 5.41  | 5.5   | 0.03 | 0.11 | -1.06 | 0.849791 | 0.255416 | 0.947149 | 0.523445 |
| MmugDNA.2665.1.S1_at    | MmugDNA.2665.1  | 7.32  | 8.06  | 0.24 | 0.04 | -1.66 | 0.006667 | 0.00619  | 0.221949 | 0.106774 |
| MmugDNA.26650.1.S1_at   | MmugDNA.26650.1 | 6.2   | 6.27  | 0.52 | 0.47 | -1.05 | 0.339938 | 0.146104 | 0.684096 | 0.420092 |
| MmugDNA.26651.1.S1_at   | MmugDNA.26651.1 | 5.46  | 5.38  | 0.54 | 0.06 | 1.06  | 0.520396 | 0.901457 | 0.793709 | 0.943931 |
| MmugDNA.26652.1.S1_at   | MmugDNA.26652.1 | 4.51  | 4.31  | 0.13 | 0.11 | 1.15  | 0.122041 | 0.1715   | 0.495677 | 0.447895 |
| MmugDNA.26653.1.S1_at   | MmugDNA.26653.1 | 3.66  | 3.67  | 0.08 | 0.23 | -1.01 | 0.547174 | 0.415499 | 0.808925 | 0.64091  |
| MmugDNA.26654.1.S1_at   | MmugDNA.26654.1 | 7.91  | 8.11  | 0.56 | 0.14 | -1.15 | 0.495804 | 0.432846 | 0.780125 | 0.653185 |
| MmugDNA.26655.1.S1_at   | MmugDNA.26655.1 | 3.75  | 3.58  | 0.14 | 0.05 | 1.13  | 0.03655  | 0.057645 | 0.355049 | 0.286357 |
| MmugDNA.26656.1.S1_at   | MmugDNA.26656.1 | 10.91 | 11.65 | 0.53 | 0.03 | -1.67 | 0.235108 | 0.05947  | 0.602266 | 0.290548 |
| MmugDNA.26657.1.S1_at   | MmugDNA.26657.1 | 5.51  | 5.5   | 0.18 | 0.22 | 1     | 0.456912 | 0.67773  | 0.758051 | 0.811787 |
| MmugDNA.26658.1.S1_at   | MmugDNA.26658.1 | 3.91  | 4.05  | 0.15 | 0.07 | -1.1  | 0.352038 | 0.229274 | 0.692649 | 0.501527 |
| MmugDNA.26659.1.S1_at   | MmugDNA.26659.1 | 7.12  | 7.15  | 0.21 | 0.05 | -1.02 | 0.965496 | 0.260354 | 0.988632 | 0.526915 |
| MmugDNA.2666.1.S1_at    | MmugDNA.2666.1  | 9.17  | 8.92  | 0.66 | 0.11 | 1.19  | 0.146871 | 0.171233 | 0.521444 | 0.447792 |
| MmugDNA.26660.1.S1_at   | MmugDNA.26660.1 | 7.87  | 7.77  | 0.06 | 0.11 | 1.07  | 0.314116 | 0.842035 | 0.665    | 0.910013 |
| MmugDNA.26662.1.S1_at   | MmugDNA.26662.1 | 3.55  | 3.15  | 0.26 | 0.11 | 1.33  | 0.125797 | 0.101863 | 0.49972  | 0.361836 |
| MmugDNA.26663.1.S1_at   | MmugDNA.26663.1 | 4.65  | 3.98  | 0.63 | 0.53 | 1.59  | 0.44291  | 0.211947 | 0.750414 | 0.48595  |
| MmugDNA.26663.1.S1_x_at | MmugDNA.26663.1 | 5.53  | 5.15  | 0.53 | 0.3  | 1.3   | 0.524273 | 0.171972 | 0.795835 | 0.448364 |
| MmugDNA.26665.1.S1_at   | MmugDNA.26665.1 | 5.91  | 5.84  | 0.43 | 0.05 | 1.05  | 0.863102 | 0.917828 | 0.95191  | 0.954011 |
| MmugDNA.26666.1.S1_at   | MmugDNA.26666.1 | 4.48  | 4.48  | 0.03 | 0.14 | 1     | 0.298377 | 0.614517 | 0.653129 | 0.771283 |
| MmugDNA.26667.1.S1_at   | MmugDNA.26667.1 | 7.81  | 7.68  | 0.08 | 0.19 | 1.1   | 0.198819 | 0.759026 | 0.570289 | 0.859964 |
| MmugDNA.2667.1.S1_at    | MmugDNA.2667.1  | 5.9   | 5.66  | 0.08 | 0.25 | 1.18  | 0.188583 | 0.413513 | 0.560489 | 0.639648 |
| MmugDNA.26671.1.S1_at   | MmugDNA.26671.1 | 9.54  | 9.64  | 0.2  | 0.21 | -1.07 | 0.288891 | 0.486808 | 0.645883 | 0.690091 |
| MmugDNA.26675.1.S1_at   | MmugDNA.26675.1 | 9.03  | 8.55  | 0.68 | 0.04 | 1.39  | 0.821443 | 0.990735 | 0.935582 | 0.994762 |
| MmugDNA.26676.1.S1_at   | MmugDNA.26676.1 | 6.15  | 5.75  | 0.79 | 0.03 | 1.32  | 0.399061 | 0.665353 | 0.722883 | 0.803901 |
| MmugDNA.26677.1.S1_s_at | MmugDNA.26677.1 | 5.76  | 5.8   | 0.11 | 0.16 | -1.03 | 0.721425 | 0.929228 | 0.891996 | 0.959644 |
| MmugDNA.26678.1.S1_at   | MmugDNA.26678.1 | 3.6   | 3.65  | 0.34 | 0.03 | -1.04 | 0.527419 | 0.783731 | 0.797084 | 0.874756 |
| MmugDNA.26680.1.S1_at   | MmugDNA.26680.1 | 5.47  | 5.35  | 0.04 | 0.11 | 1.08  | 0.217457 | 0.014634 | 0.587269 | 0.154176 |
| MmugDNA.26682.1.S1_at   | MmugDNA.26682.1 | 5.15  | 5.26  | 0.03 | 0.12 | -1.08 | 0.158239 | 0.710094 | 0.531211 | 0.831904 |
| MmugDNA.26683.1.S1_at   | MmugDNA.26683.1 | 5.25  | 5.34  | 0.06 | 0    | -1.07 | 0.120215 | 0.176131 | 0.49354  | 0.452581 |
| MmugDNA.26684.1.S1_at   | MmugDNA.26684.1 | 5.91  | 5.92  | 0.08 | 0.05 | -1.01 | 0.57019  | 0.083285 | 0.821921 | 0.333372 |
| MmugDNA.26685.1.S1_at   | MmugDNA.26685.1 | 11.15 | 10.88 | 0.66 | 0.07 | 1.21  | 0.968621 | 0.863374 | 0.989723 | 0.922402 |
| MmugDNA.26688.1.S1_at   | MmugDNA.26688.1 | 7.4   | 7.68  | 0.58 | 0.14 | -1.22 | 0.855874 | 0.937301 | 0.949046 | 0.964687 |
| MmugDNA.26690.1.S1_at   | MmugDNA.26690.1 | 4.37  | 4.32  | 0.17 | 0.03 | 1.04  | 0.599287 | 0.441258 | 0.837333 | 0.659477 |
| MmugDNA.26691.1.S1_at   | MmugDNA.26691.1 | 8.97  | 8.96  | 0.8  | 0.13 | 1.01  | 0.925621 | 0.089927 | 0.975188 | 0.344119 |
| MmugDNA.26692.1.S1_at   | MmugDNA.26692.1 | 8.07  | 9.63  | 2.53 | 0.36 | -2.95 | 0.130598 | 0.158185 | 0.504978 | 0.433986 |
| MmugDNA.26694.1.S1_at   | MmugDNA.26694.1 | 3.81  | 4.11  | 0.27 | 0.18 | -1.24 | 0.504239 | 0.342246 | 0.784627 | 0.588375 |
| MmugDNA.26697.1.S1_at   | MmugDNA.26697.1 | 8.89  | 7.98  | 0.72 | 0.18 | 1.88  | 0.272903 | 0.515319 | 0.632536 | 0.708237 |
| MmugDNA.26698.1.S1_at   | MmugDNA.26698.1 | 7.22  | 6.97  | 0.08 | 0.15 | 1.19  | 0.074724 | 0.187798 | 0.435313 | 0.463856 |
| MmugDNA.26699.1.S1_at   | MmugDNA.26699.1 | 3.04  | 3.09  | 0.2  | 0.05 | -1.04 | 0.529559 | 0.533116 | 0.798376 | 0.719436 |
| MmugDNA.39929.1.S1_s_at | MmugDNA.39929.1 | 8.2   | 8.13  | 0.1  | 0.03 | 1.05  | 0.070711 | 0.194374 | 0.42977  | 0.469464 |
| MmugDNA.2670.1.S1_at    | MmugDNA.2670.1  | 3.29  | 3.29  | 0.38 | 0.02 | -1    | 0.361055 | 0.28653  | 0.698314 | 0.547946 |
| MmugDNA.26700.1.S1_at   | MmugDNA.26700.1 | 4.53  | 4.37  | 0.23 | 0.06 | 1.12  | 0.535649 | 0.182549 | 0.801869 | 0.459065 |

|                         |                 |       |       |      |      |       |          |          |          |          |
|-------------------------|-----------------|-------|-------|------|------|-------|----------|----------|----------|----------|
| MmugDNA.26701.1.S1_at   | MmugDNA.26701.1 | 5.83  | 5.98  | 0.28 | 0.4  | -1.11 | 0.604935 | 0.755118 | 0.839754 | 0.857465 |
| MmugDNA.26703.1.S1_at   | MmugDNA.26703.1 | 7.91  | 7.21  | 1.24 | 0.73 | 1.62  | 0.778694 | 0.096994 | 0.918374 | 0.354502 |
| MmugDNA.26704.1.S1_at   | MmugDNA.26704.1 | 5.51  | 5.5   | 0.12 | 0.04 | 1.01  | 0.845505 | 0.823906 | 0.945862 | 0.898817 |
| MmugDNA.26705.1.S1_at   | MmugDNA.26705.1 | 3.88  | 4.41  | 0.35 | 0.29 | -1.45 | 0.325273 | 0.033417 | 0.673112 | 0.22646  |
| MmugDNA.26706.1.S1_at   | MmugDNA.26706.1 | 4.96  | 4.9   | 0.55 | 0.16 | 1.04  | 0.726967 | 0.320514 | 0.894589 | 0.572648 |
| MmugDNA.26708.1.S1_at   | MmugDNA.26708.1 | 5.23  | 5.51  | 0.18 | 0.22 | -1.21 | 0.155214 | 0.763019 | 0.528509 | 0.862233 |
| MmugDNA.26709.1.S1_at   | MmugDNA.26709.1 | 4.29  | 4.51  | 0.3  | 0.12 | -1.16 | 0.339441 | 0.062098 | 0.683826 | 0.296094 |
| MmugDNA.2671.1.S1_at    | MmugDNA.2671.1  | 4.94  | 4.99  | 0.06 | 0.09 | -1.04 | 0.82605  | 0.13132  | 0.937614 | 0.403407 |
| MmugDNA.26710.1.S1_at   | MmugDNA.26710.1 | 5.65  | 5.57  | 0.11 | 0.11 | 1.06  | 0.879925 | 0.986138 | 0.958347 | 0.992143 |
| MmugDNA.26711.1.S1_at   | MmugDNA.26711.1 | 4.87  | 4.85  | 0.35 | 0.26 | 1.01  | 0.683013 | 0.884275 | 0.876006 | 0.934066 |
| MmugDNA.26712.1.S1_at   | MmugDNA.26712.1 | 8.78  | 9.28  | 0.63 | 0.35 | -1.41 | 0.273568 | 0.286894 | 0.633298 | 0.548205 |
| MmugDNA.26713.1.S1_at   | MmugDNA.26713.1 | 4.02  | 3.98  | 0.15 | 0.14 | 1.03  | 0.641211 | 0.307689 | 0.857191 | 0.563871 |
| MmugDNA.26714.1.S1_at   | MmugDNA.26714.1 | 5.03  | 5.42  | 0.62 | 0.35 | -1.31 | 0.478657 | 0.090307 | 0.770122 | 0.3447   |
| MmugDNA.26716.1.S1_s_at | MmugDNA.26716.1 | 3.77  | 3.71  | 0.18 | 0.23 | 1.04  | 0.657784 | 0.062329 | 0.864279 | 0.296502 |
| MmugDNA.26717.1.S1_at   | MmugDNA.26717.1 | 3.93  | 3.94  | 0.14 | 0.07 | -1.01 | 0.842694 | 0.966264 | 0.944281 | 0.981168 |
| MmugDNA.26718.1.S1_at   | MmugDNA.26718.1 | 4.97  | 5.02  | 0.31 | 0.2  | -1.04 | 0.456203 | 0.86859  | 0.757783 | 0.925383 |
| MmugDNA.26719.1.S1_at   | MmugDNA.26719.1 | 5.84  | 5.08  | 0.57 | 0.5  | 1.69  | 0.0658   | 0.084002 | 0.421079 | 0.3349   |
| MmugDNA.2672.1.S1_at    | MmugDNA.2672.1  | 7.38  | 7.47  | 0.44 | 0.19 | -1.06 | 0.191316 | 0.2883   | 0.562786 | 0.549561 |
| MmugDNA.26720.1.S1_at   | MmugDNA.26720.1 | 4.94  | 4.9   | 0.15 | 0.05 | 1.03  | 0.939819 | 0.493273 | 0.979544 | 0.694018 |
| MmugDNA.26721.1.S1_at   | MmugDNA.26721.1 | 3.9   | 3.8   | 0.24 | 0.21 | 1.07  | 0.345973 | 0.227141 | 0.687873 | 0.499494 |
| MmugDNA.26722.1.S1_at   | MmugDNA.26722.1 | 8.64  | 10.01 | 0.28 | 0.07 | -2.57 | 0.00198  | 0.001412 | 0.17214  | 0.057381 |
| MmugDNA.26723.1.S1_at   | MmugDNA.26723.1 | 3.02  | 3.21  | 0.06 | 0.43 | -1.14 | 0.212498 | 0.139233 | 0.582995 | 0.412402 |
| MmugDNA.26724.1.S1_at   | MmugDNA.26724.1 | 6.72  | 6.81  | 0.26 | 0.05 | -1.06 | 0.847669 | 0.275521 | 0.946572 | 0.53974  |
| MmugDNA.26725.1.S1_at   | MmugDNA.26725.1 | 5.96  | 5.26  | 0.53 | 0.08 | 1.62  | 0.267071 | 0.014576 | 0.62772  | 0.15396  |
| MmugDNA.26726.1.S1_at   | MmugDNA.26726.1 | 11.35 | 11.33 | 0.02 | 0.11 | 1.01  | 0.946094 | 0.323142 | 0.981287 | 0.574351 |
| MmugDNA.26727.1.S1_at   | MmugDNA.26727.1 | 3     | 2.81  | 0.24 | 0.1  | 1.14  | 0.386318 | 0.180529 | 0.713507 | 0.457138 |
| MmugDNA.26728.1.S1_at   | MmugDNA.26728.1 | 5.66  | 6.39  | 0.13 | 0.14 | -1.66 | 0.004204 | 0.188002 | 0.198874 | 0.4641   |
| MmugDNA.26730.1.S1_at   | MmugDNA.26730.1 | 5.88  | 5.88  | 0.71 | 0.69 | 1.01  | 0.770805 | 0.853949 | 0.914237 | 0.916872 |
| MmugDNA.26731.1.S1_at   | MmugDNA.26731.1 | 5.09  | 5.09  | 0.06 | 0.04 | -1    | 0.249617 | 0.268748 | 0.615064 | 0.534151 |
| MmugDNA.26733.1.S1_at   | MmugDNA.26733.1 | 6.45  | 5.63  | 0.53 | 0.52 | 1.76  | 0.455158 | 0.500975 | 0.75733  | 0.699362 |
| MmugDNA.26736.1.S1_at   | MmugDNA.26736.1 | 7.13  | 7.16  | 0.01 | 0.04 | -1.02 | 0.090984 | 0.067886 | 0.458897 | 0.306745 |
| MmugDNA.34775.1.S1_at   | MmugDNA.34775.1 | 3.25  | 3.35  | 0.08 | 0.04 | -1.08 | 0.08276  | 0.337208 | 0.448001 | 0.584418 |
| MmugDNA.34775.1.S1_s_at | MmugDNA.34775.1 | 6.2   | 6.15  | 0.09 | 0.05 | 1.03  | 0.68663  | 0.74079  | 0.877418 | 0.84994  |
| MmugDNA.26738.1.S1_at   | MmugDNA.26738.1 | 5.46  | 4.63  | 0.69 | 0.5  | 1.78  | 0.41463  | 0.602858 | 0.733197 | 0.763758 |
| MmugDNA.26739.1.S1_at   | MmugDNA.26739.1 | 5.62  | 5.38  | 0.15 | 0.16 | 1.18  | 0.092014 | 0.105661 | 0.460597 | 0.367776 |
| MmugDNA.2674.1.S1_at    | MmugDNA.2674.1  | 6.85  | 7.03  | 0.26 | 0.22 | -1.13 | 0.702309 | 0.884111 | 0.884197 | 0.933911 |
| MmugDNA.26740.1.S1_at   | MmugDNA.26740.1 | 5.01  | 4.99  | 0.05 | 0.06 | 1.01  | 0.202645 | 0.500333 | 0.5742   | 0.699009 |
| MmugDNA.26741.1.S1_at   | MmugDNA.26741.1 | 6.53  | 6.87  | 0.79 | 0.28 | -1.27 | 0.424047 | 0.457926 | 0.739366 | 0.670999 |
| MmugDNA.26742.1.S1_s_at | MmugDNA.26742.1 | 8.08  | 7.95  | 0.11 | 0.08 | 1.09  | 0.101288 | 0.010985 | 0.471667 | 0.136546 |
| MmugDNA.26743.1.S1_at   | MmugDNA.26743.1 | 8.78  | 8.77  | 0.39 | 0.02 | 1.01  | 0.471008 | 0.107358 | 0.766294 | 0.370219 |
| MmugDNA.26744.1.S1_s_at | MmugDNA.26744.1 | 4.6   | 4.55  | 0.13 | 0.1  | 1.03  | 0.409463 | 0.320218 | 0.730084 | 0.572561 |
| MmugDNA.26745.1.S1_s_at | MmugDNA.26745.1 | 10.49 | 10.56 | 0.24 | 0.11 | -1.05 | 0.993507 | 0.061786 | 0.997488 | 0.295327 |
| MmugDNA.26747.1.S1_at   | MmugDNA.26747.1 | 7.36  | 7.63  | 0.82 | 0.39 | -1.21 | 0.227406 | 0.545368 | 0.596499 | 0.727517 |



|                         |                 |       |       |      |      |       |          |          |          |          |
|-------------------------|-----------------|-------|-------|------|------|-------|----------|----------|----------|----------|
| MmugDNA.26748.1.S1_at   | MmugDNA.26748.1 | 9.5   | 9.48  | 0.07 | 0.03 | 1.01  | 0.446651 | 0.013633 | 0.752779 | 0.149433 |
| MmugDNA.26748.1.S1_s_at | MmugDNA.26748.1 | 11.67 | 11.68 | 0.08 | 0.07 | -1    | 0.999801 | 0.0067   | 0.999991 | 0.110751 |
| MmugDNA.2675.1.S1_at    | MmugDNA.2675.1  | 8.49  | 8.86  | 0.39 | 0.15 | -1.29 | 0.787224 | 0.0792   | 0.921843 | 0.32639  |
| MmugDNA.26750.1.S1_at   | MmugDNA.26750.1 | 6.73  | 6.63  | 0.12 | 0.07 | 1.08  | 0.116266 | 0.259108 | 0.489568 | 0.526263 |
| MmugDNA.26753.1.S1_at   | MmugDNA.26753.1 | 6.23  | 5.98  | 0.07 | 0.12 | 1.19  | 0.035988 | 0.256223 | 0.353759 | 0.524075 |
| MmugDNA.26754.1.S1_at   | MmugDNA.26754.1 | 4.9   | 5.05  | 0.31 | 0.41 | -1.1  | 0.300536 | 0.378928 | 0.655092 | 0.615882 |
| MmugDNA.26755.1.S1_at   | MmugDNA.26755.1 | 4.63  | 4.63  | 0.06 | 0.06 | 1     | 0.350255 | 0.671529 | 0.691188 | 0.807948 |
| MmugDNA.26756.1.S1_s_at | MmugDNA.26756.1 | 10.72 | 10.93 | 0.04 | 0.02 | -1.16 | 0.001046 | 0.009377 | 0.155374 | 0.127634 |
| MmugDNA.26757.1.S1_at   | MmugDNA.26757.1 | 8.14  | 7.58  | 0.34 | 0.04 | 1.47  | 0.057072 | 0.000719 | 0.401454 | 0.044427 |
| MmugDNA.26758.1.S1_s_at | MmugDNA.26758.1 | 11.16 | 10.84 | 0.23 | 0.08 | 1.24  | 0.080378 | 0.039422 | 0.444007 | 0.243529 |
| MmugDNA.2676.1.S1_at    | MmugDNA.2676.1  | 5.03  | 5.03  | 0.06 | 0.03 | 1     | 0.993886 | 0.777911 | 0.99766  | 0.870964 |
| MmugDNA.26760.1.S1_at   | MmugDNA.26760.1 | 8.31  | 8.49  | 0.35 | 0.08 | -1.13 | 0.940907 | 0.850633 | 0.979891 | 0.915021 |
| MmugDNA.26761.1.S1_at   | MmugDNA.26761.1 | 3.65  | 3.72  | 0.17 | 0.07 | -1.05 | 0.864922 | 0.416509 | 0.952506 | 0.641647 |
| MmugDNA.26762.1.S1_at   | MmugDNA.26762.1 | 7.18  | 7.11  | 0.11 | 0.05 | 1.05  | 0.238762 | 0.065222 | 0.605393 | 0.301239 |
| MmugDNA.26764.1.S1_at   | MmugDNA.26764.1 | 8.81  | 9.42  | 0.44 | 0.05 | -1.53 | 0.269517 | 0.777422 | 0.629746 | 0.870674 |
| MmugDNA.26765.1.S1_at   | MmugDNA.26765.1 | 5.89  | 6.06  | 0.19 | 0.26 | -1.13 | 0.397385 | 0.547664 | 0.72174  | 0.728596 |
| MmugDNA.26766.1.S1_at   | MmugDNA.26766.1 | 4.43  | 4.54  | 0.11 | 0    | -1.08 | 0.195138 | 0.463492 | 0.5656   | 0.674461 |
| MmugDNA.26768.1.S1_s_at | MmugDNA.26768.1 | 2.98  | 2.9   | 0.1  | 0.05 | 1.06  | 0.427611 | 0.026298 | 0.741242 | 0.203132 |
| MmugDNA.26769.1.S1_at   | MmugDNA.26769.1 | 7.16  | 7.02  | 0.16 | 0.04 | 1.1   | 0.149771 | 0.432569 | 0.523273 | 0.652991 |
| MmugDNA.2677.1.S1_at    | MmugDNA.2677.1  | 8.82  | 9.65  | 0.58 | 0.16 | -1.77 | 0.081527 | 0.031507 | 0.445497 | 0.219534 |
| MmugDNA.26771.1.S1_at   | MmugDNA.26771.1 | 8.33  | 8.55  | 0.8  | 0.05 | -1.16 | 0.952388 | 0.292796 | 0.984024 | 0.552823 |
| MmugDNA.26772.1.S1_at   | MmugDNA.26772.1 | 6.72  | 6.58  | 0.18 | 0.06 | 1.1   | 0.981708 | 0.324154 | 0.994195 | 0.574853 |
| MmugDNA.26773.1.S1_at   | MmugDNA.26773.1 | 4.36  | 4.37  | 0.43 | 0.18 | -1.01 | 0.517298 | 0.438645 | 0.791973 | 0.657605 |
| MmugDNA.26775.1.S1_at   | MmugDNA.26775.1 | 11.15 | 10.85 | 0.31 | 0.1  | 1.23  | 0.271122 | 0.172472 | 0.631014 | 0.448864 |
| MmugDNA.26776.1.S1_at   | MmugDNA.26776.1 | 5.73  | 5.22  | 0.24 | 0.08 | 1.43  | 0.048177 | 0.063886 | 0.382531 | 0.29906  |
| MmugDNA.26777.1.S1_at   | MmugDNA.26777.1 | 9.82  | 10.17 | 0.19 | 0.1  | -1.27 | 0.135944 | 0.075468 | 0.510454 | 0.319857 |
| MmugDNA.26778.1.S1_at   | MmugDNA.26778.1 | 4.08  | 4.24  | 0.19 | 0.09 | -1.12 | 0.282613 | 0.051813 | 0.640996 | 0.273151 |
| MmugDNA.26779.1.S1_at   | MmugDNA.26779.1 | 4.31  | 4.11  | 0.03 | 0.23 | 1.15  | 0.161241 | 0.186341 | 0.534529 | 0.46218  |
| MmugDNA.2678.1.S1_at    | MmugDNA.2678.1  | 5.08  | 4.89  | 0.04 | 0.17 | 1.14  | 0.398849 | 0.397362 | 0.722745 | 0.628812 |
| MmugDNA.26780.1.S1_at   | MmugDNA.26780.1 | 6.08  | 6.28  | 0.38 | 0.2  | -1.15 | 0.554143 | 0.299599 | 0.812456 | 0.557956 |
| MmugDNA.26781.1.S1_at   | MmugDNA.26781.1 | 3.7   | 3.54  | 0.09 | 0.04 | 1.12  | 0.110146 | 0.067234 | 0.483183 | 0.305302 |
| MmugDNA.26782.1.S1_at   | MmugDNA.26782.1 | 4.29  | 4.3   | 0.08 | 0.11 | -1    | 0.921545 | 0.186064 | 0.973435 | 0.461931 |
| MmugDNA.26783.1.S1_at   | MmugDNA.26783.1 | 3.75  | 3.9   | 0.24 | 0.2  | -1.11 | 0.908291 | 0.963692 | 0.969112 | 0.979798 |
| MmugDNA.26784.1.S1_at   | MmugDNA.26784.1 | 5.05  | 4.73  | 0.34 | 0.09 | 1.25  | 0.158831 | 0.607777 | 0.531595 | 0.766554 |
| MmugDNA.26785.1.S1_at   | MmugDNA.26785.1 | 4.08  | 4.09  | 0.08 | 0.07 | -1.01 | 0.299066 | 0.762723 | 0.653475 | 0.862004 |
| MmugDNA.26786.1.S1_at   | MmugDNA.26786.1 | 4.02  | 4.04  | 0.11 | 0.12 | -1.01 | 0.291607 | 0.285022 | 0.647943 | 0.547095 |
| MmugDNA.26788.1.S1_at   | MmugDNA.26788.1 | 3.58  | 3.6   | 0.22 | 0.04 | -1.01 | 0.714613 | 0.632993 | 0.888874 | 0.783894 |
| MmugDNA.26789.1.S1_at   | MmugDNA.26789.1 | 10.43 | 10.9  | 0.16 | 0.12 | -1.38 | 0.019528 | 0.009737 | 0.301474 | 0.129787 |
| MmugDNA.26790.1.S1_at   | MmugDNA.26790.1 | 4     | 4.16  | 0.14 | 0.73 | -1.11 | 0.254073 | 0.066608 | 0.618638 | 0.303842 |
| MmugDNA.26791.1.S1_at   | MmugDNA.26791.1 | 6.68  | 6.49  | 0.1  | 0.05 | 1.14  | 0.064151 | 0.397797 | 0.417684 | 0.629114 |
| MmugDNA.26792.1.S1_at   | MmugDNA.26792.1 | 5.41  | 5.18  | 0.18 | 0.2  | 1.17  | 0.978942 | 0.00932  | 0.993198 | 0.127446 |
| MmugDNA.26793.1.S1_at   | MmugDNA.26793.1 | 8.6   | 8.87  | 0.21 | 0.11 | -1.21 | 0.163009 | 0.423365 | 0.536035 | 0.646277 |
| MmugDNA.26794.1.S1_s_at | MmugDNA.26794.1 | 11.74 | 11.91 | 0.06 | 0.02 | -1.13 | 0.006588 | 0.000865 | 0.220082 | 0.047425 |

|                         |                 |       |       |      |      |       |          |          |          |          |
|-------------------------|-----------------|-------|-------|------|------|-------|----------|----------|----------|----------|
| MmugDNA.26795.1.S1_at   | MmugDNA.26795.1 | 3.25  | 3.05  | 0.06 | 0.1  | 1.15  | 0.021244 | 0.214033 | 0.307222 | 0.487633 |
| MmugDNA.26798.1.S1_at   | MmugDNA.26798.1 | 6.21  | 5.95  | 0.16 | 0.05 | 1.19  | 0.248753 | 0.502731 | 0.614127 | 0.700289 |
| MmugDNA.268.1.S1_at     | MmugDNA.268.1   | 6.23  | 6.27  | 0.1  | 0.05 | -1.03 | 0.995542 | 0.837687 | 0.998302 | 0.907261 |
| MmugDNA.2680.1.S1_at    | MmugDNA.2680.1  | 7.37  | 7.51  | 0.12 | 0.13 | -1.11 | 0.216282 | 0.353126 | 0.586437 | 0.596383 |
| MmugDNA.26800.1.S1_s_at | MmugDNA.26800.1 | 11.2  | 10.81 | 0.15 | 0.23 | 1.31  | 0.026244 | 0.018484 | 0.323734 | 0.171015 |
| MmugDNA.26801.1.S1_at   | MmugDNA.26801.1 | 7.57  | 7.93  | 0.63 | 0.12 | -1.28 | 0.136913 | 0.206266 | 0.511963 | 0.480426 |
| MmugDNA.26802.1.S1_at   | MmugDNA.26802.1 | 4.54  | 4.45  | 0.13 | 0.06 | 1.06  | 0.494588 | 0.357984 | 0.779478 | 0.59957  |
| MmugDNA.26803.1.S1_at   | MmugDNA.26803.1 | 3.85  | 3.36  | 0.69 | 0.26 | 1.41  | 0.327731 | 0.456118 | 0.675222 | 0.669909 |
| MmugDNA.26804.1.S1_at   | MmugDNA.26804.1 | 9.45  | 10.15 | 0.22 | 0.19 | -1.63 | 0.014518 | 0.006763 | 0.27627  | 0.111308 |
| MmugDNA.26805.1.S1_at   | MmugDNA.26805.1 | 4.48  | 4.49  | 0.07 | 0.11 | -1.01 | 0.318004 | 0.791321 | 0.667644 | 0.879439 |
| MmugDNA.26807.1.S1_at   | MmugDNA.26807.1 | 2.83  | 2.79  | 0.08 | 0.07 | -1.03 | 0.290122 | 0.227741 | 0.646735 | 0.499979 |
| MmugDNA.26810.1.S1_at   | MmugDNA.26810.1 | 3.44  | 3.31  | 0.04 | 0.34 | 1.1   | 0.865749 | 0.844251 | 0.952762 | 0.911327 |
| MmugDNA.26811.1.S1_at   | MmugDNA.26811.1 | 2.91  | 2.71  | 0.14 | 0.04 | 1.14  | 0.103534 | 0.193777 | 0.474343 | 0.468847 |
| MmugDNA.26811.1.S1_x_at | MmugDNA.26811.1 | 2.81  | 2.8   | 0.11 | 0.03 | 1.01  | 0.782892 | 0.697503 | 0.920107 | 0.824228 |
| MmugDNA.26812.1.S1_at   | MmugDNA.26812.1 | 3.4   | 3.47  | 1.14 | 0.29 | -1.05 | 0.712298 | 0.391141 | 0.887937 | 0.624834 |
| MmugDNA.26813.1.S1_at   | MmugDNA.26813.1 | 10.66 | 10.39 | 0.87 | 0.08 | 1.21  | 0.583457 | 0.095663 | 0.829086 | 0.35269  |
| MmugDNA.26815.1.S1_at   | MmugDNA.26815.1 | 8.45  | 9.05  | 0.3  | 0.28 | -1.51 | 0.056088 | 0.022036 | 0.399441 | 0.185855 |
| MmugDNA.26816.1.S1_at   | MmugDNA.26816.1 | 5.05  | 4.54  | 0.07 | 0.77 | 1.42  | 0.810111 | 0.401545 | 0.931255 | 0.631068 |
| MmugDNA.26817.1.S1_at   | MmugDNA.26817.1 | 7.99  | 7.91  | 0.31 | 0.23 | 1.06  | 0.683276 | 0.057112 | 0.876089 | 0.284945 |
| MmugDNA.26819.1.S1_at   | MmugDNA.26819.1 | 6.62  | 6.78  | 0.09 | 0.29 | -1.12 | 0.275378 | 0.045412 | 0.634828 | 0.257437 |
| MmugDNA.26820.1.S1_at   | MmugDNA.26820.1 | 2.81  | 2.8   | 0.1  | 0.13 | 1.01  | 0.653163 | 0.305459 | 0.862212 | 0.562418 |
| MmugDNA.26821.1.S1_at   | MmugDNA.26821.1 | 9.47  | 9     | 0.53 | 0.23 | 1.38  | 0.278488 | 0.01265  | 0.637712 | 0.145088 |
| MmugDNA.26823.1.S1_at   | MmugDNA.26823.1 | 3.8   | 3.66  | 0.3  | 0.33 | 1.1   | 0.70679  | 0.612986 | 0.885938 | 0.770331 |
| MmugDNA.26824.1.S1_at   | MmugDNA.26824.1 | 5.5   | 5.37  | 0.18 | 0.14 | 1.1   | 0.914579 | 0.986349 | 0.970887 | 0.992243 |
| MmugDNA.26825.1.S1_at   | MmugDNA.26825.1 | 6.14  | 6.79  | 0.25 | 0.3  | -1.57 | 0.036706 | 0.031165 | 0.355378 | 0.218378 |
| MmugDNA.26827.1.S1_at   | MmugDNA.26827.1 | 4.89  | 4.9   | 0.12 | 0.09 | -1.01 | 0.939917 | 0.379652 | 0.979551 | 0.616523 |
| MmugDNA.26829.1.S1_at   | MmugDNA.26829.1 | 5.99  | 5.7   | 0.11 | 0.11 | 1.23  | 0.017426 | 0.025848 | 0.291663 | 0.201605 |
| MmugDNA.2683.1.S1_at    | MmugDNA.2683.1  | 5.31  | 4.61  | 0.49 | 0.13 | 1.62  | 0.156083 | 0.416422 | 0.529456 | 0.641587 |
| MmugDNA.26830.1.S1_at   | MmugDNA.26830.1 | 8.2   | 7.8   | 0.58 | 0.24 | 1.32  | 0.672035 | 0.457478 | 0.870614 | 0.670862 |
| MmugDNA.26831.1.S1_at   | MmugDNA.26831.1 | 4.17  | 4.32  | 0.15 | 0.06 | -1.11 | 0.394523 | 0.434672 | 0.719858 | 0.654756 |
| MmugDNA.26832.1.S1_at   | MmugDNA.26832.1 | 2.92  | 2.81  | 0.19 | 0.05 | 1.09  | 0.430753 | 0.597372 | 0.743048 | 0.760178 |
| MmugDNA.26833.1.S1_at   | MmugDNA.26833.1 | 3.95  | 3.58  | 0.39 | 0.3  | 1.29  | 0.103386 | 0.113691 | 0.474147 | 0.379818 |
| MmugDNA.26834.1.S1_at   | MmugDNA.26834.1 | 8.61  | 8.5   | 0.3  | 0.07 | 1.08  | 0.924472 | 0.435761 | 0.97475  | 0.655508 |
| MmugDNA.26835.1.S1_at   | MmugDNA.26835.1 | 8.24  | 8.15  | 0.99 | 0.45 | 1.06  | 0.851429 | 0.95728  | 0.947639 | 0.975831 |
| MmugDNA.26836.1.S1_at   | MmugDNA.26836.1 | 10.61 | 10.44 | 0.3  | 0.09 | 1.12  | 0.830686 | 0.107395 | 0.939399 | 0.370219 |
| MmugDNA.26839.1.S1_at   | MmugDNA.26839.1 | 8.44  | 9.32  | 0.41 | 0.2  | -1.83 | 0.043909 | 0.059455 | 0.37307  | 0.290548 |
| MmugDNA.2684.1.S1_at    | MmugDNA.2684.1  | 7.32  | 6.85  | 0.46 | 0.16 | 1.38  | 0.093705 | 0.004328 | 0.46305  | 0.092251 |
| MmugDNA.26840.1.S1_at   | MmugDNA.26840.1 | 6.06  | 5.86  | 0.57 | 0.82 | 1.15  | 0.360776 | 0.560367 | 0.698189 | 0.736645 |
| MmugDNA.26842.1.S1_at   | MmugDNA.26842.1 | 5.26  | 5.05  | 0.05 | 0.19 | 1.16  | 0.380108 | 0.605107 | 0.709362 | 0.764917 |
| MmugDNA.26843.1.S1_at   | MmugDNA.26843.1 | 4.25  | 4.21  | 0.08 | 0.26 | 1.03  | 0.543462 | 0.600746 | 0.806505 | 0.76224  |
| MmugDNA.26844.1.S1_at   | MmugDNA.26844.1 | 7.98  | 7.29  | 0.51 | 0.32 | 1.61  | 0.0498   | 0.015203 | 0.386252 | 0.156703 |
| MmugDNA.26845.1.S1_at   | MmugDNA.26845.1 | 9.63  | 9.49  | 0.68 | 0.17 | 1.1   | 0.226102 | 0.272339 | 0.595263 | 0.537108 |
| MmugDNA.26846.1.S1_at   | MmugDNA.26846.1 | 8.27  | 7.5   | 0.48 | 0.11 | 1.71  | 0.17057  | 0.415611 | 0.543588 | 0.641007 |

|                         |                 |       |       |      |      |       |          |          |          |          |
|-------------------------|-----------------|-------|-------|------|------|-------|----------|----------|----------|----------|
| MmugDNA.26847.1.S1_at   | MmugDNA.26847.1 | 5.68  | 5.6   | 1.28 | 0.44 | 1.06  | 0.513344 | 0.319785 | 0.789834 | 0.572135 |
| MmugDNA.26848.1.S1_s_at | MmugDNA.26848.1 | 5     | 5     | 0.12 | 0.04 | 1     | 0.25438  | 0.486067 | 0.618859 | 0.689573 |
| MmugDNA.26849.1.S1_at   | MmugDNA.26849.1 | 4.54  | 4.25  | 0.37 | 0.06 | 1.23  | 0.241218 | 0.310803 | 0.607441 | 0.565832 |
| MmugDNA.2685.1.S1_at    | MmugDNA.2685.1  | 4.61  | 4.31  | 0.39 | 0.06 | 1.24  | 0.70129  | 0.553651 | 0.883866 | 0.732764 |
| MmugDNA.26850.1.S1_at   | MmugDNA.26850.1 | 5.13  | 5.14  | 0.1  | 0.08 | -1    | 0.682408 | 0.732208 | 0.875741 | 0.844899 |
| MmugDNA.26851.1.S1_at   | MmugDNA.26851.1 | 8.5   | 8.75  | 0.1  | 0.19 | -1.19 | 0.036396 | 0.006187 | 0.35477  | 0.106774 |
| MmugDNA.26852.1.S1_at   | MmugDNA.26852.1 | 5.61  | 5.78  | 0.31 | 0.11 | -1.13 | 0.373733 | 0.499021 | 0.705567 | 0.697958 |
| MmugDNA.26853.1.S1_at   | MmugDNA.26853.1 | 2.97  | 3.01  | 0.15 | 0    | -1.03 | 0.690591 | 0.631218 | 0.879504 | 0.782734 |
| MmugDNA.26856.1.S1_at   | MmugDNA.26856.1 | 11.82 | 11.17 | 0.73 | 0.33 | 1.57  | 0.223886 | 0.039759 | 0.59298  | 0.244402 |
| MmugDNA.26857.1.S1_at   | MmugDNA.26857.1 | 10.59 | 10.29 | 0.67 | 0.09 | 1.23  | 0.398828 | 0.578108 | 0.722745 | 0.7483   |
| MmugDNA.26858.1.S1_at   | MmugDNA.26858.1 | 7.48  | 7.3   | 0.3  | 0.34 | -1.13 | 0.59674  | 0.000804 | 0.836122 | 0.04607  |
| MmugDNA.26859.1.S1_at   | MmugDNA.26859.1 | 3.38  | 3.65  | 0.2  | 0.34 | -1.21 | 0.695483 | 0.850011 | 0.881591 | 0.914673 |
| MmugDNA.2686.1.S1_at    | MmugDNA.2686.1  | 12.68 | 12.35 | 0.27 | 0.09 | 1.26  | 0.10026  | 0.073481 | 0.470757 | 0.316769 |
| MmugDNA.26860.1.S1_at   | MmugDNA.26860.1 | 4.65  | 4.45  | 0.22 | 0.09 | 1.15  | 0.23326  | 0.290431 | 0.600754 | 0.551169 |
| MmugDNA.26862.1.S1_at   | MmugDNA.26862.1 | 7.03  | 6.96  | 0.11 | 0.01 | 1.05  | 0.094575 | 0.252901 | 0.463794 | 0.521232 |
| MmugDNA.26864.1.S1_at   | MmugDNA.26864.1 | 7.97  | 7.84  | 0.14 | 0.09 | 1.09  | 0.245686 | 0.121915 | 0.611181 | 0.391296 |
| MmugDNA.26864.1.S1_s_at | MmugDNA.26864.1 | 9.84  | 9.62  | 0.15 | 0.03 | 1.16  | 0.02887  | 0.030552 | 0.333062 | 0.216711 |
| MmugDNA.26865.1.S1_at   | MmugDNA.26865.1 | 6.88  | 6.78  | 0.03 | 0.06 | 1.07  | 0.194537 | 0.522727 | 0.565097 | 0.713338 |
| MmugDNA.26866.1.S1_at   | MmugDNA.26866.1 | 6.07  | 5.74  | 0.23 | 0.22 | 1.26  | 0.102473 | 0.214595 | 0.472666 | 0.4884   |
| MmugDNA.26867.1.S1_at   | MmugDNA.26867.1 | 3.72  | 3.39  | 0.32 | 0.08 | 1.25  | 0.380897 | 0.504308 | 0.709767 | 0.701474 |
| MmugDNA.26868.1.S1_at   | MmugDNA.26868.1 | 3.35  | 3.16  | 0.2  | 0.21 | 1.14  | 0.79508  | 0.659537 | 0.924794 | 0.800801 |
| MmugDNA.26869.1.S1_at   | MmugDNA.26869.1 | 5     | 5     | 0.22 | 0.07 | 1     | 0.74676  | 0.687376 | 0.903726 | 0.817576 |
| MmugDNA.2687.1.S1_at    | MmugDNA.2687.1  | 6.8   | 5.81  | 0.5  | 0.23 | 1.98  | 0.03285  | 0.005105 | 0.345393 | 0.099108 |
| MmugDNA.26870.1.S1_at   | MmugDNA.26870.1 | 10.4  | 10.94 | 0.56 | 0.11 | -1.45 | 0.049929 | 0.012636 | 0.386663 | 0.145032 |
| MmugDNA.26871.1.S1_at   | MmugDNA.26871.1 | 3.63  | 3.63  | 0.23 | 0.19 | -1    | 0.943895 | 0.538685 | 0.980618 | 0.723313 |
| MmugDNA.26874.1.S1_at   | MmugDNA.26874.1 | 7.81  | 8.03  | 0.19 | 0.09 | -1.16 | 0.169253 | 0.103281 | 0.542111 | 0.364143 |
| MmugDNA.26875.1.S1_at   | MmugDNA.26875.1 | 10.16 | 10.19 | 0.1  | 0.04 | -1.02 | 0.295274 | 0.212498 | 0.651026 | 0.486502 |
| MmugDNA.26876.1.S1_at   | MmugDNA.26876.1 | 8.49  | 8.53  | 0.72 | 0.08 | -1.03 | 0.85516  | 0.926978 | 0.948787 | 0.958453 |
| MmugDNA.26877.1.S1_at   | MmugDNA.26877.1 | 8.7   | 8.61  | 0.28 | 0.08 | 1.07  | 0.861732 | 0.789232 | 0.951267 | 0.878225 |
| MmugDNA.26878.1.S1_at   | MmugDNA.26878.1 | 7.31  | 6.65  | 1.72 | 0.18 | 1.58  | 0.608029 | 0.198382 | 0.840979 | 0.473292 |
| MmugDNA.26879.1.S1_at   | MmugDNA.26879.1 | 3.92  | 4.25  | 0.06 | 0.2  | -1.26 | 0.068607 | 0.115516 | 0.425941 | 0.38267  |
| MmugDNA.2688.1.S1_at    | MmugDNA.2688.1  | 4.05  | 4.08  | 0.33 | 0.25 | -1.02 | 0.965428 | 0.802806 | 0.988598 | 0.886441 |
| MmugDNA.26880.1.S1_at   | MmugDNA.26880.1 | 4.31  | 4.25  | 0.02 | 0.05 | 1.04  | 0.051999 | 0.410446 | 0.391724 | 0.637311 |
| MmugDNA.26882.1.S1_at   | MmugDNA.26882.1 | 6.64  | 6.49  | 0.04 | 0.01 | 1.11  | 0.002269 | 0.033854 | 0.174757 | 0.227639 |
| MmugDNA.26883.1.S1_at   | MmugDNA.26883.1 | 4.96  | 4.36  | 0.37 | 0.06 | 1.52  | 0.050284 | 0.065217 | 0.386954 | 0.301239 |
| MmugDNA.26887.1.S1_at   | MmugDNA.26887.1 | 3.85  | 3.83  | 0.2  | 0.22 | 1.02  | 0.436284 | 0.590576 | 0.746272 | 0.756311 |
| MmugDNA.26888.1.S1_at   | MmugDNA.26888.1 | 5.02  | 4.68  | 0.46 | 0.26 | 1.27  | 0.934053 | 0.422065 | 0.977707 | 0.645447 |
| MmugDNA.26889.1.S1_at   | MmugDNA.26889.1 | 4.35  | 4.24  | 0.41 | 0.14 | 1.08  | 0.232368 | 0.320853 | 0.600124 | 0.572849 |
| MmugDNA.2689.1.S1_at    | MmugDNA.2689.1  | 8.93  | 8.92  | 0.48 | 0.08 | 1     | 0.927538 | 0.847981 | 0.975943 | 0.913675 |
| MmugDNA.26890.1.S1_at   | MmugDNA.26890.1 | 3.7   | 3.3   | 0.02 | 0.33 | 1.31  | 0.232728 | 0.347146 | 0.600193 | 0.591815 |
| MmugDNA.26891.1.S1_at   | MmugDNA.26891.1 | 4.2   | 4.4   | 0.53 | 0.15 | -1.15 | 0.599463 | 0.018607 | 0.837382 | 0.171539 |
| MmugDNA.26892.1.S1_at   | MmugDNA.26892.1 | 3.72  | 3.57  | 0.1  | 0.05 | 1.1   | 0.171399 | 0.359232 | 0.544662 | 0.600537 |
| MmugDNA.26893.1.S1_at   | MmugDNA.26893.1 | 6.63  | 6.74  | 0.76 | 0.22 | -1.08 | 0.880196 | 0.984843 | 0.958521 | 0.991445 |

|                         |                 |       |       |      |      |       |          |          |          |          |
|-------------------------|-----------------|-------|-------|------|------|-------|----------|----------|----------|----------|
| MmugDNA.26894.1.S1_at   | MmugDNA.26894.1 | 7.34  | 8.23  | 0.79 | 0.22 | -1.85 | 0.083739 | 0.074409 | 0.449639 | 0.318058 |
| MmugDNA.26895.1.S1_at   | MmugDNA.26895.1 | 4.08  | 3.79  | 0.49 | 0.28 | 1.23  | 0.450684 | 0.284353 | 0.754829 | 0.54659  |
| MmugDNA.26896.1.S1_at   | MmugDNA.26896.1 | 4.54  | 4.71  | 0.25 | 0.33 | -1.12 | 0.362472 | 0.535109 | 0.699302 | 0.720807 |
| MmugDNA.26897.1.S1_at   | MmugDNA.26897.1 | 5.92  | 4.9   | 0.49 | 0.29 | 2.02  | 0.08551  | 0.093103 | 0.452653 | 0.349292 |
| MmugDNA.26898.1.S1_at   | MmugDNA.26898.1 | 3.95  | 3.95  | 0.01 | 0.02 | 1     | 0.683561 | 0.096587 | 0.876134 | 0.354126 |
| MmugDNA.269.1.S1_at     | MmugDNA.269.1   | 10.83 | 11.22 | 0.88 | 0.24 | -1.31 | 0.503952 | 0.234495 | 0.784457 | 0.505674 |
| MmugDNA.2690.1.S1_at    | MmugDNA.2690.1  | 7.76  | 8.32  | 0.76 | 0.05 | -1.47 | 0.755155 | 0.75395  | 0.907714 | 0.856765 |
| MmugDNA.26900.1.S1_at   | MmugDNA.26900.1 | 6.52  | 6.73  | 0.23 | 0.4  | -1.16 | 0.797011 | 0.419884 | 0.925391 | 0.643733 |
| MmugDNA.26901.1.S1_at   | MmugDNA.26901.1 | 5.07  | 6.71  | 1    | 0.42 | -3.12 | 0.260481 | 0.269084 | 0.623301 | 0.534445 |
| MmugDNA.26906.1.S1_at   | MmugDNA.26906.1 | 11.3  | 11.29 | 0.13 | 0.02 | 1.01  | 0.677136 | 0.823018 | 0.873361 | 0.898312 |
| MmugDNA.26907.1.S1_at   | MmugDNA.26907.1 | 6.25  | 5.71  | 0.53 | 0.22 | -1.44 | 0.182396 | 0.317887 | 0.555371 | 0.571044 |
| MmugDNA.26908.1.S1_at   | MmugDNA.26908.1 | 6.04  | 6.79  | 0.46 | 0.31 | -1.67 | 0.140186 | 0.255532 | 0.515581 | 0.523538 |
| MmugDNA.26909.1.S1_at   | MmugDNA.26909.1 | 5.76  | 5.62  | 0.26 | 0.29 | 1.1   | 0.38557  | 0.141019 | 0.712897 | 0.414507 |
| MmugDNA.2691.1.S1_at    | MmugDNA.2691.1  | 10.47 | 10.24 | 0.27 | 0.03 | 1.17  | 0.087398 | 0.047713 | 0.454796 | 0.263325 |
| MmugDNA.26910.1.S1_at   | MmugDNA.26910.1 | 10.56 | 10.88 | 0.28 | 0.11 | -1.25 | 0.17457  | 0.173268 | 0.547958 | 0.449791 |
| MmugDNA.26912.1.S1_at   | MmugDNA.26912.1 | 11.59 | 10.61 | 1.15 | 0.28 | 1.98  | 0.785192 | 0.063287 | 0.921034 | 0.298244 |
| MmugDNA.26913.1.S1_at   | MmugDNA.26913.1 | 8.41  | 6.43  | 1.22 | 0.34 | 3.94  | 0.214685 | 0.187712 | 0.585106 | 0.463689 |
| MmugDNA.26914.1.S1_at   | MmugDNA.26914.1 | 3.66  | 3.61  | 0.24 | 0.09 | 1.03  | 0.264838 | 0.351069 | 0.626252 | 0.594752 |
| MmugDNA.26916.1.S1_at   | MmugDNA.26916.1 | 4.47  | 4.41  | 0.14 | 0.51 | 1.04  | 0.959224 | 0.764661 | 0.986641 | 0.863166 |
| MmugDNA.26917.1.S1_at   | MmugDNA.26917.1 | 3.35  | 3.35  | 0.06 | 0.14 | 1     | 0.397355 | 0.30164  | 0.721736 | 0.559555 |
| MmugDNA.26918.1.S1_at   | MmugDNA.26918.1 | 2.94  | 2.85  | 0.11 | 0    | 1.07  | 0.594063 | 0.705812 | 0.834583 | 0.829541 |
| MmugDNA.26919.1.S1_at   | MmugDNA.26919.1 | 4.71  | 4.62  | 0.08 | 0.08 | 1.07  | 0.220904 | 0.274708 | 0.590217 | 0.53918  |
| MmugDNA.2692.1.S1_at    | MmugDNA.2692.1  | 5.41  | 5.57  | 0.07 | 0.17 | -1.11 | 0.330306 | 0.270904 | 0.676941 | 0.536026 |
| MmugDNA.26920.1.S1_at   | MmugDNA.26920.1 | 4.56  | 4.28  | 0.24 | 0.36 | 1.22  | 0.524585 | 0.06461  | 0.795975 | 0.300314 |
| MmugDNA.26921.1.S1_at   | MmugDNA.26921.1 | 10.78 | 10.49 | 0.35 | 0.13 | 1.22  | 0.250318 | 0.074069 | 0.615561 | 0.317699 |
| MmugDNA.26922.1.S1_at   | MmugDNA.26922.1 | 2.95  | 2.88  | 0.13 | 0.06 | 1.05  | 0.413931 | 0.161294 | 0.732663 | 0.437434 |
| MmugDNA.26924.1.S1_at   | MmugDNA.26924.1 | 7.11  | 7.41  | 0.35 | 0.13 | -1.23 | 0.653039 | 0.500852 | 0.862124 | 0.699296 |
| MmugDNA.26927.1.S1_at   | MmugDNA.26927.1 | 3.25  | 3.28  | 0.11 | 0.09 | -1.02 | 0.728865 | 0.937016 | 0.895476 | 0.964492 |
| MmugDNA.2018.1.S1_at    | MmugDNA.2018.1  | 10.41 | 10.43 | 0.12 | 0.01 | -1.02 | 0.67924  | 0.140963 | 0.874274 | 0.414474 |
| MmugDNA.2018.1.S1_s_at  | MmugDNA.2018.1  | 11    | 11.12 | 0.07 | 0.05 | -1.09 | 0.165244 | 0.067967 | 0.538006 | 0.306909 |
| MmugDNA.26930.1.S1_at   | MmugDNA.26930.1 | 3.83  | 3.61  | 0.17 | 0.3  | 1.17  | 0.42536  | 0.220471 | 0.739988 | 0.493818 |
| MmugDNA.26931.1.S1_at   | MmugDNA.26931.1 | 6.5   | 6.31  | 0.08 | 0.12 | 1.15  | 0.077005 | 0.095265 | 0.43891  | 0.352254 |
| MmugDNA.26934.1.S1_at   | MmugDNA.26934.1 | 8.68  | 8.57  | 0.59 | 0.23 | 1.08  | 0.510465 | 0.685414 | 0.788228 | 0.816513 |
| MmugDNA.26935.1.S1_at   | MmugDNA.26935.1 | 11.75 | 11.72 | 0.1  | 0.03 | 1.02  | 0.655439 | 0.056932 | 0.863101 | 0.284714 |
| MmugDNA.26936.1.S1_at   | MmugDNA.26936.1 | 6.87  | 6.33  | 0.38 | 0.28 | 1.45  | 0.150598 | 0.21776  | 0.524209 | 0.491309 |
| MmugDNA.26937.1.S1_at   | MmugDNA.26937.1 | 5.32  | 5.32  | 0.08 | 0.08 | 1     | 0.50918  | 0.881823 | 0.787544 | 0.932594 |
| MmugDNA.26938.1.S1_at   | MmugDNA.26938.1 | 3.94  | 3.78  | 0.17 | 0.03 | 1.12  | 0.140834 | 0.174959 | 0.516345 | 0.451599 |
| MmugDNA.26939.1.S1_at   | MmugDNA.26939.1 | 3.7   | 3.63  | 0.08 | 0.04 | 1.05  | 0.435299 | 0.694895 | 0.745628 | 0.822638 |
| MmugDNA.26940.1.S1_at   | MmugDNA.26940.1 | 4.73  | 4.73  | 0.23 | 0.12 | 1     | 0.64304  | 0.821085 | 0.857999 | 0.897041 |
| MmugDNA.26941.1.S1_at   | MmugDNA.26941.1 | 5.11  | 5.12  | 0.29 | 0.02 | -1.01 | 0.582126 | 0.775825 | 0.827929 | 0.869553 |
| MmugDNA.26942.1.S1_at   | MmugDNA.26942.1 | 5.63  | 5.64  | 0.17 | 0.11 | -1.01 | 0.291792 | 0.457288 | 0.648084 | 0.670746 |
| MmugDNA.26943.1.S1_s_at | MmugDNA.26943.1 | 10.47 | 10.51 | 0.15 | 0.06 | -1.03 | 0.961434 | 0.109531 | 0.987435 | 0.373377 |
| MmugDNA.26944.1.S1_at   | MmugDNA.26944.1 | 4.27  | 3.7   | 0.32 | 0.37 | 1.48  | 0.125148 | 0.216497 | 0.499242 | 0.490113 |

|                         |                 |       |       |      |      |       |          |          |          |          |
|-------------------------|-----------------|-------|-------|------|------|-------|----------|----------|----------|----------|
| MmugDNA.26945.1.S1_at   | MmugDNA.26945.1 | 4.72  | 4.85  | 0.07 | 0.09 | -1.09 | 0.186548 | 0.680793 | 0.559164 | 0.813594 |
| MmugDNA.26946.1.S1_at   | MmugDNA.26946.1 | 12.48 | 12.8  | 0.11 | 0.07 | -1.25 | 0.008262 | 0.00146  | 0.232164 | 0.058204 |
| MmugDNA.26946.1.S1_s_at | MmugDNA.26946.1 | 11.8  | 12.19 | 0.21 | 0.09 | -1.31 | 0.037148 | 0.020578 | 0.356778 | 0.179964 |
| MmugDNA.26948.1.S1_s_at | MmugDNA.26948.1 | 10.21 | 10.13 | 0.15 | 0.1  | 1.05  | 0.448779 | 0.040269 | 0.754037 | 0.245902 |
| MmugDNA.26950.1.S1_at   | MmugDNA.26950.1 | 6.9   | 6.71  | 0.79 | 0.44 | 1.14  | 0.718746 | 0.088215 | 0.890773 | 0.341721 |
| MmugDNA.26952.1.S1_at   | MmugDNA.26952.1 | 4.68  | 4.62  | 0.1  | 0.08 | 1.05  | 0.351936 | 0.314201 | 0.692615 | 0.568185 |
| MmugDNA.26953.1.S1_at   | MmugDNA.26953.1 | 8.77  | 9.3   | 1.04 | 0.17 | -1.44 | 0.395143 | 0.105852 | 0.720356 | 0.368111 |
| MmugDNA.26954.1.S1_at   | MmugDNA.26954.1 | 4.11  | 4.06  | 0.13 | 0.25 | 1.04  | 0.762415 | 0.754825 | 0.910907 | 0.857323 |
| MmugDNA.26955.1.S1_at   | MmugDNA.26955.1 | 5.69  | 5.64  | 0.08 | 0.04 | 1.03  | 0.340458 | 0.282973 | 0.684528 | 0.545692 |
| MmugDNA.26956.1.S1_at   | MmugDNA.26956.1 | 9.39  | 10    | 0.3  | 0.21 | -1.52 | 0.12182  | 0.074067 | 0.495576 | 0.317699 |
| MmugDNA.26958.1.S1_at   | MmugDNA.26958.1 | 4.18  | 4.8   | 0.38 | 0.7  | -1.54 | 0.492804 | 0.462322 | 0.778629 | 0.673686 |
| MmugDNA.2696.1.S1_at    | MmugDNA.2696.1  | 8.99  | 8.92  | 0.18 | 0.11 | 1.05  | 0.507383 | 0.22801  | 0.786331 | 0.500218 |
| MmugDNA.26960.1.S1_at   | MmugDNA.26960.1 | 12.13 | 11.52 | 0.16 | 0.11 | 1.53  | 0.005665 | 0.001162 | 0.21011  | 0.053615 |
| MmugDNA.26961.1.S1_at   | MmugDNA.26961.1 | 3.55  | 3.52  | 0.19 | 0.06 | 1.02  | 0.26295  | 0.405701 | 0.624997 | 0.633894 |
| MmugDNA.26963.1.S1_at   | MmugDNA.26963.1 | 6.88  | 6.64  | 0.42 | 0.08 | 1.17  | 0.132307 | 0.049645 | 0.506752 | 0.267876 |
| MmugDNA.26965.1.S1_at   | MmugDNA.26965.1 | 8.82  | 8.78  | 1.04 | 0.19 | 1.03  | 0.361061 | 0.183785 | 0.698314 | 0.459871 |
| MmugDNA.26966.1.S1_at   | MmugDNA.26966.1 | 3.7   | 3.54  | 0.07 | 0.09 | 1.11  | 0.093148 | 0.407377 | 0.461983 | 0.634981 |
| MmugDNA.26967.1.S1_at   | MmugDNA.26967.1 | 10.88 | 10.61 | 0.12 | 0.17 | 1.2   | 0.060812 | 0.032503 | 0.408904 | 0.223265 |
| MmugDNA.26969.1.S1_at   | MmugDNA.26969.1 | 6.36  | 6.24  | 0.17 | 0.04 | 1.09  | 0.666693 | 0.434948 | 0.868397 | 0.654901 |
| MmugDNA.2697.1.S1_at    | MmugDNA.2697.1  | 6.46  | 6.46  | 0.01 | 0.02 | 1     | 0.255629 | 0.948215 | 0.619701 | 0.970472 |
| MmugDNA.26970.1.S1_at   | MmugDNA.26970.1 | 3.69  | 3.79  | 0.1  | 0.07 | -1.07 | 0.62736  | 0.167167 | 0.850503 | 0.443636 |
| MmugDNA.26970.1.S1_x_at | MmugDNA.26970.1 | 5.55  | 5.68  | 0.15 | 0.11 | -1.1  | 0.892165 | 0.151318 | 0.962988 | 0.426073 |
| MmugDNA.26973.1.S1_at   | MmugDNA.26973.1 | 7.18  | 7.03  | 0.15 | 0.13 | 1.1   | 0.328366 | 0.599193 | 0.67577  | 0.761359 |
| MmugDNA.26974.1.S1_at   | MmugDNA.26974.1 | 4.12  | 4.34  | 0.68 | 0.32 | -1.16 | 0.461079 | 0.399711 | 0.760754 | 0.629951 |
| MmugDNA.26977.1.S1_at   | MmugDNA.26977.1 | 5.29  | 5.22  | 0.09 | 0.01 | 1.05  | 0.177764 | 0.158853 | 0.550946 | 0.43496  |
| MmugDNA.26979.1.S1_at   | MmugDNA.26979.1 | 7.08  | 7.77  | 1.3  | 0.33 | -1.61 | 0.560982 | 0.762303 | 0.817    | 0.861726 |
| MmugDNA.26980.1.S1_at   | MmugDNA.26980.1 | 4.68  | 4.7   | 0.07 | 0.17 | -1.01 | 0.515647 | 0.105206 | 0.790971 | 0.366982 |
| MmugDNA.26981.1.S1_at   | MmugDNA.26981.1 | 3.33  | 3.22  | 0.04 | 0.15 | 1.08  | 0.344934 | 0.471912 | 0.687232 | 0.679793 |
| MmugDNA.26984.1.S1_at   | MmugDNA.26984.1 | 9.23  | 9.55  | 0.08 | 0.13 | -1.26 | 0.013522 | 0.01301  | 0.269448 | 0.146803 |
| MmugDNA.26985.1.S1_at   | MmugDNA.26985.1 | 5.73  | 5.71  | 0.05 | 0.08 | 1.01  | 0.333139 | 0.444    | 0.679469 | 0.661632 |
| MmugDNA.26986.1.S1_at   | MmugDNA.26986.1 | 5.88  | 5.87  | 0.2  | 0.13 | 1.01  | 0.930988 | 0.685813 | 0.976942 | 0.816612 |
| MmugDNA.26987.1.S1_at   | MmugDNA.26987.1 | 3.09  | 3.16  | 0.09 | 0.07 | -1.05 | 0.679586 | 0.878225 | 0.87431  | 0.93052  |
| MmugDNA.26988.1.S1_at   | MmugDNA.26988.1 | 5.8   | 5.56  | 0.23 | 0.13 | 1.18  | 0.273606 | 0.512289 | 0.633298 | 0.706182 |
| MmugDNA.26989.1.S1_at   | MmugDNA.26989.1 | 10.8  | 10.71 | 0.08 | 0.06 | 1.06  | 0.209781 | 0.196397 | 0.581302 | 0.471418 |
| MmugDNA.2699.1.S1_at    | MmugDNA.2699.1  | 3.87  | 3.65  | 0.06 | 0.29 | 1.16  | 0.783273 | 0.937428 | 0.920187 | 0.964687 |
| MmugDNA.26991.1.S1_s_at | MmugDNA.26991.1 | 11.25 | 11.15 | 0.26 | 0.08 | 1.08  | 0.653841 | 0.48694  | 0.862462 | 0.690118 |
| MmugDNA.26991.1.S1_x_at | MmugDNA.26991.1 | 4.71  | 4.72  | 0.26 | 0.58 | -1    | 0.396591 | 0.575903 | 0.721517 | 0.746847 |
| MmugDNA.26992.1.S1_at   | MmugDNA.26992.1 | 5.18  | 5.22  | 0.1  | 0.2  | -1.03 | 0.913264 | 0.290196 | 0.970503 | 0.551169 |
| MmugDNA.26995.1.S1_at   | MmugDNA.26995.1 | 5.99  | 6.01  | 0.26 | 0.04 | -1.01 | 0.702173 | 0.667319 | 0.884146 | 0.805297 |
| MmugDNA.26996.1.S1_at   | MmugDNA.26996.1 | 3.19  | 3.21  | 0.13 | 0.12 | -1.01 | 0.970492 | 0.34698  | 0.990336 | 0.591769 |
| MmugDNA.26998.1.S1_at   | MmugDNA.26998.1 | 3     | 2.89  | 0.02 | 0.14 | 1.08  | 0.21695  | 0.222681 | 0.586902 | 0.495617 |
| MmugDNA.26999.1.S1_at   | MmugDNA.26999.1 | 3.85  | 3.96  | 0.08 | 0.21 | -1.08 | 0.151602 | 0.282501 | 0.524628 | 0.545215 |
| MmugDNA.27.1.S1_at      | MmugDNA.27.1    | 7.43  | 7.28  | 0.23 | 0.05 | 1.11  | 0.201015 | 0.265466 | 0.572785 | 0.531363 |

|                         |                 |       |       |      |      |       |          |          |          |          |
|-------------------------|-----------------|-------|-------|------|------|-------|----------|----------|----------|----------|
| MmugDNA.270.1.S1_at     | MmugDNA.270.1   | 5.91  | 5.69  | 0.24 | 0.1  | 1.17  | 0.418243 | 0.561939 | 0.735441 | 0.737659 |
| MmugDNA.2700.1.S1_at    | MmugDNA.2700.1  | 3.91  | 3.65  | 0.22 | 0.27 | 1.2   | 0.15253  | 0.065053 | 0.525558 | 0.301009 |
| MmugDNA.27003.1.S1_at   | MmugDNA.27003.1 | 6.91  | 6.35  | 0.53 | 0.28 | 1.47  | 0.141294 | 0.095606 | 0.516365 | 0.352645 |
| MmugDNA.27005.1.S1_at   | MmugDNA.27005.1 | 7.97  | 7.58  | 0.06 | 0.11 | 1.3   | 0.005945 | 0.010366 | 0.212637 | 0.133236 |
| MmugDNA.27007.1.S1_at   | MmugDNA.27007.1 | 6     | 5.78  | 0.03 | 0.14 | 1.16  | 0.044782 | 0.00765  | 0.37512  | 0.117015 |
| MmugDNA.27008.1.S1_at   | MmugDNA.27008.1 | 5.45  | 5.62  | 0.49 | 0.14 | -1.13 | 0.909598 | 0.823275 | 0.969434 | 0.898426 |
| MmugDNA.27010.1.S1_at   | MmugDNA.27010.1 | 4.96  | 6.74  | 0.48 | 0.15 | -3.44 | 0.003345 | 0.001573 | 0.194985 | 0.060185 |
| MmugDNA.27013.1.S1_at   | MmugDNA.27013.1 | 7.81  | 7.42  | 0.27 | 0.05 | 1.31  | 0.052422 | 0.146941 | 0.392384 | 0.421008 |
| MmugDNA.27014.1.S1_at   | MmugDNA.27014.1 | 6.75  | 6.97  | 0.25 | 0.15 | -1.17 | 0.350378 | 0.180795 | 0.691263 | 0.457306 |
| MmugDNA.27015.1.S1_at   | MmugDNA.27015.1 | 9.55  | 8.85  | 0.09 | 0.19 | 1.63  | 0.004597 | 0.039207 | 0.201051 | 0.243157 |
| MmugDNA.27016.1.S1_at   | MmugDNA.27016.1 | 6.63  | 6.7   | 0.03 | 0.07 | -1.05 | 0.138267 | 0.484976 | 0.513671 | 0.688893 |
| MmugDNA.27021.1.S1_at   | MmugDNA.27021.1 | 4.2   | 4.17  | 0.13 | 0.05 | 1.02  | 0.394    | 0.502093 | 0.719575 | 0.700051 |
| MmugDNA.27024.1.S1_at   | MmugDNA.27024.1 | 6.48  | 6.75  | 0.18 | 0.01 | -1.21 | 0.185619 | 0.35243  | 0.558609 | 0.595722 |
| MmugDNA.27025.1.S1_at   | MmugDNA.27025.1 | 4.84  | 4.71  | 0.14 | 0.12 | 1.1   | 0.265239 | 0.192122 | 0.626397 | 0.467591 |
| MmugDNA.27026.1.S1_at   | MmugDNA.27026.1 | 5.79  | 6.18  | 0.01 | 0.31 | -1.32 | 0.237391 | 0.01258  | 0.604336 | 0.14463  |
| MmugDNA.27028.1.S1_at   | MmugDNA.27028.1 | 8.95  | 9.02  | 0.12 | 0.08 | -1.05 | 0.641357 | 0.977783 | 0.857278 | 0.987873 |
| MmugDNA.2703.1.S1_at    | MmugDNA.2703.1  | 3.59  | 4.07  | 0.44 | 0.19 | -1.4  | 0.415564 | 0.51089  | 0.733662 | 0.70525  |
| MmugDNA.27031.1.S1_at   | MmugDNA.27031.1 | 6.56  | 6.55  | 0.11 | 0.01 | 1     | 0.378942 | 0.266269 | 0.708502 | 0.532086 |
| MmugDNA.27032.1.S1_at   | MmugDNA.27032.1 | 3.61  | 3.55  | 0.06 | 0.07 | 1.04  | 0.375633 | 0.459776 | 0.7066   | 0.671958 |
| MmugDNA.27033.1.S1_at   | MmugDNA.27033.1 | 3.94  | 3.61  | 0.23 | 0.02 | 1.25  | 0.072502 | 0.202637 | 0.432598 | 0.47704  |
| MmugDNA.27034.1.S1_at   | MmugDNA.27034.1 | 3.9   | 3.94  | 0.3  | 0.13 | -1.03 | 0.955788 | 0.53932  | 0.985346 | 0.723689 |
| MmugDNA.27034.1.S1_s_at | MmugDNA.27034.1 | 4.01  | 3.89  | 0.09 | 0.16 | 1.09  | 0.371835 | 0.598027 | 0.705567 | 0.760536 |
| MmugDNA.27035.1.S1_at   | MmugDNA.27035.1 | 7.29  | 7.26  | 0.55 | 0.22 | 1.02  | 0.594954 | 0.46886  | 0.83502  | 0.677906 |
| MmugDNA.27036.1.S1_at   | MmugDNA.27036.1 | 5.95  | 5.91  | 0.28 | 0.19 | 1.02  | 0.553121 | 0.205963 | 0.811981 | 0.480207 |
| MmugDNA.27037.1.S1_at   | MmugDNA.27037.1 | 12.09 | 11.92 | 3.98 | 0.19 | 1.13  | 0.424569 | 0.185358 | 0.739618 | 0.461323 |
| MmugDNA.27039.1.S1_at   | MmugDNA.27039.1 | 5.95  | 5.75  | 0.61 | 0.25 | 1.15  | 0.6815   | 0.249906 | 0.875324 | 0.518889 |
| MmugDNA.27040.1.S1_at   | MmugDNA.27040.1 | 6.65  | 6.49  | 0.09 | 0.1  | 1.12  | 0.284636 | 0.364153 | 0.642354 | 0.604488 |
| MmugDNA.27041.1.S1_at   | MmugDNA.27041.1 | 5.9   | 5.37  | 0.34 | 0.17 | 1.44  | 0.118507 | 0.30854  | 0.491933 | 0.564575 |
| MmugDNA.27043.1.S1_at   | MmugDNA.27043.1 | 5.4   | 5.65  | 0.69 | 0.31 | -1.19 | 0.644582 | 0.200102 | 0.858549 | 0.474603 |
| MmugDNA.27047.1.S1_at   | MmugDNA.27047.1 | 6.84  | 7.16  | 0.75 | 0.21 | -1.25 | 0.645236 | 0.238471 | 0.858728 | 0.509084 |
| MmugDNA.27048.1.S1_at   | MmugDNA.27048.1 | 2.98  | 2.91  | 0.13 | 0.06 | 1.05  | 0.523881 | 0.787499 | 0.795658 | 0.877072 |
| MmugDNA.27049.1.S1_at   | MmugDNA.27049.1 | 3.18  | 3.26  | 0.17 | 0.53 | -1.06 | 0.581455 | 0.74204  | 0.827641 | 0.850608 |
| MmugDNA.2705.1.S1_at    | MmugDNA.2705.1  | 7     | 6.89  | 0.05 | 0.08 | 1.08  | 0.499067 | 0.004496 | 0.781932 | 0.093593 |
| MmugDNA.27051.1.S1_at   | MmugDNA.27051.1 | 5.1   | 5.67  | 1.17 | 0.32 | -1.49 | 0.542775 | 0.401886 | 0.805983 | 0.63109  |
| MmugDNA.27054.1.S1_at   | MmugDNA.27054.1 | 3.68  | 3.67  | 0.08 | 0    | 1     | 0.411049 | 0.001792 | 0.731088 | 0.063581 |
| MmugDNA.27055.1.S1_at   | MmugDNA.27055.1 | 5.68  | 5.6   | 0.04 | 0.05 | 1.05  | 0.509455 | 0.468143 | 0.787587 | 0.677624 |
| MmugDNA.27057.1.S1_at   | MmugDNA.27057.1 | 3.24  | 3.25  | 0.07 | 0.12 | -1.01 | 0.349498 | 0.292312 | 0.690493 | 0.552389 |
| MmugDNA.27058.1.S1_at   | MmugDNA.27058.1 | 11.65 | 11    | 1.34 | 0.11 | 1.57  | 0.881655 | 0.459041 | 0.959065 | 0.671535 |
| MmugDNA.2706.1.S1_at    | MmugDNA.2706.1  | 5.65  | 5.46  | 0.01 | 0.1  | 1.14  | 0.015949 | 0.043718 | 0.284606 | 0.253804 |
| MmugDNA.27060.1.S1_at   | MmugDNA.27060.1 | 3.35  | 3.27  | 0.12 | 0.27 | 1.05  | 0.966431 | 0.266447 | 0.988997 | 0.532234 |
| MmugDNA.27061.1.S1_at   | MmugDNA.27061.1 | 7.3   | 6.97  | 0.52 | 0.23 | 1.26  | 0.373267 | 0.305827 | 0.705567 | 0.562731 |
| MmugDNA.27062.1.S1_at   | MmugDNA.27062.1 | 3.75  | 3.72  | 0.02 | 0.3  | 1.02  | 0.498243 | 0.767095 | 0.781633 | 0.864712 |
| MmugDNA.27063.1.S1_at   | MmugDNA.27063.1 | 5.19  | 5.74  | 0.13 | 0.25 | -1.46 | 0.022028 | 0.059976 | 0.309781 | 0.291581 |

|                         |                 |       |       |      |      |       |          |          |          |          |
|-------------------------|-----------------|-------|-------|------|------|-------|----------|----------|----------|----------|
| MmugDNA.27064.1.S1_at   | MmugDNA.27064.1 | 3.34  | 3.09  | 0.11 | 0.03 | 1.19  | 0.018905 | 0.190549 | 0.298593 | 0.465929 |
| MmugDNA.27065.1.S1_at   | MmugDNA.27065.1 | 6.67  | 6.42  | 0.2  | 0.06 | 1.19  | 0.346192 | 0.400235 | 0.687873 | 0.630158 |
| MmugDNA.27066.1.S1_at   | MmugDNA.27066.1 | 4.34  | 4.47  | 0.1  | 0.26 | -1.09 | 0.249175 | 0.558303 | 0.614508 | 0.735514 |
| MmugDNA.27067.1.S1_at   | MmugDNA.27067.1 | 4.06  | 4.11  | 0.08 | 0.16 | -1.03 | 0.233963 | 0.20168  | 0.601531 | 0.476208 |
| MmugDNA.27068.1.S1_x_at | MmugDNA.27068.1 | 5.57  | 5.37  | 0.18 | 0.48 | 1.14  | 0.570574 | 0.208535 | 0.822227 | 0.482453 |
| MmugDNA.27069.1.S1_at   | MmugDNA.27069.1 | 3.28  | 3.33  | 0.04 | 0.07 | -1.03 | 0.840599 | 0.149269 | 0.943395 | 0.42373  |
| MmugDNA.36044.1.S1_at   | MmugDNA.36044.1 | 5.79  | 5.81  | 0.48 | 0.14 | -1.01 | 0.965627 | 0.870576 | 0.988725 | 0.926446 |
| MmugDNA.36044.1.S1_s_at | MmugDNA.36044.1 | 9.67  | 9.48  | 0.22 | 0.14 | 1.14  | 0.758261 | 0.036732 | 0.909029 | 0.236262 |
| MmugDNA.27072.1.S1_at   | MmugDNA.27072.1 | 3.58  | 3.57  | 0.15 | 0.26 | 1     | 0.447607 | 0.106475 | 0.753399 | 0.369055 |
| MmugDNA.27073.1.S1_at   | MmugDNA.27073.1 | 5.32  | 5.2   | 0.35 | 0.28 | 1.09  | 0.336144 | 0.529313 | 0.681531 | 0.717233 |
| MmugDNA.27073.1.S1_s_at | MmugDNA.27073.1 | 9.75  | 9.4   | 0.48 | 0.1  | 1.28  | 0.39505  | 0.41855  | 0.720303 | 0.642955 |
| MmugDNA.27073.1.S1_x_at | MmugDNA.27073.1 | 6.06  | 6.01  | 0.35 | 0.14 | 1.03  | 0.850772 | 0.74009  | 0.94746  | 0.849396 |
| MmugDNA.27074.1.S1_at   | MmugDNA.27074.1 | 6.28  | 6.16  | 0.19 | 0.28 | 1.09  | 0.240581 | 0.264116 | 0.606905 | 0.530214 |
| MmugDNA.27075.1.S1_at   | MmugDNA.27075.1 | 6.85  | 5.89  | 0.76 | 0.64 | 1.96  | 0.267436 | 0.10325  | 0.628131 | 0.364143 |
| MmugDNA.27076.1.S1_s_at | MmugDNA.27076.1 | 7.6   | 7.31  | 0.07 | 0.04 | 1.22  | 0.006874 | 0.037618 | 0.224141 | 0.238384 |
| MmugDNA.27077.1.S1_at   | MmugDNA.27077.1 | 6.06  | 6.06  | 0.22 | 0.17 | 1     | 0.576179 | 0.79582  | 0.825086 | 0.88238  |
| MmugDNA.27078.1.S1_at   | MmugDNA.27078.1 | 6.03  | 5.76  | 0.11 | 0.17 | 1.2   | 0.118644 | 0.0802   | 0.492161 | 0.327801 |
| MmugDNA.27079.1.S1_at   | MmugDNA.27079.1 | 8.34  | 9.41  | 0.56 | 0.14 | -2.1  | 0.11401  | 0.359969 | 0.487394 | 0.601195 |
| MmugDNA.2708.1.S1_at    | MmugDNA.2708.1  | 3.8   | 3.63  | 0.26 | 0.2  | 1.13  | 0.712405 | 0.916495 | 0.887958 | 0.953262 |
| MmugDNA.27081.1.S1_at   | MmugDNA.27081.1 | 3.69  | 3.61  | 0.21 | 0.02 | 1.06  | 0.683576 | 0.86826  | 0.876134 | 0.925234 |
| MmugDNA.27083.1.S1_at   | MmugDNA.27083.1 | 5.96  | 6.18  | 0.4  | 0.11 | -1.16 | 0.715384 | 0.730636 | 0.889268 | 0.844055 |
| MmugDNA.27085.1.S1_at   | MmugDNA.27085.1 | 4.49  | 4.95  | 0.26 | 0.27 | -1.38 | 0.073815 | 0.096672 | 0.434623 | 0.35417  |
| MmugDNA.27086.1.S1_at   | MmugDNA.27086.1 | 3.56  | 3.35  | 1    | 0.16 | 1.15  | 0.357248 | 0.530779 | 0.695575 | 0.718133 |
| MmugDNA.27087.1.S1_at   | MmugDNA.27087.1 | 3.33  | 3.28  | 0.06 | 0.25 | 1.03  | 0.889991 | 0.912289 | 0.962106 | 0.950571 |
| MmugDNA.27088.1.S1_at   | MmugDNA.27088.1 | 3.89  | 3.8   | 0.14 | 0.03 | 1.07  | 0.17688  | 0.122591 | 0.549947 | 0.39249  |
| MmugDNA.27089.1.S1_at   | MmugDNA.27089.1 | 10.25 | 10.24 | 0.17 | 0.06 | 1     | 0.626821 | 0.70634  | 0.850209 | 0.829634 |
| MmugDNA.2709.1.S1_at    | MmugDNA.2709.1  | 3.14  | 3.03  | 0.39 | 0.09 | 1.08  | 0.9078   | 0.776103 | 0.968807 | 0.869726 |
| MmugDNA.27091.1.S1_at   | MmugDNA.27091.1 | 9.11  | 8.9   | 0.58 | 0.1  | 1.16  | 0.550212 | 0.557399 | 0.810701 | 0.735031 |
| MmugDNA.27092.1.S1_at   | MmugDNA.27092.1 | 7.19  | 6.69  | 0.08 | 0.07 | 1.41  | 0.001279 | 0.000411 | 0.157784 | 0.037913 |
| MmugDNA.27094.1.S1_at   | MmugDNA.27094.1 | 9.25  | 9.19  | 0.29 | 0.04 | 1.04  | 0.843428 | 0.951756 | 0.944737 | 0.9726   |
| MmugDNA.27095.1.S1_at   | MmugDNA.27095.1 | 2.69  | 2.98  | 0.08 | 0.16 | -1.22 | 0.029329 | 0.020723 | 0.334049 | 0.180645 |
| MmugDNA.27096.1.S1_at   | MmugDNA.27096.1 | 7.69  | 7.56  | 0.24 | 0.11 | 1.1   | 0.725794 | 0.737506 | 0.893885 | 0.847993 |
| MmugDNA.7891.1.S1_s_at  | MmugDNA.7891.1  | 8.53  | 8.56  | 0.09 | 0.04 | -1.02 | 0.561429 | 0.07169  | 0.817219 | 0.313904 |
| MmugDNA.27098.1.S1_at   | MmugDNA.27098.1 | 8.22  | 8.19  | 0.25 | 0.16 | 1.02  | 0.646128 | 0.075396 | 0.859027 | 0.319693 |
| MmugDNA.27099.1.S1_at   | MmugDNA.27099.1 | 11.71 | 11.6  | 0.31 | 0.02 | 1.08  | 0.464569 | 0.166089 | 0.76257  | 0.442666 |
| MmugDNA.271.1.S1_at     | MmugDNA.271.1   | 4.63  | 4.49  | 1.07 | 0.58 | 1.1   | 0.338814 | 0.413604 | 0.683224 | 0.639669 |
| MmugDNA.2710.1.S1_at    | MmugDNA.2710.1  | 5.36  | 5.15  | 0.13 | 0.14 | 1.16  | 0.532228 | 0.048021 | 0.800166 | 0.264118 |
| MmugDNA.27100.1.S1_at   | MmugDNA.27100.1 | 2.71  | 2.76  | 0.05 | 0    | -1.04 | 0.168158 | 0.346409 | 0.540716 | 0.591247 |
| MmugDNA.27101.1.S1_at   | MmugDNA.27101.1 | 3.76  | 3.65  | 0.24 | 0.05 | 1.08  | 0.658437 | 0.283493 | 0.864636 | 0.545959 |
| MmugDNA.27102.1.S1_at   | MmugDNA.27102.1 | 5.31  | 5.33  | 0.33 | 0.07 | -1.02 | 0.782034 | 0.703123 | 0.919732 | 0.827872 |
| MmugDNA.27103.1.S1_at   | MmugDNA.27103.1 | 8.32  | 8.56  | 1.76 | 0.87 | -1.18 | 0.333232 | 0.179146 | 0.679496 | 0.45549  |
| MmugDNA.27104.1.S1_at   | MmugDNA.27104.1 | 5.05  | 5.38  | 0.15 | 0.34 | -1.26 | 0.182593 | 0.314048 | 0.555631 | 0.568178 |
| MmugDNA.27105.1.S1_at   | MmugDNA.27105.1 | 3.59  | 3.51  | 0.43 | 0.09 | 1.06  | 0.958438 | 0.723828 | 0.986346 | 0.840144 |

|                         |                 |       |       |      |      |       |          |          |          |          |
|-------------------------|-----------------|-------|-------|------|------|-------|----------|----------|----------|----------|
| MmugDNA.27106.1.S1_at   | MmugDNA.27106.1 | 5.25  | 5.21  | 0.23 | 0.49 | 1.03  | 0.748695 | 0.389794 | 0.904577 | 0.623851 |
| MmugDNA.27109.1.S1_at   | MmugDNA.27109.1 | 3.5   | 3.46  | 0.22 | 0.13 | 1.03  | 0.335646 | 0.611655 | 0.681167 | 0.769481 |
| MmugDNA.2711.1.S1_at    | MmugDNA.2711.1  | 6.8   | 7.21  | 0.44 | 0.23 | -1.33 | 0.162238 | 0.009203 | 0.535276 | 0.126579 |
| MmugDNA.27110.1.S1_at   | MmugDNA.27110.1 | 6.83  | 6.02  | 1.3  | 0.19 | 1.75  | 0.350351 | 0.217068 | 0.691249 | 0.490668 |
| MmugDNA.27112.1.S1_at   | MmugDNA.27112.1 | 3.55  | 3.31  | 0.14 | 0.05 | 1.18  | 0.147417 | 0.153927 | 0.521578 | 0.42862  |
| MmugDNA.27113.1.S1_at   | MmugDNA.27113.1 | 3.47  | 3.45  | 0.65 | 0.19 | 1.01  | 0.52238  | 0.643798 | 0.795143 | 0.791129 |
| MmugDNA.27114.1.S1_at   | MmugDNA.27114.1 | 3.56  | 3.33  | 0.43 | 0.08 | 1.18  | 0.403622 | 0.063064 | 0.725766 | 0.297788 |
| MmugDNA.27115.1.S1_at   | MmugDNA.27115.1 | 5.18  | 5.09  | 0.71 | 0.21 | 1.07  | 0.834153 | 0.14405  | 0.940528 | 0.417912 |
| MmugDNA.27118.1.S1_at   | MmugDNA.27118.1 | 4.87  | 5.03  | 0.3  | 0.07 | -1.11 | 0.87475  | 0.266967 | 0.956568 | 0.532513 |
| MmugDNA.2712.1.S1_at    | MmugDNA.2712.1  | 7.23  | 6.7   | 0.26 | 0.21 | 1.45  | 0.043407 | 0.172593 | 0.372033 | 0.449    |
| MmugDNA.27120.1.S1_at   | MmugDNA.27120.1 | 4.94  | 4.54  | 0.11 | 0.2  | -1.32 | 0.042601 | 0.081533 | 0.36962  | 0.329764 |
| MmugDNA.27121.1.S1_at   | MmugDNA.27121.1 | 4.38  | 4.35  | 0.52 | 0.49 | 1.02  | 0.994996 | 0.668834 | 0.99815  | 0.806227 |
| MmugDNA.27122.1.S1_at   | MmugDNA.27122.1 | 7.11  | 7.68  | 0.41 | 0.08 | -1.49 | 0.280251 | 0.18483  | 0.639123 | 0.460768 |
| MmugDNA.27122.1.S1_s_at | MmugDNA.27122.1 | 8.64  | 8.44  | 0.13 | 0.11 | 1.15  | 0.054283 | 0.198659 | 0.396159 | 0.473391 |
| MmugDNA.27123.1.S1_at   | MmugDNA.27123.1 | 6.17  | 6.18  | 0.12 | 0.14 | -1.01 | 0.588818 | 0.709999 | 0.831968 | 0.831887 |
| MmugDNA.27124.1.S1_at   | MmugDNA.27124.1 | 5.63  | 5.28  | 0.57 | 0.34 | 1.28  | 0.669412 | 0.836941 | 0.869559 | 0.906826 |
| MmugDNA.27125.1.S1_at   | MmugDNA.27125.1 | 3.44  | 3.53  | 0.32 | 0.08 | -1.06 | 0.2899   | 0.023966 | 0.646527 | 0.194025 |
| MmugDNA.2713.1.S1_at    | MmugDNA.2713.1  | 8.81  | 8.91  | 0.45 | 0.13 | -1.07 | 0.444117 | 0.821448 | 0.751101 | 0.897172 |
| MmugDNA.27130.1.S1_at   | MmugDNA.27130.1 | 4.82  | 4.68  | 0.12 | 0.21 | 1.1   | 0.323323 | 0.182848 | 0.672113 | 0.459357 |
| MmugDNA.27131.1.S1_at   | MmugDNA.27131.1 | 5.78  | 5.68  | 0.38 | 0.34 | 1.07  | 0.64429  | 0.476804 | 0.858491 | 0.682948 |
| MmugDNA.27132.1.S1_at   | MmugDNA.27132.1 | 7.46  | 7.46  | 0.02 | 0.09 | -1    | 0.292726 | 0.84745  | 0.649033 | 0.913316 |
| MmugDNA.27134.1.S1_at   | MmugDNA.27134.1 | 6.03  | 5.69  | 0.3  | 0.12 | 1.27  | 0.123802 | 0.234485 | 0.497339 | 0.505674 |
| MmugDNA.27135.1.S1_at   | MmugDNA.27135.1 | 6.03  | 6.01  | 0.07 | 0.09 | 1.02  | 0.546781 | 0.000555 | 0.808796 | 0.040995 |
| MmugDNA.27136.1.S1_at   | MmugDNA.27136.1 | 6.63  | 7.22  | 0.73 | 0.48 | -1.51 | 0.299685 | 0.030935 | 0.654125 | 0.217705 |
| MmugDNA.27137.1.S1_at   | MmugDNA.27137.1 | 6.87  | 6.98  | 0.22 | 0.06 | -1.08 | 0.652266 | 0.382306 | 0.862004 | 0.618482 |
| MmugDNA.27138.1.S1_at   | MmugDNA.27138.1 | 5.09  | 4.22  | 0.34 | 0.12 | 1.82  | 0.007234 | 0.004703 | 0.226509 | 0.09546  |
| MmugDNA.27140.1.S1_at   | MmugDNA.27140.1 | 7.61  | 7.62  | 0.04 | 0.13 | -1.01 | 0.936585 | 0.788969 | 0.978722 | 0.878011 |
| MmugDNA.27141.1.S1_at   | MmugDNA.27141.1 | 3.9   | 4     | 0.36 | 0.06 | -1.08 | 0.559614 | 0.800391 | 0.816313 | 0.885129 |
| MmugDNA.27142.1.S1_at   | MmugDNA.27142.1 | 3.58  | 3.58  | 0.16 | 0.23 | -1    | 0.472804 | 0.443332 | 0.767273 | 0.661168 |
| MmugDNA.27143.1.S1_at   | MmugDNA.27143.1 | 4.14  | 4.15  | 0.13 | 0.21 | -1.01 | 0.527087 | 0.702468 | 0.796919 | 0.827542 |
| MmugDNA.27144.1.S1_at   | MmugDNA.27144.1 | 8.15  | 8.57  | 0.46 | 0.19 | -1.33 | 0.416094 | 0.573117 | 0.734059 | 0.744941 |
| MmugDNA.27145.1.S1_at   | MmugDNA.27145.1 | 6.22  | 6.2   | 0.19 | 0.18 | 1.02  | 0.492429 | 0.667485 | 0.778267 | 0.805333 |
| MmugDNA.27146.1.S1_at   | MmugDNA.27146.1 | 4.96  | 4.81  | 0.15 | 0.02 | 1.11  | 0.154385 | 0.386435 | 0.527506 | 0.621593 |
| MmugDNA.27147.1.S1_at   | MmugDNA.27147.1 | 3.82  | 3.68  | 0.13 | 0.18 | 1.1   | 0.377243 | 0.277911 | 0.707423 | 0.541664 |
| MmugDNA.27148.1.S1_at   | MmugDNA.27148.1 | 10.49 | 10.86 | 0.54 | 0.07 | -1.29 | 0.091931 | 0.0896   | 0.460308 | 0.343811 |
| MmugDNA.27149.1.S1_at   | MmugDNA.27149.1 | 6.14  | 6.77  | 0.17 | 0.22 | -1.55 | 0.006327 | 0.026922 | 0.218505 | 0.205227 |
| MmugDNA.2715.1.S1_at    | MmugDNA.2715.1  | 6.18  | 6.28  | 0.12 | 0.15 | -1.07 | 0.928614 | 0.126867 | 0.976317 | 0.397534 |
| MmugDNA.27150.1.S1_at   | MmugDNA.27150.1 | 9.04  | 8.86  | 0.35 | 0.06 | 1.13  | 0.448395 | 0.125423 | 0.753886 | 0.396079 |
| MmugDNA.27151.1.S1_at   | MmugDNA.27151.1 | 10.86 | 10.71 | 0.55 | 0.19 | 1.11  | 0.51119  | 0.702758 | 0.78856  | 0.827685 |
| MmugDNA.27152.1.S1_at   | MmugDNA.27152.1 | 7.43  | 7.94  | 0.68 | 0.29 | -1.42 | 0.22491  | 0.334326 | 0.594108 | 0.582352 |
| MmugDNA.27153.1.S1_x_at | MmugDNA.27153.1 | 9.66  | 9.79  | 0.32 | 0.31 | -1.1  | 0.670842 | 0.503072 | 0.870106 | 0.700566 |
| MmugDNA.27154.1.S1_at   | MmugDNA.27154.1 | 4.02  | 3.98  | 0.04 | 0.03 | 1.03  | 0.050197 | 0.034239 | 0.386852 | 0.228886 |
| MmugDNA.27156.1.S1_at   | MmugDNA.27156.1 | 7.99  | 8.73  | 0.41 | 0.25 | -1.67 | 0.141131 | 0.045706 | 0.516345 | 0.258049 |



|                         |                 |       |       |      |      |       |          |          |          |          |
|-------------------------|-----------------|-------|-------|------|------|-------|----------|----------|----------|----------|
| MmugDNA.27158.1.S1_at   | MmugDNA.27158.1 | 4.42  | 4.41  | 0.1  | 0.08 | 1     | 0.851594 | 0.309436 | 0.947639 | 0.564979 |
| MmugDNA.27159.1.S1_at   | MmugDNA.27159.1 | 3.38  | 3.32  | 0.31 | 0.07 | 1.04  | 0.20762  | 0.27613  | 0.579231 | 0.540169 |
| MmugDNA.2716.1.S1_at    | MmugDNA.2716.1  | 3.39  | 3.7   | 1.28 | 0.28 | -1.23 | 0.477443 | 0.678243 | 0.769855 | 0.812064 |
| MmugDNA.27161.1.S1_at   | MmugDNA.27161.1 | 4.9   | 5.88  | 0.2  | 0.47 | -1.98 | 0.028718 | 0.053229 | 0.333062 | 0.276445 |
| MmugDNA.27162.1.S1_at   | MmugDNA.27162.1 | 5.88  | 5.74  | 0.13 | 0.11 | 1.1   | 0.213311 | 0.289742 | 0.58383  | 0.550776 |
| MmugDNA.27165.1.S1_at   | MmugDNA.27165.1 | 9.74  | 9.35  | 0.21 | 0.07 | 1.31  | 0.041212 | 0.1439   | 0.365734 | 0.41782  |
| MmugDNA.27165.1.S1_s_at | MmugDNA.27165.1 | 9.94  | 9.64  | 0.19 | 0.08 | 1.23  | 0.066108 | 0.190314 | 0.421668 | 0.465906 |
| MmugDNA.27166.1.S1_at   | MmugDNA.27166.1 | 5.51  | 5.54  | 0.15 | 0.09 | -1.02 | 0.494759 | 0.618683 | 0.779514 | 0.774185 |
| MmugDNA.27167.1.S1_at   | MmugDNA.27167.1 | 4.25  | 3.84  | 0.88 | 0.24 | 1.34  | 0.48765  | 0.670734 | 0.775141 | 0.807469 |
| MmugDNA.27168.1.S1_at   | MmugDNA.27168.1 | 4.21  | 4.02  | 0.17 | 0.06 | 1.14  | 0.40988  | 0.080424 | 0.730334 | 0.328057 |
| MmugDNA.27169.1.S1_at   | MmugDNA.27169.1 | 9.08  | 10.04 | 1    | 0.12 | -1.95 | 0.153947 | 0.152001 | 0.527271 | 0.426741 |
| MmugDNA.2717.1.S1_at    | MmugDNA.2717.1  | 7.99  | 7.42  | 0.25 | 0.22 | 1.49  | 0.072971 | 0.547252 | 0.433769 | 0.728342 |
| MmugDNA.27170.1.S1_at   | MmugDNA.27170.1 | 10.07 | 10.15 | 0.44 | 0.11 | -1.06 | 0.829137 | 0.865308 | 0.938698 | 0.923554 |
| MmugDNA.27172.1.S1_at   | MmugDNA.27172.1 | 6     | 6.3   | 0.88 | 0.46 | -1.23 | 0.771292 | 0.891716 | 0.914448 | 0.938272 |
| MmugDNA.27175.1.S1_at   | MmugDNA.27175.1 | 8.51  | 7.77  | 0.09 | 0.14 | 1.67  | 0.002137 | 0.006169 | 0.174757 | 0.106774 |
| MmugDNA.27176.1.S1_at   | MmugDNA.27176.1 | 4.5   | 4.58  | 0.23 | 0.12 | -1.06 | 0.607655 | 0.396098 | 0.840969 | 0.627915 |
| MmugDNA.27178.1.S1_at   | MmugDNA.27178.1 | 8.82  | 9.67  | 0.62 | 0.15 | -1.8  | 0.163855 | 0.12338  | 0.536659 | 0.393391 |
| MmugDNA.27179.1.S1_at   | MmugDNA.27179.1 | 9.43  | 10.06 | 0.59 | 0.02 | -1.54 | 0.147891 | 0.056652 | 0.522184 | 0.284094 |
| MmugDNA.2718.1.S1_at    | MmugDNA.2718.1  | 4.17  | 4.21  | 0.19 | 0.04 | -1.03 | 0.884812 | 0.746177 | 0.960159 | 0.852688 |
| MmugDNA.27180.1.S1_at   | MmugDNA.27180.1 | 8.18  | 8.91  | 0.96 | 0.2  | -1.66 | 0.329619 | 0.20951  | 0.67648  | 0.48315  |
| MmugDNA.27182.1.S1_at   | MmugDNA.27182.1 | 11.2  | 11.1  | 0.31 | 0.13 | 1.07  | 0.20637  | 0.143682 | 0.578152 | 0.417555 |
| MmugDNA.27183.1.S1_at   | MmugDNA.27183.1 | 7.55  | 7.82  | 0.32 | 0.31 | -1.2  | 0.119352 | 0.177426 | 0.492749 | 0.453773 |
| MmugDNA.27186.1.S1_at   | MmugDNA.27186.1 | 10.17 | 9.79  | 0.4  | 0.04 | 1.3   | 0.19368  | 0.005479 | 0.564275 | 0.102081 |
| MmugDNA.27187.1.S1_at   | MmugDNA.27187.1 | 5.73  | 6.35  | 0.57 | 0.16 | -1.53 | 0.255806 | 0.743355 | 0.619764 | 0.85129  |
| MmugDNA.27188.1.S1_at   | MmugDNA.27188.1 | 3.8   | 3.66  | 0.09 | 0.05 | 1.1   | 0.053349 | 0.040567 | 0.394644 | 0.246274 |
| MmugDNA.27190.1.S1_at   | MmugDNA.27190.1 | 5.68  | 5.51  | 0.17 | 0.13 | 1.12  | 0.314277 | 0.470214 | 0.665103 | 0.678572 |
| MmugDNA.27191.1.S1_at   | MmugDNA.27191.1 | 6.75  | 6.66  | 0.39 | 0.13 | 1.06  | 0.960349 | 0.15689  | 0.987164 | 0.432372 |
| MmugDNA.27192.1.S1_at   | MmugDNA.27192.1 | 10.4  | 10.05 | 0.9  | 0.09 | 1.27  | 0.703144 | 0.687726 | 0.884538 | 0.817664 |
| MmugDNA.27193.1.S1_at   | MmugDNA.27193.1 | 6.52  | 7.18  | 0.64 | 0.1  | -1.58 | 0.166575 | 0.408073 | 0.539239 | 0.635428 |
| MmugDNA.27194.1.S1_at   | MmugDNA.27194.1 | 8.49  | 8.06  | 0.41 | 0.11 | 1.35  | 0.467362 | 0.9214   | 0.764311 | 0.955761 |
| MmugDNA.27196.1.S1_at   | MmugDNA.27196.1 | 4.5   | 4.48  | 0.25 | 0.1  | 1.01  | 0.477856 | 0.453417 | 0.76987  | 0.667816 |
| MmugDNA.27198.1.S1_at   | MmugDNA.27198.1 | 5.32  | 5.11  | 0.33 | 0.17 | 1.16  | 0.441024 | 0.785277 | 0.748943 | 0.875687 |
| MmugDNA.272.1.S1_at     | MmugDNA.272.1   | 9.11  | 8.92  | 2.43 | 0.43 | 1.14  | 0.873025 | 0.167707 | 0.955973 | 0.444225 |
| MmugDNA.2720.1.S1_at    | MmugDNA.2720.1  | 10.03 | 10.24 | 1.09 | 0.11 | -1.16 | 0.708687 | 0.768277 | 0.886591 | 0.865456 |
| MmugDNA.27200.1.S1_at   | MmugDNA.27200.1 | 11.58 | 11.72 | 0.12 | 0.06 | -1.11 | 0.638982 | 0.116174 | 0.856133 | 0.383524 |
| MmugDNA.27202.1.S1_at   | MmugDNA.27202.1 | 8.05  | 8.06  | 0.18 | 0.06 | -1    | 0.850072 | 0.416706 | 0.947281 | 0.64167  |
| MmugDNA.27203.1.S1_at   | MmugDNA.27203.1 | 10.01 | 9.76  | 0.1  | 0.1  | 1.19  | 0.034568 | 0.025797 | 0.350124 | 0.201349 |
| MmugDNA.27205.1.S1_at   | MmugDNA.27205.1 | 6.99  | 8.49  | 1.05 | 0.1  | -2.81 | 0.069623 | 0.080947 | 0.427443 | 0.328993 |
| MmugDNA.27206.1.S1_at   | MmugDNA.27206.1 | 9.52  | 9.5   | 0.07 | 0.06 | 1.01  | 0.512639 | 0.375679 | 0.789481 | 0.613577 |
| MmugDNA.27207.1.S1_at   | MmugDNA.27207.1 | 9.51  | 9.43  | 0.21 | 0.04 | 1.06  | 0.493538 | 0.406529 | 0.778987 | 0.634382 |
| MmugDNA.27209.1.S1_at   | MmugDNA.27209.1 | 6.6   | 6.76  | 0.24 | 0.33 | -1.12 | 0.950855 | 0.659639 | 0.983338 | 0.800823 |
| MmugDNA.2721.1.S1_s_at  | MmugDNA.2721.1  | 9.6   | 9.12  | 0.47 | 0.12 | 1.39  | 0.123045 | 0.011835 | 0.496589 | 0.14094  |
| MmugDNA.27210.1.S1_at   | MmugDNA.27210.1 | 5.96  | 5.89  | 0.07 | 0.04 | 1.04  | 0.435064 | 0.541171 | 0.745472 | 0.724774 |

|                         |                 |       |       |      |      |       |          |          |          |          |
|-------------------------|-----------------|-------|-------|------|------|-------|----------|----------|----------|----------|
| MmugDNA.27211.1.S1_at   | MmugDNA.27211.1 | 10.33 | 10.8  | 0.14 | 0.11 | -1.39 | 0.00782  | 0.040291 | 0.230997 | 0.245902 |
| MmugDNA.27211.1.S1_s_at | MmugDNA.27211.1 | 8.12  | 8.58  | 0.2  | 0.03 | -1.37 | 0.018437 | 0.094374 | 0.297408 | 0.350924 |
| MmugDNA.27212.1.S1_at   | MmugDNA.27212.1 | 5.56  | 5.55  | 0.03 | 0.07 | 1     | 0.457624 | 0.277848 | 0.758364 | 0.541664 |
| MmugDNA.27215.1.S1_at   | MmugDNA.27215.1 | 4.04  | 4.01  | 0.1  | 0.21 | 1.02  | 0.710328 | 0.694346 | 0.887279 | 0.822254 |
| MmugDNA.27216.1.S1_at   | MmugDNA.27216.1 | 5.13  | 5.03  | 0.06 | 0.08 | 1.08  | 0.082234 | 0.198855 | 0.447052 | 0.473475 |
| MmugDNA.27217.1.S1_s_at | MmugDNA.27217.1 | 11.98 | 11.59 | 0.2  | 0.05 | 1.31  | 0.045815 | 0.002263 | 0.377317 | 0.070074 |
| MmugDNA.3139.1.S1_s_at  | MmugDNA.3139.1  | 7.3   | 7.3   | 0.09 | 0.03 | 1     | 0.839009 | 0.616472 | 0.942442 | 0.772691 |
| MmugDNA.27220.1.S1_at   | MmugDNA.27220.1 | 3.8   | 3.54  | 0.16 | 0.09 | 1.19  | 0.163418 | 0.298142 | 0.53621  | 0.556797 |
| MmugDNA.27221.1.S1_at   | MmugDNA.27221.1 | 3.28  | 3.02  | 0.11 | 0.1  | 1.2   | 0.03323  | 0.07317  | 0.346442 | 0.316064 |
| MmugDNA.27222.1.S1_at   | MmugDNA.27222.1 | 6.75  | 6.62  | 0.31 | 0.16 | 1.09  | 0.37232  | 0.314642 | 0.705567 | 0.568415 |
| MmugDNA.27224.1.S1_at   | MmugDNA.27224.1 | 5.68  | 5.41  | 0.26 | 0.4  | 1.21  | 0.735859 | 0.890765 | 0.89895  | 0.937717 |
| MmugDNA.27225.1.S1_at   | MmugDNA.27225.1 | 7.2   | 7.03  | 0.08 | 0.05 | 1.13  | 0.029791 | 0.44568  | 0.335991 | 0.662478 |
| MmugDNA.27227.1.S1_at   | MmugDNA.27227.1 | 6.77  | 6.4   | 0.32 | 0.28 | 1.29  | 0.345751 | 0.113499 | 0.687742 | 0.37961  |
| MmugDNA.27228.1.S1_at   | MmugDNA.27228.1 | 4.56  | 4.09  | 0.33 | 0.01 | 1.38  | 0.217889 | 0.257049 | 0.5879   | 0.524781 |
| MmugDNA.2723.1.S1_at    | MmugDNA.2723.1  | 9.95  | 9.69  | 0.35 | 0.11 | 1.2   | 0.081431 | 0.068738 | 0.445406 | 0.308711 |
| MmugDNA.27231.1.S1_at   | MmugDNA.27231.1 | 6.37  | 6.4   | 0.16 | 0.09 | -1.02 | 0.518451 | 0.745674 | 0.792692 | 0.85256  |
| MmugDNA.27233.1.S1_at   | MmugDNA.27233.1 | 3.46  | 3.48  | 0.01 | 0.1  | -1.02 | 0.65947  | 0.098985 | 0.865234 | 0.357049 |
| MmugDNA.39057.1.S1_at   | MmugDNA.39057.1 | 7.1   | 6.89  | 0.14 | 0.14 | 1.15  | 0.312757 | 0.502087 | 0.664208 | 0.700051 |
| MmugDNA.39057.1.S1_s_at | MmugDNA.39057.1 | 8.29  | 8.18  | 0.17 | 0.05 | 1.08  | 0.347345 | 0.312728 | 0.68869  | 0.567299 |
| MmugDNA.27236.1.S1_at   | MmugDNA.27236.1 | 10.66 | 10.5  | 0.39 | 0.2  | 1.12  | 0.727884 | 0.676333 | 0.894887 | 0.810904 |
| MmugDNA.2724.1.S1_at    | MmugDNA.2724.1  | 10.47 | 10.22 | 0.65 | 0.17 | 1.19  | 0.769532 | 0.283566 | 0.913715 | 0.54601  |
| MmugDNA.27243.1.S1_at   | MmugDNA.27243.1 | 11.23 | 11.02 | 0.58 | 0.08 | 1.15  | 0.574796 | 0.652115 | 0.82429  | 0.796591 |
| MmugDNA.27244.1.S1_at   | MmugDNA.27244.1 | 3.25  | 3.26  | 0.01 | 0.04 | -1    | 0.608007 | 0.418839 | 0.840979 | 0.643118 |
| MmugDNA.27245.1.S1_at   | MmugDNA.27245.1 | 7.02  | 6.88  | 0.08 | 0.05 | 1.1   | 0.127591 | 0.036886 | 0.501756 | 0.236506 |
| MmugDNA.27247.1.S1_at   | MmugDNA.27247.1 | 3.15  | 3.09  | 0.14 | 0.06 | 1.05  | 0.178289 | 0.241209 | 0.551301 | 0.511821 |
| MmugDNA.27248.1.S1_at   | MmugDNA.27248.1 | 2.95  | 3.17  | 0.07 | 0.05 | -1.16 | 0.021266 | 0.011575 | 0.307422 | 0.139225 |
| MmugDNA.27249.1.S1_at   | MmugDNA.27249.1 | 9.45  | 9.46  | 0.72 | 0.16 | -1    | 0.964757 | 0.991936 | 0.988406 | 0.995469 |
| MmugDNA.2725.1.S1_at    | MmugDNA.2725.1  | 5.27  | 5.14  | 0.34 | 0.66 | 1.09  | 0.714509 | 0.872959 | 0.888807 | 0.927791 |
| MmugDNA.27251.1.S1_at   | MmugDNA.27251.1 | 5.14  | 4.81  | 0.07 | 0.02 | 1.25  | 0.00174  | 0.000196 | 0.166657 | 0.030951 |
| MmugDNA.27252.1.S1_at   | MmugDNA.27252.1 | 7.87  | 7.94  | 0.38 | 0.35 | -1.05 | 0.997957 | 0.98492  | 0.999327 | 0.991478 |
| MmugDNA.27253.1.S1_at   | MmugDNA.27253.1 | 4     | 3.86  | 0.12 | 0.07 | 1.1   | 0.15239  | 0.294669 | 0.525402 | 0.554326 |
| MmugDNA.27254.1.S1_s_at | MmugDNA.27254.1 | 4.81  | 5.84  | 0.63 | 0.67 | -2.05 | 0.159279 | 0.111399 | 0.531952 | 0.376126 |
| MmugDNA.27255.1.S1_at   | MmugDNA.27255.1 | 5     | 5.31  | 0.22 | 0.08 | -1.24 | 0.035665 | 0.722862 | 0.352882 | 0.839464 |
| MmugDNA.27256.1.S1_at   | MmugDNA.27256.1 | 10.05 | 10.33 | 0.39 | 0.1  | -1.22 | 0.378289 | 0.490871 | 0.708156 | 0.692666 |
| MmugDNA.2242.1.S1_s_at  | MmugDNA.2242.1  | 9.72  | 10.05 | 0.3  | 0.08 | -1.25 | 0.161102 | 0.199868 | 0.534413 | 0.474559 |
| MmugDNA.27257.1.S1_at   | MmugDNA.27257.1 | 4.08  | 4.04  | 0.15 | 0.05 | 1.02  | 0.674084 | 0.220656 | 0.871751 | 0.494069 |
| MmugDNA.27259.1.S1_at   | MmugDNA.27259.1 | 4.18  | 4.16  | 0.05 | 0.12 | 1.02  | 0.955643 | 0.291316 | 0.985346 | 0.551803 |
| MmugDNA.2726.1.S1_at    | MmugDNA.2726.1  | 10.14 | 10.91 | 0.39 | 0.02 | -1.7  | 0.076361 | 0.016962 | 0.437977 | 0.165103 |
| MmugDNA.27260.1.S1_at   | MmugDNA.27260.1 | 6.63  | 6.46  | 0.09 | 0.05 | 1.12  | 0.025947 | 0.011861 | 0.32273  | 0.140973 |
| MmugDNA.27261.1.S1_at   | MmugDNA.27261.1 | 6.67  | 6.5   | 0.25 | 0.26 | 1.12  | 0.980071 | 0.015021 | 0.993744 | 0.155736 |
| MmugDNA.27264.1.S1_at   | MmugDNA.27264.1 | 3.59  | 3.58  | 0.09 | 0.06 | 1.01  | 0.723804 | 0.359823 | 0.89287  | 0.601086 |
| MmugDNA.27266.1.S1_at   | MmugDNA.27266.1 | 8.27  | 8.18  | 0.23 | 0.08 | 1.06  | 0.747173 | 0.009623 | 0.903915 | 0.12918  |
| MmugDNA.27268.1.S1_at   | MmugDNA.27268.1 | 5.39  | 5.51  | 0.15 | 0.09 | -1.09 | 0.933037 | 0.890629 | 0.977247 | 0.937649 |

|                         |                 |       |       |      |      |       |          |          |          |          |
|-------------------------|-----------------|-------|-------|------|------|-------|----------|----------|----------|----------|
| MmugDNA.27269.1.S1_at   | MmugDNA.27269.1 | 8.71  | 8.59  | 0.44 | 0.11 | 1.09  | 0.609734 | 0.276636 | 0.841773 | 0.540596 |
| MmugDNA.27270.1.S1_at   | MmugDNA.27270.1 | 7.47  | 7.4   | 0.03 | 0.09 | 1.05  | 0.13507  | 0.109237 | 0.50914  | 0.37308  |
| MmugDNA.27271.1.S1_at   | MmugDNA.27271.1 | 3.52  | 3.25  | 0.1  | 0.15 | 1.2   | 0.054123 | 0.407702 | 0.395995 | 0.635135 |
| MmugDNA.27273.1.S1_at   | MmugDNA.27273.1 | 6.9   | 7.14  | 1.55 | 0.3  | -1.18 | 0.786913 | 0.380219 | 0.921703 | 0.616914 |
| MmugDNA.27275.1.S1_at   | MmugDNA.27275.1 | 5.3   | 5.02  | 0.42 | 0.27 | 1.22  | 0.114986 | 0.1862   | 0.488167 | 0.46207  |
| MmugDNA.27277.1.S1_at   | MmugDNA.27277.1 | 5.86  | 5.68  | 0.12 | 0.07 | 1.13  | 0.040124 | 0.038326 | 0.363395 | 0.240641 |
| MmugDNA.2728.1.S1_at    | MmugDNA.2728.1  | 5.31  | 5.25  | 0.06 | 0.04 | 1.04  | 0.340527 | 0.581099 | 0.684537 | 0.750212 |
| MmugDNA.27281.1.S1_at   | MmugDNA.27281.1 | 7.6   | 7.75  | 0.13 | 0.11 | -1.11 | 0.263935 | 0.526683 | 0.62583  | 0.715627 |
| MmugDNA.27282.1.S1_at   | MmugDNA.27282.1 | 11.03 | 11    | 1    | 0.16 | 1.02  | 0.993911 | 0.255918 | 0.997666 | 0.523862 |
| MmugDNA.27283.1.S1_at   | MmugDNA.27283.1 | 8.84  | 8.86  | 0.5  | 0.08 | -1.01 | 0.964664 | 0.67648  | 0.988371 | 0.81095  |
| MmugDNA.27285.1.S1_at   | MmugDNA.27285.1 | 4.01  | 3.86  | 0.09 | 0.09 | 1.11  | 0.112505 | 0.781568 | 0.485849 | 0.873395 |
| MmugDNA.27286.1.S1_at   | MmugDNA.27286.1 | 9.23  | 9.3   | 0.22 | 0.15 | -1.05 | 0.227781 | 0.591959 | 0.596693 | 0.757386 |
| MmugDNA.27287.1.S1_at   | MmugDNA.27287.1 | 4.69  | 4.76  | 0.04 | 0.14 | -1.05 | 0.93207  | 0.083732 | 0.977133 | 0.33448  |
| MmugDNA.27288.1.S1_at   | MmugDNA.27288.1 | 6.06  | 5.79  | 0.26 | 0.17 | 1.2   | 0.213731 | 0.130979 | 0.584304 | 0.403037 |
| MmugDNA.39152.1.S1_s_at | MmugDNA.39152.1 | 5.2   | 5.74  | 0.28 | 0.04 | -1.46 | 0.026283 | 0.001071 | 0.323826 | 0.051873 |
| MmugDNA.27290.1.S1_s_at | MmugDNA.27290.1 | 12.52 | 12.57 | 0.05 | 0.02 | -1.03 | 0.719081 | 0.5242   | 0.890853 | 0.714207 |
| MmugDNA.27291.1.S1_at   | MmugDNA.27291.1 | 3.24  | 3.14  | 0.14 | 0.04 | 1.07  | 0.299093 | 0.611275 | 0.653479 | 0.769205 |
| MmugDNA.27293.1.S1_at   | MmugDNA.27293.1 | 5.6   | 7.58  | 0.7  | 0.18 | -3.94 | 0.024606 | 0.003969 | 0.319173 | 0.089594 |
| MmugDNA.27294.1.S1_at   | MmugDNA.27294.1 | 9.96  | 10.47 | 0.36 | 0.09 | -1.43 | 0.075875 | 0.078754 | 0.436934 | 0.325716 |
| MmugDNA.27295.1.S1_at   | MmugDNA.27295.1 | 8     | 7.98  | 0.75 | 0.18 | 1.01  | 0.475636 | 0.622129 | 0.768676 | 0.77667  |
| MmugDNA.27296.1.S1_at   | MmugDNA.27296.1 | 3.13  | 3.33  | 0.15 | 0.09 | -1.15 | 0.17703  | 0.187159 | 0.550154 | 0.46313  |
| MmugDNA.27297.1.S1_at   | MmugDNA.27297.1 | 3.63  | 3.76  | 0.39 | 0.73 | -1.09 | 0.613701 | 0.322383 | 0.843604 | 0.573972 |
| MmugDNA.27299.1.S1_at   | MmugDNA.27299.1 | 8.07  | 8.42  | 0.34 | 0.12 | -1.28 | 0.129462 | 0.010819 | 0.504211 | 0.135641 |
| MmugDNA.273.1.S1_at     | MmugDNA.273.1   | 12.58 | 12.56 | 0.03 | 0.03 | 1.01  | 0.224878 | 0.93591  | 0.594108 | 0.96389  |
| MmugDNA.2730.1.S1_at    | MmugDNA.2730.1  | 6.38  | 6.62  | 0.3  | 0.28 | -1.18 | 0.928877 | 0.517811 | 0.976332 | 0.709928 |
| MmugDNA.27301.1.S1_at   | MmugDNA.27301.1 | 7.37  | 7.25  | 0.05 | 0.04 | 1.08  | 0.022021 | 0.532178 | 0.309781 | 0.718995 |
| MmugDNA.27302.1.S1_at   | MmugDNA.27302.1 | 3.77  | 3.45  | 0.35 | 0.43 | 1.25  | 0.424419 | 0.697672 | 0.739564 | 0.824317 |
| MmugDNA.27303.1.S1_at   | MmugDNA.27303.1 | 6.74  | 5.79  | 1.32 | 0.76 | 1.94  | 0.378921 | 0.123884 | 0.708502 | 0.394194 |
| MmugDNA.27304.1.S1_at   | MmugDNA.27304.1 | 9.09  | 9.28  | 0.36 | 0.24 | -1.15 | 0.342015 | 0.920675 | 0.685567 | 0.955279 |
| MmugDNA.27305.1.S1_at   | MmugDNA.27305.1 | 4.79  | 4.57  | 0.36 | 0.3  | 1.17  | 0.82229  | 0.199758 | 0.935933 | 0.474382 |
| MmugDNA.27306.1.S1_at   | MmugDNA.27306.1 | 3.45  | 3.45  | 0.15 | 0.11 | 1     | 0.98819  | 0.128159 | 0.995876 | 0.399148 |
| MmugDNA.27307.1.S1_at   | MmugDNA.27307.1 | 2.75  | 2.82  | 0.04 | 0.1  | -1.05 | 0.220017 | 0.151872 | 0.589114 | 0.426512 |
| MmugDNA.27308.1.S1_at   | MmugDNA.27308.1 | 6.68  | 7.11  | 0.29 | 0.23 | -1.34 | 0.412811 | 0.059535 | 0.732098 | 0.290548 |
| MmugDNA.27309.1.S1_at   | MmugDNA.27309.1 | 5.36  | 5.33  | 0.14 | 0.02 | 1.02  | 0.603818 | 0.887352 | 0.839359 | 0.935852 |
| MmugDNA.2731.1.S1_at    | MmugDNA.2731.1  | 6.52  | 6.7   | 0.48 | 0.13 | -1.14 | 0.758715 | 0.07153  | 0.909286 | 0.313706 |
| MmugDNA.27310.1.S1_at   | MmugDNA.27310.1 | 9.13  | 8.8   | 0.8  | 0.13 | 1.26  | 0.89069  | 0.79433  | 0.962478 | 0.881371 |
| MmugDNA.27311.1.S1_at   | MmugDNA.27311.1 | 3.35  | 3.15  | 0.09 | 0.05 | 1.15  | 0.057843 | 0.052932 | 0.403172 | 0.275692 |
| MmugDNA.27312.1.S1_at   | MmugDNA.27312.1 | 4.49  | 4.51  | 0.25 | 0.26 | -1.01 | 0.776494 | 0.281735 | 0.917314 | 0.544807 |
| MmugDNA.27314.1.S1_at   | MmugDNA.27314.1 | 9.38  | 9.44  | 0.32 | 0.26 | -1.04 | 0.732529 | 0.106885 | 0.897267 | 0.369499 |
| MmugDNA.27315.1.S1_at   | MmugDNA.27315.1 | 7.21  | 6.74  | 0.29 | 0.24 | 1.38  | 0.084984 | 0.617131 | 0.45159  | 0.773224 |
| MmugDNA.27316.1.S1_at   | MmugDNA.27316.1 | 3.51  | 3.38  | 0.12 | 0.1  | 1.09  | 0.26758  | 0.083511 | 0.628193 | 0.334048 |
| MmugDNA.27316.1.S1_x_at | MmugDNA.27316.1 | 3.99  | 4     | 0.12 | 0.04 | -1    | 0.553701 | 0.461221 | 0.812271 | 0.672916 |
| MmugDNA.27317.1.S1_at   | MmugDNA.27317.1 | 3.69  | 3.45  | 0.28 | 0.15 | 1.18  | 0.219211 | 0.086036 | 0.588642 | 0.338256 |

|                         |                 |       |       |      |      |       |          |          |          |          |
|-------------------------|-----------------|-------|-------|------|------|-------|----------|----------|----------|----------|
| MmugDNA.27319.1.S1_at   | MmugDNA.27319.1 | 9.16  | 8.87  | 0.31 | 0.08 | 1.22  | 0.251139 | 0.372635 | 0.616334 | 0.61161  |
| MmugDNA.2732.1.S1_at    | MmugDNA.2732.1  | 7.37  | 7.34  | 0.32 | 0.25 | 1.02  | 0.607103 | 0.501903 | 0.840743 | 0.699953 |
| MmugDNA.27321.1.S1_at   | MmugDNA.27321.1 | 8.29  | 7.84  | 0.32 | 0.12 | 1.37  | 0.166956 | 0.125772 | 0.539531 | 0.396313 |
| MmugDNA.27322.1.S1_at   | MmugDNA.27322.1 | 4.59  | 4.95  | 0.34 | 0.53 | -1.28 | 0.919083 | 0.028776 | 0.972407 | 0.211515 |
| MmugDNA.27323.1.S1_at   | MmugDNA.27323.1 | 6.28  | 6.29  | 0.11 | 0.25 | -1.01 | 0.299508 | 0.266978 | 0.653953 | 0.532515 |
| MmugDNA.27324.1.S1_at   | MmugDNA.27324.1 | 8.31  | 8.4   | 0.63 | 0.18 | -1.06 | 0.980289 | 0.91276  | 0.993785 | 0.950874 |
| MmugDNA.27325.1.S1_at   | MmugDNA.27325.1 | 7.41  | 7.34  | 0.9  | 0.24 | 1.05  | 0.35516  | 0.243208 | 0.69464  | 0.513356 |
| MmugDNA.27326.1.S1_at   | MmugDNA.27326.1 | 6.42  | 5.9   | 0.15 | 0.17 | 1.44  | 0.022966 | 0.039426 | 0.313723 | 0.243529 |
| MmugDNA.27328.1.S1_at   | MmugDNA.27328.1 | 8.85  | 7.76  | 0.97 | 0.12 | 2.13  | 0.342335 | 0.450637 | 0.685747 | 0.665844 |
| MmugDNA.27329.1.S1_at   | MmugDNA.27329.1 | 7.23  | 8.25  | 1.07 | 0.12 | -2.03 | 0.165747 | 0.235548 | 0.538623 | 0.506633 |
| MmugDNA.27331.1.S1_at   | MmugDNA.27331.1 | 5.92  | 5.87  | 0.08 | 0    | -1.04 | 0.838951 | 0.969631 | 0.942422 | 0.983359 |
| MmugDNA.27333.1.S1_at   | MmugDNA.27333.1 | 3.44  | 3.33  | 0.15 | 0.03 | 1.08  | 0.256003 | 0.49925  | 0.619926 | 0.698117 |
| MmugDNA.27334.1.S1_at   | MmugDNA.27334.1 | 4.75  | 4.81  | 0.15 | 0.09 | -1.04 | 0.50495  | 0.058104 | 0.785092 | 0.287718 |
| MmugDNA.27335.1.S1_at   | MmugDNA.27335.1 | 3.67  | 3.57  | 0.06 | 0.89 | 1.07  | 0.733702 | 0.532544 | 0.897902 | 0.719092 |
| MmugDNA.27338.1.S1_at   | MmugDNA.27338.1 | 7.23  | 7.53  | 0.62 | 0.12 | -1.23 | 0.727311 | 0.044912 | 0.894648 | 0.256424 |
| MmugDNA.2734.1.S1_at    | MmugDNA.2734.1  | 8.62  | 8.52  | 0.65 | 0.12 | 1.07  | 0.578474 | 0.764056 | 0.826202 | 0.862833 |
| MmugDNA.27340.1.S1_at   | MmugDNA.27340.1 | 5.35  | 4.98  | 0.69 | 0.87 | 1.3   | 0.740014 | 0.359486 | 0.900699 | 0.600754 |
| MmugDNA.27343.1.S1_s_at | MmugDNA.27343.1 | 10.09 | 10.31 | 0.59 | 0.36 | -1.17 | 0.466878 | 0.179784 | 0.763921 | 0.456321 |
| MmugDNA.27346.1.S1_at   | MmugDNA.27346.1 | 3.23  | 3.34  | 1.16 | 0.21 | -1.08 | 0.37813  | 0.493114 | 0.708016 | 0.694001 |
| MmugDNA.27347.1.S1_at   | MmugDNA.27347.1 | 3.01  | 3     | 0.02 | 0.54 | 1.01  | 0.385667 | 0.52055  | 0.713001 | 0.711831 |
| MmugDNA.27348.1.S1_at   | MmugDNA.27348.1 | 7.64  | 7.14  | 0.92 | 0.17 | 1.42  | 0.385801 | 0.029819 | 0.713049 | 0.214326 |
| MmugDNA.27349.1.S1_at   | MmugDNA.27349.1 | 5.64  | 5.43  | 0.47 | 0.2  | 1.16  | 0.182903 | 0.244019 | 0.555732 | 0.514069 |
| MmugDNA.27350.1.S1_at   | MmugDNA.27350.1 | 4.77  | 4.76  | 0.1  | 0.4  | 1.01  | 0.527196 | 0.136111 | 0.797021 | 0.408419 |
| MmugDNA.27354.1.S1_at   | MmugDNA.27354.1 | 5.39  | 5.25  | 0.04 | 0.17 | 1.1   | 0.305623 | 0.399159 | 0.659056 | 0.62969  |
| MmugDNA.27355.1.S1_at   | MmugDNA.27355.1 | 8.27  | 8.29  | 0.4  | 0.1  | -1.01 | 0.511688 | 0.050338 | 0.788813 | 0.269619 |
| MmugDNA.27357.1.S1_at   | MmugDNA.27357.1 | 3.89  | 3.62  | 0.13 | 0.05 | 1.2   | 0.070285 | 0.396669 | 0.428889 | 0.628434 |
| MmugDNA.27359.1.S1_at   | MmugDNA.27359.1 | 7.46  | 8.16  | 0.72 | 0.2  | -1.63 | 0.062525 | 0.051521 | 0.413307 | 0.27241  |
| MmugDNA.2736.1.S1_at    | MmugDNA.2736.1  | 8.27  | 8.29  | 1.01 | 0.17 | -1.01 | 0.887647 | 0.810832 | 0.961096 | 0.890845 |
| MmugDNA.27360.1.S1_at   | MmugDNA.27360.1 | 7.76  | 8.34  | 0.92 | 0.51 | -1.5  | 0.519905 | 0.51341  | 0.793377 | 0.706881 |
| MmugDNA.27365.1.S1_at   | MmugDNA.27365.1 | 10.19 | 10.3  | 0.24 | 0.14 | -1.08 | 0.942524 | 0.634694 | 0.98031  | 0.784978 |
| MmugDNA.27366.1.S1_at   | MmugDNA.27366.1 | 3.88  | 3.7   | 0.29 | 0.24 | 1.13  | 0.682083 | 0.322571 | 0.875584 | 0.573991 |
| MmugDNA.27367.1.S1_at   | MmugDNA.27367.1 | 10.86 | 10.59 | 0.3  | 0.27 | 1.21  | 0.144692 | 0.125552 | 0.520018 | 0.396226 |
| MmugDNA.27367.1.S1_x_at | MmugDNA.27367.1 | 11.23 | 10.99 | 0.25 | 0.21 | 1.18  | 0.151867 | 0.113286 | 0.525001 | 0.379339 |
| MmugDNA.27368.1.S1_at   | MmugDNA.27368.1 | 5.24  | 4.95  | 0.52 | 0.23 | 1.22  | 0.570777 | 0.395148 | 0.822287 | 0.627379 |
| MmugDNA.27369.1.S1_at   | MmugDNA.27369.1 | 7.8   | 7.74  | 0.26 | 0.04 | 1.04  | 0.732913 | 0.113477 | 0.897467 | 0.379588 |
| MmugDNA.27370.1.S1_at   | MmugDNA.27370.1 | 4.91  | 5.01  | 0.41 | 0.21 | -1.07 | 0.240786 | 0.515288 | 0.607067 | 0.70823  |
| MmugDNA.27370.1.S1_s_at | MmugDNA.27370.1 | 4.67  | 5.3   | 0.29 | 0.34 | -1.55 | 0.159263 | 0.258885 | 0.531932 | 0.52608  |
| MmugDNA.27371.1.S1_at   | MmugDNA.27371.1 | 7.74  | 8.65  | 0.46 | 0.27 | -1.88 | 0.074286 | 0.022076 | 0.435027 | 0.185927 |
| MmugDNA.27372.1.S1_at   | MmugDNA.27372.1 | 5.65  | 4.66  | 0.17 | 0.33 | 1.99  | 0.029663 | 0.014566 | 0.335362 | 0.153907 |
| MmugDNA.27373.1.S1_at   | MmugDNA.27373.1 | 8.13  | 8.94  | 0.17 | 0.21 | -1.75 | 0.006548 | 0.000538 | 0.219791 | 0.040466 |
| MmugDNA.27374.1.S1_at   | MmugDNA.27374.1 | 2.84  | 2.88  | 0.03 | 0.08 | -1.03 | 0.5626   | 0.05461  | 0.817773 | 0.279211 |
| MmugDNA.27375.1.S1_at   | MmugDNA.27375.1 | 10.01 | 10.62 | 0.48 | 0.16 | -1.53 | 0.152771 | 0.160752 | 0.525696 | 0.436897 |
| MmugDNA.41358.1.S1_at   | MmugDNA.41358.1 | 3.87  | 4.1   | 0.18 | 0.07 | -1.17 | 0.304322 | 0.13502  | 0.657987 | 0.406995 |

|                         |                 |       |       |      |      |       |          |          |          |          |
|-------------------------|-----------------|-------|-------|------|------|-------|----------|----------|----------|----------|
| MmugDNA.41358.1.S1_s_at | MmugDNA.41358.1 | 5.4   | 5.68  | 0.29 | 0.12 | -1.21 | 0.189014 | 0.04447  | 0.560718 | 0.255242 |
| MmugDNA.27377.1.S1_at   | MmugDNA.27377.1 | 9.9   | 9.77  | 0.44 | 0.17 | 1.1   | 0.357146 | 0.055437 | 0.695543 | 0.281336 |
| MmugDNA.27378.1.S1_at   | MmugDNA.27378.1 | 5.96  | 5.86  | 0.17 | 0.15 | 1.07  | 0.921406 | 0.006902 | 0.973373 | 0.11226  |
| MmugDNA.27379.1.S1_at   | MmugDNA.27379.1 | 3.99  | 4.27  | 0.55 | 0.22 | -1.21 | 0.58629  | 0.240743 | 0.831211 | 0.511469 |
| MmugDNA.27380.1.S1_s_at | MmugDNA.27380.1 | 8.06  | 7.87  | 0.64 | 0.06 | 1.15  | 0.203585 | 0.093624 | 0.575074 | 0.349995 |
| MmugDNA.27386.1.S1_at   | MmugDNA.27386.1 | 4.44  | 4.12  | 0.14 | 0.1  | 1.25  | 0.095353 | 0.119205 | 0.464168 | 0.387659 |
| MmugDNA.27388.1.S1_at   | MmugDNA.27388.1 | 7.88  | 7.33  | 0.58 | 0.26 | 1.46  | 0.55821  | 0.641816 | 0.815182 | 0.789771 |
| MmugDNA.27389.1.S1_at   | MmugDNA.27389.1 | 5.33  | 5.29  | 0.05 | 0.05 | 1.03  | 0.133567 | 0.675677 | 0.508012 | 0.810429 |
| MmugDNA.27390.1.S1_at   | MmugDNA.27390.1 | 3.86  | 3.84  | 0.12 | 0.01 | 1.01  | 0.491755 | 0.241807 | 0.778032 | 0.51238  |
| MmugDNA.27391.1.S1_at   | MmugDNA.27391.1 | 8.9   | 8.93  | 1.38 | 0.54 | -1.02 | 0.656193 | 0.346584 | 0.863485 | 0.591427 |
| MmugDNA.27392.1.S1_at   | MmugDNA.27392.1 | 6.82  | 6.59  | 0.2  | 0.08 | -1.17 | 0.111518 | 0.184394 | 0.484785 | 0.460458 |
| MmugDNA.27393.1.S1_at   | MmugDNA.27393.1 | 3.31  | 3.2   | 0.13 | 0.14 | 1.07  | 0.209515 | 0.256376 | 0.58099  | 0.524114 |
| MmugDNA.27394.1.S1_at   | MmugDNA.27394.1 | 4.1   | 3.95  | 0.19 | 0.13 | 1.11  | 0.609447 | 0.323079 | 0.841773 | 0.574351 |
| MmugDNA.27395.1.S1_at   | MmugDNA.27395.1 | 11.05 | 11    | 0.69 | 0.1  | 1.03  | 0.326896 | 0.188088 | 0.674552 | 0.464169 |
| MmugDNA.27396.1.S1_at   | MmugDNA.27396.1 | 5.83  | 5.75  | 0.19 | 0.05 | 1.05  | 0.769469 | 0.220019 | 0.913662 | 0.49344  |
| MmugDNA.27397.1.S1_at   | MmugDNA.27397.1 | 10.47 | 10.54 | 0.12 | 0.05 | -1.05 | 0.477542 | 0.16888  | 0.76987  | 0.445458 |
| MmugDNA.27398.1.S1_at   | MmugDNA.27398.1 | 3.78  | 4.09  | 0.37 | 0.75 | -1.24 | 0.986033 | 0.769939 | 0.995505 | 0.866376 |
| MmugDNA.27399.1.S1_at   | MmugDNA.27399.1 | 5.45  | 5.44  | 0.15 | 0.1  | 1.01  | 0.56891  | 0.865568 | 0.821082 | 0.923598 |
| MmugDNA.274.1.S1_at     | MmugDNA.274.1   | 9.19  | 8.67  | 0.39 | 0.34 | 1.43  | 0.183339 | 0.052709 | 0.556384 | 0.275206 |
| MmugDNA.2740.1.S1_at    | MmugDNA.2740.1  | 7.97  | 7.78  | 0.64 | 0.22 | 1.14  | 0.567309 | 0.720902 | 0.820391 | 0.838368 |
| MmugDNA.27400.1.S1_at   | MmugDNA.27400.1 | 8.11  | 8.34  | 0.42 | 0.27 | -1.17 | 0.810475 | 0.11794  | 0.931338 | 0.385845 |
| MmugDNA.27401.1.S1_at   | MmugDNA.27401.1 | 4.69  | 4.5   | 0.26 | 0.12 | 1.14  | 0.216987 | 0.343591 | 0.586934 | 0.589322 |
| MmugDNA.27402.1.S1_at   | MmugDNA.27402.1 | 5.85  | 5.91  | 0.17 | 0.05 | -1.04 | 0.539381 | 0.598951 | 0.803764 | 0.761244 |
| MmugDNA.27404.1.S1_at   | MmugDNA.27404.1 | 6.37  | 6.95  | 0.54 | 0.11 | -1.49 | 0.144889 | 0.138914 | 0.520198 | 0.412037 |
| MmugDNA.27405.1.S1_at   | MmugDNA.27405.1 | 5.83  | 5.29  | 0.54 | 0.6  | 1.45  | 0.260613 | 0.324536 | 0.623301 | 0.57507  |
| MmugDNA.27406.1.S1_at   | MmugDNA.27406.1 | 8.68  | 8.28  | 0.02 | 0.23 | 1.32  | 0.023096 | 0.016123 | 0.314614 | 0.160936 |
| MmugDNA.27407.1.S1_at   | MmugDNA.27407.1 | 5.36  | 5.46  | 0.19 | 0.34 | -1.07 | 0.966698 | 0.843596 | 0.989053 | 0.910913 |
| MmugDNA.27408.1.S1_at   | MmugDNA.27408.1 | 5.02  | 5.05  | 0.15 | 0.07 | -1.02 | 0.295156 | 0.501673 | 0.651016 | 0.6998   |
| MmugDNA.27409.1.S1_at   | MmugDNA.27409.1 | 4.8   | 4.43  | 0.05 | 0.12 | 1.29  | 0.017914 | 0.014248 | 0.294439 | 0.152403 |
| MmugDNA.2741.1.S1_at    | MmugDNA.2741.1  | 6.91  | 7.11  | 0.44 | 0.16 | -1.15 | 0.59874  | 0.589889 | 0.837099 | 0.755987 |
| MmugDNA.27410.1.S1_at   | MmugDNA.27410.1 | 3.15  | 3.26  | 0.28 | 0.07 | -1.08 | 0.611807 | 0.379068 | 0.842611 | 0.616029 |
| MmugDNA.27411.1.S1_at   | MmugDNA.27411.1 | 8.02  | 8.26  | 0.59 | 0.17 | -1.18 | 0.714759 | 0.785627 | 0.888929 | 0.875891 |
| MmugDNA.27413.1.S1_at   | MmugDNA.27413.1 | 5.92  | 6.02  | 0.24 | 0.07 | -1.07 | 0.619836 | 0.269268 | 0.846932 | 0.534534 |
| MmugDNA.27414.1.S1_at   | MmugDNA.27414.1 | 5.75  | 5.65  | 0.1  | 0.21 | 1.07  | 0.620858 | 0.184719 | 0.847317 | 0.460645 |
| MmugDNA.27415.1.S1_at   | MmugDNA.27415.1 | 7.4   | 7.26  | 0.2  | 0.06 | 1.1   | 0.288755 | 0.17475  | 0.645757 | 0.451302 |
| MmugDNA.27416.1.S1_at   | MmugDNA.27416.1 | 2.69  | 2.68  | 0.09 | 0.09 | 1.01  | 0.947651 | 0.994578 | 0.981984 | 0.99666  |
| MmugDNA.27417.1.S1_at   | MmugDNA.27417.1 | 4.83  | 4.81  | 0.04 | 0.09 | 1.02  | 0.784922 | 0.225224 | 0.920961 | 0.497865 |
| MmugDNA.27418.1.S1_at   | MmugDNA.27418.1 | 8.41  | 7.69  | 0.13 | 0.17 | 1.65  | 0.003996 | 0.00043  | 0.198571 | 0.038359 |
| MmugDNA.27419.1.S1_at   | MmugDNA.27419.1 | 8.37  | 8.27  | 0.34 | 0.08 | 1.07  | 0.189916 | 0.265184 | 0.561297 | 0.531121 |
| MmugDNA.2742.1.S1_at    | MmugDNA.2742.1  | 6.54  | 6.13  | 0.28 | 0.16 | 1.32  | 0.174222 | 0.455813 | 0.547348 | 0.669659 |
| MmugDNA.27420.1.S1_at   | MmugDNA.27420.1 | 6.37  | 6.65  | 0.16 | 0.24 | -1.21 | 0.182767 | 0.31431  | 0.555631 | 0.568263 |
| MmugDNA.27421.1.S1_at   | MmugDNA.27421.1 | 3.78  | 3.62  | 0.24 | 0.25 | 1.12  | 0.588968 | 0.618207 | 0.832092 | 0.77393  |
| MmugDNA.27422.1.S1_at   | MmugDNA.27422.1 | 11.9  | 11.63 | 0.21 | 0.16 | 1.21  | 0.316159 | 0.134888 | 0.666364 | 0.406878 |

|                         |                 |       |       |      |      |       |          |          |          |          |
|-------------------------|-----------------|-------|-------|------|------|-------|----------|----------|----------|----------|
| MmugDNA.27423.1.S1_at   | MmugDNA.27423.1 | 3.82  | 3.66  | 0.19 | 0.05 | 1.12  | 0.513122 | 0.698006 | 0.789654 | 0.82456  |
| MmugDNA.27424.1.S1_at   | MmugDNA.27424.1 | 7.5   | 7.25  | 0.17 | 0.18 | 1.19  | 0.127945 | 0.039487 | 0.502422 | 0.243642 |
| MmugDNA.27426.1.S1_at   | MmugDNA.27426.1 | 4.54  | 4.42  | 0.07 | 0.08 | 1.09  | 0.55629  | 0.109233 | 0.814025 | 0.37308  |
| MmugDNA.27430.1.S1_at   | MmugDNA.27430.1 | 4.48  | 4.35  | 0.14 | 0.05 | 1.09  | 0.123737 | 0.132733 | 0.497289 | 0.404544 |
| MmugDNA.27431.1.S1_at   | MmugDNA.27431.1 | 13.33 | 13.34 | 0.04 | 0.02 | -1.01 | 0.796169 | 0.562962 | 0.925068 | 0.738285 |
| MmugDNA.27433.1.S1_at   | MmugDNA.27433.1 | 5.8   | 5.98  | 0.23 | 0.14 | -1.14 | 0.205317 | 0.298309 | 0.577038 | 0.556972 |
| MmugDNA.27434.1.S1_at   | MmugDNA.27434.1 | 6.64  | 6.18  | 0.46 | 0.49 | 1.37  | 0.369879 | 0.538648 | 0.70442  | 0.723301 |
| MmugDNA.27436.1.S1_at   | MmugDNA.27436.1 | 4.86  | 4.59  | 0.55 | 0.42 | 1.21  | 0.876087 | 0.46452  | 0.956886 | 0.675158 |
| MmugDNA.27437.1.S1_at   | MmugDNA.27437.1 | 5.35  | 4.99  | 0.01 | 0.17 | 1.28  | 0.031616 | 0.035209 | 0.341657 | 0.231826 |
| MmugDNA.27439.1.S1_at   | MmugDNA.27439.1 | 5.09  | 4.35  | 0.46 | 0.42 | 1.66  | 0.063354 | 0.029163 | 0.415687 | 0.212798 |
| MmugDNA.27440.1.S1_at   | MmugDNA.27440.1 | 4.39  | 4.42  | 0.05 | 0    | -1.02 | 0.448161 | 0.694577 | 0.753804 | 0.822424 |
| MmugDNA.27441.1.S1_at   | MmugDNA.27441.1 | 7.33  | 7.12  | 0.59 | 0.54 | 1.16  | 0.608224 | 0.221932 | 0.841093 | 0.495019 |
| MmugDNA.27442.1.S1_at   | MmugDNA.27442.1 | 5.34  | 5.42  | 0.18 | 0.37 | -1.05 | 0.475588 | 0.345976 | 0.768676 | 0.59115  |
| MmugDNA.27443.1.S1_at   | MmugDNA.27443.1 | 6.86  | 7.62  | 0.65 | 0.04 | -1.69 | 0.359812 | 0.148004 | 0.697545 | 0.422406 |
| MmugDNA.27444.1.S1_at   | MmugDNA.27444.1 | 2.83  | 2.65  | 0.17 | 0.11 | 1.14  | 0.273748 | 0.263268 | 0.633406 | 0.529531 |
| MmugDNA.27445.1.S1_at   | MmugDNA.27445.1 | 7.17  | 7.2   | 0.07 | 0.05 | -1.02 | 0.732733 | 0.887034 | 0.89733  | 0.935666 |
| MmugDNA.27446.1.S1_at   | MmugDNA.27446.1 | 6.49  | 6.19  | 0.24 | 0.21 | 1.24  | 0.094741 | 0.095057 | 0.463921 | 0.352124 |
| MmugDNA.27447.1.S1_at   | MmugDNA.27447.1 | 2.59  | 2.6   | 0.2  | 0.15 | -1.01 | 0.626406 | 0.295056 | 0.849991 | 0.554551 |
| MmugDNA.27448.1.S1_at   | MmugDNA.27448.1 | 5.06  | 4.96  | 0.11 | 0.07 | 1.07  | 0.130562 | 0.168194 | 0.504948 | 0.444824 |
| MmugDNA.27449.1.S1_at   | MmugDNA.27449.1 | 5.93  | 5.71  | 0.08 | 0.11 | 1.16  | 0.074185 | 0.271755 | 0.434946 | 0.536577 |
| MmugDNA.2745.1.S1_at    | MmugDNA.2745.1  | 3.73  | 3.75  | 0.08 | 0.11 | -1.02 | 0.338712 | 0.66398  | 0.683213 | 0.803247 |
| MmugDNA.27450.1.S1_at   | MmugDNA.27450.1 | 4.76  | 4.3   | 0.38 | 0.09 | 1.38  | 0.196604 | 0.253847 | 0.567235 | 0.522185 |
| MmugDNA.27451.1.S1_at   | MmugDNA.27451.1 | 5.43  | 5.47  | 0.13 | 0    | -1.02 | 0.751927 | 0.635234 | 0.906228 | 0.785279 |
| MmugDNA.27453.1.S1_at   | MmugDNA.27453.1 | 8     | 7.81  | 0.13 | 0.3  | 1.14  | 0.472853 | 0.08027  | 0.767284 | 0.327882 |
| MmugDNA.27453.1.S1_s_at | MmugDNA.27453.1 | 5.47  | 5.28  | 0.44 | 0.83 | 1.14  | 0.425984 | 0.418239 | 0.740218 | 0.642683 |
| MmugDNA.27454.1.S1_at   | MmugDNA.27454.1 | 3.1   | 3.16  | 0.06 | 0.1  | -1.04 | 0.149972 | 0.454802 | 0.523486 | 0.668859 |
| MmugDNA.27455.1.S1_at   | MmugDNA.27455.1 | 4.97  | 5.09  | 0.4  | 0.42 | -1.08 | 0.732635 | 0.441452 | 0.897293 | 0.65962  |
| MmugDNA.27456.1.S1_at   | MmugDNA.27456.1 | 11.78 | 11.66 | 0.34 | 0.12 | 1.09  | 0.525732 | 0.724271 | 0.796402 | 0.840433 |
| MmugDNA.27457.1.S1_at   | MmugDNA.27457.1 | 11.4  | 11.58 | 0.07 | 0.03 | -1.13 | 0.012578 | 0.007343 | 0.263116 | 0.11509  |
| MmugDNA.27458.1.S1_at   | MmugDNA.27458.1 | 4.84  | 4.66  | 0.19 | 0.2  | 1.14  | 0.775359 | 0.847322 | 0.916741 | 0.913262 |
| MmugDNA.27459.1.S1_at   | MmugDNA.27459.1 | 5.51  | 6.34  | 1.14 | 0.16 | -1.77 | 0.131987 | 0.419986 | 0.506447 | 0.643787 |
| MmugDNA.2746.1.S1_at    | MmugDNA.2746.1  | 4.42  | 4.76  | 0.44 | 0.18 | -1.26 | 0.277094 | 0.43437  | 0.636753 | 0.654536 |
| MmugDNA.27460.1.S1_at   | MmugDNA.27460.1 | 3.25  | 3.11  | 0.04 | 0.04 | 1.1   | 0.0118   | 0.528055 | 0.257504 | 0.716428 |
| MmugDNA.27461.1.S1_at   | MmugDNA.27461.1 | 8.3   | 8     | 0.42 | 0.21 | 1.23  | 0.789381 | 0.825477 | 0.92257  | 0.899751 |
| MmugDNA.27462.1.S1_at   | MmugDNA.27462.1 | 3.34  | 3.37  | 0.1  | 0.23 | -1.02 | 0.561372 | 0.785247 | 0.817219 | 0.875672 |
| MmugDNA.27465.1.S1_at   | MmugDNA.27465.1 | 5.66  | 5.28  | 0.26 | 0.13 | 1.31  | 0.214975 | 0.22101  | 0.585505 | 0.494401 |
| MmugDNA.27466.1.S1_at   | MmugDNA.27466.1 | 3.67  | 3.57  | 0.25 | 0.16 | 1.07  | 0.417657 | 0.115277 | 0.735015 | 0.382292 |
| MmugDNA.27468.1.S1_at   | MmugDNA.27468.1 | 7.88  | 7.64  | 0.15 | 0.06 | 1.18  | 0.078808 | 0.035088 | 0.441464 | 0.231521 |
| MmugDNA.27469.1.S1_at   | MmugDNA.27469.1 | 11.35 | 11.09 | 0.39 | 0.1  | 1.2   | 0.095814 | 0.069485 | 0.464449 | 0.309802 |
| MmugDNA.2747.1.S1_at    | MmugDNA.2747.1  | 3.77  | 3.69  | 0.05 | 0.02 | 1.06  | 0.075419 | 0.086449 | 0.436562 | 0.338938 |
| MmugDNA.27470.1.S1_at   | MmugDNA.27470.1 | 8.12  | 8.33  | 0.89 | 0.21 | -1.16 | 0.665695 | 0.843398 | 0.868043 | 0.910815 |
| MmugDNA.27472.1.S1_at   | MmugDNA.27472.1 | 3.59  | 3.45  | 0.05 | 0.16 | 1.1   | 0.166576 | 0.215431 | 0.539239 | 0.489123 |
| MmugDNA.27473.1.S1_at   | MmugDNA.27473.1 | 11.76 | 10.57 | 0.36 | 0.25 | 2.28  | 0.011475 | 0.001044 | 0.255267 | 0.051426 |

|                         |                 |       |       |      |      |       |          |          |          |          |
|-------------------------|-----------------|-------|-------|------|------|-------|----------|----------|----------|----------|
| MmugDNA.27473.1.S1_s_at | MmugDNA.27473.1 | 10.01 | 8.44  | 0.38 | 0.34 | 2.97  | 0.002536 | 0.000424 | 0.179931 | 0.038316 |
| MmugDNA.27474.1.S1_at   | MmugDNA.27474.1 | 5.2   | 5.87  | 2.2  | 0.18 | -1.59 | 0.852199 | 0.921335 | 0.947936 | 0.955739 |
| MmugDNA.27475.1.S1_at   | MmugDNA.27475.1 | 2.91  | 2.9   | 0.04 | 0.09 | 1.01  | 0.696992 | 0.835627 | 0.882175 | 0.905921 |
| MmugDNA.27478.1.S1_at   | MmugDNA.27478.1 | 5.75  | 5.6   | 0.1  | 0.11 | 1.11  | 0.129855 | 0.364874 | 0.504468 | 0.605148 |
| MmugDNA.27479.1.S1_at   | MmugDNA.27479.1 | 10.65 | 10.47 | 0.14 | 0.03 | 1.13  | 0.111012 | 0.001876 | 0.484303 | 0.064979 |
| MmugDNA.2748.1.S1_at    | MmugDNA.2748.1  | 12.15 | 12.45 | 0.08 | 0.02 | -1.22 | 0.004208 | 0.001271 | 0.198874 | 0.055241 |
| MmugDNA.27480.1.S1_at   | MmugDNA.27480.1 | 11.3  | 11.4  | 0.13 | 0.22 | -1.07 | 0.841284 | 0.731273 | 0.943701 | 0.84425  |
| MmugDNA.27480.1.S1_s_at | MmugDNA.27480.1 | 11.11 | 11.38 | 0.19 | 0.09 | -1.21 | 0.358849 | 0.608669 | 0.696729 | 0.767185 |
| MmugDNA.27481.1.S1_at   | MmugDNA.27481.1 | 5.25  | 5.66  | 0.19 | 0.22 | -1.32 | 0.059975 | 0.026527 | 0.407399 | 0.203899 |
| MmugDNA.27482.1.S1_at   | MmugDNA.27482.1 | 4.34  | 4.15  | 0.18 | 0.08 | 1.14  | 0.124791 | 0.203825 | 0.49891  | 0.478081 |
| MmugDNA.27483.1.S1_at   | MmugDNA.27483.1 | 4.29  | 4.24  | 0.11 | 0.11 | -1.04 | 0.255113 | 0.392766 | 0.619267 | 0.625846 |
| MmugDNA.27485.1.S1_at   | MmugDNA.27485.1 | 4.44  | 4.4   | 0.16 | 0.2  | 1.03  | 0.344544 | 0.550016 | 0.686997 | 0.730238 |
| MmugDNA.27486.1.S1_at   | MmugDNA.27486.1 | 5.62  | 5.75  | 0.17 | 0.19 | -1.1  | 0.37876  | 0.383005 | 0.708454 | 0.61904  |
| MmugDNA.27487.1.S1_at   | MmugDNA.27487.1 | 9.69  | 9.93  | 0.08 | 0.05 | -1.18 | 0.012462 | 0.003084 | 0.262327 | 0.081159 |
| MmugDNA.27488.1.S1_at   | MmugDNA.27488.1 | 6.34  | 6.2   | 0.13 | 0.02 | 1.1   | 0.121143 | 0.075879 | 0.494765 | 0.320523 |
| MmugDNA.38170.1.S1_at   | MmugDNA.38170.1 | 7.55  | 7.66  | 0.27 | 0.08 | -1.08 | 0.768607 | 0.054825 | 0.913202 | 0.279675 |
| MmugDNA.38170.1.S1_s_at | MmugDNA.38170.1 | 7.45  | 7.73  | 0.49 | 0.22 | -1.21 | 0.859069 | 0.014042 | 0.950315 | 0.15177  |
| MmugDNA.2749.1.S1_at    | MmugDNA.2749.1  | 4.42  | 4.18  | 0.38 | 0.23 | 1.18  | 0.224593 | 0.290094 | 0.593868 | 0.551128 |
| MmugDNA.27490.1.S1_at   | MmugDNA.27490.1 | 5.13  | 5.15  | 0.18 | 0.07 | -1.01 | 0.483718 | 0.024046 | 0.773253 | 0.194371 |
| MmugDNA.27491.1.S1_at   | MmugDNA.27491.1 | 5.33  | 6.34  | 2.09 | 0.36 | -2.02 | 0.452833 | 0.161449 | 0.755901 | 0.437604 |
| MmugDNA.27492.1.S1_at   | MmugDNA.27492.1 | 2.77  | 2.85  | 0.06 | 0.05 | -1.06 | 0.129007 | 0.142488 | 0.503646 | 0.416082 |
| MmugDNA.27493.1.S1_at   | MmugDNA.27493.1 | 8.23  | 8.12  | 0.46 | 0.12 | 1.07  | 0.474021 | 0.186899 | 0.767923 | 0.46276  |
| MmugDNA.27494.1.S1_at   | MmugDNA.27494.1 | 6.06  | 6.45  | 0.08 | 0.26 | -1.31 | 0.069101 | 0.179683 | 0.426548 | 0.456153 |
| MmugDNA.27496.1.S1_at   | MmugDNA.27496.1 | 3.12  | 2.94  | 0.1  | 0.15 | 1.13  | 0.13402  | 0.301179 | 0.508283 | 0.559356 |
| MmugDNA.27498.1.S1_at   | MmugDNA.27498.1 | 6.31  | 6.91  | 0.7  | 0.12 | -1.52 | 0.229167 | 0.227389 | 0.598088 | 0.499659 |
| MmugDNA.275.1.S1_at     | MmugDNA.275.1   | 7.89  | 7.78  | 0.21 | 0.13 | 1.08  | 0.450643 | 0.581616 | 0.754829 | 0.750589 |
| MmugDNA.2750.1.S1_at    | MmugDNA.2750.1  | 9.14  | 9.4   | 1.31 | 0.42 | -1.2  | 0.974425 | 0.345686 | 0.991912 | 0.590854 |
| MmugDNA.27500.1.S1_at   | MmugDNA.27500.1 | 5.8   | 5.61  | 0.23 | 0.16 | 1.14  | 0.930205 | 0.318091 | 0.97666  | 0.571046 |
| MmugDNA.27501.1.S1_at   | MmugDNA.27501.1 | 3.77  | 3.97  | 0.26 | 0.25 | -1.15 | 0.193911 | 0.487792 | 0.564486 | 0.690669 |
| MmugDNA.27502.1.S1_at   | MmugDNA.27502.1 | 3.61  | 3.26  | 0.26 | 0.1  | 1.28  | 0.103659 | 0.07182  | 0.474343 | 0.314082 |
| MmugDNA.27503.1.S1_at   | MmugDNA.27503.1 | 12.92 | 13.08 | 0.24 | 0    | -1.12 | 0.287267 | 0.24934  | 0.644369 | 0.518461 |
| MmugDNA.27504.1.S1_at   | MmugDNA.27504.1 | 4.2   | 3.77  | 0.76 | 0.14 | 1.35  | 0.355593 | 0.018427 | 0.694743 | 0.170755 |
| MmugDNA.27505.1.S1_at   | MmugDNA.27505.1 | 3.97  | 3.97  | 0.15 | 0.29 | -1    | 0.976134 | 0.958831 | 0.992259 | 0.976695 |
| MmugDNA.27506.1.S1_at   | MmugDNA.27506.1 | 5.5   | 5.65  | 0.06 | 0.09 | -1.11 | 0.13031  | 0.839761 | 0.504682 | 0.908633 |
| MmugDNA.27507.1.S1_at   | MmugDNA.27507.1 | 7.98  | 7.9   | 0.21 | 0.19 | 1.06  | 0.322675 | 0.214841 | 0.671344 | 0.488729 |
| MmugDNA.27508.1.S1_at   | MmugDNA.27508.1 | 3.52  | 3.36  | 0.1  | 0.06 | 1.12  | 0.055482 | 0.061365 | 0.398621 | 0.294488 |
| MmugDNA.27509.1.S1_at   | MmugDNA.27509.1 | 10.73 | 11.24 | 0.28 | 0.11 | -1.42 | 0.136644 | 0.236128 | 0.511811 | 0.507179 |
| MmugDNA.2751.1.S1_at    | MmugDNA.2751.1  | 5.29  | 5.1   | 0.1  | 0.03 | 1.15  | 0.052346 | 0.073154 | 0.392196 | 0.316064 |
| MmugDNA.27510.1.S1_at   | MmugDNA.27510.1 | 3.57  | 3.58  | 0.21 | 0    | -1    | 0.827205 | 0.936769 | 0.938039 | 0.964351 |
| MmugDNA.27511.1.S1_at   | MmugDNA.27511.1 | 3.72  | 3.77  | 0.29 | 0.18 | -1.03 | 0.606998 | 0.894979 | 0.840743 | 0.940055 |
| MmugDNA.27512.1.S1_at   | MmugDNA.27512.1 | 9.33  | 8.21  | 0.26 | 0.2  | 2.17  | 0.003483 | 0.000158 | 0.195142 | 0.030199 |
| MmugDNA.27512.1.S1_x_at | MmugDNA.27512.1 | 9.44  | 8.42  | 0.25 | 0.03 | 2.03  | 0.003682 | 0.000115 | 0.197111 | 0.028568 |
| MmugDNA.27513.1.S1_at   | MmugDNA.27513.1 | 5.87  | 6.11  | 0.79 | 0.24 | -1.18 | 0.867637 | 0.801583 | 0.953609 | 0.885853 |

|                         |                 |       |       |      |      |       |          |          |          |          |
|-------------------------|-----------------|-------|-------|------|------|-------|----------|----------|----------|----------|
| MmugDNA.27514.1.S1_at   | MmugDNA.27514.1 | 7.09  | 7.21  | 0.39 | 0.18 | -1.08 | 0.854473 | 0.747271 | 0.948527 | 0.853149 |
| MmugDNA.27516.1.S1_at   | MmugDNA.27516.1 | 4.89  | 4.99  | 0.2  | 0.08 | -1.07 | 0.956574 | 0.608264 | 0.985575 | 0.766971 |
| MmugDNA.27517.1.S1_at   | MmugDNA.27517.1 | 2.98  | 3.04  | 0.02 | 0.16 | -1.04 | 0.603543 | 0.792057 | 0.839251 | 0.879814 |
| MmugDNA.27518.1.S1_at   | MmugDNA.27518.1 | 11.85 | 11.86 | 0.03 | 0.14 | -1    | 0.358552 | 0.592601 | 0.696434 | 0.757847 |
| MmugDNA.27519.1.S1_at   | MmugDNA.27519.1 | 5.4   | 5.49  | 0.12 | 0.03 | -1.06 | 0.409834 | 0.309538 | 0.730334 | 0.564987 |
| MmugDNA.39509.1.S1_s_at | MmugDNA.39509.1 | 7.22  | 7.08  | 0.33 | 0.03 | 1.1   | 0.609774 | 0.726951 | 0.841773 | 0.84203  |
| MmugDNA.27522.1.S1_at   | MmugDNA.27522.1 | 11.15 | 11.1  | 0.38 | 0.08 | 1.03  | 0.83365  | 0.756489 | 0.940366 | 0.858223 |
| MmugDNA.27523.1.S1_at   | MmugDNA.27523.1 | 4.94  | 4.87  | 0.25 | 0.3  | 1.05  | 0.687786 | 0.881599 | 0.87793  | 0.932407 |
| MmugDNA.27524.1.S1_at   | MmugDNA.27524.1 | 4.23  | 4.31  | 0.07 | 0.26 | -1.06 | 0.358811 | 0.436343 | 0.69668  | 0.655923 |
| MmugDNA.27525.1.S1_at   | MmugDNA.27525.1 | 7.98  | 8.04  | 0.41 | 0.14 | -1.04 | 0.668581 | 0.400366 | 0.86912  | 0.630177 |
| MmugDNA.27526.1.S1_at   | MmugDNA.27526.1 | 10.47 | 11.22 | 0.28 | 0.09 | -1.68 | 0.011188 | 0.008104 | 0.252769 | 0.119551 |
| MmugDNA.27527.1.S1_at   | MmugDNA.27527.1 | 4.3   | 4.23  | 0.16 | 0.02 | 1.05  | 0.420514 | 0.348236 | 0.737009 | 0.592441 |
| MmugDNA.27528.1.S1_at   | MmugDNA.27528.1 | 6.54  | 6.25  | 0.21 | 0.26 | 1.23  | 0.339695 | 0.072909 | 0.683982 | 0.315942 |
| MmugDNA.27529.1.S1_at   | MmugDNA.27529.1 | 5.65  | 5.28  | 0.45 | 0.27 | 1.29  | 0.157536 | 0.146686 | 0.530588 | 0.420713 |
| MmugDNA.2753.1.S1_at    | MmugDNA.2753.1  | 3.56  | 3.4   | 0.21 | 0.07 | 1.12  | 0.263708 | 0.402011 | 0.625638 | 0.631153 |
| MmugDNA.27530.1.S1_at   | MmugDNA.27530.1 | 3.88  | 3.52  | 0.22 | 0.19 | 1.28  | 0.107367 | 0.315143 | 0.47976  | 0.568855 |
| MmugDNA.27531.1.S1_at   | MmugDNA.27531.1 | 4.43  | 4.35  | 0.04 | 0.09 | 1.06  | 0.121432 | 0.127698 | 0.495101 | 0.398581 |
| MmugDNA.27532.1.S1_at   | MmugDNA.27532.1 | 4.62  | 4.58  | 0.04 | 0.21 | 1.03  | 0.475253 | 0.668921 | 0.768515 | 0.806313 |
| MmugDNA.27533.1.S1_at   | MmugDNA.27533.1 | 7.59  | 7.85  | 0.53 | 0.1  | -1.2  | 0.204087 | 0.094222 | 0.5753   | 0.350889 |
| MmugDNA.27534.1.S1_at   | MmugDNA.27534.1 | 3.8   | 3.5   | 0.31 | 0.09 | 1.23  | 0.071103 | 0.186572 | 0.430341 | 0.462364 |
| MmugDNA.27535.1.S1_at   | MmugDNA.27535.1 | 5.76  | 5.59  | 0.24 | 0.16 | 1.12  | 0.430287 | 0.706386 | 0.742617 | 0.829634 |
| MmugDNA.27536.1.S1_at   | MmugDNA.27536.1 | 3.25  | 3.2   | 0.19 | 0.07 | 1.04  | 0.608599 | 0.451352 | 0.841286 | 0.666168 |
| MmugDNA.27537.1.S1_at   | MmugDNA.27537.1 | 10.15 | 10.03 | 0.4  | 0.06 | 1.08  | 0.358438 | 0.480455 | 0.696372 | 0.685781 |
| MmugDNA.27538.1.S1_at   | MmugDNA.27538.1 | 3.7   | 3.66  | 0.02 | 0.08 | 1.03  | 0.365068 | 0.118574 | 0.700784 | 0.38654  |
| MmugDNA.2754.1.S1_at    | MmugDNA.2754.1  | 6.01  | 5.91  | 0.1  | 0.11 | 1.07  | 0.122497 | 0.116427 | 0.495926 | 0.383671 |
| MmugDNA.27540.1.S1_at   | MmugDNA.27540.1 | 5.53  | 5.43  | 0.34 | 0.25 | 1.07  | 0.756718 | 0.841011 | 0.908337 | 0.909421 |
| MmugDNA.27541.1.S1_at   | MmugDNA.27541.1 | 8.63  | 8.63  | 0.49 | 0.05 | 1     | 0.81043  | 0.596685 | 0.931338 | 0.75976  |
| MmugDNA.27542.1.S1_at   | MmugDNA.27542.1 | 6.86  | 6.33  | 0.46 | 0.17 | 1.44  | 0.129715 | 0.473998 | 0.504468 | 0.681163 |
| MmugDNA.27543.1.S1_at   | MmugDNA.27543.1 | 5.95  | 5.82  | 0.07 | 0.07 | 1.1   | 0.063106 | 0.057191 | 0.414989 | 0.285009 |
| MmugDNA.27544.1.S1_at   | MmugDNA.27544.1 | 4.44  | 4.27  | 0.21 | 0.49 | 1.13  | 0.884983 | 0.877883 | 0.960159 | 0.93029  |
| MmugDNA.27545.1.S1_at   | MmugDNA.27545.1 | 3.65  | 3.37  | 0.25 | 0.24 | 1.21  | 0.416142 | 0.414748 | 0.734069 | 0.640456 |
| MmugDNA.27546.1.S1_s_at | MmugDNA.27546.1 | 3.92  | 3.89  | 0.08 | 0.12 | 1.02  | 0.170665 | 0.469909 | 0.543714 | 0.678572 |
| MmugDNA.27547.1.S1_at   | MmugDNA.27547.1 | 6.09  | 6.03  | 0.14 | 0.16 | 1.04  | 0.969746 | 0.120822 | 0.990053 | 0.389657 |
| MmugDNA.27548.1.S1_s_at | MmugDNA.27548.1 | 8.65  | 8.11  | 0.5  | 0.08 | 1.45  | 0.10741  | 0.075256 | 0.47976  | 0.319434 |
| MmugDNA.27549.1.S1_at   | MmugDNA.27549.1 | 3.87  | 3.79  | 0.33 | 0.06 | 1.06  | 0.720474 | 0.556595 | 0.891614 | 0.734636 |
| MmugDNA.27550.1.S1_at   | MmugDNA.27550.1 | 4.83  | 5.26  | 0.11 | 0.13 | -1.35 | 0.004231 | 0.406697 | 0.198874 | 0.634487 |
| MmugDNA.27551.1.S1_at   | MmugDNA.27551.1 | 9.96  | 10.13 | 0.19 | 0.08 | -1.12 | 0.273081 | 0.171046 | 0.632689 | 0.447597 |
| MmugDNA.27553.1.S1_at   | MmugDNA.27553.1 | 4.27  | 4.54  | 0.2  | 0.24 | -1.2  | 0.25188  | 0.805574 | 0.616976 | 0.888295 |
| MmugDNA.27554.1.S1_at   | MmugDNA.27554.1 | 9.19  | 8.78  | 1.99 | 0.25 | 1.32  | 0.75929  | 0.142776 | 0.909584 | 0.416687 |
| MmugDNA.27555.1.S1_at   | MmugDNA.27555.1 | 8.94  | 8.81  | 0.15 | 0.14 | 1.09  | 0.481966 | 0.083857 | 0.772261 | 0.334752 |
| MmugDNA.27556.1.S1_at   | MmugDNA.27556.1 | 10.43 | 10.4  | 0.08 | 0.12 | 1.02  | 0.394329 | 0.157604 | 0.719703 | 0.433131 |
| MmugDNA.27558.1.S1_at   | MmugDNA.27558.1 | 7.36  | 8.15  | 0.75 | 0.36 | -1.74 | 0.178251 | 0.037433 | 0.551301 | 0.237777 |
| MmugDNA.27559.1.S1_at   | MmugDNA.27559.1 | 3.47  | 3.4   | 0.1  | 0.09 | 1.05  | 0.224157 | 0.084479 | 0.593274 | 0.335864 |



|                         |                 |       |       |      |      |       |          |          |          |          |
|-------------------------|-----------------|-------|-------|------|------|-------|----------|----------|----------|----------|
| MmugDNA.2756.1.S1_at    | MmugDNA.2756.1  | 6.95  | 6.86  | 0.05 | 0.08 | 1.06  | 0.111846 | 0.264411 | 0.48497  | 0.530385 |
| MmugDNA.27560.1.S1_at   | MmugDNA.27560.1 | 11.38 | 12.15 | 0.07 | 0.05 | -1.71 | 0.000112 | 0.00022  | 0.108151 | 0.032385 |
| MmugDNA.27561.1.S1_at   | MmugDNA.27561.1 | 8.34  | 9.12  | 0.86 | 0.08 | -1.72 | 0.62857  | 0.444505 | 0.851159 | 0.662072 |
| MmugDNA.27562.1.S1_at   | MmugDNA.27562.1 | 6.24  | 6.25  | 0.2  | 0.09 | -1    | 0.457586 | 0.518355 | 0.758364 | 0.71038  |
| MmugDNA.27563.1.S1_at   | MmugDNA.27563.1 | 6.82  | 6.67  | 0.07 | 0.05 | 1.12  | 0.040572 | 0.380553 | 0.364613 | 0.61719  |
| MmugDNA.27565.1.S1_at   | MmugDNA.27565.1 | 4.54  | 4.39  | 0.28 | 0.04 | 1.11  | 0.956256 | 0.995099 | 0.985486 | 0.996947 |
| MmugDNA.27566.1.S1_at   | MmugDNA.27566.1 | 6.9   | 6.62  | 0.1  | 0.16 | 1.21  | 0.070436 | 0.099615 | 0.429233 | 0.358095 |
| MmugDNA.27567.1.S1_at   | MmugDNA.27567.1 | 7.88  | 7.38  | 0.51 | 0.15 | 1.41  | 0.100815 | 0.31374  | 0.47159  | 0.568083 |
| MmugDNA.27568.1.S1_at   | MmugDNA.27568.1 | 3.58  | 3.68  | 0.16 | 0.12 | -1.07 | 0.742254 | 0.487387 | 0.901638 | 0.690473 |
| MmugDNA.27569.1.S1_at   | MmugDNA.27569.1 | 3.48  | 3.39  | 0.11 | 0.1  | 1.06  | 0.146929 | 0.168914 | 0.521545 | 0.445458 |
| MmugDNA.2757.1.S1_at    | MmugDNA.2757.1  | 3.55  | 3.44  | 0.24 | 0.04 | -1.08 | 0.420016 | 0.45928  | 0.736634 | 0.671678 |
| MmugDNA.27570.1.S1_at   | MmugDNA.27570.1 | 6.89  | 6.71  | 0.21 | 0.09 | 1.13  | 0.172961 | 0.192364 | 0.546108 | 0.467834 |
| MmugDNA.27571.1.S1_at   | MmugDNA.27571.1 | 10.79 | 11.08 | 0.45 | 0.14 | -1.22 | 0.531164 | 0.766433 | 0.799522 | 0.86428  |
| MmugDNA.27572.1.S1_at   | MmugDNA.27572.1 | 2.79  | 2.75  | 0.1  | 0.09 | 1.02  | 0.469723 | 0.560006 | 0.765623 | 0.736439 |
| MmugDNA.27573.1.S1_at   | MmugDNA.27573.1 | 4.08  | 4.09  | 0.16 | 0.18 | -1.01 | 0.425747 | 0.441237 | 0.740112 | 0.659477 |
| MmugDNA.27574.1.S1_at   | MmugDNA.27574.1 | 12.51 | 12.05 | 3.67 | 0.25 | 1.38  | 0.515276 | 0.20968  | 0.79089  | 0.48341  |
| MmugDNA.27575.1.S1_at   | MmugDNA.27575.1 | 5.15  | 4.98  | 0.11 | 0.01 | 1.13  | 0.050411 | 0.034659 | 0.387138 | 0.230352 |
| MmugDNA.27576.1.S1_at   | MmugDNA.27576.1 | 7.11  | 6.95  | 0.34 | 0.07 | 1.12  | 0.610004 | 0.02018  | 0.841827 | 0.178424 |
| MmugDNA.27578.1.S1_at   | MmugDNA.27578.1 | 9.93  | 9.58  | 0.3  | 0.13 | 1.27  | 0.261386 | 0.219417 | 0.623819 | 0.493156 |
| MmugDNA.2758.1.S1_at    | MmugDNA.2758.1  | 4.53  | 3.3   | 1.34 | 0.32 | 2.34  | 0.209713 | 0.336071 | 0.581302 | 0.583652 |
| MmugDNA.27581.1.S1_at   | MmugDNA.27581.1 | 5.05  | 4.91  | 0.11 | 0.08 | 1.1   | 0.372035 | 0.281771 | 0.705567 | 0.544844 |
| MmugDNA.27582.1.S1_at   | MmugDNA.27582.1 | 2.94  | 2.82  | 0.18 | 0.11 | 1.09  | 0.885003 | 0.302929 | 0.960159 | 0.560383 |
| MmugDNA.27583.1.S1_at   | MmugDNA.27583.1 | 7.44  | 6.55  | 0.43 | 0.36 | 1.85  | 0.068526 | 0.184171 | 0.425885 | 0.460382 |
| MmugDNA.27585.1.S1_at   | MmugDNA.27585.1 | 9     | 8.92  | 0.17 | 0.07 | 1.05  | 0.345234 | 0.5659   | 0.68742  | 0.740154 |
| MmugDNA.27586.1.S1_at   | MmugDNA.27586.1 | 9.57  | 9.62  | 0.57 | 0.11 | -1.03 | 0.976281 | 0.26013  | 0.992292 | 0.526776 |
| MmugDNA.27587.1.S1_at   | MmugDNA.27587.1 | 4     | 4.03  | 0.19 | 0.2  | -1.02 | 0.427735 | 0.05906  | 0.741365 | 0.289927 |
| MmugDNA.27588.1.S1_at   | MmugDNA.27588.1 | 3.95  | 3.7   | 1.05 | 0.71 | 1.19  | 0.980497 | 0.712417 | 0.993785 | 0.833371 |
| MmugDNA.27589.1.S1_at   | MmugDNA.27589.1 | 4.24  | 4.21  | 0.08 | 0.24 | 1.02  | 0.618261 | 0.384165 | 0.845869 | 0.61993  |
| MmugDNA.2759.1.S1_at    | MmugDNA.2759.1  | 8.35  | 7.94  | 0.42 | 0.17 | 1.33  | 0.336165 | 0.797286 | 0.681549 | 0.883122 |
| MmugDNA.27590.1.S1_at   | MmugDNA.27590.1 | 6.89  | 7.79  | 0.24 | 0.07 | -1.87 | 0.003689 | 0.035852 | 0.197111 | 0.233788 |
| MmugDNA.27591.1.S1_at   | MmugDNA.27591.1 | 3.68  | 3.78  | 0.47 | 0.28 | -1.06 | 0.73927  | 0.204615 | 0.900434 | 0.478993 |
| MmugDNA.27592.1.S1_at   | MmugDNA.27592.1 | 3.64  | 3.6   | 0.09 | 0.05 | 1.03  | 0.123789 | 0.257328 | 0.497339 | 0.525115 |
| MmugDNA.36405.1.S1_at   | MmugDNA.36405.1 | 11.59 | 11.97 | 0.15 | 0.24 | -1.3  | 0.155393 | 0.228364 | 0.528651 | 0.50054  |
| MmugDNA.36405.1.S1_s_at | MmugDNA.36405.1 | 14.51 | 14.52 | 0.02 | 0.01 | -1    | 0.700253 | 0.248602 | 0.883486 | 0.517903 |
| MmugDNA.27595.1.S1_at   | MmugDNA.27595.1 | 3.09  | 2.98  | 0.18 | 0.07 | 1.08  | 0.298573 | 0.166574 | 0.653176 | 0.443065 |
| MmugDNA.27596.1.S1_at   | MmugDNA.27596.1 | 4.72  | 4.83  | 0.05 | 0.32 | -1.08 | 0.670057 | 0.37164  | 0.869803 | 0.610431 |
| MmugDNA.27597.1.S1_at   | MmugDNA.27597.1 | 3.03  | 3.13  | 0.16 | 0.05 | -1.07 | 0.641746 | 0.865584 | 0.857493 | 0.923598 |
| MmugDNA.27598.1.S1_at   | MmugDNA.27598.1 | 5.51  | 5.35  | 0.02 | 0.21 | 1.11  | 0.253738 | 0.572621 | 0.618349 | 0.744597 |
| MmugDNA.27599.1.S1_at   | MmugDNA.27599.1 | 8.16  | 7.95  | 0.5  | 0.33 | 1.15  | 0.862762 | 0.009722 | 0.951714 | 0.129718 |
| MmugDNA.276.1.S1_at     | MmugDNA.276.1   | 11.97 | 11.45 | 0.18 | 0.15 | 1.44  | 0.021884 | 0.026186 | 0.309781 | 0.202799 |
| MmugDNA.2760.1.S1_at    | MmugDNA.2760.1  | 13.09 | 13.33 | 0.77 | 0.03 | -1.18 | 0.427288 | 0.40013  | 0.740974 | 0.630158 |
| MmugDNA.27600.1.S1_at   | MmugDNA.27600.1 | 5.56  | 5.54  | 0.3  | 0.25 | 1.01  | 0.455176 | 0.683533 | 0.75733  | 0.815375 |
| MmugDNA.27601.1.S1_at   | MmugDNA.27601.1 | 5.87  | 5.45  | 0.37 | 0.59 | 1.34  | 0.376095 | 0.535473 | 0.706657 | 0.721033 |

|                       |                 |       |       |      |      |       |          |          |          |          |
|-----------------------|-----------------|-------|-------|------|------|-------|----------|----------|----------|----------|
| MmugDNA.27603.1.S1_at | MmugDNA.27603.1 | 5.36  | 5.2   | 0.22 | 0.29 | 1.12  | 0.831689 | 0.142506 | 0.939628 | 0.416106 |
| MmugDNA.27604.1.S1_at | MmugDNA.27604.1 | 10.63 | 10.74 | 0.13 | 0.07 | -1.08 | 0.40323  | 0.130785 | 0.725542 | 0.402959 |
| MmugDNA.27605.1.S1_at | MmugDNA.27605.1 | 9.54  | 8.83  | 0.34 | 0.17 | 1.63  | 0.022767 | 0.005927 | 0.312286 | 0.105331 |
| MmugDNA.27607.1.S1_at | MmugDNA.27607.1 | 3.75  | 3.84  | 0.24 | 0.19 | -1.07 | 0.935552 | 0.559978 | 0.978223 | 0.736439 |
| MmugDNA.27608.1.S1_at | MmugDNA.27608.1 | 6.2   | 6.01  | 0.18 | 0.18 | 1.14  | 0.46028  | 0.54404  | 0.760108 | 0.726592 |
| MmugDNA.27609.1.S1_at | MmugDNA.27609.1 | 5.06  | 5.18  | 0.34 | 0.08 | -1.09 | 0.257976 | 0.301813 | 0.62169  | 0.559758 |
| MmugDNA.2761.1.S1_at  | MmugDNA.2761.1  | 10.91 | 10.45 | 0.53 | 0.09 | 1.38  | 0.297135 | 0.121966 | 0.652609 | 0.391389 |
| MmugDNA.27610.1.S1_at | MmugDNA.27610.1 | 5.82  | 5.44  | 0.08 | 0.16 | 1.3   | 0.023986 | 0.081995 | 0.317529 | 0.330664 |
| MmugDNA.27611.1.S1_at | MmugDNA.27611.1 | 2.61  | 2.67  | 0.08 | 0.17 | -1.04 | 0.363041 | 0.430408 | 0.699794 | 0.651404 |
| MmugDNA.27613.1.S1_at | MmugDNA.27613.1 | 3.66  | 3.6   | 0    | 0.25 | 1.05  | 0.645161 | 0.752739 | 0.858718 | 0.855968 |
| MmugDNA.27614.1.S1_at | MmugDNA.27614.1 | 3.89  | 3.86  | 0.11 | 0.05 | -1.02 | 0.52682  | 0.677513 | 0.796797 | 0.811672 |
| MmugDNA.27615.1.S1_at | MmugDNA.27615.1 | 6.48  | 6.36  | 0.09 | 0.05 | 1.09  | 0.273997 | 0.555624 | 0.633715 | 0.733978 |
| MmugDNA.27616.1.S1_at | MmugDNA.27616.1 | 7.73  | 7.52  | 0.37 | 0.35 | 1.15  | 0.239579 | 0.119516 | 0.606084 | 0.388167 |
| MmugDNA.27618.1.S1_at | MmugDNA.27618.1 | 4.37  | 4.43  | 0.22 | 0.04 | -1.04 | 0.67566  | 0.557095 | 0.872698 | 0.73494  |
| MmugDNA.27619.1.S1_at | MmugDNA.27619.1 | 3.43  | 3.72  | 0.23 | 0.04 | -1.22 | 0.385936 | 0.188314 | 0.713125 | 0.46433  |
| MmugDNA.2762.1.S1_at  | MmugDNA.2762.1  | 6     | 5.52  | 0.21 | 0.2  | 1.39  | 0.096239 | 0.076556 | 0.464755 | 0.32166  |
| MmugDNA.27620.1.S1_at | MmugDNA.27620.1 | 7.12  | 7.26  | 0.3  | 0.16 | -1.1  | 0.303359 | 0.341662 | 0.657248 | 0.587796 |
| MmugDNA.27622.1.S1_at | MmugDNA.27622.1 | 3.53  | 3.43  | 0.08 | 0.09 | 1.07  | 0.111776 | 0.173533 | 0.484941 | 0.449938 |
| MmugDNA.27623.1.S1_at | MmugDNA.27623.1 | 6.94  | 6.68  | 0.8  | 0.14 | 1.2   | 0.502127 | 0.57899  | 0.783497 | 0.748791 |
| MmugDNA.27624.1.S1_at | MmugDNA.27624.1 | 8.26  | 7.9   | 0.26 | 0.06 | 1.28  | 0.084163 | 0.085744 | 0.450559 | 0.337761 |
| MmugDNA.27625.1.S1_at | MmugDNA.27625.1 | 3.96  | 4     | 0.19 | 0.22 | -1.03 | 0.846741 | 0.762311 | 0.94629  | 0.861726 |
| MmugDNA.27627.1.S1_at | MmugDNA.27627.1 | 3.72  | 3.73  | 0.07 | 0.08 | -1.01 | 0.416274 | 0.316324 | 0.734198 | 0.569809 |
| MmugDNA.27629.1.S1_at | MmugDNA.27629.1 | 5.84  | 6.03  | 0.49 | 0.45 | -1.14 | 0.60309  | 0.103403 | 0.83911  | 0.3643   |
| MmugDNA.2763.1.S1_at  | MmugDNA.2763.1  | 4.95  | 4.91  | 0    | 0.01 | 1.03  | 0.001993 | 0.184664 | 0.172704 | 0.460645 |
| MmugDNA.27630.1.S1_at | MmugDNA.27630.1 | 4.57  | 4.69  | 0.73 | 0.03 | -1.09 | 0.925587 | 0.77502  | 0.975188 | 0.869033 |
| MmugDNA.27632.1.S1_at | MmugDNA.27632.1 | 6.48  | 6.44  | 0.68 | 0.12 | 1.03  | 0.355851 | 0.593792 | 0.694889 | 0.758418 |
| MmugDNA.27633.1.S1_at | MmugDNA.27633.1 | 5.31  | 5.7   | 0.76 | 0.53 | -1.31 | 0.375697 | 0.352825 | 0.7066   | 0.596151 |
| MmugDNA.27634.1.S1_at | MmugDNA.27634.1 | 9.58  | 9.54  | 0.46 | 0.03 | 1.03  | 0.87821  | 0.965191 | 0.957601 | 0.98061  |
| MmugDNA.27635.1.S1_at | MmugDNA.27635.1 | 6.97  | 6.91  | 0.1  | 0.08 | 1.04  | 0.229155 | 0.0491   | 0.598088 | 0.266518 |
| MmugDNA.27636.1.S1_at | MmugDNA.27636.1 | 12.79 | 11.87 | 2.18 | 0.22 | 1.89  | 0.913218 | 0.252437 | 0.970487 | 0.521061 |
| MmugDNA.27637.1.S1_at | MmugDNA.27637.1 | 7.26  | 7.02  | 0.09 | 0.01 | 1.18  | 0.011582 | 0.090139 | 0.255545 | 0.344432 |
| MmugDNA.27638.1.S1_at | MmugDNA.27638.1 | 9.23  | 9.49  | 0.27 | 0.27 | -1.19 | 0.336618 | 0.381369 | 0.681969 | 0.617681 |
| MmugDNA.27639.1.S1_at | MmugDNA.27639.1 | 9.04  | 8.95  | 0.59 | 0.18 | 1.06  | 0.522322 | 0.584846 | 0.795143 | 0.75256  |
| MmugDNA.27640.1.S1_at | MmugDNA.27640.1 | 11.71 | 11.75 | 0.11 | 0.07 | -1.03 | 0.142658 | 0.03421  | 0.517642 | 0.228779 |
| MmugDNA.27641.1.S1_at | MmugDNA.27641.1 | 6.9   | 6.84  | 0.57 | 0.29 | 1.05  | 0.930454 | 0.746868 | 0.976823 | 0.853023 |
| MmugDNA.27642.1.S1_at | MmugDNA.27642.1 | 5.6   | 5.96  | 0.73 | 0.45 | -1.28 | 0.58137  | 0.324915 | 0.82757  | 0.575451 |
| MmugDNA.27643.1.S1_at | MmugDNA.27643.1 | 4.64  | 4.56  | 0.12 | 0.18 | 1.06  | 0.192099 | 0.288483 | 0.563184 | 0.54977  |
| MmugDNA.27644.1.S1_at | MmugDNA.27644.1 | 7.43  | 8.39  | 0.65 | 0.11 | -1.94 | 0.034555 | 0.042263 | 0.350124 | 0.250026 |
| MmugDNA.27645.1.S1_at | MmugDNA.27645.1 | 10.42 | 10.39 | 1.23 | 0.16 | 1.02  | 0.383333 | 0.327416 | 0.711306 | 0.577284 |
| MmugDNA.27646.1.S1_at | MmugDNA.27646.1 | 7.01  | 7.29  | 0.93 | 0.21 | -1.22 | 0.55025  | 0.417724 | 0.810707 | 0.642382 |
| MmugDNA.27647.1.S1_at | MmugDNA.27647.1 | 9.76  | 9.59  | 1.05 | 0.19 | 1.13  | 0.91481  | 0.608447 | 0.970941 | 0.767074 |
| MmugDNA.27648.1.S1_at | MmugDNA.27648.1 | 5.33  | 5.62  | 0.67 | 0.43 | -1.22 | 0.491102 | 0.757627 | 0.777532 | 0.858927 |
| MmugDNA.2765.1.S1_at  | MmugDNA.2765.1  | 8.52  | 8.12  | 0.32 | 0.06 | 1.32  | 0.115102 | 0.143256 | 0.488314 | 0.417211 |

|                       |                 |       |       |      |      |       |          |          |          |          |
|-----------------------|-----------------|-------|-------|------|------|-------|----------|----------|----------|----------|
| MmugDNA.27650.1.S1_at | MmugDNA.27650.1 | 6.69  | 6.83  | 0.2  | 0.37 | -1.1  | 0.993089 | 0.830796 | 0.997423 | 0.902905 |
| MmugDNA.27651.1.S1_at | MmugDNA.27651.1 | 3.32  | 3.18  | 0.03 | 0.1  | 1.11  | 0.042592 | 0.05724  | 0.369605 | 0.285059 |
| MmugDNA.27653.1.S1_at | MmugDNA.27653.1 | 4.5   | 4.31  | 0.28 | 0.05 | 1.14  | 0.384632 | 0.652018 | 0.712173 | 0.796529 |
| MmugDNA.27654.1.S1_at | MmugDNA.27654.1 | 3.1   | 3.28  | 0.18 | 0.2  | -1.13 | 0.579764 | 0.596038 | 0.826659 | 0.759325 |
| MmugDNA.27656.1.S1_at | MmugDNA.27656.1 | 5.55  | 5.27  | 0.25 | 0.02 | 1.22  | 0.12161  | 0.132866 | 0.495256 | 0.404544 |
| MmugDNA.27657.1.S1_at | MmugDNA.27657.1 | 4.17  | 4.05  | 0.14 | 0.1  | 1.09  | 0.324215 | 0.471013 | 0.672526 | 0.679162 |
| MmugDNA.27658.1.S1_at | MmugDNA.27658.1 | 5.51  | 5.48  | 0.05 | 0.07 | 1.03  | 0.903646 | 0.196995 | 0.967623 | 0.472105 |
| MmugDNA.2766.1.S1_at  | MmugDNA.2766.1  | 5.96  | 5.7   | 0.18 | 0.11 | 1.2   | 0.106291 | 0.108502 | 0.478748 | 0.372066 |
| MmugDNA.27661.1.S1_at | MmugDNA.27661.1 | 3.38  | 3.33  | 0.05 | 0.09 | 1.04  | 0.297933 | 0.843806 | 0.652791 | 0.911025 |
| MmugDNA.27662.1.S1_at | MmugDNA.27662.1 | 3.17  | 3.19  | 0.2  | 0.11 | -1.01 | 0.634389 | 0.613532 | 0.854053 | 0.770578 |
| MmugDNA.27665.1.S1_at | MmugDNA.27665.1 | 6.15  | 5.99  | 0.12 | 0.06 | -1.11 | 0.091311 | 0.295049 | 0.459115 | 0.554551 |
| MmugDNA.27667.1.S1_at | MmugDNA.27667.1 | 5.61  | 5.68  | 0.2  | 0.34 | -1.05 | 0.735031 | 0.225025 | 0.898576 | 0.49773  |
| MmugDNA.27669.1.S1_at | MmugDNA.27669.1 | 7.5   | 7.49  | 0.59 | 0.19 | 1.01  | 0.81526  | 0.086676 | 0.933137 | 0.339267 |
| MmugDNA.27670.1.S1_at | MmugDNA.27670.1 | 3.45  | 3.39  | 0.1  | 0.15 | 1.05  | 0.439756 | 0.56946  | 0.748282 | 0.742405 |
| MmugDNA.27672.1.S1_at | MmugDNA.27672.1 | 7.87  | 8.03  | 0.86 | 0.16 | -1.11 | 0.653358 | 0.868973 | 0.86233  | 0.925578 |
| MmugDNA.27673.1.S1_at | MmugDNA.27673.1 | 3.95  | 3.85  | 0.04 | 0.11 | 1.07  | 0.437497 | 0.040755 | 0.746842 | 0.246735 |
| MmugDNA.27674.1.S1_at | MmugDNA.27674.1 | 3.44  | 3.09  | 0.14 | 0.44 | 1.27  | 0.801531 | 0.968574 | 0.927649 | 0.982645 |
| MmugDNA.27677.1.S1_at | MmugDNA.27677.1 | 6.01  | 5.97  | 0.22 | 0.11 | 1.03  | 0.799125 | 0.585383 | 0.926464 | 0.752844 |
| MmugDNA.27678.1.S1_at | MmugDNA.27678.1 | 10.06 | 10.53 | 0.41 | 0.06 | -1.39 | 0.109558 | 0.024998 | 0.482328 | 0.198121 |
| MmugDNA.27679.1.S1_at | MmugDNA.27679.1 | 5.09  | 5.16  | 0.2  | 0.22 | -1.05 | 0.286267 | 0.38093  | 0.64358  | 0.617426 |
| MmugDNA.27680.1.S1_at | MmugDNA.27680.1 | 11.34 | 11.54 | 0.39 | 0.08 | -1.15 | 0.138006 | 0.065521 | 0.513671 | 0.301415 |
| MmugDNA.27686.1.S1_at | MmugDNA.27686.1 | 11.79 | 11.82 | 0.14 | 0.05 | -1.02 | 0.589751 | 0.510748 | 0.832634 | 0.705145 |
| MmugDNA.2769.1.S1_at  | MmugDNA.2769.1  | 5.82  | 6.21  | 0.27 | 0.36 | -1.31 | 0.261133 | 0.426307 | 0.623749 | 0.648483 |
| MmugDNA.27692.1.S1_at | MmugDNA.27692.1 | 3.31  | 3.19  | 0.05 | 0.09 | 1.09  | 0.10694  | 0.099298 | 0.479433 | 0.357562 |
| MmugDNA.27694.1.S1_at | MmugDNA.27694.1 | 6.37  | 6.29  | 0.13 | 0.06 | 1.05  | 0.141318 | 0.346534 | 0.516365 | 0.591411 |
| MmugDNA.2770.1.S1_at  | MmugDNA.2770.1  | 6.16  | 6.27  | 0.23 | 0.08 | -1.08 | 0.958879 | 0.82109  | 0.986529 | 0.897041 |
| MmugDNA.27700.1.S1_at | MmugDNA.27700.1 | 9.65  | 9.72  | 0.2  | 0.05 | -1.05 | 0.452091 | 0.044346 | 0.755619 | 0.255072 |
| MmugDNA.27702.1.S1_at | MmugDNA.27702.1 | 4.08  | 3.95  | 0.22 | 0.16 | 1.1   | 0.954356 | 0.109505 | 0.984852 | 0.373339 |
| MmugDNA.27704.1.S1_at | MmugDNA.27704.1 | 3.68  | 3.66  | 0.29 | 0.06 | 1.02  | 0.739945 | 0.615517 | 0.900699 | 0.772025 |
| MmugDNA.27705.1.S1_at | MmugDNA.27705.1 | 9.42  | 9.57  | 0.1  | 0.1  | -1.11 | 0.061757 | 0.122298 | 0.41144  | 0.391979 |
| MmugDNA.27707.1.S1_at | MmugDNA.27707.1 | 7.35  | 7.13  | 0.03 | 0.05 | 1.16  | 0.00374  | 0.008781 | 0.197739 | 0.124066 |
| MmugDNA.27708.1.S1_at | MmugDNA.27708.1 | 7.58  | 7.47  | 0.58 | 0.35 | 1.08  | 0.590354 | 0.73685  | 0.832841 | 0.847693 |
| MmugDNA.27709.1.S1_at | MmugDNA.27709.1 | 4.48  | 6.05  | 0.29 | 0.61 | -2.97 | 0.035039 | 0.170951 | 0.350898 | 0.447561 |
| MmugDNA.2771.1.S1_at  | MmugDNA.2771.1  | 7.73  | 7.8   | 0.33 | 0.2  | -1.05 | 0.803101 | 0.95335  | 0.928218 | 0.97351  |
| MmugDNA.27711.1.S1_at | MmugDNA.27711.1 | 7.66  | 7.8   | 0.3  | 0.39 | -1.11 | 0.130161 | 0.584895 | 0.504663 | 0.75256  |
| MmugDNA.27712.1.S1_at | MmugDNA.27712.1 | 8.25  | 8.19  | 0.28 | 0.19 | 1.04  | 0.174259 | 0.231855 | 0.547368 | 0.503594 |
| MmugDNA.27713.1.S1_at | MmugDNA.27713.1 | 7.31  | 6.56  | 1.3  | 0.68 | 1.69  | 0.456288 | 0.507366 | 0.757808 | 0.702917 |
| MmugDNA.27714.1.S1_at | MmugDNA.27714.1 | 4.03  | 3.62  | 0.13 | 0.13 | 1.34  | 0.049685 | 0.054684 | 0.38604  | 0.27934  |
| MmugDNA.27716.1.S1_at | MmugDNA.27716.1 | 7.47  | 6.78  | 0.26 | 0.36 | 1.61  | 0.08772  | 0.137405 | 0.455356 | 0.410338 |
| MmugDNA.27717.1.S1_at | MmugDNA.27717.1 | 3.74  | 3.51  | 0.11 | 0.14 | 1.17  | 0.038719 | 0.234858 | 0.360177 | 0.506125 |
| MmugDNA.27718.1.S1_at | MmugDNA.27718.1 | 3.53  | 3.4   | 0.12 | 0.12 | 1.1   | 0.566604 | 0.677625 | 0.820086 | 0.811734 |
| MmugDNA.27719.1.S1_at | MmugDNA.27719.1 | 8.1   | 8.11  | 0.52 | 0.11 | -1.01 | 0.903112 | 0.710008 | 0.967378 | 0.831887 |
| MmugDNA.2772.1.S1_at  | MmugDNA.2772.1  | 5.1   | 4.82  | 0.16 | 0.18 | 1.21  | 0.578451 | 0.774554 | 0.826202 | 0.868769 |

|                         |                 |       |       |      |      |       |          |          |          |          |
|-------------------------|-----------------|-------|-------|------|------|-------|----------|----------|----------|----------|
| MmugDNA.27721.1.S1_at   | MmugDNA.27721.1 | 2.51  | 2.5   | 0.03 | 0.1  | 1.01  | 0.875761 | 0.920372 | 0.956794 | 0.955115 |
| MmugDNA.27721.1.S1_x_at | MmugDNA.27721.1 | 2.57  | 2.61  | 0.09 | 0.04 | -1.03 | 0.289124 | 0.030074 | 0.645892 | 0.215243 |
| MmugDNA.27722.1.S1_at   | MmugDNA.27722.1 | 9.85  | 9.74  | 0.3  | 0.05 | 1.08  | 0.428115 | 0.296045 | 0.741605 | 0.555314 |
| MmugDNA.27723.1.S1_at   | MmugDNA.27723.1 | 5.39  | 5.36  | 0.19 | 0.12 | 1.03  | 0.765959 | 0.939523 | 0.911981 | 0.965642 |
| MmugDNA.27724.1.S1_at   | MmugDNA.27724.1 | 6.89  | 6.57  | 0.47 | 0.11 | 1.25  | 0.568364 | 0.127094 | 0.820743 | 0.397922 |
| MmugDNA.27725.1.S1_at   | MmugDNA.27725.1 | 9.93  | 9.98  | 0.19 | 0.08 | -1.03 | 0.963805 | 0.782802 | 0.988182 | 0.874272 |
| MmugDNA.27726.1.S1_at   | MmugDNA.27726.1 | 4.52  | 4.41  | 0.3  | 0.27 | 1.08  | 0.863339 | 0.259534 | 0.952018 | 0.526448 |
| MmugDNA.27727.1.S1_at   | MmugDNA.27727.1 | 9.8   | 9.44  | 0.26 | 0.26 | 1.29  | 0.112991 | 0.125737 | 0.486386 | 0.396313 |
| MmugDNA.27728.1.S1_at   | MmugDNA.27728.1 | 3.32  | 3.08  | 0.23 | 0.05 | 1.18  | 0.062577 | 0.064917 | 0.41335  | 0.300818 |
| MmugDNA.2773.1.S1_at    | MmugDNA.2773.1  | 6.73  | 6.91  | 0.47 | 0.13 | -1.13 | 0.498586 | 0.013406 | 0.781804 | 0.148363 |
| MmugDNA.27731.1.S1_at   | MmugDNA.27731.1 | 7.45  | 7.47  | 0.16 | 0.12 | -1.01 | 0.374531 | 0.625916 | 0.705935 | 0.7794   |
| MmugDNA.27732.1.S1_at   | MmugDNA.27732.1 | 10.86 | 11.12 | 0.34 | 0.09 | -1.2  | 0.239316 | 0.306991 | 0.605811 | 0.563427 |
| MmugDNA.27733.1.S1_at   | MmugDNA.27733.1 | 3.45  | 3.35  | 0.05 | 0.1  | 1.07  | 0.22735  | 0.279505 | 0.596459 | 0.543055 |
| MmugDNA.27735.1.S1_at   | MmugDNA.27735.1 | 11.1  | 11.78 | 0.15 | 0.06 | -1.59 | 0.001769 | 0.000424 | 0.167444 | 0.038316 |
| MmugDNA.27737.1.S1_at   | MmugDNA.27737.1 | 5.19  | 5.16  | 0.04 | 0.05 | 1.02  | 0.719426 | 0.304612 | 0.891003 | 0.561838 |
| MmugDNA.27738.1.S1_at   | MmugDNA.27738.1 | 3.01  | 3.34  | 0.42 | 0.25 | -1.25 | 0.831483 | 0.433594 | 0.939628 | 0.653865 |
| MmugDNA.27739.1.S1_at   | MmugDNA.27739.1 | 4.43  | 4.24  | 0.05 | 0.2  | 1.14  | 0.175827 | 0.013622 | 0.548999 | 0.1494   |
| MmugDNA.27740.1.S1_at   | MmugDNA.27740.1 | 7.49  | 7.64  | 0.65 | 0.32 | -1.11 | 0.841428 | 0.979898 | 0.943775 | 0.989228 |
| MmugDNA.27742.1.S1_s_at | MmugDNA.27742.1 | 10.48 | 11    | 0.17 | 0.05 | -1.43 | 0.012406 | 0.002429 | 0.262097 | 0.073093 |
| MmugDNA.27743.1.S1_at   | MmugDNA.27743.1 | 4.15  | 4.13  | 0.24 | 0.22 | 1.01  | 0.337001 | 0.561207 | 0.682166 | 0.737235 |
| MmugDNA.27745.1.S1_at   | MmugDNA.27745.1 | 4.1   | 4.19  | 0.09 | 0.37 | -1.06 | 0.649289 | 0.4154   | 0.860245 | 0.640873 |
| MmugDNA.27748.1.S1_at   | MmugDNA.27748.1 | 6.13  | 5.56  | 0.39 | 0.06 | 1.48  | 0.08187  | 0.158292 | 0.446396 | 0.43403  |
| MmugDNA.27749.1.S1_at   | MmugDNA.27749.1 | 9.82  | 9.41  | 0.06 | 0.12 | 1.32  | 0.007802 | 0.037865 | 0.230997 | 0.238987 |
| MmugDNA.31397.1.S1_s_at | MmugDNA.31397.1 | 10.35 | 10.03 | 0.08 | 0.11 | 1.25  | 0.014919 | 0.075605 | 0.278597 | 0.32003  |
| MmugDNA.2775.1.S1_at    | MmugDNA.2775.1  | 7.32  | 7.9   | 0.23 | 0.12 | -1.5  | 0.059286 | 0.068397 | 0.406296 | 0.307955 |
| MmugDNA.27750.1.S1_at   | MmugDNA.27750.1 | 3.5   | 3.47  | 0.11 | 0.09 | 1.03  | 0.38926  | 0.637133 | 0.715989 | 0.786653 |
| MmugDNA.27751.1.S1_at   | MmugDNA.27751.1 | 5.44  | 5.09  | 0.28 | 0.38 | 1.28  | 0.272102 | 0.429054 | 0.631904 | 0.650583 |
| MmugDNA.27754.1.S1_at   | MmugDNA.27754.1 | 5.32  | 5.59  | 0.16 | 0.12 | -1.21 | 0.067049 | 0.153616 | 0.423026 | 0.428341 |
| MmugDNA.27755.1.S1_at   | MmugDNA.27755.1 | 3.97  | 4.35  | 0.11 | 0.49 | -1.3  | 0.100979 | 0.318508 | 0.47159  | 0.571239 |
| MmugDNA.27756.1.S1_at   | MmugDNA.27756.1 | 5.68  | 4.73  | 0.29 | 0.76 | 1.93  | 0.467142 | 0.006446 | 0.764162 | 0.109087 |
| MmugDNA.2776.1.S1_at    | MmugDNA.2776.1  | 8.54  | 8.49  | 0.92 | 0.16 | 1.04  | 0.988844 | 0.464141 | 0.995895 | 0.674916 |
| MmugDNA.27761.1.S1_at   | MmugDNA.27761.1 | 4.84  | 4.67  | 0.06 | 0.04 | 1.13  | 0.033628 | 0.043923 | 0.34712  | 0.254098 |
| MmugDNA.27764.1.S1_at   | MmugDNA.27764.1 | 3.77  | 4.94  | 0.36 | 0.42 | -2.25 | 0.051622 | 0.053325 | 0.390696 | 0.276481 |
| MmugDNA.27765.1.S1_at   | MmugDNA.27765.1 | 3.27  | 3.27  | 0.14 | 0.15 | 1     | 0.230628 | 0.31658  | 0.598752 | 0.569949 |
| MmugDNA.27767.1.S1_at   | MmugDNA.27767.1 | 4.9   | 4.92  | 0.12 | 0.2  | -1.01 | 0.486514 | 0.334651 | 0.774627 | 0.582581 |
| MmugDNA.27770.1.S1_at   | MmugDNA.27770.1 | 4.78  | 4.95  | 0.45 | 0.07 | -1.12 | 0.408932 | 0.323806 | 0.729658 | 0.574609 |
| MmugDNA.27771.1.S1_at   | MmugDNA.27771.1 | 6.97  | 7.12  | 0.12 | 0.25 | -1.11 | 0.963262 | 0.931817 | 0.988152 | 0.961265 |
| MmugDNA.27774.1.S1_at   | MmugDNA.27774.1 | 7.18  | 7.07  | 0.07 | 0.05 | 1.08  | 0.042125 | 0.160646 | 0.368452 | 0.436745 |
| MmugDNA.27775.1.S1_at   | MmugDNA.27775.1 | 5.46  | 5.48  | 0.11 | 0.06 | -1.01 | 0.315635 | 0.764497 | 0.666029 | 0.863128 |
| MmugDNA.27777.1.S1_at   | MmugDNA.27777.1 | 5.69  | 5.76  | 0.1  | 0.05 | -1.05 | 0.400736 | 0.434984 | 0.723941 | 0.654901 |
| MmugDNA.27778.1.S1_at   | MmugDNA.27778.1 | 11.68 | 11.84 | 0.13 | 0.06 | -1.12 | 0.032007 | 0.042618 | 0.342916 | 0.251037 |
| MmugDNA.27778.1.S1_s_at | MmugDNA.27778.1 | 11.37 | 11.67 | 0.02 | 0.03 | -1.23 | 0.000152 | 0.009204 | 0.112332 | 0.126579 |
| MmugDNA.27780.1.S1_at   | MmugDNA.27780.1 | 4.88  | 4.71  | 0.07 | 0.04 | 1.12  | 0.013937 | 0.004258 | 0.273301 | 0.091808 |

|                         |                 |       |       |      |      |       |          |          |          |          |
|-------------------------|-----------------|-------|-------|------|------|-------|----------|----------|----------|----------|
| MmugDNA.27782.1.S1_at   | MmugDNA.27782.1 | 7.7   | 7.76  | 0.66 | 0    | -1.04 | 0.970961 | 0.995143 | 0.990513 | 0.996973 |
| MmugDNA.27783.1.S1_at   | MmugDNA.27783.1 | 8.57  | 8.44  | 0.26 | 0.06 | 1.09  | 0.855742 | 0.318671 | 0.949014 | 0.571315 |
| MmugDNA.27784.1.S1_at   | MmugDNA.27784.1 | 7.29  | 7.29  | 0.31 | 0.01 | 1     | 0.362925 | 0.481074 | 0.699735 | 0.686127 |
| MmugDNA.27786.1.S1_at   | MmugDNA.27786.1 | 3.71  | 3.66  | 0.14 | 0.11 | 1.04  | 0.312129 | 0.421395 | 0.66374  | 0.644994 |
| MmugDNA.27789.1.S1_at   | MmugDNA.27789.1 | 7.85  | 7.46  | 0.12 | 0.17 | 1.31  | 0.055626 | 0.050294 | 0.398946 | 0.269573 |
| MmugDNA.2779.1.S1_at    | MmugDNA.2779.1  | 3.63  | 3.49  | 0.07 | 0.05 | 1.1   | 0.022114 | 0.017126 | 0.310301 | 0.165775 |
| MmugDNA.27791.1.S1_at   | MmugDNA.27791.1 | 4.35  | 4.29  | 0.07 | 0.08 | 1.04  | 0.305336 | 0.59384  | 0.65879  | 0.758418 |
| MmugDNA.27792.1.S1_at   | MmugDNA.27792.1 | 3.42  | 3.45  | 0.1  | 0.08 | -1.02 | 0.186252 | 0.267899 | 0.559101 | 0.533607 |
| MmugDNA.27794.1.S1_at   | MmugDNA.27794.1 | 5.91  | 6.86  | 0.44 | 0.33 | -1.93 | 0.105055 | 0.171006 | 0.476672 | 0.447561 |
| MmugDNA.27795.1.S1_at   | MmugDNA.27795.1 | 4.78  | 4.86  | 0.09 | 0.18 | -1.06 | 0.59115  | 0.902825 | 0.833275 | 0.944844 |
| MmugDNA.27796.1.S1_at   | MmugDNA.27796.1 | 5.47  | 5.98  | 0.57 | 0.09 | -1.42 | 0.277295 | 0.285653 | 0.636787 | 0.547395 |
| MmugDNA.27797.1.S1_at   | MmugDNA.27797.1 | 3.78  | 3.78  | 0    | 0    | 1     | 1        | 0.559603 | 1        | 0.736365 |
| MmugDNA.27798.1.S1_at   | MmugDNA.27798.1 | 5.71  | 5.89  | 0.28 | 0.12 | -1.13 | 0.446547 | 0.114936 | 0.752779 | 0.381665 |
| MmugDNA.27799.1.S1_at   | MmugDNA.27799.1 | 4.96  | 4.96  | 0.28 | 0.29 | -1    | 0.239203 | 0.263963 | 0.605741 | 0.530153 |
| MmugDNA.27800.1.S1_at   | MmugDNA.27800.1 | 4.28  | 4.46  | 0.65 | 0.28 | -1.14 | 0.663654 | 0.169704 | 0.867258 | 0.446287 |
| MmugDNA.27802.1.S1_at   | MmugDNA.27802.1 | 5.56  | 5.6   | 0.31 | 0.21 | -1.03 | 0.680065 | 0.717579 | 0.874524 | 0.836471 |
| MmugDNA.27803.1.S1_at   | MmugDNA.27803.1 | 3.25  | 3.01  | 0.15 | 0.05 | 1.18  | 0.06783  | 0.112602 | 0.42446  | 0.378094 |
| MmugDNA.27806.1.S1_at   | MmugDNA.27806.1 | 3.3   | 4.07  | 0.21 | 0.48 | -1.7  | 0.15916  | 0.170995 | 0.531816 | 0.447561 |
| MmugDNA.27807.1.S1_at   | MmugDNA.27807.1 | 5.89  | 5.88  | 0.03 | 0.17 | 1.01  | 0.276842 | 0.452927 | 0.636476 | 0.667359 |
| MmugDNA.27809.1.S1_at   | MmugDNA.27809.1 | 6.37  | 5.73  | 0.47 | 0.12 | 1.56  | 0.090796 | 0.007467 | 0.458873 | 0.115888 |
| MmugDNA.27810.1.S1_at   | MmugDNA.27810.1 | 5.17  | 5.28  | 0.61 | 0.24 | -1.08 | 0.899495 | 0.550096 | 0.965803 | 0.730241 |
| MmugDNA.27811.1.S1_at   | MmugDNA.27811.1 | 4.8   | 4.59  | 0.14 | 0.17 | 1.16  | 0.041673 | 0.059162 | 0.367007 | 0.290182 |
| MmugDNA.27812.1.S1_at   | MmugDNA.27812.1 | 5.96  | 5.97  | 0.13 | 0.1  | -1    | 0.221514 | 0.462022 | 0.591221 | 0.673527 |
| MmugDNA.27813.1.S1_at   | MmugDNA.27813.1 | 9.15  | 8.94  | 0.07 | 0.13 | 1.15  | 0.096425 | 0.137713 | 0.4651   | 0.410711 |
| MmugDNA.27814.1.S1_at   | MmugDNA.27814.1 | 9.13  | 8.94  | 0.84 | 0.06 | 1.14  | 0.690462 | 0.350335 | 0.879504 | 0.594081 |
| MmugDNA.27815.1.S1_at   | MmugDNA.27815.1 | 7.09  | 6.65  | 1.49 | 0.3  | 1.36  | 0.6839   | 0.896023 | 0.876251 | 0.940574 |
| MmugDNA.27817.1.S1_at   | MmugDNA.27817.1 | 7.78  | 7.68  | 1.43 | 0.31 | 1.07  | 0.565144 | 0.267294 | 0.819091 | 0.532924 |
| MmugDNA.27818.1.S1_at   | MmugDNA.27818.1 | 5.34  | 5.2   | 0.08 | 0.02 | 1.1   | 0.184673 | 0.726588 | 0.557393 | 0.841849 |
| MmugDNA.27819.1.S1_at   | MmugDNA.27819.1 | 6.43  | 6.97  | 0.67 | 0.29 | -1.46 | 0.097336 | 0.215283 | 0.466219 | 0.489018 |
| MmugDNA.27820.1.S1_at   | MmugDNA.27820.1 | 5.95  | 5.77  | 0.08 | 0.19 | 1.13  | 0.877981 | 0.100613 | 0.957532 | 0.359897 |
| MmugDNA.27821.1.S1_at   | MmugDNA.27821.1 | 3.33  | 3.31  | 0.08 | 0.02 | 1.01  | 0.69412  | 0.229925 | 0.880976 | 0.501802 |
| MmugDNA.27822.1.S1_at   | MmugDNA.27822.1 | 4.46  | 4.81  | 0.16 | 0.14 | -1.28 | 0.028749 | 0.01775  | 0.333062 | 0.168367 |
| MmugDNA.25318.1.S1_s_at | MmugDNA.25318.1 | 5.55  | 5.64  | 0.13 | 0.19 | -1.07 | 0.720567 | 0.568172 | 0.891623 | 0.741859 |
| MmugDNA.27823.1.S1_at   | MmugDNA.27823.1 | 9.72  | 9.65  | 0.09 | 0.04 | 1.05  | 0.285818 | 0.233071 | 0.643438 | 0.50445  |
| MmugDNA.27824.1.S1_at   | MmugDNA.27824.1 | 4.44  | 3.83  | 0.43 | 0.1  | 1.53  | 0.208853 | 0.363783 | 0.580477 | 0.604189 |
| MmugDNA.27825.1.S1_at   | MmugDNA.27825.1 | 11.14 | 11.45 | 2.06 | 0.07 | -1.24 | 0.347897 | 0.457212 | 0.689091 | 0.670746 |
| MmugDNA.27826.1.S1_at   | MmugDNA.27826.1 | 5.11  | 5.12  | 0.2  | 0.06 | -1    | 0.287097 | 0.553223 | 0.644229 | 0.73239  |
| MmugDNA.27828.1.S1_at   | MmugDNA.27828.1 | 10.56 | 10.73 | 0.46 | 0.12 | -1.13 | 0.89431  | 0.512172 | 0.963789 | 0.706087 |
| MmugDNA.2783.1.S1_at    | MmugDNA.2783.1  | 3.99  | 4.05  | 0.11 | 0.03 | -1.05 | 0.491795 | 0.339461 | 0.778032 | 0.586093 |
| MmugDNA.27830.1.S1_at   | MmugDNA.27830.1 | 9.39  | 9.25  | 0.56 | 0.38 | 1.1   | 0.834905 | 0.96984  | 0.940771 | 0.983503 |
| MmugDNA.27831.1.S1_at   | MmugDNA.27831.1 | 6.03  | 5.23  | 0.11 | 0.29 | 1.73  | 0.014995 | 0.0054   | 0.2791   | 0.101438 |
| MmugDNA.27832.1.S1_at   | MmugDNA.27832.1 | 6.78  | 5.92  | 0.47 | 0.15 | 1.81  | 0.052221 | 0.043183 | 0.392084 | 0.252557 |
| MmugDNA.27834.1.S1_at   | MmugDNA.27834.1 | 6.95  | 6.93  | 0.05 | 0.13 | 1.01  | 0.81481  | 0.936078 | 0.933137 | 0.963958 |

|                         |                 |       |       |      |      |       |          |          |          |          |
|-------------------------|-----------------|-------|-------|------|------|-------|----------|----------|----------|----------|
| MmugDNA.27837.1.S1_at   | MmugDNA.27837.1 | 10.15 | 10.22 | 0.56 | 0.09 | -1.05 | 0.742955 | 0.85612  | 0.901935 | 0.917842 |
| MmugDNA.27838.1.S1_at   | MmugDNA.27838.1 | 4.91  | 5.22  | 0.79 | 0.36 | -1.24 | 0.578121 | 0.551344 | 0.826177 | 0.730922 |
| MmugDNA.2784.1.S1_at    | MmugDNA.2784.1  | 4.78  | 4.65  | 0.08 | 0.17 | 1.09  | 0.15905  | 0.220907 | 0.53176  | 0.494317 |
| MmugDNA.27840.1.S1_at   | MmugDNA.27840.1 | 10.8  | 10.51 | 0.21 | 0.09 | 1.22  | 0.170773 | 0.069321 | 0.543739 | 0.309558 |
| MmugDNA.27841.1.S1_at   | MmugDNA.27841.1 | 12    | 12.29 | 0.18 | 0.02 | -1.22 | 0.04514  | 0.008622 | 0.375796 | 0.123117 |
| MmugDNA.27842.1.S1_at   | MmugDNA.27842.1 | 6.24  | 6.24  | 0.13 | 0.18 | -1    | 0.238565 | 0.304858 | 0.605359 | 0.561994 |
| MmugDNA.27843.1.S1_at   | MmugDNA.27843.1 | 4.94  | 5.1   | 0.38 | 0.03 | -1.12 | 0.758155 | 0.817181 | 0.908979 | 0.894545 |
| MmugDNA.27846.1.S1_at   | MmugDNA.27846.1 | 7.36  | 7.29  | 0.55 | 0.3  | 1.04  | 0.920354 | 0.793092 | 0.972913 | 0.88052  |
| MmugDNA.27847.1.S1_at   | MmugDNA.27847.1 | 4.55  | 4.4   | 0.27 | 0.24 | 1.11  | 0.875732 | 0.195224 | 0.956794 | 0.470253 |
| MmugDNA.27849.1.S1_at   | MmugDNA.27849.1 | 3.07  | 3.08  | 0.08 | 0.09 | -1.01 | 0.651874 | 0.7048   | 0.86186  | 0.828831 |
| MmugDNA.27851.1.S1_at   | MmugDNA.27851.1 | 8.78  | 8.34  | 1.04 | 0.14 | 1.36  | 0.439929 | 0.458412 | 0.748282 | 0.671165 |
| MmugDNA.27852.1.S1_at   | MmugDNA.27852.1 | 12.23 | 11.99 | 0.8  | 0.03 | 1.18  | 0.747649 | 0.620491 | 0.904098 | 0.775449 |
| MmugDNA.27853.1.S1_at   | MmugDNA.27853.1 | 11.02 | 10.63 | 1.05 | 0.07 | 1.31  | 0.696594 | 0.316961 | 0.882169 | 0.570275 |
| MmugDNA.27854.1.S1_at   | MmugDNA.27854.1 | 8.99  | 9.08  | 0.48 | 0.1  | -1.07 | 0.549673 | 0.202878 | 0.810392 | 0.477312 |
| MmugDNA.27855.1.S1_at   | MmugDNA.27855.1 | 5.82  | 5.15  | 0.28 | 0.27 | 1.59  | 0.063549 | 0.230489 | 0.41578  | 0.502251 |
| MmugDNA.27856.1.S1_s_at | MmugDNA.27856.1 | 6.22  | 6.27  | 0.08 | 0.05 | -1.04 | 0.542267 | 0.205772 | 0.805613 | 0.48007  |
| MmugDNA.27858.1.S1_at   | MmugDNA.27858.1 | 6.73  | 6.78  | 0.11 | 0.03 | -1.04 | 0.345511 | 0.148936 | 0.687499 | 0.423294 |
| MmugDNA.27860.1.S1_at   | MmugDNA.27860.1 | 4.05  | 4.74  | 0    | 0.73 | -1.62 | 0.545828 | 0.591012 | 0.8082   | 0.756581 |
| MmugDNA.27861.1.S1_at   | MmugDNA.27861.1 | 3.6   | 3.91  | 0.4  | 0.25 | -1.24 | 0.687229 | 0.947294 | 0.877656 | 0.970103 |
| MmugDNA.27862.1.S1_at   | MmugDNA.27862.1 | 3.33  | 3.38  | 0.05 | 0.19 | -1.03 | 0.691637 | 0.889676 | 0.879919 | 0.937154 |
| MmugDNA.27863.1.S1_at   | MmugDNA.27863.1 | 4.81  | 4.73  | 0.09 | 0.74 | 1.06  | 0.40956  | 0.432123 | 0.730133 | 0.652775 |
| MmugDNA.27864.1.S1_at   | MmugDNA.27864.1 | 7.35  | 7.98  | 0.6  | 0.2  | -1.55 | 0.298507 | 0.225092 | 0.653176 | 0.497741 |
| MmugDNA.27865.1.S1_at   | MmugDNA.27865.1 | 10.23 | 10.59 | 0.15 | 0.1  | -1.28 | 0.056238 | 0.08313  | 0.399699 | 0.332999 |
| MmugDNA.27866.1.S1_at   | MmugDNA.27866.1 | 5     | 4.93  | 1.12 | 0.05 | 1.05  | 0.912188 | 0.992595 | 0.970255 | 0.995715 |
| MmugDNA.27867.1.S1_at   | MmugDNA.27867.1 | 6.27  | 6.45  | 0.15 | 0.34 | -1.13 | 0.895799 | 0.353788 | 0.964355 | 0.596815 |
| MmugDNA.27868.1.S1_at   | MmugDNA.27868.1 | 5.38  | 5.54  | 0.15 | 0.07 | -1.12 | 0.17259  | 0.098978 | 0.545826 | 0.357049 |
| MmugDNA.2787.1.S1_at    | MmugDNA.2787.1  | 3.72  | 3.8   | 0.05 | 0.15 | -1.06 | 0.372319 | 0.675232 | 0.705567 | 0.81026  |
| MmugDNA.27871.1.S1_at   | MmugDNA.27871.1 | 4.14  | 4.05  | 0.14 | 0.24 | 1.06  | 0.406395 | 0.764407 | 0.727927 | 0.863093 |
| MmugDNA.27872.1.S1_at   | MmugDNA.27872.1 | 6.88  | 6.88  | 0.04 | 0.18 | 1     | 0.306773 | 0.043394 | 0.659706 | 0.252955 |
| MmugDNA.27874.1.S1_at   | MmugDNA.27874.1 | 6.39  | 6.27  | 0.05 | 0.05 | 1.09  | 0.06485  | 0.031851 | 0.419026 | 0.220909 |
| MmugDNA.27875.1.S1_at   | MmugDNA.27875.1 | 12.28 | 12.17 | 0.05 | 0.15 | 1.08  | 0.351764 | 0.528657 | 0.692512 | 0.716749 |
| MmugDNA.27877.1.S1_at   | MmugDNA.27877.1 | 5.39  | 5.32  | 0.14 | 0.63 | 1.05  | 0.675786 | 0.964135 | 0.872746 | 0.980052 |
| MmugDNA.27878.1.S1_at   | MmugDNA.27878.1 | 3.16  | 3.15  | 0.84 | 0.57 | 1.01  | 0.986219 | 0.781932 | 0.995557 | 0.873615 |
| MmugDNA.27879.1.S1_at   | MmugDNA.27879.1 | 8.44  | 9.59  | 0.96 | 0.16 | -2.21 | 0.35247  | 0.248263 | 0.692659 | 0.517596 |
| MmugDNA.27880.1.S1_at   | MmugDNA.27880.1 | 5.9   | 5.82  | 0.19 | 0.04 | 1.06  | 0.699109 | 0.559472 | 0.883052 | 0.736301 |
| MmugDNA.27881.1.S1_at   | MmugDNA.27881.1 | 8.25  | 7.73  | 0.61 | 0.32 | 1.43  | 0.374408 | 0.557535 | 0.705837 | 0.73509  |
| MmugDNA.27882.1.S1_at   | MmugDNA.27882.1 | 6.51  | 6.51  | 0.24 | 0.15 | -1    | 0.237194 | 0.14228  | 0.604099 | 0.41579  |
| MmugDNA.27883.1.S1_at   | MmugDNA.27883.1 | 4.6   | 4.58  | 0.16 | 0.12 | 1.01  | 0.955651 | 0.302752 | 0.985346 | 0.560307 |
| MmugDNA.27884.1.S1_at   | MmugDNA.27884.1 | 4.46  | 4.25  | 0.12 | 0.16 | 1.16  | 0.10912  | 0.122555 | 0.481684 | 0.392468 |
| MmugDNA.27887.1.S1_at   | MmugDNA.27887.1 | 9.2   | 8.63  | 0.97 | 0.13 | 1.48  | 0.320899 | 0.395556 | 0.669494 | 0.627565 |
| MmugDNA.27889.1.S1_at   | MmugDNA.27889.1 | 9.5   | 9.77  | 1.05 | 0.19 | -1.21 | 0.728018 | 0.796933 | 0.894913 | 0.882822 |
| MmugDNA.2789.1.S1_at    | MmugDNA.2789.1  | 8.51  | 8.31  | 0.61 | 0.11 | 1.15  | 0.917734 | 0.002155 | 0.972051 | 0.068763 |
| MmugDNA.27890.1.S1_s_at | MmugDNA.27890.1 | 9.73  | 9.39  | 0.26 | 0.08 | 1.27  | 0.369767 | 0.173808 | 0.704295 | 0.450128 |

|                         |                 |       |       |      |      |       |          |          |          |          |
|-------------------------|-----------------|-------|-------|------|------|-------|----------|----------|----------|----------|
| MmugDNA.27891.1.S1_at   | MmugDNA.27891.1 | 6.44  | 6.39  | 0.1  | 0.03 | 1.03  | 0.209003 | 0.25066  | 0.580603 | 0.51941  |
| MmugDNA.27892.1.S1_at   | MmugDNA.27892.1 | 5.9   | 5.76  | 0.04 | 0.09 | 1.1   | 0.081187 | 0.568553 | 0.445179 | 0.742027 |
| MmugDNA.27893.1.S1_at   | MmugDNA.27893.1 | 6.38  | 6.14  | 0.11 | 0.03 | 1.18  | 0.073379 | 0.466817 | 0.434422 | 0.676543 |
| MmugDNA.27894.1.S1_at   | MmugDNA.27894.1 | 3.92  | 3.54  | 0.21 | 0.28 | 1.3   | 0.320297 | 0.489404 | 0.669215 | 0.691792 |
| MmugDNA.27896.1.S1_at   | MmugDNA.27896.1 | 6.7   | 6.85  | 0.04 | 0.19 | -1.11 | 0.285031 | 0.168542 | 0.642951 | 0.445172 |
| MmugDNA.27897.1.S1_at   | MmugDNA.27897.1 | 4.95  | 4.9   | 0.04 | 0.06 | 1.04  | 0.174893 | 0.329328 | 0.548031 | 0.57871  |
| MmugDNA.27898.1.S1_at   | MmugDNA.27898.1 | 3.55  | 3.86  | 0.18 | 0.21 | -1.24 | 0.224906 | 0.501695 | 0.594108 | 0.6998   |
| MmugDNA.27899.1.S1_at   | MmugDNA.27899.1 | 5.04  | 4.85  | 0.29 | 0.14 | 1.14  | 0.861085 | 0.752934 | 0.95112  | 0.856089 |
| MmugDNA.279.1.S1_at     | MmugDNA.279.1   | 5.73  | 5.68  | 0.42 | 0.14 | 1.03  | 0.692435 | 0.840124 | 0.880095 | 0.908905 |
| MmugDNA.2790.1.S1_at    | MmugDNA.2790.1  | 9.39  | 9.29  | 0.15 | 0.09 | 1.08  | 0.884137 | 0.189207 | 0.959791 | 0.464997 |
| MmugDNA.27901.1.S1_at   | MmugDNA.27901.1 | 5.83  | 6.28  | 0.44 | 0.29 | -1.37 | 0.328701 | 0.688678 | 0.67577  | 0.818281 |
| MmugDNA.27902.1.S1_at   | MmugDNA.27902.1 | 3.35  | 3.38  | 0.16 | 0.02 | -1.02 | 0.229835 | 0.224657 | 0.598481 | 0.497613 |
| MmugDNA.27906.1.S1_at   | MmugDNA.27906.1 | 5.53  | 5.34  | 0.22 | 0.07 | 1.14  | 0.204649 | 0.416616 | 0.576136 | 0.641647 |
| MmugDNA.27908.1.S1_at   | MmugDNA.27908.1 | 6.47  | 6.56  | 0.69 | 0.02 | -1.07 | 0.494304 | 0.322149 | 0.779404 | 0.573743 |
| MmugDNA.27909.1.S1_at   | MmugDNA.27909.1 | 8.49  | 8.95  | 0.11 | 0.11 | -1.38 | 0.005969 | 0.000797 | 0.213061 | 0.046064 |
| MmugDNA.2791.1.S1_at    | MmugDNA.2791.1  | 9.38  | 9.08  | 0.94 | 0.07 | 1.23  | 0.774612 | 0.025265 | 0.91642  | 0.199437 |
| MmugDNA.27911.1.S1_at   | MmugDNA.27911.1 | 10.92 | 10.96 | 0.29 | 0.1  | -1.03 | 0.305101 | 0.188192 | 0.658601 | 0.464251 |
| MmugDNA.27916.1.S1_at   | MmugDNA.27916.1 | 3.38  | 3.3   | 0.15 | 0.1  | 1.06  | 0.243368 | 0.414475 | 0.609284 | 0.640342 |
| MmugDNA.27917.1.S1_at   | MmugDNA.27917.1 | 4.61  | 4.21  | 0.1  | 0.04 | 1.32  | 0.006692 | 0.041856 | 0.22263  | 0.249172 |
| MmugDNA.27918.1.S1_at   | MmugDNA.27918.1 | 4.9   | 4.38  | 0.2  | 0.12 | 1.43  | 0.038876 | 0.01794  | 0.360459 | 0.168998 |
| MmugDNA.27919.1.S1_at   | MmugDNA.27919.1 | 6.34  | 7.02  | 0.52 | 0.09 | -1.6  | 0.073269 | 0.087478 | 0.434186 | 0.340617 |
| MmugDNA.27920.1.S1_at   | MmugDNA.27920.1 | 5.2   | 4.85  | 0.11 | 0.17 | 1.27  | 0.131219 | 0.558608 | 0.505421 | 0.735766 |
| MmugDNA.27921.1.S1_at   | MmugDNA.27921.1 | 9.59  | 8.52  | 0.18 | 0.12 | 2.1   | 0.00185  | 0.000312 | 0.168185 | 0.035198 |
| MmugDNA.27923.1.S1_at   | MmugDNA.27923.1 | 4.65  | 4.6   | 0.06 | 0.09 | 1.04  | 0.270141 | 0.629849 | 0.630217 | 0.782009 |
| MmugDNA.27924.1.S1_at   | MmugDNA.27924.1 | 3.5   | 3.28  | 0.19 | 0.08 | 1.17  | 0.082528 | 0.058095 | 0.447377 | 0.2877   |
| MmugDNA.27925.1.S1_at   | MmugDNA.27925.1 | 4.3   | 4.47  | 0.05 | 0.16 | -1.12 | 0.058599 | 0.126725 | 0.404785 | 0.397398 |
| MmugDNA.27926.1.S1_at   | MmugDNA.27926.1 | 5.03  | 5.27  | 0.41 | 0.37 | -1.18 | 0.973144 | 0.994217 | 0.991238 | 0.99645  |
| MmugDNA.27927.1.S1_at   | MmugDNA.27927.1 | 10.06 | 9.72  | 0.31 | 0.28 | 1.27  | 0.489839 | 0.004631 | 0.776542 | 0.094988 |
| MmugDNA.27927.1.S1_s_at | MmugDNA.27927.1 | 9.47  | 9.33  | 0.28 | 0.3  | 1.1   | 0.962266 | 0.006719 | 0.987732 | 0.110963 |
| MmugDNA.27928.1.S1_at   | MmugDNA.27928.1 | 4.9   | 4.81  | 0.17 | 0.14 | 1.06  | 0.435137 | 0.585319 | 0.745512 | 0.752844 |
| MmugDNA.2793.1.S1_at    | MmugDNA.2793.1  | 7.6   | 7.62  | 0.06 | 0.03 | -1.01 | 0.621134 | 0.864222 | 0.847506 | 0.922972 |
| MmugDNA.2774.1.S1_at    | MmugDNA.2774.1  | 6.7   | 6.39  | 0.13 | 0.15 | 1.25  | 0.056942 | 0.082817 | 0.401454 | 0.332331 |
| MmugDNA.2774.1.S1_s_at  | MmugDNA.2774.1  | 6.04  | 5.92  | 0.14 | 0.14 | 1.08  | 0.36439  | 0.147149 | 0.700567 | 0.421376 |
| MmugDNA.27930.1.S1_at   | MmugDNA.27930.1 | 9.33  | 7.75  | 0.34 | 0.57 | 3     | 0.014005 | 0.067265 | 0.273301 | 0.305363 |
| MmugDNA.27931.1.S1_at   | MmugDNA.27931.1 | 5.61  | 4.68  | 0.99 | 0.36 | 1.9   | 0.249889 | 0.095179 | 0.615347 | 0.35218  |
| MmugDNA.27932.1.S1_at   | MmugDNA.27932.1 | 11.33 | 11.44 | 0.34 | 0.19 | -1.07 | 0.527013 | 0.638648 | 0.79688  | 0.787767 |
| MmugDNA.27933.1.S1_s_at | MmugDNA.27933.1 | 11.9  | 12.43 | 0.6  | 0.14 | -1.45 | 0.234477 | 0.242922 | 0.601746 | 0.513293 |
| MmugDNA.27935.1.S1_at   | MmugDNA.27935.1 | 6.11  | 6.13  | 0.17 | 0.09 | -1.01 | 0.219601 | 0.471295 | 0.589062 | 0.679323 |
| MmugDNA.27935.1.S1_s_at | MmugDNA.27935.1 | 5.57  | 6.25  | 0.36 | 0.34 | -1.61 | 0.102076 | 0.14901  | 0.472436 | 0.423337 |
| MmugDNA.27936.1.S1_s_at | MmugDNA.27936.1 | 7.7   | 7.52  | 0.15 | 0.18 | 1.14  | 0.085849 | 0.058962 | 0.453025 | 0.289669 |
| MmugDNA.27937.1.S1_at   | MmugDNA.27937.1 | 6.75  | 7.84  | 1.73 | 0.38 | -2.12 | 0.410474 | 0.07831  | 0.730749 | 0.324949 |
| MmugDNA.27938.1.S1_at   | MmugDNA.27938.1 | 2.86  | 2.8   | 0.13 | 0.13 | 1.04  | 0.494403 | 0.266475 | 0.779452 | 0.532234 |
| MmugDNA.27939.1.S1_at   | MmugDNA.27939.1 | 4.12  | 4.09  | 0.21 | 0.15 | 1.02  | 0.601039 | 0.886702 | 0.838053 | 0.935519 |

|                         |                 |       |       |      |      |       |          |          |          |          |
|-------------------------|-----------------|-------|-------|------|------|-------|----------|----------|----------|----------|
| MmugDNA.2794.1.S1_at    | MmugDNA.2794.1  | 5.08  | 5.08  | 0.08 | 0.16 | -1    | 0.911799 | 0.470561 | 0.970171 | 0.678898 |
| MmugDNA.27941.1.S1_at   | MmugDNA.27941.1 | 3.31  | 3.25  | 0.15 | 0.07 | 1.04  | 0.123102 | 0.203177 | 0.496589 | 0.477415 |
| MmugDNA.27942.1.S1_at   | MmugDNA.27942.1 | 10.12 | 9.81  | 0.12 | 0.1  | 1.23  | 0.035116 | 0.064648 | 0.351058 | 0.300314 |
| MmugDNA.27942.1.S1_s_at | MmugDNA.27942.1 | 10.67 | 10.76 | 0.14 | 0.19 | -1.06 | 0.611071 | 0.85482  | 0.842323 | 0.917266 |
| MmugDNA.27943.1.S1_at   | MmugDNA.27943.1 | 6.74  | 6.78  | 0.57 | 0.04 | -1.03 | 0.814428 | 0.942985 | 0.93297  | 0.967603 |
| MmugDNA.27944.1.S1_at   | MmugDNA.27944.1 | 11.35 | 11.69 | 0.16 | 0.23 | -1.26 | 0.103698 | 0.663375 | 0.474343 | 0.802979 |
| MmugDNA.27945.1.S1_at   | MmugDNA.27945.1 | 2.88  | 2.87  | 0.1  | 0.11 | 1     | 0.507239 | 0.786356 | 0.786208 | 0.876293 |
| MmugDNA.27946.1.S1_at   | MmugDNA.27946.1 | 4.6   | 4.6   | 0.01 | 0.09 | 1     | 0.324555 | 0.769304 | 0.672781 | 0.866034 |
| MmugDNA.27947.1.S1_at   | MmugDNA.27947.1 | 5.62  | 5.11  | 0.57 | 0.27 | 1.42  | 0.23765  | 0.343067 | 0.604643 | 0.588878 |
| MmugDNA.27948.1.S1_at   | MmugDNA.27948.1 | 2.65  | 2.6   | 0.12 | 0.07 | 1.04  | 0.161516 | 0.213838 | 0.534843 | 0.48758  |
| MmugDNA.27948.1.S1_s_at | MmugDNA.27948.1 | 6.01  | 5.87  | 0.02 | 0.14 | 1.1   | 0.147301 | 0.099407 | 0.521578 | 0.357689 |
| MmugDNA.27949.1.S1_at   | MmugDNA.27949.1 | 12.34 | 12.13 | 0.25 | 0.02 | 1.16  | 0.209434 | 0.152144 | 0.580868 | 0.426919 |
| MmugDNA.27950.1.S1_at   | MmugDNA.27950.1 | 4.24  | 4.09  | 0.27 | 0.17 | 1.1   | 0.975008 | 0.671633 | 0.991912 | 0.808036 |
| MmugDNA.27951.1.S1_at   | MmugDNA.27951.1 | 5.7   | 5.45  | 0.11 | 0.75 | 1.19  | 0.61009  | 0.692698 | 0.841839 | 0.821139 |
| MmugDNA.27952.1.S1_at   | MmugDNA.27952.1 | 3.74  | 3.82  | 0.19 | 0.06 | -1.06 | 0.750133 | 0.251271 | 0.905347 | 0.519984 |
| MmugDNA.27953.1.S1_at   | MmugDNA.27953.1 | 9.41  | 9.41  | 0.57 | 0.02 | -1    | 0.997555 | 0.291874 | 0.999184 | 0.552094 |
| MmugDNA.27956.1.S1_at   | MmugDNA.27956.1 | 3.67  | 3.62  | 0.02 | 0.17 | 1.03  | 0.530398 | 0.64496  | 0.799006 | 0.791968 |
| MmugDNA.27958.1.S1_at   | MmugDNA.27958.1 | 11.17 | 11.47 | 0.25 | 0.11 | -1.23 | 0.091902 | 0.20639  | 0.460249 | 0.480546 |
| MmugDNA.27959.1.S1_at   | MmugDNA.27959.1 | 7.82  | 7.94  | 1.94 | 0.25 | -1.09 | 0.892444 | 0.214512 | 0.963113 | 0.488274 |
| MmugDNA.2796.1.S1_at    | MmugDNA.2796.1  | 6.36  | 6.61  | 0.21 | 0.05 | -1.19 | 0.175349 | 0.255085 | 0.548245 | 0.52317  |
| MmugDNA.27960.1.S1_at   | MmugDNA.27960.1 | 11.15 | 11.03 | 0.12 | 0.24 | 1.08  | 0.144818 | 0.228415 | 0.520103 | 0.500587 |
| MmugDNA.27962.1.S1_at   | MmugDNA.27962.1 | 11.95 | 12.19 | 0.11 | 0.12 | -1.18 | 0.100796 | 0.089628 | 0.47159  | 0.343821 |
| MmugDNA.27964.1.S1_at   | MmugDNA.27964.1 | 6.81  | 6.63  | 0.23 | 0.11 | 1.14  | 0.165022 | 0.060036 | 0.537704 | 0.291714 |
| MmugDNA.27965.1.S1_at   | MmugDNA.27965.1 | 3.83  | 3.75  | 0.14 | 0.2  | 1.06  | 0.26715  | 0.237431 | 0.627823 | 0.508117 |
| MmugDNA.27966.1.S1_at   | MmugDNA.27966.1 | 9.57  | 9.69  | 0.36 | 0.31 | -1.08 | 0.384448 | 0.497211 | 0.711993 | 0.696514 |
| MmugDNA.27967.1.S1_at   | MmugDNA.27967.1 | 6.39  | 6.35  | 0.24 | 0.19 | 1.03  | 0.745995 | 0.008481 | 0.903166 | 0.122133 |
| MmugDNA.27968.1.S1_at   | MmugDNA.27968.1 | 2.96  | 3.03  | 0.06 | 0.11 | -1.05 | 0.263971 | 0.634957 | 0.625857 | 0.785108 |
| MmugDNA.27969.1.S1_at   | MmugDNA.27969.1 | 4.25  | 3.57  | 0.52 | 0.34 | 1.6   | 0.079855 | 0.058247 | 0.442789 | 0.287992 |
| MmugDNA.27970.1.S1_at   | MmugDNA.27970.1 | 5.83  | 4.71  | 0.64 | 0.71 | 2.18  | 0.360328 | 0.191281 | 0.697871 | 0.466553 |
| MmugDNA.27972.1.S1_at   | MmugDNA.27972.1 | 10.34 | 10.3  | 0.28 | 0.03 | 1.03  | 0.944675 | 0.810622 | 0.980778 | 0.890812 |
| MmugDNA.27974.1.S1_at   | MmugDNA.27974.1 | 10.51 | 10.27 | 0.16 | 0.11 | 1.18  | 0.048823 | 0.162523 | 0.384485 | 0.438649 |
| MmugDNA.27974.1.S1_s_at | MmugDNA.27974.1 | 12.73 | 12.76 | 0.05 | 0.03 | -1.02 | 0.893719 | 0.992423 | 0.963505 | 0.995715 |
| MmugDNA.27975.1.S1_s_at | MmugDNA.27975.1 | 12.23 | 12.48 | 0.09 | 0.03 | -1.19 | 0.012504 | 0.000374 | 0.262623 | 0.037273 |
| MmugDNA.27976.1.S1_at   | MmugDNA.27976.1 | 9.63  | 9.07  | 0.45 | 0.1  | 1.47  | 0.101156 | 0.146024 | 0.471667 | 0.420022 |
| MmugDNA.27979.1.S1_at   | MmugDNA.27979.1 | 3.48  | 3.4   | 0.16 | 0.05 | 1.06  | 0.424334 | 0.27543  | 0.739562 | 0.539682 |
| MmugDNA.2798.1.S1_at    | MmugDNA.2798.1  | 9.11  | 8.33  | 0.65 | 0.07 | 1.72  | 0.223698 | 0.246011 | 0.592842 | 0.515719 |
| MmugDNA.27981.1.S1_at   | MmugDNA.27981.1 | 10.16 | 10.16 | 0.7  | 0.12 | 1     | 0.809407 | 0.803744 | 0.93104  | 0.887111 |
| MmugDNA.27982.1.S1_at   | MmugDNA.27982.1 | 5.08  | 5.17  | 0.56 | 0.38 | -1.07 | 0.506539 | 0.246538 | 0.785899 | 0.515917 |
| MmugDNA.27984.1.S1_at   | MmugDNA.27984.1 | 9.04  | 9.04  | 0.3  | 0.06 | -1    | 0.805937 | 0.270737 | 0.929563 | 0.53602  |
| MmugDNA.27985.1.S1_at   | MmugDNA.27985.1 | 4.35  | 4.23  | 0.21 | 0.09 | 1.08  | 0.283193 | 0.277481 | 0.641313 | 0.541411 |
| MmugDNA.27986.1.S1_at   | MmugDNA.27986.1 | 7.41  | 7.79  | 0.17 | 0.12 | -1.3  | 0.025615 | 0.001044 | 0.322382 | 0.051426 |
| MmugDNA.27988.1.S1_at   | MmugDNA.27988.1 | 7.25  | 6.63  | 0.18 | 0.61 | 1.53  | 0.082392 | 0.086225 | 0.447257 | 0.33863  |
| MmugDNA.27989.1.S1_at   | MmugDNA.27989.1 | 7.75  | 9.38  | 2.11 | 0.89 | -3.08 | 0.162882 | 0.110222 | 0.535867 | 0.374349 |



|                         |                 |       |       |      |      |       |          |          |          |          |
|-------------------------|-----------------|-------|-------|------|------|-------|----------|----------|----------|----------|
| MmugDNA.27991.1.S1_at   | MmugDNA.27991.1 | 4.46  | 4.64  | 0.11 | 0.22 | -1.13 | 0.478066 | 0.219257 | 0.769934 | 0.493026 |
| MmugDNA.27993.1.S1_at   | MmugDNA.27993.1 | 3.27  | 3.27  | 0.03 | 0.1  | -1.01 | 0.672322 | 0.662966 | 0.870879 | 0.802687 |
| MmugDNA.27994.1.S1_at   | MmugDNA.27994.1 | 3.5   | 3.58  | 0.13 | 0.02 | -1.05 | 0.207108 | 0.535124 | 0.578774 | 0.720807 |
| MmugDNA.27995.1.S1_at   | MmugDNA.27995.1 | 5.15  | 4.99  | 0.29 | 0.36 | 1.12  | 0.62907  | 0.376516 | 0.851386 | 0.614337 |
| MmugDNA.27996.1.S1_at   | MmugDNA.27996.1 | 8     | 7.78  | 0.11 | 0.1  | 1.17  | 0.122714 | 0.165795 | 0.496146 | 0.442107 |
| MmugDNA.27998.1.S1_at   | MmugDNA.27998.1 | 8.74  | 7.46  | 1.56 | 0.49 | 2.44  | 0.328904 | 0.232354 | 0.676084 | 0.504088 |
| MmugDNA.27999.1.S1_at   | MmugDNA.27999.1 | 5.73  | 5.72  | 0.08 | 0.04 | 1.01  | 0.8023   | 0.783824 | 0.927885 | 0.874823 |
| MmugDNA.28.1.S1_at      | MmugDNA.28.1    | 3.79  | 3.96  | 0.19 | 0.41 | -1.13 | 0.848573 | 0.388449 | 0.946803 | 0.622858 |
| MmugDNA.280.1.S1_at     | MmugDNA.280.1   | 4.22  | 4.05  | 0.21 | 0.48 | 1.13  | 0.611096 | 0.484681 | 0.842323 | 0.688615 |
| MmugDNA.2800.1.S1_at    | MmugDNA.2800.1  | 4.75  | 5.07  | 0.07 | 0.39 | -1.24 | 0.281231 | 0.466145 | 0.639849 | 0.676144 |
| MmugDNA.28000.1.S1_at   | MmugDNA.28000.1 | 4.56  | 4.42  | 0.1  | 0.09 | -1.11 | 0.268489 | 0.136417 | 0.628846 | 0.408839 |
| MmugDNA.28003.1.S1_at   | MmugDNA.28003.1 | 5.15  | 5.6   | 0.49 | 0.62 | -1.36 | 0.59784  | 0.503891 | 0.836527 | 0.701193 |
| MmugDNA.28004.1.S1_at   | MmugDNA.28004.1 | 4.23  | 3.96  | 0.21 | 0.09 | 1.21  | 0.105675 | 0.211235 | 0.477409 | 0.48553  |
| MmugDNA.28006.1.S1_at   | MmugDNA.28006.1 | 8.91  | 9.33  | 0.3  | 0.03 | -1.33 | 0.069225 | 0.015282 | 0.426664 | 0.156987 |
| MmugDNA.28007.1.S1_at   | MmugDNA.28007.1 | 6.68  | 6.28  | 1.65 | 0.38 | 1.32  | 0.764558 | 0.613027 | 0.911553 | 0.770364 |
| MmugDNA.28008.1.S1_at   | MmugDNA.28008.1 | 7.73  | 8.58  | 0.39 | 0.29 | -1.8  | 0.017983 | 0.019628 | 0.294714 | 0.176052 |
| MmugDNA.28009.1.S1_s_at | MmugDNA.28009.1 | 6.16  | 7.08  | 0.94 | 0.11 | -1.9  | 0.155599 | 0.184353 | 0.528901 | 0.460458 |
| MmugDNA.28010.1.S1_at   | MmugDNA.28010.1 | 8.18  | 7.32  | 0.32 | 0.43 | 1.82  | 0.090758 | 0.001129 | 0.458873 | 0.053019 |
| MmugDNA.28011.1.S1_at   | MmugDNA.28011.1 | 4.98  | 5.08  | 0.02 | 0.15 | -1.07 | 0.287884 | 0.192076 | 0.644955 | 0.467522 |
| MmugDNA.28012.1.S1_at   | MmugDNA.28012.1 | 6.63  | 5.21  | 1.1  | 0.64 | 2.68  | 0.590351 | 0.418603 | 0.832841 | 0.642999 |
| MmugDNA.28013.1.S1_s_at | MmugDNA.28013.1 | 11.09 | 11.02 | 0.23 | 0.06 | 1.05  | 0.656316 | 0.156359 | 0.863538 | 0.431641 |
| MmugDNA.28014.1.S1_at   | MmugDNA.28014.1 | 11.24 | 11.26 | 0.7  | 0.12 | -1.02 | 0.913561 | 0.321491 | 0.970603 | 0.573226 |
| MmugDNA.28016.1.S1_at   | MmugDNA.28016.1 | 4.18  | 3.79  | 0.06 | 0.1  | 1.31  | 0.008981 | 0.079708 | 0.239778 | 0.326981 |
| MmugDNA.28017.1.S1_at   | MmugDNA.28017.1 | 3.15  | 3.02  | 0.09 | 0.07 | 1.09  | 0.113952 | 0.447213 | 0.487339 | 0.663391 |
| MmugDNA.28018.1.S1_at   | MmugDNA.28018.1 | 4.4   | 4.69  | 0.6  | 0.79 | -1.22 | 0.700655 | 0.401069 | 0.883597 | 0.630671 |
| MmugDNA.28019.1.S1_at   | MmugDNA.28019.1 | 4.4   | 4.43  | 0.06 | 0.05 | -1.02 | 0.378723 | 0.716752 | 0.708438 | 0.835987 |
| MmugDNA.2802.1.S1_at    | MmugDNA.2802.1  | 7.4   | 7.4   | 0.04 | 0.06 | -1    | 0.521314 | 0.91509  | 0.79444  | 0.952307 |
| MmugDNA.28021.1.S1_at   | MmugDNA.28021.1 | 5.82  | 5.74  | 0.16 | 0.19 | 1.06  | 0.494608 | 0.096197 | 0.779478 | 0.353519 |
| MmugDNA.28022.1.S1_at   | MmugDNA.28022.1 | 3.47  | 3.53  | 0.12 | 0.15 | -1.04 | 0.691038 | 0.792694 | 0.879715 | 0.880287 |
| MmugDNA.28024.1.S1_at   | MmugDNA.28024.1 | 7.64  | 7.84  | 0.16 | 0.21 | -1.15 | 0.505335 | 0.116485 | 0.785264 | 0.383671 |
| MmugDNA.28025.1.S1_at   | MmugDNA.28025.1 | 5.47  | 5.88  | 0.42 | 0.1  | -1.32 | 0.229808 | 0.012895 | 0.598481 | 0.14622  |
| MmugDNA.28026.1.S1_at   | MmugDNA.28026.1 | 7.37  | 7.51  | 0.52 | 0.22 | -1.1  | 0.693485 | 0.913268 | 0.880681 | 0.951159 |
| MmugDNA.28028.1.S1_at   | MmugDNA.28028.1 | 7.74  | 7.85  | 0.58 | 0.24 | -1.07 | 0.45971  | 0.423796 | 0.759763 | 0.646542 |
| MmugDNA.22897.1.S1_s_at | MmugDNA.22897.1 | 14.12 | 13.73 | 0.05 | 0.1  | 1.31  | 0.003764 | 0.003673 | 0.197739 | 0.086568 |
| MmugDNA.2803.1.S1_at    | MmugDNA.2803.1  | 3.1   | 3.04  | 0.06 | 0.07 | 1.05  | 0.678314 | 0.807771 | 0.873961 | 0.889345 |
| MmugDNA.28030.1.S1_at   | MmugDNA.28030.1 | 7.02  | 6.88  | 0.22 | 0.11 | 1.1   | 0.180583 | 0.103535 | 0.553774 | 0.364346 |
| MmugDNA.28031.1.S1_at   | MmugDNA.28031.1 | 9.69  | 9.89  | 0.4  | 0.09 | -1.15 | 0.42772  | 0.673005 | 0.741365 | 0.808913 |
| MmugDNA.28032.1.S1_at   | MmugDNA.28032.1 | 4.06  | 3.79  | 0.31 | 0.08 | 1.21  | 0.056041 | 0.045217 | 0.399441 | 0.257005 |
| MmugDNA.28035.1.S1_at   | MmugDNA.28035.1 | 4.26  | 4.24  | 0.09 | 0.21 | 1.01  | 0.852912 | 0.976396 | 0.94811  | 0.98717  |
| MmugDNA.28039.1.S1_at   | MmugDNA.28039.1 | 5.86  | 6.26  | 0.77 | 0.56 | -1.32 | 0.639444 | 0.871412 | 0.85626  | 0.926844 |
| MmugDNA.28040.1.S1_at   | MmugDNA.28040.1 | 7.25  | 7.11  | 0.09 | 0.12 | 1.1   | 0.114513 | 0.22853  | 0.487606 | 0.500752 |
| MmugDNA.28041.1.S1_at   | MmugDNA.28041.1 | 3.52  | 3.43  | 0.1  | 0.35 | 1.07  | 0.795882 | 0.886438 | 0.924994 | 0.935397 |
| MmugDNA.28043.1.S1_at   | MmugDNA.28043.1 | 5.87  | 5.63  | 0.05 | 0.15 | 1.18  | 0.241388 | 0.60667  | 0.607596 | 0.765925 |

|                         |                 |       |       |      |      |       |          |          |          |          |
|-------------------------|-----------------|-------|-------|------|------|-------|----------|----------|----------|----------|
| MmugDNA.28044.1.S1_at   | MmugDNA.28044.1 | 6.12  | 6.06  | 0.2  | 0.22 | 1.04  | 0.753451 | 0.167582 | 0.907059 | 0.443998 |
| MmugDNA.28045.1.S1_s_at | MmugDNA.28045.1 | 11.44 | 11.59 | 0.26 | 0.09 | -1.11 | 0.449603 | 0.057108 | 0.754534 | 0.284945 |
| MmugDNA.28046.1.S1_at   | MmugDNA.28046.1 | 4.7   | 5.02  | 0.28 | 0.08 | -1.25 | 0.110328 | 0.065537 | 0.483363 | 0.301415 |
| MmugDNA.28047.1.S1_at   | MmugDNA.28047.1 | 5.3   | 5.15  | 0.04 | 0.13 | 1.11  | 0.207645 | 0.369659 | 0.579269 | 0.608957 |
| MmugDNA.28048.1.S1_at   | MmugDNA.28048.1 | 7.92  | 7.01  | 0.5  | 0.12 | 1.88  | 0.043606 | 0.073706 | 0.372234 | 0.317051 |
| MmugDNA.2805.1.S1_at    | MmugDNA.2805.1  | 5.4   | 5.4   | 0.09 | 0.16 | -1    | 0.868516 | 0.656584 | 0.953968 | 0.799169 |
| MmugDNA.28050.1.S1_at   | MmugDNA.28050.1 | 6.34  | 6.53  | 0.34 | 0.13 | -1.14 | 0.357593 | 0.856286 | 0.695902 | 0.917926 |
| MmugDNA.28051.1.S1_at   | MmugDNA.28051.1 | 5.52  | 5.79  | 0.12 | 0.18 | -1.2  | 0.026116 | 0.09181  | 0.323344 | 0.346977 |
| MmugDNA.28052.1.S1_at   | MmugDNA.28052.1 | 4.59  | 5.2   | 1.14 | 0.37 | -1.53 | 0.567983 | 0.830714 | 0.820586 | 0.902872 |
| MmugDNA.28054.1.S1_at   | MmugDNA.28054.1 | 4.08  | 4.93  | 0.72 | 0.3  | -1.8  | 0.260055 | 0.349807 | 0.622946 | 0.593595 |
| MmugDNA.28055.1.S1_at   | MmugDNA.28055.1 | 3.76  | 3.62  | 0.19 | 0.15 | 1.1   | 0.793733 | 0.586387 | 0.924414 | 0.753454 |
| MmugDNA.28056.1.S1_at   | MmugDNA.28056.1 | 7.18  | 6.98  | 0.57 | 0.07 | 1.14  | 0.605098 | 0.811696 | 0.839779 | 0.891328 |
| MmugDNA.28058.1.S1_at   | MmugDNA.28058.1 | 4.22  | 4.36  | 0.12 | 0.11 | -1.1  | 0.204611 | 0.438146 | 0.576064 | 0.657187 |
| MmugDNA.28059.1.S1_at   | MmugDNA.28059.1 | 7.08  | 7.11  | 0.09 | 0.09 | -1.02 | 0.822192 | 0.576919 | 0.935933 | 0.747521 |
| MmugDNA.28061.1.S1_at   | MmugDNA.28061.1 | 6.25  | 6.24  | 0.1  | 0    | 1     | 0.932022 | 0.962561 | 0.977118 | 0.978987 |
| MmugDNA.28062.1.S1_s_at | MmugDNA.28062.1 | 6.2   | 5.89  | 0.14 | 0.11 | 1.24  | 0.040956 | 0.03034  | 0.365546 | 0.216116 |
| MmugDNA.28063.1.S1_at   | MmugDNA.28063.1 | 7.06  | 6.96  | 0.12 | 0.09 | 1.07  | 0.081011 | 0.056523 | 0.445056 | 0.283744 |
| MmugDNA.28064.1.S1_at   | MmugDNA.28064.1 | 9.16  | 8.17  | 0.48 | 0.48 | 1.99  | 0.037156 | 0.029118 | 0.356778 | 0.212733 |
| MmugDNA.28065.1.S1_at   | MmugDNA.28065.1 | 5.44  | 5.5   | 0.06 | 0.27 | -1.04 | 0.243781 | 0.828138 | 0.609712 | 0.901214 |
| MmugDNA.28066.1.S1_at   | MmugDNA.28066.1 | 7.19  | 7.45  | 0.23 | 0.12 | -1.2  | 0.096661 | 0.22676  | 0.465288 | 0.499176 |
| MmugDNA.28068.1.S1_at   | MmugDNA.28068.1 | 3.96  | 3.86  | 0.25 | 0.15 | 1.07  | 0.377552 | 0.536325 | 0.707557 | 0.721648 |
| MmugDNA.28069.1.S1_at   | MmugDNA.28069.1 | 6.08  | 6.19  | 0.1  | 0.03 | -1.07 | 0.158093 | 0.284714 | 0.531053 | 0.546925 |
| MmugDNA.28070.1.S1_at   | MmugDNA.28070.1 | 8.52  | 8.38  | 0.19 | 0.06 | 1.1   | 0.541463 | 0.69866  | 0.805165 | 0.824932 |
| MmugDNA.28071.1.S1_at   | MmugDNA.28071.1 | 10.44 | 10.59 | 0.27 | 0.24 | -1.12 | 0.541602 | 0.072921 | 0.805192 | 0.315955 |
| MmugDNA.28072.1.S1_at   | MmugDNA.28072.1 | 12.68 | 12.83 | 1.71 | 0.2  | -1.11 | 0.601658 | 0.055692 | 0.838496 | 0.281818 |
| MmugDNA.28074.1.S1_at   | MmugDNA.28074.1 | 9.15  | 10    | 0.61 | 0.33 | -1.81 | 0.279364 | 0.279209 | 0.63831  | 0.54288  |
| MmugDNA.28075.1.S1_at   | MmugDNA.28075.1 | 6.56  | 6.38  | 0.12 | 0.13 | 1.13  | 0.150789 | 0.138347 | 0.524367 | 0.411244 |
| MmugDNA.28077.1.S1_at   | MmugDNA.28077.1 | 10.72 | 11.27 | 0.15 | 0.07 | -1.47 | 0.006552 | 0.001843 | 0.219791 | 0.064452 |
| MmugDNA.28078.1.S1_at   | MmugDNA.28078.1 | 4.79  | 4.7   | 0.16 | 0.06 | 1.07  | 0.278066 | 0.487554 | 0.637354 | 0.690562 |
| MmugDNA.2808.1.S1_at    | MmugDNA.2808.1  | 4.21  | 4.06  | 0.11 | 0.08 | 1.11  | 0.238212 | 0.102145 | 0.605262 | 0.362212 |
| MmugDNA.28080.1.S1_at   | MmugDNA.28080.1 | 6.26  | 6.23  | 0.15 | 0.04 | 1.02  | 0.784761 | 0.918905 | 0.920949 | 0.954473 |
| MmugDNA.28081.1.S1_at   | MmugDNA.28081.1 | 4.52  | 4.3   | 0.13 | 0.12 | 1.16  | 0.241167 | 0.170255 | 0.607368 | 0.446987 |
| MmugDNA.28082.1.S1_at   | MmugDNA.28082.1 | 5.69  | 5.57  | 0.25 | 0.23 | 1.09  | 0.51293  | 0.479676 | 0.789566 | 0.685353 |
| MmugDNA.28083.1.S1_at   | MmugDNA.28083.1 | 3.51  | 3.03  | 0.26 | 0.15 | 1.39  | 0.125909 | 0.309008 | 0.49972  | 0.564721 |
| MmugDNA.28084.1.S1_at   | MmugDNA.28084.1 | 9.93  | 10.05 | 0.14 | 0.07 | -1.09 | 0.414843 | 0.418868 | 0.733393 | 0.643141 |
| MmugDNA.28085.1.S1_at   | MmugDNA.28085.1 | 5.22  | 5.15  | 0.16 | 0.09 | 1.05  | 0.401147 | 0.174872 | 0.724131 | 0.45155  |
| MmugDNA.28087.1.S1_at   | MmugDNA.28087.1 | 4.42  | 4.45  | 0.16 | 0.3  | -1.02 | 0.348958 | 0.663848 | 0.690079 | 0.803202 |
| MmugDNA.28088.1.S1_at   | MmugDNA.28088.1 | 8.83  | 8.77  | 0.37 | 0.27 | 1.04  | 0.879694 | 0.461115 | 0.958294 | 0.672855 |
| MmugDNA.28089.1.S1_s_at | MmugDNA.28089.1 | 9.08  | 8.82  | 0.23 | 0.23 | 1.2   | 0.318231 | 0.535316 | 0.667935 | 0.720887 |
| MmugDNA.2809.1.S1_at    | MmugDNA.2809.1  | 5.93  | 5.7   | 0.6  | 0.06 | 1.17  | 0.438164 | 0.450149 | 0.747231 | 0.665505 |
| MmugDNA.28090.1.S1_at   | MmugDNA.28090.1 | 5.32  | 5.32  | 0.03 | 0.06 | 1     | 0.755941 | 0.967891 | 0.90805  | 0.982235 |
| MmugDNA.28091.1.S1_at   | MmugDNA.28091.1 | 4.75  | 4.63  | 0.19 | 0.18 | 1.09  | 0.791589 | 0.95189  | 0.923462 | 0.972702 |
| MmugDNA.28092.1.S1_at   | MmugDNA.28092.1 | 4.75  | 4.93  | 0.37 | 0.19 | -1.13 | 0.773402 | 0.046724 | 0.915791 | 0.260831 |

|                         |                 |       |       |      |      |       |          |          |          |          |
|-------------------------|-----------------|-------|-------|------|------|-------|----------|----------|----------|----------|
| MmugDNA.28093.1.S1_at   | MmugDNA.28093.1 | 4.42  | 4.5   | 0.05 | 0.19 | -1.05 | 0.938119 | 0.511711 | 0.979247 | 0.705797 |
| MmugDNA.28094.1.S1_at   | MmugDNA.28094.1 | 4.55  | 4.51  | 0.21 | 0.25 | 1.03  | 0.912006 | 0.188656 | 0.970255 | 0.464569 |
| MmugDNA.28098.1.S1_at   | MmugDNA.28098.1 | 7.56  | 7.34  | 0.24 | 0.08 | 1.16  | 0.289848 | 0.044063 | 0.646474 | 0.254195 |
| MmugDNA.28099.1.S1_at   | MmugDNA.28099.1 | 4.56  | 4.64  | 0.05 | 0.23 | -1.06 | 0.252739 | 0.009653 | 0.617744 | 0.129267 |
| MmugDNA.281.1.S1_at     | MmugDNA.281.1   | 3.06  | 2.99  | 0.03 | 0.02 | 1.05  | 0.022039 | 0.328207 | 0.309781 | 0.577947 |
| MmugDNA.2810.1.S1_at    | MmugDNA.2810.1  | 3.56  | 3.95  | 0.35 | 0.31 | -1.31 | 0.181353 | 0.318247 | 0.554526 | 0.571122 |
| MmugDNA.28100.1.S1_at   | MmugDNA.28100.1 | 3.82  | 3.68  | 0.09 | 0.1  | 1.1   | 0.097759 | 0.25248  | 0.466724 | 0.521077 |
| MmugDNA.28102.1.S1_at   | MmugDNA.28102.1 | 11.68 | 11.91 | 0.77 | 0.17 | -1.17 | 0.751325 | 0.019988 | 0.905926 | 0.177571 |
| MmugDNA.28103.1.S1_at   | MmugDNA.28103.1 | 6.32  | 6.36  | 0.35 | 0.17 | -1.03 | 0.79009  | 0.075611 | 0.922759 | 0.320031 |
| MmugDNA.28104.1.S1_at   | MmugDNA.28104.1 | 3.67  | 3.76  | 0.14 | 0.23 | -1.07 | 0.564924 | 0.331375 | 0.819077 | 0.580076 |
| MmugDNA.28105.1.S1_at   | MmugDNA.28105.1 | 6.72  | 6.54  | 0.57 | 0.16 | -1.14 | 0.701676 | 0.171906 | 0.883974 | 0.448352 |
| MmugDNA.28106.1.S1_at   | MmugDNA.28106.1 | 6.25  | 6.13  | 0.98 | 0.22 | 1.09  | 0.954083 | 0.668609 | 0.984705 | 0.806109 |
| MmugDNA.28107.1.S1_s_at | MmugDNA.28107.1 | 6.22  | 6.21  | 0.11 | 0.01 | 1.01  | 0.696798 | 0.761323 | 0.882175 | 0.86133  |
| MmugDNA.28108.1.S1_at   | MmugDNA.28108.1 | 6.2   | 6.67  | 1    | 0.13 | -1.38 | 0.58184  | 0.384161 | 0.827791 | 0.61993  |
| MmugDNA.2811.1.S1_at    | MmugDNA.2811.1  | 3.95  | 3.87  | 0.27 | 0.2  | 1.05  | 0.523263 | 0.722947 | 0.795531 | 0.839489 |
| MmugDNA.28110.1.S1_at   | MmugDNA.28110.1 | 7.07  | 6.95  | 0.54 | 0.21 | 1.08  | 0.75652  | 0.939612 | 0.908278 | 0.965668 |
| MmugDNA.28111.1.S1_at   | MmugDNA.28111.1 | 8.66  | 7.8   | 2.29 | 0.26 | 1.81  | 0.817985 | 0.156061 | 0.934212 | 0.431494 |
| MmugDNA.28111.1.S1_x_at | MmugDNA.28111.1 | 8.16  | 7.19  | 2.15 | 0.25 | 1.96  | 0.774688 | 0.244832 | 0.91642  | 0.514655 |
| MmugDNA.28112.1.S1_at   | MmugDNA.28112.1 | 4.53  | 4.61  | 0.16 | 0.09 | -1.05 | 0.358037 | 0.681053 | 0.695993 | 0.813776 |
| MmugDNA.28114.1.S1_at   | MmugDNA.28114.1 | 3.2   | 3.01  | 0.25 | 0.23 | 1.14  | 0.487003 | 0.591927 | 0.774859 | 0.757386 |
| MmugDNA.28115.1.S1_at   | MmugDNA.28115.1 | 4.89  | 4.92  | 0.43 | 0.11 | -1.02 | 0.80875  | 0.924801 | 0.930843 | 0.957467 |
| MmugDNA.28116.1.S1_x_at | MmugDNA.28116.1 | 10.28 | 10.43 | 0.17 | 0.12 | -1.11 | 0.666386 | 0.313576 | 0.868243 | 0.567977 |
| MmugDNA.28119.1.S1_at   | MmugDNA.28119.1 | 11.6  | 12.07 | 1.09 | 0.13 | -1.38 | 0.465967 | 0.318503 | 0.763311 | 0.571239 |
| MmugDNA.2812.1.S1_at    | MmugDNA.2812.1  | 3.52  | 3.39  | 0.12 | 0.1  | 1.09  | 0.253669 | 0.472113 | 0.618323 | 0.679861 |
| MmugDNA.28120.1.S1_at   | MmugDNA.28120.1 | 5.79  | 6.13  | 0.37 | 0.22 | -1.26 | 0.148464 | 0.071008 | 0.522567 | 0.312637 |
| MmugDNA.28122.1.S1_at   | MmugDNA.28122.1 | 5.08  | 5.06  | 0.15 | 0    | 1.01  | 0.493749 | 0.765765 | 0.77903  | 0.863914 |
| MmugDNA.28123.1.S1_at   | MmugDNA.28123.1 | 5.73  | 5.52  | 0.33 | 0.16 | 1.16  | 0.369185 | 0.880163 | 0.704181 | 0.931547 |
| MmugDNA.28124.1.S1_at   | MmugDNA.28124.1 | 10.24 | 10.29 | 0.34 | 0.15 | -1.04 | 0.666011 | 0.179166 | 0.868171 | 0.455496 |
| MmugDNA.28125.1.S1_at   | MmugDNA.28125.1 | 4.18  | 4.72  | 0.53 | 0.17 | -1.46 | 0.677547 | 0.883803 | 0.873568 | 0.933691 |
| MmugDNA.28126.1.S1_at   | MmugDNA.28126.1 | 8.71  | 8.2   | 0.16 | 0.15 | 1.42  | 0.016964 | 0.015508 | 0.288969 | 0.158052 |
| MmugDNA.28127.1.S1_at   | MmugDNA.28127.1 | 4.8   | 4.89  | 0.15 | 0.11 | -1.06 | 0.582759 | 0.326658 | 0.828555 | 0.576683 |
| MmugDNA.28129.1.S1_at   | MmugDNA.28129.1 | 5.75  | 5.75  | 0.48 | 0.29 | 1     | 0.558228 | 0.710125 | 0.815182 | 0.831904 |
| MmugDNA.2813.1.S1_at    | MmugDNA.2813.1  | 7.81  | 7.68  | 0.07 | 0.05 | 1.1   | 0.023929 | 0.007072 | 0.317529 | 0.113284 |
| MmugDNA.28130.1.S1_s_at | MmugDNA.28130.1 | 10.39 | 10.36 | 0.07 | 0.03 | 1.02  | 0.187622 | 0.092899 | 0.559902 | 0.349024 |
| MmugDNA.28131.1.S1_at   | MmugDNA.28131.1 | 8.22  | 7.99  | 0.23 | 0.05 | 1.17  | 0.360086 | 0.096939 | 0.697741 | 0.354379 |
| MmugDNA.28132.1.S1_x_at | MmugDNA.28132.1 | 6.74  | 6.67  | 0.4  | 0.35 | 1.05  | 0.967913 | 0.178226 | 0.989418 | 0.454572 |
| MmugDNA.28133.1.S1_at   | MmugDNA.28133.1 | 10.84 | 10.78 | 0.07 | 0.09 | 1.04  | 0.080577 | 0.006031 | 0.444462 | 0.106089 |
| MmugDNA.28134.1.S1_at   | MmugDNA.28134.1 | 5.67  | 5.67  | 0.11 | 0.06 | 1     | 0.249929 | 0.810561 | 0.615366 | 0.890812 |
| MmugDNA.28135.1.S1_at   | MmugDNA.28135.1 | 6.01  | 6.01  | 0.22 | 0.15 | -1    | 0.520269 | 0.507945 | 0.793607 | 0.703358 |
| MmugDNA.28136.1.S1_at   | MmugDNA.28136.1 | 6.38  | 6.36  | 0.16 | 0.07 | 1.02  | 0.510323 | 0.085966 | 0.788145 | 0.338116 |
| MmugDNA.28138.1.S1_at   | MmugDNA.28138.1 | 4.53  | 4.43  | 0.08 | 0.08 | 1.07  | 0.082779 | 0.541214 | 0.448006 | 0.724781 |
| MmugDNA.28139.1.S1_at   | MmugDNA.28139.1 | 4.22  | 4.15  | 0.22 | 0.03 | 1.05  | 0.705744 | 0.361618 | 0.885355 | 0.602374 |
| MmugDNA.2814.1.S1_at    | MmugDNA.2814.1  | 5.15  | 4.43  | 0.45 | 0.44 | 1.64  | 0.265294 | 0.12497  | 0.626397 | 0.395386 |

|                         |                 |       |       |      |      |       |          |          |          |          |
|-------------------------|-----------------|-------|-------|------|------|-------|----------|----------|----------|----------|
| MmugDNA.28140.1.S1_at   | MmugDNA.28140.1 | 6.12  | 6.01  | 0.35 | 0.23 | 1.08  | 0.741896 | 0.801937 | 0.901596 | 0.885989 |
| MmugDNA.28141.1.S1_at   | MmugDNA.28141.1 | 8.61  | 7.46  | 0.15 | 0.34 | 2.23  | 0.007818 | 0.015494 | 0.230997 | 0.158044 |
| MmugDNA.28142.1.S1_at   | MmugDNA.28142.1 | 4.46  | 4.59  | 0.22 | 0.1  | -1.09 | 0.381263 | 0.208751 | 0.709924 | 0.482608 |
| MmugDNA.28143.1.S1_at   | MmugDNA.28143.1 | 4.64  | 4.57  | 0.07 | 0.1  | 1.05  | 0.401485 | 0.455255 | 0.724554 | 0.669198 |
| MmugDNA.28144.1.S1_at   | MmugDNA.28144.1 | 5.82  | 5.96  | 0.17 | 0.14 | -1.1  | 0.627724 | 0.381471 | 0.850686 | 0.617691 |
| MmugDNA.28145.1.S1_s_at | MmugDNA.28145.1 | 8.58  | 9.36  | 0.41 | 0.38 | -1.72 | 0.048763 | 0.070122 | 0.384242 | 0.311029 |
| MmugDNA.28146.1.S1_at   | MmugDNA.28146.1 | 7.27  | 7.01  | 0.06 | 0.15 | 1.19  | 0.144407 | 0.303384 | 0.51982  | 0.560842 |
| MmugDNA.28148.1.S1_at   | MmugDNA.28148.1 | 3.59  | 4.04  | 0.23 | 0.2  | -1.37 | 0.085735 | 0.190121 | 0.452943 | 0.465774 |
| MmugDNA.28149.1.S1_at   | MmugDNA.28149.1 | 9.53  | 10.28 | 0.32 | 0.16 | -1.68 | 0.022002 | 0.027381 | 0.309781 | 0.206695 |
| MmugDNA.2815.1.S1_at    | MmugDNA.2815.1  | 5.01  | 5.04  | 0.09 | 0.03 | -1.03 | 0.683303 | 0.877387 | 0.876089 | 0.930136 |
| MmugDNA.28150.1.S1_at   | MmugDNA.28150.1 | 3.28  | 3.53  | 0.14 | 0.08 | -1.19 | 0.127534 | 0.392545 | 0.501716 | 0.625813 |
| MmugDNA.28151.1.S1_at   | MmugDNA.28151.1 | 4.01  | 3.91  | 0.04 | 0.08 | 1.07  | 0.064953 | 0.47201  | 0.419361 | 0.679835 |
| MmugDNA.28152.1.S1_at   | MmugDNA.28152.1 | 6.22  | 6.21  | 0.02 | 0.07 | 1.01  | 0.473187 | 0.569965 | 0.767466 | 0.742751 |
| MmugDNA.28153.1.S1_at   | MmugDNA.28153.1 | 8.6   | 9.65  | 0.17 | 0.1  | -2.07 | 0.000661 | 0.000137 | 0.144737 | 0.02919  |
| MmugDNA.28154.1.S1_at   | MmugDNA.28154.1 | 10.8  | 10.55 | 0.25 | 0.01 | 1.19  | 0.104705 | 0.160417 | 0.475918 | 0.436528 |
| MmugDNA.28156.1.S1_at   | MmugDNA.28156.1 | 10.05 | 10.31 | 0.47 | 0.17 | -1.2  | 0.421617 | 0.528691 | 0.737563 | 0.716773 |
| MmugDNA.28157.1.S1_at   | MmugDNA.28157.1 | 5.48  | 5.07  | 0.13 | 0.1  | 1.33  | 0.025835 | 0.031249 | 0.32273  | 0.218668 |
| MmugDNA.28160.1.S1_at   | MmugDNA.28160.1 | 4.68  | 5.27  | 0.32 | 0.43 | -1.51 | 0.340867 | 0.158187 | 0.684799 | 0.433986 |
| MmugDNA.28161.1.S1_at   | MmugDNA.28161.1 | 8.08  | 9.02  | 0.38 | 0.12 | -1.91 | 0.011106 | 0.002891 | 0.252486 | 0.079107 |
| MmugDNA.28162.1.S1_at   | MmugDNA.28162.1 | 3.95  | 3.89  | 0.1  | 0.04 | 1.04  | 0.287482 | 0.092712 | 0.644595 | 0.348867 |
| MmugDNA.28163.1.S1_at   | MmugDNA.28163.1 | 5.04  | 4.97  | 0.14 | 0.28 | 1.05  | 0.400968 | 0.372334 | 0.724096 | 0.611229 |
| MmugDNA.28166.1.S1_at   | MmugDNA.28166.1 | 5.18  | 4.96  | 0.18 | 0.02 | 1.16  | 0.085338 | 0.366056 | 0.452611 | 0.605891 |
| MmugDNA.28168.1.S1_at   | MmugDNA.28168.1 | 2.61  | 2.74  | 0.14 | 0.06 | -1.1  | 0.444798 | 0.77555  | 0.751542 | 0.869402 |
| MmugDNA.2817.1.S1_at    | MmugDNA.2817.1  | 10.63 | 10.5  | 0.16 | 0.24 | 1.1   | 0.773913 | 0.676546 | 0.916036 | 0.810956 |
| MmugDNA.28170.1.S1_at   | MmugDNA.28170.1 | 8.88  | 9.24  | 0.16 | 0.12 | -1.28 | 0.020281 | 0.01374  | 0.303799 | 0.150134 |
| MmugDNA.28171.1.S1_at   | MmugDNA.28171.1 | 7.47  | 6.8   | 0.76 | 0.06 | 1.59  | 0.258627 | 0.104466 | 0.622286 | 0.365719 |
| MmugDNA.28172.1.S1_at   | MmugDNA.28172.1 | 3.54  | 3.42  | 0.1  | 0.25 | 1.09  | 0.489803 | 0.352052 | 0.776518 | 0.595426 |
| MmugDNA.28173.1.S1_at   | MmugDNA.28173.1 | 5.85  | 5.49  | 0.14 | 0.48 | 1.28  | 0.811416 | 0.46939  | 0.931761 | 0.678209 |
| MmugDNA.28174.1.S1_at   | MmugDNA.28174.1 | 4.64  | 4.33  | 0.16 | 0.1  | 1.24  | 0.113052 | 0.145537 | 0.486488 | 0.419442 |
| MmugDNA.28175.1.S1_at   | MmugDNA.28175.1 | 3.89  | 3.67  | 0.23 | 0.13 | 1.17  | 0.197939 | 0.102473 | 0.569101 | 0.362722 |
| MmugDNA.28176.1.S1_at   | MmugDNA.28176.1 | 4.1   | 4.02  | 0.12 | 0.03 | 1.05  | 0.645317 | 0.605958 | 0.858731 | 0.765547 |
| MmugDNA.28177.1.S1_s_at | MmugDNA.28177.1 | 10.48 | 10.67 | 0.07 | 0.05 | -1.14 | 0.022232 | 0.158414 | 0.310495 | 0.434313 |
| MmugDNA.28178.1.S1_at   | MmugDNA.28178.1 | 4.05  | 4.04  | 0.29 | 0.08 | 1     | 0.909593 | 0.109735 | 0.969434 | 0.373701 |
| MmugDNA.2818.1.S1_at    | MmugDNA.2818.1  | 7.01  | 6.93  | 0.11 | 0.04 | 1.06  | 0.141111 | 0.496627 | 0.516345 | 0.696119 |
| MmugDNA.28180.1.S1_at   | MmugDNA.28180.1 | 8.25  | 8.19  | 0.27 | 0.22 | 1.04  | 0.173693 | 0.215142 | 0.546749 | 0.488943 |
| MmugDNA.28181.1.S1_at   | MmugDNA.28181.1 | 8.35  | 10.66 | 0.4  | 0.01 | -4.97 | 0.000529 | 0.000065 | 0.143137 | 0.025805 |
| MmugDNA.28182.1.S1_at   | MmugDNA.28182.1 | 11.6  | 11.66 | 1.61 | 0.19 | -1.04 | 0.836208 | 0.687757 | 0.941202 | 0.817665 |
| MmugDNA.28183.1.S1_at   | MmugDNA.28183.1 | 3.43  | 3.46  | 0.21 | 0.01 | -1.02 | 0.525699 | 0.445942 | 0.796374 | 0.662623 |
| MmugDNA.28184.1.S1_at   | MmugDNA.28184.1 | 5.05  | 6.07  | 0.13 | 0.56 | -2.03 | 0.029871 | 0.169875 | 0.336071 | 0.446566 |
| MmugDNA.28185.1.S1_at   | MmugDNA.28185.1 | 8.53  | 8.94  | 0.81 | 0.06 | -1.33 | 0.472935 | 0.491507 | 0.767334 | 0.693004 |
| MmugDNA.28187.1.S1_at   | MmugDNA.28187.1 | 5.13  | 5.15  | 0.09 | 0.18 | -1.02 | 0.987712 | 0.69443  | 0.995831 | 0.822288 |
| MmugDNA.28188.1.S1_at   | MmugDNA.28188.1 | 7.7   | 7.81  | 0.61 | 0.13 | -1.08 | 0.434469 | 0.711326 | 0.745164 | 0.832597 |
| MmugDNA.28189.1.S1_at   | MmugDNA.28189.1 | 5.33  | 5.37  | 0.18 | 0.07 | -1.03 | 0.609574 | 0.14337  | 0.841773 | 0.417384 |

|                         |                 |       |       |      |      |       |          |          |          |          |
|-------------------------|-----------------|-------|-------|------|------|-------|----------|----------|----------|----------|
| MmugDNA.13537.1.S1_s_at | MmugDNA.13537.1 | 4.87  | 4.66  | 0.15 | 0.11 | 1.15  | 0.126936 | 0.535488 | 0.500834 | 0.721035 |
| MmugDNA.28193.1.S1_at   | MmugDNA.28193.1 | 5.17  | 5.18  | 0.16 | 0.15 | -1    | 0.89513  | 0.968511 | 0.964244 | 0.982645 |
| MmugDNA.28194.1.S1_at   | MmugDNA.28194.1 | 3.66  | 3.57  | 0.2  | 0.15 | 1.07  | 0.701394 | 0.088417 | 0.883866 | 0.341877 |
| MmugDNA.28195.1.S1_at   | MmugDNA.28195.1 | 10.13 | 10.02 | 0.46 | 0.02 | 1.08  | 0.281083 | 0.107906 | 0.639668 | 0.370945 |
| MmugDNA.28196.1.S1_at   | MmugDNA.28196.1 | 4.65  | 4.63  | 0.11 | 0.19 | 1.01  | 0.989767 | 0.212807 | 0.996193 | 0.486769 |
| MmugDNA.28197.1.S1_at   | MmugDNA.28197.1 | 9.3   | 9.58  | 2.27 | 0.34 | -1.21 | 0.742528 | 0.173697 | 0.901825 | 0.450043 |
| MmugDNA.28199.1.S1_at   | MmugDNA.28199.1 | 9.21  | 9.98  | 0.13 | 0.02 | -1.7  | 0.000716 | 0.000073 | 0.147936 | 0.026477 |
| MmugDNA.282.1.S1_at     | MmugDNA.282.1   | 3.64  | 3.72  | 0.33 | 0.03 | -1.06 | 0.980973 | 0.429522 | 0.993927 | 0.650957 |
| MmugDNA.28200.1.S1_at   | MmugDNA.28200.1 | 5.03  | 5.06  | 0.55 | 0.05 | -1.02 | 0.458767 | 0.83538  | 0.759072 | 0.905783 |
| MmugDNA.28201.1.S1_at   | MmugDNA.28201.1 | 11.73 | 11.42 | 0.3  | 0.08 | 1.24  | 0.068982 | 0.059179 | 0.426361 | 0.290208 |
| MmugDNA.28202.1.S1_at   | MmugDNA.28202.1 | 4.63  | 4.96  | 0.21 | 0.13 | -1.26 | 0.069656 | 0.440156 | 0.427522 | 0.658763 |
| MmugDNA.28203.1.S1_at   | MmugDNA.28203.1 | 5.45  | 5.34  | 0.05 | 0.36 | 1.08  | 0.762347 | 0.914059 | 0.910879 | 0.951684 |
| MmugDNA.28204.1.S1_at   | MmugDNA.28204.1 | 8.36  | 8.1   | 0.34 | 0.14 | 1.19  | 0.642965 | 0.740933 | 0.857999 | 0.850031 |
| MmugDNA.28205.1.S1_at   | MmugDNA.28205.1 | 11.03 | 10.96 | 0.32 | 0.13 | 1.05  | 0.531733 | 0.629532 | 0.799853 | 0.781923 |
| MmugDNA.28207.1.S1_at   | MmugDNA.28207.1 | 5.66  | 6.07  | 0.65 | 0.04 | -1.33 | 0.889731 | 0.399096 | 0.961988 | 0.62969  |
| MmugDNA.28208.1.S1_at   | MmugDNA.28208.1 | 3.27  | 3.21  | 0.04 | 0.12 | 1.04  | 0.245605 | 0.263413 | 0.611179 | 0.529715 |
| MmugDNA.28209.1.S1_at   | MmugDNA.28209.1 | 4.95  | 4.89  | 0.04 | 0.03 | 1.04  | 0.204474 | 0.078506 | 0.575907 | 0.325285 |
| MmugDNA.2821.1.S1_at    | MmugDNA.2821.1  | 3.71  | 3.53  | 0.12 | 0.12 | 1.13  | 0.125308 | 0.115126 | 0.499501 | 0.382007 |
| MmugDNA.28212.1.S1_at   | MmugDNA.28212.1 | 12.3  | 11.97 | 1.19 | 0.05 | 1.25  | 0.668796 | 0.506358 | 0.869159 | 0.702371 |
| MmugDNA.28213.1.S1_at   | MmugDNA.28213.1 | 9.51  | 9.66  | 0.13 | 0.26 | -1.11 | 0.389956 | 0.091091 | 0.716422 | 0.345932 |
| MmugDNA.28213.1.S1_s_at | MmugDNA.28213.1 | 7.78  | 7.73  | 0.16 | 0.18 | 1.03  | 0.997067 | 0.146459 | 0.998914 | 0.420523 |
| MmugDNA.28214.1.S1_at   | MmugDNA.28214.1 | 7.52  | 6.34  | 0.53 | 0.6  | 2.27  | 0.13552  | 0.016719 | 0.510014 | 0.163766 |
| MmugDNA.28215.1.S1_at   | MmugDNA.28215.1 | 4.76  | 4.77  | 0.06 | 0.07 | -1    | 0.589492 | 0.782665 | 0.832373 | 0.874202 |
| MmugDNA.28216.1.S1_at   | MmugDNA.28216.1 | 9.18  | 8.97  | 0.31 | 0.19 | 1.15  | 0.581163 | 0.77425  | 0.827417 | 0.868735 |
| MmugDNA.28217.1.S1_s_at | MmugDNA.28217.1 | 6.19  | 5.84  | 0.16 | 0.15 | 1.27  | 0.053511 | 0.047866 | 0.394865 | 0.263695 |
| MmugDNA.28218.1.S1_at   | MmugDNA.28218.1 | 5.9   | 5.94  | 0.44 | 0.08 | -1.03 | 0.581883 | 0.937588 | 0.827791 | 0.964687 |
| MmugDNA.28219.1.S1_at   | MmugDNA.28219.1 | 3.99  | 3.94  | 0.13 | 0.03 | 1.03  | 0.412296 | 0.648901 | 0.731945 | 0.794501 |
| MmugDNA.2822.1.S1_at    | MmugDNA.2822.1  | 9.01  | 7.91  | 1.39 | 0.15 | 2.15  | 0.729972 | 0.908566 | 0.895921 | 0.948227 |
| MmugDNA.28220.1.S1_at   | MmugDNA.28220.1 | 4.49  | 4.43  | 0.09 | 0.07 | 1.04  | 0.156605 | 0.197399 | 0.529647 | 0.472311 |
| MmugDNA.28221.1.S1_at   | MmugDNA.28221.1 | 9.25  | 9.57  | 1.02 | 0.04 | -1.25 | 0.794519 | 0.833963 | 0.924569 | 0.904859 |
| MmugDNA.28222.1.S1_at   | MmugDNA.28222.1 | 10.06 | 10.42 | 0.03 | 0.1  | -1.29 | 0.002226 | 0.044847 | 0.174757 | 0.256375 |
| MmugDNA.28223.1.S1_at   | MmugDNA.28223.1 | 2.69  | 2.71  | 0.12 | 0.11 | -1.01 | 0.86815  | 0.839877 | 0.953843 | 0.908703 |
| MmugDNA.28224.1.S1_at   | MmugDNA.28224.1 | 6.5   | 5.64  | 0.56 | 0.12 | 1.81  | 0.133855 | 0.040197 | 0.508124 | 0.245726 |
| MmugDNA.28225.1.S1_at   | MmugDNA.28225.1 | 10.74 | 10.94 | 0.16 | 0.23 | -1.15 | 0.898377 | 0.579674 | 0.965455 | 0.749254 |
| MmugDNA.28226.1.S1_at   | MmugDNA.28226.1 | 9.6   | 10.42 | 0.21 | 0.09 | -1.77 | 0.003975 | 0.00032  | 0.198571 | 0.035444 |
| MmugDNA.28227.1.S1_at   | MmugDNA.28227.1 | 6.09  | 6.45  | 0.55 | 0.13 | -1.29 | 0.946976 | 0.617228 | 0.981587 | 0.77329  |
| MmugDNA.28228.1.S1_at   | MmugDNA.28228.1 | 3.18  | 3.04  | 0.1  | 0.12 | 1.1   | 0.598998 | 0.84963  | 0.837238 | 0.914612 |
| MmugDNA.28229.1.S1_at   | MmugDNA.28229.1 | 3.15  | 2.93  | 0.2  | 0.04 | 1.17  | 0.272402 | 0.53757  | 0.632202 | 0.722606 |
| MmugDNA.2823.1.S1_at    | MmugDNA.2823.1  | 5.38  | 6.29  | 0.42 | 0.52 | -1.87 | 0.040481 | 0.160156 | 0.364533 | 0.436296 |
| MmugDNA.28231.1.S1_at   | MmugDNA.28231.1 | 3.56  | 3.68  | 0.05 | 0.12 | -1.08 | 0.149505 | 0.111168 | 0.523226 | 0.375798 |
| MmugDNA.28232.1.S1_at   | MmugDNA.28232.1 | 9.45  | 10.07 | 0.15 | 0.02 | -1.53 | 0.001729 | 0.002394 | 0.166176 | 0.072408 |
| MmugDNA.28233.1.S1_at   | MmugDNA.28233.1 | 2.79  | 2.58  | 0.09 | 0.02 | 1.16  | 0.037989 | 0.024171 | 0.358308 | 0.19464  |
| MmugDNA.28235.1.S1_s_at | MmugDNA.28235.1 | 12.27 | 12.49 | 0.1  | 0.05 | -1.16 | 0.037987 | 0.043523 | 0.358308 | 0.253227 |

|                         |                 |       |       |      |      |       |          |          |          |          |
|-------------------------|-----------------|-------|-------|------|------|-------|----------|----------|----------|----------|
| MmugDNA.28236.1.S1_at   | MmugDNA.28236.1 | 3.66  | 3.65  | 0.23 | 0.01 | 1.01  | 0.844757 | 0.717399 | 0.945495 | 0.836425 |
| MmugDNA.28237.1.S1_at   | MmugDNA.28237.1 | 9.13  | 9.15  | 0.07 | 0.12 | -1.01 | 0.555474 | 0.151714 | 0.813493 | 0.426383 |
| MmugDNA.28238.1.S1_at   | MmugDNA.28238.1 | 4.44  | 4.47  | 0.13 | 0.08 | -1.02 | 0.745589 | 0.835497 | 0.903074 | 0.905854 |
| MmugDNA.28239.1.S1_at   | MmugDNA.28239.1 | 4.83  | 4.76  | 0.05 | 0.15 | 1.05  | 0.313697 | 0.105101 | 0.664799 | 0.366755 |
| MmugDNA.2824.1.S1_at    | MmugDNA.2824.1  | 8.67  | 8.29  | 0.2  | 0.06 | 1.3   | 0.049778 | 0.024109 | 0.386252 | 0.1945   |
| MmugDNA.28240.1.S1_at   | MmugDNA.28240.1 | 5.39  | 5.14  | 0.19 | 0.15 | 1.19  | 0.073187 | 0.079725 | 0.434039 | 0.326982 |
| MmugDNA.28241.1.S1_at   | MmugDNA.28241.1 | 9.34  | 10.36 | 0.19 | 0.17 | -2.03 | 0.002146 | 0.004704 | 0.174757 | 0.09546  |
| MmugDNA.28242.1.S1_at   | MmugDNA.28242.1 | 3.78  | 3.62  | 0.26 | 0.05 | 1.12  | 0.331214 | 0.461831 | 0.677909 | 0.673361 |
| MmugDNA.28243.1.S1_at   | MmugDNA.28243.1 | 4.75  | 4.44  | 0.05 | 0.08 | 1.24  | 0.004057 | 0.024883 | 0.198571 | 0.197662 |
| MmugDNA.28245.1.S1_at   | MmugDNA.28245.1 | 6.61  | 6.49  | 0.05 | 0.06 | 1.09  | 0.029806 | 0.116997 | 0.335991 | 0.384404 |
| MmugDNA.28247.1.S1_at   | MmugDNA.28247.1 | 6.1   | 6.2   | 0.07 | 0.04 | -1.08 | 0.111865 | 0.073836 | 0.48497  | 0.317166 |
| MmugDNA.28248.1.S1_at   | MmugDNA.28248.1 | 11.63 | 11.83 | 0.13 | 0.02 | -1.15 | 0.078415 | 0.328881 | 0.441003 | 0.578452 |
| MmugDNA.28249.1.S1_at   | MmugDNA.28249.1 | 3.48  | 3.6   | 1.08 | 0.32 | -1.09 | 0.501263 | 0.616796 | 0.783112 | 0.772969 |
| MmugDNA.2825.1.S1_at    | MmugDNA.2825.1  | 3.45  | 3.69  | 0.05 | 0.06 | -1.18 | 0.011882 | 0.006944 | 0.257858 | 0.112568 |
| MmugDNA.28251.1.S1_at   | MmugDNA.28251.1 | 9.92  | 9.56  | 0.66 | 0.05 | 1.28  | 0.507926 | 0.210944 | 0.786553 | 0.484934 |
| MmugDNA.28253.1.S1_at   | MmugDNA.28253.1 | 4.23  | 3.79  | 1.21 | 0.31 | 1.35  | 0.440656 | 0.604279 | 0.748563 | 0.764558 |
| MmugDNA.28254.1.S1_x_at | MmugDNA.28254.1 | 6.53  | 6.33  | 0.27 | 0.17 | 1.15  | 0.539221 | 0.601918 | 0.803663 | 0.763122 |
| MmugDNA.28255.1.S1_at   | MmugDNA.28255.1 | 8.47  | 8.84  | 0.5  | 0.12 | -1.3  | 0.201499 | 0.081605 | 0.573163 | 0.329818 |
| MmugDNA.28256.1.S1_at   | MmugDNA.28256.1 | 4.46  | 4.26  | 0.67 | 0.11 | 1.15  | 0.260237 | 0.42675  | 0.623127 | 0.648857 |
| MmugDNA.28257.1.S1_at   | MmugDNA.28257.1 | 3.22  | 3.21  | 0.03 | 0.03 | 1     | 0.815005 | 0.112801 | 0.933137 | 0.37844  |
| MmugDNA.28258.1.S1_at   | MmugDNA.28258.1 | 6.24  | 6.31  | 0.13 | 0.05 | -1.05 | 0.385799 | 0.400168 | 0.713049 | 0.630158 |
| MmugDNA.28259.1.S1_at   | MmugDNA.28259.1 | 8.47  | 8.62  | 0.59 | 0.12 | -1.11 | 0.625188 | 0.901471 | 0.849236 | 0.943931 |
| MmugDNA.2826.1.S1_at    | MmugDNA.2826.1  | 8.87  | 8.49  | 0.32 | 0.15 | 1.31  | 0.091248 | 0.208168 | 0.459035 | 0.482086 |
| MmugDNA.28261.1.S1_at   | MmugDNA.28261.1 | 4.67  | 4.57  | 0.17 | 0.08 | 1.07  | 0.246727 | 0.321596 | 0.612243 | 0.573303 |
| MmugDNA.28262.1.S1_at   | MmugDNA.28262.1 | 4.05  | 4.18  | 0.1  | 0.17 | -1.09 | 0.899751 | 0.969591 | 0.965967 | 0.983356 |
| MmugDNA.28263.1.S1_at   | MmugDNA.28263.1 | 6.06  | 5.81  | 0.26 | 0.16 | 1.19  | 0.397452 | 0.797695 | 0.721771 | 0.883459 |
| MmugDNA.28264.1.S1_at   | MmugDNA.28264.1 | 3.86  | 3.84  | 0.21 | 0.13 | 1.02  | 0.853771 | 0.264149 | 0.948346 | 0.530214 |
| MmugDNA.28265.1.S1_s_at | MmugDNA.28265.1 | 6.74  | 6.1   | 0.26 | 0.35 | 1.56  | 0.028229 | 0.004557 | 0.33163  | 0.094355 |
| MmugDNA.28266.1.S1_at   | MmugDNA.28266.1 | 5.9   | 5.96  | 0.15 | 0.02 | -1.05 | 0.429703 | 0.522926 | 0.742304 | 0.713429 |
| MmugDNA.28267.1.S1_at   | MmugDNA.28267.1 | 7.56  | 6.55  | 0.32 | 0.16 | 2.01  | 0.016942 | 0.035199 | 0.288969 | 0.231787 |
| MmugDNA.28268.1.S1_at   | MmugDNA.28268.1 | 5.07  | 4.9   | 0.11 | 0.17 | 1.12  | 0.050637 | 0.061003 | 0.387563 | 0.293811 |
| MmugDNA.28269.1.S1_at   | MmugDNA.28269.1 | 4.31  | 4.13  | 0.23 | 0.16 | 1.13  | 0.602025 | 0.643534 | 0.838675 | 0.790981 |
| MmugDNA.2827.1.S1_at    | MmugDNA.2827.1  | 9.95  | 10.39 | 1.63 | 0.12 | -1.36 | 0.548661 | 0.347505 | 0.809852 | 0.592019 |
| MmugDNA.28270.1.S1_at   | MmugDNA.28270.1 | 3.2   | 3.29  | 0.06 | 0.17 | -1.06 | 0.459459 | 0.771965 | 0.759538 | 0.867436 |
| MmugDNA.28271.1.S1_at   | MmugDNA.28271.1 | 5.1   | 5.25  | 0.45 | 0.1  | -1.11 | 0.676247 | 0.231221 | 0.873043 | 0.5029   |
| MmugDNA.28272.1.S1_at   | MmugDNA.28272.1 | 5.72  | 6.77  | 0.77 | 0.09 | -2.08 | 0.276486 | 0.119983 | 0.636031 | 0.388672 |
| MmugDNA.28273.1.S1_at   | MmugDNA.28273.1 | 5.47  | 5.41  | 0.22 | 0.28 | 1.04  | 0.896232 | 0.790247 | 0.964545 | 0.878754 |
| MmugDNA.28274.1.S1_at   | MmugDNA.28274.1 | 5.34  | 5.24  | 0.11 | 0.11 | 1.07  | 0.169682 | 0.023634 | 0.542696 | 0.192555 |
| MmugDNA.28275.1.S1_at   | MmugDNA.28275.1 | 6.35  | 6.46  | 0.74 | 0.09 | -1.08 | 0.38203  | 0.423185 | 0.710398 | 0.646188 |
| MmugDNA.28276.1.S1_at   | MmugDNA.28276.1 | 4.25  | 4.1   | 0.26 | 0.11 | 1.11  | 0.536357 | 0.511794 | 0.802267 | 0.705797 |
| MmugDNA.28277.1.S1_at   | MmugDNA.28277.1 | 5.25  | 5.26  | 0.2  | 0.12 | -1.01 | 0.884948 | 0.903481 | 0.960159 | 0.945191 |
| MmugDNA.28280.1.S1_at   | MmugDNA.28280.1 | 5.39  | 5.32  | 0.11 | 0.06 | 1.05  | 0.274098 | 0.776129 | 0.633792 | 0.869726 |
| MmugDNA.28281.1.S1_at   | MmugDNA.28281.1 | 5.45  | 5.48  | 0.83 | 0.29 | -1.02 | 0.938264 | 0.148792 | 0.979247 | 0.423201 |

|                         |                 |       |       |      |      |       |          |          |          |          |
|-------------------------|-----------------|-------|-------|------|------|-------|----------|----------|----------|----------|
| MmugDNA.28283.1.S1_at   | MmugDNA.28283.1 | 4.75  | 4.47  | 0.18 | 0.15 | 1.22  | 0.36483  | 0.488423 | 0.700775 | 0.691144 |
| MmugDNA.28285.1.S1_at   | MmugDNA.28285.1 | 3.27  | 3.38  | 0.06 | 0.2  | -1.08 | 0.490115 | 0.377008 | 0.776766 | 0.614703 |
| MmugDNA.28286.1.S1_at   | MmugDNA.28286.1 | 5.03  | 4.81  | 0.16 | 0.15 | 1.16  | 0.120045 | 0.330056 | 0.493293 | 0.578938 |
| MmugDNA.28286.1.S1_s_at | MmugDNA.28286.1 | 5.94  | 5.6   | 0.07 | 0.16 | 1.26  | 0.050166 | 0.062461 | 0.386848 | 0.296717 |
| MmugDNA.28287.1.S1_at   | MmugDNA.28287.1 | 4.34  | 4.22  | 0.2  | 0.11 | 1.08  | 0.946782 | 0.016334 | 0.981556 | 0.161853 |
| MmugDNA.2829.1.S1_at    | MmugDNA.2829.1  | 4.04  | 4.01  | 0.42 | 0.11 | 1.02  | 0.667805 | 0.890821 | 0.868753 | 0.937722 |
| MmugDNA.28290.1.S1_at   | MmugDNA.28290.1 | 11.26 | 11.31 | 0.13 | 0.1  | -1.04 | 0.436971 | 0.014882 | 0.746628 | 0.155055 |
| MmugDNA.28292.1.S1_at   | MmugDNA.28292.1 | 5.25  | 5.18  | 0.04 | 0.06 | 1.05  | 0.11799  | 0.130941 | 0.491371 | 0.403037 |
| MmugDNA.28293.1.S1_at   | MmugDNA.28293.1 | 9.38  | 8.94  | 0.36 | 0.12 | 1.36  | 0.134543 | 0.09556  | 0.508462 | 0.352631 |
| MmugDNA.28293.1.S1_s_at | MmugDNA.28293.1 | 10.13 | 9.69  | 0.46 | 0.12 | 1.35  | 0.185977 | 0.141483 | 0.558924 | 0.415019 |
| MmugDNA.28296.1.S1_at   | MmugDNA.28296.1 | 6.5   | 6.26  | 0.32 | 0.13 | 1.18  | 0.724499 | 0.135101 | 0.893156 | 0.407128 |
| MmugDNA.28297.1.S1_at   | MmugDNA.28297.1 | 6.02  | 6.03  | 0.2  | 0.22 | -1    | 0.736223 | 0.903406 | 0.899063 | 0.945171 |
| MmugDNA.28298.1.S1_at   | MmugDNA.28298.1 | 12.49 | 12.63 | 0.24 | 0.04 | -1.1  | 0.920105 | 0.026265 | 0.972913 | 0.203033 |
| MmugDNA.28299.1.S1_at   | MmugDNA.28299.1 | 6.49  | 6.56  | 0.14 | 0.07 | -1.05 | 0.290807 | 0.516569 | 0.647362 | 0.709034 |
| MmugDNA.30962.1.S1_at   | MmugDNA.30962.1 | 7.95  | 8.03  | 0.68 | 0.07 | -1.06 | 0.324541 | 0.645721 | 0.672781 | 0.792516 |
| MmugDNA.30962.1.S1_s_at | MmugDNA.30962.1 | 7.14  | 7.23  | 0.14 | 0    | -1.06 | 0.349408 | 0.712204 | 0.690424 | 0.833243 |
| MmugDNA.283.1.S1_at     | MmugDNA.283.1   | 5.57  | 5.56  | 0.06 | 0.2  | 1     | 0.970025 | 0.64152  | 0.990084 | 0.789578 |
| MmugDNA.28300.1.S1_at   | MmugDNA.28300.1 | 6.6   | 6.55  | 0.12 | 0.1  | 1.03  | 0.423069 | 0.374859 | 0.738771 | 0.613091 |
| MmugDNA.28302.1.S1_at   | MmugDNA.28302.1 | 5.7   | 5.73  | 0.32 | 0.16 | -1.02 | 0.8114   | 0.709889 | 0.931761 | 0.831863 |
| MmugDNA.28303.1.S1_at   | MmugDNA.28303.1 | 6.57  | 6.61  | 0.28 | 0.3  | -1.03 | 0.62565  | 0.925528 | 0.849478 | 0.957833 |
| MmugDNA.28304.1.S1_at   | MmugDNA.28304.1 | 5.71  | 4.56  | 0.67 | 0.08 | 2.22  | 0.033763 | 0.00903  | 0.347257 | 0.125559 |
| MmugDNA.28306.1.S1_at   | MmugDNA.28306.1 | 6.94  | 6.78  | 0.1  | 0.04 | 1.12  | 0.055724 | 0.081227 | 0.399166 | 0.329351 |
| MmugDNA.28308.1.S1_at   | MmugDNA.28308.1 | 4.31  | 3.99  | 0.21 | 0.22 | 1.25  | 0.221853 | 0.268164 | 0.591401 | 0.533876 |
| MmugDNA.2831.1.S1_at    | MmugDNA.2831.1  | 9.44  | 9.35  | 0.71 | 0.24 | 1.06  | 0.351363 | 0.309543 | 0.692006 | 0.564987 |
| MmugDNA.32394.1.S1_at   | MmugDNA.32394.1 | 9.34  | 9.98  | 1.03 | 0.23 | -1.56 | 0.1996   | 0.164072 | 0.571482 | 0.440265 |
| MmugDNA.32394.1.S1_s_at | MmugDNA.32394.1 | 9.87  | 10    | 0.83 | 0.22 | -1.1  | 0.278097 | 0.230505 | 0.637354 | 0.502251 |
| MmugDNA.28310.1.S1_at   | MmugDNA.28310.1 | 3.54  | 3.63  | 0.24 | 0.07 | -1.06 | 0.608639 | 0.929258 | 0.841286 | 0.959645 |
| MmugDNA.8184.1.S1_s_at  | MmugDNA.8184.1  | 13.77 | 13.82 | 0.65 | 0.02 | -1.04 | 0.731876 | 0.655813 | 0.896927 | 0.798709 |
| MmugDNA.28312.1.S1_at   | MmugDNA.28312.1 | 10.56 | 10.84 | 0.11 | 0.03 | -1.21 | 0.010537 | 0.00327  | 0.248239 | 0.082312 |
| MmugDNA.4576.1.S1_at    | MmugDNA.4576.1  | 13.19 | 13.19 | 0.07 | 0.01 | 1     | 0.990619 | 0.964315 | 0.996425 | 0.980149 |
| MmugDNA.4576.1.S1_s_at  | MmugDNA.4576.1  | 13.06 | 13.05 | 0.03 | 0.02 | 1.01  | 0.987638 | 0.987758 | 0.995831 | 0.993169 |
| MmugDNA.28315.1.S1_at   | MmugDNA.28315.1 | 4.75  | 4.77  | 0.14 | 0.09 | -1.01 | 0.788287 | 0.362525 | 0.922212 | 0.603067 |
| MmugDNA.28317.1.S1_at   | MmugDNA.28317.1 | 8.48  | 8.47  | 0.18 | 0.04 | 1.01  | 0.321665 | 0.442159 | 0.670485 | 0.66021  |
| MmugDNA.28318.1.S1_at   | MmugDNA.28318.1 | 5.34  | 5.09  | 0.23 | 0.07 | 1.19  | 0.334595 | 0.512935 | 0.680478 | 0.706623 |
| MmugDNA.2832.1.S1_at    | MmugDNA.2832.1  | 9.63  | 9.71  | 0.14 | 0.07 | -1.05 | 0.15122  | 0.206175 | 0.52444  | 0.480364 |
| MmugDNA.28320.1.S1_at   | MmugDNA.28320.1 | 5.58  | 6.2   | 0.06 | 0.54 | -1.53 | 0.34568  | 0.143921 | 0.687742 | 0.417858 |
| MmugDNA.28321.1.S1_at   | MmugDNA.28321.1 | 3.26  | 3.46  | 0.08 | 0.28 | -1.15 | 0.08517  | 0.086656 | 0.45215  | 0.339212 |
| MmugDNA.28324.1.S1_at   | MmugDNA.28324.1 | 4.99  | 4.67  | 0.28 | 0.07 | 1.24  | 0.40508  | 0.242753 | 0.727124 | 0.5131   |
| MmugDNA.28325.1.S1_at   | MmugDNA.28325.1 | 4.97  | 5.43  | 0.31 | 0.09 | -1.38 | 0.075699 | 0.168415 | 0.436722 | 0.445092 |
| MmugDNA.28326.1.S1_at   | MmugDNA.28326.1 | 5.68  | 5.98  | 0.98 | 0.14 | -1.23 | 0.668788 | 0.087068 | 0.869159 | 0.340038 |
| MmugDNA.28327.1.S1_at   | MmugDNA.28327.1 | 5.02  | 4.95  | 0.13 | 0    | 1.05  | 0.469455 | 0.854045 | 0.76556  | 0.91692  |
| MmugDNA.28329.1.S1_at   | MmugDNA.28329.1 | 7     | 7.28  | 1.03 | 0.2  | -1.22 | 0.680707 | 0.561366 | 0.874774 | 0.737362 |
| MmugDNA.28330.1.S1_at   | MmugDNA.28330.1 | 12.38 | 12.61 | 0.11 | 0.02 | -1.18 | 0.022572 | 0.042141 | 0.311408 | 0.249753 |

|                         |                 |       |       |      |      |       |          |          |          |          |
|-------------------------|-----------------|-------|-------|------|------|-------|----------|----------|----------|----------|
| MmugDNA.28332.1.S1_at   | MmugDNA.28332.1 | 4.87  | 5.03  | 0.07 | 0.28 | -1.12 | 0.164153 | 0.303506 | 0.537002 | 0.561    |
| MmugDNA.28334.1.S1_at   | MmugDNA.28334.1 | 7.05  | 7.36  | 0.38 | 0.12 | -1.24 | 0.15435  | 0.194142 | 0.527483 | 0.469266 |
| MmugDNA.28335.1.S1_at   | MmugDNA.28335.1 | 12.77 | 12.71 | 0.28 | 0.06 | 1.05  | 0.830595 | 0.026556 | 0.939379 | 0.203915 |
| MmugDNA.28336.1.S1_at   | MmugDNA.28336.1 | 4.23  | 3.71  | 0.41 | 0.07 | 1.43  | 0.074784 | 0.191738 | 0.435313 | 0.467043 |
| MmugDNA.28337.1.S1_at   | MmugDNA.28337.1 | 5.65  | 5.59  | 0.24 | 0.06 | 1.04  | 0.543791 | 0.492821 | 0.806798 | 0.693802 |
| MmugDNA.28338.1.S1_at   | MmugDNA.28338.1 | 6.17  | 5.97  | 0.21 | 0.17 | 1.15  | 0.243264 | 0.341681 | 0.609182 | 0.587796 |
| MmugDNA.28339.1.S1_at   | MmugDNA.28339.1 | 10.18 | 8.77  | 0.53 | 0.38 | 2.65  | 0.021936 | 0.006112 | 0.309781 | 0.10649  |
| MmugDNA.2834.1.S1_at    | MmugDNA.2834.1  | 10.18 | 10.35 | 0.05 | 0.05 | -1.13 | 0.017321 | 0.142826 | 0.290682 | 0.416786 |
| MmugDNA.28340.1.S1_at   | MmugDNA.28340.1 | 4.86  | 4.92  | 0.23 | 0.15 | -1.04 | 0.983087 | 0.140987 | 0.994868 | 0.414507 |
| MmugDNA.28341.1.S1_at   | MmugDNA.28341.1 | 5.53  | 5.63  | 0.16 | 0.17 | -1.07 | 0.318024 | 0.640386 | 0.66766  | 0.788874 |
| MmugDNA.28342.1.S1_at   | MmugDNA.28342.1 | 5.55  | 5.54  | 0.07 | 0.04 | -1.01 | 0.191551 | 0.762568 | 0.562859 | 0.861882 |
| MmugDNA.28343.1.S1_at   | MmugDNA.28343.1 | 5.82  | 5.28  | 1.02 | 0.17 | 1.46  | 0.464148 | 0.573501 | 0.762403 | 0.745173 |
| MmugDNA.28344.1.S1_s_at | MmugDNA.28344.1 | 9.17  | 7.99  | 1.48 | 0.15 | 2.27  | 0.646737 | 0.687368 | 0.859235 | 0.817576 |
| MmugDNA.28345.1.S1_at   | MmugDNA.28345.1 | 10.26 | 10.08 | 0.66 | 0.19 | 1.13  | 0.755737 | 0.329093 | 0.90805  | 0.578482 |
| MmugDNA.28346.1.S1_at   | MmugDNA.28346.1 | 3.4   | 3.38  | 0.12 | 0.06 | 1.02  | 0.797126 | 0.229895 | 0.925393 | 0.501802 |
| MmugDNA.28348.1.S1_s_at | MmugDNA.28348.1 | 12.6  | 12.6  | 0.21 | 0.05 | 1     | 0.912792 | 0.888356 | 0.970334 | 0.936338 |
| MmugDNA.2835.1.S1_at    | MmugDNA.2835.1  | 8.1   | 7.44  | 1.19 | 0.24 | 1.58  | 0.885808 | 0.985236 | 0.96038  | 0.991633 |
| MmugDNA.28350.1.S1_at   | MmugDNA.28350.1 | 4.85  | 5.44  | 0.69 | 0.22 | -1.5  | 0.664287 | 0.571867 | 0.867677 | 0.744056 |
| MmugDNA.28353.1.S1_at   | MmugDNA.28353.1 | 7.59  | 7.49  | 0.06 | 0.04 | 1.07  | 0.085124 | 0.57109  | 0.451997 | 0.743541 |
| MmugDNA.28354.1.S1_at   | MmugDNA.28354.1 | 3.28  | 3.42  | 0.17 | 0.25 | -1.1  | 0.594447 | 0.837584 | 0.834747 | 0.907168 |
| MmugDNA.28355.1.S1_at   | MmugDNA.28355.1 | 4.14  | 4.29  | 0.09 | 0.16 | -1.11 | 0.399698 | 0.677959 | 0.723284 | 0.811858 |
| MmugDNA.28356.1.S1_at   | MmugDNA.28356.1 | 4.78  | 4.73  | 0.28 | 0.37 | 1.03  | 0.431166 | 0.727882 | 0.743261 | 0.842703 |
| MmugDNA.28357.1.S1_s_at | MmugDNA.28357.1 | 11.23 | 11.44 | 0.11 | 0.06 | -1.16 | 0.019249 | 0.0447   | 0.300345 | 0.255871 |
| MmugDNA.28358.1.S1_at   | MmugDNA.28358.1 | 2.98  | 2.9   | 0.13 | 0.12 | 1.06  | 0.887306 | 0.67     | 0.960923 | 0.806989 |
| MmugDNA.28359.1.S1_at   | MmugDNA.28359.1 | 6.72  | 6.14  | 1.04 | 0.2  | 1.5   | 0.805297 | 0.73778  | 0.929175 | 0.848088 |
| MmugDNA.28360.1.S1_at   | MmugDNA.28360.1 | 4.53  | 4.57  | 0.38 | 0.47 | -1.03 | 0.832973 | 0.893961 | 0.940095 | 0.939462 |
| MmugDNA.28362.1.S1_at   | MmugDNA.28362.1 | 7.32  | 6.77  | 0.61 | 0.52 | 1.47  | 0.850691 | 0.965871 | 0.947412 | 0.980863 |
| MmugDNA.28363.1.S1_at   | MmugDNA.28363.1 | 5.26  | 5.28  | 0.32 | 0.12 | -1.01 | 0.24238  | 0.543289 | 0.608517 | 0.726012 |
| MmugDNA.28364.1.S1_at   | MmugDNA.28364.1 | 3.2   | 3.2   | 0.22 | 0.05 | -1    | 0.390319 | 0.438674 | 0.71664  | 0.65762  |
| MmugDNA.28365.1.S1_at   | MmugDNA.28365.1 | 6.09  | 6.37  | 0.29 | 0.16 | -1.21 | 0.139618 | 0.261438 | 0.515028 | 0.527919 |
| MmugDNA.28366.1.S1_at   | MmugDNA.28366.1 | 6.7   | 7.06  | 1.21 | 0.19 | -1.29 | 0.662911 | 0.848899 | 0.866995 | 0.914216 |
| MmugDNA.28368.1.S1_at   | MmugDNA.28368.1 | 5.74  | 5.54  | 0.12 | 0.09 | 1.14  | 0.326035 | 0.157233 | 0.67367  | 0.432721 |
| MmugDNA.2837.1.S1_at    | MmugDNA.2837.1  | 6.35  | 6.18  | 0.09 | 0.09 | 1.13  | 0.074941 | 0.472025 | 0.435653 | 0.679835 |
| MmugDNA.28370.1.S1_at   | MmugDNA.28370.1 | 11.92 | 11.37 | 0.06 | 0.26 | 1.46  | 0.011425 | 0.00286  | 0.254838 | 0.078756 |
| MmugDNA.28371.1.S1_at   | MmugDNA.28371.1 | 4.14  | 3.96  | 0.21 | 0.63 | 1.13  | 0.791833 | 0.606281 | 0.923496 | 0.765727 |
| MmugDNA.28372.1.S1_at   | MmugDNA.28372.1 | 3.2   | 3.19  | 0.02 | 0.1  | 1     | 0.28442  | 0.413497 | 0.642301 | 0.639648 |
| MmugDNA.28373.1.S1_at   | MmugDNA.28373.1 | 7.11  | 6.97  | 0.08 | 0.06 | 1.1   | 0.032762 | 0.012399 | 0.345393 | 0.144058 |
| MmugDNA.28374.1.S1_at   | MmugDNA.28374.1 | 3.9   | 3.72  | 0.66 | 0.43 | 1.13  | 0.675656 | 0.293969 | 0.872698 | 0.553909 |
| MmugDNA.28375.1.S1_at   | MmugDNA.28375.1 | 4.88  | 4.54  | 0.2  | 0.04 | 1.27  | 0.071651 | 0.118704 | 0.431242 | 0.38672  |
| MmugDNA.28377.1.S1_at   | MmugDNA.28377.1 | 5.84  | 5.83  | 0.16 | 0.04 | 1.01  | 0.453249 | 0.341653 | 0.755962 | 0.587796 |
| MmugDNA.28378.1.S1_at   | MmugDNA.28378.1 | 8.54  | 8     | 0.19 | 0.24 | 1.45  | 0.025605 | 0.016326 | 0.322382 | 0.16183  |
| MmugDNA.28379.1.S1_at   | MmugDNA.28379.1 | 5.25  | 5.29  | 0.06 | 0.09 | -1.03 | 0.157449 | 0.50254  | 0.530565 | 0.700192 |
| MmugDNA.2838.1.S1_at    | MmugDNA.2838.1  | 5.54  | 5.45  | 0.16 | 0.04 | 1.06  | 0.144179 | 0.011063 | 0.519528 | 0.136934 |



|                         |                 |       |       |      |      |       |          |          |          |          |
|-------------------------|-----------------|-------|-------|------|------|-------|----------|----------|----------|----------|
| MmugDNA.28381.1.S1_at   | MmugDNA.28381.1 | 4.62  | 4.98  | 0.07 | 0.46 | -1.28 | 0.117315 | 0.142336 | 0.490925 | 0.415907 |
| MmugDNA.28383.1.S1_at   | MmugDNA.28383.1 | 7.22  | 7.07  | 0.18 | 0.02 | 1.11  | 0.186391 | 0.080181 | 0.559101 | 0.327772 |
| MmugDNA.28384.1.S1_at   | MmugDNA.28384.1 | 5.91  | 6.64  | 0.15 | 0.14 | -1.65 | 0.006923 | 0.023576 | 0.224141 | 0.192311 |
| MmugDNA.28385.1.S1_at   | MmugDNA.28385.1 | 3.9   | 4.2   | 0.52 | 0.46 | -1.24 | 0.932644 | 0.567999 | 0.977227 | 0.74176  |
| MmugDNA.28386.1.S1_at   | MmugDNA.28386.1 | 6.81  | 6.55  | 0.56 | 0.38 | 1.19  | 0.295925 | 0.19939  | 0.65162  | 0.474002 |
| MmugDNA.28387.1.S1_at   | MmugDNA.28387.1 | 7.4   | 7.41  | 0.19 | 0.28 | -1.01 | 0.663586 | 0.961714 | 0.867226 | 0.978408 |
| MmugDNA.28388.1.S1_at   | MmugDNA.28388.1 | 3.34  | 3.48  | 0.2  | 0.58 | -1.1  | 0.216462 | 0.271776 | 0.586564 | 0.536577 |
| MmugDNA.28389.1.S1_at   | MmugDNA.28389.1 | 4.99  | 4.99  | 0.1  | 0.1  | 1     | 0.248092 | 0.425672 | 0.613685 | 0.648002 |
| MmugDNA.2839.1.S1_at    | MmugDNA.2839.1  | 6.78  | 7.06  | 0.07 | 0.14 | -1.22 | 0.036634 | 0.172041 | 0.355252 | 0.448447 |
| MmugDNA.28391.1.S1_at   | MmugDNA.28391.1 | 6.64  | 6.52  | 0.22 | 0    | 1.08  | 0.589284 | 0.871638 | 0.832298 | 0.92696  |
| MmugDNA.28392.1.S1_at   | MmugDNA.28392.1 | 6.1   | 6.47  | 0.07 | 0.44 | -1.29 | 0.580243 | 0.967486 | 0.826923 | 0.982071 |
| MmugDNA.28394.1.S1_at   | MmugDNA.28394.1 | 3.83  | 3.84  | 0.11 | 0.03 | -1.01 | 0.345285 | 0.472512 | 0.687436 | 0.680025 |
| MmugDNA.28395.1.S1_at   | MmugDNA.28395.1 | 5.49  | 5.55  | 0.07 | 0.05 | -1.04 | 0.271192 | 0.770617 | 0.631112 | 0.866798 |
| MmugDNA.28396.1.S1_at   | MmugDNA.28396.1 | 7.12  | 6.97  | 0.06 | 0.09 | 1.11  | 0.111983 | 0.448894 | 0.485105 | 0.664672 |
| MmugDNA.28397.1.S1_at   | MmugDNA.28397.1 | 4.1   | 4.16  | 0.25 | 0.09 | -1.04 | 0.544363 | 0.342893 | 0.807196 | 0.588712 |
| MmugDNA.28398.1.S1_at   | MmugDNA.28398.1 | 3.54  | 3.56  | 0.2  | 0.1  | -1.02 | 0.963664 | 0.529312 | 0.988152 | 0.717233 |
| MmugDNA.28399.1.S1_x_at | MmugDNA.28399.1 | 6.55  | 6.08  | 0.6  | 0.06 | 1.38  | 0.66275  | 0.783242 | 0.866912 | 0.874547 |
| MmugDNA.284.1.S1_at     | MmugDNA.284.1   | 6.7   | 6.71  | 0.23 | 0.16 | -1    | 0.24406  | 0.401993 | 0.609861 | 0.631153 |
| MmugDNA.28400.1.S1_at   | MmugDNA.28400.1 | 12    | 12.15 | 0.37 | 0.1  | -1.12 | 0.203196 | 0.269165 | 0.574732 | 0.534497 |
| MmugDNA.28403.1.S1_at   | MmugDNA.28403.1 | 4.63  | 4.75  | 0.15 | 0.06 | -1.08 | 0.52598  | 0.733273 | 0.796442 | 0.845573 |
| MmugDNA.28404.1.S1_at   | MmugDNA.28404.1 | 5.49  | 5.49  | 0.11 | 0.03 | 1     | 0.343786 | 0.431971 | 0.686878 | 0.652723 |
| MmugDNA.28405.1.S1_at   | MmugDNA.28405.1 | 7.14  | 7.82  | 0.89 | 0.24 | -1.6  | 0.119296 | 0.225044 | 0.492749 | 0.49773  |
| MmugDNA.28406.1.S1_at   | MmugDNA.28406.1 | 5.88  | 6.29  | 0.47 | 0.25 | -1.32 | 0.057085 | 0.095236 | 0.401454 | 0.352197 |
| MmugDNA.28407.1.S1_at   | MmugDNA.28407.1 | 3.1   | 3.11  | 0.03 | 0.15 | -1.01 | 0.759517 | 0.546182 | 0.90969  | 0.727803 |
| MmugDNA.28408.1.S1_at   | MmugDNA.28408.1 | 7.13  | 7.82  | 0.66 | 0.32 | -1.61 | 0.729531 | 0.089674 | 0.895795 | 0.343848 |
| MmugDNA.28409.1.S1_at   | MmugDNA.28409.1 | 9.92  | 10.41 | 0.93 | 0.26 | -1.4  | 0.740283 | 0.045393 | 0.900758 | 0.257395 |
| MmugDNA.2841.1.S1_at    | MmugDNA.2841.1  | 3.69  | 3.81  | 0.27 | 0.24 | -1.09 | 0.875687 | 0.970282 | 0.956794 | 0.983812 |
| MmugDNA.28410.1.S1_at   | MmugDNA.28410.1 | 4.32  | 4.15  | 0.17 | 0.03 | 1.12  | 0.539014 | 0.452961 | 0.803644 | 0.667385 |
| MmugDNA.28411.1.S1_at   | MmugDNA.28411.1 | 4.85  | 4.42  | 0.46 | 0.26 | 1.34  | 0.32168  | 0.480513 | 0.670488 | 0.685845 |
| MmugDNA.28412.1.S1_at   | MmugDNA.28412.1 | 9.29  | 9.52  | 0.49 | 0.2  | -1.17 | 0.228277 | 0.305191 | 0.597182 | 0.562255 |
| MmugDNA.28416.1.S1_at   | MmugDNA.28416.1 | 3.24  | 3.19  | 0.1  | 0.09 | 1.03  | 0.859822 | 0.35094  | 0.950484 | 0.594649 |
| MmugDNA.28417.1.S1_at   | MmugDNA.28417.1 | 5.2   | 4.96  | 0.12 | 0.26 | 1.18  | 0.324638 | 0.644378 | 0.672781 | 0.791566 |
| MmugDNA.2842.1.S1_at    | MmugDNA.2842.1  | 3.04  | 2.96  | 0.08 | 0.1  | 1.06  | 0.598628 | 0.19831  | 0.836987 | 0.473267 |
| MmugDNA.28421.1.S1_at   | MmugDNA.28421.1 | 6.96  | 8.16  | 0.26 | 0.24 | -2.31 | 0.002697 | 0.000338 | 0.184127 | 0.036485 |
| MmugDNA.28424.1.S1_at   | MmugDNA.28424.1 | 2.78  | 2.77  | 0.22 | 0.03 | 1.01  | 0.364775 | 0.535841 | 0.700772 | 0.721345 |
| MmugDNA.28425.1.S1_at   | MmugDNA.28425.1 | 10.1  | 9.48  | 0.3  | 0.11 | 1.54  | 0.052351 | 0.055874 | 0.392196 | 0.282172 |
| MmugDNA.28426.1.S1_at   | MmugDNA.28426.1 | 5.59  | 5.33  | 0.21 | 0.08 | 1.2   | 0.350094 | 0.457748 | 0.691084 | 0.670897 |
| MmugDNA.28427.1.S1_at   | MmugDNA.28427.1 | 8.25  | 8.03  | 0.97 | 0.21 | 1.17  | 0.936351 | 0.332139 | 0.978555 | 0.580584 |
| MmugDNA.28428.1.S1_at   | MmugDNA.28428.1 | 6.42  | 6.31  | 0.22 | 0.08 | 1.08  | 0.193588 | 0.377322 | 0.564275 | 0.614891 |
| MmugDNA.28429.1.S1_at   | MmugDNA.28429.1 | 10.95 | 11.42 | 0.35 | 0.03 | -1.39 | 0.123158 | 0.060986 | 0.496589 | 0.293811 |
| MmugDNA.2843.1.S1_at    | MmugDNA.2843.1  | 5.32  | 5.42  | 0.05 | 0.26 | -1.07 | 0.549615 | 0.095617 | 0.810392 | 0.352645 |
| MmugDNA.28431.1.S1_x_at | MmugDNA.28431.1 | 7.76  | 7.75  | 0.04 | 0.06 | 1     | 0.210072 | 0.526266 | 0.581555 | 0.715488 |
| MmugDNA.28432.1.S1_at   | MmugDNA.28432.1 | 10.05 | 10.39 | 0.58 | 0.15 | -1.27 | 0.979547 | 0.602009 | 0.993506 | 0.763157 |

|                         |                 |       |       |      |      |       |          |          |          |          |
|-------------------------|-----------------|-------|-------|------|------|-------|----------|----------|----------|----------|
| MmugDNA.28433.1.S1_at   | MmugDNA.28433.1 | 8.49  | 8.2   | 1.15 | 0.58 | 1.22  | 0.190785 | 0.207224 | 0.561793 | 0.481364 |
| MmugDNA.28434.1.S1_at   | MmugDNA.28434.1 | 10.96 | 11.1  | 0.26 | 0.07 | -1.1  | 0.60947  | 0.034185 | 0.841773 | 0.228728 |
| MmugDNA.28435.1.S1_at   | MmugDNA.28435.1 | 9.18  | 8.97  | 0.42 | 0.11 | 1.15  | 0.606323 | 0.807951 | 0.840455 | 0.889436 |
| MmugDNA.28436.1.S1_at   | MmugDNA.28436.1 | 4.45  | 4.37  | 0.09 | 0.01 | 1.06  | 0.204317 | 0.014826 | 0.575722 | 0.154895 |
| MmugDNA.28438.1.S1_at   | MmugDNA.28438.1 | 13.47 | 13.52 | 0.16 | 0.05 | -1.03 | 0.520952 | 0.455433 | 0.794207 | 0.669404 |
| MmugDNA.2844.1.S1_s_at  | MmugDNA.2844.1  | 5.17  | 5.12  | 0.21 | 0.18 | 1.03  | 0.339502 | 0.378255 | 0.683828 | 0.615438 |
| MmugDNA.28442.1.S1_s_at | MmugDNA.28442.1 | 5.45  | 5.75  | 0.22 | 0.32 | -1.23 | 0.310998 | 0.922964 | 0.662807 | 0.956659 |
| MmugDNA.28445.1.S1_at   | MmugDNA.28445.1 | 4.09  | 3.8   | 0.6  | 0.12 | 1.23  | 0.472029 | 0.505581 | 0.766842 | 0.702218 |
| MmugDNA.28447.1.S1_at   | MmugDNA.28447.1 | 5.8   | 5.83  | 0.34 | 0.03 | -1.02 | 0.418052 | 0.459624 | 0.735353 | 0.671921 |
| MmugDNA.28449.1.S1_at   | MmugDNA.28449.1 | 5.31  | 5.53  | 0.23 | 0.25 | -1.17 | 0.585211 | 0.80646  | 0.830366 | 0.888651 |
| MmugDNA.2845.1.S1_at    | MmugDNA.2845.1  | 5.97  | 5.83  | 0.14 | 0.08 | 1.1   | 0.139516 | 0.165494 | 0.514956 | 0.44175  |
| MmugDNA.28450.1.S1_at   | MmugDNA.28450.1 | 8.91  | 8.38  | 0.78 | 0.18 | 1.44  | 0.325257 | 0.306498 | 0.673112 | 0.563035 |
| MmugDNA.28452.1.S1_at   | MmugDNA.28452.1 | 4.28  | 5.08  | 0.3  | 0.49 | -1.75 | 0.078058 | 0.460033 | 0.440115 | 0.671989 |
| MmugDNA.28454.1.S1_at   | MmugDNA.28454.1 | 5.58  | 4.89  | 0.39 | 0.28 | 1.61  | 0.070875 | 0.07351  | 0.430067 | 0.316778 |
| MmugDNA.28456.1.S1_at   | MmugDNA.28456.1 | 3.94  | 3.85  | 0.15 | 0.06 | 1.07  | 0.245077 | 0.214609 | 0.610449 | 0.488411 |
| MmugDNA.28457.1.S1_at   | MmugDNA.28457.1 | 6.44  | 6.12  | 0.17 | 0.03 | 1.24  | 0.080982 | 0.176869 | 0.445056 | 0.453303 |
| MmugDNA.28458.1.S1_at   | MmugDNA.28458.1 | 9.04  | 9.57  | 0.21 | 0.13 | -1.44 | 0.011656 | 0.008479 | 0.256051 | 0.122133 |
| MmugDNA.28459.1.S1_at   | MmugDNA.28459.1 | 9.54  | 9.36  | 0.23 | 0.05 | 1.13  | 0.674626 | 0.197986 | 0.872174 | 0.472936 |
| MmugDNA.28460.1.S1_at   | MmugDNA.28460.1 | 7.88  | 7.56  | 0.54 | 0.18 | 1.25  | 0.467296 | 0.636575 | 0.764285 | 0.786262 |
| MmugDNA.28463.1.S1_at   | MmugDNA.28463.1 | 5.34  | 5.32  | 0.1  | 0.1  | 1.01  | 0.549927 | 0.892477 | 0.810479 | 0.938696 |
| MmugDNA.28464.1.S1_at   | MmugDNA.28464.1 | 7.72  | 7.58  | 0.2  | 0.08 | 1.1   | 0.347374 | 0.060671 | 0.68869  | 0.292876 |
| MmugDNA.28466.1.S1_at   | MmugDNA.28466.1 | 6.83  | 7.56  | 0.95 | 0.19 | -1.67 | 0.233489 | 0.307577 | 0.601071 | 0.563785 |
| MmugDNA.28468.1.S1_at   | MmugDNA.28468.1 | 8.09  | 8.38  | 0.27 | 0.12 | -1.22 | 0.139079 | 0.78803  | 0.514459 | 0.877426 |
| MmugDNA.28470.1.S1_at   | MmugDNA.28470.1 | 3.86  | 3.61  | 0.18 | 0.15 | 1.19  | 0.23209  | 0.918799 | 0.599914 | 0.954387 |
| MmugDNA.28475.1.S1_at   | MmugDNA.28475.1 | 13.23 | 12.92 | 0.09 | 0.1  | 1.24  | 0.009318 | 0.00386  | 0.241866 | 0.088378 |
| MmugDNA.28476.1.S1_at   | MmugDNA.28476.1 | 11.04 | 11.03 | 0.12 | 0.04 | 1.01  | 0.7628   | 0.931155 | 0.91092  | 0.960891 |
| MmugDNA.28477.1.S1_at   | MmugDNA.28477.1 | 4.51  | 4.6   | 0.02 | 0.08 | -1.07 | 0.088064 | 0.005737 | 0.45606  | 0.104271 |
| MmugDNA.2848.1.S1_at    | MmugDNA.2848.1  | 4.01  | 4     | 0.1  | 0    | 1.01  | 0.622286 | 0.352549 | 0.847684 | 0.595789 |
| MmugDNA.28480.1.S1_at   | MmugDNA.28480.1 | 5.47  | 5.32  | 0.17 | 0.11 | 1.11  | 0.692558 | 0.942151 | 0.880119 | 0.967154 |
| MmugDNA.28481.1.S1_at   | MmugDNA.28481.1 | 3.25  | 3.08  | 0.16 | 0.15 | 1.12  | 0.438496 | 0.619137 | 0.747368 | 0.774379 |
| MmugDNA.28482.1.S1_at   | MmugDNA.28482.1 | 6.48  | 6.28  | 0.05 | 0.08 | 1.15  | 0.095832 | 0.090765 | 0.464449 | 0.345227 |
| MmugDNA.28483.1.S1_at   | MmugDNA.28483.1 | 3.86  | 3.63  | 0.14 | 0.05 | 1.17  | 0.055437 | 0.016878 | 0.398621 | 0.164713 |
| MmugDNA.28484.1.S1_at   | MmugDNA.28484.1 | 5.62  | 5.57  | 0.04 | 0.05 | 1.03  | 0.175358 | 0.121153 | 0.548245 | 0.390217 |
| MmugDNA.28486.1.S1_at   | MmugDNA.28486.1 | 3.97  | 4.15  | 0.37 | 0.1  | -1.14 | 0.790733 | 0.917811 | 0.922991 | 0.954011 |
| MmugDNA.28487.1.S1_at   | MmugDNA.28487.1 | 9.21  | 9.48  | 0.21 | 0.18 | -1.21 | 0.142014 | 0.057147 | 0.516979 | 0.284972 |
| MmugDNA.28488.1.S1_at   | MmugDNA.28488.1 | 8.88  | 9.59  | 0.82 | 0.02 | -1.63 | 0.635324 | 0.142077 | 0.854522 | 0.415655 |
| MmugDNA.28491.1.S1_at   | MmugDNA.28491.1 | 8.21  | 7.09  | 0.9  | 0.6  | 2.16  | 0.250102 | 0.108731 | 0.615476 | 0.372257 |
| MmugDNA.28492.1.S1_at   | MmugDNA.28492.1 | 3.96  | 3.99  | 0.7  | 0.01 | -1.02 | 0.419435 | 0.418321 | 0.736296 | 0.642707 |
| MmugDNA.28494.1.S1_at   | MmugDNA.28494.1 | 4.26  | 5.2   | 0.78 | 0.4  | -1.92 | 0.519623 | 0.483157 | 0.793262 | 0.687762 |
| MmugDNA.28496.1.S1_at   | MmugDNA.28496.1 | 6.02  | 5.71  | 0.42 | 0.21 | 1.24  | 0.540635 | 0.038303 | 0.804454 | 0.240571 |
| MmugDNA.28498.1.S1_at   | MmugDNA.28498.1 | 3.01  | 3.17  | 0.27 | 0.33 | -1.12 | 0.373101 | 0.763816 | 0.705567 | 0.862673 |
| MmugDNA.28499.1.S1_at   | MmugDNA.28499.1 | 3.76  | 3.66  | 0.13 | 0.12 | 1.08  | 0.334003 | 0.388119 | 0.679986 | 0.622607 |
| MmugDNA.285.1.S1_at     | MmugDNA.285.1   | 8.12  | 7.33  | 1.04 | 0.45 | 1.73  | 0.224465 | 0.053354 | 0.593643 | 0.27654  |

|                         |                 |       |       |      |      |       |          |          |          |          |
|-------------------------|-----------------|-------|-------|------|------|-------|----------|----------|----------|----------|
| MmugDNA.2850.1.S1_at    | MmugDNA.2850.1  | 8.27  | 7.76  | 0.37 | 0.45 | 1.42  | 0.20218  | 0.06436  | 0.573629 | 0.299875 |
| MmugDNA.28500.1.S1_at   | MmugDNA.28500.1 | 6.68  | 6.63  | 0.11 | 0.05 | 1.04  | 0.183355 | 0.668613 | 0.556401 | 0.806109 |
| MmugDNA.28502.1.S1_at   | MmugDNA.28502.1 | 3.69  | 3.68  | 0.16 | 0.19 | 1.01  | 0.908714 | 0.761017 | 0.969262 | 0.861185 |
| MmugDNA.28503.1.S1_at   | MmugDNA.28503.1 | 8.22  | 8.14  | 0.16 | 0.09 | 1.06  | 0.919687 | 0.000699 | 0.972712 | 0.04424  |
| MmugDNA.28505.1.S1_at   | MmugDNA.28505.1 | 4.9   | 5.32  | 0.24 | 0.02 | -1.34 | 0.039991 | 0.046784 | 0.362955 | 0.261029 |
| MmugDNA.28506.1.S1_at   | MmugDNA.28506.1 | 3.38  | 3.4   | 0.06 | 0.1  | -1.01 | 0.97618  | 0.200683 | 0.992259 | 0.47524  |
| MmugDNA.28507.1.S1_at   | MmugDNA.28507.1 | 10.28 | 10.48 | 0.28 | 0.03 | -1.15 | 0.810843 | 0.292893 | 0.931427 | 0.552857 |
| MmugDNA.28508.1.S1_at   | MmugDNA.28508.1 | 6.01  | 5.8   | 0.27 | 0.05 | 1.15  | 0.229479 | 0.452331 | 0.598339 | 0.667046 |
| MmugDNA.28509.1.S1_at   | MmugDNA.28509.1 | 4.57  | 4.68  | 0.24 | 0.16 | -1.08 | 0.70306  | 0.622207 | 0.884538 | 0.776749 |
| MmugDNA.2851.1.S1_at    | MmugDNA.2851.1  | 11.91 | 11.46 | 0.33 | 0.03 | 1.37  | 0.090905 | 0.148404 | 0.458873 | 0.423003 |
| MmugDNA.28510.1.S1_at   | MmugDNA.28510.1 | 5.88  | 5.71  | 0.08 | 0.04 | -1.12 | 0.019464 | 0.228846 | 0.30143  | 0.501117 |
| MmugDNA.28511.1.S1_s_at | MmugDNA.28511.1 | 9.96  | 10.14 | 0.27 | 0.05 | -1.13 | 0.28103  | 0.028417 | 0.639612 | 0.210385 |
| MmugDNA.28512.1.S1_at   | MmugDNA.28512.1 | 4.3   | 4.07  | 0.17 | 0.06 | 1.17  | 0.371772 | 0.628955 | 0.705567 | 0.781556 |
| MmugDNA.28513.1.S1_at   | MmugDNA.28513.1 | 12.02 | 12.14 | 0.83 | 0.18 | -1.09 | 0.734393 | 0.732431 | 0.898343 | 0.845008 |
| MmugDNA.28515.1.S1_at   | MmugDNA.28515.1 | 7.64  | 8.03  | 0.16 | 0.18 | -1.31 | 0.245209 | 0.025304 | 0.610623 | 0.199522 |
| MmugDNA.28516.1.S1_s_at | MmugDNA.28516.1 | 9.81  | 9.63  | 0.06 | 0.12 | 1.13  | 0.142233 | 0.014311 | 0.517202 | 0.152747 |
| MmugDNA.28517.1.S1_at   | MmugDNA.28517.1 | 3.25  | 3.27  | 0.21 | 0.08 | -1.02 | 0.718195 | 0.331531 | 0.890613 | 0.580171 |
| MmugDNA.28518.1.S1_at   | MmugDNA.28518.1 | 5.4   | 4.89  | 0.14 | 0.17 | 1.42  | 0.010322 | 0.010015 | 0.246929 | 0.131262 |
| MmugDNA.28519.1.S1_at   | MmugDNA.28519.1 | 7.24  | 7.25  | 0.18 | 0.04 | -1.01 | 0.88038  | 0.20228  | 0.958593 | 0.476687 |
| MmugDNA.2852.1.S1_at    | MmugDNA.2852.1  | 4.23  | 3.91  | 0.08 | 0.15 | 1.26  | 0.119684 | 0.023354 | 0.493172 | 0.191568 |
| MmugDNA.28520.1.S1_at   | MmugDNA.28520.1 | 5.32  | 5.7   | 0.28 | 0.41 | -1.3  | 0.445464 | 0.364679 | 0.752226 | 0.605001 |
| MmugDNA.28521.1.S1_at   | MmugDNA.28521.1 | 6.66  | 6.58  | 0.21 | 0.1  | 1.06  | 0.5139   | 0.390313 | 0.790207 | 0.624142 |
| MmugDNA.28522.1.S1_at   | MmugDNA.28522.1 | 8.42  | 8.94  | 0.99 | 0.22 | -1.44 | 0.382185 | 0.455118 | 0.710505 | 0.669109 |
| MmugDNA.28523.1.S1_at   | MmugDNA.28523.1 | 11.22 | 11.23 | 0.25 | 0.16 | -1.01 | 0.415519 | 0.085896 | 0.733656 | 0.338068 |
| MmugDNA.28524.1.S1_at   | MmugDNA.28524.1 | 4.54  | 4.83  | 0.2  | 0.56 | -1.22 | 0.470466 | 0.564699 | 0.766162 | 0.739425 |
| MmugDNA.28525.1.S1_at   | MmugDNA.28525.1 | 6.49  | 6.84  | 0.14 | 0.29 | -1.27 | 0.07009  | 0.012329 | 0.428522 | 0.143659 |
| MmugDNA.28526.1.S1_at   | MmugDNA.28526.1 | 3.51  | 3.37  | 0.1  | 0.11 | 1.1   | 0.433675 | 0.161662 | 0.744576 | 0.437771 |
| MmugDNA.28528.1.S1_at   | MmugDNA.28528.1 | 8.19  | 8.46  | 0.28 | 0.07 | -1.21 | 0.50005  | 0.0991   | 0.782313 | 0.357241 |
| MmugDNA.28529.1.S1_at   | MmugDNA.28529.1 | 5.25  | 6.45  | 1.39 | 0.25 | -2.29 | 0.632952 | 0.31683  | 0.853404 | 0.570212 |
| MmugDNA.28532.1.S1_at   | MmugDNA.28532.1 | 3.05  | 2.94  | 0.02 | 0.31 | 1.08  | 0.694654 | 0.855336 | 0.881132 | 0.917526 |
| MmugDNA.28533.1.S1_at   | MmugDNA.28533.1 | 6.34  | 6.14  | 0.12 | 0.04 | 1.15  | 0.036554 | 0.050708 | 0.355049 | 0.270338 |
| MmugDNA.28536.1.S1_at   | MmugDNA.28536.1 | 3.46  | 3.73  | 0.08 | 0.09 | -1.21 | 0.028985 | 0.549592 | 0.333482 | 0.729956 |
| MmugDNA.28537.1.S1_at   | MmugDNA.28537.1 | 6.66  | 6.68  | 0.06 | 0.02 | -1.01 | 0.296114 | 0.72544  | 0.651764 | 0.841043 |
| MmugDNA.28539.1.S1_at   | MmugDNA.28539.1 | 11.05 | 11.74 | 0.8  | 0.13 | -1.62 | 0.217017 | 0.257949 | 0.586964 | 0.525531 |
| MmugDNA.2854.1.S1_at    | MmugDNA.2854.1  | 6.91  | 6.86  | 0.21 | 0.08 | 1.03  | 0.781963 | 0.713769 | 0.919716 | 0.833937 |
| MmugDNA.28540.1.S1_at   | MmugDNA.28540.1 | 3.31  | 3.11  | 0.1  | 0.06 | 1.15  | 0.065853 | 0.383783 | 0.421209 | 0.619734 |
| MmugDNA.28541.1.S1_at   | MmugDNA.28541.1 | 4.51  | 5.17  | 0.75 | 0.15 | -1.58 | 0.260475 | 0.338914 | 0.623301 | 0.585891 |
| MmugDNA.28542.1.S1_at   | MmugDNA.28542.1 | 3.15  | 3.06  | 0.22 | 0.09 | 1.06  | 0.168247 | 0.204284 | 0.540864 | 0.478541 |
| MmugDNA.28542.1.S1_x_at | MmugDNA.28542.1 | 3.6   | 3.44  | 0.15 | 0.32 | 1.12  | 0.165269 | 0.298557 | 0.538018 | 0.557183 |
| MmugDNA.28543.1.S1_at   | MmugDNA.28543.1 | 10.78 | 10.96 | 0.39 | 0.15 | -1.13 | 0.632745 | 0.858083 | 0.853253 | 0.919063 |
| MmugDNA.28545.1.S1_at   | MmugDNA.28545.1 | 5.6   | 5.68  | 0.19 | 0.02 | -1.06 | 0.736698 | 0.848009 | 0.899286 | 0.913686 |
| MmugDNA.28547.1.S1_at   | MmugDNA.28547.1 | 4.64  | 4.95  | 0.2  | 0.27 | -1.24 | 0.472459 | 0.040326 | 0.767074 | 0.245973 |
| MmugDNA.28548.1.S1_at   | MmugDNA.28548.1 | 5.51  | 5.35  | 0.37 | 0.18 | 1.12  | 0.840242 | 0.034908 | 0.943147 | 0.231062 |

|                         |                 |       |       |      |      |       |          |          |          |          |
|-------------------------|-----------------|-------|-------|------|------|-------|----------|----------|----------|----------|
| MmugDNA.28549.1.S1_s_at | MmugDNA.28549.1 | 11.57 | 11.27 | 0.34 | 0.04 | 1.23  | 0.258896 | 0.341646 | 0.622286 | 0.587796 |
| MmugDNA.28550.1.S1_at   | MmugDNA.28550.1 | 7.91  | 8.44  | 0.32 | 0.23 | -1.44 | 0.159022 | 0.039682 | 0.531755 | 0.244271 |
| MmugDNA.28551.1.S1_at   | MmugDNA.28551.1 | 7.41  | 7.34  | 0.28 | 0.15 | 1.05  | 0.592717 | 0.856301 | 0.833974 | 0.917926 |
| MmugDNA.28552.1.S1_at   | MmugDNA.28552.1 | 8.03  | 8.06  | 0.25 | 0.05 | -1.02 | 0.417335 | 0.57652  | 0.734845 | 0.747267 |
| MmugDNA.28553.1.S1_at   | MmugDNA.28553.1 | 4.85  | 5.07  | 0.3  | 0.47 | -1.16 | 0.652519 | 0.864758 | 0.862013 | 0.923286 |
| MmugDNA.28555.1.S1_at   | MmugDNA.28555.1 | 5.14  | 4.9   | 0.03 | 0.09 | 1.19  | 0.009302 | 0.060999 | 0.241866 | 0.293811 |
| MmugDNA.28556.1.S1_at   | MmugDNA.28556.1 | 5.11  | 5.02  | 0.3  | 0.01 | 1.07  | 0.612238 | 0.201078 | 0.842951 | 0.475509 |
| MmugDNA.28557.1.S1_s_at | MmugDNA.28557.1 | 3.06  | 2.91  | 0.04 | 0.15 | 1.11  | 0.508703 | 0.638979 | 0.787207 | 0.787973 |
| MmugDNA.28558.1.S1_at   | MmugDNA.28558.1 | 4.97  | 4.97  | 0.21 | 0.24 | -1    | 0.93215  | 0.70637  | 0.977159 | 0.829634 |
| MmugDNA.28559.1.S1_at   | MmugDNA.28559.1 | 4.45  | 4.54  | 0.06 | 0.11 | -1.06 | 0.553712 | 0.465268 | 0.812271 | 0.67567  |
| MmugDNA.2856.1.S1_at    | MmugDNA.2856.1  | 3.41  | 3.51  | 0.1  | 0.07 | -1.07 | 0.130777 | 0.332882 | 0.505266 | 0.581266 |
| MmugDNA.28560.1.S1_at   | MmugDNA.28560.1 | 9.48  | 8.71  | 0.16 | 0.06 | 1.7   | 0.002663 | 0.00003  | 0.182785 | 0.022097 |
| MmugDNA.28562.1.S1_at   | MmugDNA.28562.1 | 6.44  | 6.44  | 0.08 | 0.12 | 1.01  | 0.570004 | 0.485057 | 0.821866 | 0.688908 |
| MmugDNA.28563.1.S1_at   | MmugDNA.28563.1 | 6.27  | 7.02  | 0.03 | 0.2  | -1.69 | 0.003404 | 0.001343 | 0.194985 | 0.056396 |
| MmugDNA.28564.1.S1_at   | MmugDNA.28564.1 | 5.33  | 4.91  | 0.87 | 1    | 1.34  | 0.443833 | 0.617442 | 0.751068 | 0.77343  |
| MmugDNA.28565.1.S1_at   | MmugDNA.28565.1 | 3.88  | 3.85  | 0.29 | 0.1  | 1.02  | 0.824821 | 0.962411 | 0.937078 | 0.978891 |
| MmugDNA.28567.1.S1_at   | MmugDNA.28567.1 | 5.91  | 5.69  | 0.18 | 0.22 | 1.17  | 0.131147 | 0.058977 | 0.5054   | 0.289669 |
| MmugDNA.28568.1.S1_at   | MmugDNA.28568.1 | 5.41  | 5.61  | 0.26 | 0.09 | -1.15 | 0.092663 | 0.185799 | 0.461192 | 0.461631 |
| MmugDNA.28573.1.S1_at   | MmugDNA.28573.1 | 4.9   | 4.51  | 0.24 | 0.28 | 1.31  | 0.285719 | 0.742945 | 0.643438 | 0.851083 |
| MmugDNA.28575.1.S1_at   | MmugDNA.28575.1 | 6.35  | 6.23  | 0.4  | 0.31 | 1.09  | 0.429697 | 0.02026  | 0.742304 | 0.178715 |
| MmugDNA.28576.1.S1_at   | MmugDNA.28576.1 | 5.39  | 5.26  | 0.7  | 0.08 | 1.09  | 0.736978 | 0.625119 | 0.899286 | 0.779004 |
| MmugDNA.28577.1.S1_at   | MmugDNA.28577.1 | 5.74  | 5.96  | 0.27 | 0.03 | -1.17 | 0.333009 | 0.665665 | 0.679412 | 0.804131 |
| MmugDNA.28578.1.S1_at   | MmugDNA.28578.1 | 5.36  | 5.18  | 0.08 | 0.2  | 1.13  | 0.16578  | 0.374554 | 0.538623 | 0.6129   |
| MmugDNA.28579.1.S1_at   | MmugDNA.28579.1 | 6.7   | 6.94  | 0.08 | 0.11 | -1.18 | 0.055356 | 0.042697 | 0.39842  | 0.251049 |
| MmugDNA.2858.1.S1_at    | MmugDNA.2858.1  | 4.21  | 4.28  | 0.16 | 0.07 | -1.05 | 0.333303 | 0.442819 | 0.679565 | 0.660759 |
| MmugDNA.28580.1.S1_at   | MmugDNA.28580.1 | 11.98 | 11.97 | 0.77 | 0.17 | 1     | 0.887393 | 0.216981 | 0.960961 | 0.4906   |
| MmugDNA.28581.1.S1_at   | MmugDNA.28581.1 | 6.84  | 7.42  | 0.22 | 0.16 | -1.49 | 0.027762 | 0.038842 | 0.329202 | 0.242022 |
| MmugDNA.28582.1.S1_at   | MmugDNA.28582.1 | 3.99  | 3.92  | 0.15 | 0.08 | 1.05  | 0.431623 | 0.326287 | 0.743486 | 0.576452 |
| MmugDNA.28583.1.S1_at   | MmugDNA.28583.1 | 4.96  | 4.46  | 0.09 | 0.26 | 1.42  | 0.036387 | 0.130415 | 0.35477  | 0.402257 |
| MmugDNA.28584.1.S1_at   | MmugDNA.28584.1 | 3.26  | 3.49  | 0.14 | 0.06 | -1.17 | 0.25352  | 0.33811  | 0.618302 | 0.585286 |
| MmugDNA.28585.1.S1_at   | MmugDNA.28585.1 | 4.07  | 4.26  | 0.16 | 0.1  | -1.14 | 0.180044 | 0.198583 | 0.553172 | 0.473391 |
| MmugDNA.28586.1.S1_at   | MmugDNA.28586.1 | 4.81  | 4.77  | 0.07 | 0.04 | 1.03  | 0.14808  | 0.227068 | 0.522369 | 0.499415 |
| MmugDNA.28587.1.S1_at   | MmugDNA.28587.1 | 8.43  | 8.86  | 0.5  | 0.21 | -1.34 | 0.267521 | 0.402816 | 0.628193 | 0.631615 |
| MmugDNA.28588.1.S1_at   | MmugDNA.28588.1 | 5.33  | 5.3   | 0.48 | 0.12 | 1.02  | 0.276876 | 0.183582 | 0.636504 | 0.459681 |
| MmugDNA.28589.1.S1_at   | MmugDNA.28589.1 | 4.33  | 4.32  | 0.15 | 0.04 | 1     | 0.802669 | 0.148803 | 0.92802  | 0.423201 |
| MmugDNA.2859.1.S1_at    | MmugDNA.2859.1  | 3.24  | 3.26  | 0.2  | 0.15 | -1.02 | 0.286673 | 0.365739 | 0.643923 | 0.605685 |
| MmugDNA.28590.1.S1_at   | MmugDNA.28590.1 | 6.96  | 6.73  | 0.73 | 0.35 | 1.17  | 0.467977 | 0.768359 | 0.764607 | 0.865493 |
| MmugDNA.28592.1.S1_at   | MmugDNA.28592.1 | 3.12  | 3.23  | 0.07 | 0.08 | -1.08 | 0.073727 | 0.271024 | 0.434623 | 0.536155 |
| MmugDNA.28593.1.S1_at   | MmugDNA.28593.1 | 7.05  | 7.64  | 0.39 | 0.21 | -1.51 | 0.375096 | 0.318064 | 0.706298 | 0.571046 |
| MmugDNA.28594.1.S1_at   | MmugDNA.28594.1 | 5.77  | 6.13  | 0.4  | 0.1  | -1.29 | 0.148285 | 0.131116 | 0.522535 | 0.403084 |
| MmugDNA.28595.1.S1_at   | MmugDNA.28595.1 | 5.03  | 5.06  | 0.05 | 0.17 | -1.02 | 0.485095 | 0.638706 | 0.774035 | 0.787808 |
| MmugDNA.28596.1.S1_at   | MmugDNA.28596.1 | 4.68  | 4.59  | 0.3  | 0.1  | 1.06  | 0.972931 | 0.374249 | 0.991155 | 0.612738 |
| MmugDNA.28597.1.S1_at   | MmugDNA.28597.1 | 4.18  | 3.98  | 0.18 | 0.14 | 1.15  | 0.118532 | 0.215524 | 0.491933 | 0.489269 |

|                         |                 |       |       |      |      |       |          |          |          |          |
|-------------------------|-----------------|-------|-------|------|------|-------|----------|----------|----------|----------|
| MmugDNA.28598.1.S1_at   | MmugDNA.28598.1 | 8     | 7.74  | 1.25 | 0.09 | 1.2   | 0.56222  | 0.736447 | 0.817632 | 0.84751  |
| MmugDNA.2860.1.S1_at    | MmugDNA.2860.1  | 4.21  | 4.2   | 0.11 | 0.13 | 1.01  | 0.410818 | 0.53969  | 0.730947 | 0.72391  |
| MmugDNA.28600.1.S1_at   | MmugDNA.28600.1 | 5.9   | 5.71  | 0.19 | 0.02 | 1.14  | 0.117623 | 0.208135 | 0.491008 | 0.482082 |
| MmugDNA.28601.1.S1_at   | MmugDNA.28601.1 | 7.46  | 7.08  | 0.79 | 0.33 | 1.3   | 0.912056 | 0.490331 | 0.970255 | 0.692363 |
| MmugDNA.28602.1.S1_at   | MmugDNA.28602.1 | 5.88  | 5.88  | 0.21 | 0.08 | 1     | 0.99511  | 0.998911 | 0.99815  | 0.99944  |
| MmugDNA.28604.1.S1_at   | MmugDNA.28604.1 | 9.7   | 9.71  | 0.21 | 0.08 | -1.01 | 0.659642 | 0.401633 | 0.865323 | 0.631068 |
| MmugDNA.28605.1.S1_at   | MmugDNA.28605.1 | 6.99  | 7.02  | 0.66 | 0.31 | -1.02 | 0.761597 | 0.195277 | 0.910578 | 0.470253 |
| MmugDNA.28606.1.S1_s_at | MmugDNA.28606.1 | 10.82 | 10.81 | 0.17 | 0.07 | 1.01  | 0.66054  | 0.465198 | 0.865778 | 0.675638 |
| MmugDNA.28607.1.S1_at   | MmugDNA.28607.1 | 6.07  | 5.99  | 0.15 | 0.15 | 1.05  | 0.491606 | 0.707494 | 0.777944 | 0.830363 |
| MmugDNA.28608.1.S1_at   | MmugDNA.28608.1 | 6.31  | 6.59  | 1.31 | 0.23 | -1.22 | 0.326463 | 0.313496 | 0.674053 | 0.567926 |
| MmugDNA.28609.1.S1_at   | MmugDNA.28609.1 | 3.54  | 3.69  | 0.09 | 0.15 | -1.11 | 0.306472 | 0.332292 | 0.659434 | 0.580733 |
| MmugDNA.2861.1.S1_at    | MmugDNA.2861.1  | 4.37  | 4.26  | 0.2  | 0.03 | 1.08  | 0.228167 | 0.336512 | 0.597073 | 0.583862 |
| MmugDNA.28610.1.S1_at   | MmugDNA.28610.1 | 9.91  | 9.8   | 1    | 0.19 | 1.08  | 0.505249 | 0.712766 | 0.785248 | 0.8335   |
| MmugDNA.28611.1.S1_at   | MmugDNA.28611.1 | 4.09  | 3.77  | 0.06 | 0.11 | 1.25  | 0.027594 | 0.074787 | 0.328249 | 0.31853  |
| MmugDNA.28612.1.S1_at   | MmugDNA.28612.1 | 6.99  | 8.73  | 0.75 | 0.18 | -3.33 | 0.019765 | 0.006059 | 0.302428 | 0.106152 |
| MmugDNA.28613.1.S1_at   | MmugDNA.28613.1 | 3.25  | 3.08  | 0.14 | 0.13 | 1.12  | 0.114994 | 0.157213 | 0.488167 | 0.432687 |
| MmugDNA.28614.1.S1_at   | MmugDNA.28614.1 | 5.67  | 4.97  | 0.61 | 0.31 | 1.62  | 0.327191 | 0.214713 | 0.674872 | 0.488578 |
| MmugDNA.28615.1.S1_at   | MmugDNA.28615.1 | 3.48  | 3.38  | 0.27 | 0.14 | 1.07  | 0.603101 | 0.836547 | 0.83911  | 0.906546 |
| MmugDNA.28616.1.S1_at   | MmugDNA.28616.1 | 3.53  | 3.23  | 0.12 | 0.12 | 1.23  | 0.090057 | 0.338748 | 0.457992 | 0.585819 |
| MmugDNA.28617.1.S1_at   | MmugDNA.28617.1 | 5.99  | 5.44  | 0.31 | 0.05 | 1.47  | 0.1071   | 0.080336 | 0.47951  | 0.327965 |
| MmugDNA.28618.1.S1_at   | MmugDNA.28618.1 | 7.87  | 7.8   | 1.14 | 0.12 | 1.05  | 0.859569 | 0.877055 | 0.9504   | 0.92994  |
| MmugDNA.28619.1.S1_at   | MmugDNA.28619.1 | 3.23  | 3.62  | 0.33 | 0.14 | -1.31 | 0.37384  | 0.556109 | 0.705567 | 0.73438  |
| MmugDNA.2862.1.S1_at    | MmugDNA.2862.1  | 4.65  | 4.62  | 0.08 | 0.09 | 1.02  | 0.991511 | 0.990064 | 0.996693 | 0.994314 |
| MmugDNA.28620.1.S1_at   | MmugDNA.28620.1 | 3.33  | 3.31  | 0.11 | 0.03 | 1.01  | 0.802716 | 0.758556 | 0.92802  | 0.859634 |
| MmugDNA.28622.1.S1_at   | MmugDNA.28622.1 | 6.6   | 7.79  | 0.33 | 0.06 | -2.28 | 0.007711 | 0.000635 | 0.230943 | 0.042882 |
| MmugDNA.28622.1.S1_s_at | MmugDNA.28622.1 | 7.64  | 8.83  | 0.46 | 0.2  | -2.28 | 0.029473 | 0.004524 | 0.334349 | 0.093974 |
| MmugDNA.28623.1.S1_at   | MmugDNA.28623.1 | 10.53 | 10.95 | 0.13 | 0.03 | -1.35 | 0.005629 | 0.00137  | 0.209565 | 0.05691  |
| MmugDNA.28624.1.S1_at   | MmugDNA.28624.1 | 5.2   | 5.09  | 0.13 | 0.08 | 1.08  | 0.274218 | 0.236133 | 0.633792 | 0.507179 |
| MmugDNA.28628.1.S1_at   | MmugDNA.28628.1 | 6.26  | 6.19  | 0.07 | 0.09 | 1.05  | 0.135781 | 0.145632 | 0.510277 | 0.419554 |
| MmugDNA.28629.1.S1_s_at | MmugDNA.28629.1 | 7.63  | 7.87  | 0.13 | 0.06 | -1.18 | 0.029105 | 0.033764 | 0.333841 | 0.22741  |
| MmugDNA.28630.1.S1_at   | MmugDNA.28630.1 | 6.34  | 6.43  | 0.3  | 0.42 | -1.06 | 0.787136 | 0.383099 | 0.92182  | 0.619136 |
| MmugDNA.40354.1.S1_s_at | MmugDNA.40354.1 | 11.62 | 11.72 | 0.13 | 0.08 | -1.07 | 0.066993 | 0.045573 | 0.422979 | 0.257646 |
| MmugDNA.28633.1.S1_at   | MmugDNA.28633.1 | 7.54  | 7.67  | 0.26 | 0.05 | -1.1  | 0.578976 | 0.500341 | 0.826338 | 0.699009 |
| MmugDNA.28636.1.S1_at   | MmugDNA.28636.1 | 4.8   | 4.73  | 0.23 | 0.03 | 1.05  | 0.664636 | 0.799222 | 0.867683 | 0.884446 |
| MmugDNA.28638.1.S1_at   | MmugDNA.28638.1 | 7.31  | 7.31  | 0.93 | 0.28 | 1     | 0.98061  | 0.407241 | 0.993845 | 0.634843 |
| MmugDNA.28639.1.S1_at   | MmugDNA.28639.1 | 8.79  | 8.38  | 0.33 | 0.39 | 1.33  | 0.198467 | 0.348014 | 0.569807 | 0.592215 |
| MmugDNA.23581.1.S1_at   | MmugDNA.23581.1 | 10.54 | 11    | 0.17 | 0.04 | -1.37 | 0.011626 | 0.00783  | 0.255776 | 0.117929 |
| MmugDNA.23581.1.S1_s_at | MmugDNA.23581.1 | 9.2   | 9.35  | 0.18 | 0.03 | -1.1  | 0.181064 | 0.141998 | 0.554326 | 0.415564 |
| MmugDNA.28640.1.S1_at   | MmugDNA.28640.1 | 4.63  | 4.42  | 0.04 | 0.02 | 1.16  | 0.002446 | 0.305592 | 0.177103 | 0.562504 |
| MmugDNA.28642.1.S1_at   | MmugDNA.28642.1 | 4.25  | 4.37  | 0.13 | 0.11 | -1.09 | 0.575184 | 0.170207 | 0.824603 | 0.446906 |
| MmugDNA.28644.1.S1_at   | MmugDNA.28644.1 | 11    | 11.26 | 0.3  | 0.09 | -1.2  | 0.840001 | 0.225626 | 0.943103 | 0.498155 |
| MmugDNA.28645.1.S1_at   | MmugDNA.28645.1 | 6.16  | 6.01  | 0.13 | 0.13 | 1.11  | 0.100831 | 0.08923  | 0.47159  | 0.34333  |
| MmugDNA.28646.1.S1_at   | MmugDNA.28646.1 | 7.89  | 7.94  | 0.46 | 0.17 | -1.04 | 0.988299 | 0.684422 | 0.995877 | 0.815943 |

|                         |                 |       |       |      |      |       |          |          |          |          |
|-------------------------|-----------------|-------|-------|------|------|-------|----------|----------|----------|----------|
| MmugDNA.28647.1.S1_at   | MmugDNA.28647.1 | 7.4   | 7.29  | 0.06 | 0.07 | 1.08  | 0.119124 | 0.656926 | 0.492552 | 0.799401 |
| MmugDNA.28648.1.S1_at   | MmugDNA.28648.1 | 5.23  | 4.98  | 0.15 | 0.06 | 1.19  | 0.1112   | 0.163824 | 0.484303 | 0.440054 |
| MmugDNA.28649.1.S1_at   | MmugDNA.28649.1 | 4.3   | 4.08  | 0.17 | 0.06 | 1.17  | 0.124493 | 0.119904 | 0.498544 | 0.388593 |
| MmugDNA.2865.1.S1_at    | MmugDNA.2865.1  | 9.64  | 9.63  | 0.05 | 0.05 | 1.01  | 0.63456  | 0.413938 | 0.854096 | 0.639942 |
| MmugDNA.28650.1.S1_at   | MmugDNA.28650.1 | 5.31  | 5.32  | 0.06 | 0.12 | -1    | 0.450643 | 0.622106 | 0.754829 | 0.77667  |
| MmugDNA.28651.1.S1_at   | MmugDNA.28651.1 | 3.41  | 3.39  | 0.2  | 0.06 | 1.02  | 0.317027 | 0.380009 | 0.666916 | 0.616686 |
| MmugDNA.130.1.S1_s_at   | MmugDNA.130.1   | 6.32  | 6.84  | 0.08 | 0.25 | -1.43 | 0.0333   | 0.015279 | 0.346442 | 0.156987 |
| MmugDNA.28653.1.S1_at   | MmugDNA.28653.1 | 8.72  | 9.84  | 0.49 | 0.03 | -2.18 | 0.019347 | 0.006419 | 0.300575 | 0.108813 |
| MmugDNA.28654.1.S1_at   | MmugDNA.28654.1 | 8.32  | 8.21  | 0.33 | 0.1  | 1.08  | 0.718733 | 0.32044  | 0.890773 | 0.572648 |
| MmugDNA.28655.1.S1_at   | MmugDNA.28655.1 | 3.47  | 3.03  | 0.25 | 0.18 | 1.35  | 0.059284 | 0.260212 | 0.406296 | 0.526807 |
| MmugDNA.28655.1.S1_s_at | MmugDNA.28655.1 | 5.49  | 5.08  | 0.33 | 0.16 | 1.33  | 0.149489 | 0.417196 | 0.523226 | 0.642069 |
| MmugDNA.28656.1.S1_at   | MmugDNA.28656.1 | 6.12  | 5.99  | 0.12 | 0.13 | 1.09  | 0.121532 | 0.114701 | 0.495145 | 0.381252 |
| MmugDNA.28657.1.S1_at   | MmugDNA.28657.1 | 4.44  | 4.41  | 0.37 | 0.22 | 1.02  | 0.990576 | 0.824327 | 0.996425 | 0.899073 |
| MmugDNA.28658.1.S1_at   | MmugDNA.28658.1 | 9.68  | 9.45  | 0.77 | 0.12 | 1.17  | 0.618501 | 0.743529 | 0.845978 | 0.851395 |
| MmugDNA.28659.1.S1_at   | MmugDNA.28659.1 | 8.24  | 8.38  | 0.2  | 0.2  | -1.1  | 0.17433  | 0.596398 | 0.547557 | 0.759542 |
| MmugDNA.2866.1.S1_at    | MmugDNA.2866.1  | 10.22 | 10.1  | 0.08 | 0.04 | 1.09  | 0.081721 | 0.143755 | 0.446024 | 0.417583 |
| MmugDNA.28660.1.S1_at   | MmugDNA.28660.1 | 7.95  | 7.94  | 0.2  | 0.08 | 1.01  | 0.562373 | 0.141015 | 0.817686 | 0.414507 |
| MmugDNA.28661.1.S1_at   | MmugDNA.28661.1 | 7.17  | 6.71  | 0.14 | 0.07 | 1.37  | 0.016596 | 0.009886 | 0.287478 | 0.130618 |
| MmugDNA.28662.1.S1_at   | MmugDNA.28662.1 | 3.58  | 3.41  | 0.47 | 0.59 | 1.12  | 0.832085 | 0.545482 | 0.939756 | 0.727564 |
| MmugDNA.28663.1.S1_at   | MmugDNA.28663.1 | 8.66  | 8.88  | 0.58 | 0.21 | -1.16 | 0.942407 | 0.849275 | 0.980289 | 0.914453 |
| MmugDNA.28664.1.S1_at   | MmugDNA.28664.1 | 7.19  | 7.58  | 0.5  | 0.37 | -1.31 | 0.383805 | 0.269625 | 0.711503 | 0.534868 |
| MmugDNA.28665.1.S1_at   | MmugDNA.28665.1 | 5.71  | 5.54  | 0.09 | 0.04 | 1.12  | 0.053733 | 0.263251 | 0.39536  | 0.529531 |
| MmugDNA.28667.1.S1_at   | MmugDNA.28667.1 | 10.27 | 10.16 | 0.24 | 0.01 | 1.08  | 0.566825 | 0.770348 | 0.820086 | 0.866591 |
| MmugDNA.28668.1.S1_at   | MmugDNA.28668.1 | 10.95 | 10.77 | 0.4  | 0.15 | 1.13  | 0.59458  | 0.202939 | 0.83481  | 0.477343 |
| MmugDNA.28669.1.S1_at   | MmugDNA.28669.1 | 3.34  | 3.71  | 0.29 | 0.29 | -1.3  | 0.086769 | 0.002786 | 0.454762 | 0.077966 |
| MmugDNA.2867.1.S1_at    | MmugDNA.2867.1  | 7.56  | 7.88  | 0.25 | 0.47 | -1.25 | 0.327473 | 0.263706 | 0.675118 | 0.529988 |
| MmugDNA.28670.1.S1_at   | MmugDNA.28670.1 | 10.91 | 10.68 | 0.2  | 0.21 | 1.17  | 0.234348 | 0.325888 | 0.601622 | 0.576171 |
| MmugDNA.28671.1.S1_at   | MmugDNA.28671.1 | 4.02  | 4.03  | 0.07 | 0.1  | -1.01 | 0.182696 | 0.553715 | 0.555631 | 0.732777 |
| MmugDNA.28673.1.S1_at   | MmugDNA.28673.1 | 4.01  | 3.93  | 0.25 | 0.27 | 1.06  | 0.325518 | 0.445639 | 0.673335 | 0.662468 |
| MmugDNA.28674.1.S1_at   | MmugDNA.28674.1 | 6.45  | 6.65  | 0.29 | 0.35 | -1.14 | 0.944207 | 0.02573  | 0.980647 | 0.201029 |
| MmugDNA.28675.1.S1_at   | MmugDNA.28675.1 | 5.54  | 5.24  | 0.1  | 0.04 | 1.23  | 0.009431 | 0.003711 | 0.24201  | 0.086814 |
| MmugDNA.28676.1.S1_at   | MmugDNA.28676.1 | 4.12  | 4.14  | 0.17 | 0.07 | -1.02 | 0.471015 | 0.476342 | 0.766294 | 0.682695 |
| MmugDNA.28677.1.S1_at   | MmugDNA.28677.1 | 4.09  | 4.04  | 0    | 0.18 | 1.04  | 0.669881 | 0.659475 | 0.869803 | 0.800789 |
| MmugDNA.28679.1.S1_at   | MmugDNA.28679.1 | 4.98  | 4.82  | 0.1  | 0.06 | 1.12  | 0.22196  | 0.286796 | 0.591547 | 0.548149 |
| MmugDNA.2868.1.S1_at    | MmugDNA.2868.1  | 5.29  | 4.96  | 0.26 | 0.07 | 1.26  | 0.402033 | 0.591714 | 0.724787 | 0.757198 |
| MmugDNA.28680.1.S1_at   | MmugDNA.28680.1 | 10.06 | 10.26 | 0.32 | 0.11 | -1.14 | 0.459431 | 0.630456 | 0.759517 | 0.782237 |
| MmugDNA.28681.1.S1_at   | MmugDNA.28681.1 | 6.08  | 6.02  | 0.03 | 0.11 | 1.04  | 0.181128 | 0.505336 | 0.554358 | 0.702073 |
| MmugDNA.28684.1.S1_at   | MmugDNA.28684.1 | 3.49  | 3.38  | 0.22 | 0.09 | 1.08  | 0.832159 | 0.505838 | 0.939781 | 0.702218 |
| MmugDNA.28685.1.S1_at   | MmugDNA.28685.1 | 4.67  | 4.21  | 0.69 | 0.33 | 1.38  | 0.52064  | 0.770928 | 0.793875 | 0.866807 |
| MmugDNA.28687.1.S1_at   | MmugDNA.28687.1 | 4.34  | 4.51  | 0.14 | 0.78 | -1.13 | 0.623117 | 0.61154  | 0.848101 | 0.76941  |
| MmugDNA.28688.1.S1_at   | MmugDNA.28688.1 | 6.51  | 6.33  | 0.2  | 0.07 | 1.14  | 0.211718 | 0.090412 | 0.582625 | 0.344899 |
| MmugDNA.2869.1.S1_at    | MmugDNA.2869.1  | 3.76  | 3.85  | 0.3  | 0.14 | -1.07 | 0.75209  | 0.123095 | 0.906281 | 0.393102 |
| MmugDNA.28690.1.S1_at   | MmugDNA.28690.1 | 4.81  | 4.9   | 0.18 | 0    | -1.07 | 0.942749 | 0.934852 | 0.98031  | 0.963108 |

|                         |                 |       |       |      |      |       |          |          |          |          |
|-------------------------|-----------------|-------|-------|------|------|-------|----------|----------|----------|----------|
| MmugDNA.28691.1.S1_at   | MmugDNA.28691.1 | 8.46  | 8.2   | 0.47 | 0.13 | 1.2   | 0.822889 | 0.843542 | 0.936102 | 0.910896 |
| MmugDNA.28692.1.S1_at   | MmugDNA.28692.1 | 7.5   | 8.67  | 0.65 | 0.13 | -2.24 | 0.104283 | 0.222658 | 0.475417 | 0.495617 |
| MmugDNA.28693.1.S1_s_at | MmugDNA.28693.1 | 9.06  | 8.4   | 0.06 | 0.05 | 1.58  | 0.000175 | 0.000007 | 0.112975 | 0.016421 |
| MmugDNA.28695.1.S1_s_at | MmugDNA.28695.1 | 11.83 | 11.71 | 0.19 | 0.05 | 1.08  | 0.395534 | 0.535258 | 0.720494 | 0.720836 |
| MmugDNA.28696.1.S1_at   | MmugDNA.28696.1 | 6.66  | 8.59  | 1.27 | 0.19 | -3.82 | 0.209092 | 0.306555 | 0.580645 | 0.563101 |
| MmugDNA.28697.1.S1_at   | MmugDNA.28697.1 | 4.15  | 4.15  | 0.11 | 0.01 | 1     | 0.415173 | 0.299464 | 0.73361  | 0.557907 |
| MmugDNA.28699.1.S1_at   | MmugDNA.28699.1 | 6.91  | 6.05  | 0.24 | 0.36 | 1.82  | 0.013946 | 0.137371 | 0.273301 | 0.41029  |
| MmugDNA.287.1.S1_at     | MmugDNA.287.1   | 12.1  | 12.1  | 0.38 | 0.04 | 1     | 0.640795 | 0.065014 | 0.856938 | 0.300961 |
| MmugDNA.28701.1.S1_at   | MmugDNA.28701.1 | 4.36  | 4.25  | 0.15 | 0.16 | 1.08  | 0.744421 | 0.869922 | 0.90255  | 0.926178 |
| MmugDNA.28702.1.S1_at   | MmugDNA.28702.1 | 10.95 | 11.06 | 0.42 | 0.11 | -1.08 | 0.788994 | 0.145422 | 0.922472 | 0.419421 |
| MmugDNA.28703.1.S1_at   | MmugDNA.28703.1 | 10.15 | 9.91  | 0.03 | 0.07 | 1.18  | 0.007094 | 0.001986 | 0.225651 | 0.066165 |
| MmugDNA.28705.1.S1_at   | MmugDNA.28705.1 | 9.78  | 9.53  | 0.06 | 0.06 | 1.19  | 0.011056 | 0.002521 | 0.252253 | 0.074158 |
| MmugDNA.28707.1.S1_at   | MmugDNA.28707.1 | 9.03  | 9.12  | 0.01 | 0.12 | -1.06 | 0.291993 | 0.320769 | 0.648363 | 0.572849 |
| MmugDNA.28708.1.S1_at   | MmugDNA.28708.1 | 5.67  | 5.42  | 0.19 | 0    | 1.19  | 0.08479  | 0.096505 | 0.451403 | 0.35409  |
| MmugDNA.28709.1.S1_at   | MmugDNA.28709.1 | 5.31  | 5.15  | 0.07 | 0.16 | 1.12  | 0.119451 | 0.357134 | 0.492875 | 0.59881  |
| MmugDNA.2871.1.S1_s_at  | MmugDNA.2871.1  | 9.26  | 8.43  | 0.02 | 0.39 | 1.77  | 0.018194 | 0.010035 | 0.295482 | 0.131317 |
| MmugDNA.28710.1.S1_at   | MmugDNA.28710.1 | 5.81  | 7.4   | 1.14 | 0.11 | -3.02 | 0.256936 | 0.335799 | 0.620821 | 0.583525 |
| MmugDNA.28711.1.S1_at   | MmugDNA.28711.1 | 7.02  | 6.77  | 2.6  | 0.48 | 1.19  | 0.853519 | 0.212612 | 0.948299 | 0.486547 |
| MmugDNA.28712.1.S1_at   | MmugDNA.28712.1 | 3.19  | 3.15  | 0.08 | 0    | 1.03  | 0.227197 | 0.262782 | 0.596459 | 0.529136 |
| MmugDNA.28714.1.S1_at   | MmugDNA.28714.1 | 6.45  | 6.42  | 0.11 | 0.04 | 1.02  | 0.52522  | 0.090583 | 0.796191 | 0.345079 |
| MmugDNA.28715.1.S1_at   | MmugDNA.28715.1 | 6.49  | 8.17  | 0.31 | 0.18 | -3.21 | 0.002049 | 0.000582 | 0.173807 | 0.04147  |
| MmugDNA.28716.1.S1_at   | MmugDNA.28716.1 | 8.3   | 8.51  | 0.25 | 0.33 | -1.16 | 0.169363 | 0.12186  | 0.542311 | 0.391189 |
| MmugDNA.28717.1.S1_at   | MmugDNA.28717.1 | 10.17 | 9.87  | 0.77 | 0.15 | 1.22  | 0.640431 | 0.490736 | 0.856752 | 0.692666 |
| MmugDNA.28718.1.S1_at   | MmugDNA.28718.1 | 8.33  | 8.8   | 0.26 | 0.15 | -1.38 | 0.024044 | 0.015716 | 0.317529 | 0.158858 |
| MmugDNA.28719.1.S1_at   | MmugDNA.28719.1 | 9.11  | 9.49  | 0.91 | 0.2  | -1.31 | 0.457034 | 0.34752  | 0.758078 | 0.592019 |
| MmugDNA.2872.1.S1_at    | MmugDNA.2872.1  | 4.56  | 4.32  | 0.04 | 0.08 | 1.19  | 0.009914 | 0.052853 | 0.244219 | 0.275521 |
| MmugDNA.28720.1.S1_at   | MmugDNA.28720.1 | 11.42 | 11.46 | 0.15 | 0.15 | -1.03 | 0.643164 | 0.722938 | 0.858088 | 0.839489 |
| MmugDNA.28722.1.S1_at   | MmugDNA.28722.1 | 12.96 | 13.07 | 0.43 | 0.06 | -1.08 | 0.263047 | 0.198165 | 0.625096 | 0.473148 |
| MmugDNA.28723.1.S1_at   | MmugDNA.28723.1 | 10.88 | 11.04 | 0.61 | 0.18 | -1.11 | 0.247835 | 0.263018 | 0.613496 | 0.529397 |
| MmugDNA.28725.1.S1_at   | MmugDNA.28725.1 | 11.68 | 12.22 | 0.13 | 0.22 | -1.45 | 0.019918 | 0.102248 | 0.302615 | 0.36236  |
| MmugDNA.28725.1.S1_s_at | MmugDNA.28725.1 | 12.03 | 12.33 | 0.11 | 0.06 | -1.23 | 0.012359 | 0.209436 | 0.261875 | 0.483069 |
| MmugDNA.28726.1.S1_at   | MmugDNA.28726.1 | 6.38  | 6.36  | 0.14 | 0.09 | 1.01  | 0.349579 | 0.521872 | 0.690595 | 0.712667 |
| MmugDNA.28727.1.S1_at   | MmugDNA.28727.1 | 4.26  | 4.7   | 0.74 | 0.33 | -1.35 | 0.621583 | 0.865283 | 0.847584 | 0.923554 |
| MmugDNA.28728.1.S1_at   | MmugDNA.28728.1 | 5.18  | 5.33  | 0.29 | 0.62 | -1.11 | 0.991058 | 0.998346 | 0.996653 | 0.999091 |
| MmugDNA.28729.1.S1_at   | MmugDNA.28729.1 | 3.78  | 3.63  | 0.13 | 0.02 | 1.11  | 0.356343 | 0.181911 | 0.695154 | 0.458442 |
| MmugDNA.28730.1.S1_at   | MmugDNA.28730.1 | 3.01  | 3.03  | 0.1  | 0.21 | -1.02 | 0.568511 | 0.92209  | 0.82091  | 0.956072 |
| MmugDNA.28731.1.S1_at   | MmugDNA.28731.1 | 5.96  | 5.97  | 0.1  | 0.16 | -1.01 | 0.779413 | 0.875707 | 0.918638 | 0.929398 |
| MmugDNA.28732.1.S1_at   | MmugDNA.28732.1 | 5.67  | 5.63  | 0.27 | 0.08 | 1.03  | 0.370106 | 0.688456 | 0.704535 | 0.818166 |
| MmugDNA.28733.1.S1_at   | MmugDNA.28733.1 | 4.77  | 4.94  | 0.1  | 0.52 | -1.12 | 0.250184 | 0.454842 | 0.615476 | 0.668889 |
| MmugDNA.28734.1.S1_at   | MmugDNA.28734.1 | 3.92  | 3.88  | 0.22 | 0.48 | 1.03  | 0.876137 | 0.96987  | 0.956886 | 0.983507 |
| MmugDNA.28735.1.S1_at   | MmugDNA.28735.1 | 5.29  | 5.27  | 0.07 | 0.18 | 1.01  | 0.228155 | 0.229824 | 0.597069 | 0.501802 |
| MmugDNA.28736.1.S1_at   | MmugDNA.28736.1 | 8     | 8.03  | 0.99 | 0.17 | -1.02 | 0.801724 | 0.952648 | 0.927736 | 0.973147 |
| MmugDNA.28737.1.S1_at   | MmugDNA.28737.1 | 7.69  | 7.44  | 0.24 | 0.18 | 1.2   | 0.08475  | 0.229825 | 0.451328 | 0.501802 |

|                         |                 |       |       |      |      |       |          |          |          |          |
|-------------------------|-----------------|-------|-------|------|------|-------|----------|----------|----------|----------|
| MmugDNA.28739.1.S1_at   | MmugDNA.28739.1 | 6.06  | 6.2   | 0.22 | 0.09 | -1.1  | 0.382148 | 0.005371 | 0.710505 | 0.101194 |
| MmugDNA.28740.1.S1_at   | MmugDNA.28740.1 | 9.65  | 10.31 | 0.86 | 0.11 | -1.58 | 0.742039 | 0.034942 | 0.901613 | 0.231062 |
| MmugDNA.28741.1.S1_at   | MmugDNA.28741.1 | 10.68 | 11.37 | 0.07 | 0.17 | -1.62 | 0.002419 | 0.000618 | 0.177075 | 0.042444 |
| MmugDNA.28743.1.S1_at   | MmugDNA.28743.1 | 9.25  | 9.17  | 0.45 | 0.03 | 1.05  | 0.845729 | 0.075814 | 0.945907 | 0.320402 |
| MmugDNA.28744.1.S1_at   | MmugDNA.28744.1 | 5.03  | 4.95  | 0.1  | 0.05 | 1.06  | 0.28617  | 0.196545 | 0.64358  | 0.471582 |
| MmugDNA.28745.1.S1_at   | MmugDNA.28745.1 | 9.81  | 10.17 | 0.84 | 0.13 | -1.29 | 0.75079  | 0.164134 | 0.905556 | 0.440346 |
| MmugDNA.28746.1.S1_at   | MmugDNA.28746.1 | 5.7   | 5.76  | 0.22 | 0.13 | -1.05 | 0.453635 | 0.035139 | 0.756225 | 0.231645 |
| MmugDNA.28747.1.S1_at   | MmugDNA.28747.1 | 7.92  | 7.58  | 0.36 | 0.16 | 1.26  | 0.56606  | 0.64624  | 0.819767 | 0.792712 |
| MmugDNA.28750.1.S1_at   | MmugDNA.28750.1 | 6.68  | 6.61  | 0.57 | 0.21 | 1.05  | 0.216509 | 0.273969 | 0.586605 | 0.538503 |
| MmugDNA.28751.1.S1_at   | MmugDNA.28751.1 | 10.36 | 9.46  | 0.75 | 0.3  | 1.86  | 0.241364 | 0.241671 | 0.607596 | 0.512225 |
| MmugDNA.28753.1.S1_at   | MmugDNA.28753.1 | 3.2   | 3.2   | 0.08 | 0.05 | -1    | 0.803658 | 0.049772 | 0.928541 | 0.26818  |
| MmugDNA.28754.1.S1_at   | MmugDNA.28754.1 | 6.85  | 6.72  | 0.11 | 0.05 | 1.1   | 0.079521 | 0.061993 | 0.442306 | 0.295862 |
| MmugDNA.28755.1.S1_at   | MmugDNA.28755.1 | 4.88  | 5.87  | 0.47 | 0.57 | -1.99 | 0.162127 | 0.454565 | 0.535244 | 0.668668 |
| MmugDNA.28756.1.S1_at   | MmugDNA.28756.1 | 5.25  | 4.28  | 0.66 | 0.16 | 1.96  | 0.072296 | 0.047395 | 0.432116 | 0.262443 |
| MmugDNA.28759.1.S1_at   | MmugDNA.28759.1 | 6.47  | 6.83  | 0.33 | 0.38 | -1.28 | 0.246889 | 0.258537 | 0.612531 | 0.525796 |
| MmugDNA.2876.1.S1_at    | MmugDNA.2876.1  | 4.08  | 3.8   | 0.14 | 0.08 | 1.22  | 0.092624 | 0.079275 | 0.461192 | 0.326444 |
| MmugDNA.28760.1.S1_at   | MmugDNA.28760.1 | 5.07  | 4.79  | 0.58 | 0.26 | 1.21  | 0.239429 | 0.106507 | 0.605885 | 0.369078 |
| MmugDNA.28761.1.S1_at   | MmugDNA.28761.1 | 7.55  | 7.47  | 0.1  | 0.03 | 1.06  | 0.148574 | 0.374132 | 0.522648 | 0.612678 |
| MmugDNA.28762.1.S1_at   | MmugDNA.28762.1 | 8.38  | 8.99  | 0.68 | 0.17 | -1.53 | 0.298075 | 0.353925 | 0.652872 | 0.596894 |
| MmugDNA.28763.1.S1_at   | MmugDNA.28763.1 | 4.61  | 4.79  | 0.26 | 0.14 | -1.13 | 0.453448 | 0.484186 | 0.75608  | 0.688399 |
| MmugDNA.36143.1.S1_s_at | MmugDNA.36143.1 | 6.81  | 6.65  | 0.2  | 0.18 | 1.12  | 0.797283 | 0.524194 | 0.925402 | 0.714207 |
| MmugDNA.28765.1.S1_at   | MmugDNA.28765.1 | 10.91 | 10.89 | 0.08 | 0.03 | 1.01  | 0.779698 | 0.164301 | 0.918789 | 0.440539 |
| MmugDNA.28766.1.S1_at   | MmugDNA.28766.1 | 5.16  | 5.15  | 0.27 | 0.09 | 1     | 0.400763 | 0.024311 | 0.723941 | 0.195175 |
| MmugDNA.28767.1.S1_at   | MmugDNA.28767.1 | 2.96  | 2.97  | 0.57 | 0.58 | -1    | 0.982031 | 0.292215 | 0.994351 | 0.552363 |
| MmugDNA.28768.1.S1_at   | MmugDNA.28768.1 | 6.4   | 6.4   | 0.05 | 0.1  | -1    | 0.857675 | 0.345545 | 0.949729 | 0.59079  |
| MmugDNA.28769.1.S1_at   | MmugDNA.28769.1 | 3.7   | 3.84  | 0.04 | 0.1  | -1.1  | 0.272811 | 0.051979 | 0.632522 | 0.273453 |
| MmugDNA.2877.1.S1_at    | MmugDNA.2877.1  | 3.61  | 3.58  | 0.31 | 0.02 | 1.02  | 0.296388 | 0.255321 | 0.65205  | 0.523394 |
| MmugDNA.28770.1.S1_at   | MmugDNA.28770.1 | 8.53  | 8.14  | 0.05 | 0.05 | 1.3   | 0.000866 | 0.022092 | 0.153739 | 0.185972 |
| MmugDNA.28771.1.S1_at   | MmugDNA.28771.1 | 7.16  | 7.37  | 0.68 | 0.18 | -1.16 | 0.523073 | 0.014558 | 0.795458 | 0.153907 |
| MmugDNA.28772.1.S1_at   | MmugDNA.28772.1 | 4.07  | 3.86  | 0.19 | 0.08 | 1.15  | 0.459837 | 0.177364 | 0.759823 | 0.453742 |
| MmugDNA.28774.1.S1_at   | MmugDNA.28774.1 | 3.02  | 2.85  | 0.26 | 0.01 | 1.13  | 0.229625 | 0.286042 | 0.598458 | 0.547527 |
| MmugDNA.28775.1.S1_at   | MmugDNA.28775.1 | 8.47  | 8.21  | 0.96 | 0.27 | 1.2   | 0.564773 | 0.292814 | 0.81898  | 0.552823 |
| MmugDNA.28777.1.S1_at   | MmugDNA.28777.1 | 7.42  | 6.63  | 0.25 | 0.1  | 1.72  | 0.008025 | 0.133441 | 0.232005 | 0.405282 |
| MmugDNA.28778.1.S1_at   | MmugDNA.28778.1 | 10.21 | 9.93  | 0.06 | 0.09 | 1.21  | 0.007695 | 0.000983 | 0.23074  | 0.050067 |
| MmugDNA.28780.1.S1_at   | MmugDNA.28780.1 | 5.27  | 4.77  | 0.16 | 0.14 | 1.41  | 0.030828 | 0.165033 | 0.338919 | 0.44123  |
| MmugDNA.28781.1.S1_s_at | MmugDNA.28781.1 | 7.14  | 7.81  | 0.87 | 0.11 | -1.6  | 0.234311 | 0.031121 | 0.601622 | 0.218175 |
| MmugDNA.28782.1.S1_at   | MmugDNA.28782.1 | 10.02 | 9.3   | 0.35 | 0.34 | 1.64  | 0.165514 | 0.079054 | 0.538324 | 0.326117 |
| MmugDNA.28782.1.S1_s_at | MmugDNA.28782.1 | 9.54  | 8.74  | 0.37 | 0.35 | 1.74  | 0.133445 | 0.122923 | 0.507925 | 0.392923 |
| MmugDNA.28783.1.S1_at   | MmugDNA.28783.1 | 3.7   | 3.91  | 0.21 | 0.14 | -1.15 | 0.069675 | 0.082867 | 0.427525 | 0.332423 |
| MmugDNA.28784.1.S1_at   | MmugDNA.28784.1 | 3.94  | 4.41  | 0.16 | 0.12 | -1.38 | 0.025315 | 0.090869 | 0.32131  | 0.345474 |
| MmugDNA.28785.1.S1_at   | MmugDNA.28785.1 | 9.91  | 8.9   | 0.16 | 0.39 | 2.01  | 0.011904 | 0.003049 | 0.257858 | 0.08051  |
| MmugDNA.28786.1.S1_at   | MmugDNA.28786.1 | 3.64  | 3.33  | 0.19 | 0.26 | 1.24  | 0.314254 | 0.47613  | 0.665103 | 0.682524 |
| MmugDNA.28788.1.S1_at   | MmugDNA.28788.1 | 12.16 | 12.05 | 0.39 | 0.14 | 1.08  | 0.225402 | 0.212553 | 0.594611 | 0.486502 |



|                         |                 |       |       |      |      |       |          |          |          |          |
|-------------------------|-----------------|-------|-------|------|------|-------|----------|----------|----------|----------|
| MmugDNA.28789.1.S1_s_at | MmugDNA.28789.1 | 11.42 | 10.85 | 0.06 | 0.07 | 1.49  | 0.000416 | 0.008446 | 0.137028 | 0.121922 |
| MmugDNA.2879.1.S1_at    | MmugDNA.2879.1  | 2.88  | 2.8   | 0.07 | 0.06 | 1.06  | 0.426244 | 0.227995 | 0.740398 | 0.500211 |
| MmugDNA.28790.1.S1_at   | MmugDNA.28790.1 | 4.52  | 4.35  | 0.12 | 0.12 | 1.13  | 0.247054 | 0.319594 | 0.612582 | 0.571885 |
| MmugDNA.28791.1.S1_at   | MmugDNA.28791.1 | 5.55  | 5.79  | 0.89 | 0.74 | -1.18 | 0.748582 | 0.387309 | 0.904527 | 0.622027 |
| MmugDNA.28793.1.S1_at   | MmugDNA.28793.1 | 3.85  | 3.93  | 0.19 | 0.18 | -1.06 | 0.853292 | 0.970741 | 0.948299 | 0.984051 |
| MmugDNA.28794.1.S1_at   | MmugDNA.28794.1 | 5.86  | 5.63  | 0.2  | 0.46 | 1.17  | 0.3498   | 0.488019 | 0.690835 | 0.690855 |
| MmugDNA.28795.1.S1_at   | MmugDNA.28795.1 | 7.26  | 7.87  | 0.19 | 0.35 | -1.52 | 0.103357 | 0.17087  | 0.474122 | 0.447512 |
| MmugDNA.28796.1.S1_at   | MmugDNA.28796.1 | 3.8   | 3.85  | 0.05 | 0.07 | -1.03 | 0.36111  | 0.0975   | 0.698314 | 0.355299 |
| MmugDNA.28797.1.S1_at   | MmugDNA.28797.1 | 7.49  | 7.21  | 0.41 | 0.11 | 1.21  | 0.382499 | 0.482114 | 0.710759 | 0.687016 |
| MmugDNA.28798.1.S1_at   | MmugDNA.28798.1 | 6.89  | 6.61  | 0.28 | 0.08 | 1.22  | 0.132866 | 0.107421 | 0.507071 | 0.370243 |
| MmugDNA.28799.1.S1_at   | MmugDNA.28799.1 | 3.66  | 3.57  | 0.43 | 0.1  | -1.06 | 0.643349 | 0.890091 | 0.858192 | 0.937419 |
| MmugDNA.288.1.S1_at     | MmugDNA.288.1   | 11.58 | 11    | 0.57 | 0.1  | 1.5   | 0.130741 | 0.015743 | 0.505234 | 0.158972 |
| MmugDNA.28800.1.S1_at   | MmugDNA.28800.1 | 3.82  | 3.13  | 0.3  | 0.46 | 1.6   | 0.355605 | 0.054557 | 0.694743 | 0.279114 |
| MmugDNA.28801.1.S1_at   | MmugDNA.28801.1 | 6.14  | 6.07  | 0.14 | 0.03 | 1.04  | 0.378785 | 0.571195 | 0.708454 | 0.743594 |
| MmugDNA.28802.1.S1_at   | MmugDNA.28802.1 | 5.89  | 5.63  | 0.23 | 0.07 | 1.2   | 0.152736 | 0.071945 | 0.525643 | 0.314293 |
| MmugDNA.28803.1.S1_at   | MmugDNA.28803.1 | 9.78  | 9.96  | 0.15 | 0.04 | -1.13 | 0.149655 | 0.029202 | 0.523226 | 0.212898 |
| MmugDNA.28804.1.S1_at   | MmugDNA.28804.1 | 5.4   | 5.32  | 0.16 | 0.11 | 1.06  | 0.380852 | 0.516583 | 0.70974  | 0.709034 |
| MmugDNA.28805.1.S1_at   | MmugDNA.28805.1 | 2.71  | 2.81  | 0.21 | 0.1  | -1.07 | 0.568827 | 0.185717 | 0.821041 | 0.46163  |
| MmugDNA.28806.1.S1_at   | MmugDNA.28806.1 | 6.94  | 6.97  | 0.15 | 0.49 | -1.02 | 0.621508 | 0.391255 | 0.847545 | 0.624942 |
| MmugDNA.28807.1.S1_at   | MmugDNA.28807.1 | 9.09  | 9.2   | 0.31 | 0.11 | -1.08 | 0.648021 | 0.285036 | 0.859643 | 0.547095 |
| MmugDNA.28808.1.S1_at   | MmugDNA.28808.1 | 11.06 | 10.95 | 2.96 | 0.22 | 1.08  | 0.670735 | 0.251577 | 0.870059 | 0.520309 |
| MmugDNA.28809.1.S1_at   | MmugDNA.28809.1 | 6.46  | 7.29  | 0.68 | 0.17 | -1.78 | 0.411564 | 0.510927 | 0.731543 | 0.705282 |
| MmugDNA.28810.1.S1_at   | MmugDNA.28810.1 | 8.8   | 8.56  | 0.67 | 0.26 | 1.18  | 0.32571  | 0.038196 | 0.673403 | 0.240129 |
| MmugDNA.28811.1.S1_at   | MmugDNA.28811.1 | 7.66  | 7.55  | 0.12 | 0.1  | 1.08  | 0.270318 | 0.221722 | 0.630253 | 0.494901 |
| MmugDNA.28812.1.S1_at   | MmugDNA.28812.1 | 3.96  | 3.97  | 0.01 | 0.28 | -1.01 | 0.604206 | 0.797441 | 0.839545 | 0.883215 |
| MmugDNA.28813.1.S1_at   | MmugDNA.28813.1 | 11.76 | 10.67 | 0.48 | 0.31 | 2.13  | 0.027946 | 0.03129  | 0.330017 | 0.218776 |
| MmugDNA.28814.1.S1_at   | MmugDNA.28814.1 | 12.12 | 12.45 | 0.14 | 0.05 | -1.26 | 0.014422 | 0.017656 | 0.27544  | 0.168002 |
| MmugDNA.28815.1.S1_at   | MmugDNA.28815.1 | 4.83  | 4.77  | 0.07 | 0.17 | 1.05  | 0.206828 | 0.20803  | 0.578774 | 0.482049 |
| MmugDNA.28816.1.S1_at   | MmugDNA.28816.1 | 7.04  | 7.28  | 0.29 | 0.07 | -1.18 | 0.112899 | 0.370644 | 0.486223 | 0.609667 |
| MmugDNA.28817.1.S1_at   | MmugDNA.28817.1 | 4.32  | 4.17  | 0.35 | 0.37 | 1.11  | 0.991039 | 0.598432 | 0.996653 | 0.760839 |
| MmugDNA.28818.1.S1_at   | MmugDNA.28818.1 | 3.05  | 3.28  | 0.17 | 0.29 | -1.17 | 0.280258 | 0.274215 | 0.639123 | 0.538698 |
| MmugDNA.28819.1.S1_at   | MmugDNA.28819.1 | 3.9   | 3.92  | 0.15 | 0.22 | -1.02 | 0.797186 | 0.282751 | 0.925393 | 0.545473 |
| MmugDNA.28823.1.S1_at   | MmugDNA.28823.1 | 5.32  | 5.24  | 0.24 | 0.15 | 1.06  | 0.683314 | 0.805281 | 0.876089 | 0.888065 |
| MmugDNA.28824.1.S1_s_at | MmugDNA.28824.1 | 11.46 | 12.1  | 0.18 | 0.05 | -1.56 | 0.00601  | 0.001862 | 0.213939 | 0.064697 |
| MmugDNA.28825.1.S1_at   | MmugDNA.28825.1 | 6.46  | 7.61  | 0.2  | 0.19 | -2.23 | 0.001801 | 0.001375 | 0.167444 | 0.05691  |
| MmugDNA.28826.1.S1_at   | MmugDNA.28826.1 | 3.62  | 3.54  | 0    | 0.14 | 1.06  | 0.333361 | 0.63658  | 0.679591 | 0.786262 |
| MmugDNA.28827.1.S1_at   | MmugDNA.28827.1 | 5.86  | 5.89  | 0.12 | 0.05 | -1.02 | 0.563575 | 0.757433 | 0.818298 | 0.858821 |
| MmugDNA.28829.1.S1_at   | MmugDNA.28829.1 | 3.45  | 3.49  | 0.09 | 0.12 | -1.03 | 0.336988 | 0.578647 | 0.682166 | 0.748603 |
| MmugDNA.2883.1.S1_at    | MmugDNA.2883.1  | 3.83  | 3.66  | 0.13 | 0.17 | 1.12  | 0.522435 | 0.712645 | 0.795143 | 0.83344  |
| MmugDNA.28830.1.S1_at   | MmugDNA.28830.1 | 4.97  | 4.98  | 0.18 | 0.08 | -1.01 | 0.909759 | 0.99413  | 0.96945  | 0.996429 |
| MmugDNA.28832.1.S1_at   | MmugDNA.28832.1 | 3.09  | 3.1   | 0.02 | 0.12 | -1.01 | 0.442118 | 0.515454 | 0.749848 | 0.708312 |
| MmugDNA.28833.1.S1_at   | MmugDNA.28833.1 | 9.27  | 9.26  | 0.26 | 0.11 | 1.01  | 0.37467  | 0.215913 | 0.706036 | 0.489546 |
| MmugDNA.28834.1.S1_at   | MmugDNA.28834.1 | 11.42 | 11.49 | 0.03 | 0.01 | -1.05 | 0.029967 | 0.000881 | 0.336449 | 0.047602 |

|                         |                 |       |       |      |      |       |          |          |          |          |
|-------------------------|-----------------|-------|-------|------|------|-------|----------|----------|----------|----------|
| MmugDNA.28834.1.S1_s_at | MmugDNA.28834.1 | 11.9  | 11.94 | 0.02 | 0.06 | -1.02 | 0.156696 | 0.006657 | 0.529833 | 0.110505 |
| MmugDNA.28835.1.S1_at   | MmugDNA.28835.1 | 7.88  | 7.92  | 0.06 | 0.25 | -1.03 | 0.902205 | 0.114909 | 0.966916 | 0.381621 |
| MmugDNA.28836.1.S1_at   | MmugDNA.28836.1 | 5.32  | 5.54  | 0.13 | 0.06 | -1.16 | 0.090492 | 0.239942 | 0.458754 | 0.510627 |
| MmugDNA.28838.1.S1_at   | MmugDNA.28838.1 | 3.26  | 3.14  | 0.04 | 0.03 | 1.08  | 0.018903 | 0.030684 | 0.298593 | 0.217148 |
| MmugDNA.28839.1.S1_at   | MmugDNA.28839.1 | 5.86  | 6.28  | 0.3  | 0.28 | -1.34 | 0.198221 | 0.0037   | 0.569466 | 0.086769 |
| MmugDNA.28841.1.S1_at   | MmugDNA.28841.1 | 5.53  | 5.41  | 0.25 | 0.06 | 1.08  | 0.431045 | 0.488868 | 0.74323  | 0.691436 |
| MmugDNA.28844.1.S1_at   | MmugDNA.28844.1 | 4.68  | 4.48  | 0.08 | 0.05 | 1.15  | 0.030957 | 0.285665 | 0.339277 | 0.547395 |
| MmugDNA.28845.1.S1_at   | MmugDNA.28845.1 | 4.06  | 3.98  | 0.23 | 0.16 | 1.05  | 0.831873 | 0.333392 | 0.939678 | 0.581668 |
| MmugDNA.28846.1.S1_at   | MmugDNA.28846.1 | 5.98  | 5.81  | 0.17 | 0    | 1.12  | 0.544087 | 0.409367 | 0.807024 | 0.636452 |
| MmugDNA.28847.1.S1_at   | MmugDNA.28847.1 | 3.89  | 3.71  | 0.34 | 0.1  | 1.14  | 0.820599 | 0.391918 | 0.935289 | 0.625419 |
| MmugDNA.28849.1.S1_at   | MmugDNA.28849.1 | 5.12  | 5.41  | 0.09 | 0.24 | -1.22 | 0.126348 | 0.06607  | 0.50012  | 0.302434 |
| MmugDNA.2885.1.S1_at    | MmugDNA.2885.1  | 4.01  | 4.01  | 0.12 | 0.05 | 1     | 0.267266 | 0.477355 | 0.62804  | 0.683422 |
| MmugDNA.28850.1.S1_at   | MmugDNA.28850.1 | 6.52  | 6.49  | 0.36 | 0.14 | 1.02  | 0.866914 | 0.816553 | 0.953253 | 0.894202 |
| MmugDNA.28851.1.S1_at   | MmugDNA.28851.1 | 3.2   | 3.16  | 0.15 | 0.19 | 1.03  | 0.506756 | 0.140099 | 0.786013 | 0.413394 |
| MmugDNA.28852.1.S1_at   | MmugDNA.28852.1 | 3.14  | 2.95  | 0.03 | 0.15 | 1.15  | 0.095082 | 0.24874  | 0.464131 | 0.517931 |
| MmugDNA.28852.1.S1_s_at | MmugDNA.28852.1 | 8.33  | 8.04  | 0.38 | 0.36 | 1.22  | 0.413971 | 0.073969 | 0.732685 | 0.317476 |
| MmugDNA.28853.1.S1_at   | MmugDNA.28853.1 | 6.13  | 6.13  | 0.09 | 0.11 | -1    | 0.236818 | 0.316023 | 0.603719 | 0.569488 |
| MmugDNA.28854.1.S1_at   | MmugDNA.28854.1 | 3.09  | 3     | 0.08 | 0.11 | 1.06  | 0.798266 | 0.894437 | 0.926014 | 0.939731 |
| MmugDNA.28856.1.S1_at   | MmugDNA.28856.1 | 3.01  | 3.06  | 0.15 | 0.38 | -1.03 | 0.957394 | 0.984031 | 0.985974 | 0.991118 |
| MmugDNA.28857.1.S1_at   | MmugDNA.28857.1 | 4.8   | 4.63  | 0.06 | 0.26 | 1.13  | 0.26867  | 0.527137 | 0.628969 | 0.715861 |
| MmugDNA.28858.1.S1_at   | MmugDNA.28858.1 | 7.41  | 7.2   | 0.17 | 0.23 | 1.16  | 0.466803 | 0.160595 | 0.763884 | 0.436745 |
| MmugDNA.28859.1.S1_at   | MmugDNA.28859.1 | 4.66  | 4.53  | 0.03 | 0.23 | 1.09  | 0.362904 | 0.422416 | 0.699735 | 0.645722 |
| MmugDNA.2886.1.S1_at    | MmugDNA.2886.1  | 3.99  | 4.03  | 0.12 | 0.44 | -1.03 | 0.493181 | 0.078055 | 0.778772 | 0.324529 |
| MmugDNA.28860.1.S1_at   | MmugDNA.28860.1 | 5.36  | 5.39  | 0.23 | 0.04 | -1.02 | 0.939702 | 0.99648  | 0.979532 | 0.997934 |
| MmugDNA.28861.1.S1_at   | MmugDNA.28861.1 | 5.12  | 4.94  | 0.24 | 0.1  | 1.13  | 0.285152 | 0.188164 | 0.643069 | 0.464251 |
| MmugDNA.28862.1.S1_at   | MmugDNA.28862.1 | 4.22  | 4.29  | 0.49 | 0.15 | -1.05 | 0.382928 | 0.573069 | 0.711061 | 0.744941 |
| MmugDNA.28863.1.S1_at   | MmugDNA.28863.1 | 10.05 | 10.68 | 0.77 | 0.1  | -1.55 | 0.101757 | 0.101088 | 0.472011 | 0.360724 |
| MmugDNA.28864.1.S1_at   | MmugDNA.28864.1 | 13.58 | 13.36 | 0.04 | 0.11 | 1.17  | 0.03166  | 0.023731 | 0.341694 | 0.192891 |
| MmugDNA.28865.1.S1_at   | MmugDNA.28865.1 | 10.7  | 11.45 | 0.55 | 0.17 | -1.68 | 0.091368 | 0.068799 | 0.459181 | 0.308711 |
| MmugDNA.28866.1.S1_at   | MmugDNA.28866.1 | 4.34  | 4.23  | 0.1  | 0.26 | 1.08  | 0.208895 | 0.130111 | 0.580477 | 0.401746 |
| MmugDNA.28867.1.S1_at   | MmugDNA.28867.1 | 3.84  | 3.84  | 0.04 | 0.06 | 1     | 0.240502 | 0.303834 | 0.606822 | 0.561225 |
| MmugDNA.28868.1.S1_at   | MmugDNA.28868.1 | 10.81 | 11.36 | 0.56 | 0.25 | -1.47 | 0.046095 | 0.020826 | 0.37735  | 0.180995 |
| MmugDNA.28869.1.S1_s_at | MmugDNA.28869.1 | 9.41  | 9.38  | 0.34 | 0.23 | 1.02  | 0.517815 | 0.484449 | 0.792286 | 0.688478 |
| MmugDNA.2887.1.S1_at    | MmugDNA.2887.1  | 7.62  | 7.42  | 0.11 | 0.09 | 1.15  | 0.067288 | 0.324841 | 0.423412 | 0.575375 |
| MmugDNA.28871.1.S1_at   | MmugDNA.28871.1 | 7.84  | 8.1   | 0.94 | 0.12 | -1.2  | 0.621817 | 0.821464 | 0.847631 | 0.897172 |
| MmugDNA.28872.1.S1_at   | MmugDNA.28872.1 | 4.85  | 4.32  | 0.78 | 0.29 | 1.44  | 0.323477 | 0.360944 | 0.672273 | 0.601991 |
| MmugDNA.28873.1.S1_at   | MmugDNA.28873.1 | 8.7   | 9.13  | 0.25 | 0.06 | -1.35 | 0.057622 | 0.012826 | 0.402592 | 0.145883 |
| MmugDNA.28874.1.S1_at   | MmugDNA.28874.1 | 9.3   | 9.53  | 0.45 | 0.12 | -1.17 | 0.897554 | 0.796418 | 0.965207 | 0.882655 |
| MmugDNA.28876.1.S1_at   | MmugDNA.28876.1 | 5.39  | 5.34  | 0.24 | 0.09 | 1.04  | 0.536041 | 0.516524 | 0.802031 | 0.709034 |
| MmugDNA.28877.1.S1_at   | MmugDNA.28877.1 | 11.05 | 11.03 | 0.3  | 0.03 | 1.01  | 0.810181 | 0.907546 | 0.931274 | 0.947728 |
| MmugDNA.28878.1.S1_at   | MmugDNA.28878.1 | 5.12  | 5.15  | 0.03 | 0.19 | -1.03 | 0.548518 | 0.724666 | 0.809836 | 0.840629 |
| MmugDNA.2888.1.S1_at    | MmugDNA.2888.1  | 9.47  | 9.58  | 0.38 | 0.42 | -1.08 | 0.360125 | 0.107464 | 0.697745 | 0.370311 |
| MmugDNA.28881.1.S1_at   | MmugDNA.28881.1 | 8.23  | 8.24  | 0.04 | 0.08 | -1    | 0.257033 | 0.812168 | 0.620913 | 0.89155  |

|                         |                 |       |       |      |      |       |          |          |          |          |
|-------------------------|-----------------|-------|-------|------|------|-------|----------|----------|----------|----------|
| MmugDNA.28882.1.S1_at   | MmugDNA.28882.1 | 3.91  | 3.77  | 0.16 | 0.07 | 1.1   | 0.645574 | 0.304381 | 0.858801 | 0.561684 |
| MmugDNA.28884.1.S1_at   | MmugDNA.28884.1 | 8.57  | 8.74  | 0.37 | 0.08 | -1.12 | 0.214854 | 0.178047 | 0.585284 | 0.454422 |
| MmugDNA.28885.1.S1_at   | MmugDNA.28885.1 | 9.11  | 9.35  | 0.4  | 0.16 | -1.18 | 0.97701  | 0.024922 | 0.992518 | 0.197766 |
| MmugDNA.28886.1.S1_at   | MmugDNA.28886.1 | 4.38  | 5.15  | 0.27 | 0.59 | -1.7  | 0.113761 | 0.094151 | 0.487196 | 0.350859 |
| MmugDNA.28887.1.S1_at   | MmugDNA.28887.1 | 4.32  | 4.29  | 0.16 | 0.21 | 1.03  | 0.769838 | 0.284886 | 0.913873 | 0.54701  |
| MmugDNA.28888.1.S1_at   | MmugDNA.28888.1 | 5.19  | 5.07  | 0.29 | 0.3  | 1.09  | 0.633035 | 0.638757 | 0.853404 | 0.787827 |
| MmugDNA.2889.1.S1_at    | MmugDNA.2889.1  | 2.9   | 2.87  | 0.08 | 0.1  | 1.02  | 0.975114 | 0.531112 | 0.991912 | 0.718416 |
| MmugDNA.28891.1.S1_at   | MmugDNA.28891.1 | 5.52  | 5.13  | 0.02 | 0.01 | 1.3   | 0.000005 | 0.008618 | 0.050439 | 0.123117 |
| MmugDNA.28892.1.S1_at   | MmugDNA.28892.1 | 5.45  | 5.03  | 0.34 | 0.42 | 1.34  | 0.531647 | 0.301193 | 0.799819 | 0.559356 |
| MmugDNA.28893.1.S1_at   | MmugDNA.28893.1 | 6.84  | 6.69  | 0.09 | 0.06 | 1.11  | 0.261886 | 0.007018 | 0.624136 | 0.113044 |
| MmugDNA.28894.1.S1_at   | MmugDNA.28894.1 | 6.71  | 6.39  | 0.29 | 0.24 | 1.24  | 0.239732 | 0.311292 | 0.606154 | 0.566351 |
| MmugDNA.28895.1.S1_at   | MmugDNA.28895.1 | 5.51  | 5.46  | 0.19 | 0.02 | 1.03  | 0.226893 | 0.617285 | 0.596276 | 0.773326 |
| MmugDNA.28896.1.S1_at   | MmugDNA.28896.1 | 3.59  | 3.69  | 0.19 | 0.13 | -1.07 | 0.181327 | 0.329466 | 0.554512 | 0.578781 |
| MmugDNA.28897.1.S1_at   | MmugDNA.28897.1 | 6.96  | 6.69  | 0.28 | 0.08 | 1.21  | 0.191732 | 0.075988 | 0.562859 | 0.320676 |
| MmugDNA.28898.1.S1_at   | MmugDNA.28898.1 | 3.01  | 2.97  | 0.33 | 0.26 | 1.03  | 0.794079 | 0.897217 | 0.924489 | 0.941342 |
| MmugDNA.28899.1.S1_at   | MmugDNA.28899.1 | 3.89  | 4.12  | 0.09 | 0.31 | -1.18 | 0.276852 | 0.299285 | 0.636476 | 0.557769 |
| MmugDNA.2890.1.S1_at    | MmugDNA.2890.1  | 5.54  | 5.51  | 0.32 | 0.65 | 1.02  | 0.729202 | 0.934771 | 0.89566  | 0.963044 |
| MmugDNA.28900.1.S1_at   | MmugDNA.28900.1 | 6.28  | 6.34  | 0.12 | 0.02 | -1.04 | 0.455798 | 0.827223 | 0.757582 | 0.9008   |
| MmugDNA.28901.1.S1_at   | MmugDNA.28901.1 | 5.56  | 5.84  | 0.13 | 0.23 | -1.21 | 0.143803 | 0.12105  | 0.519093 | 0.39006  |
| MmugDNA.28902.1.S1_at   | MmugDNA.28902.1 | 10.78 | 11.44 | 0.21 | 0.07 | -1.58 | 0.015685 | 0.00781  | 0.28333  | 0.117858 |
| MmugDNA.28904.1.S1_at   | MmugDNA.28904.1 | 3.46  | 3.28  | 0.03 | 0.1  | 1.13  | 0.090907 | 0.064983 | 0.458873 | 0.300855 |
| MmugDNA.28905.1.S1_at   | MmugDNA.28905.1 | 6.73  | 6.7   | 0.36 | 0.05 | 1.02  | 0.331979 | 0.542591 | 0.678409 | 0.725615 |
| MmugDNA.28906.1.S1_at   | MmugDNA.28906.1 | 7.23  | 7.01  | 0.09 | 0.04 | 1.16  | 0.039776 | 0.099988 | 0.36261  | 0.3588   |
| MmugDNA.28908.1.S1_at   | MmugDNA.28908.1 | 7.03  | 6.92  | 0.18 | 0.16 | 1.08  | 0.969306 | 0.994061 | 0.989889 | 0.996398 |
| MmugDNA.28908.1.S1_s_at | MmugDNA.28908.1 | 8.31  | 8.25  | 0.15 | 0    | 1.04  | 0.464077 | 0.824836 | 0.762381 | 0.899424 |
| MmugDNA.28909.1.S1_at   | MmugDNA.28909.1 | 4.29  | 4.09  | 0.31 | 0.15 | 1.15  | 0.509789 | 0.588256 | 0.787835 | 0.754847 |
| MmugDNA.2891.1.S1_at    | MmugDNA.2891.1  | 5.64  | 5.33  | 0.03 | 0.17 | 1.24  | 0.034876 | 0.034391 | 0.350453 | 0.229384 |
| MmugDNA.28910.1.S1_at   | MmugDNA.28910.1 | 5.12  | 4.95  | 0.58 | 0.12 | 1.13  | 0.278549 | 0.416122 | 0.637744 | 0.64135  |
| MmugDNA.28912.1.S1_at   | MmugDNA.28912.1 | 3.71  | 3.27  | 0.25 | 0.5  | 1.36  | 0.972311 | 0.887289 | 0.991019 | 0.93582  |
| MmugDNA.28913.1.S1_at   | MmugDNA.28913.1 | 5.46  | 5.36  | 0.41 | 0.31 | 1.07  | 0.964422 | 0.213245 | 0.988371 | 0.487131 |
| MmugDNA.28914.1.S1_at   | MmugDNA.28914.1 | 11.82 | 11.98 | 0.21 | 0.07 | -1.12 | 0.570109 | 0.022694 | 0.821883 | 0.188693 |
| MmugDNA.28915.1.S1_at   | MmugDNA.28915.1 | 3.15  | 3.1   | 0.01 | 0.15 | 1.03  | 0.616157 | 0.858136 | 0.844767 | 0.91909  |
| MmugDNA.28917.1.S1_at   | MmugDNA.28917.1 | 4.33  | 4.18  | 0.62 | 0.3  | 1.11  | 0.277774 | 0.159207 | 0.637047 | 0.435217 |
| MmugDNA.28920.1.S1_at   | MmugDNA.28920.1 | 4.23  | 4.13  | 0.05 | 0.12 | 1.08  | 0.266389 | 0.010653 | 0.627318 | 0.134769 |
| MmugDNA.28921.1.S1_at   | MmugDNA.28921.1 | 4.95  | 4.77  | 0.16 | 0.22 | 1.14  | 0.329321 | 0.399434 | 0.676319 | 0.629798 |
| MmugDNA.28923.1.S1_at   | MmugDNA.28923.1 | 4.94  | 4.86  | 0.31 | 0    | 1.06  | 0.554159 | 0.802755 | 0.812456 | 0.886441 |
| MmugDNA.28924.1.S1_at   | MmugDNA.28924.1 | 6.65  | 6.61  | 0.11 | 0.03 | 1.02  | 0.630228 | 0.184714 | 0.851919 | 0.460645 |
| MmugDNA.28925.1.S1_at   | MmugDNA.28925.1 | 4.69  | 4.69  | 0.07 | 0.02 | 1     | 0.305614 | 0.761498 | 0.659056 | 0.861416 |
| MmugDNA.28926.1.S1_at   | MmugDNA.28926.1 | 7.16  | 6.64  | 0.3  | 0.1  | 1.43  | 0.050006 | 0.088966 | 0.386663 | 0.342822 |
| MmugDNA.28928.1.S1_at   | MmugDNA.28928.1 | 9.84  | 9.95  | 0.51 | 0.13 | -1.08 | 0.672686 | 0.141977 | 0.871051 | 0.415525 |
| MmugDNA.28929.1.S1_at   | MmugDNA.28929.1 | 4.71  | 4.26  | 0.08 | 0.16 | 1.37  | 0.007744 | 0.006083 | 0.230997 | 0.106306 |
| MmugDNA.2893.1.S1_at    | MmugDNA.2893.1  | 6.63  | 6.43  | 0.1  | 0.08 | 1.15  | 0.245239 | 0.76136  | 0.610643 | 0.861352 |
| MmugDNA.28930.1.S1_at   | MmugDNA.28930.1 | 8.02  | 7.97  | 0.84 | 0.17 | 1.04  | 0.956466 | 0.526801 | 0.985548 | 0.715627 |

|                         |                 |       |       |      |      |       |          |          |          |          |
|-------------------------|-----------------|-------|-------|------|------|-------|----------|----------|----------|----------|
| MmugDNA.28931.1.S1_at   | MmugDNA.28931.1 | 8.45  | 8.29  | 0.92 | 0.12 | 1.12  | 0.268356 | 0.140353 | 0.628784 | 0.413542 |
| MmugDNA.28932.1.S1_at   | MmugDNA.28932.1 | 5.86  | 5.5   | 0.14 | 0.14 | 1.28  | 0.05278  | 0.369256 | 0.39321  | 0.608691 |
| MmugDNA.28934.1.S1_at   | MmugDNA.28934.1 | 4.94  | 5.86  | 0.25 | 0.88 | -1.89 | 0.174674 | 0.074959 | 0.548031 | 0.318932 |
| MmugDNA.28935.1.S1_at   | MmugDNA.28935.1 | 5.11  | 4.58  | 0.27 | 0.04 | 1.44  | 0.083864 | 0.172511 | 0.449936 | 0.448864 |
| MmugDNA.28937.1.S1_at   | MmugDNA.28937.1 | 4.36  | 4.15  | 0.92 | 0.23 | 1.16  | 0.591002 | 0.671786 | 0.833199 | 0.808157 |
| MmugDNA.28939.1.S1_at   | MmugDNA.28939.1 | 4.02  | 4.03  | 0    | 0.04 | -1    | 0.519293 | 0.688154 | 0.793113 | 0.817952 |
| MmugDNA.2894.1.S1_at    | MmugDNA.2894.1  | 5.78  | 5.51  | 0.23 | 0.13 | 1.21  | 0.122838 | 0.567068 | 0.496214 | 0.740985 |
| MmugDNA.28940.1.S1_at   | MmugDNA.28940.1 | 9.99  | 10.4  | 0.38 | 0.09 | -1.32 | 0.161007 | 0.187555 | 0.534327 | 0.463628 |
| MmugDNA.28941.1.S1_at   | MmugDNA.28941.1 | 2.89  | 3.16  | 0.17 | 0.37 | -1.21 | 0.485714 | 0.721597 | 0.774425 | 0.838759 |
| MmugDNA.28942.1.S1_at   | MmugDNA.28942.1 | 8.6   | 8.34  | 0.61 | 0.15 | 1.2   | 0.592587 | 0.752313 | 0.833923 | 0.855787 |
| MmugDNA.28943.1.S1_at   | MmugDNA.28943.1 | 4.27  | 4.3   | 0.18 | 0.1  | -1.02 | 0.876295 | 0.61606  | 0.956886 | 0.77245  |
| MmugDNA.28944.1.S1_at   | MmugDNA.28944.1 | 5.74  | 4.55  | 0.34 | 0.2  | 2.28  | 0.00921  | 0.022088 | 0.241866 | 0.185972 |
| MmugDNA.28945.1.S1_at   | MmugDNA.28945.1 | 5.68  | 5.76  | 0.85 | 0.22 | -1.06 | 0.719499 | 0.901563 | 0.891072 | 0.943991 |
| MmugDNA.28946.1.S1_at   | MmugDNA.28946.1 | 4.35  | 4.23  | 0.46 | 0.22 | 1.08  | 0.406848 | 0.25341  | 0.72838  | 0.521713 |
| MmugDNA.28947.1.S1_at   | MmugDNA.28947.1 | 9.64  | 9.86  | 1.33 | 0.2  | -1.16 | 0.883847 | 0.665756 | 0.959789 | 0.804165 |
| MmugDNA.28948.1.S1_at   | MmugDNA.28948.1 | 9.59  | 9.73  | 0.17 | 0.14 | -1.1  | 0.138664 | 0.377105 | 0.514023 | 0.614795 |
| MmugDNA.28948.1.S1_s_at | MmugDNA.28948.1 | 10.58 | 10.69 | 0.25 | 0.16 | -1.08 | 0.190603 | 0.374859 | 0.561788 | 0.613091 |
| MmugDNA.28949.1.S1_at   | MmugDNA.28949.1 | 5.11  | 5.12  | 0.5  | 0.26 | -1    | 0.669325 | 0.86397  | 0.869511 | 0.922815 |
| MmugDNA.28950.1.S1_at   | MmugDNA.28950.1 | 5.55  | 5.1   | 0.19 | 0.14 | 1.37  | 0.133485 | 0.157253 | 0.507931 | 0.432729 |
| MmugDNA.28951.1.S1_at   | MmugDNA.28951.1 | 5.94  | 5.84  | 0.12 | 0.14 | 1.08  | 0.486707 | 0.32625  | 0.774667 | 0.576452 |
| MmugDNA.28952.1.S1_at   | MmugDNA.28952.1 | 4.56  | 4.66  | 0.07 | 0.13 | -1.07 | 0.910868 | 0.603008 | 0.969778 | 0.763857 |
| MmugDNA.28953.1.S1_at   | MmugDNA.28953.1 | 2.82  | 2.7   | 0.3  | 0.06 | 1.08  | 0.92935  | 0.825154 | 0.976333 | 0.899551 |
| MmugDNA.28954.1.S1_at   | MmugDNA.28954.1 | 11.47 | 11.35 | 0.21 | 0.07 | 1.09  | 0.277134 | 0.540017 | 0.636753 | 0.724035 |
| MmugDNA.28955.1.S1_at   | MmugDNA.28955.1 | 12.48 | 12.15 | 0.23 | 0.23 | 1.26  | 0.32521  | 0.246182 | 0.673069 | 0.515883 |
| MmugDNA.28956.1.S1_s_at | MmugDNA.28956.1 | 8.62  | 8.5   | 0.09 | 0.15 | 1.08  | 0.291279 | 0.010933 | 0.647756 | 0.136187 |
| MmugDNA.28957.1.S1_at   | MmugDNA.28957.1 | 9.51  | 10.12 | 0.25 | 0.09 | -1.53 | 0.032686 | 0.093251 | 0.345175 | 0.349378 |
| MmugDNA.2896.1.S1_at    | MmugDNA.2896.1  | 11.24 | 11.56 | 0.34 | 0.03 | -1.24 | 0.243899 | 0.328216 | 0.609715 | 0.577947 |
| MmugDNA.28960.1.S1_x_at | MmugDNA.28960.1 | 8.36  | 8.33  | 0.14 | 0.12 | 1.02  | 0.687565 | 0.004844 | 0.877864 | 0.097102 |
| MmugDNA.28961.1.S1_a_at | MmugDNA.28961.1 | 4.14  | 4.19  | 0.16 | 0.08 | -1.03 | 0.979761 | 0.138618 | 0.993574 | 0.41168  |
| MmugDNA.28962.1.S1_s_at | MmugDNA.28962.1 | 8.79  | 8.83  | 0.19 | 0.03 | -1.03 | 0.218021 | 0.000541 | 0.587987 | 0.040593 |
| MmugDNA.28964.1.S1_at   | MmugDNA.28964.1 | 4.64  | 4.74  | 0.84 | 0.32 | -1.07 | 0.284822 | 0.306217 | 0.642616 | 0.562907 |
| MmugDNA.28966.1.S1_at   | MmugDNA.28966.1 | 3.74  | 3.45  | 0.59 | 0.13 | 1.23  | 0.144679 | 0.246413 | 0.520018 | 0.515899 |
| MmugDNA.28967.1.S1_at   | MmugDNA.28967.1 | 3.39  | 3.38  | 0.13 | 0.06 | 1     | 0.580199 | 0.316838 | 0.826923 | 0.570212 |
| MmugDNA.28968.1.S1_at   | MmugDNA.28968.1 | 5.93  | 7.09  | 0.11 | 0.16 | -2.23 | 0.000827 | 0.000375 | 0.151259 | 0.037273 |
| MmugDNA.28969.1.S1_at   | MmugDNA.28969.1 | 7.53  | 6.76  | 0.37 | 0.06 | 1.7   | 0.025748 | 0.019795 | 0.322693 | 0.176951 |
| MmugDNA.28970.1.S1_at   | MmugDNA.28970.1 | 7.27  | 7.29  | 0.8  | 0.14 | -1.01 | 0.889128 | 0.628007 | 0.96181  | 0.780911 |
| MmugDNA.28971.1.S1_at   | MmugDNA.28971.1 | 6.65  | 6.3   | 0.15 | 0.22 | 1.27  | 0.146389 | 0.463283 | 0.520747 | 0.674323 |
| MmugDNA.28971.1.S1_x_at | MmugDNA.28971.1 | 6.49  | 6.07  | 0.11 | 0.11 | 1.33  | 0.033231 | 0.569913 | 0.346442 | 0.742739 |
| MmugDNA.28972.1.S1_at   | MmugDNA.28972.1 | 6.11  | 5.7   | 0.31 | 0.1  | 1.33  | 0.259722 | 0.387569 | 0.622771 | 0.622193 |
| MmugDNA.28973.1.S1_at   | MmugDNA.28973.1 | 7.68  | 7.28  | 0.56 | 0.17 | 1.32  | 0.267257 | 0.007795 | 0.62804  | 0.117765 |
| MmugDNA.28974.1.S1_at   | MmugDNA.28974.1 | 8.94  | 8.67  | 0.58 | 0.22 | 1.2   | 0.924198 | 0.305217 | 0.974623 | 0.562255 |
| MmugDNA.28975.1.S1_at   | MmugDNA.28975.1 | 5.7   | 5.98  | 0.36 | 0.09 | -1.21 | 0.408287 | 0.047292 | 0.729223 | 0.262176 |
| MmugDNA.28976.1.S1_at   | MmugDNA.28976.1 | 6.19  | 5.59  | 0.56 | 0.22 | 1.51  | 0.20525  | 0.250857 | 0.576972 | 0.51956  |

|                         |                 |       |       |      |      |       |          |          |          |          |
|-------------------------|-----------------|-------|-------|------|------|-------|----------|----------|----------|----------|
| MmugDNA.28977.1.S1_at   | MmugDNA.28977.1 | 9.3   | 9.7   | 0.32 | 0.1  | -1.31 | 0.32968  | 0.079995 | 0.676495 | 0.327352 |
| MmugDNA.28978.1.S1_at   | MmugDNA.28978.1 | 5.61  | 5.17  | 0.67 | 0.12 | 1.35  | 0.263946 | 0.160516 | 0.62583  | 0.436686 |
| MmugDNA.2898.1.S1_at    | MmugDNA.2898.1  | 5.97  | 5.69  | 0.14 | 0.05 | 1.22  | 0.034447 | 0.035003 | 0.350047 | 0.231203 |
| MmugDNA.28980.1.S1_at   | MmugDNA.28980.1 | 3.64  | 3.73  | 0.1  | 0.12 | -1.06 | 0.681626 | 0.847751 | 0.875365 | 0.913501 |
| MmugDNA.28981.1.S1_at   | MmugDNA.28981.1 | 11.11 | 11.3  | 0.33 | 0.13 | -1.14 | 0.136867 | 0.100547 | 0.511963 | 0.359831 |
| MmugDNA.28983.1.S1_at   | MmugDNA.28983.1 | 4.73  | 4.61  | 0.04 | 0.06 | 1.09  | 0.031642 | 0.278629 | 0.341694 | 0.54233  |
| MmugDNA.28985.1.S1_at   | MmugDNA.28985.1 | 4.7   | 4.77  | 0    | 0.16 | -1.04 | 0.549363 | 0.825373 | 0.810299 | 0.899693 |
| MmugDNA.28988.1.S1_s_at | MmugDNA.28988.1 | 9.94  | 9.68  | 0.25 | 0.34 | 1.2   | 0.341429 | 0.321319 | 0.685061 | 0.57319  |
| MmugDNA.28989.1.S1_at   | MmugDNA.28989.1 | 7.06  | 6.87  | 0.12 | 0.08 | 1.14  | 0.085772 | 0.283087 | 0.453025 | 0.545692 |
| MmugDNA.28990.1.S1_at   | MmugDNA.28990.1 | 6.68  | 6.36  | 0.35 | 0.12 | 1.24  | 0.218029 | 0.318525 | 0.587987 | 0.571239 |
| MmugDNA.28991.1.S1_at   | MmugDNA.28991.1 | 4.39  | 4.34  | 0.14 | 0.03 | -1.03 | 0.347585 | 0.536872 | 0.688798 | 0.722119 |
| MmugDNA.28992.1.S1_at   | MmugDNA.28992.1 | 4.68  | 4.66  | 0.17 | 0.17 | 1.01  | 0.420114 | 0.570324 | 0.736751 | 0.743056 |
| MmugDNA.28994.1.S1_at   | MmugDNA.28994.1 | 3.11  | 3.11  | 0.18 | 0.1  | -1    | 0.735058 | 0.749732 | 0.898576 | 0.854564 |
| MmugDNA.28995.1.S1_at   | MmugDNA.28995.1 | 3.01  | 2.83  | 0.2  | 0.16 | 1.14  | 0.56794  | 0.75765  | 0.820586 | 0.858927 |
| MmugDNA.28996.1.S1_at   | MmugDNA.28996.1 | 4.68  | 4.71  | 0.11 | 0.1  | -1.02 | 0.986503 | 0.998656 | 0.995654 | 0.99928  |
| MmugDNA.28999.1.S1_at   | MmugDNA.28999.1 | 6.99  | 6.93  | 0.42 | 0.06 | 1.04  | 0.638423 | 0.705032 | 0.855923 | 0.828945 |
| MmugDNA.290.1.S1_at     | MmugDNA.290.1   | 10.79 | 10.83 | 0.16 | 0.13 | -1.03 | 0.715234 | 0.431215 | 0.889206 | 0.652219 |
| MmugDNA.2900.1.S1_at    | MmugDNA.2900.1  | 6.27  | 6.42  | 0.39 | 0.04 | -1.11 | 0.535402 | 0.710945 | 0.801724 | 0.832335 |
| MmugDNA.29000.1.S1_at   | MmugDNA.29000.1 | 4.28  | 3.82  | 0.5  | 1    | 1.37  | 0.881672 | 0.568271 | 0.959065 | 0.741876 |
| MmugDNA.29002.1.S1_at   | MmugDNA.29002.1 | 3.48  | 3.77  | 0.68 | 0.28 | -1.22 | 0.820455 | 0.957237 | 0.935289 | 0.975806 |
| MmugDNA.29003.1.S1_at   | MmugDNA.29003.1 | 5.55  | 5.51  | 0.11 | 0.14 | 1.03  | 0.37198  | 0.487596 | 0.705567 | 0.690565 |
| MmugDNA.29004.1.S1_at   | MmugDNA.29004.1 | 6.68  | 6.51  | 0.07 | 0.06 | 1.13  | 0.053981 | 0.14051  | 0.395633 | 0.413727 |
| MmugDNA.29005.1.S1_at   | MmugDNA.29005.1 | 4.75  | 4.85  | 0.31 | 0.18 | -1.07 | 0.974053 | 0.952502 | 0.991706 | 0.973066 |
| MmugDNA.29008.1.S1_at   | MmugDNA.29008.1 | 6.98  | 6.49  | 0.17 | 0.15 | 1.41  | 0.039631 | 0.051388 | 0.362432 | 0.272154 |
| MmugDNA.29009.1.S1_at   | MmugDNA.29009.1 | 10.19 | 10.44 | 0.56 | 0.02 | -1.19 | 0.872553 | 0.716248 | 0.955759 | 0.835531 |
| MmugDNA.29010.1.S1_at   | MmugDNA.29010.1 | 7.97  | 7.41  | 0.33 | 0.28 | 1.47  | 0.339462 | 0.467482 | 0.683826 | 0.677091 |
| MmugDNA.29011.1.S1_at   | MmugDNA.29011.1 | 3.4   | 3.38  | 0.32 | 0.17 | 1.01  | 0.317908 | 0.36124  | 0.667635 | 0.602104 |
| MmugDNA.29012.1.S1_at   | MmugDNA.29012.1 | 3.54  | 3.54  | 0.03 | 0.07 | 1     | 0.266792 | 0.713699 | 0.627644 | 0.833916 |
| MmugDNA.29013.1.S1_at   | MmugDNA.29013.1 | 8.29  | 8.01  | 0.03 | 0.08 | 1.21  | 0.005379 | 0.057553 | 0.208157 | 0.286008 |
| MmugDNA.29015.1.S1_at   | MmugDNA.29015.1 | 8.46  | 8.27  | 0.74 | 0.23 | 1.14  | 0.64355  | 0.784209 | 0.858218 | 0.875049 |
| MmugDNA.29016.1.S1_at   | MmugDNA.29016.1 | 12.41 | 12.13 | 0.07 | 0.09 | 1.21  | 0.047101 | 0.025295 | 0.379283 | 0.199522 |
| MmugDNA.29017.1.S1_at   | MmugDNA.29017.1 | 3.15  | 3.18  | 0.03 | 0.63 | -1.02 | 0.358431 | 0.506008 | 0.696372 | 0.702337 |
| MmugDNA.29019.1.S1_at   | MmugDNA.29019.1 | 9.3   | 9.35  | 0.32 | 0.16 | -1.03 | 0.791729 | 0.175439 | 0.923474 | 0.452157 |
| MmugDNA.29020.1.S1_at   | MmugDNA.29020.1 | 5.23  | 5.11  | 0.26 | 0.08 | 1.09  | 0.360885 | 0.442618 | 0.698207 | 0.660578 |
| MmugDNA.29021.1.S1_at   | MmugDNA.29021.1 | 5.38  | 5.36  | 0.1  | 0.02 | 1.02  | 0.224329 | 0.2517   | 0.593546 | 0.520444 |
| MmugDNA.29024.1.S1_at   | MmugDNA.29024.1 | 5.43  | 5.4   | 0.3  | 0.06 | 1.02  | 0.307502 | 0.109282 | 0.660255 | 0.37308  |
| MmugDNA.29026.1.S1_at   | MmugDNA.29026.1 | 9.88  | 9.95  | 0.18 | 0.08 | -1.05 | 0.320177 | 0.002119 | 0.669177 | 0.068092 |
| MmugDNA.29027.1.S1_at   | MmugDNA.29027.1 | 5.66  | 5.14  | 0.2  | 0.12 | 1.43  | 0.05072  | 0.068054 | 0.387806 | 0.307142 |
| MmugDNA.29028.1.S1_at   | MmugDNA.29028.1 | 3.6   | 3.79  | 0.15 | 0.09 | -1.14 | 0.135496 | 0.047165 | 0.510003 | 0.261755 |
| MmugDNA.2903.1.S1_at    | MmugDNA.2903.1  | 8.71  | 8.62  | 0.63 | 0.13 | 1.07  | 0.262738 | 0.361499 | 0.624951 | 0.602232 |
| MmugDNA.29031.1.S1_at   | MmugDNA.29031.1 | 7.1   | 6.66  | 0.15 | 0.11 | 1.36  | 0.005795 | 0.018324 | 0.211798 | 0.170215 |
| MmugDNA.29032.1.S1_at   | MmugDNA.29032.1 | 6.4   | 6.6   | 0.28 | 0.04 | -1.15 | 0.733271 | 0.498519 | 0.897531 | 0.697582 |
| MmugDNA.29033.1.S1_at   | MmugDNA.29033.1 | 10.38 | 10.51 | 0.08 | 0.02 | -1.1  | 0.058743 | 0.07607  | 0.405368 | 0.320843 |

|                         |                 |       |       |      |      |       |          |          |          |          |
|-------------------------|-----------------|-------|-------|------|------|-------|----------|----------|----------|----------|
| MmugDNA.29034.1.S1_at   | MmugDNA.29034.1 | 9.13  | 9.23  | 0.93 | 0.35 | -1.07 | 0.704517 | 0.863662 | 0.885155 | 0.922638 |
| MmugDNA.29035.1.S1_at   | MmugDNA.29035.1 | 3.66  | 3.67  | 0.07 | 0.04 | -1    | 0.66089  | 0.510721 | 0.865819 | 0.705126 |
| MmugDNA.29037.1.S1_at   | MmugDNA.29037.1 | 4.47  | 4.56  | 0.04 | 0.13 | -1.06 | 0.132528 | 0.257873 | 0.506856 | 0.525467 |
| MmugDNA.29039.1.S1_at   | MmugDNA.29039.1 | 10.79 | 10.61 | 0.09 | 0.41 | 1.13  | 0.413822 | 0.298836 | 0.732545 | 0.557444 |
| MmugDNA.2904.1.S1_at    | MmugDNA.2904.1  | 5.22  | 5.61  | 0.44 | 0.04 | -1.31 | 0.314163 | 0.276221 | 0.66502  | 0.540183 |
| MmugDNA.29041.1.S1_at   | MmugDNA.29041.1 | 4.62  | 5.12  | 0.42 | 0.61 | -1.41 | 0.259041 | 0.453526 | 0.622425 | 0.667957 |
| MmugDNA.29043.1.S1_at   | MmugDNA.29043.1 | 9.03  | 8.47  | 0.28 | 0.23 | 1.47  | 0.062881 | 0.116544 | 0.414181 | 0.383705 |
| MmugDNA.29044.1.S1_at   | MmugDNA.29044.1 | 6.02  | 6.04  | 0.21 | 0.09 | -1.01 | 0.90903  | 0.755057 | 0.969287 | 0.857434 |
| MmugDNA.29045.1.S1_at   | MmugDNA.29045.1 | 4.15  | 3.81  | 0.06 | 0.03 | 1.27  | 0.001572 | 0.045783 | 0.161959 | 0.258303 |
| MmugDNA.29050.1.S1_at   | MmugDNA.29050.1 | 8.64  | 8.46  | 0.45 | 0.08 | 1.14  | 0.5568   | 0.785355 | 0.814405 | 0.875741 |
| MmugDNA.29051.1.S1_at   | MmugDNA.29051.1 | 8.57  | 8.62  | 0.5  | 0.11 | -1.04 | 0.373366 | 0.392932 | 0.705567 | 0.625917 |
| MmugDNA.29052.1.S1_at   | MmugDNA.29052.1 | 5.73  | 5.74  | 0.51 | 0.48 | -1.01 | 0.890353 | 0.527549 | 0.962291 | 0.716154 |
| MmugDNA.29054.1.S1_at   | MmugDNA.29054.1 | 4.5   | 4.24  | 0.09 | 0.21 | 1.2   | 0.165888 | 0.20186  | 0.538623 | 0.476373 |
| MmugDNA.29056.1.S1_at   | MmugDNA.29056.1 | 7.17  | 7.24  | 0.06 | 0.16 | -1.05 | 0.906604 | 0.849423 | 0.968356 | 0.914533 |
| MmugDNA.29057.1.S1_at   | MmugDNA.29057.1 | 3.51  | 3.36  | 0.07 | 0.18 | 1.11  | 0.197533 | 0.183581 | 0.56849  | 0.459681 |
| MmugDNA.29058.1.S1_at   | MmugDNA.29058.1 | 10.59 | 10.89 | 0.31 | 0.15 | -1.23 | 0.23417  | 0.179039 | 0.601531 | 0.455404 |
| MmugDNA.29059.1.S1_at   | MmugDNA.29059.1 | 3.99  | 3.84  | 0.57 | 0.14 | 1.1   | 0.233959 | 0.251901 | 0.601531 | 0.520632 |
| MmugDNA.29060.1.S1_at   | MmugDNA.29060.1 | 4.91  | 4.95  | 0.28 | 0.19 | -1.03 | 0.922393 | 0.134757 | 0.973786 | 0.40678  |
| MmugDNA.29061.1.S1_at   | MmugDNA.29061.1 | 5.07  | 4.9   | 0.1  | 0.01 | 1.12  | 0.061388 | 0.031793 | 0.410609 | 0.220741 |
| MmugDNA.43339.1.S1_s_at | MmugDNA.43339.1 | 7.08  | 6.22  | 0.51 | 0.12 | 1.81  | 0.016524 | 0.031371 | 0.287478 | 0.219065 |
| MmugDNA.29063.1.S1_at   | MmugDNA.29063.1 | 4.5   | 4.47  | 0.22 | 0.12 | 1.02  | 0.753396 | 0.889363 | 0.907028 | 0.93695  |
| MmugDNA.29064.1.S1_at   | MmugDNA.29064.1 | 3.81  | 3.8   | 0.11 | 0.15 | 1     | 0.521123 | 0.708424 | 0.794359 | 0.830919 |
| MmugDNA.29065.1.S1_at   | MmugDNA.29065.1 | 7.07  | 6.9   | 0.11 | 0.16 | 1.13  | 0.127758 | 0.814578 | 0.50215  | 0.892959 |
| MmugDNA.29067.1.S1_at   | MmugDNA.29067.1 | 5.52  | 5.3   | 0.25 | 0.02 | 1.16  | 0.145854 | 0.261085 | 0.520572 | 0.527481 |
| MmugDNA.29069.1.S1_at   | MmugDNA.29069.1 | 8.48  | 8.62  | 0.15 | 0.11 | -1.1  | 0.207712 | 0.403969 | 0.579364 | 0.63254  |
| MmugDNA.2907.1.S1_at    | MmugDNA.2907.1  | 3.69  | 3.38  | 0.19 | 0.22 | 1.24  | 0.218588 | 0.233887 | 0.588313 | 0.505169 |
| MmugDNA.29070.1.S1_at   | MmugDNA.29070.1 | 6.06  | 6.02  | 0.07 | 0.18 | 1.03  | 0.717499 | 0.977782 | 0.890431 | 0.987873 |
| MmugDNA.29071.1.S1_at   | MmugDNA.29071.1 | 5.24  | 5.21  | 0.03 | 0.09 | 1.02  | 0.987335 | 0.94359  | 0.995831 | 0.967955 |
| MmugDNA.29072.1.S1_at   | MmugDNA.29072.1 | 7.22  | 7.18  | 0.05 | 0.12 | 1.03  | 0.176252 | 0.752662 | 0.549326 | 0.855968 |
| MmugDNA.29074.1.S1_at   | MmugDNA.29074.1 | 8.44  | 7.53  | 2.25 | 0.25 | 1.87  | 0.787756 | 0.81129  | 0.922045 | 0.891123 |
| MmugDNA.29076.1.S1_at   | MmugDNA.29076.1 | 6.91  | 8.27  | 0.36 | 0.3  | -2.58 | 0.010749 | 0.10594  | 0.249768 | 0.36826  |
| MmugDNA.29077.1.S1_at   | MmugDNA.29077.1 | 8.35  | 8.26  | 0.01 | 0.15 | 1.06  | 0.476356 | 0.06277  | 0.769097 | 0.297193 |
| MmugDNA.29078.1.S1_at   | MmugDNA.29078.1 | 5.69  | 5.53  | 0.25 | 0.17 | 1.12  | 0.511873 | 0.597325 | 0.788926 | 0.760137 |
| MmugDNA.29079.1.S1_at   | MmugDNA.29079.1 | 7.44  | 7.11  | 1.13 | 0.48 | 1.26  | 0.214493 | 0.127674 | 0.584975 | 0.398581 |
| MmugDNA.2908.1.S1_at    | MmugDNA.2908.1  | 4.1   | 3.66  | 0.16 | 0.18 | 1.36  | 0.072979 | 0.195846 | 0.433769 | 0.470737 |
| MmugDNA.29080.1.S1_at   | MmugDNA.29080.1 | 8.34  | 7.75  | 0.45 | 0.09 | 1.51  | 0.086216 | 0.082413 | 0.453817 | 0.331381 |
| MmugDNA.29081.1.S1_at   | MmugDNA.29081.1 | 11.02 | 11.19 | 0.14 | 0.05 | -1.13 | 0.042946 | 0.245596 | 0.371035 | 0.515348 |
| MmugDNA.29082.1.S1_at   | MmugDNA.29082.1 | 3.51  | 3.45  | 0.15 | 0.08 | 1.04  | 0.602549 | 0.6284   | 0.838885 | 0.781141 |
| MmugDNA.29083.1.S1_at   | MmugDNA.29083.1 | 5.29  | 5.16  | 0.03 | 0.3  | 1.1   | 0.289042 | 0.263481 | 0.645892 | 0.529799 |
| MmugDNA.29084.1.S1_at   | MmugDNA.29084.1 | 10.06 | 10.94 | 0.87 | 0.17 | -1.85 | 0.187417 | 0.229615 | 0.559787 | 0.501574 |
| MmugDNA.29085.1.S1_at   | MmugDNA.29085.1 | 5.66  | 5.56  | 0.37 | 0.19 | 1.07  | 0.942136 | 0.98803  | 0.980279 | 0.993307 |
| MmugDNA.29086.1.S1_at   | MmugDNA.29086.1 | 11.87 | 11.43 | 0.09 | 0.02 | 1.36  | 0.002284 | 0.013439 | 0.174757 | 0.148537 |
| MmugDNA.29087.1.S1_at   | MmugDNA.29087.1 | 5.54  | 6.89  | 0.75 | 0.38 | -2.54 | 0.014842 | 0.004621 | 0.278597 | 0.094974 |

|                         |                 |       |       |      |      |       |          |          |          |          |
|-------------------------|-----------------|-------|-------|------|------|-------|----------|----------|----------|----------|
| MmugDNA.2909.1.S1_at    | MmugDNA.2909.1  | 5.24  | 5.2   | 0.09 | 0.04 | 1.03  | 0.702697 | 0.893775 | 0.884378 | 0.939386 |
| MmugDNA.29091.1.S1_at   | MmugDNA.29091.1 | 6.98  | 6.74  | 0.04 | 0.15 | 1.18  | 0.134534 | 0.200246 | 0.508462 | 0.474689 |
| MmugDNA.29092.1.S1_at   | MmugDNA.29092.1 | 3.93  | 3.81  | 0.2  | 0.09 | 1.09  | 0.938943 | 0.081262 | 0.979348 | 0.329351 |
| MmugDNA.29095.1.S1_at   | MmugDNA.29095.1 | 4.62  | 4.94  | 0.21 | 0.24 | -1.25 | 0.141242 | 0.23654  | 0.516365 | 0.507364 |
| MmugDNA.29096.1.S1_s_at | MmugDNA.29096.1 | 8.67  | 7.96  | 0.29 | 0.03 | 1.64  | 0.008661 | 0.00351  | 0.236048 | 0.08503  |
| MmugDNA.29097.1.S1_at   | MmugDNA.29097.1 | 3.75  | 3.8   | 0.1  | 0.03 | -1.04 | 0.182444 | 0.205287 | 0.555421 | 0.479606 |
| MmugDNA.29098.1.S1_at   | MmugDNA.29098.1 | 11.75 | 11.72 | 0.28 | 0.06 | 1.02  | 0.443228 | 0.158974 | 0.75064  | 0.435156 |
| MmugDNA.29099.1.S1_at   | MmugDNA.29099.1 | 13.35 | 13.47 | 0.07 | 0    | -1.09 | 0.035898 | 0.002517 | 0.353707 | 0.074158 |
| MmugDNA.291.1.S1_at     | MmugDNA.291.1   | 5.48  | 5.14  | 0.26 | 0.11 | 1.26  | 0.097391 | 0.078863 | 0.466321 | 0.325838 |
| MmugDNA.2910.1.S1_at    | MmugDNA.2910.1  | 9.54  | 9.61  | 0.94 | 0    | -1.05 | 0.330304 | 0.22354  | 0.676941 | 0.496385 |
| MmugDNA.29102.1.S1_at   | MmugDNA.29102.1 | 5.75  | 5.73  | 0.16 | 0.02 | 1.02  | 0.922885 | 0.997989 | 0.974033 | 0.999008 |
| MmugDNA.29103.1.S1_at   | MmugDNA.29103.1 | 5.79  | 6.24  | 0.47 | 0.37 | -1.37 | 0.656796 | 0.975738 | 0.86372  | 0.98677  |
| MmugDNA.29105.1.S1_at   | MmugDNA.29105.1 | 3.13  | 3.09  | 0.17 | 0.02 | 1.03  | 0.708615 | 0.885651 | 0.886591 | 0.934982 |
| MmugDNA.29106.1.S1_at   | MmugDNA.29106.1 | 5.46  | 5.18  | 0.27 | 0.19 | 1.22  | 0.103283 | 0.605064 | 0.474087 | 0.764917 |
| MmugDNA.29107.1.S1_at   | MmugDNA.29107.1 | 3.26  | 3.3   | 0.16 | 0.03 | -1.03 | 0.72859  | 0.712409 | 0.895243 | 0.833371 |
| MmugDNA.29108.1.S1_at   | MmugDNA.29108.1 | 11.08 | 11.07 | 0.57 | 0.1  | 1.01  | 0.645234 | 0.628502 | 0.858728 | 0.781231 |
| MmugDNA.29109.1.S1_at   | MmugDNA.29109.1 | 3.21  | 3.08  | 0.14 | 0.15 | 1.1   | 0.834188 | 0.755406 | 0.940528 | 0.857572 |
| MmugDNA.2911.1.S1_at    | MmugDNA.2911.1  | 5.39  | 5.4   | 0.07 | 0.26 | -1    | 0.305391 | 0.444958 | 0.65885  | 0.662174 |
| MmugDNA.29111.1.S1_at   | MmugDNA.29111.1 | 7.86  | 7.74  | 0.13 | 0.03 | 1.09  | 0.366291 | 0.04451  | 0.701752 | 0.255346 |
| MmugDNA.29112.1.S1_at   | MmugDNA.29112.1 | 3.7   | 3.59  | 0.39 | 0.1  | 1.07  | 0.244556 | 0.208015 | 0.610092 | 0.482049 |
| MmugDNA.29113.1.S1_at   | MmugDNA.29113.1 | 9.95  | 9.58  | 0.94 | 0.12 | 1.29  | 0.552908 | 0.630396 | 0.81193  | 0.782237 |
| MmugDNA.29114.1.S1_at   | MmugDNA.29114.1 | 6.01  | 6     | 0.18 | 0.03 | 1.01  | 0.989246 | 0.543236 | 0.995994 | 0.726012 |
| MmugDNA.29115.1.S1_at   | MmugDNA.29115.1 | 5.74  | 5.89  | 0.51 | 0.13 | -1.11 | 0.475296 | 0.534651 | 0.768515 | 0.720477 |
| MmugDNA.29116.1.S1_at   | MmugDNA.29116.1 | 7.43  | 7.49  | 0.07 | 0.04 | -1.04 | 0.330315 | 0.324747 | 0.676941 | 0.575287 |
| MmugDNA.29117.1.S1_at   | MmugDNA.29117.1 | 8.59  | 8.73  | 0.39 | 0.18 | -1.1  | 0.701317 | 0.804259 | 0.883866 | 0.887401 |
| MmugDNA.29117.1.S1_s_at | MmugDNA.29117.1 | 8.07  | 8.3   | 0.34 | 0.26 | -1.17 | 0.694069 | 0.711426 | 0.880942 | 0.832667 |
| MmugDNA.29120.1.S1_at   | MmugDNA.29120.1 | 7.39  | 7.55  | 0.38 | 0.16 | -1.11 | 0.908579 | 0.276513 | 0.969247 | 0.540522 |
| MmugDNA.29121.1.S1_at   | MmugDNA.29121.1 | 5.72  | 5.65  | 0.07 | 0    | 1.05  | 0.161524 | 0.104941 | 0.534843 | 0.366498 |
| MmugDNA.29122.1.S1_s_at | MmugDNA.29122.1 | 7.07  | 6.96  | 0.06 | 0.11 | 1.08  | 0.114202 | 0.162814 | 0.487585 | 0.438932 |
| MmugDNA.29123.1.S1_at   | MmugDNA.29123.1 | 4.58  | 4.9   | 0.33 | 0.28 | -1.25 | 0.362481 | 0.011316 | 0.699302 | 0.138076 |
| MmugDNA.29124.1.S1_at   | MmugDNA.29124.1 | 4.3   | 4.21  | 0.04 | 0.02 | 1.06  | 0.014548 | 0.012699 | 0.276396 | 0.145316 |
| MmugDNA.29125.1.S1_at   | MmugDNA.29125.1 | 4.88  | 5.32  | 0.4  | 0.32 | -1.36 | 0.314352 | 0.36421  | 0.665127 | 0.604513 |
| MmugDNA.29126.1.S1_at   | MmugDNA.29126.1 | 6.36  | 6.04  | 0.16 | 0.02 | 1.25  | 0.085873 | 0.246239 | 0.453035 | 0.515889 |
| MmugDNA.29128.1.S1_at   | MmugDNA.29128.1 | 5.06  | 4.89  | 0.14 | 0.01 | 1.12  | 0.038061 | 0.033907 | 0.358549 | 0.227771 |
| MmugDNA.29129.1.S1_at   | MmugDNA.29129.1 | 4.82  | 4.67  | 0.16 | 0.1  | 1.12  | 0.075635 | 0.061949 | 0.436722 | 0.295734 |
| MmugDNA.2913.1.S1_at    | MmugDNA.2913.1  | 6.59  | 6.52  | 0.07 | 0.15 | 1.05  | 0.286084 | 0.475282 | 0.64358  | 0.682031 |
| MmugDNA.29131.1.S1_at   | MmugDNA.29131.1 | 9.22  | 10    | 0.14 | 0.08 | -1.72 | 0.001284 | 0.000871 | 0.157784 | 0.047471 |
| MmugDNA.29132.1.S1_s_at | MmugDNA.29132.1 | 10.29 | 10.67 | 0.23 | 0.05 | -1.3  | 0.076512 | 0.036886 | 0.437977 | 0.236506 |
| MmugDNA.29133.1.S1_at   | MmugDNA.29133.1 | 4.32  | 5.11  | 0.4  | 0.47 | -1.73 | 0.089812 | 0.093211 | 0.457893 | 0.34931  |
| MmugDNA.29135.1.S1_at   | MmugDNA.29135.1 | 8.98  | 9.66  | 0.52 | 0.13 | -1.6  | 0.092998 | 0.072803 | 0.46164  | 0.315651 |
| MmugDNA.29137.1.S1_at   | MmugDNA.29137.1 | 4.85  | 4.91  | 0.1  | 0.14 | -1.04 | 0.233493 | 0.195159 | 0.601071 | 0.470241 |
| MmugDNA.2914.1.S1_at    | MmugDNA.2914.1  | 4.97  | 4.53  | 0.3  | 0.12 | 1.35  | 0.095703 | 0.096749 | 0.4643   | 0.354171 |
| MmugDNA.29140.1.S1_s_at | MmugDNA.29140.1 | 8.52  | 8.54  | 0.61 | 0.18 | -1.01 | 0.810104 | 0.764997 | 0.931255 | 0.863388 |

|                         |                 |       |       |      |      |       |          |          |          |          |
|-------------------------|-----------------|-------|-------|------|------|-------|----------|----------|----------|----------|
| MmugDNA.29141.1.S1_at   | MmugDNA.29141.1 | 8.66  | 8.11  | 0.63 | 0.22 | 1.46  | 0.202503 | 0.359289 | 0.574003 | 0.600575 |
| MmugDNA.29142.1.S1_s_at | MmugDNA.29142.1 | 12.82 | 12.52 | 0.17 | 0.12 | 1.23  | 0.07271  | 0.037591 | 0.433315 | 0.238336 |
| MmugDNA.29143.1.S1_at   | MmugDNA.29143.1 | 12.09 | 11.45 | 0.29 | 0.15 | 1.56  | 0.028566 | 0.019345 | 0.332627 | 0.174785 |
| MmugDNA.29145.1.S1_at   | MmugDNA.29145.1 | 5.2   | 5.09  | 0.16 | 0.04 | 1.08  | 0.225611 | 0.222062 | 0.594769 | 0.495112 |
| MmugDNA.29148.1.S1_at   | MmugDNA.29148.1 | 6.97  | 6.91  | 0.05 | 0.18 | 1.04  | 0.554173 | 0.90308  | 0.812456 | 0.944962 |
| MmugDNA.29149.1.S1_at   | MmugDNA.29149.1 | 2.98  | 3.13  | 0.11 | 0.26 | -1.11 | 0.524621 | 0.187093 | 0.795975 | 0.463003 |
| MmugDNA.29150.1.S1_at   | MmugDNA.29150.1 | 3.57  | 3.52  | 0.05 | 0.04 | 1.04  | 0.578959 | 0.114496 | 0.826338 | 0.381041 |
| MmugDNA.29152.1.S1_at   | MmugDNA.29152.1 | 11.5  | 11.58 | 0.42 | 0.03 | -1.06 | 0.758836 | 0.866617 | 0.909368 | 0.924185 |
| MmugDNA.29153.1.S1_at   | MmugDNA.29153.1 | 5.1   | 5.27  | 0.27 | 0.04 | -1.13 | 0.917347 | 0.98233  | 0.971972 | 0.990348 |
| MmugDNA.29155.1.S1_at   | MmugDNA.29155.1 | 5.56  | 5.38  | 0.21 | 0.05 | 1.13  | 0.657127 | 0.054394 | 0.863934 | 0.278799 |
| MmugDNA.29156.1.S1_at   | MmugDNA.29156.1 | 6.1   | 6.82  | 0.51 | 0.32 | -1.65 | 0.291305 | 0.42473  | 0.647759 | 0.647239 |
| MmugDNA.29158.1.S1_at   | MmugDNA.29158.1 | 4.18  | 4.35  | 0.29 | 0.12 | -1.13 | 0.678245 | 0.691299 | 0.873961 | 0.820381 |
| MmugDNA.29159.1.S1_at   | MmugDNA.29159.1 | 6.75  | 7.26  | 0.68 | 0.27 | -1.43 | 0.741732 | 0.863753 | 0.90146  | 0.922638 |
| MmugDNA.2916.1.S1_at    | MmugDNA.2916.1  | 7.66  | 7.75  | 0.12 | 0.15 | -1.07 | 0.976992 | 0.01779  | 0.992518 | 0.168549 |
| MmugDNA.29160.1.S1_at   | MmugDNA.29160.1 | 4.09  | 4.07  | 0.1  | 0.03 | 1.01  | 0.410509 | 0.645837 | 0.730749 | 0.792616 |
| MmugDNA.29161.1.S1_at   | MmugDNA.29161.1 | 4.25  | 4.82  | 1.14 | 0.32 | -1.48 | 0.990345 | 0.998025 | 0.996406 | 0.999008 |
| MmugDNA.29162.1.S1_at   | MmugDNA.29162.1 | 6.33  | 6.18  | 0.21 | 0.13 | 1.11  | 0.169006 | 0.23408  | 0.541946 | 0.505319 |
| MmugDNA.29163.1.S1_at   | MmugDNA.29163.1 | 3.38  | 3.4   | 0.08 | 0.06 | -1.01 | 0.598391 | 0.320746 | 0.836965 | 0.572846 |
| MmugDNA.29166.1.S1_at   | MmugDNA.29166.1 | 8.64  | 8.78  | 0.18 | 0.24 | -1.1  | 0.161235 | 0.078859 | 0.534529 | 0.325838 |
| MmugDNA.29167.1.S1_at   | MmugDNA.29167.1 | 3.23  | 3.23  | 0.13 | 0.03 | -1    | 0.849208 | 0.888609 | 0.946978 | 0.936492 |
| MmugDNA.29168.1.S1_at   | MmugDNA.29168.1 | 9.01  | 9.08  | 0.17 | 0.16 | -1.06 | 0.517911 | 0.003205 | 0.792296 | 0.082023 |
| MmugDNA.29169.1.S1_at   | MmugDNA.29169.1 | 9.3   | 8.66  | 0.88 | 0.14 | 1.56  | 0.313713 | 0.279119 | 0.664799 | 0.542807 |
| MmugDNA.2917.1.S1_at    | MmugDNA.2917.1  | 9.53  | 10.28 | 0.29 | 0.05 | -1.68 | 0.012577 | 0.037621 | 0.263116 | 0.238384 |
| MmugDNA.29170.1.S1_at   | MmugDNA.29170.1 | 9.32  | 9.23  | 0.36 | 0.08 | 1.07  | 0.512137 | 0.053272 | 0.789105 | 0.276463 |
| MmugDNA.29170.1.S1_s_at | MmugDNA.29170.1 | 7.75  | 7.99  | 0.29 | 0.41 | -1.18 | 0.790045 | 0.904251 | 0.922759 | 0.945683 |
| MmugDNA.29171.1.S1_at   | MmugDNA.29171.1 | 8.7   | 9.39  | 0.55 | 0.19 | -1.61 | 0.126804 | 0.137265 | 0.500609 | 0.410165 |
| MmugDNA.29173.1.S1_at   | MmugDNA.29173.1 | 4.11  | 3.62  | 0.54 | 0.23 | 1.4   | 0.183548 | 0.155099 | 0.55651  | 0.43023  |
| MmugDNA.29175.1.S1_s_at | MmugDNA.29175.1 | 6.46  | 6.18  | 0.28 | 0.11 | 1.21  | 0.183719 | 0.119092 | 0.556516 | 0.387386 |
| MmugDNA.29177.1.S1_at   | MmugDNA.29177.1 | 3.77  | 4.1   | 0.19 | 0.07 | -1.26 | 0.075462 | 0.294418 | 0.436649 | 0.554169 |
| MmugDNA.29178.1.S1_at   | MmugDNA.29178.1 | 7.93  | 8.67  | 0.23 | 0.03 | -1.68 | 0.005962 | 0.000564 | 0.212951 | 0.041049 |
| MmugDNA.29179.1.S1_at   | MmugDNA.29179.1 | 3.04  | 2.95  | 0.02 | 0.07 | 1.06  | 0.124203 | 0.239675 | 0.498334 | 0.510389 |
| MmugDNA.2918.1.S1_at    | MmugDNA.2918.1  | 8.14  | 7.98  | 0.11 | 0.1  | 1.11  | 0.154964 | 0.143834 | 0.528235 | 0.417676 |
| MmugDNA.29180.1.S1_at   | MmugDNA.29180.1 | 4.56  | 5.38  | 0.62 | 0.21 | -1.77 | 0.151589 | 0.061547 | 0.524628 | 0.294865 |
| MmugDNA.29181.1.S1_at   | MmugDNA.29181.1 | 7.39  | 7.05  | 0.34 | 0.13 | 1.26  | 0.155347 | 0.129945 | 0.528651 | 0.401515 |
| MmugDNA.29182.1.S1_at   | MmugDNA.29182.1 | 8.59  | 9.04  | 0.52 | 0.26 | -1.36 | 0.385075 | 0.056392 | 0.712381 | 0.283382 |
| MmugDNA.29184.1.S1_at   | MmugDNA.29184.1 | 5.74  | 5.56  | 0.12 | 0.08 | 1.13  | 0.082965 | 0.099464 | 0.44828  | 0.357827 |
| MmugDNA.29185.1.S1_at   | MmugDNA.29185.1 | 4.61  | 4.3   | 0.12 | 0.28 | 1.24  | 0.413781 | 0.06449  | 0.732521 | 0.300137 |
| MmugDNA.29187.1.S1_at   | MmugDNA.29187.1 | 3.45  | 3.73  | 0.17 | 0.1  | -1.22 | 0.072874 | 0.159206 | 0.433594 | 0.435217 |
| MmugDNA.29187.1.S1_x_at | MmugDNA.29187.1 | 6.77  | 7.08  | 0.15 | 0.14 | -1.24 | 0.030754 | 0.041207 | 0.338524 | 0.247826 |
| MmugDNA.29189.1.S1_at   | MmugDNA.29189.1 | 8.84  | 9.77  | 0.33 | 0.05 | -1.91 | 0.017826 | 0.006181 | 0.293979 | 0.106774 |
| MmugDNA.2919.1.S1_at    | MmugDNA.2919.1  | 4.27  | 4.42  | 0.19 | 0.34 | -1.11 | 0.834829 | 0.754596 | 0.940758 | 0.857244 |
| MmugDNA.29190.1.S1_at   | MmugDNA.29190.1 | 5.53  | 5.48  | 0.18 | 0.07 | 1.04  | 0.2117   | 0.532326 | 0.582625 | 0.719017 |
| MmugDNA.29192.1.S1_at   | MmugDNA.29192.1 | 3.68  | 3.21  | 0.3  | 0.32 | 1.39  | 0.470512 | 0.543122 | 0.766162 | 0.725952 |



|                         |                 |       |       |      |      |       |          |          |          |          |
|-------------------------|-----------------|-------|-------|------|------|-------|----------|----------|----------|----------|
| MmugDNA.29193.1.S1_at   | MmugDNA.29193.1 | 6.88  | 6.87  | 0.17 | 0.04 | 1.01  | 0.255726 | 0.141708 | 0.619741 | 0.415265 |
| MmugDNA.29194.1.S1_at   | MmugDNA.29194.1 | 6.07  | 6.21  | 0.17 | 0.17 | -1.1  | 0.606436 | 0.227725 | 0.840496 | 0.499979 |
| MmugDNA.29195.1.S1_at   | MmugDNA.29195.1 | 6.81  | 6.65  | 0.05 | 0.02 | 1.12  | 0.003393 | 0.015356 | 0.194985 | 0.157392 |
| MmugDNA.29198.1.S1_x_at | MmugDNA.29198.1 | 8.69  | 8.72  | 0.12 | 0.17 | -1.02 | 0.995052 | 0.243345 | 0.99815  | 0.513384 |
| MmugDNA.29199.1.S1_at   | MmugDNA.29199.1 | 3.23  | 3.47  | 0.42 | 0.4  | -1.18 | 0.482794 | 0.225675 | 0.772578 | 0.498155 |
| MmugDNA.292.1.S1_at     | MmugDNA.292.1   | 5.81  | 6.35  | 0.3  | 0.31 | -1.46 | 0.21867  | 0.099782 | 0.588341 | 0.358379 |
| MmugDNA.2920.1.S1_at    | MmugDNA.2920.1  | 3.39  | 3.4   | 0.16 | 0.05 | -1.01 | 0.345433 | 0.5895   | 0.687499 | 0.755691 |
| MmugDNA.29200.1.S1_at   | MmugDNA.29200.1 | 5.33  | 6.81  | 0.64 | 0.48 | -2.8  | 0.043189 | 0.010588 | 0.371555 | 0.134213 |
| MmugDNA.15109.1.S1_s_at | MmugDNA.15109.1 | 5.2   | 4.94  | 0.52 | 0.85 | 1.19  | 0.758996 | 0.262396 | 0.909414 | 0.528655 |
| MmugDNA.29202.1.S1_at   | MmugDNA.29202.1 | 4.93  | 5.12  | 0.17 | 0.23 | -1.14 | 0.828373 | 0.49317  | 0.938275 | 0.694004 |
| MmugDNA.29203.1.S1_at   | MmugDNA.29203.1 | 5.3   | 5.3   | 0.03 | 0.06 | -1    | 0.630801 | 0.269123 | 0.852175 | 0.534447 |
| MmugDNA.29205.1.S1_at   | MmugDNA.29205.1 | 5.07  | 4.14  | 0.6  | 0.29 | 1.91  | 0.123277 | 0.05934  | 0.496589 | 0.29054  |
| MmugDNA.29206.1.S1_at   | MmugDNA.29206.1 | 3.74  | 3.7   | 0.24 | 0.4  | 1.03  | 0.293448 | 0.540463 | 0.649776 | 0.724395 |
| MmugDNA.29207.1.S1_at   | MmugDNA.29207.1 | 4.17  | 4.25  | 0.06 | 0.11 | -1.06 | 0.598222 | 0.612297 | 0.836817 | 0.769941 |
| MmugDNA.29208.1.S1_at   | MmugDNA.29208.1 | 7.16  | 7.64  | 0.64 | 0.2  | -1.39 | 0.52883  | 0.263324 | 0.798077 | 0.529582 |
| MmugDNA.29209.1.S1_at   | MmugDNA.29209.1 | 5.28  | 5.25  | 0.14 | 0.18 | 1.02  | 0.465868 | 0.39505  | 0.763236 | 0.62727  |
| MmugDNA.2921.1.S1_at    | MmugDNA.2921.1  | 6.35  | 6.24  | 0.14 | 0.04 | 1.08  | 0.24515  | 0.296083 | 0.610566 | 0.555339 |
| MmugDNA.29210.1.S1_at   | MmugDNA.29210.1 | 4.13  | 4.04  | 0.12 | 0.07 | 1.06  | 0.848585 | 0.382084 | 0.946803 | 0.618309 |
| MmugDNA.29212.1.S1_at   | MmugDNA.29212.1 | 6.42  | 6.51  | 0.11 | 0.4  | -1.06 | 0.580792 | 0.143947 | 0.827254 | 0.417867 |
| MmugDNA.29214.1.S1_at   | MmugDNA.29214.1 | 4.77  | 4.78  | 0.07 | 0.01 | -1.01 | 0.270077 | 0.299098 | 0.630217 | 0.557663 |
| MmugDNA.29215.1.S1_at   | MmugDNA.29215.1 | 3.64  | 3.45  | 0.34 | 0.04 | 1.14  | 0.426715 | 0.5929   | 0.740709 | 0.757939 |
| MmugDNA.29216.1.S1_at   | MmugDNA.29216.1 | 3.94  | 3.98  | 0.15 | 0.18 | -1.03 | 0.81065  | 0.868455 | 0.931368 | 0.925329 |
| MmugDNA.29219.1.S1_at   | MmugDNA.29219.1 | 7     | 7.47  | 0.24 | 0.27 | -1.38 | 0.084062 | 0.011238 | 0.45029  | 0.138014 |
| MmugDNA.2922.1.S1_at    | MmugDNA.2922.1  | 7.39  | 7.67  | 0.09 | 0.2  | -1.21 | 0.065929 | 0.023131 | 0.421278 | 0.190443 |
| MmugDNA.29221.1.S1_at   | MmugDNA.29221.1 | 10.78 | 10.53 | 0.56 | 0.16 | 1.18  | 0.36069  | 0.395262 | 0.698099 | 0.62738  |
| MmugDNA.29222.1.S1_at   | MmugDNA.29222.1 | 3.49  | 3.22  | 0.29 | 0.17 | 1.21  | 0.243661 | 0.498117 | 0.609595 | 0.697266 |
| MmugDNA.29224.1.S1_at   | MmugDNA.29224.1 | 5.91  | 5.77  | 0.47 | 0.19 | 1.1   | 0.222249 | 0.321344 | 0.591828 | 0.57319  |
| MmugDNA.29225.1.S1_at   | MmugDNA.29225.1 | 5.69  | 5.64  | 0.11 | 0.12 | 1.04  | 0.556664 | 0.097684 | 0.814296 | 0.355554 |
| MmugDNA.29226.1.S1_at   | MmugDNA.29226.1 | 5.2   | 4.57  | 0.14 | 0.48 | 1.55  | 0.102326 | 0.087314 | 0.472589 | 0.340377 |
| MmugDNA.29227.1.S1_at   | MmugDNA.29227.1 | 5.88  | 5.79  | 0.07 | 0.09 | 1.07  | 0.129853 | 0.123902 | 0.504468 | 0.394201 |
| MmugDNA.29228.1.S1_at   | MmugDNA.29228.1 | 5.44  | 5.07  | 0.49 | 0.33 | 1.29  | 0.393127 | 0.043343 | 0.718999 | 0.252853 |
| MmugDNA.29229.1.S1_at   | MmugDNA.29229.1 | 4.39  | 4.39  | 0.11 | 0.46 | -1    | 0.291361 | 0.752051 | 0.647853 | 0.855744 |
| MmugDNA.29231.1.S1_at   | MmugDNA.29231.1 | 3.84  | 3.87  | 0.02 | 0.15 | -1.02 | 0.554005 | 0.210332 | 0.812435 | 0.484202 |
| MmugDNA.29232.1.S1_at   | MmugDNA.29232.1 | 6.13  | 6.22  | 0.14 | 0.07 | -1.06 | 0.962433 | 0.040835 | 0.987827 | 0.246981 |
| MmugDNA.29235.1.S1_at   | MmugDNA.29235.1 | 3.28  | 2.95  | 0.15 | 0.17 | 1.25  | 0.170768 | 0.25007  | 0.543739 | 0.519122 |
| MmugDNA.29236.1.S1_at   | MmugDNA.29236.1 | 6.59  | 7.56  | 0.56 | 0.09 | -1.97 | 0.051647 | 0.073427 | 0.390829 | 0.316616 |
| MmugDNA.29237.1.S1_at   | MmugDNA.29237.1 | 3.61  | 3.58  | 0.11 | 0.06 | 1.02  | 0.784453 | 0.423936 | 0.920789 | 0.646587 |
| MmugDNA.29238.1.S1_at   | MmugDNA.29238.1 | 10.54 | 9.97  | 1.37 | 0.02 | 1.48  | 0.810912 | 0.181676 | 0.931466 | 0.458271 |
| MmugDNA.29239.1.S1_at   | MmugDNA.29239.1 | 4.89  | 4.74  | 0.34 | 0.11 | 1.11  | 0.177153 | 0.218969 | 0.550212 | 0.492722 |
| MmugDNA.2924.1.S1_at    | MmugDNA.2924.1  | 6.88  | 6.86  | 0.31 | 0.11 | 1.01  | 0.306105 | 0.592545 | 0.659271 | 0.757844 |
| MmugDNA.29240.1.S1_at   | MmugDNA.29240.1 | 6.71  | 6.2   | 0.2  | 0.25 | 1.42  | 0.088677 | 0.045183 | 0.456387 | 0.256979 |
| MmugDNA.29241.1.S1_at   | MmugDNA.29241.1 | 5.92  | 5.58  | 0.32 | 0.02 | 1.26  | 0.133104 | 0.054978 | 0.507433 | 0.279898 |
| MmugDNA.29243.1.S1_at   | MmugDNA.29243.1 | 4.31  | 4.83  | 0.09 | 0.34 | -1.43 | 0.196978 | 0.407899 | 0.567757 | 0.635288 |

|                         |                 |       |       |      |      |       |          |          |          |          |
|-------------------------|-----------------|-------|-------|------|------|-------|----------|----------|----------|----------|
| MmugDNA.29245.1.S1_at   | MmugDNA.29245.1 | 5.32  | 5.24  | 0.2  | 0.18 | 1.05  | 0.529945 | 0.869848 | 0.798613 | 0.926148 |
| MmugDNA.29247.1.S1_at   | MmugDNA.29247.1 | 5.97  | 5.68  | 0.31 | 0.08 | 1.22  | 0.174721 | 0.176734 | 0.548031 | 0.453171 |
| MmugDNA.29248.1.S1_at   | MmugDNA.29248.1 | 5.37  | 5.54  | 0.24 | 0.05 | -1.13 | 0.580078 | 0.279949 | 0.826842 | 0.543359 |
| MmugDNA.29248.1.S1_s_at | MmugDNA.29248.1 | 8.37  | 8.41  | 0.3  | 0.04 | -1.03 | 0.772864 | 0.490481 | 0.915516 | 0.692472 |
| MmugDNA.29249.1.S1_at   | MmugDNA.29249.1 | 5.64  | 5.56  | 0.16 | 0.16 | 1.06  | 0.38443  | 0.694533 | 0.711993 | 0.822391 |
| MmugDNA.29250.1.S1_at   | MmugDNA.29250.1 | 12.67 | 12.83 | 0.21 | 0.02 | -1.12 | 0.759287 | 0.215108 | 0.909584 | 0.488937 |
| MmugDNA.29252.1.S1_at   | MmugDNA.29252.1 | 4.21  | 3.72  | 0.25 | 0.15 | 1.4   | 0.05934  | 0.28726  | 0.406303 | 0.548526 |
| MmugDNA.29253.1.S1_at   | MmugDNA.29253.1 | 6.87  | 6.77  | 0.09 | 0.21 | 1.07  | 0.277028 | 0.354158 | 0.636653 | 0.597059 |
| MmugDNA.29255.1.S1_at   | MmugDNA.29255.1 | 5.22  | 5.44  | 0.74 | 0.23 | -1.16 | 0.492444 | 0.715796 | 0.778267 | 0.835259 |
| MmugDNA.29256.1.S1_at   | MmugDNA.29256.1 | 5.46  | 5.66  | 0.4  | 0.44 | -1.15 | 0.699444 | 0.353356 | 0.88316  | 0.596477 |
| MmugDNA.29257.1.S1_at   | MmugDNA.29257.1 | 6.31  | 6.09  | 0.33 | 0.39 | -1.16 | 0.998856 | 0.999975 | 0.999707 | 0.999975 |
| MmugDNA.29258.1.S1_at   | MmugDNA.29258.1 | 3.4   | 3.38  | 0    | 0.13 | 1.01  | 0.656242 | 0.447668 | 0.863506 | 0.663731 |
| MmugDNA.29259.1.S1_at   | MmugDNA.29259.1 | 8.37  | 8.54  | 0.59 | 0.36 | -1.13 | 0.74537  | 0.461078 | 0.902991 | 0.672838 |
| MmugDNA.2926.1.S1_at    | MmugDNA.2926.1  | 6.01  | 6.08  | 0.25 | 0.06 | -1.05 | 0.288893 | 0.101893 | 0.645883 | 0.36188  |
| MmugDNA.29260.1.S1_at   | MmugDNA.29260.1 | 6.05  | 5.98  | 0.09 | 0.17 | 1.05  | 0.213607 | 0.757199 | 0.584261 | 0.858648 |
| MmugDNA.29261.1.S1_at   | MmugDNA.29261.1 | 4.93  | 4.9   | 0.22 | 0.2  | 1.02  | 0.268041 | 0.534496 | 0.628386 | 0.720396 |
| MmugDNA.29262.1.S1_at   | MmugDNA.29262.1 | 3.62  | 3.45  | 0.19 | 0.19 | 1.12  | 0.639955 | 0.025684 | 0.856464 | 0.200834 |
| MmugDNA.29264.1.S1_at   | MmugDNA.29264.1 | 12.32 | 12.46 | 0.3  | 0.12 | -1.1  | 0.696451 | 0.423355 | 0.882142 | 0.646277 |
| MmugDNA.29266.1.S1_at   | MmugDNA.29266.1 | 8.86  | 9.68  | 1.32 | 0.07 | -1.77 | 0.416424 | 0.64816  | 0.734327 | 0.794002 |
| MmugDNA.29267.1.S1_at   | MmugDNA.29267.1 | 4.43  | 4.15  | 0.29 | 0.31 | 1.21  | 0.976594 | 0.057083 | 0.992376 | 0.284945 |
| MmugDNA.29268.1.S1_at   | MmugDNA.29268.1 | 5.48  | 5.47  | 0.99 | 0.43 | 1.01  | 0.598518 | 0.287751 | 0.836974 | 0.549029 |
| MmugDNA.2927.1.S1_at    | MmugDNA.2927.1  | 4.95  | 4.73  | 0.67 | 0.27 | 1.16  | 0.627686 | 0.738872 | 0.850661 | 0.848647 |
| MmugDNA.29270.1.S1_at   | MmugDNA.29270.1 | 4.6   | 4.58  | 0.05 | 0.28 | 1.01  | 0.289426 | 0.38714  | 0.646114 | 0.621935 |
| MmugDNA.29271.1.S1_at   | MmugDNA.29271.1 | 9.56  | 9.42  | 0.49 | 0.04 | 1.1   | 0.642154 | 0.571128 | 0.857628 | 0.743552 |
| MmugDNA.29273.1.S1_at   | MmugDNA.29273.1 | 6.96  | 6.54  | 0.35 | 0.35 | 1.34  | 0.261953 | 0.069906 | 0.624194 | 0.310552 |
| MmugDNA.29276.1.S1_at   | MmugDNA.29276.1 | 11.37 | 11.17 | 0.14 | 0.1  | 1.15  | 0.090524 | 0.113289 | 0.458781 | 0.379339 |
| MmugDNA.29279.1.S1_x_at | MmugDNA.29279.1 | 6.89  | 6.79  | 0.28 | 0.23 | 1.07  | 0.737778 | 0.330909 | 0.899629 | 0.579609 |
| MmugDNA.29280.1.S1_at   | MmugDNA.29280.1 | 5.74  | 5.71  | 0.33 | 0    | 1.02  | 0.646195 | 0.662924 | 0.859027 | 0.802665 |
| MmugDNA.29282.1.S1_s_at | MmugDNA.29282.1 | 10.76 | 10.58 | 0.21 | 0.05 | 1.14  | 0.068778 | 0.023647 | 0.426056 | 0.192564 |
| MmugDNA.29283.1.S1_at   | MmugDNA.29283.1 | 3.84  | 3.84  | 0.08 | 0    | 1     | 0.373901 | 0.530127 | 0.705567 | 0.717729 |
| MmugDNA.29284.1.S1_at   | MmugDNA.29284.1 | 11.54 | 11.4  | 0.49 | 0.13 | 1.1   | 0.705365 | 0.206585 | 0.885355 | 0.480619 |
| MmugDNA.29286.1.S1_at   | MmugDNA.29286.1 | 8.02  | 7.18  | 0.26 | 0.32 | 1.79  | 0.02021  | 0.038395 | 0.303696 | 0.240833 |
| MmugDNA.29287.1.S1_at   | MmugDNA.29287.1 | 6.89  | 6.82  | 0.16 | 0.15 | 1.05  | 0.636194 | 0.03314  | 0.854813 | 0.225324 |
| MmugDNA.29289.1.S1_at   | MmugDNA.29289.1 | 7.07  | 7.4   | 1.06 | 0.29 | -1.26 | 0.532032 | 0.529199 | 0.799992 | 0.717207 |
| MmugDNA.2929.1.S1_at    | MmugDNA.2929.1  | 9.18  | 10.23 | 0.64 | 0.17 | -2.07 | 0.045915 | 0.034568 | 0.37735  | 0.23001  |
| MmugDNA.29290.1.S1_at   | MmugDNA.29290.1 | 12.68 | 13.11 | 0.31 | 0.03 | -1.34 | 0.098696 | 0.118832 | 0.468025 | 0.386991 |
| MmugDNA.29291.1.S1_at   | MmugDNA.29291.1 | 4.93  | 4.75  | 0.11 | 0.05 | 1.13  | 0.043329 | 0.033561 | 0.371787 | 0.226764 |
| MmugDNA.29292.1.S1_at   | MmugDNA.29292.1 | 6.99  | 7.53  | 0.14 | 0.07 | -1.46 | 0.002976 | 0.037054 | 0.190446 | 0.236952 |
| MmugDNA.29293.1.S1_s_at | MmugDNA.29293.1 | 3.22  | 3.56  | 0.12 | 0.15 | -1.26 | 0.029648 | 0.017745 | 0.335282 | 0.168367 |
| MmugDNA.29294.1.S1_at   | MmugDNA.29294.1 | 4.16  | 4.18  | 0.21 | 0.06 | -1.01 | 0.904236 | 0.585061 | 0.967773 | 0.752684 |
| MmugDNA.29295.1.S1_at   | MmugDNA.29295.1 | 9.2   | 9.44  | 0.5  | 0.09 | -1.18 | 0.468691 | 0.227889 | 0.765063 | 0.500201 |
| MmugDNA.29297.1.S1_at   | MmugDNA.29297.1 | 12.19 | 11.2  | 0.17 | 0.14 | 1.98  | 0.002639 | 0.000109 | 0.18209  | 0.028099 |
| MmugDNA.29298.1.S1_at   | MmugDNA.29298.1 | 5.98  | 6     | 0.29 | 0.1  | -1.01 | 0.917631 | 0.990655 | 0.972048 | 0.994725 |

|                         |                 |       |       |      |      |       |          |          |          |          |
|-------------------------|-----------------|-------|-------|------|------|-------|----------|----------|----------|----------|
| MmugDNA.293.1.S1_at     | MmugDNA.293.1   | 8.73  | 9.33  | 0.6  | 0.25 | -1.51 | 0.091144 | 0.321147 | 0.459035 | 0.573111 |
| MmugDNA.2930.1.S1_at    | MmugDNA.2930.1  | 10.72 | 10.7  | 0.42 | 0.04 | 1.01  | 0.925481 | 0.741393 | 0.975188 | 0.850285 |
| MmugDNA.29300.1.S1_at   | MmugDNA.29300.1 | 8.65  | 9.32  | 0.27 | 0.05 | -1.59 | 0.006696 | 0.000455 | 0.222639 | 0.038572 |
| MmugDNA.29301.1.S1_at   | MmugDNA.29301.1 | 4.48  | 4.3   | 0.22 | 0.19 | 1.13  | 0.166942 | 0.342888 | 0.539531 | 0.588712 |
| MmugDNA.29302.1.S1_at   | MmugDNA.29302.1 | 5.23  | 5.2   | 0.13 | 0.06 | 1.02  | 0.688081 | 0.87013  | 0.878062 | 0.926362 |
| MmugDNA.29303.1.S1_at   | MmugDNA.29303.1 | 10.04 | 10.88 | 0.72 | 0.05 | -1.79 | 0.105953 | 0.113724 | 0.477816 | 0.379889 |
| MmugDNA.29305.1.S1_s_at | MmugDNA.29305.1 | 4.3   | 4.54  | 0.25 | 0.17 | -1.18 | 0.478919 | 0.060486 | 0.770342 | 0.292569 |
| MmugDNA.29306.1.S1_at   | MmugDNA.29306.1 | 4.42  | 4.55  | 0.25 | 0.07 | -1.09 | 0.724659 | 0.496229 | 0.893235 | 0.695914 |
| MmugDNA.29307.1.S1_at   | MmugDNA.29307.1 | 7.15  | 7.07  | 0.66 | 0.25 | 1.05  | 0.221595 | 0.076288 | 0.591315 | 0.321299 |
| MmugDNA.29309.1.S1_at   | MmugDNA.29309.1 | 5.09  | 5.04  | 0.24 | 0.09 | 1.04  | 0.350761 | 0.694042 | 0.691616 | 0.822068 |
| MmugDNA.2931.1.S1_at    | MmugDNA.2931.1  | 4.15  | 3.97  | 0.07 | 0.08 | -1.13 | 0.079552 | 0.265419 | 0.44236  | 0.531363 |
| MmugDNA.29310.1.S1_at   | MmugDNA.29310.1 | 8.2   | 7.55  | 0.38 | 0.16 | 1.58  | 0.132003 | 0.737388 | 0.506447 | 0.847889 |
| MmugDNA.29311.1.S1_at   | MmugDNA.29311.1 | 7.36  | 7.17  | 0.49 | 0.09 | 1.14  | 0.978571 | 0.148768 | 0.993032 | 0.423201 |
| MmugDNA.29312.1.S1_at   | MmugDNA.29312.1 | 4.69  | 4.71  | 0.18 | 0.03 | -1.01 | 0.405536 | 0.633845 | 0.727426 | 0.784497 |
| MmugDNA.29313.1.S1_at   | MmugDNA.29313.1 | 2.97  | 2.95  | 0.1  | 0.11 | 1.01  | 0.35666  | 0.302852 | 0.695204 | 0.560356 |
| MmugDNA.29315.1.S1_at   | MmugDNA.29315.1 | 9.35  | 8.2   | 0.41 | 0.44 | 2.22  | 0.085539 | 0.00494  | 0.452653 | 0.097917 |
| MmugDNA.29317.1.S1_at   | MmugDNA.29317.1 | 11.11 | 10.57 | 0.12 | 0.28 | 1.46  | 0.042462 | 0.109091 | 0.369047 | 0.372869 |
| MmugDNA.29318.1.S1_at   | MmugDNA.29318.1 | 9.86  | 10.13 | 0.43 | 0.16 | -1.2  | 0.370183 | 0.240003 | 0.704548 | 0.510717 |
| MmugDNA.2932.1.S1_at    | MmugDNA.2932.1  | 3.51  | 3.51  | 0.11 | 0.08 | 1     | 0.835821 | 0.225404 | 0.941194 | 0.498035 |
| MmugDNA.29323.1.S1_at   | MmugDNA.29323.1 | 5.92  | 5.7   | 0.22 | 0.19 | 1.17  | 0.215461 | 0.225267 | 0.585748 | 0.497892 |
| MmugDNA.29324.1.S1_at   | MmugDNA.29324.1 | 3.85  | 3.84  | 0.14 | 0.01 | 1.01  | 0.738205 | 0.693478 | 0.8998   | 0.821713 |
| MmugDNA.29325.1.S1_at   | MmugDNA.29325.1 | 3.86  | 3.96  | 0.23 | 0.21 | -1.08 | 0.596743 | 0.47267  | 0.836122 | 0.68007  |
| MmugDNA.29326.1.S1_at   | MmugDNA.29326.1 | 4.01  | 4.07  | 0.11 | 0.15 | -1.04 | 0.783394 | 0.817257 | 0.920232 | 0.894592 |
| MmugDNA.29329.1.S1_at   | MmugDNA.29329.1 | 5.46  | 7.91  | 0.97 | 0.29 | -5.48 | 0.030947 | 0.017926 | 0.339277 | 0.168998 |
| MmugDNA.29331.1.S1_at   | MmugDNA.29331.1 | 12.12 | 11.99 | 0.27 | 0.11 | 1.09  | 0.335215 | 0.033964 | 0.680744 | 0.227969 |
| MmugDNA.29334.1.S1_at   | MmugDNA.29334.1 | 3.88  | 3.92  | 0.27 | 0.37 | -1.03 | 0.903245 | 0.570743 | 0.967455 | 0.743326 |
| MmugDNA.29335.1.S1_at   | MmugDNA.29335.1 | 4.14  | 4.08  | 0.05 | 0.08 | 1.04  | 0.134259 | 0.15546  | 0.508462 | 0.430824 |
| MmugDNA.7297.1.S1_s_at  | MmugDNA.7297.1  | 7.96  | 8.25  | 0.55 | 0.1  | -1.22 | 0.808845 | 0.051646 | 0.930844 | 0.272698 |
| MmugDNA.29339.1.S1_at   | MmugDNA.29339.1 | 4.46  | 3.97  | 0.61 | 0.11 | 1.41  | 0.064177 | 0.041588 | 0.41772  | 0.248831 |
| MmugDNA.29340.1.S1_at   | MmugDNA.29340.1 | 8.6   | 9.97  | 0.36 | 0.13 | -2.57 | 0.005791 | 0.000596 | 0.211798 | 0.041941 |
| MmugDNA.29341.1.S1_at   | MmugDNA.29341.1 | 4.15  | 4.11  | 0.26 | 0.1  | 1.03  | 0.307422 | 0.456967 | 0.660255 | 0.670592 |
| MmugDNA.29342.1.S1_at   | MmugDNA.29342.1 | 4.92  | 4.83  | 0.06 | 0.11 | 1.07  | 0.23142  | 0.968817 | 0.599368 | 0.982835 |
| MmugDNA.29343.1.S1_at   | MmugDNA.29343.1 | 11.2  | 11.89 | 0.67 | 0.04 | -1.61 | 0.173468 | 0.194744 | 0.546571 | 0.469774 |
| MmugDNA.29344.1.S1_at   | MmugDNA.29344.1 | 3.27  | 3.28  | 0.2  | 0.03 | -1.01 | 0.389128 | 0.316792 | 0.715919 | 0.570195 |
| MmugDNA.29345.1.S1_at   | MmugDNA.29345.1 | 4.97  | 5.56  | 1.02 | 0.2  | -1.51 | 0.878568 | 0.640356 | 0.957757 | 0.788874 |
| MmugDNA.29346.1.S1_at   | MmugDNA.29346.1 | 7.56  | 7.89  | 0.2  | 0.1  | -1.25 | 0.130837 | 0.227078 | 0.505266 | 0.499417 |
| MmugDNA.29346.1.S1_s_at | MmugDNA.29346.1 | 11.37 | 11.51 | 0.27 | 0.05 | -1.1  | 0.368553 | 0.652974 | 0.703707 | 0.797125 |
| MmugDNA.29347.1.S1_at   | MmugDNA.29347.1 | 3.38  | 3.43  | 0.06 | 0.17 | -1.04 | 0.62986  | 0.048529 | 0.85173  | 0.265534 |
| MmugDNA.29348.1.S1_at   | MmugDNA.29348.1 | 4.97  | 5.91  | 0.3  | 0.16 | -1.92 | 0.026417 | 0.199283 | 0.32471  | 0.473999 |
| MmugDNA.29349.1.S1_at   | MmugDNA.29349.1 | 7.88  | 7.81  | 0.33 | 0.16 | 1.05  | 0.6966   | 0.294744 | 0.882169 | 0.554345 |
| MmugDNA.29350.1.S1_at   | MmugDNA.29350.1 | 2.76  | 2.82  | 0.09 | 0.11 | -1.05 | 0.323232 | 0.402867 | 0.672034 | 0.631631 |
| MmugDNA.29351.1.S1_at   | MmugDNA.29351.1 | 5.1   | 6.67  | 1.19 | 0.36 | -2.97 | 0.286545 | 0.435676 | 0.643782 | 0.655454 |
| MmugDNA.29352.1.S1_at   | MmugDNA.29352.1 | 4.75  | 4.7   | 0.1  | 0.03 | 1.04  | 0.444449 | 0.585612 | 0.751266 | 0.752934 |

|                         |                 |       |       |      |      |       |          |          |          |          |
|-------------------------|-----------------|-------|-------|------|------|-------|----------|----------|----------|----------|
| MmugDNA.29354.1.S1_at   | MmugDNA.29354.1 | 11.07 | 11    | 0.43 | 0.12 | 1.05  | 0.357055 | 0.479387 | 0.695468 | 0.685126 |
| MmugDNA.29355.1.S1_at   | MmugDNA.29355.1 | 5.16  | 5.08  | 0.07 | 0.25 | 1.05  | 0.477042 | 0.654976 | 0.76966  | 0.7982   |
| MmugDNA.29356.1.S1_at   | MmugDNA.29356.1 | 10.7  | 9.77  | 0.04 | 0.11 | 1.89  | 0.000218 | 0.001951 | 0.120771 | 0.065813 |
| MmugDNA.29357.1.S1_at   | MmugDNA.29357.1 | 6.29  | 5.81  | 0.17 | 0.04 | 1.39  | 0.010256 | 0.030897 | 0.246929 | 0.217584 |
| MmugDNA.29358.1.S1_at   | MmugDNA.29358.1 | 7.19  | 6.96  | 0.06 | 0.11 | 1.17  | 0.058778 | 0.176936 | 0.405391 | 0.453337 |
| MmugDNA.29359.1.S1_at   | MmugDNA.29359.1 | 6.62  | 6.68  | 0.14 | 0.21 | -1.04 | 0.543938 | 0.725019 | 0.806882 | 0.840843 |
| MmugDNA.29360.1.S1_at   | MmugDNA.29360.1 | 5.5   | 5.15  | 0.22 | 0.09 | 1.27  | 0.122178 | 0.285799 | 0.495677 | 0.547484 |
| MmugDNA.29361.1.S1_at   | MmugDNA.29361.1 | 7.34  | 7.55  | 0.28 | 0.2  | -1.16 | 0.339764 | 0.563972 | 0.684042 | 0.738913 |
| MmugDNA.29362.1.S1_at   | MmugDNA.29362.1 | 10.08 | 9.95  | 1.74 | 0.23 | 1.09  | 0.390099 | 0.144532 | 0.716509 | 0.418408 |
| MmugDNA.29363.1.S1_at   | MmugDNA.29363.1 | 4.94  | 5.09  | 0.26 | 0.12 | -1.11 | 0.610356 | 0.746665 | 0.841841 | 0.852899 |
| MmugDNA.29364.1.S1_at   | MmugDNA.29364.1 | 11.35 | 11.08 | 0.26 | 0.06 | 1.2   | 0.066974 | 0.014303 | 0.422979 | 0.152693 |
| MmugDNA.29365.1.S1_at   | MmugDNA.29365.1 | 5.94  | 4.89  | 0.27 | 0.2  | 2.06  | 0.005931 | 0.002643 | 0.212439 | 0.076012 |
| MmugDNA.29366.1.S1_at   | MmugDNA.29366.1 | 7.06  | 6.64  | 0.21 | 0.13 | 1.33  | 0.035909 | 0.069325 | 0.353707 | 0.309558 |
| MmugDNA.29367.1.S1_at   | MmugDNA.29367.1 | 7.51  | 7.26  | 0.13 | 0.09 | 1.2   | 0.047701 | 0.153651 | 0.38112  | 0.428413 |
| MmugDNA.29368.1.S1_at   | MmugDNA.29368.1 | 4.53  | 4.52  | 0.14 | 0.07 | 1.01  | 0.811321 | 0.908079 | 0.931713 | 0.947903 |
| MmugDNA.29369.1.S1_at   | MmugDNA.29369.1 | 7.17  | 7.09  | 0.58 | 0.27 | 1.05  | 0.273547 | 0.159675 | 0.633298 | 0.435785 |
| MmugDNA.2937.1.S1_at    | MmugDNA.2937.1  | 7.94  | 7.9   | 0.43 | 0.24 | 1.03  | 0.4364   | 0.219642 | 0.746306 | 0.49324  |
| MmugDNA.29372.1.S1_at   | MmugDNA.29372.1 | 3.26  | 3.1   | 0.13 | 0.13 | 1.11  | 0.112836 | 0.210739 | 0.486223 | 0.48478  |
| MmugDNA.29373.1.S1_at   | MmugDNA.29373.1 | 5.57  | 5.1   | 0.9  | 0.43 | 1.38  | 0.514316 | 0.124696 | 0.790322 | 0.39513  |
| MmugDNA.29376.1.S1_at   | MmugDNA.29376.1 | 7.6   | 7.75  | 0.62 | 0.12 | -1.11 | 0.666003 | 0.68166  | 0.868171 | 0.814095 |
| MmugDNA.29377.1.S1_at   | MmugDNA.29377.1 | 4.76  | 4.64  | 0.13 | 0.08 | 1.09  | 0.125356 | 0.195053 | 0.499523 | 0.470179 |
| MmugDNA.29378.1.S1_at   | MmugDNA.29378.1 | 3.84  | 3.89  | 0.25 | 0.34 | -1.03 | 0.189183 | 0.348314 | 0.560823 | 0.592478 |
| MmugDNA.29379.1.S1_at   | MmugDNA.29379.1 | 5.69  | 7.17  | 0.5  | 0.68 | -2.78 | 0.036303 | 0.077553 | 0.35477  | 0.323421 |
| MmugDNA.2938.1.S1_at    | MmugDNA.2938.1  | 6.7   | 6.25  | 0.5  | 0.01 | 1.36  | 0.243005 | 0.03335  | 0.608888 | 0.226324 |
| MmugDNA.29380.1.S1_at   | MmugDNA.29380.1 | 7.48  | 7.39  | 0.12 | 0.04 | 1.07  | 0.312806 | 0.145325 | 0.664222 | 0.419365 |
| MmugDNA.29381.1.S1_at   | MmugDNA.29381.1 | 3.31  | 3.24  | 0.06 | 0    | 1.05  | 0.081445 | 0.117406 | 0.445406 | 0.385054 |
| MmugDNA.29382.1.S1_at   | MmugDNA.29382.1 | 6.97  | 7.08  | 0.24 | 0.61 | -1.08 | 0.282392 | 0.840363 | 0.640907 | 0.909015 |
| MmugDNA.29383.1.S1_at   | MmugDNA.29383.1 | 8.23  | 8.01  | 0.39 | 0.03 | 1.17  | 0.527486 | 0.294562 | 0.797132 | 0.554282 |
| MmugDNA.29384.1.S1_at   | MmugDNA.29384.1 | 4.11  | 3.95  | 0.09 | 0.07 | 1.11  | 0.060522 | 0.043919 | 0.408362 | 0.254098 |
| MmugDNA.29385.1.S1_at   | MmugDNA.29385.1 | 13.04 | 12.62 | 0.46 | 0.07 | 1.34  | 0.575467 | 0.44205  | 0.824671 | 0.660148 |
| MmugDNA.29386.1.S1_at   | MmugDNA.29386.1 | 3.23  | 3.21  | 0.16 | 0.07 | 1.01  | 0.639441 | 0.739909 | 0.85626  | 0.849298 |
| MmugDNA.29387.1.S1_at   | MmugDNA.29387.1 | 3.49  | 3.51  | 0.08 | 0    | -1.01 | 0.663748 | 0.614704 | 0.867359 | 0.771445 |
| MmugDNA.29388.1.S1_at   | MmugDNA.29388.1 | 10.11 | 10.23 | 0.31 | 0.07 | -1.08 | 0.668153 | 0.292757 | 0.868924 | 0.552783 |
| MmugDNA.29388.1.S1_s_at | MmugDNA.29388.1 | 10.59 | 10.65 | 0.24 | 0.01 | -1.05 | 0.626328 | 0.289864 | 0.849967 | 0.550831 |
| MmugDNA.29389.1.S1_at   | MmugDNA.29389.1 | 7.04  | 6.98  | 0.16 | 0.07 | 1.04  | 0.581653 | 0.269766 | 0.827791 | 0.53503  |
| MmugDNA.2939.1.S1_at    | MmugDNA.2939.1  | 3.37  | 3.2   | 0.13 | 0.11 | 1.13  | 0.359203 | 0.163499 | 0.697162 | 0.439731 |
| MmugDNA.29390.1.S1_at   | MmugDNA.29390.1 | 4.08  | 4.54  | 0.23 | 0.58 | -1.38 | 0.314945 | 0.406221 | 0.665641 | 0.634225 |
| MmugDNA.29392.1.S1_at   | MmugDNA.29392.1 | 10.58 | 8.62  | 0.72 | 0.38 | 3.9   | 0.010547 | 0.002875 | 0.248239 | 0.078929 |
| MmugDNA.29393.1.S1_at   | MmugDNA.29393.1 | 8.14  | 8.66  | 0.28 | 0.02 | -1.43 | 0.014342 | 0.276381 | 0.274905 | 0.540334 |
| MmugDNA.29394.1.S1_at   | MmugDNA.29394.1 | 4.91  | 4.32  | 0.66 | 0.34 | 1.51  | 0.14339  | 0.273334 | 0.518743 | 0.537788 |
| MmugDNA.29396.1.S1_at   | MmugDNA.29396.1 | 5.39  | 6     | 0.94 | 0.01 | -1.52 | 0.916946 | 0.85733  | 0.971858 | 0.918543 |
| MmugDNA.29397.1.S1_at   | MmugDNA.29397.1 | 3.57  | 3.43  | 0.1  | 0.02 | 1.1   | 0.111759 | 0.204276 | 0.484908 | 0.478541 |
| MmugDNA.29398.1.S1_at   | MmugDNA.29398.1 | 4.8   | 4.68  | 0.12 | 0.12 | 1.09  | 0.151383 | 0.172532 | 0.524547 | 0.448864 |

|                         |                 |       |       |      |      |       |          |          |          |          |
|-------------------------|-----------------|-------|-------|------|------|-------|----------|----------|----------|----------|
| MmugDNA.29399.1.S1_at   | MmugDNA.29399.1 | 11.01 | 11.34 | 0.21 | 0.08 | -1.25 | 0.018898 | 0.023637 | 0.298593 | 0.192555 |
| MmugDNA.294.1.S1_at     | MmugDNA.294.1   | 4.1   | 4.08  | 0.15 | 0.13 | 1.02  | 0.575525 | 0.501868 | 0.824671 | 0.699941 |
| MmugDNA.29400.1.S1_at   | MmugDNA.29400.1 | 10.05 | 10.42 | 0.25 | 0.02 | -1.29 | 0.062875 | 0.036029 | 0.414181 | 0.234255 |
| MmugDNA.29401.1.S1_at   | MmugDNA.29401.1 | 7.29  | 7.56  | 0.63 | 0.22 | -1.2  | 0.79838  | 0.856174 | 0.926122 | 0.917861 |
| MmugDNA.29402.1.S1_at   | MmugDNA.29402.1 | 10.6  | 10.78 | 0.39 | 0.08 | -1.13 | 0.505099 | 0.651974 | 0.785147 | 0.796529 |
| MmugDNA.29403.1.S1_at   | MmugDNA.29403.1 | 4.26  | 4.54  | 0.32 | 0.18 | -1.21 | 0.496287 | 0.349421 | 0.780328 | 0.593406 |
| MmugDNA.29404.1.S1_at   | MmugDNA.29404.1 | 8.18  | 7.63  | 0.76 | 0.15 | 1.46  | 0.423847 | 0.394085 | 0.739299 | 0.626734 |
| MmugDNA.29405.1.S1_at   | MmugDNA.29405.1 | 5.18  | 5.01  | 0.16 | 0.15 | 1.13  | 0.115666 | 0.245989 | 0.488929 | 0.515713 |
| MmugDNA.29406.1.S1_at   | MmugDNA.29406.1 | 7.8   | 7.28  | 0.15 | 0.21 | 1.43  | 0.008553 | 0.002658 | 0.235156 | 0.076211 |
| MmugDNA.29407.1.S1_s_at | MmugDNA.29407.1 | 8.42  | 8.08  | 0.77 | 0.18 | 1.26  | 0.675474 | 0.028135 | 0.872698 | 0.209306 |
| MmugDNA.29409.1.S1_at   | MmugDNA.29409.1 | 3.15  | 3.15  | 0.06 | 0.07 | -1    | 0.482318 | 0.731981 | 0.772308 | 0.844751 |
| MmugDNA.2941.1.S1_at    | MmugDNA.2941.1  | 3.38  | 3.46  | 0.14 | 0.13 | -1.05 | 0.852653 | 0.345171 | 0.948073 | 0.590438 |
| MmugDNA.29412.1.S1_at   | MmugDNA.29412.1 | 5.18  | 5.24  | 0.13 | 0.17 | -1.04 | 0.765221 | 0.798783 | 0.911729 | 0.884072 |
| MmugDNA.29413.1.S1_at   | MmugDNA.29413.1 | 3.48  | 3.46  | 0.14 | 0.04 | 1.02  | 0.975151 | 0.784476 | 0.991912 | 0.875181 |
| MmugDNA.29414.1.S1_at   | MmugDNA.29414.1 | 11.22 | 11.59 | 0.24 | 0.08 | -1.29 | 0.048434 | 0.005582 | 0.383306 | 0.103258 |
| MmugDNA.29415.1.S1_at   | MmugDNA.29415.1 | 7.52  | 8     | 0.15 | 0    | -1.39 | 0.011307 | 0.000861 | 0.253709 | 0.047371 |
| MmugDNA.29416.1.S1_at   | MmugDNA.29416.1 | 3.23  | 3.13  | 0.08 | 0.08 | 1.07  | 0.21998  | 0.250538 | 0.589114 | 0.519391 |
| MmugDNA.29419.1.S1_at   | MmugDNA.29419.1 | 3.74  | 3.63  | 0.11 | 0.12 | 1.08  | 0.123806 | 0.141227 | 0.497339 | 0.414749 |
| MmugDNA.29420.1.S1_at   | MmugDNA.29420.1 | 7.09  | 7.09  | 0.06 | 0.08 | -1    | 0.928435 | 0.898842 | 0.976259 | 0.942448 |
| MmugDNA.29421.1.S1_at   | MmugDNA.29421.1 | 5.66  | 5.58  | 0.12 | 0.01 | 1.06  | 0.279143 | 0.516101 | 0.638024 | 0.708704 |
| MmugDNA.29422.1.S1_at   | MmugDNA.29422.1 | 5.01  | 4.86  | 0.05 | 0.08 | 1.12  | 0.059074 | 0.07434  | 0.405996 | 0.318046 |
| MmugDNA.29423.1.S1_at   | MmugDNA.29423.1 | 5.61  | 5.45  | 0.13 | 0.14 | 1.11  | 0.572764 | 0.516081 | 0.823366 | 0.708704 |
| MmugDNA.29424.1.S1_at   | MmugDNA.29424.1 | 5.12  | 5.55  | 0.21 | 0.11 | -1.34 | 0.060036 | 0.150812 | 0.407399 | 0.425335 |
| MmugDNA.29425.1.S1_at   | MmugDNA.29425.1 | 7.59  | 7.86  | 0.19 | 0.09 | -1.21 | 0.387301 | 0.040929 | 0.714163 | 0.247161 |
| MmugDNA.29426.1.S1_at   | MmugDNA.29426.1 | 7.24  | 7.32  | 0.65 | 0.4  | -1.05 | 0.549449 | 0.879643 | 0.810316 | 0.931253 |
| MmugDNA.29427.1.S1_at   | MmugDNA.29427.1 | 3.67  | 3.67  | 0.02 | 0.14 | 1     | 0.32966  | 0.71063  | 0.67648  | 0.832169 |
| MmugDNA.29428.1.S1_at   | MmugDNA.29428.1 | 3.92  | 3.81  | 0.2  | 0.2  | 1.08  | 0.687822 | 0.87796  | 0.877942 | 0.930333 |
| MmugDNA.29429.1.S1_at   | MmugDNA.29429.1 | 9.09  | 9.29  | 0.31 | 0.12 | -1.15 | 0.309273 | 0.168421 | 0.661663 | 0.445092 |
| MmugDNA.2943.1.S1_at    | MmugDNA.2943.1  | 6.2   | 6.21  | 0.91 | 0.38 | -1    | 0.487029 | 0.579921 | 0.774859 | 0.749335 |
| MmugDNA.29430.1.S1_at   | MmugDNA.29430.1 | 10.2  | 9.56  | 0.23 | 0.19 | 1.55  | 0.011521 | 0.004008 | 0.255545 | 0.089969 |
| MmugDNA.27011.1.S1_s_at | MmugDNA.27011.1 | 6.12  | 6.07  | 0.07 | 0.08 | 1.03  | 0.89938  | 0.974887 | 0.965794 | 0.986264 |
| MmugDNA.29432.1.S1_at   | MmugDNA.29432.1 | 7.45  | 6.99  | 0.34 | 0.19 | 1.38  | 0.103356 | 0.040752 | 0.474122 | 0.246735 |
| MmugDNA.29434.1.S1_at   | MmugDNA.29434.1 | 6.05  | 6.07  | 0.07 | 0.14 | -1.02 | 0.793766 | 0.856518 | 0.924425 | 0.918027 |
| MmugDNA.29435.1.S1_at   | MmugDNA.29435.1 | 6.68  | 6.69  | 0.11 | 0.2  | -1.01 | 0.681842 | 0.426823 | 0.87542  | 0.648894 |
| MmugDNA.29437.1.S1_at   | MmugDNA.29437.1 | 6.12  | 6.17  | 0.21 | 0.01 | -1.04 | 0.603791 | 0.741747 | 0.839359 | 0.850485 |
| MmugDNA.29438.1.S1_at   | MmugDNA.29438.1 | 7.89  | 8.03  | 0.46 | 0.1  | -1.1  | 0.662275 | 0.070084 | 0.866677 | 0.31098  |
| MmugDNA.29439.1.S1_at   | MmugDNA.29439.1 | 4.11  | 3.91  | 0.28 | 0.44 | 1.15  | 0.850573 | 0.971248 | 0.947381 | 0.984375 |
| MmugDNA.29441.1.S1_at   | MmugDNA.29441.1 | 8.1   | 8.77  | 0.24 | 0.06 | -1.59 | 0.008216 | 0.055681 | 0.232005 | 0.28179  |
| MmugDNA.29442.1.S1_at   | MmugDNA.29442.1 | 8.56  | 6.94  | 0.38 | 0.41 | 3.07  | 0.006443 | 0.001784 | 0.219301 | 0.063434 |
| MmugDNA.29443.1.S1_at   | MmugDNA.29443.1 | 5.11  | 4.95  | 0.35 | 0.19 | 1.12  | 0.218568 | 0.257575 | 0.588313 | 0.525302 |
| MmugDNA.29445.1.S1_at   | MmugDNA.29445.1 | 3.18  | 3.15  | 0.1  | 0.05 | 1.02  | 0.937649 | 0.476481 | 0.97904  | 0.682725 |
| MmugDNA.29446.1.S1_at   | MmugDNA.29446.1 | 4.32  | 4.3   | 0.35 | 0.07 | 1.01  | 0.846622 | 0.571607 | 0.94629  | 0.743847 |
| MmugDNA.29447.1.S1_at   | MmugDNA.29447.1 | 4.27  | 3.84  | 0.15 | 0.47 | 1.35  | 0.807339 | 0.183002 | 0.930145 | 0.459481 |

|                         |                 |       |       |      |      |       |          |          |          |          |
|-------------------------|-----------------|-------|-------|------|------|-------|----------|----------|----------|----------|
| MmugDNA.35458.1.S1_at   | MmugDNA.35458.1 | 12.4  | 12.27 | 0.17 | 0.08 | 1.09  | 0.950709 | 0.847053 | 0.983335 | 0.913065 |
| MmugDNA.35458.1.S1_s_at | MmugDNA.35458.1 | 13.72 | 13.74 | 0.13 | 0.04 | -1.01 | 0.612579 | 0.810412 | 0.843101 | 0.890812 |
| MmugDNA.29450.1.S1_at   | MmugDNA.29450.1 | 12.04 | 11.53 | 0.09 | 0.03 | 1.43  | 0.001024 | 0.000419 | 0.155374 | 0.038093 |
| MmugDNA.29451.1.S1_at   | MmugDNA.29451.1 | 5.47  | 5.01  | 0.23 | 0.11 | 1.38  | 0.091806 | 0.069245 | 0.460177 | 0.309436 |
| MmugDNA.29452.1.S1_at   | MmugDNA.29452.1 | 12.04 | 12.58 | 0.23 | 0.02 | -1.44 | 0.023133 | 0.005978 | 0.314781 | 0.105736 |
| MmugDNA.29453.1.S1_at   | MmugDNA.29453.1 | 5.19  | 4.95  | 0.11 | 0.15 | 1.18  | 0.309747 | 0.34737  | 0.661815 | 0.591967 |
| MmugDNA.29454.1.S1_at   | MmugDNA.29454.1 | 9.75  | 9.87  | 0.18 | 0.09 | -1.09 | 0.2411   | 0.391458 | 0.607346 | 0.625086 |
| MmugDNA.29455.1.S1_at   | MmugDNA.29455.1 | 11.23 | 11.17 | 0.42 | 0.08 | 1.04  | 0.981604 | 0.039376 | 0.994147 | 0.243406 |
| MmugDNA.29456.1.S1_at   | MmugDNA.29456.1 | 9.67  | 9.86  | 0.09 | 0.12 | -1.14 | 0.081139 | 0.083309 | 0.445139 | 0.333375 |
| MmugDNA.29457.1.S1_at   | MmugDNA.29457.1 | 3.19  | 3.31  | 0.3  | 0.22 | -1.09 | 0.98569  | 0.999371 | 0.995461 | 0.999769 |
| MmugDNA.29458.1.S1_at   | MmugDNA.29458.1 | 4.19  | 3.75  | 0.23 | 0.09 | -1.35 | 0.081848 | 0.095121 | 0.446396 | 0.352151 |
| MmugDNA.29459.1.S1_at   | MmugDNA.29459.1 | 6.13  | 6.14  | 0.12 | 0.01 | -1.01 | 0.896274 | 0.64703  | 0.964545 | 0.793279 |
| MmugDNA.2946.1.S1_at    | MmugDNA.2946.1  | 4.09  | 4.04  | 0.1  | 0.04 | 1.03  | 0.172381 | 0.138058 | 0.545696 | 0.410919 |
| MmugDNA.29460.1.S1_at   | MmugDNA.29460.1 | 3.5   | 3.7   | 0.14 | 0.31 | -1.15 | 0.292232 | 0.323561 | 0.648567 | 0.574497 |
| MmugDNA.29461.1.S1_at   | MmugDNA.29461.1 | 5.34  | 5.35  | 0.29 | 0.23 | -1.01 | 0.670951 | 0.866155 | 0.870106 | 0.923842 |
| MmugDNA.29462.1.S1_at   | MmugDNA.29462.1 | 3.49  | 3.45  | 0.39 | 0.06 | 1.03  | 0.820308 | 0.861114 | 0.935289 | 0.920974 |
| MmugDNA.29463.1.S1_at   | MmugDNA.29463.1 | 2.88  | 2.81  | 0.11 | 0.12 | 1.05  | 0.920037 | 0.896298 | 0.972913 | 0.940788 |
| MmugDNA.29464.1.S1_at   | MmugDNA.29464.1 | 10.11 | 9.31  | 0.06 | 0.14 | 1.74  | 0.000784 | 0.000067 | 0.15004  | 0.025805 |
| MmugDNA.29465.1.S1_at   | MmugDNA.29465.1 | 8.87  | 9.1   | 0.15 | 0.1  | -1.18 | 0.024445 | 0.032292 | 0.318809 | 0.222452 |
| MmugDNA.29466.1.S1_at   | MmugDNA.29466.1 | 9.75  | 9.29  | 0.68 | 0.06 | 1.37  | 0.86275  | 0.698171 | 0.951714 | 0.824649 |
| MmugDNA.29468.1.S1_x_at | MmugDNA.29468.1 | 8.59  | 8.24  | 0.28 | 0.11 | 1.27  | 0.031401 | 0.030421 | 0.341227 | 0.216377 |
| MmugDNA.29469.1.S1_at   | MmugDNA.29469.1 | 6.83  | 6.74  | 0.29 | 0.01 | 1.06  | 0.574796 | 0.900143 | 0.82429  | 0.943307 |
| MmugDNA.2947.1.S1_at    | MmugDNA.2947.1  | 9.76  | 10    | 0.62 | 0.05 | -1.19 | 0.485452 | 0.098508 | 0.774354 | 0.356636 |
| MmugDNA.29470.1.S1_at   | MmugDNA.29470.1 | 11.25 | 10.93 | 0.52 | 0.2  | 1.26  | 0.220343 | 0.03391  | 0.589644 | 0.227771 |
| MmugDNA.29471.1.S1_at   | MmugDNA.29471.1 | 3.77  | 3.63  | 0.15 | 0.06 | 1.1   | 0.116861 | 0.135436 | 0.490029 | 0.407526 |
| MmugDNA.29472.1.S1_at   | MmugDNA.29472.1 | 3.1   | 2.97  | 0.12 | 0.39 | 1.09  | 0.917436 | 0.992688 | 0.972005 | 0.995715 |
| MmugDNA.29474.1.S1_at   | MmugDNA.29474.1 | 10.4  | 10.15 | 0.34 | 0.09 | 1.19  | 0.761776 | 0.681486 | 0.910682 | 0.814091 |
| MmugDNA.29476.1.S1_at   | MmugDNA.29476.1 | 7.73  | 7.61  | 0.24 | 0.06 | 1.09  | 0.209331 | 0.323124 | 0.580845 | 0.574351 |
| MmugDNA.29478.1.S1_at   | MmugDNA.29478.1 | 8.04  | 8.15  | 0.12 | 0.07 | -1.08 | 0.536237 | 0.041759 | 0.802201 | 0.248939 |
| MmugDNA.29479.1.S1_at   | MmugDNA.29479.1 | 10.38 | 10.1  | 1.17 | 0.15 | 1.22  | 0.602556 | 0.804608 | 0.838885 | 0.88762  |
| MmugDNA.29480.1.S1_at   | MmugDNA.29480.1 | 4.97  | 4.93  | 0.26 | 0.22 | 1.03  | 0.901071 | 0.88691  | 0.966467 | 0.935578 |
| MmugDNA.29481.1.S1_at   | MmugDNA.29481.1 | 4.84  | 4.79  | 0.09 | 0.16 | 1.03  | 0.884062 | 0.609239 | 0.959789 | 0.767684 |
| MmugDNA.29482.1.S1_at   | MmugDNA.29482.1 | 5.65  | 6.4   | 0.35 | 0.24 | -1.68 | 0.073881 | 0.108052 | 0.434623 | 0.37128  |
| MmugDNA.29484.1.S1_at   | MmugDNA.29484.1 | 4.94  | 4.94  | 0.12 | 0.14 | 1     | 0.852146 | 0.952404 | 0.947936 | 0.973038 |
| MmugDNA.29485.1.S1_at   | MmugDNA.29485.1 | 4.36  | 4.21  | 0.06 | 0.04 | 1.11  | 0.053507 | 0.568642 | 0.394865 | 0.742052 |
| MmugDNA.29486.1.S1_at   | MmugDNA.29486.1 | 8.04  | 8.01  | 0.12 | 0.07 | 1.02  | 0.164455 | 0.49784  | 0.537322 | 0.697071 |
| MmugDNA.29487.1.S1_at   | MmugDNA.29487.1 | 9.73  | 9.17  | 0.9  | 0.14 | 1.47  | 0.365336 | 0.286228 | 0.701002 | 0.547725 |
| MmugDNA.29488.1.S1_at   | MmugDNA.29488.1 | 6.75  | 6.75  | 0.27 | 0.15 | 1     | 0.24097  | 0.557338 | 0.607226 | 0.735031 |
| MmugDNA.29489.1.S1_at   | MmugDNA.29489.1 | 6.6   | 6.44  | 0.18 | 0.01 | 1.12  | 0.112878 | 0.143988 | 0.486223 | 0.417912 |
| MmugDNA.2949.1.S1_at    | MmugDNA.2949.1  | 6.65  | 6.77  | 0.13 | 0.6  | -1.09 | 0.576142 | 0.600437 | 0.825056 | 0.762128 |
| MmugDNA.29490.1.S1_at   | MmugDNA.29490.1 | 2.88  | 2.72  | 0.09 | 0.1  | 1.12  | 0.487928 | 0.373588 | 0.775315 | 0.612375 |
| MmugDNA.29491.1.S1_at   | MmugDNA.29491.1 | 4.01  | 3.98  | 0.38 | 0.18 | 1.02  | 0.830072 | 0.029149 | 0.939049 | 0.212767 |
| MmugDNA.29492.1.S1_x_at | MmugDNA.29492.1 | 8.77  | 9.1   | 0.25 | 0.2  | -1.26 | 0.363237 | 0.299551 | 0.699934 | 0.557945 |

|                         |                 |       |       |      |      |       |          |          |          |          |
|-------------------------|-----------------|-------|-------|------|------|-------|----------|----------|----------|----------|
| MmugDNA.29493.1.S1_at   | MmugDNA.29493.1 | 5.45  | 5.34  | 0.45 | 0.07 | 1.08  | 0.275543 | 0.445099 | 0.635035 | 0.662281 |
| MmugDNA.29495.1.S1_at   | MmugDNA.29495.1 | 6.54  | 6.51  | 0.18 | 0.09 | 1.02  | 0.764145 | 0.94405  | 0.911428 | 0.968301 |
| MmugDNA.29496.1.S1_at   | MmugDNA.29496.1 | 4.08  | 4.23  | 0.5  | 0.09 | -1.1  | 0.690617 | 0.860219 | 0.879513 | 0.920296 |
| MmugDNA.10539.1.S1_s_at | MmugDNA.10539.1 | 9.96  | 9.96  | 0.22 | 0.05 | 1     | 0.986445 | 0.713054 | 0.995654 | 0.833638 |
| MmugDNA.29498.1.S1_at   | MmugDNA.29498.1 | 8.86  | 8.27  | 0.36 | 0.15 | 1.5   | 0.119095 | 0.006788 | 0.492552 | 0.111388 |
| MmugDNA.29499.1.S1_at   | MmugDNA.29499.1 | 7.19  | 7.55  | 0.59 | 0.29 | -1.29 | 0.231775 | 0.045144 | 0.599694 | 0.256979 |
| MmugDNA.295.1.S1_at     | MmugDNA.295.1   | 8.88  | 8.48  | 0.84 | 0.24 | 1.32  | 0.462587 | 0.460918 | 0.761708 | 0.672772 |
| MmugDNA.2950.1.S1_at    | MmugDNA.2950.1  | 2.88  | 2.76  | 0.06 | 1.03 | 1.09  | 0.439153 | 0.631897 | 0.747933 | 0.78302  |
| MmugDNA.29500.1.S1_at   | MmugDNA.29500.1 | 6.63  | 6.64  | 0.04 | 0.07 | -1    | 0.665029 | 0.558097 | 0.867733 | 0.735404 |
| MmugDNA.29501.1.S1_at   | MmugDNA.29501.1 | 3.33  | 3.57  | 0.07 | 0.11 | -1.18 | 0.072676 | 0.337841 | 0.433195 | 0.585027 |
| MmugDNA.29502.1.S1_at   | MmugDNA.29502.1 | 4.43  | 4.31  | 0.09 | 0.19 | 1.08  | 0.580702 | 0.340921 | 0.827245 | 0.587035 |
| MmugDNA.29504.1.S1_at   | MmugDNA.29504.1 | 5.55  | 5.39  | 0.27 | 0.15 | 1.12  | 0.268097 | 0.296119 | 0.628457 | 0.555339 |
| MmugDNA.29505.1.S1_at   | MmugDNA.29505.1 | 6.74  | 6.28  | 0.3  | 0.17 | 1.38  | 0.077881 | 0.177221 | 0.439987 | 0.45365  |
| MmugDNA.29506.1.S1_at   | MmugDNA.29506.1 | 7.78  | 7.47  | 0.22 | 0.13 | 1.23  | 0.092069 | 0.396296 | 0.460683 | 0.628079 |
| MmugDNA.29508.1.S1_at   | MmugDNA.29508.1 | 11.9  | 12.01 | 0.19 | 0.08 | -1.08 | 0.950698 | 0.001487 | 0.983335 | 0.058901 |
| MmugDNA.29509.1.S1_at   | MmugDNA.29509.1 | 3.87  | 3.83  | 0.53 | 0.25 | 1.03  | 0.576112 | 0.10375  | 0.825056 | 0.364519 |
| MmugDNA.29510.1.S1_at   | MmugDNA.29510.1 | 4.49  | 4.53  | 0.25 | 0.01 | -1.03 | 0.667446 | 0.329391 | 0.868621 | 0.578733 |
| MmugDNA.29511.1.S1_at   | MmugDNA.29511.1 | 5.05  | 5.05  | 0.21 | 0.13 | -1.01 | 0.813858 | 0.000313 | 0.932816 | 0.035198 |
| MmugDNA.29512.1.S1_at   | MmugDNA.29512.1 | 4.65  | 4.69  | 0.3  | 0.03 | -1.03 | 0.619893 | 0.941221 | 0.846932 | 0.966693 |
| MmugDNA.29513.1.S1_at   | MmugDNA.29513.1 | 8.38  | 8.87  | 0.76 | 0.01 | -1.4  | 0.868753 | 0.975661 | 0.954083 | 0.98673  |
| MmugDNA.29516.1.S1_at   | MmugDNA.29516.1 | 5.24  | 5.29  | 0.83 | 0.29 | -1.03 | 0.814221 | 0.947624 | 0.932949 | 0.970275 |
| MmugDNA.29518.1.S1_at   | MmugDNA.29518.1 | 6.84  | 6.67  | 0.02 | 0.03 | 1.12  | 0.000582 | 0.1886   | 0.143137 | 0.464557 |
| MmugDNA.29519.1.S1_at   | MmugDNA.29519.1 | 8.73  | 8.96  | 0.42 | 0.28 | -1.17 | 0.85995  | 0.64235  | 0.950535 | 0.790158 |
| MmugDNA.2952.1.S1_at    | MmugDNA.2952.1  | 3.28  | 3.46  | 0.06 | 0.2  | -1.13 | 0.326245 | 0.129151 | 0.673788 | 0.400611 |
| MmugDNA.29520.1.S1_at   | MmugDNA.29520.1 | 10.12 | 10.62 | 0.32 | 0.06 | -1.42 | 0.072744 | 0.015507 | 0.433332 | 0.158052 |
| MmugDNA.29521.1.S1_at   | MmugDNA.29521.1 | 4.2   | 4.21  | 0.04 | 0.15 | -1    | 0.93956  | 0.934713 | 0.979532 | 0.963039 |
| MmugDNA.29523.1.S1_at   | MmugDNA.29523.1 | 3.51  | 3.43  | 0.26 | 0.14 | 1.06  | 0.975778 | 0.650561 | 0.992214 | 0.795663 |
| MmugDNA.29523.1.S1_s_at | MmugDNA.29523.1 | 12.5  | 12.59 | 0.02 | 0.01 | -1.07 | 0.001789 | 0.00035  | 0.167444 | 0.037097 |
| MmugDNA.29524.1.S1_at   | MmugDNA.29524.1 | 6.56  | 6.55  | 0.24 | 0.46 | 1.01  | 0.551826 | 0.813029 | 0.811455 | 0.891895 |
| MmugDNA.29525.1.S1_at   | MmugDNA.29525.1 | 12.37 | 12.06 | 0.07 | 0.14 | 1.24  | 0.019621 | 0.000563 | 0.302081 | 0.041049 |
| MmugDNA.29526.1.S1_at   | MmugDNA.29526.1 | 3.7   | 3.76  | 0.05 | 0.06 | -1.04 | 0.416122 | 0.778829 | 0.734059 | 0.871622 |
| MmugDNA.29527.1.S1_at   | MmugDNA.29527.1 | 8.88  | 8.64  | 0.26 | 0.18 | 1.18  | 0.116314 | 0.103521 | 0.489568 | 0.364346 |
| MmugDNA.29528.1.S1_at   | MmugDNA.29528.1 | 4.84  | 4.74  | 0.05 | 0.23 | 1.07  | 0.48015  | 0.490337 | 0.771113 | 0.692363 |
| MmugDNA.29532.1.S1_at   | MmugDNA.29532.1 | 4.84  | 4.8   | 0.02 | 0.09 | 1.03  | 0.231836 | 0.286448 | 0.599694 | 0.547829 |
| MmugDNA.29535.1.S1_at   | MmugDNA.29535.1 | 3.69  | 3.55  | 0.1  | 0.03 | 1.1   | 0.182516 | 0.167683 | 0.555611 | 0.444205 |
| MmugDNA.29537.1.S1_at   | MmugDNA.29537.1 | 4.64  | 4.92  | 0.2  | 0.15 | -1.21 | 0.288339 | 0.514615 | 0.645454 | 0.707767 |
| MmugDNA.29538.1.S1_at   | MmugDNA.29538.1 | 7.33  | 8.15  | 0.51 | 0.1  | -1.77 | 0.073043 | 0.05914  | 0.433915 | 0.290131 |
| MmugDNA.29539.1.S1_at   | MmugDNA.29539.1 | 4.7   | 4.92  | 0.24 | 0.22 | -1.16 | 0.801185 | 0.295068 | 0.927395 | 0.554551 |
| MmugDNA.29541.1.S1_at   | MmugDNA.29541.1 | 5.55  | 6.47  | 1.42 | 0.62 | -1.88 | 0.420334 | 0.199052 | 0.73689  | 0.473621 |
| MmugDNA.29542.1.S1_at   | MmugDNA.29542.1 | 8.67  | 8.81  | 0.35 | 0.1  | -1.1  | 0.733267 | 0.632693 | 0.897531 | 0.783731 |
| MmugDNA.29543.1.S1_at   | MmugDNA.29543.1 | 4.94  | 4.99  | 0.07 | 0.05 | -1.03 | 0.1873   | 0.189634 | 0.559729 | 0.465297 |
| MmugDNA.29544.1.S1_at   | MmugDNA.29544.1 | 7.7   | 8.06  | 0.36 | 0.16 | -1.29 | 0.125083 | 0.000281 | 0.499056 | 0.03453  |
| MmugDNA.29545.1.S1_at   | MmugDNA.29545.1 | 4.04  | 4.13  | 0.24 | 0.26 | -1.06 | 0.735449 | 0.906566 | 0.89872  | 0.947166 |

|                         |                 |       |       |      |      |       |          |          |          |          |
|-------------------------|-----------------|-------|-------|------|------|-------|----------|----------|----------|----------|
| MmugDNA.29546.1.S1_at   | MmugDNA.29546.1 | 6.46  | 6.12  | 0.04 | 0.17 | 1.26  | 0.047943 | 0.329693 | 0.381691 | 0.578874 |
| MmugDNA.29547.1.S1_at   | MmugDNA.29547.1 | 3.62  | 3.45  | 0.14 | 0.1  | 1.12  | 0.186138 | 0.313265 | 0.559096 | 0.567753 |
| MmugDNA.29548.1.S1_at   | MmugDNA.29548.1 | 4.38  | 4.37  | 0.1  | 0.21 | 1     | 0.420531 | 0.839228 | 0.737009 | 0.908353 |
| MmugDNA.29549.1.S1_s_at | MmugDNA.29549.1 | 4.38  | 5.18  | 0.28 | 0.29 | -1.74 | 0.014905 | 0.008473 | 0.278597 | 0.12211  |
| MmugDNA.2955.1.S1_at    | MmugDNA.2955.1  | 4.04  | 3.97  | 0.25 | 0.2  | 1.05  | 0.972216 | 0.386832 | 0.991006 | 0.621935 |
| MmugDNA.29550.1.S1_at   | MmugDNA.29550.1 | 10.88 | 11.09 | 0.5  | 0.11 | -1.15 | 0.705124 | 0.293177 | 0.885355 | 0.553093 |
| MmugDNA.29551.1.S1_at   | MmugDNA.29551.1 | 3.74  | 3.82  | 0.09 | 0.21 | -1.05 | 0.604743 | 0.342514 | 0.839732 | 0.588539 |
| MmugDNA.29552.1.S1_at   | MmugDNA.29552.1 | 4.97  | 4.95  | 0.16 | 0.36 | 1.01  | 0.863243 | 0.67945  | 0.952006 | 0.812834 |
| MmugDNA.29553.1.S1_at   | MmugDNA.29553.1 | 6.34  | 6.43  | 0.08 | 0.05 | -1.06 | 0.275447 | 0.008334 | 0.634959 | 0.121147 |
| MmugDNA.29554.1.S1_at   | MmugDNA.29554.1 | 3.02  | 2.85  | 0.06 | 0.07 | 1.13  | 0.052662 | 0.235572 | 0.392806 | 0.506633 |
| MmugDNA.29555.1.S1_at   | MmugDNA.29555.1 | 5.18  | 5.45  | 0.14 | 0.34 | -1.2  | 0.343083 | 0.222822 | 0.686308 | 0.495748 |
| MmugDNA.29556.1.S1_at   | MmugDNA.29556.1 | 6.58  | 6.52  | 0.16 | 0.07 | 1.05  | 0.16052  | 0.050521 | 0.533738 | 0.270134 |
| MmugDNA.29557.1.S1_at   | MmugDNA.29557.1 | 6.71  | 6.59  | 0.34 | 0.2  | 1.09  | 0.634365 | 0.371963 | 0.854043 | 0.610792 |
| MmugDNA.29559.1.S1_at   | MmugDNA.29559.1 | 5.37  | 4.86  | 0.11 | 0.47 | 1.42  | 0.302018 | 0.019088 | 0.655989 | 0.173827 |
| MmugDNA.2956.1.S1_at    | MmugDNA.2956.1  | 6.84  | 6.7   | 0.08 | 0.06 | 1.11  | 0.145983 | 0.453649 | 0.520572 | 0.668074 |
| MmugDNA.29560.1.S1_at   | MmugDNA.29560.1 | 8.23  | 9.32  | 1.32 | 0.17 | -2.12 | 0.245314 | 0.402024 | 0.610772 | 0.631153 |
| MmugDNA.29563.1.S1_at   | MmugDNA.29563.1 | 6.22  | 6.21  | 0.67 | 0.62 | 1.01  | 0.541727 | 0.272211 | 0.805219 | 0.536976 |
| MmugDNA.29564.1.S1_at   | MmugDNA.29564.1 | 3.46  | 3.44  | 0.01 | 0.03 | 1.01  | 0.979779 | 0.784918 | 0.993574 | 0.875471 |
| MmugDNA.29567.1.S1_at   | MmugDNA.29567.1 | 4.48  | 4.14  | 0.13 | 0.14 | 1.26  | 0.016278 | 0.00709  | 0.287042 | 0.113367 |
| MmugDNA.29568.1.S1_at   | MmugDNA.29568.1 | 5.93  | 7.15  | 0.17 | 0.35 | -2.33 | 0.003085 | 0.033044 | 0.191107 | 0.225023 |
| MmugDNA.2957.1.S1_at    | MmugDNA.2957.1  | 4.72  | 4.67  | 0.25 | 0.13 | 1.03  | 0.335205 | 0.520149 | 0.680744 | 0.711472 |
| MmugDNA.29572.1.S1_at   | MmugDNA.29572.1 | 7.91  | 7.63  | 0.07 | 0.3  | 1.21  | 0.239036 | 0.072563 | 0.605503 | 0.315511 |
| MmugDNA.29573.1.S1_at   | MmugDNA.29573.1 | 5.78  | 5.27  | 0.1  | 0.18 | 1.42  | 0.045849 | 0.210961 | 0.37735  | 0.484938 |
| MmugDNA.29574.1.S1_at   | MmugDNA.29574.1 | 7.79  | 7.31  | 0.56 | 0.23 | 1.39  | 0.941819 | 0.269242 | 0.980207 | 0.534534 |
| MmugDNA.29575.1.S1_at   | MmugDNA.29575.1 | 9.83  | 9.04  | 0.37 | 0.11 | 1.72  | 0.020376 | 0.001206 | 0.303945 | 0.054389 |
| MmugDNA.29576.1.S1_at   | MmugDNA.29576.1 | 3.18  | 3.11  | 0.07 | 0.05 | 1.05  | 0.044858 | 0.009425 | 0.375225 | 0.127893 |
| MmugDNA.29579.1.S1_at   | MmugDNA.29579.1 | 7.46  | 6.99  | 0.37 | 0.18 | 1.39  | 0.289101 | 0.325611 | 0.645892 | 0.575912 |
| MmugDNA.2958.1.S1_at    | MmugDNA.2958.1  | 4.62  | 4.45  | 0.21 | 0.12 | 1.12  | 0.328223 | 0.320612 | 0.675701 | 0.572703 |
| MmugDNA.29580.1.S1_at   | MmugDNA.29580.1 | 7.91  | 6.52  | 1.25 | 0.25 | 2.62  | 0.425923 | 0.536578 | 0.74016  | 0.721903 |
| MmugDNA.29581.1.S1_at   | MmugDNA.29581.1 | 5.76  | 5.35  | 0.2  | 0.05 | 1.33  | 0.074724 | 0.04863  | 0.435313 | 0.265602 |
| MmugDNA.29583.1.S1_at   | MmugDNA.29583.1 | 8.7   | 8.43  | 0.24 | 0.14 | 1.2   | 0.267884 | 0.603691 | 0.628278 | 0.764245 |
| MmugDNA.29584.1.S1_at   | MmugDNA.29584.1 | 5.35  | 5.37  | 0.88 | 0.21 | -1.01 | 0.396875 | 0.395727 | 0.721565 | 0.627639 |
| MmugDNA.29586.1.S1_at   | MmugDNA.29586.1 | 4.13  | 4.21  | 0.21 | 0.11 | -1.05 | 0.515016 | 0.627268 | 0.790752 | 0.780361 |
| MmugDNA.29587.1.S1_at   | MmugDNA.29587.1 | 11.56 | 11.33 | 0.4  | 0.14 | 1.17  | 0.961489 | 0.531283 | 0.987441 | 0.718555 |
| MmugDNA.29589.1.S1_at   | MmugDNA.29589.1 | 5.97  | 5.55  | 0.67 | 0.42 | 1.34  | 0.966366 | 0.783941 | 0.988971 | 0.874935 |
| MmugDNA.2959.1.S1_at    | MmugDNA.2959.1  | 5.38  | 5.28  | 0.03 | 0.02 | 1.07  | 0.010602 | 0.548867 | 0.2485   | 0.729463 |
| MmugDNA.29590.1.S1_at   | MmugDNA.29590.1 | 6.32  | 6.18  | 0.09 | 0.03 | 1.1   | 0.069164 | 0.318168 | 0.426656 | 0.571046 |
| MmugDNA.29592.1.S1_at   | MmugDNA.29592.1 | 8.44  | 8.91  | 0.83 | 0.19 | -1.38 | 0.845123 | 0.806957 | 0.945674 | 0.888903 |
| MmugDNA.29595.1.S1_at   | MmugDNA.29595.1 | 2.87  | 2.91  | 0.18 | 0.12 | -1.02 | 0.182302 | 0.20522  | 0.555371 | 0.479596 |
| MmugDNA.29596.1.S1_at   | MmugDNA.29596.1 | 3.15  | 3.13  | 0.1  | 0.09 | 1.01  | 0.921828 | 0.400374 | 0.973627 | 0.630177 |
| MmugDNA.29597.1.S1_at   | MmugDNA.29597.1 | 4.3   | 4.4   | 0.5  | 0.16 | -1.07 | 0.69737  | 0.803713 | 0.882272 | 0.887094 |
| MmugDNA.29598.1.S1_at   | MmugDNA.29598.1 | 5.09  | 5.09  | 0.01 | 0.1  | 1     | 0.339568 | 0.124967 | 0.68383  | 0.395386 |
| MmugDNA.296.1.S1_at     | MmugDNA.296.1   | 4.28  | 4.47  | 0.15 | 0.22 | -1.14 | 0.355382 | 0.038195 | 0.694724 | 0.240129 |



|                         |                 |       |       |      |      |       |          |          |          |          |
|-------------------------|-----------------|-------|-------|------|------|-------|----------|----------|----------|----------|
| MmugDNA.29600.1.S1_at   | MmugDNA.29600.1 | 5.85  | 5.43  | 1.01 | 0.96 | 1.34  | 0.358578 | 0.647199 | 0.69646  | 0.793312 |
| MmugDNA.29601.1.S1_at   | MmugDNA.29601.1 | 5.35  | 5.46  | 0.05 | 0.06 | -1.08 | 0.03253  | 0.295793 | 0.346442 | 0.555196 |
| MmugDNA.29602.1.S1_at   | MmugDNA.29602.1 | 5.92  | 6.3   | 0.93 | 0.54 | -1.3  | 0.53599  | 0.807638 | 0.802014 | 0.889237 |
| MmugDNA.29603.1.S1_at   | MmugDNA.29603.1 | 6.59  | 6.35  | 0.1  | 0.21 | 1.18  | 0.081985 | 0.813018 | 0.446632 | 0.891895 |
| MmugDNA.29605.1.S1_at   | MmugDNA.29605.1 | 11.89 | 11.81 | 1.32 | 0.26 | 1.06  | 0.939368 | 0.248    | 0.979532 | 0.517487 |
| MmugDNA.29606.1.S1_at   | MmugDNA.29606.1 | 7.76  | 7.63  | 0.28 | 0.22 | 1.1   | 0.406027 | 0.75627  | 0.727638 | 0.858165 |
| MmugDNA.29607.1.S1_at   | MmugDNA.29607.1 | 9.87  | 9.75  | 0.33 | 0.21 | 1.09  | 0.248288 | 0.344525 | 0.613834 | 0.589905 |
| MmugDNA.29608.1.S1_at   | MmugDNA.29608.1 | 10.92 | 11.31 | 0.33 | 0.12 | -1.32 | 0.463401 | 0.639494 | 0.762124 | 0.788314 |
| MmugDNA.29609.1.S1_at   | MmugDNA.29609.1 | 6.29  | 5.99  | 0.65 | 0.39 | 1.23  | 0.89124  | 0.828778 | 0.962572 | 0.901565 |
| MmugDNA.2961.1.S1_at    | MmugDNA.2961.1  | 3.04  | 2.89  | 0.16 | 0.1  | 1.11  | 0.126108 | 0.145706 | 0.499873 | 0.419653 |
| MmugDNA.29610.1.S1_at   | MmugDNA.29610.1 | 3.14  | 3.29  | 0.05 | 0.06 | -1.11 | 0.053949 | 0.360902 | 0.395633 | 0.60194  |
| MmugDNA.29611.1.S1_at   | MmugDNA.29611.1 | 4.09  | 4.39  | 0.22 | 0.29 | -1.24 | 0.656851 | 0.2491   | 0.863732 | 0.51821  |
| MmugDNA.29612.1.S1_at   | MmugDNA.29612.1 | 6.58  | 6.09  | 0.79 | 0.31 | 1.41  | 0.529818 | 0.09678  | 0.798514 | 0.354207 |
| MmugDNA.29613.1.S1_at   | MmugDNA.29613.1 | 3.47  | 3.53  | 0.24 | 0.18 | -1.04 | 0.724929 | 0.81753  | 0.893319 | 0.894746 |
| MmugDNA.29614.1.S1_at   | MmugDNA.29614.1 | 8.66  | 9.27  | 0.48 | 0.15 | -1.53 | 0.099975 | 0.110824 | 0.470171 | 0.375124 |
| MmugDNA.5184.1.S1_s_at  | MmugDNA.5184.1  | 9.98  | 8.43  | 0.15 | 0.3  | 2.94  | 0.001345 | 0.000433 | 0.159096 | 0.038359 |
| MmugDNA.29618.1.S1_at   | MmugDNA.29618.1 | 8.29  | 8.49  | 0.27 | 0.03 | -1.15 | 0.075889 | 0.06155  | 0.436934 | 0.294865 |
| MmugDNA.29619.1.S1_at   | MmugDNA.29619.1 | 7.83  | 7.57  | 0.17 | 0.11 | 1.19  | 0.152165 | 0.151556 | 0.525249 | 0.426307 |
| MmugDNA.2962.1.S1_at    | MmugDNA.2962.1  | 4.84  | 4.87  | 0.24 | 0.2  | -1.02 | 0.359389 | 0.394471 | 0.697237 | 0.62701  |
| MmugDNA.29623.1.S1_at   | MmugDNA.29623.1 | 5.72  | 5.63  | 0.14 | 0.1  | 1.07  | 0.651512 | 0.433923 | 0.861636 | 0.654102 |
| MmugDNA.29624.1.S1_at   | MmugDNA.29624.1 | 3.84  | 3.71  | 0.13 | 0.22 | 1.1   | 0.573568 | 0.503895 | 0.823642 | 0.701193 |
| MmugDNA.29626.1.S1_at   | MmugDNA.29626.1 | 5.75  | 5.71  | 0.12 | 0.12 | 1.02  | 0.162303 | 0.52449  | 0.535388 | 0.714395 |
| MmugDNA.29628.1.S1_at   | MmugDNA.29628.1 | 5.3   | 5.25  | 0.6  | 0.22 | 1.04  | 0.891642 | 0.563969 | 0.962739 | 0.738913 |
| MmugDNA.29629.1.S1_at   | MmugDNA.29629.1 | 5.01  | 4.72  | 0.17 | 0.1  | 1.23  | 0.146668 | 0.106106 | 0.521007 | 0.368498 |
| MmugDNA.29630.1.S1_at   | MmugDNA.29630.1 | 8.85  | 8.71  | 0.36 | 0.25 | 1.1   | 0.859878 | 0.729618 | 0.950512 | 0.843613 |
| MmugDNA.29631.1.S1_at   | MmugDNA.29631.1 | 3.09  | 3.08  | 0.1  | 0.1  | 1.01  | 0.815457 | 0.87135  | 0.933137 | 0.926844 |
| MmugDNA.29632.1.S1_at   | MmugDNA.29632.1 | 3.06  | 3.1   | 0.02 | 0.12 | -1.03 | 0.579368 | 0.825771 | 0.82645  | 0.899849 |
| MmugDNA.29633.1.S1_at   | MmugDNA.29633.1 | 4.52  | 5.58  | 0.28 | 0.45 | -2.08 | 0.098839 | 0.17083  | 0.468203 | 0.447451 |
| MmugDNA.29634.1.S1_at   | MmugDNA.29634.1 | 9.6   | 9.67  | 0.54 | 0.13 | -1.05 | 0.338188 | 0.236312 | 0.682759 | 0.507308 |
| MmugDNA.29635.1.S1_at   | MmugDNA.29635.1 | 4.02  | 3.88  | 0.11 | 0.04 | 1.1   | 0.27431  | 0.243328 | 0.633792 | 0.513371 |
| MmugDNA.29636.1.S1_at   | MmugDNA.29636.1 | 5.24  | 5.49  | 0.15 | 0.48 | -1.19 | 0.278793 | 0.284827 | 0.637886 | 0.546966 |
| MmugDNA.29637.1.S1_at   | MmugDNA.29637.1 | 3.31  | 3.21  | 0.12 | 0.18 | 1.07  | 0.606711 | 0.763507 | 0.84064  | 0.862471 |
| MmugDNA.29638.1.S1_at   | MmugDNA.29638.1 | 4.56  | 4.39  | 0.13 | 0.07 | 1.12  | 0.092411 | 0.176321 | 0.46089  | 0.452752 |
| MmugDNA.29639.1.S1_at   | MmugDNA.29639.1 | 8.72  | 8.57  | 0.35 | 0.16 | 1.11  | 0.193431 | 0.12848  | 0.564275 | 0.399818 |
| MmugDNA.2964.1.S1_at    | MmugDNA.2964.1  | 6.7   | 6.69  | 0.07 | 0.02 | 1.01  | 0.64754  | 0.681343 | 0.859364 | 0.813957 |
| MmugDNA.29640.1.S1_s_at | MmugDNA.29640.1 | 9.3   | 8.74  | 0.11 | 0.12 | 1.47  | 0.007249 | 0.006234 | 0.226509 | 0.107112 |
| MmugDNA.29641.1.S1_at   | MmugDNA.29641.1 | 12.05 | 12.05 | 0.04 | 0.06 | -1    | 0.456891 | 0.708122 | 0.758051 | 0.830704 |
| MmugDNA.29642.1.S1_at   | MmugDNA.29642.1 | 6.8   | 7.39  | 1.31 | 0.99 | -1.51 | 0.500935 | 0.571893 | 0.78303  | 0.744056 |
| MmugDNA.29643.1.S1_at   | MmugDNA.29643.1 | 5.94  | 5.83  | 0.23 | 0.04 | 1.08  | 0.345596 | 0.485478 | 0.687622 | 0.68914  |
| MmugDNA.29644.1.S1_at   | MmugDNA.29644.1 | 6.46  | 6.47  | 0.14 | 0.15 | -1.01 | 0.451871 | 0.427243 | 0.755596 | 0.649175 |
| MmugDNA.29645.1.S1_at   | MmugDNA.29645.1 | 4.87  | 4.95  | 0.19 | 0.16 | -1.06 | 0.879844 | 0.137003 | 0.958318 | 0.409836 |
| MmugDNA.29646.1.S1_at   | MmugDNA.29646.1 | 4.82  | 5.2   | 0.26 | 0.22 | -1.3  | 0.270316 | 0.590343 | 0.630253 | 0.756166 |
| MmugDNA.29647.1.S1_at   | MmugDNA.29647.1 | 4.68  | 4.48  | 0.12 | 0.03 | 1.15  | 0.084028 | 0.281129 | 0.45029  | 0.544261 |

|                         |                 |       |       |      |      |       |          |          |          |          |
|-------------------------|-----------------|-------|-------|------|------|-------|----------|----------|----------|----------|
| MmugDNA.29649.1.S1_at   | MmugDNA.29649.1 | 6.78  | 7.04  | 0.03 | 0.1  | -1.2  | 0.025065 | 0.150467 | 0.320402 | 0.425007 |
| MmugDNA.2965.1.S1_at    | MmugDNA.2965.1  | 9.77  | 9.7   | 0.27 | 0.14 | 1.06  | 0.523029 | 0.057602 | 0.795452 | 0.286171 |
| MmugDNA.29650.1.S1_at   | MmugDNA.29650.1 | 8.2   | 8.21  | 0.2  | 0.11 | -1.01 | 0.925677 | 0.071566 | 0.975188 | 0.313714 |
| MmugDNA.29651.1.S1_at   | MmugDNA.29651.1 | 5.8   | 5.69  | 0.28 | 0.17 | 1.08  | 0.315913 | 0.226757 | 0.666243 | 0.499176 |
| MmugDNA.29652.1.S1_at   | MmugDNA.29652.1 | 7.84  | 8.1   | 0.45 | 0.16 | -1.2  | 0.26635  | 0.359288 | 0.627253 | 0.600575 |
| MmugDNA.29653.1.S1_at   | MmugDNA.29653.1 | 5.31  | 5.88  | 1.11 | 0.37 | -1.48 | 0.425028 | 0.312228 | 0.739773 | 0.566963 |
| MmugDNA.29654.1.S1_s_at | MmugDNA.29654.1 | 12.36 | 12.26 | 0.06 | 0.03 | 1.07  | 0.129059 | 0.011796 | 0.503706 | 0.140638 |
| MmugDNA.29655.1.S1_at   | MmugDNA.29655.1 | 3.68  | 3.51  | 0.3  | 0.1  | 1.12  | 0.124943 | 0.125692 | 0.498917 | 0.396249 |
| MmugDNA.29657.1.S1_at   | MmugDNA.29657.1 | 6.72  | 6.41  | 0.24 | 0.05 | 1.24  | 0.352295 | 0.382258 | 0.692649 | 0.618438 |
| MmugDNA.29658.1.S1_at   | MmugDNA.29658.1 | 3.09  | 3.16  | 0.12 | 0.14 | -1.06 | 0.657265 | 0.225863 | 0.863937 | 0.498248 |
| MmugDNA.29659.1.S1_at   | MmugDNA.29659.1 | 12.16 | 11.96 | 0.31 | 0.14 | 1.14  | 0.356953 | 0.080679 | 0.695386 | 0.328487 |
| MmugDNA.2966.1.S1_at    | MmugDNA.2966.1  | 8.27  | 8.17  | 1.11 | 0.05 | 1.07  | 0.91619  | 0.859962 | 0.971447 | 0.920188 |
| MmugDNA.29660.1.S1_at   | MmugDNA.29660.1 | 5.27  | 5.29  | 0.07 | 0.01 | -1.01 | 0.591384 | 0.803567 | 0.833427 | 0.886984 |
| MmugDNA.29661.1.S1_at   | MmugDNA.29661.1 | 5.69  | 5.54  | 0    | 0.33 | 1.11  | 0.764878 | 0.472449 | 0.911649 | 0.67999  |
| MmugDNA.29662.1.S1_at   | MmugDNA.29662.1 | 6.48  | 6.29  | 0.19 | 0.3  | 1.14  | 0.732733 | 0.873273 | 0.89733  | 0.927896 |
| MmugDNA.29663.1.S1_at   | MmugDNA.29663.1 | 8.71  | 8.49  | 0.17 | 0.11 | 1.16  | 0.053764 | 0.103523 | 0.39536  | 0.364346 |
| MmugDNA.29664.1.S1_at   | MmugDNA.29664.1 | 8.95  | 8.8   | 0.73 | 0.22 | 1.11  | 0.991339 | 0.176918 | 0.996655 | 0.453317 |
| MmugDNA.29665.1.S1_at   | MmugDNA.29665.1 | 11.14 | 10.58 | 0.38 | 0.17 | 1.47  | 0.058212 | 0.061592 | 0.403804 | 0.295042 |
| MmugDNA.29666.1.S1_at   | MmugDNA.29666.1 | 4.5   | 4.47  | 0.05 | 0.23 | 1.02  | 0.230235 | 0.176009 | 0.598481 | 0.452526 |
| MmugDNA.29667.1.S1_at   | MmugDNA.29667.1 | 5.19  | 4.57  | 1.57 | 0.44 | 1.53  | 0.680306 | 0.322701 | 0.874646 | 0.574043 |
| MmugDNA.29668.1.S1_at   | MmugDNA.29668.1 | 5.19  | 5.04  | 0.03 | 0.03 | 1.11  | 0.002763 | 0.085746 | 0.185352 | 0.337761 |
| MmugDNA.2967.1.S1_at    | MmugDNA.2967.1  | 12.22 | 12.57 | 0.45 | 0.06 | -1.27 | 0.302827 | 0.130497 | 0.656669 | 0.402373 |
| MmugDNA.29671.1.S1_at   | MmugDNA.29671.1 | 9.96  | 10.4  | 0.26 | 0.06 | -1.36 | 0.119857 | 0.057464 | 0.493259 | 0.285751 |
| MmugDNA.29672.1.S1_at   | MmugDNA.29672.1 | 4.95  | 4.94  | 0.08 | 0    | 1.01  | 0.82279  | 0.844538 | 0.936094 | 0.911525 |
| MmugDNA.29673.1.S1_at   | MmugDNA.29673.1 | 4.92  | 4.9   | 0.17 | 0.12 | 1.01  | 0.445833 | 0.618527 | 0.752392 | 0.774147 |
| MmugDNA.29674.1.S1_at   | MmugDNA.29674.1 | 9.41  | 8.99  | 0.23 | 0.18 | 1.34  | 0.167562 | 0.14849  | 0.540101 | 0.423016 |
| MmugDNA.29676.1.S1_at   | MmugDNA.29676.1 | 4.45  | 4.58  | 1.23 | 0.32 | -1.09 | 0.535284 | 0.476316 | 0.801636 | 0.682693 |
| MmugDNA.29677.1.S1_at   | MmugDNA.29677.1 | 10.51 | 11.36 | 0.21 | 0.13 | -1.8  | 0.004121 | 0.005156 | 0.198822 | 0.09966  |
| MmugDNA.29678.1.S1_at   | MmugDNA.29678.1 | 3.81  | 3.47  | 0.19 | 0.19 | 1.27  | 0.036039 | 0.031538 | 0.354142 | 0.219695 |
| MmugDNA.29679.1.S1_at   | MmugDNA.29679.1 | 7.83  | 7.93  | 0.15 | 0.31 | -1.07 | 0.618054 | 0.847839 | 0.845782 | 0.91354  |
| MmugDNA.2968.1.S1_at    | MmugDNA.2968.1  | 5.4   | 5.42  | 0.15 | 0.21 | -1.01 | 0.468585 | 0.477713 | 0.764997 | 0.683731 |
| MmugDNA.29680.1.S1_at   | MmugDNA.29680.1 | 5.62  | 5.57  | 0.38 | 0.27 | 1.03  | 0.943254 | 0.255134 | 0.980435 | 0.52317  |
| MmugDNA.29682.1.S1_at   | MmugDNA.29682.1 | 6.4   | 6.38  | 0.23 | 0.12 | 1.02  | 0.578754 | 0.348416 | 0.826289 | 0.592591 |
| MmugDNA.29683.1.S1_at   | MmugDNA.29683.1 | 4.43  | 4.3   | 0.09 | 0.03 | 1.1   | 0.026379 | 0.029218 | 0.32457  | 0.212898 |
| MmugDNA.29684.1.S1_at   | MmugDNA.29684.1 | 9.73  | 9.77  | 0.07 | 0.02 | -1.03 | 0.168163 | 0.660367 | 0.540716 | 0.801285 |
| MmugDNA.29685.1.S1_at   | MmugDNA.29685.1 | 6.8   | 6.33  | 0.48 | 0.31 | 1.38  | 0.291602 | 0.254785 | 0.647943 | 0.523051 |
| MmugDNA.29686.1.S1_at   | MmugDNA.29686.1 | 4.66  | 4.43  | 0.04 | 0.11 | 1.17  | 0.058498 | 0.391483 | 0.404566 | 0.625086 |
| MmugDNA.29687.1.S1_at   | MmugDNA.29687.1 | 7.45  | 7.28  | 0.15 | 0.04 | 1.12  | 0.132955 | 0.10464  | 0.507241 | 0.365941 |
| MmugDNA.29688.1.S1_at   | MmugDNA.29688.1 | 6.63  | 6.52  | 0.69 | 0.36 | 1.09  | 0.338196 | 0.504654 | 0.682759 | 0.701754 |
| MmugDNA.29690.1.S1_at   | MmugDNA.29690.1 | 12.11 | 11.32 | 3.01 | 0.2  | 1.73  | 0.63453  | 0.818521 | 0.854096 | 0.8954   |
| MmugDNA.29691.1.S1_at   | MmugDNA.29691.1 | 8.02  | 7.13  | 0.1  | 0.26 | 1.86  | 0.012234 | 0.006588 | 0.260865 | 0.110034 |
| MmugDNA.29692.1.S1_at   | MmugDNA.29692.1 | 5.15  | 5.57  | 0.37 | 0.26 | -1.33 | 0.840056 | 0.013519 | 0.943103 | 0.148864 |
| MmugDNA.29693.1.S1_at   | MmugDNA.29693.1 | 7.04  | 7.29  | 0.08 | 0.17 | -1.19 | 0.035909 | 0.048145 | 0.353707 | 0.264422 |

|                         |                 |       |       |      |      |       |          |          |          |          |
|-------------------------|-----------------|-------|-------|------|------|-------|----------|----------|----------|----------|
| MmugDNA.29694.1.S1_at   | MmugDNA.29694.1 | 7.64  | 8.03  | 0.45 | 0.02 | -1.32 | 0.397339 | 0.275399 | 0.721736 | 0.539663 |
| MmugDNA.29694.1.S1_s_at | MmugDNA.29694.1 | 7.41  | 8.12  | 0.68 | 0.02 | -1.64 | 0.445924 | 0.459567 | 0.752482 | 0.671856 |
| MmugDNA.29695.1.S1_at   | MmugDNA.29695.1 | 3.65  | 3.74  | 0.2  | 0    | -1.06 | 0.499352 | 0.231742 | 0.781984 | 0.503577 |
| MmugDNA.29696.1.S1_at   | MmugDNA.29696.1 | 4.46  | 4.59  | 0.32 | 0.05 | -1.09 | 0.765843 | 0.928854 | 0.91197  | 0.959449 |
| MmugDNA.29698.1.S1_at   | MmugDNA.29698.1 | 11.07 | 11.02 | 0.23 | 0.1  | 1.04  | 0.81078  | 0.850015 | 0.931427 | 0.914673 |
| MmugDNA.29699.1.S1_at   | MmugDNA.29699.1 | 8.15  | 7.86  | 0.34 | 0.38 | 1.22  | 0.434537 | 0.001249 | 0.745208 | 0.054879 |
| MmugDNA.297.1.S1_at     | MmugDNA.297.1   | 9.42  | 9.59  | 0.32 | 0.18 | -1.12 | 0.935094 | 0.434959 | 0.978053 | 0.654901 |
| MmugDNA.2970.1.S1_at    | MmugDNA.2970.1  | 7.86  | 7.93  | 0.32 | 0.21 | -1.05 | 0.583598 | 0.118699 | 0.829134 | 0.38672  |
| MmugDNA.29700.1.S1_at   | MmugDNA.29700.1 | 4.72  | 4.59  | 0.13 | 0.08 | 1.09  | 0.173648 | 0.126839 | 0.546749 | 0.397499 |
| MmugDNA.29701.1.S1_at   | MmugDNA.29701.1 | 3.26  | 3.98  | 0.38 | 0.57 | -1.65 | 0.234823 | 0.077328 | 0.602132 | 0.323135 |
| MmugDNA.29702.1.S1_at   | MmugDNA.29702.1 | 4.65  | 4.66  | 0.03 | 0.03 | -1.01 | 0.368832 | 0.209425 | 0.703826 | 0.483069 |
| MmugDNA.29703.1.S1_at   | MmugDNA.29703.1 | 6.13  | 6.12  | 0.27 | 0.08 | 1.01  | 0.977456 | 0.713883 | 0.992685 | 0.833976 |
| MmugDNA.29704.1.S1_at   | MmugDNA.29704.1 | 9.68  | 9.84  | 0.26 | 0.2  | -1.11 | 0.991457 | 0.082849 | 0.996693 | 0.332384 |
| MmugDNA.29705.1.S1_at   | MmugDNA.29705.1 | 4.91  | 4.91  | 0.33 | 0.27 | 1     | 0.308783 | 0.313028 | 0.661293 | 0.567594 |
| MmugDNA.29707.1.S1_at   | MmugDNA.29707.1 | 5.25  | 4.63  | 0.52 | 0.26 | 1.54  | 0.547349 | 0.186085 | 0.809053 | 0.461931 |
| MmugDNA.29708.1.S1_at   | MmugDNA.29708.1 | 4.14  | 4.53  | 0.21 | 0.41 | -1.31 | 0.587597 | 0.458204 | 0.831748 | 0.671077 |
| MmugDNA.29709.1.S1_at   | MmugDNA.29709.1 | 5.95  | 5.68  | 0.13 | 0.05 | 1.21  | 0.071239 | 0.057406 | 0.430589 | 0.285608 |
| MmugDNA.2971.1.S1_at    | MmugDNA.2971.1  | 5.8   | 6.08  | 0.52 | 0.18 | -1.21 | 0.66631  | 0.658091 | 0.868243 | 0.800181 |
| MmugDNA.29711.1.S1_at   | MmugDNA.29711.1 | 4.19  | 4.56  | 0.12 | 0.25 | -1.3  | 0.108388 | 0.112996 | 0.480777 | 0.378851 |
| MmugDNA.29713.1.S1_at   | MmugDNA.29713.1 | 4.73  | 4.63  | 0.24 | 0.1  | 1.07  | 0.240354 | 0.064903 | 0.60669  | 0.300815 |
| MmugDNA.29714.1.S1_s_at | MmugDNA.29714.1 | 6.73  | 6.78  | 0.65 | 0.27 | -1.04 | 0.926873 | 0.983964 | 0.975766 | 0.991088 |
| MmugDNA.29715.1.S1_at   | MmugDNA.29715.1 | 4.1   | 4.64  | 0.53 | 0.49 | -1.45 | 0.798589 | 0.161238 | 0.926227 | 0.437386 |
| MmugDNA.29716.1.S1_at   | MmugDNA.29716.1 | 6.15  | 6.2   | 0.08 | 0.09 | -1.04 | 0.940119 | 0.231828 | 0.979649 | 0.503592 |
| MmugDNA.29717.1.S1_at   | MmugDNA.29717.1 | 3.57  | 3.52  | 0.11 | 0.15 | 1.03  | 0.97634  | 0.526481 | 0.992314 | 0.715574 |
| MmugDNA.29718.1.S1_at   | MmugDNA.29718.1 | 5.5   | 5.5   | 0.04 | 0.08 | 1     | 0.702107 | 0.072737 | 0.884146 | 0.315565 |
| MmugDNA.29719.1.S1_at   | MmugDNA.29719.1 | 5.77  | 5.66  | 0.09 | 0.28 | 1.08  | 0.380645 | 0.524187 | 0.709523 | 0.714207 |
| MmugDNA.29721.1.S1_at   | MmugDNA.29721.1 | 12.13 | 12.39 | 0.12 | 0.12 | -1.2  | 0.284041 | 0.087959 | 0.641948 | 0.341368 |
| MmugDNA.29725.1.S1_at   | MmugDNA.29725.1 | 6.92  | 6.92  | 0    | 0    | 1     | 1        | 0.947626 | 1        | 0.970275 |
| MmugDNA.29728.1.S1_at   | MmugDNA.29728.1 | 8.42  | 8.13  | 0.66 | 1.37 | 1.23  | 0.377659 | 0.286316 | 0.707625 | 0.547784 |
| MmugDNA.29730.1.S1_at   | MmugDNA.29730.1 | 7.86  | 7.57  | 0.26 | 0.04 | 1.22  | 0.131594 | 0.16694  | 0.505989 | 0.443415 |
| MmugDNA.29731.1.S1_at   | MmugDNA.29731.1 | 4.44  | 4.31  | 0.08 | 0.2  | 1.09  | 0.240192 | 0.191629 | 0.606503 | 0.466918 |
| MmugDNA.29732.1.S1_at   | MmugDNA.29732.1 | 3.51  | 3.51  | 0.08 | 0.04 | 1     | 0.679624 | 0.972792 | 0.87431  | 0.985352 |
| MmugDNA.29733.1.S1_at   | MmugDNA.29733.1 | 5     | 5.01  | 0.05 | 0.15 | -1    | 0.443341 | 0.310191 | 0.750691 | 0.565379 |
| MmugDNA.29734.1.S1_at   | MmugDNA.29734.1 | 4.76  | 4.39  | 0.14 | 0.13 | 1.29  | 0.02887  | 0.036208 | 0.333062 | 0.234837 |
| MmugDNA.29737.1.S1_at   | MmugDNA.29737.1 | 4.15  | 4.05  | 0.07 | 0.09 | 1.07  | 0.476387 | 0.799855 | 0.769113 | 0.884906 |
| MmugDNA.29738.1.S1_at   | MmugDNA.29738.1 | 10.81 | 10.73 | 0.36 | 0.19 | 1.05  | 0.698022 | 0.877884 | 0.882607 | 0.93029  |
| MmugDNA.29739.1.S1_at   | MmugDNA.29739.1 | 4.43  | 4.31  | 0.23 | 0.07 | 1.08  | 0.328007 | 0.427846 | 0.675501 | 0.649582 |
| MmugDNA.29740.1.S1_at   | MmugDNA.29740.1 | 9.76  | 9.68  | 0.36 | 0.19 | 1.06  | 0.857875 | 0.667652 | 0.94975  | 0.805472 |
| MmugDNA.29741.1.S1_at   | MmugDNA.29741.1 | 10.41 | 9.65  | 0.44 | 0.17 | 1.7   | 0.042304 | 0.035563 | 0.368868 | 0.232813 |
| MmugDNA.29745.1.S1_at   | MmugDNA.29745.1 | 7.45  | 8.08  | 1.76 | 0.41 | -1.54 | 0.694711 | 0.414782 | 0.881139 | 0.640456 |
| MmugDNA.29746.1.S1_at   | MmugDNA.29746.1 | 3.92  | 4.61  | 0.35 | 0.31 | -1.61 | 0.031525 | 0.125445 | 0.341227 | 0.396086 |
| MmugDNA.29747.1.S1_s_at | MmugDNA.29747.1 | 3.76  | 3.82  | 0.2  | 0.01 | -1.04 | 0.503596 | 0.59596  | 0.784375 | 0.759313 |
| MmugDNA.29749.1.S1_at   | MmugDNA.29749.1 | 3.18  | 3.25  | 0.05 | 0.22 | -1.05 | 0.960496 | 0.384648 | 0.987213 | 0.620255 |

|                         |                 |       |       |      |      |       |          |          |          |          |
|-------------------------|-----------------|-------|-------|------|------|-------|----------|----------|----------|----------|
| MmugDNA.29749.1.S1_s_at | MmugDNA.29749.1 | 3.34  | 3.15  | 0.24 | 0.1  | 1.15  | 0.176635 | 0.183319 | 0.549766 | 0.459553 |
| MmugDNA.29750.1.S1_at   | MmugDNA.29750.1 | 7.46  | 7.31  | 0.09 | 0.08 | 1.11  | 0.486521 | 0.188465 | 0.774627 | 0.464458 |
| MmugDNA.29751.1.S1_at   | MmugDNA.29751.1 | 9.66  | 9.2   | 0.23 | 0.12 | 1.38  | 0.076965 | 0.037113 | 0.438889 | 0.237165 |
| MmugDNA.29752.1.S1_at   | MmugDNA.29752.1 | 9.98  | 9.61  | 0.17 | 0.1  | 1.29  | 0.047098 | 0.044792 | 0.379283 | 0.256105 |
| MmugDNA.29753.1.S1_at   | MmugDNA.29753.1 | 8.05  | 7.91  | 0.07 | 0.1  | 1.1   | 0.626425 | 0.341928 | 0.849991 | 0.588008 |
| MmugDNA.29755.1.S1_at   | MmugDNA.29755.1 | 11.58 | 11.46 | 0.19 | 0.07 | 1.09  | 0.495433 | 0.626882 | 0.780058 | 0.780043 |
| MmugDNA.29756.1.S1_at   | MmugDNA.29756.1 | 3.62  | 3.63  | 0    | 0.08 | -1.01 | 0.714285 | 0.752034 | 0.888728 | 0.855744 |
| MmugDNA.29757.1.S1_at   | MmugDNA.29757.1 | 5.52  | 5.98  | 0.78 | 0.76 | -1.38 | 0.496229 | 0.733959 | 0.780283 | 0.845896 |
| MmugDNA.29758.1.S1_at   | MmugDNA.29758.1 | 6.62  | 6.66  | 0.27 | 0.62 | -1.03 | 0.423744 | 0.582091 | 0.739193 | 0.750784 |
| MmugDNA.29759.1.S1_at   | MmugDNA.29759.1 | 3.34  | 3.28  | 0.2  | 0.11 | 1.04  | 0.441519 | 0.616233 | 0.749404 | 0.772538 |
| MmugDNA.2976.1.S1_at    | MmugDNA.2976.1  | 8.89  | 9.01  | 0.25 | 0.15 | -1.08 | 0.364189 | 0.002839 | 0.700459 | 0.078566 |
| MmugDNA.29760.1.S1_at   | MmugDNA.29760.1 | 10.33 | 10.36 | 0.26 | 0.05 | -1.02 | 0.61369  | 0.479921 | 0.843604 | 0.685555 |
| MmugDNA.29762.1.S1_at   | MmugDNA.29762.1 | 6.95  | 7.64  | 1.23 | 0.07 | -1.62 | 0.980633 | 0.988926 | 0.993849 | 0.993666 |
| MmugDNA.29764.1.S1_at   | MmugDNA.29764.1 | 4.07  | 3.95  | 0.2  | 0.09 | 1.09  | 0.451963 | 0.197513 | 0.755619 | 0.472488 |
| MmugDNA.29765.1.S1_at   | MmugDNA.29765.1 | 5.24  | 5.42  | 0.52 | 0.29 | -1.13 | 0.620369 | 0.184005 | 0.847109 | 0.460195 |
| MmugDNA.29766.1.S1_at   | MmugDNA.29766.1 | 8.79  | 9.4   | 0.47 | 0.3  | -1.52 | 0.08226  | 0.040219 | 0.447052 | 0.245801 |
| MmugDNA.29767.1.S1_at   | MmugDNA.29767.1 | 3.17  | 3.18  | 0.03 | 0.22 | -1.01 | 0.923665 | 0.352127 | 0.974389 | 0.595496 |
| MmugDNA.29768.1.S1_at   | MmugDNA.29768.1 | 5.79  | 5.58  | 0.57 | 0.14 | 1.16  | 0.631654 | 0.282113 | 0.852513 | 0.544937 |
| MmugDNA.29769.1.S1_at   | MmugDNA.29769.1 | 9.9   | 9.94  | 0.7  | 0.14 | -1.02 | 0.954928 | 0.180105 | 0.985039 | 0.456699 |
| MmugDNA.2977.1.S1_at    | MmugDNA.2977.1  | 3.21  | 3.23  | 0.26 | 0.13 | -1.01 | 0.780388 | 0.368597 | 0.919137 | 0.608098 |
| MmugDNA.29770.1.S1_at   | MmugDNA.29770.1 | 5.6   | 5.6   | 0.13 | 0.07 | 1     | 0.248098 | 0.436919 | 0.613685 | 0.656357 |
| MmugDNA.29771.1.S1_at   | MmugDNA.29771.1 | 8.09  | 8.75  | 1.14 | 0.17 | -1.57 | 0.272491 | 0.277957 | 0.632289 | 0.541664 |
| MmugDNA.29773.1.S1_at   | MmugDNA.29773.1 | 3.61  | 3.38  | 0.13 | 0.15 | 1.17  | 0.095297 | 0.076716 | 0.464131 | 0.322127 |
| MmugDNA.29774.1.S1_at   | MmugDNA.29774.1 | 5.32  | 5.22  | 0.21 | 0.47 | 1.07  | 0.876896 | 0.226023 | 0.95711  | 0.498465 |
| MmugDNA.29775.1.S1_at   | MmugDNA.29775.1 | 4.25  | 3.49  | 0.17 | 0.29 | 1.69  | 0.061187 | 0.157957 | 0.410228 | 0.433697 |
| MmugDNA.29776.1.S1_at   | MmugDNA.29776.1 | 5.57  | 5.91  | 0.39 | 0.33 | -1.27 | 0.287654 | 0.386203 | 0.644777 | 0.621435 |
| MmugDNA.29777.1.S1_at   | MmugDNA.29777.1 | 4.3   | 4.23  | 0.32 | 0.1  | 1.05  | 0.182114 | 0.224481 | 0.555194 | 0.497492 |
| MmugDNA.29778.1.S1_at   | MmugDNA.29778.1 | 3.61  | 3.38  | 0.29 | 0.16 | 1.17  | 0.445715 | 0.618562 | 0.752285 | 0.774155 |
| MmugDNA.29780.1.S1_at   | MmugDNA.29780.1 | 6.04  | 5.85  | 0.61 | 0.17 | 1.14  | 0.451023 | 0.618881 | 0.755    | 0.774212 |
| MmugDNA.29781.1.S1_at   | MmugDNA.29781.1 | 7.15  | 6.98  | 0.23 | 0.25 | 1.12  | 0.849099 | 0.025971 | 0.946949 | 0.202085 |
| MmugDNA.29782.1.S1_at   | MmugDNA.29782.1 | 7.28  | 6.79  | 0.31 | 0.18 | 1.41  | 0.053298 | 0.00751  | 0.394565 | 0.116291 |
| MmugDNA.29783.1.S1_at   | MmugDNA.29783.1 | 9.73  | 10.37 | 0.39 | 0.2  | -1.56 | 0.045123 | 0.010654 | 0.375796 | 0.134769 |
| MmugDNA.29784.1.S1_at   | MmugDNA.29784.1 | 5.94  | 6.4   | 0.62 | 0.25 | -1.38 | 0.098642 | 0.018813 | 0.468025 | 0.172431 |
| MmugDNA.29785.1.S1_at   | MmugDNA.29785.1 | 4.83  | 4.8   | 0.43 | 0.19 | 1.02  | 0.626844 | 0.606413 | 0.850214 | 0.765747 |
| MmugDNA.29786.1.S1_at   | MmugDNA.29786.1 | 5.77  | 5.66  | 0.11 | 0.09 | 1.08  | 0.121999 | 0.601384 | 0.495677 | 0.762731 |
| MmugDNA.29787.1.S1_at   | MmugDNA.29787.1 | 2.85  | 2.83  | 0.03 | 0.15 | 1.01  | 0.402118 | 0.619831 | 0.724846 | 0.775009 |
| MmugDNA.29789.1.S1_at   | MmugDNA.29789.1 | 2.89  | 3.1   | 0.11 | 0.35 | -1.15 | 0.264529 | 0.362654 | 0.626029 | 0.603188 |
| MmugDNA.2979.1.S1_at    | MmugDNA.2979.1  | 7.52  | 6.74  | 0.58 | 0.26 | 1.72  | 0.316785 | 0.167174 | 0.666701 | 0.443636 |
| MmugDNA.29790.1.S1_at   | MmugDNA.29790.1 | 3.38  | 3.28  | 0.07 | 0.08 | 1.07  | 0.176055 | 0.245739 | 0.549159 | 0.515519 |
| MmugDNA.29791.1.S1_at   | MmugDNA.29791.1 | 7.61  | 7.43  | 0.15 | 0.04 | 1.13  | 0.108654 | 0.21823  | 0.480791 | 0.491764 |
| MmugDNA.29793.1.S1_at   | MmugDNA.29793.1 | 7.61  | 7.6   | 0.08 | 0.04 | 1     | 0.720324 | 0.948673 | 0.89153  | 0.970685 |
| MmugDNA.29794.1.S1_at   | MmugDNA.29794.1 | 3.63  | 3.68  | 0.2  | 0.13 | -1.03 | 0.380241 | 0.566506 | 0.709387 | 0.74062  |
| MmugDNA.29795.1.S1_at   | MmugDNA.29795.1 | 3.71  | 3.6   | 0.13 | 0.41 | 1.08  | 0.831522 | 0.51865  | 0.939628 | 0.710598 |

|                         |                 |       |       |      |      |       |          |          |          |          |
|-------------------------|-----------------|-------|-------|------|------|-------|----------|----------|----------|----------|
| MmugDNA.29796.1.S1_at   | MmugDNA.29796.1 | 5.03  | 4.98  | 0.12 | 0.05 | 1.04  | 0.263311 | 0.344692 | 0.625264 | 0.59007  |
| MmugDNA.29797.1.S1_at   | MmugDNA.29797.1 | 4.23  | 4.12  | 0.02 | 0.15 | 1.09  | 0.167784 | 0.219755 | 0.540451 | 0.493388 |
| MmugDNA.29798.1.S1_at   | MmugDNA.29798.1 | 5.69  | 5.34  | 0.03 | 0.07 | 1.28  | 0.000761 | 0.000226 | 0.15004  | 0.032385 |
| MmugDNA.298.1.S1_at     | MmugDNA.298.1   | 5.95  | 6.04  | 0.27 | 0.08 | -1.07 | 0.788965 | 0.384835 | 0.922472 | 0.620462 |
| MmugDNA.2980.1.S1_at    | MmugDNA.2980.1  | 6.7   | 6.72  | 0.09 | 0.05 | -1.01 | 0.610001 | 0.000961 | 0.841827 | 0.049342 |
| MmugDNA.5436.1.S1_at    | MmugDNA.5436.1  | 8.65  | 8.62  | 0.19 | 0.32 | 1.02  | 0.463599 | 0.017276 | 0.762265 | 0.166459 |
| MmugDNA.5436.1.S1_s_at  | MmugDNA.5436.1  | 7.61  | 7.44  | 0.11 | 0.21 | 1.13  | 0.949527 | 0.003521 | 0.982929 | 0.085137 |
| MmugDNA.29800.1.S1_at   | MmugDNA.29800.1 | 5.34  | 5.07  | 0.07 | 0.11 | 1.21  | 0.026723 | 0.020984 | 0.325965 | 0.181647 |
| MmugDNA.29803.1.S1_at   | MmugDNA.29803.1 | 9.68  | 9.76  | 0.09 | 0.1  | -1.06 | 0.714442 | 0.908569 | 0.888774 | 0.948227 |
| MmugDNA.29804.1.S1_at   | MmugDNA.29804.1 | 7.42  | 8.37  | 2.38 | 0.23 | -1.93 | 0.419997 | 0.082599 | 0.736634 | 0.331808 |
| MmugDNA.29805.1.S1_at   | MmugDNA.29805.1 | 4.66  | 4.74  | 0.39 | 0.25 | -1.06 | 0.830973 | 0.818006 | 0.939545 | 0.895039 |
| MmugDNA.29806.1.S1_at   | MmugDNA.29806.1 | 7     | 7.13  | 0.3  | 0.03 | -1.1  | 0.53969  | 0.596819 | 0.80393  | 0.75984  |
| MmugDNA.29808.1.S1_at   | MmugDNA.29808.1 | 6.21  | 6.72  | 0.05 | 0.29 | -1.43 | 0.02965  | 0.022706 | 0.335282 | 0.188723 |
| MmugDNA.29809.1.S1_at   | MmugDNA.29809.1 | 4.77  | 4.67  | 0.03 | 0.08 | 1.07  | 0.078971 | 0.099317 | 0.441671 | 0.357584 |
| MmugDNA.29810.1.S1_at   | MmugDNA.29810.1 | 7.78  | 7.67  | 0.1  | 0.11 | 1.08  | 0.932034 | 0.912987 | 0.977118 | 0.951043 |
| MmugDNA.29811.1.S1_at   | MmugDNA.29811.1 | 4.79  | 5.37  | 0.64 | 0.19 | -1.5  | 0.139663 | 0.252335 | 0.515088 | 0.520979 |
| MmugDNA.29816.1.S1_at   | MmugDNA.29816.1 | 5.74  | 6.02  | 0.19 | 0.1  | -1.21 | 0.118868 | 0.035327 | 0.492396 | 0.232227 |
| MmugDNA.29817.1.S1_at   | MmugDNA.29817.1 | 7.89  | 6.98  | 0.74 | 0.01 | 1.88  | 0.316571 | 0.824104 | 0.666494 | 0.898903 |
| MmugDNA.29818.1.S1_s_at | MmugDNA.29818.1 | 8.11  | 8.03  | 0.11 | 0.04 | 1.06  | 0.083973 | 0.159057 | 0.450226 | 0.435217 |
| MmugDNA.2982.1.S1_at    | MmugDNA.2982.1  | 7.72  | 7.6   | 0.14 | 0.05 | 1.09  | 0.350598 | 0.790637 | 0.691425 | 0.878957 |
| MmugDNA.29821.1.S1_at   | MmugDNA.29821.1 | 3.88  | 4.01  | 0.11 | 0.03 | -1.1  | 0.238077 | 0.047984 | 0.605216 | 0.264101 |
| MmugDNA.29823.1.S1_at   | MmugDNA.29823.1 | 5.56  | 5.65  | 0.22 | 0    | -1.07 | 0.502102 | 0.728017 | 0.783497 | 0.842711 |
| MmugDNA.29824.1.S1_at   | MmugDNA.29824.1 | 3.02  | 3.01  | 0.08 | 0    | 1     | 0.606307 | 0.251334 | 0.840455 | 0.520051 |
| MmugDNA.29825.1.S1_at   | MmugDNA.29825.1 | 9.6   | 8.88  | 0.33 | 0.24 | 1.64  | 0.035457 | 0.024139 | 0.352096 | 0.194527 |
| MmugDNA.29826.1.S1_at   | MmugDNA.29826.1 | 5.16  | 5.18  | 0.15 | 0.03 | -1.02 | 0.860668 | 0.947465 | 0.950856 | 0.970204 |
| MmugDNA.29827.1.S1_at   | MmugDNA.29827.1 | 10.53 | 10.57 | 0.36 | 0.27 | -1.03 | 0.29556  | 0.395327 | 0.651318 | 0.627404 |
| MmugDNA.29829.1.S1_at   | MmugDNA.29829.1 | 6.49  | 6.88  | 0.57 | 0.08 | -1.31 | 0.366649 | 0.206382 | 0.702101 | 0.480546 |
| MmugDNA.2983.1.S1_at    | MmugDNA.2983.1  | 3.54  | 3.52  | 0.22 | 0.01 | 1.01  | 0.905205 | 0.984149 | 0.968109 | 0.991189 |
| MmugDNA.29831.1.S1_at   | MmugDNA.29831.1 | 4.68  | 4.85  | 0.08 | 0.13 | -1.13 | 0.265019 | 0.653731 | 0.626381 | 0.797625 |
| MmugDNA.29832.1.S1_at   | MmugDNA.29832.1 | 5.85  | 6.38  | 0.18 | 0.32 | -1.45 | 0.044775 | 0.026339 | 0.37512  | 0.203321 |
| MmugDNA.29834.1.S1_at   | MmugDNA.29834.1 | 10.13 | 10.25 | 1.05 | 0.08 | -1.09 | 0.320479 | 0.332458 | 0.669365 | 0.58087  |
| MmugDNA.29835.1.S1_at   | MmugDNA.29835.1 | 4.91  | 4.59  | 0.36 | 0.15 | 1.24  | 0.654861 | 0.599654 | 0.862999 | 0.761524 |
| MmugDNA.29836.1.S1_at   | MmugDNA.29836.1 | 5.24  | 4.59  | 0.34 | 0.34 | 1.58  | 0.36118  | 0.05881  | 0.698358 | 0.289228 |
| MmugDNA.29837.1.S1_at   | MmugDNA.29837.1 | 6.25  | 7.93  | 0.68 | 0.44 | -3.21 | 0.0452   | 0.086566 | 0.376019 | 0.33911  |
| MmugDNA.29838.1.S1_at   | MmugDNA.29838.1 | 7.98  | 8.19  | 0.67 | 0.13 | -1.15 | 0.66563  | 0.697759 | 0.868038 | 0.824384 |
| MmugDNA.2984.1.S1_at    | MmugDNA.2984.1  | 5.65  | 5.65  | 0.12 | 0.11 | 1     | 0.226222 | 0.312875 | 0.595342 | 0.567453 |
| MmugDNA.29840.1.S1_at   | MmugDNA.29840.1 | 9.51  | 9.6   | 0.65 | 0.1  | -1.07 | 0.564109 | 0.420532 | 0.81857  | 0.644221 |
| MmugDNA.29840.1.S1_x_at | MmugDNA.29840.1 | 9.71  | 9.77  | 0.65 | 0.04 | -1.04 | 0.63603  | 0.375731 | 0.854813 | 0.613624 |
| MmugDNA.29841.1.S1_at   | MmugDNA.29841.1 | 8.44  | 7.56  | 0.33 | 0.33 | 1.84  | 0.067548 | 0.12899  | 0.423952 | 0.400461 |
| MmugDNA.29844.1.S1_at   | MmugDNA.29844.1 | 6.91  | 6.93  | 0.13 | 0.05 | -1.01 | 0.795202 | 0.613365 | 0.924811 | 0.770518 |
| MmugDNA.29845.1.S1_at   | MmugDNA.29845.1 | 7.11  | 6.97  | 0.13 | 0.08 | 1.1   | 0.198201 | 0.183412 | 0.569451 | 0.459553 |
| MmugDNA.29846.1.S1_at   | MmugDNA.29846.1 | 8.75  | 8.91  | 0.29 | 0.11 | -1.12 | 0.392697 | 0.322653 | 0.718592 | 0.574024 |
| MmugDNA.29847.1.S1_at   | MmugDNA.29847.1 | 5.27  | 5.24  | 0.15 | 0.05 | 1.02  | 0.59676  | 0.803465 | 0.836122 | 0.886895 |

|                         |                 |       |       |      |      |       |          |          |          |          |
|-------------------------|-----------------|-------|-------|------|------|-------|----------|----------|----------|----------|
| MmugDNA.29848.1.S1_at   | MmugDNA.29848.1 | 5.96  | 6.01  | 0.18 | 0.58 | -1.03 | 0.977559 | 0.187233 | 0.992714 | 0.463221 |
| MmugDNA.29849.1.S1_at   | MmugDNA.29849.1 | 3.2   | 3.2   | 0.01 | 0.03 | 1     | 0.277417 | 0.665421 | 0.636861 | 0.803964 |
| MmugDNA.29850.1.S1_at   | MmugDNA.29850.1 | 10.7  | 10.78 | 0.05 | 0.04 | -1.06 | 0.162489 | 0.203436 | 0.535633 | 0.477634 |
| MmugDNA.29852.1.S1_at   | MmugDNA.29852.1 | 4.25  | 4.15  | 0.15 | 0.64 | 1.07  | 0.999897 | 0.892371 | 1        | 0.938624 |
| MmugDNA.29852.1.S1_x_at | MmugDNA.29852.1 | 8.92  | 8.98  | 0.12 | 0.2  | -1.04 | 0.727487 | 0.524829 | 0.89474  | 0.714619 |
| MmugDNA.29853.1.S1_at   | MmugDNA.29853.1 | 5.43  | 5.39  | 0.64 | 0.66 | 1.02  | 0.65601  | 0.184249 | 0.863416 | 0.460382 |
| MmugDNA.29854.1.S1_at   | MmugDNA.29854.1 | 5.05  | 5.53  | 0.15 | 0.16 | -1.4  | 0.033596 | 0.093149 | 0.346951 | 0.349303 |
| MmugDNA.29854.1.S1_x_at | MmugDNA.29854.1 | 6.17  | 6.37  | 0.07 | 0.19 | -1.16 | 0.090805 | 0.173989 | 0.458873 | 0.450247 |
| MmugDNA.29856.1.S1_at   | MmugDNA.29856.1 | 10.59 | 10.83 | 0.23 | 0.17 | -1.18 | 0.106463 | 0.03845  | 0.478853 | 0.24098  |
| MmugDNA.29857.1.S1_at   | MmugDNA.29857.1 | 4.14  | 4.17  | 0.26 | 0.2  | -1.02 | 0.273561 | 0.370925 | 0.633298 | 0.609902 |
| MmugDNA.29859.1.S1_at   | MmugDNA.29859.1 | 3.39  | 3.39  | 0.05 | 0.01 | 1     | 0.305023 | 0.50258  | 0.658544 | 0.700213 |
| MmugDNA.2986.1.S1_at    | MmugDNA.2986.1  | 6.11  | 5.74  | 0.81 | 0.68 | 1.29  | 0.90109  | 0.493273 | 0.966467 | 0.694018 |
| MmugDNA.29860.1.S1_at   | MmugDNA.29860.1 | 3.37  | 3.2   | 0.04 | 0.1  | 1.12  | 0.107167 | 0.675363 | 0.47974  | 0.81026  |
| MmugDNA.29862.1.S1_at   | MmugDNA.29862.1 | 9.72  | 10.06 | 1.19 | 0.19 | -1.26 | 0.408304 | 0.522064 | 0.729223 | 0.712853 |
| MmugDNA.29864.1.S1_at   | MmugDNA.29864.1 | 4.24  | 4.79  | 0.29 | 0.24 | -1.46 | 0.135532 | 0.105952 | 0.510014 | 0.36826  |
| MmugDNA.29865.1.S1_at   | MmugDNA.29865.1 | 2.89  | 2.84  | 0.07 | 0.07 | 1.03  | 0.591443 | 0.65424  | 0.833444 | 0.797979 |
| MmugDNA.29866.1.S1_at   | MmugDNA.29866.1 | 3.12  | 3.17  | 0.2  | 0.05 | -1.04 | 0.955425 | 0.994768 | 0.985312 | 0.996729 |
| MmugDNA.29868.1.S1_at   | MmugDNA.29868.1 | 6     | 5.89  | 0.03 | 0.09 | 1.08  | 0.143441 | 0.253392 | 0.518743 | 0.521713 |
| MmugDNA.29869.1.S1_at   | MmugDNA.29869.1 | 6.81  | 6.42  | 0.13 | 0.16 | 1.31  | 0.020776 | 0.091764 | 0.305611 | 0.346977 |
| MmugDNA.2987.1.S1_at    | MmugDNA.2987.1  | 4.57  | 4.6   | 0.18 | 0.04 | -1.02 | 0.636207 | 0.763805 | 0.854813 | 0.862673 |
| MmugDNA.29870.1.S1_at   | MmugDNA.29870.1 | 12.54 | 12.31 | 0.17 | 0.07 | 1.17  | 0.099615 | 0.11733  | 0.469263 | 0.384947 |
| MmugDNA.29874.1.S1_at   | MmugDNA.29874.1 | 8.35  | 9.83  | 1.06 | 0.09 | -2.79 | 0.207227 | 0.313795 | 0.578837 | 0.568083 |
| MmugDNA.29875.1.S1_at   | MmugDNA.29875.1 | 8.94  | 8.93  | 0.72 | 0.03 | 1.01  | 0.375158 | 0.517289 | 0.706343 | 0.709435 |
| MmugDNA.29877.1.S1_at   | MmugDNA.29877.1 | 4.54  | 4.45  | 0.11 | 0.38 | 1.06  | 0.836597 | 0.198634 | 0.941274 | 0.473391 |
| MmugDNA.29881.1.S1_at   | MmugDNA.29881.1 | 5.51  | 5.59  | 0.5  | 0.31 | -1.05 | 0.575302 | 0.209402 | 0.824614 | 0.483069 |
| MmugDNA.29882.1.S1_at   | MmugDNA.29882.1 | 3.78  | 3.87  | 0.03 | 0.23 | -1.06 | 0.359364 | 0.414589 | 0.697237 | 0.640431 |
| MmugDNA.29883.1.S1_at   | MmugDNA.29883.1 | 8.27  | 8.47  | 0.23 | 0.05 | -1.15 | 0.34859  | 0.000963 | 0.689949 | 0.049392 |
| MmugDNA.29885.1.S1_at   | MmugDNA.29885.1 | 6.21  | 6.11  | 0.09 | 0.07 | 1.07  | 0.07961  | 0.043098 | 0.442496 | 0.252256 |
| MmugDNA.29886.1.S1_at   | MmugDNA.29886.1 | 5.53  | 5.14  | 0.46 | 0.46 | 1.32  | 0.75912  | 0.620818 | 0.909481 | 0.775619 |
| MmugDNA.29887.1.S1_at   | MmugDNA.29887.1 | 9.65  | 9.99  | 0.35 | 0.1  | -1.26 | 0.417677 | 0.187021 | 0.735015 | 0.462938 |
| MmugDNA.29888.1.S1_at   | MmugDNA.29888.1 | 3.38  | 3.29  | 0.09 | 0.07 | 1.06  | 0.604722 | 0.211131 | 0.839732 | 0.485153 |
| MmugDNA.29889.1.S1_at   | MmugDNA.29889.1 | 5.58  | 5.56  | 0.11 | 0.06 | 1.01  | 0.186202 | 0.435761 | 0.559101 | 0.655508 |
| MmugDNA.29892.1.S1_at   | MmugDNA.29892.1 | 4.51  | 4.26  | 0.28 | 0.08 | 1.19  | 0.129358 | 0.127054 | 0.504178 | 0.397885 |
| MmugDNA.29893.1.S1_at   | MmugDNA.29893.1 | 8.1   | 7.95  | 0.61 | 0.11 | 1.11  | 0.448204 | 0.648613 | 0.753851 | 0.794369 |
| MmugDNA.29896.1.S1_at   | MmugDNA.29896.1 | 5.2   | 5.48  | 0.63 | 0.57 | -1.22 | 0.615792 | 0.180631 | 0.844633 | 0.457245 |
| MmugDNA.29898.1.S1_at   | MmugDNA.29898.1 | 6.24  | 6.32  | 0.04 | 0.03 | -1.06 | 0.135688 | 0.146489 | 0.510145 | 0.420533 |
| MmugDNA.29899.1.S1_at   | MmugDNA.29899.1 | 5.64  | 5.6   | 0.35 | 0.08 | 1.03  | 0.737682 | 0.924774 | 0.899619 | 0.957465 |
| MmugDNA.299.1.S1_at     | MmugDNA.299.1   | 4.42  | 4.43  | 0.06 | 0.13 | -1    | 0.236382 | 0.289637 | 0.603291 | 0.5507   |
| MmugDNA.2990.1.S1_at    | MmugDNA.2990.1  | 8.76  | 8.54  | 0.12 | 0.01 | 1.17  | 0.060302 | 0.003111 | 0.407914 | 0.081305 |
| MmugDNA.29900.1.S1_s_at | MmugDNA.29900.1 | 9.29  | 9     | 0.15 | 0.11 | 1.22  | 0.107365 | 0.001271 | 0.47976  | 0.055241 |
| MmugDNA.29901.1.S1_at   | MmugDNA.29901.1 | 6.86  | 6.61  | 0.29 | 0.12 | 1.19  | 0.369861 | 0.218093 | 0.70442  | 0.491683 |
| MmugDNA.29902.1.S1_at   | MmugDNA.29902.1 | 9.41  | 9.81  | 0.24 | 0.05 | -1.32 | 0.026711 | 0.073418 | 0.325965 | 0.316609 |
| MmugDNA.29903.1.S1_at   | MmugDNA.29903.1 | 7.94  | 8.61  | 0.29 | 0.13 | -1.6  | 0.034748 | 0.031578 | 0.350358 | 0.219857 |

|                         |                 |       |       |      |      |       |          |          |          |          |
|-------------------------|-----------------|-------|-------|------|------|-------|----------|----------|----------|----------|
| MmugDNA.29904.1.S1_at   | MmugDNA.29904.1 | 5.16  | 5.36  | 0.46 | 0.38 | -1.15 | 0.859832 | 0.127889 | 0.950484 | 0.398825 |
| MmugDNA.29905.1.S1_at   | MmugDNA.29905.1 | 5.03  | 5.04  | 0.09 | 0.04 | -1.01 | 0.706702 | 0.320463 | 0.885887 | 0.572648 |
| MmugDNA.29907.1.S1_at   | MmugDNA.29907.1 | 8.39  | 8.42  | 0.08 | 0.1  | -1.01 | 0.395523 | 0.782629 | 0.720494 | 0.874202 |
| MmugDNA.29908.1.S1_at   | MmugDNA.29908.1 | 5.62  | 5.57  | 0.21 | 0.06 | 1.03  | 0.240523 | 0.389614 | 0.606845 | 0.623668 |
| MmugDNA.29909.1.S1_at   | MmugDNA.29909.1 | 4.52  | 4.37  | 0.12 | 0.2  | 1.11  | 0.403251 | 0.331932 | 0.725542 | 0.580503 |
| MmugDNA.2991.1.S1_at    | MmugDNA.2991.1  | 5.87  | 5.96  | 0.49 | 0.02 | -1.06 | 0.557225 | 0.727308 | 0.814536 | 0.84224  |
| MmugDNA.29910.1.S1_at   | MmugDNA.29910.1 | 4.91  | 4.99  | 1.4  | 0.09 | -1.06 | 0.431041 | 0.579223 | 0.74323  | 0.748973 |
| MmugDNA.29911.1.S1_at   | MmugDNA.29911.1 | 9.47  | 8.68  | 0.31 | 0.08 | 1.74  | 0.029569 | 0.017007 | 0.334942 | 0.165333 |
| MmugDNA.29912.1.S1_at   | MmugDNA.29912.1 | 5.2   | 5.15  | 0.11 | 0.12 | 1.04  | 0.799862 | 0.910193 | 0.926711 | 0.949342 |
| MmugDNA.29913.1.S1_at   | MmugDNA.29913.1 | 3.88  | 3.9   | 0.39 | 0.04 | -1.01 | 0.934031 | 0.892276 | 0.977707 | 0.938598 |
| MmugDNA.29914.1.S1_at   | MmugDNA.29914.1 | 4.48  | 4.64  | 0.49 | 0.18 | -1.11 | 0.599507 | 0.582068 | 0.837382 | 0.750784 |
| MmugDNA.29915.1.S1_at   | MmugDNA.29915.1 | 10    | 9.09  | 0.51 | 0.09 | 1.89  | 0.029716 | 0.003898 | 0.335672 | 0.088806 |
| MmugDNA.29916.1.S1_at   | MmugDNA.29916.1 | 4.64  | 4.97  | 0.02 | 0.17 | -1.25 | 0.032303 | 0.004176 | 0.343723 | 0.091064 |
| MmugDNA.29917.1.S1_at   | MmugDNA.29917.1 | 4.22  | 3.98  | 1.2  | 0.59 | 1.18  | 0.695835 | 0.321725 | 0.881741 | 0.573355 |
| MmugDNA.29918.1.S1_at   | MmugDNA.29918.1 | 9.27  | 7.94  | 0.91 | 0.21 | 2.51  | 0.076365 | 0.072912 | 0.437977 | 0.315942 |
| MmugDNA.29919.1.S1_at   | MmugDNA.29919.1 | 4.61  | 4.41  | 0.45 | 0.18 | 1.15  | 0.911684 | 0.213832 | 0.970152 | 0.48758  |
| MmugDNA.2992.1.S1_at    | MmugDNA.2992.1  | 9.25  | 9.78  | 0.51 | 0.23 | -1.45 | 0.076769 | 0.010423 | 0.438226 | 0.133525 |
| MmugDNA.29920.1.S1_at   | MmugDNA.29920.1 | 5.48  | 5.45  | 0.14 | 0.13 | 1.02  | 0.598136 | 0.868307 | 0.836786 | 0.925241 |
| MmugDNA.29921.1.S1_at   | MmugDNA.29921.1 | 3.04  | 3.03  | 0.17 | 0.08 | 1     | 0.629271 | 0.68947  | 0.851501 | 0.818854 |
| MmugDNA.29923.1.S1_at   | MmugDNA.29923.1 | 5.49  | 6.82  | 0.41 | 0.31 | -2.51 | 0.037428 | 0.061937 | 0.357092 | 0.295734 |
| MmugDNA.29925.1.S1_at   | MmugDNA.29925.1 | 9.7   | 9.42  | 0.27 | 0.22 | 1.22  | 0.503917 | 0.137411 | 0.78444  | 0.410338 |
| MmugDNA.29926.1.S1_at   | MmugDNA.29926.1 | 6.02  | 5.81  | 0.22 | 0.18 | 1.15  | 0.552301 | 0.100941 | 0.811715 | 0.360509 |
| MmugDNA.29927.1.S1_at   | MmugDNA.29927.1 | 4.61  | 4.49  | 0.2  | 0.1  | 1.08  | 0.17866  | 0.18266  | 0.551451 | 0.459186 |
| MmugDNA.29928.1.S1_at   | MmugDNA.29928.1 | 5.82  | 5.79  | 0.22 | 0.09 | 1.02  | 0.229885 | 0.438846 | 0.598481 | 0.657715 |
| MmugDNA.29929.1.S1_at   | MmugDNA.29929.1 | 5.13  | 5.1   | 0.21 | 0.23 | 1.02  | 0.721268 | 0.256811 | 0.891977 | 0.524607 |
| MmugDNA.2993.1.S1_at    | MmugDNA.2993.1  | 5.92  | 5.79  | 0.08 | 0.36 | 1.1   | 0.234363 | 0.167539 | 0.601622 | 0.443979 |
| MmugDNA.29931.1.S1_at   | MmugDNA.29931.1 | 5.53  | 5.37  | 0.15 | 0.22 | 1.11  | 0.592748 | 0.709612 | 0.833974 | 0.831691 |
| MmugDNA.29932.1.S1_at   | MmugDNA.29932.1 | 3.3   | 3.22  | 0.45 | 0.09 | 1.06  | 0.21683  | 0.314532 | 0.586868 | 0.568372 |
| MmugDNA.29934.1.S1_at   | MmugDNA.29934.1 | 11.13 | 10.57 | 0.43 | 0.15 | 1.48  | 0.199692 | 0.027934 | 0.571494 | 0.208628 |
| MmugDNA.29935.1.S1_at   | MmugDNA.29935.1 | 8.27  | 8.37  | 0.39 | 0.23 | -1.07 | 0.698297 | 0.930497 | 0.882746 | 0.960513 |
| MmugDNA.29935.1.S1_s_at | MmugDNA.29935.1 | 9.63  | 9.81  | 0.17 | 0.13 | -1.13 | 0.189011 | 0.584556 | 0.560718 | 0.752462 |
| MmugDNA.29937.1.S1_at   | MmugDNA.29937.1 | 5.5   | 5.37  | 0.35 | 0.37 | 1.1   | 0.666818 | 0.507356 | 0.868452 | 0.702917 |
| MmugDNA.29937.1.S1_x_at | MmugDNA.29937.1 | 5.37  | 5.61  | 0.42 | 0.24 | -1.18 | 0.352886 | 0.64721  | 0.692895 | 0.793312 |
| MmugDNA.29938.1.S1_at   | MmugDNA.29938.1 | 8.8   | 8.09  | 0.55 | 0.17 | 1.64  | 0.415474 | 0.002383 | 0.733656 | 0.072165 |
| MmugDNA.2994.1.S1_at    | MmugDNA.2994.1  | 3.51  | 4.16  | 0.12 | 0.49 | -1.56 | 0.121352 | 0.239884 | 0.494968 | 0.510627 |
| MmugDNA.29940.1.S1_at   | MmugDNA.29940.1 | 3.32  | 3.25  | 0.1  | 0    | 1.05  | 0.218517 | 0.081773 | 0.588313 | 0.330121 |
| MmugDNA.29942.1.S1_at   | MmugDNA.29942.1 | 6.18  | 6.04  | 0.06 | 0.21 | 1.1   | 0.517148 | 0.719809 | 0.791816 | 0.837888 |
| MmugDNA.29943.1.S1_at   | MmugDNA.29943.1 | 7.98  | 8.26  | 0.66 | 0.19 | -1.21 | 0.519622 | 0.737999 | 0.793262 | 0.848158 |
| MmugDNA.29944.1.S1_at   | MmugDNA.29944.1 | 3.84  | 3.59  | 0.15 | 0.12 | 1.19  | 0.038427 | 0.029345 | 0.359251 | 0.213228 |
| MmugDNA.29945.1.S1_at   | MmugDNA.29945.1 | 12.42 | 11.95 | 0.24 | 0.02 | 1.38  | 0.033319 | 0.027905 | 0.346442 | 0.208529 |
| MmugDNA.29946.1.S1_at   | MmugDNA.29946.1 | 5.19  | 5.84  | 0.34 | 0.15 | -1.56 | 0.017884 | 0.01251  | 0.294161 | 0.144302 |
| MmugDNA.29947.1.S1_at   | MmugDNA.29947.1 | 5.55  | 5.46  | 0.19 | 0.16 | 1.07  | 0.140614 | 0.186672 | 0.51604  | 0.462459 |
| MmugDNA.29948.1.S1_at   | MmugDNA.29948.1 | 7.03  | 6.77  | 0.14 | 0.08 | 1.19  | 0.056876 | 0.060131 | 0.401384 | 0.291882 |

|                         |                 |       |       |      |      |       |          |          |          |          |
|-------------------------|-----------------|-------|-------|------|------|-------|----------|----------|----------|----------|
| MmugDNA.29949.1.S1_at   | MmugDNA.29949.1 | 3.7   | 3.64  | 0.05 | 0.11 | 1.05  | 0.225535 | 0.157611 | 0.594764 | 0.433131 |
| MmugDNA.2995.1.S1_at    | MmugDNA.2995.1  | 6.64  | 5.97  | 1.27 | 0.28 | 1.59  | 0.636914 | 0.37439  | 0.855296 | 0.612855 |
| MmugDNA.29951.1.S1_at   | MmugDNA.29951.1 | 7.94  | 7.99  | 0.22 | 0.12 | -1.03 | 0.939361 | 0.595541 | 0.979532 | 0.759091 |
| MmugDNA.29953.1.S1_at   | MmugDNA.29953.1 | 4.56  | 4.31  | 0.09 | 0.09 | 1.19  | 0.043589 | 0.126538 | 0.372206 | 0.39714  |
| MmugDNA.29955.1.S1_at   | MmugDNA.29955.1 | 10.91 | 11.04 | 0.69 | 0.06 | -1.1  | 0.799442 | 0.936756 | 0.926545 | 0.964351 |
| MmugDNA.29957.1.S1_at   | MmugDNA.29957.1 | 5.12  | 5.04  | 0.14 | 0.07 | 1.06  | 0.844767 | 0.415673 | 0.945495 | 0.641027 |
| MmugDNA.29959.1.S1_at   | MmugDNA.29959.1 | 9.51  | 9.96  | 0.22 | 0.2  | -1.37 | 0.12048  | 0.14654  | 0.493859 | 0.420583 |
| MmugDNA.2996.1.S1_at    | MmugDNA.2996.1  | 3.67  | 3.48  | 0.07 | 0.2  | 1.14  | 0.135108 | 0.234792 | 0.50916  | 0.506108 |
| MmugDNA.29960.1.S1_at   | MmugDNA.29960.1 | 4.69  | 4.75  | 0.19 | 0.27 | -1.04 | 0.3647   | 0.558702 | 0.700726 | 0.735856 |
| MmugDNA.29961.1.S1_at   | MmugDNA.29961.1 | 5.74  | 5.69  | 0.74 | 0.39 | 1.04  | 0.429628 | 0.702193 | 0.74228  | 0.827347 |
| MmugDNA.29963.1.S1_at   | MmugDNA.29963.1 | 4.37  | 4.3   | 0.07 | 0.06 | -1.05 | 0.264606 | 0.231831 | 0.626029 | 0.503592 |
| MmugDNA.29964.1.S1_at   | MmugDNA.29964.1 | 3.55  | 3.35  | 0.19 | 0.08 | 1.15  | 0.113988 | 0.112951 | 0.487339 | 0.378759 |
| MmugDNA.29966.1.S1_at   | MmugDNA.29966.1 | 12.73 | 12.6  | 0.17 | 0.14 | 1.1   | 0.176417 | 0.043487 | 0.549443 | 0.253159 |
| MmugDNA.29967.1.S1_at   | MmugDNA.29967.1 | 11.31 | 11.04 | 0.12 | 0.04 | 1.21  | 0.015427 | 0.401882 | 0.281512 | 0.63109  |
| MmugDNA.29968.1.S1_at   | MmugDNA.29968.1 | 4.57  | 4.92  | 0.32 | 0.31 | -1.28 | 0.348009 | 0.10866  | 0.689251 | 0.372171 |
| MmugDNA.29969.1.S1_at   | MmugDNA.29969.1 | 5.47  | 5.39  | 0.24 | 0.11 | 1.06  | 0.352675 | 0.313273 | 0.692704 | 0.567753 |
| MmugDNA.29973.1.S1_at   | MmugDNA.29973.1 | 3.66  | 3.89  | 0.1  | 0.11 | -1.17 | 0.026771 | 0.028935 | 0.326171 | 0.211979 |
| MmugDNA.29974.1.S1_at   | MmugDNA.29974.1 | 4.31  | 4.1   | 0.88 | 0.5  | 1.16  | 0.451574 | 0.31989  | 0.755243 | 0.572245 |
| MmugDNA.29976.1.S1_at   | MmugDNA.29976.1 | 3.71  | 3.77  | 0.15 | 0.08 | -1.04 | 0.623906 | 0.700097 | 0.84841  | 0.825946 |
| MmugDNA.29978.1.S1_at   | MmugDNA.29978.1 | 5.42  | 5.4   | 0.08 | 0.03 | 1.01  | 0.790121 | 0.047237 | 0.922763 | 0.261952 |
| MmugDNA.2998.1.S1_at    | MmugDNA.2998.1  | 8.02  | 8.1   | 0.25 | 0.09 | -1.06 | 0.987638 | 0.232561 | 0.995831 | 0.504341 |
| MmugDNA.29980.1.S1_at   | MmugDNA.29980.1 | 3.52  | 3.48  | 0.51 | 0.14 | 1.03  | 0.31964  | 0.454137 | 0.668882 | 0.668407 |
| MmugDNA.29981.1.S1_s_at | MmugDNA.29981.1 | 11.64 | 11.92 | 0.22 | 0.05 | -1.21 | 0.170625 | 0.2275   | 0.543673 | 0.499805 |
| MmugDNA.29982.1.S1_at   | MmugDNA.29982.1 | 9.37  | 9.44  | 0.24 | 0.1  | -1.05 | 0.611004 | 0.486399 | 0.842306 | 0.689764 |
| MmugDNA.33355.1.S1_at   | MmugDNA.33355.1 | 12.33 | 12.23 | 0.34 | 0.08 | 1.08  | 0.681968 | 0.735932 | 0.87548  | 0.847217 |
| MmugDNA.33355.1.S1_s_at | MmugDNA.33355.1 | 11.06 | 10.93 | 0.37 | 0.09 | 1.09  | 0.571451 | 0.8237   | 0.822774 | 0.898726 |
| MmugDNA.29984.1.S1_at   | MmugDNA.29984.1 | 5.74  | 5.89  | 0.31 | 0.05 | -1.11 | 0.398979 | 0.334074 | 0.722874 | 0.582104 |
| MmugDNA.29985.1.S1_at   | MmugDNA.29985.1 | 8.84  | 8.84  | 0.16 | 0.03 | 1     | 0.307195 | 0.615477 | 0.660096 | 0.772012 |
| MmugDNA.29986.1.S1_at   | MmugDNA.29986.1 | 6.03  | 5.91  | 0.33 | 0.09 | 1.09  | 0.739354 | 0.792399 | 0.900473 | 0.880041 |
| MmugDNA.29987.1.S1_at   | MmugDNA.29987.1 | 5.07  | 5.07  | 0.28 | 0.31 | -1.01 | 0.440282 | 0.834114 | 0.748408 | 0.904949 |
| MmugDNA.29988.1.S1_at   | MmugDNA.29988.1 | 7.97  | 8.97  | 0.08 | 0.3  | -2    | 0.007969 | 0.005196 | 0.232005 | 0.099895 |
| MmugDNA.29990.1.S1_s_at | MmugDNA.29990.1 | 4.23  | 4.15  | 0.09 | 0.11 | 1.06  | 0.433454 | 0.217396 | 0.744486 | 0.491012 |
| MmugDNA.29991.1.S1_at   | MmugDNA.29991.1 | 4.76  | 4.45  | 0.28 | 0.21 | 1.24  | 0.101379 | 0.206631 | 0.471667 | 0.480662 |
| MmugDNA.29992.1.S1_at   | MmugDNA.29992.1 | 10.27 | 10.58 | 0.5  | 0.04 | -1.23 | 0.418077 | 0.087449 | 0.735373 | 0.340617 |
| MmugDNA.29993.1.S1_s_at | MmugDNA.29993.1 | 12.73 | 11.69 | 4.16 | 0.21 | 2.04  | 0.640341 | 0.412637 | 0.856656 | 0.639015 |
| MmugDNA.29995.1.S1_at   | MmugDNA.29995.1 | 10.34 | 10.28 | 0.06 | 0.06 | 1.04  | 0.27192  | 0.155575 | 0.631647 | 0.43094  |
| MmugDNA.29997.1.S1_at   | MmugDNA.29997.1 | 8.93  | 8.81  | 0.16 | 0.11 | 1.09  | 0.836104 | 0.079848 | 0.941202 | 0.327179 |
| MmugDNA.29998.1.S1_at   | MmugDNA.29998.1 | 6.64  | 6.67  | 0.11 | 0.11 | -1.02 | 0.184032 | 0.337529 | 0.55695  | 0.584716 |
| MmugDNA.29999.1.S1_at   | MmugDNA.29999.1 | 8.8   | 8.57  | 0.56 | 0.11 | 1.17  | 0.892479 | 0.880392 | 0.963131 | 0.931677 |
| MmugDNA.3.1.S1_at       | MmugDNA.3.1     | 6.45  | 6.68  | 0.71 | 0.44 | -1.18 | 0.754871 | 0.173512 | 0.907518 | 0.449938 |
| MmugDNA.30.1.S1_at      | MmugDNA.30.1    | 4.1   | 4.08  | 0.19 | 0.07 | 1.01  | 0.906254 | 0.488227 | 0.968295 | 0.690997 |
| MmugDNA.300.1.S1_at     | MmugDNA.300.1   | 5.5   | 5.47  | 0.18 | 0.12 | 1.03  | 0.172785 | 0.20932  | 0.545887 | 0.483038 |
| MmugDNA.30000.1.S1_at   | MmugDNA.30000.1 | 3.52  | 3.27  | 0.16 | 0.06 | 1.2   | 0.111679 | 0.160588 | 0.484896 | 0.436745 |



|                         |                 |       |       |      |      |       |          |          |          |          |
|-------------------------|-----------------|-------|-------|------|------|-------|----------|----------|----------|----------|
| MmugDNA.30001.1.S1_at   | MmugDNA.30001.1 | 3     | 3.02  | 0.04 | 0.17 | -1.02 | 0.309721 | 0.275392 | 0.661815 | 0.539663 |
| MmugDNA.30002.1.S1_at   | MmugDNA.30002.1 | 6.23  | 5.6   | 0.53 | 0.07 | 1.54  | 0.185484 | 0.508464 | 0.55851  | 0.70363  |
| MmugDNA.31451.1.S1_s_at | MmugDNA.31451.1 | 6.6   | 6.48  | 0.07 | 0.09 | 1.09  | 0.060524 | 0.065199 | 0.408362 | 0.301239 |
| MmugDNA.30005.1.S1_at   | MmugDNA.30005.1 | 3.98  | 3.68  | 0.26 | 0.19 | 1.23  | 0.146756 | 0.524916 | 0.521143 | 0.714646 |
| MmugDNA.30006.1.S1_at   | MmugDNA.30006.1 | 6.72  | 6.54  | 0.13 | 0.28 | 1.14  | 0.900181 | 0.059401 | 0.966012 | 0.290548 |
| MmugDNA.30007.1.S1_at   | MmugDNA.30007.1 | 8.19  | 8.66  | 0.47 | 0.22 | -1.38 | 0.15388  | 0.098683 | 0.527213 | 0.356783 |
| MmugDNA.30008.1.S1_at   | MmugDNA.30008.1 | 9.06  | 9.64  | 1.13 | 0.06 | -1.5  | 0.241917 | 0.314213 | 0.607952 | 0.568185 |
| MmugDNA.30009.1.S1_s_at | MmugDNA.30009.1 | 11.55 | 11.61 | 0.31 | 0.03 | -1.04 | 0.816668 | 0.861761 | 0.933716 | 0.921441 |
| MmugDNA.30014.1.S1_at   | MmugDNA.30014.1 | 4.23  | 4.1   | 0.21 | 0.13 | 1.1   | 0.27682  | 0.642142 | 0.636476 | 0.79003  |
| MmugDNA.30015.1.S1_at   | MmugDNA.30015.1 | 10.8  | 10.93 | 0.34 | 0.07 | -1.09 | 0.739782 | 0.8333   | 0.900699 | 0.9044   |
| MmugDNA.30017.1.S1_at   | MmugDNA.30017.1 | 11.52 | 11.63 | 0.24 | 0.06 | -1.07 | 0.814825 | 0.003702 | 0.933137 | 0.086769 |
| MmugDNA.4234.1.S1_s_at  | MmugDNA.4234.1  | 11.17 | 11.24 | 0.33 | 0.09 | -1.05 | 0.809267 | 0.005358 | 0.93104  | 0.101092 |
| MmugDNA.30018.1.S1_at   | MmugDNA.30018.1 | 7.05  | 6.91  | 0.34 | 0.09 | 1.1   | 0.240984 | 0.008994 | 0.607226 | 0.125485 |
| MmugDNA.3002.1.S1_at    | MmugDNA.3002.1  | 9     | 8.95  | 0.39 | 0.02 | 1.03  | 0.636817 | 0.479116 | 0.855281 | 0.684942 |
| MmugDNA.30020.1.S1_at   | MmugDNA.30020.1 | 4.45  | 4.44  | 0.14 | 0.73 | 1.01  | 0.51502  | 0.625371 | 0.790752 | 0.779171 |
| MmugDNA.30021.1.S1_at   | MmugDNA.30021.1 | 13.77 | 13.66 | 0.06 | 0.04 | 1.08  | 0.041207 | 0.021003 | 0.365734 | 0.181715 |
| MmugDNA.30022.1.S1_at   | MmugDNA.30022.1 | 5.7   | 5.49  | 0.11 | 0.07 | 1.15  | 0.046619 | 0.046061 | 0.378317 | 0.258977 |
| MmugDNA.30023.1.S1_at   | MmugDNA.30023.1 | 6.86  | 7.3   | 0.27 | 0.37 | -1.36 | 0.633058 | 0.729579 | 0.853404 | 0.843613 |
| MmugDNA.30024.1.S1_at   | MmugDNA.30024.1 | 5     | 5.26  | 0.4  | 0.82 | -1.2  | 0.52242  | 0.569273 | 0.795143 | 0.742375 |
| MmugDNA.30025.1.S1_at   | MmugDNA.30025.1 | 6.69  | 6.39  | 0.44 | 0.45 | 1.23  | 0.542997 | 0.770923 | 0.806109 | 0.866807 |
| MmugDNA.30029.1.S1_at   | MmugDNA.30029.1 | 5.7   | 5.49  | 0.26 | 0.17 | 1.15  | 0.697843 | 0.560809 | 0.882465 | 0.736978 |
| MmugDNA.3003.1.S1_at    | MmugDNA.3003.1  | 5.1   | 5.05  | 0.22 | 0.22 | 1.03  | 0.408299 | 0.537891 | 0.729223 | 0.722779 |
| MmugDNA.30034.1.S1_at   | MmugDNA.30034.1 | 5.92  | 5.25  | 0.67 | 1.08 | 1.59  | 0.726806 | 0.792171 | 0.894481 | 0.879905 |
| MmugDNA.30035.1.S1_at   | MmugDNA.30035.1 | 4.39  | 4.41  | 0.08 | 0.39 | -1.01 | 0.785846 | 0.17592  | 0.921215 | 0.452486 |
| MmugDNA.30036.1.S1_at   | MmugDNA.30036.1 | 7.55  | 7.4   | 0.35 | 0.12 | 1.11  | 0.623704 | 0.299762 | 0.84831  | 0.558081 |
| MmugDNA.30037.1.S1_at   | MmugDNA.30037.1 | 7.43  | 7.45  | 0.25 | 0.11 | -1.01 | 0.853893 | 0.044526 | 0.948426 | 0.255364 |
| MmugDNA.30039.1.S1_at   | MmugDNA.30039.1 | 10.37 | 10.07 | 0.3  | 0.04 | 1.23  | 0.057015 | 0.084816 | 0.401454 | 0.336344 |
| MmugDNA.30040.1.S1_at   | MmugDNA.30040.1 | 5.19  | 5.14  | 0.09 | 0.06 | 1.03  | 0.68906  | 0.254842 | 0.878634 | 0.523051 |
| MmugDNA.30041.1.S1_at   | MmugDNA.30041.1 | 4.84  | 4.65  | 0.36 | 0.2  | 1.14  | 0.859209 | 0.319138 | 0.950315 | 0.57167  |
| MmugDNA.30043.1.S1_at   | MmugDNA.30043.1 | 9.27  | 9.51  | 0.09 | 0.13 | -1.18 | 0.044837 | 0.076877 | 0.375225 | 0.322368 |
| MmugDNA.30047.1.S1_at   | MmugDNA.30047.1 | 5.72  | 5.32  | 0.46 | 0.16 | 1.32  | 0.226604 | 0.135824 | 0.595901 | 0.408019 |
| MmugDNA.30048.1.S1_at   | MmugDNA.30048.1 | 8.9   | 8.73  | 0.16 | 0.1  | 1.13  | 0.294071 | 0.372657 | 0.650324 | 0.611617 |
| MmugDNA.30049.1.S1_at   | MmugDNA.30049.1 | 9.72  | 10.05 | 0.28 | 0.14 | -1.25 | 0.054672 | 0.080317 | 0.397122 | 0.327965 |
| MmugDNA.30050.1.S1_at   | MmugDNA.30050.1 | 6.73  | 7.26  | 0.27 | 0.59 | -1.44 | 0.553508 | 0.230346 | 0.812247 | 0.502112 |
| MmugDNA.30051.1.S1_at   | MmugDNA.30051.1 | 9.59  | 8     | 0.26 | 0.34 | 3     | 0.002353 | 0.003679 | 0.176862 | 0.086591 |
| MmugDNA.30052.1.S1_at   | MmugDNA.30052.1 | 3.91  | 3.74  | 0.43 | 0.16 | 1.12  | 0.784934 | 0.46024  | 0.920961 | 0.672134 |
| MmugDNA.30053.1.S1_at   | MmugDNA.30053.1 | 5.05  | 5.83  | 0.09 | 0.64 | -1.72 | 0.033217 | 0.002699 | 0.346442 | 0.076461 |
| MmugDNA.30053.1.S1_s_at | MmugDNA.30053.1 | 5.97  | 7.19  | 0.51 | 0.41 | -2.34 | 0.035229 | 0.004439 | 0.351392 | 0.092958 |
| MmugDNA.30054.1.S1_at   | MmugDNA.30054.1 | 11.88 | 11.27 | 0.49 | 0.06 | 1.53  | 0.315041 | 0.339003 | 0.665641 | 0.585891 |
| MmugDNA.30055.1.S1_at   | MmugDNA.30055.1 | 8.03  | 8.24  | 0.07 | 0.29 | -1.15 | 0.484908 | 0.542469 | 0.77383  | 0.725516 |
| MmugDNA.30056.1.S1_at   | MmugDNA.30056.1 | 11.21 | 10.96 | 0.08 | 0.06 | 1.19  | 0.008187 | 0.000087 | 0.232005 | 0.027016 |
| MmugDNA.30058.1.S1_at   | MmugDNA.30058.1 | 6.12  | 6.14  | 0.23 | 0.08 | -1.01 | 0.757986 | 0.937242 | 0.908926 | 0.96465  |
| MmugDNA.3006.1.S1_at    | MmugDNA.3006.1  | 4.45  | 4.45  | 1.05 | 0.18 | 1     | 0.385526 | 0.547167 | 0.712865 | 0.728314 |

|                         |                 |       |       |      |      |       |          |          |          |          |
|-------------------------|-----------------|-------|-------|------|------|-------|----------|----------|----------|----------|
| MmugDNA.30060.1.S1_at   | MmugDNA.30060.1 | 5.07  | 5.04  | 0.3  | 0.03 | 1.02  | 0.879571 | 0.94905  | 0.958258 | 0.970812 |
| MmugDNA.30061.1.S1_at   | MmugDNA.30061.1 | 6.05  | 5.88  | 0.29 | 0.12 | 1.12  | 0.3027   | 0.331119 | 0.656634 | 0.579835 |
| MmugDNA.30063.1.S1_at   | MmugDNA.30063.1 | 6.21  | 8.92  | 1.15 | 0.24 | -6.54 | 0.015571 | 0.0178   | 0.282681 | 0.168575 |
| MmugDNA.30065.1.S1_at   | MmugDNA.30065.1 | 3.78  | 3.66  | 0.34 | 0.11 | 1.08  | 0.881043 | 0.730813 | 0.958933 | 0.844063 |
| MmugDNA.30066.1.S1_at   | MmugDNA.30066.1 | 5.81  | 6.5   | 0.16 | 0.19 | -1.61 | 0.009218 | 0.139672 | 0.241866 | 0.413008 |
| MmugDNA.30068.1.S1_at   | MmugDNA.30068.1 | 6.83  | 6.86  | 1.5  | 0.12 | -1.02 | 0.931134 | 0.458795 | 0.976966 | 0.671427 |
| MmugDNA.3007.1.S1_at    | MmugDNA.3007.1  | 6.24  | 6.17  | 0.08 | 0.07 | 1.05  | 0.302204 | 0.733023 | 0.656154 | 0.845498 |
| MmugDNA.30070.1.S1_at   | MmugDNA.30070.1 | 5.31  | 5.34  | 0.06 | 0.02 | -1.02 | 0.705305 | 0.848415 | 0.885355 | 0.913956 |
| MmugDNA.30071.1.S1_at   | MmugDNA.30071.1 | 6.99  | 7.15  | 0.25 | 0.03 | -1.12 | 0.107081 | 0.131514 | 0.47951  | 0.403658 |
| MmugDNA.30072.1.S1_s_at | MmugDNA.30072.1 | 10.4  | 9.85  | 0.05 | 0.21 | 1.47  | 0.005438 | 0.004377 | 0.208157 | 0.092619 |
| MmugDNA.30073.1.S1_at   | MmugDNA.30073.1 | 7.21  | 7.28  | 0.1  | 0.07 | -1.05 | 0.37586  | 0.876571 | 0.706657 | 0.929709 |
| MmugDNA.30073.1.S1_s_at | MmugDNA.30073.1 | 4.6   | 4.42  | 0.49 | 0.19 | 1.13  | 0.391232 | 0.57689  | 0.717502 | 0.747519 |
| MmugDNA.30075.1.S1_at   | MmugDNA.30075.1 | 8.88  | 9.92  | 0.92 | 0.17 | -2.06 | 0.111015 | 0.094355 | 0.484303 | 0.350889 |
| MmugDNA.30077.1.S1_at   | MmugDNA.30077.1 | 4.9   | 4.96  | 0.44 | 0.18 | -1.04 | 0.898309 | 0.491277 | 0.965455 | 0.692921 |
| MmugDNA.30078.1.S1_at   | MmugDNA.30078.1 | 9.59  | 9.69  | 0.64 | 0.34 | -1.07 | 0.687587 | 0.284553 | 0.877864 | 0.546721 |
| MmugDNA.30078.1.S1_x_at | MmugDNA.30078.1 | 9.67  | 9.62  | 0.63 | 0.3  | 1.04  | 0.796655 | 0.423015 | 0.925303 | 0.646145 |
| MmugDNA.3008.1.S1_at    | MmugDNA.3008.1  | 9.82  | 9.53  | 0.36 | 0.17 | 1.22  | 0.158833 | 0.00217  | 0.531595 | 0.068844 |
| MmugDNA.30080.1.S1_at   | MmugDNA.30080.1 | 4.95  | 4.93  | 0.08 | 0.02 | 1.02  | 0.197556 | 0.318359 | 0.568525 | 0.571192 |
| MmugDNA.30081.1.S1_at   | MmugDNA.30081.1 | 3.91  | 4.84  | 0.28 | 0.32 | -1.9  | 0.035868 | 0.031896 | 0.353707 | 0.220981 |
| MmugDNA.30082.1.S1_at   | MmugDNA.30082.1 | 8.61  | 8.63  | 0.12 | 0.13 | -1.01 | 0.633223 | 0.044747 | 0.853409 | 0.256009 |
| MmugDNA.30083.1.S1_at   | MmugDNA.30083.1 | 4.57  | 4.59  | 0    | 0.18 | -1.01 | 0.674648 | 0.545892 | 0.872183 | 0.727697 |
| MmugDNA.30084.1.S1_at   | MmugDNA.30084.1 | 5.87  | 6.02  | 0.19 | 0.1  | -1.11 | 0.2944   | 0.07125  | 0.650593 | 0.313293 |
| MmugDNA.30086.1.S1_at   | MmugDNA.30086.1 | 9.38  | 9.54  | 0.3  | 0.09 | -1.12 | 0.487818 | 0.389313 | 0.775245 | 0.623403 |
| MmugDNA.30087.1.S1_at   | MmugDNA.30087.1 | 5.64  | 6.18  | 0.7  | 0.42 | -1.45 | 0.822145 | 0.717269 | 0.935933 | 0.836332 |
| MmugDNA.30088.1.S1_at   | MmugDNA.30088.1 | 6.87  | 6.79  | 0.32 | 0.46 | 1.06  | 0.538138 | 0.698466 | 0.803016 | 0.82482  |
| MmugDNA.3009.1.S1_at    | MmugDNA.3009.1  | 6.72  | 6.64  | 0.14 | 0.04 | 1.06  | 0.188484 | 0.286958 | 0.560489 | 0.548246 |
| MmugDNA.30090.1.S1_at   | MmugDNA.30090.1 | 5.53  | 5.51  | 0.11 | 0.12 | 1.01  | 0.834052 | 0.528595 | 0.940492 | 0.71669  |
| MmugDNA.30091.1.S1_at   | MmugDNA.30091.1 | 5.52  | 5.4   | 0.07 | 0.07 | 1.09  | 0.05889  | 0.153461 | 0.405628 | 0.42827  |
| MmugDNA.30092.1.S1_at   | MmugDNA.30092.1 | 7.08  | 7.09  | 0.16 | 0.04 | -1.01 | 0.425906 | 0.040086 | 0.740154 | 0.245388 |
| MmugDNA.30093.1.S1_at   | MmugDNA.30093.1 | 10.71 | 11.09 | 0.29 | 0.05 | -1.31 | 0.198354 | 0.14657  | 0.569615 | 0.420583 |
| MmugDNA.30094.1.S1_at   | MmugDNA.30094.1 | 8.87  | 8.72  | 0.36 | 0.09 | 1.1   | 0.475641 | 0.021655 | 0.768676 | 0.184333 |
| MmugDNA.30095.1.S1_at   | MmugDNA.30095.1 | 6.72  | 6.82  | 0.12 | 0.06 | -1.07 | 0.907147 | 0.017576 | 0.968482 | 0.167721 |
| MmugDNA.30096.1.S1_at   | MmugDNA.30096.1 | 5.73  | 5.34  | 0.09 | 0.17 | 1.31  | 0.022462 | 0.04769  | 0.310736 | 0.263323 |
| MmugDNA.30099.1.S1_at   | MmugDNA.30099.1 | 3.81  | 3.58  | 0.26 | 0.17 | 1.17  | 0.507863 | 0.598973 | 0.786553 | 0.761244 |
| MmugDNA.301.1.S1_at     | MmugDNA.301.1   | 5.53  | 5.53  | 0.11 | 0.16 | -1.01 | 0.258571 | 0.31377  | 0.622286 | 0.568083 |
| MmugDNA.3010.1.S1_at    | MmugDNA.3010.1  | 3.58  | 3.68  | 0.14 | 0.04 | -1.08 | 0.117915 | 0.020929 | 0.491305 | 0.181439 |
| MmugDNA.30100.1.S1_at   | MmugDNA.30100.1 | 3.99  | 3.98  | 0.19 | 0.11 | 1.01  | 0.775961 | 0.188617 | 0.916951 | 0.464569 |
| MmugDNA.30101.1.S1_at   | MmugDNA.30101.1 | 11.28 | 11.33 | 0.27 | 0.08 | -1.04 | 0.754077 | 0.561861 | 0.907305 | 0.737659 |
| MmugDNA.30104.1.S1_at   | MmugDNA.30104.1 | 5.52  | 5.77  | 0.26 | 0.06 | -1.19 | 0.235226 | 0.25218  | 0.602266 | 0.520863 |
| MmugDNA.30107.1.S1_at   | MmugDNA.30107.1 | 5.64  | 5.64  | 0.26 | 0.06 | -1    | 0.511786 | 0.710843 | 0.7889   | 0.832271 |
| MmugDNA.30109.1.S1_at   | MmugDNA.30109.1 | 5.69  | 5.66  | 0.11 | 0.1  | 1.02  | 0.321248 | 0.534083 | 0.669932 | 0.720079 |
| MmugDNA.30110.1.S1_at   | MmugDNA.30110.1 | 5.55  | 5.44  | 0.08 | 0.04 | 1.08  | 0.093312 | 0.268507 | 0.462406 | 0.534123 |
| MmugDNA.30111.1.S1_at   | MmugDNA.30111.1 | 8.19  | 8.21  | 0.22 | 0.04 | -1.01 | 0.493737 | 0.424672 | 0.77903  | 0.647214 |

|                         |                 |       |       |      |      |       |          |          |          |          |
|-------------------------|-----------------|-------|-------|------|------|-------|----------|----------|----------|----------|
| MmugDNA.30112.1.S1_at   | MmugDNA.30112.1 | 4.75  | 4.66  | 0.56 | 0.05 | 1.07  | 0.334928 | 0.43009  | 0.680734 | 0.651143 |
| MmugDNA.30113.1.S1_at   | MmugDNA.30113.1 | 8.88  | 8.97  | 1.44 | 0.12 | -1.07 | 0.828399 | 0.080321 | 0.938275 | 0.327965 |
| MmugDNA.30114.1.S1_at   | MmugDNA.30114.1 | 10.97 | 11.11 | 0.13 | 0.15 | -1.1  | 0.060589 | 0.081596 | 0.408456 | 0.329808 |
| MmugDNA.30115.1.S1_at   | MmugDNA.30115.1 | 5.77  | 5.66  | 0.16 | 0.06 | 1.08  | 0.101431 | 0.412292 | 0.471667 | 0.638705 |
| MmugDNA.30116.1.S1_at   | MmugDNA.30116.1 | 8.01  | 8     | 0.05 | 0.2  | 1     | 0.653842 | 0.283902 | 0.862462 | 0.546237 |
| MmugDNA.30117.1.S1_at   | MmugDNA.30117.1 | 4.9   | 5.03  | 0.24 | 0.11 | -1.09 | 0.918068 | 0.861103 | 0.972062 | 0.920974 |
| MmugDNA.30118.1.S1_at   | MmugDNA.30118.1 | 12.25 | 11.93 | 0.2  | 0.17 | 1.25  | 0.050852 | 0.001418 | 0.38821  | 0.057458 |
| MmugDNA.30119.1.S1_at   | MmugDNA.30119.1 | 5.78  | 5.52  | 0.22 | 0.25 | 1.19  | 0.083311 | 0.594727 | 0.449112 | 0.758628 |
| MmugDNA.3012.1.S1_s_at  | MmugDNA.3012.1  | 10.73 | 10.35 | 0.15 | 0.08 | 1.29  | 0.016369 | 0.010942 | 0.287478 | 0.13621  |
| MmugDNA.30120.1.S1_at   | MmugDNA.30120.1 | 7.83  | 7.68  | 0.6  | 0.21 | 1.11  | 0.237719 | 0.243974 | 0.604764 | 0.514069 |
| MmugDNA.30122.1.S1_at   | MmugDNA.30122.1 | 9.79  | 9.95  | 0.25 | 0.11 | -1.11 | 0.183256 | 0.500628 | 0.556197 | 0.69917  |
| MmugDNA.30123.1.S1_at   | MmugDNA.30123.1 | 3.61  | 3.35  | 0.04 | 0.15 | 1.2   | 0.02588  | 0.017125 | 0.32273  | 0.165775 |
| MmugDNA.30124.1.S1_at   | MmugDNA.30124.1 | 5.06  | 4.89  | 0.29 | 0.11 | 1.12  | 0.406777 | 0.370223 | 0.728377 | 0.609392 |
| MmugDNA.30125.1.S1_at   | MmugDNA.30125.1 | 5.42  | 5.38  | 0.07 | 0.03 | 1.03  | 0.265206 | 0.244486 | 0.626397 | 0.514295 |
| MmugDNA.30126.1.S1_at   | MmugDNA.30126.1 | 10.87 | 9.88  | 3.58 | 0.33 | 1.99  | 0.715065 | 0.311777 | 0.889059 | 0.56678  |
| MmugDNA.30127.1.S1_at   | MmugDNA.30127.1 | 4.36  | 4.37  | 0.14 | 0.04 | -1.01 | 0.917398 | 0.542062 | 0.971986 | 0.725196 |
| MmugDNA.30128.1.S1_s_at | MmugDNA.30128.1 | 12.48 | 12.27 | 0.27 | 0.05 | 1.15  | 0.261328 | 0.306654 | 0.623819 | 0.563224 |
| MmugDNA.30129.1.S1_at   | MmugDNA.30129.1 | 10.52 | 11.01 | 0.96 | 0.15 | -1.41 | 0.522564 | 0.22002  | 0.795157 | 0.49344  |
| MmugDNA.30130.1.S1_at   | MmugDNA.30130.1 | 9.3   | 9.68  | 0.17 | 0.14 | -1.3  | 0.022225 | 0.002452 | 0.310495 | 0.073276 |
| MmugDNA.30131.1.S1_at   | MmugDNA.30131.1 | 6.39  | 7.01  | 0.41 | 0.22 | -1.53 | 0.171254 | 0.262478 | 0.544432 | 0.528747 |
| MmugDNA.30132.1.S1_at   | MmugDNA.30132.1 | 10.58 | 10.8  | 0.12 | 0.16 | -1.17 | 0.079609 | 0.030369 | 0.442496 | 0.216116 |
| MmugDNA.30133.1.S1_at   | MmugDNA.30133.1 | 10.43 | 10.72 | 0.61 | 0.16 | -1.22 | 0.924846 | 0.975092 | 0.974863 | 0.986405 |
| MmugDNA.30134.1.S1_at   | MmugDNA.30134.1 | 4.53  | 4.52  | 0.18 | 0.07 | 1     | 0.789594 | 0.236104 | 0.922615 | 0.507179 |
| MmugDNA.30135.1.S1_at   | MmugDNA.30135.1 | 3.76  | 3.51  | 0.14 | 0.31 | 1.18  | 0.686604 | 0.302547 | 0.877418 | 0.560201 |
| MmugDNA.30137.1.S1_at   | MmugDNA.30137.1 | 9.08  | 8.82  | 0.3  | 0.2  | 1.2   | 0.610081 | 0.315395 | 0.841839 | 0.568939 |
| MmugDNA.30139.1.S1_at   | MmugDNA.30139.1 | 4.76  | 4.75  | 0.24 | 0.16 | 1.01  | 0.920096 | 0.967566 | 0.972913 | 0.982093 |
| MmugDNA.3014.1.S1_at    | MmugDNA.3014.1  | 11.44 | 11.99 | 0.43 | 0.09 | -1.46 | 0.160285 | 0.148645 | 0.533335 | 0.423201 |
| MmugDNA.30141.1.S1_at   | MmugDNA.30141.1 | 6.88  | 6.67  | 0.19 | 0.06 | 1.15  | 0.119064 | 0.166852 | 0.492539 | 0.443311 |
| MmugDNA.30142.1.S1_at   | MmugDNA.30142.1 | 6.61  | 6.61  | 0.04 | 0.01 | 1     | 0.725675 | 0.492247 | 0.893811 | 0.693477 |
| MmugDNA.30143.1.S1_at   | MmugDNA.30143.1 | 8.25  | 8.23  | 0.15 | 0.11 | 1.01  | 0.705251 | 0.571057 | 0.885355 | 0.743533 |
| MmugDNA.30146.1.S1_at   | MmugDNA.30146.1 | 4.14  | 4.59  | 0.21 | 0.32 | -1.37 | 0.089881 | 0.124679 | 0.457893 | 0.39513  |
| MmugDNA.30148.1.S1_at   | MmugDNA.30148.1 | 5.51  | 5.71  | 0.77 | 0.66 | -1.15 | 0.872503 | 0.383352 | 0.955759 | 0.619374 |
| MmugDNA.30149.1.S1_at   | MmugDNA.30149.1 | 5.15  | 4.93  | 0.1  | 0.06 | 1.16  | 0.043487 | 0.226252 | 0.372168 | 0.498699 |
| MmugDNA.30150.1.S1_at   | MmugDNA.30150.1 | 9.52  | 10.15 | 0.08 | 0.08 | -1.55 | 0.00056  | 0.000009 | 0.143137 | 0.016421 |
| MmugDNA.30151.1.S1_at   | MmugDNA.30151.1 | 6.45  | 7.09  | 0.37 | 0.17 | -1.57 | 0.050442 | 0.306165 | 0.387138 | 0.562889 |
| MmugDNA.30152.1.S1_at   | MmugDNA.30152.1 | 5.67  | 5.32  | 0.12 | 0.24 | 1.27  | 0.027144 | 0.017344 | 0.327242 | 0.166673 |
| MmugDNA.30153.1.S1_at   | MmugDNA.30153.1 | 9.41  | 9.23  | 0.3  | 0.04 | 1.13  | 0.54716  | 0.078971 | 0.808925 | 0.325986 |
| MmugDNA.30155.1.S1_at   | MmugDNA.30155.1 | 7.39  | 7.2   | 0.06 | 0.08 | 1.14  | 0.017364 | 0.013329 | 0.291232 | 0.148042 |
| MmugDNA.30157.1.S1_s_at | MmugDNA.30157.1 | 10.21 | 10.89 | 0.46 | 0.27 | -1.6  | 0.059253 | 0.007198 | 0.406296 | 0.114062 |
| MmugDNA.30158.1.S1_at   | MmugDNA.30158.1 | 4.03  | 3.68  | 0.83 | 0.21 | 1.27  | 0.344183 | 0.463608 | 0.686913 | 0.674537 |
| MmugDNA.30159.1.S1_at   | MmugDNA.30159.1 | 3.46  | 3.46  | 0.13 | 0.08 | -1    | 0.253974 | 0.524527 | 0.618622 | 0.714395 |
| MmugDNA.3016.1.S1_at    | MmugDNA.3016.1  | 3.99  | 4.43  | 0.17 | 0.24 | -1.36 | 0.099704 | 0.178453 | 0.469478 | 0.454778 |
| MmugDNA.30160.1.S1_at   | MmugDNA.30160.1 | 11.22 | 11.79 | 0.39 | 0.05 | -1.49 | 0.164873 | 0.126968 | 0.537595 | 0.397729 |

|                         |                 |       |       |      |      |       |          |          |          |          |
|-------------------------|-----------------|-------|-------|------|------|-------|----------|----------|----------|----------|
| MmugDNA.30161.1.S1_at   | MmugDNA.30161.1 | 5.36  | 5.39  | 0.39 | 0.65 | -1.02 | 0.460483 | 0.569118 | 0.760242 | 0.742251 |
| MmugDNA.30165.1.S1_at   | MmugDNA.30165.1 | 6.83  | 6.09  | 0.47 | 0.09 | 1.66  | 0.040674 | 0.023474 | 0.364778 | 0.19201  |
| MmugDNA.30166.1.S1_s_at | MmugDNA.30166.1 | 9.33  | 8.55  | 0.63 | 0.25 | 1.71  | 0.316547 | 0.034537 | 0.666494 | 0.229979 |
| MmugDNA.30167.1.S1_at   | MmugDNA.30167.1 | 13.31 | 12.89 | 0.3  | 0.14 | 1.34  | 0.030178 | 0.022363 | 0.336719 | 0.187176 |
| MmugDNA.3017.1.S1_at    | MmugDNA.3017.1  | 6.5   | 6.37  | 0.08 | 0.07 | 1.09  | 0.055097 | 0.500474 | 0.397965 | 0.69907  |
| MmugDNA.30170.1.S1_at   | MmugDNA.30170.1 | 7.16  | 7.2   | 0.64 | 0.1  | -1.03 | 0.899308 | 0.801636 | 0.965794 | 0.885894 |
| MmugDNA.30171.1.S1_at   | MmugDNA.30171.1 | 12.31 | 12.25 | 0.19 | 0.08 | 1.04  | 0.979362 | 0.186341 | 0.993437 | 0.46218  |
| MmugDNA.30172.1.S1_at   | MmugDNA.30172.1 | 3.36  | 3.25  | 0.23 | 0.06 | 1.08  | 0.132694 | 0.148759 | 0.506936 | 0.423201 |
| MmugDNA.30173.1.S1_at   | MmugDNA.30173.1 | 5.72  | 5.8   | 0.15 | 0.08 | -1.06 | 0.984648 | 0.497772 | 0.995256 | 0.697059 |
| MmugDNA.30174.1.S1_at   | MmugDNA.30174.1 | 8.84  | 9.01  | 0.41 | 0.16 | -1.13 | 0.799332 | 0.096483 | 0.926464 | 0.35409  |
| MmugDNA.30176.1.S1_at   | MmugDNA.30176.1 | 3.1   | 3.2   | 0.08 | 0.24 | -1.07 | 0.797747 | 0.229442 | 0.925727 | 0.501527 |
| MmugDNA.30178.1.S1_at   | MmugDNA.30178.1 | 10.5  | 10.87 | 0.77 | 0.26 | -1.29 | 0.34033  | 0.304282 | 0.684511 | 0.561599 |
| MmugDNA.30178.1.S1_s_at | MmugDNA.30178.1 | 11.43 | 11.73 | 0.95 | 0.27 | -1.24 | 0.336674 | 0.243763 | 0.682056 | 0.513899 |
| MmugDNA.30179.1.S1_at   | MmugDNA.30179.1 | 6.42  | 7.28  | 1.27 | 0.24 | -1.81 | 0.187751 | 0.215163 | 0.559968 | 0.488943 |
| MmugDNA.30180.1.S1_at   | MmugDNA.30180.1 | 5.99  | 6.16  | 0.37 | 0.14 | -1.13 | 0.8322   | 0.59317  | 0.939787 | 0.758097 |
| MmugDNA.30182.1.S1_at   | MmugDNA.30182.1 | 7.25  | 7.66  | 0.62 | 0.22 | -1.33 | 0.400856 | 0.139062 | 0.723967 | 0.412165 |
| MmugDNA.30184.1.S1_at   | MmugDNA.30184.1 | 6.93  | 6.84  | 0.08 | 0.14 | 1.06  | 0.152618 | 0.378606 | 0.525558 | 0.615639 |
| MmugDNA.30185.1.S1_at   | MmugDNA.30185.1 | 3.56  | 3.56  | 0.07 | 0.18 | -1    | 0.62281  | 0.054897 | 0.847958 | 0.279748 |
| MmugDNA.30188.1.S1_at   | MmugDNA.30188.1 | 11.33 | 11.83 | 0.34 | 0.09 | -1.41 | 0.25572  | 0.131537 | 0.619741 | 0.403658 |
| MmugDNA.30189.1.S1_at   | MmugDNA.30189.1 | 4.8   | 4.84  | 0.46 | 0.14 | -1.03 | 0.905722 | 0.875667 | 0.968196 | 0.929374 |
| MmugDNA.3019.1.S1_at    | MmugDNA.3019.1  | 4.67  | 4.33  | 0.33 | 0.3  | 1.26  | 0.333635 | 0.286331 | 0.679781 | 0.547784 |
| MmugDNA.30191.1.S1_at   | MmugDNA.30191.1 | 4.18  | 3.94  | 0.27 | 0.2  | 1.18  | 0.693824 | 0.109641 | 0.880839 | 0.373629 |
| MmugDNA.30192.1.S1_at   | MmugDNA.30192.1 | 6.49  | 6.9   | 0.04 | 0.2  | -1.33 | 0.018993 | 0.016258 | 0.299549 | 0.161615 |
| MmugDNA.30194.1.S1_at   | MmugDNA.30194.1 | 6.07  | 6.1   | 0.13 | 0.04 | -1.02 | 0.181586 | 0.113664 | 0.554726 | 0.379818 |
| MmugDNA.30195.1.S1_at   | MmugDNA.30195.1 | 10.03 | 10.54 | 0.16 | 0.07 | -1.42 | 0.017781 | 0.006479 | 0.293582 | 0.109342 |
| MmugDNA.30196.1.S1_at   | MmugDNA.30196.1 | 5.67  | 5.4   | 0.41 | 0.25 | 1.21  | 0.692323 | 0.44307  | 0.880095 | 0.660962 |
| MmugDNA.30197.1.S1_at   | MmugDNA.30197.1 | 7.14  | 7.34  | 0.2  | 0.06 | -1.15 | 0.079009 | 0.004122 | 0.441671 | 0.090887 |
| MmugDNA.30198.1.S1_at   | MmugDNA.30198.1 | 3.6   | 3.55  | 0.11 | 0.14 | 1.03  | 0.503974 | 0.873354 | 0.784459 | 0.927953 |
| MmugDNA.30199.1.S1_at   | MmugDNA.30199.1 | 11.35 | 11.55 | 0.27 | 0.19 | -1.15 | 0.167263 | 0.20615  | 0.539832 | 0.480348 |
| MmugDNA.302.1.S1_at     | MmugDNA.302.1   | 10.81 | 10.85 | 0.43 | 0.09 | -1.03 | 0.930462 | 0.933227 | 0.976823 | 0.962071 |
| MmugDNA.3020.1.S1_at    | MmugDNA.3020.1  | 8.15  | 8.34  | 0.37 | 0.23 | -1.14 | 0.810461 | 0.017149 | 0.931338 | 0.165888 |
| MmugDNA.30201.1.S1_at   | MmugDNA.30201.1 | 4.77  | 4.75  | 0.07 | 0.06 | 1.01  | 0.646874 | 0.728776 | 0.85932  | 0.843203 |
| MmugDNA.30202.1.S1_at   | MmugDNA.30202.1 | 2.98  | 2.86  | 0.2  | 0.07 | 1.09  | 0.11173  | 0.151525 | 0.484908 | 0.426242 |
| MmugDNA.30203.1.S1_at   | MmugDNA.30203.1 | 5.15  | 5.17  | 0.06 | 0.23 | -1.02 | 0.596573 | 0.377333 | 0.83601  | 0.614891 |
| MmugDNA.30204.1.S1_at   | MmugDNA.30204.1 | 4.13  | 3.89  | 0.04 | 0.15 | 1.18  | 0.188298 | 0.580657 | 0.560429 | 0.749827 |
| MmugDNA.30205.1.S1_at   | MmugDNA.30205.1 | 4.53  | 4.26  | 0.1  | 0.36 | 1.2   | 0.793559 | 0.271466 | 0.924409 | 0.536512 |
| MmugDNA.30206.1.S1_at   | MmugDNA.30206.1 | 4.16  | 4.24  | 0.12 | 0.13 | -1.05 | 0.861933 | 0.547453 | 0.951335 | 0.728464 |
| MmugDNA.30207.1.S1_at   | MmugDNA.30207.1 | 4.6   | 4.94  | 0.11 | 0.24 | -1.26 | 0.068811 | 0.002985 | 0.426107 | 0.079958 |
| MmugDNA.30208.1.S1_at   | MmugDNA.30208.1 | 6.86  | 6.35  | 0.49 | 0.05 | 1.42  | 0.153217 | 0.105703 | 0.526374 | 0.3678   |
| MmugDNA.30209.1.S1_at   | MmugDNA.30209.1 | 6.9   | 6.74  | 0.29 | 0.09 | 1.11  | 0.631407 | 0.204069 | 0.852417 | 0.478386 |
| MmugDNA.3021.1.S1_at    | MmugDNA.3021.1  | 7.94  | 7.9   | 0.18 | 0.19 | 1.03  | 0.789736 | 0.942368 | 0.922635 | 0.967292 |
| MmugDNA.30210.1.S1_at   | MmugDNA.30210.1 | 8.16  | 7.6   | 0.13 | 0.25 | 1.47  | 0.02325  | 0.018684 | 0.314809 | 0.171717 |
| MmugDNA.30211.1.S1_at   | MmugDNA.30211.1 | 7     | 7.63  | 0.32 | 0.42 | -1.55 | 0.188959 | 0.572184 | 0.560718 | 0.744268 |

|                       |                 |       |       |      |      |       |          |          |          |          |
|-----------------------|-----------------|-------|-------|------|------|-------|----------|----------|----------|----------|
| MmugDNA.30212.1.S1_at | MmugDNA.30212.1 | 5.41  | 5.41  | 0.08 | 0.21 | 1     | 0.732104 | 0.889152 | 0.896996 | 0.936796 |
| MmugDNA.30213.1.S1_at | MmugDNA.30213.1 | 7.25  | 7.48  | 0.16 | 0.28 | -1.18 | 0.636932 | 0.546955 | 0.855299 | 0.728283 |
| MmugDNA.30214.1.S1_at | MmugDNA.30214.1 | 3.55  | 3.53  | 0.21 | 0.06 | 1.01  | 0.770289 | 0.38082  | 0.913936 | 0.617426 |
| MmugDNA.30216.1.S1_at | MmugDNA.30216.1 | 3.8   | 3.64  | 0.09 | 0.05 | 1.12  | 0.025229 | 0.063878 | 0.320761 | 0.29906  |
| MmugDNA.30217.1.S1_at | MmugDNA.30217.1 | 6.62  | 6.68  | 0.2  | 0.3  | -1.04 | 0.72701  | 0.903131 | 0.894589 | 0.94497  |
| MmugDNA.30218.1.S1_at | MmugDNA.30218.1 | 3.34  | 2.97  | 0.16 | 0.12 | 1.3   | 0.1487   | 0.141381 | 0.522734 | 0.414874 |
| MmugDNA.3022.1.S1_at  | MmugDNA.3022.1  | 5.94  | 5.94  | 0.06 | 0.09 | -1    | 0.478468 | 0.878005 | 0.770085 | 0.930359 |
| MmugDNA.30221.1.S1_at | MmugDNA.30221.1 | 7.87  | 7.72  | 0.46 | 0.17 | 1.11  | 0.991059 | 0.565983 | 0.996653 | 0.740174 |
| MmugDNA.30222.1.S1_at | MmugDNA.30222.1 | 7.55  | 7.46  | 0.13 | 0.16 | 1.07  | 0.223347 | 0.565944 | 0.592569 | 0.740174 |
| MmugDNA.30223.1.S1_at | MmugDNA.30223.1 | 8.71  | 8.49  | 0.99 | 0.48 | 1.17  | 0.532188 | 0.384734 | 0.800152 | 0.620363 |
| MmugDNA.30224.1.S1_at | MmugDNA.30224.1 | 12.34 | 12.19 | 0.22 | 0.15 | -1.11 | 0.361693 | 0.236259 | 0.69871  | 0.507263 |
| MmugDNA.30225.1.S1_at | MmugDNA.30225.1 | 13.14 | 13.15 | 0.21 | 0.01 | -1    | 0.381185 | 0.284071 | 0.709924 | 0.546307 |
| MmugDNA.30226.1.S1_at | MmugDNA.30226.1 | 6     | 6.16  | 0.39 | 0.14 | -1.12 | 0.582733 | 0.704355 | 0.828547 | 0.828437 |
| MmugDNA.30228.1.S1_at | MmugDNA.30228.1 | 4.7   | 4.76  | 0.24 | 0.04 | -1.04 | 0.595775 | 0.246413 | 0.835605 | 0.515899 |
| MmugDNA.3023.1.S1_at  | MmugDNA.3023.1  | 8.66  | 8.82  | 0.25 | 0.15 | -1.12 | 0.261319 | 0.002578 | 0.623819 | 0.075183 |
| MmugDNA.30230.1.S1_at | MmugDNA.30230.1 | 9.33  | 9.26  | 0.54 | 0.2  | 1.05  | 0.973281 | 0.430029 | 0.991301 | 0.65111  |
| MmugDNA.30231.1.S1_at | MmugDNA.30231.1 | 4.88  | 4.9   | 0.05 | 0.38 | -1.01 | 0.964336 | 0.952962 | 0.988358 | 0.973344 |
| MmugDNA.30232.1.S1_at | MmugDNA.30232.1 | 5.85  | 5.96  | 0.26 | 0.17 | -1.08 | 0.84804  | 0.318354 | 0.946629 | 0.571192 |
| MmugDNA.30233.1.S1_at | MmugDNA.30233.1 | 4.2   | 4.03  | 0.19 | 0.24 | 1.13  | 0.799321 | 0.500732 | 0.926464 | 0.699242 |
| MmugDNA.30234.1.S1_at | MmugDNA.30234.1 | 5.04  | 4.99  | 0.16 | 0.36 | 1.04  | 0.344234 | 0.279443 | 0.686913 | 0.543049 |
| MmugDNA.30235.1.S1_at | MmugDNA.30235.1 | 5.42  | 5.43  | 0.29 | 0.24 | -1.01 | 0.543164 | 0.798215 | 0.806244 | 0.88385  |
| MmugDNA.30236.1.S1_at | MmugDNA.30236.1 | 8.28  | 8.23  | 0.11 | 0.04 | 1.03  | 0.523124 | 0.917362 | 0.795458 | 0.953807 |
| MmugDNA.30237.1.S1_at | MmugDNA.30237.1 | 4.87  | 5.21  | 1.33 | 0.15 | -1.26 | 0.70801  | 0.34375  | 0.886458 | 0.589457 |
| MmugDNA.30238.1.S1_at | MmugDNA.30238.1 | 5.11  | 4.28  | 0.49 | 0.44 | 1.78  | 0.142097 | 0.100766 | 0.517066 | 0.360174 |
| MmugDNA.30239.1.S1_at | MmugDNA.30239.1 | 6.73  | 6.64  | 0.2  | 0.35 | 1.06  | 0.890729 | 0.468526 | 0.962492 | 0.677755 |
| MmugDNA.3024.1.S1_at  | MmugDNA.3024.1  | 5.17  | 5.11  | 0.15 | 0.05 | 1.04  | 0.207696 | 0.401428 | 0.579351 | 0.631018 |
| MmugDNA.30240.1.S1_at | MmugDNA.30240.1 | 3.18  | 3.05  | 0.12 | 0.09 | 1.1   | 0.918421 | 0.367886 | 0.972122 | 0.607469 |
| MmugDNA.30241.1.S1_at | MmugDNA.30241.1 | 6.43  | 6.52  | 0.22 | 0.07 | -1.07 | 0.297767 | 0.017244 | 0.652791 | 0.166347 |
| MmugDNA.30242.1.S1_at | MmugDNA.30242.1 | 6.9   | 6.86  | 0.18 | 0.07 | 1.03  | 0.531022 | 0.657537 | 0.799375 | 0.799759 |
| MmugDNA.30243.1.S1_at | MmugDNA.30243.1 | 9.77  | 9.7   | 0.38 | 0.28 | 1.05  | 0.52498  | 0.828334 | 0.796179 | 0.901341 |
| MmugDNA.30244.1.S1_at | MmugDNA.30244.1 | 3.65  | 3.56  | 0.07 | 0.07 | 1.06  | 0.14192  | 0.274927 | 0.516885 | 0.539375 |
| MmugDNA.30245.1.S1_at | MmugDNA.30245.1 | 6.72  | 7.18  | 0.6  | 0.27 | -1.37 | 0.456779 | 0.238311 | 0.758051 | 0.5089   |
| MmugDNA.30246.1.S1_at | MmugDNA.30246.1 | 6.2   | 6.08  | 0.26 | 0.01 | 1.09  | 0.480972 | 0.431787 | 0.771639 | 0.652556 |
| MmugDNA.30247.1.S1_at | MmugDNA.30247.1 | 11.64 | 11.28 | 0.2  | 0.14 | 1.28  | 0.02778  | 0.012413 | 0.329202 | 0.144066 |
| MmugDNA.30248.1.S1_at | MmugDNA.30248.1 | 3.11  | 3.09  | 0.06 | 0.1  | 1.02  | 0.645626 | 0.392599 | 0.858801 | 0.625813 |
| MmugDNA.3025.1.S1_at  | MmugDNA.3025.1  | 4.94  | 4.98  | 0.14 | 0.38 | -1.03 | 0.341826 | 0.189615 | 0.685438 | 0.465297 |
| MmugDNA.30251.1.S1_at | MmugDNA.30251.1 | 7.14  | 7.09  | 0.16 | 0.03 | 1.03  | 0.259343 | 0.718676 | 0.622607 | 0.837178 |
| MmugDNA.30252.1.S1_at | MmugDNA.30252.1 | 3.73  | 4.19  | 0.17 | 0.25 | -1.37 | 0.107388 | 0.011156 | 0.47976  | 0.137506 |
| MmugDNA.30254.1.S1_at | MmugDNA.30254.1 | 8.72  | 8.45  | 0.27 | 0.28 | 1.2   | 0.294895 | 0.323947 | 0.650971 | 0.57466  |
| MmugDNA.30256.1.S1_at | MmugDNA.30256.1 | 10.58 | 10.71 | 0.44 | 0.1  | -1.1  | 0.660893 | 0.213934 | 0.865819 | 0.487596 |
| MmugDNA.30258.1.S1_at | MmugDNA.30258.1 | 5.53  | 5.23  | 0.15 | 0.19 | 1.23  | 0.0834   | 0.068097 | 0.449388 | 0.307142 |
| MmugDNA.30259.1.S1_at | MmugDNA.30259.1 | 4.4   | 4.33  | 0.09 | 0.03 | 1.05  | 0.152273 | 0.208951 | 0.52528  | 0.482751 |
| MmugDNA.30260.1.S1_at | MmugDNA.30260.1 | 5.26  | 5.1   | 0.09 | 0.13 | 1.12  | 0.356075 | 0.65576  | 0.695045 | 0.798709 |

|                         |                 |       |       |      |      |       |          |          |          |          |
|-------------------------|-----------------|-------|-------|------|------|-------|----------|----------|----------|----------|
| MmugDNA.30261.1.S1_at   | MmugDNA.30261.1 | 4.53  | 4.55  | 0.2  | 0.16 | -1.02 | 0.933025 | 0.700204 | 0.977247 | 0.825987 |
| MmugDNA.30262.1.S1_at   | MmugDNA.30262.1 | 6.64  | 6.54  | 0.12 | 0.13 | 1.07  | 0.48379  | 0.198304 | 0.773283 | 0.473267 |
| MmugDNA.30264.1.S1_at   | MmugDNA.30264.1 | 7.26  | 7.11  | 0.09 | 0.09 | 1.11  | 0.105369 | 0.184389 | 0.477051 | 0.460458 |
| MmugDNA.30265.1.S1_at   | MmugDNA.30265.1 | 5.26  | 5.26  | 0.16 | 0.21 | -1    | 0.492861 | 0.728241 | 0.778647 | 0.842893 |
| MmugDNA.30267.1.S1_at   | MmugDNA.30267.1 | 3.79  | 3.78  | 0.16 | 0.11 | 1     | 0.462251 | 0.594098 | 0.761512 | 0.758517 |
| MmugDNA.30270.1.S1_at   | MmugDNA.30270.1 | 5.1   | 5.03  | 0.1  | 0.22 | 1.05  | 0.913052 | 0.077707 | 0.970415 | 0.323851 |
| MmugDNA.30272.1.S1_at   | MmugDNA.30272.1 | 3.69  | 3.5   | 0.1  | 0.15 | 1.14  | 0.241336 | 0.243224 | 0.607596 | 0.513356 |
| MmugDNA.30273.1.S1_at   | MmugDNA.30273.1 | 6.73  | 6.69  | 1.12 | 0.09 | 1.03  | 0.929935 | 0.86012  | 0.976539 | 0.920245 |
| MmugDNA.30274.1.S1_at   | MmugDNA.30274.1 | 6.37  | 6.81  | 0.38 | 0.42 | -1.36 | 0.229003 | 0.455876 | 0.597957 | 0.669664 |
| MmugDNA.30275.1.S1_at   | MmugDNA.30275.1 | 10.1  | 9.69  | 1.39 | 0.21 | 1.33  | 0.576213 | 0.075234 | 0.825113 | 0.319432 |
| MmugDNA.30276.1.S1_s_at | MmugDNA.30276.1 | 4.59  | 4.66  | 0.15 | 0.06 | -1.05 | 0.589327 | 0.602196 | 0.832298 | 0.763212 |
| MmugDNA.30277.1.S1_at   | MmugDNA.30277.1 | 6.67  | 7.73  | 0.31 | 0.12 | -2.08 | 0.00522  | 0.000682 | 0.206226 | 0.044166 |
| MmugDNA.30278.1.S1_at   | MmugDNA.30278.1 | 3.66  | 3.71  | 0.16 | 0.14 | -1.04 | 0.752198 | 0.926134 | 0.906315 | 0.95813  |
| MmugDNA.30279.1.S1_at   | MmugDNA.30279.1 | 3.82  | 3.82  | 0.07 | 0.11 | 1     | 0.731732 | 0.922509 | 0.896887 | 0.956337 |
| MmugDNA.3028.1.S1_at    | MmugDNA.3028.1  | 7.02  | 7.3   | 0.22 | 0.48 | -1.21 | 0.915424 | 0.980922 | 0.971229 | 0.989478 |
| MmugDNA.30280.1.S1_at   | MmugDNA.30280.1 | 6.73  | 7.08  | 0.48 | 0.41 | -1.27 | 0.34712  | 0.04218  | 0.688549 | 0.249842 |
| MmugDNA.30281.1.S1_at   | MmugDNA.30281.1 | 6.31  | 6.84  | 0.48 | 0.3  | -1.44 | 0.812185 | 0.031384 | 0.932076 | 0.219065 |
| MmugDNA.30282.1.S1_at   | MmugDNA.30282.1 | 11.36 | 10.95 | 0.26 | 0.11 | 1.33  | 0.07428  | 0.118057 | 0.435027 | 0.385921 |
| MmugDNA.30283.1.S1_at   | MmugDNA.30283.1 | 5.3   | 5.27  | 0.09 | 0.06 | 1.02  | 0.277147 | 0.664865 | 0.636753 | 0.803709 |
| MmugDNA.30283.1.S1_s_at | MmugDNA.30283.1 | 10.85 | 10.95 | 0.29 | 0.04 | -1.07 | 0.995632 | 0.478797 | 0.998312 | 0.684733 |
| MmugDNA.30284.1.S1_at   | MmugDNA.30284.1 | 3.16  | 3.05  | 0.22 | 0.06 | 1.08  | 0.207076 | 0.446236 | 0.578774 | 0.662743 |
| MmugDNA.30285.1.S1_at   | MmugDNA.30285.1 | 10.8  | 10.85 | 0.98 | 0    | -1.04 | 0.47765  | 0.584776 | 0.76987  | 0.752534 |
| MmugDNA.30288.1.S1_at   | MmugDNA.30288.1 | 3.12  | 3.05  | 0.18 | 0.05 | 1.05  | 0.588525 | 0.457362 | 0.831953 | 0.670806 |
| MmugDNA.30289.1.S1_at   | MmugDNA.30289.1 | 3.19  | 3.2   | 0.14 | 0.08 | -1    | 0.594692 | 0.516809 | 0.834885 | 0.70925  |
| MmugDNA.3029.1.S1_at    | MmugDNA.3029.1  | 4.63  | 4.45  | 0.29 | 0.21 | 1.13  | 0.184422 | 0.120083 | 0.557285 | 0.388792 |
| MmugDNA.30290.1.S1_at   | MmugDNA.30290.1 | 7.7   | 8.05  | 0.35 | 0.14 | -1.27 | 0.22664  | 0.00734  | 0.595968 | 0.11509  |
| MmugDNA.30291.1.S1_at   | MmugDNA.30291.1 | 3.37  | 3.45  | 0.04 | 0.03 | -1.06 | 0.032797 | 0.407571 | 0.345393 | 0.63505  |
| MmugDNA.30292.1.S1_at   | MmugDNA.30292.1 | 9.45  | 8.08  | 0.76 | 0.04 | 2.59  | 0.099191 | 0.014128 | 0.468572 | 0.152052 |
| MmugDNA.30293.1.S1_at   | MmugDNA.30293.1 | 4.34  | 4.44  | 0.08 | 0.05 | -1.07 | 0.102071 | 0.402711 | 0.472436 | 0.631543 |
| MmugDNA.30295.1.S1_at   | MmugDNA.30295.1 | 10.73 | 11.09 | 0.17 | 0.2  | -1.28 | 0.115535 | 0.51691  | 0.488793 | 0.709317 |
| MmugDNA.303.1.S1_at     | MmugDNA.303.1   | 9.01  | 9.2   | 0.42 | 0.19 | -1.15 | 0.411638 | 0.021895 | 0.731572 | 0.185199 |
| MmugDNA.3030.1.S1_at    | MmugDNA.3030.1  | 2.83  | 2.84  | 0.06 | 0.06 | -1    | 0.2486   | 0.770279 | 0.613894 | 0.866566 |
| MmugDNA.30301.1.S1_s_at | MmugDNA.30301.1 | 10.43 | 10.71 | 0.1  | 0.07 | -1.21 | 0.020953 | 0.159779 | 0.30624  | 0.435871 |
| MmugDNA.30303.1.S1_at   | MmugDNA.30303.1 | 8.3   | 7.87  | 0.91 | 0.17 | 1.35  | 0.406862 | 0.515681 | 0.72838  | 0.708451 |
| MmugDNA.30304.1.S1_at   | MmugDNA.30304.1 | 6.06  | 5.84  | 0.23 | 0.18 | 1.16  | 0.654643 | 0.585649 | 0.862882 | 0.752957 |
| MmugDNA.30305.1.S1_at   | MmugDNA.30305.1 | 7.6   | 7.48  | 0.12 | 0.01 | 1.09  | 0.152125 | 0.122489 | 0.525249 | 0.392376 |
| MmugDNA.30306.1.S1_at   | MmugDNA.30306.1 | 11.67 | 11.86 | 0.28 | 0.08 | -1.14 | 0.153086 | 0.016032 | 0.52616  | 0.160532 |
| MmugDNA.30307.1.S1_at   | MmugDNA.30307.1 | 7.67  | 6.79  | 0.5  | 0.15 | 1.85  | 0.017702 | 0.005101 | 0.293353 | 0.099108 |
| MmugDNA.30308.1.S1_at   | MmugDNA.30308.1 | 5.12  | 5.09  | 0.22 | 0.03 | 1.02  | 0.576611 | 0.37826  | 0.825166 | 0.615438 |
| MmugDNA.30309.1.S1_s_at | MmugDNA.30309.1 | 4.58  | 4.63  | 0.29 | 0.09 | -1.03 | 0.911605 | 0.882225 | 0.970117 | 0.932845 |
| MmugDNA.3031.1.S1_at    | MmugDNA.3031.1  | 4.9   | 4.9   | 0.09 | 0    | 1     | 0.373901 | 0.937745 | 0.705567 | 0.964687 |
| MmugDNA.30310.1.S1_at   | MmugDNA.30310.1 | 3.92  | 3.7   | 0.16 | 0.2  | 1.16  | 0.459568 | 0.449335 | 0.759647 | 0.665021 |
| MmugDNA.30311.1.S1_at   | MmugDNA.30311.1 | 4.48  | 4.29  | 0.19 | 0.52 | 1.14  | 0.748198 | 0.87908  | 0.904327 | 0.931015 |

|                         |                 |       |       |      |      |       |          |          |          |          |
|-------------------------|-----------------|-------|-------|------|------|-------|----------|----------|----------|----------|
| MmugDNA.30312.1.S1_at   | MmugDNA.30312.1 | 3.55  | 3.21  | 0.11 | 0.07 | 1.26  | 0.025408 | 0.023852 | 0.32178  | 0.193455 |
| MmugDNA.30313.1.S1_at   | MmugDNA.30313.1 | 3.06  | 2.98  | 0.16 | 0.06 | 1.05  | 0.25333  | 0.28919  | 0.618067 | 0.550293 |
| MmugDNA.30314.1.S1_at   | MmugDNA.30314.1 | 9.25  | 9.42  | 0.35 | 0.12 | -1.12 | 0.463531 | 0.014703 | 0.762218 | 0.154371 |
| MmugDNA.30315.1.S1_at   | MmugDNA.30315.1 | 8.04  | 8.14  | 0.39 | 0.01 | -1.07 | 0.299965 | 0.03286  | 0.654436 | 0.224478 |
| MmugDNA.30316.1.S1_at   | MmugDNA.30316.1 | 6.47  | 5.72  | 0.9  | 0.35 | 1.68  | 0.691188 | 0.13685  | 0.879715 | 0.409566 |
| MmugDNA.30317.1.S1_at   | MmugDNA.30317.1 | 8.96  | 8.51  | 0.18 | 0.19 | 1.36  | 0.06459  | 0.053284 | 0.418401 | 0.276463 |
| MmugDNA.30317.1.S1_s_at | MmugDNA.30317.1 | 8.22  | 8.02  | 0.23 | 0.12 | 1.15  | 0.055623 | 0.052195 | 0.398946 | 0.274036 |
| MmugDNA.30318.1.S1_at   | MmugDNA.30318.1 | 8.83  | 9.55  | 0.57 | 0.15 | -1.65 | 0.152792 | 0.12557  | 0.525725 | 0.396226 |
| MmugDNA.3032.1.S1_at    | MmugDNA.3032.1  | 5.68  | 5.61  | 0.37 | 0.08 | 1.05  | 0.254001 | 0.296832 | 0.618622 | 0.5558   |
| MmugDNA.30320.1.S1_at   | MmugDNA.30320.1 | 3.29  | 3.37  | 0.06 | 0.11 | -1.06 | 0.364713 | 0.738173 | 0.700726 | 0.848203 |
| MmugDNA.30324.1.S1_at   | MmugDNA.30324.1 | 4.41  | 4.29  | 0.13 | 0.2  | 1.09  | 0.983321 | 0.764167 | 0.994928 | 0.862867 |
| MmugDNA.30325.1.S1_at   | MmugDNA.30325.1 | 10.33 | 10.13 | 0.16 | 0.18 | 1.15  | 0.100037 | 0.060804 | 0.470251 | 0.293306 |
| MmugDNA.30326.1.S1_at   | MmugDNA.30326.1 | 4.63  | 4.56  | 0.26 | 0.04 | 1.05  | 0.230069 | 0.319079 | 0.598481 | 0.571625 |
| MmugDNA.30327.1.S1_at   | MmugDNA.30327.1 | 3.77  | 3.78  | 0.17 | 0.13 | -1    | 0.502627 | 0.665269 | 0.783781 | 0.803854 |
| MmugDNA.3033.1.S1_at    | MmugDNA.3033.1  | 3.36  | 3.51  | 0.16 | 0.12 | -1.11 | 0.638546 | 0.80478  | 0.855989 | 0.887735 |
| MmugDNA.30330.1.S1_at   | MmugDNA.30330.1 | 6.52  | 6.29  | 0.28 | 0.15 | 1.17  | 0.082495 | 0.042167 | 0.447377 | 0.249821 |
| MmugDNA.30332.1.S1_at   | MmugDNA.30332.1 | 3.47  | 3.32  | 0.06 | 0.17 | 1.11  | 0.198131 | 0.212149 | 0.569361 | 0.486036 |
| MmugDNA.30335.1.S1_s_at | MmugDNA.30335.1 | 8.74  | 8.93  | 0.15 | 0.11 | -1.14 | 0.13167  | 0.000915 | 0.506119 | 0.048471 |
| MmugDNA.30336.1.S1_at   | MmugDNA.30336.1 | 6.61  | 6.56  | 0.17 | 0.06 | 1.04  | 0.466671 | 0.559159 | 0.763795 | 0.736091 |
| MmugDNA.30337.1.S1_at   | MmugDNA.30337.1 | 9.69  | 10.15 | 3.3  | 0.21 | -1.38 | 0.455111 | 0.318811 | 0.75733  | 0.571379 |
| MmugDNA.30338.1.S1_at   | MmugDNA.30338.1 | 5.94  | 5.6   | 0.23 | 0.08 | 1.27  | 0.195788 | 0.303729 | 0.566117 | 0.561146 |
| MmugDNA.30339.1.S1_at   | MmugDNA.30339.1 | 3.11  | 3.14  | 0.23 | 0.07 | -1.02 | 0.69445  | 0.776717 | 0.881128 | 0.870216 |
| MmugDNA.30340.1.S1_at   | MmugDNA.30340.1 | 5.19  | 5.06  | 0.18 | 0.1  | 1.1   | 0.414635 | 0.121375 | 0.733197 | 0.390439 |
| MmugDNA.30342.1.S1_at   | MmugDNA.30342.1 | 11.03 | 11.48 | 0.38 | 0.05 | -1.36 | 0.350113 | 0.019384 | 0.691084 | 0.175012 |
| MmugDNA.30343.1.S1_at   | MmugDNA.30343.1 | 5.32  | 5.27  | 0.07 | 0.25 | 1.04  | 0.710934 | 0.652037 | 0.88743  | 0.796529 |
| MmugDNA.30344.1.S1_at   | MmugDNA.30344.1 | 5.76  | 5.82  | 0.42 | 0.2  | -1.04 | 0.822211 | 0.356463 | 0.935933 | 0.598459 |
| MmugDNA.30344.1.S1_x_at | MmugDNA.30344.1 | 6.67  | 7.04  | 0.38 | 0.25 | -1.29 | 0.606793 | 0.184742 | 0.840686 | 0.460656 |
| MmugDNA.30345.1.S1_at   | MmugDNA.30345.1 | 3.27  | 3.01  | 0.12 | 0.15 | 1.19  | 0.15957  | 0.081242 | 0.532526 | 0.329351 |
| MmugDNA.30346.1.S1_at   | MmugDNA.30346.1 | 4.55  | 4.3   | 0.32 | 0.26 | 1.19  | 0.303207 | 0.409054 | 0.657117 | 0.636113 |
| MmugDNA.30347.1.S1_at   | MmugDNA.30347.1 | 5.23  | 5.43  | 0.1  | 0.25 | -1.15 | 0.306675 | 0.463905 | 0.659628 | 0.67471  |
| MmugDNA.30348.1.S1_at   | MmugDNA.30348.1 | 6.87  | 6.22  | 0.5  | 0.17 | 1.57  | 0.144386 | 0.053302 | 0.519779 | 0.276463 |
| MmugDNA.30349.1.S1_at   | MmugDNA.30349.1 | 9.33  | 9.34  | 0.24 | 0.11 | -1.01 | 0.733215 | 0.085429 | 0.897525 | 0.337409 |
| MmugDNA.3035.1.S1_at    | MmugDNA.3035.1  | 4.18  | 4.4   | 0.88 | 0.13 | -1.17 | 0.626535 | 0.648328 | 0.849991 | 0.794167 |
| MmugDNA.30353.1.S1_at   | MmugDNA.30353.1 | 4.6   | 4.61  | 0.09 | 0.19 | -1.01 | 0.792286 | 0.924558 | 0.923801 | 0.957386 |
| MmugDNA.30354.1.S1_at   | MmugDNA.30354.1 | 3.02  | 3.02  | 0.17 | 0.37 | 1     | 0.504795 | 0.63337  | 0.785075 | 0.784111 |
| MmugDNA.30356.1.S1_s_at | MmugDNA.30356.1 | 10.39 | 9.6   | 0.43 | 0.05 | 1.72  | 0.043081 | 0.038703 | 0.371135 | 0.24169  |
| MmugDNA.30357.1.S1_at   | MmugDNA.30357.1 | 6.08  | 5.95  | 0.09 | 0.13 | 1.09  | 0.19463  | 0.309297 | 0.565144 | 0.564899 |
| MmugDNA.30358.1.S1_at   | MmugDNA.30358.1 | 6.6   | 6.55  | 0.15 | 0.1  | 1.03  | 0.764943 | 0.976601 | 0.911685 | 0.987237 |
| MmugDNA.30358.1.S1_s_at | MmugDNA.30358.1 | 7.57  | 7.54  | 0.37 | 0.09 | 1.02  | 0.847082 | 0.954838 | 0.946415 | 0.974414 |
| MmugDNA.3036.1.S1_at    | MmugDNA.3036.1  | 8.9   | 10.19 | 0.35 | 0.05 | -2.46 | 0.003559 | 0.000398 | 0.196915 | 0.037471 |
| MmugDNA.30360.1.S1_at   | MmugDNA.30360.1 | 9.11  | 8.19  | 0.08 | 0.15 | 1.9   | 0.001266 | 0.001536 | 0.157784 | 0.059437 |
| MmugDNA.30362.1.S1_at   | MmugDNA.30362.1 | 7.57  | 6.95  | 0.85 | 0.27 | 1.54  | 0.085739 | 0.041781 | 0.452943 | 0.248981 |
| MmugDNA.30363.1.S1_at   | MmugDNA.30363.1 | 6.87  | 6.92  | 0.29 | 0.08 | -1.04 | 0.790426 | 0.914714 | 0.922945 | 0.952066 |

|                         |                 |       |       |      |      |        |          |          |          |          |
|-------------------------|-----------------|-------|-------|------|------|--------|----------|----------|----------|----------|
| MmugDNA.30364.1.S1_at   | MmugDNA.30364.1 | 3.74  | 3.73  | 0.06 | 0.08 | 1.01   | 0.370933 | 0.178521 | 0.70517  | 0.454778 |
| MmugDNA.30365.1.S1_at   | MmugDNA.30365.1 | 6.61  | 6.02  | 0.29 | 0.27 | 1.51   | 0.063525 | 0.031875 | 0.415717 | 0.220938 |
| MmugDNA.30368.1.S1_at   | MmugDNA.30368.1 | 8.25  | 7.94  | 0.2  | 0.22 | 1.24   | 0.128722 | 0.194348 | 0.503453 | 0.469464 |
| MmugDNA.30369.1.S1_at   | MmugDNA.30369.1 | 8.94  | 8.53  | 0.24 | 0.12 | 1.33   | 0.021928 | 0.006397 | 0.309781 | 0.108738 |
| MmugDNA.3037.1.S1_at    | MmugDNA.3037.1  | 6.46  | 6.31  | 0.24 | 0.17 | 1.11   | 0.147465 | 0.457068 | 0.521578 | 0.67067  |
| MmugDNA.30370.1.S1_at   | MmugDNA.30370.1 | 3.94  | 4.05  | 0.29 | 0.23 | -1.08  | 0.420676 | 0.437747 | 0.737059 | 0.656924 |
| MmugDNA.30372.1.S1_at   | MmugDNA.30372.1 | 3.54  | 3.65  | 0.07 | 0.14 | -1.08  | 0.185734 | 0.357218 | 0.558625 | 0.598864 |
| MmugDNA.30373.1.S1_at   | MmugDNA.30373.1 | 6.57  | 6.39  | 0.12 | 0.06 | 1.13   | 0.135442 | 0.409361 | 0.509874 | 0.636452 |
| MmugDNA.30373.1.S1_s_at | MmugDNA.30373.1 | 3.73  | 3.74  | 0.07 | 0.09 | -1     | 0.822219 | 0.538681 | 0.935933 | 0.723313 |
| MmugDNA.30374.1.S1_at   | MmugDNA.30374.1 | 6.03  | 5.69  | 0.2  | 0.06 | 1.27   | 0.133402 | 0.047465 | 0.507921 | 0.262486 |
| MmugDNA.30375.1.S1_at   | MmugDNA.30375.1 | 6.3   | 6.09  | 0.13 | 0.16 | -1.16  | 0.08701  | 0.312142 | 0.454785 | 0.566904 |
| MmuSTS.724.1.S1_at      | MmuSTS.724.1    | 8.84  | 8.73  | 0.14 | 0.09 | 1.08   | 0.11082  | 0.17203  | 0.484214 | 0.448441 |
| MmuSTS.724.1.S1_s_at    | MmuSTS.724.1    | 8.52  | 8.12  | 0.21 | 0.08 | 1.33   | 0.027875 | 0.030655 | 0.329811 | 0.217119 |
| MmugDNA.30377.1.S1_at   | MmugDNA.30377.1 | 11.1  | 10.24 | 0.18 | 0.1  | 1.82   | 0.002334 | 0.000316 | 0.176234 | 0.035358 |
| MmugDNA.30379.1.S1_at   | MmugDNA.30379.1 | 3.76  | 3.68  | 0.06 | 0.02 | 1.06   | 0.138016 | 0.091275 | 0.513671 | 0.346281 |
| MmugDNA.3038.1.S1_at    | MmugDNA.3038.1  | 5.51  | 5.54  | 0.06 | 0.04 | -1.02  | 0.764717 | 0.386982 | 0.911553 | 0.621935 |
| MmugDNA.30380.1.S1_at   | MmugDNA.30380.1 | 9.28  | 9.6   | 0.31 | 0.14 | -1.25  | 0.102588 | 0.002992 | 0.472846 | 0.079958 |
| MmugDNA.30381.1.S1_at   | MmugDNA.30381.1 | 7.14  | 7.05  | 0.1  | 0.12 | 1.07   | 0.1206   | 0.133956 | 0.494072 | 0.4061   |
| MmugDNA.30382.1.S1_at   | MmugDNA.30382.1 | 5.69  | 5.08  | 0.61 | 0.08 | 1.53   | 0.492929 | 0.733032 | 0.778657 | 0.845498 |
| MmugDNA.30383.1.S1_at   | MmugDNA.30383.1 | 6.93  | 6.81  | 0.31 | 0.21 | 1.08   | 0.953296 | 0.753541 | 0.984409 | 0.856527 |
| MmugDNA.30385.1.S1_at   | MmugDNA.30385.1 | 8.97  | 8.11  | 0.36 | 0.11 | 1.81   | 0.030294 | 0.110611 | 0.337364 | 0.374854 |
| MmugDNA.30386.1.S1_at   | MmugDNA.30386.1 | 7.09  | 6.96  | 0.12 | 0.07 | 1.09   | 0.120173 | 0.288296 | 0.493472 | 0.549561 |
| MmugDNA.30388.1.S1_at   | MmugDNA.30388.1 | 3.33  | 3.24  | 0.09 | 0.05 | 1.06   | 0.135815 | 0.252614 | 0.510363 | 0.521169 |
| MmugDNA.30389.1.S1_at   | MmugDNA.30389.1 | 4.46  | 8.2   | 0.83 | 0.76 | -13.37 | 0.006609 | 0.037031 | 0.220539 | 0.236886 |
| MmugDNA.3039.1.S1_at    | MmugDNA.3039.1  | 6.95  | 6.93  | 0.32 | 0.21 | 1.02   | 0.486903 | 0.345705 | 0.774839 | 0.590854 |
| MmugDNA.30390.1.S1_at   | MmugDNA.30390.1 | 2.88  | 2.85  | 0.38 | 0.05 | 1.02   | 0.337192 | 0.440888 | 0.682275 | 0.659138 |
| MmugDNA.30393.1.S1_at   | MmugDNA.30393.1 | 8.42  | 9.03  | 0.61 | 0    | -1.53  | 0.121936 | 0.021101 | 0.495655 | 0.181869 |
| MmugDNA.30394.1.S1_at   | MmugDNA.30394.1 | 7.84  | 7.51  | 1.1  | 0.28 | 1.26   | 0.627267 | 0.658861 | 0.850453 | 0.800473 |
| MmugDNA.30395.1.S1_at   | MmugDNA.30395.1 | 3.35  | 3.22  | 0.18 | 0.07 | 1.1    | 0.19208  | 0.39943  | 0.563157 | 0.629798 |
| MmugDNA.30396.1.S1_at   | MmugDNA.30396.1 | 5.38  | 5.28  | 0.18 | 0.12 | 1.07   | 0.095574 | 0.142244 | 0.464229 | 0.415754 |
| MmugDNA.30397.1.S1_at   | MmugDNA.30397.1 | 8.6   | 7.2   | 0.15 | 0.4  | 2.64   | 0.005439 | 0.004671 | 0.208157 | 0.095314 |
| MmugDNA.30398.1.S1_at   | MmugDNA.30398.1 | 5.16  | 5.08  | 0.16 | 0.05 | 1.05   | 0.950578 | 0.840286 | 0.983335 | 0.908996 |
| MmugDNA.30399.1.S1_at   | MmugDNA.30399.1 | 9.23  | 9.38  | 0.61 | 0.34 | -1.11  | 0.888865 | 0.809139 | 0.961646 | 0.889995 |
| MmugDNA.304.1.S1_at     | MmugDNA.304.1   | 5.21  | 5.31  | 0.05 | 0.33 | -1.07  | 0.593094 | 0.26178  | 0.834072 | 0.528227 |
| MmugDNA.30400.1.S1_at   | MmugDNA.30400.1 | 2.85  | 2.71  | 0.07 | 0.11 | 1.1    | 0.145108 | 0.222618 | 0.520309 | 0.495617 |
| MmugDNA.30401.1.S1_at   | MmugDNA.30401.1 | 4.13  | 4.3   | 0.1  | 0.02 | -1.12  | 0.138358 | 0.331271 | 0.51369  | 0.579984 |
| MmugDNA.30402.1.S1_at   | MmugDNA.30402.1 | 4.57  | 4.93  | 0.13 | 0.07 | -1.29  | 0.007759 | 0.033819 | 0.230997 | 0.227489 |
| MmugDNA.30403.1.S1_s_at | MmugDNA.30403.1 | 13.54 | 12.46 | 0.54 | 0.26 | 2.12   | 0.093913 | 0.073821 | 0.463304 | 0.317146 |
| MmugDNA.30404.1.S1_at   | MmugDNA.30404.1 | 3.37  | 3.35  | 0.03 | 0.1  | 1.02   | 0.320548 | 0.498527 | 0.66937  | 0.697582 |
| MmugDNA.30405.1.S1_at   | MmugDNA.30405.1 | 6.38  | 6.26  | 0.26 | 0.05 | 1.09   | 0.341346 | 0.589835 | 0.685051 | 0.755973 |
| MmugDNA.30408.1.S1_at   | MmugDNA.30408.1 | 5.09  | 5.3   | 0.01 | 0.05 | -1.16  | 0.001039 | 0.000779 | 0.155374 | 0.045626 |
| MmugDNA.30409.1.S1_at   | MmugDNA.30409.1 | 8.28  | 7.66  | 0.82 | 0.03 | 1.54   | 0.139541 | 0.021519 | 0.514956 | 0.183771 |
| MmugDNA.3041.1.S1_at    | MmugDNA.3041.1  | 10.79 | 11.51 | 0.95 | 0.07 | -1.64  | 0.274935 | 0.162864 | 0.634221 | 0.438966 |



|                         |                 |       |       |      |      |       |          |          |          |          |
|-------------------------|-----------------|-------|-------|------|------|-------|----------|----------|----------|----------|
| MmugDNA.30410.1.S1_s_at | MmugDNA.30410.1 | 7.43  | 7.92  | 0.52 | 0.63 | -1.4  | 0.369277 | 0.029626 | 0.704181 | 0.213783 |
| MmugDNA.30411.1.S1_at   | MmugDNA.30411.1 | 3.56  | 3.44  | 0.18 | 0.1  | 1.08  | 0.08314  | 0.036353 | 0.448722 | 0.235105 |
| MmugDNA.30413.1.S1_at   | MmugDNA.30413.1 | 8.56  | 8.31  | 0.03 | 0.05 | 1.18  | 0.001852 | 0.012059 | 0.168185 | 0.142044 |
| MmugDNA.30414.1.S1_at   | MmugDNA.30414.1 | 4.84  | 5.12  | 0.28 | 0.41 | -1.21 | 0.290392 | 0.486517 | 0.646973 | 0.689881 |
| MmugDNA.30414.1.S1_s_at | MmugDNA.30414.1 | 10.82 | 10.43 | 1.19 | 0.25 | 1.3   | 0.508373 | 0.063945 | 0.786928 | 0.29906  |
| MmugDNA.30415.1.S1_at   | MmugDNA.30415.1 | 6.91  | 6.93  | 0.29 | 0.08 | -1.01 | 0.37219  | 0.181859 | 0.705567 | 0.458395 |
| MmugDNA.30417.1.S1_at   | MmugDNA.30417.1 | 3.4   | 3.21  | 0.08 | 0.12 | 1.14  | 0.43376  | 0.870729 | 0.744621 | 0.926534 |
| MmugDNA.30418.1.S1_at   | MmugDNA.30418.1 | 4.9   | 4.68  | 0.14 | 0.17 | 1.17  | 0.088165 | 0.102602 | 0.45606  | 0.362984 |
| MmugDNA.3042.1.S1_at    | MmugDNA.3042.1  | 7.58  | 7.55  | 0.12 | 0.11 | 1.02  | 0.372017 | 0.009451 | 0.705567 | 0.128022 |
| MmugDNA.30420.1.S1_at   | MmugDNA.30420.1 | 5.68  | 5.2   | 0.21 | 0.3  | 1.39  | 0.36491  | 0.753473 | 0.700775 | 0.856527 |
| MmugDNA.30421.1.S1_at   | MmugDNA.30421.1 | 4.7   | 4.56  | 0.07 | 0.2  | 1.11  | 0.813645 | 0.983661 | 0.93266  | 0.990902 |
| MmugDNA.30422.1.S1_at   | MmugDNA.30422.1 | 7.1   | 6.8   | 0.12 | 0.05 | 1.23  | 0.043405 | 0.012268 | 0.372033 | 0.143266 |
| MmugDNA.30423.1.S1_at   | MmugDNA.30423.1 | 4.87  | 4.28  | 0.46 | 0.54 | 1.5   | 0.554825 | 0.351805 | 0.813014 | 0.595256 |
| MmugDNA.30424.1.S1_at   | MmugDNA.30424.1 | 4.96  | 4.97  | 0.16 | 0.15 | -1.01 | 0.266225 | 0.482141 | 0.627106 | 0.687037 |
| MmugDNA.30426.1.S1_at   | MmugDNA.30426.1 | 11.49 | 11.72 | 0.37 | 0.08 | -1.17 | 0.265878 | 0.069668 | 0.626951 | 0.310164 |
| MmugDNA.30426.1.S1_s_at | MmugDNA.30426.1 | 12.98 | 13.16 | 0.22 | 0.05 | -1.13 | 0.151689 | 0.068789 | 0.524628 | 0.308711 |
| MmugDNA.30428.1.S1_at   | MmugDNA.30428.1 | 2.89  | 3     | 0.12 | 0.1  | -1.07 | 0.137096 | 0.163578 | 0.512022 | 0.439765 |
| MmugDNA.3043.1.S1_at    | MmugDNA.3043.1  | 5.61  | 6.21  | 0.46 | 0.37 | -1.52 | 0.114852 | 0.215028 | 0.487957 | 0.488898 |
| MmugDNA.30430.1.S1_at   | MmugDNA.30430.1 | 3.46  | 3.27  | 0.13 | 0.09 | 1.13  | 0.300288 | 0.088557 | 0.654847 | 0.341995 |
| MmugDNA.30431.1.S1_at   | MmugDNA.30431.1 | 3.86  | 3.96  | 0.14 | 0.17 | -1.07 | 0.861746 | 0.877517 | 0.951267 | 0.930162 |
| MmugDNA.30432.1.S1_at   | MmugDNA.30432.1 | 4.76  | 4.25  | 0.07 | 0.22 | 1.42  | 0.054695 | 0.073894 | 0.397122 | 0.31727  |
| MmugDNA.30434.1.S1_at   | MmugDNA.30434.1 | 4.3   | 4.22  | 0.04 | 0.11 | 1.06  | 0.131355 | 0.525452 | 0.505684 | 0.715025 |
| MmugDNA.30436.1.S1_at   | MmugDNA.30436.1 | 4.59  | 4.62  | 0.06 | 0.21 | -1.02 | 0.789939 | 0.655202 | 0.922714 | 0.798333 |
| MmugDNA.30437.1.S1_at   | MmugDNA.30437.1 | 5.7   | 5.74  | 0.3  | 0.16 | -1.03 | 0.82067  | 0.378483 | 0.935289 | 0.615514 |
| MmugDNA.30438.1.S1_at   | MmugDNA.30438.1 | 12.65 | 12.72 | 0.1  | 0.06 | -1.05 | 0.138541 | 0.23938  | 0.513952 | 0.510039 |
| MmugDNA.3044.1.S1_at    | MmugDNA.3044.1  | 5.05  | 4.94  | 0.07 | 0.07 | 1.08  | 0.119753 | 0.742469 | 0.493259 | 0.850851 |
| MmugDNA.30440.1.S1_at   | MmugDNA.30440.1 | 5.35  | 5.36  | 0.02 | 0.06 | -1.01 | 0.793897 | 0.978243 | 0.924476 | 0.988093 |
| MmugDNA.30441.1.S1_at   | MmugDNA.30441.1 | 4.63  | 4.31  | 0.49 | 0.12 | 1.25  | 0.194587 | 0.449557 | 0.565144 | 0.665113 |
| MmugDNA.30443.1.S1_at   | MmugDNA.30443.1 | 4.77  | 4.53  | 0.44 | 0.1  | 1.18  | 0.489579 | 0.475889 | 0.776292 | 0.682387 |
| MmugDNA.30444.1.S1_at   | MmugDNA.30444.1 | 5.53  | 5.6   | 0.19 | 0.04 | -1.05 | 0.619265 | 0.010464 | 0.846563 | 0.133678 |
| MmugDNA.30448.1.S1_at   | MmugDNA.30448.1 | 11.7  | 10.91 | 0.2  | 0.23 | 1.73  | 0.009319 | 0.000402 | 0.241866 | 0.037471 |
| MmugDNA.30449.1.S1_at   | MmugDNA.30449.1 | 5.42  | 5.41  | 0.2  | 0.18 | 1     | 0.470104 | 0.537633 | 0.76595  | 0.722616 |
| MmugDNA.30450.1.S1_at   | MmugDNA.30450.1 | 5.05  | 5.26  | 0.03 | 0.27 | -1.16 | 0.754672 | 0.470017 | 0.907464 | 0.678572 |
| MmugDNA.30451.1.S1_at   | MmugDNA.30451.1 | 5.51  | 5.51  | 0.11 | 0.06 | -1    | 0.531341 | 0.761973 | 0.799582 | 0.861597 |
| MmugDNA.30452.1.S1_at   | MmugDNA.30452.1 | 5.63  | 5.48  | 0.57 | 0.15 | 1.11  | 0.486055 | 0.646582 | 0.774427 | 0.792965 |
| MmugDNA.30453.1.S1_at   | MmugDNA.30453.1 | 4.49  | 4.5   | 0.24 | 0.09 | -1    | 0.403618 | 0.522203 | 0.725766 | 0.712954 |
| MmugDNA.30454.1.S1_at   | MmugDNA.30454.1 | 8.1   | 8.8   | 1.08 | 0.19 | -1.62 | 0.11612  | 0.138015 | 0.489554 | 0.410919 |
| MmugDNA.30455.1.S1_at   | MmugDNA.30455.1 | 5.82  | 5.81  | 0.2  | 0.11 | 1.01  | 0.932502 | 0.15432  | 0.977227 | 0.429188 |
| MmugDNA.30457.1.S1_at   | MmugDNA.30457.1 | 5.2   | 4.87  | 0.12 | 0.29 | 1.26  | 0.211176 | 0.082383 | 0.582625 | 0.331354 |
| MmugDNA.30458.1.S1_at   | MmugDNA.30458.1 | 8.65  | 9.19  | 0.32 | 0.18 | -1.46 | 0.198313 | 0.17642  | 0.569559 | 0.45282  |
| MmugDNA.30458.1.S1_x_at | MmugDNA.30458.1 | 8.44  | 9     | 0.3  | 0.15 | -1.47 | 0.136743 | 0.151464 | 0.511963 | 0.426214 |
| MmugDNA.30459.1.S1_at   | MmugDNA.30459.1 | 4.15  | 4.06  | 0.08 | 0.46 | 1.06  | 0.45276  | 0.42403  | 0.755901 | 0.646666 |
| MmugDNA.30460.1.S1_at   | MmugDNA.30460.1 | 8.85  | 9.18  | 0.58 | 0.23 | -1.26 | 0.663386 | 0.16734  | 0.867106 | 0.443785 |

|                         |                 |       |       |      |      |       |          |          |          |          |
|-------------------------|-----------------|-------|-------|------|------|-------|----------|----------|----------|----------|
| MmugDNA.30461.1.S1_at   | MmugDNA.30461.1 | 3.06  | 2.98  | 0.06 | 0.15 | 1.05  | 0.198134 | 0.32363  | 0.569361 | 0.574525 |
| MmugDNA.30462.1.S1_at   | MmugDNA.30462.1 | 5.3   | 6.61  | 0.92 | 0.21 | -2.47 | 0.173449 | 0.129801 | 0.546571 | 0.40147  |
| MmugDNA.30465.1.S1_at   | MmugDNA.30465.1 | 6.13  | 5.92  | 0.08 | 0.1  | 1.16  | 0.075268 | 0.088743 | 0.436118 | 0.342415 |
| MmugDNA.30468.1.S1_at   | MmugDNA.30468.1 | 4.03  | 3.83  | 0.2  | 0.13 | 1.15  | 0.793687 | 0.1755   | 0.924414 | 0.452157 |
| MmugDNA.30469.1.S1_at   | MmugDNA.30469.1 | 6.22  | 6.14  | 0.14 | 0.29 | 1.06  | 0.973203 | 0.976347 | 0.991241 | 0.98714  |
| MmugDNA.3047.1.S1_at    | MmugDNA.3047.1  | 6.47  | 6.24  | 0.25 | 0.17 | 1.17  | 0.187346 | 0.218858 | 0.559771 | 0.492611 |
| MmugDNA.30470.1.S1_at   | MmugDNA.30470.1 | 12.26 | 11.68 | 0.14 | 0.18 | 1.5   | 0.011264 | 0.005    | 0.253508 | 0.098514 |
| MmugDNA.30471.1.S1_at   | MmugDNA.30471.1 | 13.35 | 12.94 | 0.08 | 0.05 | 1.33  | 0.002282 | 0.00038  | 0.174757 | 0.037273 |
| MmugDNA.30472.1.S1_at   | MmugDNA.30472.1 | 4.89  | 5.01  | 0.62 | 0.31 | -1.08 | 0.858651 | 0.002282 | 0.950076 | 0.07037  |
| MmugDNA.30473.1.S1_at   | MmugDNA.30473.1 | 5.03  | 4.8   | 0.2  | 0.23 | 1.18  | 0.193015 | 0.078568 | 0.563847 | 0.325285 |
| MmugDNA.30474.1.S1_at   | MmugDNA.30474.1 | 4.42  | 4.51  | 0.08 | 0.26 | -1.06 | 0.518721 | 0.053738 | 0.792804 | 0.277384 |
| MmugDNA.30475.1.S1_at   | MmugDNA.30475.1 | 7     | 6.76  | 0.3  | 0.14 | 1.18  | 0.277322 | 0.539757 | 0.636787 | 0.723926 |
| MmugDNA.30476.1.S1_at   | MmugDNA.30476.1 | 5.11  | 4.96  | 0.36 | 0.05 | 1.11  | 0.195292 | 0.01591  | 0.565686 | 0.160062 |
| MmugDNA.30477.1.S1_at   | MmugDNA.30477.1 | 5.07  | 5.23  | 0.25 | 0.12 | -1.12 | 0.243427 | 0.40614  | 0.609316 | 0.634211 |
| MmugDNA.30478.1.S1_at   | MmugDNA.30478.1 | 3.7   | 3.59  | 0.29 | 0.06 | 1.08  | 0.438749 | 0.421632 | 0.747479 | 0.645195 |
| MmugDNA.30479.1.S1_at   | MmugDNA.30479.1 | 3.07  | 3.31  | 0.48 | 0.11 | -1.18 | 0.919623 | 0.864136 | 0.972706 | 0.922925 |
| MmugDNA.30479.1.S1_x_at | MmugDNA.30479.1 | 4.17  | 4.33  | 0.37 | 0.28 | -1.12 | 0.794083 | 0.948124 | 0.924489 | 0.970446 |
| MmugDNA.3048.1.S1_at    | MmugDNA.3048.1  | 3.38  | 3.4   | 0.05 | 0.16 | -1.01 | 0.393569 | 0.714703 | 0.719354 | 0.8345   |
| MmugDNA.30480.1.S1_at   | MmugDNA.30480.1 | 6.86  | 6.94  | 0.65 | 0.04 | -1.06 | 0.545715 | 0.209324 | 0.808147 | 0.483038 |
| MmugDNA.30482.1.S1_at   | MmugDNA.30482.1 | 7.97  | 8.89  | 0.35 | 0.25 | -1.89 | 0.010706 | 0.007861 | 0.249245 | 0.118059 |
| MmugDNA.30483.1.S1_at   | MmugDNA.30483.1 | 10.63 | 10.93 | 0.34 | 0.02 | -1.23 | 0.611347 | 0.382935 | 0.842471 | 0.619021 |
| MmugDNA.30484.1.S1_at   | MmugDNA.30484.1 | 10.12 | 10.12 | 1.68 | 0.21 | -1    | 0.40488  | 0.56068  | 0.726978 | 0.736919 |
| MmugDNA.30485.1.S1_at   | MmugDNA.30485.1 | 5.31  | 5.52  | 0.13 | 0.17 | -1.15 | 0.523415 | 0.421605 | 0.795628 | 0.645173 |
| MmugDNA.30486.1.S1_at   | MmugDNA.30486.1 | 3.66  | 3.69  | 0.36 | 0.15 | -1.03 | 0.730868 | 0.295779 | 0.896271 | 0.555196 |
| MmugDNA.30488.1.S1_at   | MmugDNA.30488.1 | 7.79  | 7.48  | 0.42 | 0.15 | 1.24  | 0.805273 | 0.794469 | 0.929175 | 0.881455 |
| MmugDNA.30489.1.S1_at   | MmugDNA.30489.1 | 8.41  | 8.37  | 0.26 | 0.07 | 1.03  | 0.90194  | 0.031962 | 0.966869 | 0.221191 |
| MmugDNA.30491.1.S1_at   | MmugDNA.30491.1 | 7.77  | 8.47  | 0.73 | 0.08 | -1.62 | 0.174896 | 0.220872 | 0.548031 | 0.494262 |
| MmugDNA.30492.1.S1_at   | MmugDNA.30492.1 | 10.12 | 11.48 | 1.03 | 0.03 | -2.58 | 0.068241 | 0.05022  | 0.425017 | 0.269367 |
| MmugDNA.30493.1.S1_at   | MmugDNA.30493.1 | 5.77  | 7.13  | 0.17 | 0.48 | -2.56 | 0.02874  | 0.030519 | 0.333062 | 0.216711 |
| MmugDNA.30494.1.S1_at   | MmugDNA.30494.1 | 6.42  | 6.48  | 0.18 | 0.1  | -1.04 | 0.431066 | 0.761711 | 0.74323  | 0.861459 |
| MmugDNA.30495.1.S1_at   | MmugDNA.30495.1 | 6     | 5.53  | 0.57 | 0.4  | 1.38  | 0.298485 | 0.445999 | 0.653176 | 0.662635 |
| MmugDNA.30497.1.S1_at   | MmugDNA.30497.1 | 3.33  | 3.39  | 0.25 | 0.28 | -1.04 | 0.747779 | 0.961707 | 0.904205 | 0.978408 |
| MmugDNA.30498.1.S1_at   | MmugDNA.30498.1 | 6.57  | 8.9   | 1.06 | 0.03 | -5.05 | 0.046517 | 0.07364  | 0.378094 | 0.316967 |
| MmugDNA.30499.1.S1_at   | MmugDNA.30499.1 | 3.25  | 3.2   | 0.05 | 0.11 | 1.04  | 0.647606 | 0.466653 | 0.859364 | 0.676425 |
| MmugDNA.305.1.S1_at     | MmugDNA.305.1   | 8.9   | 9.15  | 0.65 | 0.06 | -1.2  | 0.600118 | 0.685527 | 0.837736 | 0.816542 |
| MmugDNA.3050.1.S1_at    | MmugDNA.3050.1  | 3.98  | 4.13  | 0.16 | 0.21 | -1.1  | 0.498947 | 0.326505 | 0.781868 | 0.576576 |
| MmugDNA.30500.1.S1_at   | MmugDNA.30500.1 | 6.62  | 6.6   | 0.09 | 0.01 | 1.01  | 0.26773  | 0.40031  | 0.62827  | 0.630169 |
| MmugDNA.30501.1.S1_at   | MmugDNA.30501.1 | 5.71  | 5.7   | 0.13 | 0.03 | 1     | 0.495669 | 0.579362 | 0.780125 | 0.749058 |
| MmugDNA.30502.1.S1_at   | MmugDNA.30502.1 | 6.4   | 6.91  | 0.57 | 0.51 | -1.42 | 0.806478 | 0.08371  | 0.929767 | 0.334417 |
| MmugDNA.30504.1.S1_at   | MmugDNA.30504.1 | 10.82 | 10.18 | 0.88 | 0.24 | 1.57  | 0.295134 | 0.087225 | 0.651016 | 0.340206 |
| MmugDNA.30506.1.S1_at   | MmugDNA.30506.1 | 3.71  | 3.89  | 0.03 | 0.23 | -1.13 | 0.807322 | 0.796651 | 0.930145 | 0.882765 |
| MmugDNA.30508.1.S1_at   | MmugDNA.30508.1 | 9.31  | 9.48  | 0.11 | 0.11 | -1.12 | 0.276973 | 0.199367 | 0.636653 | 0.474002 |
| MmugDNA.30509.1.S1_at   | MmugDNA.30509.1 | 4.9   | 4.64  | 0.52 | 0.08 | 1.19  | 0.96047  | 0.986336 | 0.987213 | 0.992243 |

|                         |                 |       |       |      |      |       |          |          |          |          |
|-------------------------|-----------------|-------|-------|------|------|-------|----------|----------|----------|----------|
| MmugDNA.3051.1.S1_at    | MmugDNA.3051.1  | 3.17  | 3.35  | 0.37 | 0.09 | -1.13 | 0.731648 | 0.624882 | 0.896832 | 0.778939 |
| MmugDNA.30511.1.S1_at   | MmugDNA.30511.1 | 2.74  | 2.55  | 0.01 | 0.5  | 1.14  | 0.79643  | 0.897194 | 0.925177 | 0.941337 |
| MmugDNA.30513.1.S1_at   | MmugDNA.30513.1 | 8.32  | 7.96  | 0.37 | 0.35 | 1.28  | 0.298513 | 0.200899 | 0.653176 | 0.475395 |
| MmugDNA.30514.1.S1_at   | MmugDNA.30514.1 | 3.57  | 3.36  | 0.22 | 0.07 | 1.15  | 0.577086 | 0.117099 | 0.825346 | 0.384548 |
| MmugDNA.30516.1.S1_at   | MmugDNA.30516.1 | 5.25  | 5.06  | 0.69 | 0.31 | 1.14  | 0.185625 | 0.216246 | 0.558609 | 0.489816 |
| MmugDNA.30518.1.S1_at   | MmugDNA.30518.1 | 4.91  | 4.95  | 0.14 | 0.08 | -1.02 | 0.640851 | 0.292755 | 0.856959 | 0.552783 |
| MmugDNA.30519.1.S1_at   | MmugDNA.30519.1 | 9.06  | 8.7   | 0.64 | 0.14 | 1.28  | 0.108187 | 0.085263 | 0.480628 | 0.337096 |
| MmugDNA.3052.1.S1_at    | MmugDNA.3052.1  | 2.85  | 2.87  | 0.05 | 0.12 | -1.01 | 0.495993 | 0.355787 | 0.780178 | 0.597864 |
| MmugDNA.30520.1.S1_at   | MmugDNA.30520.1 | 6.4   | 6.89  | 0.35 | 0.07 | -1.41 | 0.072597 | 0.060465 | 0.432824 | 0.292553 |
| MmugDNA.30521.1.S1_at   | MmugDNA.30521.1 | 3.26  | 3.27  | 0.15 | 0.05 | -1.01 | 0.483702 | 0.557609 | 0.773253 | 0.735113 |
| MmugDNA.30522.1.S1_at   | MmugDNA.30522.1 | 7.2   | 7.42  | 0.17 | 0.04 | -1.16 | 0.14867  | 0.246792 | 0.522734 | 0.516126 |
| MmugDNA.30523.1.S1_at   | MmugDNA.30523.1 | 4.81  | 4.43  | 0.29 | 0.08 | 1.3   | 0.324015 | 0.304765 | 0.672429 | 0.561921 |
| MmugDNA.30524.1.S1_at   | MmugDNA.30524.1 | 4.74  | 5.29  | 0.05 | 0.34 | -1.46 | 0.181099 | 0.172474 | 0.554326 | 0.448864 |
| MmugDNA.30525.1.S1_at   | MmugDNA.30525.1 | 5.42  | 5.64  | 0.22 | 0.53 | -1.17 | 0.83624  | 0.238226 | 0.941202 | 0.508825 |
| MmugDNA.30527.1.S1_at   | MmugDNA.30527.1 | 4.8   | 4.7   | 0.13 | 0.11 | 1.08  | 0.725092 | 0.072795 | 0.893356 | 0.315651 |
| MmugDNA.30529.1.S1_at   | MmugDNA.30529.1 | 6.85  | 7.5   | 0.6  | 0.29 | -1.57 | 0.675501 | 0.054613 | 0.872698 | 0.279211 |
| MmugDNA.30531.1.S1_at   | MmugDNA.30531.1 | 5.5   | 5.6   | 0.12 | 0.2  | -1.07 | 0.525825 | 0.300091 | 0.796442 | 0.558262 |
| MmugDNA.30532.1.S1_at   | MmugDNA.30532.1 | 3.47  | 3.56  | 0.14 | 0.27 | -1.06 | 0.435215 | 0.517332 | 0.745582 | 0.709435 |
| MmugDNA.30533.1.S1_at   | MmugDNA.30533.1 | 8.11  | 8.57  | 0.86 | 0.16 | -1.37 | 0.353949 | 0.48939  | 0.693507 | 0.691792 |
| MmugDNA.30535.1.S1_at   | MmugDNA.30535.1 | 5.59  | 6.02  | 0.92 | 0.23 | -1.34 | 0.448416 | 0.611788 | 0.753886 | 0.769583 |
| MmugDNA.30536.1.S1_at   | MmugDNA.30536.1 | 3.33  | 3.46  | 0.38 | 0.1  | -1.09 | 0.748587 | 0.766369 | 0.904527 | 0.864264 |
| MmugDNA.30536.1.S1_x_at | MmugDNA.30536.1 | 4.81  | 5.04  | 0.3  | 0.04 | -1.17 | 0.217815 | 0.230625 | 0.58782  | 0.502327 |
| MmugDNA.30538.1.S1_at   | MmugDNA.30538.1 | 3.1   | 3     | 0.15 | 0.09 | 1.07  | 0.268508 | 0.38349  | 0.628847 | 0.619446 |
| MmugDNA.30539.1.S1_at   | MmugDNA.30539.1 | 11.08 | 10.5  | 0.5  | 0.11 | 1.49  | 0.109413 | 0.13107  | 0.482257 | 0.403084 |
| MmugDNA.30539.1.S1_x_at | MmugDNA.30539.1 | 10.83 | 10.17 | 0.54 | 0.11 | 1.58  | 0.09103  | 0.118529 | 0.458927 | 0.38654  |
| MmugDNA.3054.1.S1_at    | MmugDNA.3054.1  | 3.11  | 3.11  | 0.08 | 0.04 | 1     | 0.23756  | 0.325099 | 0.604484 | 0.575545 |
| MmugDNA.30540.1.S1_at   | MmugDNA.30540.1 | 8.47  | 8.63  | 0.26 | 0.03 | -1.12 | 0.322416 | 0.064713 | 0.671134 | 0.300314 |
| MmugDNA.30542.1.S1_at   | MmugDNA.30542.1 | 11.67 | 11.5  | 0.19 | 0.05 | 1.13  | 0.154023 | 0.216028 | 0.527325 | 0.48965  |
| MmugDNA.30543.1.S1_at   | MmugDNA.30543.1 | 4.87  | 4.5   | 0.27 | 0.04 | 1.3   | 0.071466 | 0.048837 | 0.431049 | 0.265858 |
| MmuSTS.2792.1.S1_at     | MmuSTS.2792.1   | 4.22  | 4.36  | 0.24 | 0.07 | -1.1  | 0.545238 | 0.728068 | 0.807713 | 0.842733 |
| MmuSTS.2792.1.S1_s_at   | MmuSTS.2792.1   | 4.67  | 4.69  | 0.05 | 0.15 | -1.01 | 0.943449 | 0.91226  | 0.980509 | 0.950559 |
| MmugDNA.30544.1.S1_at   | MmugDNA.30544.1 | 6.39  | 6.5   | 0.28 | 0.17 | -1.08 | 0.237185 | 0.233399 | 0.604099 | 0.504751 |
| MmugDNA.30545.1.S1_at   | MmugDNA.30545.1 | 8.72  | 9.22  | 0.42 | 0.16 | -1.42 | 0.158614 | 0.11341  | 0.531588 | 0.379509 |
| MmugDNA.30546.1.S1_at   | MmugDNA.30546.1 | 3.64  | 3.67  | 0.25 | 0.05 | -1.02 | 0.518723 | 0.400596 | 0.792804 | 0.630415 |
| MmugDNA.30547.1.S1_at   | MmugDNA.30547.1 | 6.37  | 6.28  | 0.1  | 0.16 | 1.06  | 0.154672 | 0.271887 | 0.527939 | 0.536644 |
| MmugDNA.30548.1.S1_at   | MmugDNA.30548.1 | 6.6   | 7.21  | 0.54 | 0.1  | -1.52 | 0.140986 | 0.089017 | 0.516345 | 0.342876 |
| MmugDNA.30549.1.S1_at   | MmugDNA.30549.1 | 3.23  | 3.15  | 0.16 | 0.06 | 1.06  | 0.148487 | 0.236841 | 0.522567 | 0.507565 |
| MmugDNA.3055.1.S1_at    | MmugDNA.3055.1  | 3.08  | 3.56  | 0.14 | 0.14 | -1.4  | 0.021969 | 0.033761 | 0.309781 | 0.22741  |
| MmugDNA.30550.1.S1_at   | MmugDNA.30550.1 | 6.09  | 5.92  | 0.43 | 0.26 | 1.13  | 0.809576 | 0.043998 | 0.931065 | 0.254195 |
| MmugDNA.27278.1.S1_s_at | MmugDNA.27278.1 | 6.14  | 6.11  | 0.03 | 0.08 | 1.02  | 0.84285  | 0.974709 | 0.944371 | 0.986238 |
| MmugDNA.30553.1.S1_at   | MmugDNA.30553.1 | 6.3   | 6.15  | 0.08 | 0.12 | 1.11  | 0.351872 | 0.112367 | 0.692553 | 0.37769  |
| MmugDNA.30556.1.S1_at   | MmugDNA.30556.1 | 5.62  | 5.51  | 0.29 | 0.13 | 1.08  | 0.700378 | 0.828143 | 0.883486 | 0.901214 |
| MmugDNA.30557.1.S1_at   | MmugDNA.30557.1 | 5.56  | 5.41  | 0.7  | 0.09 | 1.11  | 0.857048 | 0.190058 | 0.94962  | 0.465697 |

|                         |                 |       |       |      |      |       |          |          |          |          |
|-------------------------|-----------------|-------|-------|------|------|-------|----------|----------|----------|----------|
| MmugDNA.30558.1.S1_at   | MmugDNA.30558.1 | 3.76  | 3.61  | 0.08 | 0.09 | 1.11  | 0.103995 | 0.323457 | 0.474656 | 0.574466 |
| MmugDNA.3056.1.S1_at    | MmugDNA.3056.1  | 8.04  | 8.64  | 0.59 | 0.04 | -1.51 | 0.266453 | 0.36212  | 0.627329 | 0.602821 |
| MmugDNA.30560.1.S1_at   | MmugDNA.30560.1 | 3.59  | 3.88  | 0.18 | 0.31 | -1.23 | 0.48423  | 0.460485 | 0.773472 | 0.672362 |
| MmugDNA.30561.1.S1_at   | MmugDNA.30561.1 | 8.07  | 7.71  | 0.58 | 0.01 | 1.28  | 0.270635 | 0.172149 | 0.63052  | 0.448529 |
| MmugDNA.30561.1.S1_s_at | MmugDNA.30561.1 | 7.55  | 6.38  | 0.33 | 0.25 | 2.25  | 0.00702  | 0.002162 | 0.225062 | 0.068763 |
| MmugDNA.30564.1.S1_at   | MmugDNA.30564.1 | 11.02 | 10.94 | 0.48 | 0.13 | 1.05  | 0.694673 | 0.753563 | 0.881132 | 0.856527 |
| MmugDNA.30567.1.S1_at   | MmugDNA.30567.1 | 6.98  | 7.06  | 0.28 | 0.15 | -1.05 | 0.785334 | 0.476888 | 0.921121 | 0.683011 |
| MmugDNA.30569.1.S1_at   | MmugDNA.30569.1 | 4.7   | 4.9   | 2.21 | 0.74 | -1.15 | 0.657139 | 0.673854 | 0.863934 | 0.809483 |
| MmugDNA.3057.1.S1_at    | MmugDNA.3057.1  | 4.94  | 4.96  | 0.15 | 0.07 | -1.01 | 0.500286 | 0.67394  | 0.782451 | 0.809483 |
| MmugDNA.30570.1.S1_at   | MmugDNA.30570.1 | 9.85  | 9.6   | 0.06 | 0.18 | 1.19  | 0.02426  | 0.009407 | 0.317812 | 0.127839 |
| MmugDNA.30571.1.S1_at   | MmugDNA.30571.1 | 4.61  | 4.28  | 0.22 | 0.14 | -1.26 | 0.424992 | 0.154852 | 0.739773 | 0.429849 |
| MmugDNA.30573.1.S1_at   | MmugDNA.30573.1 | 10.2  | 10.07 | 0.49 | 0.12 | 1.1   | 0.81459  | 0.035624 | 0.933055 | 0.233105 |
| MmugDNA.30574.1.S1_at   | MmugDNA.30574.1 | 4.5   | 4.15  | 0.12 | 0.06 | 1.27  | 0.011928 | 0.013154 | 0.257858 | 0.147338 |
| MmugDNA.30575.1.S1_at   | MmugDNA.30575.1 | 6.78  | 6.96  | 0.23 | 0.07 | -1.13 | 0.09171  | 0.005354 | 0.45996  | 0.101092 |
| MmugDNA.30576.1.S1_at   | MmugDNA.30576.1 | 4.93  | 4.92  | 0.11 | 0.06 | 1     | 0.578515 | 0.368373 | 0.826206 | 0.607917 |
| MmugDNA.30577.1.S1_at   | MmugDNA.30577.1 | 7.42  | 6.97  | 0.51 | 0.15 | 1.37  | 0.208514 | 0.268108 | 0.580248 | 0.533862 |
| MmugDNA.30579.1.S1_at   | MmugDNA.30579.1 | 12.35 | 12.35 | 0.3  | 0.03 | 1     | 0.355504 | 0.085512 | 0.694743 | 0.337508 |
| MmugDNA.3058.1.S1_at    | MmugDNA.3058.1  | 5.92  | 5.99  | 0.09 | 0.07 | -1.05 | 0.542277 | 0.918332 | 0.805613 | 0.954227 |
| MmugDNA.30583.1.S1_at   | MmugDNA.30583.1 | 7.35  | 7.65  | 0.17 | 0.33 | -1.23 | 0.29444  | 0.30891  | 0.650602 | 0.564656 |
| MmugDNA.30584.1.S1_at   | MmugDNA.30584.1 | 3.76  | 3.77  | 0.18 | 0.08 | -1.01 | 0.224361 | 0.327124 | 0.593546 | 0.577136 |
| MmugDNA.30585.1.S1_at   | MmugDNA.30585.1 | 3.47  | 3.35  | 0.17 | 0.17 | 1.09  | 0.341365 | 0.386778 | 0.685051 | 0.621895 |
| MmugDNA.30586.1.S1_at   | MmugDNA.30586.1 | 5.57  | 4.84  | 0.32 | 0.05 | 1.66  | 0.017089 | 0.280986 | 0.289186 | 0.544166 |
| MmugDNA.30587.1.S1_s_at | MmugDNA.30587.1 | 7.53  | 6.97  | 0.24 | 0.17 | 1.48  | 0.020373 | 0.012841 | 0.303945 | 0.145955 |
| MmugDNA.30588.1.S1_at   | MmugDNA.30588.1 | 5.16  | 5.16  | 0.06 | 0.09 | 1     | 0.40107  | 0.412755 | 0.72413  | 0.63909  |
| MmugDNA.30589.1.S1_at   | MmugDNA.30589.1 | 10.19 | 11.2  | 0.48 | 0.09 | -2.01 | 0.072113 | 0.115652 | 0.432032 | 0.382714 |
| MmugDNA.30590.1.S1_at   | MmugDNA.30590.1 | 3.67  | 3.73  | 0.12 | 0.08 | -1.04 | 0.907845 | 0.077914 | 0.968816 | 0.32425  |
| MmugDNA.30591.1.S1_at   | MmugDNA.30591.1 | 5.68  | 5.69  | 0.08 | 0.32 | -1    | 0.993308 | 0.960125 | 0.99744  | 0.977408 |
| MmugDNA.30596.1.S1_at   | MmugDNA.30596.1 | 10.6  | 10.32 | 0.2  | 0.06 | 1.22  | 0.070394 | 0.113408 | 0.429174 | 0.379509 |
| MmugDNA.30597.1.S1_at   | MmugDNA.30597.1 | 9.87  | 10.04 | 0.23 | 0.05 | -1.12 | 0.249244 | 0.545588 | 0.614581 | 0.727579 |
| MmugDNA.30599.1.S1_at   | MmugDNA.30599.1 | 4.57  | 4.55  | 0.14 | 0.1  | 1.01  | 0.668189 | 0.768874 | 0.868932 | 0.865722 |
| MmugDNA.306.1.S1_at     | MmugDNA.306.1   | 3.52  | 3.54  | 0.03 | 0.17 | -1.01 | 0.726849 | 0.749982 | 0.894496 | 0.854652 |
| MmugDNA.306.1.S1_s_at   | MmugDNA.306.1   | 5.53  | 5.42  | 0.35 | 0.02 | 1.08  | 0.654675 | 0.756558 | 0.862882 | 0.858235 |
| MmugDNA.30600.1.S1_at   | MmugDNA.30600.1 | 3.89  | 3.76  | 0.14 | 0.29 | 1.1   | 0.606495 | 0.64105  | 0.840496 | 0.789381 |
| MmugDNA.30602.1.S1_at   | MmugDNA.30602.1 | 5.51  | 4.82  | 0.29 | 0.19 | 1.61  | 0.024474 | 0.017284 | 0.31887  | 0.166461 |
| MmugDNA.30603.1.S1_at   | MmugDNA.30603.1 | 11.51 | 11.66 | 0.28 | 0.1  | -1.11 | 0.685736 | 0.17221  | 0.876883 | 0.448609 |
| MmugDNA.30603.1.S1_s_at | MmugDNA.30603.1 | 11.87 | 12.05 | 0.18 | 0.08 | -1.13 | 0.631909 | 0.123225 | 0.85263  | 0.39328  |
| MmugDNA.30605.1.S1_at   | MmugDNA.30605.1 | 4.96  | 5.06  | 0.33 | 0.18 | -1.07 | 0.682131 | 0.118371 | 0.875625 | 0.386398 |
| MmugDNA.30606.1.S1_at   | MmugDNA.30606.1 | 3.59  | 3.65  | 0.29 | 0.43 | -1.04 | 0.920229 | 0.073241 | 0.972913 | 0.316225 |
| MmugDNA.30607.1.S1_at   | MmugDNA.30607.1 | 3.58  | 3.62  | 0.14 | 0.08 | -1.03 | 0.806206 | 0.490743 | 0.929632 | 0.692666 |
| MmugDNA.30608.1.S1_at   | MmugDNA.30608.1 | 7.84  | 7.39  | 0.33 | 0.25 | 1.36  | 0.096488 | 0.141846 | 0.465152 | 0.41535  |
| MmugDNA.3061.1.S1_at    | MmugDNA.3061.1  | 5.54  | 5.52  | 0.27 | 0.05 | 1.02  | 0.712481 | 0.914205 | 0.887958 | 0.951773 |
| MmugDNA.30610.1.S1_at   | MmugDNA.30610.1 | 6.68  | 6.63  | 0.09 | 0.02 | 1.03  | 0.144429 | 0.243264 | 0.519862 | 0.513356 |
| MmugDNA.30612.1.S1_at   | MmugDNA.30612.1 | 11.8  | 11.73 | 0.74 | 0.14 | 1.05  | 0.884313 | 0.127369 | 0.959932 | 0.398205 |

|                         |                 |       |       |      |      |       |          |          |          |          |
|-------------------------|-----------------|-------|-------|------|------|-------|----------|----------|----------|----------|
| MmugDNA.30613.1.S1_at   | MmugDNA.30613.1 | 8     | 7.57  | 0.33 | 0.15 | 1.35  | 0.310156 | 0.049887 | 0.662073 | 0.268454 |
| MmugDNA.30614.1.S1_at   | MmugDNA.30614.1 | 8.37  | 8.43  | 0.16 | 0.14 | -1.04 | 0.704834 | 0.185439 | 0.885227 | 0.46148  |
| MmugDNA.30616.1.S1_at   | MmugDNA.30616.1 | 4.12  | 4     | 0.2  | 0.32 | 1.09  | 0.801932 | 0.356709 | 0.927804 | 0.598516 |
| MmugDNA.30617.1.S1_at   | MmugDNA.30617.1 | 6.6   | 5.96  | 0.42 | 0.11 | 1.56  | 0.161366 | 0.147366 | 0.534731 | 0.421554 |
| MmugDNA.30617.1.S1_s_at | MmugDNA.30617.1 | 7.14  | 6.69  | 0.41 | 0.22 | 1.36  | 0.25147  | 0.321534 | 0.616712 | 0.573226 |
| MmugDNA.30618.1.S1_at   | MmugDNA.30618.1 | 8.67  | 8.76  | 0.31 | 0.01 | -1.06 | 0.685716 | 0.734037 | 0.876883 | 0.845896 |
| MmugDNA.30622.1.S1_at   | MmugDNA.30622.1 | 4.02  | 4.05  | 0.28 | 0.03 | -1.02 | 0.414051 | 0.134304 | 0.732753 | 0.406573 |
| MmugDNA.30622.1.S1_s_at | MmugDNA.30622.1 | 3.08  | 3.67  | 0.33 | 0.99 | -1.51 | 0.450747 | 0.709998 | 0.754859 | 0.831887 |
| MmugDNA.30624.1.S1_at   | MmugDNA.30624.1 | 4.49  | 4.27  | 0.48 | 0.06 | 1.17  | 0.420034 | 0.814418 | 0.736634 | 0.892923 |
| MmugDNA.30625.1.S1_at   | MmugDNA.30625.1 | 8.88  | 9.03  | 0.45 | 0.12 | -1.11 | 0.415776 | 0.003831 | 0.73381  | 0.088065 |
| MmugDNA.30626.1.S1_at   | MmugDNA.30626.1 | 6.27  | 6.37  | 0.23 | 0.18 | -1.07 | 0.167274 | 0.379967 | 0.539832 | 0.616659 |
| MmugDNA.30627.1.S1_at   | MmugDNA.30627.1 | 8.03  | 8.06  | 1.07 | 0.25 | -1.02 | 0.923909 | 0.901771 | 0.97453  | 0.944082 |
| MmugDNA.30627.1.S1_s_at | MmugDNA.30627.1 | 10.48 | 10.58 | 0.85 | 0.09 | -1.07 | 0.738337 | 0.746342 | 0.899866 | 0.85272  |
| MmugDNA.3063.1.S1_at    | MmugDNA.3063.1  | 5.71  | 5.42  | 0.29 | 0.12 | 1.23  | 0.138272 | 0.156491 | 0.513671 | 0.431866 |
| MmugDNA.30630.1.S1_at   | MmugDNA.30630.1 | 4.88  | 5.04  | 0.1  | 0.29 | -1.12 | 0.948088 | 0.198164 | 0.98218  | 0.473148 |
| MmugDNA.30631.1.S1_at   | MmugDNA.30631.1 | 3.13  | 3.11  | 0.08 | 0.18 | 1.01  | 0.781682 | 0.607823 | 0.919573 | 0.766594 |
| MmugDNA.30633.1.S1_at   | MmugDNA.30633.1 | 10.21 | 10.39 | 0.34 | 0.29 | -1.13 | 0.984876 | 0.087552 | 0.995256 | 0.340753 |
| MmugDNA.30637.1.S1_at   | MmugDNA.30637.1 | 4.49  | 4.59  | 0.08 | 0.04 | -1.07 | 0.231466 | 0.103273 | 0.599368 | 0.364143 |
| MmugDNA.30638.1.S1_at   | MmugDNA.30638.1 | 3.4   | 3.3   | 0.13 | 0.02 | 1.07  | 0.204465 | 0.200335 | 0.575907 | 0.474729 |
| MmugDNA.30640.1.S1_at   | MmugDNA.30640.1 | 3.03  | 3.04  | 0.1  | 0.1  | -1.01 | 0.901005 | 0.730089 | 0.966467 | 0.843808 |
| MmugDNA.30641.1.S1_at   | MmugDNA.30641.1 | 3.78  | 3.81  | 0.24 | 0.32 | -1.02 | 0.979739 | 0.62752  | 0.993574 | 0.780488 |
| MmugDNA.30642.1.S1_at   | MmugDNA.30642.1 | 7.2   | 6.73  | 0.86 | 0.43 | 1.38  | 0.27241  | 0.312001 | 0.632202 | 0.566838 |
| MmugDNA.30647.1.S1_at   | MmugDNA.30647.1 | 4.45  | 4.41  | 0.25 | 0.16 | 1.03  | 0.334952 | 0.582054 | 0.680734 | 0.750784 |
| MmugDNA.30650.1.S1_at   | MmugDNA.30650.1 | 3.3   | 3.34  | 0.08 | 0.14 | -1.03 | 0.764479 | 0.915072 | 0.911502 | 0.952307 |
| MmugDNA.30651.1.S1_at   | MmugDNA.30651.1 | 5.4   | 5.44  | 0.3  | 0.03 | -1.02 | 0.424541 | 0.58555  | 0.739618 | 0.752909 |
| MmugDNA.30652.1.S1_at   | MmugDNA.30652.1 | 6.69  | 7.25  | 1.29 | 0.43 | -1.48 | 0.716076 | 0.150299 | 0.889675 | 0.424877 |
| MmugDNA.30652.1.S1_s_at | MmugDNA.30652.1 | 6.73  | 7.21  | 1.6  | 0.43 | -1.4  | 0.73676  | 0.237706 | 0.899286 | 0.50826  |
| MmugDNA.30653.1.S1_at   | MmugDNA.30653.1 | 5.47  | 5.49  | 0.23 | 0.19 | -1.01 | 0.691089 | 0.468258 | 0.879715 | 0.6777   |
| MmugDNA.30656.1.S1_at   | MmugDNA.30656.1 | 12.58 | 12.64 | 0.09 | 0.02 | -1.04 | 0.364924 | 0.237108 | 0.700775 | 0.507849 |
| MmugDNA.30657.1.S1_at   | MmugDNA.30657.1 | 3.1   | 3.05  | 0.03 | 0.37 | 1.04  | 0.579496 | 0.7773   | 0.826489 | 0.87064  |
| MmugDNA.30658.1.S1_at   | MmugDNA.30658.1 | 6.37  | 6.77  | 0.59 | 0.13 | -1.31 | 0.754414 | 0.456178 | 0.907353 | 0.669959 |
| MmugDNA.3066.1.S1_at    | MmugDNA.3066.1  | 8.78  | 9.71  | 0.45 | 0.1  | -1.9  | 0.074739 | 0.079307 | 0.435313 | 0.326549 |
| MmugDNA.30660.1.S1_at   | MmugDNA.30660.1 | 3.64  | 3.7   | 0.11 | 0.1  | -1.04 | 0.405439 | 0.232972 | 0.727426 | 0.50445  |
| MmugDNA.30661.1.S1_s_at | MmugDNA.30661.1 | 10.11 | 10.3  | 0.39 | 0.07 | -1.14 | 0.804485 | 0.18494  | 0.928965 | 0.460776 |
| MmugDNA.30663.1.S1_at   | MmugDNA.30663.1 | 8.37  | 8.78  | 0.4  | 0.07 | -1.32 | 0.546925 | 0.015102 | 0.808912 | 0.156008 |
| MmugDNA.30664.1.S1_at   | MmugDNA.30664.1 | 7.72  | 7.4   | 0.5  | 0.15 | 1.25  | 0.7033   | 0.827196 | 0.884629 | 0.90079  |
| MmugDNA.30668.1.S1_at   | MmugDNA.30668.1 | 3.81  | 3.67  | 0.16 | 0.1  | 1.1   | 0.255587 | 0.631577 | 0.619684 | 0.782845 |
| MmugDNA.30669.1.S1_at   | MmugDNA.30669.1 | 4.04  | 3.84  | 0.07 | 0.07 | 1.14  | 0.064416 | 0.111811 | 0.418165 | 0.376856 |
| MmugDNA.3067.1.S1_at    | MmugDNA.3067.1  | 4.21  | 4.09  | 0.07 | 0.04 | 1.09  | 0.08995  | 0.771692 | 0.457959 | 0.867344 |
| MmugDNA.30672.1.S1_at   | MmugDNA.30672.1 | 12.47 | 12.92 | 0.28 | 0.03 | -1.36 | 0.052143 | 0.036495 | 0.392084 | 0.235526 |
| MmugDNA.30673.1.S1_at   | MmugDNA.30673.1 | 8.16  | 8.4   | 0.12 | 0.22 | -1.17 | 0.334504 | 0.192622 | 0.680478 | 0.468116 |
| MmugDNA.30673.1.S1_s_at | MmugDNA.30673.1 | 11.75 | 11.85 | 0.16 | 0.15 | -1.07 | 0.449894 | 0.472712 | 0.754621 | 0.680072 |
| MmugDNA.30674.1.S1_at   | MmugDNA.30674.1 | 11.28 | 11.32 | 0.39 | 0.13 | -1.03 | 0.94508  | 0.307035 | 0.980852 | 0.563427 |

|                         |                 |       |       |      |      |       |          |          |          |          |
|-------------------------|-----------------|-------|-------|------|------|-------|----------|----------|----------|----------|
| MmugDNA.30675.1.S1_at   | MmugDNA.30675.1 | 10.75 | 11.14 | 0.28 | 0.18 | -1.31 | 0.079927 | 0.121453 | 0.443024 | 0.390578 |
| MmugDNA.30676.1.S1_at   | MmugDNA.30676.1 | 10    | 10.69 | 0.67 | 0.03 | -1.61 | 0.474651 | 0.613398 | 0.768152 | 0.770528 |
| MmugDNA.3068.1.S1_at    | MmugDNA.3068.1  | 4.05  | 4.16  | 0.06 | 0.12 | -1.08 | 0.088013 | 0.197154 | 0.456029 | 0.472213 |
| MmugDNA.30680.1.S1_at   | MmugDNA.30680.1 | 9.03  | 9.04  | 0.99 | 0.18 | -1    | 0.917507 | 0.081526 | 0.972005 | 0.329764 |
| MmugDNA.30681.1.S1_at   | MmugDNA.30681.1 | 5.14  | 5.25  | 1.07 | 0.58 | -1.08 | 0.611898 | 0.361473 | 0.842626 | 0.602216 |
| MmugDNA.30682.1.S1_at   | MmugDNA.30682.1 | 5.25  | 5.62  | 0.23 | 0.16 | -1.29 | 0.057687 | 0.157371 | 0.402592 | 0.432859 |
| MmugDNA.30685.1.S1_at   | MmugDNA.30685.1 | 4.34  | 4.17  | 0.15 | 0.07 | 1.12  | 0.550888 | 0.827841 | 0.811067 | 0.90116  |
| MmugDNA.30687.1.S1_at   | MmugDNA.30687.1 | 7.44  | 7.24  | 0.09 | 0.09 | 1.15  | 0.061549 | 0.339505 | 0.411001 | 0.586095 |
| MmugDNA.3069.1.S1_at    | MmugDNA.3069.1  | 10.62 | 10.42 | 0.13 | 0.03 | 1.15  | 0.070683 | 0.040581 | 0.42977  | 0.246306 |
| MmugDNA.30690.1.S1_at   | MmugDNA.30690.1 | 6.54  | 6.77  | 0.15 | 0    | -1.17 | 0.175197 | 0.106929 | 0.548034 | 0.369499 |
| MmugDNA.30692.1.S1_at   | MmugDNA.30692.1 | 6.31  | 6.23  | 0.03 | 0.16 | -1.06 | 0.1544   | 0.08159  | 0.527521 | 0.329808 |
| MmugDNA.30693.1.S1_at   | MmugDNA.30693.1 | 4.72  | 4.57  | 0.09 | 0.11 | 1.11  | 0.336074 | 0.265857 | 0.681441 | 0.531705 |
| MmugDNA.30695.1.S1_at   | MmugDNA.30695.1 | 4.78  | 4.58  | 0.26 | 0.28 | 1.14  | 0.376068 | 0.230416 | 0.706657 | 0.502199 |
| MmugDNA.30696.1.S1_at   | MmugDNA.30696.1 | 3.03  | 3.32  | 0.05 | 0.12 | -1.23 | 0.015129 | 0.007049 | 0.2796   | 0.113192 |
| MmugDNA.30697.1.S1_at   | MmugDNA.30697.1 | 7.34  | 7.33  | 0.34 | 0.12 | 1.01  | 0.417311 | 0.256875 | 0.734845 | 0.524698 |
| MmugDNA.30698.1.S1_at   | MmugDNA.30698.1 | 4.02  | 3.93  | 0.32 | 0.18 | 1.06  | 0.431618 | 0.684359 | 0.743486 | 0.815919 |
| MmugDNA.30699.1.S1_at   | MmugDNA.30699.1 | 5.19  | 5.29  | 0.2  | 0.05 | -1.07 | 0.498575 | 0.123298 | 0.781804 | 0.393386 |
| MmugDNA.307.1.S1_at     | MmugDNA.307.1   | 8.2   | 7.88  | 0.45 | 0.27 | 1.25  | 0.294464 | 0.543001 | 0.650602 | 0.725879 |
| MmugDNA.3070.1.S1_at    | MmugDNA.3070.1  | 4.11  | 3.75  | 0.29 | 0.09 | 1.28  | 0.109752 | 0.178165 | 0.482577 | 0.454527 |
| MmugDNA.30700.1.S1_at   | MmugDNA.30700.1 | 5.78  | 5.94  | 0.24 | 0.03 | -1.11 | 0.276266 | 0.133952 | 0.635903 | 0.4061   |
| MmugDNA.30701.1.S1_at   | MmugDNA.30701.1 | 4.82  | 4.65  | 0.03 | 0.03 | 1.13  | 0.001554 | 0.027791 | 0.161959 | 0.20819  |
| MmugDNA.30702.1.S1_x_at | MmugDNA.30702.1 | 9.79  | 9.81  | 0.15 | 0.15 | -1.01 | 0.6525   | 0.335987 | 0.862013 | 0.583601 |
| MmugDNA.30703.1.S1_at   | MmugDNA.30703.1 | 3.8   | 3.66  | 0.26 | 0.04 | 1.1   | 0.909582 | 0.734129 | 0.969434 | 0.845896 |
| MmugDNA.30704.1.S1_at   | MmugDNA.30704.1 | 3.77  | 4.44  | 0.77 | 0.7  | -1.59 | 0.544401 | 0.630942 | 0.807207 | 0.782552 |
| MmugDNA.30705.1.S1_at   | MmugDNA.30705.1 | 4.87  | 5.03  | 0.29 | 0.05 | -1.12 | 0.454083 | 0.243977 | 0.756542 | 0.514069 |
| MmugDNA.30707.1.S1_at   | MmugDNA.30707.1 | 4.81  | 4.59  | 0.06 | 0.55 | 1.16  | 0.689292 | 0.237921 | 0.878821 | 0.508478 |
| MmugDNA.30708.1.S1_at   | MmugDNA.30708.1 | 12.56 | 12.22 | 0.15 | 0.07 | 1.27  | 0.033659 | 0.016215 | 0.34712  | 0.161389 |
| MmugDNA.30709.1.S1_at   | MmugDNA.30709.1 | 7.24  | 7.24  | 0.25 | 0.05 | -1    | 0.305844 | 0.312495 | 0.659264 | 0.567211 |
| MmugDNA.3071.1.S1_at    | MmugDNA.3071.1  | 8.13  | 9.05  | 0.13 | 0.1  | -1.89 | 0.000626 | 0.017665 | 0.143353 | 0.168048 |
| MmugDNA.30710.1.S1_at   | MmugDNA.30710.1 | 8.23  | 8.69  | 1.21 | 0.16 | -1.37 | 0.512038 | 0.316966 | 0.789065 | 0.570275 |
| MmugDNA.30714.1.S1_at   | MmugDNA.30714.1 | 5.05  | 5.03  | 0.07 | 0.09 | 1.01  | 0.73053  | 0.189765 | 0.896248 | 0.465403 |
| MmugDNA.30716.1.S1_at   | MmugDNA.30716.1 | 11.81 | 12.05 | 0.18 | 0.08 | -1.18 | 0.055957 | 0.001732 | 0.399441 | 0.062895 |
| MmugDNA.30716.1.S1_s_at | MmugDNA.30716.1 | 11.11 | 11.37 | 0.13 | 0.08 | -1.2  | 0.033062 | 0.000869 | 0.345994 | 0.047471 |
| MmugDNA.30717.1.S1_at   | MmugDNA.30717.1 | 6.4   | 6.24  | 0.06 | 0.1  | 1.12  | 0.031798 | 0.068967 | 0.342447 | 0.308954 |
| MmugDNA.30718.1.S1_at   | MmugDNA.30718.1 | 5.15  | 4.96  | 0.2  | 0.05 | 1.14  | 0.330971 | 0.362874 | 0.67754  | 0.603383 |
| MmugDNA.3072.1.S1_at    | MmugDNA.3072.1  | 4.73  | 4.68  | 0.17 | 0.32 | 1.04  | 0.492342 | 0.142459 | 0.77824  | 0.416035 |
| MmugDNA.30720.1.S1_at   | MmugDNA.30720.1 | 3.02  | 3.02  | 0.03 | 0.17 | 1     | 0.482242 | 0.190305 | 0.7723   | 0.465906 |
| MmugDNA.30721.1.S1_at   | MmugDNA.30721.1 | 12.51 | 11.26 | 0.37 | 0.19 | 2.38  | 0.006357 | 0.004438 | 0.218572 | 0.092958 |
| MmugDNA.30722.1.S1_at   | MmugDNA.30722.1 | 8.78  | 8.92  | 0.13 | 0.04 | -1.1  | 0.272211 | 0.706134 | 0.631963 | 0.829634 |
| MmugDNA.30723.1.S1_at   | MmugDNA.30723.1 | 7.02  | 6.89  | 0.25 | 0.11 | 1.09  | 0.617484 | 0.747942 | 0.84544  | 0.853333 |
| MmugDNA.30724.1.S1_at   | MmugDNA.30724.1 | 4.02  | 4.02  | 0.15 | 0.08 | 1     | 0.970615 | 0.697474 | 0.990399 | 0.824228 |
| MmugDNA.30726.1.S1_s_at | MmugDNA.30726.1 | 9.15  | 10.4  | 0.29 | 0.04 | -2.38 | 0.001623 | 0.000397 | 0.162459 | 0.037471 |
| MmugDNA.30727.1.S1_at   | MmugDNA.30727.1 | 3.6   | 3.61  | 0.07 | 0.05 | -1    | 0.740045 | 0.123742 | 0.900699 | 0.393883 |

|                         |                 |       |       |      |      |       |          |          |          |          |
|-------------------------|-----------------|-------|-------|------|------|-------|----------|----------|----------|----------|
| MmugDNA.30728.1.S1_at   | MmugDNA.30728.1 | 8.5   | 8.18  | 0.44 | 0.07 | 1.25  | 0.285818 | 0.445122 | 0.643438 | 0.662296 |
| MmugDNA.30729.1.S1_s_at | MmugDNA.30729.1 | 11.31 | 11.23 | 0.04 | 0.02 | 1.06  | 0.036149 | 0.154679 | 0.354479 | 0.429605 |
| MmugDNA.3073.1.S1_at    | MmugDNA.3073.1  | 3.14  | 3.07  | 0.04 | 0.01 | 1.05  | 0.096489 | 0.840399 | 0.465152 | 0.909015 |
| MmugDNA.30731.1.S1_at   | MmugDNA.30731.1 | 5.13  | 4.88  | 0.33 | 0.18 | 1.19  | 0.276844 | 0.172215 | 0.636476 | 0.448609 |
| MmugDNA.30732.1.S1_at   | MmugDNA.30732.1 | 6.35  | 6.26  | 0.15 | 0.33 | 1.06  | 0.899916 | 0.860951 | 0.965989 | 0.920854 |
| MmugDNA.30734.1.S1_at   | MmugDNA.30734.1 | 7.27  | 7.99  | 0.08 | 0.13 | -1.65 | 0.002035 | 0.000093 | 0.173807 | 0.027285 |
| MmugDNA.30735.1.S1_at   | MmugDNA.30735.1 | 6.31  | 6.39  | 0.1  | 0.07 | -1.06 | 0.261671 | 0.236213 | 0.62388  | 0.507252 |
| MmugDNA.30736.1.S1_at   | MmugDNA.30736.1 | 9.35  | 11.4  | 0.91 | 0.11 | -4.14 | 0.021934 | 0.014353 | 0.309781 | 0.152926 |
| MmugDNA.30737.1.S1_at   | MmugDNA.30737.1 | 6.99  | 6.19  | 1.7  | 0.3  | 1.74  | 0.804841 | 0.501958 | 0.929036 | 0.699986 |
| MmugDNA.30738.1.S1_at   | MmugDNA.30738.1 | 4.64  | 4.64  | 0.13 | 0.17 | -1    | 0.236883 | 0.465028 | 0.603787 | 0.675534 |
| MmugDNA.30739.1.S1_at   | MmugDNA.30739.1 | 4.93  | 5.18  | 0.19 | 0.13 | -1.19 | 0.558094 | 0.304431 | 0.815182 | 0.561712 |
| MmugDNA.3074.1.S1_at    | MmugDNA.3074.1  | 6.11  | 6.09  | 0.09 | 0.58 | 1.02  | 0.901146 | 0.12223  | 0.966467 | 0.391926 |
| MmugDNA.30740.1.S1_at   | MmugDNA.30740.1 | 5.96  | 5.99  | 0.29 | 0.35 | -1.02 | 0.601162 | 0.786022 | 0.838113 | 0.876037 |
| MmugDNA.30741.1.S1_at   | MmugDNA.30741.1 | 4.43  | 4.14  | 0.04 | 0.16 | 1.23  | 0.082122 | 0.126945 | 0.446921 | 0.397686 |
| MmugDNA.30743.1.S1_at   | MmugDNA.30743.1 | 4.27  | 4.27  | 0.11 | 0.14 | 1     | 0.705201 | 0.875338 | 0.885355 | 0.929211 |
| MmugDNA.30745.1.S1_at   | MmugDNA.30745.1 | 8.49  | 8.36  | 0.17 | 0.28 | 1.09  | 0.381833 | 0.027607 | 0.710335 | 0.207455 |
| MmugDNA.30748.1.S1_at   | MmugDNA.30748.1 | 7.21  | 7.2   | 0.19 | 0.04 | 1.01  | 0.447304 | 0.468611 | 0.753177 | 0.677755 |
| MmugDNA.30749.1.S1_at   | MmugDNA.30749.1 | 12.47 | 12.55 | 0.21 | 0.02 | -1.06 | 0.815389 | 0.725165 | 0.933137 | 0.84092  |
| MmugDNA.3075.1.S1_at    | MmugDNA.3075.1  | 6.53  | 6.58  | 0.14 | 0.51 | -1.04 | 0.94942  | 0.320819 | 0.982867 | 0.572849 |
| MmugDNA.30750.1.S1_at   | MmugDNA.30750.1 | 3.17  | 3.29  | 0.2  | 0.06 | -1.08 | 0.957875 | 0.897528 | 0.986116 | 0.941525 |
| MmugDNA.30751.1.S1_s_at | MmugDNA.30751.1 | 10.14 | 10.26 | 0.23 | 0.1  | -1.09 | 0.402348 | 0.152937 | 0.724848 | 0.42777  |
| MmugDNA.30752.1.S1_at   | MmugDNA.30752.1 | 6.66  | 6.86  | 0.15 | 0.15 | -1.14 | 0.086797 | 0.168452 | 0.454762 | 0.445092 |
| MmugDNA.30753.1.S1_at   | MmugDNA.30753.1 | 11.93 | 12.03 | 0.09 | 0.16 | -1.07 | 0.483574 | 0.298562 | 0.773194 | 0.557183 |
| MmugDNA.30754.1.S1_at   | MmugDNA.30754.1 | 6.03  | 5.92  | 0.1  | 0.08 | 1.08  | 0.126535 | 0.229452 | 0.500465 | 0.501527 |
| MmugDNA.30755.1.S1_at   | MmugDNA.30755.1 | 4.29  | 4.24  | 0.15 | 0.11 | 1.04  | 0.279508 | 0.385093 | 0.638364 | 0.620662 |
| MmugDNA.30756.1.S1_at   | MmugDNA.30756.1 | 10.93 | 10.18 | 0.58 | 0.24 | 1.68  | 0.328252 | 0.199884 | 0.675714 | 0.474559 |
| MmugDNA.30758.1.S1_at   | MmugDNA.30758.1 | 6.23  | 7.21  | 1.61 | 0.48 | -1.97 | 0.23518  | 0.476601 | 0.602266 | 0.682787 |
| MmugDNA.30759.1.S1_at   | MmugDNA.30759.1 | 3.61  | 3.9   | 0.18 | 0.13 | -1.22 | 0.164674 | 0.101967 | 0.537466 | 0.36202  |
| MmugDNA.30760.1.S1_at   | MmugDNA.30760.1 | 6.07  | 6.06  | 0.08 | 0.01 | 1.01  | 0.928323 | 0.308939 | 0.976259 | 0.564656 |
| MmugDNA.30761.1.S1_at   | MmugDNA.30761.1 | 5.71  | 5.32  | 0.81 | 0.44 | 1.32  | 0.259823 | 0.032941 | 0.622814 | 0.224663 |
| MmugDNA.30762.1.S1_at   | MmugDNA.30762.1 | 5     | 5.02  | 0.03 | 0.24 | -1.01 | 0.975557 | 0.330025 | 0.992129 | 0.578915 |
| MmugDNA.30763.1.S1_at   | MmugDNA.30763.1 | 10.32 | 10.03 | 0.22 | 0.17 | 1.22  | 0.114486 | 0.035496 | 0.487606 | 0.232645 |
| MmugDNA.30764.1.S1_at   | MmugDNA.30764.1 | 10.48 | 10.27 | 0.55 | 0.15 | 1.16  | 0.561598 | 0.665911 | 0.817232 | 0.804281 |
| MmugDNA.30766.1.S1_at   | MmugDNA.30766.1 | 4.82  | 4.75  | 0.09 | 0.1  | 1.05  | 0.154352 | 0.371238 | 0.527483 | 0.610135 |
| MmugDNA.30767.1.S1_at   | MmugDNA.30767.1 | 5.07  | 4.55  | 0.48 | 0.14 | 1.43  | 0.051933 | 0.025883 | 0.3916   | 0.201698 |
| MmugDNA.3077.1.S1_at    | MmugDNA.3077.1  | 5.94  | 5.94  | 0.17 | 0.09 | 1     | 0.668472 | 0.765033 | 0.86912  | 0.863388 |
| MmugDNA.30770.1.S1_at   | MmugDNA.30770.1 | 8.66  | 8.23  | 0.46 | 0.05 | 1.35  | 0.20749  | 0.110668 | 0.579021 | 0.374854 |
| MmugDNA.30773.1.S1_at   | MmugDNA.30773.1 | 13.18 | 13.21 | 0.06 | 0.02 | -1.02 | 0.424709 | 0.017804 | 0.739622 | 0.168584 |
| MmugDNA.30773.1.S1_s_at | MmugDNA.30773.1 | 13.1  | 13.17 | 0.05 | 0.02 | -1.05 | 0.264126 | 0.020811 | 0.625948 | 0.180917 |
| MmugDNA.30774.1.S1_at   | MmugDNA.30774.1 | 4.89  | 4.82  | 0.19 | 0.13 | 1.05  | 0.920688 | 0.119863 | 0.973151 | 0.388577 |
| MmugDNA.30777.1.S1_at   | MmugDNA.30777.1 | 7.32  | 7.17  | 0.42 | 0.11 | 1.11  | 0.478832 | 0.701054 | 0.770271 | 0.826613 |
| MmugDNA.30779.1.S1_at   | MmugDNA.30779.1 | 2.76  | 2.76  | 0.03 | 0.02 | -1    | 0.2644   | 0.54705  | 0.626029 | 0.728283 |
| MmugDNA.3078.1.S1_at    | MmugDNA.3078.1  | 8.08  | 8.31  | 0.18 | 0.29 | -1.17 | 0.105352 | 0.045159 | 0.477051 | 0.256979 |

|                         |                 |       |       |      |      |       |          |          |          |          |
|-------------------------|-----------------|-------|-------|------|------|-------|----------|----------|----------|----------|
| MmugDNA.30782.1.S1_at   | MmugDNA.30782.1 | 3.96  | 3.82  | 0.05 | 0.01 | 1.1   | 0.010548 | 0.08619  | 0.248239 | 0.338568 |
| MmugDNA.30783.1.S1_at   | MmugDNA.30783.1 | 4.42  | 4.45  | 0.25 | 0.12 | -1.03 | 0.963683 | 0.911603 | 0.988152 | 0.950175 |
| MmugDNA.30785.1.S1_at   | MmugDNA.30785.1 | 3.81  | 4.12  | 0.19 | 0.26 | -1.24 | 0.352352 | 0.225743 | 0.692649 | 0.498159 |
| MmugDNA.30786.1.S1_at   | MmugDNA.30786.1 | 3.74  | 3.86  | 0.17 | 0.51 | -1.09 | 0.550978 | 0.714736 | 0.811101 | 0.8345   |
| MmugDNA.30787.1.S1_at   | MmugDNA.30787.1 | 3.85  | 3.81  | 0.13 | 0.22 | 1.03  | 0.607698 | 0.183048 | 0.840969 | 0.459493 |
| MmugDNA.30788.1.S1_at   | MmugDNA.30788.1 | 4.81  | 4.52  | 0.3  | 0.16 | 1.22  | 0.52435  | 0.216265 | 0.795835 | 0.48984  |
| MmugDNA.30789.1.S1_at   | MmugDNA.30789.1 | 5.51  | 5.62  | 0.43 | 0.15 | -1.08 | 0.576308 | 0.78938  | 0.825166 | 0.878335 |
| MmugDNA.3079.1.S1_at    | MmugDNA.3079.1  | 6.29  | 6     | 0.55 | 0.26 | 1.22  | 0.655902 | 0.851875 | 0.86336  | 0.915799 |
| MmugDNA.30791.1.S1_at   | MmugDNA.30791.1 | 3.27  | 3.35  | 0.06 | 0.07 | -1.05 | 0.274188 | 0.321064 | 0.633792 | 0.573046 |
| MmugDNA.30792.1.S1_at   | MmugDNA.30792.1 | 5.18  | 5.25  | 0.28 | 0.1  | -1.05 | 0.969382 | 0.374168 | 0.989943 | 0.612678 |
| MmugDNA.30793.1.S1_at   | MmugDNA.30793.1 | 6.44  | 6.2   | 0.19 | 0.13 | -1.18 | 0.066165 | 0.069572 | 0.421918 | 0.309848 |
| MmugDNA.30794.1.S1_at   | MmugDNA.30794.1 | 3.25  | 3.24  | 0.13 | 0.1  | 1.01  | 0.558673 | 0.298026 | 0.815593 | 0.556695 |
| MmugDNA.30795.1.S1_at   | MmugDNA.30795.1 | 3.41  | 3.34  | 0.2  | 0.11 | 1.05  | 0.637363 | 0.652147 | 0.85553  | 0.796592 |
| MmugDNA.30796.1.S1_at   | MmugDNA.30796.1 | 3.65  | 3.42  | 0.1  | 0.12 | 1.18  | 0.110165 | 0.112827 | 0.483228 | 0.37844  |
| MmugDNA.308.1.S1_at     | MmugDNA.308.1   | 8.17  | 8     | 0.19 | 0.11 | 1.13  | 0.241962 | 0.706699 | 0.607993 | 0.829857 |
| MmugDNA.3080.1.S1_at    | MmugDNA.3080.1  | 3.23  | 3.04  | 0.08 | 0.06 | 1.14  | 0.0599   | 0.005804 | 0.407389 | 0.104597 |
| MmugDNA.30801.1.S1_at   | MmugDNA.30801.1 | 11.69 | 11.92 | 0.6  | 0.05 | -1.17 | 0.496834 | 0.670327 | 0.780864 | 0.807235 |
| MmugDNA.30805.1.S1_at   | MmugDNA.30805.1 | 5.13  | 5     | 0.2  | 0.06 | 1.09  | 0.288186 | 0.624961 | 0.645272 | 0.778972 |
| MmugDNA.30806.1.S1_at   | MmugDNA.30806.1 | 5.12  | 5.07  | 0.08 | 0.1  | 1.03  | 0.112091 | 0.259106 | 0.485224 | 0.526263 |
| MmugDNA.30807.1.S1_at   | MmugDNA.30807.1 | 4.81  | 4.77  | 0.2  | 0.39 | 1.02  | 0.49532  | 0.707851 | 0.779921 | 0.830504 |
| MmugDNA.35605.1.S1_s_at | MmugDNA.35605.1 | 12.44 | 12.33 | 0.22 | 0.09 | 1.08  | 0.491125 | 0.283953 | 0.777532 | 0.546237 |
| MmugDNA.30809.1.S1_at   | MmugDNA.30809.1 | 3.26  | 3.39  | 0.35 | 0.62 | -1.09 | 0.84984  | 0.367676 | 0.947164 | 0.607369 |
| MmugDNA.3081.1.S1_at    | MmugDNA.3081.1  | 6.18  | 5.94  | 0.13 | 0.21 | 1.18  | 0.142842 | 0.420371 | 0.517926 | 0.644099 |
| MmugDNA.30810.1.S1_at   | MmugDNA.30810.1 | 6.03  | 6.01  | 0.22 | 0.05 | 1.01  | 0.322061 | 0.492354 | 0.670729 | 0.693485 |
| MmugDNA.30811.1.S1_at   | MmugDNA.30811.1 | 3.47  | 3.62  | 0.05 | 0.09 | -1.1  | 0.090462 | 0.11826  | 0.458706 | 0.386244 |
| MmugDNA.30812.1.S1_at   | MmugDNA.30812.1 | 9.35  | 9.11  | 0.26 | 0.27 | 1.18  | 0.495868 | 0.707604 | 0.780141 | 0.830424 |
| MmugDNA.30813.1.S1_at   | MmugDNA.30813.1 | 10.95 | 10.8  | 0.49 | 0.07 | 1.11  | 0.674026 | 0.209608 | 0.871714 | 0.483271 |
| MmugDNA.30814.1.S1_at   | MmugDNA.30814.1 | 6.56  | 6.54  | 0.43 | 0.1  | 1.02  | 0.935799 | 0.580593 | 0.978396 | 0.749782 |
| MmugDNA.30815.1.S1_at   | MmugDNA.30815.1 | 9.33  | 9.81  | 0.06 | 0.13 | -1.39 | 0.005907 | 0.021713 | 0.212197 | 0.184333 |
| MmugDNA.30816.1.S1_at   | MmugDNA.30816.1 | 5.39  | 5.28  | 0.08 | 0.08 | 1.07  | 0.36117  | 0.106988 | 0.698358 | 0.369557 |
| MmugDNA.30817.1.S1_at   | MmugDNA.30817.1 | 9.61  | 8.61  | 0.57 | 0.22 | 2     | 0.043532 | 0.010077 | 0.372168 | 0.13168  |
| MmugDNA.30819.1.S1_at   | MmugDNA.30819.1 | 3.3   | 3.46  | 0.05 | 0.14 | -1.12 | 0.082799 | 0.114516 | 0.44803  | 0.381059 |
| MmugDNA.30820.1.S1_at   | MmugDNA.30820.1 | 3.58  | 3.36  | 0.06 | 0.23 | 1.16  | 0.747536 | 0.285301 | 0.90404  | 0.547196 |
| MmugDNA.30821.1.S1_at   | MmugDNA.30821.1 | 5.92  | 5.46  | 0.11 | 0.25 | 1.38  | 0.048002 | 0.135895 | 0.381764 | 0.408103 |
| MmugDNA.30822.1.S1_at   | MmugDNA.30822.1 | 5.38  | 5.17  | 0.17 | 0.2  | 1.16  | 0.208159 | 0.65231  | 0.579837 | 0.796682 |
| MmugDNA.30823.1.S1_at   | MmugDNA.30823.1 | 3.97  | 3.78  | 0.13 | 0.2  | 1.13  | 0.270398 | 0.408115 | 0.630298 | 0.635475 |
| MmugDNA.30825.1.S1_at   | MmugDNA.30825.1 | 6.26  | 6.38  | 0.12 | 0.11 | -1.09 | 0.682711 | 0.046241 | 0.875881 | 0.259397 |
| MmugDNA.30826.1.S1_at   | MmugDNA.30826.1 | 4.98  | 5.02  | 0.17 | 0.13 | -1.03 | 0.764678 | 0.205735 | 0.911553 | 0.48007  |
| MmugDNA.30827.1.S1_at   | MmugDNA.30827.1 | 7.17  | 7.72  | 0.56 | 0.16 | -1.46 | 0.291173 | 0.039378 | 0.647603 | 0.243406 |
| MmugDNA.3083.1.S1_at    | MmugDNA.3083.1  | 11.72 | 12.04 | 0.25 | 0.22 | -1.25 | 0.150681 | 0.435344 | 0.524234 | 0.65516  |
| MmugDNA.30833.1.S1_at   | MmugDNA.30833.1 | 9.19  | 10.13 | 0.33 | 0.07 | -1.91 | 0.018199 | 0.009907 | 0.295482 | 0.130731 |
| MmugDNA.30834.1.S1_at   | MmugDNA.30834.1 | 3.2   | 3.13  | 0.29 | 0.12 | 1.05  | 0.429626 | 0.049715 | 0.74228  | 0.267995 |
| MmugDNA.30835.1.S1_at   | MmugDNA.30835.1 | 5.47  | 7.02  | 1.35 | 0.26 | -2.92 | 0.40392  | 0.725288 | 0.726061 | 0.840954 |



|                         |                 |       |       |      |      |       |          |          |          |          |
|-------------------------|-----------------|-------|-------|------|------|-------|----------|----------|----------|----------|
| MmugDNA.30838.1.S1_at   | MmugDNA.30838.1 | 6.69  | 6.57  | 0.12 | 0.05 | 1.08  | 0.067229 | 0.136268 | 0.423307 | 0.408681 |
| MmugDNA.30839.1.S1_at   | MmugDNA.30839.1 | 5.73  | 5.43  | 1.19 | 0.36 | 1.23  | 0.688615 | 0.254044 | 0.878487 | 0.522387 |
| MmugDNA.3084.1.S1_at    | MmugDNA.3084.1  | 9.63  | 9.23  | 0.54 | 0.13 | 1.32  | 0.341516 | 0.485348 | 0.685067 | 0.689081 |
| MmugDNA.30840.1.S1_at   | MmugDNA.30840.1 | 4.01  | 4.17  | 0.4  | 0.11 | -1.12 | 0.777093 | 0.243515 | 0.917443 | 0.513585 |
| MmugDNA.30843.1.S1_at   | MmugDNA.30843.1 | 5.7   | 5.65  | 0.08 | 0.2  | 1.03  | 0.411711 | 0.836915 | 0.731625 | 0.906826 |
| MmugDNA.30844.1.S1_at   | MmugDNA.30844.1 | 5.83  | 5.98  | 0.1  | 0.14 | -1.11 | 0.265572 | 0.369895 | 0.626762 | 0.609138 |
| MmugDNA.30845.1.S1_at   | MmugDNA.30845.1 | 7.68  | 7.48  | 1.31 | 0.14 | 1.15  | 0.999945 | 0.999919 | 1        | 0.999968 |
| MmugDNA.30846.1.S1_at   | MmugDNA.30846.1 | 7.75  | 8.1   | 0.3  | 0.23 | -1.27 | 0.363689 | 0.003    | 0.700278 | 0.079958 |
| MmugDNA.30849.1.S1_at   | MmugDNA.30849.1 | 5.86  | 5.95  | 0.25 | 0.12 | -1.06 | 0.645757 | 0.739258 | 0.858801 | 0.848883 |
| MmugDNA.3085.1.S1_at    | MmugDNA.3085.1  | 10.83 | 10.55 | 0.38 | 0.12 | 1.21  | 0.29274  | 0.276769 | 0.649033 | 0.540682 |
| MmugDNA.30850.1.S1_at   | MmugDNA.30850.1 | 3.13  | 3.25  | 0.23 | 0.12 | -1.09 | 0.166599 | 0.136968 | 0.539239 | 0.409769 |
| MmugDNA.30851.1.S1_s_at | MmugDNA.30851.1 | 5.55  | 5.52  | 0.05 | 0.02 | 1.02  | 0.465995 | 0.738636 | 0.763317 | 0.848483 |
| MmugDNA.30852.1.S1_at   | MmugDNA.30852.1 | 4.11  | 4.46  | 0.16 | 0.19 | -1.28 | 0.080956 | 0.30758  | 0.445056 | 0.563785 |
| MmugDNA.30853.1.S1_at   | MmugDNA.30853.1 | 3.28  | 3.29  | 0.09 | 0.09 | -1.01 | 0.619876 | 0.487919 | 0.846932 | 0.690787 |
| MmugDNA.30855.1.S1_at   | MmugDNA.30855.1 | 12.78 | 12.83 | 0.03 | 0.04 | -1.03 | 0.106939 | 0.335897 | 0.479433 | 0.58354  |
| MmugDNA.30855.1.S1_s_at | MmugDNA.30855.1 | 11.86 | 11.83 | 0.11 | 0.08 | 1.02  | 0.44744  | 0.425341 | 0.753309 | 0.647722 |
| MmugDNA.30856.1.S1_at   | MmugDNA.30856.1 | 8.83  | 9.12  | 0.28 | 0.05 | -1.23 | 0.186643 | 0.031533 | 0.559223 | 0.219688 |
| MmugDNA.30857.1.S1_at   | MmugDNA.30857.1 | 2.7   | 2.56  | 0.09 | 0.08 | 1.1   | 0.155828 | 0.296876 | 0.529022 | 0.555847 |
| MmugDNA.30858.1.S1_at   | MmugDNA.30858.1 | 4.71  | 4.32  | 0.25 | 0.22 | 1.31  | 0.22783  | 0.549056 | 0.596693 | 0.729549 |
| MmugDNA.30859.1.S1_at   | MmugDNA.30859.1 | 8.52  | 9.34  | 0.39 | 0.09 | -1.77 | 0.022127 | 0.015824 | 0.310301 | 0.159503 |
| MmugDNA.3086.1.S1_at    | MmugDNA.3086.1  | 10.28 | 9.94  | 0.71 | 0.02 | 1.26  | 0.432906 | 0.427316 | 0.744141 | 0.649175 |
| MmugDNA.30860.1.S1_s_at | MmugDNA.30860.1 | 10.61 | 10.62 | 0.14 | 0.06 | -1.01 | 0.74626  | 0.068392 | 0.90336  | 0.307955 |
| MmugDNA.30861.1.S1_at   | MmugDNA.30861.1 | 4.43  | 4.32  | 0.2  | 0.09 | 1.08  | 0.15807  | 0.398983 | 0.531053 | 0.629665 |
| MmugDNA.30863.1.S1_at   | MmugDNA.30863.1 | 12.79 | 12.6  | 0.17 | 0.03 | 1.15  | 0.101666 | 0.07609  | 0.47191  | 0.320848 |
| MmugDNA.30864.1.S1_a_at | MmugDNA.30864.1 | 6.22  | 6.14  | 0.06 | 0.09 | 1.06  | 0.935297 | 0.098136 | 0.978129 | 0.356241 |
| MmugDNA.30865.1.S1_at   | MmugDNA.30865.1 | 5.9   | 5.16  | 0.16 | 0.31 | 1.66  | 0.057068 | 0.053311 | 0.401454 | 0.276463 |
| MmugDNA.30866.1.S1_at   | MmugDNA.30866.1 | 5.29  | 5.27  | 0.02 | 0.02 | 1.01  | 0.114803 | 0.348049 | 0.487957 | 0.59222  |
| MmugDNA.30867.1.S1_at   | MmugDNA.30867.1 | 8.33  | 6.6   | 1.49 | 0.69 | 3.32  | 0.640311 | 0.896738 | 0.856637 | 0.941007 |
| MmugDNA.30868.1.S1_at   | MmugDNA.30868.1 | 9.31  | 9.85  | 0.18 | 0.14 | -1.45 | 0.055068 | 0.058423 | 0.397921 | 0.288459 |
| MmugDNA.30869.1.S1_s_at | MmugDNA.30869.1 | 7.02  | 7.14  | 0.45 | 0.16 | -1.09 | 0.964351 | 0.246315 | 0.988358 | 0.515889 |
| MmugDNA.3087.1.S1_at    | MmugDNA.3087.1  | 10.43 | 10.06 | 0.35 | 0.12 | 1.3   | 0.261013 | 0.068805 | 0.623563 | 0.308711 |
| MmugDNA.30870.1.S1_at   | MmugDNA.30870.1 | 6.36  | 7.94  | 1.06 | 0.29 | -2.98 | 0.231663 | 0.126711 | 0.59963  | 0.397376 |
| MmugDNA.30871.1.S1_at   | MmugDNA.30871.1 | 6.47  | 6.38  | 0.08 | 0.11 | 1.07  | 0.598794 | 0.007782 | 0.837129 | 0.117732 |
| MmugDNA.30872.1.S1_at   | MmugDNA.30872.1 | 9.72  | 10.44 | 0.17 | 0.02 | -1.65 | 0.001784 | 0.000088 | 0.167444 | 0.027016 |
| MmugDNA.30875.1.S1_at   | MmugDNA.30875.1 | 9.14  | 9.25  | 1    | 0.13 | -1.08 | 0.954121 | 0.537228 | 0.984725 | 0.72233  |
| MmugDNA.30876.1.S1_at   | MmugDNA.30876.1 | 4.53  | 4.47  | 0.2  | 0.04 | 1.04  | 0.484491 | 0.788065 | 0.773652 | 0.877426 |
| MmugDNA.30877.1.S1_at   | MmugDNA.30877.1 | 9.63  | 9.89  | 0.13 | 0.06 | -1.2  | 0.017307 | 0.015736 | 0.290632 | 0.158941 |
| MmugDNA.30878.1.S1_at   | MmugDNA.30878.1 | 5.31  | 5.33  | 0.12 | 0.16 | -1.01 | 0.27823  | 0.612131 | 0.637428 | 0.769787 |
| MmugDNA.30879.1.S1_at   | MmugDNA.30879.1 | 4.21  | 3.95  | 0.2  | 0.05 | 1.2   | 0.084433 | 0.19235  | 0.450991 | 0.467834 |
| MmugDNA.3088.1.S1_at    | MmugDNA.3088.1  | 11.41 | 11.22 | 0.95 | 0.14 | 1.14  | 0.776502 | 0.05394  | 0.917314 | 0.277766 |
| MmugDNA.30880.1.S1_at   | MmugDNA.30880.1 | 3.65  | 3.56  | 0.41 | 0.06 | 1.06  | 0.637833 | 0.65519  | 0.855669 | 0.798333 |
| MmugDNA.30881.1.S1_at   | MmugDNA.30881.1 | 3.8   | 3.62  | 0.2  | 0.38 | 1.13  | 0.574055 | 0.723861 | 0.823829 | 0.840163 |
| MmugDNA.30882.1.S1_at   | MmugDNA.30882.1 | 3.5   | 3.51  | 0.11 | 0.06 | -1.01 | 0.798748 | 0.007271 | 0.926306 | 0.114408 |

|                         |                 |       |       |      |      |       |          |          |          |          |
|-------------------------|-----------------|-------|-------|------|------|-------|----------|----------|----------|----------|
| MmugDNA.30883.1.S1_at   | MmugDNA.30883.1 | 7.56  | 5.83  | 0.38 | 0.24 | 3.33  | 0.003013 | 0.015945 | 0.19086  | 0.160254 |
| MmugDNA.30884.1.S1_at   | MmugDNA.30884.1 | 5.15  | 4.91  | 0.02 | 0.14 | 1.18  | 0.096057 | 0.230926 | 0.464614 | 0.502548 |
| MmugDNA.30886.1.S1_at   | MmugDNA.30886.1 | 4.7   | 5     | 0.22 | 0.65 | -1.23 | 0.897186 | 0.32499  | 0.964999 | 0.575512 |
| MmugDNA.30887.1.S1_at   | MmugDNA.30887.1 | 6.55  | 6.84  | 0.25 | 0.01 | -1.23 | 0.351303 | 0.036273 | 0.691963 | 0.235    |
| MmugDNA.30889.1.S1_at   | MmugDNA.30889.1 | 8.71  | 8.9   | 0.42 | 0.15 | -1.14 | 0.656614 | 0.319307 | 0.863636 | 0.571724 |
| MmugDNA.3089.1.S1_at    | MmugDNA.3089.1  | 3.63  | 4.19  | 0.39 | 0.56 | -1.48 | 0.220408 | 0.135896 | 0.589697 | 0.408103 |
| MmugDNA.30890.1.S1_at   | MmugDNA.30890.1 | 8.75  | 9.66  | 0.37 | 0.07 | -1.87 | 0.03482  | 0.010426 | 0.350422 | 0.133525 |
| MmugDNA.30892.1.S1_at   | MmugDNA.30892.1 | 3.69  | 3.69  | 0.09 | 0.03 | 1     | 0.276584 | 0.7639   | 0.636157 | 0.862744 |
| MmugDNA.30893.1.S1_at   | MmugDNA.30893.1 | 7.56  | 8.38  | 0.25 | 0.03 | -1.77 | 0.004584 | 0.001491 | 0.201051 | 0.058965 |
| MmugDNA.30895.1.S1_at   | MmugDNA.30895.1 | 13.25 | 13.35 | 0.02 | 0.04 | -1.07 | 0.021828 | 0.463935 | 0.309781 | 0.674716 |
| MmugDNA.30895.1.S1_s_at | MmugDNA.30895.1 | 13.95 | 14.01 | 0.1  | 0.04 | -1.04 | 0.600549 | 0.759094 | 0.837913 | 0.859979 |
| MmugDNA.30896.1.S1_at   | MmugDNA.30896.1 | 10.13 | 10.29 | 0.46 | 0.1  | -1.12 | 0.802723 | 0.651131 | 0.92802  | 0.796048 |
| MmugDNA.30898.1.S1_at   | MmugDNA.30898.1 | 4.39  | 4.29  | 0.07 | 0.11 | 1.07  | 0.281435 | 0.305535 | 0.639917 | 0.562486 |
| MmugDNA.30899.1.S1_at   | MmugDNA.30899.1 | 4.39  | 4.89  | 0.42 | 0.33 | -1.41 | 0.244888 | 0.339504 | 0.61043  | 0.586095 |
| MmugDNA.309.1.S1_at     | MmugDNA.309.1   | 9.39  | 9.18  | 0.34 | 0.1  | 1.16  | 0.37585  | 0.555382 | 0.706657 | 0.733767 |
| MmugDNA.3090.1.S1_at    | MmugDNA.3090.1  | 9.11  | 9.81  | 0.31 | 0.11 | -1.62 | 0.058035 | 0.019304 | 0.403663 | 0.174723 |
| MmugDNA.30900.1.S1_at   | MmugDNA.30900.1 | 2.8   | 2.85  | 0.05 | 0.08 | -1.03 | 0.986491 | 0.287025 | 0.995654 | 0.548317 |
| MmugDNA.30901.1.S1_at   | MmugDNA.30901.1 | 4.66  | 4.54  | 0.29 | 0.41 | 1.08  | 0.675626 | 0.49663  | 0.872698 | 0.696119 |
| MmugDNA.30903.1.S1_at   | MmugDNA.30903.1 | 5.02  | 4.31  | 1.02 | 0.51 | 1.64  | 0.63823  | 0.671025 | 0.855896 | 0.807635 |
| MmugDNA.30904.1.S1_at   | MmugDNA.30904.1 | 4.01  | 4.09  | 0.39 | 0.14 | -1.05 | 0.573718 | 0.837399 | 0.823742 | 0.907098 |
| MmugDNA.30905.1.S1_at   | MmugDNA.30905.1 | 12.52 | 12.38 | 0.11 | 0.04 | 1.1   | 0.06103  | 0.029119 | 0.409749 | 0.212733 |
| MmugDNA.30906.1.S1_at   | MmugDNA.30906.1 | 3.09  | 3.03  | 0.3  | 0.13 | 1.04  | 0.77476  | 0.875994 | 0.91642  | 0.929526 |
| MmugDNA.30907.1.S1_at   | MmugDNA.30907.1 | 10.3  | 10.23 | 0.14 | 0.02 | 1.05  | 0.607981 | 0.895999 | 0.840979 | 0.940569 |
| MmugDNA.30908.1.S1_at   | MmugDNA.30908.1 | 4.34  | 4.35  | 0.29 | 0.15 | -1.01 | 0.259777 | 0.431004 | 0.622814 | 0.651988 |
| MmugDNA.30909.1.S1_at   | MmugDNA.30909.1 | 11.99 | 11.62 | 0.17 | 0.11 | 1.29  | 0.079196 | 0.115501 | 0.442056 | 0.38267  |
| MmugDNA.30910.1.S1_at   | MmugDNA.30910.1 | 11.54 | 11.23 | 0.22 | 0.04 | 1.25  | 0.101369 | 0.07183  | 0.471667 | 0.314082 |
| MmugDNA.30911.1.S1_at   | MmugDNA.30911.1 | 4.15  | 3.87  | 0.08 | 0.1  | 1.22  | 0.038469 | 0.005103 | 0.359469 | 0.099108 |
| MmugDNA.30912.1.S1_at   | MmugDNA.30912.1 | 7.84  | 7.46  | 0.91 | 0.27 | 1.3   | 0.578968 | 0.040401 | 0.826338 | 0.246134 |
| MmugDNA.30913.1.S1_at   | MmugDNA.30913.1 | 9.89  | 9.85  | 0.16 | 0.05 | 1.03  | 0.61512  | 0.035709 | 0.844202 | 0.233368 |
| MmugDNA.30915.1.S1_s_at | MmugDNA.30915.1 | 7.77  | 7.78  | 0.02 | 0.1  | -1.01 | 0.385762 | 0.820832 | 0.713049 | 0.896833 |
| MmugDNA.30917.1.S1_at   | MmugDNA.30917.1 | 7.06  | 7.23  | 0.28 | 0.12 | -1.12 | 0.755789 | 0.127164 | 0.90805  | 0.397922 |
| MmugDNA.30918.1.S1_at   | MmugDNA.30918.1 | 8.42  | 8.62  | 0.27 | 0.03 | -1.15 | 0.724992 | 0.771635 | 0.893334 | 0.867316 |
| MmugDNA.30920.1.S1_at   | MmugDNA.30920.1 | 3.23  | 3.16  | 0.13 | 0.32 | 1.04  | 0.79652  | 0.585399 | 0.925188 | 0.752844 |
| MmugDNA.30923.1.S1_at   | MmugDNA.30923.1 | 7.66  | 6.68  | 1.05 | 0.05 | 1.97  | 0.456904 | 0.710604 | 0.758051 | 0.832158 |
| MmugDNA.30924.1.S1_at   | MmugDNA.30924.1 | 9.21  | 9.24  | 0.12 | 0.09 | -1.02 | 0.327676 | 0.229968 | 0.675137 | 0.501807 |
| MmugDNA.30925.1.S1_at   | MmugDNA.30925.1 | 6.62  | 7.31  | 0.38 | 0.43 | -1.61 | 0.426766 | 0.752216 | 0.740724 | 0.855787 |
| MmugDNA.30926.1.S1_at   | MmugDNA.30926.1 | 3.72  | 3.45  | 0.09 | 0.25 | 1.21  | 0.109111 | 0.161447 | 0.481684 | 0.437604 |
| MmugDNA.30927.1.S1_at   | MmugDNA.30927.1 | 9     | 9.11  | 1.67 | 0.2  | -1.08 | 0.335664 | 0.105887 | 0.681167 | 0.368175 |
| MmugDNA.30928.1.S1_at   | MmugDNA.30928.1 | 4.04  | 4.05  | 0.11 | 0.02 | -1.01 | 0.587752 | 0.814544 | 0.83181  | 0.892959 |
| MmugDNA.3093.1.S1_at    | MmugDNA.3093.1  | 3.75  | 3.66  | 0.2  | 0.1  | 1.06  | 0.459961 | 0.253077 | 0.759871 | 0.521415 |
| MmugDNA.30930.1.S1_at   | MmugDNA.30930.1 | 5.96  | 5.7   | 0.16 | 0.02 | 1.2   | 0.059618 | 0.044052 | 0.406669 | 0.254195 |
| MmugDNA.30931.1.S1_at   | MmugDNA.30931.1 | 10.49 | 9.4   | 0.36 | 0.18 | 2.13  | 0.01851  | 0.005825 | 0.297536 | 0.104661 |
| MmugDNA.30932.1.S1_at   | MmugDNA.30932.1 | 6.57  | 6.67  | 0.08 | 0.18 | -1.07 | 0.662111 | 0.028001 | 0.866635 | 0.208898 |

|                         |                 |       |       |      |      |       |          |          |          |          |
|-------------------------|-----------------|-------|-------|------|------|-------|----------|----------|----------|----------|
| MmugDNA.30935.1.S1_at   | MmugDNA.30935.1 | 3.26  | 3.21  | 0.06 | 0.06 | 1.04  | 0.232197 | 0.431603 | 0.600074 | 0.652439 |
| MmugDNA.30936.1.S1_at   | MmugDNA.30936.1 | 3.13  | 3.1   | 0.04 | 0.08 | 1.02  | 0.859597 | 0.290794 | 0.9504   | 0.551399 |
| MmugDNA.30938.1.S1_at   | MmugDNA.30938.1 | 10.97 | 10.74 | 0.01 | 0.17 | 1.17  | 0.087385 | 0.085116 | 0.454796 | 0.336936 |
| MmugDNA.30939.1.S1_at   | MmugDNA.30939.1 | 8.92  | 9.29  | 0.96 | 0.21 | -1.29 | 0.408545 | 0.148542 | 0.729393 | 0.423074 |
| MmugDNA.3094.1.S1_at    | MmugDNA.3094.1  | 9.78  | 8.42  | 0.35 | 0.25 | 2.58  | 0.009423 | 0.019514 | 0.241943 | 0.175439 |
| MmugDNA.30940.1.S1_at   | MmugDNA.30940.1 | 4.66  | 4.74  | 0.31 | 0.24 | -1.06 | 0.809502 | 0.248448 | 0.93104  | 0.517727 |
| MmugDNA.30941.1.S1_at   | MmugDNA.30941.1 | 11.92 | 11.75 | 0.08 | 0.15 | 1.12  | 0.315803 | 0.270356 | 0.666118 | 0.535681 |
| MmugDNA.30942.1.S1_at   | MmugDNA.30942.1 | 3.83  | 3.97  | 0.28 | 0.13 | -1.1  | 0.806828 | 0.297129 | 0.929947 | 0.555996 |
| MmugDNA.30944.1.S1_at   | MmugDNA.30944.1 | 10.76 | 8.4   | 0.39 | 0.36 | 5.11  | 0.001483 | 0.000762 | 0.161549 | 0.04544  |
| MmugDNA.30945.1.S1_at   | MmugDNA.30945.1 | 9.41  | 8.6   | 0.36 | 0.23 | 1.75  | 0.028093 | 0.082443 | 0.330472 | 0.331433 |
| MmugDNA.30946.1.S1_at   | MmugDNA.30946.1 | 8.07  | 7.96  | 0.16 | 0.03 | 1.08  | 0.148914 | 0.255304 | 0.522869 | 0.52339  |
| MmugDNA.30946.1.S1_x_at | MmugDNA.30946.1 | 7.18  | 6.85  | 0.17 | 0.05 | 1.25  | 0.086301 | 0.121325 | 0.453939 | 0.390351 |
| MmugDNA.30948.1.S1_at   | MmugDNA.30948.1 | 4.9   | 4.79  | 0.1  | 0.18 | 1.08  | 0.421127 | 0.492039 | 0.737303 | 0.693403 |
| MmugDNA.30949.1.S1_at   | MmugDNA.30949.1 | 3.74  | 3.64  | 0.12 | 0.17 | 1.07  | 0.162357 | 0.221916 | 0.5354   | 0.495019 |
| MmugDNA.3095.1.S1_at    | MmugDNA.3095.1  | 4.9   | 4.73  | 0.13 | 0.14 | 1.12  | 0.113288 | 0.198329 | 0.486648 | 0.473267 |
| MmugDNA.30950.1.S1_at   | MmugDNA.30950.1 | 5.29  | 5.26  | 0.29 | 0.06 | 1.02  | 0.722798 | 0.841582 | 0.892502 | 0.909677 |
| MmugDNA.30951.1.S1_at   | MmugDNA.30951.1 | 6.39  | 6.06  | 0.18 | 0.37 | 1.26  | 0.926051 | 0.215036 | 0.975377 | 0.488898 |
| MmugDNA.30952.1.S1_at   | MmugDNA.30952.1 | 5.33  | 5.39  | 0.17 | 0.07 | -1.04 | 0.717718 | 0.348011 | 0.890498 | 0.592215 |
| MmugDNA.30954.1.S1_at   | MmugDNA.30954.1 | 5.04  | 5.01  | 0.18 | 0.1  | 1.02  | 0.296993 | 0.463791 | 0.652558 | 0.674656 |
| MmugDNA.30955.1.S1_at   | MmugDNA.30955.1 | 3.29  | 3.46  | 0.15 | 0.2  | -1.13 | 0.587104 | 0.75155  | 0.831568 | 0.855508 |
| MmugDNA.30956.1.S1_at   | MmugDNA.30956.1 | 9.44  | 9.26  | 0.31 | 0.19 | 1.13  | 0.195249 | 0.076055 | 0.565674 | 0.320805 |
| MmugDNA.30957.1.S1_at   | MmugDNA.30957.1 | 11.89 | 11.95 | 0.13 | 0.06 | -1.05 | 0.697405 | 0.014454 | 0.882272 | 0.153403 |
| MmugDNA.30957.1.S1_x_at | MmugDNA.30957.1 | 12.01 | 12.03 | 0.17 | 0.03 | -1.01 | 0.74117  | 0.028544 | 0.901149 | 0.210754 |
| MmugDNA.30958.1.S1_at   | MmugDNA.30958.1 | 10.6  | 10.84 | 0.44 | 0.06 | -1.18 | 0.624974 | 0.458975 | 0.849098 | 0.671504 |
| MmugDNA.30959.1.S1_at   | MmugDNA.30959.1 | 7.3   | 7.32  | 0.24 | 0.19 | -1.01 | 0.89142  | 0.955869 | 0.962578 | 0.975006 |
| MmugDNA.3096.1.S1_at    | MmugDNA.3096.1  | 8.97  | 8.84  | 0.6  | 0.49 | 1.09  | 0.458086 | 0.192215 | 0.758638 | 0.467665 |
| MmugDNA.30960.1.S1_at   | MmugDNA.30960.1 | 7.9   | 6.57  | 0.89 | 0.08 | 2.51  | 0.064576 | 0.026017 | 0.418362 | 0.202179 |
| MmugDNA.30961.1.S1_at   | MmugDNA.30961.1 | 3.89  | 3.49  | 0.35 | 0.09 | 1.32  | 0.420941 | 0.671941 | 0.737135 | 0.808177 |
| MmugDNA.30963.1.S1_at   | MmugDNA.30963.1 | 4.73  | 4.83  | 0.35 | 0.22 | -1.07 | 0.724383 | 0.970498 | 0.893143 | 0.983936 |
| MmugDNA.30964.1.S1_at   | MmugDNA.30964.1 | 3.22  | 3.27  | 0.04 | 0.3  | -1.04 | 0.423815 | 0.620532 | 0.739268 | 0.77547  |
| MmugDNA.30965.1.S1_at   | MmugDNA.30965.1 | 4.46  | 4.53  | 0.17 | 0.17 | -1.05 | 0.692203 | 0.724959 | 0.880095 | 0.840792 |
| MmugDNA.30967.1.S1_at   | MmugDNA.30967.1 | 7.07  | 7.5   | 0.77 | 0.4  | -1.34 | 0.414327 | 0.503295 | 0.732997 | 0.700767 |
| MmugDNA.30968.1.S1_at   | MmugDNA.30968.1 | 2.95  | 2.97  | 0.14 | 0.05 | -1.01 | 0.380365 | 0.648808 | 0.709387 | 0.794478 |
| MmugDNA.30969.1.S1_at   | MmugDNA.30969.1 | 10.65 | 10.27 | 0.6  | 0.21 | 1.3   | 0.387626 | 0.338477 | 0.714525 | 0.585465 |
| MmugDNA.3097.1.S1_s_at  | MmugDNA.3097.1  | 5.25  | 4.95  | 0.16 | 0.1  | 1.22  | 0.090061 | 0.107606 | 0.457992 | 0.370497 |
| MmugDNA.30970.1.S1_at   | MmugDNA.30970.1 | 5.55  | 5.36  | 0.13 | 0.1  | 1.14  | 0.227117 | 0.31525  | 0.596459 | 0.568939 |
| MmugDNA.30971.1.S1_at   | MmugDNA.30971.1 | 11.06 | 11.08 | 2.54 | 0.22 | -1.02 | 0.55507  | 0.038701 | 0.813148 | 0.24169  |
| MmugDNA.1900.1.S1_at    | MmugDNA.1900.1  | 3.71  | 4.27  | 1.15 | 0.17 | -1.48 | 0.805572 | 0.516945 | 0.929362 | 0.709329 |
| MmugDNA.1900.1.S1_s_at  | MmugDNA.1900.1  | 10.27 | 10.36 | 2.51 | 0.22 | -1.07 | 0.620098 | 0.045564 | 0.847027 | 0.257646 |
| MmugDNA.30972.1.S1_at   | MmugDNA.30972.1 | 10.16 | 9.36  | 0.17 | 0.35 | 1.74  | 0.007895 | 0.009356 | 0.231366 | 0.127602 |
| MmugDNA.30974.1.S1_at   | MmugDNA.30974.1 | 8.13  | 7.86  | 0.28 | 0.15 | 1.21  | 0.253385 | 0.023516 | 0.618146 | 0.192225 |
| MmugDNA.30975.1.S1_s_at | MmugDNA.30975.1 | 9.53  | 9.38  | 0.2  | 0.07 | 1.11  | 0.422675 | 0.426264 | 0.738399 | 0.648455 |
| MmugDNA.30977.1.S1_at   | MmugDNA.30977.1 | 10.81 | 11.43 | 1.24 | 0.06 | -1.53 | 0.355193 | 0.349733 | 0.69464  | 0.593566 |

|                         |                 |       |       |      |      |       |          |          |          |          |
|-------------------------|-----------------|-------|-------|------|------|-------|----------|----------|----------|----------|
| MmugDNA.30979.1.S1_at   | MmugDNA.30979.1 | 8.38  | 8.61  | 0.26 | 0.24 | -1.18 | 0.455905 | 0.441828 | 0.75759  | 0.659939 |
| MmugDNA.3098.1.S1_at    | MmugDNA.3098.1  | 5.92  | 6.1   | 0.32 | 0.03 | -1.13 | 0.136975 | 0.470215 | 0.511963 | 0.678572 |
| MmugDNA.30981.1.S1_at   | MmugDNA.30981.1 | 3.5   | 3.32  | 0.26 | 0.08 | 1.14  | 0.228923 | 0.565356 | 0.597921 | 0.739877 |
| MmugDNA.30982.1.S1_at   | MmugDNA.30982.1 | 4.95  | 4.93  | 0.24 | 0.1  | 1.01  | 0.324024 | 0.231076 | 0.672429 | 0.502813 |
| MmugDNA.30983.1.S1_at   | MmugDNA.30983.1 | 6.48  | 7.37  | 0.51 | 0.12 | -1.85 | 0.155266 | 0.284038 | 0.528587 | 0.546283 |
| MmugDNA.30986.1.S1_at   | MmugDNA.30986.1 | 2.97  | 3.11  | 0.16 | 0.34 | -1.1  | 0.625946 | 0.539829 | 0.849654 | 0.723976 |
| MmugDNA.30987.1.S1_at   | MmugDNA.30987.1 | 4.19  | 4.25  | 0.15 | 0.02 | -1.04 | 0.561703 | 0.071492 | 0.817307 | 0.313706 |
| MmugDNA.30988.1.S1_at   | MmugDNA.30988.1 | 5.55  | 6.19  | 0.15 | 0.98 | -1.55 | 0.920193 | 0.10537  | 0.972913 | 0.367245 |
| MmugDNA.30989.1.S1_at   | MmugDNA.30989.1 | 3.26  | 3.18  | 0.07 | 0.1  | 1.06  | 0.579307 | 0.296701 | 0.82645  | 0.555717 |
| MmugDNA.3099.1.S1_at    | MmugDNA.3099.1  | 5.75  | 5.75  | 0.13 | 0.07 | -1    | 0.960884 | 0.983667 | 0.987225 | 0.990902 |
| MmugDNA.30990.1.S1_at   | MmugDNA.30990.1 | 9.16  | 8.94  | 0.14 | 0.01 | -1.17 | 0.020038 | 0.059857 | 0.303343 | 0.291297 |
| MmugDNA.30991.1.S1_at   | MmugDNA.30991.1 | 5.86  | 5.62  | 0.29 | 0.23 | 1.18  | 0.26615  | 0.521549 | 0.627106 | 0.712483 |
| MmugDNA.30992.1.S1_at   | MmugDNA.30992.1 | 4.36  | 4.19  | 0.64 | 0.56 | 1.13  | 0.76462  | 0.701393 | 0.911553 | 0.826814 |
| MmugDNA.30993.1.S1_at   | MmugDNA.30993.1 | 4.36  | 4.21  | 0.44 | 0.39 | 1.11  | 0.875651 | 0.973142 | 0.956794 | 0.985426 |
| MmugDNA.30994.1.S1_at   | MmugDNA.30994.1 | 3.82  | 3.8   | 0.29 | 0.05 | 1.02  | 0.485372 | 0.665571 | 0.77429  | 0.804072 |
| MmugDNA.30995.1.S1_at   | MmugDNA.30995.1 | 9.94  | 9.61  | 0.72 | 0.08 | 1.26  | 0.87864  | 0.858973 | 0.957816 | 0.919706 |
| MmugDNA.30996.1.S1_at   | MmugDNA.30996.1 | 5.46  | 5.42  | 0.04 | 0.06 | 1.03  | 0.158216 | 0.867071 | 0.531211 | 0.924465 |
| MmugDNA.30997.1.S1_at   | MmugDNA.30997.1 | 4.31  | 4.21  | 0.13 | 0.08 | 1.07  | 0.64412  | 0.273926 | 0.858432 | 0.538452 |
| MmugDNA.30999.1.S1_at   | MmugDNA.30999.1 | 6.71  | 6.7   | 0.18 | 0.02 | 1.01  | 0.333759 | 0.521729 | 0.679885 | 0.712623 |
| MmugDNA.31.1.S1_at      | MmugDNA.31.1    | 6.41  | 6.46  | 0.02 | 0.08 | -1.04 | 0.16759  | 0.427659 | 0.540155 | 0.649406 |
| MmugDNA.310.1.S1_at     | MmugDNA.310.1   | 4.19  | 4.08  | 0.11 | 0.13 | 1.08  | 0.129212 | 0.254343 | 0.50393  | 0.522647 |
| MmugDNA.31000.1.S1_at   | MmugDNA.31000.1 | 5.13  | 5.67  | 0.42 | 0.21 | -1.46 | 0.058046 | 0.557194 | 0.403663 | 0.735006 |
| MmugDNA.31001.1.S1_at   | MmugDNA.31001.1 | 4.43  | 4.42  | 0.09 | 0.02 | 1.01  | 0.783365 | 0.273326 | 0.920218 | 0.537788 |
| MmugDNA.31003.1.S1_at   | MmugDNA.31003.1 | 5.62  | 5.78  | 0.13 | 0.33 | -1.11 | 0.45878  | 0.183275 | 0.759072 | 0.459553 |
| MmugDNA.31004.1.S1_at   | MmugDNA.31004.1 | 3.92  | 3.92  | 0.17 | 0.07 | -1    | 0.692411 | 0.910869 | 0.880095 | 0.949709 |
| MmugDNA.31005.1.S1_at   | MmugDNA.31005.1 | 10.45 | 10.36 | 0.25 | 0.07 | 1.06  | 0.5882   | 0.630721 | 0.83181  | 0.782389 |
| MmugDNA.31006.1.S1_at   | MmugDNA.31006.1 | 11.45 | 11.1  | 0.07 | 0.11 | 1.27  | 0.009407 | 0.094322 | 0.241869 | 0.350889 |
| MmugDNA.31006.1.S1_s_at | MmugDNA.31006.1 | 12.65 | 12.43 | 0.04 | 0.08 | 1.16  | 0.011422 | 0.062413 | 0.254838 | 0.296669 |
| MmugDNA.31008.1.S1_at   | MmugDNA.31008.1 | 7.63  | 5.47  | 1.08 | 0.96 | 4.48  | 0.2895   | 0.099903 | 0.646199 | 0.358619 |
| MmugDNA.31009.1.S1_at   | MmugDNA.31009.1 | 3.34  | 3.32  | 0.25 | 0.1  | 1.01  | 0.638444 | 0.835944 | 0.855923 | 0.906135 |
| MmugDNA.3101.1.S1_at    | MmugDNA.3101.1  | 6.32  | 5.62  | 0.19 | 0.37 | 1.62  | 0.026444 | 0.125744 | 0.324765 | 0.396313 |
| MmugDNA.31010.1.S1_at   | MmugDNA.31010.1 | 5.51  | 5.44  | 0.11 | 0.28 | 1.04  | 0.642715 | 0.859182 | 0.857894 | 0.919754 |
| MmugDNA.31014.1.S1_at   | MmugDNA.31014.1 | 4.27  | 4.66  | 0.26 | 0.18 | -1.31 | 0.333471 | 0.064726 | 0.679631 | 0.300314 |
| MmugDNA.31016.1.S1_at   | MmugDNA.31016.1 | 4.21  | 4.34  | 0.58 | 0.1  | -1.09 | 0.809963 | 0.174135 | 0.931255 | 0.45044  |
| MmugDNA.31017.1.S1_at   | MmugDNA.31017.1 | 8.08  | 8.29  | 0.07 | 0.07 | -1.16 | 0.063655 | 0.002433 | 0.416123 | 0.073093 |
| MmugDNA.31019.1.S1_at   | MmugDNA.31019.1 | 7.42  | 7.43  | 0.11 | 0.07 | -1.01 | 0.55443  | 0.70644  | 0.812721 | 0.829634 |
| MmugDNA.3102.1.S1_at    | MmugDNA.3102.1  | 2.84  | 2.95  | 0.18 | 0.13 | -1.08 | 0.479606 | 0.252026 | 0.77082  | 0.520647 |
| MmugDNA.3102.1.S1_x_at  | MmugDNA.3102.1  | 2.92  | 3.07  | 0.11 | 0.03 | -1.12 | 0.242843 | 0.557122 | 0.608808 | 0.734946 |
| MmugDNA.31020.1.S1_at   | MmugDNA.31020.1 | 5.98  | 5.93  | 0.27 | 0.14 | 1.03  | 0.509454 | 0.02928  | 0.787587 | 0.213122 |
| MmugDNA.31022.1.S1_at   | MmugDNA.31022.1 | 4.95  | 4.93  | 0.12 | 0.05 | 1.01  | 0.549637 | 0.945614 | 0.810392 | 0.969098 |
| MmugDNA.31023.1.S1_at   | MmugDNA.31023.1 | 4.22  | 4.36  | 0.42 | 0.08 | -1.1  | 0.709727 | 0.610597 | 0.887017 | 0.76874  |
| MmugDNA.31024.1.S1_at   | MmugDNA.31024.1 | 4.1   | 3.89  | 0.17 | 0.12 | 1.16  | 0.139627 | 0.164912 | 0.515028 | 0.441219 |
| MmugDNA.31025.1.S1_at   | MmugDNA.31025.1 | 7.63  | 8.07  | 0.44 | 0.07 | -1.35 | 0.498643 | 0.090946 | 0.781829 | 0.345594 |

|                         |                 |       |       |      |      |       |          |          |          |          |
|-------------------------|-----------------|-------|-------|------|------|-------|----------|----------|----------|----------|
| MmugDNA.31026.1.S1_at   | MmugDNA.31026.1 | 3.07  | 3.35  | 0.21 | 0.29 | -1.22 | 0.19306  | 0.248325 | 0.563873 | 0.5176   |
| MmugDNA.31027.1.S1_at   | MmugDNA.31027.1 | 4.85  | 4.89  | 0.07 | 0.14 | -1.03 | 0.968976 | 0.686935 | 0.989849 | 0.817365 |
| MmugDNA.31028.1.S1_at   | MmugDNA.31028.1 | 6.69  | 5.76  | 0.27 | 0.22 | 1.91  | 0.01736  | 0.013192 | 0.291232 | 0.147352 |
| MmugDNA.31029.1.S1_at   | MmugDNA.31029.1 | 6.27  | 5.73  | 0.39 | 0.66 | 1.46  | 0.751674 | 0.68598  | 0.906126 | 0.816691 |
| MmugDNA.31029.1.S1_s_at | MmugDNA.31029.1 | 5.64  | 5.2   | 0.1  | 0.43 | 1.36  | 0.479867 | 0.728053 | 0.770904 | 0.842733 |
| MmugDNA.3103.1.S1_at    | MmugDNA.3103.1  | 8.95  | 9.17  | 0.99 | 0.2  | -1.17 | 0.310412 | 0.439812 | 0.662171 | 0.658439 |
| MmugDNA.31031.1.S1_at   | MmugDNA.31031.1 | 5.31  | 5.31  | 0.05 | 0.03 | 1     | 0.235226 | 0.510629 | 0.602266 | 0.705036 |
| MmugDNA.31032.1.S1_at   | MmugDNA.31032.1 | 11.6  | 10.85 | 0.5  | 0.01 | 1.68  | 0.173873 | 0.126117 | 0.546898 | 0.39672  |
| MmugDNA.31033.1.S1_at   | MmugDNA.31033.1 | 10.91 | 10.76 | 0.71 | 0.02 | 1.11  | 0.741097 | 0.712897 | 0.901123 | 0.833557 |
| MmugDNA.9801.1.S1_s_at  | MmugDNA.9801.1  | 10.87 | 10.73 | 0.74 | 0.01 | 1.1   | 0.747359 | 0.786908 | 0.903959 | 0.876732 |
| MmugDNA.31036.1.S1_at   | MmugDNA.31036.1 | 6.39  | 6.68  | 0.17 | 0.08 | -1.23 | 0.245592 | 0.235438 | 0.611179 | 0.506489 |
| MmugDNA.31037.1.S1_at   | MmugDNA.31037.1 | 6.36  | 8.1   | 0.29 | 0.19 | -3.32 | 0.000916 | 0.00027  | 0.153739 | 0.033828 |
| MmugDNA.31038.1.S1_at   | MmugDNA.31038.1 | 6.47  | 6.49  | 0.31 | 0.21 | -1.02 | 0.829051 | 0.86171  | 0.938657 | 0.921406 |
| MmugDNA.31039.1.S1_at   | MmugDNA.31039.1 | 3.45  | 3.43  | 0.2  | 0.14 | 1.01  | 0.9881   | 0.82726  | 0.995831 | 0.900803 |
| MmugDNA.3104.1.S1_at    | MmugDNA.3104.1  | 10.75 | 11.12 | 0.3  | 0.19 | -1.29 | 0.213612 | 0.111747 | 0.584261 | 0.376787 |
| MmugDNA.31041.1.S1_at   | MmugDNA.31041.1 | 5.7   | 5.68  | 0.06 | 0.07 | 1.02  | 0.940957 | 0.992101 | 0.979891 | 0.995515 |
| MmugDNA.31042.1.S1_at   | MmugDNA.31042.1 | 4.86  | 4.93  | 0.01 | 0.24 | -1.05 | 0.546763 | 0.530127 | 0.808796 | 0.717729 |
| MmugDNA.31044.1.S1_at   | MmugDNA.31044.1 | 11.14 | 11.26 | 0.36 | 0.12 | -1.09 | 0.449724 | 0.264267 | 0.754584 | 0.530329 |
| MmugDNA.31045.1.S1_at   | MmugDNA.31045.1 | 8.33  | 6.83  | 1.09 | 0.16 | 2.82  | 0.257239 | 0.372404 | 0.621021 | 0.611306 |
| MmugDNA.31046.1.S1_at   | MmugDNA.31046.1 | 4.22  | 3.82  | 0.31 | 0.17 | 1.32  | 0.060654 | 0.075205 | 0.408583 | 0.319384 |
| MmugDNA.31047.1.S1_at   | MmugDNA.31047.1 | 4.31  | 4.06  | 0.25 | 0.3  | 1.19  | 0.615045 | 0.055956 | 0.844186 | 0.28236  |
| MmugDNA.31048.1.S1_at   | MmugDNA.31048.1 | 3.95  | 3.92  | 0.07 | 0.2  | 1.02  | 0.521231 | 0.180979 | 0.794371 | 0.457466 |
| MmugDNA.31050.1.S1_at   | MmugDNA.31050.1 | 8.63  | 8.67  | 0.39 | 0.12 | -1.03 | 0.930927 | 0.983952 | 0.976936 | 0.991088 |
| MmugDNA.31051.1.S1_at   | MmugDNA.31051.1 | 9.01  | 9.47  | 0.55 | 0.1  | -1.37 | 0.592885 | 0.026571 | 0.833994 | 0.203932 |
| MmugDNA.31052.1.S1_at   | MmugDNA.31052.1 | 5.62  | 5.58  | 0.66 | 0.53 | 1.03  | 0.809781 | 0.824788 | 0.931163 | 0.89939  |
| MmugDNA.31053.1.S1_at   | MmugDNA.31053.1 | 8.41  | 8.61  | 0.19 | 0.03 | -1.15 | 0.408551 | 0.143934 | 0.729393 | 0.417867 |
| MmugDNA.31055.1.S1_at   | MmugDNA.31055.1 | 10.59 | 9.65  | 0.14 | 0.2  | 1.92  | 0.001407 | 0.000222 | 0.160065 | 0.032385 |
| MmugDNA.31058.1.S1_at   | MmugDNA.31058.1 | 9.05  | 9.4   | 0.72 | 0.27 | -1.28 | 0.248492 | 0.042791 | 0.613851 | 0.251394 |
| MmugDNA.31061.1.S1_at   | MmugDNA.31061.1 | 3.41  | 3.54  | 0.21 | 0.1  | -1.09 | 0.500824 | 0.323263 | 0.782991 | 0.574408 |
| MmugDNA.31062.1.S1_at   | MmugDNA.31062.1 | 5.95  | 5.91  | 0.04 | 0.06 | 1.03  | 0.3751   | 0.958226 | 0.706298 | 0.976343 |
| MmugDNA.31063.1.S1_at   | MmugDNA.31063.1 | 3.47  | 3.29  | 0.33 | 0.07 | 1.13  | 0.194537 | 0.170359 | 0.565097 | 0.447103 |
| MmugDNA.31064.1.S1_at   | MmugDNA.31064.1 | 3.39  | 3.36  | 0.04 | 0.29 | 1.02  | 0.555693 | 0.763398 | 0.813597 | 0.862471 |
| MmugDNA.31065.1.S1_at   | MmugDNA.31065.1 | 7.01  | 6.93  | 0.27 | 0.02 | 1.06  | 0.202264 | 0.356579 | 0.573733 | 0.598459 |
| MmugDNA.31066.1.S1_at   | MmugDNA.31066.1 | 7.57  | 8.35  | 0.78 | 0.15 | -1.71 | 0.147776 | 0.146738 | 0.52196  | 0.42078  |
| MmugDNA.31068.1.S1_at   | MmugDNA.31068.1 | 7.04  | 7.08  | 0.4  | 0.03 | -1.02 | 0.830782 | 0.614494 | 0.93945  | 0.771283 |
| MmugDNA.31069.1.S1_at   | MmugDNA.31069.1 | 7.08  | 7.54  | 0.43 | 0.03 | -1.37 | 0.433513 | 0.171232 | 0.744491 | 0.447792 |
| MmugDNA.31069.1.S1_s_at | MmugDNA.31069.1 | 9.53  | 9.83  | 0.19 | 0.1  | -1.23 | 0.207251 | 0.130072 | 0.578873 | 0.401724 |
| MmugDNA.3107.1.S1_at    | MmugDNA.3107.1  | 8.23  | 8.1   | 0.41 | 0.24 | 1.1   | 0.684528 | 0.871493 | 0.87645  | 0.926844 |
| MmugDNA.31071.1.S1_at   | MmugDNA.31071.1 | 7.05  | 7.32  | 0.43 | 0.07 | -1.2  | 0.687872 | 0.165132 | 0.877963 | 0.441373 |
| MmugDNA.31072.1.S1_at   | MmugDNA.31072.1 | 7.36  | 7.23  | 0.7  | 0.29 | 1.09  | 0.826018 | 0.430696 | 0.937613 | 0.651691 |
| MmugDNA.31073.1.S1_at   | MmugDNA.31073.1 | 12.03 | 11.5  | 0.05 | 0.06 | 1.45  | 0.000416 | 0.000167 | 0.137028 | 0.030511 |
| MmugDNA.31074.1.S1_at   | MmugDNA.31074.1 | 5.11  | 4.79  | 0.16 | 0.2  | 1.25  | 0.049152 | 0.106396 | 0.385288 | 0.36895  |
| MmugDNA.31075.1.S1_at   | MmugDNA.31075.1 | 6.82  | 7.06  | 0.23 | 0.29 | -1.18 | 0.345051 | 0.639192 | 0.68735  | 0.788125 |

|                         |                 |       |       |      |      |       |          |          |          |          |
|-------------------------|-----------------|-------|-------|------|------|-------|----------|----------|----------|----------|
| MmugDNA.31076.1.S1_at   | MmugDNA.31076.1 | 5.47  | 5.44  | 0.16 | 0.17 | 1.02  | 0.665377 | 0.831694 | 0.867966 | 0.903453 |
| MmugDNA.31077.1.S1_at   | MmugDNA.31077.1 | 5.99  | 5.86  | 0.33 | 0.29 | 1.09  | 0.135928 | 0.126219 | 0.510454 | 0.396751 |
| MmugDNA.31078.1.S1_at   | MmugDNA.31078.1 | 4.38  | 4.47  | 0.09 | 0.1  | -1.07 | 0.399464 | 0.277937 | 0.723131 | 0.541664 |
| MmugDNA.31079.1.S1_at   | MmugDNA.31079.1 | 7.54  | 7.45  | 0.75 | 0.1  | 1.06  | 0.790477 | 0.38946  | 0.922954 | 0.623564 |
| MmugDNA.3108.1.S1_at    | MmugDNA.3108.1  | 8.01  | 9.09  | 0.57 | 0.13 | -2.12 | 0.115182 | 0.093005 | 0.488314 | 0.349174 |
| MmugDNA.31081.1.S1_at   | MmugDNA.31081.1 | 10.14 | 9.69  | 0.36 | 0.2  | 1.37  | 0.086616 | 0.03878  | 0.454485 | 0.241916 |
| MmugDNA.31082.1.S1_at   | MmugDNA.31082.1 | 4.98  | 4.86  | 0.29 | 0.13 | 1.09  | 0.688263 | 0.607494 | 0.878229 | 0.766417 |
| MmugDNA.31083.1.S1_at   | MmugDNA.31083.1 | 3.32  | 3.32  | 0.15 | 0.05 | 1.01  | 0.306463 | 0.339593 | 0.659434 | 0.586188 |
| MmugDNA.31084.1.S1_at   | MmugDNA.31084.1 | 10.46 | 10.73 | 0.43 | 0.12 | -1.21 | 0.545203 | 0.569274 | 0.807687 | 0.742375 |
| MmugDNA.31086.1.S1_at   | MmugDNA.31086.1 | 7.31  | 7.28  | 0.02 | 0.06 | 1.02  | 0.153607 | 0.801207 | 0.526754 | 0.885679 |
| MmugDNA.31087.1.S1_at   | MmugDNA.31087.1 | 8.84  | 8.61  | 0.16 | 0.46 | -1.18 | 0.203448 | 0.29234  | 0.574965 | 0.552408 |
| MmugDNA.31089.1.S1_s_at | MmugDNA.31089.1 | 10.63 | 10.5  | 0.16 | 0.06 | 1.09  | 0.084655 | 0.007258 | 0.451162 | 0.114309 |
| MmugDNA.3109.1.S1_at    | MmugDNA.3109.1  | 8     | 10.15 | 2.76 | 0.05 | -4.42 | 0.096496 | 0.038104 | 0.465152 | 0.239835 |
| MmugDNA.3109.1.S1_s_at  | MmugDNA.3109.1  | 7.09  | 9.3   | 1.5  | 0.26 | -4.62 | 0.069471 | 0.012641 | 0.427294 | 0.14505  |
| MmugDNA.31091.1.S1_at   | MmugDNA.31091.1 | 9.8   | 10.37 | 0.59 | 0.03 | -1.48 | 0.103911 | 0.104538 | 0.474646 | 0.365805 |
| MmugDNA.31093.1.S1_at   | MmugDNA.31093.1 | 10.52 | 10.4  | 0.13 | 0.28 | 1.09  | 0.852394 | 0.386733 | 0.947963 | 0.621891 |
| MmugDNA.31094.1.S1_at   | MmugDNA.31094.1 | 6.11  | 5.77  | 0.37 | 0.28 | 1.26  | 0.306931 | 0.355798 | 0.659867 | 0.597864 |
| MmugDNA.31095.1.S1_at   | MmugDNA.31095.1 | 11.5  | 11.3  | 0.18 | 0.06 | 1.15  | 0.064575 | 0.219955 | 0.418362 | 0.49344  |
| MmugDNA.31097.1.S1_at   | MmugDNA.31097.1 | 6.24  | 6.14  | 0.09 | 0.04 | 1.07  | 0.163083 | 0.216731 | 0.536035 | 0.490311 |
| MmugDNA.31099.1.S1_at   | MmugDNA.31099.1 | 7.51  | 7.72  | 0.39 | 0.08 | -1.15 | 0.814918 | 0.123143 | 0.933137 | 0.393174 |
| MmugDNA.31099.1.S1_s_at | MmugDNA.31099.1 | 8.94  | 9.19  | 0.56 | 0.09 | -1.19 | 0.96392  | 0.190674 | 0.988182 | 0.466127 |
| MmugDNA.311.1.S1_at     | MmugDNA.311.1   | 4.32  | 4.25  | 0.17 | 0.15 | 1.05  | 0.64873  | 0.829323 | 0.860066 | 0.901879 |
| MmugDNA.3110.1.S1_at    | MmugDNA.3110.1  | 2.82  | 2.85  | 0.21 | 0.01 | -1.02 | 0.538011 | 0.583192 | 0.802969 | 0.751632 |
| MmugDNA.31101.1.S1_at   | MmugDNA.31101.1 | 8.81  | 8.8   | 0.45 | 0.07 | 1.01  | 0.487943 | 0.607527 | 0.775315 | 0.766417 |
| MmugDNA.31102.1.S1_at   | MmugDNA.31102.1 | 5.94  | 6.39  | 0.13 | 0.36 | -1.37 | 0.490743 | 0.843387 | 0.777256 | 0.910815 |
| MmugDNA.31103.1.S1_at   | MmugDNA.31103.1 | 7.7   | 7.43  | 0.05 | 0.12 | 1.21  | 0.035775 | 0.457649 | 0.353107 | 0.670889 |
| MmugDNA.31104.1.S1_at   | MmugDNA.31104.1 | 5.13  | 5.04  | 0.41 | 0.05 | 1.07  | 0.469669 | 0.677409 | 0.765623 | 0.81167  |
| MmugDNA.31105.1.S1_at   | MmugDNA.31105.1 | 3.65  | 3.78  | 0.22 | 0.04 | -1.1  | 0.754655 | 0.393012 | 0.907464 | 0.625971 |
| MmugDNA.31108.1.S1_at   | MmugDNA.31108.1 | 4.23  | 3.77  | 0.7  | 0.12 | 1.38  | 0.154119 | 0.23396  | 0.527483 | 0.505221 |
| MmugDNA.3111.1.S1_at    | MmugDNA.3111.1  | 4.75  | 4.45  | 0.21 | 0.27 | 1.23  | 0.299998 | 0.909714 | 0.654455 | 0.949067 |
| MmugDNA.31110.1.S1_at   | MmugDNA.31110.1 | 3.5   | 3.51  | 0.1  | 0.07 | -1    | 0.264514 | 0.604056 | 0.626029 | 0.764452 |
| MmugDNA.31111.1.S1_at   | MmugDNA.31111.1 | 6.35  | 6.43  | 0.06 | 0.13 | -1.05 | 0.635058 | 0.706063 | 0.854507 | 0.829633 |
| MmugDNA.31113.1.S1_at   | MmugDNA.31113.1 | 5.52  | 5.74  | 0.44 | 0.1  | -1.16 | 0.166985 | 0.541642 | 0.539589 | 0.725033 |
| MmugDNA.31115.1.S1_at   | MmugDNA.31115.1 | 3.33  | 3.25  | 0.07 | 0.14 | 1.06  | 0.215265 | 0.282989 | 0.585748 | 0.545692 |
| MmugDNA.31116.1.S1_at   | MmugDNA.31116.1 | 6.6   | 6.41  | 0.16 | 0.21 | 1.15  | 0.208413 | 0.476592 | 0.580097 | 0.682787 |
| MmugDNA.31117.1.S1_at   | MmugDNA.31117.1 | 4.87  | 4.8   | 0.24 | 0.04 | 1.05  | 0.223157 | 0.524202 | 0.592569 | 0.714207 |
| MmugDNA.31118.1.S1_at   | MmugDNA.31118.1 | 7.1   | 7     | 0.11 | 0.12 | 1.07  | 0.147526 | 0.139839 | 0.521578 | 0.413131 |
| MmugDNA.31119.1.S1_at   | MmugDNA.31119.1 | 5.16  | 5.03  | 0.02 | 0.03 | 1.1   | 0.002713 | 0.018009 | 0.184127 | 0.169233 |
| MmugDNA.3112.1.S1_at    | MmugDNA.3112.1  | 2.96  | 2.96  | 0.07 | 0.1  | 1.01  | 0.724112 | 0.657766 | 0.893041 | 0.799981 |
| MmugDNA.31121.1.S1_at   | MmugDNA.31121.1 | 2.91  | 2.88  | 0.14 | 0.13 | 1.02  | 0.985893 | 0.948435 | 0.995501 | 0.970595 |
| MmugDNA.31123.1.S1_at   | MmugDNA.31123.1 | 5.18  | 4.95  | 0.02 | 0.09 | 1.17  | 0.035289 | 0.484631 | 0.351598 | 0.68858  |
| MmugDNA.31124.1.S1_at   | MmugDNA.31124.1 | 7.61  | 8.29  | 0.86 | 0.03 | -1.6  | 0.278801 | 0.42711  | 0.637886 | 0.649106 |
| MmugDNA.31126.1.S1_at   | MmugDNA.31126.1 | 4.77  | 4.87  | 0.09 | 0.07 | -1.07 | 0.222916 | 0.05621  | 0.592482 | 0.282978 |

|                         |                 |       |       |      |      |       |          |          |          |          |
|-------------------------|-----------------|-------|-------|------|------|-------|----------|----------|----------|----------|
| MmugDNA.31127.1.S1_at   | MmugDNA.31127.1 | 3.19  | 3.12  | 0.15 | 0.12 | 1.05  | 0.155219 | 0.113811 | 0.528509 | 0.380052 |
| MmugDNA.31128.1.S1_at   | MmugDNA.31128.1 | 7.7   | 7.53  | 0.17 | 0.02 | 1.12  | 0.157421 | 0.373797 | 0.530565 | 0.61244  |
| MmugDNA.31129.1.S1_at   | MmugDNA.31129.1 | 10.25 | 10.08 | 0.41 | 0.2  | 1.13  | 0.443843 | 0.030751 | 0.751068 | 0.217248 |
| MmugDNA.3113.1.S1_at    | MmugDNA.3113.1  | 6.8   | 6.93  | 0.39 | 0.28 | -1.1  | 0.284186 | 0.169327 | 0.642085 | 0.445925 |
| MmugDNA.31130.1.S1_at   | MmugDNA.31130.1 | 7.17  | 6.92  | 0.1  | 0.05 | 1.19  | 0.030097 | 0.294058 | 0.336449 | 0.553912 |
| MmugDNA.31130.1.S1_x_at | MmugDNA.31130.1 | 6.67  | 6.51  | 0.11 | 0.04 | 1.12  | 0.051742 | 0.129175 | 0.391209 | 0.400611 |
| MmugDNA.31133.1.S1_at   | MmugDNA.31133.1 | 4.97  | 5.03  | 0.16 | 0.15 | -1.05 | 0.61701  | 0.729318 | 0.845238 | 0.843541 |
| MmugDNA.31137.1.S1_at   | MmugDNA.31137.1 | 5.82  | 5.66  | 0.18 | 0.12 | 1.12  | 0.555453 | 0.753529 | 0.813493 | 0.856527 |
| MmugDNA.31138.1.S1_at   | MmugDNA.31138.1 | 5.44  | 5.11  | 0.14 | 0.11 | 1.26  | 0.038626 | 0.046266 | 0.359972 | 0.259486 |
| MmugDNA.31140.1.S1_at   | MmugDNA.31140.1 | 4.34  | 4.36  | 0    | 0.12 | -1.01 | 0.527835 | 0.429228 | 0.797303 | 0.650729 |
| MmugDNA.31142.1.S1_at   | MmugDNA.31142.1 | 8.94  | 9.46  | 0.89 | 0.08 | -1.43 | 0.435493 | 0.446492 | 0.745735 | 0.662842 |
| MmugDNA.31143.1.S1_at   | MmugDNA.31143.1 | 8.32  | 7.41  | 0.31 | 0.06 | 1.88  | 0.00931  | 0.002519 | 0.241866 | 0.074158 |
| MmugDNA.31144.1.S1_at   | MmugDNA.31144.1 | 4.32  | 4.1   | 0.1  | 0.16 | 1.16  | 0.093734 | 0.12045  | 0.46305  | 0.38925  |
| MmugDNA.31145.1.S1_at   | MmugDNA.31145.1 | 3.21  | 3.43  | 0.43 | 0.11 | -1.16 | 0.89102  | 0.948358 | 0.962566 | 0.970554 |
| MmugDNA.31146.1.S1_at   | MmugDNA.31146.1 | 4.85  | 4.72  | 0.17 | 0.05 | 1.09  | 0.319906 | 0.675331 | 0.669028 | 0.81026  |
| MmugDNA.31147.1.S1_at   | MmugDNA.31147.1 | 7.91  | 7.93  | 0.1  | 0.03 | -1.01 | 0.636186 | 0.745409 | 0.854813 | 0.852384 |
| MmugDNA.31147.1.S1_s_at | MmugDNA.31147.1 | 5.47  | 5.37  | 0.02 | 0.06 | 1.07  | 0.044778 | 0.048745 | 0.37512  | 0.265744 |
| MmugDNA.31149.1.S1_at   | MmugDNA.31149.1 | 3.34  | 3.29  | 0.04 | 0.07 | 1.04  | 0.459318 | 0.323639 | 0.759425 | 0.574525 |
| MmugDNA.3115.1.S1_at    | MmugDNA.3115.1  | 4.49  | 4.1   | 0.48 | 0.07 | 1.31  | 0.16825  | 0.147562 | 0.540864 | 0.421872 |
| MmugDNA.31151.1.S1_at   | MmugDNA.31151.1 | 4.1   | 4.09  | 0.11 | 0.03 | 1.01  | 0.498148 | 0.743903 | 0.781592 | 0.85159  |
| MmugDNA.31152.1.S1_at   | MmugDNA.31152.1 | 2.85  | 3.14  | 0.06 | 0.12 | -1.22 | 0.019042 | 0.089488 | 0.29965  | 0.343811 |
| MmugDNA.31153.1.S1_at   | MmugDNA.31153.1 | 6.23  | 6.31  | 0.57 | 0.17 | -1.05 | 0.795951 | 0.11773  | 0.925013 | 0.385519 |
| MmugDNA.31155.1.S1_at   | MmugDNA.31155.1 | 3.91  | 4     | 0.09 | 0.37 | -1.07 | 0.23853  | 0.322543 | 0.605359 | 0.573991 |
| MmugDNA.31156.1.S1_s_at | MmugDNA.31156.1 | 10.96 | 10.52 | 0.56 | 0.06 | 1.36  | 0.583831 | 0.597236 | 0.829306 | 0.76013  |
| MmugDNA.31158.1.S1_at   | MmugDNA.31158.1 | 5.05  | 5.04  | 0.23 | 0.03 | 1     | 0.401457 | 0.684716 | 0.724533 | 0.816113 |
| MmugDNA.3116.1.S1_at    | MmugDNA.3116.1  | 3.86  | 4.29  | 0.54 | 0.08 | -1.35 | 0.678065 | 0.811481 | 0.873899 | 0.891185 |
| MmugDNA.31160.1.S1_at   | MmugDNA.31160.1 | 5.36  | 7.01  | 0.78 | 0.47 | -3.13 | 0.06753  | 0.022963 | 0.423938 | 0.189548 |
| MmugDNA.31161.1.S1_at   | MmugDNA.31161.1 | 8.9   | 9.53  | 0.59 | 0.13 | -1.54 | 0.331543 | 0.016651 | 0.678103 | 0.163343 |
| MmugDNA.31163.1.S1_at   | MmugDNA.31163.1 | 3.32  | 3.1   | 0.11 | 0.04 | 1.17  | 0.033679 | 0.025897 | 0.34712  | 0.201714 |
| MmugDNA.31164.1.S1_at   | MmugDNA.31164.1 | 10.65 | 11.44 | 0.37 | 0.2  | -1.72 | 0.020966 | 0.011577 | 0.30624  | 0.139225 |
| MmugDNA.31165.1.S1_at   | MmugDNA.31165.1 | 3.39  | 3.35  | 0.09 | 0.09 | 1.03  | 0.848893 | 0.953439 | 0.946889 | 0.97351  |
| MmugDNA.31167.1.S1_s_at | MmugDNA.31167.1 | 3.89  | 3.39  | 0.62 | 0.09 | 1.42  | 0.217473 | 0.174524 | 0.587269 | 0.450998 |
| MmugDNA.31167.1.S1_x_at | MmugDNA.31167.1 | 3.28  | 3.27  | 0.54 | 0.4  | 1     | 0.830096 | 0.399303 | 0.939056 | 0.629737 |
| MmugDNA.31168.1.S1_at   | MmugDNA.31168.1 | 3.94  | 3.8   | 0.07 | 0.13 | 1.1   | 0.755579 | 0.221748 | 0.907976 | 0.494901 |
| MmugDNA.31169.1.S1_at   | MmugDNA.31169.1 | 6.58  | 7.26  | 0.41 | 0.25 | -1.61 | 0.096529 | 0.031605 | 0.465152 | 0.219905 |
| MmugDNA.3117.1.S1_at    | MmugDNA.3117.1  | 4.22  | 4.43  | 0.14 | 0.33 | -1.16 | 0.418185 | 0.671366 | 0.735441 | 0.807861 |
| MmugDNA.31170.1.S1_at   | MmugDNA.31170.1 | 4.98  | 5.03  | 0.13 | 0.35 | -1.03 | 0.927016 | 0.38343  | 0.975766 | 0.619424 |
| MmugDNA.31171.1.S1_at   | MmugDNA.31171.1 | 5.19  | 5.11  | 0.13 | 0.21 | 1.06  | 0.572278 | 0.35707  | 0.823212 | 0.59875  |
| MmugDNA.31173.1.S1_at   | MmugDNA.31173.1 | 5.8   | 5.81  | 0.06 | 0.13 | -1.01 | 0.799341 | 0.931088 | 0.926464 | 0.960841 |
| MmugDNA.31174.1.S1_at   | MmugDNA.31174.1 | 3.48  | 3.4   | 0.25 | 0.17 | 1.06  | 0.50789  | 0.800055 | 0.786553 | 0.885072 |
| MmugDNA.31176.1.S1_at   | MmugDNA.31176.1 | 4.05  | 4.04  | 0.1  | 0.04 | 1     | 0.981938 | 0.798473 | 0.994301 | 0.884012 |
| MmugDNA.31178.1.S1_at   | MmugDNA.31178.1 | 8.57  | 8.29  | 0.06 | 0.33 | 1.22  | 0.105042 | 0.474313 | 0.476655 | 0.68135  |
| MmugDNA.31179.1.S1_at   | MmugDNA.31179.1 | 11.2  | 10.98 | 0.18 | 0.1  | 1.17  | 0.515412 | 0.002152 | 0.79089  | 0.068732 |

|                         |                 |       |       |      |      |       |          |          |          |          |
|-------------------------|-----------------|-------|-------|------|------|-------|----------|----------|----------|----------|
| MmugDNA.3118.1.S1_at    | MmugDNA.3118.1  | 5.53  | 5.38  | 0.01 | 0.12 | 1.11  | 0.125996 | 0.102118 | 0.49972  | 0.362168 |
| MmugDNA.31180.1.S1_at   | MmugDNA.31180.1 | 10.42 | 10.46 | 0.73 | 0.23 | -1.03 | 0.809812 | 0.77994  | 0.931174 | 0.872422 |
| MmugDNA.31182.1.S1_at   | MmugDNA.31182.1 | 9.5   | 9.2   | 0.54 | 0.55 | 1.23  | 0.975759 | 0.831421 | 0.992214 | 0.903343 |
| MmugDNA.31183.1.S1_at   | MmugDNA.31183.1 | 5.14  | 5.22  | 0.15 | 0.12 | -1.05 | 0.576888 | 0.7361   | 0.825252 | 0.84733  |
| MmugDNA.31184.1.S1_at   | MmugDNA.31184.1 | 5.1   | 4.97  | 0.09 | 0.11 | 1.09  | 0.398552 | 0.254853 | 0.722547 | 0.523051 |
| MmugDNA.31186.1.S1_at   | MmugDNA.31186.1 | 8.81  | 7.12  | 1.24 | 0.44 | 3.25  | 0.388241 | 0.50121  | 0.715159 | 0.699449 |
| MmugDNA.31187.1.S1_at   | MmugDNA.31187.1 | 6.89  | 6.9   | 0.08 | 0.15 | -1.01 | 0.736455 | 0.527858 | 0.899136 | 0.71629  |
| MmugDNA.31188.1.S1_at   | MmugDNA.31188.1 | 9.63  | 9.71  | 0.65 | 0.15 | -1.06 | 0.399573 | 0.03776  | 0.723158 | 0.238746 |
| MmugDNA.31189.1.S1_at   | MmugDNA.31189.1 | 4.96  | 5.04  | 0.22 | 0.69 | -1.05 | 0.41712  | 0.573877 | 0.734701 | 0.745442 |
| MmugDNA.31190.1.S1_at   | MmugDNA.31190.1 | 4.97  | 5.05  | 0.18 | 0.01 | -1.05 | 0.740762 | 0.917567 | 0.900905 | 0.95389  |
| MmugDNA.31192.1.S1_at   | MmugDNA.31192.1 | 4.25  | 4.14  | 0.21 | 0.12 | 1.08  | 0.150771 | 0.242595 | 0.524367 | 0.51293  |
| MmugDNA.31193.1.S1_at   | MmugDNA.31193.1 | 8.89  | 8.77  | 0.23 | 0.1  | 1.08  | 0.474908 | 0.046189 | 0.768236 | 0.25935  |
| MmugDNA.31194.1.S1_at   | MmugDNA.31194.1 | 6.74  | 6.74  | 0.17 | 0.14 | 1     | 0.232317 | 0.361324 | 0.600124 | 0.602112 |
| MmugDNA.31195.1.S1_at   | MmugDNA.31195.1 | 6.7   | 6.44  | 0.14 | 0.05 | 1.19  | 0.081954 | 0.048731 | 0.44659  | 0.265744 |
| MmugDNA.31196.1.S1_at   | MmugDNA.31196.1 | 9.26  | 10.48 | 1.27 | 0.24 | -2.32 | 0.180764 | 0.21527  | 0.554105 | 0.489011 |
| MmugDNA.31197.1.S1_at   | MmugDNA.31197.1 | 3.89  | 3.85  | 0.17 | 0.04 | 1.03  | 0.243955 | 0.470048 | 0.609715 | 0.678572 |
| MmugDNA.31199.1.S1_at   | MmugDNA.31199.1 | 10.25 | 9.51  | 1.15 | 0.2  | 1.67  | 0.389718 | 0.079037 | 0.716272 | 0.326117 |
| MmugDNA.312.1.S1_at     | MmugDNA.312.1   | 3.65  | 3.6   | 0.11 | 0.13 | 1.03  | 0.369349 | 0.309598 | 0.704215 | 0.564987 |
| MmugDNA.3120.1.S1_at    | MmugDNA.3120.1  | 2.87  | 2.84  | 0.01 | 0.08 | 1.02  | 0.261834 | 0.05285  | 0.62407  | 0.275521 |
| MmugDNA.31200.1.S1_at   | MmugDNA.31200.1 | 3.56  | 3.72  | 0.18 | 0.13 | -1.12 | 0.679351 | 0.70717  | 0.874274 | 0.830195 |
| MmugDNA.31202.1.S1_at   | MmugDNA.31202.1 | 9.12  | 9.33  | 0.52 | 0.11 | -1.15 | 0.513214 | 0.421095 | 0.789773 | 0.644743 |
| MmugDNA.31203.1.S1_at   | MmugDNA.31203.1 | 5.89  | 7.71  | 0.52 | 0.23 | -3.53 | 0.003206 | 0.000419 | 0.191748 | 0.038093 |
| MmugDNA.31204.1.S1_at   | MmugDNA.31204.1 | 5.36  | 5.51  | 0.24 | 0.34 | -1.11 | 0.797762 | 0.099504 | 0.925727 | 0.35789  |
| MmugDNA.31205.1.S1_at   | MmugDNA.31205.1 | 3.39  | 3.2   | 0.09 | 0.13 | 1.14  | 0.112123 | 0.115763 | 0.485224 | 0.382814 |
| MmugDNA.31205.1.S1_s_at | MmugDNA.31205.1 | 6.02  | 5.93  | 0.12 | 0.22 | 1.06  | 0.747493 | 0.881596 | 0.904013 | 0.932407 |
| MmugDNA.31206.1.S1_at   | MmugDNA.31206.1 | 8.51  | 7.86  | 0.43 | 0.19 | 1.58  | 0.067512 | 0.046065 | 0.423938 | 0.258977 |
| MmugDNA.31207.1.S1_at   | MmugDNA.31207.1 | 7.56  | 7.57  | 0.11 | 0.03 | -1.01 | 0.463307 | 0.720228 | 0.762124 | 0.838202 |
| MmugDNA.31208.1.S1_at   | MmugDNA.31208.1 | 3.29  | 3.27  | 0.2  | 0.08 | 1.01  | 0.847854 | 0.904601 | 0.946586 | 0.945935 |
| MmugDNA.31209.1.S1_at   | MmugDNA.31209.1 | 6.28  | 6.05  | 0.18 | 0.25 | 1.17  | 0.10932  | 0.631272 | 0.482242 | 0.782742 |
| MmugDNA.3121.1.S1_at    | MmugDNA.3121.1  | 5.09  | 5.1   | 0.1  | 0.07 | -1    | 0.259968 | 0.48258  | 0.622946 | 0.687366 |
| MmugDNA.31210.1.S1_at   | MmugDNA.31210.1 | 5.62  | 5.51  | 0.04 | 0.09 | 1.08  | 0.041798 | 0.359595 | 0.367252 | 0.600859 |
| MmugDNA.31212.1.S1_at   | MmugDNA.31212.1 | 12.08 | 11.86 | 0.07 | 0.1  | 1.17  | 0.028783 | 0.012901 | 0.333062 | 0.146227 |
| MmugDNA.31213.1.S1_at   | MmugDNA.31213.1 | 4.94  | 4.95  | 0.3  | 0.06 | -1.01 | 0.496699 | 0.452344 | 0.780748 | 0.667046 |
| MmugDNA.31214.1.S1_at   | MmugDNA.31214.1 | 3.75  | 3.76  | 0.18 | 0.11 | -1.01 | 0.836887 | 0.990112 | 0.941497 | 0.994344 |
| MmugDNA.31215.1.S1_at   | MmugDNA.31215.1 | 6.96  | 7.03  | 0.1  | 0.03 | -1.05 | 0.486272 | 0.273916 | 0.774492 | 0.538452 |
| MmugDNA.31216.1.S1_at   | MmugDNA.31216.1 | 3.67  | 3.55  | 0.1  | 0.04 | 1.09  | 0.321961 | 0.319147 | 0.670545 | 0.57167  |
| MmugDNA.31217.1.S1_at   | MmugDNA.31217.1 | 2.85  | 2.83  | 0.04 | 0.03 | 1.01  | 0.767787 | 0.710374 | 0.912627 | 0.831943 |
| MmugDNA.31220.1.S1_at   | MmugDNA.31220.1 | 4.92  | 4.75  | 0.04 | 0.38 | 1.12  | 0.914363 | 0.996824 | 0.970837 | 0.998184 |
| MmugDNA.31222.1.S1_at   | MmugDNA.31222.1 | 5.95  | 6.39  | 0.28 | 0.54 | -1.36 | 0.086231 | 0.405635 | 0.453817 | 0.633891 |
| MmugDNA.31224.1.S1_at   | MmugDNA.31224.1 | 8.42  | 8.94  | 0.38 | 0.23 | -1.43 | 0.083465 | 0.008342 | 0.449546 | 0.121147 |
| MmugDNA.31226.1.S1_at   | MmugDNA.31226.1 | 6.39  | 6.32  | 0.17 | 0.04 | 1.05  | 0.655336 | 0.295931 | 0.863101 | 0.555241 |
| MmugDNA.31228.1.S1_at   | MmugDNA.31228.1 | 3.1   | 2.92  | 0.16 | 0.08 | 1.13  | 0.266443 | 0.305731 | 0.627329 | 0.562722 |
| MmugDNA.31229.1.S1_at   | MmugDNA.31229.1 | 5.99  | 5.95  | 0.47 | 0.17 | 1.03  | 0.886108 | 0.494648 | 0.960485 | 0.69497  |



|                         |                 |       |       |      |      |       |          |          |          |          |
|-------------------------|-----------------|-------|-------|------|------|-------|----------|----------|----------|----------|
| MmugDNA.3123.1.S1_at    | MmugDNA.3123.1  | 5.43  | 5.04  | 0.28 | 0.14 | 1.32  | 0.146846 | 0.277821 | 0.521393 | 0.541664 |
| MmugDNA.31230.1.S1_at   | MmugDNA.31230.1 | 6.91  | 6.81  | 0.09 | 0.24 | 1.07  | 0.553508 | 0.31385  | 0.812247 | 0.568091 |
| MmugDNA.31231.1.S1_at   | MmugDNA.31231.1 | 4.35  | 4.07  | 0.06 | 0.07 | 1.21  | 0.020683 | 0.255208 | 0.305403 | 0.523254 |
| MmugDNA.31233.1.S1_at   | MmugDNA.31233.1 | 3.71  | 3.6   | 0.1  | 0.09 | 1.08  | 0.510977 | 0.222897 | 0.788449 | 0.495791 |
| MmugDNA.31234.1.S1_at   | MmugDNA.31234.1 | 3.69  | 3.69  | 0.02 | 0.1  | -1    | 0.389918 | 0.581522 | 0.716422 | 0.750522 |
| MmugDNA.31235.1.S1_at   | MmugDNA.31235.1 | 3.53  | 3.57  | 0.26 | 0.09 | -1.03 | 0.63871  | 0.308627 | 0.856034 | 0.56461  |
| MmugDNA.31236.1.S1_at   | MmugDNA.31236.1 | 5.72  | 5.69  | 0.34 | 0.27 | 1.03  | 0.39741  | 0.383059 | 0.72174  | 0.619089 |
| MmugDNA.31237.1.S1_at   | MmugDNA.31237.1 | 5.14  | 5.57  | 0.34 | 0.18 | -1.35 | 0.231232 | 0.225665 | 0.59916  | 0.498155 |
| MmugDNA.31238.1.S1_at   | MmugDNA.31238.1 | 7.66  | 7     | 1.03 | 0.08 | 1.58  | 0.339418 | 0.514416 | 0.683826 | 0.707677 |
| MmugDNA.31239.1.S1_at   | MmugDNA.31239.1 | 6.78  | 6.01  | 0.72 | 0.29 | 1.7   | 0.429847 | 0.758156 | 0.742392 | 0.8593   |
| MmugDNA.3124.1.S1_at    | MmugDNA.3124.1  | 11.14 | 10.53 | 0.49 | 0.08 | -1.52 | 0.268936 | 0.590585 | 0.629195 | 0.756311 |
| MmugDNA.31240.1.S1_at   | MmugDNA.31240.1 | 3.75  | 3.67  | 0.06 | 0.05 | 1.05  | 0.199584 | 0.294479 | 0.571471 | 0.554225 |
| MmugDNA.31241.1.S1_at   | MmugDNA.31241.1 | 5.85  | 5.73  | 0.15 | 0.09 | 1.08  | 0.146098 | 0.778808 | 0.520572 | 0.871617 |
| MmugDNA.31242.1.S1_at   | MmugDNA.31242.1 | 12.14 | 12.08 | 0.35 | 0.06 | 1.04  | 0.542818 | 0.188795 | 0.805988 | 0.464778 |
| MmugDNA.31242.1.S1_s_at | MmugDNA.31242.1 | 11.72 | 11.4  | 0.34 | 0.07 | 1.25  | 0.163239 | 0.115977 | 0.536063 | 0.383164 |
| MmugDNA.31243.1.S1_at   | MmugDNA.31243.1 | 9.86  | 10.06 | 0.24 | 0.03 | -1.15 | 0.151575 | 0.317043 | 0.524628 | 0.570317 |
| MmugDNA.31245.1.S1_at   | MmugDNA.31245.1 | 8.42  | 8.85  | 0.16 | 0.05 | -1.34 | 0.006317 | 0.008877 | 0.218403 | 0.124662 |
| MmugDNA.31246.1.S1_at   | MmugDNA.31246.1 | 6.69  | 6.46  | 0.17 | 0.12 | 1.18  | 0.252163 | 0.355096 | 0.61717  | 0.597508 |
| MmugDNA.31247.1.S1_at   | MmugDNA.31247.1 | 11.08 | 11.5  | 0.15 | 0.02 | -1.33 | 0.016967 | 0.028018 | 0.288969 | 0.208909 |
| MmugDNA.31248.1.S1_at   | MmugDNA.31248.1 | 3.94  | 3.95  | 0.24 | 0.44 | -1.01 | 0.802644 | 0.286615 | 0.92802  | 0.548069 |
| MmugDNA.31249.1.S1_at   | MmugDNA.31249.1 | 11.87 | 11.55 | 0.27 | 0.07 | 1.25  | 0.35704  | 0.022457 | 0.695464 | 0.187518 |
| MmugDNA.3125.1.S1_at    | MmugDNA.3125.1  | 10.44 | 9.74  | 0.04 | 0.54 | 1.62  | 0.065573 | 0.047551 | 0.420827 | 0.262758 |
| MmugDNA.31250.1.S1_at   | MmugDNA.31250.1 | 6.36  | 6.26  | 0.18 | 0.05 | 1.07  | 0.247975 | 0.321046 | 0.613615 | 0.573046 |
| MmugDNA.31251.1.S1_at   | MmugDNA.31251.1 | 6.99  | 8.43  | 2.03 | 0.18 | -2.73 | 0.251614 | 0.083598 | 0.616728 | 0.334194 |
| MmugDNA.31251.1.S1_s_at | MmugDNA.31251.1 | 7.04  | 7.38  | 0.81 | 0.42 | -1.27 | 0.520559 | 0.199369 | 0.793774 | 0.474002 |
| MmugDNA.31252.1.S1_at   | MmugDNA.31252.1 | 8.45  | 8.47  | 0.11 | 0.09 | -1.01 | 0.930046 | 0.973719 | 0.976599 | 0.985652 |
| MmugDNA.31253.1.S1_at   | MmugDNA.31253.1 | 3.6   | 4.02  | 0.4  | 0.51 | -1.34 | 0.259311 | 0.3928   | 0.622607 | 0.625846 |
| MmugDNA.31254.1.S1_at   | MmugDNA.31254.1 | 3.2   | 3.36  | 0.11 | 0.24 | -1.11 | 0.384719 | 0.321598 | 0.712173 | 0.573303 |
| MmugDNA.31255.1.S1_at   | MmugDNA.31255.1 | 8.43  | 7.94  | 0.47 | 0.14 | 1.4   | 0.464016 | 0.817732 | 0.762376 | 0.894815 |
| MmugDNA.31257.1.S1_at   | MmugDNA.31257.1 | 10.25 | 10.03 | 0.42 | 0.07 | 1.16  | 0.35031  | 0.51563  | 0.691193 | 0.708449 |
| MmugDNA.31259.1.S1_at   | MmugDNA.31259.1 | 4.82  | 4.83  | 0.03 | 0    | -1.01 | 0.808499 | 0.269735 | 0.930687 | 0.53502  |
| MmugDNA.3126.1.S1_at    | MmugDNA.3126.1  | 3.51  | 3.38  | 0.19 | 0.04 | 1.09  | 0.25261  | 0.658783 | 0.61758  | 0.800473 |
| MmugDNA.31260.1.S1_at   | MmugDNA.31260.1 | 7.81  | 7.42  | 0.41 | 0.22 | 1.31  | 0.157985 | 0.008391 | 0.530982 | 0.12163  |
| MmugDNA.31262.1.S1_at   | MmugDNA.31262.1 | 6.2   | 6.28  | 0.06 | 0.12 | -1.06 | 0.651802 | 0.524797 | 0.86186  | 0.714595 |
| MmugDNA.31264.1.S1_at   | MmugDNA.31264.1 | 4.59  | 4.87  | 0.1  | 0.24 | -1.21 | 0.108378 | 0.711715 | 0.480776 | 0.832794 |
| MmugDNA.31266.1.S1_at   | MmugDNA.31266.1 | 4.31  | 4.61  | 0.09 | 0.19 | -1.23 | 0.149294 | 0.361158 | 0.523146 | 0.60207  |
| MmugDNA.31267.1.S1_at   | MmugDNA.31267.1 | 6.74  | 6.46  | 0.04 | 0.11 | 1.21  | 0.015133 | 0.184555 | 0.2796   | 0.460582 |
| MmugDNA.31268.1.S1_at   | MmugDNA.31268.1 | 5.05  | 4.38  | 1.04 | 0.46 | 1.58  | 0.97313  | 0.664465 | 0.991238 | 0.803396 |
| MmugDNA.31271.1.S1_at   | MmugDNA.31271.1 | 8.52  | 9.2   | 0.78 | 0.13 | -1.6  | 0.152228 | 0.174693 | 0.525262 | 0.451231 |
| MmugDNA.31273.1.S1_at   | MmugDNA.31273.1 | 10.31 | 10.2  | 0.3  | 0.05 | 1.08  | 0.235685 | 0.047323 | 0.602783 | 0.262262 |
| MmugDNA.31275.1.S1_at   | MmugDNA.31275.1 | 2.71  | 2.75  | 0.05 | 0.07 | -1.03 | 0.378711 | 0.2217   | 0.708438 | 0.494901 |
| MmugDNA.31278.1.S1_at   | MmugDNA.31278.1 | 5.76  | 5.72  | 0.05 | 0.04 | 1.03  | 0.87491  | 0.981901 | 0.956568 | 0.990085 |
| MmugDNA.31279.1.S1_at   | MmugDNA.31279.1 | 6.26  | 5.79  | 0.15 | 0.09 | 1.38  | 0.018878 | 0.012939 | 0.298593 | 0.14641  |

|                         |                 |       |       |      |      |       |          |          |          |          |
|-------------------------|-----------------|-------|-------|------|------|-------|----------|----------|----------|----------|
| MmugDNA.3128.1.S1_at    | MmugDNA.3128.1  | 5.64  | 5.42  | 0.14 | 0.11 | 1.17  | 0.232825 | 0.495144 | 0.600228 | 0.695319 |
| MmugDNA.31280.1.S1_at   | MmugDNA.31280.1 | 5.18  | 5.08  | 0.29 | 0.39 | 1.07  | 0.890932 | 0.98915  | 0.962522 | 0.993825 |
| MmugDNA.31281.1.S1_at   | MmugDNA.31281.1 | 9.99  | 10.34 | 0.2  | 0.04 | -1.28 | 0.11467  | 0.066909 | 0.487772 | 0.304608 |
| MmugDNA.31282.1.S1_at   | MmugDNA.31282.1 | 4.39  | 5.68  | 0.69 | 0.19 | -2.44 | 0.09711  | 0.051745 | 0.465734 | 0.273002 |
| MmugDNA.31283.1.S1_at   | MmugDNA.31283.1 | 8.08  | 8.14  | 0.31 | 0.25 | -1.04 | 0.648339 | 0.006567 | 0.859825 | 0.109895 |
| MmugDNA.31284.1.S1_at   | MmugDNA.31284.1 | 6.64  | 6.69  | 0.29 | 0.08 | -1.04 | 0.845599 | 0.302453 | 0.945907 | 0.56012  |
| MmugDNA.31285.1.S1_at   | MmugDNA.31285.1 | 6.48  | 6.43  | 0.71 | 0.24 | 1.04  | 0.685275 | 0.74828  | 0.876766 | 0.853508 |
| MmugDNA.31286.1.S1_x_at | MmugDNA.31286.1 | 11.46 | 11.55 | 0.24 | 0.19 | -1.06 | 0.39253  | 0.479467 | 0.718456 | 0.685202 |
| MmugDNA.31287.1.S1_at   | MmugDNA.31287.1 | 9.72  | 9.74  | 0.29 | 0.05 | -1.01 | 0.931799 | 0.510438 | 0.977114 | 0.704938 |
| MmugDNA.31290.1.S1_at   | MmugDNA.31290.1 | 4.97  | 4.76  | 0.14 | 0.03 | 1.16  | 0.060915 | 0.094548 | 0.409323 | 0.351301 |
| MmugDNA.31294.1.S1_at   | MmugDNA.31294.1 | 5.62  | 5.75  | 0.13 | 0.06 | -1.09 | 0.109686 | 0.228576 | 0.482529 | 0.500752 |
| MmugDNA.31295.1.S1_at   | MmugDNA.31295.1 | 6.74  | 6.53  | 0.01 | 0.08 | 1.16  | 0.005099 | 0.003105 | 0.204981 | 0.081305 |
| MmugDNA.31296.1.S1_at   | MmugDNA.31296.1 | 8.03  | 7.58  | 0.26 | 0.08 | 1.36  | 0.04621  | 0.04706  | 0.377596 | 0.261469 |
| MmugDNA.31297.1.S1_at   | MmugDNA.31297.1 | 4.03  | 3.84  | 0.42 | 0.04 | 1.14  | 0.139508 | 0.362814 | 0.514956 | 0.60332  |
| MmugDNA.31298.1.S1_at   | MmugDNA.31298.1 | 7.16  | 6.95  | 0.55 | 0.66 | 1.15  | 0.850448 | 0.753913 | 0.947381 | 0.85676  |
| MmugDNA.31299.1.S1_at   | MmugDNA.31299.1 | 4.54  | 4.55  | 0.11 | 0.03 | -1.01 | 0.404865 | 0.788282 | 0.726978 | 0.877534 |
| MmugDNA.313.1.S1_at     | MmugDNA.313.1   | 6.95  | 6.8   | 0.22 | 0.18 | 1.11  | 0.363535 | 0.036506 | 0.700162 | 0.235526 |
| MmugDNA.31300.1.S1_s_at | MmugDNA.31300.1 | 6.57  | 6.57  | 0.27 | 0.18 | -1    | 0.239782 | 0.321111 | 0.606158 | 0.57309  |
| MmugDNA.31301.1.S1_at   | MmugDNA.31301.1 | 4.29  | 4.15  | 0.04 | 0.23 | 1.1   | 0.090914 | 0.084224 | 0.458873 | 0.33533  |
| MmugDNA.31303.1.S1_at   | MmugDNA.31303.1 | 3.93  | 4.09  | 0.06 | 0.09 | -1.12 | 0.02722  | 0.349335 | 0.327322 | 0.593355 |
| MmugDNA.31304.1.S1_at   | MmugDNA.31304.1 | 3.57  | 3.49  | 0.35 | 0.25 | 1.06  | 0.728008 | 0.823502 | 0.894913 | 0.8986   |
| MmugDNA.31305.1.S1_at   | MmugDNA.31305.1 | 6.16  | 6.15  | 0.1  | 0.08 | 1.01  | 0.959608 | 0.43663  | 0.986863 | 0.656124 |
| MmugDNA.31307.1.S1_at   | MmugDNA.31307.1 | 5.3   | 4.51  | 0.39 | 0.22 | 1.73  | 0.060671 | 0.061918 | 0.408583 | 0.295717 |
| MmugDNA.31309.1.S1_at   | MmugDNA.31309.1 | 4.86  | 5.01  | 0.39 | 0.21 | -1.11 | 0.783121 | 0.526831 | 0.920153 | 0.715627 |
| MmugDNA.3131.1.S1_at    | MmugDNA.3131.1  | 4.71  | 4.28  | 0.28 | 0.35 | 1.35  | 0.349282 | 0.353373 | 0.690376 | 0.596477 |
| MmugDNA.31310.1.S1_at   | MmugDNA.31310.1 | 9.36  | 9.02  | 0.11 | 0.13 | 1.27  | 0.022129 | 0.006    | 0.310301 | 0.105939 |
| MmugDNA.31311.1.S1_at   | MmugDNA.31311.1 | 9.79  | 10.35 | 0.42 | 0.11 | -1.48 | 0.1733   | 0.266505 | 0.5465   | 0.532235 |
| MmugDNA.31311.1.S1_s_at | MmugDNA.31311.1 | 10.5  | 10.82 | 0.33 | 0.3  | -1.25 | 0.145688 | 0.22756  | 0.520555 | 0.499841 |
| MmugDNA.31314.1.S1_at   | MmugDNA.31314.1 | 8.85  | 8.73  | 0.2  | 0.15 | 1.09  | 0.091332 | 0.052283 | 0.459138 | 0.274146 |
| MmugDNA.31315.1.S1_at   | MmugDNA.31315.1 | 5.04  | 5.03  | 0.06 | 0.09 | 1.01  | 0.207373 | 0.217479 | 0.578933 | 0.491035 |
| MmugDNA.31316.1.S1_at   | MmugDNA.31316.1 | 6.66  | 6.05  | 1.03 | 0.64 | 1.53  | 0.628719 | 0.519956 | 0.851242 | 0.71141  |
| MmugDNA.31316.1.S1_s_at | MmugDNA.31316.1 | 11.86 | 11.55 | 0.24 | 0.07 | 1.24  | 0.234409 | 0.0749   | 0.601644 | 0.318838 |
| MmugDNA.31317.1.S1_at   | MmugDNA.31317.1 | 4.76  | 4.7   | 0.08 | 0.05 | 1.04  | 0.280396 | 0.395218 | 0.639232 | 0.62738  |
| MmugDNA.31318.1.S1_at   | MmugDNA.31318.1 | 3.29  | 3.25  | 0.14 | 0.23 | 1.03  | 0.867774 | 0.958333 | 0.95372  | 0.976396 |
| MmugDNA.31319.1.S1_at   | MmugDNA.31319.1 | 6.59  | 6.82  | 0.13 | 0.36 | -1.17 | 0.580331 | 0.729252 | 0.826978 | 0.843541 |
| MmugDNA.3132.1.S1_at    | MmugDNA.3132.1  | 4.32  | 4.7   | 0.74 | 0.35 | -1.3  | 0.903005 | 0.416065 | 0.967303 | 0.641342 |
| MmugDNA.31320.1.S1_at   | MmugDNA.31320.1 | 3.28  | 3.28  | 0.19 | 0.11 | -1    | 0.377243 | 0.662643 | 0.707423 | 0.802461 |
| MmugDNA.31321.1.S1_at   | MmugDNA.31321.1 | 2.9   | 2.94  | 0.2  | 0.11 | -1.02 | 0.700302 | 0.855738 | 0.883486 | 0.917693 |
| MmugDNA.31322.1.S1_at   | MmugDNA.31322.1 | 5.85  | 5.58  | 0.08 | 0.18 | 1.21  | 0.065977 | 0.106859 | 0.421396 | 0.369487 |
| MmugDNA.31323.1.S1_at   | MmugDNA.31323.1 | 3.51  | 3.43  | 0.1  | 0.11 | 1.06  | 0.651933 | 0.189605 | 0.86189  | 0.465297 |
| MmugDNA.31325.1.S1_at   | MmugDNA.31325.1 | 7.08  | 7.69  | 0.73 | 0.23 | -1.52 | 0.335816 | 0.362441 | 0.681232 | 0.603016 |
| MmugDNA.31326.1.S1_at   | MmugDNA.31326.1 | 7.25  | 6.82  | 0.16 | 0.21 | 1.35  | 0.012979 | 0.012024 | 0.26612  | 0.141889 |
| MmugDNA.31328.1.S1_at   | MmugDNA.31328.1 | 3.57  | 3.43  | 0.19 | 0.14 | 1.1   | 0.952792 | 0.35685  | 0.9842   | 0.598638 |

|                         |                 |       |       |      |      |       |          |          |          |          |
|-------------------------|-----------------|-------|-------|------|------|-------|----------|----------|----------|----------|
| MmugDNA.31329.1.S1_at   | MmugDNA.31329.1 | 4.42  | 4.41  | 0.1  | 0.09 | 1.01  | 0.837725 | 0.644806 | 0.941813 | 0.791889 |
| MmugDNA.31332.1.S1_at   | MmugDNA.31332.1 | 3.17  | 3.16  | 0.11 | 0.04 | 1.01  | 0.498986 | 0.013961 | 0.781868 | 0.151509 |
| MmugDNA.31334.1.S1_at   | MmugDNA.31334.1 | 12.9  | 12.97 | 0.09 | 0.01 | -1.05 | 0.298316 | 0.283067 | 0.653103 | 0.545692 |
| MmugDNA.31338.1.S1_at   | MmugDNA.31338.1 | 5.94  | 5.84  | 0.18 | 0.07 | 1.07  | 0.177736 | 0.645928 | 0.550946 | 0.792659 |
| MmugDNA.31339.1.S1_at   | MmugDNA.31339.1 | 5.67  | 5.69  | 0.26 | 0.14 | -1.01 | 0.714037 | 0.498182 | 0.888579 | 0.697339 |
| MmugDNA.3134.1.S1_at    | MmugDNA.3134.1  | 3.51  | 3.39  | 0.05 | 0.01 | 1.09  | 0.014218 | 0.00711  | 0.274019 | 0.113555 |
| MmugDNA.31340.1.S1_at   | MmugDNA.31340.1 | 6.24  | 6     | 0.16 | 0.17 | 1.18  | 0.155553 | 0.222109 | 0.528837 | 0.495113 |
| MmugDNA.31342.1.S1_at   | MmugDNA.31342.1 | 6.11  | 6.05  | 0.27 | 0.25 | 1.04  | 0.904499 | 0.434435 | 0.967857 | 0.654569 |
| MmugDNA.31344.1.S1_at   | MmugDNA.31344.1 | 4.55  | 4.23  | 0.2  | 0.07 | 1.24  | 0.22876  | 0.061675 | 0.59773  | 0.295135 |
| MmugDNA.31345.1.S1_at   | MmugDNA.31345.1 | 3.03  | 2.89  | 0.09 | 0.13 | 1.1   | 0.075066 | 0.135546 | 0.435751 | 0.407655 |
| MmugDNA.31346.1.S1_at   | MmugDNA.31346.1 | 5.62  | 5.38  | 0.02 | 0.16 | -1.18 | 0.077178 | 0.061713 | 0.439109 | 0.295166 |
| MmugDNA.31347.1.S1_at   | MmugDNA.31347.1 | 4.77  | 4.91  | 0.04 | 0.16 | -1.1  | 0.215513 | 0.703076 | 0.585748 | 0.827866 |
| MmugDNA.31348.1.S1_at   | MmugDNA.31348.1 | 11.1  | 11.16 | 0.75 | 0.11 | -1.04 | 0.297343 | 0.173259 | 0.652737 | 0.449791 |
| MmugDNA.31349.1.S1_at   | MmugDNA.31349.1 | 5.33  | 4.96  | 0.46 | 0.1  | 1.29  | 0.308    | 0.717008 | 0.660838 | 0.836191 |
| MmugDNA.31350.1.S1_at   | MmugDNA.31350.1 | 6.09  | 5.95  | 0.16 | 0.06 | 1.1   | 0.199079 | 0.06568  | 0.570667 | 0.301631 |
| MmugDNA.31352.1.S1_at   | MmugDNA.31352.1 | 5.64  | 5.52  | 0.07 | 0.04 | 1.09  | 0.164498 | 0.146454 | 0.537365 | 0.420523 |
| MmugDNA.31353.1.S1_at   | MmugDNA.31353.1 | 9.38  | 9.17  | 0.18 | 0.22 | 1.16  | 0.378664 | 0.060892 | 0.708438 | 0.293504 |
| MmugDNA.31353.1.S1_s_at | MmugDNA.31353.1 | 8.57  | 8.46  | 0.28 | 0.34 | 1.08  | 0.30396  | 0.245271 | 0.657774 | 0.515052 |
| MmugDNA.31354.1.S1_at   | MmugDNA.31354.1 | 9.43  | 9.69  | 1.09 | 0.22 | -1.2  | 0.878948 | 0.4066   | 0.95792  | 0.634462 |
| MmugDNA.15302.1.S1_s_at | MmugDNA.15302.1 | 11.48 | 12.07 | 0.46 | 0.04 | -1.51 | 0.088809 | 0.069797 | 0.456567 | 0.310331 |
| MmugDNA.31358.1.S1_s_at | MmugDNA.31358.1 | 4.13  | 4.64  | 0.41 | 0.21 | -1.42 | 0.148986 | 0.189425 | 0.522915 | 0.465117 |
| MmugDNA.3136.1.S1_at    | MmugDNA.3136.1  | 3.65  | 3.8   | 0.16 | 0.22 | -1.11 | 0.702469 | 0.036634 | 0.884233 | 0.235943 |
| MmugDNA.31361.1.S1_at   | MmugDNA.31361.1 | 12.63 | 12.6  | 0.07 | 0.07 | 1.02  | 0.365134 | 0.000287 | 0.700849 | 0.034857 |
| MmugDNA.31363.1.S1_at   | MmugDNA.31363.1 | 5.84  | 5.8   | 0.13 | 0.04 | 1.03  | 0.674723 | 0.316933 | 0.872212 | 0.570275 |
| MmugDNA.31364.1.S1_at   | MmugDNA.31364.1 | 6.53  | 6.45  | 0.4  | 0.02 | 1.05  | 0.28434  | 0.34458  | 0.642268 | 0.589942 |
| MmugDNA.31365.1.S1_at   | MmugDNA.31365.1 | 11.6  | 11.55 | 0.15 | 0.14 | 1.04  | 0.309073 | 0.261508 | 0.661444 | 0.527999 |
| MmugDNA.31366.1.S1_at   | MmugDNA.31366.1 | 12.69 | 12.63 | 0.6  | 0.16 | 1.05  | 0.678932 | 0.489299 | 0.874211 | 0.691774 |
| MmugDNA.31367.1.S1_at   | MmugDNA.31367.1 | 4.2   | 4.28  | 0.09 | 0.15 | -1.05 | 0.40588  | 0.661386 | 0.727533 | 0.801746 |
| MmugDNA.31368.1.S1_at   | MmugDNA.31368.1 | 7.68  | 8.02  | 0.37 | 0.13 | -1.27 | 0.290916 | 0.017791 | 0.64744  | 0.168549 |
| MmugDNA.31369.1.S1_at   | MmugDNA.31369.1 | 11.97 | 11.75 | 0.04 | 0.11 | 1.16  | 0.027501 | 0.005527 | 0.327829 | 0.102563 |
| MmugDNA.31370.1.S1_at   | MmugDNA.31370.1 | 4.92  | 4.87  | 0.12 | 0.05 | 1.04  | 0.614574 | 0.399151 | 0.843991 | 0.62969  |
| MmugDNA.31372.1.S1_at   | MmugDNA.31372.1 | 3.39  | 3.45  | 0.08 | 0.13 | -1.04 | 0.168844 | 0.423077 | 0.541688 | 0.646145 |
| MmugDNA.23687.1.S1_at   | MmugDNA.23687.1 | 3.16  | 2.9   | 0.27 | 0.07 | 1.2   | 0.192374 | 0.258775 | 0.56355  | 0.525949 |
| MmugDNA.23687.1.S1_s_at | MmugDNA.23687.1 | 3.62  | 3.62  | 0.16 | 0.06 | 1     | 0.913994 | 0.783394 | 0.970812 | 0.874571 |
| MmugDNA.31374.1.S1_at   | MmugDNA.31374.1 | 9.54  | 9.36  | 0.28 | 0.44 | 1.14  | 0.182759 | 0.212842 | 0.555631 | 0.486774 |
| MmugDNA.31375.1.S1_s_at | MmugDNA.31375.1 | 9.94  | 10.56 | 2.6  | 0.42 | -1.54 | 0.514271 | 0.297735 | 0.790322 | 0.556393 |
| MmugDNA.31376.1.S1_at   | MmugDNA.31376.1 | 5.65  | 5.66  | 0.2  | 0.12 | -1.01 | 0.910626 | 0.973058 | 0.969704 | 0.985401 |
| MmugDNA.31377.1.S1_s_at | MmugDNA.31377.1 | 11.4  | 11.86 | 2.6  | 0.25 | -1.38 | 0.493618 | 0.285221 | 0.779001 | 0.547165 |
| MmugDNA.31379.1.S1_at   | MmugDNA.31379.1 | 7.44  | 7.78  | 0.3  | 0.1  | -1.27 | 0.450679 | 0.288916 | 0.754829 | 0.550032 |
| MmugDNA.31380.1.S1_at   | MmugDNA.31380.1 | 10.04 | 10.15 | 0.02 | 0.07 | -1.08 | 0.045408 | 0.866718 | 0.376374 | 0.924237 |
| MmugDNA.31381.1.S1_at   | MmugDNA.31381.1 | 4.78  | 5.3   | 0.15 | 0.13 | -1.43 | 0.009086 | 0.468832 | 0.241233 | 0.677906 |
| MmugDNA.31382.1.S1_at   | MmugDNA.31382.1 | 5.65  | 5.84  | 0.29 | 0.24 | -1.14 | 0.183385 | 0.185503 | 0.556402 | 0.461566 |
| MmugDNA.31383.1.S1_at   | MmugDNA.31383.1 | 9.55  | 10.16 | 1.02 | 0.27 | -1.52 | 0.483117 | 0.342566 | 0.772862 | 0.588572 |

|                         |                 |       |       |      |      |       |          |          |          |          |
|-------------------------|-----------------|-------|-------|------|------|-------|----------|----------|----------|----------|
| MmugDNA.31384.1.S1_at   | MmugDNA.31384.1 | 4.08  | 4     | 0.32 | 0.12 | 1.06  | 0.256337 | 0.283958 | 0.620399 | 0.546237 |
| MmugDNA.31386.1.S1_at   | MmugDNA.31386.1 | 4.03  | 4.04  | 0.19 | 0.16 | -1.01 | 0.534706 | 0.705269 | 0.801404 | 0.829122 |
| MmugDNA.31390.1.S1_at   | MmugDNA.31390.1 | 6     | 5.88  | 0.01 | 0.21 | 1.09  | 0.602317 | 0.141818 | 0.838783 | 0.415331 |
| MmugDNA.31392.1.S1_at   | MmugDNA.31392.1 | 3.36  | 3.18  | 0.16 | 0.01 | 1.13  | 0.138645 | 0.19359  | 0.514023 | 0.468785 |
| MmugDNA.31395.1.S1_at   | MmugDNA.31395.1 | 6.79  | 5.7   | 0.68 | 0.08 | 2.12  | 0.151556 | 0.057012 | 0.524628 | 0.284868 |
| MmugDNA.31399.1.S1_at   | MmugDNA.31399.1 | 10.6  | 10.97 | 0.21 | 0.06 | -1.3  | 0.104313 | 0.096794 | 0.475417 | 0.354207 |
| MmugDNA.314.1.S1_at     | MmugDNA.314.1   | 4.78  | 4.57  | 0.27 | 0.14 | 1.16  | 0.478383 | 0.184761 | 0.77008  | 0.460661 |
| MmugDNA.3140.1.S1_at    | MmugDNA.3140.1  | 2.92  | 2.8   | 0.02 | 0.05 | 1.09  | 0.013965 | 0.013883 | 0.273301 | 0.151137 |
| MmugDNA.31400.1.S1_at   | MmugDNA.31400.1 | 10.63 | 10.02 | 0.43 | 0.09 | 1.52  | 0.086064 | 0.183102 | 0.453615 | 0.459493 |
| MmugDNA.31401.1.S1_at   | MmugDNA.31401.1 | 3.52  | 3.53  | 0.1  | 0.08 | -1    | 0.793338 | 0.21749  | 0.92426  | 0.491037 |
| MmugDNA.31401.1.S1_s_at | MmugDNA.31401.1 | 2.76  | 2.76  | 0.05 | 0.03 | 1     | 0.747474 | 0.225083 | 0.904011 | 0.497741 |
| MmugDNA.31402.1.S1_at   | MmugDNA.31402.1 | 8.83  | 8.26  | 0.74 | 0.1  | 1.48  | 0.258278 | 0.270064 | 0.622127 | 0.535338 |
| MmugDNA.31403.1.S1_at   | MmugDNA.31403.1 | 4.17  | 4.24  | 0.51 | 0.06 | -1.05 | 0.525296 | 0.739941 | 0.796198 | 0.849317 |
| MmugDNA.31404.1.S1_at   | MmugDNA.31404.1 | 7.86  | 7.52  | 1.31 | 0.19 | 1.27  | 0.717819 | 0.763577 | 0.890514 | 0.862495 |
| MmugDNA.31407.1.S1_at   | MmugDNA.31407.1 | 4.87  | 4.7   | 0.05 | 0.06 | 1.13  | 0.023504 | 0.251281 | 0.316003 | 0.519984 |
| MmugDNA.31408.1.S1_at   | MmugDNA.31408.1 | 7.11  | 6.92  | 0.58 | 0.25 | 1.15  | 0.595658 | 0.806421 | 0.835575 | 0.888651 |
| MmugDNA.31409.1.S1_at   | MmugDNA.31409.1 | 6.61  | 6.35  | 0.05 | 0.16 | 1.2   | 0.071999 | 0.073154 | 0.431899 | 0.316064 |
| MmugDNA.3141.1.S1_at    | MmugDNA.3141.1  | 8.09  | 7.82  | 0.6  | 0.3  | 1.21  | 0.730065 | 0.285509 | 0.895956 | 0.547395 |
| MmugDNA.31410.1.S1_at   | MmugDNA.31410.1 | 11.85 | 11.26 | 0.58 | 0.14 | 1.51  | 0.158669 | 0.215675 | 0.531588 | 0.489477 |
| MmugDNA.31413.1.S1_x_at | MmugDNA.31413.1 | 7.23  | 7.52  | 0.22 | 0.26 | -1.22 | 0.413157 | 0.338813 | 0.732218 | 0.585875 |
| MmugDNA.31415.1.S1_at   | MmugDNA.31415.1 | 7.06  | 6.96  | 0.09 | 0.03 | 1.07  | 0.137259 | 0.550795 | 0.512385 | 0.730611 |
| MmugDNA.31416.1.S1_at   | MmugDNA.31416.1 | 3.57  | 3.37  | 0.13 | 0.06 | 1.15  | 0.026121 | 0.059865 | 0.323344 | 0.291305 |
| MmugDNA.31417.1.S1_at   | MmugDNA.31417.1 | 4.41  | 4.51  | 0.27 | 0.21 | -1.07 | 0.596909 | 0.821341 | 0.83613  | 0.897125 |
| MmugDNA.31418.1.S1_at   | MmugDNA.31418.1 | 4.83  | 4.37  | 0.14 | 0.23 | 1.38  | 0.12796  | 0.055527 | 0.502422 | 0.281454 |
| MmugDNA.3142.1.S1_at    | MmugDNA.3142.1  | 10.25 | 10.06 | 0.24 | 0.28 | 1.13  | 0.202135 | 0.116185 | 0.573629 | 0.383524 |
| MmugDNA.31420.1.S1_at   | MmugDNA.31420.1 | 5.08  | 5.29  | 0.25 | 0.27 | -1.16 | 0.679474 | 0.752564 | 0.874274 | 0.855926 |
| MmugDNA.31421.1.S1_at   | MmugDNA.31421.1 | 6.38  | 7.06  | 0.4  | 0.16 | -1.61 | 0.056164 | 0.03071  | 0.399665 | 0.217148 |
| MmugDNA.31422.1.S1_at   | MmugDNA.31422.1 | 5.45  | 5.39  | 0.11 | 0.05 | 1.05  | 0.16     | 0.222089 | 0.533013 | 0.495113 |
| MmugDNA.31423.1.S1_at   | MmugDNA.31423.1 | 6.57  | 6.65  | 0.11 | 0.04 | -1.06 | 0.294103 | 0.00561  | 0.650324 | 0.103487 |
| MmugDNA.31424.1.S1_at   | MmugDNA.31424.1 | 12.04 | 12.31 | 0.07 | 0.14 | -1.21 | 0.088327 | 0.011861 | 0.45606  | 0.140973 |
| MmugDNA.31426.1.S1_s_at | MmugDNA.31426.1 | 10.21 | 10.35 | 1.86 | 0.1  | -1.1  | 0.78402  | 0.151478 | 0.920602 | 0.426223 |
| MmugDNA.3143.1.S1_at    | MmugDNA.3143.1  | 6.3   | 6.18  | 0.14 | 0.09 | 1.08  | 0.113648 | 0.256928 | 0.486989 | 0.524765 |
| MmugDNA.31430.1.S1_at   | MmugDNA.31430.1 | 6.11  | 6.1   | 0.02 | 0.2  | 1     | 0.33127  | 0.497701 | 0.677942 | 0.697017 |
| MmugDNA.31431.1.S1_at   | MmugDNA.31431.1 | 8.91  | 8.92  | 0.11 | 0.12 | -1.01 | 0.386116 | 0.91997  | 0.713295 | 0.954967 |
| MmugDNA.31432.1.S1_at   | MmugDNA.31432.1 | 4.88  | 4.62  | 0.25 | 0.08 | 1.2   | 0.173607 | 0.452873 | 0.546749 | 0.667359 |
| MmugDNA.31433.1.S1_at   | MmugDNA.31433.1 | 10.02 | 10.87 | 0.98 | 0.07 | -1.8  | 0.637919 | 0.622727 | 0.85573  | 0.777232 |
| MmugDNA.31434.1.S1_at   | MmugDNA.31434.1 | 6.79  | 7.46  | 0.76 | 0.09 | -1.59 | 0.172336 | 0.140424 | 0.545696 | 0.413589 |
| MmugDNA.31435.1.S1_at   | MmugDNA.31435.1 | 6.02  | 5.79  | 0.14 | 0.28 | 1.17  | 0.166999 | 0.172129 | 0.539599 | 0.448529 |
| MmugDNA.31437.1.S1_at   | MmugDNA.31437.1 | 7.86  | 8.01  | 0.62 | 0.23 | -1.11 | 0.681351 | 0.806698 | 0.875176 | 0.888775 |
| MmugDNA.31438.1.S1_at   | MmugDNA.31438.1 | 5.94  | 7.25  | 0.87 | 0.46 | -2.47 | 0.095181 | 0.052141 | 0.464131 | 0.273955 |
| MmugDNA.31439.1.S1_at   | MmugDNA.31439.1 | 7.71  | 7.92  | 0.08 | 0.14 | -1.15 | 0.143573 | 0.954397 | 0.519008 | 0.974132 |
| MmugDNA.31440.1.S1_at   | MmugDNA.31440.1 | 3.02  | 3.11  | 0.11 | 0.05 | -1.06 | 0.426122 | 0.235291 | 0.740376 | 0.506336 |
| MmugDNA.31441.1.S1_at   | MmugDNA.31441.1 | 5.84  | 5.42  | 0.76 | 0.46 | 1.33  | 0.833095 | 0.557325 | 0.940095 | 0.735031 |

|                         |                 |       |       |      |      |       |          |          |          |          |
|-------------------------|-----------------|-------|-------|------|------|-------|----------|----------|----------|----------|
| MmugDNA.31442.1.S1_at   | MmugDNA.31442.1 | 5.23  | 5.02  | 0.13 | 0.07 | 1.16  | 0.103697 | 0.071951 | 0.474343 | 0.314293 |
| MmugDNA.31443.1.S1_at   | MmugDNA.31443.1 | 6.33  | 5.98  | 0.15 | 0.09 | 1.27  | 0.06098  | 0.099041 | 0.409514 | 0.357183 |
| MmugDNA.31445.1.S1_at   | MmugDNA.31445.1 | 3.83  | 3.79  | 0.27 | 0.16 | 1.03  | 0.386466 | 0.403755 | 0.713581 | 0.632356 |
| MmugDNA.3145.1.S1_at    | MmugDNA.3145.1  | 3.02  | 3.01  | 0.08 | 0.02 | 1     | 0.455944 | 0.533314 | 0.75759  | 0.719556 |
| MmugDNA.31453.1.S1_at   | MmugDNA.31453.1 | 4.25  | 4.13  | 0.08 | 0.1  | 1.08  | 0.076987 | 0.047816 | 0.438889 | 0.263649 |
| MmugDNA.31454.1.S1_at   | MmugDNA.31454.1 | 11.51 | 11.33 | 0.3  | 0.23 | 1.13  | 0.230046 | 0.111173 | 0.598481 | 0.375798 |
| MmugDNA.31454.1.S1_s_at | MmugDNA.31454.1 | 12.4  | 12.21 | 0.3  | 0.19 | 1.14  | 0.231585 | 0.134907 | 0.599546 | 0.406878 |
| MmugDNA.31455.1.S1_at   | MmugDNA.31455.1 | 11.81 | 11.58 | 0.14 | 0.13 | 1.18  | 0.070853 | 0.042427 | 0.430067 | 0.25063  |
| MmugDNA.31455.1.S1_s_at | MmugDNA.31455.1 | 11.7  | 11.54 | 0.18 | 0.08 | 1.12  | 0.137438 | 0.060257 | 0.51292  | 0.29214  |
| MmugDNA.31459.1.S1_at   | MmugDNA.31459.1 | 7.17  | 6.64  | 0.13 | 0.28 | 1.44  | 0.068361 | 0.049401 | 0.425365 | 0.267199 |
| MmugDNA.3146.1.S1_at    | MmugDNA.3146.1  | 4.34  | 4.31  | 0.24 | 0.51 | 1.02  | 0.717148 | 0.309501 | 0.890289 | 0.564987 |
| MmugDNA.31460.1.S1_at   | MmugDNA.31460.1 | 4.97  | 4.69  | 0.06 | 0.05 | 1.22  | 0.003902 | 0.052897 | 0.198571 | 0.27559  |
| MmugDNA.12460.1.S1_s_at | MmugDNA.12460.1 | 11.02 | 11.03 | 0.38 | 0.19 | -1.01 | 0.775528 | 0.766815 | 0.916777 | 0.864582 |
| MmugDNA.31463.1.S1_at   | MmugDNA.31463.1 | 6.84  | 6.82  | 0.11 | 0.04 | 1.01  | 0.664486 | 0.908946 | 0.867683 | 0.948471 |
| MmugDNA.31464.1.S1_at   | MmugDNA.31464.1 | 6.14  | 6.92  | 0.43 | 0.16 | -1.72 | 0.043252 | 0.15132  | 0.371655 | 0.426073 |
| MmugDNA.31465.1.S1_at   | MmugDNA.31465.1 | 3.21  | 3.24  | 0.07 | 0.2  | -1.02 | 0.843676 | 0.633999 | 0.944855 | 0.784594 |
| MmugDNA.31466.1.S1_at   | MmugDNA.31466.1 | 8.3   | 8.89  | 0.22 | 0.11 | -1.5  | 0.016157 | 0.013388 | 0.286239 | 0.14827  |
| MmugDNA.31468.1.S1_at   | MmugDNA.31468.1 | 13.2  | 13.25 | 0.05 | 0.03 | -1.04 | 0.308089 | 0.063768 | 0.660895 | 0.29906  |
| MmugDNA.31469.1.S1_at   | MmugDNA.31469.1 | 7.17  | 7.36  | 0.12 | 0.06 | -1.14 | 0.100962 | 0.076344 | 0.47159  | 0.321368 |
| MmugDNA.3147.1.S1_at    | MmugDNA.3147.1  | 9.61  | 9.84  | 0.39 | 0.2  | -1.17 | 0.676331 | 0.207049 | 0.873062 | 0.481115 |
| MmugDNA.31470.1.S1_at   | MmugDNA.31470.1 | 6.34  | 7.12  | 0.57 | 0.46 | -1.72 | 0.277479 | 0.374105 | 0.636861 | 0.612678 |
| MmugDNA.31471.1.S1_at   | MmugDNA.31471.1 | 7.9   | 8.32  | 0.38 | 0.45 | -1.34 | 0.287151 | 0.06814  | 0.644253 | 0.307227 |
| MmugDNA.31472.1.S1_at   | MmugDNA.31472.1 | 6.84  | 6.47  | 0.22 | 0.21 | 1.29  | 0.089192 | 0.089394 | 0.457024 | 0.343637 |
| MmugDNA.31473.1.S1_at   | MmugDNA.31473.1 | 3.99  | 3.56  | 0.21 | 0.18 | 1.35  | 0.120976 | 0.189129 | 0.494694 | 0.464973 |
| MmugDNA.31474.1.S1_at   | MmugDNA.31474.1 | 10.94 | 10.68 | 0.47 | 0.11 | 1.19  | 0.122266 | 0.139478 | 0.495677 | 0.412743 |
| MmugDNA.31475.1.S1_at   | MmugDNA.31475.1 | 4.16  | 4.16  | 0.17 | 0.04 | 1     | 0.488581 | 0.53674  | 0.775646 | 0.722078 |
| MmugDNA.31477.1.S1_at   | MmugDNA.31477.1 | 8.45  | 8.47  | 0.62 | 0.1  | -1.02 | 0.538407 | 0.356522 | 0.803248 | 0.598459 |
| MmugDNA.31479.1.S1_at   | MmugDNA.31479.1 | 9.78  | 10.03 | 0.22 | 0.34 | -1.19 | 0.464418 | 0.07228  | 0.762534 | 0.314934 |
| MmugDNA.3148.1.S1_at    | MmugDNA.3148.1  | 4.31  | 4.56  | 0.26 | 0.3  | -1.19 | 0.145952 | 0.021672 | 0.520572 | 0.184333 |
| MmugDNA.31483.1.S1_s_at | MmugDNA.31483.1 | 9.01  | 9.38  | 0.74 | 0.2  | -1.3  | 0.476356 | 0.03532  | 0.769097 | 0.232207 |
| MmugDNA.31487.1.S1_at   | MmugDNA.31487.1 | 10.45 | 9.3   | 0.51 | 0.21 | 2.22  | 0.065071 | 0.073888 | 0.419717 | 0.31727  |
| MmugDNA.31488.1.S1_at   | MmugDNA.31488.1 | 3.77  | 3.78  | 0.11 | 0.17 | -1.01 | 0.824889 | 0.705765 | 0.937097 | 0.829505 |
| MmugDNA.31489.1.S1_at   | MmugDNA.31489.1 | 9.45  | 8.94  | 0.47 | 0.05 | 1.42  | 0.149532 | 0.190218 | 0.523226 | 0.465854 |
| MmugDNA.3149.1.S1_at    | MmugDNA.3149.1  | 6.15  | 5.82  | 0.34 | 0.33 | 1.26  | 0.203507 | 0.224624 | 0.57497  | 0.497613 |
| MmugDNA.30854.1.S1_s_at | MmugDNA.30854.1 | 11.19 | 11.34 | 0.12 | 0.1  | -1.11 | 0.194467 | 0.291339 | 0.565072 | 0.551803 |
| MmugDNA.31490.1.S1_at   | MmugDNA.31490.1 | 4.13  | 3.87  | 0.84 | 0.31 | 1.19  | 0.683305 | 0.655683 | 0.876089 | 0.7987   |
| MmugDNA.31491.1.S1_at   | MmugDNA.31491.1 | 7.73  | 7.27  | 0.41 | 0.06 | 1.38  | 0.129725 | 0.182324 | 0.504468 | 0.458787 |
| MmugDNA.31493.1.S1_s_at | MmugDNA.31493.1 | 8.21  | 7.91  | 0.12 | 0.04 | 1.23  | 0.007767 | 0.036376 | 0.230997 | 0.235146 |
| MmugDNA.31494.1.S1_at   | MmugDNA.31494.1 | 4.08  | 4.05  | 0.07 | 0.05 | 1.02  | 0.424036 | 0.722346 | 0.739366 | 0.839197 |
| MmugDNA.31495.1.S1_at   | MmugDNA.31495.1 | 4.01  | 3.88  | 0.09 | 0.15 | 1.09  | 0.232397 | 0.261548 | 0.600124 | 0.52802  |
| MmugDNA.31496.1.S1_at   | MmugDNA.31496.1 | 5.91  | 5.85  | 0.24 | 0.26 | 1.05  | 0.653262 | 0.504913 | 0.86229  | 0.701947 |
| MmugDNA.31497.1.S1_at   | MmugDNA.31497.1 | 5.22  | 5.33  | 0.76 | 0.26 | -1.08 | 0.365222 | 0.241549 | 0.700955 | 0.512152 |
| MmugDNA.31498.1.S1_at   | MmugDNA.31498.1 | 5.93  | 5.95  | 0.37 | 0.12 | -1.02 | 0.442587 | 0.595981 | 0.750229 | 0.759321 |

|                         |                 |       |       |      |      |       |          |          |          |          |
|-------------------------|-----------------|-------|-------|------|------|-------|----------|----------|----------|----------|
| MmugDNA.31499.1.S1_at   | MmugDNA.31499.1 | 5.75  | 5.52  | 0.12 | 0.16 | 1.18  | 0.308979 | 0.594121 | 0.661437 | 0.758517 |
| MmugDNA.315.1.S1_at     | MmugDNA.315.1   | 4.13  | 3.86  | 0.13 | 0.04 | 1.21  | 0.043398 | 0.139276 | 0.372033 | 0.412461 |
| MmugDNA.3150.1.S1_at    | MmugDNA.3150.1  | 9.84  | 10.39 | 0.32 | 0.08 | -1.47 | 0.043007 | 0.034949 | 0.371135 | 0.231062 |
| MmugDNA.3150.1.S1_s_at  | MmugDNA.3150.1  | 9.15  | 9.51  | 0.31 | 0.05 | -1.28 | 0.107885 | 0.092583 | 0.480398 | 0.348529 |
| MmugDNA.31500.1.S1_at   | MmugDNA.31500.1 | 3.28  | 3.35  | 0.09 | 0.18 | -1.05 | 0.880288 | 0.356187 | 0.958566 | 0.598158 |
| MmugDNA.31502.1.S1_at   | MmugDNA.31502.1 | 5.77  | 5.61  | 0.12 | 0.08 | 1.12  | 0.322079 | 0.633494 | 0.670738 | 0.784173 |
| MmugDNA.31503.1.S1_at   | MmugDNA.31503.1 | 3.98  | 3.86  | 0.07 | 0.13 | 1.08  | 0.501235 | 0.11089  | 0.783112 | 0.375256 |
| MmugDNA.39643.1.S1_at   | MmugDNA.39643.1 | 11.75 | 12.31 | 0.07 | 0.09 | -1.47 | 0.001    | 0.000434 | 0.155374 | 0.038359 |
| MmugDNA.39643.1.S1_s_at | MmugDNA.39643.1 | 11.09 | 11.46 | 0.11 | 0.05 | -1.29 | 0.007895 | 0.007444 | 0.231366 | 0.115858 |
| MmugDNA.31507.1.S1_at   | MmugDNA.31507.1 | 3.94  | 3.9   | 0.01 | 0.02 | 1.03  | 0.007014 | 0.012255 | 0.225062 | 0.143179 |
| MmugDNA.3151.1.S1_at    | MmugDNA.3151.1  | 4.04  | 3.9   | 0.24 | 0.24 | 1.1   | 0.638215 | 0.795967 | 0.855896 | 0.882469 |
| MmugDNA.31510.1.S1_at   | MmugDNA.31510.1 | 2.95  | 2.97  | 0.01 | 0.06 | -1.01 | 0.711429 | 0.662301 | 0.887632 | 0.802245 |
| MmugDNA.31511.1.S1_at   | MmugDNA.31511.1 | 4.09  | 4.09  | 0.06 | 0.07 | 1     | 0.928478 | 0.055812 | 0.976259 | 0.2821   |
| MmugDNA.31512.1.S1_at   | MmugDNA.31512.1 | 7.22  | 7.85  | 0.39 | 0.14 | -1.55 | 0.047924 | 0.014765 | 0.38161  | 0.154596 |
| MmugDNA.31514.1.S1_at   | MmugDNA.31514.1 | 5.03  | 4.85  | 0.04 | 0.1  | 1.13  | 0.04573  | 0.03408  | 0.377029 | 0.228514 |
| MmugDNA.31515.1.S1_at   | MmugDNA.31515.1 | 4.68  | 4.59  | 0.27 | 0.4  | 1.07  | 0.579551 | 0.376826 | 0.826489 | 0.614596 |
| MmugDNA.31516.1.S1_at   | MmugDNA.31516.1 | 6.81  | 6.76  | 0.2  | 0.03 | 1.04  | 0.771092 | 0.05693  | 0.914377 | 0.284714 |
| MmugDNA.31517.1.S1_at   | MmugDNA.31517.1 | 4.94  | 5.09  | 0.13 | 0.02 | -1.11 | 0.108286 | 0.515703 | 0.480728 | 0.708451 |
| MmugDNA.31518.1.S1_at   | MmugDNA.31518.1 | 4.21  | 3.81  | 0.15 | 0.08 | 1.32  | 0.052591 | 0.211387 | 0.392678 | 0.48553  |
| MmugDNA.31519.1.S1_at   | MmugDNA.31519.1 | 6.09  | 6.32  | 0.18 | 0.1  | -1.17 | 0.034408 | 0.04539  | 0.349795 | 0.257395 |
| MmugDNA.3152.1.S1_at    | MmugDNA.3152.1  | 5.33  | 5.18  | 0.07 | 0.2  | 1.11  | 0.132632 | 0.096602 | 0.506936 | 0.354126 |
| MmugDNA.31520.1.S1_at   | MmugDNA.31520.1 | 6.04  | 6.05  | 0.52 | 0.25 | -1.01 | 0.704418 | 0.889059 | 0.885155 | 0.936779 |
| MmugDNA.31521.1.S1_at   | MmugDNA.31521.1 | 3.81  | 3.68  | 0.05 | 0.07 | 1.09  | 0.083749 | 0.504407 | 0.449639 | 0.701557 |
| MmugDNA.31522.1.S1_s_at | MmugDNA.31522.1 | 7.93  | 8.28  | 0.34 | 0.2  | -1.27 | 0.348952 | 0.045516 | 0.690079 | 0.257513 |
| MmugDNA.31525.1.S1_s_at | MmugDNA.31525.1 | 14.37 | 14.35 | 0.05 | 0.03 | 1.01  | 0.665163 | 0.722983 | 0.867814 | 0.839513 |
| MmugDNA.31526.1.S1_at   | MmugDNA.31526.1 | 3.02  | 3.05  | 0.08 | 0.06 | -1.02 | 0.364704 | 0.048844 | 0.700726 | 0.265858 |
| MmugDNA.31527.1.S1_at   | MmugDNA.31527.1 | 3.27  | 3.12  | 0.53 | 0.08 | 1.12  | 0.59025  | 0.743059 | 0.832832 | 0.851135 |
| MmugDNA.3153.1.S1_at    | MmugDNA.3153.1  | 6.61  | 6.55  | 0.25 | 0.16 | 1.05  | 0.827426 | 0.100869 | 0.938039 | 0.360398 |
| MmugDNA.31530.1.S1_at   | MmugDNA.31530.1 | 5.83  | 6.57  | 0.31 | 0.01 | -1.66 | 0.009892 | 0.283908 | 0.244171 | 0.546237 |
| MmugDNA.31537.1.S1_at   | MmugDNA.31537.1 | 4.46  | 5.39  | 0.58 | 0.1  | -1.91 | 0.121281 | 0.320214 | 0.494864 | 0.572561 |
| MmugDNA.31539.1.S1_at   | MmugDNA.31539.1 | 7.49  | 6.74  | 0.54 | 0.07 | 1.69  | 0.06689  | 0.071153 | 0.422979 | 0.313041 |
| MmugDNA.3154.1.S1_at    | MmugDNA.3154.1  | 4.98  | 4.98  | 0.3  | 0.03 | -1    | 0.388559 | 0.317197 | 0.715408 | 0.570458 |
| MmugDNA.31541.1.S1_at   | MmugDNA.31541.1 | 6.73  | 6.66  | 0.31 | 0.23 | 1.05  | 0.670183 | 0.109302 | 0.86983  | 0.37308  |
| MmugDNA.31542.1.S1_at   | MmugDNA.31542.1 | 11.53 | 12.19 | 0.49 | 0.06 | -1.59 | 0.113333 | 0.109803 | 0.486648 | 0.373758 |
| MmugDNA.31543.1.S1_at   | MmugDNA.31543.1 | 2.7   | 2.68  | 0.09 | 0.03 | 1.02  | 0.253195 | 0.418649 | 0.617925 | 0.643031 |
| MmugDNA.31544.1.S1_at   | MmugDNA.31544.1 | 3.39  | 3.58  | 0.05 | 0.54 | -1.14 | 0.208251 | 0.285672 | 0.579938 | 0.547395 |
| MmugDNA.31547.1.S1_at   | MmugDNA.31547.1 | 6.9   | 7.32  | 0.17 | 0.44 | -1.33 | 0.18203  | 0.185805 | 0.555125 | 0.461631 |
| MmugDNA.31548.1.S1_at   | MmugDNA.31548.1 | 2.99  | 3.15  | 0.05 | 0.17 | -1.12 | 0.239373 | 0.315351 | 0.60587  | 0.568939 |
| MmugDNA.31549.1.S1_at   | MmugDNA.31549.1 | 2.87  | 2.67  | 0.62 | 0.07 | 1.15  | 0.189008 | 0.198057 | 0.560718 | 0.473041 |
| MmugDNA.3155.1.S1_at    | MmugDNA.3155.1  | 5.29  | 5.32  | 0.06 | 0.21 | -1.02 | 0.836152 | 0.738904 | 0.941202 | 0.84866  |
| MmugDNA.31550.1.S1_at   | MmugDNA.31550.1 | 5.75  | 5.05  | 0.6  | 0.05 | 1.62  | 0.256393 | 0.395543 | 0.620399 | 0.627563 |
| MmugDNA.31551.1.S1_at   | MmugDNA.31551.1 | 6.36  | 6.13  | 0.23 | 0.01 | 1.18  | 0.145778 | 0.070506 | 0.520572 | 0.311777 |
| MmugDNA.31552.1.S1_at   | MmugDNA.31552.1 | 10.44 | 9.93  | 0.64 | 0.05 | 1.43  | 0.276994 | 0.483502 | 0.636653 | 0.687943 |

|                         |                 |       |       |      |      |       |          |          |          |          |
|-------------------------|-----------------|-------|-------|------|------|-------|----------|----------|----------|----------|
| MmugDNA.3156.1.S1_at    | MmugDNA.3156.1  | 3.61  | 3.61  | 0.13 | 0.06 | 1     | 0.645481 | 0.366966 | 0.858779 | 0.606583 |
| MmugDNA.31561.1.S1_at   | MmugDNA.31561.1 | 3.69  | 3.39  | 0.25 | 0.05 | 1.23  | 0.10487  | 0.067283 | 0.476242 | 0.305408 |
| MmugDNA.31565.1.S1_at   | MmugDNA.31565.1 | 7.9   | 7.41  | 0.06 | 0.03 | 1.41  | 0.000212 | 0.019171 | 0.120771 | 0.1742   |
| MmugDNA.31567.1.S1_s_at | MmugDNA.31567.1 | 10.32 | 9.95  | 0.6  | 0.14 | 1.29  | 0.961353 | 0.348546 | 0.98737  | 0.592609 |
| MmugDNA.42447.1.S1_s_at | MmugDNA.42447.1 | 11.84 | 11.88 | 0.65 | 0.17 | -1.02 | 0.878877 | 0.117442 | 0.95792  | 0.385147 |
| MmugDNA.31569.1.S1_at   | MmugDNA.31569.1 | 4.42  | 4.99  | 0.05 | 0.63 | -1.49 | 0.531375 | 0.616673 | 0.799589 | 0.772869 |
| MmugDNA.3157.1.S1_at    | MmugDNA.3157.1  | 3.74  | 3.69  | 0.01 | 0.02 | 1.04  | 0.008386 | 0.114429 | 0.233808 | 0.38101  |
| MmugDNA.31570.1.S1_at   | MmugDNA.31570.1 | 4.47  | 4.43  | 0.5  | 0.07 | 1.03  | 0.329029 | 0.255352 | 0.676156 | 0.523406 |
| MmugDNA.31572.1.S1_at   | MmugDNA.31572.1 | 11.91 | 11.62 | 0.3  | 0.18 | 1.22  | 0.390825 | 0.001255 | 0.71703  | 0.055001 |
| MmugDNA.31573.1.S1_at   | MmugDNA.31573.1 | 3.97  | 4.08  | 0.2  | 0.18 | -1.08 | 0.355855 | 0.525134 | 0.694889 | 0.714766 |
| MmugDNA.31574.1.S1_at   | MmugDNA.31574.1 | 4.04  | 3.78  | 0.3  | 0.09 | 1.2   | 0.530091 | 0.765667 | 0.798702 | 0.863841 |
| MmugDNA.31575.1.S1_at   | MmugDNA.31575.1 | 6.54  | 6.3   | 0.39 | 0.15 | 1.18  | 0.476438 | 0.396437 | 0.769113 | 0.628227 |
| MmugDNA.31576.1.S1_at   | MmugDNA.31576.1 | 3.34  | 3.25  | 0.08 | 0.12 | 1.07  | 0.146243 | 0.47019  | 0.52059  | 0.678572 |
| MmugDNA.31577.1.S1_at   | MmugDNA.31577.1 | 4.52  | 4.11  | 0.33 | 0.21 | 1.33  | 0.125535 | 0.333535 | 0.499523 | 0.581753 |
| MmugDNA.31578.1.S1_at   | MmugDNA.31578.1 | 7.64  | 7.57  | 0.43 | 0.16 | 1.05  | 0.193912 | 0.243079 | 0.564486 | 0.513356 |
| MmugDNA.31579.1.S1_at   | MmugDNA.31579.1 | 5.44  | 5.61  | 0.05 | 0.13 | -1.12 | 0.075437 | 0.054932 | 0.436562 | 0.279821 |
| MmugDNA.31580.1.S1_at   | MmugDNA.31580.1 | 6.58  | 6.34  | 0.05 | 0.07 | 1.17  | 0.014455 | 0.498639 | 0.275691 | 0.697648 |
| MmugDNA.31581.1.S1_at   | MmugDNA.31581.1 | 6.99  | 6.94  | 0.13 | 0.09 | 1.04  | 0.225203 | 0.000466 | 0.594472 | 0.038572 |
| MmugDNA.31582.1.S1_at   | MmugDNA.31582.1 | 4.44  | 4.45  | 0.13 | 0.18 | -1.01 | 0.275274 | 0.368585 | 0.634676 | 0.608098 |
| MmugDNA.31584.1.S1_at   | MmugDNA.31584.1 | 5.03  | 4.79  | 0.1  | 0.04 | 1.18  | 0.014317 | 0.026901 | 0.274725 | 0.205158 |
| MmugDNA.31585.1.S1_at   | MmugDNA.31585.1 | 3.45  | 3.43  | 0.17 | 0.07 | 1.01  | 0.888583 | 0.984127 | 0.961514 | 0.991189 |
| MmugDNA.6631.1.S1_s_at  | MmugDNA.6631.1  | 13.03 | 13.16 | 0.18 | 0.01 | -1.09 | 0.752175 | 0.240251 | 0.906315 | 0.510851 |
| MmugDNA.31587.1.S1_at   | MmugDNA.31587.1 | 7.61  | 9.52  | 1.01 | 0.22 | -3.75 | 0.091867 | 0.327223 | 0.460177 | 0.577173 |
| MmugDNA.31589.1.S1_at   | MmugDNA.31589.1 | 4.16  | 4.35  | 0.18 | 0.42 | -1.14 | 0.340931 | 0.657102 | 0.684799 | 0.799439 |
| MmugDNA.3159.1.S1_at    | MmugDNA.3159.1  | 6.55  | 6.59  | 0.13 | 0.02 | -1.02 | 0.227064 | 0.264181 | 0.596459 | 0.530257 |
| MmugDNA.31590.1.S1_at   | MmugDNA.31590.1 | 2.92  | 3.4   | 0.31 | 0.07 | -1.39 | 0.134984 | 0.075272 | 0.509124 | 0.319441 |
| MmugDNA.31592.1.S1_at   | MmugDNA.31592.1 | 4.12  | 4.08  | 0.11 | 0.19 | 1.03  | 0.327524 | 0.460993 | 0.675137 | 0.672825 |
| MmugDNA.31594.1.S1_at   | MmugDNA.31594.1 | 4.67  | 4.6   | 0.22 | 0.03 | 1.05  | 0.668532 | 0.306904 | 0.86912  | 0.563427 |
| MmugDNA.31595.1.S1_at   | MmugDNA.31595.1 | 5.6   | 5.9   | 0.32 | 0.04 | -1.23 | 0.386921 | 0.409652 | 0.713948 | 0.636687 |
| MmugDNA.31596.1.S1_at   | MmugDNA.31596.1 | 8.57  | 8.46  | 0.27 | 0.02 | 1.07  | 0.284598 | 0.038009 | 0.642354 | 0.239495 |
| MmugDNA.31598.1.S1_at   | MmugDNA.31598.1 | 6.24  | 6.18  | 0.09 | 0.09 | 1.04  | 0.087263 | 0.256377 | 0.454785 | 0.524114 |
| MmugDNA.31599.1.S1_at   | MmugDNA.31599.1 | 5.58  | 5.59  | 0.28 | 0.21 | -1    | 0.250495 | 0.481866 | 0.615697 | 0.686812 |
| MmugDNA.31600.1.S1_at   | MmugDNA.31600.1 | 6.32  | 6.2   | 0.06 | 0.07 | 1.09  | 0.098022 | 0.008704 | 0.467429 | 0.123697 |
| MmugDNA.31601.1.S1_at   | MmugDNA.31601.1 | 3.91  | 3.61  | 0.15 | 0.2  | 1.23  | 0.089734 | 0.110623 | 0.457893 | 0.374854 |
| MmugDNA.31602.1.S1_at   | MmugDNA.31602.1 | 5.22  | 5.3   | 0.31 | 0.05 | -1.06 | 0.778705 | 0.33525  | 0.918374 | 0.583031 |
| MmugDNA.31604.1.S1_at   | MmugDNA.31604.1 | 7.15  | 7.03  | 0.5  | 0.01 | 1.09  | 0.22332  | 0.250601 | 0.592569 | 0.51941  |
| MmugDNA.31605.1.S1_at   | MmugDNA.31605.1 | 12.71 | 13.18 | 0.22 | 0.07 | -1.38 | 0.063229 | 0.006033 | 0.415331 | 0.106089 |
| MmugDNA.31606.1.S1_at   | MmugDNA.31606.1 | 9.48  | 9.05  | 0.42 | 0.19 | 1.35  | 0.505945 | 0.346178 | 0.785583 | 0.591195 |
| MmugDNA.31607.1.S1_at   | MmugDNA.31607.1 | 3.2   | 3.19  | 0.08 | 0.08 | 1     | 0.995856 | 0.635485 | 0.998312 | 0.785405 |
| MmugDNA.31608.1.S1_at   | MmugDNA.31608.1 | 4.1   | 3.75  | 0.17 | 0.21 | 1.28  | 0.203486 | 0.198734 | 0.57497  | 0.473391 |
| MmugDNA.31609.1.S1_at   | MmugDNA.31609.1 | 3.8   | 3.73  | 0.07 | 0.25 | 1.05  | 0.755225 | 0.359527 | 0.907736 | 0.600802 |
| MmugDNA.3161.1.S1_at    | MmugDNA.3161.1  | 5.1   | 5.19  | 0.32 | 0.45 | -1.06 | 0.331312 | 0.437303 | 0.677949 | 0.656613 |
| MmugDNA.31610.1.S1_at   | MmugDNA.31610.1 | 4.21  | 4.22  | 0.12 | 0.08 | -1.01 | 0.852616 | 0.926405 | 0.948073 | 0.958291 |

|                         |                 |       |       |      |      |       |          |          |          |          |
|-------------------------|-----------------|-------|-------|------|------|-------|----------|----------|----------|----------|
| MmugDNA.31611.1.S1_at   | MmugDNA.31611.1 | 9.56  | 9.29  | 0.13 | 0.17 | 1.2   | 0.113122 | 0.008956 | 0.486619 | 0.125084 |
| MmugDNA.31612.1.S1_at   | MmugDNA.31612.1 | 2.92  | 2.96  | 0.13 | 0.03 | -1.03 | 0.875598 | 0.962514 | 0.956789 | 0.978958 |
| MmugDNA.31614.1.S1_at   | MmugDNA.31614.1 | 3.77  | 4.13  | 0.34 | 0.06 | -1.28 | 0.491405 | 0.656855 | 0.777734 | 0.799401 |
| MmugDNA.31615.1.S1_at   | MmugDNA.31615.1 | 3.5   | 3.5   | 0.02 | 0.11 | -1    | 0.829697 | 0.307368 | 0.938862 | 0.563635 |
| MmugDNA.31616.1.S1_at   | MmugDNA.31616.1 | 5.52  | 3.84  | 0.96 | 0.31 | 3.22  | 0.163074 | 0.182486 | 0.536035 | 0.459065 |
| MmugDNA.31617.1.S1_at   | MmugDNA.31617.1 | 3.02  | 3.04  | 0.09 | 0.04 | -1.02 | 0.812781 | 0.680539 | 0.932215 | 0.813481 |
| MmugDNA.3162.1.S1_at    | MmugDNA.3162.1  | 4.11  | 3.98  | 0.04 | 0.19 | 1.1   | 0.83808  | 0.91246  | 0.941963 | 0.950692 |
| MmugDNA.31620.1.S1_s_at | MmugDNA.31620.1 | 4.38  | 4.35  | 0.18 | 0.27 | 1.02  | 0.89712  | 0.824322 | 0.964979 | 0.899073 |
| MmugDNA.31621.1.S1_at   | MmugDNA.31621.1 | 3.71  | 3.67  | 0.15 | 0.07 | 1.03  | 0.470913 | 0.190886 | 0.766231 | 0.466264 |
| MmugDNA.31622.1.S1_at   | MmugDNA.31622.1 | 4.64  | 4.78  | 0.31 | 0.09 | -1.1  | 0.865247 | 0.951609 | 0.952585 | 0.972522 |
| MmugDNA.31623.1.S1_at   | MmugDNA.31623.1 | 10.84 | 11.28 | 0.61 | 0.16 | -1.36 | 0.222113 | 0.088519 | 0.591686 | 0.341947 |
| MmugDNA.31626.1.S1_at   | MmugDNA.31626.1 | 5.46  | 5.83  | 0.35 | 0.28 | -1.3  | 0.093382 | 0.102428 | 0.462462 | 0.362627 |
| MmugDNA.31627.1.S1_at   | MmugDNA.31627.1 | 7     | 7.03  | 0.1  | 0.06 | -1.03 | 0.859415 | 0.925452 | 0.950399 | 0.957811 |
| MmugDNA.31628.1.S1_at   | MmugDNA.31628.1 | 7.49  | 7.48  | 0.16 | 0.02 | 1.01  | 0.825289 | 0.376312 | 0.937201 | 0.614156 |
| MmugDNA.31629.1.S1_at   | MmugDNA.31629.1 | 5.89  | 6.27  | 0.61 | 0.45 | -1.3  | 0.423938 | 0.224207 | 0.739366 | 0.497164 |
| MmugDNA.3163.1.S1_x_at  | MmugDNA.3163.1  | 9.48  | 9.68  | 0.3  | 0.28 | -1.14 | 0.439773 | 0.230579 | 0.748282 | 0.502269 |
| MmugDNA.31632.1.S1_at   | MmugDNA.31632.1 | 5.51  | 5.48  | 0.19 | 0.15 | 1.02  | 0.792851 | 0.016917 | 0.924133 | 0.164969 |
| MmugDNA.31634.1.S1_at   | MmugDNA.31634.1 | 4.17  | 4.14  | 0.25 | 0.21 | 1.02  | 0.502663 | 0.339278 | 0.783781 | 0.585968 |
| MmugDNA.31635.1.S1_at   | MmugDNA.31635.1 | 8.81  | 9.11  | 0.55 | 0.35 | -1.24 | 0.702974 | 0.075051 | 0.884538 | 0.31921  |
| MmugDNA.31637.1.S1_s_at | MmugDNA.31637.1 | 10.12 | 11.01 | 0.08 | 0.17 | -1.86 | 0.001222 | 0.000155 | 0.156419 | 0.030109 |
| MmugDNA.31638.1.S1_at   | MmugDNA.31638.1 | 8.47  | 9.14  | 0.23 | 0.11 | -1.6  | 0.013597 | 0.003195 | 0.269894 | 0.08199  |
| MmugDNA.31639.1.S1_at   | MmugDNA.31639.1 | 5.7   | 5.81  | 0.1  | 0.03 | -1.08 | 0.108908 | 0.085088 | 0.48128  | 0.336891 |
| MmugDNA.31640.1.S1_at   | MmugDNA.31640.1 | 9.06  | 9.16  | 0.11 | 0.09 | -1.07 | 0.272867 | 0.246786 | 0.632536 | 0.516126 |
| MmugDNA.31641.1.S1_at   | MmugDNA.31641.1 | 4.32  | 4.45  | 0.25 | 0.39 | -1.09 | 0.846678 | 0.801022 | 0.94629  | 0.885548 |
| MmugDNA.31642.1.S1_at   | MmugDNA.31642.1 | 5.4   | 5.54  | 0.63 | 0.07 | -1.1  | 0.642823 | 0.7268   | 0.857894 | 0.841963 |
| MmugDNA.31643.1.S1_at   | MmugDNA.31643.1 | 5.95  | 5.54  | 0.07 | 0.1  | 1.33  | 0.01228  | 0.024265 | 0.260951 | 0.194952 |
| MmugDNA.31646.1.S1_at   | MmugDNA.31646.1 | 6.57  | 6.63  | 0.33 | 0.08 | -1.04 | 0.473288 | 0.417478 | 0.767506 | 0.64224  |
| MmugDNA.31648.1.S1_at   | MmugDNA.31648.1 | 10.78 | 10.53 | 0.24 | 0.14 | 1.19  | 0.127393 | 0.608296 | 0.501574 | 0.766989 |
| MmugDNA.3165.1.S1_s_at  | MmugDNA.3165.1  | 7.99  | 7.81  | 0.14 | 0.08 | 1.13  | 0.163297 | 0.414035 | 0.536063 | 0.639981 |
| MmugDNA.31650.1.S1_at   | MmugDNA.31650.1 | 9.96  | 9.17  | 0.5  | 0.14 | 1.73  | 0.043674 | 0.024899 | 0.372554 | 0.197685 |
| MmugDNA.31651.1.S1_at   | MmugDNA.31651.1 | 4.43  | 4.43  | 0.11 | 0.03 | -1    | 0.969091 | 0.631771 | 0.989875 | 0.782957 |
| MmugDNA.31653.1.S1_at   | MmugDNA.31653.1 | 8.88  | 9.17  | 0.34 | 0.08 | -1.22 | 0.151992 | 0.312948 | 0.525094 | 0.567546 |
| MmugDNA.31656.1.S1_at   | MmugDNA.31656.1 | 9.78  | 9.39  | 0.18 | 0.09 | 1.31  | 0.071141 | 0.05333  | 0.430356 | 0.276484 |
| MmugDNA.31658.1.S1_at   | MmugDNA.31658.1 | 3.2   | 3.2   | 0    | 0.02 | 1     | 0.373901 | 0.747023 | 0.705567 | 0.853124 |
| MmugDNA.3166.1.S1_at    | MmugDNA.3166.1  | 4.03  | 4.02  | 0.02 | 0.02 | 1.01  | 0.835894 | 0.300423 | 0.941202 | 0.558748 |
| MmugDNA.31661.1.S1_at   | MmugDNA.31661.1 | 9.11  | 9.02  | 0.64 | 0.03 | 1.06  | 0.925606 | 0.892843 | 0.975188 | 0.93888  |
| MmugDNA.31663.1.S1_at   | MmugDNA.31663.1 | 11.72 | 11.97 | 0.78 | 0.12 | -1.18 | 0.64718  | 0.055185 | 0.859341 | 0.280555 |
| MmugDNA.31664.1.S1_at   | MmugDNA.31664.1 | 3.32  | 3.82  | 0.26 | 0.64 | -1.41 | 0.220758 | 0.042927 | 0.590084 | 0.251759 |
| MmugDNA.31665.1.S1_at   | MmugDNA.31665.1 | 4.65  | 4.57  | 0.32 | 0.12 | 1.06  | 0.478765 | 0.621383 | 0.770234 | 0.775982 |
| MmugDNA.31667.1.S1_at   | MmugDNA.31667.1 | 4.83  | 4.85  | 0.29 | 0.03 | -1.01 | 0.420632 | 0.474605 | 0.737035 | 0.681571 |
| MmugDNA.31668.1.S1_at   | MmugDNA.31668.1 | 8.59  | 8.48  | 0.16 | 0.09 | 1.08  | 0.224893 | 0.347095 | 0.594108 | 0.591815 |
| MmugDNA.31669.1.S1_at   | MmugDNA.31669.1 | 4.85  | 4.87  | 0.14 | 0.07 | -1.01 | 0.607865 | 0.843609 | 0.840979 | 0.910913 |
| MmugDNA.3167.1.S1_at    | MmugDNA.3167.1  | 5.85  | 5.67  | 0.12 | 0.06 | 1.13  | 0.030021 | 0.063183 | 0.336449 | 0.298115 |



|                         |                 |       |       |      |      |       |          |          |          |          |
|-------------------------|-----------------|-------|-------|------|------|-------|----------|----------|----------|----------|
| MmugDNA.31670.1.S1_at   | MmugDNA.31670.1 | 7.01  | 5.61  | 0.88 | 0.55 | 2.63  | 0.12641  | 0.013004 | 0.500227 | 0.146803 |
| MmugDNA.31672.1.S1_at   | MmugDNA.31672.1 | 10.59 | 10.77 | 0.31 | 0.05 | -1.13 | 0.589588 | 0.458298 | 0.832472 | 0.671096 |
| MmugDNA.31673.1.S1_at   | MmugDNA.31673.1 | 9.04  | 8.9   | 0.45 | 0.13 | 1.1   | 0.482588 | 0.190211 | 0.772508 | 0.465854 |
| MmugDNA.31673.1.S1_x_at | MmugDNA.31673.1 | 8.73  | 8.48  | 0.43 | 0.14 | 1.19  | 0.41271  | 0.31185  | 0.732098 | 0.56683  |
| MmugDNA.31674.1.S1_at   | MmugDNA.31674.1 | 3.45  | 3.46  | 0.06 | 0.15 | -1.01 | 0.454581 | 0.415352 | 0.756874 | 0.640835 |
| MmugDNA.31675.1.S1_at   | MmugDNA.31675.1 | 4.48  | 4.46  | 0.28 | 0.11 | 1.01  | 0.798494 | 0.833463 | 0.926173 | 0.904502 |
| MmugDNA.31676.1.S1_at   | MmugDNA.31676.1 | 5.54  | 5.36  | 0.18 | 0.24 | 1.14  | 0.259465 | 0.259236 | 0.622626 | 0.526368 |
| MmugDNA.31678.1.S1_at   | MmugDNA.31678.1 | 5.98  | 5.75  | 0.12 | 0.04 | 1.17  | 0.062352 | 0.084899 | 0.413023 | 0.336494 |
| MmugDNA.3168.1.S1_at    | MmugDNA.3168.1  | 5.52  | 5.47  | 0.58 | 0.2  | 1.04  | 0.413183 | 0.679232 | 0.732218 | 0.81275  |
| MmugDNA.31680.1.S1_at   | MmugDNA.31680.1 | 10.59 | 10.74 | 0.58 | 0.07 | -1.11 | 0.734216 | 0.745129 | 0.898192 | 0.852267 |
| MmugDNA.31681.1.S1_at   | MmugDNA.31681.1 | 4.29  | 4.22  | 0.06 | 0.11 | 1.05  | 0.451999 | 0.669849 | 0.755619 | 0.806933 |
| MmugDNA.31683.1.S1_at   | MmugDNA.31683.1 | 3.29  | 3.25  | 0.17 | 0.07 | 1.03  | 0.280971 | 0.197563 | 0.639604 | 0.472564 |
| MmugDNA.31686.1.S1_at   | MmugDNA.31686.1 | 5.44  | 5.44  | 0.1  | 0.02 | 1     | 0.814528 | 0.080329 | 0.933045 | 0.327965 |
| MmugDNA.31687.1.S1_at   | MmugDNA.31687.1 | 6.76  | 7     | 0.22 | 0.15 | -1.18 | 0.317704 | 0.072466 | 0.667521 | 0.315294 |
| MmugDNA.31688.1.S1_at   | MmugDNA.31688.1 | 11.52 | 11.46 | 0.29 | 0.18 | 1.04  | 0.353337 | 0.639256 | 0.693208 | 0.788125 |
| MmugDNA.31691.1.S1_at   | MmugDNA.31691.1 | 5.62  | 5.81  | 0.06 | 0.32 | -1.14 | 0.22787  | 0.202711 | 0.596693 | 0.477172 |
| MmugDNA.31691.1.S1_x_at | MmugDNA.31691.1 | 6.67  | 6.58  | 0.2  | 0.16 | 1.07  | 0.610684 | 0.265425 | 0.841982 | 0.531363 |
| MmugDNA.31693.1.S1_at   | MmugDNA.31693.1 | 6.13  | 5.76  | 0.14 | 0.14 | 1.29  | 0.035459 | 0.012806 | 0.352096 | 0.145832 |
| MmugDNA.31694.1.S1_at   | MmugDNA.31694.1 | 11.98 | 11.97 | 0.14 | 0.01 | 1.01  | 0.811298 | 0.354429 | 0.931713 | 0.59721  |
| MmugDNA.31695.1.S1_at   | MmugDNA.31695.1 | 9.58  | 9.89  | 0.36 | 0.06 | -1.24 | 0.21811  | 0.219519 | 0.588076 | 0.493168 |
| MmugDNA.31697.1.S1_at   | MmugDNA.31697.1 | 3.55  | 3.64  | 0.24 | 0.13 | -1.06 | 0.905331 | 0.65597  | 0.968115 | 0.798771 |
| MmugDNA.31698.1.S1_at   | MmugDNA.31698.1 | 6.3   | 7.13  | 0.51 | 0.21 | -1.78 | 0.262164 | 0.375473 | 0.624399 | 0.613412 |
| MmugDNA.317.1.S1_at     | MmugDNA.317.1   | 2.99  | 2.97  | 0.14 | 0.19 | 1.02  | 0.550776 | 0.405034 | 0.811036 | 0.633457 |
| MmugDNA.3170.1.S1_at    | MmugDNA.3170.1  | 8.36  | 7.51  | 0.69 | 0.22 | 1.8   | 0.478787 | 0.397806 | 0.770246 | 0.629114 |
| MmugDNA.31700.1.S1_at   | MmugDNA.31700.1 | 10.58 | 10.5  | 0.73 | 0.14 | 1.06  | 0.817569 | 0.227856 | 0.934038 | 0.500191 |
| MmugDNA.31701.1.S1_at   | MmugDNA.31701.1 | 6.81  | 7.21  | 0.49 | 0.34 | -1.32 | 0.453112 | 0.327795 | 0.755962 | 0.577604 |
| MmugDNA.31702.1.S1_at   | MmugDNA.31702.1 | 6.08  | 6.08  | 0.03 | 0.04 | 1     | 0.594415 | 0.866361 | 0.834747 | 0.923996 |
| MmugDNA.31703.1.S1_at   | MmugDNA.31703.1 | 9.37  | 9.75  | 0.49 | 0.16 | -1.3  | 0.258478 | 0.741183 | 0.622213 | 0.850135 |
| MmugDNA.31705.1.S1_at   | MmugDNA.31705.1 | 4.51  | 4.37  | 0.19 | 0.15 | 1.11  | 0.932777 | 0.754905 | 0.977227 | 0.857334 |
| MmugDNA.31706.1.S1_at   | MmugDNA.31706.1 | 6.65  | 6.66  | 0.11 | 0.09 | -1.01 | 0.868772 | 0.015541 | 0.954083 | 0.158053 |
| MmugDNA.31707.1.S1_at   | MmugDNA.31707.1 | 10.97 | 11.35 | 0.09 | 0.08 | -1.3  | 0.013948 | 0.02289  | 0.273301 | 0.189338 |
| MmugDNA.31708.1.S1_at   | MmugDNA.31708.1 | 6.15  | 6.23  | 0.19 | 0.07 | -1.06 | 0.423229 | 0.026003 | 0.738919 | 0.202179 |
| MmugDNA.3171.1.S1_at    | MmugDNA.3171.1  | 6.52  | 6.35  | 0.11 | 0.4  | 1.13  | 0.201474 | 0.105254 | 0.573122 | 0.366999 |
| MmugDNA.31710.1.S1_at   | MmugDNA.31710.1 | 5.09  | 4.93  | 0.16 | 0.16 | 1.12  | 0.59995  | 0.084105 | 0.837647 | 0.335133 |
| MmugDNA.31711.1.S1_at   | MmugDNA.31711.1 | 3.39  | 3.49  | 0.29 | 0.06 | -1.07 | 0.573753 | 0.274098 | 0.823742 | 0.538565 |
| MmugDNA.31712.1.S1_at   | MmugDNA.31712.1 | 5.78  | 6.15  | 0.52 | 0.17 | -1.3  | 0.534808 | 0.32873  | 0.801404 | 0.578255 |
| MmugDNA.31714.1.S1_at   | MmugDNA.31714.1 | 5.44  | 5.32  | 0.23 | 0.17 | 1.08  | 0.417647 | 0.614453 | 0.735015 | 0.771275 |
| MmugDNA.31715.1.S1_at   | MmugDNA.31715.1 | 4.54  | 4.83  | 0.13 | 0.13 | -1.22 | 0.186019 | 0.113863 | 0.558965 | 0.380084 |
| MmugDNA.31717.1.S1_at   | MmugDNA.31717.1 | 9.24  | 9.48  | 1.48 | 0.32 | -1.18 | 0.563793 | 0.674938 | 0.818372 | 0.810089 |
| MmugDNA.31720.1.S1_at   | MmugDNA.31720.1 | 8     | 7.92  | 0.19 | 0.16 | 1.06  | 0.12016  | 0.241905 | 0.493466 | 0.512489 |
| MmugDNA.31721.1.S1_at   | MmugDNA.31721.1 | 6.03  | 5.65  | 0.28 | 0.21 | 1.3   | 0.298267 | 0.321227 | 0.653102 | 0.573144 |
| MmugDNA.31722.1.S1_at   | MmugDNA.31722.1 | 10.37 | 11.03 | 0.13 | 0.15 | -1.58 | 0.004639 | 0.0021   | 0.201164 | 0.067779 |
| MmugDNA.31722.1.S1_s_at | MmugDNA.31722.1 | 10.66 | 11.2  | 0.13 | 0.15 | -1.45 | 0.009094 | 0.000643 | 0.241233 | 0.042928 |

|                         |                 |       |       |      |      |       |          |          |          |          |
|-------------------------|-----------------|-------|-------|------|------|-------|----------|----------|----------|----------|
| MmugDNA.31723.1.S1_at   | MmugDNA.31723.1 | 4.4   | 4.27  | 0.05 | 0.06 | 1.09  | 0.065958 | 0.325376 | 0.421335 | 0.575785 |
| MmugDNA.31724.1.S1_at   | MmugDNA.31724.1 | 7.23  | 7.15  | 1.52 | 0.27 | 1.06  | 0.891075 | 0.810494 | 0.962566 | 0.890812 |
| MmugDNA.31726.1.S1_at   | MmugDNA.31726.1 | 5.55  | 5.71  | 0.38 | 0.23 | -1.12 | 0.534621 | 0.355421 | 0.801404 | 0.597738 |
| MmugDNA.31727.1.S1_at   | MmugDNA.31727.1 | 7.78  | 7.76  | 0.06 | 0.05 | 1.01  | 0.335835 | 0.256788 | 0.681245 | 0.524607 |
| MmugDNA.31729.1.S1_at   | MmugDNA.31729.1 | 3.43  | 3.56  | 0.1  | 0.02 | -1.1  | 0.085982 | 0.175618 | 0.453337 | 0.45218  |
| MmugDNA.3173.1.S1_at    | MmugDNA.3173.1  | 11.2  | 10.96 | 0.32 | 0.01 | 1.18  | 0.244829 | 0.333725 | 0.61037  | 0.581892 |
| MmugDNA.31730.1.S1_at   | MmugDNA.31730.1 | 7.61  | 6.01  | 0.24 | 0.06 | 3.03  | 0.000418 | 0.000797 | 0.137028 | 0.046064 |
| MmugDNA.31731.1.S1_at   | MmugDNA.31731.1 | 11.65 | 11.99 | 0.24 | 0.1  | -1.27 | 0.026769 | 0.011485 | 0.326171 | 0.138627 |
| MmugDNA.31731.1.S1_s_at | MmugDNA.31731.1 | 11.36 | 11.68 | 0.26 | 0.07 | -1.25 | 0.031654 | 0.006093 | 0.341694 | 0.106327 |
| MmugDNA.31732.1.S1_at   | MmugDNA.31732.1 | 4.43  | 4.15  | 0.1  | 0.2  | 1.21  | 0.094459 | 0.067729 | 0.463794 | 0.306339 |
| MmugDNA.31734.1.S1_at   | MmugDNA.31734.1 | 10.82 | 9.68  | 0.44 | 0.21 | 2.21  | 0.019665 | 0.030353 | 0.302206 | 0.216116 |
| MmugDNA.31735.1.S1_at   | MmugDNA.31735.1 | 4.3   | 3.92  | 0.62 | 0.36 | 1.3   | 0.295364 | 0.225687 | 0.651062 | 0.498159 |
| MmugDNA.31736.1.S1_at   | MmugDNA.31736.1 | 8.6   | 8.08  | 1.23 | 0.17 | 1.43  | 0.656436 | 0.771607 | 0.863589 | 0.867303 |
| MmugDNA.31737.1.S1_at   | MmugDNA.31737.1 | 10.07 | 9.99  | 0.24 | 0.04 | 1.06  | 0.46094  | 0.049648 | 0.760656 | 0.267876 |
| MmugDNA.3174.1.S1_at    | MmugDNA.3174.1  | 3.36  | 3.34  | 0.2  | 0.13 | 1.01  | 0.440016 | 0.608955 | 0.748282 | 0.767418 |
| MmugDNA.31740.1.S1_at   | MmugDNA.31740.1 | 4.49  | 5.3   | 0.04 | 0.58 | -1.76 | 0.041153 | 0.163916 | 0.365675 | 0.440105 |
| MmugDNA.31740.1.S1_s_at | MmugDNA.31740.1 | 10.81 | 10.69 | 0.1  | 0.24 | 1.09  | 0.642784 | 0.884711 | 0.857894 | 0.934321 |
| MmugDNA.31741.1.S1_at   | MmugDNA.31741.1 | 7.66  | 7.52  | 0.5  | 0.23 | 1.11  | 0.42567  | 0.59374  | 0.740112 | 0.758418 |
| MmugDNA.31742.1.S1_at   | MmugDNA.31742.1 | 6.02  | 5.84  | 0.24 | 0.07 | 1.13  | 0.123099 | 0.076745 | 0.496589 | 0.322168 |
| MmugDNA.31744.1.S1_at   | MmugDNA.31744.1 | 3.85  | 4.31  | 0.17 | 0.28 | -1.37 | 0.105386 | 0.151858 | 0.477051 | 0.426512 |
| MmugDNA.31745.1.S1_at   | MmugDNA.31745.1 | 3.35  | 3.24  | 0.09 | 0.11 | 1.08  | 0.407451 | 0.358901 | 0.728597 | 0.600291 |
| MmugDNA.31747.1.S1_at   | MmugDNA.31747.1 | 4.1   | 4.23  | 0.11 | 0.09 | -1.1  | 0.098832 | 0.297973 | 0.468203 | 0.556695 |
| MmugDNA.31748.1.S1_at   | MmugDNA.31748.1 | 4.67  | 4.4   | 0.26 | 0.06 | 1.21  | 0.473216 | 0.582822 | 0.767466 | 0.751399 |
| MmugDNA.3175.1.S1_at    | MmugDNA.3175.1  | 9.63  | 9.87  | 0.7  | 0.07 | -1.18 | 0.732493 | 0.761734 | 0.897244 | 0.861459 |
| MmugDNA.31750.1.S1_at   | MmugDNA.31750.1 | 9.44  | 9.59  | 0.33 | 0.16 | -1.11 | 0.854681 | 0.306133 | 0.948588 | 0.562854 |
| MmugDNA.31751.1.S1_at   | MmugDNA.31751.1 | 7.25  | 7.23  | 0.11 | 0.13 | 1.02  | 0.98084  | 0.087118 | 0.993918 | 0.340073 |
| MmugDNA.31751.1.S1_s_at | MmugDNA.31751.1 | 6.67  | 6.75  | 0.22 | 0.07 | -1.06 | 0.791672 | 0.009196 | 0.923472 | 0.126573 |
| MmugDNA.31752.1.S1_s_at | MmugDNA.31752.1 | 9.86  | 9.34  | 0.14 | 0.09 | 1.43  | 0.006872 | 0.013636 | 0.224141 | 0.149433 |
| MmugDNA.31755.1.S1_at   | MmugDNA.31755.1 | 6.77  | 6.51  | 0.15 | 0.28 | 1.2   | 0.585648 | 0.290782 | 0.830611 | 0.551399 |
| MmugDNA.31756.1.S1_at   | MmugDNA.31756.1 | 9.83  | 10.03 | 0.71 | 0.36 | -1.14 | 0.765591 | 0.821145 | 0.911862 | 0.897064 |
| MmugDNA.31757.1.S1_at   | MmugDNA.31757.1 | 5.05  | 5.07  | 0.13 | 0.11 | -1.01 | 0.723672 | 0.704869 | 0.892847 | 0.828846 |
| MmugDNA.31759.1.S1_at   | MmugDNA.31759.1 | 6.67  | 5.95  | 0.26 | 0.3  | 1.64  | 0.036444 | 0.023377 | 0.355009 | 0.191629 |
| MmugDNA.31760.1.S1_at   | MmugDNA.31760.1 | 6.31  | 6.31  | 0.35 | 0.12 | 1     | 0.997334 | 0.957688 | 0.999096 | 0.976059 |
| MmugDNA.31762.1.S1_at   | MmugDNA.31762.1 | 5.53  | 5.55  | 0.94 | 0.16 | -1.02 | 0.973543 | 0.329756 | 0.99138  | 0.578874 |
| MmugDNA.31763.1.S1_at   | MmugDNA.31763.1 | 10.09 | 10.03 | 0.25 | 0.1  | 1.05  | 0.657956 | 0.819991 | 0.864364 | 0.896303 |
| MmugDNA.31766.1.S1_at   | MmugDNA.31766.1 | 7.02  | 6.99  | 0.32 | 0.01 | 1.02  | 0.610286 | 0.571878 | 0.841839 | 0.744056 |
| MmugDNA.31768.1.S1_at   | MmugDNA.31768.1 | 3.05  | 2.95  | 0.21 | 0.19 | 1.07  | 0.921893 | 0.729969 | 0.973627 | 0.843733 |
| MmugDNA.31769.1.S1_at   | MmugDNA.31769.1 | 3.37  | 3.32  | 0.22 | 0.19 | 1.04  | 0.751919 | 0.835463 | 0.906228 | 0.905836 |
| MmugDNA.3177.1.S1_at    | MmugDNA.3177.1  | 7.48  | 7.33  | 0.35 | 0.02 | 1.11  | 0.393191 | 0.097796 | 0.719023 | 0.355639 |
| MmugDNA.31770.1.S1_at   | MmugDNA.31770.1 | 12.9  | 12.94 | 0.12 | 0.04 | -1.03 | 0.447757 | 0.586888 | 0.753554 | 0.753893 |
| MmugDNA.31771.1.S1_at   | MmugDNA.31771.1 | 13.13 | 12.78 | 0.2  | 0.09 | 1.27  | 0.083323 | 0.148411 | 0.449112 | 0.423003 |
| MmugDNA.31771.1.S1_s_at | MmugDNA.31771.1 | 12.38 | 12.38 | 0.12 | 0.07 | -1    | 0.304198 | 0.373972 | 0.657892 | 0.612588 |
| MmugDNA.31773.1.S1_at   | MmugDNA.31773.1 | 4.56  | 4.92  | 0.19 | 0.02 | -1.28 | 0.090728 | 0.104315 | 0.458873 | 0.365519 |

|                         |                 |       |       |      |      |       |          |          |          |          |
|-------------------------|-----------------|-------|-------|------|------|-------|----------|----------|----------|----------|
| MmugDNA.31774.1.S1_at   | MmugDNA.31774.1 | 4.44  | 5.19  | 0.63 | 0.49 | -1.68 | 0.212606 | 0.201014 | 0.583139 | 0.475442 |
| MmugDNA.31775.1.S1_at   | MmugDNA.31775.1 | 9.24  | 9.12  | 0.81 | 0.02 | 1.08  | 0.908758 | 0.522934 | 0.969262 | 0.713429 |
| MmugDNA.31776.1.S1_at   | MmugDNA.31776.1 | 6.55  | 6.56  | 0.01 | 0.01 | -1.01 | 0.299649 | 0.294168 | 0.654124 | 0.553974 |
| MmugDNA.31777.1.S1_at   | MmugDNA.31777.1 | 9.86  | 9.71  | 0.45 | 0.08 | 1.12  | 0.663338 | 0.812291 | 0.867106 | 0.891561 |
| MmugDNA.31778.1.S1_at   | MmugDNA.31778.1 | 3.59  | 3.65  | 0.26 | 0.02 | -1.04 | 0.880036 | 0.449439 | 0.958422 | 0.665069 |
| MmugDNA.3178.1.S1_at    | MmugDNA.3178.1  | 4.3   | 4.14  | 0.11 | 0.19 | 1.12  | 0.217857 | 0.502172 | 0.587841 | 0.70006  |
| MmugDNA.31780.1.S1_at   | MmugDNA.31780.1 | 9.4   | 9.99  | 0.31 | 0.12 | -1.51 | 0.096197 | 0.135293 | 0.464755 | 0.407381 |
| MmugDNA.31780.1.S1_s_at | MmugDNA.31780.1 | 12.41 | 12.07 | 0.23 | 0.14 | 1.27  | 0.066938 | 0.013333 | 0.422979 | 0.148042 |
| MmugDNA.31782.1.S1_at   | MmugDNA.31782.1 | 10.65 | 10.86 | 0.08 | 0.23 | -1.16 | 0.142538 | 0.114251 | 0.517603 | 0.380761 |
| MmugDNA.31783.1.S1_at   | MmugDNA.31783.1 | 7.91  | 6.93  | 0.93 | 0.35 | 1.97  | 0.250137 | 0.284838 | 0.615476 | 0.546966 |
| MmugDNA.31785.1.S1_at   | MmugDNA.31785.1 | 9.02  | 9.63  | 0.8  | 0.12 | -1.52 | 0.251319 | 0.08469  | 0.616622 | 0.336196 |
| MmugDNA.31786.1.S1_at   | MmugDNA.31786.1 | 7.47  | 7.68  | 0.31 | 0.15 | -1.16 | 0.889108 | 0.974787 | 0.96181  | 0.986245 |
| MmugDNA.31787.1.S1_at   | MmugDNA.31787.1 | 4.44  | 4.51  | 0.1  | 0.18 | -1.05 | 0.266767 | 0.605892 | 0.627644 | 0.765543 |
| MmugDNA.31788.1.S1_at   | MmugDNA.31788.1 | 6.5   | 6.45  | 0.16 | 0.1  | 1.03  | 0.909035 | 0.674411 | 0.969287 | 0.809775 |
| MmugDNA.3179.1.S1_at    | MmugDNA.3179.1  | 5.59  | 5.6   | 0.14 | 0.08 | -1.01 | 0.389904 | 0.469343 | 0.716422 | 0.678197 |
| MmugDNA.31790.1.S1_at   | MmugDNA.31790.1 | 5.96  | 5.96  | 0.29 | 0.07 | 1     | 0.344766 | 0.457919 | 0.687049 | 0.670999 |
| MmugDNA.31792.1.S1_at   | MmugDNA.31792.1 | 10.86 | 11.49 | 0.04 | 0.07 | -1.55 | 0.000135 | 0.032473 | 0.111942 | 0.223254 |
| MmugDNA.31793.1.S1_at   | MmugDNA.31793.1 | 3.85  | 3.78  | 0.13 | 0.07 | 1.05  | 0.223496 | 0.713366 | 0.592569 | 0.833698 |
| MmugDNA.31794.1.S1_at   | MmugDNA.31794.1 | 6.21  | 5.92  | 0.09 | 0.11 | 1.22  | 0.033159 | 0.0561   | 0.346294 | 0.282723 |
| MmugDNA.31795.1.S1_at   | MmugDNA.31795.1 | 12.86 | 12.93 | 0.14 | 0.05 | -1.05 | 0.419149 | 0.01921  | 0.736167 | 0.174431 |
| MmugDNA.31796.1.S1_at   | MmugDNA.31796.1 | 6.01  | 5.76  | 0.37 | 0.2  | 1.19  | 0.297845 | 0.243438 | 0.652791 | 0.513479 |
| MmugDNA.31797.1.S1_at   | MmugDNA.31797.1 | 7.07  | 7.28  | 0.24 | 0.08 | -1.16 | 0.133359 | 0.261682 | 0.507921 | 0.528129 |
| MmugDNA.31798.1.S1_at   | MmugDNA.31798.1 | 7.83  | 8.14  | 0.45 | 0.11 | -1.24 | 0.425213 | 0.275073 | 0.739924 | 0.539482 |
| MmugDNA.31799.1.S1_at   | MmugDNA.31799.1 | 5.56  | 5.56  | 0.04 | 0.02 | -1    | 0.91821  | 0.83455  | 0.972089 | 0.905227 |
| MmugDNA.318.1.S1_at     | MmugDNA.318.1   | 3.33  | 3.21  | 0.15 | 0.11 | 1.09  | 0.116536 | 0.157301 | 0.489684 | 0.432782 |
| MmugDNA.31800.1.S1_at   | MmugDNA.31800.1 | 12.9  | 12.5  | 0.11 | 0.19 | 1.31  | 0.02045  | 0.015494 | 0.303985 | 0.158044 |
| MmugDNA.31801.1.S1_at   | MmugDNA.31801.1 | 8.5   | 8.32  | 0.46 | 0.1  | 1.13  | 0.639797 | 0.65429  | 0.856331 | 0.797979 |
| MmugDNA.31802.1.S1_at   | MmugDNA.31802.1 | 9.43  | 10.57 | 0.29 | 0.1  | -2.21 | 0.006902 | 0.021764 | 0.224141 | 0.184565 |
| MmugDNA.31803.1.S1_at   | MmugDNA.31803.1 | 8.03  | 9.01  | 0.29 | 0.2  | -1.97 | 0.017778 | 0.043884 | 0.293582 | 0.254098 |
| MmugDNA.31804.1.S1_at   | MmugDNA.31804.1 | 4.51  | 4.2   | 0.15 | 0.11 | 1.24  | 0.106369 | 0.108872 | 0.478837 | 0.372496 |
| MmugDNA.31805.1.S1_at   | MmugDNA.31805.1 | 5.88  | 5.53  | 0.38 | 0.07 | 1.28  | 0.211139 | 0.198935 | 0.582141 | 0.473521 |
| MmugDNA.31807.1.S1_at   | MmugDNA.31807.1 | 6.07  | 6.25  | 0.71 | 0.28 | -1.13 | 0.706276 | 0.411729 | 0.8857   | 0.638434 |
| MmugDNA.31808.1.S1_at   | MmugDNA.31808.1 | 6.94  | 5.98  | 0.39 | 0.29 | 1.95  | 0.062827 | 0.082361 | 0.414082 | 0.331354 |
| MmugDNA.31809.1.S1_at   | MmugDNA.31809.1 | 6.33  | 6.11  | 0.16 | 0.13 | 1.17  | 0.167557 | 0.146289 | 0.540101 | 0.420301 |
| MmugDNA.3181.1.S1_at    | MmugDNA.3181.1  | 3.38  | 4.3   | 0.19 | 0.42 | -1.89 | 0.099881 | 0.131859 | 0.469936 | 0.403891 |
| MmugDNA.31810.1.S1_at   | MmugDNA.31810.1 | 5.99  | 6.42  | 0.89 | 0.43 | -1.35 | 0.677455 | 0.897129 | 0.873508 | 0.941305 |
| MmugDNA.31811.1.S1_at   | MmugDNA.31811.1 | 3.45  | 3.4   | 0.05 | 0.1  | 1.04  | 0.158747 | 0.144528 | 0.531595 | 0.418408 |
| MmugDNA.31812.1.S1_at   | MmugDNA.31812.1 | 4.94  | 4.94  | 0.06 | 0.14 | 1     | 0.609573 | 0.631812 | 0.841773 | 0.78297  |
| MmugDNA.31813.1.S1_at   | MmugDNA.31813.1 | 3.63  | 3.5   | 0.14 | 0.01 | 1.09  | 0.134108 | 0.103546 | 0.508395 | 0.364346 |
| MmugDNA.31814.1.S1_at   | MmugDNA.31814.1 | 5.04  | 5.23  | 0.24 | 0.06 | -1.14 | 0.185399 | 0.050644 | 0.55849  | 0.270317 |
| MmugDNA.31815.1.S1_at   | MmugDNA.31815.1 | 5.48  | 5.96  | 0.51 | 0.21 | -1.4  | 0.318814 | 0.265326 | 0.668363 | 0.531314 |
| MmugDNA.31817.1.S1_at   | MmugDNA.31817.1 | 8.68  | 8.95  | 0.28 | 0.06 | -1.21 | 0.408829 | 0.051881 | 0.729545 | 0.273151 |
| MmugDNA.31818.1.S1_at   | MmugDNA.31818.1 | 4.43  | 4.2   | 0.04 | 0.02 | 1.17  | 0.000868 | 0.073523 | 0.153739 | 0.316799 |

|                         |                 |       |       |      |      |       |          |          |          |          |
|-------------------------|-----------------|-------|-------|------|------|-------|----------|----------|----------|----------|
| MmugDNA.31819.1.S1_at   | MmugDNA.31819.1 | 9.29  | 10.18 | 0.97 | 0.31 | -1.85 | 0.263658 | 0.800257 | 0.625638 | 0.885129 |
| MmugDNA.31820.1.S1_at   | MmugDNA.31820.1 | 5.04  | 4.87  | 0.2  | 0.18 | 1.12  | 0.148964 | 0.494171 | 0.52291  | 0.694704 |
| MmugDNA.31821.1.S1_at   | MmugDNA.31821.1 | 3.77  | 3.75  | 0.03 | 0.17 | 1.01  | 0.648783 | 0.533143 | 0.860071 | 0.719436 |
| MmugDNA.31822.1.S1_at   | MmugDNA.31822.1 | 6.11  | 6.02  | 0.08 | 0.05 | 1.07  | 0.102442 | 0.166658 | 0.472592 | 0.443133 |
| MmugDNA.31823.1.S1_at   | MmugDNA.31823.1 | 7.63  | 5.7   | 0.4  | 0.37 | 3.82  | 0.004603 | 0.00128  | 0.201051 | 0.055351 |
| MmugDNA.31824.1.S1_at   | MmugDNA.31824.1 | 8.59  | 8.94  | 0.43 | 0.16 | -1.27 | 0.579491 | 0.113555 | 0.826489 | 0.379632 |
| MmugDNA.31825.1.S1_at   | MmugDNA.31825.1 | 6.52  | 7.38  | 1.12 | 0.65 | -1.82 | 0.504881 | 0.131602 | 0.785092 | 0.403716 |
| MmugDNA.31826.1.S1_at   | MmugDNA.31826.1 | 3.22  | 3.39  | 0.05 | 0.13 | -1.13 | 0.19745  | 0.162412 | 0.568435 | 0.438575 |
| MmugDNA.31827.1.S1_at   | MmugDNA.31827.1 | 9.91  | 10.09 | 0.21 | 0.07 | -1.13 | 0.08011  | 0.257641 | 0.443423 | 0.525332 |
| MmugDNA.31828.1.S1_at   | MmugDNA.31828.1 | 9.06  | 9.07  | 0.11 | 0.02 | -1    | 0.351128 | 0.606972 | 0.691852 | 0.766178 |
| MmugDNA.31829.1.S1_at   | MmugDNA.31829.1 | 5.25  | 5.61  | 0.16 | 0.22 | -1.28 | 0.153669 | 0.464937 | 0.526829 | 0.675523 |
| MmugDNA.3183.1.S1_at    | MmugDNA.3183.1  | 3.35  | 3.64  | 0.04 | 0.12 | -1.22 | 0.022645 | 0.046529 | 0.311731 | 0.260221 |
| MmugDNA.31830.1.S1_at   | MmugDNA.31830.1 | 9.58  | 9.97  | 0.08 | 0.07 | -1.31 | 0.00169  | 0.002448 | 0.164787 | 0.073228 |
| MmugDNA.31831.1.S1_at   | MmugDNA.31831.1 | 5.25  | 6.21  | 0.47 | 0.11 | -1.94 | 0.027062 | 0.001019 | 0.327141 | 0.050911 |
| MmugDNA.31832.1.S1_at   | MmugDNA.31832.1 | 4.93  | 4.77  | 0.17 | 0.06 | 1.11  | 0.206143 | 0.252649 | 0.578134 | 0.521174 |
| MmugDNA.31833.1.S1_s_at | MmugDNA.31833.1 | 11.94 | 12.17 | 0.44 | 0.03 | -1.17 | 0.56732  | 0.624364 | 0.820391 | 0.778577 |
| MmugDNA.31834.1.S1_at   | MmugDNA.31834.1 | 7.22  | 7.73  | 0.08 | 0.14 | -1.42 | 0.005326 | 0.003714 | 0.207623 | 0.086832 |
| MmugDNA.31835.1.S1_at   | MmugDNA.31835.1 | 4.51  | 4.47  | 0.11 | 0.13 | 1.03  | 0.789313 | 0.57286  | 0.922532 | 0.74478  |
| MmugDNA.31835.1.S1_x_at | MmugDNA.31835.1 | 4.66  | 4.5   | 0.01 | 0.22 | 1.12  | 0.428862 | 0.521303 | 0.742105 | 0.712346 |
| MmugDNA.31836.1.S1_at   | MmugDNA.31836.1 | 3.15  | 3.54  | 0.14 | 0.23 | -1.3  | 0.066481 | 0.506952 | 0.422351 | 0.702692 |
| MmugDNA.31836.1.S1_x_at | MmugDNA.31836.1 | 3.77  | 3.94  | 0.05 | 0.03 | -1.13 | 0.014027 | 0.831071 | 0.273301 | 0.903111 |
| MmugDNA.31838.1.S1_at   | MmugDNA.31838.1 | 5.46  | 5.19  | 0.38 | 0.07 | 1.21  | 0.268431 | 0.333851 | 0.628814 | 0.581995 |
| MmugDNA.31838.1.S1_s_at | MmugDNA.31838.1 | 10.25 | 10.69 | 1.01 | 0.21 | -1.36 | 0.604471 | 0.076228 | 0.83963  | 0.321127 |
| MmugDNA.31839.1.S1_at   | MmugDNA.31839.1 | 6.1   | 4.74  | 1.24 | 0.05 | 2.56  | 0.42002  | 0.609219 | 0.736634 | 0.767677 |
| MmugDNA.3184.1.S1_at    | MmugDNA.3184.1  | 8.3   | 8.58  | 0.28 | 0.09 | -1.21 | 0.116416 | 0.063068 | 0.489622 | 0.297788 |
| MmugDNA.31840.1.S1_at   | MmugDNA.31840.1 | 5.78  | 5.75  | 0.26 | 0.09 | 1.02  | 0.528335 | 0.363118 | 0.797609 | 0.60356  |
| MmugDNA.31843.1.S1_at   | MmugDNA.31843.1 | 8.95  | 7.96  | 0.57 | 0.36 | 1.98  | 0.088732 | 0.070481 | 0.456425 | 0.311777 |
| MmugDNA.31844.1.S1_at   | MmugDNA.31844.1 | 5.92  | 5.76  | 0.18 | 0.1  | 1.12  | 0.395074 | 0.578565 | 0.720316 | 0.748589 |
| MmugDNA.31845.1.S1_at   | MmugDNA.31845.1 | 7.24  | 6.47  | 0.54 | 0.25 | 1.7   | 0.047819 | 0.02429  | 0.381293 | 0.195066 |
| MmugDNA.31846.1.S1_at   | MmugDNA.31846.1 | 6.08  | 6.36  | 0.71 | 0.16 | -1.21 | 0.84521  | 0.671192 | 0.945709 | 0.807707 |
| MmugDNA.31847.1.S1_at   | MmugDNA.31847.1 | 4.71  | 6.19  | 0.56 | 0.26 | -2.78 | 0.015565 | 0.001721 | 0.282681 | 0.062866 |
| MmugDNA.31848.1.S1_at   | MmugDNA.31848.1 | 4.12  | 4.31  | 0.2  | 0.36 | -1.15 | 0.393561 | 0.225252 | 0.719354 | 0.497892 |
| MmugDNA.31849.1.S1_at   | MmugDNA.31849.1 | 9.64  | 9.47  | 0.23 | 0.07 | 1.12  | 0.464581 | 0.183308 | 0.76257  | 0.459553 |
| MmugDNA.3185.1.S1_at    | MmugDNA.3185.1  | 3.46  | 3.45  | 0.62 | 0.1  | 1.01  | 0.361584 | 0.495377 | 0.698663 | 0.695435 |
| MmugDNA.31851.1.S1_x_at | MmugDNA.31851.1 | 8.34  | 8.41  | 0.16 | 0.16 | -1.06 | 0.29949  | 0.15406  | 0.65394  | 0.428867 |
| MmugDNA.31852.1.S1_at   | MmugDNA.31852.1 | 8.02  | 8.22  | 0.6  | 0.17 | -1.15 | 0.675959 | 0.733383 | 0.872796 | 0.845627 |
| MmugDNA.31854.1.S1_at   | MmugDNA.31854.1 | 6.93  | 6.86  | 0.07 | 0.15 | 1.05  | 0.203375 | 0.375668 | 0.574902 | 0.613577 |
| MmugDNA.31855.1.S1_at   | MmugDNA.31855.1 | 5.32  | 5.22  | 0.67 | 0.61 | 1.07  | 0.461855 | 0.741117 | 0.761308 | 0.850131 |
| MmugDNA.31856.1.S1_at   | MmugDNA.31856.1 | 10.41 | 11.07 | 0.5  | 0.07 | -1.58 | 0.107048 | 0.02051  | 0.47951  | 0.179742 |
| MmugDNA.31857.1.S1_at   | MmugDNA.31857.1 | 4.78  | 4.78  | 0.07 | 0.19 | 1     | 0.295139 | 0.742752 | 0.651016 | 0.851023 |
| MmugDNA.31858.1.S1_at   | MmugDNA.31858.1 | 7.19  | 6.98  | 0.14 | 0.06 | 1.16  | 0.14422  | 0.399128 | 0.519606 | 0.62969  |
| MmugDNA.31859.1.S1_at   | MmugDNA.31859.1 | 3.82  | 3.65  | 0.15 | 0.25 | 1.13  | 0.772898 | 0.271608 | 0.915516 | 0.536577 |
| MmugDNA.3186.1.S1_at    | MmugDNA.3186.1  | 9.83  | 9.94  | 1.62 | 0.2  | -1.08 | 0.292993 | 0.123006 | 0.649327 | 0.392923 |

|                         |                 |       |       |      |      |       |          |          |          |          |
|-------------------------|-----------------|-------|-------|------|------|-------|----------|----------|----------|----------|
| MmugDNA.31860.1.S1_at   | MmugDNA.31860.1 | 5.89  | 6     | 0.44 | 0.12 | -1.08 | 0.817969 | 0.580389 | 0.934212 | 0.749646 |
| MmugDNA.31862.1.S1_at   | MmugDNA.31862.1 | 3.47  | 3.61  | 0.18 | 0.08 | -1.1  | 0.29033  | 0.525033 | 0.646903 | 0.71475  |
| MmugDNA.31863.1.S1_at   | MmugDNA.31863.1 | 9.38  | 8.97  | 0.32 | 0.07 | 1.33  | 0.052953 | 0.103909 | 0.393634 | 0.364582 |
| MmugDNA.31864.1.S1_at   | MmugDNA.31864.1 | 6.17  | 6.08  | 0.17 | 0.29 | 1.06  | 0.666167 | 0.153366 | 0.868243 | 0.428186 |
| MmugDNA.31864.1.S1_x_at | MmugDNA.31864.1 | 5.89  | 5.7   | 0.28 | 0.3  | 1.14  | 0.538783 | 0.219583 | 0.803474 | 0.493192 |
| MmugDNA.31865.1.S1_at   | MmugDNA.31865.1 | 6.87  | 6.93  | 0.24 | 0.66 | -1.05 | 0.631815 | 0.565831 | 0.85263  | 0.740112 |
| MmugDNA.31866.1.S1_at   | MmugDNA.31866.1 | 6.14  | 6.08  | 0.71 | 0.1  | 1.05  | 0.99942  | 0.435392 | 0.999871 | 0.655194 |
| MmugDNA.31868.1.S1_at   | MmugDNA.31868.1 | 6.82  | 6.87  | 0.04 | 0.11 | -1.04 | 0.896067 | 0.411881 | 0.964483 | 0.638434 |
| MmugDNA.31869.1.S1_at   | MmugDNA.31869.1 | 4.9   | 4.92  | 0.14 | 0.26 | -1.01 | 0.224743 | 0.095058 | 0.594031 | 0.352124 |
| MmugDNA.3187.1.S1_at    | MmugDNA.3187.1  | 8.71  | 8.84  | 0.42 | 0.14 | -1.09 | 0.643746 | 0.033244 | 0.858276 | 0.225803 |
| MmugDNA.31870.1.S1_at   | MmugDNA.31870.1 | 6.28  | 6.41  | 0.11 | 0.07 | -1.09 | 0.155721 | 0.329287 | 0.528929 | 0.57869  |
| MmugDNA.31871.1.S1_at   | MmugDNA.31871.1 | 3.31  | 3.09  | 0.1  | 0.12 | 1.16  | 0.223886 | 0.1644   | 0.59298  | 0.440678 |
| MmugDNA.31872.1.S1_at   | MmugDNA.31872.1 | 4.09  | 3.92  | 0    | 0.11 | 1.13  | 0.047893 | 0.041364 | 0.381475 | 0.247995 |
| MmugDNA.31873.1.S1_at   | MmugDNA.31873.1 | 7.45  | 8.66  | 2.7  | 0.44 | -2.32 | 0.394687 | 0.157827 | 0.719972 | 0.433475 |
| MmugDNA.31874.1.S1_at   | MmugDNA.31874.1 | 5.4   | 5.58  | 0.37 | 0.11 | -1.13 | 0.232994 | 0.5326   | 0.600437 | 0.719144 |
| MmugDNA.31875.1.S1_at   | MmugDNA.31875.1 | 4.15  | 4.15  | 0    | 0.01 | 1     | 0.59348  | 0.408418 | 0.834223 | 0.635685 |
| MmugDNA.31876.1.S1_at   | MmugDNA.31876.1 | 5.15  | 5.2   | 0.29 | 0.03 | -1.04 | 0.611518 | 0.280043 | 0.84257  | 0.543369 |
| MmugDNA.31878.1.S1_at   | MmugDNA.31878.1 | 3.41  | 3.38  | 0.26 | 0.12 | 1.02  | 0.744585 | 0.238722 | 0.902602 | 0.509386 |
| MmugDNA.31879.1.S1_at   | MmugDNA.31879.1 | 7.85  | 7.51  | 0.21 | 0.12 | 1.27  | 0.182551 | 0.046902 | 0.555631 | 0.261281 |
| MmugDNA.3188.1.S1_at    | MmugDNA.3188.1  | 5.12  | 5.01  | 0.13 | 0.12 | 1.08  | 0.151236 | 0.212758 | 0.52444  | 0.486769 |
| MmugDNA.31880.1.S1_at   | MmugDNA.31880.1 | 8.44  | 7.3   | 0.28 | 0.4  | 2.21  | 0.021908 | 0.017436 | 0.309781 | 0.167111 |
| MmugDNA.31881.1.S1_at   | MmugDNA.31881.1 | 3.23  | 3.01  | 0.1  | 0.04 | 1.17  | 0.062872 | 0.176435 | 0.414181 | 0.45282  |
| MmugDNA.31882.1.S1_at   | MmugDNA.31882.1 | 3.39  | 3.08  | 0.14 | 0.1  | 1.24  | 0.069338 | 0.082748 | 0.42692  | 0.332206 |
| MmugDNA.31883.1.S1_at   | MmugDNA.31883.1 | 8.24  | 8.22  | 0.28 | 0.16 | 1.01  | 0.838601 | 0.796513 | 0.942303 | 0.882705 |
| MmugDNA.31884.1.S1_at   | MmugDNA.31884.1 | 3.43  | 3.46  | 0.18 | 0.13 | -1.03 | 0.988624 | 0.950678 | 0.995877 | 0.972007 |
| MmugDNA.31885.1.S1_at   | MmugDNA.31885.1 | 10.83 | 10.86 | 0.16 | 0.07 | -1.02 | 0.908482 | 0.062023 | 0.969203 | 0.295897 |
| MmugDNA.31886.1.S1_at   | MmugDNA.31886.1 | 6.06  | 6.36  | 0.05 | 0.28 | -1.24 | 0.126971 | 0.094766 | 0.500834 | 0.35164  |
| MmugDNA.31887.1.S1_at   | MmugDNA.31887.1 | 9.68  | 9.25  | 0.59 | 0.03 | 1.34  | 0.272359 | 0.14107  | 0.632141 | 0.414592 |
| MmugDNA.31888.1.S1_at   | MmugDNA.31888.1 | 4.19  | 4.48  | 0.26 | 0.28 | -1.22 | 0.625543 | 0.014881 | 0.849478 | 0.155055 |
| MmugDNA.31889.1.S1_s_at | MmugDNA.31889.1 | 3.15  | 3.2   | 0.03 | 0.15 | -1.04 | 0.254961 | 0.385203 | 0.619267 | 0.620695 |
| MmugDNA.3189.1.S1_at    | MmugDNA.3189.1  | 4.7   | 4.83  | 0.22 | 0.11 | -1.09 | 0.928872 | 0.505774 | 0.976332 | 0.702218 |
| MmugDNA.31890.1.S1_at   | MmugDNA.31890.1 | 6.69  | 6.23  | 0.18 | 0.06 | 1.37  | 0.019847 | 0.12631  | 0.302615 | 0.396786 |
| MmugDNA.31891.1.S1_at   | MmugDNA.31891.1 | 7.26  | 7.88  | 0.15 | 0.17 | -1.54 | 0.005384 | 0.000511 | 0.208157 | 0.039357 |
| MmugDNA.31892.1.S1_at   | MmugDNA.31892.1 | 4.33  | 4.18  | 0.1  | 0.21 | 1.11  | 0.590577 | 0.70632  | 0.832911 | 0.829634 |
| MmugDNA.31894.1.S1_at   | MmugDNA.31894.1 | 11.53 | 12.12 | 0.61 | 0.19 | -1.51 | 0.06314  | 0.065577 | 0.415058 | 0.301476 |
| MmugDNA.31894.1.S1_s_at | MmugDNA.31894.1 | 11.15 | 11.91 | 0.52 | 0.18 | -1.7  | 0.059615 | 0.043946 | 0.406669 | 0.254098 |
| MmugDNA.31895.1.S1_at   | MmugDNA.31895.1 | 3.56  | 3.49  | 0.27 | 0.27 | 1.05  | 0.342802 | 0.341775 | 0.686105 | 0.587862 |
| MmugDNA.31896.1.S1_at   | MmugDNA.31896.1 | 5.95  | 6.23  | 0.18 | 0.1  | -1.22 | 0.121105 | 0.146767 | 0.494725 | 0.420799 |
| MmugDNA.31897.1.S1_at   | MmugDNA.31897.1 | 11.8  | 12.46 | 0.46 | 0.13 | -1.58 | 0.074026 | 0.068089 | 0.434725 | 0.307142 |
| MmugDNA.31898.1.S1_s_at | MmugDNA.31898.1 | 12.01 | 12.52 | 0.41 | 0.05 | -1.42 | 0.29678  | 0.092834 | 0.652405 | 0.349024 |
| MmugDNA.31900.1.S1_at   | MmugDNA.31900.1 | 5.36  | 5.26  | 0.06 | 0    | 1.08  | 0.042225 | 0.427985 | 0.368796 | 0.649602 |
| MmugDNA.31901.1.S1_at   | MmugDNA.31901.1 | 12.54 | 9.89  | 0.78 | 0.32 | 6.32  | 0.009743 | 0.005382 | 0.243347 | 0.101199 |
| MmugDNA.31902.1.S1_at   | MmugDNA.31902.1 | 10.92 | 11.82 | 0.51 | 0.02 | -1.86 | 0.034876 | 0.02559  | 0.350453 | 0.200684 |

|                         |                 |       |       |      |      |       |          |          |          |          |
|-------------------------|-----------------|-------|-------|------|------|-------|----------|----------|----------|----------|
| MmugDNA.31904.1.S1_x_at | MmugDNA.31904.1 | 13.12 | 13.23 | 0.25 | 0.13 | -1.08 | 0.197788 | 0.290218 | 0.568831 | 0.551169 |
| MmugDNA.31907.1.S1_at   | MmugDNA.31907.1 | 4.09  | 4.09  | 0.09 | 0.2  | 1     | 0.259341 | 0.567279 | 0.622607 | 0.741185 |
| MmugDNA.31908.1.S1_at   | MmugDNA.31908.1 | 7.39  | 6.73  | 0.31 | 0.04 | 1.58  | 0.022166 | 0.012234 | 0.31038  | 0.142996 |
| MmugDNA.31909.1.S1_at   | MmugDNA.31909.1 | 3.44  | 3.42  | 0.16 | 0.06 | 1.02  | 0.202137 | 0.346374 | 0.573629 | 0.59124  |
| MmugDNA.3191.1.S1_at    | MmugDNA.3191.1  | 12.09 | 12.22 | 0.17 | 0.03 | -1.09 | 0.302137 | 0.318078 | 0.656112 | 0.571046 |
| MmugDNA.31910.1.S1_at   | MmugDNA.31910.1 | 7.27  | 7.07  | 0.59 | 0.35 | 1.15  | 0.79693  | 0.380248 | 0.925379 | 0.616941 |
| MmugDNA.31911.1.S1_at   | MmugDNA.31911.1 | 5.17  | 5.9   | 0.84 | 0.14 | -1.66 | 0.602365 | 0.694084 | 0.838783 | 0.82208  |
| MmugDNA.31912.1.S1_at   | MmugDNA.31912.1 | 10.42 | 10.26 | 0.27 | 0.07 | 1.12  | 0.40526  | 0.511861 | 0.727293 | 0.705797 |
| MmugDNA.31914.1.S1_at   | MmugDNA.31914.1 | 5.67  | 5.63  | 0.25 | 0.16 | 1.03  | 0.310213 | 0.044259 | 0.662073 | 0.25493  |
| MmugDNA.31915.1.S1_at   | MmugDNA.31915.1 | 6.9   | 6.96  | 0.1  | 0.18 | -1.04 | 0.839574 | 0.185112 | 0.942817 | 0.460962 |
| MmugDNA.31917.1.S1_at   | MmugDNA.31917.1 | 6.9   | 6.8   | 0.06 | 0.02 | 1.07  | 0.060705 | 0.152468 | 0.408585 | 0.42728  |
| MmugDNA.31919.1.S1_at   | MmugDNA.31919.1 | 7.93  | 7.92  | 0.34 | 0.11 | 1.01  | 0.922601 | 0.307391 | 0.973908 | 0.563638 |
| MmugDNA.3192.1.S1_at    | MmugDNA.3192.1  | 2.87  | 2.85  | 0.02 | 0.09 | 1.02  | 0.720012 | 0.642773 | 0.891311 | 0.790476 |
| MmugDNA.31921.1.S1_at   | MmugDNA.31921.1 | 5.1   | 4.9   | 0.3  | 0.25 | 1.15  | 0.680449 | 0.198426 | 0.874676 | 0.473302 |
| MmugDNA.31922.1.S1_at   | MmugDNA.31922.1 | 4.39  | 4.2   | 0.23 | 0.15 | 1.14  | 0.159641 | 0.427989 | 0.532583 | 0.649602 |
| MmugDNA.31923.1.S1_at   | MmugDNA.31923.1 | 7.08  | 7.34  | 0.32 | 0.15 | -1.2  | 0.740669 | 0.076714 | 0.900871 | 0.322127 |
| MmugDNA.31924.1.S1_at   | MmugDNA.31924.1 | 7.32  | 7.26  | 0.02 | 0.02 | 1.05  | 0.021504 | 0.849961 | 0.30891  | 0.914673 |
| MmugDNA.31925.1.S1_at   | MmugDNA.31925.1 | 10.25 | 10.05 | 0.3  | 0.19 | 1.14  | 0.261755 | 0.401717 | 0.624034 | 0.631068 |
| MmugDNA.31925.1.S1_s_at | MmugDNA.31925.1 | 11.89 | 11.8  | 0.13 | 0.07 | 1.06  | 0.201582 | 0.32102  | 0.573165 | 0.573025 |
| MmugDNA.31926.1.S1_at   | MmugDNA.31926.1 | 12.63 | 12.66 | 0.17 | 0.02 | -1.02 | 0.348838 | 0.4206   | 0.690077 | 0.644287 |
| MmugDNA.31926.1.S1_x_at | MmugDNA.31926.1 | 12.55 | 12.63 | 0.22 | 0.03 | -1.06 | 0.389028 | 0.451982 | 0.715919 | 0.666724 |
| MmugDNA.31927.1.S1_at   | MmugDNA.31927.1 | 3.93  | 4.01  | 0.07 | 0.1  | -1.05 | 0.961084 | 0.315382 | 0.987225 | 0.568939 |
| MmugDNA.31928.1.S1_at   | MmugDNA.31928.1 | 6.66  | 6.85  | 0.64 | 0.16 | -1.14 | 0.680802 | 0.005803 | 0.874832 | 0.104597 |
| MmugDNA.31929.1.S1_at   | MmugDNA.31929.1 | 6.75  | 6.33  | 0.32 | 0.1  | 1.33  | 0.291434 | 0.273394 | 0.647937 | 0.537845 |
| MmugDNA.31929.1.S1_s_at | MmugDNA.31929.1 | 6.44  | 6.09  | 0.9  | 0.13 | 1.28  | 0.348095 | 0.193669 | 0.689374 | 0.468785 |
| MmugDNA.3193.1.S1_at    | MmugDNA.3193.1  | 4.08  | 4.02  | 0.06 | 0.2  | 1.04  | 0.480246 | 0.440598 | 0.771116 | 0.659029 |
| MmugDNA.3193.1.S1_x_at  | MmugDNA.3193.1  | 4.01  | 3.88  | 0.1  | 0.28 | 1.1   | 0.932949 | 0.963403 | 0.977247 | 0.979599 |
| MmugDNA.31930.1.S1_at   | MmugDNA.31930.1 | 4.57  | 3.6   | 0.27 | 0.37 | 1.96  | 0.071494 | 0.08651  | 0.431049 | 0.33907  |
| MmugDNA.31932.1.S1_at   | MmugDNA.31932.1 | 3.39  | 3.46  | 0.05 | 0.03 | -1.04 | 0.095166 | 0.726795 | 0.464131 | 0.841963 |
| MmugDNA.31933.1.S1_at   | MmugDNA.31933.1 | 10.33 | 10.79 | 0.9  | 0.18 | -1.37 | 0.486674 | 0.06313  | 0.774667 | 0.29795  |
| MmugDNA.31935.1.S1_at   | MmugDNA.31935.1 | 3.62  | 3.63  | 0.54 | 0.08 | -1.01 | 0.337641 | 0.464239 | 0.682552 | 0.674983 |
| MmugDNA.31937.1.S1_at   | MmugDNA.31937.1 | 12.4  | 12.5  | 0.07 | 0.08 | -1.07 | 0.091095 | 0.074722 | 0.458955 | 0.318465 |
| MmugDNA.31938.1.S1_at   | MmugDNA.31938.1 | 10.27 | 10.14 | 0.22 | 0.08 | 1.09  | 0.437743 | 0.865314 | 0.746879 | 0.923554 |
| MmugDNA.31939.1.S1_at   | MmugDNA.31939.1 | 4.86  | 3.98  | 0.46 | 0.06 | 1.84  | 0.027552 | 0.022284 | 0.327903 | 0.186724 |
| MmugDNA.3194.1.S1_at    | MmugDNA.3194.1  | 7.82  | 7.6   | 0.08 | 0.11 | 1.16  | 0.025918 | 0.235968 | 0.32273  | 0.507056 |
| MmugDNA.31940.1.S1_at   | MmugDNA.31940.1 | 3.65  | 3.47  | 0.1  | 0.11 | 1.14  | 0.045099 | 0.108677 | 0.375796 | 0.372171 |
| MmugDNA.31941.1.S1_at   | MmugDNA.31941.1 | 6.15  | 6.12  | 0.03 | 0.04 | 1.02  | 0.298716 | 0.773884 | 0.653263 | 0.868533 |
| MmugDNA.31942.1.S1_at   | MmugDNA.31942.1 | 6.35  | 6.89  | 0.2  | 0.29 | -1.46 | 0.058989 | 0.237804 | 0.405865 | 0.508309 |
| MmugDNA.31943.1.S1_at   | MmugDNA.31943.1 | 4.6   | 4.32  | 0.39 | 0.6  | 1.21  | 0.870305 | 0.05183  | 0.954834 | 0.273151 |
| MmugDNA.31947.1.S1_at   | MmugDNA.31947.1 | 5.03  | 4.94  | 0.38 | 0.6  | 1.06  | 0.519677 | 0.706882 | 0.793298 | 0.829968 |
| MmugDNA.31949.1.S1_at   | MmugDNA.31949.1 | 8.12  | 8.75  | 0.3  | 0.19 | -1.55 | 0.092383 | 0.00104  | 0.460833 | 0.051426 |
| MmugDNA.3195.1.S1_at    | MmugDNA.3195.1  | 3.94  | 4.67  | 0.38 | 0.04 | -1.66 | 0.085899 | 0.033425 | 0.453109 | 0.226484 |
| MmugDNA.31950.1.S1_at   | MmugDNA.31950.1 | 12.07 | 12.16 | 0.47 | 0.05 | -1.07 | 0.871437 | 0.740079 | 0.955422 | 0.849396 |

|                         |                 |       |       |      |      |       |          |          |          |          |
|-------------------------|-----------------|-------|-------|------|------|-------|----------|----------|----------|----------|
| MmugDNA.31951.1.S1_at   | MmugDNA.31951.1 | 10.21 | 10.25 | 0.13 | 0.17 | -1.03 | 0.775689 | 0.149804 | 0.916804 | 0.424394 |
| MmugDNA.31952.1.S1_s_at | MmugDNA.31952.1 | 10.43 | 9.35  | 0.32 | 0.18 | 2.11  | 0.020506 | 0.010256 | 0.304231 | 0.132655 |
| MmugDNA.31953.1.S1_at   | MmugDNA.31953.1 | 9.57  | 6.8   | 1.14 | 0.21 | 6.82  | 0.040162 | 0.019976 | 0.36348  | 0.177532 |
| MmugDNA.31954.1.S1_at   | MmugDNA.31954.1 | 4.79  | 5.94  | 0.24 | 0.18 | -2.21 | 0.006476 | 0.065214 | 0.21945  | 0.301239 |
| MmugDNA.31956.1.S1_at   | MmugDNA.31956.1 | 6.4   | 7.01  | 0.46 | 0.15 | -1.53 | 0.394716 | 0.164307 | 0.719986 | 0.440539 |
| MmugDNA.31957.1.S1_at   | MmugDNA.31957.1 | 6.88  | 7.56  | 0.45 | 0.2  | -1.59 | 0.045973 | 0.035645 | 0.37735  | 0.233217 |
| MmugDNA.31958.1.S1_at   | MmugDNA.31958.1 | 2.89  | 2.83  | 0.03 | 0.14 | 1.04  | 0.456269 | 0.490355 | 0.757808 | 0.692363 |
| MmugDNA.31959.1.S1_at   | MmugDNA.31959.1 | 11.54 | 11.39 | 0.07 | 0.1  | 1.11  | 0.389254 | 0.000573 | 0.715989 | 0.041171 |
| MmugDNA.3196.1.S1_at    | MmugDNA.3196.1  | 6.27  | 6.52  | 0.57 | 0.22 | -1.19 | 0.547926 | 0.563968 | 0.80929  | 0.738913 |
| MmugDNA.31960.1.S1_at   | MmugDNA.31960.1 | 5.97  | 6.18  | 0.4  | 0.33 | -1.16 | 0.215484 | 0.250927 | 0.585748 | 0.519612 |
| MmugDNA.31961.1.S1_at   | MmugDNA.31961.1 | 8.53  | 8     | 0.2  | 0.09 | -1.45 | 0.026235 | 0.008087 | 0.323734 | 0.119519 |
| MmugDNA.31963.1.S1_at   | MmugDNA.31963.1 | 8.22  | 7.11  | 0.5  | 0.22 | 2.16  | 0.02446  | 0.181552 | 0.318814 | 0.458105 |
| MmugDNA.31966.1.S1_at   | MmugDNA.31966.1 | 11.21 | 11.38 | 0.8  | 0.07 | -1.13 | 0.827176 | 0.063953 | 0.938039 | 0.29906  |
| MmugDNA.31967.1.S1_at   | MmugDNA.31967.1 | 12.18 | 12.76 | 0.25 | 0.09 | -1.5  | 0.024766 | 0.027316 | 0.31972  | 0.206625 |
| MmugDNA.31969.1.S1_at   | MmugDNA.31969.1 | 7.39  | 7.95  | 0.17 | 0.23 | -1.47 | 0.021698 | 0.228155 | 0.309332 | 0.500327 |
| MmugDNA.3197.1.S1_at    | MmugDNA.3197.1  | 5.17  | 5.99  | 0.32 | 0.29 | -1.76 | 0.082122 | 0.275898 | 0.446921 | 0.540035 |
| MmugDNA.31971.1.S1_at   | MmugDNA.31971.1 | 8.71  | 9.08  | 0.35 | 0.18 | -1.29 | 0.120884 | 0.179256 | 0.494481 | 0.45567  |
| MmugDNA.31972.1.S1_at   | MmugDNA.31972.1 | 8.85  | 8.56  | 0.21 | 0.24 | 1.23  | 0.364529 | 0.34271  | 0.700603 | 0.588666 |
| MmugDNA.31973.1.S1_at   | MmugDNA.31973.1 | 6.7   | 6.18  | 0.51 | 0.12 | 1.44  | 0.198508 | 0.132451 | 0.569807 | 0.404483 |
| MmugDNA.31974.1.S1_at   | MmugDNA.31974.1 | 7.47  | 7.34  | 0.07 | 0.07 | 1.09  | 0.09079  | 0.075517 | 0.458873 | 0.319941 |
| MmugDNA.31975.1.S1_at   | MmugDNA.31975.1 | 7.84  | 9.17  | 0.86 | 0.56 | -2.52 | 0.055979 | 0.039488 | 0.399441 | 0.243642 |
| MmugDNA.31976.1.S1_at   | MmugDNA.31976.1 | 4.31  | 4.44  | 0.18 | 0.22 | -1.09 | 0.968734 | 0.751258 | 0.989723 | 0.855385 |
| MmugDNA.31977.1.S1_at   | MmugDNA.31977.1 | 4.87  | 4.77  | 0.06 | 0.1  | 1.07  | 0.219078 | 0.178889 | 0.588516 | 0.455208 |
| MmugDNA.31978.1.S1_at   | MmugDNA.31978.1 | 3.32  | 3.42  | 0.12 | 0.24 | -1.07 | 0.51806  | 0.355737 | 0.792409 | 0.597864 |
| MmugDNA.3198.1.S1_at    | MmugDNA.3198.1  | 11.85 | 10.98 | 0.61 | 0.39 | 1.84  | 0.06642  | 0.014696 | 0.422255 | 0.154371 |
| MmugDNA.31980.1.S1_at   | MmugDNA.31980.1 | 3.2   | 3.36  | 0.1  | 0.05 | -1.11 | 0.150506 | 0.222036 | 0.524173 | 0.495083 |
| MmugDNA.31981.1.S1_at   | MmugDNA.31981.1 | 11.73 | 11.8  | 0.03 | 0.15 | -1.05 | 0.79753  | 0.944536 | 0.92559  | 0.968614 |
| MmugDNA.31982.1.S1_at   | MmugDNA.31982.1 | 3.51  | 3.95  | 0.2  | 0.16 | -1.36 | 0.036367 | 0.219508 | 0.35477  | 0.493168 |
| MmugDNA.31983.1.S1_at   | MmugDNA.31983.1 | 4.44  | 4.37  | 0.05 | 0.03 | 1.05  | 0.095166 | 0.086221 | 0.464131 | 0.33863  |
| MmugDNA.31984.1.S1_at   | MmugDNA.31984.1 | 3.82  | 3.72  | 0.22 | 0.09 | 1.07  | 0.251332 | 0.473766 | 0.616622 | 0.68101  |
| MmugDNA.31985.1.S1_at   | MmugDNA.31985.1 | 8.85  | 8.65  | 0.78 | 0.15 | 1.15  | 0.725298 | 0.745247 | 0.893524 | 0.852317 |
| MmugDNA.31986.1.S1_s_at | MmugDNA.31986.1 | 8.92  | 8.48  | 0.24 | 0.17 | 1.35  | 0.038914 | 0.000192 | 0.360586 | 0.030888 |
| MmugDNA.31988.1.S1_at   | MmugDNA.31988.1 | 5.91  | 5.86  | 0.04 | 0.01 | 1.04  | 0.119334 | 0.555951 | 0.492749 | 0.734244 |
| MmugDNA.3199.1.S1_at    | MmugDNA.3199.1  | 3.33  | 3.29  | 0.21 | 0.08 | 1.03  | 0.415519 | 0.658118 | 0.733656 | 0.800181 |
| MmugDNA.31990.1.S1_at   | MmugDNA.31990.1 | 6.71  | 6.64  | 0.11 | 0.08 | 1.05  | 0.438307 | 0.254502 | 0.747277 | 0.522829 |
| MmugDNA.31991.1.S1_at   | MmugDNA.31991.1 | 9.78  | 9.53  | 0.12 | 0.09 | 1.19  | 0.040307 | 0.006166 | 0.363929 | 0.106774 |
| MmugDNA.31992.1.S1_at   | MmugDNA.31992.1 | 4.09  | 4.27  | 0.46 | 0.22 | -1.13 | 0.588679 | 0.222515 | 0.831968 | 0.495588 |
| MmugDNA.31994.1.S1_at   | MmugDNA.31994.1 | 3.2   | 3.31  | 0.32 | 0.21 | -1.08 | 0.69487  | 0.295684 | 0.881222 | 0.555113 |
| MmugDNA.31998.1.S1_at   | MmugDNA.31998.1 | 11.14 | 10.7  | 0.18 | 0.2  | 1.36  | 0.055564 | 0.057239 | 0.398856 | 0.285059 |
| MmugDNA.31999.1.S1_at   | MmugDNA.31999.1 | 6.1   | 6.32  | 0.21 | 0.1  | -1.17 | 0.447245 | 0.659081 | 0.753177 | 0.800513 |
| MmugDNA.31999.1.S1_s_at | MmugDNA.31999.1 | 3.94  | 4.44  | 0.32 | 0.64 | -1.41 | 0.380025 | 0.249542 | 0.709343 | 0.518596 |
| MmugDNA.32.1.S1_at      | MmugDNA.32.1    | 3.36  | 3.39  | 0.35 | 0.3  | -1.02 | 0.938065 | 0.60628  | 0.979242 | 0.765727 |
| MmugDNA.320.1.S1_at     | MmugDNA.320.1   | 7.21  | 8.01  | 0.4  | 0.09 | -1.74 | 0.07668  | 0.143314 | 0.438075 | 0.417294 |

|                         |                 |       |       |      |      |       |          |          |          |          |
|-------------------------|-----------------|-------|-------|------|------|-------|----------|----------|----------|----------|
| MmugDNA.3200.1.S1_at    | MmugDNA.3200.1  | 5.18  | 4.49  | 0.29 | 0.24 | 1.62  | 0.062729 | 0.064145 | 0.413747 | 0.29954  |
| MmugDNA.32000.1.S1_at   | MmugDNA.32000.1 | 6.71  | 6.68  | 0.26 | 0.11 | 1.02  | 0.588302 | 0.424677 | 0.831856 | 0.647214 |
| MmugDNA.32001.1.S1_at   | MmugDNA.32001.1 | 3.5   | 3.5   | 0.07 | 0.1  | -1    | 0.249908 | 0.455149 | 0.615347 | 0.669135 |
| MmugDNA.32003.1.S1_at   | MmugDNA.32003.1 | 5.47  | 5.09  | 0.17 | 0.07 | 1.3   | 0.062032 | 0.458181 | 0.412007 | 0.671077 |
| MmugDNA.32005.1.S1_at   | MmugDNA.32005.1 | 7.52  | 7.79  | 0.27 | 0.02 | -1.21 | 0.560781 | 0.577013 | 0.816958 | 0.747605 |
| MmugDNA.32006.1.S1_at   | MmugDNA.32006.1 | 7.61  | 7.6   | 0.1  | 0.02 | 1.01  | 0.271835 | 0.822607 | 0.631589 | 0.89799  |
| MmugDNA.32006.1.S1_s_at | MmugDNA.32006.1 | 6.59  | 6.59  | 0.23 | 0.08 | -1    | 0.77013  | 0.829555 | 0.913903 | 0.902076 |
| MmugDNA.32008.1.S1_at   | MmugDNA.32008.1 | 8.05  | 8.53  | 0.17 | 0.17 | -1.4  | 0.022006 | 0.01786  | 0.309781 | 0.168774 |
| MmugDNA.32009.1.S1_at   | MmugDNA.32009.1 | 7.13  | 7.99  | 0.48 | 0.07 | -1.82 | 0.073501 | 0.004323 | 0.434623 | 0.092241 |
| MmugDNA.3201.1.S1_at    | MmugDNA.3201.1  | 4.55  | 4.18  | 0.25 | 0.33 | 1.29  | 0.114082 | 0.257661 | 0.487405 | 0.525332 |
| MmugDNA.32010.1.S1_at   | MmugDNA.32010.1 | 4.01  | 4.18  | 0.01 | 0.19 | -1.13 | 0.194561 | 0.075596 | 0.565135 | 0.32003  |
| MmugDNA.32011.1.S1_at   | MmugDNA.32011.1 | 6.55  | 6.56  | 0.07 | 0.1  | -1.01 | 0.968376 | 0.419185 | 0.989623 | 0.643394 |
| MmugDNA.32012.1.S1_at   | MmugDNA.32012.1 | 6.22  | 6.26  | 0.37 | 0.12 | -1.02 | 0.920786 | 0.953643 | 0.973159 | 0.973626 |
| MmugDNA.32015.1.S1_at   | MmugDNA.32015.1 | 7.9   | 7.2   | 1.15 | 0.17 | 1.63  | 0.650147 | 0.348208 | 0.860779 | 0.592413 |
| MmugDNA.32016.1.S1_at   | MmugDNA.32016.1 | 10.78 | 10.71 | 0.98 | 0.26 | 1.05  | 0.785031 | 0.122943 | 0.920961 | 0.392923 |
| MmugDNA.32017.1.S1_at   | MmugDNA.32017.1 | 4.31  | 4.41  | 0.12 | 0.12 | -1.07 | 0.959779 | 0.075828 | 0.986943 | 0.320436 |
| MmugDNA.3202.1.S1_at    | MmugDNA.3202.1  | 7.22  | 7.75  | 0.91 | 0.26 | -1.44 | 0.307801 | 0.266344 | 0.660653 | 0.532114 |
| MmugDNA.32020.1.S1_at   | MmugDNA.32020.1 | 6.09  | 6.33  | 0.31 | 0.13 | -1.18 | 0.501754 | 0.553737 | 0.783425 | 0.732785 |
| MmugDNA.32021.1.S1_at   | MmugDNA.32021.1 | 3.05  | 3.14  | 0.14 | 0.08 | -1.06 | 0.473065 | 0.417309 | 0.76744  | 0.642143 |
| MmugDNA.32023.1.S1_at   | MmugDNA.32023.1 | 10.81 | 10.92 | 0.09 | 0.08 | -1.08 | 0.164743 | 0.405284 | 0.537466 | 0.633642 |
| MmugDNA.32025.1.S1_at   | MmugDNA.32025.1 | 3.5   | 3.51  | 0.07 | 0.08 | -1.01 | 0.566601 | 0.919792 | 0.820086 | 0.954906 |
| MmugDNA.32026.1.S1_at   | MmugDNA.32026.1 | 5.68  | 5.68  | 0.05 | 0    | -1    | 0.324949 | 0.811858 | 0.672925 | 0.891451 |
| MmugDNA.32027.1.S1_at   | MmugDNA.32027.1 | 6.74  | 7.29  | 0.47 | 0.4  | -1.46 | 0.513435 | 0.222622 | 0.789843 | 0.495617 |
| MmugDNA.32028.1.S1_at   | MmugDNA.32028.1 | 7.4   | 6.96  | 0.66 | 0.18 | 1.36  | 0.68931  | 0.154778 | 0.878822 | 0.42979  |
| MmugDNA.32029.1.S1_at   | MmugDNA.32029.1 | 6.9   | 6.62  | 0.81 | 0.12 | 1.21  | 0.619989 | 0.59196  | 0.846961 | 0.757386 |
| MmugDNA.3203.1.S1_at    | MmugDNA.3203.1  | 11.91 | 12.39 | 0.42 | 0.23 | -1.4  | 0.320805 | 0.023996 | 0.669445 | 0.194183 |
| MmugDNA.32030.1.S1_at   | MmugDNA.32030.1 | 6.52  | 6.67  | 0.12 | 0.2  | -1.11 | 0.675202 | 0.827099 | 0.872514 | 0.900721 |
| MmugDNA.32032.1.S1_at   | MmugDNA.32032.1 | 3.3   | 3.38  | 0.17 | 0.1  | -1.06 | 0.935222 | 0.168724 | 0.97809  | 0.445379 |
| MmugDNA.32033.1.S1_at   | MmugDNA.32033.1 | 6.33  | 6.16  | 0.04 | 0.06 | 1.13  | 0.008738 | 0.140384 | 0.236496 | 0.413586 |
| MmugDNA.32034.1.S1_at   | MmugDNA.32034.1 | 7.5   | 7.34  | 0.3  | 0.09 | 1.12  | 0.13916  | 0.297074 | 0.514459 | 0.555996 |
| MmugDNA.32035.1.S1_at   | MmugDNA.32035.1 | 6.06  | 5.76  | 0.46 | 0.14 | 1.23  | 0.600868 | 0.712776 | 0.838005 | 0.8335   |
| MmugDNA.32036.1.S1_at   | MmugDNA.32036.1 | 3.77  | 3.95  | 0.75 | 0.11 | -1.14 | 0.527496 | 0.71418  | 0.797132 | 0.834155 |
| MmugDNA.32038.1.S1_at   | MmugDNA.32038.1 | 8.61  | 8.67  | 0.21 | 0.13 | -1.04 | 0.787777 | 0.235603 | 0.922045 | 0.506671 |
| MmugDNA.32039.1.S1_at   | MmugDNA.32039.1 | 13.57 | 13.59 | 0.19 | 0.08 | -1.01 | 0.709996 | 0.954455 | 0.88718  | 0.974155 |
| MmugDNA.32039.1.S1_x_at | MmugDNA.32039.1 | 14.06 | 14.07 | 0.13 | 0.03 | -1.01 | 0.906141 | 0.76165  | 0.968249 | 0.861459 |
| MmugDNA.3204.1.S1_at    | MmugDNA.3204.1  | 10.2  | 10.2  | 0.93 | 0.17 | -1    | 0.949101 | 0.12359  | 0.982749 | 0.393637 |
| MmugDNA.32040.1.S1_at   | MmugDNA.32040.1 | 11.92 | 12.07 | 0.12 | 0.05 | -1.11 | 0.247654 | 0.005195 | 0.613245 | 0.099895 |
| MmugDNA.32041.1.S1_at   | MmugDNA.32041.1 | 5.4   | 5.39  | 0.1  | 0.05 | 1.01  | 0.858269 | 0.685608 | 0.94994  | 0.816542 |
| MmugDNA.32043.1.S1_at   | MmugDNA.32043.1 | 6.22  | 6.24  | 0.09 | 0.07 | -1.02 | 0.680589 | 0.085004 | 0.874731 | 0.336712 |
| MmugDNA.32044.1.S1_at   | MmugDNA.32044.1 | 5.42  | 5.11  | 0.17 | 0.15 | 1.24  | 0.136828 | 0.333989 | 0.511963 | 0.582063 |
| MmugDNA.32045.1.S1_x_at | MmugDNA.32045.1 | 9.7   | 9.89  | 0.17 | 0.07 | -1.14 | 0.27154  | 0.134062 | 0.631445 | 0.406276 |
| MmugDNA.32046.1.S1_at   | MmugDNA.32046.1 | 5.01  | 5.02  | 0.16 | 0.04 | -1.01 | 0.704276 | 0.588417 | 0.885095 | 0.754907 |
| MmugDNA.32047.1.S1_at   | MmugDNA.32047.1 | 11.4  | 11.43 | 0.26 | 0.04 | -1.02 | 0.375674 | 0.173604 | 0.7066   | 0.449956 |



|                         |                 |       |       |      |      |       |          |          |          |          |
|-------------------------|-----------------|-------|-------|------|------|-------|----------|----------|----------|----------|
| MmugDNA.32048.1.S1_at   | MmugDNA.32048.1 | 4.99  | 4.99  | 0.21 | 0.11 | 1     | 0.395569 | 0.70028  | 0.720499 | 0.826033 |
| MmugDNA.32049.1.S1_at   | MmugDNA.32049.1 | 11.09 | 11.02 | 0.48 | 0.05 | 1.05  | 0.735124 | 0.780363 | 0.898576 | 0.872597 |
| MmugDNA.3205.1.S1_at    | MmugDNA.3205.1  | 4.01  | 4.21  | 0.21 | 0.03 | -1.15 | 0.142806 | 0.106954 | 0.517889 | 0.369526 |
| MmugDNA.32050.1.S1_at   | MmugDNA.32050.1 | 6.95  | 9.04  | 0.31 | 0.13 | -4.28 | 0.000507 | 0.000975 | 0.143137 | 0.04983  |
| MmugDNA.32052.1.S1_at   | MmugDNA.32052.1 | 4.29  | 4.3   | 0.03 | 0.15 | -1.01 | 0.92624  | 0.940234 | 0.975484 | 0.966105 |
| MmugDNA.32053.1.S1_at   | MmugDNA.32053.1 | 4.15  | 4.15  | 0.06 | 0.08 | 1     | 0.542401 | 0.866047 | 0.805699 | 0.923791 |
| MmugDNA.32055.1.S1_at   | MmugDNA.32055.1 | 6.28  | 6.28  | 0.27 | 0.46 | -1    | 0.914176 | 0.082346 | 0.970825 | 0.331322 |
| MmugDNA.32056.1.S1_at   | MmugDNA.32056.1 | 8.97  | 6.95  | 0.27 | 0.38 | 4.07  | 0.001724 | 0.000176 | 0.166176 | 0.030511 |
| MmugDNA.32057.1.S1_at   | MmugDNA.32057.1 | 6.22  | 5.99  | 0.29 | 0.08 | 1.17  | 0.915187 | 0.958265 | 0.971084 | 0.976345 |
| MmugDNA.3206.1.S1_at    | MmugDNA.3206.1  | 3.48  | 3.3   | 0.4  | 0.1  | 1.14  | 0.187081 | 0.308359 | 0.559708 | 0.564428 |
| MmugDNA.32060.1.S1_s_at | MmugDNA.32060.1 | 11.37 | 11.06 | 0.41 | 0.08 | 1.25  | 0.205853 | 0.061866 | 0.577793 | 0.295577 |
| MmugDNA.32061.1.S1_at   | MmugDNA.32061.1 | 4.9   | 4.85  | 0.13 | 0.12 | 1.03  | 0.452879 | 0.463928 | 0.755901 | 0.674716 |
| MmugDNA.32062.1.S1_at   | MmugDNA.32062.1 | 5.57  | 5.44  | 0.2  | 0.04 | 1.09  | 0.110499 | 0.080398 | 0.483572 | 0.328028 |
| MmugDNA.32066.1.S1_at   | MmugDNA.32066.1 | 8.7   | 9.5   | 0.37 | 0.24 | -1.74 | 0.061805 | 0.052605 | 0.411556 | 0.274853 |
| MmugDNA.32068.1.S1_at   | MmugDNA.32068.1 | 6.55  | 5.87  | 0.68 | 0.14 | 1.6   | 0.13151  | 0.18062  | 0.50595  | 0.457245 |
| MmugDNA.32069.1.S1_at   | MmugDNA.32069.1 | 8.79  | 8.98  | 0.34 | 0.14 | -1.14 | 0.293109 | 0.104212 | 0.64945  | 0.365373 |
| MmugDNA.3207.1.S1_at    | MmugDNA.3207.1  | 5.65  | 5.54  | 0.1  | 0.16 | 1.08  | 0.14242  | 0.213328 | 0.517564 | 0.487225 |
| MmugDNA.32070.1.S1_at   | MmugDNA.32070.1 | 5.21  | 6.19  | 0.13 | 0.14 | -1.98 | 0.001013 | 0.00055  | 0.155374 | 0.040948 |
| MmugDNA.32071.1.S1_at   | MmugDNA.32071.1 | 6.01  | 6.4   | 0.79 | 0.25 | -1.32 | 0.303804 | 0.364909 | 0.657614 | 0.60517  |
| MmugDNA.32072.1.S1_at   | MmugDNA.32072.1 | 9.85  | 9.76  | 0.25 | 0.05 | 1.07  | 0.175382 | 0.411808 | 0.548255 | 0.638434 |
| MmugDNA.32075.1.S1_at   | MmugDNA.32075.1 | 9.47  | 9.93  | 0.28 | 0.24 | -1.37 | 0.1152   | 0.123147 | 0.488336 | 0.393174 |
| MmugDNA.32075.1.S1_x_at | MmugDNA.32075.1 | 9.67  | 10.08 | 0.23 | 0.19 | -1.33 | 0.072335 | 0.081616 | 0.432139 | 0.329824 |
| MmugDNA.32076.1.S1_at   | MmugDNA.32076.1 | 10.74 | 10.55 | 0.16 | 0.05 | 1.15  | 0.062359 | 0.017027 | 0.413023 | 0.165384 |
| MmugDNA.32077.1.S1_at   | MmugDNA.32077.1 | 4.44  | 4.23  | 0.3  | 0.22 | 1.16  | 0.428755 | 0.334689 | 0.742032 | 0.582592 |
| MmugDNA.32078.1.S1_at   | MmugDNA.32078.1 | 7.25  | 7.23  | 0.24 | 0.28 | 1.02  | 0.465287 | 0.004007 | 0.763035 | 0.089969 |
| MmugDNA.32080.1.S1_at   | MmugDNA.32080.1 | 2.87  | 2.96  | 0.06 | 0.1  | -1.07 | 0.904362 | 0.360619 | 0.967796 | 0.601657 |
| MmugDNA.32082.1.S1_at   | MmugDNA.32082.1 | 6.61  | 5.97  | 0.16 | 0.12 | 1.55  | 0.007482 | 0.131627 | 0.229281 | 0.403716 |
| MmugDNA.32083.1.S1_at   | MmugDNA.32083.1 | 3.07  | 3.16  | 0.19 | 0.22 | -1.07 | 0.764712 | 0.712903 | 0.911553 | 0.833557 |
| MmugDNA.32087.1.S1_at   | MmugDNA.32087.1 | 5.63  | 5.65  | 0.03 | 0.02 | -1.01 | 0.199569 | 0.385692 | 0.571471 | 0.621079 |
| MmugDNA.32088.1.S1_at   | MmugDNA.32088.1 | 3.24  | 2.96  | 0.25 | 0.18 | 1.21  | 0.53596  | 0.717885 | 0.802014 | 0.836699 |
| MmugDNA.32092.1.S1_at   | MmugDNA.32092.1 | 6.37  | 6.35  | 0.28 | 0.28 | 1.01  | 0.391395 | 0.477103 | 0.71755  | 0.683209 |
| MmugDNA.32095.1.S1_at   | MmugDNA.32095.1 | 12.18 | 12.24 | 0.11 | 0.06 | -1.04 | 0.411484 | 0.009201 | 0.731491 | 0.126579 |
| MmugDNA.32096.1.S1_at   | MmugDNA.32096.1 | 6.26  | 7.11  | 0.56 | 0.75 | -1.79 | 0.111751 | 0.128863 | 0.484908 | 0.400277 |
| MmugDNA.321.1.S1_at     | MmugDNA.321.1   | 4.79  | 4.9   | 0.88 | 0.24 | -1.08 | 0.452698 | 0.176798 | 0.755901 | 0.45321  |
| MmugDNA.3210.1.S1_at    | MmugDNA.3210.1  | 4.53  | 4.86  | 0.18 | 0.07 | -1.25 | 0.037155 | 0.010014 | 0.356778 | 0.131262 |
| MmugDNA.32100.1.S1_at   | MmugDNA.32100.1 | 6.28  | 6.5   | 0.5  | 0.15 | -1.16 | 0.946758 | 0.012579 | 0.981556 | 0.14463  |
| MmugDNA.32102.1.S1_at   | MmugDNA.32102.1 | 3.51  | 3.47  | 0.07 | 0.07 | 1.03  | 0.473796 | 0.503453 | 0.767754 | 0.700892 |
| MmugDNA.32104.1.S1_at   | MmugDNA.32104.1 | 5.45  | 5.86  | 0.31 | 0.17 | -1.32 | 0.13264  | 0.160943 | 0.506936 | 0.437116 |
| MmugDNA.32105.1.S1_at   | MmugDNA.32105.1 | 14.06 | 14.12 | 0.01 | 0.05 | -1.04 | 0.129249 | 0.041286 | 0.503999 | 0.247995 |
| MmugDNA.32107.1.S1_at   | MmugDNA.32107.1 | 5.8   | 5.74  | 0.03 | 0.11 | 1.05  | 0.116372 | 0.14224  | 0.489622 | 0.415754 |
| MmugDNA.32108.1.S1_at   | MmugDNA.32108.1 | 7.49  | 7.57  | 0.5  | 0.2  | -1.05 | 0.232787 | 0.341387 | 0.600212 | 0.587526 |
| MmugDNA.32109.1.S1_at   | MmugDNA.32109.1 | 5.35  | 5.38  | 0.14 | 0.05 | -1.02 | 0.76378  | 0.632604 | 0.911265 | 0.783658 |
| MmugDNA.3211.1.S1_x_at  | MmugDNA.3211.1  | 5.58  | 5.48  | 0.47 | 0.39 | 1.07  | 0.718437 | 0.108237 | 0.890635 | 0.371557 |

|                         |                 |       |       |      |      |       |          |          |          |          |
|-------------------------|-----------------|-------|-------|------|------|-------|----------|----------|----------|----------|
| MmugDNA.32110.1.S1_at   | MmugDNA.32110.1 | 3.85  | 3.83  | 0.12 | 0.32 | 1.01  | 0.993499 | 0.423861 | 0.997488 | 0.646555 |
| MmugDNA.32111.1.S1_at   | MmugDNA.32111.1 | 5.32  | 4.74  | 0.65 | 0.38 | 1.49  | 0.40701  | 0.559904 | 0.728471 | 0.736439 |
| MmugDNA.32112.1.S1_at   | MmugDNA.32112.1 | 4.62  | 4.5   | 0.66 | 0.06 | 1.09  | 0.72843  | 0.456492 | 0.895191 | 0.670197 |
| MmugDNA.32113.1.S1_at   | MmugDNA.32113.1 | 5.4   | 5.4   | 0.02 | 0.03 | 1     | 0.255329 | 0.764001 | 0.619432 | 0.86279  |
| MmugDNA.32114.1.S1_at   | MmugDNA.32114.1 | 7.52  | 7.41  | 0.29 | 0.19 | 1.08  | 0.527098 | 0.00357  | 0.796919 | 0.085525 |
| MmugDNA.32115.1.S1_at   | MmugDNA.32115.1 | 10.04 | 10.01 | 0.09 | 0.06 | 1.02  | 0.693201 | 0.017261 | 0.880472 | 0.166393 |
| MmugDNA.32117.1.S1_at   | MmugDNA.32117.1 | 5.47  | 5.72  | 0.37 | 0.34 | -1.19 | 0.257647 | 0.239631 | 0.621338 | 0.510315 |
| MmugDNA.32118.1.S1_at   | MmugDNA.32118.1 | 4.03  | 3.98  | 0.11 | 0.1  | 1.03  | 0.690348 | 0.087846 | 0.879445 | 0.341218 |
| MmugDNA.32119.1.S1_at   | MmugDNA.32119.1 | 8.88  | 8.88  | 0.6  | 0.09 | 1     | 0.871869 | 0.135913 | 0.955578 | 0.408103 |
| MmugDNA.32120.1.S1_at   | MmugDNA.32120.1 | 4.76  | 6.34  | 0.32 | 0.37 | -2.98 | 0.004679 | 0.022243 | 0.201699 | 0.18659  |
| MmugDNA.32121.1.S1_at   | MmugDNA.32121.1 | 4.09  | 4.2   | 0.49 | 0.32 | -1.08 | 0.976513 | 0.998388 | 0.992376 | 0.999091 |
| MmugDNA.32122.1.S1_at   | MmugDNA.32122.1 | 7     | 6.96  | 0.31 | 0.2  | 1.03  | 0.937949 | 0.574192 | 0.979152 | 0.745679 |
| MmugDNA.32123.1.S1_at   | MmugDNA.32123.1 | 6.97  | 7.33  | 0.25 | 0.26 | -1.28 | 0.164758 | 0.119671 | 0.537466 | 0.388324 |
| MmugDNA.32125.1.S1_at   | MmugDNA.32125.1 | 6.62  | 7.33  | 0.33 | 0.1  | -1.64 | 0.041516 | 0.016672 | 0.366704 | 0.163492 |
| MmugDNA.32126.1.S1_at   | MmugDNA.32126.1 | 3.88  | 3.81  | 0.37 | 0.02 | 1.05  | 0.577961 | 0.504429 | 0.82603  | 0.701557 |
| MmugDNA.3213.1.S1_at    | MmugDNA.3213.1  | 6.6   | 6.5   | 0.23 | 0.02 | 1.07  | 0.52379  | 0.482896 | 0.795656 | 0.68765  |
| MmugDNA.32130.1.S1_at   | MmugDNA.32130.1 | 5.99  | 5.7   | 0.34 | 0.13 | 1.23  | 0.159244 | 0.114786 | 0.531932 | 0.381311 |
| MmugDNA.32133.1.S1_at   | MmugDNA.32133.1 | 11.85 | 11.79 | 0.21 | 0.09 | 1.05  | 0.197495 | 0.044955 | 0.568443 | 0.256489 |
| MmugDNA.32134.1.S1_at   | MmugDNA.32134.1 | 3.8   | 3.58  | 0.19 | 0.15 | 1.17  | 0.124632 | 0.242019 | 0.498747 | 0.512573 |
| MmugDNA.32135.1.S1_at   | MmugDNA.32135.1 | 8.26  | 8.46  | 0.29 | 0.01 | -1.15 | 0.33037  | 0.145721 | 0.676965 | 0.419653 |
| MmugDNA.32136.1.S1_at   | MmugDNA.32136.1 | 4.27  | 4.16  | 0.12 | 0.06 | 1.08  | 0.19881  | 0.747312 | 0.570289 | 0.853149 |
| MmugDNA.32137.1.S1_at   | MmugDNA.32137.1 | 4.7   | 4.75  | 0.05 | 0.03 | -1.04 | 0.319882 | 0.214039 | 0.669028 | 0.487633 |
| MmugDNA.32138.1.S1_at   | MmugDNA.32138.1 | 7.86  | 7.77  | 0.42 | 0.32 | 1.06  | 0.29578  | 0.347185 | 0.651408 | 0.591815 |
| MmugDNA.32139.1.S1_at   | MmugDNA.32139.1 | 3.55  | 3.88  | 0.1  | 0.34 | -1.26 | 0.151607 | 0.214007 | 0.524628 | 0.487633 |
| MmugDNA.32140.1.S1_at   | MmugDNA.32140.1 | 4.81  | 4.75  | 0.2  | 0    | 1.04  | 0.523816 | 0.384268 | 0.795656 | 0.619994 |
| MmugDNA.32141.1.S1_at   | MmugDNA.32141.1 | 4.44  | 6.13  | 0.21 | 0.72 | -3.23 | 0.038289 | 0.04438  | 0.358719 | 0.255157 |
| MmugDNA.32142.1.S1_at   | MmugDNA.32142.1 | 5.68  | 5.58  | 0.1  | 0.06 | 1.07  | 0.107322 | 0.1503   | 0.47976  | 0.424877 |
| MmugDNA.32143.1.S1_at   | MmugDNA.32143.1 | 5.97  | 5.91  | 0.13 | 0.04 | 1.04  | 0.913106 | 0.399911 | 0.970415 | 0.63009  |
| MmugDNA.32146.1.S1_at   | MmugDNA.32146.1 | 8.14  | 7.88  | 0.63 | 0.23 | 1.19  | 0.814992 | 0.184222 | 0.933137 | 0.460382 |
| MmugDNA.32147.1.S1_at   | MmugDNA.32147.1 | 5.15  | 5.26  | 0.07 | 0.05 | -1.07 | 0.214787 | 0.124864 | 0.585205 | 0.395219 |
| MmugDNA.32149.1.S1_at   | MmugDNA.32149.1 | 5.76  | 5.82  | 0.07 | 0.37 | -1.04 | 0.261981 | 0.033565 | 0.624194 | 0.226764 |
| MmugDNA.3215.1.S1_at    | MmugDNA.3215.1  | 4.35  | 4.47  | 0.14 | 0.04 | -1.09 | 0.73725  | 0.779446 | 0.899426 | 0.87211  |
| MmugDNA.32151.1.S1_at   | MmugDNA.32151.1 | 3.94  | 3.92  | 0.12 | 0.12 | 1.01  | 0.510664 | 0.158668 | 0.788228 | 0.4347   |
| MmugDNA.17076.1.S1_s_at | MmugDNA.17076.1 | 4.87  | 5.01  | 0.07 | 0.17 | -1.1  | 0.341062 | 0.374836 | 0.684841 | 0.613091 |
| MmugDNA.32153.1.S1_at   | MmugDNA.32153.1 | 5.94  | 5.42  | 0.59 | 0.6  | 1.44  | 0.310574 | 0.215679 | 0.662437 | 0.489477 |
| MmugDNA.32154.1.S1_s_at | MmugDNA.32154.1 | 9.23  | 9.64  | 0.23 | 0.14 | -1.33 | 0.127711 | 0.213103 | 0.50202  | 0.487054 |
| MmugDNA.32155.1.S1_at   | MmugDNA.32155.1 | 8.19  | 9.01  | 0.21 | 0.13 | -1.77 | 0.005721 | 0.0003   | 0.210666 | 0.034892 |
| MmugDNA.32156.1.S1_at   | MmugDNA.32156.1 | 4.45  | 4.58  | 0.1  | 0.12 | -1.1  | 0.342164 | 0.55533  | 0.685625 | 0.733767 |
| MmugDNA.32157.1.S1_at   | MmugDNA.32157.1 | 9.54  | 10.17 | 0.21 | 0.12 | -1.55 | 0.005309 | 0.004277 | 0.207623 | 0.091847 |
| MmugDNA.32157.1.S1_s_at | MmugDNA.32157.1 | 7.54  | 8.36  | 0.37 | 0.07 | -1.77 | 0.019813 | 0.032372 | 0.302615 | 0.222746 |
| MmugDNA.32158.1.S1_at   | MmugDNA.32158.1 | 4.09  | 4.01  | 0    | 0.1  | 1.06  | 0.18745  | 0.617167 | 0.559787 | 0.773242 |
| MmugDNA.32159.1.S1_at   | MmugDNA.32159.1 | 3.39  | 3.33  | 0.04 | 0.1  | 1.04  | 0.410714 | 0.194027 | 0.730947 | 0.469151 |
| MmugDNA.3216.1.S1_at    | MmugDNA.3216.1  | 4.44  | 5.06  | 0.34 | 0.08 | -1.54 | 0.030575 | 0.064764 | 0.338095 | 0.300435 |

|                         |                 |       |       |      |      |       |          |          |          |          |
|-------------------------|-----------------|-------|-------|------|------|-------|----------|----------|----------|----------|
| MmugDNA.32160.1.S1_at   | MmugDNA.32160.1 | 2.91  | 3     | 0.07 | 0.12 | -1.07 | 0.296825 | 0.170669 | 0.652405 | 0.447252 |
| MmugDNA.32161.1.S1_at   | MmugDNA.32161.1 | 4.57  | 4.57  | 0.16 | 0.12 | 1     | 0.859701 | 0.495987 | 0.9504   | 0.695851 |
| MmugDNA.32162.1.S1_at   | MmugDNA.32162.1 | 6.2   | 6.11  | 0.34 | 0.41 | 1.06  | 0.940865 | 0.898568 | 0.979891 | 0.942254 |
| MmugDNA.32164.1.S1_at   | MmugDNA.32164.1 | 3.03  | 2.86  | 0.36 | 0.4  | 1.13  | 0.89061  | 0.885836 | 0.962413 | 0.93508  |
| MmugDNA.32165.1.S1_at   | MmugDNA.32165.1 | 5.03  | 5.04  | 0.78 | 0.55 | -1.01 | 0.604706 | 0.630626 | 0.839732 | 0.782345 |
| MmugDNA.32166.1.S1_at   | MmugDNA.32166.1 | 4.82  | 4.46  | 0.6  | 0.45 | 1.28  | 0.195894 | 0.427453 | 0.56627  | 0.649291 |
| MmugDNA.32168.1.S1_at   | MmugDNA.32168.1 | 3.67  | 3.78  | 0.34 | 0.12 | -1.08 | 0.667279 | 0.966094 | 0.868553 | 0.981014 |
| MmugDNA.32171.1.S1_at   | MmugDNA.32171.1 | 11.66 | 11.03 | 0.27 | 0.15 | 1.55  | 0.020005 | 0.013563 | 0.303174 | 0.149001 |
| MmugDNA.32171.1.S1_s_at | MmugDNA.32171.1 | 11.78 | 11.58 | 0.09 | 0.07 | 1.14  | 0.039804 | 0.129359 | 0.362691 | 0.400748 |
| MmugDNA.32173.1.S1_at   | MmugDNA.32173.1 | 5.82  | 5.67  | 0.1  | 0.04 | 1.11  | 0.038783 | 0.100274 | 0.36035  | 0.359318 |
| MmugDNA.32174.1.S1_at   | MmugDNA.32174.1 | 3.12  | 3.27  | 0.13 | 0    | -1.11 | 0.150943 | 0.080734 | 0.52444  | 0.328632 |
| MmugDNA.32175.1.S1_at   | MmugDNA.32175.1 | 6.78  | 7.06  | 0.9  | 0.36 | -1.21 | 0.644467 | 0.872307 | 0.858526 | 0.927429 |
| MmugDNA.32176.1.S1_at   | MmugDNA.32176.1 | 10.79 | 10.2  | 0.21 | 0.12 | 1.5   | 0.007496 | 0.002153 | 0.229281 | 0.068739 |
| MmugDNA.32177.1.S1_at   | MmugDNA.32177.1 | 3.95  | 3.94  | 0.04 | 0.08 | 1     | 0.920123 | 0.974073 | 0.972913 | 0.985859 |
| MmugDNA.32178.1.S1_at   | MmugDNA.32178.1 | 6.38  | 6.94  | 0.9  | 0.21 | -1.48 | 0.115821 | 0.070154 | 0.489202 | 0.311081 |
| MmugDNA.32179.1.S1_at   | MmugDNA.32179.1 | 3.54  | 3.54  | 0.1  | 0.12 | 1     | 0.597649 | 0.17926  | 0.836481 | 0.45567  |
| MmugDNA.3218.1.S1_at    | MmugDNA.3218.1  | 3.63  | 3.83  | 0.04 | 0.11 | -1.15 | 0.037073 | 0.405707 | 0.356667 | 0.633894 |
| MmugDNA.32181.1.S1_at   | MmugDNA.32181.1 | 5.14  | 5.27  | 0.23 | 0.05 | -1.1  | 0.252486 | 0.563739 | 0.617481 | 0.738808 |
| MmugDNA.32183.1.S1_at   | MmugDNA.32183.1 | 5.6   | 4.99  | 0.44 | 0.05 | 1.53  | 0.071851 | 0.018449 | 0.431686 | 0.170868 |
| MmugDNA.32184.1.S1_at   | MmugDNA.32184.1 | 7.68  | 8.24  | 0.67 | 0.15 | -1.47 | 0.080592 | 0.023912 | 0.444498 | 0.193701 |
| MmugDNA.32185.1.S1_s_at | MmugDNA.32185.1 | 6.91  | 6.77  | 0.09 | 0.04 | 1.1   | 0.092595 | 0.583763 | 0.461192 | 0.751983 |
| MmugDNA.32187.1.S1_at   | MmugDNA.32187.1 | 6.24  | 6.3   | 0.5  | 0.07 | -1.04 | 0.636632 | 0.362175 | 0.855179 | 0.602827 |
| MmugDNA.32188.1.S1_at   | MmugDNA.32188.1 | 10.27 | 10.6  | 0.22 | 0.11 | -1.26 | 0.230955 | 0.410571 | 0.599045 | 0.637403 |
| MmugDNA.32189.1.S1_at   | MmugDNA.32189.1 | 11.97 | 11.23 | 1.2  | 0.25 | 1.67  | 0.321818 | 0.285857 | 0.670537 | 0.547484 |
| MmugDNA.3219.1.S1_at    | MmugDNA.3219.1  | 3.53  | 3.41  | 0.22 | 0.01 | 1.08  | 0.937628 | 0.986472 | 0.979038 | 0.992348 |
| MmugDNA.32190.1.S1_at   | MmugDNA.32190.1 | 7.02  | 7.44  | 1.13 | 0.41 | -1.33 | 0.631323 | 0.820057 | 0.852417 | 0.89632  |
| MmugDNA.32192.1.S1_at   | MmugDNA.32192.1 | 5.81  | 6.02  | 0.09 | 0.09 | -1.15 | 0.031642 | 0.020161 | 0.341694 | 0.178414 |
| MmugDNA.32193.1.S1_at   | MmugDNA.32193.1 | 5.9   | 6.21  | 0.34 | 0.47 | -1.24 | 0.158263 | 0.090658 | 0.531211 | 0.345151 |
| MmugDNA.32196.1.S1_at   | MmugDNA.32196.1 | 6.45  | 6.12  | 0.23 | 0.2  | 1.25  | 0.07028  | 0.099099 | 0.428889 | 0.357241 |
| MmugDNA.32197.1.S1_at   | MmugDNA.32197.1 | 4.99  | 5.08  | 0.26 | 0.59 | -1.07 | 0.192559 | 0.435658 | 0.563577 | 0.655446 |
| MmugDNA.32198.1.S1_at   | MmugDNA.32198.1 | 5.17  | 5.4   | 0.8  | 0.15 | -1.17 | 0.740664 | 0.889689 | 0.900871 | 0.937154 |
| MmugDNA.32199.1.S1_at   | MmugDNA.32199.1 | 3.62  | 3.73  | 0.31 | 0.13 | -1.08 | 0.56211  | 0.882244 | 0.817608 | 0.932845 |
| MmugDNA.32200.1.S1_at   | MmugDNA.32200.1 | 5.05  | 5     | 0.76 | 0.18 | 1.03  | 0.377226 | 0.096525 | 0.707423 | 0.354096 |
| MmugDNA.32201.1.S1_at   | MmugDNA.32201.1 | 4.24  | 4.24  | 0.13 | 0.06 | 1     | 0.329998 | 0.615013 | 0.676703 | 0.771689 |
| MmugDNA.32202.1.S1_at   | MmugDNA.32202.1 | 3.63  | 3.25  | 0.02 | 0.24 | 1.3   | 0.169178 | 0.445683 | 0.542068 | 0.662478 |
| MmugDNA.32203.1.S1_at   | MmugDNA.32203.1 | 6.25  | 6.2   | 0.06 | 0.03 | 1.04  | 0.39669  | 0.158852 | 0.721542 | 0.43496  |
| MmugDNA.32204.1.S1_at   | MmugDNA.32204.1 | 4.81  | 4.74  | 0.22 | 0.08 | 1.05  | 0.455525 | 0.645545 | 0.757444 | 0.792392 |
| MmugDNA.32205.1.S1_at   | MmugDNA.32205.1 | 6.74  | 6.51  | 0.26 | 0.11 | 1.18  | 0.288555 | 0.550064 | 0.645614 | 0.730241 |
| MmugDNA.32205.1.S1_s_at | MmugDNA.32205.1 | 12.6  | 12.08 | 0.27 | 0.05 | 1.43  | 0.083536 | 0.074936 | 0.449622 | 0.31891  |
| MmugDNA.32205.1.S1_x_at | MmugDNA.32205.1 | 8.18  | 7.67  | 0.27 | 0.03 | 1.42  | 0.092168 | 0.109958 | 0.460755 | 0.374038 |
| MmugDNA.32207.1.S1_at   | MmugDNA.32207.1 | 3.74  | 3.35  | 0.44 | 0.1  | 1.32  | 0.151686 | 0.267549 | 0.524628 | 0.533272 |
| MmugDNA.32208.1.S1_at   | MmugDNA.32208.1 | 7.97  | 8.09  | 0.12 | 0.12 | -1.09 | 0.197766 | 0.105079 | 0.56882  | 0.366755 |
| MmugDNA.32209.1.S1_at   | MmugDNA.32209.1 | 3.71  | 3.83  | 0.4  | 0.18 | -1.09 | 0.490618 | 0.54541  | 0.77724  | 0.727521 |

|                         |                 |       |       |      |      |       |          |          |          |          |
|-------------------------|-----------------|-------|-------|------|------|-------|----------|----------|----------|----------|
| MmugDNA.3221.1.S1_at    | MmugDNA.3221.1  | 3.73  | 3.66  | 0.06 | 0.11 | 1.05  | 0.892287 | 0.093928 | 0.963003 | 0.350445 |
| MmugDNA.32210.1.S1_at   | MmugDNA.32210.1 | 6.32  | 6     | 0.41 | 0.23 | 1.25  | 0.368043 | 0.31738  | 0.703496 | 0.570613 |
| MmugDNA.32211.1.S1_at   | MmugDNA.32211.1 | 5.05  | 4.43  | 0.94 | 0.28 | 1.54  | 0.348964 | 0.133417 | 0.690079 | 0.405246 |
| MmugDNA.32212.1.S1_at   | MmugDNA.32212.1 | 5.99  | 6.05  | 0.25 | 0.11 | -1.05 | 0.604414 | 0.423638 | 0.839628 | 0.646464 |
| MmugDNA.32213.1.S1_at   | MmugDNA.32213.1 | 6.59  | 7     | 0.26 | 0.17 | -1.33 | 0.223208 | 0.195115 | 0.592569 | 0.470241 |
| MmugDNA.32214.1.S1_at   | MmugDNA.32214.1 | 8.3   | 8.62  | 0.68 | 0.01 | -1.25 | 0.485887 | 0.166432 | 0.774427 | 0.442887 |
| MmugDNA.32214.1.S1_s_at | MmugDNA.32214.1 | 10.1  | 10.42 | 0.55 | 0.11 | -1.24 | 0.484229 | 0.161653 | 0.773472 | 0.437771 |
| MmugDNA.32215.1.S1_at   | MmugDNA.32215.1 | 4.22  | 4.09  | 0.13 | 0.12 | 1.1   | 0.258769 | 0.587792 | 0.622286 | 0.75454  |
| MmugDNA.32216.1.S1_at   | MmugDNA.32216.1 | 8.5   | 8.74  | 1.75 | 0.3  | -1.18 | 0.633181 | 0.233597 | 0.853404 | 0.50492  |
| MmugDNA.32217.1.S1_at   | MmugDNA.32217.1 | 3.78  | 4.75  | 0.24 | 0.87 | -1.96 | 0.067313 | 0.021626 | 0.423432 | 0.184333 |
| MmugDNA.32218.1.S1_at   | MmugDNA.32218.1 | 10.3  | 10.02 | 0.5  | 0.35 | -1.21 | 0.177072 | 0.138924 | 0.550212 | 0.412037 |
| MmugDNA.29742.1.S1_at   | MmugDNA.29742.1 | 10.53 | 11.27 | 2.23 | 0.36 | -1.66 | 0.54926  | 0.193405 | 0.810281 | 0.468711 |
| MmugDNA.29742.1.S1_s_at | MmugDNA.29742.1 | 12.26 | 11.72 | 2.81 | 0.29 | 1.45  | 0.643125 | 0.203884 | 0.858057 | 0.478102 |
| MmugDNA.3222.1.S1_at    | MmugDNA.3222.1  | 7.54  | 7.19  | 0.67 | 0.22 | 1.27  | 0.329134 | 0.654294 | 0.676252 | 0.797979 |
| MmugDNA.32222.1.S1_at   | MmugDNA.32222.1 | 10.02 | 9.46  | 0.07 | 0.33 | 1.48  | 0.017613 | 0.007595 | 0.292913 | 0.11661  |
| MmugDNA.32224.1.S1_at   | MmugDNA.32224.1 | 9.36  | 9.47  | 1.57 | 0.06 | -1.08 | 0.666692 | 0.647834 | 0.868397 | 0.793789 |
| MmugDNA.32225.1.S1_at   | MmugDNA.32225.1 | 4.71  | 4.75  | 0.25 | 0.22 | -1.03 | 0.476066 | 0.132318 | 0.768871 | 0.404294 |
| MmugDNA.32227.1.S1_at   | MmugDNA.32227.1 | 3.41  | 3.41  | 0    | 0.1  | -1    | 0.637639 | 0.855694 | 0.855596 | 0.917683 |
| MmugDNA.32228.1.S1_at   | MmugDNA.32228.1 | 5.1   | 5     | 0.23 | 0.27 | 1.07  | 0.273895 | 0.409438 | 0.633563 | 0.636503 |
| MmugDNA.32231.1.S1_at   | MmugDNA.32231.1 | 3.15  | 2.77  | 0.14 | 0.09 | 1.3   | 0.019136 | 0.019862 | 0.299936 | 0.177189 |
| MmugDNA.32232.1.S1_at   | MmugDNA.32232.1 | 4.56  | 4.54  | 0.13 | 0.04 | 1.01  | 0.924346 | 0.648868 | 0.974666 | 0.794491 |
| MmugDNA.32233.1.S1_at   | MmugDNA.32233.1 | 12.32 | 12.24 | 0.42 | 0.06 | 1.05  | 0.696876 | 0.692609 | 0.882175 | 0.821061 |
| MmugDNA.32233.1.S1_s_at | MmugDNA.32233.1 | 12.03 | 11.69 | 0.4  | 0.02 | 1.26  | 0.22609  | 0.206946 | 0.595263 | 0.481058 |
| MmugDNA.32234.1.S1_at   | MmugDNA.32234.1 | 6.32  | 6.34  | 0.48 | 0.27 | -1.02 | 0.672726 | 0.014768 | 0.871072 | 0.154596 |
| MmugDNA.32235.1.S1_at   | MmugDNA.32235.1 | 3.19  | 3.15  | 0.22 | 0.01 | 1.03  | 0.722485 | 0.747447 | 0.892352 | 0.853149 |
| MmugDNA.32236.1.S1_at   | MmugDNA.32236.1 | 5.48  | 5.31  | 0.14 | 0.09 | 1.13  | 0.323829 | 0.746031 | 0.672332 | 0.852688 |
| MmugDNA.32237.1.S1_at   | MmugDNA.32237.1 | 2.73  | 2.79  | 0.07 | 0.12 | -1.05 | 0.197304 | 0.254574 | 0.568336 | 0.522867 |
| MmugDNA.32238.1.S1_at   | MmugDNA.32238.1 | 7.55  | 6.48  | 0.25 | 0.52 | 2.09  | 0.047678 | 0.046154 | 0.381027 | 0.259257 |
| MmugDNA.3224.1.S1_at    | MmugDNA.3224.1  | 7.83  | 7.58  | 0.97 | 0.12 | 1.19  | 0.600203 | 0.419189 | 0.837764 | 0.643394 |
| MmugDNA.32240.1.S1_at   | MmugDNA.32240.1 | 3.67  | 4.1   | 0.63 | 0.37 | -1.34 | 0.88968  | 0.66996  | 0.961988 | 0.806982 |
| MmugDNA.32241.1.S1_at   | MmugDNA.32241.1 | 5.24  | 4.87  | 0.16 | 0.31 | 1.29  | 0.147024 | 0.578753 | 0.521545 | 0.748611 |
| MmugDNA.32244.1.S1_at   | MmugDNA.32244.1 | 3.59  | 3.57  | 0.22 | 0.08 | 1.02  | 0.927398 | 0.631038 | 0.97593  | 0.782599 |
| MmugDNA.32246.1.S1_at   | MmugDNA.32246.1 | 5.08  | 4.91  | 0.15 | 0.07 | 1.12  | 0.125033 | 0.305244 | 0.49897  | 0.562255 |
| MmugDNA.32247.1.S1_at   | MmugDNA.32247.1 | 5.12  | 5.08  | 0.13 | 0.13 | 1.03  | 0.581187 | 0.865011 | 0.827417 | 0.923442 |
| MmugDNA.3225.1.S1_at    | MmugDNA.3225.1  | 10.66 | 10.15 | 0.32 | 0.29 | 1.43  | 0.078786 | 0.015104 | 0.441464 | 0.156008 |
| MmugDNA.32250.1.S1_at   | MmugDNA.32250.1 | 8.06  | 7.91  | 0.14 | 0.05 | 1.1   | 0.492835 | 0.52621  | 0.778629 | 0.715449 |
| MmugDNA.32252.1.S1_at   | MmugDNA.32252.1 | 5.63  | 5.55  | 0.1  | 0.22 | 1.06  | 0.940083 | 0.821723 | 0.979646 | 0.897343 |
| MmugDNA.32253.1.S1_at   | MmugDNA.32253.1 | 4.8   | 4.77  | 0.08 | 0.17 | 1.02  | 0.2239   | 0.383757 | 0.59298  | 0.619734 |
| MmugDNA.32256.1.S1_at   | MmugDNA.32256.1 | 8.24  | 8.37  | 0.15 | 0.02 | -1.09 | 0.216756 | 0.021667 | 0.586817 | 0.184333 |
| MmugDNA.32257.1.S1_at   | MmugDNA.32257.1 | 5.82  | 6.12  | 0.18 | 0.37 | -1.23 | 0.434608 | 0.071252 | 0.745233 | 0.313293 |
| MmugDNA.32259.1.S1_at   | MmugDNA.32259.1 | 10.3  | 10.15 | 0.17 | 0.02 | 1.11  | 0.161112 | 0.109221 | 0.534413 | 0.37308  |
| MmugDNA.32259.1.S1_s_at | MmugDNA.32259.1 | 11.33 | 11.43 | 0.2  | 0.08 | -1.07 | 0.64238  | 0.452496 | 0.857734 | 0.667111 |
| MmugDNA.32260.1.S1_at   | MmugDNA.32260.1 | 10.63 | 8     | 0.9  | 1.12 | 6.22  | 0.047004 | 0.01801  | 0.379253 | 0.169233 |

|                         |                 |       |       |      |      |       |          |          |          |          |
|-------------------------|-----------------|-------|-------|------|------|-------|----------|----------|----------|----------|
| MmugDNA.32261.1.S1_at   | MmugDNA.32261.1 | 2.98  | 2.92  | 0.08 | 0.1  | 1.04  | 0.12998  | 0.213185 | 0.504648 | 0.487069 |
| MmugDNA.32262.1.S1_at   | MmugDNA.32262.1 | 8.8   | 8.71  | 0.1  | 0.05 | 1.06  | 0.207172 | 0.366966 | 0.578774 | 0.606583 |
| MmugDNA.32263.1.S1_at   | MmugDNA.32263.1 | 5.4   | 5.25  | 0.16 | 0.09 | 1.11  | 0.600264 | 0.250049 | 0.837789 | 0.519111 |
| MmugDNA.32265.1.S1_at   | MmugDNA.32265.1 | 9.85  | 9.98  | 0.02 | 0.1  | -1.09 | 0.041289 | 0.009852 | 0.366046 | 0.130274 |
| MmugDNA.32266.1.S1_at   | MmugDNA.32266.1 | 6     | 6.35  | 0.89 | 0.22 | -1.27 | 0.408697 | 0.498894 | 0.729499 | 0.697855 |
| MmugDNA.32267.1.S1_at   | MmugDNA.32267.1 | 6.31  | 6.15  | 0.01 | 0.13 | 1.12  | 0.137098 | 0.037344 | 0.512022 | 0.237683 |
| MmugDNA.32268.1.S1_at   | MmugDNA.32268.1 | 3.06  | 3.13  | 0.05 | 0.15 | -1.05 | 0.394233 | 0.406251 | 0.719675 | 0.634225 |
| MmugDNA.32269.1.S1_at   | MmugDNA.32269.1 | 5.04  | 5.04  | 0.12 | 0.1  | 1     | 0.382484 | 0.492314 | 0.710759 | 0.693485 |
| MmugDNA.3227.1.S1_at    | MmugDNA.3227.1  | 5.54  | 5.45  | 0.11 | 0.04 | 1.06  | 0.178577 | 0.288781 | 0.551383 | 0.549936 |
| MmugDNA.32270.1.S1_at   | MmugDNA.32270.1 | 6.62  | 6.47  | 0.1  | 0.03 | 1.1   | 0.084836 | 0.363358 | 0.451419 | 0.60375  |
| MmugDNA.32271.1.S1_at   | MmugDNA.32271.1 | 5.28  | 5.36  | 0.05 | 0.08 | -1.05 | 0.407256 | 0.040182 | 0.728545 | 0.245709 |
| MmugDNA.32272.1.S1_at   | MmugDNA.32272.1 | 5.41  | 5.89  | 0.36 | 0.19 | -1.4  | 0.096814 | 0.073953 | 0.465555 | 0.317462 |
| MmugDNA.32273.1.S1_at   | MmugDNA.32273.1 | 4.3   | 4.35  | 0.07 | 0.1  | -1.03 | 0.672949 | 0.514754 | 0.871072 | 0.707865 |
| MmugDNA.32275.1.S1_at   | MmugDNA.32275.1 | 10.61 | 10.78 | 0.12 | 0.07 | -1.12 | 0.073515 | 0.037186 | 0.434623 | 0.237285 |
| MmugDNA.32279.1.S1_at   | MmugDNA.32279.1 | 5.94  | 5.96  | 0.05 | 0.08 | -1.01 | 0.31311  | 0.035231 | 0.664442 | 0.231941 |
| MmugDNA.3228.1.S1_at    | MmugDNA.3228.1  | 10.57 | 9.5   | 1.52 | 0.36 | 2.09  | 0.996063 | 0.978708 | 0.998439 | 0.988411 |
| MmugDNA.32281.1.S1_at   | MmugDNA.32281.1 | 3.95  | 4.01  | 0.33 | 0.89 | -1.04 | 0.239556 | 0.239925 | 0.60607  | 0.510627 |
| MmugDNA.32282.1.S1_s_at | MmugDNA.32282.1 | 6.1   | 6.08  | 0.06 | 0.03 | 1.01  | 0.185601 | 0.878477 | 0.558599 | 0.930638 |
| MmugDNA.32284.1.S1_at   | MmugDNA.32284.1 | 4.05  | 4.48  | 1.2  | 0.6  | -1.35 | 0.669357 | 0.849969 | 0.869531 | 0.914673 |
| MmugDNA.32285.1.S1_at   | MmugDNA.32285.1 | 4.32  | 4.42  | 0.34 | 0.2  | -1.07 | 0.829797 | 0.85632  | 0.938865 | 0.917926 |
| MmugDNA.32286.1.S1_at   | MmugDNA.32286.1 | 7.71  | 6.31  | 0.28 | 0.39 | 2.64  | 0.005325 | 0.001162 | 0.207623 | 0.053615 |
| MmugDNA.32287.1.S1_at   | MmugDNA.32287.1 | 12.37 | 12.61 | 0.2  | 0.05 | -1.18 | 0.128559 | 0.050701 | 0.503351 | 0.270338 |
| MmugDNA.32288.1.S1_at   | MmugDNA.32288.1 | 7.09  | 6.96  | 0.13 | 0.11 | 1.09  | 0.316751 | 0.131621 | 0.666682 | 0.403716 |
| MmugDNA.3229.1.S1_at    | MmugDNA.3229.1  | 6.12  | 5.86  | 0.12 | 0.19 | 1.2   | 0.289859 | 0.319481 | 0.646474 | 0.571823 |
| MmugDNA.32290.1.S1_at   | MmugDNA.32290.1 | 5.54  | 5.49  | 0.09 | 0.14 | 1.03  | 0.824175 | 0.188529 | 0.936573 | 0.464458 |
| MmugDNA.32291.1.S1_at   | MmugDNA.32291.1 | 4.09  | 3.91  | 0.07 | 0.16 | 1.13  | 0.18475  | 0.005144 | 0.557496 | 0.099496 |
| MmugDNA.32292.1.S1_at   | MmugDNA.32292.1 | 7.78  | 9.11  | 0.08 | 0.05 | -2.51 | 0.000019 | 5.67E-07 | 0.108151 | 0.005999 |
| MmugDNA.32294.1.S1_at   | MmugDNA.32294.1 | 10.13 | 9.78  | 0.18 | 0.14 | 1.28  | 0.028001 | 0.09928  | 0.330017 | 0.357546 |
| MmugDNA.32296.1.S1_at   | MmugDNA.32296.1 | 10.7  | 10.37 | 0.24 | 0.14 | 1.26  | 0.122137 | 0.210232 | 0.495677 | 0.484056 |
| MmugDNA.32297.1.S1_s_at | MmugDNA.32297.1 | 9.07  | 9.88  | 0.25 | 0.16 | -1.75 | 0.028888 | 0.025866 | 0.333062 | 0.201654 |
| MmugDNA.32298.1.S1_at   | MmugDNA.32298.1 | 3.13  | 3.13  | 0.16 | 0.21 | -1    | 0.477975 | 0.415002 | 0.769901 | 0.640594 |
| MmugDNA.32299.1.S1_at   | MmugDNA.32299.1 | 8.69  | 8.55  | 0.13 | 0.02 | 1.11  | 0.391942 | 0.273123 | 0.718015 | 0.537732 |
| MmugDNA.3230.1.S1_at    | MmugDNA.3230.1  | 4.22  | 3.97  | 0.25 | 0.03 | 1.19  | 0.507914 | 0.444751 | 0.786553 | 0.662072 |
| MmugDNA.32301.1.S1_at   | MmugDNA.32301.1 | 8.37  | 8.64  | 0.35 | 0.05 | -1.2  | 0.226248 | 0.148671 | 0.59538  | 0.423201 |
| MmugDNA.32303.1.S1_at   | MmugDNA.32303.1 | 10.48 | 10.41 | 0.47 | 0.1  | 1.05  | 0.999774 | 0.099342 | 0.999982 | 0.35761  |
| MmugDNA.32304.1.S1_at   | MmugDNA.32304.1 | 4.3   | 4.28  | 0.05 | 0.28 | 1.01  | 0.701694 | 0.103883 | 0.883974 | 0.364538 |
| MmugDNA.32304.1.S1_x_at | MmugDNA.32304.1 | 3.96  | 4.09  | 0.25 | 0.08 | -1.1  | 0.367232 | 0.164025 | 0.702778 | 0.440161 |
| MmugDNA.32305.1.S1_at   | MmugDNA.32305.1 | 10.01 | 10.36 | 0.48 | 0.24 | -1.27 | 0.200547 | 0.281803 | 0.572378 | 0.544844 |
| MmugDNA.32308.1.S1_at   | MmugDNA.32308.1 | 3.99  | 4.33  | 0.19 | 0.37 | -1.26 | 0.156391 | 0.452365 | 0.529581 | 0.667046 |
| MmugDNA.32310.1.S1_at   | MmugDNA.32310.1 | 3.02  | 2.97  | 0.56 | 0.35 | 1.04  | 0.700371 | 0.73066  | 0.883486 | 0.844055 |
| MmugDNA.32311.1.S1_at   | MmugDNA.32311.1 | 7.11  | 7.03  | 0.19 | 0.05 | 1.05  | 0.567849 | 0.503514 | 0.820586 | 0.700904 |
| MmugDNA.32312.1.S1_at   | MmugDNA.32312.1 | 3.13  | 3.14  | 0.27 | 0.19 | -1.01 | 0.923574 | 0.28939  | 0.97437  | 0.550431 |
| MmugDNA.32313.1.S1_at   | MmugDNA.32313.1 | 8.11  | 8.01  | 0.08 | 0.02 | 1.07  | 0.10798  | 0.345702 | 0.480459 | 0.590854 |

|                         |                 |       |       |      |      |       |          |          |          |          |
|-------------------------|-----------------|-------|-------|------|------|-------|----------|----------|----------|----------|
| MmugDNA.32314.1.S1_at   | MmugDNA.32314.1 | 6.31  | 6.13  | 0.18 | 0.08 | 1.13  | 0.542282 | 0.287313 | 0.805613 | 0.548589 |
| MmugDNA.32315.1.S1_at   | MmugDNA.32315.1 | 7.4   | 7.46  | 0.34 | 0.1  | -1.04 | 0.259578 | 0.735511 | 0.622626 | 0.846953 |
| MmugDNA.32316.1.S1_at   | MmugDNA.32316.1 | 5.73  | 5.74  | 0.27 | 0.09 | -1.01 | 0.466876 | 0.585293 | 0.763921 | 0.752844 |
| MmugDNA.32317.1.S1_at   | MmugDNA.32317.1 | 6.48  | 6.54  | 0.35 | 0.44 | -1.04 | 0.784134 | 0.596009 | 0.920631 | 0.759321 |
| MmugDNA.32319.1.S1_at   | MmugDNA.32319.1 | 8.11  | 8.18  | 0.29 | 0.11 | -1.05 | 0.642322 | 0.534401 | 0.857722 | 0.720351 |
| MmugDNA.32320.1.S1_at   | MmugDNA.32320.1 | 10.64 | 10.54 | 0.39 | 0.07 | 1.07  | 0.683242 | 0.828202 | 0.876089 | 0.901235 |
| MmugDNA.32322.1.S1_at   | MmugDNA.32322.1 | 3.7   | 3.65  | 0.11 | 0.18 | 1.04  | 0.895044 | 0.940819 | 0.964206 | 0.966506 |
| MmugDNA.32323.1.S1_at   | MmugDNA.32323.1 | 5.55  | 5.55  | 0.03 | 0.01 | 1     | 0.306694 | 0.200088 | 0.659644 | 0.474603 |
| MmugDNA.32324.1.S1_at   | MmugDNA.32324.1 | 4.01  | 4.05  | 0.12 | 0.22 | -1.03 | 0.531879 | 0.475444 | 0.799982 | 0.682155 |
| MmugDNA.32325.1.S1_at   | MmugDNA.32325.1 | 7.06  | 7.36  | 0.24 | 0.11 | -1.23 | 0.052596 | 0.009815 | 0.392678 | 0.130205 |
| MmugDNA.32326.1.S1_at   | MmugDNA.32326.1 | 5.78  | 5.72  | 0.15 | 0.37 | 1.04  | 0.841773 | 0.404185 | 0.943923 | 0.632691 |
| MmugDNA.32327.1.S1_at   | MmugDNA.32327.1 | 6.61  | 6.54  | 0.12 | 0.16 | 1.05  | 0.658697 | 0.920839 | 0.864821 | 0.955412 |
| MmugDNA.3233.1.S1_at    | MmugDNA.3233.1  | 4.51  | 4.46  | 0.23 | 0.05 | 1.04  | 0.760204 | 0.273171 | 0.909887 | 0.537787 |
| MmugDNA.32330.1.S1_at   | MmugDNA.32330.1 | 4.9   | 4.59  | 0.32 | 0.43 | 1.24  | 0.685477 | 0.308903 | 0.876846 | 0.564656 |
| MmugDNA.32331.1.S1_at   | MmugDNA.32331.1 | 4.03  | 4.32  | 0.48 | 0.41 | -1.23 | 0.884838 | 0.458954 | 0.960159 | 0.671504 |
| MmugDNA.32332.1.S1_at   | MmugDNA.32332.1 | 10.93 | 10.76 | 0.07 | 0.12 | 1.13  | 0.143825 | 0.17094  | 0.519104 | 0.447561 |
| MmugDNA.32335.1.S1_at   | MmugDNA.32335.1 | 5.66  | 5.61  | 0.18 | 0.07 | 1.03  | 0.942382 | 0.644892 | 0.980289 | 0.791927 |
| MmugDNA.32336.1.S1_at   | MmugDNA.32336.1 | 2.81  | 2.81  | 0.03 | 0    | 1     | 0.373901 | 0.045199 | 0.705567 | 0.256979 |
| MmugDNA.32337.1.S1_at   | MmugDNA.32337.1 | 6.75  | 6.81  | 0.35 | 0.16 | -1.04 | 0.606256 | 0.830399 | 0.840408 | 0.902659 |
| MmugDNA.32338.1.S1_at   | MmugDNA.32338.1 | 8.83  | 8.97  | 1.33 | 0.1  | -1.1  | 0.798063 | 0.894359 | 0.925892 | 0.939704 |
| MmugDNA.3234.1.S1_at    | MmugDNA.3234.1  | 8.29  | 8.59  | 0.31 | 0.06 | -1.23 | 0.132847 | 0.163381 | 0.507035 | 0.43955  |
| MmugDNA.32340.1.S1_at   | MmugDNA.32340.1 | 7.34  | 7.37  | 1.03 | 0.1  | -1.02 | 0.97894  | 0.976798 | 0.993198 | 0.987389 |
| MmugDNA.32341.1.S1_at   | MmugDNA.32341.1 | 3.57  | 3.68  | 0.27 | 0.12 | -1.08 | 0.874425 | 0.44738  | 0.956448 | 0.66348  |
| MmugDNA.32342.1.S1_at   | MmugDNA.32342.1 | 6.37  | 6.65  | 0.14 | 0.51 | -1.21 | 0.126037 | 0.371334 | 0.49977  | 0.610172 |
| MmugDNA.32343.1.S1_at   | MmugDNA.32343.1 | 6.66  | 6.72  | 0.49 | 0.2  | -1.04 | 0.339081 | 0.0968   | 0.683527 | 0.354207 |
| MmugDNA.32343.1.S1_x_at | MmugDNA.32343.1 | 7.22  | 7.47  | 0.16 | 0.18 | -1.19 | 0.104423 | 0.050664 | 0.475473 | 0.270317 |
| MmugDNA.32348.1.S1_at   | MmugDNA.32348.1 | 4.33  | 4.33  | 0.07 | 0    | -1    | 0.846709 | 0.965789 | 0.94629  | 0.980824 |
| MmugDNA.32349.1.S1_at   | MmugDNA.32349.1 | 5.21  | 4.79  | 0.3  | 0.16 | 1.34  | 0.408708 | 0.355106 | 0.729499 | 0.597508 |
| MmugDNA.22766.1.S1_at   | MmugDNA.22766.1 | 12.42 | 12.23 | 0.11 | 0.08 | 1.15  | 0.037413 | 0.066313 | 0.357092 | 0.303177 |
| MmugDNA.22766.1.S1_s_at | MmugDNA.22766.1 | 11.48 | 11.35 | 0.12 | 0.08 | 1.1   | 0.096977 | 0.161879 | 0.465684 | 0.437979 |
| MmugDNA.32350.1.S1_at   | MmugDNA.32350.1 | 5.54  | 5.24  | 0.24 | 0.45 | 1.23  | 0.786952 | 0.9748   | 0.921729 | 0.986245 |
| MmugDNA.32351.1.S1_at   | MmugDNA.32351.1 | 8.39  | 7.52  | 0.71 | 0.38 | 1.83  | 0.092562 | 0.18391  | 0.461192 | 0.460057 |
| MmugDNA.32352.1.S1_at   | MmugDNA.32352.1 | 5.93  | 5.79  | 0.14 | 0.12 | 1.1   | 0.104015 | 0.294587 | 0.474656 | 0.554282 |
| MmugDNA.32353.1.S1_at   | MmugDNA.32353.1 | 3.14  | 3.09  | 0.08 | 0.03 | 1.04  | 0.837092 | 0.222002 | 0.941548 | 0.49507  |
| MmugDNA.32356.1.S1_at   | MmugDNA.32356.1 | 6.36  | 6.32  | 0.22 | 0.1  | 1.03  | 0.177477 | 0.451302 | 0.550585 | 0.66613  |
| MmugDNA.32357.1.S1_at   | MmugDNA.32357.1 | 6.98  | 6.57  | 0.3  | 0.1  | 1.33  | 0.045407 | 0.315405 | 0.376374 | 0.568939 |
| MmugDNA.32358.1.S1_at   | MmugDNA.32358.1 | 11.2  | 10.32 | 0.38 | 0.23 | 1.84  | 0.023285 | 0.002858 | 0.314809 | 0.078756 |
| MmugDNA.3236.1.S1_at    | MmugDNA.3236.1  | 4.94  | 4.92  | 0.28 | 0.13 | 1.01  | 0.941617 | 0.487984 | 0.980194 | 0.690839 |
| MmugDNA.32360.1.S1_at   | MmugDNA.32360.1 | 4.16  | 5     | 0.16 | 0.17 | -1.78 | 0.003294 | 0.021761 | 0.194357 | 0.184563 |
| MmugDNA.32361.1.S1_at   | MmugDNA.32361.1 | 6.39  | 6.34  | 0.28 | 0.08 | 1.04  | 0.81384  | 0.882198 | 0.932816 | 0.932845 |
| MmugDNA.32363.1.S1_at   | MmugDNA.32363.1 | 2.95  | 3.04  | 0.12 | 0.05 | -1.07 | 0.437945 | 0.533212 | 0.747043 | 0.719483 |
| MmugDNA.32365.1.S1_at   | MmugDNA.32365.1 | 4.66  | 4.67  | 0.26 | 0.11 | -1.01 | 0.417695 | 0.262925 | 0.735015 | 0.529325 |
| MmugDNA.32367.1.S1_at   | MmugDNA.32367.1 | 6.13  | 5.87  | 0.35 | 0.16 | 1.2   | 0.342066 | 0.036846 | 0.685569 | 0.236451 |

|                         |                 |       |       |      |      |       |          |          |          |          |
|-------------------------|-----------------|-------|-------|------|------|-------|----------|----------|----------|----------|
| MmugDNA.32368.1.S1_at   | MmugDNA.32368.1 | 4.34  | 4.41  | 0.35 | 0.22 | -1.05 | 0.639063 | 0.20647  | 0.856181 | 0.480571 |
| MmugDNA.32369.1.S1_at   | MmugDNA.32369.1 | 6.84  | 6.65  | 0.17 | 0.23 | 1.14  | 0.510885 | 0.757173 | 0.788393 | 0.858648 |
| MmugDNA.3237.1.S1_at    | MmugDNA.3237.1  | 5.4   | 5.26  | 0.08 | 0.31 | 1.1   | 0.381874 | 0.375541 | 0.710335 | 0.613485 |
| MmugDNA.32370.1.S1_at   | MmugDNA.32370.1 | 4.44  | 5.07  | 0.45 | 0.54 | -1.54 | 0.380507 | 0.584562 | 0.709387 | 0.752462 |
| MmugDNA.32371.1.S1_at   | MmugDNA.32371.1 | 6.6   | 6.22  | 0.35 | 0.28 | 1.3   | 0.280699 | 0.502854 | 0.639467 | 0.700392 |
| MmugDNA.41435.1.S1_s_at | MmugDNA.41435.1 | 10.66 | 10.83 | 0.25 | 0.16 | -1.13 | 0.154441 | 0.329914 | 0.527559 | 0.578874 |
| MmugDNA.32373.1.S1_at   | MmugDNA.32373.1 | 8.97  | 8.54  | 0.88 | 0.19 | 1.35  | 0.937416 | 0.791096 | 0.978954 | 0.879263 |
| MmugDNA.32376.1.S1_at   | MmugDNA.32376.1 | 8.42  | 8.12  | 0.24 | 0.16 | 1.23  | 0.295589 | 0.390704 | 0.651318 | 0.624496 |
| MmugDNA.32378.1.S1_at   | MmugDNA.32378.1 | 3.6   | 4.11  | 0.3  | 0.14 | -1.42 | 0.100792 | 0.176023 | 0.47159  | 0.452526 |
| MmugDNA.32379.1.S1_s_at | MmugDNA.32379.1 | 11.95 | 12.28 | 0.41 | 0.11 | -1.26 | 0.215637 | 0.222892 | 0.585748 | 0.495791 |
| MmugDNA.3238.1.S1_s_at  | MmugDNA.3238.1  | 3.37  | 3.26  | 0.17 | 0.21 | 1.08  | 0.353898 | 0.43384  | 0.693507 | 0.654032 |
| MmugDNA.32380.1.S1_at   | MmugDNA.32380.1 | 8.44  | 8.71  | 0.32 | 0.15 | -1.21 | 0.789926 | 0.035801 | 0.922714 | 0.233625 |
| MmugDNA.32382.1.S1_at   | MmugDNA.32382.1 | 11.62 | 11.33 | 0.3  | 0.09 | 1.23  | 0.141128 | 0.101104 | 0.516345 | 0.360724 |
| MmugDNA.32383.1.S1_at   | MmugDNA.32383.1 | 8.4   | 8.44  | 0.19 | 0.03 | -1.03 | 0.916424 | 0.639601 | 0.971609 | 0.788354 |
| MmugDNA.32389.1.S1_at   | MmugDNA.32389.1 | 9.58  | 10.1  | 0.43 | 0.15 | -1.43 | 0.113808 | 0.010007 | 0.487244 | 0.131262 |
| MmugDNA.3239.1.S1_at    | MmugDNA.3239.1  | 9.95  | 9.7   | 0.37 | 0.17 | 1.19  | 0.473206 | 0.105913 | 0.767466 | 0.368216 |
| MmugDNA.32392.1.S1_at   | MmugDNA.32392.1 | 6.92  | 6.91  | 0.16 | 0.18 | 1.01  | 0.860849 | 0.882978 | 0.950958 | 0.933236 |
| MmugDNA.32396.1.S1_at   | MmugDNA.32396.1 | 5.3   | 5.42  | 0.2  | 0.19 | -1.09 | 0.949161 | 0.539973 | 0.982772 | 0.723995 |
| MmugDNA.32397.1.S1_at   | MmugDNA.32397.1 | 3.81  | 3.87  | 0.26 | 0.17 | -1.04 | 0.924877 | 0.725862 | 0.97487  | 0.841285 |
| MmugDNA.32399.1.S1_at   | MmugDNA.32399.1 | 6.17  | 6.16  | 0.09 | 0.19 | 1.01  | 0.62963  | 0.813589 | 0.851663 | 0.892313 |
| MmugDNA.324.1.S1_at     | MmugDNA.324.1   | 7.97  | 7.98  | 0.12 | 0.07 | -1.01 | 0.361939 | 0.596291 | 0.698882 | 0.75946  |
| MmugDNA.3240.1.S1_at    | MmugDNA.3240.1  | 7.34  | 7.36  | 0.16 | 0.21 | -1.02 | 0.772876 | 0.019022 | 0.915516 | 0.173623 |
| MmugDNA.32401.1.S1_at   | MmugDNA.32401.1 | 3.81  | 3.84  | 0.44 | 0.29 | -1.02 | 0.919007 | 0.944531 | 0.972347 | 0.968614 |
| MmugDNA.32402.1.S1_at   | MmugDNA.32402.1 | 3.69  | 3.66  | 0.12 | 0.08 | 1.02  | 0.310767 | 0.201645 | 0.662635 | 0.476208 |
| MmugDNA.32403.1.S1_at   | MmugDNA.32403.1 | 3.43  | 3.34  | 0.01 | 0.09 | 1.06  | 0.179647 | 0.369926 | 0.552979 | 0.609164 |
| MmugDNA.32404.1.S1_at   | MmugDNA.32404.1 | 4.18  | 4.06  | 0.22 | 0.1  | 1.08  | 0.563647 | 0.153548 | 0.818336 | 0.428309 |
| MmugDNA.32406.1.S1_at   | MmugDNA.32406.1 | 7.38  | 7.13  | 0.29 | 0.23 | 1.19  | 0.391507 | 0.080751 | 0.717597 | 0.328632 |
| MmugDNA.32407.1.S1_at   | MmugDNA.32407.1 | 4.54  | 4.48  | 0.04 | 0.17 | 1.04  | 0.238375 | 0.50672  | 0.605341 | 0.702574 |
| MmugDNA.32409.1.S1_s_at | MmugDNA.32409.1 | 10.23 | 11.49 | 1.35 | 0.15 | -2.38 | 0.175191 | 0.160012 | 0.548034 | 0.436167 |
| MmugDNA.3241.1.S1_at    | MmugDNA.3241.1  | 9.21  | 9.78  | 0.4  | 0    | -1.49 | 0.101962 | 0.050243 | 0.472424 | 0.269432 |
| MmugDNA.32411.1.S1_at   | MmugDNA.32411.1 | 5.83  | 6.21  | 0.42 | 0.06 | -1.3  | 0.197887 | 0.06781  | 0.569012 | 0.306548 |
| MmugDNA.32414.1.S1_at   | MmugDNA.32414.1 | 4.51  | 4.7   | 0    | 0.14 | -1.14 | 0.240894 | 0.677782 | 0.607203 | 0.811816 |
| MmugDNA.32416.1.S1_at   | MmugDNA.32416.1 | 7.44  | 7.75  | 0.19 | 0.05 | -1.25 | 0.082984 | 0.188876 | 0.44828  | 0.464789 |
| MmugDNA.32417.1.S1_at   | MmugDNA.32417.1 | 3.23  | 3.23  | 0.05 | 0.08 | -1    | 0.609974 | 0.423549 | 0.841827 | 0.646445 |
| MmugDNA.32418.1.S1_at   | MmugDNA.32418.1 | 4.87  | 4.65  | 0.1  | 0.2  | 1.16  | 0.28813  | 0.566537 | 0.645269 | 0.740639 |
| MmugDNA.3242.1.S1_at    | MmugDNA.3242.1  | 6.22  | 5.77  | 0.28 | 0.2  | 1.37  | 0.192864 | 0.475312 | 0.563676 | 0.682031 |
| MmugDNA.32421.1.S1_at   | MmugDNA.32421.1 | 11.73 | 11.24 | 0.38 | 0.09 | 1.4   | 0.313151 | 0.411276 | 0.664448 | 0.637991 |
| MmugDNA.32424.1.S1_at   | MmugDNA.32424.1 | 6.5   | 6.66  | 0.22 | 0.29 | -1.11 | 0.465571 | 0.367443 | 0.763035 | 0.607095 |
| MmugDNA.32425.1.S1_at   | MmugDNA.32425.1 | 7.51  | 7.08  | 0.28 | 0.13 | 1.35  | 0.045112 | 0.172869 | 0.375796 | 0.449431 |
| MmugDNA.32426.1.S1_at   | MmugDNA.32426.1 | 5.94  | 6.11  | 0.22 | 0.09 | -1.13 | 0.106373 | 0.087224 | 0.478837 | 0.340206 |
| MmugDNA.32427.1.S1_at   | MmugDNA.32427.1 | 5.08  | 5.12  | 0.02 | 0.19 | -1.03 | 0.6646   | 0.529673 | 0.867683 | 0.717463 |
| MmugDNA.32428.1.S1_at   | MmugDNA.32428.1 | 5.04  | 5.01  | 0.16 | 0.04 | 1.02  | 0.953953 | 0.260086 | 0.984675 | 0.52675  |
| MmugDNA.32429.1.S1_at   | MmugDNA.32429.1 | 7.93  | 8.44  | 0.69 | 0.34 | -1.43 | 0.192004 | 0.191277 | 0.563029 | 0.466553 |

|                         |                 |       |       |      |      |       |          |          |          |          |
|-------------------------|-----------------|-------|-------|------|------|-------|----------|----------|----------|----------|
| MmugDNA.3243.1.S1_at    | MmugDNA.3243.1  | 3.75  | 3.46  | 0.12 | 0.13 | 1.22  | 0.042187 | 0.493412 | 0.368796 | 0.694107 |
| MmugDNA.32431.1.S1_at   | MmugDNA.32431.1 | 4.52  | 5.1   | 0.23 | 0.04 | -1.49 | 0.037968 | 0.004375 | 0.358308 | 0.092619 |
| MmugDNA.32434.1.S1_at   | MmugDNA.32434.1 | 8.03  | 8.14  | 0.23 | 0.06 | -1.07 | 0.487844 | 0.326498 | 0.775262 | 0.576576 |
| MmugDNA.32436.1.S1_at   | MmugDNA.32436.1 | 5.07  | 4.99  | 0.37 | 0.46 | 1.05  | 0.693793 | 0.924767 | 0.88082  | 0.957465 |
| MmugDNA.32437.1.S1_at   | MmugDNA.32437.1 | 3.65  | 3.41  | 0.43 | 0.72 | 1.18  | 0.879879 | 0.979978 | 0.958318 | 0.989229 |
| MmugDNA.32438.1.S1_at   | MmugDNA.32438.1 | 8.61  | 8.44  | 0.03 | 0.13 | 1.13  | 0.06609  | 0.059686 | 0.421668 | 0.290919 |
| MmugDNA.32439.1.S1_at   | MmugDNA.32439.1 | 7.38  | 7.19  | 0.14 | 0.06 | 1.15  | 0.156527 | 0.117679 | 0.529581 | 0.385399 |
| MmugDNA.3244.1.S1_s_at  | MmugDNA.3244.1  | 6.98  | 6.93  | 0.48 | 0.02 | 1.04  | 0.326482 | 0.46298  | 0.674067 | 0.674149 |
| MmugDNA.32440.1.S1_at   | MmugDNA.32440.1 | 7.07  | 7.07  | 0.55 | 0.64 | 1     | 0.794607 | 0.772651 | 0.924622 | 0.867785 |
| MmugDNA.32441.1.S1_at   | MmugDNA.32441.1 | 3.22  | 3.19  | 0.32 | 0.12 | 1.02  | 0.811674 | 0.759282 | 0.931835 | 0.860036 |
| MmugDNA.32443.1.S1_at   | MmugDNA.32443.1 | 5.44  | 5.24  | 0.06 | 0.06 | -1.14 | 0.00985  | 0.019654 | 0.244005 | 0.176187 |
| MmugDNA.32444.1.S1_at   | MmugDNA.32444.1 | 4.82  | 4.5   | 0.17 | 0.06 | 1.25  | 0.064677 | 0.087179 | 0.418501 | 0.340133 |
| MmugDNA.32445.1.S1_at   | MmugDNA.32445.1 | 3.39  | 3.31  | 0.23 | 0.19 | 1.06  | 0.612633 | 0.095333 | 0.843101 | 0.35236  |
| MmugDNA.32446.1.S1_at   | MmugDNA.32446.1 | 3.76  | 3.72  | 0.24 | 0.05 | 1.03  | 0.929735 | 0.33648  | 0.976518 | 0.583831 |
| MmugDNA.32447.1.S1_at   | MmugDNA.32447.1 | 3.69  | 3.69  | 0.03 | 0.03 | 1     | 0.983782 | 0.46523  | 0.995094 | 0.675638 |
| MmugDNA.32448.1.S1_at   | MmugDNA.32448.1 | 6.28  | 6.33  | 0.49 | 0.09 | -1.03 | 0.392488 | 0.825052 | 0.718451 | 0.899488 |
| MmugDNA.32449.1.S1_at   | MmugDNA.32449.1 | 6.71  | 7.32  | 0.71 | 0.35 | -1.53 | 0.201332 | 0.005349 | 0.57304  | 0.101092 |
| MmugDNA.32449.1.S1_s_at | MmugDNA.32449.1 | 8.13  | 8.82  | 1.77 | 0.71 | -1.61 | 0.291871 | 0.527612 | 0.648213 | 0.716154 |
| MmugDNA.32451.1.S1_at   | MmugDNA.32451.1 | 8.87  | 9.49  | 0.1  | 0.05 | -1.54 | 0.000702 | 0.000235 | 0.147476 | 0.03241  |
| MmugDNA.32455.1.S1_s_at | MmugDNA.32455.1 | 11.11 | 11.37 | 0.2  | 0.07 | -1.19 | 0.061968 | 0.082181 | 0.411707 | 0.331036 |
| MmugDNA.32456.1.S1_at   | MmugDNA.32456.1 | 9.5   | 9.18  | 0.05 | 0.07 | 1.25  | 0.002763 | 0.015538 | 0.185352 | 0.158053 |
| MmugDNA.32457.1.S1_at   | MmugDNA.32457.1 | 3.68  | 3.72  | 0.07 | 0.02 | -1.02 | 0.389862 | 0.675382 | 0.716422 | 0.81026  |
| MmugDNA.3246.1.S1_at    | MmugDNA.3246.1  | 5.15  | 4.88  | 0.15 | 0.14 | 1.21  | 0.056021 | 0.008347 | 0.399441 | 0.121193 |
| MmugDNA.32461.1.S1_at   | MmugDNA.32461.1 | 10.75 | 10.73 | 0.25 | 0.19 | 1.02  | 0.898542 | 0.959191 | 0.965555 | 0.976862 |
| MmugDNA.32462.1.S1_at   | MmugDNA.32462.1 | 4.09  | 4.07  | 0.04 | 0.11 | 1.01  | 0.661883 | 0.483281 | 0.866593 | 0.687887 |
| MmugDNA.32463.1.S1_at   | MmugDNA.32463.1 | 10.93 | 10.75 | 0.15 | 0.08 | 1.13  | 0.69933  | 0.901426 | 0.883137 | 0.943931 |
| MmugDNA.32464.1.S1_at   | MmugDNA.32464.1 | 5.13  | 5.05  | 0.23 | 0.36 | 1.05  | 0.510581 | 0.220005 | 0.788228 | 0.49344  |
| MmugDNA.32465.1.S1_at   | MmugDNA.32465.1 | 8.5   | 8.44  | 0.55 | 0.07 | 1.04  | 0.426601 | 0.611867 | 0.740608 | 0.769622 |
| MmugDNA.32467.1.S1_at   | MmugDNA.32467.1 | 12.97 | 13    | 0.36 | 0.07 | -1.02 | 0.758381 | 0.45964  | 0.909091 | 0.671926 |
| MmugDNA.32468.1.S1_at   | MmugDNA.32468.1 | 5.58  | 5.92  | 0.26 | 0.1  | -1.26 | 0.203818 | 0.220845 | 0.57513  | 0.494262 |
| MmugDNA.32469.1.S1_at   | MmugDNA.32469.1 | 8.68  | 8.47  | 0.2  | 0.19 | 1.15  | 0.120246 | 0.233617 | 0.493545 | 0.50492  |
| MmugDNA.32471.1.S1_at   | MmugDNA.32471.1 | 3.31  | 3.26  | 0.36 | 0.06 | 1.03  | 0.718921 | 0.878276 | 0.890837 | 0.930529 |
| MmugDNA.32472.1.S1_at   | MmugDNA.32472.1 | 4.61  | 4.33  | 0.33 | 0.2  | 1.21  | 0.20796  | 0.304439 | 0.579653 | 0.561712 |
| MmugDNA.32473.1.S1_at   | MmugDNA.32473.1 | 4.77  | 4.54  | 0.04 | 0.13 | 1.17  | 0.081809 | 0.107602 | 0.446363 | 0.370497 |
| MmugDNA.32474.1.S1_at   | MmugDNA.32474.1 | 4.15  | 4.17  | 0.04 | 0.15 | -1.01 | 0.817546 | 0.730569 | 0.934033 | 0.844055 |
| MmugDNA.32475.1.S1_at   | MmugDNA.32475.1 | 6.44  | 6.19  | 0.26 | 0.12 | 1.19  | 0.63964  | 0.770891 | 0.85626  | 0.866807 |
| MmugDNA.32476.1.S1_at   | MmugDNA.32476.1 | 3.61  | 3.62  | 0.28 | 0.22 | -1.01 | 0.605497 | 0.286703 | 0.839993 | 0.548077 |
| MmugDNA.32477.1.S1_at   | MmugDNA.32477.1 | 5.22  | 5.22  | 0.5  | 1.08 | 1     | 0.66828  | 0.861256 | 0.868985 | 0.921088 |
| MmugDNA.32478.1.S1_at   | MmugDNA.32478.1 | 5.26  | 5.65  | 0.19 | 0.29 | -1.32 | 0.084889 | 0.165477 | 0.451489 | 0.441726 |
| MmugDNA.32479.1.S1_at   | MmugDNA.32479.1 | 7.65  | 7.91  | 0.41 | 0.29 | -1.19 | 0.46427  | 0.011163 | 0.762534 | 0.137551 |
| MmugDNA.3248.1.S1_at    | MmugDNA.3248.1  | 3.38  | 3.23  | 0.17 | 0.08 | 1.1   | 0.152878 | 0.201929 | 0.525753 | 0.476412 |
| MmugDNA.3248.1.S1_x_at  | MmugDNA.3248.1  | 4.42  | 4.28  | 0.19 | 0.07 | 1.1   | 0.288014 | 0.425659 | 0.645144 | 0.648    |
| MmugDNA.32480.1.S1_at   | MmugDNA.32480.1 | 3.66  | 3.64  | 0.03 | 0.14 | 1.01  | 0.407272 | 0.572146 | 0.728545 | 0.744268 |



|                         |                 |       |       |      |      |       |          |          |          |          |
|-------------------------|-----------------|-------|-------|------|------|-------|----------|----------|----------|----------|
| MmugDNA.32481.1.S1_s_at | MmugDNA.32481.1 | 11.25 | 11.13 | 0.92 | 0.18 | 1.09  | 0.830641 | 0.569424 | 0.939392 | 0.742382 |
| MmugDNA.32482.1.S1_s_at | MmugDNA.32482.1 | 9.72  | 10.28 | 0.15 | 0.3  | -1.47 | 0.111653 | 0.125787 | 0.484896 | 0.396313 |
| MmugDNA.32483.1.S1_at   | MmugDNA.32483.1 | 4.75  | 5.33  | 0.08 | 0.51 | -1.5  | 0.102063 | 0.115846 | 0.472436 | 0.382929 |
| MmugDNA.32484.1.S1_s_at | MmugDNA.32484.1 | 12.15 | 12.68 | 0.09 | 0.17 | -1.45 | 0.027918 | 0.015425 | 0.330017 | 0.157699 |
| MmugDNA.32486.1.S1_at   | MmugDNA.32486.1 | 5.25  | 5.26  | 0.1  | 0.27 | -1.01 | 0.907122 | 0.876827 | 0.968482 | 0.92983  |
| MmugDNA.32488.1.S1_at   | MmugDNA.32488.1 | 7.33  | 7.64  | 0.27 | 0.58 | -1.24 | 0.407063 | 0.459833 | 0.728508 | 0.671989 |
| MmugDNA.32489.1.S1_at   | MmugDNA.32489.1 | 11.08 | 11.04 | 0.25 | 0.06 | 1.03  | 0.825232 | 0.137091 | 0.937201 | 0.409869 |
| MmugDNA.3249.1.S1_at    | MmugDNA.3249.1  | 8.05  | 8.01  | 0.07 | 0.21 | 1.03  | 0.586254 | 0.296969 | 0.831211 | 0.555904 |
| MmugDNA.3249.1.S1_x_at  | MmugDNA.3249.1  | 6.93  | 6.73  | 0.3  | 0.14 | 1.15  | 0.881438 | 0.246465 | 0.959052 | 0.515899 |
| MmugDNA.32490.1.S1_at   | MmugDNA.32490.1 | 4.42  | 4.38  | 0.23 | 0.18 | 1.03  | 0.318986 | 0.451239 | 0.668492 | 0.666095 |
| MmugDNA.32491.1.S1_at   | MmugDNA.32491.1 | 4.3   | 4.28  | 0.17 | 0.09 | -1.01 | 0.48474  | 0.031867 | 0.773772 | 0.220909 |
| MmugDNA.32492.1.S1_at   | MmugDNA.32492.1 | 3.73  | 3.51  | 0.42 | 0.07 | 1.17  | 0.461992 | 0.676833 | 0.76137  | 0.811172 |
| MmugDNA.32494.1.S1_at   | MmugDNA.32494.1 | 7.49  | 7.94  | 1.26 | 0.24 | -1.36 | 0.678563 | 0.296461 | 0.874071 | 0.555528 |
| MmugDNA.32494.1.S1_s_at | MmugDNA.32494.1 | 9.36  | 10.06 | 1.19 | 0.14 | -1.63 | 0.417101 | 0.254098 | 0.734701 | 0.522439 |
| MmugDNA.32497.1.S1_at   | MmugDNA.32497.1 | 4.22  | 4.41  | 0.11 | 0.11 | -1.14 | 0.246069 | 0.254556 | 0.611464 | 0.522863 |
| MmugDNA.32498.1.S1_at   | MmugDNA.32498.1 | 5.68  | 5.63  | 0.17 | 0.06 | 1.04  | 0.213876 | 0.588362 | 0.584484 | 0.754874 |
| MmugDNA.32499.1.S1_at   | MmugDNA.32499.1 | 5.35  | 5.05  | 0.07 | 0.05 | 1.23  | 0.003177 | 0.009852 | 0.191107 | 0.130274 |
| MmugDNA.325.1.S1_at     | MmugDNA.325.1   | 4.84  | 4.65  | 0.14 | 0.04 | 1.15  | 0.090141 | 0.068114 | 0.458008 | 0.307163 |
| MmugDNA.3250.1.S1_at    | MmugDNA.3250.1  | 5.03  | 4.88  | 0.19 | 0.11 | 1.11  | 0.40552  | 0.321421 | 0.727426 | 0.573207 |
| MmugDNA.32500.1.S1_at   | MmugDNA.32500.1 | 7.72  | 8.05  | 0.16 | 0.16 | -1.26 | 0.170048 | 0.183403 | 0.543047 | 0.459553 |
| MmugDNA.32500.1.S1_x_at | MmugDNA.32500.1 | 9.77  | 10.02 | 0.21 | 0.18 | -1.19 | 0.216603 | 0.230879 | 0.586674 | 0.502546 |
| MmugDNA.32502.1.S1_at   | MmugDNA.32502.1 | 6.08  | 5.01  | 0.52 | 0.34 | 2.1   | 0.029245 | 0.057119 | 0.333974 | 0.284945 |
| MmugDNA.32503.1.S1_at   | MmugDNA.32503.1 | 4.7   | 4.7   | 0.19 | 0.07 | 1     | 0.270571 | 0.582984 | 0.630481 | 0.751492 |
| MmugDNA.32505.1.S1_at   | MmugDNA.32505.1 | 11.32 | 10.81 | 0.67 | 0.16 | 1.42  | 0.741387 | 0.820623 | 0.901371 | 0.89668  |
| MmugDNA.32506.1.S1_at   | MmugDNA.32506.1 | 3.18  | 3.3   | 0.07 | 0.03 | -1.09 | 0.06454  | 0.053558 | 0.418343 | 0.277065 |
| MmugDNA.32507.1.S1_at   | MmugDNA.32507.1 | 7.35  | 6.2   | 0.37 | 0.09 | 2.21  | 0.014839 | 0.007068 | 0.278597 | 0.113284 |
| MmugDNA.32508.1.S1_at   | MmugDNA.32508.1 | 10.88 | 11.19 | 0.22 | 0.07 | -1.24 | 0.029263 | 0.09469  | 0.333974 | 0.351481 |
| MmugDNA.32508.1.S1_s_at | MmugDNA.32508.1 | 10.12 | 10.36 | 0.21 | 0.17 | -1.18 | 0.165888 | 0.24326  | 0.538623 | 0.513356 |
| MmugDNA.32509.1.S1_at   | MmugDNA.32509.1 | 5.7   | 5.73  | 0.15 | 0.09 | -1.02 | 0.912328 | 0.877341 | 0.970266 | 0.930105 |
| MmugDNA.32510.1.S1_at   | MmugDNA.32510.1 | 8.59  | 8.28  | 0.48 | 0.17 | 1.24  | 0.168378 | 0.204663 | 0.54098  | 0.479016 |
| MmugDNA.32512.1.S1_at   | MmugDNA.32512.1 | 7.71  | 7.71  | 0.18 | 0.04 | -1    | 0.851853 | 0.227274 | 0.947748 | 0.499589 |
| MmugDNA.32513.1.S1_at   | MmugDNA.32513.1 | 3.4   | 3.7   | 0.22 | 0.37 | -1.23 | 0.691938 | 0.879455 | 0.880088 | 0.931144 |
| MmugDNA.32514.1.S1_at   | MmugDNA.32514.1 | 4.03  | 4.07  | 0.04 | 0.09 | -1.03 | 0.53714  | 0.235122 | 0.802624 | 0.50629  |
| MmugDNA.32517.1.S1_at   | MmugDNA.32517.1 | 5.18  | 4.99  | 0.18 | 0    | 1.14  | 0.453749 | 0.653397 | 0.756276 | 0.797435 |
| MmugDNA.32518.1.S1_at   | MmugDNA.32518.1 | 6.42  | 6.74  | 0.42 | 0.08 | -1.24 | 0.285709 | 0.029888 | 0.643438 | 0.214558 |
| MmugDNA.32519.1.S1_at   | MmugDNA.32519.1 | 5.94  | 6.3   | 0.27 | 0.17 | -1.28 | 0.095259 | 0.089573 | 0.464131 | 0.343811 |
| MmugDNA.32520.1.S1_at   | MmugDNA.32520.1 | 5.41  | 5.24  | 0.16 | 0.13 | 1.13  | 0.151996 | 0.220376 | 0.525094 | 0.493783 |
| MmugDNA.32521.1.S1_s_at | MmugDNA.32521.1 | 8.57  | 8.82  | 0.49 | 0.24 | -1.19 | 0.618259 | 0.148252 | 0.845869 | 0.422749 |
| MmugDNA.32523.1.S1_at   | MmugDNA.32523.1 | 4.92  | 5.09  | 0.07 | 0.22 | -1.12 | 0.279969 | 0.684519 | 0.638821 | 0.81598  |
| MmugDNA.32524.1.S1_at   | MmugDNA.32524.1 | 6.04  | 5.69  | 0.29 | 0.14 | 1.28  | 0.158181 | 0.141026 | 0.531211 | 0.414507 |
| MmugDNA.32525.1.S1_at   | MmugDNA.32525.1 | 5.26  | 5.22  | 0.12 | 0.27 | 1.03  | 0.440004 | 0.630098 | 0.748282 | 0.782148 |
| MmugDNA.32526.1.S1_at   | MmugDNA.32526.1 | 11.46 | 11.26 | 0.4  | 0.11 | 1.15  | 0.509175 | 0.030796 | 0.787544 | 0.217376 |
| MmugDNA.32527.1.S1_at   | MmugDNA.32527.1 | 10.26 | 10.22 | 0.33 | 0.07 | 1.03  | 0.318134 | 0.466175 | 0.667759 | 0.676147 |

|                         |                 |       |       |      |      |       |          |          |          |          |
|-------------------------|-----------------|-------|-------|------|------|-------|----------|----------|----------|----------|
| MmugDNA.3253.1.S1_at    | MmugDNA.3253.1  | 8.62  | 9.15  | 0.2  | 0.16 | -1.44 | 0.021608 | 0.005564 | 0.309241 | 0.103062 |
| MmugDNA.32530.1.S1_at   | MmugDNA.32530.1 | 5.17  | 5.16  | 0.57 | 0.16 | 1.01  | 0.787917 | 0.517303 | 0.922082 | 0.709435 |
| MmugDNA.32532.1.S1_at   | MmugDNA.32532.1 | 7.16  | 7.15  | 0.24 | 0.09 | 1.01  | 0.522119 | 0.785416 | 0.795075 | 0.875768 |
| MmugDNA.32533.1.S1_at   | MmugDNA.32533.1 | 8.99  | 9.63  | 0.14 | 0.04 | -1.56 | 0.001289 | 0.003181 | 0.157784 | 0.081921 |
| MmugDNA.32534.1.S1_at   | MmugDNA.32534.1 | 4.15  | 4.02  | 0.11 | 0.18 | 1.1   | 0.179808 | 0.562694 | 0.553052 | 0.7381   |
| MmugDNA.32536.1.S1_at   | MmugDNA.32536.1 | 4.24  | 4.67  | 0.19 | 0.18 | -1.35 | 0.016326 | 0.011242 | 0.287398 | 0.138014 |
| MmugDNA.32537.1.S1_at   | MmugDNA.32537.1 | 3.51  | 3.65  | 0.25 | 0.04 | -1.1  | 0.35043  | 0.554781 | 0.691263 | 0.733501 |
| MmugDNA.32539.1.S1_at   | MmugDNA.32539.1 | 7.61  | 7.38  | 0.27 | 0.42 | 1.17  | 0.844006 | 0.299724 | 0.945004 | 0.558037 |
| MmugDNA.3254.1.S1_at    | MmugDNA.3254.1  | 6.8   | 6.5   | 0.05 | 0.07 | 1.23  | 0.003794 | 0.041676 | 0.198412 | 0.24887  |
| MmugDNA.32543.1.S1_at   | MmugDNA.32543.1 | 4.38  | 4.05  | 0.92 | 0.35 | 1.26  | 0.151885 | 0.22327  | 0.525001 | 0.496078 |
| MmugDNA.32544.1.S1_at   | MmugDNA.32544.1 | 12.29 | 12.27 | 0.32 | 0.01 | -1.01 | 0.958349 | 0.831674 | 0.986346 | 0.903453 |
| MmugDNA.32545.1.S1_at   | MmugDNA.32545.1 | 6.59  | 7.16  | 0.35 | 0.07 | -1.48 | 0.065271 | 0.079447 | 0.420223 | 0.326766 |
| MmugDNA.32547.1.S1_at   | MmugDNA.32547.1 | 5.19  | 5.39  | 0.2  | 0.2  | -1.15 | 0.605333 | 0.250831 | 0.839942 | 0.51956  |
| MmugDNA.32548.1.S1_at   | MmugDNA.32548.1 | 3.33  | 3.6   | 0.21 | 0.22 | -1.2  | 0.148533 | 0.215054 | 0.522567 | 0.488898 |
| MmugDNA.3255.1.S1_at    | MmugDNA.3255.1  | 6.75  | 6.73  | 0.12 | 0.09 | 1.02  | 0.336757 | 0.636709 | 0.682118 | 0.786348 |
| MmugDNA.32550.1.S1_at   | MmugDNA.32550.1 | 4.25  | 3.91  | 0.29 | 0.52 | 1.27  | 0.912243 | 0.838715 | 0.970255 | 0.908041 |
| MmugDNA.32552.1.S1_at   | MmugDNA.32552.1 | 10.55 | 10.48 | 0.07 | 0.12 | 1.05  | 0.270083 | 0.009512 | 0.630217 | 0.128473 |
| MmugDNA.32553.1.S1_at   | MmugDNA.32553.1 | 8.1   | 8.04  | 0.05 | 0    | 1.04  | 0.029977 | 0.667945 | 0.336449 | 0.805689 |
| MmugDNA.32554.1.S1_at   | MmugDNA.32554.1 | 4.04  | 3.91  | 0.1  | 0.14 | 1.1   | 0.09584  | 0.086236 | 0.464449 | 0.338635 |
| MmugDNA.32555.1.S1_at   | MmugDNA.32555.1 | 5.21  | 5.24  | 0.43 | 0.33 | -1.02 | 0.41214  | 0.762325 | 0.73192  | 0.861726 |
| MmugDNA.32556.1.S1_at   | MmugDNA.32556.1 | 5.59  | 6.52  | 0.61 | 0.52 | -1.91 | 0.091713 | 0.160251 | 0.45996  | 0.436398 |
| MmugDNA.32557.1.S1_at   | MmugDNA.32557.1 | 6.82  | 6.64  | 0.34 | 0.14 | 1.13  | 0.232955 | 0.476885 | 0.600437 | 0.683011 |
| MmugDNA.32559.1.S1_at   | MmugDNA.32559.1 | 9.89  | 9.67  | 0.45 | 0.19 | 1.16  | 0.529035 | 0.448059 | 0.798106 | 0.663986 |
| MmugDNA.14377.1.S1_s_at | MmugDNA.14377.1 | 9.91  | 9.77  | 0.47 | 0.13 | 1.1   | 0.62514  | 0.536472 | 0.849207 | 0.72179  |
| MmugDNA.3256.1.S1_at    | MmugDNA.3256.1  | 8.57  | 8.17  | 0.49 | 0.17 | 1.31  | 0.292526 | 0.15906  | 0.648901 | 0.435217 |
| MmugDNA.32563.1.S1_at   | MmugDNA.32563.1 | 10.5  | 10.45 | 0.34 | 0.1  | 1.04  | 0.504476 | 0.062898 | 0.784778 | 0.297495 |
| MmugDNA.32564.1.S1_at   | MmugDNA.32564.1 | 4.17  | 4.2   | 0.23 | 0.04 | -1.02 | 0.637839 | 0.715972 | 0.855669 | 0.835339 |
| MmugDNA.32565.1.S1_at   | MmugDNA.32565.1 | 6.37  | 6.36  | 1.08 | 0.09 | 1.01  | 0.485959 | 0.846797 | 0.774427 | 0.912863 |
| MmugDNA.32568.1.S1_at   | MmugDNA.32568.1 | 4.02  | 4.94  | 0.17 | 0.48 | -1.89 | 0.051598 | 0.098588 | 0.390696 | 0.356709 |
| MmugDNA.32569.1.S1_at   | MmugDNA.32569.1 | 5.88  | 5.7   | 0.37 | 0.34 | 1.13  | 0.68395  | 0.90428  | 0.876251 | 0.945683 |
| MmugDNA.3257.1.S1_at    | MmugDNA.3257.1  | 3.97  | 3.95  | 0.13 | 0.01 | 1.01  | 0.875411 | 0.924573 | 0.956729 | 0.957386 |
| MmugDNA.32571.1.S1_at   | MmugDNA.32571.1 | 3.5   | 3.59  | 0.33 | 0.19 | -1.06 | 0.691179 | 0.892356 | 0.879715 | 0.938624 |
| MmugDNA.32572.1.S1_at   | MmugDNA.32572.1 | 8.25  | 8.48  | 0.46 | 0.36 | -1.18 | 0.926113 | 0.027487 | 0.975395 | 0.207144 |
| MmugDNA.22330.1.S1_s_at | MmugDNA.22330.1 | 13.33 | 13.21 | 0.04 | 0.02 | 1.09  | 0.03015  | 0.106342 | 0.336644 | 0.368857 |
| MmugDNA.32575.1.S1_at   | MmugDNA.32575.1 | 5.52  | 5.52  | 0.13 | 0.17 | 1     | 0.471687 | 0.176214 | 0.76658  | 0.452716 |
| MmugDNA.32578.1.S1_at   | MmugDNA.32578.1 | 10.16 | 10.26 | 0.04 | 0.05 | -1.07 | 0.045757 | 0.560789 | 0.377135 | 0.73697  |
| MmugDNA.32579.1.S1_at   | MmugDNA.32579.1 | 8.5   | 8.5   | 0.35 | 0.21 | 1     | 0.401898 | 0.149574 | 0.724759 | 0.424095 |
| MmugDNA.32580.1.S1_at   | MmugDNA.32580.1 | 5.17  | 5.04  | 0.05 | 0.1  | 1.09  | 0.206355 | 0.119512 | 0.578142 | 0.388167 |
| MmugDNA.32581.1.S1_at   | MmugDNA.32581.1 | 7.55  | 7.58  | 0.02 | 0.07 | -1.02 | 0.582186 | 0.166202 | 0.827992 | 0.442767 |
| MmugDNA.32587.1.S1_at   | MmugDNA.32587.1 | 7.09  | 7.06  | 0.03 | 0.1  | 1.03  | 0.282035 | 0.667934 | 0.640534 | 0.805689 |
| MmugDNA.32588.1.S1_at   | MmugDNA.32588.1 | 5.92  | 5.84  | 0.16 | 0.04 | 1.05  | 0.409218 | 0.683484 | 0.72983  | 0.815372 |
| MmugDNA.32589.1.S1_at   | MmugDNA.32589.1 | 4.6   | 4.63  | 0.14 | 0.02 | -1.02 | 0.514905 | 0.533689 | 0.790695 | 0.719848 |
| MmugDNA.3259.1.S1_at    | MmugDNA.3259.1  | 4.06  | 3.98  | 0.12 | 0.08 | 1.05  | 0.46553  | 0.373801 | 0.763035 | 0.61244  |

|                         |                 |       |       |      |      |       |          |          |          |          |
|-------------------------|-----------------|-------|-------|------|------|-------|----------|----------|----------|----------|
| MmugDNA.32592.1.S1_at   | MmugDNA.32592.1 | 7.74  | 7.51  | 0.12 | 0.1  | 1.17  | 0.139289 | 0.16331  | 0.51471  | 0.439468 |
| MmugDNA.32593.1.S1_at   | MmugDNA.32593.1 | 3.65  | 3.67  | 0.03 | 0.13 | -1.01 | 0.867185 | 0.792962 | 0.953449 | 0.88043  |
| MmugDNA.32595.1.S1_at   | MmugDNA.32595.1 | 10.9  | 10.76 | 0.41 | 0.11 | 1.11  | 0.679117 | 0.011366 | 0.874243 | 0.138214 |
| MmugDNA.32597.1.S1_at   | MmugDNA.32597.1 | 7.19  | 5.77  | 1.13 | 0.34 | 2.68  | 0.146405 | 0.184858 | 0.520747 | 0.460776 |
| MmugDNA.32598.1.S1_at   | MmugDNA.32598.1 | 6.64  | 6.68  | 0.25 | 0.13 | -1.03 | 0.527343 | 0.716176 | 0.797084 | 0.835515 |
| MmugDNA.32599.1.S1_at   | MmugDNA.32599.1 | 5.18  | 4.91  | 0.04 | 0.16 | 1.21  | 0.037606 | 0.075482 | 0.357625 | 0.319868 |
| MmugDNA.3260.1.S1_at    | MmugDNA.3260.1  | 8.38  | 9.27  | 0.24 | 0.21 | -1.85 | 0.014905 | 0.725952 | 0.278597 | 0.841316 |
| MmugDNA.32600.1.S1_at   | MmugDNA.32600.1 | 5.07  | 5.04  | 0.12 | 0.08 | 1.02  | 0.271825 | 0.151675 | 0.631589 | 0.426383 |
| MmugDNA.32602.1.S1_at   | MmugDNA.32602.1 | 9.85  | 9.95  | 0.14 | 0.05 | -1.07 | 0.392092 | 0.152269 | 0.718056 | 0.42706  |
| MmugDNA.32603.1.S1_at   | MmugDNA.32603.1 | 6.23  | 6.09  | 0.52 | 0.07 | 1.1   | 0.652899 | 0.859911 | 0.862095 | 0.92017  |
| MmugDNA.32604.1.S1_at   | MmugDNA.32604.1 | 7.3   | 7.31  | 0.36 | 0.2  | -1    | 0.710692 | 0.015256 | 0.887398 | 0.15693  |
| MmugDNA.32605.1.S1_at   | MmugDNA.32605.1 | 6.55  | 6.5   | 0.27 | 0.17 | 1.04  | 0.364136 | 0.659543 | 0.700455 | 0.800801 |
| MmugDNA.32606.1.S1_s_at | MmugDNA.32606.1 | 11.71 | 11.38 | 0.29 | 0.36 | 1.26  | 0.982094 | 0.166222 | 0.994358 | 0.442775 |
| MmugDNA.32607.1.S1_s_at | MmugDNA.32607.1 | 9.35  | 9.34  | 0.33 | 0.11 | 1.01  | 0.871504 | 0.942756 | 0.955436 | 0.967499 |
| MmugDNA.32609.1.S1_at   | MmugDNA.32609.1 | 10.35 | 9.34  | 0.75 | 0.34 | 2.02  | 0.081085 | 0.1681   | 0.445056 | 0.444698 |
| MmugDNA.3261.1.S1_at    | MmugDNA.3261.1  | 7.57  | 7.32  | 0.25 | 0.1  | 1.19  | 0.157894 | 0.415248 | 0.530883 | 0.640769 |
| MmugDNA.32610.1.S1_at   | MmugDNA.32610.1 | 7.55  | 7.4   | 0.45 | 0    | 1.11  | 0.598086 | 0.469338 | 0.836739 | 0.678197 |
| MmugDNA.32611.1.S1_at   | MmugDNA.32611.1 | 5.54  | 4.87  | 0.59 | 0.24 | 1.59  | 0.152857 | 0.131612 | 0.525753 | 0.403716 |
| MmugDNA.32611.1.S1_s_at | MmugDNA.32611.1 | 4.3   | 3.99  | 0.26 | 0.2  | 1.23  | 0.107893 | 0.115357 | 0.480398 | 0.382394 |
| MmugDNA.32614.1.S1_at   | MmugDNA.32614.1 | 4.74  | 4.45  | 0.08 | 0.08 | 1.22  | 0.019484 | 0.219847 | 0.301444 | 0.493388 |
| MmugDNA.32615.1.S1_at   | MmugDNA.32615.1 | 5.64  | 5.61  | 0.08 | 0.06 | 1.02  | 0.343682 | 0.203103 | 0.686779 | 0.477371 |
| MmugDNA.32616.1.S1_at   | MmugDNA.32616.1 | 6.83  | 6.84  | 0.63 | 0.17 | -1    | 0.99297  | 0.280783 | 0.997404 | 0.543952 |
| MmugDNA.32617.1.S1_at   | MmugDNA.32617.1 | 5.3   | 5.13  | 0.1  | 0    | 1.12  | 0.116147 | 0.043548 | 0.489554 | 0.253261 |
| MmugDNA.32618.1.S1_at   | MmugDNA.32618.1 | 7.65  | 6.79  | 0.37 | 0.1  | 1.82  | 0.016686 | 0.086083 | 0.287553 | 0.33835  |
| MmugDNA.32619.1.S1_at   | MmugDNA.32619.1 | 8.52  | 9.2   | 0.85 | 0.04 | -1.6  | 0.195051 | 0.02878  | 0.565479 | 0.21152  |
| MmugDNA.3262.1.S1_at    | MmugDNA.3262.1  | 6.04  | 5.94  | 0.02 | 0.08 | 1.07  | 0.103004 | 0.389201 | 0.473671 | 0.623403 |
| MmugDNA.32620.1.S1_at   | MmugDNA.32620.1 | 7.07  | 7.05  | 0.38 | 0.09 | 1.02  | 0.265938 | 0.336717 | 0.627038 | 0.584045 |
| MmugDNA.32621.1.S1_at   | MmugDNA.32621.1 | 3.1   | 3.15  | 0.11 | 0.04 | -1.03 | 0.884056 | 0.990384 | 0.959789 | 0.994548 |
| MmugDNA.32622.1.S1_at   | MmugDNA.32622.1 | 12.5  | 12.78 | 0.31 | 0.03 | -1.21 | 0.355542 | 0.474254 | 0.694743 | 0.68135  |
| MmugDNA.32623.1.S1_at   | MmugDNA.32623.1 | 10.53 | 9.7   | 0.3  | 0.15 | 1.77  | 0.018105 | 0.001628 | 0.295257 | 0.060983 |
| MmugDNA.32625.1.S1_at   | MmugDNA.32625.1 | 8.67  | 9.35  | 1.02 | 0.09 | -1.59 | 0.91055  | 0.928001 | 0.969704 | 0.959116 |
| MmugDNA.32627.1.S1_at   | MmugDNA.32627.1 | 6.34  | 7.03  | 0.75 | 0.19 | -1.61 | 0.738666 | 0.520489 | 0.900053 | 0.711799 |
| MmugDNA.32628.1.S1_at   | MmugDNA.32628.1 | 4.44  | 4.43  | 0.28 | 0.07 | 1.01  | 0.712165 | 0.512821 | 0.887918 | 0.70653  |
| MmugDNA.32628.1.S1_x_at | MmugDNA.32628.1 | 5.04  | 4.94  | 0.05 | 0.22 | 1.07  | 0.530595 | 0.721368 | 0.799143 | 0.838685 |
| MmugDNA.32629.1.S1_at   | MmugDNA.32629.1 | 8.19  | 8.45  | 1.22 | 0.2  | -1.2  | 0.243455 | 0.083806 | 0.609335 | 0.334647 |
| MmugDNA.3263.1.S1_at    | MmugDNA.3263.1  | 5.65  | 5.55  | 0.17 | 0.12 | 1.07  | 0.611246 | 0.546538 | 0.842397 | 0.728079 |
| MmugDNA.32630.1.S1_at   | MmugDNA.32630.1 | 10.45 | 10.46 | 0.13 | 0.12 | -1    | 0.336995 | 0.279919 | 0.682166 | 0.543342 |
| MmugDNA.32631.1.S1_at   | MmugDNA.32631.1 | 12.91 | 12.8  | 0.05 | 0    | 1.08  | 0.011512 | 0.006029 | 0.255545 | 0.106089 |
| MmugDNA.32632.1.S1_at   | MmugDNA.32632.1 | 4.53  | 4.49  | 0.08 | 0.31 | 1.03  | 0.322421 | 0.531436 | 0.671134 | 0.718636 |
| MmugDNA.32633.1.S1_at   | MmugDNA.32633.1 | 6.69  | 6.38  | 0.88 | 0.12 | 1.24  | 0.447963 | 0.263951 | 0.753716 | 0.530153 |
| MmugDNA.32634.1.S1_at   | MmugDNA.32634.1 | 8.38  | 8.5   | 0.35 | 0.28 | -1.09 | 0.596286 | 0.532114 | 0.835834 | 0.718995 |
| MmugDNA.32634.1.S1_s_at | MmugDNA.32634.1 | 9.08  | 9.5   | 0.45 | 0.03 | -1.33 | 0.54679  | 0.550318 | 0.808796 | 0.730382 |
| MmugDNA.32635.1.S1_at   | MmugDNA.32635.1 | 3.14  | 3.04  | 0.23 | 0.36 | 1.07  | 0.63963  | 0.867758 | 0.85626  | 0.924861 |

|                         |                 |       |       |      |      |       |          |          |          |          |
|-------------------------|-----------------|-------|-------|------|------|-------|----------|----------|----------|----------|
| MmugDNA.32636.1.S1_at   | MmugDNA.32636.1 | 6.24  | 6.1   | 0.15 | 0.07 | 1.1   | 0.081248 | 0.216061 | 0.445338 | 0.489671 |
| MmugDNA.32637.1.S1_at   | MmugDNA.32637.1 | 9.85  | 8.47  | 0.97 | 0.69 | 2.6   | 0.288541 | 0.209914 | 0.645614 | 0.483701 |
| MmugDNA.32638.1.S1_at   | MmugDNA.32638.1 | 11.17 | 11.09 | 0.03 | 0.06 | 1.06  | 0.068018 | 0.061623 | 0.42451  | 0.295095 |
| MmugDNA.32639.1.S1_at   | MmugDNA.32639.1 | 3.4   | 3.52  | 0.06 | 0.35 | -1.09 | 0.541039 | 0.71872  | 0.804829 | 0.837211 |
| MmugDNA.3264.1.S1_at    | MmugDNA.3264.1  | 6.04  | 5.8   | 0.39 | 0.11 | 1.18  | 0.273399 | 0.383774 | 0.63317  | 0.619734 |
| MmugDNA.5862.1.S1_s_at  | MmugDNA.5862.1  | 6.15  | 6.33  | 0.04 | 0.34 | -1.13 | 0.15977  | 0.138566 | 0.532756 | 0.411557 |
| MmugDNA.32644.1.S1_at   | MmugDNA.32644.1 | 10.82 | 10.62 | 0.03 | 0.02 | 1.15  | 0.000607 | 0.007075 | 0.143137 | 0.113284 |
| MmugDNA.32646.1.S1_at   | MmugDNA.32646.1 | 12.94 | 12.9  | 0.08 | 0.04 | 1.02  | 0.826353 | 0.387161 | 0.937751 | 0.621935 |
| MmugDNA.32647.1.S1_at   | MmugDNA.32647.1 | 5.61  | 6.3   | 0.14 | 0.4  | -1.62 | 0.111753 | 0.081793 | 0.484908 | 0.330177 |
| MmugDNA.32647.1.S1_s_at | MmugDNA.32647.1 | 8.29  | 8.38  | 0.25 | 0.03 | -1.06 | 0.214003 | 0.059339 | 0.584533 | 0.29054  |
| MmugDNA.32648.1.S1_at   | MmugDNA.32648.1 | 4.98  | 4.99  | 0.18 | 0.12 | -1    | 0.918791 | 0.114238 | 0.972261 | 0.380761 |
| MmugDNA.3265.1.S1_at    | MmugDNA.3265.1  | 8.27  | 7.06  | 0.64 | 0.69 | 2.31  | 0.146737 | 0.107583 | 0.521143 | 0.370497 |
| MmugDNA.32650.1.S1_at   | MmugDNA.32650.1 | 10.2  | 9.66  | 0.12 | 0.1  | 1.45  | 0.004823 | 0.028318 | 0.202685 | 0.21008  |
| MmugDNA.32651.1.S1_at   | MmugDNA.32651.1 | 3.03  | 3.18  | 0.08 | 0.05 | -1.11 | 0.041673 | 0.456355 | 0.367007 | 0.670145 |
| MmugDNA.32652.1.S1_at   | MmugDNA.32652.1 | 8.93  | 8.69  | 0.21 | 0.12 | 1.18  | 0.11548  | 0.223984 | 0.488793 | 0.497025 |
| MmugDNA.32654.1.S1_at   | MmugDNA.32654.1 | 5.39  | 5.14  | 0.25 | 0.09 | 1.19  | 0.113957 | 0.134964 | 0.487339 | 0.406951 |
| MmugDNA.32655.1.S1_at   | MmugDNA.32655.1 | 4.01  | 3.48  | 0.27 | 0.55 | 1.45  | 0.736649 | 0.596776 | 0.899272 | 0.759804 |
| MmugDNA.32657.1.S1_at   | MmugDNA.32657.1 | 5.48  | 5.46  | 0.14 | 0.12 | 1.01  | 0.190454 | 0.342538 | 0.561786 | 0.588543 |
| MmugDNA.32658.1.S1_at   | MmugDNA.32658.1 | 5.96  | 5.71  | 1.12 | 0.35 | 1.19  | 0.693542 | 0.436658 | 0.880681 | 0.656148 |
| MmugDNA.32659.1.S1_at   | MmugDNA.32659.1 | 4.09  | 4.14  | 0.14 | 0.18 | -1.03 | 0.752797 | 0.839586 | 0.906817 | 0.908582 |
| MmugDNA.3266.1.S1_at    | MmugDNA.3266.1  | 6.06  | 6.02  | 0.05 | 0.02 | 1.03  | 0.313004 | 0.266681 | 0.664399 | 0.53241  |
| MmugDNA.32661.1.S1_at   | MmugDNA.32661.1 | 4.07  | 4.05  | 0.16 | 0    | 1.01  | 0.847251 | 0.720671 | 0.946516 | 0.838368 |
| MmugDNA.32662.1.S1_at   | MmugDNA.32662.1 | 3.1   | 3.08  | 0.01 | 0.09 | 1.01  | 0.577935 | 0.766234 | 0.82603  | 0.864167 |
| MmugDNA.32663.1.S1_at   | MmugDNA.32663.1 | 3.09  | 3.25  | 0.08 | 0.6  | -1.12 | 0.306788 | 0.423731 | 0.659712 | 0.646518 |
| MmugDNA.32664.1.S1_at   | MmugDNA.32664.1 | 9.92  | 9.67  | 0.35 | 0.06 | 1.19  | 0.776933 | 0.923958 | 0.917413 | 0.957162 |
| MmugDNA.32665.1.S1_at   | MmugDNA.32665.1 | 6.59  | 6.73  | 0.36 | 0.19 | -1.11 | 0.208692 | 0.114116 | 0.580413 | 0.380543 |
| MmugDNA.32667.1.S1_at   | MmugDNA.32667.1 | 8.98  | 7.61  | 0.19 | 0.39 | 2.58  | 0.009289 | 0.002443 | 0.241866 | 0.073201 |
| MmugDNA.32668.1.S1_at   | MmugDNA.32668.1 | 5.97  | 5.86  | 0.05 | 0.14 | 1.08  | 0.984499 | 0.175738 | 0.995256 | 0.452344 |
| MmugDNA.32669.1.S1_at   | MmugDNA.32669.1 | 9.27  | 9.12  | 0.55 | 0.01 | 1.11  | 0.809483 | 0.92155  | 0.93104  | 0.955761 |
| MmugDNA.3267.1.S1_at    | MmugDNA.3267.1  | 9.99  | 9.56  | 0.26 | 0.15 | 1.35  | 0.054027 | 0.076585 | 0.395693 | 0.321733 |
| MmugDNA.32670.1.S1_at   | MmugDNA.32670.1 | 6.52  | 6.9   | 0.24 | 0.2  | -1.31 | 0.249005 | 0.232643 | 0.61432  | 0.504359 |
| MmugDNA.32671.1.S1_at   | MmugDNA.32671.1 | 4.22  | 4.15  | 0.19 | 0.05 | 1.05  | 0.446215 | 0.635134 | 0.752589 | 0.785229 |
| MmugDNA.32672.1.S1_at   | MmugDNA.32672.1 | 4.8   | 4.73  | 0.14 | 0.15 | 1.04  | 0.174447 | 0.314609 | 0.54773  | 0.568415 |
| MmugDNA.32674.1.S1_at   | MmugDNA.32674.1 | 5.24  | 5.14  | 0.23 | 0.06 | 1.07  | 0.394284 | 0.440334 | 0.719675 | 0.658899 |
| MmugDNA.32675.1.S1_at   | MmugDNA.32675.1 | 3.78  | 3.73  | 0.04 | 0.07 | 1.03  | 0.202183 | 0.28187  | 0.573629 | 0.544844 |
| MmugDNA.32676.1.S1_at   | MmugDNA.32676.1 | 3.04  | 3.06  | 0.08 | 0.06 | -1.02 | 0.182946 | 0.559809 | 0.555799 | 0.736394 |
| MmugDNA.32677.1.S1_s_at | MmugDNA.32677.1 | 7.23  | 6.63  | 0.95 | 0.07 | 1.52  | 0.416616 | 0.631546 | 0.734439 | 0.782845 |
| MmugDNA.32679.1.S1_at   | MmugDNA.32679.1 | 3.58  | 3.63  | 0.4  | 0.13 | -1.03 | 0.456629 | 0.663527 | 0.758026 | 0.803016 |
| MmugDNA.3268.1.S1_at    | MmugDNA.3268.1  | 3.4   | 3.38  | 0.13 | 0.01 | 1.02  | 0.506153 | 0.752203 | 0.785701 | 0.855787 |
| MmugDNA.32680.1.S1_at   | MmugDNA.32680.1 | 9.43  | 8.78  | 1.07 | 0.22 | 1.57  | 0.939472 | 0.225785 | 0.979532 | 0.498159 |
| MmugDNA.32681.1.S1_at   | MmugDNA.32681.1 | 5.77  | 5.48  | 0.25 | 0.38 | 1.22  | 0.119998 | 0.578782 | 0.493289 | 0.748614 |
| MmugDNA.32682.1.S1_at   | MmugDNA.32682.1 | 4.18  | 4.25  | 0.08 | 0.16 | -1.05 | 0.851524 | 0.301256 | 0.947639 | 0.559356 |
| MmugDNA.32684.1.S1_at   | MmugDNA.32684.1 | 4.15  | 4.11  | 0.31 | 0.06 | 1.03  | 0.783695 | 0.849944 | 0.920386 | 0.914673 |

|                         |                 |       |       |      |      |       |          |          |          |          |
|-------------------------|-----------------|-------|-------|------|------|-------|----------|----------|----------|----------|
| MmugDNA.32685.1.S1_at   | MmugDNA.32685.1 | 9.27  | 9.28  | 0.19 | 0.21 | -1.01 | 0.542141 | 0.81339  | 0.805539 | 0.89215  |
| MmugDNA.32686.1.S1_at   | MmugDNA.32686.1 | 5.08  | 5.62  | 0.18 | 0.38 | -1.45 | 0.410268 | 0.274991 | 0.730705 | 0.539402 |
| MmugDNA.32687.1.S1_at   | MmugDNA.32687.1 | 4.24  | 4.38  | 0.01 | 0.11 | -1.1  | 0.095075 | 0.373472 | 0.464131 | 0.61228  |
| MmugDNA.32688.1.S1_at   | MmugDNA.32688.1 | 9.47  | 10.33 | 0.75 | 0.13 | -1.81 | 0.077975 | 0.073681 | 0.439987 | 0.317014 |
| MmugDNA.32689.1.S1_at   | MmugDNA.32689.1 | 5.89  | 5.62  | 0.11 | 0.09 | 1.21  | 0.055451 | 0.006382 | 0.398621 | 0.108551 |
| MmugDNA.3269.1.S1_at    | MmugDNA.3269.1  | 4.58  | 4.86  | 0.48 | 0.09 | -1.22 | 0.925316 | 0.922723 | 0.975138 | 0.956468 |
| MmugDNA.32691.1.S1_at   | MmugDNA.32691.1 | 8.22  | 8.95  | 0.78 | 0.14 | -1.66 | 0.120777 | 0.053506 | 0.494337 | 0.276963 |
| MmugDNA.32692.1.S1_at   | MmugDNA.32692.1 | 4.14  | 4.21  | 0.07 | 0.06 | -1.05 | 0.122226 | 0.206987 | 0.495677 | 0.481111 |
| MmugDNA.32693.1.S1_at   | MmugDNA.32693.1 | 6.82  | 6.69  | 0.35 | 0.1  | 1.1   | 0.976143 | 0.868616 | 0.992259 | 0.925383 |
| MmugDNA.32694.1.S1_at   | MmugDNA.32694.1 | 9.79  | 10.03 | 1.64 | 0.35 | -1.18 | 0.812008 | 0.237306 | 0.932004 | 0.508027 |
| MmugDNA.32694.1.S1_s_at | MmugDNA.32694.1 | 10.94 | 11.33 | 1.43 | 0.24 | -1.31 | 0.638251 | 0.244307 | 0.855896 | 0.514184 |
| MmugDNA.32695.1.S1_at   | MmugDNA.32695.1 | 5.26  | 5.17  | 0.14 | 0.05 | 1.06  | 0.987932 | 0.347562 | 0.995831 | 0.592019 |
| MmugDNA.32696.1.S1_at   | MmugDNA.32696.1 | 5.2   | 4.99  | 0.19 | 0.2  | 1.16  | 0.353152 | 0.124817 | 0.693168 | 0.395219 |
| MmugDNA.32698.1.S1_at   | MmugDNA.32698.1 | 4.76  | 5.18  | 0.28 | 0.14 | -1.33 | 0.097008 | 0.193657 | 0.465689 | 0.468785 |
| MmugDNA.32699.1.S1_at   | MmugDNA.32699.1 | 9.85  | 9.03  | 3.33 | 0.41 | 1.78  | 0.87645  | 0.263263 | 0.956921 | 0.529531 |
| MmugDNA.3270.1.S1_at    | MmugDNA.3270.1  | 11.5  | 11.33 | 0.19 | 0.1  | 1.12  | 0.155919 | 0.143151 | 0.529116 | 0.417029 |
| MmugDNA.32700.1.S1_at   | MmugDNA.32700.1 | 4.58  | 4.17  | 0.13 | 0.13 | 1.33  | 0.067726 | 0.168287 | 0.42444  | 0.444935 |
| MmugDNA.32701.1.S1_at   | MmugDNA.32701.1 | 3.97  | 4.15  | 0.22 | 0.06 | -1.13 | 0.876306 | 0.635317 | 0.956886 | 0.785344 |
| MmugDNA.32702.1.S1_at   | MmugDNA.32702.1 | 9.06  | 7.55  | 1.44 | 0.08 | 2.86  | 0.17786  | 0.021044 | 0.550987 | 0.181869 |
| MmugDNA.32704.1.S1_at   | MmugDNA.32704.1 | 13.02 | 12.96 | 0.12 | 0.09 | 1.04  | 0.330525 | 0.069575 | 0.67715  | 0.309848 |
| MmugDNA.7703.1.S1_s_at  | MmugDNA.7703.1  | 9.69  | 9.94  | 0.29 | 0.1  | -1.19 | 0.398186 | 0.416413 | 0.722353 | 0.641587 |
| MmugDNA.32706.1.S1_at   | MmugDNA.32706.1 | 6.75  | 6.93  | 0.44 | 0.03 | -1.13 | 0.508097 | 0.811939 | 0.786661 | 0.891493 |
| MmugDNA.32707.1.S1_at   | MmugDNA.32707.1 | 3.96  | 3.87  | 0.16 | 0.14 | 1.06  | 0.461542 | 0.669892 | 0.76103  | 0.806933 |
| MmugDNA.32708.1.S1_at   | MmugDNA.32708.1 | 3.33  | 3.36  | 0.15 | 0.02 | -1.02 | 0.590334 | 0.608883 | 0.832841 | 0.767364 |
| MmugDNA.3271.1.S1_at    | MmugDNA.3271.1  | 4.68  | 4.78  | 0.27 | 0.01 | -1.07 | 0.774969 | 0.86     | 0.916523 | 0.920191 |
| MmugDNA.32710.1.S1_at   | MmugDNA.32710.1 | 4.27  | 3.71  | 0.11 | 0.15 | 1.48  | 0.019485 | 0.009682 | 0.301444 | 0.12945  |
| MmugDNA.32711.1.S1_at   | MmugDNA.32711.1 | 7.6   | 7.29  | 0.35 | 0.14 | 1.24  | 0.227219 | 0.008993 | 0.596459 | 0.125485 |
| MmugDNA.32712.1.S1_at   | MmugDNA.32712.1 | 4.7   | 4.49  | 0.14 | 0.13 | 1.16  | 0.085524 | 0.172281 | 0.452653 | 0.448666 |
| MmugDNA.32713.1.S1_at   | MmugDNA.32713.1 | 4.92  | 5.03  | 0.26 | 0.11 | -1.08 | 0.324202 | 0.538009 | 0.672526 | 0.72281  |
| MmugDNA.32714.1.S1_at   | MmugDNA.32714.1 | 2.95  | 2.8   | 0.03 | 0.17 | 1.11  | 0.692466 | 0.778594 | 0.880095 | 0.871488 |
| MmugDNA.32717.1.S1_at   | MmugDNA.32717.1 | 11.25 | 11.38 | 0.29 | 0.04 | -1.1  | 0.777775 | 0.965037 | 0.917813 | 0.980558 |
| MmugDNA.32718.1.S1_at   | MmugDNA.32718.1 | 3.47  | 3.17  | 0.14 | 0.05 | 1.24  | 0.021212 | 0.035124 | 0.307172 | 0.231645 |
| MmugDNA.32719.1.S1_at   | MmugDNA.32719.1 | 3.95  | 3.95  | 0.08 | 0.03 | 1     | 0.276467 | 0.639414 | 0.636031 | 0.788289 |
| MmugDNA.32720.1.S1_at   | MmugDNA.32720.1 | 10.19 | 10.06 | 0.57 | 0.25 | 1.09  | 0.885801 | 0.960177 | 0.96038  | 0.977425 |
| MmugDNA.32721.1.S1_at   | MmugDNA.32721.1 | 6.16  | 5.79  | 0.15 | 0.44 | 1.29  | 0.903548 | 0.526848 | 0.967608 | 0.715627 |
| MmugDNA.32722.1.S1_at   | MmugDNA.32722.1 | 6.79  | 6.74  | 0.14 | 0.11 | 1.03  | 0.156344 | 0.170199 | 0.529536 | 0.446906 |
| MmugDNA.32723.1.S1_at   | MmugDNA.32723.1 | 7.75  | 7.83  | 0.26 | 0.08 | -1.06 | 0.731801 | 0.505871 | 0.896916 | 0.702226 |
| MmugDNA.32726.1.S1_at   | MmugDNA.32726.1 | 8.55  | 8.49  | 0.32 | 0.11 | 1.05  | 0.51495  | 0.000108 | 0.790722 | 0.028099 |
| MmugDNA.32727.1.S1_at   | MmugDNA.32727.1 | 7.52  | 6.86  | 0.58 | 0.14 | 1.58  | 0.050983 | 0.399587 | 0.388526 | 0.629912 |
| MmugDNA.32729.1.S1_at   | MmugDNA.32729.1 | 8.82  | 8.79  | 0.23 | 0.21 | 1.02  | 0.851937 | 0.00024  | 0.947822 | 0.032579 |
| MmugDNA.32730.1.S1_at   | MmugDNA.32730.1 | 5.1   | 5.11  | 0.05 | 0.27 | -1.01 | 0.329956 | 0.375196 | 0.676692 | 0.613249 |
| MmugDNA.32733.1.S1_at   | MmugDNA.32733.1 | 6.74  | 6.41  | 0.79 | 0.79 | 1.26  | 0.807525 | 0.606444 | 0.930185 | 0.765747 |
| MmugDNA.32736.1.S1_at   | MmugDNA.32736.1 | 5.45  | 7.74  | 0.76 | 0.02 | -4.88 | 0.009887 | 0.002231 | 0.244171 | 0.069565 |

|                         |                 |       |       |      |      |       |          |          |          |          |
|-------------------------|-----------------|-------|-------|------|------|-------|----------|----------|----------|----------|
| MmugDNA.32737.1.S1_at   | MmugDNA.32737.1 | 5.48  | 5.59  | 0.08 | 0.06 | -1.07 | 0.189719 | 0.096025 | 0.561075 | 0.353302 |
| MmugDNA.32738.1.S1_at   | MmugDNA.32738.1 | 7.15  | 7.3   | 0.42 | 0.09 | -1.11 | 0.44331  | 0.603994 | 0.750683 | 0.764427 |
| MmugDNA.3274.1.S1_at    | MmugDNA.3274.1  | 3.39  | 3.1   | 0.13 | 0.46 | 1.22  | 0.946762 | 0.842676 | 0.981556 | 0.910333 |
| MmugDNA.32743.1.S1_at   | MmugDNA.32743.1 | 5.49  | 5.54  | 0.18 | 0.3  | -1.04 | 0.542418 | 0.002209 | 0.805702 | 0.069408 |
| MmugDNA.32744.1.S1_at   | MmugDNA.32744.1 | 14.54 | 14.54 | 0.02 | 0.02 | 1     | 0.23653  | 0.384105 | 0.603453 | 0.619926 |
| MmugDNA.32745.1.S1_at   | MmugDNA.32745.1 | 8.03  | 8.34  | 0.56 | 0.03 | -1.24 | 0.60095  | 0.084798 | 0.838005 | 0.336325 |
| MmugDNA.32746.1.S1_at   | MmugDNA.32746.1 | 7.28  | 7.79  | 0.48 | 0.11 | -1.42 | 0.354402 | 0.089078 | 0.694008 | 0.343006 |
| MmugDNA.32747.1.S1_s_at | MmugDNA.32747.1 | 11.13 | 10.35 | 0.2  | 0.05 | 1.72  | 0.002327 | 0.002356 | 0.17599  | 0.071631 |
| MmugDNA.32749.1.S1_at   | MmugDNA.32749.1 | 8.14  | 8.95  | 0.86 | 0.41 | -1.75 | 0.822002 | 0.119028 | 0.935807 | 0.387296 |
| MmugDNA.3275.1.S1_at    | MmugDNA.3275.1  | 6.92  | 6.78  | 0.1  | 0.19 | 1.1   | 0.430332 | 0.154551 | 0.742672 | 0.429429 |
| MmugDNA.32750.1.S1_at   | MmugDNA.32750.1 | 5.83  | 5.82  | 0.25 | 0.26 | -1.01 | 0.968304 | 0.494448 | 0.989587 | 0.694872 |
| MmugDNA.32751.1.S1_at   | MmugDNA.32751.1 | 7.37  | 7.81  | 0.46 | 0.11 | -1.36 | 0.23361  | 0.035976 | 0.601158 | 0.234155 |
| MmugDNA.32752.1.S1_at   | MmugDNA.32752.1 | 6.33  | 5.89  | 0.45 | 0.04 | 1.35  | 0.058438 | 0.01634  | 0.404396 | 0.161886 |
| MmugDNA.32753.1.S1_s_at | MmugDNA.32753.1 | 13.17 | 13.22 | 0.05 | 0.03 | -1.03 | 0.45021  | 0.563638 | 0.754757 | 0.738768 |
| MmugDNA.32754.1.S1_at   | MmugDNA.32754.1 | 3.51  | 3.29  | 0.08 | 0.22 | 1.16  | 0.368438 | 0.094922 | 0.703625 | 0.352044 |
| MmugDNA.32755.1.S1_at   | MmugDNA.32755.1 | 5.15  | 5.13  | 0.15 | 0.03 | 1.01  | 0.285882 | 0.392682 | 0.643497 | 0.625813 |
| MmugDNA.32757.1.S1_at   | MmugDNA.32757.1 | 5.87  | 5.72  | 0.11 | 0.16 | 1.11  | 0.968766 | 0.328096 | 0.989735 | 0.577871 |
| MmugDNA.32758.1.S1_at   | MmugDNA.32758.1 | 7.74  | 7.25  | 0.07 | 0.2  | 1.41  | 0.014272 | 0.054502 | 0.274559 | 0.278959 |
| MmugDNA.32759.1.S1_at   | MmugDNA.32759.1 | 5.71  | 5.75  | 0.16 | 0.04 | -1.02 | 0.264064 | 0.377208 | 0.625948 | 0.61484  |
| MmugDNA.32760.1.S1_at   | MmugDNA.32760.1 | 8.09  | 7.95  | 1.15 | 0.59 | 1.1   | 0.794937 | 0.33679  | 0.92471  | 0.584093 |
| MmugDNA.32762.1.S1_at   | MmugDNA.32762.1 | 9.68  | 9.06  | 0.59 | 0.28 | 1.53  | 0.35231  | 0.736799 | 0.692649 | 0.847693 |
| MmugDNA.32764.1.S1_at   | MmugDNA.32764.1 | 3.5   | 3.52  | 0.17 | 0.06 | -1.01 | 0.899623 | 0.137431 | 0.965902 | 0.410368 |
| MmugDNA.32765.1.S1_at   | MmugDNA.32765.1 | 3.77  | 3.44  | 0.23 | 0.02 | 1.26  | 0.076526 | 0.029543 | 0.437977 | 0.213535 |
| MmugDNA.32766.1.S1_at   | MmugDNA.32766.1 | 4.75  | 4.9   | 0.18 | 0.18 | -1.12 | 0.346544 | 0.387526 | 0.68831  | 0.622163 |
| MmugDNA.32767.1.S1_at   | MmugDNA.32767.1 | 6.95  | 6.92  | 0.61 | 0.29 | 1.02  | 0.836201 | 0.424947 | 0.941202 | 0.647439 |
| MmugDNA.32768.1.S1_at   | MmugDNA.32768.1 | 3.34  | 3.25  | 0.07 | 0.1  | 1.06  | 0.504639 | 0.380932 | 0.784939 | 0.617426 |
| MmugDNA.32769.1.S1_at   | MmugDNA.32769.1 | 4.86  | 4.8   | 0.15 | 0.11 | 1.04  | 0.311845 | 0.022354 | 0.663542 | 0.187159 |
| MmugDNA.3277.1.S1_at    | MmugDNA.3277.1  | 3.9   | 3.9   | 0.02 | 0    | 1     | 0.803173 | 0.72417  | 0.928233 | 0.840374 |
| MmugDNA.32771.1.S1_at   | MmugDNA.32771.1 | 5.05  | 5.2   | 0.18 | 0.14 | -1.11 | 0.856524 | 0.846311 | 0.949449 | 0.912526 |
| MmugDNA.32772.1.S1_at   | MmugDNA.32772.1 | 4.3   | 4.21  | 0.11 | 0    | 1.06  | 0.474724 | 0.388975 | 0.768199 | 0.623278 |
| MmugDNA.32773.1.S1_at   | MmugDNA.32773.1 | 11.08 | 11.73 | 0.2  | 0.05 | -1.58 | 0.010904 | 0.000402 | 0.250796 | 0.037471 |
| MmugDNA.32774.1.S1_at   | MmugDNA.32774.1 | 7.74  | 7.65  | 0.31 | 0.18 | 1.06  | 0.697168 | 0.688044 | 0.882223 | 0.817896 |
| MmugDNA.32775.1.S1_at   | MmugDNA.32775.1 | 7.22  | 7.17  | 0.08 | 0.06 | 1.04  | 0.865508 | 0.370735 | 0.95264  | 0.609721 |
| MmugDNA.32778.1.S1_at   | MmugDNA.32778.1 | 4.86  | 4.88  | 0.14 | 0.07 | -1.01 | 0.528663 | 0.755238 | 0.797961 | 0.857509 |
| MmugDNA.32779.1.S1_at   | MmugDNA.32779.1 | 6.14  | 6.35  | 0.2  | 0.27 | -1.16 | 0.454612 | 0.759606 | 0.756874 | 0.860234 |
| MmugDNA.3278.1.S1_at    | MmugDNA.3278.1  | 4.55  | 4.2   | 0.12 | 0.11 | 1.28  | 0.02465  | 0.014626 | 0.319333 | 0.154176 |
| MmugDNA.32780.1.S1_at   | MmugDNA.32780.1 | 4.24  | 4.56  | 0.26 | 0.14 | -1.25 | 0.124171 | 0.036944 | 0.498278 | 0.236659 |
| MmugDNA.32781.1.S1_at   | MmugDNA.32781.1 | 4.13  | 4.19  | 0.21 | 0.38 | -1.04 | 0.837998 | 0.96304  | 0.941963 | 0.979361 |
| MmugDNA.32782.1.S1_at   | MmugDNA.32782.1 | 6.67  | 6.56  | 0.05 | 0.07 | 1.07  | 0.099387 | 0.346089 | 0.468989 | 0.591166 |
| MmugDNA.32783.1.S1_at   | MmugDNA.32783.1 | 3.04  | 3.03  | 0.03 | 0.04 | 1     | 0.845288 | 0.600752 | 0.945758 | 0.76224  |
| MmugDNA.32785.1.S1_at   | MmugDNA.32785.1 | 4     | 3.97  | 0.21 | 0.04 | 1.02  | 0.412836 | 0.454449 | 0.732098 | 0.668603 |
| MmugDNA.32787.1.S1_at   | MmugDNA.32787.1 | 5.34  | 5.28  | 0.06 | 0.03 | 1.04  | 0.344651 | 0.205047 | 0.686997 | 0.47934  |
| MmugDNA.32788.1.S1_at   | MmugDNA.32788.1 | 5.61  | 5.67  | 0.94 | 0.09 | -1.04 | 0.820774 | 0.524454 | 0.935289 | 0.714384 |

|                         |                 |       |       |      |      |       |          |          |          |          |
|-------------------------|-----------------|-------|-------|------|------|-------|----------|----------|----------|----------|
| MmugDNA.32789.1.S1_at   | MmugDNA.32789.1 | 3.07  | 3.09  | 0.05 | 0.07 | -1.01 | 0.349092 | 0.882101 | 0.690223 | 0.932794 |
| MmugDNA.32790.1.S1_at   | MmugDNA.32790.1 | 3.46  | 3.46  | 0.03 | 0.04 | 1     | 0.931079 | 0.183571 | 0.976966 | 0.459681 |
| MmugDNA.32791.1.S1_at   | MmugDNA.32791.1 | 5.89  | 4.83  | 0.5  | 0.14 | 2.09  | 0.033841 | 0.189103 | 0.347296 | 0.464934 |
| MmugDNA.32792.1.S1_at   | MmugDNA.32792.1 | 6.3   | 7.04  | 0.53 | 0.06 | -1.66 | 0.206172 | 0.291739 | 0.578134 | 0.552054 |
| MmugDNA.32793.1.S1_at   | MmugDNA.32793.1 | 6.86  | 6.56  | 0.11 | 0.03 | 1.24  | 0.022017 | 0.041738 | 0.309781 | 0.24892  |
| MmugDNA.32794.1.S1_at   | MmugDNA.32794.1 | 4.37  | 4.42  | 0.05 | 0.01 | -1.04 | 0.448935 | 0.701599 | 0.754037 | 0.826955 |
| MmugDNA.32795.1.S1_at   | MmugDNA.32795.1 | 5.33  | 5.7   | 0.04 | 0.22 | -1.29 | 0.043565 | 0.016576 | 0.372185 | 0.163023 |
| MmugDNA.32796.1.S1_at   | MmugDNA.32796.1 | 8.42  | 8.34  | 0.15 | 0.01 | 1.06  | 0.198146 | 0.365111 | 0.569361 | 0.605299 |
| MmugDNA.32797.1.S1_at   | MmugDNA.32797.1 | 9.28  | 9.78  | 0.52 | 0.19 | -1.41 | 0.372328 | 0.379801 | 0.705567 | 0.616576 |
| MmugDNA.32798.1.S1_at   | MmugDNA.32798.1 | 4.29  | 4.25  | 0.13 | 0.34 | 1.02  | 0.37401  | 0.502173 | 0.705665 | 0.70006  |
| MmugDNA.3280.1.S1_at    | MmugDNA.3280.1  | 3.26  | 3.26  | 0.02 | 0.1  | -1.01 | 0.863745 | 0.507108 | 0.952043 | 0.70277  |
| MmugDNA.32801.1.S1_at   | MmugDNA.32801.1 | 4     | 3.86  | 0.01 | 0.12 | 1.11  | 0.034867 | 0.060852 | 0.350453 | 0.293437 |
| MmugDNA.32802.1.S1_at   | MmugDNA.32802.1 | 10.61 | 10.01 | 0.21 | 0.14 | 1.52  | 0.010858 | 0.006698 | 0.250539 | 0.110751 |
| MmugDNA.32806.1.S1_at   | MmugDNA.32806.1 | 3.32  | 3.25  | 0.12 | 0.06 | 1.05  | 0.242418 | 0.368808 | 0.608517 | 0.608313 |
| MmugDNA.32809.1.S1_at   | MmugDNA.32809.1 | 6.12  | 6.07  | 0    | 0.03 | 1.04  | 0.133863 | 0.424603 | 0.508124 | 0.647158 |
| MmugDNA.3281.1.S1_at    | MmugDNA.3281.1  | 4.19  | 4     | 0.26 | 0.1  | 1.14  | 0.136904 | 0.658676 | 0.511963 | 0.800473 |
| MmugDNA.32810.1.S1_at   | MmugDNA.32810.1 | 8.52  | 7.98  | 0.46 | 0.09 | 1.45  | 0.06928  | 0.104643 | 0.426761 | 0.365941 |
| MmugDNA.32811.1.S1_at   | MmugDNA.32811.1 | 8.14  | 8.44  | 0.27 | 0.22 | -1.23 | 0.206974 | 0.465419 | 0.578774 | 0.675748 |
| MmugDNA.32813.1.S1_at   | MmugDNA.32813.1 | 5.35  | 5.13  | 0.17 | 0.07 | 1.16  | 0.099192 | 0.43275  | 0.468572 | 0.653101 |
| MmugDNA.32814.1.S1_at   | MmugDNA.32814.1 | 7.82  | 8.33  | 0.61 | 0.21 | -1.42 | 0.103643 | 0.233878 | 0.474343 | 0.505169 |
| MmugDNA.32816.1.S1_s_at | MmugDNA.32816.1 | 4.97  | 5.99  | 1.41 | 0.59 | -2.03 | 0.484281 | 0.246457 | 0.773506 | 0.515899 |
| MmugDNA.32817.1.S1_at   | MmugDNA.32817.1 | 5.81  | 5.49  | 0.08 | 0.61 | 1.25  | 0.832361 | 0.876893 | 0.939855 | 0.929855 |
| MmugDNA.32818.1.S1_at   | MmugDNA.32818.1 | 4.64  | 5.03  | 0.57 | 0.46 | -1.31 | 0.775254 | 0.486236 | 0.916675 | 0.689657 |
| MmugDNA.32819.1.S1_at   | MmugDNA.32819.1 | 4.18  | 4.27  | 0.03 | 0.16 | -1.06 | 0.38956  | 0.266474 | 0.716241 | 0.532234 |
| MmugDNA.32820.1.S1_at   | MmugDNA.32820.1 | 6.13  | 5.95  | 0.35 | 0.08 | 1.13  | 0.131838 | 0.034437 | 0.506276 | 0.229602 |
| MmugDNA.32822.1.S1_at   | MmugDNA.32822.1 | 6.18  | 6.52  | 1.5  | 0.27 | -1.26 | 0.812474 | 0.336107 | 0.932099 | 0.583652 |
| MmugDNA.32823.1.S1_at   | MmugDNA.32823.1 | 6.49  | 7.1   | 0.13 | 0.19 | -1.53 | 0.009873 | 0.011014 | 0.244171 | 0.13671  |
| MmugDNA.32824.1.S1_at   | MmugDNA.32824.1 | 10.64 | 11.13 | 0.17 | 0.12 | -1.41 | 0.016923 | 0.302585 | 0.288966 | 0.560201 |
| MmugDNA.32825.1.S1_at   | MmugDNA.32825.1 | 5.94  | 5.93  | 0.17 | 0.1  | 1.01  | 0.877072 | 0.981759 | 0.957122 | 0.989984 |
| MmugDNA.32826.1.S1_at   | MmugDNA.32826.1 | 12.39 | 12.32 | 1.05 | 0.17 | 1.05  | 0.764044 | 0.05338  | 0.911355 | 0.276606 |
| MmugDNA.32829.1.S1_at   | MmugDNA.32829.1 | 4.91  | 5.29  | 0.49 | 0.42 | -1.3  | 0.297326 | 0.335862 | 0.652737 | 0.583533 |
| MmugDNA.3283.1.S1_at    | MmugDNA.3283.1  | 4.06  | 4.15  | 1.34 | 0.28 | -1.07 | 0.893442 | 0.79521  | 0.963467 | 0.882    |
| MmugDNA.32830.1.S1_at   | MmugDNA.32830.1 | 7.03  | 5.75  | 0.91 | 0.72 | 2.42  | 0.315177 | 0.296564 | 0.665641 | 0.555566 |
| MmugDNA.32831.1.S1_at   | MmugDNA.32831.1 | 5.2   | 5.32  | 0.62 | 0.3  | -1.09 | 0.761268 | 0.926148 | 0.910425 | 0.95813  |
| MmugDNA.32832.1.S1_at   | MmugDNA.32832.1 | 3.73  | 3.49  | 0.13 | 0.18 | 1.18  | 0.13228  | 0.077852 | 0.506752 | 0.324093 |
| MmugDNA.32833.1.S1_at   | MmugDNA.32833.1 | 3.99  | 4.02  | 0.19 | 0.08 | -1.02 | 0.389674 | 0.284311 | 0.716272 | 0.546589 |
| MmugDNA.32834.1.S1_at   | MmugDNA.32834.1 | 3.36  | 3.39  | 0.05 | 0.07 | -1.02 | 0.263389 | 0.180741 | 0.625348 | 0.457294 |
| MmugDNA.32835.1.S1_at   | MmugDNA.32835.1 | 4.06  | 3.91  | 0.13 | 0.05 | 1.11  | 0.522814 | 0.707776 | 0.795346 | 0.830472 |
| MmugDNA.32836.1.S1_at   | MmugDNA.32836.1 | 10.65 | 10.9  | 1.33 | 0.08 | -1.19 | 0.55109  | 0.771732 | 0.811221 | 0.867344 |
| MmugDNA.32838.1.S1_at   | MmugDNA.32838.1 | 4.1   | 4.04  | 0.08 | 0.11 | 1.04  | 0.19992  | 0.250434 | 0.571811 | 0.519391 |
| MmugDNA.32839.1.S1_at   | MmugDNA.32839.1 | 8.47  | 7.94  | 0.11 | 0.04 | 1.44  | 0.00121  | 0.001166 | 0.156386 | 0.053615 |
| MmugDNA.3284.1.S1_at    | MmugDNA.3284.1  | 5.53  | 5.02  | 0.8  | 0.1  | 1.43  | 0.220285 | 0.225088 | 0.589578 | 0.497741 |
| MmugDNA.32842.1.S1_at   | MmugDNA.32842.1 | 2.99  | 3.05  | 0.15 | 0.05 | -1.05 | 0.629929 | 0.435253 | 0.85178  | 0.655127 |

|                         |                 |       |       |      |      |       |          |          |          |          |
|-------------------------|-----------------|-------|-------|------|------|-------|----------|----------|----------|----------|
| MmugDNA.32843.1.S1_at   | MmugDNA.32843.1 | 10.11 | 10.3  | 0.16 | 0.06 | -1.14 | 0.100851 | 0.12199  | 0.47159  | 0.391416 |
| MmugDNA.32844.1.S1_at   | MmugDNA.32844.1 | 5.42  | 5.24  | 0.07 | 0.04 | 1.13  | 0.006137 | 0.168302 | 0.216351 | 0.444942 |
| MmugDNA.32845.1.S1_at   | MmugDNA.32845.1 | 5.37  | 5.29  | 0.17 | 0.16 | 1.06  | 0.815245 | 0.20245  | 0.933137 | 0.476786 |
| MmugDNA.32846.1.S1_at   | MmugDNA.32846.1 | 3.88  | 3.68  | 0.57 | 0.42 | 1.15  | 0.924144 | 0.259017 | 0.974622 | 0.526218 |
| MmugDNA.32847.1.S1_at   | MmugDNA.32847.1 | 4.86  | 4.86  | 0.47 | 0.05 | 1     | 0.341366 | 0.135909 | 0.685051 | 0.408103 |
| MmugDNA.32849.1.S1_at   | MmugDNA.32849.1 | 4.35  | 4.72  | 0.25 | 0.12 | -1.29 | 0.086025 | 0.376609 | 0.453457 | 0.614432 |
| MmugDNA.3285.1.S1_at    | MmugDNA.3285.1  | 7.99  | 7.43  | 0.64 | 0.26 | 1.48  | 0.265192 | 0.090377 | 0.626397 | 0.344827 |
| MmugDNA.32850.1.S1_at   | MmugDNA.32850.1 | 4.53  | 4.58  | 0.3  | 0.19 | -1.04 | 0.549103 | 0.848626 | 0.810213 | 0.914061 |
| MmugDNA.32851.1.S1_at   | MmugDNA.32851.1 | 10.65 | 9.93  | 0.31 | 0.06 | 1.65  | 0.039499 | 0.027517 | 0.362034 | 0.207161 |
| MmugDNA.32853.1.S1_at   | MmugDNA.32853.1 | 9.46  | 9.15  | 0.24 | 0.12 | 1.24  | 0.043983 | 0.030935 | 0.373462 | 0.217705 |
| MmugDNA.32854.1.S1_at   | MmugDNA.32854.1 | 6.08  | 6.06  | 0.52 | 0.11 | -1.01 | 0.900651 | 0.073479 | 0.96623  | 0.316769 |
| MmugDNA.32855.1.S1_at   | MmugDNA.32855.1 | 10.16 | 9.65  | 0.91 | 0.21 | 1.43  | 0.68035  | 0.084721 | 0.874646 | 0.336196 |
| MmugDNA.32857.1.S1_at   | MmugDNA.32857.1 | 12.57 | 12.66 | 0.22 | 0.11 | -1.07 | 0.541637 | 0.219118 | 0.805212 | 0.492868 |
| MmugDNA.32858.1.S1_at   | MmugDNA.32858.1 | 5.65  | 6.2   | 0.96 | 0.46 | -1.47 | 0.154638 | 0.109756 | 0.527914 | 0.373701 |
| MmugDNA.32859.1.S1_at   | MmugDNA.32859.1 | 7.42  | 5.52  | 1.02 | 0.07 | 3.73  | 0.089864 | 0.090754 | 0.457893 | 0.345227 |
| MmugDNA.3286.1.S1_at    | MmugDNA.3286.1  | 7.4   | 7.19  | 0.07 | 0.09 | 1.16  | 0.058789 | 0.557834 | 0.405412 | 0.735262 |
| MmugDNA.32860.1.S1_at   | MmugDNA.32860.1 | 5.34  | 5.29  | 0    | 0.1  | 1.03  | 0.784844 | 0.959374 | 0.920956 | 0.976959 |
| MmugDNA.32861.1.S1_at   | MmugDNA.32861.1 | 9.31  | 9.06  | 0.27 | 0.17 | 1.19  | 0.094529 | 0.18607  | 0.463794 | 0.461931 |
| MmugDNA.32862.1.S1_at   | MmugDNA.32862.1 | 5.73  | 6.15  | 0.44 | 0.09 | -1.34 | 0.215536 | 0.047504 | 0.585748 | 0.262578 |
| MmugDNA.32862.1.S1_s_at | MmugDNA.32862.1 | 7.56  | 7.73  | 0.13 | 0.14 | -1.12 | 0.408419 | 0.023841 | 0.72928  | 0.193392 |
| MmugDNA.32863.1.S1_at   | MmugDNA.32863.1 | 9.97  | 9.85  | 0.43 | 0.16 | 1.09  | 0.737256 | 0.8475   | 0.899426 | 0.913321 |
| MmugDNA.32864.1.S1_at   | MmugDNA.32864.1 | 5.85  | 5.79  | 0.09 | 0.15 | 1.04  | 0.694902 | 0.304339 | 0.881223 | 0.561645 |
| MmugDNA.32865.1.S1_at   | MmugDNA.32865.1 | 8.28  | 8.53  | 0.69 | 0.06 | -1.19 | 0.759484 | 0.057011 | 0.909671 | 0.284868 |
| MmugDNA.32867.1.S1_at   | MmugDNA.32867.1 | 5.03  | 4.93  | 0.11 | 0.25 | 1.07  | 0.817082 | 0.792837 | 0.933848 | 0.880387 |
| MmugDNA.32868.1.S1_x_at | MmugDNA.32868.1 | 11.05 | 11.41 | 0.22 | 0.13 | -1.28 | 0.207372 | 0.246292 | 0.578933 | 0.515889 |
| MmugDNA.32869.1.S1_at   | MmugDNA.32869.1 | 5.17  | 5.13  | 0.05 | 0.01 | 1.03  | 0.138356 | 0.941346 | 0.51369  | 0.966765 |
| MmugDNA.3287.1.S1_at    | MmugDNA.3287.1  | 4.37  | 4.37  | 0.03 | 0.05 | -1    | 0.794687 | 0.728909 | 0.924622 | 0.8433   |
| MmugDNA.32871.1.S1_at   | MmugDNA.32871.1 | 4.21  | 4.15  | 0.07 | 0.02 | 1.04  | 0.254742 | 0.151028 | 0.619146 | 0.425681 |
| MmugDNA.32872.1.S1_at   | MmugDNA.32872.1 | 3.07  | 3.22  | 0.37 | 0.11 | -1.1  | 0.817865 | 0.883613 | 0.93417  | 0.93366  |
| MmugDNA.32874.1.S1_at   | MmugDNA.32874.1 | 3.09  | 2.94  | 0.02 | 0.06 | 1.11  | 0.021797 | 0.299363 | 0.309672 | 0.557857 |
| MmugDNA.32875.1.S1_at   | MmugDNA.32875.1 | 11.78 | 11.83 | 0.12 | 0.06 | -1.04 | 0.191727 | 0.003652 | 0.562859 | 0.086526 |
| MmugDNA.32875.1.S1_x_at | MmugDNA.32875.1 | 11.89 | 11.93 | 0.1  | 0.08 | -1.03 | 0.239742 | 0.002694 | 0.606154 | 0.076455 |
| MmugDNA.32879.1.S1_at   | MmugDNA.32879.1 | 3.55  | 3.43  | 0.11 | 0.07 | 1.08  | 0.139783 | 0.149146 | 0.5153   | 0.423585 |
| MmugDNA.3288.1.S1_at    | MmugDNA.3288.1  | 4.74  | 4.78  | 0.2  | 0.18 | -1.03 | 0.598841 | 0.803846 | 0.837129 | 0.887148 |
| MmugDNA.32880.1.S1_at   | MmugDNA.32880.1 | 9.7   | 9.06  | 0.11 | 0.04 | 1.56  | 0.00051  | 0.001009 | 0.143137 | 0.050657 |
| MmugDNA.32881.1.S1_at   | MmugDNA.32881.1 | 4.35  | 4.25  | 0.06 | 0.13 | 1.08  | 0.715455 | 0.777616 | 0.889293 | 0.870762 |
| MmugDNA.32882.1.S1_at   | MmugDNA.32882.1 | 10.53 | 10.51 | 0.72 | 0.24 | 1.01  | 0.734804 | 0.069354 | 0.898492 | 0.309558 |
| MmugDNA.32884.1.S1_at   | MmugDNA.32884.1 | 6.88  | 6.64  | 0.1  | 0.08 | 1.19  | 0.03352  | 0.250687 | 0.346442 | 0.51941  |
| MmugDNA.32886.1.S1_at   | MmugDNA.32886.1 | 5.73  | 5.72  | 0.23 | 0.43 | 1.01  | 0.709894 | 0.826609 | 0.887115 | 0.900429 |
| MmugDNA.32887.1.S1_at   | MmugDNA.32887.1 | 11.66 | 10.82 | 1.03 | 0.12 | 1.79  | 0.625735 | 0.773537 | 0.849564 | 0.868348 |
| MmugDNA.3289.1.S1_at    | MmugDNA.3289.1  | 11.36 | 11.23 | 0.48 | 0.17 | 1.09  | 0.859465 | 0.985503 | 0.9504   | 0.991808 |
| MmugDNA.32891.1.S1_at   | MmugDNA.32891.1 | 6.49  | 6.04  | 0.07 | 0.13 | 1.36  | 0.007444 | 0.150234 | 0.229238 | 0.42486  |
| MmugDNA.32892.1.S1_at   | MmugDNA.32892.1 | 8.07  | 8.58  | 0.39 | 0.23 | -1.42 | 0.116259 | 0.12596  | 0.489568 | 0.396505 |



|                         |                 |       |       |      |      |       |          |          |          |          |
|-------------------------|-----------------|-------|-------|------|------|-------|----------|----------|----------|----------|
| MmugDNA.32893.1.S1_at   | MmugDNA.32893.1 | 3.34  | 3.45  | 0.04 | 0.46 | -1.08 | 0.703173 | 0.482111 | 0.884538 | 0.687016 |
| MmugDNA.32895.1.S1_at   | MmugDNA.32895.1 | 11.99 | 11.67 | 0.21 | 0.1  | 1.25  | 0.097577 | 0.144355 | 0.466487 | 0.418293 |
| MmugDNA.32896.1.S1_at   | MmugDNA.32896.1 | 8.05  | 7.94  | 0.6  | 0.34 | 1.08  | 0.639629 | 0.761083 | 0.85626  | 0.861205 |
| MmugDNA.32897.1.S1_at   | MmugDNA.32897.1 | 4.39  | 5.66  | 0.12 | 1.02 | -2.41 | 0.356265 | 0.681711 | 0.69508  | 0.814123 |
| MmugDNA.32898.1.S1_at   | MmugDNA.32898.1 | 7.48  | 7.82  | 0.61 | 0.16 | -1.26 | 0.484664 | 0.139484 | 0.773768 | 0.412743 |
| MmugDNA.32899.1.S1_at   | MmugDNA.32899.1 | 6.21  | 6.04  | 0.17 | 0.44 | 1.13  | 0.812703 | 0.241619 | 0.932167 | 0.512217 |
| MmugDNA.329.1.S1_at     | MmugDNA.329.1   | 6.5   | 6.74  | 0.05 | 0.08 | -1.19 | 0.006845 | 0.00791  | 0.224141 | 0.118534 |
| MmugDNA.329.1.S1_s_at   | MmugDNA.329.1   | 7     | 8.12  | 0.48 | 0.03 | -2.18 | 0.033475 | 0.007628 | 0.346442 | 0.116869 |
| MmugDNA.3290.1.S1_at    | MmugDNA.3290.1  | 3.8   | 3.97  | 0.03 | 0.03 | -1.12 | 0.005672 | 0.012849 | 0.21011  | 0.145986 |
| MmugDNA.32900.1.S1_at   | MmugDNA.32900.1 | 10.95 | 10.69 | 0.45 | 0.04 | 1.2   | 0.359109 | 0.353083 | 0.69708  | 0.596369 |
| MmugDNA.32901.1.S1_at   | MmugDNA.32901.1 | 4.4   | 4.62  | 0.03 | 0.23 | -1.17 | 0.360172 | 0.134877 | 0.697768 | 0.406878 |
| MmugDNA.32905.1.S1_at   | MmugDNA.32905.1 | 6.69  | 6.68  | 0.15 | 0.2  | 1.01  | 0.219924 | 0.451279 | 0.589114 | 0.666113 |
| MmugDNA.32905.1.S1_s_at | MmugDNA.32905.1 | 5.18  | 5.18  | 0.16 | 0.03 | 1     | 0.316552 | 0.714617 | 0.666494 | 0.834436 |
| MmugDNA.32906.1.S1_at   | MmugDNA.32906.1 | 7.99  | 7.48  | 0.26 | 0.33 | 1.43  | 0.476717 | 0.00355  | 0.769364 | 0.085371 |
| MmugDNA.32909.1.S1_at   | MmugDNA.32909.1 | 4.88  | 4.68  | 0.09 | 0.09 | 1.15  | 0.039029 | 0.029477 | 0.36091  | 0.213368 |
| MmugDNA.3291.1.S1_at    | MmugDNA.3291.1  | 4.49  | 4.53  | 0.12 | 0.43 | -1.03 | 0.671326 | 0.677474 | 0.870293 | 0.81167  |
| MmugDNA.32911.1.S1_at   | MmugDNA.32911.1 | 10.34 | 10.53 | 0.68 | 0.02 | -1.14 | 0.743366 | 0.061111 | 0.902116 | 0.293975 |
| MmugDNA.32912.1.S1_at   | MmugDNA.32912.1 | 4.42  | 4.47  | 0.02 | 0.12 | -1.04 | 0.644989 | 0.826678 | 0.85869  | 0.900485 |
| MmugDNA.32913.1.S1_at   | MmugDNA.32913.1 | 6.04  | 5.9   | 0.12 | 0.06 | 1.1   | 0.171782 | 0.11544  | 0.545121 | 0.382557 |
| MmugDNA.32915.1.S1_at   | MmugDNA.32915.1 | 6.47  | 6.66  | 0.28 | 0.11 | -1.15 | 0.220031 | 0.158261 | 0.589114 | 0.43403  |
| MmugDNA.32916.1.S1_at   | MmugDNA.32916.1 | 5.27  | 5.93  | 0.35 | 0.58 | -1.58 | 0.156114 | 0.551202 | 0.529456 | 0.73084  |
| MmugDNA.32918.1.S1_at   | MmugDNA.32918.1 | 7.73  | 8.63  | 0.66 | 0.16 | -1.87 | 0.247086 | 0.106277 | 0.612582 | 0.368729 |
| MmugDNA.32919.1.S1_at   | MmugDNA.32919.1 | 4.47  | 4.54  | 0.2  | 0.09 | -1.05 | 0.611415 | 0.84831  | 0.842499 | 0.91389  |
| MmugDNA.3292.1.S1_at    | MmugDNA.3292.1  | 4.78  | 4.87  | 0.26 | 0.16 | -1.07 | 0.965168 | 0.900431 | 0.988542 | 0.94344  |
| MmugDNA.32922.1.S1_at   | MmugDNA.32922.1 | 6.52  | 6.66  | 0.56 | 0.27 | -1.1  | 0.450562 | 0.18492  | 0.754829 | 0.460776 |
| MmugDNA.32923.1.S1_at   | MmugDNA.32923.1 | 10.27 | 9.73  | 0.38 | 0.25 | 1.45  | 0.123697 | 0.196939 | 0.49721  | 0.472072 |
| MmugDNA.32924.1.S1_at   | MmugDNA.32924.1 | 3.25  | 3.11  | 0.14 | 0.26 | 1.1   | 0.256162 | 0.31932  | 0.620254 | 0.571724 |
| MmugDNA.32926.1.S1_at   | MmugDNA.32926.1 | 7.21  | 5.65  | 0.77 | 0.47 | 2.93  | 0.038162 | 0.029954 | 0.358577 | 0.214833 |
| MmugDNA.32927.1.S1_at   | MmugDNA.32927.1 | 4.16  | 4.15  | 0.11 | 0.03 | 1.01  | 0.57309  | 0.520132 | 0.823428 | 0.711472 |
| MmugDNA.32928.1.S1_at   | MmugDNA.32928.1 | 3.82  | 3.52  | 0.01 | 0.03 | 1.24  | 0.000055 | 0.000727 | 0.108151 | 0.044699 |
| MmugDNA.32929.1.S1_at   | MmugDNA.32929.1 | 3     | 2.91  | 0.07 | 0.13 | 1.06  | 0.280502 | 0.089822 | 0.639288 | 0.34404  |
| MmugDNA.3293.1.S1_at    | MmugDNA.3293.1  | 4.65  | 4.68  | 0.07 | 0.37 | -1.03 | 0.800543 | 0.922037 | 0.927008 | 0.956039 |
| MmugDNA.32930.1.S1_at   | MmugDNA.32930.1 | 3.92  | 3.57  | 0.05 | 0.16 | 1.28  | 0.024812 | 0.018603 | 0.31992  | 0.171539 |
| MmugDNA.32930.1.S1_s_at | MmugDNA.32930.1 | 2.91  | 2.79  | 0.6  | 0.17 | 1.08  | 0.402234 | 0.549271 | 0.724848 | 0.729744 |
| MmugDNA.32931.1.S1_at   | MmugDNA.32931.1 | 6.9   | 7.47  | 0.65 | 0.15 | -1.49 | 0.405212 | 0.320276 | 0.727263 | 0.572606 |
| MmugDNA.32932.1.S1_at   | MmugDNA.32932.1 | 8.06  | 7.96  | 0.41 | 0.19 | 1.08  | 0.320647 | 0.433788 | 0.669445 | 0.653992 |
| MmugDNA.32933.1.S1_at   | MmugDNA.32933.1 | 9.67  | 10.52 | 0.24 | 0.12 | -1.8  | 0.007116 | 0.00127  | 0.225651 | 0.055241 |
| MmugDNA.32933.1.S1_s_at | MmugDNA.32933.1 | 7.52  | 8.41  | 0.15 | 0.35 | -1.86 | 0.007053 | 0.002135 | 0.225384 | 0.068391 |
| MmugDNA.32934.1.S1_at   | MmugDNA.32934.1 | 10.29 | 10.03 | 0.24 | 0.2  | 1.19  | 0.090024 | 0.215088 | 0.457992 | 0.488932 |
| MmugDNA.32935.1.S1_at   | MmugDNA.32935.1 | 5.38  | 4.88  | 0.35 | 0.89 | 1.42  | 0.878476 | 0.48585  | 0.957748 | 0.689442 |
| MmugDNA.32936.1.S1_at   | MmugDNA.32936.1 | 11.24 | 10.27 | 0.81 | 0.27 | 1.96  | 0.304589 | 0.411455 | 0.658191 | 0.638189 |
| MmugDNA.32937.1.S1_at   | MmugDNA.32937.1 | 7.43  | 7.03  | 0.06 | 0.05 | 1.31  | 0.000997 | 0.000984 | 0.155374 | 0.050067 |
| MmugDNA.3294.1.S1_s_at  | MmugDNA.3294.1  | 13.1  | 12.81 | 0.21 | 0.02 | 1.23  | 0.231467 | 0.359855 | 0.599368 | 0.601104 |

|                       |                 |       |       |      |      |       |          |          |          |          |
|-----------------------|-----------------|-------|-------|------|------|-------|----------|----------|----------|----------|
| MmugDNA.32941.1.S1_at | MmugDNA.32941.1 | 9.14  | 9.47  | 0.53 | 0.25 | -1.26 | 0.325442 | 0.016005 | 0.67326  | 0.160458 |
| MmugDNA.32942.1.S1_at | MmugDNA.32942.1 | 6.67  | 7.03  | 0.16 | 0.09 | -1.28 | 0.015648 | 0.04523  | 0.28333  | 0.257005 |
| MmugDNA.32943.1.S1_at | MmugDNA.32943.1 | 3.29  | 3.47  | 0.07 | 0.25 | -1.13 | 0.310176 | 0.233867 | 0.662073 | 0.505169 |
| MmugDNA.32945.1.S1_at | MmugDNA.32945.1 | 5.84  | 5.91  | 0.12 | 0.1  | -1.05 | 0.852665 | 0.777709 | 0.948073 | 0.870845 |
| MmugDNA.32946.1.S1_at | MmugDNA.32946.1 | 5.67  | 5.62  | 0.17 | 0    | 1.04  | 0.729846 | 0.923442 | 0.895849 | 0.956981 |
| MmugDNA.32947.1.S1_at | MmugDNA.32947.1 | 10.31 | 10.43 | 0.11 | 0.11 | -1.09 | 0.350489 | 0.01044  | 0.691263 | 0.133573 |
| MmugDNA.32948.1.S1_at | MmugDNA.32948.1 | 9.36  | 8.69  | 0.35 | 0.16 | 1.59  | 0.025673 | 0.006262 | 0.322444 | 0.107376 |
| MmugDNA.32949.1.S1_at | MmugDNA.32949.1 | 12.98 | 13.09 | 0.19 | 0.01 | -1.08 | 0.503287 | 0.661453 | 0.784174 | 0.801791 |
| MmugDNA.3295.1.S1_at  | MmugDNA.3295.1  | 4.16  | 3.97  | 0.03 | 0.11 | 1.14  | 0.092612 | 0.165759 | 0.461192 | 0.442032 |
| MmugDNA.32951.1.S1_at | MmugDNA.32951.1 | 9.99  | 10.67 | 0.51 | 0.16 | -1.61 | 0.050818 | 0.037836 | 0.388085 | 0.238912 |
| MmugDNA.32952.1.S1_at | MmugDNA.32952.1 | 4.45  | 4.49  | 0.06 | 0.14 | -1.03 | 0.383347 | 0.45503  | 0.711306 | 0.66903  |
| MmugDNA.32955.1.S1_at | MmugDNA.32955.1 | 4.59  | 4.55  | 0.08 | 0.13 | 1.03  | 0.708691 | 0.925087 | 0.886591 | 0.957602 |
| MmugDNA.32956.1.S1_at | MmugDNA.32956.1 | 9     | 8.23  | 0.29 | 0.27 | 1.71  | 0.025909 | 0.024091 | 0.32273  | 0.194493 |
| MmugDNA.32957.1.S1_at | MmugDNA.32957.1 | 4.04  | 4.25  | 0.21 | 0.07 | -1.15 | 0.114262 | 0.232932 | 0.487606 | 0.50445  |
| MmugDNA.32959.1.S1_at | MmugDNA.32959.1 | 8.82  | 8.96  | 0.93 | 0.14 | -1.11 | 0.825717 | 0.873134 | 0.937412 | 0.927823 |
| MmugDNA.3296.1.S1_at  | MmugDNA.3296.1  | 12.14 | 11.94 | 0.04 | 0.04 | 1.15  | 0.001963 | 0.017028 | 0.172125 | 0.165384 |
| MmugDNA.32961.1.S1_at | MmugDNA.32961.1 | 4.42  | 5.38  | 0.19 | 0.25 | -1.94 | 0.00798  | 0.066425 | 0.232005 | 0.303385 |
| MmugDNA.32963.1.S1_at | MmugDNA.32963.1 | 8.53  | 8.87  | 0.08 | 0.14 | -1.27 | 0.030008 | 0.051847 | 0.336449 | 0.273151 |
| MmugDNA.32964.1.S1_at | MmugDNA.32964.1 | 6.3   | 6.96  | 0.71 | 0.28 | -1.58 | 0.661723 | 0.850096 | 0.8665   | 0.914709 |
| MmugDNA.32965.1.S1_at | MmugDNA.32965.1 | 12.73 | 13.01 | 0.36 | 0.08 | -1.21 | 0.229921 | 0.27168  | 0.598481 | 0.536577 |
| MmugDNA.32967.1.S1_at | MmugDNA.32967.1 | 10.9  | 10.83 | 0.14 | 0.06 | 1.05  | 0.259212 | 0.386763 | 0.622592 | 0.621895 |
| MmugDNA.32969.1.S1_at | MmugDNA.32969.1 | 5.33  | 5.33  | 0    | 0.01 | -1    | 0.829421 | 0.427274 | 0.938794 | 0.649175 |
| MmugDNA.3297.1.S1_at  | MmugDNA.3297.1  | 3.47  | 3.16  | 0.12 | 0.03 | 1.24  | 0.028465 | 0.019253 | 0.332568 | 0.174522 |
| MmugDNA.32970.1.S1_at | MmugDNA.32970.1 | 6.23  | 6.12  | 0.14 | 0.14 | 1.08  | 0.212273 | 0.000553 | 0.582812 | 0.040962 |
| MmugDNA.32971.1.S1_at | MmugDNA.32971.1 | 6.91  | 6.83  | 0.05 | 0.03 | 1.06  | 0.054735 | 0.091936 | 0.397122 | 0.347267 |
| MmugDNA.32972.1.S1_at | MmugDNA.32972.1 | 7.78  | 8.54  | 0.65 | 0.16 | -1.7  | 0.126763 | 0.094515 | 0.500599 | 0.351276 |
| MmugDNA.32973.1.S1_at | MmugDNA.32973.1 | 7.83  | 7.31  | 0.38 | 0.25 | 1.44  | 0.279364 | 0.033022 | 0.63831  | 0.224983 |
| MmugDNA.32974.1.S1_at | MmugDNA.32974.1 | 4.18  | 3.93  | 0.11 | 0.19 | 1.19  | 0.081521 | 0.512999 | 0.445497 | 0.706665 |
| MmugDNA.32975.1.S1_at | MmugDNA.32975.1 | 3.63  | 3.54  | 0.22 | 0.06 | 1.07  | 0.175905 | 0.109146 | 0.549047 | 0.373004 |
| MmugDNA.32976.1.S1_at | MmugDNA.32976.1 | 9.13  | 9.36  | 0.19 | 0.28 | -1.18 | 0.582531 | 0.091311 | 0.828349 | 0.346281 |
| MmugDNA.32978.1.S1_at | MmugDNA.32978.1 | 7.5   | 7.17  | 0.09 | 0.15 | 1.26  | 0.011763 | 0.12483  | 0.257281 | 0.395219 |
| MmugDNA.32979.1.S1_at | MmugDNA.32979.1 | 5.19  | 5.64  | 0.29 | 0.09 | -1.36 | 0.063002 | 0.500307 | 0.414551 | 0.699009 |
| MmugDNA.32980.1.S1_at | MmugDNA.32980.1 | 5.16  | 5.23  | 0.12 | 0.08 | -1.05 | 0.252318 | 0.552628 | 0.617313 | 0.731885 |
| MmugDNA.32981.1.S1_at | MmugDNA.32981.1 | 4.71  | 4.77  | 0.18 | 0.16 | -1.05 | 0.889882 | 0.925059 | 0.962057 | 0.957602 |
| MmugDNA.32982.1.S1_at | MmugDNA.32982.1 | 3.69  | 3.85  | 0.16 | 0.07 | -1.12 | 0.299586 | 0.054836 | 0.654042 | 0.279675 |
| MmugDNA.32983.1.S1_at | MmugDNA.32983.1 | 4     | 4.48  | 0.12 | 0.36 | -1.39 | 0.250354 | 0.548954 | 0.615561 | 0.729505 |
| MmugDNA.32985.1.S1_at | MmugDNA.32985.1 | 6.03  | 6.18  | 0.09 | 0.31 | -1.1  | 0.14872  | 0.282585 | 0.522734 | 0.545292 |
| MmugDNA.32986.1.S1_at | MmugDNA.32986.1 | 3.77  | 3.6   | 0.11 | 0.1  | 1.13  | 0.123666 | 0.213862 | 0.497192 | 0.48758  |
| MmugDNA.32987.1.S1_at | MmugDNA.32987.1 | 3.13  | 3.01  | 0.36 | 0.23 | 1.09  | 0.721864 | 0.737555 | 0.892101 | 0.847993 |
| MmugDNA.32989.1.S1_at | MmugDNA.32989.1 | 7.15  | 6.96  | 0.03 | 0.03 | 1.14  | 0.001876 | 0.239514 | 0.168981 | 0.510191 |
| MmugDNA.3299.1.S1_at  | MmugDNA.3299.1  | 5.24  | 5.19  | 0.23 | 0.29 | 1.04  | 0.368254 | 0.277431 | 0.70351  | 0.541336 |
| MmugDNA.32992.1.S1_at | MmugDNA.32992.1 | 2.8   | 2.87  | 0.14 | 0.04 | -1.05 | 0.607558 | 0.263551 | 0.840951 | 0.529826 |
| MmugDNA.32993.1.S1_at | MmugDNA.32993.1 | 3.47  | 3.5   | 0.04 | 0.12 | -1.01 | 0.489268 | 0.399576 | 0.776032 | 0.629912 |

|                         |                 |       |       |      |      |       |          |          |          |          |
|-------------------------|-----------------|-------|-------|------|------|-------|----------|----------|----------|----------|
| MmugDNA.32994.1.S1_at   | MmugDNA.32994.1 | 7.77  | 7.59  | 0.05 | 0.13 | 1.13  | 0.078392 | 0.011175 | 0.441003 | 0.137551 |
| MmugDNA.32995.1.S1_at   | MmugDNA.32995.1 | 4.34  | 4.06  | 0.18 | 0.38 | 1.21  | 0.518482 | 0.858015 | 0.792692 | 0.919035 |
| MmugDNA.32996.1.S1_at   | MmugDNA.32996.1 | 7.47  | 7.32  | 0.25 | 0.14 | 1.11  | 0.650063 | 0.774627 | 0.860714 | 0.868797 |
| MmugDNA.32997.1.S1_at   | MmugDNA.32997.1 | 4.13  | 3.91  | 0.08 | 0.24 | 1.17  | 0.399961 | 0.503044 | 0.723437 | 0.700559 |
| MmugDNA.32999.1.S1_at   | MmugDNA.32999.1 | 3.44  | 3.49  | 0.93 | 0.19 | -1.04 | 0.421628 | 0.584777 | 0.737563 | 0.752534 |
| MmugDNA.33.1.S1_at      | MmugDNA.33.1    | 4.39  | 4.22  | 0.85 | 0.17 | 1.13  | 0.889735 | 0.937771 | 0.961988 | 0.964687 |
| MmugDNA.330.1.S1_at     | MmugDNA.330.1   | 5.46  | 5.45  | 0.15 | 0.15 | 1.01  | 0.531931 | 0.252422 | 0.799992 | 0.521061 |
| MmugDNA.3300.1.S1_at    | MmugDNA.3300.1  | 4.51  | 4.45  | 0    | 0.19 | 1.04  | 0.628561 | 0.829202 | 0.851159 | 0.901809 |
| MmugDNA.33000.1.S1_at   | MmugDNA.33000.1 | 3.52  | 3.5   | 0.34 | 0.14 | 1.01  | 0.991316 | 0.73104  | 0.996655 | 0.844197 |
| MmugDNA.33002.1.S1_at   | MmugDNA.33002.1 | 6.35  | 6.69  | 0.16 | 0.13 | -1.27 | 0.042095 | 0.000168 | 0.368438 | 0.030511 |
| MmugDNA.33005.1.S1_at   | MmugDNA.33005.1 | 6.68  | 6.97  | 0.34 | 0.18 | -1.23 | 0.083211 | 0.20923  | 0.448962 | 0.483303 |
| MmugDNA.33006.1.S1_at   | MmugDNA.33006.1 | 5.56  | 5.3   | 0.17 | 0.15 | 1.2   | 0.128365 | 0.260813 | 0.50293  | 0.52721  |
| MmugDNA.33007.1.S1_at   | MmugDNA.33007.1 | 4.2   | 4.13  | 0.11 | 0.08 | 1.05  | 0.856135 | 0.076833 | 0.949177 | 0.322319 |
| MmugDNA.33008.1.S1_at   | MmugDNA.33008.1 | 5.98  | 5.97  | 0.12 | 0.07 | 1.01  | 0.701244 | 0.519566 | 0.883866 | 0.711134 |
| MmugDNA.33009.1.S1_at   | MmugDNA.33009.1 | 5.82  | 5.77  | 0.24 | 0.14 | 1.03  | 0.399386 | 0.417868 | 0.723066 | 0.642449 |
| MmugDNA.3301.1.S1_at    | MmugDNA.3301.1  | 11.82 | 11.71 | 0.37 | 0.09 | 1.08  | 0.75608  | 0.340032 | 0.908123 | 0.586516 |
| MmugDNA.33012.1.S1_at   | MmugDNA.33012.1 | 4.49  | 4.36  | 0.21 | 0.07 | 1.1   | 0.235088 | 0.421385 | 0.602266 | 0.644994 |
| MmugDNA.33013.1.S1_at   | MmugDNA.33013.1 | 8.49  | 8.65  | 0.66 | 0.32 | -1.12 | 0.569548 | 0.532082 | 0.82149  | 0.718995 |
| MmugDNA.33015.1.S1_at   | MmugDNA.33015.1 | 7.07  | 7.27  | 0.17 | 0.04 | -1.16 | 0.133946 | 0.088467 | 0.50813  | 0.341922 |
| MmugDNA.33016.1.S1_at   | MmugDNA.33016.1 | 12.86 | 12.57 | 0.14 | 0.1  | 1.22  | 0.054202 | 0.099345 | 0.396156 | 0.35761  |
| MmugDNA.33018.1.S1_at   | MmugDNA.33018.1 | 3.82  | 3.84  | 0.03 | 0.02 | -1.01 | 0.802076 | 0.095553 | 0.927856 | 0.352627 |
| MmugDNA.3302.1.S1_at    | MmugDNA.3302.1  | 5.27  | 5.59  | 0.38 | 0.36 | -1.25 | 0.165476 | 0.4759   | 0.538324 | 0.682387 |
| MmugDNA.33020.1.S1_at   | MmugDNA.33020.1 | 4.54  | 4.67  | 0.25 | 0.64 | -1.1  | 0.77961  | 0.745447 | 0.918762 | 0.852398 |
| MmugDNA.33021.1.S1_at   | MmugDNA.33021.1 | 4.86  | 4.86  | 0    | 0.14 | 1     | 0.373901 | 0.786358 | 0.705567 | 0.876293 |
| MmugDNA.33022.1.S1_at   | MmugDNA.33022.1 | 3.84  | 3.75  | 0.17 | 0.2  | 1.07  | 0.945711 | 0.943603 | 0.981093 | 0.967955 |
| MmugDNA.33023.1.S1_at   | MmugDNA.33023.1 | 8.97  | 9.1   | 0.25 | 0.16 | -1.1  | 0.592943 | 0.02143  | 0.834001 | 0.183342 |
| MmugDNA.33023.1.S1_s_at | MmugDNA.33023.1 | 8.97  | 9.22  | 0.3  | 0.14 | -1.19 | 0.393892 | 0.042856 | 0.719549 | 0.251591 |
| MmugDNA.33024.1.S1_at   | MmugDNA.33024.1 | 3.97  | 4.61  | 0.34 | 0.36 | -1.55 | 0.093278 | 0.264788 | 0.462336 | 0.530791 |
| MmugDNA.33024.1.S1_s_at | MmugDNA.33024.1 | 6.15  | 6.45  | 0.52 | 0.08 | -1.24 | 0.867951 | 0.731977 | 0.953795 | 0.844751 |
| MmugDNA.33025.1.S1_at   | MmugDNA.33025.1 | 3.61  | 3.61  | 0.19 | 0.11 | 1     | 0.540494 | 0.284775 | 0.804382 | 0.546966 |
| MmugDNA.33026.1.S1_at   | MmugDNA.33026.1 | 8.39  | 7.62  | 0.28 | 0.03 | 1.7   | 0.007964 | 0.005328 | 0.232005 | 0.100928 |
| MmugDNA.33027.1.S1_at   | MmugDNA.33027.1 | 3.81  | 3.96  | 0.45 | 0.13 | -1.1  | 0.817469 | 0.606188 | 0.933964 | 0.765727 |
| MmugDNA.33027.1.S1_s_at | MmugDNA.33027.1 | 4.91  | 4.4   | 0.4  | 0.18 | 1.43  | 0.140857 | 0.169225 | 0.516345 | 0.445815 |
| MmugDNA.33028.1.S1_at   | MmugDNA.33028.1 | 10.63 | 11.38 | 0.2  | 0.05 | -1.68 | 0.006234 | 0.002353 | 0.217663 | 0.07161  |
| MmugDNA.33029.1.S1_at   | MmugDNA.33029.1 | 4.28  | 3.93  | 0.57 | 0.19 | 1.28  | 0.309453 | 0.269129 | 0.661755 | 0.534447 |
| MmugDNA.33030.1.S1_at   | MmugDNA.33030.1 | 6.02  | 5.77  | 0.13 | 0.05 | 1.19  | 0.063333 | 0.158991 | 0.415687 | 0.43518  |
| MmugDNA.33033.1.S1_at   | MmugDNA.33033.1 | 4.36  | 4.48  | 0.25 | 0.19 | -1.08 | 0.40257  | 0.593614 | 0.725008 | 0.758334 |
| MmugDNA.33034.1.S1_at   | MmugDNA.33034.1 | 3.24  | 2.99  | 0.11 | 0.09 | 1.19  | 0.068753 | 0.056902 | 0.426022 | 0.284672 |
| MmugDNA.33035.1.S1_at   | MmugDNA.33035.1 | 9.48  | 9.31  | 0.42 | 0.45 | 1.12  | 0.305986 | 0.15333  | 0.659264 | 0.428139 |
| MmugDNA.33038.1.S1_at   | MmugDNA.33038.1 | 6.91  | 6.93  | 0.09 | 0.14 | -1.01 | 0.596445 | 0.772605 | 0.835968 | 0.867785 |
| MmugDNA.33039.1.S1_at   | MmugDNA.33039.1 | 8.58  | 8.63  | 0.11 | 0.01 | -1.03 | 0.445268 | 0.431997 | 0.751987 | 0.652738 |
| MmugDNA.33041.1.S1_at   | MmugDNA.33041.1 | 9.65  | 9.94  | 1.14 | 0.09 | -1.22 | 0.84041  | 0.195074 | 0.943295 | 0.470207 |
| MmugDNA.33043.1.S1_at   | MmugDNA.33043.1 | 7.06  | 7.2   | 0.83 | 0.36 | -1.1  | 0.710932 | 0.295105 | 0.88743  | 0.554551 |

|                         |                 |       |       |      |      |       |          |          |          |          |
|-------------------------|-----------------|-------|-------|------|------|-------|----------|----------|----------|----------|
| MmugDNA.33044.1.S1_at   | MmugDNA.33044.1 | 4.44  | 4.5   | 0.34 | 0.04 | -1.04 | 0.548689 | 0.665059 | 0.809852 | 0.803733 |
| MmugDNA.33045.1.S1_at   | MmugDNA.33045.1 | 5.93  | 5.7   | 0.29 | 0.1  | 1.17  | 0.740596 | 0.866328 | 0.900871 | 0.923989 |
| MmugDNA.33046.1.S1_at   | MmugDNA.33046.1 | 4.65  | 4.77  | 0.11 | 0.32 | -1.09 | 0.778353 | 0.165322 | 0.918249 | 0.441514 |
| MmugDNA.33047.1.S1_at   | MmugDNA.33047.1 | 5.26  | 5.18  | 0.08 | 0.1  | 1.06  | 0.255645 | 0.369068 | 0.619709 | 0.608608 |
| MmugDNA.33048.1.S1_at   | MmugDNA.33048.1 | 6.11  | 6.27  | 0.4  | 0.49 | -1.12 | 0.692    | 0.895332 | 0.880095 | 0.940185 |
| MmugDNA.27649.1.S1_s_at | MmugDNA.27649.1 | 8.97  | 9.03  | 0.47 | 0.06 | -1.04 | 0.750726 | 0.21584  | 0.905556 | 0.489536 |
| MmugDNA.33050.1.S1_at   | MmugDNA.33050.1 | 3.01  | 3.01  | 0.18 | 0.39 | -1    | 0.458636 | 0.684835 | 0.759008 | 0.816189 |
| MmugDNA.33050.1.S1_x_at | MmugDNA.33050.1 | 3.12  | 3.07  | 0.18 | 0.17 | 1.04  | 0.697064 | 0.855223 | 0.882183 | 0.917457 |
| MmugDNA.33051.1.S1_at   | MmugDNA.33051.1 | 4.15  | 4.16  | 0.08 | 0.1  | -1.01 | 0.404138 | 0.854528 | 0.726203 | 0.917099 |
| MmugDNA.33052.1.S1_at   | MmugDNA.33052.1 | 6.35  | 6.15  | 0.17 | 0.1  | 1.15  | 0.062104 | 0.056828 | 0.412245 | 0.284531 |
| MmugDNA.33053.1.S1_at   | MmugDNA.33053.1 | 3.3   | 2.94  | 0.3  | 0.02 | -1.28 | 0.29024  | 0.304352 | 0.646873 | 0.561649 |
| MmugDNA.33054.1.S1_at   | MmugDNA.33054.1 | 7.19  | 7.02  | 0.32 | 0.05 | 1.12  | 0.348865 | 0.110336 | 0.690079 | 0.374457 |
| MmugDNA.33055.1.S1_at   | MmugDNA.33055.1 | 6.96  | 6.33  | 0.12 | 0.18 | 1.54  | 0.01227  | 0.064409 | 0.260951 | 0.300001 |
| MmugDNA.33056.1.S1_at   | MmugDNA.33056.1 | 6.09  | 6.81  | 0.34 | 0.28 | -1.64 | 0.113467 | 0.435729 | 0.486767 | 0.655496 |
| MmugDNA.33057.1.S1_at   | MmugDNA.33057.1 | 7.15  | 6.99  | 0.53 | 0.56 | 1.11  | 0.697974 | 0.028353 | 0.882568 | 0.210223 |
| MmugDNA.33061.1.S1_at   | MmugDNA.33061.1 | 5.45  | 5.44  | 0.32 | 0.28 | 1.01  | 0.516195 | 0.578767 | 0.791334 | 0.748611 |
| MmugDNA.33062.1.S1_at   | MmugDNA.33062.1 | 6.6   | 6.38  | 0.15 | 0.16 | 1.17  | 0.069522 | 0.075837 | 0.427368 | 0.320447 |
| MmugDNA.33063.1.S1_at   | MmugDNA.33063.1 | 5.61  | 5.61  | 0.12 | 0.1  | -1    | 0.660922 | 0.912588 | 0.865819 | 0.950764 |
| MmugDNA.33064.1.S1_at   | MmugDNA.33064.1 | 9.8   | 10.2  | 0.5  | 0.22 | -1.32 | 0.283419 | 0.290728 | 0.641407 | 0.551382 |
| MmugDNA.33064.1.S1_x_at | MmugDNA.33064.1 | 9.6   | 10.15 | 0.5  | 0.27 | -1.46 | 0.226575 | 0.216475 | 0.595885 | 0.490084 |
| MmugDNA.33066.1.S1_at   | MmugDNA.33066.1 | 5.46  | 5.36  | 0.26 | 0.32 | 1.07  | 0.908306 | 0.421272 | 0.969112 | 0.644906 |
| MmugDNA.33068.1.S1_at   | MmugDNA.33068.1 | 3.45  | 3.54  | 0.05 | 0.16 | -1.06 | 0.452932 | 0.678298 | 0.755901 | 0.812081 |
| MmugDNA.33069.1.S1_at   | MmugDNA.33069.1 | 5.91  | 5.75  | 0.09 | 0.01 | 1.12  | 0.032023 | 0.415638 | 0.342916 | 0.641007 |
| MmugDNA.3307.1.S1_at    | MmugDNA.3307.1  | 5.55  | 5.33  | 0.47 | 0.8  | 1.17  | 0.954253 | 0.746771 | 0.984783 | 0.852952 |
| MmugDNA.33070.1.S1_at   | MmugDNA.33070.1 | 5.61  | 5.32  | 0.26 | 0.14 | 1.23  | 0.146221 | 0.17972  | 0.520572 | 0.456204 |
| MmugDNA.33072.1.S1_at   | MmugDNA.33072.1 | 4.1   | 4.01  | 0.07 | 0.06 | 1.06  | 0.260633 | 0.077193 | 0.623301 | 0.322773 |
| MmugDNA.33073.1.S1_at   | MmugDNA.33073.1 | 3     | 2.87  | 0.15 | 0.13 | 1.09  | 0.65723  | 0.670564 | 0.863937 | 0.80741  |
| MmugDNA.33074.1.S1_at   | MmugDNA.33074.1 | 10.49 | 10.64 | 0.13 | 0.2  | -1.11 | 0.236973 | 0.258146 | 0.603869 | 0.525574 |
| MmugDNA.33075.1.S1_at   | MmugDNA.33075.1 | 3.87  | 3.63  | 0.1  | 0.08 | 1.18  | 0.063822 | 0.057132 | 0.416646 | 0.284945 |
| MmugDNA.33076.1.S1_at   | MmugDNA.33076.1 | 8.74  | 9.54  | 0.51 | 0.14 | -1.74 | 0.07845  | 0.002165 | 0.441003 | 0.068812 |
| MmugDNA.33077.1.S1_at   | MmugDNA.33077.1 | 5.28  | 5.25  | 0.03 | 0    | 1.02  | 0.189536 | 0.640159 | 0.560987 | 0.788733 |
| MmugDNA.33078.1.S1_at   | MmugDNA.33078.1 | 5.41  | 5.41  | 0.03 | 0.13 | 1     | 0.495803 | 0.097811 | 0.780125 | 0.355639 |
| MmugDNA.3308.1.S1_at    | MmugDNA.3308.1  | 4.61  | 4.71  | 0.36 | 0.2  | -1.07 | 0.932593 | 0.989503 | 0.977227 | 0.994037 |
| MmugDNA.33080.1.S1_at   | MmugDNA.33080.1 | 8.9   | 9.5   | 0.19 | 0.19 | -1.51 | 0.010255 | 0.00855  | 0.246929 | 0.122656 |
| MmugDNA.33081.1.S1_at   | MmugDNA.33081.1 | 4.85  | 4.91  | 0.12 | 0.07 | -1.04 | 0.529121 | 0.398526 | 0.798106 | 0.629458 |
| MmugDNA.33084.1.S1_at   | MmugDNA.33084.1 | 3.06  | 2.9   | 0.29 | 0.12 | 1.11  | 0.22896  | 0.17708  | 0.597921 | 0.453598 |
| MmugDNA.33086.1.S1_at   | MmugDNA.33086.1 | 8.38  | 7.24  | 0.59 | 0.18 | 2.21  | 0.029284 | 0.017616 | 0.334049 | 0.16783  |
| MmugDNA.33087.1.S1_at   | MmugDNA.33087.1 | 2.71  | 2.75  | 0.12 | 0.09 | -1.03 | 0.281248 | 0.405382 | 0.639849 | 0.633701 |
| MmugDNA.3309.1.S1_at    | MmugDNA.3309.1  | 9.03  | 8.88  | 0.19 | 0.24 | 1.11  | 0.423043 | 0.350371 | 0.73875  | 0.594122 |
| MmugDNA.33090.1.S1_at   | MmugDNA.33090.1 | 5.9   | 5.79  | 0.07 | 0.09 | 1.08  | 0.362009 | 0.00927  | 0.698912 | 0.127091 |
| MmugDNA.33091.1.S1_at   | MmugDNA.33091.1 | 6.16  | 6.25  | 0.03 | 0.05 | -1.07 | 0.10836  | 0.005298 | 0.480775 | 0.100787 |
| MmugDNA.33092.1.S1_s_at | MmugDNA.33092.1 | 5.97  | 5.84  | 0.09 | 0.04 | 1.1   | 0.092334 | 0.643442 | 0.460762 | 0.790931 |
| MmugDNA.33094.1.S1_at   | MmugDNA.33094.1 | 5.65  | 5.53  | 0.09 | 0.06 | 1.09  | 0.07543  | 0.511703 | 0.436562 | 0.705797 |

|                         |                 |       |       |      |      |       |          |          |          |          |
|-------------------------|-----------------|-------|-------|------|------|-------|----------|----------|----------|----------|
| MmugDNA.33096.1.S1_s_at | MmugDNA.33096.1 | 11.71 | 10.98 | 0.44 | 0.23 | 1.66  | 0.099308 | 0.0743   | 0.468787 | 0.318046 |
| MmugDNA.30891.1.S1_s_at | MmugDNA.30891.1 | 11.98 | 12.19 | 0.15 | 0.06 | -1.16 | 0.088601 | 0.082823 | 0.456339 | 0.332331 |
| MmugDNA.331.1.S1_at     | MmugDNA.331.1   | 6.34  | 6.15  | 0.09 | 0.06 | 1.14  | 0.037829 | 0.175862 | 0.358028 | 0.452475 |
| MmugDNA.33100.1.S1_at   | MmugDNA.33100.1 | 7.04  | 7.03  | 0.03 | 0.07 | 1     | 0.239958 | 0.464776 | 0.606208 | 0.675419 |
| MmugDNA.33100.1.S1_s_at | MmugDNA.33100.1 | 6.1   | 6.05  | 0.05 | 0.16 | 1.03  | 0.19402  | 0.204109 | 0.564618 | 0.478418 |
| MmugDNA.33101.1.S1_s_at | MmugDNA.33101.1 | 4.51  | 4.26  | 0.33 | 0.08 | 1.19  | 0.314804 | 0.380162 | 0.665538 | 0.616839 |
| MmugDNA.33103.1.S1_at   | MmugDNA.33103.1 | 7.82  | 6.57  | 0.13 | 0.47 | 2.37  | 0.025473 | 0.009759 | 0.322259 | 0.129958 |
| MmugDNA.33104.1.S1_at   | MmugDNA.33104.1 | 3.48  | 3.48  | 0.07 | 0.03 | 1     | 0.416569 | 0.852905 | 0.734407 | 0.916372 |
| MmugDNA.33105.1.S1_at   | MmugDNA.33105.1 | 4.18  | 3.96  | 0.21 | 0.28 | 1.17  | 0.745278 | 0.248781 | 0.902958 | 0.517931 |
| MmugDNA.33106.1.S1_at   | MmugDNA.33106.1 | 11.41 | 11.41 | 0.07 | 0.04 | 1     | 0.383156 | 0.155726 | 0.711245 | 0.431086 |
| MmugDNA.33107.1.S1_at   | MmugDNA.33107.1 | 9.26  | 9.89  | 2.42 | 0.1  | -1.55 | 0.491572 | 0.369749 | 0.777913 | 0.609048 |
| MmugDNA.33108.1.S1_at   | MmugDNA.33108.1 | 4.99  | 4.93  | 0.13 | 0.03 | 1.04  | 0.524123 | 0.781407 | 0.795719 | 0.873256 |
| MmugDNA.33109.1.S1_at   | MmugDNA.33109.1 | 5.53  | 5.43  | 0.05 | 0.06 | 1.07  | 0.08568  | 0.459381 | 0.452722 | 0.671741 |
| MmugDNA.3311.1.S1_at    | MmugDNA.3311.1  | 9.41  | 9.04  | 0.48 | 0.04 | 1.3   | 0.267722 | 0.243083 | 0.62827  | 0.513356 |
| MmugDNA.33110.1.S1_at   | MmugDNA.33110.1 | 8.49  | 8.32  | 0.27 | 0.16 | 1.13  | 0.474876 | 0.258936 | 0.768229 | 0.526162 |
| MmugDNA.33111.1.S1_at   | MmugDNA.33111.1 | 3.7   | 3.47  | 0.21 | 0.22 | 1.17  | 0.26075  | 0.221635 | 0.623301 | 0.494901 |
| MmugDNA.33112.1.S1_at   | MmugDNA.33112.1 | 5.67  | 5.65  | 0.44 | 0.35 | 1.01  | 0.575313 | 0.753969 | 0.824614 | 0.856768 |
| MmugDNA.33113.1.S1_at   | MmugDNA.33113.1 | 12.54 | 12.6  | 0.07 | 0.02 | -1.04 | 0.535002 | 0.701899 | 0.801404 | 0.827167 |
| MmugDNA.33117.1.S1_at   | MmugDNA.33117.1 | 10.7  | 10.33 | 0.34 | 0.27 | 1.29  | 0.09977  | 0.024183 | 0.469709 | 0.194673 |
| MmugDNA.33118.1.S1_s_at | MmugDNA.33118.1 | 8.8   | 8.43  | 0.13 | 0.07 | 1.29  | 0.025137 | 0.036515 | 0.32052  | 0.235526 |
| MmugDNA.3312.1.S1_at    | MmugDNA.3312.1  | 4.54  | 4.92  | 0.09 | 0.19 | -1.3  | 0.022329 | 0.058202 | 0.310495 | 0.287988 |
| MmugDNA.3312.1.S1_s_at  | MmugDNA.3312.1  | 5.86  | 6.01  | 0.22 | 0.31 | -1.11 | 0.553218 | 0.263972 | 0.812025 | 0.530153 |
| MmugDNA.33121.1.S1_at   | MmugDNA.33121.1 | 6.01  | 6.06  | 0.11 | 0.02 | -1.04 | 0.555261 | 0.001439 | 0.813375 | 0.057876 |
| MmugDNA.33124.1.S1_at   | MmugDNA.33124.1 | 12.23 | 12.31 | 0.04 | 0.01 | -1.06 | 0.040944 | 0.032519 | 0.365521 | 0.223323 |
| MmugDNA.33125.1.S1_at   | MmugDNA.33125.1 | 10.75 | 10.62 | 0.23 | 0.08 | 1.09  | 0.143424 | 0.111421 | 0.518743 | 0.376126 |
| MmugDNA.33125.1.S1_s_at | MmugDNA.33125.1 | 11.01 | 10.82 | 0.17 | 0.05 | 1.14  | 0.14038  | 0.136503 | 0.515777 | 0.408969 |
| MmugDNA.33126.1.S1_at   | MmugDNA.33126.1 | 5.41  | 5.2   | 0.26 | 0.18 | 1.15  | 0.648998 | 0.071889 | 0.860183 | 0.314189 |
| MmugDNA.33127.1.S1_at   | MmugDNA.33127.1 | 7     | 7.9   | 0.21 | 0.61 | -1.87 | 0.022856 | 0.036764 | 0.312704 | 0.236291 |
| MmugDNA.33129.1.S1_at   | MmugDNA.33129.1 | 6.91  | 6.65  | 0.18 | 0.12 | 1.2   | 0.146471 | 0.182725 | 0.520749 | 0.459215 |
| MmugDNA.3313.1.S1_at    | MmugDNA.3313.1  | 5.35  | 5.54  | 0.1  | 0.12 | -1.14 | 0.244229 | 0.509427 | 0.60991  | 0.704167 |
| MmugDNA.33131.1.S1_at   | MmugDNA.33131.1 | 6.68  | 6.73  | 0.26 | 0.11 | -1.04 | 0.501058 | 0.66619  | 0.783101 | 0.804415 |
| MmugDNA.33132.1.S1_at   | MmugDNA.33132.1 | 9.65  | 9.65  | 0.21 | 0.08 | -1    | 0.874216 | 0.639689 | 0.956448 | 0.788389 |
| MmugDNA.33133.1.S1_at   | MmugDNA.33133.1 | 4.67  | 5.48  | 0.25 | 0.22 | -1.76 | 0.018673 | 0.000292 | 0.298184 | 0.034892 |
| MmugDNA.33138.1.S1_at   | MmugDNA.33138.1 | 6.11  | 5.95  | 0.12 | 0.12 | 1.12  | 0.161212 | 0.157613 | 0.534529 | 0.433131 |
| MmugDNA.3314.1.S1_at    | MmugDNA.3314.1  | 5.24  | 5.63  | 0.39 | 0.38 | -1.31 | 0.205225 | 0.399891 | 0.576964 | 0.63009  |
| MmugDNA.33142.1.S1_at   | MmugDNA.33142.1 | 7.16  | 6.77  | 0.22 | 0.66 | 1.31  | 0.955094 | 0.886169 | 0.985095 | 0.935211 |
| MmugDNA.33144.1.S1_at   | MmugDNA.33144.1 | 4.49  | 4.35  | 0.16 | 0.02 | 1.1   | 0.170184 | 0.47562  | 0.543323 | 0.682288 |
| MmugDNA.33145.1.S1_at   | MmugDNA.33145.1 | 8.42  | 7.98  | 0.1  | 0.19 | 1.36  | 0.007869 | 0.001014 | 0.231047 | 0.050767 |
| MmugDNA.33146.1.S1_s_at | MmugDNA.33146.1 | 10.98 | 10.74 | 0.15 | 0.1  | 1.17  | 0.060337 | 0.015268 | 0.407956 | 0.156987 |
| MmugDNA.33147.1.S1_at   | MmugDNA.33147.1 | 5.34  | 5.33  | 0.12 | 0.02 | 1.01  | 0.755983 | 0.928208 | 0.90805  | 0.959209 |
| MmugDNA.33148.1.S1_at   | MmugDNA.33148.1 | 8.78  | 9.32  | 0.6  | 0.07 | -1.45 | 0.264669 | 0.058938 | 0.626029 | 0.28962  |
| MmugDNA.33150.1.S1_at   | MmugDNA.33150.1 | 9.75  | 9.72  | 0.86 | 0.08 | 1.03  | 0.959432 | 0.864143 | 0.986777 | 0.922925 |
| MmugDNA.33151.1.S1_at   | MmugDNA.33151.1 | 3.26  | 3.26  | 0    | 0.14 | 1     | 0.865267 | 0.898476 | 0.952585 | 0.942214 |

|                         |                 |       |       |      |      |       |          |          |          |          |
|-------------------------|-----------------|-------|-------|------|------|-------|----------|----------|----------|----------|
| MmugDNA.33152.1.S1_at   | MmugDNA.33152.1 | 7.82  | 7.32  | 0.43 | 0.09 | 1.41  | 0.038109 | 0.010323 | 0.358577 | 0.132968 |
| MmugDNA.33153.1.S1_at   | MmugDNA.33153.1 | 4     | 4.22  | 0.12 | 0.16 | -1.17 | 0.270859 | 0.066781 | 0.630819 | 0.304293 |
| MmugDNA.33154.1.S1_at   | MmugDNA.33154.1 | 4.18  | 4.11  | 0.1  | 0.02 | 1.05  | 0.593729 | 0.770662 | 0.834396 | 0.866801 |
| MmugDNA.33155.1.S1_at   | MmugDNA.33155.1 | 6.71  | 7.26  | 0.14 | 0.36 | -1.46 | 0.061674 | 0.034335 | 0.41131  | 0.229266 |
| MmugDNA.33156.1.S1_at   | MmugDNA.33156.1 | 10.97 | 10.63 | 1.1  | 0.37 | 1.27  | 0.922271 | 0.436803 | 0.973786 | 0.65629  |
| MmugDNA.33156.1.S1_s_at | MmugDNA.33156.1 | 11.88 | 11.62 | 0.65 | 0.12 | 1.2   | 0.803797 | 0.534006 | 0.928583 | 0.720046 |
| MmugDNA.33157.1.S1_at   | MmugDNA.33157.1 | 10.29 | 9.92  | 0.21 | 0.19 | 1.29  | 0.042225 | 0.160289 | 0.368796 | 0.436406 |
| MmugDNA.33158.1.S1_at   | MmugDNA.33158.1 | 8.34  | 8.39  | 0.3  | 0.1  | -1.03 | 0.883314 | 0.63349  | 0.95964  | 0.784173 |
| MmugDNA.3316.1.S1_at    | MmugDNA.3316.1  | 6.13  | 5.85  | 0.26 | 0.11 | 1.21  | 0.160091 | 0.09367  | 0.53316  | 0.350103 |
| MmugDNA.3316.1.S1_x_at  | MmugDNA.3316.1  | 6.09  | 5.7   | 0.19 | 0.08 | 1.31  | 0.02744  | 0.003469 | 0.327679 | 0.084806 |
| MmugDNA.33160.1.S1_at   | MmugDNA.33160.1 | 5.86  | 5.41  | 0.21 | 0.06 | 1.37  | 0.019874 | 0.013049 | 0.302615 | 0.14696  |
| MmugDNA.33164.1.S1_at   | MmugDNA.33164.1 | 4.91  | 5.04  | 0.09 | 0.05 | -1.1  | 0.146752 | 0.085476 | 0.521143 | 0.337473 |
| MmugDNA.33165.1.S1_at   | MmugDNA.33165.1 | 5.3   | 6.6   | 0.28 | 0.4  | -2.45 | 0.030951 | 0.410215 | 0.339277 | 0.637131 |
| MmugDNA.33166.1.S1_x_at | MmugDNA.33166.1 | 14.24 | 14.25 | 0.08 | 0    | -1    | 0.842539 | 0.975958 | 0.944281 | 0.986856 |
| MmugDNA.33167.1.S1_at   | MmugDNA.33167.1 | 9.11  | 8.65  | 0.17 | 0.37 | 1.37  | 0.108643 | 0.037138 | 0.480791 | 0.2372   |
| MmugDNA.33168.1.S1_at   | MmugDNA.33168.1 | 5.77  | 5.77  | 0.09 | 0.09 | 1     | 0.380009 | 0.463437 | 0.709343 | 0.674419 |
| MmugDNA.33169.1.S1_at   | MmugDNA.33169.1 | 9.82  | 9.41  | 0.23 | 0.16 | 1.33  | 0.187365 | 0.03008  | 0.559787 | 0.215243 |
| MmugDNA.3317.1.S1_at    | MmugDNA.3317.1  | 4.04  | 4.07  | 0.26 | 0.06 | -1.02 | 0.383743 | 0.496669 | 0.711503 | 0.696119 |
| MmugDNA.33170.1.S1_at   | MmugDNA.33170.1 | 7.43  | 7.26  | 0.13 | 0.02 | 1.13  | 0.1162   | 0.414029 | 0.489568 | 0.639981 |
| MmugDNA.33173.1.S1_at   | MmugDNA.33173.1 | 6.41  | 5.98  | 0.5  | 0.12 | 1.35  | 0.213005 | 0.267514 | 0.583596 | 0.533242 |
| MmugDNA.33174.1.S1_at   | MmugDNA.33174.1 | 9.29  | 8.53  | 0.36 | 0.08 | 1.7   | 0.011045 | 0.007923 | 0.252123 | 0.11857  |
| MmugDNA.33175.1.S1_at   | MmugDNA.33175.1 | 10.73 | 10.74 | 0.15 | 0.06 | -1.01 | 0.585372 | 0.299345 | 0.830512 | 0.557842 |
| MmugDNA.33176.1.S1_at   | MmugDNA.33176.1 | 3.12  | 3.21  | 0.07 | 0.04 | -1.07 | 0.573252 | 0.886018 | 0.823482 | 0.935122 |
| MmugDNA.33177.1.S1_at   | MmugDNA.33177.1 | 6.94  | 6.58  | 0.18 | 0.24 | 1.28  | 0.217624 | 0.071569 | 0.587515 | 0.313714 |
| MmugDNA.33178.1.S1_at   | MmugDNA.33178.1 | 7.75  | 7.98  | 0.12 | 0.15 | -1.18 | 0.043076 | 0.015421 | 0.371135 | 0.157699 |
| MmugDNA.33178.1.S1_x_at | MmugDNA.33178.1 | 8.19  | 8.19  | 0.26 | 0.18 | 1     | 0.241411 | 0.208496 | 0.607596 | 0.482435 |
| MmugDNA.3318.1.S1_at    | MmugDNA.3318.1  | 6.38  | 6.79  | 0.22 | 0.14 | -1.33 | 0.066589 | 0.112672 | 0.422442 | 0.378255 |
| MmugDNA.33180.1.S1_at   | MmugDNA.33180.1 | 3.08  | 3.33  | 0.12 | 0.09 | -1.19 | 0.027184 | 0.233009 | 0.327322 | 0.50445  |
| MmugDNA.33181.1.S1_at   | MmugDNA.33181.1 | 4.2   | 3.99  | 0.55 | 0.28 | 1.16  | 0.866283 | 0.776095 | 0.953032 | 0.869726 |
| MmugDNA.33182.1.S1_at   | MmugDNA.33182.1 | 6.21  | 6.07  | 0.15 | 0.07 | 1.1   | 0.188164 | 0.241034 | 0.56029  | 0.511657 |
| MmugDNA.33185.1.S1_at   | MmugDNA.33185.1 | 11.32 | 11.69 | 0.64 | 0.1  | -1.29 | 0.382668 | 0.328577 | 0.710805 | 0.578148 |
| MmugDNA.33186.1.S1_at   | MmugDNA.33186.1 | 9.99  | 10.66 | 0.06 | 0.12 | -1.59 | 0.000868 | 0.001107 | 0.153739 | 0.052714 |
| MmugDNA.33186.1.S1_s_at | MmugDNA.33186.1 | 7.8   | 8.36  | 0.07 | 0.09 | -1.47 | 0.001148 | 0.052615 | 0.156386 | 0.27488  |
| MmugDNA.33187.1.S1_at   | MmugDNA.33187.1 | 4.05  | 4.25  | 0.18 | 0.06 | -1.14 | 0.125603 | 0.10692  | 0.499523 | 0.369499 |
| MmugDNA.36880.1.S1_s_at | MmugDNA.36880.1 | 10.59 | 10.96 | 0.05 | 0.22 | -1.29 | 0.045093 | 0.032602 | 0.375796 | 0.223643 |
| MmugDNA.33189.1.S1_at   | MmugDNA.33189.1 | 13.25 | 13.14 | 0.18 | 0.02 | 1.09  | 0.576753 | 0.125848 | 0.825166 | 0.396315 |
| MmugDNA.3319.1.S1_at    | MmugDNA.3319.1  | 4.98  | 4.32  | 0.53 | 0.16 | 1.58  | 0.083626 | 0.077721 | 0.449639 | 0.323851 |
| MmugDNA.33190.1.S1_at   | MmugDNA.33190.1 | 5.31  | 5.47  | 0.09 | 0.28 | -1.12 | 0.411876 | 0.636443 | 0.731751 | 0.786176 |
| MmugDNA.33192.1.S1_at   | MmugDNA.33192.1 | 9.25  | 9.67  | 1.25 | 0.2  | -1.34 | 0.682967 | 0.374049 | 0.876006 | 0.612676 |
| MmugDNA.33196.1.S1_at   | MmugDNA.33196.1 | 6.83  | 6.42  | 0.38 | 0.33 | 1.33  | 0.489974 | 0.104463 | 0.776662 | 0.365719 |
| MmugDNA.33197.1.S1_at   | MmugDNA.33197.1 | 8.37  | 9.7   | 0.62 | 0.04 | -2.51 | 0.009733 | 0.003021 | 0.243347 | 0.080204 |
| MmugDNA.33198.1.S1_at   | MmugDNA.33198.1 | 3.3   | 3.21  | 0.19 | 0.07 | 1.07  | 0.210411 | 0.284881 | 0.581688 | 0.54701  |
| MmugDNA.2144.1.S1_s_at  | MmugDNA.2144.1  | 13.71 | 13.98 | 0.1  | 0.03 | -1.21 | 0.005149 | 0.000596 | 0.205615 | 0.041941 |

|                         |                 |       |       |      |      |       |          |          |          |          |
|-------------------------|-----------------|-------|-------|------|------|-------|----------|----------|----------|----------|
| MmugDNA.332.1.S1_at     | MmugDNA.332.1   | 4.2   | 4.2   | 0.28 | 0.17 | -1    | 0.926543 | 0.800624 | 0.975594 | 0.885312 |
| MmugDNA.3320.1.S1_at    | MmugDNA.3320.1  | 11.55 | 11.73 | 0.11 | 0.05 | -1.13 | 0.09668  | 0.001855 | 0.465288 | 0.064629 |
| MmugDNA.33200.1.S1_at   | MmugDNA.33200.1 | 5     | 4.68  | 0.07 | 0.11 | 1.24  | 0.023151 | 0.068844 | 0.314809 | 0.308714 |
| MmugDNA.33201.1.S1_at   | MmugDNA.33201.1 | 3.94  | 4.08  | 0.08 | 0.17 | -1.1  | 0.452083 | 0.619324 | 0.755619 | 0.774577 |
| MmugDNA.33202.1.S1_at   | MmugDNA.33202.1 | 3.19  | 3.15  | 0.08 | 0.06 | 1.03  | 0.599988 | 0.314929 | 0.837654 | 0.56872  |
| MmugDNA.33203.1.S1_at   | MmugDNA.33203.1 | 5.34  | 5.19  | 0.22 | 0.3  | 1.11  | 0.769818 | 0.918101 | 0.91387  | 0.954068 |
| MmugDNA.33204.1.S1_at   | MmugDNA.33204.1 | 7.52  | 7.69  | 0.33 | 0.03 | -1.12 | 0.546525 | 0.730982 | 0.808553 | 0.844172 |
| MmugDNA.33205.1.S1_at   | MmugDNA.33205.1 | 4.21  | 4.07  | 0.3  | 0.1  | 1.1   | 0.965658 | 0.998763 | 0.988737 | 0.999349 |
| MmugDNA.33207.1.S1_at   | MmugDNA.33207.1 | 5.3   | 5.35  | 0.16 | 0.04 | -1.03 | 0.688851 | 0.685799 | 0.878555 | 0.816612 |
| MmugDNA.33208.1.S1_at   | MmugDNA.33208.1 | 11.58 | 11.31 | 0.3  | 0.11 | 1.21  | 0.202901 | 0.012333 | 0.574279 | 0.143659 |
| MmugDNA.33209.1.S1_at   | MmugDNA.33209.1 | 6.49  | 6.65  | 0.07 | 0.18 | -1.11 | 0.264429 | 0.502498 | 0.626029 | 0.700192 |
| MmugDNA.3321.1.S1_at    | MmugDNA.3321.1  | 5.55  | 5.45  | 0.06 | 0.07 | 1.07  | 0.065062 | 0.28866  | 0.419717 | 0.549827 |
| MmugDNA.33211.1.S1_s_at | MmugDNA.33211.1 | 13.44 | 13.35 | 0.12 | 0.07 | 1.06  | 0.215962 | 0.17619  | 0.586049 | 0.4527   |
| MmugDNA.33213.1.S1_at   | MmugDNA.33213.1 | 4.9   | 4.63  | 0.29 | 0.02 | 1.2   | 0.057642 | 0.044468 | 0.402592 | 0.255242 |
| MmugDNA.33215.1.S1_at   | MmugDNA.33215.1 | 10.35 | 11.05 | 0.93 | 0.19 | -1.63 | 0.2063   | 0.155609 | 0.578142 | 0.430977 |
| MmugDNA.33217.1.S1_at   | MmugDNA.33217.1 | 3.55  | 3.83  | 0.04 | 0.03 | -1.21 | 0.000604 | 0.000679 | 0.143137 | 0.04413  |
| MmugDNA.33219.1.S1_at   | MmugDNA.33219.1 | 10.05 | 9.92  | 1.02 | 0.06 | 1.09  | 0.782216 | 0.940376 | 0.919732 | 0.966182 |
| MmugDNA.3322.1.S1_at    | MmugDNA.3322.1  | 3.99  | 4     | 0.28 | 0.02 | -1.01 | 0.441954 | 0.465158 | 0.749733 | 0.675621 |
| MmugDNA.33220.1.S1_at   | MmugDNA.33220.1 | 7.52  | 7.21  | 0.14 | 0.05 | 1.24  | 0.059949 | 0.032931 | 0.407399 | 0.22466  |
| MmugDNA.33221.1.S1_at   | MmugDNA.33221.1 | 6.95  | 6.62  | 0.24 | 0.16 | 1.26  | 0.12284  | 0.364349 | 0.496214 | 0.604693 |
| MmugDNA.15044.1.S1_s_at | MmugDNA.15044.1 | 5.49  | 5.22  | 0.11 | 0.06 | 1.21  | 0.043476 | 0.321668 | 0.372168 | 0.573346 |
| MmugDNA.33223.1.S1_at   | MmugDNA.33223.1 | 10.88 | 11.13 | 0.19 | 0.1  | -1.19 | 0.103232 | 0.104844 | 0.474032 | 0.36638  |
| MmugDNA.33224.1.S1_at   | MmugDNA.33224.1 | 11.13 | 10.98 | 0.18 | 0.1  | 1.11  | 0.334047 | 0.661918 | 0.680021 | 0.802024 |
| MmugDNA.33227.1.S1_at   | MmugDNA.33227.1 | 3.58  | 3.57  | 0.15 | 0.02 | 1.01  | 0.899473 | 0.4125   | 0.965803 | 0.638915 |
| MmugDNA.33228.1.S1_at   | MmugDNA.33228.1 | 8.72  | 9.41  | 1.27 | 0.23 | -1.62 | 0.104429 | 0.068851 | 0.475473 | 0.308721 |
| MmugDNA.33229.1.S1_at   | MmugDNA.33229.1 | 6.12  | 7.63  | 0.74 | 0.2  | -2.83 | 0.022781 | 0.011496 | 0.312286 | 0.138685 |
| MmugDNA.3323.1.S1_at    | MmugDNA.3323.1  | 2.78  | 2.8   | 0.07 | 0.04 | -1.01 | 0.639611 | 0.033494 | 0.85626  | 0.226577 |
| MmugDNA.33230.1.S1_at   | MmugDNA.33230.1 | 3.74  | 3.57  | 0.38 | 0.15 | 1.12  | 0.204063 | 0.217366 | 0.5753   | 0.490978 |
| MmugDNA.33231.1.S1_at   | MmugDNA.33231.1 | 3.97  | 3.9   | 0.18 | 0.02 | 1.05  | 0.40347  | 0.6013   | 0.725709 | 0.762661 |
| MmugDNA.33232.1.S1_at   | MmugDNA.33232.1 | 4.16  | 3.78  | 0.16 | 0.14 | 1.3   | 0.018047 | 0.14471  | 0.295184 | 0.418546 |
| MmugDNA.33234.1.S1_at   | MmugDNA.33234.1 | 10.31 | 10.12 | 0.22 | 0.11 | 1.14  | 0.140542 | 0.150642 | 0.516012 | 0.425195 |
| MmugDNA.953.1.S1_s_at   | MmugDNA.953.1   | 6.62  | 6.46  | 0.16 | 0.06 | 1.11  | 0.22713  | 0.013911 | 0.596459 | 0.151286 |
| MmugDNA.33239.1.S1_at   | MmugDNA.33239.1 | 10.62 | 10.79 | 0.43 | 0.23 | -1.12 | 0.569966 | 0.632232 | 0.821844 | 0.783289 |
| MmugDNA.3324.1.S1_at    | MmugDNA.3324.1  | 2.87  | 2.87  | 0.1  | 0.04 | 1     | 0.598856 | 0.551961 | 0.837129 | 0.731387 |
| MmugDNA.33241.1.S1_at   | MmugDNA.33241.1 | 11.42 | 11.14 | 0.42 | 0.09 | 1.22  | 0.354419 | 0.107133 | 0.694016 | 0.369808 |
| MmugDNA.33244.1.S1_at   | MmugDNA.33244.1 | 5.47  | 5.83  | 0.46 | 0.14 | -1.28 | 0.721084 | 0.948116 | 0.891927 | 0.970446 |
| MmugDNA.33245.1.S1_at   | MmugDNA.33245.1 | 6.94  | 6.89  | 0.07 | 0.05 | 1.04  | 0.228375 | 0.329619 | 0.597351 | 0.578813 |
| MmugDNA.33246.1.S1_at   | MmugDNA.33246.1 | 10.61 | 10.8  | 0.07 | 0.08 | -1.14 | 0.044723 | 0.211511 | 0.374984 | 0.48563  |
| MmugDNA.33247.1.S1_at   | MmugDNA.33247.1 | 8.66  | 9.15  | 0.34 | 0.08 | -1.41 | 0.064086 | 0.029237 | 0.417391 | 0.212898 |
| MmugDNA.33247.1.S1_s_at | MmugDNA.33247.1 | 8.68  | 8.93  | 0.43 | 0.09 | -1.19 | 0.193086 | 0.134499 | 0.563917 | 0.406626 |
| MmugDNA.33248.1.S1_at   | MmugDNA.33248.1 | 11.8  | 10.89 | 0.56 | 0.16 | 1.88  | 0.056427 | 0.035979 | 0.400189 | 0.234155 |
| MmugDNA.3325.1.S1_at    | MmugDNA.3325.1  | 7.67  | 7.43  | 0.37 | 0.26 | 1.18  | 0.226669 | 0.570903 | 0.596014 | 0.743422 |
| MmugDNA.33250.1.S1_at   | MmugDNA.33250.1 | 6.09  | 5.94  | 0.02 | 0.07 | 1.11  | 0.015049 | 0.093269 | 0.2796   | 0.349412 |

|                       |                 |       |       |      |      |       |          |          |          |          |
|-----------------------|-----------------|-------|-------|------|------|-------|----------|----------|----------|----------|
| MmugDNA.33253.1.S1_at | MmugDNA.33253.1 | 6.56  | 6.21  | 0.19 | 0.12 | 1.27  | 0.137862 | 0.266206 | 0.513592 | 0.53202  |
| MmugDNA.33254.1.S1_at | MmugDNA.33254.1 | 5.55  | 5.69  | 0.49 | 0.19 | -1.1  | 0.281223 | 0.078592 | 0.639849 | 0.325343 |
| MmugDNA.33256.1.S1_at | MmugDNA.33256.1 | 3.24  | 3.2   | 0.09 | 0.03 | 1.03  | 0.881102 | 0.39938  | 0.958957 | 0.629776 |
| MmugDNA.33257.1.S1_at | MmugDNA.33257.1 | 8.35  | 8.46  | 0.23 | 0.09 | -1.08 | 0.859517 | 0.342621 | 0.9504   | 0.588644 |
| MmugDNA.33258.1.S1_at | MmugDNA.33258.1 | 12.82 | 12.82 | 0.65 | 0.07 | -1    | 0.979179 | 0.323485 | 0.993351 | 0.574473 |
| MmugDNA.33259.1.S1_at | MmugDNA.33259.1 | 5.08  | 5.07  | 0.19 | 0.06 | 1.01  | 0.974474 | 0.325983 | 0.991912 | 0.576235 |
| MmugDNA.3326.1.S1_at  | MmugDNA.3326.1  | 4.37  | 4.31  | 0.04 | 0.04 | 1.05  | 0.112008 | 0.044573 | 0.485105 | 0.255512 |
| MmugDNA.33261.1.S1_at | MmugDNA.33261.1 | 5.55  | 6.09  | 0.79 | 0.46 | -1.46 | 0.68725  | 0.830535 | 0.877656 | 0.902753 |
| MmugDNA.33265.1.S1_at | MmugDNA.33265.1 | 4.98  | 4.55  | 0.16 | 0.19 | 1.35  | 0.036797 | 0.035456 | 0.355785 | 0.232564 |
| MmugDNA.33266.1.S1_at | MmugDNA.33266.1 | 10.7  | 10.44 | 0.73 | 0.26 | 1.2   | 0.347851 | 0.504696 | 0.689068 | 0.701774 |
| MmugDNA.33267.1.S1_at | MmugDNA.33267.1 | 3.87  | 3.78  | 0.12 | 0.17 | -1.07 | 0.457263 | 0.348657 | 0.758304 | 0.592661 |
| MmugDNA.33268.1.S1_at | MmugDNA.33268.1 | 5.45  | 5.39  | 0.1  | 0.21 | 1.04  | 0.175325 | 0.324331 | 0.548245 | 0.574924 |
| MmugDNA.33269.1.S1_at | MmugDNA.33269.1 | 5.12  | 4.95  | 0.41 | 0.52 | 1.12  | 0.59848  | 0.519811 | 0.836974 | 0.71135  |
| MmugDNA.3327.1.S1_at  | MmugDNA.3327.1  | 4.73  | 4.78  | 0.8  | 0.65 | -1.03 | 0.921846 | 0.991331 | 0.973627 | 0.995189 |
| MmugDNA.33271.1.S1_at | MmugDNA.33271.1 | 6.77  | 6.31  | 0.18 | 0.09 | 1.37  | 0.016245 | 0.044174 | 0.286783 | 0.254605 |
| MmugDNA.33273.1.S1_at | MmugDNA.33273.1 | 5     | 5.34  | 0.58 | 0.49 | -1.27 | 0.773783 | 0.863158 | 0.915965 | 0.922263 |
| MmugDNA.33275.1.S1_at | MmugDNA.33275.1 | 12.67 | 12.33 | 0.2  | 0.09 | 1.27  | 0.033332 | 0.007004 | 0.346442 | 0.112985 |
| MmugDNA.33277.1.S1_at | MmugDNA.33277.1 | 8.63  | 8.28  | 0.04 | 0.29 | 1.27  | 0.035089 | 0.056921 | 0.35097  | 0.284712 |
| MmugDNA.33278.1.S1_at | MmugDNA.33278.1 | 4.81  | 4.82  | 0.11 | 0.12 | -1.01 | 0.670498 | 0.646661 | 0.869943 | 0.793044 |
| MmugDNA.3328.1.S1_at  | MmugDNA.3328.1  | 3.21  | 2.94  | 0.09 | 0.06 | 1.21  | 0.014833 | 0.01466  | 0.278597 | 0.154231 |
| MmugDNA.33280.1.S1_at | MmugDNA.33280.1 | 7.23  | 7.02  | 0.01 | 0.08 | 1.16  | 0.010809 | 0.014725 | 0.250389 | 0.154415 |
| MmugDNA.33282.1.S1_at | MmugDNA.33282.1 | 11.1  | 11.03 | 0.33 | 0.11 | 1.05  | 0.78392  | 0.945634 | 0.920584 | 0.969098 |
| MmugDNA.33284.1.S1_at | MmugDNA.33284.1 | 6.35  | 6.01  | 0.24 | 0.16 | 1.26  | 0.542106 | 0.806375 | 0.80551  | 0.888642 |
| MmugDNA.33285.1.S1_at | MmugDNA.33285.1 | 6.49  | 6.43  | 0.21 | 0.19 | 1.05  | 0.68421  | 0.778433 | 0.876357 | 0.871327 |
| MmugDNA.33287.1.S1_at | MmugDNA.33287.1 | 3.79  | 3.88  | 0.15 | 0.39 | -1.06 | 0.331383 | 0.164582 | 0.678041 | 0.440829 |
| MmugDNA.33288.1.S1_at | MmugDNA.33288.1 | 9.09  | 9.22  | 0.26 | 0.06 | -1.09 | 0.655055 | 0.030362 | 0.863003 | 0.216116 |
| MmugDNA.33289.1.S1_at | MmugDNA.33289.1 | 6.15  | 6.11  | 0.13 | 0.08 | 1.02  | 0.957083 | 0.968277 | 0.98582  | 0.982549 |
| MmugDNA.3329.1.S1_at  | MmugDNA.3329.1  | 4.1   | 4.14  | 0.45 | 0.15 | -1.03 | 0.874488 | 0.618664 | 0.956448 | 0.774185 |
| MmugDNA.33291.1.S1_at | MmugDNA.33291.1 | 8.99  | 8.6   | 0.34 | 0.05 | 1.31  | 0.356224 | 0.335531 | 0.69508  | 0.583326 |
| MmugDNA.33293.1.S1_at | MmugDNA.33293.1 | 5.45  | 5.59  | 0.33 | 0.45 | -1.1  | 0.377284 | 0.735351 | 0.70746  | 0.846916 |
| MmugDNA.33294.1.S1_at | MmugDNA.33294.1 | 7.01  | 6.47  | 0.18 | 0.42 | 1.46  | 0.347447 | 0.002569 | 0.688705 | 0.075084 |
| MmugDNA.33295.1.S1_at | MmugDNA.33295.1 | 8.33  | 8.25  | 0.83 | 0.08 | 1.05  | 0.971979 | 0.909143 | 0.990867 | 0.948564 |
| MmugDNA.33297.1.S1_at | MmugDNA.33297.1 | 8.79  | 8.98  | 0.18 | 0.12 | -1.14 | 0.685523 | 0.418056 | 0.876846 | 0.642569 |
| MmugDNA.33298.1.S1_at | MmugDNA.33298.1 | 7.86  | 8.11  | 0.52 | 0.11 | -1.19 | 0.453238 | 0.054974 | 0.755962 | 0.279898 |
| MmugDNA.33299.1.S1_at | MmugDNA.33299.1 | 4.64  | 4.35  | 0.15 | 0.18 | 1.22  | 0.246267 | 0.209989 | 0.611704 | 0.483748 |
| MmugDNA.3330.1.S1_at  | MmugDNA.3330.1  | 10.67 | 10.07 | 0.66 | 0.09 | 1.51  | 0.669722 | 0.033384 | 0.869663 | 0.226396 |
| MmugDNA.33300.1.S1_at | MmugDNA.33300.1 | 8.91  | 8.73  | 0.27 | 0.07 | 1.14  | 0.24508  | 0.018052 | 0.610449 | 0.169372 |
| MmugDNA.33301.1.S1_at | MmugDNA.33301.1 | 5.77  | 5.57  | 0.02 | 0.11 | 1.15  | 0.013372 | 0.019688 | 0.268216 | 0.176286 |
| MmugDNA.33304.1.S1_at | MmugDNA.33304.1 | 5.91  | 6.03  | 0.16 | 0.04 | -1.09 | 0.187667 | 0.509525 | 0.559909 | 0.704233 |
| MmugDNA.33305.1.S1_at | MmugDNA.33305.1 | 5.68  | 5.91  | 0.19 | 0.05 | -1.17 | 0.380411 | 0.06415  | 0.709387 | 0.29954  |
| MmugDNA.33306.1.S1_at | MmugDNA.33306.1 | 3.31  | 3.39  | 0.13 | 0.02 | -1.06 | 0.330169 | 0.352886 | 0.676891 | 0.596217 |
| MmugDNA.33309.1.S1_at | MmugDNA.33309.1 | 3.28  | 3.27  | 0.15 | 0.15 | 1     | 0.436853 | 0.150353 | 0.746611 | 0.42489  |
| MmugDNA.33310.1.S1_at | MmugDNA.33310.1 | 4.08  | 4.09  | 0.24 | 0.08 | -1.01 | 0.397548 | 0.515849 | 0.721771 | 0.708504 |



|                         |                 |       |       |      |      |       |          |          |          |          |
|-------------------------|-----------------|-------|-------|------|------|-------|----------|----------|----------|----------|
| MmugDNA.33313.1.S1_at   | MmugDNA.33313.1 | 5.78  | 5.91  | 0.12 | 0.1  | -1.09 | 0.317239 | 0.166033 | 0.667045 | 0.442606 |
| MmugDNA.33314.1.S1_at   | MmugDNA.33314.1 | 6.24  | 5.88  | 0.07 | 0.17 | 1.28  | 0.064487 | 0.133345 | 0.418343 | 0.405139 |
| MmugDNA.33315.1.S1_at   | MmugDNA.33315.1 | 4.16  | 3.87  | 0.09 | 0.18 | 1.23  | 0.087041 | 0.174114 | 0.454785 | 0.450431 |
| MmugDNA.33316.1.S1_at   | MmugDNA.33316.1 | 13.71 | 13.75 | 0.11 | 0    | -1.03 | 0.575899 | 0.142373 | 0.82502  | 0.415965 |
| MmugDNA.33317.1.S1_at   | MmugDNA.33317.1 | 5.58  | 5.54  | 0.08 | 0.06 | 1.03  | 0.861147 | 0.085367 | 0.951162 | 0.337246 |
| MmugDNA.33319.1.S1_at   | MmugDNA.33319.1 | 5.75  | 5.69  | 0.2  | 0.04 | 1.04  | 0.211496 | 0.5519   | 0.582513 | 0.731343 |
| MmugDNA.3332.1.S1_at    | MmugDNA.3332.1  | 5.66  | 5.63  | 0    | 0.19 | 1.02  | 0.600892 | 0.229402 | 0.838005 | 0.501527 |
| MmugDNA.33321.1.S1_at   | MmugDNA.33321.1 | 4.56  | 4.76  | 0.47 | 0.49 | -1.15 | 0.774323 | 0.924355 | 0.916259 | 0.957351 |
| MmugDNA.33322.1.S1_at   | MmugDNA.33322.1 | 5.3   | 5.36  | 0.18 | 0.42 | -1.04 | 0.502425 | 0.353292 | 0.783594 | 0.596477 |
| MmugDNA.33324.1.S1_at   | MmugDNA.33324.1 | 7.02  | 7.57  | 0.08 | 0.36 | -1.47 | 0.146003 | 0.102263 | 0.520572 | 0.36236  |
| MmugDNA.33328.1.S1_at   | MmugDNA.33328.1 | 10.36 | 10.43 | 0.17 | 0.05 | -1.05 | 0.935773 | 0.644439 | 0.978396 | 0.791578 |
| MmugDNA.3333.1.S1_s_at  | MmugDNA.3333.1  | 11.15 | 10.9  | 0.11 | 0.08 | 1.18  | 0.01352  | 0.042929 | 0.269448 | 0.251759 |
| MmugDNA.33332.1.S1_at   | MmugDNA.33332.1 | 5.91  | 5.86  | 0.18 | 0.11 | 1.04  | 0.411276 | 0.683614 | 0.731277 | 0.815387 |
| MmugDNA.33334.1.S1_at   | MmugDNA.33334.1 | 3.95  | 3.97  | 0.44 | 0.35 | -1.01 | 0.435183 | 0.410385 | 0.745567 | 0.637245 |
| MmugDNA.33335.1.S1_at   | MmugDNA.33335.1 | 10.66 | 9.98  | 0.21 | 0.12 | 1.6   | 0.016899 | 0.0376   | 0.288956 | 0.238367 |
| MmugDNA.33339.1.S1_at   | MmugDNA.33339.1 | 6.76  | 7.02  | 0.44 | 0.02 | -1.2  | 0.320791 | 0.042971 | 0.669445 | 0.251849 |
| MmugDNA.3334.1.S1_at    | MmugDNA.3334.1  | 10.55 | 10.44 | 1.29 | 0.1  | 1.08  | 0.87098  | 0.727534 | 0.95519  | 0.84241  |
| MmugDNA.33340.1.S1_at   | MmugDNA.33340.1 | 9.37  | 9.29  | 0.62 | 0.27 | 1.06  | 0.534998 | 0.758659 | 0.801404 | 0.859716 |
| MmugDNA.33337.1.S1_at   | MmugDNA.33337.1 | 12.15 | 12.51 | 0.6  | 0.03 | -1.28 | 0.329388 | 0.120427 | 0.676319 | 0.38925  |
| MmugDNA.33337.1.S1_s_at | MmugDNA.33337.1 | 12.49 | 12.84 | 0.52 | 0.06 | -1.27 | 0.269643 | 0.102182 | 0.629945 | 0.362273 |
| MmugDNA.33342.1.S1_at   | MmugDNA.33342.1 | 6.1   | 5.95  | 0.25 | 0.09 | 1.11  | 0.273625 | 0.391748 | 0.633298 | 0.625301 |
| MmugDNA.33344.1.S1_at   | MmugDNA.33344.1 | 6.55  | 6.47  | 0.1  | 0.09 | 1.06  | 0.25248  | 0.630092 | 0.617481 | 0.782148 |
| MmugDNA.33345.1.S1_at   | MmugDNA.33345.1 | 12.35 | 12.18 | 0.39 | 0.19 | 1.13  | 0.729957 | 0.28435  | 0.895921 | 0.54659  |
| MmugDNA.33347.1.S1_at   | MmugDNA.33347.1 | 5.47  | 5.08  | 0.26 | 0.07 | 1.31  | 0.257791 | 0.484395 | 0.621456 | 0.688478 |
| MmugDNA.33348.1.S1_at   | MmugDNA.33348.1 | 2.94  | 2.74  | 0.06 | 0.34 | 1.15  | 0.945667 | 0.691762 | 0.981093 | 0.820691 |
| MmugDNA.33349.1.S1_at   | MmugDNA.33349.1 | 6.79  | 6.67  | 0.07 | 0.08 | 1.08  | 0.119124 | 0.44317  | 0.492552 | 0.661011 |
| MmugDNA.3335.1.S1_s_at  | MmugDNA.3335.1  | 13.73 | 13.67 | 0.11 | 0.02 | 1.04  | 0.14606  | 0.168963 | 0.520572 | 0.445519 |
| MmugDNA.33350.1.S1_at   | MmugDNA.33350.1 | 3.5   | 3.41  | 0.23 | 0.19 | 1.06  | 0.18476  | 0.237697 | 0.557496 | 0.50826  |
| MmugDNA.33351.1.S1_at   | MmugDNA.33351.1 | 12.7  | 12.38 | 0.1  | 0.06 | 1.25  | 0.014633 | 0.005524 | 0.276873 | 0.102531 |
| MmugDNA.33353.1.S1_at   | MmugDNA.33353.1 | 5.19  | 5.12  | 0.26 | 0.07 | 1.05  | 0.350946 | 0.58374  | 0.691768 | 0.751983 |
| MmugDNA.33354.1.S1_at   | MmugDNA.33354.1 | 9.57  | 9.35  | 0.23 | 0.1  | 1.17  | 0.069108 | 0.132037 | 0.426548 | 0.404043 |
| MmugDNA.33356.1.S1_at   | MmugDNA.33356.1 | 6.73  | 6.41  | 0.15 | 0.26 | 1.25  | 0.269445 | 0.274766 | 0.62965  | 0.539225 |
| MmugDNA.33357.1.S1_at   | MmugDNA.33357.1 | 3.64  | 3.72  | 0.09 | 0.07 | -1.05 | 0.861824 | 0.616899 | 0.95128  | 0.773025 |
| MmugDNA.33358.1.S1_at   | MmugDNA.33358.1 | 3.07  | 3.17  | 0.15 | 0.19 | -1.07 | 0.484504 | 0.309119 | 0.773652 | 0.564788 |
| MmugDNA.33359.1.S1_at   | MmugDNA.33359.1 | 3.33  | 3.22  | 0.03 | 0.11 | 1.08  | 0.189597 | 0.214693 | 0.561075 | 0.48856  |
| MmugDNA.3336.1.S1_at    | MmugDNA.3336.1  | 6.6   | 7.19  | 0.51 | 0.16 | -1.51 | 0.151058 | 0.152728 | 0.52444  | 0.427571 |
| MmugDNA.33361.1.S1_at   | MmugDNA.33361.1 | 5.2   | 5.03  | 0.22 | 0.11 | 1.13  | 0.297762 | 0.114682 | 0.652791 | 0.381227 |
| MmugDNA.33362.1.S1_at   | MmugDNA.33362.1 | 4.94  | 5.03  | 0.31 | 0.13 | -1.06 | 0.449213 | 0.49805  | 0.754212 | 0.697228 |
| MmugDNA.33363.1.S1_at   | MmugDNA.33363.1 | 3.8   | 3.8   | 0.06 | 0.04 | -1    | 0.681866 | 0.362306 | 0.87542  | 0.602931 |
| MmugDNA.33364.1.S1_at   | MmugDNA.33364.1 | 9.17  | 8.6   | 0.88 | 0.49 | 1.48  | 0.365986 | 0.324125 | 0.701466 | 0.574823 |
| MmugDNA.33365.1.S1_at   | MmugDNA.33365.1 | 5.39  | 5.02  | 0.83 | 0.5  | 1.3   | 0.505975 | 0.516975 | 0.785585 | 0.709346 |
| MmugDNA.33368.1.S1_at   | MmugDNA.33368.1 | 7.21  | 7.08  | 0.07 | 0.08 | 1.09  | 0.353944 | 0.578601 | 0.693507 | 0.748595 |
| MmugDNA.33369.1.S1_at   | MmugDNA.33369.1 | 4.85  | 4.77  | 0.39 | 0.18 | 1.05  | 0.586177 | 0.734929 | 0.831191 | 0.846588 |

|                         |                 |       |       |      |      |       |          |          |          |          |
|-------------------------|-----------------|-------|-------|------|------|-------|----------|----------|----------|----------|
| MmugDNA.3337.1.S1_at    | MmugDNA.3337.1  | 7.26  | 8.23  | 0.59 | 0.25 | -1.97 | 0.106264 | 0.042255 | 0.478666 | 0.250023 |
| MmugDNA.33372.1.S1_at   | MmugDNA.33372.1 | 4.42  | 4.01  | 0.54 | 0.02 | 1.33  | 0.279596 | 0.228778 | 0.638509 | 0.501008 |
| MmugDNA.33374.1.S1_at   | MmugDNA.33374.1 | 7.54  | 7.75  | 0.59 | 0.22 | -1.16 | 0.678391 | 0.835717 | 0.873975 | 0.905981 |
| MmugDNA.33375.1.S1_at   | MmugDNA.33375.1 | 8.98  | 9     | 0.31 | 0.23 | -1.01 | 0.21472  | 0.29786  | 0.585143 | 0.556546 |
| MmugDNA.33377.1.S1_at   | MmugDNA.33377.1 | 3.41  | 3.46  | 0.05 | 0.1  | -1.04 | 0.408039 | 0.223755 | 0.729168 | 0.496696 |
| MmugDNA.33378.1.S1_s_at | MmugDNA.33378.1 | 9.9   | 9.59  | 0.24 | 0.03 | 1.25  | 0.098667 | 0.091439 | 0.468025 | 0.346417 |
| MmugDNA.33379.1.S1_at   | MmugDNA.33379.1 | 9.39  | 10.07 | 0.67 | 0.23 | -1.61 | 0.113425 | 0.055494 | 0.486734 | 0.281404 |
| MmugDNA.3338.1.S1_at    | MmugDNA.3338.1  | 5.08  | 5.16  | 0.4  | 0.45 | -1.05 | 0.68168  | 0.597464 | 0.875365 | 0.760203 |
| MmugDNA.33380.1.S1_at   | MmugDNA.33380.1 | 7.49  | 7.03  | 0.25 | 0.18 | 1.37  | 0.116105 | 0.00542  | 0.489554 | 0.10157  |
| MmugDNA.33381.1.S1_at   | MmugDNA.33381.1 | 10.43 | 9.76  | 0.7  | 0.17 | 1.6   | 0.544276 | 0.725306 | 0.807169 | 0.840954 |
| MmugDNA.33382.1.S1_at   | MmugDNA.33382.1 | 3.2   | 3.19  | 0    | 0.06 | -1.01 | 0.735683 | 0.605918 | 0.898923 | 0.765543 |
| MmugDNA.33382.1.S1_s_at | MmugDNA.33382.1 | 6.82  | 6.84  | 0.09 | 0.09 | -1.01 | 0.299411 | 0.685632 | 0.653793 | 0.816553 |
| MmugDNA.33383.1.S1_at   | MmugDNA.33383.1 | 8.81  | 8.53  | 0.4  | 0.23 | 1.21  | 0.164099 | 0.000108 | 0.536892 | 0.028099 |
| MmugDNA.33384.1.S1_at   | MmugDNA.33384.1 | 6.87  | 7.06  | 0.37 | 0.13 | -1.14 | 0.638804 | 0.071304 | 0.856034 | 0.31334  |
| MmugDNA.33384.1.S1_s_at | MmugDNA.33384.1 | 7.77  | 8     | 0.56 | 0.08 | -1.17 | 0.572527 | 0.491034 | 0.823222 | 0.692751 |
| MmugDNA.33385.1.S1_at   | MmugDNA.33385.1 | 3.46  | 3.46  | 0.13 | 0.09 | 1     | 0.232593 | 0.558274 | 0.600124 | 0.735506 |
| MmugDNA.33386.1.S1_at   | MmugDNA.33386.1 | 12.67 | 12.68 | 0.1  | 0.04 | -1.01 | 0.324704 | 0.272417 | 0.672781 | 0.537122 |
| MmugDNA.33388.1.S1_at   | MmugDNA.33388.1 | 5.26  | 5.21  | 0.07 | 0.1  | 1.04  | 0.228883 | 0.416339 | 0.597884 | 0.641553 |
| MmugDNA.33389.1.S1_at   | MmugDNA.33389.1 | 5.23  | 4.92  | 0.93 | 0.19 | 1.24  | 0.494176 | 0.221318 | 0.779281 | 0.494644 |
| MmugDNA.3339.1.S1_at    | MmugDNA.3339.1  | 6.85  | 6.68  | 0.03 | 0.02 | 1.13  | 0.001085 | 0.231417 | 0.156386 | 0.503138 |
| MmugDNA.33391.1.S1_at   | MmugDNA.33391.1 | 5.21  | 6.47  | 0.37 | 0.37 | -2.4  | 0.0487   | 0.042146 | 0.383952 | 0.249753 |
| MmugDNA.33393.1.S1_at   | MmugDNA.33393.1 | 5.2   | 5.08  | 0.09 | 0.22 | 1.09  | 0.703515 | 0.081565 | 0.88474  | 0.329764 |
| MmugDNA.33394.1.S1_at   | MmugDNA.33394.1 | 5.41  | 4.79  | 0.57 | 0.15 | 1.53  | 0.194694 | 0.115737 | 0.565144 | 0.382814 |
| MmugDNA.33396.1.S1_at   | MmugDNA.33396.1 | 8.14  | 7.19  | 0.15 | 0.49 | 1.94  | 0.030142 | 0.008128 | 0.336644 | 0.11972  |
| MmugDNA.33397.1.S1_at   | MmugDNA.33397.1 | 6.86  | 6.86  | 0.2  | 0.16 | -1    | 0.98593  | 0.503834 | 0.995501 | 0.701184 |
| MmugDNA.33398.1.S1_at   | MmugDNA.33398.1 | 3.08  | 3.09  | 0.05 | 0.11 | -1    | 0.620718 | 0.412812 | 0.847208 | 0.639121 |
| MmugDNA.33399.1.S1_at   | MmugDNA.33399.1 | 6.12  | 5.91  | 0.31 | 0.16 | 1.15  | 0.823592 | 0.148155 | 0.936327 | 0.422678 |
| MmugDNA.3340.1.S1_at    | MmugDNA.3340.1  | 10.09 | 9.97  | 0.94 | 0.2  | 1.08  | 0.793858 | 0.660952 | 0.924471 | 0.801643 |
| MmugDNA.33400.1.S1_at   | MmugDNA.33400.1 | 11.79 | 11.8  | 0.15 | 0.06 | -1.01 | 0.786306 | 0.175736 | 0.921403 | 0.452344 |
| MmugDNA.33401.1.S1_at   | MmugDNA.33401.1 | 4.72  | 4.82  | 0.12 | 0.18 | -1.07 | 0.091298 | 0.000076 | 0.459095 | 0.027016 |
| MmugDNA.33402.1.S1_at   | MmugDNA.33402.1 | 4.53  | 5.38  | 0.05 | 0.27 | -1.8  | 0.00342  | 0.004688 | 0.194985 | 0.095363 |
| MmugDNA.33403.1.S1_at   | MmugDNA.33403.1 | 12.39 | 12.08 | 0.18 | 0.06 | 1.24  | 0.043799 | 0.001523 | 0.372577 | 0.059307 |
| MmugDNA.33404.1.S1_at   | MmugDNA.33404.1 | 11.89 | 12.04 | 0.12 | 0.06 | -1.11 | 0.219675 | 0.000436 | 0.589083 | 0.038359 |
| MmugDNA.33405.1.S1_at   | MmugDNA.33405.1 | 4.57  | 4.67  | 0.16 | 0.21 | -1.07 | 0.900131 | 0.068733 | 0.966012 | 0.308711 |
| MmugDNA.33406.1.S1_at   | MmugDNA.33406.1 | 9.8   | 10.02 | 0.27 | 0.09 | -1.17 | 0.300372 | 0.033159 | 0.65495  | 0.225374 |
| MmugDNA.33407.1.S1_at   | MmugDNA.33407.1 | 6.43  | 6.42  | 0.08 | 0.11 | 1.01  | 0.49635  | 0.050088 | 0.780382 | 0.268916 |
| MmugDNA.3341.1.S1_at    | MmugDNA.3341.1  | 2.98  | 2.97  | 0.13 | 0    | 1     | 0.329406 | 0.331098 | 0.676319 | 0.579816 |
| MmugDNA.33411.1.S1_at   | MmugDNA.33411.1 | 3.12  | 2.81  | 0.16 | 0.18 | 1.24  | 0.465562 | 0.491498 | 0.763035 | 0.693004 |
| MmugDNA.33412.1.S1_at   | MmugDNA.33412.1 | 4.31  | 4.3   | 0.11 | 0.11 | 1.01  | 0.203212 | 0.251984 | 0.574732 | 0.520646 |
| MmugDNA.33413.1.S1_at   | MmugDNA.33413.1 | 9.69  | 10.22 | 0.5  | 0.11 | -1.45 | 0.153248 | 0.131028 | 0.526411 | 0.403053 |
| MmugDNA.33414.1.S1_at   | MmugDNA.33414.1 | 4.34  | 3.94  | 0.08 | 0.18 | 1.32  | 0.017017 | 0.021758 | 0.288969 | 0.184563 |
| MmugDNA.33415.1.S1_at   | MmugDNA.33415.1 | 7.72  | 7.21  | 0.36 | 0.18 | 1.42  | 0.130378 | 0.180585 | 0.504689 | 0.457191 |
| MmugDNA.33416.1.S1_at   | MmugDNA.33416.1 | 7.25  | 7.63  | 0.29 | 0.32 | -1.3  | 0.902142 | 0.946815 | 0.966869 | 0.969783 |

|                         |                 |       |       |      |      |       |          |          |          |          |
|-------------------------|-----------------|-------|-------|------|------|-------|----------|----------|----------|----------|
| MmugDNA.33417.1.S1_at   | MmugDNA.33417.1 | 5.77  | 5.48  | 0.11 | 0.34 | 1.22  | 0.160603 | 0.115304 | 0.533821 | 0.382354 |
| MmugDNA.33418.1.S1_at   | MmugDNA.33418.1 | 7.93  | 9     | 0.37 | 0.03 | -2.1  | 0.003659 | 0.003002 | 0.197111 | 0.079958 |
| MmugDNA.33419.1.S1_at   | MmugDNA.33419.1 | 3.21  | 3.41  | 0.03 | 0.24 | -1.14 | 0.255132 | 0.223733 | 0.619267 | 0.496672 |
| MmugDNA.33420.1.S1_at   | MmugDNA.33420.1 | 5.61  | 5.63  | 0.54 | 0.14 | -1.02 | 0.986573 | 0.500532 | 0.995657 | 0.69911  |
| MmugDNA.33421.1.S1_at   | MmugDNA.33421.1 | 12.62 | 12.47 | 0.03 | 0.08 | 1.11  | 0.080456 | 0.312602 | 0.444133 | 0.567268 |
| MmugDNA.33422.1.S1_at   | MmugDNA.33422.1 | 4.64  | 4.17  | 0.43 | 1.04 | 1.39  | 0.597117 | 0.583662 | 0.83613  | 0.751908 |
| MmugDNA.33424.1.S1_at   | MmugDNA.33424.1 | 6.85  | 7.31  | 0.19 | 0.12 | -1.38 | 0.033814 | 0.041854 | 0.347296 | 0.249172 |
| MmugDNA.33425.1.S1_at   | MmugDNA.33425.1 | 11.1  | 11.28 | 0.12 | 0.05 | -1.13 | 0.130585 | 0.48604  | 0.504978 | 0.689563 |
| MmugDNA.33427.1.S1_at   | MmugDNA.33427.1 | 8.67  | 9.11  | 0.79 | 0.2  | -1.35 | 0.373231 | 0.422562 | 0.705567 | 0.645762 |
| MmugDNA.33428.1.S1_at   | MmugDNA.33428.1 | 12.26 | 12.14 | 0.24 | 0.08 | 1.09  | 0.465326 | 0.314758 | 0.763035 | 0.568489 |
| MmugDNA.33431.1.S1_at   | MmugDNA.33431.1 | 5.87  | 5.07  | 0.7  | 0.1  | -1.73 | 0.415033 | 0.205741 | 0.733489 | 0.48007  |
| MmugDNA.33435.1.S1_at   | MmugDNA.33435.1 | 5.78  | 5.53  | 0.81 | 0.74 | 1.19  | 0.653777 | 0.427532 | 0.862462 | 0.649318 |
| MmugDNA.33437.1.S1_at   | MmugDNA.33437.1 | 7.49  | 7.33  | 0.35 | 0.11 | 1.12  | 0.192799 | 0.038324 | 0.563577 | 0.240641 |
| MmugDNA.33437.1.S1_s_at | MmugDNA.33437.1 | 9.37  | 9.51  | 0.45 | 0.05 | -1.1  | 0.604115 | 0.094082 | 0.839485 | 0.350727 |
| MmugDNA.3344.1.S1_at    | MmugDNA.3344.1  | 8.91  | 9.21  | 0.66 | 0.13 | -1.23 | 0.471615 | 0.342927 | 0.76658  | 0.588745 |
| MmugDNA.33440.1.S1_at   | MmugDNA.33440.1 | 4.01  | 3.99  | 0.08 | 0.09 | 1.01  | 0.641117 | 0.764915 | 0.857131 | 0.863324 |
| MmugDNA.33441.1.S1_at   | MmugDNA.33441.1 | 3.81  | 3.79  | 0.29 | 0.1  | 1.02  | 0.956303 | 0.988204 | 0.985496 | 0.993428 |
| MmugDNA.33442.1.S1_at   | MmugDNA.33442.1 | 8.08  | 7.82  | 0.53 | 0.12 | 1.2   | 0.375785 | 0.325797 | 0.706657 | 0.576049 |
| MmugDNA.33444.1.S1_at   | MmugDNA.33444.1 | 6.85  | 7.77  | 0.87 | 0.09 | -1.9  | 0.144723 | 0.160445 | 0.520071 | 0.436569 |
| MmugDNA.33445.1.S1_at   | MmugDNA.33445.1 | 7.16  | 7.8   | 1.02 | 0.05 | -1.55 | 0.306454 | 0.148849 | 0.659434 | 0.423218 |
| MmugDNA.33446.1.S1_at   | MmugDNA.33446.1 | 5.21  | 5.45  | 0.45 | 0.22 | -1.19 | 0.929782 | 0.077791 | 0.976518 | 0.323933 |
| MmugDNA.33447.1.S1_at   | MmugDNA.33447.1 | 3.32  | 3.29  | 0.11 | 0.1  | 1.02  | 0.8854   | 0.880819 | 0.96036  | 0.931979 |
| MmugDNA.33448.1.S1_s_at | MmugDNA.33448.1 | 9.46  | 9.75  | 0.32 | 0.1  | -1.22 | 0.301473 | 0.856645 | 0.655772 | 0.918123 |
| MmugDNA.3345.1.S1_at    | MmugDNA.3345.1  | 6.47  | 6.3   | 0.11 | 0.12 | 1.13  | 0.041963 | 0.06996  | 0.367952 | 0.31072  |
| MmugDNA.33450.1.S1_at   | MmugDNA.33450.1 | 4.65  | 4.59  | 0.14 | 0.08 | 1.05  | 0.960917 | 0.085198 | 0.987225 | 0.337096 |
| MmugDNA.33452.1.S1_at   | MmugDNA.33452.1 | 4.14  | 4.2   | 0    | 0.28 | -1.04 | 0.647664 | 0.771993 | 0.859364 | 0.867436 |
| MmugDNA.33453.1.S1_at   | MmugDNA.33453.1 | 7.21  | 8.03  | 0.54 | 0.16 | -1.76 | 0.070851 | 0.016241 | 0.430067 | 0.161591 |
| MmugDNA.33454.1.S1_at   | MmugDNA.33454.1 | 5.4   | 5.21  | 0.18 | 0.12 | 1.14  | 0.452429 | 0.553973 | 0.755806 | 0.732896 |
| MmugDNA.33455.1.S1_at   | MmugDNA.33455.1 | 4.28  | 4.29  | 0.12 | 0.16 | -1.01 | 0.567244 | 0.483887 | 0.820335 | 0.688227 |
| MmugDNA.33456.1.S1_s_at | MmugDNA.33456.1 | 7.56  | 7.46  | 0.2  | 0.07 | 1.07  | 0.149218 | 0.21271  | 0.52307  | 0.486686 |
| MmugDNA.33457.1.S1_at   | MmugDNA.33457.1 | 7.02  | 7.13  | 0.24 | 0.3  | -1.08 | 0.662706 | 0.073924 | 0.866912 | 0.317364 |
| MmugDNA.33458.1.S1_at   | MmugDNA.33458.1 | 5.25  | 5.24  | 0.09 | 0.15 | 1.01  | 0.809303 | 0.235175 | 0.93104  | 0.50629  |
| MmugDNA.33459.1.S1_at   | MmugDNA.33459.1 | 3.96  | 4.02  | 0.18 | 0.05 | -1.05 | 0.810313 | 0.927505 | 0.931324 | 0.958809 |
| MmugDNA.3346.1.S1_at    | MmugDNA.3346.1  | 8.21  | 8.42  | 0.06 | 0.12 | -1.15 | 0.043455 | 0.101634 | 0.372168 | 0.361529 |
| MmugDNA.33461.1.S1_at   | MmugDNA.33461.1 | 6.16  | 5.97  | 0.08 | 0.17 | 1.14  | 0.067452 | 0.163902 | 0.423828 | 0.440105 |
| MmugDNA.33462.1.S1_at   | MmugDNA.33462.1 | 7.5   | 7.64  | 0.08 | 0.22 | -1.11 | 0.338191 | 0.038084 | 0.682759 | 0.239753 |
| MmugDNA.33464.1.S1_at   | MmugDNA.33464.1 | 8.7   | 8.87  | 0.39 | 0.02 | -1.12 | 0.407036 | 0.072905 | 0.728484 | 0.315942 |
| MmugDNA.33468.1.S1_at   | MmugDNA.33468.1 | 4.58  | 4.62  | 0.03 | 0.21 | -1.03 | 0.702135 | 0.796039 | 0.884146 | 0.882493 |
| MmugDNA.33469.1.S1_at   | MmugDNA.33469.1 | 3.1   | 3.09  | 0.03 | 0.1  | 1.01  | 0.479115 | 0.159571 | 0.770536 | 0.435774 |
| MmugDNA.3347.1.S1_at    | MmugDNA.3347.1  | 4.14  | 4.38  | 0.12 | 0.16 | -1.18 | 0.099294 | 0.506602 | 0.46876  | 0.702503 |
| MmugDNA.33470.1.S1_at   | MmugDNA.33470.1 | 4.51  | 4.5   | 0.15 | 0    | 1     | 0.39521  | 0.182068 | 0.720394 | 0.45857  |
| MmugDNA.33471.1.S1_at   | MmugDNA.33471.1 | 5.06  | 4.96  | 0.36 | 0.09 | 1.07  | 0.234037 | 0.317991 | 0.601531 | 0.571046 |
| MmugDNA.33473.1.S1_at   | MmugDNA.33473.1 | 4.43  | 4.46  | 0.12 | 0.09 | -1.02 | 0.655017 | 0.801745 | 0.863003 | 0.885903 |

|                         |                 |       |       |      |      |       |          |          |          |          |
|-------------------------|-----------------|-------|-------|------|------|-------|----------|----------|----------|----------|
| MmugDNA.33474.1.S1_at   | MmugDNA.33474.1 | 9.13  | 9.27  | 0.25 | 0.07 | -1.1  | 0.56145  | 0.790186 | 0.817219 | 0.878732 |
| MmugDNA.33475.1.S1_at   | MmugDNA.33475.1 | 6.73  | 6.92  | 0.14 | 0.04 | -1.14 | 0.304568 | 0.139097 | 0.658179 | 0.412205 |
| MmugDNA.33476.1.S1_at   | MmugDNA.33476.1 | 8.48  | 8.73  | 0.23 | 0.06 | -1.18 | 0.155731 | 0.25513  | 0.528929 | 0.52317  |
| MmugDNA.33477.1.S1_at   | MmugDNA.33477.1 | 4.78  | 4.68  | 0.15 | 0.1  | 1.07  | 0.253218 | 0.258023 | 0.617925 | 0.52557  |
| MmugDNA.33478.1.S1_at   | MmugDNA.33478.1 | 5.28  | 5.14  | 0.1  | 0.18 | 1.1   | 0.747083 | 0.411617 | 0.903869 | 0.638328 |
| MmugDNA.33479.1.S1_at   | MmugDNA.33479.1 | 2.86  | 2.84  | 0.16 | 0.14 | 1.01  | 0.832904 | 0.401619 | 0.94008  | 0.631068 |
| MmugDNA.3348.1.S1_at    | MmugDNA.3348.1  | 4.89  | 4.78  | 0.07 | 0.07 | 1.08  | 0.14597  | 0.234526 | 0.520572 | 0.505718 |
| MmugDNA.33480.1.S1_at   | MmugDNA.33480.1 | 3.9   | 3.89  | 0.15 | 0.03 | 1.01  | 0.378782 | 0.6523   | 0.708454 | 0.796682 |
| MmugDNA.33481.1.S1_at   | MmugDNA.33481.1 | 9.12  | 7.79  | 0.39 | 0.78 | 2.51  | 0.057761 | 0.15872  | 0.402844 | 0.434797 |
| MmugDNA.33481.1.S1_x_at | MmugDNA.33481.1 | 9.44  | 8.23  | 0.38 | 0.76 | 2.32  | 0.069271 | 0.177126 | 0.426757 | 0.453611 |
| MmugDNA.33482.1.S1_at   | MmugDNA.33482.1 | 3.65  | 4.18  | 0.35 | 0.25 | -1.44 | 0.186831 | 0.245054 | 0.559276 | 0.514835 |
| MmugDNA.33485.1.S1_at   | MmugDNA.33485.1 | 10.93 | 11.33 | 0.19 | 0.11 | -1.32 | 0.017073 | 0.010433 | 0.289103 | 0.133551 |
| MmugDNA.33486.1.S1_at   | MmugDNA.33486.1 | 11.32 | 11.57 | 0.32 | 0.06 | -1.19 | 0.238243 | 0.119898 | 0.605262 | 0.388593 |
| MmugDNA.32770.1.S1_s_at | MmugDNA.32770.1 | 3.11  | 3.01  | 0.07 | 0.03 | 1.07  | 0.159921 | 0.811164 | 0.533013 | 0.89102  |
| MmugDNA.33488.1.S1_at   | MmugDNA.33488.1 | 6.19  | 6.13  | 0.14 | 0.04 | 1.05  | 0.147224 | 0.340612 | 0.521578 | 0.586796 |
| MmugDNA.33489.1.S1_at   | MmugDNA.33489.1 | 12.74 | 12.84 | 0.08 | 0.06 | -1.07 | 0.095609 | 0.263784 | 0.464229 | 0.530066 |
| MmugDNA.3349.1.S1_at    | MmugDNA.3349.1  | 4.17  | 4.21  | 0.21 | 0.04 | -1.03 | 0.653484 | 0.741881 | 0.86241  | 0.850527 |
| MmugDNA.33490.1.S1_at   | MmugDNA.33490.1 | 6.2   | 5.95  | 0.22 | 0.3  | 1.19  | 0.111633 | 0.081417 | 0.484896 | 0.329613 |
| MmugDNA.33491.1.S1_at   | MmugDNA.33491.1 | 3.07  | 3.1   | 0.11 | 0.1  | -1.02 | 0.738497 | 0.902994 | 0.899959 | 0.944941 |
| MmugDNA.33492.1.S1_at   | MmugDNA.33492.1 | 5.37  | 5.6   | 0.88 | 0.25 | -1.17 | 0.902709 | 0.523606 | 0.967171 | 0.713854 |
| MmugDNA.33493.1.S1_at   | MmugDNA.33493.1 | 6.58  | 6.83  | 1.35 | 0.48 | -1.19 | 0.658236 | 0.832674 | 0.864474 | 0.904017 |
| MmugDNA.33494.1.S1_at   | MmugDNA.33494.1 | 10.18 | 10.26 | 1.15 | 0.11 | -1.06 | 0.295253 | 0.196925 | 0.651026 | 0.472072 |
| MmugDNA.33495.1.S1_at   | MmugDNA.33495.1 | 7.16  | 6.47  | 2.21 | 0.22 | 1.61  | 0.623051 | 0.594036 | 0.848099 | 0.758517 |
| MmugDNA.33496.1.S1_at   | MmugDNA.33496.1 | 3.46  | 3.24  | 0.12 | 0.07 | 1.16  | 0.060391 | 0.077728 | 0.408067 | 0.323851 |
| MmugDNA.33497.1.S1_at   | MmugDNA.33497.1 | 7.67  | 7.38  | 0.31 | 0.06 | 1.22  | 0.228467 | 0.405429 | 0.597474 | 0.633757 |
| MmugDNA.33498.1.S1_at   | MmugDNA.33498.1 | 7.13  | 6.97  | 0.1  | 0.04 | 1.12  | 0.022066 | 0.017948 | 0.309998 | 0.168998 |
| MmugDNA.33498.1.S1_s_at | MmugDNA.33498.1 | 6.45  | 6.23  | 0.07 | 0.12 | 1.16  | 0.140624 | 0.024757 | 0.51604  | 0.197104 |
| MmugDNA.33499.1.S1_at   | MmugDNA.33499.1 | 3.19  | 3.12  | 0.08 | 0.05 | 1.05  | 0.120614 | 0.166219 | 0.49409  | 0.442775 |
| MmugDNA.335.1.S1_at     | MmugDNA.335.1   | 5.01  | 5.16  | 0.18 | 0.27 | -1.1  | 0.672095 | 0.781216 | 0.870669 | 0.873073 |
| MmugDNA.33500.1.S1_at   | MmugDNA.33500.1 | 3.86  | 4.6   | 0.27 | 0.55 | -1.67 | 0.307244 | 0.377915 | 0.660118 | 0.615264 |
| MmugDNA.33501.1.S1_at   | MmugDNA.33501.1 | 7.73  | 7.89  | 0.35 | 0.32 | -1.12 | 0.767091 | 0.377509 | 0.912485 | 0.614989 |
| MmugDNA.33502.1.S1_at   | MmugDNA.33502.1 | 4.02  | 4.04  | 0.11 | 0.11 | -1.01 | 0.534653 | 0.514608 | 0.801404 | 0.707767 |
| MmugDNA.33503.1.S1_at   | MmugDNA.33503.1 | 3.37  | 3.12  | 0.73 | 0.42 | 1.19  | 0.867574 | 0.080054 | 0.953578 | 0.327429 |
| MmugDNA.33504.1.S1_at   | MmugDNA.33504.1 | 5.59  | 5.31  | 0.12 | 0.16 | 1.21  | 0.130524 | 0.159235 | 0.504876 | 0.435217 |
| MmugDNA.33505.1.S1_at   | MmugDNA.33505.1 | 5.72  | 5.8   | 0.12 | 0.13 | -1.06 | 0.868731 | 0.975562 | 0.954083 | 0.986686 |
| MmugDNA.33506.1.S1_at   | MmugDNA.33506.1 | 4.51  | 4.8   | 0.77 | 0.04 | -1.22 | 0.965914 | 0.871783 | 0.988768 | 0.927058 |
| MmugDNA.33507.1.S1_at   | MmugDNA.33507.1 | 5.28  | 5.36  | 0.22 | 0.14 | -1.06 | 0.981872 | 0.303512 | 0.994301 | 0.561    |
| MmugDNA.33508.1.S1_at   | MmugDNA.33508.1 | 3.75  | 3.8   | 0.23 | 0.09 | -1.03 | 0.383648 | 0.506387 | 0.711503 | 0.702371 |
| MmugDNA.33509.1.S1_at   | MmugDNA.33509.1 | 6.79  | 6.81  | 0.28 | 0.23 | -1.01 | 0.540587 | 0.901204 | 0.804445 | 0.943829 |
| MmugDNA.3351.1.S1_at    | MmugDNA.3351.1  | 10.42 | 10.62 | 1.12 | 0.17 | -1.15 | 0.894002 | 0.427489 | 0.963672 | 0.649302 |
| MmugDNA.33510.1.S1_at   | MmugDNA.33510.1 | 7.3   | 7.1   | 0.85 | 0.01 | 1.15  | 0.736416 | 0.776143 | 0.899133 | 0.869726 |
| MmugDNA.33511.1.S1_at   | MmugDNA.33511.1 | 6.55  | 7.79  | 0.54 | 0.06 | -2.37 | 0.033267 | 0.026605 | 0.346442 | 0.204008 |
| MmugDNA.33512.1.S1_at   | MmugDNA.33512.1 | 11.95 | 11.87 | 0.25 | 0.12 | 1.06  | 0.907276 | 0.6601   | 0.968503 | 0.801083 |

|                         |                 |       |       |      |      |       |          |          |          |          |
|-------------------------|-----------------|-------|-------|------|------|-------|----------|----------|----------|----------|
| MmugDNA.33514.1.S1_at   | MmugDNA.33514.1 | 3.83  | 3.84  | 0.04 | 0.01 | -1    | 0.938479 | 0.458671 | 0.979289 | 0.671276 |
| MmugDNA.33516.1.S1_s_at | MmugDNA.33516.1 | 6.64  | 6.49  | 0.08 | 0.22 | 1.11  | 0.356471 | 0.121906 | 0.695154 | 0.391291 |
| MmugDNA.33517.1.S1_at   | MmugDNA.33517.1 | 3.51  | 3.38  | 0.37 | 0.29 | 1.09  | 0.317479 | 0.144453 | 0.667356 | 0.418323 |
| MmugDNA.33519.1.S1_at   | MmugDNA.33519.1 | 6.06  | 6.5   | 0.82 | 0.21 | -1.35 | 0.146279 | 0.199426 | 0.52061  | 0.47402  |
| MmugDNA.3352.1.S1_at    | MmugDNA.3352.1  | 9.97  | 10.68 | 0.51 | 0.14 | -1.64 | 0.225971 | 0.181767 | 0.595067 | 0.458373 |
| MmugDNA.3352.1.S1_s_at  | MmugDNA.3352.1  | 9.1   | 9.86  | 0.54 | 0.1  | -1.69 | 0.227875 | 0.153439 | 0.596693 | 0.42827  |
| MmugDNA.33520.1.S1_at   | MmugDNA.33520.1 | 5.52  | 5.46  | 0.06 | 0.04 | 1.05  | 0.078465 | 0.41239  | 0.441003 | 0.6388   |
| MmugDNA.33521.1.S1_at   | MmugDNA.33521.1 | 6     | 5.99  | 0.09 | 0.12 | 1     | 0.79499  | 0.925409 | 0.924751 | 0.957803 |
| MmugDNA.33522.1.S1_at   | MmugDNA.33522.1 | 11.17 | 11.07 | 0.4  | 0.06 | 1.08  | 0.594432 | 0.132054 | 0.834747 | 0.404043 |
| MmugDNA.33523.1.S1_at   | MmugDNA.33523.1 | 5.69  | 6.16  | 0.51 | 0.87 | -1.39 | 0.281084 | 0.306991 | 0.639668 | 0.563427 |
| MmugDNA.33524.1.S1_at   | MmugDNA.33524.1 | 9.41  | 9.16  | 0.06 | 0.1  | -1.19 | 0.036892 | 0.013234 | 0.356221 | 0.147534 |
| MmugDNA.33525.1.S1_at   | MmugDNA.33525.1 | 5.16  | 5.16  | 0.05 | 0.08 | -1    | 0.460475 | 0.563826 | 0.760242 | 0.73888  |
| MmugDNA.33526.1.S1_at   | MmugDNA.33526.1 | 4.81  | 4.5   | 0.26 | 0.11 | 1.24  | 0.103236 | 0.066832 | 0.474032 | 0.304399 |
| MmugDNA.33527.1.S1_s_at | MmugDNA.33527.1 | 8.48  | 9.27  | 0.85 | 0.13 | -1.72 | 0.212789 | 0.245115 | 0.583279 | 0.514861 |
| MmugDNA.33528.1.S1_at   | MmugDNA.33528.1 | 11.12 | 10.89 | 0.12 | 0.07 | 1.17  | 0.109673 | 0.090535 | 0.482529 | 0.345015 |
| MmugDNA.3353.1.S1_at    | MmugDNA.3353.1  | 3.44  | 3.31  | 0.11 | 0.19 | 1.09  | 0.363477 | 0.531601 | 0.700102 | 0.718783 |
| MmugDNA.33530.1.S1_at   | MmugDNA.33530.1 | 5.81  | 5.85  | 0.06 | 0.15 | -1.02 | 0.815155 | 0.080616 | 0.933137 | 0.328427 |
| MmugDNA.33531.1.S1_at   | MmugDNA.33531.1 | 6.74  | 6.71  | 0.08 | 0.02 | 1.02  | 0.176551 | 0.318139 | 0.549633 | 0.571046 |
| MmugDNA.33532.1.S1_at   | MmugDNA.33532.1 | 3.53  | 3.44  | 0.14 | 0.18 | 1.07  | 0.928721 | 0.182753 | 0.976332 | 0.459215 |
| MmugDNA.33533.1.S1_at   | MmugDNA.33533.1 | 9.42  | 9.35  | 0.41 | 0.14 | 1.05  | 0.569109 | 0.422971 | 0.821167 | 0.646141 |
| MmugDNA.33533.1.S1_x_at | MmugDNA.33533.1 | 9.3   | 9.11  | 0.48 | 0.06 | 1.14  | 0.377967 | 0.315445 | 0.707914 | 0.568953 |
| MmugDNA.33534.1.S1_at   | MmugDNA.33534.1 | 5.02  | 4.85  | 0.03 | 0.09 | 1.13  | 0.080998 | 0.134731 | 0.445056 | 0.406772 |
| MmugDNA.33539.1.S1_at   | MmugDNA.33539.1 | 5.39  | 5.2   | 1.45 | 0.47 | 1.14  | 0.831268 | 0.963457 | 0.939628 | 0.979631 |
| MmugDNA.3354.1.S1_at    | MmugDNA.3354.1  | 4.97  | 5.81  | 0.81 | 0.27 | -1.79 | 0.229606 | 0.141807 | 0.598458 | 0.415331 |
| MmugDNA.33542.1.S1_at   | MmugDNA.33542.1 | 3.61  | 3.5   | 0.19 | 0.22 | 1.08  | 0.744439 | 0.719406 | 0.90255  | 0.837629 |
| MmugDNA.33545.1.S1_at   | MmugDNA.33545.1 | 2.8   | 2.97  | 0.07 | 0.06 | -1.12 | 0.043083 | 0.025087 | 0.371135 | 0.19842  |
| MmugDNA.33547.1.S1_at   | MmugDNA.33547.1 | 4.12  | 3.81  | 0.34 | 0.05 | 1.24  | 0.212662 | 0.195053 | 0.583202 | 0.470179 |
| MmugDNA.33548.1.S1_at   | MmugDNA.33548.1 | 9.05  | 9.36  | 0.52 | 0.09 | -1.24 | 0.363843 | 0.143797 | 0.700307 | 0.417593 |
| MmugDNA.33549.1.S1_at   | MmugDNA.33549.1 | 7.67  | 8.62  | 1.05 | 0.2  | -1.94 | 0.510773 | 0.673882 | 0.78831  | 0.809483 |
| MmugDNA.3355.1.S1_at    | MmugDNA.3355.1  | 6.14  | 6     | 0.04 | 0.13 | 1.1   | 0.076685 | 0.151641 | 0.438075 | 0.426383 |
| MmugDNA.33550.1.S1_at   | MmugDNA.33550.1 | 7.43  | 7.38  | 0.09 | 0.06 | 1.04  | 0.569423 | 0.048787 | 0.82149  | 0.26581  |
| MmugDNA.33551.1.S1_at   | MmugDNA.33551.1 | 3.27  | 3.32  | 0.07 | 0.06 | -1.04 | 0.359148 | 0.737071 | 0.697106 | 0.847791 |
| MmugDNA.33552.1.S1_at   | MmugDNA.33552.1 | 4.56  | 4.62  | 0.6  | 0.16 | -1.04 | 0.831467 | 0.553934 | 0.939628 | 0.732896 |
| MmugDNA.33553.1.S1_at   | MmugDNA.33553.1 | 7.86  | 7.97  | 1.06 | 0.47 | -1.08 | 0.217844 | 0.235977 | 0.587841 | 0.507056 |
| MmugDNA.33554.1.S1_at   | MmugDNA.33554.1 | 6.06  | 6.07  | 0.51 | 0.27 | -1.01 | 0.964144 | 0.251572 | 0.988259 | 0.520309 |
| MmugDNA.33555.1.S1_at   | MmugDNA.33555.1 | 3.33  | 3.4   | 0.03 | 0.12 | -1.05 | 0.277134 | 0.414702 | 0.636753 | 0.640456 |
| MmugDNA.33556.1.S1_at   | MmugDNA.33556.1 | 5.97  | 5.86  | 0.21 | 0.21 | 1.08  | 0.568831 | 0.522445 | 0.821041 | 0.713139 |
| MmugDNA.33557.1.S1_at   | MmugDNA.33557.1 | 4.06  | 4.03  | 0.26 | 0.21 | 1.03  | 0.734068 | 0.310182 | 0.898112 | 0.565379 |
| MmugDNA.33559.1.S1_at   | MmugDNA.33559.1 | 4.15  | 4.03  | 0.07 | 0.07 | 1.09  | 0.1024   | 0.216403 | 0.472589 | 0.489999 |
| MmugDNA.3356.1.S1_at    | MmugDNA.3356.1  | 6.57  | 7     | 0.11 | 0.29 | -1.34 | 0.224142 | 0.474668 | 0.593263 | 0.681643 |
| MmugDNA.33560.1.S1_at   | MmugDNA.33560.1 | 4.12  | 4.04  | 0.13 | 0.06 | 1.06  | 0.206768 | 0.348632 | 0.578736 | 0.592648 |
| MmugDNA.33561.1.S1_at   | MmugDNA.33561.1 | 3.62  | 3.49  | 0.22 | 0.11 | 1.1   | 0.145902 | 0.181573 | 0.520572 | 0.458137 |
| MmugDNA.33564.1.S1_at   | MmugDNA.33564.1 | 5.97  | 6.59  | 0.17 | 0.28 | -1.54 | 0.045754 | 0.065061 | 0.377135 | 0.301009 |

|                         |                 |       |       |      |      |       |          |          |          |          |
|-------------------------|-----------------|-------|-------|------|------|-------|----------|----------|----------|----------|
| MmugDNA.33565.1.S1_at   | MmugDNA.33565.1 | 10.42 | 10.63 | 0.25 | 0.15 | -1.16 | 0.193355 | 0.12397  | 0.564275 | 0.394262 |
| MmugDNA.33566.1.S1_at   | MmugDNA.33566.1 | 5.54  | 5.6   | 0.07 | 0.1  | -1.04 | 0.210877 | 0.392829 | 0.582007 | 0.625854 |
| MmugDNA.33567.1.S1_at   | MmugDNA.33567.1 | 6.38  | 6.26  | 0.09 | 0.07 | 1.08  | 0.117104 | 0.113336 | 0.49047  | 0.379426 |
| MmugDNA.33568.1.S1_at   | MmugDNA.33568.1 | 4.42  | 4.15  | 0.21 | 0.04 | 1.2   | 0.166448 | 0.045298 | 0.539176 | 0.257157 |
| MmugDNA.3357.1.S1_at    | MmugDNA.3357.1  | 5.39  | 5.28  | 0.27 | 0.01 | 1.08  | 0.180984 | 0.091111 | 0.554265 | 0.345945 |
| MmugDNA.33570.1.S1_at   | MmugDNA.33570.1 | 4.3   | 4.32  | 0.14 | 0.44 | -1.01 | 0.753969 | 0.396067 | 0.907261 | 0.627885 |
| MmugDNA.33574.1.S1_at   | MmugDNA.33574.1 | 3.85  | 3.67  | 0.14 | 0.05 | 1.14  | 0.081909 | 0.04485  | 0.446403 | 0.256375 |
| MmugDNA.33576.1.S1_at   | MmugDNA.33576.1 | 5.92  | 5.42  | 0.13 | 0.39 | 1.41  | 0.11742  | 0.263051 | 0.490925 | 0.529402 |
| MmugDNA.33577.1.S1_at   | MmugDNA.33577.1 | 5.61  | 5.44  | 0.27 | 0.14 | 1.12  | 0.212619 | 0.310886 | 0.583145 | 0.565881 |
| MmugDNA.33578.1.S1_at   | MmugDNA.33578.1 | 11.48 | 11.42 | 0.43 | 0.05 | 1.05  | 0.782242 | 0.164653 | 0.919732 | 0.440952 |
| MmugDNA.33579.1.S1_at   | MmugDNA.33579.1 | 4.44  | 4.6   | 0.45 | 0.06 | -1.12 | 0.885672 | 0.849195 | 0.96038  | 0.914405 |
| MmugDNA.3358.1.S1_at    | MmugDNA.3358.1  | 10.31 | 10.83 | 0.11 | 0.05 | -1.43 | 0.001062 | 0.000063 | 0.155464 | 0.025805 |
| MmugDNA.33580.1.S1_at   | MmugDNA.33580.1 | 4.24  | 4.14  | 0.04 | 0.06 | 1.07  | 0.091517 | 0.483619 | 0.45954  | 0.688067 |
| MmugDNA.33581.1.S1_at   | MmugDNA.33581.1 | 6.59  | 6.45  | 0.07 | 0.02 | 1.11  | 0.06551  | 0.177206 | 0.420827 | 0.453647 |
| MmugDNA.33583.1.S1_at   | MmugDNA.33583.1 | 4.35  | 4.42  | 0.2  | 0.18 | -1.05 | 0.979479 | 0.299502 | 0.993499 | 0.557918 |
| MmugDNA.33584.1.S1_at   | MmugDNA.33584.1 | 8.46  | 8.27  | 0.67 | 0.41 | 1.14  | 0.49122  | 0.814739 | 0.777658 | 0.893092 |
| MmugDNA.33585.1.S1_at   | MmugDNA.33585.1 | 10.59 | 11.21 | 0.36 | 0.02 | -1.54 | 0.111552 | 0.04     | 0.484807 | 0.245193 |
| MmugDNA.33586.1.S1_at   | MmugDNA.33586.1 | 10.89 | 11.08 | 0.19 | 0.01 | -1.14 | 0.527379 | 0.462074 | 0.797084 | 0.673537 |
| MmugDNA.33587.1.S1_at   | MmugDNA.33587.1 | 6.51  | 6.45  | 1.71 | 0.24 | 1.04  | 0.942534 | 0.55902  | 0.98031  | 0.735981 |
| MmugDNA.33588.1.S1_at   | MmugDNA.33588.1 | 5.17  | 5.16  | 0.2  | 0.16 | 1.01  | 0.405885 | 0.7123   | 0.727533 | 0.833332 |
| MmugDNA.3359.1.S1_at    | MmugDNA.3359.1  | 7.16  | 7.37  | 0.3  | 0.04 | -1.15 | 0.248123 | 0.393849 | 0.613685 | 0.626605 |
| MmugDNA.33591.1.S1_at   | MmugDNA.33591.1 | 8.09  | 8     | 0.04 | 0.05 | 1.06  | 0.113588 | 0.664524 | 0.486895 | 0.803413 |
| MmugDNA.33594.1.S1_at   | MmugDNA.33594.1 | 5.42  | 5.27  | 0.09 | 0.09 | 1.11  | 0.082937 | 0.295144 | 0.448264 | 0.554551 |
| MmugDNA.33596.1.S1_at   | MmugDNA.33596.1 | 3.53  | 3.4   | 0.04 | 0.21 | 1.1   | 0.442792 | 0.612595 | 0.750392 | 0.770091 |
| MmugDNA.33597.1.S1_at   | MmugDNA.33597.1 | 7.38  | 7.02  | 0.23 | 0.11 | 1.29  | 0.049462 | 0.040551 | 0.385474 | 0.246264 |
| MmugDNA.33598.1.S1_at   | MmugDNA.33598.1 | 3.47  | 3.68  | 0.01 | 0.15 | -1.16 | 0.206234 | 0.661266 | 0.578142 | 0.801687 |
| MmugDNA.336.1.S1_at     | MmugDNA.336.1   | 4.13  | 4.35  | 0.12 | 0.2  | -1.16 | 0.084251 | 0.092878 | 0.450882 | 0.349024 |
| MmugDNA.336.1.S1_s_at   | MmugDNA.336.1   | 5.75  | 6.51  | 0.53 | 0.34 | -1.69 | 0.092135 | 0.075785 | 0.460688 | 0.320354 |
| MmugDNA.3360.1.S1_at    | MmugDNA.3360.1  | 7.86  | 8.09  | 0.21 | 0.06 | -1.18 | 0.403799 | 0.516091 | 0.725934 | 0.708704 |
| MmugDNA.33601.1.S1_at   | MmugDNA.33601.1 | 6.2   | 5.98  | 0.28 | 0.14 | 1.17  | 0.274358 | 0.211887 | 0.633792 | 0.485898 |
| MmugDNA.33602.1.S1_at   | MmugDNA.33602.1 | 3.16  | 3.2   | 0.29 | 0.01 | -1.02 | 0.77     | 0.730244 | 0.913889 | 0.843884 |
| MmugDNA.33603.1.S1_at   | MmugDNA.33603.1 | 4.84  | 4.71  | 0.22 | 0.48 | 1.1   | 0.291049 | 0.593037 | 0.647518 | 0.758    |
| MmugDNA.33604.1.S1_at   | MmugDNA.33604.1 | 9.28  | 9.79  | 0.48 | 0.2  | -1.42 | 0.12486  | 0.040406 | 0.498917 | 0.246134 |
| MmugDNA.33605.1.S1_at   | MmugDNA.33605.1 | 3.42  | 3.95  | 0.14 | 0.16 | -1.45 | 0.023409 | 0.021645 | 0.315397 | 0.184333 |
| MmugDNA.33606.1.S1_at   | MmugDNA.33606.1 | 3.54  | 3.45  | 0.18 | 0.1  | 1.07  | 0.324477 | 0.329001 | 0.672695 | 0.578482 |
| MmugDNA.33608.1.S1_at   | MmugDNA.33608.1 | 9.38  | 9.42  | 0.39 | 0.1  | -1.03 | 0.728329 | 0.140968 | 0.895142 | 0.414474 |
| MmugDNA.16959.1.S1_s_at | MmugDNA.16959.1 | 11.25 | 11.37 | 0.27 | 0    | -1.09 | 0.489414 | 0.06006  | 0.776182 | 0.291744 |
| MmugDNA.3361.1.S1_at    | MmugDNA.3361.1  | 5.93  | 5.77  | 0.12 | 0.19 | 1.12  | 0.177563 | 0.228356 | 0.55065  | 0.50054  |
| MmugDNA.33610.1.S1_at   | MmugDNA.33610.1 | 4.44  | 4.24  | 0.13 | 0.21 | 1.15  | 0.351068 | 0.396761 | 0.691811 | 0.628438 |
| MmugDNA.27790.1.S1_s_at | MmugDNA.27790.1 | 6.07  | 5.89  | 0.15 | 0.07 | 1.13  | 0.111341 | 0.220995 | 0.484526 | 0.494389 |
| MmugDNA.33613.1.S1_at   | MmugDNA.33613.1 | 7.29  | 8.04  | 1.23 | 0.18 | -1.67 | 0.426854 | 0.605661 | 0.740751 | 0.765377 |
| MmugDNA.33613.1.S1_x_at | MmugDNA.33613.1 | 7.28  | 7.93  | 1.26 | 0.11 | -1.57 | 0.362321 | 0.549912 | 0.69926  | 0.730154 |
| MmugDNA.33614.1.S1_at   | MmugDNA.33614.1 | 4.67  | 4.97  | 0.66 | 0.21 | -1.23 | 0.913797 | 0.85498  | 0.97072  | 0.917383 |

|                         |                 |       |       |      |      |       |          |          |          |          |
|-------------------------|-----------------|-------|-------|------|------|-------|----------|----------|----------|----------|
| MmugDNA.33615.1.S1_at   | MmugDNA.33615.1 | 8.89  | 8.64  | 0.35 | 0.11 | 1.19  | 0.696936 | 0.637259 | 0.882175 | 0.786769 |
| MmugDNA.33616.1.S1_at   | MmugDNA.33616.1 | 6.55  | 8.58  | 1.66 | 0.09 | -4.1  | 0.094449 | 0.136294 | 0.463794 | 0.408711 |
| MmugDNA.33617.1.S1_at   | MmugDNA.33617.1 | 9.49  | 9.27  | 0.14 | 0.25 | 1.16  | 0.123663 | 0.221729 | 0.497192 | 0.494901 |
| MmugDNA.33617.1.S1_s_at | MmugDNA.33617.1 | 10.38 | 9.99  | 0.14 | 0.21 | 1.31  | 0.086929 | 0.209047 | 0.454785 | 0.482842 |
| MmugDNA.3362.1.S1_at    | MmugDNA.3362.1  | 4.36  | 4.37  | 0.08 | 0.04 | -1    | 0.531706 | 0.313118 | 0.799836 | 0.567684 |
| MmugDNA.33620.1.S1_at   | MmugDNA.33620.1 | 6.6   | 6.42  | 0.26 | 0.19 | 1.13  | 0.487746 | 0.634291 | 0.775176 | 0.784742 |
| MmugDNA.33621.1.S1_at   | MmugDNA.33621.1 | 6.87  | 7.46  | 0.34 | 0.07 | -1.51 | 0.077576 | 0.106058 | 0.43966  | 0.368438 |
| MmugDNA.33622.1.S1_at   | MmugDNA.33622.1 | 9.49  | 9.03  | 0.14 | 0.09 | 1.37  | 0.013384 | 0.000426 | 0.268216 | 0.038359 |
| MmugDNA.33623.1.S1_at   | MmugDNA.33623.1 | 3.45  | 3.43  | 0.13 | 0.05 | 1.01  | 0.510674 | 0.440283 | 0.788228 | 0.658899 |
| MmugDNA.33624.1.S1_at   | MmugDNA.33624.1 | 4.78  | 4.68  | 0.17 | 0.09 | 1.07  | 0.21972  | 0.274715 | 0.589083 | 0.53918  |
| MmugDNA.33626.1.S1_at   | MmugDNA.33626.1 | 9.16  | 9.69  | 2.54 | 0.31 | -1.44 | 0.613765 | 0.152599 | 0.843669 | 0.427435 |
| MmugDNA.33627.1.S1_at   | MmugDNA.33627.1 | 6.13  | 6.11  | 1.09 | 0.37 | 1.01  | 0.875709 | 0.156994 | 0.956794 | 0.432467 |
| MmugDNA.33629.1.S1_at   | MmugDNA.33629.1 | 8.45  | 8.59  | 0.16 | 0.12 | -1.1  | 0.965107 | 0.088011 | 0.988542 | 0.341482 |
| MmugDNA.3363.1.S1_at    | MmugDNA.3363.1  | 3.57  | 3.55  | 0.09 | 0.04 | 1.01  | 0.430258 | 0.24673  | 0.742617 | 0.51609  |
| MmugDNA.33631.1.S1_at   | MmugDNA.33631.1 | 3.45  | 3.27  | 0.06 | 0.04 | 1.13  | 0.022103 | 0.024461 | 0.310269 | 0.195724 |
| MmugDNA.33632.1.S1_at   | MmugDNA.33632.1 | 10.19 | 10.33 | 0.34 | 0.08 | -1.1  | 0.529274 | 0.361986 | 0.798256 | 0.602725 |
| MmugDNA.33634.1.S1_at   | MmugDNA.33634.1 | 6.13  | 6.44  | 0.63 | 0.36 | -1.24 | 0.98112  | 0.865499 | 0.993962 | 0.923598 |
| MmugDNA.33635.1.S1_at   | MmugDNA.33635.1 | 7.95  | 7.22  | 0.42 | 0.29 | 1.66  | 0.125323 | 0.033913 | 0.499501 | 0.227771 |
| MmugDNA.33636.1.S1_at   | MmugDNA.33636.1 | 8.51  | 8.25  | 0.2  | 0.09 | 1.19  | 0.113254 | 0.00049  | 0.486648 | 0.038921 |
| MmugDNA.33638.1.S1_at   | MmugDNA.33638.1 | 4.83  | 4.85  | 0.15 | 0.12 | -1.02 | 0.669026 | 0.066481 | 0.869314 | 0.303576 |
| MmugDNA.33639.1.S1_at   | MmugDNA.33639.1 | 10.13 | 10.18 | 0.42 | 0.01 | -1.04 | 0.759737 | 0.741915 | 0.909769 | 0.850533 |
| MmugDNA.3364.1.S1_at    | MmugDNA.3364.1  | 3.09  | 3.06  | 0.24 | 0.32 | 1.02  | 0.937418 | 0.992466 | 0.978954 | 0.995715 |
| MmugDNA.33641.1.S1_at   | MmugDNA.33641.1 | 6.93  | 6.94  | 0.15 | 0.18 | -1.01 | 0.819738 | 0.449982 | 0.935061 | 0.665414 |
| MmugDNA.33642.1.S1_at   | MmugDNA.33642.1 | 7.38  | 6.78  | 0.67 | 0.34 | 1.52  | 0.178281 | 0.05281  | 0.551301 | 0.275434 |
| MmugDNA.33642.1.S1_s_at | MmugDNA.33642.1 | 8.59  | 7.89  | 0.49 | 0.16 | 1.62  | 0.06649  | 0.013163 | 0.422351 | 0.147338 |
| MmugDNA.33645.1.S1_at   | MmugDNA.33645.1 | 7.16  | 7.81  | 0.22 | 0.51 | -1.57 | 0.505083 | 0.345787 | 0.785147 | 0.590937 |
| MmugDNA.33647.1.S1_at   | MmugDNA.33647.1 | 7.48  | 7.44  | 0.18 | 0.01 | 1.02  | 0.694779 | 0.871541 | 0.881184 | 0.926874 |
| MmugDNA.33647.1.S1_s_at | MmugDNA.33647.1 | 7.56  | 7.71  | 0.48 | 0.09 | -1.11 | 0.458257 | 0.597967 | 0.758668 | 0.760532 |
| MmugDNA.33648.1.S1_at   | MmugDNA.33648.1 | 3.71  | 3.71  | 0.08 | 0.03 | -1    | 0.426394 | 0.667498 | 0.740469 | 0.805333 |
| MmugDNA.33649.1.S1_at   | MmugDNA.33649.1 | 4.44  | 4.72  | 0.13 | 0.38 | -1.21 | 0.123335 | 0.220363 | 0.496589 | 0.493783 |
| MmugDNA.3365.1.S1_at    | MmugDNA.3365.1  | 3.64  | 3.6   | 0.06 | 0.06 | 1.03  | 0.375365 | 0.450787 | 0.706463 | 0.665869 |
| MmugDNA.33650.1.S1_at   | MmugDNA.33650.1 | 10.66 | 10.19 | 0.26 | 0.07 | 1.39  | 0.028002 | 0.010025 | 0.330017 | 0.131279 |
| MmugDNA.33651.1.S1_at   | MmugDNA.33651.1 | 4.71  | 4.79  | 0.07 | 0.1  | -1.05 | 0.772171 | 0.702126 | 0.91504  | 0.827304 |
| MmugDNA.33652.1.S1_at   | MmugDNA.33652.1 | 3.71  | 3.34  | 0.25 | 0.12 | 1.29  | 0.262929 | 0.328886 | 0.624987 | 0.578452 |
| MmugDNA.33654.1.S1_at   | MmugDNA.33654.1 | 9.88  | 10.11 | 0.34 | 0.14 | -1.18 | 0.502966 | 0.646168 | 0.784    | 0.792676 |
| MmugDNA.33656.1.S1_at   | MmugDNA.33656.1 | 6.35  | 6.29  | 0.05 | 0.15 | 1.04  | 0.128088 | 0.20878  | 0.502551 | 0.482626 |
| MmugDNA.33657.1.S1_at   | MmugDNA.33657.1 | 4.56  | 4.54  | 0.21 | 0.21 | 1.01  | 0.262917 | 0.427632 | 0.624987 | 0.649406 |
| MmugDNA.3366.1.S1_at    | MmugDNA.3366.1  | 9.32  | 8.37  | 0.06 | 0.1  | 1.93  | 0.000192 | 0.000006 | 0.114029 | 0.016421 |
| MmugDNA.33660.1.S1_at   | MmugDNA.33660.1 | 6.34  | 6.42  | 0.16 | 0.16 | -1.06 | 0.823473 | 0.91191  | 0.936294 | 0.950311 |
| MmugDNA.33662.1.S1_at   | MmugDNA.33662.1 | 3.65  | 3.76  | 0.07 | 0.27 | -1.08 | 0.356189 | 0.438896 | 0.69508  | 0.657753 |
| MmugDNA.33664.1.S1_at   | MmugDNA.33664.1 | 6.08  | 6.3   | 0.78 | 0.13 | -1.16 | 0.85547  | 0.690503 | 0.948888 | 0.819604 |
| MmugDNA.33665.1.S1_at   | MmugDNA.33665.1 | 5.69  | 6     | 0.41 | 0.1  | -1.23 | 0.49768  | 0.328391 | 0.781264 | 0.578066 |
| MmugDNA.33667.1.S1_at   | MmugDNA.33667.1 | 5.22  | 5.15  | 0.13 | 0.04 | 1.05  | 0.789684 | 0.987173 | 0.922635 | 0.992807 |

|                         |                 |       |       |      |      |       |          |          |          |          |
|-------------------------|-----------------|-------|-------|------|------|-------|----------|----------|----------|----------|
| MmugDNA.33668.1.S1_at   | MmugDNA.33668.1 | 6.22  | 6.1   | 0.18 | 0.11 | 1.08  | 0.215595 | 0.36126  | 0.585748 | 0.602104 |
| MmugDNA.3367.1.S1_at    | MmugDNA.3367.1  | 3.42  | 3.62  | 0.29 | 0.31 | -1.15 | 0.448069 | 0.507191 | 0.753744 | 0.702821 |
| MmugDNA.33671.1.S1_at   | MmugDNA.33671.1 | 10.84 | 11.23 | 0.43 | 0.23 | -1.31 | 0.410753 | 0.264016 | 0.730947 | 0.530183 |
| MmugDNA.33672.1.S1_at   | MmugDNA.33672.1 | 4.02  | 4.16  | 1.2  | 0.49 | -1.11 | 0.506391 | 0.444851 | 0.785767 | 0.662072 |
| MmugDNA.33673.1.S1_at   | MmugDNA.33673.1 | 9.01  | 9.71  | 0.09 | 0.03 | -1.62 | 0.000264 | 0.000123 | 0.130979 | 0.029087 |
| MmugDNA.33674.1.S1_at   | MmugDNA.33674.1 | 4.32  | 4.62  | 0.18 | 0.2  | -1.23 | 0.062375 | 0.04744  | 0.413027 | 0.262486 |
| MmugDNA.33676.1.S1_at   | MmugDNA.33676.1 | 7.44  | 7.66  | 0.11 | 0.34 | -1.16 | 0.835652 | 0.609556 | 0.941057 | 0.767864 |
| MmugDNA.33679.1.S1_at   | MmugDNA.33679.1 | 5.26  | 5.06  | 0.25 | 0.42 | 1.14  | 0.850219 | 0.628685 | 0.947306 | 0.781367 |
| MmugDNA.3368.1.S1_at    | MmugDNA.3368.1  | 5.81  | 5.5   | 0.35 | 0.24 | 1.24  | 0.938405 | 0.555985 | 0.979268 | 0.734254 |
| MmugDNA.33680.1.S1_at   | MmugDNA.33680.1 | 5.94  | 5.94  | 0.46 | 0.07 | 1     | 0.376568 | 0.242114 | 0.706946 | 0.512652 |
| MmugDNA.33681.1.S1_at   | MmugDNA.33681.1 | 5.33  | 5.42  | 0.18 | 0.24 | -1.07 | 0.922925 | 0.979278 | 0.974036 | 0.988845 |
| MmugDNA.33682.1.S1_at   | MmugDNA.33682.1 | 11.73 | 11.81 | 0.28 | 0.04 | -1.06 | 0.697627 | 0.446579 | 0.882383 | 0.662862 |
| MmugDNA.33683.1.S1_at   | MmugDNA.33683.1 | 6.95  | 6.99  | 0.16 | 0.21 | -1.03 | 0.632966 | 0.375107 | 0.853404 | 0.613186 |
| MmugDNA.33684.1.S1_at   | MmugDNA.33684.1 | 6.46  | 6.17  | 0.92 | 0.29 | 1.22  | 0.631928 | 0.492559 | 0.85263  | 0.693633 |
| MmugDNA.33686.1.S1_at   | MmugDNA.33686.1 | 10.39 | 11.05 | 1.52 | 0.46 | -1.58 | 0.297688 | 0.374171 | 0.652791 | 0.612678 |
| MmugDNA.33686.1.S1_s_at | MmugDNA.33686.1 | 12.38 | 12.57 | 1.24 | 0.3  | -1.14 | 0.402515 | 0.39873  | 0.725006 | 0.629464 |
| MmugDNA.33688.1.S1_at   | MmugDNA.33688.1 | 7.79  | 8.52  | 0.32 | 0.26 | -1.66 | 0.117537 | 0.416618 | 0.490984 | 0.641647 |
| MmugDNA.33689.1.S1_at   | MmugDNA.33689.1 | 4.9   | 4.77  | 0.07 | 0.18 | 1.09  | 0.799781 | 0.956707 | 0.926711 | 0.975397 |
| MmugDNA.33690.1.S1_at   | MmugDNA.33690.1 | 9.34  | 9.22  | 0.1  | 0.02 | 1.08  | 0.111322 | 0.039893 | 0.484526 | 0.244852 |
| MmugDNA.35062.1.S1_s_at | MmugDNA.35062.1 | 9.76  | 9.64  | 0.11 | 0.09 | 1.09  | 0.207814 | 0.025047 | 0.579406 | 0.198316 |
| MmugDNA.33691.1.S1_at   | MmugDNA.33691.1 | 4.27  | 4.01  | 0.25 | 0.08 | 1.2   | 0.157773 | 0.46813  | 0.53073  | 0.677624 |
| MmugDNA.33692.1.S1_at   | MmugDNA.33692.1 | 4.26  | 4.06  | 0.06 | 0.16 | 1.15  | 0.196689 | 0.240206 | 0.56736  | 0.51084  |
| MmugDNA.33693.1.S1_at   | MmugDNA.33693.1 | 4.67  | 4.41  | 0.23 | 0.04 | 1.19  | 0.276321 | 0.483734 | 0.635937 | 0.688112 |
| MmugDNA.33694.1.S1_at   | MmugDNA.33694.1 | 5.41  | 5.49  | 0.05 | 0.13 | -1.05 | 0.769665 | 0.020457 | 0.91377  | 0.179597 |
| MmugDNA.33696.1.S1_at   | MmugDNA.33696.1 | 9.14  | 8.41  | 0.61 | 0.25 | 1.66  | 0.240945 | 0.048236 | 0.607226 | 0.264686 |
| MmugDNA.33697.1.S1_at   | MmugDNA.33697.1 | 3.34  | 3.31  | 0.17 | 0.25 | 1.02  | 0.837077 | 0.969894 | 0.941548 | 0.983513 |
| MmugDNA.33698.1.S1_at   | MmugDNA.33698.1 | 3.54  | 4.12  | 0.25 | 0.48 | -1.49 | 0.259793 | 0.350879 | 0.622814 | 0.594584 |
| MmugDNA.33699.1.S1_at   | MmugDNA.33699.1 | 8.93  | 9.8   | 0.57 | 0.02 | -1.82 | 0.074661 | 0.00481  | 0.435313 | 0.096859 |
| MmugDNA.33700.1.S1_at   | MmugDNA.33700.1 | 2.79  | 2.81  | 0.09 | 0.17 | -1.01 | 0.598024 | 0.375334 | 0.836687 | 0.613336 |
| MmugDNA.33701.1.S1_at   | MmugDNA.33701.1 | 2.97  | 2.96  | 0.06 | 0.12 | 1     | 0.410774 | 0.452864 | 0.730947 | 0.667359 |
| MmugDNA.33702.1.S1_at   | MmugDNA.33702.1 | 6.22  | 6.34  | 0.12 | 0.26 | -1.08 | 0.652003 | 0.681583 | 0.861941 | 0.814092 |
| MmugDNA.33704.1.S1_at   | MmugDNA.33704.1 | 3.41  | 3.71  | 0.17 | 0.16 | -1.23 | 0.090796 | 0.080301 | 0.458873 | 0.32796  |
| MmugDNA.33705.1.S1_at   | MmugDNA.33705.1 | 6.27  | 6.15  | 0.21 | 0.17 | 1.09  | 0.50012  | 0.494577 | 0.78233  | 0.694909 |
| MmugDNA.33706.1.S1_at   | MmugDNA.33706.1 | 2.91  | 3.03  | 0.15 | 0.11 | -1.09 | 0.375549 | 0.357007 | 0.706527 | 0.598736 |
| MmugDNA.33707.1.S1_at   | MmugDNA.33707.1 | 2.95  | 2.92  | 0.19 | 0.17 | 1.03  | 0.293405 | 0.309708 | 0.649776 | 0.565005 |
| MmugDNA.33708.1.S1_at   | MmugDNA.33708.1 | 3.85  | 3.95  | 0.44 | 0.51 | -1.07 | 0.402314 | 0.604314 | 0.724848 | 0.764558 |
| MmugDNA.33709.1.S1_at   | MmugDNA.33709.1 | 12.54 | 12.61 | 0.18 | 0.01 | -1.05 | 0.513786 | 0.738342 | 0.790154 | 0.848258 |
| MmugDNA.3371.1.S1_at    | MmugDNA.3371.1  | 8.1   | 8.14  | 0.3  | 0.21 | -1.02 | 0.761702 | 0.003753 | 0.910656 | 0.08732  |
| MmugDNA.33710.1.S1_at   | MmugDNA.33710.1 | 6.13  | 6.14  | 0    | 0.12 | -1.01 | 0.524316 | 0.871482 | 0.795835 | 0.926844 |
| MmugDNA.33711.1.S1_at   | MmugDNA.33711.1 | 5.04  | 5.07  | 0.26 | 0.11 | -1.03 | 0.222846 | 0.154593 | 0.592367 | 0.429489 |
| MmugDNA.33713.1.S1_at   | MmugDNA.33713.1 | 4.18  | 4.5   | 0.07 | 0.35 | -1.25 | 0.191651 | 0.823878 | 0.562859 | 0.898817 |
| MmugDNA.33716.1.S1_at   | MmugDNA.33716.1 | 5.5   | 5.45  | 0.18 | 0.21 | 1.04  | 0.853437 | 0.10677  | 0.948299 | 0.369349 |
| MmugDNA.33717.1.S1_at   | MmugDNA.33717.1 | 3.52  | 3.52  | 0.09 | 0.15 | -1    | 0.929229 | 0.751898 | 0.976333 | 0.855714 |



|                         |                 |       |       |      |      |       |          |          |          |          |
|-------------------------|-----------------|-------|-------|------|------|-------|----------|----------|----------|----------|
| MmugDNA.33718.1.S1_at   | MmugDNA.33718.1 | 4     | 3.98  | 0.03 | 0.18 | 1.01  | 0.946954 | 0.79994  | 0.981582 | 0.884981 |
| MmugDNA.33719.1.S1_at   | MmugDNA.33719.1 | 6.53  | 6.92  | 0.23 | 0.12 | -1.31 | 0.071356 | 0.030584 | 0.430819 | 0.216849 |
| MmugDNA.3372.1.S1_at    | MmugDNA.3372.1  | 13.97 | 13.92 | 0.09 | 0.07 | 1.04  | 0.636472 | 0.600251 | 0.855006 | 0.762007 |
| MmugDNA.33720.1.S1_at   | MmugDNA.33720.1 | 8.18  | 7.52  | 0.62 | 0.26 | 1.58  | 0.362533 | 0.475598 | 0.699327 | 0.68228  |
| MmugDNA.33721.1.S1_at   | MmugDNA.33721.1 | 7.35  | 7.45  | 0.15 | 0.06 | -1.07 | 0.180241 | 0.027346 | 0.553399 | 0.206637 |
| MmugDNA.33722.1.S1_at   | MmugDNA.33722.1 | 3.63  | 3.57  | 0.06 | 0.09 | 1.04  | 0.168825 | 0.36548  | 0.541688 | 0.605587 |
| MmugDNA.33724.1.S1_at   | MmugDNA.33724.1 | 4.55  | 4.71  | 0.13 | 0.16 | -1.11 | 0.571355 | 0.50084  | 0.82268  | 0.699296 |
| MmugDNA.33725.1.S1_at   | MmugDNA.33725.1 | 6.1   | 6.05  | 0.02 | 0.03 | 1.04  | 0.097809 | 0.012654 | 0.466795 | 0.145088 |
| MmugDNA.33726.1.S1_at   | MmugDNA.33726.1 | 5.06  | 4.9   | 0.32 | 0.03 | 1.12  | 0.463641 | 0.717316 | 0.762278 | 0.836349 |
| MmugDNA.33728.1.S1_at   | MmugDNA.33728.1 | 6.74  | 6.76  | 0.16 | 0.01 | -1.01 | 0.490725 | 0.817199 | 0.777256 | 0.894546 |
| MmugDNA.3373.1.S1_at    | MmugDNA.3373.1  | 4.49  | 5.25  | 0.55 | 0.73 | -1.7  | 0.351665 | 0.461655 | 0.692445 | 0.673228 |
| MmugDNA.33730.1.S1_at   | MmugDNA.33730.1 | 3.48  | 3.47  | 0.01 | 0.12 | 1.01  | 0.529957 | 0.354231 | 0.798613 | 0.597105 |
| MmugDNA.33731.1.S1_at   | MmugDNA.33731.1 | 4.48  | 4.62  | 0.17 | 0.08 | -1.1  | 0.284595 | 0.030273 | 0.642354 | 0.215828 |
| MmugDNA.33733.1.S1_at   | MmugDNA.33733.1 | 4.3   | 4.01  | 0.59 | 0.21 | 1.22  | 0.395969 | 0.187913 | 0.72088  | 0.464026 |
| MmugDNA.33734.1.S1_at   | MmugDNA.33734.1 | 4.98  | 5.26  | 0.29 | 0.36 | -1.21 | 0.401519 | 0.367859 | 0.724554 | 0.607469 |
| MmugDNA.33735.1.S1_at   | MmugDNA.33735.1 | 3.66  | 3.76  | 0.24 | 0.38 | -1.07 | 0.891287 | 0.771429 | 0.962572 | 0.867177 |
| MmugDNA.33736.1.S1_at   | MmugDNA.33736.1 | 3.23  | 3.21  | 0.12 | 0.13 | 1.02  | 0.635009 | 0.800256 | 0.854497 | 0.885129 |
| MmugDNA.33739.1.S1_at   | MmugDNA.33739.1 | 5     | 5.03  | 0.6  | 0.28 | -1.02 | 0.791922 | 0.692595 | 0.923539 | 0.821061 |
| MmugDNA.3374.1.S1_at    | MmugDNA.3374.1  | 8.19  | 8.07  | 0.95 | 0.18 | 1.09  | 0.82011  | 0.664365 | 0.935275 | 0.803354 |
| MmugDNA.33740.1.S1_at   | MmugDNA.33740.1 | 4.88  | 5.03  | 0.17 | 0.27 | -1.1  | 0.906061 | 0.014877 | 0.968218 | 0.155055 |
| MmugDNA.33741.1.S1_at   | MmugDNA.33741.1 | 4.8   | 4.68  | 0.09 | 0.05 | 1.09  | 0.041018 | 0.030894 | 0.365672 | 0.217584 |
| MmugDNA.33742.1.S1_at   | MmugDNA.33742.1 | 6.25  | 6.21  | 0.1  | 0.05 | 1.03  | 0.590793 | 0.731483 | 0.833105 | 0.844356 |
| MmugDNA.33743.1.S1_at   | MmugDNA.33743.1 | 8.6   | 8.71  | 0.08 | 0.17 | -1.08 | 0.821574 | 0.010148 | 0.935582 | 0.132001 |
| MmugDNA.33744.1.S1_at   | MmugDNA.33744.1 | 6.72  | 7.82  | 0.82 | 0.2  | -2.14 | 0.283477 | 0.086059 | 0.641407 | 0.338305 |
| MmugDNA.33745.1.S1_at   | MmugDNA.33745.1 | 8.85  | 9.29  | 1.35 | 0.11 | -1.35 | 0.547634 | 0.498741 | 0.809225 | 0.697733 |
| MmugDNA.33747.1.S1_at   | MmugDNA.33747.1 | 4.33  | 4.25  | 0.59 | 0.38 | 1.06  | 0.757632 | 0.933776 | 0.90875  | 0.9623   |
| MmugDNA.33748.1.S1_at   | MmugDNA.33748.1 | 3.97  | 3.94  | 0.29 | 0.06 | 1.02  | 0.66651  | 0.463355 | 0.868243 | 0.674373 |
| MmugDNA.33749.1.S1_s_at | MmugDNA.33749.1 | 7.13  | 6.71  | 0.67 | 0.06 | 1.34  | 0.10661  | 0.042671 | 0.479    | 0.251037 |
| MmugDNA.3375.1.S1_at    | MmugDNA.3375.1  | 6.57  | 6.01  | 0.84 | 0.31 | 1.47  | 0.821929 | 0.927215 | 0.935744 | 0.958627 |
| MmugDNA.33750.1.S1_at   | MmugDNA.33750.1 | 6.79  | 6.62  | 0.15 | 0.07 | 1.12  | 0.469473 | 0.642796 | 0.76556  | 0.790486 |
| MmugDNA.33752.1.S1_at   | MmugDNA.33752.1 | 6.18  | 6.18  | 0.02 | 0.04 | 1     | 0.934129 | 0.076881 | 0.977721 | 0.322368 |
| MmugDNA.33754.1.S1_at   | MmugDNA.33754.1 | 4.33  | 4.36  | 0.17 | 0.13 | -1.02 | 0.563547 | 0.328352 | 0.818294 | 0.578045 |
| MmugDNA.33755.1.S1_at   | MmugDNA.33755.1 | 5.42  | 5.23  | 0.15 | 0.08 | 1.14  | 0.101514 | 0.103537 | 0.471806 | 0.364346 |
| MmugDNA.33756.1.S1_at   | MmugDNA.33756.1 | 4.5   | 4.5   | 0.01 | 0.07 | 1     | 0.335779 | 0.765037 | 0.681213 | 0.863388 |
| MmugDNA.33757.1.S1_at   | MmugDNA.33757.1 | 4.07  | 3.84  | 1.87 | 0.57 | 1.17  | 0.372931 | 0.351491 | 0.705567 | 0.595087 |
| MmugDNA.37348.1.S1_s_at | MmugDNA.37348.1 | 5.24  | 5.56  | 0.55 | 0.37 | -1.25 | 0.841251 | 0.977099 | 0.943701 | 0.987542 |
| MmugDNA.33759.1.S1_at   | MmugDNA.33759.1 | 11.03 | 11.23 | 0.11 | 0.19 | -1.15 | 0.515104 | 0.650345 | 0.790767 | 0.795586 |
| MmugDNA.33759.1.S1_s_at | MmugDNA.33759.1 | 11.4  | 11.61 | 0.06 | 0.12 | -1.16 | 0.124217 | 0.09774  | 0.498334 | 0.355598 |
| MmugDNA.3376.1.S1_at    | MmugDNA.3376.1  | 2.92  | 2.9   | 0.13 | 0    | 1.01  | 0.764306 | 0.982479 | 0.911428 | 0.99036  |
| MmugDNA.33760.1.S1_at   | MmugDNA.33760.1 | 8.31  | 8.78  | 0.28 | 0.16 | -1.39 | 0.151307 | 0.077436 | 0.524506 | 0.323236 |
| MmugDNA.33761.1.S1_at   | MmugDNA.33761.1 | 11.57 | 11.86 | 0.19 | 0.01 | -1.22 | 0.170036 | 0.167165 | 0.54304  | 0.443636 |
| MmugDNA.33763.1.S1_at   | MmugDNA.33763.1 | 8.12  | 7.5   | 0.33 | 0.04 | 1.54  | 0.035297 | 0.017482 | 0.35161  | 0.167476 |
| MmugDNA.33764.1.S1_at   | MmugDNA.33764.1 | 9.61  | 9.04  | 0.43 | 0.11 | 1.48  | 0.083811 | 0.082395 | 0.449721 | 0.331368 |

|                         |                 |       |       |      |      |       |          |          |          |          |
|-------------------------|-----------------|-------|-------|------|------|-------|----------|----------|----------|----------|
| MmugDNA.33764.1.S1_s_at | MmugDNA.33764.1 | 8.95  | 8.3   | 0.33 | 0.07 | 1.57  | 0.029355 | 0.020901 | 0.334049 | 0.181404 |
| MmugDNA.33765.1.S1_at   | MmugDNA.33765.1 | 8.59  | 8.56  | 0.41 | 0.37 | 1.02  | 0.403381 | 0.360573 | 0.725707 | 0.601624 |
| MmugDNA.33766.1.S1_at   | MmugDNA.33766.1 | 9.81  | 10.09 | 0.36 | 0.11 | -1.21 | 0.352916 | 0.252158 | 0.692895 | 0.520837 |
| MmugDNA.33767.1.S1_at   | MmugDNA.33767.1 | 8.93  | 10.04 | 0.92 | 0.16 | -2.16 | 0.106788 | 0.110452 | 0.479384 | 0.374684 |
| MmugDNA.33768.1.S1_at   | MmugDNA.33768.1 | 10.16 | 10.42 | 0.2  | 0.11 | -1.19 | 0.192542 | 0.15492  | 0.563577 | 0.429909 |
| MmugDNA.33769.1.S1_at   | MmugDNA.33769.1 | 5.15  | 5.28  | 0.32 | 0.25 | -1.09 | 0.458005 | 0.397585 | 0.758638 | 0.628973 |
| MmugDNA.3377.1.S1_at    | MmugDNA.3377.1  | 9.18  | 8.74  | 1    | 0.48 | 1.36  | 0.678643 | 0.747507 | 0.874097 | 0.853149 |
| MmugDNA.33770.1.S1_at   | MmugDNA.33770.1 | 2.71  | 2.7   | 0.07 | 0.08 | 1.01  | 0.399762 | 0.341047 | 0.72331  | 0.587164 |
| MmugDNA.33771.1.S1_at   | MmugDNA.33771.1 | 4.99  | 5     | 0.08 | 0.26 | -1    | 0.772058 | 0.930943 | 0.91501  | 0.960748 |
| MmugDNA.33772.1.S1_at   | MmugDNA.33772.1 | 7.91  | 7.76  | 0.5  | 0.18 | 1.11  | 0.419012 | 0.736938 | 0.73604  | 0.847766 |
| MmugDNA.33774.1.S1_at   | MmugDNA.33774.1 | 3.91  | 3.78  | 0.07 | 0.09 | -1.09 | 0.113411 | 0.108676 | 0.486722 | 0.372171 |
| MmugDNA.33775.1.S1_at   | MmugDNA.33775.1 | 6.01  | 6.25  | 0.18 | 0.17 | -1.18 | 0.140044 | 0.395351 | 0.515581 | 0.627409 |
| MmugDNA.33777.1.S1_at   | MmugDNA.33777.1 | 6.61  | 7.1   | 0.22 | 0.1  | -1.4  | 0.062607 | 0.06626  | 0.413402 | 0.303012 |
| MmugDNA.33778.1.S1_at   | MmugDNA.33778.1 | 4.48  | 4.26  | 0.28 | 0.12 | 1.16  | 0.742166 | 0.007032 | 0.901638 | 0.113112 |
| MmugDNA.3378.1.S1_at    | MmugDNA.3378.1  | 13.99 | 13.79 | 0.06 | 0.06 | 1.15  | 0.015563 | 0.004055 | 0.282681 | 0.090288 |
| MmugDNA.3378.1.S1_s_at  | MmugDNA.3378.1  | 13.88 | 13.77 | 0.04 | 0.02 | 1.07  | 0.013408 | 0.015528 | 0.268462 | 0.158053 |
| MmugDNA.33780.1.S1_at   | MmugDNA.33780.1 | 12.28 | 12.55 | 0.07 | 0.03 | -1.2  | 0.004724 | 0.006117 | 0.201699 | 0.106503 |
| MmugDNA.33781.1.S1_at   | MmugDNA.33781.1 | 6.2   | 6.14  | 0.21 | 0.09 | 1.04  | 0.507499 | 0.692796 | 0.78638  | 0.821217 |
| MmugDNA.33783.1.S1_at   | MmugDNA.33783.1 | 4.76  | 5.18  | 0.18 | 0.15 | -1.33 | 0.070059 | 0.041296 | 0.428515 | 0.247995 |
| MmugDNA.33784.1.S1_s_at | MmugDNA.33784.1 | 9.92  | 10.61 | 0.76 | 0.09 | -1.62 | 0.247711 | 0.162025 | 0.613245 | 0.438108 |
| MmugDNA.33786.1.S1_at   | MmugDNA.33786.1 | 7.46  | 7.5   | 0.44 | 0.07 | -1.03 | 0.331887 | 0.14922  | 0.678336 | 0.423728 |
| MmugDNA.33788.1.S1_at   | MmugDNA.33788.1 | 8.62  | 8.5   | 0.21 | 0.16 | 1.09  | 0.094096 | 0.131861 | 0.463389 | 0.403891 |
| MmugDNA.33789.1.S1_at   | MmugDNA.33789.1 | 7.18  | 6.92  | 0.19 | 0.01 | 1.2   | 0.053701 | 0.014706 | 0.39535  | 0.154379 |
| MmugDNA.33789.1.S1_x_at | MmugDNA.33789.1 | 7.59  | 7.51  | 0.29 | 0.06 | 1.05  | 0.308874 | 0.03723  | 0.661293 | 0.237329 |
| MmugDNA.3379.1.S1_at    | MmugDNA.3379.1  | 4.08  | 4.08  | 0.49 | 0.48 | 1     | 0.71797  | 0.582114 | 0.890594 | 0.750784 |
| MmugDNA.33790.1.S1_at   | MmugDNA.33790.1 | 9.75  | 9.05  | 0.36 | 0.09 | 1.63  | 0.11098  | 0.096595 | 0.484303 | 0.354126 |
| MmugDNA.33791.1.S1_at   | MmugDNA.33791.1 | 9.84  | 9.89  | 0.29 | 0.1  | -1.03 | 0.231827 | 0.115228 | 0.599694 | 0.3822   |
| MmugDNA.33792.1.S1_s_at | MmugDNA.33792.1 | 8.39  | 9.3   | 1.1  | 0.21 | -1.87 | 0.244738 | 0.162579 | 0.610301 | 0.43872  |
| MmugDNA.33793.1.S1_at   | MmugDNA.33793.1 | 8.08  | 7.95  | 0.25 | 0.2  | 1.09  | 0.904238 | 0.000089 | 0.967773 | 0.027016 |
| MmugDNA.33793.1.S1_s_at | MmugDNA.33793.1 | 7.99  | 7.9   | 0.22 | 0.07 | 1.07  | 0.391984 | 0.000253 | 0.718015 | 0.033375 |
| MmugDNA.33796.1.S1_s_at | MmugDNA.33796.1 | 4.06  | 4.15  | 0.38 | 0.39 | -1.07 | 0.559183 | 0.760271 | 0.815984 | 0.86071  |
| MmugDNA.33797.1.S1_at   | MmugDNA.33797.1 | 5.57  | 5.33  | 0.03 | 0.31 | 1.18  | 0.60528  | 0.792172 | 0.83989  | 0.879905 |
| MmugDNA.33799.1.S1_at   | MmugDNA.33799.1 | 3.75  | 3.61  | 0.12 | 0.44 | 1.11  | 0.791974 | 0.612772 | 0.923559 | 0.770189 |
| MmugDNA.338.1.S1_s_at   | MmugDNA.338.1   | 8.85  | 8.78  | 0.41 | 0.13 | 1.05  | 0.914086 | 0.817715 | 0.970812 | 0.894815 |
| MmugDNA.3380.1.S1_at    | MmugDNA.3380.1  | 12.73 | 12.7  | 0.27 | 0.03 | 1.02  | 0.406827 | 0.609579 | 0.72838  | 0.767875 |
| MmugDNA.33802.1.S1_at   | MmugDNA.33802.1 | 5.53  | 5.63  | 0.06 | 0    | -1.08 | 0.055399 | 0.433431 | 0.398621 | 0.653681 |
| MmugDNA.33803.1.S1_at   | MmugDNA.33803.1 | 3.95  | 3.99  | 0.07 | 0.08 | -1.03 | 0.291945 | 0.205895 | 0.648338 | 0.480109 |
| MmugDNA.33804.1.S1_at   | MmugDNA.33804.1 | 3.87  | 4.09  | 0.38 | 0.13 | -1.16 | 0.869824 | 0.140135 | 0.954581 | 0.413394 |
| MmugDNA.33805.1.S1_at   | MmugDNA.33805.1 | 5.68  | 5.68  | 0.12 | 0    | 1     | 0.373901 | 0.307179 | 0.705567 | 0.563487 |
| MmugDNA.33807.1.S1_at   | MmugDNA.33807.1 | 7.68  | 7.38  | 0.11 | 0.32 | 1.23  | 0.406153 | 0.015198 | 0.727815 | 0.156676 |
| MmugDNA.33808.1.S1_at   | MmugDNA.33808.1 | 5.53  | 5.55  | 0.16 | 0.02 | -1.01 | 0.43863  | 0.706709 | 0.747368 | 0.829857 |
| MmugDNA.33809.1.S1_at   | MmugDNA.33809.1 | 3.67  | 3.69  | 0.57 | 0.16 | -1.01 | 0.547698 | 0.515692 | 0.809225 | 0.708451 |
| MmugDNA.3381.1.S1_at    | MmugDNA.3381.1  | 7.14  | 7.12  | 0.07 | 0.08 | 1.01  | 0.690023 | 0.444686 | 0.879265 | 0.662072 |

|                         |                 |       |       |      |      |       |          |          |          |          |
|-------------------------|-----------------|-------|-------|------|------|-------|----------|----------|----------|----------|
| MmugDNA.33810.1.S1_at   | MmugDNA.33810.1 | 5.57  | 5.38  | 0.17 | 0.21 | 1.14  | 0.233925 | 0.580821 | 0.601511 | 0.749953 |
| MmugDNA.33811.1.S1_at   | MmugDNA.33811.1 | 6.22  | 6.73  | 0.27 | 0.61 | -1.42 | 0.230498 | 0.125585 | 0.598639 | 0.396226 |
| MmugDNA.33812.1.S1_at   | MmugDNA.33812.1 | 3.82  | 4.33  | 0.26 | 0.19 | -1.42 | 0.128275 | 0.346922 | 0.502907 | 0.591728 |
| MmugDNA.33813.1.S1_at   | MmugDNA.33813.1 | 4.44  | 4.17  | 0.35 | 0.46 | 1.21  | 0.966507 | 0.934748 | 0.989032 | 0.963039 |
| MmugDNA.33814.1.S1_at   | MmugDNA.33814.1 | 13.37 | 13.19 | 0.03 | 0.05 | 1.14  | 0.005464 | 0.003122 | 0.208157 | 0.081345 |
| MmugDNA.33815.1.S1_at   | MmugDNA.33815.1 | 6.63  | 7.41  | 0.37 | 0.05 | -1.71 | 0.061856 | 0.015727 | 0.411594 | 0.158912 |
| MmugDNA.33818.1.S1_at   | MmugDNA.33818.1 | 6.3   | 6.6   | 0.08 | 0.5  | -1.24 | 0.282804 | 0.457216 | 0.641027 | 0.670746 |
| MmugDNA.3382.1.S1_at    | MmugDNA.3382.1  | 9.46  | 9.2   | 0.66 | 0.27 | 1.2   | 0.750737 | 0.889247 | 0.905556 | 0.936852 |
| MmugDNA.33821.1.S1_at   | MmugDNA.33821.1 | 5.41  | 5.4   | 0.24 | 0.09 | 1     | 0.981213 | 0.982546 | 0.993962 | 0.99036  |
| MmugDNA.33822.1.S1_s_at | MmugDNA.33822.1 | 6.04  | 7.33  | 1.24 | 0.52 | -2.44 | 0.302354 | 0.222328 | 0.65629  | 0.495357 |
| MmugDNA.33823.1.S1_s_at | MmugDNA.33823.1 | 10.49 | 10.58 | 0.29 | 0.18 | -1.06 | 0.920954 | 0.00141  | 0.973238 | 0.057335 |
| MmugDNA.33824.1.S1_at   | MmugDNA.33824.1 | 4.14  | 3.72  | 0.25 | 0.12 | 1.34  | 0.056601 | 0.070518 | 0.400779 | 0.311777 |
| MmugDNA.33825.1.S1_at   | MmugDNA.33825.1 | 4.12  | 3.97  | 0.12 | 0.16 | 1.11  | 0.463705 | 0.300721 | 0.762278 | 0.558959 |
| MmugDNA.33827.1.S1_at   | MmugDNA.33827.1 | 4.37  | 4.25  | 0.05 | 0.28 | 1.09  | 0.822917 | 0.313209 | 0.936102 | 0.567753 |
| MmugDNA.33828.1.S1_at   | MmugDNA.33828.1 | 2.95  | 2.9   | 0.06 | 0.08 | 1.03  | 0.480774 | 0.65267  | 0.771519 | 0.796937 |
| MmugDNA.3383.1.S1_at    | MmugDNA.3383.1  | 5.37  | 5.24  | 0.1  | 0.07 | 1.09  | 0.150882 | 0.338327 | 0.524381 | 0.585417 |
| MmugDNA.33831.1.S1_at   | MmugDNA.33831.1 | 6.06  | 5.86  | 0.1  | 0.05 | 1.15  | 0.027807 | 0.025706 | 0.329316 | 0.200966 |
| MmugDNA.33833.1.S1_at   | MmugDNA.33833.1 | 4.61  | 7.06  | 0.49 | 0.39 | -5.47 | 0.002784 | 0.001253 | 0.185369 | 0.055001 |
| MmugDNA.33834.1.S1_at   | MmugDNA.33834.1 | 4.55  | 4.39  | 0.09 | 0.15 | 1.11  | 0.417545 | 0.869466 | 0.735015 | 0.925991 |
| MmugDNA.33835.1.S1_at   | MmugDNA.33835.1 | 3.54  | 3.43  | 0.19 | 0.18 | 1.08  | 0.509438 | 0.644519 | 0.787587 | 0.791629 |
| MmugDNA.33839.1.S1_at   | MmugDNA.33839.1 | 4.33  | 4.47  | 0.33 | 0.1  | -1.1  | 0.814731 | 0.590034 | 0.933137 | 0.756081 |
| MmugDNA.3384.1.S1_at    | MmugDNA.3384.1  | 9.11  | 8.89  | 0.17 | 0.08 | 1.16  | 0.285205 | 0.563725 | 0.643069 | 0.738808 |
| MmugDNA.33840.1.S1_at   | MmugDNA.33840.1 | 9.16  | 7.4   | 0.59 | 0.3  | 3.4   | 0.012943 | 0.004179 | 0.266025 | 0.091073 |
| MmugDNA.33841.1.S1_at   | MmugDNA.33841.1 | 4.61  | 4.31  | 0.08 | 0.07 | 1.24  | 0.012651 | 0.000764 | 0.263546 | 0.04544  |
| MmugDNA.33842.1.S1_at   | MmugDNA.33842.1 | 6.72  | 6.41  | 0.21 | 0.06 | 1.24  | 0.094023 | 0.122916 | 0.463368 | 0.392923 |
| MmugDNA.33844.1.S1_at   | MmugDNA.33844.1 | 9.31  | 9.61  | 0.3  | 0.15 | -1.23 | 0.421413 | 0.546802 | 0.737563 | 0.728203 |
| MmugDNA.33847.1.S1_at   | MmugDNA.33847.1 | 5.4   | 4.71  | 0.1  | 0.19 | 1.61  | 0.006441 | 0.007852 | 0.219301 | 0.118059 |
| MmugDNA.33848.1.S1_at   | MmugDNA.33848.1 | 12.51 | 12.45 | 0.09 | 0.06 | 1.05  | 0.117917 | 0.124999 | 0.491305 | 0.395386 |
| MmugDNA.33849.1.S1_at   | MmugDNA.33849.1 | 11.7  | 11.22 | 0.22 | 0.04 | 1.39  | 0.026375 | 0.059524 | 0.32457  | 0.290548 |
| MmugDNA.33849.1.S1_s_at | MmugDNA.33849.1 | 12.74 | 12.46 | 0.23 | 0.03 | 1.22  | 0.096165 | 0.148958 | 0.464695 | 0.423294 |
| MmugDNA.3385.1.S1_at    | MmugDNA.3385.1  | 3.86  | 3.65  | 0.16 | 0.03 | 1.16  | 0.09037  | 0.408772 | 0.458536 | 0.6359   |
| MmugDNA.33852.1.S1_at   | MmugDNA.33852.1 | 7.7   | 7.73  | 0.2  | 0.19 | -1.02 | 0.668858 | 0.527138 | 0.86916  | 0.715861 |
| MmugDNA.33853.1.S1_s_at | MmugDNA.33853.1 | 4.3   | 4.1   | 0.19 | 0.04 | 1.15  | 0.132566 | 0.206229 | 0.506856 | 0.480382 |
| MmugDNA.33854.1.S1_at   | MmugDNA.33854.1 | 5.81  | 5.56  | 0.21 | 0.1  | 1.19  | 0.142764 | 0.299788 | 0.517889 | 0.558081 |
| MmugDNA.33856.1.S1_at   | MmugDNA.33856.1 | 11.99 | 12.15 | 0.39 | 0.02 | -1.12 | 0.373601 | 0.095581 | 0.705567 | 0.352645 |
| MmugDNA.3386.1.S1_at    | MmugDNA.3386.1  | 9.78  | 9.94  | 0.19 | 0.15 | -1.11 | 0.494353 | 0.555602 | 0.779421 | 0.733967 |
| MmugDNA.33860.1.S1_at   | MmugDNA.33860.1 | 7.44  | 7.42  | 0.13 | 0    | 1.01  | 0.729809 | 0.801992 | 0.895824 | 0.885995 |
| MmugDNA.33861.1.S1_at   | MmugDNA.33861.1 | 8.11  | 8.58  | 0.41 | 0.17 | -1.39 | 0.137837 | 0.08328  | 0.513584 | 0.333372 |
| MmugDNA.33862.1.S1_at   | MmugDNA.33862.1 | 12.72 | 12.33 | 0.09 | 0.06 | 1.31  | 0.005486 | 0.008609 | 0.208157 | 0.123102 |
| MmugDNA.33863.1.S1_at   | MmugDNA.33863.1 | 8.96  | 8.1   | 0.25 | 0.4  | 1.82  | 0.0313   | 0.07142  | 0.340817 | 0.313555 |
| MmugDNA.33863.1.S1_s_at | MmugDNA.33863.1 | 9.36  | 8.54  | 0.24 | 0.37 | 1.76  | 0.029181 | 0.043928 | 0.333974 | 0.254098 |
| MmugDNA.33864.1.S1_at   | MmugDNA.33864.1 | 5.25  | 5.26  | 0.01 | 0.07 | -1    | 0.336961 | 0.560702 | 0.682166 | 0.736921 |
| MmugDNA.33865.1.S1_s_at | MmugDNA.33865.1 | 11.99 | 11.85 | 0.03 | 0.06 | 1.1   | 0.029442 | 0.013343 | 0.334169 | 0.148061 |

|                         |                 |       |       |      |      |       |          |          |          |          |
|-------------------------|-----------------|-------|-------|------|------|-------|----------|----------|----------|----------|
| MmugDNA.33866.1.S1_at   | MmugDNA.33866.1 | 8.06  | 8.27  | 0.1  | 0.12 | -1.16 | 0.166119 | 0.519082 | 0.538897 | 0.710813 |
| MmugDNA.33867.1.S1_at   | MmugDNA.33867.1 | 4.15  | 4.12  | 0.29 | 0.09 | 1.01  | 0.443702 | 0.36519  | 0.750982 | 0.605348 |
| MmugDNA.33868.1.S1_at   | MmugDNA.33868.1 | 11.19 | 11.23 | 0.04 | 0.02 | -1.02 | 0.0656   | 0.899506 | 0.420827 | 0.942863 |
| MmugDNA.33869.1.S1_at   | MmugDNA.33869.1 | 5.9   | 5.8   | 0.12 | 0.14 | 1.07  | 0.433998 | 0.639266 | 0.744825 | 0.788125 |
| MmugDNA.3387.1.S1_at    | MmugDNA.3387.1  | 9.1   | 10.19 | 1.44 | 0.09 | -2.12 | 0.319318 | 0.097404 | 0.668689 | 0.355097 |
| MmugDNA.33870.1.S1_at   | MmugDNA.33870.1 | 4.32  | 4.3   | 0.03 | 0.03 | 1.02  | 0.80923  | 0.007181 | 0.93104  | 0.113932 |
| MmugDNA.33871.1.S1_at   | MmugDNA.33871.1 | 4.25  | 4.64  | 0.23 | 0.57 | -1.31 | 0.549821 | 0.586005 | 0.810447 | 0.753172 |
| MmugDNA.33872.1.S1_at   | MmugDNA.33872.1 | 2.99  | 2.8   | 0.15 | 0.03 | 1.15  | 0.250346 | 0.357011 | 0.615561 | 0.598736 |
| MmugDNA.33873.1.S1_at   | MmugDNA.33873.1 | 6.98  | 6.8   | 0.24 | 0.19 | 1.13  | 0.66324  | 0.005144 | 0.867106 | 0.099496 |
| MmugDNA.33874.1.S1_at   | MmugDNA.33874.1 | 6.15  | 5.98  | 0.21 | 0.09 | 1.12  | 0.298124 | 0.305875 | 0.652952 | 0.562731 |
| MmugDNA.33875.1.S1_at   | MmugDNA.33875.1 | 7.04  | 7.07  | 0.5  | 0.18 | -1.02 | 0.352572 | 0.351279 | 0.692659 | 0.594937 |
| MmugDNA.33877.1.S1_at   | MmugDNA.33877.1 | 10.53 | 10.91 | 0.97 | 0.14 | -1.3  | 0.643666 | 0.371476 | 0.858218 | 0.610204 |
| MmugDNA.33878.1.S1_at   | MmugDNA.33878.1 | 5.81  | 5.47  | 0.69 | 0.22 | 1.27  | 0.850336 | 0.924148 | 0.947346 | 0.957248 |
| MmugDNA.3388.1.S1_at    | MmugDNA.3388.1  | 4.71  | 4.79  | 0.19 | 0.22 | -1.05 | 0.847801 | 0.963491 | 0.946572 | 0.979631 |
| MmugDNA.33880.1.S1_at   | MmugDNA.33880.1 | 5.08  | 5.76  | 0.76 | 0.15 | -1.6  | 0.605574 | 0.584267 | 0.840077 | 0.752357 |
| MmugDNA.33881.1.S1_at   | MmugDNA.33881.1 | 9.34  | 8.96  | 0.2  | 0.14 | 1.31  | 0.023589 | 0.013857 | 0.31615  | 0.150977 |
| MmugDNA.33883.1.S1_at   | MmugDNA.33883.1 | 7.94  | 8     | 0.44 | 0.18 | -1.04 | 0.341326 | 0.020535 | 0.685051 | 0.179788 |
| MmugDNA.33883.1.S1_x_at | MmugDNA.33883.1 | 7.77  | 7.63  | 0.43 | 0.15 | 1.1   | 0.211277 | 0.047919 | 0.582179 | 0.26377  |
| MmugDNA.33884.1.S1_at   | MmugDNA.33884.1 | 10.65 | 10.29 | 0.25 | 0.06 | 1.29  | 0.065577 | 0.021696 | 0.420827 | 0.184333 |
| MmugDNA.33886.1.S1_at   | MmugDNA.33886.1 | 7.54  | 8.05  | 0.1  | 0.04 | -1.43 | 0.001533 | 0.0001   | 0.161959 | 0.027996 |
| MmugDNA.33887.1.S1_at   | MmugDNA.33887.1 | 7.05  | 7.03  | 0.02 | 0.12 | 1.01  | 0.995087 | 0.963169 | 0.99815  | 0.979435 |
| MmugDNA.33888.1.S1_at   | MmugDNA.33888.1 | 7.47  | 7.28  | 0.33 | 0.24 | 1.14  | 0.338484 | 0.308416 | 0.682988 | 0.564479 |
| MmugDNA.33889.1.S1_at   | MmugDNA.33889.1 | 5.58  | 5.41  | 0.13 | 0.09 | 1.13  | 0.089494 | 0.169191 | 0.457657 | 0.445812 |
| MmugDNA.3389.1.S1_at    | MmugDNA.3389.1  | 12.66 | 12.58 | 0.04 | 0.07 | 1.05  | 0.101435 | 0.000055 | 0.471667 | 0.025666 |
| MmugDNA.33890.1.S1_at   | MmugDNA.33890.1 | 6.3   | 6.58  | 0.46 | 0.15 | -1.21 | 0.233008 | 0.009851 | 0.600438 | 0.130274 |
| MmugDNA.33891.1.S1_at   | MmugDNA.33891.1 | 4.9   | 4.74  | 0.1  | 0.15 | 1.12  | 0.125255 | 0.176885 | 0.499478 | 0.453303 |
| MmugDNA.33892.1.S1_at   | MmugDNA.33892.1 | 6.06  | 6.02  | 0.02 | 0.17 | 1.03  | 0.773534 | 0.363061 | 0.915826 | 0.603503 |
| MmugDNA.33894.1.S1_at   | MmugDNA.33894.1 | 5.73  | 5.55  | 0.15 | 0.19 | 1.13  | 0.080458 | 0.101103 | 0.444133 | 0.360724 |
| MmugDNA.33895.1.S1_at   | MmugDNA.33895.1 | 5.41  | 6.13  | 0.19 | 0.22 | -1.64 | 0.009255 | 0.019853 | 0.241866 | 0.177189 |
| MmugDNA.33896.1.S1_at   | MmugDNA.33896.1 | 11.33 | 10.83 | 0.52 | 0.16 | 1.41  | 0.180226 | 0.351241 | 0.553385 | 0.594937 |
| MmugDNA.33898.1.S1_at   | MmugDNA.33898.1 | 4.36  | 4.36  | 0.03 | 0.07 | -1    | 0.911042 | 0.309231 | 0.969801 | 0.564807 |
| MmugDNA.339.1.S1_at     | MmugDNA.339.1   | 4.1   | 3.86  | 0.83 | 0.91 | 1.18  | 0.774714 | 0.200008 | 0.91642  | 0.474603 |
| MmugDNA.3390.1.S1_at    | MmugDNA.3390.1  | 3.23  | 3.3   | 0.12 | 0.06 | -1.05 | 0.953225 | 0.691706 | 0.984409 | 0.820652 |
| MmugDNA.33901.1.S1_at   | MmugDNA.33901.1 | 11.29 | 11.68 | 0.23 | 0.05 | -1.31 | 0.073444 | 0.030613 | 0.434494 | 0.216906 |
| MmugDNA.33903.1.S1_at   | MmugDNA.33903.1 | 3.89  | 3.84  | 0.07 | 0.07 | 1.04  | 0.180463 | 0.107854 | 0.553635 | 0.370945 |
| MmugDNA.33904.1.S1_at   | MmugDNA.33904.1 | 11.75 | 11.13 | 0.27 | 0.07 | 1.54  | 0.027661 | 0.013787 | 0.328536 | 0.150462 |
| MmugDNA.33906.1.S1_at   | MmugDNA.33906.1 | 10.92 | 11.36 | 0.29 | 0.03 | -1.35 | 0.103675 | 0.054584 | 0.474343 | 0.279153 |
| MmugDNA.33909.1.S1_at   | MmugDNA.33909.1 | 3.86  | 3.75  | 0.23 | 0.09 | 1.08  | 0.412291 | 0.508595 | 0.731945 | 0.703719 |
| MmugDNA.3391.1.S1_at    | MmugDNA.3391.1  | 4.28  | 3.72  | 0.51 | 0.05 | 1.48  | 0.378042 | 0.533405 | 0.707991 | 0.719587 |
| MmugDNA.33910.1.S1_at   | MmugDNA.33910.1 | 11.56 | 11.52 | 0.09 | 0.06 | 1.02  | 0.477843 | 0.851188 | 0.76987  | 0.915364 |
| MmugDNA.33911.1.S1_s_at | MmugDNA.33911.1 | 11.01 | 11.01 | 0.23 | 0.1  | 1     | 0.970295 | 0.894781 | 0.990263 | 0.939961 |
| MmugDNA.33912.1.S1_at   | MmugDNA.33912.1 | 3.82  | 3.75  | 0.06 | 0.07 | 1.04  | 0.067697 | 0.492619 | 0.42444  | 0.693666 |
| MmugDNA.33913.1.S1_at   | MmugDNA.33913.1 | 6.84  | 6.51  | 0.19 | 0.09 | 1.26  | 0.068157 | 0.285527 | 0.424968 | 0.547395 |

|                         |                 |       |       |      |      |       |          |          |          |          |
|-------------------------|-----------------|-------|-------|------|------|-------|----------|----------|----------|----------|
| MmugDNA.33914.1.S1_at   | MmugDNA.33914.1 | 6.18  | 5.62  | 0.45 | 0.25 | 1.47  | 0.643537 | 0.756289 | 0.858218 | 0.858165 |
| MmugDNA.33915.1.S1_at   | MmugDNA.33915.1 | 11.54 | 11.28 | 0.45 | 0.23 | 1.2   | 0.668514 | 0.679066 | 0.86912  | 0.812614 |
| MmugDNA.33916.1.S1_at   | MmugDNA.33916.1 | 4.65  | 4.6   | 0.12 | 0.07 | 1.04  | 0.329728 | 0.079384 | 0.676501 | 0.32676  |
| MmugDNA.33917.1.S1_at   | MmugDNA.33917.1 | 10.83 | 10.76 | 0.26 | 0.05 | 1.05  | 0.719951 | 0.173416 | 0.891311 | 0.449918 |
| MmugDNA.33919.1.S1_at   | MmugDNA.33919.1 | 8.76  | 8.51  | 0.47 | 0.34 | 1.19  | 0.362753 | 0.16458  | 0.699596 | 0.440829 |
| MmugDNA.3392.1.S1_at    | MmugDNA.3392.1  | 3.38  | 3.4   | 0.08 | 0.08 | -1.02 | 0.79294  | 0.651413 | 0.924196 | 0.796212 |
| MmugDNA.33921.1.S1_s_at | MmugDNA.33921.1 | 7.05  | 6.85  | 0.19 | 0.15 | 1.15  | 0.189355 | 0.027747 | 0.560894 | 0.208003 |
| MmugDNA.33922.1.S1_at   | MmugDNA.33922.1 | 5.81  | 5.71  | 0.3  | 0.08 | 1.07  | 0.270115 | 0.395736 | 0.630217 | 0.627639 |
| MmugDNA.33923.1.S1_at   | MmugDNA.33923.1 | 10.07 | 10.64 | 0.4  | 0.07 | -1.48 | 0.217102 | 0.576292 | 0.587095 | 0.747148 |
| MmugDNA.33924.1.S1_at   | MmugDNA.33924.1 | 3.14  | 4.28  | 1.3  | 0.13 | -2.2  | 0.654359 | 0.320421 | 0.862772 | 0.572648 |
| MmugDNA.33925.1.S1_at   | MmugDNA.33925.1 | 3.96  | 4.06  | 0.12 | 0.22 | -1.07 | 0.610299 | 0.674696 | 0.841839 | 0.809969 |
| MmugDNA.33925.1.S1_s_at | MmugDNA.33925.1 | 6.88  | 6.84  | 0.03 | 0.04 | 1.03  | 0.260777 | 0.124812 | 0.623301 | 0.395219 |
| MmugDNA.3393.1.S1_at    | MmugDNA.3393.1  | 7.78  | 7.92  | 0.56 | 0.14 | -1.1  | 0.723404 | 0.30722  | 0.892813 | 0.563499 |
| MmugDNA.33930.1.S1_at   | MmugDNA.33930.1 | 7.17  | 9.51  | 2.09 | 0.21 | -5.08 | 0.048581 | 0.040872 | 0.383718 | 0.247049 |
| MmugDNA.33930.1.S1_s_at | MmugDNA.33930.1 | 8.19  | 8.99  | 0.78 | 0.2  | -1.74 | 0.07184  | 0.021338 | 0.431668 | 0.182856 |
| MmugDNA.33933.1.S1_at   | MmugDNA.33933.1 | 5.28  | 5.28  | 0.06 | 0.07 | -1    | 0.83427  | 0.959577 | 0.940557 | 0.977061 |
| MmugDNA.33936.1.S1_at   | MmugDNA.33936.1 | 4.51  | 4.31  | 0.03 | 0.19 | 1.15  | 0.41098  | 0.322867 | 0.731038 | 0.574209 |
| MmugDNA.33937.1.S1_at   | MmugDNA.33937.1 | 3.38  | 3.48  | 0.03 | 0.27 | -1.07 | 0.65964  | 0.161192 | 0.865323 | 0.437378 |
| MmugDNA.33938.1.S1_at   | MmugDNA.33938.1 | 6.64  | 6.62  | 0.13 | 0.02 | 1.01  | 0.768682 | 0.747254 | 0.91322  | 0.853149 |
| MmugDNA.33939.1.S1_at   | MmugDNA.33939.1 | 6.4   | 6.42  | 0.28 | 0.1  | -1.01 | 0.486    | 0.229948 | 0.774427 | 0.501802 |
| MmugDNA.33940.1.S1_at   | MmugDNA.33940.1 | 7.71  | 7.75  | 0.43 | 0.07 | -1.03 | 0.391307 | 0.561046 | 0.717502 | 0.737088 |
| MmugDNA.33942.1.S1_at   | MmugDNA.33942.1 | 4.28  | 4.22  | 0.17 | 0    | 1.04  | 0.257768 | 0.12931  | 0.621456 | 0.400726 |
| MmugDNA.33943.1.S1_at   | MmugDNA.33943.1 | 3.87  | 3.86  | 0.25 | 0.12 | 1.01  | 0.613213 | 0.744418 | 0.843382 | 0.852014 |
| MmugDNA.33944.1.S1_at   | MmugDNA.33944.1 | 7.44  | 7.43  | 0.69 | 0.12 | 1.01  | 0.555705 | 0.775492 | 0.813597 | 0.86936  |
| MmugDNA.33945.1.S1_at   | MmugDNA.33945.1 | 10.03 | 9.6   | 0.88 | 0.11 | 1.35  | 0.321024 | 0.414588 | 0.669571 | 0.640431 |
| MmugDNA.33946.1.S1_at   | MmugDNA.33946.1 | 3.55  | 3.45  | 0.12 | 0.18 | 1.07  | 0.378708 | 0.535222 | 0.708438 | 0.720824 |
| MmugDNA.33947.1.S1_at   | MmugDNA.33947.1 | 6.37  | 6.37  | 0.07 | 0    | 1     | 0.395765 | 0.358723 | 0.720706 | 0.60018  |
| MmugDNA.33948.1.S1_at   | MmugDNA.33948.1 | 7.72  | 7.66  | 0.49 | 0.16 | 1.04  | 0.699813 | 0.412138 | 0.883309 | 0.63856  |
| MmugDNA.3395.1.S1_at    | MmugDNA.3395.1  | 5.74  | 5.52  | 0.13 | 0.03 | 1.16  | 0.03587  | 0.117544 | 0.353707 | 0.38531  |
| MmugDNA.33955.1.S1_at   | MmugDNA.33955.1 | 4.05  | 4.01  | 0.24 | 0.09 | 1.03  | 0.882243 | 0.318361 | 0.959161 | 0.571192 |
| MmugDNA.33956.1.S1_at   | MmugDNA.33956.1 | 3.05  | 3.05  | 0.08 | 0.19 | -1    | 0.942156 | 0.965535 | 0.980281 | 0.980739 |
| MmugDNA.33957.1.S1_at   | MmugDNA.33957.1 | 4.33  | 4.18  | 0.9  | 0.73 | 1.11  | 0.909148 | 0.739664 | 0.969287 | 0.849146 |
| MmugDNA.33958.1.S1_at   | MmugDNA.33958.1 | 3.09  | 3.2   | 0.07 | 0.1  | -1.08 | 0.381762 | 0.3524   | 0.710282 | 0.595722 |
| MmugDNA.33959.1.S1_at   | MmugDNA.33959.1 | 4.92  | 5.05  | 0.05 | 0.03 | -1.09 | 0.04598  | 0.037394 | 0.37735  | 0.237776 |
| MmugDNA.3396.1.S1_at    | MmugDNA.3396.1  | 6.53  | 6.32  | 0.18 | 0.06 | 1.16  | 0.04528  | 0.009358 | 0.376169 | 0.127602 |
| MmugDNA.33960.1.S1_at   | MmugDNA.33960.1 | 4.43  | 4.32  | 0.32 | 0.13 | 1.08  | 0.846555 | 0.818802 | 0.94629  | 0.895578 |
| MmugDNA.33961.1.S1_at   | MmugDNA.33961.1 | 11.57 | 11.71 | 0.45 | 0.03 | -1.1  | 0.681756 | 0.121288 | 0.875387 | 0.390351 |
| MmugDNA.33963.1.S1_at   | MmugDNA.33963.1 | 4.22  | 3.9   | 0.25 | 0.11 | 1.25  | 0.204474 | 0.277178 | 0.575907 | 0.541154 |
| MmugDNA.33964.1.S1_at   | MmugDNA.33964.1 | 6.36  | 6.35  | 0.29 | 0.02 | 1.01  | 0.721565 | 0.260576 | 0.892101 | 0.527084 |
| MmugDNA.33968.1.S1_at   | MmugDNA.33968.1 | 4.31  | 4.2   | 0.11 | 0.02 | 1.08  | 0.134801 | 0.493615 | 0.508874 | 0.694288 |
| MmugDNA.33970.1.S1_at   | MmugDNA.33970.1 | 7.41  | 7.02  | 0.36 | 0.12 | 1.3   | 0.651641 | 0.239856 | 0.86172  | 0.510611 |
| MmugDNA.33971.1.S1_at   | MmugDNA.33971.1 | 6.7   | 6.7   | 0.39 | 0.39 | 1     | 0.960061 | 0.91452  | 0.986981 | 0.951957 |
| MmugDNA.33972.1.S1_at   | MmugDNA.33972.1 | 5.79  | 5.84  | 0.07 | 0.01 | -1.04 | 0.728659 | 0.902764 | 0.895285 | 0.944798 |

|                         |                 |       |       |      |      |       |          |          |          |          |
|-------------------------|-----------------|-------|-------|------|------|-------|----------|----------|----------|----------|
| MmugDNA.33974.1.S1_at   | MmugDNA.33974.1 | 12.49 | 12.43 | 0.02 | 0.19 | 1.04  | 0.621844 | 0.531928 | 0.847631 | 0.718995 |
| MmugDNA.33974.1.S1_s_at | MmugDNA.33974.1 | 10.84 | 10.64 | 0.15 | 0.17 | 1.15  | 0.101287 | 0.098769 | 0.471667 | 0.356875 |
| MmugDNA.33976.1.S1_at   | MmugDNA.33976.1 | 3.73  | 3.85  | 0.08 | 0.13 | -1.08 | 0.241536 | 0.10518  | 0.607663 | 0.366971 |
| MmugDNA.29933.1.S1_s_at | MmugDNA.29933.1 | 7.43  | 7.37  | 0    | 0.01 | 1.04  | 0.000597 | 0.644439 | 0.143137 | 0.791578 |
| MmugDNA.33977.1.S1_at   | MmugDNA.33977.1 | 4.23  | 4.3   | 0.14 | 0.02 | -1.05 | 0.786489 | 0.402232 | 0.921473 | 0.631261 |
| MmugDNA.3398.1.S1_at    | MmugDNA.3398.1  | 11.81 | 11.55 | 0.37 | 0.05 | 1.2   | 0.136683 | 0.170117 | 0.511883 | 0.446868 |
| MmugDNA.33980.1.S1_at   | MmugDNA.33980.1 | 6.78  | 7.27  | 0.19 | 0.33 | -1.41 | 0.108929 | 0.4041   | 0.48128  | 0.632614 |
| MmugDNA.33981.1.S1_at   | MmugDNA.33981.1 | 4.14  | 4.06  | 0.07 | 0.05 | 1.06  | 0.143645 | 0.369621 | 0.519043 | 0.608957 |
| MmugDNA.33983.1.S1_at   | MmugDNA.33983.1 | 5.34  | 5.68  | 0.63 | 0.21 | -1.26 | 0.429369 | 0.554373 | 0.742161 | 0.733168 |
| MmugDNA.33984.1.S1_at   | MmugDNA.33984.1 | 4.7   | 4.89  | 0.13 | 0.28 | -1.13 | 0.7642   | 0.898368 | 0.911428 | 0.942175 |
| MmugDNA.33985.1.S1_at   | MmugDNA.33985.1 | 5.11  | 5.37  | 0.24 | 0.2  | -1.2  | 0.254927 | 0.310387 | 0.619267 | 0.56558  |
| MmugDNA.33986.1.S1_at   | MmugDNA.33986.1 | 3.4   | 3.27  | 0.01 | 0.07 | 1.1   | 0.022283 | 0.266307 | 0.310495 | 0.532099 |
| MmugDNA.33988.1.S1_at   | MmugDNA.33988.1 | 4.33  | 5.28  | 0.35 | 0.65 | -1.93 | 0.218795 | 0.267001 | 0.588341 | 0.532541 |
| MmugDNA.3399.1.S1_at    | MmugDNA.3399.1  | 3.67  | 3.54  | 0.11 | 0.27 | 1.1   | 0.438559 | 0.557703 | 0.747368 | 0.735173 |
| MmugDNA.33990.1.S1_at   | MmugDNA.33990.1 | 5.93  | 5.92  | 0.08 | 0.15 | 1.01  | 0.457563 | 0.636525 | 0.758364 | 0.786247 |
| MmugDNA.33991.1.S1_at   | MmugDNA.33991.1 | 7.44  | 8.09  | 1.02 | 0.12 | -1.56 | 0.986657 | 0.548149 | 0.995667 | 0.728911 |
| MmugDNA.33992.1.S1_at   | MmugDNA.33992.1 | 7.69  | 8.14  | 0.41 | 0.12 | -1.37 | 0.101035 | 0.027025 | 0.47159  | 0.205533 |
| MmugDNA.33993.1.S1_at   | MmugDNA.33993.1 | 4.65  | 4.65  | 0.13 | 0.13 | 1     | 0.230231 | 0.47785  | 0.598481 | 0.683843 |
| MmugDNA.33995.1.S1_at   | MmugDNA.33995.1 | 6.27  | 6.36  | 0.15 | 0.09 | -1.06 | 0.665474 | 0.548301 | 0.86797  | 0.729053 |
| MmugDNA.33998.1.S1_at   | MmugDNA.33998.1 | 7.17  | 7.41  | 0.36 | 0.1  | -1.18 | 0.399104 | 0.532857 | 0.722883 | 0.71927  |
| MmugDNA.33999.1.S1_at   | MmugDNA.33999.1 | 4.02  | 3.99  | 0.08 | 0.09 | 1.02  | 0.267576 | 0.180889 | 0.628193 | 0.457394 |
| MmugDNA.340.1.S1_at     | MmugDNA.340.1   | 5.1   | 4.96  | 0.43 | 0.06 | 1.11  | 0.715057 | 0.526852 | 0.889059 | 0.715627 |
| MmugDNA.3400.1.S1_at    | MmugDNA.3400.1  | 7.26  | 7.34  | 0.1  | 0.02 | -1.06 | 0.313648 | 0.899686 | 0.664799 | 0.942903 |
| MmugDNA.34000.1.S1_at   | MmugDNA.34000.1 | 5.49  | 5.37  | 0.2  | 0.09 | 1.08  | 0.247552 | 0.664905 | 0.613225 | 0.803709 |
| MmugDNA.34001.1.S1_at   | MmugDNA.34001.1 | 9.08  | 8.55  | 0.27 | 0.37 | 1.44  | 0.066358 | 0.085231 | 0.422255 | 0.337096 |
| MmugDNA.34002.1.S1_at   | MmugDNA.34002.1 | 8.62  | 8.14  | 0.61 | 0.25 | 1.39  | 0.262506 | 0.153329 | 0.624713 | 0.428139 |
| MmugDNA.34002.1.S1_s_at | MmugDNA.34002.1 | 9.31  | 9.18  | 0.61 | 0.14 | 1.1   | 0.526189 | 0.382806 | 0.796454 | 0.618907 |
| MmugDNA.34005.1.S1_at   | MmugDNA.34005.1 | 11.44 | 11.15 | 0.38 | 0.24 | 1.22  | 0.189487 | 0.142238 | 0.560937 | 0.415754 |
| MmugDNA.34007.1.S1_at   | MmugDNA.34007.1 | 10.8  | 10.03 | 0.78 | 0.13 | 1.71  | 0.43192  | 0.542861 | 0.743687 | 0.725834 |
| MmugDNA.3401.1.S1_at    | MmugDNA.3401.1  | 10.82 | 10.81 | 0.13 | 0.13 | 1     | 0.52682  | 0.005423 | 0.796797 | 0.101583 |
| MmugDNA.34010.1.S1_at   | MmugDNA.34010.1 | 5.95  | 5.77  | 0.14 | 0.44 | 1.13  | 0.413478 | 0.529856 | 0.732278 | 0.717526 |
| MmugDNA.34013.1.S1_at   | MmugDNA.34013.1 | 7.02  | 6.85  | 0.57 | 0.09 | 1.13  | 0.741379 | 0.864935 | 0.901371 | 0.923415 |
| MmugDNA.34015.1.S1_at   | MmugDNA.34015.1 | 6.91  | 7.42  | 0.88 | 0.11 | -1.42 | 0.328486 | 0.474284 | 0.67577  | 0.68135  |
| MmugDNA.34017.1.S1_at   | MmugDNA.34017.1 | 3.8   | 3.8   | 0.11 | 0.06 | 1     | 0.951686 | 0.873063 | 0.983768 | 0.927822 |
| MmugDNA.34018.1.S1_at   | MmugDNA.34018.1 | 5.16  | 5.09  | 0.09 | 0.09 | 1.05  | 0.620506 | 0.845987 | 0.84711  | 0.912303 |
| MmugDNA.34019.1.S1_at   | MmugDNA.34019.1 | 4.51  | 4.41  | 0.36 | 0.11 | 1.07  | 0.515461 | 0.537522 | 0.79089  | 0.722606 |
| MmugDNA.34020.1.S1_at   | MmugDNA.34020.1 | 3.07  | 3.05  | 0.13 | 0.05 | 1.01  | 0.379729 | 0.579485 | 0.709128 | 0.74918  |
| MmugDNA.34021.1.S1_at   | MmugDNA.34021.1 | 8.74  | 8.49  | 0.26 | 0.25 | 1.19  | 0.23145  | 0.028456 | 0.599368 | 0.210487 |
| MmugDNA.34022.1.S1_at   | MmugDNA.34022.1 | 6.81  | 6.7   | 0.08 | 0.08 | 1.08  | 0.187214 | 0.154162 | 0.559729 | 0.428913 |
| MmugDNA.34023.1.S1_s_at | MmugDNA.34023.1 | 12.22 | 12.5  | 0.12 | 0.06 | -1.21 | 0.009755 | 0.002646 | 0.243347 | 0.076027 |
| MmugDNA.34024.1.S1_at   | MmugDNA.34024.1 | 3.78  | 4     | 0.12 | 0.09 | -1.17 | 0.059964 | 0.081671 | 0.407399 | 0.329886 |
| MmugDNA.34025.1.S1_at   | MmugDNA.34025.1 | 3.12  | 3.02  | 0.17 | 0.04 | 1.07  | 0.853756 | 0.649565 | 0.948346 | 0.795    |
| MmugDNA.34028.1.S1_at   | MmugDNA.34028.1 | 8.8   | 8.76  | 0.48 | 0.13 | 1.03  | 0.613618 | 0.070833 | 0.843603 | 0.31231  |

|                         |                 |       |       |      |      |       |          |          |          |          |
|-------------------------|-----------------|-------|-------|------|------|-------|----------|----------|----------|----------|
| MmugDNA.3403.1.S1_at    | MmugDNA.3403.1  | 4.96  | 4.96  | 0.29 | 0.09 | 1.01  | 0.268401 | 0.113563 | 0.628807 | 0.379632 |
| MmugDNA.34031.1.S1_at   | MmugDNA.34031.1 | 6.62  | 6.39  | 0.13 | 0.09 | 1.17  | 0.045331 | 0.196276 | 0.376325 | 0.471236 |
| MmugDNA.34036.1.S1_at   | MmugDNA.34036.1 | 7.72  | 8.09  | 0.17 | 0.02 | -1.3  | 0.058868 | 0.427059 | 0.405539 | 0.649087 |
| MmugDNA.34037.1.S1_at   | MmugDNA.34037.1 | 7.11  | 6.87  | 0.1  | 0.05 | 1.19  | 0.057617 | 0.11003  | 0.402592 | 0.374163 |
| MmugDNA.34038.1.S1_at   | MmugDNA.34038.1 | 6.26  | 6.2   | 0.06 | 0.15 | 1.05  | 0.559086 | 0.773485 | 0.815903 | 0.868325 |
| MmugDNA.34039.1.S1_at   | MmugDNA.34039.1 | 4.88  | 4.69  | 0.2  | 0.13 | 1.14  | 0.166634 | 0.685606 | 0.539303 | 0.816542 |
| MmugDNA.3404.1.S1_at    | MmugDNA.3404.1  | 7.82  | 7.97  | 0.27 | 0.02 | -1.1  | 0.393575 | 0.55791  | 0.719354 | 0.735292 |
| MmugDNA.34041.1.S1_at   | MmugDNA.34041.1 | 9.29  | 9.26  | 0.1  | 0.03 | 1.02  | 0.201206 | 0.075192 | 0.573015 | 0.319384 |
| MmugDNA.34042.1.S1_at   | MmugDNA.34042.1 | 11.84 | 11.15 | 0.23 | 0.16 | 1.62  | 0.013152 | 0.00174  | 0.266951 | 0.062895 |
| MmugDNA.34043.1.S1_at   | MmugDNA.34043.1 | 3.42  | 3.88  | 0.21 | 0.3  | -1.37 | 0.210563 | 0.15701  | 0.581872 | 0.432467 |
| MmugDNA.34044.1.S1_at   | MmugDNA.34044.1 | 6.97  | 7.03  | 0.11 | 0.06 | -1.04 | 0.298584 | 0.793432 | 0.653176 | 0.880785 |
| MmugDNA.34045.1.S1_at   | MmugDNA.34045.1 | 4.95  | 4.95  | 0.05 | 0.17 | 1     | 0.525374 | 0.749415 | 0.796198 | 0.854404 |
| MmugDNA.34046.1.S1_at   | MmugDNA.34046.1 | 8.03  | 8.12  | 0.53 | 0.03 | -1.06 | 0.953307 | 0.93136  | 0.984409 | 0.961034 |
| MmugDNA.34047.1.S1_at   | MmugDNA.34047.1 | 2.66  | 2.68  | 0.13 | 0.04 | -1.02 | 0.965838 | 0.492096 | 0.988768 | 0.693442 |
| MmugDNA.34048.1.S1_at   | MmugDNA.34048.1 | 6.28  | 6.26  | 0.02 | 0.01 | 1.01  | 0.097604 | 0.829342 | 0.466533 | 0.901879 |
| MmugDNA.34049.1.S1_at   | MmugDNA.34049.1 | 10.07 | 10.99 | 1.07 | 0.08 | -1.89 | 0.21401  | 0.208198 | 0.584533 | 0.482086 |
| MmugDNA.34051.1.S1_at   | MmugDNA.34051.1 | 3.38  | 3.44  | 0.09 | 0.11 | -1.04 | 0.8263   | 0.787094 | 0.937736 | 0.876832 |
| MmugDNA.34052.1.S1_at   | MmugDNA.34052.1 | 4.56  | 4.56  | 0.26 | 0.2  | -1    | 0.557815 | 0.83676  | 0.815038 | 0.906703 |
| MmugDNA.34053.1.S1_at   | MmugDNA.34053.1 | 3.06  | 3.05  | 0.06 | 0.2  | 1.01  | 0.886729 | 0.393791 | 0.96068  | 0.626565 |
| MmugDNA.34054.1.S1_at   | MmugDNA.34054.1 | 3.52  | 3.47  | 0.13 | 0.03 | 1.03  | 0.693214 | 0.96298  | 0.880472 | 0.979319 |
| MmugDNA.34058.1.S1_at   | MmugDNA.34058.1 | 10.59 | 11.39 | 0.07 | 0.26 | -1.74 | 0.003674 | 0.0003   | 0.197111 | 0.034892 |
| MmugDNA.34059.1.S1_at   | MmugDNA.34059.1 | 3.55  | 3.71  | 0.84 | 1.07 | -1.12 | 0.906273 | 0.472286 | 0.968295 | 0.67994  |
| MmugDNA.34060.1.S1_at   | MmugDNA.34060.1 | 9.9   | 10.09 | 0.13 | 0.12 | -1.14 | 0.063021 | 0.538638 | 0.414551 | 0.723301 |
| MmugDNA.34060.1.S1_s_at | MmugDNA.34060.1 | 11.41 | 11.59 | 0.09 | 0.08 | -1.13 | 0.025016 | 0.509902 | 0.320402 | 0.704492 |
| MmugDNA.34061.1.S1_s_at | MmugDNA.34061.1 | 8.94  | 8.23  | 0.18 | 0.13 | 1.63  | 0.011669 | 0.002646 | 0.256146 | 0.076027 |
| MmugDNA.34062.1.S1_at   | MmugDNA.34062.1 | 5.47  | 5.2   | 0.21 | 0.2  | 1.2   | 0.409874 | 0.633152 | 0.730334 | 0.783969 |
| MmugDNA.34066.1.S1_at   | MmugDNA.34066.1 | 6.56  | 6.56  | 0.07 | 0.05 | 1     | 0.235759 | 0.733433 | 0.602824 | 0.845666 |
| MmugDNA.34069.1.S1_at   | MmugDNA.34069.1 | 7.6   | 7.4   | 0.04 | 0.03 | 1.15  | 0.00343  | 0.318597 | 0.194985 | 0.571258 |
| MmugDNA.3407.1.S1_at    | MmugDNA.3407.1  | 8.17  | 8.45  | 0.3  | 0.09 | -1.21 | 0.242784 | 0.22906  | 0.608808 | 0.501378 |
| MmugDNA.34072.1.S1_at   | MmugDNA.34072.1 | 5.21  | 5.29  | 0.27 | 0.1  | -1.06 | 0.60826  | 0.44453  | 0.841093 | 0.662072 |
| MmugDNA.34073.1.S1_at   | MmugDNA.34073.1 | 5.56  | 5.04  | 0.35 | 0.08 | 1.43  | 0.072049 | 0.108067 | 0.431899 | 0.371281 |
| MmugDNA.34074.1.S1_at   | MmugDNA.34074.1 | 3.71  | 3.79  | 0.22 | 0.09 | -1.06 | 0.666732 | 0.917207 | 0.868398 | 0.953758 |
| MmugDNA.34075.1.S1_at   | MmugDNA.34075.1 | 7.27  | 7.51  | 0.16 | 0    | -1.18 | 0.064915 | 0.038762 | 0.41922  | 0.241916 |
| MmugDNA.34077.1.S1_at   | MmugDNA.34077.1 | 7.46  | 7.14  | 0.12 | 0.12 | 1.25  | 0.024014 | 0.582077 | 0.317529 | 0.750784 |
| MmugDNA.34078.1.S1_at   | MmugDNA.34078.1 | 3.76  | 3.77  | 0.24 | 0.12 | -1.01 | 0.42942  | 0.496743 | 0.742163 | 0.696173 |
| MmugDNA.34079.1.S1_at   | MmugDNA.34079.1 | 5.76  | 5.42  | 0.06 | 0.05 | 1.26  | 0.001811 | 0.002084 | 0.167444 | 0.067486 |
| MmugDNA.34080.1.S1_at   | MmugDNA.34080.1 | 12.12 | 12.05 | 0.14 | 0.06 | 1.05  | 0.67873  | 0.036982 | 0.874119 | 0.236733 |
| MmugDNA.34081.1.S1_at   | MmugDNA.34081.1 | 7.73  | 8.65  | 0.42 | 0.29 | -1.89 | 0.074951 | 0.048721 | 0.435653 | 0.265744 |
| MmugDNA.34082.1.S1_at   | MmugDNA.34082.1 | 3.08  | 3.27  | 0.44 | 0.38 | -1.14 | 0.827658 | 0.94585  | 0.938069 | 0.969225 |
| MmugDNA.34083.1.S1_at   | MmugDNA.34083.1 | 6.72  | 6.63  | 0.37 | 0.09 | 1.07  | 0.950879 | 0.385746 | 0.983338 | 0.621079 |
| MmugDNA.34083.1.S1_s_at | MmugDNA.34083.1 | 5.68  | 5.27  | 0.43 | 0.25 | 1.32  | 0.335031 | 0.29041  | 0.680736 | 0.551169 |
| MmugDNA.34084.1.S1_at   | MmugDNA.34084.1 | 6.51  | 6.41  | 0.22 | 0.04 | 1.07  | 0.364519 | 0.452448 | 0.700603 | 0.667111 |
| MmugDNA.34084.1.S1_x_at | MmugDNA.34084.1 | 7.43  | 7.27  | 0.11 | 0.06 | 1.11  | 0.073203 | 0.25392  | 0.434039 | 0.522274 |

|                         |                 |       |       |      |      |       |          |          |          |          |
|-------------------------|-----------------|-------|-------|------|------|-------|----------|----------|----------|----------|
| MmugDNA.34086.1.S1_at   | MmugDNA.34086.1 | 6.05  | 6.29  | 0.52 | 0.44 | -1.18 | 0.463034 | 0.069832 | 0.761921 | 0.310353 |
| MmugDNA.34087.1.S1_at   | MmugDNA.34087.1 | 4.06  | 3.94  | 0.41 | 0.03 | 1.09  | 0.729116 | 0.859278 | 0.895623 | 0.919791 |
| MmugDNA.34088.1.S1_at   | MmugDNA.34088.1 | 7.72  | 8.46  | 0.46 | 0.39 | -1.67 | 0.241854 | 0.190697 | 0.607952 | 0.466141 |
| MmugDNA.3409.1.S1_at    | MmugDNA.3409.1  | 8.01  | 8.02  | 0.2  | 0.38 | -1.01 | 0.460594 | 0.557143 | 0.760274 | 0.734957 |
| MmugDNA.34090.1.S1_at   | MmugDNA.34090.1 | 3.83  | 3.72  | 0.11 | 0.08 | 1.08  | 0.314046 | 0.613078 | 0.665    | 0.770391 |
| MmugDNA.34091.1.S1_at   | MmugDNA.34091.1 | 2.71  | 2.71  | 0.11 | 0    | 1     | 0.373901 | 0.77818  | 0.705567 | 0.871209 |
| MmugDNA.34091.1.S1_s_at | MmugDNA.34091.1 | 5.98  | 5.57  | 0.16 | 0.18 | 1.32  | 0.091878 | 0.108093 | 0.460177 | 0.371281 |
| MmugDNA.34093.1.S1_at   | MmugDNA.34093.1 | 4.33  | 3.93  | 0.1  | 0.08 | 1.32  | 0.007409 | 0.003565 | 0.229049 | 0.085525 |
| MmugDNA.34094.1.S1_at   | MmugDNA.34094.1 | 5.86  | 5.41  | 0.24 | 0.2  | 1.36  | 0.03477  | 0.04529  | 0.350358 | 0.25714  |
| MmugDNA.34096.1.S1_at   | MmugDNA.34096.1 | 4.58  | 4.62  | 0.08 | 0.06 | -1.03 | 0.470402 | 0.802119 | 0.766153 | 0.886056 |
| MmugDNA.34099.1.S1_at   | MmugDNA.34099.1 | 10.56 | 9.56  | 0.24 | 0.11 | 2     | 0.00212  | 0.001034 | 0.174757 | 0.051305 |
| MmugDNA.34100.1.S1_at   | MmugDNA.34100.1 | 8.77  | 9.62  | 0.31 | 0.06 | -1.81 | 0.02581  | 0.007212 | 0.32273  | 0.11412  |
| MmugDNA.34101.1.S1_at   | MmugDNA.34101.1 | 5.8   | 6.73  | 0.67 | 0.2  | -1.91 | 0.170721 | 0.048001 | 0.543739 | 0.264109 |
| MmugDNA.34102.1.S1_at   | MmugDNA.34102.1 | 9.24  | 8.91  | 0.12 | 0.04 | 1.26  | 0.006302 | 0.020825 | 0.218177 | 0.180995 |
| MmugDNA.34103.1.S1_at   | MmugDNA.34103.1 | 3.68  | 4     | 0.47 | 0.11 | -1.25 | 0.28604  | 0.166131 | 0.64358  | 0.442694 |
| MmugDNA.34104.1.S1_at   | MmugDNA.34104.1 | 5.09  | 5.2   | 0.23 | 0.02 | -1.08 | 0.665145 | 0.792841 | 0.867812 | 0.880387 |
| MmugDNA.34106.1.S1_s_at | MmugDNA.34106.1 | 6.7   | 6.5   | 1.21 | 0.29 | 1.15  | 0.942393 | 0.502216 | 0.980289 | 0.70006  |
| MmugDNA.34109.1.S1_at   | MmugDNA.34109.1 | 3.58  | 3.72  | 0.21 | 0.15 | -1.1  | 0.69822  | 0.61875  | 0.882731 | 0.774185 |
| MmugDNA.3411.1.S1_at    | MmugDNA.3411.1  | 6.14  | 6.13  | 0.08 | 0.05 | 1     | 0.905937 | 0.716573 | 0.968196 | 0.835815 |
| MmugDNA.34110.1.S1_at   | MmugDNA.34110.1 | 6.37  | 6.46  | 0.2  | 0.26 | -1.07 | 0.332846 | 0.533358 | 0.679338 | 0.719567 |
| MmugDNA.34111.1.S1_s_at | MmugDNA.34111.1 | 11.28 | 12.21 | 0.11 | 0.17 | -1.9  | 0.001523 | 0.002585 | 0.161959 | 0.075213 |
| MmugDNA.34112.1.S1_at   | MmugDNA.34112.1 | 3.71  | 3.72  | 0.14 | 0.12 | -1.01 | 0.861356 | 0.300058 | 0.951266 | 0.558262 |
| MmugDNA.34113.1.S1_at   | MmugDNA.34113.1 | 9.19  | 8.93  | 0.38 | 0.11 | 1.19  | 0.387688 | 0.460052 | 0.714588 | 0.671989 |
| MmugDNA.34114.1.S1_at   | MmugDNA.34114.1 | 9.97  | 9.65  | 0.38 | 0.09 | 1.25  | 0.112125 | 0.450112 | 0.485224 | 0.665505 |
| MmugDNA.34115.1.S1_at   | MmugDNA.34115.1 | 4.57  | 4.54  | 0.07 | 0    | 1.02  | 0.715792 | 0.663189 | 0.88949  | 0.802857 |
| MmugDNA.34117.1.S1_at   | MmugDNA.34117.1 | 5.15  | 5.06  | 0.19 | 0.04 | 1.06  | 0.125869 | 0.198272 | 0.49972  | 0.473234 |
| MmugDNA.34118.1.S1_at   | MmugDNA.34118.1 | 7.77  | 7.67  | 0.57 | 0.24 | 1.07  | 0.60227  | 0.471131 | 0.838783 | 0.679183 |
| MmugDNA.3412.1.S1_at    | MmugDNA.3412.1  | 4.23  | 4.68  | 0.14 | 0.37 | -1.37 | 0.147473 | 0.389682 | 0.521578 | 0.623748 |
| MmugDNA.3412.1.S1_s_at  | MmugDNA.3412.1  | 3.08  | 3     | 0.15 | 0.11 | 1.06  | 0.692371 | 0.32379  | 0.880095 | 0.574609 |
| MmugDNA.34122.1.S1_at   | MmugDNA.34122.1 | 8.04  | 8.07  | 0.51 | 0.21 | -1.02 | 0.859289 | 0.909956 | 0.950341 | 0.949206 |
| MmugDNA.34124.1.S1_at   | MmugDNA.34124.1 | 7.2   | 7.23  | 0.18 | 0.18 | -1.03 | 0.779912 | 0.03026  | 0.918949 | 0.215828 |
| MmugDNA.34125.1.S1_at   | MmugDNA.34125.1 | 5     | 5.47  | 0.88 | 1.15 | -1.38 | 0.499295 | 0.04954  | 0.781984 | 0.267514 |
| MmugDNA.34126.1.S1_at   | MmugDNA.34126.1 | 7.63  | 7.17  | 0.13 | 0.15 | 1.37  | 0.009419 | 0.000364 | 0.241943 | 0.037273 |
| MmugDNA.34127.1.S1_at   | MmugDNA.34127.1 | 5.12  | 4.82  | 0.05 | 0.1  | 1.23  | 0.012873 | 0.075604 | 0.265776 | 0.32003  |
| MmugDNA.34128.1.S1_at   | MmugDNA.34128.1 | 5.71  | 5.41  | 0.12 | 0.1  | 1.23  | 0.138222 | 0.08212  | 0.513671 | 0.330937 |
| MmugDNA.34129.1.S1_at   | MmugDNA.34129.1 | 5.07  | 5.26  | 0.53 | 0.25 | -1.14 | 0.864831 | 0.098908 | 0.952483 | 0.357049 |
| MmugDNA.3413.1.S1_at    | MmugDNA.3413.1  | 6.61  | 6.66  | 0.23 | 0.18 | -1.03 | 0.803506 | 0.458243 | 0.928425 | 0.671091 |
| MmugDNA.34130.1.S1_at   | MmugDNA.34130.1 | 6.52  | 6.46  | 0.17 | 0.08 | 1.04  | 0.532891 | 0.533363 | 0.800571 | 0.719567 |
| MmugDNA.34131.1.S1_at   | MmugDNA.34131.1 | 3.53  | 3.34  | 0.12 | 0.2  | 1.14  | 0.45391  | 0.54768  | 0.756364 | 0.7286   |
| MmugDNA.34132.1.S1_at   | MmugDNA.34132.1 | 4.94  | 5.1   | 0.25 | 0.3  | -1.12 | 0.882664 | 0.962234 | 0.95933  | 0.978768 |
| MmugDNA.34134.1.S1_at   | MmugDNA.34134.1 | 9.26  | 9.12  | 0.67 | 0.07 | 1.1   | 0.285965 | 0.008072 | 0.643508 | 0.119402 |
| MmugDNA.34137.1.S1_at   | MmugDNA.34137.1 | 5.21  | 5.1   | 0.05 | 0.2  | 1.08  | 0.964889 | 0.840791 | 0.988452 | 0.909237 |
| MmugDNA.34138.1.S1_at   | MmugDNA.34138.1 | 3.76  | 3.75  | 0.17 | 0.23 | 1     | 0.346028 | 0.426134 | 0.687873 | 0.648331 |



|                         |                 |       |       |      |      |       |          |          |          |          |
|-------------------------|-----------------|-------|-------|------|------|-------|----------|----------|----------|----------|
| MmugDNA.34139.1.S1_at   | MmugDNA.34139.1 | 4.13  | 3.37  | 0.52 | 0.2  | 1.69  | 0.050822 | 0.043707 | 0.388085 | 0.253799 |
| MmugDNA.3414.1.S1_at    | MmugDNA.3414.1  | 4.43  | 4.31  | 0.15 | 0.09 | 1.09  | 0.241075 | 0.264144 | 0.607331 | 0.530214 |
| MmugDNA.34140.1.S1_at   | MmugDNA.34140.1 | 4.27  | 4.26  | 0.16 | 0.05 | 1.01  | 0.614041 | 0.642576 | 0.843784 | 0.790343 |
| MmugDNA.34141.1.S1_at   | MmugDNA.34141.1 | 4.27  | 4.06  | 0.03 | 0.06 | 1.15  | 0.003471 | 0.003704 | 0.195142 | 0.086769 |
| MmugDNA.34142.1.S1_at   | MmugDNA.34142.1 | 11.45 | 11.6  | 0.78 | 0.58 | -1.11 | 0.783678 | 0.268862 | 0.920386 | 0.534319 |
| MmugDNA.34146.1.S1_at   | MmugDNA.34146.1 | 7.02  | 6.84  | 0.18 | 0.16 | 1.13  | 0.537387 | 0.844446 | 0.802735 | 0.911482 |
| MmugDNA.34147.1.S1_at   | MmugDNA.34147.1 | 3.41  | 3.41  | 0.63 | 0.1  | -1    | 0.601305 | 0.670914 | 0.838121 | 0.807629 |
| MmugDNA.34149.1.S1_at   | MmugDNA.34149.1 | 3.09  | 3.02  | 0.07 | 0.23 | 1.05  | 0.868794 | 0.346978 | 0.954083 | 0.591769 |
| MmugDNA.3415.1.S1_s_at  | MmugDNA.3415.1  | 9.69  | 9.52  | 0.12 | 0.12 | 1.12  | 0.134514 | 0.344253 | 0.508462 | 0.589762 |
| MmugDNA.34150.1.S1_s_at | MmugDNA.34150.1 | 12.09 | 11.25 | 0.33 | 0.14 | 1.79  | 0.01552  | 0.000688 | 0.282681 | 0.044166 |
| MmugDNA.34152.1.S1_at   | MmugDNA.34152.1 | 8.78  | 8.69  | 0.07 | 0.28 | -1.06 | 0.542941 | 0.671823 | 0.806071 | 0.808157 |
| MmugDNA.34154.1.S1_at   | MmugDNA.34154.1 | 2.91  | 2.88  | 0.24 | 0.08 | 1.02  | 0.258094 | 0.769799 | 0.621857 | 0.866339 |
| MmugDNA.34155.1.S1_at   | MmugDNA.34155.1 | 11.81 | 11.98 | 0.53 | 0.07 | -1.12 | 0.933478 | 0.957042 | 0.977466 | 0.975699 |
| MmugDNA.34156.1.S1_at   | MmugDNA.34156.1 | 4.16  | 4.34  | 0.1  | 0.02 | -1.14 | 0.10319  | 0.108701 | 0.473988 | 0.372228 |
| MmugDNA.34157.1.S1_at   | MmugDNA.34157.1 | 4.4   | 4.3   | 0.2  | 0.13 | 1.07  | 0.670579 | 0.545731 | 0.869943 | 0.727653 |
| MmugDNA.34158.1.S1_at   | MmugDNA.34158.1 | 4.51  | 4.45  | 0.36 | 0.21 | 1.04  | 0.95155  | 0.810633 | 0.983692 | 0.890812 |
| MmugDNA.34159.1.S1_at   | MmugDNA.34159.1 | 3.24  | 3.02  | 0.58 | 0.06 | 1.17  | 0.185589 | 0.265219 | 0.558594 | 0.531172 |
| MmugDNA.34161.1.S1_at   | MmugDNA.34161.1 | 4.34  | 4.31  | 0.19 | 0.06 | 1.03  | 0.206344 | 0.208473 | 0.578142 | 0.482421 |
| MmugDNA.34162.1.S1_at   | MmugDNA.34162.1 | 6.4   | 6.15  | 0.14 | 0.28 | 1.19  | 0.233295 | 0.097048 | 0.600774 | 0.354531 |
| MmugDNA.34163.1.S1_at   | MmugDNA.34163.1 | 6.75  | 6.29  | 0.31 | 0.11 | 1.38  | 0.03932  | 0.037904 | 0.361498 | 0.239203 |
| MmugDNA.34164.1.S1_at   | MmugDNA.34164.1 | 7.02  | 6.12  | 0.63 | 0.28 | 1.87  | 0.058074 | 0.044515 | 0.40369  | 0.255346 |
| MmugDNA.34166.1.S1_at   | MmugDNA.34166.1 | 6.6   | 6.78  | 0.2  | 0.15 | -1.13 | 0.286891 | 0.406303 | 0.643994 | 0.63426  |
| MmugDNA.34167.1.S1_at   | MmugDNA.34167.1 | 2.93  | 3.1   | 0.03 | 0.29 | -1.12 | 0.384818 | 0.429566 | 0.71223  | 0.650961 |
| MmugDNA.34169.1.S1_at   | MmugDNA.34169.1 | 11.36 | 10.49 | 0.19 | 0.03 | 1.82  | 0.002759 | 0.00031  | 0.185352 | 0.035145 |
| MmugDNA.3417.1.S1_at    | MmugDNA.3417.1  | 9.87  | 9.71  | 0.56 | 0.18 | 1.12  | 0.725393 | 0.081625 | 0.893578 | 0.329824 |
| MmugDNA.34170.1.S1_at   | MmugDNA.34170.1 | 8.02  | 7.66  | 0.21 | 0.15 | 1.28  | 0.176987 | 0.192873 | 0.550088 | 0.468379 |
| MmugDNA.34172.1.S1_at   | MmugDNA.34172.1 | 3.76  | 3.56  | 0.13 | 0.01 | 1.15  | 0.064126 | 0.023491 | 0.417591 | 0.19207  |
| MmugDNA.34173.1.S1_at   | MmugDNA.34173.1 | 5.37  | 5.26  | 0.15 | 0.1  | 1.08  | 0.906736 | 0.393947 | 0.968356 | 0.6267   |
| MmugDNA.34175.1.S1_at   | MmugDNA.34175.1 | 6.62  | 6.22  | 1.54 | 0.27 | 1.32  | 0.696825 | 0.264994 | 0.882175 | 0.530973 |
| MmugDNA.34176.1.S1_at   | MmugDNA.34176.1 | 4.35  | 4.23  | 0.09 | 0.08 | 1.09  | 0.123179 | 0.646875 | 0.496589 | 0.793178 |
| MmugDNA.34177.1.S1_at   | MmugDNA.34177.1 | 7.59  | 7.36  | 0.14 | 0    | 1.17  | 0.053376 | 0.004271 | 0.394644 | 0.091847 |
| MmugDNA.34178.1.S1_at   | MmugDNA.34178.1 | 6.32  | 6.21  | 0.2  | 0.31 | 1.09  | 0.12649  | 0.643897 | 0.500327 | 0.791202 |
| MmugDNA.34179.1.S1_at   | MmugDNA.34179.1 | 3.13  | 3.49  | 0.12 | 0.17 | -1.28 | 0.088508 | 0.092132 | 0.45606  | 0.347799 |
| MmugDNA.34180.1.S1_at   | MmugDNA.34180.1 | 4.41  | 4.97  | 0.28 | 0.22 | -1.48 | 0.068717 | 0.069568 | 0.426    | 0.309848 |
| MmugDNA.34181.1.S1_at   | MmugDNA.34181.1 | 9.48  | 9.36  | 0.77 | 0.14 | 1.08  | 0.233202 | 0.07155  | 0.600731 | 0.313714 |
| MmugDNA.34182.1.S1_at   | MmugDNA.34182.1 | 6.7   | 6.59  | 0.16 | 0.16 | 1.08  | 0.735186 | 0.810692 | 0.898588 | 0.890836 |
| MmugDNA.34183.1.S1_at   | MmugDNA.34183.1 | 3.88  | 3.84  | 0.26 | 0.17 | 1.02  | 0.655307 | 0.779707 | 0.863101 | 0.872303 |
| MmugDNA.34185.1.S1_at   | MmugDNA.34185.1 | 6.48  | 6.34  | 0.14 | 0.02 | 1.1   | 0.142961 | 0.18209  | 0.518179 | 0.45857  |
| MmugDNA.34186.1.S1_at   | MmugDNA.34186.1 | 5.39  | 5.35  | 0.14 | 0.19 | 1.03  | 0.33742  | 0.418237 | 0.682344 | 0.642683 |
| MmugDNA.34187.1.S1_at   | MmugDNA.34187.1 | 10.65 | 10.51 | 0.24 | 0.36 | 1.1   | 0.309566 | 0.043024 | 0.661771 | 0.252067 |
| MmugDNA.34188.1.S1_at   | MmugDNA.34188.1 | 3.74  | 3.66  | 0.32 | 0.12 | 1.06  | 0.975164 | 0.985614 | 0.991912 | 0.991824 |
| MmugDNA.34189.1.S1_at   | MmugDNA.34189.1 | 4.93  | 4.67  | 0.13 | 0.09 | 1.19  | 0.112645 | 0.575081 | 0.486043 | 0.746309 |
| MmugDNA.3419.1.S1_at    | MmugDNA.3419.1  | 6.51  | 6.32  | 0.21 | 0.05 | 1.15  | 0.132562 | 0.259555 | 0.506856 | 0.526469 |

|                         |                 |       |       |      |      |       |          |          |          |          |
|-------------------------|-----------------|-------|-------|------|------|-------|----------|----------|----------|----------|
| MmugDNA.34190.1.S1_at   | MmugDNA.34190.1 | 3.97  | 3.99  | 0.23 | 0.03 | -1.01 | 0.519313 | 0.137873 | 0.793113 | 0.410838 |
| MmugDNA.34191.1.S1_at   | MmugDNA.34191.1 | 5.18  | 5.2   | 0.08 | 0.04 | -1.01 | 0.348966 | 0.770685 | 0.690079 | 0.866801 |
| MmugDNA.34192.1.S1_at   | MmugDNA.34192.1 | 6.81  | 7.81  | 0.88 | 0.07 | -2.01 | 0.125977 | 0.095548 | 0.49972  | 0.352627 |
| MmugDNA.34193.1.S1_at   | MmugDNA.34193.1 | 10.72 | 10.82 | 0.15 | 0.02 | -1.07 | 0.863794 | 0.717429 | 0.952043 | 0.836425 |
| MmugDNA.34194.1.S1_at   | MmugDNA.34194.1 | 8.78  | 7.79  | 0.42 | 0.04 | 1.99  | 0.017395 | 0.096491 | 0.291474 | 0.35409  |
| MmugDNA.34195.1.S1_at   | MmugDNA.34195.1 | 6.02  | 5.83  | 0.07 | 0.21 | 1.14  | 0.862907 | 0.410479 | 0.951792 | 0.637335 |
| MmugDNA.34196.1.S1_at   | MmugDNA.34196.1 | 4.31  | 4.19  | 0.26 | 0.1  | 1.09  | 0.509356 | 0.786344 | 0.787587 | 0.876293 |
| MmugDNA.34198.1.S1_at   | MmugDNA.34198.1 | 5.55  | 5.41  | 0.33 | 0.04 | 1.1   | 0.454997 | 0.737819 | 0.757301 | 0.848096 |
| MmugDNA.34199.1.S1_at   | MmugDNA.34199.1 | 3.95  | 3.8   | 0.11 | 0.1  | 1.11  | 0.394663 | 0.541389 | 0.719972 | 0.7249   |
| MmugDNA.342.1.S1_at     | MmugDNA.342.1   | 6.41  | 7.18  | 0.71 | 0.45 | -1.71 | 0.314881 | 0.492477 | 0.665581 | 0.693583 |
| MmugDNA.34200.1.S1_at   | MmugDNA.34200.1 | 8.9   | 8.41  | 1.49 | 0.3  | -1.41 | 0.558786 | 0.064948 | 0.81569  | 0.300855 |
| MmugDNA.34201.1.S1_s_at | MmugDNA.34201.1 | 3.29  | 3.27  | 0.07 | 0.02 | 1.01  | 0.904671 | 0.328594 | 0.96793  | 0.578151 |
| MmugDNA.34202.1.S1_at   | MmugDNA.34202.1 | 5.92  | 6.19  | 0.4  | 0.13 | -1.21 | 0.441614 | 0.483984 | 0.749468 | 0.688262 |
| MmugDNA.34203.1.S1_at   | MmugDNA.34203.1 | 3.57  | 3.62  | 0.21 | 0.13 | -1.04 | 0.291248 | 0.354913 | 0.647741 | 0.597466 |
| MmugDNA.34205.1.S1_at   | MmugDNA.34205.1 | 6.96  | 6.7   | 0.57 | 0.2  | 1.2   | 0.250061 | 0.21504  | 0.615476 | 0.488898 |
| MmugDNA.34206.1.S1_at   | MmugDNA.34206.1 | 6.02  | 5.99  | 0.06 | 0.7  | 1.02  | 0.964548 | 0.998814 | 0.988371 | 0.999367 |
| MmugDNA.34207.1.S1_at   | MmugDNA.34207.1 | 5.2   | 5.49  | 0.42 | 0.18 | -1.22 | 0.865411 | 0.398777 | 0.952628 | 0.629482 |
| MmugDNA.34208.1.S1_at   | MmugDNA.34208.1 | 3.34  | 3.32  | 0.11 | 0.1  | 1.01  | 0.495671 | 0.661658 | 0.780125 | 0.801903 |
| MmugDNA.3421.1.S1_at    | MmugDNA.3421.1  | 6.17  | 6.03  | 0.14 | 0.1  | 1.1   | 0.122214 | 0.229324 | 0.495677 | 0.501527 |
| MmugDNA.34210.1.S1_at   | MmugDNA.34210.1 | 7.2   | 8.49  | 0.92 | 0.31 | -2.45 | 0.074971 | 0.142658 | 0.435663 | 0.416389 |
| MmugDNA.34211.1.S1_at   | MmugDNA.34211.1 | 4.68  | 4.38  | 0.22 | 0.1  | 1.23  | 0.04282  | 0.060828 | 0.370419 | 0.293348 |
| MmugDNA.34212.1.S1_at   | MmugDNA.34212.1 | 4.73  | 4.71  | 0.36 | 0.18 | 1.02  | 0.51689  | 0.17963  | 0.79167  | 0.456062 |
| MmugDNA.34213.1.S1_at   | MmugDNA.34213.1 | 9.04  | 7.87  | 0.64 | 0.23 | 2.25  | 0.039289 | 0.026677 | 0.361498 | 0.204238 |
| MmugDNA.34214.1.S1_at   | MmugDNA.34214.1 | 4.29  | 4.63  | 0.08 | 0.22 | -1.27 | 0.077037 | 0.096318 | 0.438911 | 0.353798 |
| MmugDNA.34215.1.S1_at   | MmugDNA.34215.1 | 4.71  | 5.09  | 0.42 | 0.13 | -1.3  | 0.29577  | 0.127165 | 0.651408 | 0.397922 |
| MmugDNA.34217.1.S1_at   | MmugDNA.34217.1 | 4.03  | 4.03  | 0.05 | 0.07 | -1    | 0.674777 | 0.398138 | 0.872212 | 0.629206 |
| MmugDNA.34218.1.S1_at   | MmugDNA.34218.1 | 2.8   | 2.63  | 0.47 | 0.12 | 1.12  | 0.299249 | 0.342969 | 0.653572 | 0.588786 |
| MmugDNA.34219.1.S1_at   | MmugDNA.34219.1 | 5.61  | 5.3   | 0.24 | 0.11 | 1.23  | 0.100675 | 0.110786 | 0.471575 | 0.375046 |
| MmugDNA.3422.1.S1_at    | MmugDNA.3422.1  | 3.65  | 3.7   | 0.12 | 0.01 | -1.03 | 0.80364  | 0.960899 | 0.92854  | 0.977791 |
| MmugDNA.34220.1.S1_at   | MmugDNA.34220.1 | 4.78  | 4.7   | 0.53 | 0.06 | 1.06  | 0.727995 | 0.704338 | 0.894913 | 0.828435 |
| MmugDNA.34221.1.S1_at   | MmugDNA.34221.1 | 3.5   | 3.5   | 0.06 | 0.1  | 1     | 0.500799 | 0.317758 | 0.782991 | 0.570922 |
| MmugDNA.34223.1.S1_at   | MmugDNA.34223.1 | 4.61  | 4.53  | 0.21 | 0.12 | 1.06  | 0.674818 | 0.290287 | 0.872212 | 0.551169 |
| MmugDNA.34224.1.S1_at   | MmugDNA.34224.1 | 9.23  | 9.43  | 0.2  | 0.04 | -1.14 | 0.646253 | 0.873241 | 0.859027 | 0.92788  |
| MmugDNA.34225.1.S1_at   | MmugDNA.34225.1 | 5.98  | 5.97  | 0.12 | 0.08 | 1     | 0.365336 | 0.260233 | 0.701002 | 0.526807 |
| MmugDNA.34226.1.S1_at   | MmugDNA.34226.1 | 11.64 | 11.49 | 4.05 | 0.23 | 1.11  | 0.415016 | 0.175649 | 0.733489 | 0.452211 |
| MmugDNA.34228.1.S1_at   | MmugDNA.34228.1 | 4.64  | 4.64  | 0.15 | 0.16 | 1     | 0.296253 | 0.564813 | 0.651907 | 0.739427 |
| MmugDNA.34229.1.S1_at   | MmugDNA.34229.1 | 2.84  | 2.83  | 0.06 | 0.61 | 1.01  | 0.359501 | 0.517387 | 0.697304 | 0.709493 |
| MmugDNA.34230.1.S1_at   | MmugDNA.34230.1 | 10.92 | 9.97  | 0.64 | 0.16 | 1.93  | 0.213267 | 0.294018 | 0.583803 | 0.553909 |
| MmugDNA.34231.1.S1_at   | MmugDNA.34231.1 | 6.24  | 6.35  | 0.09 | 0.09 | -1.08 | 0.109936 | 0.087179 | 0.482728 | 0.340133 |
| MmugDNA.34232.1.S1_at   | MmugDNA.34232.1 | 6.7   | 6.18  | 1.47 | 0.24 | 1.43  | 0.834839 | 0.944787 | 0.940758 | 0.968794 |
| MmugDNA.34234.1.S1_at   | MmugDNA.34234.1 | 4.97  | 4.43  | 0.09 | 0.54 | 1.45  | 0.118728 | 0.064707 | 0.492161 | 0.300314 |
| MmugDNA.34235.1.S1_at   | MmugDNA.34235.1 | 5.37  | 5.46  | 0.89 | 0.27 | -1.06 | 0.467912 | 0.629959 | 0.764607 | 0.782031 |
| MmugDNA.34236.1.S1_at   | MmugDNA.34236.1 | 4.43  | 4.75  | 0.12 | 0.29 | -1.24 | 0.120162 | 0.425217 | 0.493466 | 0.647647 |

|                         |                 |       |       |      |      |       |          |          |          |          |
|-------------------------|-----------------|-------|-------|------|------|-------|----------|----------|----------|----------|
| MmugDNA.34237.1.S1_at   | MmugDNA.34237.1 | 7.07  | 7     | 0.23 | 0.07 | 1.05  | 0.708727 | 0.335274 | 0.886591 | 0.58304  |
| MmugDNA.34238.1.S1_at   | MmugDNA.34238.1 | 4.65  | 4.49  | 0.39 | 0.36 | 1.12  | 0.624275 | 0.92245  | 0.848622 | 0.956333 |
| MmugDNA.34239.1.S1_at   | MmugDNA.34239.1 | 4.77  | 4.6   | 0.14 | 0.18 | 1.13  | 0.598622 | 0.521216 | 0.836987 | 0.712304 |
| MmugDNA.3424.1.S1_s_at  | MmugDNA.3424.1  | 9.3   | 9.22  | 0.23 | 0.11 | 1.06  | 0.766334 | 0.787287 | 0.912101 | 0.876929 |
| MmugDNA.34242.1.S1_at   | MmugDNA.34242.1 | 4.95  | 4.8   | 0.12 | 0.04 | 1.11  | 0.212601 | 0.674032 | 0.583139 | 0.809503 |
| MmugDNA.34244.1.S1_at   | MmugDNA.34244.1 | 3.59  | 3.53  | 0.47 | 0.11 | 1.04  | 0.883297 | 0.76666  | 0.95964  | 0.864438 |
| MmugDNA.34246.1.S1_at   | MmugDNA.34246.1 | 4.89  | 4.35  | 1.12 | 0.36 | 1.45  | 0.539704 | 0.560718 | 0.80393  | 0.736921 |
| MmugDNA.34247.1.S1_at   | MmugDNA.34247.1 | 10.35 | 7.94  | 1.3  | 0.42 | 5.33  | 0.076599 | 0.006813 | 0.437977 | 0.111444 |
| MmugDNA.34248.1.S1_at   | MmugDNA.34248.1 | 7.43  | 7.15  | 0.39 | 0.23 | 1.21  | 0.251815 | 0.264548 | 0.616976 | 0.53051  |
| MmugDNA.34249.1.S1_at   | MmugDNA.34249.1 | 3.86  | 3.92  | 0.05 | 0.12 | -1.04 | 0.305726 | 0.504747 | 0.659117 | 0.701808 |
| MmugDNA.3425.1.S1_at    | MmugDNA.3425.1  | 9.87  | 10.09 | 0.58 | 0.19 | -1.17 | 0.424677 | 0.499095 | 0.739622 | 0.697988 |
| MmugDNA.34250.1.S1_at   | MmugDNA.34250.1 | 6.14  | 5.96  | 0.26 | 0.05 | 1.13  | 0.096396 | 0.169911 | 0.4651   | 0.446569 |
| MmugDNA.34251.1.S1_at   | MmugDNA.34251.1 | 7.89  | 6.53  | 1.47 | 0.19 | 2.57  | 0.505774 | 0.035519 | 0.785398 | 0.232735 |
| MmugDNA.34252.1.S1_at   | MmugDNA.34252.1 | 5.82  | 6.13  | 0.28 | 0.35 | -1.24 | 0.55695  | 0.934501 | 0.814405 | 0.962878 |
| MmugDNA.34253.1.S1_at   | MmugDNA.34253.1 | 4.22  | 4.5   | 0.21 | 0.21 | -1.21 | 0.12316  | 0.293489 | 0.496589 | 0.553445 |
| MmugDNA.34255.1.S1_at   | MmugDNA.34255.1 | 5.93  | 6.03  | 0.45 | 0.18 | -1.08 | 0.435649 | 0.738184 | 0.745809 | 0.848203 |
| MmugDNA.34257.1.S1_at   | MmugDNA.34257.1 | 5.4   | 5.13  | 0.06 | 0.19 | 1.2   | 0.071245 | 0.365174 | 0.430589 | 0.605348 |
| MmugDNA.34258.1.S1_at   | MmugDNA.34258.1 | 10.18 | 10.32 | 0.41 | 0.1  | -1.09 | 0.463673 | 0.84731  | 0.762278 | 0.913262 |
| MmugDNA.3426.1.S1_at    | MmugDNA.3426.1  | 5.75  | 5.41  | 0.08 | 0.12 | 1.27  | 0.027087 | 0.154591 | 0.327141 | 0.429489 |
| MmugDNA.34261.1.S1_at   | MmugDNA.34261.1 | 4     | 3.87  | 0.17 | 0.16 | 1.09  | 0.315979 | 0.591439 | 0.666249 | 0.756977 |
| MmugDNA.34262.1.S1_at   | MmugDNA.34262.1 | 9.7   | 9.94  | 0.33 | 0.05 | -1.18 | 0.234763 | 0.188647 | 0.602111 | 0.464569 |
| MmugDNA.34263.1.S1_at   | MmugDNA.34263.1 | 8.23  | 8     | 0.18 | 0.1  | 1.17  | 0.069565 | 0.00595  | 0.427443 | 0.105513 |
| MmugDNA.34266.1.S1_at   | MmugDNA.34266.1 | 10.65 | 10.99 | 0.22 | 0.05 | -1.26 | 0.087118 | 0.257919 | 0.454785 | 0.525495 |
| MmugDNA.34267.1.S1_at   | MmugDNA.34267.1 | 5.56  | 5.45  | 0.01 | 0.06 | 1.08  | 0.088787 | 0.126441 | 0.456556 | 0.396995 |
| MmugDNA.34268.1.S1_at   | MmugDNA.34268.1 | 8.53  | 8.65  | 0.77 | 0.11 | -1.09 | 0.278588 | 0.392519 | 0.637745 | 0.625813 |
| MmugDNA.34270.1.S1_at   | MmugDNA.34270.1 | 5.24  | 4.92  | 0.12 | 0.28 | 1.25  | 0.091426 | 0.091138 | 0.45929  | 0.345997 |
| MmugDNA.34271.1.S1_at   | MmugDNA.34271.1 | 4.28  | 4.33  | 0.22 | 0.13 | -1.03 | 0.758129 | 0.303765 | 0.908979 | 0.561174 |
| MmugDNA.34272.1.S1_s_at | MmugDNA.34272.1 | 6.88  | 6.95  | 0.18 | 0.46 | -1.05 | 0.519254 | 0.612005 | 0.793113 | 0.76972  |
| MmugDNA.34273.1.S1_at   | MmugDNA.34273.1 | 4.62  | 5.17  | 0.11 | 0.26 | -1.47 | 0.016972 | 0.10206  | 0.288969 | 0.362122 |
| MmugDNA.34274.1.S1_at   | MmugDNA.34274.1 | 4.16  | 4.16  | 0.1  | 0.16 | 1     | 0.618947 | 0.508828 | 0.846305 | 0.703867 |
| MmugDNA.34275.1.S1_at   | MmugDNA.34275.1 | 12.36 | 12.11 | 0.4  | 0.03 | 1.19  | 0.890196 | 0.929091 | 0.962239 | 0.959604 |
| MmugDNA.34276.1.S1_at   | MmugDNA.34276.1 | 3.02  | 3.64  | 0.15 | 0.62 | -1.53 | 0.203404 | 0.299501 | 0.574902 | 0.557918 |
| MmugDNA.34277.1.S1_at   | MmugDNA.34277.1 | 8.11  | 8.58  | 0.95 | 0.48 | -1.39 | 0.297511 | 0.076501 | 0.652791 | 0.321584 |
| MmugDNA.34278.1.S1_at   | MmugDNA.34278.1 | 5.99  | 5.93  | 0.24 | 0.01 | 1.04  | 0.718484 | 0.798759 | 0.890671 | 0.884072 |
| MmugDNA.34279.1.S1_at   | MmugDNA.34279.1 | 10.25 | 8.92  | 1.68 | 0.35 | 2.52  | 0.826243 | 0.553954 | 0.937734 | 0.732896 |
| MmugDNA.34281.1.S1_at   | MmugDNA.34281.1 | 5.63  | 5.2   | 0.36 | 0.05 | 1.35  | 0.123946 | 0.114326 | 0.497525 | 0.380835 |
| MmugDNA.34282.1.S1_at   | MmugDNA.34282.1 | 4.74  | 4.77  | 0.24 | 0.14 | -1.02 | 0.548305 | 0.88277  | 0.809677 | 0.93317  |
| MmugDNA.34284.1.S1_at   | MmugDNA.34284.1 | 6.27  | 5.93  | 0.34 | 0.22 | 1.26  | 0.265608 | 0.330859 | 0.626763 | 0.57958  |
| MmugDNA.34285.1.S1_at   | MmugDNA.34285.1 | 12.58 | 12.82 | 0.37 | 0.15 | -1.19 | 0.526411 | 0.253602 | 0.796544 | 0.521956 |
| MmugDNA.34286.1.S1_at   | MmugDNA.34286.1 | 7.71  | 7.61  | 0.03 | 0.19 | 1.07  | 0.254298 | 0.211754 | 0.618749 | 0.485757 |
| MmugDNA.34288.1.S1_at   | MmugDNA.34288.1 | 3.52  | 3.31  | 0.17 | 0.1  | 1.16  | 0.091812 | 0.03096  | 0.460177 | 0.217817 |
| MmugDNA.34289.1.S1_at   | MmugDNA.34289.1 | 5.19  | 5.09  | 0.3  | 0.05 | 1.07  | 0.515322 | 0.358903 | 0.79089  | 0.600291 |
| MmugDNA.3429.1.S1_at    | MmugDNA.3429.1  | 5.43  | 5.29  | 0.25 | 0.08 | 1.1   | 0.350477 | 0.371979 | 0.691263 | 0.6108   |

|                         |                 |       |       |      |      |       |          |          |          |          |
|-------------------------|-----------------|-------|-------|------|------|-------|----------|----------|----------|----------|
| MmugDNA.34291.1.S1_at   | MmugDNA.34291.1 | 13.16 | 13.1  | 0.16 | 0.14 | 1.04  | 0.312586 | 0.116373 | 0.664138 | 0.383671 |
| MmugDNA.34294.1.S1_at   | MmugDNA.34294.1 | 5.27  | 5.56  | 0.16 | 0.12 | -1.22 | 0.33461  | 0.255525 | 0.680478 | 0.523538 |
| MmugDNA.34295.1.S1_at   | MmugDNA.34295.1 | 3.23  | 3.17  | 0.09 | 0.17 | 1.04  | 0.830636 | 0.698054 | 0.939392 | 0.824584 |
| MmugDNA.34296.1.S1_at   | MmugDNA.34296.1 | 7.47  | 7.19  | 0.75 | 0.02 | 1.21  | 0.730185 | 0.080456 | 0.895994 | 0.328159 |
| MmugDNA.34297.1.S1_at   | MmugDNA.34297.1 | 4.05  | 3.85  | 0.13 | 0.02 | 1.15  | 0.082404 | 0.04734  | 0.447257 | 0.262303 |
| MmugDNA.34298.1.S1_at   | MmugDNA.34298.1 | 4.67  | 4.32  | 0.04 | 0.04 | 1.27  | 0.000703 | 0.002075 | 0.147476 | 0.067389 |
| MmugDNA.34299.1.S1_at   | MmugDNA.34299.1 | 3.1   | 2.93  | 0.14 | 0.08 | 1.13  | 0.17648  | 0.163673 | 0.549512 | 0.439841 |
| MmugDNA.343.1.S1_at     | MmugDNA.343.1   | 6.46  | 6.43  | 0.21 | 0.1  | 1.02  | 0.995715 | 0.710828 | 0.998312 | 0.832271 |
| MmugDNA.343.1.S1_s_at   | MmugDNA.343.1   | 6.19  | 6.27  | 0.33 | 0.06 | -1.05 | 0.621522 | 0.70338  | 0.847545 | 0.828007 |
| MmugDNA.3430.1.S1_at    | MmugDNA.3430.1  | 6.99  | 6.96  | 0.12 | 0.02 | 1.02  | 0.246941 | 0.572558 | 0.612544 | 0.744566 |
| MmugDNA.34300.1.S1_at   | MmugDNA.34300.1 | 8.67  | 9.69  | 0.29 | 0.08 | -2.03 | 0.002486 | 0.005839 | 0.178065 | 0.10467  |
| MmugDNA.34301.1.S1_at   | MmugDNA.34301.1 | 4.56  | 4.06  | 0.17 | 0.05 | 1.42  | 0.015586 | 0.212849 | 0.282748 | 0.486774 |
| MmugDNA.34302.1.S1_at   | MmugDNA.34302.1 | 4.51  | 4.72  | 0.35 | 0.27 | -1.16 | 0.939424 | 0.995432 | 0.979532 | 0.997149 |
| MmugDNA.34303.1.S1_at   | MmugDNA.34303.1 | 5.62  | 6.98  | 1.22 | 0.39 | -2.57 | 0.199234 | 0.323283 | 0.570991 | 0.574408 |
| MmugDNA.34304.1.S1_at   | MmugDNA.34304.1 | 3.07  | 3.06  | 0.16 | 0.02 | 1.01  | 0.954808 | 0.195139 | 0.985012 | 0.470241 |
| MmugDNA.34305.1.S1_at   | MmugDNA.34305.1 | 6.26  | 5.93  | 0.19 | 0.1  | 1.26  | 0.118956 | 0.100933 | 0.49249  | 0.360509 |
| MmugDNA.34306.1.S1_at   | MmugDNA.34306.1 | 4.1   | 4.43  | 0.46 | 0.08 | -1.26 | 0.563019 | 0.928165 | 0.817962 | 0.959209 |
| MmugDNA.34307.1.S1_at   | MmugDNA.34307.1 | 5.89  | 5.66  | 0.26 | 0.41 | 1.18  | 0.775378 | 0.323611 | 0.916744 | 0.574525 |
| MmugDNA.34308.1.S1_at   | MmugDNA.34308.1 | 4.98  | 4.19  | 0.86 | 0.27 | 1.73  | 0.207005 | 0.277888 | 0.578774 | 0.541664 |
| MmugDNA.34311.1.S1_at   | MmugDNA.34311.1 | 8.1   | 8.67  | 0.33 | 0.13 | -1.49 | 0.028963 | 0.008727 | 0.333482 | 0.12389  |
| MmugDNA.34312.1.S1_at   | MmugDNA.34312.1 | 3.69  | 3.49  | 0.38 | 0.06 | 1.15  | 0.256463 | 0.105027 | 0.620443 | 0.366726 |
| MmugDNA.34313.1.S1_at   | MmugDNA.34313.1 | 3.32  | 3.28  | 0.03 | 0.11 | 1.03  | 0.257617 | 0.034544 | 0.621338 | 0.229979 |
| MmugDNA.34314.1.S1_at   | MmugDNA.34314.1 | 8.41  | 7.36  | 0.22 | 0.26 | 2.07  | 0.004315 | 0.001757 | 0.198874 | 0.063134 |
| MmugDNA.34315.1.S1_at   | MmugDNA.34315.1 | 9.84  | 9.14  | 0.57 | 0.03 | 1.62  | 0.055978 | 0.037842 | 0.399441 | 0.238912 |
| MmugDNA.34316.1.S1_at   | MmugDNA.34316.1 | 11.65 | 11    | 0.4  | 0.06 | 1.57  | 0.025175 | 0.014899 | 0.320696 | 0.155137 |
| MmugDNA.34317.1.S1_at   | MmugDNA.34317.1 | 10.3  | 10.18 | 0.68 | 0.14 | 1.08  | 0.779968 | 0.927451 | 0.918949 | 0.958791 |
| MmugDNA.34318.1.S1_at   | MmugDNA.34318.1 | 6.71  | 6.82  | 0.24 | 0.11 | -1.08 | 0.885915 | 0.32307  | 0.960399 | 0.574351 |
| MmugDNA.34319.1.S1_at   | MmugDNA.34319.1 | 12.61 | 12.7  | 0.28 | 0.05 | -1.07 | 0.209766 | 0.154927 | 0.581302 | 0.429909 |
| MmugDNA.3432.1.S1_at    | MmugDNA.3432.1  | 12.66 | 12.83 | 0.27 | 0.02 | -1.13 | 0.145055 | 0.001453 | 0.520238 | 0.058079 |
| MmugDNA.34320.1.S1_at   | MmugDNA.34320.1 | 11.64 | 11.54 | 0.07 | 0.14 | 1.07  | 0.116098 | 0.026145 | 0.489554 | 0.202721 |
| MmugDNA.11828.1.S1_at   | MmugDNA.11828.1 | 11.04 | 11.01 | 0.08 | 0.1  | 1.02  | 0.462704 | 0.036512 | 0.761736 | 0.235526 |
| MmugDNA.11828.1.S1_s_at | MmugDNA.11828.1 | 10.93 | 10.81 | 0.04 | 0.12 | 1.09  | 0.113316 | 0.019815 | 0.486648 | 0.177045 |
| MmugDNA.34322.1.S1_at   | MmugDNA.34322.1 | 4.99  | 4.97  | 0.03 | 0.25 | 1.02  | 0.371908 | 0.08931  | 0.705567 | 0.343499 |
| MmugDNA.34323.1.S1_at   | MmugDNA.34323.1 | 5.43  | 5.41  | 0.15 | 0.1  | 1.01  | 0.1891   | 0.50837  | 0.560735 | 0.703589 |
| MmugDNA.34324.1.S1_at   | MmugDNA.34324.1 | 3.76  | 3.78  | 0.11 | 0.11 | -1.01 | 0.441378 | 0.557596 | 0.74926  | 0.735113 |
| MmugDNA.34325.1.S1_at   | MmugDNA.34325.1 | 6.86  | 6.77  | 0.16 | 0.02 | 1.06  | 0.429385 | 0.774261 | 0.742161 | 0.868735 |
| MmugDNA.34327.1.S1_at   | MmugDNA.34327.1 | 4.86  | 4.86  | 0.01 | 0.08 | -1    | 0.971813 | 0.891625 | 0.990806 | 0.938242 |
| MmugDNA.34329.1.S1_at   | MmugDNA.34329.1 | 4.54  | 4.6   | 0.05 | 0.09 | -1.04 | 0.946861 | 0.116684 | 0.981556 | 0.383864 |
| MmugDNA.34331.1.S1_at   | MmugDNA.34331.1 | 6.05  | 6.42  | 0.21 | 0.1  | -1.29 | 0.035738 | 0.009849 | 0.353107 | 0.130274 |
| MmugDNA.34334.1.S1_at   | MmugDNA.34334.1 | 7.18  | 6.93  | 0.12 | 0.07 | 1.2   | 0.126148 | 0.377672 | 0.499874 | 0.615086 |
| MmugDNA.34334.1.S1_x_at | MmugDNA.34334.1 | 6.92  | 6.78  | 0.09 | 0.09 | 1.11  | 0.08887  | 0.474037 | 0.456615 | 0.681181 |
| MmugDNA.34335.1.S1_at   | MmugDNA.34335.1 | 5.04  | 4.93  | 0.74 | 0.56 | 1.07  | 0.574362 | 0.783214 | 0.824006 | 0.874547 |
| MmugDNA.34336.1.S1_at   | MmugDNA.34336.1 | 5.72  | 6.24  | 1.25 | 0.12 | -1.43 | 0.639738 | 0.879163 | 0.856326 | 0.931052 |

|                         |                 |       |       |      |      |       |          |          |          |          |
|-------------------------|-----------------|-------|-------|------|------|-------|----------|----------|----------|----------|
| MmugDNA.34337.1.S1_at   | MmugDNA.34337.1 | 3.46  | 3.26  | 0.23 | 0.09 | 1.14  | 0.607021 | 0.528458 | 0.840743 | 0.716643 |
| MmugDNA.34339.1.S1_at   | MmugDNA.34339.1 | 3.73  | 3.65  | 0.09 | 0.07 | 1.06  | 0.144179 | 0.121325 | 0.519528 | 0.390351 |
| MmugDNA.34341.1.S1_at   | MmugDNA.34341.1 | 4.84  | 5.63  | 0.29 | 0.38 | -1.73 | 0.070404 | 0.076359 | 0.429187 | 0.321368 |
| MmugDNA.34342.1.S1_at   | MmugDNA.34342.1 | 3.93  | 3.96  | 0.12 | 0.06 | -1.02 | 0.340316 | 0.34432  | 0.684511 | 0.589762 |
| MmugDNA.34343.1.S1_at   | MmugDNA.34343.1 | 8.64  | 7.72  | 1.18 | 0.41 | 1.89  | 0.231903 | 0.278241 | 0.599694 | 0.541916 |
| MmugDNA.34344.1.S1_at   | MmugDNA.34344.1 | 4.7   | 4.69  | 0.12 | 0.03 | 1     | 0.737535 | 0.474288 | 0.899564 | 0.68135  |
| MmugDNA.34345.1.S1_at   | MmugDNA.34345.1 | 5.75  | 5.46  | 0.28 | 0.19 | 1.22  | 0.127576 | 0.23923  | 0.501756 | 0.509935 |
| MmugDNA.34346.1.S1_at   | MmugDNA.34346.1 | 5.96  | 5.68  | 0.18 | 0.19 | 1.21  | 0.098533 | 0.147066 | 0.467967 | 0.421208 |
| MmugDNA.34347.1.S1_at   | MmugDNA.34347.1 | 8.49  | 8.02  | 0.14 | 0.14 | 1.38  | 0.056383 | 0.191597 | 0.400095 | 0.466918 |
| MmugDNA.34347.1.S1_s_at | MmugDNA.34347.1 | 8.29  | 8.06  | 0.15 | 0.11 | 1.17  | 0.042783 | 0.062629 | 0.370349 | 0.297022 |
| MmugDNA.34348.1.S1_at   | MmugDNA.34348.1 | 9.02  | 9.69  | 0.36 | 0.29 | -1.58 | 0.339598 | 0.600693 | 0.683866 | 0.762238 |
| MmugDNA.34349.1.S1_at   | MmugDNA.34349.1 | 3.8   | 3.85  | 0.53 | 0.14 | -1.03 | 0.565212 | 0.38962  | 0.819139 | 0.623668 |
| MmugDNA.34350.1.S1_at   | MmugDNA.34350.1 | 3.9   | 3.81  | 0.04 | 0.17 | 1.06  | 0.777382 | 0.210944 | 0.917594 | 0.484934 |
| MmugDNA.34351.1.S1_at   | MmugDNA.34351.1 | 3.98  | 3.99  | 0.06 | 0.08 | -1.01 | 0.433378 | 0.560377 | 0.744486 | 0.736645 |
| MmugDNA.34352.1.S1_at   | MmugDNA.34352.1 | 5.19  | 5.05  | 0.14 | 0.05 | 1.11  | 0.109253 | 0.39262  | 0.482109 | 0.625813 |
| MmugDNA.34354.1.S1_at   | MmugDNA.34354.1 | 4.55  | 5.94  | 0.4  | 0.29 | -2.64 | 0.01586  | 0.013171 | 0.284461 | 0.14735  |
| MmugDNA.34355.1.S1_at   | MmugDNA.34355.1 | 8.11  | 7.8   | 1.22 | 0.88 | 1.24  | 0.839225 | 0.416358 | 0.942609 | 0.641563 |
| MmugDNA.34357.1.S1_s_at | MmugDNA.34357.1 | 11.53 | 11.68 | 0.44 | 0.14 | -1.1  | 0.812069 | 0.215209 | 0.932046 | 0.488977 |
| MmugDNA.34358.1.S1_at   | MmugDNA.34358.1 | 7.77  | 8.25  | 0.82 | 0.16 | -1.4  | 0.313666 | 0.42563  | 0.664799 | 0.647993 |
| MmugDNA.34359.1.S1_at   | MmugDNA.34359.1 | 4.7   | 4.66  | 0.08 | 0.1  | 1.03  | 0.760321 | 0.923806 | 0.909959 | 0.957119 |
| MmugDNA.34360.1.S1_at   | MmugDNA.34360.1 | 8     | 8.06  | 0.63 | 0.52 | -1.04 | 0.753832 | 0.702299 | 0.907201 | 0.827417 |
| MmugDNA.34361.1.S1_at   | MmugDNA.34361.1 | 9.77  | 10.24 | 0.53 | 0.18 | -1.38 | 0.85548  | 0.411973 | 0.948888 | 0.638434 |
| MmugDNA.34362.1.S1_at   | MmugDNA.34362.1 | 6.35  | 6.3   | 0.5  | 0.25 | 1.03  | 0.664996 | 0.145339 | 0.867733 | 0.419365 |
| MmugDNA.34363.1.S1_at   | MmugDNA.34363.1 | 4.92  | 4.91  | 0.13 | 0.05 | 1.01  | 0.212562 | 0.223032 | 0.583093 | 0.495861 |
| MmugDNA.34365.1.S1_at   | MmugDNA.34365.1 | 5.11  | 5.19  | 0.11 | 0.02 | -1.06 | 0.158803 | 0.360465 | 0.531595 | 0.601534 |
| MmugDNA.34366.1.S1_at   | MmugDNA.34366.1 | 7.01  | 7.19  | 0.29 | 0.23 | -1.14 | 0.313781 | 0.214767 | 0.664877 | 0.488624 |
| MmugDNA.34367.1.S1_at   | MmugDNA.34367.1 | 4.74  | 4.46  | 0.23 | 0.11 | 1.21  | 0.133907 | 0.149069 | 0.50813  | 0.423434 |
| MmugDNA.34368.1.S1_at   | MmugDNA.34368.1 | 4.37  | 4.03  | 0.98 | 0.11 | 1.27  | 0.21858  | 0.213419 | 0.588313 | 0.48728  |
| MmugDNA.34369.1.S1_at   | MmugDNA.34369.1 | 5.98  | 5.97  | 0.17 | 0.07 | 1.01  | 0.640675 | 0.593415 | 0.856931 | 0.758267 |
| MmugDNA.3437.1.S1_at    | MmugDNA.3437.1  | 6.96  | 7.68  | 0.45 | 0.25 | -1.65 | 0.054195 | 0.115071 | 0.396156 | 0.381944 |
| MmugDNA.34370.1.S1_at   | MmugDNA.34370.1 | 5.77  | 5.78  | 0.14 | 0.05 | -1.01 | 0.406099 | 0.576251 | 0.727742 | 0.747148 |
| MmugDNA.34371.1.S1_s_at | MmugDNA.34371.1 | 13.66 | 13.66 | 0.14 | 0.11 | 1     | 0.51649  | 0.762021 | 0.791464 | 0.861597 |
| MmugDNA.34372.1.S1_at   | MmugDNA.34372.1 | 5.9   | 5.73  | 0.08 | 0.05 | 1.13  | 0.009378 | 0.133611 | 0.241869 | 0.405565 |
| MmugDNA.34373.1.S1_at   | MmugDNA.34373.1 | 4.07  | 3.92  | 0.22 | 0.17 | 1.1   | 0.998465 | 0.570097 | 0.999543 | 0.742887 |
| MmugDNA.34374.1.S1_at   | MmugDNA.34374.1 | 5.04  | 4.86  | 0.1  | 0.05 | 1.13  | 0.085465 | 0.064981 | 0.452653 | 0.300855 |
| MmugDNA.34375.1.S1_at   | MmugDNA.34375.1 | 9.34  | 9.7   | 0.29 | 0.09 | -1.28 | 0.098301 | 0.02983  | 0.467704 | 0.214378 |
| MmugDNA.11716.1.S1_s_at | MmugDNA.11716.1 | 11.75 | 12.16 | 0.27 | 0.05 | -1.33 | 0.033145 | 0.029512 | 0.346294 | 0.213486 |
| MmugDNA.34377.1.S1_at   | MmugDNA.34377.1 | 6.07  | 6.11  | 0.19 | 0.23 | -1.03 | 0.959801 | 0.080036 | 0.986946 | 0.327429 |
| MmugDNA.34378.1.S1_at   | MmugDNA.34378.1 | 5.6   | 5.67  | 0.18 | 0.12 | -1.05 | 0.784457 | 0.964782 | 0.920789 | 0.980435 |
| MmugDNA.34379.1.S1_at   | MmugDNA.34379.1 | 10.33 | 10.89 | 0.53 | 0.06 | -1.47 | 0.062264 | 0.029398 | 0.412841 | 0.213352 |
| MmugDNA.3438.1.S1_at    | MmugDNA.3438.1  | 4.95  | 6.02  | 1.12 | 0.23 | -2.09 | 0.247221 | 0.230952 | 0.612636 | 0.502584 |
| MmugDNA.34381.1.S1_at   | MmugDNA.34381.1 | 2.79  | 3.2   | 0.3  | 0.1  | -1.33 | 0.257386 | 0.355223 | 0.621083 | 0.597576 |
| MmugDNA.34383.1.S1_at   | MmugDNA.34383.1 | 3.46  | 3.32  | 0.03 | 0.08 | 1.1   | 0.196931 | 0.321213 | 0.567685 | 0.573137 |

|                         |                 |       |       |      |      |       |          |          |          |          |
|-------------------------|-----------------|-------|-------|------|------|-------|----------|----------|----------|----------|
| MmugDNA.34385.1.S1_at   | MmugDNA.34385.1 | 5.9   | 5.48  | 0.58 | 0.39 | 1.34  | 0.768828 | 0.29759  | 0.913289 | 0.556238 |
| MmugDNA.34386.1.S1_at   | MmugDNA.34386.1 | 9.84  | 9.2   | 0.57 | 0.05 | 1.55  | 0.394487 | 0.098667 | 0.719817 | 0.356751 |
| MmugDNA.34387.1.S1_at   | MmugDNA.34387.1 | 5.59  | 5.21  | 0.35 | 0.09 | 1.3   | 0.373486 | 0.749922 | 0.705567 | 0.854631 |
| MmugDNA.34388.1.S1_at   | MmugDNA.34388.1 | 5.35  | 5.4   | 0.03 | 0.2  | -1.03 | 0.23733  | 0.478041 | 0.604247 | 0.684055 |
| MmugDNA.3439.1.S1_at    | MmugDNA.3439.1  | 4.02  | 3.94  | 0.29 | 0.17 | 1.05  | 0.435849 | 0.469664 | 0.745934 | 0.678327 |
| MmugDNA.34390.1.S1_at   | MmugDNA.34390.1 | 3.3   | 3.31  | 0.02 | 0.22 | -1.01 | 0.872368 | 0.807634 | 0.955759 | 0.889237 |
| MmugDNA.34391.1.S1_at   | MmugDNA.34391.1 | 8.65  | 8.98  | 0.48 | 0.23 | -1.26 | 0.892611 | 0.989764 | 0.963196 | 0.994108 |
| MmugDNA.34392.1.S1_at   | MmugDNA.34392.1 | 4.1   | 4.09  | 0.12 | 0.03 | 1     | 0.884005 | 0.625156 | 0.959789 | 0.779025 |
| MmugDNA.34393.1.S1_at   | MmugDNA.34393.1 | 6.12  | 5.83  | 0.14 | 0.05 | 1.23  | 0.055411 | 0.043873 | 0.398621 | 0.254088 |
| MmugDNA.34394.1.S1_at   | MmugDNA.34394.1 | 4.24  | 4.79  | 0.09 | 0.4  | -1.46 | 0.264359 | 0.481421 | 0.626029 | 0.686436 |
| MmugDNA.34395.1.S1_at   | MmugDNA.34395.1 | 6.83  | 7.4   | 0.41 | 0.18 | -1.48 | 0.089041 | 0.070444 | 0.456872 | 0.311737 |
| MmugDNA.34396.1.S1_at   | MmugDNA.34396.1 | 5.3   | 5.25  | 0.02 | 0.03 | 1.03  | 0.095102 | 0.071424 | 0.464131 | 0.313555 |
| MmugDNA.34398.1.S1_at   | MmugDNA.34398.1 | 6.42  | 6.78  | 0.2  | 0.01 | -1.28 | 0.031849 | 0.01815  | 0.342614 | 0.169673 |
| MmugDNA.34399.1.S1_at   | MmugDNA.34399.1 | 8.04  | 8.23  | 0.46 | 0.17 | -1.15 | 0.578601 | 0.181306 | 0.826218 | 0.457834 |
| MmugDNA.344.1.S1_at     | MmugDNA.344.1   | 6.14  | 5.88  | 0.28 | 0.17 | 1.2   | 0.128725 | 0.082533 | 0.503453 | 0.33167  |
| MmugDNA.34400.1.S1_at   | MmugDNA.34400.1 | 7.92  | 7.51  | 0.08 | 0.11 | 1.33  | 0.004381 | 0.000755 | 0.198874 | 0.045364 |
| MmugDNA.34401.1.S1_at   | MmugDNA.34401.1 | 7.52  | 8.38  | 0.7  | 0.22 | -1.81 | 0.110563 | 0.142971 | 0.483651 | 0.416854 |
| MmugDNA.34403.1.S1_at   | MmugDNA.34403.1 | 3.93  | 3.79  | 0.17 | 0.14 | 1.11  | 0.586826 | 0.553696 | 0.831504 | 0.732777 |
| MmugDNA.34404.1.S1_at   | MmugDNA.34404.1 | 6.56  | 6.29  | 0.1  | 0.39 | 1.21  | 0.323069 | 0.406752 | 0.671928 | 0.634492 |
| MmugDNA.34404.1.S1_s_at | MmugDNA.34404.1 | 6.61  | 6.23  | 0.09 | 0.21 | 1.3   | 0.041173 | 0.181889 | 0.365734 | 0.45842  |
| MmugDNA.34406.1.S1_at   | MmugDNA.34406.1 | 3.46  | 3.44  | 0.03 | 0.12 | 1.01  | 0.94267  | 0.698702 | 0.98031  | 0.824944 |
| MmugDNA.34408.1.S1_at   | MmugDNA.34408.1 | 8.09  | 8.05  | 0.15 | 0.33 | 1.02  | 0.2168   | 0.513283 | 0.586817 | 0.706881 |
| MmugDNA.3441.1.S1_at    | MmugDNA.3441.1  | 4.31  | 3.67  | 0.13 | 0.4  | 1.56  | 0.1504   | 0.018377 | 0.523988 | 0.170499 |
| MmugDNA.34410.1.S1_at   | MmugDNA.34410.1 | 10.29 | 10.05 | 1.31 | 0.19 | 1.18  | 0.898805 | 0.942936 | 0.965641 | 0.967574 |
| MmugDNA.34411.1.S1_at   | MmugDNA.34411.1 | 7.75  | 7.58  | 0.3  | 0.12 | 1.12  | 0.881228 | 0.171499 | 0.958973 | 0.447895 |
| MmugDNA.34412.1.S1_at   | MmugDNA.34412.1 | 6.72  | 6.53  | 0.33 | 0.27 | 1.14  | 0.696595 | 0.930881 | 0.882169 | 0.960739 |
| MmugDNA.34413.1.S1_at   | MmugDNA.34413.1 | 5.14  | 5.05  | 0.06 | 0.09 | 1.06  | 0.097241 | 0.162117 | 0.46602  | 0.438267 |
| MmugDNA.34414.1.S1_at   | MmugDNA.34414.1 | 3.78  | 3.8   | 0.16 | 0.14 | -1.01 | 0.999708 | 0.251288 | 0.999942 | 0.519984 |
| MmugDNA.34416.1.S1_at   | MmugDNA.34416.1 | 5.27  | 5.56  | 0.18 | 0.25 | -1.22 | 0.327057 | 0.090689 | 0.674699 | 0.345151 |
| MmugDNA.34417.1.S1_at   | MmugDNA.34417.1 | 5.91  | 5.95  | 0.05 | 0.11 | -1.03 | 0.678332 | 0.81003  | 0.873961 | 0.890518 |
| MmugDNA.34418.1.S1_s_at | MmugDNA.34418.1 | 7.53  | 7.08  | 0.11 | 0.06 | 1.36  | 0.007042 | 0.017808 | 0.225336 | 0.168588 |
| MmugDNA.34419.1.S1_at   | MmugDNA.34419.1 | 7.04  | 6.93  | 0.15 | 0.12 | 1.08  | 0.685336 | 0.011428 | 0.8768   | 0.138437 |
| MmugDNA.3442.1.S1_at    | MmugDNA.3442.1  | 5.12  | 4.99  | 0.06 | 0.07 | 1.1   | 0.06844  | 0.432179 | 0.42564  | 0.652775 |
| MmugDNA.34421.1.S1_at   | MmugDNA.34421.1 | 3.42  | 3.42  | 0.03 | 0.04 | -1    | 0.914139 | 0.232304 | 0.970825 | 0.504031 |
| MmugDNA.34422.1.S1_at   | MmugDNA.34422.1 | 4.19  | 4.03  | 0.45 | 0.44 | 1.12  | 0.622874 | 0.408144 | 0.847967 | 0.635482 |
| MmugDNA.34423.1.S1_at   | MmugDNA.34423.1 | 4.73  | 4.73  | 0.08 | 0.16 | -1    | 0.950264 | 0.777373 | 0.983286 | 0.87064  |
| MmugDNA.34424.1.S1_at   | MmugDNA.34424.1 | 6.36  | 6.29  | 0.34 | 0.17 | 1.05  | 0.492475 | 0.106573 | 0.778293 | 0.369107 |
| MmugDNA.34425.1.S1_at   | MmugDNA.34425.1 | 3.81  | 3.8   | 0.08 | 0.01 | 1     | 0.370187 | 0.749562 | 0.704548 | 0.854499 |
| MmugDNA.34426.1.S1_at   | MmugDNA.34426.1 | 4.65  | 4.67  | 0.18 | 0.13 | -1.02 | 0.324997 | 0.440327 | 0.67293  | 0.658899 |
| MmugDNA.34427.1.S1_at   | MmugDNA.34427.1 | 4.22  | 3.82  | 0.32 | 0.18 | 1.32  | 0.115111 | 0.188222 | 0.488314 | 0.464251 |
| MmugDNA.34429.1.S1_at   | MmugDNA.34429.1 | 6.14  | 6.05  | 0.03 | 0.09 | 1.06  | 0.110556 | 0.181392 | 0.483651 | 0.457919 |
| MmugDNA.3443.1.S1_at    | MmugDNA.3443.1  | 4.4   | 4.75  | 0.23 | 0.09 | -1.28 | 0.07929  | 0.306348 | 0.442056 | 0.562971 |
| MmugDNA.34430.1.S1_at   | MmugDNA.34430.1 | 4.56  | 4.64  | 0.13 | 0.02 | -1.06 | 0.866916 | 0.980444 | 0.953253 | 0.989333 |

|                         |                 |       |       |      |      |       |          |          |          |          |
|-------------------------|-----------------|-------|-------|------|------|-------|----------|----------|----------|----------|
| MmugDNA.34432.1.S1_at   | MmugDNA.34432.1 | 6     | 5.83  | 0.18 | 0.13 | 1.13  | 0.319324 | 0.319408 | 0.668689 | 0.571762 |
| MmugDNA.34433.1.S1_at   | MmugDNA.34433.1 | 10.56 | 10.41 | 0.23 | 0.02 | 1.11  | 0.96114  | 0.657317 | 0.987225 | 0.799638 |
| MmugDNA.34434.1.S1_at   | MmugDNA.34434.1 | 7.74  | 7.62  | 0.02 | 0.05 | 1.09  | 0.019028 | 0.092889 | 0.29965  | 0.349024 |
| MmugDNA.34435.1.S1_at   | MmugDNA.34435.1 | 5.7   | 5.55  | 0.11 | 0.07 | 1.11  | 0.180931 | 0.610897 | 0.554261 | 0.768948 |
| MmugDNA.34436.1.S1_at   | MmugDNA.34436.1 | 9.92  | 9.88  | 0.79 | 0.15 | 1.03  | 0.859768 | 0.963265 | 0.950454 | 0.979477 |
| MmugDNA.34437.1.S1_at   | MmugDNA.34437.1 | 4.54  | 4.43  | 0.47 | 0.21 | 1.08  | 0.919455 | 0.328678 | 0.972575 | 0.578213 |
| MmugDNA.34438.1.S1_at   | MmugDNA.34438.1 | 4.04  | 4.02  | 0.1  | 0.04 | 1.01  | 0.717677 | 0.773226 | 0.890489 | 0.868163 |
| MmugDNA.34439.1.S1_at   | MmugDNA.34439.1 | 4.54  | 4.48  | 0.1  | 0.01 | 1.04  | 0.929144 | 0.964997 | 0.976333 | 0.980553 |
| MmugDNA.3444.1.S1_at    | MmugDNA.3444.1  | 4.56  | 4.52  | 0.07 | 0.09 | 1.03  | 0.941995 | 0.031167 | 0.980249 | 0.218378 |
| MmugDNA.34441.1.S1_at   | MmugDNA.34441.1 | 4.41  | 4.4   | 0.07 | 0.28 | 1.01  | 0.935344 | 0.94536  | 0.97814  | 0.968942 |
| MmugDNA.34443.1.S1_at   | MmugDNA.34443.1 | 4.61  | 4.51  | 0.1  | 0.09 | 1.07  | 0.262101 | 0.180781 | 0.624339 | 0.457306 |
| MmugDNA.34444.1.S1_at   | MmugDNA.34444.1 | 3.97  | 3.93  | 0    | 0.02 | 1.03  | 0.116117 | 0.217831 | 0.489554 | 0.491385 |
| MmugDNA.34445.1.S1_at   | MmugDNA.34445.1 | 6.16  | 5.98  | 0.05 | 0.07 | 1.13  | 0.078009 | 0.30527  | 0.439987 | 0.562255 |
| MmugDNA.34446.1.S1_at   | MmugDNA.34446.1 | 3.11  | 3.52  | 0.32 | 0.12 | -1.33 | 0.308222 | 0.261976 | 0.660917 | 0.52836  |
| MmugDNA.34447.1.S1_at   | MmugDNA.34447.1 | 4.03  | 3.87  | 0.03 | 0.11 | 1.12  | 0.103481 | 0.503627 | 0.474255 | 0.700988 |
| MmugDNA.34448.1.S1_at   | MmugDNA.34448.1 | 6.39  | 6.91  | 1.39 | 0.29 | -1.44 | 0.534033 | 0.380292 | 0.801189 | 0.616975 |
| MmugDNA.34449.1.S1_at   | MmugDNA.34449.1 | 7.17  | 6.83  | 0.14 | 0.24 | 1.26  | 0.31578  | 0.677429 | 0.666097 | 0.81167  |
| MmugDNA.3445.1.S1_at    | MmugDNA.3445.1  | 3.25  | 3.25  | 0.01 | 0.14 | 1     | 0.342767 | 0.57242  | 0.686105 | 0.744497 |
| MmugDNA.34450.1.S1_at   | MmugDNA.34450.1 | 3.58  | 3.58  | 0.13 | 0.11 | 1     | 0.23989  | 0.344538 | 0.606208 | 0.589909 |
| MmugDNA.34452.1.S1_s_at | MmugDNA.34452.1 | 7.25  | 8.22  | 0.79 | 0.1  | -1.96 | 0.374697 | 0.252353 | 0.706036 | 0.520998 |
| MmugDNA.34453.1.S1_at   | MmugDNA.34453.1 | 3.62  | 3.63  | 0.11 | 0    | -1.01 | 0.697293 | 0.926722 | 0.882224 | 0.958404 |
| MmugDNA.34454.1.S1_at   | MmugDNA.34454.1 | 6.55  | 7.29  | 0.23 | 0.18 | -1.67 | 0.018284 | 0.086808 | 0.296136 | 0.339583 |
| MmugDNA.34455.1.S1_at   | MmugDNA.34455.1 | 5.24  | 4.34  | 0.98 | 0.27 | 1.86  | 0.135198 | 0.089894 | 0.50918  | 0.344073 |
| MmugDNA.34457.1.S1_at   | MmugDNA.34457.1 | 4.1   | 4.05  | 0.13 | 0.03 | 1.03  | 0.209438 | 0.627896 | 0.580868 | 0.780849 |
| MmugDNA.34458.1.S1_at   | MmugDNA.34458.1 | 9.82  | 8.48  | 0.3  | 0.19 | 2.54  | 0.001808 | 0.000183 | 0.167444 | 0.030511 |
| MmugDNA.34459.1.S1_x_at | MmugDNA.34459.1 | 11.74 | 12.02 | 0.28 | 0.2  | -1.21 | 0.227707 | 0.192898 | 0.596693 | 0.468379 |
| MmugDNA.3446.1.S1_at    | MmugDNA.3446.1  | 11.83 | 12.06 | 0.22 | 0.1  | -1.17 | 0.182724 | 0.14153  | 0.555631 | 0.415063 |
| MmugDNA.34460.1.S1_at   | MmugDNA.34460.1 | 5.09  | 4.83  | 0.11 | 0.34 | 1.2   | 0.562367 | 0.688835 | 0.817686 | 0.818338 |
| MmugDNA.34461.1.S1_at   | MmugDNA.34461.1 | 7.69  | 7.71  | 1.36 | 0.71 | -1.01 | 0.701743 | 0.593398 | 0.883974 | 0.758267 |
| MmugDNA.34462.1.S1_at   | MmugDNA.34462.1 | 5.38  | 5.36  | 0.01 | 0.02 | 1.01  | 0.074487 | 0.919606 | 0.435313 | 0.954848 |
| MmugDNA.34463.1.S1_at   | MmugDNA.34463.1 | 4.25  | 4.14  | 0.18 | 0.04 | 1.08  | 0.91771  | 0.012904 | 0.97205  | 0.146232 |
| MmugDNA.34464.1.S1_at   | MmugDNA.34464.1 | 4.28  | 3.89  | 0.32 | 0.04 | 1.31  | 0.36085  | 0.475648 | 0.698204 | 0.682309 |
| MmugDNA.34465.1.S1_at   | MmugDNA.34465.1 | 3.69  | 3.84  | 0.35 | 0.09 | -1.11 | 0.660174 | 0.755057 | 0.865537 | 0.857434 |
| MmugDNA.34466.1.S1_at   | MmugDNA.34466.1 | 3.05  | 3.05  | 0.14 | 0.08 | -1    | 0.246216 | 0.293362 | 0.611606 | 0.553285 |
| MmugDNA.34467.1.S1_at   | MmugDNA.34467.1 | 4.24  | 3.9   | 0.08 | 0.25 | 1.26  | 0.133608 | 0.250631 | 0.508012 | 0.51941  |
| MmugDNA.34469.1.S1_at   | MmugDNA.34469.1 | 4.05  | 4.05  | 0.04 | 0    | -1    | 0.766434 | 0.877442 | 0.912128 | 0.930156 |
| MmugDNA.3447.1.S1_at    | MmugDNA.3447.1  | 5.9   | 6.06  | 0.36 | 0.19 | -1.12 | 0.649403 | 0.173805 | 0.860289 | 0.450128 |
| MmugDNA.34470.1.S1_at   | MmugDNA.34470.1 | 9.81  | 9.86  | 0.34 | 0.1  | -1.04 | 0.664211 | 0.594231 | 0.867648 | 0.758517 |
| MmugDNA.34470.1.S1_s_at | MmugDNA.34470.1 | 8.8   | 8.67  | 0.33 | 0.1  | 1.09  | 0.259718 | 0.295188 | 0.622771 | 0.554568 |
| MmugDNA.34472.1.S1_at   | MmugDNA.34472.1 | 7.31  | 8.49  | 1.69 | 0.21 | -2.26 | 0.29275  | 0.045235 | 0.649033 | 0.257005 |
| MmugDNA.34473.1.S1_at   | MmugDNA.34473.1 | 10.08 | 10.54 | 0.82 | 0.05 | -1.38 | 0.353777 | 0.559361 | 0.693501 | 0.736242 |
| MmugDNA.34475.1.S1_at   | MmugDNA.34475.1 | 6.37  | 6.1   | 0.04 | 0.05 | 1.21  | 0.003692 | 0.059664 | 0.197111 | 0.290919 |
| MmugDNA.34477.1.S1_at   | MmugDNA.34477.1 | 6.28  | 6.01  | 0.38 | 0.31 | 1.2   | 0.851062 | 0.875508 | 0.947526 | 0.929262 |

|                         |                 |       |       |      |      |       |          |          |          |          |
|-------------------------|-----------------|-------|-------|------|------|-------|----------|----------|----------|----------|
| MmugDNA.34478.1.S1_at   | MmugDNA.34478.1 | 4.04  | 3.92  | 0.27 | 0.21 | 1.09  | 0.469549 | 0.614021 | 0.765623 | 0.771026 |
| MmugDNA.34479.1.S1_at   | MmugDNA.34479.1 | 4.48  | 4.32  | 0.18 | 0.23 | 1.12  | 0.367809 | 0.466653 | 0.703298 | 0.676425 |
| MmugDNA.34480.1.S1_at   | MmugDNA.34480.1 | 11.15 | 11.97 | 0.54 | 0.09 | -1.77 | 0.08248  | 0.008184 | 0.447377 | 0.120053 |
| MmugDNA.34484.1.S1_at   | MmugDNA.34484.1 | 7.11  | 7.02  | 0.14 | 0.03 | 1.07  | 0.126576 | 0.235197 | 0.500481 | 0.50629  |
| MmugDNA.34485.1.S1_at   | MmugDNA.34485.1 | 6.01  | 7.04  | 0.78 | 0.15 | -2.04 | 0.275692 | 0.302524 | 0.635164 | 0.560201 |
| MmugDNA.34486.1.S1_at   | MmugDNA.34486.1 | 7.06  | 6.91  | 0.3  | 0.05 | 1.11  | 0.945386 | 0.870281 | 0.980927 | 0.926392 |
| MmugDNA.34487.1.S1_at   | MmugDNA.34487.1 | 6.67  | 6.63  | 0.09 | 0.09 | 1.02  | 0.465192 | 0.610171 | 0.76298  | 0.768419 |
| MmugDNA.11382.1.S1_at   | MmugDNA.11382.1 | 10.51 | 10.62 | 0.07 | 0.02 | -1.08 | 0.085349 | 0.734782 | 0.452611 | 0.846446 |
| MmugDNA.11382.1.S1_s_at | MmugDNA.11382.1 | 12.42 | 12.06 | 0.08 | 0.14 | 1.28  | 0.032218 | 0.198651 | 0.343319 | 0.473391 |
| MmugDNA.34489.1.S1_at   | MmugDNA.34489.1 | 3.96  | 3.83  | 0.06 | 0.09 | 1.09  | 0.029367 | 0.060329 | 0.334049 | 0.292254 |
| MmugDNA.3449.1.S1_at    | MmugDNA.3449.1  | 6.67  | 6.63  | 0.04 | 0.05 | -1.03 | 0.122621 | 0.644269 | 0.496146 | 0.791506 |
| MmugDNA.34490.1.S1_at   | MmugDNA.34490.1 | 6.31  | 6.9   | 0.2  | 0.27 | -1.51 | 0.050603 | 0.054759 | 0.387563 | 0.279506 |
| MmugDNA.34491.1.S1_at   | MmugDNA.34491.1 | 3.61  | 3.18  | 0.16 | 0.16 | 1.35  | 0.057471 | 0.236453 | 0.40213  | 0.507314 |
| MmugDNA.34492.1.S1_at   | MmugDNA.34492.1 | 3.65  | 3.34  | 0.14 | 0.1  | 1.24  | 0.079701 | 0.234489 | 0.442608 | 0.505674 |
| MmugDNA.34494.1.S1_at   | MmugDNA.34494.1 | 5.5   | 5.49  | 0.2  | 0.04 | 1.01  | 0.753371 | 0.696673 | 0.907028 | 0.823818 |
| MmugDNA.34495.1.S1_at   | MmugDNA.34495.1 | 8.14  | 8.36  | 0.34 | 0.16 | -1.16 | 0.613168 | 0.020725 | 0.843382 | 0.180645 |
| MmugDNA.34497.1.S1_at   | MmugDNA.34497.1 | 9.89  | 9.68  | 0.77 | 0.24 | 1.16  | 0.702183 | 0.545076 | 0.884146 | 0.727313 |
| MmugDNA.34499.1.S1_at   | MmugDNA.34499.1 | 4.86  | 5     | 0.3  | 0.39 | -1.11 | 0.510371 | 0.055851 | 0.788174 | 0.282172 |
| MmugDNA.345.1.S1_s_at   | MmugDNA.345.1   | 9.57  | 9.33  | 0.23 | 0.22 | 1.19  | 0.262011 | 0.027061 | 0.62421  | 0.205689 |
| MmugDNA.34502.1.S1_at   | MmugDNA.34502.1 | 6.84  | 7.14  | 1.09 | 0.09 | -1.23 | 0.735727 | 0.747984 | 0.898935 | 0.853341 |
| MmugDNA.34504.1.S1_at   | MmugDNA.34504.1 | 11.35 | 11.29 | 0.13 | 0.03 | 1.04  | 0.827936 | 0.646389 | 0.938183 | 0.792839 |
| MmugDNA.34506.1.S1_at   | MmugDNA.34506.1 | 5.69  | 6.28  | 0.13 | 0.24 | -1.51 | 0.056642 | 0.026555 | 0.400964 | 0.203915 |
| MmugDNA.34507.1.S1_at   | MmugDNA.34507.1 | 5.38  | 5.89  | 0.35 | 0.1  | -1.43 | 0.1007   | 0.135634 | 0.471575 | 0.40775  |
| MmugDNA.34508.1.S1_at   | MmugDNA.34508.1 | 7.87  | 8.56  | 0.13 | 0.3  | -1.61 | 0.032527 | 0.018909 | 0.344478 | 0.173002 |
| MmugDNA.3451.1.S1_at    | MmugDNA.3451.1  | 4.54  | 4.6   | 0.39 | 0.01 | -1.04 | 0.497124 | 0.655152 | 0.781055 | 0.798309 |
| MmugDNA.34511.1.S1_at   | MmugDNA.34511.1 | 5.78  | 6.6   | 0.56 | 0.14 | -1.78 | 0.218305 | 0.202844 | 0.58818  | 0.477312 |
| MmugDNA.34512.1.S1_at   | MmugDNA.34512.1 | 2.79  | 2.81  | 0.11 | 0.17 | -1.02 | 0.937446 | 0.97035  | 0.978964 | 0.983843 |
| MmugDNA.34513.1.S1_at   | MmugDNA.34513.1 | 6.87  | 7.32  | 0.21 | 0.18 | -1.37 | 0.025901 | 0.008021 | 0.32273  | 0.119047 |
| MmugDNA.34514.1.S1_at   | MmugDNA.34514.1 | 3.81  | 3.79  | 0.05 | 0.03 | 1.01  | 0.538482 | 0.624044 | 0.803285 | 0.778361 |
| MmugDNA.34515.1.S1_at   | MmugDNA.34515.1 | 4     | 3.96  | 0.46 | 0.51 | 1.03  | 0.536829 | 0.913732 | 0.802473 | 0.951474 |
| MmugDNA.34516.1.S1_at   | MmugDNA.34516.1 | 4.1   | 3.96  | 0.18 | 0.06 | 1.11  | 0.143974 | 0.132299 | 0.519328 | 0.404294 |
| MmugDNA.34518.1.S1_at   | MmugDNA.34518.1 | 3.25  | 3.25  | 0    | 0.05 | -1    | 0.533137 | 0.18472  | 0.800713 | 0.460645 |
| MmugDNA.34519.1.S1_at   | MmugDNA.34519.1 | 4.23  | 3.87  | 0.8  | 0.81 | 1.29  | 0.351962 | 0.118581 | 0.692617 | 0.38654  |
| MmugDNA.3452.1.S1_at    | MmugDNA.3452.1  | 7.84  | 7.64  | 0.2  | 0.1  | 1.15  | 0.233987 | 0.358543 | 0.601531 | 0.600068 |
| MmugDNA.34520.1.S1_at   | MmugDNA.34520.1 | 4.13  | 4.2   | 0.1  | 0.13 | -1.05 | 0.179065 | 0.184513 | 0.552065 | 0.460559 |
| MmugDNA.34521.1.S1_at   | MmugDNA.34521.1 | 7.07  | 6.56  | 0.49 | 0.23 | 1.42  | 0.145472 | 0.095018 | 0.52043  | 0.352124 |
| MmugDNA.34522.1.S1_at   | MmugDNA.34522.1 | 12.31 | 12.27 | 0.02 | 0.07 | 1.03  | 0.114974 | 0.099833 | 0.488167 | 0.358464 |
| MmugDNA.34524.1.S1_at   | MmugDNA.34524.1 | 4.9   | 4.77  | 0.05 | 0.07 | 1.1   | 0.162518 | 0.414929 | 0.535663 | 0.640538 |
| MmugDNA.34525.1.S1_at   | MmugDNA.34525.1 | 11.36 | 11.46 | 0.21 | 0.11 | -1.07 | 0.409835 | 0.02683  | 0.730334 | 0.204912 |
| MmugDNA.34526.1.S1_at   | MmugDNA.34526.1 | 5.25  | 5.2   | 0.18 | 0.13 | 1.04  | 0.401608 | 0.384307 | 0.724554 | 0.619996 |
| MmugDNA.34527.1.S1_at   | MmugDNA.34527.1 | 2.95  | 3.19  | 0.25 | 0.06 | -1.18 | 0.620177 | 0.327971 | 0.847047 | 0.577785 |
| MmugDNA.34529.1.S1_at   | MmugDNA.34529.1 | 5.56  | 5.44  | 0.12 | 0.05 | 1.09  | 0.165891 | 0.356703 | 0.538623 | 0.598516 |
| MmugDNA.3453.1.S1_at    | MmugDNA.3453.1  | 4.66  | 4.55  | 0.23 | 0.04 | 1.08  | 0.180175 | 0.180477 | 0.553357 | 0.457115 |



|                         |                 |       |       |      |      |       |          |          |          |          |
|-------------------------|-----------------|-------|-------|------|------|-------|----------|----------|----------|----------|
| MmugDNA.34530.1.S1_at   | MmugDNA.34530.1 | 3.82  | 3.82  | 0.16 | 0.1  | 1     | 0.851574 | 0.090444 | 0.947639 | 0.344925 |
| MmugDNA.34530.1.S1_s_at | MmugDNA.34530.1 | 7.72  | 7.64  | 0.51 | 0.13 | 1.05  | 0.553958 | 0.155836 | 0.812388 | 0.431211 |
| MmugDNA.34531.1.S1_at   | MmugDNA.34531.1 | 10.05 | 11.29 | 0.61 | 0.18 | -2.37 | 0.036599 | 0.04457  | 0.355088 | 0.255512 |
| MmugDNA.34532.1.S1_at   | MmugDNA.34532.1 | 6.68  | 6.81  | 0.3  | 0.79 | -1.1  | 0.524423 | 0.73544  | 0.795867 | 0.846919 |
| MmugDNA.34533.1.S1_at   | MmugDNA.34533.1 | 8.17  | 8.45  | 0.55 | 0.14 | -1.21 | 0.711203 | 0.11391  | 0.887567 | 0.38018  |
| MmugDNA.34535.1.S1_at   | MmugDNA.34535.1 | 5.38  | 5.22  | 0.26 | 0.08 | 1.12  | 0.952926 | 0.649881 | 0.984223 | 0.795273 |
| MmugDNA.34536.1.S1_at   | MmugDNA.34536.1 | 7.22  | 6.96  | 0.15 | 0.11 | 1.2   | 0.054403 | 0.184955 | 0.396392 | 0.460776 |
| MmugDNA.34537.1.S1_at   | MmugDNA.34537.1 | 3.88  | 3.85  | 0.06 | 0.06 | 1.02  | 0.345741 | 0.131103 | 0.687742 | 0.403084 |
| MmugDNA.34539.1.S1_s_at | MmugDNA.34539.1 | 11.41 | 11.05 | 0.33 | 0.15 | 1.28  | 0.156941 | 0.143716 | 0.530175 | 0.417583 |
| MmugDNA.3454.1.S1_at    | MmugDNA.3454.1  | 4.75  | 4.47  | 0.13 | 0.15 | 1.22  | 0.077674 | 0.078841 | 0.439817 | 0.325821 |
| MmugDNA.34540.1.S1_at   | MmugDNA.34540.1 | 3.46  | 3.4   | 0.09 | 0.04 | -1.04 | 0.159204 | 0.207643 | 0.531873 | 0.481906 |
| MmugDNA.34541.1.S1_at   | MmugDNA.34541.1 | 6.42  | 6.64  | 0.18 | 0.14 | -1.16 | 0.792446 | 0.378387 | 0.923885 | 0.615443 |
| MmugDNA.34543.1.S1_at   | MmugDNA.34543.1 | 5.29  | 5.02  | 0.08 | 0.24 | 1.21  | 0.412567 | 0.794116 | 0.732064 | 0.881296 |
| MmugDNA.34544.1.S1_at   | MmugDNA.34544.1 | 4.51  | 4.53  | 0.17 | 0.09 | -1.01 | 0.898794 | 0.960399 | 0.965641 | 0.977488 |
| MmugDNA.34545.1.S1_s_at | MmugDNA.34545.1 | 7.7   | 6.52  | 0.65 | 0.07 | 2.26  | 0.02743  | 0.005673 | 0.327679 | 0.103959 |
| MmugDNA.34547.1.S1_at   | MmugDNA.34547.1 | 4.14  | 5.12  | 1.18 | 0.64 | -1.97 | 0.893803 | 0.059475 | 0.963557 | 0.290548 |
| MmugDNA.34548.1.S1_at   | MmugDNA.34548.1 | 4.18  | 4.48  | 0.21 | 0.3  | -1.23 | 0.99688  | 0.82516  | 0.998838 | 0.899551 |
| MmugDNA.34549.1.S1_at   | MmugDNA.34549.1 | 5.5   | 5.46  | 0.09 | 0.11 | 1.03  | 0.178623 | 0.771183 | 0.551451 | 0.866992 |
| MmugDNA.3455.1.S1_at    | MmugDNA.3455.1  | 5.73  | 5.67  | 0.72 | 0.26 | 1.04  | 0.325066 | 0.562467 | 0.672982 | 0.738025 |
| MmugDNA.34552.1.S1_at   | MmugDNA.34552.1 | 4.63  | 4.78  | 0.14 | 0.02 | -1.11 | 0.125071 | 0.053362 | 0.499049 | 0.27654  |
| MmugDNA.34553.1.S1_at   | MmugDNA.34553.1 | 6.16  | 5.49  | 0.25 | 0.14 | 1.59  | 0.020682 | 0.034702 | 0.305403 | 0.230497 |
| MmugDNA.34555.1.S1_at   | MmugDNA.34555.1 | 4.33  | 4.41  | 0.22 | 0.03 | -1.06 | 0.541027 | 0.635949 | 0.804829 | 0.785795 |
| MmugDNA.34556.1.S1_at   | MmugDNA.34556.1 | 9.11  | 8.94  | 1.17 | 0.09 | 1.12  | 0.87267  | 0.555824 | 0.955802 | 0.734119 |
| MmugDNA.34558.1.S1_at   | MmugDNA.34558.1 | 6.33  | 7.02  | 0.61 | 0.16 | -1.62 | 0.12875  | 0.506203 | 0.50348  | 0.702368 |
| MmugDNA.34559.1.S1_at   | MmugDNA.34559.1 | 7.98  | 7.88  | 0.08 | 0.05 | 1.07  | 0.302609 | 0.265061 | 0.656542 | 0.531    |
| MmugDNA.34560.1.S1_at   | MmugDNA.34560.1 | 9.75  | 9.36  | 0.26 | 0.06 | 1.31  | 0.021914 | 0.000469 | 0.309781 | 0.038572 |
| MmugDNA.34561.1.S1_at   | MmugDNA.34561.1 | 6.31  | 6.29  | 0.27 | 0.05 | 1.01  | 0.44264  | 0.671841 | 0.750271 | 0.808157 |
| MmugDNA.34562.1.S1_at   | MmugDNA.34562.1 | 10.63 | 10.62 | 0.23 | 0.08 | 1.01  | 0.676373 | 0.273322 | 0.873062 | 0.537788 |
| MmugDNA.34563.1.S1_at   | MmugDNA.34563.1 | 6.27  | 6     | 0.21 | 0.01 | 1.21  | 0.264118 | 0.145899 | 0.625948 | 0.419889 |
| MmugDNA.34565.1.S1_at   | MmugDNA.34565.1 | 4.26  | 3.85  | 0.37 | 1.03 | 1.32  | 0.612627 | 0.804736 | 0.843101 | 0.887712 |
| MmugDNA.34568.1.S1_at   | MmugDNA.34568.1 | 8.13  | 8.03  | 0.06 | 0.13 | 1.07  | 0.35433  | 0.213918 | 0.693914 | 0.487596 |
| MmugDNA.36272.1.S1_at   | MmugDNA.36272.1 | 10.85 | 11.1  | 0.08 | 0.04 | -1.19 | 0.011548 | 0.013172 | 0.255545 | 0.14735  |
| MmugDNA.36272.1.S1_s_at | MmugDNA.36272.1 | 8.89  | 8.91  | 0.07 | 0.07 | -1.01 | 0.895918 | 0.006097 | 0.964401 | 0.106342 |
| MmugDNA.34569.1.S1_at   | MmugDNA.34569.1 | 4.29  | 4.33  | 0.14 | 0.26 | -1.03 | 0.938427 | 0.860585 | 0.979272 | 0.920573 |
| MmugDNA.3457.1.S1_at    | MmugDNA.3457.1  | 4.09  | 3.8   | 0.1  | 0.16 | 1.22  | 0.027349 | 0.005914 | 0.327322 | 0.105265 |
| MmugDNA.34570.1.S1_at   | MmugDNA.34570.1 | 4.6   | 4.4   | 0.1  | 0.16 | 1.15  | 0.190031 | 0.497605 | 0.561335 | 0.696935 |
| MmugDNA.34571.1.S1_at   | MmugDNA.34571.1 | 6.65  | 6.45  | 0.05 | 0.15 | 1.15  | 0.193422 | 0.111217 | 0.564275 | 0.375856 |
| MmugDNA.34572.1.S1_at   | MmugDNA.34572.1 | 11.83 | 11.56 | 0.23 | 0.15 | 1.21  | 0.089982 | 0.003953 | 0.457959 | 0.089462 |
| MmugDNA.34573.1.S1_at   | MmugDNA.34573.1 | 3.93  | 3.84  | 0.18 | 0.16 | 1.06  | 0.295911 | 0.425924 | 0.65162  | 0.648123 |
| MmugDNA.34574.1.S1_at   | MmugDNA.34574.1 | 9.99  | 10.36 | 0.27 | 0.09 | -1.29 | 0.108496 | 0.031407 | 0.480777 | 0.219107 |
| MmugDNA.34576.1.S1_at   | MmugDNA.34576.1 | 6.08  | 5.73  | 0.3  | 0.34 | 1.28  | 0.274151 | 0.507484 | 0.633792 | 0.703044 |
| MmugDNA.34577.1.S1_at   | MmugDNA.34577.1 | 3.07  | 3.07  | 0.16 | 0.21 | 1     | 0.712927 | 0.019164 | 0.888135 | 0.1742   |
| MmugDNA.34578.1.S1_at   | MmugDNA.34578.1 | 5.17  | 5.25  | 0.15 | 0.1  | -1.06 | 0.374109 | 0.486201 | 0.705764 | 0.689643 |

|                         |                 |       |       |      |      |       |          |          |          |          |
|-------------------------|-----------------|-------|-------|------|------|-------|----------|----------|----------|----------|
| MmugDNA.34579.1.S1_at   | MmugDNA.34579.1 | 5.24  | 5.22  | 0.14 | 0.04 | 1.02  | 0.532653 | 0.498272 | 0.800463 | 0.697403 |
| MmugDNA.3458.1.S1_at    | MmugDNA.3458.1  | 10.41 | 9.71  | 0.31 | 0.28 | 1.63  | 0.018719 | 0.074189 | 0.298184 | 0.317933 |
| MmugDNA.34580.1.S1_at   | MmugDNA.34580.1 | 6.6   | 6.46  | 0.06 | 0.06 | 1.1   | 0.021975 | 0.26208  | 0.309781 | 0.528374 |
| MmugDNA.34581.1.S1_at   | MmugDNA.34581.1 | 4.42  | 4.42  | 0.04 | 0.1  | 1     | 0.255009 | 0.01654  | 0.619267 | 0.162827 |
| MmugDNA.34584.1.S1_at   | MmugDNA.34584.1 | 5.29  | 5.66  | 0.18 | 0.12 | -1.29 | 0.058822 | 0.111057 | 0.405521 | 0.375588 |
| MmugDNA.34585.1.S1_at   | MmugDNA.34585.1 | 5.24  | 5.29  | 0.34 | 0.1  | -1.04 | 0.900063 | 0.980601 | 0.966011 | 0.989397 |
| MmugDNA.34586.1.S1_at   | MmugDNA.34586.1 | 5.65  | 5.83  | 0.3  | 0.17 | -1.13 | 0.323399 | 0.058613 | 0.672212 | 0.288819 |
| MmugDNA.34586.1.S1_s_at | MmugDNA.34586.1 | 4.65  | 4.92  | 0.07 | 0.23 | -1.2  | 0.085805 | 0.297608 | 0.453025 | 0.55624  |
| MmugDNA.3459.1.S1_at    | MmugDNA.3459.1  | 8.56  | 10.18 | 1.22 | 0.2  | -3.08 | 0.122808 | 0.09561  | 0.496214 | 0.352645 |
| MmugDNA.34590.1.S1_at   | MmugDNA.34590.1 | 8.67  | 9     | 0.33 | 0.13 | -1.25 | 0.167318 | 0.281134 | 0.539905 | 0.544261 |
| MmugDNA.34591.1.S1_s_at | MmugDNA.34591.1 | 9.26  | 9.4   | 0.43 | 0.1  | -1.1  | 0.843072 | 0.004077 | 0.944479 | 0.090418 |
| MmugDNA.34592.1.S1_at   | MmugDNA.34592.1 | 7.56  | 7.43  | 0.26 | 0.15 | 1.1   | 0.521611 | 0.627757 | 0.794648 | 0.780727 |
| MmugDNA.34593.1.S1_at   | MmugDNA.34593.1 | 7.98  | 8.01  | 0.6  | 0.25 | -1.02 | 0.67797  | 0.846536 | 0.873849 | 0.912676 |
| MmugDNA.34594.1.S1_at   | MmugDNA.34594.1 | 4.09  | 3.92  | 0.01 | 0.1  | 1.13  | 0.130011 | 0.168856 | 0.504648 | 0.445458 |
| MmugDNA.34595.1.S1_at   | MmugDNA.34595.1 | 8.32  | 8.59  | 0.9  | 0.21 | -1.2  | 0.292659 | 0.118266 | 0.648997 | 0.386244 |
| MmugDNA.34596.1.S1_at   | MmugDNA.34596.1 | 5.53  | 5.97  | 0.75 | 0.13 | -1.35 | 0.386409 | 0.411982 | 0.713564 | 0.638434 |
| MmugDNA.346.1.S1_at     | MmugDNA.346.1   | 3.85  | 3.82  | 0.12 | 0.08 | 1.02  | 0.420938 | 0.190734 | 0.737135 | 0.466168 |
| MmugDNA.3460.1.S1_at    | MmugDNA.3460.1  | 5.22  | 5.01  | 1.04 | 0.51 | 1.16  | 0.735108 | 0.899365 | 0.898576 | 0.942791 |
| MmugDNA.34600.1.S1_at   | MmugDNA.34600.1 | 4.9   | 4.82  | 0.24 | 0.41 | 1.06  | 0.870175 | 0.615683 | 0.954781 | 0.772141 |
| MmugDNA.34601.1.S1_at   | MmugDNA.34601.1 | 6.29  | 6.91  | 1.28 | 0.25 | -1.53 | 0.609754 | 0.431218 | 0.841773 | 0.652219 |
| MmugDNA.34602.1.S1_at   | MmugDNA.34602.1 | 3.14  | 3.04  | 0.19 | 0.1  | 1.08  | 0.362924 | 0.470097 | 0.699735 | 0.678572 |
| MmugDNA.34604.1.S1_at   | MmugDNA.34604.1 | 4.79  | 4.64  | 0.26 | 0.26 | 1.11  | 0.301094 | 0.468515 | 0.655304 | 0.677755 |
| MmugDNA.34605.1.S1_at   | MmugDNA.34605.1 | 13.31 | 13.05 | 0.02 | 0.02 | 1.2   | 0.000072 | 9.87E-07 | 0.108151 | 0.007307 |
| MmugDNA.34606.1.S1_at   | MmugDNA.34606.1 | 6.04  | 5.85  | 0.15 | 0.04 | 1.14  | 0.127201 | 0.070044 | 0.501377 | 0.310932 |
| MmugDNA.34607.1.S1_at   | MmugDNA.34607.1 | 10.02 | 10.01 | 0.27 | 0.04 | 1.01  | 0.483135 | 0.347233 | 0.772867 | 0.591857 |
| MmugDNA.3461.1.S1_at    | MmugDNA.3461.1  | 11.02 | 11.65 | 0.27 | 0.07 | -1.55 | 0.023998 | 0.014752 | 0.317529 | 0.154493 |
| MmugDNA.34610.1.S1_at   | MmugDNA.34610.1 | 3.39  | 3.39  | 0.01 | 0.08 | 1     | 0.919238 | 0.991387 | 0.972508 | 0.995189 |
| MmugDNA.34611.1.S1_at   | MmugDNA.34611.1 | 5.87  | 6.23  | 0.99 | 0.07 | -1.28 | 0.729784 | 0.773654 | 0.895824 | 0.868422 |
| MmugDNA.34612.1.S1_at   | MmugDNA.34612.1 | 4.66  | 4.58  | 0.04 | 0.04 | 1.06  | 0.079443 | 0.068817 | 0.442296 | 0.308714 |
| MmugDNA.34613.1.S1_at   | MmugDNA.34613.1 | 8.99  | 8.82  | 0.32 | 0.05 | 1.12  | 0.916915 | 0.091057 | 0.971845 | 0.345842 |
| MmugDNA.34614.1.S1_at   | MmugDNA.34614.1 | 4.01  | 4.1   | 0.55 | 0.23 | -1.06 | 0.572389 | 0.773398 | 0.82322  | 0.868269 |
| MmugDNA.34615.1.S1_at   | MmugDNA.34615.1 | 3.29  | 3.18  | 0.12 | 0.01 | 1.09  | 0.459397 | 0.639574 | 0.759484 | 0.788351 |
| MmugDNA.34616.1.S1_at   | MmugDNA.34616.1 | 9.75  | 9.18  | 2.33 | 0.21 | 1.48  | 0.780126 | 0.722487 | 0.919011 | 0.839261 |
| MmugDNA.34617.1.S1_at   | MmugDNA.34617.1 | 6.64  | 6.54  | 0.11 | 0.03 | 1.07  | 0.838442 | 0.748244 | 0.942207 | 0.853492 |
| MmugDNA.34618.1.S1_at   | MmugDNA.34618.1 | 3.15  | 2.99  | 0.04 | 0.09 | 1.11  | 0.053784 | 0.009349 | 0.395395 | 0.127602 |
| MmugDNA.34619.1.S1_at   | MmugDNA.34619.1 | 5.54  | 5.54  | 0.03 | 0.12 | -1    | 0.274648 | 0.700733 | 0.633979 | 0.82642  |
| MmugDNA.3462.1.S1_at    | MmugDNA.3462.1  | 10.97 | 11.33 | 0.13 | 0.07 | -1.28 | 0.022465 | 0.107504 | 0.310736 | 0.370387 |
| MmugDNA.34620.1.S1_at   | MmugDNA.34620.1 | 5.99  | 5.89  | 0.11 | 0.03 | 1.07  | 0.065361 | 0.306927 | 0.420558 | 0.563427 |
| MmugDNA.34621.1.S1_at   | MmugDNA.34621.1 | 6.16  | 6.17  | 0.06 | 0.22 | -1.01 | 0.567096 | 0.647126 | 0.820256 | 0.793279 |
| MmugDNA.34624.1.S1_at   | MmugDNA.34624.1 | 4.52  | 4.23  | 0.38 | 0.24 | 1.23  | 0.30911  | 0.23493  | 0.661444 | 0.506136 |
| MmugDNA.34625.1.S1_at   | MmugDNA.34625.1 | 4.96  | 5.02  | 0.13 | 0.23 | -1.04 | 0.367282 | 0.160497 | 0.702778 | 0.436679 |
| MmugDNA.34626.1.S1_at   | MmugDNA.34626.1 | 3.08  | 3.09  | 0.18 | 0.06 | -1.01 | 0.440006 | 0.474823 | 0.748282 | 0.681736 |
| MmugDNA.34628.1.S1_at   | MmugDNA.34628.1 | 6.11  | 6.28  | 0.59 | 0.58 | -1.12 | 0.708481 | 0.47374  | 0.886591 | 0.68101  |

|                         |                 |       |       |      |      |       |          |          |          |          |
|-------------------------|-----------------|-------|-------|------|------|-------|----------|----------|----------|----------|
| MmugDNA.34629.1.S1_at   | MmugDNA.34629.1 | 9.9   | 9.06  | 0.35 | 0.37 | 1.79  | 0.027938 | 0.000675 | 0.330017 | 0.04413  |
| MmugDNA.34630.1.S1_at   | MmugDNA.34630.1 | 6.63  | 6.53  | 0.09 | 0.11 | 1.07  | 0.060182 | 0.095597 | 0.407653 | 0.352645 |
| MmugDNA.34631.1.S1_at   | MmugDNA.34631.1 | 8.23  | 8.33  | 0.36 | 0.08 | -1.07 | 0.733261 | 0.234425 | 0.897531 | 0.505674 |
| MmugDNA.34632.1.S1_at   | MmugDNA.34632.1 | 8.7   | 8.29  | 0.19 | 0.15 | 1.32  | 0.080067 | 0.523051 | 0.443397 | 0.713429 |
| MmugDNA.34632.1.S1_s_at | MmugDNA.34632.1 | 9.69  | 9.39  | 0.22 | 0.08 | 1.23  | 0.081242 | 0.415197 | 0.445338 | 0.640746 |
| MmugDNA.34633.1.S1_at   | MmugDNA.34633.1 | 5.01  | 4.58  | 0.46 | 0.1  | 1.35  | 0.23982  | 0.356335 | 0.606172 | 0.598324 |
| MmugDNA.34634.1.S1_at   | MmugDNA.34634.1 | 7.05  | 7.77  | 0.71 | 0.09 | -1.65 | 0.111738 | 0.009592 | 0.484908 | 0.129058 |
| MmugDNA.34636.1.S1_at   | MmugDNA.34636.1 | 4.19  | 4.42  | 0.19 | 0.19 | -1.17 | 0.486838 | 0.571772 | 0.774758 | 0.743987 |
| MmugDNA.34637.1.S1_at   | MmugDNA.34637.1 | 3.84  | 3.85  | 0.13 | 0.08 | -1    | 0.760328 | 0.30428  | 0.909959 | 0.561599 |
| MmugDNA.34638.1.S1_at   | MmugDNA.34638.1 | 4.14  | 4.08  | 0.09 | 0.07 | 1.04  | 0.478306 | 0.221182 | 0.770076 | 0.494511 |
| MmugDNA.3464.1.S1_at    | MmugDNA.3464.1  | 4.24  | 3.89  | 0.16 | 0.07 | -1.27 | 0.046795 | 0.273361 | 0.37872  | 0.5378   |
| MmugDNA.34640.1.S1_at   | MmugDNA.34640.1 | 4.86  | 5.19  | 0.19 | 0.05 | -1.26 | 0.062243 | 0.057017 | 0.412841 | 0.284868 |
| MmugDNA.34641.1.S1_at   | MmugDNA.34641.1 | 6.39  | 5.28  | 0.15 | 0.14 | 2.15  | 0.000977 | 0.000171 | 0.155374 | 0.030511 |
| MmugDNA.34642.1.S1_at   | MmugDNA.34642.1 | 3.08  | 3.08  | 0.05 | 0.07 | 1     | 0.595545 | 0.804802 | 0.835482 | 0.887741 |
| MmugDNA.34643.1.S1_at   | MmugDNA.34643.1 | 11.25 | 12.27 | 1.06 | 0.05 | -2.03 | 0.13381  | 0.049041 | 0.508034 | 0.266367 |
| MmugDNA.34644.1.S1_at   | MmugDNA.34644.1 | 5.32  | 4.91  | 0.19 | 0.14 | 1.33  | 0.019045 | 0.062061 | 0.29965  | 0.29597  |
| MmugDNA.34646.1.S1_at   | MmugDNA.34646.1 | 9.16  | 9.18  | 0.12 | 0.1  | -1.02 | 0.343905 | 0.394927 | 0.686913 | 0.627216 |
| MmugDNA.34647.1.S1_at   | MmugDNA.34647.1 | 10.33 | 10.06 | 0.14 | 0.06 | 1.2   | 0.041733 | 0.008774 | 0.36716  | 0.124022 |
| MmugDNA.34648.1.S1_at   | MmugDNA.34648.1 | 7.35  | 7.55  | 0.07 | 0.34 | -1.16 | 0.509507 | 0.731774 | 0.787621 | 0.844619 |
| MmugDNA.3465.1.S1_at    | MmugDNA.3465.1  | 4.46  | 4.48  | 0.17 | 0    | -1.01 | 0.896847 | 0.934372 | 0.964949 | 0.962766 |
| MmugDNA.34651.1.S1_at   | MmugDNA.34651.1 | 2.84  | 2.83  | 0.06 | 0.06 | 1.01  | 0.372311 | 0.19108  | 0.705567 | 0.466364 |
| MmugDNA.34653.1.S1_at   | MmugDNA.34653.1 | 10.6  | 9.89  | 0.34 | 0.07 | 1.64  | 0.072425 | 0.059192 | 0.432302 | 0.290208 |
| MmugDNA.34654.1.S1_at   | MmugDNA.34654.1 | 9.12  | 9.07  | 0.2  | 0.12 | 1.03  | 0.776403 | 0.145075 | 0.917258 | 0.419047 |
| MmugDNA.34657.1.S1_at   | MmugDNA.34657.1 | 4.77  | 4.6   | 0.12 | 0.11 | 1.13  | 0.338005 | 0.458433 | 0.682728 | 0.671165 |
| MmugDNA.3466.1.S1_at    | MmugDNA.3466.1  | 3.93  | 3.72  | 0.06 | 0.08 | 1.16  | 0.042065 | 0.079049 | 0.368438 | 0.326117 |
| MmugDNA.34660.1.S1_at   | MmugDNA.34660.1 | 7.95  | 7.76  | 0.41 | 0.09 | 1.14  | 0.65991  | 0.002176 | 0.865468 | 0.068956 |
| MmugDNA.34661.1.S1_at   | MmugDNA.34661.1 | 4.35  | 4.13  | 0.12 | 0.14 | 1.17  | 0.058375 | 0.12593  | 0.404238 | 0.396461 |
| MmugDNA.34662.1.S1_at   | MmugDNA.34662.1 | 6.28  | 6.3   | 0.26 | 0.22 | -1.01 | 0.436506 | 0.480065 | 0.746319 | 0.68565  |
| MmugDNA.34664.1.S1_at   | MmugDNA.34664.1 | 11.33 | 11.44 | 0.79 | 0.19 | -1.08 | 0.995422 | 0.677707 | 0.998274 | 0.811777 |
| MmugDNA.69.1.S1_s_at    | MmugDNA.69.1    | 9.19  | 8.83  | 0.62 | 0.13 | 1.29  | 0.464622 | 0.539738 | 0.76259  | 0.723926 |
| MmugDNA.34666.1.S1_at   | MmugDNA.34666.1 | 6.58  | 6.53  | 0.16 | 0.03 | 1.04  | 0.195349 | 0.176872 | 0.565774 | 0.453303 |
| MmugDNA.34667.1.S1_at   | MmugDNA.34667.1 | 4.55  | 4.65  | 0.12 | 0.1  | -1.07 | 0.312212 | 0.19274  | 0.663814 | 0.468231 |
| MmugDNA.34668.1.S1_at   | MmugDNA.34668.1 | 3.98  | 4.12  | 0.18 | 0.66 | -1.1  | 0.300811 | 0.266844 | 0.65518  | 0.53241  |
| MmugDNA.34669.1.S1_at   | MmugDNA.34669.1 | 4.99  | 4.86  | 0.16 | 0.18 | 1.1   | 0.280796 | 0.289267 | 0.639467 | 0.550293 |
| MmugDNA.34670.1.S1_at   | MmugDNA.34670.1 | 4.23  | 4.47  | 0.24 | 0.28 | -1.18 | 0.479432 | 0.743367 | 0.770745 | 0.85129  |
| MmugDNA.34673.1.S1_at   | MmugDNA.34673.1 | 5.04  | 5.22  | 0.94 | 0.13 | -1.13 | 0.631172 | 0.815209 | 0.852393 | 0.893385 |
| MmugDNA.34675.1.S1_at   | MmugDNA.34675.1 | 5.21  | 5.2   | 0.14 | 0.15 | 1     | 0.971478 | 0.744566 | 0.990686 | 0.852091 |
| MmugDNA.34677.1.S1_at   | MmugDNA.34677.1 | 7.72  | 7.57  | 0.17 | 0.09 | 1.11  | 0.094566 | 0.159322 | 0.463794 | 0.43532  |
| MmugDNA.34678.1.S1_at   | MmugDNA.34678.1 | 5.33  | 5.46  | 0.01 | 0.56 | -1.1  | 0.81739  | 0.963151 | 0.933935 | 0.979435 |
| MmugDNA.34682.1.S1_at   | MmugDNA.34682.1 | 3.26  | 3.27  | 0.06 | 0.11 | -1    | 0.903389 | 0.118496 | 0.967537 | 0.386469 |
| MmugDNA.34683.1.S1_at   | MmugDNA.34683.1 | 5.32  | 5.31  | 0.17 | 0.06 | 1.01  | 0.309553 | 0.248768 | 0.661771 | 0.517931 |
| MmugDNA.34684.1.S1_at   | MmugDNA.34684.1 | 4.57  | 4.54  | 0.48 | 0.18 | 1.02  | 0.91042  | 0.401055 | 0.969634 | 0.630667 |
| MmugDNA.34685.1.S1_at   | MmugDNA.34685.1 | 4.82  | 4.41  | 0.42 | 0.12 | 1.32  | 0.245028 | 0.177725 | 0.610441 | 0.454083 |

|                         |                 |       |       |      |      |       |          |          |          |          |
|-------------------------|-----------------|-------|-------|------|------|-------|----------|----------|----------|----------|
| MmugDNA.34686.1.S1_at   | MmugDNA.34686.1 | 13.51 | 13.33 | 0.11 | 0.06 | 1.13  | 0.365373 | 0.246353 | 0.701002 | 0.515899 |
| MmugDNA.34687.1.S1_at   | MmugDNA.34687.1 | 3.37  | 3.33  | 0.2  | 0.07 | 1.03  | 0.935638 | 0.231879 | 0.978294 | 0.503594 |
| MmugDNA.34688.1.S1_at   | MmugDNA.34688.1 | 5.67  | 5.86  | 0.48 | 0.16 | -1.15 | 0.59314  | 0.249676 | 0.834079 | 0.518765 |
| MmugDNA.34689.1.S1_at   | MmugDNA.34689.1 | 3.47  | 3.46  | 0.31 | 0.16 | 1.01  | 0.869303 | 0.948688 | 0.954309 | 0.970685 |
| MmugDNA.3469.1.S1_at    | MmugDNA.3469.1  | 3.8   | 3.44  | 0.3  | 0.15 | 1.29  | 0.100491 | 0.166376 | 0.471309 | 0.442884 |
| MmugDNA.34690.1.S1_at   | MmugDNA.34690.1 | 8.19  | 8.15  | 0.21 | 0.14 | 1.02  | 0.71696  | 0.202327 | 0.890136 | 0.476691 |
| MmugDNA.34691.1.S1_at   | MmugDNA.34691.1 | 3.85  | 3.85  | 0.04 | 0.09 | -1    | 0.559905 | 0.912974 | 0.816426 | 0.951043 |
| MmugDNA.34693.1.S1_at   | MmugDNA.34693.1 | 6.2   | 6.08  | 0.23 | 0.03 | 1.09  | 0.744044 | 0.037677 | 0.902414 | 0.23859  |
| MmugDNA.34694.1.S1_at   | MmugDNA.34694.1 | 8.14  | 7.69  | 0.1  | 0.2  | 1.37  | 0.023788 | 0.100432 | 0.316761 | 0.359541 |
| MmugDNA.34695.1.S1_at   | MmugDNA.34695.1 | 7.6   | 8.53  | 0.79 | 0.45 | -1.91 | 0.411564 | 0.413924 | 0.731543 | 0.63994  |
| MmugDNA.34698.1.S1_at   | MmugDNA.34698.1 | 5.59  | 5.61  | 0.18 | 0.34 | -1.01 | 0.799669 | 0.042095 | 0.926707 | 0.249638 |
| MmugDNA.347.1.S1_at     | MmugDNA.347.1   | 4.25  | 4.56  | 0.14 | 0.14 | -1.24 | 0.193395 | 0.311223 | 0.564275 | 0.566264 |
| MmugDNA.3470.1.S1_at    | MmugDNA.3470.1  | 6.79  | 6.73  | 0.05 | 0.01 | 1.04  | 0.118203 | 0.203608 | 0.491605 | 0.477879 |
| MmugDNA.34700.1.S1_at   | MmugDNA.34700.1 | 3.44  | 3.33  | 0.1  | 0.16 | 1.08  | 0.101206 | 0.190337 | 0.471667 | 0.465906 |
| MmugDNA.34702.1.S1_at   | MmugDNA.34702.1 | 4.81  | 4.85  | 0.08 | 0.01 | -1.03 | 0.682061 | 0.836981 | 0.875578 | 0.906826 |
| MmugDNA.40729.1.S1_s_at | MmugDNA.40729.1 | 3.44  | 3.54  | 0.28 | 0.08 | -1.07 | 0.754173 | 0.27112  | 0.907331 | 0.536259 |
| MmugDNA.34705.1.S1_at   | MmugDNA.34705.1 | 8.65  | 8.63  | 0.25 | 0.17 | 1.02  | 0.41533  | 0.762837 | 0.733613 | 0.862064 |
| MmugDNA.34706.1.S1_at   | MmugDNA.34706.1 | 7.26  | 7.03  | 0.4  | 0.08 | 1.17  | 0.129598 | 0.153215 | 0.504359 | 0.428058 |
| MmugDNA.34707.1.S1_at   | MmugDNA.34707.1 | 5.32  | 4.76  | 0.2  | 0.31 | 1.47  | 0.102536 | 0.376664 | 0.472772 | 0.614483 |
| MmugDNA.34708.1.S1_at   | MmugDNA.34708.1 | 4.86  | 4.73  | 0.34 | 0.01 | 1.09  | 0.831505 | 0.906291 | 0.939628 | 0.946953 |
| MmugDNA.34709.1.S1_at   | MmugDNA.34709.1 | 5.09  | 5.41  | 0.29 | 0.4  | -1.25 | 0.412556 | 0.221119 | 0.732064 | 0.494498 |
| MmugDNA.34710.1.S1_at   | MmugDNA.34710.1 | 8.46  | 8.46  | 0.15 | 0.04 | -1    | 0.695552 | 0.324335 | 0.881655 | 0.574924 |
| MmugDNA.34711.1.S1_at   | MmugDNA.34711.1 | 4.31  | 4.22  | 0.14 | 0.01 | 1.06  | 0.126732 | 0.016406 | 0.500599 | 0.162188 |
| MmugDNA.34712.1.S1_at   | MmugDNA.34712.1 | 6.9   | 7.3   | 0.14 | 0.44 | -1.32 | 0.199635 | 0.289487 | 0.571494 | 0.550495 |
| MmugDNA.34713.1.S1_at   | MmugDNA.34713.1 | 7     | 7.45  | 0.42 | 0.25 | -1.37 | 0.155233 | 0.154753 | 0.528524 | 0.429764 |
| MmugDNA.34714.1.S1_at   | MmugDNA.34714.1 | 10.72 | 11.2  | 0.4  | 0.16 | -1.39 | 0.200898 | 0.063959 | 0.572594 | 0.29906  |
| MmugDNA.34715.1.S1_at   | MmugDNA.34715.1 | 7.7   | 7.01  | 0.62 | 0.42 | 1.61  | 0.425525 | 0.166462 | 0.740112 | 0.442903 |
| MmugDNA.34716.1.S1_at   | MmugDNA.34716.1 | 5     | 4.74  | 0.17 | 0.2  | 1.2   | 0.348935 | 0.230303 | 0.690079 | 0.502102 |
| MmugDNA.34719.1.S1_at   | MmugDNA.34719.1 | 5.94  | 5.71  | 0.11 | 0.04 | 1.17  | 0.065724 | 0.070619 | 0.420897 | 0.311913 |
| MmugDNA.3472.1.S1_at    | MmugDNA.3472.1  | 3.79  | 4.18  | 1.27 | 1.1  | -1.31 | 0.908979 | 0.778326 | 0.969287 | 0.871276 |
| MmugDNA.34720.1.S1_at   | MmugDNA.34720.1 | 2.91  | 2.9   | 0.11 | 0.1  | 1     | 0.612549 | 0.753553 | 0.843094 | 0.856527 |
| MmugDNA.34722.1.S1_at   | MmugDNA.34722.1 | 6.13  | 5.83  | 0.02 | 0.31 | 1.23  | 0.585539 | 0.729765 | 0.830549 | 0.843679 |
| MmugDNA.34723.1.S1_at   | MmugDNA.34723.1 | 3.85  | 3.82  | 0.11 | 0.16 | 1.02  | 0.258606 | 0.533691 | 0.622286 | 0.719848 |
| MmugDNA.34724.1.S1_at   | MmugDNA.34724.1 | 4.44  | 4.6   | 0.04 | 0.1  | -1.12 | 0.075278 | 0.110064 | 0.436118 | 0.374179 |
| MmugDNA.34725.1.S1_at   | MmugDNA.34725.1 | 8.57  | 8.15  | 1.01 | 0.39 | 1.34  | 0.582982 | 0.826811 | 0.8287   | 0.900529 |
| MmugDNA.34726.1.S1_at   | MmugDNA.34726.1 | 3.57  | 3.8   | 0.27 | 0.24 | -1.18 | 0.768415 | 0.40757  | 0.913024 | 0.63505  |
| MmugDNA.34726.1.S1_s_at | MmugDNA.34726.1 | 4.2   | 4.29  | 0.25 | 0.35 | -1.06 | 0.502527 | 0.721751 | 0.783707 | 0.83882  |
| MmugDNA.34727.1.S1_at   | MmugDNA.34727.1 | 9.39  | 9     | 0.9  | 0.05 | 1.32  | 0.788038 | 0.026093 | 0.922084 | 0.20248  |
| MmugDNA.34728.1.S1_at   | MmugDNA.34728.1 | 4.06  | 4.06  | 0.27 | 0.29 | -1    | 0.902744 | 0.321777 | 0.96718  | 0.573428 |
| MmugDNA.3473.1.S1_at    | MmugDNA.3473.1  | 5.54  | 5.76  | 0.06 | 0.15 | -1.17 | 0.310863 | 0.647036 | 0.662732 | 0.793279 |
| MmugDNA.34730.1.S1_at   | MmugDNA.34730.1 | 4.59  | 4.23  | 0.77 | 0.13 | 1.28  | 0.206413 | 0.187649 | 0.578212 | 0.463663 |
| MmugDNA.34731.1.S1_at   | MmugDNA.34731.1 | 6.22  | 6.06  | 0.28 | 0.24 | 1.12  | 0.640023 | 0.100938 | 0.856487 | 0.360509 |
| MmugDNA.34733.1.S1_at   | MmugDNA.34733.1 | 7.01  | 6.72  | 0.38 | 0.24 | 1.23  | 0.806466 | 0.01968  | 0.929767 | 0.176276 |

|                         |                 |       |       |      |      |       |          |          |          |          |
|-------------------------|-----------------|-------|-------|------|------|-------|----------|----------|----------|----------|
| MmugDNA.34734.1.S1_at   | MmugDNA.34734.1 | 5.76  | 5.46  | 0.11 | 0.3  | 1.24  | 0.123349 | 0.10929  | 0.496589 | 0.37308  |
| MmugDNA.34734.1.S1_s_at | MmugDNA.34734.1 | 7.95  | 8.18  | 0.1  | 0.28 | -1.18 | 0.324978 | 0.165359 | 0.67293  | 0.441544 |
| MmugDNA.34737.1.S1_at   | MmugDNA.34737.1 | 4.25  | 4.19  | 0.14 | 0.03 | 1.04  | 0.623974 | 0.114711 | 0.848448 | 0.381252 |
| MmugDNA.34738.1.S1_at   | MmugDNA.34738.1 | 11.29 | 10.52 | 0.13 | 0.21 | 1.71  | 0.00521  | 0.002998 | 0.206226 | 0.079958 |
| MmugDNA.3474.1.S1_at    | MmugDNA.3474.1  | 4.82  | 4.67  | 0.07 | 0.18 | 1.11  | 0.184146 | 0.197291 | 0.55696  | 0.472213 |
| MmugDNA.34740.1.S1_at   | MmugDNA.34740.1 | 8.01  | 7     | 0.09 | 0.1  | 2.01  | 0.00015  | 0.000475 | 0.112332 | 0.038572 |
| MmugDNA.34741.1.S1_at   | MmugDNA.34741.1 | 6.23  | 7.22  | 0.43 | 0.22 | -1.99 | 0.035918 | 0.097851 | 0.35373  | 0.355646 |
| MmugDNA.34742.1.S1_at   | MmugDNA.34742.1 | 4.32  | 4.47  | 0.27 | 0.13 | -1.11 | 0.904884 | 0.602129 | 0.968079 | 0.763172 |
| MmugDNA.34744.1.S1_at   | MmugDNA.34744.1 | 4.99  | 5.08  | 0.18 | 0.1  | -1.07 | 0.419388 | 0.228444 | 0.736296 | 0.500631 |
| MmugDNA.34745.1.S1_at   | MmugDNA.34745.1 | 6.77  | 6.98  | 0.67 | 0.23 | -1.16 | 0.498661 | 0.047472 | 0.781829 | 0.262486 |
| MmugDNA.34746.1.S1_at   | MmugDNA.34746.1 | 6.61  | 6.74  | 0.71 | 0.14 | -1.1  | 0.569182 | 0.579961 | 0.82125  | 0.749354 |
| MmugDNA.34749.1.S1_at   | MmugDNA.34749.1 | 11.37 | 9.95  | 0.57 | 0.24 | 2.67  | 0.03836  | 0.005928 | 0.359051 | 0.105331 |
| MmugDNA.3475.1.S1_at    | MmugDNA.3475.1  | 5.21  | 5.12  | 0.01 | 0.19 | 1.07  | 0.14     | 0.262268 | 0.515581 | 0.528586 |
| MmugDNA.34750.1.S1_at   | MmugDNA.34750.1 | 4.48  | 4.34  | 0.12 | 0.24 | 1.1   | 0.337857 | 0.116567 | 0.682728 | 0.383705 |
| MmugDNA.34751.1.S1_at   | MmugDNA.34751.1 | 5.62  | 5.39  | 0.29 | 0.23 | 1.18  | 0.114415 | 0.316927 | 0.487606 | 0.570275 |
| MmugDNA.34752.1.S1_at   | MmugDNA.34752.1 | 4.89  | 4.53  | 0.24 | 0.07 | 1.28  | 0.197255 | 0.350638 | 0.568308 | 0.594384 |
| MmugDNA.34754.1.S1_at   | MmugDNA.34754.1 | 5.32  | 4.79  | 0.38 | 0.32 | 1.45  | 0.387072 | 0.000082 | 0.714027 | 0.027016 |
| MmugDNA.34755.1.S1_at   | MmugDNA.34755.1 | 7.11  | 7.04  | 0.08 | 0.05 | 1.05  | 0.225487 | 0.70178  | 0.59474  | 0.827048 |
| MmugDNA.34756.1.S1_at   | MmugDNA.34756.1 | 5.6   | 5.44  | 0.38 | 0.07 | 1.11  | 0.427376 | 0.13118  | 0.741004 | 0.403211 |
| MmugDNA.34758.1.S1_at   | MmugDNA.34758.1 | 5.79  | 5.68  | 0.12 | 0.09 | 1.08  | 0.287758 | 0.190581 | 0.644849 | 0.465963 |
| MmugDNA.3476.1.S1_at    | MmugDNA.3476.1  | 6.18  | 6.65  | 0.24 | 0.11 | -1.38 | 0.022281 | 0.262746 | 0.310495 | 0.529086 |
| MmugDNA.34760.1.S1_at   | MmugDNA.34760.1 | 11.14 | 10.88 | 0.25 | 0.15 | 1.19  | 0.305815 | 0.309741 | 0.659254 | 0.565044 |
| MmugDNA.34762.1.S1_at   | MmugDNA.34762.1 | 8.64  | 8.37  | 0.63 | 0.1  | 1.2   | 0.430221 | 0.321187 | 0.742602 | 0.573111 |
| MmugDNA.34764.1.S1_s_at | MmugDNA.34764.1 | 3.96  | 3.91  | 0.25 | 0.15 | 1.04  | 0.524999 | 0.489565 | 0.796179 | 0.691824 |
| MmugDNA.34765.1.S1_at   | MmugDNA.34765.1 | 5.31  | 5.22  | 0.11 | 0.01 | 1.07  | 0.201379 | 0.140574 | 0.57304  | 0.413822 |
| MmugDNA.34769.1.S1_at   | MmugDNA.34769.1 | 4.59  | 4.62  | 0.09 | 0.21 | -1.02 | 0.709823 | 0.916147 | 0.887084 | 0.953065 |
| MmugDNA.3477.1.S1_at    | MmugDNA.3477.1  | 3.8   | 3.75  | 0.12 | 0.03 | 1.04  | 0.158492 | 0.290899 | 0.531551 | 0.551473 |
| MmugDNA.34770.1.S1_at   | MmugDNA.34770.1 | 7.22  | 6.77  | 1.6  | 0.29 | 1.37  | 0.664763 | 0.591797 | 0.867683 | 0.757276 |
| MmugDNA.34771.1.S1_at   | MmugDNA.34771.1 | 7.54  | 7.54  | 0.13 | 0.09 | 1     | 0.938744 | 0.99095  | 0.979343 | 0.994921 |
| MmugDNA.34772.1.S1_at   | MmugDNA.34772.1 | 3.77  | 3.93  | 0.36 | 0.25 | -1.12 | 0.816028 | 0.296006 | 0.933307 | 0.555295 |
| MmugDNA.34774.1.S1_at   | MmugDNA.34774.1 | 3.36  | 3.37  | 0.04 | 0.14 | -1    | 0.31432  | 0.414316 | 0.665127 | 0.640189 |
| MmugDNA.34777.1.S1_at   | MmugDNA.34777.1 | 11.22 | 11.64 | 1.02 | 0.12 | -1.34 | 0.610168 | 0.661161 | 0.841839 | 0.801687 |
| MmugDNA.34779.1.S1_at   | MmugDNA.34779.1 | 4.11  | 3.63  | 0.26 | 0.02 | 1.39  | 0.041065 | 0.094242 | 0.365672 | 0.350889 |
| MmugDNA.3478.1.S1_at    | MmugDNA.3478.1  | 4.6   | 4.72  | 0.43 | 0.24 | -1.08 | 0.936404 | 0.114333 | 0.978573 | 0.380835 |
| MmugDNA.34782.1.S1_at   | MmugDNA.34782.1 | 6.31  | 6.27  | 0.28 | 0.52 | 1.03  | 0.553762 | 0.688817 | 0.812271 | 0.818338 |
| MmugDNA.34783.1.S1_at   | MmugDNA.34783.1 | 4.95  | 4.86  | 0.1  | 0.08 | 1.07  | 0.558299 | 0.24561  | 0.815182 | 0.515348 |
| MmugDNA.34784.1.S1_at   | MmugDNA.34784.1 | 6.52  | 6.35  | 0.32 | 0.22 | 1.13  | 0.919677 | 0.956287 | 0.972712 | 0.975137 |
| MmugDNA.34785.1.S1_at   | MmugDNA.34785.1 | 9.08  | 8.95  | 0.26 | 0.27 | 1.09  | 0.603329 | 0.374664 | 0.83918  | 0.613    |
| MmugDNA.34786.1.S1_at   | MmugDNA.34786.1 | 3.52  | 3.55  | 0.07 | 0.24 | -1.02 | 0.993475 | 0.702376 | 0.997488 | 0.827489 |
| MmugDNA.34788.1.S1_at   | MmugDNA.34788.1 | 4.12  | 4.01  | 0.23 | 0.14 | 1.08  | 0.926059 | 0.851975 | 0.975377 | 0.91585  |
| MmugDNA.34789.1.S1_at   | MmugDNA.34789.1 | 7.02  | 5.78  | 0.66 | 0.23 | 2.36  | 0.036387 | 0.006053 | 0.35477  | 0.106152 |
| MmugDNA.3479.1.S1_at    | MmugDNA.3479.1  | 3.38  | 3.45  | 0.07 | 0.04 | -1.04 | 0.699738 | 0.362724 | 0.883309 | 0.603245 |
| MmugDNA.34790.1.S1_at   | MmugDNA.34790.1 | 4.32  | 4.34  | 0.16 | 0.13 | -1.02 | 0.671433 | 0.865603 | 0.870346 | 0.923598 |

|                         |                 |       |       |      |      |       |          |          |          |          |
|-------------------------|-----------------|-------|-------|------|------|-------|----------|----------|----------|----------|
| MmugDNA.34791.1.S1_at   | MmugDNA.34791.1 | 6.86  | 6.8   | 0.1  | 0.02 | 1.05  | 0.3274   | 0.871237 | 0.675065 | 0.926834 |
| MmugDNA.34792.1.S1_at   | MmugDNA.34792.1 | 5.98  | 6.18  | 0.12 | 0.26 | -1.15 | 0.271792 | 0.691454 | 0.631544 | 0.820491 |
| MmugDNA.34793.1.S1_at   | MmugDNA.34793.1 | 10.22 | 9.7   | 0.4  | 0.1  | 1.43  | 0.278611 | 0.007628 | 0.637745 | 0.116869 |
| MmugDNA.34794.1.S1_at   | MmugDNA.34794.1 | 8.53  | 8.26  | 0.22 | 0.05 | 1.2   | 0.084951 | 0.064279 | 0.451555 | 0.299722 |
| MmugDNA.34794.1.S1_s_at | MmugDNA.34794.1 | 8.82  | 8.64  | 0.24 | 0.11 | 1.13  | 0.200707 | 0.188876 | 0.57245  | 0.464789 |
| MmugDNA.34795.1.S1_at   | MmugDNA.34795.1 | 6.36  | 8.15  | 2.35 | 0.43 | -3.45 | 0.29707  | 0.358398 | 0.652603 | 0.59994  |
| MmugDNA.34797.1.S1_at   | MmugDNA.34797.1 | 3.5   | 3.5   | 0.07 | 0.04 | -1    | 0.484767 | 0.229715 | 0.773791 | 0.501729 |
| MmugDNA.34799.1.S1_at   | MmugDNA.34799.1 | 6.6   | 6.27  | 0.22 | 0.12 | 1.25  | 0.117742 | 0.22119  | 0.491041 | 0.494511 |
| MmugDNA.34801.1.S1_at   | MmugDNA.34801.1 | 3.19  | 3.2   | 0.15 | 0.04 | -1.01 | 0.730666 | 0.913232 | 0.896248 | 0.951146 |
| MmugDNA.34802.1.S1_at   | MmugDNA.34802.1 | 3.78  | 4.44  | 0.73 | 0.22 | -1.59 | 0.44355  | 0.364217 | 0.750908 | 0.604513 |
| MmugDNA.34803.1.S1_at   | MmugDNA.34803.1 | 2.91  | 2.89  | 0.11 | 0.04 | 1.02  | 0.281244 | 0.379045 | 0.639849 | 0.616011 |
| MmugDNA.34806.1.S1_at   | MmugDNA.34806.1 | 12.25 | 11.7  | 0.29 | 0.03 | 1.46  | 0.084012 | 0.086948 | 0.45029  | 0.339802 |
| MmugDNA.34808.1.S1_at   | MmugDNA.34808.1 | 3.87  | 3.86  | 0.03 | 0.17 | 1     | 0.985726 | 0.146173 | 0.995461 | 0.420124 |
| MmugDNA.34809.1.S1_at   | MmugDNA.34809.1 | 8.35  | 6.99  | 0.56 | 0.09 | 2.57  | 0.018105 | 0.001925 | 0.295257 | 0.065609 |
| MmugDNA.3481.1.S1_at    | MmugDNA.3481.1  | 4.44  | 4.14  | 0.2  | 0.37 | 1.23  | 0.252102 | 0.085044 | 0.617122 | 0.336812 |
| MmugDNA.34810.1.S1_at   | MmugDNA.34810.1 | 12.59 | 12.18 | 0.29 | 0.02 | 1.33  | 0.188612 | 0.185892 | 0.560513 | 0.461752 |
| MmugDNA.34812.1.S1_at   | MmugDNA.34812.1 | 8.61  | 8.15  | 0.12 | 0.14 | 1.38  | 0.038874 | 0.004992 | 0.360459 | 0.098466 |
| MmugDNA.34817.1.S1_at   | MmugDNA.34817.1 | 5.45  | 5.56  | 0.23 | 0.06 | -1.08 | 0.913756 | 0.923438 | 0.970716 | 0.956981 |
| MmugDNA.34817.1.S1_s_at | MmugDNA.34817.1 | 6.82  | 7.16  | 0.39 | 0.02 | -1.26 | 0.232524 | 0.2944   | 0.600124 | 0.554156 |
| MmugDNA.34818.1.S1_at   | MmugDNA.34818.1 | 6.83  | 6.67  | 0.15 | 0.2  | 1.12  | 0.163949 | 0.151201 | 0.536665 | 0.425873 |
| MmugDNA.3482.1.S1_at    | MmugDNA.3482.1  | 7.23  | 7.11  | 0.05 | 0.09 | 1.09  | 0.088458 | 0.035739 | 0.45606  | 0.233422 |
| MmugDNA.34820.1.S1_at   | MmugDNA.34820.1 | 6.47  | 6.25  | 0.53 | 0.18 | 1.17  | 0.468673 | 0.323207 | 0.765057 | 0.574408 |
| MmugDNA.34821.1.S1_at   | MmugDNA.34821.1 | 5.37  | 5.14  | 0.11 | 0.16 | 1.17  | 0.317625 | 0.287611 | 0.667511 | 0.548885 |
| MmugDNA.34822.1.S1_at   | MmugDNA.34822.1 | 5.26  | 5.22  | 0.15 | 0.13 | 1.02  | 0.177383 | 0.221131 | 0.550581 | 0.494498 |
| MmugDNA.34823.1.S1_at   | MmugDNA.34823.1 | 3.03  | 3.1   | 0.17 | 0.17 | -1.05 | 0.602143 | 0.791771 | 0.838751 | 0.879741 |
| MmugDNA.34823.1.S1_x_at | MmugDNA.34823.1 | 3.25  | 3.31  | 0.14 | 0.06 | -1.04 | 0.558873 | 0.741917 | 0.815742 | 0.850533 |
| MmugDNA.34824.1.S1_at   | MmugDNA.34824.1 | 6.38  | 5.52  | 1.08 | 0.4  | 1.82  | 0.743889 | 0.20855  | 0.902335 | 0.482453 |
| MmugDNA.34825.1.S1_at   | MmugDNA.34825.1 | 6.96  | 7.12  | 0.44 | 0.16 | -1.12 | 0.138256 | 0.147208 | 0.513671 | 0.421455 |
| MmugDNA.34826.1.S1_at   | MmugDNA.34826.1 | 9.72  | 9.94  | 0.25 | 0.11 | -1.17 | 0.921276 | 0.170551 | 0.973336 | 0.447179 |
| MmugDNA.34827.1.S1_at   | MmugDNA.34827.1 | 3.17  | 3.2   | 0.34 | 0.15 | -1.02 | 0.995819 | 0.938416 | 0.998312 | 0.965059 |
| MmugDNA.34828.1.S1_at   | MmugDNA.34828.1 | 6.57  | 7.08  | 0.6  | 0.18 | -1.42 | 0.240254 | 0.017922 | 0.606631 | 0.168998 |
| MmugDNA.34828.1.S1_s_at | MmugDNA.34828.1 | 10.9  | 9.44  | 0.57 | 0.23 | 2.75  | 0.033929 | 0.005241 | 0.347468 | 0.100307 |
| MmugDNA.34829.1.S1_at   | MmugDNA.34829.1 | 3.54  | 3.67  | 0.12 | 0.03 | -1.1  | 0.521439 | 0.429954 | 0.794521 | 0.65111  |
| MmugDNA.3483.1.S1_at    | MmugDNA.3483.1  | 5.49  | 5.64  | 0.12 | 0.23 | -1.1  | 0.992192 | 0.619664 | 0.996928 | 0.774873 |
| MmugDNA.34830.1.S1_at   | MmugDNA.34830.1 | 12.07 | 11.48 | 0.6  | 0.08 | 1.5   | 0.197997 | 0.249827 | 0.569173 | 0.518876 |
| MmugDNA.34831.1.S1_at   | MmugDNA.34831.1 | 7.16  | 7.3   | 0.2  | 0.09 | -1.1  | 0.568955 | 0.79288  | 0.821103 | 0.880387 |
| MmugDNA.34832.1.S1_at   | MmugDNA.34832.1 | 3.96  | 3.94  | 0.13 | 0.1  | 1.01  | 0.691156 | 0.898839 | 0.879715 | 0.942448 |
| MmugDNA.34833.1.S1_at   | MmugDNA.34833.1 | 7.77  | 7.43  | 0.1  | 0.13 | 1.27  | 0.014348 | 0.278886 | 0.274912 | 0.542633 |
| MmugDNA.34834.1.S1_at   | MmugDNA.34834.1 | 12.34 | 12.59 | 0.12 | 0.02 | -1.19 | 0.022851 | 0.000298 | 0.312704 | 0.034892 |
| MmugDNA.34835.1.S1_at   | MmugDNA.34835.1 | 5.67  | 5.61  | 0.47 | 0.22 | 1.04  | 0.364582 | 0.281791 | 0.700605 | 0.544844 |
| MmugDNA.34836.1.S1_at   | MmugDNA.34836.1 | 7.17  | 7.11  | 0.23 | 0.22 | 1.05  | 0.265178 | 0.347723 | 0.626397 | 0.592083 |
| MmugDNA.34837.1.S1_at   | MmugDNA.34837.1 | 6.37  | 6.35  | 0.28 | 0.03 | 1.01  | 0.884996 | 0.971329 | 0.960159 | 0.984419 |
| MmugDNA.34838.1.S1_at   | MmugDNA.34838.1 | 4.59  | 4.1   | 0.64 | 0.2  | 1.41  | 0.126773 | 0.090921 | 0.500599 | 0.345545 |

|                         |                 |       |       |      |      |       |          |          |          |          |
|-------------------------|-----------------|-------|-------|------|------|-------|----------|----------|----------|----------|
| MmugDNA.34839.1.S1_at   | MmugDNA.34839.1 | 6.31  | 6.61  | 0.71 | 0.14 | -1.22 | 0.510173 | 0.296358 | 0.788001 | 0.555492 |
| MmugDNA.3484.1.S1_at    | MmugDNA.3484.1  | 5     | 5.03  | 0.13 | 0.04 | -1.03 | 0.665188 | 0.462011 | 0.867826 | 0.673527 |
| MmugDNA.34840.1.S1_at   | MmugDNA.34840.1 | 7.8   | 7.75  | 0.72 | 0.37 | 1.03  | 0.676348 | 0.845841 | 0.873062 | 0.912246 |
| MmugDNA.34841.1.S1_at   | MmugDNA.34841.1 | 5.79  | 5.71  | 0.14 | 0.04 | 1.06  | 0.17303  | 0.505681 | 0.546142 | 0.702218 |
| MmugDNA.34842.1.S1_at   | MmugDNA.34842.1 | 4.85  | 4.79  | 0.12 | 0.04 | 1.04  | 0.191654 | 0.204453 | 0.562859 | 0.478821 |
| MmugDNA.34843.1.S1_at   | MmugDNA.34843.1 | 3.69  | 3.74  | 0.21 | 0.12 | -1.04 | 0.779981 | 0.737376 | 0.918949 | 0.847889 |
| MmugDNA.34844.1.S1_at   | MmugDNA.34844.1 | 3.72  | 4.05  | 0.06 | 0.54 | -1.26 | 0.302736 | 0.370072 | 0.656634 | 0.609333 |
| MmugDNA.34845.1.S1_at   | MmugDNA.34845.1 | 4.45  | 4.26  | 0.14 | 0.27 | 1.14  | 0.537726 | 0.711698 | 0.802792 | 0.832794 |
| MmugDNA.34846.1.S1_at   | MmugDNA.34846.1 | 5.9   | 5.88  | 0.45 | 0.01 | 1.01  | 0.440205 | 0.623302 | 0.748401 | 0.777693 |
| MmugDNA.34847.1.S1_at   | MmugDNA.34847.1 | 5.61  | 5.38  | 0.31 | 0.46 | 1.17  | 0.999018 | 0.912601 | 0.999788 | 0.950764 |
| MmugDNA.34849.1.S1_at   | MmugDNA.34849.1 | 4.72  | 4.65  | 0.11 | 0.05 | -1.05 | 0.347965 | 0.548639 | 0.689189 | 0.729318 |
| MmugDNA.3485.1.S1_at    | MmugDNA.3485.1  | 8.75  | 8.45  | 1.08 | 0.54 | 1.23  | 0.649079 | 0.11531  | 0.860204 | 0.382354 |
| MmugDNA.34851.1.S1_at   | MmugDNA.34851.1 | 3.69  | 3.68  | 0.27 | 0.1  | 1     | 0.266842 | 0.365816 | 0.627644 | 0.60574  |
| MmugDNA.34852.1.S1_at   | MmugDNA.34852.1 | 11.32 | 10.83 | 0.18 | 0.08 | 1.41  | 0.00631  | 0.001051 | 0.218297 | 0.051467 |
| MmugDNA.34853.1.S1_at   | MmugDNA.34853.1 | 3.56  | 3.56  | 0.09 | 0.05 | -1    | 0.7736   | 0.155694 | 0.915826 | 0.431054 |
| MmugDNA.34855.1.S1_at   | MmugDNA.34855.1 | 4.18  | 3.58  | 0.36 | 0.22 | 1.52  | 0.090724 | 0.155432 | 0.458873 | 0.430802 |
| MmugDNA.34856.1.S1_at   | MmugDNA.34856.1 | 3.77  | 4.45  | 0.27 | 0.32 | -1.59 | 0.237227 | 0.017979 | 0.604124 | 0.169137 |
| MmugDNA.34857.1.S1_at   | MmugDNA.34857.1 | 5.76  | 6.25  | 0.53 | 0.27 | -1.41 | 0.763943 | 0.141637 | 0.911316 | 0.415196 |
| MmugDNA.34857.1.S1_s_at | MmugDNA.34857.1 | 7.3   | 7.43  | 0.33 | 0.04 | -1.09 | 0.781644 | 0.09038  | 0.919573 | 0.344827 |
| MmugDNA.34858.1.S1_at   | MmugDNA.34858.1 | 6.25  | 6.68  | 0.61 | 0.19 | -1.35 | 0.352167 | 0.405085 | 0.692649 | 0.633481 |
| MmugDNA.34859.1.S1_at   | MmugDNA.34859.1 | 6.44  | 6.28  | 0.37 | 0.23 | 1.11  | 0.727859 | 0.873126 | 0.894887 | 0.927823 |
| MmugDNA.3486.1.S1_at    | MmugDNA.3486.1  | 3.04  | 3.03  | 0.04 | 0.07 | 1     | 0.259625 | 0.505307 | 0.622626 | 0.702073 |
| MmugDNA.34860.1.S1_at   | MmugDNA.34860.1 | 3.38  | 3.54  | 0.07 | 0.11 | -1.11 | 0.080942 | 0.462957 | 0.445056 | 0.674149 |
| MmugDNA.34861.1.S1_at   | MmugDNA.34861.1 | 8.93  | 9.15  | 0.79 | 0.03 | -1.16 | 0.353927 | 0.306357 | 0.693507 | 0.562971 |
| MmugDNA.34863.1.S1_at   | MmugDNA.34863.1 | 10.75 | 10.1  | 0.78 | 0.31 | 1.56  | 0.870545 | 0.036986 | 0.954998 | 0.236733 |
| MmugDNA.34864.1.S1_at   | MmugDNA.34864.1 | 5.43  | 5.37  | 0.86 | 0.32 | 1.04  | 0.597736 | 0.317035 | 0.836517 | 0.570317 |
| MmugDNA.34865.1.S1_at   | MmugDNA.34865.1 | 4.9   | 4.27  | 0.33 | 0.15 | 1.55  | 0.121497 | 0.022959 | 0.495106 | 0.189548 |
| MmugDNA.34866.1.S1_at   | MmugDNA.34866.1 | 4.01  | 3.88  | 0.12 | 0.02 | 1.1   | 0.115881 | 0.286336 | 0.489339 | 0.547784 |
| MmugDNA.34867.1.S1_at   | MmugDNA.34867.1 | 3.95  | 3.93  | 0.1  | 0.19 | 1.01  | 0.736904 | 0.14666  | 0.899286 | 0.420683 |
| MmugDNA.34868.1.S1_at   | MmugDNA.34868.1 | 10.51 | 10.31 | 0.47 | 0.12 | 1.14  | 0.405371 | 0.443658 | 0.727375 | 0.661364 |
| MmugDNA.34869.1.S1_at   | MmugDNA.34869.1 | 6.16  | 5.88  | 0.13 | 0.07 | 1.21  | 0.029365 | 0.010606 | 0.334049 | 0.134301 |
| MmugDNA.3487.1.S1_at    | MmugDNA.3487.1  | 6.81  | 6.87  | 0.48 | 0.42 | -1.04 | 0.501822 | 0.90107  | 0.783444 | 0.943717 |
| MmugDNA.34870.1.S1_at   | MmugDNA.34870.1 | 7.73  | 7.43  | 0.14 | 0.05 | 1.23  | 0.021487 | 0.018868 | 0.308897 | 0.172782 |
| MmugDNA.34871.1.S1_at   | MmugDNA.34871.1 | 6.42  | 6.81  | 0.27 | 0.26 | -1.31 | 0.18995  | 0.092427 | 0.561309 | 0.348313 |
| MmugDNA.34872.1.S1_at   | MmugDNA.34872.1 | 12.13 | 12.29 | 0.08 | 0.04 | -1.11 | 0.042826 | 0.007193 | 0.370419 | 0.114057 |
| MmugDNA.34875.1.S1_at   | MmugDNA.34875.1 | 5.48  | 5.24  | 0.14 | 0.09 | 1.18  | 0.082765 | 0.127565 | 0.448001 | 0.39847  |
| MmugDNA.34876.1.S1_at   | MmugDNA.34876.1 | 8.18  | 9.46  | 0.12 | 0.26 | -2.44 | 0.002515 | 0.005939 | 0.179396 | 0.105426 |
| MmugDNA.34877.1.S1_at   | MmugDNA.34877.1 | 5.38  | 5.75  | 0.61 | 0.4  | -1.29 | 0.410392 | 0.641377 | 0.730749 | 0.789506 |
| MmugDNA.34878.1.S1_at   | MmugDNA.34878.1 | 5.59  | 6.41  | 0.98 | 0.12 | -1.77 | 0.198508 | 0.055678 | 0.569807 | 0.28179  |
| MmugDNA.3488.1.S1_at    | MmugDNA.3488.1  | 4.82  | 4.97  | 0.13 | 0.05 | -1.11 | 0.505676 | 0.441847 | 0.785398 | 0.659939 |
| MmugDNA.34881.1.S1_at   | MmugDNA.34881.1 | 6.6   | 6.59  | 0.07 | 0.09 | 1.01  | 0.503744 | 0.337962 | 0.784379 | 0.585166 |
| MmugDNA.34883.1.S1_at   | MmugDNA.34883.1 | 3.84  | 3.79  | 0.1  | 0.1  | 1.03  | 0.90553  | 0.828141 | 0.968177 | 0.901214 |
| MmugDNA.34885.1.S1_at   | MmugDNA.34885.1 | 6.9   | 4.84  | 0.75 | 0.35 | 4.18  | 0.039695 | 0.090646 | 0.362432 | 0.345151 |

|                         |                 |       |       |      |      |       |          |          |          |          |
|-------------------------|-----------------|-------|-------|------|------|-------|----------|----------|----------|----------|
| MmugDNA.34887.1.S1_at   | MmugDNA.34887.1 | 3.04  | 2.92  | 0.17 | 0.09 | 1.09  | 0.241024 | 0.324076 | 0.607241 | 0.574761 |
| MmugDNA.34888.1.S1_at   | MmugDNA.34888.1 | 8.57  | 8.17  | 0.23 | 0.07 | 1.31  | 0.16511  | 0.01545  | 0.537704 | 0.157803 |
| MmugDNA.3489.1.S1_at    | MmugDNA.3489.1  | 5.79  | 5.66  | 0.25 | 0.33 | 1.09  | 0.59782  | 0.682153 | 0.836527 | 0.814372 |
| MmugDNA.34890.1.S1_at   | MmugDNA.34890.1 | 3.78  | 3.66  | 0.09 | 0.07 | 1.08  | 0.179654 | 0.237506 | 0.552979 | 0.508165 |
| MmugDNA.34891.1.S1_at   | MmugDNA.34891.1 | 3.52  | 3.51  | 0.14 | 0.06 | 1     | 0.781523 | 0.362119 | 0.919573 | 0.602821 |
| MmugDNA.34892.1.S1_at   | MmugDNA.34892.1 | 7.45  | 8.23  | 0.61 | 0.11 | -1.72 | 0.067178 | 0.324457 | 0.42323  | 0.575063 |
| MmugDNA.34893.1.S1_at   | MmugDNA.34893.1 | 9.72  | 10.31 | 0.25 | 0.12 | -1.51 | 0.013096 | 0.028812 | 0.266768 | 0.211578 |
| MmugDNA.34894.1.S1_at   | MmugDNA.34894.1 | 2.8   | 3.06  | 0.08 | 0.06 | -1.19 | 0.013207 | 0.005869 | 0.266951 | 0.104856 |
| MmugDNA.34896.1.S1_at   | MmugDNA.34896.1 | 5.6   | 5.35  | 0.2  | 0.18 | 1.19  | 0.234177 | 0.263687 | 0.601531 | 0.52997  |
| MmugDNA.34897.1.S1_at   | MmugDNA.34897.1 | 3.96  | 4.05  | 0.13 | 0.1  | -1.07 | 0.212349 | 0.163754 | 0.582875 | 0.439924 |
| MmugDNA.34898.1.S1_at   | MmugDNA.34898.1 | 3.6   | 3.59  | 0.28 | 0.08 | 1.01  | 0.467648 | 0.563179 | 0.764517 | 0.738441 |
| MmugDNA.34899.1.S1_at   | MmugDNA.34899.1 | 5.29  | 5.15  | 0.16 | 0.07 | 1.1   | 0.235838 | 0.451185 | 0.602926 | 0.666085 |
| MmugDNA.349.1.S1_at     | MmugDNA.349.1   | 4.47  | 4.36  | 0.03 | 0.16 | 1.08  | 0.393798 | 0.293744 | 0.719504 | 0.553748 |
| MmugDNA.34900.1.S1_at   | MmugDNA.34900.1 | 5.4   | 5.51  | 0.13 | 0.02 | -1.08 | 0.185438 | 0.120745 | 0.55849  | 0.389579 |
| MmugDNA.34902.1.S1_at   | MmugDNA.34902.1 | 3.46  | 3.35  | 0.67 | 0.1  | 1.08  | 0.455703 | 0.573971 | 0.75757  | 0.745491 |
| MmugDNA.34904.1.S1_at   | MmugDNA.34904.1 | 5.77  | 5.43  | 0.33 | 0.09 | 1.27  | 0.143714 | 0.103384 | 0.519054 | 0.3643   |
| MmugDNA.34906.1.S1_at   | MmugDNA.34906.1 | 5.29  | 5.14  | 0.17 | 0.05 | 1.1   | 0.105432 | 0.092649 | 0.477116 | 0.34868  |
| MmugDNA.34907.1.S1_at   | MmugDNA.34907.1 | 7.32  | 6.59  | 0.2  | 0.3  | 1.65  | 0.047477 | 0.048482 | 0.380416 | 0.265407 |
| MmugDNA.34908.1.S1_at   | MmugDNA.34908.1 | 4.8   | 5.02  | 0.16 | 0.25 | -1.16 | 0.222997 | 0.50139  | 0.592547 | 0.69955  |
| MmugDNA.34909.1.S1_s_at | MmugDNA.34909.1 | 5.25  | 5.09  | 0.47 | 0.16 | 1.12  | 0.157764 | 0.1061   | 0.53073  | 0.368498 |
| MmugDNA.34909.1.S1_x_at | MmugDNA.34909.1 | 7.66  | 7.62  | 0.05 | 0.05 | 1.03  | 0.298581 | 0.192733 | 0.653176 | 0.468231 |
| MmugDNA.34910.1.S1_at   | MmugDNA.34910.1 | 5.7   | 5.54  | 0.4  | 0.26 | 1.12  | 0.410502 | 0.510252 | 0.730749 | 0.704773 |
| MmugDNA.34911.1.S1_at   | MmugDNA.34911.1 | 8.65  | 8.62  | 0.27 | 0.13 | 1.02  | 0.538767 | 0.720599 | 0.803474 | 0.838346 |
| MmugDNA.34912.1.S1_at   | MmugDNA.34912.1 | 9.67  | 8.08  | 1.85 | 0.03 | 3     | 0.517388 | 0.173935 | 0.792    | 0.450247 |
| MmugDNA.34913.1.S1_at   | MmugDNA.34913.1 | 4.36  | 4.36  | 0.17 | 0.08 | -1.01 | 0.437602 | 0.721922 | 0.746873 | 0.838904 |
| MmugDNA.34914.1.S1_s_at | MmugDNA.34914.1 | 11.63 | 11.78 | 0.26 | 0.22 | -1.11 | 0.563875 | 0.792507 | 0.818419 | 0.880128 |
| MmugDNA.34915.1.S1_at   | MmugDNA.34915.1 | 3.26  | 3.23  | 0.03 | 0.29 | 1.02  | 0.834307 | 0.953634 | 0.940579 | 0.973626 |
| MmugDNA.34918.1.S1_at   | MmugDNA.34918.1 | 4.25  | 4.04  | 0.09 | 0.03 | 1.15  | 0.066467 | 0.486525 | 0.422326 | 0.689881 |
| MmugDNA.34919.1.S1_at   | MmugDNA.34919.1 | 3.84  | 3.77  | 0.03 | 0.21 | 1.05  | 0.671623 | 0.534535 | 0.870464 | 0.720431 |
| MmugDNA.3492.1.S1_at    | MmugDNA.3492.1  | 2.83  | 2.72  | 0.02 | 0.09 | 1.08  | 0.110518 | 0.093109 | 0.483606 | 0.349292 |
| MmugDNA.34920.1.S1_at   | MmugDNA.34920.1 | 7.16  | 7.15  | 0.18 | 0.55 | 1.01  | 0.840723 | 0.572568 | 0.943406 | 0.744566 |
| MmugDNA.34922.1.S1_at   | MmugDNA.34922.1 | 3.18  | 3.21  | 0.09 | 0    | -1.02 | 0.749301 | 0.814196 | 0.90499  | 0.892849 |
| MmugDNA.34923.1.S1_at   | MmugDNA.34923.1 | 7.3   | 6.86  | 0.6  | 0.07 | 1.35  | 0.27153  | 0.299143 | 0.631445 | 0.557663 |
| MmugDNA.34924.1.S1_at   | MmugDNA.34924.1 | 8.11  | 8     | 0.18 | 0.17 | 1.08  | 0.974319 | 0.845957 | 0.991855 | 0.912303 |
| MmugDNA.34927.1.S1_at   | MmugDNA.34927.1 | 3.71  | 3.69  | 0.09 | 0.12 | 1.01  | 0.788803 | 0.957306 | 0.922472 | 0.975838 |
| MmugDNA.34928.1.S1_at   | MmugDNA.34928.1 | 3.12  | 3.18  | 0.08 | 0.18 | -1.04 | 0.891315 | 0.46607  | 0.962572 | 0.67611  |
| MmugDNA.3493.1.S1_at    | MmugDNA.3493.1  | 3.26  | 3.25  | 0.25 | 0.1  | 1     | 0.789207 | 0.723208 | 0.92249  | 0.839645 |
| MmugDNA.34931.1.S1_at   | MmugDNA.34931.1 | 5.39  | 5.36  | 0.17 | 0.03 | 1.02  | 0.233556 | 0.253829 | 0.601115 | 0.522173 |
| MmugDNA.34934.1.S1_at   | MmugDNA.34934.1 | 4.87  | 4.86  | 0.44 | 0.06 | 1     | 0.352601 | 0.310909 | 0.692659 | 0.565887 |
| MmugDNA.34936.1.S1_at   | MmugDNA.34936.1 | 4.62  | 6.32  | 0.75 | 0.33 | -3.26 | 0.082868 | 0.083017 | 0.44803  | 0.332753 |
| MmugDNA.34937.1.S1_at   | MmugDNA.34937.1 | 7.85  | 7.23  | 0.49 | 0.26 | 1.53  | 0.068643 | 0.03932  | 0.426    | 0.243401 |
| MmugDNA.34938.1.S1_at   | MmugDNA.34938.1 | 9.32  | 9.44  | 0.47 | 0.27 | -1.09 | 0.709976 | 0.227    | 0.887176 | 0.499286 |
| MmugDNA.34939.1.S1_at   | MmugDNA.34939.1 | 5.91  | 5.92  | 0.47 | 0.57 | -1.01 | 0.949572 | 0.899666 | 0.982929 | 0.942903 |



|                         |                 |       |       |      |      |       |          |          |          |          |
|-------------------------|-----------------|-------|-------|------|------|-------|----------|----------|----------|----------|
| MmugDNA.34941.1.S1_at   | MmugDNA.34941.1 | 5.2   | 4.88  | 0.31 | 0.07 | 1.24  | 0.607163 | 0.817576 | 0.840749 | 0.894755 |
| MmugDNA.34942.1.S1_at   | MmugDNA.34942.1 | 3.06  | 3.12  | 0.19 | 0.16 | -1.04 | 0.344684 | 0.513193 | 0.686997 | 0.706841 |
| MmugDNA.34943.1.S1_at   | MmugDNA.34943.1 | 6.09  | 5.97  | 0.13 | 0.07 | 1.09  | 0.13223  | 0.03647  | 0.506752 | 0.235458 |
| MmugDNA.34944.1.S1_at   | MmugDNA.34944.1 | 5.69  | 5.35  | 0.3  | 0.18 | 1.26  | 0.039057 | 0.032158 | 0.360972 | 0.222021 |
| MmugDNA.34945.1.S1_at   | MmugDNA.34945.1 | 6.31  | 6.36  | 0.07 | 0.07 | -1.04 | 0.719343 | 0.061094 | 0.890921 | 0.293958 |
| MmugDNA.34946.1.S1_at   | MmugDNA.34946.1 | 6.27  | 5.8   | 0.69 | 0.25 | 1.38  | 0.881601 | 0.952001 | 0.959065 | 0.972758 |
| MmugDNA.34948.1.S1_at   | MmugDNA.34948.1 | 13.45 | 13.52 | 0.05 | 0.06 | -1.05 | 0.324722 | 0.059232 | 0.672781 | 0.290341 |
| MmugDNA.3495.1.S1_at    | MmugDNA.3495.1  | 3.89  | 3.66  | 0.2  | 0.23 | 1.17  | 0.467974 | 0.82048  | 0.764607 | 0.896597 |
| MmugDNA.39745.1.S1_at   | MmugDNA.39745.1 | 11.06 | 11.48 | 0.25 | 0.05 | -1.34 | 0.047089 | 0.021097 | 0.379283 | 0.181869 |
| MmugDNA.39745.1.S1_s_at | MmugDNA.39745.1 | 10.83 | 11.17 | 0.27 | 0.05 | -1.26 | 0.251996 | 0.189565 | 0.616976 | 0.465286 |
| MmugDNA.34952.1.S1_at   | MmugDNA.34952.1 | 5.77  | 5.95  | 0.79 | 0.07 | -1.13 | 0.611654 | 0.30162  | 0.84257  | 0.55955  |
| MmugDNA.34952.1.S1_s_at | MmugDNA.34952.1 | 8.39  | 8.35  | 0.54 | 0.21 | 1.03  | 0.847653 | 0.020896 | 0.946572 | 0.181404 |
| MmugDNA.34953.1.S1_at   | MmugDNA.34953.1 | 4.03  | 3.9   | 0.06 | 0.04 | 1.1   | 0.079743 | 0.045773 | 0.442726 | 0.258302 |
| MmugDNA.34956.1.S1_x_at | MmugDNA.34956.1 | 7.15  | 7.12  | 0.46 | 0.28 | 1.02  | 0.752208 | 0.305211 | 0.906315 | 0.562255 |
| MmugDNA.34957.1.S1_at   | MmugDNA.34957.1 | 3.39  | 3.23  | 0.21 | 1.26 | 1.12  | 0.559865 | 0.718485 | 0.816426 | 0.837066 |
| MmugDNA.34958.1.S1_at   | MmugDNA.34958.1 | 4.2   | 4.23  | 0.17 | 0.09 | -1.02 | 0.724052 | 0.153174 | 0.893041 | 0.428011 |
| MmugDNA.34959.1.S1_at   | MmugDNA.34959.1 | 4.24  | 4.15  | 0.08 | 0.08 | 1.06  | 0.248574 | 0.074422 | 0.613859 | 0.318058 |
| MmugDNA.3496.1.S1_at    | MmugDNA.3496.1  | 3.09  | 3.12  | 0.14 | 0.15 | -1.02 | 0.700707 | 0.578138 | 0.883597 | 0.748311 |
| MmugDNA.34960.1.S1_at   | MmugDNA.34960.1 | 7.43  | 7.38  | 0.17 | 0.32 | 1.03  | 0.912077 | 0.10577  | 0.970255 | 0.36796  |
| MmugDNA.34962.1.S1_at   | MmugDNA.34962.1 | 5.06  | 5.52  | 0.44 | 0.47 | -1.37 | 0.249274 | 0.15592  | 0.614581 | 0.431329 |
| MmugDNA.34963.1.S1_at   | MmugDNA.34963.1 | 5.24  | 5.25  | 0.12 | 0.05 | -1    | 0.666206 | 0.38217  | 0.868243 | 0.618361 |
| MmugDNA.34964.1.S1_at   | MmugDNA.34964.1 | 3.88  | 3.77  | 0.18 | 0.14 | 1.08  | 0.897958 | 0.067153 | 0.965417 | 0.305165 |
| MmugDNA.34965.1.S1_x_at | MmugDNA.34965.1 | 12    | 12.31 | 0.2  | 0.18 | -1.23 | 0.199384 | 0.227369 | 0.571138 | 0.499659 |
| MmugDNA.28840.1.S1_s_at | MmugDNA.28840.1 | 7     | 6.95  | 0.14 | 0.02 | 1.04  | 0.656744 | 0.61148  | 0.863682 | 0.769353 |
| MmugDNA.34967.1.S1_at   | MmugDNA.34967.1 | 5.88  | 5.81  | 0.22 | 0.08 | 1.04  | 0.655818 | 0.777532 | 0.863317 | 0.870732 |
| MmugDNA.34969.1.S1_at   | MmugDNA.34969.1 | 6.28  | 6.12  | 0.72 | 0.46 | 1.11  | 0.745908 | 0.815908 | 0.90313  | 0.893781 |
| MmugDNA.3497.1.S1_at    | MmugDNA.3497.1  | 5.47  | 5.49  | 0.12 | 0.34 | -1.01 | 0.42556  | 0.297367 | 0.740112 | 0.556072 |
| MmugDNA.34972.1.S1_at   | MmugDNA.34972.1 | 7.89  | 7.9   | 0.2  | 0.02 | -1    | 0.348702 | 0.258527 | 0.689977 | 0.525796 |
| MmugDNA.34973.1.S1_at   | MmugDNA.34973.1 | 6.36  | 6.3   | 0.08 | 0.11 | 1.04  | 0.191158 | 0.221739 | 0.562514 | 0.494901 |
| MmugDNA.34974.1.S1_at   | MmugDNA.34974.1 | 7.29  | 6.72  | 0.83 | 0.59 | 1.49  | 0.882017 | 0.880053 | 0.95911  | 0.931486 |
| MmugDNA.34975.1.S1_s_at | MmugDNA.34975.1 | 7.99  | 7.24  | 0.51 | 0.62 | 1.69  | 0.252355 | 0.013117 | 0.617313 | 0.147286 |
| MmugDNA.34976.1.S1_at   | MmugDNA.34976.1 | 6.73  | 6.8   | 0.21 | 0.11 | -1.05 | 0.892941 | 0.091985 | 0.963354 | 0.347348 |
| MmugDNA.34977.1.S1_at   | MmugDNA.34977.1 | 5.95  | 5.89  | 0.24 | 0.09 | 1.04  | 0.849449 | 0.783438 | 0.947087 | 0.874577 |
| MmugDNA.34979.1.S1_at   | MmugDNA.34979.1 | 9.22  | 9.07  | 0.25 | 0.13 | 1.11  | 0.375258 | 0.013008 | 0.706463 | 0.146803 |
| MmugDNA.3498.1.S1_at    | MmugDNA.3498.1  | 4.69  | 4.56  | 0.38 | 0.14 | 1.09  | 0.836927 | 0.973412 | 0.941497 | 0.985537 |
| MmugDNA.34980.1.S1_at   | MmugDNA.34980.1 | 3.33  | 3.32  | 0    | 0.05 | 1.01  | 0.839264 | 0.562877 | 0.942609 | 0.738191 |
| MmugDNA.34982.1.S1_at   | MmugDNA.34982.1 | 5.88  | 5.91  | 0.09 | 0.11 | -1.02 | 0.608452 | 0.825027 | 0.841222 | 0.899488 |
| MmugDNA.34983.1.S1_at   | MmugDNA.34983.1 | 5.62  | 5.72  | 0.09 | 0.03 | -1.07 | 0.210583 | 0.323653 | 0.581872 | 0.574525 |
| MmugDNA.34984.1.S1_at   | MmugDNA.34984.1 | 5.93  | 5.6   | 0.92 | 0.33 | 1.26  | 0.939415 | 0.290566 | 0.979532 | 0.551297 |
| MmugDNA.34985.1.S1_at   | MmugDNA.34985.1 | 3.88  | 3.9   | 0.08 | 0.18 | -1.02 | 0.541854 | 0.629091 | 0.805316 | 0.781597 |
| MmugDNA.34987.1.S1_at   | MmugDNA.34987.1 | 6.87  | 6.95  | 0.11 | 0.02 | -1.05 | 0.392826 | 0.7932   | 0.718623 | 0.880602 |
| MmugDNA.34988.1.S1_at   | MmugDNA.34988.1 | 8.25  | 8.31  | 0.19 | 0.26 | -1.04 | 0.383022 | 0.597726 | 0.71112  | 0.760358 |
| MmugDNA.34989.1.S1_at   | MmugDNA.34989.1 | 8.81  | 8.38  | 0.48 | 0.09 | 1.34  | 0.093435 | 0.063799 | 0.462593 | 0.29906  |

|                         |                 |       |       |      |      |       |          |          |          |          |
|-------------------------|-----------------|-------|-------|------|------|-------|----------|----------|----------|----------|
| MmugDNA.34991.1.S1_at   | MmugDNA.34991.1 | 5.59  | 5.59  | 0.05 | 0.03 | -1    | 0.236113 | 0.314176 | 0.603112 | 0.568185 |
| MmugDNA.34993.1.S1_at   | MmugDNA.34993.1 | 11.6  | 11.65 | 0.42 | 0.03 | -1.04 | 0.834968 | 0.498338 | 0.940822 | 0.697442 |
| MmugDNA.34994.1.S1_s_at | MmugDNA.34994.1 | 8.28  | 8.64  | 0.36 | 0.02 | -1.29 | 0.130596 | 0.080503 | 0.504978 | 0.328159 |
| MmugDNA.34995.1.S1_s_at | MmugDNA.34995.1 | 13.71 | 13.93 | 0.23 | 0.02 | -1.16 | 0.188609 | 0.121065 | 0.560513 | 0.390064 |
| MmugDNA.34996.1.S1_at   | MmugDNA.34996.1 | 5.2   | 4.5   | 0.15 | 0.52 | 1.63  | 0.246586 | 0.061948 | 0.61204  | 0.295734 |
| MmugDNA.34997.1.S1_at   | MmugDNA.34997.1 | 6.42  | 6.29  | 0.15 | 0.13 | 1.1   | 0.179771 | 0.160253 | 0.553052 | 0.436398 |
| MmugDNA.350.1.S1_at     | MmugDNA.350.1   | 6.76  | 7.02  | 0.84 | 0.53 | -1.2  | 0.48128  | 0.443039 | 0.771931 | 0.660947 |
| MmugDNA.35002.1.S1_at   | MmugDNA.35002.1 | 12.11 | 12.15 | 0.32 | 0.1  | -1.02 | 0.929573 | 0.10486  | 0.976476 | 0.366397 |
| MmugDNA.35006.1.S1_at   | MmugDNA.35006.1 | 3.44  | 3.54  | 0.11 | 0.25 | -1.07 | 0.458568 | 0.460092 | 0.758944 | 0.671993 |
| MmugDNA.35007.1.S1_at   | MmugDNA.35007.1 | 3.62  | 3.63  | 0.19 | 0.07 | -1.01 | 0.800077 | 0.520024 | 0.926794 | 0.711472 |
| MmugDNA.35008.1.S1_at   | MmugDNA.35008.1 | 10.76 | 10.36 | 0.35 | 0.04 | -1.32 | 0.103649 | 0.055509 | 0.474343 | 0.281404 |
| MmugDNA.3501.1.S1_at    | MmugDNA.3501.1  | 10.63 | 10.56 | 1.08 | 0.06 | 1.05  | 0.823432 | 0.958124 | 0.936294 | 0.976277 |
| MmugDNA.35010.1.S1_at   | MmugDNA.35010.1 | 5.48  | 5.37  | 0.13 | 0.08 | 1.08  | 0.223834 | 0.562693 | 0.59298  | 0.7381   |
| MmugDNA.35012.1.S1_at   | MmugDNA.35012.1 | 11.7  | 11.1  | 0.21 | 0.07 | 1.52  | 0.009483 | 0.002184 | 0.242401 | 0.069035 |
| MmugDNA.35013.1.S1_at   | MmugDNA.35013.1 | 5.31  | 5     | 0.1  | 0.1  | 1.25  | 0.015709 | 0.323974 | 0.28333  | 0.574672 |
| MmugDNA.35016.1.S1_at   | MmugDNA.35016.1 | 5.17  | 5.8   | 0.46 | 0.12 | -1.55 | 0.165892 | 0.252709 | 0.538623 | 0.521174 |
| MmugDNA.35018.1.S1_at   | MmugDNA.35018.1 | 3.69  | 3.69  | 0    | 0.09 | 1     | 0.689676 | 0.909466 | 0.879045 | 0.948845 |
| MmugDNA.35021.1.S1_at   | MmugDNA.35021.1 | 5.2   | 5.09  | 0.15 | 0.03 | 1.08  | 0.283602 | 0.56191  | 0.641408 | 0.737659 |
| MmugDNA.35023.1.S1_at   | MmugDNA.35023.1 | 5.38  | 5.9   | 1.11 | 0.07 | -1.43 | 0.84759  | 0.913125 | 0.946572 | 0.951134 |
| MmugDNA.35023.1.S1_s_at | MmugDNA.35023.1 | 10.14 | 10.3  | 0.62 | 0.11 | -1.12 | 0.896737 | 0.131018 | 0.96487  | 0.403053 |
| MmugDNA.35024.1.S1_at   | MmugDNA.35024.1 | 7.5   | 7.37  | 0.2  | 0.11 | 1.09  | 0.127237 | 0.251016 | 0.501431 | 0.519638 |
| MmugDNA.35025.1.S1_at   | MmugDNA.35025.1 | 6.32  | 6.28  | 0.16 | 0.54 | 1.03  | 0.950272 | 0.625886 | 0.983286 | 0.779391 |
| MmugDNA.35026.1.S1_s_at | MmugDNA.35026.1 | 11.02 | 10.82 | 0.24 | 0.1  | 1.15  | 0.279393 | 0.086591 | 0.638319 | 0.33911  |
| MmugDNA.35027.1.S1_at   | MmugDNA.35027.1 | 4.69  | 4.67  | 0.76 | 0.33 | 1.01  | 0.945245 | 0.707873 | 0.980924 | 0.830504 |
| MmugDNA.35028.1.S1_at   | MmugDNA.35028.1 | 8.03  | 7.54  | 0.36 | 0.08 | 1.4   | 0.094437 | 0.125062 | 0.463794 | 0.395506 |
| MmugDNA.35029.1.S1_at   | MmugDNA.35029.1 | 12.43 | 12.7  | 0.22 | 0.02 | -1.2  | 0.170774 | 0.196964 | 0.543739 | 0.472072 |
| MmugDNA.3503.1.S1_at    | MmugDNA.3503.1  | 3.81  | 3.5   | 0.14 | 0.51 | 1.24  | 0.872159 | 0.573829 | 0.955738 | 0.745417 |
| MmugDNA.35030.1.S1_at   | MmugDNA.35030.1 | 8.23  | 8.13  | 0.15 | 0.02 | 1.08  | 0.251969 | 0.092256 | 0.616976 | 0.348042 |
| MmugDNA.35030.1.S1_s_at | MmugDNA.35030.1 | 6.72  | 6.54  | 0.18 | 0.1  | 1.13  | 0.166449 | 0.235079 | 0.539176 | 0.50629  |
| MmugDNA.35031.1.S1_at   | MmugDNA.35031.1 | 9.75  | 10.85 | 0.53 | 0.11 | -2.15 | 0.065895 | 0.020936 | 0.421275 | 0.181465 |
| MmugDNA.35032.1.S1_at   | MmugDNA.35032.1 | 9.64  | 10.09 | 0.19 | 0.06 | -1.36 | 0.021214 | 0.00745  | 0.307172 | 0.115872 |
| MmugDNA.35033.1.S1_at   | MmugDNA.35033.1 | 5.14  | 5.12  | 0.01 | 0.2  | 1.02  | 0.665958 | 0.891471 | 0.868171 | 0.93818  |
| MmugDNA.35034.1.S1_at   | MmugDNA.35034.1 | 7.97  | 8.06  | 0.44 | 0.11 | -1.06 | 0.941392 | 0.043557 | 0.980073 | 0.253261 |
| MmugDNA.35036.1.S1_at   | MmugDNA.35036.1 | 10.98 | 11.64 | 0.55 | 0.06 | -1.58 | 0.11138  | 0.127481 | 0.484548 | 0.398349 |
| MmugDNA.35037.1.S1_at   | MmugDNA.35037.1 | 3.65  | 3.69  | 0.14 | 0.04 | -1.03 | 0.434118 | 0.096545 | 0.744876 | 0.354115 |
| MmugDNA.35038.1.S1_at   | MmugDNA.35038.1 | 3.58  | 3.46  | 0.13 | 0.06 | 1.08  | 0.180472 | 0.343616 | 0.553635 | 0.589322 |
| MmugDNA.3504.1.S1_at    | MmugDNA.3504.1  | 7.46  | 7.24  | 0.14 | 0.1  | 1.17  | 0.169435 | 0.095778 | 0.542399 | 0.352753 |
| MmugDNA.35041.1.S1_at   | MmugDNA.35041.1 | 3.39  | 3.16  | 0.13 | 0.14 | 1.18  | 0.15507  | 0.151779 | 0.528433 | 0.426413 |
| MmugDNA.35042.1.S1_at   | MmugDNA.35042.1 | 5.45  | 5.5   | 0.09 | 0.25 | -1.03 | 0.35112  | 0.530126 | 0.691852 | 0.717729 |
| MmugDNA.35043.1.S1_at   | MmugDNA.35043.1 | 4.28  | 4.08  | 0.06 | 0.12 | 1.15  | 0.060173 | 0.03919  | 0.407653 | 0.243089 |
| MmugDNA.35044.1.S1_at   | MmugDNA.35044.1 | 9.6   | 9.59  | 0.3  | 0.06 | 1     | 0.480411 | 0.706231 | 0.771169 | 0.829634 |
| MmugDNA.35045.1.S1_at   | MmugDNA.35045.1 | 3.73  | 3.82  | 0.15 | 0.13 | -1.07 | 0.558499 | 0.156098 | 0.815384 | 0.431551 |
| MmugDNA.35047.1.S1_at   | MmugDNA.35047.1 | 6.46  | 6.61  | 0.23 | 0.14 | -1.11 | 0.65     | 0.092301 | 0.860714 | 0.348137 |

|                        |                 |       |       |      |      |       |          |          |          |          |
|------------------------|-----------------|-------|-------|------|------|-------|----------|----------|----------|----------|
| MmugDNA.35048.1.S1_at  | MmugDNA.35048.1 | 3.07  | 3.21  | 0.1  | 0.03 | -1.1  | 0.089535 | 0.122202 | 0.457672 | 0.391921 |
| MmugDNA.35049.1.S1_at  | MmugDNA.35049.1 | 6.89  | 7.09  | 0.58 | 0.04 | -1.15 | 0.171961 | 0.06392  | 0.545311 | 0.29906  |
| MmugDNA.35051.1.S1_at  | MmugDNA.35051.1 | 9.78  | 10.43 | 0.89 | 0.17 | -1.57 | 0.337428 | 0.385859 | 0.682344 | 0.621161 |
| MmugDNA.35055.1.S1_at  | MmugDNA.35055.1 | 6.15  | 5.5   | 0.58 | 0.11 | 1.56  | 0.16307  | 0.077982 | 0.536035 | 0.324306 |
| MmugDNA.35056.1.S1_at  | MmugDNA.35056.1 | 5.89  | 6.14  | 0.1  | 0.19 | -1.19 | 0.069662 | 0.175929 | 0.427522 | 0.452486 |
| MmugDNA.35057.1.S1_at  | MmugDNA.35057.1 | 3.67  | 3.66  | 0.06 | 0.24 | 1     | 0.793107 | 0.549731 | 0.924208 | 0.730006 |
| MmugDNA.35058.1.S1_at  | MmugDNA.35058.1 | 6.99  | 6.74  | 0.22 | 0.04 | 1.19  | 0.12314  | 0.130915 | 0.496589 | 0.403037 |
| MmugDNA.3506.1.S1_at   | MmugDNA.3506.1  | 4.52  | 4.32  | 0.34 | 0.03 | 1.15  | 0.412473 | 0.452911 | 0.731995 | 0.667359 |
| MmugDNA.35060.1.S1_at  | MmugDNA.35060.1 | 5.81  | 5.95  | 0.3  | 0.17 | -1.1  | 0.919171 | 0.608444 | 0.972481 | 0.767074 |
| MmugDNA.35065.1.S1_at  | MmugDNA.35065.1 | 11.76 | 11.59 | 0.09 | 0.03 | 1.13  | 0.030983 | 0.241477 | 0.339326 | 0.512148 |
| MmugDNA.35068.1.S1_at  | MmugDNA.35068.1 | 9.76  | 8.57  | 0.95 | 0.15 | 2.28  | 0.306517 | 0.391981 | 0.659451 | 0.625477 |
| MmugDNA.3507.1.S1_at   | MmugDNA.3507.1  | 3.24  | 3.17  | 0.25 | 0.09 | 1.05  | 0.768012 | 0.359431 | 0.912771 | 0.600736 |
| MmugDNA.35070.1.S1_at  | MmugDNA.35070.1 | 4.42  | 4.21  | 0.38 | 0.06 | 1.16  | 0.895452 | 0.931826 | 0.964244 | 0.961265 |
| MmugDNA.35071.1.S1_at  | MmugDNA.35071.1 | 5.25  | 5.25  | 0.13 | 0.01 | 1     | 0.402413 | 0.211296 | 0.724848 | 0.485418 |
| MmugDNA.35072.1.S1_at  | MmugDNA.35072.1 | 10.39 | 10.75 | 0.33 | 0.05 | -1.28 | 0.375587 | 0.542172 | 0.706572 | 0.725325 |
| MmugDNA.35073.1.S1_at  | MmugDNA.35073.1 | 4.77  | 4.89  | 0.25 | 0.24 | -1.09 | 0.660688 | 0.884707 | 0.865819 | 0.934321 |
| MmugDNA.35074.1.S1_at  | MmugDNA.35074.1 | 3.21  | 3.27  | 0.13 | 0.02 | -1.04 | 0.755702 | 0.725259 | 0.90805  | 0.840954 |
| MmugDNA.35075.1.S1_at  | MmugDNA.35075.1 | 10.03 | 10.14 | 0.28 | 0.07 | -1.08 | 0.589831 | 0.008153 | 0.832674 | 0.119754 |
| MmugDNA.35076.1.S1_at  | MmugDNA.35076.1 | 6.2   | 6.28  | 0.28 | 0.19 | -1.06 | 0.265272 | 0.490891 | 0.626397 | 0.692666 |
| MmugDNA.35078.1.S1_at  | MmugDNA.35078.1 | 4.74  | 4.68  | 0.07 | 0.04 | 1.04  | 0.523291 | 0.383889 | 0.795531 | 0.61978  |
| MmugDNA.35079.1.S1_at  | MmugDNA.35079.1 | 3.32  | 3.19  | 0.07 | 0.07 | 1.1   | 0.280672 | 0.064659 | 0.639467 | 0.300314 |
| MmugDNA.3508.1.S1_at   | MmugDNA.3508.1  | 3.69  | 3.72  | 0.02 | 0.02 | -1.02 | 0.076464 | 0.874176 | 0.437977 | 0.928519 |
| MmugDNA.35080.1.S1_at  | MmugDNA.35080.1 | 10.71 | 11.37 | 0.48 | 0.05 | -1.58 | 0.139109 | 0.333246 | 0.514459 | 0.581498 |
| MmugDNA.35082.1.S1_at  | MmugDNA.35082.1 | 3.1   | 3.03  | 0.08 | 0.07 | 1.05  | 0.558884 | 0.859473 | 0.815742 | 0.919962 |
| MmugDNA.35083.1.S1_at  | MmugDNA.35083.1 | 3.64  | 3.66  | 0.08 | 0.1  | -1.01 | 0.631455 | 0.006574 | 0.852417 | 0.10994  |
| MmugDNA.35084.1.S1_at  | MmugDNA.35084.1 | 3.53  | 3.63  | 0.09 | 0.16 | -1.08 | 0.414907 | 0.309707 | 0.733395 | 0.565005 |
| MmugDNA.35085.1.S1_at  | MmugDNA.35085.1 | 10.05 | 9.96  | 1.4  | 0.33 | 1.07  | 0.981368 | 0.378744 | 0.994023 | 0.615748 |
| MmugDNA.35087.1.S1_at  | MmugDNA.35087.1 | 6.73  | 6.66  | 0.03 | 0.04 | 1.05  | 0.02503  | 0.049675 | 0.320402 | 0.267892 |
| MmugDNA.35088.1.S1_at  | MmugDNA.35088.1 | 5.8   | 5.87  | 0.17 | 0.11 | -1.05 | 0.764662 | 0.252749 | 0.911553 | 0.521174 |
| MmugDNA.35089.1.S1_at  | MmugDNA.35089.1 | 5.89  | 5.42  | 0.57 | 0.13 | 1.39  | 0.572985 | 0.758089 | 0.823428 | 0.859252 |
| MmugDNA.3509.1.S1_at   | MmugDNA.3509.1  | 8.25  | 8.33  | 0.7  | 0.14 | -1.06 | 0.936007 | 0.189901 | 0.978468 | 0.465424 |
| MmugDNA.3509.1.S1_s_at | MmugDNA.3509.1  | 7.87  | 8.21  | 0.77 | 0.24 | -1.26 | 0.795595 | 0.12461  | 0.924888 | 0.394995 |
| MmugDNA.35090.1.S1_at  | MmugDNA.35090.1 | 4.01  | 3.96  | 0.22 | 0.07 | 1.04  | 0.502989 | 0.713135 | 0.784    | 0.833644 |
| MmugDNA.35091.1.S1_at  | MmugDNA.35091.1 | 3.92  | 4.46  | 0.17 | 0.48 | -1.46 | 0.399554 | 0.404245 | 0.723148 | 0.632691 |
| MmugDNA.35092.1.S1_at  | MmugDNA.35092.1 | 5.04  | 5.35  | 0.58 | 0.2  | -1.24 | 0.528029 | 0.427819 | 0.79742  | 0.649582 |
| MmugDNA.35093.1.S1_at  | MmugDNA.35093.1 | 12.81 | 12.81 | 0.06 | 0.09 | 1     | 0.888064 | 0.811167 | 0.961251 | 0.89102  |
| MmugDNA.35094.1.S1_at  | MmugDNA.35094.1 | 3.61  | 4.13  | 0.3  | 0.37 | -1.44 | 0.157971 | 0.164291 | 0.530972 | 0.440539 |
| MmugDNA.35095.1.S1_at  | MmugDNA.35095.1 | 5.72  | 6.74  | 0.23 | 0.33 | -2.02 | 0.01414  | 0.304664 | 0.274019 | 0.561872 |
| MmugDNA.35096.1.S1_at  | MmugDNA.35096.1 | 3.44  | 3.55  | 0.29 | 0.18 | -1.08 | 0.472979 | 0.634406 | 0.767358 | 0.784787 |
| MmugDNA.35097.1.S1_at  | MmugDNA.35097.1 | 3.88  | 3.7   | 0.13 | 0.21 | 1.13  | 0.349299 | 0.461794 | 0.690384 | 0.673361 |
| MmugDNA.35099.1.S1_at  | MmugDNA.35099.1 | 3.9   | 3.8   | 0.03 | 0.43 | 1.07  | 0.931037 | 0.955881 | 0.97696  | 0.975006 |
| MmugDNA.351.1.S1_at    | MmugDNA.351.1   | 3.53  | 3.41  | 0.22 | 0.15 | 1.08  | 0.470802 | 0.348341 | 0.766191 | 0.592504 |
| MmugDNA.3510.1.S1_at   | MmugDNA.3510.1  | 4.66  | 4.68  | 0.11 | 0.05 | -1.01 | 0.840017 | 0.415718 | 0.943103 | 0.641045 |

|                         |                 |       |       |      |      |       |          |          |          |          |
|-------------------------|-----------------|-------|-------|------|------|-------|----------|----------|----------|----------|
| MmugDNA.35100.1.S1_at   | MmugDNA.35100.1 | 5.67  | 5.41  | 0.24 | 0.22 | 1.2   | 0.184851 | 0.174179 | 0.557643 | 0.450479 |
| MmugDNA.35101.1.S1_at   | MmugDNA.35101.1 | 5.97  | 6.07  | 0.14 | 0.26 | -1.07 | 0.834759 | 0.903812 | 0.940727 | 0.945402 |
| MmugDNA.35102.1.S1_at   | MmugDNA.35102.1 | 3.46  | 3.39  | 0.06 | 0.08 | 1.05  | 0.577586 | 0.201005 | 0.825827 | 0.475442 |
| MmugDNA.35104.1.S1_at   | MmugDNA.35104.1 | 6.06  | 5.27  | 0.48 | 0.31 | 1.73  | 0.103459 | 0.084054 | 0.474255 | 0.33503  |
| MmugDNA.35107.1.S1_at   | MmugDNA.35107.1 | 5.2   | 5.14  | 0.12 | 0.07 | 1.04  | 0.908143 | 0.235203 | 0.968997 | 0.50629  |
| MmugDNA.35109.1.S1_at   | MmugDNA.35109.1 | 5.52  | 5.44  | 0.09 | 0.1  | 1.06  | 0.234142 | 0.132556 | 0.601531 | 0.404544 |
| MmugDNA.35110.1.S1_at   | MmugDNA.35110.1 | 11.37 | 11.31 | 0.18 | 0.19 | 1.04  | 0.143121 | 0.089244 | 0.518366 | 0.34333  |
| MmugDNA.35112.1.S1_at   | MmugDNA.35112.1 | 8.39  | 8.32  | 0.17 | 0.13 | 1.05  | 0.346948 | 0.458081 | 0.688445 | 0.671038 |
| MmugDNA.35113.1.S1_at   | MmugDNA.35113.1 | 5.41  | 5.22  | 0.18 | 0    | 1.14  | 0.148757 | 0.361875 | 0.522743 | 0.60265  |
| MmugDNA.35115.1.S1_at   | MmugDNA.35115.1 | 11.49 | 11.87 | 0.11 | 0.08 | -1.3  | 0.008103 | 0.000013 | 0.232005 | 0.017532 |
| MmugDNA.35116.1.S1_at   | MmugDNA.35116.1 | 8.26  | 8.02  | 0.14 | 0.15 | -1.18 | 0.051764 | 0.032814 | 0.391265 | 0.22427  |
| MmugDNA.35117.1.S1_at   | MmugDNA.35117.1 | 6.75  | 5.94  | 0.25 | 0.29 | 1.76  | 0.016088 | 0.00989  | 0.285874 | 0.130644 |
| MmugDNA.35118.1.S1_at   | MmugDNA.35118.1 | 10.73 | 10.92 | 0.26 | 0.06 | -1.14 | 0.242997 | 0.607078 | 0.608888 | 0.766185 |
| MmugDNA.35119.1.S1_at   | MmugDNA.35119.1 | 3.44  | 3.25  | 0.18 | 0.07 | 1.14  | 0.18937  | 0.209944 | 0.560894 | 0.48371  |
| MmugDNA.35122.1.S1_at   | MmugDNA.35122.1 | 11.12 | 11.4  | 0.24 | 0.06 | -1.21 | 0.115083 | 0.374358 | 0.488314 | 0.61282  |
| MmugDNA.35123.1.S1_s_at | MmugDNA.35123.1 | 10.85 | 11.02 | 0.24 | 0.02 | -1.13 | 0.397867 | 0.077114 | 0.722119 | 0.322673 |
| MmugDNA.35124.1.S1_at   | MmugDNA.35124.1 | 6.01  | 5.79  | 0.14 | 0.12 | 1.17  | 0.045107 | 0.735023 | 0.375796 | 0.846631 |
| MmugDNA.35125.1.S1_at   | MmugDNA.35125.1 | 4.14  | 4.34  | 0.24 | 0.54 | -1.15 | 0.777086 | 0.406915 | 0.917443 | 0.634629 |
| MmugDNA.35126.1.S1_at   | MmugDNA.35126.1 | 4.11  | 4.09  | 0.13 | 0    | 1.01  | 0.692154 | 0.800993 | 0.880095 | 0.885538 |
| MmugDNA.35127.1.S1_at   | MmugDNA.35127.1 | 4.36  | 4.64  | 0.47 | 0.18 | -1.21 | 0.440589 | 0.34216  | 0.748535 | 0.588332 |
| MmugDNA.35128.1.S1_at   | MmugDNA.35128.1 | 7.25  | 7.2   | 0.47 | 0.07 | 1.03  | 0.333159 | 0.270542 | 0.679469 | 0.535837 |
| MmugDNA.22636.1.S1_s_at | MmugDNA.22636.1 | 9.67  | 9.47  | 0.42 | 0.36 | 1.15  | 0.91064  | 0.657521 | 0.969704 | 0.799757 |
| MmuSTS.2023.1.S1_at     | MmuSTS.2023.1   | 12.34 | 11.75 | 3.73 | 0.28 | 1.51  | 0.553551 | 0.319758 | 0.812258 | 0.572105 |
| MmuSTS.2023.1.S1_s_at   | MmuSTS.2023.1   | 11.52 | 11.1  | 3.4  | 0.3  | 1.34  | 0.590507 | 0.301922 | 0.832911 | 0.55986  |
| MmugDNA.35134.1.S1_at   | MmugDNA.35134.1 | 3.61  | 3.55  | 0.02 | 0.02 | 1.04  | 0.077098 | 0.067539 | 0.438911 | 0.305949 |
| MmugDNA.35135.1.S1_at   | MmugDNA.35135.1 | 11.89 | 11.71 | 0.27 | 0.08 | 1.13  | 0.611623 | 0.285222 | 0.84257  | 0.547165 |
| MmugDNA.35137.1.S1_at   | MmugDNA.35137.1 | 10.8  | 10.12 | 0.37 | 0.26 | 1.61  | 0.015748 | 0.002658 | 0.283556 | 0.076211 |
| MmugDNA.35138.1.S1_at   | MmugDNA.35138.1 | 8.94  | 9.25  | 0.45 | 0.19 | -1.24 | 0.24165  | 0.162874 | 0.607803 | 0.438966 |
| MmugDNA.35139.1.S1_at   | MmugDNA.35139.1 | 5.57  | 5.53  | 0.16 | 0.26 | 1.03  | 0.834718 | 0.80422  | 0.940727 | 0.887395 |
| MmugDNA.3514.1.S1_at    | MmugDNA.3514.1  | 3     | 2.95  | 0.03 | 0.05 | 1.04  | 0.119467 | 0.346046 | 0.492875 | 0.59115  |
| MmugDNA.35140.1.S1_at   | MmugDNA.35140.1 | 10.04 | 9.56  | 0.42 | 0.06 | 1.4   | 0.368457 | 0.568509 | 0.703625 | 0.741988 |
| MmugDNA.35142.1.S1_at   | MmugDNA.35142.1 | 4.59  | 5.1   | 0.33 | 0.38 | -1.42 | 0.080819 | 0.230551 | 0.444846 | 0.50226  |
| MmugDNA.35143.1.S1_at   | MmugDNA.35143.1 | 5.34  | 5.05  | 0.33 | 0.29 | 1.23  | 0.79524  | 0.062153 | 0.924811 | 0.296237 |
| MmugDNA.35144.1.S1_at   | MmugDNA.35144.1 | 5.53  | 5.45  | 0.19 | 0.11 | 1.06  | 0.337765 | 0.058504 | 0.682671 | 0.288585 |
| MmugDNA.35146.1.S1_at   | MmugDNA.35146.1 | 10.98 | 11.29 | 0.16 | 0.06 | -1.24 | 0.056217 | 0.045337 | 0.399676 | 0.257242 |
| MmugDNA.35147.1.S1_at   | MmugDNA.35147.1 | 7.82  | 7.78  | 0.28 | 0.14 | 1.03  | 0.198314 | 0.3974   | 0.569559 | 0.628812 |
| MmugDNA.35148.1.S1_at   | MmugDNA.35148.1 | 9.15  | 9.16  | 0.33 | 0.11 | -1.01 | 0.528534 | 0.590561 | 0.797879 | 0.756311 |
| MmugDNA.35148.1.S1_s_at | MmugDNA.35148.1 | 8.55  | 8.76  | 0.23 | 0.07 | -1.16 | 0.156553 | 0.202252 | 0.529581 | 0.476665 |
| MmugDNA.3515.1.S1_at    | MmugDNA.3515.1  | 4.32  | 4.21  | 0.27 | 0.26 | 1.08  | 0.620051 | 0.093552 | 0.847002 | 0.349884 |
| MmugDNA.35151.1.S1_at   | MmugDNA.35151.1 | 9.43  | 8.66  | 0.84 | 0.3  | 1.71  | 0.072314 | 0.019399 | 0.432116 | 0.175068 |
| MmugDNA.35152.1.S1_at   | MmugDNA.35152.1 | 4.44  | 4.47  | 0.09 | 0.09 | -1.02 | 0.338421 | 0.133278 | 0.682926 | 0.405049 |
| MmugDNA.35153.1.S1_at   | MmugDNA.35153.1 | 4.91  | 4.82  | 0.14 | 0.12 | 1.06  | 0.604921 | 0.340828 | 0.839754 | 0.586978 |
| MmugDNA.35154.1.S1_at   | MmugDNA.35154.1 | 6.29  | 6.27  | 0.39 | 1.01 | 1.01  | 0.617338 | 0.800107 | 0.845362 | 0.885076 |

|                         |                 |       |       |      |      |       |          |          |          |          |
|-------------------------|-----------------|-------|-------|------|------|-------|----------|----------|----------|----------|
| MmugDNA.35155.1.S1_at   | MmugDNA.35155.1 | 4.4   | 4.36  | 0.3  | 0.12 | 1.03  | 0.203295 | 0.331574 | 0.574813 | 0.580188 |
| MmugDNA.35157.1.S1_at   | MmugDNA.35157.1 | 5.3   | 5.19  | 0.23 | 0.04 | 1.08  | 0.90212  | 0.627289 | 0.966869 | 0.780361 |
| MmugDNA.35158.1.S1_at   | MmugDNA.35158.1 | 7.51  | 7.09  | 0.19 | 0.04 | 1.34  | 0.025593 | 0.652652 | 0.322382 | 0.796933 |
| MmugDNA.35159.1.S1_at   | MmugDNA.35159.1 | 5.44  | 5.08  | 0.17 | 0.08 | 1.28  | 0.024605 | 0.018425 | 0.319173 | 0.170755 |
| MmugDNA.35160.1.S1_at   | MmugDNA.35160.1 | 5.75  | 5.65  | 0.17 | 0.05 | 1.07  | 0.126261 | 0.3007   | 0.499948 | 0.558959 |
| MmugDNA.35162.1.S1_at   | MmugDNA.35162.1 | 6.99  | 7.18  | 1.14 | 0.19 | -1.14 | 0.913554 | 0.361105 | 0.970603 | 0.602069 |
| MmugDNA.35163.1.S1_at   | MmugDNA.35163.1 | 4.01  | 3.94  | 0    | 0.11 | 1.05  | 0.238461 | 0.287648 | 0.605341 | 0.548886 |
| MmugDNA.35164.1.S1_at   | MmugDNA.35164.1 | 11.53 | 11.65 | 0.4  | 0.12 | -1.09 | 0.574209 | 0.080819 | 0.823894 | 0.32873  |
| MmugDNA.35166.1.S1_at   | MmugDNA.35166.1 | 3.42  | 3.45  | 0.01 | 0.12 | -1.02 | 0.984997 | 0.829138 | 0.995288 | 0.901771 |
| MmugDNA.35167.1.S1_at   | MmugDNA.35167.1 | 7.28  | 6.85  | 0.14 | 0.12 | 1.35  | 0.010926 | 0.073174 | 0.250796 | 0.316064 |
| MmugDNA.35168.1.S1_at   | MmugDNA.35168.1 | 6.54  | 6.55  | 0.18 | 0.31 | -1.01 | 0.949866 | 0.565612 | 0.983078 | 0.739997 |
| MmugDNA.35170.1.S1_at   | MmugDNA.35170.1 | 7.68  | 8     | 0.22 | 0.18 | -1.25 | 0.087594 | 0.05591  | 0.455349 | 0.282221 |
| MmugDNA.35171.1.S1_at   | MmugDNA.35171.1 | 4.36  | 4.32  | 0.2  | 0.36 | 1.03  | 0.85656  | 0.265851 | 0.949449 | 0.531705 |
| MmugDNA.35172.1.S1_at   | MmugDNA.35172.1 | 7.87  | 7.99  | 0.22 | 0.08 | -1.09 | 0.349164 | 0.001262 | 0.690261 | 0.05521  |
| MmugDNA.35173.1.S1_at   | MmugDNA.35173.1 | 7.17  | 7.36  | 0.17 | 0.1  | -1.14 | 0.443527 | 0.561969 | 0.750906 | 0.737666 |
| MmugDNA.35174.1.S1_at   | MmugDNA.35174.1 | 7.95  | 7.92  | 0.26 | 0.06 | 1.02  | 0.270688 | 0.436105 | 0.630562 | 0.655802 |
| MmugDNA.35175.1.S1_at   | MmugDNA.35175.1 | 7.17  | 7.13  | 0.07 | 0.12 | 1.03  | 0.365751 | 0.072297 | 0.701331 | 0.314983 |
| MmugDNA.35176.1.S1_at   | MmugDNA.35176.1 | 10.07 | 9.63  | 0.17 | 0.08 | 1.37  | 0.023046 | 0.012751 | 0.314403 | 0.145496 |
| MmugDNA.35177.1.S1_at   | MmugDNA.35177.1 | 7.22  | 6.81  | 0.41 | 0.34 | 1.32  | 0.409585 | 0.40294  | 0.730153 | 0.631696 |
| MmugDNA.35179.1.S1_at   | MmugDNA.35179.1 | 10.28 | 9.76  | 0.6  | 0.13 | 1.44  | 0.621403 | 0.320466 | 0.847514 | 0.572648 |
| MmugDNA.35180.1.S1_at   | MmugDNA.35180.1 | 4.08  | 4.45  | 0.3  | 0.11 | -1.29 | 0.044888 | 0.044952 | 0.375297 | 0.256489 |
| MmugDNA.35181.1.S1_at   | MmugDNA.35181.1 | 11.24 | 11.65 | 0.22 | 0.09 | -1.33 | 0.036874 | 0.014327 | 0.356113 | 0.152764 |
| MmugDNA.35181.1.S1_s_at | MmugDNA.35181.1 | 10.28 | 10.84 | 0.27 | 0.06 | -1.48 | 0.055494 | 0.050087 | 0.39863  | 0.268916 |
| MmugDNA.35183.1.S1_at   | MmugDNA.35183.1 | 4.2   | 4.11  | 0.13 | 0.16 | 1.06  | 0.296392 | 0.375438 | 0.65205  | 0.61341  |
| MmugDNA.35185.1.S1_at   | MmugDNA.35185.1 | 11.12 | 10.45 | 0.15 | 0.16 | 1.59  | 0.009978 | 0.000477 | 0.245189 | 0.038572 |
| MmugDNA.35186.1.S1_at   | MmugDNA.35186.1 | 6.45  | 7.03  | 0.43 | 0.14 | -1.49 | 0.187729 | 0.101505 | 0.559968 | 0.361325 |
| MmugDNA.35187.1.S1_at   | MmugDNA.35187.1 | 6.98  | 7.02  | 0.48 | 0.34 | -1.03 | 0.779958 | 0.921427 | 0.918949 | 0.955761 |
| MmugDNA.35188.1.S1_at   | MmugDNA.35188.1 | 3.44  | 3.56  | 0.37 | 0.31 | -1.08 | 0.437661 | 0.569837 | 0.746873 | 0.742694 |
| MmugDNA.35190.1.S1_at   | MmugDNA.35190.1 | 8.86  | 8.5   | 0.08 | 0.01 | 1.29  | 0.001126 | 0.067436 | 0.156386 | 0.305694 |
| MmugDNA.35191.1.S1_at   | MmugDNA.35191.1 | 3.95  | 3.85  | 0.12 | 0.14 | 1.07  | 0.648922 | 0.446036 | 0.860173 | 0.662668 |
| MmugDNA.35193.1.S1_at   | MmugDNA.35193.1 | 6.37  | 6.33  | 0.14 | 0.18 | 1.03  | 0.971923 | 0.938209 | 0.990867 | 0.964949 |
| MmugDNA.35195.1.S1_at   | MmugDNA.35195.1 | 4.48  | 4.3   | 0.12 | 0.02 | 1.13  | 0.043922 | 0.010234 | 0.37312  | 0.1326   |
| MmugDNA.35196.1.S1_at   | MmugDNA.35196.1 | 4.73  | 5.16  | 0.82 | 0.57 | -1.35 | 0.482572 | 0.834858 | 0.772508 | 0.905477 |
| MmugDNA.35197.1.S1_at   | MmugDNA.35197.1 | 4.59  | 4.24  | 0.35 | 0.07 | 1.28  | 0.601978 | 0.789957 | 0.838675 | 0.878631 |
| MmugDNA.35198.1.S1_at   | MmugDNA.35198.1 | 6.47  | 6.49  | 0.21 | 0.03 | -1.01 | 0.438424 | 0.601002 | 0.747342 | 0.762462 |
| MmugDNA.35199.1.S1_at   | MmugDNA.35199.1 | 5.21  | 5.22  | 0.03 | 0.3  | -1.01 | 0.449082 | 0.664607 | 0.754081 | 0.803459 |
| MmugDNA.352.1.S1_at     | MmugDNA.352.1   | 6.15  | 6.85  | 0.34 | 0.32 | -1.62 | 0.121666 | 0.299269 | 0.495333 | 0.557769 |
| MmugDNA.3520.1.S1_at    | MmugDNA.3520.1  | 7.13  | 7.13  | 0.04 | 0.1  | 1     | 0.418108 | 0.650766 | 0.735404 | 0.795801 |
| MmugDNA.35200.1.S1_at   | MmugDNA.35200.1 | 9.78  | 9.72  | 0.63 | 0.35 | 1.05  | 0.309532 | 0.013898 | 0.661771 | 0.151243 |
| MmugDNA.35201.1.S1_at   | MmugDNA.35201.1 | 9.04  | 9.46  | 0.44 | 0.13 | -1.34 | 0.077705 | 0.198691 | 0.439817 | 0.473391 |
| MmugDNA.35202.1.S1_at   | MmugDNA.35202.1 | 6.92  | 6.74  | 0.07 | 0.37 | 1.14  | 0.838915 | 0.059697 | 0.942422 | 0.290945 |
| MmugDNA.35204.1.S1_at   | MmugDNA.35204.1 | 7.1   | 6.86  | 0.12 | 0.06 | 1.17  | 0.020415 | 0.019794 | 0.303985 | 0.176951 |
| MmugDNA.35205.1.S1_at   | MmugDNA.35205.1 | 5.01  | 5.55  | 1.02 | 0.18 | -1.45 | 0.973185 | 0.886213 | 0.991241 | 0.935235 |

|                         |                 |       |       |      |      |       |          |          |          |          |
|-------------------------|-----------------|-------|-------|------|------|-------|----------|----------|----------|----------|
| MmugDNA.3521.1.S1_at    | MmugDNA.3521.1  | 4.39  | 4.45  | 0.4  | 0.29 | -1.04 | 0.962658 | 0.649755 | 0.987962 | 0.79516  |
| MmugDNA.35211.1.S1_at   | MmugDNA.35211.1 | 7.19  | 6.94  | 0.43 | 0.25 | 1.18  | 0.734764 | 0.886487 | 0.898485 | 0.93543  |
| MmugDNA.35212.1.S1_at   | MmugDNA.35212.1 | 7.63  | 6.52  | 0.67 | 0.5  | 2.17  | 0.035281 | 0.026272 | 0.351598 | 0.203033 |
| MmugDNA.35213.1.S1_at   | MmugDNA.35213.1 | 13.18 | 12.99 | 0.09 | 0.02 | 1.14  | 0.055461 | 0.077335 | 0.398621 | 0.323135 |
| MmugDNA.35215.1.S1_at   | MmugDNA.35215.1 | 3.36  | 3.46  | 0.2  | 0.04 | -1.07 | 0.41328  | 0.782136 | 0.732218 | 0.873787 |
| MmugDNA.35216.1.S1_at   | MmugDNA.35216.1 | 4.43  | 4.42  | 1.19 | 0.79 | 1     | 0.742976 | 0.214634 | 0.901935 | 0.488448 |
| MmugDNA.35217.1.S1_at   | MmugDNA.35217.1 | 4.83  | 4.56  | 0.25 | 0.1  | 1.21  | 0.407249 | 0.596131 | 0.728545 | 0.759357 |
| MmugDNA.35218.1.S1_at   | MmugDNA.35218.1 | 6.12  | 6.03  | 0.09 | 0.1  | 1.06  | 0.748173 | 0.68416  | 0.904327 | 0.815791 |
| MmugDNA.35219.1.S1_at   | MmugDNA.35219.1 | 3.3   | 3.69  | 0.32 | 0.14 | -1.31 | 0.364542 | 0.444226 | 0.700603 | 0.661895 |
| MmugDNA.3522.1.S1_at    | MmugDNA.3522.1  | 6.17  | 7.24  | 0.62 | 0.04 | -2.09 | 0.041299 | 0.019657 | 0.366075 | 0.176187 |
| MmugDNA.35220.1.S1_at   | MmugDNA.35220.1 | 4.52  | 4.81  | 0.08 | 0.18 | -1.22 | 0.050617 | 0.016521 | 0.387563 | 0.16273  |
| MmugDNA.35221.1.S1_at   | MmugDNA.35221.1 | 7.08  | 7.08  | 0.44 | 0.27 | -1    | 0.617425 | 0.818292 | 0.845382 | 0.895205 |
| MmugDNA.35222.1.S1_at   | MmugDNA.35222.1 | 4.9   | 4.85  | 0.1  | 0.04 | 1.04  | 0.774958 | 0.27073  | 0.916523 | 0.53602  |
| MmugDNA.35223.1.S1_at   | MmugDNA.35223.1 | 4.99  | 4.85  | 0.11 | 0.08 | 1.1   | 0.741965 | 0.596604 | 0.901613 | 0.759694 |
| MmugDNA.35224.1.S1_at   | MmugDNA.35224.1 | 6.96  | 7.03  | 0.04 | 0.07 | -1.05 | 0.101965 | 0.098647 | 0.472424 | 0.356743 |
| MmugDNA.35225.1.S1_at   | MmugDNA.35225.1 | 11.76 | 11.9  | 0.33 | 0.06 | -1.11 | 0.628221 | 0.543698 | 0.851104 | 0.726281 |
| MmugDNA.35226.1.S1_at   | MmugDNA.35226.1 | 7.45  | 8.15  | 0.25 | 0.14 | -1.63 | 0.009329 | 0.014972 | 0.241869 | 0.155472 |
| MmugDNA.35227.1.S1_at   | MmugDNA.35227.1 | 4.3   | 4.33  | 0.05 | 0.13 | -1.02 | 0.25653  | 0.335433 | 0.620549 | 0.583234 |
| MmugDNA.35229.1.S1_at   | MmugDNA.35229.1 | 5.28  | 5.15  | 0.15 | 0.06 | 1.1   | 0.228393 | 0.177376 | 0.597369 | 0.453742 |
| MmugDNA.3523.1.S1_at    | MmugDNA.3523.1  | 9.62  | 9.42  | 0.25 | 0.16 | 1.15  | 0.11915  | 0.250968 | 0.492557 | 0.519638 |
| MmugDNA.35230.1.S1_at   | MmugDNA.35230.1 | 7.57  | 6.61  | 0.2  | 0    | 1.94  | 0.001177 | 0.000363 | 0.156386 | 0.037273 |
| MmugDNA.35231.1.S1_at   | MmugDNA.35231.1 | 4.77  | 4.71  | 0.11 | 0.07 | 1.04  | 0.16218  | 0.530404 | 0.535244 | 0.717957 |
| MmugDNA.35233.1.S1_at   | MmugDNA.35233.1 | 4.55  | 4.79  | 0.08 | 0.51 | -1.19 | 0.174816 | 0.227224 | 0.548031 | 0.499572 |
| MmugDNA.35234.1.S1_at   | MmugDNA.35234.1 | 5.17  | 5.15  | 0.24 | 0.11 | 1.02  | 0.320406 | 0.347711 | 0.669365 | 0.592082 |
| MmugDNA.35235.1.S1_at   | MmugDNA.35235.1 | 5.72  | 5.91  | 0.56 | 0.13 | -1.14 | 0.815402 | 0.513996 | 0.933137 | 0.707375 |
| MmugDNA.35237.1.S1_at   | MmugDNA.35237.1 | 7.14  | 7.54  | 0.1  | 0.1  | -1.32 | 0.007116 | 0.041742 | 0.225651 | 0.24892  |
| MmugDNA.35238.1.S1_x_at | MmugDNA.35238.1 | 6.96  | 6.99  | 0.09 | 0.11 | -1.03 | 0.802272 | 0.279222 | 0.927885 | 0.542886 |
| MmugDNA.39875.1.S1_s_at | MmugDNA.39875.1 | 7.79  | 8.49  | 1.23 | 0.04 | -1.63 | 0.45214  | 0.596311 | 0.755619 | 0.759468 |
| MmugDNA.3524.1.S1_at    | MmugDNA.3524.1  | 6.66  | 6.44  | 0.14 | 0.21 | 1.17  | 0.067426 | 0.132756 | 0.423738 | 0.404544 |
| MmugDNA.35240.1.S1_at   | MmugDNA.35240.1 | 5.67  | 5.84  | 0.27 | 0.34 | -1.12 | 0.234367 | 0.465093 | 0.601622 | 0.67557  |
| MmugDNA.35242.1.S1_at   | MmugDNA.35242.1 | 3.51  | 3.51  | 0.17 | 0.25 | -1    | 0.228621 | 0.30094  | 0.597571 | 0.559178 |
| MmugDNA.35244.1.S1_at   | MmugDNA.35244.1 | 9.01  | 8.11  | 0.46 | 0.17 | 1.87  | 0.031603 | 0.026078 | 0.341627 | 0.202453 |
| MmugDNA.35246.1.S1_at   | MmugDNA.35246.1 | 5.34  | 5.81  | 0.19 | 0.14 | -1.39 | 0.030659 | 0.157775 | 0.338263 | 0.433423 |
| MmugDNA.35247.1.S1_at   | MmugDNA.35247.1 | 5.14  | 5.86  | 0.23 | 0.13 | -1.65 | 0.008131 | 0.000762 | 0.232005 | 0.04544  |
| MmugDNA.35248.1.S1_at   | MmugDNA.35248.1 | 6.67  | 6.65  | 0.44 | 0.14 | 1.02  | 0.821262 | 0.530566 | 0.935561 | 0.718042 |
| MmugDNA.35249.1.S1_at   | MmugDNA.35249.1 | 3.65  | 3.78  | 0.11 | 0.29 | -1.09 | 0.316391 | 0.42957  | 0.666473 | 0.650961 |
| MmugDNA.3525.1.S1_at    | MmugDNA.3525.1  | 5.03  | 4.8   | 0.38 | 0.16 | 1.17  | 0.625979 | 0.109767 | 0.849667 | 0.373701 |
| MmugDNA.35250.1.S1_at   | MmugDNA.35250.1 | 7.45  | 7.3   | 0.14 | 0.03 | 1.11  | 0.15965  | 0.103699 | 0.532583 | 0.364519 |
| MmugDNA.35251.1.S1_at   | MmugDNA.35251.1 | 3.64  | 4.3   | 0.55 | 0.39 | -1.59 | 0.271962 | 0.373738 | 0.631717 | 0.61241  |
| MmugDNA.35252.1.S1_at   | MmugDNA.35252.1 | 8.21  | 8.4   | 0.58 | 0.04 | -1.15 | 0.677146 | 0.602356 | 0.873361 | 0.763342 |
| MmugDNA.35253.1.S1_at   | MmugDNA.35253.1 | 5.54  | 5.27  | 0.28 | 0.05 | 1.2   | 0.556383 | 0.199307 | 0.814093 | 0.474002 |
| MmugDNA.35254.1.S1_at   | MmugDNA.35254.1 | 5.18  | 5.28  | 0.1  | 0.23 | -1.07 | 0.175624 | 0.019656 | 0.548781 | 0.176187 |
| MmugDNA.35255.1.S1_at   | MmugDNA.35255.1 | 5.09  | 5.14  | 0.38 | 0.1  | -1.04 | 0.747818 | 0.607993 | 0.904205 | 0.766717 |

|                         |                 |       |       |      |      |       |          |          |          |          |
|-------------------------|-----------------|-------|-------|------|------|-------|----------|----------|----------|----------|
| MmugDNA.35256.1.S1_at   | MmugDNA.35256.1 | 4.84  | 4.98  | 0.27 | 0.07 | -1.1  | 0.801853 | 0.902524 | 0.927767 | 0.944622 |
| MmugDNA.35257.1.S1_at   | MmugDNA.35257.1 | 7.91  | 7.83  | 0.1  | 0.15 | 1.05  | 0.469368 | 0.634541 | 0.765531 | 0.784881 |
| MmugDNA.35258.1.S1_at   | MmugDNA.35258.1 | 4.41  | 4.38  | 0.13 | 0.13 | 1.02  | 0.82557  | 0.132957 | 0.937359 | 0.404626 |
| MmugDNA.35259.1.S1_at   | MmugDNA.35259.1 | 3.34  | 3.14  | 0.3  | 0.06 | 1.14  | 0.749345 | 0.949514 | 0.90499  | 0.971135 |
| MmugDNA.35262.1.S1_at   | MmugDNA.35262.1 | 7.32  | 7.96  | 0.27 | 0.06 | -1.56 | 0.038193 | 0.028541 | 0.358577 | 0.210754 |
| MmugDNA.35264.1.S1_at   | MmugDNA.35264.1 | 6.7   | 6.58  | 0.13 | 0.09 | 1.09  | 0.262699 | 0.475939 | 0.624947 | 0.682387 |
| MmugDNA.35265.1.S1_at   | MmugDNA.35265.1 | 3.39  | 3.43  | 0.05 | 0.07 | -1.03 | 0.167446 | 0.296207 | 0.540065 | 0.555413 |
| MmugDNA.35266.1.S1_at   | MmugDNA.35266.1 | 4.5   | 4.36  | 0.16 | 0.01 | 1.1   | 0.095021 | 0.199683 | 0.464131 | 0.474335 |
| MmugDNA.35268.1.S1_at   | MmugDNA.35268.1 | 11.8  | 11.08 | 0.24 | 0.33 | 1.65  | 0.033043 | 0.029805 | 0.345968 | 0.214318 |
| MmugDNA.35269.1.S1_at   | MmugDNA.35269.1 | 3.45  | 3.55  | 0.46 | 0.16 | -1.07 | 0.595359 | 0.794032 | 0.835317 | 0.881267 |
| MmugDNA.3527.1.S1_at    | MmugDNA.3527.1  | 5.73  | 5.55  | 0.21 | 0.13 | -1.13 | 0.292618 | 0.072417 | 0.648949 | 0.31528  |
| MmugDNA.35271.1.S1_x_at | MmugDNA.35271.1 | 9.37  | 9.44  | 0.38 | 0.23 | -1.05 | 0.662035 | 0.402729 | 0.866635 | 0.631543 |
| MmugDNA.35272.1.S1_at   | MmugDNA.35272.1 | 3.53  | 3.23  | 0.26 | 0.13 | 1.23  | 0.31423  | 0.105831 | 0.665103 | 0.368111 |
| MmugDNA.35273.1.S1_at   | MmugDNA.35273.1 | 5.68  | 5.67  | 0.06 | 0.06 | 1     | 0.418786 | 0.664588 | 0.735911 | 0.803454 |
| MmugDNA.35274.1.S1_at   | MmugDNA.35274.1 | 8.09  | 8.45  | 0.46 | 0.24 | -1.28 | 0.756937 | 0.182957 | 0.908337 | 0.459434 |
| MmugDNA.35275.1.S1_at   | MmugDNA.35275.1 | 6.45  | 6.39  | 0.05 | 0.05 | 1.04  | 0.111137 | 0.312444 | 0.484303 | 0.567197 |
| MmugDNA.35276.1.S1_at   | MmugDNA.35276.1 | 6.41  | 6.2   | 0.1  | 0.11 | 1.16  | 0.093949 | 0.028139 | 0.463304 | 0.209306 |
| MmugDNA.35277.1.S1_s_at | MmugDNA.35277.1 | 11.46 | 11.6  | 0.67 | 0.19 | -1.1  | 0.963875 | 0.199053 | 0.988182 | 0.473621 |
| MmugDNA.35278.1.S1_at   | MmugDNA.35278.1 | 4.04  | 3.85  | 0.11 | 0.08 | 1.14  | 0.080667 | 0.345582 | 0.444727 | 0.590816 |
| MmugDNA.35279.1.S1_at   | MmugDNA.35279.1 | 4.08  | 4.01  | 0.27 | 0.06 | 1.04  | 0.769129 | 0.73348  | 0.913441 | 0.845679 |
| MmugDNA.3528.1.S1_at    | MmugDNA.3528.1  | 6.3   | 6.19  | 0.03 | 0.04 | 1.08  | 0.0368   | 0.286849 | 0.355785 | 0.548162 |
| MmugDNA.35280.1.S1_at   | MmugDNA.35280.1 | 4.48  | 4.44  | 0.05 | 0.34 | 1.03  | 0.842138 | 0.65727  | 0.944083 | 0.799611 |
| MmugDNA.35281.1.S1_at   | MmugDNA.35281.1 | 8.08  | 8.07  | 0.53 | 0.13 | 1.01  | 0.84967  | 0.711537 | 0.947112 | 0.832752 |
| MmugDNA.35281.1.S1_s_at | MmugDNA.35281.1 | 10.8  | 10.85 | 0.29 | 0.19 | -1.04 | 0.978551 | 0.985642 | 0.993032 | 0.991833 |
| MmugDNA.35282.1.S1_at   | MmugDNA.35282.1 | 6.11  | 5.94  | 0.31 | 0.19 | 1.13  | 0.98664  | 0.336808 | 0.995667 | 0.584093 |
| MmugDNA.35283.1.S1_at   | MmugDNA.35283.1 | 10.22 | 10.4  | 0.14 | 0.05 | -1.13 | 0.25865  | 0.353794 | 0.622286 | 0.596815 |
| MmugDNA.35284.1.S1_at   | MmugDNA.35284.1 | 4.82  | 4.68  | 0.19 | 0.14 | 1.1   | 0.149297 | 0.401023 | 0.523146 | 0.630667 |
| MmugDNA.35285.1.S1_at   | MmugDNA.35285.1 | 7.06  | 6.91  | 0.17 | 0.11 | 1.11  | 0.306973 | 0.087909 | 0.659867 | 0.341312 |
| MmugDNA.35287.1.S1_at   | MmugDNA.35287.1 | 7.69  | 8.35  | 0.51 | 0.17 | -1.58 | 0.14536  | 0.231822 | 0.520409 | 0.503592 |
| MmugDNA.35288.1.S1_at   | MmugDNA.35288.1 | 6.95  | 7     | 0.32 | 0.22 | -1.03 | 0.306041 | 0.509242 | 0.659264 | 0.704039 |
| MmugDNA.35288.1.S1_s_at | MmugDNA.35288.1 | 6.36  | 6.14  | 0.22 | 0.08 | 1.16  | 0.085652 | 0.120815 | 0.452706 | 0.389657 |
| MmugDNA.35289.1.S1_at   | MmugDNA.35289.1 | 7.88  | 7.83  | 0.07 | 0.01 | 1.03  | 0.240697 | 0.363289 | 0.606937 | 0.60371  |
| MmugDNA.35290.1.S1_at   | MmugDNA.35290.1 | 7.24  | 7.17  | 0.1  | 0.19 | 1.05  | 0.8977   | 0.018314 | 0.965296 | 0.170178 |
| MmugDNA.35291.1.S1_s_at | MmugDNA.35291.1 | 11.31 | 11.4  | 0.42 | 0.05 | -1.06 | 0.497283 | 0.731371 | 0.781055 | 0.84431  |
| MmugDNA.35292.1.S1_at   | MmugDNA.35292.1 | 4.02  | 4.15  | 0.1  | 0.16 | -1.1  | 0.515746 | 0.47959  | 0.791016 | 0.685315 |
| MmugDNA.35295.1.S1_at   | MmugDNA.35295.1 | 5.65  | 6.78  | 0.12 | 0.26 | -2.2  | 0.004455 | 0.001011 | 0.199102 | 0.050657 |
| MmugDNA.35296.1.S1_at   | MmugDNA.35296.1 | 4.96  | 5.01  | 0.35 | 0.36 | -1.03 | 0.926468 | 0.592743 | 0.975571 | 0.75786  |
| MmugDNA.35297.1.S1_at   | MmugDNA.35297.1 | 13.95 | 14    | 0.11 | 0.05 | -1.04 | 0.718712 | 0.877885 | 0.890773 | 0.93029  |
| MmugDNA.35298.1.S1_at   | MmugDNA.35298.1 | 3.97  | 3.89  | 0.26 | 0.07 | 1.06  | 0.216196 | 0.192642 | 0.586342 | 0.468144 |
| MmugDNA.35299.1.S1_at   | MmugDNA.35299.1 | 5.28  | 4.68  | 0.22 | 0.09 | 1.52  | 0.00758  | 0.014386 | 0.229596 | 0.153115 |
| MmugDNA.353.1.S1_at     | MmugDNA.353.1   | 2.91  | 2.85  | 0.14 | 0.05 | 1.04  | 0.201122 | 0.262803 | 0.572925 | 0.529139 |
| MmugDNA.3530.1.S1_at    | MmugDNA.3530.1  | 6.21  | 6.61  | 0.09 | 0.23 | -1.32 | 0.150563 | 0.198906 | 0.524202 | 0.473506 |
| MmugDNA.35300.1.S1_at   | MmugDNA.35300.1 | 4.87  | 4.89  | 0.13 | 0.16 | -1.02 | 0.301626 | 0.376856 | 0.655844 | 0.614606 |

|                         |                 |       |       |      |      |       |          |          |          |          |
|-------------------------|-----------------|-------|-------|------|------|-------|----------|----------|----------|----------|
| MmugDNA.35301.1.S1_at   | MmugDNA.35301.1 | 5.52  | 5.49  | 0.1  | 0.06 | 1.02  | 0.572147 | 0.928093 | 0.823145 | 0.959154 |
| MmugDNA.35303.1.S1_at   | MmugDNA.35303.1 | 6.26  | 6     | 0.12 | 0.1  | 1.2   | 0.167486 | 0.133583 | 0.540065 | 0.405542 |
| MmugDNA.35305.1.S1_at   | MmugDNA.35305.1 | 6.45  | 6.07  | 0.16 | 0.04 | 1.3   | 0.026952 | 0.029748 | 0.326847 | 0.214138 |
| MmugDNA.35306.1.S1_at   | MmugDNA.35306.1 | 6.02  | 6.37  | 0.57 | 0.28 | -1.28 | 0.323822 | 0.143603 | 0.672332 | 0.41751  |
| MmugDNA.35308.1.S1_at   | MmugDNA.35308.1 | 7.68  | 7.3   | 0.3  | 0.17 | 1.29  | 0.06442  | 0.074726 | 0.418165 | 0.318465 |
| MmugDNA.35309.1.S1_at   | MmugDNA.35309.1 | 8.63  | 8.72  | 0.27 | 0.04 | -1.07 | 0.957531 | 0.506594 | 0.985977 | 0.702503 |
| MmugDNA.3531.1.S1_at    | MmugDNA.3531.1  | 10.45 | 10.43 | 0.39 | 0.14 | 1.02  | 0.992131 | 0.109269 | 0.996928 | 0.37308  |
| MmugDNA.35310.1.S1_at   | MmugDNA.35310.1 | 9.95  | 9.76  | 0.2  | 0.04 | 1.14  | 0.459317 | 0.746605 | 0.759425 | 0.852873 |
| MmugDNA.35310.1.S1_s_at | MmugDNA.35310.1 | 10.53 | 10.59 | 0.15 | 0.07 | -1.04 | 0.472182 | 0.882935 | 0.766895 | 0.933228 |
| MmugDNA.35312.1.S1_at   | MmugDNA.35312.1 | 2.85  | 3.09  | 1.37 | 0.09 | -1.19 | 0.493854 | 0.536862 | 0.779121 | 0.722119 |
| MmugDNA.35314.1.S1_at   | MmugDNA.35314.1 | 3.14  | 3.1   | 0.17 | 0.24 | 1.02  | 0.299747 | 0.376377 | 0.654182 | 0.614243 |
| MmugDNA.35315.1.S1_at   | MmugDNA.35315.1 | 8.48  | 7.96  | 0.64 | 0.15 | 1.43  | 0.193327 | 0.242083 | 0.564275 | 0.512652 |
| MmugDNA.35316.1.S1_at   | MmugDNA.35316.1 | 6.55  | 6.73  | 0.49 | 0.16 | -1.13 | 0.72221  | 0.480916 | 0.892211 | 0.686018 |
| MmugDNA.35317.1.S1_at   | MmugDNA.35317.1 | 5.88  | 6.43  | 0.48 | 0.17 | -1.46 | 0.381255 | 0.11682  | 0.709924 | 0.384133 |
| MmugDNA.35319.1.S1_at   | MmugDNA.35319.1 | 5.8   | 5.29  | 0.48 | 1.03 | 1.42  | 0.904188 | 0.24702  | 0.967773 | 0.516238 |
| MmugDNA.3532.1.S1_at    | MmugDNA.3532.1  | 6.67  | 6.62  | 0.63 | 0.44 | 1.04  | 0.8074   | 0.445629 | 0.930145 | 0.662468 |
| MmugDNA.35320.1.S1_at   | MmugDNA.35320.1 | 9.28  | 9.63  | 0.18 | 0.08 | -1.27 | 0.0283   | 0.245793 | 0.331894 | 0.515519 |
| MmugDNA.35322.1.S1_at   | MmugDNA.35322.1 | 6.73  | 6.57  | 0.06 | 0.04 | 1.12  | 0.073486 | 0.584452 | 0.434623 | 0.752435 |
| MmugDNA.35323.1.S1_at   | MmugDNA.35323.1 | 3.43  | 3.76  | 0.59 | 0.36 | -1.25 | 0.487294 | 0.413823 | 0.775017 | 0.639821 |
| MmugDNA.35324.1.S1_at   | MmugDNA.35324.1 | 6.77  | 6.74  | 0.05 | 0.08 | 1.02  | 0.178178 | 0.267842 | 0.551301 | 0.533607 |
| MmugDNA.35325.1.S1_at   | MmugDNA.35325.1 | 10.89 | 10.62 | 0.69 | 0.15 | 1.21  | 0.513449 | 0.575483 | 0.789843 | 0.746538 |
| MmugDNA.35326.1.S1_at   | MmugDNA.35326.1 | 7.07  | 6.6   | 0.42 | 0.37 | 1.39  | 0.477561 | 0.750168 | 0.76987  | 0.854731 |
| MmugDNA.35327.1.S1_at   | MmugDNA.35327.1 | 11.91 | 11.79 | 0.15 | 0.09 | 1.08  | 0.170317 | 0.617503 | 0.543379 | 0.773477 |
| MmugDNA.35329.1.S1_at   | MmugDNA.35329.1 | 6.88  | 6.49  | 0.3  | 0.05 | 1.32  | 0.293481 | 0.36782  | 0.64981  | 0.607466 |
| MmugDNA.3533.1.S1_at    | MmugDNA.3533.1  | 4.71  | 4.78  | 0.09 | 0.2  | -1.05 | 0.637445 | 0.379687 | 0.855548 | 0.616523 |
| MmugDNA.35330.1.S1_at   | MmugDNA.35330.1 | 4.8   | 4.66  | 0.23 | 0.11 | 1.1   | 0.620106 | 0.812794 | 0.847027 | 0.891795 |
| MmugDNA.35332.1.S1_at   | MmugDNA.35332.1 | 3.87  | 3.83  | 0.34 | 0.09 | 1.03  | 0.594083 | 0.555346 | 0.834583 | 0.733767 |
| MmugDNA.35333.1.S1_at   | MmugDNA.35333.1 | 3.94  | 4.05  | 0.17 | 0.09 | -1.08 | 0.232226 | 0.117848 | 0.600089 | 0.38576  |
| MmugDNA.35335.1.S1_at   | MmugDNA.35335.1 | 3.03  | 3.28  | 0.02 | 0.18 | -1.18 | 0.029906 | 0.017737 | 0.336234 | 0.168367 |
| MmugDNA.35336.1.S1_at   | MmugDNA.35336.1 | 4.86  | 4.92  | 0.03 | 0.11 | -1.05 | 0.342038 | 0.480349 | 0.685567 | 0.68574  |
| MmugDNA.35337.1.S1_at   | MmugDNA.35337.1 | 6.27  | 6.2   | 0.59 | 0.27 | 1.05  | 0.588599 | 0.723115 | 0.831968 | 0.839592 |
| MmugDNA.35340.1.S1_at   | MmugDNA.35340.1 | 3.32  | 3.42  | 0.26 | 0.25 | -1.07 | 0.136104 | 0.458615 | 0.510655 | 0.671246 |
| MmugDNA.35342.1.S1_at   | MmugDNA.35342.1 | 4.66  | 4.68  | 0.12 | 0.1  | -1.01 | 0.975321 | 0.645161 | 0.991931 | 0.792081 |
| MmugDNA.35343.1.S1_at   | MmugDNA.35343.1 | 10.11 | 10.31 | 0.23 | 0.01 | -1.14 | 0.156825 | 0.170327 | 0.530033 | 0.447103 |
| MmugDNA.35343.1.S1_s_at | MmugDNA.35343.1 | 8.25  | 8.52  | 0.07 | 0.24 | -1.2  | 0.47712  | 0.628209 | 0.769696 | 0.781087 |
| MmugDNA.35344.1.S1_at   | MmugDNA.35344.1 | 3.44  | 3.6   | 0.09 | 0.03 | -1.12 | 0.09391  | 0.079206 | 0.463304 | 0.32639  |
| MmugDNA.35345.1.S1_at   | MmugDNA.35345.1 | 3.5   | 3.43  | 0.11 | 0.05 | 1.05  | 0.393972 | 0.152441 | 0.719549 | 0.427274 |
| MmugDNA.35346.1.S1_at   | MmugDNA.35346.1 | 13.33 | 13.14 | 0.19 | 0.04 | 1.14  | 0.487469 | 0.768329 | 0.775077 | 0.865493 |
| MmugDNA.35346.1.S1_s_at | MmugDNA.35346.1 | 13.78 | 13.61 | 0.21 | 0.07 | 1.13  | 0.484552 | 0.750289 | 0.773681 | 0.854766 |
| MmugDNA.35347.1.S1_at   | MmugDNA.35347.1 | 3.52  | 3.43  | 0.2  | 0.28 | 1.07  | 0.51538  | 0.566833 | 0.79089  | 0.740807 |
| MmugDNA.35348.1.S1_at   | MmugDNA.35348.1 | 7.25  | 6.63  | 0.48 | 0.01 | 1.53  | 0.287503 | 0.347924 | 0.644595 | 0.592196 |
| MmugDNA.35349.1.S1_at   | MmugDNA.35349.1 | 7.25  | 7.17  | 0.16 | 0.16 | 1.06  | 0.121491 | 0.11663  | 0.495106 | 0.383829 |
| MmugDNA.3535.1.S1_at    | MmugDNA.3535.1  | 5.03  | 4.93  | 0.19 | 0.04 | 1.07  | 0.501823 | 0.496268 | 0.783444 | 0.695931 |



|                         |                 |       |       |      |      |       |          |          |          |          |
|-------------------------|-----------------|-------|-------|------|------|-------|----------|----------|----------|----------|
| MmugDNA.35350.1.S1_at   | MmugDNA.35350.1 | 2.85  | 2.91  | 0.13 | 0.03 | -1.04 | 0.564561 | 0.665052 | 0.818796 | 0.803733 |
| MmugDNA.35351.1.S1_at   | MmugDNA.35351.1 | 9.68  | 9.95  | 0.3  | 0.09 | -1.2  | 0.080115 | 0.104705 | 0.443423 | 0.366086 |
| MmugDNA.35352.1.S1_at   | MmugDNA.35352.1 | 10.17 | 10.53 | 0.28 | 0.08 | -1.28 | 0.078248 | 0.114632 | 0.440477 | 0.381156 |
| MmugDNA.35353.1.S1_at   | MmugDNA.35353.1 | 4.17  | 4.05  | 0.1  | 0.18 | 1.08  | 0.150544 | 0.242881 | 0.524173 | 0.513274 |
| MmugDNA.35354.1.S1_at   | MmugDNA.35354.1 | 10.37 | 10.88 | 0.35 | 0.05 | -1.42 | 0.047088 | 0.036549 | 0.379283 | 0.235649 |
| MmugDNA.35355.1.S1_at   | MmugDNA.35355.1 | 7.28  | 7.4   | 0.11 | 0.12 | -1.09 | 0.122331 | 0.280447 | 0.495694 | 0.543648 |
| MmugDNA.35356.1.S1_at   | MmugDNA.35356.1 | 7.83  | 8.07  | 0.43 | 0.1  | -1.18 | 0.132968 | 0.173524 | 0.507241 | 0.449938 |
| MmugDNA.35357.1.S1_at   | MmugDNA.35357.1 | 6.69  | 6.47  | 0.18 | 0.07 | 1.17  | 0.088023 | 0.094048 | 0.456029 | 0.350674 |
| MmugDNA.35357.1.S1_s_at | MmugDNA.35357.1 | 12.18 | 12.29 | 0.17 | 0.03 | -1.08 | 0.781768 | 0.444497 | 0.919573 | 0.662072 |
| MmugDNA.35358.1.S1_at   | MmugDNA.35358.1 | 6.61  | 6.32  | 0.17 | 0.1  | 1.22  | 0.119107 | 0.314625 | 0.492552 | 0.568415 |
| MmugDNA.35359.1.S1_at   | MmugDNA.35359.1 | 5.16  | 5.44  | 0.68 | 0.72 | -1.22 | 0.617332 | 0.834267 | 0.845362 | 0.905059 |
| MmugDNA.3536.1.S1_at    | MmugDNA.3536.1  | 7.87  | 7.44  | 0.84 | 0.14 | 1.34  | 0.408418 | 0.565159 | 0.72928  | 0.739748 |
| MmugDNA.35360.1.S1_at   | MmugDNA.35360.1 | 6.67  | 6.32  | 0.11 | 0.11 | 1.27  | 0.049599 | 0.18089  | 0.385822 | 0.457394 |
| MmugDNA.35364.1.S1_at   | MmugDNA.35364.1 | 4.75  | 4.72  | 0.11 | 0.25 | 1.02  | 0.320813 | 0.442338 | 0.669445 | 0.660347 |
| MmugDNA.35365.1.S1_at   | MmugDNA.35365.1 | 3.88  | 3.93  | 0.11 | 0.07 | -1.03 | 0.267869 | 0.214974 | 0.628278 | 0.488898 |
| MmugDNA.35366.1.S1_at   | MmugDNA.35366.1 | 4.89  | 4.57  | 0.33 | 0.03 | 1.25  | 0.059283 | 0.02534  | 0.406296 | 0.199522 |
| MmugDNA.35369.1.S1_at   | MmugDNA.35369.1 | 8.8   | 9.86  | 0.03 | 0.1  | -2.09 | 0.000053 | 0.000066 | 0.108151 | 0.025805 |
| MmugDNA.3537.1.S1_at    | MmugDNA.3537.1  | 3.21  | 3.21  | 0.26 | 0.16 | -1    | 0.244761 | 0.29105  | 0.610315 | 0.551574 |
| MmugDNA.35370.1.S1_at   | MmugDNA.35370.1 | 3.17  | 3.24  | 0.02 | 0.19 | -1.05 | 0.305587 | 0.146147 | 0.659033 | 0.420099 |
| MmugDNA.35371.1.S1_at   | MmugDNA.35371.1 | 4.42  | 4.71  | 0.13 | 0.21 | -1.22 | 0.06381  | 0.057912 | 0.416646 | 0.287117 |
| MmugDNA.35372.1.S1_at   | MmugDNA.35372.1 | 4.53  | 4.59  | 0.52 | 0.38 | -1.04 | 0.482597 | 0.509595 | 0.772508 | 0.704267 |
| MmugDNA.35373.1.S1_at   | MmugDNA.35373.1 | 4.74  | 4.28  | 0.38 | 0.16 | 1.37  | 0.127452 | 0.12898  | 0.501596 | 0.400455 |
| MmugDNA.35374.1.S1_at   | MmugDNA.35374.1 | 7.82  | 7.87  | 0.13 | 0.03 | -1.04 | 0.852913 | 0.022531 | 0.94811  | 0.187928 |
| MmugDNA.35375.1.S1_at   | MmugDNA.35375.1 | 12.28 | 12.44 | 0.03 | 0.04 | -1.12 | 0.002359 | 0.003372 | 0.176862 | 0.083569 |
| MmugDNA.35376.1.S1_at   | MmugDNA.35376.1 | 12.59 | 12.76 | 0.01 | 0.03 | -1.12 | 0.001234 | 0.005733 | 0.156419 | 0.104271 |
| MmugDNA.35377.1.S1_at   | MmugDNA.35377.1 | 4.58  | 4.64  | 0.04 | 0.08 | -1.04 | 0.564227 | 0.347616 | 0.81857  | 0.592039 |
| MmugDNA.35378.1.S1_at   | MmugDNA.35378.1 | 3.91  | 3.91  | 0.14 | 0.04 | 1     | 0.715742 | 0.748056 | 0.889467 | 0.853351 |
| MmugDNA.35379.1.S1_at   | MmugDNA.35379.1 | 3.24  | 3.61  | 0.53 | 0.16 | -1.29 | 0.636882 | 0.522839 | 0.855281 | 0.713416 |
| MmugDNA.3538.1.S1_at    | MmugDNA.3538.1  | 8.77  | 8.74  | 0.29 | 0.5  | 1.02  | 0.433772 | 0.129243 | 0.744621 | 0.400635 |
| MmugDNA.35380.1.S1_at   | MmugDNA.35380.1 | 4.4   | 5.06  | 0.81 | 0.52 | -1.57 | 0.962752 | 0.343886 | 0.987981 | 0.589575 |
| MmugDNA.35381.1.S1_at   | MmugDNA.35381.1 | 4.08  | 3.99  | 0.03 | 0.15 | 1.06  | 0.696112 | 0.933568 | 0.881964 | 0.962229 |
| MmugDNA.35382.1.S1_at   | MmugDNA.35382.1 | 5.1   | 5.1   | 0.04 | 0.1  | 1     | 0.613339 | 0.85567  | 0.84343  | 0.917683 |
| MmugDNA.35384.1.S1_at   | MmugDNA.35384.1 | 5.85  | 5.65  | 0.12 | 0.07 | 1.15  | 0.099141 | 0.275798 | 0.468557 | 0.540035 |
| MmugDNA.35385.1.S1_at   | MmugDNA.35385.1 | 7.06  | 8.34  | 0.59 | 0.2  | -2.44 | 0.022551 | 0.039244 | 0.311401 | 0.243274 |
| MmugDNA.35386.1.S1_at   | MmugDNA.35386.1 | 3.07  | 2.91  | 0.05 | 0.11 | 1.12  | 0.022412 | 0.096966 | 0.310499 | 0.354453 |
| MmugDNA.35387.1.S1_at   | MmugDNA.35387.1 | 8.3   | 8.71  | 0.71 | 0.12 | -1.33 | 0.261611 | 0.144871 | 0.62388  | 0.418762 |
| MmugDNA.35388.1.S1_at   | MmugDNA.35388.1 | 4.4   | 4.03  | 0.16 | 0.27 | 1.29  | 0.092455 | 0.088881 | 0.461013 | 0.34272  |
| MmugDNA.3539.1.S1_at    | MmugDNA.3539.1  | 10.63 | 10.4  | 0.36 | 0.01 | 1.17  | 0.285527 | 0.400095 | 0.643438 | 0.630158 |
| MmugDNA.35390.1.S1_at   | MmugDNA.35390.1 | 3.57  | 3.7   | 0    | 0.16 | -1.1  | 0.65184  | 0.695653 | 0.86186  | 0.823091 |
| MmugDNA.35391.1.S1_at   | MmugDNA.35391.1 | 4.94  | 4.43  | 0.28 | 0.18 | 1.42  | 0.136984 | 0.388639 | 0.511963 | 0.622947 |
| MmugDNA.35392.1.S1_at   | MmugDNA.35392.1 | 6.11  | 6.06  | 0.25 | 0.23 | 1.04  | 0.767469 | 0.937055 | 0.912495 | 0.964514 |
| MmugDNA.35393.1.S1_at   | MmugDNA.35393.1 | 4.4   | 4.44  | 0.29 | 0.08 | -1.03 | 0.946891 | 0.893378 | 0.981556 | 0.939163 |
| MmugDNA.35396.1.S1_at   | MmugDNA.35396.1 | 9.55  | 9.54  | 0.17 | 0.12 | 1.01  | 0.959491 | 0.545443 | 0.98678  | 0.727546 |

|                         |                 |       |       |      |      |       |          |          |          |          |
|-------------------------|-----------------|-------|-------|------|------|-------|----------|----------|----------|----------|
| MmugDNA.35397.1.S1_at   | MmugDNA.35397.1 | 5.79  | 5.78  | 0.27 | 0.2  | 1     | 0.872086 | 0.277728 | 0.955677 | 0.541648 |
| MmugDNA.35398.1.S1_at   | MmugDNA.35398.1 | 7.09  | 7.39  | 0.27 | 0.19 | -1.23 | 0.154876 | 0.158746 | 0.528194 | 0.434824 |
| MmugDNA.35399.1.S1_at   | MmugDNA.35399.1 | 6.54  | 6.46  | 0.06 | 0.03 | 1.05  | 0.108217 | 0.051781 | 0.480628 | 0.273124 |
| MmugDNA.354.1.S1_at     | MmugDNA.354.1   | 5.29  | 5.56  | 0.24 | 0.31 | -1.2  | 0.151352 | 0.179097 | 0.524547 | 0.455436 |
| MmugDNA.3540.1.S1_at    | MmugDNA.3540.1  | 3.82  | 4.42  | 0.35 | 0.19 | -1.51 | 0.11907  | 0.034307 | 0.492539 | 0.229145 |
| MmugDNA.35400.1.S1_at   | MmugDNA.35400.1 | 5.38  | 5.34  | 0.11 | 0.16 | 1.03  | 0.62138  | 0.664082 | 0.847514 | 0.803247 |
| MmugDNA.35401.1.S1_at   | MmugDNA.35401.1 | 5.76  | 6.11  | 1.02 | 0.12 | -1.28 | 0.861821 | 0.955378 | 0.95128  | 0.974645 |
| MmugDNA.35403.1.S1_at   | MmugDNA.35403.1 | 4.15  | 4.14  | 0.07 | 0.07 | 1.01  | 0.844978 | 0.442096 | 0.945592 | 0.660153 |
| MmugDNA.35405.1.S1_at   | MmugDNA.35405.1 | 6.93  | 6.69  | 0.17 | 0.13 | 1.18  | 0.611821 | 0.707858 | 0.842611 | 0.830504 |
| MmugDNA.35406.1.S1_at   | MmugDNA.35406.1 | 4.24  | 4.26  | 0.35 | 0.2  | -1.01 | 0.990062 | 0.991774 | 0.996301 | 0.995392 |
| MmugDNA.35407.1.S1_at   | MmugDNA.35407.1 | 6.85  | 6.28  | 1.44 | 0.23 | -1.49 | 0.534838 | 0.218527 | 0.801404 | 0.492142 |
| MmugDNA.35408.1.S1_at   | MmugDNA.35408.1 | 5.61  | 5.48  | 0.09 | 0.1  | 1.09  | 0.422557 | 0.281221 | 0.738218 | 0.544374 |
| MmugDNA.35409.1.S1_at   | MmugDNA.35409.1 | 4.13  | 4.1   | 0.07 | 0.09 | 1.03  | 0.293687 | 0.333194 | 0.649993 | 0.581467 |
| MmugDNA.3541.1.S1_at    | MmugDNA.3541.1  | 6.01  | 6.12  | 0.21 | 0.16 | -1.08 | 0.932432 | 0.225177 | 0.977227 | 0.497846 |
| MmugDNA.35410.1.S1_at   | MmugDNA.35410.1 | 4.23  | 4.14  | 0.06 | 0.1  | 1.06  | 0.954489 | 0.800955 | 0.984894 | 0.885538 |
| MmugDNA.35411.1.S1_at   | MmugDNA.35411.1 | 3.45  | 3.4   | 0.03 | 0.07 | 1.04  | 0.233735 | 0.244518 | 0.60129  | 0.51432  |
| MmugDNA.35412.1.S1_at   | MmugDNA.35412.1 | 5.29  | 5.17  | 0.1  | 0.09 | 1.08  | 0.120844 | 0.462213 | 0.494421 | 0.673601 |
| MmugDNA.35413.1.S1_at   | MmugDNA.35413.1 | 5.9   | 5.76  | 0.17 | 0.43 | 1.1   | 0.668613 | 0.461849 | 0.86912  | 0.673368 |
| MmugDNA.35414.1.S1_at   | MmugDNA.35414.1 | 9.36  | 8.19  | 0.11 | 0.34 | 2.26  | 0.004546 | 0.001032 | 0.200937 | 0.051297 |
| MmugDNA.35415.1.S1_at   | MmugDNA.35415.1 | 3.13  | 3.07  | 0.24 | 0.08 | 1.05  | 0.865769 | 0.485947 | 0.952764 | 0.689542 |
| MmugDNA.35416.1.S1_at   | MmugDNA.35416.1 | 8     | 7.74  | 0.19 | 0.21 | 1.2   | 0.078987 | 0.363795 | 0.441671 | 0.604189 |
| MmugDNA.35417.1.S1_at   | MmugDNA.35417.1 | 4.24  | 4.1   | 0    | 0.19 | 1.11  | 0.268055 | 0.426608 | 0.628386 | 0.648739 |
| MmugDNA.35418.1.S1_at   | MmugDNA.35418.1 | 8.38  | 9.57  | 0.14 | 0.24 | -2.28 | 0.001516 | 0.000806 | 0.161549 | 0.04607  |
| MmugDNA.35418.1.S1_s_at | MmugDNA.35418.1 | 8.82  | 9.77  | 0.12 | 0.1  | -1.93 | 0.000436 | 0.000419 | 0.139393 | 0.038093 |
| MmugDNA.35419.1.S1_at   | MmugDNA.35419.1 | 4.88  | 4.76  | 0.11 | 0.05 | 1.09  | 0.186366 | 0.045505 | 0.559101 | 0.2575   |
| MmugDNA.3542.1.S1_at    | MmugDNA.3542.1  | 8.32  | 8     | 0.79 | 0.23 | 1.25  | 0.722631 | 0.041143 | 0.892359 | 0.247669 |
| MmugDNA.35420.1.S1_at   | MmugDNA.35420.1 | 5.87  | 5.39  | 0.7  | 0.09 | 1.39  | 0.369507 | 0.302614 | 0.704236 | 0.560201 |
| MmugDNA.35421.1.S1_at   | MmugDNA.35421.1 | 5.62  | 5.62  | 0    | 0.03 | 1     | 0.373901 | 0.550748 | 0.705567 | 0.730611 |
| MmugDNA.35422.1.S1_at   | MmugDNA.35422.1 | 5.36  | 5.17  | 0.17 | 0.16 | 1.14  | 0.179952 | 0.147256 | 0.553155 | 0.421464 |
| MmugDNA.35423.1.S1_at   | MmugDNA.35423.1 | 5.76  | 5.73  | 0.03 | 0.1  | 1.02  | 0.969689 | 0.956066 | 0.990053 | 0.975045 |
| MmugDNA.35425.1.S1_at   | MmugDNA.35425.1 | 6.76  | 7     | 0.41 | 0.26 | -1.18 | 0.9433   | 0.259326 | 0.980448 | 0.526418 |
| MmugDNA.35428.1.S1_at   | MmugDNA.35428.1 | 5.74  | 5.73  | 0.1  | 0.19 | 1.01  | 0.365086 | 0.33466  | 0.700784 | 0.582581 |
| MmugDNA.35429.1.S1_at   | MmugDNA.35429.1 | 5.92  | 5.19  | 0.16 | 0.37 | 1.65  | 0.015362 | 0.002989 | 0.281111 | 0.079958 |
| MmugDNA.3543.1.S1_at    | MmugDNA.3543.1  | 10.54 | 10.08 | 0.38 | 0.28 | 1.37  | 0.081468 | 0.104542 | 0.445415 | 0.365805 |
| MmugDNA.35433.1.S1_at   | MmugDNA.35433.1 | 6.31  | 6.44  | 0.28 | 0.45 | -1.09 | 0.503493 | 0.623427 | 0.784372 | 0.777776 |
| MmugDNA.35434.1.S1_at   | MmugDNA.35434.1 | 3.69  | 3.45  | 0.11 | 0.12 | 1.18  | 0.078181 | 0.370173 | 0.440437 | 0.609371 |
| MmugDNA.35435.1.S1_at   | MmugDNA.35435.1 | 3.44  | 3.22  | 0.18 | 0.03 | 1.16  | 0.109715 | 0.10072  | 0.48257  | 0.360108 |
| MmugDNA.35436.1.S1_at   | MmugDNA.35436.1 | 4.5   | 4.75  | 0.36 | 0.67 | -1.19 | 0.244337 | 0.435933 | 0.60991  | 0.655636 |
| MmugDNA.35437.1.S1_at   | MmugDNA.35437.1 | 3.39  | 3.35  | 0.1  | 0.04 | 1.03  | 0.574082 | 0.865139 | 0.823829 | 0.923484 |
| MmugDNA.35438.1.S1_at   | MmugDNA.35438.1 | 4.08  | 4.13  | 0.13 | 0.12 | -1.04 | 0.68773  | 0.317967 | 0.877924 | 0.571046 |
| MmugDNA.35439.1.S1_s_at | MmugDNA.35439.1 | 10.75 | 11.45 | 0.09 | 0.08 | -1.63 | 0.000496 | 0.000134 | 0.143137 | 0.029087 |
| MmugDNA.35440.1.S1_at   | MmugDNA.35440.1 | 4.33  | 4.69  | 0.58 | 0.54 | -1.28 | 0.779106 | 0.582478 | 0.918583 | 0.751115 |
| MmugDNA.35441.1.S1_at   | MmugDNA.35441.1 | 4.58  | 4.59  | 0.07 | 0.11 | -1.01 | 0.409993 | 0.398498 | 0.73049  | 0.629458 |

|                         |                 |       |       |      |      |       |          |          |          |          |
|-------------------------|-----------------|-------|-------|------|------|-------|----------|----------|----------|----------|
| MmugDNA.35442.1.S1_at   | MmugDNA.35442.1 | 3.96  | 4.07  | 0.07 | 0.37 | -1.08 | 0.69878  | 0.63953  | 0.882848 | 0.788329 |
| MmugDNA.35443.1.S1_at   | MmugDNA.35443.1 | 5.85  | 5.52  | 0.47 | 0.2  | 1.26  | 0.388121 | 0.708576 | 0.715063 | 0.830979 |
| MmugDNA.35445.1.S1_at   | MmugDNA.35445.1 | 6.61  | 6.79  | 0.22 | 0.26 | -1.13 | 0.484815 | 0.686045 | 0.77382  | 0.81675  |
| MmugDNA.35445.1.S1_s_at | MmugDNA.35445.1 | 7.48  | 7.13  | 0.17 | 0.17 | 1.28  | 0.101664 | 0.177385 | 0.47191  | 0.453742 |
| MmugDNA.35446.1.S1_at   | MmugDNA.35446.1 | 9.16  | 9.04  | 0.34 | 0.25 | 1.09  | 0.62934  | 0.877407 | 0.851572 | 0.930139 |
| MmugDNA.35449.1.S1_at   | MmugDNA.35449.1 | 10.41 | 10.18 | 0.12 | 0.12 | 1.18  | 0.040529 | 0.08591  | 0.364613 | 0.338068 |
| MmugDNA.3545.1.S1_at    | MmugDNA.3545.1  | 8.4   | 7.82  | 0.24 | 0.33 | 1.49  | 0.073544 | 0.141074 | 0.434623 | 0.414592 |
| MmugDNA.35451.1.S1_at   | MmugDNA.35451.1 | 7.32  | 6.77  | 0.33 | 0.22 | 1.47  | 0.073827 | 0.064445 | 0.434623 | 0.300008 |
| MmugDNA.35452.1.S1_at   | MmugDNA.35452.1 | 3.52  | 3.36  | 0.12 | 0.01 | 1.11  | 0.114572 | 0.084075 | 0.48763  | 0.335065 |
| MmugDNA.35454.1.S1_at   | MmugDNA.35454.1 | 5.01  | 5.11  | 0.08 | 0.01 | -1.07 | 0.095463 | 0.000916 | 0.464229 | 0.048475 |
| MmugDNA.35456.1.S1_at   | MmugDNA.35456.1 | 7.06  | 6.98  | 0.1  | 0.01 | -1.06 | 0.190544 | 0.499819 | 0.561786 | 0.698538 |
| MmugDNA.3546.1.S1_at    | MmugDNA.3546.1  | 3.94  | 3.94  | 0.3  | 0.14 | 1     | 0.723753 | 0.51678  | 0.892847 | 0.70925  |
| MmugDNA.35460.1.S1_at   | MmugDNA.35460.1 | 6.06  | 6.03  | 0.19 | 0.07 | 1.02  | 0.459165 | 0.743299 | 0.759297 | 0.851281 |
| MmugDNA.35461.1.S1_at   | MmugDNA.35461.1 | 3.46  | 3.43  | 0.27 | 0.19 | 1.02  | 0.338229 | 0.542972 | 0.682773 | 0.725861 |
| MmugDNA.35462.1.S1_at   | MmugDNA.35462.1 | 3.97  | 4.04  | 0.16 | 0.1  | -1.05 | 0.843448 | 0.361954 | 0.94474  | 0.602725 |
| MmugDNA.35463.1.S1_at   | MmugDNA.35463.1 | 4.82  | 4.89  | 0.07 | 0.14 | -1.05 | 0.921306 | 0.543361 | 0.973336 | 0.72607  |
| MmugDNA.35464.1.S1_at   | MmugDNA.35464.1 | 7.24  | 7.12  | 0.08 | 0.05 | 1.09  | 0.080063 | 0.141418 | 0.443397 | 0.414874 |
| MmugDNA.35465.1.S1_at   | MmugDNA.35465.1 | 6.15  | 7.05  | 0.88 | 0.53 | -1.86 | 0.393389 | 0.306894 | 0.71919  | 0.563427 |
| MmugDNA.35466.1.S1_at   | MmugDNA.35466.1 | 3.49  | 3.49  | 0.05 | 0.02 | 1     | 0.25442  | 0.918343 | 0.618899 | 0.954227 |
| MmugDNA.35471.1.S1_at   | MmugDNA.35471.1 | 8.94  | 9.08  | 0.8  | 0.14 | -1.1  | 0.342031 | 0.12364  | 0.685567 | 0.393692 |
| MmugDNA.35472.1.S1_at   | MmugDNA.35472.1 | 4.03  | 4     | 0.85 | 0.27 | 1.02  | 0.326572 | 0.449771 | 0.674163 | 0.665263 |
| MmugDNA.35474.1.S1_at   | MmugDNA.35474.1 | 5.41  | 5.29  | 0.14 | 0.07 | 1.09  | 0.660992 | 0.502272 | 0.865852 | 0.70006  |
| MmugDNA.35475.1.S1_at   | MmugDNA.35475.1 | 5.28  | 5.12  | 0.19 | 0.08 | 1.12  | 0.281747 | 0.513935 | 0.640218 | 0.707322 |
| MmugDNA.35476.1.S1_at   | MmugDNA.35476.1 | 9.36  | 9.83  | 0.31 | 0.09 | -1.39 | 0.044644 | 0.14115  | 0.374916 | 0.414665 |
| MmugDNA.35477.1.S1_at   | MmugDNA.35477.1 | 13.1  | 12.98 | 0.09 | 0.03 | 1.09  | 0.08826  | 0.313552 | 0.45606  | 0.56796  |
| MmugDNA.35478.1.S1_at   | MmugDNA.35478.1 | 6.52  | 6.88  | 0.15 | 0.21 | -1.29 | 0.062037 | 0.001533 | 0.412007 | 0.059437 |
| MmugDNA.35479.1.S1_at   | MmugDNA.35479.1 | 3.58  | 3.62  | 0.05 | 0.1  | -1.03 | 0.535591 | 0.412756 | 0.801869 | 0.63909  |
| MmugDNA.35481.1.S1_at   | MmugDNA.35481.1 | 4.72  | 4.2   | 0.28 | 0.19 | 1.43  | 0.06021  | 0.10384  | 0.40771  | 0.364519 |
| MmugDNA.35482.1.S1_at   | MmugDNA.35482.1 | 3.82  | 3.58  | 0.16 | 0.14 | 1.18  | 0.373584 | 0.126269 | 0.705567 | 0.39678  |
| MmugDNA.35483.1.S1_at   | MmugDNA.35483.1 | 3     | 3.47  | 0.19 | 0.71 | -1.39 | 0.281693 | 0.406159 | 0.64018  | 0.634211 |
| MmugDNA.35485.1.S1_at   | MmugDNA.35485.1 | 4.52  | 4.17  | 0.26 | 0.04 | 1.28  | 0.283759 | 0.090859 | 0.64153  | 0.345474 |
| MmugDNA.35486.1.S1_at   | MmugDNA.35486.1 | 4.98  | 4.7   | 0.16 | 0.16 | 1.22  | 0.119249 | 0.120999 | 0.492749 | 0.389991 |
| MmugDNA.35487.1.S1_at   | MmugDNA.35487.1 | 7.94  | 7.79  | 0.23 | 0.04 | 1.1   | 0.88761  | 0.771794 | 0.961096 | 0.867347 |
| MmugDNA.35489.1.S1_at   | MmugDNA.35489.1 | 4.5   | 4.56  | 0.09 | 0.28 | -1.05 | 0.502295 | 0.789424 | 0.783529 | 0.878366 |
| MmugDNA.35491.1.S1_at   | MmugDNA.35491.1 | 9.97  | 10.12 | 0.2  | 0.07 | -1.11 | 0.258209 | 0.072663 | 0.622077 | 0.31561  |
| MmugDNA.35492.1.S1_at   | MmugDNA.35492.1 | 8.22  | 7.65  | 0.09 | 0.15 | 1.48  | 0.002669 | 0.001237 | 0.182785 | 0.05478  |
| MmugDNA.35493.1.S1_at   | MmugDNA.35493.1 | 3.71  | 3.25  | 0.59 | 0.21 | 1.38  | 0.309684 | 0.090657 | 0.661815 | 0.345151 |
| MmugDNA.35495.1.S1_at   | MmugDNA.35495.1 | 7.95  | 7.94  | 0.59 | 0.14 | 1.01  | 0.98709  | 0.630466 | 0.995808 | 0.782237 |
| MmugDNA.35497.1.S1_at   | MmugDNA.35497.1 | 5.19  | 4.75  | 0.32 | 0.15 | 1.36  | 0.153607 | 0.209944 | 0.526754 | 0.48371  |
| MmugDNA.35499.1.S1_at   | MmugDNA.35499.1 | 5.12  | 5.22  | 0.14 | 0.09 | -1.07 | 0.181677 | 0.503622 | 0.554854 | 0.700988 |
| MmugDNA.3550.1.S1_at    | MmugDNA.3550.1  | 6.44  | 6.43  | 0.17 | 0.03 | 1.01  | 0.962729 | 0.894287 | 0.987978 | 0.939697 |
| MmugDNA.35500.1.S1_at   | MmugDNA.35500.1 | 7.52  | 7.07  | 2.19 | 0.37 | 1.37  | 0.907765 | 0.252819 | 0.968794 | 0.521174 |
| MmugDNA.35501.1.S1_at   | MmugDNA.35501.1 | 7.95  | 7.34  | 0.17 | 0.17 | 1.53  | 0.010144 | 0.022473 | 0.246892 | 0.187564 |

|                         |                 |       |       |      |      |       |          |          |          |          |
|-------------------------|-----------------|-------|-------|------|------|-------|----------|----------|----------|----------|
| MmugDNA.35502.1.S1_at   | MmugDNA.35502.1 | 2.71  | 2.67  | 0.03 | 0.06 | 1.03  | 0.184671 | 0.068183 | 0.557393 | 0.307314 |
| MmugDNA.35505.1.S1_at   | MmugDNA.35505.1 | 7.68  | 8.17  | 0.4  | 0.27 | -1.41 | 0.356391 | 0.585827 | 0.695154 | 0.753068 |
| MmugDNA.35506.1.S1_at   | MmugDNA.35506.1 | 3.62  | 3.64  | 0.06 | 0.05 | -1.01 | 0.381703 | 0.067469 | 0.71026  | 0.305764 |
| MmugDNA.35507.1.S1_at   | MmugDNA.35507.1 | 5.69  | 5.54  | 0.17 | 0.14 | 1.11  | 0.21461  | 0.142886 | 0.585085 | 0.416846 |
| MmugDNA.35508.1.S1_at   | MmugDNA.35508.1 | 5.79  | 5.68  | 0.05 | 0.12 | 1.08  | 0.065658 | 0.062938 | 0.420827 | 0.297579 |
| MmugDNA.35509.1.S1_at   | MmugDNA.35509.1 | 10.72 | 10.71 | 0.48 | 0.32 | 1.01  | 0.845685 | 0.968909 | 0.945907 | 0.982889 |
| MmugDNA.35510.1.S1_at   | MmugDNA.35510.1 | 5.33  | 5.22  | 0.37 | 0.14 | 1.08  | 0.330966 | 0.342239 | 0.67754  | 0.588375 |
| MmugDNA.35511.1.S1_at   | MmugDNA.35511.1 | 9.09  | 9.6   | 0.15 | 0.09 | -1.42 | 0.008093 | 0.001804 | 0.232005 | 0.063714 |
| MmugDNA.35512.1.S1_at   | MmugDNA.35512.1 | 6.92  | 6.9   | 0.41 | 0.25 | 1.02  | 0.506974 | 0.801735 | 0.786064 | 0.885903 |
| MmugDNA.35513.1.S1_at   | MmugDNA.35513.1 | 5.47  | 5.38  | 0.14 | 0.17 | 1.06  | 0.22247  | 0.217451 | 0.592011 | 0.491035 |
| MmugDNA.35514.1.S1_at   | MmugDNA.35514.1 | 6.37  | 6.35  | 0.21 | 0.04 | -1.02 | 0.593558 | 0.786906 | 0.834267 | 0.876732 |
| MmugDNA.35515.1.S1_at   | MmugDNA.35515.1 | 6.29  | 6.76  | 0.6  | 0.1  | -1.38 | 0.264886 | 0.306468 | 0.626282 | 0.563029 |
| MmugDNA.35517.1.S1_at   | MmugDNA.35517.1 | 12.27 | 11.99 | 0.13 | 0.1  | 1.21  | 0.033818 | 0.00002  | 0.347296 | 0.019635 |
| MmugDNA.35518.1.S1_at   | MmugDNA.35518.1 | 5.11  | 5.05  | 0.07 | 0.22 | 1.04  | 0.23004  | 0.31251  | 0.598481 | 0.56722  |
| MmugDNA.35519.1.S1_at   | MmugDNA.35519.1 | 5.8   | 5.63  | 0.16 | 0.13 | 1.12  | 0.080034 | 0.162968 | 0.443317 | 0.439131 |
| MmugDNA.3552.1.S1_at    | MmugDNA.3552.1  | 4.46  | 4.29  | 0.12 | 0.07 | 1.13  | 0.247321 | 0.752702 | 0.612853 | 0.855968 |
| MmugDNA.35520.1.S1_at   | MmugDNA.35520.1 | 7.92  | 8.29  | 0.32 | 0.14 | -1.29 | 0.176179 | 0.307035 | 0.549319 | 0.563427 |
| MmugDNA.35521.1.S1_at   | MmugDNA.35521.1 | 3.61  | 3.6   | 0.28 | 0.07 | 1.01  | 0.763237 | 0.309796 | 0.911099 | 0.565044 |
| MmugDNA.35523.1.S1_at   | MmugDNA.35523.1 | 7.34  | 7.07  | 0.25 | 0.15 | 1.21  | 0.190257 | 0.148486 | 0.561521 | 0.423016 |
| MmugDNA.35524.1.S1_at   | MmugDNA.35524.1 | 5.04  | 5.01  | 0.08 | 0.05 | 1.02  | 0.395498 | 0.594712 | 0.720494 | 0.758628 |
| MmugDNA.35527.1.S1_at   | MmugDNA.35527.1 | 4.23  | 4.2   | 0.12 | 0.14 | 1.02  | 0.313427 | 0.447754 | 0.664763 | 0.66382  |
| MmugDNA.35528.1.S1_at   | MmugDNA.35528.1 | 9.89  | 9.37  | 0.27 | 0.09 | 1.43  | 0.035385 | 0.036805 | 0.351821 | 0.236386 |
| MmugDNA.3553.1.S1_at    | MmugDNA.3553.1  | 8.41  | 8.95  | 1.09 | 0.2  | -1.46 | 0.565347 | 0.582033 | 0.819183 | 0.750784 |
| MmugDNA.35531.1.S1_s_at | MmugDNA.35531.1 | 7.46  | 7.38  | 0.24 | 0.07 | 1.06  | 0.206523 | 0.397423 | 0.578354 | 0.628828 |
| MmugDNA.35533.1.S1_at   | MmugDNA.35533.1 | 8.23  | 8.11  | 0.3  | 0.19 | 1.09  | 0.3995   | 0.29668  | 0.723131 | 0.555697 |
| MmugDNA.35535.1.S1_at   | MmugDNA.35535.1 | 6.52  | 6.31  | 0.08 | 0.12 | 1.15  | 0.047041 | 0.011882 | 0.379283 | 0.141097 |
| MmugDNA.35536.1.S1_at   | MmugDNA.35536.1 | 11.52 | 11.47 | 0.2  | 0.1  | 1.04  | 0.679858 | 0.300475 | 0.874376 | 0.55882  |
| MmugDNA.35538.1.S1_at   | MmugDNA.35538.1 | 4.31  | 4.02  | 0.28 | 0.13 | 1.22  | 0.218758 | 0.708641 | 0.588341 | 0.831019 |
| MmugDNA.35539.1.S1_at   | MmugDNA.35539.1 | 4.59  | 4.39  | 0.23 | 0.16 | 1.15  | 0.098926 | 0.199954 | 0.468321 | 0.474603 |
| MmugDNA.3554.1.S1_at    | MmugDNA.3554.1  | 7.55  | 8     | 0.93 | 0.01 | -1.37 | 0.875511 | 0.030701 | 0.956756 | 0.217148 |
| MmugDNA.35540.1.S1_at   | MmugDNA.35540.1 | 6.13  | 6     | 0.02 | 0.11 | 1.09  | 0.111519 | 0.263259 | 0.484785 | 0.529531 |
| MmugDNA.35541.1.S1_at   | MmugDNA.35541.1 | 5.66  | 5.5   | 0.07 | 0.11 | 1.12  | 0.193843 | 0.048618 | 0.564465 | 0.265602 |
| MmugDNA.35542.1.S1_at   | MmugDNA.35542.1 | 9.46  | 9.31  | 0.37 | 0.09 | 1.11  | 0.785777 | 0.228869 | 0.921215 | 0.501124 |
| MmugDNA.35543.1.S1_at   | MmugDNA.35543.1 | 11.34 | 10.93 | 2.86 | 0.34 | 1.33  | 0.569596 | 0.193155 | 0.82149  | 0.468554 |
| MmugDNA.35545.1.S1_at   | MmugDNA.35545.1 | 10.79 | 10.87 | 0.22 | 0.09 | -1.06 | 0.65244  | 0.601317 | 0.862004 | 0.762665 |
| MmugDNA.35546.1.S1_at   | MmugDNA.35546.1 | 4.88  | 4.49  | 0.42 | 0.24 | 1.31  | 0.121803 | 0.403799 | 0.495544 | 0.632386 |
| MmugDNA.35547.1.S1_at   | MmugDNA.35547.1 | 3.8   | 3.65  | 0.23 | 0.19 | 1.11  | 0.893512 | 0.901332 | 0.963469 | 0.943898 |
| MmugDNA.35549.1.S1_at   | MmugDNA.35549.1 | 3.13  | 3.15  | 0.6  | 0.15 | -1.01 | 0.34836  | 0.537947 | 0.689636 | 0.7228   |
| MmugDNA.3555.1.S1_at    | MmugDNA.3555.1  | 10.76 | 10.68 | 1.57 | 0.5  | 1.06  | 0.864847 | 0.924207 | 0.952483 | 0.957283 |
| MmugDNA.35550.1.S1_at   | MmugDNA.35550.1 | 3.65  | 3.65  | 0.18 | 0.09 | -1.01 | 0.904991 | 0.992358 | 0.968109 | 0.995673 |
| MmugDNA.35551.1.S1_at   | MmugDNA.35551.1 | 6.39  | 6.74  | 0.65 | 0.41 | -1.28 | 0.372308 | 0.3192   | 0.705567 | 0.571688 |
| MmugDNA.35552.1.S1_at   | MmugDNA.35552.1 | 9.61  | 10.94 | 0.03 | 0.01 | -2.5  | 3.06E-07 | 0.000002 | 0.008097 | 0.011297 |
| MmugDNA.35553.1.S1_at   | MmugDNA.35553.1 | 6.32  | 6.3   | 0.16 | 0.16 | 1.02  | 0.885571 | 0.277735 | 0.96038  | 0.541648 |

|                         |                 |       |       |      |      |       |          |          |          |          |
|-------------------------|-----------------|-------|-------|------|------|-------|----------|----------|----------|----------|
| MmugDNA.35555.1.S1_at   | MmugDNA.35555.1 | 9.01  | 8.47  | 0.05 | 0.02 | 1.45  | 0.000065 | 0.000005 | 0.108151 | 0.016085 |
| MmugDNA.35556.1.S1_at   | MmugDNA.35556.1 | 7.06  | 7.53  | 0.17 | 0.26 | -1.38 | 0.050336 | 0.093012 | 0.386982 | 0.349175 |
| MmugDNA.3556.1.S1_at    | MmugDNA.3556.1  | 9.4   | 9.26  | 0.47 | 0.04 | 1.1   | 0.741636 | 0.512751 | 0.90146  | 0.7065   |
| MmugDNA.35560.1.S1_at   | MmugDNA.35560.1 | 3.48  | 3.61  | 0.16 | 0.45 | -1.09 | 0.598872 | 0.332543 | 0.837129 | 0.580954 |
| MmugDNA.35561.1.S1_at   | MmugDNA.35561.1 | 4.48  | 4.46  | 0.31 | 0.18 | 1.01  | 0.898278 | 0.973694 | 0.965455 | 0.985648 |
| MmugDNA.35563.1.S1_at   | MmugDNA.35563.1 | 10.59 | 10.04 | 0.3  | 0.19 | 1.46  | 0.031891 | 0.005404 | 0.34281  | 0.101457 |
| MmugDNA.35564.1.S1_at   | MmugDNA.35564.1 | 5.98  | 6.21  | 0.15 | 0.12 | -1.17 | 0.088308 | 0.093736 | 0.45606  | 0.350201 |
| MmugDNA.35565.1.S1_at   | MmugDNA.35565.1 | 10.33 | 10.65 | 2.77 | 0.3  | -1.25 | 0.464384 | 0.360988 | 0.762534 | 0.60201  |
| MmugDNA.35567.1.S1_at   | MmugDNA.35567.1 | 4.34  | 4.77  | 0.36 | 0.43 | -1.35 | 0.128795 | 0.190415 | 0.503567 | 0.465906 |
| MmugDNA.35568.1.S1_at   | MmugDNA.35568.1 | 6     | 6.18  | 0.11 | 0.05 | -1.13 | 0.333191 | 0.083024 | 0.679469 | 0.332758 |
| MmugDNA.35569.1.S1_at   | MmugDNA.35569.1 | 4.9   | 4.83  | 0.05 | 0.08 | 1.04  | 0.772157 | 0.468436 | 0.91504  | 0.677714 |
| MmugDNA.3557.1.S1_at    | MmugDNA.3557.1  | 9     | 8.29  | 0.86 | 0.22 | 1.63  | 0.221505 | 0.217051 | 0.591221 | 0.490668 |
| MmugDNA.3557.1.S1_x_at  | MmugDNA.3557.1  | 9.14  | 8.46  | 0.82 | 0.17 | 1.6   | 0.246078 | 0.258529 | 0.611464 | 0.525796 |
| MmugDNA.35570.1.S1_at   | MmugDNA.35570.1 | 6.71  | 6.75  | 0.22 | 0.03 | -1.03 | 0.761174 | 0.065393 | 0.910397 | 0.301415 |
| MmugDNA.35572.1.S1_at   | MmugDNA.35572.1 | 9.76  | 8.9   | 0.54 | 0.17 | 1.81  | 0.077579 | 0.08416  | 0.43966  | 0.335181 |
| MmugDNA.35574.1.S1_at   | MmugDNA.35574.1 | 6.07  | 6.56  | 0.51 | 0.69 | -1.4  | 0.1507   | 0.270383 | 0.524268 | 0.53571  |
| MmugDNA.35575.1.S1_at   | MmugDNA.35575.1 | 4.16  | 4.15  | 0.45 | 0.15 | 1     | 0.381895 | 0.322429 | 0.710335 | 0.573972 |
| MmugDNA.35577.1.S1_at   | MmugDNA.35577.1 | 3.87  | 3.96  | 0.09 | 0.17 | -1.06 | 0.436781 | 0.755515 | 0.746514 | 0.857658 |
| MmugDNA.35578.1.S1_at   | MmugDNA.35578.1 | 9.03  | 9.1   | 0.54 | 0.07 | -1.05 | 0.900602 | 0.977647 | 0.966203 | 0.987833 |
| MmugDNA.35581.1.S1_at   | MmugDNA.35581.1 | 5.13  | 5.09  | 0.11 | 0.05 | 1.03  | 0.227238 | 0.729408 | 0.596459 | 0.843541 |
| MmugDNA.35582.1.S1_at   | MmugDNA.35582.1 | 9.45  | 10.12 | 0.22 | 0.04 | -1.58 | 0.013106 | 0.002884 | 0.266768 | 0.078985 |
| MmugDNA.35584.1.S1_at   | MmugDNA.35584.1 | 4.47  | 4.34  | 0.1  | 0.08 | 1.1   | 0.34692  | 0.7562   | 0.688435 | 0.858123 |
| MmugDNA.35586.1.S1_at   | MmugDNA.35586.1 | 3.35  | 3.39  | 0.7  | 0.29 | -1.03 | 0.448528 | 0.486601 | 0.753893 | 0.689934 |
| MmugDNA.35587.1.S1_at   | MmugDNA.35587.1 | 5.42  | 5.26  | 0.18 | 0.03 | 1.12  | 0.192961 | 0.41405  | 0.563773 | 0.639985 |
| MmugDNA.35590.1.S1_at   | MmugDNA.35590.1 | 10.88 | 11.27 | 0.25 | 0.15 | -1.32 | 0.033849 | 0.163209 | 0.347296 | 0.439324 |
| MmugDNA.35591.1.S1_at   | MmugDNA.35591.1 | 12.19 | 12.05 | 0.33 | 0.05 | 1.1   | 0.528168 | 0.422428 | 0.797492 | 0.645722 |
| MmugDNA.35593.1.S1_at   | MmugDNA.35593.1 | 7.91  | 7.5   | 0.69 | 0.07 | 1.33  | 0.323351 | 0.442046 | 0.672144 | 0.660148 |
| MmugDNA.35593.1.S1_s_at | MmugDNA.35593.1 | 6.23  | 5.68  | 0.78 | 0.07 | 1.46  | 0.294732 | 0.411517 | 0.65084  | 0.638215 |
| MmugDNA.35595.1.S1_at   | MmugDNA.35595.1 | 8.68  | 8.73  | 0.6  | 0.16 | -1.03 | 0.450171 | 0.27056  | 0.754757 | 0.535837 |
| MmugDNA.35596.1.S1_at   | MmugDNA.35596.1 | 5.14  | 4.99  | 0.08 | 0.1  | 1.11  | 0.127557 | 0.140396 | 0.501756 | 0.413586 |
| MmugDNA.35597.1.S1_at   | MmugDNA.35597.1 | 3.78  | 3.78  | 0.06 | 0.05 | 1     | 0.469964 | 0.5444   | 0.765824 | 0.726798 |
| MmugDNA.35599.1.S1_at   | MmugDNA.35599.1 | 3.55  | 3.3   | 0.25 | 0.03 | 1.19  | 0.367733 | 0.599649 | 0.70326  | 0.761524 |
| MmugDNA.35600.1.S1_at   | MmugDNA.35600.1 | 10.3  | 10.37 | 0.5  | 0.12 | -1.05 | 0.999087 | 0.334345 | 0.999788 | 0.582352 |
| MmugDNA.35601.1.S1_at   | MmugDNA.35601.1 | 9.42  | 9.32  | 0.3  | 0.12 | 1.07  | 0.316098 | 0.011308 | 0.666316 | 0.138076 |
| MmugDNA.35602.1.S1_at   | MmugDNA.35602.1 | 4.43  | 4.42  | 0.1  | 0.08 | 1.01  | 0.898714 | 0.306934 | 0.965615 | 0.563427 |
| MmugDNA.35603.1.S1_at   | MmugDNA.35603.1 | 9.46  | 8.49  | 0.09 | 0.29 | 1.97  | 0.004279 | 0.000718 | 0.198874 | 0.044419 |
| MmugDNA.35604.1.S1_at   | MmugDNA.35604.1 | 4.47  | 4.33  | 0.2  | 0.12 | 1.11  | 0.241882 | 0.470121 | 0.607952 | 0.678572 |
| MmugDNA.35606.1.S1_at   | MmugDNA.35606.1 | 5.02  | 4.9   | 0.06 | 0.06 | 1.08  | 0.027401 | 0.040947 | 0.327584 | 0.24719  |
| MmugDNA.35608.1.S1_at   | MmugDNA.35608.1 | 3.99  | 3.84  | 0.11 | 0.22 | 1.11  | 0.331608 | 0.108514 | 0.678109 | 0.37207  |
| MmugDNA.35609.1.S1_at   | MmugDNA.35609.1 | 4.22  | 4.23  | 0.2  | 0.08 | -1.01 | 0.733105 | 0.911151 | 0.897503 | 0.94989  |
| MmugDNA.3561.1.S1_at    | MmugDNA.3561.1  | 5.38  | 5.49  | 0.1  | 0.11 | -1.08 | 0.663286 | 0.165664 | 0.867106 | 0.441925 |
| MmugDNA.35611.1.S1_at   | MmugDNA.35611.1 | 7.34  | 7.31  | 0.17 | 0.08 | 1.02  | 0.267431 | 0.327527 | 0.628131 | 0.57733  |
| MmugDNA.35612.1.S1_x_at | MmugDNA.35612.1 | 10.3  | 10.55 | 0.21 | 0.15 | -1.19 | 0.164293 | 0.331611 | 0.537322 | 0.580208 |

|                         |                 |       |       |      |      |       |          |          |          |          |
|-------------------------|-----------------|-------|-------|------|------|-------|----------|----------|----------|----------|
| MmugDNA.35614.1.S1_at   | MmugDNA.35614.1 | 4.53  | 4.44  | 0.1  | 0.27 | 1.06  | 0.194414 | 0.294351 | 0.564999 | 0.554083 |
| MmugDNA.35615.1.S1_at   | MmugDNA.35615.1 | 4.96  | 5.19  | 0.17 | 0.29 | -1.17 | 0.160313 | 0.162771 | 0.533335 | 0.438913 |
| MmugDNA.35616.1.S1_at   | MmugDNA.35616.1 | 4.55  | 4.42  | 0.08 | 0.07 | 1.09  | 0.108565 | 0.703832 | 0.480777 | 0.828251 |
| MmugDNA.35618.1.S1_at   | MmugDNA.35618.1 | 5.63  | 5.43  | 0.31 | 0.3  | 1.15  | 0.57608  | 0.033787 | 0.825056 | 0.227489 |
| MmugDNA.3562.1.S1_at    | MmugDNA.3562.1  | 10.54 | 11.08 | 0.77 | 0.12 | -1.45 | 0.227823 | 0.237404 | 0.596693 | 0.508117 |
| MmugDNA.35620.1.S1_at   | MmugDNA.35620.1 | 8.12  | 8.91  | 0.09 | 0.09 | -1.73 | 0.00033  | 0.000403 | 0.137028 | 0.037471 |
| MmugDNA.35621.1.S1_s_at | MmugDNA.35621.1 | 11.22 | 11.01 | 0.23 | 0.06 | 1.16  | 0.103244 | 0.132822 | 0.474032 | 0.404544 |
| MmugDNA.35622.1.S1_at   | MmugDNA.35622.1 | 9.47  | 9.36  | 0.19 | 0.23 | 1.08  | 0.503777 | 0.00427  | 0.784384 | 0.091847 |
| MmugDNA.35623.1.S1_at   | MmugDNA.35623.1 | 4.39  | 4.98  | 0.57 | 0.63 | -1.5  | 0.851788 | 0.930937 | 0.947748 | 0.960748 |
| MmugDNA.35624.1.S1_at   | MmugDNA.35624.1 | 6.13  | 6.35  | 0.26 | 0.22 | -1.16 | 0.339714 | 0.798608 | 0.683994 | 0.884032 |
| MmugDNA.35625.1.S1_s_at | MmugDNA.35625.1 | 13.06 | 12.78 | 0.23 | 0.06 | 1.22  | 0.072585 | 0.017452 | 0.432824 | 0.167229 |
| MmugDNA.35626.1.S1_at   | MmugDNA.35626.1 | 4.29  | 4.21  | 0.82 | 0.41 | 1.06  | 0.780429 | 0.082316 | 0.919137 | 0.331257 |
| MmugDNA.35626.1.S1_s_at | MmugDNA.35626.1 | 5.31  | 5.34  | 0.34 | 0.4  | -1.02 | 0.572511 | 0.044894 | 0.823222 | 0.256424 |
| MmugDNA.35627.1.S1_at   | MmugDNA.35627.1 | 11.57 | 11.59 | 0.16 | 0.1  | -1.01 | 0.758642 | 0.766142 | 0.90928  | 0.864118 |
| MmugDNA.35628.1.S1_at   | MmugDNA.35628.1 | 6.88  | 6.73  | 0.04 | 0.12 | 1.11  | 0.273777 | 0.001416 | 0.633429 | 0.057432 |
| MmugDNA.35630.1.S1_at   | MmugDNA.35630.1 | 3.06  | 3.09  | 0.3  | 0.06 | -1.02 | 0.456387 | 0.719752 | 0.75784  | 0.837888 |
| MmugDNA.35631.1.S1_at   | MmugDNA.35631.1 | 2.99  | 3.52  | 0.19 | 0.13 | -1.44 | 0.015339 | 0.108222 | 0.281074 | 0.371557 |
| MmugDNA.35632.1.S1_at   | MmugDNA.35632.1 | 6.46  | 6.25  | 0.09 | 0.11 | 1.16  | 0.062769 | 0.41004  | 0.413853 | 0.637064 |
| MmugDNA.35633.1.S1_at   | MmugDNA.35633.1 | 5.8   | 5.66  | 0.33 | 0.13 | 1.1   | 0.335694 | 0.774614 | 0.681167 | 0.868797 |
| MmugDNA.35634.1.S1_at   | MmugDNA.35634.1 | 3.76  | 3.81  | 0.14 | 0.27 | -1.04 | 0.951078 | 0.352421 | 0.983463 | 0.595722 |
| MmugDNA.35635.1.S1_at   | MmugDNA.35635.1 | 4.31  | 4.39  | 0.11 | 0.32 | -1.06 | 0.676608 | 0.564469 | 0.873178 | 0.739306 |
| MmugDNA.35636.1.S1_at   | MmugDNA.35636.1 | 6.8   | 6.79  | 0.31 | 0.26 | 1.01  | 0.729754 | 0.316084 | 0.895824 | 0.569541 |
| MmugDNA.35639.1.S1_at   | MmugDNA.35639.1 | 5.78  | 6.09  | 0.17 | 0.22 | -1.24 | 0.093703 | 0.140237 | 0.46305  | 0.413405 |
| MmugDNA.3564.1.S1_at    | MmugDNA.3564.1  | 7.89  | 8.19  | 0.3  | 0.08 | -1.23 | 0.658029 | 0.721485 | 0.864413 | 0.838713 |
| MmugDNA.35640.1.S1_at   | MmugDNA.35640.1 | 6.72  | 6.86  | 0.1  | 0.22 | -1.1  | 0.218396 | 0.776148 | 0.588185 | 0.869726 |
| MmugDNA.35641.1.S1_at   | MmugDNA.35641.1 | 4.7   | 4.7   | 0.09 | 0.36 | 1     | 0.968402 | 0.980665 | 0.98963  | 0.989424 |
| MmugDNA.35642.1.S1_at   | MmugDNA.35642.1 | 7.63  | 7.97  | 0.75 | 0.11 | -1.26 | 0.678852 | 0.839899 | 0.874196 | 0.908708 |
| MmugDNA.35644.1.S1_at   | MmugDNA.35644.1 | 10.03 | 9.32  | 0.53 | 0.24 | 1.63  | 0.293851 | 0.397942 | 0.65018  | 0.629138 |
| MmugDNA.35646.1.S1_at   | MmugDNA.35646.1 | 5.02  | 4.93  | 0.15 | 0.04 | 1.06  | 0.421892 | 0.277645 | 0.737802 | 0.541633 |
| MmugDNA.35649.1.S1_at   | MmugDNA.35649.1 | 5.48  | 5.52  | 0.11 | 0.03 | -1.03 | 0.549548 | 0.589588 | 0.810374 | 0.755749 |
| MmugDNA.3565.1.S1_at    | MmugDNA.3565.1  | 4.67  | 4.76  | 0.08 | 0.27 | -1.06 | 0.396811 | 0.612687 | 0.721565 | 0.770138 |
| MmugDNA.35650.1.S1_at   | MmugDNA.35650.1 | 10.9  | 11.62 | 0.39 | 0.04 | -1.64 | 0.022512 | 0.016318 | 0.311135 | 0.161818 |
| MmugDNA.35650.1.S1_s_at | MmugDNA.35650.1 | 11.36 | 12.06 | 0.37 | 0.07 | -1.62 | 0.024669 | 0.016562 | 0.319407 | 0.162955 |
| MmugDNA.35652.1.S1_at   | MmugDNA.35652.1 | 3.85  | 4     | 0.16 | 0.09 | -1.11 | 0.140253 | 0.188081 | 0.515581 | 0.464169 |
| MmugDNA.35652.1.S1_s_at | MmugDNA.35652.1 | 10.95 | 11.19 | 0.75 | 0.08 | -1.19 | 0.4688   | 0.080352 | 0.765126 | 0.327965 |
| MmugDNA.35653.1.S1_at   | MmugDNA.35653.1 | 6.28  | 6.06  | 0.15 | 0.24 | 1.17  | 0.119961 | 0.268542 | 0.493259 | 0.534123 |
| MmugDNA.35654.1.S1_at   | MmugDNA.35654.1 | 11.31 | 11.4  | 0.23 | 0.04 | -1.07 | 0.679474 | 0.000181 | 0.874274 | 0.030511 |
| MmugDNA.35655.1.S1_at   | MmugDNA.35655.1 | 5.21  | 5.28  | 0.11 | 0.28 | -1.05 | 0.298711 | 0.679283 | 0.653263 | 0.81275  |
| MmugDNA.35657.1.S1_at   | MmugDNA.35657.1 | 5.82  | 5.9   | 0.25 | 0.22 | -1.06 | 0.894078 | 0.320852 | 0.963672 | 0.572849 |
| MmugDNA.35658.1.S1_at   | MmugDNA.35658.1 | 6.43  | 6.26  | 0.2  | 0.34 | 1.13  | 0.972622 | 0.597533 | 0.991114 | 0.760237 |
| MmugDNA.35659.1.S1_at   | MmugDNA.35659.1 | 3.98  | 3.88  | 0.36 | 0.74 | 1.07  | 0.626448 | 0.744888 | 0.849991 | 0.852201 |
| MmugDNA.35660.1.S1_at   | MmugDNA.35660.1 | 11.33 | 11.47 | 0.22 | 0.06 | -1.1  | 0.528171 | 0.403464 | 0.797492 | 0.632162 |
| MmugDNA.35661.1.S1_at   | MmugDNA.35661.1 | 7.25  | 8.48  | 0.72 | 0.25 | -2.35 | 0.048257 | 0.088439 | 0.382735 | 0.341877 |

|                         |                 |       |       |      |      |       |          |          |          |          |
|-------------------------|-----------------|-------|-------|------|------|-------|----------|----------|----------|----------|
| MmugDNA.35662.1.S1_at   | MmugDNA.35662.1 | 4.67  | 4.65  | 0.04 | 0.12 | 1.01  | 0.910279 | 0.942136 | 0.969563 | 0.967154 |
| MmugDNA.35663.1.S1_at   | MmugDNA.35663.1 | 6.13  | 5.78  | 0.4  | 0.08 | 1.27  | 0.186734 | 0.248738 | 0.559225 | 0.517931 |
| MmugDNA.35664.1.S1_s_at | MmugDNA.35664.1 | 11.63 | 11.52 | 0.54 | 0.09 | 1.08  | 0.964095 | 0.363311 | 0.988243 | 0.60371  |
| MmugDNA.35665.1.S1_at   | MmugDNA.35665.1 | 6.37  | 6.31  | 0.03 | 0.05 | 1.04  | 0.123698 | 0.714714 | 0.49721  | 0.8345   |
| MmugDNA.35666.1.S1_at   | MmugDNA.35666.1 | 8.18  | 8.18  | 0.29 | 0.06 | 1     | 0.449718 | 0.361673 | 0.754584 | 0.602408 |
| MmugDNA.35667.1.S1_at   | MmugDNA.35667.1 | 6.81  | 8.38  | 0.75 | 0.06 | -2.97 | 0.022157 | 0.026706 | 0.31038  | 0.204345 |
| MmugDNA.35668.1.S1_at   | MmugDNA.35668.1 | 4.34  | 4.31  | 0.04 | 0.14 | 1.02  | 0.276333 | 0.530597 | 0.635937 | 0.718052 |
| MmugDNA.3567.1.S1_at    | MmugDNA.3567.1  | 6.59  | 6.92  | 0.3  | 0.16 | -1.25 | 0.167166 | 0.777309 | 0.539776 | 0.87064  |
| MmugDNA.35670.1.S1_at   | MmugDNA.35670.1 | 5.6   | 5.12  | 0.17 | 0.15 | 1.4   | 0.083002 | 0.150671 | 0.44828  | 0.42522  |
| MmugDNA.35671.1.S1_at   | MmugDNA.35671.1 | 4.78  | 4.72  | 0.17 | 0.07 | 1.04  | 0.340562 | 0.411882 | 0.684555 | 0.638434 |
| MmugDNA.35672.1.S1_at   | MmugDNA.35672.1 | 4     | 4.02  | 0.12 | 0.08 | -1.01 | 0.762491 | 0.432254 | 0.91092  | 0.652778 |
| MmugDNA.35673.1.S1_at   | MmugDNA.35673.1 | 9.97  | 10.07 | 0.39 | 0.06 | -1.07 | 0.202045 | 0.400102 | 0.573629 | 0.630158 |
| MmugDNA.35674.1.S1_at   | MmugDNA.35674.1 | 5.29  | 5.09  | 0.52 | 0.2  | 1.15  | 0.3453   | 0.5154   | 0.687441 | 0.708274 |
| MmugDNA.35675.1.S1_at   | MmugDNA.35675.1 | 5.08  | 4.99  | 0.12 | 0.15 | 1.06  | 0.514983 | 0.046238 | 0.790746 | 0.259397 |
| MmugDNA.35677.1.S1_at   | MmugDNA.35677.1 | 5.22  | 5.22  | 0.19 | 0.09 | -1    | 0.73827  | 0.432349 | 0.899817 | 0.652794 |
| MmugDNA.35678.1.S1_at   | MmugDNA.35678.1 | 7.3   | 6.86  | 0.3  | 0.34 | 1.36  | 0.165081 | 0.463858 | 0.537704 | 0.674663 |
| MmugDNA.3568.1.S1_at    | MmugDNA.3568.1  | 10.69 | 10.67 | 0.24 | 0.07 | 1.01  | 0.924133 | 0.536903 | 0.974622 | 0.722119 |
| MmugDNA.35684.1.S1_at   | MmugDNA.35684.1 | 8.91  | 8.76  | 0.56 | 0.17 | 1.11  | 0.441136 | 0.629751 | 0.749018 | 0.781989 |
| MmugDNA.35686.1.S1_at   | MmugDNA.35686.1 | 3.84  | 3.75  | 0.04 | 0.09 | 1.07  | 0.122227 | 0.136147 | 0.495677 | 0.408473 |
| MmugDNA.35688.1.S1_at   | MmugDNA.35688.1 | 5.36  | 4.77  | 0.61 | 0.69 | 1.5   | 0.75439  | 0.56547  | 0.907352 | 0.739886 |
| MmugDNA.35689.1.S1_at   | MmugDNA.35689.1 | 3.2   | 3.15  | 0.08 | 0.04 | 1.03  | 0.368841 | 0.052446 | 0.703826 | 0.274539 |
| MmugDNA.3569.1.S1_at    | MmugDNA.3569.1  | 5.79  | 6.74  | 0.9  | 0.57 | -1.93 | 0.069625 | 0.041438 | 0.427443 | 0.248368 |
| MmugDNA.35690.1.S1_at   | MmugDNA.35690.1 | 4.55  | 4.31  | 0.63 | 0.01 | 1.19  | 0.463772 | 0.621441 | 0.762278 | 0.77603  |
| MmugDNA.35691.1.S1_at   | MmugDNA.35691.1 | 3.56  | 3.57  | 0.08 | 0.03 | -1    | 0.304459 | 0.341745 | 0.658117 | 0.587862 |
| MmugDNA.35692.1.S1_s_at | MmugDNA.35692.1 | 5.51  | 5.63  | 0.18 | 0.14 | -1.09 | 0.702151 | 0.113639 | 0.884146 | 0.379775 |
| MmugDNA.35693.1.S1_at   | MmugDNA.35693.1 | 6.96  | 6.6   | 0.19 | 0.04 | 1.28  | 0.110674 | 0.078979 | 0.483893 | 0.325986 |
| MmugDNA.35694.1.S1_at   | MmugDNA.35694.1 | 4.89  | 4.95  | 0.16 | 0.15 | -1.04 | 0.832019 | 0.772274 | 0.939756 | 0.867647 |
| MmugDNA.35696.1.S1_at   | MmugDNA.35696.1 | 11.39 | 12.13 | 0.2  | 0.08 | -1.67 | 0.009233 | 0.007217 | 0.241866 | 0.114121 |
| MmugDNA.35698.1.S1_at   | MmugDNA.35698.1 | 7.13  | 7.61  | 0.62 | 0.07 | -1.4  | 0.280948 | 0.474508 | 0.639604 | 0.681511 |
| MmugDNA.35699.1.S1_at   | MmugDNA.35699.1 | 3.39  | 3.39  | 0    | 0.05 | 1     | 0.391601 | 0.840393 | 0.717611 | 0.909015 |
| MmugDNA.357.1.S1_at     | MmugDNA.357.1   | 7.56  | 8.09  | 1.2  | 0.06 | -1.45 | 0.510649 | 0.143466 | 0.788228 | 0.417442 |
| MmugDNA.3570.1.S1_at    | MmugDNA.3570.1  | 4.69  | 4.7   | 0.14 | 0.04 | -1.01 | 0.255275 | 0.590545 | 0.619354 | 0.756311 |
| MmugDNA.35703.1.S1_at   | MmugDNA.35703.1 | 6.63  | 6.59  | 0.11 | 0.08 | 1.03  | 0.996473 | 0.402163 | 0.998702 | 0.631246 |
| MmugDNA.35705.1.S1_at   | MmugDNA.35705.1 | 2.66  | 2.65  | 0.13 | 0.14 | 1.01  | 0.684625 | 0.725899 | 0.876464 | 0.84131  |
| MmugDNA.35706.1.S1_at   | MmugDNA.35706.1 | 4.58  | 4.59  | 0.23 | 0.05 | -1.01 | 0.538902 | 0.697143 | 0.803618 | 0.824045 |
| MmugDNA.35707.1.S1_at   | MmugDNA.35707.1 | 10.27 | 9.86  | 0.66 | 0.23 | 1.33  | 0.822274 | 0.358475 | 0.935933 | 0.600011 |
| MmugDNA.35708.1.S1_at   | MmugDNA.35708.1 | 3.96  | 3.85  | 0.12 | 0.12 | 1.08  | 0.684009 | 0.501973 | 0.87629  | 0.699986 |
| MmugDNA.35710.1.S1_at   | MmugDNA.35710.1 | 12.86 | 12.96 | 0.34 | 0.09 | -1.07 | 0.167493 | 0.161671 | 0.540065 | 0.437771 |
| MmugDNA.35712.1.S1_at   | MmugDNA.35712.1 | 4.57  | 4.25  | 0.44 | 0.31 | 1.25  | 0.43181  | 0.279761 | 0.743599 | 0.543235 |
| MmugDNA.35713.1.S1_at   | MmugDNA.35713.1 | 6.35  | 6.02  | 0.57 | 0.02 | 1.26  | 0.108838 | 0.071551 | 0.48125  | 0.313714 |
| MmugDNA.35714.1.S1_at   | MmugDNA.35714.1 | 6.61  | 6.46  | 0.72 | 0.42 | 1.11  | 0.823941 | 0.794844 | 0.936502 | 0.88178  |
| MmugDNA.35714.1.S1_x_at | MmugDNA.35714.1 | 6.18  | 5.85  | 0.59 | 0.47 | 1.26  | 0.592819 | 0.66813  | 0.833974 | 0.805782 |
| MmugDNA.35715.1.S1_at   | MmugDNA.35715.1 | 6.15  | 6     | 0.06 | 0.13 | 1.12  | 0.045922 | 0.009572 | 0.37735  | 0.128995 |

|                         |                 |       |       |      |      |       |          |          |          |          |
|-------------------------|-----------------|-------|-------|------|------|-------|----------|----------|----------|----------|
| MmugDNA.35716.1.S1_at   | MmugDNA.35716.1 | 7.3   | 7.13  | 0.33 | 0.09 | 1.12  | 0.463785 | 0.465389 | 0.762278 | 0.675748 |
| MmugDNA.35716.1.S1_s_at | MmugDNA.35716.1 | 5.94  | 5.9   | 0.35 | 0.17 | 1.03  | 0.487289 | 0.781714 | 0.775017 | 0.873463 |
| MmugDNA.35717.1.S1_at   | MmugDNA.35717.1 | 5.08  | 4.88  | 0.53 | 0.29 | 1.15  | 0.853185 | 0.181818 | 0.948292 | 0.458382 |
| MmugDNA.35718.1.S1_at   | MmugDNA.35718.1 | 3.52  | 3.58  | 0.12 | 0.72 | -1.04 | 0.354596 | 0.212174 | 0.694116 | 0.486072 |
| MmugDNA.35719.1.S1_at   | MmugDNA.35719.1 | 9.32  | 7.47  | 0.73 | 0.22 | 3.6   | 0.010016 | 0.00567  | 0.245352 | 0.103959 |
| MmugDNA.35721.1.S1_at   | MmugDNA.35721.1 | 10.05 | 10.08 | 0.29 | 0.02 | -1.02 | 0.310223 | 0.243095 | 0.662073 | 0.513356 |
| MmugDNA.35722.1.S1_at   | MmugDNA.35722.1 | 6.38  | 6.8   | 0.78 | 0.03 | -1.34 | 0.129593 | 0.170125 | 0.504359 | 0.446868 |
| MmugDNA.35723.1.S1_s_at | MmugDNA.35723.1 | 6.71  | 5.96  | 0.14 | 0.25 | 1.67  | 0.010441 | 0.011213 | 0.247969 | 0.137948 |
| MmugDNA.35725.1.S1_at   | MmugDNA.35725.1 | 4.35  | 4.51  | 0.19 | 0.35 | -1.12 | 0.447158 | 0.280687 | 0.753177 | 0.543874 |
| MmugDNA.35726.1.S1_at   | MmugDNA.35726.1 | 3.73  | 4.42  | 0.42 | 0.2  | -1.61 | 0.106685 | 0.129853 | 0.479013 | 0.401509 |
| MmugDNA.35727.1.S1_at   | MmugDNA.35727.1 | 5.62  | 5.06  | 0.5  | 0.24 | 1.47  | 0.427665 | 0.401041 | 0.741311 | 0.630667 |
| MmugDNA.35728.1.S1_at   | MmugDNA.35728.1 | 6.23  | 6.11  | 0.12 | 0.07 | 1.08  | 0.313196 | 0.331855 | 0.664491 | 0.580411 |
| MmugDNA.35729.1.S1_at   | MmugDNA.35729.1 | 6.18  | 6.12  | 0.03 | 0.11 | 1.05  | 0.11033  | 0.674873 | 0.483363 | 0.810065 |
| MmugDNA.3573.1.S1_at    | MmugDNA.3573.1  | 3.38  | 3.33  | 0.2  | 0.08 | 1.04  | 0.251984 | 0.316866 | 0.616976 | 0.570214 |
| MmugDNA.35731.1.S1_a_at | MmugDNA.35731.1 | 5.17  | 5.17  | 0.11 | 0.34 | 1     | 0.384045 | 0.1879   | 0.711172 | 0.464023 |
| MmugDNA.35731.1.S1_at   | MmugDNA.35731.1 | 5.1   | 5.25  | 0.15 | 0.07 | -1.11 | 0.507941 | 0.87591  | 0.786553 | 0.929502 |
| MmugDNA.35732.1.S1_at   | MmugDNA.35732.1 | 4.61  | 4.65  | 0.57 | 0.24 | -1.03 | 0.711024 | 0.178201 | 0.887436 | 0.454531 |
| MmugDNA.35735.1.S1_at   | MmugDNA.35735.1 | 7.15  | 7.19  | 0.82 | 0.21 | -1.03 | 0.987003 | 0.337263 | 0.995808 | 0.584455 |
| MmugDNA.35736.1.S1_at   | MmugDNA.35736.1 | 9.68  | 9.47  | 0.1  | 0.06 | 1.15  | 0.024255 | 0.264995 | 0.317812 | 0.530973 |
| MmugDNA.35737.1.S1_at   | MmugDNA.35737.1 | 6.57  | 7.13  | 0.13 | 0.03 | -1.48 | 0.003758 | 0.066678 | 0.197739 | 0.304031 |
| MmugDNA.35739.1.S1_at   | MmugDNA.35739.1 | 3.09  | 3.05  | 0.07 | 0.1  | 1.02  | 0.267789 | 0.359275 | 0.62827  | 0.600575 |
| MmugDNA.35739.1.S1_x_at | MmugDNA.35739.1 | 2.76  | 2.7   | 0.02 | 0.05 | 1.04  | 0.167895 | 0.098515 | 0.5405   | 0.356636 |
| MmugDNA.3574.1.S1_at    | MmugDNA.3574.1  | 3.7   | 3.68  | 0.08 | 0.19 | 1.01  | 0.774725 | 0.852485 | 0.91642  | 0.916174 |
| MmugDNA.35740.1.S1_at   | MmugDNA.35740.1 | 8.19  | 8.06  | 0.41 | 0.26 | 1.1   | 0.140247 | 0.129334 | 0.515581 | 0.400748 |
| MmugDNA.35743.1.S1_at   | MmugDNA.35743.1 | 5.3   | 5.13  | 0.08 | 0.04 | 1.13  | 0.029934 | 0.226546 | 0.336331 | 0.499001 |
| MmugDNA.35744.1.S1_at   | MmugDNA.35744.1 | 7.3   | 7.22  | 0.68 | 0.04 | 1.06  | 0.710677 | 0.851243 | 0.887398 | 0.915366 |
| MmugDNA.35746.1.S1_at   | MmugDNA.35746.1 | 8.04  | 7.99  | 0.56 | 0.1  | 1.04  | 0.453174 | 0.395581 | 0.755962 | 0.627566 |
| MmugDNA.35747.1.S1_at   | MmugDNA.35747.1 | 4.7   | 4.49  | 0.2  | 0.12 | 1.16  | 0.240579 | 0.31144  | 0.606905 | 0.566456 |
| MmugDNA.35748.1.S1_at   | MmugDNA.35748.1 | 4.8   | 4.92  | 0.82 | 0.29 | -1.09 | 0.968688 | 0.25252  | 0.989723 | 0.521079 |
| MmugDNA.35749.1.S1_at   | MmugDNA.35749.1 | 5.26  | 5.36  | 0.26 | 0.26 | -1.07 | 0.281764 | 0.239284 | 0.640218 | 0.509995 |
| MmugDNA.35750.1.S1_at   | MmugDNA.35750.1 | 4.49  | 4.72  | 0.25 | 0.18 | -1.17 | 0.49723  | 0.688563 | 0.781055 | 0.818218 |
| MmugDNA.35752.1.S1_at   | MmugDNA.35752.1 | 7.01  | 7.01  | 0.05 | 0.1  | -1    | 0.711608 | 0.699605 | 0.887684 | 0.825531 |
| MmugDNA.35754.1.S1_s_at | MmugDNA.35754.1 | 8.64  | 8.79  | 0.23 | 0.14 | -1.1  | 0.406783 | 0.171791 | 0.728377 | 0.448198 |
| MmugDNA.35755.1.S1_at   | MmugDNA.35755.1 | 3.96  | 4.15  | 0.24 | 0.17 | -1.14 | 0.884612 | 0.41121  | 0.96011  | 0.637945 |
| MmugDNA.35756.1.S1_at   | MmugDNA.35756.1 | 4.49  | 4.32  | 0.06 | 0.07 | 1.13  | 0.033181 | 0.243426 | 0.346442 | 0.513476 |
| MmugDNA.35757.1.S1_at   | MmugDNA.35757.1 | 6.1   | 6.36  | 0.32 | 0.24 | -1.19 | 0.111157 | 0.147257 | 0.484303 | 0.421464 |
| MmugDNA.35761.1.S1_at   | MmugDNA.35761.1 | 3.42  | 3.26  | 0.13 | 0.2  | 1.12  | 0.504023 | 0.714256 | 0.784489 | 0.834198 |
| MmugDNA.35762.1.S1_at   | MmugDNA.35762.1 | 3.39  | 3.38  | 0.08 | 0.11 | 1.01  | 0.378893 | 0.690821 | 0.708481 | 0.819889 |
| MmugDNA.35764.1.S1_at   | MmugDNA.35764.1 | 9.18  | 8.86  | 1.52 | 0.17 | 1.25  | 0.675965 | 0.474782 | 0.872796 | 0.681695 |
| MmugDNA.35764.1.S1_s_at | MmugDNA.35764.1 | 13.12 | 12.89 | 2.95 | 0.21 | 1.17  | 0.478962 | 0.33876  | 0.770364 | 0.58582  |
| MmugDNA.35765.1.S1_at   | MmugDNA.35765.1 | 5.65  | 6.59  | 0.91 | 0.23 | -1.92 | 0.280423 | 0.34918  | 0.639242 | 0.593225 |
| MmugDNA.35766.1.S1_at   | MmugDNA.35766.1 | 6.4   | 6.32  | 0.09 | 0.06 | 1.06  | 0.329697 | 0.25942  | 0.676501 | 0.526418 |
| MmugDNA.35768.1.S1_at   | MmugDNA.35768.1 | 4.53  | 3.99  | 0.23 | 0.24 | 1.46  | 0.051402 | 0.071351 | 0.390032 | 0.313391 |



|                         |                 |       |       |      |      |       |          |          |          |          |
|-------------------------|-----------------|-------|-------|------|------|-------|----------|----------|----------|----------|
| MmugDNA.35769.1.S1_at   | MmugDNA.35769.1 | 6.42  | 7.29  | 0.78 | 0.23 | -1.84 | 0.116848 | 0.040511 | 0.490029 | 0.246264 |
| MmugDNA.3577.1.S1_at    | MmugDNA.3577.1  | 4.95  | 4.95  | 0.29 | 0.22 | -1    | 0.236995 | 0.295175 | 0.603883 | 0.554568 |
| MmugDNA.35770.1.S1_at   | MmugDNA.35770.1 | 5.54  | 5.15  | 0.19 | 0.06 | 1.31  | 0.074112 | 0.126309 | 0.43493  | 0.396786 |
| MmugDNA.35772.1.S1_at   | MmugDNA.35772.1 | 8.94  | 8.36  | 0.29 | 0.06 | 1.49  | 0.013602 | 0.034921 | 0.269894 | 0.231062 |
| MmugDNA.35774.1.S1_at   | MmugDNA.35774.1 | 4.29  | 4.28  | 0.13 | 0.16 | 1.01  | 0.534815 | 0.656242 | 0.801404 | 0.798973 |
| MmugDNA.35775.1.S1_at   | MmugDNA.35775.1 | 7.6   | 7.88  | 1.47 | 0.27 | -1.22 | 0.885739 | 0.871188 | 0.96038  | 0.926817 |
| MmugDNA.35777.1.S1_at   | MmugDNA.35777.1 | 3.59  | 3.5   | 0.11 | 0.03 | 1.06  | 0.098523 | 0.288668 | 0.467961 | 0.549827 |
| MmugDNA.35778.1.S1_at   | MmugDNA.35778.1 | 6.13  | 6.08  | 0.14 | 0.03 | 1.04  | 0.483405 | 0.576763 | 0.773041 | 0.74741  |
| MmugDNA.35780.1.S1_at   | MmugDNA.35780.1 | 7.24  | 6.93  | 0.19 | 0.09 | 1.24  | 0.067468 | 0.193846 | 0.423849 | 0.468894 |
| MmugDNA.35781.1.S1_at   | MmugDNA.35781.1 | 2.86  | 3.08  | 0.3  | 0.12 | -1.16 | 0.828199 | 0.714178 | 0.938215 | 0.834155 |
| MmugDNA.35781.1.S1_s_at | MmugDNA.35781.1 | 6.52  | 6.43  | 0.6  | 0.25 | -1.06 | 0.335958 | 0.538818 | 0.681417 | 0.723368 |
| MmugDNA.35782.1.S1_at   | MmugDNA.35782.1 | 6.62  | 6.63  | 0.2  | 0.04 | -1.01 | 0.347093 | 0.331967 | 0.68852  | 0.58053  |
| MmugDNA.35784.1.S1_at   | MmugDNA.35784.1 | 11.23 | 11.08 | 0.36 | 0.02 | 1.11  | 0.834985 | 0.54165  | 0.940822 | 0.725033 |
| MmugDNA.35785.1.S1_at   | MmugDNA.35785.1 | 10.43 | 9.6   | 0.88 | 0.08 | 1.77  | 0.220507 | 0.09376  | 0.589753 | 0.350241 |
| MmugDNA.35786.1.S1_at   | MmugDNA.35786.1 | 10.83 | 10.81 | 0.22 | 0.18 | 1.01  | 0.519382 | 0.119785 | 0.79315  | 0.388567 |
| MmugDNA.35786.1.S1_s_at | MmugDNA.35786.1 | 10.78 | 10.61 | 0.28 | 0.23 | 1.12  | 0.408586 | 0.28184  | 0.729419 | 0.544844 |
| MmugDNA.35787.1.S1_at   | MmugDNA.35787.1 | 10.09 | 10.17 | 0.32 | 0.14 | -1.05 | 0.988868 | 0.339213 | 0.995895 | 0.585918 |
| MmugDNA.35788.1.S1_at   | MmugDNA.35788.1 | 7.42  | 7.22  | 0.4  | 0.23 | 1.15  | 0.116559 | 0.190848 | 0.489684 | 0.466228 |
| MmugDNA.35789.1.S1_at   | MmugDNA.35789.1 | 7.55  | 7.34  | 0.21 | 0.1  | 1.16  | 0.094648 | 0.038188 | 0.463796 | 0.240129 |
| MmugDNA.35789.1.S1_s_at | MmugDNA.35789.1 | 8.73  | 8.59  | 0.19 | 0.22 | 1.11  | 0.943937 | 0.597426 | 0.980618 | 0.760197 |
| MmugDNA.3579.1.S1_at    | MmugDNA.3579.1  | 3.64  | 3.77  | 0.46 | 0.24 | -1.1  | 0.899983 | 0.47021  | 0.96599  | 0.678572 |
| MmugDNA.35792.1.S1_at   | MmugDNA.35792.1 | 4.07  | 4.08  | 0.09 | 0.12 | -1    | 0.260793 | 0.195037 | 0.623301 | 0.470179 |
| MmugDNA.35793.1.S1_at   | MmugDNA.35793.1 | 3.33  | 3.36  | 0.06 | 0.08 | -1.02 | 0.391994 | 0.460831 | 0.718015 | 0.672749 |
| MmugDNA.35795.1.S1_at   | MmugDNA.35795.1 | 6.75  | 5.83  | 1.96 | 0.13 | 1.88  | 0.960084 | 0.729495 | 0.986981 | 0.843554 |
| MmugDNA.35797.1.S1_at   | MmugDNA.35797.1 | 6.24  | 7.2   | 0.19 | 0.29 | -1.94 | 0.016901 | 0.000608 | 0.288956 | 0.042176 |
| MmugDNA.35798.1.S1_at   | MmugDNA.35798.1 | 5.29  | 5.07  | 0.35 | 0.07 | 1.16  | 0.317722 | 0.414015 | 0.667521 | 0.639981 |
| MmugDNA.35799.1.S1_at   | MmugDNA.35799.1 | 8.16  | 8.24  | 0.74 | 0.29 | -1.06 | 0.571488 | 0.698529 | 0.822782 | 0.824852 |
| MmugDNA.358.1.S1_at     | MmugDNA.358.1   | 5.78  | 3.66  | 0.95 | 0.61 | 4.35  | 0.073425 | 0.043088 | 0.434463 | 0.252227 |
| MmugDNA.35800.1.S1_at   | MmugDNA.35800.1 | 2.88  | 2.75  | 0.14 | 0.44 | 1.09  | 0.905561 | 0.305962 | 0.968177 | 0.562732 |
| MmugDNA.35801.1.S1_at   | MmugDNA.35801.1 | 9.06  | 8.88  | 0.14 | 0.13 | 1.13  | 0.164459 | 0.462989 | 0.537322 | 0.674149 |
| MmugDNA.35802.1.S1_at   | MmugDNA.35802.1 | 5.19  | 5.19  | 0.09 | 0.04 | -1    | 0.708705 | 0.051507 | 0.886591 | 0.272373 |
| MmugDNA.35803.1.S1_at   | MmugDNA.35803.1 | 4.45  | 5.14  | 0.45 | 0.61 | -1.61 | 0.212567 | 0.159222 | 0.583093 | 0.435217 |
| MmugDNA.35805.1.S1_at   | MmugDNA.35805.1 | 11.39 | 11.72 | 0.22 | 0.17 | -1.26 | 0.046654 | 0.089002 | 0.378401 | 0.342876 |
| MmugDNA.35805.1.S1_s_at | MmugDNA.35805.1 | 12.56 | 13.06 | 0.2  | 0.15 | -1.41 | 0.018117 | 0.041697 | 0.295257 | 0.24887  |
| MmugDNA.35806.1.S1_at   | MmugDNA.35806.1 | 3.69  | 3.57  | 0.2  | 0.09 | 1.09  | 0.905919 | 0.392955 | 0.968196 | 0.625917 |
| MmugDNA.35809.1.S1_at   | MmugDNA.35809.1 | 3.91  | 3.71  | 0.27 | 0.24 | 1.15  | 0.794465 | 0.687078 | 0.924569 | 0.817434 |
| MmugDNA.3581.1.S1_at    | MmugDNA.3581.1  | 4.3   | 4.71  | 0.09 | 0.33 | -1.33 | 0.317663 | 0.396404 | 0.667511 | 0.628193 |
| MmugDNA.35811.1.S1_at   | MmugDNA.35811.1 | 4.37  | 4.25  | 0.14 | 0.24 | 1.09  | 0.439839 | 0.485212 | 0.748282 | 0.688981 |
| MmugDNA.35813.1.S1_at   | MmugDNA.35813.1 | 8.04  | 7.96  | 0.62 | 0.28 | 1.05  | 0.656411 | 0.219455 | 0.863588 | 0.493156 |
| MmugDNA.35815.1.S1_at   | MmugDNA.35815.1 | 4.1   | 3.98  | 0.17 | 0.03 | 1.09  | 0.244514 | 0.403129 | 0.610045 | 0.631937 |
| MmugDNA.35817.1.S1_at   | MmugDNA.35817.1 | 6.89  | 7.42  | 0.79 | 0.32 | -1.44 | 0.525758 | 0.629215 | 0.796418 | 0.781713 |
| MmugDNA.35819.1.S1_at   | MmugDNA.35819.1 | 8.75  | 8.57  | 0.13 | 0.05 | 1.13  | 0.097573 | 0.27257  | 0.466487 | 0.537323 |
| MmugDNA.3582.1.S1_at    | MmugDNA.3582.1  | 4.55  | 4.46  | 0.48 | 0.08 | 1.06  | 0.504372 | 0.630435 | 0.784709 | 0.782237 |

|                         |                 |       |       |      |      |       |          |          |          |          |
|-------------------------|-----------------|-------|-------|------|------|-------|----------|----------|----------|----------|
| MmugDNA.35820.1.S1_at   | MmugDNA.35820.1 | 5.47  | 4.31  | 0.66 | 0.14 | 2.24  | 0.019159 | 0.010189 | 0.299936 | 0.132348 |
| MmugDNA.35821.1.S1_at   | MmugDNA.35821.1 | 4.9   | 4.69  | 0.05 | 0.06 | 1.16  | 0.006476 | 0.109763 | 0.21945  | 0.373701 |
| MmugDNA.35822.1.S1_at   | MmugDNA.35822.1 | 4.74  | 4.44  | 0.28 | 0.14 | 1.23  | 0.308654 | 0.506864 | 0.661287 | 0.702627 |
| MmugDNA.35824.1.S1_at   | MmugDNA.35824.1 | 10.23 | 10.89 | 0.19 | 0.15 | -1.58 | 0.009903 | 0.008744 | 0.244171 | 0.123975 |
| MmugDNA.35825.1.S1_at   | MmugDNA.35825.1 | 4.22  | 4.17  | 0    | 0.13 | 1.04  | 0.161029 | 0.088309 | 0.534327 | 0.341721 |
| MmugDNA.35826.1.S1_at   | MmugDNA.35826.1 | 7.7   | 7.63  | 0.12 | 0.08 | 1.05  | 0.230833 | 0.256298 | 0.599045 | 0.524079 |
| MmugDNA.35827.1.S1_at   | MmugDNA.35827.1 | 3.82  | 4.36  | 0.4  | 0.22 | -1.45 | 0.346675 | 0.537679 | 0.688361 | 0.722661 |
| MmugDNA.35827.1.S1_s_at | MmugDNA.35827.1 | 3.33  | 3.69  | 0.4  | 0.06 | -1.28 | 0.732203 | 0.890293 | 0.897013 | 0.937505 |
| MmugDNA.35829.1.S1_at   | MmugDNA.35829.1 | 5.2   | 5.15  | 0.29 | 0.18 | 1.03  | 0.858279 | 0.91989  | 0.94994  | 0.954953 |
| MmugDNA.35830.1.S1_at   | MmugDNA.35830.1 | 8.07  | 8.73  | 0.39 | 0.19 | -1.58 | 0.089085 | 0.109694 | 0.456902 | 0.373675 |
| MmugDNA.35832.1.S1_at   | MmugDNA.35832.1 | 5.82  | 6.16  | 0.27 | 0.46 | -1.27 | 0.133764 | 0.457768 | 0.508012 | 0.670897 |
| MmugDNA.35833.1.S1_at   | MmugDNA.35833.1 | 7.28  | 6.23  | 0.4  | 0.14 | 2.08  | 0.015925 | 0.074135 | 0.284606 | 0.31781  |
| MmugDNA.35834.1.S1_at   | MmugDNA.35834.1 | 11.03 | 10.66 | 3.08 | 0.21 | 1.3   | 0.498299 | 0.216769 | 0.781633 | 0.490311 |
| MmugDNA.35835.1.S1_at   | MmugDNA.35835.1 | 5.53  | 5.49  | 0.14 | 0.16 | 1.02  | 0.873755 | 0.727363 | 0.956275 | 0.842286 |
| MmugDNA.35836.1.S1_at   | MmugDNA.35836.1 | 7.18  | 7.07  | 0.34 | 0.1  | 1.07  | 0.691511 | 0.375697 | 0.879864 | 0.613587 |
| MmugDNA.35838.1.S1_at   | MmugDNA.35838.1 | 4.6   | 4.9   | 0.38 | 0.18 | -1.23 | 0.14499  | 0.151867 | 0.520238 | 0.426512 |
| MmugDNA.35840.1.S1_at   | MmugDNA.35840.1 | 4.15  | 4.09  | 0.17 | 0.04 | 1.04  | 0.726642 | 0.639536 | 0.894387 | 0.788329 |
| MmugDNA.35841.1.S1_at   | MmugDNA.35841.1 | 9.12  | 9.15  | 0.27 | 0.05 | -1.02 | 0.684294 | 0.23723  | 0.876401 | 0.507954 |
| MmugDNA.35842.1.S1_at   | MmugDNA.35842.1 | 10.86 | 11.17 | 0.31 | 0.12 | -1.24 | 0.594774 | 0.175064 | 0.83491  | 0.451724 |
| MmugDNA.35845.1.S1_at   | MmugDNA.35845.1 | 11.74 | 12.21 | 0.29 | 0.05 | -1.38 | 0.180947 | 0.272264 | 0.554261 | 0.537    |
| MmugDNA.35848.1.S1_at   | MmugDNA.35848.1 | 8.52  | 8.51  | 0.17 | 0.09 | 1     | 0.441885 | 0.180026 | 0.749662 | 0.456564 |
| MmugDNA.3585.1.S1_at    | MmugDNA.3585.1  | 5.83  | 4.59  | 0.87 | 0.29 | 2.36  | 0.095589 | 0.045482 | 0.464229 | 0.2575   |
| MmugDNA.35855.1.S1_at   | MmugDNA.35855.1 | 11.29 | 11.89 | 0.38 | 0.05 | -1.52 | 0.182197 | 0.207377 | 0.555361 | 0.481594 |
| MmugDNA.35856.1.S1_at   | MmugDNA.35856.1 | 8.09  | 8.6   | 0.46 | 0.16 | -1.42 | 0.152175 | 0.022721 | 0.525249 | 0.188739 |
| MmugDNA.35857.1.S1_at   | MmugDNA.35857.1 | 5.65  | 6.08  | 0.37 | 0.62 | -1.35 | 0.50407  | 0.067882 | 0.784493 | 0.306745 |
| MmugDNA.35858.1.S1_at   | MmugDNA.35858.1 | 2.85  | 2.85  | 0.07 | 0.1  | -1.01 | 0.873432 | 0.693757 | 0.956201 | 0.8219   |
| MmugDNA.35859.1.S1_at   | MmugDNA.35859.1 | 5.15  | 5.14  | 0.24 | 0.13 | 1.01  | 0.74298  | 0.270346 | 0.901935 | 0.535681 |
| MmugDNA.3586.1.S1_at    | MmugDNA.3586.1  | 6.85  | 6.87  | 0.11 | 0.15 | -1.02 | 0.965607 | 0.079503 | 0.988724 | 0.32681  |
| MmugDNA.35860.1.S1_at   | MmugDNA.35860.1 | 7.87  | 7.85  | 0.27 | 0.08 | 1.01  | 0.934203 | 0.607881 | 0.977732 | 0.766631 |
| MmugDNA.35861.1.S1_at   | MmugDNA.35861.1 | 2.99  | 2.8   | 0.22 | 0.07 | 1.15  | 0.578385 | 0.797364 | 0.826202 | 0.883167 |
| MmugDNA.35862.1.S1_at   | MmugDNA.35862.1 | 6.74  | 7.13  | 0.35 | 0.02 | -1.31 | 0.153884 | 0.203981 | 0.527213 | 0.478265 |
| MmugDNA.35863.1.S1_at   | MmugDNA.35863.1 | 4.91  | 5.77  | 0.11 | 0.29 | -1.81 | 0.008206 | 0.005315 | 0.232005 | 0.100896 |
| MmugDNA.35864.1.S1_at   | MmugDNA.35864.1 | 10.13 | 10.29 | 0.05 | 0.13 | -1.12 | 0.112248 | 0.469512 | 0.485454 | 0.678273 |
| MmugDNA.35865.1.S1_at   | MmugDNA.35865.1 | 3.2   | 3.2   | 0.04 | 0.26 | 1     | 0.742997 | 0.561502 | 0.901935 | 0.737449 |
| MmugDNA.35866.1.S1_at   | MmugDNA.35866.1 | 12.1  | 12.34 | 0.26 | 0.04 | -1.18 | 0.140358 | 0.02151  | 0.515777 | 0.18373  |
| MmugDNA.35869.1.S1_at   | MmugDNA.35869.1 | 6.06  | 6.04  | 0.02 | 0.1  | 1.01  | 0.467957 | 0.371246 | 0.764607 | 0.610135 |
| MmugDNA.3587.1.S1_at    | MmugDNA.3587.1  | 7.68  | 7.47  | 0.16 | 0.17 | 1.15  | 0.134178 | 0.312138 | 0.508395 | 0.566904 |
| MmugDNA.35872.1.S1_at   | MmugDNA.35872.1 | 7.92  | 8.06  | 0.65 | 0.29 | -1.1  | 0.444156 | 0.061128 | 0.751101 | 0.293981 |
| MmugDNA.35873.1.S1_at   | MmugDNA.35873.1 | 3.52  | 3.51  | 0.21 | 0.01 | 1.01  | 0.823279 | 0.802252 | 0.936293 | 0.886115 |
| MmugDNA.35878.1.S1_at   | MmugDNA.35878.1 | 9.83  | 10.14 | 0.07 | 0.11 | -1.24 | 0.025276 | 0.023249 | 0.321068 | 0.191114 |
| MmugDNA.35879.1.S1_at   | MmugDNA.35879.1 | 5.61  | 5.59  | 0.16 | 0.01 | 1.01  | 0.717181 | 0.87259  | 0.890308 | 0.927568 |
| MmugDNA.35880.1.S1_at   | MmugDNA.35880.1 | 4.41  | 4.4   | 0.05 | 0.07 | 1.01  | 0.1967   | 0.719886 | 0.56736  | 0.837941 |
| MmugDNA.35881.1.S1_at   | MmugDNA.35881.1 | 3.62  | 4.51  | 0.53 | 0.79 | -1.86 | 0.369216 | 0.246289 | 0.704181 | 0.515889 |

|                         |                 |       |       |      |      |       |          |          |          |          |
|-------------------------|-----------------|-------|-------|------|------|-------|----------|----------|----------|----------|
| MmugDNA.35882.1.S1_at   | MmugDNA.35882.1 | 5.3   | 5.43  | 0.32 | 0.21 | -1.1  | 0.452474 | 0.679611 | 0.755825 | 0.812952 |
| MmugDNA.35883.1.S1_s_at | MmugDNA.35883.1 | 10.48 | 10.5  | 0.07 | 0.07 | -1.01 | 0.374151 | 0.301372 | 0.705764 | 0.559391 |
| MmugDNA.35884.1.S1_at   | MmugDNA.35884.1 | 12.98 | 12.97 | 0.03 | 0.02 | 1.01  | 0.955885 | 0.330388 | 0.985363 | 0.579149 |
| MmugDNA.35884.1.S1_x_at | MmugDNA.35884.1 | 13.08 | 13.1  | 0.02 | 0.01 | -1.01 | 0.614632 | 0.252812 | 0.843992 | 0.521174 |
| MmugDNA.35885.1.S1_at   | MmugDNA.35885.1 | 5.88  | 5.88  | 0.11 | 0.02 | 1     | 0.475327 | 0.480881 | 0.768539 | 0.686    |
| MmugDNA.35886.1.S1_at   | MmugDNA.35886.1 | 3.4   | 3.33  | 0.15 | 0.05 | 1.05  | 0.854896 | 0.4301   | 0.948638 | 0.651143 |
| MmugDNA.35888.1.S1_at   | MmugDNA.35888.1 | 8.67  | 9.12  | 0.5  | 0.03 | -1.36 | 0.663204 | 0.631936 | 0.867106 | 0.783032 |
| MmugDNA.3589.1.S1_at    | MmugDNA.3589.1  | 5.63  | 5.73  | 0.14 | 0.15 | -1.07 | 0.159981 | 0.155362 | 0.533013 | 0.430754 |
| MmugDNA.35892.1.S1_at   | MmugDNA.35892.1 | 4.95  | 5.14  | 0.5  | 0.18 | -1.14 | 0.981467 | 0.097797 | 0.994084 | 0.355639 |
| MmugDNA.35893.1.S1_at   | MmugDNA.35893.1 | 6.6   | 6.38  | 0.07 | 0.1  | 1.17  | 0.062865 | 0.052795 | 0.414181 | 0.275408 |
| MmugDNA.35894.1.S1_at   | MmugDNA.35894.1 | 7.56  | 7.67  | 0.54 | 0.18 | -1.08 | 0.69703  | 0.649859 | 0.882177 | 0.795269 |
| MmugDNA.35895.1.S1_at   | MmugDNA.35895.1 | 3.19  | 3.29  | 0.1  | 0.06 | -1.08 | 0.284282 | 0.57356  | 0.642191 | 0.745213 |
| MmugDNA.35898.1.S1_at   | MmugDNA.35898.1 | 3.54  | 3.43  | 0.09 | 0.06 | 1.08  | 0.174635 | 0.190879 | 0.547994 | 0.466264 |
| MmugDNA.35899.1.S1_at   | MmugDNA.35899.1 | 5.07  | 5.05  | 0.16 | 0.02 | 1.02  | 0.884032 | 0.988549 | 0.959789 | 0.993572 |
| MmugDNA.359.1.S1_at     | MmugDNA.359.1   | 3.64  | 3.55  | 0.06 | 0.18 | 1.07  | 0.680624 | 0.955953 | 0.874731 | 0.975016 |
| MmugDNA.35900.1.S1_at   | MmugDNA.35900.1 | 4.31  | 4.28  | 0.25 | 0.11 | 1.02  | 0.901223 | 0.88663  | 0.966477 | 0.935519 |
| MmugDNA.35901.1.S1_at   | MmugDNA.35901.1 | 4.73  | 5.07  | 0.14 | 0.16 | -1.26 | 0.049277 | 0.14756  | 0.385423 | 0.421872 |
| MmugDNA.35902.1.S1_at   | MmugDNA.35902.1 | 4.81  | 5.57  | 0.44 | 0.37 | -1.69 | 0.100093 | 0.123598 | 0.470321 | 0.393639 |
| MmugDNA.35903.1.S1_at   | MmugDNA.35903.1 | 12.66 | 12.44 | 0.25 | 0.09 | 1.17  | 0.268367 | 0.049129 | 0.628784 | 0.266534 |
| MmugDNA.35904.1.S1_at   | MmugDNA.35904.1 | 3.89  | 3.69  | 0.22 | 0.09 | 1.15  | 0.195289 | 0.539317 | 0.565686 | 0.723689 |
| MmugDNA.35905.1.S1_at   | MmugDNA.35905.1 | 6.06  | 5.88  | 0.21 | 0.01 | 1.13  | 0.181049 | 0.301035 | 0.554326 | 0.559198 |
| MmugDNA.35907.1.S1_at   | MmugDNA.35907.1 | 3.2   | 3.1   | 0.05 | 0.16 | 1.07  | 0.25392  | 0.592817 | 0.618601 | 0.75792  |
| MmugDNA.35908.1.S1_at   | MmugDNA.35908.1 | 7     | 6.69  | 0.03 | 0.06 | 1.24  | 0.000942 | 0.001518 | 0.153739 | 0.059307 |
| MmugDNA.35909.1.S1_at   | MmugDNA.35909.1 | 3.99  | 4.15  | 0.18 | 0.11 | -1.12 | 0.593801 | 0.375077 | 0.834452 | 0.613186 |
| MmugDNA.3591.1.S1_at    | MmugDNA.3591.1  | 9.54  | 9.46  | 0.27 | 0.06 | 1.06  | 0.170828 | 0.196416 | 0.543796 | 0.471423 |
| MmugDNA.35911.1.S1_at   | MmugDNA.35911.1 | 7.61  | 7.66  | 0.17 | 0.13 | -1.04 | 0.274637 | 0.157425 | 0.633979 | 0.432911 |
| MmugDNA.35912.1.S1_at   | MmugDNA.35912.1 | 4.44  | 4.22  | 0.08 | 0.18 | 1.17  | 0.091853 | 0.326446 | 0.460177 | 0.576576 |
| MmugDNA.35913.1.S1_at   | MmugDNA.35913.1 | 5.14  | 5.19  | 0.25 | 0.52 | -1.03 | 0.557141 | 0.672462 | 0.814507 | 0.808572 |
| MmugDNA.35914.1.S1_at   | MmugDNA.35914.1 | 3.1   | 3.1   | 0.03 | 0.1  | 1     | 0.572112 | 0.116273 | 0.823145 | 0.38367  |
| MmugDNA.35915.1.S1_at   | MmugDNA.35915.1 | 11.35 | 10.84 | 0.61 | 0.12 | 1.43  | 0.086765 | 0.050645 | 0.454762 | 0.270317 |
| MmugDNA.35918.1.S1_at   | MmugDNA.35918.1 | 12.14 | 12.06 | 0.25 | 0.12 | 1.06  | 0.659158 | 0.431603 | 0.865082 | 0.652439 |
| MmugDNA.35919.1.S1_at   | MmugDNA.35919.1 | 6.5   | 7.15  | 0.58 | 0.37 | -1.57 | 0.395277 | 0.627399 | 0.720403 | 0.780374 |
| MmugDNA.3592.1.S1_at    | MmugDNA.3592.1  | 9.33  | 9.36  | 0.51 | 0.11 | -1.02 | 0.899338 | 0.984491 | 0.965794 | 0.991297 |
| MmugDNA.35920.1.S1_at   | MmugDNA.35920.1 | 8.47  | 8.3   | 0.52 | 0.18 | 1.13  | 0.93727  | 0.805688 | 0.978877 | 0.888324 |
| MmugDNA.35921.1.S1_at   | MmugDNA.35921.1 | 3.7   | 3.65  | 0.19 | 0.19 | 1.03  | 0.414596 | 0.396668 | 0.733197 | 0.628434 |
| MmugDNA.35922.1.S1_at   | MmugDNA.35922.1 | 4.19  | 4.22  | 0.19 | 0.13 | -1.02 | 0.196485 | 0.218218 | 0.567086 | 0.491764 |
| MmugDNA.35923.1.S1_at   | MmugDNA.35923.1 | 6.63  | 6.41  | 0.27 | 0.21 | 1.16  | 0.536792 | 0.819901 | 0.802473 | 0.896279 |
| MmugDNA.35924.1.S1_at   | MmugDNA.35924.1 | 3.62  | 3.55  | 0.6  | 0.41 | 1.05  | 0.847678 | 0.233101 | 0.946572 | 0.504456 |
| MmugDNA.35925.1.S1_at   | MmugDNA.35925.1 | 12.4  | 12.39 | 0    | 0.02 | 1     | 0.327189 | 0.932262 | 0.674872 | 0.961583 |
| MmugDNA.35926.1.S1_at   | MmugDNA.35926.1 | 5.87  | 5.27  | 0.37 | 0.19 | 1.52  | 0.033788 | 0.037386 | 0.347296 | 0.237776 |
| MmugDNA.35927.1.S1_at   | MmugDNA.35927.1 | 5.04  | 5.04  | 0.71 | 0.08 | 1     | 0.333098 | 0.459042 | 0.679469 | 0.671535 |
| MmugDNA.35928.1.S1_at   | MmugDNA.35928.1 | 12.62 | 12.63 | 0.07 | 0.06 | -1    | 0.932854 | 0.007078 | 0.977227 | 0.113284 |
| MmugDNA.35929.1.S1_s_at | MmugDNA.35929.1 | 12.12 | 12.3  | 0.11 | 0.03 | -1.13 | 0.044654 | 0.061358 | 0.374916 | 0.29448  |

|                         |                 |       |       |      |      |       |          |          |          |          |
|-------------------------|-----------------|-------|-------|------|------|-------|----------|----------|----------|----------|
| MmugDNA.3593.1.S1_at    | MmugDNA.3593.1  | 4.82  | 4.81  | 0.32 | 0.02 | 1     | 0.989022 | 0.999495 | 0.995916 | 0.999836 |
| MmugDNA.35930.1.S1_at   | MmugDNA.35930.1 | 5.92  | 5.88  | 0.58 | 0.52 | 1.03  | 0.927376 | 0.268622 | 0.97593  | 0.534138 |
| MmugDNA.35931.1.S1_at   | MmugDNA.35931.1 | 5.02  | 5     | 0    | 0.15 | 1.01  | 0.762974 | 0.578115 | 0.910975 | 0.7483   |
| MmugDNA.35932.1.S1_at   | MmugDNA.35932.1 | 5.22  | 5.17  | 0.12 | 0.06 | 1.04  | 0.329191 | 0.1276   | 0.676253 | 0.398533 |
| MmugDNA.35933.1.S1_at   | MmugDNA.35933.1 | 3.86  | 4.02  | 0.08 | 0.37 | -1.11 | 0.626964 | 0.479263 | 0.850306 | 0.68506  |
| MmugDNA.35935.1.S1_at   | MmugDNA.35935.1 | 3.21  | 3.09  | 0.08 | 0.05 | 1.09  | 0.09898  | 0.199301 | 0.468321 | 0.474002 |
| MmugDNA.35936.1.S1_at   | MmugDNA.35936.1 | 10.26 | 8.03  | 0.66 | 0.36 | 4.69  | 0.006178 | 0.011172 | 0.216868 | 0.137551 |
| MmugDNA.35938.1.S1_at   | MmugDNA.35938.1 | 6.54  | 6.55  | 0.15 | 0.17 | -1    | 0.945295 | 0.983617 | 0.980927 | 0.990902 |
| MmugDNA.35939.1.S1_at   | MmugDNA.35939.1 | 2.89  | 2.85  | 0.04 | 0.11 | 1.03  | 0.281332 | 0.262718 | 0.639917 | 0.52907  |
| MmugDNA.35941.1.S1_at   | MmugDNA.35941.1 | 12.02 | 11.76 | 1.34 | 0.27 | 1.2   | 0.906076 | 0.124731 | 0.968218 | 0.39513  |
| MmugDNA.35943.1.S1_at   | MmugDNA.35943.1 | 5.17  | 4.97  | 0.07 | 0.13 | -1.15 | 0.034659 | 0.096486 | 0.350297 | 0.35409  |
| MmugDNA.35944.1.S1_at   | MmugDNA.35944.1 | 3.95  | 4.92  | 0.71 | 0.24 | -1.95 | 0.25507  | 0.555054 | 0.619267 | 0.733629 |
| MmugDNA.35945.1.S1_at   | MmugDNA.35945.1 | 3.51  | 3.34  | 0.04 | 0.15 | 1.13  | 0.270283 | 0.107755 | 0.630253 | 0.370816 |
| MmugDNA.35946.1.S1_at   | MmugDNA.35946.1 | 9.09  | 8.82  | 0.4  | 0.03 | 1.21  | 0.099968 | 0.159666 | 0.470171 | 0.435785 |
| MmugDNA.35947.1.S1_at   | MmugDNA.35947.1 | 4.37  | 4.25  | 0.14 | 0.09 | 1.08  | 0.128115 | 0.154075 | 0.502581 | 0.428867 |
| MmugDNA.35948.1.S1_at   | MmugDNA.35948.1 | 3.47  | 3.41  | 0.34 | 0.14 | 1.04  | 0.304913 | 0.052232 | 0.658493 | 0.274065 |
| MmugDNA.3595.1.S1_at    | MmugDNA.3595.1  | 4.65  | 4.15  | 0.26 | 0.05 | 1.41  | 0.045646 | 0.226904 | 0.376875 | 0.499276 |
| MmugDNA.35952.1.S1_at   | MmugDNA.35952.1 | 3.8   | 4.03  | 0.28 | 0.15 | -1.17 | 0.489436 | 0.441141 | 0.776182 | 0.659375 |
| MmugDNA.35953.1.S1_at   | MmugDNA.35953.1 | 8.26  | 8.56  | 0.93 | 0.02 | -1.23 | 0.653002 | 0.573957 | 0.862124 | 0.745491 |
| MmugDNA.35954.1.S1_at   | MmugDNA.35954.1 | 7.92  | 7.51  | 0.58 | 0.08 | 1.33  | 0.161962 | 0.038704 | 0.535244 | 0.24169  |
| MmugDNA.35955.1.S1_at   | MmugDNA.35955.1 | 7.4   | 7.74  | 0.23 | 0.06 | -1.26 | 0.045726 | 0.206596 | 0.377029 | 0.480624 |
| MmugDNA.35956.1.S1_at   | MmugDNA.35956.1 | 4.26  | 4.19  | 0.11 | 0.06 | 1.05  | 0.450605 | 0.15358  | 0.754829 | 0.428341 |
| MmugDNA.35957.1.S1_at   | MmugDNA.35957.1 | 9.62  | 10.16 | 0.11 | 0.17 | -1.46 | 0.015179 | 0.023492 | 0.279785 | 0.19207  |
| MmugDNA.35958.1.S1_at   | MmugDNA.35958.1 | 6.32  | 6.75  | 0.35 | 0.05 | -1.35 | 0.042056 | 0.001971 | 0.368438 | 0.065871 |
| MmugDNA.35960.1.S1_at   | MmugDNA.35960.1 | 3.69  | 3.51  | 0.47 | 0.19 | 1.14  | 0.190771 | 0.467259 | 0.561793 | 0.677016 |
| MmugDNA.35961.1.S1_at   | MmugDNA.35961.1 | 3.03  | 3.23  | 0.13 | 0.16 | -1.15 | 0.21221  | 0.328822 | 0.582812 | 0.578398 |
| MmugDNA.35962.1.S1_at   | MmugDNA.35962.1 | 2.96  | 2.93  | 0.07 | 0.11 | 1.02  | 0.527398 | 0.226434 | 0.797084 | 0.498888 |
| MmugDNA.35964.1.S1_at   | MmugDNA.35964.1 | 3.97  | 3.93  | 0.07 | 0.05 | 1.03  | 0.472534 | 0.265928 | 0.767074 | 0.531796 |
| MmugDNA.35966.1.S1_at   | MmugDNA.35966.1 | 4.61  | 4.69  | 0.24 | 0.13 | -1.06 | 0.969445 | 0.296932 | 0.989952 | 0.555895 |
| MmugDNA.35967.1.S1_at   | MmugDNA.35967.1 | 6.92  | 7.08  | 0.23 | 0.07 | -1.12 | 0.241904 | 0.029607 | 0.607952 | 0.213742 |
| MmugDNA.35968.1.S1_at   | MmugDNA.35968.1 | 8.19  | 8.82  | 0.57 | 0.37 | -1.54 | 0.331544 | 0.334916 | 0.678103 | 0.58275  |
| MmugDNA.35969.1.S1_at   | MmugDNA.35969.1 | 5.78  | 5.77  | 0.07 | 0.07 | 1     | 0.39783  | 0.392403 | 0.722112 | 0.625811 |
| MmugDNA.3597.1.S1_at    | MmugDNA.3597.1  | 9.9   | 10.78 | 0.57 | 0.34 | -1.84 | 0.033763 | 0.018206 | 0.347257 | 0.169746 |
| MmugDNA.35970.1.S1_at   | MmugDNA.35970.1 | 3.89  | 3.73  | 0.11 | 0.18 | 1.12  | 0.310034 | 0.525503 | 0.661926 | 0.715076 |
| MmugDNA.35971.1.S1_s_at | MmugDNA.35971.1 | 2.61  | 2.6   | 0.1  | 0.03 | 1     | 0.266283 | 0.262451 | 0.627151 | 0.528713 |
| MmugDNA.35973.1.S1_at   | MmugDNA.35973.1 | 10    | 9.31  | 0.83 | 0.27 | 1.61  | 0.368636 | 0.089489 | 0.703807 | 0.343811 |
| MmugDNA.35974.1.S1_at   | MmugDNA.35974.1 | 11.81 | 11.67 | 0.06 | 0.08 | 1.1   | 0.035361 | 0.453911 | 0.351775 | 0.668338 |
| MmugDNA.35975.1.S1_at   | MmugDNA.35975.1 | 6.46  | 6.63  | 0.1  | 0.08 | -1.12 | 0.107056 | 0.099564 | 0.47951  | 0.35796  |
| MmugDNA.35976.1.S1_at   | MmugDNA.35976.1 | 4.79  | 4.56  | 0.22 | 0.24 | 1.17  | 0.268375 | 0.333665 | 0.628784 | 0.581825 |
| MmugDNA.35978.1.S1_at   | MmugDNA.35978.1 | 4.52  | 4.29  | 0.09 | 0.12 | 1.17  | 0.112003 | 0.215743 | 0.485105 | 0.489503 |
| MmugDNA.35979.1.S1_at   | MmugDNA.35979.1 | 7.04  | 7.01  | 0.17 | 0.13 | 1.03  | 0.574985 | 0.652942 | 0.824422 | 0.797125 |
| MmugDNA.3598.1.S1_at    | MmugDNA.3598.1  | 3.75  | 3.78  | 0.2  | 0.02 | -1.03 | 0.641051 | 0.896624 | 0.857072 | 0.940929 |
| MmugDNA.35980.1.S1_at   | MmugDNA.35980.1 | 3.54  | 3.41  | 0.2  | 0.13 | 1.09  | 0.681872 | 0.205443 | 0.87542  | 0.479764 |

|                         |                 |       |       |      |      |       |          |          |          |          |
|-------------------------|-----------------|-------|-------|------|------|-------|----------|----------|----------|----------|
| MmugDNA.35981.1.S1_at   | MmugDNA.35981.1 | 4.46  | 4.82  | 0.33 | 0.14 | -1.28 | 0.634217 | 0.212954 | 0.853953 | 0.4869   |
| MmugDNA.35982.1.S1_at   | MmugDNA.35982.1 | 5.98  | 5.98  | 0.04 | 0.06 | 1.01  | 0.857462 | 0.1476   | 0.949729 | 0.421901 |
| MmugDNA.11019.1.S1_at   | MmugDNA.11019.1 | 6.8   | 6.73  | 0.11 | 0.01 | 1.06  | 0.087071 | 0.015626 | 0.454785 | 0.158433 |
| MmugDNA.11019.1.S1_s_at | MmugDNA.11019.1 | 6.68  | 6.63  | 0.05 | 0.02 | 1.04  | 0.237903 | 0.429847 | 0.605029 | 0.651082 |
| MmugDNA.35985.1.S1_s_at | MmugDNA.35985.1 | 11.69 | 11.89 | 0.29 | 0.13 | -1.14 | 0.274382 | 0.350763 | 0.633792 | 0.594501 |
| MmugDNA.35987.1.S1_at   | MmugDNA.35987.1 | 3.83  | 3.87  | 1.32 | 0.58 | -1.03 | 0.639823 | 0.854098 | 0.856331 | 0.916957 |
| MmugDNA.35988.1.S1_at   | MmugDNA.35988.1 | 4.83  | 4.66  | 0.07 | 0.01 | 1.12  | 0.006895 | 0.037687 | 0.224141 | 0.23859  |
| MmugDNA.35989.1.S1_at   | MmugDNA.35989.1 | 5.25  | 5.21  | 0.05 | 0.05 | 1.03  | 0.683404 | 0.20777  | 0.876089 | 0.482018 |
| MmugDNA.3599.1.S1_at    | MmugDNA.3599.1  | 2.97  | 3.13  | 0.27 | 0.47 | -1.12 | 0.776868 | 0.809006 | 0.917413 | 0.889981 |
| MmugDNA.35990.1.S1_at   | MmugDNA.35990.1 | 6.02  | 6.07  | 0.78 | 0.16 | -1.04 | 0.504957 | 0.611292 | 0.785092 | 0.769207 |
| MmugDNA.35991.1.S1_at   | MmugDNA.35991.1 | 3.38  | 3.3   | 0.14 | 0.09 | -1.06 | 0.448031 | 0.31919  | 0.753744 | 0.571688 |
| MmugDNA.35991.1.S1_x_at | MmugDNA.35991.1 | 3.33  | 3.14  | 0.08 | 0.04 | 1.14  | 0.020508 | 0.119579 | 0.304231 | 0.388247 |
| MmugDNA.35992.1.S1_at   | MmugDNA.35992.1 | 4.66  | 4.74  | 0.32 | 0.03 | -1.05 | 0.975265 | 0.185795 | 0.991912 | 0.461631 |
| MmugDNA.35994.1.S1_at   | MmugDNA.35994.1 | 5.09  | 4.9   | 0.11 | 0.04 | 1.14  | 0.054761 | 0.19798  | 0.397122 | 0.472936 |
| MmugDNA.35995.1.S1_x_at | MmugDNA.35995.1 | 11.58 | 11.69 | 0.2  | 0.12 | -1.08 | 0.418255 | 0.472299 | 0.735441 | 0.679941 |
| MmugDNA.35996.1.S1_at   | MmugDNA.35996.1 | 7.99  | 7.68  | 0.36 | 0.15 | 1.24  | 0.684124 | 0.614634 | 0.876332 | 0.771375 |
| MmugDNA.35997.1.S1_at   | MmugDNA.35997.1 | 3.83  | 3.61  | 0.13 | 0.13 | 1.16  | 0.135718 | 0.189419 | 0.510186 | 0.465117 |
| MmugDNA.35998.1.S1_at   | MmugDNA.35998.1 | 4.88  | 4.91  | 0.64 | 0.38 | -1.02 | 0.869533 | 0.583894 | 0.954469 | 0.752043 |
| MmugDNA.360.1.S1_at     | MmugDNA.360.1   | 6.11  | 5.5   | 0.22 | 0.12 | 1.52  | 0.009948 | 0.006242 | 0.244606 | 0.107169 |
| MmugDNA.3600.1.S1_at    | MmugDNA.3600.1  | 7.76  | 8.2   | 0.03 | 0.23 | -1.35 | 0.042227 | 0.015567 | 0.368796 | 0.15814  |
| MmugDNA.36000.1.S1_at   | MmugDNA.36000.1 | 7.98  | 8.03  | 0.19 | 0.11 | -1.04 | 0.462916 | 0.13877  | 0.761894 | 0.411885 |
| MmugDNA.36002.1.S1_at   | MmugDNA.36002.1 | 3.55  | 3.22  | 0.24 | 0.06 | 1.26  | 0.092084 | 0.213524 | 0.460683 | 0.48741  |
| MmugDNA.36003.1.S1_at   | MmugDNA.36003.1 | 5.62  | 4.99  | 0.32 | 0.09 | 1.54  | 0.089032 | 0.079521 | 0.456872 | 0.32682  |
| MmugDNA.36004.1.S1_at   | MmugDNA.36004.1 | 5.44  | 5.38  | 0.06 | 0.13 | 1.04  | 0.434922 | 0.429723 | 0.745356 | 0.651001 |
| MmugDNA.36006.1.S1_at   | MmugDNA.36006.1 | 5.25  | 5.18  | 0.18 | 0    | 1.05  | 0.931445 | 0.777041 | 0.97706  | 0.870487 |
| MmugDNA.36007.1.S1_at   | MmugDNA.36007.1 | 5.02  | 5.34  | 1.67 | 0.62 | -1.25 | 0.759562 | 0.873688 | 0.909706 | 0.928169 |
| MmugDNA.36008.1.S1_at   | MmugDNA.36008.1 | 6.5   | 8.87  | 1.16 | 0.33 | -5.19 | 0.023715 | 0.017752 | 0.316281 | 0.168367 |
| MmugDNA.36009.1.S1_at   | MmugDNA.36009.1 | 9.32  | 9.11  | 1.36 | 0.21 | 1.16  | 0.964824 | 0.957381 | 0.988439 | 0.975878 |
| MmugDNA.36011.1.S1_at   | MmugDNA.36011.1 | 4.95  | 4.9   | 0.08 | 0.13 | 1.04  | 0.170375 | 0.347161 | 0.543433 | 0.591815 |
| MmugDNA.36012.1.S1_at   | MmugDNA.36012.1 | 7.84  | 8.14  | 0.18 | 0.11 | -1.23 | 0.31585  | 0.000263 | 0.666192 | 0.033786 |
| MmugDNA.36014.1.S1_at   | MmugDNA.36014.1 | 2.96  | 2.96  | 0.06 | 0.03 | 1     | 0.242452 | 0.088233 | 0.608517 | 0.341721 |
| MmugDNA.36015.1.S1_at   | MmugDNA.36015.1 | 6.4   | 6.37  | 0.25 | 0.02 | 1.02  | 0.349977 | 0.13745  | 0.691053 | 0.41037  |
| MmugDNA.36016.1.S1_at   | MmugDNA.36016.1 | 5.54  | 5.61  | 1.05 | 0.1  | -1.05 | 0.430018 | 0.393879 | 0.742541 | 0.626615 |
| MmugDNA.36019.1.S1_at   | MmugDNA.36019.1 | 6.81  | 4.99  | 0.37 | 0.62 | 3.53  | 0.020152 | 0.011453 | 0.303673 | 0.13846  |
| MmugDNA.3602.1.S1_at    | MmugDNA.3602.1  | 6.45  | 6.44  | 0.15 | 0.08 | 1.01  | 0.788782 | 0.660993 | 0.922472 | 0.801674 |
| MmugDNA.36020.1.S1_at   | MmugDNA.36020.1 | 10.59 | 11.03 | 1.4  | 0.22 | -1.36 | 0.591735 | 0.479451 | 0.833648 | 0.685199 |
| MmugDNA.36021.1.S1_at   | MmugDNA.36021.1 | 8.39  | 8.52  | 0.79 | 0.14 | -1.1  | 0.800125 | 0.831815 | 0.926825 | 0.903511 |
| MmugDNA.36022.1.S1_at   | MmugDNA.36022.1 | 6.58  | 6.37  | 0.1  | 0.12 | 1.15  | 0.104799 | 0.459872 | 0.476129 | 0.671989 |
| MmugDNA.36023.1.S1_at   | MmugDNA.36023.1 | 9.17  | 9.51  | 0.11 | 0.15 | -1.27 | 0.034552 | 0.000198 | 0.350124 | 0.031116 |
| MmugDNA.36024.1.S1_at   | MmugDNA.36024.1 | 7.15  | 7.1   | 0.22 | 0.09 | 1.04  | 0.804517 | 0.567702 | 0.928965 | 0.741576 |
| MmugDNA.36025.1.S1_at   | MmugDNA.36025.1 | 8.07  | 8.93  | 0.76 | 0.5  | -1.82 | 0.12378  | 0.253354 | 0.497339 | 0.521677 |
| MmugDNA.36027.1.S1_at   | MmugDNA.36027.1 | 4.84  | 4.34  | 0.75 | 0.23 | 1.42  | 0.460293 | 0.309446 | 0.760108 | 0.564979 |
| MmugDNA.36027.1.S1_x_at | MmugDNA.36027.1 | 5.23  | 4.81  | 0.72 | 0.59 | 1.35  | 0.881015 | 0.436338 | 0.958931 | 0.655923 |

|                         |                 |       |       |      |      |       |          |          |          |          |
|-------------------------|-----------------|-------|-------|------|------|-------|----------|----------|----------|----------|
| MmugDNA.36028.1.S1_at   | MmugDNA.36028.1 | 10.83 | 11.46 | 0.51 | 0.04 | -1.54 | 0.172854 | 0.207843 | 0.545989 | 0.482049 |
| MmugDNA.36029.1.S1_at   | MmugDNA.36029.1 | 3.22  | 3.26  | 0.11 | 0.25 | -1.02 | 0.413317 | 0.383841 | 0.732218 | 0.61978  |
| MmugDNA.3603.1.S1_at    | MmugDNA.3603.1  | 6.26  | 6.42  | 0.6  | 0.45 | -1.12 | 0.276423 | 0.323099 | 0.635968 | 0.574351 |
| MmugDNA.36030.1.S1_at   | MmugDNA.36030.1 | 4.85  | 4.81  | 0.05 | 0.03 | 1.03  | 0.059883 | 0.063361 | 0.407323 | 0.298403 |
| MmugDNA.36032.1.S1_at   | MmugDNA.36032.1 | 3.14  | 3.24  | 0.17 | 0.1  | -1.07 | 0.972011 | 0.193757 | 0.990867 | 0.468828 |
| MmugDNA.36033.1.S1_at   | MmugDNA.36033.1 | 4.49  | 3.98  | 0.04 | 0.12 | 1.42  | 0.002582 | 0.002138 | 0.180775 | 0.068424 |
| MmugDNA.36036.1.S1_at   | MmugDNA.36036.1 | 5.02  | 5.57  | 0.25 | 0.21 | -1.47 | 0.020726 | 0.106452 | 0.305611 | 0.368999 |
| MmugDNA.3604.1.S1_at    | MmugDNA.3604.1  | 5.92  | 5.75  | 0.17 | 0.49 | 1.12  | 0.208002 | 0.256804 | 0.579653 | 0.524607 |
| MmugDNA.3604.1.S1_x_at  | MmugDNA.3604.1  | 6.02  | 5.72  | 0.18 | 0.35 | 1.23  | 0.327477 | 0.319928 | 0.675118 | 0.572274 |
| MmugDNA.36040.1.S1_at   | MmugDNA.36040.1 | 3.63  | 3.51  | 0.24 | 0.15 | 1.09  | 0.711672 | 0.346488 | 0.8877   | 0.591351 |
| MmugDNA.36043.1.S1_at   | MmugDNA.36043.1 | 5.9   | 5.78  | 0.08 | 0.01 | -1.09 | 0.190478 | 0.059852 | 0.561786 | 0.291297 |
| MmugDNA.36045.1.S1_at   | MmugDNA.36045.1 | 4.07  | 4.24  | 0.21 | 0.21 | -1.13 | 0.924939 | 0.06379  | 0.97491  | 0.29906  |
| MmugDNA.36048.1.S1_at   | MmugDNA.36048.1 | 4.58  | 4.37  | 0.3  | 0.13 | 1.15  | 0.512139 | 0.23955  | 0.789105 | 0.510209 |
| MmugDNA.3605.1.S1_at    | MmugDNA.3605.1  | 4.23  | 4.06  | 0.23 | 0.03 | 1.13  | 0.717553 | 0.920621 | 0.890446 | 0.955258 |
| MmugDNA.3605.1.S1_x_at  | MmugDNA.3605.1  | 4.12  | 4.25  | 0.07 | 0.02 | -1.1  | 0.031704 | 0.079508 | 0.341772 | 0.32681  |
| MmugDNA.36050.1.S1_at   | MmugDNA.36050.1 | 3.8   | 3.79  | 0.12 | 0.03 | 1.01  | 0.946882 | 0.747123 | 0.981556 | 0.853124 |
| MmugDNA.36051.1.S1_at   | MmugDNA.36051.1 | 10.03 | 10.23 | 0.64 | 0.03 | -1.15 | 0.569025 | 0.755744 | 0.821147 | 0.857771 |
| MmugDNA.36052.1.S1_at   | MmugDNA.36052.1 | 6.28  | 6.02  | 0.14 | 0.07 | 1.2   | 0.050652 | 0.046862 | 0.38762  | 0.261272 |
| MmugDNA.36054.1.S1_at   | MmugDNA.36054.1 | 6.88  | 6.81  | 0.05 | 0.08 | 1.05  | 0.13837  | 0.298892 | 0.51369  | 0.557509 |
| MmugDNA.36056.1.S1_at   | MmugDNA.36056.1 | 9.37  | 10.32 | 0.42 | 0.03 | -1.93 | 0.008393 | 0.003056 | 0.233808 | 0.08061  |
| MmugDNA.36057.1.S1_at   | MmugDNA.36057.1 | 5.36  | 5.18  | 0.16 | 0.09 | 1.13  | 0.417928 | 0.197199 | 0.735231 | 0.472213 |
| MmugDNA.3606.1.S1_at    | MmugDNA.3606.1  | 4.67  | 4.41  | 0.15 | 0.13 | 1.2   | 0.080773 | 0.127117 | 0.444846 | 0.397922 |
| MmugDNA.36060.1.S1_at   | MmugDNA.36060.1 | 4.49  | 4.44  | 0.24 | 0.16 | 1.04  | 0.742252 | 0.763359 | 0.901638 | 0.862471 |
| MmugDNA.36061.1.S1_at   | MmugDNA.36061.1 | 9.16  | 8.81  | 0.16 | 0.06 | 1.28  | 0.077374 | 0.195441 | 0.439305 | 0.470259 |
| MmugDNA.36062.1.S1_at   | MmugDNA.36062.1 | 3.7   | 3.52  | 0.16 | 0.31 | 1.13  | 0.628318 | 0.815727 | 0.851106 | 0.893731 |
| MmugDNA.36063.1.S1_at   | MmugDNA.36063.1 | 7.95  | 8     | 0.11 | 0.1  | -1.04 | 0.804549 | 0.249858 | 0.928981 | 0.518876 |
| MmugDNA.36066.1.S1_at   | MmugDNA.36066.1 | 3.75  | 3.8   | 0.07 | 0.08 | -1.03 | 0.782066 | 0.53157  | 0.919732 | 0.718781 |
| MmugDNA.36067.1.S1_at   | MmugDNA.36067.1 | 12.9  | 12.58 | 0.11 | 0.26 | 1.24  | 0.043216 | 0.046584 | 0.371614 | 0.260267 |
| MmugDNA.36068.1.S1_at   | MmugDNA.36068.1 | 6.94  | 6.93  | 0.06 | 0.08 | 1.01  | 0.850993 | 0.808449 | 0.947516 | 0.889757 |
| MmugDNA.36069.1.S1_at   | MmugDNA.36069.1 | 3.6   | 3.64  | 0.18 | 0.07 | -1.03 | 0.493827 | 0.741648 | 0.779103 | 0.850409 |
| MmugDNA.3607.1.S1_at    | MmugDNA.3607.1  | 4.36  | 4.21  | 0.15 | 0.02 | 1.11  | 0.213734 | 0.745177 | 0.584304 | 0.852292 |
| MmugDNA.36070.1.S1_at   | MmugDNA.36070.1 | 5.94  | 6.09  | 0.19 | 0.04 | -1.11 | 0.259132 | 0.078084 | 0.622541 | 0.324578 |
| MmugDNA.36071.1.S1_at   | MmugDNA.36071.1 | 9.91  | 9.61  | 0.16 | 0.14 | 1.23  | 0.044552 | 0.006771 | 0.374916 | 0.111342 |
| MmugDNA.36072.1.S1_at   | MmugDNA.36072.1 | 9.31  | 9.71  | 0.46 | 0.13 | -1.32 | 0.802402 | 0.786099 | 0.927941 | 0.876104 |
| MmugDNA.36075.1.S1_at   | MmugDNA.36075.1 | 4.57  | 6.13  | 0.58 | 0.59 | -2.96 | 0.06185  | 0.039703 | 0.411594 | 0.244271 |
| MmugDNA.36077.1.S1_at   | MmugDNA.36077.1 | 5.61  | 5.64  | 0.19 | 0.04 | -1.02 | 0.767466 | 0.645045 | 0.912495 | 0.791993 |
| MmugDNA.36078.1.S1_at   | MmugDNA.36078.1 | 3.38  | 3.02  | 0.17 | 0.06 | 1.28  | 0.071541 | 0.081253 | 0.431049 | 0.329351 |
| MmugDNA.36079.1.S1_at   | MmugDNA.36079.1 | 5.2   | 5.13  | 0.08 | 0    | 1.05  | 0.143517 | 0.056291 | 0.518911 | 0.283274 |
| MmugDNA.3608.1.S1_at    | MmugDNA.3608.1  | 7.71  | 7.61  | 0.22 | 0.12 | 1.07  | 0.548358 | 0.874563 | 0.809701 | 0.9288   |
| MmugDNA.36080.1.S1_at   | MmugDNA.36080.1 | 9.28  | 9.06  | 0.61 | 0.32 | 1.17  | 0.195861 | 0.05364  | 0.56627  | 0.277224 |
| MmugDNA.36081.1.S1_s_at | MmugDNA.36081.1 | 9.1   | 10.11 | 0.87 | 0.2  | -2.01 | 0.328975 | 0.438944 | 0.67615  | 0.657787 |
| MmugDNA.36082.1.S1_at   | MmugDNA.36082.1 | 2.76  | 2.67  | 0.15 | 0.09 | 1.06  | 0.988848 | 0.233828 | 0.995895 | 0.505169 |
| MmugDNA.36083.1.S1_at   | MmugDNA.36083.1 | 5.8   | 7.18  | 0.62 | 0.34 | -2.6  | 0.05689  | 0.23298  | 0.401423 | 0.50445  |

|                         |                 |       |       |      |      |       |          |          |          |          |
|-------------------------|-----------------|-------|-------|------|------|-------|----------|----------|----------|----------|
| MmugDNA.36083.1.S1_s_at | MmugDNA.36083.1 | 6.32  | 6.45  | 0.56 | 0.24 | -1.09 | 0.547874 | 0.353774 | 0.809245 | 0.596815 |
| MmugDNA.36084.1.S1_at   | MmugDNA.36084.1 | 8.04  | 8.38  | 0.47 | 0.17 | -1.26 | 0.606416 | 0.924106 | 0.840496 | 0.957224 |
| MmugDNA.36087.1.S1_at   | MmugDNA.36087.1 | 5.75  | 5.76  | 0.4  | 0.13 | -1.01 | 0.884063 | 0.551548 | 0.959789 | 0.731027 |
| MmugDNA.36088.1.S1_at   | MmugDNA.36088.1 | 5.75  | 5.47  | 0.32 | 0.14 | 1.21  | 0.121752 | 0.141704 | 0.495432 | 0.415265 |
| MmugDNA.36089.1.S1_at   | MmugDNA.36089.1 | 6.57  | 6.46  | 0.09 | 0.13 | 1.08  | 0.681331 | 0.835193 | 0.875176 | 0.905636 |
| MmugDNA.3609.1.S1_at    | MmugDNA.3609.1  | 9.94  | 9.19  | 0.52 | 0.33 | 1.69  | 0.191544 | 0.26154  | 0.562859 | 0.52802  |
| MmugDNA.36090.1.S1_at   | MmugDNA.36090.1 | 6.14  | 5.55  | 0.09 | 0.12 | 1.51  | 0.003719 | 0.095128 | 0.197568 | 0.352151 |
| MmugDNA.36091.1.S1_at   | MmugDNA.36091.1 | 10.85 | 11.19 | 0.16 | 0.05 | -1.27 | 0.044709 | 0.081825 | 0.374984 | 0.330204 |
| MmugDNA.36092.1.S1_at   | MmugDNA.36092.1 | 3.98  | 4.04  | 0.07 | 0.29 | -1.04 | 0.348635 | 0.502839 | 0.689949 | 0.700392 |
| MmugDNA.36093.1.S1_at   | MmugDNA.36093.1 | 5.55  | 5.27  | 0.44 | 0.42 | 1.21  | 0.396567 | 0.551146 | 0.721517 | 0.730819 |
| MmugDNA.36094.1.S1_at   | MmugDNA.36094.1 | 4.16  | 4.3   | 0.07 | 0.08 | -1.1  | 0.080758 | 0.132944 | 0.444813 | 0.404616 |
| MmugDNA.36096.1.S1_at   | MmugDNA.36096.1 | 4.67  | 4.63  | 0.03 | 0.04 | 1.03  | 0.157479 | 0.885596 | 0.530565 | 0.934982 |
| MmugDNA.36097.1.S1_at   | MmugDNA.36097.1 | 4.32  | 4.02  | 0.57 | 0.21 | 1.23  | 0.430262 | 0.368738 | 0.742617 | 0.608236 |
| MmugDNA.36099.1.S1_at   | MmugDNA.36099.1 | 3.03  | 3     | 0.11 | 0.08 | 1.02  | 0.304523 | 0.69644  | 0.65816  | 0.823672 |
| MmugDNA.361.1.S1_at     | MmugDNA.361.1   | 5.91  | 5.23  | 1.11 | 0.35 | 1.61  | 0.403649 | 0.292714 | 0.725777 | 0.552783 |
| MmugDNA.36104.1.S1_at   | MmugDNA.36104.1 | 5.33  | 5.25  | 0.31 | 0.18 | 1.05  | 0.473719 | 0.628336 | 0.767701 | 0.781112 |
| MmugDNA.11157.1.S1_at   | MmugDNA.11157.1 | 7.97  | 8.28  | 0.21 | 0.15 | -1.25 | 0.200036 | 0.237847 | 0.571864 | 0.508341 |
| MmugDNA.11157.1.S1_s_at | MmugDNA.11157.1 | 8.36  | 8.71  | 0.16 | 0.12 | -1.28 | 0.032816 | 0.031113 | 0.345393 | 0.218175 |
| MmugDNA.36106.1.S1_at   | MmugDNA.36106.1 | 5.55  | 5.35  | 0.29 | 0.22 | 1.15  | 0.644314 | 0.44208  | 0.858491 | 0.660148 |
| MmugDNA.36107.1.S1_at   | MmugDNA.36107.1 | 3.7   | 3.38  | 0.26 | 0.06 | 1.25  | 0.343796 | 0.228507 | 0.686878 | 0.500748 |
| MmugDNA.36109.1.S1_at   | MmugDNA.36109.1 | 8.76  | 8.41  | 0.08 | 0.11 | 1.27  | 0.014804 | 0.032242 | 0.278525 | 0.222229 |
| MmugDNA.3611.1.S1_at    | MmugDNA.3611.1  | 3.54  | 6.67  | 0.81 | 0.17 | -8.75 | 0.005511 | 0.043438 | 0.208157 | 0.253043 |
| MmugDNA.36111.1.S1_at   | MmugDNA.36111.1 | 3.27  | 3.27  | 0.02 | 0.05 | -1    | 0.22895  | 0.666365 | 0.597921 | 0.804499 |
| MmugDNA.36112.1.S1_at   | MmugDNA.36112.1 | 3.4   | 3.43  | 0.4  | 1.29 | -1.02 | 0.439383 | 0.593378 | 0.748153 | 0.758267 |
| MmugDNA.11166.1.S1_s_at | MmugDNA.11166.1 | 10.85 | 11    | 0.27 | 0.19 | -1.12 | 0.232048 | 0.297806 | 0.599894 | 0.556484 |
| MmugDNA.36115.1.S1_at   | MmugDNA.36115.1 | 4.7   | 4.57  | 0.19 | 0.15 | 1.1   | 0.145409 | 0.343647 | 0.520416 | 0.589357 |
| MmugDNA.36117.1.S1_at   | MmugDNA.36117.1 | 6.78  | 6.72  | 0.08 | 0.05 | 1.04  | 0.377155 | 0.161743 | 0.707423 | 0.437816 |
| MmugDNA.36119.1.S1_at   | MmugDNA.36119.1 | 6.01  | 6.22  | 0.4  | 0.18 | -1.16 | 0.821518 | 0.125549 | 0.935582 | 0.396226 |
| MmugDNA.3612.1.S1_at    | MmugDNA.3612.1  | 9.69  | 9.44  | 0.15 | 0.24 | 1.19  | 0.111801 | 0.088922 | 0.48497  | 0.34275  |
| MmugDNA.36121.1.S1_at   | MmugDNA.36121.1 | 8.23  | 8.22  | 0.92 | 0.2  | 1.01  | 0.664757 | 0.876204 | 0.867683 | 0.929606 |
| MmugDNA.36122.1.S1_at   | MmugDNA.36122.1 | 8.06  | 8.79  | 0.44 | 0.15 | -1.66 | 0.195671 | 0.109948 | 0.565981 | 0.374029 |
| MmugDNA.36123.1.S1_at   | MmugDNA.36123.1 | 4.36  | 4.58  | 0.22 | 0.39 | -1.17 | 0.916017 | 0.024828 | 0.97133  | 0.197402 |
| MmugDNA.36124.1.S1_at   | MmugDNA.36124.1 | 8.35  | 7.74  | 0.46 | 0.15 | 1.52  | 0.42057  | 0.135353 | 0.737012 | 0.40745  |
| MmugDNA.36125.1.S1_at   | MmugDNA.36125.1 | 11.73 | 11.6  | 0.01 | 0.11 | 1.09  | 0.038191 | 0.093324 | 0.358577 | 0.349412 |
| MmugDNA.36125.1.S1_s_at | MmugDNA.36125.1 | 12.64 | 12.45 | 0.14 | 0.12 | 1.13  | 0.068    | 0.071625 | 0.42451  | 0.313735 |
| MmugDNA.36126.1.S1_at   | MmugDNA.36126.1 | 4.27  | 4.12  | 0.15 | 0.02 | 1.11  | 0.176872 | 0.381621 | 0.549947 | 0.617824 |
| MmugDNA.36128.1.S1_at   | MmugDNA.36128.1 | 3.63  | 3.62  | 0.25 | 0.03 | 1.01  | 0.484389 | 0.346244 | 0.773585 | 0.591201 |
| MmugDNA.26577.1.S1_at   | MmugDNA.26577.1 | 14.26 | 14.26 | 0.08 | 0.01 | 1     | 0.34845  | 0.446054 | 0.689763 | 0.662676 |
| MmugDNA.26577.1.S1_s_at | MmugDNA.26577.1 | 14.44 | 14.44 | 0.05 | 0.01 | 1     | 0.464455 | 0.733023 | 0.762534 | 0.845498 |
| MmugDNA.36133.1.S1_at   | MmugDNA.36133.1 | 4.55  | 4.34  | 0.16 | 0.16 | 1.16  | 0.197229 | 0.547797 | 0.568263 | 0.728701 |
| MmugDNA.36134.1.S1_at   | MmugDNA.36134.1 | 4.3   | 4.42  | 0.14 | 0.06 | -1.09 | 0.338244 | 0.0899   | 0.682778 | 0.344073 |
| MmugDNA.36135.1.S1_at   | MmugDNA.36135.1 | 9.74  | 10.36 | 0.81 | 0.2  | -1.54 | 0.932681 | 0.021254 | 0.977227 | 0.182488 |
| MmugDNA.36136.1.S1_at   | MmugDNA.36136.1 | 3.71  | 3.72  | 0.14 | 0.04 | -1.01 | 0.324239 | 0.374665 | 0.672526 | 0.613    |

|                         |                 |       |       |      |      |       |          |          |          |          |
|-------------------------|-----------------|-------|-------|------|------|-------|----------|----------|----------|----------|
| MmugDNA.36137.1.S1_at   | MmugDNA.36137.1 | 3.05  | 2.83  | 0.1  | 0.43 | 1.17  | 0.876931 | 0.972586 | 0.957118 | 0.98526  |
| MmugDNA.36138.1.S1_at   | MmugDNA.36138.1 | 6.26  | 6.86  | 0.8  | 0.38 | -1.52 | 0.612702 | 0.394402 | 0.843107 | 0.626982 |
| MmugDNA.36139.1.S1_at   | MmugDNA.36139.1 | 4.97  | 5.22  | 0.3  | 0.1  | -1.19 | 0.660055 | 0.327366 | 0.865536 | 0.577284 |
| MmugDNA.3614.1.S1_at    | MmugDNA.3614.1  | 9.28  | 8.97  | 0.22 | 0.25 | 1.24  | 0.358743 | 0.070471 | 0.696626 | 0.311777 |
| MmugDNA.36141.1.S1_at   | MmugDNA.36141.1 | 7.99  | 8.03  | 0.57 | 0.21 | -1.03 | 0.427871 | 0.39055  | 0.74145  | 0.624329 |
| MmugDNA.36142.1.S1_at   | MmugDNA.36142.1 | 7.52  | 7.48  | 0.08 | 0.19 | 1.03  | 0.604513 | 0.905047 | 0.83963  | 0.946165 |
| MmugDNA.36145.1.S1_at   | MmugDNA.36145.1 | 7.01  | 6.75  | 0.63 | 0.47 | 1.2   | 0.756952 | 0.288101 | 0.908337 | 0.549319 |
| MmugDNA.36146.1.S1_at   | MmugDNA.36146.1 | 4.15  | 3.91  | 0.17 | 0.09 | 1.18  | 0.08884  | 0.06018  | 0.456567 | 0.291882 |
| MmugDNA.36147.1.S1_at   | MmugDNA.36147.1 | 8.91  | 8.77  | 0.49 | 0.24 | 1.1   | 0.651784 | 0.688722 | 0.86186  | 0.818296 |
| MmugDNA.36149.1.S1_at   | MmugDNA.36149.1 | 6.42  | 6.87  | 0.68 | 0.38 | -1.36 | 0.953795 | 0.942505 | 0.984675 | 0.967399 |
| MmugDNA.36150.1.S1_at   | MmugDNA.36150.1 | 3.18  | 3.31  | 0.41 | 0.18 | -1.09 | 0.893183 | 0.914016 | 0.963441 | 0.951658 |
| MmugDNA.36151.1.S1_at   | MmugDNA.36151.1 | 3.78  | 3.73  | 0.12 | 0.07 | 1.03  | 0.782894 | 0.122933 | 0.920107 | 0.392923 |
| MmugDNA.36152.1.S1_at   | MmugDNA.36152.1 | 4.37  | 5.37  | 0.57 | 0.58 | -2    | 0.042477 | 0.044317 | 0.369088 | 0.255021 |
| MmugDNA.36153.1.S1_at   | MmugDNA.36153.1 | 3.34  | 3.22  | 0.16 | 0.06 | 1.09  | 0.424349 | 0.316391 | 0.739564 | 0.569809 |
| MmugDNA.36154.1.S1_at   | MmugDNA.36154.1 | 3.72  | 3.74  | 0.14 | 0.11 | -1.01 | 0.802904 | 0.339632 | 0.928115 | 0.586217 |
| MmugDNA.36155.1.S1_at   | MmugDNA.36155.1 | 3.89  | 4.05  | 0.11 | 0.32 | -1.11 | 0.313075 | 0.37376  | 0.664421 | 0.61241  |
| MmugDNA.36156.1.S1_at   | MmugDNA.36156.1 | 5.6   | 5.24  | 0.96 | 0.12 | 1.29  | 0.513066 | 0.398491 | 0.789641 | 0.629458 |
| MmugDNA.36157.1.S1_at   | MmugDNA.36157.1 | 8.98  | 8.53  | 0.2  | 0.03 | 1.36  | 0.034795 | 0.006407 | 0.350364 | 0.108767 |
| MmugDNA.36158.1.S1_s_at | MmugDNA.36158.1 | 9.62  | 9.6   | 0.33 | 0.14 | 1.02  | 0.888182 | 0.019322 | 0.96126  | 0.174723 |
| MmugDNA.36159.1.S1_at   | MmugDNA.36159.1 | 4.23  | 3.95  | 0.34 | 0.05 | 1.21  | 0.767091 | 0.208168 | 0.912485 | 0.482086 |
| MmugDNA.3616.1.S1_at    | MmugDNA.3616.1  | 4.17  | 4.08  | 0.09 | 0.16 | 1.07  | 0.255049 | 0.361614 | 0.619267 | 0.602374 |
| MmugDNA.36160.1.S1_at   | MmugDNA.36160.1 | 8.68  | 9.71  | 0.45 | 0.08 | -2.04 | 0.020997 | 0.018134 | 0.306293 | 0.16964  |
| MmugDNA.36162.1.S1_at   | MmugDNA.36162.1 | 4.59  | 4.57  | 0.11 | 0    | 1.01  | 0.893169 | 0.987063 | 0.963441 | 0.992715 |
| MmugDNA.36163.1.S1_at   | MmugDNA.36163.1 | 3.3   | 3.46  | 0.13 | 0.32 | -1.12 | 0.470982 | 0.245626 | 0.766294 | 0.51536  |
| MmugDNA.36164.1.S1_at   | MmugDNA.36164.1 | 7     | 7.01  | 0.4  | 0.14 | -1.01 | 0.9781   | 0.369079 | 0.992929 | 0.608608 |
| MmugDNA.36165.1.S1_at   | MmugDNA.36165.1 | 4.1   | 3.68  | 0.33 | 0.12 | 1.33  | 0.053451 | 0.277428 | 0.394724 | 0.541336 |
| MmugDNA.36166.1.S1_at   | MmugDNA.36166.1 | 5.9   | 5.82  | 0.05 | 0.14 | 1.05  | 0.836219 | 0.046913 | 0.941202 | 0.261301 |
| MmugDNA.36169.1.S1_at   | MmugDNA.36169.1 | 4.19  | 4.02  | 0.39 | 0.34 | 1.13  | 0.402704 | 0.401714 | 0.72505  | 0.631068 |
| MmugDNA.3617.1.S1_at    | MmugDNA.3617.1  | 5.49  | 5.41  | 0.13 | 0.1  | 1.06  | 0.163081 | 0.114468 | 0.536035 | 0.381021 |
| MmugDNA.36170.1.S1_at   | MmugDNA.36170.1 | 6.22  | 5.97  | 0.53 | 0.04 | 1.19  | 0.408114 | 0.570672 | 0.729179 | 0.743269 |
| MmugDNA.36172.1.S1_at   | MmugDNA.36172.1 | 5.59  | 5.5   | 0.09 | 0.15 | 1.07  | 0.267817 | 0.574414 | 0.62827  | 0.745847 |
| MmugDNA.36173.1.S1_at   | MmugDNA.36173.1 | 3.26  | 3.27  | 0.18 | 0.03 | -1    | 0.974503 | 0.843299 | 0.991912 | 0.910767 |
| MmugDNA.36174.1.S1_at   | MmugDNA.36174.1 | 10.92 | 10.9  | 0.32 | 0.12 | 1.01  | 0.4904   | 0.028439 | 0.777012 | 0.210443 |
| MmugDNA.36174.1.S1_s_at | MmugDNA.36174.1 | 9.68  | 9.65  | 0.19 | 0.13 | 1.02  | 0.832785 | 0.035717 | 0.940026 | 0.233368 |
| MmugDNA.36176.1.S1_s_at | MmugDNA.36176.1 | 11.16 | 11.05 | 0.47 | 0.07 | 1.08  | 0.629116 | 0.807448 | 0.851386 | 0.889121 |
| MmugDNA.36177.1.S1_at   | MmugDNA.36177.1 | 8.32  | 8.48  | 0.51 | 0.12 | -1.12 | 0.859426 | 0.973341 | 0.950399 | 0.985515 |
| MmugDNA.36178.1.S1_at   | MmugDNA.36178.1 | 6.55  | 6.44  | 0.54 | 0.07 | 1.08  | 0.905206 | 0.973762 | 0.968109 | 0.985656 |
| MmugDNA.36179.1.S1_at   | MmugDNA.36179.1 | 3.23  | 3.22  | 0.17 | 0.03 | 1.01  | 0.971922 | 0.986137 | 0.990867 | 0.992143 |
| MmugDNA.3618.1.S1_at    | MmugDNA.3618.1  | 12.4  | 12.63 | 0.94 | 0.09 | -1.17 | 0.234083 | 0.347893 | 0.601531 | 0.592196 |
| MmugDNA.36180.1.S1_at   | MmugDNA.36180.1 | 10.85 | 10.58 | 0.13 | 0.08 | 1.2   | 0.097222 | 0.026016 | 0.465967 | 0.202179 |
| MmugDNA.36180.1.S1_s_at | MmugDNA.36180.1 | 13.37 | 13.35 | 0.07 | 0.03 | 1.01  | 0.243116 | 0.020238 | 0.608941 | 0.178669 |
| MmugDNA.36181.1.S1_at   | MmugDNA.36181.1 | 4.27  | 4.28  | 0.25 | 0.2  | -1    | 0.749828 | 0.910509 | 0.905303 | 0.949465 |
| MmugDNA.36184.1.S1_at   | MmugDNA.36184.1 | 4.28  | 4.31  | 0.52 | 0.09 | -1.02 | 0.960064 | 0.770806 | 0.986981 | 0.866807 |



|                         |                 |       |       |      |      |       |          |          |          |          |
|-------------------------|-----------------|-------|-------|------|------|-------|----------|----------|----------|----------|
| MmugDNA.36187.1.S1_at   | MmugDNA.36187.1 | 4.32  | 4.09  | 0.08 | 0.01 | 1.17  | 0.005272 | 0.001626 | 0.207075 | 0.060962 |
| MmugDNA.36189.1.S1_at   | MmugDNA.36189.1 | 6.65  | 6.67  | 0.24 | 0.1  | -1.01 | 0.662215 | 0.759089 | 0.866673 | 0.859979 |
| MmugDNA.3619.1.S1_at    | MmugDNA.3619.1  | 5.74  | 5.5   | 0.24 | 0.03 | 1.18  | 0.067622 | 0.13432  | 0.424311 | 0.406599 |
| MmugDNA.36190.1.S1_at   | MmugDNA.36190.1 | 3.81  | 3.71  | 0.15 | 0.2  | 1.07  | 0.705729 | 0.353397 | 0.885355 | 0.596499 |
| MmugDNA.36191.1.S1_at   | MmugDNA.36191.1 | 4.81  | 4.94  | 0.4  | 0.03 | -1.1  | 0.796974 | 0.987274 | 0.925391 | 0.992852 |
| MmugDNA.36192.1.S1_at   | MmugDNA.36192.1 | 3.03  | 3.15  | 0.11 | 0.04 | -1.09 | 0.100987 | 0.054208 | 0.47159  | 0.278222 |
| MmugDNA.36193.1.S1_at   | MmugDNA.36193.1 | 5.74  | 5.76  | 0.27 | 0.08 | -1.01 | 0.443012 | 0.750456 | 0.750491 | 0.854834 |
| MmugDNA.36194.1.S1_at   | MmugDNA.36194.1 | 9.21  | 8.85  | 0.4  | 0.06 | 1.28  | 0.088495 | 0.002361 | 0.45606  | 0.071732 |
| MmugDNA.36195.1.S1_at   | MmugDNA.36195.1 | 3.39  | 3.36  | 0.03 | 0.17 | 1.02  | 0.678683 | 0.658157 | 0.874119 | 0.800181 |
| MmugDNA.36198.1.S1_at   | MmugDNA.36198.1 | 3.07  | 3.08  | 0.1  | 0.09 | -1    | 0.528281 | 0.554514 | 0.797609 | 0.733263 |
| MmugDNA.36199.1.S1_at   | MmugDNA.36199.1 | 5.96  | 6.18  | 0.25 | 0.08 | -1.17 | 0.800411 | 0.59019  | 0.926937 | 0.756117 |
| MmugDNA.362.1.S1_at     | MmugDNA.362.1   | 2.99  | 2.92  | 0.08 | 0.58 | 1.05  | 0.50208  | 0.613799 | 0.783497 | 0.770876 |
| MmugDNA.3620.1.S1_at    | MmugDNA.3620.1  | 5.81  | 5.67  | 0.04 | 0.11 | 1.1   | 0.036641 | 0.034416 | 0.355252 | 0.229493 |
| MmugDNA.36200.1.S1_at   | MmugDNA.36200.1 | 7.33  | 7.48  | 0.15 | 0.06 | -1.11 | 0.462652 | 0.098359 | 0.761724 | 0.356466 |
| MmugDNA.36202.1.S1_at   | MmugDNA.36202.1 | 7.06  | 6.27  | 1.13 | 0.17 | 1.74  | 0.164427 | 0.115592 | 0.537322 | 0.382674 |
| MmugDNA.36203.1.S1_at   | MmugDNA.36203.1 | 8.96  | 8.99  | 0.39 | 0.2  | -1.02 | 0.623371 | 0.231148 | 0.848224 | 0.5029   |
| MmugDNA.36204.1.S1_at   | MmugDNA.36204.1 | 4.59  | 4.45  | 0.12 | 0.15 | 1.1   | 0.149852 | 0.318492 | 0.523349 | 0.571239 |
| MmugDNA.36205.1.S1_at   | MmugDNA.36205.1 | 5.95  | 6.1   | 0.29 | 0.12 | -1.11 | 0.356929 | 0.160987 | 0.695386 | 0.437116 |
| MmugDNA.36206.1.S1_s_at | MmugDNA.36206.1 | 11.13 | 10.52 | 0.31 | 0.23 | 1.53  | 0.040724 | 0.029962 | 0.364864 | 0.214858 |
| MmugDNA.36207.1.S1_at   | MmugDNA.36207.1 | 7.72  | 7.71  | 0.02 | 0.27 | 1.01  | 0.411582 | 0.480798 | 0.731543 | 0.686    |
| MmugDNA.36208.1.S1_at   | MmugDNA.36208.1 | 10.61 | 10.57 | 0.3  | 0.07 | 1.03  | 0.922682 | 0.461438 | 0.973908 | 0.673122 |
| MmugDNA.36208.1.S1_s_at | MmugDNA.36208.1 | 9.9   | 9.92  | 0.35 | 0.03 | -1.01 | 0.426408 | 0.333622 | 0.740469 | 0.581808 |
| MmugDNA.36209.1.S1_at   | MmugDNA.36209.1 | 4.91  | 5.32  | 1.37 | 0.3  | -1.33 | 0.662384 | 0.835263 | 0.866734 | 0.905675 |
| MmugDNA.36210.1.S1_at   | MmugDNA.36210.1 | 6.98  | 6.73  | 0.24 | 0.33 | 1.19  | 0.953492 | 0.000255 | 0.984499 | 0.033475 |
| MmugDNA.36211.1.S1_at   | MmugDNA.36211.1 | 8.4   | 8.07  | 0.12 | 0.07 | 1.26  | 0.032955 | 0.021796 | 0.345526 | 0.184765 |
| MmugDNA.36214.1.S1_at   | MmugDNA.36214.1 | 4.22  | 4.84  | 0.27 | 0.22 | -1.54 | 0.044511 | 0.08604  | 0.374916 | 0.338256 |
| MmugDNA.36215.1.S1_at   | MmugDNA.36215.1 | 5.24  | 4.98  | 0.05 | 0.17 | 1.2   | 0.081023 | 0.072975 | 0.445056 | 0.315986 |
| MmugDNA.36217.1.S1_at   | MmugDNA.36217.1 | 8.14  | 7.65  | 0.23 | 0.08 | 1.4   | 0.020765 | 0.018771 | 0.305611 | 0.172216 |
| MmugDNA.36218.1.S1_at   | MmugDNA.36218.1 | 10.03 | 9.77  | 0.15 | 0.14 | 1.2   | 0.086223 | 0.141916 | 0.453817 | 0.415437 |
| MmugDNA.36220.1.S1_at   | MmugDNA.36220.1 | 3.19  | 3.31  | 0.18 | 0.44 | -1.08 | 0.579632 | 0.803979 | 0.826561 | 0.887203 |
| MmugDNA.36221.1.S1_at   | MmugDNA.36221.1 | 5.64  | 5.48  | 0.06 | 0.15 | 1.12  | 0.110855 | 0.110704 | 0.48424  | 0.374854 |
| MmugDNA.36223.1.S1_at   | MmugDNA.36223.1 | 5.57  | 5.23  | 0.32 | 0.12 | 1.27  | 0.32006  | 0.015513 | 0.669117 | 0.158053 |
| MmugDNA.36224.1.S1_at   | MmugDNA.36224.1 | 3.31  | 3.22  | 0.1  | 0.5  | 1.06  | 0.539647 | 0.805501 | 0.80393  | 0.888234 |
| MmugDNA.36225.1.S1_at   | MmugDNA.36225.1 | 2.92  | 2.92  | 0.02 | 0.03 | -1    | 0.974604 | 0.825174 | 0.991912 | 0.899551 |
| MmugDNA.36226.1.S1_at   | MmugDNA.36226.1 | 4.73  | 4.73  | 0.05 | 0    | 1     | 0.937209 | 0.502628 | 0.978872 | 0.700236 |
| MmugDNA.36227.1.S1_at   | MmugDNA.36227.1 | 5.71  | 5.71  | 0.27 | 0.01 | 1     | 0.390091 | 0.73316  | 0.716509 | 0.845555 |
| MmugDNA.36228.1.S1_at   | MmugDNA.36228.1 | 6.52  | 7.05  | 1.02 | 0.21 | -1.44 | 0.436002 | 0.611079 | 0.746002 | 0.769031 |
| MmugDNA.36229.1.S1_at   | MmugDNA.36229.1 | 6.34  | 6.58  | 0.52 | 0.25 | -1.18 | 0.882823 | 0.127078 | 0.959428 | 0.397913 |
| MmugDNA.36230.1.S1_at   | MmugDNA.36230.1 | 3.32  | 3.23  | 0.02 | 0.53 | 1.07  | 0.511156 | 0.776563 | 0.78856  | 0.870099 |
| MmugDNA.36231.1.S1_at   | MmugDNA.36231.1 | 4.86  | 4.91  | 0.09 | 0.07 | -1.04 | 0.864708 | 0.830351 | 0.952416 | 0.902644 |
| MmugDNA.36232.1.S1_at   | MmugDNA.36232.1 | 9.9   | 10.14 | 0.46 | 0.04 | -1.18 | 0.454911 | 0.144777 | 0.757183 | 0.41862  |
| MmugDNA.36235.1.S1_at   | MmugDNA.36235.1 | 3.2   | 3.16  | 0.34 | 0.03 | 1.03  | 0.303904 | 0.4029   | 0.657764 | 0.631652 |
| MmugDNA.21227.1.S1_s_at | MmugDNA.21227.1 | 9.97  | 9.95  | 0.03 | 0.1  | 1.01  | 0.324426 | 0.726069 | 0.672633 | 0.841415 |

|                         |                 |       |       |      |      |       |          |          |          |          |
|-------------------------|-----------------|-------|-------|------|------|-------|----------|----------|----------|----------|
| MmugDNA.36237.1.S1_at   | MmugDNA.36237.1 | 6.81  | 6.71  | 0.55 | 0.5  | 1.07  | 0.870431 | 0.844678 | 0.954929 | 0.911602 |
| MmugDNA.36238.1.S1_at   | MmugDNA.36238.1 | 3.19  | 3.23  | 0.06 | 0.18 | -1.03 | 0.812364 | 0.878469 | 0.932076 | 0.930638 |
| MmugDNA.36239.1.S1_at   | MmugDNA.36239.1 | 4.3   | 4.3   | 0.03 | 0.2  | -1    | 0.458467 | 0.201933 | 0.758848 | 0.476412 |
| MmugDNA.36240.1.S1_at   | MmugDNA.36240.1 | 2.85  | 2.78  | 0.03 | 0.05 | 1.05  | 0.069076 | 0.033948 | 0.426529 | 0.227893 |
| MmugDNA.36242.1.S1_at   | MmugDNA.36242.1 | 3.98  | 3.99  | 0.18 | 0.05 | -1    | 0.936334 | 0.127748 | 0.978555 | 0.398596 |
| MmugDNA.36243.1.S1_at   | MmugDNA.36243.1 | 5.64  | 4.83  | 0.27 | 0.34 | 1.75  | 0.031024 | 0.148146 | 0.339397 | 0.422673 |
| MmugDNA.36244.1.S1_at   | MmugDNA.36244.1 | 6.51  | 6.37  | 0.15 | 0.04 | 1.1   | 0.254706 | 0.092023 | 0.619146 | 0.34746  |
| MmugDNA.36245.1.S1_at   | MmugDNA.36245.1 | 4.53  | 4.39  | 0.22 | 0.16 | 1.11  | 0.912719 | 0.169014 | 0.970322 | 0.445589 |
| MmugDNA.36246.1.S1_at   | MmugDNA.36246.1 | 10.08 | 9.14  | 0.09 | 0.14 | 1.91  | 0.000528 | 0.000922 | 0.143137 | 0.048692 |
| MmugDNA.36247.1.S1_at   | MmugDNA.36247.1 | 6.72  | 6.6   | 0.13 | 0.13 | 1.09  | 0.131759 | 0.249507 | 0.506189 | 0.518544 |
| MmugDNA.36248.1.S1_at   | MmugDNA.36248.1 | 4.84  | 5.31  | 0.13 | 0.21 | -1.39 | 0.030085 | 0.007588 | 0.336449 | 0.11658  |
| MmugDNA.36249.1.S1_at   | MmugDNA.36249.1 | 3.88  | 3.75  | 0.17 | 0.17 | 1.1   | 0.503169 | 0.578016 | 0.78406  | 0.748226 |
| MmugDNA.3625.1.S1_at    | MmugDNA.3625.1  | 11.9  | 11.88 | 0.09 | 0.05 | 1.02  | 0.541445 | 0.629334 | 0.805165 | 0.781818 |
| MmugDNA.36252.1.S1_at   | MmugDNA.36252.1 | 7.32  | 7.19  | 0.3  | 0.19 | 1.1   | 0.836539 | 0.515634 | 0.941249 | 0.708449 |
| MmugDNA.36253.1.S1_at   | MmugDNA.36253.1 | 4.85  | 4.71  | 0.07 | 0.02 | 1.1   | 0.075274 | 0.25157  | 0.436118 | 0.520309 |
| MmugDNA.36255.1.S1_at   | MmugDNA.36255.1 | 6.19  | 6.35  | 0.17 | 0.01 | -1.12 | 0.509807 | 0.890213 | 0.787835 | 0.937473 |
| MmugDNA.36258.1.S1_at   | MmugDNA.36258.1 | 4.53  | 3.84  | 0.71 | 0.66 | 1.61  | 0.338381 | 0.276159 | 0.682907 | 0.540169 |
| MmugDNA.36259.1.S1_at   | MmugDNA.36259.1 | 4.92  | 5.8   | 0.15 | 0.83 | -1.85 | 0.335627 | 0.259989 | 0.681167 | 0.52675  |
| MmugDNA.3626.1.S1_at    | MmugDNA.3626.1  | 9.85  | 9.44  | 0.54 | 0.3  | 1.33  | 0.172118 | 0.233064 | 0.545439 | 0.50445  |
| MmugDNA.36260.1.S1_at   | MmugDNA.36260.1 | 10.98 | 11.17 | 0.96 | 0.14 | -1.14 | 0.747857 | 0.173553 | 0.904205 | 0.449947 |
| MmugDNA.36261.1.S1_at   | MmugDNA.36261.1 | 6.62  | 6.5   | 0.07 | 0.19 | 1.09  | 0.835472 | 0.976141 | 0.94103  | 0.98697  |
| MmugDNA.36262.1.S1_at   | MmugDNA.36262.1 | 3.75  | 3.72  | 0.1  | 0.13 | 1.02  | 0.284483 | 0.31813  | 0.642303 | 0.571046 |
| MmugDNA.36264.1.S1_at   | MmugDNA.36264.1 | 8.41  | 8.61  | 1.92 | 0.2  | -1.14 | 0.745626 | 0.206227 | 0.903078 | 0.480382 |
| MmugDNA.36265.1.S1_at   | MmugDNA.36265.1 | 5.31  | 5.31  | 0.26 | 0.26 | -1    | 0.994203 | 0.533141 | 0.997789 | 0.719436 |
| MmugDNA.36267.1.S1_at   | MmugDNA.36267.1 | 8.43  | 8.53  | 0.12 | 0.03 | -1.07 | 0.217479 | 0.458296 | 0.587269 | 0.671096 |
| MmugDNA.36268.1.S1_at   | MmugDNA.36268.1 | 5.78  | 5.57  | 0.14 | 0.13 | 1.15  | 0.162119 | 0.176492 | 0.535244 | 0.452836 |
| MmugDNA.36269.1.S1_s_at | MmugDNA.36269.1 | 13.03 | 12.85 | 0.16 | 0.12 | 1.14  | 0.138178 | 0.150238 | 0.513671 | 0.42486  |
| MmugDNA.3627.1.S1_s_at  | MmugDNA.3627.1  | 11.83 | 11.68 | 0.23 | 0.05 | 1.11  | 0.23566  | 0.203861 | 0.602783 | 0.478102 |
| MmugDNA.36270.1.S1_at   | MmugDNA.36270.1 | 6.94  | 6.74  | 0.18 | 0.06 | 1.15  | 0.101798 | 0.01924  | 0.472064 | 0.174494 |
| MmugDNA.36273.1.S1_at   | MmugDNA.36273.1 | 7.63  | 6.61  | 0.38 | 0.27 | 2.03  | 0.024163 | 0.041301 | 0.317812 | 0.247995 |
| MmugDNA.36274.1.S1_at   | MmugDNA.36274.1 | 14.3  | 14.29 | 0.3  | 0.05 | 1.01  | 0.975626 | 0.187303 | 0.992157 | 0.463323 |
| MmugDNA.36275.1.S1_at   | MmugDNA.36275.1 | 6.46  | 6.23  | 0.13 | 0.14 | 1.17  | 0.098891 | 0.138953 | 0.46832  | 0.412048 |
| MmugDNA.36277.1.S1_at   | MmugDNA.36277.1 | 9.3   | 10.54 | 0.09 | 0.19 | -2.36 | 0.000343 | 0.002508 | 0.137028 | 0.074142 |
| MmugDNA.3628.1.S1_at    | MmugDNA.3628.1  | 7.06  | 6.88  | 0.04 | 0.12 | 1.13  | 0.037581 | 0.395758 | 0.357451 | 0.627639 |
| MmugDNA.36287.1.S1_at   | MmugDNA.36287.1 | 4.25  | 4.04  | 0.21 | 0.17 | 1.16  | 0.498514 | 0.36459  | 0.781796 | 0.604917 |
| MmugDNA.36288.1.S1_at   | MmugDNA.36288.1 | 3.05  | 3.35  | 0.19 | 0.1  | -1.23 | 0.216752 | 0.317011 | 0.586817 | 0.570298 |
| MmugDNA.3629.1.S1_at    | MmugDNA.3629.1  | 6.43  | 6.48  | 0.25 | 0.62 | -1.04 | 0.880634 | 0.027463 | 0.958686 | 0.20705  |
| MmugDNA.36290.1.S1_at   | MmugDNA.36290.1 | 7.93  | 7.58  | 0.56 | 0.13 | 1.27  | 0.711022 | 0.014512 | 0.887436 | 0.153682 |
| MmugDNA.36291.1.S1_at   | MmugDNA.36291.1 | 4.11  | 4.77  | 0.5  | 0.34 | -1.58 | 0.210906 | 0.028798 | 0.582007 | 0.211552 |
| MmugDNA.36292.1.S1_at   | MmugDNA.36292.1 | 5.66  | 4.84  | 0.64 | 0.31 | 1.76  | 0.100903 | 0.595092 | 0.47159  | 0.758939 |
| MmugDNA.36295.1.S1_at   | MmugDNA.36295.1 | 5.58  | 5.71  | 0.25 | 0.09 | -1.09 | 0.231582 | 0.267469 | 0.599546 | 0.533212 |
| MmugDNA.36296.1.S1_at   | MmugDNA.36296.1 | 6.62  | 6.64  | 0.3  | 0.05 | -1.01 | 0.97125  | 0.741563 | 0.990583 | 0.850329 |
| MmugDNA.363.1.S1_at     | MmugDNA.363.1   | 3.81  | 4     | 0.1  | 0.07 | -1.14 | 0.11664  | 0.324359 | 0.489805 | 0.574948 |

|                         |                 |       |       |      |      |       |          |          |          |          |
|-------------------------|-----------------|-------|-------|------|------|-------|----------|----------|----------|----------|
| MmugDNA.3630.1.S1_at    | MmugDNA.3630.1  | 4.79  | 4.62  | 0.08 | 0.08 | 1.12  | 0.067703 | 0.135536 | 0.42444  | 0.407655 |
| MmugDNA.36300.1.S1_at   | MmugDNA.36300.1 | 3.85  | 3.82  | 0.13 | 0.31 | 1.02  | 0.804654 | 0.954857 | 0.929002 | 0.974414 |
| MmugDNA.36302.1.S1_at   | MmugDNA.36302.1 | 5.34  | 5.43  | 0.16 | 0.24 | -1.06 | 0.59339  | 0.726766 | 0.834154 | 0.841963 |
| MmugDNA.36304.1.S1_at   | MmugDNA.36304.1 | 10.65 | 11.13 | 0.74 | 0.09 | -1.4  | 0.368454 | 0.518809 | 0.703625 | 0.710724 |
| MmugDNA.36305.1.S1_at   | MmugDNA.36305.1 | 5     | 4.91  | 0.07 | 0    | 1.06  | 0.136301 | 0.091862 | 0.511081 | 0.34715  |
| MmugDNA.36306.1.S1_at   | MmugDNA.36306.1 | 9.93  | 10.2  | 0.6  | 0.1  | -1.2  | 0.842172 | 0.846593 | 0.944083 | 0.912699 |
| MmugDNA.36307.1.S1_at   | MmugDNA.36307.1 | 5.42  | 6.26  | 0.36 | 0.13 | -1.79 | 0.040699 | 0.018604 | 0.364778 | 0.171539 |
| MmugDNA.36309.1.S1_at   | MmugDNA.36309.1 | 6.96  | 6.68  | 0.31 | 0.13 | 1.22  | 0.505748 | 0.874932 | 0.785398 | 0.929042 |
| MmugDNA.36310.1.S1_at   | MmugDNA.36310.1 | 3.25  | 3.25  | 0.04 | 0.13 | -1    | 0.765381 | 0.822763 | 0.911776 | 0.898071 |
| MmugDNA.36311.1.S1_at   | MmugDNA.36311.1 | 5.54  | 5.46  | 0.12 | 0.08 | 1.06  | 0.871491 | 0.276286 | 0.955436 | 0.540277 |
| MmugDNA.36312.1.S1_s_at | MmugDNA.36312.1 | 8.62  | 8.49  | 0.06 | 0.07 | -1.09 | 0.144698 | 0.680283 | 0.520018 | 0.813346 |
| MmugDNA.36313.1.S1_at   | MmugDNA.36313.1 | 6.19  | 6.02  | 0.02 | 0.08 | 1.13  | 0.00824  | 0.023557 | 0.232164 | 0.192238 |
| MmugDNA.36314.1.S1_at   | MmugDNA.36314.1 | 6.62  | 6.3   | 0.77 | 0.54 | 1.24  | 0.609989 | 0.152393 | 0.841827 | 0.427184 |
| MmugDNA.36315.1.S1_at   | MmugDNA.36315.1 | 7.81  | 7.43  | 0.25 | 0.05 | 1.3   | 0.0596   | 0.095398 | 0.406669 | 0.352428 |
| MmugDNA.36316.1.S1_at   | MmugDNA.36316.1 | 12.13 | 12.4  | 0.29 | 0.12 | -1.21 | 0.849988 | 0.052786 | 0.947268 | 0.27539  |
| MmugDNA.36317.1.S1_at   | MmugDNA.36317.1 | 4.02  | 4.01  | 0.12 | 0.05 | 1.01  | 0.747718 | 0.036552 | 0.904161 | 0.235649 |
| MmugDNA.3632.1.S1_at    | MmugDNA.3632.1  | 4.2   | 4.23  | 0.14 | 0.05 | -1.02 | 0.666336 | 0.264573 | 0.868243 | 0.530541 |
| MmugDNA.36320.1.S1_at   | MmugDNA.36320.1 | 3.81  | 4.07  | 0.1  | 0.17 | -1.2  | 0.238848 | 0.529821 | 0.605452 | 0.717498 |
| MmugDNA.36321.1.S1_at   | MmugDNA.36321.1 | 10.94 | 11.13 | 0.15 | 0.08 | -1.14 | 0.104505 | 0.204822 | 0.475567 | 0.479209 |
| MmugDNA.36322.1.S1_at   | MmugDNA.36322.1 | 4.43  | 4.4   | 0.18 | 0.01 | 1.02  | 0.272519 | 0.307234 | 0.632303 | 0.563506 |
| MmugDNA.36323.1.S1_at   | MmugDNA.36323.1 | 6.54  | 6.54  | 0.19 | 0.12 | -1    | 0.452088 | 0.502551 | 0.755619 | 0.700192 |
| MmugDNA.36324.1.S1_at   | MmugDNA.36324.1 | 10.26 | 10.16 | 0.23 | 0.06 | 1.07  | 0.491914 | 0.420204 | 0.778034 | 0.644036 |
| MmugDNA.36325.1.S1_at   | MmugDNA.36325.1 | 4.2   | 4.08  | 0.12 | 0.11 | 1.08  | 0.664527 | 0.064498 | 0.867683 | 0.300147 |
| MmugDNA.36326.1.S1_at   | MmugDNA.36326.1 | 5.48  | 5.31  | 0.16 | 0.07 | 1.12  | 0.381829 | 0.719314 | 0.710335 | 0.837566 |
| MmugDNA.36327.1.S1_at   | MmugDNA.36327.1 | 10.5  | 10.71 | 0.19 | 0.12 | -1.16 | 0.069864 | 0.030935 | 0.427911 | 0.217705 |
| MmugDNA.36328.1.S1_at   | MmugDNA.36328.1 | 11.05 | 11.07 | 0.22 | 0.03 | -1.02 | 0.646341 | 0.75242  | 0.859027 | 0.855873 |
| MmugDNA.36329.1.S1_at   | MmugDNA.36329.1 | 8.12  | 8.85  | 0.56 | 0.21 | -1.65 | 0.169358 | 0.08982  | 0.542311 | 0.34404  |
| MmugDNA.36330.1.S1_at   | MmugDNA.36330.1 | 3.88  | 3.88  | 0.07 | 0.02 | 1     | 0.553607 | 0.178118 | 0.812271 | 0.454504 |
| MmugDNA.36331.1.S1_at   | MmugDNA.36331.1 | 9.61  | 10.41 | 0.44 | 0.05 | -1.74 | 0.037436 | 0.034112 | 0.357096 | 0.228618 |
| MmugDNA.36331.1.S1_s_at | MmugDNA.36331.1 | 8.36  | 8.87  | 0.33 | 0    | -1.43 | 0.158515 | 0.102242 | 0.531551 | 0.36236  |
| MmugDNA.36332.1.S1_at   | MmugDNA.36332.1 | 4.31  | 4.57  | 0.3  | 0.22 | -1.2  | 0.346164 | 0.692227 | 0.687873 | 0.820929 |
| MmugDNA.36333.1.S1_at   | MmugDNA.36333.1 | 6.22  | 6.48  | 0.63 | 0.02 | -1.2  | 0.887217 | 0.942121 | 0.960871 | 0.967154 |
| MmugDNA.36334.1.S1_at   | MmugDNA.36334.1 | 4.5   | 4.5   | 0.36 | 0.24 | -1    | 0.649688 | 0.489622 | 0.860472 | 0.691862 |
| MmugDNA.36335.1.S1_at   | MmugDNA.36335.1 | 3.3   | 3.05  | 0.08 | 0.09 | 1.19  | 0.047082 | 0.188148 | 0.379283 | 0.464251 |
| MmugDNA.36336.1.S1_at   | MmugDNA.36336.1 | 3.88  | 3.96  | 0.06 | 0.11 | -1.06 | 0.455066 | 0.229945 | 0.75733  | 0.501802 |
| MmugDNA.36337.1.S1_at   | MmugDNA.36337.1 | 5.4   | 5.51  | 0.16 | 0.15 | -1.08 | 0.44289  | 0.489749 | 0.750405 | 0.69191  |
| MmugDNA.36338.1.S1_at   | MmugDNA.36338.1 | 5     | 5     | 0.02 | 0.11 | -1    | 0.392966 | 0.169455 | 0.718853 | 0.446075 |
| MmugDNA.36339.1.S1_at   | MmugDNA.36339.1 | 4.83  | 4.3   | 0.69 | 0.07 | 1.45  | 0.221638 | 0.597282 | 0.591315 | 0.76013  |
| MmugDNA.36340.1.S1_at   | MmugDNA.36340.1 | 6.98  | 6.98  | 0.33 | 0.09 | -1    | 0.412829 | 0.598283 | 0.732098 | 0.760715 |
| MmugDNA.36341.1.S1_at   | MmugDNA.36341.1 | 4.55  | 4.54  | 0.25 | 0.24 | 1.01  | 0.96669  | 0.736459 | 0.989053 | 0.84751  |
| MmugDNA.36344.1.S1_at   | MmugDNA.36344.1 | 7.38  | 6.91  | 0.95 | 0.48 | 1.39  | 0.905259 | 0.151399 | 0.968109 | 0.426104 |
| MmugDNA.36346.1.S1_at   | MmugDNA.36346.1 | 5.78  | 5.6   | 1.1  | 0.26 | 1.13  | 0.477054 | 0.573188 | 0.76966  | 0.744964 |
| MmugDNA.36347.1.S1_at   | MmugDNA.36347.1 | 4.8   | 4.84  | 0.47 | 0.22 | -1.03 | 0.70649  | 0.406479 | 0.885774 | 0.634352 |

|                         |                 |       |       |      |      |       |          |          |          |          |
|-------------------------|-----------------|-------|-------|------|------|-------|----------|----------|----------|----------|
| MmugDNA.36348.1.S1_at   | MmugDNA.36348.1 | 5.36  | 5.41  | 0.41 | 0.14 | -1.03 | 0.465666 | 0.036794 | 0.763118 | 0.236372 |
| MmugDNA.36349.1.S1_at   | MmugDNA.36349.1 | 7.15  | 6.81  | 0.41 | 0.11 | 1.26  | 0.219696 | 0.11096  | 0.589083 | 0.375392 |
| MmugDNA.36350.1.S1_at   | MmugDNA.36350.1 | 4.07  | 3.9   | 0.26 | 0.06 | 1.13  | 0.262347 | 0.435307 | 0.624615 | 0.655142 |
| MmugDNA.36351.1.S1_at   | MmugDNA.36351.1 | 3.25  | 3.23  | 0.1  | 0.11 | 1.01  | 0.174762 | 0.398572 | 0.548031 | 0.629458 |
| MmugDNA.36352.1.S1_at   | MmugDNA.36352.1 | 10.76 | 9.83  | 0.16 | 0.13 | 1.9   | 0.001575 | 0.00093  | 0.161959 | 0.048945 |
| MmugDNA.36353.1.S1_at   | MmugDNA.36353.1 | 6.62  | 6.62  | 1.19 | 0.12 | 1     | 0.922379 | 0.99274  | 0.973786 | 0.995715 |
| MmugDNA.36357.1.S1_at   | MmugDNA.36357.1 | 3.77  | 3.47  | 0.22 | 0.08 | 1.23  | 0.087915 | 0.118448 | 0.455784 | 0.386431 |
| MmugDNA.36358.1.S1_at   | MmugDNA.36358.1 | 4.56  | 4.21  | 0.18 | 0.09 | 1.27  | 0.038078 | 0.053415 | 0.358549 | 0.276707 |
| MmugDNA.36359.1.S1_at   | MmugDNA.36359.1 | 7.77  | 7.36  | 0.84 | 0.11 | 1.32  | 0.480278 | 0.151057 | 0.771137 | 0.425718 |
| MmugDNA.36360.1.S1_at   | MmugDNA.36360.1 | 4.19  | 4.01  | 0.18 | 0.23 | 1.13  | 0.201391 | 0.140793 | 0.57304  | 0.414168 |
| MmugDNA.36361.1.S1_at   | MmugDNA.36361.1 | 4.77  | 4.55  | 0.2  | 0.15 | -1.16 | 0.408182 | 0.700096 | 0.729194 | 0.825946 |
| MmugDNA.36362.1.S1_at   | MmugDNA.36362.1 | 3.81  | 3.68  | 0.19 | 0.08 | 1.1   | 0.359447 | 0.418299 | 0.69725  | 0.642707 |
| MmugDNA.36363.1.S1_at   | MmugDNA.36363.1 | 11.44 | 11.92 | 0.11 | 0.03 | -1.4  | 0.001834 | 0.001199 | 0.167772 | 0.054315 |
| MmugDNA.36365.1.S1_at   | MmugDNA.36365.1 | 3.66  | 3.88  | 0.11 | 0.57 | -1.16 | 0.157397 | 0.088736 | 0.530565 | 0.34241  |
| MmugDNA.36366.1.S1_at   | MmugDNA.36366.1 | 9.71  | 9.17  | 0.14 | 0.03 | 1.46  | 0.002771 | 0.002019 | 0.185369 | 0.06682  |
| MmugDNA.36367.1.S1_at   | MmugDNA.36367.1 | 10.02 | 9.78  | 0.26 | 0.06 | 1.18  | 0.57488  | 0.00604  | 0.824364 | 0.106089 |
| MmugDNA.3637.1.S1_at    | MmugDNA.3637.1  | 6.25  | 6.13  | 0.06 | 0.43 | 1.09  | 0.730514 | 0.841279 | 0.896248 | 0.909576 |
| MmugDNA.36370.1.S1_a_at | MmugDNA.36370.1 | 4.51  | 4.33  | 0.25 | 0.25 | 1.14  | 0.59976  | 0.438212 | 0.837539 | 0.657196 |
| MmugDNA.36373.1.S1_at   | MmugDNA.36373.1 | 3.43  | 3.46  | 0.41 | 0.09 | -1.02 | 0.414397 | 0.599174 | 0.733034 | 0.761359 |
| MmugDNA.36374.1.S1_at   | MmugDNA.36374.1 | 5.08  | 5.21  | 0.08 | 0.25 | -1.09 | 0.514364 | 0.441526 | 0.790322 | 0.659675 |
| MmugDNA.36376.1.S1_at   | MmugDNA.36376.1 | 3.5   | 3.83  | 0.39 | 0.29 | -1.26 | 0.400636 | 0.246524 | 0.723891 | 0.515917 |
| MmugDNA.36377.1.S1_at   | MmugDNA.36377.1 | 9.29  | 9.34  | 0.6  | 0.18 | -1.04 | 0.402179 | 0.481438 | 0.724846 | 0.686442 |
| MmugDNA.36379.1.S1_at   | MmugDNA.36379.1 | 8.67  | 8.6   | 0.05 | 0.12 | 1.05  | 0.505338 | 0.005628 | 0.785264 | 0.103694 |
| MmugDNA.3638.1.S1_at    | MmugDNA.3638.1  | 7.47  | 7.38  | 0.34 | 0.16 | 1.07  | 0.702347 | 0.029996 | 0.884206 | 0.214956 |
| MmugDNA.36380.1.S1_at   | MmugDNA.36380.1 | 3.15  | 3.15  | 0.03 | 0.1  | 1     | 0.546406 | 0.080358 | 0.808468 | 0.327965 |
| MmugDNA.36381.1.S1_at   | MmugDNA.36381.1 | 5.33  | 5.2   | 0.09 | 0.05 | 1.09  | 0.064727 | 0.146471 | 0.41867  | 0.420523 |
| MmugDNA.36384.1.S1_at   | MmugDNA.36384.1 | 3.46  | 3.47  | 0.03 | 0.08 | -1.01 | 0.417182 | 0.089544 | 0.734777 | 0.343811 |
| MmugDNA.36385.1.S1_at   | MmugDNA.36385.1 | 3.25  | 2.92  | 0.16 | 0.07 | 1.26  | 0.061324 | 0.043328 | 0.410536 | 0.252847 |
| MmugDNA.36386.1.S1_at   | MmugDNA.36386.1 | 8.97  | 8.62  | 0.29 | 0.11 | 1.28  | 0.138078 | 0.114567 | 0.513671 | 0.38111  |
| MmugDNA.36387.1.S1_at   | MmugDNA.36387.1 | 6.48  | 6.64  | 0.12 | 0.1  | -1.12 | 0.358513 | 0.341132 | 0.696434 | 0.587233 |
| MmugDNA.36388.1.S1_at   | MmugDNA.36388.1 | 7.06  | 7.32  | 0.11 | 0.09 | -1.2  | 0.104686 | 0.064585 | 0.475918 | 0.300314 |
| MmugDNA.3639.1.S1_at    | MmugDNA.3639.1  | 2.98  | 2.97  | 0.18 | 0.17 | 1.01  | 0.406328 | 0.583525 | 0.727915 | 0.751822 |
| MmugDNA.36390.1.S1_at   | MmugDNA.36390.1 | 2.75  | 2.79  | 0.2  | 0.13 | -1.03 | 0.578286 | 0.546711 | 0.826202 | 0.728136 |
| MmugDNA.36393.1.S1_at   | MmugDNA.36393.1 | 3.54  | 3.7   | 0.08 | 0.09 | -1.12 | 0.098428 | 0.090487 | 0.467888 | 0.345002 |
| MmugDNA.36396.1.S1_at   | MmugDNA.36396.1 | 3.97  | 4.02  | 0.06 | 0.06 | -1.04 | 0.355472 | 0.000551 | 0.694743 | 0.040948 |
| MmugDNA.36397.1.S1_at   | MmugDNA.36397.1 | 7.18  | 8.29  | 0.4  | 0.06 | -2.17 | 0.01697  | 0.007573 | 0.288969 | 0.116509 |
| MmugDNA.36398.1.S1_at   | MmugDNA.36398.1 | 5.63  | 5.63  | 0.1  | 0.04 | 1     | 0.79609  | 0.601844 | 0.925049 | 0.763113 |
| MmugDNA.36399.1.S1_at   | MmugDNA.36399.1 | 8.05  | 8.4   | 0.2  | 0.16 | -1.27 | 0.075177 | 0.232672 | 0.436118 | 0.504359 |
| MmugDNA.3640.1.S1_at    | MmugDNA.3640.1  | 7.32  | 7.3   | 0.35 | 0.15 | 1.02  | 0.724393 | 0.55087  | 0.893143 | 0.730625 |
| MmugDNA.36400.1.S1_at   | MmugDNA.36400.1 | 6.31  | 6.56  | 0.23 | 0.1  | -1.19 | 0.151228 | 0.164201 | 0.52444  | 0.440466 |
| MmugDNA.36401.1.S1_at   | MmugDNA.36401.1 | 3.9   | 3.67  | 0.26 | 0.08 | 1.18  | 0.190035 | 0.095222 | 0.561335 | 0.35218  |
| MmugDNA.36402.1.S1_at   | MmugDNA.36402.1 | 7.82  | 7.05  | 0.49 | 0.55 | 1.71  | 0.082848 | 0.053684 | 0.44803  | 0.277304 |
| MmugDNA.36403.1.S1_at   | MmugDNA.36403.1 | 6.9   | 6.43  | 0.14 | 0.19 | 1.39  | 0.03384  | 0.079571 | 0.347296 | 0.326922 |

|                         |                 |       |       |      |      |       |          |          |          |          |
|-------------------------|-----------------|-------|-------|------|------|-------|----------|----------|----------|----------|
| MmugDNA.36407.1.S1_at   | MmugDNA.36407.1 | 4.19  | 4.24  | 0.08 | 0.28 | -1.03 | 0.395485 | 0.544591 | 0.720494 | 0.72696  |
| MmugDNA.3641.1.S1_at    | MmugDNA.3641.1  | 4.33  | 4.3   | 0.32 | 0.07 | 1.02  | 0.990978 | 0.569525 | 0.996652 | 0.742452 |
| MmugDNA.36410.1.S1_at   | MmugDNA.36410.1 | 7.14  | 7.03  | 0.46 | 0.05 | 1.08  | 0.656751 | 0.141374 | 0.863682 | 0.414874 |
| MmugDNA.36412.1.S1_at   | MmugDNA.36412.1 | 2.88  | 2.89  | 0.22 | 0.04 | -1.01 | 0.91081  | 0.799257 | 0.969778 | 0.884448 |
| MmugDNA.36414.1.S1_at   | MmugDNA.36414.1 | 3.43  | 3.45  | 0.04 | 0.05 | -1.01 | 0.131161 | 0.264676 | 0.5054   | 0.530686 |
| MmugDNA.36415.1.S1_at   | MmugDNA.36415.1 | 7.57  | 7.57  | 0.08 | 0.01 | 1     | 0.365655 | 0.933571 | 0.701264 | 0.962229 |
| MmugDNA.36416.1.S1_at   | MmugDNA.36416.1 | 12.52 | 12.02 | 1.28 | 0.23 | 1.41  | 0.729475 | 0.325443 | 0.895786 | 0.575807 |
| MmugDNA.36417.1.S1_at   | MmugDNA.36417.1 | 4.2   | 3.94  | 0.15 | 0.34 | 1.2   | 0.296715 | 0.45144  | 0.652381 | 0.666221 |
| MmugDNA.36419.1.S1_at   | MmugDNA.36419.1 | 4.12  | 5.27  | 0.77 | 0.16 | -2.21 | 0.114824 | 0.182246 | 0.487957 | 0.458762 |
| MmugDNA.3642.1.S1_at    | MmugDNA.3642.1  | 4.33  | 4.42  | 0.11 | 0.07 | -1.06 | 0.243825 | 0.096599 | 0.609715 | 0.354126 |
| MmugDNA.36420.1.S1_at   | MmugDNA.36420.1 | 3.96  | 3.89  | 0.08 | 0.06 | -1.05 | 0.360068 | 0.466142 | 0.697741 | 0.676144 |
| MmugDNA.36422.1.S1_at   | MmugDNA.36422.1 | 8.65  | 7.43  | 0.36 | 0.07 | 2.33  | 0.002256 | 0.000225 | 0.174757 | 0.032385 |
| MmugDNA.36423.1.S1_at   | MmugDNA.36423.1 | 12.34 | 11.8  | 0.31 | 0.08 | 1.45  | 0.0312   | 0.004566 | 0.340298 | 0.094375 |
| MmugDNA.36424.1.S1_at   | MmugDNA.36424.1 | 6.62  | 6.58  | 0.21 | 0.05 | 1.03  | 0.679453 | 0.152321 | 0.874274 | 0.427072 |
| MmugDNA.36426.1.S1_at   | MmugDNA.36426.1 | 7.19  | 7.17  | 0.02 | 0.02 | 1.01  | 0.717235 | 0.477081 | 0.890326 | 0.683196 |
| MmugDNA.36427.1.S1_at   | MmugDNA.36427.1 | 5.82  | 6.19  | 0.31 | 0.22 | -1.29 | 0.75864  | 0.108281 | 0.90928  | 0.371557 |
| MmugDNA.36428.1.S1_at   | MmugDNA.36428.1 | 4.65  | 4.78  | 0.56 | 0.28 | -1.1  | 0.618991 | 0.297113 | 0.846305 | 0.555996 |
| MmugDNA.36429.1.S1_at   | MmugDNA.36429.1 | 6.18  | 6.68  | 0.65 | 0.35 | -1.42 | 0.514279 | 0.884087 | 0.790322 | 0.933904 |
| MmugDNA.3643.1.S1_at    | MmugDNA.3643.1  | 7.22  | 5.9   | 0.76 | 0.19 | 2.5   | 0.142074 | 0.427972 | 0.517046 | 0.649602 |
| MmugDNA.36431.1.S1_s_at | MmugDNA.36431.1 | 10    | 10.01 | 0.19 | 0.11 | -1.01 | 0.694414 | 0.139401 | 0.881122 | 0.412691 |
| MmugDNA.36432.1.S1_at   | MmugDNA.36432.1 | 7.16  | 7.52  | 0.34 | 0.01 | -1.29 | 0.424037 | 0.225479 | 0.739366 | 0.498129 |
| MmugDNA.36436.1.S1_at   | MmugDNA.36436.1 | 3.72  | 3.61  | 0.27 | 0.12 | 1.08  | 0.854104 | 0.659145 | 0.948436 | 0.800572 |
| MmugDNA.36437.1.S1_at   | MmugDNA.36437.1 | 3.96  | 3.88  | 0.11 | 0.15 | 1.05  | 0.622034 | 0.863735 | 0.847631 | 0.922638 |
| MmugDNA.36438.1.S1_at   | MmugDNA.36438.1 | 4.17  | 4.17  | 0.05 | 0.11 | 1     | 0.943454 | 0.249909 | 0.980509 | 0.518889 |
| MmugDNA.36439.1.S1_at   | MmugDNA.36439.1 | 6.29  | 6.89  | 0.42 | 0.16 | -1.52 | 0.099338 | 0.168487 | 0.468886 | 0.445108 |
| MmugDNA.36440.1.S1_at   | MmugDNA.36440.1 | 3.95  | 3.91  | 0.04 | 0.03 | 1.03  | 0.132847 | 0.109916 | 0.507035 | 0.37398  |
| MmugDNA.36441.1.S1_at   | MmugDNA.36441.1 | 3.98  | 4.12  | 0.18 | 0.07 | -1.1  | 0.245959 | 0.420286 | 0.611421 | 0.644084 |
| MmugDNA.5017.1.S1_at    | MmugDNA.5017.1  | 6.72  | 6.14  | 0.74 | 0.54 | 1.5   | 0.878116 | 0.736799 | 0.95758  | 0.847693 |
| MmugDNA.5017.1.S1_s_at  | MmugDNA.5017.1  | 4.95  | 4.61  | 0.51 | 0.44 | 1.27  | 0.825416 | 0.975293 | 0.937278 | 0.986527 |
| MmugDNA.36446.1.S1_s_at | MmugDNA.36446.1 | 10.01 | 10.07 | 0.22 | 0.04 | -1.04 | 0.216938 | 0.049716 | 0.586902 | 0.267995 |
| MmugDNA.36447.1.S1_at   | MmugDNA.36447.1 | 6.83  | 6.81  | 0.09 | 0.06 | 1.01  | 0.383814 | 0.487438 | 0.711503 | 0.690508 |
| MmugDNA.36449.1.S1_at   | MmugDNA.36449.1 | 6.47  | 5.53  | 0.28 | 0.17 | 1.92  | 0.009843 | 0.027092 | 0.244005 | 0.205797 |
| MmugDNA.36450.1.S1_at   | MmugDNA.36450.1 | 8.77  | 9.03  | 0.29 | 0.22 | -1.2  | 0.108734 | 0.052761 | 0.481016 | 0.275315 |
| MmugDNA.36452.1.S1_at   | MmugDNA.36452.1 | 11.4  | 10.91 | 0.44 | 0.05 | 1.4   | 0.418639 | 0.150424 | 0.735824 | 0.424955 |
| MmugDNA.36453.1.S1_at   | MmugDNA.36453.1 | 5.99  | 5.45  | 0.6  | 0.26 | 1.45  | 0.152398 | 0.191449 | 0.525402 | 0.466812 |
| MmugDNA.36455.1.S1_at   | MmugDNA.36455.1 | 6.7   | 6.68  | 0.41 | 0.07 | 1.02  | 0.655707 | 0.241812 | 0.863273 | 0.51238  |
| MmugDNA.36457.1.S1_at   | MmugDNA.36457.1 | 7.53  | 5.55  | 1.35 | 0.79 | 3.95  | 0.442806 | 0.61619  | 0.750392 | 0.772513 |
| MmugDNA.3646.1.S1_at    | MmugDNA.3646.1  | 4.32  | 4.33  | 0.35 | 0.07 | -1.01 | 0.460447 | 0.666615 | 0.760242 | 0.804709 |
| MmugDNA.36460.1.S1_at   | MmugDNA.36460.1 | 5.99  | 5.9   | 0.09 | 0.07 | 1.07  | 0.184213 | 0.143594 | 0.55696  | 0.41751  |
| MmugDNA.36461.1.S1_at   | MmugDNA.36461.1 | 3.38  | 3.33  | 0.07 | 0.06 | 1.03  | 0.155927 | 0.365187 | 0.529116 | 0.605348 |
| MmugDNA.36462.1.S1_at   | MmugDNA.36462.1 | 5.23  | 5.17  | 0.23 | 0.05 | 1.04  | 0.745099 | 0.658889 | 0.902864 | 0.800473 |
| MmugDNA.36464.1.S1_at   | MmugDNA.36464.1 | 4.07  | 3.97  | 0.21 | 0.03 | 1.08  | 0.355544 | 0.45644  | 0.694743 | 0.670188 |
| MmugDNA.36465.1.S1_at   | MmugDNA.36465.1 | 7.61  | 7.92  | 0.37 | 0.27 | -1.24 | 0.18641  | 0.010508 | 0.559101 | 0.133936 |

|                         |                 |       |       |      |      |       |          |          |          |          |
|-------------------------|-----------------|-------|-------|------|------|-------|----------|----------|----------|----------|
| MmugDNA.36465.1.S1_s_at | MmugDNA.36465.1 | 9.02  | 9.17  | 0.37 | 0.37 | -1.11 | 0.245522 | 0.011418 | 0.611174 | 0.138384 |
| MmugDNA.36466.1.S1_at   | MmugDNA.36466.1 | 4.5   | 4.42  | 0.08 | 0.11 | 1.06  | 0.325742 | 0.697523 | 0.673434 | 0.824234 |
| MmugDNA.36467.1.S1_s_at | MmugDNA.36467.1 | 10.85 | 10.25 | 1.01 | 0.56 | 1.52  | 0.633295 | 0.500977 | 0.853409 | 0.699362 |
| MmugDNA.3647.1.S1_at    | MmugDNA.3647.1  | 5.54  | 4.96  | 0.45 | 0.16 | 1.49  | 0.174631 | 0.28331  | 0.547994 | 0.545836 |
| MmugDNA.36472.1.S1_at   | MmugDNA.36472.1 | 7.84  | 6.71  | 0.39 | 0.24 | 2.19  | 0.009603 | 0.001249 | 0.242793 | 0.054879 |
| MmugDNA.36473.1.S1_at   | MmugDNA.36473.1 | 5.36  | 5.4   | 0.45 | 0.41 | -1.02 | 0.447981 | 0.894643 | 0.753716 | 0.939853 |
| MmugDNA.36476.1.S1_at   | MmugDNA.36476.1 | 7.67  | 8.17  | 0.21 | 0.11 | -1.42 | 0.019633 | 0.012558 | 0.302161 | 0.144501 |
| MmugDNA.36478.1.S1_at   | MmugDNA.36478.1 | 8.84  | 9.36  | 0.35 | 0.17 | -1.43 | 0.20236  | 0.126772 | 0.573821 | 0.397446 |
| MmugDNA.36478.1.S1_s_at | MmugDNA.36478.1 | 7.33  | 7.71  | 0.23 | 0.17 | -1.3  | 0.140987 | 0.126413 | 0.516345 | 0.396936 |
| MmugDNA.36479.1.S1_at   | MmugDNA.36479.1 | 6.14  | 6.68  | 0.57 | 0.51 | -1.46 | 0.211351 | 0.094319 | 0.582326 | 0.350889 |
| MmugDNA.3648.1.S1_at    | MmugDNA.3648.1  | 4.6   | 4.43  | 0.1  | 0.08 | 1.12  | 0.103607 | 0.349736 | 0.474343 | 0.593566 |
| MmugDNA.36480.1.S1_at   | MmugDNA.36480.1 | 3.88  | 3.9   | 0.16 | 0.18 | -1.01 | 0.685741 | 0.763105 | 0.876883 | 0.862257 |
| MmugDNA.36484.1.S1_at   | MmugDNA.36484.1 | 5.11  | 4.99  | 0.26 | 0.04 | 1.09  | 0.461366 | 0.260081 | 0.760883 | 0.52675  |
| MmugDNA.36485.1.S1_at   | MmugDNA.36485.1 | 3.3   | 3.14  | 0.13 | 0.09 | 1.12  | 0.329631 | 0.223676 | 0.67648  | 0.496603 |
| MmugDNA.36486.1.S1_at   | MmugDNA.36486.1 | 2.71  | 2.76  | 0.12 | 0.04 | -1.04 | 0.689789 | 0.378079 | 0.879092 | 0.615387 |
| MmugDNA.36487.1.S1_at   | MmugDNA.36487.1 | 7.57  | 7.78  | 0.6  | 0.18 | -1.16 | 0.703194 | 0.663469 | 0.884538 | 0.803016 |
| MmugDNA.36488.1.S1_at   | MmugDNA.36488.1 | 6.41  | 6.21  | 0.64 | 0.48 | 1.15  | 0.936896 | 0.909309 | 0.978842 | 0.948719 |
| MmugDNA.3649.1.S1_at    | MmugDNA.3649.1  | 3.51  | 3.39  | 0.09 | 0.11 | 1.09  | 0.222019 | 0.297502 | 0.591614 | 0.556122 |
| MmugDNA.36490.1.S1_at   | MmugDNA.36490.1 | 3.4   | 3.17  | 0.2  | 0.02 | 1.18  | 0.346696 | 0.400182 | 0.688361 | 0.630158 |
| MmugDNA.36491.1.S1_s_at | MmugDNA.36491.1 | 10.1  | 10.73 | 0.95 | 0.44 | -1.55 | 0.215889 | 0.29408  | 0.586043 | 0.553929 |
| MmugDNA.36493.1.S1_at   | MmugDNA.36493.1 | 6     | 5.94  | 0.26 | 0.1  | 1.05  | 0.603647 | 0.154089 | 0.83932  | 0.428867 |
| MmugDNA.36494.1.S1_at   | MmugDNA.36494.1 | 5.37  | 5.25  | 0.24 | 0.09 | 1.08  | 0.461959 | 0.564001 | 0.761366 | 0.738932 |
| MmugDNA.36498.1.S1_at   | MmugDNA.36498.1 | 4.52  | 4.57  | 0.26 | 0.3  | -1.03 | 0.840965 | 0.980462 | 0.943498 | 0.989333 |
| MmugDNA.36499.1.S1_at   | MmugDNA.36499.1 | 4.93  | 4.84  | 0.32 | 0.31 | 1.06  | 0.376214 | 0.05758  | 0.706721 | 0.286115 |
| MmugDNA.365.1.S1_at     | MmugDNA.365.1   | 5.66  | 5.57  | 0.24 | 0.05 | 1.06  | 0.192746 | 0.591398 | 0.563577 | 0.756977 |
| MmugDNA.3650.1.S1_at    | MmugDNA.3650.1  | 7.18  | 6.91  | 1    | 0.3  | 1.21  | 0.481887 | 0.266807 | 0.772261 | 0.53241  |
| MmugDNA.36500.1.S1_at   | MmugDNA.36500.1 | 12.81 | 12.54 | 0.28 | 0.14 | 1.2   | 0.319629 | 0.437516 | 0.668882 | 0.656769 |
| MmugDNA.36504.1.S1_at   | MmugDNA.36504.1 | 6.43  | 6.46  | 0.09 | 0.11 | -1.02 | 0.636221 | 0.269477 | 0.854813 | 0.534777 |
| MmugDNA.36506.1.S1_at   | MmugDNA.36506.1 | 9.26  | 9.34  | 0.22 | 0.11 | -1.06 | 0.49878  | 0.226327 | 0.781838 | 0.498781 |
| MmugDNA.36508.1.S1_at   | MmugDNA.36508.1 | 12.31 | 12.06 | 0.1  | 0    | 1.19  | 0.025884 | 0.041726 | 0.32273  | 0.248911 |
| MmugDNA.36509.1.S1_at   | MmugDNA.36509.1 | 4.82  | 4.88  | 0.36 | 0.22 | -1.04 | 0.330797 | 0.50971  | 0.677446 | 0.704318 |
| MmugDNA.3651.1.S1_s_at  | MmugDNA.3651.1  | 6.93  | 6.9   | 0.32 | 0.3  | 1.02  | 0.962772 | 0.366894 | 0.987983 | 0.606566 |
| MmugDNA.36510.1.S1_at   | MmugDNA.36510.1 | 4.9   | 6.27  | 0.39 | 0.41 | -2.59 | 0.019877 | 0.117556 | 0.302615 | 0.38531  |
| MmugDNA.36512.1.S1_at   | MmugDNA.36512.1 | 8.61  | 7.8   | 2.84 | 0.35 | 1.76  | 0.869146 | 0.150639 | 0.954244 | 0.425195 |
| MmugDNA.36513.1.S1_at   | MmugDNA.36513.1 | 6.48  | 6.43  | 0.19 | 0.07 | 1.03  | 0.232748 | 0.287267 | 0.600193 | 0.548526 |
| MmugDNA.36514.1.S1_at   | MmugDNA.36514.1 | 8.44  | 9.12  | 0.67 | 0.04 | -1.6  | 0.213966 | 0.274604 | 0.584533 | 0.539059 |
| MmugDNA.36515.1.S1_s_at | MmugDNA.36515.1 | 4.8   | 4.56  | 0.34 | 0.31 | 1.18  | 0.456958 | 0.80304  | 0.758051 | 0.886557 |
| MmugDNA.36519.1.S1_at   | MmugDNA.36519.1 | 6.71  | 7.11  | 1.09 | 0.09 | -1.32 | 0.327122 | 0.520129 | 0.674781 | 0.711472 |
| MmugDNA.36520.1.S1_at   | MmugDNA.36520.1 | 9.95  | 9.97  | 1.08 | 0.08 | -1.02 | 0.85814  | 0.721398 | 0.9499   | 0.838685 |
| MmugDNA.36522.1.S1_at   | MmugDNA.36522.1 | 5.14  | 4.98  | 0.03 | 0.14 | 1.12  | 0.380479 | 0.299119 | 0.709387 | 0.557663 |
| MmugDNA.36524.1.S1_at   | MmugDNA.36524.1 | 7.32  | 7.42  | 0.16 | 0.15 | -1.07 | 0.765889 | 0.574611 | 0.91197  | 0.74601  |
| MmugDNA.36526.1.S1_at   | MmugDNA.36526.1 | 6.57  | 6.69  | 0.25 | 0.11 | -1.09 | 0.847259 | 0.979726 | 0.946516 | 0.989119 |
| MmugDNA.36527.1.S1_at   | MmugDNA.36527.1 | 2.79  | 2.79  | 0.11 | 0.07 | -1    | 0.799238 | 0.699032 | 0.926464 | 0.825113 |

|                         |                 |       |       |      |      |       |          |          |          |          |
|-------------------------|-----------------|-------|-------|------|------|-------|----------|----------|----------|----------|
| MmugDNA.36528.1.S1_at   | MmugDNA.36528.1 | 4.94  | 4.86  | 0.08 | 0.12 | 1.06  | 0.8229   | 0.556167 | 0.936102 | 0.73442  |
| MmugDNA.3653.1.S1_at    | MmugDNA.3653.1  | 4.16  | 4     | 0.19 | 0.13 | 1.12  | 0.175055 | 0.458982 | 0.548031 | 0.671504 |
| MmugDNA.36530.1.S1_at   | MmugDNA.36530.1 | 6.24  | 6.43  | 0.19 | 0.2  | -1.14 | 0.130334 | 0.391967 | 0.504682 | 0.625473 |
| MmugDNA.36531.1.S1_at   | MmugDNA.36531.1 | 5.97  | 6.79  | 0.17 | 0.19 | -1.77 | 0.008176 | 0.051945 | 0.232005 | 0.273349 |
| MmugDNA.36532.1.S1_at   | MmugDNA.36532.1 | 5.36  | 5.55  | 0.34 | 0.2  | -1.15 | 0.981233 | 0.169423 | 0.993962 | 0.446067 |
| MmugDNA.36533.1.S1_at   | MmugDNA.36533.1 | 6.03  | 6.11  | 1.27 | 0.18 | -1.06 | 0.939757 | 0.249492 | 0.979532 | 0.518532 |
| MmugDNA.36534.1.S1_at   | MmugDNA.36534.1 | 5.6   | 5.43  | 0.07 | 0.06 | 1.12  | 0.025172 | 0.086277 | 0.320696 | 0.338734 |
| MmugDNA.36535.1.S1_at   | MmugDNA.36535.1 | 12.11 | 11.69 | 0.54 | 0.11 | 1.34  | 0.707495 | 0.921943 | 0.88615  | 0.955975 |
| MmugDNA.36536.1.S1_at   | MmugDNA.36536.1 | 2.85  | 2.84  | 0.17 | 0.06 | 1.01  | 0.227082 | 0.252007 | 0.596459 | 0.520646 |
| MmugDNA.36537.1.S1_at   | MmugDNA.36537.1 | 3.29  | 3.39  | 0.12 | 0.04 | -1.07 | 0.056784 | 0.233063 | 0.401111 | 0.50445  |
| MmugDNA.36538.1.S1_at   | MmugDNA.36538.1 | 6.95  | 7.14  | 0.58 | 0.07 | -1.14 | 0.186911 | 0.050665 | 0.559421 | 0.270317 |
| MmugDNA.36539.1.S1_at   | MmugDNA.36539.1 | 8.66  | 8.32  | 0.45 | 0.08 | 1.27  | 0.270707 | 0.60606  | 0.630562 | 0.765632 |
| MmugDNA.36540.1.S1_at   | MmugDNA.36540.1 | 3.52  | 3.44  | 0.03 | 0.18 | 1.06  | 0.329619 | 0.461289 | 0.67648  | 0.672971 |
| MmugDNA.36541.1.S1_at   | MmugDNA.36541.1 | 4.7   | 4.72  | 0.05 | 0.41 | -1.01 | 0.950798 | 0.624834 | 0.983338 | 0.778924 |
| MmugDNA.36542.1.S1_at   | MmugDNA.36542.1 | 8.43  | 8.95  | 0.45 | 0.09 | -1.43 | 0.366225 | 0.409523 | 0.701752 | 0.636543 |
| MmugDNA.36543.1.S1_at   | MmugDNA.36543.1 | 8.96  | 8.83  | 1.15 | 0.34 | 1.09  | 0.665378 | 0.48444  | 0.867966 | 0.688478 |
| MmugDNA.36543.1.S1_s_at | MmugDNA.36543.1 | 7.73  | 7.52  | 1.03 | 0.34 | 1.15  | 0.577963 | 0.317218 | 0.82603  | 0.570458 |
| MmugDNA.36549.1.S1_at   | MmugDNA.36549.1 | 5.62  | 5.85  | 0.49 | 0.25 | -1.17 | 0.512879 | 0.584347 | 0.789522 | 0.752414 |
| MmugDNA.3655.1.S1_at    | MmugDNA.3655.1  | 6.15  | 6.46  | 0.12 | 0.59 | -1.24 | 0.518776 | 0.633184 | 0.792839 | 0.783991 |
| MmugDNA.36551.1.S1_at   | MmugDNA.36551.1 | 7.43  | 6.58  | 0.91 | 0.19 | 1.79  | 0.18897  | 0.122253 | 0.560718 | 0.39196  |
| MmugDNA.36552.1.S1_at   | MmugDNA.36552.1 | 3.54  | 3.45  | 0.15 | 0.05 | 1.07  | 0.260277 | 0.545337 | 0.623195 | 0.727505 |
| MmugDNA.36553.1.S1_at   | MmugDNA.36553.1 | 4.41  | 4.1   | 0.15 | 0.1  | 1.23  | 0.120257 | 0.220193 | 0.493545 | 0.493655 |
| MmugDNA.36557.1.S1_at   | MmugDNA.36557.1 | 7.02  | 6.82  | 0.32 | 0.08 | 1.15  | 0.282525 | 0.216198 | 0.640925 | 0.489765 |
| MmugDNA.36558.1.S1_at   | MmugDNA.36558.1 | 5.38  | 5.26  | 0    | 0.13 | 1.08  | 0.176754 | 0.033119 | 0.549927 | 0.225287 |
| MmugDNA.3656.1.S1_at    | MmugDNA.3656.1  | 4.99  | 4.97  | 0.21 | 0.16 | 1.02  | 0.978024 | 0.888928 | 0.992929 | 0.936725 |
| MmugDNA.36560.1.S1_at   | MmugDNA.36560.1 | 4.85  | 4.73  | 0.11 | 0.15 | 1.08  | 0.750772 | 0.699383 | 0.905556 | 0.825344 |
| MmugDNA.36561.1.S1_at   | MmugDNA.36561.1 | 3.41  | 3.17  | 0.22 | 0.15 | 1.19  | 0.445954 | 0.569387 | 0.75251  | 0.742382 |
| MmugDNA.36562.1.S1_at   | MmugDNA.36562.1 | 5.12  | 4.62  | 0.29 | 0.23 | 1.42  | 0.190831 | 0.370625 | 0.561863 | 0.609664 |
| MmugDNA.36564.1.S1_at   | MmugDNA.36564.1 | 5.47  | 5.44  | 0.15 | 0.1  | 1.02  | 0.770267 | 0.533131 | 0.913936 | 0.719436 |
| MmugDNA.36565.1.S1_at   | MmugDNA.36565.1 | 3.89  | 4.16  | 0.97 | 0.35 | -1.21 | 0.483637 | 0.741288 | 0.773246 | 0.850236 |
| MmugDNA.36568.1.S1_at   | MmugDNA.36568.1 | 7.02  | 6.73  | 0.22 | 0.05 | 1.22  | 0.035067 | 0.014635 | 0.35097  | 0.154176 |
| MmugDNA.36569.1.S1_at   | MmugDNA.36569.1 | 5.06  | 5.25  | 0.22 | 0.14 | -1.14 | 0.383113 | 0.602104 | 0.711189 | 0.763172 |
| MmugDNA.3657.1.S1_at    | MmugDNA.3657.1  | 5.72  | 5.98  | 0.18 | 0.09 | -1.2  | 0.083537 | 0.317764 | 0.449622 | 0.570922 |
| MmugDNA.36571.1.S1_at   | MmugDNA.36571.1 | 6.7   | 6.58  | 0.04 | 0.05 | 1.09  | 0.047748 | 0.098147 | 0.381152 | 0.356253 |
| MmugDNA.36572.1.S1_at   | MmugDNA.36572.1 | 3.58  | 3.52  | 0.13 | 0.11 | 1.05  | 0.619561 | 0.526538 | 0.84677  | 0.715583 |
| MmugDNA.36575.1.S1_at   | MmugDNA.36575.1 | 3.59  | 4.16  | 0.47 | 0.11 | -1.49 | 0.301846 | 0.301709 | 0.655978 | 0.559643 |
| MmugDNA.36577.1.S1_at   | MmugDNA.36577.1 | 7.91  | 8.28  | 0.27 | 0.08 | -1.29 | 0.02709  | 0.071882 | 0.327141 | 0.314181 |
| MmugDNA.36577.1.S1_s_at | MmugDNA.36577.1 | 7.68  | 8.29  | 0.19 | 0.01 | -1.53 | 0.005122 | 0.025288 | 0.205468 | 0.199502 |
| MmugDNA.36579.1.S1_at   | MmugDNA.36579.1 | 3.66  | 4.12  | 0.12 | 0.07 | -1.38 | 0.003388 | 0.000149 | 0.194985 | 0.029832 |
| MmugDNA.3658.1.S1_at    | MmugDNA.3658.1  | 10.45 | 10.67 | 0.08 | 0.01 | -1.17 | 0.009721 | 0.113726 | 0.243347 | 0.379889 |
| MmugDNA.36581.1.S1_at   | MmugDNA.36581.1 | 4.47  | 3.65  | 0.75 | 0.43 | 1.77  | 0.167915 | 0.196061 | 0.5405   | 0.471082 |
| MmugDNA.36582.1.S1_at   | MmugDNA.36582.1 | 5.05  | 5.09  | 0.1  | 0.21 | -1.03 | 0.187284 | 0.453087 | 0.559729 | 0.667533 |
| MmugDNA.36583.1.S1_at   | MmugDNA.36583.1 | 11.91 | 12.25 | 0.13 | 0.03 | -1.27 | 0.031785 | 0.385264 | 0.342447 | 0.620718 |

|                         |                 |      |       |      |      |       |          |          |          |          |
|-------------------------|-----------------|------|-------|------|------|-------|----------|----------|----------|----------|
| MmugDNA.36584.1.S1_at   | MmugDNA.36584.1 | 5.9  | 5.26  | 0.4  | 0.1  | 1.55  | 0.066662 | 0.059406 | 0.422542 | 0.290548 |
| MmugDNA.36585.1.S1_at   | MmugDNA.36585.1 | 5.38 | 5.21  | 0.26 | 0.07 | 1.13  | 0.48741  | 0.233473 | 0.775077 | 0.504828 |
| MmugDNA.36586.1.S1_at   | MmugDNA.36586.1 | 3.39 | 3.35  | 0.14 | 0.16 | 1.03  | 0.730667 | 0.79044  | 0.896248 | 0.878867 |
| MmugDNA.36587.1.S1_at   | MmugDNA.36587.1 | 3.1  | 3.1   | 0.14 | 0.05 | -1    | 0.913058 | 0.568776 | 0.970415 | 0.74211  |
| MmugDNA.36589.1.S1_at   | MmugDNA.36589.1 | 5.75 | 5.33  | 0.22 | 0.29 | 1.34  | 0.10611  | 0.123761 | 0.478301 | 0.393908 |
| MmugDNA.36590.1.S1_at   | MmugDNA.36590.1 | 6.37 | 6.6   | 0.27 | 0.01 | -1.17 | 0.286686 | 0.242389 | 0.643923 | 0.51282  |
| MmugDNA.36591.1.S1_at   | MmugDNA.36591.1 | 6.57 | 6.65  | 0.83 | 0.23 | -1.06 | 0.947829 | 0.452908 | 0.982079 | 0.667359 |
| MmugDNA.36592.1.S1_at   | MmugDNA.36592.1 | 5.17 | 5.35  | 0.1  | 0.15 | -1.13 | 0.185518 | 0.619712 | 0.55851  | 0.774893 |
| MmugDNA.36594.1.S1_at   | MmugDNA.36594.1 | 6.68 | 6.59  | 0.13 | 0.05 | 1.07  | 0.21326  | 0.670661 | 0.583803 | 0.807454 |
| MmugDNA.36595.1.S1_at   | MmugDNA.36595.1 | 5.47 | 5.26  | 0.51 | 0.31 | 1.15  | 0.954267 | 0.971318 | 0.984783 | 0.984419 |
| MmugDNA.36596.1.S1_at   | MmugDNA.36596.1 | 5.71 | 5.56  | 0.07 | 0.18 | -1.11 | 0.159161 | 0.182494 | 0.531816 | 0.459065 |
| MmugDNA.36598.1.S1_at   | MmugDNA.36598.1 | 6.08 | 6.2   | 0.27 | 0.04 | -1.08 | 0.774156 | 0.117465 | 0.916175 | 0.385175 |
| MmugDNA.7570.1.S1_s_at  | MmugDNA.7570.1  | 11.6 | 11.92 | 0.2  | 0.04 | -1.25 | 0.166587 | 0.073826 | 0.539239 | 0.317146 |
| MmugDNA.36600.1.S1_at   | MmugDNA.36600.1 | 3.51 | 3.21  | 0.26 | 0.06 | 1.23  | 0.188233 | 0.380403 | 0.560365 | 0.617061 |
| MmugDNA.36602.1.S1_at   | MmugDNA.36602.1 | 7.99 | 8.14  | 0.16 | 0.09 | -1.11 | 0.679261 | 0.943482 | 0.874274 | 0.967907 |
| MmugDNA.36603.1.S1_at   | MmugDNA.36603.1 | 5.82 | 5.14  | 0.18 | 0.2  | 1.61  | 0.010901 | 0.008539 | 0.250796 | 0.122564 |
| MmugDNA.36604.1.S1_at   | MmugDNA.36604.1 | 5.6  | 6.13  | 0.62 | 0.36 | -1.44 | 0.104293 | 0.035269 | 0.475417 | 0.232016 |
| MmugDNA.36605.1.S1_at   | MmugDNA.36605.1 | 7.67 | 7.41  | 0.15 | 0.12 | 1.19  | 0.089113 | 0.134637 | 0.456902 | 0.406629 |
| MmugDNA.36606.1.S1_at   | MmugDNA.36606.1 | 4.45 | 4.16  | 0.19 | 0.26 | 1.22  | 0.876483 | 0.883491 | 0.956925 | 0.933594 |
| MmugDNA.36607.1.S1_at   | MmugDNA.36607.1 | 5.95 | 5.82  | 1.13 | 0.12 | 1.09  | 0.348329 | 0.157146 | 0.689626 | 0.432616 |
| MmugDNA.36611.1.S1_at   | MmugDNA.36611.1 | 6.71 | 6.55  | 0.11 | 0.06 | 1.12  | 0.334641 | 0.046652 | 0.680478 | 0.260512 |
| MmugDNA.36614.1.S1_s_at | MmugDNA.36614.1 | 8.02 | 7.98  | 0.16 | 0.05 | 1.03  | 0.68293  | 0.353371 | 0.876006 | 0.596477 |
| MmugDNA.36615.1.S1_at   | MmugDNA.36615.1 | 5.05 | 5.01  | 0.23 | 0.29 | 1.03  | 0.692876 | 0.277678 | 0.880312 | 0.541636 |
| MmugDNA.36616.1.S1_at   | MmugDNA.36616.1 | 9.83 | 9.21  | 1.21 | 0.31 | 1.54  | 0.962362 | 0.449189 | 0.987802 | 0.664892 |
| MmugDNA.36619.1.S1_at   | MmugDNA.36619.1 | 3.6  | 3.41  | 0.05 | 0.18 | 1.14  | 0.193301 | 0.21224  | 0.564275 | 0.486137 |
| MmugDNA.3662.1.S1_at    | MmugDNA.3662.1  | 12.6 | 11.87 | 0.21 | 0.15 | 1.66  | 0.015409 | 0.004883 | 0.281461 | 0.097564 |
| MmugDNA.36622.1.S1_s_at | MmugDNA.36622.1 | 4.81 | 4.76  | 0.08 | 0.12 | 1.03  | 0.303804 | 0.343396 | 0.657614 | 0.589163 |
| MmugDNA.36624.1.S1_at   | MmugDNA.36624.1 | 5.86 | 5.64  | 0.06 | 0.13 | 1.16  | 0.143107 | 0.325067 | 0.518366 | 0.575545 |
| MmugDNA.36625.1.S1_at   | MmugDNA.36625.1 | 4.16 | 4.16  | 0.35 | 0.02 | -1    | 0.387995 | 0.525756 | 0.714947 | 0.715217 |
| MmugDNA.36627.1.S1_at   | MmugDNA.36627.1 | 5.73 | 5.64  | 0.03 | 0.07 | 1.07  | 0.150222 | 0.146656 | 0.523864 | 0.420683 |
| MmugDNA.36628.1.S1_at   | MmugDNA.36628.1 | 7.63 | 6.32  | 1.37 | 0.41 | 2.48  | 0.217956 | 0.277197 | 0.587987 | 0.541157 |
| MmugDNA.3663.1.S1_at    | MmugDNA.3663.1  | 7.04 | 7.42  | 0.48 | 0.22 | -1.31 | 0.146037 | 0.31048  | 0.520572 | 0.565691 |
| MmugDNA.36635.1.S1_at   | MmugDNA.36635.1 | 3.7  | 3.76  | 0.09 | 0.12 | -1.05 | 0.468549 | 0.565214 | 0.764997 | 0.739754 |
| MmugDNA.36637.1.S1_at   | MmugDNA.36637.1 | 5.95 | 5.7   | 0.13 | 0.25 | 1.19  | 0.134818 | 0.402735 | 0.508899 | 0.631543 |
| MmugDNA.36638.1.S1_at   | MmugDNA.36638.1 | 5.15 | 4.83  | 0.15 | 0.12 | 1.25  | 0.052645 | 0.352453 | 0.392806 | 0.595723 |
| MmugDNA.36641.1.S1_at   | MmugDNA.36641.1 | 3.78 | 3.77  | 0.28 | 0.19 | 1     | 0.622124 | 0.390385 | 0.847666 | 0.624156 |
| MmugDNA.36646.1.S1_at   | MmugDNA.36646.1 | 7.2  | 7.03  | 0.07 | 0.07 | 1.13  | 0.037194 | 0.382002 | 0.356914 | 0.618258 |
| MmugDNA.3665.1.S1_at    | MmugDNA.3665.1  | 3.84 | 3.84  | 0.05 | 0.02 | -1    | 0.908744 | 0.736291 | 0.969262 | 0.847409 |
| MmugDNA.36651.1.S1_at   | MmugDNA.36651.1 | 4.3  | 4.19  | 0.04 | 0.13 | 1.08  | 0.286816 | 0.441139 | 0.643994 | 0.659375 |
| MmugDNA.36652.1.S1_at   | MmugDNA.36652.1 | 6.51 | 6.86  | 0.53 | 0.17 | -1.28 | 0.269537 | 0.185535 | 0.629766 | 0.461566 |
| MmugDNA.36653.1.S1_at   | MmugDNA.36653.1 | 5.76 | 6.33  | 0.35 | 0.07 | -1.49 | 0.152136 | 0.265915 | 0.525249 | 0.531796 |
| MmugDNA.36654.1.S1_at   | MmugDNA.36654.1 | 8.76 | 9.01  | 0.27 | 0.1  | -1.2  | 0.098154 | 0.170945 | 0.46764  | 0.447561 |
| MmugDNA.36656.1.S1_at   | MmugDNA.36656.1 | 9.3  | 9.92  | 0.36 | 0.03 | -1.53 | 0.017588 | 0.008799 | 0.292844 | 0.124117 |



|                         |                 |       |       |      |      |       |          |          |          |          |
|-------------------------|-----------------|-------|-------|------|------|-------|----------|----------|----------|----------|
| MmugDNA.36658.1.S1_at   | MmugDNA.36658.1 | 8.24  | 6.08  | 1.6  | 2.33 | 4.47  | 0.49995  | 0.276377 | 0.782311 | 0.540334 |
| MmugDNA.36659.1.S1_at   | MmugDNA.36659.1 | 4.92  | 5.03  | 0.22 | 0    | -1.08 | 0.993228 | 0.993803 | 0.997423 | 0.996274 |
| MmugDNA.36661.1.S1_at   | MmugDNA.36661.1 | 5.49  | 5.71  | 0.52 | 0.31 | -1.16 | 0.390618 | 0.592241 | 0.716866 | 0.757642 |
| MmugDNA.36663.1.S1_at   | MmugDNA.36663.1 | 9.49  | 9.81  | 0.15 | 0.04 | -1.25 | 0.024143 | 0.009519 | 0.317812 | 0.1285   |
| MmugDNA.36665.1.S1_at   | MmugDNA.36665.1 | 3.71  | 3.65  | 0.23 | 0.19 | 1.04  | 0.797111 | 0.946442 | 0.925393 | 0.969629 |
| MmugDNA.36666.1.S1_at   | MmugDNA.36666.1 | 5.6   | 5.92  | 0.27 | 0.08 | -1.25 | 0.353669 | 0.000701 | 0.693411 | 0.04424  |
| MmugDNA.24328.1.S1_s_at | MmugDNA.24328.1 | 9.41  | 9.78  | 0.34 | 0.16 | -1.29 | 0.176558 | 0.248964 | 0.549633 | 0.518026 |
| MmugDNA.36669.1.S1_at   | MmugDNA.36669.1 | 3.81  | 3.67  | 0.09 | 0.05 | 1.1   | 0.027611 | 0.020036 | 0.328297 | 0.177812 |
| MmugDNA.3667.1.S1_at    | MmugDNA.3667.1  | 3.88  | 3.72  | 0.1  | 0.06 | 1.12  | 0.073292 | 0.328679 | 0.434224 | 0.578213 |
| MmugDNA.36670.1.S1_at   | MmugDNA.36670.1 | 7.56  | 7.67  | 1.31 | 0.54 | -1.08 | 0.875431 | 0.104323 | 0.956729 | 0.365523 |
| MmugDNA.36671.1.S1_at   | MmugDNA.36671.1 | 3.61  | 3.42  | 0.09 | 0.12 | 1.14  | 0.070927 | 0.140237 | 0.430067 | 0.413405 |
| MmugDNA.36674.1.S1_at   | MmugDNA.36674.1 | 10.8  | 11.42 | 0.02 | 0.02 | -1.53 | 0.000003 | 4.43E-07 | 0.047031 | 0.005999 |
| MmugDNA.36675.1.S1_at   | MmugDNA.36675.1 | 12.43 | 12.47 | 0.28 | 0.03 | -1.03 | 0.919538 | 0.992729 | 0.972636 | 0.995715 |
| MmugDNA.36677.1.S1_at   | MmugDNA.36677.1 | 8.45  | 9.01  | 0.54 | 0.21 | -1.47 | 0.119653 | 0.175317 | 0.493097 | 0.45207  |
| MmugDNA.36679.1.S1_at   | MmugDNA.36679.1 | 6.54  | 6.28  | 0.83 | 0.09 | 1.2   | 0.65021  | 0.455934 | 0.860819 | 0.669712 |
| MmugDNA.3668.1.S1_at    | MmugDNA.3668.1  | 6.47  | 6.27  | 0.46 | 0.1  | 1.15  | 0.156865 | 0.211301 | 0.530085 | 0.485418 |
| MmugDNA.36681.1.S1_at   | MmugDNA.36681.1 | 6.58  | 6.7   | 1.28 | 1.17 | -1.08 | 0.576356 | 0.436961 | 0.825166 | 0.656361 |
| MmugDNA.36682.1.S1_at   | MmugDNA.36682.1 | 4.83  | 4.22  | 0.4  | 0.09 | 1.53  | 0.165555 | 0.138056 | 0.538358 | 0.410919 |
| MmugDNA.36683.1.S1_at   | MmugDNA.36683.1 | 3.54  | 3.37  | 0.13 | 0.06 | 1.12  | 0.06349  | 0.096914 | 0.415717 | 0.354311 |
| MmugDNA.36683.1.S1_x_at | MmugDNA.36683.1 | 4     | 3.83  | 0.22 | 0.13 | 1.12  | 0.753645 | 0.73944  | 0.907136 | 0.848995 |
| MmugDNA.36684.1.S1_at   | MmugDNA.36684.1 | 3.93  | 3.86  | 0.14 | 0.08 | 1.05  | 0.312338 | 0.534046 | 0.663932 | 0.720066 |
| MmugDNA.36685.1.S1_at   | MmugDNA.36685.1 | 10.62 | 10.88 | 0.92 | 0.07 | -1.19 | 0.621948 | 0.760444 | 0.847631 | 0.860814 |
| MmugDNA.36686.1.S1_at   | MmugDNA.36686.1 | 3.6   | 3.8   | 0.42 | 0.05 | -1.15 | 0.881751 | 0.855394 | 0.95911  | 0.917566 |
| MmugDNA.36687.1.S1_at   | MmugDNA.36687.1 | 10.17 | 10.47 | 0.2  | 0.04 | -1.23 | 0.029699 | 0.071806 | 0.335633 | 0.314082 |
| MmugDNA.36688.1.S1_at   | MmugDNA.36688.1 | 4.88  | 4.88  | 0.6  | 0.39 | 1     | 0.550216 | 0.659845 | 0.810701 | 0.800897 |
| MmugDNA.36688.1.S1_s_at | MmugDNA.36688.1 | 6.06  | 5.86  | 0.14 | 0.09 | 1.15  | 0.482604 | 0.079664 | 0.772508 | 0.326981 |
| MmugDNA.36689.1.S1_at   | MmugDNA.36689.1 | 5.44  | 6.02  | 0.5  | 0.24 | -1.5  | 0.398853 | 0.56824  | 0.722745 | 0.741866 |
| MmugDNA.3669.1.S1_at    | MmugDNA.3669.1  | 5.32  | 5.35  | 1.09 | 0.72 | -1.02 | 0.774654 | 0.595474 | 0.91642  | 0.759091 |
| MmugDNA.36690.1.S1_at   | MmugDNA.36690.1 | 7.57  | 7.48  | 0.05 | 0.03 | 1.06  | 0.111856 | 0.080523 | 0.48497  | 0.328189 |
| MmugDNA.36691.1.S1_at   | MmugDNA.36691.1 | 10.4  | 10.61 | 0.26 | 0.12 | -1.16 | 0.397188 | 0.340104 | 0.721708 | 0.586572 |
| MmugDNA.36692.1.S1_at   | MmugDNA.36692.1 | 5.76  | 5.78  | 0.14 | 0.12 | -1.01 | 0.78952  | 0.943354 | 0.92257  | 0.967832 |
| MmugDNA.36694.1.S1_at   | MmugDNA.36694.1 | 4.52  | 4.53  | 0.12 | 0.12 | -1.01 | 0.455013 | 0.568723 | 0.757304 | 0.742084 |
| MmugDNA.36695.1.S1_at   | MmugDNA.36695.1 | 9.14  | 8.82  | 0.23 | 0.08 | 1.25  | 0.051255 | 0.094941 | 0.38958  | 0.352054 |
| MmugDNA.36695.1.S1_s_at | MmugDNA.36695.1 | 10.17 | 9.84  | 0.12 | 0.1  | 1.25  | 0.029864 | 0.003661 | 0.336071 | 0.086526 |
| MmugDNA.36696.1.S1_at   | MmugDNA.36696.1 | 5.75  | 6.06  | 0.2  | 0.14 | -1.24 | 0.086969 | 0.073159 | 0.454785 | 0.316064 |
| MmugDNA.36697.1.S1_at   | MmugDNA.36697.1 | 5.17  | 5.18  | 0.09 | 0.06 | -1    | 0.260925 | 0.202073 | 0.623391 | 0.476539 |
| MmugDNA.36698.1.S1_at   | MmugDNA.36698.1 | 6.02  | 5.98  | 0.29 | 0.08 | 1.03  | 0.301025 | 0.450874 | 0.655304 | 0.665869 |
| MmugDNA.367.1.S1_at     | MmugDNA.367.1   | 3.48  | 3.33  | 0.06 | 0.16 | 1.11  | 0.25875  | 0.356385 | 0.622286 | 0.59839  |
| MmugDNA.3670.1.S1_at    | MmugDNA.3670.1  | 5.21  | 4.81  | 0.36 | 0.11 | 1.32  | 0.298376 | 0.519083 | 0.653129 | 0.710813 |
| MmugDNA.36700.1.S1_at   | MmugDNA.36700.1 | 6.55  | 6.4   | 0.06 | 0.02 | 1.11  | 0.014068 | 0.040311 | 0.273614 | 0.245936 |
| MmugDNA.36702.1.S1_at   | MmugDNA.36702.1 | 5.85  | 5.66  | 0.19 | 0.22 | 1.14  | 0.355821 | 0.564075 | 0.694889 | 0.738956 |
| MmugDNA.36703.1.S1_at   | MmugDNA.36703.1 | 4.3   | 4.2   | 0.09 | 0.01 | 1.07  | 0.152271 | 0.384598 | 0.52528  | 0.62023  |
| MmugDNA.36706.1.S1_at   | MmugDNA.36706.1 | 5.8   | 6.4   | 0.89 | 0.11 | -1.52 | 0.320745 | 0.121793 | 0.669445 | 0.391074 |

|                         |                 |       |       |      |      |       |          |          |          |          |
|-------------------------|-----------------|-------|-------|------|------|-------|----------|----------|----------|----------|
| MmugDNA.36708.1.S1_at   | MmugDNA.36708.1 | 4.77  | 4.72  | 0.1  | 0.16 | 1.03  | 0.519855 | 0.205805 | 0.793373 | 0.480072 |
| MmugDNA.36709.1.S1_at   | MmugDNA.36709.1 | 10.77 | 10.71 | 0.41 | 0.25 | 1.05  | 0.34403  | 0.398254 | 0.686913 | 0.629296 |
| MmugDNA.3671.1.S1_at    | MmugDNA.3671.1  | 11.04 | 11.28 | 0.05 | 0    | -1.18 | 0.000919 | 0.000176 | 0.153739 | 0.030511 |
| MmugDNA.36710.1.S1_at   | MmugDNA.36710.1 | 3.85  | 3.84  | 0.15 | 0.01 | 1.01  | 0.566868 | 0.772842 | 0.820105 | 0.867917 |
| MmugDNA.36712.1.S1_at   | MmugDNA.36712.1 | 5.98  | 5.72  | 0.05 | 0.07 | 1.2   | 0.00433  | 0.000899 | 0.198874 | 0.047964 |
| MmugDNA.36713.1.S1_at   | MmugDNA.36713.1 | 2.9   | 2.9   | 0.1  | 0.02 | 1     | 0.315963 | 0.556679 | 0.666243 | 0.734714 |
| MmugDNA.36715.1.S1_at   | MmugDNA.36715.1 | 5.05  | 5.11  | 0.34 | 0.31 | -1.04 | 0.178138 | 0.250142 | 0.551264 | 0.519168 |
| MmugDNA.36716.1.S1_at   | MmugDNA.36716.1 | 6.18  | 5.89  | 0.38 | 0.34 | 1.22  | 0.607166 | 0.940944 | 0.840749 | 0.966553 |
| MmugDNA.36717.1.S1_at   | MmugDNA.36717.1 | 6.26  | 6.03  | 0.13 | 0.05 | 1.18  | 0.050936 | 0.21531  | 0.388526 | 0.489058 |
| MmugDNA.3672.1.S1_x_at  | MmugDNA.3672.1  | 6.97  | 7.18  | 0.3  | 0.24 | -1.16 | 0.673928 | 0.020926 | 0.871656 | 0.181439 |
| MmugDNA.36722.1.S1_at   | MmugDNA.36722.1 | 5.89  | 5.88  | 0.16 | 0.23 | 1.01  | 0.410388 | 0.194467 | 0.730749 | 0.469557 |
| MmugDNA.36723.1.S1_at   | MmugDNA.36723.1 | 3.46  | 3.67  | 0.22 | 0.06 | -1.16 | 0.436975 | 0.262083 | 0.746628 | 0.528374 |
| MmugDNA.36724.1.S1_at   | MmugDNA.36724.1 | 5.47  | 5.7   | 0.06 | 0.02 | -1.17 | 0.002936 | 0.00177  | 0.189066 | 0.063359 |
| MmugDNA.36728.1.S1_at   | MmugDNA.36728.1 | 5.76  | 5.7   | 0.12 | 0.07 | 1.04  | 0.364324 | 0.521314 | 0.700517 | 0.712346 |
| MmugDNA.36729.1.S1_s_at | MmugDNA.36729.1 | 8.06  | 7.54  | 0.09 | 0.3  | 1.43  | 0.094182 | 0.145891 | 0.463544 | 0.419889 |
| MmugDNA.36734.1.S1_at   | MmugDNA.36734.1 | 5.26  | 4.67  | 0.87 | 0.64 | 1.5   | 0.974972 | 0.817689 | 0.991912 | 0.894805 |
| MmugDNA.36735.1.S1_at   | MmugDNA.36735.1 | 8.64  | 8.5   | 0.08 | 0.14 | 1.1   | 0.212045 | 0.144286 | 0.582812 | 0.418196 |
| MmugDNA.36738.1.S1_at   | MmugDNA.36738.1 | 9.4   | 9.7   | 0.25 | 0.02 | -1.23 | 0.082022 | 0.110259 | 0.446738 | 0.374403 |
| MmugDNA.36739.1.S1_at   | MmugDNA.36739.1 | 8.98  | 8.72  | 2.12 | 0.3  | 1.2   | 0.682531 | 0.250913 | 0.875756 | 0.519606 |
| MmugDNA.3674.1.S1_s_at  | MmugDNA.3674.1  | 12.97 | 12.99 | 0.08 | 0.08 | -1.01 | 0.332366 | 0.236884 | 0.678843 | 0.507595 |
| MmugDNA.36741.1.S1_at   | MmugDNA.36741.1 | 6.7   | 6.55  | 0.24 | 0.09 | 1.11  | 0.30507  | 0.44686  | 0.658583 | 0.663053 |
| MmugDNA.36742.1.S1_at   | MmugDNA.36742.1 | 5.44  | 4.82  | 0.59 | 0.58 | 1.53  | 0.605982 | 0.000466 | 0.840247 | 0.038572 |
| MmugDNA.36745.1.S1_at   | MmugDNA.36745.1 | 9.34  | 9.88  | 0.64 | 0.14 | -1.45 | 0.29491  | 0.210713 | 0.650971 | 0.48478  |
| MmugDNA.36746.1.S1_at   | MmugDNA.36746.1 | 7.96  | 8.83  | 0.71 | 0.21 | -1.83 | 0.200869 | 0.040711 | 0.572594 | 0.246709 |
| MmugDNA.3675.1.S1_at    | MmugDNA.3675.1  | 3.32  | 3.33  | 0.02 | 0.07 | -1.01 | 0.213931 | 0.439279 | 0.584533 | 0.658029 |
| MmugDNA.36750.1.S1_at   | MmugDNA.36750.1 | 6.2   | 6.35  | 0.56 | 0.2  | -1.11 | 0.829494 | 0.302496 | 0.938837 | 0.56018  |
| MmugDNA.36751.1.S1_at   | MmugDNA.36751.1 | 6.21  | 6.47  | 0.53 | 0.32 | -1.19 | 0.550827 | 0.861831 | 0.81106  | 0.92146  |
| MmugDNA.36755.1.S1_at   | MmugDNA.36755.1 | 8.43  | 8.99  | 0.22 | 0.13 | -1.48 | 0.013671 | 0.029867 | 0.270367 | 0.214498 |
| MmugDNA.36757.1.S1_at   | MmugDNA.36757.1 | 4.33  | 4.27  | 0.13 | 0.17 | 1.04  | 0.686616 | 0.288372 | 0.877418 | 0.549656 |
| MmugDNA.36758.1.S1_s_at | MmugDNA.36758.1 | 2.97  | 2.95  | 0.08 | 0.04 | 1.01  | 0.265216 | 0.502079 | 0.626397 | 0.700051 |
| MmugDNA.36759.1.S1_at   | MmugDNA.36759.1 | 5.83  | 5.74  | 0.95 | 0.32 | 1.06  | 0.958604 | 0.993779 | 0.986368 | 0.996274 |
| MmugDNA.3676.1.S1_at    | MmugDNA.3676.1  | 3.68  | 3.96  | 0.2  | 0.32 | -1.21 | 0.40569  | 0.462403 | 0.727426 | 0.673748 |
| MmugDNA.36760.1.S1_s_at | MmugDNA.36760.1 | 11.45 | 11.42 | 0.08 | 0.03 | 1.02  | 0.759899 | 0.501211 | 0.909794 | 0.699449 |
| MmugDNA.36761.1.S1_at   | MmugDNA.36761.1 | 4.28  | 3.96  | 0.07 | 0.24 | 1.25  | 0.084562 | 0.275378 | 0.451141 | 0.539663 |
| MmugDNA.36762.1.S1_at   | MmugDNA.36762.1 | 5.98  | 5.72  | 0.18 | 0.09 | 1.2   | 0.227351 | 0.231931 | 0.596459 | 0.503616 |
| MmugDNA.36763.1.S1_at   | MmugDNA.36763.1 | 4.76  | 4.63  | 0.42 | 0.32 | 1.09  | 0.623396 | 0.456544 | 0.848224 | 0.67024  |
| MmugDNA.36764.1.S1_at   | MmugDNA.36764.1 | 5.03  | 5.08  | 0.09 | 0.11 | -1.04 | 0.460885 | 0.423034 | 0.76063  | 0.646145 |
| MmugDNA.36765.1.S1_at   | MmugDNA.36765.1 | 9.84  | 9.73  | 0.21 | 0.07 | 1.08  | 0.584425 | 0.000185 | 0.829683 | 0.030511 |
| MmugDNA.36768.1.S1_at   | MmugDNA.36768.1 | 7.06  | 7.13  | 0.22 | 0.06 | -1.04 | 0.718339 | 0.824996 | 0.890613 | 0.899487 |
| MmugDNA.36769.1.S1_at   | MmugDNA.36769.1 | 4.58  | 4.66  | 0.12 | 0.23 | -1.05 | 0.235861 | 0.257795 | 0.602926 | 0.52542  |
| MmugDNA.3677.1.S1_at    | MmugDNA.3677.1  | 5.33  | 5.02  | 0.23 | 0.08 | 1.24  | 0.087516 | 0.033687 | 0.455232 | 0.227152 |
| MmugDNA.36770.1.S1_at   | MmugDNA.36770.1 | 3.9   | 4.66  | 0.29 | 0.33 | -1.7  | 0.021027 | 0.006509 | 0.306554 | 0.109521 |
| MmugDNA.36771.1.S1_at   | MmugDNA.36771.1 | 4.19  | 4.12  | 0.08 | 0.06 | 1.05  | 0.128036 | 0.49715  | 0.502449 | 0.696484 |

|                         |                 |       |       |      |      |       |          |          |          |          |
|-------------------------|-----------------|-------|-------|------|------|-------|----------|----------|----------|----------|
| MmugDNA.36772.1.S1_at   | MmugDNA.36772.1 | 5.01  | 5.06  | 0.16 | 0.18 | -1.04 | 0.358027 | 0.265829 | 0.695993 | 0.531695 |
| MmugDNA.36773.1.S1_at   | MmugDNA.36773.1 | 6     | 6     | 0.14 | 0.14 | 1     | 0.750277 | 0.932952 | 0.905427 | 0.961911 |
| MmugDNA.36774.1.S1_at   | MmugDNA.36774.1 | 6.66  | 6.78  | 0.09 | 0.1  | -1.09 | 0.108865 | 0.113905 | 0.48125  | 0.38018  |
| MmugDNA.36775.1.S1_at   | MmugDNA.36775.1 | 11.96 | 12.01 | 0.04 | 0.03 | -1.04 | 0.153483 | 0.179068 | 0.526635 | 0.455436 |
| MmugDNA.36777.1.S1_at   | MmugDNA.36777.1 | 5.21  | 5.18  | 0.31 | 0.09 | 1.02  | 0.343273 | 0.567978 | 0.686514 | 0.74176  |
| MmugDNA.36778.1.S1_at   | MmugDNA.36778.1 | 6.67  | 6.61  | 0.53 | 0.36 | 1.04  | 0.742209 | 0.531866 | 0.901638 | 0.71896  |
| MmugDNA.3678.1.S1_at    | MmugDNA.3678.1  | 2.57  | 2.56  | 0.15 | 0.14 | 1.01  | 0.917793 | 0.577948 | 0.972062 | 0.748185 |
| MmugDNA.36780.1.S1_at   | MmugDNA.36780.1 | 6.09  | 5.07  | 0.3  | 0.56 | 2.03  | 0.061167 | 0.212596 | 0.410199 | 0.486531 |
| MmugDNA.36781.1.S1_at   | MmugDNA.36781.1 | 5.02  | 5.03  | 0.16 | 0.32 | -1    | 0.436405 | 0.27699  | 0.746306 | 0.540995 |
| MmugDNA.36782.1.S1_at   | MmugDNA.36782.1 | 8.18  | 8.62  | 0.25 | 0.06 | -1.36 | 0.055525 | 0.053303 | 0.398716 | 0.276463 |
| MmugDNA.36785.1.S1_a_at | MmugDNA.36785.1 | 6.61  | 6.73  | 1    | 0.35 | -1.08 | 0.553651 | 0.054088 | 0.812271 | 0.277914 |
| MmugDNA.36786.1.S1_at   | MmugDNA.36786.1 | 3.43  | 3.49  | 0.27 | 0.08 | -1.04 | 0.723473 | 0.071881 | 0.892813 | 0.314181 |
| MmugDNA.36787.1.S1_at   | MmugDNA.36787.1 | 5.04  | 5.52  | 0.13 | 0.44 | -1.39 | 0.173152 | 0.295402 | 0.546196 | 0.554855 |
| MmugDNA.36788.1.S1_at   | MmugDNA.36788.1 | 4.16  | 4.15  | 0.22 | 0.02 | 1     | 0.943508 | 0.354346 | 0.980509 | 0.597166 |
| MmugDNA.3679.1.S1_at    | MmugDNA.3679.1  | 10.42 | 9.79  | 0.12 | 0.19 | 1.55  | 0.010269 | 0.000365 | 0.246929 | 0.037273 |
| MmugDNA.36790.1.S1_at   | MmugDNA.36790.1 | 6.41  | 6.46  | 0.35 | 0.35 | -1.03 | 0.614788 | 0.820745 | 0.844066 | 0.896776 |
| MmugDNA.36791.1.S1_at   | MmugDNA.36791.1 | 4.18  | 4.33  | 0.17 | 0.25 | -1.11 | 0.588434 | 0.679969 | 0.831946 | 0.813105 |
| MmugDNA.36792.1.S1_at   | MmugDNA.36792.1 | 10.37 | 10.34 | 0.15 | 0.06 | 1.02  | 0.600708 | 0.323493 | 0.837959 | 0.574473 |
| MmugDNA.36798.1.S1_at   | MmugDNA.36798.1 | 7.6   | 7.88  | 1.08 | 0.51 | -1.21 | 0.439617 | 0.376942 | 0.748253 | 0.614678 |
| MmugDNA.36799.1.S1_at   | MmugDNA.36799.1 | 8.47  | 9.09  | 0.65 | 0.53 | -1.54 | 0.054855 | 0.027821 | 0.397122 | 0.208337 |
| MmugDNA.368.1.S1_at     | MmugDNA.368.1   | 6.24  | 6.3   | 0.04 | 0.12 | -1.04 | 0.685773 | 0.852369 | 0.876883 | 0.916105 |
| MmugDNA.3680.1.S1_at    | MmugDNA.3680.1  | 8.75  | 6.47  | 0.78 | 0.08 | 4.86  | 0.004938 | 0.008874 | 0.203775 | 0.124662 |
| MmugDNA.36800.1.S1_at   | MmugDNA.36800.1 | 3.37  | 3.28  | 0.19 | 0.05 | 1.06  | 0.170394 | 0.350655 | 0.54346  | 0.594394 |
| MmugDNA.36801.1.S1_at   | MmugDNA.36801.1 | 11.08 | 11.06 | 0.15 | 0.07 | 1.01  | 0.481706 | 0.671079 | 0.772225 | 0.80765  |
| MmugDNA.36802.1.S1_at   | MmugDNA.36802.1 | 6.01  | 5.92  | 0.02 | 0.16 | 1.06  | 0.321379 | 0.603984 | 0.670064 | 0.764427 |
| MmugDNA.36803.1.S1_at   | MmugDNA.36803.1 | 5.53  | 5.59  | 0.12 | 0.09 | -1.04 | 0.874962 | 0.306674 | 0.956568 | 0.563241 |
| MmugDNA.36804.1.S1_at   | MmugDNA.36804.1 | 3.37  | 3.37  | 0.37 | 0.19 | -1    | 0.846145 | 0.975171 | 0.946059 | 0.986441 |
| MmugDNA.36805.1.S1_at   | MmugDNA.36805.1 | 6.34  | 7.81  | 0.38 | 0.09 | -2.76 | 0.002975 | 0.000568 | 0.190446 | 0.041092 |
| MmugDNA.36807.1.S1_at   | MmugDNA.36807.1 | 6.18  | 6.35  | 0.18 | 0.17 | -1.12 | 0.645172 | 0.026437 | 0.858718 | 0.203765 |
| MmugDNA.36808.1.S1_at   | MmugDNA.36808.1 | 6.44  | 6.53  | 0.63 | 0.17 | -1.07 | 0.829049 | 0.834805 | 0.938657 | 0.905439 |
| MmugDNA.36809.1.S1_at   | MmugDNA.36809.1 | 4.2   | 4.19  | 0.16 | 0.05 | 1     | 0.835306 | 0.606323 | 0.940952 | 0.765746 |
| MmugDNA.3681.1.S1_at    | MmugDNA.3681.1  | 10.9  | 10.88 | 0.1  | 0.12 | 1.02  | 0.376558 | 0.841287 | 0.706946 | 0.909576 |
| MmugDNA.3681.1.S1_s_at  | MmugDNA.3681.1  | 10.75 | 10.8  | 0.06 | 0.16 | -1.04 | 0.635911 | 0.750287 | 0.854813 | 0.854766 |
| MmugDNA.36810.1.S1_at   | MmugDNA.36810.1 | 7.54  | 7.56  | 1.07 | 0.26 | -1.01 | 0.336031 | 0.508065 | 0.681441 | 0.703358 |
| MmugDNA.36810.1.S1_s_at | MmugDNA.36810.1 | 10.11 | 9.58  | 1.04 | 0.26 | 1.45  | 0.352788 | 0.45935  | 0.692803 | 0.671726 |
| MmugDNA.36812.1.S1_at   | MmugDNA.36812.1 | 7.05  | 6.63  | 0.59 | 0.04 | 1.34  | 0.550485 | 0.379684 | 0.810833 | 0.616523 |
| MmugDNA.36813.1.S1_at   | MmugDNA.36813.1 | 3.62  | 3.56  | 0.07 | 0.05 | 1.04  | 0.137556 | 0.637912 | 0.513081 | 0.787226 |
| MmugDNA.36814.1.S1_at   | MmugDNA.36814.1 | 5.54  | 5.38  | 0.05 | 0.22 | 1.12  | 0.290812 | 0.198389 | 0.647362 | 0.473292 |
| MmugDNA.36815.1.S1_at   | MmugDNA.36815.1 | 5.25  | 6.09  | 0.29 | 0.17 | -1.8  | 0.02316  | 0.095068 | 0.314809 | 0.352124 |
| MmugDNA.36816.1.S1_at   | MmugDNA.36816.1 | 4.36  | 4.53  | 0.18 | 0.13 | -1.13 | 0.476519 | 0.763966 | 0.769173 | 0.862769 |
| MmugDNA.36817.1.S1_at   | MmugDNA.36817.1 | 4.49  | 4.3   | 0.06 | 0.09 | 1.14  | 0.073197 | 0.215724 | 0.434039 | 0.489503 |
| MmugDNA.36818.1.S1_at   | MmugDNA.36818.1 | 4.8   | 4.73  | 0.04 | 0.06 | 1.05  | 0.38142  | 0.221576 | 0.710065 | 0.494901 |
| MmugDNA.36819.1.S1_at   | MmugDNA.36819.1 | 7.27  | 7.09  | 0.04 | 0.15 | 1.13  | 0.277347 | 0.444598 | 0.636803 | 0.662072 |

|                         |                 |       |       |      |      |       |          |          |          |          |
|-------------------------|-----------------|-------|-------|------|------|-------|----------|----------|----------|----------|
| MmugDNA.3682.1.S1_at    | MmugDNA.3682.1  | 8.47  | 7.95  | 0.45 | 0.16 | 1.44  | 0.187328 | 0.36931  | 0.559771 | 0.6087   |
| MmugDNA.3682.1.S1_s_at  | MmugDNA.3682.1  | 7.7   | 7.29  | 0.53 | 0.06 | 1.32  | 0.260847 | 0.633114 | 0.62332  | 0.78396  |
| MmugDNA.36820.1.S1_at   | MmugDNA.36820.1 | 6.69  | 7.68  | 0.43 | 0.11 | -1.98 | 0.046097 | 0.048471 | 0.37735  | 0.265396 |
| MmugDNA.36821.1.S1_at   | MmugDNA.36821.1 | 3.27  | 3.1   | 0.08 | 0.19 | 1.13  | 0.340433 | 0.545638 | 0.684528 | 0.727579 |
| MmugDNA.36822.1.S1_at   | MmugDNA.36822.1 | 9.93  | 10.34 | 0.17 | 0.05 | -1.33 | 0.043142 | 0.019445 | 0.371446 | 0.175136 |
| MmugDNA.36823.1.S1_at   | MmugDNA.36823.1 | 6.83  | 6.7   | 0.06 | 0.07 | 1.09  | 0.169007 | 0.523212 | 0.541946 | 0.713594 |
| MmugDNA.36824.1.S1_at   | MmugDNA.36824.1 | 6.65  | 6.93  | 0.24 | 0.11 | -1.21 | 0.364738 | 0.022333 | 0.700726 | 0.187046 |
| MmugDNA.36825.1.S1_at   | MmugDNA.36825.1 | 4.01  | 4     | 0.02 | 0.14 | 1     | 0.823227 | 0.506131 | 0.936254 | 0.702359 |
| MmugDNA.36826.1.S1_at   | MmugDNA.36826.1 | 11.45 | 11.24 | 0.28 | 0.11 | 1.16  | 0.134017 | 0.171346 | 0.508283 | 0.447813 |
| MmugDNA.36829.1.S1_at   | MmugDNA.36829.1 | 3.51  | 3.55  | 0.37 | 0.25 | -1.03 | 0.343074 | 0.559101 | 0.686308 | 0.736046 |
| MmugDNA.3683.1.S1_at    | MmugDNA.3683.1  | 9.56  | 9.01  | 0.29 | 0.1  | 1.46  | 0.072511 | 0.223073 | 0.432604 | 0.49588  |
| MmugDNA.36830.1.S1_at   | MmugDNA.36830.1 | 3.82  | 4.53  | 0.7  | 0.64 | -1.63 | 0.483381 | 0.558476 | 0.773041 | 0.735631 |
| MmugDNA.36831.1.S1_at   | MmugDNA.36831.1 | 3.37  | 3.29  | 0.18 | 0.09 | 1.06  | 0.345933 | 0.423791 | 0.687872 | 0.646542 |
| MmugDNA.36832.1.S1_at   | MmugDNA.36832.1 | 6.7   | 6.76  | 0.53 | 0.19 | -1.04 | 0.634275 | 0.479237 | 0.854009 | 0.68504  |
| MmugDNA.36833.1.S1_at   | MmugDNA.36833.1 | 8.31  | 8.1   | 0.12 | 0.02 | 1.15  | 0.04099  | 0.04331  | 0.36567  | 0.252847 |
| MmugDNA.36835.1.S1_at   | MmugDNA.36835.1 | 5.81  | 5.44  | 0.13 | 0.21 | 1.3   | 0.090126 | 0.124014 | 0.457992 | 0.394273 |
| MmugDNA.36836.1.S1_at   | MmugDNA.36836.1 | 3.86  | 3.83  | 0.23 | 0.09 | 1.02  | 0.781266 | 0.917645 | 0.919551 | 0.953933 |
| MmugDNA.36837.1.S1_at   | MmugDNA.36837.1 | 7.01  | 7.4   | 0.19 | 0.19 | -1.31 | 0.097519 | 0.609376 | 0.466487 | 0.767746 |
| MmugDNA.36839.1.S1_at   | MmugDNA.36839.1 | 7     | 7.43  | 0.98 | 0.13 | -1.35 | 0.378749 | 0.423104 | 0.708454 | 0.646145 |
| MmugDNA.3684.1.S1_at    | MmugDNA.3684.1  | 8.22  | 7.05  | 0.9  | 0.5  | 2.24  | 0.049661 | 0.0401   | 0.385966 | 0.245388 |
| MmugDNA.36840.1.S1_at   | MmugDNA.36840.1 | 6.04  | 5.61  | 0.46 | 0.2  | 1.36  | 0.296815 | 0.216598 | 0.652405 | 0.490237 |
| MmugDNA.36841.1.S1_at   | MmugDNA.36841.1 | 5.94  | 5.92  | 0    | 0.16 | 1.01  | 0.795291 | 0.890725 | 0.924817 | 0.937712 |
| MmugDNA.36842.1.S1_at   | MmugDNA.36842.1 | 5.85  | 5.75  | 0.35 | 0.2  | 1.07  | 0.671199 | 0.387195 | 0.870255 | 0.621953 |
| MmugDNA.36843.1.S1_at   | MmugDNA.36843.1 | 8.91  | 8.58  | 0.18 | 0.21 | 1.26  | 0.097281 | 0.076925 | 0.466086 | 0.322421 |
| MmugDNA.36844.1.S1_at   | MmugDNA.36844.1 | 6.15  | 5.23  | 0.84 | 0.43 | 1.9   | 0.098341 | 0.027662 | 0.467743 | 0.207691 |
| MmugDNA.36846.1.S1_at   | MmugDNA.36846.1 | 5.74  | 5.68  | 0.29 | 0.13 | 1.04  | 0.498415 | 0.512848 | 0.781727 | 0.706549 |
| MmugDNA.36848.1.S1_at   | MmugDNA.36848.1 | 10.92 | 9.37  | 0.04 | 0.45 | 2.93  | 0.003776 | 0.000664 | 0.198052 | 0.0439   |
| MmugDNA.36849.1.S1_at   | MmugDNA.36849.1 | 4.54  | 4.71  | 0.2  | 0.31 | -1.12 | 0.107319 | 0.155384 | 0.47976  | 0.430771 |
| MmugDNA.36850.1.S1_at   | MmugDNA.36850.1 | 8.49  | 7.46  | 0.26 | 0.51 | 2.03  | 0.011186 | 0.005306 | 0.252769 | 0.10082  |
| MmugDNA.36851.1.S1_at   | MmugDNA.36851.1 | 3.82  | 3.54  | 0.19 | 0.13 | 1.21  | 0.136932 | 0.222376 | 0.511963 | 0.495444 |
| MmugDNA.36852.1.S1_at   | MmugDNA.36852.1 | 9.67  | 10.1  | 0.64 | 0.36 | -1.35 | 0.501728 | 0.028677 | 0.783425 | 0.211053 |
| MmugDNA.36853.1.S1_at   | MmugDNA.36853.1 | 5.6   | 5.47  | 0.22 | 0.14 | 1.09  | 0.81826  | 0.928721 | 0.934283 | 0.959449 |
| MmugDNA.36855.1.S1_at   | MmugDNA.36855.1 | 5.43  | 5.91  | 1.03 | 0.2  | -1.4  | 0.511248 | 0.219998 | 0.78856  | 0.49344  |
| MmugDNA.36856.1.S1_at   | MmugDNA.36856.1 | 12.51 | 11.89 | 0.31 | 0.28 | 1.54  | 0.055956 | 0.006548 | 0.399441 | 0.109707 |
| MmugDNA.36856.1.S1_s_at | MmugDNA.36856.1 | 12.86 | 12.18 | 0.23 | 0.26 | 1.61  | 0.030032 | 0.003222 | 0.336449 | 0.082115 |
| MmugDNA.36857.1.S1_at   | MmugDNA.36857.1 | 11.75 | 11.7  | 0.19 | 0.1  | 1.04  | 0.998187 | 0.018709 | 0.999429 | 0.171763 |
| MmugDNA.36859.1.S1_at   | MmugDNA.36859.1 | 7.54  | 8.3   | 0.24 | 0.28 | -1.7  | 0.007296 | 0.033866 | 0.227049 | 0.227662 |
| MmugDNA.3686.1.S1_at    | MmugDNA.3686.1  | 11.14 | 11.04 | 0.24 | 0.1  | 1.07  | 0.57355  | 0.087406 | 0.823642 | 0.340589 |
| MmugDNA.36860.1.S1_at   | MmugDNA.36860.1 | 4.53  | 4.29  | 0.31 | 0.58 | 1.18  | 0.859172 | 0.919734 | 0.950315 | 0.954884 |
| MmugDNA.17452.1.S1_s_at | MmugDNA.17452.1 | 9.6   | 9.33  | 0.28 | 0.34 | 1.21  | 0.785724 | 0.409002 | 0.921215 | 0.636073 |
| MmugDNA.36862.1.S1_at   | MmugDNA.36862.1 | 6.49  | 6.18  | 0.16 | 0.18 | 1.24  | 0.085234 | 0.257922 | 0.452315 | 0.525495 |
| MmugDNA.36865.1.S1_at   | MmugDNA.36865.1 | 5.19  | 5.19  | 0.21 | 0.04 | 1     | 0.843987 | 0.965235 | 0.945004 | 0.980613 |
| MmugDNA.36866.1.S1_at   | MmugDNA.36866.1 | 3.36  | 3.22  | 0.06 | 0.32 | 1.1   | 0.921078 | 0.590834 | 0.973311 | 0.756484 |

|                         |                 |       |       |      |      |       |          |          |          |          |
|-------------------------|-----------------|-------|-------|------|------|-------|----------|----------|----------|----------|
| MmugDNA.36868.1.S1_at   | MmugDNA.36868.1 | 4.32  | 5.33  | 0.08 | 0.64 | -2.02 | 0.163386 | 0.19201  | 0.536186 | 0.467382 |
| MmugDNA.36869.1.S1_at   | MmugDNA.36869.1 | 8.4   | 9     | 0.07 | 0.02 | -1.51 | 0.000205 | 0.000004 | 0.117514 | 0.014484 |
| MmugDNA.36870.1.S1_at   | MmugDNA.36870.1 | 3.96  | 3.92  | 0.05 | 0.07 | 1.03  | 0.342284 | 0.957842 | 0.685719 | 0.976177 |
| MmugDNA.36871.1.S1_at   | MmugDNA.36871.1 | 2.96  | 2.8   | 0.06 | 0.07 | 1.12  | 0.029236 | 0.300727 | 0.333974 | 0.558959 |
| MmugDNA.36872.1.S1_at   | MmugDNA.36872.1 | 7.27  | 6.59  | 1.03 | 0.24 | 1.6   | 0.139033 | 0.053578 | 0.514459 | 0.277127 |
| MmugDNA.36873.1.S1_at   | MmugDNA.36873.1 | 4.28  | 4.37  | 0.09 | 0.2  | -1.06 | 0.181946 | 0.38174  | 0.555022 | 0.617941 |
| MmugDNA.36874.1.S1_at   | MmugDNA.36874.1 | 7.71  | 8.3   | 0.16 | 0.16 | -1.51 | 0.016413 | 0.021942 | 0.287478 | 0.185351 |
| MmugDNA.36876.1.S1_at   | MmugDNA.36876.1 | 6.46  | 6.78  | 0.33 | 0.12 | -1.25 | 0.302148 | 0.271375 | 0.656112 | 0.536507 |
| MmugDNA.36877.1.S1_at   | MmugDNA.36877.1 | 8.23  | 9.88  | 0.7  | 0.12 | -3.14 | 0.016372 | 0.010425 | 0.287478 | 0.133525 |
| MmugDNA.36879.1.S1_at   | MmugDNA.36879.1 | 8.76  | 8.57  | 0.49 | 0.48 | 1.14  | 0.480623 | 0.008054 | 0.771344 | 0.119277 |
| MmugDNA.3688.1.S1_at    | MmugDNA.3688.1  | 8.37  | 7.66  | 0.66 | 0.06 | -1.64 | 0.129795 | 0.026452 | 0.504468 | 0.203779 |
| MmugDNA.36881.1.S1_at   | MmugDNA.36881.1 | 5.77  | 5.44  | 0.16 | 0.12 | 1.26  | 0.085455 | 0.153787 | 0.452653 | 0.428488 |
| MmugDNA.36882.1.S1_at   | MmugDNA.36882.1 | 6.43  | 6.43  | 0.13 | 0.03 | 1     | 0.522859 | 0.254862 | 0.795346 | 0.523051 |
| MmugDNA.36884.1.S1_at   | MmugDNA.36884.1 | 2.94  | 3.06  | 0.09 | 0.12 | -1.08 | 0.960589 | 0.96759  | 0.987216 | 0.982093 |
| MmugDNA.36885.1.S1_at   | MmugDNA.36885.1 | 6.29  | 6.01  | 0.11 | 0.09 | 1.21  | 0.051127 | 0.027869 | 0.389207 | 0.208453 |
| MmugDNA.36888.1.S1_at   | MmugDNA.36888.1 | 7     | 6.89  | 0.12 | 0.12 | 1.08  | 0.165575 | 0.238717 | 0.53839  | 0.509386 |
| MmugDNA.36889.1.S1_at   | MmugDNA.36889.1 | 5.37  | 5.36  | 0.28 | 0.08 | 1.01  | 0.501181 | 0.585597 | 0.783112 | 0.752934 |
| MmugDNA.36890.1.S1_at   | MmugDNA.36890.1 | 4.48  | 4.59  | 0.09 | 0.24 | -1.08 | 0.736807 | 0.899804 | 0.899286 | 0.942989 |
| MmugDNA.36891.1.S1_at   | MmugDNA.36891.1 | 3.19  | 3.18  | 0.26 | 0.19 | 1     | 0.845957 | 0.718266 | 0.945947 | 0.83694  |
| MmugDNA.36892.1.S1_at   | MmugDNA.36892.1 | 6.35  | 6.19  | 0.2  | 0.08 | 1.12  | 0.265808 | 0.394715 | 0.626921 | 0.627208 |
| MmugDNA.36893.1.S1_at   | MmugDNA.36893.1 | 4.4   | 4.48  | 0.2  | 0.23 | -1.06 | 0.328222 | 0.279476 | 0.675701 | 0.543055 |
| MmugDNA.36895.1.S1_at   | MmugDNA.36895.1 | 6.17  | 5.94  | 0.63 | 0.49 | 1.17  | 0.881927 | 0.419396 | 0.95911  | 0.643466 |
| MmugDNA.36896.1.S1_at   | MmugDNA.36896.1 | 3.64  | 3.65  | 0.26 | 0.13 | -1    | 0.264355 | 0.316411 | 0.626029 | 0.569809 |
| MmugDNA.36898.1.S1_s_at | MmugDNA.36898.1 | 8.64  | 9.09  | 0.26 | 0.16 | -1.37 | 0.097055 | 0.016181 | 0.46573  | 0.161214 |
| MmugDNA.369.1.S1_at     | MmugDNA.369.1   | 9.55  | 9.41  | 0.34 | 0.04 | 1.1   | 0.473773 | 0.051429 | 0.767741 | 0.272204 |
| MmugDNA.36900.1.S1_at   | MmugDNA.36900.1 | 5.44  | 5.52  | 0.02 | 0.03 | -1.06 | 0.019166 | 0.339584 | 0.299936 | 0.586188 |
| MmugDNA.36901.1.S1_at   | MmugDNA.36901.1 | 6.51  | 6.52  | 0.19 | 0.07 | -1.01 | 0.31672  | 0.021706 | 0.666669 | 0.184333 |
| MmugDNA.36902.1.S1_at   | MmugDNA.36902.1 | 3.61  | 3.6   | 0.08 | 0.02 | 1.01  | 0.305983 | 0.295316 | 0.659264 | 0.554734 |
| MmugDNA.36903.1.S1_at   | MmugDNA.36903.1 | 5.76  | 5.89  | 0.37 | 0.28 | -1.1  | 0.421928 | 0.052344 | 0.737802 | 0.274277 |
| MmugDNA.36904.1.S1_at   | MmugDNA.36904.1 | 4.95  | 4.81  | 0.34 | 0.19 | 1.1   | 0.816457 | 0.460049 | 0.933556 | 0.671989 |
| MmugDNA.36908.1.S1_at   | MmugDNA.36908.1 | 4.71  | 4.45  | 0.19 | 0.17 | 1.2   | 0.134637 | 0.252822 | 0.508533 | 0.521174 |
| MmugDNA.27229.1.S1_s_at | MmugDNA.27229.1 | 8.12  | 8.18  | 0.68 | 0.36 | -1.05 | 0.219521 | 0.391782 | 0.588997 | 0.625301 |
| MmugDNA.3691.1.S1_at    | MmugDNA.3691.1  | 5.43  | 5.05  | 0.34 | 0.25 | 1.31  | 0.524424 | 0.686327 | 0.795867 | 0.816939 |
| MmugDNA.36910.1.S1_at   | MmugDNA.36910.1 | 12.19 | 12.12 | 0.06 | 0.04 | 1.05  | 0.106304 | 0.02429  | 0.478767 | 0.195066 |
| MmugDNA.36911.1.S1_at   | MmugDNA.36911.1 | 5.6   | 5.54  | 0.42 | 0.08 | 1.05  | 0.274839 | 0.328263 | 0.634184 | 0.577992 |
| MmugDNA.36913.1.S1_at   | MmugDNA.36913.1 | 4.91  | 4.75  | 0.46 | 0.18 | 1.12  | 0.815765 | 0.956163 | 0.933242 | 0.975058 |
| MmugDNA.36914.1.S1_at   | MmugDNA.36914.1 | 8.87  | 8.75  | 0.6  | 0.14 | 1.08  | 0.779619 | 0.930742 | 0.918762 | 0.960672 |
| MmugDNA.36915.1.S1_at   | MmugDNA.36915.1 | 6.01  | 5.87  | 0.17 | 0.05 | 1.1   | 0.35983  | 0.33072  | 0.697545 | 0.579519 |
| MmugDNA.36916.1.S1_at   | MmugDNA.36916.1 | 11.17 | 10.61 | 0.82 | 0.02 | 1.48  | 0.297554 | 0.402458 | 0.652791 | 0.631481 |
| MmugDNA.36917.1.S1_at   | MmugDNA.36917.1 | 4.36  | 4.25  | 0.24 | 0.05 | 1.08  | 0.698708 | 0.380885 | 0.882848 | 0.617426 |
| MmugDNA.36919.1.S1_s_at | MmugDNA.36919.1 | 8.54  | 7.19  | 2.31 | 0.24 | 2.54  | 0.504853 | 0.318593 | 0.785092 | 0.571258 |
| MmugDNA.3692.1.S1_at    | MmugDNA.3692.1  | 5.53  | 5.3   | 0.02 | 0.14 | 1.17  | 0.033385 | 0.09723  | 0.346442 | 0.3549   |
| MmugDNA.36920.1.S1_at   | MmugDNA.36920.1 | 3.62  | 3.73  | 0.03 | 0.16 | -1.08 | 0.963887 | 0.977516 | 0.988182 | 0.987792 |

|                         |                 |       |       |      |      |       |          |          |          |          |
|-------------------------|-----------------|-------|-------|------|------|-------|----------|----------|----------|----------|
| MmugDNA.36921.1.S1_at   | MmugDNA.36921.1 | 5.89  | 6.03  | 0.25 | 0.09 | -1.1  | 0.357117 | 0.311907 | 0.695512 | 0.566833 |
| MmugDNA.36922.1.S1_at   | MmugDNA.36922.1 | 6.7   | 6.75  | 0.72 | 0.02 | -1.04 | 0.330397 | 0.337751 | 0.676994 | 0.584925 |
| MmugDNA.30873.1.S1_s_at | MmugDNA.30873.1 | 11.55 | 11.74 | 0.05 | 0.14 | -1.14 | 0.035765 | 0.094347 | 0.353107 | 0.350889 |
| MmugDNA.36925.1.S1_at   | MmugDNA.36925.1 | 5.87  | 5.89  | 0.13 | 0.06 | -1.01 | 0.975239 | 0.761997 | 0.991912 | 0.861597 |
| MmugDNA.36926.1.S1_at   | MmugDNA.36926.1 | 3.44  | 3.43  | 0.31 | 0.24 | 1.01  | 0.765728 | 0.922713 | 0.911902 | 0.956468 |
| MmugDNA.36927.1.S1_at   | MmugDNA.36927.1 | 8.89  | 8.62  | 0.73 | 0.09 | 1.21  | 0.764042 | 0.879947 | 0.911355 | 0.931461 |
| MmugDNA.36928.1.S1_at   | MmugDNA.36928.1 | 4.93  | 4.76  | 0.21 | 0.03 | 1.13  | 0.165869 | 0.180497 | 0.538623 | 0.457128 |
| MmugDNA.36929.1.S1_at   | MmugDNA.36929.1 | 8.86  | 9.45  | 0.35 | 0.22 | -1.51 | 0.129813 | 0.178882 | 0.504468 | 0.455208 |
| MmugDNA.3693.1.S1_at    | MmugDNA.3693.1  | 10.84 | 10.93 | 0.28 | 0.05 | -1.07 | 0.467165 | 0.307784 | 0.764178 | 0.56397  |
| MmugDNA.36930.1.S1_s_at | MmugDNA.36930.1 | 3.02  | 3.04  | 0.11 | 0.15 | -1.01 | 0.644343 | 0.714213 | 0.858491 | 0.834167 |
| MmugDNA.36931.1.S1_at   | MmugDNA.36931.1 | 3.55  | 3.47  | 0.1  | 0.06 | -1.06 | 0.171442 | 0.123306 | 0.5447   | 0.393386 |
| MmugDNA.36932.1.S1_at   | MmugDNA.36932.1 | 7.46  | 7.13  | 0.19 | 0.01 | 1.25  | 0.106151 | 0.243295 | 0.478418 | 0.513356 |
| MmugDNA.36933.1.S1_at   | MmugDNA.36933.1 | 4.63  | 4.49  | 0.21 | 0.08 | 1.1   | 0.180544 | 0.233318 | 0.553753 | 0.50468  |
| MmugDNA.36935.1.S1_at   | MmugDNA.36935.1 | 4.25  | 4.74  | 0.38 | 0.41 | -1.41 | 0.088365 | 0.295015 | 0.45606  | 0.554551 |
| MmugDNA.36936.1.S1_at   | MmugDNA.36936.1 | 8.21  | 8.45  | 0.23 | 0.13 | -1.18 | 0.143714 | 0.188823 | 0.519054 | 0.464789 |
| MmugDNA.36937.1.S1_at   | MmugDNA.36937.1 | 7.58  | 7.93  | 0.35 | 0.18 | -1.27 | 0.18413  | 0.268938 | 0.55696  | 0.534369 |
| MmugDNA.36938.1.S1_at   | MmugDNA.36938.1 | 7.44  | 7.2   | 0.04 | 0.06 | 1.18  | 0.002903 | 0.211821 | 0.188033 | 0.485788 |
| MmugDNA.36938.1.S1_s_at | MmugDNA.36938.1 | 5.23  | 5.16  | 0.12 | 0.05 | 1.05  | 0.145651 | 0.178539 | 0.520555 | 0.454778 |
| MmugDNA.3694.1.S1_s_at  | MmugDNA.3694.1  | 12.97 | 13.13 | 0.19 | 0.05 | -1.12 | 0.20003  | 0.162276 | 0.571864 | 0.438447 |
| MmugDNA.36941.1.S1_at   | MmugDNA.36941.1 | 5.33  | 5     | 0.08 | 0.16 | 1.25  | 0.051481 | 0.052639 | 0.390197 | 0.274934 |
| MmugDNA.36942.1.S1_at   | MmugDNA.36942.1 | 4.78  | 4.89  | 0.13 | 0.11 | -1.08 | 0.188393 | 0.43485  | 0.560439 | 0.654846 |
| MmugDNA.36943.1.S1_at   | MmugDNA.36943.1 | 3.85  | 3.67  | 0.19 | 0.14 | 1.13  | 0.616717 | 0.380501 | 0.845081 | 0.617165 |
| MmugDNA.36945.1.S1_at   | MmugDNA.36945.1 | 6.19  | 5.96  | 0.65 | 0.07 | 1.17  | 0.756897 | 0.460086 | 0.908337 | 0.671993 |
| MmugDNA.36949.1.S1_at   | MmugDNA.36949.1 | 9.16  | 9.38  | 0.63 | 0.15 | -1.17 | 0.252352 | 0.032775 | 0.617313 | 0.224149 |
| MmugDNA.36950.1.S1_at   | MmugDNA.36950.1 | 4.43  | 4.43  | 0.11 | 0.35 | -1    | 0.72123  | 0.361094 | 0.891962 | 0.602069 |
| MmugDNA.36951.1.S1_at   | MmugDNA.36951.1 | 6.36  | 5.9   | 0.46 | 0.38 | 1.38  | 0.596358 | 0.845544 | 0.835912 | 0.912145 |
| MmugDNA.36952.1.S1_at   | MmugDNA.36952.1 | 5.19  | 5.47  | 0.39 | 0.05 | -1.22 | 0.393278 | 0.411944 | 0.719101 | 0.638434 |
| MmugDNA.36953.1.S1_at   | MmugDNA.36953.1 | 5.3   | 5.28  | 0.15 | 0.49 | 1.02  | 0.810686 | 0.698293 | 0.931389 | 0.824756 |
| MmugDNA.36955.1.S1_at   | MmugDNA.36955.1 | 5     | 4.72  | 0.32 | 0.39 | 1.22  | 0.369554 | 0.383813 | 0.704264 | 0.619759 |
| MmugDNA.36956.1.S1_at   | MmugDNA.36956.1 | 3.25  | 3.19  | 0.07 | 0.17 | 1.04  | 0.714846 | 0.795157 | 0.889017 | 0.88196  |
| MmugDNA.36957.1.S1_at   | MmugDNA.36957.1 | 6.75  | 6.8   | 0.05 | 0.19 | -1.03 | 0.845707 | 0.658143 | 0.945907 | 0.800181 |
| MmugDNA.36957.1.S1_x_at | MmugDNA.36957.1 | 6.92  | 7.23  | 0.27 | 0.19 | -1.24 | 0.469732 | 0.394145 | 0.765623 | 0.62675  |
| MmugDNA.36958.1.S1_at   | MmugDNA.36958.1 | 3.36  | 3.39  | 0.04 | 0.21 | -1.02 | 0.636391 | 0.816531 | 0.854985 | 0.894202 |
| MmugDNA.36959.1.S1_at   | MmugDNA.36959.1 | 4.15  | 4.14  | 0.11 | 0.06 | 1     | 0.225945 | 0.40759  | 0.595028 | 0.63505  |
| MmugDNA.3696.1.S1_at    | MmugDNA.3696.1  | 6.99  | 7.15  | 0.25 | 0.21 | -1.12 | 0.499811 | 0.413587 | 0.782217 | 0.639662 |
| MmugDNA.36960.1.S1_at   | MmugDNA.36960.1 | 8.11  | 8.15  | 0.77 | 0.3  | -1.03 | 0.981876 | 0.255543 | 0.994301 | 0.523538 |
| MmugDNA.36961.1.S1_at   | MmugDNA.36961.1 | 6.98  | 6.95  | 0.32 | 0.05 | 1.02  | 0.899321 | 0.974411 | 0.965794 | 0.986069 |
| MmugDNA.36962.1.S1_at   | MmugDNA.36962.1 | 11.11 | 10.55 | 0.38 | 0.19 | 1.47  | 0.111207 | 0.017747 | 0.484303 | 0.168367 |
| MmugDNA.36964.1.S1_at   | MmugDNA.36964.1 | 6.3   | 6.21  | 0.43 | 0.28 | 1.07  | 0.686689 | 0.078906 | 0.877453 | 0.325912 |
| MmugDNA.36969.1.S1_s_at | MmugDNA.36969.1 | 11.16 | 11.47 | 0.3  | 0.08 | -1.24 | 0.395271 | 0.115996 | 0.720403 | 0.383164 |
| MmugDNA.3697.1.S1_at    | MmugDNA.3697.1  | 3.56  | 3.66  | 0.16 | 0.09 | -1.07 | 0.297756 | 0.623041 | 0.652791 | 0.777477 |
| MmugDNA.36970.1.S1_at   | MmugDNA.36970.1 | 6.38  | 6.31  | 0.22 | 0.05 | 1.05  | 0.590264 | 0.762103 | 0.832832 | 0.86164  |
| MmugDNA.36972.1.S1_at   | MmugDNA.36972.1 | 6.8   | 6.66  | 0.23 | 0.04 | 1.1   | 0.431773 | 0.057288 | 0.743599 | 0.285198 |

|                         |                 |       |       |      |      |       |          |          |          |          |
|-------------------------|-----------------|-------|-------|------|------|-------|----------|----------|----------|----------|
| MmugDNA.36973.1.S1_at   | MmugDNA.36973.1 | 9.68  | 10.3  | 0.26 | 0.06 | -1.54 | 0.029587 | 0.001848 | 0.335075 | 0.064494 |
| MmugDNA.36974.1.S1_at   | MmugDNA.36974.1 | 11.03 | 11.28 | 0.13 | 0.12 | -1.19 | 0.134143 | 0.179868 | 0.508395 | 0.456425 |
| MmugDNA.36975.1.S1_at   | MmugDNA.36975.1 | 7.72  | 8.12  | 0.16 | 0.04 | -1.32 | 0.014755 | 0.152064 | 0.278005 | 0.42682  |
| MmugDNA.36976.1.S1_at   | MmugDNA.36976.1 | 5.37  | 5.36  | 0.05 | 0.14 | 1     | 0.885349 | 0.928566 | 0.960357 | 0.959399 |
| MmugDNA.36978.1.S1_at   | MmugDNA.36978.1 | 6.5   | 6.89  | 0.23 | 0.19 | -1.31 | 0.193604 | 0.000271 | 0.564275 | 0.033839 |
| MmugDNA.3698.1.S1_at    | MmugDNA.3698.1  | 8.37  | 9.23  | 0.43 | 0.07 | -1.82 | 0.037001 | 0.005777 | 0.356628 | 0.104378 |
| MmugDNA.36980.1.S1_at   | MmugDNA.36980.1 | 6.09  | 5.99  | 0.04 | 0.06 | 1.07  | 0.079297 | 0.666524 | 0.442056 | 0.804636 |
| MmugDNA.36981.1.S1_at   | MmugDNA.36981.1 | 11.15 | 11.83 | 0.52 | 0.08 | -1.6  | 0.124823 | 0.177566 | 0.498917 | 0.453962 |
| MmugDNA.36984.1.S1_at   | MmugDNA.36984.1 | 3.43  | 3.73  | 0.19 | 0.11 | -1.23 | 0.117912 | 0.499253 | 0.491305 | 0.698117 |
| MmugDNA.36987.1.S1_at   | MmugDNA.36987.1 | 2.84  | 2.87  | 0.06 | 0.16 | -1.02 | 0.53371  | 0.598339 | 0.800937 | 0.76075  |
| MmugDNA.36988.1.S1_x_at | MmugDNA.36988.1 | 10.25 | 10.58 | 0.23 | 0.21 | -1.26 | 0.323256 | 0.285632 | 0.672034 | 0.547395 |
| MmugDNA.3699.1.S1_at    | MmugDNA.3699.1  | 4.88  | 4.73  | 0.08 | 0.22 | 1.11  | 0.946333 | 0.718501 | 0.981401 | 0.837066 |
| MmugDNA.36993.1.S1_at   | MmugDNA.36993.1 | 5.41  | 5.29  | 0.09 | 0.05 | 1.09  | 0.149022 | 0.314119 | 0.522942 | 0.568185 |
| MmugDNA.36995.1.S1_at   | MmugDNA.36995.1 | 4.48  | 4.35  | 0.08 | 0.16 | 1.09  | 0.853569 | 0.197825 | 0.948299 | 0.472721 |
| MmugDNA.36996.1.S1_at   | MmugDNA.36996.1 | 4.68  | 4.8   | 0.29 | 0.07 | -1.09 | 0.169661 | 0.231836 | 0.542663 | 0.503592 |
| MmugDNA.36997.1.S1_at   | MmugDNA.36997.1 | 8.6   | 7.83  | 0.65 | 0.07 | 1.7   | 0.151086 | 0.079914 | 0.52444  | 0.327213 |
| MmugDNA.36998.1.S1_at   | MmugDNA.36998.1 | 3.6   | 3.39  | 0.1  | 0.03 | 1.16  | 0.047601 | 0.151152 | 0.380705 | 0.425805 |
| MmugDNA.36999.1.S1_at   | MmugDNA.36999.1 | 5.26  | 5.72  | 0.81 | 0.35 | -1.37 | 0.712806 | 0.901301 | 0.888088 | 0.943884 |
| MmugDNA.37.1.S1_at      | MmugDNA.37.1    | 9.97  | 9.85  | 0.42 | 0.09 | 1.09  | 0.4597   | 0.286342 | 0.759763 | 0.547784 |
| MmugDNA.370.1.S1_at     | MmugDNA.370.1   | 3.67  | 3.68  | 0.08 | 0.04 | -1.01 | 0.662871 | 0.632745 | 0.866986 | 0.783777 |
| MmugDNA.3700.1.S1_at    | MmugDNA.3700.1  | 10.48 | 10.68 | 0.22 | 0.18 | -1.15 | 0.86164  | 0.265973 | 0.951267 | 0.531796 |
| MmugDNA.37000.1.S1_at   | MmugDNA.37000.1 | 5.04  | 4.96  | 0.08 | 0.21 | 1.05  | 0.711314 | 0.086253 | 0.887569 | 0.338664 |
| MmugDNA.37001.1.S1_at   | MmugDNA.37001.1 | 4.94  | 4.89  | 0.08 | 0.05 | 1.04  | 0.527709 | 0.332012 | 0.797225 | 0.580557 |
| MmugDNA.37005.1.S1_at   | MmugDNA.37005.1 | 8.56  | 8.3   | 0.32 | 0.02 | 1.2   | 0.146038 | 0.278859 | 0.520572 | 0.542599 |
| MmugDNA.37006.1.S1_at   | MmugDNA.37006.1 | 10.87 | 10.99 | 0.21 | 0.2  | -1.09 | 0.537377 | 0.266662 | 0.802735 | 0.532407 |
| MmugDNA.37007.1.S1_at   | MmugDNA.37007.1 | 3.38  | 3.4   | 0.03 | 0.17 | -1.02 | 0.61038  | 0.339087 | 0.841841 | 0.585891 |
| MmugDNA.37008.1.S1_at   | MmugDNA.37008.1 | 6.16  | 5.91  | 1.4  | 0.02 | 1.19  | 0.762656 | 0.801181 | 0.91092  | 0.885679 |
| MmugDNA.37009.1.S1_at   | MmugDNA.37009.1 | 5.72  | 5.72  | 0.2  | 0.09 | -1    | 0.472401 | 0.634879 | 0.767047 | 0.785042 |
| MmugDNA.3701.1.S1_at    | MmugDNA.3701.1  | 8.11  | 8.64  | 0.67 | 0.11 | -1.45 | 0.202106 | 0.467906 | 0.573629 | 0.677398 |
| MmugDNA.20818.1.S1_s_at | MmugDNA.20818.1 | 8.55  | 8.98  | 0.59 | 0.2  | -1.36 | 0.307421 | 0.609979 | 0.660255 | 0.768269 |
| MmugDNA.37010.1.S1_at   | MmugDNA.37010.1 | 6.81  | 6.79  | 0.2  | 0.1  | 1.02  | 0.206327 | 0.20577  | 0.578142 | 0.48007  |
| MmugDNA.37011.1.S1_at   | MmugDNA.37011.1 | 6.8   | 6.82  | 0.12 | 0.14 | -1.01 | 0.191343 | 0.037481 | 0.562801 | 0.237853 |
| MmugDNA.37012.1.S1_at   | MmugDNA.37012.1 | 2.75  | 2.76  | 0.09 | 0.09 | -1.01 | 0.457956 | 0.717546 | 0.758638 | 0.836463 |
| MmugDNA.37013.1.S1_at   | MmugDNA.37013.1 | 5.15  | 5.2   | 0.08 | 0.57 | -1.03 | 0.291011 | 0.373152 | 0.647518 | 0.612003 |
| MmugDNA.37014.1.S1_at   | MmugDNA.37014.1 | 4.23  | 4.15  | 0.19 | 0.34 | 1.06  | 0.814207 | 0.062636 | 0.932949 | 0.297022 |
| MmugDNA.37015.1.S1_at   | MmugDNA.37015.1 | 7.02  | 7.09  | 0.39 | 0.17 | -1.05 | 0.840906 | 0.989349 | 0.943498 | 0.993956 |
| MmugDNA.37018.1.S1_at   | MmugDNA.37018.1 | 6.28  | 6.17  | 0.5  | 0.26 | 1.07  | 0.885706 | 0.143418 | 0.96038  | 0.41743  |
| MmugDNA.37019.1.S1_at   | MmugDNA.37019.1 | 5.16  | 5.05  | 0.11 | 0.07 | 1.08  | 0.278905 | 0.587874 | 0.637923 | 0.754542 |
| MmugDNA.3702.1.S1_at    | MmugDNA.3702.1  | 7.98  | 7.62  | 0.76 | 0.24 | 1.28  | 0.271231 | 0.082054 | 0.631138 | 0.330802 |
| MmugDNA.37021.1.S1_at   | MmugDNA.37021.1 | 12.32 | 11.84 | 0.74 | 0.06 | 1.39  | 0.818398 | 0.675912 | 0.93436  | 0.810619 |
| MmugDNA.37023.1.S1_at   | MmugDNA.37023.1 | 9.45  | 9.35  | 0.66 | 0.07 | 1.07  | 0.977194 | 0.138073 | 0.992615 | 0.410924 |
| MmugDNA.37024.1.S1_at   | MmugDNA.37024.1 | 3.3   | 3.23  | 0.02 | 0.22 | 1.05  | 0.653653 | 0.190735 | 0.862462 | 0.466168 |
| MmugDNA.37025.1.S1_at   | MmugDNA.37025.1 | 5.55  | 4.89  | 0.2  | 0.12 | 1.58  | 0.009544 | 0.008656 | 0.242426 | 0.12341  |

|                         |                 |       |       |      |      |       |          |          |          |          |
|-------------------------|-----------------|-------|-------|------|------|-------|----------|----------|----------|----------|
| MmugDNA.37026.1.S1_at   | MmugDNA.37026.1 | 7.17  | 7.19  | 1    | 0.31 | -1.02 | 0.579685 | 0.701782 | 0.826569 | 0.827048 |
| MmugDNA.37029.1.S1_at   | MmugDNA.37029.1 | 3.34  | 3.28  | 0.13 | 0.02 | 1.04  | 0.43701  | 0.434755 | 0.746664 | 0.654819 |
| MmugDNA.37030.1.S1_at   | MmugDNA.37030.1 | 4.55  | 4.47  | 0.37 | 0.23 | 1.06  | 0.522297 | 0.251016 | 0.795143 | 0.519638 |
| MmugDNA.37033.1.S1_at   | MmugDNA.37033.1 | 5.18  | 4.97  | 0.09 | 0.06 | 1.16  | 0.073924 | 0.492173 | 0.434623 | 0.693477 |
| MmugDNA.37036.1.S1_at   | MmugDNA.37036.1 | 4     | 3.91  | 0.05 | 0.02 | 1.06  | 0.18656  | 0.18731  | 0.559164 | 0.463323 |
| MmugDNA.37037.1.S1_at   | MmugDNA.37037.1 | 5.55  | 5.54  | 0.11 | 0    | 1     | 0.879649 | 0.963598 | 0.958264 | 0.979721 |
| MmugDNA.37038.1.S1_at   | MmugDNA.37038.1 | 13.09 | 13.05 | 0.32 | 0.09 | 1.03  | 0.649934 | 0.073605 | 0.860712 | 0.316945 |
| MmugDNA.37039.1.S1_at   | MmugDNA.37039.1 | 3.43  | 3.43  | 0.08 | 0.11 | 1     | 0.565988 | 0.913143 | 0.819707 | 0.951134 |
| MmugDNA.3704.1.S1_at    | MmugDNA.3704.1  | 9.21  | 8.58  | 0.11 | 0.32 | 1.54  | 0.041715 | 0.00834  | 0.36716  | 0.121147 |
| MmugDNA.37040.1.S1_at   | MmugDNA.37040.1 | 3.64  | 3.7   | 0.03 | 0.12 | -1.05 | 0.377303 | 0.132685 | 0.70746  | 0.404544 |
| MmugDNA.37041.1.S1_at   | MmugDNA.37041.1 | 4.36  | 4.32  | 0.08 | 0.03 | -1.03 | 0.126168 | 0.38694  | 0.499902 | 0.621935 |
| MmugDNA.37043.1.S1_at   | MmugDNA.37043.1 | 6.67  | 6.5   | 0.08 | 0.15 | 1.13  | 0.086967 | 0.073512 | 0.454785 | 0.316778 |
| MmugDNA.37046.1.S1_at   | MmugDNA.37046.1 | 3.6   | 3.37  | 0.3  | 0.18 | 1.17  | 0.205281 | 0.315337 | 0.576998 | 0.568939 |
| MmugDNA.37047.1.S1_at   | MmugDNA.37047.1 | 6.22  | 6.65  | 0.56 | 0.38 | -1.34 | 0.224968 | 0.485241 | 0.594231 | 0.689003 |
| MmugDNA.37048.1.S1_at   | MmugDNA.37048.1 | 3.92  | 4.2   | 0.25 | 0.28 | -1.21 | 0.244954 | 0.365072 | 0.610441 | 0.605267 |
| MmugDNA.37049.1.S1_at   | MmugDNA.37049.1 | 3.74  | 4.24  | 0.2  | 0.19 | -1.41 | 0.075697 | 0.129615 | 0.436722 | 0.401223 |
| MmugDNA.3705.1.S1_at    | MmugDNA.3705.1  | 2.71  | 2.71  | 0.17 | 0.04 | 1     | 0.303286 | 0.441375 | 0.65718  | 0.659552 |
| MmugDNA.37051.1.S1_at   | MmugDNA.37051.1 | 7.03  | 7.03  | 0.04 | 0.01 | 1     | 0.592031 | 0.79235  | 0.833648 | 0.880015 |
| MmugDNA.37052.1.S1_at   | MmugDNA.37052.1 | 4.21  | 4.2   | 0.07 | 0.03 | 1.01  | 0.661204 | 0.753534 | 0.866006 | 0.856527 |
| MmugDNA.37056.1.S1_at   | MmugDNA.37056.1 | 8.68  | 9.64  | 1.65 | 0.06 | -1.94 | 0.370127 | 0.422872 | 0.704536 | 0.646054 |
| MmugDNA.37057.1.S1_at   | MmugDNA.37057.1 | 6.32  | 6.58  | 0.22 | 0.3  | -1.2  | 0.876077 | 0.298982 | 0.956886 | 0.557628 |
| MmugDNA.37058.1.S1_at   | MmugDNA.37058.1 | 3.71  | 3.67  | 0.1  | 0.1  | 1.03  | 0.846922 | 0.395953 | 0.946345 | 0.627798 |
| MmugDNA.37059.1.S1_at   | MmugDNA.37059.1 | 6.07  | 6.2   | 0.08 | 0.35 | -1.1  | 0.783016 | 0.405566 | 0.920107 | 0.633804 |
| MmugDNA.3706.1.S1_at    | MmugDNA.3706.1  | 6.77  | 6.57  | 0.42 | 0.26 | 1.15  | 0.436214 | 0.3002   | 0.746244 | 0.558413 |
| MmugDNA.37060.1.S1_at   | MmugDNA.37060.1 | 13.93 | 13.85 | 0.18 | 0.09 | 1.05  | 0.534568 | 0.41995  | 0.801404 | 0.643765 |
| MmugDNA.37062.1.S1_at   | MmugDNA.37062.1 | 6.7   | 6.52  | 0.09 | 0.13 | 1.13  | 0.342579 | 0.339785 | 0.685984 | 0.586394 |
| MmugDNA.37063.1.S1_at   | MmugDNA.37063.1 | 8.36  | 8.41  | 0.29 | 0.3  | -1.04 | 0.478069 | 0.618303 | 0.769934 | 0.774002 |
| MmugDNA.37065.1.S1_at   | MmugDNA.37065.1 | 5.44  | 5.4   | 0.18 | 0.15 | 1.03  | 0.790059 | 0.925216 | 0.922759 | 0.957716 |
| MmugDNA.37066.1.S1_at   | MmugDNA.37066.1 | 6.45  | 6.06  | 0.12 | 0.07 | 1.3   | 0.007222 | 0.00198  | 0.226509 | 0.066005 |
| MmugDNA.37067.1.S1_at   | MmugDNA.37067.1 | 7.13  | 6.07  | 0.22 | 0.17 | 2.08  | 0.003375 | 0.003744 | 0.194985 | 0.087219 |
| MmugDNA.37070.1.S1_at   | MmugDNA.37070.1 | 11.7  | 11.34 | 0.29 | 0.12 | 1.29  | 0.408459 | 0.163938 | 0.729314 | 0.440105 |
| MmugDNA.37071.1.S1_at   | MmugDNA.37071.1 | 3.79  | 3.62  | 0.13 | 0.35 | 1.12  | 0.241715 | 0.073621 | 0.607882 | 0.316952 |
| MmugDNA.37073.1.S1_at   | MmugDNA.37073.1 | 3.87  | 3.85  | 0.02 | 0.15 | 1.02  | 0.284611 | 0.478198 | 0.642354 | 0.684221 |
| MmugDNA.37075.1.S1_at   | MmugDNA.37075.1 | 5.07  | 5.23  | 0.22 | 0.14 | -1.12 | 0.236581 | 0.524881 | 0.603519 | 0.714635 |
| MmugDNA.37079.1.S1_at   | MmugDNA.37079.1 | 6.5   | 6.66  | 0.25 | 0.27 | -1.12 | 0.956877 | 0.325072 | 0.985723 | 0.575545 |
| MmugDNA.37079.1.S1_x_at | MmugDNA.37079.1 | 6.44  | 6.53  | 0.3  | 0.29 | -1.07 | 0.695439 | 0.344208 | 0.881578 | 0.589762 |
| MmugDNA.3708.1.S1_at    | MmugDNA.3708.1  | 11.38 | 11.54 | 0.39 | 0.02 | -1.12 | 0.171529 | 0.246623 | 0.544814 | 0.515957 |
| MmugDNA.37080.1.S1_at   | MmugDNA.37080.1 | 10.11 | 9.65  | 0.49 | 0.16 | 1.38  | 0.192124 | 0.025257 | 0.563197 | 0.199403 |
| MmugDNA.37081.1.S1_at   | MmugDNA.37081.1 | 6.71  | 6.58  | 0.07 | 0.02 | 1.1   | 0.026718 | 0.01515  | 0.325965 | 0.156391 |
| MmugDNA.29930.1.S1_s_at | MmugDNA.29930.1 | 9.41  | 9.3   | 0.05 | 0.15 | 1.08  | 0.688828 | 0.97247  | 0.878555 | 0.985179 |
| MmugDNA.37084.1.S1_at   | MmugDNA.37084.1 | 3.84  | 3.81  | 0.39 | 0.07 | 1.02  | 0.795861 | 0.82895  | 0.924994 | 0.901678 |
| MmugDNA.37085.1.S1_at   | MmugDNA.37085.1 | 9.17  | 9.47  | 0.98 | 0.16 | -1.23 | 0.740558 | 0.260776 | 0.900871 | 0.52721  |
| MmugDNA.37086.1.S1_at   | MmugDNA.37086.1 | 10.93 | 12.01 | 0.98 | 0.04 | -2.11 | 0.119493 | 0.160141 | 0.492875 | 0.436296 |



|                         |                 |       |       |      |      |       |          |          |          |          |
|-------------------------|-----------------|-------|-------|------|------|-------|----------|----------|----------|----------|
| MmugDNA.37087.1.S1_at   | MmugDNA.37087.1 | 9.5   | 9.64  | 1.3  | 0.07 | -1.1  | 0.460155 | 0.285075 | 0.760024 | 0.547096 |
| MmugDNA.37088.1.S1_at   | MmugDNA.37088.1 | 5.74  | 5.75  | 0.1  | 0.08 | -1.01 | 0.823706 | 0.881753 | 0.936367 | 0.932538 |
| MmugDNA.3709.1.S1_at    | MmugDNA.3709.1  | 3.89  | 3.94  | 0    | 0.14 | -1.03 | 0.698358 | 0.795482 | 0.882746 | 0.882189 |
| MmugDNA.37090.1.S1_at   | MmugDNA.37090.1 | 7.77  | 7.69  | 0.02 | 0.04 | 1.05  | 0.051896 | 0.00002  | 0.3916   | 0.019635 |
| MmugDNA.37091.1.S1_at   | MmugDNA.37091.1 | 6.04  | 5.72  | 0.13 | 0.27 | 1.24  | 0.150715 | 0.837912 | 0.524283 | 0.907449 |
| MmugDNA.37092.1.S1_at   | MmugDNA.37092.1 | 10.63 | 9.78  | 0.43 | 0.27 | 1.8   | 0.066519 | 0.131792 | 0.422354 | 0.403891 |
| MmugDNA.37093.1.S1_at   | MmugDNA.37093.1 | 2.96  | 2.94  | 0.2  | 0.14 | 1.02  | 0.646255 | 0.224861 | 0.859027 | 0.497653 |
| MmugDNA.37095.1.S1_at   | MmugDNA.37095.1 | 5     | 4.71  | 0.32 | 0.31 | 1.22  | 0.954454 | 0.326842 | 0.984894 | 0.576848 |
| MmugDNA.37096.1.S1_at   | MmugDNA.37096.1 | 5.81  | 6.33  | 0.69 | 0.43 | -1.43 | 0.469334 | 0.263651 | 0.765531 | 0.529938 |
| MmugDNA.37098.1.S1_at   | MmugDNA.37098.1 | 4.93  | 4.57  | 0.07 | 0.11 | 1.29  | 0.023986 | 0.355744 | 0.317529 | 0.597864 |
| MmugDNA.37099.1.S1_at   | MmugDNA.37099.1 | 4.86  | 4.77  | 0.06 | 0.09 | -1.07 | 0.748631 | 0.138367 | 0.904541 | 0.411244 |
| MmugDNA.3710.1.S1_at    | MmugDNA.3710.1  | 3.53  | 3.46  | 0.14 | 0.05 | 1.05  | 0.602943 | 0.86953  | 0.839083 | 0.925994 |
| MmugDNA.37100.1.S1_at   | MmugDNA.37100.1 | 3.75  | 3.68  | 0.11 | 0.08 | 1.05  | 0.794233 | 0.269584 | 0.924511 | 0.534868 |
| MmugDNA.6900.1.S1_s_at  | MmugDNA.6900.1  | 5.52  | 5.44  | 0.17 | 0.08 | 1.06  | 0.108791 | 0.147851 | 0.481112 | 0.422197 |
| MmugDNA.37102.1.S1_at   | MmugDNA.37102.1 | 6.03  | 6.01  | 0.03 | 0.17 | 1.01  | 0.87454  | 0.994727 | 0.956467 | 0.996726 |
| MmugDNA.37103.1.S1_at   | MmugDNA.37103.1 | 3.64  | 3.44  | 0.29 | 0.21 | 1.15  | 0.743133 | 0.93241  | 0.902001 | 0.961699 |
| MmugDNA.37105.1.S1_at   | MmugDNA.37105.1 | 4.01  | 4.02  | 0.17 | 0    | -1.01 | 0.324224 | 0.08873  | 0.672526 | 0.34241  |
| MmugDNA.37107.1.S1_at   | MmugDNA.37107.1 | 5.29  | 5.28  | 0.09 | 0.01 | 1.01  | 0.268565 | 0.743718 | 0.628857 | 0.851465 |
| MmugDNA.37108.1.S1_at   | MmugDNA.37108.1 | 11.01 | 11.6  | 0.14 | 0.16 | -1.51 | 0.010917 | 0.140917 | 0.250796 | 0.414394 |
| MmugDNA.37108.1.S1_s_at | MmugDNA.37108.1 | 12.64 | 12.77 | 0.2  | 0.01 | -1.1  | 0.484858 | 0.510026 | 0.77382  | 0.704549 |
| MmugDNA.37109.1.S1_at   | MmugDNA.37109.1 | 7.65  | 7.21  | 2.65 | 0.53 | 1.36  | 0.936695 | 0.292723 | 0.978759 | 0.552783 |
| MmugDNA.3711.1.S1_at    | MmugDNA.3711.1  | 3.69  | 3.85  | 0.03 | 0.06 | -1.12 | 0.057386 | 0.282383 | 0.402059 | 0.545076 |
| MmugDNA.37111.1.S1_at   | MmugDNA.37111.1 | 6.24  | 6.66  | 0.15 | 0.11 | -1.33 | 0.021085 | 0.030552 | 0.306817 | 0.216711 |
| MmugDNA.37112.1.S1_at   | MmugDNA.37112.1 | 8.45  | 7.06  | 0.46 | 0.2  | 2.62  | 0.005517 | 0.000686 | 0.208157 | 0.044166 |
| MmugDNA.37112.1.S1_s_at | MmugDNA.37112.1 | 7.87  | 6.77  | 0.49 | 0.16 | 2.14  | 0.010239 | 0.004174 | 0.246929 | 0.091064 |
| MmugDNA.37113.1.S1_at   | MmugDNA.37113.1 | 5.53  | 6.05  | 0.46 | 0.37 | -1.43 | 0.556916 | 0.279411 | 0.814405 | 0.543033 |
| MmugDNA.37115.1.S1_x_at | MmugDNA.37115.1 | 5.2   | 5.01  | 0.23 | 0.12 | 1.14  | 0.337401 | 0.399271 | 0.682344 | 0.629735 |
| MmugDNA.37117.1.S1_at   | MmugDNA.37117.1 | 10.43 | 10.42 | 0.61 | 0.09 | 1     | 0.885244 | 0.362304 | 0.960322 | 0.602931 |
| MmugDNA.37119.1.S1_at   | MmugDNA.37119.1 | 9.31  | 9.26  | 0.25 | 0.1  | 1.04  | 0.457327 | 0.221969 | 0.758326 | 0.495044 |
| MmugDNA.37122.1.S1_at   | MmugDNA.37122.1 | 3.09  | 3.05  | 0.03 | 0.09 | 1.03  | 0.73632  | 0.475266 | 0.899078 | 0.682031 |
| MmugDNA.37123.1.S1_at   | MmugDNA.37123.1 | 3.59  | 3.52  | 0.26 | 0.23 | 1.05  | 0.712751 | 0.833851 | 0.888041 | 0.904774 |
| MmugDNA.37124.1.S1_at   | MmugDNA.37124.1 | 3.5   | 3.63  | 0.16 | 0.1  | -1.09 | 0.219396 | 0.191348 | 0.588927 | 0.466673 |
| MmugDNA.37125.1.S1_at   | MmugDNA.37125.1 | 7.24  | 7.01  | 0.02 | 0.18 | 1.18  | 0.032953 | 0.01464  | 0.345526 | 0.154176 |
| MmugDNA.37126.1.S1_at   | MmugDNA.37126.1 | 4.54  | 4.38  | 0.01 | 0.15 | 1.12  | 0.06904  | 0.042487 | 0.426526 | 0.25075  |
| MmugDNA.37129.1.S1_at   | MmugDNA.37129.1 | 3.76  | 3.84  | 0.24 | 0.11 | -1.06 | 0.460896 | 0.608583 | 0.76063  | 0.767142 |
| MmugDNA.3713.1.S1_at    | MmugDNA.3713.1  | 5.06  | 5.19  | 0.2  | 0.13 | -1.1  | 0.909874 | 0.121782 | 0.96945  | 0.391074 |
| MmugDNA.37130.1.S1_at   | MmugDNA.37130.1 | 7.15  | 7     | 0.61 | 0.21 | 1.11  | 0.590216 | 0.063663 | 0.832832 | 0.298817 |
| MmugDNA.37131.1.S1_at   | MmugDNA.37131.1 | 6     | 5.93  | 0.88 | 0.5  | 1.05  | 0.928442 | 0.741411 | 0.976259 | 0.850285 |
| MmugDNA.37132.1.S1_at   | MmugDNA.37132.1 | 4.02  | 3.97  | 0.1  | 0.04 | 1.04  | 0.324715 | 0.827761 | 0.672781 | 0.901144 |
| MmugDNA.37133.1.S1_at   | MmugDNA.37133.1 | 9.23  | 8.84  | 1.56 | 0.13 | 1.3   | 0.8922   | 0.253319 | 0.962988 | 0.521662 |
| MmugDNA.37134.1.S1_at   | MmugDNA.37134.1 | 10.15 | 10.44 | 0.39 | 0.18 | -1.22 | 0.528628 | 0.749056 | 0.797961 | 0.854105 |
| MmugDNA.37136.1.S1_at   | MmugDNA.37136.1 | 9.72  | 9.73  | 1.1  | 0.08 | -1.01 | 0.997311 | 0.916252 | 0.999096 | 0.953103 |
| MmugDNA.37139.1.S1_at   | MmugDNA.37139.1 | 3.61  | 3.75  | 0.25 | 0.47 | -1.1  | 0.327377 | 0.21369  | 0.675065 | 0.487473 |

|                         |                 |       |       |      |      |       |          |          |          |          |
|-------------------------|-----------------|-------|-------|------|------|-------|----------|----------|----------|----------|
| MmugDNA.37139.1.S1_x_at | MmugDNA.37139.1 | 4.93  | 5.22  | 0.18 | 0.2  | -1.23 | 0.311933 | 0.200038 | 0.663542 | 0.474603 |
| MmugDNA.3714.1.S1_at    | MmugDNA.3714.1  | 3.52  | 3.39  | 0.07 | 0.19 | 1.09  | 0.299059 | 0.334075 | 0.653475 | 0.582104 |
| MmugDNA.37140.1.S1_at   | MmugDNA.37140.1 | 6.23  | 5.91  | 0.15 | 0.06 | 1.24  | 0.072596 | 0.438202 | 0.432824 | 0.657196 |
| MmugDNA.37141.1.S1_at   | MmugDNA.37141.1 | 8.6   | 8.21  | 0.27 | 0.14 | 1.31  | 0.046443 | 0.021699 | 0.377929 | 0.184333 |
| MmugDNA.37142.1.S1_at   | MmugDNA.37142.1 | 6.73  | 7.81  | 0.73 | 0.08 | -2.12 | 0.089766 | 0.00583  | 0.457893 | 0.104661 |
| MmugDNA.37143.1.S1_at   | MmugDNA.37143.1 | 7.01  | 6.65  | 0.91 | 0.1  | 1.29  | 0.767625 | 0.810835 | 0.912495 | 0.890845 |
| MmugDNA.37145.1.S1_at   | MmugDNA.37145.1 | 5.6   | 5.4   | 0.3  | 0.31 | 1.15  | 0.198249 | 0.271706 | 0.569495 | 0.536577 |
| MmugDNA.37146.1.S1_at   | MmugDNA.37146.1 | 3.65  | 3.62  | 0.18 | 0    | 1.02  | 0.968656 | 0.968967 | 0.989723 | 0.982912 |
| MmugDNA.37148.1.S1_at   | MmugDNA.37148.1 | 2.64  | 2.67  | 0.2  | 0.11 | -1.02 | 0.359476 | 0.441257 | 0.697282 | 0.659477 |
| MmugDNA.3715.1.S1_at    | MmugDNA.3715.1  | 7.29  | 7.11  | 0.11 | 0.16 | 1.14  | 0.095098 | 0.02803  | 0.464131 | 0.208941 |
| MmugDNA.37150.1.S1_at   | MmugDNA.37150.1 | 2.6   | 2.71  | 0.17 | 0.05 | -1.08 | 0.320993 | 0.221433 | 0.669558 | 0.49472  |
| MmugDNA.37151.1.S1_at   | MmugDNA.37151.1 | 11.31 | 10.64 | 0.43 | 0.22 | 1.58  | 0.077422 | 0.002791 | 0.43937  | 0.077966 |
| MmugDNA.37152.1.S1_at   | MmugDNA.37152.1 | 6.88  | 6.89  | 0.18 | 0.14 | -1.01 | 0.758586 | 0.664217 | 0.909254 | 0.803247 |
| MmugDNA.37155.1.S1_at   | MmugDNA.37155.1 | 10.88 | 11.53 | 0.4  | 0.07 | -1.57 | 0.0582   | 0.043741 | 0.403804 | 0.253863 |
| MmugDNA.37157.1.S1_at   | MmugDNA.37157.1 | 7.1   | 7.81  | 0.46 | 0.06 | -1.64 | 0.059592 | 0.127577 | 0.406669 | 0.398486 |
| MmugDNA.37158.1.S1_at   | MmugDNA.37158.1 | 9.13  | 8.86  | 0.4  | 0.11 | 1.21  | 0.419809 | 0.357621 | 0.736572 | 0.599228 |
| MmugDNA.37159.1.S1_at   | MmugDNA.37159.1 | 4.08  | 3.78  | 0.16 | 0.23 | 1.24  | 0.112748 | 0.327444 | 0.486223 | 0.577284 |
| MmugDNA.3716.1.S1_at    | MmugDNA.3716.1  | 11.16 | 11.31 | 0.62 | 0.03 | -1.11 | 0.21437  | 0.129182 | 0.584751 | 0.400611 |
| MmugDNA.37160.1.S1_at   | MmugDNA.37160.1 | 5.59  | 5.46  | 0.05 | 0.13 | 1.09  | 0.075228 | 0.113478 | 0.436118 | 0.379588 |
| MmugDNA.37161.1.S1_at   | MmugDNA.37161.1 | 5.18  | 5.19  | 0.15 | 0.11 | -1.01 | 0.201786 | 0.419059 | 0.573323 | 0.643266 |
| MmugDNA.37162.1.S1_at   | MmugDNA.37162.1 | 5.93  | 5.82  | 0.36 | 0.27 | 1.08  | 0.363285 | 0.71357  | 0.699943 | 0.83382  |
| MmugDNA.37163.1.S1_at   | MmugDNA.37163.1 | 6.27  | 6.01  | 0.08 | 0.18 | 1.2   | 0.281672 | 0.434758 | 0.64018  | 0.654819 |
| MmugDNA.37164.1.S1_at   | MmugDNA.37164.1 | 10.63 | 10.95 | 0.3  | 0.11 | -1.25 | 0.134643 | 0.009846 | 0.508533 | 0.130274 |
| MmugDNA.37165.1.S1_at   | MmugDNA.37165.1 | 2.81  | 2.84  | 0.13 | 0.06 | -1.03 | 0.679332 | 0.874134 | 0.874274 | 0.928493 |
| MmugDNA.37166.1.S1_at   | MmugDNA.37166.1 | 6.16  | 6.15  | 0.21 | 0.05 | 1     | 0.356247 | 0.747602 | 0.69508  | 0.853201 |
| MmugDNA.37169.1.S1_at   | MmugDNA.37169.1 | 4.02  | 4.45  | 0.24 | 0.52 | -1.35 | 0.664994 | 0.426197 | 0.867733 | 0.648388 |
| MmugDNA.37170.1.S1_at   | MmugDNA.37170.1 | 12.29 | 12.44 | 0.15 | 0.06 | -1.1  | 0.379749 | 0.291405 | 0.709128 | 0.551823 |
| MmugDNA.37172.1.S1_at   | MmugDNA.37172.1 | 5.61  | 5.73  | 0.14 | 0.05 | -1.09 | 0.462458 | 0.092371 | 0.761639 | 0.348294 |
| MmugDNA.37174.1.S1_at   | MmugDNA.37174.1 | 7.06  | 6.96  | 0.1  | 0.14 | 1.07  | 0.97435  | 0.408217 | 0.991855 | 0.635527 |
| MmugDNA.37177.1.S1_at   | MmugDNA.37177.1 | 5.62  | 5.76  | 0.23 | 0.03 | -1.1  | 0.957176 | 0.997452 | 0.985852 | 0.998661 |
| MmugDNA.3718.1.S1_at    | MmugDNA.3718.1  | 3.69  | 3.5   | 0.07 | 0.1  | 1.15  | 0.063339 | 0.39477  | 0.415687 | 0.627208 |
| MmugDNA.37180.1.S1_at   | MmugDNA.37180.1 | 10.19 | 10.37 | 0.18 | 0.1  | -1.14 | 0.226951 | 0.00828  | 0.59637  | 0.12078  |
| MmugDNA.37181.1.S1_at   | MmugDNA.37181.1 | 4.53  | 4.41  | 0.09 | 0.2  | 1.09  | 0.371881 | 0.454099 | 0.705567 | 0.668398 |
| MmugDNA.37182.1.S1_at   | MmugDNA.37182.1 | 3.78  | 3.66  | 0.28 | 0.25 | 1.08  | 0.42761  | 0.600278 | 0.741242 | 0.762019 |
| MmugDNA.37183.1.S1_at   | MmugDNA.37183.1 | 6.21  | 6.58  | 0.71 | 0.21 | -1.29 | 0.331922 | 0.548933 | 0.678356 | 0.729496 |
| MmugDNA.37184.1.S1_at   | MmugDNA.37184.1 | 5.18  | 3.8   | 0.14 | 0.51 | 2.61  | 0.022579 | 0.017484 | 0.311408 | 0.167476 |
| MmugDNA.37185.1.S1_at   | MmugDNA.37185.1 | 6.13  | 6.13  | 0.05 | 0.08 | -1    | 0.257955 | 0.418708 | 0.62169  | 0.643066 |
| MmugDNA.37186.1.S1_at   | MmugDNA.37186.1 | 3.83  | 3.73  | 0.21 | 0.23 | 1.07  | 0.45549  | 0.606456 | 0.757444 | 0.765747 |
| MmugDNA.37187.1.S1_at   | MmugDNA.37187.1 | 4.15  | 4.15  | 0.13 | 0.04 | 1     | 0.558273 | 0.306085 | 0.815182 | 0.562804 |
| MmugDNA.3719.1.S1_at    | MmugDNA.3719.1  | 5.96  | 5.71  | 0.18 | 0.07 | 1.19  | 0.058259 | 0.032306 | 0.403916 | 0.222524 |
| MmugDNA.37190.1.S1_at   | MmugDNA.37190.1 | 11.58 | 11.53 | 0.27 | 0.06 | 1.04  | 0.381542 | 0.651054 | 0.710122 | 0.795994 |
| MmugDNA.37191.1.S1_at   | MmugDNA.37191.1 | 9.1   | 9.02  | 0.27 | 0.09 | 1.06  | 0.388849 | 0.038683 | 0.715755 | 0.24169  |
| MmugDNA.37192.1.S1_at   | MmugDNA.37192.1 | 5.24  | 5.05  | 0.45 | 0.21 | 1.14  | 0.85469  | 0.526788 | 0.948588 | 0.715627 |

|                         |                 |       |       |      |      |       |          |          |          |          |
|-------------------------|-----------------|-------|-------|------|------|-------|----------|----------|----------|----------|
| MmugDNA.37193.1.S1_at   | MmugDNA.37193.1 | 5.56  | 5.65  | 0.1  | 0.04 | -1.07 | 0.617602 | 0.570912 | 0.845514 | 0.743422 |
| MmugDNA.37194.1.S1_at   | MmugDNA.37194.1 | 7.15  | 8     | 0.49 | 0.2  | -1.79 | 0.048671 | 0.00925  | 0.383893 | 0.126966 |
| MmugDNA.37195.1.S1_at   | MmugDNA.37195.1 | 6.47  | 6.3   | 0.04 | 0.16 | 1.13  | 0.090557 | 0.116908 | 0.458835 | 0.384277 |
| MmugDNA.37196.1.S1_at   | MmugDNA.37196.1 | 3.99  | 4.17  | 0.14 | 0.28 | -1.13 | 0.529534 | 0.334375 | 0.798376 | 0.582372 |
| MmugDNA.37197.1.S1_at   | MmugDNA.37197.1 | 8.81  | 8.48  | 0.28 | 0.06 | 1.25  | 0.092735 | 0.037444 | 0.461192 | 0.237777 |
| MmugDNA.37198.1.S1_at   | MmugDNA.37198.1 | 5.8   | 5.81  | 0.24 | 0.03 | -1.01 | 0.438088 | 0.561941 | 0.747178 | 0.737659 |
| MmugDNA.37199.1.S1_at   | MmugDNA.37199.1 | 4.1   | 4.25  | 0.08 | 0.04 | -1.11 | 0.079682 | 0.034364 | 0.442575 | 0.229289 |
| MmugDNA.372.1.S1_at     | MmugDNA.372.1   | 6.94  | 7.05  | 0.09 | 0.32 | -1.08 | 0.279102 | 0.180225 | 0.637997 | 0.456784 |
| MmugDNA.3720.1.S1_at    | MmugDNA.3720.1  | 10.61 | 10.86 | 1.52 | 0.09 | -1.19 | 0.255968 | 0.149407 | 0.619906 | 0.423825 |
| MmugDNA.37202.1.S1_at   | MmugDNA.37202.1 | 4.65  | 4.9   | 0.45 | 0.57 | -1.19 | 0.815305 | 0.15803  | 0.933137 | 0.433785 |
| MmugDNA.37203.1.S1_at   | MmugDNA.37203.1 | 4.67  | 4.64  | 0.21 | 0.04 | 1.02  | 0.573762 | 0.685088 | 0.823742 | 0.816309 |
| MmugDNA.37204.1.S1_at   | MmugDNA.37204.1 | 7.39  | 7.07  | 0.19 | 0.12 | 1.25  | 0.09331  | 0.072432 | 0.462406 | 0.315282 |
| MmugDNA.43000.1.S1_at   | MmugDNA.43000.1 | 7.64  | 7.91  | 0.99 | 0.13 | -1.2  | 0.561766 | 0.388013 | 0.817355 | 0.622548 |
| MmugDNA.43000.1.S1_s_at | MmugDNA.43000.1 | 7.9   | 8.15  | 1.2  | 0.11 | -1.19 | 0.578543 | 0.565853 | 0.826211 | 0.740112 |
| MmugDNA.37208.1.S1_at   | MmugDNA.37208.1 | 5.18  | 5.13  | 0.17 | 0.09 | 1.04  | 0.482176 | 0.435382 | 0.772277 | 0.655194 |
| MmugDNA.3721.1.S1_at    | MmugDNA.3721.1  | 6.92  | 6.68  | 0.1  | 0.1  | 1.18  | 0.212673 | 0.698323 | 0.583202 | 0.824773 |
| MmugDNA.37210.1.S1_at   | MmugDNA.37210.1 | 3.37  | 3.44  | 0.15 | 0.14 | -1.05 | 0.812326 | 0.939009 | 0.932076 | 0.965397 |
| MmugDNA.37211.1.S1_at   | MmugDNA.37211.1 | 2.74  | 2.76  | 0.14 | 0.03 | -1.01 | 0.395285 | 0.725628 | 0.720403 | 0.84112  |
| MmugDNA.37213.1.S1_at   | MmugDNA.37213.1 | 11.04 | 10.61 | 0.14 | 0.28 | 1.35  | 0.030085 | 0.013009 | 0.336449 | 0.146803 |
| MmugDNA.37214.1.S1_at   | MmugDNA.37214.1 | 3.9   | 4.43  | 0.09 | 0.41 | -1.44 | 0.034711 | 0.032285 | 0.350358 | 0.222435 |
| MmugDNA.37215.1.S1_at   | MmugDNA.37215.1 | 6.55  | 6.32  | 0.84 | 0.33 | 1.17  | 0.954803 | 0.421521 | 0.985012 | 0.645138 |
| MmugDNA.37216.1.S1_at   | MmugDNA.37216.1 | 3.65  | 3.25  | 0.14 | 0.27 | 1.32  | 0.309914 | 0.482549 | 0.661902 | 0.68734  |
| MmugDNA.37217.1.S1_at   | MmugDNA.37217.1 | 4.78  | 4.66  | 0.19 | 0.33 | 1.09  | 0.763897 | 0.545783 | 0.911316 | 0.727653 |
| MmugDNA.37218.1.S1_at   | MmugDNA.37218.1 | 6.51  | 5.6   | 0.53 | 0.39 | 1.88  | 0.101876 | 0.038764 | 0.472267 | 0.241916 |
| MmugDNA.3722.1.S1_at    | MmugDNA.3722.1  | 9.86  | 10.03 | 0.29 | 0.05 | -1.13 | 0.374217 | 0.078459 | 0.705837 | 0.325212 |
| MmugDNA.37220.1.S1_at   | MmugDNA.37220.1 | 3.61  | 3.63  | 0.17 | 0.07 | -1.01 | 0.606187 | 0.746591 | 0.840408 | 0.852873 |
| MmugDNA.37221.1.S1_at   | MmugDNA.37221.1 | 11.56 | 11.31 | 0.34 | 0.09 | 1.19  | 0.177096 | 0.116223 | 0.550212 | 0.38353  |
| MmugDNA.37222.1.S1_s_at | MmugDNA.37222.1 | 12.53 | 12.68 | 0.54 | 0.07 | -1.11 | 0.662723 | 0.560412 | 0.866912 | 0.736658 |
| MmugDNA.37223.1.S1_at   | MmugDNA.37223.1 | 10.48 | 10.26 | 0.31 | 0.18 | 1.17  | 0.225829 | 0.098952 | 0.594935 | 0.357049 |
| MmugDNA.37224.1.S1_at   | MmugDNA.37224.1 | 4.54  | 4.48  | 0.16 | 0.15 | 1.04  | 0.723732 | 0.311796 | 0.892847 | 0.56678  |
| MmugDNA.37226.1.S1_at   | MmugDNA.37226.1 | 6.69  | 6.58  | 0.05 | 0.04 | 1.08  | 0.038822 | 0.175215 | 0.36035  | 0.452011 |
| MmugDNA.34006.1.S1_at   | MmugDNA.34006.1 | 7.41  | 7.26  | 0.17 | 0.38 | 1.11  | 0.53373  | 0.168237 | 0.800944 | 0.444893 |
| MmugDNA.34006.1.S1_s_at | MmugDNA.34006.1 | 7.57  | 7.4   | 0.04 | 0.1  | 1.13  | 0.097595 | 0.039171 | 0.46653  | 0.243072 |
| MmugDNA.37227.1.S1_at   | MmugDNA.37227.1 | 10.52 | 9.61  | 0.27 | 0.26 | 1.89  | 0.008274 | 0.013416 | 0.232167 | 0.148424 |
| MmugDNA.37229.1.S1_at   | MmugDNA.37229.1 | 4.71  | 4.26  | 0.27 | 0.31 | 1.36  | 0.308872 | 0.146546 | 0.661293 | 0.420583 |
| MmugDNA.3723.1.S1_at    | MmugDNA.3723.1  | 3.57  | 3.57  | 0.04 | 0.04 | 1     | 0.230206 | 0.334595 | 0.598481 | 0.582581 |
| MmugDNA.37230.1.S1_at   | MmugDNA.37230.1 | 7.2   | 7.99  | 0.61 | 0.16 | -1.73 | 0.109453 | 0.089165 | 0.482287 | 0.343188 |
| MmugDNA.37231.1.S1_at   | MmugDNA.37231.1 | 7.3   | 7     | 0.08 | 0.17 | 1.24  | 0.03669  | 0.106539 | 0.355307 | 0.369099 |
| MmugDNA.37232.1.S1_at   | MmugDNA.37232.1 | 6.52  | 5.69  | 0.77 | 0.32 | 1.77  | 0.304466 | 0.464846 | 0.658117 | 0.675463 |
| MmugDNA.37233.1.S1_at   | MmugDNA.37233.1 | 6.66  | 6.77  | 0.5  | 0.08 | -1.08 | 0.765247 | 0.116443 | 0.911736 | 0.383671 |
| MmugDNA.37234.1.S1_at   | MmugDNA.37234.1 | 5.22  | 5.18  | 0.33 | 0.17 | 1.03  | 0.734635 | 0.845578 | 0.898485 | 0.912145 |
| MmugDNA.37235.1.S1_at   | MmugDNA.37235.1 | 4.67  | 4.6   | 0.18 | 0.09 | 1.05  | 0.177488 | 0.164528 | 0.550585 | 0.44076  |
| MmugDNA.37236.1.S1_at   | MmugDNA.37236.1 | 4.34  | 4.99  | 0.49 | 0.59 | -1.58 | 0.15945  | 0.265461 | 0.532324 | 0.531363 |

|                         |                 |       |       |      |      |       |          |          |          |          |
|-------------------------|-----------------|-------|-------|------|------|-------|----------|----------|----------|----------|
| MmugDNA.37238.1.S1_at   | MmugDNA.37238.1 | 6.18  | 6.02  | 0.04 | 0.03 | 1.12  | 0.007587 | 0.069373 | 0.229596 | 0.309591 |
| MmugDNA.37239.1.S1_at   | MmugDNA.37239.1 | 10.09 | 9.91  | 0.38 | 0.12 | 1.13  | 0.187284 | 0.150084 | 0.559729 | 0.424698 |
| MmugDNA.3724.1.S1_at    | MmugDNA.3724.1  | 4.69  | 4.42  | 0.26 | 0.06 | 1.21  | 0.205875 | 0.057938 | 0.577793 | 0.287157 |
| MmugDNA.37240.1.S1_at   | MmugDNA.37240.1 | 10.48 | 10.24 | 0.61 | 0.02 | 1.18  | 0.743584 | 0.481971 | 0.902179 | 0.686909 |
| MmugDNA.37241.1.S1_at   | MmugDNA.37241.1 | 7.15  | 7.19  | 0.71 | 0.29 | -1.03 | 0.890441 | 0.689995 | 0.96231  | 0.819235 |
| MmugDNA.37242.1.S1_at   | MmugDNA.37242.1 | 3.84  | 3.83  | 0.83 | 0.58 | 1.01  | 0.850181 | 0.894388 | 0.947303 | 0.939717 |
| MmugDNA.37244.1.S1_at   | MmugDNA.37244.1 | 4.4   | 4.4   | 0.07 | 0.06 | 1     | 0.920747 | 0.451904 | 0.973155 | 0.666683 |
| MmugDNA.37245.1.S1_at   | MmugDNA.37245.1 | 4.28  | 4.14  | 0.3  | 0.08 | 1.1   | 0.53499  | 0.502393 | 0.801404 | 0.700138 |
| MmugDNA.37247.1.S1_at   | MmugDNA.37247.1 | 4.57  | 4.54  | 0.26 | 0.07 | 1.02  | 0.587952 | 0.777724 | 0.83181  | 0.870845 |
| MmugDNA.37249.1.S1_at   | MmugDNA.37249.1 | 3.61  | 3.53  | 0.48 | 0.31 | 1.05  | 0.628471 | 0.795531 | 0.851106 | 0.882189 |
| MmugDNA.3725.1.S1_at    | MmugDNA.3725.1  | 4.24  | 4.24  | 0.05 | 0.07 | -1    | 0.915954 | 0.893693 | 0.97133  | 0.939323 |
| MmugDNA.37250.1.S1_at   | MmugDNA.37250.1 | 4.34  | 4.17  | 0.16 | 0.1  | 1.12  | 0.514316 | 0.394542 | 0.790322 | 0.627068 |
| MmugDNA.37252.1.S1_at   | MmugDNA.37252.1 | 3.32  | 3.33  | 0.15 | 0.14 | -1.01 | 0.910177 | 0.65815  | 0.969524 | 0.800181 |
| MmugDNA.37254.1.S1_at   | MmugDNA.37254.1 | 5.08  | 5.68  | 0.39 | 0.08 | -1.51 | 0.063493 | 0.010212 | 0.415717 | 0.132485 |
| MmugDNA.37255.1.S1_at   | MmugDNA.37255.1 | 5.76  | 5.77  | 0.15 | 0.08 | -1.01 | 0.349028 | 0.547737 | 0.690131 | 0.728658 |
| MmugDNA.37256.1.S1_at   | MmugDNA.37256.1 | 5.78  | 5.63  | 1.24 | 0.21 | 1.11  | 0.88795  | 0.89213  | 0.961205 | 0.938526 |
| MmugDNA.37258.1.S1_at   | MmugDNA.37258.1 | 5.11  | 6.05  | 0.33 | 0.17 | -1.92 | 0.023334 | 0.002605 | 0.315003 | 0.075487 |
| MmugDNA.37259.1.S1_at   | MmugDNA.37259.1 | 8.4   | 8.65  | 0.1  | 0.25 | -1.19 | 0.153572 | 0.318345 | 0.526754 | 0.571192 |
| MmugDNA.3726.1.S1_at    | MmugDNA.3726.1  | 6.48  | 7.47  | 0.89 | 0.07 | -1.98 | 0.14241  | 0.103235 | 0.517564 | 0.364143 |
| MmugDNA.37260.1.S1_at   | MmugDNA.37260.1 | 5.61  | 6.17  | 0.84 | 0.21 | -1.48 | 0.762679 | 0.645172 | 0.91092  | 0.792081 |
| MmugDNA.37263.1.S1_at   | MmugDNA.37263.1 | 5.79  | 5.73  | 0.07 | 0.1  | 1.04  | 0.394537 | 0.391329 | 0.719858 | 0.625003 |
| MmugDNA.37264.1.S1_at   | MmugDNA.37264.1 | 7.68  | 7.7   | 0.12 | 0.07 | -1.02 | 0.405835 | 0.656955 | 0.727533 | 0.799401 |
| MmugDNA.37266.1.S1_at   | MmugDNA.37266.1 | 5.13  | 5.05  | 0.12 | 0.05 | 1.05  | 0.280062 | 0.387023 | 0.638884 | 0.621935 |
| MmugDNA.37267.1.S1_at   | MmugDNA.37267.1 | 3.42  | 3.39  | 0.24 | 0.02 | 1.02  | 0.311519 | 0.556233 | 0.663328 | 0.734449 |
| MmugDNA.3727.1.S1_at    | MmugDNA.3727.1  | 3.92  | 3.98  | 0.07 | 0.04 | -1.05 | 0.285658 | 0.354542 | 0.643438 | 0.59726  |
| MmugDNA.37273.1.S1_at   | MmugDNA.37273.1 | 6.59  | 6.58  | 0.08 | 0.22 | 1     | 0.950293 | 0.738169 | 0.983289 | 0.848203 |
| MmugDNA.37275.1.S1_at   | MmugDNA.37275.1 | 8.49  | 8.67  | 0.13 | 0.32 | -1.13 | 0.597339 | 0.431692 | 0.836225 | 0.652516 |
| MmugDNA.37278.1.S1_at   | MmugDNA.37278.1 | 9.23  | 9.07  | 0.1  | 0.1  | 1.12  | 0.257354 | 0.033623 | 0.621065 | 0.227006 |
| MmugDNA.37279.1.S1_at   | MmugDNA.37279.1 | 6.48  | 6.61  | 0.2  | 0.05 | -1.09 | 0.151825 | 0.138728 | 0.524931 | 0.411807 |
| MmugDNA.3728.1.S1_at    | MmugDNA.3728.1  | 3.14  | 3.03  | 0.08 | 0.08 | 1.08  | 0.110899 | 0.334668 | 0.48424  | 0.582581 |
| MmugDNA.37280.1.S1_at   | MmugDNA.37280.1 | 3.35  | 3.16  | 0.25 | 0.05 | 1.14  | 0.277981 | 0.348932 | 0.637256 | 0.592945 |
| MmugDNA.37282.1.S1_at   | MmugDNA.37282.1 | 4.82  | 4.83  | 0.05 | 0.22 | -1.01 | 0.539517 | 0.745537 | 0.803863 | 0.852445 |
| MmugDNA.37283.1.S1_at   | MmugDNA.37283.1 | 7.31  | 6.78  | 0.24 | 0.31 | 1.44  | 0.19327  | 0.655802 | 0.564275 | 0.798709 |
| MmugDNA.37284.1.S1_at   | MmugDNA.37284.1 | 4.53  | 4.15  | 0.33 | 0.36 | 1.3   | 0.953596 | 0.464078 | 0.98451  | 0.67485  |
| MmugDNA.37285.1.S1_at   | MmugDNA.37285.1 | 8.4   | 8.56  | 0.1  | 0.04 | -1.12 | 0.120679 | 0.033542 | 0.494166 | 0.226764 |
| MmugDNA.37287.1.S1_at   | MmugDNA.37287.1 | 6.03  | 5.91  | 0.65 | 0.05 | 1.09  | 0.250049 | 0.474537 | 0.615476 | 0.681511 |
| MmugDNA.37287.1.S1_s_at | MmugDNA.37287.1 | 6.5   | 6     | 0.85 | 0.09 | 1.41  | 0.383988 | 0.610037 | 0.711691 | 0.768323 |
| MmugDNA.37288.1.S1_at   | MmugDNA.37288.1 | 6     | 6.36  | 0.99 | 0.58 | -1.28 | 0.426328 | 0.074915 | 0.740427 | 0.318845 |
| MmugDNA.3729.1.S1_at    | MmugDNA.3729.1  | 6.71  | 6.66  | 0.31 | 0.18 | 1.03  | 0.62627  | 0.239306 | 0.84992  | 0.509995 |
| MmugDNA.37291.1.S1_at   | MmugDNA.37291.1 | 2.9   | 2.82  | 0.04 | 0.19 | 1.05  | 0.662746 | 0.551775 | 0.866912 | 0.73122  |
| MmugDNA.37291.1.S1_x_at | MmugDNA.37291.1 | 2.92  | 3     | 0.13 | 0.27 | -1.06 | 0.625869 | 0.304776 | 0.849641 | 0.561922 |
| MmugDNA.37293.1.S1_at   | MmugDNA.37293.1 | 9.36  | 9.48  | 0.16 | 0.21 | -1.08 | 0.621671 | 0.004452 | 0.847631 | 0.092997 |
| MmugDNA.37294.1.S1_at   | MmugDNA.37294.1 | 6.27  | 6.19  | 0.13 | 0.04 | 1.06  | 0.940381 | 0.287624 | 0.97971  | 0.548885 |

|                       |                 |       |       |      |      |       |          |          |          |          |
|-----------------------|-----------------|-------|-------|------|------|-------|----------|----------|----------|----------|
| MmugDNA.37295.1.S1_at | MmugDNA.37295.1 | 4.36  | 4.39  | 0.49 | 0.32 | -1.02 | 0.78446  | 0.35499  | 0.920789 | 0.597466 |
| MmugDNA.37296.1.S1_at | MmugDNA.37296.1 | 11.23 | 11.33 | 0.5  | 0.01 | -1.07 | 0.687997 | 0.122713 | 0.878062 | 0.392719 |
| MmugDNA.37298.1.S1_at | MmugDNA.37298.1 | 4.37  | 4.34  | 0.18 | 0.1  | 1.01  | 0.258992 | 0.713295 | 0.622402 | 0.833666 |
| MmugDNA.37299.1.S1_at | MmugDNA.37299.1 | 4.24  | 4.11  | 0    | 0.08 | 1.09  | 0.06299  | 0.064877 | 0.414551 | 0.300746 |
| MmugDNA.373.1.S1_at   | MmugDNA.373.1   | 6.96  | 6.82  | 0.49 | 0.09 | 1.1   | 0.526002 | 0.345152 | 0.796442 | 0.590424 |
| MmugDNA.3730.1.S1_at  | MmugDNA.3730.1  | 5.62  | 5.55  | 0.21 | 0.17 | 1.05  | 0.45345  | 0.712526 | 0.75608  | 0.833383 |
| MmugDNA.37300.1.S1_at | MmugDNA.37300.1 | 5.03  | 4.75  | 0.03 | 0.05 | 1.22  | 0.002242 | 0.202006 | 0.174757 | 0.476444 |
| MmugDNA.37301.1.S1_at | MmugDNA.37301.1 | 4.78  | 4.68  | 0.08 | 0.07 | 1.07  | 0.183602 | 0.193954 | 0.55651  | 0.469068 |
| MmugDNA.37302.1.S1_at | MmugDNA.37302.1 | 5.15  | 5.09  | 0.1  | 0.16 | 1.04  | 0.84602  | 0.973565 | 0.945957 | 0.985645 |
| MmugDNA.37303.1.S1_at | MmugDNA.37303.1 | 10.03 | 9.67  | 1.9  | 0.11 | 1.28  | 0.604082 | 0.356909 | 0.839485 | 0.598699 |
| MmugDNA.37305.1.S1_at | MmugDNA.37305.1 | 3.59  | 3.59  | 0.39 | 0.2  | 1     | 0.630275 | 0.512623 | 0.851919 | 0.706442 |
| MmugDNA.37309.1.S1_at | MmugDNA.37309.1 | 3.87  | 3.63  | 0.05 | 0.15 | 1.18  | 0.080624 | 0.212048 | 0.44458  | 0.486013 |
| MmugDNA.3731.1.S1_at  | MmugDNA.3731.1  | 11.39 | 11.63 | 0.15 | 0.05 | -1.18 | 0.187558 | 0.005302 | 0.559893 | 0.100817 |
| MmugDNA.37311.1.S1_at | MmugDNA.37311.1 | 7.51  | 7.79  | 0.22 | 0.11 | -1.21 | 0.17266  | 0.062156 | 0.545872 | 0.296237 |
| MmugDNA.37312.1.S1_at | MmugDNA.37312.1 | 3.9   | 3.9   | 0.12 | 0.16 | 1     | 0.865029 | 0.2522   | 0.952557 | 0.520864 |
| MmugDNA.37313.1.S1_at | MmugDNA.37313.1 | 9.89  | 9.28  | 0.33 | 0.21 | 1.53  | 0.242401 | 0.081529 | 0.608517 | 0.329764 |
| MmugDNA.37314.1.S1_at | MmugDNA.37314.1 | 8.63  | 7.39  | 0.76 | 0.24 | 2.36  | 0.14797  | 0.156214 | 0.522184 | 0.43161  |
| MmugDNA.37315.1.S1_at | MmugDNA.37315.1 | 7.04  | 7.14  | 0.46 | 0.08 | -1.07 | 0.624031 | 0.914644 | 0.848468 | 0.952011 |
| MmugDNA.37318.1.S1_at | MmugDNA.37318.1 | 12.08 | 11.75 | 0.33 | 0.04 | 1.26  | 0.443162 | 0.02635  | 0.750554 | 0.203321 |
| MmugDNA.37319.1.S1_at | MmugDNA.37319.1 | 4.66  | 4.67  | 0.15 | 0.17 | -1    | 0.246206 | 0.306456 | 0.611606 | 0.563029 |
| MmugDNA.3732.1.S1_at  | MmugDNA.3732.1  | 9.33  | 9.71  | 0.24 | 0.11 | -1.3  | 0.08344  | 0.080654 | 0.44951  | 0.328444 |
| MmugDNA.37320.1.S1_at | MmugDNA.37320.1 | 4.94  | 4.93  | 0.05 | 0.17 | 1.01  | 0.631371 | 0.747821 | 0.852417 | 0.853252 |
| MmugDNA.37323.1.S1_at | MmugDNA.37323.1 | 3.52  | 3.36  | 0.29 | 0.29 | 1.12  | 0.524001 | 0.411843 | 0.795715 | 0.638434 |
| MmugDNA.37324.1.S1_at | MmugDNA.37324.1 | 4.22  | 4.11  | 0.08 | 0.12 | 1.08  | 0.504707 | 0.687424 | 0.785022 | 0.817583 |
| MmugDNA.37325.1.S1_at | MmugDNA.37325.1 | 6.63  | 6.55  | 0.04 | 0.02 | 1.06  | 0.065692 | 0.839309 | 0.420827 | 0.908404 |
| MmugDNA.37326.1.S1_at | MmugDNA.37326.1 | 4.74  | 4.82  | 0.8  | 0.07 | -1.06 | 0.459598 | 0.314156 | 0.759673 | 0.568185 |
| MmugDNA.37328.1.S1_at | MmugDNA.37328.1 | 6.18  | 6.22  | 0.08 | 0.2  | -1.03 | 0.178758 | 0.529272 | 0.551568 | 0.717233 |
| MmugDNA.37329.1.S1_at | MmugDNA.37329.1 | 3.98  | 3.34  | 0.16 | 0.11 | 1.55  | 0.009128 | 0.322683 | 0.241574 | 0.574036 |
| MmugDNA.37330.1.S1_at | MmugDNA.37330.1 | 4.94  | 4.77  | 0.16 | 0.12 | 1.13  | 0.345722 | 0.505624 | 0.687742 | 0.702218 |
| MmugDNA.37331.1.S1_at | MmugDNA.37331.1 | 3.04  | 3.15  | 0.15 | 0.11 | -1.08 | 0.77864  | 0.103582 | 0.918374 | 0.364346 |
| MmugDNA.37333.1.S1_at | MmugDNA.37333.1 | 4.87  | 4.77  | 0.05 | 0.16 | 1.07  | 0.167911 | 0.517314 | 0.5405   | 0.709435 |
| MmugDNA.37334.1.S1_at | MmugDNA.37334.1 | 8.33  | 8.77  | 0.73 | 0.15 | -1.35 | 0.26802  | 0.202025 | 0.628386 | 0.476448 |
| MmugDNA.37335.1.S1_at | MmugDNA.37335.1 | 4.57  | 4.72  | 0.21 | 0.06 | -1.11 | 0.969007 | 0.675034 | 0.989849 | 0.810141 |
| MmugDNA.37338.1.S1_at | MmugDNA.37338.1 | 7.93  | 7.87  | 0.1  | 0.12 | 1.04  | 0.96972  | 0.682096 | 0.990053 | 0.814349 |
| MmugDNA.37339.1.S1_at | MmugDNA.37339.1 | 14    | 13.84 | 0.05 | 0.05 | 1.12  | 0.020197 | 0.015934 | 0.303673 | 0.160235 |
| MmugDNA.3734.1.S1_at  | MmugDNA.3734.1  | 10.29 | 9.75  | 0.15 | 0.09 | 1.45  | 0.005643 | 0.002185 | 0.209598 | 0.069035 |
| MmugDNA.37340.1.S1_at | MmugDNA.37340.1 | 11.43 | 10.59 | 0.45 | 0.26 | 1.8   | 0.118708 | 0.095706 | 0.492161 | 0.352725 |
| MmugDNA.37342.1.S1_at | MmugDNA.37342.1 | 5.22  | 5.13  | 0.22 | 0.05 | 1.07  | 0.936223 | 0.482779 | 0.978537 | 0.687556 |
| MmugDNA.37344.1.S1_at | MmugDNA.37344.1 | 3.84  | 3.78  | 0.13 | 0.04 | 1.04  | 0.304244 | 0.039478 | 0.657902 | 0.243642 |
| MmugDNA.37347.1.S1_at | MmugDNA.37347.1 | 5.64  | 5.69  | 0.4  | 0.18 | -1.04 | 0.336011 | 0.517542 | 0.681441 | 0.709668 |
| MmugDNA.37349.1.S1_at | MmugDNA.37349.1 | 7.98  | 8.47  | 0.34 | 0.13 | -1.4  | 0.076406 | 0.007508 | 0.437977 | 0.116291 |
| MmugDNA.3735.1.S1_at  | MmugDNA.3735.1  | 9.06  | 8.57  | 0.5  | 0.12 | 1.41  | 0.399478 | 0.539469 | 0.723131 | 0.723763 |
| MmugDNA.37350.1.S1_at | MmugDNA.37350.1 | 6.92  | 6.76  | 0.08 | 0.23 | 1.11  | 0.313913 | 0.009418 | 0.664925 | 0.127871 |

|                         |                 |       |       |      |      |       |          |          |          |          |
|-------------------------|-----------------|-------|-------|------|------|-------|----------|----------|----------|----------|
| MmugDNA.37351.1.S1_at   | MmugDNA.37351.1 | 3.63  | 3.55  | 0.25 | 0.14 | 1.06  | 0.392745 | 0.369644 | 0.718592 | 0.608957 |
| MmugDNA.37352.1.S1_at   | MmugDNA.37352.1 | 11.27 | 11.36 | 0.33 | 0.08 | -1.06 | 0.350482 | 0.073072 | 0.691263 | 0.316017 |
| MmugDNA.37353.1.S1_at   | MmugDNA.37353.1 | 6.89  | 6.85  | 0.07 | 0.11 | 1.03  | 0.248117 | 0.156297 | 0.613685 | 0.43161  |
| MmugDNA.37354.1.S1_at   | MmugDNA.37354.1 | 4.87  | 4.76  | 0.04 | 0.14 | 1.08  | 0.207961 | 0.53434  | 0.579653 | 0.720334 |
| MmugDNA.37355.1.S1_at   | MmugDNA.37355.1 | 3.01  | 2.92  | 0.43 | 0.09 | 1.07  | 0.198499 | 0.231531 | 0.569807 | 0.503325 |
| MmugDNA.37356.1.S1_at   | MmugDNA.37356.1 | 4.99  | 5.09  | 0.4  | 0.2  | -1.07 | 0.657555 | 0.828582 | 0.864123 | 0.901537 |
| MmugDNA.37357.1.S1_at   | MmugDNA.37357.1 | 3.79  | 3.76  | 0.17 | 0.05 | 1.02  | 0.289441 | 0.6598   | 0.646114 | 0.800871 |
| MmugDNA.37358.1.S1_at   | MmugDNA.37358.1 | 3.48  | 3.63  | 0.07 | 0.32 | -1.11 | 0.228297 | 0.357341 | 0.597189 | 0.598949 |
| MmugDNA.37359.1.S1_at   | MmugDNA.37359.1 | 6.01  | 6.02  | 0.1  | 0.34 | -1.01 | 0.576432 | 0.774552 | 0.825166 | 0.868769 |
| MmugDNA.37360.1.S1_at   | MmugDNA.37360.1 | 8.31  | 7.85  | 0.44 | 0.09 | 1.37  | 0.139983 | 0.108599 | 0.515581 | 0.372171 |
| MmugDNA.37361.1.S1_at   | MmugDNA.37361.1 | 11.64 | 11.19 | 0.24 | 0.16 | -1.37 | 0.050659 | 0.063692 | 0.38762  | 0.298842 |
| MmugDNA.37363.1.S1_s_at | MmugDNA.37363.1 | 7.19  | 6.92  | 0.1  | 0.11 | 1.21  | 0.020276 | 0.027147 | 0.303799 | 0.205893 |
| MmugDNA.37365.1.S1_at   | MmugDNA.37365.1 | 5.78  | 5.77  | 0.11 | 0.47 | 1.01  | 0.875147 | 0.111217 | 0.956634 | 0.375856 |
| MmugDNA.37367.1.S1_at   | MmugDNA.37367.1 | 7.01  | 6.76  | 0.15 | 0.06 | 1.19  | 0.077914 | 0.154106 | 0.439987 | 0.42887  |
| MmugDNA.37368.1.S1_at   | MmugDNA.37368.1 | 9.41  | 9.06  | 0.33 | 0.25 | 1.28  | 0.163312 | 0.011017 | 0.536063 | 0.136715 |
| MmugDNA.37369.1.S1_x_at | MmugDNA.37369.1 | 8.11  | 8.14  | 0.29 | 0.07 | -1.02 | 0.982699 | 0.913411 | 0.994704 | 0.951233 |
| MmugDNA.3737.1.S1_at    | MmugDNA.3737.1  | 10.9  | 11.01 | 0.19 | 0.06 | -1.08 | 0.156336 | 0.153233 | 0.529536 | 0.428062 |
| MmugDNA.37370.1.S1_at   | MmugDNA.37370.1 | 5.89  | 5.57  | 0.1  | 0.04 | 1.25  | 0.011103 | 0.024718 | 0.252486 | 0.19685  |
| MmugDNA.37371.1.S1_at   | MmugDNA.37371.1 | 6.67  | 6.77  | 0.12 | 0.13 | -1.07 | 0.193584 | 0.50729  | 0.564275 | 0.702917 |
| MmugDNA.37372.1.S1_at   | MmugDNA.37372.1 | 7.44  | 6.94  | 0.46 | 0.17 | 1.41  | 0.184625 | 0.160876 | 0.557393 | 0.437116 |
| MmugDNA.37373.1.S1_at   | MmugDNA.37373.1 | 5.69  | 5.66  | 0.07 | 0.16 | 1.02  | 0.549483 | 0.812729 | 0.81033  | 0.891794 |
| MmugDNA.37375.1.S1_at   | MmugDNA.37375.1 | 5.51  | 6.7   | 0.39 | 0.54 | -2.28 | 0.020445 | 0.030968 | 0.303985 | 0.217844 |
| MmugDNA.37376.1.S1_at   | MmugDNA.37376.1 | 3.78  | 3.69  | 0.11 | 0.22 | 1.07  | 0.926946 | 0.800973 | 0.975766 | 0.885538 |
| MmugDNA.37377.1.S1_at   | MmugDNA.37377.1 | 3.89  | 3.95  | 0.33 | 0.14 | -1.04 | 0.362966 | 0.6315   | 0.699787 | 0.782845 |
| MmugDNA.37378.1.S1_at   | MmugDNA.37378.1 | 7.81  | 7.52  | 1.16 | 0.16 | 1.22  | 0.226802 | 0.161895 | 0.596222 | 0.437979 |
| MmugDNA.37379.1.S1_at   | MmugDNA.37379.1 | 3.9   | 3.93  | 0.16 | 0.2  | -1.02 | 0.866406 | 0.043105 | 0.953108 | 0.25227  |
| MmugDNA.3738.1.S1_at    | MmugDNA.3738.1  | 4.87  | 4.86  | 0.35 | 0.06 | 1     | 0.341831 | 0.154326 | 0.685438 | 0.429188 |
| MmugDNA.37380.1.S1_at   | MmugDNA.37380.1 | 5.12  | 5.14  | 0.14 | 0.02 | -1.02 | 0.542232 | 0.210794 | 0.805613 | 0.484883 |
| MmugDNA.37381.1.S1_at   | MmugDNA.37381.1 | 7.03  | 6.68  | 0.32 | 0.22 | 1.27  | 0.112363 | 0.051783 | 0.485655 | 0.273124 |
| MmugDNA.37382.1.S1_s_at | MmugDNA.37382.1 | 12.23 | 12.3  | 0.59 | 0.04 | -1.05 | 0.847367 | 0.250421 | 0.946525 | 0.519391 |
| MmugDNA.37383.1.S1_at   | MmugDNA.37383.1 | 6.55  | 6.54  | 0.34 | 0.43 | 1     | 0.924844 | 0.846836 | 0.974863 | 0.912887 |
| MmugDNA.37384.1.S1_at   | MmugDNA.37384.1 | 3.04  | 3.35  | 0.11 | 0.25 | -1.24 | 0.383809 | 0.319914 | 0.711503 | 0.572268 |
| MmugDNA.37386.1.S1_at   | MmugDNA.37386.1 | 8.71  | 10.12 | 0.69 | 0.3  | -2.65 | 0.125052 | 0.124443 | 0.499011 | 0.394865 |
| MmugDNA.37387.1.S1_at   | MmugDNA.37387.1 | 8.53  | 8.75  | 0.14 | 0.09 | -1.17 | 0.051026 | 0.120393 | 0.38874  | 0.38925  |
| MmugDNA.37387.1.S1_x_at | MmugDNA.37387.1 | 10.62 | 10.79 | 0.21 | 0.08 | -1.12 | 0.132038 | 0.13288  | 0.506472 | 0.404544 |
| MmugDNA.37388.1.S1_at   | MmugDNA.37388.1 | 9.86  | 10.36 | 0.24 | 0.14 | -1.41 | 0.039973 | 0.101493 | 0.362955 | 0.361307 |
| MmugDNA.3739.1.S1_at    | MmugDNA.3739.1  | 9.59  | 9.55  | 0.82 | 0.03 | 1.02  | 0.548554 | 0.642605 | 0.809836 | 0.790344 |
| MmugDNA.37390.1.S1_at   | MmugDNA.37390.1 | 8.31  | 8.1   | 0.23 | 0.23 | 1.16  | 0.255949 | 0.000134 | 0.619906 | 0.029087 |
| MmugDNA.37392.1.S1_at   | MmugDNA.37392.1 | 3.25  | 3.25  | 0.22 | 0.18 | 1     | 0.976627 | 0.979325 | 0.992376 | 0.988846 |
| MmugDNA.37394.1.S1_at   | MmugDNA.37394.1 | 5.09  | 4.82  | 0.19 | 0.11 | 1.21  | 0.225029 | 0.118139 | 0.594284 | 0.386045 |
| MmugDNA.37395.1.S1_at   | MmugDNA.37395.1 | 4.45  | 4.39  | 0.19 | 0.18 | 1.05  | 0.556043 | 0.798614 | 0.813904 | 0.884032 |
| MmugDNA.37396.1.S1_at   | MmugDNA.37396.1 | 2.9   | 2.9   | 0.09 | 0.12 | -1    | 0.889003 | 0.652534 | 0.961755 | 0.796827 |
| MmugDNA.37397.1.S1_at   | MmugDNA.37397.1 | 6.39  | 6.37  | 0.04 | 0.04 | 1.01  | 0.220555 | 0.306642 | 0.589765 | 0.563221 |

|                         |                 |       |       |      |      |       |          |          |          |          |
|-------------------------|-----------------|-------|-------|------|------|-------|----------|----------|----------|----------|
| MmugDNA.37398.1.S1_at   | MmugDNA.37398.1 | 9.01  | 8.95  | 0.22 | 0.07 | 1.05  | 0.275002 | 0.251967 | 0.634292 | 0.520646 |
| MmugDNA.37399.1.S1_at   | MmugDNA.37399.1 | 8.11  | 8.18  | 0.25 | 0.08 | -1.05 | 0.676117 | 0.268478 | 0.872971 | 0.534123 |
| MmugDNA.374.1.S1_at     | MmugDNA.374.1   | 5.25  | 5.23  | 0.04 | 0.15 | 1.01  | 0.396996 | 0.116431 | 0.721621 | 0.383671 |
| MmugDNA.3740.1.S1_at    | MmugDNA.3740.1  | 4.81  | 4.86  | 0.12 | 0.08 | -1.03 | 0.453794 | 0.804344 | 0.756276 | 0.887476 |
| MmugDNA.37400.1.S1_at   | MmugDNA.37400.1 | 9.65  | 9.67  | 0.37 | 0.06 | -1.01 | 0.919827 | 0.960134 | 0.972825 | 0.977408 |
| MmugDNA.37401.1.S1_at   | MmugDNA.37401.1 | 4.07  | 4.19  | 0.49 | 0.43 | -1.09 | 0.799579 | 0.942511 | 0.926629 | 0.967399 |
| MmugDNA.37402.1.S1_at   | MmugDNA.37402.1 | 6.41  | 6.56  | 0.54 | 0.05 | -1.11 | 0.737063 | 0.215469 | 0.899319 | 0.489168 |
| MmugDNA.37405.1.S1_at   | MmugDNA.37405.1 | 9.69  | 9.73  | 0.21 | 0.27 | -1.02 | 0.941948 | 0.261726 | 0.980221 | 0.528157 |
| MmugDNA.37409.1.S1_at   | MmugDNA.37409.1 | 4.16  | 3.97  | 0.33 | 0.04 | 1.13  | 0.976192 | 0.599354 | 0.992259 | 0.761418 |
| MmugDNA.37411.1.S1_at   | MmugDNA.37411.1 | 7.43  | 7.45  | 0.07 | 0.04 | -1.02 | 0.437525 | 0.002246 | 0.746843 | 0.069739 |
| MmugDNA.37412.1.S1_at   | MmugDNA.37412.1 | 8.59  | 9.05  | 0.37 | 0.17 | -1.37 | 0.211977 | 0.173451 | 0.582752 | 0.449938 |
| MmugDNA.37413.1.S1_at   | MmugDNA.37413.1 | 4.95  | 4.79  | 0.07 | 0.08 | 1.12  | 0.061084 | 0.312584 | 0.409957 | 0.567268 |
| MmugDNA.37415.1.S1_at   | MmugDNA.37415.1 | 7.91  | 8.03  | 0.21 | 0.04 | -1.08 | 0.998342 | 0.828293 | 0.999476 | 0.901315 |
| MmugDNA.37416.1.S1_at   | MmugDNA.37416.1 | 7.43  | 6.72  | 1.03 | 0.44 | 1.63  | 0.321083 | 0.155698 | 0.669666 | 0.431054 |
| MmugDNA.37417.1.S1_s_at | MmugDNA.37417.1 | 8.24  | 8.19  | 0.21 | 0.08 | 1.04  | 0.957332 | 0.694354 | 0.985942 | 0.822254 |
| MmugDNA.37418.1.S1_at   | MmugDNA.37418.1 | 10.47 | 10.24 | 0.08 | 0.06 | 1.18  | 0.011155 | 0.180214 | 0.252629 | 0.456777 |
| MmugDNA.37419.1.S1_at   | MmugDNA.37419.1 | 2.99  | 2.76  | 0.24 | 0.07 | 1.17  | 0.256744 | 0.408819 | 0.620689 | 0.6359   |
| MmugDNA.3742.1.S1_at    | MmugDNA.3742.1  | 12.56 | 12.48 | 0.03 | 0.09 | 1.06  | 0.067393 | 0.071304 | 0.423738 | 0.31334  |
| MmugDNA.37421.1.S1_at   | MmugDNA.37421.1 | 5.13  | 4.94  | 0.11 | 0.13 | 1.14  | 0.055084 | 0.284339 | 0.397965 | 0.54659  |
| MmugDNA.37423.1.S1_at   | MmugDNA.37423.1 | 3.37  | 3.38  | 0.27 | 0.07 | -1    | 0.950673 | 0.537027 | 0.983335 | 0.722236 |
| MmugDNA.37424.1.S1_at   | MmugDNA.37424.1 | 4.6   | 4.28  | 0.13 | 0.17 | 1.25  | 0.031493 | 0.000804 | 0.341227 | 0.04607  |
| MmugDNA.37425.1.S1_at   | MmugDNA.37425.1 | 5.27  | 5.25  | 0.15 | 0.12 | 1.02  | 0.885933 | 0.591264 | 0.960399 | 0.75685  |
| MmugDNA.37427.1.S1_at   | MmugDNA.37427.1 | 6.73  | 6.73  | 0.01 | 0.05 | -1    | 0.439545 | 0.889698 | 0.748221 | 0.937154 |
| MmugDNA.37428.1.S1_at   | MmugDNA.37428.1 | 8.59  | 8.56  | 0.57 | 0.15 | 1.02  | 0.97934  | 0.988727 | 0.993437 | 0.993595 |
| MmugDNA.37429.1.S1_at   | MmugDNA.37429.1 | 3.14  | 3.02  | 0.14 | 0.05 | 1.09  | 0.220871 | 0.394048 | 0.59019  | 0.626734 |
| MmugDNA.37432.1.S1_at   | MmugDNA.37432.1 | 4.11  | 4.03  | 0    | 0.07 | 1.06  | 0.351059 | 0.342861 | 0.691811 | 0.588712 |
| MmugDNA.37433.1.S1_at   | MmugDNA.37433.1 | 4.55  | 4.51  | 0.06 | 0.08 | 1.03  | 0.167109 | 0.337258 | 0.539661 | 0.584455 |
| MmugDNA.37434.1.S1_at   | MmugDNA.37434.1 | 11.51 | 11.31 | 0.21 | 0.15 | 1.15  | 0.556478 | 0.733836 | 0.814119 | 0.845891 |
| MmugDNA.37435.1.S1_s_at | MmugDNA.37435.1 | 2.45  | 2.51  | 0.03 | 0.1  | -1.04 | 0.529201 | 0.711125 | 0.798203 | 0.832417 |
| MmugDNA.37436.1.S1_at   | MmugDNA.37436.1 | 10.96 | 10.89 | 0.43 | 0.13 | 1.06  | 0.520917 | 0.70464  | 0.794207 | 0.828661 |
| MmugDNA.37437.1.S1_at   | MmugDNA.37437.1 | 3.05  | 3.12  | 0.12 | 0.08 | -1.05 | 0.955717 | 0.992643 | 0.985346 | 0.995715 |
| MmugDNA.37438.1.S1_at   | MmugDNA.37438.1 | 4.27  | 4.27  | 0.32 | 0.1  | 1     | 0.283843 | 0.694082 | 0.641639 | 0.82208  |
| MmugDNA.37439.1.S1_at   | MmugDNA.37439.1 | 9.94  | 10.11 | 0.39 | 0.12 | -1.12 | 0.212277 | 0.192793 | 0.582812 | 0.468274 |
| MmugDNA.3744.1.S1_at    | MmugDNA.3744.1  | 5.83  | 6.14  | 0.51 | 0.36 | -1.24 | 0.425772 | 0.802945 | 0.740112 | 0.886524 |
| MmugDNA.37440.1.S1_at   | MmugDNA.37440.1 | 9.54  | 8.82  | 0.53 | 0.23 | 1.65  | 0.097282 | 0.055622 | 0.466086 | 0.281649 |
| MmugDNA.37441.1.S1_s_at | MmugDNA.37441.1 | 7.66  | 7.65  | 0.19 | 0.1  | 1.01  | 0.704034 | 0.800143 | 0.884936 | 0.885076 |
| MmugDNA.37442.1.S1_at   | MmugDNA.37442.1 | 6.87  | 7.67  | 0.76 | 0.11 | -1.75 | 0.229028 | 0.32408  | 0.597964 | 0.574761 |
| MmugDNA.37443.1.S1_at   | MmugDNA.37443.1 | 7.16  | 6.35  | 1.6  | 0.19 | 1.76  | 0.910928 | 0.887298 | 0.969778 | 0.93582  |
| MmugDNA.37445.1.S1_at   | MmugDNA.37445.1 | 6.98  | 6.74  | 0.01 | 0.05 | 1.18  | 0.00107  | 0.019458 | 0.155464 | 0.175136 |
| MmugDNA.37446.1.S1_at   | MmugDNA.37446.1 | 7.03  | 5.61  | 1.41 | 0.51 | 2.67  | 0.255763 | 0.252767 | 0.61975  | 0.521174 |
| MmugDNA.37447.1.S1_at   | MmugDNA.37447.1 | 11.88 | 12.18 | 0.12 | 0.04 | -1.23 | 0.029316 | 0.004563 | 0.334049 | 0.094373 |
| MmugDNA.37449.1.S1_s_at | MmugDNA.37449.1 | 7.3   | 6.99  | 0.17 | 0.14 | 1.24  | 0.059418 | 0.001316 | 0.406303 | 0.055939 |
| MmugDNA.3745.1.S1_at    | MmugDNA.3745.1  | 6.67  | 6.57  | 0.14 | 0.08 | 1.07  | 0.316899 | 0.304223 | 0.666834 | 0.561558 |

|                         |                 |       |       |      |      |       |          |          |          |          |
|-------------------------|-----------------|-------|-------|------|------|-------|----------|----------|----------|----------|
| MmugDNA.37452.1.S1_at   | MmugDNA.37452.1 | 3.14  | 3.15  | 0.1  | 0.12 | -1    | 0.875853 | 0.27088  | 0.956816 | 0.536026 |
| MmugDNA.37453.1.S1_at   | MmugDNA.37453.1 | 11.24 | 11.11 | 0.22 | 0.02 | 1.1   | 0.361449 | 0.350085 | 0.698655 | 0.593862 |
| MmugDNA.37453.1.S1_s_at | MmugDNA.37453.1 | 5.7   | 5.72  | 0.09 | 0.34 | -1.02 | 0.84833  | 0.969791 | 0.946776 | 0.983498 |
| MmugDNA.37454.1.S1_at   | MmugDNA.37454.1 | 6     | 7.33  | 0.86 | 0.16 | -2.51 | 0.178061 | 0.188212 | 0.551187 | 0.464251 |
| MmugDNA.37455.1.S1_at   | MmugDNA.37455.1 | 7.85  | 7.55  | 1.24 | 0.11 | 1.23  | 0.780019 | 0.546917 | 0.918949 | 0.728281 |
| MmugDNA.37456.1.S1_at   | MmugDNA.37456.1 | 3.02  | 3.03  | 0.01 | 0.06 | -1.01 | 0.42331  | 0.162009 | 0.738996 | 0.438108 |
| MmugDNA.37457.1.S1_at   | MmugDNA.37457.1 | 5.15  | 5.47  | 0.15 | 0.49 | -1.24 | 0.451114 | 0.398411 | 0.755027 | 0.629374 |
| MmugDNA.37458.1.S1_at   | MmugDNA.37458.1 | 6.61  | 6.46  | 0.04 | 0.08 | 1.11  | 0.082715 | 0.549686 | 0.447936 | 0.730002 |
| MmugDNA.37459.1.S1_at   | MmugDNA.37459.1 | 4.77  | 4.63  | 0.13 | 0.1  | 1.1   | 0.223889 | 0.418833 | 0.59298  | 0.643118 |
| MmugDNA.37460.1.S1_at   | MmugDNA.37460.1 | 7.12  | 6.81  | 0.07 | 0.17 | 1.24  | 0.028877 | 0.036262 | 0.333062 | 0.235    |
| MmugDNA.37462.1.S1_at   | MmugDNA.37462.1 | 10.37 | 8.96  | 0.99 | 0.13 | 2.65  | 0.23401  | 0.296401 | 0.601531 | 0.555509 |
| MmugDNA.37463.1.S1_at   | MmugDNA.37463.1 | 9.24  | 8.69  | 0.19 | 0.08 | 1.47  | 0.012705 | 0.000644 | 0.26403  | 0.042928 |
| MmugDNA.37464.1.S1_at   | MmugDNA.37464.1 | 5.87  | 5.77  | 0.26 | 0.08 | 1.07  | 0.927315 | 0.986901 | 0.975922 | 0.992589 |
| MmugDNA.37465.1.S1_at   | MmugDNA.37465.1 | 4.02  | 3.97  | 0.15 | 0.06 | 1.03  | 0.340456 | 0.49529  | 0.684528 | 0.695411 |
| MmugDNA.37466.1.S1_at   | MmugDNA.37466.1 | 5.18  | 5.41  | 0.29 | 0.09 | -1.17 | 0.719904 | 0.156308 | 0.891311 | 0.43161  |
| MmugDNA.37468.1.S1_at   | MmugDNA.37468.1 | 3.35  | 3.37  | 0.13 | 0.2  | -1.02 | 0.244475 | 0.088215 | 0.61     | 0.341721 |
| MmugDNA.37469.1.S1_at   | MmugDNA.37469.1 | 7.26  | 7.45  | 0.08 | 0.3  | -1.15 | 0.627463 | 0.171937 | 0.850547 | 0.448352 |
| MmugDNA.37469.1.S1_x_at | MmugDNA.37469.1 | 7.3   | 7.48  | 0.07 | 0.29 | -1.14 | 0.38895  | 0.430999 | 0.715867 | 0.651988 |
| MmugDNA.3747.1.S1_at    | MmugDNA.3747.1  | 10.48 | 9.68  | 0.13 | 0.19 | 1.74  | 0.004431 | 0.000941 | 0.198874 | 0.049026 |
| MmugDNA.37471.1.S1_at   | MmugDNA.37471.1 | 4.52  | 4.53  | 0.15 | 0.1  | -1.01 | 0.683653 | 0.301496 | 0.876134 | 0.559542 |
| MmugDNA.37473.1.S1_at   | MmugDNA.37473.1 | 3.69  | 3.8   | 0.04 | 0.19 | -1.08 | 0.291729 | 0.195646 | 0.648076 | 0.470491 |
| MmugDNA.37476.1.S1_at   | MmugDNA.37476.1 | 5.39  | 5.38  | 0.11 | 0.01 | 1.01  | 0.498144 | 0.872597 | 0.781592 | 0.927568 |
| MmugDNA.37477.1.S1_at   | MmugDNA.37477.1 | 4.23  | 4.32  | 0.33 | 0.09 | -1.06 | 0.72388  | 0.405126 | 0.892935 | 0.633482 |
| MmugDNA.37478.1.S1_at   | MmugDNA.37478.1 | 4.4   | 4.37  | 0.18 | 0.14 | 1.02  | 0.981311 | 0.152601 | 0.994003 | 0.427435 |
| MmugDNA.37479.1.S1_at   | MmugDNA.37479.1 | 8.66  | 8.48  | 1.23 | 0.18 | 1.13  | 0.76891  | 0.396647 | 0.913366 | 0.628434 |
| MmugDNA.3748.1.S1_at    | MmugDNA.3748.1  | 9.95  | 9.85  | 1.64 | 0.04 | 1.07  | 0.422532 | 0.550316 | 0.738218 | 0.730382 |
| MmugDNA.37480.1.S1_at   | MmugDNA.37480.1 | 6.25  | 6.19  | 0.23 | 0.05 | 1.04  | 0.700096 | 0.870344 | 0.883403 | 0.92644  |
| MmugDNA.37481.1.S1_at   | MmugDNA.37481.1 | 4.18  | 3.9   | 0.31 | 0.06 | 1.21  | 0.604389 | 0.76208  | 0.839628 | 0.861632 |
| MmugDNA.37482.1.S1_at   | MmugDNA.37482.1 | 6.3   | 6.16  | 0.01 | 0.15 | 1.1   | 0.551081 | 0.395784 | 0.811221 | 0.627643 |
| MmugDNA.37483.1.S1_at   | MmugDNA.37483.1 | 6.49  | 7.8   | 0.18 | 0.16 | -2.47 | 0.001007 | 0.000164 | 0.155374 | 0.030506 |
| MmugDNA.37484.1.S1_at   | MmugDNA.37484.1 | 5.48  | 5.48  | 0.36 | 0.07 | 1     | 0.541582 | 0.628992 | 0.805185 | 0.781575 |
| MmugDNA.37485.1.S1_at   | MmugDNA.37485.1 | 6.74  | 7.19  | 0.14 | 0.1  | -1.37 | 0.02076  | 0.246396 | 0.305611 | 0.515899 |
| MmugDNA.37486.1.S1_at   | MmugDNA.37486.1 | 10.01 | 9.51  | 0.28 | 0.11 | 1.42  | 0.02593  | 0.000718 | 0.32273  | 0.044419 |
| MmugDNA.37487.1.S1_at   | MmugDNA.37487.1 | 5.14  | 5.24  | 0.58 | 0.84 | -1.07 | 0.696906 | 0.929445 | 0.882175 | 0.959707 |
| MmugDNA.37489.1.S1_at   | MmugDNA.37489.1 | 12.29 | 12.2  | 0.83 | 0.07 | 1.06  | 0.929157 | 0.179108 | 0.976333 | 0.455436 |
| MmugDNA.37490.1.S1_at   | MmugDNA.37490.1 | 4.15  | 4.25  | 0.09 | 0.08 | -1.07 | 0.228844 | 0.58583  | 0.597867 | 0.753068 |
| MmugDNA.37491.1.S1_at   | MmugDNA.37491.1 | 3.12  | 2.9   | 0.34 | 0.23 | 1.16  | 0.217425 | 0.190254 | 0.587269 | 0.465897 |
| MmugDNA.37492.1.S1_at   | MmugDNA.37492.1 | 4.41  | 4.27  | 0.18 | 0.05 | 1.11  | 0.721758 | 0.860157 | 0.892101 | 0.920266 |
| MmugDNA.37493.1.S1_at   | MmugDNA.37493.1 | 3.52  | 3.58  | 0.06 | 0.16 | -1.04 | 0.263755 | 0.202303 | 0.625638 | 0.476691 |
| MmugDNA.37495.1.S1_at   | MmugDNA.37495.1 | 4.75  | 4.52  | 0.58 | 0.23 | 1.17  | 0.302619 | 0.39314  | 0.656542 | 0.626102 |
| MmugDNA.37496.1.S1_at   | MmugDNA.37496.1 | 8.11  | 7.37  | 0.47 | 0.01 | 1.67  | 0.159612 | 0.120768 | 0.532583 | 0.389579 |
| MmugDNA.3750.1.S1_at    | MmugDNA.3750.1  | 8.76  | 8.26  | 0.5  | 0.17 | 1.41  | 0.064666 | 0.044916 | 0.418501 | 0.256424 |
| MmugDNA.37501.1.S1_at   | MmugDNA.37501.1 | 4.59  | 4.32  | 0.17 | 0.05 | 1.2   | 0.078856 | 0.041348 | 0.441464 | 0.247995 |



|                         |                 |       |       |      |      |       |          |          |          |          |
|-------------------------|-----------------|-------|-------|------|------|-------|----------|----------|----------|----------|
| MmugDNA.37506.1.S1_at   | MmugDNA.37506.1 | 6.59  | 6.63  | 0.15 | 0    | -1.03 | 0.26141  | 0.085314 | 0.623819 | 0.337155 |
| MmugDNA.37507.1.S1_at   | MmugDNA.37507.1 | 7.81  | 7.89  | 0.36 | 0.13 | -1.06 | 0.553143 | 0.088658 | 0.811981 | 0.342186 |
| MmugDNA.37508.1.S1_at   | MmugDNA.37508.1 | 3.16  | 3.06  | 0.18 | 0.22 | 1.07  | 0.621889 | 0.823175 | 0.847631 | 0.898361 |
| MmugDNA.37509.1.S1_at   | MmugDNA.37509.1 | 5.51  | 5.45  | 0.27 | 0.1  | 1.04  | 0.68488  | 0.858044 | 0.876588 | 0.919048 |
| MmugDNA.3751.1.S1_at    | MmugDNA.3751.1  | 8.73  | 8.67  | 1.52 | 0.08 | 1.04  | 0.38221  | 0.455559 | 0.710505 | 0.669553 |
| MmugDNA.37510.1.S1_at   | MmugDNA.37510.1 | 4.2   | 4.08  | 1.09 | 0.61 | 1.09  | 0.453731 | 0.468768 | 0.756276 | 0.677885 |
| MmugDNA.37511.1.S1_at   | MmugDNA.37511.1 | 8.65  | 8.85  | 0.44 | 0.2  | -1.15 | 0.965014 | 0.245285 | 0.988532 | 0.515054 |
| MmugDNA.37514.1.S1_at   | MmugDNA.37514.1 | 5.88  | 5.72  | 0.14 | 0.08 | 1.12  | 0.346868 | 0.551959 | 0.688435 | 0.731387 |
| MmugDNA.37515.1.S1_at   | MmugDNA.37515.1 | 12.27 | 12.02 | 0.1  | 0.03 | 1.19  | 0.014307 | 0.001044 | 0.274633 | 0.051426 |
| MmugDNA.37518.1.S1_s_at | MmugDNA.37518.1 | 11.79 | 11.76 | 0.14 | 0.15 | 1.02  | 0.357016 | 0.237007 | 0.695443 | 0.507675 |
| MmugDNA.37519.1.S1_at   | MmugDNA.37519.1 | 8.72  | 8.63  | 0.25 | 0.32 | -1.06 | 0.626897 | 0.819794 | 0.850246 | 0.896181 |
| MmugDNA.3752.1.S1_at    | MmugDNA.3752.1  | 6.2   | 6.5   | 0.42 | 0.42 | -1.23 | 0.178052 | 0.047607 | 0.551187 | 0.262982 |
| MmugDNA.37521.1.S1_at   | MmugDNA.37521.1 | 4.3   | 4.12  | 0.2  | 0.18 | 1.13  | 0.59778  | 0.672983 | 0.836527 | 0.808905 |
| MmugDNA.37523.1.S1_at   | MmugDNA.37523.1 | 5.88  | 6.34  | 0.71 | 0.49 | -1.38 | 0.724807 | 0.622122 | 0.893274 | 0.77667  |
| MmugDNA.37524.1.S1_at   | MmugDNA.37524.1 | 4.22  | 5.36  | 0.5  | 0.45 | -2.19 | 0.09983  | 0.183877 | 0.469818 | 0.460019 |
| MmugDNA.37525.1.S1_at   | MmugDNA.37525.1 | 3.65  | 3.57  | 0.25 | 0.03 | 1.06  | 0.317239 | 0.421686 | 0.667045 | 0.645222 |
| MmugDNA.37526.1.S1_at   | MmugDNA.37526.1 | 5.66  | 5.93  | 0.34 | 0.04 | -1.2  | 0.744307 | 0.750814 | 0.902542 | 0.855074 |
| MmugDNA.37527.1.S1_at   | MmugDNA.37527.1 | 6.6   | 6.6   | 0.77 | 0.42 | 1     | 0.999449 | 0.955333 | 0.999871 | 0.974645 |
| MmugDNA.37528.1.S1_at   | MmugDNA.37528.1 | 6.57  | 6.8   | 0.2  | 0.61 | -1.17 | 0.188349 | 0.316099 | 0.560439 | 0.569548 |
| MmugDNA.3753.1.S1_at    | MmugDNA.3753.1  | 9.86  | 9.71  | 0.21 | 0.04 | 1.11  | 0.197663 | 0.14111  | 0.568636 | 0.414602 |
| MmugDNA.37530.1.S1_at   | MmugDNA.37530.1 | 4.25  | 4.57  | 0.1  | 0.44 | -1.24 | 0.255365 | 0.146011 | 0.619432 | 0.420006 |
| MmugDNA.37531.1.S1_at   | MmugDNA.37531.1 | 5.68  | 5.62  | 0.22 | 0.06 | 1.04  | 0.231619 | 0.317367 | 0.599604 | 0.570608 |
| MmugDNA.37532.1.S1_at   | MmugDNA.37532.1 | 3.11  | 3.12  | 0.14 | 0.04 | -1    | 0.470704 | 0.638562 | 0.766173 | 0.787698 |
| MmugDNA.37533.1.S1_at   | MmugDNA.37533.1 | 3.62  | 3.61  | 0.17 | 0.05 | 1.01  | 0.248842 | 0.386795 | 0.614173 | 0.621895 |
| MmugDNA.37534.1.S1_at   | MmugDNA.37534.1 | 10    | 10.18 | 0.34 | 0    | -1.13 | 0.372026 | 0.427037 | 0.705567 | 0.649087 |
| MmugDNA.37535.1.S1_at   | MmugDNA.37535.1 | 5.42  | 5.34  | 0.25 | 0.74 | 1.06  | 0.566299 | 0.832191 | 0.819955 | 0.903715 |
| MmugDNA.37536.1.S1_at   | MmugDNA.37536.1 | 10.08 | 9.82  | 0.21 | 0.3  | 1.2   | 0.807807 | 0.984817 | 0.930304 | 0.991445 |
| MmugDNA.37538.1.S1_at   | MmugDNA.37538.1 | 4.34  | 4.18  | 0.26 | 0.11 | 1.12  | 0.864175 | 0.410517 | 0.952247 | 0.637357 |
| MmugDNA.37539.1.S1_at   | MmugDNA.37539.1 | 4.59  | 4.42  | 0.05 | 0.24 | 1.13  | 0.823535 | 0.093847 | 0.936302 | 0.350298 |
| MmugDNA.37540.1.S1_at   | MmugDNA.37540.1 | 6.92  | 6.64  | 0.07 | 0.12 | 1.22  | 0.059384 | 0.077983 | 0.406303 | 0.324306 |
| MmugDNA.37541.1.S1_at   | MmugDNA.37541.1 | 3.94  | 3.91  | 0.09 | 0.15 | 1.02  | 0.313588 | 0.171158 | 0.664799 | 0.447735 |
| MmugDNA.37545.1.S1_at   | MmugDNA.37545.1 | 5.46  | 5.13  | 0.11 | 0.15 | 1.25  | 0.074698 | 0.067571 | 0.435313 | 0.306045 |
| MmugDNA.37547.1.S1_at   | MmugDNA.37547.1 | 7.57  | 7.84  | 0.34 | 0.13 | -1.21 | 0.287269 | 0.328399 | 0.644369 | 0.578066 |
| MmugDNA.37548.1.S1_at   | MmugDNA.37548.1 | 5.95  | 5.96  | 0.06 | 0.26 | -1.01 | 0.922319 | 0.446251 | 0.973786 | 0.662743 |
| MmugDNA.37549.1.S1_at   | MmugDNA.37549.1 | 4.51  | 4.65  | 0.78 | 0.38 | -1.1  | 0.602496 | 0.570059 | 0.838885 | 0.742855 |
| MmugDNA.3755.1.S1_at    | MmugDNA.3755.1  | 4.67  | 4.74  | 0.32 | 0.22 | -1.05 | 0.511851 | 0.370717 | 0.788916 | 0.609721 |
| MmugDNA.37550.1.S1_at   | MmugDNA.37550.1 | 4.56  | 4.54  | 0.06 | 0.13 | 1.01  | 0.32851  | 0.377904 | 0.67577  | 0.615264 |
| MmugDNA.37551.1.S1_at   | MmugDNA.37551.1 | 8.29  | 7.81  | 0.45 | 0.3  | 1.39  | 0.051798 | 0.01822  | 0.391412 | 0.169777 |
| MmugDNA.37551.1.S1_s_at | MmugDNA.37551.1 | 8.23  | 7.53  | 0.39 | 0.21 | 1.62  | 0.01535  | 0.005759 | 0.281111 | 0.104378 |
| MmugDNA.37552.1.S1_at   | MmugDNA.37552.1 | 5.6   | 5.36  | 0.22 | 0.12 | 1.18  | 0.161254 | 0.381385 | 0.534529 | 0.617681 |
| MmugDNA.37555.1.S1_at   | MmugDNA.37555.1 | 5.91  | 6.03  | 0.67 | 0.09 | -1.09 | 0.288686 | 0.683325 | 0.645686 | 0.815238 |
| MmugDNA.37556.1.S1_at   | MmugDNA.37556.1 | 5.39  | 5.01  | 0.15 | 0.17 | 1.3   | 0.045609 | 0.132853 | 0.376875 | 0.404544 |
| MmugDNA.37559.1.S1_at   | MmugDNA.37559.1 | 4.37  | 4.46  | 0.16 | 0.14 | -1.07 | 0.46659  | 0.46436  | 0.76371  | 0.67504  |

|                         |                 |       |       |      |      |       |          |          |          |          |
|-------------------------|-----------------|-------|-------|------|------|-------|----------|----------|----------|----------|
| MmugDNA.3756.1.S1_at    | MmugDNA.3756.1  | 11.15 | 11.79 | 0.29 | 0.12 | -1.56 | 0.012183 | 0.002591 | 0.260124 | 0.075326 |
| MmugDNA.37560.1.S1_at   | MmugDNA.37560.1 | 4.54  | 4.39  | 0.1  | 0.26 | 1.11  | 0.988158 | 0.870491 | 0.995863 | 0.926446 |
| MmugDNA.37562.1.S1_at   | MmugDNA.37562.1 | 3.97  | 3.81  | 0.14 | 0.14 | 1.12  | 0.599077 | 0.453962 | 0.837258 | 0.668338 |
| MmugDNA.37565.1.S1_at   | MmugDNA.37565.1 | 5.68  | 5.18  | 0.78 | 0.36 | 1.41  | 0.232997 | 0.545559 | 0.600437 | 0.727579 |
| MmugDNA.37567.1.S1_at   | MmugDNA.37567.1 | 3.66  | 3.56  | 0.23 | 0.12 | 1.07  | 0.831378 | 0.718162 | 0.939628 | 0.836893 |
| MmugDNA.37568.1.S1_at   | MmugDNA.37568.1 | 4.34  | 5     | 0.17 | 0.36 | -1.58 | 0.076547 | 0.022003 | 0.437977 | 0.18564  |
| MmugDNA.37569.1.S1_at   | MmugDNA.37569.1 | 5.34  | 5.43  | 0.15 | 0.11 | -1.06 | 0.586896 | 0.580739 | 0.831559 | 0.749903 |
| MmugDNA.3757.1.S1_at    | MmugDNA.3757.1  | 7.39  | 9.44  | 1.65 | 0.21 | -4.15 | 0.075545 | 0.059735 | 0.436722 | 0.29107  |
| MmugDNA.37570.1.S1_at   | MmugDNA.37570.1 | 5.71  | 5.54  | 0.01 | 0.18 | 1.13  | 0.584958 | 0.450627 | 0.830162 | 0.665844 |
| MmugDNA.37571.1.S1_at   | MmugDNA.37571.1 | 3.1   | 3.92  | 0.33 | 0.52 | -1.76 | 0.220283 | 0.339933 | 0.589578 | 0.586449 |
| MmugDNA.37573.1.S1_at   | MmugDNA.37573.1 | 4     | 3.88  | 0.11 | 0.04 | 1.09  | 0.049017 | 0.071767 | 0.385152 | 0.314019 |
| MmugDNA.37574.1.S1_at   | MmugDNA.37574.1 | 3.99  | 3.6   | 0.3  | 0.19 | 1.32  | 0.106441 | 0.137744 | 0.478853 | 0.410738 |
| MmugDNA.37576.1.S1_at   | MmugDNA.37576.1 | 6.99  | 7.3   | 0.25 | 0.47 | -1.24 | 0.128801 | 0.283469 | 0.503567 | 0.545959 |
| MmugDNA.37577.1.S1_at   | MmugDNA.37577.1 | 6.32  | 6.55  | 0.24 | 0.35 | -1.17 | 0.680917 | 0.033974 | 0.874873 | 0.227969 |
| MmugDNA.38737.1.S1_s_at | MmugDNA.38737.1 | 9.69  | 10.51 | 0.32 | 0.05 | -1.77 | 0.011203 | 0.00352  | 0.252783 | 0.085137 |
| MmugDNA.37579.1.S1_at   | MmugDNA.37579.1 | 4.14  | 4.26  | 0.14 | 0.14 | -1.09 | 0.363479 | 0.523    | 0.700102 | 0.713429 |
| MmugDNA.3758.1.S1_at    | MmugDNA.3758.1  | 5.19  | 5.12  | 0.02 | 0.09 | 1.05  | 0.126125 | 0.084946 | 0.499873 | 0.336556 |
| MmugDNA.37580.1.S1_at   | MmugDNA.37580.1 | 3.75  | 3.4   | 0.18 | 0.12 | 1.27  | 0.139788 | 0.124468 | 0.5153   | 0.394865 |
| MmugDNA.37581.1.S1_at   | MmugDNA.37581.1 | 4.62  | 4.54  | 0.08 | 0.03 | 1.06  | 0.284366 | 0.040596 | 0.642299 | 0.246342 |
| MmugDNA.37582.1.S1_at   | MmugDNA.37582.1 | 3.45  | 3.34  | 0.04 | 0.17 | 1.08  | 0.374305 | 0.28386  | 0.705837 | 0.546237 |
| MmugDNA.37583.1.S1_at   | MmugDNA.37583.1 | 7.12  | 7.08  | 0.03 | 0.1  | 1.03  | 0.17278  | 0.21677  | 0.545887 | 0.490311 |
| MmugDNA.37585.1.S1_at   | MmugDNA.37585.1 | 3.84  | 4.19  | 0.29 | 0.66 | -1.28 | 0.309935 | 0.378428 | 0.661902 | 0.615443 |
| MmugDNA.37586.1.S1_at   | MmugDNA.37586.1 | 4.39  | 4.14  | 0.11 | 0.09 | 1.2   | 0.034482 | 0.065769 | 0.350081 | 0.301767 |
| MmugDNA.37588.1.S1_at   | MmugDNA.37588.1 | 5.04  | 4.58  | 0.23 | 0.07 | 1.37  | 0.026606 | 0.001536 | 0.325515 | 0.059437 |
| MmugDNA.37589.1.S1_at   | MmugDNA.37589.1 | 9.19  | 9.25  | 0.31 | 0.14 | -1.04 | 0.791269 | 0.758898 | 0.923348 | 0.859892 |
| MmugDNA.37590.1.S1_at   | MmugDNA.37590.1 | 9.07  | 8.62  | 0.18 | 0.12 | 1.36  | 0.012081 | 0.030538 | 0.259302 | 0.216711 |
| MmugDNA.37592.1.S1_at   | MmugDNA.37592.1 | 4.31  | 4.37  | 0.45 | 0.07 | -1.04 | 0.556576 | 0.413155 | 0.814196 | 0.639461 |
| MmugDNA.37594.1.S1_at   | MmugDNA.37594.1 | 7.8   | 7.79  | 0.11 | 0    | 1.01  | 0.688513 | 0.760316 | 0.878421 | 0.860743 |
| MmugDNA.37595.1.S1_at   | MmugDNA.37595.1 | 10.55 | 10.12 | 0.09 | 0.06 | 1.34  | 0.004038 | 0.034217 | 0.198571 | 0.228795 |
| MmugDNA.37595.1.S1_s_at | MmugDNA.37595.1 | 10.98 | 10.33 | 0.03 | 0.04 | 1.57  | 0.000021 | 0.000484 | 0.108151 | 0.038753 |
| MmugDNA.37596.1.S1_at   | MmugDNA.37596.1 | 5.5   | 5.85  | 0.22 | 0.17 | -1.27 | 0.078425 | 0.054151 | 0.441003 | 0.278068 |
| MmugDNA.37597.1.S1_at   | MmugDNA.37597.1 | 5.71  | 5.52  | 0.2  | 0.1  | 1.15  | 0.19088  | 0.161889 | 0.561978 | 0.437979 |
| MmugDNA.37598.1.S1_at   | MmugDNA.37598.1 | 3.72  | 4.03  | 0.16 | 0.38 | -1.24 | 0.271587 | 0.015378 | 0.631445 | 0.157432 |
| MmugDNA.376.1.S1_at     | MmugDNA.376.1   | 3.28  | 3.27  | 0.1  | 0.02 | 1.01  | 0.901265 | 0.756419 | 0.966477 | 0.858223 |
| MmugDNA.3760.1.S1_at    | MmugDNA.3760.1  | 6.65  | 6.65  | 1.98 | 0.3  | 1     | 0.85467  | 0.299019 | 0.948588 | 0.557628 |
| MmugDNA.37600.1.S1_at   | MmugDNA.37600.1 | 3.49  | 3.5   | 0.05 | 0.05 | -1    | 0.779071 | 0.278536 | 0.918562 | 0.542311 |
| MmugDNA.37602.1.S1_at   | MmugDNA.37602.1 | 2.9   | 2.75  | 0.08 | 0.06 | 1.11  | 0.105818 | 0.475711 | 0.477611 | 0.682332 |
| MmugDNA.37603.1.S1_at   | MmugDNA.37603.1 | 3.45  | 3.49  | 0.19 | 0.53 | -1.03 | 0.827041 | 0.959196 | 0.938039 | 0.976862 |
| MmugDNA.37604.1.S1_at   | MmugDNA.37604.1 | 9.05  | 9.54  | 0.52 | 0.17 | -1.4  | 0.604069 | 0.464973 | 0.839485 | 0.675534 |
| MmugDNA.37606.1.S1_at   | MmugDNA.37606.1 | 8.63  | 8.43  | 0.41 | 0.13 | 1.15  | 0.226887 | 0.017014 | 0.596276 | 0.165348 |
| MmugDNA.37607.1.S1_at   | MmugDNA.37607.1 | 4.22  | 4.17  | 0.12 | 0.12 | 1.03  | 0.346642 | 0.604263 | 0.688361 | 0.764558 |
| MmugDNA.37609.1.S1_at   | MmugDNA.37609.1 | 9.66  | 9.73  | 0.59 | 0.16 | -1.05 | 0.27326  | 0.197804 | 0.632952 | 0.472721 |
| MmugDNA.3761.1.S1_at    | MmugDNA.3761.1  | 6.66  | 6.63  | 0.64 | 0.02 | 1.02  | 0.999601 | 0.155828 | 0.999903 | 0.431211 |

|                         |                 |       |       |      |      |       |          |          |          |          |
|-------------------------|-----------------|-------|-------|------|------|-------|----------|----------|----------|----------|
| MmugDNA.37610.1.S1_at   | MmugDNA.37610.1 | 10.71 | 11    | 0.49 | 0.17 | -1.22 | 0.2634   | 0.179583 | 0.625348 | 0.45603  |
| MmugDNA.37611.1.S1_at   | MmugDNA.37611.1 | 3.2   | 3.16  | 0.05 | 0.09 | 1.03  | 0.349339 | 0.131864 | 0.690424 | 0.403891 |
| MmugDNA.37612.1.S1_at   | MmugDNA.37612.1 | 6.1   | 5.5   | 0.88 | 0.55 | 1.52  | 0.251041 | 0.236289 | 0.61618  | 0.507287 |
| MmugDNA.37613.1.S1_at   | MmugDNA.37613.1 | 4.46  | 4.47  | 0.24 | 0.12 | -1.01 | 0.718636 | 0.802859 | 0.890764 | 0.886465 |
| MmugDNA.37614.1.S1_at   | MmugDNA.37614.1 | 9.4   | 9.39  | 0.55 | 0.25 | 1.01  | 0.272919 | 0.441381 | 0.632536 | 0.659552 |
| MmugDNA.37615.1.S1_at   | MmugDNA.37615.1 | 6.28  | 5.99  | 0.19 | 0.03 | 1.22  | 0.19126  | 0.407558 | 0.56272  | 0.63505  |
| MmugDNA.37616.1.S1_at   | MmugDNA.37616.1 | 6.57  | 6.9   | 0.59 | 0.09 | -1.25 | 0.98747  | 0.017045 | 0.995831 | 0.165455 |
| MmugDNA.37616.1.S1_s_at | MmugDNA.37616.1 | 6.57  | 7.11  | 0.85 | 0.27 | -1.46 | 0.738093 | 0.026203 | 0.899775 | 0.202874 |
| MmugDNA.37617.1.S1_at   | MmugDNA.37617.1 | 4.43  | 4.25  | 0.12 | 0.24 | 1.13  | 0.119053 | 0.118698 | 0.492539 | 0.38672  |
| MmugDNA.37618.1.S1_at   | MmugDNA.37618.1 | 11.98 | 11.58 | 0.23 | 0.04 | 1.31  | 0.047986 | 0.03938  | 0.381764 | 0.243406 |
| MmugDNA.37619.1.S1_at   | MmugDNA.37619.1 | 9.95  | 9.9   | 0.22 | 0.06 | -1.03 | 0.719989 | 0.480579 | 0.891311 | 0.685902 |
| MmugDNA.3762.1.S1_at    | MmugDNA.3762.1  | 11.51 | 11.31 | 0.22 | 0.17 | 1.15  | 0.558101 | 0.548162 | 0.815182 | 0.728911 |
| MmugDNA.37620.1.S1_at   | MmugDNA.37620.1 | 4.45  | 4.16  | 0.41 | 0.06 | 1.22  | 0.240448 | 0.309613 | 0.606743 | 0.564987 |
| MmugDNA.37623.1.S1_at   | MmugDNA.37623.1 | 8.76  | 9.63  | 0.71 | 0.23 | -1.82 | 0.346237 | 0.363152 | 0.687933 | 0.60356  |
| MmugDNA.37625.1.S1_at   | MmugDNA.37625.1 | 6.39  | 6.39  | 0.02 | 0.02 | 1     | 0.921341 | 0.996148 | 0.973336 | 0.997658 |
| MmugDNA.37626.1.S1_at   | MmugDNA.37626.1 | 6.88  | 6.86  | 0.08 | 0.12 | 1.01  | 0.969939 | 0.490709 | 0.990053 | 0.692666 |
| MmugDNA.37628.1.S1_at   | MmugDNA.37628.1 | 10.63 | 9.91  | 0.52 | 0.17 | 1.66  | 0.049391 | 0.057725 | 0.385474 | 0.2866   |
| MmugDNA.37629.1.S1_at   | MmugDNA.37629.1 | 13.25 | 13.36 | 0.18 | 0.04 | -1.08 | 0.950651 | 0.458461 | 0.983335 | 0.671168 |
| MmugDNA.37630.1.S1_at   | MmugDNA.37630.1 | 11.19 | 11.34 | 0.13 | 0.08 | -1.11 | 0.245537 | 0.00573  | 0.611179 | 0.104271 |
| MmugDNA.37631.1.S1_at   | MmugDNA.37631.1 | 5.15  | 5.71  | 0.81 | 0.64 | -1.47 | 0.7199   | 0.192652 | 0.891311 | 0.468148 |
| MmugDNA.37632.1.S1_at   | MmugDNA.37632.1 | 10.87 | 11.89 | 0.54 | 0.03 | -2.03 | 0.085616 | 0.073872 | 0.452706 | 0.317241 |
| MmugDNA.37633.1.S1_at   | MmugDNA.37633.1 | 6.2   | 6.07  | 0.68 | 0.06 | 1.09  | 0.503862 | 0.707089 | 0.784418 | 0.830137 |
| MmugDNA.37634.1.S1_at   | MmugDNA.37634.1 | 8.07  | 8.38  | 0.21 | 0.2  | -1.24 | 0.094544 | 0.360158 | 0.463794 | 0.601268 |
| MmugDNA.37635.1.S1_at   | MmugDNA.37635.1 | 4.84  | 4.72  | 0.14 | 0.04 | 1.09  | 0.215327 | 0.361665 | 0.585748 | 0.602408 |
| MmugDNA.37636.1.S1_at   | MmugDNA.37636.1 | 10.85 | 10.48 | 0.06 | 0.11 | 1.3   | 0.004889 | 0.000792 | 0.203301 | 0.046023 |
| MmugDNA.37637.1.S1_at   | MmugDNA.37637.1 | 4.76  | 4.51  | 0.03 | 0.35 | 1.18  | 0.778202 | 0.90062  | 0.91815  | 0.943473 |
| MmugDNA.37638.1.S1_at   | MmugDNA.37638.1 | 9.6   | 9.73  | 0.86 | 0.17 | -1.09 | 0.841525 | 0.924356 | 0.94378  | 0.957351 |
| MmugDNA.37639.1.S1_at   | MmugDNA.37639.1 | 7.27  | 7.58  | 0.47 | 0.56 | -1.24 | 0.982911 | 0.54073  | 0.99478  | 0.724514 |
| MmugDNA.37641.1.S1_at   | MmugDNA.37641.1 | 5.46  | 5.79  | 0.41 | 0.29 | -1.26 | 0.24089  | 0.043292 | 0.607203 | 0.252847 |
| MmugDNA.37642.1.S1_at   | MmugDNA.37642.1 | 7.32  | 7.27  | 0.34 | 0.28 | 1.04  | 0.43603  | 0.147484 | 0.746002 | 0.421765 |
| MmugDNA.37643.1.S1_at   | MmugDNA.37643.1 | 5.51  | 5.35  | 0.19 | 0.11 | 1.12  | 0.347708 | 0.206047 | 0.688895 | 0.480273 |
| MmugDNA.37644.1.S1_at   | MmugDNA.37644.1 | 4.63  | 4.65  | 0.24 | 0.07 | -1.01 | 0.331999 | 0.325087 | 0.678409 | 0.575545 |
| MmugDNA.37645.1.S1_at   | MmugDNA.37645.1 | 6.85  | 6.85  | 0.15 | 0.04 | -1    | 0.860595 | 0.696562 | 0.950856 | 0.823774 |
| MmugDNA.37646.1.S1_at   | MmugDNA.37646.1 | 7.72  | 7.71  | 0.17 | 0.17 | 1.01  | 0.612766 | 0.556786 | 0.843173 | 0.734796 |
| MmugDNA.37647.1.S1_at   | MmugDNA.37647.1 | 7.56  | 7.3   | 0.2  | 0.05 | 1.19  | 0.101593 | 0.145344 | 0.47185  | 0.419365 |
| MmugDNA.37649.1.S1_at   | MmugDNA.37649.1 | 3.18  | 3.12  | 0.25 | 0.06 | 1.04  | 0.708971 | 0.832007 | 0.886591 | 0.903589 |
| MmugDNA.37650.1.S1_at   | MmugDNA.37650.1 | 4.15  | 4     | 0.17 | 0.06 | 1.11  | 0.331431 | 0.125799 | 0.678103 | 0.396313 |
| MmugDNA.37651.1.S1_at   | MmugDNA.37651.1 | 3.72  | 4.13  | 0.52 | 0.53 | -1.32 | 0.286221 | 0.386456 | 0.64358  | 0.621593 |
| MmugDNA.37652.1.S1_at   | MmugDNA.37652.1 | 3.73  | 3.72  | 0.1  | 0    | 1.01  | 0.752012 | 0.978201 | 0.906265 | 0.98807  |
| MmugDNA.37653.1.S1_at   | MmugDNA.37653.1 | 4.8   | 4.68  | 0.08 | 0.05 | 1.08  | 0.071678 | 0.050004 | 0.431332 | 0.268843 |
| MmugDNA.37654.1.S1_at   | MmugDNA.37654.1 | 12.03 | 11.94 | 0.33 | 0.06 | 1.06  | 0.640782 | 0.563751 | 0.856938 | 0.738808 |
| MmugDNA.37657.1.S1_at   | MmugDNA.37657.1 | 3.07  | 3.01  | 0.14 | 0.11 | 1.05  | 0.559276 | 0.197047 | 0.816044 | 0.472208 |
| MmugDNA.37658.1.S1_at   | MmugDNA.37658.1 | 3.68  | 3.8   | 0.21 | 0.13 | -1.09 | 0.326741 | 0.632479 | 0.674363 | 0.783558 |

|                         |                 |       |       |      |      |       |          |          |          |          |
|-------------------------|-----------------|-------|-------|------|------|-------|----------|----------|----------|----------|
| MmugDNA.37659.1.S1_at   | MmugDNA.37659.1 | 7.74  | 7.9   | 1.44 | 0.18 | -1.12 | 0.879136 | 0.959839 | 0.958001 | 0.977272 |
| MmugDNA.37660.1.S1_at   | MmugDNA.37660.1 | 6.87  | 7.44  | 0.96 | 0.18 | -1.48 | 0.1233   | 0.089247 | 0.496589 | 0.34333  |
| MmugDNA.37661.1.S1_at   | MmugDNA.37661.1 | 5.67  | 5.6   | 0.15 | 0.15 | 1.05  | 0.525428 | 0.650122 | 0.796198 | 0.795406 |
| MmugDNA.37662.1.S1_at   | MmugDNA.37662.1 | 4.93  | 4.99  | 0.4  | 0.01 | -1.04 | 0.510897 | 0.499132 | 0.788393 | 0.698006 |
| MmugDNA.37664.1.S1_at   | MmugDNA.37664.1 | 6.03  | 6.43  | 0.1  | 0.17 | -1.32 | 0.096924 | 0.719793 | 0.465626 | 0.837888 |
| MmugDNA.37665.1.S1_at   | MmugDNA.37665.1 | 3.38  | 3.27  | 0.16 | 0.05 | 1.08  | 0.146604 | 0.361301 | 0.520956 | 0.602104 |
| MmugDNA.37666.1.S1_at   | MmugDNA.37666.1 | 6.67  | 6.51  | 0.06 | 0.03 | 1.12  | 0.017892 | 0.067041 | 0.294206 | 0.304872 |
| MmugDNA.37668.1.S1_at   | MmugDNA.37668.1 | 10.28 | 10.25 | 0.13 | 0.02 | 1.02  | 0.737118 | 0.84857  | 0.899366 | 0.91405  |
| MmugDNA.37669.1.S1_at   | MmugDNA.37669.1 | 9.06  | 9.43  | 0.56 | 0.04 | -1.3  | 0.833062 | 0.843567 | 0.940095 | 0.910905 |
| MmugDNA.3767.1.S1_at    | MmugDNA.3767.1  | 4.02  | 4     | 0.08 | 0.16 | 1.01  | 0.760858 | 0.863127 | 0.910182 | 0.922249 |
| MmugDNA.37673.1.S1_at   | MmugDNA.37673.1 | 8.38  | 7.55  | 0.84 | 0.18 | -1.78 | 0.201019 | 0.014417 | 0.572785 | 0.15326  |
| MmugDNA.37675.1.S1_at   | MmugDNA.37675.1 | 3.84  | 3.92  | 0.16 | 0.05 | -1.06 | 0.472892 | 0.605995 | 0.767317 | 0.765567 |
| MmugDNA.37676.1.S1_at   | MmugDNA.37676.1 | 6.03  | 5.94  | 0.19 | 0.04 | 1.07  | 0.566754 | 0.90123  | 0.820086 | 0.943829 |
| MmugDNA.37677.1.S1_at   | MmugDNA.37677.1 | 10.85 | 10.66 | 0.62 | 0.07 | 1.14  | 0.539697 | 0.521543 | 0.80393  | 0.712483 |
| MmugDNA.37679.1.S1_at   | MmugDNA.37679.1 | 3.57  | 3.59  | 0.1  | 0.05 | -1.02 | 0.774136 | 0.413562 | 0.916175 | 0.639648 |
| MmugDNA.37681.1.S1_at   | MmugDNA.37681.1 | 4.55  | 4.57  | 0.58 | 0.45 | -1.01 | 0.296421 | 0.397084 | 0.65206  | 0.628611 |
| MmugDNA.37682.1.S1_at   | MmugDNA.37682.1 | 4.52  | 4.44  | 0.1  | 0.18 | 1.05  | 0.875049 | 0.992773 | 0.956624 | 0.995715 |
| MmugDNA.37683.1.S1_at   | MmugDNA.37683.1 | 10.63 | 10.47 | 0.4  | 0.11 | 1.12  | 0.664705 | 0.08581  | 0.867683 | 0.337901 |
| MmugDNA.37684.1.S1_at   | MmugDNA.37684.1 | 7.2   | 6.09  | 0.19 | 0.25 | 2.17  | 0.002345 | 0.00195  | 0.176602 | 0.065813 |
| MmugDNA.37685.1.S1_at   | MmugDNA.37685.1 | 9.13  | 8.86  | 0.39 | 0.24 | 1.21  | 0.167402 | 0.482    | 0.540065 | 0.686928 |
| MmugDNA.37686.1.S1_at   | MmugDNA.37686.1 | 6.31  | 6.12  | 0.07 | 0.07 | 1.14  | 0.063559 | 0.025672 | 0.415797 | 0.200834 |
| MmugDNA.37687.1.S1_at   | MmugDNA.37687.1 | 4.63  | 4.47  | 0.03 | 0.13 | 1.12  | 0.161715 | 0.287242 | 0.535125 | 0.548526 |
| MmugDNA.37688.1.S1_at   | MmugDNA.37688.1 | 5.13  | 5.19  | 0.08 | 0.23 | -1.04 | 0.498501 | 0.803806 | 0.781796 | 0.887124 |
| MmugDNA.37689.1.S1_at   | MmugDNA.37689.1 | 10.86 | 11.85 | 0.31 | 0.1  | -1.99 | 0.009469 | 0.004027 | 0.242283 | 0.090171 |
| MmugDNA.3769.1.S1_at    | MmugDNA.3769.1  | 7.11  | 7.64  | 0.08 | 0.03 | -1.44 | 0.000387 | 0.000009 | 0.137028 | 0.016421 |
| MmugDNA.37691.1.S1_at   | MmugDNA.37691.1 | 5.63  | 5.29  | 0.17 | 0.05 | 1.26  | 0.089916 | 0.048598 | 0.457894 | 0.265572 |
| MmugDNA.37692.1.S1_at   | MmugDNA.37692.1 | 5.08  | 4.87  | 0.18 | 0.05 | 1.15  | 0.363472 | 0.310078 | 0.700102 | 0.565307 |
| MmugDNA.37693.1.S1_at   | MmugDNA.37693.1 | 7.56  | 7.35  | 0.29 | 0.05 | 1.16  | 0.215927 | 0.301753 | 0.586043 | 0.559687 |
| MmugDNA.37694.1.S1_at   | MmugDNA.37694.1 | 8.22  | 7.8   | 0.27 | 0.38 | 1.34  | 0.191692 | 0.13351  | 0.562859 | 0.405422 |
| MmugDNA.37695.1.S1_at   | MmugDNA.37695.1 | 6.59  | 7.67  | 0.62 | 0.14 | -2.11 | 0.096658 | 0.066006 | 0.465288 | 0.302324 |
| MmugDNA.37697.1.S1_at   | MmugDNA.37697.1 | 3.2   | 3.37  | 0.17 | 0.31 | -1.13 | 0.248375 | 0.196861 | 0.613851 | 0.471976 |
| MmugDNA.37699.1.S1_at   | MmugDNA.37699.1 | 11.29 | 10.9  | 0.37 | 0.17 | 1.31  | 0.154211 | 0.171246 | 0.527483 | 0.447792 |
| MmugDNA.3770.1.S1_at    | MmugDNA.3770.1  | 11.66 | 11.86 | 0.51 | 0.11 | -1.14 | 0.206849 | 0.160286 | 0.578774 | 0.436406 |
| MmugDNA.37700.1.S1_at   | MmugDNA.37700.1 | 2.73  | 2.88  | 0.03 | 0.12 | -1.11 | 0.109941 | 0.091181 | 0.482728 | 0.346097 |
| MmugDNA.37701.1.S1_at   | MmugDNA.37701.1 | 4.51  | 4.5   | 0.14 | 0.1  | 1.01  | 0.864386 | 0.414773 | 0.952353 | 0.640456 |
| MmugDNA.37702.1.S1_at   | MmugDNA.37702.1 | 6.22  | 6.03  | 0.31 | 0.15 | 1.13  | 0.316062 | 0.447869 | 0.666292 | 0.663881 |
| MmugDNA.37703.1.S1_at   | MmugDNA.37703.1 | 4.13  | 3.84  | 0.21 | 0.24 | 1.23  | 0.655336 | 0.750481 | 0.863101 | 0.854844 |
| MmugDNA.37704.1.S1_at   | MmugDNA.37704.1 | 7.38  | 6.92  | 0.08 | 0.07 | 1.38  | 0.001319 | 0.041282 | 0.158997 | 0.247995 |
| MmugDNA.37705.1.S1_at   | MmugDNA.37705.1 | 8.2   | 8.2   | 0.22 | 0.14 | 1     | 0.373701 | 0.003963 | 0.705567 | 0.089522 |
| MmugDNA.37706.1.S1_at   | MmugDNA.37706.1 | 3.84  | 3.79  | 0.16 | 0.03 | 1.03  | 0.726663 | 0.268349 | 0.894392 | 0.534041 |
| MmugDNA.37707.1.S1_at   | MmugDNA.37707.1 | 9.22  | 8.92  | 0.6  | 0.11 | 1.23  | 0.899889 | 0.344802 | 0.965989 | 0.590142 |
| MmugDNA.37707.1.S1_s_at | MmugDNA.37707.1 | 9.11  | 8.64  | 0.69 | 0.11 | 1.39  | 0.872356 | 0.55771  | 0.955759 | 0.735173 |
| MmugDNA.37709.1.S1_at   | MmugDNA.37709.1 | 3.6   | 3.88  | 0.13 | 0.29 | -1.21 | 0.562898 | 0.018281 | 0.817877 | 0.170051 |

|                         |                 |       |       |      |      |       |          |          |          |          |
|-------------------------|-----------------|-------|-------|------|------|-------|----------|----------|----------|----------|
| MmugDNA.3771.1.S1_at    | MmugDNA.3771.1  | 3.88  | 3.77  | 0.02 | 0.14 | 1.08  | 0.242248 | 0.230069 | 0.608411 | 0.50194  |
| MmugDNA.37711.1.S1_at   | MmugDNA.37711.1 | 9.77  | 10.15 | 0.1  | 0.09 | -1.3  | 0.009561 | 0.071369 | 0.242426 | 0.313445 |
| MmugDNA.37712.1.S1_at   | MmugDNA.37712.1 | 6.34  | 6.92  | 0.58 | 0.08 | -1.5  | 0.157667 | 0.137169 | 0.530626 | 0.410045 |
| MmugDNA.37713.1.S1_s_at | MmugDNA.37713.1 | 5.37  | 5.82  | 0.41 | 0.15 | -1.37 | 0.324943 | 0.057791 | 0.672925 | 0.286756 |
| MmugDNA.37714.1.S1_at   | MmugDNA.37714.1 | 6.02  | 6.02  | 0.03 | 0.01 | 1     | 0.20427  | 0.780378 | 0.575652 | 0.872597 |
| MmugDNA.37716.1.S1_at   | MmugDNA.37716.1 | 3.27  | 3.25  | 0    | 0.01 | 1.01  | 0.128958 | 0.099536 | 0.503646 | 0.357957 |
| MmugDNA.37717.1.S1_at   | MmugDNA.37717.1 | 4.15  | 4.17  | 0.15 | 0.03 | -1.01 | 0.283298 | 0.337609 | 0.641313 | 0.584788 |
| MmugDNA.37718.1.S1_at   | MmugDNA.37718.1 | 4.58  | 4.68  | 0.48 | 0.29 | -1.07 | 0.416654 | 0.350094 | 0.734439 | 0.593862 |
| MmugDNA.37719.1.S1_at   | MmugDNA.37719.1 | 4.48  | 4.47  | 0.03 | 0.16 | 1.01  | 0.949356 | 0.940064 | 0.982855 | 0.965955 |
| MmugDNA.3772.1.S1_at    | MmugDNA.3772.1  | 6.39  | 6.19  | 1.12 | 0.42 | 1.15  | 0.570252 | 0.218065 | 0.821966 | 0.491683 |
| MmugDNA.37720.1.S1_at   | MmugDNA.37720.1 | 5.31  | 4.65  | 0.46 | 0.26 | -1.58 | 0.467074 | 0.323557 | 0.764099 | 0.574497 |
| MmugDNA.37721.1.S1_at   | MmugDNA.37721.1 | 5.62  | 5.61  | 0.07 | 0.04 | 1.01  | 0.56764  | 0.808755 | 0.820586 | 0.889895 |
| MmugDNA.37722.1.S1_at   | MmugDNA.37722.1 | 5.89  | 5.82  | 0.32 | 0.21 | 1.05  | 0.285748 | 0.294106 | 0.643438 | 0.553936 |
| MmugDNA.37723.1.S1_at   | MmugDNA.37723.1 | 5.1   | 5.22  | 0.45 | 0.1  | -1.09 | 0.715746 | 0.926905 | 0.889467 | 0.958424 |
| MmugDNA.37724.1.S1_at   | MmugDNA.37724.1 | 6.83  | 6.49  | 0.03 | 0.13 | 1.26  | 0.010833 | 0.029428 | 0.250427 | 0.213368 |
| MmugDNA.37725.1.S1_at   | MmugDNA.37725.1 | 7.19  | 6.69  | 0.42 | 0.07 | 1.42  | 0.036344 | 0.003101 | 0.35477  | 0.081277 |
| MmugDNA.37726.1.S1_at   | MmugDNA.37726.1 | 4.08  | 4.08  | 0.12 | 0.22 | 1     | 0.939732 | 0.083577 | 0.979532 | 0.334152 |
| MmugDNA.37727.1.S1_at   | MmugDNA.37727.1 | 4.2   | 3.79  | 0.12 | 0.07 | 1.33  | 0.019988 | 0.016043 | 0.303174 | 0.160532 |
| MmugDNA.37729.1.S1_at   | MmugDNA.37729.1 | 4.73  | 4.69  | 0.12 | 0.04 | 1.02  | 0.572789 | 0.147743 | 0.823366 | 0.42203  |
| MmugDNA.3773.1.S1_at    | MmugDNA.3773.1  | 4.95  | 4.8   | 0.43 | 0.17 | 1.11  | 0.714246 | 0.117395 | 0.88871  | 0.38505  |
| MmugDNA.37730.1.S1_at   | MmugDNA.37730.1 | 7.11  | 6.23  | 0.38 | 0.57 | 1.83  | 0.095134 | 0.052317 | 0.464131 | 0.274201 |
| MmugDNA.37731.1.S1_at   | MmugDNA.37731.1 | 3.18  | 3.18  | 0.13 | 0.2  | 1     | 0.881902 | 0.454986 | 0.95911  | 0.669026 |
| MmugDNA.37734.1.S1_at   | MmugDNA.37734.1 | 3.98  | 4.01  | 0.06 | 0.13 | -1.01 | 0.19459  | 0.048961 | 0.565144 | 0.26607  |
| MmugDNA.37735.1.S1_at   | MmugDNA.37735.1 | 9.53  | 9.3   | 0.24 | 0.05 | 1.17  | 0.370774 | 0.074368 | 0.704995 | 0.318053 |
| MmugDNA.37736.1.S1_at   | MmugDNA.37736.1 | 4.05  | 4     | 0.05 | 0.14 | 1.03  | 0.210238 | 0.310728 | 0.581624 | 0.565809 |
| MmugDNA.37738.1.S1_at   | MmugDNA.37738.1 | 5.83  | 6.76  | 0.28 | 0.2  | -1.91 | 0.018118 | 0.263664 | 0.295257 | 0.529945 |
| MmugDNA.37739.1.S1_at   | MmugDNA.37739.1 | 6.83  | 6.75  | 0.32 | 0.17 | 1.06  | 0.854376 | 0.982403 | 0.94848  | 0.99036  |
| MmugDNA.3774.1.S1_at    | MmugDNA.3774.1  | 5.78  | 6.03  | 1.42 | 0.1  | -1.19 | 0.764257 | 0.871124 | 0.911428 | 0.926785 |
| MmugDNA.37740.1.S1_at   | MmugDNA.37740.1 | 5.99  | 6.27  | 0.15 | 0.43 | -1.21 | 0.12804  | 0.07402  | 0.502449 | 0.317579 |
| MmugDNA.37742.1.S1_at   | MmugDNA.37742.1 | 12.77 | 12.67 | 0.28 | 0.24 | 1.07  | 0.306028 | 0.010374 | 0.659264 | 0.133236 |
| MmugDNA.37743.1.S1_at   | MmugDNA.37743.1 | 9.78  | 9.59  | 0.59 | 0.06 | 1.14  | 0.6911   | 0.276861 | 0.879715 | 0.540761 |
| MmugDNA.37745.1.S1_at   | MmugDNA.37745.1 | 6.8   | 7.32  | 1.04 | 0.71 | -1.43 | 0.679543 | 0.845481 | 0.87431  | 0.912096 |
| MmugDNA.37746.1.S1_at   | MmugDNA.37746.1 | 5.37  | 5.15  | 0.05 | 0.19 | 1.16  | 0.107428 | 0.038811 | 0.479782 | 0.241916 |
| MmugDNA.37747.1.S1_at   | MmugDNA.37747.1 | 3.72  | 3.72  | 0.08 | 0.16 | 1     | 0.239647 | 0.323226 | 0.606153 | 0.574408 |
| MmugDNA.37749.1.S1_at   | MmugDNA.37749.1 | 7.97  | 7.5   | 0.37 | 0.08 | 1.38  | 0.082134 | 0.097284 | 0.446938 | 0.354959 |
| MmugDNA.37750.1.S1_x_at | MmugDNA.37750.1 | 10.56 | 10.74 | 0.15 | 0.21 | -1.13 | 0.395635 | 0.219855 | 0.720594 | 0.493388 |
| MmugDNA.37751.1.S1_at   | MmugDNA.37751.1 | 4.01  | 4.37  | 0.54 | 0.1  | -1.28 | 0.468744 | 0.50667  | 0.765079 | 0.702542 |
| MmugDNA.37752.1.S1_at   | MmugDNA.37752.1 | 7.77  | 8.28  | 0.16 | 0.07 | -1.43 | 0.010167 | 0.003558 | 0.246929 | 0.085459 |
| MmugDNA.37753.1.S1_at   | MmugDNA.37753.1 | 6.11  | 6.32  | 0.46 | 0.07 | -1.16 | 0.956506 | 0.788939 | 0.985571 | 0.878011 |
| MmugDNA.37754.1.S1_at   | MmugDNA.37754.1 | 11.8  | 12.27 | 0.24 | 0.04 | -1.39 | 0.079756 | 0.036756 | 0.44275  | 0.236291 |
| MmugDNA.37755.1.S1_at   | MmugDNA.37755.1 | 3.76  | 3.72  | 0.16 | 0.19 | 1.03  | 0.44265  | 0.467312 | 0.750271 | 0.677035 |
| MmugDNA.37757.1.S1_at   | MmugDNA.37757.1 | 3.22  | 3.18  | 0.22 | 0.11 | 1.03  | 0.293957 | 0.396221 | 0.650265 | 0.628068 |
| MmugDNA.37758.1.S1_at   | MmugDNA.37758.1 | 7.19  | 6.78  | 0.7  | 0.12 | 1.33  | 0.145183 | 0.413358 | 0.520309 | 0.639626 |

|                         |                 |       |       |      |      |       |          |          |          |          |
|-------------------------|-----------------|-------|-------|------|------|-------|----------|----------|----------|----------|
| MmugDNA.37760.1.S1_at   | MmugDNA.37760.1 | 4.63  | 5.06  | 0.16 | 0.32 | -1.35 | 0.313719 | 0.406264 | 0.664799 | 0.634225 |
| MmugDNA.37761.1.S1_x_at | MmugDNA.37761.1 | 6.62  | 6.99  | 0.42 | 0.4  | -1.29 | 0.337989 | 0.25668  | 0.682728 | 0.524502 |
| MmugDNA.37764.1.S1_at   | MmugDNA.37764.1 | 8.8   | 8.95  | 0.19 | 0.02 | -1.11 | 0.215945 | 0.087902 | 0.586043 | 0.341309 |
| MmugDNA.37767.1.S1_at   | MmugDNA.37767.1 | 5.05  | 5.05  | 0.05 | 0.15 | -1    | 0.290052 | 0.618886 | 0.646655 | 0.774212 |
| MmugDNA.37768.1.S1_at   | MmugDNA.37768.1 | 6.66  | 6.38  | 0.27 | 0.07 | 1.22  | 0.593581 | 0.797733 | 0.834277 | 0.883466 |
| MmugDNA.37769.1.S1_at   | MmugDNA.37769.1 | 3.25  | 3.3   | 0.13 | 0.05 | -1.03 | 0.975827 | 0.514993 | 0.992214 | 0.708004 |
| MmugDNA.3777.1.S1_at    | MmugDNA.3777.1  | 5.86  | 5.57  | 0.27 | 0.18 | 1.22  | 0.149682 | 0.138245 | 0.523226 | 0.411198 |
| MmugDNA.37770.1.S1_at   | MmugDNA.37770.1 | 4.29  | 4.31  | 0.23 | 0.03 | -1.02 | 0.992819 | 0.826873 | 0.997353 | 0.900568 |
| MmugDNA.37771.1.S1_at   | MmugDNA.37771.1 | 4.55  | 5.8   | 0.3  | 0.49 | -2.38 | 0.017994 | 0.304906 | 0.294714 | 0.562044 |
| MmugDNA.37772.1.S1_at   | MmugDNA.37772.1 | 11.09 | 10.6  | 0.31 | 0.08 | 1.41  | 0.037478 | 0.010256 | 0.357181 | 0.132655 |
| MmugDNA.37773.1.S1_at   | MmugDNA.37773.1 | 8.42  | 8.35  | 0.59 | 0.3  | -1.05 | 0.330333 | 0.468898 | 0.676941 | 0.677924 |
| MmugDNA.37774.1.S1_at   | MmugDNA.37774.1 | 4.96  | 4.85  | 0.04 | 0.07 | 1.07  | 0.098087 | 0.468426 | 0.467531 | 0.677714 |
| MmugDNA.37775.1.S1_at   | MmugDNA.37775.1 | 7.72  | 8.78  | 1.07 | 0.4  | -2.09 | 0.064034 | 0.078516 | 0.417198 | 0.325285 |
| MmugDNA.37776.1.S1_at   | MmugDNA.37776.1 | 4.55  | 4.64  | 0.14 | 0.13 | -1.06 | 0.245054 | 0.303479 | 0.610441 | 0.560979 |
| MmugDNA.37777.1.S1_at   | MmugDNA.37777.1 | 8.45  | 8.05  | 0.84 | 0.22 | 1.32  | 0.372733 | 0.612542 | 0.705567 | 0.770077 |
| MmugDNA.37777.1.S1_s_at | MmugDNA.37777.1 | 8.74  | 8.21  | 0.94 | 0.2  | 1.45  | 0.342622 | 0.397774 | 0.686019 | 0.629114 |
| MmugDNA.37778.1.S1_at   | MmugDNA.37778.1 | 10.61 | 10.52 | 0.07 | 0.06 | 1.06  | 0.033458 | 0.046792 | 0.346442 | 0.261042 |
| MmugDNA.3778.1.S1_at    | MmugDNA.3778.1  | 5.95  | 5.94  | 0.07 | 0.04 | 1.01  | 0.502377 | 0.608865 | 0.783594 | 0.76736  |
| MmugDNA.37780.1.S1_at   | MmugDNA.37780.1 | 8.05  | 8.72  | 1.07 | 0.39 | -1.59 | 0.477115 | 0.287479 | 0.769696 | 0.548718 |
| MmugDNA.37781.1.S1_at   | MmugDNA.37781.1 | 3.15  | 3.32  | 0.13 | 0.13 | -1.12 | 0.141258 | 0.11196  | 0.516365 | 0.377063 |
| MmugDNA.37782.1.S1_at   | MmugDNA.37782.1 | 3.16  | 3.33  | 0.16 | 0.01 | -1.12 | 0.162672 | 0.070503 | 0.535867 | 0.311777 |
| MmugDNA.37782.1.S1_s_at | MmugDNA.37782.1 | 5.12  | 5.14  | 0.4  | 0.03 | -1.01 | 0.379528 | 0.191786 | 0.709048 | 0.467133 |
| MmugDNA.37785.1.S1_at   | MmugDNA.37785.1 | 3.17  | 3.17  | 0.2  | 0.09 | -1    | 0.671146 | 0.541736 | 0.870255 | 0.725057 |
| MmugDNA.37787.1.S1_at   | MmugDNA.37787.1 | 8.15  | 7.62  | 0.64 | 0.11 | 1.45  | 0.211152 | 0.155826 | 0.582141 | 0.431211 |
| MmugDNA.37788.1.S1_at   | MmugDNA.37788.1 | 2.97  | 2.95  | 0.06 | 0.04 | 1.01  | 0.279393 | 0.175999 | 0.638319 | 0.452526 |
| MmugDNA.37789.1.S1_at   | MmugDNA.37789.1 | 5.22  | 5.05  | 0.2  | 0.12 | 1.12  | 0.257239 | 0.089064 | 0.621021 | 0.342977 |
| MmugDNA.3779.1.S1_at    | MmugDNA.3779.1  | 4.96  | 5.16  | 0.2  | 0.07 | -1.15 | 0.366255 | 0.205181 | 0.701752 | 0.47957  |
| MmugDNA.37790.1.S1_at   | MmugDNA.37790.1 | 4.03  | 3.94  | 0.06 | 0.02 | 1.06  | 0.072219 | 0.063636 | 0.432091 | 0.298815 |
| MmugDNA.37791.1.S1_at   | MmugDNA.37791.1 | 4.57  | 5.03  | 1.09 | 0.24 | -1.38 | 0.896174 | 0.903961 | 0.964538 | 0.945472 |
| MmugDNA.37792.1.S1_at   | MmugDNA.37792.1 | 3.89  | 4.02  | 0.16 | 0.22 | -1.1  | 0.556065 | 0.683178 | 0.813904 | 0.815172 |
| MmugDNA.37793.1.S1_x_at | MmugDNA.37793.1 | 13.11 | 13.21 | 0.09 | 0.08 | -1.07 | 0.198261 | 0.291831 | 0.5695   | 0.552086 |
| MmugDNA.37794.1.S1_at   | MmugDNA.37794.1 | 6.12  | 5.07  | 0.45 | 0.72 | 2.07  | 0.061164 | 0.103408 | 0.410199 | 0.3643   |
| MmugDNA.37796.1.S1_at   | MmugDNA.37796.1 | 10.89 | 10.32 | 0.32 | 0.08 | 1.48  | 0.085377 | 0.017769 | 0.452611 | 0.168461 |
| MmugDNA.37799.1.S1_at   | MmugDNA.37799.1 | 4.35  | 3.95  | 0.3  | 0.69 | 1.32  | 0.461556 | 0.767529 | 0.761031 | 0.865037 |
| MmugDNA.378.1.S1_at     | MmugDNA.378.1   | 4.29  | 4.2   | 0.13 | 0.47 | 1.06  | 0.9584   | 0.685277 | 0.986346 | 0.816424 |
| MmugDNA.3780.1.S1_at    | MmugDNA.3780.1  | 4.63  | 4.73  | 0.08 | 0.48 | -1.07 | 0.666837 | 0.764486 | 0.868455 | 0.863128 |
| MmugDNA.37800.1.S1_at   | MmugDNA.37800.1 | 2.96  | 2.89  | 0.11 | 0.06 | 1.05  | 0.949785 | 0.908014 | 0.983047 | 0.947889 |
| MmugDNA.37801.1.S1_at   | MmugDNA.37801.1 | 2.88  | 2.87  | 0.07 | 0.09 | 1.01  | 0.191733 | 0.11919  | 0.562859 | 0.387634 |
| MmugDNA.37804.1.S1_at   | MmugDNA.37804.1 | 3.95  | 4     | 0.38 | 0.08 | -1.04 | 0.787573 | 0.275162 | 0.921953 | 0.539576 |
| MmugDNA.37805.1.S1_at   | MmugDNA.37805.1 | 6.77  | 6.72  | 0.06 | 0.05 | 1.04  | 0.108147 | 0.448986 | 0.480558 | 0.664771 |
| MmugDNA.37806.1.S1_at   | MmugDNA.37806.1 | 3.95  | 3.95  | 0.06 | 0.02 | 1     | 0.642148 | 0.956115 | 0.857628 | 0.975053 |
| MmugDNA.37808.1.S1_at   | MmugDNA.37808.1 | 4.47  | 4.43  | 0.11 | 0.02 | 1.03  | 0.525232 | 0.232874 | 0.796191 | 0.50445  |
| MmugDNA.37809.1.S1_at   | MmugDNA.37809.1 | 3.25  | 3.34  | 0.13 | 0.13 | -1.06 | 0.802386 | 0.703063 | 0.927941 | 0.827866 |

|                         |                 |       |       |      |      |       |          |          |          |          |
|-------------------------|-----------------|-------|-------|------|------|-------|----------|----------|----------|----------|
| MmugDNA.3781.1.S1_at    | MmugDNA.3781.1  | 5.37  | 5.25  | 0.02 | 0.08 | 1.09  | 0.026258 | 0.226608 | 0.323799 | 0.499067 |
| MmugDNA.37810.1.S1_at   | MmugDNA.37810.1 | 6.36  | 6.12  | 0.29 | 0.13 | 1.18  | 0.461444 | 0.132874 | 0.760917 | 0.404544 |
| MmugDNA.37812.1.S1_at   | MmugDNA.37812.1 | 6.72  | 6.75  | 0.25 | 0.1  | -1.02 | 0.683949 | 0.152809 | 0.876251 | 0.427601 |
| MmugDNA.37815.1.S1_at   | MmugDNA.37815.1 | 3.92  | 3.89  | 0.26 | 0.08 | 1.02  | 0.862202 | 0.879021 | 0.951433 | 0.93099  |
| MmugDNA.37816.1.S1_at   | MmugDNA.37816.1 | 3.13  | 3.06  | 0.01 | 0.06 | 1.05  | 0.045284 | 0.155722 | 0.376169 | 0.431086 |
| MmugDNA.37817.1.S1_at   | MmugDNA.37817.1 | 4.7   | 4.71  | 0.08 | 0.04 | -1    | 0.484876 | 0.919609 | 0.773825 | 0.954848 |
| MmugDNA.37818.1.S1_at   | MmugDNA.37818.1 | 12.16 | 12.03 | 0.45 | 0.04 | 1.09  | 0.736059 | 0.853191 | 0.899004 | 0.916521 |
| MmugDNA.37821.1.S1_at   | MmugDNA.37821.1 | 5.85  | 5.53  | 0.39 | 0.29 | 1.25  | 0.718972 | 0.895975 | 0.890843 | 0.940569 |
| MmugDNA.37822.1.S1_at   | MmugDNA.37822.1 | 3.88  | 3.6   | 0.81 | 0.34 | 1.21  | 0.908375 | 0.160413 | 0.969147 | 0.436528 |
| MmugDNA.37824.1.S1_at   | MmugDNA.37824.1 | 6.37  | 6.17  | 0.39 | 0.27 | 1.15  | 0.836278 | 0.553449 | 0.941202 | 0.732588 |
| MmugDNA.37825.1.S1_at   | MmugDNA.37825.1 | 4.18  | 3.9   | 0.02 | 0.11 | 1.21  | 0.031964 | 0.098205 | 0.342891 | 0.356253 |
| MmugDNA.37826.1.S1_at   | MmugDNA.37826.1 | 8.52  | 7.97  | 0.47 | 0.03 | 1.47  | 0.112789 | 0.013137 | 0.486223 | 0.147338 |
| MmugDNA.37827.1.S1_at   | MmugDNA.37827.1 | 7.24  | 7.26  | 0.05 | 0.05 | -1.01 | 0.4074   | 0.703559 | 0.728597 | 0.828139 |
| MmugDNA.37828.1.S1_at   | MmugDNA.37828.1 | 9.08  | 9.34  | 0.22 | 0.03 | -1.19 | 0.441822 | 0.695592 | 0.749615 | 0.823073 |
| MmugDNA.3783.1.S1_at    | MmugDNA.3783.1  | 7.52  | 7.05  | 0.29 | 0.21 | 1.39  | 0.078996 | 0.081271 | 0.441671 | 0.329351 |
| MmugDNA.37830.1.S1_at   | MmugDNA.37830.1 | 6.28  | 6.21  | 0.09 | 0.1  | 1.04  | 0.897157 | 0.052007 | 0.964988 | 0.273539 |
| MmugDNA.37831.1.S1_at   | MmugDNA.37831.1 | 11.24 | 10.94 | 0.04 | 0.15 | 1.23  | 0.038629 | 0.430215 | 0.359972 | 0.651279 |
| MmugDNA.37832.1.S1_at   | MmugDNA.37832.1 | 5.74  | 5.79  | 0.46 | 0.15 | -1.04 | 0.941656 | 0.329992 | 0.980204 | 0.578915 |
| MmugDNA.37833.1.S1_at   | MmugDNA.37833.1 | 8.96  | 7.86  | 1.57 | 0.86 | 2.14  | 0.612343 | 0.642082 | 0.843031 | 0.789995 |
| MmugDNA.37836.1.S1_at   | MmugDNA.37836.1 | 4.04  | 4.21  | 1.01 | 0.61 | -1.13 | 0.954566 | 0.334883 | 0.984902 | 0.58275  |
| MmugDNA.37838.1.S1_at   | MmugDNA.37838.1 | 7.31  | 6.6   | 0.33 | 0.12 | 1.63  | 0.029129 | 0.284687 | 0.333944 | 0.5469   |
| MmugDNA.37839.1.S1_s_at | MmugDNA.37839.1 | 11.54 | 11.62 | 0.25 | 0.07 | -1.06 | 0.59843  | 0.757961 | 0.836974 | 0.859199 |
| MmugDNA.37841.1.S1_at   | MmugDNA.37841.1 | 5.73  | 5.75  | 0.22 | 0.04 | -1.01 | 0.468092 | 0.106517 | 0.764699 | 0.369078 |
| MmugDNA.37842.1.S1_at   | MmugDNA.37842.1 | 7.81  | 8.48  | 0.41 | 0.13 | -1.6  | 0.206155 | 0.039037 | 0.578134 | 0.242786 |
| MmugDNA.37843.1.S1_at   | MmugDNA.37843.1 | 2.79  | 2.89  | 0.39 | 0.27 | -1.08 | 0.685151 | 0.878734 | 0.87671  | 0.930817 |
| MmugDNA.37844.1.S1_at   | MmugDNA.37844.1 | 10.9  | 11.58 | 1.1  | 0.05 | -1.6  | 0.150131 | 0.139595 | 0.523642 | 0.41286  |
| MmugDNA.37846.1.S1_at   | MmugDNA.37846.1 | 3.4   | 3.3   | 0    | 0.09 | 1.08  | 0.139361 | 0.246459 | 0.514766 | 0.515899 |
| MmugDNA.37847.1.S1_at   | MmugDNA.37847.1 | 12.62 | 12.25 | 0.08 | 0.04 | 1.29  | 0.003123 | 0.00083  | 0.191107 | 0.046851 |
| MmugDNA.37848.1.S1_at   | MmugDNA.37848.1 | 3.7   | 3.63  | 0.24 | 0.05 | 1.05  | 0.390283 | 0.597729 | 0.716623 | 0.760358 |
| MmugDNA.37849.1.S1_at   | MmugDNA.37849.1 | 9.68  | 10.45 | 1.09 | 0.16 | -1.7  | 0.192895 | 0.245601 | 0.563735 | 0.515348 |
| MmugDNA.3785.1.S1_at    | MmugDNA.3785.1  | 5.49  | 5.43  | 0.19 | 0.07 | 1.04  | 0.191974 | 0.193148 | 0.563029 | 0.468554 |
| MmugDNA.37850.1.S1_at   | MmugDNA.37850.1 | 4.92  | 4.75  | 0.16 | 0.18 | 1.13  | 0.471602 | 0.671093 | 0.76658  | 0.80765  |
| MmugDNA.37851.1.S1_at   | MmugDNA.37851.1 | 4.95  | 4.72  | 0.21 | 0.04 | 1.18  | 0.325399 | 0.331401 | 0.673233 | 0.580076 |
| MmugDNA.37852.1.S1_at   | MmugDNA.37852.1 | 5.02  | 4.98  | 0.07 | 0.04 | 1.02  | 0.565329 | 0.720447 | 0.819183 | 0.838261 |
| MmugDNA.37854.1.S1_at   | MmugDNA.37854.1 | 4.68  | 5.31  | 0.43 | 0.11 | -1.55 | 0.192983 | 0.528186 | 0.563803 | 0.716462 |
| MmugDNA.37855.1.S1_at   | MmugDNA.37855.1 | 5.66  | 5.54  | 0.2  | 0.15 | 1.08  | 0.141529 | 0.177378 | 0.516365 | 0.453742 |
| MmugDNA.37856.1.S1_at   | MmugDNA.37856.1 | 3.94  | 3.83  | 0.06 | 0.05 | 1.08  | 0.074746 | 0.503826 | 0.435313 | 0.701184 |
| MmugDNA.37857.1.S1_at   | MmugDNA.37857.1 | 4.43  | 4.23  | 0.16 | 0.27 | 1.15  | 0.28849  | 0.171603 | 0.645574 | 0.448034 |
| MmugDNA.37858.1.S1_at   | MmugDNA.37858.1 | 6.55  | 6.49  | 0.56 | 0.24 | 1.04  | 0.49363  | 0.439028 | 0.779001 | 0.657802 |
| MmugDNA.37859.1.S1_at   | MmugDNA.37859.1 | 12.35 | 12.3  | 0.13 | 0.04 | 1.04  | 0.994578 | 0.875392 | 0.997963 | 0.929245 |
| MmugDNA.37860.1.S1_at   | MmugDNA.37860.1 | 6.79  | 6.77  | 0.38 | 0.09 | 1.01  | 0.587561 | 0.23263  | 0.831719 | 0.504359 |
| MmugDNA.37862.1.S1_at   | MmugDNA.37862.1 | 4.93  | 5     | 0.52 | 0.44 | -1.05 | 0.780983 | 0.803352 | 0.919361 | 0.886825 |
| MmugDNA.37863.1.S1_at   | MmugDNA.37863.1 | 3.32  | 3.83  | 0.19 | 0.81 | -1.42 | 0.149989 | 0.214385 | 0.523486 | 0.48807  |

|                         |                 |       |       |      |      |       |          |          |          |          |
|-------------------------|-----------------|-------|-------|------|------|-------|----------|----------|----------|----------|
| MmugDNA.37864.1.S1_at   | MmugDNA.37864.1 | 9.51  | 9.22  | 0.68 | 0.22 | 1.22  | 0.558785 | 0.748797 | 0.81569  | 0.853901 |
| MmugDNA.37866.1.S1_at   | MmugDNA.37866.1 | 8.95  | 8.94  | 0.08 | 0.06 | 1.01  | 0.860422 | 0.14319  | 0.950798 | 0.417088 |
| MmugDNA.37867.1.S1_at   | MmugDNA.37867.1 | 9.72  | 9.77  | 0.05 | 0.07 | -1.03 | 0.220776 | 0.135489 | 0.590086 | 0.407591 |
| MmugDNA.37868.1.S1_at   | MmugDNA.37868.1 | 4.4   | 4.35  | 0.1  | 0.12 | 1.04  | 0.525034 | 0.438213 | 0.796179 | 0.657196 |
| MmugDNA.37870.1.S1_at   | MmugDNA.37870.1 | 4.57  | 4.47  | 0.13 | 0.07 | 1.08  | 0.625142 | 0.580388 | 0.849207 | 0.749646 |
| MmugDNA.37872.1.S1_at   | MmugDNA.37872.1 | 6.48  | 6.36  | 0.23 | 0.08 | 1.09  | 0.427365 | 0.179245 | 0.741004 | 0.45567  |
| MmugDNA.37873.1.S1_at   | MmugDNA.37873.1 | 12.18 | 12.92 | 0.62 | 0.13 | -1.67 | 0.110097 | 0.177101 | 0.483091 | 0.453611 |
| MmugDNA.37874.1.S1_at   | MmugDNA.37874.1 | 4.28  | 4.35  | 0.32 | 0.15 | -1.05 | 0.391469 | 0.274188 | 0.717597 | 0.538685 |
| MmugDNA.37875.1.S1_at   | MmugDNA.37875.1 | 7.04  | 6.57  | 0.56 | 0.33 | 1.38  | 0.194181 | 0.075317 | 0.564806 | 0.319475 |
| MmugDNA.37876.1.S1_at   | MmugDNA.37876.1 | 10.4  | 10.23 | 0.28 | 0.05 | 1.13  | 0.378816 | 0.218906 | 0.708465 | 0.492675 |
| MmugDNA.37877.1.S1_at   | MmugDNA.37877.1 | 8.26  | 8.76  | 0.49 | 0.06 | -1.41 | 0.137969 | 0.042718 | 0.513671 | 0.251141 |
| MmugDNA.12574.1.S1_s_at | MmugDNA.12574.1 | 5.83  | 5.9   | 0.67 | 0.08 | -1.05 | 0.855296 | 0.68362  | 0.948797 | 0.815387 |
| MmugDNA.37879.1.S1_at   | MmugDNA.37879.1 | 4.83  | 4.85  | 0.24 | 0.13 | -1.01 | 0.488206 | 0.401796 | 0.775437 | 0.631068 |
| MmugDNA.3788.1.S1_at    | MmugDNA.3788.1  | 7.7   | 7.71  | 0.65 | 0.21 | -1.01 | 0.270254 | 0.56356  | 0.630252 | 0.738718 |
| MmugDNA.37881.1.S1_at   | MmugDNA.37881.1 | 3.25  | 3.23  | 0.12 | 0.2  | 1.01  | 0.552866 | 0.379642 | 0.811917 | 0.616523 |
| MmugDNA.37882.1.S1_at   | MmugDNA.37882.1 | 7.15  | 7.35  | 0.61 | 0.72 | -1.15 | 0.810787 | 0.233866 | 0.931427 | 0.505169 |
| MmugDNA.37882.1.S1_s_at | MmugDNA.37882.1 | 13.38 | 12.82 | 0.33 | 0.21 | 1.48  | 0.302515 | 0.388292 | 0.656478 | 0.62274  |
| MmugDNA.37883.1.S1_at   | MmugDNA.37883.1 | 6.13  | 6.01  | 0.06 | 0.11 | 1.08  | 0.118199 | 0.334933 | 0.491605 | 0.58275  |
| MmugDNA.37884.1.S1_at   | MmugDNA.37884.1 | 3.67  | 3.8   | 0.04 | 0.09 | -1.09 | 0.157773 | 0.252993 | 0.53073  | 0.521279 |
| MmugDNA.37885.1.S1_at   | MmugDNA.37885.1 | 11.95 | 11.49 | 0.42 | 0.1  | 1.37  | 0.428633 | 0.049115 | 0.741968 | 0.266522 |
| MmugDNA.37886.1.S1_at   | MmugDNA.37886.1 | 2.65  | 2.64  | 0.07 | 0.06 | 1.01  | 0.764312 | 0.392659 | 0.911428 | 0.625813 |
| MmugDNA.37887.1.S1_at   | MmugDNA.37887.1 | 4.25  | 4.49  | 0.27 | 0.56 | -1.18 | 0.548016 | 0.737398 | 0.80936  | 0.847889 |
| MmugDNA.37888.1.S1_at   | MmugDNA.37888.1 | 9.34  | 9.74  | 0.25 | 0.07 | -1.32 | 0.170317 | 0.17778  | 0.543379 | 0.454111 |
| MmugDNA.37889.1.S1_at   | MmugDNA.37889.1 | 5.31  | 4.69  | 0.4  | 0.58 | 1.53  | 0.365527 | 0.59537  | 0.701174 | 0.759091 |
| MmugDNA.3789.1.S1_at    | MmugDNA.3789.1  | 10.32 | 10.72 | 0.43 | 0.1  | -1.32 | 0.244046 | 0.318709 | 0.609854 | 0.57133  |
| MmugDNA.37890.1.S1_at   | MmugDNA.37890.1 | 5.81  | 5.78  | 0.16 | 0.04 | 1.03  | 0.316439 | 0.335705 | 0.666494 | 0.583458 |
| MmugDNA.37892.1.S1_at   | MmugDNA.37892.1 | 5.46  | 5.25  | 0.22 | 0.16 | 1.16  | 0.414429 | 0.321631 | 0.733034 | 0.573342 |
| MmugDNA.37893.1.S1_at   | MmugDNA.37893.1 | 9.96  | 10.1  | 0.08 | 0.14 | -1.11 | 0.837944 | 0.197149 | 0.941963 | 0.472213 |
| MmugDNA.37894.1.S1_at   | MmugDNA.37894.1 | 4.45  | 4.26  | 0.25 | 0.14 | 1.14  | 0.16689  | 0.313813 | 0.539511 | 0.568083 |
| MmugDNA.37895.1.S1_at   | MmugDNA.37895.1 | 7.21  | 7.82  | 0.02 | 0.16 | -1.53 | 0.002418 | 0.00061  | 0.177075 | 0.042176 |
| MmugDNA.37896.1.S1_at   | MmugDNA.37896.1 | 6.33  | 6.26  | 0.11 | 0.25 | 1.05  | 0.428325 | 0.563076 | 0.741774 | 0.738345 |
| MmugDNA.37897.1.S1_at   | MmugDNA.37897.1 | 6.87  | 6.97  | 0.22 | 0.09 | -1.07 | 0.759406 | 0.599781 | 0.909618 | 0.761575 |
| MmugDNA.37898.1.S1_at   | MmugDNA.37898.1 | 4.04  | 3.95  | 0.08 | 0.04 | 1.06  | 0.100111 | 0.087917 | 0.470349 | 0.341318 |
| MmugDNA.379.1.S1_at     | MmugDNA.379.1   | 3.22  | 3.21  | 0.06 | 0.08 | 1     | 0.862443 | 0.749659 | 0.95158  | 0.854534 |
| MmugDNA.3790.1.S1_at    | MmugDNA.3790.1  | 5.77  | 6.65  | 0.25 | 0.15 | -1.84 | 0.005135 | 0.007032 | 0.205615 | 0.113112 |
| MmugDNA.37901.1.S1_at   | MmugDNA.37901.1 | 8.57  | 8.34  | 0.23 | 0.12 | 1.18  | 0.308164 | 0.269663 | 0.660917 | 0.534924 |
| MmugDNA.37902.1.S1_at   | MmugDNA.37902.1 | 9.2   | 9.5   | 0.47 | 0.35 | -1.23 | 0.344937 | 0.24704  | 0.687232 | 0.516238 |
| MmugDNA.37903.1.S1_at   | MmugDNA.37903.1 | 4.61  | 4.81  | 0.42 | 0.07 | -1.15 | 0.684794 | 0.386454 | 0.876588 | 0.621593 |
| MmugDNA.37905.1.S1_at   | MmugDNA.37905.1 | 4.09  | 4.09  | 0.2  | 0.17 | 1     | 0.231387 | 0.443737 | 0.599368 | 0.661427 |
| MmugDNA.37906.1.S1_at   | MmugDNA.37906.1 | 6.37  | 6.27  | 0.1  | 0.14 | 1.07  | 0.602653 | 0.255666 | 0.838904 | 0.523619 |
| MmugDNA.37907.1.S1_at   | MmugDNA.37907.1 | 6.14  | 6.06  | 0.2  | 0.02 | 1.05  | 0.493727 | 0.582095 | 0.77903  | 0.750784 |
| MmugDNA.37908.1.S1_at   | MmugDNA.37908.1 | 5.97  | 5.75  | 0.11 | 0.1  | 1.17  | 0.043684 | 0.036297 | 0.372554 | 0.235094 |
| MmugDNA.37910.1.S1_at   | MmugDNA.37910.1 | 3.98  | 4.11  | 0.16 | 0.3  | -1.1  | 0.766436 | 0.928287 | 0.912128 | 0.959243 |



|                         |                 |       |       |      |      |       |          |          |          |          |
|-------------------------|-----------------|-------|-------|------|------|-------|----------|----------|----------|----------|
| MmugDNA.37911.1.S1_at   | MmugDNA.37911.1 | 3.61  | 3.64  | 0.32 | 0.05 | -1.02 | 0.455931 | 0.49529  | 0.75759  | 0.695411 |
| MmugDNA.37912.1.S1_at   | MmugDNA.37912.1 | 5.39  | 5.34  | 0.1  | 0.1  | 1.04  | 0.525609 | 0.788965 | 0.796284 | 0.878011 |
| MmugDNA.37913.1.S1_at   | MmugDNA.37913.1 | 4.77  | 4.43  | 0.67 | 0.4  | 1.27  | 0.782727 | 0.142242 | 0.920013 | 0.415754 |
| MmugDNA.37914.1.S1_at   | MmugDNA.37914.1 | 6.87  | 6.64  | 0.14 | 0.06 | 1.17  | 0.054782 | 0.007612 | 0.397122 | 0.116745 |
| MmugDNA.37915.1.S1_at   | MmugDNA.37915.1 | 3.59  | 3.49  | 0.03 | 0.04 | 1.07  | 0.060765 | 0.423587 | 0.408849 | 0.646459 |
| MmugDNA.37916.1.S1_at   | MmugDNA.37916.1 | 5.56  | 5.58  | 0.33 | 0.19 | -1.01 | 0.701428 | 0.618523 | 0.883866 | 0.774147 |
| MmugDNA.37917.1.S1_at   | MmugDNA.37917.1 | 12.25 | 12.34 | 0.11 | 0.15 | -1.06 | 0.161826 | 0.377074 | 0.53522  | 0.614793 |
| MmugDNA.37918.1.S1_at   | MmugDNA.37918.1 | 5.34  | 5.31  | 0.13 | 0.11 | 1.02  | 0.414431 | 0.60719  | 0.733034 | 0.766271 |
| MmugDNA.37919.1.S1_at   | MmugDNA.37919.1 | 5.59  | 5.6   | 0.31 | 0.11 | -1.01 | 0.984146 | 0.807069 | 0.995199 | 0.888946 |
| MmugDNA.3792.1.S1_at    | MmugDNA.3792.1  | 5.5   | 5.59  | 0.11 | 0.22 | -1.06 | 0.501991 | 0.552333 | 0.783497 | 0.73166  |
| MmugDNA.37920.1.S1_at   | MmugDNA.37920.1 | 7.41  | 7.08  | 0.26 | 0.01 | -1.26 | 0.086336 | 0.027971 | 0.453939 | 0.208777 |
| MmugDNA.37924.1.S1_at   | MmugDNA.37924.1 | 3.77  | 3.88  | 0.03 | 0.15 | -1.08 | 0.953918 | 0.627073 | 0.984675 | 0.780185 |
| MmugDNA.37926.1.S1_at   | MmugDNA.37926.1 | 10.12 | 10.52 | 0.33 | 0.04 | -1.32 | 0.115233 | 0.064692 | 0.488399 | 0.300314 |
| MmugDNA.37928.1.S1_at   | MmugDNA.37928.1 | 4.13  | 4.46  | 0.3  | 0.57 | -1.26 | 0.696908 | 0.510598 | 0.882175 | 0.70503  |
| MmugDNA.37929.1.S1_at   | MmugDNA.37929.1 | 3.54  | 3.18  | 0.25 | 0.29 | 1.28  | 0.131591 | 0.190385 | 0.505989 | 0.465906 |
| MmugDNA.3793.1.S1_at    | MmugDNA.3793.1  | 5.56  | 5.24  | 0.27 | 0.06 | 1.25  | 0.211681 | 0.593856 | 0.582625 | 0.758418 |
| MmugDNA.37930.1.S1_at   | MmugDNA.37930.1 | 3.65  | 3.52  | 0.15 | 0.57 | 1.1   | 0.779204 | 0.707798 | 0.918608 | 0.830472 |
| MmugDNA.37931.1.S1_at   | MmugDNA.37931.1 | 3.55  | 3.46  | 0.2  | 0.14 | 1.07  | 0.217435 | 0.614838 | 0.587269 | 0.771576 |
| MmugDNA.37932.1.S1_at   | MmugDNA.37932.1 | 3.17  | 3.14  | 0.25 | 0.09 | 1.02  | 0.37872  | 0.388609 | 0.708438 | 0.622917 |
| MmugDNA.37933.1.S1_at   | MmugDNA.37933.1 | 3.53  | 3.49  | 0.11 | 0.14 | 1.03  | 0.652991 | 0.768276 | 0.862124 | 0.865456 |
| MmugDNA.37934.1.S1_at   | MmugDNA.37934.1 | 6.6   | 6.63  | 0.27 | 0.15 | -1.02 | 0.459846 | 0.6607   | 0.759823 | 0.80151  |
| MmugDNA.37937.1.S1_at   | MmugDNA.37937.1 | 3.58  | 3.64  | 0.09 | 0.1  | -1.04 | 0.912709 | 0.13663  | 0.970322 | 0.409162 |
| MmugDNA.37938.1.S1_at   | MmugDNA.37938.1 | 9.55  | 9.34  | 0.47 | 0.12 | 1.15  | 0.124701 | 0.07118  | 0.498814 | 0.31311  |
| MmugDNA.37939.1.S1_at   | MmugDNA.37939.1 | 11.73 | 11.62 | 0.62 | 0.02 | 1.08  | 0.868265 | 0.551159 | 0.953843 | 0.730819 |
| MmugDNA.3794.1.S1_at    | MmugDNA.3794.1  | 6.37  | 6.26  | 0.12 | 0.07 | 1.08  | 0.084477 | 0.128515 | 0.451025 | 0.399854 |
| MmugDNA.37940.1.S1_at   | MmugDNA.37940.1 | 8.14  | 10.12 | 0.46 | 0.27 | -3.94 | 0.002445 | 0.000203 | 0.177103 | 0.031734 |
| MmugDNA.37941.1.S1_at   | MmugDNA.37941.1 | 10.14 | 10.77 | 0.29 | 0.06 | -1.55 | 0.022578 | 0.046923 | 0.311408 | 0.261301 |
| MmugDNA.37942.1.S1_at   | MmugDNA.37942.1 | 6.91  | 6.96  | 0.31 | 0.22 | -1.04 | 0.393103 | 0.230014 | 0.718979 | 0.501865 |
| MmugDNA.37943.1.S1_at   | MmugDNA.37943.1 | 4.78  | 4.8   | 0.11 | 0.25 | -1.01 | 0.754225 | 0.207346 | 0.907331 | 0.481563 |
| MmugDNA.37944.1.S1_at   | MmugDNA.37944.1 | 9.57  | 9.49  | 0.5  | 0.06 | 1.06  | 0.557196 | 0.534223 | 0.814531 | 0.720204 |
| MmugDNA.37945.1.S1_at   | MmugDNA.37945.1 | 6.51  | 5.94  | 2.21 | 0.08 | 1.49  | 0.773104 | 0.41612  | 0.915591 | 0.64135  |
| MmugDNA.37946.1.S1_s_at | MmugDNA.37946.1 | 4.73  | 4.54  | 0.05 | 0.04 | 1.14  | 0.008185 | 0.196836 | 0.232005 | 0.471968 |
| MmugDNA.37948.1.S1_at   | MmugDNA.37948.1 | 4.42  | 4.26  | 0.06 | 0.09 | 1.12  | 0.049622 | 0.255176 | 0.385845 | 0.523228 |
| MmugDNA.37949.1.S1_at   | MmugDNA.37949.1 | 6.43  | 6.37  | 0.22 | 0.09 | 1.05  | 0.794469 | 0.265788 | 0.924569 | 0.531667 |
| MmugDNA.3795.1.S1_at    | MmugDNA.3795.1  | 12.04 | 12.1  | 0.06 | 0.02 | -1.04 | 0.467579 | 0.266808 | 0.764429 | 0.53241  |
| MmugDNA.37950.1.S1_at   | MmugDNA.37950.1 | 3.73  | 3.67  | 0.01 | 0.08 | 1.04  | 0.225415 | 0.553045 | 0.594611 | 0.732309 |
| MmugDNA.37951.1.S1_at   | MmugDNA.37951.1 | 5.08  | 4.86  | 0.21 | 0.34 | 1.17  | 0.730914 | 0.382119 | 0.896306 | 0.618346 |
| MmugDNA.37952.1.S1_at   | MmugDNA.37952.1 | 4.53  | 4.4   | 0.15 | 0.12 | 1.09  | 0.532789 | 0.252848 | 0.800482 | 0.521174 |
| MmugDNA.37953.1.S1_at   | MmugDNA.37953.1 | 7.73  | 8.4   | 0.92 | 0.21 | -1.59 | 0.345203 | 0.079502 | 0.68742  | 0.32681  |
| MmugDNA.37955.1.S1_at   | MmugDNA.37955.1 | 3.12  | 3.23  | 0.29 | 0.24 | -1.08 | 0.841004 | 0.49692  | 0.943507 | 0.696273 |
| MmugDNA.37956.1.S1_at   | MmugDNA.37956.1 | 3.82  | 3.79  | 0.39 | 0.24 | 1.02  | 0.884364 | 0.766387 | 0.959932 | 0.864265 |
| MmugDNA.37958.1.S1_at   | MmugDNA.37958.1 | 5.89  | 6.95  | 0.75 | 0.07 | -2.09 | 0.208924 | 0.270323 | 0.580477 | 0.535676 |
| MmugDNA.3796.1.S1_at    | MmugDNA.3796.1  | 6.21  | 6.17  | 0.39 | 0.12 | 1.03  | 0.829532 | 0.408475 | 0.93885  | 0.635694 |

|                         |                 |       |       |      |      |       |          |          |          |          |
|-------------------------|-----------------|-------|-------|------|------|-------|----------|----------|----------|----------|
| MmugDNA.37964.1.S1_at   | MmugDNA.37964.1 | 3.93  | 3.93  | 0.23 | 0.16 | 1     | 0.617775 | 0.721319 | 0.845619 | 0.838685 |
| MmugDNA.37966.1.S1_at   | MmugDNA.37966.1 | 7.73  | 7.67  | 0.09 | 0.12 | 1.04  | 0.997591 | 0.025727 | 0.999184 | 0.201029 |
| MmugDNA.37967.1.S1_at   | MmugDNA.37967.1 | 6.15  | 6     | 0.07 | 0.09 | 1.11  | 0.292274 | 0.181487 | 0.648604 | 0.458028 |
| MmugDNA.37968.1.S1_at   | MmugDNA.37968.1 | 10.23 | 10.65 | 0.2  | 0.01 | -1.34 | 0.021628 | 0.073073 | 0.309241 | 0.316017 |
| MmugDNA.37969.1.S1_at   | MmugDNA.37969.1 | 4.62  | 4.63  | 0.04 | 0.04 | -1    | 0.967695 | 0.076978 | 0.989348 | 0.322421 |
| MmugDNA.3797.1.S1_at    | MmugDNA.3797.1  | 10.32 | 10.5  | 0.68 | 0.57 | -1.13 | 0.693382 | 0.202203 | 0.880606 | 0.476613 |
| MmugDNA.3797.1.S1_x_at  | MmugDNA.3797.1  | 10.53 | 10.77 | 0.63 | 0.49 | -1.19 | 0.607993 | 0.189062 | 0.840979 | 0.464897 |
| MmugDNA.37970.1.S1_at   | MmugDNA.37970.1 | 5.03  | 4.92  | 0.11 | 0.17 | 1.08  | 0.078711 | 0.084115 | 0.441464 | 0.335147 |
| MmugDNA.37971.1.S1_at   | MmugDNA.37971.1 | 11.16 | 11.43 | 0.7  | 0.07 | -1.21 | 0.59651  | 0.259934 | 0.836007 | 0.52675  |
| MmugDNA.37972.1.S1_at   | MmugDNA.37972.1 | 11.98 | 11.34 | 0.21 | 0.11 | 1.56  | 0.007705 | 0.005481 | 0.230916 | 0.102081 |
| MmugDNA.37975.1.S1_at   | MmugDNA.37975.1 | 7.2   | 7.17  | 0.15 | 0.1  | -1.02 | 0.205775 | 0.242394 | 0.57765  | 0.51282  |
| MmugDNA.37976.1.S1_at   | MmugDNA.37976.1 | 3.12  | 3.2   | 0.06 | 0.1  | -1.06 | 0.860279 | 0.040485 | 0.950739 | 0.246264 |
| MmugDNA.37977.1.S1_at   | MmugDNA.37977.1 | 4.24  | 4.16  | 0.1  | 0.12 | 1.06  | 0.2094   | 0.705573 | 0.580868 | 0.829315 |
| MmugDNA.37978.1.S1_at   | MmugDNA.37978.1 | 5.42  | 5.61  | 1.2  | 0.87 | -1.14 | 0.922367 | 0.717105 | 0.973786 | 0.836232 |
| MmugDNA.37979.1.S1_at   | MmugDNA.37979.1 | 8.86  | 8.55  | 0.4  | 0.14 | 1.24  | 0.186513 | 0.347164 | 0.559164 | 0.591815 |
| MmugDNA.37979.1.S1_s_at | MmugDNA.37979.1 | 10.29 | 10.04 | 0.71 | 0.06 | 1.18  | 0.656091 | 0.841063 | 0.863476 | 0.909427 |
| MmugDNA.3798.1.S1_at    | MmugDNA.3798.1  | 3.8   | 3.65  | 0.09 | 0.09 | 1.11  | 0.30891  | 0.402056 | 0.661343 | 0.631153 |
| MmugDNA.37981.1.S1_at   | MmugDNA.37981.1 | 5.07  | 4.16  | 0.49 | 0.12 | 1.88  | 0.098645 | 0.117289 | 0.468025 | 0.38486  |
| MmugDNA.37983.1.S1_at   | MmugDNA.37983.1 | 5.86  | 5.81  | 0.23 | 0.17 | 1.04  | 0.486034 | 0.610344 | 0.774427 | 0.768564 |
| MmugDNA.37984.1.S1_at   | MmugDNA.37984.1 | 8.64  | 8.89  | 0.13 | 0.07 | -1.19 | 0.024888 | 0.020913 | 0.320135 | 0.181415 |
| MmugDNA.37985.1.S1_at   | MmugDNA.37985.1 | 8.6   | 9.42  | 0.9  | 0.06 | -1.77 | 0.629699 | 0.881543 | 0.851663 | 0.932407 |
| MmugDNA.37985.1.S1_s_at | MmugDNA.37985.1 | 9.71  | 10.45 | 0.81 | 0.19 | -1.67 | 0.555973 | 0.809325 | 0.813831 | 0.890103 |
| MmugDNA.37986.1.S1_at   | MmugDNA.37986.1 | 8.25  | 8.15  | 1.83 | 0.09 | 1.07  | 0.755247 | 0.011369 | 0.907742 | 0.138214 |
| MmugDNA.37987.1.S1_at   | MmugDNA.37987.1 | 7.7   | 7.78  | 0.55 | 1.07 | -1.06 | 0.747106 | 0.860398 | 0.903875 | 0.920449 |
| MmugDNA.37988.1.S1_x_at | MmugDNA.37988.1 | 11.42 | 11.58 | 0.23 | 0.19 | -1.12 | 0.426162 | 0.563556 | 0.740376 | 0.738718 |
| MmugDNA.37989.1.S1_at   | MmugDNA.37989.1 | 4.02  | 3.68  | 0.2  | 0.19 | 1.26  | 0.098686 | 0.435092 | 0.468025 | 0.655005 |
| MmugDNA.3799.1.S1_at    | MmugDNA.3799.1  | 7.13  | 7.51  | 0.53 | 0.65 | -1.29 | 0.525435 | 0.59646  | 0.796198 | 0.759592 |
| MmugDNA.37990.1.S1_at   | MmugDNA.37990.1 | 4.3   | 4.25  | 0.06 | 0.16 | 1.04  | 0.640003 | 0.041181 | 0.856485 | 0.247733 |
| MmugDNA.37991.1.S1_at   | MmugDNA.37991.1 | 7.21  | 6.54  | 0.33 | 0.2  | 1.6   | 0.089975 | 0.133232 | 0.457959 | 0.404999 |
| MmugDNA.37994.1.S1_at   | MmugDNA.37994.1 | 4.41  | 4.66  | 0.51 | 0.35 | -1.19 | 0.913539 | 0.201533 | 0.970603 | 0.476036 |
| MmugDNA.37997.1.S1_at   | MmugDNA.37997.1 | 3.45  | 3.5   | 0.07 | 0.22 | -1.03 | 0.939514 | 0.261989 | 0.979532 | 0.52836  |
| MmugDNA.380.1.S1_at     | MmugDNA.380.1   | 5.07  | 4.59  | 0.39 | 0.37 | 1.4   | 0.073823 | 0.088248 | 0.434623 | 0.341721 |
| MmugDNA.3800.1.S1_at    | MmugDNA.3800.1  | 6.12  | 5.96  | 0.14 | 0.15 | 1.12  | 0.502715 | 0.283296 | 0.783815 | 0.545836 |
| MmugDNA.38002.1.S1_at   | MmugDNA.38002.1 | 4.28  | 4.27  | 0.15 | 0.18 | 1.01  | 0.858883 | 0.969848 | 0.95017  | 0.983503 |
| MmugDNA.38004.1.S1_at   | MmugDNA.38004.1 | 5.22  | 5.72  | 0.42 | 0.36 | -1.41 | 0.077113 | 0.143722 | 0.438911 | 0.417583 |
| MmugDNA.38005.1.S1_at   | MmugDNA.38005.1 | 7.37  | 7.15  | 0.45 | 0.13 | 1.17  | 0.898949 | 0.851117 | 0.965677 | 0.915337 |
| MmugDNA.38007.1.S1_at   | MmugDNA.38007.1 | 2.99  | 2.97  | 0.08 | 0.1  | 1.01  | 0.178477 | 0.232712 | 0.551383 | 0.504359 |
| MmugDNA.38009.1.S1_at   | MmugDNA.38009.1 | 4.72  | 4.74  | 0.14 | 0.1  | -1.01 | 0.615881 | 0.802278 | 0.844679 | 0.886115 |
| MmugDNA.3801.1.S1_at    | MmugDNA.3801.1  | 5.06  | 4.41  | 0.4  | 0.11 | 1.57  | 0.024987 | 0.071841 | 0.320402 | 0.314082 |
| MmugDNA.38011.1.S1_at   | MmugDNA.38011.1 | 4.06  | 4.08  | 0.14 | 0.1  | -1.01 | 0.994501 | 0.006873 | 0.997927 | 0.111996 |
| MmugDNA.38012.1.S1_at   | MmugDNA.38012.1 | 5.33  | 4.61  | 0.13 | 0.23 | 1.64  | 0.019486 | 0.095072 | 0.301444 | 0.352124 |
| MmugDNA.38015.1.S1_at   | MmugDNA.38015.1 | 3.39  | 3.33  | 0.04 | 0    | 1.04  | 0.179793 | 0.129066 | 0.553052 | 0.400548 |
| MmugDNA.38015.1.S1_x_at | MmugDNA.38015.1 | 4.09  | 4.08  | 0.25 | 0.05 | 1     | 0.84446  | 0.955254 | 0.945337 | 0.974611 |

|                         |                 |       |       |      |      |       |          |          |          |          |
|-------------------------|-----------------|-------|-------|------|------|-------|----------|----------|----------|----------|
| MmugDNA.38016.1.S1_at   | MmugDNA.38016.1 | 4.68  | 4.58  | 0.15 | 0.08 | 1.07  | 0.205276 | 0.483818 | 0.576998 | 0.688165 |
| MmugDNA.38017.1.S1_at   | MmugDNA.38017.1 | 4.08  | 3.92  | 0.27 | 0.06 | 1.12  | 0.114271 | 0.15259  | 0.487606 | 0.427435 |
| MmugDNA.38018.1.S1_at   | MmugDNA.38018.1 | 3.69  | 3.87  | 0.18 | 0.23 | -1.14 | 0.444415 | 0.584065 | 0.751266 | 0.752189 |
| MmugDNA.38019.1.S1_at   | MmugDNA.38019.1 | 9.59  | 9.88  | 0.76 | 0.08 | -1.22 | 0.934247 | 0.908567 | 0.977732 | 0.948227 |
| MmugDNA.3802.1.S1_at    | MmugDNA.3802.1  | 10.22 | 9.8   | 0.31 | 0.28 | 1.33  | 0.109784 | 0.08526  | 0.482607 | 0.337096 |
| MmugDNA.38020.1.S1_at   | MmugDNA.38020.1 | 9.9   | 11.23 | 0.59 | 0.07 | -2.5  | 0.044982 | 0.082815 | 0.375607 | 0.332331 |
| MmugDNA.38021.1.S1_at   | MmugDNA.38021.1 | 5.83  | 5.78  | 0.08 | 0    | 1.03  | 0.881892 | 0.947956 | 0.95911  | 0.970406 |
| MmugDNA.38022.1.S1_at   | MmugDNA.38022.1 | 7.64  | 7.61  | 0.19 | 0.04 | 1.02  | 0.5732   | 0.206661 | 0.823465 | 0.480711 |
| MmugDNA.38023.1.S1_at   | MmugDNA.38023.1 | 8.1   | 7.76  | 0.49 | 0.08 | 1.27  | 0.099102 | 0.013224 | 0.468468 | 0.147534 |
| MmugDNA.38024.1.S1_at   | MmugDNA.38024.1 | 11.5  | 11.06 | 0.37 | 0.23 | 1.36  | 0.702238 | 0.006193 | 0.884153 | 0.106774 |
| MmugDNA.38025.1.S1_at   | MmugDNA.38025.1 | 8.06  | 7.43  | 0.66 | 0.06 | -1.55 | 0.110471 | 0.06128  | 0.483545 | 0.294247 |
| MmugDNA.38025.1.S1_s_at | MmugDNA.38025.1 | 8.45  | 7.86  | 0.71 | 0.13 | 1.5   | 0.13986  | 0.084673 | 0.515347 | 0.33618  |
| MmugDNA.38027.1.S1_at   | MmugDNA.38027.1 | 3.57  | 4.59  | 0.66 | 0.09 | -2.03 | 0.168133 | 0.12565  | 0.540716 | 0.396249 |
| MmugDNA.38028.1.S1_at   | MmugDNA.38028.1 | 2.9   | 2.84  | 0.04 | 0.04 | 1.05  | 0.083233 | 0.875256 | 0.448993 | 0.929211 |
| MmugDNA.38028.1.S1_x_at | MmugDNA.38028.1 | 2.92  | 2.93  | 0.06 | 0.24 | -1    | 0.998655 | 0.911863 | 0.99961  | 0.950295 |
| MmugDNA.3803.1.S1_at    | MmugDNA.3803.1  | 9.96  | 9.55  | 0.64 | 0.08 | 1.32  | 0.282421 | 0.382175 | 0.640907 | 0.618361 |
| MmugDNA.38030.1.S1_at   | MmugDNA.38030.1 | 11.11 | 11.04 | 0.51 | 0.08 | 1.05  | 0.694466 | 0.600746 | 0.881128 | 0.76224  |
| MmugDNA.38031.1.S1_at   | MmugDNA.38031.1 | 4.3   | 4.24  | 0    | 0.03 | 1.04  | 0.116553 | 0.198343 | 0.489684 | 0.473267 |
| MmugDNA.38032.1.S1_at   | MmugDNA.38032.1 | 5.42  | 5.39  | 0.26 | 0.21 | 1.02  | 0.955724 | 0.981413 | 0.985346 | 0.989775 |
| MmugDNA.38033.1.S1_at   | MmugDNA.38033.1 | 4.22  | 4.24  | 0.03 | 0.17 | -1.01 | 0.787517 | 0.937397 | 0.921953 | 0.964687 |
| MmugDNA.38034.1.S1_at   | MmugDNA.38034.1 | 3.68  | 3.93  | 0.15 | 0.21 | -1.19 | 0.394562 | 0.12438  | 0.719879 | 0.394857 |
| MmugDNA.38035.1.S1_at   | MmugDNA.38035.1 | 5.02  | 6.26  | 0.42 | 0.12 | -2.36 | 0.00347  | 0.208837 | 0.195142 | 0.482717 |
| MmugDNA.38036.1.S1_at   | MmugDNA.38036.1 | 3.24  | 3.16  | 0.06 | 0.07 | 1.05  | 0.279907 | 0.654767 | 0.638821 | 0.798154 |
| MmugDNA.38037.1.S1_at   | MmugDNA.38037.1 | 10.08 | 10.68 | 0.25 | 0.04 | -1.52 | 0.014212 | 0.005805 | 0.274019 | 0.104597 |
| MmugDNA.38038.1.S1_at   | MmugDNA.38038.1 | 5.37  | 5.32  | 0.24 | 0.12 | 1.04  | 0.788779 | 0.892659 | 0.922472 | 0.938777 |
| MmugDNA.38039.1.S1_at   | MmugDNA.38039.1 | 6.98  | 6.61  | 0.15 | 0.12 | 1.29  | 0.027111 | 0.036079 | 0.327173 | 0.234413 |
| MmugDNA.3804.1.S1_at    | MmugDNA.3804.1  | 6     | 5.95  | 0.13 | 0.09 | 1.04  | 0.913576 | 0.253711 | 0.970603 | 0.522067 |
| MmugDNA.38040.1.S1_at   | MmugDNA.38040.1 | 4.01  | 4.06  | 0.07 | 0    | -1.03 | 0.889584 | 0.71929  | 0.961988 | 0.837561 |
| MmugDNA.38041.1.S1_at   | MmugDNA.38041.1 | 11.71 | 11.4  | 0.08 | 0.05 | 1.24  | 0.00846  | 0.00028  | 0.234381 | 0.03453  |
| MmugDNA.38042.1.S1_at   | MmugDNA.38042.1 | 8.71  | 8.72  | 0.2  | 0.09 | -1.01 | 0.338671 | 0.741944 | 0.683213 | 0.850545 |
| MmugDNA.38043.1.S1_at   | MmugDNA.38043.1 | 10.27 | 10.6  | 0.55 | 0.1  | -1.25 | 0.882339 | 0.961443 | 0.959179 | 0.978245 |
| MmugDNA.38044.1.S1_at   | MmugDNA.38044.1 | 4.29  | 4.25  | 1.52 | 0.12 | 1.03  | 0.338731 | 0.481638 | 0.683213 | 0.686561 |
| MmugDNA.38045.1.S1_at   | MmugDNA.38045.1 | 6.95  | 6.96  | 0.52 | 0.06 | -1.01 | 0.47408  | 0.656017 | 0.767923 | 0.79881  |
| MmugDNA.38046.1.S1_at   | MmugDNA.38046.1 | 6.02  | 6.01  | 0.19 | 0.07 | 1.01  | 0.530014 | 0.306998 | 0.798631 | 0.563427 |
| MmugDNA.38048.1.S1_at   | MmugDNA.38048.1 | 6.29  | 6.13  | 0.12 | 0.1  | 1.11  | 0.066886 | 0.411082 | 0.422979 | 0.637877 |
| MmugDNA.3805.1.S1_at    | MmugDNA.3805.1  | 3.58  | 3.89  | 0.09 | 0.22 | -1.23 | 0.286615 | 0.476378 | 0.643885 | 0.682695 |
| MmugDNA.38050.1.S1_s_at | MmugDNA.38050.1 | 10.28 | 10.54 | 0.24 | 0.04 | -1.2  | 0.17374  | 0.008542 | 0.546749 | 0.122583 |
| MmugDNA.38051.1.S1_at   | MmugDNA.38051.1 | 4.49  | 4.54  | 0.24 | 0.13 | -1.03 | 0.86148  | 0.838184 | 0.951267 | 0.907595 |
| MmugDNA.38055.1.S1_at   | MmugDNA.38055.1 | 7.33  | 7.61  | 0.14 | 0.1  | -1.22 | 0.113405 | 0.084318 | 0.486722 | 0.335576 |
| MmugDNA.38056.1.S1_at   | MmugDNA.38056.1 | 6.49  | 7.18  | 0.48 | 0.2  | -1.62 | 0.184747 | 0.455183 | 0.557496 | 0.669157 |
| MmugDNA.38057.1.S1_at   | MmugDNA.38057.1 | 5.87  | 5.86  | 0.09 | 0.23 | 1.01  | 0.898124 | 0.735807 | 0.965455 | 0.847147 |
| MmugDNA.38058.1.S1_at   | MmugDNA.38058.1 | 10.36 | 10.41 | 0.29 | 0.21 | -1.04 | 0.56629  | 0.098711 | 0.819955 | 0.356809 |
| MmugDNA.38059.1.S1_at   | MmugDNA.38059.1 | 6.47  | 6.31  | 0.11 | 0.03 | 1.12  | 0.068277 | 0.01343  | 0.425182 | 0.148471 |

|                         |                 |       |       |      |      |       |          |          |          |          |
|-------------------------|-----------------|-------|-------|------|------|-------|----------|----------|----------|----------|
| MmugDNA.3806.1.S1_at    | MmugDNA.3806.1  | 6.15  | 6.07  | 0.17 | 0.08 | 1.06  | 0.953781 | 0.715975 | 0.984675 | 0.835339 |
| MmugDNA.38060.1.S1_at   | MmugDNA.38060.1 | 4.12  | 4.25  | 0.08 | 0.12 | -1.09 | 0.141694 | 0.255115 | 0.516602 | 0.52317  |
| MmugDNA.38061.1.S1_at   | MmugDNA.38061.1 | 7.48  | 7.51  | 0.16 | 0.14 | -1.02 | 0.530856 | 0.050738 | 0.799314 | 0.270387 |
| MmugDNA.38064.1.S1_s_at | MmugDNA.38064.1 | 7.12  | 7.12  | 0.05 | 0.05 | -1    | 0.255807 | 0.471013 | 0.619764 | 0.679162 |
| MmugDNA.38065.1.S1_at   | MmugDNA.38065.1 | 4.86  | 5.04  | 0.06 | 0.03 | -1.13 | 0.032507 | 0.007293 | 0.344478 | 0.114639 |
| MmugDNA.38066.1.S1_at   | MmugDNA.38066.1 | 4     | 4.13  | 0.15 | 0.05 | -1.09 | 0.464349 | 0.088254 | 0.762534 | 0.341721 |
| MmugDNA.38067.1.S1_at   | MmugDNA.38067.1 | 5.31  | 5.3   | 0.15 | 0.11 | 1.01  | 0.785048 | 0.230282 | 0.920961 | 0.502102 |
| MmugDNA.38068.1.S1_at   | MmugDNA.38068.1 | 6.43  | 6.32  | 0.21 | 0.05 | 1.08  | 0.83242  | 0.464841 | 0.939855 | 0.675463 |
| MmugDNA.3807.1.S1_at    | MmugDNA.3807.1  | 11.16 | 11.33 | 0.45 | 0.13 | -1.12 | 0.821494 | 0.640038 | 0.935582 | 0.788671 |
| MmugDNA.38071.1.S1_s_at | MmugDNA.38071.1 | 12.05 | 11.7  | 0.13 | 0.02 | 1.27  | 0.025812 | 0.014008 | 0.32273  | 0.151595 |
| MmugDNA.38073.1.S1_at   | MmugDNA.38073.1 | 3.45  | 3.45  | 0.17 | 0.03 | -1    | 0.936513 | 0.745223 | 0.978667 | 0.852308 |
| MmugDNA.38074.1.S1_at   | MmugDNA.38074.1 | 5.13  | 4.03  | 0.67 | 0.4  | 2.13  | 0.077892 | 0.107896 | 0.439987 | 0.370945 |
| MmugDNA.38075.1.S1_at   | MmugDNA.38075.1 | 10.3  | 10.02 | 0.2  | 0.02 | 1.22  | 0.066564 | 0.277161 | 0.422404 | 0.541154 |
| MmugDNA.38076.1.S1_at   | MmugDNA.38076.1 | 4.57  | 4.37  | 0.08 | 0.04 | 1.15  | 0.018197 | 0.017382 | 0.295482 | 0.166949 |
| MmugDNA.38077.1.S1_at   | MmugDNA.38077.1 | 4.8   | 4.29  | 0.29 | 0.13 | 1.42  | 0.138525 | 0.314047 | 0.513941 | 0.568178 |
| MmugDNA.38078.1.S1_at   | MmugDNA.38078.1 | 9.24  | 9.25  | 0.25 | 0.2  | -1.01 | 0.583561 | 0.661777 | 0.829134 | 0.801943 |
| MmugDNA.38079.1.S1_at   | MmugDNA.38079.1 | 7.09  | 6.38  | 0.11 | 0.1  | 1.64  | 0.00227  | 0.050721 | 0.174757 | 0.270355 |
| MmugDNA.3808.1.S1_at    | MmugDNA.3808.1  | 6.06  | 6.15  | 0.1  | 0.15 | -1.06 | 0.974891 | 0.811026 | 0.991912 | 0.890966 |
| MmugDNA.38080.1.S1_at   | MmugDNA.38080.1 | 7.39  | 6.67  | 0.23 | 0.07 | 1.65  | 0.006375 | 0.004378 | 0.218572 | 0.092619 |
| MmugDNA.38082.1.S1_at   | MmugDNA.38082.1 | 8.2   | 8.19  | 0.26 | 0.04 | 1.01  | 0.592619 | 0.77239  | 0.833923 | 0.867685 |
| MmugDNA.38083.1.S1_at   | MmugDNA.38083.1 | 3.41  | 3.57  | 0.11 | 0.11 | -1.11 | 0.096593 | 0.155969 | 0.465275 | 0.431376 |
| MmugDNA.38084.1.S1_at   | MmugDNA.38084.1 | 6.84  | 5.95  | 1.15 | 0.41 | 1.85  | 0.931799 | 0.634806 | 0.977114 | 0.785036 |
| MmugDNA.38084.1.S1_s_at | MmugDNA.38084.1 | 4.91  | 4.81  | 0.76 | 0.21 | 1.07  | 0.749427 | 0.90641  | 0.905021 | 0.94704  |
| MmugDNA.38085.1.S1_at   | MmugDNA.38085.1 | 6.44  | 6.43  | 0.15 | 0.06 | 1.01  | 0.847942 | 0.411414 | 0.946624 | 0.638149 |
| MmugDNA.38087.1.S1_at   | MmugDNA.38087.1 | 6.01  | 5.98  | 0.15 | 0.35 | 1.01  | 0.458267 | 0.345139 | 0.758668 | 0.590422 |
| MmugDNA.38088.1.S1_at   | MmugDNA.38088.1 | 6.24  | 6.17  | 0.08 | 0.1  | 1.05  | 0.150317 | 0.44316  | 0.523933 | 0.661011 |
| MmugDNA.38089.1.S1_at   | MmugDNA.38089.1 | 6.99  | 7.07  | 0.19 | 0.14 | -1.06 | 0.531133 | 0.717424 | 0.799497 | 0.836425 |
| MmugDNA.3809.1.S1_at    | MmugDNA.3809.1  | 3.69  | 3.62  | 0.09 | 0.08 | 1.05  | 0.135738 | 0.166361 | 0.510186 | 0.442884 |
| MmugDNA.38090.1.S1_at   | MmugDNA.38090.1 | 3.18  | 5.2   | 0.3  | 0.68 | -4.04 | 0.009633 | 0.003801 | 0.243036 | 0.087835 |
| MmugDNA.38091.1.S1_at   | MmugDNA.38091.1 | 8.72  | 8.95  | 0.52 | 0.12 | -1.18 | 0.478398 | 0.83837  | 0.77008  | 0.907759 |
| MmugDNA.38092.1.S1_at   | MmugDNA.38092.1 | 6.21  | 5.65  | 0.87 | 0.09 | 1.47  | 0.302209 | 0.148447 | 0.656154 | 0.423007 |
| MmugDNA.38093.1.S1_at   | MmugDNA.38093.1 | 3.57  | 3.72  | 0    | 0.17 | -1.11 | 0.240067 | 0.594704 | 0.606307 | 0.758628 |
| MmugDNA.38094.1.S1_at   | MmugDNA.38094.1 | 6.66  | 6.65  | 0.35 | 0.45 | 1.01  | 0.247865 | 0.513847 | 0.613511 | 0.707281 |
| MmugDNA.38095.1.S1_at   | MmugDNA.38095.1 | 11.67 | 11.32 | 0.25 | 0.08 | 1.27  | 0.026023 | 0.015245 | 0.323007 | 0.156859 |
| MmugDNA.38096.1.S1_s_at | MmugDNA.38096.1 | 11.81 | 11.76 | 0.3  | 0.06 | 1.04  | 0.218744 | 0.277899 | 0.588341 | 0.541664 |
| MmugDNA.38097.1.S1_at   | MmugDNA.38097.1 | 10.68 | 10.97 | 0.91 | 0.06 | -1.22 | 0.47865  | 0.601871 | 0.770122 | 0.763115 |
| MmugDNA.38098.1.S1_at   | MmugDNA.38098.1 | 2.96  | 2.96  | 0.04 | 0.06 | 1     | 0.241967 | 0.423642 | 0.607993 | 0.646464 |
| MmugDNA.381.1.S1_at     | MmugDNA.381.1   | 6.53  | 6.39  | 0.07 | 0.06 | 1.11  | 0.067686 | 0.456017 | 0.42444  | 0.669779 |
| MmugDNA.3810.1.S1_at    | MmugDNA.3810.1  | 9.49  | 9.48  | 0.35 | 0.07 | 1     | 0.707179 | 0.808989 | 0.88608  | 0.889981 |
| MmugDNA.38100.1.S1_at   | MmugDNA.38100.1 | 5.05  | 5.22  | 0.39 | 0.05 | -1.12 | 0.353403 | 0.812313 | 0.693234 | 0.891561 |
| MmugDNA.38101.1.S1_at   | MmugDNA.38101.1 | 12.01 | 11.84 | 0.13 | 0.04 | 1.12  | 0.040553 | 0.038431 | 0.364613 | 0.240918 |
| MmugDNA.38104.1.S1_at   | MmugDNA.38104.1 | 7.7   | 7.62  | 0.49 | 0.1  | 1.06  | 0.52396  | 0.241658 | 0.795715 | 0.512225 |
| MmugDNA.38105.1.S1_at   | MmugDNA.38105.1 | 7.99  | 8.04  | 0.25 | 0.04 | -1.04 | 0.654546 | 0.805137 | 0.862864 | 0.887962 |

|                         |                 |       |       |      |      |       |          |          |          |          |
|-------------------------|-----------------|-------|-------|------|------|-------|----------|----------|----------|----------|
| MmugDNA.38106.1.S1_at   | MmugDNA.38106.1 | 3.68  | 3.3   | 0.15 | 0.26 | 1.31  | 0.248539 | 0.11012  | 0.613851 | 0.374244 |
| MmugDNA.38108.1.S1_at   | MmugDNA.38108.1 | 4.43  | 4.24  | 0.09 | 0.79 | 1.14  | 0.53249  | 0.51373  | 0.800337 | 0.707217 |
| MmugDNA.38109.1.S1_at   | MmugDNA.38109.1 | 3.04  | 3.05  | 0.18 | 0.18 | -1.01 | 0.422894 | 0.659762 | 0.738587 | 0.800854 |
| MmugDNA.38110.1.S1_at   | MmugDNA.38110.1 | 6.2   | 6.15  | 0.31 | 0.24 | 1.04  | 0.936608 | 0.984221 | 0.978723 | 0.991233 |
| MmugDNA.38111.1.S1_at   | MmugDNA.38111.1 | 4.13  | 3.94  | 0.24 | 0.21 | 1.14  | 0.790846 | 0.272975 | 0.923038 | 0.53761  |
| MmugDNA.38112.1.S1_at   | MmugDNA.38112.1 | 3.27  | 3.27  | 0.05 | 0    | 1     | 0.820773 | 0.981114 | 0.935289 | 0.989575 |
| MmugDNA.38114.1.S1_at   | MmugDNA.38114.1 | 4.75  | 4.59  | 0.2  | 0.09 | 1.12  | 0.403538 | 0.717038 | 0.725712 | 0.836191 |
| MmugDNA.38116.1.S1_at   | MmugDNA.38116.1 | 7.43  | 7.71  | 0.23 | 0.32 | -1.21 | 0.235233 | 0.143599 | 0.602266 | 0.41751  |
| MmugDNA.38118.1.S1_at   | MmugDNA.38118.1 | 3.31  | 3.23  | 0.12 | 0.1  | 1.06  | 0.163118 | 0.267265 | 0.536035 | 0.532909 |
| MmugDNA.38119.1.S1_s_at | MmugDNA.38119.1 | 11.71 | 11.61 | 0.17 | 0.01 | 1.07  | 0.135512 | 0.028953 | 0.510014 | 0.212051 |
| MmugDNA.3812.1.S1_at    | MmugDNA.3812.1  | 3.92  | 3.67  | 0.27 | 0.07 | -1.19 | 0.178553 | 0.267684 | 0.551383 | 0.533467 |
| MmugDNA.38120.1.S1_at   | MmugDNA.38120.1 | 5.34  | 5.42  | 0.24 | 0.27 | -1.05 | 0.686632 | 0.039113 | 0.877418 | 0.24303  |
| MmugDNA.38122.1.S1_at   | MmugDNA.38122.1 | 5.9   | 5.91  | 0.12 | 0.12 | -1.01 | 0.81569  | 0.115969 | 0.933219 | 0.383164 |
| MmugDNA.38123.1.S1_at   | MmugDNA.38123.1 | 3.56  | 3.46  | 0.17 | 0.24 | 1.07  | 0.462433 | 0.340828 | 0.761639 | 0.586978 |
| MmugDNA.38125.1.S1_at   | MmugDNA.38125.1 | 3.45  | 3.4   | 0.27 | 0.12 | 1.03  | 0.460488 | 0.484219 | 0.760242 | 0.688408 |
| MmugDNA.38126.1.S1_at   | MmugDNA.38126.1 | 6.11  | 6.44  | 0.36 | 0.1  | -1.26 | 0.145368 | 0.524622 | 0.520409 | 0.714463 |
| MmugDNA.38127.1.S1_at   | MmugDNA.38127.1 | 4.96  | 4.45  | 0.33 | 0.25 | 1.42  | 0.08561  | 0.10682  | 0.452706 | 0.369425 |
| MmugDNA.38128.1.S1_at   | MmugDNA.38128.1 | 5.17  | 5.15  | 0.37 | 0.51 | 1.01  | 0.866604 | 0.809835 | 0.953134 | 0.890412 |
| MmugDNA.38129.1.S1_at   | MmugDNA.38129.1 | 8.19  | 7.94  | 0.4  | 0.31 | 1.19  | 0.195613 | 0.199392 | 0.565981 | 0.474002 |
| MmugDNA.3813.1.S1_at    | MmugDNA.3813.1  | 7.59  | 8.21  | 0.19 | 0.37 | -1.53 | 0.130713 | 0.014962 | 0.505202 | 0.155453 |
| MmugDNA.38130.1.S1_at   | MmugDNA.38130.1 | 3.22  | 3.23  | 0.08 | 0.26 | -1    | 0.826419 | 0.898564 | 0.937786 | 0.942254 |
| MmugDNA.38131.1.S1_at   | MmugDNA.38131.1 | 10.81 | 10.78 | 0.32 | 0.02 | 1.02  | 0.474064 | 0.550097 | 0.767923 | 0.730241 |
| MmugDNA.38131.1.S1_s_at | MmugDNA.38131.1 | 10.44 | 10.36 | 0.32 | 0.07 | 1.06  | 0.652115 | 0.795659 | 0.86196  | 0.882258 |
| MmugDNA.38133.1.S1_at   | MmugDNA.38133.1 | 3.95  | 4.04  | 0.23 | 0.01 | -1.07 | 0.839026 | 0.989235 | 0.942442 | 0.993878 |
| MmugDNA.38134.1.S1_at   | MmugDNA.38134.1 | 3.13  | 3.44  | 0.36 | 0.15 | -1.24 | 0.684053 | 0.661583 | 0.876319 | 0.801876 |
| MmugDNA.38139.1.S1_at   | MmugDNA.38139.1 | 5.68  | 5.37  | 0.16 | 0.13 | 1.24  | 0.083322 | 0.086572 | 0.449112 | 0.33911  |
| MmugDNA.3814.1.S1_at    | MmugDNA.3814.1  | 8.79  | 9.12  | 0.96 | 0.24 | -1.25 | 0.803406 | 0.302207 | 0.928371 | 0.560092 |
| MmugDNA.38140.1.S1_at   | MmugDNA.38140.1 | 6.37  | 6.2   | 0.08 | 0.13 | 1.13  | 0.345912 | 0.463368 | 0.687872 | 0.674373 |
| MmugDNA.38141.1.S1_at   | MmugDNA.38141.1 | 9.27  | 9.09  | 0.44 | 0.02 | 1.13  | 0.703197 | 0.084524 | 0.884538 | 0.335916 |
| MmugDNA.38141.1.S1_x_at | MmugDNA.38141.1 | 9.49  | 9.34  | 0.41 | 0.01 | 1.11  | 0.626604 | 0.048022 | 0.849991 | 0.264118 |
| MmugDNA.38142.1.S1_at   | MmugDNA.38142.1 | 4.93  | 4.91  | 0.11 | 0.1  | 1.02  | 0.333251 | 0.251292 | 0.679496 | 0.519984 |
| MmugDNA.3247.1.S1_at    | MmugDNA.3247.1  | 12.8  | 12.68 | 0.14 | 0.25 | 1.09  | 0.685759 | 0.21677  | 0.876883 | 0.490311 |
| MmugDNA.3247.1.S1_s_at  | MmugDNA.3247.1  | 11.16 | 11.02 | 0.15 | 0.34 | 1.1   | 0.701855 | 0.443591 | 0.883997 | 0.661336 |
| MmugDNA.38144.1.S1_at   | MmugDNA.38144.1 | 6.45  | 6.45  | 0.05 | 0.06 | 1     | 0.200058 | 0.733554 | 0.571864 | 0.845731 |
| MmugDNA.38145.1.S1_at   | MmugDNA.38145.1 | 3.67  | 3.67  | 0.21 | 0    | 1     | 0.373901 | 0.553953 | 0.705567 | 0.732896 |
| MmugDNA.38146.1.S1_at   | MmugDNA.38146.1 | 11.82 | 11.25 | 0.19 | 0.14 | 1.48  | 0.006392 | 0.002423 | 0.218859 | 0.073058 |
| MmugDNA.38146.1.S1_s_at | MmugDNA.38146.1 | 10.9  | 9.93  | 0.28 | 0.11 | 1.96  | 0.004344 | 0.001164 | 0.198874 | 0.053615 |
| MmugDNA.38147.1.S1_at   | MmugDNA.38147.1 | 7.76  | 8.29  | 0.98 | 0.2  | -1.44 | 0.461103 | 0.397983 | 0.760754 | 0.629138 |
| MmugDNA.38149.1.S1_at   | MmugDNA.38149.1 | 4.54  | 4.37  | 0.16 | 0.23 | 1.13  | 0.137161 | 0.343841 | 0.512148 | 0.589516 |
| MmugDNA.38149.1.S1_x_at | MmugDNA.38149.1 | 4.47  | 4.29  | 0.19 | 0.05 | 1.13  | 0.185423 | 0.677786 | 0.55849  | 0.811816 |
| MmugDNA.38150.1.S1_at   | MmugDNA.38150.1 | 7.25  | 7.31  | 0.05 | 0.06 | -1.04 | 0.513791 | 0.62963  | 0.790154 | 0.781989 |
| MmugDNA.38151.1.S1_at   | MmugDNA.38151.1 | 5.98  | 5.6   | 1    | 0.33 | 1.3   | 0.580746 | 0.025033 | 0.827254 | 0.198273 |
| MmugDNA.38152.1.S1_at   | MmugDNA.38152.1 | 12.11 | 12.5  | 0.25 | 0.05 | -1.31 | 0.176463 | 0.189043 | 0.549493 | 0.464897 |

|                         |                 |       |       |      |      |       |          |          |          |          |
|-------------------------|-----------------|-------|-------|------|------|-------|----------|----------|----------|----------|
| MmugDNA.38154.1.S1_at   | MmugDNA.38154.1 | 8.26  | 9.36  | 0.31 | 0.33 | -2.16 | 0.029401 | 0.060472 | 0.334078 | 0.292553 |
| MmugDNA.3343.1.S1_at    | MmugDNA.3343.1  | 12.56 | 13.39 | 0.34 | 0.11 | -1.78 | 0.020846 | 0.08024  | 0.305672 | 0.327838 |
| MmugDNA.3343.1.S1_s_at  | MmugDNA.3343.1  | 11.31 | 12.35 | 0.48 | 0.16 | -2.06 | 0.021908 | 0.03207  | 0.309781 | 0.22165  |
| MmugDNA.38155.1.S1_at   | MmugDNA.38155.1 | 4.5   | 4.37  | 0.16 | 0.13 | 1.1   | 0.280825 | 0.547453 | 0.639467 | 0.728464 |
| MmugDNA.38156.1.S1_at   | MmugDNA.38156.1 | 5.86  | 5.48  | 0.16 | 0.11 | 1.3   | 0.020651 | 0.019118 | 0.305121 | 0.17401  |
| MmugDNA.38157.1.S1_at   | MmugDNA.38157.1 | 11.42 | 10.84 | 0.27 | 0.16 | 1.5   | 0.022321 | 0.00586  | 0.310495 | 0.104856 |
| MmugDNA.38159.1.S1_at   | MmugDNA.38159.1 | 3.71  | 3.63  | 0.16 | 0.02 | 1.06  | 0.391106 | 0.526365 | 0.717437 | 0.71555  |
| MmugDNA.38160.1.S1_at   | MmugDNA.38160.1 | 4.48  | 4.45  | 0.12 | 0.05 | 1.02  | 0.343573 | 0.464368 | 0.686769 | 0.67504  |
| MmugDNA.38162.1.S1_at   | MmugDNA.38162.1 | 10.85 | 10.47 | 1.36 | 0.4  | 1.31  | 0.552263 | 0.065657 | 0.811712 | 0.301631 |
| MmugDNA.38163.1.S1_at   | MmugDNA.38163.1 | 6.3   | 6.3   | 0.3  | 0.12 | 1     | 0.438523 | 0.103853 | 0.747368 | 0.364519 |
| MmugDNA.38164.1.S1_at   | MmugDNA.38164.1 | 5.58  | 5.75  | 0.15 | 0.63 | -1.12 | 0.557743 | 0.558407 | 0.815038 | 0.735596 |
| MmugDNA.38166.1.S1_at   | MmugDNA.38166.1 | 3.93  | 3.89  | 0.14 | 0.16 | 1.02  | 0.748296 | 0.541695 | 0.904363 | 0.725057 |
| MmugDNA.38168.1.S1_at   | MmugDNA.38168.1 | 7.81  | 7.51  | 0.49 | 0.07 | 1.23  | 0.948579 | 0.996676 | 0.982401 | 0.998092 |
| MmugDNA.38169.1.S1_at   | MmugDNA.38169.1 | 8.5   | 7.86  | 0.18 | 0.38 | 1.55  | 0.029344 | 0.021202 | 0.334049 | 0.182326 |
| MmugDNA.3817.1.S1_at    | MmugDNA.3817.1  | 8.18  | 8.18  | 0.59 | 0.13 | 1     | 0.391582 | 0.050662 | 0.717611 | 0.270317 |
| MmugDNA.38171.1.S1_at   | MmugDNA.38171.1 | 5.11  | 5.13  | 0.13 | 0    | -1.02 | 0.274336 | 0.311516 | 0.633792 | 0.566505 |
| MmugDNA.38172.1.S1_at   | MmugDNA.38172.1 | 5.87  | 5.82  | 0.17 | 0.14 | 1.04  | 0.144333 | 0.121518 | 0.519755 | 0.39064  |
| MmugDNA.38173.1.S1_at   | MmugDNA.38173.1 | 7.32  | 7.1   | 0.03 | 0.13 | 1.17  | 0.167687 | 0.309156 | 0.540336 | 0.564807 |
| MmugDNA.38174.1.S1_at   | MmugDNA.38174.1 | 5.34  | 5.25  | 0.13 | 0.16 | 1.06  | 0.41076  | 0.417942 | 0.730947 | 0.642499 |
| MmugDNA.38175.1.S1_at   | MmugDNA.38175.1 | 3.9   | 3.56  | 0.27 | 0.34 | 1.26  | 0.43477  | 0.471013 | 0.745319 | 0.679162 |
| MmugDNA.38176.1.S1_at   | MmugDNA.38176.1 | 8.63  | 8.13  | 0.53 | 0.37 | 1.41  | 0.33723  | 0.597011 | 0.682275 | 0.759993 |
| MmugDNA.38176.1.S1_s_at | MmugDNA.38176.1 | 8.54  | 7.94  | 0.29 | 0.2  | 1.51  | 0.025736 | 0.077966 | 0.322693 | 0.324306 |
| MmugDNA.38177.1.S1_at   | MmugDNA.38177.1 | 8.11  | 8.56  | 0.31 | 0.18 | -1.37 | 0.451077 | 0.260175 | 0.755009 | 0.526807 |
| MmugDNA.38178.1.S1_at   | MmugDNA.38178.1 | 4.86  | 4.89  | 0.26 | 0.01 | -1.02 | 0.847076 | 0.514985 | 0.946415 | 0.708004 |
| MmugDNA.38179.1.S1_at   | MmugDNA.38179.1 | 6.12  | 6.31  | 0.2  | 0.29 | -1.14 | 0.661092 | 0.085723 | 0.865943 | 0.337761 |
| MmugDNA.3818.1.S1_s_at  | MmugDNA.3818.1  | 11.89 | 11.9  | 0.17 | 0.04 | -1.01 | 0.863417 | 0.175363 | 0.952018 | 0.452114 |
| MmugDNA.38180.1.S1_at   | MmugDNA.38180.1 | 10.01 | 9.79  | 0.29 | 0.06 | 1.17  | 0.116931 | 0.474895 | 0.490067 | 0.681784 |
| MmugDNA.38184.1.S1_at   | MmugDNA.38184.1 | 10.47 | 10.99 | 0.65 | 0.15 | -1.43 | 0.240691 | 0.259813 | 0.606937 | 0.52669  |
| MmugDNA.38185.1.S1_at   | MmugDNA.38185.1 | 10.06 | 9.92  | 0.78 | 0.01 | 1.1   | 0.987875 | 0.143028 | 0.995831 | 0.416892 |
| MmugDNA.38187.1.S1_at   | MmugDNA.38187.1 | 5.28  | 5.51  | 0.08 | 0.35 | -1.18 | 0.098793 | 0.186224 | 0.468167 | 0.462108 |
| MmugDNA.38188.1.S1_at   | MmugDNA.38188.1 | 3.3   | 3.1   | 0.56 | 0.16 | 1.15  | 0.371228 | 0.279438 | 0.705454 | 0.543049 |
| MmugDNA.38189.1.S1_at   | MmugDNA.38189.1 | 5.88  | 5.79  | 0.67 | 0.09 | 1.06  | 0.741467 | 0.413653 | 0.901406 | 0.639688 |
| MmugDNA.3819.1.S1_at    | MmugDNA.3819.1  | 7.89  | 7.61  | 0.91 | 0.1  | 1.22  | 0.568789 | 0.137057 | 0.821041 | 0.409836 |
| MmugDNA.38190.1.S1_at   | MmugDNA.38190.1 | 6.28  | 6.31  | 0.25 | 0.13 | -1.03 | 0.980889 | 0.098445 | 0.993918 | 0.356564 |
| MmugDNA.38191.1.S1_at   | MmugDNA.38191.1 | 5.1   | 5.07  | 0.03 | 0.02 | 1.02  | 0.627314 | 0.021058 | 0.850463 | 0.181869 |
| MmugDNA.38192.1.S1_at   | MmugDNA.38192.1 | 4.9   | 4.7   | 0.14 | 0.16 | 1.15  | 0.078451 | 0.387671 | 0.441003 | 0.622281 |
| MmugDNA.38193.1.S1_at   | MmugDNA.38193.1 | 12.59 | 12.71 | 0.27 | 0.1  | -1.09 | 0.825422 | 0.098613 | 0.937278 | 0.356743 |
| MmugDNA.38194.1.S1_at   | MmugDNA.38194.1 | 6.71  | 6.81  | 0.29 | 0.04 | -1.07 | 0.722404 | 0.193156 | 0.892328 | 0.468554 |
| MmugDNA.38197.1.S1_at   | MmugDNA.38197.1 | 6.55  | 6.58  | 0.28 | 0.04 | -1.03 | 0.497578 | 0.136454 | 0.781215 | 0.408866 |
| MmugDNA.38198.1.S1_at   | MmugDNA.38198.1 | 4.71  | 4.77  | 0.23 | 0.1  | -1.04 | 0.610525 | 0.229243 | 0.841909 | 0.501527 |
| MmugDNA.38199.1.S1_at   | MmugDNA.38199.1 | 3.36  | 3.09  | 0.54 | 0.05 | 1.21  | 0.370192 | 0.599397 | 0.704548 | 0.76144  |
| MmugDNA.3820.1.S1_at    | MmugDNA.3820.1  | 5.45  | 5.36  | 0.12 | 0.06 | 1.06  | 0.1557   | 0.156892 | 0.528929 | 0.432372 |
| MmugDNA.38200.1.S1_at   | MmugDNA.38200.1 | 4.55  | 4.4   | 0.19 | 0.05 | 1.11  | 0.129733 | 0.26491  | 0.504468 | 0.530909 |

|                         |                 |       |       |      |      |       |          |          |          |          |
|-------------------------|-----------------|-------|-------|------|------|-------|----------|----------|----------|----------|
| MmugDNA.38201.1.S1_at   | MmugDNA.38201.1 | 11.36 | 11.39 | 0.14 | 0.09 | -1.02 | 0.763771 | 0.072492 | 0.911265 | 0.315339 |
| MmugDNA.8357.1.S1_at    | MmugDNA.8357.1  | 7.72  | 7.52  | 0.4  | 0.06 | 1.15  | 0.372401 | 0.648465 | 0.705567 | 0.79428  |
| MmugDNA.8357.1.S1_s_at  | MmugDNA.8357.1  | 7.46  | 7.28  | 0.5  | 0.14 | 1.14  | 0.636951 | 0.774326 | 0.855302 | 0.868752 |
| MmugDNA.38204.1.S1_at   | MmugDNA.38204.1 | 6.34  | 6.57  | 0.48 | 0.32 | -1.17 | 0.224983 | 0.274488 | 0.594242 | 0.538987 |
| MmugDNA.38205.1.S1_at   | MmugDNA.38205.1 | 4.47  | 4.46  | 0.16 | 0.4  | 1.01  | 0.429265 | 0.741554 | 0.742138 | 0.850329 |
| MmugDNA.38206.1.S1_at   | MmugDNA.38206.1 | 10.04 | 9.55  | 0.31 | 0.02 | 1.4   | 0.15343  | 0.178953 | 0.526539 | 0.455243 |
| MmugDNA.38207.1.S1_at   | MmugDNA.38207.1 | 6.03  | 6.08  | 0.41 | 0.04 | -1.03 | 0.522363 | 0.761738 | 0.795143 | 0.861459 |
| MmugDNA.38208.1.S1_at   | MmugDNA.38208.1 | 9.67  | 8.71  | 0.47 | 0.42 | 1.94  | 0.028484 | 0.01441  | 0.332568 | 0.153215 |
| MmugDNA.38209.1.S1_at   | MmugDNA.38209.1 | 5.09  | 5.05  | 0.17 | 0.07 | 1.03  | 0.815949 | 0.085726 | 0.933284 | 0.337761 |
| MmugDNA.38210.1.S1_at   | MmugDNA.38210.1 | 7.79  | 7.95  | 0.48 | 0.4  | -1.12 | 0.586408 | 0.767965 | 0.831285 | 0.865284 |
| MmugDNA.38211.1.S1_at   | MmugDNA.38211.1 | 2.65  | 2.63  | 0.16 | 0.08 | 1.02  | 0.958213 | 0.816786 | 0.98633  | 0.894329 |
| MmugDNA.38211.1.S1_s_at | MmugDNA.38211.1 | 6.95  | 6.58  | 0.01 | 0.46 | 1.29  | 0.250137 | 0.262685 | 0.615476 | 0.529054 |
| MmugDNA.38212.1.S1_at   | MmugDNA.38212.1 | 6.48  | 6.32  | 0.52 | 0.86 | 1.12  | 0.358384 | 0.444435 | 0.696372 | 0.662056 |
| MmugDNA.38213.1.S1_at   | MmugDNA.38213.1 | 5.21  | 5.27  | 0.24 | 0.06 | -1.04 | 0.408275 | 0.351479 | 0.729223 | 0.595084 |
| MmugDNA.38214.1.S1_at   | MmugDNA.38214.1 | 6.06  | 6.1   | 0.25 | 0.54 | -1.03 | 0.712118 | 0.862412 | 0.887895 | 0.921765 |
| MmugDNA.38215.1.S1_at   | MmugDNA.38215.1 | 8.54  | 8.42  | 1.84 | 0.13 | 1.09  | 0.991825 | 0.267897 | 0.996849 | 0.533607 |
| MmugDNA.38218.1.S1_at   | MmugDNA.38218.1 | 4.1   | 4.04  | 0.4  | 0.25 | 1.04  | 0.633282 | 0.035675 | 0.853409 | 0.233296 |
| MmugDNA.38219.1.S1_at   | MmugDNA.38219.1 | 6.14  | 3.24  | 2.18 | 0.2  | 7.46  | 0.12272  | 0.079452 | 0.496146 | 0.326766 |
| MmugDNA.38220.1.S1_at   | MmugDNA.38220.1 | 4.27  | 4.37  | 0.1  | 0.13 | -1.08 | 0.626468 | 0.296624 | 0.849991 | 0.555612 |
| MmugDNA.38221.1.S1_at   | MmugDNA.38221.1 | 3.35  | 3.1   | 0.2  | 0.11 | 1.19  | 0.363017 | 0.510555 | 0.699794 | 0.705007 |
| MmugDNA.38222.1.S1_at   | MmugDNA.38222.1 | 4.64  | 4.42  | 0.45 | 0.3  | 1.16  | 0.352157 | 0.303159 | 0.692649 | 0.56066  |
| MmugDNA.38225.1.S1_at   | MmugDNA.38225.1 | 4.53  | 4.6   | 0.16 | 0.3  | -1.05 | 0.566449 | 0.066312 | 0.820036 | 0.303177 |
| MmugDNA.38226.1.S1_at   | MmugDNA.38226.1 | 3.09  | 3.05  | 0    | 0.08 | 1.03  | 0.451379 | 0.695433 | 0.755167 | 0.822978 |
| MmugDNA.38227.1.S1_at   | MmugDNA.38227.1 | 4.16  | 4.09  | 0.31 | 0.08 | 1.05  | 0.186409 | 0.475734 | 0.559101 | 0.682332 |
| MmugDNA.38228.1.S1_at   | MmugDNA.38228.1 | 6.78  | 6.59  | 0.14 | 0.06 | 1.14  | 0.088093 | 0.073043 | 0.45606  | 0.316017 |
| MmugDNA.38229.1.S1_at   | MmugDNA.38229.1 | 5.88  | 5.83  | 0.08 | 0.12 | 1.03  | 0.148961 | 0.27239  | 0.52291  | 0.537122 |
| MmugDNA.38229.1.S1_x_at | MmugDNA.38229.1 | 6.04  | 6.02  | 0.07 | 0.12 | 1.01  | 0.18899  | 0.209074 | 0.560718 | 0.482861 |
| MmugDNA.38230.1.S1_at   | MmugDNA.38230.1 | 4.28  | 4.02  | 0.2  | 0.3  | 1.2   | 0.158796 | 0.258392 | 0.531595 | 0.525642 |
| MmugDNA.38231.1.S1_s_at | MmugDNA.38231.1 | 10.58 | 10.03 | 0.7  | 0.06 | 1.47  | 0.308566 | 0.417988 | 0.661248 | 0.642531 |
| MmugDNA.38232.1.S1_at   | MmugDNA.38232.1 | 4.69  | 4.76  | 0.28 | 0.18 | -1.05 | 0.930263 | 0.881194 | 0.976691 | 0.93219  |
| MmugDNA.38233.1.S1_at   | MmugDNA.38233.1 | 6.87  | 8.24  | 1.1  | 0.08 | -2.58 | 0.082642 | 0.081653 | 0.447794 | 0.329836 |
| MmugDNA.38234.1.S1_at   | MmugDNA.38234.1 | 8.06  | 7.92  | 0.15 | 0.03 | 1.1   | 0.160066 | 0.193472 | 0.533134 | 0.468739 |
| MmugDNA.38235.1.S1_at   | MmugDNA.38235.1 | 11.37 | 11.41 | 0.14 | 0.01 | -1.03 | 0.235499 | 0.029714 | 0.602643 | 0.214029 |
| MmugDNA.38236.1.S1_at   | MmugDNA.38236.1 | 7.89  | 8.27  | 0.54 | 0.03 | -1.3  | 0.272169 | 0.302222 | 0.631921 | 0.560092 |
| MmugDNA.38237.1.S1_at   | MmugDNA.38237.1 | 3.33  | 3.25  | 0.07 | 0.03 | 1.05  | 0.114816 | 0.093003 | 0.487957 | 0.349174 |
| MmugDNA.38238.1.S1_at   | MmugDNA.38238.1 | 12.59 | 12.42 | 0.32 | 0.22 | 1.13  | 0.835343 | 0.540401 | 0.940956 | 0.724366 |
| MmugDNA.3824.1.S1_at    | MmugDNA.3824.1  | 4.85  | 4.54  | 0.4  | 0.72 | 1.24  | 0.961797 | 0.254831 | 0.987539 | 0.523051 |
| MmugDNA.38241.1.S1_at   | MmugDNA.38241.1 | 3.3   | 3.17  | 0.06 | 0.17 | 1.1   | 0.780672 | 0.01916  | 0.919142 | 0.1742   |
| MmugDNA.38242.1.S1_at   | MmugDNA.38242.1 | 6.22  | 6.15  | 0.11 | 0.09 | 1.05  | 0.382368 | 0.721945 | 0.710606 | 0.838904 |
| MmugDNA.38243.1.S1_at   | MmugDNA.38243.1 | 3.82  | 3.58  | 0.42 | 0.16 | 1.18  | 0.300754 | 0.147169 | 0.65518  | 0.421389 |
| MmugDNA.38245.1.S1_at   | MmugDNA.38245.1 | 6.12  | 6.42  | 0.67 | 0.26 | -1.23 | 0.405871 | 0.08312  | 0.727533 | 0.332999 |
| MmugDNA.38246.1.S1_at   | MmugDNA.38246.1 | 8.71  | 8.73  | 0.08 | 0.09 | -1.01 | 0.924952 | 0.022074 | 0.97491  | 0.185927 |
| MmugDNA.38247.1.S1_s_at | MmugDNA.38247.1 | 9.23  | 9.59  | 0.96 | 0.03 | -1.29 | 0.61617  | 0.042024 | 0.844767 | 0.249463 |

|                         |                 |       |       |      |      |       |          |          |          |          |
|-------------------------|-----------------|-------|-------|------|------|-------|----------|----------|----------|----------|
| MmugDNA.38248.1.S1_at   | MmugDNA.38248.1 | 9.15  | 9.56  | 1.38 | 0.13 | -1.33 | 0.608558 | 0.524318 | 0.841285 | 0.714254 |
| MmugDNA.38249.1.S1_at   | MmugDNA.38249.1 | 3.1   | 3.15  | 0    | 0.06 | -1.04 | 0.196561 | 0.256798 | 0.567194 | 0.524607 |
| MmugDNA.38250.1.S1_at   | MmugDNA.38250.1 | 5.83  | 5.65  | 0.25 | 0.13 | 1.13  | 0.175376 | 0.069577 | 0.548255 | 0.309848 |
| MmugDNA.38251.1.S1_at   | MmugDNA.38251.1 | 5.89  | 6.08  | 0.47 | 0.61 | -1.14 | 0.233669 | 0.50962  | 0.601232 | 0.704267 |
| MmugDNA.38253.1.S1_at   | MmugDNA.38253.1 | 3.28  | 3.13  | 0.1  | 0.09 | 1.11  | 0.082091 | 0.077974 | 0.446841 | 0.324306 |
| MmugDNA.38259.1.S1_at   | MmugDNA.38259.1 | 6.02  | 5.88  | 0.16 | 0.06 | 1.1   | 0.083953 | 0.221641 | 0.45018  | 0.494901 |
| MmugDNA.38261.1.S1_at   | MmugDNA.38261.1 | 3.81  | 3.81  | 0.07 | 0.08 | -1    | 0.858811 | 0.912557 | 0.950111 | 0.950757 |
| MmugDNA.38262.1.S1_at   | MmugDNA.38262.1 | 4.87  | 4.91  | 0.08 | 0.07 | -1.03 | 0.757852 | 0.716918 | 0.90887  | 0.836147 |
| MmugDNA.38263.1.S1_at   | MmugDNA.38263.1 | 6.05  | 6.3   | 0.27 | 0.31 | -1.19 | 0.147267 | 0.17047  | 0.521578 | 0.447103 |
| MmugDNA.38264.1.S1_at   | MmugDNA.38264.1 | 8     | 8.06  | 0.26 | 0.08 | -1.05 | 0.248121 | 0.594227 | 0.613685 | 0.758517 |
| MmugDNA.38265.1.S1_at   | MmugDNA.38265.1 | 7.55  | 7.46  | 0.02 | 0.05 | -1.06 | 0.060042 | 0.134843 | 0.407399 | 0.406878 |
| MmugDNA.38267.1.S1_at   | MmugDNA.38267.1 | 5.9   | 6.07  | 0.28 | 0.38 | -1.12 | 0.294352 | 0.663782 | 0.650593 | 0.80314  |
| MmugDNA.38268.1.S1_at   | MmugDNA.38268.1 | 8.63  | 8.89  | 0.47 | 0.1  | -1.19 | 0.960765 | 0.344287 | 0.987225 | 0.589762 |
| MmugDNA.38269.1.S1_at   | MmugDNA.38269.1 | 4.74  | 5.09  | 0.65 | 0.14 | -1.28 | 0.980948 | 0.505288 | 0.993927 | 0.702073 |
| MmugDNA.3827.1.S1_at    | MmugDNA.3827.1  | 7.35  | 7.35  | 0.09 | 0.05 | -1    | 0.67226  | 0.760736 | 0.870852 | 0.860996 |
| MmugDNA.38271.1.S1_at   | MmugDNA.38271.1 | 9.94  | 9.75  | 0.19 | 0.25 | 1.14  | 0.070238 | 0.11226  | 0.428837 | 0.37755  |
| MmugDNA.38272.1.S1_at   | MmugDNA.38272.1 | 7.42  | 7.54  | 0.11 | 0.23 | -1.08 | 0.988827 | 0.184534 | 0.995895 | 0.460574 |
| MmugDNA.38273.1.S1_at   | MmugDNA.38273.1 | 12.16 | 12.63 | 0.52 | 0.17 | -1.39 | 0.098441 | 0.066821 | 0.467888 | 0.304395 |
| MmugDNA.38274.1.S1_s_at | MmugDNA.38274.1 | 9.57  | 9.57  | 0.19 | 0.03 | 1     | 0.859431 | 0.108889 | 0.950399 | 0.372511 |
| MmugDNA.38275.1.S1_at   | MmugDNA.38275.1 | 8.76  | 8.74  | 0.11 | 0.13 | 1.01  | 0.96712  | 0.039108 | 0.989187 | 0.24303  |
| MmugDNA.38276.1.S1_at   | MmugDNA.38276.1 | 4.96  | 4.67  | 0.26 | 0.09 | 1.22  | 0.192305 | 0.412679 | 0.563473 | 0.639042 |
| MmugDNA.38278.1.S1_at   | MmugDNA.38278.1 | 8.43  | 6.49  | 0.75 | 0.54 | 3.84  | 0.083643 | 0.169469 | 0.449639 | 0.446075 |
| MmugDNA.19568.1.S1_s_at | MmugDNA.19568.1 | 7.07  | 7.27  | 0.31 | 0.13 | -1.14 | 0.618909 | 0.685404 | 0.846305 | 0.816513 |
| MmugDNA.3828.1.S1_at    | MmugDNA.3828.1  | 3.05  | 3     | 0.23 | 0.56 | 1.04  | 0.443259 | 0.661824 | 0.750657 | 0.801965 |
| MmugDNA.38280.1.S1_at   | MmugDNA.38280.1 | 5.49  | 5.08  | 0.66 | 0.42 | 1.33  | 0.12625  | 0.119898 | 0.499941 | 0.388593 |
| MmugDNA.38285.1.S1_at   | MmugDNA.38285.1 | 6.96  | 6.71  | 0.21 | 0.17 | 1.19  | 0.086021 | 0.07282  | 0.453457 | 0.315699 |
| MmugDNA.38286.1.S1_at   | MmugDNA.38286.1 | 10.56 | 10.37 | 0.14 | 0.09 | 1.14  | 0.065555 | 0.072619 | 0.420827 | 0.315578 |
| MmugDNA.38287.1.S1_x_at | MmugDNA.38287.1 | 8.37  | 8.54  | 0.22 | 0.2  | -1.13 | 0.346494 | 0.244826 | 0.688289 | 0.514655 |
| MmugDNA.38288.1.S1_at   | MmugDNA.38288.1 | 4.9   | 4.79  | 0.14 | 0.02 | 1.08  | 0.165603 | 0.161237 | 0.538447 | 0.437386 |
| MmugDNA.38289.1.S1_at   | MmugDNA.38289.1 | 4.8   | 4.82  | 0.05 | 0.45 | -1.01 | 0.316236 | 0.580139 | 0.666364 | 0.749506 |
| MmugDNA.12789.1.S1_s_at | MmugDNA.12789.1 | 6.01  | 6.06  | 0.37 | 0.02 | -1.03 | 0.514333 | 0.50975  | 0.790322 | 0.704356 |
| MmugDNA.38291.1.S1_at   | MmugDNA.38291.1 | 3.09  | 2.97  | 0.14 | 0.05 | 1.09  | 0.279736 | 0.367377 | 0.63869  | 0.607012 |
| MmugDNA.38292.1.S1_at   | MmugDNA.38292.1 | 4.59  | 4.31  | 0.26 | 0.14 | 1.22  | 0.178955 | 0.016039 | 0.552029 | 0.160532 |
| MmugDNA.38294.1.S1_at   | MmugDNA.38294.1 | 8.91  | 8.98  | 0.15 | 0.08 | -1.05 | 0.699439 | 0.972954 | 0.88316  | 0.985389 |
| MmugDNA.38295.1.S1_at   | MmugDNA.38295.1 | 3.81  | 3.69  | 0.16 | 0.09 | 1.09  | 0.253047 | 0.43051  | 0.617861 | 0.65152  |
| MmugDNA.38296.1.S1_at   | MmugDNA.38296.1 | 6.73  | 7.74  | 0.66 | 0.24 | -2.01 | 0.132696 | 0.206317 | 0.506936 | 0.480524 |
| MmugDNA.38297.1.S1_at   | MmugDNA.38297.1 | 9.04  | 10.02 | 0.61 | 0.08 | -1.96 | 0.079851 | 0.073869 | 0.442789 | 0.317241 |
| MmugDNA.38299.1.S1_at   | MmugDNA.38299.1 | 5.05  | 4.82  | 0.28 | 0.18 | 1.17  | 0.209496 | 0.30476  | 0.580969 | 0.561921 |
| MmugDNA.3830.1.S1_at    | MmugDNA.3830.1  | 6.15  | 5.85  | 0.36 | 0.07 | 1.23  | 0.642262 | 0.879497 | 0.857685 | 0.931158 |
| MmugDNA.38300.1.S1_at   | MmugDNA.38300.1 | 10.28 | 10.44 | 0.27 | 0.35 | -1.12 | 0.516856 | 0.644448 | 0.791667 | 0.791578 |
| MmugDNA.38302.1.S1_at   | MmugDNA.38302.1 | 3.62  | 3.54  | 0.02 | 0.16 | 1.05  | 0.574447 | 0.74373  | 0.824035 | 0.851465 |
| MmugDNA.38303.1.S1_at   | MmugDNA.38303.1 | 6.36  | 5.92  | 0.26 | 0.21 | 1.36  | 0.282637 | 0.147962 | 0.641023 | 0.422364 |
| MmugDNA.38304.1.S1_at   | MmugDNA.38304.1 | 6.3   | 7.11  | 0.81 | 0.2  | -1.75 | 0.142771 | 0.078735 | 0.517889 | 0.325689 |



|                         |                 |       |       |      |      |       |          |          |          |          |
|-------------------------|-----------------|-------|-------|------|------|-------|----------|----------|----------|----------|
| MmugDNA.38305.1.S1_at   | MmugDNA.38305.1 | 3.36  | 3.47  | 0.27 | 0.14 | -1.07 | 0.746304 | 0.889591 | 0.90336  | 0.937097 |
| MmugDNA.38306.1.S1_at   | MmugDNA.38306.1 | 3.15  | 3.12  | 0.24 | 0.11 | 1.03  | 0.949684 | 0.899022 | 0.983005 | 0.942524 |
| MmugDNA.38307.1.S1_x_at | MmugDNA.38307.1 | 10.43 | 10.71 | 0.26 | 0.2  | -1.22 | 0.202205 | 0.152452 | 0.57366  | 0.42728  |
| MmugDNA.38308.1.S1_at   | MmugDNA.38308.1 | 5.44  | 5.16  | 0.13 | 0.15 | 1.21  | 0.129704 | 0.17548  | 0.504468 | 0.452157 |
| MmugDNA.38310.1.S1_at   | MmugDNA.38310.1 | 3.38  | 3.38  | 0.17 | 0.11 | 1     | 0.533417 | 0.70417  | 0.80084  | 0.828349 |
| MmugDNA.38311.1.S1_at   | MmugDNA.38311.1 | 5.51  | 5.4   | 0.14 | 0.09 | 1.08  | 0.076436 | 0.018157 | 0.437977 | 0.169673 |
| MmugDNA.38312.1.S1_at   | MmugDNA.38312.1 | 6.66  | 6.54  | 0.14 | 0.02 | 1.08  | 0.238113 | 0.097218 | 0.605242 | 0.354886 |
| MmugDNA.38314.1.S1_at   | MmugDNA.38314.1 | 5.25  | 5.24  | 0.07 | 0.1  | 1.01  | 0.814772 | 0.953601 | 0.933137 | 0.973621 |
| MmugDNA.38315.1.S1_at   | MmugDNA.38315.1 | 8.54  | 9.25  | 0.49 | 0.05 | -1.64 | 0.092091 | 0.09035  | 0.460683 | 0.34479  |
| MmugDNA.38316.1.S1_at   | MmugDNA.38316.1 | 6.53  | 6.8   | 0.44 | 0.17 | -1.2  | 0.714416 | 0.491485 | 0.888774 | 0.693004 |
| MmugDNA.38317.1.S1_at   | MmugDNA.38317.1 | 9.69  | 10.37 | 0.27 | 0.1  | -1.61 | 0.025849 | 0.019405 | 0.32273  | 0.17509  |
| MmugDNA.38318.1.S1_at   | MmugDNA.38318.1 | 8.31  | 8.55  | 0.11 | 0.09 | -1.18 | 0.019524 | 0.002958 | 0.301474 | 0.079945 |
| MmugDNA.38319.1.S1_at   | MmugDNA.38319.1 | 6.8   | 6.68  | 0.29 | 0.22 | 1.08  | 0.529785 | 0.467868 | 0.798514 | 0.677386 |
| MmugDNA.3832.1.S1_at    | MmugDNA.3832.1  | 3.25  | 3.15  | 0.19 | 0.13 | 1.07  | 0.909398 | 0.382018 | 0.969434 | 0.618258 |
| MmugDNA.38320.1.S1_at   | MmugDNA.38320.1 | 5.75  | 5.87  | 0.18 | 0.21 | -1.09 | 0.435643 | 0.03113  | 0.745809 | 0.218175 |
| MmugDNA.38321.1.S1_at   | MmugDNA.38321.1 | 4.78  | 4.43  | 0.43 | 0.12 | 1.27  | 0.250614 | 0.091357 | 0.615805 | 0.346281 |
| MmugDNA.38322.1.S1_at   | MmugDNA.38322.1 | 11.64 | 11.39 | 0.15 | 0.08 | 1.19  | 0.063431 | 0.019557 | 0.415717 | 0.175563 |
| MmugDNA.38324.1.S1_at   | MmugDNA.38324.1 | 5.85  | 5.79  | 0.1  | 0.09 | 1.05  | 0.182395 | 0.216519 | 0.555371 | 0.490141 |
| MmugDNA.38325.1.S1_at   | MmugDNA.38325.1 | 6.14  | 6.08  | 0.18 | 0.08 | 1.05  | 0.225627 | 0.12781  | 0.594769 | 0.398694 |
| MmugDNA.38325.1.S1_s_at | MmugDNA.38325.1 | 7.04  | 7.19  | 0.18 | 0.02 | -1.12 | 0.149143 | 0.31442  | 0.523037 | 0.568319 |
| MmugDNA.38326.1.S1_at   | MmugDNA.38326.1 | 4.64  | 4.53  | 1.33 | 0.59 | 1.08  | 0.352532 | 0.541424 | 0.692659 | 0.724911 |
| MmugDNA.38329.1.S1_at   | MmugDNA.38329.1 | 10.69 | 11.4  | 0.44 | 0.13 | -1.64 | 0.017772 | 0.004577 | 0.293582 | 0.094474 |
| MmugDNA.3833.1.S1_at    | MmugDNA.3833.1  | 10.4  | 10.18 | 0.8  | 0.01 | 1.16  | 0.640955 | 0.312479 | 0.857    | 0.567211 |
| MmugDNA.38330.1.S1_at   | MmugDNA.38330.1 | 8.52  | 8.67  | 0.4  | 0.08 | -1.11 | 0.998683 | 0.568141 | 0.99961  | 0.741855 |
| MmugDNA.38331.1.S1_at   | MmugDNA.38331.1 | 4.16  | 4.09  | 0.23 | 0    | 1.04  | 0.400752 | 0.574825 | 0.723941 | 0.746142 |
| MmugDNA.38333.1.S1_at   | MmugDNA.38333.1 | 2.93  | 3.11  | 0.06 | 0.08 | -1.13 | 0.037485 | 0.222994 | 0.357184 | 0.495821 |
| MmugDNA.38335.1.S1_at   | MmugDNA.38335.1 | 8.15  | 8.57  | 0.42 | 0.14 | -1.33 | 0.372862 | 0.549602 | 0.705567 | 0.729956 |
| MmugDNA.38336.1.S1_at   | MmugDNA.38336.1 | 7.81  | 8.05  | 0.14 | 0.08 | -1.18 | 0.113432 | 0.017359 | 0.486734 | 0.166764 |
| MmugDNA.38337.1.S1_at   | MmugDNA.38337.1 | 7.29  | 7.37  | 0.22 | 0.09 | -1.06 | 0.403716 | 0.40686  | 0.72586  | 0.634579 |
| MmugDNA.38338.1.S1_at   | MmugDNA.38338.1 | 3.45  | 3.5   | 0.11 | 0.18 | -1.04 | 0.413739 | 0.766043 | 0.732521 | 0.864085 |
| MmugDNA.3834.1.S1_at    | MmugDNA.3834.1  | 8.59  | 7.8   | 0.45 | 0.13 | 1.72  | 0.04698  | 0.023441 | 0.379253 | 0.191956 |
| MmugDNA.38340.1.S1_at   | MmugDNA.38340.1 | 5.37  | 5.49  | 0.21 | 0.07 | -1.09 | 0.953363 | 0.395932 | 0.984423 | 0.627788 |
| MmugDNA.38341.1.S1_at   | MmugDNA.38341.1 | 10.24 | 10.49 | 0.23 | 0.09 | -1.19 | 0.205642 | 0.24583  | 0.577447 | 0.515519 |
| MmugDNA.38342.1.S1_at   | MmugDNA.38342.1 | 6.82  | 6.33  | 0.53 | 0.34 | 1.4   | 0.434912 | 0.505825 | 0.745356 | 0.702218 |
| MmugDNA.38344.1.S1_at   | MmugDNA.38344.1 | 11.46 | 11.3  | 0.17 | 0.04 | 1.12  | 0.546478 | 0.527731 | 0.808546 | 0.716246 |
| MmugDNA.38345.1.S1_at   | MmugDNA.38345.1 | 10.2  | 10.04 | 0.11 | 0.2  | 1.12  | 0.077526 | 0.069091 | 0.439603 | 0.309061 |
| MmugDNA.38347.1.S1_at   | MmugDNA.38347.1 | 4.58  | 4.12  | 0.98 | 0.14 | 1.37  | 0.449655 | 0.641686 | 0.754534 | 0.789672 |
| MmugDNA.38348.1.S1_at   | MmugDNA.38348.1 | 12.59 | 12.7  | 0.11 | 0.06 | -1.08 | 0.837248 | 0.248428 | 0.94155  | 0.517725 |
| MmugDNA.38349.1.S1_at   | MmugDNA.38349.1 | 6.85  | 7.49  | 0.26 | 0.14 | -1.55 | 0.024938 | 0.00437  | 0.320402 | 0.092586 |
| MmugDNA.3835.1.S1_at    | MmugDNA.3835.1  | 7.8   | 7.66  | 0.05 | 0.1  | 1.1   | 0.063024 | 0.320423 | 0.414551 | 0.572648 |
| MmugDNA.38350.1.S1_s_at | MmugDNA.38350.1 | 10.23 | 10.69 | 1.2  | 0.36 | -1.37 | 0.756444 | 0.09716  | 0.908234 | 0.354796 |
| MmugDNA.38351.1.S1_at   | MmugDNA.38351.1 | 6.7   | 6.69  | 0.03 | 0.07 | 1     | 0.639324 | 0.357008 | 0.856249 | 0.598736 |
| MmugDNA.38352.1.S1_at   | MmugDNA.38352.1 | 5.44  | 5.19  | 0.08 | 0.16 | 1.19  | 0.195698 | 0.150623 | 0.565981 | 0.425195 |

|                         |                 |       |       |      |      |       |          |          |          |          |
|-------------------------|-----------------|-------|-------|------|------|-------|----------|----------|----------|----------|
| MmugDNA.38353.1.S1_at   | MmugDNA.38353.1 | 9.01  | 8.74  | 0.2  | 0.19 | 1.21  | 0.066174 | 0.053233 | 0.421918 | 0.276445 |
| MmugDNA.38354.1.S1_at   | MmugDNA.38354.1 | 8.16  | 9.27  | 0.24 | 0.15 | -2.16 | 0.004005 | 0.000552 | 0.198571 | 0.040948 |
| MmugDNA.38355.1.S1_at   | MmugDNA.38355.1 | 6.45  | 6.85  | 0.26 | 0.02 | -1.33 | 0.061125 | 0.098327 | 0.410128 | 0.356397 |
| MmugDNA.38356.1.S1_at   | MmugDNA.38356.1 | 6.55  | 6.53  | 0.35 | 0.16 | 1.01  | 0.759842 | 0.862468 | 0.909769 | 0.921787 |
| MmugDNA.38359.1.S1_at   | MmugDNA.38359.1 | 8.59  | 8.88  | 0.33 | 0.15 | -1.22 | 0.145636 | 0.685815 | 0.520555 | 0.816612 |
| MmugDNA.3836.1.S1_at    | MmugDNA.3836.1  | 11.07 | 11.05 | 0.64 | 0.09 | 1.01  | 0.517494 | 0.659008 | 0.792116 | 0.800479 |
| MmugDNA.38360.1.S1_s_at | MmugDNA.38360.1 | 11.56 | 11.08 | 0.22 | 0.15 | 1.4   | 0.040414 | 0.070893 | 0.364336 | 0.312417 |
| MmugDNA.38362.1.S1_at   | MmugDNA.38362.1 | 7.42  | 7.63  | 0.25 | 0.09 | -1.15 | 0.487436 | 0.049199 | 0.775077 | 0.266627 |
| MmugDNA.38363.1.S1_at   | MmugDNA.38363.1 | 6.23  | 6.09  | 0.11 | 0.05 | 1.1   | 0.370318 | 0.323441 | 0.704572 | 0.574466 |
| MmugDNA.38364.1.S1_at   | MmugDNA.38364.1 | 7.1   | 7.11  | 0.11 | 0    | -1.01 | 0.479344 | 0.36472  | 0.770712 | 0.605044 |
| MmugDNA.38365.1.S1_at   | MmugDNA.38365.1 | 5.14  | 5.26  | 0.47 | 0.16 | -1.09 | 0.448112 | 0.134237 | 0.753761 | 0.406457 |
| MmugDNA.38369.1.S1_at   | MmugDNA.38369.1 | 3.59  | 3.38  | 0.16 | 0.08 | 1.15  | 0.20452  | 0.61294  | 0.575907 | 0.770327 |
| MmugDNA.38372.1.S1_at   | MmugDNA.38372.1 | 4.21  | 4.21  | 0.02 | 0.08 | -1    | 0.307252 | 0.822687 | 0.660118 | 0.898006 |
| MmugDNA.38373.1.S1_at   | MmugDNA.38373.1 | 5.74  | 5.91  | 0.09 | 0.07 | -1.13 | 0.102155 | 0.109819 | 0.472436 | 0.373758 |
| MmugDNA.38376.1.S1_at   | MmugDNA.38376.1 | 8.13  | 8.33  | 0.25 | 0.1  | -1.14 | 0.762726 | 0.439723 | 0.91092  | 0.65842  |
| MmugDNA.38377.1.S1_s_at | MmugDNA.38377.1 | 11.57 | 11.88 | 0.38 | 0.06 | -1.24 | 0.289702 | 0.178141 | 0.646342 | 0.454508 |
| MmugDNA.38378.1.S1_at   | MmugDNA.38378.1 | 6.76  | 6.49  | 0.13 | 0.13 | 1.21  | 0.141348 | 0.136396 | 0.516365 | 0.408839 |
| MmugDNA.3838.1.S1_at    | MmugDNA.3838.1  | 6.06  | 6.07  | 0.56 | 0.47 | -1.01 | 0.243567 | 0.283401 | 0.609466 | 0.545936 |
| MmugDNA.38380.1.S1_at   | MmugDNA.38380.1 | 4.12  | 3.98  | 0.21 | 0.47 | 1.11  | 0.581182 | 0.532804 | 0.827417 | 0.719235 |
| MmugDNA.38381.1.S1_at   | MmugDNA.38381.1 | 4.28  | 4.33  | 0.29 | 0.1  | -1.04 | 0.779189 | 0.934293 | 0.918608 | 0.96272  |
| MmugDNA.38382.1.S1_at   | MmugDNA.38382.1 | 4.85  | 4.78  | 0.23 | 0.12 | 1.05  | 0.259777 | 0.08474  | 0.622814 | 0.336218 |
| MmugDNA.38383.1.S1_at   | MmugDNA.38383.1 | 12.19 | 11.75 | 0.8  | 0.11 | 1.35  | 0.918928 | 0.847744 | 0.972302 | 0.913501 |
| MmugDNA.38384.1.S1_at   | MmugDNA.38384.1 | 9.56  | 9.67  | 0.45 | 0.14 | -1.08 | 0.627752 | 0.741716 | 0.850686 | 0.850468 |
| MmugDNA.5137.1.S1_s_at  | MmugDNA.5137.1  | 11    | 11.15 | 0.31 | 0.03 | -1.11 | 0.902118 | 0.975731 | 0.966869 | 0.98677  |
| MmugDNA.38385.1.S1_at   | MmugDNA.38385.1 | 8.91  | 8.93  | 0.66 | 0.11 | -1.02 | 0.407336 | 0.177491 | 0.728597 | 0.453881 |
| MmugDNA.38389.1.S1_at   | MmugDNA.38389.1 | 6.05  | 5.24  | 0.2  | 0.18 | 1.75  | 0.009781 | 0.040713 | 0.243444 | 0.246709 |
| MmugDNA.3839.1.S1_at    | MmugDNA.3839.1  | 3.51  | 3.46  | 0.1  | 0.17 | 1.03  | 0.48195  | 0.587513 | 0.772261 | 0.754278 |
| MmugDNA.40036.1.S1_s_at | MmugDNA.40036.1 | 13.18 | 13.13 | 0.1  | 0.07 | 1.04  | 0.214188 | 0.486798 | 0.584673 | 0.690091 |
| MmugDNA.38391.1.S1_at   | MmugDNA.38391.1 | 4.68  | 4.42  | 0.33 | 0.14 | 1.19  | 0.175974 | 0.548896 | 0.549155 | 0.729483 |
| MmugDNA.38392.1.S1_at   | MmugDNA.38392.1 | 13.33 | 13.03 | 0.09 | 0.13 | 1.22  | 0.017774 | 0.01236  | 0.293582 | 0.143761 |
| MmugDNA.8080.1.S1_s_at  | MmugDNA.8080.1  | 13.58 | 13.28 | 0.06 | 0.12 | 1.24  | 0.01039  | 0.008448 | 0.247412 | 0.121922 |
| MmugDNA.38393.1.S1_at   | MmugDNA.38393.1 | 12.41 | 12.61 | 0.28 | 0.08 | -1.15 | 0.41359  | 0.149975 | 0.732404 | 0.424616 |
| MmugDNA.38394.1.S1_at   | MmugDNA.38394.1 | 4.77  | 5.27  | 0.43 | 0.11 | -1.41 | 0.343183 | 0.213666 | 0.686483 | 0.487441 |
| MmugDNA.38395.1.S1_at   | MmugDNA.38395.1 | 5.4   | 5.37  | 0.1  | 0.09 | 1.02  | 0.308278 | 0.261548 | 0.660925 | 0.52802  |
| MmugDNA.38398.1.S1_at   | MmugDNA.38398.1 | 5.66  | 5.94  | 0.13 | 0.13 | -1.22 | 0.059641 | 0.034876 | 0.406693 | 0.230985 |
| MmugDNA.38399.1.S1_at   | MmugDNA.38399.1 | 3.91  | 3.94  | 0.09 | 0.09 | -1.02 | 0.399122 | 0.544341 | 0.722884 | 0.726752 |
| MmugDNA.384.1.S1_at     | MmugDNA.384.1   | 6.32  | 6.32  | 0.06 | 0.02 | 1     | 0.807762 | 0.913158 | 0.930292 | 0.951134 |
| MmugDNA.3840.1.S1_at    | MmugDNA.3840.1  | 3.2   | 3.2   | 0.01 | 0.07 | 1     | 0.777098 | 0.738378 | 0.917443 | 0.848278 |
| MmugDNA.38400.1.S1_at   | MmugDNA.38400.1 | 8.82  | 8.37  | 0.03 | 0.3  | 1.36  | 0.048495 | 0.040663 | 0.38332  | 0.246578 |
| MmugDNA.38402.1.S1_at   | MmugDNA.38402.1 | 9.37  | 9.5   | 0.61 | 0.04 | -1.1  | 0.691616 | 0.762892 | 0.879919 | 0.862108 |
| MmugDNA.38403.1.S1_at   | MmugDNA.38403.1 | 4.6   | 4.71  | 0.22 | 0.11 | -1.07 | 0.516635 | 0.441717 | 0.791597 | 0.659854 |
| MmugDNA.38405.1.S1_at   | MmugDNA.38405.1 | 5.68  | 5.32  | 0.35 | 0.21 | 1.29  | 0.393147 | 0.133922 | 0.71901  | 0.406043 |
| MmugDNA.38406.1.S1_at   | MmugDNA.38406.1 | 4.23  | 4.06  | 0.59 | 0.19 | 1.12  | 0.517892 | 0.489455 | 0.792289 | 0.691824 |

|                         |                 |       |       |      |      |       |          |          |          |          |
|-------------------------|-----------------|-------|-------|------|------|-------|----------|----------|----------|----------|
| MmugDNA.38407.1.S1_at   | MmugDNA.38407.1 | 8.17  | 8.6   | 0.22 | 0.09 | -1.35 | 0.036379 | 0.044269 | 0.35477  | 0.254932 |
| MmugDNA.38408.1.S1_at   | MmugDNA.38408.1 | 3.81  | 3.8   | 0.11 | 0.01 | 1     | 0.951152 | 0.787077 | 0.983504 | 0.876832 |
| MmugDNA.38409.1.S1_at   | MmugDNA.38409.1 | 6.69  | 6.56  | 0.02 | 0.06 | 1.1   | 0.037122 | 0.127945 | 0.356778 | 0.398894 |
| MmugDNA.3841.1.S1_at    | MmugDNA.3841.1  | 5.8   | 5.63  | 0.21 | 0.05 | 1.13  | 0.5602   | 0.543024 | 0.816546 | 0.725879 |
| MmugDNA.38410.1.S1_at   | MmugDNA.38410.1 | 4.81  | 4.48  | 0.31 | 0.07 | 1.26  | 0.3456   | 0.320321 | 0.687622 | 0.572648 |
| MmugDNA.38413.1.S1_at   | MmugDNA.38413.1 | 3.88  | 3.75  | 0.13 | 0.18 | 1.09  | 0.402211 | 0.628074 | 0.724848 | 0.780937 |
| MmugDNA.38414.1.S1_at   | MmugDNA.38414.1 | 8.58  | 8.73  | 0.96 | 0.06 | -1.11 | 0.815212 | 0.265361 | 0.933137 | 0.531336 |
| MmugDNA.38415.1.S1_at   | MmugDNA.38415.1 | 6.69  | 6.58  | 0.13 | 0.04 | 1.08  | 0.289678 | 0.315584 | 0.646342 | 0.569053 |
| MmugDNA.38418.1.S1_at   | MmugDNA.38418.1 | 10.97 | 11.24 | 0.16 | 0.08 | -1.2  | 0.038055 | 0.002956 | 0.358549 | 0.079945 |
| MmugDNA.38419.1.S1_at   | MmugDNA.38419.1 | 5.2   | 5.25  | 0.37 | 0.12 | -1.03 | 0.515553 | 0.715665 | 0.790909 | 0.835159 |
| MmugDNA.38420.1.S1_s_at | MmugDNA.38420.1 | 12.2  | 11.92 | 0.55 | 0.15 | 1.22  | 0.36821  | 0.158878 | 0.70351  | 0.434982 |
| MmugDNA.38421.1.S1_at   | MmugDNA.38421.1 | 6.92  | 7.21  | 0.88 | 0.04 | -1.23 | 0.690315 | 0.043407 | 0.879445 | 0.253    |
| MmugDNA.38422.1.S1_at   | MmugDNA.38422.1 | 12.33 | 11.79 | 0.2  | 0.12 | 1.45  | 0.026789 | 0.018074 | 0.326232 | 0.169379 |
| MmugDNA.38423.1.S1_at   | MmugDNA.38423.1 | 6.46  | 6.9   | 1.11 | 0.01 | -1.36 | 0.673285 | 0.732561 | 0.87123  | 0.845084 |
| MmugDNA.38424.1.S1_at   | MmugDNA.38424.1 | 10.12 | 10.76 | 0.12 | 0.05 | -1.56 | 0.000609 | 0.000026 | 0.143137 | 0.020518 |
| MmugDNA.38425.1.S1_at   | MmugDNA.38425.1 | 3.15  | 3.13  | 0.08 | 0.09 | 1.01  | 0.766327 | 0.581139 | 0.912101 | 0.75023  |
| MmugDNA.38427.1.S1_at   | MmugDNA.38427.1 | 4.1   | 4.26  | 0.17 | 0.39 | -1.12 | 0.313056 | 0.436313 | 0.664406 | 0.655923 |
| MmugDNA.38428.1.S1_at   | MmugDNA.38428.1 | 10.66 | 9.87  | 0.75 | 0.28 | 1.72  | 0.66622  | 0.180007 | 0.868243 | 0.456552 |
| MmugDNA.38429.1.S1_at   | MmugDNA.38429.1 | 9.22  | 9.48  | 0.79 | 0.2  | -1.21 | 0.723924 | 0.04053  | 0.892954 | 0.246264 |
| MmugDNA.3843.1.S1_s_at  | MmugDNA.3843.1  | 9.09  | 8.83  | 0.45 | 0.07 | 1.19  | 0.495673 | 0.630796 | 0.780125 | 0.782446 |
| MmugDNA.38430.1.S1_at   | MmugDNA.38430.1 | 6.14  | 5.89  | 0.28 | 0.06 | 1.19  | 0.548634 | 0.439244 | 0.809852 | 0.658013 |
| MmugDNA.38431.1.S1_at   | MmugDNA.38431.1 | 7.83  | 7.76  | 0.71 | 0.26 | 1.05  | 0.864974 | 0.98467  | 0.952543 | 0.991346 |
| MmugDNA.38432.1.S1_at   | MmugDNA.38432.1 | 10.2  | 10.58 | 0.47 | 0.2  | -1.3  | 0.650992 | 0.397311 | 0.861337 | 0.628781 |
| MmugDNA.38434.1.S1_at   | MmugDNA.38434.1 | 4     | 4.83  | 0.34 | 0.32 | -1.77 | 0.037363 | 0.007693 | 0.357066 | 0.117169 |
| MmugDNA.38435.1.S1_at   | MmugDNA.38435.1 | 6.95  | 6.84  | 0.08 | 0.03 | 1.07  | 0.035185 | 0.001599 | 0.351216 | 0.060468 |
| MmugDNA.38436.1.S1_at   | MmugDNA.38436.1 | 7.53  | 7.46  | 0.52 | 0.04 | 1.05  | 0.958584 | 0.743921 | 0.986368 | 0.851592 |
| MmugDNA.38437.1.S1_at   | MmugDNA.38437.1 | 5.73  | 5.7   | 0.08 | 0.22 | 1.02  | 0.97851  | 0.505808 | 0.993032 | 0.702218 |
| MmugDNA.38438.1.S1_at   | MmugDNA.38438.1 | 4.14  | 3.98  | 0.83 | 0.45 | 1.12  | 0.699517 | 0.45069  | 0.88323  | 0.665844 |
| MmugDNA.3844.1.S1_at    | MmugDNA.3844.1  | 6.67  | 6.24  | 0.22 | 0.39 | 1.35  | 0.061225 | 0.098355 | 0.41029  | 0.356466 |
| MmugDNA.38440.1.S1_at   | MmugDNA.38440.1 | 6.15  | 6.44  | 0.36 | 0.18 | -1.22 | 0.537991 | 0.031386 | 0.802961 | 0.219065 |
| MmugDNA.38441.1.S1_at   | MmugDNA.38441.1 | 9.94  | 10.86 | 0.51 | 0.16 | -1.89 | 0.021785 | 0.011238 | 0.309672 | 0.138014 |
| MmugDNA.38442.1.S1_at   | MmugDNA.38442.1 | 10.8  | 10.16 | 0.18 | 0.25 | 1.56  | 0.012496 | 0.007127 | 0.26257  | 0.113654 |
| MmugDNA.38442.1.S1_s_at | MmugDNA.38442.1 | 11.57 | 11.14 | 0.16 | 0.33 | 1.35  | 0.050348 | 0.041683 | 0.386982 | 0.24887  |
| MmugDNA.38443.1.S1_at   | MmugDNA.38443.1 | 3.4   | 3.4   | 0.05 | 0.06 | -1    | 0.881897 | 0.9956   | 0.95911  | 0.997264 |
| MmugDNA.38444.1.S1_at   | MmugDNA.38444.1 | 5.7   | 5.76  | 0.14 | 0.09 | -1.04 | 0.344295 | 0.768236 | 0.686913 | 0.865447 |
| MmugDNA.38445.1.S1_at   | MmugDNA.38445.1 | 3.59  | 3.46  | 0.23 | 0.15 | 1.1   | 0.449321 | 0.245409 | 0.754301 | 0.515213 |
| MmugDNA.38446.1.S1_at   | MmugDNA.38446.1 | 9.06  | 6.97  | 0.55 | 0.14 | 4.26  | 0.006416 | 0.007445 | 0.219106 | 0.115858 |
| MmugDNA.38447.1.S1_at   | MmugDNA.38447.1 | 10.07 | 10.28 | 0.06 | 0.15 | -1.16 | 0.029869 | 0.088266 | 0.336071 | 0.341721 |
| MmugDNA.38449.1.S1_at   | MmugDNA.38449.1 | 3.19  | 3.19  | 0.15 | 0.15 | 1     | 0.978701 | 0.870489 | 0.993071 | 0.926446 |
| MmugDNA.3845.1.S1_at    | MmugDNA.3845.1  | 8.69  | 8.9   | 0.18 | 0.08 | -1.16 | 0.123565 | 0.123794 | 0.497016 | 0.393929 |
| MmugDNA.38451.1.S1_at   | MmugDNA.38451.1 | 10.11 | 10.75 | 1.29 | 0.07 | -1.57 | 0.41095  | 0.520804 | 0.731034 | 0.711942 |
| MmugDNA.38452.1.S1_at   | MmugDNA.38452.1 | 5.96  | 5.35  | 0.23 | 0.17 | 1.53  | 0.012216 | 0.013146 | 0.260622 | 0.147338 |
| MmugDNA.38453.1.S1_at   | MmugDNA.38453.1 | 8.16  | 7.41  | 0.07 | 0.09 | 1.68  | 0.000278 | 0.004175 | 0.132073 | 0.091064 |

|                         |                 |       |       |      |      |       |          |          |          |          |
|-------------------------|-----------------|-------|-------|------|------|-------|----------|----------|----------|----------|
| MmugDNA.38456.1.S1_at   | MmugDNA.38456.1 | 5.45  | 5.1   | 0.16 | 0.2  | 1.27  | 0.117448 | 0.213883 | 0.490925 | 0.48758  |
| MmugDNA.38457.1.S1_at   | MmugDNA.38457.1 | 3.6   | 3.59  | 0.11 | 0.28 | 1.01  | 0.410791 | 0.502723 | 0.730947 | 0.700289 |
| MmugDNA.38458.1.S1_at   | MmugDNA.38458.1 | 4.92  | 4.89  | 0.16 | 0.02 | 1.02  | 0.26265  | 0.296447 | 0.624888 | 0.555528 |
| MmugDNA.3846.1.S1_at    | MmugDNA.3846.1  | 12.72 | 12.56 | 0.12 | 0.04 | 1.12  | 0.165672 | 0.079794 | 0.538504 | 0.327113 |
| MmugDNA.38461.1.S1_at   | MmugDNA.38461.1 | 3.74  | 4.15  | 0.37 | 0.06 | -1.33 | 0.507952 | 0.695607 | 0.786553 | 0.823073 |
| MmugDNA.38462.1.S1_at   | MmugDNA.38462.1 | 3.75  | 3.67  | 0.1  | 0.21 | 1.06  | 0.372126 | 0.574786 | 0.705567 | 0.746142 |
| MmugDNA.38463.1.S1_at   | MmugDNA.38463.1 | 10.3  | 10.49 | 0.35 | 0.25 | -1.14 | 0.557794 | 0.093378 | 0.815038 | 0.34958  |
| MmugDNA.38464.1.S1_at   | MmugDNA.38464.1 | 5.96  | 5.98  | 0.38 | 0.22 | -1.02 | 0.557379 | 0.021077 | 0.814693 | 0.181869 |
| MmugDNA.38465.1.S1_at   | MmugDNA.38465.1 | 13.28 | 13.49 | 0.34 | 0.04 | -1.16 | 0.356159 | 0.382342 | 0.69508  | 0.618498 |
| MmugDNA.2707.1.S1_at    | MmugDNA.2707.1  | 10.92 | 11.06 | 0.59 | 0.11 | -1.1  | 0.875938 | 0.561621 | 0.956844 | 0.73751  |
| MmugDNA.2707.1.S1_s_at  | MmugDNA.2707.1  | 11.05 | 11.11 | 0.58 | 0.14 | -1.05 | 0.962116 | 0.676526 | 0.987674 | 0.81095  |
| MmugDNA.38466.1.S1_at   | MmugDNA.38466.1 | 6.08  | 5.92  | 0.1  | 0.02 | 1.12  | 0.144545 | 0.020438 | 0.519872 | 0.179564 |
| MmugDNA.38467.1.S1_at   | MmugDNA.38467.1 | 5.35  | 5.28  | 0.18 | 0.08 | 1.05  | 0.604168 | 0.603319 | 0.839514 | 0.764049 |
| MmugDNA.38468.1.S1_at   | MmugDNA.38468.1 | 8.64  | 8.45  | 0.25 | 0.03 | 1.14  | 0.257275 | 0.397948 | 0.621021 | 0.629138 |
| MmugDNA.3847.1.S1_at    | MmugDNA.3847.1  | 9.77  | 10.32 | 0.26 | 0.06 | -1.47 | 0.056428 | 0.04517  | 0.400189 | 0.256979 |
| MmugDNA.38470.1.S1_at   | MmugDNA.38470.1 | 7.31  | 7.39  | 0.79 | 0.26 | -1.06 | 0.827937 | 0.443605 | 0.938183 | 0.661336 |
| MmugDNA.38471.1.S1_at   | MmugDNA.38471.1 | 12.22 | 12.3  | 0.28 | 0.04 | -1.05 | 0.760142 | 0.249001 | 0.909862 | 0.518083 |
| MmugDNA.38472.1.S1_at   | MmugDNA.38472.1 | 10.4  | 9.94  | 0.21 | 0.12 | 1.38  | 0.012953 | 0.00583  | 0.266031 | 0.104661 |
| MmugDNA.38473.1.S1_at   | MmugDNA.38473.1 | 9.13  | 9.21  | 0.65 | 0.01 | -1.05 | 0.302806 | 0.103533 | 0.656669 | 0.364346 |
| MmugDNA.38476.1.S1_at   | MmugDNA.38476.1 | 3.44  | 3.42  | 0.3  | 0.06 | 1.01  | 0.940148 | 0.862634 | 0.979649 | 0.92189  |
| MmugDNA.38477.1.S1_at   | MmugDNA.38477.1 | 8.56  | 8.6   | 0.12 | 0.16 | -1.03 | 0.773381 | 0.020363 | 0.915791 | 0.17912  |
| MmugDNA.38478.1.S1_s_at | MmugDNA.38478.1 | 13.57 | 13.44 | 0.17 | 0.13 | 1.1   | 0.137502 | 0.512618 | 0.513023 | 0.706442 |
| MmugDNA.3848.1.S1_at    | MmugDNA.3848.1  | 5.06  | 5.7   | 1.55 | 0.07 | -1.55 | 0.826096 | 0.864688 | 0.937641 | 0.923276 |
| MmugDNA.38480.1.S1_at   | MmugDNA.38480.1 | 3.26  | 3.15  | 0.08 | 0.17 | 1.08  | 0.249387 | 0.120094 | 0.614718 | 0.388803 |
| MmugDNA.38482.1.S1_at   | MmugDNA.38482.1 | 6.53  | 6.56  | 0.54 | 0.17 | -1.02 | 0.430945 | 0.656065 | 0.74323  | 0.798847 |
| MmugDNA.38483.1.S1_at   | MmugDNA.38483.1 | 6.97  | 7.27  | 0.1  | 0.07 | -1.23 | 0.05087  | 0.049076 | 0.388223 | 0.266501 |
| MmugDNA.38485.1.S1_at   | MmugDNA.38485.1 | 6.41  | 6.18  | 0.2  | 0.06 | 1.18  | 0.25933  | 0.308582 | 0.622607 | 0.564575 |
| MmugDNA.38486.1.S1_at   | MmugDNA.38486.1 | 5.43  | 5.39  | 0.14 | 0.17 | 1.03  | 0.384837 | 0.03027  | 0.71224  | 0.215828 |
| MmugDNA.38487.1.S1_at   | MmugDNA.38487.1 | 11.01 | 10.85 | 0.25 | 0.04 | 1.11  | 0.139254 | 0.037983 | 0.514693 | 0.239357 |
| MmugDNA.3849.1.S1_at    | MmugDNA.3849.1  | 5.74  | 5.62  | 0.09 | 0.12 | 1.08  | 0.194901 | 0.208093 | 0.565263 | 0.482082 |
| MmugDNA.38490.1.S1_at   | MmugDNA.38490.1 | 7.09  | 7.04  | 0.03 | 0.07 | 1.04  | 0.396332 | 0.643735 | 0.721323 | 0.791112 |
| MmugDNA.38491.1.S1_at   | MmugDNA.38491.1 | 4.89  | 4.78  | 0.06 | 0.14 | 1.08  | 0.150378 | 0.094142 | 0.523988 | 0.350851 |
| MmugDNA.38493.1.S1_at   | MmugDNA.38493.1 | 10.72 | 10.29 | 1.05 | 0.06 | 1.35  | 0.586986 | 0.780191 | 0.831568 | 0.872539 |
| MmugDNA.38494.1.S1_at   | MmugDNA.38494.1 | 5.74  | 5.62  | 0.1  | 0.15 | 1.09  | 0.131299 | 0.470894 | 0.505606 | 0.679128 |
| MmugDNA.38495.1.S1_at   | MmugDNA.38495.1 | 6.47  | 5.62  | 0.31 | 0.36 | 1.81  | 0.065264 | 0.254048 | 0.420223 | 0.522387 |
| MmugDNA.38496.1.S1_at   | MmugDNA.38496.1 | 3.82  | 3.66  | 0.17 | 0.05 | 1.11  | 0.485683 | 0.382998 | 0.774425 | 0.61904  |
| MmugDNA.38497.1.S1_at   | MmugDNA.38497.1 | 6.01  | 5.88  | 0.02 | 0.06 | 1.09  | 0.019366 | 0.390086 | 0.300582 | 0.624002 |
| MmugDNA.38499.1.S1_at   | MmugDNA.38499.1 | 9.01  | 7.98  | 0.68 | 0.16 | 2.04  | 0.140739 | 0.037769 | 0.51617  | 0.238746 |
| MmugDNA.385.1.S1_at     | MmugDNA.385.1   | 11.44 | 11.4  | 0.57 | 0.1  | 1.03  | 0.434411 | 0.187934 | 0.745089 | 0.464041 |
| MmugDNA.3850.1.S1_at    | MmugDNA.3850.1  | 7.32  | 6.09  | 0.38 | 0.22 | 2.35  | 0.017972 | 0.012046 | 0.294714 | 0.142044 |
| MmugDNA.38500.1.S1_at   | MmugDNA.38500.1 | 4.18  | 4.47  | 0.09 | 0.04 | -1.22 | 0.0046   | 0.009525 | 0.201051 | 0.128521 |
| MmugDNA.38502.1.S1_at   | MmugDNA.38502.1 | 2.91  | 2.81  | 0.06 | 0.01 | 1.07  | 0.097573 | 0.257446 | 0.466487 | 0.52521  |
| MmugDNA.38503.1.S1_at   | MmugDNA.38503.1 | 8.68  | 8.63  | 0.15 | 0.01 | 1.03  | 0.201429 | 0.647354 | 0.573072 | 0.793415 |

|                         |                 |       |       |      |      |       |          |          |          |          |
|-------------------------|-----------------|-------|-------|------|------|-------|----------|----------|----------|----------|
| MmugDNA.38504.1.S1_at   | MmugDNA.38504.1 | 7.17  | 6.77  | 0.43 | 0.06 | 1.32  | 0.26502  | 0.13746  | 0.626381 | 0.41037  |
| MmugDNA.38505.1.S1_at   | MmugDNA.38505.1 | 4.26  | 4.13  | 0.26 | 0.07 | 1.09  | 0.413713 | 0.559983 | 0.732521 | 0.736439 |
| MmugDNA.38507.1.S1_at   | MmugDNA.38507.1 | 6.74  | 7.01  | 0.73 | 0.28 | -1.2  | 0.614402 | 0.70816  | 0.843931 | 0.830731 |
| MmugDNA.38509.1.S1_at   | MmugDNA.38509.1 | 3.47  | 3.4   | 0.14 | 0.09 | 1.05  | 0.3609   | 0.461285 | 0.698207 | 0.672971 |
| MmugDNA.38511.1.S1_at   | MmugDNA.38511.1 | 3.18  | 3.08  | 0.25 | 0.14 | 1.08  | 0.327626 | 0.437288 | 0.675137 | 0.656613 |
| MmugDNA.38511.1.S1_x_at | MmugDNA.38511.1 | 2.86  | 2.87  | 0.2  | 0.08 | -1.01 | 0.432801 | 0.334503 | 0.744125 | 0.582498 |
| MmugDNA.38512.1.S1_at   | MmugDNA.38512.1 | 5.34  | 5.05  | 0.16 | 0.08 | 1.22  | 0.052254 | 0.046183 | 0.392084 | 0.259345 |
| MmugDNA.38514.1.S1_at   | MmugDNA.38514.1 | 5.62  | 5.59  | 0.13 | 0.03 | 1.03  | 0.208171 | 0.471928 | 0.579837 | 0.679793 |
| MmugDNA.38517.1.S1_at   | MmugDNA.38517.1 | 8.78  | 8.82  | 0.34 | 0.13 | -1.03 | 0.803387 | 0.128671 | 0.928371 | 0.400083 |
| MmugDNA.38519.1.S1_at   | MmugDNA.38519.1 | 5.42  | 5.26  | 0.05 | 0.04 | 1.12  | 0.011658 | 0.160113 | 0.256051 | 0.436296 |
| MmugDNA.3852.1.S1_at    | MmugDNA.3852.1  | 6.49  | 6.79  | 0.17 | 0.08 | -1.23 | 0.109804 | 0.013231 | 0.482607 | 0.147534 |
| MmugDNA.38520.1.S1_at   | MmugDNA.38520.1 | 5.39  | 5.21  | 0.16 | 0.16 | 1.13  | 0.115168 | 0.260798 | 0.488314 | 0.52721  |
| MmugDNA.38521.1.S1_at   | MmugDNA.38521.1 | 6.6   | 6.49  | 0.09 | 0.12 | 1.08  | 0.216331 | 0.17994  | 0.586447 | 0.456476 |
| MmugDNA.38523.1.S1_at   | MmugDNA.38523.1 | 3.8   | 3.8   | 0.13 | 0.05 | 1     | 0.368827 | 0.542767 | 0.703826 | 0.725734 |
| MmugDNA.38529.1.S1_at   | MmugDNA.38529.1 | 6.59  | 7.16  | 0.92 | 0.35 | -1.49 | 0.800633 | 0.751002 | 0.927072 | 0.855235 |
| MmugDNA.38531.1.S1_at   | MmugDNA.38531.1 | 6.53  | 6.59  | 0.12 | 0.07 | -1.04 | 0.57691  | 0.620655 | 0.825252 | 0.775525 |
| MmugDNA.38532.1.S1_at   | MmugDNA.38532.1 | 4.6   | 4.63  | 0.16 | 0.18 | -1.02 | 0.564762 | 0.363011 | 0.81898  | 0.603478 |
| MmugDNA.38533.1.S1_at   | MmugDNA.38533.1 | 6.98  | 7.15  | 0.5  | 0.12 | -1.13 | 0.682993 | 0.891253 | 0.876006 | 0.938045 |
| MmugDNA.38536.1.S1_at   | MmugDNA.38536.1 | 4.33  | 4.34  | 0.11 | 0.06 | -1.01 | 0.788444 | 0.946652 | 0.922311 | 0.969766 |
| MmugDNA.38537.1.S1_at   | MmugDNA.38537.1 | 4.06  | 4.03  | 0.36 | 0.14 | 1.02  | 0.805091 | 0.83719  | 0.929121 | 0.906927 |
| MmugDNA.38538.1.S1_at   | MmugDNA.38538.1 | 6.7   | 6.61  | 0.6  | 0.43 | 1.06  | 0.964091 | 0.715214 | 0.988243 | 0.834912 |
| MmugDNA.3854.1.S1_at    | MmugDNA.3854.1  | 7.76  | 8.59  | 0.32 | 0.76 | -1.78 | 0.691222 | 0.158423 | 0.879715 | 0.434313 |
| MmugDNA.38540.1.S1_at   | MmugDNA.38540.1 | 6.47  | 6.78  | 0.15 | 0.12 | -1.24 | 0.046283 | 0.012427 | 0.377679 | 0.144095 |
| MmugDNA.38541.1.S1_at   | MmugDNA.38541.1 | 7.14  | 7.15  | 0.3  | 0.34 | -1    | 0.231471 | 0.308941 | 0.599368 | 0.564656 |
| MmugDNA.38542.1.S1_at   | MmugDNA.38542.1 | 7.33  | 7.17  | 0.41 | 0.2  | 1.12  | 0.419867 | 0.768635 | 0.736572 | 0.865637 |
| MmugDNA.38543.1.S1_x_at | MmugDNA.38543.1 | 3.63  | 3.48  | 0.25 | 0.14 | 1.11  | 0.411945 | 0.238578 | 0.731794 | 0.509192 |
| MmugDNA.38544.1.S1_at   | MmugDNA.38544.1 | 5.73  | 5.58  | 0.13 | 0.09 | 1.11  | 0.049815 | 0.069281 | 0.386252 | 0.309468 |
| MmugDNA.38545.1.S1_at   | MmugDNA.38545.1 | 4.62  | 4.53  | 0.21 | 0.19 | 1.06  | 0.655471 | 0.707917 | 0.863114 | 0.830538 |
| MmugDNA.38546.1.S1_s_at | MmugDNA.38546.1 | 3.41  | 3.51  | 0.06 | 0.16 | -1.07 | 0.809148 | 0.005225 | 0.931038 | 0.10016  |
| MmugDNA.38547.1.S1_at   | MmugDNA.38547.1 | 11.49 | 11.3  | 0.49 | 0.08 | 1.14  | 0.33753  | 0.568406 | 0.68243  | 0.741962 |
| MmugDNA.3855.1.S1_at    | MmugDNA.3855.1  | 3.69  | 3.56  | 0.07 | 0.17 | 1.09  | 0.499552 | 0.341553 | 0.7821   | 0.587748 |
| MmugDNA.38550.1.S1_s_at | MmugDNA.38550.1 | 11.98 | 12.24 | 0.15 | 0.33 | -1.2  | 0.149186 | 0.226909 | 0.523063 | 0.499276 |
| MmugDNA.38551.1.S1_at   | MmugDNA.38551.1 | 6.78  | 6.62  | 0.12 | 0.06 | 1.11  | 0.232024 | 0.736179 | 0.59986  | 0.847335 |
| MmugDNA.38552.1.S1_at   | MmugDNA.38552.1 | 11.78 | 10.96 | 0.22 | 0.06 | 1.77  | 0.003552 | 0.001778 | 0.196915 | 0.06341  |
| MmugDNA.38553.1.S1_at   | MmugDNA.38553.1 | 10.21 | 10.47 | 0.1  | 0.03 | -1.2  | 0.016803 | 0.001962 | 0.288545 | 0.065832 |
| MmugDNA.38555.1.S1_at   | MmugDNA.38555.1 | 5.13  | 5.24  | 0.2  | 0.08 | -1.08 | 0.236224 | 0.126379 | 0.603256 | 0.396902 |
| MmugDNA.38557.1.S1_at   | MmugDNA.38557.1 | 11.41 | 11.61 | 0.16 | 0.05 | -1.15 | 0.117512 | 0.376752 | 0.490983 | 0.614541 |
| MmugDNA.38559.1.S1_at   | MmugDNA.38559.1 | 3.56  | 3.43  | 0.2  | 0.16 | 1.09  | 0.561402 | 0.802066 | 0.817219 | 0.886016 |
| MmugDNA.3856.1.S1_at    | MmugDNA.3856.1  | 6.63  | 6.33  | 0.26 | 0.05 | 1.24  | 0.442495 | 0.680042 | 0.750144 | 0.813156 |
| MmugDNA.38560.1.S1_at   | MmugDNA.38560.1 | 6.48  | 6.42  | 0.78 | 0.2  | 1.05  | 0.901479 | 0.555144 | 0.966589 | 0.733715 |
| MmugDNA.38561.1.S1_at   | MmugDNA.38561.1 | 7.38  | 7.36  | 0.22 | 0.04 | 1.02  | 0.415131 | 0.456473 | 0.733561 | 0.670188 |
| MmugDNA.38566.1.S1_at   | MmugDNA.38566.1 | 6.22  | 6.13  | 1.17 | 0.84 | 1.07  | 0.466761 | 0.591374 | 0.763876 | 0.756973 |
| MmugDNA.38567.1.S1_at   | MmugDNA.38567.1 | 3.2   | 3.4   | 0.18 | 0.03 | -1.15 | 0.480171 | 0.600029 | 0.771113 | 0.761762 |

|                         |                 |       |       |      |      |       |          |          |          |          |
|-------------------------|-----------------|-------|-------|------|------|-------|----------|----------|----------|----------|
| MmugDNA.38568.1.S1_at   | MmugDNA.38568.1 | 9.95  | 10.32 | 1.34 | 0.07 | -1.29 | 0.512727 | 0.594506 | 0.789486 | 0.758623 |
| MmugDNA.38569.1.S1_at   | MmugDNA.38569.1 | 7.57  | 7.97  | 0.33 | 0.02 | -1.32 | 0.366444 | 0.125412 | 0.701905 | 0.396075 |
| MmugDNA.3857.1.S1_at    | MmugDNA.3857.1  | 4.96  | 4.75  | 0.27 | 0.11 | 1.16  | 0.134633 | 0.116398 | 0.508533 | 0.383671 |
| MmugDNA.38570.1.S1_s_at | MmugDNA.38570.1 | 7.97  | 8.16  | 0.45 | 0.24 | -1.14 | 0.67014  | 0.07638  | 0.869829 | 0.321368 |
| MmugDNA.38571.1.S1_at   | MmugDNA.38571.1 | 3.89  | 3.61  | 0.2  | 0.05 | 1.21  | 0.193519 | 0.543499 | 0.564275 | 0.726175 |
| MmugDNA.38572.1.S1_at   | MmugDNA.38572.1 | 6.38  | 6.37  | 0.08 | 0.05 | 1.01  | 0.549668 | 0.14977  | 0.810392 | 0.424394 |
| MmugDNA.38574.1.S1_at   | MmugDNA.38574.1 | 4.35  | 4.4   | 0.15 | 0.18 | -1.03 | 0.822844 | 0.959384 | 0.9361   | 0.976959 |
| MmugDNA.38575.1.S1_at   | MmugDNA.38575.1 | 10.43 | 10.66 | 0.35 | 0.04 | -1.17 | 0.977719 | 0.999206 | 0.99273  | 0.99966  |
| MmugDNA.38576.1.S1_s_at | MmugDNA.38576.1 | 12.55 | 12.74 | 0.06 | 0.06 | -1.14 | 0.033699 | 0.365792 | 0.347149 | 0.60572  |
| MmugDNA.38577.1.S1_at   | MmugDNA.38577.1 | 4.98  | 5.14  | 0.14 | 0.08 | -1.12 | 0.28143  | 0.614332 | 0.639917 | 0.771206 |
| MmugDNA.38578.1.S1_at   | MmugDNA.38578.1 | 8.95  | 9.13  | 0.17 | 0.09 | -1.13 | 0.181786 | 0.197225 | 0.554854 | 0.472213 |
| MmugDNA.3858.1.S1_at    | MmugDNA.3858.1  | 3.67  | 3.67  | 0.23 | 0.02 | 1     | 0.333784 | 0.444965 | 0.679885 | 0.662174 |
| MmugDNA.38580.1.S1_at   | MmugDNA.38580.1 | 9.11  | 8.31  | 0.55 | 0.29 | 1.75  | 0.14362  | 0.154524 | 0.519043 | 0.429405 |
| MmugDNA.38582.1.S1_at   | MmugDNA.38582.1 | 4.72  | 4.73  | 0.5  | 0.13 | -1    | 0.894504 | 0.844005 | 0.963846 | 0.911155 |
| MmugDNA.38583.1.S1_s_at | MmugDNA.38583.1 | 10.62 | 10.17 | 0.2  | 0.07 | 1.37  | 0.023289 | 0.038072 | 0.314809 | 0.239748 |
| MmugDNA.18685.1.S1_at   | MmugDNA.18685.1 | 6.83  | 7.84  | 1    | 0.2  | -2.01 | 0.503645 | 0.111239 | 0.784375 | 0.375882 |
| MmugDNA.18685.1.S1_s_at | MmugDNA.18685.1 | 9.38  | 10.19 | 0.67 | 0.13 | -1.74 | 0.425793 | 0.071699 | 0.740112 | 0.313904 |
| MmugDNA.38585.1.S1_at   | MmugDNA.38585.1 | 6.34  | 6.24  | 0.1  | 0.16 | 1.07  | 0.288582 | 0.504428 | 0.645614 | 0.701557 |
| MmugDNA.38586.1.S1_at   | MmugDNA.38586.1 | 8.16  | 8.65  | 0.46 | 0.25 | -1.4  | 0.165176 | 0.192191 | 0.537885 | 0.467651 |
| MmugDNA.38588.1.S1_at   | MmugDNA.38588.1 | 12.51 | 12.09 | 0.24 | 0.17 | 1.34  | 0.052258 | 0.010676 | 0.392084 | 0.134919 |
| MmugDNA.38588.1.S1_s_at | MmugDNA.38588.1 | 11.42 | 10.98 | 0.26 | 0.19 | 1.36  | 0.047882 | 0.012152 | 0.381444 | 0.142648 |
| MmugDNA.38589.1.S1_at   | MmugDNA.38589.1 | 12.04 | 11.39 | 0.26 | 0.09 | 1.56  | 0.011337 | 0.00353  | 0.254281 | 0.085242 |
| MmugDNA.3859.1.S1_at    | MmugDNA.3859.1  | 10.28 | 10.38 | 0.32 | 0.15 | -1.08 | 0.141039 | 0.097838 | 0.516345 | 0.355639 |
| MmugDNA.38590.1.S1_at   | MmugDNA.38590.1 | 7.24  | 7.1   | 0.18 | 0.08 | 1.1   | 0.438759 | 0.479632 | 0.747479 | 0.685331 |
| MmugDNA.38591.1.S1_at   | MmugDNA.38591.1 | 5.44  | 6     | 0.35 | 0.24 | -1.48 | 0.09654  | 0.114289 | 0.465152 | 0.38083  |
| MmugDNA.38592.1.S1_at   | MmugDNA.38592.1 | 6.92  | 6.98  | 0.23 | 0.11 | -1.04 | 0.498155 | 0.976975 | 0.781592 | 0.987472 |
| MmugDNA.38593.1.S1_at   | MmugDNA.38593.1 | 8.66  | 8.69  | 0.13 | 0.35 | -1.02 | 0.491379 | 0.451079 | 0.777734 | 0.666023 |
| MmugDNA.38594.1.S1_at   | MmugDNA.38594.1 | 6.66  | 7.11  | 1.14 | 0.25 | -1.37 | 0.351249 | 0.478911 | 0.691945 | 0.684779 |
| MmugDNA.38596.1.S1_at   | MmugDNA.38596.1 | 5.53  | 5.5   | 0.21 | 0.07 | 1.02  | 0.303608 | 0.268388 | 0.657406 | 0.534086 |
| MmugDNA.38597.1.S1_at   | MmugDNA.38597.1 | 3.37  | 3.46  | 0.31 | 0.25 | -1.06 | 0.818154 | 0.746726 | 0.934249 | 0.852931 |
| MmugDNA.38598.1.S1_at   | MmugDNA.38598.1 | 5.76  | 5.62  | 0.46 | 0.26 | 1.1   | 0.448839 | 0.710089 | 0.754037 | 0.831904 |
| MmugDNA.3860.1.S1_at    | MmugDNA.3860.1  | 6.16  | 6.05  | 0.13 | 0.5  | 1.08  | 0.777126 | 0.145083 | 0.917456 | 0.419047 |
| MmugDNA.13629.1.S1_at   | MmugDNA.13629.1 | 4.36  | 4.53  | 0.4  | 0.32 | -1.13 | 0.213186 | 0.131496 | 0.583803 | 0.403658 |
| MmugDNA.13629.1.S1_s_at | MmugDNA.13629.1 | 11.03 | 11.05 | 0.37 | 0.09 | -1.02 | 0.354072 | 0.20532  | 0.693644 | 0.479639 |
| MmugDNA.38604.1.S1_at   | MmugDNA.38604.1 | 4.09  | 4     | 0.12 | 0.02 | 1.06  | 0.20777  | 0.160677 | 0.579372 | 0.436758 |
| MmugDNA.38605.1.S1_at   | MmugDNA.38605.1 | 6.37  | 6.2   | 0.11 | 0.14 | 1.12  | 0.374043 | 0.574889 | 0.705702 | 0.746177 |
| MmugDNA.38607.1.S1_at   | MmugDNA.38607.1 | 4.9   | 5.76  | 0.28 | 0.46 | -1.81 | 0.1189   | 0.267762 | 0.492404 | 0.533553 |
| MmugDNA.38608.1.S1_at   | MmugDNA.38608.1 | 3.86  | 4.01  | 0.43 | 0.42 | -1.11 | 0.709878 | 0.688787 | 0.887115 | 0.818337 |
| MmugDNA.38609.1.S1_at   | MmugDNA.38609.1 | 6.09  | 6.09  | 0.2  | 0.04 | 1.01  | 0.961879 | 0.998412 | 0.987562 | 0.999092 |
| MmugDNA.3861.1.S1_at    | MmugDNA.3861.1  | 6.31  | 5.41  | 0.59 | 0.38 | 1.87  | 0.212335 | 0.222313 | 0.582875 | 0.495346 |
| MmugDNA.38610.1.S1_at   | MmugDNA.38610.1 | 4.71  | 4.79  | 0.26 | 0.21 | -1.06 | 0.391469 | 0.493858 | 0.717597 | 0.694433 |
| MmugDNA.38612.1.S1_at   | MmugDNA.38612.1 | 3.15  | 3.08  | 0.02 | 0.03 | 1.05  | 0.029808 | 0.614858 | 0.335991 | 0.771583 |
| MmugDNA.38613.1.S1_at   | MmugDNA.38613.1 | 4.28  | 4.16  | 0.03 | 0.02 | 1.09  | 0.010237 | 0.667409 | 0.246929 | 0.805333 |

|                        |                 |       |       |      |      |       |          |          |          |          |
|------------------------|-----------------|-------|-------|------|------|-------|----------|----------|----------|----------|
| MmugDNA.38614.1.S1_at  | MmugDNA.38614.1 | 5.1   | 4.59  | 0.38 | 0.7  | 1.43  | 0.567993 | 0.038352 | 0.820586 | 0.240736 |
| MmugDNA.38616.1.S1_at  | MmugDNA.38616.1 | 4.55  | 4.73  | 0.36 | 0.11 | -1.13 | 0.635205 | 0.23745  | 0.854522 | 0.508127 |
| MmugDNA.38617.1.S1_at  | MmugDNA.38617.1 | 4.38  | 4.72  | 0.12 | 0.68 | -1.26 | 0.316999 | 0.15473  | 0.666916 | 0.429723 |
| MmugDNA.38619.1.S1_at  | MmugDNA.38619.1 | 6.08  | 6.01  | 0.23 | 0.04 | 1.05  | 0.961651 | 0.978119 | 0.987465 | 0.988066 |
| MmugDNA.3862.1.S1_at   | MmugDNA.3862.1  | 5.2   | 5     | 0.2  | 0.08 | 1.15  | 0.177434 | 0.15763  | 0.550585 | 0.433131 |
| MmugDNA.38620.1.S1_at  | MmugDNA.38620.1 | 12.1  | 12.21 | 0.15 | 0.03 | -1.08 | 0.188516 | 0.15708  | 0.560489 | 0.432547 |
| MmugDNA.38622.1.S1_at  | MmugDNA.38622.1 | 8.27  | 8.38  | 0.13 | 0.13 | -1.07 | 0.188556 | 0.616261 | 0.560489 | 0.772555 |
| MmugDNA.38623.1.S1_at  | MmugDNA.38623.1 | 4.18  | 4.15  | 0.08 | 0.1  | 1.02  | 0.720688 | 0.491554 | 0.891709 | 0.693034 |
| MmugDNA.38624.1.S1_at  | MmugDNA.38624.1 | 4.84  | 4.2   | 0.25 | 0.28 | 1.56  | 0.043319 | 0.098659 | 0.371766 | 0.356743 |
| MmugDNA.38625.1.S1_at  | MmugDNA.38625.1 | 6.49  | 6.46  | 0.24 | 0.02 | 1.02  | 0.52773  | 0.112226 | 0.797225 | 0.377537 |
| MmugDNA.38627.1.S1_at  | MmugDNA.38627.1 | 9.77  | 9.15  | 0.56 | 0.09 | 1.54  | 0.419301 | 0.544924 | 0.736228 | 0.727184 |
| MmugDNA.38629.1.S1_at  | MmugDNA.38629.1 | 11.34 | 11.41 | 0.61 | 0.05 | -1.05 | 0.814707 | 0.176053 | 0.933137 | 0.452526 |
| MmugDNA.3863.1.S1_at   | MmugDNA.3863.1  | 8.8   | 6.14  | 0.88 | 0.64 | 6.29  | 0.011965 | 0.003217 | 0.257858 | 0.082088 |
| MmugDNA.38631.1.S1_at  | MmugDNA.38631.1 | 4.46  | 3.86  | 0.54 | 0.2  | 1.51  | 0.428515 | 0.476034 | 0.741933 | 0.682473 |
| MmugDNA.38632.1.S1_at  | MmugDNA.38632.1 | 7.07  | 7.04  | 0.12 | 0.02 | 1.02  | 0.230283 | 0.440323 | 0.598481 | 0.658899 |
| MmugDNA.38633.1.S1_at  | MmugDNA.38633.1 | 11    | 11.37 | 0.17 | 0.19 | -1.29 | 0.028638 | 0.120396 | 0.332804 | 0.38925  |
| MmugDNA.38634.1.S1_at  | MmugDNA.38634.1 | 6.54  | 6.58  | 0.13 | 0.03 | -1.03 | 0.146219 | 0.460499 | 0.520572 | 0.672364 |
| MmugDNA.38635.1.S1_at  | MmugDNA.38635.1 | 3.51  | 3.11  | 0.06 | 0.14 | 1.31  | 0.025222 | 0.028026 | 0.320761 | 0.208941 |
| MmugDNA.38636.1.S1_at  | MmugDNA.38636.1 | 9.35  | 9.28  | 0.95 | 0.14 | 1.05  | 0.453116 | 0.234025 | 0.755962 | 0.505312 |
| MmugDNA.38637.1.S1_at  | MmugDNA.38637.1 | 3.16  | 3.23  | 0.19 | 0.15 | -1.06 | 0.809238 | 0.615315 | 0.93104  | 0.771918 |
| MmugDNA.38639.1.S1_at  | MmugDNA.38639.1 | 4.04  | 4.23  | 0.19 | 0.06 | -1.14 | 0.240941 | 0.351909 | 0.607226 | 0.595331 |
| MmugDNA.3864.1.S1_at   | MmugDNA.3864.1  | 3.7   | 3.78  | 0.23 | 0.38 | -1.06 | 0.596434 | 0.756516 | 0.835968 | 0.858223 |
| MmugDNA.38642.1.S1_at  | MmugDNA.38642.1 | 10.39 | 9.82  | 0.35 | 0.2  | 1.48  | 0.028    | 0.003433 | 0.330017 | 0.084252 |
| MmugDNA.38643.1.S1_at  | MmugDNA.38643.1 | 5.9   | 5.74  | 0.08 | 0.22 | 1.12  | 0.088968 | 0.151844 | 0.456806 | 0.42651  |
| MmugDNA.38645.1.S1_at  | MmugDNA.38645.1 | 5.82  | 6.1   | 0.32 | 0.77 | -1.22 | 0.559914 | 0.70885  | 0.816426 | 0.831167 |
| MmugDNA.38646.1.S1_at  | MmugDNA.38646.1 | 6.81  | 6.76  | 0.24 | 0.05 | 1.04  | 0.815329 | 0.026888 | 0.933137 | 0.205141 |
| MmugDNA.38647.1.S1_at  | MmugDNA.38647.1 | 2.89  | 3.02  | 0.07 | 0.04 | -1.09 | 0.019464 | 0.167519 | 0.30143  | 0.443968 |
| MmugDNA.38648.1.S1_at  | MmugDNA.38648.1 | 9.98  | 10.13 | 0.21 | 0.03 | -1.11 | 0.225798 | 0.008704 | 0.594935 | 0.123697 |
| MmugDNA.38649.1.S1_at  | MmugDNA.38649.1 | 6.38  | 6.93  | 0.38 | 0.03 | -1.46 | 0.172014 | 0.229538 | 0.545311 | 0.501534 |
| MmugDNA.3865.1.S1_at   | MmugDNA.3865.1  | 10.71 | 10.7  | 0.4  | 0.19 | 1.01  | 0.674518 | 0.467396 | 0.872077 | 0.677085 |
| MmugDNA.38650.1.S1_at  | MmugDNA.38650.1 | 7.12  | 7.59  | 1.37 | 0.52 | -1.38 | 0.503071 | 0.692089 | 0.784024 | 0.82091  |
| MmugDNA.38651.1.S1_at  | MmugDNA.38651.1 | 8.75  | 8.7   | 0.24 | 0.07 | 1.04  | 0.267143 | 0.369208 | 0.627823 | 0.608669 |
| MmugDNA.38652.1.S1_at  | MmugDNA.38652.1 | 6.01  | 6.25  | 0.18 | 0.26 | -1.17 | 0.714712 | 0.138356 | 0.888892 | 0.411244 |
| MmugDNA.38653.1.S1_at  | MmugDNA.38653.1 | 6.65  | 7.46  | 0.63 | 0.28 | -1.75 | 0.042389 | 0.041613 | 0.369001 | 0.24887  |
| MmugDNA.38655.1.S1_at  | MmugDNA.38655.1 | 6.3   | 6.29  | 0.01 | 0.09 | 1.01  | 0.890463 | 0.933169 | 0.96231  | 0.962032 |
| MmugDNA.38656.1.S1_at  | MmugDNA.38656.1 | 2.54  | 2.54  | 0.08 | 0.04 | 1     | 0.648981 | 0.82801  | 0.860183 | 0.901214 |
| MmugDNA.38657.1.S1_at  | MmugDNA.38657.1 | 7.64  | 7.8   | 0.02 | 0.24 | -1.12 | 0.378571 | 0.504271 | 0.708405 | 0.701474 |
| MmugDNA.38659.1.S1_at  | MmugDNA.38659.1 | 12.68 | 12.34 | 0.19 | 0.02 | 1.26  | 0.070479 | 0.322675 | 0.429392 | 0.574036 |
| MmugDNA.3866.1.S1_s_at | MmugDNA.3866.1  | 11.39 | 11    | 0.2  | 0.01 | 1.31  | 0.034384 | 0.104876 | 0.349795 | 0.366419 |
| MmugDNA.38665.1.S1_at  | MmugDNA.38665.1 | 9.45  | 9.48  | 0.22 | 0.14 | -1.02 | 0.960624 | 0.9816   | 0.987216 | 0.989914 |
| MmugDNA.38667.1.S1_at  | MmugDNA.38667.1 | 8.26  | 7.93  | 0.42 | 0.28 | 1.25  | 0.273007 | 0.506158 | 0.632603 | 0.702359 |
| MmugDNA.38668.1.S1_at  | MmugDNA.38668.1 | 3.38  | 3.41  | 0.17 | 0.07 | -1.02 | 0.94305  | 0.343092 | 0.980374 | 0.588883 |
| MmugDNA.38669.1.S1_at  | MmugDNA.38669.1 | 5.94  | 5.82  | 0.03 | 0.07 | 1.09  | 0.198852 | 0.172302 | 0.570297 | 0.448666 |

|                         |                 |       |       |      |      |       |          |          |          |          |
|-------------------------|-----------------|-------|-------|------|------|-------|----------|----------|----------|----------|
| MmugDNA.3867.1.S1_at    | MmugDNA.3867.1  | 10.16 | 9.49  | 0.25 | 0.02 | 1.59  | 0.020997 | 0.026503 | 0.306293 | 0.203897 |
| MmugDNA.38670.1.S1_at   | MmugDNA.38670.1 | 10.71 | 10.65 | 0.49 | 0.06 | 1.04  | 0.421917 | 0.397251 | 0.737802 | 0.628763 |
| MmugDNA.38671.1.S1_at   | MmugDNA.38671.1 | 3.84  | 4.04  | 0.27 | 0.07 | -1.14 | 0.345507 | 0.327622 | 0.687499 | 0.577448 |
| MmugDNA.38672.1.S1_at   | MmugDNA.38672.1 | 11.86 | 11.83 | 0.42 | 0.05 | 1.02  | 0.694474 | 0.54937  | 0.881128 | 0.72982  |
| MmugDNA.38673.1.S1_s_at | MmugDNA.38673.1 | 8.75  | 8.81  | 0.28 | 0.14 | -1.04 | 0.556099 | 0.788144 | 0.813904 | 0.877471 |
| MmugDNA.38674.1.S1_at   | MmugDNA.38674.1 | 9.48  | 9.46  | 0.3  | 0.11 | 1.01  | 0.807696 | 0.153172 | 0.930258 | 0.428011 |
| MmugDNA.38676.1.S1_at   | MmugDNA.38676.1 | 12.03 | 10.9  | 0.71 | 0.04 | 2.18  | 0.147027 | 0.109815 | 0.521545 | 0.373758 |
| MmugDNA.38677.1.S1_at   | MmugDNA.38677.1 | 5.34  | 5.39  | 0.02 | 0.05 | -1.04 | 0.108191 | 0.432056 | 0.480628 | 0.652775 |
| MmugDNA.38678.1.S1_at   | MmugDNA.38678.1 | 4.34  | 4.52  | 0.34 | 0.18 | -1.13 | 0.849172 | 0.492333 | 0.94697  | 0.693485 |
| MmugDNA.3868.1.S1_at    | MmugDNA.3868.1  | 8.53  | 8.63  | 0.28 | 0.14 | -1.07 | 0.620551 | 0.663297 | 0.84711  | 0.802921 |
| MmugDNA.38680.1.S1_at   | MmugDNA.38680.1 | 6.46  | 6.63  | 0.74 | 0.36 | -1.13 | 0.503159 | 0.686361 | 0.78406  | 0.816948 |
| MmugDNA.38681.1.S1_at   | MmugDNA.38681.1 | 6.99  | 5.91  | 0.56 | 0.38 | 2.12  | 0.143013 | 0.186092 | 0.518259 | 0.461931 |
| MmugDNA.38682.1.S1_at   | MmugDNA.38682.1 | 6.46  | 6.46  | 0.2  | 0.09 | 1     | 0.260338 | 0.532666 | 0.62325  | 0.719186 |
| MmugDNA.38683.1.S1_at   | MmugDNA.38683.1 | 10.66 | 10.47 | 0.38 | 0.05 | 1.15  | 0.511186 | 0.013019 | 0.78856  | 0.146821 |
| MmugDNA.38684.1.S1_at   | MmugDNA.38684.1 | 6.6   | 6.55  | 0.12 | 0.38 | 1.03  | 0.56737  | 0.692116 | 0.820391 | 0.82091  |
| MmugDNA.38685.1.S1_at   | MmugDNA.38685.1 | 3.93  | 3.67  | 0.28 | 0.12 | 1.2   | 0.148355 | 0.226436 | 0.522567 | 0.498888 |
| MmugDNA.38687.1.S1_at   | MmugDNA.38687.1 | 5.29  | 5.85  | 0.33 | 0.1  | -1.48 | 0.094101 | 0.060291 | 0.463389 | 0.292225 |
| MmugDNA.38689.1.S1_at   | MmugDNA.38689.1 | 7.28  | 7.12  | 0.14 | 0.03 | 1.12  | 0.276133 | 0.427351 | 0.635764 | 0.649175 |
| MmugDNA.3869.1.S1_at    | MmugDNA.3869.1  | 6.45  | 5.79  | 0.29 | 0.07 | 1.59  | 0.018166 | 0.019378 | 0.295482 | 0.174992 |
| MmugDNA.38691.1.S1_at   | MmugDNA.38691.1 | 7.9   | 8.45  | 0.57 | 0.14 | -1.47 | 0.207727 | 0.258258 | 0.579365 | 0.52558  |
| MmugDNA.38695.1.S1_at   | MmugDNA.38695.1 | 11.88 | 11.88 | 0.12 | 0.22 | -1    | 0.273569 | 0.498961 | 0.633298 | 0.697912 |
| MmugDNA.38696.1.S1_at   | MmugDNA.38696.1 | 7.54  | 7.54  | 0.07 | 0.04 | -1    | 0.492991 | 0.932218 | 0.778657 | 0.961557 |
| MmugDNA.387.1.S1_at     | MmugDNA.387.1   | 7.6   | 8.24  | 0.28 | 0.14 | -1.56 | 0.03991  | 0.045509 | 0.362952 | 0.2575   |
| MmugDNA.3870.1.S1_at    | MmugDNA.3870.1  | 3.06  | 3.16  | 0.4  | 0.22 | -1.07 | 0.635259 | 0.491382 | 0.854522 | 0.692976 |
| MmugDNA.38702.1.S1_at   | MmugDNA.38702.1 | 11.8  | 10.83 | 1.98 | 0.1  | 1.96  | 0.941009 | 0.895044 | 0.979916 | 0.940055 |
| MmugDNA.38703.1.S1_at   | MmugDNA.38703.1 | 3.32  | 3.14  | 0.11 | 0.07 | 1.14  | 0.067876 | 0.119268 | 0.42451  | 0.387769 |
| MmugDNA.38704.1.S1_at   | MmugDNA.38704.1 | 3.75  | 3.77  | 0.31 | 0.38 | -1.01 | 0.689586 | 0.003193 | 0.879026 | 0.08199  |
| MmugDNA.38705.1.S1_at   | MmugDNA.38705.1 | 7.3   | 7.3   | 0.09 | 0.09 | 1     | 0.435318 | 0.769588 | 0.745628 | 0.866212 |
| MmugDNA.29620.1.S1_s_at | MmugDNA.29620.1 | 6.84  | 6.83  | 0.08 | 0.02 | 1     | 0.834096 | 0.888104 | 0.940502 | 0.936183 |
| MmugDNA.38707.1.S1_at   | MmugDNA.38707.1 | 4.22  | 4.27  | 0.12 | 0.03 | -1.04 | 0.84071  | 0.65824  | 0.943406 | 0.800244 |
| MmugDNA.38708.1.S1_at   | MmugDNA.38708.1 | 11.11 | 11.43 | 0.13 | 0.09 | -1.25 | 0.071235 | 0.016113 | 0.430589 | 0.160891 |
| MmugDNA.38708.1.S1_s_at | MmugDNA.38708.1 | 12.54 | 12.88 | 0.16 | 0.03 | -1.27 | 0.056985 | 0.048837 | 0.401454 | 0.265858 |
| MmugDNA.38709.1.S1_at   | MmugDNA.38709.1 | 4.28  | 4.3   | 0.12 | 0.11 | -1.02 | 0.939807 | 0.892511 | 0.979544 | 0.938696 |
| MmugDNA.38711.1.S1_at   | MmugDNA.38711.1 | 5.4   | 4.69  | 1.14 | 0.24 | 1.63  | 0.143225 | 0.134169 | 0.518489 | 0.406421 |
| MmugDNA.38713.1.S1_at   | MmugDNA.38713.1 | 3.81  | 3.82  | 0.15 | 0.1  | -1.01 | 0.74646  | 0.352236 | 0.903467 | 0.595568 |
| MmugDNA.38716.1.S1_at   | MmugDNA.38716.1 | 6.65  | 6.35  | 0.74 | 0.28 | 1.23  | 0.617111 | 0.523024 | 0.84528  | 0.713429 |
| MmugDNA.38717.1.S1_at   | MmugDNA.38717.1 | 5.02  | 4.79  | 0.33 | 0.03 | 1.17  | 0.234183 | 0.277159 | 0.601531 | 0.541154 |
| MmugDNA.38718.1.S1_at   | MmugDNA.38718.1 | 4.56  | 4.39  | 0.92 | 0.13 | 1.13  | 0.227123 | 0.297267 | 0.596459 | 0.556067 |
| MmugDNA.3872.1.S1_at    | MmugDNA.3872.1  | 10.89 | 11.43 | 0.53 | 0.09 | -1.45 | 0.135113 | 0.064186 | 0.50916  | 0.299592 |
| MmugDNA.38720.1.S1_at   | MmugDNA.38720.1 | 3.69  | 3.59  | 0.85 | 0.09 | 1.07  | 0.300686 | 0.367947 | 0.655174 | 0.607537 |
| MmugDNA.38721.1.S1_at   | MmugDNA.38721.1 | 5.36  | 5.31  | 0.1  | 0.16 | 1.04  | 0.280393 | 0.376855 | 0.639232 | 0.614606 |
| MmugDNA.38724.1.S1_at   | MmugDNA.38724.1 | 4.26  | 4.23  | 0.22 | 0.15 | 1.02  | 0.849652 | 0.368364 | 0.947112 | 0.607917 |
| MmugDNA.38726.1.S1_at   | MmugDNA.38726.1 | 3.88  | 4.15  | 0.1  | 0.19 | -1.21 | 0.043997 | 0.029862 | 0.373462 | 0.214491 |



|                         |                 |       |       |      |      |       |          |          |          |          |
|-------------------------|-----------------|-------|-------|------|------|-------|----------|----------|----------|----------|
| MmugDNA.38727.1.S1_at   | MmugDNA.38727.1 | 5.63  | 5.4   | 0.22 | 0.15 | 1.17  | 0.11023  | 0.177922 | 0.483363 | 0.454259 |
| MmugDNA.38728.1.S1_at   | MmugDNA.38728.1 | 9.36  | 9.32  | 1.14 | 0.1  | 1.03  | 0.927171 | 0.414963 | 0.975848 | 0.640553 |
| MmugDNA.38730.1.S1_at   | MmugDNA.38730.1 | 5.76  | 5.53  | 0.47 | 0.11 | 1.18  | 0.185952 | 0.318917 | 0.558892 | 0.571531 |
| MmugDNA.38731.1.S1_at   | MmugDNA.38731.1 | 5.83  | 6.35  | 0.72 | 0.25 | -1.44 | 0.718184 | 0.397396 | 0.890613 | 0.628812 |
| MmugDNA.38732.1.S1_at   | MmugDNA.38732.1 | 3.74  | 3.73  | 0.06 | 0.15 | 1     | 0.742712 | 0.463695 | 0.901884 | 0.674615 |
| MmugDNA.38734.1.S1_at   | MmugDNA.38734.1 | 5.04  | 6.08  | 0.4  | 0.09 | -2.05 | 0.017457 | 0.028318 | 0.291886 | 0.21008  |
| MmugDNA.38738.1.S1_at   | MmugDNA.38738.1 | 5.61  | 5.23  | 0.1  | 0.14 | 1.3   | 0.042071 | 0.034359 | 0.368438 | 0.229283 |
| MmugDNA.38739.1.S1_at   | MmugDNA.38739.1 | 8.07  | 8.95  | 0.57 | 0.18 | -1.84 | 0.079865 | 0.278351 | 0.442799 | 0.542089 |
| MmugDNA.3874.1.S1_at    | MmugDNA.3874.1  | 12.78 | 12.63 | 0.1  | 0.06 | 1.11  | 0.033955 | 0.116437 | 0.347468 | 0.383671 |
| MmugDNA.38740.1.S1_at   | MmugDNA.38740.1 | 13.41 | 13.36 | 0.52 | 0.09 | 1.03  | 0.854864 | 0.354602 | 0.948629 | 0.597297 |
| MmugDNA.38741.1.S1_at   | MmugDNA.38741.1 | 4     | 3.88  | 0.15 | 0.63 | 1.08  | 0.637027 | 0.468391 | 0.855318 | 0.677714 |
| MmugDNA.38742.1.S1_at   | MmugDNA.38742.1 | 5.45  | 5.36  | 0.1  | 0.03 | 1.07  | 0.123356 | 0.481973 | 0.496589 | 0.686909 |
| MmugDNA.38743.1.S1_at   | MmugDNA.38743.1 | 10.38 | 10.3  | 0.43 | 0.23 | 1.06  | 0.630345 | 0.863328 | 0.85195  | 0.922371 |
| MmugDNA.38744.1.S1_at   | MmugDNA.38744.1 | 5.56  | 5.56  | 0.06 | 0.06 | 1     | 0.723891 | 0.524307 | 0.892935 | 0.714254 |
| MmugDNA.38745.1.S1_at   | MmugDNA.38745.1 | 11.33 | 11.78 | 0.35 | 0.07 | -1.37 | 0.097953 | 0.072559 | 0.467227 | 0.315511 |
| MmugDNA.38746.1.S1_at   | MmugDNA.38746.1 | 7.81  | 8.08  | 0.21 | 0.3  | -1.2  | 0.360138 | 0.486851 | 0.697746 | 0.690091 |
| MmugDNA.38748.1.S1_at   | MmugDNA.38748.1 | 4.21  | 4.35  | 0.45 | 0.6  | -1.1  | 0.906631 | 0.918963 | 0.968356 | 0.954477 |
| MmugDNA.38749.1.S1_at   | MmugDNA.38749.1 | 7.53  | 7.77  | 0.32 | 0.09 | -1.18 | 0.211624 | 0.119312 | 0.582623 | 0.387834 |
| MmugDNA.3875.1.S1_at    | MmugDNA.3875.1  | 5.38  | 5.29  | 0.78 | 0.06 | 1.06  | 0.537646 | 0.742932 | 0.802735 | 0.851083 |
| MmugDNA.38750.1.S1_at   | MmugDNA.38750.1 | 7.81  | 7.48  | 0.36 | 0.07 | 1.26  | 0.111038 | 0.05231  | 0.484303 | 0.274201 |
| MmugDNA.38751.1.S1_at   | MmugDNA.38751.1 | 10.23 | 10.15 | 0.3  | 0.09 | 1.05  | 0.752465 | 0.019816 | 0.906542 | 0.177045 |
| MmugDNA.38753.1.S1_s_at | MmugDNA.38753.1 | 12.92 | 13.13 | 0.51 | 0.09 | -1.16 | 0.53243  | 0.051011 | 0.800287 | 0.271158 |
| MmugDNA.38754.1.S1_at   | MmugDNA.38754.1 | 4.09  | 6.17  | 0.13 | 0.15 | -4.24 | 0.000063 | 0.023229 | 0.108151 | 0.191039 |
| MmugDNA.38755.1.S1_at   | MmugDNA.38755.1 | 7.2   | 7.43  | 0.17 | 0.24 | -1.17 | 0.253115 | 0.216666 | 0.617917 | 0.490307 |
| MmugDNA.38755.1.S1_x_at | MmugDNA.38755.1 | 6.7   | 6.98  | 0.32 | 0.12 | -1.22 | 0.748571 | 0.329079 | 0.904527 | 0.578482 |
| MmugDNA.38757.1.S1_at   | MmugDNA.38757.1 | 7.93  | 7.63  | 0.75 | 0.29 | 1.23  | 0.319977 | 0.050654 | 0.669028 | 0.270317 |
| MmugDNA.38758.1.S1_at   | MmugDNA.38758.1 | 4.23  | 4.12  | 0.13 | 0.13 | 1.08  | 0.243616 | 0.518901 | 0.609531 | 0.710789 |
| MmugDNA.38759.1.S1_at   | MmugDNA.38759.1 | 4.38  | 5.11  | 0.2  | 0.14 | -1.66 | 0.007373 | 0.019892 | 0.228072 | 0.177357 |
| MmugDNA.3876.1.S1_at    | MmugDNA.3876.1  | 5.61  | 5.51  | 0.15 | 0.27 | 1.07  | 0.495796 | 0.351829 | 0.780125 | 0.595274 |
| MmugDNA.38760.1.S1_at   | MmugDNA.38760.1 | 4.09  | 4.07  | 0.04 | 0.08 | 1.01  | 0.649657 | 0.668396 | 0.860452 | 0.805938 |
| MmugDNA.38762.1.S1_s_at | MmugDNA.38762.1 | 10.37 | 10.07 | 0.33 | 0.01 | 1.22  | 0.616834 | 0.816151 | 0.845119 | 0.893955 |
| MmugDNA.38763.1.S1_at   | MmugDNA.38763.1 | 3.69  | 3.49  | 0.05 | 0.14 | 1.15  | 0.074808 | 0.053022 | 0.435313 | 0.27592  |
| MmugDNA.38764.1.S1_at   | MmugDNA.38764.1 | 6.33  | 6.48  | 0.43 | 0.05 | -1.11 | 0.528986 | 0.676919 | 0.798106 | 0.811237 |
| MmugDNA.38765.1.S1_at   | MmugDNA.38765.1 | 6.94  | 7.17  | 0.23 | 0.33 | -1.18 | 0.273755 | 0.557422 | 0.633406 | 0.735031 |
| MmugDNA.38766.1.S1_at   | MmugDNA.38766.1 | 6.64  | 6.66  | 0.94 | 0.65 | -1.01 | 0.858654 | 0.984296 | 0.950076 | 0.991271 |
| MmugDNA.38767.1.S1_at   | MmugDNA.38767.1 | 5.52  | 6.06  | 0.08 | 0.23 | -1.46 | 0.021639 | 0.064598 | 0.309241 | 0.300314 |
| MmugDNA.38768.1.S1_at   | MmugDNA.38768.1 | 8.71  | 8.83  | 0.18 | 0.03 | -1.09 | 0.312974 | 0.014639 | 0.664399 | 0.154176 |
| MmugDNA.38769.1.S1_at   | MmugDNA.38769.1 | 7.57  | 7.73  | 0.15 | 0.11 | -1.11 | 0.095886 | 0.129115 | 0.46445  | 0.400611 |
| MmugDNA.3877.1.S1_at    | MmugDNA.3877.1  | 10.68 | 11.06 | 0.88 | 0.12 | -1.31 | 0.481949 | 0.478548 | 0.772261 | 0.684556 |
| MmugDNA.38771.1.S1_at   | MmugDNA.38771.1 | 8.03  | 7.91  | 0.08 | 0.07 | 1.09  | 0.052255 | 0.189495 | 0.392084 | 0.465237 |
| MmugDNA.38772.1.S1_at   | MmugDNA.38772.1 | 4.12  | 4.02  | 0.23 | 0.19 | 1.07  | 0.392738 | 0.050267 | 0.718592 | 0.269509 |
| MmugDNA.38773.1.S1_at   | MmugDNA.38773.1 | 6.08  | 6.44  | 0.84 | 0.13 | -1.28 | 0.700803 | 0.529419 | 0.883629 | 0.717276 |
| MmugDNA.38774.1.S1_at   | MmugDNA.38774.1 | 5.76  | 5.76  | 0.17 | 0.01 | 1     | 0.349953 | 0.125149 | 0.69105  | 0.395577 |

|                         |                 |       |       |      |      |       |          |          |          |          |
|-------------------------|-----------------|-------|-------|------|------|-------|----------|----------|----------|----------|
| MmugDNA.38775.1.S1_at   | MmugDNA.38775.1 | 6.49  | 6.33  | 0.13 | 0.09 | 1.12  | 0.064777 | 0.088364 | 0.418789 | 0.341824 |
| MmugDNA.38776.1.S1_at   | MmugDNA.38776.1 | 9.7   | 10.31 | 0.03 | 0.17 | -1.52 | 0.003978 | 0.050195 | 0.198571 | 0.269263 |
| MmugDNA.38777.1.S1_at   | MmugDNA.38777.1 | 11.65 | 11.68 | 0.27 | 0.09 | -1.02 | 0.478489 | 0.201951 | 0.770085 | 0.476412 |
| MmugDNA.3878.1.S1_at    | MmugDNA.3878.1  | 6.86  | 6.57  | 0.1  | 0.13 | 1.22  | 0.041073 | 0.031403 | 0.365672 | 0.219107 |
| MmugDNA.38781.1.S1_at   | MmugDNA.38781.1 | 4.04  | 3.95  | 0.03 | 0.16 | 1.06  | 0.320547 | 0.529266 | 0.66937  | 0.717233 |
| MmugDNA.38782.1.S1_at   | MmugDNA.38782.1 | 7.04  | 7.09  | 0.17 | 0.14 | -1.04 | 0.744076 | 0.220267 | 0.90242  | 0.493701 |
| MmugDNA.38783.1.S1_at   | MmugDNA.38783.1 | 4.4   | 4.37  | 0.19 | 0.1  | 1.02  | 0.49141  | 0.237435 | 0.777734 | 0.508117 |
| MmugDNA.38784.1.S1_at   | MmugDNA.38784.1 | 4.17  | 4     | 0.1  | 0.14 | 1.12  | 0.232982 | 0.354643 | 0.600437 | 0.597326 |
| MmugDNA.38785.1.S1_at   | MmugDNA.38785.1 | 7     | 7.37  | 0.34 | 0.46 | -1.3  | 0.772798 | 0.076382 | 0.91551  | 0.321368 |
| MmugDNA.38787.1.S1_at   | MmugDNA.38787.1 | 11.11 | 11.25 | 0.33 | 0.01 | -1.1  | 0.170301 | 0.044768 | 0.543379 | 0.256021 |
| MmugDNA.38788.1.S1_at   | MmugDNA.38788.1 | 6.62  | 6.45  | 0.03 | 0.04 | -1.13 | 0.005752 | 0.003663 | 0.211377 | 0.086527 |
| MmugDNA.38789.1.S1_at   | MmugDNA.38789.1 | 12.4  | 12.07 | 0.11 | 0.09 | 1.26  | 0.016733 | 0.019566 | 0.287863 | 0.175612 |
| MmugDNA.38790.1.S1_at   | MmugDNA.38790.1 | 7.5   | 6.65  | 0.55 | 0.33 | 1.8   | 0.258387 | 0.273879 | 0.622212 | 0.538438 |
| MmugDNA.38792.1.S1_at   | MmugDNA.38792.1 | 3.34  | 3.4   | 0.1  | 0.32 | -1.04 | 0.835499 | 0.761513 | 0.941041 | 0.861416 |
| MmugDNA.38794.1.S1_s_at | MmugDNA.38794.1 | 4.25  | 4.34  | 0.09 | 0.02 | -1.06 | 0.218867 | 0.195316 | 0.588341 | 0.470253 |
| MmugDNA.38795.1.S1_at   | MmugDNA.38795.1 | 3.92  | 3.98  | 0.08 | 0.1  | -1.04 | 0.749102 | 0.649672 | 0.904862 | 0.795076 |
| MmugDNA.38796.1.S1_s_at | MmugDNA.38796.1 | 8.59  | 9.39  | 0.73 | 0.16 | -1.74 | 0.419465 | 0.236705 | 0.736296 | 0.507459 |
| MmugDNA.38797.1.S1_at   | MmugDNA.38797.1 | 3.72  | 3.46  | 0.71 | 0.15 | 1.2   | 0.353527 | 0.297327 | 0.693348 | 0.556071 |
| MmugDNA.38798.1.S1_at   | MmugDNA.38798.1 | 9.44  | 7.81  | 0.65 | 0.34 | 3.08  | 0.017994 | 0.030596 | 0.294714 | 0.216887 |
| MmugDNA.388.1.S1_at     | MmugDNA.388.1   | 10.03 | 9.65  | 0.15 | 0.12 | 1.3   | 0.053391 | 0.000552 | 0.394699 | 0.040948 |
| MmugDNA.3880.1.S1_at    | MmugDNA.3880.1  | 4.71  | 4.76  | 0.11 | 0.25 | -1.04 | 0.932714 | 0.538903 | 0.977227 | 0.723368 |
| MmugDNA.38802.1.S1_at   | MmugDNA.38802.1 | 5.8   | 5.26  | 0.59 | 0.73 | 1.46  | 0.765788 | 0.585492 | 0.911934 | 0.752852 |
| MmugDNA.38803.1.S1_at   | MmugDNA.38803.1 | 7.18  | 7.62  | 0.4  | 0.22 | -1.35 | 0.476414 | 0.421602 | 0.769113 | 0.645173 |
| MmugDNA.38804.1.S1_at   | MmugDNA.38804.1 | 6.64  | 5.95  | 0.59 | 0.33 | 1.6   | 0.241165 | 0.224888 | 0.607368 | 0.497657 |
| MmugDNA.38805.1.S1_at   | MmugDNA.38805.1 | 3.4   | 3.41  | 0.11 | 0.21 | -1.01 | 0.594959 | 0.469157 | 0.83502  | 0.67815  |
| MmugDNA.38806.1.S1_at   | MmugDNA.38806.1 | 12.12 | 11.55 | 0.09 | 0.05 | 1.48  | 0.000732 | 0.000092 | 0.14887  | 0.027225 |
| MmugDNA.38807.1.S1_at   | MmugDNA.38807.1 | 4.51  | 4.41  | 0.03 | 0.41 | 1.07  | 0.636458 | 0.866073 | 0.855006 | 0.923791 |
| MmugDNA.38808.1.S1_at   | MmugDNA.38808.1 | 6.03  | 6.09  | 0.01 | 0.13 | -1.05 | 0.22556  | 0.18133  | 0.594764 | 0.457834 |
| MmugDNA.38809.1.S1_at   | MmugDNA.38809.1 | 6.71  | 6.64  | 0.19 | 0.08 | 1.05  | 0.210342 | 0.490854 | 0.581668 | 0.692666 |
| MmugDNA.3881.1.S1_at    | MmugDNA.3881.1  | 3.4   | 3.14  | 0.43 | 0.24 | 1.2   | 0.2551   | 0.364146 | 0.619267 | 0.604488 |
| MmugDNA.38811.1.S1_at   | MmugDNA.38811.1 | 7.04  | 6.92  | 0.1  | 0.06 | 1.09  | 0.373708 | 0.450442 | 0.705567 | 0.665643 |
| MmugDNA.38812.1.S1_at   | MmugDNA.38812.1 | 9.96  | 10.96 | 0.23 | 0.1  | -2.01 | 0.003232 | 0.000835 | 0.192611 | 0.046851 |
| MmugDNA.38814.1.S1_at   | MmugDNA.38814.1 | 5.15  | 5.12  | 0.14 | 0.12 | 1.02  | 0.750501 | 0.824051 | 0.905496 | 0.898901 |
| MmugDNA.38815.1.S1_at   | MmugDNA.38815.1 | 5.99  | 5.99  | 0.13 | 0.08 | 1     | 0.956425 | 0.729468 | 0.985548 | 0.843541 |
| MmugDNA.38817.1.S1_at   | MmugDNA.38817.1 | 9.68  | 10.34 | 0.84 | 0    | -1.58 | 0.261281 | 0.264348 | 0.623819 | 0.530385 |
| MmugDNA.38819.1.S1_at   | MmugDNA.38819.1 | 7.23  | 7.11  | 1.2  | 0.08 | 1.09  | 0.712645 | 0.774469 | 0.888014 | 0.868766 |
| MmugDNA.38820.1.S1_at   | MmugDNA.38820.1 | 7.31  | 6.13  | 1.24 | 0.13 | 2.27  | 0.171801 | 0.060007 | 0.545121 | 0.291649 |
| MmugDNA.38822.1.S1_at   | MmugDNA.38822.1 | 5.19  | 5.18  | 0.14 | 0.05 | 1.01  | 0.650067 | 0.785914 | 0.860714 | 0.87599  |
| MmugDNA.38823.1.S1_at   | MmugDNA.38823.1 | 4.39  | 4.42  | 1.2  | 0.28 | -1.03 | 0.418846 | 0.559467 | 0.735966 | 0.736301 |
| MmugDNA.38824.1.S1_at   | MmugDNA.38824.1 | 6.61  | 6.97  | 0.76 | 0.14 | -1.28 | 0.242578 | 0.547356 | 0.608517 | 0.728426 |
| MmugDNA.38827.1.S1_at   | MmugDNA.38827.1 | 5.17  | 5.04  | 0.11 | 0.12 | 1.09  | 0.173395 | 0.189867 | 0.546571 | 0.465403 |
| MmugDNA.38828.1.S1_at   | MmugDNA.38828.1 | 6.22  | 6     | 0.25 | 0.2  | 1.16  | 0.212222 | 0.225752 | 0.582812 | 0.498159 |
| MmugDNA.38829.1.S1_at   | MmugDNA.38829.1 | 4.32  | 4.08  | 0.18 | 0.35 | 1.18  | 0.549271 | 0.604521 | 0.810281 | 0.764655 |

|                         |                 |       |       |      |      |       |          |          |          |          |
|-------------------------|-----------------|-------|-------|------|------|-------|----------|----------|----------|----------|
| MmugDNA.38832.1.S1_at   | MmugDNA.38832.1 | 4.97  | 5.52  | 0.22 | 0.19 | -1.47 | 0.125413 | 0.018589 | 0.499523 | 0.171539 |
| MmugDNA.38834.1.S1_at   | MmugDNA.38834.1 | 4.44  | 4.22  | 0.24 | 0.04 | 1.16  | 0.68002  | 0.587671 | 0.874507 | 0.754425 |
| MmugDNA.38835.1.S1_at   | MmugDNA.38835.1 | 11.28 | 11.34 | 0.18 | 0.05 | -1.04 | 0.723669 | 0.001652 | 0.892847 | 0.061436 |
| MmugDNA.38836.1.S1_at   | MmugDNA.38836.1 | 7.19  | 7.11  | 0.07 | 0.03 | 1.05  | 0.038919 | 0.171639 | 0.360586 | 0.448044 |
| MmugDNA.38837.1.S1_at   | MmugDNA.38837.1 | 10.43 | 10.36 | 0.51 | 0.09 | 1.04  | 0.612544 | 0.027024 | 0.843094 | 0.205533 |
| MmugDNA.38838.1.S1_at   | MmugDNA.38838.1 | 4.82  | 4.9   | 0.07 | 0.08 | -1.06 | 0.125187 | 0.132811 | 0.499284 | 0.404544 |
| MmugDNA.3884.1.S1_at    | MmugDNA.3884.1  | 12.16 | 12.36 | 0.16 | 0.14 | -1.15 | 0.150678 | 0.171256 | 0.524234 | 0.447792 |
| MmugDNA.38842.1.S1_at   | MmugDNA.38842.1 | 3.94  | 3.86  | 0    | 0.12 | 1.05  | 0.298933 | 0.125804 | 0.653465 | 0.396313 |
| MmugDNA.38843.1.S1_at   | MmugDNA.38843.1 | 5.22  | 4.9   | 0.15 | 0.07 | 1.25  | 0.02683  | 0.012463 | 0.326468 | 0.14417  |
| MmugDNA.38844.1.S1_at   | MmugDNA.38844.1 | 3.58  | 3.04  | 0.18 | 0.16 | 1.45  | 0.050188 | 0.315014 | 0.386852 | 0.568759 |
| MmugDNA.38846.1.S1_at   | MmugDNA.38846.1 | 5.75  | 5.59  | 0.14 | 0.04 | -1.12 | 0.145166 | 0.507822 | 0.520309 | 0.703346 |
| MmugDNA.38847.1.S1_at   | MmugDNA.38847.1 | 5.96  | 5.91  | 0.07 | 0.07 | 1.03  | 0.870616 | 0.700182 | 0.955036 | 0.825987 |
| MmugDNA.38848.1.S1_at   | MmugDNA.38848.1 | 4.95  | 4.71  | 0.12 | 0.04 | 1.19  | 0.07253  | 0.106621 | 0.432622 | 0.36916  |
| MmugDNA.38849.1.S1_at   | MmugDNA.38849.1 | 6.89  | 7.16  | 0.33 | 0.16 | -1.2  | 0.906317 | 0.366552 | 0.9683   | 0.606293 |
| MmugDNA.3885.1.S1_at    | MmugDNA.3885.1  | 5.24  | 5.15  | 0.22 | 0.09 | 1.06  | 0.277489 | 0.2913   | 0.636861 | 0.551803 |
| MmugDNA.38850.1.S1_s_at | MmugDNA.38850.1 | 12.59 | 12.35 | 0.28 | 0.2  | 1.18  | 0.139067 | 0.060151 | 0.514459 | 0.291882 |
| MmugDNA.38852.1.S1_at   | MmugDNA.38852.1 | 3.89  | 3.95  | 0.07 | 0    | -1.04 | 0.182754 | 0.437844 | 0.555631 | 0.656977 |
| MmugDNA.38854.1.S1_at   | MmugDNA.38854.1 | 6.64  | 6.68  | 0.35 | 0.24 | -1.03 | 0.52538  | 0.922486 | 0.796198 | 0.956333 |
| MmugDNA.38855.1.S1_at   | MmugDNA.38855.1 | 4.77  | 4.8   | 0.06 | 0.26 | -1.02 | 0.465327 | 0.514572 | 0.763035 | 0.707767 |
| MmugDNA.38857.1.S1_at   | MmugDNA.38857.1 | 4.89  | 5.38  | 0.23 | 0.31 | -1.4  | 0.195885 | 0.067787 | 0.56627  | 0.306471 |
| MmugDNA.38858.1.S1_at   | MmugDNA.38858.1 | 8.61  | 8.79  | 0.89 | 0.13 | -1.13 | 0.775835 | 0.758996 | 0.916874 | 0.859948 |
| MmugDNA.38859.1.S1_at   | MmugDNA.38859.1 | 4.35  | 4.29  | 0.1  | 0.19 | 1.04  | 0.756833 | 0.868235 | 0.908337 | 0.925234 |
| MmugDNA.3886.1.S1_at    | MmugDNA.3886.1  | 8.78  | 9.13  | 0.17 | 0.17 | -1.27 | 0.035475 | 0.047588 | 0.352121 | 0.262934 |
| MmugDNA.38860.1.S1_at   | MmugDNA.38860.1 | 5.3   | 5.07  | 0.14 | 0.1  | 1.17  | 0.174354 | 0.163963 | 0.547573 | 0.440107 |
| MmugDNA.38861.1.S1_at   | MmugDNA.38861.1 | 12.15 | 12.54 | 0.09 | 0.01 | -1.31 | 0.001307 | 0.011313 | 0.158862 | 0.138076 |
| MmugDNA.38862.1.S1_at   | MmugDNA.38862.1 | 5.99  | 6.23  | 0.12 | 0.04 | -1.18 | 0.046093 | 0.079684 | 0.37735  | 0.326981 |
| MmugDNA.38864.1.S1_at   | MmugDNA.38864.1 | 3.41  | 3.39  | 0.16 | 0.1  | 1.02  | 0.627979 | 0.288683 | 0.85084  | 0.549835 |
| MmugDNA.38865.1.S1_at   | MmugDNA.38865.1 | 5.03  | 5.22  | 0.09 | 0.15 | -1.14 | 0.440745 | 0.747127 | 0.748664 | 0.853124 |
| MmugDNA.38866.1.S1_at   | MmugDNA.38866.1 | 7.67  | 8.67  | 0.52 | 0    | -1.99 | 0.035014 | 0.003674 | 0.350898 | 0.086568 |
| MmugDNA.38867.1.S1_at   | MmugDNA.38867.1 | 5.8   | 5.66  | 0.14 | 0.3  | 1.1   | 0.716624 | 0.669469 | 0.88994  | 0.806626 |
| MmugDNA.38868.1.S1_at   | MmugDNA.38868.1 | 3.6   | 3.74  | 0.1  | 0.2  | -1.1  | 0.214153 | 0.373501 | 0.584673 | 0.612309 |
| MmugDNA.38869.1.S1_at   | MmugDNA.38869.1 | 4.65  | 4.56  | 0.1  | 0.16 | 1.07  | 0.478087 | 0.49339  | 0.76994  | 0.694105 |
| MmugDNA.3887.1.S1_at    | MmugDNA.3887.1  | 5.64  | 5.41  | 0.36 | 0.09 | 1.17  | 0.315349 | 0.009003 | 0.665744 | 0.125499 |
| MmugDNA.38871.1.S1_at   | MmugDNA.38871.1 | 8.4   | 8.77  | 0.37 | 0.17 | -1.29 | 0.277324 | 0.197698 | 0.636787 | 0.472633 |
| MmugDNA.38872.1.S1_at   | MmugDNA.38872.1 | 11.33 | 11.74 | 0.31 | 0.05 | -1.33 | 0.106992 | 0.05983  | 0.479496 | 0.291286 |
| MmugDNA.38873.1.S1_at   | MmugDNA.38873.1 | 4.16  | 4.12  | 0.1  | 0.12 | 1.02  | 0.317357 | 0.466162 | 0.667266 | 0.676147 |
| MmugDNA.38874.1.S1_at   | MmugDNA.38874.1 | 4.46  | 4.3   | 0.14 | 0.06 | 1.12  | 0.599513 | 0.382336 | 0.837382 | 0.618498 |
| MmugDNA.38876.1.S1_at   | MmugDNA.38876.1 | 4.26  | 4.08  | 0.05 | 0.16 | 1.13  | 0.213196 | 0.006023 | 0.583803 | 0.106089 |
| MmugDNA.38877.1.S1_at   | MmugDNA.38877.1 | 6.97  | 6.92  | 0.17 | 0.03 | 1.04  | 0.52368  | 0.800752 | 0.795656 | 0.885417 |
| MmugDNA.38878.1.S1_at   | MmugDNA.38878.1 | 6.82  | 7.26  | 0.46 | 0.3  | -1.36 | 0.275175 | 0.264092 | 0.634581 | 0.530214 |
| MmugDNA.3888.1.S1_at    | MmugDNA.3888.1  | 4.94  | 4.9   | 0.19 | 0.05 | 1.03  | 0.720747 | 0.340533 | 0.891741 | 0.586776 |
| MmugDNA.38880.1.S1_at   | MmugDNA.38880.1 | 2.98  | 2.97  | 0.05 | 0.09 | 1     | 0.855624 | 0.653075 | 0.948973 | 0.79718  |
| MmugDNA.38881.1.S1_at   | MmugDNA.38881.1 | 7.05  | 7.12  | 0.24 | 0.23 | -1.05 | 0.515654 | 0.717034 | 0.790971 | 0.836191 |

|                         |                 |       |       |      |      |       |          |          |          |          |
|-------------------------|-----------------|-------|-------|------|------|-------|----------|----------|----------|----------|
| MmugDNA.38882.1.S1_at   | MmugDNA.38882.1 | 7.47  | 7.86  | 0.27 | 0.16 | -1.31 | 0.03503  | 0.014666 | 0.350898 | 0.154231 |
| MmugDNA.38883.1.S1_at   | MmugDNA.38883.1 | 8.88  | 8.95  | 0.43 | 0.15 | -1.05 | 0.741793 | 0.913437 | 0.901509 | 0.951242 |
| MmugDNA.38884.1.S1_at   | MmugDNA.38884.1 | 5.99  | 6.32  | 2.23 | 0.92 | -1.26 | 0.670539 | 0.405897 | 0.869943 | 0.634037 |
| MmugDNA.38888.1.S1_at   | MmugDNA.38888.1 | 9.73  | 9.16  | 0.27 | 0.11 | 1.49  | 0.022994 | 0.018681 | 0.313862 | 0.171717 |
| MmugDNA.3889.1.S1_at    | MmugDNA.3889.1  | 5.7   | 5.86  | 0.34 | 0.13 | -1.12 | 0.512767 | 0.339326 | 0.789521 | 0.585984 |
| MmugDNA.38890.1.S1_at   | MmugDNA.38890.1 | 5.26  | 5.23  | 0.18 | 0.2  | 1.02  | 0.698779 | 0.533176 | 0.882848 | 0.719462 |
| MmugDNA.38891.1.S1_at   | MmugDNA.38891.1 | 10.42 | 10.38 | 0.18 | 0.16 | 1.03  | 0.803826 | 0.297401 | 0.928583 | 0.556078 |
| MmugDNA.38893.1.S1_at   | MmugDNA.38893.1 | 4.67  | 4.54  | 0.11 | 0.1  | 1.09  | 0.301476 | 0.35693  | 0.655772 | 0.5987   |
| MmugDNA.38894.1.S1_at   | MmugDNA.38894.1 | 7.4   | 7.15  | 0.07 | 0.05 | 1.19  | 0.010558 | 0.151728 | 0.248239 | 0.426383 |
| MmugDNA.38895.1.S1_at   | MmugDNA.38895.1 | 6.37  | 6.83  | 0.45 | 0.07 | -1.38 | 0.177253 | 0.291332 | 0.550363 | 0.551803 |
| MmugDNA.38896.1.S1_at   | MmugDNA.38896.1 | 5.28  | 5.28  | 0.12 | 0.18 | -1    | 0.421942 | 0.143566 | 0.737802 | 0.417492 |
| MmugDNA.38897.1.S1_at   | MmugDNA.38897.1 | 8.64  | 9.24  | 0.08 | 0.28 | -1.52 | 0.049322 | 0.017542 | 0.385474 | 0.167632 |
| MmugDNA.38898.1.S1_at   | MmugDNA.38898.1 | 2.96  | 2.94  | 0.08 | 0.11 | 1.01  | 0.450488 | 0.384334 | 0.754829 | 0.620012 |
| MmugDNA.389.1.S1_at     | MmugDNA.389.1   | 8.88  | 9.35  | 0.29 | 0.14 | -1.38 | 0.060023 | 0.020321 | 0.407399 | 0.178954 |
| MmugDNA.3890.1.S1_at    | MmugDNA.3890.1  | 4.42  | 4.45  | 0.2  | 0.14 | -1.02 | 0.664368 | 0.605102 | 0.867683 | 0.764917 |
| MmugDNA.38901.1.S1_at   | MmugDNA.38901.1 | 6.35  | 6.32  | 0    | 0.08 | 1.02  | 0.660176 | 0.630219 | 0.865537 | 0.782181 |
| MmugDNA.38902.1.S1_at   | MmugDNA.38902.1 | 3.2   | 3.27  | 0.21 | 0.08 | -1.05 | 0.985553 | 0.750952 | 0.995461 | 0.855196 |
| MmugDNA.38903.1.S1_at   | MmugDNA.38903.1 | 4.17  | 4.15  | 0.13 | 0.12 | 1.01  | 0.609237 | 0.803778 | 0.84167  | 0.887124 |
| MmugDNA.38904.1.S1_at   | MmugDNA.38904.1 | 6.14  | 5.99  | 0.22 | 0.16 | 1.1   | 0.766343 | 0.573243 | 0.912101 | 0.744985 |
| MmugDNA.38905.1.S1_at   | MmugDNA.38905.1 | 4.18  | 4.26  | 0.14 | 0.03 | -1.05 | 0.902717 | 0.438053 | 0.967171 | 0.657068 |
| MmugDNA.38906.1.S1_at   | MmugDNA.38906.1 | 6.68  | 6.68  | 0.11 | 0.02 | 1     | 0.779214 | 0.858245 | 0.918608 | 0.919151 |
| MmugDNA.38907.1.S1_at   | MmugDNA.38907.1 | 5.85  | 5.79  | 0.01 | 0.04 | 1.05  | 0.052716 | 0.587757 | 0.39295  | 0.754518 |
| MmugDNA.38908.1.S1_at   | MmugDNA.38908.1 | 3.85  | 3.75  | 0.12 | 0.07 | 1.08  | 0.36695  | 0.497171 | 0.702449 | 0.696495 |
| MmugDNA.38909.1.S1_at   | MmugDNA.38909.1 | 9.4   | 9.32  | 0.66 | 0.23 | 1.06  | 0.732562 | 0.899644 | 0.897275 | 0.942903 |
| MmugDNA.38912.1.S1_at   | MmugDNA.38912.1 | 6.18  | 6.34  | 0.16 | 0.11 | -1.12 | 0.193275 | 0.171016 | 0.564275 | 0.447561 |
| MmugDNA.38913.1.S1_at   | MmugDNA.38913.1 | 5.98  | 6.07  | 0.22 | 0.05 | -1.06 | 0.174939 | 0.776921 | 0.548031 | 0.870408 |
| MmugDNA.38915.1.S1_s_at | MmugDNA.38915.1 | 7.95  | 7.28  | 0.51 | 0.43 | 1.59  | 0.054056 | 0.029414 | 0.395747 | 0.213368 |
| MmugDNA.38916.1.S1_at   | MmugDNA.38916.1 | 7.07  | 8.16  | 1.69 | 0.28 | -2.12 | 0.139549 | 0.226173 | 0.514956 | 0.49867  |
| MmugDNA.38917.1.S1_at   | MmugDNA.38917.1 | 12.15 | 12.33 | 0.67 | 0.02 | -1.13 | 0.570676 | 0.67833  | 0.822247 | 0.8121   |
| MmugDNA.38918.1.S1_at   | MmugDNA.38918.1 | 3.56  | 3.6   | 0.11 | 0.02 | -1.03 | 0.624896 | 0.443933 | 0.849035 | 0.661553 |
| MmugDNA.38921.1.S1_at   | MmugDNA.38921.1 | 4.16  | 3.9   | 0.11 | 0.09 | 1.2   | 0.105311 | 0.081078 | 0.477051 | 0.329249 |
| MmugDNA.38922.1.S1_at   | MmugDNA.38922.1 | 7     | 6.43  | 0.59 | 0.13 | 1.48  | 0.144299 | 0.108815 | 0.519698 | 0.372379 |
| MmugDNA.38924.1.S1_at   | MmugDNA.38924.1 | 13.12 | 12.68 | 0.06 | 0.16 | 1.35  | 0.014498 | 0.19895  | 0.276099 | 0.473526 |
| MmugDNA.38925.1.S1_at   | MmugDNA.38925.1 | 8.23  | 8.76  | 0.7  | 0.16 | -1.44 | 0.147587 | 0.022717 | 0.52164  | 0.188736 |
| MmugDNA.38926.1.S1_at   | MmugDNA.38926.1 | 6.97  | 6.99  | 0.24 | 0.2  | -1.01 | 0.386698 | 0.381294 | 0.713685 | 0.617616 |
| MmugDNA.38927.1.S1_at   | MmugDNA.38927.1 | 5.49  | 5.31  | 0.14 | 0.12 | 1.13  | 0.143639 | 0.145132 | 0.519043 | 0.419097 |
| MmugDNA.38928.1.S1_at   | MmugDNA.38928.1 | 8.71  | 9.53  | 1.04 | 0.25 | -1.76 | 0.379948 | 0.063478 | 0.709317 | 0.298441 |
| MmugDNA.38929.1.S1_at   | MmugDNA.38929.1 | 10.55 | 11.22 | 0.92 | 0.1  | -1.59 | 0.089542 | 0.075728 | 0.457672 | 0.320322 |
| MmugDNA.38931.1.S1_at   | MmugDNA.38931.1 | 4.7   | 4.75  | 0.14 | 0.24 | -1.03 | 0.855787 | 0.938064 | 0.949014 | 0.964913 |
| MmugDNA.38932.1.S1_at   | MmugDNA.38932.1 | 7.5   | 7.5   | 0.06 | 0.02 | 1     | 0.617642 | 0.923146 | 0.845547 | 0.956773 |
| MmugDNA.38933.1.S1_at   | MmugDNA.38933.1 | 6.47  | 6.39  | 0.09 | 0.07 | 1.06  | 0.249779 | 0.222305 | 0.615225 | 0.495346 |
| MmugDNA.38934.1.S1_at   | MmugDNA.38934.1 | 7.15  | 6.98  | 0.14 | 0.04 | 1.13  | 0.063252 | 0.182701 | 0.415431 | 0.459186 |
| MmugDNA.38935.1.S1_at   | MmugDNA.38935.1 | 7.63  | 7.44  | 0.15 | 0.05 | 1.14  | 0.119068 | 0.174483 | 0.492539 | 0.450952 |

|                         |                 |       |       |      |      |       |          |          |          |          |
|-------------------------|-----------------|-------|-------|------|------|-------|----------|----------|----------|----------|
| MmugDNA.38936.1.S1_at   | MmugDNA.38936.1 | 4.63  | 4.7   | 0.21 | 0.15 | -1.05 | 0.986235 | 0.426507 | 0.995557 | 0.648694 |
| MmugDNA.38937.1.S1_at   | MmugDNA.38937.1 | 6.49  | 7.37  | 0.74 | 0.29 | -1.84 | 0.244461 | 0.170148 | 0.61     | 0.446906 |
| MmugDNA.38938.1.S1_at   | MmugDNA.38938.1 | 8.58  | 7.96  | 0.22 | 0.18 | 1.54  | 0.037673 | 0.067712 | 0.35775  | 0.30629  |
| MmugDNA.3894.1.S1_at    | MmugDNA.3894.1  | 3.66  | 3.58  | 0.32 | 0.49 | 1.06  | 0.753963 | 0.928    | 0.907261 | 0.959116 |
| MmugDNA.38941.1.S1_at   | MmugDNA.38941.1 | 4.35  | 4.43  | 0.09 | 0.2  | -1.06 | 0.813144 | 0.838565 | 0.932369 | 0.907933 |
| MmugDNA.38943.1.S1_at   | MmugDNA.38943.1 | 4     | 4     | 0    | 0.11 | 1     | 0.373901 | 0.482609 | 0.705567 | 0.687368 |
| MmugDNA.38944.1.S1_at   | MmugDNA.38944.1 | 5.62  | 5.57  | 0.19 | 0.04 | 1.04  | 0.791238 | 0.117174 | 0.923332 | 0.384627 |
| MmugDNA.38946.1.S1_at   | MmugDNA.38946.1 | 10.9  | 11.3  | 0.37 | 0.1  | -1.32 | 0.282115 | 0.015278 | 0.640628 | 0.156987 |
| MmugDNA.38947.1.S1_at   | MmugDNA.38947.1 | 6.49  | 6.67  | 0.19 | 0.29 | -1.14 | 0.948241 | 0.958752 | 0.982204 | 0.976654 |
| MmugDNA.38948.1.S1_at   | MmugDNA.38948.1 | 13.21 | 13.16 | 0.03 | 0.02 | 1.03  | 0.14778  | 0.15013  | 0.52196  | 0.424714 |
| MmugDNA.38948.1.S1_s_at | MmugDNA.38948.1 | 13.32 | 13.31 | 0.01 | 0.01 | -1.01 | 0.862405 | 0.098175 | 0.951572 | 0.356253 |
| MmugDNA.38949.1.S1_at   | MmugDNA.38949.1 | 5.44  | 5.33  | 0.03 | 0.16 | 1.08  | 0.678575 | 0.305158 | 0.874071 | 0.562255 |
| MmugDNA.3895.1.S1_at    | MmugDNA.3895.1  | 8.57  | 8.61  | 0.12 | 0.11 | -1.02 | 0.736315 | 0.338307 | 0.899078 | 0.585417 |
| MmugDNA.38951.1.S1_at   | MmugDNA.38951.1 | 11.19 | 10.65 | 0.2  | 0.36 | 1.46  | 0.052833 | 0.040749 | 0.393368 | 0.246735 |
| MmugDNA.38952.1.S1_at   | MmugDNA.38952.1 | 4.16  | 4.06  | 0.11 | 0.18 | 1.07  | 0.297875 | 0.441517 | 0.652791 | 0.659675 |
| MmugDNA.38954.1.S1_at   | MmugDNA.38954.1 | 4.82  | 4.73  | 0.08 | 0.07 | 1.06  | 0.140026 | 0.340959 | 0.515581 | 0.587051 |
| MmugDNA.38955.1.S1_at   | MmugDNA.38955.1 | 4.2   | 4.03  | 0.15 | 0.06 | 1.13  | 0.10946  | 0.186802 | 0.482287 | 0.46263  |
| MmugDNA.38957.1.S1_at   | MmugDNA.38957.1 | 7.38  | 7.19  | 0.78 | 0.53 | 1.13  | 0.781509 | 0.15422  | 0.919573 | 0.428967 |
| MmugDNA.38958.1.S1_at   | MmugDNA.38958.1 | 5.38  | 5.22  | 0.13 | 0.35 | 1.12  | 0.942392 | 0.803042 | 0.980289 | 0.886557 |
| MmugDNA.3896.1.S1_at    | MmugDNA.3896.1  | 3.51  | 3.54  | 0.05 | 0.64 | -1.02 | 0.342639 | 0.605539 | 0.686019 | 0.765302 |
| MmugDNA.38961.1.S1_at   | MmugDNA.38961.1 | 10.39 | 10.81 | 0.19 | 0.06 | -1.34 | 0.016789 | 0.026242 | 0.288545 | 0.202991 |
| MmugDNA.38964.1.S1_at   | MmugDNA.38964.1 | 6.59  | 7.64  | 1.08 | 0.34 | -2.08 | 0.468588 | 0.329852 | 0.764997 | 0.578874 |
| MmugDNA.38965.1.S1_at   | MmugDNA.38965.1 | 5.13  | 5.18  | 0.7  | 0.51 | -1.03 | 0.630411 | 0.849886 | 0.851961 | 0.914673 |
| MmugDNA.38967.1.S1_at   | MmugDNA.38967.1 | 3.91  | 3.94  | 0.17 | 0.17 | -1.02 | 0.67793  | 0.722446 | 0.873818 | 0.839239 |
| MmugDNA.38969.1.S1_at   | MmugDNA.38969.1 | 5.47  | 5.45  | 0.08 | 0.13 | 1.01  | 0.637457 | 0.898071 | 0.855548 | 0.941957 |
| MmugDNA.3897.1.S1_at    | MmugDNA.3897.1  | 4.58  | 5.02  | 0.93 | 0.18 | -1.35 | 0.346723 | 0.101091 | 0.688361 | 0.360724 |
| MmugDNA.38970.1.S1_at   | MmugDNA.38970.1 | 11.19 | 10.86 | 0.09 | 0.24 | 1.25  | 0.03634  | 0.010913 | 0.35477  | 0.136002 |
| MmugDNA.38970.1.S1_x_at | MmugDNA.38970.1 | 11.14 | 10.76 | 0.07 | 0.24 | 1.3   | 0.043525 | 0.011451 | 0.372168 | 0.13846  |
| MmugDNA.38973.1.S1_at   | MmugDNA.38973.1 | 4.92  | 4.59  | 0.17 | 0.48 | 1.26  | 0.884013 | 0.624574 | 0.959789 | 0.778729 |
| MmugDNA.38974.1.S1_at   | MmugDNA.38974.1 | 4.68  | 4.03  | 0.19 | 0.47 | 1.57  | 0.180186 | 0.161706 | 0.553357 | 0.437771 |
| MmugDNA.38975.1.S1_at   | MmugDNA.38975.1 | 3.05  | 3.05  | 0.06 | 0.15 | -1    | 0.707661 | 0.595564 | 0.88624  | 0.759091 |
| MmugDNA.38976.1.S1_at   | MmugDNA.38976.1 | 5.78  | 5.38  | 0.65 | 0.47 | 1.32  | 0.180888 | 0.2824   | 0.554259 | 0.545076 |
| MmugDNA.38977.1.S1_at   | MmugDNA.38977.1 | 5.87  | 6.67  | 0.66 | 0.48 | -1.75 | 0.64698  | 0.216114 | 0.859341 | 0.489686 |
| MmugDNA.38978.1.S1_at   | MmugDNA.38978.1 | 2.99  | 3.05  | 0.2  | 0.11 | -1.04 | 0.678134 | 0.29083  | 0.873905 | 0.551431 |
| MmugDNA.38979.1.S1_at   | MmugDNA.38979.1 | 11.73 | 11.92 | 0.19 | 0.02 | -1.14 | 0.530497 | 0.597943 | 0.799063 | 0.760521 |
| MmugDNA.3898.1.S1_at    | MmugDNA.3898.1  | 6.12  | 6.36  | 0.9  | 0.23 | -1.18 | 0.567478 | 0.730339 | 0.820493 | 0.843976 |
| MmugDNA.38980.1.S1_at   | MmugDNA.38980.1 | 10.61 | 10.52 | 0.24 | 0.05 | 1.07  | 0.523624 | 0.620123 | 0.795656 | 0.775227 |
| MmugDNA.38982.1.S1_at   | MmugDNA.38982.1 | 10.25 | 10.2  | 0.83 | 0.17 | 1.03  | 0.989825 | 0.116077 | 0.996232 | 0.383336 |
| MmugDNA.38983.1.S1_at   | MmugDNA.38983.1 | 6.01  | 6.53  | 1.29 | 0.29 | -1.44 | 0.773159 | 0.935413 | 0.915615 | 0.963536 |
| MmugDNA.38985.1.S1_at   | MmugDNA.38985.1 | 4.35  | 4.25  | 0.06 | 0.09 | 1.07  | 0.207088 | 0.709705 | 0.578774 | 0.831749 |
| MmugDNA.38986.1.S1_at   | MmugDNA.38986.1 | 6.11  | 5.84  | 0.29 | 0.13 | 1.21  | 0.163914 | 0.071522 | 0.536665 | 0.313706 |
| MmugDNA.38988.1.S1_at   | MmugDNA.38988.1 | 8.74  | 8.23  | 0.3  | 0.01 | 1.43  | 0.046233 | 0.038406 | 0.377646 | 0.240877 |
| MmugDNA.38988.1.S1_s_at | MmugDNA.38988.1 | 9.64  | 9.16  | 0.24 | 0.1  | 1.4   | 0.017011 | 0.033386 | 0.288969 | 0.226396 |

|                         |                 |       |       |      |      |       |          |          |          |          |
|-------------------------|-----------------|-------|-------|------|------|-------|----------|----------|----------|----------|
| MmugDNA.38989.1.S1_at   | MmugDNA.38989.1 | 2.97  | 2.98  | 0.05 | 0.05 | -1    | 0.368103 | 0.122434 | 0.70351  | 0.392278 |
| MmugDNA.38990.1.S1_at   | MmugDNA.38990.1 | 3.47  | 3.2   | 0.12 | 0.07 | 1.21  | 0.026574 | 0.091671 | 0.325381 | 0.346875 |
| MmugDNA.38991.1.S1_at   | MmugDNA.38991.1 | 6.85  | 6.52  | 0.47 | 0.57 | 1.26  | 0.639187 | 0.685236 | 0.856229 | 0.816411 |
| MmugDNA.38992.1.S1_at   | MmugDNA.38992.1 | 3.75  | 3.64  | 0.08 | 0.02 | 1.08  | 0.096418 | 0.081136 | 0.4651   | 0.32931  |
| MmugDNA.38993.1.S1_at   | MmugDNA.38993.1 | 6.65  | 6.87  | 0.91 | 0.34 | -1.16 | 0.5785   | 0.335277 | 0.826206 | 0.58304  |
| MmugDNA.38994.1.S1_at   | MmugDNA.38994.1 | 4.08  | 4.32  | 0.54 | 0.39 | -1.19 | 0.769816 | 0.596547 | 0.91387  | 0.759659 |
| MmugDNA.38995.1.S1_at   | MmugDNA.38995.1 | 3.31  | 3.39  | 0.17 | 0.04 | -1.06 | 0.298363 | 0.303598 | 0.653129 | 0.561061 |
| MmugDNA.38996.1.S1_at   | MmugDNA.38996.1 | 3.04  | 2.99  | 0.06 | 0.12 | 1.03  | 0.222596 | 0.284532 | 0.592081 | 0.546715 |
| MmugDNA.38997.1.S1_at   | MmugDNA.38997.1 | 11.57 | 11.55 | 0.34 | 0.11 | 1.01  | 0.935315 | 0.864262 | 0.978129 | 0.922977 |
| MmugDNA.38998.1.S1_at   | MmugDNA.38998.1 | 8.93  | 8.95  | 0.68 | 0.09 | -1.02 | 0.374767 | 0.00548  | 0.706085 | 0.102081 |
| MmugDNA.38999.1.S1_at   | MmugDNA.38999.1 | 11.21 | 10.93 | 0.05 | 0.14 | 1.22  | 0.02903  | 0.00329  | 0.333482 | 0.082553 |
| MmugDNA.39.1.S1_at      | MmugDNA.39.1    | 6.44  | 6.41  | 0.09 | 0.06 | 1.02  | 0.469949 | 0.362152 | 0.765824 | 0.602827 |
| MmugDNA.390.1.S1_at     | MmugDNA.390.1   | 6.98  | 5.72  | 0.81 | 0.16 | 2.4   | 0.06624  | 0.049112 | 0.421918 | 0.266522 |
| MmugDNA.3900.1.S1_at    | MmugDNA.3900.1  | 3.89  | 3.7   | 0.22 | 0.1  | 1.14  | 0.272621 | 0.340591 | 0.632416 | 0.586789 |
| MmugDNA.39001.1.S1_at   | MmugDNA.39001.1 | 4.88  | 4.63  | 0.1  | 0.17 | 1.19  | 0.439803 | 0.251759 | 0.748282 | 0.520444 |
| MmugDNA.39002.1.S1_at   | MmugDNA.39002.1 | 3.08  | 2.94  | 0.04 | 0.03 | 1.1   | 0.011396 | 0.170656 | 0.254725 | 0.44724  |
| MmugDNA.39003.1.S1_at   | MmugDNA.39003.1 | 6.17  | 6.2   | 0.1  | 0.07 | -1.02 | 0.635968 | 0.749531 | 0.854813 | 0.854499 |
| MmugDNA.39005.1.S1_at   | MmugDNA.39005.1 | 5.46  | 5.42  | 0.09 | 0.12 | 1.03  | 0.258851 | 0.458924 | 0.622286 | 0.671504 |
| MmugDNA.39006.1.S1_at   | MmugDNA.39006.1 | 5.85  | 5.53  | 0.15 | 0.13 | 1.25  | 0.032076 | 0.06442  | 0.343052 | 0.300001 |
| MmugDNA.39007.1.S1_at   | MmugDNA.39007.1 | 5.13  | 6.01  | 0.04 | 0.1  | -1.84 | 0.000124 | 0.061445 | 0.11102  | 0.294704 |
| MmugDNA.39008.1.S1_at   | MmugDNA.39008.1 | 5.54  | 5.33  | 0.34 | 0.22 | 1.16  | 0.355152 | 0.379917 | 0.69464  | 0.616659 |
| MmugDNA.3901.1.S1_at    | MmugDNA.3901.1  | 7.85  | 7.68  | 0.49 | 0.1  | 1.12  | 0.704581 | 0.064986 | 0.885155 | 0.300855 |
| MmugDNA.39010.1.S1_at   | MmugDNA.39010.1 | 4.24  | 4.13  | 0.03 | 0.1  | 1.08  | 0.14715  | 0.366377 | 0.521578 | 0.606087 |
| MmugDNA.39011.1.S1_at   | MmugDNA.39011.1 | 5     | 4.76  | 0.14 | 0.03 | 1.17  | 0.044646 | 0.09578  | 0.374916 | 0.352753 |
| MmugDNA.39013.1.S1_at   | MmugDNA.39013.1 | 4.22  | 4.17  | 0.16 | 0.12 | 1.04  | 0.603706 | 0.92262  | 0.839328 | 0.956416 |
| MmugDNA.39017.1.S1_at   | MmugDNA.39017.1 | 11.17 | 10.92 | 0.05 | 0.18 | 1.18  | 0.043802 | 0.024911 | 0.372577 | 0.19771  |
| MmugDNA.39019.1.S1_at   | MmugDNA.39019.1 | 3.74  | 3.74  | 0.01 | 0.07 | -1    | 0.992698 | 0.891005 | 0.997282 | 0.937877 |
| MmugDNA.39020.1.S1_at   | MmugDNA.39020.1 | 4.83  | 5.15  | 0.34 | 0.18 | -1.25 | 0.432284 | 0.200954 | 0.743876 | 0.475426 |
| MmugDNA.39021.1.S1_at   | MmugDNA.39021.1 | 7.98  | 8.12  | 0.21 | 0.28 | -1.11 | 0.414891 | 0.00425  | 0.733395 | 0.091707 |
| MmugDNA.39023.1.S1_at   | MmugDNA.39023.1 | 5.51  | 5.78  | 0.8  | 0.33 | -1.2  | 0.34765  | 0.220129 | 0.688864 | 0.493578 |
| MmugDNA.39024.1.S1_at   | MmugDNA.39024.1 | 4.34  | 4.04  | 0.32 | 0.5  | 1.23  | 0.984079 | 0.861637 | 0.995199 | 0.921365 |
| MmugDNA.39026.1.S1_at   | MmugDNA.39026.1 | 3.34  | 3.39  | 0.2  | 0.04 | -1.03 | 0.322469 | 0.059533 | 0.67114  | 0.290548 |
| MmugDNA.39027.1.S1_at   | MmugDNA.39027.1 | 4.63  | 4.46  | 0    | 0.13 | 1.13  | 0.250514 | 0.220059 | 0.615714 | 0.493485 |
| MmugDNA.39028.1.S1_at   | MmugDNA.39028.1 | 3.62  | 3.59  | 0.03 | 0.11 | 1.02  | 0.424189 | 0.369476 | 0.739457 | 0.608861 |
| MmugDNA.39028.1.S1_x_at | MmugDNA.39028.1 | 3.33  | 3.39  | 0.05 | 0.05 | -1.04 | 0.115625 | 0.23046  | 0.488896 | 0.502232 |
| MmugDNA.3903.1.S1_at    | MmugDNA.3903.1  | 5.89  | 5.82  | 0.03 | 0.09 | 1.04  | 0.176759 | 0.393175 | 0.549927 | 0.626117 |
| MmugDNA.39030.1.S1_at   | MmugDNA.39030.1 | 4.25  | 4.14  | 0.13 | 0.19 | 1.08  | 0.213227 | 0.277967 | 0.583803 | 0.541664 |
| MmugDNA.39032.1.S1_at   | MmugDNA.39032.1 | 3.51  | 3.21  | 0.2  | 0.17 | 1.23  | 0.315054 | 0.592903 | 0.665641 | 0.757939 |
| MmugDNA.39033.1.S1_at   | MmugDNA.39033.1 | 8.37  | 8.43  | 0.16 | 0.33 | -1.04 | 0.402538 | 0.696594 | 0.725006 | 0.823774 |
| MmugDNA.39035.1.S1_at   | MmugDNA.39035.1 | 6.63  | 6.38  | 0.17 | 0.14 | 1.19  | 0.093462 | 0.078091 | 0.462593 | 0.324578 |
| MmugDNA.39037.1.S1_at   | MmugDNA.39037.1 | 8.6   | 8.11  | 0.4  | 0.23 | 1.4   | 0.142183 | 0.132879 | 0.517194 | 0.404544 |
| MmugDNA.39037.1.S1_s_at | MmugDNA.39037.1 | 8.85  | 8.44  | 0.29 | 0.12 | 1.33  | 0.208904 | 0.142822 | 0.580477 | 0.416786 |
| MmugDNA.39038.1.S1_at   | MmugDNA.39038.1 | 4.1   | 4.09  | 0.21 | 0    | 1.01  | 0.776009 | 0.956584 | 0.916957 | 0.975329 |

|                         |                 |       |       |      |      |       |          |          |          |          |
|-------------------------|-----------------|-------|-------|------|------|-------|----------|----------|----------|----------|
| MmugDNA.3904.1.S1_at    | MmugDNA.3904.1  | 8.64  | 8.58  | 0.16 | 0.16 | 1.05  | 0.841255 | 0.001526 | 0.943701 | 0.059327 |
| MmugDNA.39040.1.S1_at   | MmugDNA.39040.1 | 10.32 | 10.06 | 0.41 | 0.12 | 1.2   | 0.256767 | 0.031434 | 0.620689 | 0.219107 |
| MmugDNA.39040.1.S1_x_at | MmugDNA.39040.1 | 10.39 | 10.07 | 0.43 | 0.03 | 1.25  | 0.277594 | 0.062989 | 0.636883 | 0.297633 |
| MmugDNA.39041.1.S1_at   | MmugDNA.39041.1 | 6.04  | 5.81  | 0.18 | 0.07 | 1.17  | 0.330971 | 0.213768 | 0.67754  | 0.487564 |
| MmugDNA.39042.1.S1_at   | MmugDNA.39042.1 | 3.31  | 3.26  | 0.21 | 0.07 | 1.03  | 0.229462 | 0.390626 | 0.598339 | 0.624409 |
| MmugDNA.39043.1.S1_at   | MmugDNA.39043.1 | 5.56  | 5.33  | 0.19 | 0.15 | 1.18  | 0.118495 | 0.178178 | 0.491933 | 0.454531 |
| MmugDNA.39044.1.S1_x_at | MmugDNA.39044.1 | 6.55  | 6.09  | 0.4  | 0.07 | 1.37  | 0.185494 | 0.075557 | 0.55851  | 0.319982 |
| MmugDNA.39045.1.S1_at   | MmugDNA.39045.1 | 6.87  | 6.77  | 0.12 | 0.04 | 1.07  | 0.410901 | 0.233502 | 0.731022 | 0.504835 |
| MmugDNA.39046.1.S1_at   | MmugDNA.39046.1 | 3.47  | 3.45  | 0.04 | 0.04 | 1.01  | 0.110273 | 0.097112 | 0.483363 | 0.35467  |
| MmugDNA.39047.1.S1_at   | MmugDNA.39047.1 | 4.64  | 4.59  | 0.2  | 0.03 | 1.04  | 0.268018 | 0.533677 | 0.628386 | 0.719848 |
| MmugDNA.39048.1.S1_at   | MmugDNA.39048.1 | 10.84 | 10.94 | 0.26 | 0.04 | -1.07 | 0.644388 | 0.376733 | 0.858501 | 0.614539 |
| MmugDNA.3905.1.S1_at    | MmugDNA.3905.1  | 3.18  | 3.32  | 0.19 | 0.1  | -1.1  | 0.727409 | 0.889927 | 0.894665 | 0.937302 |
| MmugDNA.39050.1.S1_at   | MmugDNA.39050.1 | 4.43  | 4.08  | 0.11 | 0.12 | 1.28  | 0.018407 | 0.208314 | 0.297316 | 0.482199 |
| MmugDNA.39051.1.S1_at   | MmugDNA.39051.1 | 3.4   | 3.05  | 0.07 | 0.21 | 1.28  | 0.104925 | 0.206326 | 0.476247 | 0.480524 |
| MmugDNA.39052.1.S1_at   | MmugDNA.39052.1 | 3.83  | 3.34  | 0.11 | 0.14 | 1.4   | 0.025327 | 0.016248 | 0.32131  | 0.161608 |
| MmugDNA.39053.1.S1_at   | MmugDNA.39053.1 | 5.35  | 5.39  | 0.51 | 0.28 | -1.03 | 0.474228 | 0.613276 | 0.767936 | 0.770491 |
| MmugDNA.39054.1.S1_at   | MmugDNA.39054.1 | 7.09  | 7.73  | 0.26 | 0.13 | -1.56 | 0.019926 | 0.103559 | 0.302615 | 0.364346 |
| MmugDNA.39055.1.S1_at   | MmugDNA.39055.1 | 9.56  | 9.5   | 0.12 | 0.19 | 1.05  | 0.231111 | 0.508054 | 0.599078 | 0.703358 |
| MmugDNA.39056.1.S1_at   | MmugDNA.39056.1 | 9.41  | 9.2   | 0.19 | 0.08 | 1.15  | 0.264371 | 0.675983 | 0.626029 | 0.810632 |
| MmugDNA.39056.1.S1_s_at | MmugDNA.39056.1 | 10.06 | 9.84  | 0.08 | 0.16 | 1.16  | 0.22583  | 0.707457 | 0.594935 | 0.830361 |
| MmugDNA.39058.1.S1_at   | MmugDNA.39058.1 | 3.61  | 3.48  | 0.11 | 0.07 | 1.09  | 0.049286 | 0.07379  | 0.385423 | 0.317146 |
| MmugDNA.39059.1.S1_at   | MmugDNA.39059.1 | 8.04  | 8.41  | 0.66 | 0.27 | -1.29 | 0.894133 | 0.011687 | 0.963697 | 0.140104 |
| MmugDNA.39060.1.S1_at   | MmugDNA.39060.1 | 9.63  | 10    | 0.14 | 0.2  | -1.29 | 0.066608 | 0.13516  | 0.422511 | 0.407181 |
| MmugDNA.39063.1.S1_at   | MmugDNA.39063.1 | 7.44  | 7.19  | 0.11 | 0.15 | 1.18  | 0.09431  | 0.222021 | 0.463769 | 0.495071 |
| MmugDNA.39064.1.S1_at   | MmugDNA.39064.1 | 5.46  | 5.31  | 0.2  | 0.09 | 1.11  | 0.160936 | 0.244808 | 0.534282 | 0.514644 |
| MmugDNA.39065.1.S1_at   | MmugDNA.39065.1 | 6.27  | 6.03  | 0.39 | 0.1  | 1.18  | 0.138278 | 0.085069 | 0.513671 | 0.336843 |
| MmugDNA.39066.1.S1_at   | MmugDNA.39066.1 | 6.48  | 6.24  | 0.4  | 0.14 | 1.18  | 0.493544 | 0.853091 | 0.778987 | 0.916487 |
| MmugDNA.39067.1.S1_at   | MmugDNA.39067.1 | 4.54  | 4.48  | 0.24 | 0.16 | 1.04  | 0.840225 | 0.579131 | 0.943147 | 0.748917 |
| MmugDNA.39069.1.S1_at   | MmugDNA.39069.1 | 4.18  | 4.48  | 0.2  | 0.27 | -1.23 | 0.245999 | 0.48855  | 0.611421 | 0.691222 |
| MmugDNA.3907.1.S1_at    | MmugDNA.3907.1  | 5.78  | 6.62  | 0.47 | 0.16 | -1.79 | 0.08359  | 0.01108  | 0.449622 | 0.137013 |
| MmugDNA.39071.1.S1_at   | MmugDNA.39071.1 | 7.15  | 7.28  | 0.31 | 0.1  | -1.09 | 0.44398  | 0.137848 | 0.751068 | 0.410832 |
| MmugDNA.39072.1.S1_at   | MmugDNA.39072.1 | 3.96  | 3.85  | 0.07 | 0.2  | 1.08  | 0.523712 | 0.183921 | 0.795656 | 0.460064 |
| MmugDNA.39073.1.S1_at   | MmugDNA.39073.1 | 5.04  | 5     | 0.22 | 0.18 | 1.03  | 0.420885 | 0.083497 | 0.737135 | 0.33402  |
| MmugDNA.39075.1.S1_at   | MmugDNA.39075.1 | 4.22  | 4.23  | 0.07 | 0.15 | -1    | 0.381568 | 0.664979 | 0.710122 | 0.803726 |
| MmugDNA.39076.1.S1_at   | MmugDNA.39076.1 | 5.68  | 5.64  | 0.13 | 0.04 | 1.03  | 0.593501 | 0.41076  | 0.834232 | 0.637584 |
| MmugDNA.39077.1.S1_at   | MmugDNA.39077.1 | 7.42  | 7.27  | 0.06 | 0.22 | 1.11  | 0.319809 | 0.096256 | 0.669028 | 0.353644 |
| MmugDNA.39078.1.S1_at   | MmugDNA.39078.1 | 5.37  | 5.25  | 0.17 | 0.03 | 1.08  | 0.480225 | 0.176742 | 0.771116 | 0.453171 |
| MmugDNA.39079.1.S1_at   | MmugDNA.39079.1 | 4.87  | 4.73  | 0.23 | 0.32 | 1.1   | 0.7747   | 0.861868 | 0.91642  | 0.921482 |
| MmugDNA.3908.1.S1_at    | MmugDNA.3908.1  | 3.7   | 3.55  | 0.11 | 0.14 | 1.11  | 0.587372 | 0.02088  | 0.831578 | 0.181338 |
| MmugDNA.39080.1.S1_at   | MmugDNA.39080.1 | 2.74  | 2.79  | 0.24 | 0.16 | -1.04 | 0.584064 | 0.714492 | 0.829433 | 0.834363 |
| MmugDNA.39081.1.S1_at   | MmugDNA.39081.1 | 2.94  | 2.95  | 0.1  | 0.08 | -1.01 | 0.987113 | 0.247086 | 0.995808 | 0.516259 |
| MmugDNA.39082.1.S1_at   | MmugDNA.39082.1 | 6.29  | 6.05  | 0.07 | 0.15 | 1.18  | 0.11574  | 0.133062 | 0.489017 | 0.404726 |
| MmugDNA.39083.1.S1_at   | MmugDNA.39083.1 | 4.54  | 4.12  | 0.44 | 0.32 | 1.34  | 0.19934  | 0.107601 | 0.571138 | 0.370497 |

|                         |                 |       |       |      |      |       |          |          |          |          |
|-------------------------|-----------------|-------|-------|------|------|-------|----------|----------|----------|----------|
| MmugDNA.39084.1.S1_at   | MmugDNA.39084.1 | 8.88  | 8.79  | 0.35 | 0.17 | 1.06  | 0.730282 | 0.292834 | 0.896072 | 0.552832 |
| MmugDNA.39086.1.S1_at   | MmugDNA.39086.1 | 4.34  | 4.37  | 0.14 | 0.06 | -1.02 | 0.528033 | 0.096102 | 0.79742  | 0.353322 |
| MmugDNA.39087.1.S1_at   | MmugDNA.39087.1 | 9.07  | 8.99  | 0.73 | 0.16 | 1.05  | 0.996325 | 0.885921 | 0.99863  | 0.935113 |
| MmugDNA.39088.1.S1_at   | MmugDNA.39088.1 | 6     | 5.47  | 2.45 | 0.15 | 1.44  | 0.558904 | 0.398245 | 0.81575  | 0.629296 |
| MmugDNA.39089.1.S1_at   | MmugDNA.39089.1 | 11.6  | 11.44 | 0.59 | 0.11 | 1.12  | 0.802878 | 0.5686   | 0.928106 | 0.742052 |
| MmugDNA.3909.1.S1_at    | MmugDNA.3909.1  | 9.42  | 9.3   | 0.11 | 0.02 | 1.08  | 0.055995 | 0.495554 | 0.399441 | 0.695538 |
| MmugDNA.14177.1.S1_at   | MmugDNA.14177.1 | 5.66  | 5.52  | 0.04 | 0.11 | 1.1   | 0.139837 | 0.208711 | 0.515319 | 0.482595 |
| MmugDNA.14177.1.S1_s_at | MmugDNA.14177.1 | 3.84  | 3.53  | 0.21 | 0.2  | 1.24  | 0.063209 | 0.170467 | 0.415267 | 0.447103 |
| MmugDNA.39096.1.S1_at   | MmugDNA.39096.1 | 3.22  | 3.09  | 0.17 | 0.08 | 1.09  | 0.185571 | 0.391397 | 0.558594 | 0.625086 |
| MmugDNA.39097.1.S1_at   | MmugDNA.39097.1 | 10.16 | 9.53  | 0.82 | 0.11 | 1.54  | 0.301947 | 0.14003  | 0.655989 | 0.413372 |
| MmugDNA.39098.1.S1_at   | MmugDNA.39098.1 | 3.83  | 3.86  | 0.08 | 0.18 | -1.02 | 0.875167 | 0.394082 | 0.956634 | 0.626734 |
| MmugDNA.39099.1.S1_at   | MmugDNA.39099.1 | 6.03  | 6.2   | 0.32 | 0.41 | -1.13 | 0.613805 | 0.827602 | 0.843681 | 0.901081 |
| MmugDNA.3910.1.S1_at    | MmugDNA.3910.1  | 3.26  | 3.93  | 0.2  | 0.31 | -1.59 | 0.041509 | 0.030502 | 0.366704 | 0.216644 |
| MmugDNA.39101.1.S1_at   | MmugDNA.39101.1 | 7.28  | 7.87  | 0.28 | 0.16 | -1.51 | 0.031518 | 0.103044 | 0.341227 | 0.363891 |
| MmugDNA.39102.1.S1_at   | MmugDNA.39102.1 | 4.4   | 4.4   | 0.18 | 0.1  | -1    | 0.44174  | 0.638426 | 0.749537 | 0.787641 |
| MmugDNA.39103.1.S1_at   | MmugDNA.39103.1 | 7.82  | 7.71  | 0.35 | 0.36 | 1.08  | 0.810264 | 0.462567 | 0.931318 | 0.673876 |
| MmugDNA.39104.1.S1_at   | MmugDNA.39104.1 | 3.37  | 3.65  | 0.12 | 0.11 | -1.21 | 0.071642 | 0.480329 | 0.431242 | 0.68574  |
| MmugDNA.39105.1.S1_at   | MmugDNA.39105.1 | 11.62 | 12    | 0.09 | 0.07 | -1.3  | 0.004214 | 0.100567 | 0.198874 | 0.359845 |
| MmugDNA.39106.1.S1_at   | MmugDNA.39106.1 | 7.74  | 6.83  | 0.36 | 0.23 | 1.88  | 0.034959 | 0.035938 | 0.350749 | 0.234032 |
| MmugDNA.39107.1.S1_at   | MmugDNA.39107.1 | 12.42 | 12.78 | 0.31 | 0.17 | -1.28 | 0.073759 | 0.047468 | 0.434623 | 0.262486 |
| MmugDNA.39108.1.S1_at   | MmugDNA.39108.1 | 3.9   | 3.88  | 0    | 0.17 | 1.01  | 0.76079  | 0.974622 | 0.910166 | 0.986197 |
| MmugDNA.39109.1.S1_at   | MmugDNA.39109.1 | 5.4   | 6.68  | 1.48 | 0.17 | -2.42 | 0.647142 | 0.842599 | 0.859341 | 0.910315 |
| MmugDNA.3911.1.S1_at    | MmugDNA.3911.1  | 9.82  | 10.21 | 0.62 | 0.03 | -1.32 | 0.335467 | 0.50202  | 0.681047 | 0.700006 |
| MmugDNA.39110.1.S1_at   | MmugDNA.39110.1 | 10.66 | 10.51 | 0.14 | 0.07 | 1.11  | 0.149592 | 0.172838 | 0.523226 | 0.449424 |
| MmugDNA.39111.1.S1_at   | MmugDNA.39111.1 | 7.44  | 7.81  | 0.39 | 0.19 | -1.3  | 0.497536 | 0.4636   | 0.781215 | 0.674537 |
| MmugDNA.39113.1.S1_at   | MmugDNA.39113.1 | 7.33  | 7.57  | 0.54 | 0.16 | -1.18 | 0.173492 | 0.148026 | 0.546614 | 0.422418 |
| MmugDNA.39114.1.S1_at   | MmugDNA.39114.1 | 6.85  | 7.1   | 0.35 | 0.11 | -1.19 | 0.616545 | 0.563161 | 0.844997 | 0.738435 |
| MmugDNA.39115.1.S1_at   | MmugDNA.39115.1 | 5.88  | 6.78  | 0.75 | 0.15 | -1.87 | 0.118881 | 0.14519  | 0.492396 | 0.41919  |
| MmugDNA.39116.1.S1_at   | MmugDNA.39116.1 | 8.33  | 8.14  | 1    | 0.19 | 1.14  | 0.719325 | 0.078906 | 0.890921 | 0.325912 |
| MmugDNA.39117.1.S1_at   | MmugDNA.39117.1 | 4.77  | 4.66  | 0.05 | 0.1  | 1.08  | 0.080556 | 0.153986 | 0.444432 | 0.428739 |
| MmugDNA.39118.1.S1_at   | MmugDNA.39118.1 | 6.22  | 5.78  | 0.23 | 0.09 | 1.36  | 0.066368 | 0.401399 | 0.422255 | 0.631018 |
| MmugDNA.39119.1.S1_at   | MmugDNA.39119.1 | 8.96  | 9.53  | 0.09 | 0.11 | -1.49 | 0.002432 | 0.003143 | 0.177075 | 0.081652 |
| MmugDNA.3912.1.S1_at    | MmugDNA.3912.1  | 3.92  | 3.54  | 0.15 | 0.17 | 1.29  | 0.089133 | 0.062614 | 0.456902 | 0.297022 |
| MmugDNA.39120.1.S1_s_at | MmugDNA.39120.1 | 8.22  | 8.48  | 1.66 | 0.34 | -1.2  | 0.832394 | 0.087181 | 0.939855 | 0.340133 |
| MmugDNA.39123.1.S1_at   | MmugDNA.39123.1 | 5.62  | 5.61  | 0.02 | 0.03 | 1     | 0.67294  | 0.485656 | 0.871072 | 0.68924  |
| MmugDNA.20100.1.S1_s_at | MmugDNA.20100.1 | 8.7   | 8.37  | 0.36 | 0.13 | 1.26  | 0.270713 | 0.133421 | 0.630562 | 0.405246 |
| MmugDNA.39125.1.S1_at   | MmugDNA.39125.1 | 7.71  | 7.55  | 0.57 | 0.18 | 1.11  | 0.532358 | 0.313839 | 0.800247 | 0.568091 |
| MmugDNA.39126.1.S1_at   | MmugDNA.39126.1 | 2.86  | 2.95  | 0.1  | 0.11 | -1.06 | 0.218268 | 0.217086 | 0.58818  | 0.490668 |
| MmugDNA.39127.1.S1_at   | MmugDNA.39127.1 | 6.34  | 6.24  | 0.06 | 0.12 | 1.08  | 0.069434 | 0.275825 | 0.427116 | 0.540035 |
| MmugDNA.39128.1.S1_at   | MmugDNA.39128.1 | 12.57 | 12.98 | 0.26 | 0.02 | -1.33 | 0.05898  | 0.031118 | 0.405865 | 0.218175 |
| MmugDNA.39129.1.S1_at   | MmugDNA.39129.1 | 11.98 | 12.02 | 0.17 | 0.03 | -1.03 | 0.264736 | 0.078749 | 0.626102 | 0.325716 |
| MmugDNA.3913.1.S1_at    | MmugDNA.3913.1  | 6.57  | 6.49  | 0.6  | 0.14 | 1.05  | 0.737161 | 0.915316 | 0.899377 | 0.952467 |
| MmugDNA.39130.1.S1_at   | MmugDNA.39130.1 | 3.41  | 3.27  | 0.31 | 0.14 | 1.1   | 0.298947 | 0.338185 | 0.653465 | 0.58536  |



|                         |                 |       |       |      |      |       |          |          |          |          |
|-------------------------|-----------------|-------|-------|------|------|-------|----------|----------|----------|----------|
| MmugDNA.39134.1.S1_at   | MmugDNA.39134.1 | 4.51  | 4.54  | 0.14 | 0.17 | -1.02 | 0.551533 | 0.873555 | 0.81144  | 0.928102 |
| MmugDNA.39135.1.S1_at   | MmugDNA.39135.1 | 4.93  | 4.47  | 0.07 | 0.17 | 1.37  | 0.031049 | 0.020101 | 0.339487 | 0.178084 |
| MmugDNA.39137.1.S1_at   | MmugDNA.39137.1 | 6.15  | 6.07  | 0.29 | 0.32 | 1.06  | 0.80325  | 0.048122 | 0.928293 | 0.264417 |
| MmugDNA.3914.1.S1_at    | MmugDNA.3914.1  | 9.46  | 9.33  | 0.8  | 0.19 | 1.09  | 0.410817 | 0.042414 | 0.730947 | 0.25061  |
| MmugDNA.39140.1.S1_at   | MmugDNA.39140.1 | 5.38  | 5.3   | 0    | 0.04 | 1.05  | 0.116819 | 0.672636 | 0.490029 | 0.808671 |
| MmugDNA.39142.1.S1_at   | MmugDNA.39142.1 | 5.47  | 5.4   | 0.08 | 0.07 | 1.05  | 0.607736 | 0.961125 | 0.84097  | 0.977997 |
| MmugDNA.39143.1.S1_at   | MmugDNA.39143.1 | 5.12  | 4.92  | 0.53 | 0.22 | 1.15  | 0.864717 | 0.991101 | 0.952416 | 0.994997 |
| MmugDNA.39144.1.S1_at   | MmugDNA.39144.1 | 6.62  | 6.52  | 0.4  | 0.11 | 1.07  | 0.742695 | 0.196413 | 0.901884 | 0.471423 |
| MmugDNA.39145.1.S1_at   | MmugDNA.39145.1 | 6.7   | 6.4   | 0.31 | 0.11 | 1.23  | 0.16809  | 0.322229 | 0.540712 | 0.573807 |
| MmugDNA.39146.1.S1_at   | MmugDNA.39146.1 | 9.68  | 9.17  | 0.18 | 0.14 | 1.42  | 0.009299 | 0.009409 | 0.241866 | 0.127841 |
| MmugDNA.39147.1.S1_at   | MmugDNA.39147.1 | 2.86  | 2.9   | 0.16 | 0.25 | -1.02 | 0.883081 | 0.93594  | 0.959571 | 0.963892 |
| MmugDNA.39148.1.S1_at   | MmugDNA.39148.1 | 6.02  | 6.08  | 0.81 | 0.22 | -1.04 | 0.347189 | 0.624631 | 0.688563 | 0.778781 |
| MmugDNA.3915.1.S1_at    | MmugDNA.3915.1  | 5.65  | 5.59  | 0.38 | 0.31 | 1.04  | 0.753181 | 0.924816 | 0.906991 | 0.957467 |
| MmugDNA.39150.1.S1_at   | MmugDNA.39150.1 | 8.42  | 7.99  | 0.46 | 0.04 | 1.35  | 0.506346 | 0.627941 | 0.785754 | 0.780883 |
| MmugDNA.39151.1.S1_at   | MmugDNA.39151.1 | 5.26  | 5.36  | 0.17 | 0.15 | -1.07 | 0.949211 | 0.960055 | 0.9828   | 0.977408 |
| MmugDNA.39153.1.S1_at   | MmugDNA.39153.1 | 7.41  | 7.34  | 0.39 | 0.07 | 1.05  | 0.594244 | 0.74032  | 0.834654 | 0.849596 |
| MmugDNA.39155.1.S1_at   | MmugDNA.39155.1 | 10.7  | 9.88  | 0.21 | 0.13 | 1.77  | 0.004178 | 0.001407 | 0.198874 | 0.057264 |
| MmugDNA.39156.1.S1_at   | MmugDNA.39156.1 | 9.27  | 8.47  | 0.65 | 0.11 | 1.74  | 0.146387 | 0.169438 | 0.520747 | 0.446075 |
| MmugDNA.3916.1.S1_at    | MmugDNA.3916.1  | 6.77  | 6.68  | 0.06 | 0.05 | 1.07  | 0.088418 | 0.543645 | 0.45606  | 0.726239 |
| MmugDNA.39161.1.S1_at   | MmugDNA.39161.1 | 5.69  | 5.65  | 0.14 | 0.04 | 1.03  | 0.35786  | 0.459863 | 0.695993 | 0.671989 |
| MmugDNA.39162.1.S1_at   | MmugDNA.39162.1 | 4.78  | 4.61  | 0.13 | 0.07 | 1.12  | 0.132564 | 0.189187 | 0.506856 | 0.464997 |
| MmugDNA.39164.1.S1_at   | MmugDNA.39164.1 | 6.05  | 6.13  | 0.15 | 0.21 | -1.06 | 0.927019 | 0.917386 | 0.975766 | 0.953814 |
| MmugDNA.39165.1.S1_s_at | MmugDNA.39165.1 | 6.48  | 7.34  | 0.56 | 0.24 | -1.81 | 0.128035 | 0.275085 | 0.502449 | 0.539485 |
| MmugDNA.3917.1.S1_at    | MmugDNA.3917.1  | 4.06  | 3.74  | 0.09 | 0.37 | 1.25  | 0.51901  | 0.556245 | 0.793034 | 0.734449 |
| MmugDNA.16397.1.S1_s_at | MmugDNA.16397.1 | 10.88 | 10.64 | 1.33 | 0.13 | 1.18  | 0.886123 | 0.328404 | 0.960485 | 0.578066 |
| MmugDNA.39173.1.S1_at   | MmugDNA.39173.1 | 11.5  | 11.59 | 0.2  | 0.05 | -1.07 | 0.349411 | 0.018163 | 0.690424 | 0.169673 |
| MmugDNA.39174.1.S1_at   | MmugDNA.39174.1 | 9.06  | 8.88  | 0.17 | 0.02 | 1.13  | 0.199839 | 0.22496  | 0.571609 | 0.49773  |
| MmugDNA.39174.1.S1_s_at | MmugDNA.39174.1 | 7.92  | 7.96  | 0.34 | 0.02 | -1.03 | 0.478526 | 0.692585 | 0.770085 | 0.821061 |
| MmugDNA.39175.1.S1_at   | MmugDNA.39175.1 | 10.05 | 9.97  | 0.23 | 0.14 | 1.06  | 0.776624 | 0.214208 | 0.917412 | 0.487856 |
| MmugDNA.39176.1.S1_at   | MmugDNA.39176.1 | 7.21  | 6.96  | 1.33 | 0.53 | 1.19  | 0.418813 | 0.287617 | 0.735933 | 0.548885 |
| MmugDNA.39177.1.S1_at   | MmugDNA.39177.1 | 3.67  | 3.71  | 0.17 | 0.08 | -1.03 | 0.472288 | 0.432616 | 0.767001 | 0.653025 |
| MmugDNA.39178.1.S1_at   | MmugDNA.39178.1 | 3.34  | 3.29  | 0.06 | 0.28 | 1.04  | 0.881957 | 0.653649 | 0.95911  | 0.797546 |
| MmugDNA.39179.1.S1_at   | MmugDNA.39179.1 | 3.66  | 3.67  | 0.11 | 0.18 | -1.01 | 0.480697 | 0.676465 | 0.771418 | 0.81095  |
| MmugDNA.39183.1.S1_at   | MmugDNA.39183.1 | 4.47  | 4.56  | 0.69 | 0.73 | -1.07 | 0.854343 | 0.186687 | 0.948469 | 0.462471 |
| MmugDNA.39184.1.S1_at   | MmugDNA.39184.1 | 5.49  | 5.5   | 0.17 | 0.1  | -1.01 | 0.508038 | 0.655649 | 0.786611 | 0.7987   |
| MmugDNA.39185.1.S1_at   | MmugDNA.39185.1 | 8.45  | 8.47  | 0.49 | 0.06 | -1.01 | 0.878757 | 0.554026 | 0.957905 | 0.73293  |
| MmugDNA.39186.1.S1_at   | MmugDNA.39186.1 | 8.47  | 7.53  | 0.09 | 0.26 | 1.92  | 0.002379 | 0.002684 | 0.177065 | 0.076408 |
| MmugDNA.3919.1.S1_at    | MmugDNA.3919.1  | 7.26  | 6.78  | 0.17 | 0.13 | 1.4   | 0.028752 | 0.079614 | 0.333062 | 0.326981 |
| MmugDNA.39190.1.S1_at   | MmugDNA.39190.1 | 3.1   | 3.1   | 0.03 | 0    | 1     | 0.373901 | 0.333415 | 0.705567 | 0.581677 |
| MmugDNA.39191.1.S1_at   | MmugDNA.39191.1 | 6.72  | 7.58  | 0.82 | 0.18 | -1.81 | 0.589693 | 0.403944 | 0.832598 | 0.632538 |
| MmugDNA.39193.1.S1_at   | MmugDNA.39193.1 | 3.65  | 3.75  | 0.11 | 0.12 | -1.07 | 0.678606 | 0.34268  | 0.874071 | 0.588666 |
| MmugDNA.39194.1.S1_at   | MmugDNA.39194.1 | 10.25 | 10.02 | 0.64 | 0.19 | 1.17  | 0.60504  | 0.345246 | 0.839761 | 0.590546 |
| MmugDNA.39195.1.S1_at   | MmugDNA.39195.1 | 5.07  | 4.95  | 0.15 | 0.16 | 1.09  | 0.075891 | 0.058861 | 0.436934 | 0.289381 |

|                       |                 |       |       |      |      |       |          |          |          |          |
|-----------------------|-----------------|-------|-------|------|------|-------|----------|----------|----------|----------|
| MmugDNA.39196.1.S1_at | MmugDNA.39196.1 | 4.52  | 4.38  | 0.06 | 0.11 | 1.1   | 0.094562 | 0.040303 | 0.463794 | 0.245928 |
| MmugDNA.39197.1.S1_at | MmugDNA.39197.1 | 10.84 | 10.46 | 0.34 | 0.04 | 1.3   | 0.076396 | 0.108238 | 0.437977 | 0.371557 |
| MmugDNA.39198.1.S1_at | MmugDNA.39198.1 | 4.65  | 5.27  | 0.22 | 0.18 | -1.53 | 0.051046 | 0.092142 | 0.388837 | 0.34781  |
| MmugDNA.39199.1.S1_at | MmugDNA.39199.1 | 6.77  | 6.86  | 0.24 | 0.06 | -1.07 | 0.657805 | 0.675605 | 0.864279 | 0.810429 |
| MmugDNA.392.1.S1_at   | MmugDNA.392.1   | 5.2   | 5.38  | 0.27 | 0.32 | -1.14 | 0.788289 | 0.571492 | 0.922212 | 0.743807 |
| MmugDNA.3920.1.S1_at  | MmugDNA.3920.1  | 5.99  | 5.85  | 0.07 | 0.03 | 1.1   | 0.034774 | 0.00826  | 0.350358 | 0.12078  |
| MmugDNA.39200.1.S1_at | MmugDNA.39200.1 | 12.12 | 13.09 | 0.1  | 0.04 | -1.96 | 0.000063 | 0.000021 | 0.108151 | 0.019635 |
| MmugDNA.39201.1.S1_at | MmugDNA.39201.1 | 5.64  | 5.44  | 0.31 | 0.15 | 1.15  | 0.368931 | 0.191996 | 0.703895 | 0.467382 |
| MmugDNA.39202.1.S1_at | MmugDNA.39202.1 | 4.21  | 4.05  | 0.21 | 0.23 | 1.11  | 0.471681 | 0.654661 | 0.76658  | 0.798114 |
| MmugDNA.39204.1.S1_at | MmugDNA.39204.1 | 5.59  | 6.52  | 0.36 | 0.15 | -1.91 | 0.011126 | 0.017189 | 0.253508 | 0.166089 |
| MmugDNA.39205.1.S1_at | MmugDNA.39205.1 | 10.84 | 10.62 | 0.61 | 0.3  | -1.17 | 0.483849 | 0.373112 | 0.77333  | 0.61196  |
| MmugDNA.39206.1.S1_at | MmugDNA.39206.1 | 3.46  | 3.43  | 0.11 | 0.16 | 1.02  | 0.813457 | 0.327153 | 0.932585 | 0.577136 |
| MmugDNA.39207.1.S1_at | MmugDNA.39207.1 | 4.32  | 4.48  | 0.11 | 0.04 | -1.12 | 0.159512 | 0.300826 | 0.532461 | 0.559046 |
| MmugDNA.39209.1.S1_at | MmugDNA.39209.1 | 6.98  | 6.99  | 0.34 | 0.32 | -1.01 | 0.558084 | 0.646277 | 0.815182 | 0.792738 |
| MmugDNA.39210.1.S1_at | MmugDNA.39210.1 | 10.99 | 11.59 | 0.21 | 0.18 | -1.51 | 0.015722 | 0.0106   | 0.283432 | 0.134272 |
| MmugDNA.39212.1.S1_at | MmugDNA.39212.1 | 8.46  | 8.21  | 0.72 | 0.08 | 1.19  | 0.802651 | 0.143745 | 0.92802  | 0.417583 |
| MmugDNA.39213.1.S1_at | MmugDNA.39213.1 | 9.66  | 9.3   | 0.31 | 0.3  | 1.29  | 0.498976 | 0.009734 | 0.781868 | 0.129786 |
| MmugDNA.39214.1.S1_at | MmugDNA.39214.1 | 4.12  | 4.19  | 0.12 | 0.18 | -1.05 | 0.607916 | 0.938377 | 0.840979 | 0.965059 |
| MmugDNA.39215.1.S1_at | MmugDNA.39215.1 | 9.05  | 9.13  | 0.31 | 0    | -1.06 | 0.227577 | 0.07543  | 0.596693 | 0.319774 |
| MmugDNA.39218.1.S1_at | MmugDNA.39218.1 | 8.23  | 9.02  | 0.03 | 0.26 | -1.72 | 0.004649 | 0.000737 | 0.201454 | 0.044855 |
| MmugDNA.39219.1.S1_at | MmugDNA.39219.1 | 6.56  | 6.67  | 0.05 | 0.09 | -1.08 | 0.354601 | 0.809113 | 0.694116 | 0.889995 |
| MmugDNA.3922.1.S1_at  | MmugDNA.3922.1  | 7.1   | 6.99  | 0.46 | 0.42 | 1.08  | 0.995588 | 0.980283 | 0.998302 | 0.989317 |
| MmugDNA.39220.1.S1_at | MmugDNA.39220.1 | 10.27 | 10.72 | 0.47 | 0.03 | -1.37 | 0.123342 | 0.005009 | 0.496589 | 0.098626 |
| MmugDNA.39222.1.S1_at | MmugDNA.39222.1 | 12.15 | 12.16 | 0.11 | 0.02 | -1    | 0.344402 | 0.820095 | 0.686913 | 0.896336 |
| MmugDNA.39224.1.S1_at | MmugDNA.39224.1 | 4.42  | 4.49  | 0.05 | 0.07 | -1.05 | 0.226773 | 0.447554 | 0.596222 | 0.663579 |
| MmugDNA.39225.1.S1_at | MmugDNA.39225.1 | 3.69  | 3.18  | 0.05 | 0.22 | 1.42  | 0.044446 | 0.059414 | 0.374916 | 0.290548 |
| MmugDNA.39226.1.S1_at | MmugDNA.39226.1 | 9.35  | 9.74  | 0.21 | 0.26 | -1.31 | 0.057476 | 0.048337 | 0.40213  | 0.265024 |
| MmugDNA.39228.1.S1_at | MmugDNA.39228.1 | 7.09  | 7.28  | 0.68 | 0.25 | -1.14 | 0.733907 | 0.251735 | 0.898019 | 0.520444 |
| MmugDNA.39229.1.S1_at | MmugDNA.39229.1 | 12    | 11.6  | 0.29 | 0.06 | 1.31  | 0.251763 | 0.035705 | 0.61695  | 0.233368 |
| MmugDNA.3923.1.S1_at  | MmugDNA.3923.1  | 3.74  | 3.76  | 0.24 | 0.04 | -1.02 | 0.613124 | 0.588294 | 0.843382 | 0.754859 |
| MmugDNA.39230.1.S1_at | MmugDNA.39230.1 | 4.54  | 4.55  | 0.13 | 0.22 | -1.01 | 0.510673 | 0.165279 | 0.788228 | 0.441488 |
| MmugDNA.39231.1.S1_at | MmugDNA.39231.1 | 10.08 | 9.74  | 0.61 | 0.17 | 1.26  | 0.840054 | 0.62112  | 0.943103 | 0.775813 |
| MmugDNA.39232.1.S1_at | MmugDNA.39232.1 | 4.48  | 4.35  | 0.18 | 0.09 | 1.09  | 0.915759 | 0.935192 | 0.971302 | 0.963346 |
| MmugDNA.39233.1.S1_at | MmugDNA.39233.1 | 4.65  | 4.67  | 0.05 | 0.07 | -1.02 | 0.699021 | 0.954577 | 0.883004 | 0.974203 |
| MmugDNA.39234.1.S1_at | MmugDNA.39234.1 | 7.83  | 7.36  | 0.31 | 0.11 | 1.39  | 0.077057 | 0.174302 | 0.438911 | 0.450696 |
| MmugDNA.39235.1.S1_at | MmugDNA.39235.1 | 9.19  | 9.26  | 0.28 | 0.08 | -1.05 | 0.328617 | 0.39275  | 0.67577  | 0.625846 |
| MmugDNA.39236.1.S1_at | MmugDNA.39236.1 | 7.67  | 7.72  | 0.22 | 0.26 | -1.03 | 0.940718 | 0.988368 | 0.979845 | 0.993461 |
| MmugDNA.39237.1.S1_at | MmugDNA.39237.1 | 4.8   | 4.64  | 0.33 | 0.1  | 1.11  | 0.24157  | 0.634423 | 0.60769  | 0.784787 |
| MmugDNA.39238.1.S1_at | MmugDNA.39238.1 | 6.28  | 6.28  | 0.07 | 0.06 | 1     | 0.692538 | 0.708892 | 0.880115 | 0.831167 |
| MmugDNA.39239.1.S1_at | MmugDNA.39239.1 | 8.91  | 8.85  | 0.83 | 0.13 | 1.04  | 0.978185 | 0.63342  | 0.992929 | 0.784154 |
| MmugDNA.3924.1.S1_at  | MmugDNA.3924.1  | 8.37  | 7.44  | 0.29 | 0.58 | 1.92  | 0.150867 | 0.473963 | 0.524381 | 0.681148 |
| MmugDNA.39240.1.S1_at | MmugDNA.39240.1 | 9.12  | 8.33  | 1.23 | 0.37 | 1.72  | 0.268321 | 0.128159 | 0.628784 | 0.399148 |
| MmugDNA.39242.1.S1_at | MmugDNA.39242.1 | 9.94  | 9.74  | 0.13 | 0.2  | 1.14  | 0.406881 | 0.255239 | 0.72838  | 0.523284 |

|                         |                 |       |       |      |      |       |          |          |          |          |
|-------------------------|-----------------|-------|-------|------|------|-------|----------|----------|----------|----------|
| MmugDNA.39242.1.S1_s_at | MmugDNA.39242.1 | 8.37  | 8.25  | 0.12 | 0.29 | 1.09  | 0.29498  | 0.356412 | 0.650971 | 0.598396 |
| MmugDNA.39245.1.S1_at   | MmugDNA.39245.1 | 4.64  | 4.34  | 0.49 | 0.34 | 1.23  | 0.850902 | 0.973929 | 0.947487 | 0.985754 |
| MmugDNA.39246.1.S1_at   | MmugDNA.39246.1 | 3.07  | 3.09  | 0.2  | 0.01 | -1.01 | 0.922118 | 0.179591 | 0.973729 | 0.45603  |
| MmugDNA.39248.1.S1_at   | MmugDNA.39248.1 | 2.72  | 2.84  | 0.1  | 0.13 | -1.09 | 0.510488 | 0.504848 | 0.788228 | 0.701897 |
| MmugDNA.39249.1.S1_at   | MmugDNA.39249.1 | 5.48  | 5.16  | 0.12 | 0.08 | 1.25  | 0.008647 | 0.006768 | 0.236048 | 0.111322 |
| MmugDNA.3925.1.S1_at    | MmugDNA.3925.1  | 4.59  | 4.34  | 0.31 | 0.33 | 1.19  | 0.417707 | 0.803082 | 0.735015 | 0.886577 |
| MmugDNA.39250.1.S1_at   | MmugDNA.39250.1 | 4.2   | 4.31  | 0.07 | 0.1  | -1.08 | 0.815435 | 0.465689 | 0.933137 | 0.675863 |
| MmugDNA.39252.1.S1_at   | MmugDNA.39252.1 | 4.95  | 4.73  | 0.48 | 0.24 | 1.17  | 0.626499 | 0.804253 | 0.849991 | 0.887401 |
| MmugDNA.39254.1.S1_at   | MmugDNA.39254.1 | 3.83  | 4.11  | 0.08 | 0.16 | -1.22 | 0.235936 | 0.185528 | 0.603043 | 0.461566 |
| MmugDNA.39255.1.S1_at   | MmugDNA.39255.1 | 3.27  | 3.24  | 0.04 | 0.07 | 1.03  | 0.835602 | 0.431841 | 0.941057 | 0.6526   |
| MmugDNA.39256.1.S1_at   | MmugDNA.39256.1 | 7.24  | 7.33  | 0.43 | 0.32 | -1.06 | 0.794235 | 0.239377 | 0.924511 | 0.510039 |
| MmugDNA.39259.1.S1_at   | MmugDNA.39259.1 | 8.73  | 9.79  | 0.07 | 0.34 | -2.08 | 0.006923 | 0.023869 | 0.224141 | 0.193495 |
| MmugDNA.3926.1.S1_at    | MmugDNA.3926.1  | 2.8   | 2.63  | 0.07 | 0.05 | 1.12  | 0.037509 | 0.06598  | 0.35724  | 0.302282 |
| MmugDNA.39260.1.S1_at   | MmugDNA.39260.1 | 8.9   | 8.57  | 1    | 0.04 | 1.26  | 0.692406 | 0.285649 | 0.880095 | 0.547395 |
| MmugDNA.39261.1.S1_at   | MmugDNA.39261.1 | 6.05  | 6.35  | 0.27 | 0.05 | -1.23 | 0.087287 | 0.752789 | 0.454785 | 0.855968 |
| MmugDNA.7381.1.S1_at    | MmugDNA.7381.1  | 6.51  | 6.32  | 0.18 | 0.07 | 1.14  | 0.17506  | 0.100888 | 0.548031 | 0.360442 |
| MmugDNA.7381.1.S1_s_at  | MmugDNA.7381.1  | 11.26 | 11.62 | 2.58 | 0.07 | -1.29 | 0.481329 | 0.198263 | 0.771945 | 0.473234 |
| MmugDNA.39264.1.S1_at   | MmugDNA.39264.1 | 4.58  | 3.99  | 0.28 | 0.11 | 1.5   | 0.010708 | 0.005496 | 0.249245 | 0.102081 |
| MmugDNA.39266.1.S1_at   | MmugDNA.39266.1 | 4.12  | 3.91  | 0.21 | 0.1  | 1.16  | 0.477839 | 0.496164 | 0.76987  | 0.695877 |
| MmugDNA.39267.1.S1_at   | MmugDNA.39267.1 | 8.08  | 9.06  | 0.24 | 0.03 | -1.97 | 0.003292 | 0.000891 | 0.194357 | 0.047789 |
| MmugDNA.39268.1.S1_at   | MmugDNA.39268.1 | 6.86  | 6.68  | 0.52 | 0.12 | 1.13  | 0.706808 | 0.936098 | 0.885938 | 0.96396  |
| MmugDNA.39269.1.S1_at   | MmugDNA.39269.1 | 5.62  | 4.63  | 0.69 | 0.12 | 1.98  | 0.11464  | 0.109041 | 0.487722 | 0.372838 |
| MmugDNA.3927.1.S1_at    | MmugDNA.3927.1  | 4.97  | 4.84  | 0.43 | 0.17 | 1.1   | 0.702873 | 0.054503 | 0.884531 | 0.278959 |
| MmugDNA.39270.1.S1_at   | MmugDNA.39270.1 | 3.44  | 4.03  | 0.49 | 0.14 | -1.51 | 0.140256 | 0.236829 | 0.515581 | 0.507559 |
| MmugDNA.39271.1.S1_at   | MmugDNA.39271.1 | 4.35  | 4.37  | 0.23 | 0.5  | -1.01 | 0.593282 | 0.779431 | 0.834114 | 0.87211  |
| MmugDNA.39272.1.S1_at   | MmugDNA.39272.1 | 3.54  | 3.57  | 0.03 | 0.07 | -1.02 | 0.769253 | 0.288842 | 0.913552 | 0.549981 |
| MmugDNA.39274.1.S1_at   | MmugDNA.39274.1 | 5.12  | 4.99  | 0.16 | 0.01 | 1.09  | 0.250704 | 0.366816 | 0.615874 | 0.606522 |
| MmugDNA.39275.1.S1_at   | MmugDNA.39275.1 | 3.34  | 3.32  | 0.16 | 0.13 | 1.02  | 0.833377 | 0.356103 | 0.940218 | 0.598107 |
| MmugDNA.39276.1.S1_at   | MmugDNA.39276.1 | 4.81  | 4.78  | 0.16 | 0.15 | 1.02  | 0.70895  | 0.930301 | 0.886591 | 0.960385 |
| MmugDNA.39277.1.S1_at   | MmugDNA.39277.1 | 6.53  | 6.57  | 0.19 | 0.37 | -1.03 | 0.797559 | 0.68725  | 0.9256   | 0.817523 |
| MmugDNA.39279.1.S1_at   | MmugDNA.39279.1 | 6.66  | 6.85  | 0.09 | 0.23 | -1.14 | 0.186336 | 0.32247  | 0.559101 | 0.573991 |
| MmugDNA.3928.1.S1_at    | MmugDNA.3928.1  | 3.65  | 3.4   | 0.17 | 0.19 | 1.19  | 0.166143 | 0.238069 | 0.538903 | 0.508649 |
| MmugDNA.39280.1.S1_at   | MmugDNA.39280.1 | 5.49  | 5.35  | 0.32 | 0.21 | 1.1   | 0.361773 | 0.316543 | 0.698762 | 0.569938 |
| MmugDNA.39284.1.S1_at   | MmugDNA.39284.1 | 4.11  | 3.93  | 0.18 | 0.26 | 1.13  | 0.458634 | 0.825944 | 0.759008 | 0.900001 |
| MmugDNA.39286.1.S1_at   | MmugDNA.39286.1 | 6.41  | 5.71  | 0.36 | 0.34 | 1.63  | 0.06092  | 0.131225 | 0.409323 | 0.403252 |
| MmugDNA.39287.1.S1_at   | MmugDNA.39287.1 | 9.05  | 7.8   | 0.2  | 0.2  | 2.38  | 0.002042 | 0.000393 | 0.173807 | 0.037471 |
| MmugDNA.39288.1.S1_at   | MmugDNA.39288.1 | 3.84  | 3.84  | 0.09 | 0.04 | 1     | 0.787101 | 0.679964 | 0.92182  | 0.813105 |
| MmugDNA.39289.1.S1_at   | MmugDNA.39289.1 | 7.74  | 7.68  | 0.5  | 0.31 | 1.04  | 0.505263 | 0.877699 | 0.785248 | 0.930219 |
| MmugDNA.3929.1.S1_at    | MmugDNA.3929.1  | 7.19  | 7.19  | 0.09 | 0.13 | 1     | 0.220852 | 0.310601 | 0.590169 | 0.565787 |
| MmugDNA.39290.1.S1_at   | MmugDNA.39290.1 | 8.14  | 7.3   | 0.63 | 0.31 | 1.8   | 0.140429 | 0.030768 | 0.515828 | 0.217307 |
| MmugDNA.39292.1.S1_at   | MmugDNA.39292.1 | 5.99  | 5.42  | 0.25 | 0.49 | 1.48  | 0.13484  | 0.07019  | 0.508948 | 0.311186 |
| MmugDNA.39293.1.S1_at   | MmugDNA.39293.1 | 6.83  | 7.25  | 1.07 | 0.2  | -1.34 | 0.514592 | 0.155635 | 0.790444 | 0.430993 |
| MmugDNA.39294.1.S1_at   | MmugDNA.39294.1 | 4.37  | 4.27  | 0    | 0.11 | 1.07  | 0.186437 | 0.303824 | 0.559111 | 0.561225 |

|                         |                 |       |       |      |      |       |          |          |          |          |
|-------------------------|-----------------|-------|-------|------|------|-------|----------|----------|----------|----------|
| MmugDNA.39295.1.S1_at   | MmugDNA.39295.1 | 8.49  | 8.41  | 0.31 | 0.17 | 1.05  | 0.314938 | 0.005492 | 0.665641 | 0.102081 |
| MmugDNA.39296.1.S1_at   | MmugDNA.39296.1 | 5.07  | 4.78  | 0.12 | 0.07 | 1.22  | 0.033869 | 0.052383 | 0.347392 | 0.274345 |
| MmugDNA.39299.1.S1_at   | MmugDNA.39299.1 | 4.43  | 4.34  | 0.28 | 0.45 | 1.06  | 0.999885 | 0.036173 | 1        | 0.234778 |
| MmugDNA.393.1.S1_at     | MmugDNA.393.1   | 7.47  | 6.79  | 0.49 | 0.22 | 1.61  | 0.289115 | 0.041599 | 0.645892 | 0.248852 |
| MmugDNA.3930.1.S1_at    | MmugDNA.3930.1  | 6.62  | 6.41  | 0.08 | 0.04 | 1.15  | 0.056031 | 0.340527 | 0.399441 | 0.586776 |
| MmugDNA.39301.1.S1_at   | MmugDNA.39301.1 | 4.65  | 4.46  | 0.1  | 0.15 | 1.14  | 0.157725 | 0.354296 | 0.53073  | 0.597158 |
| MmugDNA.39302.1.S1_at   | MmugDNA.39302.1 | 3.93  | 3.93  | 0.05 | 0.06 | 1     | 0.952092 | 0.948223 | 0.983952 | 0.970472 |
| MmugDNA.39303.1.S1_at   | MmugDNA.39303.1 | 7.74  | 7.5   | 0.95 | 0.19 | 1.18  | 0.61994  | 0.500548 | 0.846932 | 0.699114 |
| MmugDNA.39304.1.S1_at   | MmugDNA.39304.1 | 6.62  | 6.31  | 0.18 | 0.07 | 1.24  | 0.208566 | 0.397583 | 0.580248 | 0.628973 |
| MmugDNA.39308.1.S1_at   | MmugDNA.39308.1 | 8.67  | 9.51  | 0.7  | 0.08 | -1.8  | 0.104095 | 0.066151 | 0.474823 | 0.302699 |
| MmugDNA.3931.1.S1_at    | MmugDNA.3931.1  | 7.39  | 6.99  | 0.66 | 0.06 | 1.32  | 0.937913 | 0.983001 | 0.979142 | 0.990691 |
| MmugDNA.39311.1.S1_at   | MmugDNA.39311.1 | 7.81  | 7.31  | 0.54 | 0.3  | 1.41  | 0.207755 | 0.365603 | 0.579365 | 0.605617 |
| MmugDNA.39313.1.S1_at   | MmugDNA.39313.1 | 6.63  | 6.77  | 0.19 | 0.11 | -1.1  | 0.152209 | 0.349987 | 0.525262 | 0.593743 |
| MmugDNA.39314.1.S1_at   | MmugDNA.39314.1 | 10.68 | 10.26 | 0.14 | 0.07 | 1.33  | 0.011073 | 0.268332 | 0.252486 | 0.534041 |
| MmugDNA.39315.1.S1_at   | MmugDNA.39315.1 | 12.75 | 12.41 | 0.08 | 0.09 | 1.27  | 0.010269 | 0.013153 | 0.246929 | 0.147338 |
| MmugDNA.39318.1.S1_at   | MmugDNA.39318.1 | 6.56  | 6.37  | 0.1  | 0    | 1.14  | 0.065523 | 0.046574 | 0.420827 | 0.260267 |
| MmugDNA.39319.1.S1_at   | MmugDNA.39319.1 | 7.88  | 8.45  | 0.4  | 0.19 | -1.48 | 0.081872 | 0.089991 | 0.446396 | 0.34429  |
| MmugDNA.3932.1.S1_at    | MmugDNA.3932.1  | 5.77  | 5.49  | 0.08 | 0.1  | 1.22  | 0.011113 | 0.018284 | 0.252486 | 0.170051 |
| MmugDNA.39321.1.S1_at   | MmugDNA.39321.1 | 7.62  | 7.97  | 0.14 | 0.2  | -1.28 | 0.068878 | 0.455794 | 0.426231 | 0.669659 |
| MmugDNA.39323.1.S1_at   | MmugDNA.39323.1 | 7.24  | 7.39  | 0.02 | 0.09 | -1.11 | 0.020766 | 0.012023 | 0.305611 | 0.141889 |
| MmugDNA.39324.1.S1_at   | MmugDNA.39324.1 | 7.91  | 8.93  | 0.14 | 0.18 | -2.03 | 0.001142 | 0.000848 | 0.156386 | 0.047089 |
| MmugDNA.39326.1.S1_at   | MmugDNA.39326.1 | 3.61  | 3.68  | 0.17 | 0.08 | -1.05 | 0.336438 | 0.488996 | 0.681813 | 0.691529 |
| MmugDNA.39327.1.S1_at   | MmugDNA.39327.1 | 3.18  | 3.19  | 0.13 | 0.08 | -1.01 | 0.808862 | 0.059914 | 0.930844 | 0.291408 |
| MmugDNA.39329.1.S1_at   | MmugDNA.39329.1 | 3.37  | 3.42  | 0.19 | 0.24 | -1.03 | 0.70067  | 0.841532 | 0.883597 | 0.909663 |
| MmugDNA.39330.1.S1_at   | MmugDNA.39330.1 | 9.2   | 9.2   | 0.14 | 0.09 | 1     | 0.831614 | 0.00478  | 0.939628 | 0.096453 |
| MmugDNA.39332.1.S1_at   | MmugDNA.39332.1 | 7.6   | 7.77  | 0.44 | 0.48 | -1.12 | 0.92093  | 0.343401 | 0.973233 | 0.589163 |
| MmugDNA.39333.1.S1_at   | MmugDNA.39333.1 | 5.14  | 6.3   | 1.04 | 0.39 | -2.23 | 0.371548 | 0.471059 | 0.705567 | 0.679172 |
| MmugDNA.39334.1.S1_at   | MmugDNA.39334.1 | 3.25  | 3.22  | 0.04 | 0.13 | 1.02  | 0.843923 | 0.518092 | 0.944991 | 0.710138 |
| MmugDNA.39335.1.S1_at   | MmugDNA.39335.1 | 3.96  | 3.88  | 0.15 | 0.16 | 1.06  | 0.377859 | 0.482259 | 0.707875 | 0.687144 |
| MmugDNA.39338.1.S1_at   | MmugDNA.39338.1 | 9.34  | 9.44  | 0.66 | 0.23 | -1.08 | 0.871837 | 0.229131 | 0.955578 | 0.501438 |
| MmugDNA.39339.1.S1_at   | MmugDNA.39339.1 | 5.49  | 5.48  | 0.08 | 0.08 | 1.01  | 0.8541   | 0.212821 | 0.948436 | 0.486772 |
| MmugDNA.3934.1.S1_at    | MmugDNA.3934.1  | 9.52  | 9.75  | 0.23 | 0.04 | -1.17 | 0.497494 | 0.686542 | 0.781182 | 0.817066 |
| MmugDNA.39340.1.S1_at   | MmugDNA.39340.1 | 5.51  | 6.23  | 0.62 | 0.6  | -1.66 | 0.217847 | 0.633701 | 0.587841 | 0.784372 |
| MmugDNA.39341.1.S1_at   | MmugDNA.39341.1 | 4.28  | 4.26  | 0.15 | 0.14 | 1.02  | 0.907585 | 0.696093 | 0.968677 | 0.823446 |
| MmugDNA.39342.1.S1_s_at | MmugDNA.39342.1 | 12.16 | 12.35 | 0.33 | 0.13 | -1.14 | 0.794637 | 0.033002 | 0.924622 | 0.224908 |
| MmugDNA.39343.1.S1_at   | MmugDNA.39343.1 | 4.28  | 5.6   | 0.41 | 0.2  | -2.49 | 0.021992 | 0.072945 | 0.309781 | 0.315986 |
| MmugDNA.39344.1.S1_at   | MmugDNA.39344.1 | 10.04 | 11.35 | 0.35 | 0.2  | -2.48 | 0.008213 | 0.007998 | 0.232005 | 0.118865 |
| MmugDNA.39346.1.S1_at   | MmugDNA.39346.1 | 7.25  | 7.09  | 0.31 | 0.05 | 1.12  | 0.17737  | 0.241218 | 0.550581 | 0.511821 |
| MmugDNA.39347.1.S1_at   | MmugDNA.39347.1 | 6.55  | 6.55  | 0.57 | 0.4  | -1.01 | 0.541505 | 0.713811 | 0.805165 | 0.833937 |
| MmugDNA.39348.1.S1_at   | MmugDNA.39348.1 | 6.98  | 6.85  | 0.09 | 0.03 | 1.09  | 0.05592  | 0.337847 | 0.399441 | 0.585027 |
| MmugDNA.39349.1.S1_at   | MmugDNA.39349.1 | 9.17  | 9.63  | 0.33 | 0.11 | -1.38 | 0.162974 | 0.195114 | 0.53603  | 0.470241 |
| MmugDNA.3935.1.S1_at    | MmugDNA.3935.1  | 5.73  | 5.37  | 0.33 | 0.33 | 1.28  | 0.518546 | 0.595706 | 0.792717 | 0.759191 |
| MmugDNA.39350.1.S1_at   | MmugDNA.39350.1 | 4.21  | 4.25  | 0.29 | 0.19 | -1.03 | 0.899933 | 0.98836  | 0.965989 | 0.993461 |

|                         |                 |       |       |      |      |       |          |          |          |          |
|-------------------------|-----------------|-------|-------|------|------|-------|----------|----------|----------|----------|
| MmugDNA.39351.1.S1_at   | MmugDNA.39351.1 | 3.44  | 3.47  | 0.08 | 0.22 | -1.02 | 0.293857 | 0.56867  | 0.65018  | 0.742052 |
| MmugDNA.39353.1.S1_at   | MmugDNA.39353.1 | 11.13 | 10.96 | 0.45 | 0.11 | 1.12  | 0.732038 | 0.790906 | 0.896978 | 0.879071 |
| MmugDNA.39355.1.S1_at   | MmugDNA.39355.1 | 4.86  | 4.86  | 0.09 | 0.07 | 1     | 0.228951 | 0.342863 | 0.597921 | 0.588712 |
| MmugDNA.39357.1.S1_at   | MmugDNA.39357.1 | 6.21  | 6.39  | 0.07 | 0.3  | -1.14 | 0.089865 | 0.10366  | 0.457893 | 0.364465 |
| MmugDNA.39358.1.S1_at   | MmugDNA.39358.1 | 5.51  | 5.48  | 0.18 | 0.03 | 1.02  | 0.282157 | 0.467779 | 0.640648 | 0.677307 |
| MmugDNA.39359.1.S1_at   | MmugDNA.39359.1 | 6.59  | 6.5   | 0.13 | 0.21 | 1.06  | 0.798883 | 0.746547 | 0.926364 | 0.852872 |
| MmugDNA.39360.1.S1_at   | MmugDNA.39360.1 | 3.69  | 3.86  | 0.02 | 0.13 | -1.12 | 0.095515 | 0.081504 | 0.464229 | 0.329764 |
| MmugDNA.39361.1.S1_at   | MmugDNA.39361.1 | 6.45  | 6.61  | 0.62 | 0.43 | -1.12 | 0.721497 | 0.7631   | 0.892042 | 0.862257 |
| MmugDNA.39362.1.S1_at   | MmugDNA.39362.1 | 3.77  | 3.78  | 0.16 | 0.12 | -1.01 | 0.783077 | 0.585451 | 0.920125 | 0.752852 |
| MmugDNA.39363.1.S1_at   | MmugDNA.39363.1 | 11.18 | 11.51 | 0.08 | 0.09 | -1.25 | 0.009251 | 0.013318 | 0.241866 | 0.148042 |
| MmugDNA.39364.1.S1_at   | MmugDNA.39364.1 | 5.83  | 5.82  | 0.05 | 0.14 | 1.01  | 0.656573 | 0.530078 | 0.863636 | 0.717729 |
| MmugDNA.39365.1.S1_at   | MmugDNA.39365.1 | 6.01  | 6     | 0.16 | 0.02 | 1.01  | 0.446106 | 0.459738 | 0.752589 | 0.671948 |
| MmugDNA.39368.1.S1_at   | MmugDNA.39368.1 | 6.35  | 6.43  | 0.17 | 0.31 | -1.06 | 0.67843  | 0.504983 | 0.873994 | 0.70197  |
| MmugDNA.3937.1.S1_at    | MmugDNA.3937.1  | 6.44  | 6.44  | 0.62 | 0.25 | -1    | 0.98896  | 0.731418 | 0.995916 | 0.84431  |
| MmugDNA.39370.1.S1_at   | MmugDNA.39370.1 | 4.33  | 4.8   | 0.17 | 0.27 | -1.38 | 0.028681 | 0.002482 | 0.332977 | 0.073652 |
| MmugDNA.39372.1.S1_at   | MmugDNA.39372.1 | 9.05  | 9.05  | 0.14 | 0.11 | 1     | 0.248717 | 0.306738 | 0.614097 | 0.5633   |
| MmugDNA.39373.1.S1_at   | MmugDNA.39373.1 | 12.57 | 12.24 | 0.52 | 0.07 | 1.26  | 0.912069 | 0.055364 | 0.970255 | 0.281125 |
| MmugDNA.39374.1.S1_at   | MmugDNA.39374.1 | 5.68  | 5.78  | 0.22 | 0.01 | -1.07 | 0.314774 | 0.419614 | 0.665515 | 0.643568 |
| MmugDNA.39376.1.S1_at   | MmugDNA.39376.1 | 12.44 | 12.42 | 0.22 | 0.15 | 1.01  | 0.986921 | 0.194624 | 0.995774 | 0.469744 |
| MmugDNA.10262.1.S1_at   | MmugDNA.10262.1 | 7.14  | 6.93  | 0.19 | 0.14 | 1.15  | 0.150467 | 0.161821 | 0.524077 | 0.437937 |
| MmugDNA.10262.1.S1_s_at | MmugDNA.10262.1 | 5.48  | 5.17  | 0.37 | 0.09 | 1.24  | 0.217123 | 0.039271 | 0.587097 | 0.243338 |
| MmugDNA.39380.1.S1_at   | MmugDNA.39380.1 | 4     | 3.8   | 0.11 | 0.03 | 1.15  | 0.095824 | 0.452732 | 0.464449 | 0.66729  |
| MmugDNA.39381.1.S1_at   | MmugDNA.39381.1 | 9.99  | 9.95  | 0.52 | 0.09 | 1.03  | 0.85415  | 0.737301 | 0.948437 | 0.847869 |
| MmugDNA.39383.1.S1_at   | MmugDNA.39383.1 | 6.58  | 6.81  | 0.45 | 0.11 | -1.17 | 0.633035 | 0.655882 | 0.853404 | 0.798739 |
| MmugDNA.39384.1.S1_at   | MmugDNA.39384.1 | 6.8   | 6.59  | 0.25 | 0.16 | 1.16  | 0.265505 | 0.336182 | 0.626687 | 0.583712 |
| MmugDNA.39385.1.S1_at   | MmugDNA.39385.1 | 4.29  | 4.3   | 0.16 | 0.15 | -1    | 0.540488 | 0.498692 | 0.804382 | 0.697702 |
| MmugDNA.39386.1.S1_at   | MmugDNA.39386.1 | 6.88  | 6.76  | 0.05 | 0.04 | 1.09  | 0.027616 | 0.308056 | 0.328297 | 0.56421  |
| MmugDNA.39387.1.S1_at   | MmugDNA.39387.1 | 5.83  | 6.73  | 0.49 | 0.12 | -1.86 | 0.046969 | 0.118567 | 0.379253 | 0.38654  |
| MmugDNA.39387.1.S1_x_at | MmugDNA.39387.1 | 6.03  | 6.45  | 0.58 | 0.04 | -1.35 | 0.171975 | 0.202868 | 0.545311 | 0.477312 |
| MmugDNA.39388.1.S1_at   | MmugDNA.39388.1 | 3.91  | 3.87  | 0.13 | 0.09 | 1.03  | 0.54831  | 0.728536 | 0.809677 | 0.843072 |
| MmugDNA.39389.1.S1_at   | MmugDNA.39389.1 | 5.28  | 5.13  | 0.48 | 0.02 | 1.1   | 0.210253 | 0.155743 | 0.581624 | 0.431111 |
| MmugDNA.3939.1.S1_at    | MmugDNA.3939.1  | 7.22  | 7.03  | 0.13 | 0.07 | 1.15  | 0.058139 | 0.042098 | 0.403716 | 0.249638 |
| MmugDNA.39390.1.S1_at   | MmugDNA.39390.1 | 5.42  | 5.33  | 0.04 | 0.06 | 1.06  | 0.109522 | 0.189782 | 0.482328 | 0.465403 |
| MmugDNA.39391.1.S1_at   | MmugDNA.39391.1 | 5     | 4.76  | 0.45 | 0.25 | 1.18  | 0.178738 | 0.176715 | 0.551554 | 0.453168 |
| MmugDNA.39393.1.S1_at   | MmugDNA.39393.1 | 7.78  | 8.07  | 0.21 | 0.24 | -1.23 | 0.107092 | 0.007413 | 0.47951  | 0.115758 |
| MmugDNA.39394.1.S1_at   | MmugDNA.39394.1 | 4.17  | 4.07  | 0.16 | 0.07 | 1.07  | 0.141244 | 0.334525 | 0.516365 | 0.582498 |
| MmugDNA.39395.1.S1_s_at | MmugDNA.39395.1 | 12.07 | 12.16 | 0.03 | 0.03 | -1.07 | 0.043318 | 0.110054 | 0.371766 | 0.374179 |
| MmugDNA.39398.1.S1_at   | MmugDNA.39398.1 | 11.78 | 12.4  | 0.11 | 0.11 | -1.53 | 0.002264 | 0.009583 | 0.174757 | 0.129001 |
| MmugDNA.39399.1.S1_at   | MmugDNA.39399.1 | 6.1   | 6.07  | 0.06 | 0.03 | 1.02  | 0.171294 | 0.293273 | 0.544459 | 0.553216 |
| MmugDNA.394.1.S1_at     | MmugDNA.394.1   | 10.8  | 10.68 | 0.33 | 0.22 | 1.09  | 0.19132  | 0.004162 | 0.562786 | 0.091036 |
| MmugDNA.3940.1.S1_at    | MmugDNA.3940.1  | 6.32  | 6.23  | 0.15 | 0.11 | 1.07  | 0.325358 | 0.650584 | 0.673195 | 0.795663 |
| MmugDNA.39400.1.S1_at   | MmugDNA.39400.1 | 6.24  | 5.74  | 0.44 | 0.25 | 1.4   | 0.217454 | 0.545205 | 0.587269 | 0.727441 |
| MmugDNA.39402.1.S1_at   | MmugDNA.39402.1 | 11.4  | 11.48 | 0.12 | 0.13 | -1.05 | 0.700727 | 0.124218 | 0.883597 | 0.394521 |

|                         |                 |       |       |      |      |       |          |          |          |          |
|-------------------------|-----------------|-------|-------|------|------|-------|----------|----------|----------|----------|
| MmugDNA.39406.1.S1_at   | MmugDNA.39406.1 | 4.87  | 4.87  | 0.01 | 0.13 | 1     | 0.353243 | 0.387809 | 0.693204 | 0.622484 |
| MmugDNA.39407.1.S1_at   | MmugDNA.39407.1 | 4.43  | 3.69  | 1.22 | 0.09 | 1.66  | 0.314847 | 0.323218 | 0.665563 | 0.574408 |
| MmugDNA.39408.1.S1_at   | MmugDNA.39408.1 | 3.36  | 3.2   | 0.14 | 0.06 | 1.12  | 0.32463  | 0.430022 | 0.672781 | 0.65111  |
| MmugDNA.39409.1.S1_at   | MmugDNA.39409.1 | 3.9   | 4.06  | 0.14 | 0.15 | -1.12 | 0.246913 | 0.330865 | 0.612537 | 0.57958  |
| MmugDNA.3941.1.S1_at    | MmugDNA.3941.1  | 2.95  | 2.94  | 0.14 | 0.06 | 1.01  | 0.70443  | 0.290736 | 0.885155 | 0.551382 |
| MmugDNA.39410.1.S1_at   | MmugDNA.39410.1 | 4.28  | 4.03  | 0.13 | 0.07 | 1.18  | 0.077646 | 0.070784 | 0.439716 | 0.312275 |
| MmugDNA.39411.1.S1_at   | MmugDNA.39411.1 | 4.94  | 4.79  | 0.2  | 0.09 | 1.11  | 0.175162 | 0.176919 | 0.548034 | 0.453317 |
| MmugDNA.39413.1.S1_at   | MmugDNA.39413.1 | 7.33  | 7.13  | 0.2  | 0.13 | 1.15  | 0.1116   | 0.24987  | 0.484892 | 0.518876 |
| MmugDNA.39417.1.S1_at   | MmugDNA.39417.1 | 5.25  | 5.05  | 0.14 | 0.08 | 1.15  | 0.08432  | 0.163808 | 0.450953 | 0.440049 |
| MmugDNA.39418.1.S1_at   | MmugDNA.39418.1 | 6.05  | 5.78  | 0.2  | 0.14 | 1.2   | 0.171556 | 0.208943 | 0.544814 | 0.482751 |
| MmugDNA.3942.1.S1_at    | MmugDNA.3942.1  | 5.58  | 6.12  | 0.61 | 0.18 | -1.45 | 0.604085 | 0.379388 | 0.839485 | 0.61636  |
| MmugDNA.39420.1.S1_at   | MmugDNA.39420.1 | 3.98  | 3.7   | 0.29 | 0.11 | 1.21  | 0.537536 | 0.720845 | 0.802735 | 0.838368 |
| MmugDNA.39421.1.S1_at   | MmugDNA.39421.1 | 3.41  | 3.57  | 0.22 | 0.06 | -1.12 | 0.759927 | 0.931869 | 0.909794 | 0.96129  |
| MmugDNA.39423.1.S1_at   | MmugDNA.39423.1 | 5.7   | 5.63  | 0.14 | 0.09 | 1.05  | 0.198949 | 0.484081 | 0.570451 | 0.688318 |
| MmugDNA.39426.1.S1_at   | MmugDNA.39426.1 | 7.51  | 7.32  | 0.39 | 0.13 | 1.14  | 0.341959 | 0.170217 | 0.685567 | 0.44691  |
| MmugDNA.39428.1.S1_at   | MmugDNA.39428.1 | 6.78  | 5.94  | 0.52 | 0.61 | 1.79  | 0.146189 | 0.28999  | 0.520572 | 0.550995 |
| MmugDNA.39429.1.S1_at   | MmugDNA.39429.1 | 5.57  | 5.48  | 0.26 | 0.22 | 1.07  | 0.600521 | 0.540562 | 0.837913 | 0.724459 |
| MmugDNA.3943.1.S1_at    | MmugDNA.3943.1  | 6.9   | 6.88  | 0.05 | 0.04 | 1.01  | 0.647571 | 0.836212 | 0.859364 | 0.906332 |
| MmugDNA.39431.1.S1_at   | MmugDNA.39431.1 | 3.02  | 3.01  | 0.05 | 0.08 | 1.01  | 0.616758 | 0.948025 | 0.845081 | 0.970439 |
| MmugDNA.39432.1.S1_at   | MmugDNA.39432.1 | 5.52  | 5.59  | 0.54 | 0.21 | -1.05 | 0.458776 | 0.552931 | 0.759072 | 0.732201 |
| MmugDNA.39433.1.S1_at   | MmugDNA.39433.1 | 3.27  | 2.98  | 0.2  | 0.08 | 1.22  | 0.118496 | 0.124551 | 0.491933 | 0.394987 |
| MmugDNA.39434.1.S1_at   | MmugDNA.39434.1 | 7.32  | 7.03  | 0.22 | 0.18 | 1.22  | 0.090976 | 0.304746 | 0.458897 | 0.561921 |
| MmugDNA.39435.1.S1_at   | MmugDNA.39435.1 | 4.6   | 4.5   | 0.15 | 0.14 | 1.07  | 0.663215 | 0.516053 | 0.867106 | 0.708694 |
| MmugDNA.39436.1.S1_at   | MmugDNA.39436.1 | 6.36  | 6.65  | 0.42 | 0.29 | -1.23 | 0.201045 | 0.166445 | 0.572826 | 0.4429   |
| MmugDNA.39437.1.S1_at   | MmugDNA.39437.1 | 9.98  | 9.94  | 0.07 | 0.1  | 1.02  | 0.743569 | 0.000992 | 0.902179 | 0.050398 |
| MmugDNA.39437.1.S1_s_at | MmugDNA.39437.1 | 10.78 | 10.68 | 0.01 | 0.08 | 1.07  | 0.161993 | 0.00606  | 0.535244 | 0.106152 |
| MmugDNA.39438.1.S1_at   | MmugDNA.39438.1 | 5.65  | 5.65  | 0.02 | 0.15 | 1     | 0.427127 | 0.393244 | 0.740938 | 0.626174 |
| MmugDNA.39438.1.S1_x_at | MmugDNA.39438.1 | 3.93  | 4.06  | 0.29 | 0.06 | -1.09 | 0.846718 | 0.938462 | 0.94629  | 0.965059 |
| MmugDNA.39439.1.S1_at   | MmugDNA.39439.1 | 7.52  | 8     | 0.18 | 0.31 | -1.4  | 0.033923 | 0.005598 | 0.347468 | 0.10339  |
| MmugDNA.39441.1.S1_at   | MmugDNA.39441.1 | 6.93  | 6.62  | 0.1  | 0.15 | 1.24  | 0.100959 | 0.150093 | 0.47159  | 0.424698 |
| MmugDNA.39441.1.S1_s_at | MmugDNA.39441.1 | 5.66  | 5.6   | 0.08 | 0.18 | 1.04  | 0.432768 | 0.595069 | 0.744125 | 0.758928 |
| MmugDNA.39442.1.S1_at   | MmugDNA.39442.1 | 4.47  | 4.19  | 0.06 | 0.12 | 1.22  | 0.047228 | 0.042647 | 0.379823 | 0.251037 |
| MmugDNA.39444.1.S1_at   | MmugDNA.39444.1 | 3.47  | 3.51  | 0.03 | 0.09 | -1.03 | 0.692473 | 0.595421 | 0.880095 | 0.759091 |
| MmugDNA.39445.1.S1_at   | MmugDNA.39445.1 | 4.23  | 4.24  | 0.32 | 0.16 | -1.01 | 0.451036 | 0.631709 | 0.755    | 0.782953 |
| MmugDNA.39447.1.S1_at   | MmugDNA.39447.1 | 8.35  | 8.43  | 0.16 | 0.13 | -1.05 | 0.90405  | 0.910371 | 0.967748 | 0.949414 |
| MmugDNA.39448.1.S1_at   | MmugDNA.39448.1 | 6.06  | 6.44  | 0.47 | 0.19 | -1.3  | 0.988746 | 0.705039 | 0.995895 | 0.828945 |
| MmugDNA.39449.1.S1_at   | MmugDNA.39449.1 | 8.42  | 7.91  | 0.75 | 0.06 | 1.43  | 0.909997 | 0.353483 | 0.96945  | 0.596547 |
| MmugDNA.3945.1.S1_at    | MmugDNA.3945.1  | 8.23  | 8.35  | 0.98 | 0.09 | -1.09 | 0.498333 | 0.721482 | 0.78164  | 0.838713 |
| MmugDNA.39451.1.S1_at   | MmugDNA.39451.1 | 5.26  | 5.2   | 0.12 | 0.1  | 1.04  | 0.364883 | 0.311683 | 0.700775 | 0.566653 |
| MmugDNA.39452.1.S1_at   | MmugDNA.39452.1 | 6.05  | 5.89  | 0.14 | 0.1  | 1.12  | 0.401034 | 0.254115 | 0.724096 | 0.522439 |
| MmugDNA.39453.1.S1_s_at | MmugDNA.39453.1 | 13.68 | 13.65 | 0.09 | 0.02 | 1.02  | 0.696758 | 0.012866 | 0.882175 | 0.146025 |
| MmugDNA.39454.1.S1_at   | MmugDNA.39454.1 | 3.87  | 3.95  | 0.27 | 0.13 | -1.06 | 0.229692 | 0.552774 | 0.59847  | 0.732052 |
| MmugDNA.39456.1.S1_at   | MmugDNA.39456.1 | 3.67  | 3.62  | 0.19 | 0.06 | 1.03  | 0.41965  | 0.456957 | 0.736449 | 0.670592 |

|                         |                 |       |       |      |      |       |          |          |          |          |
|-------------------------|-----------------|-------|-------|------|------|-------|----------|----------|----------|----------|
| MmugDNA.39458.1.S1_at   | MmugDNA.39458.1 | 9.15  | 8.63  | 0.45 | 0.04 | 1.43  | 0.098833 | 0.079513 | 0.468203 | 0.32681  |
| MmugDNA.39459.1.S1_at   | MmugDNA.39459.1 | 11.13 | 11.05 | 0.35 | 0.2  | 1.05  | 0.427146 | 0.177712 | 0.740946 | 0.454073 |
| MmugDNA.3946.1.S1_at    | MmugDNA.3946.1  | 4.81  | 4.93  | 0.03 | 0.17 | -1.09 | 0.081888 | 0.200975 | 0.446396 | 0.475434 |
| MmugDNA.39461.1.S1_at   | MmugDNA.39461.1 | 7.56  | 6.49  | 0.68 | 0.02 | 2.1   | 0.045951 | 0.03662  | 0.37735  | 0.235943 |
| MmugDNA.39462.1.S1_at   | MmugDNA.39462.1 | 6     | 5.9   | 0.08 | 0.14 | 1.07  | 0.364989 | 0.156164 | 0.700775 | 0.43161  |
| MmugDNA.39463.1.S1_at   | MmugDNA.39463.1 | 7.09  | 6.9   | 0.1  | 0.05 | 1.14  | 0.111378 | 0.052567 | 0.484548 | 0.274848 |
| MmugDNA.39464.1.S1_at   | MmugDNA.39464.1 | 3.6   | 3.49  | 0.24 | 0.19 | 1.08  | 0.481332 | 0.444551 | 0.771945 | 0.662072 |
| MmugDNA.39466.1.S1_at   | MmugDNA.39466.1 | 2.86  | 2.77  | 0.14 | 0.08 | 1.06  | 0.381491 | 0.148904 | 0.710122 | 0.423284 |
| MmugDNA.39467.1.S1_at   | MmugDNA.39467.1 | 10.3  | 10.38 | 0.42 | 0.29 | -1.05 | 0.524107 | 0.221699 | 0.795719 | 0.494901 |
| MmugDNA.39468.1.S1_at   | MmugDNA.39468.1 | 10.53 | 10.79 | 0.48 | 0.12 | -1.2  | 0.353173 | 0.484236 | 0.693168 | 0.688408 |
| MmugDNA.39469.1.S1_at   | MmugDNA.39469.1 | 8.68  | 8.77  | 0.47 | 0.08 | -1.06 | 0.524816 | 0.44466  | 0.796132 | 0.662072 |
| MmugDNA.3947.1.S1_at    | MmugDNA.3947.1  | 4.36  | 4.28  | 0.1  | 0.04 | 1.06  | 0.409617 | 0.107195 | 0.730187 | 0.36989  |
| MmugDNA.39470.1.S1_at   | MmugDNA.39470.1 | 5.68  | 5.7   | 0.12 | 0.13 | -1.01 | 0.29212  | 0.654585 | 0.648425 | 0.798087 |
| MmugDNA.39471.1.S1_s_at | MmugDNA.39471.1 | 12.46 | 12.75 | 0.24 | 0.04 | -1.22 | 0.041426 | 0.02659  | 0.366401 | 0.204008 |
| MmugDNA.39472.1.S1_at   | MmugDNA.39472.1 | 10.83 | 11.53 | 1.14 | 0.3  | -1.62 | 0.858336 | 0.809532 | 0.949983 | 0.890191 |
| MmugDNA.39473.1.S1_at   | MmugDNA.39473.1 | 4.18  | 4.57  | 0.25 | 0.06 | -1.31 | 0.174548 | 0.068768 | 0.54795  | 0.308711 |
| MmugDNA.39474.1.S1_at   | MmugDNA.39474.1 | 11.07 | 11.01 | 0.15 | 0.08 | 1.04  | 0.761974 | 0.125549 | 0.910776 | 0.396226 |
| MmugDNA.39475.1.S1_at   | MmugDNA.39475.1 | 5.64  | 5.52  | 0.35 | 0.1  | 1.09  | 0.388398 | 0.391674 | 0.715274 | 0.62529  |
| MmugDNA.39478.1.S1_at   | MmugDNA.39478.1 | 2.85  | 2.84  | 0.21 | 0.09 | 1.01  | 0.471196 | 0.526995 | 0.766384 | 0.715759 |
| MmugDNA.39479.1.S1_at   | MmugDNA.39479.1 | 11.65 | 11.69 | 0.03 | 0.08 | -1.03 | 0.869767 | 0.097348 | 0.954581 | 0.355066 |
| MmugDNA.3948.1.S1_at    | MmugDNA.3948.1  | 7.81  | 7.09  | 0.22 | 0.35 | 1.65  | 0.030095 | 0.147701 | 0.336449 | 0.422007 |
| MmugDNA.39480.1.S1_at   | MmugDNA.39480.1 | 6.08  | 6.09  | 0.24 | 0.14 | -1.01 | 0.333763 | 0.554793 | 0.679885 | 0.733501 |
| MmugDNA.39481.1.S1_at   | MmugDNA.39481.1 | 12.01 | 11.79 | 0.33 | 0.1  | 1.16  | 0.309636 | 0.20383  | 0.661815 | 0.478081 |
| MmugDNA.39482.1.S1_at   | MmugDNA.39482.1 | 4.02  | 4.07  | 0.17 | 0.09 | -1.03 | 0.305467 | 0.312627 | 0.658936 | 0.567268 |
| MmugDNA.39483.1.S1_at   | MmugDNA.39483.1 | 11.82 | 11.83 | 0.13 | 0.05 | -1.01 | 0.332546 | 0.76963  | 0.678949 | 0.866223 |
| MmugDNA.39484.1.S1_at   | MmugDNA.39484.1 | 6.77  | 7.82  | 0.6  | 0.31 | -2.06 | 0.086371 | 0.06937  | 0.454016 | 0.309591 |
| MmugDNA.39485.1.S1_s_at | MmugDNA.39485.1 | 12.58 | 12.84 | 0.05 | 0.03 | -1.2  | 0.001898 | 0.000604 | 0.169816 | 0.042002 |
| MmugDNA.39486.1.S1_at   | MmugDNA.39486.1 | 8.81  | 8.95  | 0.4  | 0.05 | -1.1  | 0.941822 | 0.911584 | 0.980207 | 0.950173 |
| MmugDNA.39488.1.S1_at   | MmugDNA.39488.1 | 5.36  | 5.18  | 0.09 | 0.08 | 1.13  | 0.074737 | 0.057985 | 0.435313 | 0.287289 |
| MmugDNA.39489.1.S1_at   | MmugDNA.39489.1 | 3.56  | 3.51  | 0.06 | 0.03 | 1.04  | 0.434955 | 0.259127 | 0.745369 | 0.526264 |
| MmugDNA.3949.1.S1_at    | MmugDNA.3949.1  | 6.02  | 5.66  | 0.29 | 0.3  | 1.28  | 0.082926 | 0.054176 | 0.448251 | 0.278114 |
| MmugDNA.39491.1.S1_at   | MmugDNA.39491.1 | 4.88  | 3.49  | 0.49 | 0.34 | 2.62  | 0.028858 | 0.01186  | 0.333062 | 0.140973 |
| MmugDNA.39492.1.S1_at   | MmugDNA.39492.1 | 4.13  | 3.42  | 1.31 | 0.3  | 1.63  | 0.324248 | 0.341813 | 0.672526 | 0.587908 |
| MmugDNA.39493.1.S1_at   | MmugDNA.39493.1 | 3.63  | 3.6   | 0.1  | 0.3  | 1.02  | 0.750718 | 0.764513 | 0.905556 | 0.863128 |
| MmugDNA.39495.1.S1_x_at | MmugDNA.39495.1 | 5.99  | 5.94  | 0.23 | 0.22 | 1.04  | 0.906812 | 0.073718 | 0.968379 | 0.317068 |
| MmugDNA.39496.1.S1_at   | MmugDNA.39496.1 | 5.08  | 5.78  | 1.08 | 0.57 | -1.63 | 0.438352 | 0.585483 | 0.747289 | 0.752852 |
| MmugDNA.39497.1.S1_at   | MmugDNA.39497.1 | 9.49  | 9.71  | 0.1  | 0.07 | -1.16 | 0.027082 | 0.040268 | 0.327141 | 0.245902 |
| MmugDNA.39498.1.S1_at   | MmugDNA.39498.1 | 3.49  | 3.51  | 0.3  | 0.12 | -1.01 | 0.821086 | 0.407004 | 0.93547  | 0.63468  |
| MmugDNA.39499.1.S1_at   | MmugDNA.39499.1 | 2.63  | 2.63  | 0.03 | 0.02 | -1    | 0.622565 | 0.832403 | 0.847855 | 0.90389  |
| MmugDNA.3950.1.S1_at    | MmugDNA.3950.1  | 5.16  | 5.48  | 0.46 | 0.23 | -1.24 | 0.077197 | 0.629795 | 0.439109 | 0.781989 |
| MmugDNA.39500.1.S1_at   | MmugDNA.39500.1 | 4.66  | 4.66  | 0.26 | 0.03 | -1    | 0.905945 | 0.713757 | 0.968196 | 0.833937 |
| MmugDNA.39502.1.S1_at   | MmugDNA.39502.1 | 9.75  | 10.01 | 1.97 | 0.23 | -1.2  | 0.651744 | 0.246418 | 0.861835 | 0.515899 |
| MmugDNA.39505.1.S1_at   | MmugDNA.39505.1 | 5.04  | 5.39  | 0.15 | 0.21 | -1.27 | 0.065189 | 0.223864 | 0.419963 | 0.496812 |

|                         |                 |       |       |      |      |       |          |          |          |          |
|-------------------------|-----------------|-------|-------|------|------|-------|----------|----------|----------|----------|
| MmugDNA.39506.1.S1_at   | MmugDNA.39506.1 | 4.52  | 4.38  | 0.24 | 0.07 | 1.1   | 0.478448 | 0.123935 | 0.770085 | 0.394212 |
| MmugDNA.39508.1.S1_x_at | MmugDNA.39508.1 | 7.61  | 7.53  | 0.06 | 0.21 | 1.05  | 0.375138 | 0.628726 | 0.706332 | 0.781399 |
| MmugDNA.39511.1.S1_at   | MmugDNA.39511.1 | 12.4  | 12.89 | 0.29 | 0.09 | -1.41 | 0.12281  | 0.091616 | 0.496214 | 0.346715 |
| MmugDNA.39512.1.S1_at   | MmugDNA.39512.1 | 4.8   | 4.88  | 0.07 | 0.12 | -1.06 | 0.164581 | 0.638057 | 0.537466 | 0.787332 |
| MmugDNA.39513.1.S1_at   | MmugDNA.39513.1 | 4.69  | 4.68  | 0.1  | 0.09 | 1.01  | 0.321341 | 0.19186  | 0.670047 | 0.467233 |
| MmugDNA.39514.1.S1_at   | MmugDNA.39514.1 | 11.06 | 11.38 | 0.31 | 0.06 | -1.25 | 0.172474 | 0.155332 | 0.545748 | 0.430693 |
| MmugDNA.39515.1.S1_at   | MmugDNA.39515.1 | 11.09 | 10.73 | 0.36 | 0.32 | 1.28  | 0.376126 | 0.473865 | 0.706657 | 0.681082 |
| MmugDNA.39516.1.S1_at   | MmugDNA.39516.1 | 6.14  | 6.19  | 0.09 | 0.15 | -1.04 | 0.756299 | 0.177712 | 0.908175 | 0.454073 |
| MmugDNA.39517.1.S1_at   | MmugDNA.39517.1 | 9.64  | 9.64  | 0.34 | 0.09 | 1     | 0.953088 | 0.967602 | 0.984312 | 0.982093 |
| MmugDNA.39518.1.S1_at   | MmugDNA.39518.1 | 3.62  | 3.73  | 0.17 | 0.45 | -1.08 | 0.406963 | 0.537227 | 0.728452 | 0.72233  |
| MmugDNA.39519.1.S1_at   | MmugDNA.39519.1 | 4.6   | 4.48  | 0.07 | 0.06 | -1.08 | 0.201458 | 0.137041 | 0.573109 | 0.409836 |
| MmugDNA.3952.1.S1_at    | MmugDNA.3952.1  | 9.69  | 9.94  | 0.45 | 0.07 | -1.19 | 0.553875 | 0.323004 | 0.812334 | 0.574313 |
| MmugDNA.39520.1.S1_at   | MmugDNA.39520.1 | 11.82 | 12.05 | 2.39 | 0.21 | -1.17 | 0.509311 | 0.363518 | 0.787587 | 0.603941 |
| MmugDNA.39521.1.S1_at   | MmugDNA.39521.1 | 3.62  | 3.48  | 0.14 | 0.2  | 1.1   | 0.889232 | 0.922821 | 0.96181  | 0.956549 |
| MmugDNA.39522.1.S1_s_at | MmugDNA.39522.1 | 11.65 | 10.78 | 0.51 | 0.09 | 1.82  | 0.057634 | 0.066427 | 0.402592 | 0.303385 |
| MmugDNA.39523.1.S1_at   | MmugDNA.39523.1 | 6.04  | 5.77  | 0.05 | 0.12 | 1.21  | 0.010945 | 0.006973 | 0.250796 | 0.112743 |
| MmugDNA.39524.1.S1_at   | MmugDNA.39524.1 | 9.86  | 9.52  | 0.13 | 0.44 | 1.27  | 0.121088 | 0.215176 | 0.494725 | 0.488943 |
| MmugDNA.39526.1.S1_at   | MmugDNA.39526.1 | 5.26  | 5.58  | 0.44 | 0.23 | -1.25 | 0.087647 | 0.182878 | 0.455349 | 0.459362 |
| MmugDNA.39527.1.S1_at   | MmugDNA.39527.1 | 5.14  | 5.48  | 0.22 | 0.15 | -1.26 | 0.050327 | 0.144046 | 0.386982 | 0.417912 |
| MmugDNA.39528.1.S1_at   | MmugDNA.39528.1 | 4.56  | 4.61  | 0.12 | 0.06 | -1.04 | 0.669592 | 0.933764 | 0.869663 | 0.9623   |
| MmugDNA.3953.1.S1_at    | MmugDNA.3953.1  | 3.36  | 3.53  | 0.14 | 0.14 | -1.12 | 0.309071 | 0.110134 | 0.661444 | 0.374244 |
| MmugDNA.3953.1.S1_x_at  | MmugDNA.3953.1  | 11.53 | 11.62 | 0.13 | 0.16 | -1.06 | 0.426579 | 0.539927 | 0.740608 | 0.723995 |
| MmugDNA.39531.1.S1_at   | MmugDNA.39531.1 | 3.8   | 3.84  | 0.45 | 0.62 | -1.03 | 0.814378 | 0.616703 | 0.932969 | 0.77288  |
| MmugDNA.39533.1.S1_at   | MmugDNA.39533.1 | 5.35  | 4.96  | 0.08 | 0.06 | 1.31  | 0.002845 | 0.00079  | 0.187326 | 0.045969 |
| MmugDNA.39535.1.S1_at   | MmugDNA.39535.1 | 2.75  | 2.64  | 0.06 | 0.07 | 1.08  | 0.275907 | 0.056074 | 0.635438 | 0.282697 |
| MmugDNA.39537.1.S1_at   | MmugDNA.39537.1 | 8.46  | 8.67  | 1.1  | 0.01 | -1.16 | 0.719236 | 0.738042 | 0.890913 | 0.848158 |
| MmugDNA.39538.1.S1_at   | MmugDNA.39538.1 | 5.52  | 5.29  | 0.13 | 0.12 | 1.17  | 0.095136 | 0.266197 | 0.464131 | 0.53202  |
| MmugDNA.3954.1.S1_s_at  | MmugDNA.3954.1  | 6.85  | 7.29  | 0.47 | 0.08 | -1.36 | 0.549798 | 0.804052 | 0.810447 | 0.887265 |
| MmugDNA.39541.1.S1_at   | MmugDNA.39541.1 | 6.14  | 5.76  | 0.09 | 0.23 | 1.3   | 0.105847 | 0.054886 | 0.477635 | 0.279748 |
| MmugDNA.39543.1.S1_at   | MmugDNA.39543.1 | 5.5   | 5.36  | 0.07 | 0.11 | 1.1   | 0.409388 | 0.045471 | 0.729999 | 0.2575   |
| MmugDNA.39544.1.S1_at   | MmugDNA.39544.1 | 5.26  | 5.58  | 0.6  | 0.06 | -1.25 | 0.891259 | 0.214819 | 0.962572 | 0.4887   |
| MmugDNA.39546.1.S1_at   | MmugDNA.39546.1 | 2.64  | 2.72  | 0.06 | 0.12 | -1.05 | 0.274699 | 0.532427 | 0.634037 | 0.719057 |
| MmugDNA.39549.1.S1_at   | MmugDNA.39549.1 | 5.96  | 6.55  | 0.66 | 0.27 | -1.5  | 0.415851 | 0.584308 | 0.73381  | 0.752392 |
| MmugDNA.3955.1.S1_at    | MmugDNA.3955.1  | 9.75  | 9.52  | 0.35 | 0.17 | 1.17  | 0.620019 | 0.32911  | 0.846981 | 0.578482 |
| MmugDNA.39550.1.S1_at   | MmugDNA.39550.1 | 3.87  | 3.88  | 0.22 | 0    | -1.01 | 0.552762 | 0.762606 | 0.811917 | 0.861896 |
| MmugDNA.39551.1.S1_at   | MmugDNA.39551.1 | 4.45  | 4.46  | 0.07 | 0    | -1.01 | 0.303497 | 0.200731 | 0.657314 | 0.47524  |
| MmugDNA.39552.1.S1_at   | MmugDNA.39552.1 | 9.37  | 8.38  | 0.49 | 0.26 | 1.98  | 0.034414 | 0.027566 | 0.349795 | 0.20732  |
| MmugDNA.39553.1.S1_at   | MmugDNA.39553.1 | 3.64  | 3.83  | 0.11 | 0.18 | -1.14 | 0.838651 | 0.284471 | 0.942303 | 0.546637 |
| MmugDNA.39556.1.S1_at   | MmugDNA.39556.1 | 5.25  | 4.99  | 0.2  | 0.03 | 1.2   | 0.054746 | 0.091804 | 0.397122 | 0.346977 |
| MmugDNA.39557.1.S1_at   | MmugDNA.39557.1 | 5.66  | 5.34  | 0.12 | 0.18 | 1.25  | 0.183165 | 0.336629 | 0.556057 | 0.583988 |
| MmugDNA.39558.1.S1_s_at | MmugDNA.39558.1 | 11.92 | 11.52 | 0.23 | 0.04 | 1.32  | 0.047486 | 0.041921 | 0.380416 | 0.249343 |
| MmugDNA.39561.1.S1_at   | MmugDNA.39561.1 | 5.8   | 5.74  | 0.31 | 0.15 | 1.05  | 0.839397 | 0.225164 | 0.942739 | 0.497837 |
| MmugDNA.39562.1.S1_at   | MmugDNA.39562.1 | 3.54  | 4.02  | 0.36 | 0.15 | -1.39 | 0.160622 | 0.153823 | 0.533821 | 0.428488 |



|                         |                 |       |       |      |      |       |          |          |          |          |
|-------------------------|-----------------|-------|-------|------|------|-------|----------|----------|----------|----------|
| MmugDNA.39563.1.S1_at   | MmugDNA.39563.1 | 3.08  | 3.05  | 0.22 | 0.06 | 1.02  | 0.301444 | 0.215382 | 0.655772 | 0.489067 |
| MmugDNA.39564.1.S1_at   | MmugDNA.39564.1 | 3.05  | 3.18  | 0.2  | 0.14 | -1.09 | 0.982292 | 0.39526  | 0.994472 | 0.62738  |
| MmugDNA.39565.1.S1_at   | MmugDNA.39565.1 | 6.22  | 6.58  | 0.16 | 0.31 | -1.28 | 0.151369 | 0.583429 | 0.524547 | 0.751772 |
| MmugDNA.39565.1.S1_s_at | MmugDNA.39565.1 | 12.74 | 12.73 | 0.07 | 0.07 | 1.01  | 0.519541 | 0.056596 | 0.793229 | 0.283947 |
| MmugDNA.39566.1.S1_at   | MmugDNA.39566.1 | 9.16  | 8.52  | 0.29 | 0.09 | 1.56  | 0.008422 | 0.003314 | 0.233823 | 0.082825 |
| MmugDNA.39567.1.S1_at   | MmugDNA.39567.1 | 5.18  | 4.54  | 0.79 | 0.36 | 1.56  | 0.094544 | 0.144418 | 0.463794 | 0.418323 |
| MmugDNA.39568.1.S1_at   | MmugDNA.39568.1 | 4.26  | 3.79  | 0.17 | 0.77 | 1.39  | 0.953296 | 0.485004 | 0.984409 | 0.688893 |
| MmugDNA.39569.1.S1_at   | MmugDNA.39569.1 | 8.08  | 7.9   | 0.54 | 0.11 | 1.13  | 0.762264 | 0.392611 | 0.910853 | 0.625813 |
| MmugDNA.3957.1.S1_at    | MmugDNA.3957.1  | 12.29 | 12.61 | 0.12 | 0.03 | -1.25 | 0.004938 | 0.003944 | 0.203775 | 0.089335 |
| MmugDNA.39570.1.S1_at   | MmugDNA.39570.1 | 6.33  | 6.19  | 0.05 | 0.14 | 1.1   | 0.057884 | 0.028633 | 0.40327  | 0.210901 |
| MmugDNA.39572.1.S1_at   | MmugDNA.39572.1 | 5.77  | 5.76  | 0.25 | 0.11 | 1     | 0.409804 | 0.526169 | 0.730334 | 0.715411 |
| MmugDNA.39573.1.S1_s_at | MmugDNA.39573.1 | 8.72  | 10.04 | 1.46 | 0.29 | -2.49 | 0.17277  | 0.173449 | 0.545887 | 0.449938 |
| MmugDNA.39575.1.S1_at   | MmugDNA.39575.1 | 5.51  | 5.38  | 0.23 | 0.09 | 1.09  | 0.104414 | 0.067666 | 0.475473 | 0.306199 |
| MmugDNA.39576.1.S1_at   | MmugDNA.39576.1 | 9.32  | 9.27  | 0.47 | 0.19 | 1.03  | 0.898979 | 0.059853 | 0.965677 | 0.291297 |
| MmugDNA.39577.1.S1_s_at | MmugDNA.39577.1 | 6.61  | 6.66  | 0.09 | 0.09 | -1.04 | 0.901442 | 0.605011 | 0.966569 | 0.764917 |
| MmugDNA.39578.1.S1_at   | MmugDNA.39578.1 | 6.29  | 6.11  | 0.09 | 0.13 | 1.13  | 0.145253 | 0.340153 | 0.520396 | 0.58661  |
| MmugDNA.39579.1.S1_at   | MmugDNA.39579.1 | 5.03  | 5.54  | 0.59 | 0.38 | -1.42 | 0.418975 | 0.181137 | 0.73604  | 0.457582 |
| MmugDNA.3958.1.S1_at    | MmugDNA.3958.1  | 4.67  | 4.75  | 0.04 | 0.09 | -1.06 | 0.37601  | 0.714601 | 0.706657 | 0.834435 |
| MmugDNA.39581.1.S1_at   | MmugDNA.39581.1 | 4.73  | 4.57  | 0.19 | 0.38 | 1.12  | 0.85003  | 0.941777 | 0.947281 | 0.96702  |
| MmugDNA.39583.1.S1_at   | MmugDNA.39583.1 | 3.4   | 3.44  | 0.03 | 0.03 | -1.03 | 0.671609 | 0.684264 | 0.870464 | 0.815842 |
| MmugDNA.39585.1.S1_at   | MmugDNA.39585.1 | 12.3  | 11.92 | 0.07 | 0.12 | 1.31  | 0.004736 | 0.003658 | 0.201699 | 0.086526 |
| MmugDNA.39587.1.S1_at   | MmugDNA.39587.1 | 8.34  | 8.24  | 0.16 | 0.06 | 1.07  | 0.309856 | 0.208035 | 0.661839 | 0.482049 |
| MmugDNA.39589.1.S1_at   | MmugDNA.39589.1 | 5.58  | 5.41  | 0.37 | 0.15 | 1.12  | 0.876728 | 0.53209  | 0.957055 | 0.718995 |
| MmugDNA.3959.1.S1_at    | MmugDNA.3959.1  | 7.44  | 7.84  | 0.4  | 0.15 | -1.31 | 0.504955 | 0.015036 | 0.785092 | 0.155766 |
| MmugDNA.39590.1.S1_at   | MmugDNA.39590.1 | 2.85  | 2.83  | 0.08 | 0.15 | 1.02  | 0.745195 | 0.364079 | 0.902907 | 0.604449 |
| MmugDNA.39591.1.S1_at   | MmugDNA.39591.1 | 3.25  | 3.25  | 0.03 | 0.04 | 1     | 0.232586 | 0.665082 | 0.600124 | 0.803733 |
| MmugDNA.39592.1.S1_at   | MmugDNA.39592.1 | 3.53  | 3.64  | 0.83 | 0.08 | -1.08 | 0.487598 | 0.671586 | 0.775104 | 0.807997 |
| MmugDNA.39593.1.S1_x_at | MmugDNA.39593.1 | 8.3   | 8.33  | 0.26 | 0.22 | -1.02 | 0.895246 | 0.201218 | 0.964244 | 0.475667 |
| MmugDNA.39594.1.S1_at   | MmugDNA.39594.1 | 6.63  | 6.78  | 0.2  | 0.24 | -1.11 | 0.225774 | 0.078436 | 0.594935 | 0.325193 |
| MmugDNA.39595.1.S1_at   | MmugDNA.39595.1 | 3.98  | 4.01  | 0.25 | 0.13 | -1.02 | 0.967504 | 0.496025 | 0.98927  | 0.695877 |
| MmugDNA.39596.1.S1_at   | MmugDNA.39596.1 | 4.28  | 3.92  | 0.12 | 0.18 | 1.28  | 0.020281 | 0.07171  | 0.303799 | 0.313925 |
| MmugDNA.39597.1.S1_at   | MmugDNA.39597.1 | 11.13 | 11.26 | 0.17 | 0.08 | -1.09 | 0.15112  | 0.006685 | 0.52444  | 0.110612 |
| MmugDNA.39598.1.S1_at   | MmugDNA.39598.1 | 11.31 | 11.48 | 0.15 | 0.06 | -1.12 | 0.25487  | 0.012067 | 0.619267 | 0.14211  |
| MmugDNA.39599.1.S1_at   | MmugDNA.39599.1 | 3.26  | 3.22  | 0.1  | 0.11 | 1.03  | 0.411091 | 0.851939 | 0.731138 | 0.915848 |
| MmugDNA.3960.1.S1_at    | MmugDNA.3960.1  | 4.44  | 4.63  | 0.17 | 0.22 | -1.14 | 0.769279 | 0.936989 | 0.913558 | 0.964492 |
| MmugDNA.39600.1.S1_at   | MmugDNA.39600.1 | 5.23  | 5.1   | 0.06 | 0.07 | 1.09  | 0.078198 | 0.446455 | 0.440439 | 0.662842 |
| MmugDNA.16141.1.S1_at   | MmugDNA.16141.1 | 9.47  | 9.74  | 0.19 | 0.08 | -1.2  | 0.10643  | 0.148963 | 0.478853 | 0.423294 |
| MmugDNA.16141.1.S1_s_at | MmugDNA.16141.1 | 11.54 | 11.7  | 0.07 | 0.07 | -1.11 | 0.028798 | 0.022135 | 0.333062 | 0.186245 |
| MmugDNA.39602.1.S1_at   | MmugDNA.39602.1 | 5.6   | 5.58  | 0.66 | 0.07 | 1.02  | 0.947596 | 0.996395 | 0.981978 | 0.997887 |
| MmugDNA.39603.1.S1_at   | MmugDNA.39603.1 | 5.1   | 5.22  | 0.07 | 0    | -1.09 | 0.01404  | 0.007161 | 0.273301 | 0.113794 |
| MmugDNA.39604.1.S1_at   | MmugDNA.39604.1 | 7.88  | 6.78  | 0.78 | 0.22 | 2.16  | 0.319674 | 0.329449 | 0.668882 | 0.578781 |
| MmugDNA.39605.1.S1_at   | MmugDNA.39605.1 | 11.33 | 11.09 | 0.2  | 0.18 | 1.18  | 0.043988 | 0.077562 | 0.373462 | 0.323421 |
| MmugDNA.39608.1.S1_at   | MmugDNA.39608.1 | 11.34 | 11.66 | 0.38 | 0.09 | -1.25 | 0.818144 | 0.931898 | 0.934249 | 0.9613   |

|                         |                 |       |       |      |      |       |          |          |          |          |
|-------------------------|-----------------|-------|-------|------|------|-------|----------|----------|----------|----------|
| MmugDNA.3961.1.S1_at    | MmugDNA.3961.1  | 4.24  | 4.23  | 0.06 | 0.1  | 1.01  | 0.647387 | 0.014619 | 0.859364 | 0.154176 |
| MmugDNA.39610.1.S1_at   | MmugDNA.39610.1 | 5.84  | 4.95  | 0.43 | 0.38 | 1.85  | 0.05133  | 0.060335 | 0.389827 | 0.292254 |
| MmugDNA.39611.1.S1_at   | MmugDNA.39611.1 | 4.61  | 5.57  | 0.3  | 0.1  | -1.95 | 0.00429  | 0.003649 | 0.198874 | 0.086526 |
| MmugDNA.39612.1.S1_at   | MmugDNA.39612.1 | 3.96  | 3.78  | 0.35 | 0.43 | 1.13  | 0.553336 | 0.182211 | 0.812105 | 0.458739 |
| MmugDNA.39613.1.S1_at   | MmugDNA.39613.1 | 5.33  | 5.54  | 0.15 | 0.43 | -1.16 | 0.959884 | 0.196241 | 0.986974 | 0.471236 |
| MmugDNA.39614.1.S1_at   | MmugDNA.39614.1 | 4.9   | 4.85  | 0.16 | 0.05 | 1.04  | 0.209237 | 0.785831 | 0.580725 | 0.875982 |
| MmugDNA.39615.1.S1_at   | MmugDNA.39615.1 | 11.73 | 11.64 | 0.41 | 0.1  | 1.07  | 0.750289 | 0.911971 | 0.905427 | 0.950333 |
| MmugDNA.39617.1.S1_at   | MmugDNA.39617.1 | 6.03  | 6.26  | 0.22 | 0.14 | -1.17 | 0.373814 | 0.410645 | 0.705567 | 0.637463 |
| MmugDNA.39620.1.S1_at   | MmugDNA.39620.1 | 4.94  | 5.47  | 0.26 | 0.06 | -1.44 | 0.082383 | 0.365966 | 0.447257 | 0.605818 |
| MmugDNA.39622.1.S1_at   | MmugDNA.39622.1 | 8.99  | 9.57  | 0.26 | 0.08 | -1.49 | 0.018808 | 0.261013 | 0.298593 | 0.527371 |
| MmugDNA.39623.1.S1_at   | MmugDNA.39623.1 | 5.41  | 5.1   | 0.11 | 0.15 | 1.24  | 0.041063 | 0.018504 | 0.365672 | 0.171136 |
| MmugDNA.39624.1.S1_at   | MmugDNA.39624.1 | 8.16  | 8.84  | 1.24 | 0.19 | -1.6  | 0.939422 | 0.887682 | 0.979532 | 0.93601  |
| MmugDNA.39625.1.S1_at   | MmugDNA.39625.1 | 7.54  | 7.5   | 0.27 | 0.08 | 1.03  | 0.621403 | 0.847419 | 0.847514 | 0.913316 |
| MmugDNA.39628.1.S1_at   | MmugDNA.39628.1 | 5.73  | 5.68  | 0.24 | 0.16 | 1.03  | 0.379437 | 0.210882 | 0.708981 | 0.484934 |
| MmugDNA.39629.1.S1_at   | MmugDNA.39629.1 | 3.22  | 3.31  | 0.14 | 0.13 | -1.07 | 0.60026  | 0.4378   | 0.837789 | 0.656968 |
| MmugDNA.39630.1.S1_at   | MmugDNA.39630.1 | 5.77  | 5.55  | 0.18 | 0.24 | 1.17  | 0.992239 | 0.019716 | 0.996954 | 0.176461 |
| MmugDNA.39633.1.S1_at   | MmugDNA.39633.1 | 6.06  | 6.49  | 0.62 | 0.05 | -1.35 | 0.30837  | 0.094972 | 0.660989 | 0.352056 |
| MmugDNA.39633.1.S1_s_at | MmugDNA.39633.1 | 5.95  | 7.16  | 0.64 | 0.23 | -2.31 | 0.037174 | 0.004526 | 0.356809 | 0.093974 |
| MmugDNA.39635.1.S1_at   | MmugDNA.39635.1 | 10.36 | 9.15  | 0.54 | 0.05 | 2.31  | 0.013962 | 0.01402  | 0.273301 | 0.151595 |
| MmugDNA.39636.1.S1_at   | MmugDNA.39636.1 | 10.07 | 10.34 | 0.25 | 0.15 | -1.2  | 0.507625 | 0.722855 | 0.78646  | 0.839464 |
| MmugDNA.39638.1.S1_at   | MmugDNA.39638.1 | 6.26  | 5.33  | 0.48 | 0.25 | 1.9   | 0.063838 | 0.08651  | 0.416646 | 0.33907  |
| MmugDNA.39639.1.S1_at   | MmugDNA.39639.1 | 11    | 10.05 | 0.27 | 0.23 | 1.94  | 0.014763 | 0.054466 | 0.278005 | 0.278959 |
| MmugDNA.3964.1.S1_at    | MmugDNA.3964.1  | 10.45 | 10.33 | 0.22 | 0.1  | 1.09  | 0.269795 | 0.261412 | 0.62995  | 0.527887 |
| MmugDNA.39640.1.S1_at   | MmugDNA.39640.1 | 4.65  | 4.43  | 0.14 | 0.19 | 1.16  | 0.169609 | 0.251554 | 0.542592 | 0.520309 |
| MmugDNA.39641.1.S1_at   | MmugDNA.39641.1 | 3.32  | 3.27  | 0.08 | 0.04 | 1.04  | 0.438805 | 0.505748 | 0.747532 | 0.702218 |
| MmugDNA.39642.1.S1_at   | MmugDNA.39642.1 | 8.37  | 8.41  | 0.72 | 0.14 | -1.03 | 0.384076 | 0.645957 | 0.711753 | 0.792676 |
| MmugDNA.39644.1.S1_at   | MmugDNA.39644.1 | 7.91  | 7.9   | 0.85 | 0.5  | 1     | 0.375799 | 0.768977 | 0.706657 | 0.865764 |
| MmugDNA.39646.1.S1_s_at | MmugDNA.39646.1 | 10.28 | 9.76  | 0.11 | 0.04 | 1.43  | 0.003228 | 0.13856  | 0.192606 | 0.411557 |
| MmugDNA.39647.1.S1_at   | MmugDNA.39647.1 | 4.5   | 4.53  | 0.1  | 0.14 | -1.02 | 0.338707 | 0.514863 | 0.683213 | 0.707923 |
| MmugDNA.39648.1.S1_at   | MmugDNA.39648.1 | 3.55  | 3.37  | 0.11 | 0.07 | 1.14  | 0.132674 | 0.303969 | 0.506936 | 0.561344 |
| MmugDNA.39649.1.S1_at   | MmugDNA.39649.1 | 3.23  | 3.1   | 0.16 | 0.1  | 1.09  | 0.47548  | 0.315474 | 0.768646 | 0.568985 |
| MmugDNA.39650.1.S1_at   | MmugDNA.39650.1 | 11.13 | 10.4  | 0.19 | 0.06 | 1.66  | 0.004593 | 0.002356 | 0.201051 | 0.071631 |
| MmugDNA.39651.1.S1_at   | MmugDNA.39651.1 | 3.59  | 3.73  | 0.05 | 0.21 | -1.1  | 0.915061 | 0.982857 | 0.971014 | 0.990596 |
| MmugDNA.39654.1.S1_at   | MmugDNA.39654.1 | 5.53  | 5.61  | 0.51 | 0.32 | -1.06 | 0.475714 | 0.09759  | 0.768676 | 0.355456 |
| MmugDNA.39655.1.S1_at   | MmugDNA.39655.1 | 7.55  | 7.44  | 0.69 | 0.2  | 1.08  | 0.791614 | 0.292572 | 0.923466 | 0.552628 |
| MmugDNA.39656.1.S1_at   | MmugDNA.39656.1 | 7.1   | 7.22  | 0.16 | 0.07 | -1.09 | 0.306305 | 0.051551 | 0.659412 | 0.272469 |
| MmugDNA.39657.1.S1_at   | MmugDNA.39657.1 | 6.44  | 5.85  | 0.17 | 0.7  | 1.51  | 0.150428 | 0.173297 | 0.524009 | 0.449791 |
| MmugDNA.39658.1.S1_at   | MmugDNA.39658.1 | 5.35  | 5.36  | 0.28 | 0.16 | -1.01 | 0.775212 | 0.544653 | 0.916671 | 0.727006 |
| MmugDNA.39659.1.S1_at   | MmugDNA.39659.1 | 3.81  | 3.71  | 0.16 | 0.12 | 1.07  | 0.218865 | 0.32737  | 0.588341 | 0.577284 |
| MmugDNA.39660.1.S1_at   | MmugDNA.39660.1 | 3.38  | 3.4   | 0.27 | 0.08 | -1.01 | 0.848508 | 0.980103 | 0.946777 | 0.989236 |
| MmugDNA.39661.1.S1_at   | MmugDNA.39661.1 | 9.72  | 9.81  | 0.29 | 0.18 | -1.06 | 0.980334 | 0.002408 | 0.993785 | 0.07278  |
| MmugDNA.39662.1.S1_at   | MmugDNA.39662.1 | 11.13 | 11.09 | 0.1  | 0.08 | 1.03  | 0.580863 | 0.000429 | 0.827317 | 0.038359 |
| MmugDNA.39665.1.S1_at   | MmugDNA.39665.1 | 4.93  | 4.88  | 0.38 | 0.25 | 1.04  | 0.482313 | 0.299109 | 0.772308 | 0.557663 |

|                         |                 |       |       |      |      |       |          |          |          |          |
|-------------------------|-----------------|-------|-------|------|------|-------|----------|----------|----------|----------|
| MmugDNA.39666.1.S1_at   | MmugDNA.39666.1 | 11.01 | 10.98 | 0.16 | 0.19 | 1.03  | 0.703825 | 0.625053 | 0.884872 | 0.778973 |
| MmugDNA.39667.1.S1_at   | MmugDNA.39667.1 | 5.96  | 5.9   | 0.23 | 0.02 | 1.05  | 0.662631 | 0.880133 | 0.866912 | 0.931533 |
| MmugDNA.39668.1.S1_at   | MmugDNA.39668.1 | 5.64  | 5.38  | 0.19 | 0.11 | 1.2   | 0.293085 | 0.39337  | 0.649424 | 0.626258 |
| MmugDNA.3967.1.S1_at    | MmugDNA.3967.1  | 13.12 | 12.95 | 0.15 | 0.05 | 1.12  | 0.096063 | 0.088102 | 0.464614 | 0.341641 |
| MmugDNA.3967.1.S1_s_at  | MmugDNA.3967.1  | 12.3  | 11.83 | 0.21 | 0.11 | 1.39  | 0.017391 | 0.007528 | 0.291474 | 0.1163   |
| MmugDNA.39670.1.S1_at   | MmugDNA.39670.1 | 10.57 | 10.44 | 0.28 | 0.16 | 1.09  | 0.705577 | 0.10226  | 0.885355 | 0.36236  |
| MmugDNA.39671.1.S1_at   | MmugDNA.39671.1 | 10.43 | 10.49 | 0.56 | 0.23 | -1.04 | 0.86989  | 0.898234 | 0.954596 | 0.942072 |
| MmugDNA.39672.1.S1_at   | MmugDNA.39672.1 | 11.59 | 11.31 | 0.06 | 0.05 | 1.21  | 0.008101 | 0.002972 | 0.232005 | 0.079958 |
| MmugDNA.39673.1.S1_at   | MmugDNA.39673.1 | 7.2   | 7.03  | 0.53 | 0.25 | 1.13  | 0.838082 | 0.592468 | 0.941963 | 0.757832 |
| MmugDNA.39674.1.S1_at   | MmugDNA.39674.1 | 6.41  | 5.75  | 0.36 | 0.63 | 1.58  | 0.649038 | 0.140478 | 0.860193 | 0.413679 |
| MmugDNA.39675.1.S1_at   | MmugDNA.39675.1 | 5.33  | 5.43  | 0.05 | 0.1  | -1.07 | 0.236122 | 0.209282 | 0.603112 | 0.48303  |
| MmugDNA.39676.1.S1_at   | MmugDNA.39676.1 | 4.69  | 4.37  | 0.07 | 0.11 | 1.26  | 0.010161 | 0.012432 | 0.246929 | 0.144098 |
| MmugDNA.39677.1.S1_at   | MmugDNA.39677.1 | 3.66  | 3.38  | 0.3  | 0.42 | 1.22  | 0.700775 | 0.619952 | 0.883615 | 0.775141 |
| MmugDNA.39680.1.S1_at   | MmugDNA.39680.1 | 5.12  | 4.7   | 0.07 | 0.06 | 1.34  | 0.002068 | 0.017783 | 0.174088 | 0.168549 |
| MmugDNA.39681.1.S1_at   | MmugDNA.39681.1 | 6.04  | 6.68  | 0.25 | 0.25 | -1.56 | 0.075753 | 0.260703 | 0.436784 | 0.527199 |
| MmugDNA.39682.1.S1_at   | MmugDNA.39682.1 | 3.22  | 3.18  | 0.03 | 0.16 | 1.02  | 0.685778 | 0.185574 | 0.876883 | 0.461566 |
| MmugDNA.39683.1.S1_at   | MmugDNA.39683.1 | 3.29  | 3.34  | 0.11 | 0.04 | -1.03 | 0.492202 | 0.577171 | 0.778212 | 0.747682 |
| MmugDNA.39684.1.S1_at   | MmugDNA.39684.1 | 6.1   | 5.97  | 0.06 | 0.06 | 1.09  | 0.058934 | 0.456842 | 0.405776 | 0.670521 |
| MmugDNA.39685.1.S1_at   | MmugDNA.39685.1 | 6.26  | 5.76  | 0.71 | 0.26 | 1.41  | 0.10586  | 0.191262 | 0.477635 | 0.466553 |
| MmugDNA.39686.1.S1_at   | MmugDNA.39686.1 | 9.11  | 8.9   | 0.21 | 0.05 | 1.16  | 0.644575 | 0.267494 | 0.858549 | 0.533223 |
| MmugDNA.39688.1.S1_at   | MmugDNA.39688.1 | 6.96  | 7.43  | 0.17 | 0.23 | -1.39 | 0.07311  | 0.059898 | 0.434019 | 0.291387 |
| MmugDNA.39689.1.S1_at   | MmugDNA.39689.1 | 4.25  | 3.7   | 0.25 | 0.39 | 1.46  | 0.209011 | 0.269518 | 0.580603 | 0.534806 |
| MmugDNA.3969.1.S1_at    | MmugDNA.3969.1  | 6.62  | 6.55  | 0.41 | 0.08 | 1.05  | 0.222451 | 0.196536 | 0.591989 | 0.471582 |
| MmugDNA.39690.1.S1_at   | MmugDNA.39690.1 | 3.69  | 3.65  | 0.07 | 0.18 | 1.03  | 0.721107 | 0.34263  | 0.891935 | 0.588644 |
| MmugDNA.39691.1.S1_at   | MmugDNA.39691.1 | 9.57  | 9.61  | 0.25 | 0.24 | -1.03 | 0.315301 | 0.424982 | 0.665724 | 0.647458 |
| MmugDNA.39691.1.S1_s_at | MmugDNA.39691.1 | 9.06  | 9.17  | 0.26 | 0.21 | -1.08 | 0.455997 | 0.662598 | 0.75763  | 0.802443 |
| MmugDNA.39692.1.S1_at   | MmugDNA.39692.1 | 4.15  | 3.96  | 0.69 | 0.42 | 1.14  | 0.718266 | 0.722515 | 0.890613 | 0.839261 |
| MmugDNA.39693.1.S1_at   | MmugDNA.39693.1 | 3.34  | 3.15  | 0.23 | 0.12 | 1.14  | 0.264354 | 0.291319 | 0.626029 | 0.551803 |
| MmugDNA.39694.1.S1_at   | MmugDNA.39694.1 | 8.07  | 7.94  | 0.46 | 0.13 | 1.09  | 0.350399 | 0.157656 | 0.691263 | 0.433137 |
| MmugDNA.39695.1.S1_at   | MmugDNA.39695.1 | 9.33  | 9.01  | 0.08 | 0.13 | 1.25  | 0.033978 | 0.041779 | 0.347469 | 0.248981 |
| MmugDNA.39695.1.S1_s_at | MmugDNA.39695.1 | 7.9   | 7.44  | 0.12 | 0.24 | 1.38  | 0.053064 | 0.061066 | 0.393954 | 0.293952 |
| MmugDNA.39696.1.S1_at   | MmugDNA.39696.1 | 8.12  | 8.21  | 0.51 | 0.32 | -1.06 | 0.357586 | 0.675462 | 0.695902 | 0.810337 |
| MmugDNA.39697.1.S1_at   | MmugDNA.39697.1 | 7.26  | 7.11  | 0.45 | 0.19 | 1.11  | 0.28168  | 0.404713 | 0.64018  | 0.633217 |
| MmugDNA.39698.1.S1_at   | MmugDNA.39698.1 | 5.32  | 5.33  | 0.16 | 0.1  | -1.01 | 0.264969 | 0.224053 | 0.62636  | 0.497048 |
| MmugDNA.397.1.S1_at     | MmugDNA.397.1   | 5.03  | 4.67  | 0.15 | 0.64 | 1.29  | 0.820682 | 0.680022 | 0.935289 | 0.81315  |
| MmugDNA.3970.1.S1_at    | MmugDNA.3970.1  | 9.07  | 8.96  | 0.3  | 0.01 | 1.08  | 0.742953 | 0.736677 | 0.901935 | 0.847687 |
| MmugDNA.39700.1.S1_at   | MmugDNA.39700.1 | 5.38  | 5.12  | 0.1  | 0.15 | 1.2   | 0.066501 | 0.05509  | 0.422351 | 0.280248 |
| MmugDNA.39702.1.S1_at   | MmugDNA.39702.1 | 3.72  | 3.73  | 0.14 | 0.09 | -1.01 | 0.378444 | 0.283776 | 0.708344 | 0.546196 |
| MmugDNA.39703.1.S1_at   | MmugDNA.39703.1 | 10.42 | 10.28 | 0.03 | 0.02 | 1.1   | 0.001411 | 0.000309 | 0.160065 | 0.035119 |
| MmugDNA.39704.1.S1_at   | MmugDNA.39704.1 | 5.89  | 5.49  | 0.25 | 0.2  | 1.32  | 0.150728 | 0.23556  | 0.524294 | 0.506633 |
| MmugDNA.39705.1.S1_at   | MmugDNA.39705.1 | 4.62  | 5.02  | 0.42 | 0.36 | -1.32 | 0.140747 | 0.210912 | 0.51617  | 0.484934 |
| MmugDNA.39706.1.S1_at   | MmugDNA.39706.1 | 4.97  | 4.74  | 0.73 | 0.18 | 1.17  | 0.410867 | 0.621189 | 0.730985 | 0.775813 |
| MmugDNA.39707.1.S1_at   | MmugDNA.39707.1 | 8.4   | 7.47  | 0.89 | 0.28 | 1.91  | 0.359514 | 0.491067 | 0.697304 | 0.692753 |

|                         |                 |       |       |      |      |       |          |          |          |          |
|-------------------------|-----------------|-------|-------|------|------|-------|----------|----------|----------|----------|
| MmugDNA.39710.1.S1_at   | MmugDNA.39710.1 | 7.66  | 8.07  | 0.58 | 0.49 | -1.32 | 0.320123 | 0.415485 | 0.669154 | 0.64091  |
| MmugDNA.39711.1.S1_at   | MmugDNA.39711.1 | 5.27  | 5.09  | 0.15 | 0.11 | 1.13  | 0.23141  | 0.447491 | 0.599368 | 0.663561 |
| MmugDNA.39712.1.S1_at   | MmugDNA.39712.1 | 4.6   | 4.67  | 0.26 | 0    | -1.05 | 0.799221 | 0.767483 | 0.926464 | 0.865004 |
| MmugDNA.39715.1.S1_at   | MmugDNA.39715.1 | 7.84  | 7.65  | 0.13 | 0.08 | 1.14  | 0.087299 | 0.113425 | 0.454785 | 0.379509 |
| MmugDNA.39716.1.S1_at   | MmugDNA.39716.1 | 7.23  | 6.47  | 0.41 | 0.05 | 1.7   | 0.035601 | 0.050646 | 0.352514 | 0.270317 |
| MmugDNA.39717.1.S1_at   | MmugDNA.39717.1 | 4.36  | 4.33  | 0.32 | 0.13 | 1.02  | 0.727705 | 0.743823 | 0.894799 | 0.851535 |
| MmugDNA.39718.1.S1_at   | MmugDNA.39718.1 | 10.28 | 10.25 | 0.42 | 0.13 | 1.02  | 0.861549 | 0.185697 | 0.951267 | 0.46163  |
| MmugDNA.39720.1.S1_at   | MmugDNA.39720.1 | 4.05  | 4.05  | 0.12 | 0.21 | 1     | 0.242858 | 0.447318 | 0.608808 | 0.663434 |
| MmugDNA.39721.1.S1_at   | MmugDNA.39721.1 | 11.41 | 11.04 | 0.38 | 0.13 | 1.3   | 0.380285 | 0.186769 | 0.709387 | 0.46257  |
| MmugDNA.39722.1.S1_at   | MmugDNA.39722.1 | 9.58  | 9.05  | 1.18 | 0.4  | 1.45  | 0.64728  | 0.505903 | 0.859364 | 0.702252 |
| MmugDNA.39723.1.S1_at   | MmugDNA.39723.1 | 2.81  | 2.91  | 0.12 | 0.19 | -1.07 | 0.318545 | 0.362024 | 0.668228 | 0.602727 |
| MmugDNA.39724.1.S1_at   | MmugDNA.39724.1 | 6.12  | 6.25  | 0.13 | 0.08 | -1.1  | 0.054281 | 0.187582 | 0.396159 | 0.463628 |
| MmugDNA.39725.1.S1_at   | MmugDNA.39725.1 | 11.03 | 11.61 | 0.3  | 0.1  | -1.49 | 0.109792 | 0.059672 | 0.482607 | 0.290919 |
| MmugDNA.39726.1.S1_at   | MmugDNA.39726.1 | 9.36  | 9.94  | 0.1  | 0.14 | -1.49 | 0.009558 | 0.030405 | 0.242426 | 0.216319 |
| MmugDNA.39727.1.S1_at   | MmugDNA.39727.1 | 6.04  | 6.9   | 0.22 | 0.14 | -1.81 | 0.005909 | 0.002232 | 0.212197 | 0.069565 |
| MmugDNA.39728.1.S1_at   | MmugDNA.39728.1 | 4.23  | 4.06  | 0.35 | 0.27 | 1.13  | 0.794444 | 0.951593 | 0.924569 | 0.972522 |
| MmugDNA.39729.1.S1_at   | MmugDNA.39729.1 | 3.96  | 3.9   | 0.27 | 0.11 | 1.05  | 0.380343 | 0.153341 | 0.709387 | 0.428139 |
| MmugDNA.39730.1.S1_at   | MmugDNA.39730.1 | 6.8   | 6.62  | 0.09 | 0.03 | 1.14  | 0.031509 | 0.322328 | 0.341227 | 0.57392  |
| MmugDNA.39731.1.S1_at   | MmugDNA.39731.1 | 6.24  | 6.11  | 0.15 | 0.11 | 1.09  | 0.23965  | 0.445258 | 0.606153 | 0.662338 |
| MmugDNA.39732.1.S1_at   | MmugDNA.39732.1 | 4.7   | 4.7   | 0.03 | 0.08 | 1     | 0.368016 | 0.632774 | 0.703469 | 0.783788 |
| MmugDNA.39733.1.S1_at   | MmugDNA.39733.1 | 10.1  | 9.71  | 0.92 | 0.27 | 1.31  | 0.848824 | 0.478291 | 0.946889 | 0.684289 |
| MmugDNA.39734.1.S1_at   | MmugDNA.39734.1 | 3.51  | 3.57  | 0.22 | 0.19 | -1.04 | 0.793513 | 0.909748 | 0.924375 | 0.949083 |
| MmugDNA.39735.1.S1_at   | MmugDNA.39735.1 | 6.96  | 6.67  | 0.19 | 0.09 | 1.22  | 0.111594 | 0.299559 | 0.484892 | 0.557945 |
| MmugDNA.39736.1.S1_at   | MmugDNA.39736.1 | 4.27  | 4.18  | 0.12 | 0.14 | 1.06  | 0.547276 | 0.883551 | 0.808985 | 0.933618 |
| MmugDNA.39737.1.S1_at   | MmugDNA.39737.1 | 5.98  | 5.9   | 0.15 | 0.04 | 1.06  | 0.13934  | 0.262553 | 0.514724 | 0.528878 |
| MmugDNA.39738.1.S1_at   | MmugDNA.39738.1 | 8.75  | 8.85  | 1.95 | 0.36 | -1.08 | 0.821223 | 0.1776   | 0.935545 | 0.453962 |
| MmugDNA.39739.1.S1_at   | MmugDNA.39739.1 | 5.12  | 5.39  | 0.49 | 0.36 | -1.21 | 0.862264 | 0.306248 | 0.951462 | 0.562907 |
| MmugDNA.3974.1.S1_at    | MmugDNA.3974.1  | 10.88 | 11    | 0.14 | 0.06 | -1.09 | 0.613084 | 0.73434  | 0.843382 | 0.846084 |
| MmugDNA.39740.1.S1_at   | MmugDNA.39740.1 | 7.22  | 7.21  | 0.2  | 0.06 | 1.01  | 0.777534 | 0.730412 | 0.917657 | 0.844017 |
| MmugDNA.39741.1.S1_at   | MmugDNA.39741.1 | 7.03  | 7.08  | 0.21 | 0.12 | -1.04 | 0.603637 | 0.465619 | 0.83932  | 0.675863 |
| MmugDNA.39742.1.S1_at   | MmugDNA.39742.1 | 3.25  | 3.25  | 0.05 | 0.07 | -1    | 0.533347 | 0.487365 | 0.80084  | 0.690461 |
| MmugDNA.39743.1.S1_at   | MmugDNA.39743.1 | 10.58 | 10.88 | 0.34 | 0.06 | -1.23 | 0.30835  | 0.302277 | 0.660989 | 0.560092 |
| MmugDNA.39746.1.S1_at   | MmugDNA.39746.1 | 5.03  | 5.13  | 0.28 | 0.29 | -1.07 | 0.670575 | 0.853361 | 0.869943 | 0.916579 |
| MmugDNA.39747.1.S1_at   | MmugDNA.39747.1 | 3.59  | 3.66  | 0.44 | 0.15 | -1.05 | 0.80591  | 0.662489 | 0.929557 | 0.802356 |
| MmugDNA.39748.1.S1_at   | MmugDNA.39748.1 | 2.94  | 3.1   | 0.3  | 0.11 | -1.12 | 0.728356 | 0.76792  | 0.895142 | 0.865256 |
| MmugDNA.39749.1.S1_at   | MmugDNA.39749.1 | 11.73 | 11.79 | 0.39 | 0.11 | -1.04 | 0.829635 | 0.132478 | 0.938862 | 0.404534 |
| MmugDNA.3975.1.S1_at    | MmugDNA.3975.1  | 5.6   | 5.36  | 0.06 | 0.2  | 1.18  | 0.131177 | 0.150017 | 0.5054   | 0.424621 |
| MmugDNA.39750.1.S1_at   | MmugDNA.39750.1 | 3.53  | 3.72  | 0.16 | 0.02 | -1.14 | 0.118402 | 0.322477 | 0.491933 | 0.573991 |
| MmugDNA.39751.1.S1_at   | MmugDNA.39751.1 | 7.98  | 8.21  | 0.17 | 0.2  | -1.18 | 0.366629 | 0.090819 | 0.702101 | 0.345355 |
| MmugDNA.39752.1.S1_at   | MmugDNA.39752.1 | 5.5   | 5.45  | 0.14 | 0.1  | 1.03  | 0.183935 | 0.685494 | 0.556882 | 0.816536 |
| MmugDNA.39753.1.S1_s_at | MmugDNA.39753.1 | 12.65 | 12.8  | 0.17 | 0.11 | -1.11 | 0.185878 | 0.035582 | 0.558795 | 0.232862 |
| MmugDNA.39754.1.S1_s_at | MmugDNA.39754.1 | 2.82  | 2.68  | 0.2  | 0.03 | 1.1   | 0.965858 | 0.098289 | 0.988768 | 0.356337 |
| MmugDNA.39755.1.S1_at   | MmugDNA.39755.1 | 5.54  | 5.51  | 0.08 | 0.1  | 1.02  | 0.373853 | 0.746142 | 0.705567 | 0.852688 |

|                       |                 |       |       |      |      |       |          |          |          |          |
|-----------------------|-----------------|-------|-------|------|------|-------|----------|----------|----------|----------|
| MmugDNA.39756.1.S1_at | MmugDNA.39756.1 | 3.5   | 3.74  | 0.37 | 0.27 | -1.18 | 0.671221 | 0.706024 | 0.870255 | 0.829633 |
| MmugDNA.39757.1.S1_at | MmugDNA.39757.1 | 9.21  | 9.19  | 0.38 | 0.04 | 1.02  | 0.379138 | 0.830121 | 0.708639 | 0.902487 |
| MmugDNA.39758.1.S1_at | MmugDNA.39758.1 | 3.81  | 3.5   | 0.26 | 0.19 | 1.24  | 0.387093 | 0.010298 | 0.714039 | 0.132854 |
| MmugDNA.39759.1.S1_at | MmugDNA.39759.1 | 4.14  | 3.98  | 0.15 | 0.03 | 1.12  | 0.129003 | 0.084396 | 0.503646 | 0.335713 |
| MmugDNA.3976.1.S1_at  | MmugDNA.3976.1  | 8.61  | 9.65  | 0.23 | 0.36 | -2.06 | 0.025857 | 0.026518 | 0.32273  | 0.203899 |
| MmugDNA.39760.1.S1_at | MmugDNA.39760.1 | 5.97  | 5.81  | 0.33 | 0.04 | 1.12  | 0.143767 | 0.17691  | 0.519062 | 0.453317 |
| MmugDNA.39761.1.S1_at | MmugDNA.39761.1 | 6.56  | 6.37  | 0.1  | 0.04 | 1.14  | 0.045975 | 0.347212 | 0.37735  | 0.591841 |
| MmugDNA.39762.1.S1_at | MmugDNA.39762.1 | 9.7   | 9.99  | 1.12 | 0.3  | -1.22 | 0.83285  | 0.024061 | 0.940059 | 0.194434 |
| MmugDNA.39764.1.S1_at | MmugDNA.39764.1 | 3.66  | 3.56  | 0.01 | 0.09 | 1.07  | 0.128592 | 0.753647 | 0.503383 | 0.856589 |
| MmugDNA.39765.1.S1_at | MmugDNA.39765.1 | 7.2   | 7.33  | 0.62 | 0.24 | -1.09 | 0.523859 | 0.274044 | 0.795658 | 0.538527 |
| MmugDNA.39766.1.S1_at | MmugDNA.39766.1 | 6.81  | 6.8   | 1.27 | 0.24 | 1.01  | 0.81599  | 0.730932 | 0.933284 | 0.844163 |
| MmugDNA.39767.1.S1_at | MmugDNA.39767.1 | 4.61  | 4.28  | 0.08 | 0.12 | 1.25  | 0.040546 | 0.025899 | 0.364613 | 0.201714 |
| MmugDNA.39768.1.S1_at | MmugDNA.39768.1 | 10.94 | 10.96 | 0.18 | 0.1  | -1.01 | 0.202262 | 0.322547 | 0.573733 | 0.573991 |
| MmugDNA.39769.1.S1_at | MmugDNA.39769.1 | 5.94  | 5.93  | 0.15 | 0.12 | 1     | 0.8888   | 0.725515 | 0.961633 | 0.841043 |
| MmugDNA.3977.1.S1_at  | MmugDNA.3977.1  | 5.48  | 4.79  | 0.47 | 0.34 | 1.61  | 0.385517 | 0.122282 | 0.712865 | 0.391973 |
| MmugDNA.39770.1.S1_at | MmugDNA.39770.1 | 9.79  | 9.48  | 0.18 | 0.08 | 1.24  | 0.039503 | 0.001805 | 0.362034 | 0.063714 |
| MmugDNA.39771.1.S1_at | MmugDNA.39771.1 | 7.14  | 7.44  | 0.49 | 0.65 | -1.23 | 0.223282 | 0.530692 | 0.592569 | 0.718104 |
| MmugDNA.39773.1.S1_at | MmugDNA.39773.1 | 3.8   | 3.77  | 0.28 | 0.04 | 1.02  | 0.755984 | 0.633314 | 0.90805  | 0.784071 |
| MmugDNA.39775.1.S1_at | MmugDNA.39775.1 | 7.09  | 6.72  | 0.21 | 0.06 | 1.3   | 0.11114  | 0.039487 | 0.484303 | 0.243642 |
| MmugDNA.39777.1.S1_at | MmugDNA.39777.1 | 9.35  | 9.88  | 0.39 | 0.15 | -1.44 | 0.094701 | 0.118653 | 0.46387  | 0.386673 |
| MmugDNA.39778.1.S1_at | MmugDNA.39778.1 | 4.35  | 4.12  | 0.88 | 0.2  | 1.17  | 0.834602 | 0.059839 | 0.94072  | 0.291286 |
| MmugDNA.3978.1.S1_at  | MmugDNA.3978.1  | 4.63  | 4.28  | 0.27 | 0.08 | 1.27  | 0.074079 | 0.080059 | 0.434845 | 0.327429 |
| MmugDNA.39780.1.S1_at | MmugDNA.39780.1 | 5.02  | 4.74  | 0.13 | 0.1  | 1.21  | 0.053448 | 0.173295 | 0.394724 | 0.449791 |
| MmugDNA.39781.1.S1_at | MmugDNA.39781.1 | 5.34  | 6.35  | 0.59 | 0.53 | -2.01 | 0.204524 | 0.238473 | 0.575907 | 0.509084 |
| MmugDNA.39783.1.S1_at | MmugDNA.39783.1 | 3.1   | 3.11  | 0.04 | 0.11 | -1    | 0.260004 | 0.424584 | 0.622946 | 0.647146 |
| MmugDNA.39784.1.S1_at | MmugDNA.39784.1 | 11.25 | 11.35 | 0.27 | 0.15 | -1.07 | 0.976792 | 0.836415 | 0.992455 | 0.906441 |
| MmugDNA.39785.1.S1_at | MmugDNA.39785.1 | 4.79  | 4.74  | 0.28 | 0.12 | 1.03  | 0.366636 | 0.434687 | 0.702101 | 0.654756 |
| MmugDNA.39786.1.S1_at | MmugDNA.39786.1 | 2.94  | 2.85  | 0.07 | 0.03 | 1.07  | 0.095293 | 0.087694 | 0.464131 | 0.340941 |
| MmugDNA.39787.1.S1_at | MmugDNA.39787.1 | 7.02  | 6.91  | 0.35 | 0.05 | 1.08  | 0.611623 | 0.47269  | 0.84257  | 0.68007  |
| MmugDNA.39788.1.S1_at | MmugDNA.39788.1 | 9.33  | 8.59  | 0.5  | 0.15 | 1.67  | 0.148778 | 0.085645 | 0.522743 | 0.337706 |
| MmugDNA.3979.1.S1_at  | MmugDNA.3979.1  | 5.1   | 4.69  | 0.41 | 0.22 | 1.33  | 0.854961 | 0.239113 | 0.948671 | 0.509827 |
| MmugDNA.39790.1.S1_at | MmugDNA.39790.1 | 5.54  | 5.5   | 0.08 | 0.05 | 1.03  | 0.087644 | 0.144501 | 0.455349 | 0.418394 |
| MmugDNA.39792.1.S1_at | MmugDNA.39792.1 | 3.49  | 3.25  | 0.13 | 0.55 | 1.18  | 0.65901  | 0.513734 | 0.865035 | 0.707217 |
| MmugDNA.39793.1.S1_at | MmugDNA.39793.1 | 5.1   | 5.13  | 0.23 | 0.16 | -1.02 | 0.967795 | 0.54307  | 0.989373 | 0.72592  |
| MmugDNA.39795.1.S1_at | MmugDNA.39795.1 | 5.79  | 5.45  | 0.11 | 0.21 | 1.27  | 0.077458 | 0.063808 | 0.439403 | 0.29906  |
| MmugDNA.39797.1.S1_at | MmugDNA.39797.1 | 3.91  | 3.74  | 1.08 | 0.74 | 1.12  | 0.657252 | 0.506334 | 0.863937 | 0.702371 |
| MmugDNA.39798.1.S1_at | MmugDNA.39798.1 | 6.44  | 5.51  | 0.74 | 0.31 | 1.91  | 0.079846 | 0.044964 | 0.442789 | 0.256489 |
| MmugDNA.39799.1.S1_at | MmugDNA.39799.1 | 4.07  | 3.94  | 0.03 | 0.04 | 1.09  | 0.030203 | 0.627516 | 0.336927 | 0.780488 |
| MmugDNA.398.1.S1_at   | MmugDNA.398.1   | 3.87  | 3.84  | 0.23 | 0.16 | 1.03  | 0.988257 | 0.612488 | 0.995877 | 0.770071 |
| MmugDNA.3980.1.S1_at  | MmugDNA.3980.1  | 2.98  | 2.93  | 0.04 | 0.06 | 1.04  | 0.113882 | 0.109852 | 0.487339 | 0.373823 |
| MmugDNA.39800.1.S1_at | MmugDNA.39800.1 | 10.84 | 9.95  | 0.38 | 0.21 | 1.86  | 0.022276 | 0.00777  | 0.310495 | 0.117732 |
| MmugDNA.39801.1.S1_at | MmugDNA.39801.1 | 10.72 | 10.7  | 0.07 | 0.01 | 1.01  | 0.992663 | 0.361398 | 0.997266 | 0.602196 |
| MmugDNA.39802.1.S1_at | MmugDNA.39802.1 | 3.48  | 3.44  | 0.29 | 0.06 | 1.02  | 0.652442 | 0.727976 | 0.862004 | 0.842711 |

|                         |                 |       |       |      |      |       |          |          |          |          |
|-------------------------|-----------------|-------|-------|------|------|-------|----------|----------|----------|----------|
| MmugDNA.39803.1.S1_at   | MmugDNA.39803.1 | 6.93  | 7.14  | 0.29 | 0.11 | -1.16 | 0.413711 | 0.680735 | 0.732521 | 0.813572 |
| MmugDNA.39804.1.S1_at   | MmugDNA.39804.1 | 10.33 | 10.93 | 0.2  | 0.14 | -1.52 | 0.012025 | 0.009633 | 0.258642 | 0.129267 |
| MmugDNA.39805.1.S1_at   | MmugDNA.39805.1 | 7.68  | 7.41  | 0.32 | 0.07 | 1.21  | 0.838764 | 0.000466 | 0.942329 | 0.038572 |
| MmugDNA.39806.1.S1_at   | MmugDNA.39806.1 | 4.03  | 4.03  | 0.05 | 0.12 | -1    | 0.997653 | 0.825643 | 0.999184 | 0.899784 |
| MmugDNA.39808.1.S1_at   | MmugDNA.39808.1 | 8.2   | 8.38  | 0.73 | 0.08 | -1.13 | 0.756892 | 0.512301 | 0.908337 | 0.706182 |
| MmugDNA.39809.1.S1_at   | MmugDNA.39809.1 | 3.65  | 3.29  | 0.21 | 0.08 | 1.29  | 0.045341 | 0.016305 | 0.376335 | 0.161818 |
| MmugDNA.3981.1.S1_at    | MmugDNA.3981.1  | 5.57  | 5.47  | 0.11 | 0.13 | 1.07  | 0.077762 | 0.032492 | 0.439884 | 0.223254 |
| MmugDNA.39810.1.S1_s_at | MmugDNA.39810.1 | 8.28  | 7.61  | 0.27 | 0.14 | 1.6   | 0.044902 | 0.006085 | 0.375307 | 0.106308 |
| MmugDNA.39812.1.S1_at   | MmugDNA.39812.1 | 7.62  | 8.18  | 0.71 | 0.21 | -1.48 | 0.103931 | 0.132821 | 0.474656 | 0.404544 |
| MmugDNA.39814.1.S1_at   | MmugDNA.39814.1 | 4.43  | 4.37  | 0.15 | 0.08 | 1.05  | 0.170996 | 0.543508 | 0.544133 | 0.726175 |
| MmugDNA.39815.1.S1_at   | MmugDNA.39815.1 | 11.24 | 10.82 | 0.23 | 0.08 | -1.34 | 0.169087 | 0.196389 | 0.542061 | 0.471418 |
| MmugDNA.39816.1.S1_at   | MmugDNA.39816.1 | 7.52  | 7.2   | 0.49 | 0.09 | 1.25  | 0.332475 | 0.375455 | 0.678846 | 0.613412 |
| MmugDNA.39817.1.S1_at   | MmugDNA.39817.1 | 6.56  | 6.75  | 0.2  | 0.18 | -1.14 | 0.856558 | 0.662643 | 0.949449 | 0.802461 |
| MmugDNA.39818.1.S1_at   | MmugDNA.39818.1 | 6.63  | 6.62  | 0.28 | 0.21 | 1.01  | 0.420143 | 0.519372 | 0.736776 | 0.710998 |
| MmugDNA.39819.1.S1_at   | MmugDNA.39819.1 | 3.66  | 3.59  | 0.12 | 0.08 | 1.06  | 0.150875 | 0.134204 | 0.524381 | 0.406453 |
| MmugDNA.3982.1.S1_at    | MmugDNA.3982.1  | 5.38  | 5.58  | 0.98 | 0.32 | -1.15 | 0.964917 | 0.387324 | 0.988457 | 0.622027 |
| MmugDNA.39820.1.S1_at   | MmugDNA.39820.1 | 6.25  | 6.19  | 0.05 | 0.06 | 1.05  | 0.991069 | 0.361715 | 0.996653 | 0.602422 |
| MmugDNA.39824.1.S1_at   | MmugDNA.39824.1 | 4.9   | 4.9   | 0.03 | 0.13 | 1     | 0.324834 | 0.219242 | 0.672925 | 0.493013 |
| MmugDNA.39825.1.S1_at   | MmugDNA.39825.1 | 10.05 | 10.31 | 0.46 | 0.06 | -1.2  | 0.268781 | 0.512284 | 0.629139 | 0.706182 |
| MmugDNA.22347.1.S1_at   | MmugDNA.22347.1 | 12.92 | 13.08 | 0.05 | 0.06 | -1.11 | 0.038692 | 0.0994   | 0.360112 | 0.357686 |
| MmugDNA.22347.1.S1_s_at | MmugDNA.22347.1 | 12.66 | 12.69 | 0.14 | 0.05 | -1.02 | 0.490944 | 0.281266 | 0.777361 | 0.544385 |
| MmugDNA.39827.1.S1_at   | MmugDNA.39827.1 | 5.15  | 5.19  | 0.09 | 0.02 | -1.02 | 0.456883 | 0.720575 | 0.758051 | 0.838346 |
| MmugDNA.39829.1.S1_at   | MmugDNA.39829.1 | 4.16  | 4.56  | 0.6  | 0.51 | -1.33 | 0.405001 | 0.387899 | 0.727065 | 0.622509 |
| MmugDNA.39830.1.S1_at   | MmugDNA.39830.1 | 5.39  | 5.46  | 0.18 | 0.35 | -1.05 | 0.854775 | 0.503662 | 0.948598 | 0.701018 |
| MmugDNA.39831.1.S1_at   | MmugDNA.39831.1 | 5.78  | 5.54  | 0.06 | 0.09 | 1.19  | 0.024028 | 0.035936 | 0.317529 | 0.234032 |
| MmugDNA.39833.1.S1_at   | MmugDNA.39833.1 | 9.44  | 9.99  | 0.59 | 0.36 | -1.46 | 0.255233 | 0.187585 | 0.61931  | 0.463628 |
| MmugDNA.39835.1.S1_at   | MmugDNA.39835.1 | 2.97  | 3.07  | 0.47 | 0.12 | -1.07 | 0.554849 | 0.731089 | 0.813019 | 0.844197 |
| MmugDNA.39836.1.S1_at   | MmugDNA.39836.1 | 9.5   | 9.77  | 0.48 | 0.05 | -1.2  | 0.961008 | 0.956648 | 0.987225 | 0.975375 |
| MmugDNA.39837.1.S1_s_at | MmugDNA.39837.1 | 7.35  | 7.63  | 0.16 | 0.16 | -1.21 | 0.264277 | 0.276695 | 0.626029 | 0.540617 |
| MmugDNA.3984.1.S1_at    | MmugDNA.3984.1  | 4.14  | 4.13  | 0.29 | 0.33 | 1.01  | 0.533575 | 0.607273 | 0.80084  | 0.766339 |
| MmugDNA.39840.1.S1_at   | MmugDNA.39840.1 | 12.95 | 13.2  | 0.39 | 0.15 | -1.19 | 0.58994  | 0.159901 | 0.832714 | 0.435987 |
| MmugDNA.17139.1.S1_s_at | MmugDNA.17139.1 | 13.28 | 13.56 | 0.34 | 0.16 | -1.22 | 0.522635 | 0.139993 | 0.795192 | 0.413309 |
| MmugDNA.39841.1.S1_at   | MmugDNA.39841.1 | 11.09 | 11.26 | 0.32 | 0.15 | -1.12 | 0.163999 | 0.043431 | 0.536696 | 0.253043 |
| MmugDNA.39843.1.S1_at   | MmugDNA.39843.1 | 4.39  | 4.36  | 0.17 | 0    | 1.02  | 0.534143 | 0.754599 | 0.8012   | 0.857244 |
| MmugDNA.39844.1.S1_at   | MmugDNA.39844.1 | 5.89  | 5.85  | 0.24 | 0.02 | 1.03  | 0.820825 | 0.893988 | 0.935313 | 0.939464 |
| MmugDNA.39845.1.S1_at   | MmugDNA.39845.1 | 4.37  | 4.29  | 0.15 | 0.07 | 1.05  | 0.458017 | 0.894201 | 0.758638 | 0.939665 |
| MmugDNA.39846.1.S1_at   | MmugDNA.39846.1 | 2.9   | 2.98  | 0.16 | 0.13 | -1.06 | 0.461702 | 0.709392 | 0.761152 | 0.831622 |
| MmugDNA.39848.1.S1_at   | MmugDNA.39848.1 | 8.95  | 9.38  | 0.46 | 0.13 | -1.34 | 0.165801 | 0.075254 | 0.538623 | 0.319434 |
| MmugDNA.3985.1.S1_at    | MmugDNA.3985.1  | 8.32  | 8.3   | 0.3  | 0.03 | 1.01  | 0.383701 | 0.165005 | 0.711503 | 0.44123  |
| MmugDNA.39850.1.S1_at   | MmugDNA.39850.1 | 5.04  | 5.21  | 0.11 | 0.07 | -1.12 | 0.108493 | 0.107014 | 0.480777 | 0.369588 |
| MmugDNA.39852.1.S1_at   | MmugDNA.39852.1 | 6.98  | 6.93  | 0.05 | 0.12 | 1.03  | 0.1239   | 0.175465 | 0.497452 | 0.452157 |
| MmugDNA.39853.1.S1_at   | MmugDNA.39853.1 | 8.2   | 7.8   | 0.36 | 0.17 | 1.32  | 0.277259 | 0.837374 | 0.636787 | 0.907089 |
| MmugDNA.39854.1.S1_at   | MmugDNA.39854.1 | 6.29  | 6.64  | 0.36 | 0.21 | -1.28 | 0.124502 | 0.230139 | 0.498544 | 0.502007 |

|                         |                 |       |       |      |      |       |          |          |          |          |
|-------------------------|-----------------|-------|-------|------|------|-------|----------|----------|----------|----------|
| MmugDNA.39855.1.S1_at   | MmugDNA.39855.1 | 8.81  | 9.49  | 0.32 | 0.23 | -1.61 | 0.052212 | 0.003791 | 0.392084 | 0.087708 |
| MmugDNA.39856.1.S1_at   | MmugDNA.39856.1 | 3.83  | 4.19  | 0.2  | 0.24 | -1.28 | 0.081456 | 0.125581 | 0.445406 | 0.396226 |
| MmugDNA.39857.1.S1_at   | MmugDNA.39857.1 | 6.93  | 6.99  | 0.22 | 0.14 | -1.04 | 0.403657 | 0.047814 | 0.725777 | 0.263649 |
| MmugDNA.39860.1.S1_at   | MmugDNA.39860.1 | 4.91  | 4.66  | 0.13 | 0.14 | -1.19 | 0.080198 | 0.417317 | 0.443536 | 0.642143 |
| MmugDNA.39862.1.S1_at   | MmugDNA.39862.1 | 9.16  | 10.18 | 0.32 | 0.4  | -2.02 | 0.008655 | 0.050626 | 0.236048 | 0.270317 |
| MmugDNA.39863.1.S1_at   | MmugDNA.39863.1 | 8.7   | 8.88  | 0.62 | 0.02 | -1.13 | 0.221752 | 0.002685 | 0.591359 | 0.076408 |
| MmugDNA.39865.1.S1_at   | MmugDNA.39865.1 | 3.51  | 3.51  | 0.05 | 0.05 | 1     | 0.642067 | 0.200316 | 0.857628 | 0.474705 |
| MmugDNA.39866.1.S1_at   | MmugDNA.39866.1 | 8.51  | 8.48  | 0.52 | 0.11 | 1.02  | 0.930686 | 0.120475 | 0.976902 | 0.38925  |
| MmugDNA.39867.1.S1_at   | MmugDNA.39867.1 | 8.48  | 7.9   | 0.45 | 0.14 | 1.5   | 0.089154 | 0.074409 | 0.456902 | 0.318058 |
| MmugDNA.39868.1.S1_at   | MmugDNA.39868.1 | 5.22  | 5.4   | 0.13 | 0.2  | -1.13 | 0.210512 | 0.222016 | 0.581832 | 0.495071 |
| MmugDNA.39869.1.S1_at   | MmugDNA.39869.1 | 3.18  | 3.13  | 0.17 | 0.01 | -1.03 | 0.770836 | 0.228575 | 0.914237 | 0.500752 |
| MmugDNA.3987.1.S1_at    | MmugDNA.3987.1  | 4.56  | 4.38  | 0.11 | 0.02 | 1.13  | 0.190951 | 0.078459 | 0.562156 | 0.325212 |
| MmugDNA.39870.1.S1_x_at | MmugDNA.39870.1 | 8.62  | 8.73  | 0.05 | 0.21 | -1.08 | 0.565315 | 0.281642 | 0.819183 | 0.544706 |
| MmugDNA.39872.1.S1_at   | MmugDNA.39872.1 | 9.55  | 9.39  | 0.46 | 0.1  | 1.12  | 0.753204 | 0.753837 | 0.906998 | 0.856692 |
| MmugDNA.39872.1.S1_s_at | MmugDNA.39872.1 | 9.36  | 9.27  | 0.44 | 0.12 | 1.07  | 0.959174 | 0.930899 | 0.986635 | 0.96074  |
| MmugDNA.39873.1.S1_at   | MmugDNA.39873.1 | 12.03 | 11.7  | 0.13 | 0.07 | 1.26  | 0.011132 | 0.028851 | 0.252486 | 0.211661 |
| MmugDNA.39873.1.S1_s_at | MmugDNA.39873.1 | 12.63 | 12.34 | 0.09 | 0.06 | 1.22  | 0.009506 | 0.050906 | 0.242401 | 0.270955 |
| MmugDNA.39877.1.S1_at   | MmugDNA.39877.1 | 4.54  | 4.53  | 0.19 | 0.2  | 1.01  | 0.339002 | 0.264427 | 0.683499 | 0.530385 |
| MmugDNA.39877.1.S1_s_at | MmugDNA.39877.1 | 7.02  | 6.9   | 0.2  | 0.12 | 1.09  | 0.267754 | 0.373332 | 0.62827  | 0.612164 |
| MmugDNA.39878.1.S1_at   | MmugDNA.39878.1 | 8.3   | 8.74  | 0.23 | 0    | -1.36 | 0.028464 | 0.000701 | 0.332568 | 0.04424  |
| MmugDNA.39879.1.S1_at   | MmugDNA.39879.1 | 4.27  | 4.19  | 0.06 | 0.03 | 1.06  | 0.096118 | 0.577599 | 0.46463  | 0.748013 |
| MmugDNA.3988.1.S1_at    | MmugDNA.3988.1  | 5.48  | 6.57  | 1.02 | 0.51 | -2.12 | 0.188378 | 0.010723 | 0.560439 | 0.135271 |
| MmugDNA.39880.1.S1_at   | MmugDNA.39880.1 | 4.88  | 4.68  | 0.06 | 0.1  | 1.15  | 0.024199 | 0.147377 | 0.317812 | 0.421554 |
| MmugDNA.39882.1.S1_at   | MmugDNA.39882.1 | 3.5   | 3.69  | 0.37 | 0.09 | -1.14 | 0.384466 | 0.372313 | 0.712001 | 0.611225 |
| MmugDNA.39883.1.S1_at   | MmugDNA.39883.1 | 4.39  | 4.37  | 0.24 | 0.05 | 1.01  | 0.871772 | 0.961678 | 0.955537 | 0.978408 |
| MmugDNA.39884.1.S1_at   | MmugDNA.39884.1 | 6.26  | 6.88  | 0.26 | 0.09 | -1.54 | 0.0366   | 0.007982 | 0.355088 | 0.118766 |
| MmugDNA.39885.1.S1_at   | MmugDNA.39885.1 | 9.11  | 8.69  | 0.53 | 0.13 | 1.34  | 0.249103 | 0.245093 | 0.614389 | 0.514861 |
| MmugDNA.39886.1.S1_at   | MmugDNA.39886.1 | 10.33 | 10.62 | 0.34 | 0.29 | -1.23 | 0.726819 | 0.488046 | 0.894481 | 0.69087  |
| MmugDNA.39887.1.S1_s_at | MmugDNA.39887.1 | 13.23 | 13.22 | 0.05 | 0.02 | 1.01  | 0.363884 | 0.903081 | 0.700307 | 0.944962 |
| MmugDNA.39888.1.S1_at   | MmugDNA.39888.1 | 3.94  | 4.09  | 0.06 | 0.15 | -1.11 | 0.502741 | 0.69875  | 0.783832 | 0.824973 |
| MmugDNA.39889.1.S1_at   | MmugDNA.39889.1 | 3.15  | 3.15  | 0.07 | 0.02 | -1.01 | 0.906445 | 0.725918 | 0.968353 | 0.841313 |
| MmugDNA.3989.1.S1_at    | MmugDNA.3989.1  | 4.29  | 3.86  | 0.65 | 0.08 | 1.34  | 0.44544  | 0.657854 | 0.752218 | 0.800051 |
| MmugDNA.39891.1.S1_at   | MmugDNA.39891.1 | 3.82  | 3.65  | 0.03 | 0.3  | 1.13  | 0.576617 | 0.287088 | 0.825166 | 0.548379 |
| MmugDNA.39892.1.S1_at   | MmugDNA.39892.1 | 3.67  | 4.63  | 0.28 | 0.05 | -1.95 | 0.009825 | 0.146047 | 0.244005 | 0.420064 |
| MmugDNA.39893.1.S1_at   | MmugDNA.39893.1 | 10.26 | 10.04 | 0.28 | 0.12 | 1.16  | 0.229189 | 0.197883 | 0.598088 | 0.472818 |
| MmugDNA.39894.1.S1_at   | MmugDNA.39894.1 | 6.82  | 6.76  | 0.44 | 0.01 | 1.04  | 0.271775 | 0.180706 | 0.631538 | 0.457258 |
| MmugDNA.39895.1.S1_at   | MmugDNA.39895.1 | 10.23 | 10    | 0.86 | 0.09 | 1.17  | 0.570945 | 0.385131 | 0.822359 | 0.620662 |
| MmugDNA.39896.1.S1_at   | MmugDNA.39896.1 | 4.05  | 3.26  | 0.28 | 0.22 | 1.73  | 0.061948 | 0.473981 | 0.411683 | 0.681155 |
| MmugDNA.39899.1.S1_at   | MmugDNA.39899.1 | 6.09  | 5.89  | 0.9  | 0.33 | 1.15  | 0.534874 | 0.444198 | 0.801404 | 0.661871 |
| MmugDNA.39901.1.S1_at   | MmugDNA.39901.1 | 6.76  | 6.66  | 0.03 | 0.21 | 1.08  | 0.329734 | 0.29115  | 0.676501 | 0.551652 |
| MmugDNA.39902.1.S1_at   | MmugDNA.39902.1 | 8.04  | 8.17  | 1.21 | 0.35 | -1.09 | 0.868244 | 0.399295 | 0.953843 | 0.629737 |
| MmugDNA.39903.1.S1_at   | MmugDNA.39903.1 | 5.61  | 5.6   | 0.02 | 0.05 | 1.01  | 0.580274 | 0.789135 | 0.82694  | 0.878136 |
| MmugDNA.39904.1.S1_at   | MmugDNA.39904.1 | 5.7   | 5.76  | 0.34 | 0.17 | -1.04 | 0.974738 | 0.702622 | 0.991912 | 0.827641 |

|                         |                 |       |      |      |      |       |          |          |          |          |
|-------------------------|-----------------|-------|------|------|------|-------|----------|----------|----------|----------|
| MmugDNA.39906.1.S1_at   | MmugDNA.39906.1 | 3.11  | 2.95 | 0.12 | 0.1  | 1.12  | 0.141236 | 0.231193 | 0.516365 | 0.5029   |
| MmugDNA.39908.1.S1_at   | MmugDNA.39908.1 | 5     | 5.14 | 0.21 | 0.87 | -1.1  | 0.724526 | 0.811603 | 0.893156 | 0.891244 |
| MmugDNA.39909.1.S1_at   | MmugDNA.39909.1 | 7.17  | 7.15 | 0.14 | 0.13 | 1.01  | 0.408721 | 0.491039 | 0.729499 | 0.692751 |
| MmugDNA.3991.1.S1_at    | MmugDNA.3991.1  | 5.13  | 5.19 | 0.1  | 0.05 | -1.04 | 0.967528 | 0.181679 | 0.98927  | 0.458271 |
| MmugDNA.39910.1.S1_at   | MmugDNA.39910.1 | 4.85  | 4.85 | 0.18 | 0.12 | 1     | 0.41128  | 0.610928 | 0.731277 | 0.768948 |
| MmugDNA.39911.1.S1_at   | MmugDNA.39911.1 | 6.86  | 6.87 | 0.07 | 0.29 | -1    | 0.46648  | 0.922564 | 0.763647 | 0.956376 |
| MmugDNA.39912.1.S1_at   | MmugDNA.39912.1 | 5.5   | 5.8  | 0.42 | 0.2  | -1.23 | 0.103458 | 0.353799 | 0.474255 | 0.596815 |
| MmugDNA.39915.1.S1_at   | MmugDNA.39915.1 | 7.54  | 7.29 | 0.42 | 0.19 | 1.19  | 0.443982 | 0.191628 | 0.751068 | 0.466918 |
| MmugDNA.39916.1.S1_at   | MmugDNA.39916.1 | 3.32  | 3.26 | 0.12 | 0.22 | 1.04  | 0.968715 | 0.566685 | 0.989723 | 0.740723 |
| MmugDNA.39917.1.S1_at   | MmugDNA.39917.1 | 4.61  | 4.31 | 0.2  | 0.05 | 1.23  | 0.218551 | 0.199577 | 0.588313 | 0.474208 |
| MmugDNA.21083.1.S1_at   | MmugDNA.21083.1 | 5.91  | 5.87 | 0.18 | 0.15 | -1.03 | 0.803152 | 0.514377 | 0.928233 | 0.707675 |
| MmugDNA.21083.1.S1_s_at | MmugDNA.21083.1 | 6.6   | 6.46 | 0.13 | 0.16 | 1.1   | 0.668233 | 0.673089 | 0.868967 | 0.808977 |
| MmugDNA.3992.1.S1_at    | MmugDNA.3992.1  | 4.97  | 4.86 | 0.39 | 0.29 | 1.08  | 0.433427 | 0.688835 | 0.744486 | 0.818338 |
| MmugDNA.39921.1.S1_at   | MmugDNA.39921.1 | 7.63  | 7.33 | 0.19 | 0.13 | 1.23  | 0.062993 | 0.069148 | 0.414551 | 0.30917  |
| MmugDNA.39922.1.S1_at   | MmugDNA.39922.1 | 6.04  | 6.06 | 0.45 | 0.1  | -1.02 | 0.528015 | 0.431422 | 0.79742  | 0.652359 |
| MmugDNA.39923.1.S1_at   | MmugDNA.39923.1 | 5.69  | 5.5  | 0.64 | 0.07 | 1.13  | 0.7119   | 0.163433 | 0.887734 | 0.439629 |
| MmugDNA.39926.1.S1_at   | MmugDNA.39926.1 | 3.54  | 3.54 | 0.19 | 0.05 | 1     | 0.468521 | 0.657862 | 0.764997 | 0.800051 |
| MmugDNA.39928.1.S1_at   | MmugDNA.39928.1 | 7.65  | 7.26 | 0.46 | 0.17 | 1.31  | 0.333515 | 0.605503 | 0.679694 | 0.765274 |
| MmugDNA.3993.1.S1_at    | MmugDNA.3993.1  | 6.1   | 6.04 | 0.49 | 0.11 | 1.05  | 0.978891 | 0.312768 | 0.993188 | 0.567314 |
| MmugDNA.39930.1.S1_at   | MmugDNA.39930.1 | 6.26  | 5.74 | 1.24 | 0.28 | 1.43  | 0.36333  | 0.074768 | 0.699988 | 0.318526 |
| MmugDNA.39931.1.S1_at   | MmugDNA.39931.1 | 7.24  | 8.5  | 0.45 | 0.46 | -2.4  | 0.031488 | 0.024564 | 0.341227 | 0.196128 |
| MmugDNA.39932.1.S1_at   | MmugDNA.39932.1 | 10.49 | 9.57 | 0.21 | 0.15 | 1.89  | 0.006796 | 0.016986 | 0.223856 | 0.165245 |
| MmugDNA.39933.1.S1_at   | MmugDNA.39933.1 | 6     | 5.81 | 0.12 | 0.22 | 1.14  | 0.432471 | 0.046744 | 0.743915 | 0.260886 |
| MmugDNA.39934.1.S1_at   | MmugDNA.39934.1 | 5.33  | 5.37 | 0.05 | 0.19 | -1.03 | 0.641664 | 0.557898 | 0.857449 | 0.735292 |
| MmugDNA.39936.1.S1_at   | MmugDNA.39936.1 | 3.2   | 3.2  | 0.07 | 0.07 | 1     | 0.507803 | 0.556144 | 0.786553 | 0.734408 |
| MmugDNA.39937.1.S1_at   | MmugDNA.39937.1 | 4.9   | 4.82 | 0.21 | 0.27 | 1.05  | 0.471154 | 0.297242 | 0.766384 | 0.556067 |
| MmugDNA.39938.1.S1_at   | MmugDNA.39938.1 | 4.61  | 4.3  | 0.17 | 0.13 | 1.24  | 0.133736 | 0.209286 | 0.508012 | 0.48303  |
| MmugDNA.39940.1.S1_at   | MmugDNA.39940.1 | 9.47  | 9.91 | 0.24 | 0.14 | -1.35 | 0.08566  | 0.092909 | 0.452706 | 0.349024 |
| MmugDNA.39941.1.S1_at   | MmugDNA.39941.1 | 5.66  | 5.54 | 0.1  | 0.02 | 1.09  | 0.109799 | 0.114711 | 0.482607 | 0.381252 |
| MmugDNA.39942.1.S1_at   | MmugDNA.39942.1 | 6.27  | 5.91 | 0.26 | 0.13 | 1.29  | 0.110442 | 0.108295 | 0.483482 | 0.371557 |
| MmugDNA.39943.1.S1_at   | MmugDNA.39943.1 | 8.79  | 9.11 | 0.47 | 0.13 | -1.25 | 0.094501 | 0.049598 | 0.463794 | 0.267713 |
| MmugDNA.39944.1.S1_at   | MmugDNA.39944.1 | 5.49  | 5.5  | 0.2  | 0.31 | -1.01 | 0.890338 | 0.81754  | 0.962291 | 0.894746 |
| MmugDNA.39945.1.S1_at   | MmugDNA.39945.1 | 8.83  | 9    | 3.18 | 0.53 | -1.13 | 0.636779 | 0.18841  | 0.855278 | 0.464416 |
| MmugDNA.39946.1.S1_at   | MmugDNA.39946.1 | 3.77  | 3.97 | 0.14 | 0.11 | -1.15 | 0.216039 | 0.043532 | 0.586169 | 0.253227 |
| MmugDNA.39947.1.S1_at   | MmugDNA.39947.1 | 5.72  | 5.46 | 0.22 | 0.09 | 1.19  | 0.368745 | 0.567504 | 0.703807 | 0.74139  |
| MmugDNA.39949.1.S1_at   | MmugDNA.39949.1 | 4.5   | 4.51 | 0.08 | 0.04 | -1.01 | 0.747964 | 0.725295 | 0.904242 | 0.840954 |
| MmugDNA.3995.1.S1_s_at  | MmugDNA.3995.1  | 8.76  | 8.43 | 0.25 | 0.26 | 1.26  | 0.039986 | 0.056387 | 0.362955 | 0.283382 |
| MmugDNA.39950.1.S1_at   | MmugDNA.39950.1 | 3.21  | 3.31 | 0.11 | 0.09 | -1.07 | 0.322975 | 0.646022 | 0.671853 | 0.792676 |
| MmugDNA.39951.1.S1_at   | MmugDNA.39951.1 | 5.94  | 5.7  | 0.12 | 0.03 | 1.18  | 0.079705 | 0.67601  | 0.442608 | 0.810632 |
| MmugDNA.39951.1.S1_s_at | MmugDNA.39951.1 | 8.05  | 7.84 | 0.15 | 0.06 | 1.15  | 0.235693 | 0.587643 | 0.602783 | 0.754408 |
| MmugDNA.39952.1.S1_at   | MmugDNA.39952.1 | 3.59  | 3.06 | 0.54 | 0.16 | 1.44  | 0.256684 | 0.403422 | 0.620636 | 0.632114 |
| MmugDNA.39953.1.S1_at   | MmugDNA.39953.1 | 5.49  | 5.52 | 0.25 | 0.16 | -1.02 | 0.566838 | 0.814076 | 0.820086 | 0.892736 |
| MmugDNA.39954.1.S1_at   | MmugDNA.39954.1 | 8.84  | 8.78 | 0.56 | 0.32 | 1.05  | 0.722118 | 0.431962 | 0.892193 | 0.652723 |



|                         |                 |       |       |      |      |       |          |          |          |          |
|-------------------------|-----------------|-------|-------|------|------|-------|----------|----------|----------|----------|
| MmugDNA.39954.1.S1_s_at | MmugDNA.39954.1 | 9.06  | 9.42  | 0.6  | 0.2  | -1.29 | 0.854989 | 0.651714 | 0.948681 | 0.796356 |
| MmugDNA.39955.1.S1_at   | MmugDNA.39955.1 | 10.29 | 9.83  | 1.39 | 0.16 | 1.37  | 0.63009  | 0.814902 | 0.851878 | 0.893213 |
| MmugDNA.39956.1.S1_at   | MmugDNA.39956.1 | 5.04  | 4.99  | 0.19 | 0    | 1.04  | 0.542301 | 0.276661 | 0.805619 | 0.540596 |
| MmugDNA.39959.1.S1_at   | MmugDNA.39959.1 | 3.77  | 3.46  | 0.3  | 0.3  | 1.24  | 0.941809 | 0.895558 | 0.980207 | 0.94031  |
| MmugDNA.39960.1.S1_at   | MmugDNA.39960.1 | 6.9   | 6.63  | 0.22 | 0.03 | 1.21  | 0.076243 | 0.166402 | 0.437711 | 0.442884 |
| MmugDNA.39961.1.S1_at   | MmugDNA.39961.1 | 9.15  | 9.04  | 0.46 | 0.06 | 1.08  | 0.508877 | 0.376392 | 0.787315 | 0.614243 |
| MmugDNA.39962.1.S1_at   | MmugDNA.39962.1 | 4.39  | 4.63  | 0.31 | 0.24 | -1.19 | 0.486332 | 0.137546 | 0.774492 | 0.410509 |
| MmugDNA.39963.1.S1_at   | MmugDNA.39963.1 | 11.15 | 11.38 | 0.17 | 0.23 | -1.17 | 0.578388 | 0.02091  | 0.826202 | 0.181415 |
| MmugDNA.39964.1.S1_at   | MmugDNA.39964.1 | 4.19  | 4.18  | 0.1  | 0.13 | 1.01  | 0.967773 | 0.571895 | 0.989373 | 0.744056 |
| MmugDNA.39965.1.S1_at   | MmugDNA.39965.1 | 7.55  | 7.43  | 0.07 | 0.04 | 1.08  | 0.063914 | 0.055863 | 0.416821 | 0.282172 |
| MmugDNA.39966.1.S1_at   | MmugDNA.39966.1 | 3.72  | 3.49  | 0.15 | 0.25 | -1.17 | 0.216156 | 0.143753 | 0.586305 | 0.417583 |
| MmugDNA.39968.1.S1_at   | MmugDNA.39968.1 | 11.32 | 11.59 | 0.07 | 0.1  | -1.2  | 0.027076 | 0.069583 | 0.327141 | 0.309848 |
| MmugDNA.3997.1.S1_at    | MmugDNA.3997.1  | 4.35  | 4.14  | 0.19 | 0.1  | 1.16  | 0.098784 | 0.078221 | 0.468167 | 0.324765 |
| MmugDNA.39970.1.S1_at   | MmugDNA.39970.1 | 8.99  | 9.32  | 0.87 | 0.18 | -1.26 | 0.19018  | 0.05064  | 0.561403 | 0.270317 |
| MmugDNA.39971.1.S1_at   | MmugDNA.39971.1 | 4.83  | 4.88  | 0.07 | 0.14 | -1.04 | 0.472338 | 0.331667 | 0.767001 | 0.580237 |
| MmugDNA.39972.1.S1_at   | MmugDNA.39972.1 | 9.96  | 9.67  | 0.39 | 0.15 | 1.22  | 0.67912  | 0.730777 | 0.874243 | 0.844057 |
| MmugDNA.39973.1.S1_at   | MmugDNA.39973.1 | 11.67 | 11.63 | 0.38 | 0.02 | 1.03  | 0.486309 | 0.551058 | 0.774492 | 0.730772 |
| MmugDNA.39976.1.S1_at   | MmugDNA.39976.1 | 3.21  | 3.1   | 0.09 | 0.08 | 1.08  | 0.452331 | 0.691662 | 0.755778 | 0.820652 |
| MmugDNA.39977.1.S1_at   | MmugDNA.39977.1 | 5.13  | 5.13  | 0.03 | 0.08 | 1     | 0.782956 | 0.505681 | 0.920107 | 0.702218 |
| MmugDNA.39978.1.S1_at   | MmugDNA.39978.1 | 3.92  | 3.59  | 0.35 | 0.13 | 1.25  | 0.348347 | 0.309783 | 0.689636 | 0.565044 |
| MmugDNA.39979.1.S1_at   | MmugDNA.39979.1 | 6.05  | 5.94  | 0.19 | 0.03 | 1.08  | 0.296957 | 0.3466   | 0.652525 | 0.591427 |
| MmugDNA.39980.1.S1_at   | MmugDNA.39980.1 | 4.15  | 4.15  | 0.07 | 0.21 | 1     | 0.516248 | 0.226559 | 0.791342 | 0.499001 |
| MmugDNA.39981.1.S1_at   | MmugDNA.39981.1 | 10.22 | 9.89  | 0.6  | 0.2  | 1.25  | 0.808044 | 0.572533 | 0.930458 | 0.744566 |
| MmugDNA.39982.1.S1_at   | MmugDNA.39982.1 | 9.06  | 9.53  | 1.86 | 0.2  | -1.38 | 0.645025 | 0.186571 | 0.85869  | 0.462364 |
| MmugDNA.39983.1.S1_at   | MmugDNA.39983.1 | 6.75  | 6.53  | 0.7  | 0.16 | 1.17  | 0.607139 | 0.452273 | 0.840749 | 0.667023 |
| MmugDNA.39984.1.S1_at   | MmugDNA.39984.1 | 3.76  | 3.67  | 0.09 | 0.07 | 1.07  | 0.640219 | 0.206367 | 0.856628 | 0.480546 |
| MmugDNA.39986.1.S1_at   | MmugDNA.39986.1 | 4.82  | 4.63  | 0.21 | 0.14 | 1.14  | 0.535658 | 0.418328 | 0.801869 | 0.642707 |
| MmugDNA.39987.1.S1_at   | MmugDNA.39987.1 | 4.25  | 4.23  | 0.13 | 0.12 | 1.02  | 0.418159 | 0.700873 | 0.735441 | 0.826529 |
| MmugDNA.39988.1.S1_at   | MmugDNA.39988.1 | 7.33  | 7.64  | 2.38 | 0.32 | -1.24 | 0.29926  | 0.35967  | 0.653572 | 0.600946 |
| MmugDNA.39989.1.S1_at   | MmugDNA.39989.1 | 3.14  | 3.27  | 0.14 | 0    | -1.09 | 0.657425 | 0.478483 | 0.864073 | 0.684481 |
| MmugDNA.3999.1.S1_at    | MmugDNA.3999.1  | 4.07  | 3.91  | 0.23 | 0.14 | 1.12  | 0.357539 | 0.341291 | 0.695892 | 0.587393 |
| MmugDNA.39990.1.S1_at   | MmugDNA.39990.1 | 6.92  | 6.65  | 0.23 | 0.25 | 1.21  | 0.23446  | 0.357076 | 0.601744 | 0.59875  |
| MmugDNA.39991.1.S1_at   | MmugDNA.39991.1 | 4.49  | 4.27  | 0.16 | 0.14 | 1.17  | 0.092736 | 0.120702 | 0.461192 | 0.389556 |
| MmugDNA.39992.1.S1_at   | MmugDNA.39992.1 | 8.88  | 9.26  | 0.83 | 0.19 | -1.3  | 0.643914 | 0.200097 | 0.858287 | 0.474603 |
| MmugDNA.39993.1.S1_at   | MmugDNA.39993.1 | 6.23  | 5.95  | 0.11 | 0.19 | 1.21  | 0.2182   | 0.398572 | 0.588113 | 0.629458 |
| MmugDNA.39995.1.S1_at   | MmugDNA.39995.1 | 7.23  | 8.17  | 0.08 | 0.17 | -1.91 | 0.001403 | 0.074735 | 0.160065 | 0.318465 |
| MmugDNA.39997.1.S1_at   | MmugDNA.39997.1 | 4.54  | 4.52  | 0.13 | 0.11 | 1.02  | 0.638757 | 0.480057 | 0.856034 | 0.68565  |
| MmugDNA.39998.1.S1_at   | MmugDNA.39998.1 | 10.13 | 10.54 | 0.49 | 0.06 | -1.32 | 0.590988 | 0.87111  | 0.833199 | 0.926785 |
| MmugDNA.39999.1.S1_at   | MmugDNA.39999.1 | 4.58  | 4.49  | 0.05 | 0.14 | 1.06  | 0.086541 | 0.453317 | 0.45441  | 0.667688 |
| MmugDNA.4.1.S1_at       | MmugDNA.4.1     | 8.05  | 8.16  | 0.25 | 0.29 | -1.08 | 0.839439 | 0.97663  | 0.942766 | 0.987237 |
| MmugDNA.40.1.S1_at      | MmugDNA.40.1    | 4.95  | 4.91  | 0.12 | 0.05 | 1.03  | 0.230178 | 0.706522 | 0.598481 | 0.829711 |
| MmugDNA.400.1.S1_at     | MmugDNA.400.1   | 3.71  | 3.45  | 0.13 | 0.02 | 1.2   | 0.025923 | 0.018462 | 0.32273  | 0.170923 |
| MmugDNA.4000.1.S1_at    | MmugDNA.4000.1  | 6.09  | 5.94  | 0.41 | 0.17 | 1.11  | 0.309085 | 0.382168 | 0.661444 | 0.618361 |

|                         |                 |       |       |      |      |       |          |          |          |          |
|-------------------------|-----------------|-------|-------|------|------|-------|----------|----------|----------|----------|
| MmugDNA.40000.1.S1_at   | MmugDNA.40000.1 | 8.91  | 8.6   | 0.62 | 0.04 | 1.24  | 0.588242 | 0.48031  | 0.83181  | 0.68574  |
| MmugDNA.40002.1.S1_at   | MmugDNA.40002.1 | 3.86  | 4.02  | 0.16 | 0.05 | -1.12 | 0.400176 | 0.754103 | 0.723606 | 0.856848 |
| MmugDNA.40003.1.S1_at   | MmugDNA.40003.1 | 6.2   | 5.96  | 0.06 | 0.14 | 1.18  | 0.083714 | 0.097068 | 0.449639 | 0.354556 |
| MmugDNA.40004.1.S1_at   | MmugDNA.40004.1 | 11.67 | 11.58 | 0.69 | 0.12 | 1.06  | 0.48339  | 0.50628  | 0.773041 | 0.702368 |
| MmugDNA.40005.1.S1_at   | MmugDNA.40005.1 | 4.07  | 4.06  | 0.31 | 0.09 | 1.01  | 0.361718 | 0.451766 | 0.698733 | 0.66661  |
| MmugDNA.40006.1.S1_at   | MmugDNA.40006.1 | 3.1   | 3.1   | 0.04 | 0.13 | 1     | 0.4527   | 0.784023 | 0.755901 | 0.874963 |
| MmugDNA.40007.1.S1_at   | MmugDNA.40007.1 | 3.6   | 3.53  | 0.05 | 0.09 | 1.05  | 0.117776 | 0.459087 | 0.491067 | 0.671544 |
| MmugDNA.40008.1.S1_at   | MmugDNA.40008.1 | 5.87  | 5.79  | 0.02 | 0.4  | 1.06  | 0.581424 | 0.827669 | 0.82762  | 0.901081 |
| MmugDNA.40009.1.S1_at   | MmugDNA.40009.1 | 6.87  | 5.74  | 0.66 | 0.5  | 2.18  | 0.380868 | 0.4384   | 0.70974  | 0.657383 |
| MmugDNA.4001.1.S1_at    | MmugDNA.4001.1  | 5.32  | 5.99  | 0.41 | 0.34 | -1.6  | 0.267824 | 0.37449  | 0.62827  | 0.6129   |
| MmugDNA.40010.1.S1_at   | MmugDNA.40010.1 | 6.02  | 5.59  | 0.2  | 0.15 | -1.35 | 0.165356 | 0.056891 | 0.538073 | 0.284642 |
| MmugDNA.40011.1.S1_s_at | MmugDNA.40011.1 | 12.63 | 12.34 | 0.35 | 0.11 | 1.22  | 0.169895 | 0.196808 | 0.542818 | 0.471956 |
| MmugDNA.40012.1.S1_at   | MmugDNA.40012.1 | 6.91  | 6.7   | 0.21 | 0.15 | 1.16  | 0.089823 | 0.166723 | 0.457893 | 0.443215 |
| MmugDNA.40013.1.S1_at   | MmugDNA.40013.1 | 3.28  | 3.27  | 0.1  | 0.02 | 1.01  | 0.58482  | 0.282977 | 0.83004  | 0.545692 |
| MmugDNA.40014.1.S1_at   | MmugDNA.40014.1 | 5.2   | 4.75  | 0.39 | 0.44 | 1.36  | 0.186574 | 0.256523 | 0.559164 | 0.524275 |
| MmugDNA.40015.1.S1_at   | MmugDNA.40015.1 | 3.49  | 3.57  | 0.19 | 0.09 | -1.05 | 0.652043 | 0.72715  | 0.86196  | 0.842187 |
| MmugDNA.40016.1.S1_at   | MmugDNA.40016.1 | 6.24  | 6.59  | 0.62 | 0.08 | -1.28 | 0.952759 | 0.958258 | 0.9842   | 0.976345 |
| MmugDNA.40018.1.S1_at   | MmugDNA.40018.1 | 11.21 | 11.21 | 0.07 | 0.09 | 1     | 0.495106 | 0.481563 | 0.779748 | 0.686528 |
| MmugDNA.40019.1.S1_at   | MmugDNA.40019.1 | 11.9  | 11.75 | 0.21 | 0.11 | 1.11  | 0.276335 | 0.113581 | 0.635937 | 0.379668 |
| MmugDNA.40020.1.S1_at   | MmugDNA.40020.1 | 8.47  | 8.38  | 0.13 | 0.01 | 1.07  | 0.082086 | 0.037324 | 0.446841 | 0.237622 |
| MmugDNA.20053.1.S1_at   | MmugDNA.20053.1 | 9.62  | 9.37  | 0.13 | 0.06 | 1.19  | 0.042104 | 0.15955  | 0.368438 | 0.435763 |
| MmugDNA.20053.1.S1_s_at | MmugDNA.20053.1 | 9.89  | 9.63  | 0.13 | 0.03 | 1.19  | 0.020815 | 0.188041 | 0.305659 | 0.464144 |
| MmugDNA.40021.1.S1_at   | MmugDNA.40021.1 | 3.39  | 3.14  | 0.05 | 0.04 | 1.18  | 0.001421 | 0.029552 | 0.160483 | 0.213572 |
| MmugDNA.40022.1.S1_at   | MmugDNA.40022.1 | 13.25 | 13.29 | 0.16 | 0.01 | -1.02 | 0.367215 | 0.373211 | 0.702778 | 0.612042 |
| MmugDNA.40023.1.S1_at   | MmugDNA.40023.1 | 4.68  | 4.72  | 0.16 | 0.03 | -1.03 | 0.798934 | 0.657108 | 0.926372 | 0.799439 |
| MmugDNA.40025.1.S1_at   | MmugDNA.40025.1 | 6.78  | 6.37  | 0.77 | 0.24 | 1.33  | 0.42967  | 0.33681  | 0.742304 | 0.584093 |
| MmugDNA.40027.1.S1_at   | MmugDNA.40027.1 | 6.58  | 5.88  | 1.12 | 0.69 | 1.63  | 0.401872 | 0.29703  | 0.724759 | 0.555979 |
| MmugDNA.40028.1.S1_at   | MmugDNA.40028.1 | 7.34  | 7.75  | 0.52 | 0.3  | -1.33 | 0.529327 | 0.367198 | 0.798256 | 0.606851 |
| MmugDNA.40029.1.S1_at   | MmugDNA.40029.1 | 4.77  | 4.77  | 0.17 | 0.18 | 1     | 0.231132 | 0.210574 | 0.599078 | 0.484527 |
| MmugDNA.4003.1.S1_at    | MmugDNA.4003.1  | 4.39  | 4.49  | 0.61 | 0.13 | -1.07 | 0.417599 | 0.703073 | 0.735015 | 0.827866 |
| MmugDNA.40030.1.S1_at   | MmugDNA.40030.1 | 8.75  | 7.89  | 2.2  | 0.32 | 1.82  | 0.639487 | 0.36568  | 0.85626  | 0.605684 |
| MmugDNA.40031.1.S1_at   | MmugDNA.40031.1 | 4.76  | 4.8   | 0.36 | 0.26 | -1.02 | 0.809502 | 0.579912 | 0.93104  | 0.749335 |
| MmugDNA.40032.1.S1_x_at | MmugDNA.40032.1 | 8.18  | 8.56  | 0.36 | 0.16 | -1.3  | 0.197471 | 0.077332 | 0.568443 | 0.323135 |
| MmugDNA.40033.1.S1_at   | MmugDNA.40033.1 | 8.29  | 7.72  | 0.96 | 0.16 | 1.49  | 0.932363 | 0.429636 | 0.977227 | 0.650973 |
| MmugDNA.40034.1.S1_at   | MmugDNA.40034.1 | 9.19  | 9.55  | 0.67 | 0.18 | -1.28 | 0.169799 | 0.201253 | 0.542758 | 0.47571  |
| MmugDNA.40035.1.S1_at   | MmugDNA.40035.1 | 4.25  | 4.09  | 0.36 | 0.01 | 1.11  | 0.253647 | 0.146476 | 0.618323 | 0.420523 |
| MmugDNA.40037.1.S1_at   | MmugDNA.40037.1 | 4.77  | 4.54  | 0.08 | 0.07 | 1.18  | 0.031854 | 0.142966 | 0.342614 | 0.416854 |
| MmugDNA.40038.1.S1_at   | MmugDNA.40038.1 | 7.34  | 7.27  | 0.11 | 0.14 | 1.05  | 0.360551 | 0.604687 | 0.697965 | 0.764769 |
| MmugDNA.40039.1.S1_at   | MmugDNA.40039.1 | 4.86  | 4.51  | 0.2  | 0.44 | 1.28  | 0.284135 | 0.474213 | 0.642084 | 0.68135  |
| MmugDNA.4004.1.S1_at    | MmugDNA.4004.1  | 4.09  | 4.09  | 0.26 | 0.18 | -1    | 0.344911 | 0.350408 | 0.687232 | 0.594161 |
| MmugDNA.40040.1.S1_at   | MmugDNA.40040.1 | 5.9   | 5.75  | 0.03 | 0.15 | 1.11  | 0.091879 | 0.341895 | 0.460177 | 0.587972 |
| MmugDNA.40041.1.S1_at   | MmugDNA.40041.1 | 5.03  | 4.91  | 0.19 | 0.07 | 1.09  | 0.52632  | 0.540279 | 0.796483 | 0.724221 |
| MmugDNA.40042.1.S1_at   | MmugDNA.40042.1 | 6.64  | 6.18  | 0.07 | 0.47 | 1.38  | 0.243907 | 0.455816 | 0.609715 | 0.669659 |

|                         |                 |       |       |      |      |       |          |          |          |          |
|-------------------------|-----------------|-------|-------|------|------|-------|----------|----------|----------|----------|
| MmugDNA.40043.1.S1_at   | MmugDNA.40043.1 | 10.34 | 9.52  | 0.02 | 0.12 | 1.77  | 0.000356 | 0.018197 | 0.137028 | 0.169696 |
| MmugDNA.40044.1.S1_at   | MmugDNA.40044.1 | 3.2   | 3.17  | 0.23 | 0.22 | 1.03  | 0.542839 | 0.777007 | 0.805988 | 0.870467 |
| MmugDNA.40046.1.S1_at   | MmugDNA.40046.1 | 3.01  | 3.2   | 0.11 | 0.21 | -1.14 | 0.475294 | 0.591978 | 0.768515 | 0.757386 |
| MmugDNA.40048.1.S1_at   | MmugDNA.40048.1 | 7.38  | 7.29  | 0.74 | 0.08 | 1.06  | 0.695031 | 0.005677 | 0.881262 | 0.103959 |
| MmugDNA.40049.1.S1_at   | MmugDNA.40049.1 | 10.05 | 9.63  | 1.05 | 0.1  | 1.33  | 0.709961 | 0.24196  | 0.887176 | 0.512489 |
| MmugDNA.4005.1.S1_at    | MmugDNA.4005.1  | 7.8   | 7.73  | 0.34 | 0.07 | 1.05  | 0.970065 | 0.991715 | 0.990105 | 0.995392 |
| MmugDNA.4005.1.S1_x_at  | MmugDNA.4005.1  | 7.88  | 7.78  | 0.19 | 0.07 | 1.07  | 0.160271 | 0.224864 | 0.533335 | 0.497653 |
| MmugDNA.40050.1.S1_at   | MmugDNA.40050.1 | 4.68  | 4.84  | 0.36 | 0.27 | -1.12 | 0.692086 | 0.261412 | 0.880095 | 0.527887 |
| MmugDNA.40051.1.S1_at   | MmugDNA.40051.1 | 12.64 | 12.5  | 0.09 | 0.18 | 1.1   | 0.668824 | 0.483489 | 0.869159 | 0.687943 |
| MmugDNA.40052.1.S1_at   | MmugDNA.40052.1 | 3.76  | 3.67  | 0.23 | 0.05 | 1.06  | 0.280044 | 0.352501 | 0.638871 | 0.595747 |
| MmugDNA.40053.1.S1_at   | MmugDNA.40053.1 | 8.18  | 8.26  | 0.49 | 0.17 | -1.06 | 0.92125  | 0.532343 | 0.973336 | 0.719017 |
| MmugDNA.40053.1.S1_x_at | MmugDNA.40053.1 | 8.32  | 8.4   | 0.48 | 0.16 | -1.05 | 0.908483 | 0.608444 | 0.969203 | 0.767074 |
| MmugDNA.40054.1.S1_at   | MmugDNA.40054.1 | 3.43  | 4.68  | 0.35 | 0.37 | -2.37 | 0.032569 | 0.244978 | 0.344695 | 0.514782 |
| MmugDNA.40055.1.S1_at   | MmugDNA.40055.1 | 4.08  | 4.13  | 0.3  | 0.45 | -1.04 | 0.64632  | 0.675629 | 0.859027 | 0.810429 |
| MmugDNA.40056.1.S1_at   | MmugDNA.40056.1 | 5.65  | 5.51  | 0.15 | 0.19 | 1.1   | 0.950659 | 0.274505 | 0.983335 | 0.538987 |
| MmugDNA.40057.1.S1_at   | MmugDNA.40057.1 | 10.77 | 10.51 | 0.39 | 0.08 | 1.19  | 0.229621 | 0.12052  | 0.598458 | 0.38929  |
| MmugDNA.40062.1.S1_at   | MmugDNA.40062.1 | 5.69  | 5.55  | 0.12 | 0.08 | 1.1   | 0.204712 | 0.71415  | 0.576258 | 0.834155 |
| MmugDNA.40063.1.S1_at   | MmugDNA.40063.1 | 6.04  | 6.22  | 0.74 | 0.38 | -1.13 | 0.271703 | 0.253811 | 0.631506 | 0.52217  |
| MmugDNA.40064.1.S1_at   | MmugDNA.40064.1 | 2.87  | 2.76  | 0.16 | 0.04 | 1.08  | 0.225033 | 0.242202 | 0.594284 | 0.51267  |
| MmugDNA.40065.1.S1_at   | MmugDNA.40065.1 | 3.31  | 3.22  | 0.08 | 0.06 | 1.06  | 0.738041 | 0.900896 | 0.899775 | 0.943591 |
| MmugDNA.40067.1.S1_at   | MmugDNA.40067.1 | 5.58  | 6.38  | 0.24 | 0.25 | -1.74 | 0.009297 | 0.029747 | 0.241866 | 0.214138 |
| MmugDNA.40068.1.S1_at   | MmugDNA.40068.1 | 11.17 | 10.91 | 0.04 | 0.07 | 1.2   | 0.003055 | 0.280883 | 0.191107 | 0.544054 |
| MmugDNA.40069.1.S1_at   | MmugDNA.40069.1 | 9.36  | 8.79  | 0.38 | 0.12 | 1.48  | 0.069231 | 0.050844 | 0.426664 | 0.27076  |
| MmugDNA.4007.1.S1_at    | MmugDNA.4007.1  | 3.8   | 3.62  | 0.05 | 0.05 | 1.14  | 0.014192 | 0.00938  | 0.274019 | 0.127634 |
| MmugDNA.40070.1.S1_at   | MmugDNA.40070.1 | 4.83  | 4.78  | 0.14 | 0.27 | 1.04  | 0.609586 | 0.829207 | 0.841773 | 0.901809 |
| MmugDNA.40071.1.S1_at   | MmugDNA.40071.1 | 5.31  | 5.24  | 0.12 | 0.05 | 1.05  | 0.905917 | 0.451002 | 0.968196 | 0.665965 |
| MmugDNA.40072.1.S1_at   | MmugDNA.40072.1 | 8.19  | 8.34  | 0.66 | 0.11 | -1.11 | 0.641797 | 0.432302 | 0.857493 | 0.652778 |
| MmugDNA.40073.1.S1_at   | MmugDNA.40073.1 | 7.72  | 7.42  | 0.57 | 0.04 | 1.23  | 0.865391 | 0.015786 | 0.952626 | 0.159295 |
| MmugDNA.40074.1.S1_at   | MmugDNA.40074.1 | 6.27  | 6.23  | 0.63 | 0.46 | 1.03  | 0.648765 | 0.358249 | 0.860071 | 0.599765 |
| MmugDNA.40075.1.S1_at   | MmugDNA.40075.1 | 3.4   | 3.4   | 0.09 | 0.04 | 1     | 0.621478 | 0.333462 | 0.847545 | 0.581683 |
| MmugDNA.40076.1.S1_at   | MmugDNA.40076.1 | 3.57  | 3.47  | 0.07 | 0.19 | 1.08  | 0.133278 | 0.063709 | 0.507801 | 0.298899 |
| MmugDNA.40079.1.S1_at   | MmugDNA.40079.1 | 3.13  | 2.88  | 0.07 | 0.15 | 1.18  | 0.055663 | 0.258321 | 0.398998 | 0.5256   |
| MmugDNA.4008.1.S1_at    | MmugDNA.4008.1  | 4.29  | 4.08  | 0.17 | 0.21 | 1.16  | 0.281207 | 0.303702 | 0.639849 | 0.561115 |
| MmugDNA.40081.1.S1_at   | MmugDNA.40081.1 | 5.77  | 5.49  | 0.01 | 0.17 | 1.21  | 0.141484 | 0.124533 | 0.516365 | 0.394987 |
| MmugDNA.26770.1.S1_s_at | MmugDNA.26770.1 | 12.96 | 12.7  | 0.07 | 0.09 | 1.19  | 0.015091 | 0.003263 | 0.2796   | 0.082278 |
| MmugDNA.40082.1.S1_s_at | MmugDNA.40082.1 | 5.58  | 5.31  | 0.22 | 0.08 | 1.2   | 0.04008  | 0.052242 | 0.363191 | 0.274065 |
| MmugDNA.40083.1.S1_at   | MmugDNA.40083.1 | 3.21  | 3.2   | 0.08 | 0    | 1     | 0.886139 | 0.810491 | 0.960485 | 0.890812 |
| MmugDNA.40084.1.S1_at   | MmugDNA.40084.1 | 3.44  | 3.39  | 0.18 | 0.23 | 1.03  | 0.328358 | 0.432241 | 0.67577  | 0.652776 |
| MmugDNA.40087.1.S1_at   | MmugDNA.40087.1 | 3.58  | 3.58  | 0.13 | 0.05 | -1    | 0.398115 | 0.494167 | 0.722323 | 0.694704 |
| MmugDNA.40089.1.S1_at   | MmugDNA.40089.1 | 11.78 | 11.74 | 0.22 | 0.18 | 1.03  | 0.917229 | 0.152345 | 0.97197  | 0.427072 |
| MmugDNA.4009.1.S1_at    | MmugDNA.4009.1  | 4.56  | 5.52  | 0.52 | 0.24 | -1.95 | 0.027092 | 0.295645 | 0.327141 | 0.555108 |
| MmugDNA.40092.1.S1_at   | MmugDNA.40092.1 | 6.92  | 7.04  | 0.43 | 0.16 | -1.09 | 0.474055 | 0.398883 | 0.767923 | 0.629593 |
| MmugDNA.40093.1.S1_at   | MmugDNA.40093.1 | 5.89  | 5.94  | 0.3  | 0.22 | -1.03 | 0.429923 | 0.714375 | 0.742417 | 0.834282 |

|                         |                 |       |       |      |      |       |          |          |          |          |
|-------------------------|-----------------|-------|-------|------|------|-------|----------|----------|----------|----------|
| MmugDNA.40094.1.S1_at   | MmugDNA.40094.1 | 8.21  | 8.49  | 0.13 | 0.18 | -1.21 | 0.024772 | 0.012876 | 0.31972  | 0.146098 |
| MmugDNA.40095.1.S1_at   | MmugDNA.40095.1 | 9.93  | 9.57  | 0.34 | 0.06 | 1.28  | 0.05741  | 0.029151 | 0.402072 | 0.212767 |
| MmugDNA.40096.1.S1_at   | MmugDNA.40096.1 | 6.48  | 7.55  | 0.78 | 0.21 | -2.09 | 0.036523 | 0.011303 | 0.355049 | 0.138076 |
| MmugDNA.40098.1.S1_at   | MmugDNA.40098.1 | 8.27  | 8.2   | 0.09 | 0.14 | 1.05  | 0.621511 | 0.107335 | 0.847545 | 0.370219 |
| MmugDNA.40099.1.S1_at   | MmugDNA.40099.1 | 10.17 | 9.5   | 0.46 | 0.3  | 1.59  | 0.058669 | 0.033917 | 0.405162 | 0.227775 |
| MmugDNA.401.1.S1_at     | MmugDNA.401.1   | 4.01  | 4.34  | 0.5  | 0.44 | -1.25 | 0.860519 | 0.164942 | 0.950846 | 0.44123  |
| MmugDNA.4010.1.S1_at    | MmugDNA.4010.1  | 3.21  | 3.15  | 0.13 | 0.07 | 1.05  | 0.534246 | 0.305587 | 0.80126  | 0.562504 |
| MmugDNA.40100.1.S1_at   | MmugDNA.40100.1 | 9.44  | 9.5   | 0.08 | 0.04 | -1.04 | 0.195514 | 0.487201 | 0.565944 | 0.690322 |
| MmugDNA.40101.1.S1_at   | MmugDNA.40101.1 | 4.85  | 4.83  | 0.08 | 0.15 | 1.01  | 0.941862 | 0.334143 | 0.980207 | 0.582198 |
| MmugDNA.40102.1.S1_at   | MmugDNA.40102.1 | 9.1   | 9.85  | 0.35 | 0.13 | -1.68 | 0.030452 | 0.010405 | 0.337918 | 0.133414 |
| MmugDNA.40103.1.S1_at   | MmugDNA.40103.1 | 3.34  | 3.19  | 0.29 | 0.05 | -1.12 | 0.183848 | 0.193677 | 0.556716 | 0.468785 |
| MmugDNA.40104.1.S1_at   | MmugDNA.40104.1 | 3.75  | 3.82  | 0.06 | 0.06 | -1.04 | 0.122487 | 0.067125 | 0.495926 | 0.305093 |
| MmugDNA.40106.1.S1_at   | MmugDNA.40106.1 | 4.09  | 4.64  | 0.77 | 0.22 | -1.47 | 0.795987 | 0.949094 | 0.925023 | 0.970837 |
| MmugDNA.40107.1.S1_at   | MmugDNA.40107.1 | 4.84  | 5.42  | 0.46 | 0.27 | -1.49 | 0.343525 | 0.680744 | 0.686751 | 0.813572 |
| MmugDNA.40108.1.S1_at   | MmugDNA.40108.1 | 4.19  | 3.99  | 0.28 | 0.21 | 1.15  | 0.402363 | 0.532227 | 0.724848 | 0.718999 |
| MmugDNA.4011.1.S1_at    | MmugDNA.4011.1  | 4.37  | 4.37  | 0.17 | 0.04 | -1    | 0.352408 | 0.759121 | 0.692649 | 0.859979 |
| MmugDNA.40110.1.S1_at   | MmugDNA.40110.1 | 6.45  | 6.46  | 0.18 | 0.18 | -1    | 0.531286 | 0.810561 | 0.799582 | 0.890812 |
| MmugDNA.40111.1.S1_at   | MmugDNA.40111.1 | 5.52  | 4.79  | 0.24 | 0.45 | 1.66  | 0.064354 | 0.263008 | 0.418055 | 0.529397 |
| MmugDNA.40112.1.S1_at   | MmugDNA.40112.1 | 4.12  | 4.03  | 0.09 | 0.15 | 1.06  | 0.385411 | 0.467515 | 0.712733 | 0.677091 |
| MmugDNA.40114.1.S1_at   | MmugDNA.40114.1 | 11.23 | 10.76 | 0.21 | 0.08 | 1.38  | 0.020463 | 0.013882 | 0.304045 | 0.151137 |
| MmugDNA.40115.1.S1_at   | MmugDNA.40115.1 | 7.73  | 7.85  | 0.61 | 0.19 | -1.08 | 0.751893 | 0.137316 | 0.906228 | 0.41024  |
| MmugDNA.40116.1.S1_at   | MmugDNA.40116.1 | 6.82  | 6.28  | 0.19 | 0.21 | 1.46  | 0.035968 | 0.04592  | 0.353759 | 0.258722 |
| MmugDNA.40117.1.S1_at   | MmugDNA.40117.1 | 5.34  | 5.45  | 0.25 | 0.17 | -1.08 | 0.563267 | 0.295038 | 0.818148 | 0.554551 |
| MmugDNA.40119.1.S1_s_at | MmugDNA.40119.1 | 10.4  | 10.19 | 0.14 | 0.15 | 1.16  | 0.141068 | 0.282356 | 0.516345 | 0.545076 |
| MmugDNA.4012.1.S1_at    | MmugDNA.4012.1  | 8.1   | 7.53  | 0.23 | 0.09 | 1.48  | 0.025105 | 0.024763 | 0.320458 | 0.197124 |
| MmugDNA.40120.1.S1_at   | MmugDNA.40120.1 | 3.76  | 3.73  | 0.32 | 0.07 | 1.02  | 0.784296 | 0.890621 | 0.920715 | 0.937649 |
| MmugDNA.40121.1.S1_at   | MmugDNA.40121.1 | 12.3  | 11.8  | 0.12 | 0.15 | 1.42  | 0.013581 | 0.009285 | 0.269894 | 0.127101 |
| MmugDNA.40122.1.S1_at   | MmugDNA.40122.1 | 3.77  | 3.77  | 0.04 | 0.01 | 1     | 0.302228 | 0.634466 | 0.656154 | 0.784807 |
| MmugDNA.40123.1.S1_at   | MmugDNA.40123.1 | 10.78 | 11.91 | 0.64 | 0.16 | -2.19 | 0.045162 | 0.04404  | 0.375925 | 0.254195 |
| MmugDNA.40125.1.S1_at   | MmugDNA.40125.1 | 5.09  | 4.86  | 0.12 | 0.14 | 1.18  | 0.194764 | 0.050569 | 0.565183 | 0.27025  |
| MmugDNA.40126.1.S1_at   | MmugDNA.40126.1 | 3.54  | 3.51  | 0.08 | 0.01 | 1.02  | 0.897778 | 0.683606 | 0.965322 | 0.815387 |
| MmugDNA.40127.1.S1_at   | MmugDNA.40127.1 | 2.99  | 2.99  | 0.02 | 0.06 | -1.01 | 0.958891 | 0.810636 | 0.986529 | 0.890812 |
| MmugDNA.40128.1.S1_at   | MmugDNA.40128.1 | 3.97  | 4.13  | 0.11 | 0.16 | -1.12 | 0.264649 | 0.48852  | 0.626029 | 0.691222 |
| MmugDNA.40129.1.S1_at   | MmugDNA.40129.1 | 4.82  | 4.88  | 0.04 | 0.16 | -1.04 | 0.371015 | 0.119373 | 0.705275 | 0.387887 |
| MmugDNA.4013.1.S1_at    | MmugDNA.4013.1  | 4.15  | 3.99  | 0.2  | 0.1  | 1.11  | 0.135592 | 0.277781 | 0.51011  | 0.541664 |
| MmugDNA.40130.1.S1_at   | MmugDNA.40130.1 | 2.91  | 2.92  | 0.04 | 0.06 | -1.01 | 0.588101 | 0.315001 | 0.83181  | 0.568759 |
| MmugDNA.40131.1.S1_at   | MmugDNA.40131.1 | 4.96  | 4.94  | 0.08 | 0.14 | 1.02  | 0.841009 | 0.246591 | 0.943507 | 0.515917 |
| MmugDNA.40132.1.S1_at   | MmugDNA.40132.1 | 4.49  | 4.54  | 0.26 | 0.12 | -1.03 | 0.559881 | 0.609408 | 0.816426 | 0.767768 |
| MmugDNA.40133.1.S1_at   | MmugDNA.40133.1 | 10.79 | 11.63 | 0.48 | 0.05 | -1.78 | 0.102399 | 0.029184 | 0.472589 | 0.212861 |
| MmugDNA.40133.1.S1_s_at | MmugDNA.40133.1 | 11.29 | 12    | 0.44 | 0.02 | -1.64 | 0.118283 | 0.045188 | 0.491784 | 0.256979 |
| MmugDNA.40135.1.S1_at   | MmugDNA.40135.1 | 3.74  | 3.83  | 0.58 | 0.8  | -1.06 | 0.390737 | 0.514113 | 0.716935 | 0.707434 |
| MmugDNA.40136.1.S1_at   | MmugDNA.40136.1 | 9.85  | 9.68  | 1    | 0.2  | 1.12  | 0.698678 | 0.108301 | 0.882848 | 0.371557 |
| MmugDNA.4014.1.S1_at    | MmugDNA.4014.1  | 10.54 | 10.33 | 0.23 | 0.1  | 1.16  | 0.308796 | 0.296129 | 0.661293 | 0.555339 |

|                         |                 |       |       |      |      |       |          |          |          |          |
|-------------------------|-----------------|-------|-------|------|------|-------|----------|----------|----------|----------|
| MmugDNA.40140.1.S1_at   | MmugDNA.40140.1 | 3.02  | 3.02  | 0.08 | 0.15 | 1     | 0.660947 | 0.749775 | 0.865819 | 0.854593 |
| MmugDNA.40141.1.S1_at   | MmugDNA.40141.1 | 5.17  | 4.95  | 0.35 | 0.14 | 1.16  | 0.378857 | 0.209017 | 0.708471 | 0.482814 |
| MmugDNA.40142.1.S1_at   | MmugDNA.40142.1 | 6.79  | 7.59  | 0.27 | 0.05 | -1.74 | 0.007782 | 0.000369 | 0.230997 | 0.037273 |
| MmugDNA.40143.1.S1_at   | MmugDNA.40143.1 | 8.17  | 8.35  | 0.34 | 0.09 | -1.13 | 0.983258 | 0.132219 | 0.994908 | 0.404274 |
| MmugDNA.40145.1.S1_at   | MmugDNA.40145.1 | 11.99 | 11.98 | 0.15 | 0.04 | 1.01  | 0.952851 | 0.882145 | 0.984203 | 0.932822 |
| MmugDNA.40148.1.S1_at   | MmugDNA.40148.1 | 6.76  | 6.58  | 0.07 | 0.09 | 1.13  | 0.076173 | 0.296516 | 0.437562 | 0.555528 |
| MmugDNA.40149.1.S1_at   | MmugDNA.40149.1 | 5.29  | 5.31  | 0.02 | 0.2  | -1.01 | 0.484162 | 0.856051 | 0.773472 | 0.917823 |
| MmugDNA.4015.1.S1_at    | MmugDNA.4015.1  | 4.13  | 4.28  | 0.19 | 0.14 | -1.11 | 0.749834 | 0.654776 | 0.905303 | 0.798154 |
| MmugDNA.40150.1.S1_at   | MmugDNA.40150.1 | 6.45  | 6.34  | 0.12 | 0.11 | 1.07  | 0.304146 | 0.070064 | 0.657885 | 0.310966 |
| MmugDNA.40151.1.S1_at   | MmugDNA.40151.1 | 11.46 | 11.43 | 0.11 | 0.11 | 1.02  | 0.753867 | 0.818724 | 0.907201 | 0.895529 |
| MmugDNA.40152.1.S1_at   | MmugDNA.40152.1 | 4.91  | 4.91  | 0.04 | 0.02 | 1     | 0.434622 | 0.750065 | 0.745233 | 0.854684 |
| MmugDNA.40154.1.S1_at   | MmugDNA.40154.1 | 7.52  | 7.46  | 0.06 | 0.3  | 1.04  | 0.6983   | 0.647798 | 0.882746 | 0.793775 |
| MmugDNA.40155.1.S1_at   | MmugDNA.40155.1 | 9.91  | 10.18 | 0.34 | 0.09 | -1.21 | 0.471537 | 0.111954 | 0.76658  | 0.377063 |
| MmugDNA.40156.1.S1_at   | MmugDNA.40156.1 | 13.46 | 13.31 | 0.12 | 0.03 | 1.11  | 0.061415 | 0.133381 | 0.410677 | 0.405193 |
| MmugDNA.40157.1.S1_at   | MmugDNA.40157.1 | 7.31  | 7.09  | 0.1  | 0.02 | 1.16  | 0.055013 | 0.299274 | 0.397577 | 0.557769 |
| MmugDNA.40158.1.S1_at   | MmugDNA.40158.1 | 4.56  | 4.38  | 0.34 | 0.16 | 1.14  | 0.25096  | 0.212038 | 0.616067 | 0.486013 |
| MmugDNA.40159.1.S1_s_at | MmugDNA.40159.1 | 7.58  | 7.64  | 0.17 | 0.09 | -1.04 | 0.826647 | 0.059517 | 0.937924 | 0.290548 |
| MmugDNA.4016.1.S1_at    | MmugDNA.4016.1  | 10.63 | 10.12 | 0.06 | 0.16 | 1.42  | 0.00723  | 0.002968 | 0.226509 | 0.079958 |
| MmugDNA.40160.1.S1_at   | MmugDNA.40160.1 | 5.19  | 4.6   | 0.56 | 0.36 | 1.51  | 0.159089 | 0.056697 | 0.531772 | 0.284213 |
| MmugDNA.40161.1.S1_at   | MmugDNA.40161.1 | 4.12  | 4.03  | 0.25 | 0.1  | 1.07  | 0.345176 | 0.560024 | 0.68742  | 0.736441 |
| MmugDNA.40162.1.S1_at   | MmugDNA.40162.1 | 5.94  | 6.02  | 0.18 | 0.1  | -1.06 | 0.523097 | 0.166313 | 0.795458 | 0.442861 |
| MmugDNA.40163.1.S1_at   | MmugDNA.40163.1 | 7.07  | 7.06  | 0.11 | 0.11 | 1     | 0.213817 | 0.334796 | 0.58443  | 0.582702 |
| MmugDNA.40165.1.S1_at   | MmugDNA.40165.1 | 12.26 | 12.28 | 0.93 | 0.07 | -1.02 | 0.352622 | 0.42482  | 0.692659 | 0.64729  |
| MmugDNA.40166.1.S1_at   | MmugDNA.40166.1 | 7.99  | 8.28  | 0.7  | 0.16 | -1.22 | 0.189264 | 0.225724 | 0.560874 | 0.498159 |
| MmugDNA.40167.1.S1_at   | MmugDNA.40167.1 | 7.6   | 6.69  | 0.84 | 0.26 | 1.87  | 0.358048 | 0.547998 | 0.695993 | 0.72884  |
| MmugDNA.40168.1.S1_at   | MmugDNA.40168.1 | 4.2   | 4.09  | 0.06 | 0.01 | 1.08  | 0.134122 | 0.076949 | 0.508395 | 0.322421 |
| MmugDNA.40169.1.S1_at   | MmugDNA.40169.1 | 8.09  | 7.95  | 0.32 | 0.04 | 1.1   | 0.474668 | 0.756022 | 0.768155 | 0.857974 |
| MmugDNA.4017.1.S1_at    | MmugDNA.4017.1  | 3.83  | 3.74  | 0.09 | 0.15 | 1.06  | 0.266847 | 0.410331 | 0.627644 | 0.637216 |
| MmugDNA.40171.1.S1_at   | MmugDNA.40171.1 | 6.48  | 7.37  | 0.66 | 0.09 | -1.86 | 0.085448 | 0.230155 | 0.452653 | 0.502007 |
| MmugDNA.40172.1.S1_at   | MmugDNA.40172.1 | 4.87  | 4.58  | 0.16 | 0.07 | 1.22  | 0.131574 | 0.152934 | 0.505989 | 0.42777  |
| MmugDNA.40173.1.S1_at   | MmugDNA.40173.1 | 3.19  | 3.13  | 0.14 | 0.11 | 1.04  | 0.282606 | 0.226022 | 0.640996 | 0.498465 |
| MmugDNA.40174.1.S1_at   | MmugDNA.40174.1 | 5.39  | 5.41  | 0.09 | 0.13 | -1.01 | 0.349375 | 0.62176  | 0.690424 | 0.776338 |
| MmugDNA.40175.1.S1_at   | MmugDNA.40175.1 | 6.73  | 5.41  | 1    | 0.35 | 2.5   | 0.372205 | 0.555841 | 0.705567 | 0.734119 |
| MmugDNA.40176.1.S1_at   | MmugDNA.40176.1 | 8.36  | 7.82  | 1.06 | 0.12 | 1.46  | 0.921432 | 0.044433 | 0.973373 | 0.25521  |
| MmugDNA.40177.1.S1_at   | MmugDNA.40177.1 | 4.94  | 6.16  | 0.2  | 0.18 | -2.33 | 0.001823 | 0.014196 | 0.167772 | 0.152173 |
| MmugDNA.40179.1.S1_at   | MmugDNA.40179.1 | 3.89  | 3.75  | 0.29 | 0.25 | 1.1   | 0.870168 | 0.929325 | 0.954781 | 0.959675 |
| MmugDNA.4018.1.S1_at    | MmugDNA.4018.1  | 4.26  | 4.49  | 0.77 | 0.28 | -1.17 | 0.693555 | 0.652852 | 0.880681 | 0.797104 |
| MmugDNA.40180.1.S1_at   | MmugDNA.40180.1 | 5.15  | 5.47  | 0.29 | 0.4  | -1.25 | 0.752043 | 0.740585 | 0.906265 | 0.849805 |
| MmugDNA.40181.1.S1_at   | MmugDNA.40181.1 | 7.14  | 7.14  | 0.09 | 0.03 | -1    | 0.466281 | 0.41757  | 0.763448 | 0.642252 |
| MmugDNA.40181.1.S1_s_at | MmugDNA.40181.1 | 4.98  | 5.51  | 0.42 | 0.21 | -1.44 | 0.351037 | 0.486073 | 0.691811 | 0.689573 |
| MmugDNA.40182.1.S1_at   | MmugDNA.40182.1 | 4.1   | 4.06  | 0.1  | 0.1  | 1.03  | 0.300147 | 0.118781 | 0.654699 | 0.386875 |
| MmugDNA.40183.1.S1_at   | MmugDNA.40183.1 | 7.61  | 7.59  | 0.12 | 0.02 | 1.01  | 0.891154 | 0.398988 | 0.962566 | 0.629665 |
| MmugDNA.40184.1.S1_at   | MmugDNA.40184.1 | 3.11  | 3.26  | 0.1  | 0.11 | -1.11 | 0.340839 | 0.266125 | 0.684799 | 0.531957 |

|                         |                 |       |       |      |      |       |          |          |          |          |
|-------------------------|-----------------|-------|-------|------|------|-------|----------|----------|----------|----------|
| MmugDNA.40185.1.S1_at   | MmugDNA.40185.1 | 5.25  | 4.66  | 0.29 | 0.08 | 1.5   | 0.075187 | 0.304238 | 0.436118 | 0.561558 |
| MmugDNA.40186.1.S1_at   | MmugDNA.40186.1 | 6.94  | 6.87  | 0.08 | 0.06 | 1.05  | 0.122566 | 0.58333  | 0.496093 | 0.751719 |
| MmugDNA.40187.1.S1_at   | MmugDNA.40187.1 | 3.14  | 3.03  | 0.01 | 0.06 | 1.07  | 0.034503 | 0.055965 | 0.350124 | 0.28236  |
| MmugDNA.40188.1.S1_at   | MmugDNA.40188.1 | 11.02 | 10.54 | 1.83 | 0.16 | 1.39  | 0.616599 | 0.267876 | 0.845004 | 0.533607 |
| MmugDNA.40189.1.S1_at   | MmugDNA.40189.1 | 12    | 11.18 | 0.52 | 0.38 | 1.77  | 0.084193 | 0.085477 | 0.450673 | 0.337473 |
| MmugDNA.40191.1.S1_at   | MmugDNA.40191.1 | 5.77  | 5.78  | 0.04 | 0.23 | -1.01 | 0.439986 | 0.584482 | 0.748282 | 0.752435 |
| MmugDNA.40191.1.S1_x_at | MmugDNA.40191.1 | 6.22  | 6.39  | 0.06 | 0.13 | -1.12 | 0.163433 | 0.103098 | 0.53621  | 0.364006 |
| MmugDNA.40194.1.S1_at   | MmugDNA.40194.1 | 12.16 | 11.66 | 0.17 | 0.05 | 1.41  | 0.01128  | 0.006317 | 0.253564 | 0.107907 |
| MmugDNA.36623.1.S1_s_at | MmugDNA.36623.1 | 11.62 | 10.98 | 0.15 | 0.06 | 1.56  | 0.004108 | 0.00171  | 0.198572 | 0.062657 |
| MmugDNA.40195.1.S1_at   | MmugDNA.40195.1 | 6.18  | 6.57  | 0.69 | 0.45 | -1.31 | 0.424589 | 0.520641 | 0.739618 | 0.711831 |
| MmugDNA.40196.1.S1_at   | MmugDNA.40196.1 | 3.12  | 3.91  | 0.18 | 0.05 | -1.72 | 0.001815 | 0.008289 | 0.167492 | 0.120788 |
| MmugDNA.40197.1.S1_at   | MmugDNA.40197.1 | 8.22  | 8.37  | 0.55 | 0.19 | -1.11 | 0.461356 | 0.017043 | 0.760883 | 0.165455 |
| MmugDNA.40199.1.S1_at   | MmugDNA.40199.1 | 6.88  | 6.92  | 0.45 | 0.04 | -1.03 | 0.944144 | 0.52175  | 0.980647 | 0.712623 |
| MmugDNA.402.1.S1_at     | MmugDNA.402.1   | 5.95  | 5.97  | 0.07 | 0.15 | -1.02 | 0.612233 | 0.326893 | 0.842951 | 0.576848 |
| MmugDNA.4020.1.S1_at    | MmugDNA.4020.1  | 3.28  | 3.29  | 0.1  | 0.24 | -1.01 | 0.83926  | 0.81963  | 0.942609 | 0.896113 |
| MmugDNA.40200.1.S1_at   | MmugDNA.40200.1 | 8.71  | 8.84  | 0.14 | 0.22 | -1.1  | 0.211074 | 0.744787 | 0.582141 | 0.852198 |
| MmugDNA.21349.1.S1_s_at | MmugDNA.21349.1 | 3.55  | 3.17  | 0.26 | 0.2  | 1.3   | 0.210714 | 0.160148 | 0.581995 | 0.436296 |
| MmugDNA.40202.1.S1_at   | MmugDNA.40202.1 | 4.55  | 4.62  | 0.13 | 0.14 | -1.05 | 0.244324 | 0.169918 | 0.60991  | 0.446569 |
| MmugDNA.40203.1.S1_at   | MmugDNA.40203.1 | 11.06 | 10.67 | 0.13 | 0.08 | 1.31  | 0.010904 | 0.056137 | 0.250796 | 0.282825 |
| MmugDNA.40205.1.S1_at   | MmugDNA.40205.1 | 4.91  | 4.94  | 0.09 | 0.09 | -1.02 | 0.91941  | 0.396752 | 0.972575 | 0.628438 |
| MmugDNA.40207.1.S1_at   | MmugDNA.40207.1 | 12.82 | 12.89 | 0.1  | 0.03 | -1.05 | 0.458113 | 0.080747 | 0.758638 | 0.328632 |
| MmugDNA.40207.1.S1_s_at | MmugDNA.40207.1 | 12.74 | 12.88 | 0.13 | 0    | -1.11 | 0.400553 | 0.379167 | 0.723841 | 0.616153 |
| MmugDNA.40209.1.S1_at   | MmugDNA.40209.1 | 4.68  | 4.52  | 0.24 | 0.07 | 1.12  | 0.11141  | 0.101315 | 0.484548 | 0.361094 |
| MmugDNA.4021.1.S1_at    | MmugDNA.4021.1  | 4.7   | 4.5   | 0.18 | 0.09 | 1.15  | 0.313036 | 0.557663 | 0.664401 | 0.735165 |
| MmugDNA.40210.1.S1_at   | MmugDNA.40210.1 | 5.77  | 5.73  | 0.92 | 0.09 | 1.03  | 0.320284 | 0.418164 | 0.669215 | 0.642638 |
| MmugDNA.40211.1.S1_at   | MmugDNA.40211.1 | 6.1   | 5.97  | 0.19 | 0.1  | 1.09  | 0.287668 | 0.505672 | 0.644777 | 0.702218 |
| MmugDNA.40212.1.S1_at   | MmugDNA.40212.1 | 6.04  | 6.09  | 0.04 | 0.18 | -1.04 | 0.694963 | 0.658392 | 0.881254 | 0.800319 |
| MmugDNA.40214.1.S1_at   | MmugDNA.40214.1 | 3.24  | 4.51  | 0.25 | 0.45 | -2.42 | 0.025564 | 0.018016 | 0.322382 | 0.169255 |
| MmugDNA.40215.1.S1_at   | MmugDNA.40215.1 | 3.56  | 3.42  | 0.09 | 0.25 | 1.1   | 0.96883  | 0.999321 | 0.989781 | 0.999756 |
| MmugDNA.40216.1.S1_at   | MmugDNA.40216.1 | 6.34  | 6.21  | 0.24 | 0.07 | 1.1   | 0.549865 | 0.69288  | 0.810447 | 0.82128  |
| MmugDNA.40217.1.S1_at   | MmugDNA.40217.1 | 5.69  | 5.53  | 0.05 | 0.2  | 1.11  | 0.591443 | 0.504851 | 0.833444 | 0.701897 |
| MmugDNA.4022.1.S1_at    | MmugDNA.4022.1  | 3.44  | 3.39  | 0.02 | 0.01 | 1.03  | 0.021655 | 0.118306 | 0.309241 | 0.386327 |
| MmugDNA.40220.1.S1_at   | MmugDNA.40220.1 | 4.21  | 4.17  | 0.18 | 0.18 | 1.03  | 0.637385 | 0.581807 | 0.855537 | 0.750781 |
| MmugDNA.40221.1.S1_at   | MmugDNA.40221.1 | 3.3   | 4.24  | 0.16 | 0.11 | -1.93 | 0.000812 | 0.003888 | 0.15004  | 0.088775 |
| MmugDNA.40222.1.S1_at   | MmugDNA.40222.1 | 6.52  | 6.18  | 0.1  | 0.05 | 1.26  | 0.012786 | 0.640685 | 0.26497  | 0.789053 |
| MmugDNA.40223.1.S1_at   | MmugDNA.40223.1 | 4.27  | 4.36  | 0.05 | 0.28 | -1.07 | 0.203893 | 0.453318 | 0.57513  | 0.667688 |
| MmugDNA.40224.1.S1_at   | MmugDNA.40224.1 | 7.09  | 7.51  | 0.43 | 0.22 | -1.34 | 0.347611 | 0.484538 | 0.688824 | 0.688536 |
| MmugDNA.40226.1.S1_at   | MmugDNA.40226.1 | 4.65  | 4.47  | 0.19 | 0.12 | 1.13  | 0.300487 | 0.005752 | 0.655035 | 0.104378 |
| MmugDNA.40229.1.S1_s_at | MmugDNA.40229.1 | 8.9   | 8.98  | 0.11 | 0.15 | -1.06 | 0.363026 | 0.66863  | 0.699794 | 0.806111 |
| MmugDNA.4023.1.S1_at    | MmugDNA.4023.1  | 5.33  | 5.25  | 1.56 | 0.74 | 1.06  | 0.675794 | 0.55966  | 0.872746 | 0.736365 |
| MmugDNA.40231.1.S1_at   | MmugDNA.40231.1 | 3.63  | 3.51  | 0.02 | 0.05 | 1.09  | 0.008799 | 0.169366 | 0.237083 | 0.445983 |
| MmugDNA.40234.1.S1_at   | MmugDNA.40234.1 | 5.87  | 5.59  | 0.14 | 0.18 | 1.21  | 0.082651 | 0.117577 | 0.447794 | 0.38531  |
| MmugDNA.40235.1.S1_at   | MmugDNA.40235.1 | 7.47  | 7.56  | 0.54 | 0.29 | -1.06 | 0.259353 | 0.141549 | 0.622607 | 0.415063 |

|                         |                 |       |       |      |      |       |          |          |          |          |
|-------------------------|-----------------|-------|-------|------|------|-------|----------|----------|----------|----------|
| MmugDNA.40237.1.S1_at   | MmugDNA.40237.1 | 5.65  | 5.63  | 1.09 | 0.57 | 1.01  | 0.425805 | 0.664624 | 0.740112 | 0.803461 |
| MmugDNA.40238.1.S1_at   | MmugDNA.40238.1 | 5.82  | 5.9   | 0.23 | 0.17 | -1.06 | 0.426647 | 0.471305 | 0.740639 | 0.679323 |
| MmugDNA.40239.1.S1_at   | MmugDNA.40239.1 | 4.44  | 4.41  | 0.06 | 0.1  | 1.02  | 0.416676 | 0.917004 | 0.734448 | 0.953623 |
| MmugDNA.21359.1.S1_s_at | MmugDNA.21359.1 | 6.2   | 6.11  | 0.17 | 0.04 | 1.06  | 0.240662 | 0.262073 | 0.606937 | 0.528374 |
| MmugDNA.40240.1.S1_at   | MmugDNA.40240.1 | 5.68  | 5.68  | 0.3  | 0.1  | 1     | 0.732405 | 0.737317 | 0.897157 | 0.847869 |
| MmugDNA.40241.1.S1_at   | MmugDNA.40241.1 | 10.95 | 10.11 | 0.31 | 0.09 | 1.78  | 0.008846 | 0.000765 | 0.237612 | 0.04544  |
| MmugDNA.40242.1.S1_at   | MmugDNA.40242.1 | 6.21  | 6.18  | 0.82 | 0.26 | 1.02  | 0.471579 | 0.136666 | 0.76658  | 0.409207 |
| MmugDNA.40243.1.S1_at   | MmugDNA.40243.1 | 3.92  | 4.6   | 1.79 | 0    | -1.59 | 0.787505 | 0.849919 | 0.921953 | 0.914673 |
| MmugDNA.40244.1.S1_at   | MmugDNA.40244.1 | 5.72  | 5.33  | 0.1  | 0.12 | 1.31  | 0.023165 | 0.250719 | 0.314809 | 0.51941  |
| MmugDNA.40245.1.S1_at   | MmugDNA.40245.1 | 3.55  | 3.8   | 0.47 | 0.11 | -1.19 | 0.877565 | 0.305387 | 0.957399 | 0.562397 |
| MmugDNA.40247.1.S1_at   | MmugDNA.40247.1 | 3.02  | 3.03  | 0.27 | 0.15 | -1.01 | 0.711797 | 0.340332 | 0.887709 | 0.586725 |
| MmugDNA.40248.1.S1_at   | MmugDNA.40248.1 | 6.14  | 6.15  | 0.16 | 0.22 | -1.01 | 0.916025 | 0.60245  | 0.97133  | 0.763411 |
| MmugDNA.40249.1.S1_at   | MmugDNA.40249.1 | 6.69  | 6.4   | 0.71 | 0.23 | 1.22  | 0.604552 | 0.004441 | 0.839651 | 0.092958 |
| MmugDNA.4025.1.S1_at    | MmugDNA.4025.1  | 3.41  | 3.17  | 0.25 | 0.14 | 1.18  | 0.442444 | 0.136068 | 0.750082 | 0.408363 |
| MmugDNA.40250.1.S1_at   | MmugDNA.40250.1 | 5.14  | 5.18  | 0.13 | 0.09 | -1.03 | 0.77905  | 0.485544 | 0.918562 | 0.689192 |
| MmugDNA.40251.1.S1_at   | MmugDNA.40251.1 | 10.02 | 9.81  | 0.25 | 0.07 | 1.15  | 0.26167  | 0.016786 | 0.62388  | 0.164091 |
| MmugDNA.40252.1.S1_at   | MmugDNA.40252.1 | 7.18  | 7.24  | 0.19 | 0.03 | -1.04 | 0.868552 | 0.699591 | 0.953979 | 0.825531 |
| MmugDNA.40253.1.S1_at   | MmugDNA.40253.1 | 5.68  | 5.51  | 0.13 | 0.03 | 1.12  | 0.032054 | 0.01325  | 0.342916 | 0.147683 |
| MmugDNA.40255.1.S1_at   | MmugDNA.40255.1 | 3.27  | 3.28  | 0.19 | 0.1  | -1.01 | 0.467843 | 0.507362 | 0.764607 | 0.702917 |
| MmugDNA.40256.1.S1_at   | MmugDNA.40256.1 | 6.08  | 5.93  | 0.02 | 0.05 | 1.11  | 0.005867 | 0.098964 | 0.211798 | 0.357049 |
| MmugDNA.40257.1.S1_at   | MmugDNA.40257.1 | 8.31  | 8.37  | 1.01 | 0.23 | -1.04 | 0.926277 | 0.803972 | 0.97549  | 0.887203 |
| MmugDNA.40260.1.S1_at   | MmugDNA.40260.1 | 4.38  | 4.39  | 0.17 | 1.08 | -1.01 | 0.377767 | 0.534367 | 0.707777 | 0.720341 |
| MmugDNA.40262.1.S1_at   | MmugDNA.40262.1 | 3.14  | 3.15  | 0.12 | 0.03 | -1.01 | 0.3443   | 0.483745 | 0.686913 | 0.688112 |
| MmugDNA.40263.1.S1_at   | MmugDNA.40263.1 | 4.23  | 4.13  | 0.08 | 0.04 | 1.07  | 0.344    | 0.167739 | 0.686913 | 0.444282 |
| MmugDNA.40265.1.S1_at   | MmugDNA.40265.1 | 9.1   | 9.46  | 0.05 | 0.14 | -1.29 | 0.009668 | 0.004047 | 0.243153 | 0.090281 |
| MmugDNA.40266.1.S1_at   | MmugDNA.40266.1 | 4.32  | 4.16  | 0.04 | 0.11 | 1.11  | 0.108416 | 0.009969 | 0.480777 | 0.131094 |
| MmugDNA.40267.1.S1_at   | MmugDNA.40267.1 | 4.76  | 4.55  | 0.2  | 0.01 | 1.16  | 0.141727 | 0.029942 | 0.516682 | 0.214776 |
| MmugDNA.40268.1.S1_at   | MmugDNA.40268.1 | 5.92  | 5.89  | 0.1  | 0.15 | 1.03  | 0.71463  | 0.117908 | 0.888874 | 0.385837 |
| MmugDNA.40268.1.S1_x_at | MmugDNA.40268.1 | 5.82  | 6.04  | 0.21 | 0.08 | -1.16 | 0.520515 | 0.157343 | 0.79373  | 0.432821 |
| MmugDNA.40269.1.S1_at   | MmugDNA.40269.1 | 4.52  | 4.43  | 0.3  | 0.06 | 1.07  | 0.852829 | 0.941591 | 0.94811  | 0.966886 |
| MmugDNA.4027.1.S1_at    | MmugDNA.4027.1  | 5.33  | 5.33  | 0.1  | 0.1  | -1    | 0.311263 | 0.122012 | 0.663146 | 0.391465 |
| MmugDNA.40270.1.S1_at   | MmugDNA.40270.1 | 5.33  | 5.27  | 0.19 | 0.05 | 1.05  | 0.141848 | 0.355841 | 0.516838 | 0.597864 |
| MmugDNA.40270.1.S1_x_at | MmugDNA.40270.1 | 5.03  | 5.09  | 0.04 | 0.07 | -1.04 | 0.785647 | 0.237663 | 0.921215 | 0.50826  |
| MmugDNA.40271.1.S1_at   | MmugDNA.40271.1 | 8.46  | 8.35  | 0.23 | 0.22 | 1.08  | 0.581265 | 0.547089 | 0.827482 | 0.728283 |
| MmugDNA.40272.1.S1_at   | MmugDNA.40272.1 | 3.71  | 3.9   | 0.08 | 0.1  | -1.14 | 0.132346 | 0.102888 | 0.506752 | 0.363508 |
| MmugDNA.40273.1.S1_at   | MmugDNA.40273.1 | 8.23  | 8.01  | 0.16 | 0.21 | 1.17  | 0.346194 | 0.093793 | 0.687873 | 0.350281 |
| MmugDNA.40275.1.S1_at   | MmugDNA.40275.1 | 8.44  | 8.49  | 0.18 | 0.12 | -1.04 | 0.771162 | 0.925914 | 0.914377 | 0.958059 |
| MmugDNA.40276.1.S1_at   | MmugDNA.40276.1 | 9.28  | 9.3   | 0.16 | 0.08 | -1.02 | 0.892786 | 0.418937 | 0.963286 | 0.643157 |
| MmugDNA.40277.1.S1_at   | MmugDNA.40277.1 | 4.22  | 4.03  | 0.26 | 0.2  | 1.14  | 0.371169 | 0.414856 | 0.705423 | 0.640481 |
| MmugDNA.40278.1.S1_at   | MmugDNA.40278.1 | 4.23  | 3.78  | 0.16 | 0.34 | 1.37  | 0.171341 | 0.240817 | 0.544543 | 0.511521 |
| MmugDNA.40279.1.S1_at   | MmugDNA.40279.1 | 7.49  | 7.34  | 0.05 | 0.14 | 1.11  | 0.056981 | 0.071057 | 0.401454 | 0.312724 |
| MmugDNA.4028.1.S1_at    | MmugDNA.4028.1  | 6.3   | 6.22  | 0.12 | 0.26 | 1.05  | 0.678066 | 0.634653 | 0.873899 | 0.784964 |
| MmugDNA.4028.1.S1_s_at  | MmugDNA.4028.1  | 10.32 | 8.96  | 1.73 | 0.63 | 2.57  | 0.987992 | 0.889252 | 0.995831 | 0.936852 |

|                         |                 |       |       |      |      |       |          |          |          |          |
|-------------------------|-----------------|-------|-------|------|------|-------|----------|----------|----------|----------|
| MmugDNA.40280.1.S1_at   | MmugDNA.40280.1 | 5.39  | 5.06  | 0.08 | 0.11 | 1.25  | 0.021829 | 0.029316 | 0.309781 | 0.21321  |
| MmugDNA.40281.1.S1_at   | MmugDNA.40281.1 | 4.29  | 4.18  | 0.08 | 0.06 | 1.08  | 0.029299 | 0.249867 | 0.334049 | 0.518876 |
| MmugDNA.40282.1.S1_at   | MmugDNA.40282.1 | 4.77  | 5.06  | 0.24 | 0.34 | -1.22 | 0.160917 | 0.083146 | 0.534282 | 0.332999 |
| MmugDNA.40284.1.S1_at   | MmugDNA.40284.1 | 4.7   | 4.57  | 0.16 | 0.16 | 1.09  | 0.696071 | 0.857297 | 0.881955 | 0.918526 |
| MmugDNA.40285.1.S1_at   | MmugDNA.40285.1 | 10.75 | 10.58 | 0.18 | 0.08 | 1.12  | 0.16102  | 0.021389 | 0.534327 | 0.183143 |
| MmugDNA.40286.1.S1_at   | MmugDNA.40286.1 | 7.03  | 8.42  | 0.83 | 0.16 | -2.62 | 0.161806 | 0.390115 | 0.535218 | 0.624002 |
| MmugDNA.40287.1.S1_at   | MmugDNA.40287.1 | 5.13  | 5.14  | 0.14 | 0.11 | -1.01 | 0.56243  | 0.806455 | 0.81769  | 0.888651 |
| MmugDNA.40289.1.S1_at   | MmugDNA.40289.1 | 6.53  | 7.47  | 0.52 | 0.28 | -1.91 | 0.05314  | 0.122216 | 0.394058 | 0.391921 |
| MmugDNA.40290.1.S1_at   | MmugDNA.40290.1 | 6.13  | 6.55  | 0.31 | 0.32 | -1.34 | 0.467293 | 0.073141 | 0.764285 | 0.316064 |
| MmugDNA.40293.1.S1_x_at | MmugDNA.40293.1 | 6.46  | 6.57  | 0.25 | 0.16 | -1.08 | 0.458125 | 0.257865 | 0.758638 | 0.525467 |
| MmugDNA.40295.1.S1_at   | MmugDNA.40295.1 | 4.88  | 4.81  | 0.1  | 0.09 | -1.05 | 0.173132 | 0.36771  | 0.546165 | 0.607374 |
| MmugDNA.40296.1.S1_at   | MmugDNA.40296.1 | 7.44  | 7.76  | 0.25 | 0.31 | -1.25 | 0.087335 | 0.309379 | 0.454785 | 0.564912 |
| MmugDNA.40298.1.S1_at   | MmugDNA.40298.1 | 3.77  | 3.7   | 0.08 | 0.14 | 1.05  | 0.219123 | 0.287655 | 0.588525 | 0.548886 |
| MmugDNA.40299.1.S1_at   | MmugDNA.40299.1 | 7.64  | 7.68  | 0.19 | 0.21 | -1.03 | 0.362459 | 0.587867 | 0.699302 | 0.754542 |
| MmugDNA.4030.1.S1_at    | MmugDNA.4030.1  | 5.21  | 5.17  | 0.06 | 0.14 | 1.03  | 0.730833 | 0.29425  | 0.896252 | 0.55405  |
| MmugDNA.40300.1.S1_at   | MmugDNA.40300.1 | 3.96  | 3.95  | 0.06 | 0.02 | 1     | 0.970194 | 0.862794 | 0.990179 | 0.922006 |
| MmugDNA.40301.1.S1_at   | MmugDNA.40301.1 | 9.73  | 9.97  | 0.35 | 0.05 | -1.17 | 0.987018 | 0.449823 | 0.995808 | 0.665284 |
| MmugDNA.40301.1.S1_s_at | MmugDNA.40301.1 | 9.29  | 9.2   | 0.28 | 0.12 | 1.07  | 0.289399 | 0.330423 | 0.646114 | 0.579191 |
| MmugDNA.40302.1.S1_s_at | MmugDNA.40302.1 | 6.32  | 6.12  | 1.1  | 0.33 | 1.15  | 0.786874 | 0.150343 | 0.921699 | 0.42489  |
| MmugDNA.40303.1.S1_at   | MmugDNA.40303.1 | 7.53  | 7.94  | 0.31 | 0.24 | -1.33 | 0.319313 | 0.45466  | 0.668689 | 0.668763 |
| MmugDNA.40304.1.S1_at   | MmugDNA.40304.1 | 4.94  | 4     | 0.43 | 0.76 | 1.91  | 0.377025 | 0.698896 | 0.707265 | 0.825026 |
| MmugDNA.40306.1.S1_at   | MmugDNA.40306.1 | 6.68  | 6.67  | 0.14 | 0.21 | 1.01  | 0.396356 | 0.400139 | 0.721336 | 0.630158 |
| MmugDNA.40308.1.S1_at   | MmugDNA.40308.1 | 4.56  | 4.57  | 0.01 | 0.05 | -1.01 | 0.570663 | 0.717035 | 0.822247 | 0.836191 |
| MmugDNA.40312.1.S1_at   | MmugDNA.40312.1 | 4.75  | 4.78  | 0.77 | 0.14 | -1.02 | 0.855683 | 0.472891 | 0.949003 | 0.680219 |
| MmugDNA.40313.1.S1_at   | MmugDNA.40313.1 | 8.52  | 8.76  | 1.35 | 0.17 | -1.18 | 0.848947 | 0.705434 | 0.946892 | 0.829222 |
| MmugDNA.40316.1.S1_at   | MmugDNA.40316.1 | 3.8   | 3.68  | 0.2  | 0.13 | 1.09  | 0.186311 | 0.36246  | 0.559101 | 0.603016 |
| MmugDNA.40317.1.S1_at   | MmugDNA.40317.1 | 10.73 | 10.98 | 0.05 | 0.06 | -1.18 | 0.003291 | 0.00083  | 0.194357 | 0.046851 |
| MmugDNA.40318.1.S1_at   | MmugDNA.40318.1 | 4.82  | 4.59  | 0.59 | 0.2  | 1.18  | 0.398509 | 0.663911 | 0.722525 | 0.803242 |
| MmugDNA.40320.1.S1_at   | MmugDNA.40320.1 | 3.23  | 3.28  | 0.23 | 0.21 | -1.03 | 0.926052 | 0.241719 | 0.975377 | 0.512306 |
| MmugDNA.40321.1.S1_at   | MmugDNA.40321.1 | 4.29  | 4.1   | 0.1  | 0.03 | 1.14  | 0.111178 | 0.16447  | 0.484303 | 0.440679 |
| MmugDNA.40322.1.S1_at   | MmugDNA.40322.1 | 9.08  | 8.33  | 3.06 | 0.46 | 1.68  | 0.870166 | 0.351983 | 0.954781 | 0.595366 |
| MmugDNA.40323.1.S1_at   | MmugDNA.40323.1 | 6.02  | 6.53  | 0.34 | 0.56 | -1.42 | 0.276493 | 0.482988 | 0.636031 | 0.687687 |
| MmugDNA.40324.1.S1_at   | MmugDNA.40324.1 | 3.99  | 3.62  | 0.09 | 0.42 | 1.29  | 0.526789 | 0.409882 | 0.796797 | 0.636913 |
| MmugDNA.40325.1.S1_at   | MmugDNA.40325.1 | 6.78  | 6.49  | 0.25 | 0.01 | 1.23  | 0.128375 | 0.072936 | 0.50293  | 0.315986 |
| MmugDNA.40326.1.S1_at   | MmugDNA.40326.1 | 4.26  | 3.87  | 0.39 | 0.29 | 1.32  | 0.478055 | 0.360995 | 0.769934 | 0.60201  |
| MmugDNA.40327.1.S1_at   | MmugDNA.40327.1 | 4.25  | 4.3   | 0.07 | 0    | -1.03 | 0.944163 | 0.728738 | 0.980647 | 0.843195 |
| MmugDNA.40328.1.S1_at   | MmugDNA.40328.1 | 6.44  | 6.27  | 0.12 | 0.01 | 1.13  | 0.128032 | 0.528258 | 0.502449 | 0.716462 |
| MmugDNA.4033.1.S1_at    | MmugDNA.4033.1  | 8.08  | 7.47  | 0.07 | 0.22 | 1.52  | 0.012036 | 0.008803 | 0.258642 | 0.124117 |
| MmugDNA.40330.1.S1_at   | MmugDNA.40330.1 | 5.2   | 5.04  | 0.06 | 0.19 | 1.12  | 0.138267 | 0.459773 | 0.513671 | 0.671958 |
| MmugDNA.40332.1.S1_at   | MmugDNA.40332.1 | 10.45 | 10.45 | 0.05 | 0.03 | -1    | 0.554204 | 0.622307 | 0.81248  | 0.776819 |
| MmugDNA.40335.1.S1_at   | MmugDNA.40335.1 | 4.88  | 5.64  | 0.97 | 0.19 | -1.69 | 0.305308 | 0.484726 | 0.65878  | 0.688659 |
| MmugDNA.40336.1.S1_at   | MmugDNA.40336.1 | 11.78 | 12.01 | 0.54 | 0.04 | -1.18 | 0.583121 | 0.745826 | 0.828785 | 0.852591 |
| MmugDNA.40339.1.S1_at   | MmugDNA.40339.1 | 9.84  | 10.05 | 0.15 | 0.14 | -1.16 | 0.201996 | 0.015652 | 0.573629 | 0.158576 |



|                         |                 |       |       |      |      |       |          |          |          |          |
|-------------------------|-----------------|-------|-------|------|------|-------|----------|----------|----------|----------|
| MmugDNA.4034.1.S1_at    | MmugDNA.4034.1  | 3.6   | 3.16  | 0.42 | 0.13 | 1.36  | 0.484353 | 0.490161 | 0.773551 | 0.692233 |
| MmugDNA.40340.1.S1_at   | MmugDNA.40340.1 | 5.7   | 5.68  | 0.21 | 0.09 | 1.02  | 0.765586 | 0.281031 | 0.911862 | 0.544179 |
| MmugDNA.40341.1.S1_at   | MmugDNA.40341.1 | 4.96  | 5.25  | 0.2  | 0.2  | -1.22 | 0.345812 | 0.479862 | 0.687791 | 0.68549  |
| MmugDNA.40342.1.S1_at   | MmugDNA.40342.1 | 13.42 | 13.5  | 0.16 | 0.09 | -1.06 | 0.852709 | 0.712891 | 0.948102 | 0.833557 |
| MmugDNA.40343.1.S1_at   | MmugDNA.40343.1 | 4.15  | 4.14  | 0.01 | 0.06 | 1.01  | 0.576305 | 0.803368 | 0.825166 | 0.886825 |
| MmugDNA.40344.1.S1_at   | MmugDNA.40344.1 | 5.94  | 5.91  | 0.05 | 0.06 | 1.02  | 0.445527 | 0.283838 | 0.752245 | 0.546237 |
| MmugDNA.40345.1.S1_at   | MmugDNA.40345.1 | 5.52  | 5.76  | 0.2  | 0.16 | -1.18 | 0.126997 | 0.373682 | 0.500834 | 0.612403 |
| MmugDNA.40346.1.S1_at   | MmugDNA.40346.1 | 7.94  | 7.58  | 0.19 | 0.18 | 1.28  | 0.198033 | 0.021248 | 0.56923  | 0.182465 |
| MmugDNA.40347.1.S1_at   | MmugDNA.40347.1 | 5.54  | 5.65  | 0.14 | 0.08 | -1.08 | 0.59173  | 0.301282 | 0.833648 | 0.559356 |
| MmugDNA.40348.1.S1_at   | MmugDNA.40348.1 | 5.82  | 5.73  | 0.4  | 0.16 | 1.07  | 0.845975 | 0.915162 | 0.945947 | 0.952344 |
| MmugDNA.40349.1.S1_at   | MmugDNA.40349.1 | 6.44  | 6.1   | 0.15 | 0.1  | -1.26 | 0.046646 | 0.036194 | 0.378401 | 0.234827 |
| MmugDNA.4035.1.S1_at    | MmugDNA.4035.1  | 10.85 | 10.7  | 0.62 | 0.07 | 1.11  | 0.686064 | 0.58408  | 0.877083 | 0.752189 |
| MmugDNA.40350.1.S1_s_at | MmugDNA.40350.1 | 10.35 | 9.83  | 0.27 | 0.08 | 1.44  | 0.025351 | 0.013117 | 0.321465 | 0.147286 |
| MmugDNA.40351.1.S1_at   | MmugDNA.40351.1 | 3.54  | 3.21  | 0.06 | 0.19 | 1.25  | 0.148368 | 0.198936 | 0.522567 | 0.473521 |
| MmugDNA.40352.1.S1_at   | MmugDNA.40352.1 | 6.4   | 6.13  | 0.75 | 0.45 | 1.21  | 0.624626 | 0.488826 | 0.848871 | 0.6914   |
| MmugDNA.40353.1.S1_at   | MmugDNA.40353.1 | 3.93  | 3.76  | 0.25 | 0.08 | 1.12  | 0.398867 | 0.475928 | 0.722745 | 0.682387 |
| MmugDNA.40355.1.S1_at   | MmugDNA.40355.1 | 6.18  | 5.93  | 0.13 | 0.11 | 1.19  | 0.057106 | 0.124729 | 0.401454 | 0.39513  |
| MmugDNA.40356.1.S1_at   | MmugDNA.40356.1 | 8.62  | 8.78  | 0.2  | 0.13 | -1.12 | 0.208739 | 0.24103  | 0.580477 | 0.511657 |
| MmugDNA.40358.1.S1_at   | MmugDNA.40358.1 | 5.35  | 5.27  | 0.18 | 0.06 | 1.06  | 0.327766 | 0.575546 | 0.675226 | 0.746587 |
| MmugDNA.4036.1.S1_at    | MmugDNA.4036.1  | 9.48  | 9.47  | 0.25 | 0.15 | 1     | 0.811863 | 0.173087 | 0.931979 | 0.449765 |
| MmugDNA.40360.1.S1_at   | MmugDNA.40360.1 | 5.73  | 5.61  | 0.28 | 0.07 | 1.09  | 0.187429 | 0.235565 | 0.559787 | 0.506633 |
| MmugDNA.40362.1.S1_at   | MmugDNA.40362.1 | 6.52  | 6.35  | 0.13 | 0.14 | 1.12  | 0.073809 | 0.350149 | 0.434623 | 0.593918 |
| MmugDNA.40363.1.S1_at   | MmugDNA.40363.1 | 5.92  | 5.92  | 0.06 | 0.12 | 1     | 0.664272 | 0.633323 | 0.867677 | 0.784071 |
| MmugDNA.40367.1.S1_at   | MmugDNA.40367.1 | 3.74  | 3.75  | 0.02 | 0.1  | -1.01 | 0.941778 | 0.984866 | 0.980207 | 0.991449 |
| MmugDNA.40368.1.S1_at   | MmugDNA.40368.1 | 5.49  | 6.13  | 0.67 | 0.4  | -1.56 | 0.34614  | 0.450756 | 0.687873 | 0.665844 |
| MmugDNA.40369.1.S1_at   | MmugDNA.40369.1 | 12.02 | 12.03 | 0.29 | 0.06 | -1    | 0.712505 | 0.182806 | 0.887958 | 0.459317 |
| MmugDNA.4037.1.S1_at    | MmugDNA.4037.1  | 7.28  | 7.88  | 0.06 | 0.1  | -1.52 | 0.000876 | 0.000232 | 0.153739 | 0.03241  |
| MmugDNA.40370.1.S1_at   | MmugDNA.40370.1 | 3.46  | 3.51  | 0.08 | 0.36 | -1.03 | 0.820293 | 0.763308 | 0.935289 | 0.86245  |
| MmugDNA.40372.1.S1_at   | MmugDNA.40372.1 | 5.14  | 4.98  | 0.09 | 0.08 | 1.12  | 0.033816 | 0.028708 | 0.347296 | 0.211165 |
| MmugDNA.40373.1.S1_at   | MmugDNA.40373.1 | 3.03  | 2.97  | 0.09 | 0.77 | 1.04  | 0.44172  | 0.529476 | 0.749537 | 0.717289 |
| MmugDNA.40374.1.S1_at   | MmugDNA.40374.1 | 4.45  | 4.46  | 0.52 | 0.07 | -1    | 0.326582 | 0.49533  | 0.674163 | 0.695427 |
| MmugDNA.40375.1.S1_at   | MmugDNA.40375.1 | 5.77  | 4.17  | 0.68 | 0.26 | 3.05  | 0.034503 | 0.158187 | 0.350124 | 0.433986 |
| MmugDNA.40376.1.S1_at   | MmugDNA.40376.1 | 4.33  | 4.11  | 0.24 | 0.4  | 1.16  | 0.3394   | 0.04202  | 0.683826 | 0.249463 |
| MmugDNA.40377.1.S1_at   | MmugDNA.40377.1 | 6.19  | 6.1   | 0.2  | 0.37 | 1.06  | 0.937122 | 0.189227 | 0.978872 | 0.464997 |
| MmugDNA.40378.1.S1_at   | MmugDNA.40378.1 | 3.27  | 3.25  | 0.06 | 0.3  | 1.01  | 0.644332 | 0.782116 | 0.858491 | 0.873783 |
| MmugDNA.40379.1.S1_at   | MmugDNA.40379.1 | 11.92 | 12.16 | 0.14 | 0.1  | -1.18 | 0.04022  | 0.003093 | 0.36348  | 0.081194 |
| MmugDNA.4038.1.S1_at    | MmugDNA.4038.1  | 6.19  | 6.06  | 0.09 | 0.21 | 1.1   | 0.233146 | 0.233505 | 0.600675 | 0.504835 |
| MmugDNA.40380.1.S1_at   | MmugDNA.40380.1 | 6.31  | 6.24  | 0.02 | 0.25 | 1.05  | 0.658492 | 0.311378 | 0.864659 | 0.566448 |
| MmugDNA.40382.1.S1_at   | MmugDNA.40382.1 | 4.51  | 4.15  | 0.2  | 0.15 | 1.28  | 0.073843 | 0.392527 | 0.434623 | 0.625813 |
| MmugDNA.40385.1.S1_at   | MmugDNA.40385.1 | 10.92 | 10.76 | 0.06 | 0.11 | 1.11  | 0.072396 | 0.069125 | 0.432302 | 0.309162 |
| MmugDNA.40387.1.S1_at   | MmugDNA.40387.1 | 10.15 | 10.79 | 0.9  | 0.22 | -1.56 | 0.075844 | 0.054058 | 0.436927 | 0.277914 |
| MmugDNA.40389.1.S1_at   | MmugDNA.40389.1 | 6.23  | 6.1   | 0.18 | 0.26 | 1.1   | 0.295171 | 0.188854 | 0.651016 | 0.464789 |
| MmugDNA.40390.1.S1_at   | MmugDNA.40390.1 | 2.82  | 2.76  | 0.12 | 0    | 1.04  | 0.403124 | 0.421132 | 0.725471 | 0.644766 |

|                         |                 |       |       |      |      |       |          |          |          |          |
|-------------------------|-----------------|-------|-------|------|------|-------|----------|----------|----------|----------|
| MmugDNA.40393.1.S1_at   | MmugDNA.40393.1 | 8.82  | 9.05  | 0.11 | 0.06 | -1.17 | 0.025448 | 0.083795 | 0.322155 | 0.334647 |
| MmugDNA.40395.1.S1_at   | MmugDNA.40395.1 | 11.92 | 11.96 | 0.8  | 0.02 | -1.03 | 0.326995 | 0.455378 | 0.674651 | 0.669361 |
| MmugDNA.40396.1.S1_at   | MmugDNA.40396.1 | 4.18  | 4.12  | 0.15 | 0.07 | 1.04  | 0.891361 | 0.975346 | 0.962572 | 0.986553 |
| MmugDNA.40398.1.S1_at   | MmugDNA.40398.1 | 5.82  | 5.48  | 0.12 | 0.16 | 1.27  | 0.069719 | 0.127067 | 0.427625 | 0.397902 |
| MmugDNA.40399.1.S1_at   | MmugDNA.40399.1 | 3.66  | 3.62  | 0.14 | 0.04 | 1.03  | 0.469854 | 0.743659 | 0.765709 | 0.851456 |
| MmugDNA.404.1.S1_at     | MmugDNA.404.1   | 5.39  | 5.24  | 0.08 | 0.12 | 1.11  | 0.103712 | 0.123638 | 0.474343 | 0.393692 |
| MmugDNA.40401.1.S1_at   | MmugDNA.40401.1 | 11.95 | 11.33 | 0.06 | 0.07 | 1.54  | 0.000403 | 0.000159 | 0.137028 | 0.030319 |
| MmugDNA.40402.1.S1_at   | MmugDNA.40402.1 | 3.76  | 3.66  | 0.07 | 0    | 1.07  | 0.147324 | 0.112483 | 0.521578 | 0.377815 |
| MmugDNA.40404.1.S1_x_at | MmugDNA.40404.1 | 9.84  | 10.08 | 0.3  | 0.13 | -1.18 | 0.482379 | 0.153501 | 0.772358 | 0.42827  |
| MmugDNA.40409.1.S1_at   | MmugDNA.40409.1 | 6.76  | 7.87  | 0.75 | 0.32 | -2.15 | 0.094201 | 0.171976 | 0.463596 | 0.448364 |
| MmugDNA.4041.1.S1_at    | MmugDNA.4041.1  | 6.06  | 5.88  | 0.58 | 0.11 | -1.13 | 0.609117 | 0.571533 | 0.841525 | 0.743824 |
| MmugDNA.40411.1.S1_at   | MmugDNA.40411.1 | 7.04  | 7.73  | 1.3  | 0.03 | -1.62 | 0.88166  | 0.385291 | 0.959065 | 0.620743 |
| MmugDNA.40412.1.S1_at   | MmugDNA.40412.1 | 4.21  | 4.04  | 0.06 | 0.23 | 1.13  | 0.09099  | 0.135387 | 0.458897 | 0.407478 |
| MmugDNA.40413.1.S1_at   | MmugDNA.40413.1 | 4.68  | 4.31  | 0.28 | 0.1  | 1.29  | 0.156343 | 0.406641 | 0.529536 | 0.634468 |
| MmugDNA.40414.1.S1_at   | MmugDNA.40414.1 | 6.59  | 6.59  | 0.18 | 0.07 | 1     | 0.269399 | 0.505466 | 0.629638 | 0.702161 |
| MmugDNA.40415.1.S1_at   | MmugDNA.40415.1 | 4.48  | 4.43  | 0.09 | 0.08 | 1.04  | 0.431539 | 0.087697 | 0.743474 | 0.340941 |
| MmugDNA.40416.1.S1_at   | MmugDNA.40416.1 | 3.26  | 3.39  | 0.07 | 0.08 | -1.09 | 0.544695 | 0.299962 | 0.807438 | 0.558262 |
| MmugDNA.40418.1.S1_at   | MmugDNA.40418.1 | 4.49  | 4.57  | 0.19 | 0.27 | -1.06 | 0.681539 | 0.658009 | 0.875332 | 0.80013  |
| MmugDNA.40419.1.S1_at   | MmugDNA.40419.1 | 8.07  | 9.78  | 0.97 | 0.04 | -3.28 | 0.100238 | 0.04035  | 0.470696 | 0.245984 |
| MmugDNA.40420.1.S1_at   | MmugDNA.40420.1 | 9.7   | 9.22  | 0.17 | 0.02 | 1.39  | 0.007868 | 0.129027 | 0.231047 | 0.400513 |
| MmugDNA.40420.1.S1_s_at | MmugDNA.40420.1 | 10.35 | 9.98  | 0.22 | 0.07 | 1.29  | 0.049806 | 0.115467 | 0.386252 | 0.382611 |
| MmugDNA.40422.1.S1_at   | MmugDNA.40422.1 | 7.92  | 8.5   | 0.53 | 0.25 | -1.5  | 0.282124 | 0.521789 | 0.640628 | 0.712646 |
| MmugDNA.40423.1.S1_at   | MmugDNA.40423.1 | 4.53  | 4.44  | 0.4  | 0.16 | 1.07  | 0.807504 | 0.253639 | 0.930185 | 0.52198  |
| MmugDNA.40425.1.S1_at   | MmugDNA.40425.1 | 4.2   | 4.25  | 0.1  | 0.11 | -1.04 | 0.565055 | 0.429986 | 0.819091 | 0.65111  |
| MmugDNA.40426.1.S1_at   | MmugDNA.40426.1 | 4.71  | 5.03  | 0.48 | 0.32 | -1.25 | 0.500587 | 0.562012 | 0.782726 | 0.737679 |
| MmugDNA.40428.1.S1_at   | MmugDNA.40428.1 | 6.17  | 5.93  | 0.08 | 0.12 | 1.18  | 0.063664 | 0.136887 | 0.416123 | 0.409583 |
| MmugDNA.4043.1.S1_at    | MmugDNA.4043.1  | 3.51  | 3.42  | 0.07 | 0.07 | 1.06  | 0.488523 | 0.222068 | 0.775598 | 0.495112 |
| MmugDNA.4043.1.S1_s_at  | MmugDNA.4043.1  | 8.74  | 8.79  | 0.12 | 0.02 | -1.04 | 0.790395 | 0.032039 | 0.922945 | 0.221576 |
| MmugDNA.32666.1.S1_s_at | MmugDNA.32666.1 | 13.57 | 13.6  | 0.07 | 0.06 | -1.02 | 0.545153 | 0.038641 | 0.807687 | 0.241683 |
| MmugDNA.40432.1.S1_at   | MmugDNA.40432.1 | 7.44  | 7.2   | 0.11 | 0.05 | 1.18  | 0.069621 | 0.054117 | 0.427443 | 0.277968 |
| MmugDNA.40433.1.S1_at   | MmugDNA.40433.1 | 4.95  | 4.59  | 0.64 | 0.18 | 1.28  | 0.519927 | 0.771986 | 0.793377 | 0.867436 |
| MmugDNA.40434.1.S1_at   | MmugDNA.40434.1 | 7.49  | 7.19  | 0.95 | 0.09 | 1.22  | 0.683212 | 0.897315 | 0.876089 | 0.941407 |
| MmugDNA.40435.1.S1_at   | MmugDNA.40435.1 | 6.21  | 6.93  | 0.57 | 0.25 | -1.65 | 0.129592 | 0.284083 | 0.504359 | 0.546309 |
| MmugDNA.40436.1.S1_at   | MmugDNA.40436.1 | 6.4   | 6.51  | 0.08 | 0.11 | -1.08 | 0.423485 | 0.798505 | 0.739107 | 0.884012 |
| MmugDNA.40436.1.S1_s_at | MmugDNA.40436.1 | 8.47  | 8.56  | 0.15 | 0.04 | -1.07 | 0.45269  | 0.327824 | 0.755901 | 0.577604 |
| MmugDNA.40437.1.S1_at   | MmugDNA.40437.1 | 3.44  | 3.35  | 0.1  | 0.06 | 1.07  | 0.17246  | 0.088877 | 0.545738 | 0.34272  |
| MmugDNA.40439.1.S1_at   | MmugDNA.40439.1 | 4.91  | 5.05  | 0.22 | 0.72 | -1.1  | 0.223175 | 0.207898 | 0.592569 | 0.482049 |
| MmugDNA.4044.1.S1_at    | MmugDNA.4044.1  | 9.14  | 8.65  | 0.17 | 0.29 | 1.41  | 0.023173 | 0.002529 | 0.314809 | 0.074291 |
| MmugDNA.40440.1.S1_at   | MmugDNA.40440.1 | 5.94  | 5.76  | 0.31 | 0.03 | 1.13  | 0.916643 | 0.973648 | 0.971712 | 0.985648 |
| MmugDNA.40441.1.S1_at   | MmugDNA.40441.1 | 8.42  | 7.5   | 0.54 | 0.11 | 1.89  | 0.045521 | 0.040844 | 0.376595 | 0.246991 |
| MmugDNA.40443.1.S1_at   | MmugDNA.40443.1 | 5.88  | 5.74  | 0.12 | 0.12 | 1.1   | 0.134747 | 0.173146 | 0.508741 | 0.449765 |
| MmugDNA.40444.1.S1_at   | MmugDNA.40444.1 | 4.19  | 4.3   | 0.17 | 0.13 | -1.08 | 0.448509 | 0.832535 | 0.753886 | 0.903934 |
| MmugDNA.40445.1.S1_at   | MmugDNA.40445.1 | 4.07  | 4.09  | 0.53 | 0.29 | -1.01 | 0.979343 | 0.67991  | 0.993437 | 0.8131   |

|                         |                 |       |       |      |      |       |          |          |          |          |
|-------------------------|-----------------|-------|-------|------|------|-------|----------|----------|----------|----------|
| MmugDNA.40446.1.S1_at   | MmugDNA.40446.1 | 3.71  | 3.67  | 0.06 | 0.1  | 1.03  | 0.392366 | 0.018064 | 0.71829  | 0.169379 |
| MmugDNA.40447.1.S1_at   | MmugDNA.40447.1 | 13.35 | 13.72 | 0.24 | 0.04 | -1.29 | 0.067116 | 0.00797  | 0.423157 | 0.118702 |
| MmugDNA.40448.1.S1_at   | MmugDNA.40448.1 | 5.99  | 6.32  | 0.69 | 0.8  | -1.25 | 0.953939 | 0.545964 | 0.984675 | 0.727708 |
| MmugDNA.4045.1.S1_at    | MmugDNA.4045.1  | 11.24 | 10.95 | 0.18 | 0.32 | 1.22  | 0.117473 | 0.000691 | 0.490925 | 0.044166 |
| MmugDNA.40450.1.S1_at   | MmugDNA.40450.1 | 6.71  | 6.63  | 0.26 | 0.06 | 1.06  | 0.161744 | 0.126095 | 0.535147 | 0.39672  |
| MmugDNA.40450.1.S1_s_at | MmugDNA.40450.1 | 5.84  | 5.64  | 0.21 | 0.08 | 1.15  | 0.606434 | 0.77717  | 0.840496 | 0.870539 |
| MmugDNA.40452.1.S1_at   | MmugDNA.40452.1 | 6.25  | 6.27  | 0.19 | 0.12 | -1.01 | 0.268989 | 0.375623 | 0.62929  | 0.613562 |
| MmugDNA.40453.1.S1_at   | MmugDNA.40453.1 | 5.19  | 5.21  | 0.44 | 0.08 | -1.01 | 0.964583 | 0.926398 | 0.988371 | 0.958291 |
| MmugDNA.40454.1.S1_at   | MmugDNA.40454.1 | 3.62  | 3.63  | 0.08 | 0.05 | -1    | 0.818994 | 0.15694  | 0.934641 | 0.432372 |
| MmugDNA.40455.1.S1_at   | MmugDNA.40455.1 | 7.87  | 7.54  | 0.07 | 0.05 | 1.26  | 0.00159  | 0.006812 | 0.162459 | 0.111444 |
| MmugDNA.40458.1.S1_at   | MmugDNA.40458.1 | 6.82  | 6.62  | 0.04 | 0.09 | -1.14 | 0.054925 | 0.573233 | 0.397373 | 0.744985 |
| MmugDNA.4046.1.S1_at    | MmugDNA.4046.1  | 12.85 | 12.79 | 0.17 | 0.09 | 1.04  | 0.899962 | 0.000798 | 0.96599  | 0.046064 |
| MmugDNA.40460.1.S1_at   | MmugDNA.40460.1 | 10.99 | 10.72 | 0.25 | 0.1  | 1.21  | 0.099248 | 0.136748 | 0.468747 | 0.409308 |
| MmugDNA.40461.1.S1_at   | MmugDNA.40461.1 | 12.38 | 12.24 | 0.16 | 0.04 | 1.1   | 0.130997 | 0.273612 | 0.5054   | 0.538053 |
| MmugDNA.40463.1.S1_at   | MmugDNA.40463.1 | 6.68  | 6.04  | 0.8  | 0.61 | 1.55  | 0.781785 | 0.943301 | 0.919573 | 0.967814 |
| MmugDNA.40464.1.S1_at   | MmugDNA.40464.1 | 6.4   | 6.17  | 0.05 | 0.13 | 1.17  | 0.091216 | 0.079851 | 0.459035 | 0.327179 |
| MmugDNA.40465.1.S1_at   | MmugDNA.40465.1 | 3.48  | 3.26  | 0.34 | 0.12 | 1.17  | 0.34106  | 0.462533 | 0.684841 | 0.673854 |
| MmugDNA.40466.1.S1_at   | MmugDNA.40466.1 | 8.1   | 8.21  | 0.51 | 0.47 | -1.08 | 0.61389  | 0.014521 | 0.843708 | 0.153711 |
| MmugDNA.40467.1.S1_at   | MmugDNA.40467.1 | 7.92  | 7.46  | 0.59 | 0.29 | 1.37  | 0.340449 | 0.053965 | 0.684528 | 0.27777  |
| MmugDNA.40468.1.S1_at   | MmugDNA.40468.1 | 7.65  | 7.05  | 0.4  | 0.16 | 1.52  | 0.041654 | 0.007214 | 0.367007 | 0.11412  |
| MmugDNA.40469.1.S1_at   | MmugDNA.40469.1 | 4.56  | 4.85  | 0.24 | 0.22 | -1.22 | 0.244803 | 0.564513 | 0.61037  | 0.739347 |
| MmugDNA.4047.1.S1_at    | MmugDNA.4047.1  | 7.52  | 6.56  | 0.48 | 0.28 | 1.94  | 0.037989 | 0.052878 | 0.358308 | 0.275541 |
| MmugDNA.40471.1.S1_at   | MmugDNA.40471.1 | 6.09  | 6.16  | 0.06 | 0.4  | -1.05 | 0.479767 | 0.669459 | 0.770896 | 0.806626 |
| MmugDNA.40472.1.S1_at   | MmugDNA.40472.1 | 7.41  | 7.56  | 0.29 | 0.09 | -1.1  | 0.446141 | 0.193431 | 0.752589 | 0.468711 |
| MmugDNA.40473.1.S1_at   | MmugDNA.40473.1 | 7.39  | 7.62  | 0.55 | 0.29 | -1.17 | 0.6234   | 0.026857 | 0.848224 | 0.205049 |
| MmugDNA.40474.1.S1_at   | MmugDNA.40474.1 | 4.17  | 4.15  | 0.11 | 0.1  | 1.01  | 0.399359 | 0.42031  | 0.723041 | 0.644086 |
| MmugDNA.40475.1.S1_at   | MmugDNA.40475.1 | 7.11  | 6.98  | 0.14 | 0.07 | 1.09  | 0.997856 | 0.89463  | 0.999314 | 0.939853 |
| MmugDNA.40476.1.S1_at   | MmugDNA.40476.1 | 7.95  | 7.99  | 0.74 | 0.16 | -1.03 | 0.267695 | 0.385151 | 0.62827  | 0.620662 |
| MmugDNA.40478.1.S1_at   | MmugDNA.40478.1 | 8.36  | 8.2   | 0.26 | 0.07 | 1.12  | 0.521596 | 0.222688 | 0.794648 | 0.495617 |
| MmugDNA.40479.1.S1_at   | MmugDNA.40479.1 | 3.86  | 4.03  | 0.4  | 0.19 | -1.13 | 0.853083 | 0.923941 | 0.948219 | 0.957162 |
| MmugDNA.4048.1.S1_at    | MmugDNA.4048.1  | 7.81  | 7.88  | 0.27 | 0.19 | -1.05 | 0.703328 | 0.116959 | 0.884629 | 0.384343 |
| MmugDNA.40483.1.S1_at   | MmugDNA.40483.1 | 5.32  | 4.81  | 0.6  | 0.46 | 1.43  | 0.608532 | 0.122585 | 0.841285 | 0.39249  |
| MmugDNA.40484.1.S1_at   | MmugDNA.40484.1 | 5.67  | 5.68  | 0.07 | 0.02 | -1.01 | 0.213059 | 0.392775 | 0.583667 | 0.625846 |
| MmugDNA.4049.1.S1_at    | MmugDNA.4049.1  | 9.22  | 9.03  | 0.17 | 0.26 | 1.14  | 0.86092  | 0.574912 | 0.950991 | 0.746181 |
| MmugDNA.40490.1.S1_at   | MmugDNA.40490.1 | 3.1   | 3.24  | 0.07 | 0.14 | -1.1  | 0.318663 | 0.381117 | 0.668228 | 0.617478 |
| MmugDNA.40491.1.S1_at   | MmugDNA.40491.1 | 3.94  | 3.81  | 0.2  | 0.02 | 1.09  | 0.206121 | 0.126214 | 0.578134 | 0.396751 |
| MmugDNA.40494.1.S1_x_at | MmugDNA.40494.1 | 7.79  | 7.74  | 0.32 | 0.24 | 1.03  | 0.72961  | 0.384385 | 0.895824 | 0.620058 |
| MmugDNA.40496.1.S1_at   | MmugDNA.40496.1 | 3.94  | 3.9   | 0.1  | 0.09 | 1.03  | 0.52833  | 0.896001 | 0.797609 | 0.940569 |
| MmugDNA.40497.1.S1_at   | MmugDNA.40497.1 | 13.19 | 13.33 | 0.23 | 0.08 | -1.1  | 0.325196 | 0.534577 | 0.673069 | 0.720452 |
| MmugDNA.40498.1.S1_at   | MmugDNA.40498.1 | 9.36  | 8.26  | 0.67 | 0.23 | 2.15  | 0.068698 | 0.150191 | 0.426    | 0.424841 |
| MmugDNA.40499.1.S1_at   | MmugDNA.40499.1 | 4.22  | 3.91  | 0.12 | 0.12 | 1.24  | 0.067826 | 0.037944 | 0.42446  | 0.239302 |
| MmugDNA.4050.1.S1_at    | MmugDNA.4050.1  | 3.22  | 3.24  | 0.07 | 0.09 | -1.01 | 0.887096 | 0.218963 | 0.960795 | 0.492722 |
| MmugDNA.40500.1.S1_at   | MmugDNA.40500.1 | 8.43  | 9.45  | 0.7  | 0.24 | -2.02 | 0.151677 | 0.37449  | 0.524628 | 0.6129   |

|                         |                 |       |       |      |      |       |          |          |          |          |
|-------------------------|-----------------|-------|-------|------|------|-------|----------|----------|----------|----------|
| MmugDNA.40501.1.S1_at   | MmugDNA.40501.1 | 5.26  | 5.1   | 0.11 | 0.06 | 1.11  | 0.100413 | 0.20014  | 0.471139 | 0.474603 |
| MmugDNA.40501.1.S1_s_at | MmugDNA.40501.1 | 8.21  | 7.99  | 0.2  | 0.03 | 1.17  | 0.406881 | 0.502234 | 0.72838  | 0.70006  |
| MmugDNA.40502.1.S1_at   | MmugDNA.40502.1 | 7.73  | 8.06  | 0.18 | 0.08 | -1.26 | 0.063156 | 0.252443 | 0.41511  | 0.521061 |
| MmugDNA.40503.1.S1_at   | MmugDNA.40503.1 | 11.58 | 11.78 | 0.28 | 0.26 | -1.15 | 0.190767 | 0.19047  | 0.561793 | 0.465906 |
| MmugDNA.40505.1.S1_at   | MmugDNA.40505.1 | 4.33  | 4.32  | 0.41 | 0.2  | 1.01  | 0.744578 | 0.719118 | 0.902602 | 0.837453 |
| MmugDNA.40507.1.S1_at   | MmugDNA.40507.1 | 5.38  | 6     | 0.34 | 0.03 | -1.53 | 0.087163 | 0.028838 | 0.454785 | 0.211661 |
| MmugDNA.40508.1.S1_at   | MmugDNA.40508.1 | 5.31  | 5.3   | 0.02 | 0.11 | 1.01  | 0.353597 | 0.469359 | 0.693411 | 0.678201 |
| MmugDNA.4051.1.S1_s_at  | MmugDNA.4051.1  | 5.25  | 4.65  | 0.25 | 0.14 | 1.51  | 0.044686 | 0.107855 | 0.374916 | 0.370945 |
| MmugDNA.40510.1.S1_at   | MmugDNA.40510.1 | 4.71  | 4.84  | 0.13 | 0.12 | -1.09 | 0.534645 | 0.698831 | 0.801404 | 0.825022 |
| MmugDNA.40511.1.S1_at   | MmugDNA.40511.1 | 5.17  | 5.52  | 0.07 | 0.19 | -1.27 | 0.147621 | 0.224713 | 0.521685 | 0.497614 |
| MmugDNA.40514.1.S1_at   | MmugDNA.40514.1 | 8.87  | 7.37  | 0.1  | 0.32 | 2.82  | 0.001375 | 0.000104 | 0.159096 | 0.028099 |
| MmugDNA.40515.1.S1_at   | MmugDNA.40515.1 | 11.02 | 10.78 | 0.39 | 0.02 | 1.18  | 0.11924  | 0.002957 | 0.492749 | 0.079945 |
| MmugDNA.40516.1.S1_at   | MmugDNA.40516.1 | 3.08  | 2.85  | 0.11 | 0.05 | 1.17  | 0.060236 | 0.025375 | 0.407786 | 0.199677 |
| MmugDNA.40517.1.S1_at   | MmugDNA.40517.1 | 4.57  | 4.65  | 0.16 | 0.08 | -1.06 | 0.755299 | 0.118996 | 0.907767 | 0.387269 |
| MmugDNA.40518.1.S1_at   | MmugDNA.40518.1 | 5.96  | 6.84  | 0.46 | 0.59 | -1.84 | 0.093532 | 0.103096 | 0.462739 | 0.364006 |
| MmugDNA.40519.1.S1_at   | MmugDNA.40519.1 | 11.99 | 11.92 | 0.16 | 0.15 | 1.05  | 0.91424  | 0.537737 | 0.970825 | 0.722664 |
| MmugDNA.40521.1.S1_at   | MmugDNA.40521.1 | 6.56  | 6.34  | 0.07 | 0.19 | 1.17  | 0.147178 | 0.088649 | 0.521578 | 0.342176 |
| MmugDNA.40522.1.S1_at   | MmugDNA.40522.1 | 5.98  | 6.04  | 0.14 | 0.28 | -1.04 | 0.91482  | 0.848754 | 0.970941 | 0.914116 |
| MmugDNA.40523.1.S1_s_at | MmugDNA.40523.1 | 12.45 | 12.41 | 0.23 | 0.15 | 1.03  | 0.515773 | 0.740825 | 0.791016 | 0.849962 |
| MmugDNA.40524.1.S1_at   | MmugDNA.40524.1 | 3.12  | 2.75  | 0.31 | 0.11 | 1.29  | 0.136267 | 0.05137  | 0.511048 | 0.272083 |
| MmugDNA.40525.1.S1_at   | MmugDNA.40525.1 | 3.73  | 3.91  | 0.07 | 0.08 | -1.13 | 0.060804 | 0.185547 | 0.408904 | 0.461566 |
| MmugDNA.40526.1.S1_at   | MmugDNA.40526.1 | 3.01  | 2.94  | 0.12 | 0.1  | 1.05  | 0.930842 | 0.497876 | 0.97692  | 0.697077 |
| MmugDNA.40528.1.S1_at   | MmugDNA.40528.1 | 6.16  | 6.3   | 0.09 | 0.02 | -1.1  | 0.10121  | 0.124846 | 0.471667 | 0.395219 |
| MmugDNA.40529.1.S1_at   | MmugDNA.40529.1 | 6.09  | 5.84  | 0.16 | 0.05 | 1.18  | 0.110538 | 0.320975 | 0.48362  | 0.572964 |
| MmugDNA.4053.1.S1_at    | MmugDNA.4053.1  | 4.32  | 4.31  | 0.17 | 0.1  | 1.01  | 0.33007  | 0.685599 | 0.67679  | 0.816542 |
| MmugDNA.40530.1.S1_at   | MmugDNA.40530.1 | 5.62  | 5.61  | 0.05 | 0.06 | 1.01  | 0.468353 | 0.084131 | 0.76496  | 0.335181 |
| MmugDNA.40533.1.S1_at   | MmugDNA.40533.1 | 3.32  | 3.31  | 0.08 | 0.13 | 1.01  | 0.752333 | 0.491772 | 0.906439 | 0.693268 |
| MmugDNA.40534.1.S1_s_at | MmugDNA.40534.1 | 10.59 | 10.89 | 0.43 | 0.13 | -1.23 | 0.253999 | 0.005219 | 0.618622 | 0.100105 |
| MmugDNA.40535.1.S1_at   | MmugDNA.40535.1 | 7.92  | 7.78  | 0.11 | 0.06 | 1.1   | 0.098695 | 0.000151 | 0.468025 | 0.029832 |
| MmugDNA.40537.1.S1_at   | MmugDNA.40537.1 | 11.69 | 11.91 | 0.18 | 0.07 | -1.16 | 0.11858  | 0.118036 | 0.492088 | 0.385881 |
| MmugDNA.40538.1.S1_at   | MmugDNA.40538.1 | 4.61  | 4.53  | 0.17 | 0.06 | 1.05  | 0.404934 | 0.5413   | 0.727024 | 0.724837 |
| MmugDNA.40539.1.S1_at   | MmugDNA.40539.1 | 10.46 | 10.18 | 0.87 | 0.28 | 1.22  | 0.493981 | 0.173607 | 0.779169 | 0.449956 |
| MmugDNA.4054.1.S1_at    | MmugDNA.4054.1  | 8.96  | 8.74  | 0.22 | 0.06 | 1.17  | 0.148488 | 0.220632 | 0.522567 | 0.494069 |
| MmugDNA.40540.1.S1_at   | MmugDNA.40540.1 | 4.66  | 4.76  | 0.29 | 0.02 | -1.07 | 0.596438 | 0.534952 | 0.835968 | 0.720644 |
| MmugDNA.40541.1.S1_at   | MmugDNA.40541.1 | 9.75  | 9.68  | 0.49 | 0.08 | 1.05  | 0.915644 | 0.524072 | 0.971302 | 0.714177 |
| MmugDNA.40542.1.S1_at   | MmugDNA.40542.1 | 6.08  | 6.19  | 1.06 | 0.31 | -1.08 | 0.970822 | 0.389346 | 0.990457 | 0.62342  |
| MmugDNA.40543.1.S1_at   | MmugDNA.40543.1 | 6.13  | 5.56  | 0.46 | 0.25 | 1.49  | 0.075342 | 0.107214 | 0.436298 | 0.369902 |
| MmugDNA.40544.1.S1_at   | MmugDNA.40544.1 | 6.62  | 7.21  | 0.42 | 0.31 | -1.5  | 0.154696 | 0.262115 | 0.527946 | 0.528397 |
| MmugDNA.40545.1.S1_at   | MmugDNA.40545.1 | 3.28  | 3.26  | 0.21 | 0.15 | 1.01  | 0.616394 | 0.686142 | 0.84491  | 0.81681  |
| MmugDNA.40546.1.S1_at   | MmugDNA.40546.1 | 5.03  | 5.14  | 0.2  | 0.05 | -1.08 | 0.408672 | 0.408773 | 0.729499 | 0.6359   |
| MmugDNA.40547.1.S1_at   | MmugDNA.40547.1 | 3.63  | 3.45  | 0.2  | 0.04 | 1.13  | 0.096951 | 0.149378 | 0.465649 | 0.423811 |
| MmugDNA.40548.1.S1_at   | MmugDNA.40548.1 | 5.99  | 5.98  | 0.02 | 0.16 | 1.01  | 0.815202 | 0.913464 | 0.933137 | 0.951252 |
| MmugDNA.40549.1.S1_at   | MmugDNA.40549.1 | 4.09  | 4.58  | 0.27 | 0.11 | -1.41 | 0.046095 | 0.087113 | 0.37735  | 0.340073 |

|                         |                 |       |       |      |      |       |          |          |          |          |
|-------------------------|-----------------|-------|-------|------|------|-------|----------|----------|----------|----------|
| MmugDNA.4055.1.S1_at    | MmugDNA.4055.1  | 4.38  | 4.09  | 0.08 | 0.13 | 1.23  | 0.027453 | 0.283127 | 0.327757 | 0.545694 |
| MmugDNA.40550.1.S1_at   | MmugDNA.40550.1 | 6.78  | 6.7   | 0.09 | 0.04 | 1.06  | 0.126562 | 0.152344 | 0.500465 | 0.427072 |
| MmugDNA.40553.1.S1_at   | MmugDNA.40553.1 | 6.1   | 6.12  | 0.11 | 0.08 | -1.01 | 0.838723 | 0.554483 | 0.942303 | 0.733245 |
| MmugDNA.40555.1.S1_at   | MmugDNA.40555.1 | 8.07  | 8.09  | 0.23 | 0.1  | -1.02 | 0.863695 | 0.26342  | 0.952043 | 0.529715 |
| MmugDNA.40556.1.S1_at   | MmugDNA.40556.1 | 5.98  | 5.93  | 0.19 | 0.07 | 1.04  | 0.476044 | 0.529387 | 0.768871 | 0.71726  |
| MmugDNA.40557.1.S1_at   | MmugDNA.40557.1 | 6.78  | 6.57  | 0.12 | 0.12 | 1.16  | 0.105502 | 0.017437 | 0.477143 | 0.167111 |
| MmugDNA.40558.1.S1_at   | MmugDNA.40558.1 | 5.24  | 5.19  | 0.53 | 0.16 | 1.04  | 0.374688 | 0.470225 | 0.706036 | 0.678572 |
| MmugDNA.40559.1.S1_at   | MmugDNA.40559.1 | 6.18  | 5.88  | 0.13 | 0.02 | 1.23  | 0.012996 | 0.063566 | 0.26612  | 0.298653 |
| MmugDNA.4056.1.S1_at    | MmugDNA.4056.1  | 10.19 | 9.99  | 0.33 | 0.16 | 1.15  | 0.286823 | 0.292412 | 0.643994 | 0.552498 |
| MmugDNA.40560.1.S1_at   | MmugDNA.40560.1 | 3.57  | 3.45  | 0.11 | 0.1  | 1.08  | 0.110291 | 0.393692 | 0.483363 | 0.626522 |
| MmugDNA.40561.1.S1_at   | MmugDNA.40561.1 | 9.28  | 9.11  | 0.26 | 0.07 | -1.13 | 0.408744 | 0.540598 | 0.729499 | 0.724459 |
| MmugDNA.40562.1.S1_at   | MmugDNA.40562.1 | 4.41  | 4.57  | 0.22 | 0.12 | -1.12 | 0.210294 | 0.323013 | 0.581624 | 0.574313 |
| MmugDNA.40563.1.S1_at   | MmugDNA.40563.1 | 13.35 | 13.37 | 0.3  | 0.15 | -1.01 | 0.53712  | 0.61813  | 0.802624 | 0.773929 |
| MmugDNA.40564.1.S1_at   | MmugDNA.40564.1 | 3.99  | 4.23  | 0.12 | 0.17 | -1.19 | 0.101872 | 0.096751 | 0.472267 | 0.354171 |
| MmugDNA.40565.1.S1_at   | MmugDNA.40565.1 | 4.61  | 4.72  | 0.39 | 0.16 | -1.08 | 0.373153 | 0.72168  | 0.705567 | 0.838808 |
| MmugDNA.40566.1.S1_at   | MmugDNA.40566.1 | 3.74  | 3.9   | 0.33 | 0.25 | -1.12 | 0.66728  | 0.193724 | 0.868553 | 0.468818 |
| MmugDNA.40567.1.S1_at   | MmugDNA.40567.1 | 9.42  | 9.29  | 0.3  | 0.03 | 1.09  | 0.691496 | 0.62624  | 0.879864 | 0.779684 |
| MmugDNA.40567.1.S1_s_at | MmugDNA.40567.1 | 9.83  | 9.82  | 0.31 | 0.03 | 1.01  | 0.933714 | 0.512508 | 0.977596 | 0.706375 |
| MmugDNA.40568.1.S1_at   | MmugDNA.40568.1 | 4.4   | 4.22  | 0.78 | 0.11 | 1.13  | 0.257668 | 0.363355 | 0.621338 | 0.60375  |
| MmugDNA.4057.1.S1_at    | MmugDNA.4057.1  | 9.05  | 9.87  | 0.67 | 0.08 | -1.77 | 0.183208 | 0.230693 | 0.556146 | 0.502381 |
| MmugDNA.40570.1.S1_at   | MmugDNA.40570.1 | 3.9   | 3.78  | 0.06 | 0.07 | 1.09  | 0.042305 | 0.046492 | 0.368868 | 0.260164 |
| MmugDNA.40571.1.S1_at   | MmugDNA.40571.1 | 11.05 | 10.91 | 0.23 | 0.2  | 1.11  | 0.654871 | 0.854543 | 0.862999 | 0.917099 |
| MmugDNA.40573.1.S1_at   | MmugDNA.40573.1 | 6.44  | 6.2   | 0.18 | 0.12 | 1.18  | 0.101476 | 0.424516 | 0.471735 | 0.647118 |
| MmugDNA.40574.1.S1_at   | MmugDNA.40574.1 | 5.44  | 5.13  | 0.15 | 0.09 | 1.24  | 0.062751 | 0.109459 | 0.413785 | 0.373326 |
| MmugDNA.40575.1.S1_at   | MmugDNA.40575.1 | 5.93  | 5.39  | 0.32 | 0.09 | 1.45  | 0.181342 | 0.208125 | 0.554526 | 0.482082 |
| MmugDNA.40576.1.S1_at   | MmugDNA.40576.1 | 4.46  | 4.86  | 0.34 | 0.06 | -1.32 | 0.042332 | 0.013529 | 0.368919 | 0.148875 |
| MmugDNA.40577.1.S1_at   | MmugDNA.40577.1 | 2.97  | 2.95  | 0.06 | 0.13 | 1.01  | 0.813486 | 0.629807 | 0.932599 | 0.781989 |
| MmugDNA.40578.1.S1_at   | MmugDNA.40578.1 | 10.39 | 10.05 | 0.5  | 0.04 | 1.27  | 0.604905 | 0.425103 | 0.839754 | 0.647579 |
| MmugDNA.40579.1.S1_at   | MmugDNA.40579.1 | 7.61  | 8.12  | 0.59 | 0.11 | -1.42 | 0.219944 | 0.175366 | 0.589114 | 0.452114 |
| MmugDNA.4058.1.S1_at    | MmugDNA.4058.1  | 9.81  | 10.35 | 0.17 | 0.03 | -1.46 | 0.005924 | 0.047076 | 0.21232  | 0.261469 |
| MmugDNA.4058.1.S1_s_at  | MmugDNA.4058.1  | 4.96  | 4.77  | 0.01 | 0.06 | 1.14  | 0.00748  | 0.791892 | 0.229281 | 0.87976  |
| MmugDNA.40580.1.S1_at   | MmugDNA.40580.1 | 5.1   | 4.85  | 0.18 | 0.08 | 1.19  | 0.093248 | 0.16643  | 0.462288 | 0.442887 |
| MmugDNA.40582.1.S1_at   | MmugDNA.40582.1 | 8.73  | 9.02  | 0.68 | 0.44 | -1.22 | 0.684414 | 0.882766 | 0.87645  | 0.93317  |
| MmugDNA.40583.1.S1_at   | MmugDNA.40583.1 | 3.72  | 3.65  | 0.05 | 0.27 | 1.05  | 0.181552 | 0.181131 | 0.554686 | 0.457582 |
| MmugDNA.40585.1.S1_at   | MmugDNA.40585.1 | 4.16  | 4.18  | 0.05 | 0.09 | -1.01 | 0.517835 | 0.701046 | 0.792289 | 0.826613 |
| MmugDNA.40587.1.S1_at   | MmugDNA.40587.1 | 5.79  | 5.74  | 0.02 | 0.07 | 1.03  | 0.166725 | 0.743103 | 0.539373 | 0.851135 |
| MmugDNA.40588.1.S1_at   | MmugDNA.40588.1 | 11.11 | 10.6  | 1.15 | 0.1  | 1.43  | 0.777577 | 0.344808 | 0.917671 | 0.590142 |
| MmugDNA.19545.1.S1_s_at | MmugDNA.19545.1 | 2.96  | 2.85  | 0.08 | 0.07 | 1.08  | 0.113549 | 0.405151 | 0.48689  | 0.633491 |
| MmugDNA.40590.1.S1_at   | MmugDNA.40590.1 | 8.99  | 9.32  | 0.3  | 0.18 | -1.25 | 0.33685  | 0.360352 | 0.682166 | 0.601402 |
| MmugDNA.40591.1.S1_s_at | MmugDNA.40591.1 | 9.2   | 9.15  | 0.75 | 0.38 | 1.04  | 0.643374 | 0.00439  | 0.858195 | 0.092744 |
| MmugDNA.40593.1.S1_at   | MmugDNA.40593.1 | 8.16  | 7.6   | 0.38 | 0.19 | 1.47  | 0.049452 | 0.012942 | 0.385474 | 0.146416 |
| MmugDNA.40594.1.S1_at   | MmugDNA.40594.1 | 3.03  | 3.03  | 0.09 | 0.12 | 1     | 0.236355 | 0.490518 | 0.603291 | 0.692497 |
| MmugDNA.40595.1.S1_at   | MmugDNA.40595.1 | 10.05 | 9.32  | 0.36 | 0.17 | 1.66  | 0.038161 | 0.032829 | 0.358577 | 0.22434  |

|                         |                 |       |       |      |      |       |          |          |          |          |
|-------------------------|-----------------|-------|-------|------|------|-------|----------|----------|----------|----------|
| MmugDNA.40596.1.S1_at   | MmugDNA.40596.1 | 4.78  | 4.36  | 0.26 | 0.12 | 1.34  | 0.060662 | 0.040852 | 0.408583 | 0.247004 |
| MmugDNA.40597.1.S1_at   | MmugDNA.40597.1 | 4.3   | 4.17  | 0.14 | 0.15 | 1.1   | 0.199167 | 0.380734 | 0.570832 | 0.61739  |
| MmugDNA.40599.1.S1_at   | MmugDNA.40599.1 | 4.57  | 4.51  | 0.08 | 0.05 | 1.05  | 0.134875 | 0.267152 | 0.50897  | 0.532773 |
| MmugDNA.4060.1.S1_at    | MmugDNA.4060.1  | 12.86 | 12.86 | 0.19 | 0.09 | -1    | 0.688718 | 0.395161 | 0.878545 | 0.627379 |
| MmugDNA.40601.1.S1_at   | MmugDNA.40601.1 | 3.88  | 3.89  | 0.2  | 0.11 | -1.01 | 0.736813 | 0.695633 | 0.899286 | 0.823085 |
| MmugDNA.40602.1.S1_at   | MmugDNA.40602.1 | 7.93  | 8.62  | 1.89 | 0.23 | -1.61 | 0.481641 | 0.098928 | 0.772225 | 0.357049 |
| MmugDNA.40604.1.S1_at   | MmugDNA.40604.1 | 3.65  | 3.64  | 0.28 | 0.21 | 1     | 0.679195 | 0.573199 | 0.874274 | 0.744964 |
| MmugDNA.40606.1.S1_at   | MmugDNA.40606.1 | 8.7   | 9.25  | 2.25 | 0.07 | -1.46 | 0.572573 | 0.608709 | 0.823222 | 0.767217 |
| MmugDNA.40608.1.S1_at   | MmugDNA.40608.1 | 4.96  | 4.88  | 0.16 | 0.05 | 1.06  | 0.599127 | 0.097545 | 0.837263 | 0.355398 |
| MmugDNA.40609.1.S1_at   | MmugDNA.40609.1 | 7.37  | 8.51  | 0.82 | 0.35 | -2.19 | 0.124982 | 0.142046 | 0.498917 | 0.415633 |
| MmugDNA.4061.1.S1_at    | MmugDNA.4061.1  | 11.56 | 11.66 | 0.95 | 0.09 | -1.07 | 0.911151 | 0.233499 | 0.969838 | 0.504835 |
| MmugDNA.40611.1.S1_at   | MmugDNA.40611.1 | 3.21  | 3.51  | 0.11 | 0.36 | -1.24 | 0.07885  | 0.163223 | 0.441464 | 0.439324 |
| MmugDNA.40612.1.S1_at   | MmugDNA.40612.1 | 5.1   | 5.02  | 0.06 | 0    | 1.06  | 0.035586 | 0.022449 | 0.35243  | 0.187515 |
| MmugDNA.40613.1.S1_x_at | MmugDNA.40613.1 | 11.65 | 11.88 | 0.29 | 0.16 | -1.18 | 0.343923 | 0.577129 | 0.686913 | 0.747646 |
| MmugDNA.40617.1.S1_at   | MmugDNA.40617.1 | 9.66  | 9.38  | 0.55 | 0.23 | 1.22  | 0.869568 | 0.553961 | 0.954469 | 0.732896 |
| MmugDNA.40618.1.S1_at   | MmugDNA.40618.1 | 4.96  | 4.97  | 0.12 | 0.27 | -1    | 0.625259 | 0.275819 | 0.849267 | 0.540035 |
| MmugDNA.40619.1.S1_at   | MmugDNA.40619.1 | 11.99 | 11.99 | 0.22 | 0.07 | 1     | 0.751894 | 0.560388 | 0.906228 | 0.736645 |
| MmugDNA.4062.1.S1_at    | MmugDNA.4062.1  | 4.48  | 4.55  | 0.33 | 0.09 | -1.05 | 0.442274 | 0.318695 | 0.749953 | 0.571326 |
| MmugDNA.40620.1.S1_at   | MmugDNA.40620.1 | 3.6   | 3.5   | 0.14 | 0.12 | 1.07  | 0.408776 | 0.400245 | 0.729499 | 0.630158 |
| MmugDNA.40621.1.S1_at   | MmugDNA.40621.1 | 4.47  | 4.46  | 0.37 | 0.07 | 1.01  | 0.773143 | 0.830918 | 0.915615 | 0.903001 |
| MmugDNA.40622.1.S1_at   | MmugDNA.40622.1 | 4.96  | 4.98  | 0.16 | 0.51 | -1.02 | 0.745466 | 0.865134 | 0.903049 | 0.923484 |
| MmugDNA.40624.1.S1_at   | MmugDNA.40624.1 | 4.33  | 3.97  | 0.17 | 0.11 | 1.29  | 0.11706  | 0.146405 | 0.490362 | 0.420454 |
| MmugDNA.40627.1.S1_at   | MmugDNA.40627.1 | 4.95  | 5.05  | 0.17 | 0.1  | -1.07 | 0.62192  | 0.464645 | 0.847631 | 0.675303 |
| MmugDNA.40627.1.S1_s_at | MmugDNA.40627.1 | 6.56  | 5.53  | 0.75 | 0.28 | 2.04  | 0.188309 | 0.204065 | 0.560429 | 0.478386 |
| MmugDNA.40629.1.S1_at   | MmugDNA.40629.1 | 4.29  | 4.28  | 0.18 | 0.07 | 1     | 0.422133 | 0.836259 | 0.738013 | 0.906346 |
| MmugDNA.4063.1.S1_at    | MmugDNA.4063.1  | 6.54  | 6.61  | 0.05 | 0.08 | -1.04 | 0.112217 | 0.111312 | 0.485383 | 0.375989 |
| MmugDNA.40631.1.S1_at   | MmugDNA.40631.1 | 8.74  | 8.59  | 1.12 | 0.27 | 1.11  | 0.673504 | 0.86715  | 0.871397 | 0.924511 |
| MmugDNA.40632.1.S1_at   | MmugDNA.40632.1 | 6.95  | 7.29  | 0.27 | 0.21 | -1.27 | 0.114141 | 0.120485 | 0.487405 | 0.38925  |
| MmugDNA.40634.1.S1_at   | MmugDNA.40634.1 | 6.31  | 6.17  | 0.13 | 0.2  | 1.1   | 0.202153 | 0.277015 | 0.573629 | 0.541023 |
| MmugDNA.40635.1.S1_at   | MmugDNA.40635.1 | 5.95  | 5.83  | 0.22 | 0.18 | 1.08  | 0.917277 | 0.343969 | 0.97197  | 0.58962  |
| MmugDNA.40636.1.S1_at   | MmugDNA.40636.1 | 5.84  | 5.74  | 0.29 | 0.26 | 1.08  | 0.730122 | 0.93592  | 0.895994 | 0.96389  |
| MmugDNA.40637.1.S1_at   | MmugDNA.40637.1 | 6.67  | 7.5   | 0.52 | 0.16 | -1.78 | 0.045664 | 0.097586 | 0.376898 | 0.355456 |
| MmugDNA.40638.1.S1_at   | MmugDNA.40638.1 | 4.14  | 4.05  | 0.07 | 0.02 | 1.06  | 0.107703 | 0.440541 | 0.480288 | 0.65901  |
| MmugDNA.40639.1.S1_at   | MmugDNA.40639.1 | 4.98  | 4.94  | 0.18 | 0.03 | 1.02  | 0.328001 | 0.201006 | 0.675501 | 0.475442 |
| MmugDNA.4064.1.S1_at    | MmugDNA.4064.1  | 5.94  | 5.97  | 0.28 | 0.03 | -1.02 | 0.683893 | 0.658875 | 0.876251 | 0.800473 |
| MmugDNA.40641.1.S1_at   | MmugDNA.40641.1 | 4.1   | 3.86  | 0.16 | 0.06 | 1.18  | 0.089004 | 0.044477 | 0.456831 | 0.255242 |
| MmugDNA.40642.1.S1_at   | MmugDNA.40642.1 | 5.28  | 5.13  | 0.19 | 0.09 | 1.11  | 0.498763 | 0.691492 | 0.781838 | 0.820518 |
| MmugDNA.40643.1.S1_at   | MmugDNA.40643.1 | 4.26  | 4.23  | 0.15 | 0.12 | 1.02  | 0.716035 | 0.668218 | 0.889675 | 0.805834 |
| MmugDNA.40646.1.S1_at   | MmugDNA.40646.1 | 6.08  | 6.07  | 0.15 | 0.02 | 1.01  | 0.340625 | 0.491123 | 0.684563 | 0.692777 |
| MmugDNA.4065.1.S1_at    | MmugDNA.4065.1  | 3.09  | 3.1   | 0.06 | 0.1  | -1    | 0.914318 | 0.899659 | 0.970825 | 0.942903 |
| MmugDNA.40650.1.S1_at   | MmugDNA.40650.1 | 4.77  | 4.61  | 0.11 | 0.18 | 1.11  | 0.400842 | 0.621029 | 0.723966 | 0.775754 |
| MmugDNA.40651.1.S1_at   | MmugDNA.40651.1 | 3.28  | 3.19  | 0.09 | 0.34 | 1.07  | 0.6392   | 0.749011 | 0.856229 | 0.854072 |
| MmugDNA.40652.1.S1_at   | MmugDNA.40652.1 | 6.77  | 7.14  | 0.32 | 0.38 | -1.29 | 0.205602 | 0.022989 | 0.577416 | 0.189624 |

|                         |                 |       |       |      |      |       |          |          |          |          |
|-------------------------|-----------------|-------|-------|------|------|-------|----------|----------|----------|----------|
| MmugDNA.40653.1.S1_at   | MmugDNA.40653.1 | 7.87  | 7.72  | 0.65 | 0.02 | 1.11  | 0.579863 | 0.774719 | 0.826712 | 0.868833 |
| MmugDNA.40654.1.S1_at   | MmugDNA.40654.1 | 6.06  | 6.56  | 0.35 | 0.19 | -1.41 | 0.257237 | 0.573641 | 0.621021 | 0.745229 |
| MmugDNA.40655.1.S1_at   | MmugDNA.40655.1 | 8.73  | 8.23  | 0.22 | 0.15 | 1.41  | 0.129993 | 0.003765 | 0.504648 | 0.087403 |
| MmugDNA.40656.1.S1_s_at | MmugDNA.40656.1 | 6.63  | 6.55  | 0.05 | 0.08 | 1.05  | 0.07223  | 0.046578 | 0.432091 | 0.260267 |
| MmugDNA.40657.1.S1_at   | MmugDNA.40657.1 | 12.75 | 12.75 | 0.21 | 0.07 | 1     | 0.957491 | 0.328992 | 0.985977 | 0.578482 |
| MmugDNA.40658.1.S1_at   | MmugDNA.40658.1 | 4.58  | 4.9   | 0.25 | 0.09 | -1.25 | 0.47975  | 0.604953 | 0.770896 | 0.764917 |
| MmugDNA.40659.1.S1_at   | MmugDNA.40659.1 | 4.11  | 3.39  | 0.58 | 0.1  | 1.65  | 0.111035 | 0.11007  | 0.484303 | 0.374179 |
| MmugDNA.4066.1.S1_at    | MmugDNA.4066.1  | 8.44  | 8.99  | 0.57 | 0.12 | -1.47 | 0.212891 | 0.178635 | 0.583497 | 0.454847 |
| MmugDNA.40660.1.S1_at   | MmugDNA.40660.1 | 5.29  | 5.21  | 0.05 | 0    | 1.06  | 0.123222 | 0.063282 | 0.496589 | 0.298244 |
| MmugDNA.40664.1.S1_at   | MmugDNA.40664.1 | 5.7   | 5.67  | 0.03 | 0.02 | 1.02  | 0.032176 | 0.553124 | 0.343286 | 0.73239  |
| MmugDNA.40665.1.S1_at   | MmugDNA.40665.1 | 11.53 | 11.9  | 0.13 | 0    | -1.29 | 0.016979 | 0.001218 | 0.288969 | 0.054583 |
| MmugDNA.40666.1.S1_at   | MmugDNA.40666.1 | 3.42  | 3.24  | 0.14 | 0.12 | 1.14  | 0.399105 | 0.131875 | 0.722883 | 0.403891 |
| MmugDNA.40667.1.S1_at   | MmugDNA.40667.1 | 7.46  | 7.15  | 0.37 | 0.26 | 1.24  | 0.631842 | 0.258748 | 0.85263  | 0.525949 |
| MmugDNA.40674.1.S1_s_at | MmugDNA.40674.1 | 11.19 | 11.61 | 0.11 | 0.12 | -1.34 | 0.020281 | 0.047721 | 0.303799 | 0.263325 |
| MmugDNA.40675.1.S1_at   | MmugDNA.40675.1 | 5.5   | 5.46  | 0.04 | 0.11 | 1.03  | 0.734021 | 0.176475 | 0.898081 | 0.452836 |
| MmugDNA.40676.1.S1_at   | MmugDNA.40676.1 | 5.54  | 5.54  | 0.07 | 0.09 | 1     | 0.889187 | 0.004683 | 0.96181  | 0.095363 |
| MmugDNA.40677.1.S1_s_at | MmugDNA.40677.1 | 10.74 | 10.49 | 0.12 | 0.06 | 1.19  | 0.021121 | 0.041627 | 0.306884 | 0.24887  |
| MmugDNA.40678.1.S1_at   | MmugDNA.40678.1 | 12.7  | 12.92 | 0.25 | 0.03 | -1.17 | 0.223177 | 0.116928 | 0.592569 | 0.384297 |
| MmugDNA.40679.1.S1_at   | MmugDNA.40679.1 | 3.88  | 4.02  | 0.31 | 0.04 | -1.1  | 0.886276 | 0.588309 | 0.960501 | 0.754859 |
| MmugDNA.4068.1.S1_at    | MmugDNA.4068.1  | 4.26  | 4.24  | 0.03 | 0.22 | 1.01  | 0.807151 | 0.97421  | 0.930053 | 0.985922 |
| MmugDNA.40680.1.S1_at   | MmugDNA.40680.1 | 3.92  | 3.95  | 0.1  | 0.15 | -1.02 | 0.179908 | 0.238426 | 0.553155 | 0.50907  |
| MmugDNA.40681.1.S1_at   | MmugDNA.40681.1 | 5.07  | 5.17  | 0.1  | 0.11 | -1.07 | 0.723255 | 0.909853 | 0.892777 | 0.949148 |
| MmugDNA.40682.1.S1_at   | MmugDNA.40682.1 | 3.12  | 3.28  | 0.13 | 0.53 | -1.12 | 0.541728 | 0.496808 | 0.805219 | 0.696208 |
| MmugDNA.40683.1.S1_at   | MmugDNA.40683.1 | 8.36  | 6.81  | 0.54 | 0.51 | 2.93  | 0.030306 | 0.034158 | 0.33739  | 0.228708 |
| MmugDNA.40684.1.S1_at   | MmugDNA.40684.1 | 3.54  | 3.43  | 0.25 | 0.21 | 1.08  | 0.523754 | 0.757265 | 0.795656 | 0.858672 |
| MmugDNA.40685.1.S1_at   | MmugDNA.40685.1 | 3.57  | 3.56  | 0.09 | 0.02 | 1     | 0.535835 | 0.425017 | 0.801985 | 0.647471 |
| MmugDNA.40687.1.S1_at   | MmugDNA.40687.1 | 3.77  | 3.85  | 0.15 | 0.08 | -1.05 | 0.882248 | 0.883746 | 0.959161 | 0.933691 |
| MmugDNA.40689.1.S1_at   | MmugDNA.40689.1 | 5.72  | 5.25  | 0.16 | 0.1  | 1.38  | 0.007828 | 0.004159 | 0.231004 | 0.091036 |
| MmugDNA.4069.1.S1_at    | MmugDNA.4069.1  | 7.31  | 7.29  | 0.12 | 0.03 | 1.01  | 0.885592 | 0.242769 | 0.96038  | 0.513112 |
| MmugDNA.40691.1.S1_at   | MmugDNA.40691.1 | 6.81  | 6.6   | 0.08 | 0.09 | 1.16  | 0.041376 | 0.258789 | 0.366275 | 0.525949 |
| MmugDNA.2735.1.S1_s_at  | MmugDNA.2735.1  | 12.25 | 12.35 | 0.02 | 0.04 | -1.07 | 0.011962 | 0.302302 | 0.257858 | 0.560092 |
| MmugDNA.40694.1.S1_at   | MmugDNA.40694.1 | 3.84  | 3.66  | 0.07 | 0.36 | 1.13  | 0.955365 | 0.303239 | 0.985312 | 0.560731 |
| MmugDNA.40695.1.S1_at   | MmugDNA.40695.1 | 3.32  | 3.51  | 0.06 | 0.12 | -1.14 | 0.19477  | 0.168076 | 0.565183 | 0.444666 |
| MmugDNA.40696.1.S1_at   | MmugDNA.40696.1 | 11.65 | 11.61 | 0.19 | 0.1  | 1.03  | 0.915741 | 0.88673  | 0.971302 | 0.935519 |
| MmugDNA.40697.1.S1_at   | MmugDNA.40697.1 | 5.89  | 6.14  | 0.27 | 0.27 | -1.19 | 0.869507 | 0.424818 | 0.954469 | 0.64729  |
| MmugDNA.22260.1.S1_s_at | MmugDNA.22260.1 | 8.52  | 8.51  | 0.12 | 0.11 | 1     | 0.783979 | 0.451836 | 0.920602 | 0.66662  |
| MmugDNA.40699.1.S1_at   | MmugDNA.40699.1 | 5.24  | 5.39  | 0.48 | 0.39 | -1.11 | 0.802496 | 0.233544 | 0.927969 | 0.504878 |
| MmugDNA.407.1.S1_at     | MmugDNA.407.1   | 9.71  | 7.18  | 2.5  | 0.08 | 5.75  | 0.508914 | 0.255326 | 0.78735  | 0.523394 |
| MmugDNA.4070.1.S1_at    | MmugDNA.4070.1  | 4.65  | 4.61  | 0.1  | 0.14 | 1.03  | 0.601589 | 0.859963 | 0.838465 | 0.920188 |
| MmugDNA.40700.1.S1_at   | MmugDNA.40700.1 | 5.28  | 4.3   | 0.45 | 0.63 | 1.97  | 0.209913 | 0.20075  | 0.581346 | 0.475264 |
| MmugDNA.40701.1.S1_at   | MmugDNA.40701.1 | 8.09  | 7.81  | 0.52 | 0.18 | 1.21  | 0.612859 | 0.073606 | 0.843235 | 0.316945 |
| MmugDNA.40702.1.S1_at   | MmugDNA.40702.1 | 12.08 | 11.86 | 0.09 | 0.09 | 1.17  | 0.053262 | 0.000123 | 0.394387 | 0.029087 |
| MmugDNA.40705.1.S1_at   | MmugDNA.40705.1 | 3.41  | 3.3   | 0.17 | 0.08 | 1.08  | 0.903881 | 0.953832 | 0.967712 | 0.973705 |

|                         |                 |       |       |      |      |       |          |          |          |          |
|-------------------------|-----------------|-------|-------|------|------|-------|----------|----------|----------|----------|
| MmugDNA.4071.1.S1_at    | MmugDNA.4071.1  | 5.94  | 5.87  | 0.22 | 0.22 | 1.05  | 0.741692 | 0.92311  | 0.90146  | 0.956754 |
| MmugDNA.4071.1.S1_s_at  | MmugDNA.4071.1  | 5.74  | 5.82  | 0.25 | 0.06 | -1.06 | 0.488525 | 0.58203  | 0.775598 | 0.750784 |
| MmugDNA.40710.1.S1_at   | MmugDNA.40710.1 | 3.82  | 3.48  | 0.22 | 0.22 | 1.27  | 0.203745 | 0.255921 | 0.57513  | 0.523862 |
| MmugDNA.40712.1.S1_at   | MmugDNA.40712.1 | 6.32  | 6.26  | 0.1  | 0.03 | 1.04  | 0.656855 | 0.185539 | 0.863732 | 0.461566 |
| MmugDNA.40713.1.S1_at   | MmugDNA.40713.1 | 6.52  | 5.83  | 0.07 | 0.21 | 1.61  | 0.005399 | 0.077866 | 0.208157 | 0.324099 |
| MmugDNA.40715.1.S1_at   | MmugDNA.40715.1 | 4.22  | 4.02  | 0.22 | 0.14 | 1.15  | 0.123543 | 0.137864 | 0.497016 | 0.410833 |
| MmugDNA.40716.1.S1_at   | MmugDNA.40716.1 | 5.93  | 5.9   | 0.06 | 0.07 | 1.02  | 0.242482 | 0.661083 | 0.608517 | 0.801683 |
| MmugDNA.4072.1.S1_at    | MmugDNA.4072.1  | 4.42  | 4.24  | 0.22 | 0.4  | 1.13  | 0.682473 | 0.801788 | 0.875741 | 0.885932 |
| MmugDNA.40721.1.S1_at   | MmugDNA.40721.1 | 8.16  | 8.6   | 0.36 | 0.13 | -1.36 | 0.350189 | 0.040113 | 0.691084 | 0.245438 |
| MmugDNA.40721.1.S1_s_at | MmugDNA.40721.1 | 8.76  | 9.21  | 0.4  | 0.02 | -1.36 | 0.273599 | 0.068785 | 0.633298 | 0.308711 |
| MmugDNA.40723.1.S1_at   | MmugDNA.40723.1 | 3.7   | 3.64  | 0.05 | 0.11 | -1.04 | 0.735399 | 0.645326 | 0.89872  | 0.792179 |
| MmugDNA.40706.1.S1_s_at | MmugDNA.40706.1 | 6.54  | 5.96  | 0.78 | 1.14 | 1.5   | 0.791635 | 0.421904 | 0.923469 | 0.645369 |
| MmugDNA.40726.1.S1_at   | MmugDNA.40726.1 | 8.89  | 9.01  | 0.51 | 0.3  | -1.09 | 0.887911 | 0.021827 | 0.961203 | 0.184799 |
| MmugDNA.40727.1.S1_at   | MmugDNA.40727.1 | 4.41  | 7.13  | 0.52 | 0.5  | -6.59 | 0.001974 | 0.000352 | 0.17214  | 0.037121 |
| MmugDNA.40730.1.S1_at   | MmugDNA.40730.1 | 4.85  | 4.71  | 0.14 | 0.1  | 1.11  | 0.181531 | 0.007525 | 0.554659 | 0.1163   |
| MmugDNA.40731.1.S1_at   | MmugDNA.40731.1 | 3.84  | 3.8   | 0.02 | 0.01 | 1.03  | 0.094001 | 0.896416 | 0.463368 | 0.940875 |
| MmugDNA.40732.1.S1_at   | MmugDNA.40732.1 | 6.61  | 6.84  | 0.27 | 0.01 | -1.17 | 0.073848 | 0.01928  | 0.434623 | 0.174698 |
| MmugDNA.40733.1.S1_at   | MmugDNA.40733.1 | 4.9   | 4.71  | 0.2  | 0.08 | 1.14  | 0.426782 | 0.354253 | 0.740725 | 0.597105 |
| MmugDNA.40735.1.S1_at   | MmugDNA.40735.1 | 9.13  | 8.51  | 1.65 | 0.04 | 1.54  | 0.761423 | 0.926883 | 0.910549 | 0.958424 |
| MmugDNA.40736.1.S1_at   | MmugDNA.40736.1 | 7.48  | 7.76  | 0.42 | 0.14 | -1.22 | 0.769603 | 0.671813 | 0.913757 | 0.808157 |
| MmugDNA.40738.1.S1_at   | MmugDNA.40738.1 | 7.97  | 7.65  | 0.27 | 0.27 | 1.24  | 0.497075 | 0.068649 | 0.781055 | 0.308548 |
| MmugDNA.40740.1.S1_at   | MmugDNA.40740.1 | 5.29  | 5.29  | 0.01 | 0.04 | 1     | 0.472902 | 0.068716 | 0.767317 | 0.308711 |
| MmugDNA.40741.1.S1_at   | MmugDNA.40741.1 | 5.64  | 5.65  | 0.14 | 0.06 | -1.01 | 0.309761 | 0.50807  | 0.661815 | 0.703358 |
| MmugDNA.40746.1.S1_at   | MmugDNA.40746.1 | 7.66  | 8.03  | 0.37 | 0.12 | -1.3  | 0.188184 | 0.229056 | 0.560303 | 0.501378 |
| MmugDNA.40747.1.S1_at   | MmugDNA.40747.1 | 4.53  | 4.33  | 0.21 | 0.19 | 1.15  | 0.261973 | 0.28586  | 0.624194 | 0.547484 |
| MmugDNA.40748.1.S1_at   | MmugDNA.40748.1 | 5.44  | 5.38  | 0.35 | 0.23 | 1.04  | 0.722291 | 0.243193 | 0.892242 | 0.513356 |
| MmugDNA.40749.1.S1_at   | MmugDNA.40749.1 | 11.84 | 11.9  | 0.18 | 0.09 | -1.05 | 0.878487 | 0.967486 | 0.957748 | 0.982071 |
| MmugDNA.4075.1.S1_at    | MmugDNA.4075.1  | 6.5   | 6.61  | 0.36 | 0.12 | -1.08 | 0.900426 | 0.747943 | 0.966101 | 0.853333 |
| MmugDNA.40750.1.S1_at   | MmugDNA.40750.1 | 3.07  | 3.07  | 0.21 | 0.04 | 1     | 0.365933 | 0.341252 | 0.701433 | 0.587344 |
| MmugDNA.40750.1.S1_s_at | MmugDNA.40750.1 | 10.52 | 10.24 | 0.28 | 0.14 | 1.22  | 0.117466 | 0.12715  | 0.490925 | 0.397922 |
| MmugDNA.40750.1.S1_x_at | MmugDNA.40750.1 | 3.33  | 3.22  | 0.15 | 0.14 | 1.08  | 0.170541 | 0.21677  | 0.543588 | 0.490311 |
| MmugDNA.40751.1.S1_at   | MmugDNA.40751.1 | 3.52  | 3.42  | 0.08 | 0.1  | 1.07  | 0.065027 | 0.030762 | 0.419689 | 0.217296 |
| MmugDNA.40754.1.S1_at   | MmugDNA.40754.1 | 6.34  | 6.8   | 0.37 | 0.24 | -1.37 | 0.108637 | 0.183999 | 0.480791 | 0.460195 |
| MmugDNA.40755.1.S1_at   | MmugDNA.40755.1 | 4.04  | 3.98  | 0.09 | 0.05 | 1.04  | 0.215516 | 0.233589 | 0.585748 | 0.50492  |
| MmugDNA.40756.1.S1_at   | MmugDNA.40756.1 | 5.27  | 4.97  | 0.19 | 0.14 | 1.23  | 0.189279 | 0.248271 | 0.560887 | 0.517596 |
| MmugDNA.40757.1.S1_x_at | MmugDNA.40757.1 | 12.14 | 12.26 | 0.18 | 0.15 | -1.09 | 0.164743 | 0.431783 | 0.537466 | 0.652556 |
| MmugDNA.40758.1.S1_at   | MmugDNA.40758.1 | 9.27  | 9.63  | 0.86 | 0.14 | -1.28 | 0.594969 | 0.711994 | 0.83502  | 0.833066 |
| MmugDNA.40759.1.S1_at   | MmugDNA.40759.1 | 12.27 | 11.02 | 0.37 | 0.14 | 2.38  | 0.005864 | 0.002077 | 0.211798 | 0.067404 |
| MmugDNA.4076.1.S1_at    | MmugDNA.4076.1  | 6.21  | 7.06  | 1.02 | 0.43 | -1.8  | 0.28841  | 0.418489 | 0.645509 | 0.642898 |
| MmugDNA.40761.1.S1_at   | MmugDNA.40761.1 | 6.55  | 6.41  | 0.08 | 0.06 | 1.1   | 0.109885 | 0.108301 | 0.482728 | 0.371557 |
| MmugDNA.40762.1.S1_at   | MmugDNA.40762.1 | 5     | 5.45  | 0.28 | 0.35 | -1.37 | 0.104355 | 0.282566 | 0.475417 | 0.545292 |
| MmugDNA.40766.1.S1_at   | MmugDNA.40766.1 | 6.03  | 6.41  | 0.13 | 0.27 | -1.3  | 0.430782 | 0.071439 | 0.743048 | 0.313597 |
| MmugDNA.40767.1.S1_at   | MmugDNA.40767.1 | 10.57 | 10.49 | 0.27 | 0.16 | 1.06  | 0.956575 | 0.014604 | 0.985575 | 0.15408  |



|                         |                 |       |       |      |      |       |          |          |          |          |
|-------------------------|-----------------|-------|-------|------|------|-------|----------|----------|----------|----------|
| MmugDNA.40768.1.S1_at   | MmugDNA.40768.1 | 10.27 | 9.86  | 2.86 | 0.42 | 1.33  | 0.635513 | 0.339173 | 0.854585 | 0.585918 |
| MmugDNA.40769.1.S1_s_at | MmugDNA.40769.1 | 11.64 | 11.6  | 0.46 | 0.13 | 1.03  | 0.856519 | 0.174156 | 0.949449 | 0.450451 |
| MmugDNA.40771.1.S1_at   | MmugDNA.40771.1 | 6.76  | 6.51  | 0.7  | 0.43 | 1.18  | 0.408809 | 0.496066 | 0.729534 | 0.695877 |
| MmugDNA.40772.1.S1_at   | MmugDNA.40772.1 | 4.85  | 4.35  | 0.32 | 0.38 | 1.42  | 0.362286 | 0.354156 | 0.699243 | 0.597059 |
| MmugDNA.40773.1.S1_at   | MmugDNA.40773.1 | 7.2   | 7.48  | 0.55 | 0.13 | -1.22 | 0.477409 | 0.179006 | 0.769855 | 0.455354 |
| MmugDNA.40774.1.S1_at   | MmugDNA.40774.1 | 5.57  | 5.66  | 0.06 | 0.37 | -1.07 | 0.690113 | 0.249209 | 0.879286 | 0.518313 |
| MmugDNA.40775.1.S1_at   | MmugDNA.40775.1 | 3.46  | 3.51  | 0.34 | 0.03 | -1.04 | 0.462181 | 0.603592 | 0.761468 | 0.764204 |
| MmugDNA.40776.1.S1_at   | MmugDNA.40776.1 | 6.98  | 7.11  | 0.07 | 0.26 | -1.1  | 0.329895 | 0.519005 | 0.676657 | 0.710813 |
| MmugDNA.40777.1.S1_at   | MmugDNA.40777.1 | 4.17  | 4.29  | 0.25 | 0.5  | -1.09 | 0.41298  | 0.495522 | 0.732147 | 0.695527 |
| MmugDNA.40777.1.S1_x_at | MmugDNA.40777.1 | 6.53  | 6.95  | 0.46 | 0.51 | -1.33 | 0.36688  | 0.385385 | 0.702346 | 0.620818 |
| MmugDNA.40778.1.S1_at   | MmugDNA.40778.1 | 7.04  | 6.78  | 0.17 | 0.12 | 1.2   | 0.02356  | 0.008944 | 0.31615  | 0.12502  |
| MmugDNA.40779.1.S1_at   | MmugDNA.40779.1 | 5.45  | 6     | 0.29 | 0.5  | -1.46 | 0.226805 | 0.217607 | 0.596222 | 0.491216 |
| MmugDNA.4078.1.S1_at    | MmugDNA.4078.1  | 7.7   | 6.91  | 0.3  | 0.26 | 1.73  | 0.052512 | 0.097772 | 0.39261  | 0.355638 |
| MmugDNA.40780.1.S1_at   | MmugDNA.40780.1 | 6.33  | 6.29  | 0.13 | 0.1  | 1.03  | 0.317577 | 0.432193 | 0.667464 | 0.652775 |
| MmugDNA.40781.1.S1_at   | MmugDNA.40781.1 | 6.24  | 6.04  | 0.21 | 0.46 | 1.15  | 0.724438 | 0.839045 | 0.893143 | 0.908268 |
| MmugDNA.40782.1.S1_at   | MmugDNA.40782.1 | 9.12  | 9.55  | 1.03 | 0.13 | -1.34 | 0.782904 | 0.750408 | 0.920107 | 0.854798 |
| MmugDNA.40783.1.S1_at   | MmugDNA.40783.1 | 3.67  | 3.5   | 0.29 | 0.01 | 1.12  | 0.468469 | 0.658721 | 0.764997 | 0.800473 |
| MmugDNA.40784.1.S1_at   | MmugDNA.40784.1 | 6.83  | 6.75  | 0.49 | 0.11 | 1.06  | 0.918456 | 0.785665 | 0.972122 | 0.875916 |
| MmugDNA.40785.1.S1_at   | MmugDNA.40785.1 | 3.76  | 3.62  | 0.08 | 0.07 | 1.1   | 0.078902 | 0.02027  | 0.441531 | 0.17872  |
| MmugDNA.40786.1.S1_at   | MmugDNA.40786.1 | 6.51  | 6.99  | 0.18 | 0.12 | -1.4  | 0.039349 | 0.056365 | 0.361498 | 0.283382 |
| MmugDNA.40787.1.S1_at   | MmugDNA.40787.1 | 6.72  | 6.72  | 0.08 | 0.07 | 1     | 0.307503 | 0.384915 | 0.660255 | 0.620515 |
| MmugDNA.40788.1.S1_at   | MmugDNA.40788.1 | 5.2   | 5.56  | 0.16 | 0.37 | -1.29 | 0.061581 | 0.187542 | 0.411026 | 0.463628 |
| MmugDNA.40789.1.S1_at   | MmugDNA.40789.1 | 4.18  | 4.21  | 0.04 | 0.24 | -1.02 | 0.570334 | 0.215813 | 0.821994 | 0.489536 |
| MmugDNA.4079.1.S1_at    | MmugDNA.4079.1  | 3.54  | 3.6   | 0.08 | 0.12 | -1.04 | 0.515528 | 0.916753 | 0.790894 | 0.9534   |
| MmugDNA.40790.1.S1_at   | MmugDNA.40790.1 | 12.16 | 11.93 | 0.25 | 0.07 | 1.18  | 0.179908 | 0.091002 | 0.553155 | 0.345755 |
| MmugDNA.40790.1.S1_s_at | MmugDNA.40790.1 | 12.98 | 12.94 | 0.14 | 0.02 | 1.03  | 0.697577 | 0.569339 | 0.882361 | 0.742375 |
| MmugDNA.40791.1.S1_at   | MmugDNA.40791.1 | 3.68  | 3.8   | 0.11 | 0.19 | -1.09 | 0.377855 | 0.340583 | 0.707875 | 0.586789 |
| MmugDNA.40792.1.S1_at   | MmugDNA.40792.1 | 3.69  | 3.6   | 0.08 | 0.19 | 1.06  | 0.17593  | 0.205257 | 0.549062 | 0.479599 |
| MmugDNA.40793.1.S1_at   | MmugDNA.40793.1 | 4.06  | 4.01  | 0.35 | 0.14 | 1.04  | 0.55954  | 0.843137 | 0.816227 | 0.910701 |
| MmugDNA.40794.1.S1_at   | MmugDNA.40794.1 | 4.64  | 4.55  | 0.06 | 0.14 | 1.06  | 0.162989 | 0.166413 | 0.536035 | 0.442884 |
| MmugDNA.40795.1.S1_at   | MmugDNA.40795.1 | 5.82  | 5.85  | 0.24 | 0.39 | -1.02 | 0.546109 | 0.490928 | 0.808323 | 0.692666 |
| MmugDNA.40796.1.S1_at   | MmugDNA.40796.1 | 4.97  | 5.05  | 0.07 | 0.07 | -1.06 | 0.306151 | 0.44393  | 0.659271 | 0.661553 |
| MmugDNA.40797.1.S1_at   | MmugDNA.40797.1 | 6.87  | 6.61  | 0.26 | 0.48 | 1.2   | 0.691332 | 0.108807 | 0.879786 | 0.372374 |
| MmugDNA.40799.1.S1_at   | MmugDNA.40799.1 | 10    | 9.15  | 0.23 | 0.28 | 1.8   | 0.01453  | 0.001613 | 0.27631  | 0.060683 |
| MmugDNA.408.1.S1_at     | MmugDNA.408.1   | 4.46  | 4.26  | 0.14 | 0.12 | 1.15  | 0.174598 | 0.217795 | 0.547978 | 0.491368 |
| MmugDNA.40801.1.S1_at   | MmugDNA.40801.1 | 4.16  | 4.53  | 0.22 | 0.2  | -1.29 | 0.106403 | 0.161222 | 0.478838 | 0.437386 |
| MmugDNA.40804.1.S1_at   | MmugDNA.40804.1 | 3.29  | 3.1   | 0.08 | 0.15 | 1.13  | 0.091074 | 0.086864 | 0.458927 | 0.339651 |
| MmugDNA.40805.1.S1_at   | MmugDNA.40805.1 | 3.64  | 3.72  | 0.08 | 0.1  | -1.06 | 0.245725 | 0.371274 | 0.611181 | 0.610135 |
| MmugDNA.40807.1.S1_at   | MmugDNA.40807.1 | 4.14  | 3.81  | 0.27 | 0.1  | 1.25  | 0.061942 | 0.055146 | 0.411683 | 0.280451 |
| MmugDNA.40808.1.S1_at   | MmugDNA.40808.1 | 5.04  | 5.02  | 0.04 | 0.18 | 1.02  | 0.410461 | 0.250474 | 0.730749 | 0.519391 |
| MmugDNA.40809.1.S1_at   | MmugDNA.40809.1 | 3.81  | 4.35  | 0.29 | 0.44 | -1.45 | 0.19875  | 0.236241 | 0.570193 | 0.507252 |
| MmugDNA.4081.1.S1_at    | MmugDNA.4081.1  | 5.47  | 5.47  | 0.04 | 0.28 | -1    | 0.329925 | 0.532498 | 0.676657 | 0.719065 |
| MmugDNA.40810.1.S1_at   | MmugDNA.40810.1 | 6.84  | 6.53  | 0.33 | 0.18 | 1.24  | 0.188489 | 0.268392 | 0.560489 | 0.534086 |

|                         |                 |       |       |      |      |       |          |          |          |          |
|-------------------------|-----------------|-------|-------|------|------|-------|----------|----------|----------|----------|
| MmugDNA.40812.1.S1_at   | MmugDNA.40812.1 | 11.96 | 12.04 | 0.11 | 0.01 | -1.06 | 0.084562 | 0.024069 | 0.451141 | 0.194468 |
| MmugDNA.40813.1.S1_at   | MmugDNA.40813.1 | 5.29  | 5.25  | 0.02 | 0.23 | 1.03  | 0.829765 | 0.890206 | 0.938863 | 0.937473 |
| MmugDNA.40815.1.S1_at   | MmugDNA.40815.1 | 3.11  | 2.97  | 0.04 | 0.06 | 1.1   | 0.022675 | 0.101762 | 0.311921 | 0.361632 |
| MmugDNA.40817.1.S1_at   | MmugDNA.40817.1 | 5.55  | 5.36  | 0.23 | 0.28 | 1.14  | 0.647552 | 0.252729 | 0.859364 | 0.521174 |
| MmugDNA.40818.1.S1_at   | MmugDNA.40818.1 | 6.7   | 7.15  | 0.73 | 0.45 | -1.37 | 0.973872 | 0.721457 | 0.99154  | 0.838713 |
| MmugDNA.4082.1.S1_at    | MmugDNA.4082.1  | 9.57  | 9.47  | 0.31 | 0.11 | 1.07  | 0.920389 | 0.951355 | 0.972913 | 0.972417 |
| MmugDNA.40820.1.S1_at   | MmugDNA.40820.1 | 4.88  | 5.02  | 0.09 | 0.38 | -1.1  | 0.668445 | 0.369497 | 0.869115 | 0.608861 |
| MmugDNA.40821.1.S1_at   | MmugDNA.40821.1 | 9.24  | 8.76  | 0.34 | 0.12 | 1.39  | 0.024151 | 0.0155   | 0.317812 | 0.158044 |
| MmugDNA.40822.1.S1_at   | MmugDNA.40822.1 | 3.41  | 3.4   | 0.33 | 0.1  | 1.01  | 0.784965 | 0.755585 | 0.920961 | 0.857719 |
| MmugDNA.40823.1.S1_at   | MmugDNA.40823.1 | 2.63  | 2.62  | 0.19 | 0.11 | 1.01  | 0.327234 | 0.44479  | 0.674934 | 0.662072 |
| MmugDNA.40824.1.S1_at   | MmugDNA.40824.1 | 3.84  | 3.6   | 0.33 | 0.12 | -1.18 | 0.400051 | 0.646792 | 0.723452 | 0.793117 |
| MmugDNA.40825.1.S1_at   | MmugDNA.40825.1 | 8.95  | 8.31  | 0.42 | 0.13 | 1.55  | 0.213253 | 0.10651  | 0.583803 | 0.369078 |
| MmugDNA.40826.1.S1_at   | MmugDNA.40826.1 | 3.4   | 3.4   | 0.01 | 0.16 | 1     | 0.356693 | 0.213965 | 0.695204 | 0.487596 |
| MmugDNA.40827.1.S1_at   | MmugDNA.40827.1 | 11.2  | 11.45 | 0.07 | 0.03 | -1.19 | 0.00443  | 0.046226 | 0.198874 | 0.259397 |
| MmugDNA.40828.1.S1_at   | MmugDNA.40828.1 | 6     | 5.92  | 0.04 | 0.06 | 1.06  | 0.298184 | 0.819173 | 0.653003 | 0.895796 |
| MmugDNA.40829.1.S1_at   | MmugDNA.40829.1 | 5.53  | 5.49  | 0.16 | 0.05 | 1.03  | 0.536272 | 0.65999  | 0.80223  | 0.80101  |
| MmugDNA.4083.1.S1_s_at  | MmugDNA.4083.1  | 11.9  | 11.64 | 0.03 | 0.25 | 1.19  | 0.046799 | 0.079674 | 0.37872  | 0.326981 |
| MmugDNA.40830.1.S1_at   | MmugDNA.40830.1 | 9.5   | 8.5   | 0.19 | 0.19 | 2     | 0.00438  | 0.002005 | 0.198874 | 0.066428 |
| MmugDNA.40831.1.S1_at   | MmugDNA.40831.1 | 4.98  | 5.21  | 0.13 | 0.23 | -1.17 | 0.509597 | 0.563078 | 0.787715 | 0.738345 |
| MmugDNA.40832.1.S1_at   | MmugDNA.40832.1 | 5.81  | 5.62  | 0.16 | 0.02 | 1.14  | 0.163184 | 0.062233 | 0.536035 | 0.296307 |
| MmugDNA.40833.1.S1_at   | MmugDNA.40833.1 | 4.38  | 4.36  | 0.15 | 0.05 | 1.01  | 0.31836  | 0.185782 | 0.668073 | 0.461631 |
| MmugDNA.40834.1.S1_at   | MmugDNA.40834.1 | 7.5   | 7.52  | 0.31 | 0.36 | -1.01 | 0.645088 | 0.321436 | 0.858716 | 0.573207 |
| MmugDNA.40835.1.S1_at   | MmugDNA.40835.1 | 6.11  | 6.18  | 0.21 | 0.04 | -1.05 | 0.503835 | 0.882865 | 0.784418 | 0.933206 |
| MmugDNA.40836.1.S1_at   | MmugDNA.40836.1 | 7.96  | 8.56  | 1.03 | 0.24 | -1.52 | 0.679001 | 0.744649 | 0.874211 | 0.852121 |
| MmugDNA.40837.1.S1_at   | MmugDNA.40837.1 | 6.97  | 6.92  | 0.31 | 0.02 | 1.03  | 0.280936 | 0.059094 | 0.639604 | 0.289985 |
| MmugDNA.40838.1.S1_at   | MmugDNA.40838.1 | 5.13  | 4.43  | 0.45 | 0.13 | 1.62  | 0.065627 | 0.40119  | 0.420827 | 0.630823 |
| MmugDNA.40838.1.S1_s_at | MmugDNA.40838.1 | 12.58 | 12.32 | 0.14 | 0.02 | 1.2   | 0.061217 | 0.050058 | 0.41029  | 0.268916 |
| MmugDNA.40839.1.S1_at   | MmugDNA.40839.1 | 5.04  | 5.03  | 0.07 | 0.01 | 1.01  | 0.629559 | 0.138345 | 0.851663 | 0.411244 |
| MmugDNA.40840.1.S1_at   | MmugDNA.40840.1 | 9.67  | 9.89  | 1.14 | 0.17 | -1.17 | 0.46789  | 0.597598 | 0.764607 | 0.760265 |
| MmugDNA.40841.1.S1_at   | MmugDNA.40841.1 | 12.33 | 12.43 | 0.29 | 0.1  | -1.07 | 0.532507 | 0.003967 | 0.800337 | 0.089593 |
| MmugDNA.40842.1.S1_at   | MmugDNA.40842.1 | 13.03 | 13.14 | 0.25 | 0.13 | -1.08 | 0.594514 | 0.014078 | 0.83479  | 0.151885 |
| MmugDNA.40843.1.S1_at   | MmugDNA.40843.1 | 3.71  | 4.39  | 0.34 | 0.12 | -1.59 | 0.078155 | 0.33624  | 0.440334 | 0.583736 |
| MmugDNA.40844.1.S1_at   | MmugDNA.40844.1 | 6.26  | 6.43  | 0.39 | 0.38 | -1.12 | 0.537586 | 0.203065 | 0.802735 | 0.477343 |
| MmugDNA.40845.1.S1_at   | MmugDNA.40845.1 | 4.64  | 4.5   | 0.05 | 0.15 | 1.1   | 0.864906 | 0.149803 | 0.952506 | 0.424394 |
| MmugDNA.40847.1.S1_at   | MmugDNA.40847.1 | 7.05  | 6.97  | 0.09 | 0.27 | 1.05  | 0.431387 | 0.606423 | 0.743363 | 0.765747 |
| MmugDNA.40848.1.S1_at   | MmugDNA.40848.1 | 6.19  | 5.97  | 0.12 | 0.04 | 1.17  | 0.039144 | 0.076883 | 0.361202 | 0.322368 |
| MmugDNA.40849.1.S1_at   | MmugDNA.40849.1 | 7.39  | 6.67  | 0.59 | 0.14 | 1.65  | 0.115691 | 0.010454 | 0.488929 | 0.133648 |
| MmugDNA.40850.1.S1_at   | MmugDNA.40850.1 | 10.18 | 10.1  | 0.53 | 0.1  | 1.05  | 0.820972 | 0.240013 | 0.93538  | 0.510717 |
| MmugDNA.40851.1.S1_at   | MmugDNA.40851.1 | 10.24 | 10.03 | 0.44 | 0.03 | 1.15  | 0.350152 | 0.518922 | 0.691084 | 0.710789 |
| MmugDNA.40852.1.S1_at   | MmugDNA.40852.1 | 5.49  | 4.89  | 0.45 | 0.42 | 1.52  | 0.074171 | 0.031966 | 0.434946 | 0.221191 |
| MmugDNA.40853.1.S1_at   | MmugDNA.40853.1 | 3.6   | 3.59  | 0.22 | 0.05 | 1.01  | 0.795289 | 0.633592 | 0.924817 | 0.784275 |
| MmugDNA.40854.1.S1_at   | MmugDNA.40854.1 | 5.35  | 5.69  | 0.12 | 0.09 | -1.27 | 0.030032 | 0.108669 | 0.336449 | 0.372171 |
| MmugDNA.40854.1.S1_s_at | MmugDNA.40854.1 | 8.39  | 8.02  | 0.43 | 0.17 | 1.29  | 0.180787 | 0.274597 | 0.554128 | 0.539059 |

|                         |                 |       |       |      |      |       |          |          |          |          |
|-------------------------|-----------------|-------|-------|------|------|-------|----------|----------|----------|----------|
| MmugDNA.40856.1.S1_at   | MmugDNA.40856.1 | 3.5   | 3.51  | 0.12 | 0.21 | -1.01 | 0.891206 | 0.608363 | 0.962572 | 0.767055 |
| MmugDNA.40857.1.S1_at   | MmugDNA.40857.1 | 9.68  | 10.38 | 0.38 | 0.12 | -1.63 | 0.077286 | 0.026607 | 0.439109 | 0.204008 |
| MmugDNA.40859.1.S1_at   | MmugDNA.40859.1 | 6.9   | 6.89  | 0.17 | 0.05 | 1     | 0.268805 | 0.325522 | 0.629167 | 0.575827 |
| MmugDNA.40860.1.S1_at   | MmugDNA.40860.1 | 8.24  | 7.85  | 0.16 | 0.15 | 1.3   | 0.053327 | 0.044202 | 0.394644 | 0.254711 |
| MmugDNA.40861.1.S1_at   | MmugDNA.40861.1 | 3.72  | 3.66  | 0.21 | 0.07 | 1.04  | 0.250351 | 0.607952 | 0.615561 | 0.766684 |
| MmugDNA.40862.1.S1_at   | MmugDNA.40862.1 | 8.16  | 7.35  | 0.23 | 0.06 | 1.76  | 0.007088 | 0.082024 | 0.225651 | 0.330729 |
| MmugDNA.40863.1.S1_at   | MmugDNA.40863.1 | 4.34  | 4.18  | 0.06 | 0.14 | 1.12  | 0.383231 | 0.238768 | 0.711259 | 0.509442 |
| MmugDNA.40864.1.S1_at   | MmugDNA.40864.1 | 3.57  | 3.46  | 0.06 | 0.15 | 1.08  | 0.496275 | 0.184946 | 0.780328 | 0.460776 |
| MmugDNA.40865.1.S1_at   | MmugDNA.40865.1 | 2.81  | 2.96  | 0.04 | 0.2  | -1.11 | 0.754258 | 0.294142 | 0.907331 | 0.553962 |
| MmugDNA.8441.1.S1_at    | MmugDNA.8441.1  | 3.74  | 3.76  | 0.21 | 0.2  | -1.01 | 0.915626 | 0.799006 | 0.971302 | 0.884263 |
| MmugDNA.8441.1.S1_s_at  | MmugDNA.8441.1  | 3.75  | 4.07  | 0.43 | 0.19 | -1.25 | 0.407454 | 0.566397 | 0.728597 | 0.740513 |
| MmugDNA.40866.1.S1_at   | MmugDNA.40866.1 | 4.92  | 4.88  | 0.17 | 0.1  | 1.03  | 0.7272   | 0.628655 | 0.894637 | 0.781348 |
| MmugDNA.40867.1.S1_at   | MmugDNA.40867.1 | 7.02  | 7.05  | 0.18 | 0.06 | -1.02 | 0.508273 | 0.096634 | 0.786841 | 0.354145 |
| MmugDNA.40869.1.S1_at   | MmugDNA.40869.1 | 9.2   | 8.43  | 0.53 | 0.27 | 1.71  | 0.233616 | 0.071147 | 0.601158 | 0.313041 |
| MmugDNA.4087.1.S1_at    | MmugDNA.4087.1  | 3.04  | 2.88  | 0.02 | 0.57 | 1.11  | 0.605044 | 0.77256  | 0.839761 | 0.867784 |
| MmugDNA.40870.1.S1_at   | MmugDNA.40870.1 | 2.77  | 2.81  | 0.41 | 0.05 | -1.03 | 0.456388 | 0.680952 | 0.75784  | 0.813691 |
| MmugDNA.40873.1.S1_at   | MmugDNA.40873.1 | 8.8   | 9.26  | 0.71 | 0.02 | -1.38 | 0.32187  | 0.457648 | 0.67054  | 0.670889 |
| MmugDNA.40874.1.S1_at   | MmugDNA.40874.1 | 5.32  | 5.33  | 0.01 | 0.07 | -1.01 | 0.504834 | 0.405568 | 0.785092 | 0.633804 |
| MmugDNA.40875.1.S1_at   | MmugDNA.40875.1 | 7.08  | 8.01  | 0.45 | 0.19 | -1.9  | 0.067025 | 0.006791 | 0.422979 | 0.111388 |
| MmugDNA.40877.1.S1_at   | MmugDNA.40877.1 | 4.91  | 4.92  | 0.8  | 0.21 | -1.01 | 0.856722 | 0.915337 | 0.949508 | 0.952467 |
| MmugDNA.40878.1.S1_at   | MmugDNA.40878.1 | 9.35  | 8.56  | 0.09 | 0.07 | 1.73  | 0.000281 | 0.001975 | 0.132073 | 0.065871 |
| MmugDNA.40878.1.S1_s_at | MmugDNA.40878.1 | 9.66  | 8.96  | 0.15 | 0.14 | 1.63  | 0.002156 | 0.000349 | 0.174757 | 0.037097 |
| MmugDNA.40879.1.S1_at   | MmugDNA.40879.1 | 7.33  | 7.25  | 0.06 | 0.04 | 1.06  | 0.151633 | 0.497606 | 0.524628 | 0.696935 |
| MmugDNA.40880.1.S1_at   | MmugDNA.40880.1 | 11.2  | 11.25 | 0.23 | 0.19 | -1.03 | 0.502421 | 0.730466 | 0.783594 | 0.844017 |
| MmugDNA.40881.1.S1_at   | MmugDNA.40881.1 | 3.02  | 3.05  | 0.05 | 0.1  | -1.02 | 0.627287 | 0.466988 | 0.850453 | 0.676755 |
| MmugDNA.40883.1.S1_at   | MmugDNA.40883.1 | 4.01  | 3.96  | 0.24 | 0.08 | 1.03  | 0.643792 | 0.48729  | 0.858276 | 0.690391 |
| MmugDNA.40884.1.S1_at   | MmugDNA.40884.1 | 4.21  | 4.17  | 0.25 | 0.17 | 1.03  | 0.470596 | 0.790828 | 0.766172 | 0.87902  |
| MmugDNA.40887.1.S1_at   | MmugDNA.40887.1 | 11.45 | 9.53  | 0.84 | 0.24 | 3.79  | 0.061391 | 0.016324 | 0.410609 | 0.16183  |
| MmugDNA.40888.1.S1_at   | MmugDNA.40888.1 | 10.64 | 10.65 | 0.58 | 0.07 | -1.01 | 0.825276 | 0.569908 | 0.937201 | 0.742739 |
| MmugDNA.40889.1.S1_at   | MmugDNA.40889.1 | 4.17  | 4.17  | 0.14 | 0.07 | -1.01 | 0.427581 | 0.210921 | 0.741242 | 0.484934 |
| MmugDNA.40890.1.S1_at   | MmugDNA.40890.1 | 8.99  | 7.92  | 0.28 | 0.06 | 2.11  | 0.001789 | 0.004871 | 0.167444 | 0.097453 |
| MmugDNA.40891.1.S1_at   | MmugDNA.40891.1 | 4.43  | 5.28  | 0.53 | 0.36 | -1.8  | 0.204084 | 0.306049 | 0.5753   | 0.562782 |
| MmugDNA.40892.1.S1_at   | MmugDNA.40892.1 | 6.21  | 6.44  | 0.62 | 0.23 | -1.17 | 0.523402 | 0.643823 | 0.795628 | 0.791142 |
| MmugDNA.40894.1.S1_at   | MmugDNA.40894.1 | 8.5   | 9.46  | 1.36 | 0.24 | -1.95 | 0.319401 | 0.073183 | 0.668706 | 0.316064 |
| MmugDNA.40895.1.S1_at   | MmugDNA.40895.1 | 6.53  | 6.04  | 0.04 | 0.13 | 1.4   | 0.005051 | 0.000434 | 0.204763 | 0.038359 |
| MmugDNA.40896.1.S1_at   | MmugDNA.40896.1 | 2.8   | 2.85  | 0.09 | 0.04 | -1.03 | 0.87523  | 0.187    | 0.956676 | 0.462938 |
| MmugDNA.40897.1.S1_at   | MmugDNA.40897.1 | 4.72  | 4.57  | 0.13 | 0.08 | 1.1   | 0.85408  | 0.205777 | 0.948436 | 0.48007  |
| MmugDNA.40898.1.S1_at   | MmugDNA.40898.1 | 5.05  | 4.95  | 0.03 | 0.1  | 1.07  | 0.043084 | 0.091203 | 0.371135 | 0.346119 |
| MmugDNA.409.1.S1_at     | MmugDNA.409.1   | 5.71  | 5.55  | 0.36 | 0.16 | 1.11  | 0.82216  | 0.56702  | 0.935933 | 0.740959 |
| MmugDNA.40900.1.S1_at   | MmugDNA.40900.1 | 5.53  | 5.14  | 0.4  | 0.28 | 1.31  | 0.468633 | 0.695005 | 0.765035 | 0.822711 |
| MmugDNA.40901.1.S1_at   | MmugDNA.40901.1 | 9.9   | 9.46  | 0.15 | 0.18 | 1.35  | 0.014974 | 0.001431 | 0.279083 | 0.057607 |
| MmugDNA.40902.1.S1_at   | MmugDNA.40902.1 | 8.41  | 8.31  | 0.19 | 0.04 | 1.07  | 0.3725   | 0.469617 | 0.705567 | 0.678314 |
| MmugDNA.40903.1.S1_at   | MmugDNA.40903.1 | 6.83  | 6.46  | 0.4  | 0.09 | 1.3   | 0.238997 | 0.035976 | 0.60548  | 0.234155 |

|                         |                 |       |       |      |      |       |          |          |          |          |
|-------------------------|-----------------|-------|-------|------|------|-------|----------|----------|----------|----------|
| MmugDNA.40904.1.S1_at   | MmugDNA.40904.1 | 4.46  | 4.46  | 0.09 | 0.02 | -1    | 0.40628  | 0.59699  | 0.727915 | 0.759993 |
| MmugDNA.40905.1.S1_at   | MmugDNA.40905.1 | 4.3   | 4.19  | 0.11 | 0.12 | 1.08  | 0.233036 | 0.517186 | 0.60048  | 0.709435 |
| MmugDNA.40906.1.S1_at   | MmugDNA.40906.1 | 9.22  | 8.34  | 0.32 | 0.47 | 1.84  | 0.263456 | 0.003313 | 0.625387 | 0.082825 |
| MmugDNA.40907.1.S1_at   | MmugDNA.40907.1 | 7.25  | 6.51  | 0.47 | 1.03 | 1.67  | 0.510185 | 0.479783 | 0.788001 | 0.68541  |
| MmugDNA.40908.1.S1_s_at | MmugDNA.40908.1 | 8.78  | 8.55  | 0.13 | 0.03 | 1.17  | 0.038142 | 0.014773 | 0.358577 | 0.154616 |
| MmugDNA.40910.1.S1_at   | MmugDNA.40910.1 | 7.65  | 7.42  | 0.16 | 0.08 | 1.17  | 0.040823 | 0.0039   | 0.36514  | 0.088806 |
| MmugDNA.40911.1.S1_at   | MmugDNA.40911.1 | 5.47  | 5.6   | 0.32 | 0.12 | -1.1  | 0.780281 | 0.778028 | 0.919087 | 0.871075 |
| MmugDNA.40912.1.S1_at   | MmugDNA.40912.1 | 4.15  | 3.8   | 0.2  | 0.15 | 1.28  | 0.165803 | 0.289665 | 0.538623 | 0.550733 |
| MmugDNA.40913.1.S1_at   | MmugDNA.40913.1 | 3.46  | 3.27  | 0.13 | 0.06 | 1.14  | 0.083684 | 0.068407 | 0.449639 | 0.307955 |
| MmugDNA.40914.1.S1_at   | MmugDNA.40914.1 | 5.33  | 5.33  | 0.13 | 0.13 | 1     | 0.885812 | 0.633032 | 0.96038  | 0.783894 |
| MmugDNA.40915.1.S1_at   | MmugDNA.40915.1 | 5.74  | 5.74  | 0.16 | 0.11 | 1     | 0.278427 | 0.36927  | 0.637601 | 0.608695 |
| MmugDNA.40916.1.S1_at   | MmugDNA.40916.1 | 5.52  | 5.57  | 0.35 | 0.27 | -1.04 | 0.577259 | 0.794179 | 0.825493 | 0.881296 |
| MmugDNA.40918.1.S1_at   | MmugDNA.40918.1 | 6.93  | 6.79  | 0.13 | 0.04 | 1.1   | 0.089687 | 0.182971 | 0.457878 | 0.459449 |
| MmugDNA.40919.1.S1_at   | MmugDNA.40919.1 | 4.2   | 4.3   | 0.04 | 0.14 | -1.08 | 0.319499 | 0.440826 | 0.668738 | 0.659138 |
| MmugDNA.40920.1.S1_at   | MmugDNA.40920.1 | 9.47  | 9.44  | 0.34 | 0.3  | 1.03  | 0.196896 | 0.254375 | 0.567663 | 0.522681 |
| MmugDNA.40921.1.S1_at   | MmugDNA.40921.1 | 3.32  | 3.28  | 0.13 | 0.14 | 1.03  | 0.356662 | 0.630411 | 0.695204 | 0.782237 |
| MmugDNA.40923.1.S1_at   | MmugDNA.40923.1 | 3.38  | 3.28  | 0.28 | 0.14 | 1.07  | 0.553748 | 0.651445 | 0.812271 | 0.796213 |
| MmugDNA.40924.1.S1_at   | MmugDNA.40924.1 | 4.85  | 4.43  | 0.09 | 0.06 | 1.34  | 0.001225 | 0.004929 | 0.156419 | 0.097846 |
| MmugDNA.40925.1.S1_at   | MmugDNA.40925.1 | 5.71  | 4.94  | 0.45 | 0.07 | 1.71  | 0.115226 | 0.13829  | 0.488399 | 0.411198 |
| MmugDNA.40927.1.S1_at   | MmugDNA.40927.1 | 2.85  | 3.13  | 0.15 | 0.08 | -1.21 | 0.132993 | 0.295038 | 0.507273 | 0.554551 |
| MmugDNA.40928.1.S1_at   | MmugDNA.40928.1 | 10.38 | 10.05 | 0.1  | 0.14 | 1.26  | 0.030165 | 0.046731 | 0.336644 | 0.260843 |
| MmugDNA.40928.1.S1_s_at | MmugDNA.40928.1 | 10.74 | 10.56 | 0.04 | 0.1  | 1.14  | 0.023239 | 0.084686 | 0.314809 | 0.336196 |
| MmugDNA.40929.1.S1_at   | MmugDNA.40929.1 | 10.22 | 10.42 | 0.17 | 0.12 | -1.14 | 0.197019 | 0.140375 | 0.567814 | 0.413583 |
| MmugDNA.40930.1.S1_at   | MmugDNA.40930.1 | 4.97  | 4.89  | 0.1  | 0.22 | 1.06  | 0.192335 | 0.224199 | 0.5635   | 0.497164 |
| MmugDNA.40931.1.S1_at   | MmugDNA.40931.1 | 6.21  | 6     | 0.08 | 0.06 | 1.16  | 0.037702 | 0.001358 | 0.357804 | 0.056687 |
| MmugDNA.40932.1.S1_at   | MmugDNA.40932.1 | 8.11  | 8.81  | 0.17 | 0.11 | -1.62 | 0.004695 | 0.000162 | 0.201699 | 0.030478 |
| MmugDNA.40933.1.S1_at   | MmugDNA.40933.1 | 5.64  | 5.61  | 0.35 | 0.04 | 1.02  | 0.867154 | 0.874654 | 0.953435 | 0.928837 |
| MmugDNA.40934.1.S1_at   | MmugDNA.40934.1 | 7.23  | 7.4   | 0.29 | 0.27 | -1.13 | 0.955365 | 0.963232 | 0.985312 | 0.979462 |
| MmugDNA.40935.1.S1_at   | MmugDNA.40935.1 | 6.48  | 5.19  | 0.94 | 0.57 | 2.46  | 0.07799  | 0.073476 | 0.439987 | 0.316769 |
| MmugDNA.40936.1.S1_at   | MmugDNA.40936.1 | 4.85  | 5.04  | 0.47 | 0.53 | -1.14 | 0.754517 | 0.850407 | 0.907353 | 0.914927 |
| MmugDNA.40938.1.S1_at   | MmugDNA.40938.1 | 2.98  | 2.91  | 0.1  | 0.27 | 1.05  | 0.656684 | 0.852464 | 0.863636 | 0.916174 |
| MmugDNA.40939.1.S1_at   | MmugDNA.40939.1 | 4.07  | 3.95  | 0.28 | 0.23 | 1.09  | 0.277543 | 0.379349 | 0.636861 | 0.616334 |
| MmugDNA.4094.1.S1_at    | MmugDNA.4094.1  | 5.79  | 5.66  | 0.11 | 0.13 | 1.09  | 0.216095 | 0.141705 | 0.58626  | 0.415265 |
| MmugDNA.40940.1.S1_at   | MmugDNA.40940.1 | 7     | 6.94  | 0.06 | 0.13 | 1.04  | 0.149702 | 0.306269 | 0.523226 | 0.562907 |
| MmugDNA.40941.1.S1_at   | MmugDNA.40941.1 | 3.49  | 3.32  | 0.06 | 0.5  | 1.13  | 0.755117 | 0.194329 | 0.9077   | 0.46946  |
| MmugDNA.40942.1.S1_at   | MmugDNA.40942.1 | 10.79 | 9.72  | 0.58 | 0.16 | 2.09  | 0.030697 | 0.000473 | 0.338298 | 0.038572 |
| MmugDNA.40944.1.S1_at   | MmugDNA.40944.1 | 4.74  | 4.71  | 0.04 | 0.15 | 1.02  | 0.813115 | 0.409756 | 0.932369 | 0.636811 |
| MmugDNA.40946.1.S1_at   | MmugDNA.40946.1 | 6.82  | 6.9   | 0.16 | 0    | -1.06 | 0.675398 | 0.911754 | 0.872682 | 0.950257 |
| MmugDNA.40947.1.S1_at   | MmugDNA.40947.1 | 5.12  | 4.66  | 0.21 | 0.24 | 1.37  | 0.137464 | 0.145714 | 0.51292  | 0.419653 |
| MmugDNA.40948.1.S1_at   | MmugDNA.40948.1 | 2.76  | 2.81  | 0.06 | 0.03 | -1.03 | 0.166255 | 0.22024  | 0.538973 | 0.493681 |
| MmugDNA.40949.1.S1_at   | MmugDNA.40949.1 | 5.84  | 6.13  | 0.21 | 0.2  | -1.22 | 0.17734  | 0.132807 | 0.550567 | 0.404544 |
| MmugDNA.4095.1.S1_at    | MmugDNA.4095.1  | 6.04  | 6.04  | 0.2  | 0.08 | -1    | 0.470786 | 0.668939 | 0.766191 | 0.806317 |
| MmugDNA.40950.1.S1_at   | MmugDNA.40950.1 | 6.31  | 6.7   | 0.2  | 0.42 | -1.31 | 0.202918 | 0.230268 | 0.574296 | 0.502102 |

|                        |                 |       |       |      |      |       |          |          |          |          |
|------------------------|-----------------|-------|-------|------|------|-------|----------|----------|----------|----------|
| MmugDNA.40951.1.S1_at  | MmugDNA.40951.1 | 4.9   | 5.12  | 0.47 | 0.56 | -1.17 | 0.613104 | 0.602997 | 0.843382 | 0.763857 |
| MmugDNA.40952.1.S1_at  | MmugDNA.40952.1 | 4.48  | 4.1   | 0.41 | 0.27 | 1.31  | 0.247072 | 0.06408  | 0.612582 | 0.299311 |
| MmugDNA.40953.1.S1_at  | MmugDNA.40953.1 | 6.58  | 6.61  | 0.28 | 0.12 | -1.02 | 0.324245 | 0.326327 | 0.672526 | 0.576503 |
| MmugDNA.40955.1.S1_at  | MmugDNA.40955.1 | 3.75  | 3.95  | 0.82 | 0.16 | -1.15 | 0.592969 | 0.258051 | 0.834015 | 0.525574 |
| MmugDNA.40956.1.S1_at  | MmugDNA.40956.1 | 11.03 | 11.68 | 0.1  | 0.06 | -1.57 | 0.000868 | 0.002785 | 0.153739 | 0.077966 |
| MmugDNA.40958.1.S1_at  | MmugDNA.40958.1 | 3.66  | 3.56  | 0.37 | 0.06 | 1.07  | 0.222482 | 0.186462 | 0.592012 | 0.462306 |
| MmugDNA.40959.1.S1_at  | MmugDNA.40959.1 | 4.63  | 4.56  | 0.13 | 0.14 | 1.05  | 0.313825 | 0.335101 | 0.664925 | 0.582853 |
| MmugDNA.4096.1.S1_at   | MmugDNA.4096.1  | 5.02  | 4.71  | 0.12 | 0.04 | 1.24  | 0.01077  | 0.007272 | 0.25004  | 0.114408 |
| MmugDNA.40960.1.S1_at  | MmugDNA.40960.1 | 3.15  | 3.1   | 0.11 | 0.22 | 1.03  | 0.610362 | 0.388702 | 0.841841 | 0.622991 |
| MmugDNA.40961.1.S1_at  | MmugDNA.40961.1 | 8.45  | 7.08  | 0.29 | 0.36 | 2.6   | 0.006154 | 0.034531 | 0.216442 | 0.229979 |
| MmugDNA.40963.1.S1_at  | MmugDNA.40963.1 | 11.16 | 11.35 | 0.91 | 0.08 | -1.14 | 0.264667 | 0.378889 | 0.626029 | 0.615852 |
| MmugDNA.40964.1.S1_at  | MmugDNA.40964.1 | 5     | 5.01  | 0.04 | 0.41 | -1.01 | 0.912222 | 0.791383 | 0.970255 | 0.879472 |
| MmugDNA.40965.1.S1_at  | MmugDNA.40965.1 | 9.88  | 9.14  | 0.5  | 0.19 | 1.68  | 0.075772 | 0.093931 | 0.436784 | 0.350445 |
| MmugDNA.40966.1.S1_at  | MmugDNA.40966.1 | 5.94  | 5.94  | 0.02 | 0.03 | 1     | 0.931239 | 0.253243 | 0.977037 | 0.521614 |
| MmugDNA.40967.1.S1_at  | MmugDNA.40967.1 | 4.79  | 4.69  | 0.21 | 0.09 | 1.07  | 0.37208  | 0.512759 | 0.705567 | 0.7065   |
| MmugDNA.40968.1.S1_at  | MmugDNA.40968.1 | 4.58  | 4.54  | 0.25 | 0.09 | 1.03  | 0.799938 | 0.262336 | 0.926774 | 0.528633 |
| MmugDNA.40969.1.S1_at  | MmugDNA.40969.1 | 9.95  | 9.36  | 0.3  | 0.02 | 1.5   | 0.02278  | 0.038926 | 0.312286 | 0.242297 |
| MmugDNA.4097.1.S1_at   | MmugDNA.4097.1  | 10.14 | 9.78  | 1.43 | 0.09 | 1.28  | 0.709643 | 0.510955 | 0.88701  | 0.705302 |
| MmugDNA.40970.1.S1_at  | MmugDNA.40970.1 | 7.39  | 7.21  | 0.1  | 0.12 | 1.13  | 0.096928 | 0.072107 | 0.465626 | 0.314595 |
| MmugDNA.40971.1.S1_at  | MmugDNA.40971.1 | 8.95  | 8.58  | 0.27 | 0.04 | 1.29  | 0.272758 | 0.005841 | 0.632512 | 0.10467  |
| MmugDNA.40972.1.S1_at  | MmugDNA.40972.1 | 5.67  | 5.72  | 0.55 | 0.09 | -1.04 | 0.322627 | 0.513627 | 0.671289 | 0.707143 |
| MmugDNA.40974.1.S1_at  | MmugDNA.40974.1 | 5.7   | 5.93  | 0.35 | 0.15 | -1.17 | 0.34501  | 0.333243 | 0.687328 | 0.581498 |
| MmugDNA.40976.1.S1_at  | MmugDNA.40976.1 | 5.84  | 5.96  | 0.95 | 0.05 | -1.08 | 0.733211 | 0.700956 | 0.897525 | 0.826604 |
| MmugDNA.40978.1.S1_at  | MmugDNA.40978.1 | 3.96  | 3.99  | 0.14 | 0.05 | -1.02 | 0.608291 | 0.737925 | 0.841093 | 0.848145 |
| MmugDNA.4098.1.S1_s_at | MmugDNA.4098.1  | 11.06 | 11.41 | 0.06 | 0.03 | -1.28 | 0.00054  | 0.001853 | 0.143137 | 0.064616 |
| MmugDNA.40980.1.S1_at  | MmugDNA.40980.1 | 3.59  | 3.46  | 0.24 | 0.11 | 1.09  | 0.805405 | 0.033806 | 0.92924  | 0.227489 |
| MmugDNA.40982.1.S1_at  | MmugDNA.40982.1 | 4.65  | 4.4   | 0.08 | 0.17 | 1.19  | 0.029391 | 0.059084 | 0.334078 | 0.289985 |
| MmugDNA.40983.1.S1_at  | MmugDNA.40983.1 | 3.61  | 3.56  | 0.26 | 0.11 | 1.04  | 0.277994 | 0.215566 | 0.637256 | 0.489304 |
| MmugDNA.40985.1.S1_at  | MmugDNA.40985.1 | 7.37  | 7.96  | 1.04 | 0.06 | -1.5  | 0.348537 | 0.461183 | 0.689884 | 0.67288  |
| MmugDNA.40986.1.S1_at  | MmugDNA.40986.1 | 9.17  | 9.17  | 0.08 | 0.15 | 1     | 0.359711 | 0.000175 | 0.697502 | 0.030511 |
| MmugDNA.40988.1.S1_at  | MmugDNA.40988.1 | 3.38  | 3.35  | 0.15 | 0.16 | 1.02  | 0.706807 | 0.724558 | 0.885938 | 0.840552 |
| MmugDNA.40989.1.S1_at  | MmugDNA.40989.1 | 7.74  | 7.97  | 0.18 | 0.06 | -1.18 | 0.100696 | 0.211496 | 0.471575 | 0.48563  |
| MmugDNA.4099.1.S1_at   | MmugDNA.4099.1  | 6.41  | 6.42  | 0.33 | 0.07 | -1    | 0.316551 | 0.194501 | 0.666494 | 0.469597 |
| MmugDNA.40990.1.S1_at  | MmugDNA.40990.1 | 4.81  | 4.53  | 0.15 | 0.17 | 1.21  | 0.488186 | 0.68444  | 0.775435 | 0.815943 |
| MmugDNA.40991.1.S1_at  | MmugDNA.40991.1 | 6.73  | 7.26  | 0.37 | 0.18 | -1.44 | 0.264365 | 0.14663  | 0.626029 | 0.420664 |
| MmugDNA.40992.1.S1_at  | MmugDNA.40992.1 | 4.34  | 4.2   | 0.03 | 0.06 | 1.1   | 0.008694 | 0.039289 | 0.236048 | 0.243338 |
| MmugDNA.40993.1.S1_at  | MmugDNA.40993.1 | 6.95  | 7.33  | 0.36 | 0.35 | -1.31 | 0.552019 | 0.583282 | 0.811583 | 0.751682 |
| MmugDNA.40994.1.S1_at  | MmugDNA.40994.1 | 3.63  | 4.18  | 0.12 | 0.23 | -1.46 | 0.032143 | 0.043333 | 0.343204 | 0.252847 |
| MmugDNA.40995.1.S1_at  | MmugDNA.40995.1 | 6.66  | 6.66  | 0.22 | 0.12 | -1    | 0.453477 | 0.444784 | 0.75608  | 0.662072 |
| MmugDNA.40996.1.S1_at  | MmugDNA.40996.1 | 4.79  | 4.67  | 0.08 | 0    | 1.09  | 0.025009 | 0.016614 | 0.320402 | 0.163117 |
| MmugDNA.40997.1.S1_at  | MmugDNA.40997.1 | 5.89  | 5.84  | 0.37 | 0.3  | 1.03  | 0.995652 | 0.42259  | 0.998312 | 0.645764 |
| MmugDNA.40998.1.S1_at  | MmugDNA.40998.1 | 2.48  | 2.49  | 0.04 | 0    | -1    | 0.918107 | 0.952866 | 0.972062 | 0.973271 |
| MmugDNA.41.1.S1_at     | MmugDNA.41.1    | 6.06  | 6.26  | 0.99 | 0.16 | -1.14 | 0.78586  | 0.252766 | 0.921215 | 0.521174 |

|                         |                 |       |       |      |      |       |          |          |          |          |
|-------------------------|-----------------|-------|-------|------|------|-------|----------|----------|----------|----------|
| MmugDNA.410.1.S1_s_at   | MmugDNA.410.1   | 11.8  | 10.85 | 2.74 | 0.22 | 1.94  | 0.89341  | 0.660725 | 0.963467 | 0.801516 |
| MmugDNA.4100.1.S1_at    | MmugDNA.4100.1  | 5.33  | 5.46  | 0.41 | 0.29 | -1.1  | 0.469421 | 0.186153 | 0.76556  | 0.461995 |
| MmugDNA.4100.1.S1_x_at  | MmugDNA.4100.1  | 5.62  | 5.61  | 0.6  | 0.44 | 1     | 0.464938 | 0.215789 | 0.762776 | 0.489536 |
| MmugDNA.41002.1.S1_at   | MmugDNA.41002.1 | 3.66  | 3.66  | 0.03 | 0.18 | 1     | 0.318743 | 0.367805 | 0.668266 | 0.607466 |
| MmugDNA.41004.1.S1_at   | MmugDNA.41004.1 | 3.18  | 3.25  | 0.07 | 0.05 | -1.05 | 0.149299 | 0.310274 | 0.523146 | 0.565461 |
| MmugDNA.29165.1.S1_s_at | MmugDNA.29165.1 | 12.35 | 12.12 | 3.45 | 0.19 | 1.17  | 0.442009 | 0.201342 | 0.749777 | 0.47589  |
| MmugDNA.41006.1.S1_at   | MmugDNA.41006.1 | 6.03  | 6.06  | 0.25 | 0.09 | -1.02 | 0.506983 | 0.189562 | 0.786064 | 0.465286 |
| MmugDNA.41007.1.S1_at   | MmugDNA.41007.1 | 4.84  | 5.01  | 0.06 | 0.1  | -1.12 | 0.066504 | 0.08279  | 0.422351 | 0.332323 |
| MmugDNA.41008.1.S1_at   | MmugDNA.41008.1 | 5.03  | 4.75  | 0.24 | 0.19 | 1.21  | 0.225797 | 0.141887 | 0.594935 | 0.415403 |
| MmugDNA.41009.1.S1_at   | MmugDNA.41009.1 | 5.59  | 5.36  | 0.37 | 0.16 | 1.17  | 0.2352   | 0.378372 | 0.602266 | 0.615443 |
| MmugDNA.41010.1.S1_at   | MmugDNA.41010.1 | 5.6   | 4.91  | 0.1  | 0.38 | -1.62 | 0.116941 | 0.303647 | 0.490067 | 0.561088 |
| MmugDNA.41011.1.S1_at   | MmugDNA.41011.1 | 4.37  | 4.43  | 0.04 | 0.12 | -1.04 | 0.827896 | 0.365934 | 0.938183 | 0.605798 |
| MmugDNA.41013.1.S1_at   | MmugDNA.41013.1 | 5.15  | 5.09  | 0.25 | 0.13 | 1.04  | 0.650409 | 0.806449 | 0.86091  | 0.888651 |
| MmugDNA.41015.1.S1_at   | MmugDNA.41015.1 | 6.13  | 7.13  | 0.02 | 0.05 | -2    | 0.000004 | 0.00152  | 0.047031 | 0.059307 |
| MmugDNA.41016.1.S1_at   | MmugDNA.41016.1 | 3.99  | 3.99  | 0.05 | 0.16 | 1     | 0.533431 | 0.939539 | 0.80084  | 0.965642 |
| MmugDNA.41017.1.S1_at   | MmugDNA.41017.1 | 5.23  | 6.28  | 0.3  | 0.14 | -2.08 | 0.008338 | 0.041299 | 0.233235 | 0.247995 |
| MmugDNA.41019.1.S1_at   | MmugDNA.41019.1 | 7.7   | 7.18  | 0.2  | 0.39 | 1.43  | 0.104804 | 0.225523 | 0.476129 | 0.498153 |
| MmugDNA.4102.1.S1_at    | MmugDNA.4102.1  | 10.01 | 9.46  | 0.26 | 0.22 | 1.47  | 0.028421 | 0.029253 | 0.332479 | 0.212978 |
| MmugDNA.4102.1.S1_s_at  | MmugDNA.4102.1  | 10.2  | 9.8   | 0.2  | 0.13 | 1.32  | 0.019233 | 0.019932 | 0.300345 | 0.177448 |
| MmugDNA.41020.1.S1_at   | MmugDNA.41020.1 | 4.31  | 4.33  | 0.09 | 0.26 | -1.01 | 0.655975 | 0.559786 | 0.8634   | 0.736394 |
| MmugDNA.41021.1.S1_at   | MmugDNA.41021.1 | 2.84  | 2.9   | 0.19 | 0.12 | -1.04 | 0.645617 | 0.80741  | 0.858801 | 0.889121 |
| MmugDNA.41022.1.S1_at   | MmugDNA.41022.1 | 6.19  | 6.37  | 0.86 | 0.08 | -1.14 | 0.834202 | 0.729621 | 0.940528 | 0.843613 |
| MmugDNA.41023.1.S1_at   | MmugDNA.41023.1 | 4.37  | 4.37  | 0.07 | 0.07 | 1     | 0.690098 | 0.32726  | 0.879286 | 0.577173 |
| MmugDNA.41025.1.S1_at   | MmugDNA.41025.1 | 3.6   | 3.51  | 0.19 | 0.28 | 1.06  | 0.655707 | 0.575743 | 0.863273 | 0.746758 |
| MmugDNA.41027.1.S1_at   | MmugDNA.41027.1 | 4.39  | 4.46  | 0.13 | 0.13 | -1.05 | 0.777297 | 0.423964 | 0.917569 | 0.646612 |
| MmugDNA.41028.1.S1_s_at | MmugDNA.41028.1 | 8     | 7.99  | 0.05 | 0.12 | 1     | 0.425337 | 0.550358 | 0.739988 | 0.730398 |
| MmugDNA.41029.1.S1_at   | MmugDNA.41029.1 | 6.32  | 6.42  | 0.09 | 0.07 | -1.07 | 0.881136 | 0.501566 | 0.958973 | 0.699719 |
| MmugDNA.4103.1.S1_at    | MmugDNA.4103.1  | 4.81  | 4.79  | 0.02 | 0.03 | 1.02  | 0.254529 | 0.051863 | 0.618992 | 0.273151 |
| MmugDNA.41030.1.S1_at   | MmugDNA.41030.1 | 9.78  | 9.9   | 0.32 | 0.06 | -1.08 | 0.754335 | 0.816806 | 0.907331 | 0.894329 |
| MmugDNA.41031.1.S1_at   | MmugDNA.41031.1 | 3.21  | 3.35  | 0.44 | 0.26 | -1.1  | 0.714997 | 0.646728 | 0.889037 | 0.793089 |
| MmugDNA.41032.1.S1_at   | MmugDNA.41032.1 | 3.99  | 4.04  | 0.12 | 0.2  | -1.04 | 0.418188 | 0.701703 | 0.735441 | 0.826991 |
| MmugDNA.41033.1.S1_at   | MmugDNA.41033.1 | 3.52  | 3.51  | 0.15 | 0    | 1.01  | 0.871623 | 0.308404 | 0.955537 | 0.564476 |
| MmugDNA.41034.1.S1_at   | MmugDNA.41034.1 | 6.15  | 6.22  | 0.18 | 0.12 | -1.05 | 0.197629 | 0.078348 | 0.56861  | 0.325007 |
| MmugDNA.41035.1.S1_at   | MmugDNA.41035.1 | 8.92  | 9.07  | 0.19 | 0.07 | -1.11 | 0.376315 | 0.097569 | 0.706812 | 0.355455 |
| MmugDNA.41036.1.S1_at   | MmugDNA.41036.1 | 8.15  | 8.43  | 1.29 | 0.2  | -1.21 | 0.850526 | 0.653926 | 0.947381 | 0.797715 |
| MmugDNA.41037.1.S1_at   | MmugDNA.41037.1 | 11.86 | 11.92 | 0.31 | 0.03 | -1.05 | 0.710125 | 0.311861 | 0.887263 | 0.56683  |
| MmugDNA.41038.1.S1_at   | MmugDNA.41038.1 | 8.91  | 8.54  | 0.3  | 0.11 | 1.29  | 0.042566 | 0.046069 | 0.369561 | 0.258977 |
| MmugDNA.41039.1.S1_at   | MmugDNA.41039.1 | 5.05  | 4.97  | 0.29 | 0    | 1.06  | 0.690576 | 0.66434  | 0.879504 | 0.803354 |
| MmugDNA.4104.1.S1_at    | MmugDNA.4104.1  | 8.76  | 8.67  | 0.49 | 0.17 | 1.06  | 0.993191 | 0.016354 | 0.997423 | 0.161943 |
| MmugDNA.41040.1.S1_at   | MmugDNA.41040.1 | 7.25  | 6.98  | 0.07 | 0.09 | 1.2   | 0.014581 | 0.00955  | 0.276563 | 0.128764 |
| MmugDNA.41041.1.S1_at   | MmugDNA.41041.1 | 7.07  | 6.95  | 0.05 | 0.07 | 1.09  | 0.283277 | 0.868294 | 0.641313 | 0.925241 |
| MmugDNA.41043.1.S1_at   | MmugDNA.41043.1 | 10.17 | 10.02 | 0.25 | 0.02 | 1.11  | 0.313169 | 0.426366 | 0.664459 | 0.648535 |
| MmugDNA.41044.1.S1_at   | MmugDNA.41044.1 | 10.81 | 11.04 | 0.25 | 0.08 | -1.17 | 0.186473 | 0.236971 | 0.559164 | 0.507675 |

|                         |                 |       |       |      |      |       |          |          |          |          |
|-------------------------|-----------------|-------|-------|------|------|-------|----------|----------|----------|----------|
| MmugDNA.41045.1.S1_at   | MmugDNA.41045.1 | 3.82  | 3.82  | 0.14 | 0.2  | 1     | 0.853467 | 0.9888   | 0.948299 | 0.993611 |
| MmugDNA.41047.1.S1_at   | MmugDNA.41047.1 | 5.71  | 5.71  | 0.3  | 0.08 | 1     | 0.337293 | 0.717754 | 0.682275 | 0.836602 |
| MmugDNA.41048.1.S1_at   | MmugDNA.41048.1 | 6.39  | 6.37  | 0.21 | 0.24 | 1.01  | 0.526081 | 0.539425 | 0.796442 | 0.723763 |
| MmugDNA.41049.1.S1_at   | MmugDNA.41049.1 | 4.68  | 4.1   | 0.35 | 0.29 | 1.5   | 0.113341 | 0.334735 | 0.486648 | 0.582615 |
| MmugDNA.41049.1.S1_s_at | MmugDNA.41049.1 | 6.46  | 6.1   | 0.36 | 0.22 | 1.28  | 0.305225 | 0.22445  | 0.658726 | 0.497444 |
| MmugDNA.4105.1.S1_at    | MmugDNA.4105.1  | 5.93  | 6.01  | 0.68 | 0.43 | -1.06 | 0.383689 | 0.553575 | 0.711503 | 0.732717 |
| MmugDNA.41050.1.S1_at   | MmugDNA.41050.1 | 3.23  | 3.21  | 0.16 | 0.13 | 1.01  | 0.761496 | 0.609922 | 0.910578 | 0.768216 |
| MmugDNA.41052.1.S1_at   | MmugDNA.41052.1 | 6.1   | 6.09  | 0.09 | 0.07 | 1.01  | 0.200898 | 0.540277 | 0.572594 | 0.724221 |
| MmugDNA.41053.1.S1_at   | MmugDNA.41053.1 | 4.73  | 5.04  | 0.15 | 0.12 | -1.24 | 0.060063 | 0.402615 | 0.407399 | 0.631505 |
| MmugDNA.41054.1.S1_at   | MmugDNA.41054.1 | 3.64  | 3.65  | 0.07 | 0.07 | -1.01 | 0.442184 | 0.451177 | 0.749897 | 0.666085 |
| MmugDNA.41057.1.S1_at   | MmugDNA.41057.1 | 6.03  | 5.68  | 0.75 | 0.42 | 1.27  | 0.593022 | 0.71077  | 0.834046 | 0.832259 |
| MmugDNA.41058.1.S1_at   | MmugDNA.41058.1 | 4.21  | 4.17  | 0.32 | 0.08 | 1.03  | 0.877467 | 0.94352  | 0.957366 | 0.967926 |
| MmugDNA.41059.1.S1_at   | MmugDNA.41059.1 | 7.32  | 7.17  | 0.09 | 0.08 | 1.11  | 0.066372 | 0.032929 | 0.422255 | 0.22466  |
| MmugDNA.41059.1.S1_s_at | MmugDNA.41059.1 | 7.57  | 7.16  | 0.06 | 0.09 | 1.33  | 0.003091 | 0.002415 | 0.191107 | 0.072905 |
| MmugDNA.4106.1.S1_at    | MmugDNA.4106.1  | 4.26  | 4.26  | 0.05 | 0.01 | 1     | 0.573957 | 0.698018 | 0.823778 | 0.82456  |
| MmugDNA.41060.1.S1_at   | MmugDNA.41060.1 | 5.09  | 4.82  | 0.05 | 0.29 | 1.21  | 0.066637 | 0.018946 | 0.422542 | 0.17317  |
| MmugDNA.41061.1.S1_at   | MmugDNA.41061.1 | 5.24  | 5.46  | 0.19 | 0.18 | -1.17 | 0.213684 | 0.1877   | 0.584304 | 0.46368  |
| MmugDNA.41062.1.S1_at   | MmugDNA.41062.1 | 5.52  | 5.36  | 0.19 | 0.12 | 1.12  | 0.547067 | 0.625074 | 0.808925 | 0.778973 |
| MmugDNA.41063.1.S1_at   | MmugDNA.41063.1 | 9.51  | 9.95  | 0.37 | 0.1  | -1.36 | 0.146322 | 0.037214 | 0.520684 | 0.237285 |
| MmugDNA.41064.1.S1_at   | MmugDNA.41064.1 | 3.8   | 3.83  | 0.14 | 0.05 | -1.02 | 0.712479 | 0.31985  | 0.887958 | 0.572213 |
| MmugDNA.41065.1.S1_at   | MmugDNA.41065.1 | 8.32  | 8.69  | 1.03 | 0.29 | -1.29 | 0.700392 | 0.336681 | 0.883486 | 0.584037 |
| MmugDNA.41068.1.S1_at   | MmugDNA.41068.1 | 6     | 5.07  | 0.55 | 0.13 | 1.9   | 0.125737 | 0.027429 | 0.499705 | 0.206851 |
| MmugDNA.41069.1.S1_at   | MmugDNA.41069.1 | 4.92  | 4.81  | 0.03 | 0.2  | 1.08  | 0.368171 | 0.634347 | 0.70351  | 0.784758 |
| MmugDNA.4107.1.S1_at    | MmugDNA.4107.1  | 3.44  | 3.22  | 0.38 | 0.31 | 1.17  | 0.416552 | 0.479522 | 0.734401 | 0.685262 |
| MmugDNA.41070.1.S1_at   | MmugDNA.41070.1 | 3.12  | 2.99  | 0.27 | 0.1  | 1.09  | 0.519813 | 0.628056 | 0.793373 | 0.780934 |
| MmugDNA.7061.1.S1_at    | MmugDNA.7061.1  | 10.01 | 9.83  | 0.22 | 0.04 | 1.13  | 0.196252 | 0.281322 | 0.566746 | 0.544391 |
| MmugDNA.7061.1.S1_s_at  | MmugDNA.7061.1  | 12    | 11.91 | 0.11 | 0.02 | 1.07  | 0.802859 | 0.860096 | 0.928105 | 0.920245 |
| MmugDNA.41072.1.S1_at   | MmugDNA.41072.1 | 5.3   | 5.81  | 0.5  | 0.15 | -1.42 | 0.376045 | 0.235134 | 0.706657 | 0.50629  |
| MmugDNA.41073.1.S1_at   | MmugDNA.41073.1 | 11.33 | 11.44 | 0.51 | 0.12 | -1.08 | 0.981576 | 0.91339  | 0.994146 | 0.951231 |
| MmugDNA.41074.1.S1_at   | MmugDNA.41074.1 | 4.32  | 4.06  | 0.31 | 0.07 | 1.19  | 0.70892  | 0.663563 | 0.886591 | 0.803017 |
| MmugDNA.41075.1.S1_at   | MmugDNA.41075.1 | 6.46  | 6.71  | 0.8  | 0.27 | -1.19 | 0.318659 | 0.36662  | 0.668228 | 0.606387 |
| MmugDNA.41077.1.S1_at   | MmugDNA.41077.1 | 10.64 | 10.85 | 0.16 | 0.08 | -1.16 | 0.186515 | 0.262639 | 0.559164 | 0.52899  |
| MmugDNA.14249.1.S1_s_at | MmugDNA.14249.1 | 11.67 | 11.88 | 0.16 | 0.02 | -1.16 | 0.134911 | 0.101192 | 0.509035 | 0.36084  |
| MmugDNA.41078.1.S1_at   | MmugDNA.41078.1 | 3.83  | 3.5   | 0.31 | 0.01 | 1.26  | 0.107065 | 0.164777 | 0.47951  | 0.441105 |
| MmugDNA.4108.1.S1_at    | MmugDNA.4108.1  | 9.95  | 9.33  | 0.04 | 0.14 | 1.55  | 0.001367 | 0.000757 | 0.159096 | 0.045403 |
| MmugDNA.41080.1.S1_at   | MmugDNA.41080.1 | 3.72  | 3.72  | 0.12 | 0.05 | 1     | 0.872534 | 0.595446 | 0.955759 | 0.759091 |
| MmugDNA.41081.1.S1_at   | MmugDNA.41081.1 | 4.36  | 4.2   | 0.22 | 0.11 | 1.12  | 0.203749 | 0.431699 | 0.57513  | 0.652516 |
| MmugDNA.41083.1.S1_at   | MmugDNA.41083.1 | 5.93  | 5.73  | 0.08 | 0.06 | 1.15  | 0.12399  | 0.076028 | 0.497663 | 0.320716 |
| MmugDNA.41084.1.S1_at   | MmugDNA.41084.1 | 5.22  | 5.46  | 0.27 | 0.18 | -1.18 | 0.363162 | 0.496631 | 0.699885 | 0.696119 |
| MmugDNA.41085.1.S1_at   | MmugDNA.41085.1 | 5.87  | 5.85  | 0.29 | 0.24 | 1.01  | 0.877078 | 0.977591 | 0.957122 | 0.987812 |
| MmugDNA.41086.1.S1_at   | MmugDNA.41086.1 | 8.53  | 8.74  | 0.27 | 0.24 | -1.16 | 0.556087 | 0.704998 | 0.813904 | 0.828934 |
| MmugDNA.41088.1.S1_at   | MmugDNA.41088.1 | 6.29  | 6.16  | 0.13 | 0.03 | 1.1   | 0.390216 | 0.445042 | 0.716599 | 0.66224  |
| MmugDNA.41089.1.S1_at   | MmugDNA.41089.1 | 4.32  | 4.41  | 0.32 | 0.16 | -1.06 | 0.711159 | 0.884351 | 0.887684 | 0.9341   |

|                         |                 |       |       |      |      |       |          |          |          |          |
|-------------------------|-----------------|-------|-------|------|------|-------|----------|----------|----------|----------|
| MmugDNA.4109.1.S1_at    | MmugDNA.4109.1  | 5.01  | 5.24  | 0.35 | 0.19 | -1.17 | 0.756173 | 0.417339 | 0.90814  | 0.642147 |
| MmugDNA.41092.1.S1_at   | MmugDNA.41092.1 | 3.79  | 3.59  | 0.3  | 0.04 | 1.15  | 0.223296 | 0.494498 | 0.592569 | 0.694905 |
| MmugDNA.41095.1.S1_at   | MmugDNA.41095.1 | 9.75  | 9.73  | 0.57 | 0.13 | 1.01  | 0.466959 | 0.036224 | 0.764    | 0.234909 |
| MmugDNA.41096.1.S1_at   | MmugDNA.41096.1 | 8.89  | 9.24  | 0.37 | 0.35 | -1.27 | 0.059942 | 0.030809 | 0.407399 | 0.217376 |
| MmugDNA.41098.1.S1_at   | MmugDNA.41098.1 | 4.61  | 4.58  | 0.16 | 0.13 | 1.02  | 0.78051  | 0.715066 | 0.919137 | 0.834794 |
| MmugDNA.41099.1.S1_at   | MmugDNA.41099.1 | 5.06  | 5     | 0.09 | 0.03 | 1.04  | 0.164637 | 0.111067 | 0.537466 | 0.375588 |
| MmugDNA.411.1.S1_at     | MmugDNA.411.1   | 5.1   | 4.87  | 0.16 | 0.17 | 1.18  | 0.339847 | 0.325716 | 0.684042 | 0.57602  |
| MmugDNA.4110.1.S1_at    | MmugDNA.4110.1  | 6.78  | 6.61  | 0.2  | 0.17 | 1.12  | 0.222686 | 0.377187 | 0.592169 | 0.614825 |
| MmugDNA.41103.1.S1_at   | MmugDNA.41103.1 | 3.2   | 3.18  | 0.16 | 0.05 | 1.02  | 0.25887  | 0.147358 | 0.622286 | 0.421554 |
| MmugDNA.41107.1.S1_at   | MmugDNA.41107.1 | 8.31  | 5.99  | 0.45 | 0.41 | 5     | 0.003365 | 0.000711 | 0.194985 | 0.044419 |
| MmugDNA.41108.1.S1_at   | MmugDNA.41108.1 | 5.93  | 5.68  | 0.08 | 0.1  | -1.19 | 0.033684 | 0.031864 | 0.34712  | 0.220909 |
| MmugDNA.41109.1.S1_at   | MmugDNA.41109.1 | 5.27  | 4.9   | 0.19 | 0.17 | 1.29  | 0.065485 | 0.083911 | 0.420827 | 0.334814 |
| MmugDNA.4111.1.S1_at    | MmugDNA.4111.1  | 5.83  | 5.78  | 0.06 | 0.05 | 1.03  | 0.859272 | 0.034991 | 0.950341 | 0.231175 |
| MmugDNA.41112.1.S1_at   | MmugDNA.41112.1 | 3.72  | 3.62  | 0.04 | 0.01 | 1.07  | 0.025367 | 0.357593 | 0.32151  | 0.599221 |
| MmugDNA.41113.1.S1_at   | MmugDNA.41113.1 | 6.3   | 5.5   | 0.28 | 0.17 | 1.74  | 0.045289 | 0.009157 | 0.376169 | 0.126264 |
| MmugDNA.41115.1.S1_at   | MmugDNA.41115.1 | 12.69 | 12.76 | 0.06 | 0.06 | -1.05 | 0.466571 | 0.646109 | 0.763702 | 0.792676 |
| MmugDNA.41116.1.S1_at   | MmugDNA.41116.1 | 5.1   | 5.25  | 0.36 | 0.12 | -1.1  | 0.735205 | 0.019283 | 0.898588 | 0.174698 |
| MmugDNA.41117.1.S1_at   | MmugDNA.41117.1 | 4.44  | 4.51  | 0.1  | 0.17 | -1.05 | 0.929051 | 0.227361 | 0.976333 | 0.499659 |
| MmugDNA.41118.1.S1_at   | MmugDNA.41118.1 | 4.77  | 4.44  | 0.11 | 0.14 | 1.26  | 0.073909 | 0.224639 | 0.434623 | 0.497613 |
| MmugDNA.4112.1.S1_at    | MmugDNA.4112.1  | 3.81  | 5.43  | 2.46 | 0.5  | -3.08 | 0.878079 | 0.487855 | 0.95758  | 0.69073  |
| MmugDNA.4112.1.S1_s_at  | MmugDNA.4112.1  | 7.34  | 7.63  | 1.05 | 0.14 | -1.22 | 0.674006 | 0.39724  | 0.871714 | 0.628763 |
| MmugDNA.4112.1.S1_x_at  | MmugDNA.4112.1  | 6.08  | 7.15  | 1.72 | 0.4  | -2.09 | 0.808075 | 0.624916 | 0.93047  | 0.778939 |
| MmugDNA.41121.1.S1_at   | MmugDNA.41121.1 | 5.73  | 5.46  | 0.5  | 0.2  | 1.2   | 0.433453 | 0.576528 | 0.744486 | 0.747267 |
| MmugDNA.41123.1.S1_at   | MmugDNA.41123.1 | 4.56  | 4.31  | 0.34 | 0.24 | 1.19  | 0.149311 | 0.151279 | 0.523152 | 0.426026 |
| MmugDNA.41124.1.S1_at   | MmugDNA.41124.1 | 4.76  | 4.61  | 0.12 | 0.02 | 1.1   | 0.079795 | 0.036454 | 0.442778 | 0.235423 |
| MmugDNA.41125.1.S1_at   | MmugDNA.41125.1 | 11.42 | 11.04 | 0.23 | 0.03 | 1.3   | 0.143925 | 0.017198 | 0.519323 | 0.166145 |
| MmugDNA.41126.1.S1_at   | MmugDNA.41126.1 | 3.88  | 3.83  | 0.28 | 0.08 | 1.04  | 0.27356  | 0.361304 | 0.633298 | 0.602104 |
| MmugDNA.41127.1.S1_at   | MmugDNA.41127.1 | 8.6   | 8.53  | 0.16 | 0.06 | 1.04  | 0.501492 | 0.037378 | 0.783296 | 0.237776 |
| MmugDNA.38950.1.S1_s_at | MmugDNA.38950.1 | 9.68  | 9.56  | 0.24 | 0.01 | 1.08  | 0.435347 | 0.486252 | 0.745631 | 0.689661 |
| MmugDNA.41130.1.S1_at   | MmugDNA.41130.1 | 6.81  | 7.41  | 0.29 | 0.05 | -1.51 | 0.082226 | 0.303992 | 0.447052 | 0.561344 |
| MmugDNA.41131.1.S1_at   | MmugDNA.41131.1 | 5.2   | 5.14  | 0.12 | 0.16 | 1.04  | 0.763646 | 0.595879 | 0.911265 | 0.759258 |
| MmugDNA.41132.1.S1_at   | MmugDNA.41132.1 | 3.58  | 3.37  | 0.13 | 0.16 | 1.15  | 0.210408 | 0.213421 | 0.581688 | 0.48728  |
| MmugDNA.41133.1.S1_at   | MmugDNA.41133.1 | 6.63  | 7.05  | 0.47 | 0.2  | -1.34 | 0.332294 | 0.429106 | 0.67875  | 0.65062  |
| MmugDNA.41135.1.S1_at   | MmugDNA.41135.1 | 6.27  | 6.15  | 0.13 | 0.47 | 1.09  | 0.766976 | 0.800131 | 0.912422 | 0.885076 |
| MmugDNA.41137.1.S1_at   | MmugDNA.41137.1 | 8.2   | 8.2   | 0.63 | 0.03 | -1    | 0.947529 | 0.383901 | 0.981931 | 0.61978  |
| MmugDNA.41139.1.S1_at   | MmugDNA.41139.1 | 12.17 | 12.18 | 0.07 | 0.02 | -1.01 | 0.587121 | 0.890491 | 0.831568 | 0.937597 |
| MmugDNA.4114.1.S1_at    | MmugDNA.4114.1  | 12.75 | 12.55 | 0.15 | 0.08 | 1.15  | 0.260687 | 0.048113 | 0.623301 | 0.264398 |
| MmugDNA.41140.1.S1_at   | MmugDNA.41140.1 | 4.6   | 4.59  | 0.12 | 0.06 | 1     | 0.266579 | 0.72634  | 0.627504 | 0.841617 |
| MmugDNA.41141.1.S1_at   | MmugDNA.41141.1 | 5.39  | 4.77  | 0.32 | 0.06 | 1.54  | 0.072428 | 0.090538 | 0.432302 | 0.345015 |
| MmugDNA.41142.1.S1_at   | MmugDNA.41142.1 | 5.51  | 5.42  | 0.11 | 0.14 | 1.07  | 0.347431 | 0.669245 | 0.688705 | 0.806502 |
| MmugDNA.41143.1.S1_at   | MmugDNA.41143.1 | 5.86  | 5.77  | 0.11 | 0.12 | 1.06  | 0.445017 | 0.15351  | 0.751792 | 0.42827  |
| MmugDNA.41143.1.S1_s_at | MmugDNA.41143.1 | 5.71  | 5.7   | 0.13 | 0.11 | 1     | 0.229833 | 0.251992 | 0.598481 | 0.520646 |
| MmugDNA.41144.1.S1_at   | MmugDNA.41144.1 | 7.12  | 8.82  | 0.67 | 0.47 | -3.25 | 0.02911  | 0.030796 | 0.333841 | 0.217376 |



|                         |                 |       |       |      |      |       |          |          |          |          |
|-------------------------|-----------------|-------|-------|------|------|-------|----------|----------|----------|----------|
| MmugDNA.41145.1.S1_at   | MmugDNA.41145.1 | 3.23  | 2.82  | 0.32 | 0.12 | 1.32  | 0.35155  | 0.434968 | 0.6923   | 0.654901 |
| MmugDNA.41146.1.S1_at   | MmugDNA.41146.1 | 8.57  | 9.82  | 0.51 | 0.03 | -2.39 | 0.012007 | 0.005255 | 0.258642 | 0.100401 |
| MmugDNA.41147.1.S1_at   | MmugDNA.41147.1 | 4.65  | 4.58  | 0.14 | 0.02 | 1.05  | 0.276239 | 0.65247  | 0.635878 | 0.796793 |
| MmugDNA.4115.1.S1_at    | MmugDNA.4115.1  | 3.59  | 3.36  | 0.16 | 0.09 | 1.17  | 0.092898 | 0.588132 | 0.461563 | 0.754761 |
| MmugDNA.41150.1.S1_a_at | MmugDNA.41150.1 | 2.97  | 2.81  | 0.15 | 0.03 | 1.11  | 0.28572  | 0.060795 | 0.643438 | 0.293295 |
| MmugDNA.41150.1.S1_at   | MmugDNA.41150.1 | 7.65  | 7.31  | 1.27 | 0.15 | 1.26  | 0.672478 | 0.170203 | 0.870974 | 0.446906 |
| MmugDNA.41151.1.S1_at   | MmugDNA.41151.1 | 6.8   | 6.63  | 0.21 | 0.13 | 1.12  | 0.260594 | 0.163898 | 0.623301 | 0.440105 |
| MmugDNA.41152.1.S1_at   | MmugDNA.41152.1 | 4.52  | 4.47  | 0.12 | 0.17 | 1.04  | 0.658001 | 0.918647 | 0.864401 | 0.954356 |
| MmugDNA.41153.1.S1_at   | MmugDNA.41153.1 | 12.42 | 12.44 | 0.14 | 0.11 | -1.02 | 0.491427 | 0.154973 | 0.777734 | 0.429973 |
| MmugDNA.41154.1.S1_at   | MmugDNA.41154.1 | 5.29  | 4.19  | 0.22 | 0.28 | 2.14  | 0.00589  | 0.003233 | 0.212104 | 0.08214  |
| MmugDNA.41158.1.S1_at   | MmugDNA.41158.1 | 5.84  | 5.94  | 0.17 | 0.16 | -1.07 | 0.432401 | 0.678173 | 0.74389  | 0.812022 |
| MmugDNA.41159.1.S1_at   | MmugDNA.41159.1 | 5.63  | 5.37  | 0.27 | 0.06 | 1.2   | 0.551738 | 0.243299 | 0.81144  | 0.513356 |
| MmugDNA.4116.1.S1_at    | MmugDNA.4116.1  | 14.34 | 14.29 | 0.02 | 0.01 | 1.04  | 0.058905 | 0.432724 | 0.405679 | 0.653094 |
| MmugDNA.41160.1.S1_at   | MmugDNA.41160.1 | 9.08  | 9.25  | 0.08 | 0.05 | -1.13 | 0.024757 | 0.001096 | 0.31972  | 0.052317 |
| MmugDNA.41162.1.S1_at   | MmugDNA.41162.1 | 7.23  | 7.25  | 0.04 | 0.25 | -1.02 | 0.861627 | 0.417283 | 0.951267 | 0.642141 |
| MmugDNA.41163.1.S1_at   | MmugDNA.41163.1 | 5.77  | 5.99  | 0.92 | 0.63 | -1.16 | 0.533378 | 0.332113 | 0.80084  | 0.580584 |
| MmugDNA.41165.1.S1_at   | MmugDNA.41165.1 | 3.73  | 3.72  | 0.12 | 0.04 | 1     | 0.619346 | 0.810569 | 0.846601 | 0.890812 |
| MmugDNA.41166.1.S1_x_at | MmugDNA.41166.1 | 7.72  | 7.8   | 0.35 | 0.18 | -1.05 | 0.74449  | 0.208763 | 0.90255  | 0.482608 |
| MmugDNA.41167.1.S1_at   | MmugDNA.41167.1 | 5.85  | 5.59  | 0.43 | 0.41 | 1.2   | 0.660675 | 0.661791 | 0.865819 | 0.801943 |
| MmugDNA.41168.1.S1_at   | MmugDNA.41168.1 | 9.57  | 9.26  | 0.33 | 0.07 | 1.24  | 0.186803 | 0.438968 | 0.559225 | 0.657787 |
| MmugDNA.41169.1.S1_at   | MmugDNA.41169.1 | 8.58  | 8.67  | 0.15 | 0.31 | -1.06 | 0.610464 | 0.591983 | 0.841868 | 0.757386 |
| MmugDNA.4117.1.S1_at    | MmugDNA.4117.1  | 7.32  | 7.36  | 0.26 | 0.04 | -1.03 | 0.763502 | 0.915352 | 0.911265 | 0.952467 |
| MmugDNA.41171.1.S1_s_at | MmugDNA.41171.1 | 12.44 | 12.44 | 0.23 | 0.16 | 1     | 0.786881 | 0.684441 | 0.921699 | 0.815943 |
| MmugDNA.41176.1.S1_at   | MmugDNA.41176.1 | 9.66  | 10.59 | 0.26 | 0.14 | -1.91 | 0.003224 | 0.001025 | 0.192557 | 0.051079 |
| MmugDNA.41177.1.S1_at   | MmugDNA.41177.1 | 10.64 | 10.22 | 0.08 | 0.15 | 1.34  | 0.011111 | 0.003173 | 0.252486 | 0.081873 |
| MmugDNA.41178.1.S1_at   | MmugDNA.41178.1 | 9.69  | 9.71  | 0.28 | 0.13 | -1.01 | 0.652903 | 0.366288 | 0.862095 | 0.606048 |
| MmugDNA.41179.1.S1_at   | MmugDNA.41179.1 | 11.46 | 11.2  | 0.07 | 0.07 | 1.2   | 0.017046 | 0.065746 | 0.289048 | 0.301766 |
| MmugDNA.4118.1.S1_at    | MmugDNA.4118.1  | 5.53  | 4.94  | 0.18 | 0.1  | 1.5   | 0.006924 | 0.010113 | 0.224141 | 0.131859 |
| MmugDNA.41180.1.S1_at   | MmugDNA.41180.1 | 5.21  | 5.23  | 0.09 | 0.28 | -1.01 | 0.470666 | 0.641993 | 0.766172 | 0.78994  |
| MmugDNA.41181.1.S1_at   | MmugDNA.41181.1 | 7.47  | 7.52  | 0.23 | 0.08 | -1.04 | 0.670948 | 0.111823 | 0.870106 | 0.376856 |
| MmugDNA.41182.1.S1_at   | MmugDNA.41182.1 | 3.05  | 3.18  | 0.23 | 0.16 | -1.09 | 0.951195 | 0.177923 | 0.983528 | 0.454259 |
| MmugDNA.41183.1.S1_at   | MmugDNA.41183.1 | 4.27  | 4.41  | 0.21 | 0.39 | -1.1  | 0.762592 | 0.895066 | 0.91092  | 0.940055 |
| MmugDNA.41184.1.S1_at   | MmugDNA.41184.1 | 3.65  | 3.73  | 0.12 | 0.12 | -1.06 | 0.173547 | 0.295679 | 0.546692 | 0.555113 |
| MmugDNA.41185.1.S1_at   | MmugDNA.41185.1 | 5.28  | 5.38  | 0.1  | 0.07 | -1.07 | 0.230088 | 0.285332 | 0.598481 | 0.547198 |
| MmugDNA.41186.1.S1_at   | MmugDNA.41186.1 | 3.08  | 3.15  | 0.11 | 0.01 | -1.05 | 0.980513 | 0.999575 | 0.993785 | 0.999859 |
| MmugDNA.41187.1.S1_at   | MmugDNA.41187.1 | 9.47  | 9.99  | 0.15 | 0.05 | -1.43 | 0.004593 | 0.001196 | 0.201051 | 0.05421  |
| MmugDNA.4119.1.S1_at    | MmugDNA.4119.1  | 13.63 | 13.66 | 0.06 | 0.03 | -1.02 | 0.258754 | 0.018319 | 0.622286 | 0.170201 |
| MmugDNA.41190.1.S1_at   | MmugDNA.41190.1 | 3.69  | 3.73  | 0.12 | 0.1  | -1.03 | 0.893951 | 0.085906 | 0.963658 | 0.338068 |
| MmugDNA.41191.1.S1_at   | MmugDNA.41191.1 | 3.6   | 3.62  | 0.17 | 0.06 | -1.01 | 0.912154 | 0.328287 | 0.970255 | 0.578012 |
| MmugDNA.41193.1.S1_at   | MmugDNA.41193.1 | 7.72  | 8.07  | 0.24 | 0.12 | -1.28 | 0.244286 | 0.618633 | 0.60991  | 0.774185 |
| MmugDNA.41195.1.S1_at   | MmugDNA.41195.1 | 5.38  | 5.27  | 0.06 | 0.22 | 1.08  | 0.952275 | 0.799516 | 0.98399  | 0.884661 |
| MmugDNA.41196.1.S1_at   | MmugDNA.41196.1 | 8.71  | 8.52  | 1.12 | 0.03 | 1.15  | 0.499186 | 0.322053 | 0.781984 | 0.57365  |
| MmugDNA.41199.1.S1_at   | MmugDNA.41199.1 | 2.98  | 3.35  | 0.23 | 0.38 | -1.29 | 0.495622 | 0.524306 | 0.780125 | 0.714254 |

|                       |                 |       |       |      |      |       |          |          |          |          |
|-----------------------|-----------------|-------|-------|------|------|-------|----------|----------|----------|----------|
| MmugDNA.412.1.S1_at   | MmugDNA.412.1   | 5.59  | 5.51  | 0.06 | 0.04 | 1.06  | 0.10805  | 0.324032 | 0.480489 | 0.57473  |
| MmugDNA.41200.1.S1_at | MmugDNA.41200.1 | 3.78  | 3.62  | 0.16 | 0.25 | 1.12  | 0.30554  | 0.105848 | 0.658985 | 0.368111 |
| MmugDNA.41201.1.S1_at | MmugDNA.41201.1 | 9.48  | 8.92  | 0.26 | 0.17 | 1.47  | 0.068039 | 0.138827 | 0.42451  | 0.412015 |
| MmugDNA.41202.1.S1_at | MmugDNA.41202.1 | 6.57  | 6.61  | 0.62 | 0.34 | -1.02 | 0.27412  | 0.579993 | 0.633792 | 0.749373 |
| MmugDNA.41204.1.S1_at | MmugDNA.41204.1 | 5.27  | 5.3   | 0.11 | 0.13 | -1.02 | 0.769792 | 0.632838 | 0.91387  | 0.783788 |
| MmugDNA.41206.1.S1_at | MmugDNA.41206.1 | 7.08  | 7.44  | 0.38 | 0.09 | -1.29 | 0.678993 | 0.533011 | 0.874211 | 0.719367 |
| MmugDNA.41207.1.S1_at | MmugDNA.41207.1 | 6.91  | 6.52  | 0.07 | 0.04 | 1.31  | 0.000588 | 0.000306 | 0.143137 | 0.034907 |
| MmugDNA.41208.1.S1_at | MmugDNA.41208.1 | 6.17  | 6.19  | 0.18 | 0.06 | -1.01 | 0.33086  | 0.502108 | 0.677482 | 0.700054 |
| MmugDNA.41209.1.S1_at | MmugDNA.41209.1 | 6.24  | 6.27  | 0.06 | 0.28 | -1.02 | 0.362498 | 0.260817 | 0.699302 | 0.52721  |
| MmugDNA.4121.1.S1_at  | MmugDNA.4121.1  | 4.64  | 4.6   | 0.02 | 0.15 | 1.03  | 0.563735 | 0.686175 | 0.818372 | 0.816831 |
| MmugDNA.41210.1.S1_at | MmugDNA.41210.1 | 5.34  | 5.88  | 0.5  | 0.43 | -1.45 | 0.417011 | 0.577064 | 0.734647 | 0.747635 |
| MmugDNA.41212.1.S1_at | MmugDNA.41212.1 | 3.68  | 3.66  | 0.22 | 0.01 | 1.02  | 0.775181 | 0.918166 | 0.916671 | 0.954096 |
| MmugDNA.41213.1.S1_at | MmugDNA.41213.1 | 3.9   | 3.9   | 0    | 0.03 | 1     | 0.373901 | 0.106555 | 0.705567 | 0.369099 |
| MmugDNA.41214.1.S1_at | MmugDNA.41214.1 | 6.82  | 6.82  | 0.12 | 0.18 | 1     | 0.435424 | 0.238177 | 0.745679 | 0.508818 |
| MmugDNA.41215.1.S1_at | MmugDNA.41215.1 | 10.67 | 10.64 | 0.36 | 0.2  | 1.02  | 0.214867 | 0.269407 | 0.585284 | 0.534737 |
| MmugDNA.41216.1.S1_at | MmugDNA.41216.1 | 9.51  | 9.33  | 0.42 | 0.09 | 1.13  | 0.20868  | 0.33626  | 0.58041  | 0.583736 |
| MmugDNA.41218.1.S1_at | MmugDNA.41218.1 | 5.3   | 5.29  | 0.58 | 0.16 | 1     | 0.808613 | 0.218569 | 0.930737 | 0.492172 |
| MmugDNA.41219.1.S1_at | MmugDNA.41219.1 | 3.93  | 3.84  | 0.19 | 0.43 | 1.06  | 0.385273 | 0.447905 | 0.712598 | 0.663881 |
| MmugDNA.4122.1.S1_at  | MmugDNA.4122.1  | 5.94  | 5.94  | 0    | 0.05 | 1     | 0.613098 | 0.952834 | 0.843382 | 0.97327  |
| MmugDNA.41221.1.S1_at | MmugDNA.41221.1 | 5.13  | 5.05  | 0.19 | 0.19 | 1.06  | 0.388827 | 0.421403 | 0.715741 | 0.644994 |
| MmugDNA.41223.1.S1_at | MmugDNA.41223.1 | 8.13  | 8.74  | 0.33 | 0.07 | -1.53 | 0.016457 | 0.031251 | 0.287478 | 0.218668 |
| MmugDNA.41224.1.S1_at | MmugDNA.41224.1 | 3.96  | 3.79  | 0.03 | 0.41 | 1.12  | 0.80622  | 0.231814 | 0.929632 | 0.503592 |
| MmugDNA.41225.1.S1_at | MmugDNA.41225.1 | 4.29  | 4.42  | 0.05 | 0.18 | -1.09 | 0.992025 | 0.309777 | 0.996928 | 0.565044 |
| MmugDNA.41226.1.S1_at | MmugDNA.41226.1 | 7.69  | 7.7   | 0.9  | 0.27 | -1.01 | 0.704065 | 0.220925 | 0.884936 | 0.494337 |
| MmugDNA.41227.1.S1_at | MmugDNA.41227.1 | 5.33  | 5.67  | 0.1  | 0.1  | -1.26 | 0.019871 | 0.089613 | 0.302615 | 0.343811 |
| MmugDNA.41228.1.S1_at | MmugDNA.41228.1 | 4.33  | 4.24  | 0.8  | 0.15 | 1.06  | 0.320431 | 0.495176 | 0.669365 | 0.69534  |
| MmugDNA.41229.1.S1_at | MmugDNA.41229.1 | 5.48  | 4.8   | 0.78 | 0.06 | 1.6   | 0.364299 | 0.311787 | 0.700517 | 0.56678  |
| MmugDNA.4123.1.S1_at  | MmugDNA.4123.1  | 6.73  | 6.76  | 0.13 | 0.16 | -1.02 | 0.811216 | 0.896869 | 0.931693 | 0.941126 |
| MmugDNA.41230.1.S1_at | MmugDNA.41230.1 | 6.29  | 5.14  | 0.54 | 0.33 | 2.22  | 0.048222 | 0.094341 | 0.382603 | 0.350889 |
| MmugDNA.41231.1.S1_at | MmugDNA.41231.1 | 5.14  | 5.16  | 0.03 | 0.02 | -1.02 | 0.10385  | 0.683575 | 0.474583 | 0.815387 |
| MmugDNA.41232.1.S1_at | MmugDNA.41232.1 | 3.25  | 3.17  | 0    | 0.14 | 1.06  | 0.388282 | 0.189196 | 0.715185 | 0.464997 |
| MmugDNA.41233.1.S1_at | MmugDNA.41233.1 | 10.61 | 10.31 | 0.63 | 0.2  | 1.23  | 0.950465 | 0.16737  | 0.983308 | 0.443785 |
| MmuSTS.2204.1.S1_at   | MmuSTS.2204.1   | 12.78 | 12.69 | 0.43 | 0.14 | 1.07  | 0.730657 | 0.177249 | 0.896248 | 0.453679 |
| MmuSTS.2204.1.S1_s_at | MmuSTS.2204.1   | 11.62 | 11.54 | 0.59 | 0.18 | 1.05  | 0.81518  | 0.189051 | 0.933137 | 0.464897 |
| MmugDNA.41234.1.S1_at | MmugDNA.41234.1 | 5.78  | 5.73  | 0.08 | 0.1  | 1.03  | 0.248353 | 0.661304 | 0.613851 | 0.801687 |
| MmugDNA.41235.1.S1_at | MmugDNA.41235.1 | 6.86  | 6.7   | 0.18 | 0.03 | 1.12  | 0.149054 | 0.127382 | 0.522978 | 0.398205 |
| MmugDNA.41236.1.S1_at | MmugDNA.41236.1 | 4.56  | 5.06  | 0.38 | 0.17 | -1.41 | 0.118969 | 0.285159 | 0.492504 | 0.547098 |
| MmugDNA.41237.1.S1_at | MmugDNA.41237.1 | 3.21  | 3.19  | 0.06 | 0.13 | 1.01  | 0.804792 | 0.685852 | 0.929036 | 0.816612 |
| MmugDNA.41238.1.S1_at | MmugDNA.41238.1 | 5.46  | 5.57  | 0.1  | 0.06 | -1.07 | 0.181293 | 0.314025 | 0.554504 | 0.568178 |
| MmugDNA.41239.1.S1_at | MmugDNA.41239.1 | 3.65  | 3.68  | 0.16 | 0.06 | -1.03 | 0.268848 | 0.191256 | 0.629184 | 0.466553 |
| MmugDNA.41240.1.S1_at | MmugDNA.41240.1 | 11.17 | 11.64 | 0.07 | 0.09 | -1.38 | 0.001626 | 0.011939 | 0.162459 | 0.141357 |
| MmugDNA.41241.1.S1_at | MmugDNA.41241.1 | 3.37  | 3.4   | 0.09 | 0.06 | -1.02 | 0.584379 | 0.37994  | 0.829672 | 0.616659 |
| MmugDNA.41242.1.S1_at | MmugDNA.41242.1 | 8.64  | 9.08  | 0.78 | 0.1  | -1.36 | 0.328717 | 0.466806 | 0.675778 | 0.676543 |

|                         |                 |       |       |      |      |       |          |          |          |          |
|-------------------------|-----------------|-------|-------|------|------|-------|----------|----------|----------|----------|
| MmugDNA.41243.1.S1_at   | MmugDNA.41243.1 | 5.38  | 4.76  | 0.74 | 0.3  | 1.53  | 0.740103 | 0.181162 | 0.900701 | 0.457601 |
| MmugDNA.41246.1.S1_at   | MmugDNA.41246.1 | 6.03  | 5.99  | 1.36 | 0.5  | 1.03  | 0.647158 | 0.842866 | 0.859341 | 0.910483 |
| MmugDNA.41247.1.S1_at   | MmugDNA.41247.1 | 3.88  | 3.62  | 0.12 | 0.19 | 1.19  | 0.102416 | 0.275058 | 0.472592 | 0.539481 |
| MmugDNA.41249.1.S1_at   | MmugDNA.41249.1 | 3.21  | 3.31  | 0.09 | 0.09 | -1.07 | 0.174815 | 0.61763  | 0.548031 | 0.773538 |
| MmugDNA.4125.1.S1_at    | MmugDNA.4125.1  | 6.58  | 6.42  | 0.5  | 0.08 | 1.11  | 0.252554 | 0.751285 | 0.617542 | 0.855391 |
| MmugDNA.41251.1.S1_at   | MmugDNA.41251.1 | 8.7   | 7.79  | 0.64 | 0.43 | 1.88  | 0.199069 | 0.017115 | 0.570667 | 0.165769 |
| MmugDNA.41253.1.S1_at   | MmugDNA.41253.1 | 8.27  | 7.67  | 0.1  | 0.22 | 1.51  | 0.031082 | 0.040454 | 0.339635 | 0.246241 |
| MmugDNA.41255.1.S1_at   | MmugDNA.41255.1 | 8.97  | 9.11  | 0.37 | 0.19 | -1.1  | 0.762533 | 0.060102 | 0.91092  | 0.291829 |
| MmugDNA.41256.1.S1_at   | MmugDNA.41256.1 | 6.53  | 6.8   | 0.29 | 0.06 | -1.21 | 0.690736 | 0.937614 | 0.879579 | 0.964687 |
| MmugDNA.41259.1.S1_at   | MmugDNA.41259.1 | 4     | 4.01  | 0.02 | 0.07 | -1    | 0.467498 | 0.940371 | 0.764376 | 0.966182 |
| MmugDNA.4126.1.S1_at    | MmugDNA.4126.1  | 4.53  | 4.55  | 0.33 | 0.05 | -1.01 | 0.569044 | 0.720244 | 0.821147 | 0.838202 |
| MmugDNA.41260.1.S1_at   | MmugDNA.41260.1 | 4.52  | 4.47  | 0    | 0.05 | 1.03  | 0.166842 | 0.932731 | 0.539457 | 0.961786 |
| MmugDNA.41261.1.S1_at   | MmugDNA.41261.1 | 7.03  | 6.89  | 0.12 | 0.04 | 1.1   | 0.124807 | 0.567792 | 0.498917 | 0.741656 |
| MmugDNA.41262.1.S1_at   | MmugDNA.41262.1 | 6.18  | 5.87  | 0.81 | 0.29 | 1.23  | 0.79809  | 0.544191 | 0.925892 | 0.726643 |
| MmugDNA.41263.1.S1_at   | MmugDNA.41263.1 | 7.55  | 7.64  | 0.17 | 0.1  | -1.07 | 0.611658 | 0.302423 | 0.84257  | 0.560109 |
| MmugDNA.41266.1.S1_at   | MmugDNA.41266.1 | 5.48  | 6.17  | 0.51 | 0.4  | -1.61 | 0.308858 | 0.131644 | 0.661293 | 0.403746 |
| MmugDNA.41268.1.S1_at   | MmugDNA.41268.1 | 12.01 | 11.68 | 0.25 | 0.18 | 1.25  | 0.235434 | 0.000464 | 0.602548 | 0.038572 |
| MmugDNA.41269.1.S1_at   | MmugDNA.41269.1 | 6.92  | 7.33  | 0.82 | 0.25 | -1.33 | 0.21376  | 0.42372  | 0.584333 | 0.646518 |
| MmugDNA.41270.1.S1_at   | MmugDNA.41270.1 | 5.88  | 5.84  | 0.13 | 0.29 | 1.03  | 0.538341 | 0.396458 | 0.803227 | 0.628241 |
| MmugDNA.41271.1.S1_at   | MmugDNA.41271.1 | 7.59  | 7.71  | 0.14 | 0.1  | -1.09 | 0.215619 | 0.067691 | 0.585748 | 0.306219 |
| MmugDNA.41271.1.S1_s_at | MmugDNA.41271.1 | 6.52  | 6.4   | 0.29 | 0.08 | 1.09  | 0.980512 | 0.98093  | 0.993785 | 0.989478 |
| MmugDNA.41271.1.S1_x_at | MmugDNA.41271.1 | 7.35  | 7.39  | 0.08 | 0.07 | -1.03 | 0.467977 | 0.308367 | 0.764607 | 0.564428 |
| MmugDNA.41272.1.S1_at   | MmugDNA.41272.1 | 3.52  | 3.51  | 0.1  | 0.02 | 1.01  | 0.818465 | 0.923533 | 0.934409 | 0.956997 |
| MmugDNA.41273.1.S1_at   | MmugDNA.41273.1 | 6.75  | 7.01  | 0.54 | 0.33 | -1.19 | 0.370657 | 0.015277 | 0.70495  | 0.156987 |
| MmugDNA.41274.1.S1_at   | MmugDNA.41274.1 | 5.13  | 5.15  | 0.08 | 0.29 | -1.01 | 0.494341 | 0.646752 | 0.779421 | 0.7931   |
| MmugDNA.41276.1.S1_at   | MmugDNA.41276.1 | 6.26  | 6.1   | 0.06 | 0.05 | 1.12  | 0.012915 | 0.074259 | 0.265815 | 0.318046 |
| MmugDNA.41277.1.S1_at   | MmugDNA.41277.1 | 5.02  | 5.11  | 0.06 | 0.1  | -1.07 | 0.152323 | 0.342935 | 0.525296 | 0.588745 |
| MmugDNA.41278.1.S1_at   | MmugDNA.41278.1 | 8.46  | 8.84  | 2.75 | 0.46 | -1.3  | 0.774579 | 0.572542 | 0.91642  | 0.744566 |
| MmugDNA.41279.1.S1_at   | MmugDNA.41279.1 | 12.5  | 12.55 | 0.07 | 0.03 | -1.03 | 0.271881 | 0.039419 | 0.631647 | 0.243529 |
| MmugDNA.4128.1.S1_at    | MmugDNA.4128.1  | 4.46  | 4.57  | 0.43 | 0.14 | -1.08 | 0.957327 | 0.683323 | 0.985942 | 0.815238 |
| MmugDNA.41280.1.S1_at   | MmugDNA.41280.1 | 11.29 | 11.48 | 0.17 | 0.01 | -1.14 | 0.189215 | 0.345778 | 0.560824 | 0.590937 |
| MmugDNA.41281.1.S1_at   | MmugDNA.41281.1 | 3.03  | 3.34  | 0.47 | 0.02 | -1.24 | 0.848419 | 0.954457 | 0.946776 | 0.974155 |
| MmugDNA.41282.1.S1_at   | MmugDNA.41282.1 | 4.32  | 4.21  | 0.21 | 0.03 | 1.08  | 0.936759 | 0.549902 | 0.978763 | 0.730154 |
| MmugDNA.41283.1.S1_at   | MmugDNA.41283.1 | 6.91  | 6.41  | 0.66 | 0.16 | 1.41  | 0.625151 | 0.470315 | 0.849207 | 0.678599 |
| MmugDNA.41284.1.S1_at   | MmugDNA.41284.1 | 5.68  | 5.9   | 0.03 | 0.16 | -1.16 | 0.232256 | 0.837456 | 0.600108 | 0.907122 |
| MmugDNA.41285.1.S1_at   | MmugDNA.41285.1 | 4.93  | 4.28  | 0.08 | 0.14 | 1.57  | 0.002521 | 0.001593 | 0.179396 | 0.06044  |
| MmugDNA.41285.1.S1_s_at | MmugDNA.41285.1 | 5.82  | 5.45  | 0.07 | 0.09 | 1.29  | 0.002133 | 0.000866 | 0.174757 | 0.047425 |
| MmugDNA.41287.1.S1_at   | MmugDNA.41287.1 | 4.36  | 4.35  | 0.07 | 0.03 | 1.01  | 0.912176 | 0.827981 | 0.970255 | 0.901214 |
| MmugDNA.41289.1.S1_at   | MmugDNA.41289.1 | 7.82  | 7.87  | 0.45 | 0.16 | -1.04 | 0.49531  | 0.351724 | 0.779921 | 0.595164 |
| MmugDNA.4129.1.S1_at    | MmugDNA.4129.1  | 3.04  | 2.95  | 0.01 | 0.09 | 1.06  | 0.146131 | 0.142655 | 0.520572 | 0.416389 |
| MmugDNA.41290.1.S1_at   | MmugDNA.41290.1 | 3.77  | 4.41  | 0.05 | 0.22 | -1.55 | 0.00725  | 0.091891 | 0.226509 | 0.347237 |
| MmugDNA.41291.1.S1_at   | MmugDNA.41291.1 | 3.81  | 3.72  | 0.03 | 0.09 | 1.06  | 0.121123 | 0.097426 | 0.494751 | 0.355097 |
| MmugDNA.41292.1.S1_at   | MmugDNA.41292.1 | 3.84  | 3.83  | 0.09 | 0.09 | 1     | 0.557051 | 0.653042 | 0.814485 | 0.79718  |

|                         |                 |       |       |      |      |       |          |          |          |          |
|-------------------------|-----------------|-------|-------|------|------|-------|----------|----------|----------|----------|
| MmugDNA.41294.1.S1_at   | MmugDNA.41294.1 | 5.8   | 5.55  | 0.16 | 0.08 | 1.2   | 0.075267 | 0.197243 | 0.436118 | 0.472213 |
| MmugDNA.41295.1.S1_at   | MmugDNA.41295.1 | 3.74  | 3.68  | 0.11 | 0.37 | 1.05  | 0.616453 | 0.806047 | 0.844957 | 0.888465 |
| MmugDNA.41298.1.S1_at   | MmugDNA.41298.1 | 6.36  | 6.51  | 0.15 | 0.14 | -1.11 | 0.126683 | 0.352416 | 0.500599 | 0.595722 |
| MmugDNA.413.1.S1_at     | MmugDNA.413.1   | 7.77  | 7.88  | 0.49 | 0.38 | -1.08 | 0.698583 | 0.11984  | 0.882848 | 0.388577 |
| MmugDNA.41300.1.S1_at   | MmugDNA.41300.1 | 3.47  | 3.47  | 0.13 | 0.35 | -1    | 0.918463 | 0.101198 | 0.972122 | 0.36084  |
| MmugDNA.41301.1.S1_at   | MmugDNA.41301.1 | 3.56  | 3.52  | 0.03 | 0.02 | 1.03  | 0.110475 | 0.167461 | 0.483545 | 0.443861 |
| MmugDNA.41302.1.S1_at   | MmugDNA.41302.1 | 4.58  | 4.55  | 0.06 | 0.02 | 1.02  | 0.800804 | 0.26534  | 0.927161 | 0.531314 |
| MmugDNA.41303.1.S1_at   | MmugDNA.41303.1 | 6.13  | 6.13  | 0.15 | 0.09 | 1     | 0.378269 | 0.494532 | 0.708156 | 0.694909 |
| MmugDNA.14800.1.S1_s_at | MmugDNA.14800.1 | 8.63  | 9.21  | 0.12 | 0.17 | -1.5  | 0.00895  | 0.020792 | 0.239209 | 0.1809   |
| MmugDNA.41304.1.S1_at   | MmugDNA.41304.1 | 7.62  | 6.83  | 0.28 | 0.19 | 1.73  | 0.015147 | 0.003759 | 0.2796   | 0.087393 |
| MmugDNA.41305.1.S1_at   | MmugDNA.41305.1 | 4.49  | 4.55  | 0.19 | 0.06 | -1.04 | 0.547005 | 0.000382 | 0.808912 | 0.037273 |
| MmugDNA.41306.1.S1_at   | MmugDNA.41306.1 | 9.49  | 9.86  | 0.08 | 0.05 | -1.3  | 0.001349 | 0.001222 | 0.159096 | 0.054593 |
| MmugDNA.41307.1.S1_at   | MmugDNA.41307.1 | 11.35 | 11.75 | 0.07 | 0.1  | -1.32 | 0.005548 | 0.003222 | 0.208157 | 0.082115 |
| MmugDNA.41309.1.S1_at   | MmugDNA.41309.1 | 6.14  | 6.31  | 0.13 | 0.28 | -1.12 | 0.389097 | 0.878211 | 0.715919 | 0.93052  |
| MmugDNA.4131.1.S1_at    | MmugDNA.4131.1  | 3.87  | 3.75  | 0.18 | 0.24 | 1.09  | 0.304014 | 0.456752 | 0.657781 | 0.67043  |
| MmugDNA.41316.1.S1_at   | MmugDNA.41316.1 | 6.95  | 7.22  | 0.2  | 0.04 | -1.21 | 0.057681 | 0.009419 | 0.402592 | 0.127871 |
| MmugDNA.41317.1.S1_s_at | MmugDNA.41317.1 | 9.48  | 8.96  | 0.19 | 0.04 | 1.43  | 0.010108 | 0.064679 | 0.24663  | 0.300314 |
| MmugDNA.41319.1.S1_at   | MmugDNA.41319.1 | 6.18  | 6.19  | 0.15 | 0.11 | -1.01 | 0.950003 | 0.897372 | 0.9832   | 0.94143  |
| MmugDNA.4132.1.S1_at    | MmugDNA.4132.1  | 5.91  | 5.82  | 0.14 | 0.1  | 1.07  | 0.494825 | 0.743507 | 0.779514 | 0.851395 |
| MmugDNA.41320.1.S1_at   | MmugDNA.41320.1 | 8.33  | 8.47  | 0.52 | 0.26 | -1.1  | 0.465453 | 0.147979 | 0.763035 | 0.42238  |
| MmugDNA.41321.1.S1_at   | MmugDNA.41321.1 | 5.99  | 5.82  | 1.8  | 0.24 | 1.13  | 0.815486 | 0.208876 | 0.933137 | 0.482717 |
| MmugDNA.41322.1.S1_at   | MmugDNA.41322.1 | 4.68  | 4.25  | 0.34 | 0.11 | 1.35  | 0.087647 | 0.162616 | 0.455349 | 0.43872  |
| MmugDNA.41323.1.S1_at   | MmugDNA.41323.1 | 10.88 | 11.56 | 0.44 | 0.11 | -1.6  | 0.132295 | 0.1523   | 0.506752 | 0.427072 |
| MmugDNA.41324.1.S1_at   | MmugDNA.41324.1 | 3.89  | 4.09  | 0.17 | 0.05 | -1.15 | 0.104858 | 0.100302 | 0.476242 | 0.359368 |
| MmugDNA.41325.1.S1_at   | MmugDNA.41325.1 | 7.53  | 7.97  | 0.71 | 0.14 | -1.36 | 0.237795 | 0.30591  | 0.604841 | 0.562732 |
| MmugDNA.41326.1.S1_at   | MmugDNA.41326.1 | 4.87  | 4.88  | 0.13 | 0.08 | -1.01 | 0.820671 | 0.851793 | 0.935289 | 0.915766 |
| MmugDNA.41327.1.S1_at   | MmugDNA.41327.1 | 4.55  | 4.42  | 0.32 | 0.14 | 1.1   | 0.311438 | 0.485313 | 0.663221 | 0.689049 |
| MmugDNA.41328.1.S1_at   | MmugDNA.41328.1 | 9.27  | 7.81  | 0.31 | 0.64 | 2.75  | 0.058861 | 0.174944 | 0.405539 | 0.451599 |
| MmugDNA.4133.1.S1_at    | MmugDNA.4133.1  | 5.19  | 5.17  | 0.09 | 0.15 | 1.01  | 0.359063 | 0.546685 | 0.697042 | 0.728135 |
| MmugDNA.41330.1.S1_at   | MmugDNA.41330.1 | 3.3   | 3.08  | 0.18 | 0.11 | 1.16  | 0.691425 | 0.260932 | 0.879833 | 0.527351 |
| MmugDNA.41331.1.S1_at   | MmugDNA.41331.1 | 4.92  | 4.54  | 0.35 | 0.6  | 1.29  | 0.24328  | 0.326502 | 0.609182 | 0.576576 |
| MmugDNA.41332.1.S1_at   | MmugDNA.41332.1 | 3.82  | 3.85  | 0.25 | 0.07 | -1.02 | 0.41188  | 0.102215 | 0.731751 | 0.362343 |
| MmugDNA.41333.1.S1_at   | MmugDNA.41333.1 | 3.3   | 3.35  | 0.13 | 0.1  | -1.03 | 0.326068 | 0.455856 | 0.67367  | 0.669664 |
| MmugDNA.41335.1.S1_at   | MmugDNA.41335.1 | 4.99  | 4.85  | 1.31 | 0.3  | 1.1   | 0.991287 | 0.207732 | 0.996655 | 0.481994 |
| MmugDNA.41337.1.S1_at   | MmugDNA.41337.1 | 9.51  | 9.21  | 0.11 | 0.02 | 1.23  | 0.020051 | 0.018327 | 0.303343 | 0.170218 |
| MmugDNA.41338.1.S1_at   | MmugDNA.41338.1 | 7.34  | 7.43  | 0.55 | 0.12 | -1.06 | 0.258912 | 0.786723 | 0.622296 | 0.876633 |
| MmugDNA.4134.1.S1_at    | MmugDNA.4134.1  | 7.24  | 7.6   | 0.4  | 0.22 | -1.28 | 0.183035 | 0.085721 | 0.555915 | 0.337761 |
| MmugDNA.41340.1.S1_at   | MmugDNA.41340.1 | 3.2   | 3.2   | 0.06 | 0.03 | 1     | 0.705685 | 0.346242 | 0.885355 | 0.591201 |
| MmugDNA.41341.1.S1_at   | MmugDNA.41341.1 | 4.92  | 4.71  | 0.34 | 0.31 | 1.15  | 0.495619 | 0.537621 | 0.780125 | 0.722616 |
| MmugDNA.41343.1.S1_at   | MmugDNA.41343.1 | 5.19  | 5.05  | 0.2  | 0.13 | 1.1   | 0.374913 | 0.143679 | 0.70621  | 0.417555 |
| MmugDNA.41344.1.S1_at   | MmugDNA.41344.1 | 6.03  | 5.74  | 0.16 | 0.06 | 1.22  | 0.055421 | 0.203224 | 0.398621 | 0.477415 |
| MmugDNA.41346.1.S1_at   | MmugDNA.41346.1 | 6.66  | 6.22  | 0.37 | 0.1  | 1.36  | 0.102923 | 0.062016 | 0.473381 | 0.295892 |
| MmugDNA.41348.1.S1_at   | MmugDNA.41348.1 | 9.62  | 9.76  | 0.32 | 0.07 | -1.1  | 0.670961 | 0.100572 | 0.870106 | 0.359845 |

|                         |                 |       |       |      |      |       |          |          |          |          |
|-------------------------|-----------------|-------|-------|------|------|-------|----------|----------|----------|----------|
| MmugDNA.41349.1.S1_at   | MmugDNA.41349.1 | 4.28  | 4.37  | 0.34 | 0    | -1.06 | 0.615146 | 0.737725 | 0.844207 | 0.848062 |
| MmugDNA.4135.1.S1_at    | MmugDNA.4135.1  | 5.04  | 4.95  | 0.29 | 0.31 | 1.07  | 0.792804 | 0.326736 | 0.92412  | 0.576725 |
| MmugDNA.41350.1.S1_at   | MmugDNA.41350.1 | 5.46  | 5.43  | 0.16 | 0.14 | 1.02  | 0.928361 | 0.931237 | 0.976259 | 0.96095  |
| MmugDNA.41351.1.S1_at   | MmugDNA.41351.1 | 6.34  | 6.17  | 0.49 | 0.33 | 1.13  | 0.745283 | 0.407813 | 0.902958 | 0.63521  |
| MmugDNA.41352.1.S1_at   | MmugDNA.41352.1 | 6.1   | 6.23  | 0.13 | 0.16 | -1.09 | 0.126589 | 0.434787 | 0.500496 | 0.654826 |
| MmugDNA.41353.1.S1_at   | MmugDNA.41353.1 | 10.12 | 10.35 | 0.16 | 0.14 | -1.18 | 0.148706 | 0.01759  | 0.522734 | 0.167721 |
| MmugDNA.41354.1.S1_at   | MmugDNA.41354.1 | 3.69  | 3.57  | 0.28 | 0.23 | 1.09  | 0.898843 | 0.631442 | 0.965643 | 0.782839 |
| MmugDNA.41355.1.S1_at   | MmugDNA.41355.1 | 9.12  | 8.46  | 0.85 | 0.21 | 1.59  | 0.505548 | 0.223292 | 0.785389 | 0.496105 |
| MmugDNA.4136.1.S1_at    | MmugDNA.4136.1  | 9.41  | 8.85  | 0.84 | 0.16 | 1.48  | 0.857857 | 0.527007 | 0.94975  | 0.715759 |
| MmugDNA.41362.1.S1_at   | MmugDNA.41362.1 | 3.42  | 3.36  | 0.01 | 0.06 | 1.04  | 0.421917 | 0.581195 | 0.737802 | 0.750266 |
| MmugDNA.41363.1.S1_at   | MmugDNA.41363.1 | 7.31  | 7.29  | 0.49 | 0.22 | -1.01 | 0.951556 | 0.941848 | 0.983692 | 0.967075 |
| MmugDNA.41365.1.S1_at   | MmugDNA.41365.1 | 11.28 | 11.49 | 0.07 | 0.16 | -1.16 | 0.291794 | 0.562199 | 0.648084 | 0.737871 |
| MmugDNA.41366.1.S1_at   | MmugDNA.41366.1 | 6.22  | 6.08  | 0.11 | 0.27 | 1.11  | 0.846822 | 0.879633 | 0.94629  | 0.931253 |
| MmugDNA.41367.1.S1_at   | MmugDNA.41367.1 | 4.73  | 5.05  | 0.36 | 0.14 | -1.25 | 0.147815 | 0.016617 | 0.52196  | 0.163117 |
| MmugDNA.41368.1.S1_at   | MmugDNA.41368.1 | 9.2   | 9.88  | 0.91 | 0.05 | -1.61 | 0.760558 | 0.918756 | 0.910074 | 0.954387 |
| MmugDNA.41369.1.S1_at   | MmugDNA.41369.1 | 6.31  | 6.16  | 0.17 | 0.17 | 1.11  | 0.343898 | 0.271916 | 0.686913 | 0.536655 |
| MmugDNA.4137.1.S1_at    | MmugDNA.4137.1  | 6.66  | 6.59  | 0.04 | 0.14 | 1.05  | 0.438291 | 0.096541 | 0.747277 | 0.354115 |
| MmugDNA.41370.1.S1_at   | MmugDNA.41370.1 | 4.29  | 4.23  | 0.47 | 0.17 | 1.04  | 0.479695 | 0.648879 | 0.770886 | 0.794491 |
| MmugDNA.41370.1.S1_x_at | MmugDNA.41370.1 | 5.26  | 5.04  | 0.31 | 0.11 | 1.17  | 0.168114 | 0.200623 | 0.540716 | 0.475176 |
| MmugDNA.41372.1.S1_at   | MmugDNA.41372.1 | 6.65  | 7.93  | 1.68 | 0.09 | -2.43 | 0.27011  | 0.349509 | 0.630217 | 0.593484 |
| MmugDNA.41373.1.S1_at   | MmugDNA.41373.1 | 4.85  | 4.89  | 0.14 | 0.06 | -1.03 | 0.771644 | 0.335883 | 0.914784 | 0.583537 |
| MmugDNA.41375.1.S1_at   | MmugDNA.41375.1 | 5.1   | 5.17  | 0.48 | 0.5  | -1.05 | 0.567015 | 0.507335 | 0.820189 | 0.702917 |
| MmugDNA.41377.1.S1_at   | MmugDNA.41377.1 | 5.57  | 5.44  | 0.16 | 0.22 | 1.09  | 0.46127  | 0.570152 | 0.760868 | 0.742922 |
| MmugDNA.41378.1.S1_at   | MmugDNA.41378.1 | 5.92  | 5.68  | 0.12 | 0.08 | 1.18  | 0.081379 | 0.173236 | 0.445406 | 0.449791 |
| MmugDNA.41380.1.S1_at   | MmugDNA.41380.1 | 7.54  | 7.38  | 0.15 | 0.09 | 1.11  | 0.184196 | 0.607137 | 0.55696  | 0.766223 |
| MmugDNA.41381.1.S1_at   | MmugDNA.41381.1 | 5.09  | 4.15  | 0.47 | 0.31 | 1.92  | 0.074773 | 0.299716 | 0.435313 | 0.558037 |
| MmugDNA.41382.1.S1_at   | MmugDNA.41382.1 | 6.02  | 5.85  | 0.02 | 0.06 | 1.12  | 0.01567  | 0.076179 | 0.28333  | 0.321047 |
| MmugDNA.41385.1.S1_at   | MmugDNA.41385.1 | 8.97  | 8.4   | 0.19 | 0.13 | 1.48  | 0.020378 | 0.017399 | 0.303945 | 0.16699  |
| MmugDNA.41386.1.S1_at   | MmugDNA.41386.1 | 5.91  | 5.54  | 0.16 | 0.12 | 1.3   | 0.036778 | 0.039732 | 0.355785 | 0.244323 |
| MmugDNA.41387.1.S1_at   | MmugDNA.41387.1 | 11.86 | 11.53 | 0.12 | 0.12 | 1.25  | 0.028004 | 0.023596 | 0.330017 | 0.192397 |
| MmugDNA.41388.1.S1_at   | MmugDNA.41388.1 | 3.87  | 3.76  | 0.07 | 0.12 | 1.08  | 0.089624 | 0.125091 | 0.457723 | 0.395506 |
| MmugDNA.41389.1.S1_at   | MmugDNA.41389.1 | 11.27 | 11.74 | 0.24 | 0.05 | -1.39 | 0.036136 | 0.074118 | 0.354443 | 0.317794 |
| MmugDNA.41390.1.S1_at   | MmugDNA.41390.1 | 9.7   | 9.28  | 0.7  | 0.15 | 1.33  | 0.423238 | 0.012808 | 0.738919 | 0.145832 |
| MmugDNA.41392.1.S1_at   | MmugDNA.41392.1 | 7.84  | 8.15  | 0.41 | 0.08 | -1.25 | 0.35126  | 0.060891 | 0.691945 | 0.293504 |
| MmugDNA.41393.1.S1_at   | MmugDNA.41393.1 | 6.57  | 6.45  | 0.05 | 0    | 1.08  | 0.034328 | 0.007562 | 0.349593 | 0.116437 |
| MmugDNA.41394.1.S1_at   | MmugDNA.41394.1 | 5.66  | 5.36  | 0.23 | 0.08 | 1.23  | 0.437493 | 0.444033 | 0.746842 | 0.661644 |
| MmugDNA.41396.1.S1_at   | MmugDNA.41396.1 | 7.85  | 8.12  | 0.47 | 0.18 | -1.2  | 0.607604 | 0.274661 | 0.840951 | 0.539133 |
| MmugDNA.41398.1.S1_at   | MmugDNA.41398.1 | 9.85  | 10.33 | 0.42 | 0.2  | -1.4  | 0.238901 | 0.09231  | 0.60547  | 0.348147 |
| MmugDNA.41399.1.S1_s_at | MmugDNA.41399.1 | 11.34 | 11.34 | 0.48 | 0.08 | -1    | 0.979751 | 0.665966 | 0.993574 | 0.80431  |
| MmugDNA.414.1.S1_at     | MmugDNA.414.1   | 8.45  | 7.74  | 0.57 | 0.07 | 1.63  | 0.096017 | 0.075473 | 0.464614 | 0.319857 |
| MmugDNA.4140.1.S1_at    | MmugDNA.4140.1  | 4.13  | 4.41  | 0.19 | 0.49 | -1.22 | 0.141012 | 0.63105  | 0.516345 | 0.782599 |
| MmugDNA.41400.1.S1_at   | MmugDNA.41400.1 | 3.38  | 3.16  | 0.19 | 0.07 | 1.17  | 0.068482 | 0.261859 | 0.42567  | 0.528265 |
| MmugDNA.41401.1.S1_at   | MmugDNA.41401.1 | 3.32  | 3.32  | 0.03 | 0.02 | 1     | 0.23504  | 0.604225 | 0.602266 | 0.764555 |

|                         |                 |       |       |      |      |       |          |          |          |          |
|-------------------------|-----------------|-------|-------|------|------|-------|----------|----------|----------|----------|
| MmugDNA.41403.1.S1_at   | MmugDNA.41403.1 | 5.37  | 6.17  | 0.39 | 0.24 | -1.74 | 0.161417 | 0.124955 | 0.534763 | 0.395386 |
| MmugDNA.41404.1.S1_at   | MmugDNA.41404.1 | 5.23  | 4.69  | 0.41 | 0.08 | 1.45  | 0.082516 | 0.465483 | 0.447377 | 0.675774 |
| MmugDNA.41406.1.S1_at   | MmugDNA.41406.1 | 6.97  | 6.79  | 0.16 | 0.1  | 1.13  | 0.136755 | 0.213342 | 0.511963 | 0.487225 |
| MmugDNA.41408.1.S1_at   | MmugDNA.41408.1 | 5.04  | 4.52  | 0.06 | 0.35 | 1.43  | 0.196695 | 0.252664 | 0.56736  | 0.521174 |
| MmugDNA.41409.1.S1_at   | MmugDNA.41409.1 | 3.59  | 3.49  | 0.06 | 0.28 | 1.07  | 0.867879 | 0.827437 | 0.953785 | 0.900959 |
| MmugDNA.4141.1.S1_at    | MmugDNA.4141.1  | 3.9   | 3.87  | 0.2  | 0.08 | 1.02  | 0.856931 | 0.218707 | 0.94962  | 0.492438 |
| MmugDNA.41410.1.S1_at   | MmugDNA.41410.1 | 7.55  | 7.21  | 0.94 | 0.25 | 1.27  | 0.745108 | 0.372866 | 0.902864 | 0.611735 |
| MmugDNA.41411.1.S1_at   | MmugDNA.41411.1 | 4.89  | 4.94  | 0.39 | 0.16 | -1.03 | 0.54673  | 0.6179   | 0.808789 | 0.773765 |
| MmugDNA.41415.1.S1_at   | MmugDNA.41415.1 | 4.92  | 4.88  | 0.22 | 0.06 | 1.03  | 0.819873 | 0.207632 | 0.935136 | 0.481906 |
| MmugDNA.4142.1.S1_at    | MmugDNA.4142.1  | 7.16  | 7.17  | 0.07 | 0.04 | -1.01 | 0.806888 | 0.968294 | 0.929983 | 0.982549 |
| MmugDNA.41421.1.S1_at   | MmugDNA.41421.1 | 9.76  | 10.16 | 0.31 | 0.15 | -1.32 | 0.364934 | 0.080495 | 0.700775 | 0.328159 |
| MmugDNA.41423.1.S1_at   | MmugDNA.41423.1 | 3.69  | 3.65  | 0.12 | 0.13 | 1.03  | 0.810287 | 0.198134 | 0.931318 | 0.473135 |
| MmugDNA.41425.1.S1_at   | MmugDNA.41425.1 | 7.02  | 8.09  | 0.32 | 0.23 | -2.1  | 0.010562 | 0.005478 | 0.248239 | 0.102081 |
| MmugDNA.41426.1.S1_s_at | MmugDNA.41426.1 | 11.97 | 11.88 | 0.24 | 0.09 | 1.06  | 0.491955 | 0.661239 | 0.778053 | 0.801687 |
| MmugDNA.41427.1.S1_at   | MmugDNA.41427.1 | 5     | 5.07  | 0.11 | 0.12 | -1.05 | 0.540404 | 0.35871  | 0.804374 | 0.600178 |
| MmugDNA.41428.1.S1_at   | MmugDNA.41428.1 | 5.31  | 5.31  | 0.28 | 0.26 | 1     | 0.967509 | 0.659973 | 0.98927  | 0.801008 |
| MmugDNA.41429.1.S1_at   | MmugDNA.41429.1 | 5     | 4.39  | 1.07 | 0.18 | 1.52  | 0.110643 | 0.048213 | 0.483799 | 0.264671 |
| MmugDNA.4143.1.S1_at    | MmugDNA.4143.1  | 4.65  | 4.53  | 0.05 | 0.15 | 1.09  | 0.526748 | 0.79511  | 0.796797 | 0.881926 |
| MmugDNA.41431.1.S1_at   | MmugDNA.41431.1 | 7.34  | 7.71  | 1.2  | 0.05 | -1.29 | 0.671753 | 0.156844 | 0.87055  | 0.432372 |
| MmugDNA.41432.1.S1_s_at | MmugDNA.41432.1 | 9.69  | 9.76  | 0.34 | 0.04 | -1.05 | 0.608797 | 0.238756 | 0.841357 | 0.509438 |
| MmugDNA.41437.1.S1_at   | MmugDNA.41437.1 | 12.15 | 11.99 | 0.11 | 0.11 | 1.12  | 0.117394 | 0.049529 | 0.490925 | 0.267481 |
| MmugDNA.41438.1.S1_at   | MmugDNA.41438.1 | 3.82  | 3.85  | 0.15 | 0.25 | -1.02 | 0.72354  | 0.742971 | 0.892847 | 0.851094 |
| MmugDNA.41439.1.S1_at   | MmugDNA.41439.1 | 12.32 | 11.91 | 0.23 | 0.1  | 1.33  | 0.020857 | 0.00321  | 0.305672 | 0.082023 |
| MmugDNA.4144.1.S1_s_at  | MmugDNA.4144.1  | 6.36  | 6.29  | 0.24 | 0.37 | 1.05  | 0.296318 | 0.487484 | 0.651995 | 0.690556 |
| MmugDNA.41440.1.S1_at   | MmugDNA.41440.1 | 5.47  | 6.12  | 0.45 | 0.57 | -1.56 | 0.185568 | 0.208585 | 0.558594 | 0.482512 |
| MmugDNA.41441.1.S1_at   | MmugDNA.41441.1 | 4.11  | 4.07  | 0.04 | 0.19 | 1.03  | 0.3753   | 0.671232 | 0.706463 | 0.807737 |
| MmugDNA.41442.1.S1_at   | MmugDNA.41442.1 | 4.76  | 4.77  | 0.26 | 0.27 | -1.01 | 0.993095 | 0.4661   | 0.997423 | 0.676117 |
| MmugDNA.6164.1.S1_s_at  | MmugDNA.6164.1  | 10.95 | 10.97 | 0.28 | 0.11 | -1.01 | 0.803821 | 0.525782 | 0.928583 | 0.715217 |
| MmugDNA.41444.1.S1_at   | MmugDNA.41444.1 | 7.45  | 8.22  | 0.36 | 0.19 | -1.7  | 0.059794 | 0.038129 | 0.407034 | 0.239923 |
| MmugDNA.41445.1.S1_at   | MmugDNA.41445.1 | 6.1   | 6     | 0.09 | 0.01 | 1.07  | 0.166172 | 0.018433 | 0.538903 | 0.170756 |
| MmugDNA.41446.1.S1_at   | MmugDNA.41446.1 | 6.2   | 5.79  | 1.17 | 0.32 | 1.33  | 0.762915 | 0.679341 | 0.910973 | 0.812775 |
| MmugDNA.41449.1.S1_at   | MmugDNA.41449.1 | 5.34  | 5.09  | 0.26 | 0    | 1.19  | 0.537941 | 0.675383 | 0.802959 | 0.81026  |
| MmugDNA.4145.1.S1_at    | MmugDNA.4145.1  | 3.93  | 3.96  | 0.16 | 0.16 | -1.02 | 0.357884 | 0.599954 | 0.695993 | 0.761722 |
| MmugDNA.41450.1.S1_at   | MmugDNA.41450.1 | 3.6   | 3.42  | 0.14 | 0.13 | 1.13  | 0.168223 | 0.367488 | 0.540845 | 0.607139 |
| MmugDNA.41451.1.S1_at   | MmugDNA.41451.1 | 8.71  | 7.97  | 0.28 | 0.41 | 1.67  | 0.046007 | 0.054122 | 0.37735  | 0.277968 |
| MmugDNA.41451.1.S1_s_at | MmugDNA.41451.1 | 8.23  | 7.61  | 0.26 | 0.25 | 1.53  | 0.035067 | 0.086744 | 0.35097  | 0.339484 |
| MmugDNA.41455.1.S1_at   | MmugDNA.41455.1 | 3.17  | 3.25  | 0.32 | 0.25 | -1.05 | 0.629846 | 0.800337 | 0.85173  | 0.885129 |
| MmugDNA.41456.1.S1_at   | MmugDNA.41456.1 | 8.84  | 9     | 0.89 | 0.04 | -1.12 | 0.790076 | 0.2328   | 0.922759 | 0.504426 |
| MmugDNA.41458.1.S1_at   | MmugDNA.41458.1 | 9.34  | 10    | 0.33 | 0.16 | -1.58 | 0.014767 | 0.007756 | 0.278005 | 0.117622 |
| MmugDNA.41460.1.S1_at   | MmugDNA.41460.1 | 3.2   | 3.01  | 0.13 | 0.08 | 1.14  | 0.103724 | 0.115394 | 0.474343 | 0.382441 |
| MmugDNA.41463.1.S1_at   | MmugDNA.41463.1 | 3.28  | 3.29  | 0.79 | 0.09 | -1.01 | 0.373469 | 0.512652 | 0.705567 | 0.706448 |
| MmugDNA.41464.1.S1_at   | MmugDNA.41464.1 | 7.27  | 7.22  | 0.22 | 0.03 | 1.03  | 0.673878 | 0.59862  | 0.871616 | 0.760996 |
| MmugDNA.41465.1.S1_at   | MmugDNA.41465.1 | 3.44  | 3.16  | 0.05 | 0.12 | 1.21  | 0.034105 | 0.00022  | 0.348061 | 0.032385 |

|                         |                 |       |       |      |      |       |          |          |          |          |
|-------------------------|-----------------|-------|-------|------|------|-------|----------|----------|----------|----------|
| MmugDNA.41466.1.S1_at   | MmugDNA.41466.1 | 7.06  | 6.96  | 0.08 | 0.16 | 1.07  | 0.213901 | 0.121499 | 0.584507 | 0.39064  |
| MmugDNA.41467.1.S1_at   | MmugDNA.41467.1 | 5.44  | 5.32  | 0.32 | 0.19 | 1.09  | 0.845627 | 0.048197 | 0.945907 | 0.264665 |
| MmugDNA.4147.1.S1_at    | MmugDNA.4147.1  | 10.61 | 9.72  | 1.03 | 0.2  | 1.85  | 0.237245 | 0.143542 | 0.604124 | 0.41747  |
| MmugDNA.41470.1.S1_at   | MmugDNA.41470.1 | 3.79  | 3.7   | 0.4  | 0.23 | 1.07  | 0.748602 | 0.610478 | 0.904527 | 0.768677 |
| MmugDNA.41471.1.S1_at   | MmugDNA.41471.1 | 4.56  | 4.47  | 0.14 | 0.01 | 1.07  | 0.150267 | 0.256376 | 0.523933 | 0.524114 |
| MmugDNA.41473.1.S1_at   | MmugDNA.41473.1 | 4.12  | 4.96  | 0.83 | 0.43 | -1.79 | 0.323518 | 0.2974   | 0.672279 | 0.556078 |
| MmugDNA.41474.1.S1_at   | MmugDNA.41474.1 | 3.56  | 3.58  | 0.32 | 0.01 | -1.01 | 0.412163 | 0.590122 | 0.731935 | 0.756117 |
| MmugDNA.41476.1.S1_at   | MmugDNA.41476.1 | 6.08  | 5.97  | 0.1  | 0.19 | 1.08  | 0.480055 | 0.6215   | 0.771035 | 0.776067 |
| MmugDNA.41477.1.S1_at   | MmugDNA.41477.1 | 3.18  | 3.11  | 0.18 | 0.08 | 1.05  | 0.215541 | 0.500725 | 0.585748 | 0.699242 |
| MmugDNA.41477.1.S1_s_at | MmugDNA.41477.1 | 3.66  | 3.8   | 0.1  | 0.01 | -1.11 | 0.071605 | 0.171668 | 0.431092 | 0.448048 |
| MmugDNA.41478.1.S1_at   | MmugDNA.41478.1 | 6.14  | 5.73  | 0.32 | 0.46 | 1.33  | 0.325964 | 0.196765 | 0.673582 | 0.471873 |
| MmugDNA.41479.1.S1_at   | MmugDNA.41479.1 | 3.22  | 3.16  | 0.12 | 0.05 | 1.04  | 0.946404 | 0.069803 | 0.981426 | 0.310331 |
| MmugDNA.4148.1.S1_at    | MmugDNA.4148.1  | 4.91  | 5.58  | 0.37 | 0.34 | -1.59 | 0.131173 | 0.132617 | 0.5054   | 0.404544 |
| MmugDNA.41480.1.S1_at   | MmugDNA.41480.1 | 7.39  | 8.12  | 0.41 | 0.14 | -1.65 | 0.140724 | 0.721218 | 0.51617  | 0.838628 |
| MmugDNA.41482.1.S1_at   | MmugDNA.41482.1 | 4.18  | 4.21  | 0.36 | 0.05 | -1.02 | 0.81334  | 0.79715  | 0.932522 | 0.883004 |
| MmugDNA.41483.1.S1_at   | MmugDNA.41483.1 | 6.91  | 6.86  | 0.17 | 0.37 | 1.03  | 0.477705 | 0.085575 | 0.76987  | 0.337567 |
| MmugDNA.41483.1.S1_x_at | MmugDNA.41483.1 | 6.86  | 6.76  | 0.13 | 0.53 | 1.07  | 0.312995 | 0.09536  | 0.664399 | 0.35239  |
| MmugDNA.41484.1.S1_at   | MmugDNA.41484.1 | 10.79 | 10.1  | 0.76 | 0.23 | 1.61  | 0.708199 | 0.688088 | 0.886591 | 0.817914 |
| MmugDNA.41485.1.S1_at   | MmugDNA.41485.1 | 7.01  | 6.95  | 0.24 | 0.05 | 1.04  | 0.891064 | 0.772885 | 0.962566 | 0.867946 |
| MmugDNA.41489.1.S1_at   | MmugDNA.41489.1 | 6.95  | 8.4   | 0.39 | 0.23 | -2.73 | 0.003914 | 0.00106  | 0.198571 | 0.05171  |
| MmugDNA.4149.1.S1_at    | MmugDNA.4149.1  | 5.65  | 5.45  | 0.07 | 0.21 | 1.14  | 0.353936 | 0.460207 | 0.693507 | 0.672105 |
| MmugDNA.41490.1.S1_at   | MmugDNA.41490.1 | 5.24  | 5.08  | 0.21 | 0.16 | 1.12  | 0.590221 | 0.489647 | 0.832832 | 0.691862 |
| MmugDNA.41492.1.S1_at   | MmugDNA.41492.1 | 3.99  | 3.74  | 0.17 | 0.1  | 1.19  | 0.252493 | 0.343599 | 0.617481 | 0.589322 |
| MmugDNA.41493.1.S1_at   | MmugDNA.41493.1 | 7.03  | 6.05  | 0.33 | 0.75 | 1.97  | 0.306412 | 0.192157 | 0.659434 | 0.467632 |
| MmugDNA.41494.1.S1_at   | MmugDNA.41494.1 | 5.85  | 5.9   | 0.03 | 0.47 | -1.04 | 0.756807 | 0.884961 | 0.908337 | 0.934455 |
| MmugDNA.41495.1.S1_at   | MmugDNA.41495.1 | 5.74  | 6.29  | 0.48 | 0.36 | -1.47 | 0.368285 | 0.184894 | 0.703527 | 0.460776 |
| MmugDNA.41496.1.S1_at   | MmugDNA.41496.1 | 2.94  | 2.99  | 0.04 | 0.29 | -1.04 | 0.914041 | 0.865061 | 0.970812 | 0.923476 |
| MmugDNA.41497.1.S1_at   | MmugDNA.41497.1 | 6.47  | 6.49  | 0.08 | 0.05 | -1.02 | 0.899395 | 0.992701 | 0.965794 | 0.995715 |
| MmugDNA.41499.1.S1_at   | MmugDNA.41499.1 | 10.27 | 10.26 | 0.28 | 0.16 | 1.01  | 0.586685 | 0.706226 | 0.831415 | 0.829634 |
| MmugDNA.415.1.S1_at     | MmugDNA.415.1   | 4.66  | 4.62  | 0.29 | 0.34 | 1.03  | 0.958486 | 0.218732 | 0.986346 | 0.492438 |
| MmugDNA.4150.1.S1_at    | MmugDNA.4150.1  | 6.21  | 6.86  | 0.73 | 0.77 | -1.57 | 0.229689 | 0.089231 | 0.59847  | 0.34333  |
| MmugDNA.41500.1.S1_at   | MmugDNA.41500.1 | 3.67  | 3.64  | 0.05 | 0.19 | 1.02  | 0.371541 | 0.064647 | 0.705567 | 0.300314 |
| MmugDNA.41501.1.S1_at   | MmugDNA.41501.1 | 8.3   | 7.75  | 0.25 | 0.17 | 1.47  | 0.03382  | 0.028525 | 0.347296 | 0.210754 |
| MmugDNA.41503.1.S1_at   | MmugDNA.41503.1 | 5.67  | 5.33  | 0.21 | 0.08 | 1.27  | 0.024588 | 0.13669  | 0.319173 | 0.409226 |
| MmugDNA.41504.1.S1_at   | MmugDNA.41504.1 | 12.32 | 12.28 | 0.17 | 0.06 | 1.03  | 0.820214 | 0.928073 | 0.935289 | 0.959154 |
| MmugDNA.41505.1.S1_at   | MmugDNA.41505.1 | 4.92  | 4.67  | 0.32 | 0.23 | 1.19  | 0.127955 | 0.307206 | 0.502422 | 0.563499 |
| MmugDNA.41508.1.S1_at   | MmugDNA.41508.1 | 3.33  | 3.32  | 0.08 | 0.12 | 1     | 0.243009 | 0.089718 | 0.608888 | 0.34398  |
| MmugDNA.4151.1.S1_at    | MmugDNA.4151.1  | 4.75  | 5.03  | 0.1  | 0.28 | -1.21 | 0.390727 | 0.527967 | 0.716935 | 0.716382 |
| MmugDNA.41511.1.S1_at   | MmugDNA.41511.1 | 3     | 3.11  | 0.23 | 0.58 | -1.08 | 0.557184 | 0.717082 | 0.814531 | 0.836224 |
| MmugDNA.41512.1.S1_at   | MmugDNA.41512.1 | 8.12  | 7.63  | 0.17 | 0.04 | 1.4   | 0.021727 | 0.000711 | 0.309332 | 0.044419 |
| MmugDNA.41513.1.S1_at   | MmugDNA.41513.1 | 6.15  | 5.84  | 0.17 | 0.1  | 1.24  | 0.066668 | 0.005238 | 0.422542 | 0.301239 |
| MmugDNA.41360.1.S1_s_at | MmugDNA.41360.1 | 9     | 8.87  | 0.23 | 0.26 | 1.1   | 0.893167 | 0.003955 | 0.963441 | 0.089462 |
| MmugDNA.41516.1.S1_at   | MmugDNA.41516.1 | 3.44  | 3.6   | 0.38 | 0.12 | -1.12 | 0.73014  | 0.913887 | 0.895994 | 0.951561 |

|                         |                 |       |       |      |      |       |          |          |          |          |
|-------------------------|-----------------|-------|-------|------|------|-------|----------|----------|----------|----------|
| MmugDNA.41517.1.S1_at   | MmugDNA.41517.1 | 3.47  | 3.47  | 0.29 | 0.13 | -1    | 0.710888 | 0.354449 | 0.88743  | 0.597225 |
| MmugDNA.41519.1.S1_at   | MmugDNA.41519.1 | 4.43  | 4.26  | 0.06 | 0.05 | 1.12  | 0.01026  | 0.006189 | 0.246929 | 0.106774 |
| MmugDNA.41520.1.S1_at   | MmugDNA.41520.1 | 6.07  | 5.47  | 1.33 | 0.27 | 1.51  | 0.154322 | 0.19312  | 0.527483 | 0.468554 |
| MmugDNA.41521.1.S1_at   | MmugDNA.41521.1 | 4.51  | 4.88  | 0.03 | 0.14 | -1.29 | 0.008406 | 0.135787 | 0.233808 | 0.407979 |
| MmugDNA.41523.1.S1_at   | MmugDNA.41523.1 | 5.43  | 5.7   | 0.17 | 0.15 | -1.2  | 0.098138 | 0.272663 | 0.467605 | 0.537433 |
| MmugDNA.41524.1.S1_at   | MmugDNA.41524.1 | 4.89  | 4.85  | 0.05 | 0.11 | 1.03  | 0.215625 | 0.428215 | 0.585748 | 0.649721 |
| MmugDNA.41525.1.S1_at   | MmugDNA.41525.1 | 6.62  | 5.94  | 0.85 | 0.29 | 1.6   | 0.171781 | 0.190008 | 0.545121 | 0.465619 |
| MmugDNA.41526.1.S1_at   | MmugDNA.41526.1 | 6.15  | 7.51  | 1.47 | 0.56 | -2.57 | 0.065755 | 0.152252 | 0.420945 | 0.427045 |
| MmugDNA.41527.1.S1_at   | MmugDNA.41527.1 | 6.22  | 5.69  | 0.17 | 0.26 | 1.45  | 0.026162 | 0.329077 | 0.323523 | 0.578482 |
| MmugDNA.41528.1.S1_at   | MmugDNA.41528.1 | 4.58  | 4.6   | 0.43 | 0.26 | -1.01 | 0.864742 | 0.987526 | 0.952416 | 0.993022 |
| MmugDNA.41529.1.S1_at   | MmugDNA.41529.1 | 4.21  | 4.02  | 0.5  | 0.12 | -1.14 | 0.512189 | 0.795857 | 0.789137 | 0.882403 |
| MmugDNA.4153.1.S1_at    | MmugDNA.4153.1  | 4.68  | 3.9   | 0.45 | 0.54 | 1.71  | 0.345815 | 0.485171 | 0.687791 | 0.688969 |
| MmugDNA.41530.1.S1_at   | MmugDNA.41530.1 | 10.8  | 11.1  | 0.79 | 0.26 | -1.23 | 0.6356   | 0.553598 | 0.854617 | 0.73273  |
| MmugDNA.41531.1.S1_at   | MmugDNA.41531.1 | 8.86  | 9.75  | 1.2  | 0.15 | -1.86 | 0.231906 | 0.329958 | 0.599694 | 0.578874 |
| MmugDNA.41533.1.S1_at   | MmugDNA.41533.1 | 6.37  | 6.35  | 0.37 | 0.05 | 1.01  | 0.892732 | 0.947864 | 0.963274 | 0.970378 |
| MmugDNA.41534.1.S1_at   | MmugDNA.41534.1 | 5.45  | 5.48  | 0.07 | 0.12 | -1.02 | 0.684254 | 0.489515 | 0.876373 | 0.691824 |
| MmugDNA.41535.1.S1_at   | MmugDNA.41535.1 | 6.68  | 6.74  | 0.15 | 0.04 | -1.04 | 0.669707 | 0.934218 | 0.869663 | 0.962662 |
| MmugDNA.41536.1.S1_at   | MmugDNA.41536.1 | 4.48  | 4.72  | 0.33 | 0.12 | -1.18 | 0.986554 | 0.197607 | 0.995657 | 0.472564 |
| MmugDNA.41537.1.S1_at   | MmugDNA.41537.1 | 6.81  | 6.29  | 0.42 | 0.21 | 1.43  | 0.235579 | 0.316505 | 0.602691 | 0.569913 |
| MmugDNA.41538.1.S1_at   | MmugDNA.41538.1 | 6.2   | 6.17  | 0.34 | 0.26 | 1.02  | 0.823716 | 0.396576 | 0.936367 | 0.628409 |
| MmugDNA.41539.1.S1_at   | MmugDNA.41539.1 | 7.58  | 7.09  | 0.52 | 0.16 | 1.41  | 0.121864 | 0.149902 | 0.495636 | 0.424522 |
| MmugDNA.41541.1.S1_at   | MmugDNA.41541.1 | 5.55  | 5.54  | 0.25 | 0.1  | 1.01  | 0.901046 | 0.09008  | 0.966467 | 0.344402 |
| MmugDNA.41542.1.S1_at   | MmugDNA.41542.1 | 5.24  | 5.1   | 0.17 | 0.08 | 1.1   | 0.125498 | 0.156739 | 0.499523 | 0.432216 |
| MmugDNA.41543.1.S1_at   | MmugDNA.41543.1 | 3.74  | 3.74  | 0.15 | 0.26 | -1    | 0.431781 | 0.335684 | 0.743599 | 0.583441 |
| MmugDNA.13982.1.S1_s_at | MmugDNA.13982.1 | 10.34 | 10.71 | 0.25 | 0.05 | -1.3  | 0.06331  | 0.065199 | 0.415656 | 0.301239 |
| MmugDNA.41545.1.S1_at   | MmugDNA.41545.1 | 7.75  | 7.86  | 0.94 | 0.48 | -1.08 | 0.805022 | 0.362592 | 0.929121 | 0.603141 |
| MmugDNA.41549.1.S1_at   | MmugDNA.41549.1 | 4.13  | 4.06  | 0.16 | 0.18 | 1.05  | 0.697069 | 0.749617 | 0.882183 | 0.854505 |
| MmugDNA.4155.1.S1_at    | MmugDNA.4155.1  | 4.05  | 4.24  | 0.64 | 0.06 | -1.14 | 0.881182 | 0.983281 | 0.958973 | 0.990726 |
| MmugDNA.41550.1.S1_at   | MmugDNA.41550.1 | 7.39  | 7.46  | 0.64 | 0.17 | -1.05 | 0.909876 | 0.771958 | 0.96945  | 0.867436 |
| MmugDNA.41551.1.S1_at   | MmugDNA.41551.1 | 8.18  | 8.08  | 0.08 | 0.08 | 1.07  | 0.113929 | 0.32143  | 0.487339 | 0.573207 |
| MmugDNA.41552.1.S1_at   | MmugDNA.41552.1 | 5.34  | 5.24  | 0.07 | 0.11 | 1.07  | 0.130967 | 0.425409 | 0.5054   | 0.647807 |
| MmugDNA.41553.1.S1_at   | MmugDNA.41553.1 | 6.05  | 6.07  | 0.08 | 0.03 | -1.01 | 0.425616 | 0.73308  | 0.740112 | 0.845503 |
| MmugDNA.41555.1.S1_at   | MmugDNA.41555.1 | 9.54  | 10.44 | 0.76 | 0.05 | -1.87 | 0.121503 | 0.130784 | 0.495106 | 0.402959 |
| MmugDNA.41556.1.S1_at   | MmugDNA.41556.1 | 5.66  | 5.28  | 0.18 | 0.1  | 1.3   | 0.070761 | 0.161054 | 0.429834 | 0.437227 |
| MmugDNA.41557.1.S1_at   | MmugDNA.41557.1 | 3.22  | 3.2   | 0.22 | 0.03 | 1.02  | 0.375504 | 0.544873 | 0.706517 | 0.727183 |
| MmugDNA.22773.1.S1_s_at | MmugDNA.22773.1 | 5.87  | 5.78  | 0.06 | 0.11 | 1.06  | 0.167107 | 0.23323  | 0.539661 | 0.504591 |
| MmugDNA.41558.1.S1_at   | MmugDNA.41558.1 | 3.28  | 3.26  | 0.15 | 0.14 | 1.01  | 0.432026 | 0.423607 | 0.743696 | 0.646459 |
| MmugDNA.41558.1.S1_s_at | MmugDNA.41558.1 | 10.67 | 10.38 | 0.56 | 0.1  | 1.22  | 0.680565 | 0.051916 | 0.874731 | 0.273306 |
| MmugDNA.41560.1.S1_at   | MmugDNA.41560.1 | 8.31  | 8.14  | 0.34 | 0.2  | 1.12  | 0.530692 | 0.591442 | 0.799187 | 0.756977 |
| MmugDNA.41561.1.S1_at   | MmugDNA.41561.1 | 7.5   | 7.02  | 0.18 | 0.17 | 1.4   | 0.037036 | 0.208414 | 0.356628 | 0.482316 |
| MmugDNA.41563.1.S1_at   | MmugDNA.41563.1 | 4.03  | 3.89  | 0.07 | 0.13 | 1.1   | 0.633131 | 0.730952 | 0.853404 | 0.844168 |
| MmugDNA.41564.1.S1_at   | MmugDNA.41564.1 | 3.61  | 3.61  | 0.23 | 0.33 | 1     | 0.889873 | 0.822055 | 0.962057 | 0.89765  |
| MmugDNA.41565.1.S1_at   | MmugDNA.41565.1 | 12.93 | 13.04 | 0.09 | 0.02 | -1.08 | 0.113818 | 0.003002 | 0.487244 | 0.079958 |



|                         |                 |       |       |      |      |       |          |          |          |          |
|-------------------------|-----------------|-------|-------|------|------|-------|----------|----------|----------|----------|
| MmugDNA.41566.1.S1_at   | MmugDNA.41566.1 | 11.56 | 11.62 | 0.17 | 0.06 | -1.05 | 0.936966 | 0.268534 | 0.978849 | 0.534123 |
| MmugDNA.41567.1.S1_at   | MmugDNA.41567.1 | 2.98  | 3.1   | 0.11 | 0.45 | -1.09 | 0.170772 | 0.20584  | 0.543739 | 0.480094 |
| MmugDNA.41569.1.S1_at   | MmugDNA.41569.1 | 12.83 | 12.72 | 0.06 | 0.04 | 1.08  | 0.280689 | 0.774501 | 0.639467 | 0.868769 |
| MmugDNA.41569.1.S1_s_at | MmugDNA.41569.1 | 12.91 | 12.83 | 0.09 | 0.04 | 1.05  | 0.326442 | 0.475895 | 0.674037 | 0.682387 |
| MmugDNA.41571.1.S1_s_at | MmugDNA.41571.1 | 10.83 | 10.64 | 0.46 | 0.01 | 1.14  | 0.448443 | 0.482229 | 0.753886 | 0.687128 |
| MmugDNA.41573.1.S1_at   | MmugDNA.41573.1 | 3.86  | 3.78  | 0.11 | 0    | 1.05  | 0.184655 | 0.04029  | 0.557393 | 0.245902 |
| MmugDNA.41574.1.S1_at   | MmugDNA.41574.1 | 7.86  | 7.54  | 0.09 | 0.02 | 1.25  | 0.002214 | 0.014099 | 0.174757 | 0.15195  |
| MmugDNA.41575.1.S1_at   | MmugDNA.41575.1 | 3.86  | 3.87  | 0.1  | 0.07 | -1.01 | 0.412106 | 0.30998  | 0.73192  | 0.565227 |
| MmugDNA.41577.1.S1_at   | MmugDNA.41577.1 | 6.59  | 8.27  | 0.58 | 0.37 | -3.22 | 0.01596  | 0.011694 | 0.284606 | 0.140155 |
| MmugDNA.41578.1.S1_at   | MmugDNA.41578.1 | 6.45  | 6.32  | 0.18 | 0.11 | 1.09  | 0.128865 | 0.466701 | 0.503618 | 0.676431 |
| MmugDNA.41580.1.S1_x_at | MmugDNA.41580.1 | 7.18  | 7.33  | 0.28 | 0.25 | -1.11 | 0.736779 | 0.197324 | 0.899286 | 0.472251 |
| MmugDNA.41583.1.S1_at   | MmugDNA.41583.1 | 3.8   | 3.63  | 0.04 | 0.07 | 1.13  | 0.021877 | 0.028056 | 0.309781 | 0.20903  |
| MmugDNA.41584.1.S1_at   | MmugDNA.41584.1 | 6.99  | 7.02  | 0.13 | 0.06 | -1.02 | 0.482123 | 0.569079 | 0.772274 | 0.742239 |
| MmugDNA.41585.1.S1_at   | MmugDNA.41585.1 | 5.83  | 6.02  | 0.6  | 0.4  | -1.14 | 0.687546 | 0.097842 | 0.877864 | 0.355639 |
| MmugDNA.41586.1.S1_at   | MmugDNA.41586.1 | 3.52  | 3.55  | 0.21 | 0.19 | -1.02 | 0.557774 | 0.745194 | 0.815038 | 0.852293 |
| MmugDNA.41587.1.S1_at   | MmugDNA.41587.1 | 5.88  | 5.92  | 0.29 | 0.09 | -1.03 | 0.367797 | 0.505694 | 0.703298 | 0.702218 |
| MmugDNA.41589.1.S1_at   | MmugDNA.41589.1 | 6.04  | 5.89  | 0.11 | 0.15 | 1.11  | 0.21338  | 0.389018 | 0.583928 | 0.623288 |
| MmugDNA.4159.1.S1_at    | MmugDNA.4159.1  | 5.02  | 4.75  | 0.25 | 0.08 | 1.21  | 0.126724 | 0.073809 | 0.500599 | 0.317146 |
| MmugDNA.41590.1.S1_at   | MmugDNA.41590.1 | 2.76  | 2.95  | 0.08 | 0.13 | -1.14 | 0.280085 | 0.067185 | 0.638908 | 0.305204 |
| MmugDNA.41591.1.S1_at   | MmugDNA.41591.1 | 3.26  | 3.25  | 0.08 | 0.03 | 1.01  | 0.33152  | 0.131218 | 0.678103 | 0.403252 |
| MmugDNA.41592.1.S1_at   | MmugDNA.41592.1 | 11.33 | 11.67 | 0.32 | 0.11 | -1.26 | 0.616041 | 0.621148 | 0.844712 | 0.775813 |
| MmugDNA.41593.1.S1_at   | MmugDNA.41593.1 | 3.95  | 3.95  | 0.08 | 0.07 | 1     | 0.255205 | 0.624828 | 0.61927  | 0.778924 |
| MmugDNA.41596.1.S1_at   | MmugDNA.41596.1 | 6.52  | 7.07  | 0.2  | 0.24 | -1.46 | 0.022249 | 0.124924 | 0.310495 | 0.395313 |
| MmugDNA.41597.1.S1_at   | MmugDNA.41597.1 | 4.37  | 4.76  | 0.26 | 0.13 | -1.31 | 0.294373 | 0.642586 | 0.650593 | 0.790343 |
| MmugDNA.41598.1.S1_at   | MmugDNA.41598.1 | 5.43  | 5.09  | 0.13 | 0.12 | 1.27  | 0.054119 | 0.138965 | 0.395995 | 0.412048 |
| MmugDNA.41599.1.S1_at   | MmugDNA.41599.1 | 7.41  | 7.16  | 0.12 | 0.13 | 1.19  | 0.15054  | 0.317566 | 0.524173 | 0.570774 |
| MmugDNA.4160.1.S1_at    | MmugDNA.4160.1  | 11.65 | 11.51 | 0.42 | 0.08 | 1.1   | 0.757414 | 0.650872 | 0.908621 | 0.795849 |
| MmugDNA.41600.1.S1_at   | MmugDNA.41600.1 | 5.1   | 4.92  | 0.14 | 0.2  | 1.13  | 0.373983 | 0.388563 | 0.705639 | 0.622897 |
| MmugDNA.41602.1.S1_at   | MmugDNA.41602.1 | 4.65  | 4.66  | 0.08 | 0.02 | -1.01 | 0.51343  | 0.512192 | 0.789843 | 0.706087 |
| MmugDNA.41603.1.S1_at   | MmugDNA.41603.1 | 8.02  | 8.02  | 1.33 | 0.2  | 1.01  | 0.984878 | 0.861568 | 0.995256 | 0.921322 |
| MmugDNA.41604.1.S1_at   | MmugDNA.41604.1 | 5.28  | 5.29  | 0.11 | 0.14 | -1.01 | 0.516837 | 0.133695 | 0.791667 | 0.405647 |
| MmugDNA.41605.1.S1_at   | MmugDNA.41605.1 | 3.55  | 3.72  | 0.04 | 0.41 | -1.12 | 0.594125 | 0.855204 | 0.834588 | 0.917457 |
| MmugDNA.41605.1.S1_s_at | MmugDNA.41605.1 | 10.27 | 9.96  | 0.23 | 0.18 | 1.24  | 0.139307 | 0.187849 | 0.51471  | 0.46394  |
| MmugDNA.41607.1.S1_at   | MmugDNA.41607.1 | 10.38 | 10.39 | 0.36 | 0.01 | -1.01 | 0.788376 | 0.936564 | 0.922253 | 0.964214 |
| MmugDNA.41608.1.S1_at   | MmugDNA.41608.1 | 7.15  | 7.28  | 1.17 | 0.27 | -1.1  | 0.308284 | 0.31135  | 0.660925 | 0.566418 |
| MmugDNA.41609.1.S1_at   | MmugDNA.41609.1 | 11.29 | 11.43 | 0.13 | 0.02 | -1.1  | 0.050064 | 0.01758  | 0.386663 | 0.167721 |
| MmugDNA.4161.1.S1_at    | MmugDNA.4161.1  | 5.68  | 5.45  | 0.16 | 0.03 | 1.18  | 0.060315 | 0.04569  | 0.407927 | 0.258049 |
| MmugDNA.41610.1.S1_at   | MmugDNA.41610.1 | 4.82  | 4.78  | 0.07 | 0.28 | 1.03  | 0.945219 | 0.99308  | 0.980919 | 0.995925 |
| MmugDNA.41611.1.S1_at   | MmugDNA.41611.1 | 3.11  | 3.15  | 0.09 | 0    | -1.02 | 0.528114 | 0.537848 | 0.797476 | 0.722758 |
| MmugDNA.41612.1.S1_at   | MmugDNA.41612.1 | 6.47  | 5.87  | 0.7  | 0.07 | 1.52  | 0.192721 | 0.091611 | 0.563577 | 0.346715 |
| MmugDNA.41613.1.S1_at   | MmugDNA.41613.1 | 2.84  | 2.78  | 0.01 | 0.2  | 1.04  | 0.588188 | 0.510508 | 0.83181  | 0.704979 |
| MmugDNA.41614.1.S1_at   | MmugDNA.41614.1 | 5.86  | 6.97  | 0.65 | 0.22 | -2.17 | 0.062583 | 0.025007 | 0.41335  | 0.198121 |
| MmugDNA.41615.1.S1_at   | MmugDNA.41615.1 | 5.11  | 4.93  | 0.18 | 0.12 | 1.14  | 0.101099 | 0.169929 | 0.471663 | 0.446574 |

|                         |                 |      |       |      |      |       |          |          |          |          |
|-------------------------|-----------------|------|-------|------|------|-------|----------|----------|----------|----------|
| MmugDNA.41616.1.S1_at   | MmugDNA.41616.1 | 4.96 | 4.85  | 0.27 | 0.18 | 1.08  | 0.187565 | 0.18571  | 0.559893 | 0.46163  |
| MmugDNA.41617.1.S1_at   | MmugDNA.41617.1 | 3.89 | 3.84  | 0.11 | 0.28 | 1.04  | 0.192424 | 0.178488 | 0.563564 | 0.454778 |
| MmugDNA.41618.1.S1_at   | MmugDNA.41618.1 | 3.46 | 3.36  | 0.13 | 0.02 | 1.07  | 0.551648 | 0.500412 | 0.81144  | 0.699036 |
| MmugDNA.41619.1.S1_at   | MmugDNA.41619.1 | 3.69 | 3.65  | 0.05 | 0.03 | 1.03  | 0.210283 | 0.109789 | 0.581624 | 0.373751 |
| MmugDNA.41620.1.S1_at   | MmugDNA.41620.1 | 6.34 | 7.53  | 0.24 | 0.27 | -2.29 | 0.012998 | 0.227246 | 0.26612  | 0.499574 |
| MmugDNA.41621.1.S1_at   | MmugDNA.41621.1 | 5.32 | 6.06  | 0.06 | 0.17 | -1.68 | 0.001202 | 0.00062  | 0.156386 | 0.042444 |
| MmugDNA.41622.1.S1_at   | MmugDNA.41622.1 | 3.13 | 2.97  | 0.28 | 0.25 | 1.12  | 0.905348 | 0.971464 | 0.968115 | 0.984481 |
| MmugDNA.41623.1.S1_at   | MmugDNA.41623.1 | 9.61 | 10.14 | 0.35 | 0.23 | -1.45 | 0.160658 | 0.087608 | 0.533821 | 0.340846 |
| MmugDNA.41624.1.S1_at   | MmugDNA.41624.1 | 7.84 | 7.94  | 0.36 | 0.23 | -1.07 | 0.265646 | 0.417751 | 0.626818 | 0.642391 |
| MmugDNA.41627.1.S1_at   | MmugDNA.41627.1 | 6.33 | 6.39  | 0.02 | 0.3  | -1.04 | 0.960654 | 0.167562 | 0.987225 | 0.443998 |
| MmugDNA.41628.1.S1_at   | MmugDNA.41628.1 | 7.87 | 7.51  | 0.35 | 0.33 | -1.29 | 0.763137 | 0.751107 | 0.911064 | 0.855317 |
| MmugDNA.41629.1.S1_at   | MmugDNA.41629.1 | 8.22 | 8.04  | 0.48 | 0.14 | 1.14  | 0.650767 | 0.102928 | 0.86119  | 0.363601 |
| MmugDNA.4163.1.S1_at    | MmugDNA.4163.1  | 8.05 | 8.13  | 0.26 | 0.11 | -1.05 | 0.739227 | 0.018814 | 0.900422 | 0.172431 |
| MmugDNA.41630.1.S1_at   | MmugDNA.41630.1 | 4.64 | 4.57  | 0.48 | 0.38 | 1.05  | 0.348894 | 0.211647 | 0.690079 | 0.485681 |
| MmugDNA.41631.1.S1_at   | MmugDNA.41631.1 | 3.56 | 4.53  | 0.76 | 0.2  | -1.96 | 0.394084 | 0.404007 | 0.719612 | 0.632558 |
| MmugDNA.41634.1.S1_at   | MmugDNA.41634.1 | 3.6  | 3.46  | 0.03 | 0.05 | 1.1   | 0.015687 | 0.007348 | 0.28333  | 0.115137 |
| MmugDNA.41635.1.S1_at   | MmugDNA.41635.1 | 6.13 | 6.07  | 0.05 | 0.05 | 1.04  | 0.354981 | 0.655093 | 0.69464  | 0.798291 |
| MmugDNA.41637.1.S1_at   | MmugDNA.41637.1 | 4.36 | 4.39  | 0.26 | 0.31 | -1.02 | 0.745858 | 0.503465 | 0.90313  | 0.700892 |
| MmugDNA.41638.1.S1_at   | MmugDNA.41638.1 | 4.82 | 4.9   | 0.31 | 0.12 | -1.06 | 0.376049 | 0.285958 | 0.706657 | 0.547505 |
| MmugDNA.41639.1.S1_at   | MmugDNA.41639.1 | 5.87 | 5.94  | 0.39 | 0.02 | -1.05 | 0.694149 | 0.852065 | 0.880977 | 0.915854 |
| MmugDNA.4164.1.S1_at    | MmugDNA.4164.1  | 8.03 | 8.09  | 0.39 | 0.17 | -1.04 | 0.53205  | 0.843699 | 0.799992 | 0.910955 |
| MmugDNA.4164.1.S1_s_at  | MmugDNA.4164.1  | 7.36 | 7.2   | 0.64 | 0.18 | 1.11  | 0.570885 | 0.628589 | 0.822316 | 0.781302 |
| MmugDNA.41642.1.S1_at   | MmugDNA.41642.1 | 9.29 | 8.86  | 0.6  | 0.21 | 1.34  | 0.282965 | 0.222895 | 0.641162 | 0.495791 |
| MmugDNA.41643.1.S1_at   | MmugDNA.41643.1 | 6.39 | 7.48  | 0.55 | 0.35 | -2.12 | 0.11296  | 0.209715 | 0.48633  | 0.483433 |
| MmugDNA.41644.1.S1_at   | MmugDNA.41644.1 | 8.77 | 9.35  | 0.69 | 0.03 | -1.49 | 0.451347 | 0.062763 | 0.755167 | 0.297193 |
| MmugDNA.19802.1.S1_at   | MmugDNA.19802.1 | 9.48 | 10.3  | 0.68 | 0.31 | -1.76 | 0.311116 | 0.068017 | 0.662925 | 0.307083 |
| MmugDNA.19802.1.S1_s_at | MmugDNA.19802.1 | 9.54 | 10.23 | 0.53 | 0.15 | -1.61 | 0.210607 | 0.024132 | 0.581872 | 0.1945   |
| MmugDNA.41645.1.S1_at   | MmugDNA.41645.1 | 5.1  | 4.61  | 0.31 | 0.14 | 1.4   | 0.133951 | 0.072419 | 0.50813  | 0.31528  |
| MmugDNA.41649.1.S1_at   | MmugDNA.41649.1 | 5.77 | 5.65  | 0.06 | 0.08 | 1.09  | 0.106854 | 0.328472 | 0.479384 | 0.57809  |
| MmugDNA.4165.1.S1_at    | MmugDNA.4165.1  | 6.84 | 7.09  | 0.74 | 0.28 | -1.19 | 0.214514 | 0.326506 | 0.585003 | 0.576576 |
| MmugDNA.41650.1.S1_at   | MmugDNA.41650.1 | 3.95 | 4.09  | 0.04 | 0.05 | -1.1  | 0.027211 | 0.244946 | 0.327322 | 0.514752 |
| MmugDNA.41651.1.S1_at   | MmugDNA.41651.1 | 5.04 | 5.02  | 0.07 | 0.18 | 1.01  | 0.670063 | 0.925442 | 0.869803 | 0.957811 |
| MmugDNA.41653.1.S1_at   | MmugDNA.41653.1 | 6.24 | 5.86  | 0.18 | 0.5  | 1.3   | 0.103961 | 0.02484  | 0.474656 | 0.19744  |
| MmugDNA.41654.1.S1_at   | MmugDNA.41654.1 | 5.11 | 4.9   | 0.17 | 0.24 | 1.15  | 0.123867 | 0.300532 | 0.497392 | 0.558852 |
| MmugDNA.41655.1.S1_at   | MmugDNA.41655.1 | 8.85 | 8.8   | 0.19 | 0.19 | 1.03  | 0.803886 | 0.727144 | 0.928601 | 0.842187 |
| MmugDNA.41656.1.S1_at   | MmugDNA.41656.1 | 7.47 | 7.02  | 0.12 | 0.33 | 1.36  | 0.077431 | 0.05211  | 0.43937  | 0.273866 |
| MmugDNA.41657.1.S1_at   | MmugDNA.41657.1 | 9.05 | 9.47  | 0.56 | 0.05 | -1.34 | 0.60092  | 0.340381 | 0.838005 | 0.586725 |
| MmugDNA.41658.1.S1_at   | MmugDNA.41658.1 | 9.86 | 9.73  | 0.73 | 0.12 | 1.09  | 0.806047 | 0.835543 | 0.929569 | 0.905864 |
| MmugDNA.41659.1.S1_at   | MmugDNA.41659.1 | 2.92 | 2.85  | 0.11 | 0.04 | 1.05  | 0.323683 | 0.347465 | 0.672279 | 0.592019 |
| MmugDNA.4166.1.S1_at    | MmugDNA.4166.1  | 7.21 | 6.71  | 0.72 | 0.25 | 1.42  | 0.176033 | 0.295686 | 0.549155 | 0.555113 |
| MmugDNA.41660.1.S1_at   | MmugDNA.41660.1 | 5.35 | 5.38  | 0.42 | 0    | -1.02 | 0.438127 | 0.354088 | 0.747221 | 0.597048 |
| MmugDNA.41662.1.S1_at   | MmugDNA.41662.1 | 3.11 | 3.03  | 0.14 | 0.04 | 1.06  | 0.586597 | 0.766307 | 0.831389 | 0.864212 |
| MmugDNA.41663.1.S1_at   | MmugDNA.41663.1 | 5.14 | 5.19  | 0.07 | 0    | -1.04 | 0.329021 | 0.303525 | 0.676156 | 0.561004 |

|                         |                 |       |       |      |      |       |          |          |          |          |
|-------------------------|-----------------|-------|-------|------|------|-------|----------|----------|----------|----------|
| MmugDNA.41664.1.S1_at   | MmugDNA.41664.1 | 6.49  | 6.86  | 0.29 | 0.16 | -1.29 | 0.168626 | 0.066149 | 0.541383 | 0.302699 |
| MmugDNA.41665.1.S1_at   | MmugDNA.41665.1 | 8.67  | 8.53  | 0.03 | 0.01 | 1.1   | 0.003124 | 0.083635 | 0.191107 | 0.334255 |
| MmugDNA.41666.1.S1_at   | MmugDNA.41666.1 | 5.58  | 5.35  | 0.25 | 0.37 | 1.17  | 0.669683 | 0.183649 | 0.869663 | 0.459681 |
| MmugDNA.41667.1.S1_at   | MmugDNA.41667.1 | 9.85  | 8.62  | 2.21 | 0.33 | 2.36  | 0.491413 | 0.165332 | 0.777734 | 0.441518 |
| MmugDNA.41668.1.S1_at   | MmugDNA.41668.1 | 3.74  | 3.72  | 0.14 | 0.04 | 1.01  | 0.260714 | 0.790103 | 0.623301 | 0.878677 |
| MmugDNA.41669.1.S1_at   | MmugDNA.41669.1 | 3.24  | 3.25  | 0.05 | 0.03 | -1.01 | 0.516844 | 0.000061 | 0.791667 | 0.025666 |
| MmugDNA.41670.1.S1_at   | MmugDNA.41670.1 | 7.23  | 6.79  | 0.46 | 0.28 | 1.36  | 0.227791 | 0.081231 | 0.596693 | 0.329351 |
| MmugDNA.41671.1.S1_at   | MmugDNA.41671.1 | 3.79  | 3.75  | 0.23 | 0.1  | 1.03  | 0.954426 | 0.711433 | 0.984894 | 0.832667 |
| MmugDNA.41673.1.S1_at   | MmugDNA.41673.1 | 4.56  | 4.57  | 0.11 | 0.28 | -1    | 0.473905 | 0.72857  | 0.767861 | 0.843093 |
| MmugDNA.41675.1.S1_at   | MmugDNA.41675.1 | 8.3   | 8.23  | 1.21 | 0.4  | 1.05  | 0.355919 | 0.56995  | 0.694946 | 0.742751 |
| MmugDNA.41676.1.S1_at   | MmugDNA.41676.1 | 3.39  | 3.15  | 0.14 | 0.09 | -1.19 | 0.090359 | 0.138847 | 0.458536 | 0.412022 |
| MmugDNA.41677.1.S1_at   | MmugDNA.41677.1 | 3.72  | 3.8   | 0.57 | 0.45 | -1.05 | 0.631418 | 0.509999 | 0.852417 | 0.704549 |
| MmugDNA.41678.1.S1_at   | MmugDNA.41678.1 | 5.84  | 5.98  | 0.12 | 0.6  | -1.1  | 0.642477 | 0.92302  | 0.857755 | 0.956698 |
| MmugDNA.41679.1.S1_at   | MmugDNA.41679.1 | 8.09  | 8.61  | 0.77 | 0.11 | -1.43 | 0.764416 | 0.48502  | 0.911482 | 0.688893 |
| MmugDNA.4168.1.S1_at    | MmugDNA.4168.1  | 5.08  | 5.03  | 0.2  | 0.1  | 1.03  | 0.810159 | 0.343039 | 0.931269 | 0.588868 |
| MmugDNA.4168.1.S1_s_at  | MmugDNA.4168.1  | 6.33  | 6.47  | 0.14 | 0.13 | -1.1  | 0.553839 | 0.162438 | 0.812304 | 0.438575 |
| MmugDNA.41680.1.S1_at   | MmugDNA.41680.1 | 6.36  | 6.39  | 0.65 | 0.34 | -1.02 | 0.279408 | 0.594565 | 0.638319 | 0.758623 |
| MmugDNA.41681.1.S1_at   | MmugDNA.41681.1 | 10.41 | 11.11 | 0.5  | 0.04 | -1.63 | 0.199428 | 0.190007 | 0.571179 | 0.465619 |
| MmugDNA.41682.1.S1_at   | MmugDNA.41682.1 | 5.13  | 5.13  | 0.21 | 0.23 | 1     | 0.479597 | 0.593672 | 0.77082  | 0.758391 |
| MmugDNA.41684.1.S1_at   | MmugDNA.41684.1 | 4.12  | 4.14  | 0.28 | 0.29 | -1.02 | 0.918242 | 0.806172 | 0.972102 | 0.88857  |
| MmugDNA.41686.1.S1_at   | MmugDNA.41686.1 | 9.54  | 9.75  | 0.41 | 0.04 | -1.16 | 0.304123 | 0.6748   | 0.657861 | 0.810039 |
| MmugDNA.41687.1.S1_at   | MmugDNA.41687.1 | 6.29  | 6.62  | 0.33 | 0.15 | -1.26 | 0.221632 | 0.916232 | 0.591315 | 0.953102 |
| MmugDNA.41688.1.S1_at   | MmugDNA.41688.1 | 8.48  | 8.41  | 0.39 | 0.05 | 1.05  | 0.660771 | 0.079725 | 0.865819 | 0.326982 |
| MmugDNA.41690.1.S1_at   | MmugDNA.41690.1 | 6.37  | 5.53  | 0.33 | 0.07 | 1.79  | 0.015765 | 0.004011 | 0.283686 | 0.089969 |
| MmugDNA.41692.1.S1_at   | MmugDNA.41692.1 | 5.04  | 5.58  | 0.4  | 0.33 | -1.45 | 0.372954 | 0.034539 | 0.705567 | 0.229979 |
| MmugDNA.41693.1.S1_at   | MmugDNA.41693.1 | 5.02  | 5.02  | 0.07 | 0.09 | -1    | 0.968217 | 0.884427 | 0.989538 | 0.934152 |
| MmugDNA.41694.1.S1_at   | MmugDNA.41694.1 | 10.41 | 10.91 | 0.44 | 0.18 | -1.42 | 0.089001 | 0.083881 | 0.456831 | 0.334771 |
| MmugDNA.41694.1.S1_s_at | MmugDNA.41694.1 | 13.69 | 13.52 | 0.12 | 0.03 | 1.12  | 0.081515 | 0.11936  | 0.445497 | 0.387887 |
| MmugDNA.41695.1.S1_at   | MmugDNA.41695.1 | 4.13  | 3.64  | 0.05 | 0.2  | 1.41  | 0.035027 | 0.02285  | 0.350898 | 0.189246 |
| MmugDNA.41696.1.S1_at   | MmugDNA.41696.1 | 4.58  | 4.6   | 0.16 | 0.01 | -1.01 | 0.707027 | 0.405989 | 0.886005 | 0.634136 |
| MmugDNA.41697.1.S1_at   | MmugDNA.41697.1 | 5.09  | 5.2   | 0.05 | 0.3  | -1.08 | 0.746007 | 0.1593   | 0.903166 | 0.43531  |
| MmugDNA.41698.1.S1_at   | MmugDNA.41698.1 | 8.79  | 8.72  | 1.77 | 0.28 | 1.05  | 0.98487  | 0.201143 | 0.995256 | 0.475534 |
| MmugDNA.41699.1.S1_at   | MmugDNA.41699.1 | 4.22  | 4.25  | 0.13 | 0.13 | -1.02 | 0.785272 | 0.423102 | 0.921087 | 0.646145 |
| MmugDNA.417.1.S1_at     | MmugDNA.417.1   | 6.66  | 6.13  | 0.34 | 0.17 | 1.44  | 0.195181 | 0.213042 | 0.56563  | 0.487005 |
| MmugDNA.4170.1.S1_at    | MmugDNA.4170.1  | 5.54  | 5.29  | 0.31 | 0.13 | 1.19  | 0.476272 | 0.530121 | 0.769056 | 0.717729 |
| MmugDNA.41700.1.S1_at   | MmugDNA.41700.1 | 8.01  | 8.23  | 0.81 | 0.15 | -1.16 | 0.641516 | 0.847788 | 0.85736  | 0.913522 |
| MmugDNA.41702.1.S1_at   | MmugDNA.41702.1 | 4.9   | 4.81  | 0.17 | 0.15 | 1.06  | 0.493462 | 0.58593  | 0.778968 | 0.753141 |
| MmugDNA.41703.1.S1_at   | MmugDNA.41703.1 | 11.33 | 10.87 | 1.17 | 0.12 | 1.38  | 0.712689 | 0.433434 | 0.888019 | 0.653681 |
| MmugDNA.41704.1.S1_at   | MmugDNA.41704.1 | 3.14  | 2.93  | 0.24 | 0.29 | 1.15  | 0.866619 | 0.203273 | 0.953134 | 0.477494 |
| MmugDNA.41705.1.S1_at   | MmugDNA.41705.1 | 5.72  | 5.47  | 0.2  | 0.08 | 1.19  | 0.101399 | 0.048589 | 0.471667 | 0.265572 |
| MmugDNA.41706.1.S1_at   | MmugDNA.41706.1 | 8.33  | 7.87  | 0.38 | 0.3  | 1.37  | 0.473045 | 0.659312 | 0.767432 | 0.800647 |
| MmugDNA.41707.1.S1_at   | MmugDNA.41707.1 | 4.88  | 4.69  | 0.14 | 0.37 | 1.14  | 0.655754 | 0.605351 | 0.863273 | 0.765119 |
| MmugDNA.41708.1.S1_at   | MmugDNA.41708.1 | 7.81  | 7.98  | 0.32 | 0.1  | -1.13 | 0.96634  | 0.213281 | 0.988971 | 0.487179 |

|                         |                 |       |       |      |      |       |          |          |          |          |
|-------------------------|-----------------|-------|-------|------|------|-------|----------|----------|----------|----------|
| MmugDNA.41709.1.S1_at   | MmugDNA.41709.1 | 4.54  | 4.28  | 0.68 | 0.04 | 1.2   | 0.325129 | 0.392781 | 0.67306  | 0.625846 |
| MmugDNA.4171.1.S1_at    | MmugDNA.4171.1  | 4.43  | 4.53  | 0.08 | 0.15 | -1.07 | 0.709731 | 0.116683 | 0.887017 | 0.383864 |
| MmugDNA.41711.1.S1_at   | MmugDNA.41711.1 | 9.55  | 7.11  | 0.45 | 0.66 | 5.43  | 0.006082 | 0.000539 | 0.215214 | 0.040469 |
| MmugDNA.41712.1.S1_at   | MmugDNA.41712.1 | 4.28  | 4.4   | 0.07 | 0.04 | -1.09 | 0.072953 | 0.183486 | 0.433769 | 0.459627 |
| MmugDNA.41713.1.S1_at   | MmugDNA.41713.1 | 9.92  | 10.65 | 0.53 | 0.24 | -1.67 | 0.063782 | 0.324743 | 0.416638 | 0.575287 |
| MmugDNA.41714.1.S1_at   | MmugDNA.41714.1 | 3.64  | 3.73  | 0.07 | 0.04 | -1.07 | 0.205648 | 0.184993 | 0.577447 | 0.460814 |
| MmugDNA.41714.1.S1_s_at | MmugDNA.41714.1 | 3.2   | 3.13  | 0.31 | 0.76 | 1.05  | 0.704295 | 0.865385 | 0.885095 | 0.923579 |
| MmugDNA.41715.1.S1_at   | MmugDNA.41715.1 | 8.84  | 9.02  | 0.85 | 0.13 | -1.13 | 0.251237 | 0.368467 | 0.616546 | 0.60798  |
| MmugDNA.41716.1.S1_at   | MmugDNA.41716.1 | 6.65  | 6.77  | 0.2  | 0.15 | -1.08 | 0.94821  | 0.131761 | 0.982204 | 0.403891 |
| MmugDNA.41718.1.S1_at   | MmugDNA.41718.1 | 7.13  | 8.26  | 0.93 | 0.07 | -2.19 | 0.323854 | 0.402769 | 0.672332 | 0.63156  |
| MmugDNA.41719.1.S1_at   | MmugDNA.41719.1 | 6.74  | 7.4   | 0.41 | 0.08 | -1.58 | 0.134266 | 0.029439 | 0.508462 | 0.213368 |
| MmugDNA.41720.1.S1_at   | MmugDNA.41720.1 | 5.7   | 6.31  | 1.03 | 0.19 | -1.53 | 0.831698 | 0.773932 | 0.939628 | 0.868568 |
| MmugDNA.41721.1.S1_at   | MmugDNA.41721.1 | 3.29  | 3.29  | 0.25 | 0.07 | -1    | 0.993874 | 0.965564 | 0.99766  | 0.980739 |
| MmugDNA.41722.1.S1_at   | MmugDNA.41722.1 | 3.04  | 2.91  | 0.24 | 0.08 | 1.1   | 0.808874 | 0.333918 | 0.930844 | 0.582056 |
| MmugDNA.41723.1.S1_at   | MmugDNA.41723.1 | 6.76  | 6.11  | 0.26 | 0.04 | 1.57  | 0.008001 | 0.001103 | 0.232005 | 0.052576 |
| MmugDNA.41724.1.S1_at   | MmugDNA.41724.1 | 3.7   | 3.54  | 0.14 | 0.1  | 1.12  | 0.179096 | 0.040446 | 0.552128 | 0.246223 |
| MmugDNA.41725.1.S1_at   | MmugDNA.41725.1 | 4.42  | 4.1   | 0.08 | 0.09 | 1.25  | 0.008058 | 0.002463 | 0.232005 | 0.073515 |
| MmugDNA.41727.1.S1_at   | MmugDNA.41727.1 | 4.01  | 3.97  | 0.08 | 0.06 | 1.03  | 0.528009 | 0.647741 | 0.79742  | 0.793723 |
| MmugDNA.41729.1.S1_at   | MmugDNA.41729.1 | 7.54  | 7.7   | 0.64 | 0.11 | -1.12 | 0.733159 | 0.119292 | 0.897503 | 0.387799 |
| MmugDNA.4173.1.S1_at    | MmugDNA.4173.1  | 6.22  | 6.03  | 0.15 | 0.24 | 1.14  | 0.465105 | 0.467253 | 0.762909 | 0.677016 |
| MmugDNA.41730.1.S1_at   | MmugDNA.41730.1 | 3.77  | 3.57  | 0.22 | 0.12 | 1.15  | 0.381432 | 0.486921 | 0.710065 | 0.690118 |
| MmugDNA.41733.1.S1_s_at | MmugDNA.41733.1 | 10.47 | 10.61 | 0.17 | 0.12 | -1.1  | 0.161897 | 0.133801 | 0.535244 | 0.405793 |
| MmugDNA.41735.1.S1_at   | MmugDNA.41735.1 | 4.85  | 5.05  | 0.11 | 0.12 | -1.15 | 0.083268 | 0.179491 | 0.449053 | 0.455951 |
| MmugDNA.41736.1.S1_at   | MmugDNA.41736.1 | 4.73  | 4.58  | 0.18 | 0.22 | 1.11  | 0.194641 | 0.224608 | 0.565144 | 0.497613 |
| MmugDNA.41737.1.S1_at   | MmugDNA.41737.1 | 3.15  | 3.32  | 0.06 | 0.11 | -1.13 | 0.130257 | 0.11752  | 0.504682 | 0.385295 |
| MmugDNA.41739.1.S1_at   | MmugDNA.41739.1 | 6.71  | 6.76  | 0.8  | 0.2  | -1.04 | 0.932218 | 0.48036  | 0.977191 | 0.68574  |
| MmugDNA.4174.1.S1_at    | MmugDNA.4174.1  | 7.63  | 7.73  | 1.69 | 0.23 | -1.07 | 0.837636 | 0.954171 | 0.941762 | 0.973959 |
| MmugDNA.41740.1.S1_at   | MmugDNA.41740.1 | 11.46 | 11.79 | 0.36 | 0.13 | -1.26 | 0.168484 | 0.003688 | 0.541113 | 0.086591 |
| MmugDNA.41742.1.S1_at   | MmugDNA.41742.1 | 6.27  | 5.97  | 0.15 | 0.1  | 1.23  | 0.070496 | 0.148361 | 0.429402 | 0.422945 |
| MmugDNA.41743.1.S1_at   | MmugDNA.41743.1 | 8.46  | 8.43  | 0.51 | 0.07 | 1.02  | 0.384628 | 0.579768 | 0.712173 | 0.749284 |
| MmugDNA.41744.1.S1_at   | MmugDNA.41744.1 | 12.47 | 12.38 | 0.23 | 0.07 | 1.06  | 0.787354 | 0.089619 | 0.921895 | 0.343811 |
| MmugDNA.41745.1.S1_at   | MmugDNA.41745.1 | 3.78  | 3.84  | 0.05 | 0.05 | -1.04 | 0.315565 | 0.101557 | 0.666002 | 0.361407 |
| MmugDNA.41746.1.S1_at   | MmugDNA.41746.1 | 6.3   | 6.1   | 0.12 | 0.32 | 1.15  | 0.141039 | 0.160161 | 0.516345 | 0.436296 |
| MmugDNA.41747.1.S1_at   | MmugDNA.41747.1 | 2.58  | 2.67  | 0.04 | 0.21 | -1.06 | 0.270267 | 0.535235 | 0.630252 | 0.720824 |
| MmugDNA.41748.1.S1_at   | MmugDNA.41748.1 | 5.87  | 5.75  | 0.12 | 0.13 | 1.09  | 0.225663 | 0.385159 | 0.59481  | 0.620662 |
| MmugDNA.41749.1.S1_at   | MmugDNA.41749.1 | 3.25  | 3.27  | 0.09 | 0.03 | -1.01 | 0.525491 | 0.907955 | 0.796198 | 0.947889 |
| MmugDNA.4175.1.S1_at    | MmugDNA.4175.1  | 5.54  | 5     | 0.22 | 0.38 | 1.45  | 0.382295 | 0.502261 | 0.71057  | 0.70006  |
| MmugDNA.41751.1.S1_at   | MmugDNA.41751.1 | 5.38  | 5.37  | 0.03 | 0.06 | 1.01  | 0.833406 | 0.406268 | 0.940225 | 0.634225 |
| MmugDNA.41753.1.S1_at   | MmugDNA.41753.1 | 3.65  | 3.65  | 0.14 | 0.1  | -1    | 0.798806 | 0.548085 | 0.926306 | 0.728874 |
| MmugDNA.41754.1.S1_at   | MmugDNA.41754.1 | 4.82  | 4.7   | 0.06 | 0.24 | 1.09  | 0.858741 | 0.642824 | 0.950093 | 0.790502 |
| MmugDNA.41755.1.S1_at   | MmugDNA.41755.1 | 5.94  | 5.71  | 0.09 | 0.48 | 1.17  | 0.985988 | 0.248869 | 0.995501 | 0.517951 |
| MmugDNA.41757.1.S1_at   | MmugDNA.41757.1 | 5.34  | 5.02  | 0.15 | 0.2  | 1.25  | 0.178743 | 0.429906 | 0.551554 | 0.651109 |
| MmugDNA.41758.1.S1_at   | MmugDNA.41758.1 | 3.31  | 3.2   | 0.08 | 0.12 | 1.08  | 0.135079 | 0.179444 | 0.50914  | 0.455929 |

|                         |                 |       |       |      |      |       |          |          |          |          |
|-------------------------|-----------------|-------|-------|------|------|-------|----------|----------|----------|----------|
| MmugDNA.41759.1.S1_at   | MmugDNA.41759.1 | 8.95  | 8.47  | 0.22 | 0.18 | 1.4   | 0.124416 | 0.404028 | 0.498504 | 0.632558 |
| MmugDNA.4176.1.S1_at    | MmugDNA.4176.1  | 5.58  | 5.52  | 0.05 | 0.12 | 1.04  | 0.165776 | 0.690823 | 0.538623 | 0.819889 |
| MmugDNA.41760.1.S1_at   | MmugDNA.41760.1 | 6.2   | 6.22  | 0.1  | 0.03 | -1.02 | 0.568429 | 0.360055 | 0.820814 | 0.601204 |
| MmugDNA.41761.1.S1_at   | MmugDNA.41761.1 | 3.83  | 3.84  | 0.12 | 0.06 | -1    | 0.886378 | 0.953881 | 0.960501 | 0.973725 |
| MmugDNA.41762.1.S1_at   | MmugDNA.41762.1 | 9.34  | 9.36  | 0.62 | 0.09 | -1.02 | 0.984883 | 0.251436 | 0.995256 | 0.520175 |
| MmugDNA.41763.1.S1_at   | MmugDNA.41763.1 | 7.1   | 6.97  | 0.35 | 0.07 | 1.1   | 0.888598 | 0.930855 | 0.961514 | 0.960732 |
| MmugDNA.41765.1.S1_at   | MmugDNA.41765.1 | 7.36  | 7.24  | 0.23 | 0.08 | 1.08  | 0.557668 | 0.000131 | 0.815003 | 0.029087 |
| MmugDNA.41766.1.S1_at   | MmugDNA.41766.1 | 5.94  | 5.83  | 0.18 | 0.25 | 1.07  | 0.377161 | 0.353944 | 0.707423 | 0.596907 |
| MmugDNA.41767.1.S1_at   | MmugDNA.41767.1 | 5.45  | 5.67  | 0.28 | 0.32 | -1.16 | 0.404262 | 0.194923 | 0.726307 | 0.470059 |
| MmugDNA.41769.1.S1_at   | MmugDNA.41769.1 | 2.85  | 2.74  | 0.01 | 0.22 | 1.08  | 0.949775 | 0.874617 | 0.983047 | 0.928837 |
| MmugDNA.4177.1.S1_at    | MmugDNA.4177.1  | 4.63  | 4.73  | 0.15 | 0.09 | -1.07 | 0.782449 | 0.76698  | 0.919858 | 0.864663 |
| MmugDNA.41770.1.S1_at   | MmugDNA.41770.1 | 5.9   | 5.9   | 0.05 | 0.01 | 1     | 0.324024 | 0.206929 | 0.672429 | 0.481052 |
| MmugDNA.41771.1.S1_at   | MmugDNA.41771.1 | 7.16  | 6.97  | 0.31 | 0.14 | 1.15  | 0.620563 | 0.423261 | 0.84711  | 0.646277 |
| MmugDNA.41772.1.S1_s_at | MmugDNA.41772.1 | 9.76  | 9.77  | 0.49 | 0.25 | -1    | 0.707033 | 0.884361 | 0.886005 | 0.9341   |
| MmugDNA.41775.1.S1_at   | MmugDNA.41775.1 | 8.78  | 8.31  | 0.65 | 0.12 | 1.38  | 0.306387 | 0.22275  | 0.659434 | 0.49569  |
| MmugDNA.41777.1.S1_at   | MmugDNA.41777.1 | 3.44  | 3.31  | 0.18 | 0.23 | 1.09  | 0.96579  | 0.856309 | 0.988741 | 0.917926 |
| MmugDNA.41778.1.S1_at   | MmugDNA.41778.1 | 6.18  | 6.1   | 0.01 | 0.11 | 1.06  | 0.315718 | 0.323805 | 0.666057 | 0.574609 |
| MmugDNA.41779.1.S1_at   | MmugDNA.41779.1 | 4.03  | 4.1   | 0.28 | 0.5  | -1.05 | 0.882232 | 0.202393 | 0.959161 | 0.476763 |
| MmugDNA.41779.1.S1_s_at | MmugDNA.41779.1 | 5.44  | 5.22  | 0.19 | 0.15 | 1.17  | 0.192935 | 0.064402 | 0.56375  | 0.300001 |
| MmugDNA.4178.1.S1_at    | MmugDNA.4178.1  | 3.49  | 3.38  | 0.32 | 0.33 | 1.08  | 0.887416 | 0.981761 | 0.960963 | 0.989984 |
| MmugDNA.41780.1.S1_at   | MmugDNA.41780.1 | 11.65 | 10.96 | 0.06 | 0.18 | 1.61  | 0.00195  | 0.000272 | 0.171474 | 0.033875 |
| MmugDNA.41781.1.S1_at   | MmugDNA.41781.1 | 4.13  | 3.8   | 0.2  | 0.08 | 1.26  | 0.048775 | 0.403089 | 0.384274 | 0.631893 |
| MmugDNA.41784.1.S1_at   | MmugDNA.41784.1 | 3.53  | 3.39  | 0.64 | 0.14 | 1.11  | 0.747618 | 0.930985 | 0.904082 | 0.960769 |
| MmugDNA.41785.1.S1_at   | MmugDNA.41785.1 | 5.3   | 5.15  | 0.28 | 0.24 | 1.11  | 0.875526 | 0.821644 | 0.956756 | 0.897303 |
| MmugDNA.41787.1.S1_at   | MmugDNA.41787.1 | 5.94  | 6.09  | 0.75 | 0.11 | -1.1  | 0.539475 | 0.126055 | 0.803858 | 0.39672  |
| MmugDNA.41788.1.S1_at   | MmugDNA.41788.1 | 4.17  | 4.5   | 0.04 | 0.25 | -1.26 | 0.060192 | 0.030535 | 0.407653 | 0.216711 |
| MmugDNA.41789.1.S1_at   | MmugDNA.41789.1 | 8.71  | 7.28  | 0.66 | 0.16 | 2.7   | 0.04325  | 0.034687 | 0.371655 | 0.230454 |
| MmugDNA.4179.1.S1_at    | MmugDNA.4179.1  | 3.4   | 3.3   | 0.04 | 0.04 | 1.07  | 0.054098 | 0.551127 | 0.395944 | 0.730813 |
| MmugDNA.41790.1.S1_at   | MmugDNA.41790.1 | 12.69 | 12.41 | 0.07 | 0.05 | 1.22  | 0.006532 | 0.005077 | 0.219791 | 0.099077 |
| MmugDNA.41793.1.S1_at   | MmugDNA.41793.1 | 4.64  | 4.51  | 0.52 | 0.1  | 1.1   | 0.276161 | 0.467621 | 0.6358   | 0.677203 |
| MmugDNA.41795.1.S1_at   | MmugDNA.41795.1 | 4.43  | 4.37  | 0.07 | 0.08 | 1.04  | 0.358441 | 0.386046 | 0.696372 | 0.621296 |
| MmugDNA.41796.1.S1_at   | MmugDNA.41796.1 | 5.17  | 5.19  | 0.21 | 0.15 | -1.01 | 0.270756 | 0.509223 | 0.630607 | 0.704032 |
| MmugDNA.41797.1.S1_at   | MmugDNA.41797.1 | 6.07  | 5.51  | 1.17 | 0.36 | 1.47  | 0.356641 | 0.486824 | 0.695204 | 0.690091 |
| MmugDNA.41798.1.S1_at   | MmugDNA.41798.1 | 5.44  | 5.3   | 0.27 | 0.15 | 1.1   | 0.183777 | 0.142857 | 0.556596 | 0.416786 |
| MmugDNA.4180.1.S1_at    | MmugDNA.4180.1  | 4.12  | 4.29  | 0.44 | 0.32 | -1.12 | 0.696481 | 0.854605 | 0.882142 | 0.917148 |
| MmugDNA.41800.1.S1_at   | MmugDNA.41800.1 | 3.39  | 3.32  | 0.34 | 0.08 | 1.05  | 0.925645 | 0.185572 | 0.975188 | 0.461566 |
| MmugDNA.41801.1.S1_at   | MmugDNA.41801.1 | 3.37  | 3.25  | 0.15 | 0.12 | 1.09  | 0.41224  | 0.57301  | 0.731945 | 0.74492  |
| MmugDNA.41802.1.S1_at   | MmugDNA.41802.1 | 11.26 | 11.16 | 0.22 | 0.12 | 1.07  | 0.855042 | 0.568882 | 0.948681 | 0.742129 |
| MmugDNA.41803.1.S1_at   | MmugDNA.41803.1 | 4.88  | 4.98  | 0.09 | 0.16 | -1.07 | 0.923077 | 0.770713 | 0.97416  | 0.866807 |
| MmugDNA.41804.1.S1_at   | MmugDNA.41804.1 | 7.75  | 7.58  | 0.2  | 0.36 | 1.13  | 0.817123 | 0.794303 | 0.933852 | 0.881364 |
| MmugDNA.41805.1.S1_at   | MmugDNA.41805.1 | 7.54  | 7     | 0.39 | 0.28 | 1.46  | 0.068239 | 0.074777 | 0.425017 | 0.318527 |
| MmugDNA.41806.1.S1_s_at | MmugDNA.41806.1 | 12.26 | 12.36 | 0.02 | 0.05 | -1.07 | 0.136804 | 0.148032 | 0.511963 | 0.422418 |
| MmugDNA.41807.1.S1_at   | MmugDNA.41807.1 | 13.06 | 13.08 | 0.14 | 0.09 | -1.01 | 0.728398 | 0.343944 | 0.895173 | 0.589617 |

|                         |                 |       |       |      |      |       |          |          |          |          |
|-------------------------|-----------------|-------|-------|------|------|-------|----------|----------|----------|----------|
| MmugDNA.41808.1.S1_at   | MmugDNA.41808.1 | 3.07  | 2.99  | 0.13 | 0.08 | 1.06  | 0.371673 | 0.131017 | 0.705567 | 0.403053 |
| MmugDNA.4181.1.S1_at    | MmugDNA.4181.1  | 7.12  | 7.6   | 0.35 | 0.1  | -1.39 | 0.125782 | 0.074304 | 0.49972  | 0.318046 |
| MmugDNA.41810.1.S1_at   | MmugDNA.41810.1 | 8.67  | 9.1   | 0.29 | 0.02 | -1.35 | 0.047473 | 0.020244 | 0.380416 | 0.178671 |
| MmugDNA.41813.1.S1_at   | MmugDNA.41813.1 | 9.89  | 10.06 | 0.26 | 0.18 | -1.12 | 0.286277 | 0.070831 | 0.64358  | 0.31231  |
| MmugDNA.41814.1.S1_at   | MmugDNA.41814.1 | 7.03  | 7.82  | 0.46 | 0.16 | -1.73 | 0.176319 | 0.289442 | 0.549336 | 0.55046  |
| MmugDNA.41815.1.S1_at   | MmugDNA.41815.1 | 3.87  | 3.97  | 0.14 | 0.04 | -1.07 | 0.413457 | 0.676862 | 0.732278 | 0.811188 |
| MmugDNA.41816.1.S1_at   | MmugDNA.41816.1 | 6.61  | 6.49  | 0.1  | 0.01 | 1.09  | 0.0738   | 0.263026 | 0.434623 | 0.529397 |
| MmugDNA.41817.1.S1_at   | MmugDNA.41817.1 | 8.26  | 7.29  | 0.09 | 0.01 | 1.95  | 0.00005  | 0.006134 | 0.108151 | 0.106665 |
| MmugDNA.4182.1.S1_at    | MmugDNA.4182.1  | 13.73 | 13.72 | 0.07 | 0.12 | 1     | 0.324882 | 0.023618 | 0.672925 | 0.19253  |
| MmugDNA.41820.1.S1_at   | MmugDNA.41820.1 | 6.34  | 6.24  | 0.06 | 0.06 | 1.07  | 0.136623 | 0.079005 | 0.511766 | 0.326018 |
| MmugDNA.41822.1.S1_at   | MmugDNA.41822.1 | 8.96  | 8.7   | 0.01 | 0.11 | 1.2   | 0.013546 | 0.091126 | 0.269719 | 0.345977 |
| MmugDNA.41824.1.S1_s_at | MmugDNA.41824.1 | 6.22  | 6.15  | 0.12 | 0.04 | 1.05  | 0.119354 | 0.018645 | 0.492749 | 0.171648 |
| MmugDNA.41825.1.S1_at   | MmugDNA.41825.1 | 6.43  | 6.64  | 0.23 | 0.17 | -1.16 | 0.669576 | 0.116512 | 0.869663 | 0.383671 |
| MmugDNA.41826.1.S1_at   | MmugDNA.41826.1 | 3.67  | 3.68  | 0.06 | 0.06 | -1.01 | 0.686353 | 0.864822 | 0.877356 | 0.923333 |
| MmugDNA.41827.1.S1_at   | MmugDNA.41827.1 | 8.53  | 8.41  | 0.3  | 0.19 | 1.09  | 0.878077 | 0.379947 | 0.95758  | 0.616659 |
| MmugDNA.41828.1.S1_at   | MmugDNA.41828.1 | 6.39  | 6.25  | 0.25 | 0.09 | 1.1   | 0.429376 | 0.517224 | 0.742161 | 0.709435 |
| MmugDNA.41829.1.S1_at   | MmugDNA.41829.1 | 12.64 | 12.72 | 0.11 | 0.02 | -1.06 | 0.328653 | 0.376477 | 0.67577  | 0.614293 |
| MmugDNA.41830.1.S1_at   | MmugDNA.41830.1 | 3.92  | 4.26  | 0.23 | 0.34 | -1.26 | 0.570269 | 0.101422 | 0.821966 | 0.361202 |
| MmugDNA.41831.1.S1_at   | MmugDNA.41831.1 | 6.45  | 6.61  | 0.42 | 0.23 | -1.12 | 0.60805  | 0.720879 | 0.840979 | 0.838368 |
| MmugDNA.41834.1.S1_at   | MmugDNA.41834.1 | 11.36 | 11.56 | 0.47 | 0.18 | -1.15 | 0.59338  | 0.329293 | 0.834154 | 0.57869  |
| MmugDNA.41836.1.S1_at   | MmugDNA.41836.1 | 7.34  | 7.84  | 0.5  | 0.11 | -1.41 | 0.191553 | 0.004952 | 0.562859 | 0.098015 |
| MmugDNA.41839.1.S1_at   | MmugDNA.41839.1 | 4.79  | 4.67  | 0.42 | 0.18 | 1.09  | 0.491429 | 0.623357 | 0.777734 | 0.777726 |
| MmugDNA.4184.1.S1_at    | MmugDNA.4184.1  | 11.54 | 11.83 | 0.2  | 0.04 | -1.22 | 0.172524 | 0.275601 | 0.545782 | 0.539837 |
| MmugDNA.41841.1.S1_at   | MmugDNA.41841.1 | 4.31  | 4.26  | 0.09 | 0.03 | 1.03  | 0.226163 | 0.025397 | 0.595305 | 0.199747 |
| MmugDNA.41845.1.S1_at   | MmugDNA.41845.1 | 12.13 | 11.94 | 0.25 | 0.04 | 1.14  | 0.278836 | 0.377683 | 0.637903 | 0.615086 |
| MmugDNA.41845.1.S1_s_at | MmugDNA.41845.1 | 12.38 | 12.24 | 0.23 | 0.02 | 1.1   | 0.434064 | 0.511309 | 0.744833 | 0.705495 |
| MmugDNA.41846.1.S1_at   | MmugDNA.41846.1 | 6.83  | 6.64  | 0.14 | 0.05 | 1.14  | 0.039032 | 0.081437 | 0.36091  | 0.329632 |
| MmugDNA.41847.1.S1_at   | MmugDNA.41847.1 | 5.49  | 5.44  | 0.12 | 0.16 | 1.03  | 0.223438 | 0.245866 | 0.592569 | 0.51552  |
| MmugDNA.41850.1.S1_at   | MmugDNA.41850.1 | 4.64  | 4.54  | 0.05 | 0.07 | 1.08  | 0.050028 | 0.027733 | 0.386663 | 0.207987 |
| MmugDNA.41851.1.S1_at   | MmugDNA.41851.1 | 3.89  | 3.9   | 0.18 | 0.04 | -1.01 | 0.909457 | 0.945075 | 0.969434 | 0.968834 |
| MmugDNA.41852.1.S1_at   | MmugDNA.41852.1 | 4.56  | 4.52  | 0.17 | 0.09 | 1.03  | 0.559435 | 0.524908 | 0.816154 | 0.714646 |
| MmugDNA.41853.1.S1_at   | MmugDNA.41853.1 | 4.15  | 4.22  | 0.07 | 0.06 | -1.05 | 0.267448 | 0.402868 | 0.628132 | 0.631631 |
| MmugDNA.41854.1.S1_at   | MmugDNA.41854.1 | 3.63  | 3.96  | 0.15 | 0.15 | -1.26 | 0.089466 | 0.085827 | 0.457657 | 0.337901 |
| MmugDNA.41854.1.S1_s_at | MmugDNA.41854.1 | 4.57  | 4.78  | 0.7  | 0.12 | -1.16 | 0.654819 | 0.080473 | 0.862999 | 0.328159 |
| MmugDNA.41855.1.S1_at   | MmugDNA.41855.1 | 10.92 | 10.56 | 0.63 | 0.19 | 1.28  | 0.304163 | 0.026234 | 0.657892 | 0.202965 |
| MmugDNA.41856.1.S1_at   | MmugDNA.41856.1 | 5.7   | 5.75  | 0.26 | 0.05 | -1.03 | 0.651154 | 0.93742  | 0.861442 | 0.964687 |
| MmugDNA.41857.1.S1_at   | MmugDNA.41857.1 | 6.88  | 6.53  | 0.3  | 0.12 | 1.27  | 0.103382 | 0.150264 | 0.474147 | 0.424877 |
| MmugDNA.41859.1.S1_at   | MmugDNA.41859.1 | 11.66 | 11.55 | 0.1  | 0.11 | 1.08  | 0.398317 | 0.003811 | 0.722451 | 0.08794  |
| MmugDNA.4186.1.S1_at    | MmugDNA.4186.1  | 8.65  | 8.58  | 0.21 | 0.1  | 1.05  | 0.741128 | 0.040021 | 0.901139 | 0.245241 |
| MmugDNA.41860.1.S1_at   | MmugDNA.41860.1 | 8.02  | 7.57  | 0.91 | 0.04 | 1.37  | 0.418516 | 0.38075  | 0.735698 | 0.617396 |
| MmugDNA.41861.1.S1_at   | MmugDNA.41861.1 | 5.25  | 4.99  | 0.09 | 0.22 | 1.19  | 0.101132 | 0.150273 | 0.471667 | 0.424877 |
| MmugDNA.41862.1.S1_at   | MmugDNA.41862.1 | 4.99  | 4.8   | 0.11 | 0.02 | 1.14  | 0.044035 | 0.131027 | 0.373552 | 0.403053 |
| MmugDNA.41864.1.S1_at   | MmugDNA.41864.1 | 3.46  | 3.4   | 0.01 | 0.16 | 1.04  | 0.708945 | 0.413778 | 0.886591 | 0.639771 |

|                         |                 |       |       |      |      |       |          |          |          |          |
|-------------------------|-----------------|-------|-------|------|------|-------|----------|----------|----------|----------|
| MmugDNA.41867.1.S1_at   | MmugDNA.41867.1 | 5.15  | 5.12  | 0.19 | 0.02 | 1.02  | 0.509272 | 0.221619 | 0.787587 | 0.494901 |
| MmugDNA.41869.1.S1_at   | MmugDNA.41869.1 | 6.36  | 6.29  | 0.15 | 0.41 | 1.05  | 0.82032  | 0.198615 | 0.935289 | 0.473391 |
| MmugDNA.4187.1.S1_at    | MmugDNA.4187.1  | 5.65  | 5.59  | 0.15 | 0.08 | 1.04  | 0.179143 | 0.36477  | 0.552242 | 0.605071 |
| MmugDNA.41871.1.S1_at   | MmugDNA.41871.1 | 3.41  | 3.64  | 0.08 | 0.13 | -1.17 | 0.096669 | 0.204285 | 0.465288 | 0.478541 |
| MmugDNA.41872.1.S1_at   | MmugDNA.41872.1 | 9.93  | 10.8  | 0.29 | 0.09 | -1.83 | 0.011846 | 0.070249 | 0.257666 | 0.311287 |
| MmugDNA.41873.1.S1_at   | MmugDNA.41873.1 | 4.44  | 5     | 0.28 | 0.08 | -1.47 | 0.024161 | 0.01422  | 0.317812 | 0.152283 |
| MmugDNA.41874.1.S1_at   | MmugDNA.41874.1 | 4.11  | 4.15  | 0.33 | 0.07 | -1.03 | 0.388893 | 0.48856  | 0.715799 | 0.691222 |
| MmugDNA.41875.1.S1_at   | MmugDNA.41875.1 | 10.25 | 9.38  | 0.24 | 0.12 | 1.83  | 0.009773 | 0.000671 | 0.243347 | 0.04413  |
| MmugDNA.41876.1.S1_at   | MmugDNA.41876.1 | 8.74  | 9.46  | 0.46 | 0.21 | -1.64 | 0.134184 | 0.019455 | 0.508395 | 0.175136 |
| MmugDNA.41877.1.S1_at   | MmugDNA.41877.1 | 3.75  | 3.72  | 0.03 | 0.14 | 1.02  | 0.24198  | 0.373394 | 0.607998 | 0.61221  |
| MmugDNA.41878.1.S1_at   | MmugDNA.41878.1 | 3.95  | 4.07  | 0.06 | 0.24 | -1.08 | 0.612973 | 0.60855  | 0.843305 | 0.767127 |
| MmugDNA.41879.1.S1_at   | MmugDNA.41879.1 | 12.75 | 12.74 | 0.07 | 0.15 | 1.01  | 0.696816 | 0.637608 | 0.882175 | 0.787067 |
| MmugDNA.41880.1.S1_at   | MmugDNA.41880.1 | 7.86  | 7.37  | 0.16 | 0.25 | 1.41  | 0.074819 | 0.191417 | 0.435313 | 0.466776 |
| MmugDNA.41881.1.S1_at   | MmugDNA.41881.1 | 4.75  | 4.45  | 0.19 | 0.09 | 1.23  | 0.070122 | 0.327031 | 0.428522 | 0.577033 |
| MmugDNA.41883.1.S1_at   | MmugDNA.41883.1 | 5.93  | 7.54  | 1.01 | 0.3  | -3.07 | 0.212433 | 0.27159  | 0.582937 | 0.536577 |
| MmugDNA.29591.1.S1_s_at | MmugDNA.29591.1 | 3.58  | 3.5   | 0.02 | 0.06 | 1.06  | 0.297429 | 0.744806 | 0.652772 | 0.852198 |
| MmugDNA.41885.1.S1_at   | MmugDNA.41885.1 | 5.54  | 5.54  | 0.11 | 0.08 | 1     | 0.744543 | 0.926509 | 0.902593 | 0.958312 |
| MmugDNA.41886.1.S1_at   | MmugDNA.41886.1 | 6.52  | 7.19  | 0.34 | 0.14 | -1.59 | 0.029194 | 0.077558 | 0.333974 | 0.323421 |
| MmugDNA.41888.1.S1_at   | MmugDNA.41888.1 | 5.17  | 6.08  | 0.61 | 0.18 | -1.88 | 0.064754 | 0.003721 | 0.418744 | 0.086946 |
| MmugDNA.41889.1.S1_at   | MmugDNA.41889.1 | 7.38  | 7.33  | 0.06 | 0.06 | 1.04  | 0.384607 | 0.089653 | 0.712173 | 0.343842 |
| MmugDNA.4189.1.S1_at    | MmugDNA.4189.1  | 10.78 | 10.47 | 0.23 | 0.05 | 1.25  | 0.152545 | 0.225722 | 0.525558 | 0.498159 |
| MmugDNA.41891.1.S1_at   | MmugDNA.41891.1 | 5.12  | 4.78  | 0.26 | 0.02 | 1.26  | 0.145256 | 0.18207  | 0.520396 | 0.45857  |
| MmugDNA.41892.1.S1_at   | MmugDNA.41892.1 | 7.59  | 8.65  | 0.83 | 0.11 | -2.07 | 0.272894 | 0.373718 | 0.632536 | 0.612403 |
| MmugDNA.41893.1.S1_at   | MmugDNA.41893.1 | 4.13  | 4.15  | 0.23 | 0.22 | -1.01 | 0.674211 | 0.773732 | 0.871851 | 0.868448 |
| MmugDNA.41894.1.S1_at   | MmugDNA.41894.1 | 3.84  | 3.76  | 0.04 | 0.06 | 1.05  | 0.097085 | 0.069041 | 0.46573  | 0.309017 |
| MmugDNA.41895.1.S1_at   | MmugDNA.41895.1 | 11.48 | 11.73 | 0.2  | 0.03 | -1.19 | 0.085364 | 0.190035 | 0.452611 | 0.465661 |
| MmugDNA.41896.1.S1_at   | MmugDNA.41896.1 | 12.37 | 12.42 | 0.07 | 0.05 | -1.03 | 0.145047 | 0.199569 | 0.520238 | 0.474208 |
| MmugDNA.41896.1.S1_s_at | MmugDNA.41896.1 | 11.28 | 11.25 | 0.16 | 0.03 | 1.02  | 0.221728 | 0.057225 | 0.591359 | 0.285059 |
| MmugDNA.41897.1.S1_at   | MmugDNA.41897.1 | 3.06  | 3.07  | 0.11 | 0.11 | -1.01 | 0.727158 | 0.260507 | 0.894637 | 0.527026 |
| MmugDNA.41898.1.S1_at   | MmugDNA.41898.1 | 4.24  | 4.31  | 0.18 | 0.12 | -1.05 | 0.698621 | 0.168812 | 0.882848 | 0.445458 |
| MmugDNA.41899.1.S1_at   | MmugDNA.41899.1 | 8.78  | 8.17  | 0.24 | 0.17 | 1.53  | 0.017104 | 0.048574 | 0.289261 | 0.265572 |
| MmugDNA.419.1.S1_at     | MmugDNA.419.1   | 3.97  | 3.74  | 0.18 | 0.09 | 1.17  | 0.205392 | 0.252668 | 0.577188 | 0.521174 |
| MmugDNA.37696.1.S1_s_at | MmugDNA.37696.1 | 9.67  | 9.43  | 1.5  | 0.04 | 1.18  | 0.819129 | 0.153254 | 0.934711 | 0.428077 |
| MmugDNA.41901.1.S1_at   | MmugDNA.41901.1 | 5.59  | 5.46  | 0.58 | 0.1  | 1.09  | 0.367423 | 0.172855 | 0.702896 | 0.449424 |
| MmugDNA.41902.1.S1_at   | MmugDNA.41902.1 | 7.1   | 6.86  | 0.22 | 0.03 | 1.18  | 0.415689 | 0.652345 | 0.733788 | 0.796688 |
| MmugDNA.41903.1.S1_at   | MmugDNA.41903.1 | 8.58  | 8.56  | 0.24 | 0.14 | 1.01  | 0.711315 | 0.01316  | 0.887569 | 0.147338 |
| MmugDNA.41904.1.S1_at   | MmugDNA.41904.1 | 5.45  | 5.88  | 0.37 | 0.08 | -1.35 | 0.431281 | 0.073698 | 0.743363 | 0.317051 |
| MmugDNA.41905.1.S1_at   | MmugDNA.41905.1 | 6.34  | 6.22  | 0.28 | 0.12 | 1.09  | 0.872984 | 0.097667 | 0.955968 | 0.355554 |
| MmugDNA.41906.1.S1_at   | MmugDNA.41906.1 | 7.23  | 7.51  | 0.31 | 0.13 | -1.22 | 0.227771 | 0.150828 | 0.596693 | 0.425346 |
| MmugDNA.41907.1.S1_at   | MmugDNA.41907.1 | 8.13  | 7.81  | 0.42 | 0.07 | 1.25  | 0.101722 | 0.021398 | 0.471947 | 0.183193 |
| MmugDNA.41908.1.S1_at   | MmugDNA.41908.1 | 4.72  | 4.72  | 0    | 0.15 | 1     | 0.373901 | 0.311552 | 0.705567 | 0.566532 |
| MmugDNA.4191.1.S1_at    | MmugDNA.4191.1  | 4.49  | 4.53  | 0.14 | 0.04 | -1.03 | 0.929411 | 0.772994 | 0.976344 | 0.867995 |
| MmugDNA.41910.1.S1_at   | MmugDNA.41910.1 | 3.84  | 4.17  | 0.19 | 0.22 | -1.25 | 0.473499 | 0.559371 | 0.767603 | 0.736242 |

|                         |                 |       |       |      |      |       |          |          |          |          |
|-------------------------|-----------------|-------|-------|------|------|-------|----------|----------|----------|----------|
| MmugDNA.41911.1.S1_at   | MmugDNA.41911.1 | 5.82  | 5.6   | 0.51 | 0.35 | 1.17  | 0.994603 | 0.216469 | 0.997963 | 0.490084 |
| MmugDNA.41915.1.S1_at   | MmugDNA.41915.1 | 6.49  | 6.52  | 0.48 | 0.07 | -1.02 | 0.422887 | 0.214078 | 0.738587 | 0.487645 |
| MmugDNA.41916.1.S1_at   | MmugDNA.41916.1 | 2.9   | 3     | 0.02 | 0.13 | -1.07 | 0.27798  | 0.420392 | 0.637256 | 0.644099 |
| MmugDNA.41916.1.S1_s_at | MmugDNA.41916.1 | 3.17  | 3.1   | 0.06 | 0.05 | 1.05  | 0.241255 | 0.541153 | 0.607503 | 0.724768 |
| MmugDNA.41917.1.S1_at   | MmugDNA.41917.1 | 4.11  | 4.08  | 0.02 | 0.22 | 1.03  | 0.850951 | 0.729778 | 0.947503 | 0.843679 |
| MmugDNA.41918.1.S1_at   | MmugDNA.41918.1 | 6.7   | 7.37  | 0.67 | 0.31 | -1.6  | 0.115377 | 0.141236 | 0.488677 | 0.414749 |
| MmugDNA.41919.1.S1_at   | MmugDNA.41919.1 | 7.43  | 7.44  | 0.25 | 0.01 | -1    | 0.397289 | 0.54538  | 0.721717 | 0.727517 |
| MmugDNA.41920.1.S1_at   | MmugDNA.41920.1 | 3.99  | 4.08  | 0.47 | 0.09 | -1.06 | 0.26991  | 0.321243 | 0.630108 | 0.573152 |
| MmugDNA.41921.1.S1_at   | MmugDNA.41921.1 | 6.82  | 6.69  | 0.09 | 0.1  | 1.1   | 0.193288 | 0.313897 | 0.564275 | 0.568094 |
| MmugDNA.41923.1.S1_at   | MmugDNA.41923.1 | 8.81  | 8.95  | 0.24 | 0.09 | -1.1  | 0.115161 | 0.008008 | 0.488314 | 0.118976 |
| MmugDNA.41924.1.S1_at   | MmugDNA.41924.1 | 3.51  | 3.39  | 0.13 | 0.03 | -1.09 | 0.138493 | 0.112309 | 0.513941 | 0.377592 |
| MmugDNA.41925.1.S1_at   | MmugDNA.41925.1 | 4.43  | 4.71  | 0.07 | 0.39 | -1.22 | 0.091343 | 0.080054 | 0.459149 | 0.327429 |
| MmugDNA.41927.1.S1_at   | MmugDNA.41927.1 | 5.75  | 5.67  | 0.17 | 0.05 | 1.06  | 0.663492 | 0.329862 | 0.867154 | 0.578874 |
| MmugDNA.41928.1.S1_at   | MmugDNA.41928.1 | 8.8   | 8.98  | 0.03 | 0.11 | -1.13 | 0.21967  | 0.00467  | 0.589083 | 0.095314 |
| MmugDNA.41929.1.S1_at   | MmugDNA.41929.1 | 4.6   | 4.93  | 0.38 | 0.22 | -1.25 | 0.28329  | 0.007219 | 0.641313 | 0.114121 |
| MmugDNA.4193.1.S1_at    | MmugDNA.4193.1  | 3.37  | 3.45  | 0.22 | 0.64 | -1.06 | 0.278126 | 0.502475 | 0.637354 | 0.700192 |
| MmugDNA.41930.1.S1_at   | MmugDNA.41930.1 | 6.58  | 6.77  | 0.37 | 0.14 | -1.14 | 0.518485 | 0.240522 | 0.792692 | 0.511144 |
| MmugDNA.41931.1.S1_at   | MmugDNA.41931.1 | 8.08  | 8.31  | 0.22 | 0.01 | -1.17 | 0.14697  | 0.131227 | 0.521545 | 0.403252 |
| MmugDNA.41932.1.S1_s_at | MmugDNA.41932.1 | 6.87  | 6.53  | 0.07 | 0.08 | 1.26  | 0.004717 | 0.296362 | 0.201699 | 0.555492 |
| MmugDNA.41933.1.S1_at   | MmugDNA.41933.1 | 3.62  | 3.55  | 0.07 | 0.02 | 1.05  | 0.14455  | 0.442532 | 0.519872 | 0.660487 |
| MmugDNA.41935.1.S1_at   | MmugDNA.41935.1 | 6.56  | 6     | 0.47 | 0.6  | 1.47  | 0.614044 | 0.647094 | 0.843784 | 0.793279 |
| MmugDNA.41936.1.S1_at   | MmugDNA.41936.1 | 5.69  | 5.44  | 0.17 | 0.05 | 1.19  | 0.184158 | 0.347141 | 0.55696  | 0.591815 |
| MmugDNA.41937.1.S1_at   | MmugDNA.41937.1 | 8.29  | 8.48  | 0.53 | 0.05 | -1.14 | 0.669913 | 0.344278 | 0.869803 | 0.589762 |
| MmugDNA.41938.1.S1_at   | MmugDNA.41938.1 | 5.34  | 5.88  | 0.29 | 0.03 | -1.45 | 0.105646 | 0.000365 | 0.477409 | 0.037273 |
| MmugDNA.41939.1.S1_at   | MmugDNA.41939.1 | 6.94  | 7.59  | 0.8  | 0.23 | -1.57 | 0.599372 | 0.53565  | 0.837382 | 0.721199 |
| MmugDNA.4194.1.S1_at    | MmugDNA.4194.1  | 5.11  | 6.26  | 0.87 | 0.71 | -2.21 | 0.145887 | 0.106113 | 0.520572 | 0.368498 |
| MmugDNA.41940.1.S1_at   | MmugDNA.41940.1 | 6.87  | 6.73  | 0.02 | 0.03 | 1.1   | 0.003958 | 0.112121 | 0.198571 | 0.377398 |
| MmugDNA.41941.1.S1_at   | MmugDNA.41941.1 | 7     | 7.01  | 0.19 | 0.14 | -1    | 0.787938 | 0.660758 | 0.922084 | 0.801537 |
| MmugDNA.41942.1.S1_at   | MmugDNA.41942.1 | 3.37  | 3.58  | 0.17 | 0.65 | -1.15 | 0.542044 | 0.590331 | 0.805464 | 0.756166 |
| MmugDNA.41943.1.S1_at   | MmugDNA.41943.1 | 8.03  | 7.7   | 0.51 | 0.15 | 1.25  | 0.409553 | 0.59191  | 0.730133 | 0.757386 |
| MmugDNA.41944.1.S1_at   | MmugDNA.41944.1 | 5.52  | 5.16  | 0.25 | 0.28 | 1.28  | 0.144954 | 0.0697   | 0.520238 | 0.310164 |
| MmugDNA.41945.1.S1_at   | MmugDNA.41945.1 | 6.02  | 5.92  | 0.4  | 0.08 | 1.08  | 0.779765 | 0.784193 | 0.918831 | 0.875049 |
| MmugDNA.41945.1.S1_s_at | MmugDNA.41945.1 | 9.92  | 10.08 | 0.56 | 0.14 | -1.12 | 0.652731 | 0.697418 | 0.86202  | 0.824183 |
| MmugDNA.41947.1.S1_at   | MmugDNA.41947.1 | 3.11  | 3.05  | 0.23 | 0.04 | 1.04  | 0.767384 | 0.908234 | 0.912495 | 0.948008 |
| MmugDNA.41948.1.S1_at   | MmugDNA.41948.1 | 8.72  | 8.36  | 0.66 | 0.2  | 1.29  | 0.738231 | 0.924218 | 0.8998   | 0.957283 |
| MmugDNA.4195.1.S1_at    | MmugDNA.4195.1  | 9.67  | 9.64  | 0.19 | 0.06 | 1.02  | 0.646359 | 0.143046 | 0.859027 | 0.416922 |
| MmugDNA.41950.1.S1_at   | MmugDNA.41950.1 | 5.72  | 5.61  | 0.61 | 0.22 | 1.08  | 0.976882 | 0.277207 | 0.992494 | 0.541157 |
| MmugDNA.41951.1.S1_at   | MmugDNA.41951.1 | 10.1  | 9.76  | 0.42 | 0.11 | 1.26  | 0.332439 | 0.450111 | 0.678846 | 0.665505 |
| MmugDNA.41951.1.S1_s_at | MmugDNA.41951.1 | 12.13 | 11.87 | 0.26 | 0.11 | 1.19  | 0.416691 | 0.447411 | 0.734451 | 0.66348  |
| MmugDNA.41952.1.S1_at   | MmugDNA.41952.1 | 5.73  | 5.45  | 0.25 | 0.28 | 1.22  | 0.394385 | 0.321677 | 0.719752 | 0.573346 |
| MmugDNA.41954.1.S1_at   | MmugDNA.41954.1 | 6.86  | 6.64  | 0.03 | 0.09 | 1.16  | 0.042634 | 0.400914 | 0.369787 | 0.630658 |
| MmugDNA.41955.1.S1_at   | MmugDNA.41955.1 | 3.11  | 3.33  | 0.05 | 0.66 | -1.17 | 0.170266 | 0.138287 | 0.543379 | 0.411198 |
| MmugDNA.41956.1.S1_at   | MmugDNA.41956.1 | 3.94  | 3.7   | 0.11 | 0.09 | 1.18  | 0.058756 | 0.070346 | 0.405368 | 0.311541 |



|                         |                 |       |       |      |      |       |          |          |          |          |
|-------------------------|-----------------|-------|-------|------|------|-------|----------|----------|----------|----------|
| MmugDNA.41957.1.S1_at   | MmugDNA.41957.1 | 11.18 | 11.02 | 0.19 | 0.25 | 1.12  | 0.786289 | 0.009096 | 0.921403 | 0.125944 |
| MmugDNA.41958.1.S1_at   | MmugDNA.41958.1 | 8.17  | 8.46  | 0.33 | 0.24 | -1.22 | 0.572285 | 0.342511 | 0.823212 | 0.588539 |
| MmugDNA.41959.1.S1_at   | MmugDNA.41959.1 | 8.43  | 9.1   | 0.44 | 0.11 | -1.59 | 0.163407 | 0.146477 | 0.53621  | 0.420523 |
| MmugDNA.4196.1.S1_at    | MmugDNA.4196.1  | 4.62  | 4.55  | 0.28 | 0.08 | 1.05  | 0.643476 | 0.502311 | 0.858218 | 0.700078 |
| MmugDNA.41960.1.S1_at   | MmugDNA.41960.1 | 4.64  | 4.62  | 0.1  | 0.13 | 1.01  | 0.810139 | 0.46459  | 0.931266 | 0.675241 |
| MmugDNA.41961.1.S1_at   | MmugDNA.41961.1 | 4.84  | 4.83  | 0    | 0.08 | 1.01  | 0.841606 | 0.901863 | 0.943836 | 0.944154 |
| MmugDNA.41962.1.S1_at   | MmugDNA.41962.1 | 6.43  | 6.38  | 0.17 | 0.32 | 1.03  | 0.340678 | 0.363816 | 0.684574 | 0.604189 |
| MmugDNA.41964.1.S1_at   | MmugDNA.41964.1 | 7.35  | 7.08  | 0.52 | 0.12 | 1.21  | 0.487337 | 0.225642 | 0.775062 | 0.498155 |
| MmugDNA.41965.1.S1_at   | MmugDNA.41965.1 | 9.85  | 9.64  | 0.2  | 0.11 | 1.15  | 0.342295 | 0.367239 | 0.685719 | 0.606869 |
| MmugDNA.41967.1.S1_at   | MmugDNA.41967.1 | 6.47  | 5.73  | 0.72 | 0.32 | 1.67  | 0.263034 | 0.053453 | 0.625096 | 0.27685  |
| MmugDNA.41968.1.S1_at   | MmugDNA.41968.1 | 6.96  | 6.72  | 0.13 | 0.05 | -1.18 | 0.081174 | 0.162186 | 0.445179 | 0.43834  |
| MmugDNA.41969.1.S1_at   | MmugDNA.41969.1 | 3.45  | 3.26  | 0.03 | 0.12 | 1.14  | 0.270347 | 0.635046 | 0.630265 | 0.785156 |
| MmugDNA.41970.1.S1_at   | MmugDNA.41970.1 | 3.36  | 3.27  | 0.15 | 0.03 | 1.07  | 0.340225 | 0.618335 | 0.68442  | 0.774009 |
| MmugDNA.41971.1.S1_at   | MmugDNA.41971.1 | 3.14  | 2.96  | 0.34 | 0.07 | 1.14  | 0.154369 | 0.305968 | 0.527483 | 0.562732 |
| MmugDNA.41972.1.S1_at   | MmugDNA.41972.1 | 4.45  | 4.5   | 0.26 | 0.34 | -1.03 | 0.797162 | 0.39701  | 0.925393 | 0.62857  |
| MmugDNA.41973.1.S1_s_at | MmugDNA.41973.1 | 4.5   | 4.49  | 0.37 | 0.23 | 1.01  | 0.75153  | 0.759485 | 0.906035 | 0.860133 |
| MmugDNA.41974.1.S1_at   | MmugDNA.41974.1 | 6.31  | 6.18  | 0.08 | 0.03 | 1.1   | 0.065492 | 0.609274 | 0.420827 | 0.76771  |
| MmugDNA.41975.1.S1_at   | MmugDNA.41975.1 | 6.47  | 6.43  | 0.08 | 0.03 | 1.02  | 0.121393 | 0.790518 | 0.49506  | 0.878895 |
| MmugDNA.41976.1.S1_s_at | MmugDNA.41976.1 | 10.06 | 9.82  | 0.41 | 0.18 | 1.18  | 0.257518 | 0.008262 | 0.621318 | 0.12078  |
| MmugDNA.41977.1.S1_at   | MmugDNA.41977.1 | 5.06  | 5.13  | 0.18 | 0.2  | -1.04 | 0.6057   | 0.879177 | 0.840163 | 0.931052 |
| MmugDNA.41978.1.S1_at   | MmugDNA.41978.1 | 3.95  | 4.28  | 0.21 | 0.06 | -1.26 | 0.0964   | 0.173988 | 0.4651   | 0.450247 |
| MmugDNA.41979.1.S1_at   | MmugDNA.41979.1 | 9.73  | 10.07 | 0.64 | 0.28 | -1.27 | 0.952171 | 0.737839 | 0.983952 | 0.848101 |
| MmugDNA.4198.1.S1_at    | MmugDNA.4198.1  | 6.45  | 6.31  | 0.06 | 0.08 | 1.1   | 0.078758 | 0.548912 | 0.441464 | 0.729486 |
| MmugDNA.41980.1.S1_at   | MmugDNA.41980.1 | 3.04  | 3.06  | 0.2  | 0.1  | -1.01 | 0.491894 | 0.790465 | 0.778032 | 0.878876 |
| MmugDNA.41981.1.S1_at   | MmugDNA.41981.1 | 7.47  | 7.27  | 0.08 | 0.03 | 1.15  | 0.019454 | 0.092177 | 0.30143  | 0.347894 |
| MmugDNA.41982.1.S1_at   | MmugDNA.41982.1 | 5.48  | 5.56  | 0.21 | 0.16 | -1.06 | 0.267522 | 0.331061 | 0.628193 | 0.579791 |
| MmugDNA.41983.1.S1_at   | MmugDNA.41983.1 | 5.19  | 5.22  | 0.25 | 0.39 | -1.02 | 0.907489 | 0.935504 | 0.968632 | 0.96359  |
| MmugDNA.41985.1.S1_at   | MmugDNA.41985.1 | 5.2   | 5.63  | 0.28 | 0.28 | -1.35 | 0.087142 | 0.247756 | 0.454785 | 0.517199 |
| MmugDNA.41987.1.S1_at   | MmugDNA.41987.1 | 3.74  | 3.69  | 0.2  | 0.04 | 1.04  | 0.64754  | 0.759949 | 0.859364 | 0.860511 |
| MmugDNA.41988.1.S1_at   | MmugDNA.41988.1 | 8.95  | 8.78  | 0.26 | 0.06 | 1.12  | 0.349481 | 0.181417 | 0.690485 | 0.457923 |
| MmugDNA.41989.1.S1_at   | MmugDNA.41989.1 | 3.7   | 3.42  | 0.29 | 0.13 | 1.22  | 0.14024  | 0.233385 | 0.515581 | 0.504741 |
| MmugDNA.4199.1.S1_at    | MmugDNA.4199.1  | 3.86  | 3.78  | 0.17 | 0.36 | 1.06  | 0.260751 | 0.110831 | 0.623301 | 0.375126 |
| MmugDNA.41990.1.S1_at   | MmugDNA.41990.1 | 5.92  | 6.22  | 0.19 | 0.09 | -1.23 | 0.130977 | 0.422218 | 0.5054   | 0.645588 |
| MmugDNA.41991.1.S1_at   | MmugDNA.41991.1 | 8.51  | 8.38  | 0.1  | 0.12 | 1.09  | 0.083228 | 0.294529 | 0.448993 | 0.554265 |
| MmugDNA.41992.1.S1_at   | MmugDNA.41992.1 | 7.15  | 5.81  | 1.3  | 0.2  | 2.53  | 0.212366 | 0.079077 | 0.582875 | 0.326161 |
| MmugDNA.41993.1.S1_at   | MmugDNA.41993.1 | 10.55 | 11.23 | 0.62 | 0.15 | -1.6  | 0.05082  | 0.043271 | 0.388085 | 0.252793 |
| MmugDNA.41995.1.S1_s_at | MmugDNA.41995.1 | 7.98  | 8.02  | 0.05 | 0.05 | -1.03 | 0.131195 | 0.767126 | 0.5054   | 0.864712 |
| MmugDNA.41996.1.S1_at   | MmugDNA.41996.1 | 3.33  | 3.03  | 0.16 | 0.17 | 1.24  | 0.447205 | 0.624745 | 0.753177 | 0.77888  |
| MmugDNA.41997.1.S1_at   | MmugDNA.41997.1 | 3.18  | 3.21  | 0.23 | 0.14 | -1.02 | 0.781789 | 0.82993  | 0.919573 | 0.902299 |
| MmugDNA.41998.1.S1_at   | MmugDNA.41998.1 | 4.47  | 4.42  | 0.28 | 0.09 | 1.03  | 0.214682 | 0.545487 | 0.585106 | 0.727564 |
| MmugDNA.41999.1.S1_at   | MmugDNA.41999.1 | 4.74  | 4.75  | 0.31 | 0.14 | -1.01 | 0.991428 | 0.812444 | 0.99669  | 0.891649 |
| MmugDNA.42.1.S1_at      | MmugDNA.42.1    | 9.55  | 9.31  | 0.12 | 0.06 | 1.18  | 0.02671  | 0.057691 | 0.325965 | 0.286531 |
| MmugDNA.420.1.S1_at     | MmugDNA.420.1   | 3.34  | 3.24  | 0.13 | 0.06 | 1.07  | 0.33316  | 0.336404 | 0.679469 | 0.583831 |

|                         |                 |       |       |      |      |       |          |          |          |          |
|-------------------------|-----------------|-------|-------|------|------|-------|----------|----------|----------|----------|
| MmugDNA.4200.1.S1_at    | MmugDNA.4200.1  | 8.36  | 8.31  | 0.05 | 0.05 | 1.04  | 0.214777 | 0.60062  | 0.585205 | 0.762183 |
| MmugDNA.42000.1.S1_at   | MmugDNA.42000.1 | 8.24  | 8.4   | 0.43 | 0.11 | -1.12 | 0.697137 | 0.872456 | 0.882223 | 0.927474 |
| MmugDNA.42001.1.S1_at   | MmugDNA.42001.1 | 10.82 | 10.96 | 0.1  | 0.13 | -1.1  | 0.892008 | 0.911666 | 0.962971 | 0.950222 |
| MmugDNA.42002.1.S1_at   | MmugDNA.42002.1 | 6.36  | 6.33  | 0.17 | 0.12 | 1.02  | 0.277775 | 0.364846 | 0.637047 | 0.605139 |
| MmugDNA.42002.1.S1_x_at | MmugDNA.42002.1 | 6.87  | 6.66  | 0.1  | 0.14 | 1.16  | 0.070183 | 0.028486 | 0.428682 | 0.21056  |
| MmugDNA.42003.1.S1_at   | MmugDNA.42003.1 | 6.51  | 7.16  | 0.19 | 0.12 | -1.57 | 0.011182 | 0.000169 | 0.252769 | 0.030511 |
| MmugDNA.42004.1.S1_at   | MmugDNA.42004.1 | 3.79  | 3.86  | 0.26 | 0.02 | -1.05 | 0.782783 | 0.417042 | 0.920045 | 0.641944 |
| MmugDNA.42005.1.S1_at   | MmugDNA.42005.1 | 9.72  | 9.55  | 0.33 | 0.09 | 1.12  | 0.363829 | 0.056081 | 0.700307 | 0.282707 |
| MmugDNA.42007.1.S1_at   | MmugDNA.42007.1 | 7.56  | 7.2   | 0.33 | 0.08 | 1.28  | 0.133236 | 0.041678 | 0.507715 | 0.24887  |
| MmugDNA.42010.1.S1_at   | MmugDNA.42010.1 | 6.51  | 5.51  | 0.56 | 0.35 | 2.01  | 0.06653  | 0.156374 | 0.422375 | 0.431659 |
| MmugDNA.42011.1.S1_at   | MmugDNA.42011.1 | 3.99  | 3.89  | 0.2  | 0.18 | 1.08  | 0.967316 | 0.846492 | 0.989247 | 0.912665 |
| MmugDNA.42012.1.S1_at   | MmugDNA.42012.1 | 6.9   | 6.23  | 0.39 | 0.15 | 1.59  | 0.02168  | 0.017728 | 0.309332 | 0.168367 |
| MmugDNA.42013.1.S1_at   | MmugDNA.42013.1 | 5.48  | 5.58  | 0.42 | 0.18 | -1.07 | 0.895583 | 0.267274 | 0.964276 | 0.532909 |
| MmugDNA.42014.1.S1_at   | MmugDNA.42014.1 | 3.18  | 3.13  | 0.34 | 0.29 | 1.04  | 0.824158 | 0.415099 | 0.936573 | 0.640707 |
| MmugDNA.42017.1.S1_at   | MmugDNA.42017.1 | 3.45  | 3.56  | 0.15 | 0.09 | -1.08 | 0.765911 | 0.663573 | 0.911976 | 0.803017 |
| MmugDNA.4202.1.S1_at    | MmugDNA.4202.1  | 6.04  | 5.89  | 0.17 | 0.27 | 1.11  | 0.179012 | 0.398101 | 0.552029 | 0.629185 |
| MmugDNA.42020.1.S1_at   | MmugDNA.42020.1 | 12.5  | 12.39 | 0.31 | 0.07 | 1.08  | 0.702676 | 0.204251 | 0.884378 | 0.478541 |
| MmugDNA.42021.1.S1_at   | MmugDNA.42021.1 | 12.93 | 12.85 | 0.25 | 0.03 | 1.06  | 0.631386 | 0.619681 | 0.852417 | 0.774876 |
| MmugDNA.42022.1.S1_at   | MmugDNA.42022.1 | 3.8   | 3.59  | 0.25 | 0.15 | 1.15  | 0.216313 | 0.403249 | 0.586447 | 0.631996 |
| MmugDNA.42023.1.S1_at   | MmugDNA.42023.1 | 4.08  | 3.92  | 0.09 | 0.18 | 1.12  | 0.991872 | 0.356506 | 0.996849 | 0.598459 |
| MmugDNA.42024.1.S1_at   | MmugDNA.42024.1 | 12.13 | 12.26 | 0.22 | 0.04 | -1.09 | 0.995599 | 0.48713  | 0.998302 | 0.690277 |
| MmugDNA.42025.1.S1_at   | MmugDNA.42025.1 | 11.37 | 11.1  | 0.24 | 0.07 | 1.2   | 0.104324 | 0.046369 | 0.475417 | 0.259844 |
| MmugDNA.42028.1.S1_at   | MmugDNA.42028.1 | 10.75 | 11.13 | 0.47 | 0.06 | -1.3  | 0.707436 | 0.382705 | 0.886113 | 0.618858 |
| MmugDNA.42029.1.S1_at   | MmugDNA.42029.1 | 3.77  | 3.73  | 0.24 | 0.27 | 1.02  | 0.807103 | 0.71854  | 0.930053 | 0.837072 |
| MmugDNA.42030.1.S1_at   | MmugDNA.42030.1 | 3.91  | 3.9   | 0.11 | 0.22 | 1.01  | 0.227291 | 0.30383  | 0.596459 | 0.561225 |
| MmugDNA.42031.1.S1_at   | MmugDNA.42031.1 | 5.06  | 5.07  | 0.13 | 0.03 | -1.01 | 0.63119  | 0.832739 | 0.852396 | 0.904032 |
| MmugDNA.42032.1.S1_at   | MmugDNA.42032.1 | 7.78  | 7.44  | 0.17 | 0.16 | 1.27  | 0.135139 | 0.00894  | 0.50918  | 0.125013 |
| MmugDNA.42033.1.S1_at   | MmugDNA.42033.1 | 4.09  | 4.52  | 0.3  | 0.16 | -1.35 | 0.087156 | 0.258293 | 0.454785 | 0.525596 |
| MmugDNA.42034.1.S1_at   | MmugDNA.42034.1 | 5.75  | 5.63  | 0.11 | 0.06 | 1.09  | 0.216676 | 0.747337 | 0.586753 | 0.853149 |
| MmugDNA.42035.1.S1_at   | MmugDNA.42035.1 | 2.97  | 3.04  | 0.52 | 0.18 | -1.05 | 0.711818 | 0.463053 | 0.887709 | 0.674193 |
| MmugDNA.42037.1.S1_at   | MmugDNA.42037.1 | 4.84  | 6.01  | 1.09 | 0.5  | -2.24 | 0.65717  | 0.489063 | 0.863937 | 0.691588 |
| MmugDNA.42038.1.S1_at   | MmugDNA.42038.1 | 4.58  | 4.79  | 0.09 | 0.4  | -1.16 | 0.659652 | 0.865612 | 0.865323 | 0.923598 |
| MmugDNA.42039.1.S1_at   | MmugDNA.42039.1 | 3.68  | 3.64  | 0.02 | 0.26 | 1.03  | 0.579937 | 0.183412 | 0.826742 | 0.459553 |
| MmugDNA.4204.1.S1_at    | MmugDNA.4204.1  | 6.01  | 5.58  | 0.11 | 0.18 | 1.34  | 0.042177 | 0.476074 | 0.368784 | 0.682475 |
| MmugDNA.42040.1.S1_at   | MmugDNA.42040.1 | 5.7   | 6.55  | 0.24 | 0.32 | -1.81 | 0.018812 | 0.033618 | 0.298593 | 0.227006 |
| MmugDNA.42041.1.S1_at   | MmugDNA.42041.1 | 6.86  | 7.06  | 0.71 | 0.04 | -1.15 | 0.558258 | 0.774543 | 0.815182 | 0.868769 |
| MmugDNA.42042.1.S1_at   | MmugDNA.42042.1 | 3.83  | 3.6   | 0.1  | 0.11 | 1.17  | 0.090727 | 0.11252  | 0.458873 | 0.377914 |
| MmugDNA.42043.1.S1_at   | MmugDNA.42043.1 | 5.42  | 5.41  | 0.13 | 0.05 | 1     | 0.849774 | 0.47883  | 0.947149 | 0.684739 |
| MmugDNA.42045.1.S1_at   | MmugDNA.42045.1 | 11.96 | 11.91 | 0.21 | 0.07 | 1.04  | 0.719579 | 0.067057 | 0.891124 | 0.304872 |
| MmugDNA.42047.1.S1_at   | MmugDNA.42047.1 | 5.98  | 6.08  | 0.24 | 0.14 | -1.07 | 0.476081 | 0.520836 | 0.768871 | 0.711942 |
| MmugDNA.42048.1.S1_at   | MmugDNA.42048.1 | 3.21  | 3.12  | 0.05 | 0.08 | 1.07  | 0.376025 | 0.299137 | 0.706657 | 0.557663 |
| MmugDNA.4205.1.S1_at    | MmugDNA.4205.1  | 6.43  | 6.29  | 0.03 | 0.21 | 1.11  | 0.257101 | 0.46648  | 0.620962 | 0.676333 |
| MmugDNA.42050.1.S1_at   | MmugDNA.42050.1 | 8.39  | 9.03  | 0.47 | 0.04 | -1.56 | 0.073614 | 0.013384 | 0.434623 | 0.14827  |

|                         |                 |       |       |      |      |       |          |          |          |          |
|-------------------------|-----------------|-------|-------|------|------|-------|----------|----------|----------|----------|
| MmugDNA.42052.1.S1_at   | MmugDNA.42052.1 | 5.16  | 5.11  | 0.24 | 0.09 | 1.03  | 0.623757 | 0.448308 | 0.848338 | 0.664195 |
| MmugDNA.42052.1.S1_s_at | MmugDNA.42052.1 | 6.54  | 6.4   | 0.1  | 0.13 | 1.1   | 0.119316 | 0.250555 | 0.492749 | 0.519395 |
| MmugDNA.42053.1.S1_at   | MmugDNA.42053.1 | 5.2   | 5.24  | 0.63 | 0.49 | -1.02 | 0.938921 | 0.331629 | 0.979343 | 0.580208 |
| MmugDNA.42054.1.S1_at   | MmugDNA.42054.1 | 5.03  | 4.97  | 0.12 | 0.04 | 1.05  | 0.161589 | 0.074283 | 0.534937 | 0.318046 |
| MmugDNA.42055.1.S1_at   | MmugDNA.42055.1 | 6.66  | 6.23  | 0.19 | 0.07 | 1.35  | 0.032865 | 0.05927  | 0.345474 | 0.29047  |
| MmugDNA.42056.1.S1_at   | MmugDNA.42056.1 | 2.96  | 2.96  | 0.09 | 0.06 | -1    | 0.47264  | 0.306835 | 0.767198 | 0.563399 |
| MmugDNA.42057.1.S1_at   | MmugDNA.42057.1 | 8.43  | 7.55  | 0.15 | 0.46 | 1.84  | 0.03479  | 0.030816 | 0.350364 | 0.217376 |
| MmugDNA.42059.1.S1_at   | MmugDNA.42059.1 | 7.41  | 5.85  | 0.6  | 0.7  | 2.96  | 0.085838 | 0.079698 | 0.453025 | 0.326981 |
| MmugDNA.4206.1.S1_at    | MmugDNA.4206.1  | 8.67  | 9.02  | 0.82 | 0.1  | -1.27 | 0.468483 | 0.552178 | 0.764997 | 0.73155  |
| MmugDNA.42060.1.S1_at   | MmugDNA.42060.1 | 6.2   | 6.03  | 0.36 | 0.24 | 1.12  | 0.533589 | 0.399742 | 0.80084  | 0.629951 |
| MmugDNA.42061.1.S1_at   | MmugDNA.42061.1 | 3.38  | 3.31  | 0.1  | 0.25 | -1.05 | 0.7512   | 0.220873 | 0.905843 | 0.494262 |
| MmugDNA.42062.1.S1_at   | MmugDNA.42062.1 | 9.08  | 9.61  | 0.45 | 0.28 | -1.44 | 0.178393 | 0.004872 | 0.551369 | 0.097453 |
| MmugDNA.42063.1.S1_at   | MmugDNA.42063.1 | 3.33  | 3.37  | 0.08 | 0.27 | -1.03 | 0.70531  | 0.900171 | 0.885355 | 0.943311 |
| MmugDNA.42066.1.S1_at   | MmugDNA.42066.1 | 4.96  | 4.82  | 0.29 | 0.67 | 1.1   | 0.486217 | 0.620538 | 0.77447  | 0.77547  |
| MmugDNA.42067.1.S1_at   | MmugDNA.42067.1 | 9.1   | 8.3   | 0.33 | 0.28 | 1.74  | 0.016459 | 0.00311  | 0.287478 | 0.081305 |
| MmugDNA.42068.1.S1_at   | MmugDNA.42068.1 | 8.98  | 9.2   | 0.57 | 0.05 | -1.17 | 0.652369 | 0.049859 | 0.862004 | 0.268413 |
| MmugDNA.4207.1.S1_at    | MmugDNA.4207.1  | 11.69 | 11.44 | 0.41 | 0.02 | 1.19  | 0.264093 | 0.212698 | 0.625948 | 0.486681 |
| MmugDNA.42072.1.S1_at   | MmugDNA.42072.1 | 5.91  | 5.7   | 0.03 | 0.13 | 1.15  | 0.047871 | 0.027408 | 0.381444 | 0.206752 |
| MmugDNA.42073.1.S1_at   | MmugDNA.42073.1 | 6.68  | 6.97  | 0.6  | 0.15 | -1.22 | 0.114127 | 0.216735 | 0.487405 | 0.490311 |
| MmugDNA.42074.1.S1_at   | MmugDNA.42074.1 | 5.39  | 5.14  | 0.08 | 0.08 | 1.19  | 0.032151 | 0.116953 | 0.343204 | 0.384343 |
| MmugDNA.42075.1.S1_at   | MmugDNA.42075.1 | 3.13  | 3.01  | 0.1  | 0    | 1.08  | 0.138645 | 0.091784 | 0.514023 | 0.346977 |
| MmugDNA.42076.1.S1_at   | MmugDNA.42076.1 | 2.91  | 3.06  | 0.32 | 0.14 | -1.11 | 0.635555 | 0.653493 | 0.854591 | 0.797464 |
| MmugDNA.42077.1.S1_at   | MmugDNA.42077.1 | 4.67  | 4.54  | 0.14 | 0.13 | 1.09  | 0.31998  | 0.433833 | 0.669028 | 0.654032 |
| MmugDNA.42078.1.S1_at   | MmugDNA.42078.1 | 8.04  | 8.2   | 0.44 | 0.26 | -1.12 | 0.809473 | 0.846138 | 0.93104  | 0.912395 |
| MmugDNA.42079.1.S1_at   | MmugDNA.42079.1 | 3.71  | 3.88  | 0.23 | 0.36 | -1.13 | 0.316118 | 0.640366 | 0.666331 | 0.788874 |
| MmugDNA.42080.1.S1_at   | MmugDNA.42080.1 | 4.3   | 4.31  | 0.07 | 0.12 | -1.01 | 0.972004 | 0.445632 | 0.990867 | 0.662468 |
| MmugDNA.42081.1.S1_at   | MmugDNA.42081.1 | 3.45  | 3.39  | 0.11 | 0.07 | 1.04  | 0.640942 | 0.877722 | 0.857    | 0.930219 |
| MmugDNA.42082.1.S1_at   | MmugDNA.42082.1 | 4.19  | 4.34  | 0.39 | 0.27 | -1.11 | 0.78994  | 0.630189 | 0.922714 | 0.782181 |
| MmugDNA.42083.1.S1_at   | MmugDNA.42083.1 | 5.53  | 5.51  | 0.23 | 0.09 | 1.02  | 0.783286 | 0.145236 | 0.920187 | 0.419256 |
| MmugDNA.42084.1.S1_at   | MmugDNA.42084.1 | 6.05  | 6.02  | 0.33 | 0.05 | 1.02  | 0.715423 | 0.801312 | 0.889274 | 0.885696 |
| MmugDNA.42085.1.S1_at   | MmugDNA.42085.1 | 5.56  | 4.86  | 0.89 | 0.02 | 1.63  | 0.715533 | 0.888607 | 0.889369 | 0.936492 |
| MmugDNA.42086.1.S1_at   | MmugDNA.42086.1 | 6.5   | 5.86  | 0.57 | 0.12 | 1.56  | 0.118448 | 0.238264 | 0.491933 | 0.508825 |
| MmugDNA.42087.1.S1_at   | MmugDNA.42087.1 | 6.8   | 7.01  | 1.38 | 0.04 | -1.16 | 0.698521 | 0.854931 | 0.882799 | 0.917368 |
| MmugDNA.42089.1.S1_at   | MmugDNA.42089.1 | 3.06  | 2.97  | 0.02 | 0.09 | 1.07  | 0.139121 | 0.071212 | 0.514459 | 0.31317  |
| MmugDNA.42090.1.S1_at   | MmugDNA.42090.1 | 5.53  | 5.31  | 0.36 | 0.21 | 1.16  | 0.162197 | 0.198976 | 0.535244 | 0.473566 |
| MmugDNA.42091.1.S1_at   | MmugDNA.42091.1 | 7.97  | 8.33  | 0.18 | 0.05 | -1.28 | 0.022802 | 0.003567 | 0.312286 | 0.085525 |
| MmugDNA.42092.1.S1_at   | MmugDNA.42092.1 | 11.01 | 11.63 | 0.24 | 0.05 | -1.54 | 0.011846 | 0.003066 | 0.257666 | 0.080758 |
| MmugDNA.42093.1.S1_at   | MmugDNA.42093.1 | 4.59  | 4.56  | 0.1  | 0.03 | 1.02  | 0.231702 | 0.24462  | 0.599679 | 0.514435 |
| MmugDNA.42094.1.S1_at   | MmugDNA.42094.1 | 4.77  | 4.86  | 0    | 0.1  | -1.07 | 0.195263 | 0.07297  | 0.565681 | 0.315986 |
| MmugDNA.42096.1.S1_s_at | MmugDNA.42096.1 | 13.55 | 13.53 | 0.01 | 0.01 | 1.01  | 0.099022 | 0.748867 | 0.4684   | 0.853944 |
| MmugDNA.42097.1.S1_at   | MmugDNA.42097.1 | 7.3   | 7.53  | 0.25 | 0.2  | -1.17 | 0.857343 | 0.215789 | 0.949683 | 0.489536 |
| MmugDNA.42098.1.S1_at   | MmugDNA.42098.1 | 11.36 | 10.62 | 0.1  | 0.13 | 1.67  | 0.001686 | 0.000442 | 0.164714 | 0.038359 |
| MmugDNA.42099.1.S1_at   | MmugDNA.42099.1 | 4.57  | 4.67  | 0.06 | 0.1  | -1.07 | 0.250366 | 0.0902   | 0.615561 | 0.344588 |

|                         |                 |       |       |      |      |       |          |          |          |          |
|-------------------------|-----------------|-------|-------|------|------|-------|----------|----------|----------|----------|
| MmugDNA.4210.1.S1_at    | MmugDNA.4210.1  | 2.93  | 3.04  | 0.28 | 0.3  | -1.08 | 0.772253 | 0.611924 | 0.915075 | 0.769636 |
| MmugDNA.42101.1.S1_at   | MmugDNA.42101.1 | 5.5   | 4.83  | 1.47 | 0.45 | 1.6   | 0.344347 | 0.404586 | 0.686913 | 0.633075 |
| MmugDNA.42102.1.S1_at   | MmugDNA.42102.1 | 11.23 | 10.38 | 0.31 | 0.1  | 1.8   | 0.019584 | 0.011133 | 0.301696 | 0.137297 |
| MmugDNA.42103.1.S1_at   | MmugDNA.42103.1 | 10.98 | 11.09 | 0.25 | 0.27 | -1.08 | 0.877249 | 0.183132 | 0.957209 | 0.459531 |
| MmugDNA.42104.1.S1_at   | MmugDNA.42104.1 | 7.14  | 8.1   | 0.08 | 0.03 | -1.94 | 0.000032 | 0.000683 | 0.108151 | 0.044166 |
| MmugDNA.42105.1.S1_at   | MmugDNA.42105.1 | 11.63 | 11.58 | 0.27 | 0.14 | 1.04  | 0.909922 | 0.358129 | 0.96945  | 0.59966  |
| MmugDNA.42106.1.S1_at   | MmugDNA.42106.1 | 11.23 | 10.89 | 0.19 | 0.07 | 1.27  | 0.037057 | 0.074024 | 0.356635 | 0.317579 |
| MmugDNA.42109.1.S1_at   | MmugDNA.42109.1 | 10.52 | 10.59 | 0.4  | 0.13 | -1.05 | 0.690721 | 0.39761  | 0.879579 | 0.628973 |
| MmugDNA.42110.1.S1_at   | MmugDNA.42110.1 | 6.62  | 6.06  | 0.61 | 0.03 | 1.48  | 0.215548 | 0.50111  | 0.585748 | 0.699443 |
| MmugDNA.42111.1.S1_at   | MmugDNA.42111.1 | 6.34  | 6.24  | 0.08 | 0.16 | 1.08  | 0.639622 | 0.004011 | 0.85626  | 0.089969 |
| MmugDNA.42112.1.S1_at   | MmugDNA.42112.1 | 6.75  | 6.54  | 0.16 | 0    | -1.16 | 0.124266 | 0.110132 | 0.498334 | 0.374244 |
| MmugDNA.42113.1.S1_at   | MmugDNA.42113.1 | 3.21  | 3.21  | 0.06 | 0.07 | -1    | 0.58065  | 0.871459 | 0.827245 | 0.926844 |
| MmugDNA.42114.1.S1_s_at | MmugDNA.42114.1 | 3.27  | 3.14  | 0.11 | 0.1  | 1.09  | 0.218391 | 0.526557 | 0.588185 | 0.71559  |
| MmugDNA.42115.1.S1_at   | MmugDNA.42115.1 | 5.64  | 5.65  | 0.11 | 0.02 | -1    | 0.747853 | 0.331622 | 0.904205 | 0.580208 |
| MmugDNA.42116.1.S1_at   | MmugDNA.42116.1 | 8.24  | 8.05  | 2.12 | 0.15 | 1.14  | 0.787035 | 0.250671 | 0.921805 | 0.51941  |
| MmugDNA.42118.1.S1_at   | MmugDNA.42118.1 | 7.11  | 6.5   | 0.25 | 0.28 | 1.52  | 0.026122 | 0.03459  | 0.323344 | 0.230072 |
| MmugDNA.42119.1.S1_at   | MmugDNA.42119.1 | 8.02  | 8.56  | 0.45 | 0.1  | -1.46 | 0.04746  | 0.037712 | 0.380416 | 0.23859  |
| MmugDNA.4212.1.S1_at    | MmugDNA.4212.1  | 2.77  | 2.76  | 0.06 | 0.03 | 1     | 0.567921 | 0.789631 | 0.820586 | 0.87847  |
| MmugDNA.42120.1.S1_at   | MmugDNA.42120.1 | 8.52  | 7.88  | 0.24 | 0.16 | 1.56  | 0.017067 | 0.015669 | 0.289095 | 0.158598 |
| MmugDNA.42121.1.S1_at   | MmugDNA.42121.1 | 7.7   | 7.71  | 0.16 | 0.15 | -1.01 | 0.765205 | 0.264615 | 0.911729 | 0.530605 |
| MmugDNA.42121.1.S1_x_at | MmugDNA.42121.1 | 7.37  | 7.35  | 0.18 | 0.28 | 1.01  | 0.98709  | 0.401769 | 0.995808 | 0.631068 |
| MmugDNA.42122.1.S1_at   | MmugDNA.42122.1 | 3.49  | 3.55  | 0.12 | 0.18 | -1.04 | 0.27857  | 0.590817 | 0.637745 | 0.75648  |
| MmugDNA.42123.1.S1_at   | MmugDNA.42123.1 | 3.95  | 3.83  | 0.18 | 0.11 | 1.09  | 0.340942 | 0.61422  | 0.684799 | 0.771166 |
| MmugDNA.42124.1.S1_at   | MmugDNA.42124.1 | 7.93  | 8.11  | 0.44 | 0.11 | -1.13 | 0.558292 | 0.842593 | 0.815182 | 0.910315 |
| MmugDNA.42125.1.S1_at   | MmugDNA.42125.1 | 4.49  | 4.45  | 0.06 | 0.02 | 1.03  | 0.146122 | 0.548051 | 0.520572 | 0.728874 |
| MmugDNA.42126.1.S1_at   | MmugDNA.42126.1 | 3.63  | 3.38  | 0.08 | 0.26 | 1.19  | 0.589284 | 0.865612 | 0.832298 | 0.923598 |
| MmugDNA.42127.1.S1_at   | MmugDNA.42127.1 | 6.65  | 6.69  | 0.66 | 0.2  | -1.03 | 0.81302  | 0.684403 | 0.932327 | 0.815943 |
| MmugDNA.4213.1.S1_at    | MmugDNA.4213.1  | 2.75  | 2.71  | 0.19 | 0.02 | 1.02  | 0.890792 | 0.715415 | 0.962492 | 0.835033 |
| MmugDNA.42131.1.S1_at   | MmugDNA.42131.1 | 8.23  | 8.21  | 0.34 | 0.11 | 1.01  | 0.859113 | 0.151502 | 0.950315 | 0.426223 |
| MmugDNA.42132.1.S1_at   | MmugDNA.42132.1 | 5.18  | 4.84  | 0.2  | 0.01 | 1.27  | 0.047172 | 0.05505  | 0.379682 | 0.280138 |
| MmugDNA.42133.1.S1_at   | MmugDNA.42133.1 | 4.81  | 4.82  | 0.23 | 0.12 | -1    | 0.435793 | 0.429209 | 0.745886 | 0.650726 |
| MmugDNA.42134.1.S1_at   | MmugDNA.42134.1 | 3.69  | 3.72  | 0.25 | 0    | -1.02 | 0.467127 | 0.465533 | 0.764161 | 0.675802 |
| MmugDNA.42135.1.S1_at   | MmugDNA.42135.1 | 9.22  | 9.1   | 0.4  | 0.23 | 1.08  | 0.340911 | 0.005661 | 0.684799 | 0.103959 |
| MmugDNA.42136.1.S1_at   | MmugDNA.42136.1 | 3.06  | 3.05  | 0.06 | 0.1  | 1.01  | 0.789129 | 0.664    | 0.92249  | 0.803247 |
| MmugDNA.42137.1.S1_at   | MmugDNA.42137.1 | 7.05  | 7.19  | 0.17 | 0.11 | -1.1  | 0.250629 | 0.152    | 0.615805 | 0.426741 |
| MmugDNA.42138.1.S1_at   | MmugDNA.42138.1 | 7.76  | 7.44  | 0.18 | 0.24 | 1.25  | 0.324032 | 0.424856 | 0.672429 | 0.647319 |
| MmugDNA.4214.1.S1_at    | MmugDNA.4214.1  | 3.56  | 3.57  | 0.08 | 0.18 | -1.01 | 0.507365 | 0.910734 | 0.786331 | 0.949643 |
| MmugDNA.42140.1.S1_at   | MmugDNA.42140.1 | 4.95  | 4.92  | 0.11 | 0.07 | 1.02  | 0.547765 | 0.153846 | 0.809225 | 0.428506 |
| MmugDNA.42142.1.S1_at   | MmugDNA.42142.1 | 7.01  | 6.87  | 0.08 | 0.02 | 1.1   | 0.05926  | 0.051341 | 0.406296 | 0.272052 |
| MmugDNA.42144.1.S1_s_at | MmugDNA.42144.1 | 11.73 | 10.58 | 0.45 | 0.11 | 2.22  | 0.023716 | 0.014281 | 0.316281 | 0.152609 |
| MmugDNA.42145.1.S1_at   | MmugDNA.42145.1 | 6.85  | 6.73  | 0.39 | 0.24 | 1.09  | 0.397594 | 0.450866 | 0.721825 | 0.665869 |
| MmugDNA.42146.1.S1_at   | MmugDNA.42146.1 | 5.24  | 5.05  | 0.11 | 0.16 | 1.13  | 0.179527 | 0.388934 | 0.552876 | 0.623249 |
| MmugDNA.42148.1.S1_at   | MmugDNA.42148.1 | 7.96  | 7.75  | 0.47 | 0.09 | 1.16  | 0.686152 | 0.020722 | 0.877166 | 0.180645 |

|                         |                 |       |       |      |      |       |          |          |          |          |
|-------------------------|-----------------|-------|-------|------|------|-------|----------|----------|----------|----------|
| MmugDNA.30407.1.S1_s_at | MmugDNA.30407.1 | 5.96  | 6.58  | 0.25 | 0.16 | -1.54 | 0.045319 | 0.114618 | 0.37628  | 0.381156 |
| MmugDNA.42152.1.S1_at   | MmugDNA.42152.1 | 11.58 | 11.51 | 0.19 | 0.04 | 1.05  | 0.444398 | 0.026438 | 0.751266 | 0.203765 |
| MmugDNA.42154.1.S1_at   | MmugDNA.42154.1 | 6.48  | 6.44  | 0.45 | 0.25 | 1.03  | 0.655743 | 0.576906 | 0.863273 | 0.747521 |
| MmugDNA.42155.1.S1_at   | MmugDNA.42155.1 | 4.99  | 4.99  | 0.13 | 0.1  | 1     | 0.908632 | 0.748588 | 0.969262 | 0.853719 |
| MmugDNA.42156.1.S1_at   | MmugDNA.42156.1 | 3.84  | 3.91  | 0.06 | 0.35 | -1.05 | 0.740059 | 0.881497 | 0.900699 | 0.932382 |
| MmugDNA.42157.1.S1_at   | MmugDNA.42157.1 | 5.71  | 4.51  | 0.81 | 0.38 | 2.3   | 0.097024 | 0.080662 | 0.465695 | 0.328444 |
| MmugDNA.42158.1.S1_at   | MmugDNA.42158.1 | 7.86  | 8.16  | 0.56 | 0.06 | -1.22 | 0.382001 | 0.081883 | 0.710373 | 0.330339 |
| MmugDNA.42159.1.S1_at   | MmugDNA.42159.1 | 6.65  | 6.62  | 0.14 | 0.03 | 1.02  | 0.278423 | 0.459967 | 0.637601 | 0.671989 |
| MmugDNA.4216.1.S1_at    | MmugDNA.4216.1  | 5.8   | 5.73  | 0.24 | 0.1  | 1.05  | 0.36041  | 0.650579 | 0.697914 | 0.795663 |
| MmugDNA.42160.1.S1_at   | MmugDNA.42160.1 | 8.84  | 8.42  | 0.79 | 0.21 | 1.33  | 0.870445 | 0.955684 | 0.954929 | 0.974899 |
| MmugDNA.42161.1.S1_at   | MmugDNA.42161.1 | 3.82  | 3.59  | 0.13 | 0.24 | -1.17 | 0.570703 | 0.835929 | 0.822256 | 0.906135 |
| MmugDNA.42163.1.S1_at   | MmugDNA.42163.1 | 5.21  | 5.07  | 0.09 | 0.19 | 1.11  | 0.328283 | 0.668472 | 0.675717 | 0.805975 |
| MmugDNA.42164.1.S1_s_at | MmugDNA.42164.1 | 5.17  | 5.26  | 0.14 | 0.12 | -1.07 | 0.214554 | 0.034084 | 0.58502  | 0.228514 |
| MmugDNA.42165.1.S1_at   | MmugDNA.42165.1 | 4.39  | 4.36  | 0.04 | 0.07 | 1.02  | 0.345224 | 0.778781 | 0.68742  | 0.871617 |
| MmugDNA.42166.1.S1_at   | MmugDNA.42166.1 | 7.14  | 7.61  | 0.19 | 0.29 | -1.39 | 0.020341 | 0.041153 | 0.303839 | 0.247702 |
| MmugDNA.42167.1.S1_at   | MmugDNA.42167.1 | 4.78  | 4.65  | 0.16 | 0.06 | 1.09  | 0.305006 | 0.409311 | 0.658544 | 0.636437 |
| MmugDNA.42168.1.S1_at   | MmugDNA.42168.1 | 3.55  | 3.59  | 0.12 | 0.1  | -1.03 | 0.447465 | 0.508014 | 0.753312 | 0.703358 |
| MmugDNA.42169.1.S1_at   | MmugDNA.42169.1 | 7.31  | 6.99  | 0.13 | 0.11 | 1.24  | 0.015099 | 0.013142 | 0.2796   | 0.147338 |
| MmugDNA.4217.1.S1_at    | MmugDNA.4217.1  | 3.74  | 3.5   | 0.38 | 0.1  | 1.18  | 0.559948 | 0.713418 | 0.816426 | 0.833698 |
| MmugDNA.42170.1.S1_at   | MmugDNA.42170.1 | 4.73  | 4.63  | 0.42 | 0.51 | 1.07  | 0.750861 | 0.706191 | 0.9056   | 0.829634 |
| MmugDNA.42171.1.S1_at   | MmugDNA.42171.1 | 5.4   | 5.28  | 0.06 | 0.03 | 1.09  | 0.036598 | 0.677801 | 0.355088 | 0.811816 |
| MmugDNA.42172.1.S1_at   | MmugDNA.42172.1 | 5.45  | 5.35  | 0.12 | 0.14 | 1.07  | 0.268379 | 0.659578 | 0.628784 | 0.800802 |
| MmugDNA.42173.1.S1_at   | MmugDNA.42173.1 | 5.13  | 5.01  | 0.19 | 0.22 | 1.09  | 0.419775 | 0.484429 | 0.736572 | 0.688478 |
| MmugDNA.42176.1.S1_at   | MmugDNA.42176.1 | 3.35  | 3.9   | 0.47 | 0.42 | -1.47 | 0.337833 | 0.51411  | 0.682728 | 0.707434 |
| MmugDNA.42178.1.S1_at   | MmugDNA.42178.1 | 6.31  | 6.17  | 0.12 | 0.03 | 1.1   | 0.127715 | 0.439802 | 0.50202  | 0.658439 |
| MmugDNA.42179.1.S1_at   | MmugDNA.42179.1 | 5.54  | 5.45  | 0.09 | 0.1  | 1.06  | 0.132444 | 0.217858 | 0.506752 | 0.491406 |
| MmugDNA.4218.1.S1_at    | MmugDNA.4218.1  | 9.7   | 9.41  | 0.77 | 0.06 | 1.23  | 0.83449  | 0.965664 | 0.940665 | 0.980751 |
| MmugDNA.42180.1.S1_at   | MmugDNA.42180.1 | 7.02  | 7.08  | 0.1  | 0.02 | -1.05 | 0.28983  | 0.421478 | 0.646464 | 0.64509  |
| MmugDNA.42182.1.S1_at   | MmugDNA.42182.1 | 10.19 | 11.68 | 0.76 | 0.16 | -2.82 | 0.090645 | 0.095927 | 0.458873 | 0.353204 |
| MmugDNA.42183.1.S1_at   | MmugDNA.42183.1 | 6.18  | 6.19  | 0.2  | 0.1  | -1    | 0.451986 | 0.312736 | 0.755619 | 0.567299 |
| MmugDNA.42184.1.S1_at   | MmugDNA.42184.1 | 9.7   | 9.4   | 0.6  | 0.29 | 1.23  | 0.76214  | 0.545981 | 0.910788 | 0.727708 |
| MmugDNA.42185.1.S1_at   | MmugDNA.42185.1 | 5.3   | 6.01  | 0.03 | 0.42 | -1.64 | 0.029867 | 0.290967 | 0.336071 | 0.551525 |
| MmugDNA.42187.1.S1_at   | MmugDNA.42187.1 | 8.12  | 7.56  | 1.19 | 0.28 | 1.48  | 0.476309 | 0.596081 | 0.769092 | 0.759339 |
| MmugDNA.42188.1.S1_at   | MmugDNA.42188.1 | 3.93  | 3.95  | 0.09 | 0.26 | -1.02 | 0.319201 | 0.610364 | 0.66867  | 0.768571 |
| MmugDNA.42192.1.S1_at   | MmugDNA.42192.1 | 6.31  | 6.28  | 0.12 | 0.04 | 1.02  | 0.833611 | 0.895843 | 0.940366 | 0.940479 |
| MmugDNA.42193.1.S1_at   | MmugDNA.42193.1 | 10.25 | 8.76  | 0.46 | 0.35 | 2.8   | 0.011423 | 0.004047 | 0.254838 | 0.090281 |
| MmugDNA.42194.1.S1_at   | MmugDNA.42194.1 | 6.51  | 6.5   | 0.34 | 0.05 | 1.01  | 0.929131 | 0.905286 | 0.976333 | 0.946296 |
| MmugDNA.42195.1.S1_at   | MmugDNA.42195.1 | 9.3   | 9.2   | 0.26 | 0.04 | 1.07  | 0.227517 | 0.368372 | 0.596631 | 0.607917 |
| MmugDNA.42197.1.S1_s_at | MmugDNA.42197.1 | 11.94 | 11.94 | 0.11 | 0.03 | 1     | 0.883238 | 0.213963 | 0.95964  | 0.487596 |
| MmugDNA.42199.1.S1_at   | MmugDNA.42199.1 | 4.61  | 4.52  | 0.19 | 0.27 | 1.06  | 0.996415 | 0.676015 | 0.998682 | 0.810632 |
| MmugDNA.4220.1.S1_at    | MmugDNA.4220.1  | 4.46  | 4.42  | 0.51 | 0.05 | 1.03  | 0.319035 | 0.259093 | 0.668492 | 0.526263 |
| MmugDNA.42200.1.S1_at   | MmugDNA.42200.1 | 7.03  | 7.47  | 0.72 | 0.25 | -1.35 | 0.745721 | 0.667294 | 0.903099 | 0.805297 |
| MmugDNA.42201.1.S1_at   | MmugDNA.42201.1 | 10.98 | 11.32 | 0.18 | 0.11 | -1.26 | 0.058244 | 0.04503  | 0.403916 | 0.256697 |

|                       |                 |       |       |      |      |       |          |          |          |          |
|-----------------------|-----------------|-------|-------|------|------|-------|----------|----------|----------|----------|
| MmugDNA.42204.1.S1_at | MmugDNA.42204.1 | 5.07  | 7.09  | 0.89 | 0.2  | -4.03 | 0.045104 | 0.118844 | 0.375796 | 0.387009 |
| MmugDNA.42208.1.S1_at | MmugDNA.42208.1 | 3.26  | 3.27  | 0.06 | 0.02 | -1    | 0.498749 | 0.754024 | 0.781838 | 0.856812 |
| MmugDNA.42209.1.S1_at | MmugDNA.42209.1 | 6.76  | 6.6   | 0.22 | 0.08 | 1.11  | 0.369492 | 0.013846 | 0.704236 | 0.150924 |
| MmugDNA.4221.1.S1_at  | MmugDNA.4221.1  | 2.79  | 2.81  | 0.28 | 0.01 | -1.02 | 0.471874 | 0.292508 | 0.766685 | 0.55258  |
| MmugDNA.42210.1.S1_at | MmugDNA.42210.1 | 6.14  | 5.98  | 0.09 | 0.05 | 1.12  | 0.084094 | 0.302206 | 0.450372 | 0.560092 |
| MmugDNA.42211.1.S1_at | MmugDNA.42211.1 | 10.05 | 10.56 | 0.54 | 0.2  | -1.43 | 0.17224  | 0.160643 | 0.545597 | 0.436745 |
| MmugDNA.42212.1.S1_at | MmugDNA.42212.1 | 4.48  | 4.6   | 0.15 | 0.21 | -1.08 | 0.376746 | 0.33002  | 0.706991 | 0.578915 |
| MmugDNA.42213.1.S1_at | MmugDNA.42213.1 | 3.26  | 3.34  | 0.04 | 0.2  | -1.06 | 0.602968 | 0.499366 | 0.839083 | 0.698219 |
| MmugDNA.42214.1.S1_at | MmugDNA.42214.1 | 3.06  | 3.06  | 0.06 | 0    | 1     | 0.373901 | 0.74778  | 0.705567 | 0.853252 |
| MmugDNA.42216.1.S1_at | MmugDNA.42216.1 | 4.51  | 4.39  | 0.09 | 0.02 | 1.09  | 0.114504 | 0.230565 | 0.487606 | 0.50226  |
| MmugDNA.42217.1.S1_at | MmugDNA.42217.1 | 5.29  | 5.3   | 0.07 | 0.03 | -1.01 | 0.384877 | 0.949173 | 0.712263 | 0.970886 |
| MmugDNA.42218.1.S1_at | MmugDNA.42218.1 | 4.39  | 5.38  | 0.7  | 0.23 | -1.99 | 0.318609 | 0.06529  | 0.668228 | 0.301249 |
| MmugDNA.42219.1.S1_at | MmugDNA.42219.1 | 3.79  | 4     | 0.1  | 0.08 | -1.16 | 0.043541 | 0.270775 | 0.372168 | 0.536026 |
| MmugDNA.4222.1.S1_at  | MmugDNA.4222.1  | 4.29  | 4.32  | 0.05 | 0.12 | -1.02 | 0.596873 | 0.677321 | 0.83613  | 0.811609 |
| MmugDNA.42220.1.S1_at | MmugDNA.42220.1 | 5.74  | 5.68  | 0.3  | 0.19 | 1.04  | 0.780619 | 0.940956 | 0.919137 | 0.966553 |
| MmugDNA.42221.1.S1_at | MmugDNA.42221.1 | 11.27 | 10.77 | 0.47 | 0.29 | 1.42  | 0.190782 | 0.244483 | 0.561793 | 0.514295 |
| MmugDNA.42223.1.S1_at | MmugDNA.42223.1 | 5.27  | 5.55  | 1.11 | 0.21 | -1.21 | 0.82043  | 0.651004 | 0.935289 | 0.795969 |
| MmugDNA.42224.1.S1_at | MmugDNA.42224.1 | 5.97  | 6.41  | 0.39 | 0.12 | -1.36 | 0.13416  | 0.328107 | 0.508395 | 0.577872 |
| MmugDNA.42225.1.S1_at | MmugDNA.42225.1 | 10.22 | 9.75  | 0.74 | 0.25 | 1.38  | 0.213336 | 0.017404 | 0.583844 | 0.166995 |
| MmugDNA.42226.1.S1_at | MmugDNA.42226.1 | 9.82  | 9.88  | 0.32 | 0.18 | -1.04 | 0.675326 | 0.190843 | 0.872632 | 0.466228 |
| MmugDNA.42227.1.S1_at | MmugDNA.42227.1 | 9.07  | 8.86  | 0.24 | 0.16 | 1.15  | 0.113625 | 0.202457 | 0.486931 | 0.476786 |
| MmugDNA.42228.1.S1_at | MmugDNA.42228.1 | 13.15 | 13.21 | 0.08 | 0.01 | -1.04 | 0.247486 | 0.009346 | 0.613141 | 0.127602 |
| MmugDNA.42229.1.S1_at | MmugDNA.42229.1 | 3.1   | 3.07  | 0.11 | 0.12 | 1.02  | 0.587119 | 0.664199 | 0.831568 | 0.803247 |
| MmugDNA.4223.1.S1_at  | MmugDNA.4223.1  | 4.58  | 4.52  | 0.18 | 0.04 | 1.04  | 0.446143 | 0.22623  | 0.752589 | 0.498692 |
| MmugDNA.42231.1.S1_at | MmugDNA.42231.1 | 4.74  | 4.75  | 0.3  | 0.19 | -1.01 | 0.696278 | 0.618042 | 0.882048 | 0.773852 |
| MmugDNA.42232.1.S1_at | MmugDNA.42232.1 | 5.74  | 5.61  | 0.04 | 0.08 | 1.09  | 0.089535 | 0.391646 | 0.457672 | 0.625282 |
| MmugDNA.42234.1.S1_at | MmugDNA.42234.1 | 3.32  | 3.32  | 0    | 0.05 | 1     | 0.743641 | 0.864699 | 0.902191 | 0.923276 |
| MmugDNA.42235.1.S1_at | MmugDNA.42235.1 | 7.88  | 8.14  | 0.26 | 0.16 | -1.2  | 0.87738  | 0.285953 | 0.957302 | 0.547505 |
| MmugDNA.42236.1.S1_at | MmugDNA.42236.1 | 5.79  | 5.84  | 0.92 | 0.68 | -1.03 | 0.943071 | 0.68954  | 0.980374 | 0.818901 |
| MmugDNA.42237.1.S1_at | MmugDNA.42237.1 | 5.05  | 5.3   | 0.41 | 0.07 | -1.18 | 0.441678 | 0.853123 | 0.749528 | 0.916487 |
| MmugDNA.42238.1.S1_at | MmugDNA.42238.1 | 4.73  | 4.88  | 0.55 | 0.19 | -1.1  | 0.854237 | 0.119084 | 0.948453 | 0.387386 |
| MmugDNA.42239.1.S1_at | MmugDNA.42239.1 | 5.8   | 5.73  | 0.18 | 0.13 | 1.05  | 0.934061 | 0.172304 | 0.977707 | 0.448666 |
| MmugDNA.42242.1.S1_at | MmugDNA.42242.1 | 4.51  | 4.49  | 0.22 | 0.36 | 1.02  | 0.505637 | 0.320038 | 0.785398 | 0.572412 |
| MmugDNA.42244.1.S1_at | MmugDNA.42244.1 | 5.01  | 4.75  | 0.6  | 0.34 | 1.2   | 0.374624 | 0.745025 | 0.706017 | 0.852262 |
| MmugDNA.42246.1.S1_at | MmugDNA.42246.1 | 4.39  | 4.49  | 0.21 | 0.14 | -1.07 | 0.980758 | 0.151681 | 0.993904 | 0.426383 |
| MmugDNA.42248.1.S1_at | MmugDNA.42248.1 | 3.8   | 4.16  | 0.15 | 0.11 | -1.28 | 0.05677  | 0.050329 | 0.401111 | 0.269595 |
| MmugDNA.4225.1.S1_at  | MmugDNA.4225.1  | 4.44  | 4.48  | 0.05 | 0.12 | -1.03 | 0.967279 | 0.90803  | 0.989229 | 0.947889 |
| MmugDNA.42252.1.S1_at | MmugDNA.42252.1 | 11.24 | 11.22 | 0.38 | 0.05 | 1.01  | 0.886485 | 0.848812 | 0.960565 | 0.914141 |
| MmugDNA.42253.1.S1_at | MmugDNA.42253.1 | 5.73  | 5.45  | 0.12 | 0.15 | 1.22  | 0.05557  | 0.164298 | 0.398856 | 0.440539 |
| MmugDNA.42254.1.S1_at | MmugDNA.42254.1 | 4.38  | 4.42  | 0.24 | 0.28 | -1.03 | 0.526714 | 0.618733 | 0.796797 | 0.774185 |
| MmugDNA.42256.1.S1_at | MmugDNA.42256.1 | 4.75  | 4.72  | 0.34 | 0.01 | 1.02  | 0.622192 | 0.652194 | 0.847666 | 0.796592 |
| MmugDNA.42258.1.S1_at | MmugDNA.42258.1 | 4.77  | 4.76  | 0.06 | 0.1  | 1.01  | 0.389739 | 0.921883 | 0.716272 | 0.955951 |
| MmugDNA.42259.1.S1_at | MmugDNA.42259.1 | 3.57  | 3.27  | 0.38 | 0.22 | 1.23  | 0.115185 | 0.169026 | 0.488314 | 0.445593 |

|                         |                 |       |       |      |      |       |          |          |          |          |
|-------------------------|-----------------|-------|-------|------|------|-------|----------|----------|----------|----------|
| MmugDNA.4226.1.S1_at    | MmugDNA.4226.1  | 7.96  | 7.62  | 0.05 | 0.49 | 1.26  | 0.851143 | 0.00051  | 0.947553 | 0.039357 |
| MmugDNA.42260.1.S1_at   | MmugDNA.42260.1 | 10.41 | 10.75 | 0.19 | 0.05 | -1.27 | 0.103577 | 0.021139 | 0.474343 | 0.182036 |
| MmugDNA.42261.1.S1_at   | MmugDNA.42261.1 | 4.09  | 4.04  | 0.06 | 0.2  | 1.04  | 0.227018 | 0.39772  | 0.596459 | 0.62909  |
| MmugDNA.42262.1.S1_at   | MmugDNA.42262.1 | 4.53  | 4.54  | 0.03 | 0.1  | -1.01 | 0.384013 | 0.556279 | 0.711171 | 0.734476 |
| MmugDNA.42263.1.S1_at   | MmugDNA.42263.1 | 4.7   | 4.65  | 0.13 | 0.16 | 1.04  | 0.667641 | 0.790034 | 0.868646 | 0.878637 |
| MmugDNA.42264.1.S1_s_at | MmugDNA.42264.1 | 9.48  | 9.61  | 3.19 | 0.2  | -1.09 | 0.512836 | 0.400289 | 0.789522 | 0.630158 |
| MmugDNA.42264.1.S1_x_at | MmugDNA.42264.1 | 5.14  | 5.5   | 0.81 | 0.24 | -1.29 | 0.686851 | 0.308937 | 0.877549 | 0.564656 |
| MmugDNA.42266.1.S1_at   | MmugDNA.42266.1 | 3.57  | 3.57  | 0    | 0.02 | 1     | 0.373901 | 0.860482 | 0.705567 | 0.920521 |
| MmugDNA.42267.1.S1_at   | MmugDNA.42267.1 | 4.47  | 4.77  | 0.31 | 0.66 | -1.23 | 0.431602 | 0.683357 | 0.743486 | 0.815239 |
| MmugDNA.42268.1.S1_at   | MmugDNA.42268.1 | 4.09  | 4.09  | 0.07 | 0.25 | 1     | 0.283898 | 0.505273 | 0.641735 | 0.702073 |
| MmugDNA.42271.1.S1_at   | MmugDNA.42271.1 | 4.06  | 4.41  | 0.09 | 0.79 | -1.27 | 0.35794  | 0.55782  | 0.695993 | 0.735261 |
| MmugDNA.42272.1.S1_at   | MmugDNA.42272.1 | 7.54  | 7.45  | 0.41 | 0.26 | 1.06  | 0.296216 | 0.486922 | 0.651906 | 0.690118 |
| MmugDNA.42273.1.S1_at   | MmugDNA.42273.1 | 6.88  | 6.89  | 0.12 | 0.08 | -1.01 | 0.536353 | 0.314094 | 0.802267 | 0.568185 |
| MmugDNA.42274.1.S1_at   | MmugDNA.42274.1 | 7.18  | 6.74  | 0.4  | 0.16 | 1.35  | 0.105425 | 0.110621 | 0.477116 | 0.374854 |
| MmugDNA.42275.1.S1_at   | MmugDNA.42275.1 | 7.58  | 7.81  | 0.25 | 0.13 | -1.17 | 0.396218 | 0.000418 | 0.721233 | 0.038093 |
| MmugDNA.42276.1.S1_at   | MmugDNA.42276.1 | 5.57  | 5.52  | 0.06 | 0.03 | 1.03  | 0.139018 | 0.556387 | 0.514459 | 0.734507 |
| MmugDNA.42277.1.S1_at   | MmugDNA.42277.1 | 3.66  | 3.98  | 0.13 | 0.29 | -1.25 | 0.411811 | 0.628947 | 0.731729 | 0.781556 |
| MmugDNA.42278.1.S1_at   | MmugDNA.42278.1 | 11.95 | 10.89 | 0.02 | 0.14 | 2.08  | 0.000257 | 0.000059 | 0.130979 | 0.025666 |
| MmugDNA.42278.1.S1_s_at | MmugDNA.42278.1 | 11.53 | 10.64 | 0.07 | 0.1  | 1.85  | 0.000254 | 0.000018 | 0.130979 | 0.019635 |
| MmugDNA.42279.1.S1_at   | MmugDNA.42279.1 | 5.36  | 4.97  | 0.96 | 0.23 | 1.3   | 0.535344 | 0.690327 | 0.801658 | 0.819503 |
| MmugDNA.4228.1.S1_at    | MmugDNA.4228.1  | 7.07  | 6.86  | 0.48 | 0.4  | 1.16  | 0.91875  | 0.985026 | 0.972261 | 0.991497 |
| MmugDNA.42280.1.S1_at   | MmugDNA.42280.1 | 5.99  | 5.88  | 0.17 | 0.29 | 1.08  | 0.218682 | 0.603483 | 0.588341 | 0.764189 |
| MmugDNA.42282.1.S1_at   | MmugDNA.42282.1 | 5.66  | 5.48  | 0.09 | 0.19 | 1.14  | 0.10968  | 0.197271 | 0.482529 | 0.472213 |
| MmugDNA.42285.1.S1_at   | MmugDNA.42285.1 | 3.39  | 3.44  | 0.06 | 0.17 | -1.04 | 0.911605 | 0.251644 | 0.970117 | 0.520387 |
| MmugDNA.42286.1.S1_at   | MmugDNA.42286.1 | 3.68  | 4.02  | 0.11 | 0.34 | -1.26 | 0.223789 | 0.759266 | 0.592954 | 0.860036 |
| MmugDNA.42286.1.S1_s_at | MmugDNA.42286.1 | 12.81 | 12.72 | 0.07 | 0.08 | 1.06  | 0.394839 | 0.061076 | 0.720137 | 0.293952 |
| MmugDNA.42288.1.S1_at   | MmugDNA.42288.1 | 2.97  | 3.01  | 0.03 | 0.06 | -1.03 | 0.167197 | 0.630445 | 0.539832 | 0.782237 |
| MmugDNA.42289.1.S1_at   | MmugDNA.42289.1 | 6.91  | 6.95  | 0.14 | 0.48 | -1.03 | 0.8834   | 0.672682 | 0.95964  | 0.808708 |
| MmugDNA.4229.1.S1_at    | MmugDNA.4229.1  | 6.86  | 7.37  | 0.36 | 0.33 | -1.42 | 0.133418 | 0.129835 | 0.507921 | 0.401506 |
| MmugDNA.42290.1.S1_at   | MmugDNA.42290.1 | 3.55  | 3.4   | 0.08 | 0.12 | 1.11  | 0.379762 | 0.514188 | 0.709128 | 0.70751  |
| MmugDNA.42291.1.S1_at   | MmugDNA.42291.1 | 7.25  | 6.83  | 0.17 | 0.26 | 1.34  | 0.068446 | 0.074712 | 0.42564  | 0.318465 |
| MmugDNA.42292.1.S1_at   | MmugDNA.42292.1 | 6.35  | 6.35  | 0.03 | 0.04 | -1    | 0.200642 | 0.224334 | 0.572447 | 0.497249 |
| MmugDNA.42293.1.S1_at   | MmugDNA.42293.1 | 5.3   | 5.41  | 0.16 | 0.08 | -1.08 | 0.309331 | 0.302881 | 0.661672 | 0.560356 |
| MmugDNA.42294.1.S1_at   | MmugDNA.42294.1 | 3.33  | 3.27  | 0.15 | 0.16 | 1.04  | 0.769257 | 0.737538 | 0.913552 | 0.847993 |
| MmugDNA.42296.1.S1_at   | MmugDNA.42296.1 | 4.38  | 4.91  | 0.54 | 0.05 | -1.44 | 0.219456 | 0.204505 | 0.588927 | 0.478845 |
| MmugDNA.42297.1.S1_at   | MmugDNA.42297.1 | 4.87  | 4.88  | 0.04 | 0.21 | -1.01 | 0.845489 | 0.946105 | 0.945862 | 0.969374 |
| MmugDNA.42298.1.S1_at   | MmugDNA.42298.1 | 6.44  | 6.27  | 0.23 | 0.29 | 1.13  | 0.091626 | 0.404268 | 0.459957 | 0.632709 |
| MmugDNA.42299.1.S1_at   | MmugDNA.42299.1 | 4.66  | 4.41  | 0.45 | 0.64 | 1.19  | 0.512405 | 0.187197 | 0.789354 | 0.463153 |
| MmugDNA.423.1.S1_at     | MmugDNA.423.1   | 5.28  | 5.25  | 0.22 | 0.09 | 1.02  | 0.494632 | 0.812653 | 0.779488 | 0.891778 |
| MmugDNA.4230.1.S1_at    | MmugDNA.4230.1  | 4.2   | 4.15  | 0    | 0.12 | 1.04  | 0.879754 | 0.992715 | 0.958307 | 0.995715 |
| MmugDNA.42300.1.S1_at   | MmugDNA.42300.1 | 11.38 | 11.66 | 0.46 | 0.09 | -1.22 | 0.361954 | 0.471571 | 0.698882 | 0.679522 |
| MmugDNA.42303.1.S1_at   | MmugDNA.42303.1 | 11.92 | 11.62 | 0.03 | 0.08 | 1.23  | 0.003895 | 0.001059 | 0.198571 | 0.05171  |
| MmugDNA.42305.1.S1_at   | MmugDNA.42305.1 | 6.94  | 6.71  | 0.28 | 0.2  | 1.17  | 0.509298 | 0.449471 | 0.787587 | 0.665087 |

|                         |                 |       |       |      |      |       |          |          |          |          |
|-------------------------|-----------------|-------|-------|------|------|-------|----------|----------|----------|----------|
| MmugDNA.42306.1.S1_at   | MmugDNA.42306.1 | 8.75  | 8.4   | 0.39 | 0.1  | 1.28  | 0.296006 | 0.291449 | 0.65169  | 0.551823 |
| MmugDNA.42307.1.S1_s_at | MmugDNA.42307.1 | 4.6   | 3.79  | 0.39 | 0.23 | 1.75  | 0.109957 | 0.143324 | 0.482755 | 0.417294 |
| MmugDNA.42310.1.S1_at   | MmugDNA.42310.1 | 10.29 | 10.57 | 0.35 | 0.03 | -1.22 | 0.299565 | 0.324245 | 0.654022 | 0.57488  |
| MmugDNA.42312.1.S1_at   | MmugDNA.42312.1 | 12.02 | 12.6  | 0.42 | 0.02 | -1.5  | 0.078528 | 0.04201  | 0.441146 | 0.249463 |
| MmugDNA.42315.1.S1_at   | MmugDNA.42315.1 | 4.99  | 4.57  | 0.67 | 0.74 | 1.34  | 0.888086 | 0.241954 | 0.961251 | 0.512489 |
| MmugDNA.42316.1.S1_at   | MmugDNA.42316.1 | 4.14  | 3.9   | 0.17 | 0.16 | 1.18  | 0.162996 | 0.189834 | 0.536035 | 0.465403 |
| MmugDNA.42317.1.S1_at   | MmugDNA.42317.1 | 5.35  | 5.49  | 0.16 | 0.08 | -1.1  | 0.974831 | 0.836696 | 0.991912 | 0.906689 |
| MmugDNA.42318.1.S1_at   | MmugDNA.42318.1 | 4.8   | 4.68  | 0.17 | 0.02 | 1.09  | 0.340523 | 0.451753 | 0.684537 | 0.666609 |
| MmugDNA.42319.1.S1_at   | MmugDNA.42319.1 | 4.54  | 4.54  | 0.04 | 0.12 | 1     | 0.560206 | 0.927475 | 0.816546 | 0.958797 |
| MmugDNA.4232.1.S1_at    | MmugDNA.4232.1  | 6.18  | 6.21  | 0.2  | 0.05 | -1.02 | 0.392645 | 0.525912 | 0.718539 | 0.715246 |
| MmugDNA.42320.1.S1_at   | MmugDNA.42320.1 | 6.95  | 6.88  | 0.25 | 0.05 | -1.05 | 0.544366 | 0.117498 | 0.807196 | 0.38526  |
| MmugDNA.42322.1.S1_at   | MmugDNA.42322.1 | 5.95  | 5.88  | 0.11 | 0.3  | 1.05  | 0.231915 | 0.301931 | 0.599694 | 0.55986  |
| MmugDNA.42324.1.S1_at   | MmugDNA.42324.1 | 6.31  | 5.92  | 0.27 | 0.53 | 1.3   | 0.47546  | 0.683884 | 0.768639 | 0.815591 |
| MmugDNA.42325.1.S1_at   | MmugDNA.42325.1 | 7.2   | 7.22  | 0.16 | 0.24 | -1.01 | 0.897734 | 0.589825 | 0.965296 | 0.755973 |
| MmugDNA.4233.1.S1_at    | MmugDNA.4233.1  | 6.16  | 6.14  | 0.07 | 0.05 | 1.01  | 0.704251 | 0.540809 | 0.885085 | 0.724565 |
| MmugDNA.42330.1.S1_at   | MmugDNA.42330.1 | 4     | 4.21  | 0.37 | 0.09 | -1.15 | 0.392819 | 0.453994 | 0.718623 | 0.668362 |
| MmugDNA.42331.1.S1_at   | MmugDNA.42331.1 | 2.93  | 2.91  | 0.15 | 0.04 | 1.02  | 0.920143 | 0.993202 | 0.972913 | 0.995946 |
| MmugDNA.42332.1.S1_at   | MmugDNA.42332.1 | 4.1   | 3.96  | 0.1  | 0.08 | 1.1   | 0.26207  | 0.247021 | 0.624294 | 0.516238 |
| MmugDNA.42333.1.S1_at   | MmugDNA.42333.1 | 6.1   | 5.97  | 0.17 | 0.06 | 1.1   | 0.234854 | 0.200301 | 0.602142 | 0.474689 |
| MmugDNA.42334.1.S1_at   | MmugDNA.42334.1 | 3.14  | 3.2   | 0.13 | 0.18 | -1.04 | 0.934466 | 0.791845 | 0.977802 | 0.87976  |
| MmugDNA.42335.1.S1_at   | MmugDNA.42335.1 | 8.89  | 8.45  | 0.16 | 0.32 | 1.36  | 0.067012 | 0.177143 | 0.422979 | 0.453611 |
| MmugDNA.42338.1.S1_at   | MmugDNA.42338.1 | 9.45  | 9.57  | 0.6  | 0.13 | -1.08 | 0.42838  | 0.040556 | 0.741821 | 0.246268 |
| MmugDNA.42339.1.S1_at   | MmugDNA.42339.1 | 4.59  | 4.58  | 0.08 | 0    | 1.01  | 0.842648 | 0.969305 | 0.944281 | 0.983179 |
| MmugDNA.42340.1.S1_at   | MmugDNA.42340.1 | 6.25  | 6.41  | 0.79 | 0.14 | -1.11 | 0.699699 | 0.867576 | 0.883309 | 0.924742 |
| MmugDNA.42342.1.S1_at   | MmugDNA.42342.1 | 8.18  | 8.17  | 1.23 | 0.45 | 1.01  | 0.730813 | 0.77314  | 0.896252 | 0.868084 |
| MmugDNA.42342.1.S1_s_at | MmugDNA.42342.1 | 9.74  | 9.57  | 0.96 | 0.12 | 1.13  | 0.638426 | 0.676326 | 0.855923 | 0.810904 |
| MmugDNA.42343.1.S1_at   | MmugDNA.42343.1 | 9.73  | 9.65  | 1.14 | 0.17 | 1.06  | 0.744045 | 0.75624  | 0.902414 | 0.85815  |
| MmugDNA.42344.1.S1_at   | MmugDNA.42344.1 | 8.6   | 8.33  | 1.25 | 0.24 | 1.2   | 0.6936   | 0.862116 | 0.880681 | 0.921635 |
| MmugDNA.42346.1.S1_at   | MmugDNA.42346.1 | 3.11  | 3.88  | 0.12 | 0.53 | -1.7  | 0.084679 | 0.111454 | 0.451174 | 0.376126 |
| MmugDNA.42347.1.S1_at   | MmugDNA.42347.1 | 4.69  | 4.8   | 0.84 | 0.22 | -1.08 | 0.3785   | 0.650056 | 0.708363 | 0.795399 |
| MmugDNA.42348.1.S1_at   | MmugDNA.42348.1 | 10.84 | 10.73 | 0.17 | 0.1  | 1.08  | 0.935987 | 0.135375 | 0.978468 | 0.407478 |
| MmugDNA.42349.1.S1_at   | MmugDNA.42349.1 | 3.69  | 3.72  | 0.27 | 0.29 | -1.02 | 0.871165 | 0.338814 | 0.955222 | 0.585875 |
| MmugDNA.4235.1.S1_at    | MmugDNA.4235.1  | 3.55  | 2.92  | 0.47 | 0.21 | 1.56  | 0.151598 | 0.201535 | 0.524628 | 0.476036 |
| MmugDNA.42350.1.S1_at   | MmugDNA.42350.1 | 6.43  | 7.12  | 0.18 | 0.24 | -1.61 | 0.017632 | 0.006984 | 0.292934 | 0.112771 |
| MmugDNA.42351.1.S1_at   | MmugDNA.42351.1 | 5.4   | 4.76  | 0.71 | 0.5  | 1.57  | 0.189861 | 0.42586  | 0.561226 | 0.6481   |
| MmugDNA.42352.1.S1_at   | MmugDNA.42352.1 | 5.3   | 5.62  | 0.49 | 0.24 | -1.25 | 0.299802 | 0.357419 | 0.654243 | 0.599041 |
| MmugDNA.42353.1.S1_at   | MmugDNA.42353.1 | 7.18  | 7.09  | 0.18 | 0.09 | 1.06  | 0.163492 | 0.399189 | 0.5363   | 0.629699 |
| MmugDNA.42354.1.S1_at   | MmugDNA.42354.1 | 5.09  | 5.04  | 0.09 | 0.18 | 1.03  | 0.309769 | 0.407586 | 0.661815 | 0.63505  |
| MmugDNA.42356.1.S1_at   | MmugDNA.42356.1 | 4.65  | 4.63  | 0.06 | 0.25 | 1.01  | 0.939714 | 0.68195  | 0.979532 | 0.81424  |
| MmugDNA.42357.1.S1_at   | MmugDNA.42357.1 | 5.06  | 5.09  | 0.16 | 0.03 | -1.02 | 0.315284 | 0.144757 | 0.665715 | 0.418609 |
| MmugDNA.42358.1.S1_s_at | MmugDNA.42358.1 | 6.23  | 6.13  | 0.1  | 0.07 | 1.07  | 0.583619 | 0.943383 | 0.829134 | 0.967843 |
| MmugDNA.42359.1.S1_at   | MmugDNA.42359.1 | 4.87  | 4.71  | 0.12 | 0.04 | 1.12  | 0.382361 | 0.311896 | 0.710606 | 0.566833 |
| MmugDNA.4236.1.S1_at    | MmugDNA.4236.1  | 4.28  | 4.2   | 0.13 | 0.08 | 1.05  | 0.170575 | 0.322142 | 0.543588 | 0.573743 |



|                         |                 |       |       |      |      |       |          |          |          |          |
|-------------------------|-----------------|-------|-------|------|------|-------|----------|----------|----------|----------|
| MmugDNA.42360.1.S1_at   | MmugDNA.42360.1 | 3.5   | 3.62  | 0.12 | 0.11 | -1.08 | 0.243819 | 0.444768 | 0.609715 | 0.662072 |
| MmugDNA.42362.1.S1_at   | MmugDNA.42362.1 | 10.31 | 10.3  | 0.08 | 0.07 | 1.01  | 0.420348 | 0.492421 | 0.736891 | 0.693534 |
| MmugDNA.42363.1.S1_at   | MmugDNA.42363.1 | 3.82  | 3.68  | 0.18 | 0.11 | 1.1   | 0.125895 | 0.189347 | 0.49972  | 0.465092 |
| MmugDNA.42364.1.S1_at   | MmugDNA.42364.1 | 5.97  | 5.9   | 0.06 | 0.08 | 1.05  | 0.252772 | 0.264782 | 0.617761 | 0.530791 |
| MmugDNA.42365.1.S1_s_at | MmugDNA.42365.1 | 3.78  | 3.7   | 0.11 | 0.08 | 1.06  | 0.211236 | 0.592707 | 0.582141 | 0.757854 |
| MmugDNA.42366.1.S1_at   | MmugDNA.42366.1 | 13.31 | 13.24 | 0.05 | 0.07 | 1.05  | 0.150029 | 0.113439 | 0.52355  | 0.379509 |
| MmugDNA.42367.1.S1_at   | MmugDNA.42367.1 | 7.56  | 8.05  | 0.29 | 0.16 | -1.4  | 0.118709 | 0.118343 | 0.492161 | 0.386395 |
| MmugDNA.42368.1.S1_at   | MmugDNA.42368.1 | 4.85  | 4.59  | 0.11 | 0.23 | 1.2   | 0.176565 | 0.230288 | 0.549633 | 0.502102 |
| MmugDNA.42369.1.S1_s_at | MmugDNA.42369.1 | 11.48 | 11.42 | 0.29 | 0.07 | 1.04  | 0.440273 | 0.062591 | 0.748408 | 0.297022 |
| MmugDNA.4237.1.S1_at    | MmugDNA.4237.1  | 3.45  | 3.5   | 0.27 | 0.13 | -1.04 | 0.84791  | 0.134426 | 0.946608 | 0.406603 |
| MmugDNA.42370.1.S1_at   | MmugDNA.42370.1 | 5.94  | 5.83  | 0.1  | 0.03 | -1.08 | 0.393946 | 0.53662  | 0.719549 | 0.721934 |
| MmugDNA.42372.1.S1_at   | MmugDNA.42372.1 | 4.26  | 4.63  | 0.31 | 0.16 | -1.29 | 0.241389 | 0.023064 | 0.607596 | 0.190066 |
| MmugDNA.42373.1.S1_at   | MmugDNA.42373.1 | 8.09  | 8.04  | 0.29 | 0.23 | 1.04  | 0.698888 | 0.893378 | 0.882963 | 0.939163 |
| MmugDNA.42374.1.S1_at   | MmugDNA.42374.1 | 3.7   | 3.49  | 0.23 | 0.07 | 1.16  | 0.215153 | 0.232973 | 0.585748 | 0.50445  |
| MmugDNA.42377.1.S1_at   | MmugDNA.42377.1 | 9.64  | 9.9   | 0.2  | 0.06 | -1.2  | 0.078199 | 0.091324 | 0.440439 | 0.346281 |
| MmugDNA.42379.1.S1_at   | MmugDNA.42379.1 | 4.42  | 3.97  | 0.21 | 0.3  | 1.36  | 0.492302 | 0.42427  | 0.77824  | 0.646855 |
| MmugDNA.4238.1.S1_at    | MmugDNA.4238.1  | 3.84  | 3.71  | 0.04 | 0.22 | 1.09  | 0.88392  | 0.495852 | 0.959789 | 0.695754 |
| MmugDNA.42384.1.S1_at   | MmugDNA.42384.1 | 5.51  | 5.52  | 0.09 | 0.2  | -1.01 | 0.328615 | 0.550129 | 0.67577  | 0.730241 |
| MmugDNA.42386.1.S1_at   | MmugDNA.42386.1 | 5.78  | 6.05  | 0.3  | 0.01 | -1.21 | 0.314054 | 0.214579 | 0.665    | 0.488385 |
| MmugDNA.42387.1.S1_at   | MmugDNA.42387.1 | 5.14  | 4.91  | 0.09 | 0.1  | 1.17  | 0.012885 | 0.03889  | 0.265776 | 0.242159 |
| MmugDNA.42388.1.S1_at   | MmugDNA.42388.1 | 5.74  | 5.76  | 0.09 | 0.05 | -1.02 | 0.330908 | 0.49646  | 0.67754  | 0.696071 |
| MmugDNA.42389.1.S1_at   | MmugDNA.42389.1 | 4     | 3.98  | 0.15 | 0.05 | 1.01  | 0.726993 | 0.236377 | 0.894589 | 0.507308 |
| MmugDNA.4239.1.S1_at    | MmugDNA.4239.1  | 5.93  | 5.92  | 0.14 | 0.04 | 1.01  | 0.678731 | 0.803968 | 0.874119 | 0.887203 |
| MmugDNA.42390.1.S1_at   | MmugDNA.42390.1 | 4.68  | 4.49  | 0.57 | 0.03 | 1.14  | 0.263107 | 0.381109 | 0.625101 | 0.617478 |
| MmugDNA.42391.1.S1_at   | MmugDNA.42391.1 | 9.05  | 8.65  | 0.19 | 0.06 | 1.32  | 0.029005 | 0.132777 | 0.333482 | 0.404544 |
| MmugDNA.42392.1.S1_at   | MmugDNA.42392.1 | 4.01  | 4.34  | 0.15 | 0.15 | -1.26 | 0.050519 | 0.262708 | 0.387394 | 0.529069 |
| MmugDNA.42393.1.S1_at   | MmugDNA.42393.1 | 6.11  | 6.18  | 0.25 | 0.06 | -1.05 | 0.882668 | 0.29881  | 0.95933  | 0.557415 |
| MmugDNA.42394.1.S1_at   | MmugDNA.42394.1 | 6.82  | 6.61  | 0.63 | 0.51 | 1.16  | 0.480304 | 0.329018 | 0.771137 | 0.578482 |
| MmugDNA.42395.1.S1_at   | MmugDNA.42395.1 | 10.55 | 10.95 | 0.19 | 0.19 | -1.32 | 0.283552 | 0.398763 | 0.641408 | 0.629478 |
| MmugDNA.42396.1.S1_at   | MmugDNA.42396.1 | 9.03  | 8.89  | 0.11 | 0.16 | 1.1   | 0.751555 | 0.046445 | 0.906044 | 0.260042 |
| MmugDNA.42397.1.S1_at   | MmugDNA.42397.1 | 4.11  | 4.12  | 0.25 | 0.2  | -1    | 0.887824 | 0.97731  | 0.961188 | 0.987656 |
| MmugDNA.42398.1.S1_at   | MmugDNA.42398.1 | 6.46  | 6.27  | 0.21 | 0.12 | 1.14  | 0.974463 | 0.964152 | 0.991912 | 0.980052 |
| MmugDNA.424.1.S1_at     | MmugDNA.424.1   | 10.47 | 10.83 | 0.83 | 0.13 | -1.28 | 0.451626 | 0.193207 | 0.755305 | 0.468578 |
| MmugDNA.9557.1.S1_at    | MmugDNA.9557.1  | 12.69 | 12.67 | 0.2  | 0.02 | 1.01  | 0.315054 | 0.041942 | 0.665641 | 0.249397 |
| MmugDNA.9557.1.S1_s_at  | MmugDNA.9557.1  | 12.28 | 12.1  | 0.24 | 0.05 | 1.14  | 0.069084 | 0.020435 | 0.426529 | 0.179564 |
| MmugDNA.42400.1.S1_at   | MmugDNA.42400.1 | 4.48  | 4.28  | 0.55 | 0.25 | 1.15  | 0.381725 | 0.141349 | 0.71026  | 0.414874 |
| MmugDNA.42402.1.S1_at   | MmugDNA.42402.1 | 9.77  | 9.41  | 0.25 | 0.16 | 1.28  | 0.057455 | 0.0876   | 0.40213  | 0.340846 |
| MmugDNA.27577.1.S1_s_at | MmugDNA.27577.1 | 9.87  | 9.69  | 0.23 | 0.09 | 1.13  | 0.114121 | 0.1401   | 0.487405 | 0.413394 |
| MmugDNA.42403.1.S1_at   | MmugDNA.42403.1 | 9.93  | 9.39  | 0.06 | 0.14 | 1.45  | 0.002871 | 0.004386 | 0.187837 | 0.092719 |
| MmugDNA.42404.1.S1_at   | MmugDNA.42404.1 | 8.32  | 8.25  | 0.42 | 0.12 | 1.04  | 0.257346 | 0.542964 | 0.621065 | 0.725861 |
| MmugDNA.42406.1.S1_at   | MmugDNA.42406.1 | 10.91 | 10.53 | 0.68 | 0.03 | 1.3   | 0.409061 | 0.372873 | 0.729748 | 0.611735 |
| MmugDNA.42407.1.S1_at   | MmugDNA.42407.1 | 10.85 | 11    | 0.46 | 0.12 | -1.11 | 0.801294 | 0.944555 | 0.927471 | 0.968614 |
| MmugDNA.42408.1.S1_at   | MmugDNA.42408.1 | 7.78  | 7.65  | 0.63 | 0.18 | 1.1   | 0.615469 | 0.693197 | 0.844453 | 0.821545 |

|                         |                 |       |       |      |      |       |          |          |          |          |
|-------------------------|-----------------|-------|-------|------|------|-------|----------|----------|----------|----------|
| MmugDNA.42409.1.S1_at   | MmugDNA.42409.1 | 6.72  | 6.71  | 0.14 | 0.06 | 1.01  | 0.237782 | 0.49541  | 0.604841 | 0.695448 |
| MmugDNA.4241.1.S1_at    | MmugDNA.4241.1  | 4.52  | 4.6   | 0.19 | 0.23 | -1.06 | 0.825032 | 0.537972 | 0.937107 | 0.72281  |
| MmugDNA.42413.1.S1_at   | MmugDNA.42413.1 | 3.62  | 3.18  | 0.3  | 0.29 | 1.35  | 0.174915 | 0.186508 | 0.548031 | 0.462364 |
| MmugDNA.42414.1.S1_at   | MmugDNA.42414.1 | 9.34  | 9.25  | 0.23 | 0.21 | 1.07  | 0.269992 | 0.163123 | 0.630215 | 0.43928  |
| MmugDNA.42415.1.S1_at   | MmugDNA.42415.1 | 6.64  | 6.32  | 0.05 | 0.05 | 1.25  | 0.002299 | 0.064969 | 0.174899 | 0.300855 |
| MmugDNA.42416.1.S1_at   | MmugDNA.42416.1 | 12.49 | 12.61 | 0.17 | 0.06 | -1.09 | 0.401083 | 0.058745 | 0.72413  | 0.289049 |
| MmugDNA.42416.1.S1_s_at | MmugDNA.42416.1 | 11.77 | 11.89 | 0.2  | 0.14 | -1.09 | 0.844356 | 0.050761 | 0.945296 | 0.270455 |
| MmugDNA.42417.1.S1_at   | MmugDNA.42417.1 | 3.51  | 3.48  | 0.05 | 0.33 | 1.02  | 0.643587 | 0.704395 | 0.858218 | 0.828446 |
| MmugDNA.42419.1.S1_at   | MmugDNA.42419.1 | 4.33  | 4.38  | 0.19 | 0.12 | -1.04 | 0.744865 | 0.268099 | 0.902797 | 0.533862 |
| MmugDNA.4242.1.S1_at    | MmugDNA.4242.1  | 9.26  | 8.95  | 0.25 | 0.04 | 1.24  | 0.393606 | 0.037968 | 0.719354 | 0.239302 |
| MmugDNA.42420.1.S1_at   | MmugDNA.42420.1 | 5     | 4.62  | 0.18 | 0.11 | 1.3   | 0.084695 | 0.053898 | 0.451217 | 0.277685 |
| MmugDNA.42421.1.S1_at   | MmugDNA.42421.1 | 10.6  | 10.82 | 0.09 | 0.14 | -1.16 | 0.049929 | 0.038596 | 0.386663 | 0.241492 |
| MmugDNA.42422.1.S1_at   | MmugDNA.42422.1 | 5.78  | 5.55  | 0.15 | 0.12 | 1.17  | 0.415369 | 0.150574 | 0.733613 | 0.425106 |
| MmugDNA.42424.1.S1_x_at | MmugDNA.42424.1 | 7.77  | 7.93  | 0.28 | 0.27 | -1.12 | 0.280662 | 0.20292  | 0.639467 | 0.477343 |
| MmugDNA.42425.1.S1_at   | MmugDNA.42425.1 | 5.11  | 5.1   | 0.14 | 0.12 | 1.01  | 0.482765 | 0.549714 | 0.77256  | 0.730002 |
| MmugDNA.42426.1.S1_at   | MmugDNA.42426.1 | 5.13  | 6.18  | 1.39 | 0.23 | -2.07 | 0.269351 | 0.344064 | 0.629582 | 0.58962  |
| MmugDNA.42427.1.S1_at   | MmugDNA.42427.1 | 4.95  | 4.66  | 0.29 | 0.22 | 1.23  | 0.236314 | 0.074149 | 0.603291 | 0.31781  |
| MmugDNA.42428.1.S1_at   | MmugDNA.42428.1 | 10.86 | 9.87  | 0.06 | 0.29 | 1.98  | 0.003913 | 0.000456 | 0.198571 | 0.038572 |
| MmugDNA.42429.1.S1_at   | MmugDNA.42429.1 | 6.92  | 6.74  | 0.19 | 0.19 | 1.14  | 0.271618 | 0.08848  | 0.631445 | 0.341946 |
| MmugDNA.42430.1.S1_at   | MmugDNA.42430.1 | 6.03  | 7.18  | 0.95 | 0.17 | -2.22 | 0.038619 | 0.015992 | 0.359972 | 0.160458 |
| MmugDNA.42431.1.S1_at   | MmugDNA.42431.1 | 3.1   | 3.05  | 0.05 | 0.04 | 1.03  | 0.340372 | 0.425218 | 0.684512 | 0.647647 |
| MmugDNA.42432.1.S1_at   | MmugDNA.42432.1 | 10.32 | 10.62 | 0.34 | 0.11 | -1.23 | 0.81974  | 0.101687 | 0.935061 | 0.361562 |
| MmugDNA.42433.1.S1_at   | MmugDNA.42433.1 | 3.05  | 2.93  | 0.21 | 0.37 | 1.08  | 0.785775 | 0.766933 | 0.921215 | 0.864661 |
| MmugDNA.42434.1.S1_at   | MmugDNA.42434.1 | 8.47  | 8.46  | 0.27 | 0.13 | 1     | 0.939854 | 0.39484  | 0.979544 | 0.627216 |
| MmugDNA.42435.1.S1_at   | MmugDNA.42435.1 | 4.12  | 4.95  | 0.43 | 0.29 | -1.78 | 0.042762 | 0.039845 | 0.370345 | 0.244732 |
| MmugDNA.42436.1.S1_at   | MmugDNA.42436.1 | 3.09  | 3.07  | 0.27 | 0.12 | 1.01  | 0.68178  | 0.867601 | 0.875387 | 0.924749 |
| MmugDNA.42437.1.S1_at   | MmugDNA.42437.1 | 9.29  | 8.97  | 0.25 | 0.07 | 1.25  | 0.085843 | 0.031126 | 0.453025 | 0.218175 |
| MmugDNA.42438.1.S1_at   | MmugDNA.42438.1 | 7.26  | 6.97  | 0.53 | 0.7  | 1.23  | 0.778488 | 0.732491 | 0.918264 | 0.84504  |
| MmugDNA.42439.1.S1_at   | MmugDNA.42439.1 | 4.37  | 4.29  | 0.11 | 0.13 | 1.05  | 0.987688 | 0.438775 | 0.995831 | 0.657683 |
| MmugDNA.4244.1.S1_at    | MmugDNA.4244.1  | 3.77  | 3.72  | 0.18 | 0.02 | 1.04  | 0.594979 | 0.855117 | 0.83502  | 0.917418 |
| MmugDNA.42440.1.S1_at   | MmugDNA.42440.1 | 13    | 13.15 | 0.1  | 0.05 | -1.11 | 0.025009 | 0.041273 | 0.320402 | 0.247995 |
| MmugDNA.42441.1.S1_at   | MmugDNA.42441.1 | 4.08  | 4.06  | 0.19 | 0.15 | 1.01  | 0.221569 | 0.314082 | 0.591315 | 0.568185 |
| MmugDNA.42443.1.S1_at   | MmugDNA.42443.1 | 4.34  | 4.31  | 0.04 | 0.03 | 1.02  | 0.3348   | 0.636223 | 0.680656 | 0.785986 |
| MmugDNA.42444.1.S1_at   | MmugDNA.42444.1 | 5.61  | 5.65  | 0.24 | 0.2  | -1.03 | 0.852932 | 0.608227 | 0.94811  | 0.766957 |
| MmugDNA.42445.1.S1_at   | MmugDNA.42445.1 | 3.33  | 3.45  | 0.19 | 0.11 | -1.09 | 0.987747 | 0.447853 | 0.995831 | 0.663881 |
| MmugDNA.42448.1.S1_at   | MmugDNA.42448.1 | 5.47  | 5.26  | 0.69 | 0.13 | 1.15  | 0.541237 | 0.305261 | 0.805026 | 0.562255 |
| MmugDNA.42449.1.S1_at   | MmugDNA.42449.1 | 7.51  | 7.63  | 0.67 | 0.09 | -1.09 | 0.749724 | 0.85282  | 0.905282 | 0.91634  |
| MmugDNA.42450.1.S1_at   | MmugDNA.42450.1 | 5     | 4.71  | 0.21 | 0.11 | 1.23  | 0.160673 | 0.294322 | 0.533821 | 0.55407  |
| MmugDNA.42451.1.S1_at   | MmugDNA.42451.1 | 4.17  | 3.87  | 0.41 | 0.18 | 1.23  | 0.479317 | 0.703656 | 0.770701 | 0.828186 |
| MmugDNA.42452.1.S1_at   | MmugDNA.42452.1 | 8.47  | 8.76  | 0.24 | 0.27 | -1.22 | 0.98448  | 0.375965 | 0.995256 | 0.613797 |
| MmugDNA.42453.1.S1_at   | MmugDNA.42453.1 | 11.09 | 11    | 0.11 | 0.13 | 1.06  | 0.863612 | 0.983843 | 0.952043 | 0.991004 |
| MmugDNA.42455.1.S1_at   | MmugDNA.42455.1 | 6.85  | 6.37  | 0.13 | 0.4  | 1.39  | 0.058453 | 0.123477 | 0.40441  | 0.393518 |
| MmugDNA.42456.1.S1_at   | MmugDNA.42456.1 | 7.17  | 6.89  | 0.1  | 0.05 | 1.21  | 0.011153 | 0.020681 | 0.252629 | 0.1805   |

|                         |                 |       |       |      |      |       |          |          |          |          |
|-------------------------|-----------------|-------|-------|------|------|-------|----------|----------|----------|----------|
| MmugDNA.42457.1.S1_at   | MmugDNA.42457.1 | 10.69 | 10.28 | 0.13 | 0.16 | 1.33  | 0.076722 | 0.004663 | 0.438134 | 0.095301 |
| MmugDNA.42457.1.S1_x_at | MmugDNA.42457.1 | 11.22 | 10.9  | 0.15 | 0.19 | 1.25  | 0.301875 | 0.023789 | 0.655978 | 0.193119 |
| MmugDNA.42459.1.S1_at   | MmugDNA.42459.1 | 10.25 | 10.27 | 0.2  | 0.06 | -1.01 | 0.779347 | 0.571607 | 0.918638 | 0.743847 |
| MmugDNA.4246.1.S1_at    | MmugDNA.4246.1  | 6.47  | 6.42  | 0.24 | 0.12 | 1.03  | 0.791594 | 0.660302 | 0.923462 | 0.801241 |
| MmugDNA.42460.1.S1_at   | MmugDNA.42460.1 | 8.45  | 8.73  | 0.68 | 0.23 | -1.21 | 0.417346 | 0.575588 | 0.734845 | 0.746619 |
| MmugDNA.42461.1.S1_at   | MmugDNA.42461.1 | 5.64  | 5.75  | 0.25 | 0.11 | -1.08 | 0.550092 | 0.286012 | 0.81061  | 0.547512 |
| MmugDNA.42462.1.S1_at   | MmugDNA.42462.1 | 4.87  | 4.67  | 0.06 | 0.19 | 1.15  | 0.346887 | 0.472159 | 0.688435 | 0.679874 |
| MmugDNA.42463.1.S1_at   | MmugDNA.42463.1 | 5.88  | 5.18  | 0.19 | 0.11 | 1.62  | 0.009718 | 0.018053 | 0.243347 | 0.169372 |
| MmugDNA.42464.1.S1_at   | MmugDNA.42464.1 | 4.29  | 4.13  | 0.21 | 0.15 | 1.12  | 0.229765 | 0.405778 | 0.598481 | 0.633964 |
| MmugDNA.42465.1.S1_at   | MmugDNA.42465.1 | 5.23  | 5.19  | 0.14 | 0.23 | 1.03  | 0.678979 | 0.893969 | 0.874211 | 0.939462 |
| MmugDNA.42466.1.S1_at   | MmugDNA.42466.1 | 5.58  | 5.98  | 0.46 | 0.07 | -1.31 | 0.142    | 0.266874 | 0.516979 | 0.53244  |
| MmugDNA.42467.1.S1_at   | MmugDNA.42467.1 | 7.45  | 6.65  | 0.13 | 0.19 | 1.74  | 0.003582 | 0.005281 | 0.197111 | 0.10068  |
| MmugDNA.4247.1.S1_at    | MmugDNA.4247.1  | 10.41 | 11.41 | 0.26 | 0.04 | -2    | 0.005321 | 0.031942 | 0.207623 | 0.221125 |
| MmugDNA.4247.1.S1_s_at  | MmugDNA.4247.1  | 10.17 | 10.9  | 0.27 | 0.01 | -1.66 | 0.009653 | 0.08714  | 0.243152 | 0.340123 |
| MmugDNA.42470.1.S1_at   | MmugDNA.42470.1 | 5.32  | 5.43  | 0.2  | 0.02 | -1.08 | 0.983416 | 0.997931 | 0.994928 | 0.998971 |
| MmugDNA.42471.1.S1_at   | MmugDNA.42471.1 | 8.2   | 8.43  | 1.96 | 0.27 | -1.18 | 0.737277 | 0.149375 | 0.899426 | 0.423811 |
| MmugDNA.42472.1.S1_at   | MmugDNA.42472.1 | 4.65  | 4.79  | 0.11 | 0.01 | -1.1  | 0.346311 | 0.490854 | 0.688012 | 0.692666 |
| MmugDNA.42473.1.S1_at   | MmugDNA.42473.1 | 6.22  | 6.28  | 0.81 | 0.22 | -1.04 | 0.617984 | 0.449551 | 0.845774 | 0.665113 |
| MmugDNA.42474.1.S1_at   | MmugDNA.42474.1 | 4.83  | 4.74  | 0.07 | 0.11 | 1.06  | 0.588108 | 0.25647  | 0.83181  | 0.524234 |
| MmugDNA.42475.1.S1_at   | MmugDNA.42475.1 | 7.05  | 7.42  | 0.49 | 0.42 | -1.3  | 0.713999 | 0.210441 | 0.88857  | 0.484317 |
| MmugDNA.42477.1.S1_at   | MmugDNA.42477.1 | 5.66  | 5.13  | 0.22 | 0.19 | 1.44  | 0.050715 | 0.214495 | 0.387806 | 0.488257 |
| MmugDNA.42478.1.S1_at   | MmugDNA.42478.1 | 4.87  | 4.71  | 0.24 | 0.29 | 1.11  | 0.509473 | 0.777335 | 0.787592 | 0.87064  |
| MmugDNA.42479.1.S1_at   | MmugDNA.42479.1 | 8.69  | 8.71  | 0.32 | 0.24 | -1.01 | 0.212831 | 0.025664 | 0.583362 | 0.200834 |
| MmugDNA.4248.1.S1_at    | MmugDNA.4248.1  | 8.49  | 7.81  | 0.38 | 0.42 | 1.61  | 0.054443 | 0.054061 | 0.396542 | 0.277914 |
| MmugDNA.42483.1.S1_at   | MmugDNA.42483.1 | 6.49  | 6.4   | 0.41 | 0.28 | 1.06  | 0.410392 | 0.572834 | 0.730749 | 0.744765 |
| MmugDNA.42486.1.S1_at   | MmugDNA.42486.1 | 5.69  | 5.7   | 0.15 | 0.13 | -1    | 0.794008 | 0.819739 | 0.924489 | 0.896139 |
| MmugDNA.42487.1.S1_at   | MmugDNA.42487.1 | 3.43  | 3.66  | 0.15 | 0.01 | -1.18 | 0.118163 | 0.292277 | 0.491554 | 0.552389 |
| MmugDNA.42488.1.S1_at   | MmugDNA.42488.1 | 10.06 | 9.84  | 0.2  | 0.11 | 1.17  | 0.43638  | 0.695363 | 0.746306 | 0.82295  |
| MmugDNA.42490.1.S1_at   | MmugDNA.42490.1 | 6.6   | 6.61  | 0.17 | 0.14 | -1.01 | 0.454307 | 0.701361 | 0.756717 | 0.826814 |
| MmugDNA.42491.1.S1_at   | MmugDNA.42491.1 | 5.79  | 5.59  | 0.2  | 0.21 | 1.15  | 0.273803 | 0.448793 | 0.633462 | 0.664615 |
| MmugDNA.42492.1.S1_at   | MmugDNA.42492.1 | 9.95  | 9.79  | 1.26 | 0.35 | 1.12  | 0.763314 | 0.305233 | 0.91114  | 0.562255 |
| MmugDNA.42493.1.S1_at   | MmugDNA.42493.1 | 3.39  | 3.4   | 0.12 | 0.11 | -1    | 0.29244  | 0.601874 | 0.648844 | 0.763115 |
| MmugDNA.42494.1.S1_at   | MmugDNA.42494.1 | 8.36  | 9.35  | 0.87 | 0.19 | -1.98 | 0.305954 | 0.362458 | 0.659264 | 0.603016 |
| MmugDNA.42495.1.S1_at   | MmugDNA.42495.1 | 4.62  | 4.37  | 0.36 | 0.14 | 1.19  | 0.760531 | 0.25534  | 0.910074 | 0.523403 |
| MmugDNA.42495.1.S1_x_at | MmugDNA.42495.1 | 4.62  | 4.6   | 0.18 | 0.11 | 1.01  | 0.878876 | 0.637628 | 0.95792  | 0.787067 |
| MmugDNA.42496.1.S1_at   | MmugDNA.42496.1 | 4.49  | 4.55  | 0.22 | 0.14 | -1.04 | 0.703155 | 0.513332 | 0.884538 | 0.706881 |
| MmugDNA.17880.1.S1_at   | MmugDNA.17880.1 | 11.9  | 11.63 | 0.45 | 0.01 | 1.21  | 0.523592 | 0.892573 | 0.795656 | 0.938742 |
| MmugDNA.17880.1.S1_s_at | MmugDNA.17880.1 | 12.21 | 12.04 | 0.42 | 0.04 | 1.12  | 0.566607 | 0.903014 | 0.820086 | 0.944941 |
| MmugDNA.42498.1.S1_at   | MmugDNA.42498.1 | 13.36 | 13.42 | 0.06 | 0.04 | -1.04 | 0.461202 | 0.027406 | 0.760828 | 0.206752 |
| MmugDNA.425.1.S1_at     | MmugDNA.425.1   | 5.87  | 5.4   | 0.06 | 0.14 | 1.38  | 0.009602 | 0.20605  | 0.242793 | 0.480273 |
| MmugDNA.4250.1.S1_at    | MmugDNA.4250.1  | 9.2   | 9.44  | 0.26 | 0.1  | -1.18 | 0.401271 | 0.573151 | 0.724247 | 0.744941 |
| MmugDNA.42500.1.S1_at   | MmugDNA.42500.1 | 6.72  | 6.99  | 0.14 | 0.36 | -1.21 | 0.94351  | 0.57867  | 0.980509 | 0.748603 |
| MmugDNA.42501.1.S1_at   | MmugDNA.42501.1 | 9.86  | 10.11 | 0.94 | 0.06 | -1.19 | 0.70295  | 0.819063 | 0.884538 | 0.895738 |

|                         |                 |       |       |      |      |       |          |          |          |          |
|-------------------------|-----------------|-------|-------|------|------|-------|----------|----------|----------|----------|
| MmugDNA.42502.1.S1_at   | MmugDNA.42502.1 | 7.56  | 7.67  | 0.54 | 0.39 | -1.07 | 0.514781 | 0.381134 | 0.790644 | 0.617478 |
| MmugDNA.42503.1.S1_at   | MmugDNA.42503.1 | 4.58  | 4.91  | 0.35 | 0.47 | -1.25 | 0.373172 | 0.011916 | 0.705567 | 0.141283 |
| MmugDNA.42504.1.S1_at   | MmugDNA.42504.1 | 6.39  | 6.19  | 0.23 | 0.13 | 1.14  | 0.124228 | 0.237958 | 0.498334 | 0.508495 |
| MmugDNA.42508.1.S1_at   | MmugDNA.42508.1 | 6.28  | 7.22  | 0.28 | 0.36 | -1.92 | 0.053952 | 0.051231 | 0.395633 | 0.271799 |
| MmugDNA.42509.1.S1_at   | MmugDNA.42509.1 | 11.45 | 11.6  | 0.12 | 0.11 | -1.11 | 0.133382 | 0.193941 | 0.507921 | 0.469058 |
| MmugDNA.42509.1.S1_s_at | MmugDNA.42509.1 | 12.24 | 12.37 | 0.04 | 0.09 | -1.09 | 0.046696 | 0.02408  | 0.378526 | 0.194487 |
| MmugDNA.4251.1.S1_at    | MmugDNA.4251.1  | 7.45  | 7.34  | 0.09 | 0.1  | 1.08  | 0.103338 | 0.286851 | 0.474122 | 0.548162 |
| MmugDNA.42510.1.S1_at   | MmugDNA.42510.1 | 4.26  | 4.06  | 0.06 | 0.09 | 1.15  | 0.030383 | 0.251238 | 0.337508 | 0.519984 |
| MmugDNA.42512.1.S1_at   | MmugDNA.42512.1 | 5.22  | 5.91  | 0.77 | 0.61 | -1.61 | 0.962431 | 0.144018 | 0.987827 | 0.417912 |
| MmugDNA.42513.1.S1_at   | MmugDNA.42513.1 | 7.81  | 7.99  | 0.18 | 0.06 | -1.13 | 0.407644 | 0.01386  | 0.728783 | 0.15098  |
| MmugDNA.42514.1.S1_at   | MmugDNA.42514.1 | 11.05 | 11.57 | 0.13 | 0.07 | -1.44 | 0.004972 | 0.001921 | 0.204084 | 0.06556  |
| MmugDNA.42515.1.S1_at   | MmugDNA.42515.1 | 3.73  | 3.29  | 0.8  | 0.09 | 1.36  | 0.126417 | 0.048107 | 0.500227 | 0.264394 |
| MmugDNA.42515.1.S1_s_at | MmugDNA.42515.1 | 5.39  | 5.23  | 0.23 | 0.2  | 1.12  | 0.394157 | 0.024943 | 0.719638 | 0.197799 |
| MmugDNA.42516.1.S1_at   | MmugDNA.42516.1 | 3.53  | 3.24  | 0.35 | 0.08 | 1.22  | 0.309079 | 0.317119 | 0.661444 | 0.570377 |
| MmugDNA.42518.1.S1_at   | MmugDNA.42518.1 | 7.67  | 7.12  | 1.97 | 0.22 | 1.46  | 0.807666 | 0.09885  | 0.930244 | 0.357002 |
| MmugDNA.4252.1.S1_at    | MmugDNA.4252.1  | 6.24  | 6.7   | 0.14 | 0.14 | -1.38 | 0.007479 | 0.021173 | 0.229281 | 0.182268 |
| MmugDNA.42520.1.S1_at   | MmugDNA.42520.1 | 5.76  | 5.75  | 0.45 | 0.31 | 1.01  | 0.251344 | 0.660156 | 0.616622 | 0.801083 |
| MmugDNA.42523.1.S1_at   | MmugDNA.42523.1 | 2.85  | 2.86  | 0.06 | 0.06 | -1.01 | 0.276801 | 0.635472 | 0.636471 | 0.785405 |
| MmugDNA.42524.1.S1_at   | MmugDNA.42524.1 | 7.56  | 7.63  | 0.23 | 0.13 | -1.05 | 0.701199 | 0.545234 | 0.883834 | 0.727441 |
| MmugDNA.42526.1.S1_at   | MmugDNA.42526.1 | 3.65  | 4.31  | 0.68 | 0.06 | -1.58 | 0.393938 | 0.349258 | 0.719549 | 0.593267 |
| MmugDNA.42527.1.S1_at   | MmugDNA.42527.1 | 5.99  | 5.8   | 0.47 | 0.66 | 1.14  | 0.576939 | 0.838637 | 0.825252 | 0.907993 |
| MmugDNA.42529.1.S1_at   | MmugDNA.42529.1 | 5.29  | 5.21  | 0.04 | 0.41 | 1.06  | 0.647204 | 0.831548 | 0.859341 | 0.903407 |
| MmugDNA.4253.1.S1_at    | MmugDNA.4253.1  | 4.58  | 4.64  | 0.05 | 0.39 | -1.04 | 0.588822 | 0.654145 | 0.831968 | 0.79789  |
| MmugDNA.42531.1.S1_at   | MmugDNA.42531.1 | 6.51  | 6.6   | 0.18 | 0.26 | -1.06 | 0.742699 | 0.805045 | 0.901884 | 0.887934 |
| MmugDNA.42532.1.S1_at   | MmugDNA.42532.1 | 4.66  | 4.63  | 0.04 | 0.01 | 1.02  | 0.239562 | 0.760252 | 0.60607  | 0.86071  |
| MmugDNA.42533.1.S1_at   | MmugDNA.42533.1 | 5.7   | 5.72  | 0.36 | 0.18 | -1.01 | 0.997897 | 0.994225 | 0.999314 | 0.99645  |
| MmugDNA.42534.1.S1_at   | MmugDNA.42534.1 | 4.67  | 4.35  | 0.27 | 0.6  | 1.25  | 0.836652 | 0.40029  | 0.941316 | 0.630158 |
| MmugDNA.42535.1.S1_at   | MmugDNA.42535.1 | 4.8   | 4.74  | 0.38 | 0.13 | 1.05  | 0.421638 | 0.665958 | 0.737563 | 0.80431  |
| MmugDNA.29047.1.S1_s_at | MmugDNA.29047.1 | 6.81  | 7.27  | 0.2  | 0.19 | -1.38 | 0.035712 | 0.173156 | 0.352985 | 0.449765 |
| MmugDNA.42537.1.S1_at   | MmugDNA.42537.1 | 3.45  | 3.46  | 0.09 | 0.01 | -1    | 0.454316 | 0.911335 | 0.756717 | 0.950008 |
| MmugDNA.42538.1.S1_at   | MmugDNA.42538.1 | 3.78  | 3.91  | 0.12 | 0.18 | -1.09 | 0.149823 | 0.096149 | 0.523349 | 0.353422 |
| MmugDNA.42539.1.S1_at   | MmugDNA.42539.1 | 3.6   | 3.17  | 0.06 | 0.1  | 1.35  | 0.004222 | 0.008336 | 0.198874 | 0.121147 |
| MmugDNA.4254.1.S1_at    | MmugDNA.4254.1  | 11.01 | 11.85 | 0.29 | 0.09 | -1.8  | 0.004677 | 0.001296 | 0.201699 | 0.055585 |
| MmugDNA.42540.1.S1_at   | MmugDNA.42540.1 | 3.9   | 3.93  | 0.24 | 0.08 | -1.02 | 0.614623 | 0.809025 | 0.843992 | 0.889981 |
| MmugDNA.42541.1.S1_at   | MmugDNA.42541.1 | 3.55  | 3.48  | 0    | 0.07 | 1.05  | 0.217354 | 0.479576 | 0.587269 | 0.685315 |
| MmugDNA.42542.1.S1_at   | MmugDNA.42542.1 | 4.48  | 4.51  | 0.05 | 0.16 | -1.02 | 0.596724 | 0.728124 | 0.836122 | 0.842779 |
| MmugDNA.42543.1.S1_at   | MmugDNA.42543.1 | 6.15  | 6.83  | 1.21 | 0.19 | -1.61 | 0.690836 | 0.328176 | 0.879631 | 0.577935 |
| MmugDNA.42545.1.S1_at   | MmugDNA.42545.1 | 5.93  | 5.82  | 0.11 | 0.01 | 1.08  | 0.159929 | 0.384117 | 0.533013 | 0.619926 |
| MmugDNA.42546.1.S1_at   | MmugDNA.42546.1 | 3.61  | 3.5   | 0.2  | 0.17 | 1.08  | 0.943786 | 0.880951 | 0.980606 | 0.932026 |
| MmugDNA.30294.1.S1_s_at | MmugDNA.30294.1 | 12.22 | 12.61 | 0.1  | 0.07 | -1.3  | 0.003537 | 0.000348 | 0.196849 | 0.037097 |
| MmugDNA.42550.1.S1_at   | MmugDNA.42550.1 | 4.37  | 4.41  | 0.12 | 0.07 | -1.02 | 0.81425  | 0.977729 | 0.932949 | 0.98787  |
| MmugDNA.42551.1.S1_at   | MmugDNA.42551.1 | 6.55  | 6.45  | 0.23 | 0.01 | 1.07  | 0.465074 | 0.161936 | 0.762882 | 0.438029 |
| MmugDNA.42552.1.S1_x_at | MmugDNA.42552.1 | 7.58  | 7.76  | 0.16 | 0.11 | -1.13 | 0.649832 | 0.050589 | 0.86062  | 0.270301 |

|                         |                 |       |       |      |      |       |          |          |          |          |
|-------------------------|-----------------|-------|-------|------|------|-------|----------|----------|----------|----------|
| MmugDNA.42554.1.S1_at   | MmugDNA.42554.1 | 5.3   | 5.07  | 0.04 | 0.1  | 1.17  | 0.007    | 0.037299 | 0.225012 | 0.237622 |
| MmugDNA.42556.1.S1_at   | MmugDNA.42556.1 | 5.18  | 4.95  | 0.43 | 0.3  | 1.18  | 0.246705 | 0.279958 | 0.612234 | 0.543359 |
| MmugDNA.42557.1.S1_at   | MmugDNA.42557.1 | 5.45  | 5.24  | 0.13 | 0.14 | 1.16  | 0.067006 | 0.298015 | 0.422979 | 0.556695 |
| MmugDNA.42558.1.S1_at   | MmugDNA.42558.1 | 5.28  | 5.03  | 0.18 | 0.13 | 1.19  | 0.15444  | 0.362746 | 0.527559 | 0.603246 |
| MmugDNA.42559.1.S1_at   | MmugDNA.42559.1 | 5.65  | 5.67  | 0.21 | 0.11 | -1.02 | 0.513369 | 0.19412  | 0.789838 | 0.469266 |
| MmugDNA.4256.1.S1_at    | MmugDNA.4256.1  | 9.25  | 9.04  | 0.27 | 0.18 | 1.16  | 0.178807 | 0.319189 | 0.55169  | 0.571688 |
| MmugDNA.42560.1.S1_at   | MmugDNA.42560.1 | 4.17  | 3.97  | 0.21 | 0.11 | 1.14  | 0.45244  | 0.058696 | 0.755806 | 0.288956 |
| MmugDNA.42561.1.S1_at   | MmugDNA.42561.1 | 5.6   | 5.56  | 0.16 | 0.14 | 1.03  | 0.775597 | 0.422036 | 0.916804 | 0.645422 |
| MmugDNA.42563.1.S1_at   | MmugDNA.42563.1 | 5.64  | 5.61  | 0.06 | 0.04 | 1.02  | 0.234152 | 0.458983 | 0.601531 | 0.671504 |
| MmugDNA.42564.1.S1_at   | MmugDNA.42564.1 | 6.03  | 7.14  | 0.45 | 0.16 | -2.15 | 0.016136 | 0.035023 | 0.286063 | 0.231264 |
| MmugDNA.42565.1.S1_at   | MmugDNA.42565.1 | 7.68  | 7.71  | 0.38 | 0.16 | -1.02 | 0.69814  | 0.361101 | 0.882657 | 0.602069 |
| MmugDNA.42566.1.S1_at   | MmugDNA.42566.1 | 6.05  | 5.73  | 0.13 | 0.07 | 1.25  | 0.073919 | 0.027169 | 0.434623 | 0.205893 |
| MmugDNA.42567.1.S1_at   | MmugDNA.42567.1 | 12.77 | 12.97 | 0.28 | 0.07 | -1.15 | 0.218159 | 0.193204 | 0.588113 | 0.468578 |
| MmugDNA.42567.1.S1_s_at | MmugDNA.42567.1 | 11.84 | 12.12 | 0.52 | 0.05 | -1.21 | 0.41709  | 0.459483 | 0.734701 | 0.671789 |
| MmugDNA.42568.1.S1_at   | MmugDNA.42568.1 | 8.63  | 9     | 0.44 | 0.12 | -1.29 | 0.309406 | 0.088834 | 0.661718 | 0.342662 |
| MmugDNA.42569.1.S1_at   | MmugDNA.42569.1 | 5.86  | 6.06  | 0.04 | 0.19 | -1.15 | 0.044664 | 0.4739   | 0.374916 | 0.681111 |
| MmugDNA.4257.1.S1_at    | MmugDNA.4257.1  | 5.04  | 4.66  | 0.27 | 0.1  | 1.3   | 0.086973 | 0.118563 | 0.454785 | 0.38654  |
| MmugDNA.42570.1.S1_at   | MmugDNA.42570.1 | 9.59  | 10.03 | 0.17 | 0.1  | -1.36 | 0.020805 | 0.004802 | 0.305611 | 0.096745 |
| MmugDNA.42572.1.S1_at   | MmugDNA.42572.1 | 8.37  | 8.14  | 0.61 | 0.22 | 1.18  | 0.721663 | 0.790219 | 0.892101 | 0.878751 |
| MmugDNA.42573.1.S1_at   | MmugDNA.42573.1 | 5.67  | 5.75  | 0.18 | 0.2  | -1.06 | 0.431525 | 0.002222 | 0.743474 | 0.069434 |
| MmugDNA.42574.1.S1_at   | MmugDNA.42574.1 | 5.28  | 4.63  | 1.13 | 0.16 | 1.57  | 0.901258 | 0.742775 | 0.966477 | 0.851023 |
| MmugDNA.42576.1.S1_at   | MmugDNA.42576.1 | 4.71  | 4.61  | 0.27 | 0.33 | 1.08  | 0.831421 | 0.938536 | 0.939628 | 0.965059 |
| MmugDNA.42577.1.S1_at   | MmugDNA.42577.1 | 5.78  | 6.16  | 0.23 | 0.47 | -1.3  | 0.886761 | 0.041718 | 0.96068  | 0.248893 |
| MmugDNA.42578.1.S1_at   | MmugDNA.42578.1 | 13.77 | 13.63 | 0.14 | 0.05 | 1.1   | 0.344003 | 0.303045 | 0.686913 | 0.56049  |
| MmugDNA.42579.1.S1_at   | MmugDNA.42579.1 | 4.11  | 4.19  | 0.17 | 0.56 | -1.05 | 0.309652 | 0.811153 | 0.661815 | 0.89102  |
| MmugDNA.42580.1.S1_at   | MmugDNA.42580.1 | 6.71  | 6.79  | 0.51 | 0.16 | -1.05 | 0.993253 | 0.841211 | 0.997423 | 0.909568 |
| MmugDNA.42580.1.S1_x_at | MmugDNA.42580.1 | 7.69  | 7.62  | 0.28 | 0.13 | 1.05  | 0.368764 | 0.063532 | 0.703807 | 0.298571 |
| MmugDNA.42582.1.S1_at   | MmugDNA.42582.1 | 5.23  | 5.29  | 0.25 | 0.02 | -1.04 | 0.563797 | 0.670044 | 0.818372 | 0.807023 |
| MmugDNA.42583.1.S1_at   | MmugDNA.42583.1 | 5.48  | 5.26  | 0.11 | 0.18 | 1.16  | 0.257278 | 0.315    | 0.621021 | 0.568759 |
| MmugDNA.42584.1.S1_at   | MmugDNA.42584.1 | 5.84  | 5.52  | 0.04 | 0.23 | 1.25  | 0.065774 | 0.044761 | 0.420964 | 0.256009 |
| MmugDNA.42585.1.S1_at   | MmugDNA.42585.1 | 3.96  | 4.44  | 0.19 | 0.09 | -1.4  | 0.023284 | 0.364865 | 0.314809 | 0.605148 |
| MmugDNA.42586.1.S1_at   | MmugDNA.42586.1 | 2.89  | 2.78  | 0.17 | 0.24 | 1.08  | 0.83237  | 0.399261 | 0.939855 | 0.629735 |
| MmugDNA.42587.1.S1_at   | MmugDNA.42587.1 | 7.07  | 7.03  | 0.32 | 0.38 | 1.03  | 0.724928 | 0.377401 | 0.893319 | 0.6149   |
| MmugDNA.42589.1.S1_at   | MmugDNA.42589.1 | 2.98  | 3     | 0.13 | 0.25 | -1.01 | 0.367332 | 0.513401 | 0.702824 | 0.706881 |
| MmugDNA.4259.1.S1_at    | MmugDNA.4259.1  | 9.29  | 9.42  | 0.27 | 0.02 | -1.1  | 0.126928 | 0.004113 | 0.500834 | 0.090887 |
| MmugDNA.10392.1.S1_at   | MmugDNA.10392.1 | 12.26 | 12.47 | 0.28 | 0.1  | -1.16 | 0.096953 | 0.011817 | 0.465649 | 0.140829 |
| MmugDNA.10392.1.S1_s_at | MmugDNA.10392.1 | 10.9  | 11.12 | 0.38 | 0.02 | -1.16 | 0.240955 | 0.006992 | 0.607226 | 0.112858 |
| MmugDNA.42590.1.S1_at   | MmugDNA.42590.1 | 3.46  | 4.12  | 0.26 | 0.1  | -1.58 | 0.012963 | 0.000296 | 0.266038 | 0.034892 |
| MmugDNA.42591.1.S1_at   | MmugDNA.42591.1 | 10.21 | 10.8  | 0.61 | 0.15 | -1.51 | 0.131606 | 0.08017  | 0.505989 | 0.327755 |
| MmugDNA.42592.1.S1_at   | MmugDNA.42592.1 | 9.87  | 9.81  | 0.79 | 0.2  | 1.05  | 0.639242 | 0.048541 | 0.856238 | 0.265534 |
| MmugDNA.42592.1.S1_s_at | MmugDNA.42592.1 | 7.66  | 7.78  | 0.78 | 0.15 | -1.09 | 0.706523 | 0.014701 | 0.885774 | 0.154371 |
| MmugDNA.42593.1.S1_at   | MmugDNA.42593.1 | 11.54 | 11.41 | 0.7  | 0.16 | 1.09  | 0.68448  | 0.020352 | 0.87645  | 0.179112 |
| MmugDNA.42594.1.S1_at   | MmugDNA.42594.1 | 3     | 3.15  | 0.1  | 0.13 | -1.11 | 0.643668 | 0.170201 | 0.858218 | 0.446906 |

|                       |                 |       |       |      |      |       |          |          |          |          |
|-----------------------|-----------------|-------|-------|------|------|-------|----------|----------|----------|----------|
| MmugDNA.42595.1.S1_at | MmugDNA.42595.1 | 5.9   | 5.85  | 0.13 | 0.17 | 1.03  | 0.936791 | 0.49386  | 0.978763 | 0.694433 |
| MmugDNA.42596.1.S1_at | MmugDNA.42596.1 | 13.43 | 13.29 | 0.07 | 0.05 | 1.11  | 0.03542  | 0.292402 | 0.352031 | 0.552498 |
| MmugDNA.42597.1.S1_at | MmugDNA.42597.1 | 3.46  | 3.5   | 0.16 | 0.21 | -1.03 | 0.731151 | 0.283878 | 0.89641  | 0.546237 |
| MmugDNA.42598.1.S1_at | MmugDNA.42598.1 | 4.07  | 3.62  | 0.28 | 0.29 | 1.37  | 0.115972 | 0.084768 | 0.48949  | 0.336278 |
| MmugDNA.42599.1.S1_at | MmugDNA.42599.1 | 9.61  | 9.55  | 1.37 | 0.33 | 1.04  | 0.912345 | 0.209159 | 0.970266 | 0.482953 |
| MmugDNA.426.1.S1_at   | MmugDNA.426.1   | 5.95  | 6.89  | 0.24 | 0.21 | -1.91 | 0.012441 | 0.011116 | 0.262327 | 0.137241 |
| MmugDNA.42600.1.S1_at | MmugDNA.42600.1 | 4.91  | 5.09  | 0.12 | 0.17 | -1.14 | 0.112955 | 0.625515 | 0.48633  | 0.779204 |
| MmugDNA.42601.1.S1_at | MmugDNA.42601.1 | 4.09  | 4.04  | 0.14 | 0.13 | 1.04  | 0.548417 | 0.219883 | 0.809748 | 0.493401 |
| MmugDNA.42602.1.S1_at | MmugDNA.42602.1 | 4.57  | 4.42  | 0.07 | 0.12 | 1.11  | 0.213738 | 0.273014 | 0.584304 | 0.537638 |
| MmugDNA.42603.1.S1_at | MmugDNA.42603.1 | 7.86  | 7.56  | 0.93 | 0.25 | 1.23  | 0.702463 | 0.858715 | 0.884233 | 0.919548 |
| MmugDNA.42604.1.S1_at | MmugDNA.42604.1 | 4.75  | 4.66  | 0.38 | 0.1  | 1.07  | 0.965202 | 0.559736 | 0.988558 | 0.736365 |
| MmugDNA.42605.1.S1_at | MmugDNA.42605.1 | 5.73  | 5.69  | 0.07 | 0.1  | 1.03  | 0.7062   | 0.94829  | 0.88564  | 0.970522 |
| MmugDNA.42606.1.S1_at | MmugDNA.42606.1 | 6.92  | 6.31  | 0.19 | 0.11 | 1.53  | 0.011719 | 0.00961  | 0.256742 | 0.129157 |
| MmugDNA.42609.1.S1_at | MmugDNA.42609.1 | 9.06  | 9.72  | 0.75 | 0.1  | -1.58 | 0.167802 | 0.065502 | 0.540451 | 0.301415 |
| MmugDNA.4261.1.S1_at  | MmugDNA.4261.1  | 7.65  | 6.72  | 0.37 | 0.14 | 1.9   | 0.007525 | 0.004144 | 0.229281 | 0.091027 |
| MmugDNA.42610.1.S1_at | MmugDNA.42610.1 | 4.29  | 4     | 0.24 | 0.05 | 1.23  | 0.032011 | 0.028673 | 0.342916 | 0.211053 |
| MmugDNA.42611.1.S1_at | MmugDNA.42611.1 | 6.45  | 6.54  | 0.2  | 0.11 | -1.06 | 0.349385 | 0.419653 | 0.690424 | 0.643583 |
| MmugDNA.42612.1.S1_at | MmugDNA.42612.1 | 5.36  | 5.41  | 0.65 | 0.42 | -1.03 | 0.789522 | 0.518389 | 0.92257  | 0.71038  |
| MmugDNA.42614.1.S1_at | MmugDNA.42614.1 | 4.84  | 4.89  | 0.09 | 0.12 | -1.03 | 0.475426 | 0.575315 | 0.768639 | 0.74643  |
| MmugDNA.42616.1.S1_at | MmugDNA.42616.1 | 4.55  | 4.53  | 0.03 | 0.04 | 1.01  | 0.193634 | 0.573149 | 0.564275 | 0.744941 |
| MmugDNA.42617.1.S1_at | MmugDNA.42617.1 | 3.39  | 3.17  | 0.14 | 0.28 | 1.17  | 0.472317 | 0.411626 | 0.767001 | 0.638328 |
| MmugDNA.42618.1.S1_at | MmugDNA.42618.1 | 4.79  | 4.8   | 0.29 | 0.19 | -1.01 | 0.815161 | 0.812166 | 0.933137 | 0.89155  |
| MmugDNA.42619.1.S1_at | MmugDNA.42619.1 | 6.23  | 6.3   | 0.28 | 0.09 | -1.05 | 0.610384 | 0.625843 | 0.841841 | 0.779355 |
| MmugDNA.4262.1.S1_at  | MmugDNA.4262.1  | 5.17  | 5.09  | 0.08 | 0    | 1.06  | 0.23814  | 0.687611 | 0.605254 | 0.817624 |
| MmugDNA.42620.1.S1_at | MmugDNA.42620.1 | 3.7   | 3.79  | 0.13 | 0.09 | -1.06 | 0.36814  | 0.511123 | 0.70351  | 0.705399 |
| MmugDNA.42621.1.S1_at | MmugDNA.42621.1 | 5.16  | 5.05  | 0.2  | 0.11 | 1.08  | 0.711651 | 0.697379 | 0.887696 | 0.824174 |
| MmugDNA.42622.1.S1_at | MmugDNA.42622.1 | 2.9   | 2.95  | 0    | 0.14 | -1.04 | 0.948833 | 0.855882 | 0.982605 | 0.917744 |
| MmugDNA.42623.1.S1_at | MmugDNA.42623.1 | 5.51  | 5.33  | 0.53 | 0.3  | 1.13  | 0.512093 | 0.266763 | 0.789086 | 0.53241  |
| MmugDNA.42625.1.S1_at | MmugDNA.42625.1 | 5.09  | 5.52  | 0.07 | 0.33 | -1.35 | 0.033751 | 0.014235 | 0.347257 | 0.152364 |
| MmugDNA.42626.1.S1_at | MmugDNA.42626.1 | 12.79 | 12.83 | 0.2  | 0.04 | -1.03 | 0.653724 | 0.29955  | 0.862462 | 0.557945 |
| MmugDNA.42627.1.S1_at | MmugDNA.42627.1 | 4.43  | 4.39  | 0.07 | 0.28 | 1.03  | 0.533089 | 0.773319 | 0.800665 | 0.868249 |
| MmugDNA.42628.1.S1_at | MmugDNA.42628.1 | 6.65  | 6.52  | 0.08 | 0.07 | 1.09  | 0.082482 | 0.178566 | 0.447377 | 0.454803 |
| MmugDNA.42629.1.S1_at | MmugDNA.42629.1 | 3.21  | 3.35  | 0.1  | 0.12 | -1.1  | 0.200792 | 0.227647 | 0.572488 | 0.499898 |
| MmugDNA.4263.1.S1_at  | MmugDNA.4263.1  | 4.75  | 4.55  | 0.29 | 0.14 | 1.15  | 0.282274 | 0.301318 | 0.640833 | 0.559356 |
| MmugDNA.42630.1.S1_at | MmugDNA.42630.1 | 6.07  | 6.49  | 0.57 | 0.1  | -1.34 | 0.444436 | 0.419223 | 0.751266 | 0.643398 |
| MmugDNA.42631.1.S1_at | MmugDNA.42631.1 | 6.48  | 7.35  | 0.75 | 0.09 | -1.82 | 0.352385 | 0.238175 | 0.692649 | 0.508818 |
| MmugDNA.42632.1.S1_at | MmugDNA.42632.1 | 9.35  | 9.69  | 0.26 | 0.11 | -1.26 | 0.10805  | 0.013472 | 0.480489 | 0.148627 |
| MmugDNA.42633.1.S1_at | MmugDNA.42633.1 | 6.23  | 6.13  | 0.04 | 0.09 | 1.07  | 0.151127 | 0.191935 | 0.52444  | 0.467295 |
| MmugDNA.42636.1.S1_at | MmugDNA.42636.1 | 13.32 | 13.37 | 0.35 | 0.06 | -1.03 | 0.288687 | 0.170748 | 0.645686 | 0.447316 |
| MmugDNA.42637.1.S1_at | MmugDNA.42637.1 | 4.95  | 4.96  | 0.08 | 0.19 | -1.01 | 0.670578 | 0.259709 | 0.869943 | 0.5266   |
| MmugDNA.42640.1.S1_at | MmugDNA.42640.1 | 6.47  | 7.84  | 0.79 | 0.19 | -2.59 | 0.10965  | 0.075119 | 0.482529 | 0.319301 |
| MmugDNA.42641.1.S1_at | MmugDNA.42641.1 | 6.56  | 6.61  | 0.09 | 0.03 | -1.04 | 0.362126 | 0.330577 | 0.699036 | 0.579307 |
| MmugDNA.42642.1.S1_at | MmugDNA.42642.1 | 5.44  | 5.45  | 0.06 | 0.05 | -1.01 | 0.445663 | 0.798406 | 0.752285 | 0.883979 |

|                         |                 |       |       |      |      |       |          |          |          |          |
|-------------------------|-----------------|-------|-------|------|------|-------|----------|----------|----------|----------|
| MmugDNA.42643.1.S1_at   | MmugDNA.42643.1 | 4.03  | 3.72  | 0.15 | 0.1  | 1.25  | 0.057508 | 0.168228 | 0.402283 | 0.44489  |
| MmugDNA.42644.1.S1_at   | MmugDNA.42644.1 | 3.76  | 3.52  | 0.12 | 0.1  | 1.18  | 0.037671 | 0.062225 | 0.35775  | 0.296307 |
| MmugDNA.42645.1.S1_at   | MmugDNA.42645.1 | 9.54  | 8.09  | 1.74 | 2.31 | 2.74  | 0.185906 | 0.071805 | 0.558823 | 0.314082 |
| MmugDNA.42646.1.S1_at   | MmugDNA.42646.1 | 6.74  | 6.95  | 0.31 | 0.29 | -1.15 | 0.471322 | 0.063413 | 0.766509 | 0.298441 |
| MmugDNA.42648.1.S1_at   | MmugDNA.42648.1 | 6.97  | 6.69  | 0.2  | 0.1  | 1.22  | 0.09003  | 0.129869 | 0.457992 | 0.401509 |
| MmugDNA.42649.1.S1_at   | MmugDNA.42649.1 | 4.17  | 4.04  | 0.1  | 0.18 | 1.09  | 0.416896 | 0.637454 | 0.734592 | 0.786937 |
| MmugDNA.4265.1.S1_at    | MmugDNA.4265.1  | 5.11  | 5.01  | 0.03 | 0.09 | 1.07  | 0.052908 | 0.120344 | 0.393459 | 0.38925  |
| MmugDNA.42650.1.S1_at   | MmugDNA.42650.1 | 6.43  | 6.38  | 0.18 | 0.09 | 1.03  | 0.789718 | 0.888929 | 0.922635 | 0.936725 |
| MmugDNA.42651.1.S1_at   | MmugDNA.42651.1 | 3.92  | 3.96  | 0.05 | 0.18 | -1.03 | 0.219772 | 0.196522 | 0.589114 | 0.471577 |
| MmugDNA.42652.1.S1_at   | MmugDNA.42652.1 | 12.51 | 12.87 | 0.28 | 0.04 | -1.29 | 0.168904 | 0.124453 | 0.541847 | 0.394865 |
| MmugDNA.42653.1.S1_at   | MmugDNA.42653.1 | 3.84  | 3.69  | 0.31 | 0.15 | -1.11 | 0.501555 | 0.346163 | 0.783353 | 0.591195 |
| MmugDNA.42654.1.S1_at   | MmugDNA.42654.1 | 3.7   | 3.73  | 0.09 | 0.21 | -1.02 | 0.934314 | 0.419744 | 0.97776  | 0.643666 |
| MmugDNA.42655.1.S1_at   | MmugDNA.42655.1 | 6.39  | 6.37  | 0.29 | 0.24 | 1.02  | 0.87822  | 0.842487 | 0.957601 | 0.910315 |
| MmugDNA.42656.1.S1_at   | MmugDNA.42656.1 | 5.87  | 6.3   | 1.08 | 0.43 | -1.34 | 0.601822 | 0.176361 | 0.838575 | 0.45282  |
| MmugDNA.42658.1.S1_at   | MmugDNA.42658.1 | 3.27  | 3.2   | 0.03 | 0.14 | 1.05  | 0.83109  | 0.613239 | 0.939617 | 0.770484 |
| MmugDNA.42659.1.S1_at   | MmugDNA.42659.1 | 7.3   | 7.39  | 0.37 | 0.12 | -1.06 | 0.647387 | 0.013467 | 0.859364 | 0.148626 |
| MmugDNA.4266.1.S1_at    | MmugDNA.4266.1  | 4.6   | 4.32  | 0.1  | 0.21 | 1.21  | 0.187544 | 0.206798 | 0.559893 | 0.480945 |
| MmugDNA.42660.1.S1_at   | MmugDNA.42660.1 | 8.03  | 7.81  | 0.9  | 0.44 | 1.17  | 0.572887 | 0.740682 | 0.823428 | 0.849853 |
| MmugDNA.42661.1.S1_at   | MmugDNA.42661.1 | 3.81  | 3.68  | 0.12 | 0.07 | 1.1   | 0.108417 | 0.106422 | 0.480777 | 0.368978 |
| MmugDNA.42662.1.S1_at   | MmugDNA.42662.1 | 8.29  | 7.71  | 0.66 | 0.26 | 1.5   | 0.210647 | 0.077271 | 0.581872 | 0.322945 |
| MmugDNA.42665.1.S1_at   | MmugDNA.42665.1 | 7.21  | 6.81  | 0.84 | 0.08 | 1.32  | 0.427036 | 0.377454 | 0.74088  | 0.614937 |
| MmugDNA.42666.1.S1_at   | MmugDNA.42666.1 | 7.52  | 8.07  | 1    | 0.36 | -1.46 | 0.412779 | 0.475087 | 0.732098 | 0.681892 |
| MmugDNA.42667.1.S1_at   | MmugDNA.42667.1 | 3.52  | 3.69  | 0.04 | 0.24 | -1.12 | 0.731985 | 0.110135 | 0.896977 | 0.374244 |
| MmugDNA.42669.1.S1_at   | MmugDNA.42669.1 | 5.65  | 5.5   | 0.1  | 0.1  | 1.11  | 0.098441 | 0.558929 | 0.467888 | 0.735944 |
| MmugDNA.42670.1.S1_s_at | MmugDNA.42670.1 | 3.86  | 3.79  | 0.04 | 0.15 | 1.05  | 0.476031 | 0.457874 | 0.768871 | 0.670996 |
| MmugDNA.42671.1.S1_at   | MmugDNA.42671.1 | 6.31  | 5.62  | 0.48 | 0.12 | 1.6   | 0.187195 | 0.148754 | 0.559729 | 0.423201 |
| MmugDNA.42672.1.S1_at   | MmugDNA.42672.1 | 6.3   | 6.3   | 0.42 | 0.22 | -1    | 0.430614 | 0.327809 | 0.742928 | 0.577604 |
| MmugDNA.42673.1.S1_at   | MmugDNA.42673.1 | 4.23  | 3.74  | 0.23 | 0.17 | 1.41  | 0.028835 | 0.219318 | 0.333062 | 0.493094 |
| MmugDNA.42674.1.S1_at   | MmugDNA.42674.1 | 10.12 | 10.35 | 0.49 | 0.16 | -1.17 | 0.470298 | 0.359901 | 0.766078 | 0.601142 |
| MmugDNA.15704.1.S1_at   | MmugDNA.15704.1 | 11.8  | 11.97 | 0.45 | 0.02 | -1.12 | 0.253682 | 0.168441 | 0.618323 | 0.445092 |
| MmugDNA.15704.1.S1_s_at | MmugDNA.15704.1 | 10.59 | 10.74 | 0.48 | 0.13 | -1.11 | 0.526826 | 0.39038  | 0.796797 | 0.624156 |
| MmugDNA.42675.1.S1_at   | MmugDNA.42675.1 | 7.89  | 8.38  | 0.48 | 0.37 | -1.4  | 0.645486 | 0.478084 | 0.858779 | 0.684096 |
| MmugDNA.42676.1.S1_at   | MmugDNA.42676.1 | 3.26  | 3     | 0.23 | 0.11 | 1.2   | 0.05547  | 0.04513  | 0.398621 | 0.256979 |
| MmugDNA.42677.1.S1_at   | MmugDNA.42677.1 | 3.95  | 3.75  | 0.18 | 0.43 | 1.15  | 0.711497 | 0.433692 | 0.887684 | 0.65392  |
| MmugDNA.42678.1.S1_at   | MmugDNA.42678.1 | 3.34  | 3.33  | 0.07 | 0.04 | 1.01  | 0.690283 | 0.1876   | 0.879445 | 0.463628 |
| MmugDNA.42679.1.S1_at   | MmugDNA.42679.1 | 9.64  | 9.6   | 0.26 | 0.05 | 1.03  | 0.785988 | 0.384902 | 0.921288 | 0.620513 |
| MmugDNA.4268.1.S1_at    | MmugDNA.4268.1  | 5.51  | 5.35  | 0.08 | 0.06 | 1.11  | 0.044584 | 0.629424 | 0.374916 | 0.781862 |
| MmugDNA.42680.1.S1_at   | MmugDNA.42680.1 | 10.71 | 10.76 | 0.04 | 0.04 | -1.03 | 0.944925 | 0.000049 | 0.980852 | 0.025273 |
| MmugDNA.42681.1.S1_at   | MmugDNA.42681.1 | 10.3  | 10.38 | 0.31 | 0.14 | -1.06 | 0.705709 | 0.523019 | 0.885355 | 0.713429 |
| MmugDNA.42681.1.S1_s_at | MmugDNA.42681.1 | 10.5  | 10.8  | 0.28 | 0.1  | -1.23 | 0.482255 | 0.367889 | 0.7723   | 0.607469 |
| MmugDNA.42685.1.S1_at   | MmugDNA.42685.1 | 5.37  | 4.41  | 0.84 | 0.47 | 1.94  | 0.163996 | 0.25573  | 0.536696 | 0.523675 |
| MmugDNA.42686.1.S1_at   | MmugDNA.42686.1 | 6.45  | 6.82  | 0.51 | 0.27 | -1.29 | 0.827725 | 0.744806 | 0.938082 | 0.852198 |
| MmugDNA.42687.1.S1_at   | MmugDNA.42687.1 | 13.84 | 13.9  | 0.14 | 0.05 | -1.05 | 0.165937 | 0.186085 | 0.538661 | 0.461931 |

|                         |                 |       |       |      |      |       |          |          |          |          |
|-------------------------|-----------------|-------|-------|------|------|-------|----------|----------|----------|----------|
| MmugDNA.42688.1.S1_at   | MmugDNA.42688.1 | 3.72  | 3.55  | 0.09 | 0.07 | 1.13  | 0.267323 | 0.096741 | 0.628089 | 0.354171 |
| MmugDNA.42689.1.S1_at   | MmugDNA.42689.1 | 5.62  | 5.85  | 0.28 | 0.34 | -1.17 | 0.40205  | 0.32404  | 0.724787 | 0.57473  |
| MmugDNA.4269.1.S1_at    | MmugDNA.4269.1  | 12.79 | 12.54 | 0.1  | 0.07 | 1.19  | 0.013956 | 0.005185 | 0.273301 | 0.099739 |
| MmugDNA.42690.1.S1_s_at | MmugDNA.42690.1 | 7.67  | 7.33  | 0.45 | 0    | 1.27  | 0.266201 | 0.193367 | 0.627106 | 0.468698 |
| MmugDNA.42691.1.S1_at   | MmugDNA.42691.1 | 4.71  | 4.71  | 0.29 | 0.19 | -1    | 0.573782 | 0.262959 | 0.823742 | 0.529372 |
| MmugDNA.42692.1.S1_at   | MmugDNA.42692.1 | 3.62  | 3.49  | 0.37 | 0.11 | 1.1   | 0.500591 | 0.702995 | 0.782726 | 0.827866 |
| MmugDNA.42693.1.S1_at   | MmugDNA.42693.1 | 2.94  | 2.92  | 0.11 | 0.06 | 1.01  | 0.869609 | 0.278716 | 0.954469 | 0.542421 |
| MmugDNA.42695.1.S1_at   | MmugDNA.42695.1 | 3.51  | 3.34  | 0.06 | 0.07 | 1.13  | 0.071064 | 0.695422 | 0.430341 | 0.822978 |
| MmugDNA.42696.1.S1_at   | MmugDNA.42696.1 | 3.85  | 3.54  | 0.64 | 0.38 | 1.24  | 0.756424 | 0.897936 | 0.908234 | 0.941871 |
| MmugDNA.42697.1.S1_at   | MmugDNA.42697.1 | 3.44  | 3.38  | 0.08 | 0.01 | 1.04  | 0.211172 | 0.520598 | 0.582141 | 0.711831 |
| MmugDNA.4270.1.S1_at    | MmugDNA.4270.1  | 10.58 | 10.14 | 0.36 | 0.09 | -1.36 | 0.107821 | 0.163946 | 0.480316 | 0.440105 |
| MmugDNA.42700.1.S1_at   | MmugDNA.42700.1 | 6.55  | 5.83  | 1.25 | 0.26 | 1.64  | 0.465025 | 0.281305 | 0.762863 | 0.544391 |
| MmugDNA.42701.1.S1_at   | MmugDNA.42701.1 | 5.52  | 5.37  | 0.01 | 0.02 | 1.12  | 0.000782 | 0.047456 | 0.15004  | 0.262486 |
| MmugDNA.42702.1.S1_at   | MmugDNA.42702.1 | 3.7   | 3.69  | 0.12 | 0.07 | 1.01  | 0.562864 | 0.83987  | 0.817877 | 0.908703 |
| MmugDNA.42703.1.S1_at   | MmugDNA.42703.1 | 11.84 | 11.65 | 0.27 | 0.06 | 1.14  | 0.205572 | 0.229805 | 0.577387 | 0.501802 |
| MmugDNA.42704.1.S1_at   | MmugDNA.42704.1 | 5.85  | 5.68  | 0.05 | 0.15 | 1.13  | 0.043225 | 0.052235 | 0.371614 | 0.274065 |
| MmugDNA.42707.1.S1_at   | MmugDNA.42707.1 | 8.84  | 9.27  | 0.49 | 0.04 | -1.35 | 0.318133 | 0.189377 | 0.667759 | 0.465117 |
| MmugDNA.42708.1.S1_at   | MmugDNA.42708.1 | 5.78  | 5.79  | 0.22 | -0.1 | -1.01 | 0.372817 | 0.735903 | 0.705567 | 0.847202 |
| MmugDNA.42709.1.S1_at   | MmugDNA.42709.1 | 9.19  | 9.33  | 0.14 | 0    | -1.1  | 0.513807 | 0.616843 | 0.790156 | 0.772992 |
| MmugDNA.42709.1.S1_s_at | MmugDNA.42709.1 | 10.58 | 10.88 | 0.25 | 0.02 | -1.24 | 0.294278 | 0.301403 | 0.650512 | 0.55943  |
| MmugDNA.42710.1.S1_at   | MmugDNA.42710.1 | 3.72  | 3.72  | 0.05 | 0.07 | 1     | 0.845963 | 0.735802 | 0.945947 | 0.847147 |
| MmugDNA.42711.1.S1_at   | MmugDNA.42711.1 | 3.52  | 3.5   | 0.11 | 0.15 | 1.01  | 0.431112 | 0.583905 | 0.74323  | 0.752043 |
| MmugDNA.42712.1.S1_at   | MmugDNA.42712.1 | 7.7   | 8.23  | 0.34 | 0.09 | -1.44 | 0.059571 | 0.052283 | 0.406669 | 0.274146 |
| MmugDNA.42713.1.S1_at   | MmugDNA.42713.1 | 4.38  | 4.36  | 0.1  | 0.1  | 1.01  | 0.184609 | 0.730988 | 0.557393 | 0.844172 |
| MmugDNA.42714.1.S1_at   | MmugDNA.42714.1 | 3.42  | 3.33  | 0.15 | 0.1  | 1.07  | 0.235772 | 0.290691 | 0.602829 | 0.551382 |
| MmugDNA.42715.1.S1_at   | MmugDNA.42715.1 | 2.86  | 2.81  | 0.09 | 0.02 | 1.04  | 0.886897 | 0.673443 | 0.960715 | 0.8092   |
| MmugDNA.42716.1.S1_at   | MmugDNA.42716.1 | 5.45  | 5.64  | 0.07 | 0.34 | -1.14 | 0.520209 | 0.631347 | 0.793561 | 0.78278  |
| MmugDNA.42718.1.S1_at   | MmugDNA.42718.1 | 9.94  | 10.19 | 0.5  | 0.15 | -1.19 | 0.290646 | 0.064865 | 0.647273 | 0.300719 |
| MmugDNA.42719.1.S1_at   | MmugDNA.42719.1 | 5.81  | 5.94  | 0.23 | 0.06 | -1.09 | 0.994447 | 0.517232 | 0.997902 | 0.709435 |
| MmugDNA.4272.1.S1_at    | MmugDNA.4272.1  | 11.78 | 11.55 | 0.37 | 0.03 | 1.17  | 0.272994 | 0.179808 | 0.632603 | 0.456339 |
| MmugDNA.42720.1.S1_at   | MmugDNA.42720.1 | 7.7   | 8.14  | 0.26 | 0.23 | -1.36 | 0.053012 | 0.041961 | 0.393826 | 0.24943  |
| MmugDNA.42721.1.S1_at   | MmugDNA.42721.1 | 5.67  | 5.62  | 0.06 | 0.01 | 1.04  | 0.170681 | 0.888072 | 0.543722 | 0.936183 |
| MmugDNA.42722.1.S1_at   | MmugDNA.42722.1 | 12.22 | 12.35 | 0.23 | 0.05 | -1.1  | 0.299259 | 0.534448 | 0.653572 | 0.720369 |
| MmugDNA.42723.1.S1_at   | MmugDNA.42723.1 | 3.52  | 3.44  | 0    | 0.21 | 1.06  | 0.455469 | 0.653493 | 0.757444 | 0.797464 |
| MmugDNA.42725.1.S1_at   | MmugDNA.42725.1 | 9.01  | 9.69  | 1    | 0.18 | -1.61 | 0.299686 | 0.163658 | 0.654125 | 0.439841 |
| MmugDNA.42727.1.S1_at   | MmugDNA.42727.1 | 5.46  | 6.88  | 0.66 | 0.53 | -2.69 | 0.05044  | 0.197709 | 0.387138 | 0.472633 |
| MmugDNA.42728.1.S1_at   | MmugDNA.42728.1 | 3.66  | 3.61  | 0.08 | 0.09 | 1.03  | 0.163753 | 0.12791  | 0.536523 | 0.398865 |
| MmugDNA.42729.1.S1_at   | MmugDNA.42729.1 | 4.09  | 4.09  | 0.03 | 0.04 | 1     | 0.234785 | 0.385689 | 0.602111 | 0.621079 |
| MmugDNA.4273.1.S1_at    | MmugDNA.4273.1  | 4.42  | 4.3   | 0.17 | 0.18 | 1.09  | 0.430284 | 0.526424 | 0.742617 | 0.715557 |
| MmugDNA.26826.1.S1_s_at | MmugDNA.26826.1 | 9.11  | 9.21  | 1.37 | 0.1  | -1.07 | 0.887833 | 0.577359 | 0.961188 | 0.747871 |
| MmugDNA.16686.1.S1_at   | MmugDNA.16686.1 | 11.6  | 11.66 | 0.14 | 0.15 | -1.04 | 0.900311 | 0.003561 | 0.966081 | 0.085503 |
| MmugDNA.16686.1.S1_s_at | MmugDNA.16686.1 | 11.49 | 11.55 | 0.15 | 0.13 | -1.04 | 0.842363 | 0.005726 | 0.944264 | 0.104271 |
| MmugDNA.42732.1.S1_at   | MmugDNA.42732.1 | 4.1   | 4.24  | 0.08 | 0.06 | -1.1  | 0.087964 | 0.068596 | 0.455951 | 0.308466 |



|                         |                 |       |       |      |      |       |          |          |          |          |
|-------------------------|-----------------|-------|-------|------|------|-------|----------|----------|----------|----------|
| MmugDNA.42733.1.S1_at   | MmugDNA.42733.1 | 8.82  | 9.95  | 0.13 | 0.16 | -2.2  | 0.000927 | 0.000182 | 0.153739 | 0.030511 |
| MmugDNA.42734.1.S1_at   | MmugDNA.42734.1 | 7.97  | 8.11  | 0.23 | 0.03 | -1.11 | 0.889634 | 0.683227 | 0.961988 | 0.81521  |
| MmugDNA.42735.1.S1_at   | MmugDNA.42735.1 | 7.5   | 7.73  | 0.62 | 0.29 | -1.18 | 0.937041 | 0.057412 | 0.978859 | 0.285608 |
| MmugDNA.42736.1.S1_at   | MmugDNA.42736.1 | 6.82  | 7.49  | 0.74 | 0.35 | -1.59 | 0.361672 | 0.032207 | 0.698694 | 0.222139 |
| MmugDNA.42737.1.S1_at   | MmugDNA.42737.1 | 2.77  | 2.76  | 0.12 | 0.02 | 1.01  | 0.642886 | 0.830665 | 0.857956 | 0.902855 |
| MmugDNA.42738.1.S1_at   | MmugDNA.42738.1 | 3.37  | 3.32  | 0.18 | 0.11 | 1.04  | 0.702136 | 0.720051 | 0.884146 | 0.838096 |
| MmugDNA.42738.1.S1_s_at | MmugDNA.42738.1 | 6.61  | 6.72  | 0.35 | 0.09 | -1.08 | 0.986905 | 0.881611 | 0.995774 | 0.932407 |
| MmugDNA.42740.1.S1_at   | MmugDNA.42740.1 | 4.3   | 4.36  | 0.28 | 0.15 | -1.04 | 0.951578 | 0.708435 | 0.983695 | 0.830919 |
| MmugDNA.25790.1.S1_at   | MmugDNA.25790.1 | 14.05 | 14.1  | 0.1  | 0.05 | -1.03 | 0.183672 | 0.21942  | 0.55651  | 0.493156 |
| MmugDNA.25790.1.S1_s_at | MmugDNA.25790.1 | 14.57 | 14.59 | 0.03 | 0.01 | -1.02 | 0.061949 | 0.034288 | 0.411683 | 0.229072 |
| MmugDNA.42743.1.S1_at   | MmugDNA.42743.1 | 3.87  | 3.65  | 0.18 | 0.08 | -1.17 | 0.100937 | 0.189287 | 0.47159  | 0.465059 |
| MmugDNA.42744.1.S1_at   | MmugDNA.42744.1 | 4.55  | 4.77  | 0.9  | 0.29 | -1.16 | 0.612931 | 0.369823 | 0.843269 | 0.609132 |
| MmugDNA.42745.1.S1_at   | MmugDNA.42745.1 | 8.44  | 8.39  | 0.04 | 0.14 | 1.04  | 0.206338 | 0.386983 | 0.578142 | 0.621935 |
| MmugDNA.42746.1.S1_at   | MmugDNA.42746.1 | 3.74  | 3.76  | 0.02 | 0.12 | -1.01 | 0.861803 | 0.550511 | 0.95128  | 0.730509 |
| MmugDNA.42747.1.S1_at   | MmugDNA.42747.1 | 5.7   | 5.82  | 0.29 | 0.07 | -1.08 | 0.578109 | 0.844186 | 0.826177 | 0.911295 |
| MmugDNA.42750.1.S1_at   | MmugDNA.42750.1 | 5.39  | 5.48  | 0.7  | 0.33 | -1.07 | 0.492686 | 0.347994 | 0.778488 | 0.592215 |
| MmugDNA.42751.1.S1_at   | MmugDNA.42751.1 | 6.9   | 7.34  | 0.59 | 0.05 | -1.35 | 0.532714 | 0.550874 | 0.800478 | 0.730625 |
| MmugDNA.42753.1.S1_at   | MmugDNA.42753.1 | 4.87  | 4.82  | 0.07 | 0.03 | 1.04  | 0.360445 | 0.205877 | 0.697914 | 0.480109 |
| MmugDNA.42756.1.S1_at   | MmugDNA.42756.1 | 7.57  | 9.32  | 0.52 | 0.26 | -3.36 | 0.007129 | 0.017396 | 0.225651 | 0.16699  |
| MmugDNA.42757.1.S1_at   | MmugDNA.42757.1 | 5.47  | 6.34  | 0.2  | 0.37 | -1.83 | 0.034068 | 0.004583 | 0.347823 | 0.094484 |
| MmugDNA.42758.1.S1_at   | MmugDNA.42758.1 | 2.95  | 3.06  | 0.22 | 0.07 | -1.08 | 0.777364 | 0.747221 | 0.917593 | 0.853149 |
| MmugDNA.42759.1.S1_at   | MmugDNA.42759.1 | 8.19  | 7.86  | 0.04 | 0.12 | 1.26  | 0.018889 | 0.280926 | 0.298593 | 0.544097 |
| MmugDNA.4276.1.S1_at    | MmugDNA.4276.1  | 4.66  | 4.81  | 0.18 | 0.1  | -1.11 | 0.17049  | 0.327302 | 0.543539 | 0.577222 |
| MmugDNA.42760.1.S1_at   | MmugDNA.42760.1 | 5.73  | 5.42  | 0.02 | 0.16 | 1.24  | 0.093563 | 0.088303 | 0.462739 | 0.341721 |
| MmugDNA.42761.1.S1_at   | MmugDNA.42761.1 | 4.66  | 4.91  | 0.18 | 0.25 | -1.18 | 0.222241 | 0.512545 | 0.591828 | 0.706408 |
| MmugDNA.42763.1.S1_at   | MmugDNA.42763.1 | 6.74  | 7.04  | 0.56 | 0.19 | -1.24 | 0.495624 | 0.537382 | 0.780125 | 0.722499 |
| MmugDNA.42764.1.S1_at   | MmugDNA.42764.1 | 5.58  | 5.16  | 0.44 | 0.65 | 1.33  | 0.34484  | 0.323612 | 0.68712  | 0.574525 |
| MmugDNA.42764.1.S1_s_at | MmugDNA.42764.1 | 6.9   | 6.68  | 0.21 | 0.05 | 1.16  | 0.103054 | 0.22412  | 0.473774 | 0.497109 |
| MmugDNA.42765.1.S1_at   | MmugDNA.42765.1 | 4.69  | 4.56  | 0.1  | 0.1  | 1.1   | 0.101123 | 0.470418 | 0.471667 | 0.678729 |
| MmugDNA.42766.1.S1_at   | MmugDNA.42766.1 | 4.16  | 3.92  | 0.28 | 0.3  | 1.18  | 0.760144 | 0.789346 | 0.909862 | 0.878316 |
| MmugDNA.42767.1.S1_at   | MmugDNA.42767.1 | 4.04  | 4.28  | 0.3  | 0.29 | -1.18 | 0.356287 | 0.269741 | 0.69508  | 0.53502  |
| MmugDNA.4277.1.S1_at    | MmugDNA.4277.1  | 6.55  | 6.17  | 0.22 | 0.18 | 1.3   | 0.045981 | 0.220871 | 0.37735  | 0.494262 |
| MmugDNA.42771.1.S1_at   | MmugDNA.42771.1 | 2.85  | 2.85  | 0.18 | 0.05 | 1     | 0.289698 | 0.471111 | 0.646342 | 0.679173 |
| MmugDNA.42773.1.S1_at   | MmugDNA.42773.1 | 6.27  | 6.17  | 0.13 | 0.06 | 1.07  | 0.176369 | 0.2917   | 0.549355 | 0.552054 |
| MmugDNA.42774.1.S1_s_at | MmugDNA.42774.1 | 9.31  | 9.51  | 0.61 | 0.13 | -1.15 | 0.614495 | 0.502673 | 0.84397  | 0.700251 |
| MmugDNA.42777.1.S1_s_at | MmugDNA.42777.1 | 8.23  | 8.62  | 0.79 | 0.13 | -1.31 | 0.412746 | 0.429984 | 0.732098 | 0.65111  |
| MmugDNA.4278.1.S1_at    | MmugDNA.4278.1  | 6.03  | 6.01  | 0.88 | 0.11 | 1.02  | 0.90244  | 0.423064 | 0.96705  | 0.646145 |
| MmugDNA.42781.1.S1_at   | MmugDNA.42781.1 | 5.28  | 4.92  | 0.26 | 0.19 | 1.29  | 0.29748  | 0.370557 | 0.652776 | 0.609618 |
| MmugDNA.42782.1.S1_at   | MmugDNA.42782.1 | 4.74  | 4.87  | 0.11 | 0.06 | -1.1  | 0.082525 | 0.071488 | 0.447377 | 0.313706 |
| MmugDNA.42782.1.S1_s_at | MmugDNA.42782.1 | 7.08  | 6.74  | 0.44 | 0.22 | 1.26  | 0.887434 | 0.159792 | 0.960963 | 0.435871 |
| MmugDNA.42784.1.S1_at   | MmugDNA.42784.1 | 4.44  | 3.97  | 0.48 | 0.16 | 1.38  | 0.075679 | 0.438345 | 0.436722 | 0.657341 |
| MmugDNA.42785.1.S1_at   | MmugDNA.42785.1 | 5.94  | 6.68  | 0.65 | 0.62 | -1.67 | 0.487147 | 0.449096 | 0.7749   | 0.664892 |
| MmugDNA.42786.1.S1_at   | MmugDNA.42786.1 | 4.55  | 4.72  | 0.15 | 0.21 | -1.13 | 0.588016 | 0.227184 | 0.83181  | 0.499529 |

|                         |                 |       |       |      |      |       |          |          |          |          |
|-------------------------|-----------------|-------|-------|------|------|-------|----------|----------|----------|----------|
| MmugDNA.42787.1.S1_at   | MmugDNA.42787.1 | 3.18  | 3.18  | 0.18 | 0.03 | 1     | 0.789412 | 0.774444 | 0.92257  | 0.868766 |
| MmugDNA.42788.1.S1_at   | MmugDNA.42788.1 | 11.1  | 11.61 | 0.33 | 0.02 | -1.42 | 0.065657 | 0.10006  | 0.420827 | 0.358961 |
| MmugDNA.4279.1.S1_at    | MmugDNA.4279.1  | 5.58  | 5.55  | 0.32 | 0.33 | 1.02  | 0.422391 | 0.696283 | 0.738123 | 0.823545 |
| MmugDNA.42790.1.S1_at   | MmugDNA.42790.1 | 3.92  | 4.23  | 0.79 | 0.2  | -1.24 | 0.616814 | 0.677898 | 0.845114 | 0.811841 |
| MmugDNA.42791.1.S1_at   | MmugDNA.42791.1 | 4.49  | 4.45  | 0.25 | 0.03 | 1.03  | 0.277254 | 0.328612 | 0.636787 | 0.578163 |
| MmugDNA.42792.1.S1_at   | MmugDNA.42792.1 | 9.41  | 9.68  | 0.32 | 0.31 | -1.2  | 0.102403 | 0.055629 | 0.472589 | 0.281649 |
| MmugDNA.42797.1.S1_at   | MmugDNA.42797.1 | 5.28  | 5.18  | 0.3  | 0.05 | 1.07  | 0.785798 | 0.236561 | 0.921215 | 0.507364 |
| MmugDNA.42798.1.S1_at   | MmugDNA.42798.1 | 10.58 | 10.64 | 0.12 | 0.04 | -1.04 | 0.423334 | 0.589519 | 0.739013 | 0.755696 |
| MmugDNA.4280.1.S1_at    | MmugDNA.4280.1  | 11.32 | 11.82 | 0.09 | 0.06 | -1.41 | 0.000948 | 0.000343 | 0.154136 | 0.036856 |
| MmugDNA.42800.1.S1_at   | MmugDNA.42800.1 | 9.22  | 8.4   | 1.77 | 0.3  | 1.77  | 0.854177 | 0.765469 | 0.948437 | 0.863679 |
| MmugDNA.42802.1.S1_at   | MmugDNA.42802.1 | 8.94  | 7.79  | 0.08 | 0.28 | 2.21  | 0.0048   | 0.003141 | 0.202502 | 0.081652 |
| MmugDNA.42803.1.S1_at   | MmugDNA.42803.1 | 4.16  | 3.99  | 0.08 | 0.12 | 1.13  | 0.07882  | 0.081809 | 0.441464 | 0.330192 |
| MmugDNA.42804.1.S1_at   | MmugDNA.42804.1 | 5.71  | 5.72  | 0.01 | 0.08 | -1    | 0.390726 | 0.873362 | 0.716935 | 0.927953 |
| MmugDNA.42805.1.S1_at   | MmugDNA.42805.1 | 8.85  | 9.06  | 0.41 | 0.08 | -1.16 | 0.537488 | 0.402349 | 0.802735 | 0.631387 |
| MmugDNA.42806.1.S1_at   | MmugDNA.42806.1 | 6.42  | 7.16  | 0.13 | 0.31 | -1.67 | 0.00871  | 0.065889 | 0.236262 | 0.302126 |
| MmugDNA.42807.1.S1_at   | MmugDNA.42807.1 | 8.12  | 7.95  | 0.47 | 0.12 | 1.12  | 0.603063 | 0.832769 | 0.83911  | 0.904046 |
| MmugDNA.42808.1.S1_at   | MmugDNA.42808.1 | 11.92 | 12.15 | 0.31 | 0.08 | -1.17 | 0.231781 | 0.222758 | 0.599694 | 0.49569  |
| MmugDNA.42809.1.S1_at   | MmugDNA.42809.1 | 7.04  | 7.37  | 0.39 | 0.11 | -1.26 | 0.804874 | 0.917521 | 0.929036 | 0.953879 |
| MmugDNA.4281.1.S1_at    | MmugDNA.4281.1  | 6.91  | 6.81  | 0.59 | 0.21 | 1.08  | 0.857559 | 0.953289 | 0.949729 | 0.973509 |
| MmugDNA.42812.1.S1_at   | MmugDNA.42812.1 | 3.95  | 3.92  | 0.57 | 0.28 | 1.02  | 0.462756 | 0.588064 | 0.761749 | 0.754719 |
| MmugDNA.42813.1.S1_at   | MmugDNA.42813.1 | 12.64 | 12.3  | 0.14 | 0.1  | 1.27  | 0.024109 | 0.00588  | 0.317812 | 0.104899 |
| MmugDNA.42814.1.S1_at   | MmugDNA.42814.1 | 3.85  | 3.61  | 0.18 | 0.1  | 1.18  | 0.118514 | 0.12281  | 0.491933 | 0.392786 |
| MmugDNA.42817.1.S1_at   | MmugDNA.42817.1 | 4.61  | 3.91  | 0.42 | 0.22 | 1.62  | 0.075679 | 0.340826 | 0.436722 | 0.586978 |
| MmugDNA.42818.1.S1_at   | MmugDNA.42818.1 | 9.07  | 8.93  | 0.17 | 0.17 | 1.1   | 0.073406 | 0.048825 | 0.434422 | 0.265858 |
| MmugDNA.42819.1.S1_at   | MmugDNA.42819.1 | 9.3   | 9.39  | 0.07 | 0.06 | -1.07 | 0.099936 | 0.1149   | 0.47011  | 0.381615 |
| MmugDNA.42820.1.S1_s_at | MmugDNA.42820.1 | 10.63 | 10.41 | 0.19 | 0.08 | 1.17  | 0.055923 | 0.123982 | 0.399441 | 0.394262 |
| MmugDNA.42821.1.S1_at   | MmugDNA.42821.1 | 7.5   | 7.41  | 0.08 | 0.04 | 1.06  | 0.037101 | 0.071573 | 0.356778 | 0.313714 |
| MmugDNA.42822.1.S1_s_at | MmugDNA.42822.1 | 7.52  | 7.48  | 0.14 | 0.08 | 1.03  | 0.643636 | 0.067158 | 0.858218 | 0.305165 |
| MmugDNA.42824.1.S1_at   | MmugDNA.42824.1 | 4.94  | 4.85  | 0.13 | 0.1  | 1.06  | 0.150982 | 0.264917 | 0.52444  | 0.530909 |
| MmugDNA.42825.1.S1_at   | MmugDNA.42825.1 | 4.26  | 4.09  | 0.02 | 0.11 | 1.12  | 0.052267 | 0.090444 | 0.392084 | 0.344925 |
| MmugDNA.42826.1.S1_at   | MmugDNA.42826.1 | 8.72  | 8.73  | 0.39 | 0.09 | -1    | 0.524123 | 0.227944 | 0.795719 | 0.500211 |
| MmugDNA.42827.1.S1_at   | MmugDNA.42827.1 | 7.21  | 7.25  | 0.04 | 0.14 | -1.03 | 0.646452 | 0.385557 | 0.859051 | 0.621027 |
| MmugDNA.4283.1.S1_at    | MmugDNA.4283.1  | 7.55  | 7.55  | 0.4  | 0.14 | 1     | 0.922694 | 0.257003 | 0.973908 | 0.524781 |
| MmugDNA.42830.1.S1_at   | MmugDNA.42830.1 | 3.72  | 3.67  | 0.02 | 0.1  | 1.04  | 0.906587 | 0.97479  | 0.968356 | 0.986245 |
| MmugDNA.42831.1.S1_at   | MmugDNA.42831.1 | 5.55  | 5.27  | 0.2  | 0.19 | 1.22  | 0.248533 | 0.249386 | 0.613851 | 0.518496 |
| MmugDNA.42833.1.S1_at   | MmugDNA.42833.1 | 7.89  | 8.25  | 0.36 | 0.11 | -1.29 | 0.274448 | 0.40698  | 0.63386  | 0.634661 |
| MmugDNA.42834.1.S1_at   | MmugDNA.42834.1 | 6.63  | 7.23  | 0.41 | 0.26 | -1.52 | 0.067863 | 0.019786 | 0.42451  | 0.176951 |
| MmugDNA.42835.1.S1_at   | MmugDNA.42835.1 | 6.8   | 6.67  | 0.16 | 0.09 | 1.1   | 0.18193  | 0.143237 | 0.555022 | 0.417179 |
| MmugDNA.42836.1.S1_at   | MmugDNA.42836.1 | 4.2   | 3.82  | 0.41 | 0.33 | 1.3   | 0.886852 | 0.371467 | 0.960715 | 0.610204 |
| MmugDNA.42837.1.S1_at   | MmugDNA.42837.1 | 6.81  | 7.22  | 0.59 | 0.34 | -1.34 | 0.255087 | 0.505069 | 0.619267 | 0.70197  |
| MmugDNA.76.1.S1_at      | MmugDNA.76.1    | 3.18  | 3.16  | 0.2  | 0.14 | 1.01  | 0.423717 | 0.652513 | 0.739193 | 0.796819 |
| MmugDNA.76.1.S1_s_at    | MmugDNA.76.1    | 7.32  | 7.9   | 0.51 | 0.19 | -1.49 | 0.14878  | 0.456547 | 0.522743 | 0.67024  |
| MmugDNA.42839.1.S1_at   | MmugDNA.42839.1 | 8.05  | 8.25  | 0.1  | 0.24 | -1.15 | 0.196239 | 0.13181  | 0.566739 | 0.403891 |

|                         |                 |       |       |      |      |       |          |          |          |          |
|-------------------------|-----------------|-------|-------|------|------|-------|----------|----------|----------|----------|
| MmugDNA.4284.1.S1_at    | MmugDNA.4284.1  | 3.68  | 3.29  | 0.02 | 0.63 | 1.31  | 0.794031 | 0.46028  | 0.924489 | 0.672148 |
| MmugDNA.42840.1.S1_at   | MmugDNA.42840.1 | 8.87  | 8.83  | 0.24 | 0.12 | 1.03  | 0.296058 | 0.466458 | 0.651722 | 0.67632  |
| MmugDNA.42841.1.S1_at   | MmugDNA.42841.1 | 5.08  | 5.03  | 0.05 | 0.13 | 1.04  | 0.320539 | 0.561666 | 0.66937  | 0.73751  |
| MmugDNA.42842.1.S1_at   | MmugDNA.42842.1 | 5.78  | 5.89  | 0.15 | 0.05 | -1.08 | 0.768701 | 0.897503 | 0.91322  | 0.941525 |
| MmugDNA.42844.1.S1_at   | MmugDNA.42844.1 | 7.38  | 7.03  | 0.63 | 0.27 | 1.27  | 0.139429 | 0.19468  | 0.514872 | 0.469765 |
| MmugDNA.42844.1.S1_s_at | MmugDNA.42844.1 | 10.03 | 9.55  | 0.48 | 0.32 | 1.4   | 0.090714 | 0.116392 | 0.458873 | 0.383671 |
| MmugDNA.42845.1.S1_at   | MmugDNA.42845.1 | 6.25  | 6.1   | 0.09 | 0.09 | 1.11  | 0.229987 | 0.536802 | 0.598481 | 0.722119 |
| MmugDNA.42846.1.S1_at   | MmugDNA.42846.1 | 8.95  | 9.75  | 0.71 | 0.18 | -1.74 | 0.197804 | 0.261581 | 0.568831 | 0.528047 |
| MmugDNA.42848.1.S1_at   | MmugDNA.42848.1 | 7.15  | 6.9   | 0.25 | 0.29 | 1.2   | 0.282808 | 0.430443 | 0.641027 | 0.651438 |
| MmugDNA.42849.1.S1_at   | MmugDNA.42849.1 | 10.32 | 9.99  | 0.41 | 0.19 | 1.26  | 0.212496 | 0.195392 | 0.582995 | 0.470253 |
| MmugDNA.4285.1.S1_at    | MmugDNA.4285.1  | 7.54  | 8.02  | 1.07 | 0.47 | -1.39 | 0.57439  | 0.66006  | 0.824006 | 0.801057 |
| MmugDNA.42850.1.S1_at   | MmugDNA.42850.1 | 12.24 | 10.83 | 0.14 | 0.22 | 2.67  | 0.001445 | 0.000463 | 0.161412 | 0.038572 |
| MmugDNA.42853.1.S1_at   | MmugDNA.42853.1 | 4.96  | 5.36  | 0.33 | 0.37 | -1.32 | 0.248002 | 0.289218 | 0.61362  | 0.550293 |
| MmugDNA.42854.1.S1_at   | MmugDNA.42854.1 | 12.21 | 12.26 | 0.23 | 0.08 | -1.03 | 0.565362 | 0.556904 | 0.819183 | 0.734847 |
| MmugDNA.42855.1.S1_at   | MmugDNA.42855.1 | 8.65  | 8.45  | 0.36 | 0.08 | 1.15  | 0.679823 | 0.00253  | 0.874376 | 0.074291 |
| MmugDNA.42856.1.S1_at   | MmugDNA.42856.1 | 6.53  | 6.86  | 0.46 | 0.08 | -1.26 | 0.265673 | 0.036338 | 0.626818 | 0.235105 |
| MmugDNA.42857.1.S1_at   | MmugDNA.42857.1 | 7     | 6.71  | 0.69 | 0.26 | 1.22  | 0.386698 | 0.530698 | 0.713685 | 0.718104 |
| MmugDNA.42858.1.S1_at   | MmugDNA.42858.1 | 5.67  | 5.47  | 0.46 | 0.16 | 1.15  | 0.466353 | 0.857035 | 0.763504 | 0.91832  |
| MmugDNA.4286.1.S1_at    | MmugDNA.4286.1  | 5.82  | 5.6   | 0.17 | 0.15 | 1.17  | 0.222419 | 0.092903 | 0.591979 | 0.349024 |
| MmugDNA.42861.1.S1_at   | MmugDNA.42861.1 | 10.28 | 10.46 | 0.12 | 0.02 | -1.13 | 0.088069 | 0.129751 | 0.45606  | 0.401362 |
| MmugDNA.42862.1.S1_s_at | MmugDNA.42862.1 | 9.64  | 9.12  | 0.25 | 0.1  | 1.43  | 0.077435 | 0.068169 | 0.43937  | 0.307314 |
| MmugDNA.42863.1.S1_at   | MmugDNA.42863.1 | 7.47  | 7.09  | 0.33 | 0.18 | 1.31  | 0.177603 | 0.393709 | 0.55065  | 0.626522 |
| MmugDNA.42864.1.S1_at   | MmugDNA.42864.1 | 3.66  | 3.67  | 0.43 | 0.58 | -1    | 0.987319 | 0.989696 | 0.995831 | 0.994108 |
| MmugDNA.42865.1.S1_at   | MmugDNA.42865.1 | 10.08 | 10.91 | 0.8  | 0.06 | -1.77 | 0.46826  | 0.565169 | 0.764855 | 0.739748 |
| MmugDNA.42866.1.S1_at   | MmugDNA.42866.1 | 8.73  | 8.56  | 0.39 | 0.22 | 1.12  | 0.885987 | 0.091489 | 0.960417 | 0.346533 |
| MmugDNA.42867.1.S1_at   | MmugDNA.42867.1 | 4.41  | 4.77  | 0.04 | 0.08 | -1.28 | 0.00389  | 0.027235 | 0.198571 | 0.206279 |
| MmugDNA.42868.1.S1_at   | MmugDNA.42868.1 | 4.28  | 4.2   | 0.3  | 0.05 | 1.05  | 0.699057 | 0.743096 | 0.883029 | 0.851135 |
| MmugDNA.42869.1.S1_at   | MmugDNA.42869.1 | 7.99  | 7.95  | 0.11 | 0.06 | 1.03  | 0.661362 | 0.897641 | 0.866147 | 0.941618 |
| MmugDNA.4287.1.S1_at    | MmugDNA.4287.1  | 4.29  | 4.47  | 0.38 | 0.06 | -1.13 | 0.76016  | 0.232249 | 0.909862 | 0.503975 |
| MmugDNA.42871.1.S1_at   | MmugDNA.42871.1 | 4.98  | 4.84  | 0.15 | 0.19 | 1.1   | 0.595868 | 0.757269 | 0.835646 | 0.858672 |
| MmugDNA.42874.1.S1_at   | MmugDNA.42874.1 | 6.24  | 6.13  | 0.14 | 0.07 | 1.08  | 0.156094 | 0.244213 | 0.529456 | 0.514167 |
| MmugDNA.42875.1.S1_at   | MmugDNA.42875.1 | 3.77  | 3.94  | 0.11 | 0.02 | -1.13 | 0.102665 | 0.261358 | 0.472935 | 0.527858 |
| MmugDNA.42878.1.S1_at   | MmugDNA.42878.1 | 8.15  | 8.02  | 0.09 | 0.03 | 1.09  | 0.07662  | 0.021875 | 0.437977 | 0.185121 |
| MmugDNA.42879.1.S1_at   | MmugDNA.42879.1 | 7.81  | 8.36  | 0.25 | 0.32 | -1.46 | 0.180196 | 0.883438 | 0.553357 | 0.933594 |
| MmugDNA.4288.1.S1_at    | MmugDNA.4288.1  | 3.95  | 3.96  | 0.03 | 0.07 | -1    | 0.301437 | 0.334406 | 0.655772 | 0.582387 |
| MmugDNA.42882.1.S1_at   | MmugDNA.42882.1 | 5.35  | 5.09  | 0.16 | 0.13 | 1.2   | 0.118052 | 0.092827 | 0.491371 | 0.349024 |
| MmugDNA.42882.1.S1_x_at | MmugDNA.42882.1 | 5.3   | 5.22  | 0.25 | 0.01 | 1.06  | 0.569767 | 0.477079 | 0.821624 | 0.683196 |
| MmugDNA.42884.1.S1_at   | MmugDNA.42884.1 | 7.38  | 7.91  | 0.44 | 0.11 | -1.44 | 0.067576 | 0.036509 | 0.424076 | 0.235526 |
| MmugDNA.42886.1.S1_at   | MmugDNA.42886.1 | 5.58  | 6.16  | 0.01 | 0.07 | -1.5  | 0.000187 | 0.000057 | 0.114006 | 0.025666 |
| MmugDNA.42887.1.S1_at   | MmugDNA.42887.1 | 7.52  | 6.67  | 1.08 | 0.54 | 1.8   | 0.939878 | 0.156554 | 0.979549 | 0.43196  |
| MmugDNA.42888.1.S1_at   | MmugDNA.42888.1 | 11.05 | 11.82 | 0.49 | 0.05 | -1.71 | 0.057162 | 0.010782 | 0.401473 | 0.135512 |
| MmugDNA.4289.1.S1_at    | MmugDNA.4289.1  | 8.35  | 8.16  | 0.28 | 0.13 | 1.14  | 0.889671 | 0.952824 | 0.961988 | 0.97327  |
| MmugDNA.42892.1.S1_at   | MmugDNA.42892.1 | 5.69  | 5.44  | 0.17 | 0.26 | 1.19  | 0.984234 | 0.656494 | 0.995199 | 0.799097 |

|                        |                 |       |       |      |      |       |          |          |          |          |
|------------------------|-----------------|-------|-------|------|------|-------|----------|----------|----------|----------|
| MmugDNA.42893.1.S1_at  | MmugDNA.42893.1 | 5.08  | 5.28  | 0.47 | 0.52 | -1.15 | 0.489971 | 0.849841 | 0.776662 | 0.914673 |
| MmugDNA.42894.1.S1_at  | MmugDNA.42894.1 | 4.57  | 4.53  | 0.24 | 0.12 | 1.03  | 0.914273 | 0.509414 | 0.970825 | 0.704167 |
| MmugDNA.42895.1.S1_at  | MmugDNA.42895.1 | 4.53  | 4.79  | 0.8  | 0.41 | -1.19 | 0.983133 | 0.242301 | 0.994889 | 0.512739 |
| MmugDNA.42896.1.S1_at  | MmugDNA.42896.1 | 3.84  | 3.86  | 0.22 | 0.21 | -1.01 | 0.456578 | 0.314401 | 0.757977 | 0.56831  |
| MmugDNA.42898.1.S1_at  | MmugDNA.42898.1 | 9.53  | 10.09 | 0.65 | 0.18 | -1.48 | 0.218625 | 0.394835 | 0.588341 | 0.627216 |
| MmugDNA.429.1.S1_at    | MmugDNA.429.1   | 2.9   | 2.9   | 0.08 | 0.1  | -1    | 0.85841  | 0.954501 | 0.95001  | 0.974181 |
| MmugDNA.4290.1.S1_at   | MmugDNA.4290.1  | 9.71  | 9.33  | 0.18 | 0.18 | 1.3   | 0.061908 | 0.213579 | 0.411683 | 0.48741  |
| MmugDNA.42900.1.S1_at  | MmugDNA.42900.1 | 5.71  | 5.54  | 0.2  | 0.1  | 1.12  | 0.174243 | 0.344363 | 0.547351 | 0.589762 |
| MmugDNA.42904.1.S1_at  | MmugDNA.42904.1 | 6.04  | 6.67  | 0.2  | 0.06 | -1.55 | 0.012032 | 0.000419 | 0.258642 | 0.038093 |
| MmugDNA.42906.1.S1_at  | MmugDNA.42906.1 | 7.53  | 7.69  | 0.72 | 0.15 | -1.12 | 0.716772 | 0.013941 | 0.890016 | 0.151391 |
| MmugDNA.42907.1.S1_at  | MmugDNA.42907.1 | 3.96  | 3.96  | 0.04 | 0.04 | -1    | 0.990485 | 0.577483 | 0.996425 | 0.747923 |
| MmugDNA.42908.1.S1_at  | MmugDNA.42908.1 | 6.14  | 6.72  | 0.83 | 0.48 | -1.5  | 0.143116 | 0.129608 | 0.518366 | 0.401223 |
| MmugDNA.42909.1.S1_at  | MmugDNA.42909.1 | 4.7   | 4.46  | 0.09 | 0.2  | 1.18  | 0.100561 | 0.141381 | 0.471414 | 0.414874 |
| MmugDNA.4291.1.S1_at   | MmugDNA.4291.1  | 9.89  | 9.45  | 0.14 | 0.04 | 1.35  | 0.005793 | 0.002346 | 0.211798 | 0.07161  |
| MmugDNA.42911.1.S1_at  | MmugDNA.42911.1 | 5.66  | 5.6   | 0.17 | 0.03 | 1.04  | 0.626612 | 0.853071 | 0.849991 | 0.916487 |
| MmugDNA.42912.1.S1_at  | MmugDNA.42912.1 | 8.98  | 8.09  | 0.19 | 0.27 | 1.85  | 0.009644 | 0.027073 | 0.243111 | 0.205754 |
| MmugDNA.42914.1.S1_at  | MmugDNA.42914.1 | 7.07  | 7.22  | 0.2  | 0.22 | -1.11 | 0.266848 | 0.439301 | 0.627644 | 0.658043 |
| MmugDNA.42915.1.S1_at  | MmugDNA.42915.1 | 6.29  | 6.11  | 0.15 | 0.03 | 1.13  | 0.081039 | 0.08452  | 0.445056 | 0.335916 |
| MmugDNA.42916.1.S1_at  | MmugDNA.42916.1 | 8.8   | 8.91  | 0.46 | 0.04 | -1.08 | 0.741985 | 0.9082   | 0.901613 | 0.947992 |
| MmugDNA.42917.1.S1_at  | MmugDNA.42917.1 | 4.51  | 4.65  | 0.24 | 0.81 | -1.1  | 0.643461 | 0.77422  | 0.858218 | 0.868735 |
| MmugDNA.42918.1.S1_at  | MmugDNA.42918.1 | 4.75  | 4.73  | 0.1  | 0.08 | 1.01  | 0.448221 | 0.450976 | 0.753856 | 0.665946 |
| MmugDNA.42919.1.S1_at  | MmugDNA.42919.1 | 13.11 | 12.99 | 0.07 | 0.09 | 1.08  | 0.150269 | 0.070873 | 0.523933 | 0.312373 |
| MmugDNA.4292.1.S1_at   | MmugDNA.4292.1  | 7.54  | 7.75  | 0.23 | 0.14 | -1.16 | 0.461442 | 0.449674 | 0.760917 | 0.665156 |
| MmugDNA.42920.1.S1_at  | MmugDNA.42920.1 | 13.76 | 13.78 | 0.03 | 0.02 | -1.01 | 0.162542 | 0.439728 | 0.535667 | 0.65842  |
| MmugDNA.42922.1.S1_at  | MmugDNA.42922.1 | 6.92  | 6.98  | 0.4  | 0.12 | -1.05 | 0.994163 | 0.298518 | 0.997789 | 0.557175 |
| MmugDNA.42923.1.S1_at  | MmugDNA.42923.1 | 11.19 | 11.3  | 0.14 | 0.1  | -1.08 | 0.260789 | 0.145671 | 0.623301 | 0.419644 |
| MmugDNA.42927.1.S1_at  | MmugDNA.42927.1 | 3.22  | 3.26  | 0.43 | 0.25 | -1.03 | 0.592322 | 0.761439 | 0.833845 | 0.861416 |
| MmugDNA.42929.1.S1_at  | MmugDNA.42929.1 | 3.47  | 3.56  | 0.11 | 0.12 | -1.07 | 0.329925 | 0.539496 | 0.676657 | 0.723763 |
| MmugDNA.42930.1.S1_at  | MmugDNA.42930.1 | 13.67 | 12.46 | 1.6  | 0.06 | 2.31  | 0.755722 | 0.090758 | 0.90805  | 0.345227 |
| MmugDNA.5636.1.S1_s_at | MmugDNA.5636.1  | 5.8   | 5.44  | 0.22 | 0.27 | 1.29  | 0.331462 | 0.553221 | 0.678103 | 0.73239  |
| MmugDNA.42932.1.S1_at  | MmugDNA.42932.1 | 4.43  | 5.22  | 0.18 | 0.45 | -1.73 | 0.033451 | 0.151001 | 0.346442 | 0.425628 |
| MmugDNA.42933.1.S1_at  | MmugDNA.42933.1 | 5.6   | 6.97  | 0.49 | 0.31 | -2.59 | 0.01865  | 0.047023 | 0.298184 | 0.261469 |
| MmugDNA.42935.1.S1_at  | MmugDNA.42935.1 | 3.53  | 3.49  | 0.11 | 0.03 | 1.02  | 0.437382 | 0.534018 | 0.746793 | 0.720046 |
| MmugDNA.42936.1.S1_at  | MmugDNA.42936.1 | 4.53  | 4.43  | 0.08 | 0.13 | 1.07  | 0.389652 | 0.496157 | 0.716272 | 0.695877 |
| MmugDNA.42937.1.S1_at  | MmugDNA.42937.1 | 7.54  | 8.1   | 0.37 | 0.05 | -1.47 | 0.189767 | 0.373631 | 0.561075 | 0.612389 |
| MmugDNA.4294.1.S1_at   | MmugDNA.4294.1  | 3.07  | 2.98  | 0.49 | 0.12 | 1.07  | 0.591598 | 0.777361 | 0.833595 | 0.87064  |
| MmugDNA.42940.1.S1_at  | MmugDNA.42940.1 | 10.96 | 11.47 | 0.15 | 0.1  | -1.42 | 0.008062 | 0.068401 | 0.232005 | 0.307955 |
| MmugDNA.42941.1.S1_at  | MmugDNA.42941.1 | 10.57 | 10.85 | 0.27 | 0.13 | -1.22 | 0.155425 | 0.328304 | 0.528651 | 0.578012 |
| MmugDNA.42943.1.S1_at  | MmugDNA.42943.1 | 6.41  | 6.46  | 0.28 | 0.29 | -1.03 | 0.759077 | 0.543973 | 0.909468 | 0.72652  |
| MmugDNA.42944.1.S1_at  | MmugDNA.42944.1 | 3.33  | 3.19  | 0.03 | 0.12 | 1.11  | 0.129854 | 0.613831 | 0.504468 | 0.77088  |
| MmugDNA.42945.1.S1_at  | MmugDNA.42945.1 | 8.58  | 9.35  | 1.84 | 0.37 | -1.7  | 0.431742 | 0.565538 | 0.743599 | 0.739956 |
| MmugDNA.42946.1.S1_at  | MmugDNA.42946.1 | 7.42  | 7.44  | 0.36 | 0.22 | -1.01 | 0.376574 | 0.357758 | 0.706946 | 0.599382 |
| MmugDNA.42947.1.S1_at  | MmugDNA.42947.1 | 3.12  | 2.85  | 0.04 | 0.04 | 1.21  | 0.001598 | 0.23445  | 0.162459 | 0.505674 |

|                         |                 |       |       |      |      |       |          |          |          |          |
|-------------------------|-----------------|-------|-------|------|------|-------|----------|----------|----------|----------|
| MmugDNA.42948.1.S1_x_at | MmugDNA.42948.1 | 7.17  | 7.16  | 0.2  | 0.2  | 1.01  | 0.93199  | 0.200291 | 0.977118 | 0.474689 |
| MmugDNA.42949.1.S1_at   | MmugDNA.42949.1 | 7.75  | 8.13  | 0.6  | 0.34 | -1.3  | 0.976016 | 0.957642 | 0.992259 | 0.976031 |
| MmugDNA.4295.1.S1_at    | MmugDNA.4295.1  | 5.32  | 5.34  | 0.42 | 0.15 | -1.01 | 0.905982 | 0.987799 | 0.968196 | 0.993191 |
| MmugDNA.42950.1.S1_at   | MmugDNA.42950.1 | 3.77  | 3.81  | 0.1  | 0.29 | -1.03 | 0.811377 | 0.76627  | 0.931757 | 0.864189 |
| MmugDNA.42951.1.S1_at   | MmugDNA.42951.1 | 8.67  | 8.32  | 0.12 | 0.1  | 1.27  | 0.016774 | 0.096698 | 0.28837  | 0.35417  |
| MmugDNA.42952.1.S1_at   | MmugDNA.42952.1 | 12.9  | 12.91 | 0.15 | 0.01 | -1    | 0.341191 | 0.280762 | 0.684986 | 0.543952 |
| MmugDNA.42953.1.S1_at   | MmugDNA.42953.1 | 9.16  | 10.32 | 0.7  | 0.08 | -2.23 | 0.112406 | 0.101262 | 0.485692 | 0.360998 |
| MmugDNA.42954.1.S1_at   | MmugDNA.42954.1 | 9.13  | 9.11  | 0.18 | 0.15 | 1.01  | 0.882708 | 0.000568 | 0.959343 | 0.041092 |
| MmugDNA.42955.1.S1_at   | MmugDNA.42955.1 | 4.27  | 4.2   | 0.42 | 0.17 | 1.05  | 0.574583 | 0.590965 | 0.824155 | 0.75656  |
| MmugDNA.42956.1.S1_at   | MmugDNA.42956.1 | 3.54  | 3.45  | 0.14 | 0.06 | 1.06  | 0.280838 | 0.436957 | 0.639467 | 0.656361 |
| MmugDNA.42958.1.S1_at   | MmugDNA.42958.1 | 4.74  | 4.69  | 0.03 | 0.63 | 1.04  | 0.447604 | 0.648492 | 0.753399 | 0.794294 |
| MmugDNA.42959.1.S1_at   | MmugDNA.42959.1 | 6.09  | 6.15  | 0.11 | 0.08 | -1.04 | 0.574981 | 0.755939 | 0.824422 | 0.8579   |
| MmugDNA.4296.1.S1_at    | MmugDNA.4296.1  | 3.34  | 3.49  | 0.14 | 0.14 | -1.11 | 0.637813 | 0.476669 | 0.855669 | 0.682847 |
| MmugDNA.42961.1.S1_at   | MmugDNA.42961.1 | 9.95  | 10.18 | 0.72 | 0.08 | -1.17 | 0.554069 | 0.685839 | 0.812439 | 0.816612 |
| MmugDNA.42962.1.S1_at   | MmugDNA.42962.1 | 8.49  | 8.53  | 0.73 | 0.34 | -1.03 | 0.828061 | 0.92483  | 0.938183 | 0.957467 |
| MmugDNA.42963.1.S1_at   | MmugDNA.42963.1 | 4.93  | 4.71  | 0.24 | 0.23 | 1.16  | 0.303615 | 0.390473 | 0.657406 | 0.624267 |
| MmugDNA.42964.1.S1_at   | MmugDNA.42964.1 | 6.22  | 6.22  | 0.12 | 0.17 | 1     | 0.962049 | 0.013528 | 0.987644 | 0.148875 |
| MmugDNA.42965.1.S1_at   | MmugDNA.42965.1 | 4.68  | 4.37  | 0.41 | 0.28 | 1.24  | 0.403038 | 0.200151 | 0.725406 | 0.474603 |
| MmugDNA.42966.1.S1_at   | MmugDNA.42966.1 | 5.48  | 5.51  | 0.24 | 0.15 | -1.02 | 0.911716 | 0.967621 | 0.970166 | 0.982093 |
| MmugDNA.42967.1.S1_at   | MmugDNA.42967.1 | 8.78  | 8.67  | 0.05 | 0.07 | 1.08  | 0.088467 | 0.524862 | 0.45606  | 0.714635 |
| MmugDNA.42967.1.S1_s_at | MmugDNA.42967.1 | 9.62  | 9.61  | 0.09 | 0.03 | 1     | 0.874935 | 0.979794 | 0.956568 | 0.989168 |
| MmugDNA.42969.1.S1_at   | MmugDNA.42969.1 | 3.72  | 3.74  | 0.11 | 0.07 | -1.01 | 0.797935 | 0.340009 | 0.925842 | 0.586516 |
| MmugDNA.42970.1.S1_at   | MmugDNA.42970.1 | 5.91  | 5.93  | 0.17 | 0.23 | -1.01 | 0.696612 | 0.817907 | 0.882169 | 0.894951 |
| MmugDNA.42971.1.S1_at   | MmugDNA.42971.1 | 5.89  | 5.78  | 0.07 | 0.11 | 1.08  | 0.402924 | 0.490248 | 0.725287 | 0.692301 |
| MmugDNA.42972.1.S1_at   | MmugDNA.42972.1 | 8.25  | 7.98  | 0.34 | 0.01 | 1.2   | 0.225416 | 0.017964 | 0.594611 | 0.169043 |
| MmugDNA.42973.1.S1_at   | MmugDNA.42973.1 | 9.1   | 8.84  | 0.12 | 0.06 | 1.2   | 0.033334 | 0.03988  | 0.346442 | 0.244852 |
| MmugDNA.42974.1.S1_at   | MmugDNA.42974.1 | 3.34  | 3.05  | 0.4  | 0.45 | 1.22  | 0.750787 | 0.672329 | 0.905556 | 0.808488 |
| MmugDNA.42975.1.S1_at   | MmugDNA.42975.1 | 5.58  | 5.16  | 0.04 | 0.14 | 1.34  | 0.004315 | 0.001109 | 0.198874 | 0.052745 |
| MmugDNA.42976.1.S1_at   | MmugDNA.42976.1 | 4.93  | 4.95  | 0.25 | 0.1  | -1.01 | 0.299408 | 0.378341 | 0.653793 | 0.615443 |
| MmugDNA.42978.1.S1_at   | MmugDNA.42978.1 | 5.26  | 5.2   | 0.42 | 0.62 | 1.04  | 0.204784 | 0.260313 | 0.576337 | 0.526876 |
| MmugDNA.42981.1.S1_at   | MmugDNA.42981.1 | 9.85  | 9.81  | 0.54 | 0.17 | 1.03  | 0.343928 | 0.098608 | 0.686913 | 0.356743 |
| MmugDNA.42982.1.S1_at   | MmugDNA.42982.1 | 13.44 | 13.57 | 0.16 | 0.04 | -1.09 | 0.07667  | 0.062361 | 0.438075 | 0.296504 |
| MmugDNA.42983.1.S1_s_at | MmugDNA.42983.1 | 11.66 | 11.78 | 1    | 0.17 | -1.09 | 0.916593 | 0.277632 | 0.971679 | 0.541628 |
| MmugDNA.42984.1.S1_at   | MmugDNA.42984.1 | 6.27  | 6.22  | 0.15 | 0.07 | 1.04  | 0.158506 | 0.594133 | 0.531551 | 0.758517 |
| MmugDNA.42985.1.S1_at   | MmugDNA.42985.1 | 4.04  | 3.96  | 0.07 | 0.17 | 1.05  | 0.274299 | 0.041316 | 0.633792 | 0.247995 |
| MmugDNA.42986.1.S1_at   | MmugDNA.42986.1 | 3.82  | 3.78  | 0.11 | 0.12 | 1.02  | 0.798393 | 0.480111 | 0.926122 | 0.685659 |
| MmugDNA.42987.1.S1_at   | MmugDNA.42987.1 | 5.7   | 5.32  | 0.37 | 0.24 | 1.3   | 0.152704 | 0.079655 | 0.525612 | 0.326981 |
| MmugDNA.42988.1.S1_at   | MmugDNA.42988.1 | 5.74  | 5.43  | 0.28 | 0.09 | 1.24  | 0.586812 | 0.380138 | 0.831504 | 0.616819 |
| MmugDNA.42989.1.S1_at   | MmugDNA.42989.1 | 3.74  | 3.67  | 0.14 | 0.28 | 1.04  | 0.923553 | 0.288132 | 0.97437  | 0.54936  |
| MmugDNA.4299.1.S1_at    | MmugDNA.4299.1  | 5.83  | 5.64  | 0.28 | 0.25 | 1.15  | 0.952249 | 0.585658 | 0.983984 | 0.752957 |
| MmugDNA.42991.1.S1_at   | MmugDNA.42991.1 | 7.56  | 6.2   | 0.14 | 0.36 | 2.56  | 0.004377 | 0.010537 | 0.198874 | 0.134072 |
| MmugDNA.42992.1.S1_at   | MmugDNA.42992.1 | 4.96  | 4.47  | 0.63 | 0.47 | 1.41  | 0.405545 | 0.385692 | 0.727426 | 0.621079 |
| MmugDNA.42993.1.S1_at   | MmugDNA.42993.1 | 9.51  | 9.1   | 0.33 | 0.2  | 1.33  | 0.244192 | 0.277674 | 0.60991  | 0.541636 |

|                         |                 |       |       |      |      |       |          |          |          |          |
|-------------------------|-----------------|-------|-------|------|------|-------|----------|----------|----------|----------|
| MmugDNA.42994.1.S1_at   | MmugDNA.42994.1 | 6.68  | 7.63  | 0.15 | 0.12 | -1.94 | 0.001141 | 0.001867 | 0.156386 | 0.06479  |
| MmugDNA.42995.1.S1_at   | MmugDNA.42995.1 | 5.45  | 5.26  | 0.77 | 0.14 | 1.14  | 0.352284 | 0.591642 | 0.692649 | 0.75717  |
| MmugDNA.42996.1.S1_at   | MmugDNA.42996.1 | 3.24  | 3.18  | 0.08 | 0.08 | 1.04  | 0.17525  | 0.319557 | 0.548169 | 0.571875 |
| MmugDNA.42997.1.S1_at   | MmugDNA.42997.1 | 6.19  | 5.04  | 0.35 | 0.29 | 2.22  | 0.018516 | 0.024087 | 0.297536 | 0.194493 |
| MmugDNA.42998.1.S1_at   | MmugDNA.42998.1 | 5.49  | 5.55  | 0.14 | 0.03 | -1.04 | 0.456221 | 0.820042 | 0.757788 | 0.89632  |
| MmugDNA.42999.1.S1_at   | MmugDNA.42999.1 | 5.34  | 5.38  | 0.06 | 0.07 | -1.02 | 0.631956 | 0.903445 | 0.852641 | 0.945185 |
| MmugDNA.430.1.S1_at     | MmugDNA.430.1   | 5.17  | 5.03  | 0.1  | 0.2  | 1.1   | 0.857346 | 0.319372 | 0.949683 | 0.571724 |
| MmugDNA.4300.1.S1_at    | MmugDNA.4300.1  | 4.76  | 5.36  | 0.46 | 0.19 | -1.52 | 0.103474 | 0.025147 | 0.474255 | 0.198717 |
| MmugDNA.43002.1.S1_at   | MmugDNA.43002.1 | 9.79  | 10.27 | 0.35 | 0.18 | -1.4  | 0.121235 | 0.028078 | 0.494848 | 0.209118 |
| MmugDNA.43003.1.S1_at   | MmugDNA.43003.1 | 3.84  | 4     | 0.08 | 0.38 | -1.11 | 0.551176 | 0.72062  | 0.811279 | 0.838352 |
| MmugDNA.43004.1.S1_at   | MmugDNA.43004.1 | 2.75  | 2.74  | 0.31 | 0.17 | -1.01 | 0.633762 | 0.844621 | 0.853666 | 0.91156  |
| MmugDNA.43005.1.S1_at   | MmugDNA.43005.1 | 5.58  | 5.68  | 1.06 | 0.13 | -1.08 | 0.459945 | 0.633908 | 0.759871 | 0.784538 |
| MmugDNA.43006.1.S1_at   | MmugDNA.43006.1 | 4.25  | 4.89  | 0.16 | 0.35 | -1.55 | 0.02914  | 0.02735  | 0.333944 | 0.206637 |
| MmugDNA.43007.1.S1_at   | MmugDNA.43007.1 | 7.82  | 7.64  | 0.42 | 0.15 | 1.14  | 0.324351 | 0.452766 | 0.672562 | 0.667321 |
| MmugDNA.43008.1.S1_at   | MmugDNA.43008.1 | 3.25  | 3.24  | 0.05 | 0.08 | 1.01  | 0.94783  | 0.945905 | 0.982079 | 0.969245 |
| MmugDNA.4301.1.S1_at    | MmugDNA.4301.1  | 8.41  | 8.9   | 0.58 | 0.14 | -1.41 | 0.684885 | 0.425186 | 0.876588 | 0.647647 |
| MmugDNA.43011.1.S1_at   | MmugDNA.43011.1 | 6.43  | 6.5   | 0.29 | 0.22 | -1.05 | 0.611385 | 0.373384 | 0.842491 | 0.61221  |
| MmugDNA.43013.1.S1_at   | MmugDNA.43013.1 | 5.69  | 5.28  | 0.13 | 0.17 | 1.32  | 0.123831 | 0.195259 | 0.497344 | 0.470253 |
| MmugDNA.43014.1.S1_at   | MmugDNA.43014.1 | 6.35  | 6.83  | 0.32 | 0.32 | -1.39 | 0.105087 | 0.306818 | 0.47678  | 0.563387 |
| MmugDNA.43015.1.S1_at   | MmugDNA.43015.1 | 10.18 | 10.18 | 0.64 | 0.05 | 1     | 0.901667 | 0.523632 | 0.966689 | 0.713871 |
| MmugDNA.43016.1.S1_at   | MmugDNA.43016.1 | 5.77  | 5.4   | 0.37 | 0.26 | 1.29  | 0.144101 | 0.014168 | 0.519461 | 0.152143 |
| MmugDNA.43017.1.S1_at   | MmugDNA.43017.1 | 11.71 | 11.78 | 0.26 | 0.05 | -1.05 | 0.22004  | 0.307164 | 0.589114 | 0.563487 |
| MmugDNA.43018.1.S1_at   | MmugDNA.43018.1 | 5.94  | 5.94  | 0.06 | 0.07 | -1    | 0.515321 | 0.167745 | 0.79089  | 0.444282 |
| MmugDNA.4302.1.S1_at    | MmugDNA.4302.1  | 4.3   | 3.73  | 0.35 | 0.41 | 1.48  | 0.302953 | 0.010364 | 0.656807 | 0.133236 |
| MmugDNA.43020.1.S1_at   | MmugDNA.43020.1 | 6.84  | 6.12  | 0.33 | 0.42 | 1.64  | 0.058973 | 0.063034 | 0.405865 | 0.297739 |
| MmugDNA.43021.1.S1_at   | MmugDNA.43021.1 | 9.95  | 9.88  | 0.41 | 0.09 | 1.05  | 0.791057 | 0.01373  | 0.923182 | 0.150093 |
| MmugDNA.43022.1.S1_at   | MmugDNA.43022.1 | 10.24 | 9.84  | 0.46 | 0.16 | 1.32  | 0.525116 | 0.647032 | 0.796179 | 0.793279 |
| MmugDNA.43023.1.S1_at   | MmugDNA.43023.1 | 8.43  | 8.85  | 0.13 | 0.23 | -1.34 | 0.02476  | 0.015958 | 0.31972  | 0.16035  |
| MmugDNA.43025.1.S1_at   | MmugDNA.43025.1 | 8.69  | 9.11  | 1.41 | 0.29 | -1.33 | 0.169201 | 0.193551 | 0.542076 | 0.468785 |
| MmugDNA.43026.1.S1_at   | MmugDNA.43026.1 | 4.37  | 4.3   | 0.07 | 0.03 | 1.05  | 0.118592 | 0.738345 | 0.492099 | 0.848258 |
| MmugDNA.43028.1.S1_at   | MmugDNA.43028.1 | 7.73  | 7.25  | 0.18 | 0.29 | 1.39  | 0.168677 | 0.093718 | 0.541482 | 0.350192 |
| MmugDNA.43029.1.S1_at   | MmugDNA.43029.1 | 4.32  | 4.23  | 0.17 | 0.24 | 1.07  | 0.750548 | 0.517906 | 0.905533 | 0.710027 |
| MmugDNA.4303.1.S1_at    | MmugDNA.4303.1  | 10.03 | 10.55 | 0.05 | 0.12 | -1.44 | 0.002228 | 0.000059 | 0.174757 | 0.025666 |
| MmugDNA.43030.1.S1_at   | MmugDNA.43030.1 | 9.29  | 8.96  | 0.35 | 0.21 | 1.26  | 0.231025 | 0.17577  | 0.599045 | 0.452344 |
| MmugDNA.43031.1.S1_at   | MmugDNA.43031.1 | 3.24  | 3.06  | 0.09 | 0.17 | 1.14  | 0.118456 | 0.160354 | 0.491933 | 0.436528 |
| MmugDNA.43032.1.S1_at   | MmugDNA.43032.1 | 9.54  | 9.84  | 0.42 | 0.12 | -1.23 | 0.383811 | 0.521846 | 0.711503 | 0.712654 |
| MmugDNA.43034.1.S1_at   | MmugDNA.43034.1 | 9.17  | 9.27  | 0.32 | 0.05 | -1.08 | 0.609042 | 0.156938 | 0.841511 | 0.432372 |
| MmugDNA.43036.1.S1_s_at | MmugDNA.43036.1 | 8.64  | 8.88  | 0.17 | 0.23 | -1.18 | 0.571613 | 0.029752 | 0.822859 | 0.21414  |
| MmugDNA.43039.1.S1_at   | MmugDNA.43039.1 | 8.27  | 8.33  | 0.47 | 0.01 | -1.04 | 0.710976 | 0.682439 | 0.887436 | 0.814526 |
| MmugDNA.4304.1.S1_at    | MmugDNA.4304.1  | 5.8   | 5.93  | 0.55 | 0.17 | -1.09 | 0.1818   | 0.217191 | 0.554854 | 0.490843 |
| MmugDNA.43042.1.S1_at   | MmugDNA.43042.1 | 7.75  | 8.07  | 0.25 | 0.15 | -1.25 | 0.032386 | 0.030241 | 0.34414  | 0.215784 |
| MmugDNA.43043.1.S1_at   | MmugDNA.43043.1 | 5.56  | 5.5   | 0.1  | 0.06 | 1.04  | 0.487173 | 0.012403 | 0.774918 | 0.144058 |
| MmugDNA.43044.1.S1_at   | MmugDNA.43044.1 | 3.41  | 3.28  | 0.19 | 0.08 | 1.09  | 0.295317 | 0.38183  | 0.651046 | 0.618047 |

|                         |                 |       |       |      |      |       |          |          |          |          |
|-------------------------|-----------------|-------|-------|------|------|-------|----------|----------|----------|----------|
| MmugDNA.43045.1.S1_at   | MmugDNA.43045.1 | 6.07  | 5.85  | 0.1  | 0.16 | 1.17  | 0.062896 | 0.078651 | 0.414228 | 0.325522 |
| MmugDNA.43046.1.S1_at   | MmugDNA.43046.1 | 4.08  | 4.1   | 0.12 | 0.08 | -1.02 | 0.666181 | 0.859179 | 0.868243 | 0.919754 |
| MmugDNA.43047.1.S1_at   | MmugDNA.43047.1 | 6.13  | 6.14  | 0.18 | 0.07 | -1.01 | 0.715306 | 0.809997 | 0.889213 | 0.890518 |
| MmugDNA.43048.1.S1_at   | MmugDNA.43048.1 | 6.53  | 5.93  | 0.1  | 0.36 | 1.51  | 0.049699 | 0.053531 | 0.38604  | 0.277016 |
| MmugDNA.43049.1.S1_at   | MmugDNA.43049.1 | 6.47  | 5.82  | 0.39 | 0.18 | 1.56  | 0.102129 | 0.361713 | 0.472436 | 0.602422 |
| MmugDNA.4305.1.S1_at    | MmugDNA.4305.1  | 11.92 | 11.89 | 0.7  | 0.11 | 1.03  | 0.507936 | 0.595902 | 0.786553 | 0.759258 |
| MmugDNA.4305.1.S1_s_at  | MmugDNA.4305.1  | 12.49 | 12.47 | 0.49 | 0.1  | 1.01  | 0.45688  | 0.500948 | 0.758051 | 0.69936  |
| MmugDNA.43051.1.S1_at   | MmugDNA.43051.1 | 9.84  | 9.38  | 0.38 | 0.16 | 1.37  | 0.278323 | 0.070768 | 0.637536 | 0.312257 |
| MmugDNA.43051.1.S1_s_at | MmugDNA.43051.1 | 12.88 | 12.8  | 0.21 | 0.17 | 1.06  | 0.862985 | 0.090129 | 0.951821 | 0.344432 |
| MmugDNA.43052.1.S1_at   | MmugDNA.43052.1 | 6.35  | 5.86  | 0.31 | 0.26 | 1.41  | 0.132445 | 0.532006 | 0.506752 | 0.718995 |
| MmugDNA.43053.1.S1_at   | MmugDNA.43053.1 | 8.36  | 9.28  | 0.11 | 0.14 | -1.9  | 0.001045 | 0.000917 | 0.155374 | 0.048499 |
| MmugDNA.43056.1.S1_at   | MmugDNA.43056.1 | 6.19  | 6.32  | 0.24 | 0.05 | -1.09 | 0.942579 | 0.523042 | 0.98031  | 0.713429 |
| MmugDNA.43057.1.S1_at   | MmugDNA.43057.1 | 5.16  | 5.13  | 0.19 | 0.16 | 1.03  | 0.43741  | 0.268955 | 0.746793 | 0.534369 |
| MmugDNA.43058.1.S1_at   | MmugDNA.43058.1 | 7.45  | 7.03  | 0.26 | 0.38 | 1.34  | 0.104708 | 0.095077 | 0.475918 | 0.352124 |
| MmugDNA.43059.1.S1_at   | MmugDNA.43059.1 | 4.6   | 4.6   | 0.1  | 0.08 | 1     | 0.232527 | 0.458326 | 0.600124 | 0.671119 |
| MmugDNA.4306.1.S1_at    | MmugDNA.4306.1  | 7.09  | 7.55  | 0.56 | 0.23 | -1.38 | 0.812742 | 0.099631 | 0.932191 | 0.358128 |
| MmugDNA.43061.1.S1_at   | MmugDNA.43061.1 | 3.44  | 3.31  | 0.04 | 0.14 | 1.1   | 0.186238 | 0.193742 | 0.559101 | 0.468828 |
| MmugDNA.43062.1.S1_at   | MmugDNA.43062.1 | 5.78  | 5.74  | 0.08 | 0.01 | 1.03  | 0.484017 | 0.347568 | 0.773436 | 0.592019 |
| MmugDNA.43063.1.S1_s_at | MmugDNA.43063.1 | 10.03 | 8.73  | 0.31 | 0.29 | 2.46  | 0.010756 | 0.014511 | 0.249841 | 0.153682 |
| MmugDNA.43064.1.S1_at   | MmugDNA.43064.1 | 4.14  | 3.84  | 0.04 | 0.06 | 1.23  | 0.002033 | 0.00049  | 0.173807 | 0.038921 |
| MmugDNA.43066.1.S1_at   | MmugDNA.43066.1 | 5.2   | 4.93  | 0.55 | 1.1  | 1.21  | 0.677582 | 0.925065 | 0.873568 | 0.957602 |
| MmugDNA.43068.1.S1_at   | MmugDNA.43068.1 | 8.25  | 8.14  | 0.08 | 0.04 | 1.08  | 0.053207 | 0.342859 | 0.394167 | 0.588712 |
| MmugDNA.43069.1.S1_at   | MmugDNA.43069.1 | 5.44  | 5.36  | 0.18 | 0.07 | 1.06  | 0.374355 | 0.244009 | 0.705837 | 0.514069 |
| MmugDNA.4307.1.S1_at    | MmugDNA.4307.1  | 10.83 | 10.69 | 0.64 | 0.22 | 1.1   | 0.263743 | 0.288798 | 0.625638 | 0.549936 |
| MmugDNA.43071.1.S1_at   | MmugDNA.43071.1 | 7.62  | 7.81  | 0.1  | 0.16 | -1.14 | 0.44274  | 0.012548 | 0.750342 | 0.144487 |
| MmugDNA.43072.1.S1_at   | MmugDNA.43072.1 | 8.82  | 8.7   | 0.07 | 0.15 | 1.09  | 0.262758 | 0.339485 | 0.624951 | 0.586095 |
| MmugDNA.43073.1.S1_at   | MmugDNA.43073.1 | 6.11  | 6.13  | 0.12 | 0.27 | -1.02 | 0.782544 | 0.936715 | 0.919923 | 0.964332 |
| MmugDNA.43074.1.S1_at   | MmugDNA.43074.1 | 7.81  | 8.3   | 0.29 | 0.23 | -1.41 | 0.181531 | 0.135803 | 0.554659 | 0.407979 |
| MmugDNA.43075.1.S1_at   | MmugDNA.43075.1 | 6.88  | 6.88  | 0.19 | 0.14 | 1     | 0.876405 | 0.903824 | 0.956919 | 0.945402 |
| MmugDNA.43076.1.S1_at   | MmugDNA.43076.1 | 6.68  | 6.68  | 0.31 | 0.08 | 1     | 0.87366  | 0.029434 | 0.956275 | 0.213368 |
| MmugDNA.43077.1.S1_at   | MmugDNA.43077.1 | 6.29  | 6.92  | 0.57 | 0.1  | -1.55 | 0.295731 | 0.468859 | 0.651408 | 0.677906 |
| MmugDNA.43078.1.S1_at   | MmugDNA.43078.1 | 7.69  | 6.87  | 0.57 | 0.09 | 1.76  | 0.058154 | 0.098917 | 0.403716 | 0.357049 |
| MmugDNA.43079.1.S1_at   | MmugDNA.43079.1 | 5.99  | 5.94  | 0.1  | 0.05 | 1.04  | 0.292092 | 0.59455  | 0.648392 | 0.758623 |
| MmugDNA.43080.1.S1_at   | MmugDNA.43080.1 | 5.13  | 5.01  | 0.17 | 0.21 | 1.09  | 0.259816 | 0.332443 | 0.622814 | 0.58087  |
| MmugDNA.43081.1.S1_at   | MmugDNA.43081.1 | 3.69  | 3.95  | 0.71 | 0.16 | -1.19 | 0.95485  | 0.763094 | 0.985034 | 0.862257 |
| MmugDNA.43082.1.S1_at   | MmugDNA.43082.1 | 4.21  | 3.54  | 0.08 | 0.14 | 1.58  | 0.00285  | 0.040436 | 0.187406 | 0.24621  |
| MmugDNA.43083.1.S1_at   | MmugDNA.43083.1 | 7.8   | 8.3   | 0.21 | 0.3  | -1.42 | 0.135662 | 0.011525 | 0.510119 | 0.138822 |
| MmugDNA.43084.1.S1_at   | MmugDNA.43084.1 | 3.55  | 3.44  | 0.36 | 0.06 | 1.08  | 0.387798 | 0.217077 | 0.714741 | 0.490668 |
| MmugDNA.43086.1.S1_at   | MmugDNA.43086.1 | 5.99  | 5.64  | 0.17 | 0.14 | 1.28  | 0.048552 | 0.07942  | 0.383547 | 0.326766 |
| MmugDNA.43087.1.S1_at   | MmugDNA.43087.1 | 10.62 | 10.79 | 0.27 | 0.08 | -1.13 | 0.420736 | 0.538139 | 0.737059 | 0.722911 |
| MmugDNA.43088.1.S1_at   | MmugDNA.43088.1 | 5.76  | 5.77  | 0.12 | 0.08 | -1.01 | 0.53364  | 0.134417 | 0.800854 | 0.406603 |
| MmugDNA.4309.1.S1_at    | MmugDNA.4309.1  | 6.62  | 7.61  | 0.76 | 0.28 | -2    | 0.167877 | 0.061162 | 0.5405   | 0.293981 |
| MmugDNA.43090.1.S1_at   | MmugDNA.43090.1 | 6.12  | 7.31  | 0.56 | 0.08 | -2.29 | 0.064661 | 0.08153  | 0.418501 | 0.329764 |

|                         |                 |       |       |      |      |       |          |          |          |          |
|-------------------------|-----------------|-------|-------|------|------|-------|----------|----------|----------|----------|
| MmugDNA.43091.1.S1_at   | MmugDNA.43091.1 | 11.96 | 11.77 | 0.31 | 0.03 | 1.14  | 0.333167 | 0.455952 | 0.679469 | 0.66972  |
| MmugDNA.43092.1.S1_at   | MmugDNA.43092.1 | 6.1   | 5.91  | 0.19 | 0.04 | 1.14  | 0.129684 | 0.280477 | 0.504468 | 0.543671 |
| MmugDNA.43093.1.S1_at   | MmugDNA.43093.1 | 5.75  | 5.95  | 0.7  | 0.33 | -1.15 | 0.636078 | 0.751625 | 0.854813 | 0.855539 |
| MmugDNA.43095.1.S1_at   | MmugDNA.43095.1 | 8.59  | 8.74  | 0.12 | 0.16 | -1.11 | 0.256867 | 0.079819 | 0.620749 | 0.327154 |
| MmugDNA.43097.1.S1_at   | MmugDNA.43097.1 | 7.66  | 7.59  | 0.37 | 0.17 | 1.05  | 0.857613 | 0.066532 | 0.949729 | 0.303705 |
| MmugDNA.431.1.S1_at     | MmugDNA.431.1   | 10.37 | 10.42 | 0.1  | 0    | -1.03 | 0.300195 | 0.002215 | 0.654749 | 0.069424 |
| MmugDNA.431.1.S1_s_at   | MmugDNA.431.1   | 11.37 | 11.43 | 0.14 | 0.06 | -1.04 | 0.343209 | 0.057888 | 0.686483 | 0.287025 |
| MmugDNA.43100.1.S1_at   | MmugDNA.43100.1 | 4.61  | 5.14  | 0.28 | 0.36 | -1.44 | 0.086132 | 0.129233 | 0.453703 | 0.400635 |
| MmugDNA.43101.1.S1_at   | MmugDNA.43101.1 | 8.29  | 8.24  | 0.23 | 0.03 | 1.04  | 0.957553 | 0.1412   | 0.985977 | 0.414709 |
| MmugDNA.43102.1.S1_at   | MmugDNA.43102.1 | 4.63  | 4.24  | 0.46 | 0.12 | 1.31  | 0.238669 | 0.313327 | 0.605393 | 0.567787 |
| MmugDNA.43103.1.S1_at   | MmugDNA.43103.1 | 6.12  | 5.14  | 0.69 | 0.78 | -1.98 | 0.822371 | 0.311614 | 0.935982 | 0.566586 |
| MmugDNA.43104.1.S1_at   | MmugDNA.43104.1 | 4.35  | 4.23  | 0.14 | 0.06 | 1.08  | 0.164139 | 0.057834 | 0.536988 | 0.286866 |
| MmugDNA.43105.1.S1_at   | MmugDNA.43105.1 | 4.71  | 4.58  | 0.15 | 0.16 | 1.1   | 0.152085 | 0.259866 | 0.525215 | 0.526737 |
| MmugDNA.43106.1.S1_at   | MmugDNA.43106.1 | 3.3   | 3.25  | 0.08 | 0.02 | 1.04  | 0.140536 | 0.216043 | 0.516012 | 0.48965  |
| MmugDNA.43108.1.S1_at   | MmugDNA.43108.1 | 2.96  | 2.95  | 0.06 | 0.19 | 1.01  | 0.309971 | 0.444023 | 0.661926 | 0.661644 |
| MmugDNA.4311.1.S1_at    | MmugDNA.4311.1  | 4.68  | 4.8   | 0.15 | 0.23 | -1.08 | 0.267868 | 0.555986 | 0.628278 | 0.734254 |
| MmugDNA.43110.1.S1_at   | MmugDNA.43110.1 | 4.82  | 4.69  | 0.84 | 0.34 | 1.09  | 0.844672 | 0.784401 | 0.945495 | 0.87518  |
| MmugDNA.43111.1.S1_at   | MmugDNA.43111.1 | 3.29  | 3.26  | 0.15 | 0.18 | 1.02  | 0.705437 | 0.767741 | 0.885355 | 0.865182 |
| MmugDNA.43114.1.S1_at   | MmugDNA.43114.1 | 8.24  | 8.28  | 0.7  | 0.11 | -1.02 | 0.381764 | 0.077544 | 0.710282 | 0.323421 |
| MmugDNA.43115.1.S1_at   | MmugDNA.43115.1 | 7.2   | 7.99  | 0.22 | 0.1  | -1.74 | 0.00713  | 0.001676 | 0.225651 | 0.061986 |
| MmugDNA.43118.1.S1_at   | MmugDNA.43118.1 | 4.62  | 4.66  | 0.67 | 0.06 | -1.03 | 0.960713 | 0.275601 | 0.987225 | 0.539837 |
| MmugDNA.43119.1.S1_at   | MmugDNA.43119.1 | 4.18  | 4.22  | 0.26 | 0.08 | -1.03 | 0.627421 | 0.662496 | 0.850543 | 0.802356 |
| MmugDNA.4312.1.S1_at    | MmugDNA.4312.1  | 9.37  | 9.48  | 1.13 | 0.21 | -1.08 | 0.777585 | 0.173982 | 0.917671 | 0.450247 |
| MmugDNA.43122.1.S1_at   | MmugDNA.43122.1 | 5.61  | 6.27  | 0.25 | 0.31 | -1.58 | 0.099088 | 0.091507 | 0.468468 | 0.346552 |
| MmugDNA.43123.1.S1_at   | MmugDNA.43123.1 | 8.83  | 8.5   | 1.8  | 0.33 | 1.26  | 0.739177 | 0.906713 | 0.900398 | 0.947216 |
| MmugDNA.43124.1.S1_at   | MmugDNA.43124.1 | 3.94  | 4.26  | 0.72 | 0.17 | -1.25 | 0.989894 | 0.785069 | 0.996263 | 0.875577 |
| MmugDNA.43125.1.S1_at   | MmugDNA.43125.1 | 4.87  | 4.96  | 0.2  | 0.17 | -1.07 | 0.715632 | 0.831928 | 0.889404 | 0.90356  |
| MmugDNA.43127.1.S1_at   | MmugDNA.43127.1 | 3.3   | 2.92  | 0.11 | 0.09 | 1.3   | 0.016811 | 0.118334 | 0.288545 | 0.386393 |
| MmugDNA.43129.1.S1_at   | MmugDNA.43129.1 | 7.12  | 7.33  | 0.28 | 0.03 | -1.16 | 0.228483 | 0.01104  | 0.597485 | 0.136821 |
| MmugDNA.43130.1.S1_at   | MmugDNA.43130.1 | 7.83  | 7.5   | 1.02 | 0.53 | 1.25  | 0.743877 | 0.971451 | 0.902335 | 0.984481 |
| MmugDNA.43134.1.S1_at   | MmugDNA.43134.1 | 11.14 | 11.01 | 0.52 | 0.14 | 1.1   | 0.707624 | 0.917776 | 0.88624  | 0.954011 |
| MmugDNA.43135.1.S1_at   | MmugDNA.43135.1 | 4.08  | 4     | 0.23 | 0.1  | 1.05  | 0.707734 | 0.305044 | 0.88624  | 0.562201 |
| MmugDNA.43136.1.S1_at   | MmugDNA.43136.1 | 8.66  | 8.35  | 0.61 | 0.16 | 1.24  | 0.431753 | 0.415267 | 0.743599 | 0.640769 |
| MmugDNA.43137.1.S1_at   | MmugDNA.43137.1 | 7.39  | 7.45  | 0.17 | 0.26 | -1.04 | 0.605913 | 0.762489 | 0.840202 | 0.861855 |
| MmugDNA.43139.1.S1_at   | MmugDNA.43139.1 | 9.59  | 10.85 | 0.34 | 0.11 | -2.39 | 0.003656 | 0.000542 | 0.197111 | 0.040617 |
| MmugDNA.4314.1.S1_s_at  | MmugDNA.4314.1  | 7.16  | 7.02  | 2.21 | 0.41 | 1.1   | 0.870203 | 0.485021 | 0.954781 | 0.688893 |
| MmugDNA.43140.1.S1_at   | MmugDNA.43140.1 | 4.43  | 3.9   | 0.22 | 0.31 | 1.44  | 0.35018  | 0.097303 | 0.691084 | 0.354999 |
| MmugDNA.43141.1.S1_at   | MmugDNA.43141.1 | 5.25  | 5.28  | 0.15 | 0.15 | -1.02 | 0.718284 | 0.69792  | 0.890613 | 0.824518 |
| MmugDNA.43142.1.S1_at   | MmugDNA.43142.1 | 7.21  | 6.99  | 0.3  | 0.23 | 1.17  | 0.638819 | 0.63555  | 0.856034 | 0.785437 |
| MmugDNA.43143.1.S1_s_at | MmugDNA.43143.1 | 7.11  | 7.57  | 1.47 | 0.19 | -1.38 | 0.680209 | 0.62827  | 0.874564 | 0.781109 |
| MmugDNA.43144.1.S1_at   | MmugDNA.43144.1 | 11.32 | 10.97 | 0.28 | 0.08 | 1.27  | 0.425962 | 0.436191 | 0.740204 | 0.655879 |
| MmugDNA.43145.1.S1_at   | MmugDNA.43145.1 | 5.64  | 5.58  | 0.15 | 0.07 | 1.04  | 0.121497 | 0.00924  | 0.495106 | 0.126946 |
| MmugDNA.43146.1.S1_at   | MmugDNA.43146.1 | 6.51  | 6.43  | 0.13 | 0.03 | 1.06  | 0.211116 | 0.687504 | 0.582141 | 0.817606 |



|                         |                 |       |       |      |      |       |          |          |          |          |
|-------------------------|-----------------|-------|-------|------|------|-------|----------|----------|----------|----------|
| MmugDNA.43147.1.S1_at   | MmugDNA.43147.1 | 5.46  | 5.35  | 0.06 | 0.1  | 1.08  | 0.1491   | 0.42919  | 0.523002 | 0.650715 |
| MmugDNA.43148.1.S1_at   | MmugDNA.43148.1 | 7.45  | 7.44  | 0.06 | 0.08 | 1.01  | 0.519834 | 0.285592 | 0.793373 | 0.547395 |
| MmugDNA.43149.1.S1_at   | MmugDNA.43149.1 | 5.2   | 5.08  | 0.14 | 0.14 | 1.09  | 0.356364 | 0.518924 | 0.695154 | 0.710789 |
| MmugDNA.4315.1.S1_at    | MmugDNA.4315.1  | 6.02  | 6.01  | 0.01 | 0.17 | 1.01  | 0.589409 | 0.622948 | 0.83233  | 0.777422 |
| MmugDNA.43150.1.S1_at   | MmugDNA.43150.1 | 8.3   | 8.72  | 0.92 | 0.94 | -1.34 | 0.535667 | 0.065072 | 0.801869 | 0.301017 |
| MmugDNA.43151.1.S1_at   | MmugDNA.43151.1 | 4.32  | 4.56  | 0.42 | 0.49 | -1.18 | 0.554635 | 0.635585 | 0.812818 | 0.785437 |
| MmugDNA.43152.1.S1_at   | MmugDNA.43152.1 | 11.85 | 12.01 | 0.08 | 0.04 | -1.12 | 0.084161 | 0.147538 | 0.450559 | 0.421872 |
| MmugDNA.43153.1.S1_at   | MmugDNA.43153.1 | 5.25  | 6.36  | 0.54 | 0.16 | -2.16 | 0.073398 | 0.049378 | 0.434422 | 0.267126 |
| MmugDNA.43154.1.S1_at   | MmugDNA.43154.1 | 3.06  | 2.97  | 0.16 | 0.05 | 1.06  | 0.314096 | 0.65305  | 0.665    | 0.79718  |
| MmugDNA.24978.1.S1_at   | MmugDNA.24978.1 | 7.66  | 7.45  | 0.17 | 0.16 | 1.16  | 0.189527 | 0.376593 | 0.560987 | 0.614425 |
| MmugDNA.24978.1.S1_s_at | MmugDNA.24978.1 | 6.86  | 6.63  | 0.12 | 0.11 | -1.17 | 0.149014 | 0.161557 | 0.522942 | 0.43767  |
| MmugDNA.43156.1.S1_at   | MmugDNA.43156.1 | 4.15  | 4.04  | 0.23 | 0.03 | 1.07  | 0.283277 | 0.320241 | 0.641313 | 0.572583 |
| MmugDNA.43157.1.S1_at   | MmugDNA.43157.1 | 5.94  | 5.9   | 0.09 | 0.06 | 1.03  | 0.189712 | 0.633792 | 0.561075 | 0.784449 |
| MmugDNA.43159.1.S1_at   | MmugDNA.43159.1 | 6.41  | 6.01  | 0.11 | 0.12 | 1.31  | 0.033476 | 0.047853 | 0.346442 | 0.263679 |
| MmugDNA.4316.1.S1_at    | MmugDNA.4316.1  | 3.98  | 3.92  | 0.16 | 0.02 | 1.05  | 0.621854 | 0.971161 | 0.847631 | 0.984325 |
| MmugDNA.43160.1.S1_at   | MmugDNA.43160.1 | 4.16  | 3.88  | 0.13 | 0.12 | 1.21  | 0.059681 | 0.03868  | 0.406705 | 0.24169  |
| MmugDNA.43161.1.S1_at   | MmugDNA.43161.1 | 5.24  | 4.43  | 0.03 | 0.1  | 1.75  | 0.000169 | 0.001469 | 0.112975 | 0.058429 |
| MmugDNA.43162.1.S1_at   | MmugDNA.43162.1 | 3.87  | 4.08  | 0.71 | 0.13 | -1.15 | 0.644733 | 0.751582 | 0.858593 | 0.855508 |
| MmugDNA.43163.1.S1_at   | MmugDNA.43163.1 | 7.98  | 7.39  | 0.28 | 0.14 | 1.51  | 0.027183 | 0.004058 | 0.327322 | 0.090288 |
| MmugDNA.43164.1.S1_at   | MmugDNA.43164.1 | 3.27  | 3.28  | 0.09 | 0.18 | -1    | 0.23993  | 0.300621 | 0.606208 | 0.558921 |
| MmugDNA.43165.1.S1_at   | MmugDNA.43165.1 | 4.56  | 4.8   | 0.67 | 0.31 | -1.18 | 0.510901 | 0.595573 | 0.788393 | 0.759091 |
| MmugDNA.43166.1.S1_at   | MmugDNA.43166.1 | 12.44 | 12.56 | 0.37 | 0.1  | -1.08 | 0.780152 | 0.075753 | 0.919017 | 0.320347 |
| MmugDNA.43168.1.S1_at   | MmugDNA.43168.1 | 5.6   | 5.32  | 0.27 | 0.27 | 1.21  | 0.258878 | 0.062517 | 0.622286 | 0.29687  |
| MmugDNA.4317.1.S1_at    | MmugDNA.4317.1  | 5.59  | 5.53  | 0.2  | 0.03 | 1.04  | 0.200563 | 0.286323 | 0.572378 | 0.547784 |
| MmugDNA.43170.1.S1_at   | MmugDNA.43170.1 | 3.64  | 3.54  | 0.16 | 0.36 | 1.07  | 0.706833 | 0.752085 | 0.885938 | 0.855744 |
| MmugDNA.43171.1.S1_at   | MmugDNA.43171.1 | 3.47  | 3.48  | 0.18 | 0.29 | -1.01 | 0.835902 | 0.757143 | 0.941202 | 0.858648 |
| MmugDNA.43173.1.S1_at   | MmugDNA.43173.1 | 5.65  | 5.54  | 0.1  | 0.14 | 1.08  | 0.40981  | 0.472729 | 0.730334 | 0.680077 |
| MmugDNA.43174.1.S1_at   | MmugDNA.43174.1 | 4.54  | 4.59  | 0.09 | 0.06 | -1.03 | 0.161946 | 0.184212 | 0.535244 | 0.460382 |
| MmugDNA.43175.1.S1_at   | MmugDNA.43175.1 | 8.85  | 9.14  | 0.18 | 0.06 | -1.23 | 0.022002 | 0.28104  | 0.309781 | 0.544179 |
| MmugDNA.43176.1.S1_at   | MmugDNA.43176.1 | 5.05  | 5.33  | 0.31 | 0.05 | -1.21 | 0.715179 | 0.908944 | 0.889172 | 0.948471 |
| MmugDNA.43177.1.S1_at   | MmugDNA.43177.1 | 4.88  | 4.65  | 0.1  | 0.07 | 1.17  | 0.033833 | 0.488447 | 0.347296 | 0.691147 |
| MmugDNA.43178.1.S1_at   | MmugDNA.43178.1 | 4.08  | 4.08  | 0.09 | 0.1  | 1     | 0.531364 | 0.439704 | 0.799589 | 0.65842  |
| MmugDNA.43179.1.S1_at   | MmugDNA.43179.1 | 7.15  | 7.03  | 0.09 | 0.05 | 1.09  | 0.185512 | 0.226668 | 0.55851  | 0.499139 |
| MmugDNA.43180.1.S1_at   | MmugDNA.43180.1 | 4     | 3.63  | 0.1  | 0.18 | 1.3   | 0.117404 | 0.243053 | 0.490925 | 0.513356 |
| MmugDNA.43181.1.S1_at   | MmugDNA.43181.1 | 6.29  | 6.23  | 0.05 | 0.04 | 1.04  | 0.103671 | 0.064444 | 0.474343 | 0.300008 |
| MmugDNA.43182.1.S1_at   | MmugDNA.43182.1 | 4.24  | 4.03  | 0.2  | 0.13 | 1.16  | 0.101538 | 0.242894 | 0.471812 | 0.513274 |
| MmugDNA.43183.1.S1_at   | MmugDNA.43183.1 | 5.16  | 4.97  | 0.4  | 0.1  | 1.14  | 0.180074 | 0.192224 | 0.553208 | 0.467665 |
| MmugDNA.43185.1.S1_at   | MmugDNA.43185.1 | 10.13 | 10.07 | 0.28 | 0.03 | 1.04  | 0.757517 | 0.011553 | 0.908649 | 0.139091 |
| MmugDNA.43186.1.S1_at   | MmugDNA.43186.1 | 5.21  | 5.12  | 0.09 | 0    | 1.06  | 0.391076 | 0.886371 | 0.717433 | 0.935364 |
| MmugDNA.43188.1.S1_at   | MmugDNA.43188.1 | 3.96  | 3.86  | 0.06 | 0.1  | 1.07  | 0.08822  | 0.517123 | 0.45606  | 0.709435 |
| MmugDNA.43189.1.S1_at   | MmugDNA.43189.1 | 3.71  | 3.84  | 0.06 | 0.15 | -1.09 | 0.089069 | 0.58052  | 0.456902 | 0.74976  |
| MmugDNA.43191.1.S1_at   | MmugDNA.43191.1 | 9     | 8.89  | 1.31 | 0.04 | 1.08  | 0.780798 | 0.667877 | 0.919225 | 0.80568  |
| MmugDNA.43192.1.S1_at   | MmugDNA.43192.1 | 11.66 | 11.7  | 0.07 | 0.01 | -1.03 | 0.19618  | 0.0048   | 0.566663 | 0.096735 |

|                         |                 |       |       |      |      |       |          |          |          |          |
|-------------------------|-----------------|-------|-------|------|------|-------|----------|----------|----------|----------|
| MmugDNA.43194.1.S1_at   | MmugDNA.43194.1 | 7.45  | 6.91  | 0.62 | 0.09 | 1.45  | 0.364558 | 0.073794 | 0.700605 | 0.317146 |
| MmugDNA.43196.1.S1_at   | MmugDNA.43196.1 | 7.01  | 6.83  | 0.05 | 0.07 | 1.13  | 0.022444 | 0.37014  | 0.310698 | 0.609369 |
| MmugDNA.43197.1.S1_at   | MmugDNA.43197.1 | 7.09  | 6.98  | 0.08 | 0.13 | 1.08  | 0.153509 | 0.147294 | 0.526691 | 0.421493 |
| MmugDNA.43198.1.S1_at   | MmugDNA.43198.1 | 8.1   | 7.89  | 0.31 | 0.1  | 1.16  | 0.2157   | 0.317599 | 0.585788 | 0.570787 |
| MmugDNA.43199.1.S1_at   | MmugDNA.43199.1 | 3.81  | 3.67  | 0.25 | 0.1  | 1.1   | 0.332225 | 0.453951 | 0.678722 | 0.668338 |
| MmugDNA.432.1.S1_at     | MmugDNA.432.1   | 4.42  | 4.26  | 0.2  | 0.34 | 1.12  | 0.652797 | 0.767642 | 0.86202  | 0.865109 |
| MmugDNA.39419.1.S1_s_at | MmugDNA.39419.1 | 12.47 | 12.62 | 0.04 | 0.13 | -1.11 | 0.515117 | 0.066006 | 0.790767 | 0.302324 |
| MmugDNA.43202.1.S1_at   | MmugDNA.43202.1 | 5.43  | 5.42  | 0.33 | 0.08 | 1.01  | 0.859574 | 0.805944 | 0.9504   | 0.888397 |
| MmugDNA.43203.1.S1_at   | MmugDNA.43203.1 | 11.27 | 11.5  | 0.19 | 0.06 | -1.18 | 0.236828 | 0.00845  | 0.603719 | 0.121922 |
| MmugDNA.43204.1.S1_at   | MmugDNA.43204.1 | 4.47  | 4.51  | 0.19 | 0.15 | -1.03 | 0.698344 | 0.907269 | 0.882746 | 0.947562 |
| MmugDNA.43205.1.S1_at   | MmugDNA.43205.1 | 4.02  | 3.87  | 0.27 | 0.16 | -1.11 | 0.249856 | 0.273467 | 0.615347 | 0.537868 |
| MmugDNA.43207.1.S1_at   | MmugDNA.43207.1 | 8.95  | 9.48  | 0.2  | 0.09 | -1.44 | 0.0092   | 0.001818 | 0.241866 | 0.063958 |
| MmugDNA.43208.1.S1_at   | MmugDNA.43208.1 | 5.78  | 5.72  | 0.46 | 0.43 | 1.05  | 0.96664  | 0.854159 | 0.989053 | 0.916964 |
| MmugDNA.26435.1.S1_s_at | MmugDNA.26435.1 | 6.79  | 6.86  | 0.28 | 0.09 | -1.05 | 0.603356 | 0.384637 | 0.83918  | 0.620255 |
| MmugDNA.43212.1.S1_at   | MmugDNA.43212.1 | 4.98  | 5.05  | 0.68 | 0.15 | -1.05 | 0.897549 | 0.542712 | 0.965207 | 0.725698 |
| MmugDNA.43214.1.S1_at   | MmugDNA.43214.1 | 5.19  | 5.22  | 0.1  | 0.26 | -1.02 | 0.33008  | 0.631054 | 0.67679  | 0.782599 |
| MmugDNA.43215.1.S1_at   | MmugDNA.43215.1 | 4.24  | 4.11  | 0.14 | 0.11 | 1.1   | 0.273182 | 0.471528 | 0.632855 | 0.6795   |
| MmugDNA.43216.1.S1_at   | MmugDNA.43216.1 | 9.83  | 7.79  | 0.11 | 0.34 | 4.11  | 0.000558 | 0.00304  | 0.143137 | 0.080419 |
| MmugDNA.43218.1.S1_at   | MmugDNA.43218.1 | 10.09 | 10.37 | 0.31 | 0.22 | -1.21 | 0.07699  | 0.014554 | 0.438889 | 0.153907 |
| MmugDNA.4322.1.S1_at    | MmugDNA.4322.1  | 12.57 | 12.66 | 0.25 | 0.06 | -1.07 | 0.803875 | 0.94159  | 0.928601 | 0.966886 |
| MmugDNA.4322.1.S1_s_at  | MmugDNA.4322.1  | 12.51 | 12.62 | 0.21 | 0.06 | -1.08 | 0.961705 | 0.965535 | 0.987501 | 0.980739 |
| MmugDNA.43220.1.S1_at   | MmugDNA.43220.1 | 5.49  | 5.49  | 0.18 | 0.12 | -1    | 0.935212 | 0.824027 | 0.97809  | 0.898894 |
| MmugDNA.43221.1.S1_at   | MmugDNA.43221.1 | 7.36  | 7.49  | 0.37 | 0.15 | -1.1  | 0.202658 | 0.126985 | 0.574204 | 0.397741 |
| MmugDNA.43222.1.S1_at   | MmugDNA.43222.1 | 4.22  | 4.23  | 0.17 | 0.18 | -1.01 | 0.59506  | 0.415682 | 0.835068 | 0.641027 |
| MmugDNA.43223.1.S1_at   | MmugDNA.43223.1 | 4.8   | 4.62  | 0.16 | 0.07 | 1.14  | 0.104389 | 0.085908 | 0.475473 | 0.338068 |
| MmugDNA.43224.1.S1_at   | MmugDNA.43224.1 | 3.59  | 3.56  | 0.2  | 0.08 | 1.02  | 0.362542 | 0.439099 | 0.699327 | 0.657854 |
| MmugDNA.43226.1.S1_at   | MmugDNA.43226.1 | 2.94  | 2.91  | 0.21 | 0.06 | 1.02  | 0.67321  | 0.853716 | 0.871201 | 0.916773 |
| MmugDNA.43227.1.S1_at   | MmugDNA.43227.1 | 4.17  | 4.1   | 0.03 | 0.15 | 1.05  | 0.197338 | 0.170431 | 0.568393 | 0.447103 |
| MmugDNA.43228.1.S1_at   | MmugDNA.43228.1 | 5.19  | 5.22  | 0.26 | 0.02 | -1.02 | 0.741724 | 0.604401 | 0.90146  | 0.764613 |
| MmugDNA.43229.1.S1_at   | MmugDNA.43229.1 | 4.87  | 4.2   | 0.27 | 0.5  | 1.59  | 0.107801 | 0.087694 | 0.480316 | 0.340941 |
| MmugDNA.4323.1.S1_at    | MmugDNA.4323.1  | 3.19  | 3.2   | 0.04 | 0.06 | -1.01 | 0.739919 | 0.741557 | 0.900699 | 0.850329 |
| MmugDNA.43230.1.S1_at   | MmugDNA.43230.1 | 4.26  | 3.82  | 0.13 | 0.28 | 1.36  | 0.025518 | 0.029462 | 0.322263 | 0.213368 |
| MmugDNA.43231.1.S1_at   | MmugDNA.43231.1 | 3.01  | 2.83  | 0.13 | 0.12 | 1.13  | 0.286423 | 0.180808 | 0.643673 | 0.457306 |
| MmugDNA.43232.1.S1_at   | MmugDNA.43232.1 | 4.22  | 4.22  | 0.05 | 0.2  | 1     | 0.446516 | 0.693813 | 0.752779 | 0.821925 |
| MmugDNA.43234.1.S1_at   | MmugDNA.43234.1 | 5.37  | 5.25  | 0.16 | 0.07 | 1.08  | 0.431409 | 0.273276 | 0.743365 | 0.537788 |
| MmugDNA.43235.1.S1_at   | MmugDNA.43235.1 | 2.76  | 2.77  | 0.23 | 0.07 | -1.01 | 0.454544 | 0.399737 | 0.756874 | 0.629951 |
| MmugDNA.43236.1.S1_at   | MmugDNA.43236.1 | 4.3   | 4.1   | 0.28 | 0.13 | 1.15  | 0.181781 | 0.270527 | 0.554854 | 0.535835 |
| MmugDNA.43240.1.S1_s_at | MmugDNA.43240.1 | 5.91  | 6.2   | 0.77 | 0.3  | -1.23 | 0.587285 | 0.81445  | 0.831578 | 0.892923 |
| MmugDNA.43241.1.S1_at   | MmugDNA.43241.1 | 10.26 | 10.28 | 0.21 | 0.06 | -1.01 | 0.910404 | 0.403377 | 0.969634 | 0.632083 |
| MmugDNA.43243.1.S1_at   | MmugDNA.43243.1 | 11.49 | 11.72 | 0.22 | 0.03 | -1.18 | 0.115391 | 0.075458 | 0.488677 | 0.319857 |
| MmugDNA.43245.1.S1_at   | MmugDNA.43245.1 | 4.45  | 4.21  | 0.09 | 0.3  | 1.18  | 0.281001 | 0.429237 | 0.639604 | 0.650729 |
| MmugDNA.43247.1.S1_at   | MmugDNA.43247.1 | 6.52  | 6.53  | 0.13 | 0.14 | -1.01 | 0.66743  | 0.338003 | 0.868621 | 0.5852   |
| MmugDNA.4325.1.S1_at    | MmugDNA.4325.1  | 4.62  | 4.69  | 0.23 | 0.07 | -1.05 | 0.551812 | 0.60845  | 0.811455 | 0.767074 |

|                       |                 |       |       |      |      |       |          |          |          |          |
|-----------------------|-----------------|-------|-------|------|------|-------|----------|----------|----------|----------|
| MmugDNA.43250.1.S1_at | MmugDNA.43250.1 | 7.98  | 7.88  | 0.72 | 0.11 | 1.07  | 0.981282 | 0.952047 | 0.993992 | 0.972785 |
| MmugDNA.43252.1.S1_at | MmugDNA.43252.1 | 8.95  | 8.95  | 0.47 | 0.06 | -1    | 0.929614 | 0.98001  | 0.976476 | 0.989229 |
| MmugDNA.43256.1.S1_at | MmugDNA.43256.1 | 3.41  | 3.54  | 0.18 | 0.09 | -1.1  | 0.398524 | 0.086319 | 0.722525 | 0.338771 |
| MmugDNA.43257.1.S1_at | MmugDNA.43257.1 | 7.46  | 7.47  | 0.07 | 0.02 | -1.01 | 0.202834 | 0.288477 | 0.574251 | 0.54977  |
| MmugDNA.43258.1.S1_at | MmugDNA.43258.1 | 3.73  | 3.99  | 0.25 | 0.21 | -1.19 | 0.231159 | 0.298613 | 0.59909  | 0.557225 |
| MmugDNA.43259.1.S1_at | MmugDNA.43259.1 | 10.03 | 10.35 | 0.32 | 0.23 | -1.25 | 0.54022  | 0.392161 | 0.804291 | 0.625652 |
| MmugDNA.4326.1.S1_at  | MmugDNA.4326.1  | 8.7   | 9.24  | 0.42 | 0.42 | -1.45 | 0.197978 | 0.037745 | 0.569172 | 0.238716 |
| MmugDNA.43261.1.S1_at | MmugDNA.43261.1 | 7.45  | 8.15  | 0.15 | 0.12 | -1.62 | 0.002195 | 0.007973 | 0.174757 | 0.118702 |
| MmugDNA.43262.1.S1_at | MmugDNA.43262.1 | 8.2   | 8.15  | 0.14 | 0.08 | 1.03  | 0.84239  | 0.849825 | 0.944264 | 0.914673 |
| MmugDNA.43264.1.S1_at | MmugDNA.43264.1 | 5.47  | 5.37  | 0.21 | 0.03 | 1.07  | 0.507522 | 0.752768 | 0.786393 | 0.855968 |
| MmugDNA.43268.1.S1_at | MmugDNA.43268.1 | 8.73  | 8.68  | 0.32 | 0.31 | 1.03  | 0.188907 | 0.224013 | 0.560718 | 0.497045 |
| MmugDNA.43269.1.S1_at | MmugDNA.43269.1 | 12.72 | 12.67 | 0.11 | 0.04 | 1.04  | 0.871077 | 0.005702 | 0.955209 | 0.104102 |
| MmugDNA.43270.1.S1_at | MmugDNA.43270.1 | 7.52  | 7.33  | 0.23 | 0.18 | 1.14  | 0.752027 | 0.022437 | 0.906265 | 0.187441 |
| MmugDNA.43271.1.S1_at | MmugDNA.43271.1 | 4.35  | 4.23  | 0.15 | 0.07 | 1.09  | 0.290291 | 0.306052 | 0.646889 | 0.562782 |
| MmugDNA.43272.1.S1_at | MmugDNA.43272.1 | 5.77  | 5.85  | 0.06 | 0    | -1.06 | 0.303827 | 0.372836 | 0.657624 | 0.611735 |
| MmugDNA.43274.1.S1_at | MmugDNA.43274.1 | 7.33  | 6.94  | 0.31 | 0.07 | 1.31  | 0.046448 | 0.081694 | 0.377929 | 0.329928 |
| MmugDNA.43275.1.S1_at | MmugDNA.43275.1 | 11.86 | 12.18 | 0.66 | 0.08 | -1.25 | 0.410367 | 0.567673 | 0.730749 | 0.74156  |
| MmugDNA.43276.1.S1_at | MmugDNA.43276.1 | 4.72  | 4.65  | 0.3  | 0.09 | 1.05  | 0.284851 | 0.515171 | 0.642653 | 0.708145 |
| MmugDNA.43277.1.S1_at | MmugDNA.43277.1 | 7.38  | 6.65  | 0.57 | 0.32 | 1.66  | 0.084326 | 0.020533 | 0.450953 | 0.179788 |
| MmugDNA.43278.1.S1_at | MmugDNA.43278.1 | 3.66  | 3.6   | 0.14 | 0.18 | 1.04  | 0.815262 | 0.281878 | 0.933137 | 0.544844 |
| MmugDNA.43279.1.S1_at | MmugDNA.43279.1 | 3.74  | 3.62  | 0.15 | 0.12 | 1.09  | 0.414246 | 0.571001 | 0.732926 | 0.743479 |
| MmugDNA.43280.1.S1_at | MmugDNA.43280.1 | 4     | 4     | 0.15 | 0    | -1    | 0.386981 | 0.44115  | 0.713959 | 0.659375 |
| MmugDNA.43281.1.S1_at | MmugDNA.43281.1 | 3.99  | 4.47  | 1.06 | 0.75 | -1.4  | 0.820109 | 0.774521 | 0.935275 | 0.868769 |
| MmugDNA.43282.1.S1_at | MmugDNA.43282.1 | 3.78  | 3.75  | 0.19 | 0.16 | 1.02  | 0.360415 | 0.394124 | 0.697914 | 0.62675  |
| MmugDNA.43284.1.S1_at | MmugDNA.43284.1 | 5.98  | 6.26  | 0.2  | 0.16 | -1.21 | 0.28053  | 0.171497 | 0.639288 | 0.447895 |
| MmugDNA.43285.1.S1_at | MmugDNA.43285.1 | 3.75  | 3.71  | 0.07 | 0    | 1.03  | 0.294021 | 0.908288 | 0.650324 | 0.948047 |
| MmugDNA.43287.1.S1_at | MmugDNA.43287.1 | 3.36  | 3.45  | 0.09 | 0.05 | -1.07 | 0.451157 | 0.377281 | 0.755046 | 0.614869 |
| MmugDNA.43289.1.S1_at | MmugDNA.43289.1 | 9.23  | 9.88  | 0.64 | 0.15 | -1.56 | 0.141825 | 0.154315 | 0.516824 | 0.429188 |
| MmugDNA.4329.1.S1_at  | MmugDNA.4329.1  | 6.25  | 6.27  | 0.03 | 0.16 | -1.01 | 0.386647 | 0.71608  | 0.713641 | 0.835424 |
| MmugDNA.43292.1.S1_at | MmugDNA.43292.1 | 4.99  | 5.01  | 0.18 | 0.3  | -1.01 | 0.909508 | 0.82968  | 0.969434 | 0.902187 |
| MmugDNA.43293.1.S1_at | MmugDNA.43293.1 | 6.21  | 6.69  | 0.34 | 0.22 | -1.4  | 0.104014 | 0.063559 | 0.474656 | 0.298646 |
| MmugDNA.43294.1.S1_at | MmugDNA.43294.1 | 3.45  | 3.34  | 0.12 | 0.13 | 1.08  | 0.325012 | 0.193442 | 0.67293  | 0.468711 |
| MmugDNA.43295.1.S1_at | MmugDNA.43295.1 | 3.83  | 4.38  | 0.7  | 0.59 | -1.47 | 0.993253 | 0.040465 | 0.997423 | 0.246264 |
| MmugDNA.43296.1.S1_at | MmugDNA.43296.1 | 7.3   | 7.34  | 0.56 | 0.48 | -1.03 | 0.987553 | 0.310874 | 0.995831 | 0.565881 |
| MmugDNA.43298.1.S1_at | MmugDNA.43298.1 | 6.64  | 6.53  | 0.15 | 0.07 | 1.08  | 0.25906  | 0.575004 | 0.622425 | 0.746227 |
| MmugDNA.43299.1.S1_at | MmugDNA.43299.1 | 4.35  | 4.04  | 0.16 | 0.07 | 1.23  | 0.067069 | 0.362857 | 0.423102 | 0.603373 |
| MmugDNA.433.1.S1_at   | MmugDNA.433.1   | 9.6   | 9.54  | 1.22 | 0.15 | 1.05  | 0.475588 | 0.388334 | 0.768676 | 0.62274  |
| MmugDNA.4330.1.S1_at  | MmugDNA.4330.1  | 7.8   | 7.78  | 0.21 | 0.02 | 1.02  | 0.472519 | 0.112229 | 0.767074 | 0.377537 |
| MmugDNA.43300.1.S1_at | MmugDNA.43300.1 | 5.68  | 5.62  | 0.17 | 0.08 | 1.04  | 0.712586 | 0.154441 | 0.887961 | 0.429327 |
| MmugDNA.43301.1.S1_at | MmugDNA.43301.1 | 10.56 | 11.07 | 0.61 | 0.18 | -1.42 | 0.256583 | 0.005068 | 0.620603 | 0.09907  |
| MmugDNA.43302.1.S1_at | MmugDNA.43302.1 | 4.44  | 4.56  | 0.07 | 0.13 | -1.09 | 0.114341 | 0.019702 | 0.487606 | 0.176386 |
| MmugDNA.43303.1.S1_at | MmugDNA.43303.1 | 12.01 | 12.02 | 0.69 | 0.35 | -1.01 | 0.689015 | 0.011897 | 0.878634 | 0.141211 |
| MmugDNA.43304.1.S1_at | MmugDNA.43304.1 | 3.57  | 3.33  | 0.16 | 0.18 | 1.18  | 0.348311 | 0.239243 | 0.689616 | 0.509941 |

|                         |                 |       |       |      |      |       |          |          |          |          |
|-------------------------|-----------------|-------|-------|------|------|-------|----------|----------|----------|----------|
| MmugDNA.43305.1.S1_at   | MmugDNA.43305.1 | 5.35  | 6.12  | 1.08 | 0.22 | -1.7  | 0.315318 | 0.440632 | 0.665729 | 0.659029 |
| MmugDNA.43306.1.S1_at   | MmugDNA.43306.1 | 8.25  | 8.83  | 0.73 | 0.11 | -1.49 | 0.223185 | 0.068968 | 0.592569 | 0.308954 |
| MmugDNA.43307.1.S1_at   | MmugDNA.43307.1 | 3.94  | 4.02  | 0.05 | 0.17 | -1.06 | 0.327019 | 0.661968 | 0.674674 | 0.802047 |
| MmugDNA.43309.1.S1_at   | MmugDNA.43309.1 | 9.48  | 8.98  | 0.49 | 0.05 | 1.42  | 0.165622 | 0.197172 | 0.538477 | 0.472213 |
| MmugDNA.4331.1.S1_at    | MmugDNA.4331.1  | 3.33  | 3.33  | 0.01 | 0.06 | 1     | 0.308719 | 0.698192 | 0.661293 | 0.824655 |
| MmugDNA.43311.1.S1_at   | MmugDNA.43311.1 | 7.48  | 7.44  | 0.27 | 0.2  | 1.03  | 0.994329 | 0.527602 | 0.997869 | 0.716154 |
| MmugDNA.43312.1.S1_at   | MmugDNA.43312.1 | 3.71  | 3.54  | 0.02 | 0.12 | 1.12  | 0.043444 | 0.028828 | 0.372168 | 0.211661 |
| MmugDNA.43314.1.S1_at   | MmugDNA.43314.1 | 5.72  | 5.45  | 0.03 | 0.05 | 1.2   | 0.001887 | 0.00045  | 0.169422 | 0.038539 |
| MmugDNA.43315.1.S1_at   | MmugDNA.43315.1 | 7     | 8.02  | 0.47 | 0.09 | -2.04 | 0.021694 | 0.023866 | 0.309332 | 0.193495 |
| MmugDNA.43317.1.S1_at   | MmugDNA.43317.1 | 9.87  | 8.38  | 0.26 | 0.38 | 2.81  | 0.007849 | 0.018474 | 0.231023 | 0.170946 |
| MmugDNA.43319.1.S1_at   | MmugDNA.43319.1 | 4.64  | 4.89  | 0.23 | 0.15 | -1.19 | 0.193856 | 0.06161  | 0.564465 | 0.295094 |
| MmugDNA.4332.1.S1_at    | MmugDNA.4332.1  | 10.11 | 10.44 | 0.09 | 0.1  | -1.25 | 0.027516 | 0.013143 | 0.327829 | 0.147338 |
| MmugDNA.43320.1.S1_at   | MmugDNA.43320.1 | 8.08  | 7.4   | 0.31 | 0.4  | 1.6   | 0.271625 | 0.045059 | 0.631445 | 0.256789 |
| MmugDNA.43321.1.S1_at   | MmugDNA.43321.1 | 2.98  | 2.96  | 0.04 | 0.09 | 1.01  | 0.195699 | 0.102725 | 0.565981 | 0.363175 |
| MmugDNA.43322.1.S1_at   | MmugDNA.43322.1 | 11.83 | 11.96 | 1.08 | 0.14 | -1.1  | 0.743259 | 0.338922 | 0.902055 | 0.585891 |
| MmugDNA.43323.1.S1_at   | MmugDNA.43323.1 | 4.14  | 3.91  | 0.23 | 0.25 | 1.17  | 0.405565 | 0.515737 | 0.727426 | 0.708479 |
| MmugDNA.43324.1.S1_at   | MmugDNA.43324.1 | 3.6   | 3.36  | 0.44 | 0.19 | 1.18  | 0.141067 | 0.302854 | 0.516345 | 0.560356 |
| MmugDNA.43325.1.S1_at   | MmugDNA.43325.1 | 5.52  | 5.26  | 0.14 | 0.17 | 1.21  | 0.2656   | 0.207213 | 0.626763 | 0.48136  |
| MmugDNA.43326.1.S1_at   | MmugDNA.43326.1 | 3.51  | 3.58  | 0.07 | 0.09 | -1.05 | 0.576313 | 0.144463 | 0.825166 | 0.418323 |
| MmugDNA.43328.1.S1_at   | MmugDNA.43328.1 | 6.36  | 6.55  | 0.25 | 0.51 | -1.14 | 0.879792 | 0.602352 | 0.958318 | 0.763342 |
| MmugDNA.43329.1.S1_at   | MmugDNA.43329.1 | 5.54  | 5.04  | 0.29 | 0.04 | 1.42  | 0.05006  | 0.08229  | 0.386663 | 0.331223 |
| MmugDNA.4333.1.S1_at    | MmugDNA.4333.1  | 8.76  | 8.98  | 0.2  | 0.03 | -1.17 | 0.090852 | 0.174899 | 0.458873 | 0.451576 |
| MmugDNA.43330.1.S1_at   | MmugDNA.43330.1 | 9.45  | 9.62  | 0.17 | 0.03 | -1.12 | 0.318792 | 0.237317 | 0.668343 | 0.508029 |
| MmugDNA.43331.1.S1_at   | MmugDNA.43331.1 | 7.72  | 7.6   | 0.46 | 0.33 | 1.09  | 0.747458 | 0.882211 | 0.904011 | 0.932845 |
| MmugDNA.43332.1.S1_at   | MmugDNA.43332.1 | 6.39  | 6.06  | 0.12 | 0.22 | 1.25  | 0.404152 | 0.003118 | 0.726203 | 0.081345 |
| MmugDNA.43333.1.S1_at   | MmugDNA.43333.1 | 5.35  | 5.67  | 0.18 | 0.39 | -1.24 | 0.199981 | 0.115118 | 0.571864 | 0.382004 |
| MmugDNA.43334.1.S1_at   | MmugDNA.43334.1 | 7.8   | 7.84  | 0.16 | 0.25 | -1.03 | 0.325715 | 0.012426 | 0.673403 | 0.144095 |
| MmugDNA.43335.1.S1_at   | MmugDNA.43335.1 | 4.3   | 4.5   | 0.04 | 0.4  | -1.15 | 0.396836 | 0.519167 | 0.721565 | 0.710878 |
| MmugDNA.43336.1.S1_at   | MmugDNA.43336.1 | 8.6   | 7.96  | 0.3  | 0.06 | 1.56  | 0.047816 | 0.001553 | 0.381293 | 0.059606 |
| MmugDNA.43337.1.S1_at   | MmugDNA.43337.1 | 6.79  | 6.23  | 0.13 | 0.1  | 1.47  | 0.009708 | 0.01164  | 0.243347 | 0.139789 |
| MmugDNA.43338.1.S1_at   | MmugDNA.43338.1 | 9.72  | 9.5   | 0.31 | 0.06 | 1.17  | 0.260668 | 0.50861  | 0.623301 | 0.703719 |
| MmugDNA.43341.1.S1_s_at | MmugDNA.43341.1 | 9.95  | 9.27  | 0.23 | 0.17 | 1.61  | 0.012442 | 0.011723 | 0.262327 | 0.140206 |
| MmugDNA.43342.1.S1_at   | MmugDNA.43342.1 | 6.45  | 6.48  | 0.22 | 0.08 | -1.02 | 0.346031 | 0.638131 | 0.687873 | 0.787396 |
| MmugDNA.43344.1.S1_at   | MmugDNA.43344.1 | 7.15  | 7.34  | 0.42 | 0.31 | -1.14 | 0.761541 | 0.003971 | 0.910578 | 0.089595 |
| MmugDNA.43344.1.S1_s_at | MmugDNA.43344.1 | 6.63  | 7.2   | 0.56 | 0.25 | -1.48 | 0.288254 | 0.003974 | 0.645355 | 0.089634 |
| MmugDNA.43345.1.S1_at   | MmugDNA.43345.1 | 11.77 | 11.99 | 0.5  | 0.15 | -1.16 | 0.205502 | 0.062519 | 0.577367 | 0.29687  |
| MmugDNA.43346.1.S1_at   | MmugDNA.43346.1 | 4.25  | 4.12  | 0.14 | 0.21 | 1.09  | 0.443002 | 0.6355   | 0.750491 | 0.785405 |
| MmugDNA.43347.1.S1_at   | MmugDNA.43347.1 | 8.22  | 7.68  | 0.35 | 0.24 | 1.45  | 0.105581 | 0.066234 | 0.477341 | 0.302921 |
| MmugDNA.43348.1.S1_at   | MmugDNA.43348.1 | 8.57  | 8.41  | 0.39 | 0.57 | 1.12  | 0.717351 | 0.008745 | 0.890353 | 0.123975 |
| MmugDNA.43349.1.S1_at   | MmugDNA.43349.1 | 9.24  | 6.74  | 1.36 | 0.08 | 5.64  | 0.093621 | 0.011341 | 0.462863 | 0.138148 |
| MmugDNA.4335.1.S1_at    | MmugDNA.4335.1  | 6.43  | 6.79  | 0.36 | 0.31 | -1.29 | 0.248829 | 0.385713 | 0.614173 | 0.621079 |
| MmugDNA.43350.1.S1_at   | MmugDNA.43350.1 | 8.16  | 7.7   | 0.93 | 0.23 | 1.38  | 0.341485 | 0.400428 | 0.685061 | 0.630206 |
| MmugDNA.43351.1.S1_at   | MmugDNA.43351.1 | 6.53  | 6.34  | 0.19 | 0.04 | 1.13  | 0.188484 | 0.226653 | 0.560489 | 0.499139 |

|                         |                 |       |       |      |      |       |          |          |          |          |
|-------------------------|-----------------|-------|-------|------|------|-------|----------|----------|----------|----------|
| MmugDNA.43352.1.S1_at   | MmugDNA.43352.1 | 6.64  | 6.41  | 0.34 | 0.23 | 1.17  | 0.566253 | 0.264382 | 0.819955 | 0.530385 |
| MmugDNA.43353.1.S1_at   | MmugDNA.43353.1 | 3.98  | 3.97  | 0.26 | 0.14 | 1     | 0.619357 | 0.670977 | 0.846601 | 0.807635 |
| MmugDNA.43355.1.S1_at   | MmugDNA.43355.1 | 4.82  | 4.43  | 0.1  | 0.09 | 1.3   | 0.010149 | 0.003609 | 0.246908 | 0.085933 |
| MmugDNA.43356.1.S1_at   | MmugDNA.43356.1 | 7.2   | 7.54  | 1    | 0.05 | -1.27 | 0.33513  | 0.297505 | 0.680744 | 0.556122 |
| MmugDNA.43357.1.S1_at   | MmugDNA.43357.1 | 5.41  | 5.3   | 0.12 | 0.3  | 1.08  | 0.71383  | 0.808862 | 0.888547 | 0.889935 |
| MmugDNA.43358.1.S1_at   | MmugDNA.43358.1 | 6.17  | 6.69  | 0.62 | 0.48 | -1.44 | 0.078229 | 0.020073 | 0.440443 | 0.177957 |
| MmugDNA.43359.1.S1_at   | MmugDNA.43359.1 | 6.96  | 6.33  | 0.96 | 0.07 | 1.55  | 0.09964  | 0.116513 | 0.469263 | 0.383671 |
| MmugDNA.4336.1.S1_at    | MmugDNA.4336.1  | 9.05  | 9.81  | 1.29 | 0.01 | -1.69 | 0.456177 | 0.709175 | 0.757783 | 0.831405 |
| MmugDNA.43360.1.S1_at   | MmugDNA.43360.1 | 6.24  | 6.75  | 0.51 | 0.26 | -1.42 | 0.260586 | 0.216938 | 0.623301 | 0.490566 |
| MmugDNA.43361.1.S1_at   | MmugDNA.43361.1 | 8.28  | 8.2   | 0.2  | 0.06 | 1.06  | 0.497365 | 0.902093 | 0.781071 | 0.944306 |
| MmugDNA.43362.1.S1_at   | MmugDNA.43362.1 | 3.46  | 3.2   | 0.08 | 0.17 | 1.2   | 0.059331 | 0.1002   | 0.406303 | 0.359195 |
| MmugDNA.43363.1.S1_at   | MmugDNA.43363.1 | 10.23 | 9.99  | 0.73 | 0.13 | 1.18  | 0.605937 | 0.005162 | 0.840207 | 0.0997   |
| MmugDNA.43364.1.S1_at   | MmugDNA.43364.1 | 7.02  | 7.26  | 1.12 | 0.2  | -1.18 | 0.747973 | 0.2786   | 0.904242 | 0.542329 |
| MmugDNA.43365.1.S1_at   | MmugDNA.43365.1 | 11.18 | 12.11 | 0.05 | 0.25 | -1.91 | 0.003125 | 0.080132 | 0.191107 | 0.327639 |
| MmugDNA.43366.1.S1_at   | MmugDNA.43366.1 | 4.44  | 4.24  | 0.12 | 0.2  | 1.15  | 0.162189 | 0.108944 | 0.535244 | 0.372637 |
| MmugDNA.43367.1.S1_at   | MmugDNA.43367.1 | 11.03 | 10.31 | 0.31 | 0.04 | 1.65  | 0.016877 | 0.000713 | 0.288837 | 0.044419 |
| MmugDNA.43369.1.S1_at   | MmugDNA.43369.1 | 11.07 | 11.15 | 0.88 | 0.04 | -1.06 | 0.709835 | 0.885913 | 0.887084 | 0.935113 |
| MmugDNA.43370.1.S1_at   | MmugDNA.43370.1 | 5.74  | 5.68  | 0.06 | 0.18 | 1.04  | 0.716606 | 0.241424 | 0.88994  | 0.512072 |
| MmugDNA.43371.1.S1_at   | MmugDNA.43371.1 | 6.67  | 6.7   | 0.73 | 0.68 | -1.03 | 0.872877 | 0.354837 | 0.95589  | 0.59746  |
| MmugDNA.43372.1.S1_at   | MmugDNA.43372.1 | 3.25  | 3.14  | 0.19 | 0.11 | 1.08  | 0.151047 | 0.188928 | 0.52444  | 0.464854 |
| MmugDNA.43375.1.S1_at   | MmugDNA.43375.1 | 3.27  | 3.48  | 0.01 | 0.21 | -1.16 | 0.086457 | 0.058122 | 0.454228 | 0.287755 |
| MmugDNA.43376.1.S1_s_at | MmugDNA.43376.1 | 6.84  | 5.98  | 0.93 | 0.33 | 1.82  | 0.134655 | 0.157133 | 0.508533 | 0.432616 |
| MmugDNA.43377.1.S1_at   | MmugDNA.43377.1 | 5     | 6.33  | 0.49 | 0.37 | -2.51 | 0.01553  | 0.020623 | 0.282681 | 0.180141 |
| MmugDNA.43378.1.S1_at   | MmugDNA.43378.1 | 3.3   | 3.27  | 0.16 | 0.07 | 1.02  | 0.201409 | 0.25822  | 0.573061 | 0.52558  |
| MmugDNA.43379.1.S1_at   | MmugDNA.43379.1 | 6.89  | 6.67  | 0.12 | 0.08 | 1.17  | 0.028308 | 0.116853 | 0.331894 | 0.384192 |
| MmugDNA.4338.1.S1_at    | MmugDNA.4338.1  | 3.62  | 3.3   | 0.06 | 0.22 | 1.25  | 0.116566 | 0.105462 | 0.489684 | 0.367324 |
| MmugDNA.43380.1.S1_at   | MmugDNA.43380.1 | 7.9   | 8.86  | 1.73 | 0.08 | -1.95 | 0.986495 | 0.999672 | 0.995654 | 0.99988  |
| MmugDNA.43381.1.S1_at   | MmugDNA.43381.1 | 5.67  | 5.53  | 0.16 | 0.07 | 1.1   | 0.3645   | 0.061902 | 0.700603 | 0.295668 |
| MmugDNA.43382.1.S1_at   | MmugDNA.43382.1 | 4.44  | 4.42  | 0.25 | 0.13 | 1.01  | 0.580539 | 0.879637 | 0.827206 | 0.931253 |
| MmugDNA.43383.1.S1_at   | MmugDNA.43383.1 | 4.64  | 4.54  | 0.05 | 0.13 | 1.08  | 0.217162 | 0.3181   | 0.587139 | 0.571046 |
| MmugDNA.43384.1.S1_at   | MmugDNA.43384.1 | 8.16  | 8.11  | 0.15 | 0.05 | 1.04  | 0.902926 | 0.525239 | 0.967257 | 0.714809 |
| MmugDNA.43385.1.S1_at   | MmugDNA.43385.1 | 9.6   | 9.62  | 0.24 | 0.05 | -1.02 | 0.915117 | 0.048849 | 0.97103  | 0.265858 |
| MmugDNA.43386.1.S1_at   | MmugDNA.43386.1 | 9.2   | 8.12  | 0.22 | 0.2  | 2.11  | 0.00327  | 0.001991 | 0.194357 | 0.066247 |
| MmugDNA.43387.1.S1_at   | MmugDNA.43387.1 | 5.09  | 5.09  | 0.08 | 0.1  | -1    | 0.319884 | 0.23499  | 0.669028 | 0.506162 |
| MmugDNA.43388.1.S1_at   | MmugDNA.43388.1 | 6.55  | 5.64  | 0.21 | 0.24 | 1.88  | 0.014576 | 0.006672 | 0.276563 | 0.110605 |
| MmugDNA.43389.1.S1_at   | MmugDNA.43389.1 | 9.33  | 8.83  | 0.26 | 0.22 | 1.42  | 0.070307 | 0.043632 | 0.428892 | 0.253531 |
| MmugDNA.4339.1.S1_at    | MmugDNA.4339.1  | 3.66  | 3.71  | 0.06 | 0.04 | -1.04 | 0.476501 | 0.229838 | 0.769168 | 0.501802 |
| MmugDNA.43390.1.S1_at   | MmugDNA.43390.1 | 3.94  | 3.86  | 0.14 | 0.16 | 1.06  | 0.737183 | 0.949689 | 0.899383 | 0.97122  |
| MmugDNA.43391.1.S1_at   | MmugDNA.43391.1 | 4.24  | 4.27  | 0.23 | 0.12 | -1.02 | 0.628448 | 0.459252 | 0.851106 | 0.671675 |
| MmugDNA.43392.1.S1_at   | MmugDNA.43392.1 | 4.98  | 4.56  | 0.57 | 0.15 | 1.33  | 0.632462 | 0.710248 | 0.852958 | 0.831904 |
| MmugDNA.43393.1.S1_at   | MmugDNA.43393.1 | 3.12  | 3.08  | 0.13 | 0.03 | 1.03  | 0.563545 | 0.356104 | 0.818294 | 0.598107 |
| MmugDNA.43394.1.S1_at   | MmugDNA.43394.1 | 7.52  | 7.58  | 0.32 | 0.21 | -1.04 | 0.396473 | 0.723287 | 0.721487 | 0.839718 |
| MmugDNA.43395.1.S1_at   | MmugDNA.43395.1 | 4.74  | 4.62  | 0.05 | 0.28 | 1.09  | 0.90833  | 0.895417 | 0.969119 | 0.940218 |

|                         |                 |       |       |      |      |       |          |          |          |          |
|-------------------------|-----------------|-------|-------|------|------|-------|----------|----------|----------|----------|
| MmugDNA.43396.1.S1_at   | MmugDNA.43396.1 | 5.09  | 5.03  | 0.17 | 0.14 | 1.04  | 0.230363 | 0.5882   | 0.598513 | 0.754811 |
| MmugDNA.43397.1.S1_at   | MmugDNA.43397.1 | 4.48  | 4.42  | 0.06 | 0.08 | 1.04  | 0.798815 | 0.923186 | 0.926306 | 0.956796 |
| MmugDNA.43398.1.S1_at   | MmugDNA.43398.1 | 3.56  | 3.44  | 0.08 | 0.05 | 1.09  | 0.089631 | 0.496194 | 0.457723 | 0.695883 |
| MmugDNA.43399.1.S1_at   | MmugDNA.43399.1 | 7.98  | 8.76  | 0.79 | 0.06 | -1.72 | 0.2302   | 0.417867 | 0.598481 | 0.642449 |
| MmugDNA.434.1.S1_at     | MmugDNA.434.1   | 5.31  | 5.28  | 0.24 | 0.08 | 1.02  | 0.783654 | 0.953365 | 0.920386 | 0.97351  |
| MmugDNA.4340.1.S1_at    | MmugDNA.4340.1  | 7.45  | 7.81  | 0.1  | 0.2  | -1.28 | 0.04746  | 0.006189 | 0.380416 | 0.106774 |
| MmugDNA.43400.1.S1_at   | MmugDNA.43400.1 | 3.12  | 3.12  | 0.02 | 0.02 | 1     | 0.993116 | 0.439779 | 0.997423 | 0.658439 |
| MmugDNA.43401.1.S1_at   | MmugDNA.43401.1 | 5.55  | 5.6   | 0.22 | 0.13 | -1.03 | 0.616018 | 0.095316 | 0.844702 | 0.35236  |
| MmugDNA.43403.1.S1_at   | MmugDNA.43403.1 | 4.35  | 4.23  | 0.16 | 0.07 | 1.09  | 0.14416  | 0.117231 | 0.519528 | 0.384766 |
| MmugDNA.43405.1.S1_at   | MmugDNA.43405.1 | 3.04  | 2.85  | 0.29 | 0.03 | 1.14  | 0.120266 | 0.116218 | 0.493545 | 0.38353  |
| MmugDNA.43406.1.S1_at   | MmugDNA.43406.1 | 6.67  | 6.74  | 0.54 | 0.12 | -1.05 | 0.463508 | 0.202422 | 0.762205 | 0.476768 |
| MmugDNA.43408.1.S1_at   | MmugDNA.43408.1 | 7.61  | 7.51  | 0.06 | 0.01 | 1.07  | 0.083    | 0.343161 | 0.44828  | 0.588905 |
| MmugDNA.43408.1.S1_s_at | MmugDNA.43408.1 | 5.43  | 5.21  | 0.07 | 0.05 | 1.16  | 0.011354 | 0.00576  | 0.254437 | 0.104378 |
| MmugDNA.4341.1.S1_at    | MmugDNA.4341.1  | 8.24  | 8.37  | 0.14 | 0.16 | -1.09 | 0.42251  | 0.819424 | 0.738218 | 0.89598  |
| MmugDNA.43410.1.S1_at   | MmugDNA.43410.1 | 3.82  | 3.6   | 0.29 | 0.07 | 1.16  | 0.378613 | 0.488657 | 0.708438 | 0.691273 |
| MmugDNA.43411.1.S1_at   | MmugDNA.43411.1 | 4.25  | 4     | 0.06 | 0.36 | 1.19  | 0.859121 | 0.757998 | 0.950315 | 0.859223 |
| MmugDNA.43413.1.S1_at   | MmugDNA.43413.1 | 6.3   | 6.21  | 0.06 | 0.08 | 1.07  | 0.220528 | 0.032352 | 0.589753 | 0.222667 |
| MmugDNA.43414.1.S1_at   | MmugDNA.43414.1 | 3.86  | 4     | 0.11 | 0.08 | -1.1  | 0.468462 | 0.446962 | 0.764997 | 0.663167 |
| MmugDNA.43415.1.S1_at   | MmugDNA.43415.1 | 11.65 | 11.47 | 0.14 | 0.03 | 1.14  | 0.278326 | 0.383154 | 0.637536 | 0.619153 |
| MmugDNA.43416.1.S1_at   | MmugDNA.43416.1 | 6.46  | 6.14  | 0.36 | 0.43 | 1.24  | 0.905906 | 0.153817 | 0.968196 | 0.428488 |
| MmugDNA.43417.1.S1_at   | MmugDNA.43417.1 | 6.53  | 6.57  | 0.14 | 0.05 | -1.03 | 0.626548 | 0.591449 | 0.849991 | 0.756977 |
| MmugDNA.43418.1.S1_at   | MmugDNA.43418.1 | 4.25  | 4.26  | 0.16 | 0.56 | -1.01 | 0.957151 | 0.525854 | 0.985852 | 0.715222 |
| MmugDNA.43419.1.S1_at   | MmugDNA.43419.1 | 11.16 | 11.13 | 0.15 | 0.06 | 1.02  | 0.460456 | 0.010011 | 0.760242 | 0.131262 |
| MmugDNA.4342.1.S1_at    | MmugDNA.4342.1  | 5.93  | 5.8   | 0.32 | 0.14 | 1.1   | 0.586282 | 0.141649 | 0.831211 | 0.415207 |
| MmugDNA.43420.1.S1_at   | MmugDNA.43420.1 | 5.37  | 5.08  | 0.32 | 0.09 | 1.22  | 0.095661 | 0.069987 | 0.4643   | 0.310754 |
| MmugDNA.18976.1.S1_s_at | MmugDNA.18976.1 | 6.41  | 6.17  | 0.26 | 0.16 | 1.18  | 0.312984 | 0.382536 | 0.664399 | 0.618735 |
| MmugDNA.43421.1.S1_at   | MmugDNA.43421.1 | 8.37  | 8.48  | 0.11 | 0.15 | -1.08 | 0.282706 | 0.049795 | 0.641025 | 0.268228 |
| MmugDNA.43422.1.S1_at   | MmugDNA.43422.1 | 11.23 | 11.32 | 0.12 | 0.05 | -1.06 | 0.362321 | 0.744542 | 0.69926  | 0.852091 |
| MmugDNA.43422.1.S1_s_at | MmugDNA.43422.1 | 10.8  | 11.05 | 0.05 | 0.04 | -1.19 | 0.004996 | 0.16957  | 0.204255 | 0.446186 |
| MmugDNA.43423.1.S1_at   | MmugDNA.43423.1 | 5.92  | 5.69  | 0.03 | 0.26 | 1.17  | 0.249879 | 0.426208 | 0.615347 | 0.648388 |
| MmugDNA.43423.1.S1_s_at | MmugDNA.43423.1 | 4.91  | 4.67  | 0.01 | 0.16 | 1.18  | 0.058382 | 0.445719 | 0.404238 | 0.662489 |
| MmugDNA.43425.1.S1_at   | MmugDNA.43425.1 | 5.42  | 5.21  | 0.21 | 0.35 | 1.16  | 0.675144 | 0.741175 | 0.872479 | 0.850135 |
| MmugDNA.43426.1.S1_at   | MmugDNA.43426.1 | 4.66  | 4.71  | 0.03 | 0.04 | -1.04 | 0.614895 | 0.949585 | 0.844126 | 0.97117  |
| MmugDNA.43427.1.S1_at   | MmugDNA.43427.1 | 3.46  | 3.35  | 0.02 | 0.16 | 1.07  | 0.424651 | 0.369314 | 0.739622 | 0.6087   |
| MmugDNA.43428.1.S1_at   | MmugDNA.43428.1 | 4.01  | 3.87  | 0.08 | 0.09 | 1.11  | 0.047771 | 0.03856  | 0.381152 | 0.241357 |
| MmugDNA.4343.1.S1_at    | MmugDNA.4343.1  | 10.71 | 10.63 | 0.12 | 0.01 | 1.06  | 0.279228 | 0.073818 | 0.638137 | 0.317146 |
| MmugDNA.43430.1.S1_at   | MmugDNA.43430.1 | 5.97  | 5.89  | 0.11 | 0.03 | 1.06  | 0.286321 | 0.348528 | 0.64358  | 0.592609 |
| MmugDNA.43432.1.S1_at   | MmugDNA.43432.1 | 5.83  | 6.28  | 0.19 | 0.51 | -1.36 | 0.36214  | 0.485046 | 0.699037 | 0.688908 |
| MmugDNA.43434.1.S1_at   | MmugDNA.43434.1 | 6.13  | 6.14  | 0.14 | 0.08 | -1.01 | 0.717204 | 0.288639 | 0.890316 | 0.549827 |
| MmugDNA.43435.1.S1_at   | MmugDNA.43435.1 | 6.48  | 5.65  | 0.86 | 0.54 | 1.77  | 0.421453 | 0.574394 | 0.737563 | 0.745847 |
| MmugDNA.43437.1.S1_at   | MmugDNA.43437.1 | 6.2   | 6.21  | 0.11 | 0.1  | -1.01 | 0.538695 | 0.794224 | 0.803474 | 0.881314 |
| MmugDNA.43438.1.S1_at   | MmugDNA.43438.1 | 5.57  | 5.52  | 0.11 | 0.2  | 1.03  | 0.704455 | 0.900431 | 0.885155 | 0.94344  |
| MmugDNA.43439.1.S1_at   | MmugDNA.43439.1 | 11.94 | 11.75 | 0.17 | 0.02 | 1.14  | 0.427477 | 0.559338 | 0.741156 | 0.736241 |

|                         |                 |       |       |      |      |       |          |          |          |          |
|-------------------------|-----------------|-------|-------|------|------|-------|----------|----------|----------|----------|
| MmugDNA.4344.1.S1_at    | MmugDNA.4344.1  | 3.46  | 3.46  | 0.03 | 0.02 | 1     | 0.243054 | 0.270887 | 0.608888 | 0.536026 |
| MmugDNA.43440.1.S1_at   | MmugDNA.43440.1 | 12.08 | 11.97 | 0.07 | 0.08 | 1.08  | 0.078255 | 0.021662 | 0.440477 | 0.184333 |
| MmugDNA.43441.1.S1_at   | MmugDNA.43441.1 | 7.14  | 7.01  | 0.2  | 0.01 | 1.1   | 0.219482 | 0.202477 | 0.58895  | 0.476811 |
| MmugDNA.43442.1.S1_at   | MmugDNA.43442.1 | 9.41  | 9.55  | 0.42 | 0.21 | -1.11 | 0.486663 | 0.016496 | 0.774667 | 0.162577 |
| MmugDNA.43443.1.S1_at   | MmugDNA.43443.1 | 6.06  | 5.85  | 0.12 | 0.05 | 1.16  | 0.052605 | 0.075591 | 0.392678 | 0.32003  |
| MmugDNA.43444.1.S1_at   | MmugDNA.43444.1 | 3.71  | 3.71  | 0.18 | 0.2  | -1    | 0.914385 | 0.811318 | 0.970837 | 0.891133 |
| MmugDNA.43445.1.S1_at   | MmugDNA.43445.1 | 7.34  | 6.47  | 0.38 | 0.38 | 1.82  | 0.119896 | 0.021346 | 0.493259 | 0.182894 |
| MmugDNA.43446.1.S1_at   | MmugDNA.43446.1 | 3.1   | 3.08  | 0.3  | 0.22 | 1.01  | 0.332782 | 0.32241  | 0.679274 | 0.573972 |
| MmugDNA.43447.1.S1_at   | MmugDNA.43447.1 | 3.96  | 3.89  | 0.03 | 0.17 | 1.05  | 0.391297 | 0.594636 | 0.717502 | 0.758623 |
| MmugDNA.43448.1.S1_at   | MmugDNA.43448.1 | 4.16  | 4.41  | 1.14 | 0.14 | -1.19 | 0.6444   | 0.728456 | 0.858501 | 0.843019 |
| MmugDNA.43449.1.S1_at   | MmugDNA.43449.1 | 3.57  | 3.55  | 0.15 | 0.17 | 1.02  | 0.450451 | 0.417778 | 0.754829 | 0.642404 |
| MmugDNA.4345.1.S1_at    | MmugDNA.4345.1  | 9.12  | 9.32  | 0.41 | 0.11 | -1.15 | 0.520938 | 0.839869 | 0.794207 | 0.908703 |
| MmugDNA.43450.1.S1_at   | MmugDNA.43450.1 | 7.09  | 6.98  | 0.02 | 0.1  | 1.07  | 0.121971 | 0.311213 | 0.495677 | 0.566264 |
| MmugDNA.43451.1.S1_at   | MmugDNA.43451.1 | 4.16  | 4.15  | 0.07 | 0.03 | 1.01  | 0.216328 | 0.446268 | 0.586447 | 0.662743 |
| MmugDNA.43452.1.S1_at   | MmugDNA.43452.1 | 5.69  | 5.63  | 0.24 | 0.07 | 1.05  | 0.245556 | 0.314641 | 0.611179 | 0.568415 |
| MmugDNA.43453.1.S1_at   | MmugDNA.43453.1 | 5.99  | 5.73  | 0.16 | 0.03 | 1.19  | 0.062275 | 0.033976 | 0.412841 | 0.227969 |
| MmugDNA.43454.1.S1_at   | MmugDNA.43454.1 | 2.86  | 3.06  | 0.23 | 0.18 | -1.15 | 0.74971  | 0.778348 | 0.905282 | 0.871276 |
| MmugDNA.43455.1.S1_at   | MmugDNA.43455.1 | 3.02  | 3.03  | 0.12 | 0.16 | -1.01 | 0.837146 | 0.981162 | 0.94155  | 0.989586 |
| MmugDNA.43456.1.S1_at   | MmugDNA.43456.1 | 6.33  | 6.12  | 0.06 | 0.05 | 1.16  | 0.013957 | 0.000794 | 0.273301 | 0.046064 |
| MmugDNA.43457.1.S1_at   | MmugDNA.43457.1 | 4.3   | 4.46  | 0.11 | 0.06 | -1.11 | 0.425758 | 0.784032 | 0.740112 | 0.874963 |
| MmugDNA.43459.1.S1_at   | MmugDNA.43459.1 | 4.71  | 4.7   | 0.16 | 0.14 | 1.01  | 0.244692 | 0.272829 | 0.610258 | 0.537554 |
| MmugDNA.4346.1.S1_at    | MmugDNA.4346.1  | 5.39  | 4.75  | 0.64 | 0.48 | 1.56  | 0.347661 | 0.585132 | 0.688864 | 0.752755 |
| MmugDNA.43460.1.S1_at   | MmugDNA.43460.1 | 7.54  | 7.25  | 0.26 | 0.08 | 1.22  | 0.142523 | 0.124409 | 0.517603 | 0.394857 |
| MmugDNA.43462.1.S1_at   | MmugDNA.43462.1 | 11.25 | 11.42 | 0.06 | 0.05 | -1.12 | 0.02006  | 0.004872 | 0.303343 | 0.097453 |
| MmugDNA.43463.1.S1_x_at | MmugDNA.43463.1 | 12.17 | 12.24 | 0.29 | 0.08 | -1.05 | 0.526888 | 0.722366 | 0.796797 | 0.839202 |
| MmugDNA.43465.1.S1_at   | MmugDNA.43465.1 | 10.43 | 9.9   | 0.12 | 0.14 | 1.44  | 0.011538 | 0.006305 | 0.255545 | 0.107813 |
| MmugDNA.43467.1.S1_at   | MmugDNA.43467.1 | 5.85  | 6.24  | 1.08 | 0.26 | -1.31 | 0.627472 | 0.482398 | 0.850547 | 0.687259 |
| MmugDNA.43470.1.S1_at   | MmugDNA.43470.1 | 4.86  | 4.56  | 0.34 | 0.12 | 1.23  | 0.054833 | 0.049682 | 0.397122 | 0.267892 |
| MmugDNA.43471.1.S1_s_at | MmugDNA.43471.1 | 4.23  | 4.23  | 0.14 | 0.09 | 1     | 0.623848 | 0.721055 | 0.848386 | 0.838489 |
| MmugDNA.43472.1.S1_at   | MmugDNA.43472.1 | 9.09  | 8.95  | 0.33 | 0.18 | 1.1   | 0.657047 | 0.077947 | 0.863856 | 0.324283 |
| MmugDNA.43473.1.S1_at   | MmugDNA.43473.1 | 4.16  | 3.55  | 0.31 | 0.5  | 1.53  | 0.522856 | 0.751263 | 0.795346 | 0.855385 |
| MmugDNA.43474.1.S1_at   | MmugDNA.43474.1 | 9.26  | 9.67  | 0.26 | 0.07 | -1.33 | 0.133674 | 0.005959 | 0.508012 | 0.105573 |
| MmugDNA.43475.1.S1_at   | MmugDNA.43475.1 | 7.99  | 8.28  | 0.25 | 0.17 | -1.22 | 0.62656  | 0.424298 | 0.849991 | 0.646878 |
| MmugDNA.43476.1.S1_at   | MmugDNA.43476.1 | 10.32 | 10.3  | 0.33 | 0.06 | 1.02  | 0.397848 | 0.118037 | 0.722112 | 0.385881 |
| MmugDNA.43479.1.S1_at   | MmugDNA.43479.1 | 12.09 | 11.64 | 0.74 | 0.23 | 1.37  | 0.271135 | 0.047075 | 0.631016 | 0.261469 |
| MmugDNA.4348.1.S1_at    | MmugDNA.4348.1  | 5.3   | 5.47  | 0.17 | 0.21 | -1.13 | 0.751383 | 0.282801 | 0.90594  | 0.545524 |
| MmugDNA.43480.1.S1_at   | MmugDNA.43480.1 | 7.69  | 6.91  | 0.79 | 0.23 | 1.72  | 0.186328 | 0.074559 | 0.559101 | 0.318185 |
| MmugDNA.43481.1.S1_at   | MmugDNA.43481.1 | 10.98 | 10.76 | 0.21 | 0.02 | 1.17  | 0.045633 | 0.074145 | 0.376875 | 0.31781  |
| MmugDNA.43482.1.S1_at   | MmugDNA.43482.1 | 3.86  | 3.67  | 0.17 | 0.03 | 1.14  | 0.197354 | 0.281973 | 0.568407 | 0.544868 |
| MmugDNA.43483.1.S1_at   | MmugDNA.43483.1 | 10.4  | 10.63 | 0.35 | 0.05 | -1.17 | 0.336044 | 0.104433 | 0.681441 | 0.365719 |
| MmugDNA.43484.1.S1_at   | MmugDNA.43484.1 | 9.61  | 9.76  | 0.3  | 0.07 | -1.11 | 0.113589 | 0.225499 | 0.486895 | 0.498141 |
| MmugDNA.43485.1.S1_at   | MmugDNA.43485.1 | 4.43  | 4.96  | 0.45 | 0.54 | -1.44 | 0.128037 | 0.271739 | 0.502449 | 0.536577 |
| MmugDNA.43488.1.S1_at   | MmugDNA.43488.1 | 2.71  | 2.78  | 0.15 | 0.16 | -1.05 | 0.215734 | 0.266807 | 0.585813 | 0.53241  |

|                         |                 |       |       |      |      |       |          |          |          |          |
|-------------------------|-----------------|-------|-------|------|------|-------|----------|----------|----------|----------|
| MmugDNA.43489.1.S1_at   | MmugDNA.43489.1 | 7.73  | 7.6   | 0.11 | 0.03 | 1.1   | 0.181486 | 0.013389 | 0.554659 | 0.14827  |
| MmugDNA.4349.1.S1_at    | MmugDNA.4349.1  | 3.01  | 3.08  | 0.14 | 0.08 | -1.05 | 0.578238 | 0.846757 | 0.826177 | 0.91284  |
| MmugDNA.43490.1.S1_at   | MmugDNA.43490.1 | 5.09  | 5.02  | 0.51 | 0.03 | 1.05  | 0.489148 | 0.638495 | 0.775981 | 0.78765  |
| MmugDNA.43491.1.S1_at   | MmugDNA.43491.1 | 3.01  | 3.02  | 0.03 | 0.1  | -1    | 0.313041 | 0.474314 | 0.664401 | 0.68135  |
| MmugDNA.43492.1.S1_at   | MmugDNA.43492.1 | 3.02  | 2.94  | 0.07 | 0.08 | 1.06  | 0.599919 | 0.680589 | 0.83764  | 0.813515 |
| MmugDNA.43493.1.S1_at   | MmugDNA.43493.1 | 4.1   | 3.99  | 0.25 | 0.05 | 1.08  | 0.460263 | 0.54755  | 0.760108 | 0.728511 |
| MmugDNA.43494.1.S1_at   | MmugDNA.43494.1 | 12.77 | 12.22 | 0.11 | 0.12 | 1.46  | 0.00332  | 0.00045  | 0.194799 | 0.038539 |
| MmugDNA.43494.1.S1_x_at | MmugDNA.43494.1 | 12.87 | 12.36 | 0.12 | 0.09 | 1.43  | 0.002307 | 0.000221 | 0.175236 | 0.032385 |
| MmugDNA.43495.1.S1_at   | MmugDNA.43495.1 | 6.06  | 5.9   | 0.08 | 0.08 | 1.11  | 0.166325 | 0.190842 | 0.538998 | 0.466228 |
| MmugDNA.43496.1.S1_at   | MmugDNA.43496.1 | 5.68  | 4.95  | 0.07 | 0.12 | 1.65  | 0.000697 | 0.000146 | 0.147476 | 0.029509 |
| MmugDNA.43497.1.S1_at   | MmugDNA.43497.1 | 11.07 | 11.06 | 0.17 | 0.03 | -1.01 | 0.495051 | 0.038847 | 0.77973  | 0.242022 |
| MmugDNA.43499.1.S1_at   | MmugDNA.43499.1 | 5.11  | 4.92  | 0.84 | 0.13 | 1.14  | 0.507136 | 0.134653 | 0.78619  | 0.406629 |
| MmugDNA.435.1.S1_at     | MmugDNA.435.1   | 4.29  | 4.31  | 0.46 | 0.09 | -1.01 | 0.90377  | 0.966015 | 0.967671 | 0.98099  |
| MmugDNA.4350.1.S1_at    | MmugDNA.4350.1  | 7.99  | 7.77  | 0.17 | 0.05 | 1.17  | 0.222505 | 0.340281 | 0.592042 | 0.586666 |
| MmugDNA.43501.1.S1_at   | MmugDNA.43501.1 | 4.55  | 4.44  | 0.18 | 0.15 | 1.08  | 0.095035 | 0.115765 | 0.464131 | 0.382814 |
| MmugDNA.43502.1.S1_at   | MmugDNA.43502.1 | 5.8   | 5.59  | 0.11 | 0.05 | 1.16  | 0.027257 | 0.008843 | 0.327322 | 0.124493 |
| MmugDNA.43503.1.S1_at   | MmugDNA.43503.1 | 3.33  | 3.24  | 0.05 | 0.09 | 1.06  | 0.576585 | 0.095219 | 0.825166 | 0.35218  |
| MmugDNA.43504.1.S1_at   | MmugDNA.43504.1 | 4.67  | 4.55  | 0.18 | 0.12 | 1.09  | 0.670517 | 0.434384 | 0.869943 | 0.654536 |
| MmugDNA.43505.1.S1_at   | MmugDNA.43505.1 | 3.64  | 3.64  | 0.05 | 0.1  | 1.01  | 0.723291 | 0.773825 | 0.892777 | 0.868485 |
| MmugDNA.43506.1.S1_at   | MmugDNA.43506.1 | 5.53  | 5.39  | 0.53 | 0.25 | 1.1   | 0.86347  | 0.436922 | 0.952018 | 0.656357 |
| MmugDNA.43507.1.S1_at   | MmugDNA.43507.1 | 6.1   | 6.03  | 0.17 | 0.09 | 1.06  | 0.296677 | 0.300542 | 0.652351 | 0.558852 |
| MmugDNA.43508.1.S1_at   | MmugDNA.43508.1 | 5.99  | 5.81  | 0.26 | 0.05 | 1.13  | 0.465772 | 0.495834 | 0.763177 | 0.695746 |
| MmugDNA.43509.1.S1_at   | MmugDNA.43509.1 | 6.03  | 6.18  | 0.21 | 0.15 | -1.11 | 0.293512 | 0.419321 | 0.649839 | 0.643447 |
| MmugDNA.4351.1.S1_at    | MmugDNA.4351.1  | 5.46  | 5.42  | 0.12 | 0.12 | 1.03  | 0.966687 | 0.00997  | 0.989053 | 0.131094 |
| MmugDNA.43512.1.S1_at   | MmugDNA.43512.1 | 9.25  | 9.85  | 0.43 | 0.3  | -1.52 | 0.37164  | 0.382665 | 0.705567 | 0.618843 |
| MmugDNA.43515.1.S1_at   | MmugDNA.43515.1 | 5.06  | 4.94  | 0.26 | 0.12 | 1.08  | 0.489534 | 0.660398 | 0.776244 | 0.801302 |
| MmugDNA.43516.1.S1_at   | MmugDNA.43516.1 | 5.08  | 4.88  | 0.06 | 0.08 | 1.15  | 0.049115 | 0.414147 | 0.385273 | 0.640063 |
| MmugDNA.43517.1.S1_at   | MmugDNA.43517.1 | 5.88  | 5.68  | 0.2  | 0.11 | 1.15  | 0.221638 | 0.276184 | 0.591315 | 0.540179 |
| MmugDNA.43520.1.S1_at   | MmugDNA.43520.1 | 6.5   | 6.45  | 0.22 | 0.07 | 1.04  | 0.487457 | 0.817065 | 0.775077 | 0.894492 |
| MmugDNA.43522.1.S1_at   | MmugDNA.43522.1 | 9.69  | 8.68  | 0.38 | 0.13 | 2.01  | 0.019812 | 0.059476 | 0.302615 | 0.290548 |
| MmugDNA.43523.1.S1_at   | MmugDNA.43523.1 | 5.92  | 5.74  | 0.1  | 0.03 | 1.13  | 0.029433 | 0.025929 | 0.334169 | 0.201872 |
| MmugDNA.43524.1.S1_at   | MmugDNA.43524.1 | 3.49  | 3.35  | 0.16 | 0.6  | 1.11  | 0.499204 | 0.47138  | 0.781984 | 0.679413 |
| MmugDNA.43525.1.S1_at   | MmugDNA.43525.1 | 5.66  | 4.95  | 0.25 | 0.17 | 1.63  | 0.042645 | 0.014659 | 0.369824 | 0.154231 |
| MmugDNA.43527.1.S1_at   | MmugDNA.43527.1 | 7.96  | 8.14  | 0.41 | 0.08 | -1.13 | 0.290547 | 0.20144  | 0.647135 | 0.475963 |
| MmugDNA.43528.1.S1_at   | MmugDNA.43528.1 | 3.21  | 3.27  | 0.09 | 0.04 | -1.04 | 0.677769 | 0.333889 | 0.873679 | 0.582024 |
| MmugDNA.43530.1.S1_at   | MmugDNA.43530.1 | 6.91  | 6     | 0.63 | 0.21 | 1.88  | 0.139109 | 0.042459 | 0.514459 | 0.250702 |
| MmugDNA.43531.1.S1_at   | MmugDNA.43531.1 | 4.81  | 4.64  | 0.1  | 0.03 | 1.13  | 0.080381 | 0.054245 | 0.444007 | 0.278331 |
| MmugDNA.43534.1.S1_at   | MmugDNA.43534.1 | 12.52 | 12.51 | 0.17 | 0.07 | 1.01  | 0.939647 | 0.565216 | 0.979532 | 0.739754 |
| MmugDNA.43535.1.S1_at   | MmugDNA.43535.1 | 3.84  | 3.83  | 0.03 | 0.03 | 1     | 0.373913 | 0.525585 | 0.705567 | 0.715132 |
| MmugDNA.43538.1.S1_at   | MmugDNA.43538.1 | 7.61  | 7.76  | 2.48 | 0.24 | -1.11 | 0.777309 | 0.342491 | 0.917569 | 0.588539 |
| MmugDNA.43539.1.S1_at   | MmugDNA.43539.1 | 5.83  | 6.2   | 0.33 | 0.27 | -1.29 | 0.452    | 0.37255  | 0.755619 | 0.61149  |
| MmugDNA.4354.1.S1_at    | MmugDNA.4354.1  | 4.56  | 4.54  | 0.08 | 0.1  | 1.01  | 0.401791 | 0.673884 | 0.72469  | 0.809483 |
| MmugDNA.43540.1.S1_at   | MmugDNA.43540.1 | 4.46  | 4.17  | 0.14 | 0.11 | 1.22  | 0.044417 | 0.106729 | 0.374916 | 0.369337 |



|                         |                 |       |       |      |      |       |          |          |          |          |
|-------------------------|-----------------|-------|-------|------|------|-------|----------|----------|----------|----------|
| MmugDNA.43541.1.S1_at   | MmugDNA.43541.1 | 4.5   | 4.44  | 0.22 | 0.23 | 1.04  | 0.302847 | 0.357247 | 0.656685 | 0.598867 |
| MmugDNA.43542.1.S1_at   | MmugDNA.43542.1 | 5.24  | 4.88  | 0.18 | 0.11 | 1.28  | 0.061276 | 0.035921 | 0.410357 | 0.234021 |
| MmugDNA.43543.1.S1_at   | MmugDNA.43543.1 | 6.95  | 7.26  | 0.7  | 0.69 | -1.24 | 0.83223  | 0.288037 | 0.939788 | 0.54928  |
| MmugDNA.43544.1.S1_at   | MmugDNA.43544.1 | 9.1   | 9.22  | 0.25 | 0.05 | -1.09 | 0.566815 | 0.622953 | 0.820086 | 0.777422 |
| MmugDNA.43545.1.S1_at   | MmugDNA.43545.1 | 11.12 | 11.33 | 0.91 | 0.09 | -1.16 | 0.553785 | 0.206088 | 0.812271 | 0.480306 |
| MmugDNA.43547.1.S1_at   | MmugDNA.43547.1 | 3.65  | 3.8   | 0.1  | 0.41 | -1.11 | 0.367281 | 0.402688 | 0.702778 | 0.631543 |
| MmugDNA.43548.1.S1_at   | MmugDNA.43548.1 | 3.33  | 3.38  | 0.11 | 0.05 | -1.03 | 0.299079 | 0.619367 | 0.653475 | 0.774611 |
| MmugDNA.43549.1.S1_at   | MmugDNA.43549.1 | 3.2   | 3.29  | 0.06 | 0.15 | -1.07 | 0.336208 | 0.398676 | 0.681609 | 0.629458 |
| MmugDNA.4355.1.S1_at    | MmugDNA.4355.1  | 3.4   | 3.49  | 0.09 | 0.17 | -1.06 | 0.219731 | 0.340923 | 0.589083 | 0.587035 |
| MmugDNA.43550.1.S1_at   | MmugDNA.43550.1 | 4.99  | 4.85  | 0.07 | 0.09 | 1.11  | 0.395415 | 0.144973 | 0.72046  | 0.418913 |
| MmugDNA.43552.1.S1_at   | MmugDNA.43552.1 | 5.8   | 5.82  | 0.05 | 0    | -1.02 | 0.153379 | 0.208672 | 0.526445 | 0.482544 |
| MmugDNA.43553.1.S1_at   | MmugDNA.43553.1 | 6.65  | 7.36  | 0.43 | 0.28 | -1.63 | 0.177558 | 0.488322 | 0.55065  | 0.691058 |
| MmugDNA.43554.1.S1_at   | MmugDNA.43554.1 | 4.6   | 4.51  | 0.05 | 0.08 | 1.06  | 0.190209 | 0.064961 | 0.561439 | 0.300855 |
| MmugDNA.43555.1.S1_at   | MmugDNA.43555.1 | 4.82  | 4.74  | 0.29 | 0.19 | 1.06  | 0.757876 | 0.493598 | 0.908875 | 0.694286 |
| MmugDNA.43558.1.S1_at   | MmugDNA.43558.1 | 4.68  | 4.29  | 0.77 | 0.34 | 1.31  | 0.165194 | 0.190567 | 0.537911 | 0.46595  |
| MmugDNA.43559.1.S1_at   | MmugDNA.43559.1 | 6.27  | 6.26  | 0.06 | 0.05 | 1.01  | 0.554021 | 0.766884 | 0.812436 | 0.864635 |
| MmugDNA.4356.1.S1_x_at  | MmugDNA.4356.1  | 9.47  | 10.01 | 0.26 | 0.21 | -1.45 | 0.068943 | 0.285847 | 0.426331 | 0.547484 |
| MmugDNA.43561.1.S1_at   | MmugDNA.43561.1 | 4.96  | 5.07  | 0.29 | 0.17 | -1.07 | 0.43751  | 0.39265  | 0.746842 | 0.625813 |
| MmugDNA.43562.1.S1_at   | MmugDNA.43562.1 | 4.09  | 4.42  | 0.22 | 0.03 | -1.26 | 0.17207  | 0.18924  | 0.545406 | 0.465007 |
| MmugDNA.43563.1.S1_at   | MmugDNA.43563.1 | 4.57  | 4.34  | 0.04 | 0.01 | 1.17  | 0.000991 | 0.020056 | 0.155374 | 0.177898 |
| MmugDNA.43564.1.S1_at   | MmugDNA.43564.1 | 5.78  | 5.53  | 0.1  | 0.2  | 1.19  | 0.123412 | 0.21281  | 0.496707 | 0.486769 |
| MmugDNA.43565.1.S1_at   | MmugDNA.43565.1 | 4.49  | 4.64  | 0.09 | 0.24 | -1.11 | 0.576063 | 0.711398 | 0.825056 | 0.832662 |
| MmugDNA.43566.1.S1_x_at | MmugDNA.43566.1 | 5.63  | 5.78  | 0.03 | 0.07 | -1.11 | 0.020275 | 0.215866 | 0.303799 | 0.489536 |
| MmugDNA.43567.1.S1_at   | MmugDNA.43567.1 | 2.9   | 2.86  | 0.12 | 0.14 | 1.02  | 0.182804 | 0.193483 | 0.555631 | 0.468745 |
| MmugDNA.43568.1.S1_at   | MmugDNA.43568.1 | 6.03  | 5.81  | 0.61 | 0.41 | 1.17  | 0.461818 | 0.731277 | 0.761308 | 0.84425  |
| MmugDNA.43569.1.S1_at   | MmugDNA.43569.1 | 3.93  | 4.1   | 0.21 | 0.24 | -1.12 | 0.389239 | 0.543182 | 0.715989 | 0.725996 |
| MmugDNA.4721.1.S1_s_at  | MmugDNA.4721.1  | 4.02  | 4.18  | 0.18 | 0.13 | -1.11 | 0.24301  | 0.254722 | 0.608888 | 0.522987 |
| MmugDNA.4357.1.S1_at    | MmugDNA.4357.1  | 5.45  | 5.33  | 0.2  | 0.17 | 1.08  | 0.176272 | 0.721774 | 0.549326 | 0.838827 |
| MmugDNA.43570.1.S1_at   | MmugDNA.43570.1 | 4.5   | 4.49  | 0.09 | 0.09 | 1.01  | 0.682189 | 0.332065 | 0.875657 | 0.580584 |
| MmugDNA.43571.1.S1_at   | MmugDNA.43571.1 | 5.7   | 6.02  | 0.15 | 0.62 | -1.25 | 0.144681 | 0.350453 | 0.520018 | 0.594161 |
| MmugDNA.43572.1.S1_at   | MmugDNA.43572.1 | 9.39  | 9.73  | 0.12 | 0.18 | -1.26 | 0.072833 | 0.004767 | 0.433499 | 0.096325 |
| MmugDNA.43573.1.S1_at   | MmugDNA.43573.1 | 3.39  | 3.88  | 0.07 | 0.12 | -1.4  | 0.002556 | 0.332151 | 0.180386 | 0.580584 |
| MmugDNA.43574.1.S1_at   | MmugDNA.43574.1 | 4.87  | 4.81  | 0.13 | 0.1  | 1.04  | 0.969935 | 0.081285 | 0.990053 | 0.329351 |
| MmugDNA.43575.1.S1_at   | MmugDNA.43575.1 | 7.05  | 7.1   | 0.13 | 0.24 | -1.03 | 0.407263 | 0.432543 | 0.728545 | 0.65297  |
| MmugDNA.43576.1.S1_at   | MmugDNA.43576.1 | 4.38  | 4.35  | 0.13 | 0.22 | 1.02  | 0.543405 | 0.558036 | 0.806498 | 0.735346 |
| MmugDNA.43577.1.S1_at   | MmugDNA.43577.1 | 3.33  | 3.19  | 0.03 | 0.14 | 1.1   | 0.134347 | 0.038043 | 0.508462 | 0.239624 |
| MmugDNA.43578.1.S1_at   | MmugDNA.43578.1 | 3.62  | 3.48  | 0.08 | 0.02 | 1.1   | 0.045402 | 0.009674 | 0.376374 | 0.129405 |
| MmugDNA.4358.1.S1_at    | MmugDNA.4358.1  | 3.75  | 3.75  | 0.56 | 0.19 | -1    | 0.674828 | 0.273068 | 0.872212 | 0.537644 |
| MmugDNA.43580.1.S1_at   | MmugDNA.43580.1 | 5.52  | 6.22  | 0.22 | 0.07 | -1.63 | 0.006442 | 0.00378  | 0.219301 | 0.08754  |
| MmugDNA.43581.1.S1_at   | MmugDNA.43581.1 | 10.9  | 10.86 | 0.25 | 0.03 | 1.03  | 0.756724 | 0.24437  | 0.908337 | 0.514215 |
| MmugDNA.43583.1.S1_at   | MmugDNA.43583.1 | 4.48  | 4.22  | 0.04 | 0.12 | 1.2   | 0.062099 | 0.07197  | 0.412245 | 0.314305 |
| MmugDNA.43583.1.S1_x_at | MmugDNA.43583.1 | 5.52  | 5.52  | 0.06 | 0.11 | 1.01  | 0.386139 | 0.547445 | 0.713295 | 0.728464 |
| MmugDNA.43584.1.S1_at   | MmugDNA.43584.1 | 4.88  | 4.01  | 0.15 | 0.82 | 1.82  | 0.52191  | 0.143635 | 0.794904 | 0.417555 |

|                         |                 |       |       |      |      |       |          |          |          |          |
|-------------------------|-----------------|-------|-------|------|------|-------|----------|----------|----------|----------|
| MmugDNA.43586.1.S1_at   | MmugDNA.43586.1 | 3.72  | 3.78  | 0.04 | 0.02 | -1.04 | 0.133713 | 0.098213 | 0.508012 | 0.356253 |
| MmugDNA.43587.1.S1_at   | MmugDNA.43587.1 | 5.14  | 4.75  | 0.28 | 0.5  | 1.31  | 0.175548 | 0.334261 | 0.548678 | 0.582308 |
| MmugDNA.43590.1.S1_at   | MmugDNA.43590.1 | 4.4   | 4.29  | 0.18 | 0.09 | 1.08  | 0.144091 | 0.175999 | 0.519461 | 0.452526 |
| MmugDNA.43592.1.S1_at   | MmugDNA.43592.1 | 7.08  | 7.31  | 1.01 | 0.35 | -1.17 | 0.806062 | 0.860573 | 0.929569 | 0.920573 |
| MmugDNA.43593.1.S1_at   | MmugDNA.43593.1 | 5.51  | 5.85  | 0.3  | 0.13 | -1.26 | 0.285664 | 0.332561 | 0.643438 | 0.580954 |
| MmugDNA.43594.1.S1_at   | MmugDNA.43594.1 | 6.57  | 6.26  | 0.52 | 0.08 | 1.24  | 0.953292 | 0.903116 | 0.984409 | 0.94497  |
| MmugDNA.43595.1.S1_at   | MmugDNA.43595.1 | 7.37  | 7.24  | 0.06 | 0.03 | 1.09  | 0.024149 | 0.088509 | 0.317812 | 0.341947 |
| MmugDNA.43596.1.S1_at   | MmugDNA.43596.1 | 5.38  | 5.47  | 0.15 | 0.13 | -1.06 | 0.519516 | 0.550857 | 0.793229 | 0.730625 |
| MmugDNA.43598.1.S1_at   | MmugDNA.43598.1 | 11.24 | 11.94 | 1.01 | 0.21 | -1.63 | 0.327313 | 0.208236 | 0.675065 | 0.482126 |
| MmugDNA.43599.1.S1_at   | MmugDNA.43599.1 | 3.4   | 3.41  | 0.08 | 0.05 | -1    | 0.957785 | 0.710176 | 0.986101 | 0.831904 |
| MmugDNA.436.1.S1_at     | MmugDNA.436.1   | 4.4   | 4.28  | 0.12 | 0.06 | -1.09 | 0.585408 | 0.222681 | 0.830541 | 0.495617 |
| MmugDNA.43600.1.S1_at   | MmugDNA.43600.1 | 4.09  | 4.26  | 0.11 | 0.21 | -1.13 | 0.188969 | 0.333709 | 0.560718 | 0.581882 |
| MmugDNA.43602.1.S1_at   | MmugDNA.43602.1 | 11.02 | 10.91 | 0.43 | 0.05 | 1.08  | 0.715645 | 0.505267 | 0.889404 | 0.702073 |
| MmugDNA.43603.1.S1_at   | MmugDNA.43603.1 | 5.27  | 5.06  | 0.14 | 0.34 | 1.16  | 0.64928  | 0.906185 | 0.860245 | 0.94693  |
| MmugDNA.43605.1.S1_at   | MmugDNA.43605.1 | 2.85  | 2.82  | 0.03 | 0.01 | 1.02  | 0.143659 | 0.000244 | 0.519043 | 0.032798 |
| MmugDNA.43606.1.S1_at   | MmugDNA.43606.1 | 6.39  | 7.45  | 0.36 | 0.58 | -2.08 | 0.145683 | 0.036993 | 0.520555 | 0.236733 |
| MmugDNA.43607.1.S1_at   | MmugDNA.43607.1 | 6     | 5.94  | 0.08 | 0.08 | 1.05  | 0.198843 | 0.48578  | 0.570297 | 0.689398 |
| MmugDNA.43608.1.S1_at   | MmugDNA.43608.1 | 5.36  | 5.14  | 0.11 | 0.12 | 1.17  | 0.052478 | 0.176428 | 0.392511 | 0.45282  |
| MmugDNA.43609.1.S1_at   | MmugDNA.43609.1 | 5.08  | 5.22  | 0.28 | 0.11 | -1.11 | 0.600762 | 0.706434 | 0.837959 | 0.829634 |
| MmugDNA.4361.1.S1_at    | MmugDNA.4361.1  | 4.24  | 4.6   | 1.11 | 0.46 | -1.28 | 0.8893   | 0.966046 | 0.961821 | 0.980991 |
| MmugDNA.43610.1.S1_at   | MmugDNA.43610.1 | 3.98  | 3.98  | 0.08 | 0.03 | -1    | 0.832119 | 0.712988 | 0.939756 | 0.833583 |
| MmugDNA.43611.1.S1_at   | MmugDNA.43611.1 | 3.89  | 3.87  | 0.11 | 0.13 | 1.01  | 0.187933 | 0.366649 | 0.560014 | 0.606417 |
| MmugDNA.43612.1.S1_at   | MmugDNA.43612.1 | 3.36  | 3.31  | 0.09 | 0.21 | 1.04  | 0.931306 | 0.423169 | 0.97706  | 0.646183 |
| MmugDNA.43614.1.S1_at   | MmugDNA.43614.1 | 3.94  | 3.83  | 1.72 | 0.28 | 1.07  | 0.459916 | 0.501515 | 0.759871 | 0.699688 |
| MmugDNA.43615.1.S1_at   | MmugDNA.43615.1 | 5.56  | 5.02  | 0.45 | 0.33 | 1.45  | 0.580575 | 0.346336 | 0.827236 | 0.59124  |
| MmugDNA.43616.1.S1_at   | MmugDNA.43616.1 | 4.75  | 4.73  | 0.14 | 0.2  | 1.02  | 0.482683 | 0.535702 | 0.772527 | 0.721232 |
| MmugDNA.43617.1.S1_at   | MmugDNA.43617.1 | 11.28 | 11.7  | 0.83 | 0.02 | -1.34 | 0.519004 | 0.614381 | 0.793034 | 0.771226 |
| MmugDNA.43618.1.S1_at   | MmugDNA.43618.1 | 3.49  | 3.8   | 0.77 | 0.83 | -1.23 | 0.633153 | 0.876598 | 0.853404 | 0.929709 |
| MmugDNA.43619.1.S1_at   | MmugDNA.43619.1 | 8.17  | 8.52  | 0.51 | 0.08 | -1.27 | 0.261109 | 0.117834 | 0.62372  | 0.38576  |
| MmugDNA.4362.1.S1_at    | MmugDNA.4362.1  | 7.41  | 7.47  | 0.85 | 0.15 | -1.04 | 0.796278 | 0.948941 | 0.925098 | 0.97078  |
| MmugDNA.43620.1.S1_at   | MmugDNA.43620.1 | 11.66 | 11.75 | 0.13 | 0.05 | -1.07 | 0.219913 | 0.001005 | 0.589114 | 0.050657 |
| MmugDNA.43621.1.S1_at   | MmugDNA.43621.1 | 3.15  | 3.16  | 0.03 | 0.11 | -1.01 | 0.649988 | 0.594342 | 0.860714 | 0.758587 |
| MmugDNA.43622.1.S1_at   | MmugDNA.43622.1 | 5.71  | 5.53  | 0.59 | 0.08 | 1.14  | 0.397973 | 0.258407 | 0.722205 | 0.525654 |
| MmugDNA.43623.1.S1_s_at | MmugDNA.43623.1 | 10.69 | 11.11 | 1.03 | 0.16 | -1.34 | 0.576014 | 0.516305 | 0.825049 | 0.708836 |
| MmugDNA.4363.1.S1_at    | MmugDNA.4363.1  | 5.21  | 5.23  | 0.31 | 0.07 | -1.02 | 0.765141 | 0.641141 | 0.911696 | 0.789442 |
| MmugDNA.4365.1.S1_s_at  | MmugDNA.4365.1  | 7.43  | 7.42  | 0.42 | 0.1  | 1.01  | 0.408373 | 0.412577 | 0.72928  | 0.638941 |
| MmugDNA.4366.1.S1_at    | MmugDNA.4366.1  | 5.22  | 5.77  | 0.63 | 0.71 | -1.46 | 0.797512 | 0.703859 | 0.92559  | 0.828259 |
| MmugDNA.4367.1.S1_at    | MmugDNA.4367.1  | 5.28  | 6.75  | 1.4  | 0.59 | -2.77 | 0.729526 | 0.278017 | 0.895795 | 0.541699 |
| MmugDNA.4369.1.S1_at    | MmugDNA.4369.1  | 5.94  | 4.81  | 0.66 | 0.15 | 2.18  | 0.062537 | 0.066052 | 0.413307 | 0.302401 |
| MmugDNA.437.1.S1_at     | MmugDNA.437.1   | 8.74  | 9.06  | 0.6  | 0.19 | -1.25 | 0.816776 | 0.65153  | 0.933718 | 0.796245 |
| MmugDNA.4371.1.S1_at    | MmugDNA.4371.1  | 4.75  | 4.65  | 0.32 | 0.06 | 1.07  | 0.841477 | 0.797968 | 0.94378  | 0.883669 |
| MmugDNA.4372.1.S1_at    | MmugDNA.4372.1  | 5.62  | 5.52  | 0.06 | 0.16 | 1.07  | 0.354475 | 0.816911 | 0.694035 | 0.894398 |
| MmugDNA.4373.1.S1_at    | MmugDNA.4373.1  | 5.73  | 5.6   | 0.18 | 0.19 | 1.09  | 0.824897 | 0.101867 | 0.937097 | 0.361836 |

|                        |                |       |       |      |      |       |          |          |          |          |
|------------------------|----------------|-------|-------|------|------|-------|----------|----------|----------|----------|
| MmugDNA.4376.1.S1_at   | MmugDNA.4376.1 | 6.72  | 6.42  | 0.2  | 0.07 | 1.23  | 0.086928 | 0.067195 | 0.454785 | 0.305204 |
| MmugDNA.4377.1.S1_at   | MmugDNA.4377.1 | 4.1   | 3.77  | 0.17 | 0.06 | 1.26  | 0.017967 | 0.005177 | 0.294714 | 0.099727 |
| MmugDNA.438.1.S1_at    | MmugDNA.438.1  | 5.47  | 5.7   | 0.63 | 0.25 | -1.17 | 0.758748 | 0.291767 | 0.909304 | 0.552054 |
| MmugDNA.4380.1.S1_at   | MmugDNA.4380.1 | 4.51  | 4.57  | 0.11 | 0.13 | -1.04 | 0.515113 | 0.566664 | 0.790767 | 0.740723 |
| MmugDNA.4381.1.S1_at   | MmugDNA.4381.1 | 9.93  | 9.77  | 0.35 | 0.02 | 1.12  | 0.82012  | 0.924009 | 0.935275 | 0.957162 |
| MmugDNA.4382.1.S1_at   | MmugDNA.4382.1 | 3.08  | 3.21  | 0.21 | 0.06 | -1.1  | 0.428426 | 0.305584 | 0.741876 | 0.562504 |
| MmugDNA.4383.1.S1_at   | MmugDNA.4383.1 | 5.85  | 5.67  | 0.18 | 0.02 | 1.14  | 0.128413 | 0.067385 | 0.503044 | 0.305618 |
| MmugDNA.4384.1.S1_at   | MmugDNA.4384.1 | 7.95  | 9.87  | 0.61 | 0.12 | -3.79 | 0.012716 | 0.051444 | 0.26403  | 0.272231 |
| MmugDNA.4386.1.S1_at   | MmugDNA.4386.1 | 3.17  | 3.11  | 0.17 | 0.03 | 1.04  | 0.570051 | 0.374086 | 0.821883 | 0.612678 |
| MmugDNA.4387.1.S1_at   | MmugDNA.4387.1 | 5.45  | 5.2   | 0.08 | 0.13 | 1.19  | 0.0664   | 0.017386 | 0.422255 | 0.166963 |
| MmugDNA.4388.1.S1_at   | MmugDNA.4388.1 | 5.08  | 5.1   | 0.19 | 0.29 | -1.02 | 0.283597 | 0.351526 | 0.641408 | 0.595094 |
| MmugDNA.439.1.S1_at    | MmugDNA.439.1  | 6.29  | 6.42  | 0.68 | 0.15 | -1.09 | 0.392755 | 0.226996 | 0.718592 | 0.499286 |
| MmugDNA.4391.1.S1_at   | MmugDNA.4391.1 | 6.2   | 6.5   | 0.24 | 0.08 | -1.23 | 0.113589 | 0.016525 | 0.486895 | 0.162738 |
| MmugDNA.4392.1.S1_at   | MmugDNA.4392.1 | 5     | 6.3   | 0.62 | 0.18 | -2.46 | 0.066206 | 0.52827  | 0.421918 | 0.716462 |
| MmugDNA.4393.1.S1_at   | MmugDNA.4393.1 | 4.31  | 4.34  | 0.16 | 0.18 | -1.03 | 0.772634 | 0.893358 | 0.915403 | 0.939163 |
| MmugDNA.4396.1.S1_at   | MmugDNA.4396.1 | 12.58 | 12.29 | 0.34 | 0.11 | 1.22  | 0.505559 | 0.476249 | 0.785389 | 0.682616 |
| MmugDNA.4397.1.S1_at   | MmugDNA.4397.1 | 4.56  | 4.52  | 0.17 | 0.11 | 1.03  | 0.814202 | 0.951112 | 0.932949 | 0.972319 |
| MmugDNA.4399.1.S1_at   | MmugDNA.4399.1 | 4.48  | 4.58  | 0.13 | 0.09 | -1.07 | 0.875909 | 0.851032 | 0.956834 | 0.915265 |
| MmugDNA.44.1.S1_at     | MmugDNA.44.1   | 5.31  | 5.27  | 0.01 | 0.11 | 1.03  | 0.763001 | 0.466272 | 0.910975 | 0.676227 |
| MmugDNA.4400.1.S1_at   | MmugDNA.4400.1 | 4.61  | 6.87  | 0.94 | 0.68 | -4.79 | 0.082671 | 0.211167 | 0.447833 | 0.485195 |
| MmugDNA.4401.1.S1_at   | MmugDNA.4401.1 | 5.83  | 5.86  | 0.23 | 0.43 | -1.02 | 0.76579  | 0.701027 | 0.911934 | 0.826613 |
| MmugDNA.4402.1.S1_at   | MmugDNA.4402.1 | 11.2  | 11.35 | 0.31 | 0.08 | -1.11 | 0.320771 | 0.036376 | 0.669445 | 0.235146 |
| MmugDNA.4402.1.S1_s_at | MmugDNA.4402.1 | 10.78 | 10.91 | 0.41 | 0.07 | -1.09 | 0.463166 | 0.041851 | 0.762045 | 0.249172 |
| MmugDNA.4403.1.S1_at   | MmugDNA.4403.1 | 6.49  | 6.77  | 0.73 | 0.28 | -1.21 | 0.681652 | 0.881874 | 0.875365 | 0.93263  |
| MmugDNA.4407.1.S1_s_at | MmugDNA.4407.1 | 9.04  | 8.93  | 0.14 | 0.27 | 1.08  | 0.851699 | 0.909008 | 0.947717 | 0.948484 |
| MmugDNA.4408.1.S1_at   | MmugDNA.4408.1 | 5.82  | 5.56  | 0.15 | 0.08 | 1.2   | 0.078664 | 0.11142  | 0.441461 | 0.376126 |
| MmugDNA.4410.1.S1_at   | MmugDNA.4410.1 | 2.95  | 2.76  | 0.11 | 0.06 | 1.14  | 0.115111 | 0.347888 | 0.488314 | 0.592196 |
| MmugDNA.4411.1.S1_at   | MmugDNA.4411.1 | 3.84  | 3.75  | 0    | 0.19 | 1.07  | 0.914844 | 0.482537 | 0.970941 | 0.68734  |
| MmugDNA.4412.1.S1_at   | MmugDNA.4412.1 | 7.42  | 7.93  | 0.2  | 0.21 | -1.42 | 0.021719 | 0.009965 | 0.309332 | 0.131094 |
| MmugDNA.4413.1.S1_at   | MmugDNA.4413.1 | 4.02  | 4.05  | 0.26 | 0.04 | -1.02 | 0.493002 | 0.604018 | 0.778657 | 0.764427 |
| MmugDNA.4414.1.S1_at   | MmugDNA.4414.1 | 3.81  | 3.65  | 0.2  | 0.18 | 1.11  | 0.42455  | 0.512439 | 0.739618 | 0.706299 |
| MmugDNA.4415.1.S1_at   | MmugDNA.4415.1 | 4.42  | 4.86  | 0.11 | 0.05 | -1.36 | 0.002381 | 0.094735 | 0.177065 | 0.351549 |
| MmugDNA.4417.1.S1_at   | MmugDNA.4417.1 | 5.18  | 4.92  | 0.03 | 0.02 | 1.19  | 0.000296 | 0.02132  | 0.132733 | 0.182772 |
| MmugDNA.4418.1.S1_at   | MmugDNA.4418.1 | 10.46 | 10.22 | 0.19 | 0.07 | 1.18  | 0.308802 | 0.578107 | 0.661293 | 0.7483   |
| MmugDNA.4421.1.S1_at   | MmugDNA.4421.1 | 7.83  | 7.55  | 1.65 | 0.19 | 1.21  | 0.954639 | 0.172282 | 0.98492  | 0.448666 |
| MmugDNA.4423.1.S1_at   | MmugDNA.4423.1 | 5.19  | 5.32  | 0.23 | 0.05 | -1.09 | 0.995035 | 0.937723 | 0.99815  | 0.964687 |
| MmugDNA.4424.1.S1_at   | MmugDNA.4424.1 | 7.35  | 7.73  | 0.14 | 0.36 | -1.3  | 0.130223 | 0.07198  | 0.504682 | 0.314305 |
| MmugDNA.4425.1.S1_at   | MmugDNA.4425.1 | 4.53  | 4.7   | 0.27 | 0.37 | -1.12 | 0.148399 | 0.169054 | 0.522567 | 0.445593 |
| MmugDNA.4426.1.S1_at   | MmugDNA.4426.1 | 3.8   | 3.52  | 0.28 | 0.17 | 1.21  | 0.463259 | 0.587876 | 0.762124 | 0.754542 |
| MmugDNA.4428.1.S1_at   | MmugDNA.4428.1 | 7.11  | 6.73  | 0.73 | 0.19 | 1.31  | 0.892021 | 0.194041 | 0.962971 | 0.469151 |
| MmugDNA.4429.1.S1_at   | MmugDNA.4429.1 | 3.64  | 3.53  | 0.23 | 0.18 | 1.09  | 0.152869 | 0.241479 | 0.525753 | 0.512148 |
| MmugDNA.443.1.S1_at    | MmugDNA.443.1  | 12.79 | 12.78 | 0.27 | 0.04 | 1.01  | 0.402651 | 0.160245 | 0.725018 | 0.436398 |
| MmugDNA.4431.1.S1_at   | MmugDNA.4431.1 | 6.19  | 6.23  | 0.44 | 0.04 | -1.03 | 0.938187 | 0.991689 | 0.979247 | 0.995392 |

|                        |                |       |       |      |      |       |          |          |          |          |
|------------------------|----------------|-------|-------|------|------|-------|----------|----------|----------|----------|
| MmugDNA.4432.1.S1_at   | MmugDNA.4432.1 | 7.32  | 8.24  | 0.55 | 0.06 | -1.9  | 0.126992 | 0.156335 | 0.500834 | 0.43161  |
| MmugDNA.4435.1.S1_at   | MmugDNA.4435.1 | 3.45  | 3.44  | 0.23 | 0    | 1.01  | 0.59617  | 0.874043 | 0.835819 | 0.928462 |
| MmugDNA.4436.1.S1_at   | MmugDNA.4436.1 | 3.58  | 3.55  | 0.17 | 0.11 | 1.03  | 0.355139 | 0.476382 | 0.69464  | 0.682695 |
| MmugDNA.4437.1.S1_at   | MmugDNA.4437.1 | 5.85  | 5.76  | 0.16 | 0.06 | 1.06  | 0.150541 | 0.132287 | 0.524173 | 0.404294 |
| MmugDNA.4439.1.S1_at   | MmugDNA.4439.1 | 4.35  | 4.47  | 0.04 | 0.05 | -1.09 | 0.015481 | 0.030119 | 0.282102 | 0.215399 |
| MmugDNA.444.1.S1_s_at  | MmugDNA.444.1  | 11.55 | 11.75 | 0.19 | 0.07 | -1.15 | 0.230375 | 0.394268 | 0.598513 | 0.626868 |
| MmugDNA.4440.1.S1_at   | MmugDNA.4440.1 | 5.15  | 5.08  | 0.14 | 0.14 | 1.04  | 0.272128 | 0.707728 | 0.631909 | 0.830472 |
| MmugDNA.4441.1.S1_at   | MmugDNA.4441.1 | 3.1   | 3.01  | 0.11 | 0.1  | 1.07  | 0.407007 | 0.075658 | 0.728471 | 0.320125 |
| MmugDNA.4442.1.S1_at   | MmugDNA.4442.1 | 3.28  | 3.16  | 0.06 | 0.46 | 1.09  | 0.633163 | 0.837026 | 0.853404 | 0.906826 |
| MmugDNA.4443.1.S1_at   | MmugDNA.4443.1 | 8.35  | 8.27  | 1.04 | 0.14 | 1.06  | 0.742035 | 0.149802 | 0.901613 | 0.424394 |
| MmugDNA.4444.1.S1_at   | MmugDNA.4444.1 | 6.75  | 6.93  | 0.86 | 0.37 | -1.13 | 0.919281 | 0.316358 | 0.972508 | 0.569809 |
| MmugDNA.4445.1.S1_at   | MmugDNA.4445.1 | 10.43 | 10.34 | 0.15 | 0.09 | 1.06  | 0.222292 | 0.006082 | 0.591863 | 0.106306 |
| MmugDNA.4446.1.S1_s_at | MmugDNA.4446.1 | 7.19  | 6.7   | 0.24 | 0.23 | 1.41  | 0.317651 | 0.002843 | 0.667511 | 0.078566 |
| MmugDNA.4447.1.S1_at   | MmugDNA.4447.1 | 3.35  | 3.34  | 0.26 | 0.05 | 1.01  | 0.924826 | 0.993989 | 0.974863 | 0.996372 |
| MmugDNA.445.1.S1_at    | MmugDNA.445.1  | 2.9   | 2.88  | 0.1  | 0.07 | 1.02  | 0.64567  | 0.780923 | 0.858801 | 0.872893 |
| MmugDNA.4450.1.S1_at   | MmugDNA.4450.1 | 3.96  | 3.23  | 0.53 | 0.31 | 1.66  | 0.364088 | 0.418125 | 0.700445 | 0.642619 |
| MmugDNA.4451.1.S1_at   | MmugDNA.4451.1 | 3.82  | 3.71  | 0.14 | 0.12 | 1.08  | 0.158715 | 0.681611 | 0.531595 | 0.814092 |
| MmugDNA.4452.1.S1_at   | MmugDNA.4452.1 | 8.03  | 8.17  | 0.43 | 0.1  | -1.11 | 0.633165 | 0.029351 | 0.853404 | 0.213228 |
| MmugDNA.4453.1.S1_at   | MmugDNA.4453.1 | 3.39  | 3.47  | 0.09 | 0.24 | -1.06 | 0.534286 | 0.736722 | 0.80126  | 0.847693 |
| MmugDNA.4454.1.S1_at   | MmugDNA.4454.1 | 9.24  | 9.82  | 0.97 | 0.11 | -1.49 | 0.329258 | 0.075812 | 0.676288 | 0.320402 |
| MmugDNA.4455.1.S1_at   | MmugDNA.4455.1 | 13.36 | 13.46 | 0.08 | 0.03 | -1.07 | 0.190649 | 0.075589 | 0.561788 | 0.32003  |
| MmugDNA.4456.1.S1_at   | MmugDNA.4456.1 | 9.07  | 8.83  | 0.42 | 0.1  | 1.18  | 0.933343 | 0.096593 | 0.977395 | 0.354126 |
| MmugDNA.4457.1.S1_at   | MmugDNA.4457.1 | 4.35  | 4.11  | 0.24 | 0.1  | 1.18  | 0.206176 | 0.605013 | 0.578134 | 0.764917 |
| MmugDNA.4458.1.S1_at   | MmugDNA.4458.1 | 7     | 6.78  | 0.17 | 0.08 | 1.16  | 0.106899 | 0.603234 | 0.479405 | 0.764033 |
| MmugDNA.4459.1.S1_at   | MmugDNA.4459.1 | 5.67  | 5.79  | 0.43 | 0.7  | -1.08 | 0.776812 | 0.55558  | 0.917412 | 0.733957 |
| MmugDNA.446.1.S1_at    | MmugDNA.446.1  | 3.62  | 3.28  | 0.17 | 0.26 | 1.27  | 0.094059 | 0.127536 | 0.463389 | 0.398407 |
| MmugDNA.4460.1.S1_at   | MmugDNA.4460.1 | 5.95  | 6     | 0.36 | 0.11 | -1.03 | 0.537329 | 0.398057 | 0.802735 | 0.629148 |
| MmugDNA.4462.1.S1_at   | MmugDNA.4462.1 | 5.53  | 5.82  | 0.72 | 0.26 | -1.22 | 0.669859 | 0.348548 | 0.869798 | 0.592609 |
| MmugDNA.4464.1.S1_at   | MmugDNA.4464.1 | 3.3   | 3.46  | 0.28 | 0.22 | -1.12 | 0.586891 | 0.395887 | 0.831559 | 0.627749 |
| MmugDNA.4465.1.S1_at   | MmugDNA.4465.1 | 4.81  | 4.91  | 0.47 | 0.08 | -1.07 | 0.56283  | 0.124599 | 0.817877 | 0.394995 |
| MmugDNA.4466.1.S1_at   | MmugDNA.4466.1 | 2.76  | 2.72  | 0.15 | 0.03 | 1.03  | 0.167246 | 0.428851 | 0.539832 | 0.650408 |
| MmugDNA.4467.1.S1_at   | MmugDNA.4467.1 | 4.93  | 5.02  | 0.14 | 0.23 | -1.07 | 0.416378 | 0.3814   | 0.734315 | 0.617681 |
| MmugDNA.4468.1.S1_at   | MmugDNA.4468.1 | 4.75  | 4.42  | 0.03 | 0.15 | 1.25  | 0.009599 | 0.015629 | 0.242793 | 0.158437 |
| MmugDNA.4469.1.S1_at   | MmugDNA.4469.1 | 3.96  | 3.98  | 0.1  | 0.11 | -1.01 | 0.609834 | 0.640535 | 0.841773 | 0.78899  |
| MmugDNA.447.1.S1_at    | MmugDNA.447.1  | 11.64 | 11.1  | 0.22 | 0.02 | 1.45  | 0.016313 | 0.003683 | 0.287363 | 0.086591 |
| MmugDNA.4470.1.S1_at   | MmugDNA.4470.1 | 3.53  | 3.4   | 0.15 | 0.09 | 1.09  | 0.50127  | 0.650601 | 0.783112 | 0.795663 |
| MmugDNA.4471.1.S1_at   | MmugDNA.4471.1 | 3.99  | 3.88  | 0    | 0.2  | 1.08  | 0.433206 | 0.248128 | 0.744296 | 0.517567 |
| MmugDNA.4472.1.S1_at   | MmugDNA.4472.1 | 4.77  | 4.78  | 0.13 | 0.05 | -1.01 | 0.399875 | 0.39967  | 0.723381 | 0.629933 |
| MmugDNA.4474.1.S1_at   | MmugDNA.4474.1 | 5.11  | 5.19  | 0.34 | 0.43 | -1.06 | 0.333594 | 0.488125 | 0.679759 | 0.690902 |
| MmugDNA.4475.1.S1_at   | MmugDNA.4475.1 | 5.6   | 5.63  | 0.13 | 0.13 | -1.02 | 0.790899 | 0.832087 | 0.923079 | 0.903658 |
| MmugDNA.4476.1.S1_at   | MmugDNA.4476.1 | 7.04  | 5.9   | 0.24 | 0.18 | 2.22  | 0.003758 | 0.011704 | 0.197739 | 0.140174 |
| MmugDNA.4477.1.S1_at   | MmugDNA.4477.1 | 9.27  | 9.06  | 0.88 | 0.92 | 1.16  | 0.873683 | 0.606214 | 0.956275 | 0.765727 |
| MmugDNA.448.1.S1_at    | MmugDNA.448.1  | 7.44  | 9.14  | 0.2  | 0.41 | -3.24 | 0.004595 | 0.000722 | 0.201051 | 0.044531 |

|                        |                |       |       |      |      |       |          |          |          |          |
|------------------------|----------------|-------|-------|------|------|-------|----------|----------|----------|----------|
| MmugDNA.4480.1.S1_at   | MmugDNA.4480.1 | 4.58  | 4.69  | 0.14 | 0.01 | -1.08 | 0.743337 | 0.939821 | 0.902104 | 0.965805 |
| MmugDNA.4481.1.S1_at   | MmugDNA.4481.1 | 12.45 | 13.15 | 1.39 | 0.14 | -1.62 | 0.329354 | 0.222526 | 0.676319 | 0.495591 |
| MmugDNA.4482.1.S1_at   | MmugDNA.4482.1 | 6.16  | 6.52  | 0.55 | 0.25 | -1.29 | 0.898589 | 0.003275 | 0.965566 | 0.082366 |
| MmugDNA.4483.1.S1_at   | MmugDNA.4483.1 | 4.67  | 4.37  | 0.2  | 0    | 1.24  | 0.121015 | 0.170117 | 0.494696 | 0.446868 |
| MmugDNA.4484.1.S1_at   | MmugDNA.4484.1 | 8.09  | 8.56  | 0.26 | 0.23 | -1.39 | 0.068847 | 0.021666 | 0.42618  | 0.184333 |
| MmugDNA.4485.1.S1_at   | MmugDNA.4485.1 | 10.19 | 10.1  | 0.35 | 0.16 | 1.07  | 0.659067 | 0.307828 | 0.865035 | 0.56397  |
| MmugDNA.4486.1.S1_at   | MmugDNA.4486.1 | 4.62  | 4.37  | 0.12 | 0.05 | 1.19  | 0.06588  | 0.118155 | 0.421234 | 0.386071 |
| MmugDNA.4488.1.S1_at   | MmugDNA.4488.1 | 11.03 | 10.73 | 0.33 | 0.11 | 1.23  | 0.237954 | 0.024152 | 0.605101 | 0.194572 |
| MmugDNA.4489.1.S1_at   | MmugDNA.4489.1 | 5.3   | 5.17  | 0.04 | 0.08 | 1.09  | 0.104479 | 0.232054 | 0.475531 | 0.503781 |
| MmugDNA.449.1.S1_at    | MmugDNA.449.1  | 6.04  | 5.79  | 0.09 | 0.07 | 1.19  | 0.051566 | 0.07176  | 0.390603 | 0.314014 |
| MmugDNA.4490.1.S1_at   | MmugDNA.4490.1 | 4.24  | 4.09  | 0.14 | 0.05 | -1.11 | 0.073395 | 0.020207 | 0.434422 | 0.178561 |
| MmugDNA.4490.1.S1_x_at | MmugDNA.4490.1 | 3.87  | 3.62  | 0.1  | 0.03 | 1.18  | 0.018194 | 0.04545  | 0.295482 | 0.2575   |
| MmugDNA.4491.1.S1_s_at | MmugDNA.4491.1 | 11.2  | 11.47 | 0.25 | 0.07 | -1.21 | 0.118147 | 0.214785 | 0.491528 | 0.488643 |
| MmugDNA.4492.1.S1_at   | MmugDNA.4492.1 | 5.3   | 5.2   | 0.07 | 0.06 | 1.07  | 0.119012 | 0.144444 | 0.492539 | 0.418323 |
| MmugDNA.4493.1.S1_at   | MmugDNA.4493.1 | 3.03  | 2.95  | 0.13 | 0.15 | 1.06  | 0.316702 | 0.223109 | 0.666657 | 0.49588  |
| MmugDNA.4494.1.S1_at   | MmugDNA.4494.1 | 7.71  | 6.4   | 0.15 | 0.52 | 2.48  | 0.016234 | 0.32338  | 0.286783 | 0.574453 |
| MmugDNA.4495.1.S1_at   | MmugDNA.4495.1 | 3.25  | 3.21  | 0.22 | 0.02 | 1.02  | 0.587529 | 0.788405 | 0.831697 | 0.877619 |
| MmugDNA.4497.1.S1_at   | MmugDNA.4497.1 | 3.5   | 3.53  | 0.33 | 0.2  | -1.02 | 0.653321 | 0.662061 | 0.862325 | 0.802105 |
| MmugDNA.4498.1.S1_at   | MmugDNA.4498.1 | 3.46  | 3.45  | 0.04 | 0.03 | 1.01  | 0.610273 | 0.615388 | 0.841839 | 0.771962 |
| MmugDNA.4499.1.S1_at   | MmugDNA.4499.1 | 7.49  | 8.31  | 0.86 | 0.08 | -1.76 | 0.157291 | 0.189354 | 0.530508 | 0.465092 |
| MmugDNA.450.1.S1_at    | MmugDNA.450.1  | 7.03  | 6.96  | 0.07 | 0.07 | 1.05  | 0.167861 | 0.313905 | 0.5405   | 0.568094 |
| MmugDNA.4500.1.S1_at   | MmugDNA.4500.1 | 4.43  | 5.3   | 0.11 | 0.43 | -1.83 | 0.054814 | 0.070544 | 0.397122 | 0.311777 |
| MmugDNA.4502.1.S1_at   | MmugDNA.4502.1 | 3.88  | 3.92  | 0.15 | 0.15 | -1.03 | 0.623591 | 0.386903 | 0.848284 | 0.621935 |
| MmugDNA.4503.1.S1_at   | MmugDNA.4503.1 | 5.87  | 5.68  | 0.1  | 0.01 | 1.14  | 0.013026 | 0.032532 | 0.266166 | 0.223378 |
| MmugDNA.4504.1.S1_at   | MmugDNA.4504.1 | 9.67  | 9.01  | 0.33 | 0.08 | 1.58  | 0.016403 | 0.009251 | 0.287478 | 0.126966 |
| MmugDNA.4505.1.S1_at   | MmugDNA.4505.1 | 6.54  | 7.15  | 0.8  | 0.41 | -1.53 | 0.284489 | 0.455697 | 0.642303 | 0.669654 |
| MmugDNA.4506.1.S1_at   | MmugDNA.4506.1 | 6.27  | 6.08  | 0.1  | 0.06 | 1.14  | 0.077924 | 0.288094 | 0.439987 | 0.549319 |
| MmugDNA.4507.1.S1_at   | MmugDNA.4507.1 | 8.67  | 8.99  | 0.35 | 0.12 | -1.25 | 0.61685  | 0.788237 | 0.845119 | 0.877514 |
| MmugDNA.4508.1.S1_at   | MmugDNA.4508.1 | 12.02 | 12.52 | 0.31 | 0.01 | -1.41 | 0.053668 | 0.022965 | 0.39535  | 0.189548 |
| MmugDNA.4509.1.S1_at   | MmugDNA.4509.1 | 8.08  | 8.1   | 0.54 | 0.16 | -1.01 | 0.827352 | 0.455776 | 0.938039 | 0.669659 |
| MmugDNA.451.1.S1_at    | MmugDNA.451.1  | 3.94  | 4.87  | 0.18 | 0.26 | -1.9  | 0.008428 | 0.297348 | 0.233823 | 0.556071 |
| MmugDNA.4511.1.S1_at   | MmugDNA.4511.1 | 10.65 | 10.49 | 0.07 | 0.31 | 1.12  | 0.902014 | 0.118653 | 0.966869 | 0.386673 |
| MmugDNA.4512.1.S1_at   | MmugDNA.4512.1 | 8.3   | 7.62  | 0.36 | 0.29 | 1.6   | 0.050357 | 0.036099 | 0.386989 | 0.234417 |
| MmugDNA.4513.1.S1_at   | MmugDNA.4513.1 | 7.38  | 6.85  | 0.12 | 0.17 | 1.44  | 0.022601 | 0.013418 | 0.311427 | 0.148424 |
| MmugDNA.4514.1.S1_at   | MmugDNA.4514.1 | 4.47  | 4.54  | 0.06 | 0.07 | -1.05 | 0.131915 | 0.150113 | 0.506356 | 0.42471  |
| MmugDNA.4516.1.S1_at   | MmugDNA.4516.1 | 7.1   | 6.66  | 0.03 | 0.2  | 1.35  | 0.009793 | 0.024679 | 0.243624 | 0.196662 |
| MmugDNA.4517.1.S1_s_at | MmugDNA.4517.1 | 9.83  | 9.81  | 0.41 | 0.06 | 1.01  | 0.971203 | 0.732959 | 0.990583 | 0.84547  |
| MmugDNA.4518.1.S1_at   | MmugDNA.4518.1 | 3.8   | 3.83  | 0.03 | 0.13 | -1.03 | 0.604477 | 0.967663 | 0.83963  | 0.982117 |
| MmugDNA.4519.1.S1_at   | MmugDNA.4519.1 | 8.15  | 8.13  | 0.18 | 0.02 | 1.01  | 0.961551 | 0.160541 | 0.987441 | 0.436708 |
| MmugDNA.4520.1.S1_at   | MmugDNA.4520.1 | 5.06  | 4.9   | 0.24 | 0.1  | 1.12  | 0.513454 | 0.753721 | 0.789843 | 0.856634 |
| MmugDNA.4521.1.S1_at   | MmugDNA.4521.1 | 8.14  | 8.64  | 0.54 | 0.23 | -1.41 | 0.87939  | 0.658913 | 0.958199 | 0.800473 |
| MmugDNA.4522.1.S1_at   | MmugDNA.4522.1 | 3.12  | 3.2   | 0.09 | 0.14 | -1.06 | 0.665453 | 0.743616 | 0.86797  | 0.851428 |
| MmugDNA.4523.1.S1_at   | MmugDNA.4523.1 | 9.73  | 9.32  | 0.3  | 0.2  | 1.33  | 0.581829 | 0.040986 | 0.827791 | 0.247202 |

|                         |                 |       |       |      |      |       |          |          |          |          |
|-------------------------|-----------------|-------|-------|------|------|-------|----------|----------|----------|----------|
| MmugDNA.29813.1.S1_at   | MmugDNA.29813.1 | 10.84 | 10.95 | 0.2  | 0.32 | -1.08 | 0.227264 | 0.107745 | 0.596459 | 0.370816 |
| MmugDNA.29813.1.S1_s_at | MmugDNA.29813.1 | 10.71 | 10.41 | 0.29 | 0.28 | 1.23  | 0.920735 | 0.090047 | 0.973155 | 0.344402 |
| MmugDNA.4524.1.S1_at    | MmugDNA.4524.1  | 7.57  | 8.17  | 0.42 | 0.13 | -1.52 | 0.18793  | 0.23022  | 0.560014 | 0.502084 |
| MmugDNA.4525.1.S1_at    | MmugDNA.4525.1  | 11.9  | 12.22 | 0.23 | 0.04 | -1.24 | 0.086177 | 0.082022 | 0.453748 | 0.330729 |
| MmugDNA.4526.1.S1_at    | MmugDNA.4526.1  | 7.81  | 8.65  | 0.41 | 0.18 | -1.79 | 0.037367 | 0.021803 | 0.357066 | 0.184765 |
| MmugDNA.4527.1.S1_at    | MmugDNA.4527.1  | 6.33  | 6.13  | 0.48 | 0.07 | 1.14  | 0.855344 | 0.653493 | 0.948797 | 0.797464 |
| MmugDNA.4528.1.S1_at    | MmugDNA.4528.1  | 4.88  | 4.66  | 0.37 | 0.11 | 1.17  | 0.532958 | 0.353671 | 0.800589 | 0.596752 |
| MmugDNA.4529.1.S1_at    | MmugDNA.4529.1  | 3.83  | 3.61  | 0.22 | 0.13 | 1.16  | 0.895988 | 0.103918 | 0.964456 | 0.36459  |
| MmugDNA.453.1.S1_at     | MmugDNA.453.1   | 10.61 | 10.38 | 0.92 | 0.63 | 1.17  | 0.79718  | 0.516835 | 0.925393 | 0.709251 |
| MmugDNA.4530.1.S1_at    | MmugDNA.4530.1  | 4.18  | 4.08  | 0.23 | 0.14 | 1.07  | 0.209875 | 0.263293 | 0.581346 | 0.529561 |
| MmugDNA.4532.1.S1_at    | MmugDNA.4532.1  | 11.74 | 12.06 | 0.42 | 0.02 | -1.24 | 0.360872 | 0.392294 | 0.698207 | 0.625694 |
| MmugDNA.4533.1.S1_at    | MmugDNA.4533.1  | 6.67  | 7.03  | 0.45 | 0.07 | -1.28 | 0.474205 | 0.291345 | 0.767936 | 0.551803 |
| MmugDNA.4534.1.S1_at    | MmugDNA.4534.1  | 10.15 | 10.23 | 0.58 | 0.08 | -1.06 | 0.747959 | 0.339308 | 0.904242 | 0.585982 |
| MmugDNA.4535.1.S1_at    | MmugDNA.4535.1  | 5.89  | 5.72  | 0.79 | 0.31 | 1.12  | 0.492401 | 0.652722 | 0.778247 | 0.796982 |
| MmugDNA.4536.1.S1_at    | MmugDNA.4536.1  | 6.69  | 6.6   | 0.13 | 0.41 | 1.06  | 0.373918 | 0.41425  | 0.705567 | 0.640163 |
| MmugDNA.4537.1.S1_at    | MmugDNA.4537.1  | 7.39  | 7.21  | 0.67 | 0.17 | 1.13  | 0.867362 | 0.240894 | 0.953465 | 0.511584 |
| MmugDNA.4538.1.S1_at    | MmugDNA.4538.1  | 9.72  | 9.91  | 0.23 | 0.18 | -1.15 | 0.712716 | 0.61858  | 0.888019 | 0.774158 |
| MmugDNA.4539.1.S1_at    | MmugDNA.4539.1  | 6.78  | 6.81  | 0.02 | 0.03 | -1.03 | 0.881618 | 0.989561 | 0.959065 | 0.994055 |
| MmugDNA.454.1.S1_at     | MmugDNA.454.1   | 11.44 | 10.93 | 0.35 | 0.17 | 1.43  | 0.033963 | 0.002455 | 0.347469 | 0.073314 |
| MmugDNA.4540.1.S1_at    | MmugDNA.4540.1  | 11.3  | 11.62 | 0.02 | 0.06 | -1.25 | 0.000857 | 0.001151 | 0.153739 | 0.053529 |
| MmugDNA.4541.1.S1_at    | MmugDNA.4541.1  | 3.99  | 4.31  | 1.2  | 0.39 | -1.25 | 0.685478 | 0.859518 | 0.876846 | 0.919992 |
| MmugDNA.4542.1.S1_at    | MmugDNA.4542.1  | 3.08  | 3.15  | 0.03 | 0.07 | -1.05 | 0.182743 | 0.060241 | 0.555631 | 0.292091 |
| MmugDNA.4543.1.S1_at    | MmugDNA.4543.1  | 9.31  | 9.37  | 0.21 | 0.11 | -1.04 | 0.378149 | 0.012898 | 0.708016 | 0.146225 |
| MmugDNA.4544.1.S1_at    | MmugDNA.4544.1  | 5.62  | 5.85  | 0.35 | 0.23 | -1.18 | 0.400713 | 0.379734 | 0.723941 | 0.616543 |
| MmugDNA.4545.1.S1_at    | MmugDNA.4545.1  | 9.15  | 9.92  | 0.18 | 0.05 | -1.7  | 0.003726 | 0.000592 | 0.197739 | 0.041912 |
| MmugDNA.4546.1.S1_at    | MmugDNA.4546.1  | 6.21  | 6.13  | 0.1  | 0.05 | 1.06  | 0.138833 | 0.185711 | 0.514434 | 0.46163  |
| MmugDNA.4548.1.S1_at    | MmugDNA.4548.1  | 4.99  | 5.14  | 0.17 | 0.29 | -1.11 | 0.946092 | 0.311457 | 0.981287 | 0.566456 |
| MmugDNA.4549.1.S1_at    | MmugDNA.4549.1  | 3.2   | 3.29  | 0.22 | 0.12 | -1.07 | 0.372914 | 0.605045 | 0.705567 | 0.764917 |
| MmugDNA.455.1.S1_at     | MmugDNA.455.1   | 5.94  | 6.08  | 0.26 | 0.24 | -1.11 | 0.542755 | 0.645879 | 0.805983 | 0.792632 |
| MmugDNA.4550.1.S1_at    | MmugDNA.4550.1  | 4.92  | 4.79  | 0.04 | 0.23 | 1.09  | 0.356925 | 0.103868 | 0.695386 | 0.364519 |
| MmugDNA.4551.1.S1_at    | MmugDNA.4551.1  | 2.75  | 2.95  | 0.11 | 0.13 | -1.15 | 0.287404 | 0.272249 | 0.644533 | 0.536992 |
| MmugDNA.4553.1.S1_at    | MmugDNA.4553.1  | 5.94  | 5.81  | 0.28 | 0.17 | 1.1   | 0.966241 | 0.395678 | 0.988967 | 0.627623 |
| MmugDNA.4555.1.S1_at    | MmugDNA.4555.1  | 4.71  | 4.53  | 0.06 | 0.03 | 1.13  | 0.010926 | 0.004622 | 0.250796 | 0.094974 |
| MmugDNA.4556.1.S1_at    | MmugDNA.4556.1  | 6.62  | 6.07  | 1.12 | 0.25 | 1.46  | 0.83625  | 0.12973  | 0.941202 | 0.401362 |
| MmugDNA.4557.1.S1_at    | MmugDNA.4557.1  | 7.66  | 7.77  | 0.22 | 0.51 | -1.08 | 0.279088 | 0.219511 | 0.637997 | 0.493168 |
| MmugDNA.4558.1.S1_at    | MmugDNA.4558.1  | 8.49  | 8.15  | 0.81 | 0.09 | 1.26  | 0.519315 | 0.449898 | 0.793113 | 0.665343 |
| MmugDNA.4559.1.S1_at    | MmugDNA.4559.1  | 7.46  | 7.1   | 1.06 | 0.12 | 1.28  | 0.544549 | 0.29107  | 0.807324 | 0.551574 |
| MmugDNA.4560.1.S1_at    | MmugDNA.4560.1  | 4.95  | 4.76  | 0.15 | 0.12 | 1.14  | 0.088263 | 0.004065 | 0.45606  | 0.090288 |
| MmugDNA.4561.1.S1_at    | MmugDNA.4561.1  | 4.39  | 4.28  | 0.17 | 0.13 | 1.08  | 0.436528 | 0.395336 | 0.746319 | 0.627404 |
| MmugDNA.4563.1.S1_at    | MmugDNA.4563.1  | 6.33  | 6.22  | 0.04 | 0.05 | 1.09  | 0.042276 | 0.00733  | 0.368858 | 0.115015 |
| MmugDNA.4564.1.S1_at    | MmugDNA.4564.1  | 7.25  | 7.51  | 0.35 | 0.53 | -1.2  | 0.39131  | 0.136325 | 0.717502 | 0.408746 |
| MmugDNA.4565.1.S1_at    | MmugDNA.4565.1  | 5.49  | 5.63  | 0.18 | 0.08 | -1.1  | 0.512704 | 0.67964  | 0.789486 | 0.812969 |
| MmugDNA.4566.1.S1_at    | MmugDNA.4566.1  | 8.17  | 7.38  | 0.75 | 0.11 | 1.73  | 0.454065 | 0.676453 | 0.756537 | 0.81095  |

|                         |                 |       |       |      |      |       |          |          |          |          |
|-------------------------|-----------------|-------|-------|------|------|-------|----------|----------|----------|----------|
| MmugDNA.4568.1.S1_at    | MmugDNA.4568.1  | 3.24  | 3.4   | 0.43 | 0.14 | -1.11 | 0.552601 | 0.432652 | 0.811888 | 0.653054 |
| MmugDNA.4569.1.S1_at    | MmugDNA.4569.1  | 10.57 | 10.72 | 0.24 | 0.09 | -1.12 | 0.404886 | 0.008567 | 0.726978 | 0.122809 |
| MmugDNA.4570.1.S1_at    | MmugDNA.4570.1  | 4.79  | 4.81  | 0.05 | 0.12 | -1.01 | 0.366839 | 0.745038 | 0.702346 | 0.852262 |
| MmugDNA.4571.1.S1_at    | MmugDNA.4571.1  | 5.97  | 5.81  | 0.14 | 0.08 | 1.12  | 0.058205 | 0.028939 | 0.403804 | 0.21198  |
| MmugDNA.4572.1.S1_at    | MmugDNA.4572.1  | 5.88  | 6.64  | 0.09 | 0.06 | -1.69 | 0.000332 | 0.002997 | 0.137028 | 0.079958 |
| MmugDNA.4575.1.S1_at    | MmugDNA.4575.1  | 4.61  | 5.07  | 0.54 | 0.25 | -1.38 | 0.631524 | 0.124922 | 0.852417 | 0.395313 |
| MmugDNA.4577.1.S1_at    | MmugDNA.4577.1  | 5.96  | 5.86  | 0.23 | 0.05 | 1.07  | 0.170327 | 0.206928 | 0.543379 | 0.481052 |
| MmugDNA.4579.1.S1_at    | MmugDNA.4579.1  | 3.76  | 3.76  | 0.15 | 0.09 | -1    | 0.945078 | 0.42026  | 0.980852 | 0.64407  |
| MmugDNA.458.1.S1_at     | MmugDNA.458.1   | 7.35  | 6.47  | 0.75 | 0.14 | 1.85  | 0.042114 | 0.00885  | 0.368438 | 0.124493 |
| MmugDNA.4580.1.S1_at    | MmugDNA.4580.1  | 6.53  | 6.51  | 0.57 | 0.48 | 1.01  | 0.852634 | 0.883849 | 0.948073 | 0.933709 |
| MmugDNA.4582.1.S1_at    | MmugDNA.4582.1  | 5.18  | 5.42  | 0.62 | 0.28 | -1.18 | 0.950369 | 0.993607 | 0.983308 | 0.996218 |
| MmugDNA.4585.1.S1_at    | MmugDNA.4585.1  | 5.29  | 5.32  | 0.46 | 0.5  | -1.02 | 0.705644 | 0.360203 | 0.885355 | 0.601275 |
| MmugDNA.4586.1.S1_at    | MmugDNA.4586.1  | 12.01 | 12.26 | 0.18 | 0.02 | -1.19 | 0.120668 | 0.008044 | 0.494164 | 0.119181 |
| MmugDNA.4587.1.S1_at    | MmugDNA.4587.1  | 5.84  | 5.47  | 0.18 | 0.09 | 1.29  | 0.13811  | 0.186852 | 0.513671 | 0.462707 |
| MmugDNA.4588.1.S1_at    | MmugDNA.4588.1  | 7.78  | 8.26  | 0.14 | 0.19 | -1.4  | 0.037631 | 0.01796  | 0.357733 | 0.169043 |
| MmugDNA.459.1.S1_at     | MmugDNA.459.1   | 3.87  | 3.95  | 0.18 | 0.06 | -1.06 | 0.562171 | 0.81755  | 0.817608 | 0.894746 |
| MmugDNA.4590.1.S1_at    | MmugDNA.4590.1  | 4.04  | 3.92  | 0.11 | 0.23 | 1.09  | 0.413314 | 0.484453 | 0.732218 | 0.688478 |
| MmugDNA.4591.1.S1_at    | MmugDNA.4591.1  | 5.41  | 6.39  | 0.54 | 0.38 | -1.98 | 0.147004 | 0.207096 | 0.521545 | 0.481189 |
| MmugDNA.4593.1.S1_at    | MmugDNA.4593.1  | 8.16  | 8.44  | 0.4  | 0.19 | -1.22 | 0.899658 | 0.444685 | 0.96591  | 0.662072 |
| MmugDNA.29515.1.S1_at   | MmugDNA.29515.1 | 7.98  | 8.24  | 0.39 | 0.1  | -1.2  | 0.264411 | 0.008769 | 0.626029 | 0.124009 |
| MmugDNA.29515.1.S1_s_at | MmugDNA.29515.1 | 9.35  | 9.54  | 0.33 | 0.1  | -1.14 | 0.093281 | 0.003643 | 0.462336 | 0.086518 |
| MmugDNA.4595.1.S1_at    | MmugDNA.4595.1  | 6.5   | 6.52  | 0.19 | 0.06 | -1.01 | 0.902095 | 0.971559 | 0.966869 | 0.984558 |
| MmugDNA.4596.1.S1_at    | MmugDNA.4596.1  | 3.41  | 3.26  | 0.18 | 0.01 | 1.11  | 0.184027 | 0.200117 | 0.55695  | 0.474603 |
| MmugDNA.4597.1.S1_at    | MmugDNA.4597.1  | 12.14 | 12.69 | 0.06 | 0.03 | -1.46 | 0.000147 | 0.002653 | 0.112332 | 0.076147 |
| MmugDNA.4598.1.S1_at    | MmugDNA.4598.1  | 4.71  | 4.5   | 0.1  | 0.09 | 1.16  | 0.176827 | 0.242156 | 0.549945 | 0.512652 |
| MmugDNA.4599.1.S1_at    | MmugDNA.4599.1  | 5.2   | 5.58  | 1.16 | 0.47 | -1.3  | 0.40648  | 0.240389 | 0.727994 | 0.510966 |
| MmugDNA.46.1.S1_at      | MmugDNA.46.1    | 10    | 9.16  | 0.32 | 0.16 | 1.79  | 0.021415 | 0.028423 | 0.308506 | 0.210385 |
| MmugDNA.460.1.S1_at     | MmugDNA.460.1   | 6.37  | 6.22  | 0.1  | 0.18 | 1.11  | 0.587238 | 0.07529  | 0.831578 | 0.319441 |
| MmugDNA.4600.1.S1_at    | MmugDNA.4600.1  | 3.96  | 3.71  | 0.13 | 0.15 | 1.19  | 0.16711  | 0.2259   | 0.539661 | 0.498298 |
| MmugDNA.4601.1.S1_at    | MmugDNA.4601.1  | 5.35  | 6.15  | 1.11 | 0.05 | -1.74 | 0.798083 | 0.936016 | 0.925892 | 0.963932 |
| MmugDNA.4602.1.S1_at    | MmugDNA.4602.1  | 6.1   | 6.74  | 0.56 | 0.42 | -1.57 | 0.376654 | 0.168827 | 0.706953 | 0.445458 |
| MmugDNA.4603.1.S1_at    | MmugDNA.4603.1  | 5.75  | 6.55  | 0.59 | 0.27 | -1.73 | 0.173441 | 0.01212  | 0.546571 | 0.142442 |
| MmugDNA.4604.1.S1_at    | MmugDNA.4604.1  | 6.05  | 6.04  | 0.37 | 0.03 | 1.01  | 0.369416 | 0.38983  | 0.704236 | 0.623878 |
| MmugDNA.4605.1.S1_at    | MmugDNA.4605.1  | 5.66  | 4.4   | 0.71 | 0.55 | 2.4   | 0.154116 | 0.075112 | 0.527483 | 0.319301 |
| MmugDNA.4606.1.S1_at    | MmugDNA.4606.1  | 5.74  | 6.04  | 0.47 | 0.19 | -1.23 | 0.668817 | 0.799633 | 0.869159 | 0.884762 |
| MmugDNA.4607.1.S1_at    | MmugDNA.4607.1  | 8.75  | 8.76  | 0.4  | 0.18 | -1.01 | 0.81768  | 0.732152 | 0.934085 | 0.844852 |
| MmugDNA.4608.1.S1_at    | MmugDNA.4608.1  | 5.06  | 5.53  | 0.03 | 0.03 | -1.38 | 0.000032 | 0.025606 | 0.108151 | 0.200784 |
| MmugDNA.461.1.S1_at     | MmugDNA.461.1   | 10.94 | 10.76 | 0.48 | 0.24 | 1.13  | 0.347803 | 0.080627 | 0.689024 | 0.328427 |
| MmugDNA.4610.1.S1_at    | MmugDNA.4610.1  | 3.13  | 3.18  | 0.24 | 0.14 | -1.04 | 0.200434 | 0.2609   | 0.57229  | 0.527351 |
| MmugDNA.4611.1.S1_at    | MmugDNA.4611.1  | 5.77  | 5.69  | 0.23 | 0.08 | 1.06  | 0.663212 | 0.269915 | 0.867106 | 0.535204 |
| MmugDNA.4612.1.S1_at    | MmugDNA.4612.1  | 6.51  | 7     | 0.43 | 0.07 | -1.41 | 0.126681 | 0.017725 | 0.500599 | 0.168367 |
| MmugDNA.4613.1.S1_at    | MmugDNA.4613.1  | 12.88 | 12.91 | 0.02 | 0.01 | -1.02 | 0.103207 | 0.738397 | 0.474024 | 0.848281 |
| MmugDNA.4614.1.S1_at    | MmugDNA.4614.1  | 11.98 | 11.85 | 0.29 | 0.03 | 1.09  | 0.177086 | 0.175302 | 0.550212 | 0.452064 |

|                      |                |       |       |      |      |       |          |          |          |          |
|----------------------|----------------|-------|-------|------|------|-------|----------|----------|----------|----------|
| MmugDNA.4616.1.S1_at | MmugDNA.4616.1 | 10.7  | 10.28 | 0.39 | 0.08 | 1.33  | 0.095311 | 0.129979 | 0.464131 | 0.401549 |
| MmugDNA.4617.1.S1_at | MmugDNA.4617.1 | 3.91  | 3.9   | 0.18 | 0.03 | 1.01  | 0.371697 | 0.332862 | 0.705567 | 0.581266 |
| MmugDNA.4619.1.S1_at | MmugDNA.4619.1 | 3.21  | 3.44  | 0.11 | 0.14 | -1.18 | 0.195424 | 0.126109 | 0.565793 | 0.39672  |
| MmugDNA.462.1.S1_at  | MmugDNA.462.1  | 7.91  | 7.49  | 0.52 | 0.41 | 1.34  | 0.880523 | 0.936075 | 0.958664 | 0.963958 |
| MmugDNA.4620.1.S1_at | MmugDNA.4620.1 | 4.14  | 4.21  | 0.14 | 0.13 | -1.05 | 0.636039 | 0.132972 | 0.854813 | 0.404626 |
| MmugDNA.4621.1.S1_at | MmugDNA.4621.1 | 12.04 | 11.72 | 0.27 | 0.14 | 1.25  | 0.233617 | 0.469109 | 0.601158 | 0.678117 |
| MmugDNA.4623.1.S1_at | MmugDNA.4623.1 | 3.94  | 4     | 0.13 | 0.08 | -1.04 | 0.961136 | 0.907684 | 0.987225 | 0.947753 |
| MmugDNA.4624.1.S1_at | MmugDNA.4624.1 | 6.1   | 6.01  | 0.15 | 0.1  | 1.06  | 0.463491 | 0.514339 | 0.762205 | 0.707645 |
| MmugDNA.4625.1.S1_at | MmugDNA.4625.1 | 4.48  | 4.41  | 0.1  | 0.07 | 1.05  | 0.290411 | 0.115751 | 0.646973 | 0.382814 |
| MmugDNA.4626.1.S1_at | MmugDNA.4626.1 | 7.75  | 7.86  | 0.46 | 0.11 | -1.08 | 0.964632 | 0.630916 | 0.988371 | 0.782539 |
| MmugDNA.4627.1.S1_at | MmugDNA.4627.1 | 5.14  | 4.99  | 0.17 | 0.32 | 1.11  | 0.907109 | 0.34149  | 0.968482 | 0.587676 |
| MmugDNA.4628.1.S1_at | MmugDNA.4628.1 | 3.92  | 4.06  | 1.37 | 0.17 | -1.1  | 0.491826 | 0.647922 | 0.778032 | 0.793872 |
| MmugDNA.4629.1.S1_at | MmugDNA.4629.1 | 4.49  | 4.17  | 0.17 | 0.04 | 1.25  | 0.018408 | 0.019174 | 0.297316 | 0.1742   |
| MmugDNA.4631.1.S1_at | MmugDNA.4631.1 | 4.53  | 6.02  | 0.1  | 0.06 | -2.79 | 0.000024 | 0.038581 | 0.108151 | 0.241429 |
| MmugDNA.4632.1.S1_at | MmugDNA.4632.1 | 9.92  | 9.71  | 0.2  | 0.01 | 1.15  | 0.157785 | 0.041704 | 0.53073  | 0.24887  |
| MmugDNA.4633.1.S1_at | MmugDNA.4633.1 | 6.79  | 7.07  | 0.18 | 0.12 | -1.21 | 0.052143 | 0.097137 | 0.392084 | 0.354735 |
| MmugDNA.4634.1.S1_at | MmugDNA.4634.1 | 3.36  | 3.32  | 0.04 | 0.07 | 1.03  | 0.432453 | 0.16636  | 0.743915 | 0.442884 |
| MmugDNA.4635.1.S1_at | MmugDNA.4635.1 | 4.41  | 5.34  | 0.18 | 0.09 | -1.9  | 0.000884 | 0.195508 | 0.153739 | 0.470351 |
| MmugDNA.4638.1.S1_at | MmugDNA.4638.1 | 7.04  | 6.18  | 1.14 | 0.36 | 1.81  | 0.414523 | 0.672443 | 0.733123 | 0.808568 |
| MmugDNA.4639.1.S1_at | MmugDNA.4639.1 | 2.81  | 3.11  | 0.12 | 0.38 | -1.23 | 0.156833 | 0.132328 | 0.530033 | 0.404294 |
| MmugDNA.464.1.S1_at  | MmugDNA.464.1  | 8.85  | 8.56  | 0.22 | 0.25 | 1.22  | 0.918289 | 0.162656 | 0.972108 | 0.43876  |
| MmugDNA.4640.1.S1_at | MmugDNA.4640.1 | 7     | 6.63  | 0.61 | 0.28 | 1.3   | 0.340158 | 0.400832 | 0.684341 | 0.630658 |
| MmugDNA.4641.1.S1_at | MmugDNA.4641.1 | 5.07  | 5.09  | 0.29 | 0.01 | -1.01 | 0.571336 | 0.770194 | 0.822675 | 0.86656  |
| MmugDNA.4642.1.S1_at | MmugDNA.4642.1 | 5.92  | 5.38  | 0.05 | 0.12 | 1.46  | 0.001778 | 0.000505 | 0.167444 | 0.039158 |
| MmugDNA.4643.1.S1_at | MmugDNA.4643.1 | 6.97  | 6.92  | 0.37 | 0.02 | 1.03  | 0.812244 | 0.49352  | 0.932076 | 0.694195 |
| MmugDNA.4644.1.S1_at | MmugDNA.4644.1 | 3.47  | 3.32  | 0.04 | 0.12 | 1.11  | 0.078522 | 0.059515 | 0.441146 | 0.290548 |
| MmugDNA.4648.1.S1_at | MmugDNA.4648.1 | 3.22  | 3.34  | 0.3  | 0.21 | -1.09 | 0.758922 | 0.3759   | 0.909414 | 0.613749 |
| MmugDNA.4649.1.S1_at | MmugDNA.4649.1 | 7.44  | 6.69  | 1.05 | 0.43 | 1.67  | 0.167411 | 0.138675 | 0.540065 | 0.411742 |
| MmugDNA.465.1.S1_at  | MmugDNA.465.1  | 5.1   | 4.43  | 0.58 | 0.06 | 1.6   | 0.119529 | 0.161613 | 0.49288  | 0.437771 |
| MmugDNA.4650.1.S1_at | MmugDNA.4650.1 | 7.87  | 8.43  | 2.02 | 0.2  | -1.47 | 0.634702 | 0.848649 | 0.854193 | 0.914061 |
| MmugDNA.4652.1.S1_at | MmugDNA.4652.1 | 9.62  | 10.45 | 0.78 | 0.08 | -1.78 | 0.402801 | 0.386399 | 0.725151 | 0.621593 |
| MmugDNA.4653.1.S1_at | MmugDNA.4653.1 | 3.92  | 4.04  | 0.04 | 0.03 | -1.08 | 0.015126 | 0.522493 | 0.2796   | 0.713164 |
| MmugDNA.4654.1.S1_at | MmugDNA.4654.1 | 7.49  | 7.63  | 0.4  | 0.17 | -1.11 | 0.914516 | 0.42412  | 0.970879 | 0.646737 |
| MmugDNA.4655.1.S1_at | MmugDNA.4655.1 | 10.43 | 10.51 | 0.25 | 0.07 | -1.05 | 0.475668 | 0.00714  | 0.768676 | 0.113735 |
| MmugDNA.4656.1.S1_at | MmugDNA.4656.1 | 6.74  | 6.11  | 0.86 | 0.27 | 1.55  | 0.429353 | 0.429894 | 0.742161 | 0.651109 |
| MmugDNA.4658.1.S1_at | MmugDNA.4658.1 | 6.28  | 6.62  | 0.19 | 0.12 | -1.27 | 0.018783 | 0.004183 | 0.298593 | 0.091084 |
| MmugDNA.4659.1.S1_at | MmugDNA.4659.1 | 4.63  | 4.38  | 0.17 | 0.11 | 1.19  | 0.056542 | 0.053793 | 0.400575 | 0.277457 |
| MmugDNA.466.1.S1_at  | MmugDNA.466.1  | 6.64  | 7     | 0.3  | 0.19 | -1.28 | 0.162391 | 0.444676 | 0.535412 | 0.662072 |
| MmugDNA.4660.1.S1_at | MmugDNA.4660.1 | 6.82  | 6.76  | 0.81 | 0.4  | 1.04  | 0.988993 | 0.41468  | 0.995916 | 0.640456 |
| MmugDNA.4661.1.S1_at | MmugDNA.4661.1 | 6.36  | 6.4   | 0.36 | 0.54 | -1.03 | 0.442121 | 0.192425 | 0.749848 | 0.467919 |
| MmugDNA.4662.1.S1_at | MmugDNA.4662.1 | 3.39  | 3.39  | 0.08 | 0.07 | 1     | 0.918621 | 0.302322 | 0.972234 | 0.560092 |
| MmugDNA.4663.1.S1_at | MmugDNA.4663.1 | 4.44  | 4.39  | 0.04 | 0.03 | 1.04  | 0.028489 | 0.145582 | 0.332568 | 0.419456 |
| MmugDNA.4665.1.S1_at | MmugDNA.4665.1 | 6.56  | 6.45  | 0.55 | 0.23 | 1.08  | 0.708965 | 0.69052  | 0.886591 | 0.819604 |



|                        |                |       |       |      |      |       |          |          |          |          |
|------------------------|----------------|-------|-------|------|------|-------|----------|----------|----------|----------|
| MmugDNA.4666.1.S1_at   | MmugDNA.4666.1 | 2.88  | 2.86  | 0.17 | 0.11 | 1.01  | 0.811614 | 0.941101 | 0.931835 | 0.96664  |
| MmugDNA.4668.1.S1_at   | MmugDNA.4668.1 | 8.9   | 9.08  | 0.14 | 0.12 | -1.13 | 0.379189 | 0.001193 | 0.708687 | 0.054172 |
| MmugDNA.4669.1.S1_at   | MmugDNA.4669.1 | 11.21 | 11.15 | 0.09 | 0.08 | 1.04  | 0.140068 | 0.498502 | 0.515581 | 0.697582 |
| MmugDNA.4672.1.S1_at   | MmugDNA.4672.1 | 6.86  | 6.67  | 0.36 | 0.28 | 1.14  | 0.939584 | 0.32662  | 0.979532 | 0.576649 |
| MmugDNA.4673.1.S1_at   | MmugDNA.4673.1 | 3.31  | 3.39  | 0.09 | 0.05 | -1.06 | 0.20774  | 0.322648 | 0.579365 | 0.574024 |
| MmugDNA.4674.1.S1_at   | MmugDNA.4674.1 | 8.68  | 8.79  | 0.09 | 0.15 | -1.08 | 0.179873 | 0.561009 | 0.553136 | 0.737076 |
| MmugDNA.4675.1.S1_at   | MmugDNA.4675.1 | 8.68  | 8.39  | 0.4  | 0.2  | 1.22  | 0.357198 | 0.259436 | 0.695575 | 0.526418 |
| MmugDNA.4675.1.S1_s_at | MmugDNA.4675.1 | 9.11  | 8.82  | 0.53 | 0.11 | 1.22  | 0.498134 | 0.397653 | 0.781592 | 0.629023 |
| MmugDNA.4676.1.S1_at   | MmugDNA.4676.1 | 6.48  | 6.62  | 0.29 | 0.3  | -1.1  | 0.903578 | 0.50607  | 0.967608 | 0.702355 |
| MmugDNA.4677.1.S1_at   | MmugDNA.4677.1 | 4.68  | 4.7   | 0.14 | 0.09 | -1.01 | 0.637816 | 0.139329 | 0.855669 | 0.412525 |
| MmugDNA.4678.1.S1_at   | MmugDNA.4678.1 | 4.03  | 4.11  | 0.17 | 0.22 | -1.06 | 0.485941 | 0.427321 | 0.774427 | 0.649175 |
| MmugDNA.4680.1.S1_s_at | MmugDNA.4680.1 | 9.97  | 9.78  | 0.11 | 0.17 | 1.14  | 0.235971 | 0.362097 | 0.603072 | 0.602821 |
| MmugDNA.4682.1.S1_at   | MmugDNA.4682.1 | 5.94  | 5.79  | 0.05 | 0.17 | 1.11  | 0.192943 | 0.069007 | 0.56375  | 0.309017 |
| MmugDNA.4683.1.S1_at   | MmugDNA.4683.1 | 3.56  | 3.54  | 0.05 | 0.14 | 1.02  | 0.299036 | 0.189821 | 0.653475 | 0.465403 |
| MmugDNA.4684.1.S1_at   | MmugDNA.4684.1 | 9.48  | 9.81  | 0.36 | 0.06 | -1.26 | 0.420939 | 0.586603 | 0.737135 | 0.753603 |
| MmugDNA.4685.1.S1_at   | MmugDNA.4685.1 | 3.51  | 3.35  | 0.24 | 0.27 | 1.12  | 0.836936 | 0.665826 | 0.941497 | 0.804196 |
| MmugDNA.4687.1.S1_at   | MmugDNA.4687.1 | 11    | 11.34 | 0.08 | 0.17 | -1.27 | 0.024163 | 0.036678 | 0.317812 | 0.235973 |
| MmugDNA.4688.1.S1_at   | MmugDNA.4688.1 | 9.24  | 9.73  | 0.29 | 0.12 | -1.4  | 0.055262 | 0.001298 | 0.398125 | 0.055585 |
| MmugDNA.4689.1.S1_at   | MmugDNA.4689.1 | 6     | 6.52  | 0.61 | 0.07 | -1.42 | 0.594158 | 0.681338 | 0.834593 | 0.813957 |
| MmugDNA.469.1.S1_at    | MmugDNA.469.1  | 10.94 | 10.64 | 0.09 | 0.09 | 1.24  | 0.052959 | 0.110292 | 0.393634 | 0.374403 |
| MmugDNA.4690.1.S1_at   | MmugDNA.4690.1 | 4     | 3.98  | 0.03 | 0.18 | 1.01  | 0.265182 | 0.322336 | 0.626397 | 0.57392  |
| MmugDNA.4691.1.S1_at   | MmugDNA.4691.1 | 4.27  | 4.04  | 0.2  | 0.09 | 1.17  | 0.103895 | 0.125911 | 0.474631 | 0.396452 |
| MmugDNA.4692.1.S1_at   | MmugDNA.4692.1 | 11.69 | 11.41 | 0.14 | 0.06 | 1.21  | 0.06948  | 0.122755 | 0.427298 | 0.39274  |
| MmugDNA.4694.1.S1_at   | MmugDNA.4694.1 | 7.67  | 7.91  | 0.29 | 0.06 | -1.18 | 0.296248 | 0.496046 | 0.651907 | 0.695877 |
| MmugDNA.4695.1.S1_at   | MmugDNA.4695.1 | 7.37  | 7.76  | 0.72 | 0.25 | -1.31 | 0.38615  | 0.520496 | 0.713295 | 0.711799 |
| MmugDNA.4697.1.S1_at   | MmugDNA.4697.1 | 3.05  | 3.12  | 0.2  | 0.1  | -1.05 | 0.915891 | 0.601125 | 0.97133  | 0.762531 |
| MmugDNA.4699.1.S1_at   | MmugDNA.4699.1 | 3.59  | 3.6   | 0.23 | 0.11 | -1.01 | 0.67911  | 0.27938  | 0.874243 | 0.543014 |
| MmugDNA.47.1.S1_at     | MmugDNA.47.1   | 11.8  | 12.13 | 0.24 | 0.07 | -1.26 | 0.078931 | 0.010369 | 0.441599 | 0.133236 |
| MmugDNA.470.1.S1_at    | MmugDNA.470.1  | 4.4   | 4.43  | 0.23 | 0.02 | -1.02 | 0.639212 | 0.852989 | 0.856229 | 0.916437 |
| MmugDNA.4700.1.S1_at   | MmugDNA.4700.1 | 4     | 3.64  | 0.63 | 0.22 | 1.28  | 0.327616 | 0.348764 | 0.675137 | 0.592786 |
| MmugDNA.4701.1.S1_at   | MmugDNA.4701.1 | 7.81  | 7.63  | 0.03 | 0.05 | 1.13  | 0.019328 | 0.070923 | 0.300575 | 0.312444 |
| MmugDNA.4702.1.S1_at   | MmugDNA.4702.1 | 6.35  | 6.28  | 0.17 | 0.03 | 1.05  | 0.969232 | 0.568704 | 0.989875 | 0.742078 |
| MmugDNA.4704.1.S1_at   | MmugDNA.4704.1 | 3.9   | 3.57  | 0.03 | 0.1  | 1.26  | 0.012641 | 0.354467 | 0.263506 | 0.597237 |
| MmugDNA.4705.1.S1_s_at | MmugDNA.4705.1 | 6.5   | 6.69  | 0.38 | 0.38 | -1.14 | 0.931062 | 0.987395 | 0.976966 | 0.992936 |
| MmugDNA.4706.1.S1_at   | MmugDNA.4706.1 | 5.7   | 5.69  | 0.2  | 0.13 | 1.01  | 0.530368 | 0.4722   | 0.798983 | 0.679876 |
| MmugDNA.4708.1.S1_at   | MmugDNA.4708.1 | 4.82  | 4.78  | 0.75 | 0.11 | 1.03  | 0.50719  | 0.71578  | 0.786201 | 0.835258 |
| MmugDNA.4709.1.S1_at   | MmugDNA.4709.1 | 3.35  | 3.33  | 0.13 | 0.19 | 1.02  | 0.613312 | 0.476734 | 0.843419 | 0.682885 |
| MmugDNA.471.1.S1_at    | MmugDNA.471.1  | 3.74  | 3.62  | 0.11 | 0.09 | 1.09  | 0.08456  | 0.228401 | 0.451141 | 0.500587 |
| MmugDNA.4710.1.S1_at   | MmugDNA.4710.1 | 9.8   | 9.19  | 0.03 | 0.12 | 1.52  | 0.001205 | 0.004209 | 0.156386 | 0.091368 |
| MmugDNA.4711.1.S1_at   | MmugDNA.4711.1 | 2.85  | 2.85  | 0.05 | 0.08 | -1    | 0.845687 | 0.715662 | 0.945907 | 0.835159 |
| MmugDNA.4712.1.S1_at   | MmugDNA.4712.1 | 3.53  | 3.52  | 0.24 | 0.15 | 1.01  | 0.926627 | 0.687507 | 0.975645 | 0.817606 |
| MmugDNA.4713.1.S1_at   | MmugDNA.4713.1 | 3.04  | 3.36  | 0.25 | 0.13 | -1.25 | 0.537874 | 0.547855 | 0.802945 | 0.728723 |
| MmugDNA.4714.1.S1_at   | MmugDNA.4714.1 | 11.41 | 11.18 | 0.13 | 0.02 | 1.18  | 0.098188 | 0.116812 | 0.467651 | 0.384133 |

|                        |                |       |       |      |      |       |          |          |          |          |
|------------------------|----------------|-------|-------|------|------|-------|----------|----------|----------|----------|
| MmugDNA.4715.1.S1_at   | MmugDNA.4715.1 | 3.38  | 3.36  | 0.09 | 0.01 | 1.02  | 0.233772 | 0.281341 | 0.601291 | 0.544391 |
| MmugDNA.4716.1.S1_at   | MmugDNA.4716.1 | 3.93  | 4.24  | 0.06 | 0.11 | -1.24 | 0.021424 | 0.059745 | 0.308523 | 0.29107  |
| MmugDNA.4717.1.S1_at   | MmugDNA.4717.1 | 4.83  | 4.84  | 0.52 | 0.67 | -1.01 | 0.705242 | 0.467973 | 0.885355 | 0.677457 |
| MmugDNA.4718.1.S1_s_at | MmugDNA.4718.1 | 10.65 | 10.53 | 0.43 | 0.13 | 1.08  | 0.631411 | 0.236817 | 0.852417 | 0.507555 |
| MmugDNA.472.1.S1_at    | MmugDNA.472.1  | 5.82  | 5.88  | 0.23 | 0.24 | -1.05 | 0.794001 | 0.970915 | 0.924489 | 0.984133 |
| MmugDNA.4720.1.S1_s_at | MmugDNA.4720.1 | 3.54  | 3.48  | 0.06 | 0.04 | 1.04  | 0.112346 | 0.194286 | 0.48564  | 0.469384 |
| MmugDNA.4722.1.S1_at   | MmugDNA.4722.1 | 9.49  | 9.05  | 0.53 | 0.3  | 1.36  | 0.479847 | 0.004636 | 0.770896 | 0.094988 |
| MmugDNA.4723.1.S1_at   | MmugDNA.4723.1 | 3.99  | 4     | 0.03 | 0.01 | -1    | 0.498699 | 0.530904 | 0.781838 | 0.718247 |
| MmugDNA.4724.1.S1_at   | MmugDNA.4724.1 | 6.55  | 6.33  | 0.07 | 0.04 | 1.17  | 0.02553  | 0.047199 | 0.322263 | 0.261823 |
| MmugDNA.4726.1.S1_at   | MmugDNA.4726.1 | 8.62  | 8.07  | 0.27 | 0.35 | 1.46  | 0.208955 | 0.044606 | 0.580535 | 0.255589 |
| MmugDNA.4727.1.S1_at   | MmugDNA.4727.1 | 4.4   | 4.55  | 0.23 | 0.37 | -1.11 | 0.744685 | 0.27638  | 0.902641 | 0.540334 |
| MmugDNA.4729.1.S1_at   | MmugDNA.4729.1 | 4.78  | 4.57  | 0.12 | 0.07 | 1.15  | 0.126242 | 0.235487 | 0.499941 | 0.506551 |
| MmugDNA.473.1.S1_at    | MmugDNA.473.1  | 5.81  | 5.72  | 0.09 | 0.07 | 1.06  | 0.253449 | 0.320432 | 0.618215 | 0.572648 |
| MmugDNA.4730.1.S1_at   | MmugDNA.4730.1 | 12.11 | 11.79 | 0.02 | 0.12 | 1.24  | 0.024349 | 0.057172 | 0.317828 | 0.284974 |
| MmugDNA.4733.1.S1_at   | MmugDNA.4733.1 | 8.91  | 8.82  | 0.4  | 0.13 | 1.07  | 0.823586 | 0.015357 | 0.936327 | 0.157392 |
| MmugDNA.4734.1.S1_at   | MmugDNA.4734.1 | 4.55  | 4.68  | 0.04 | 0.13 | -1.09 | 0.073744 | 0.321406 | 0.434623 | 0.573207 |
| MmugDNA.4735.1.S1_at   | MmugDNA.4735.1 | 3.55  | 3.49  | 0.08 | 0.03 | 1.04  | 0.356567 | 0.734412 | 0.695204 | 0.846131 |
| MmugDNA.4736.1.S1_at   | MmugDNA.4736.1 | 5.38  | 5.16  | 0.32 | 0.42 | 1.16  | 0.982846 | 0.042063 | 0.994764 | 0.249599 |
| MmugDNA.4737.1.S1_at   | MmugDNA.4737.1 | 5.74  | 5.72  | 0.05 | 0.22 | 1.01  | 0.5274   | 0.875184 | 0.797084 | 0.929179 |
| MmugDNA.4738.1.S1_at   | MmugDNA.4738.1 | 5.02  | 5.24  | 0.06 | 0.18 | -1.17 | 0.094548 | 0.297481 | 0.463794 | 0.556122 |
| MmugDNA.4739.1.S1_at   | MmugDNA.4739.1 | 4.81  | 4.77  | 0.16 | 0.23 | 1.03  | 0.847786 | 0.624913 | 0.946572 | 0.778939 |
| MmugDNA.4741.1.S1_at   | MmugDNA.4741.1 | 3.09  | 3.13  | 0.43 | 0.03 | -1.03 | 0.428591 | 0.502898 | 0.741963 | 0.700417 |
| MmugDNA.4743.1.S1_at   | MmugDNA.4743.1 | 9.04  | 8.39  | 0.56 | 0.14 | 1.56  | 0.081846 | 0.125185 | 0.446396 | 0.395666 |
| MmugDNA.4744.1.S1_at   | MmugDNA.4744.1 | 3.61  | 3.55  | 0.2  | 0.13 | 1.04  | 0.600561 | 0.714295 | 0.837913 | 0.834226 |
| MmugDNA.4746.1.S1_at   | MmugDNA.4746.1 | 6.87  | 7.49  | 0.11 | 0.15 | -1.54 | 0.006579 | 0.009539 | 0.219977 | 0.12867  |
| MmugDNA.4747.1.S1_at   | MmugDNA.4747.1 | 8.69  | 8.37  | 0.29 | 0.13 | 1.24  | 0.186088 | 0.026347 | 0.559046 | 0.203321 |
| MmugDNA.4748.1.S1_at   | MmugDNA.4748.1 | 7.04  | 7.44  | 0.35 | 0.21 | -1.32 | 0.239438 | 0.201822 | 0.605885 | 0.476367 |
| MmugDNA.475.1.S1_at    | MmugDNA.475.1  | 7.6   | 7.34  | 0.44 | 0.12 | 1.2   | 0.407277 | 0.052095 | 0.728545 | 0.273841 |
| MmugDNA.4751.1.S1_at   | MmugDNA.4751.1 | 10.8  | 11.82 | 0.93 | 0.14 | -2.02 | 0.126274 | 0.142388 | 0.499959 | 0.415965 |
| MmugDNA.4753.1.S1_at   | MmugDNA.4753.1 | 4.67  | 4.79  | 0.35 | 0.04 | -1.08 | 0.562894 | 0.487571 | 0.817877 | 0.690565 |
| MmugDNA.4754.1.S1_at   | MmugDNA.4754.1 | 7.91  | 7.68  | 0.07 | 0.03 | 1.17  | 0.009348 | 0.19663  | 0.241869 | 0.471656 |
| MmugDNA.4755.1.S1_at   | MmugDNA.4755.1 | 3.04  | 3.15  | 0.08 | 0.01 | -1.08 | 0.079269 | 0.169253 | 0.442056 | 0.445863 |
| MmugDNA.4756.1.S1_at   | MmugDNA.4756.1 | 3.92  | 4.02  | 0.24 | 0.15 | -1.07 | 0.682796 | 0.865587 | 0.875926 | 0.923598 |
| MmugDNA.4758.1.S1_at   | MmugDNA.4758.1 | 6.37  | 6.69  | 0.57 | 0.32 | -1.24 | 0.402931 | 0.351733 | 0.725287 | 0.595164 |
| MmugDNA.4759.1.S1_at   | MmugDNA.4759.1 | 6.48  | 6.48  | 0.05 | 0.13 | 1     | 0.269415 | 0.578958 | 0.629648 | 0.748786 |
| MmugDNA.4763.1.S1_at   | MmugDNA.4763.1 | 4.78  | 5.16  | 0.21 | 0.1  | -1.31 | 0.099601 | 0.024245 | 0.469263 | 0.194936 |
| MmugDNA.4764.1.S1_at   | MmugDNA.4764.1 | 4.89  | 4.87  | 0.05 | 0.06 | 1.02  | 0.907324 | 0.42437  | 0.968534 | 0.646933 |
| MmugDNA.4765.1.S1_at   | MmugDNA.4765.1 | 10.88 | 10.89 | 0.55 | 0.12 | -1    | 0.81548  | 0.899653 | 0.933137 | 0.942903 |
| MmugDNA.4767.1.S1_at   | MmugDNA.4767.1 | 5.79  | 5.75  | 0.47 | 0.22 | 1.03  | 0.80017  | 0.938448 | 0.92683  | 0.965059 |
| MmugDNA.4768.1.S1_at   | MmugDNA.4768.1 | 3.21  | 3.06  | 0.07 | 0.13 | 1.11  | 0.107367 | 0.148764 | 0.47976  | 0.423201 |
| MmugDNA.4769.1.S1_at   | MmugDNA.4769.1 | 6.42  | 6.31  | 0.16 | 0.05 | 1.08  | 0.737761 | 0.051227 | 0.899629 | 0.271799 |
| MmugDNA.4770.1.S1_at   | MmugDNA.4770.1 | 6.68  | 6.59  | 0.05 | 0.05 | 1.06  | 0.046486 | 0.04019  | 0.378053 | 0.245709 |
| MmugDNA.4771.1.S1_at   | MmugDNA.4771.1 | 9.69  | 9.67  | 0.17 | 0.02 | 1.01  | 0.522899 | 0.649287 | 0.795346 | 0.794734 |

|                        |                |       |       |      |      |       |          |          |          |          |
|------------------------|----------------|-------|-------|------|------|-------|----------|----------|----------|----------|
| MmugDNA.4772.1.S1_at   | MmugDNA.4772.1 | 6.85  | 6.53  | 0.14 | 0.26 | 1.25  | 0.572161 | 0.128863 | 0.823145 | 0.400277 |
| MmugDNA.4774.1.S1_at   | MmugDNA.4774.1 | 9.14  | 8.31  | 0.11 | 0.19 | 1.78  | 0.002974 | 0.000834 | 0.190446 | 0.046851 |
| MmugDNA.4775.1.S1_at   | MmugDNA.4775.1 | 6.96  | 6.81  | 0.11 | 0.01 | 1.12  | 0.185794 | 0.15931  | 0.55867  | 0.43531  |
| MmugDNA.4776.1.S1_at   | MmugDNA.4776.1 | 5.51  | 5.35  | 0.11 | 0.15 | 1.12  | 0.158565 | 0.278097 | 0.531588 | 0.541754 |
| MmugDNA.4777.1.S1_at   | MmugDNA.4777.1 | 5.21  | 5.19  | 0.69 | 0.47 | 1.01  | 0.643356 | 0.684582 | 0.858192 | 0.816019 |
| MmugDNA.4779.1.S1_at   | MmugDNA.4779.1 | 3.57  | 3.45  | 0.06 | 0.18 | 1.08  | 0.229269 | 0.313266 | 0.59818  | 0.567753 |
| MmugDNA.478.1.S1_at    | MmugDNA.478.1  | 8.5   | 8.37  | 0.66 | 0.03 | 1.09  | 0.742046 | 0.799841 | 0.901613 | 0.884906 |
| MmugDNA.4780.1.S1_at   | MmugDNA.4780.1 | 3.64  | 3.43  | 0.09 | 0.13 | 1.15  | 0.241799 | 0.194242 | 0.607952 | 0.469357 |
| MmugDNA.4781.1.S1_at   | MmugDNA.4781.1 | 9.51  | 9.05  | 0.2  | 0.13 | 1.38  | 0.056667 | 0.382152 | 0.401051 | 0.618361 |
| MmugDNA.4782.1.S1_at   | MmugDNA.4782.1 | 4.07  | 4.31  | 0.44 | 0.33 | -1.18 | 0.44009  | 0.140681 | 0.748323 | 0.413978 |
| MmugDNA.4783.1.S1_at   | MmugDNA.4783.1 | 6.87  | 6.55  | 0.03 | 0.41 | 1.25  | 0.233886 | 0.110857 | 0.601438 | 0.375187 |
| MmugDNA.4785.1.S1_at   | MmugDNA.4785.1 | 5.73  | 5.56  | 0.03 | 0.22 | 1.12  | 0.679257 | 0.67233  | 0.874274 | 0.808488 |
| MmugDNA.4786.1.S1_at   | MmugDNA.4786.1 | 7.07  | 7.1   | 0.04 | 0.13 | -1.02 | 0.71036  | 0.869464 | 0.887279 | 0.925991 |
| MmugDNA.4787.1.S1_at   | MmugDNA.4787.1 | 7.75  | 7.42  | 0.3  | 0.21 | 1.26  | 0.113235 | 0.153173 | 0.486648 | 0.428011 |
| MmugDNA.4788.1.S1_at   | MmugDNA.4788.1 | 4.44  | 4.39  | 0.05 | 0.16 | 1.03  | 0.691225 | 0.343483 | 0.879715 | 0.589246 |
| MmugDNA.479.1.S1_at    | MmugDNA.479.1  | 11.37 | 11.06 | 0.3  | 0.06 | 1.24  | 0.124655 | 0.150325 | 0.498771 | 0.424878 |
| MmugDNA.4790.1.S1_at   | MmugDNA.4790.1 | 3.77  | 3.72  | 0.28 | 0.15 | 1.03  | 0.61597  | 0.52938  | 0.844679 | 0.71726  |
| MmugDNA.4792.1.S1_at   | MmugDNA.4792.1 | 8.89  | 8.91  | 0.12 | 0.05 | -1.01 | 0.843549 | 0.32356  | 0.944813 | 0.574497 |
| MmugDNA.4793.1.S1_at   | MmugDNA.4793.1 | 9.22  | 9.99  | 0.48 | 0.16 | -1.71 | 0.164458 | 0.293074 | 0.537322 | 0.552978 |
| MmugDNA.4794.1.S1_at   | MmugDNA.4794.1 | 3.91  | 3.94  | 0.39 | 0.24 | -1.02 | 0.972813 | 0.618766 | 0.991136 | 0.774185 |
| MmugDNA.4795.1.S1_at   | MmugDNA.4795.1 | 3.98  | 4     | 0.4  | 0.02 | -1.02 | 0.401009 | 0.456473 | 0.724096 | 0.670188 |
| MmugDNA.4796.1.S1_at   | MmugDNA.4796.1 | 7.9   | 8.01  | 0.17 | 0.15 | -1.08 | 0.242685 | 0.3532   | 0.608699 | 0.596432 |
| MmugDNA.4797.1.S1_at   | MmugDNA.4797.1 | 3.4   | 3.41  | 0.02 | 0.06 | -1.01 | 0.166288 | 0.171928 | 0.538983 | 0.448352 |
| MmugDNA.4798.1.S1_at   | MmugDNA.4798.1 | 8.21  | 8.03  | 0.55 | 0.03 | 1.13  | 0.696608 | 0.88903  | 0.882169 | 0.936779 |
| MmugDNA.48.1.S1_at     | MmugDNA.48.1   | 4.07  | 4.08  | 0.07 | 0.18 | -1.01 | 0.528753 | 0.323076 | 0.798051 | 0.574351 |
| MmugDNA.4800.1.S1_at   | MmugDNA.4800.1 | 4.22  | 4.16  | 0.05 | 0.03 | 1.04  | 0.099591 | 0.895156 | 0.469263 | 0.940131 |
| MmugDNA.4802.1.S1_at   | MmugDNA.4802.1 | 6.05  | 5.83  | 0.37 | 0.11 | 1.16  | 0.397352 | 0.168035 | 0.721736 | 0.444641 |
| MmugDNA.4802.1.S1_s_at | MmugDNA.4802.1 | 3.35  | 3.26  | 0.15 | 0.02 | 1.07  | 0.488798 | 0.625276 | 0.775818 | 0.779099 |
| MmugDNA.4803.1.S1_at   | MmugDNA.4803.1 | 3.73  | 3.74  | 0.06 | 0.07 | -1.01 | 0.399733 | 0.309484 | 0.723309 | 0.564987 |
| MmugDNA.4805.1.S1_at   | MmugDNA.4805.1 | 4.44  | 4.43  | 0.17 | 0.2  | 1     | 0.928089 | 0.420861 | 0.976259 | 0.644535 |
| MmugDNA.4807.1.S1_at   | MmugDNA.4807.1 | 8.18  | 9.24  | 1.19 | 0.1  | -2.08 | 0.187876 | 0.239297 | 0.560014 | 0.509995 |
| MmugDNA.4808.1.S1_at   | MmugDNA.4808.1 | 2.85  | 2.88  | 0.07 | 0.18 | -1.02 | 0.614155 | 0.214495 | 0.843828 | 0.488257 |
| MmugDNA.4809.1.S1_s_at | MmugDNA.4809.1 | 12.72 | 12.56 | 0.05 | 0.02 | 1.12  | 0.012759 | 0.177211 | 0.264614 | 0.453647 |
| MmugDNA.481.1.S1_at    | MmugDNA.481.1  | 6.27  | 6.42  | 0.36 | 0.22 | -1.11 | 0.923802 | 0.910945 | 0.974455 | 0.94975  |
| MmugDNA.4810.1.S1_at   | MmugDNA.4810.1 | 12.4  | 12.11 | 0.47 | 0.15 | 1.22  | 0.464962 | 0.250353 | 0.762792 | 0.519362 |
| MmugDNA.4811.1.S1_at   | MmugDNA.4811.1 | 5.75  | 5.64  | 0.14 | 0.09 | 1.08  | 0.13066  | 0.491804 | 0.505076 | 0.693275 |
| MmugDNA.4812.1.S1_at   | MmugDNA.4812.1 | 6.58  | 6.51  | 0.5  | 0.04 | 1.05  | 0.895241 | 0.123779 | 0.964244 | 0.393908 |
| MmugDNA.4813.1.S1_at   | MmugDNA.4813.1 | 4.65  | 4.52  | 0.21 | 0.01 | 1.1   | 0.289058 | 0.325267 | 0.645892 | 0.575648 |
| MmugDNA.4814.1.S1_at   | MmugDNA.4814.1 | 10.02 | 10.41 | 0.73 | 0.13 | -1.32 | 0.499602 | 0.203142 | 0.782125 | 0.477415 |
| MmugDNA.4816.1.S1_at   | MmugDNA.4816.1 | 10.8  | 9.93  | 0.16 | 0.18 | 1.82  | 0.002988 | 0.000443 | 0.190762 | 0.038359 |
| MmugDNA.4817.1.S1_at   | MmugDNA.4817.1 | 4.72  | 4.37  | 0.37 | 0.07 | 1.28  | 0.157381 | 0.192401 | 0.530565 | 0.467881 |
| MmugDNA.4819.1.S1_at   | MmugDNA.4819.1 | 3.81  | 4.1   | 0.21 | 0.34 | -1.22 | 0.671688 | 0.904526 | 0.870527 | 0.945875 |
| MmugDNA.482.1.S1_at    | MmugDNA.482.1  | 2.78  | 2.75  | 0.05 | 0.02 | 1.02  | 0.850539 | 0.399359 | 0.947381 | 0.629776 |

|                         |                 |       |       |      |      |       |          |          |          |          |
|-------------------------|-----------------|-------|-------|------|------|-------|----------|----------|----------|----------|
| MmugDNA.4821.1.S1_at    | MmugDNA.4821.1  | 4.33  | 4.46  | 0.58 | 0.23 | -1.1  | 0.589197 | 0.859192 | 0.832275 | 0.919754 |
| MmugDNA.4824.1.S1_at    | MmugDNA.4824.1  | 10.47 | 10.97 | 0.1  | 0.06 | -1.41 | 0.001375 | 0.000265 | 0.159096 | 0.033786 |
| MmugDNA.4825.1.S1_at    | MmugDNA.4825.1  | 7.77  | 7.68  | 0.09 | 0.08 | 1.07  | 0.78537  | 0.040998 | 0.921121 | 0.247202 |
| MmugDNA.4826.1.S1_at    | MmugDNA.4826.1  | 4.13  | 4.21  | 0.61 | 0.08 | -1.06 | 0.504166 | 0.525376 | 0.784596 | 0.714977 |
| MmugDNA.4829.1.S1_at    | MmugDNA.4829.1  | 8.75  | 8.8   | 1.12 | 0.06 | -1.03 | 0.616757 | 0.786927 | 0.845081 | 0.876732 |
| MmugDNA.4831.1.S1_at    | MmugDNA.4831.1  | 4.55  | 4.54  | 0.1  | 0.11 | 1.01  | 0.767487 | 0.559835 | 0.912495 | 0.736394 |
| MmugDNA.4832.1.S1_at    | MmugDNA.4832.1  | 8.91  | 7.99  | 1.29 | 0.1  | 1.89  | 0.360468 | 0.107071 | 0.697914 | 0.369728 |
| MmugDNA.4833.1.S1_at    | MmugDNA.4833.1  | 5.95  | 5.88  | 0.17 | 0.27 | 1.05  | 0.365919 | 0.015998 | 0.701433 | 0.160458 |
| MmugDNA.4835.1.S1_at    | MmugDNA.4835.1  | 3.82  | 3.67  | 0.57 | 0.11 | 1.11  | 0.619481 | 0.592697 | 0.846702 | 0.757854 |
| MmugDNA.4835.1.S1_s_at  | MmugDNA.4835.1  | 10.21 | 10.28 | 0.3  | 0.08 | -1.05 | 0.514782 | 0.269009 | 0.790644 | 0.53441  |
| MmugDNA.4838.1.S1_at    | MmugDNA.4838.1  | 12.42 | 12.45 | 0.15 | 0.18 | -1.02 | 0.964629 | 0.986607 | 0.988371 | 0.992446 |
| MmugDNA.4840.1.S1_at    | MmugDNA.4840.1  | 11.97 | 12.06 | 0.18 | 0    | -1.06 | 0.346097 | 0.003399 | 0.687873 | 0.083992 |
| MmugDNA.4841.1.S1_at    | MmugDNA.4841.1  | 3.53  | 3.37  | 0.02 | 0.12 | 1.11  | 0.092218 | 0.098948 | 0.460762 | 0.357049 |
| MmugDNA.4842.1.S1_at    | MmugDNA.4842.1  | 3.54  | 3.53  | 0.12 | 0.15 | 1.01  | 0.203478 | 0.184717 | 0.57497  | 0.460645 |
| MmugDNA.25793.1.S1_x_at | MmugDNA.25793.1 | 14.28 | 14.28 | 0.07 | 0.02 | -1    | 0.490998 | 0.351402 | 0.777423 | 0.595054 |
| MmugDNA.4844.1.S1_at    | MmugDNA.4844.1  | 6.86  | 7.69  | 1.07 | 0.1  | -1.77 | 0.214623 | 0.013755 | 0.585085 | 0.150235 |
| MmugDNA.4845.1.S1_at    | MmugDNA.4845.1  | 12.45 | 12.63 | 0.12 | 0.06 | -1.13 | 0.058956 | 0.046868 | 0.405865 | 0.261272 |
| MmugDNA.4845.1.S1_s_at  | MmugDNA.4845.1  | 11.98 | 12.18 | 0.13 | 0.11 | -1.14 | 0.052718 | 0.079727 | 0.39295  | 0.326982 |
| MmugDNA.4846.1.S1_at    | MmugDNA.4846.1  | 4.44  | 4.44  | 0.2  | 0.14 | -1    | 0.393508 | 0.48582  | 0.719322 | 0.689436 |
| MmugDNA.4847.1.S1_at    | MmugDNA.4847.1  | 4.62  | 4.38  | 0.12 | 0.08 | 1.19  | 0.098952 | 0.480664 | 0.468321 | 0.68595  |
| MmugDNA.4848.1.S1_s_at  | MmugDNA.4848.1  | 3.68  | 3.78  | 0.15 | 0.04 | -1.07 | 0.302573 | 0.364584 | 0.656525 | 0.604917 |
| MmugDNA.485.1.S1_at     | MmugDNA.485.1   | 3.34  | 3.32  | 0.04 | 0.11 | 1.01  | 0.474377 | 0.217371 | 0.767951 | 0.490978 |
| MmugDNA.4851.1.S1_at    | MmugDNA.4851.1  | 7.23  | 8.17  | 0.88 | 0.48 | -1.92 | 0.783198 | 0.377438 | 0.920185 | 0.61493  |
| MmugDNA.4852.1.S1_at    | MmugDNA.4852.1  | 4.65  | 4.69  | 0.18 | 0.28 | -1.03 | 0.757461 | 0.528545 | 0.908627 | 0.716664 |
| MmugDNA.4853.1.S1_at    | MmugDNA.4853.1  | 10    | 9.28  | 0.9  | 0.32 | 1.65  | 0.177465 | 0.220315 | 0.550585 | 0.493766 |
| MmugDNA.4854.1.S1_at    | MmugDNA.4854.1  | 5.85  | 5.79  | 0.19 | 0.1  | 1.04  | 0.196579 | 0.290281 | 0.567194 | 0.551169 |
| MmugDNA.4855.1.S1_at    | MmugDNA.4855.1  | 5.68  | 5.89  | 0.42 | 0.1  | -1.16 | 0.681043 | 0.559927 | 0.874927 | 0.736439 |
| MmugDNA.4856.1.S1_at    | MmugDNA.4856.1  | 4.01  | 3.83  | 0.06 | 0.14 | 1.14  | 0.429228 | 0.213624 | 0.742138 | 0.487441 |
| MmugDNA.4858.1.S1_at    | MmugDNA.4858.1  | 3.37  | 3.24  | 0.25 | 0.2  | 1.1   | 0.418526 | 0.128055 | 0.735698 | 0.399035 |
| MmugDNA.4860.1.S1_at    | MmugDNA.4860.1  | 4.97  | 4.66  | 0.15 | 0.1  | 1.24  | 0.171984 | 0.331479 | 0.545311 | 0.580121 |
| MmugDNA.4861.1.S1_at    | MmugDNA.4861.1  | 4.2   | 3.95  | 0.4  | 0.14 | 1.19  | 0.520005 | 0.323624 | 0.793413 | 0.574525 |
| MmugDNA.4862.1.S1_at    | MmugDNA.4862.1  | 4.67  | 4.62  | 0.17 | 0.11 | 1.03  | 0.831369 | 0.357511 | 0.939628 | 0.599157 |
| MmugDNA.4863.1.S1_at    | MmugDNA.4863.1  | 8.08  | 8.41  | 0.64 | 0.16 | -1.26 | 0.831513 | 0.959685 | 0.939628 | 0.977152 |
| MmugDNA.4864.1.S1_at    | MmugDNA.4864.1  | 10.73 | 11.08 | 0.18 | 0.05 | -1.28 | 0.025316 | 0.043072 | 0.32131  | 0.252157 |
| MmugDNA.4865.1.S1_at    | MmugDNA.4865.1  | 3.49  | 3.64  | 0.1  | 0.04 | -1.1  | 0.067826 | 0.150484 | 0.42446  | 0.42501  |
| MmugDNA.4867.1.S1_at    | MmugDNA.4867.1  | 5.11  | 4.89  | 0.18 | 0.13 | 1.17  | 0.200093 | 0.238032 | 0.571873 | 0.50861  |
| MmugDNA.4868.1.S1_at    | MmugDNA.4868.1  | 8.37  | 9.19  | 1.55 | 0.24 | -1.77 | 0.406254 | 0.152995 | 0.727915 | 0.427805 |
| MmugDNA.4869.1.S1_at    | MmugDNA.4869.1  | 5.9   | 5.82  | 0.25 | 0.07 | 1.06  | 0.287639 | 0.00763  | 0.644777 | 0.116869 |
| MmugDNA.4869.1.S1_s_at  | MmugDNA.4869.1  | 10.37 | 10.56 | 2.14 | 0.24 | -1.14 | 0.73602  | 0.179558 | 0.899002 | 0.456011 |
| MmugDNA.487.1.S1_at     | MmugDNA.487.1   | 7.12  | 7.95  | 0.02 | 0.53 | -1.78 | 0.050451 | 0.005313 | 0.38715  | 0.100896 |
| MmugDNA.4870.1.S1_at    | MmugDNA.4870.1  | 6.1   | 6.63  | 0.12 | 0.32 | -1.45 | 0.016518 | 0.006181 | 0.287478 | 0.106774 |
| MmugDNA.4873.1.S1_at    | MmugDNA.4873.1  | 6     | 6.22  | 1.09 | 0.65 | -1.17 | 0.845315 | 0.689444 | 0.945769 | 0.818841 |
| MmugDNA.4875.1.S1_at    | MmugDNA.4875.1  | 4.14  | 4.01  | 0.1  | 0.06 | 1.1   | 0.086974 | 0.09768  | 0.454785 | 0.355554 |

|                        |                |       |       |      |      |       |          |          |          |          |
|------------------------|----------------|-------|-------|------|------|-------|----------|----------|----------|----------|
| MmugDNA.4876.1.S1_at   | MmugDNA.4876.1 | 3.17  | 3.26  | 0.34 | 0.06 | -1.06 | 0.662642 | 0.228208 | 0.866912 | 0.500383 |
| MmugDNA.4877.1.S1_at   | MmugDNA.4877.1 | 4.15  | 4.12  | 0.1  | 0.06 | 1.02  | 0.170967 | 0.312546 | 0.544107 | 0.567265 |
| MmugDNA.4879.1.S1_at   | MmugDNA.4879.1 | 9.2   | 9.04  | 0.75 | 0.25 | 1.12  | 0.693133 | 0.11244  | 0.880472 | 0.377784 |
| MmugDNA.4880.1.S1_at   | MmugDNA.4880.1 | 12.39 | 12.41 | 0.36 | 0.13 | -1.01 | 0.850627 | 0.196297 | 0.947402 | 0.471264 |
| MmugDNA.4881.1.S1_at   | MmugDNA.4881.1 | 5.05  | 5.34  | 0.15 | 0.33 | -1.22 | 0.482197 | 0.373721 | 0.772277 | 0.612403 |
| MmugDNA.4882.1.S1_at   | MmugDNA.4882.1 | 2.81  | 2.85  | 0.08 | 0.12 | -1.03 | 0.759949 | 0.397999 | 0.909794 | 0.629138 |
| MmugDNA.4883.1.S1_at   | MmugDNA.4883.1 | 6.19  | 6.49  | 0.17 | 0.06 | -1.23 | 0.031683 | 0.019509 | 0.341749 | 0.175439 |
| MmugDNA.4884.1.S1_at   | MmugDNA.4884.1 | 4.92  | 5.59  | 0.56 | 0.41 | -1.59 | 0.484478 | 0.635612 | 0.773652 | 0.785452 |
| MmugDNA.4885.1.S1_at   | MmugDNA.4885.1 | 8.52  | 7.81  | 1.74 | 0.15 | 1.64  | 0.511208 | 0.381977 | 0.78856  | 0.618252 |
| MmugDNA.4886.1.S1_at   | MmugDNA.4886.1 | 8.14  | 9.47  | 1.37 | 0.22 | -2.52 | 0.625231 | 0.177152 | 0.849267 | 0.453611 |
| MmugDNA.4887.1.S1_at   | MmugDNA.4887.1 | 4.09  | 3.81  | 0.13 | 0.34 | 1.21  | 0.864524 | 0.094964 | 0.952391 | 0.352054 |
| MmugDNA.4889.1.S1_s_at | MmugDNA.4889.1 | 9.23  | 9.16  | 0.15 | 0.03 | 1.05  | 0.52095  | 0.184257 | 0.794207 | 0.460382 |
| MmugDNA.489.1.S1_at    | MmugDNA.489.1  | 4.7   | 4.45  | 0.54 | 0.31 | 1.19  | 0.623524 | 0.26615  | 0.848274 | 0.531988 |
| MmugDNA.4890.1.S1_at   | MmugDNA.4890.1 | 5.92  | 5.53  | 1.52 | 0.51 | 1.31  | 0.697929 | 0.642645 | 0.882532 | 0.790374 |
| MmugDNA.4891.1.S1_at   | MmugDNA.4891.1 | 5.01  | 5.24  | 0.77 | 0.32 | -1.17 | 0.637214 | 0.143379 | 0.855417 | 0.417386 |
| MmugDNA.4892.1.S1_at   | MmugDNA.4892.1 | 11.59 | 12.01 | 0.21 | 0.11 | -1.34 | 0.074148 | 0.074297 | 0.434946 | 0.318046 |
| MmugDNA.4893.1.S1_at   | MmugDNA.4893.1 | 7.91  | 7.53  | 0.6  | 0.19 | 1.3   | 0.928164 | 0.620417 | 0.976259 | 0.775393 |
| MmugDNA.4894.1.S1_at   | MmugDNA.4894.1 | 10.51 | 11.29 | 0.41 | 0.12 | -1.71 | 0.034589 | 0.026495 | 0.350124 | 0.203897 |
| MmugDNA.4897.1.S1_s_at | MmugDNA.4897.1 | 11.89 | 11.73 | 0.05 | 0.06 | 1.12  | 0.025058 | 0.004377 | 0.320402 | 0.092619 |
| MmugDNA.4898.1.S1_at   | MmugDNA.4898.1 | 5.95  | 5.52  | 0.46 | 0.12 | 1.35  | 0.191564 | 0.253445 | 0.562859 | 0.521742 |
| MmugDNA.4901.1.S1_at   | MmugDNA.4901.1 | 6.94  | 6.58  | 0.53 | 0.03 | 1.29  | 0.853448 | 0.17252  | 0.948299 | 0.448864 |
| MmugDNA.4902.1.S1_at   | MmugDNA.4902.1 | 4.24  | 4.09  | 0.16 | 0.05 | 1.11  | 0.090434 | 0.131853 | 0.458677 | 0.403891 |
| MmugDNA.4903.1.S1_at   | MmugDNA.4903.1 | 3.39  | 3.32  | 0.1  | 0.24 | 1.05  | 0.811282 | 0.909885 | 0.931713 | 0.94915  |
| MmugDNA.4903.1.S1_x_at | MmugDNA.4903.1 | 5.39  | 5.28  | 0.11 | 0.13 | 1.08  | 0.507747 | 0.301156 | 0.786553 | 0.559356 |
| MmugDNA.4904.1.S1_at   | MmugDNA.4904.1 | 8.87  | 9.04  | 0.25 | 0.03 | -1.13 | 0.09552  | 0.107054 | 0.464229 | 0.369702 |
| MmugDNA.4905.1.S1_at   | MmugDNA.4905.1 | 2.97  | 3.11  | 0.07 | 0.08 | -1.1  | 0.127527 | 0.442121 | 0.501716 | 0.660171 |
| MmugDNA.4906.1.S1_at   | MmugDNA.4906.1 | 11.65 | 11.89 | 0.14 | 0.08 | -1.19 | 0.031014 | 0.053729 | 0.339397 | 0.277384 |
| MmugDNA.4907.1.S1_at   | MmugDNA.4907.1 | 9.29  | 9.42  | 0.61 | 0.21 | -1.09 | 0.428746 | 0.196163 | 0.742032 | 0.471236 |
| MmugDNA.4908.1.S1_at   | MmugDNA.4908.1 | 6.63  | 6.63  | 0.07 | 0    | -1    | 0.672904 | 0.920154 | 0.871072 | 0.955094 |
| MmugDNA.491.1.S1_at    | MmugDNA.491.1  | 5.3   | 5.78  | 0.8  | 0.35 | -1.39 | 0.836018 | 0.853108 | 0.941202 | 0.916487 |
| MmugDNA.4910.1.S1_at   | MmugDNA.4910.1 | 4.64  | 4.33  | 0.33 | 0.12 | 1.24  | 0.129137 | 0.126146 | 0.503825 | 0.396734 |
| MmugDNA.4911.1.S1_at   | MmugDNA.4911.1 | 5.82  | 6.42  | 0.35 | 0.41 | -1.52 | 0.131033 | 0.083564 | 0.5054   | 0.334152 |
| MmugDNA.4914.1.S1_s_at | MmugDNA.4914.1 | 13.74 | 13.73 | 0.39 | 0.13 | 1.01  | 0.755493 | 0.065455 | 0.907924 | 0.301415 |
| MmugDNA.4915.1.S1_at   | MmugDNA.4915.1 | 7.12  | 7.07  | 0.44 | 0.35 | 1.04  | 0.991175 | 0.630346 | 0.996655 | 0.782217 |
| MmugDNA.4917.1.S1_at   | MmugDNA.4917.1 | 11.8  | 11.54 | 0.04 | 0.01 | 1.2   | 0.00041  | 0.000397 | 0.137028 | 0.037471 |
| MmugDNA.492.1.S1_at    | MmugDNA.492.1  | 7.77  | 7.58  | 0.26 | 0.08 | 1.14  | 0.456707 | 0.0844   | 0.758051 | 0.335713 |
| MmugDNA.4920.1.S1_at   | MmugDNA.4920.1 | 7.55  | 7.22  | 0.08 | 0.22 | 1.26  | 0.033405 | 0.017984 | 0.346442 | 0.169137 |
| MmugDNA.4921.1.S1_at   | MmugDNA.4921.1 | 3.11  | 2.97  | 0.18 | 0.17 | 1.1   | 0.645336 | 0.821992 | 0.858731 | 0.8976   |
| MmugDNA.4922.1.S1_at   | MmugDNA.4922.1 | 4.96  | 4.84  | 0.29 | 0.13 | 1.09  | 0.512887 | 0.892606 | 0.789522 | 0.938758 |
| MmugDNA.4923.1.S1_at   | MmugDNA.4923.1 | 7.79  | 7.6   | 0.89 | 0.13 | 1.14  | 0.532724 | 0.441794 | 0.800478 | 0.659938 |
| MmugDNA.4924.1.S1_at   | MmugDNA.4924.1 | 10.68 | 10.66 | 0.13 | 0.02 | 1.01  | 0.436231 | 0.011462 | 0.746244 | 0.138495 |
| MmugDNA.4925.1.S1_at   | MmugDNA.4925.1 | 9.18  | 8.79  | 0.59 | 0.26 | 1.31  | 0.795596 | 0.211685 | 0.924888 | 0.485708 |
| MmugDNA.4928.1.S1_at   | MmugDNA.4928.1 | 8.69  | 9.13  | 0.39 | 0.04 | -1.36 | 0.392713 | 0.556374 | 0.718592 | 0.734507 |

|                         |                 |       |       |      |      |       |          |          |          |          |
|-------------------------|-----------------|-------|-------|------|------|-------|----------|----------|----------|----------|
| MmugDNA.4929.1.S1_at    | MmugDNA.4929.1  | 7.86  | 8.04  | 0.18 | 0.13 | -1.13 | 0.208556 | 0.413327 | 0.580248 | 0.639596 |
| MmugDNA.493.1.S1_at     | MmugDNA.493.1   | 5.8   | 5.94  | 0.13 | 0.21 | -1.1  | 0.863445 | 0.293924 | 0.952018 | 0.553891 |
| MmugDNA.4931.1.S1_at    | MmugDNA.4931.1  | 6.7   | 7.37  | 0.19 | 0.1  | -1.59 | 0.010968 | 0.021709 | 0.251011 | 0.184333 |
| MmugDNA.4932.1.S1_at    | MmugDNA.4932.1  | 10.54 | 10.13 | 0.22 | 0.11 | 1.33  | 0.086248 | 0.022588 | 0.453862 | 0.188092 |
| MmugDNA.4932.1.S1_s_at  | MmugDNA.4932.1  | 9.26  | 8.82  | 0.01 | 0.21 | 1.36  | 0.014136 | 0.005677 | 0.274019 | 0.103959 |
| MmugDNA.4933.1.S1_at    | MmugDNA.4933.1  | 6.62  | 6.96  | 0.68 | 0.12 | -1.26 | 0.145576 | 0.173517 | 0.520527 | 0.449938 |
| MmugDNA.4934.1.S1_at    | MmugDNA.4934.1  | 10.09 | 9.46  | 0.34 | 0.08 | 1.56  | 0.091262 | 0.100386 | 0.459035 | 0.359541 |
| MmugDNA.4935.1.S1_at    | MmugDNA.4935.1  | 4.99  | 3.88  | 0.5  | 1.02 | 2.16  | 0.728035 | 0.161296 | 0.894913 | 0.437434 |
| MmugDNA.4936.1.S1_at    | MmugDNA.4936.1  | 9.47  | 9.09  | 0.25 | 0.06 | 1.31  | 0.047421 | 0.188193 | 0.380246 | 0.464251 |
| MmugDNA.4937.1.S1_at    | MmugDNA.4937.1  | 5.63  | 5.77  | 0.47 | 0.06 | -1.1  | 0.66476  | 0.815582 | 0.867683 | 0.893609 |
| MmugDNA.4941.1.S1_at    | MmugDNA.4941.1  | 7.91  | 8.36  | 0.23 | 0.14 | -1.37 | 0.033363 | 0.001346 | 0.346442 | 0.056466 |
| MmugDNA.4942.1.S1_at    | MmugDNA.4942.1  | 10.57 | 10.88 | 0.28 | 0.15 | -1.24 | 0.064542 | 0.016139 | 0.418343 | 0.161012 |
| MmugDNA.4942.1.S1_x_at  | MmugDNA.4942.1  | 10.57 | 10.82 | 0.24 | 0.13 | -1.19 | 0.06631  | 0.020497 | 0.422145 | 0.179723 |
| MmugDNA.30842.1.S1_s_at | MmugDNA.30842.1 | 11.45 | 11.96 | 0.59 | 0.06 | -1.42 | 0.710821 | 0.02291  | 0.88743  | 0.189395 |
| MmugDNA.30976.1.S1_s_at | MmugDNA.30976.1 | 10.97 | 10.51 | 0.18 | 0.11 | 1.37  | 0.017119 | 0.007783 | 0.28928  | 0.117732 |
| MmugDNA.19803.1.S1_s_at | MmugDNA.19803.1 | 9.21  | 9.64  | 0.37 | 0.11 | -1.35 | 0.12047  | 0.009421 | 0.493859 | 0.127871 |
| MmugDNA.4947.1.S1_at    | MmugDNA.4947.1  | 3.71  | 3.61  | 0.25 | 0.16 | 1.07  | 0.59121  | 0.215097 | 0.833293 | 0.488932 |
| MmugDNA.4949.1.S1_at    | MmugDNA.4949.1  | 5.65  | 5.69  | 0.17 | 0.3  | -1.02 | 0.558369 | 0.155444 | 0.815217 | 0.430802 |
| MmugDNA.495.1.S1_at     | MmugDNA.495.1   | 10.95 | 11.85 | 0.14 | 0.01 | -1.87 | 0.000462 | 0.001213 | 0.140406 | 0.054455 |
| MmugDNA.495.1.S1_s_at   | MmugDNA.495.1   | 11.9  | 12.5  | 0.08 | 0.04 | -1.51 | 0.000229 | 0.004934 | 0.123409 | 0.097875 |
| MmugDNA.4950.1.S1_at    | MmugDNA.4950.1  | 2.82  | 2.9   | 0.09 | 0.13 | -1.06 | 0.452935 | 0.24683  | 0.755901 | 0.516186 |
| MmugDNA.4951.1.S1_at    | MmugDNA.4951.1  | 4.71  | 4.71  | 0.03 | 0.2  | 1     | 0.848484 | 0.891754 | 0.946776 | 0.938272 |
| MmugDNA.4952.1.S1_at    | MmugDNA.4952.1  | 8.83  | 7.89  | 0.95 | 0.39 | 1.91  | 0.187713 | 0.330589 | 0.559968 | 0.579309 |
| MmugDNA.4953.1.S1_at    | MmugDNA.4953.1  | 3.31  | 3.42  | 0.17 | 0.12 | -1.08 | 0.907922 | 0.142279 | 0.968853 | 0.41579  |
| MmugDNA.4955.1.S1_at    | MmugDNA.4955.1  | 4.56  | 4.79  | 0.1  | 0.4  | -1.17 | 0.404152 | 0.851367 | 0.726203 | 0.915439 |
| MmugDNA.4956.1.S1_at    | MmugDNA.4956.1  | 11.82 | 11.62 | 0.21 | 0.02 | 1.15  | 0.165944 | 0.265447 | 0.538661 | 0.531363 |
| MmugDNA.4957.1.S1_at    | MmugDNA.4957.1  | 5.39  | 5.42  | 0.29 | 0.22 | -1.02 | 0.815228 | 0.338422 | 0.933137 | 0.585432 |
| MmugDNA.4958.1.S1_at    | MmugDNA.4958.1  | 7.13  | 7.19  | 0.05 | 0.05 | -1.04 | 0.525605 | 0.182416 | 0.796284 | 0.45897  |
| MmugDNA.4959.1.S1_at    | MmugDNA.4959.1  | 4.46  | 4.42  | 0.04 | 0.03 | 1.03  | 0.041075 | 0.010748 | 0.365672 | 0.135385 |
| MmugDNA.496.1.S1_at     | MmugDNA.496.1   | 3.12  | 3.15  | 0.12 | 0.16 | -1.02 | 0.707697 | 0.561324 | 0.88624  | 0.737326 |
| MmugDNA.4960.1.S1_at    | MmugDNA.4960.1  | 3.7   | 3.62  | 0.17 | 0.05 | 1.06  | 0.106178 | 0.151197 | 0.478443 | 0.425873 |
| MmugDNA.4961.1.S1_at    | MmugDNA.4961.1  | 11.68 | 11.3  | 0.22 | 0.19 | 1.31  | 0.202134 | 0.008441 | 0.573629 | 0.121922 |
| MmugDNA.4963.1.S1_at    | MmugDNA.4963.1  | 4.62  | 4.66  | 0.04 | 0    | -1.03 | 0.153759 | 0.105082 | 0.527051 | 0.366755 |
| MmugDNA.4964.1.S1_at    | MmugDNA.4964.1  | 9.32  | 8.75  | 0.39 | 0.17 | 1.48  | 0.055509 | 0.081196 | 0.398656 | 0.329351 |
| MmugDNA.4965.1.S1_at    | MmugDNA.4965.1  | 4.55  | 4.54  | 0.07 | 0.1  | 1.01  | 0.7837   | 0.755733 | 0.920386 | 0.857771 |
| MmugDNA.4966.1.S1_at    | MmugDNA.4966.1  | 7.28  | 7.32  | 0.16 | 0.19 | -1.03 | 0.323575 | 0.355844 | 0.672279 | 0.597864 |
| MmugDNA.4968.1.S1_at    | MmugDNA.4968.1  | 5.67  | 5.9   | 0.2  | 0.23 | -1.18 | 0.113166 | 0.203547 | 0.486619 | 0.477767 |
| MmugDNA.4970.1.S1_at    | MmugDNA.4970.1  | 6.7   | 7.15  | 0.85 | 0.27 | -1.37 | 0.641689 | 0.307038 | 0.857461 | 0.563427 |
| MmugDNA.4971.1.S1_at    | MmugDNA.4971.1  | 3.17  | 3.08  | 0.3  | 0.35 | 1.06  | 0.96368  | 0.973652 | 0.988152 | 0.985648 |
| MmugDNA.4972.1.S1_at    | MmugDNA.4972.1  | 4.02  | 4.16  | 0.17 | 0.09 | -1.1  | 0.162868 | 0.225931 | 0.535867 | 0.498344 |
| MmugDNA.4975.1.S1_at    | MmugDNA.4975.1  | 7.59  | 7.46  | 0.33 | 0.02 | 1.09  | 0.559995 | 0.036317 | 0.816426 | 0.235105 |
| MmugDNA.4976.1.S1_at    | MmugDNA.4976.1  | 5.31  | 5.61  | 0.54 | 0.21 | -1.23 | 0.271577 | 0.651039 | 0.631445 | 0.795993 |
| MmugDNA.4977.1.S1_at    | MmugDNA.4977.1  | 5.55  | 7.2   | 1.38 | 0.44 | -3.15 | 0.374811 | 0.231137 | 0.706109 | 0.5029   |

|                         |                 |       |       |      |      |       |          |          |          |          |
|-------------------------|-----------------|-------|-------|------|------|-------|----------|----------|----------|----------|
| MmugDNA.4978.1.S1_at    | MmugDNA.4978.1  | 4.29  | 4.48  | 0.22 | 0.02 | -1.14 | 0.602733 | 0.687963 | 0.838977 | 0.817831 |
| MmugDNA.4979.1.S1_at    | MmugDNA.4979.1  | 4.12  | 3.94  | 0.04 | 0.11 | 1.13  | 0.055219 | 0.0738   | 0.398095 | 0.317146 |
| MmugDNA.498.1.S1_at     | MmugDNA.498.1   | 2.84  | 2.89  | 0.1  | 0.05 | -1.04 | 0.474771 | 0.258176 | 0.768229 | 0.525574 |
| MmugDNA.4980.1.S1_at    | MmugDNA.4980.1  | 7.04  | 7.04  | 0.11 | 0.06 | 1     | 0.437446 | 0.212802 | 0.74683  | 0.486769 |
| MmugDNA.4981.1.S1_at    | MmugDNA.4981.1  | 3.4   | 3.37  | 0    | 0.27 | 1.02  | 0.648257 | 0.735643 | 0.859825 | 0.847031 |
| MmugDNA.4982.1.S1_at    | MmugDNA.4982.1  | 10.69 | 11.54 | 0.35 | 0.1  | -1.8  | 0.027247 | 0.010282 | 0.327322 | 0.132774 |
| MmugDNA.4984.1.S1_at    | MmugDNA.4984.1  | 3.7   | 3.69  | 0.13 | 0.04 | 1.01  | 0.90543  | 0.761112 | 0.968115 | 0.861205 |
| MmugDNA.4985.1.S1_at    | MmugDNA.4985.1  | 7.87  | 8.52  | 0.37 | 0.24 | -1.56 | 0.059924 | 0.039591 | 0.407399 | 0.244002 |
| MmugDNA.4987.1.S1_at    | MmugDNA.4987.1  | 5.6   | 5.65  | 0.17 | 0.26 | -1.04 | 0.846568 | 0.621812 | 0.94629  | 0.776383 |
| MmugDNA.4988.1.S1_at    | MmugDNA.4988.1  | 4.13  | 3.95  | 0.17 | 0.31 | 1.13  | 0.904266 | 0.08023  | 0.967773 | 0.32783  |
| MmugDNA.4989.1.S1_at    | MmugDNA.4989.1  | 5     | 4.28  | 0.42 | 0.09 | -1.65 | 0.036374 | 0.016677 | 0.35477  | 0.163509 |
| MmugDNA.499.1.S1_at     | MmugDNA.499.1   | 3.07  | 3.16  | 0.1  | 0.09 | -1.06 | 0.544874 | 0.593457 | 0.807495 | 0.758299 |
| MmugDNA.4990.1.S1_at    | MmugDNA.4990.1  | 4.15  | 4.29  | 0.39 | 0.52 | -1.1  | 0.791406 | 0.942583 | 0.923383 | 0.967453 |
| MmugDNA.4991.1.S1_at    | MmugDNA.4991.1  | 8.02  | 7.62  | 0.92 | 0.26 | 1.32  | 0.742836 | 0.704844 | 0.901935 | 0.828846 |
| MmugDNA.23460.1.S1_s_at | MmugDNA.23460.1 | 10.03 | 9.61  | 1.1  | 0.14 | 1.34  | 0.658219 | 0.816596 | 0.864473 | 0.894202 |
| MmugDNA.4992.1.S1_at    | MmugDNA.4992.1  | 6.87  | 6.75  | 1.3  | 0.28 | 1.09  | 0.862658 | 0.94816  | 0.951672 | 0.97046  |
| MmugDNA.4994.1.S1_at    | MmugDNA.4994.1  | 5.15  | 5.43  | 0.08 | 0.15 | -1.21 | 0.120402 | 0.260134 | 0.493723 | 0.526776 |
| MmugDNA.4995.1.S1_at    | MmugDNA.4995.1  | 7.81  | 7.63  | 0.26 | 0.1  | 1.13  | 0.323256 | 0.4357   | 0.672034 | 0.655471 |
| MmugDNA.5.1.S1_at       | MmugDNA.5.1     | 4.89  | 4.51  | 0.38 | 0.49 | 1.3   | 0.790587 | 0.742177 | 0.92298  | 0.850645 |
| MmugDNA.500.1.S1_at     | MmugDNA.500.1   | 3.78  | 3.61  | 0.21 | 0.13 | 1.13  | 0.107237 | 0.120129 | 0.47976  | 0.388869 |
| MmugDNA.5000.1.S1_at    | MmugDNA.5000.1  | 3.27  | 3.69  | 0.62 | 0.32 | -1.34 | 0.84901  | 0.710224 | 0.946917 | 0.831904 |
| MmugDNA.5001.1.S1_at    | MmugDNA.5001.1  | 5.76  | 5.75  | 0.08 | 0.07 | 1     | 0.851831 | 0.675039 | 0.947748 | 0.810141 |
| MmugDNA.5002.1.S1_at    | MmugDNA.5002.1  | 3.38  | 3.31  | 0.24 | 0.18 | 1.05  | 0.661495 | 0.898117 | 0.866278 | 0.941987 |
| MmugDNA.5003.1.S1_at    | MmugDNA.5003.1  | 10.84 | 11.85 | 0.75 | 0.08 | -2.01 | 0.080373 | 0.019858 | 0.444007 | 0.177189 |
| MmugDNA.5004.1.S1_at    | MmugDNA.5004.1  | 9.87  | 11.2  | 1.13 | 0.13 | -2.53 | 0.3045   | 0.406703 | 0.658137 | 0.634487 |
| MmugDNA.5005.1.S1_at    | MmugDNA.5005.1  | 11.76 | 11.8  | 0.11 | 0.12 | -1.02 | 0.153804 | 0.134443 | 0.527154 | 0.406605 |
| MmugDNA.5006.1.S1_x_at  | MmugDNA.5006.1  | 7.33  | 7.34  | 0.2  | 0.19 | -1.01 | 0.486009 | 0.374733 | 0.774427 | 0.613037 |
| MmugDNA.5007.1.S1_at    | MmugDNA.5007.1  | 5.71  | 5.34  | 0.49 | 0.11 | 1.29  | 0.219721 | 0.056685 | 0.589083 | 0.284204 |
| MmugDNA.5008.1.S1_at    | MmugDNA.5008.1  | 3.42  | 3.63  | 0.11 | 0.16 | -1.15 | 0.110755 | 0.224766 | 0.484166 | 0.497617 |
| MmugDNA.5009.1.S1_at    | MmugDNA.5009.1  | 10.82 | 11.19 | 0.35 | 0.12 | -1.29 | 0.223446 | 0.078431 | 0.592569 | 0.325193 |
| MmugDNA.501.1.S1_at     | MmugDNA.501.1   | 4.27  | 4.05  | 0.35 | 0.06 | 1.16  | 0.319089 | 0.410156 | 0.668541 | 0.637086 |
| MmugDNA.5010.1.S1_s_at  | MmugDNA.5010.1  | 8.31  | 8.83  | 0.78 | 0.02 | -1.43 | 0.311746 | 0.290754 | 0.66351  | 0.551395 |
| MmugDNA.5011.1.S1_at    | MmugDNA.5011.1  | 5.7   | 6.62  | 0.64 | 0.15 | -1.89 | 0.070579 | 0.157984 | 0.429614 | 0.433725 |
| MmugDNA.5013.1.S1_at    | MmugDNA.5013.1  | 8.81  | 9.7   | 0.75 | 0.11 | -1.85 | 0.312751 | 0.459977 | 0.664208 | 0.671989 |
| MmugDNA.1879.1.S1_s_at  | MmugDNA.1879.1  | 5.74  | 6.61  | 0.22 | 0.28 | -1.82 | 0.0181   | 0.082141 | 0.295257 | 0.330937 |
| MmugDNA.5015.1.S1_s_at  | MmugDNA.5015.1  | 3.06  | 3.21  | 0.05 | 0.14 | -1.11 | 0.213941 | 0.292723 | 0.584533 | 0.552783 |
| MmugDNA.5016.1.S1_at    | MmugDNA.5016.1  | 5.47  | 5.36  | 0.04 | 0.12 | 1.08  | 0.297383 | 0.165434 | 0.652737 | 0.441634 |
| MmugDNA.5019.1.S1_at    | MmugDNA.5019.1  | 4.28  | 4.94  | 0.52 | 0.58 | -1.59 | 0.239322 | 0.269767 | 0.605811 | 0.53503  |
| MmugDNA.502.1.S1_at     | MmugDNA.502.1   | 6.06  | 6.05  | 0.19 | 0.38 | 1.01  | 0.411836 | 0.507735 | 0.731748 | 0.703317 |
| MmugDNA.5020.1.S1_at    | MmugDNA.5020.1  | 6.7   | 6.3   | 0.72 | 1.53 | 1.32  | 0.62489  | 0.243969 | 0.849035 | 0.514069 |
| MmugDNA.5021.1.S1_at    | MmugDNA.5021.1  | 6.45  | 6.1   | 0.23 | 0.18 | 1.28  | 0.132334 | 0.088375 | 0.506752 | 0.341842 |
| MmugDNA.5022.1.S1_at    | MmugDNA.5022.1  | 4.9   | 5.45  | 0.33 | 0.5  | -1.47 | 0.072086 | 0.091329 | 0.432014 | 0.346281 |
| MmugDNA.5025.1.S1_at    | MmugDNA.5025.1  | 6.13  | 6.16  | 0.22 | 0.27 | -1.02 | 0.585053 | 0.526331 | 0.83021  | 0.71554  |

|                         |                 |      |       |      |      |       |          |          |          |          |
|-------------------------|-----------------|------|-------|------|------|-------|----------|----------|----------|----------|
| MmugDNA.5026.1.S1_at    | MmugDNA.5026.1  | 7.64 | 8.45  | 0.12 | 0.1  | -1.75 | 0.001014 | 0.064027 | 0.155374 | 0.299168 |
| MmugDNA.5027.1.S1_at    | MmugDNA.5027.1  | 4    | 4.54  | 0.43 | 0.08 | -1.46 | 0.279265 | 0.187019 | 0.638166 | 0.462938 |
| MmugDNA.5029.1.S1_at    | MmugDNA.5029.1  | 3.71 | 3.51  | 0.2  | 0.05 | 1.15  | 0.168476 | 0.446216 | 0.541113 | 0.662743 |
| MmugDNA.5030.1.S1_at    | MmugDNA.5030.1  | 5.52 | 5.5   | 0.41 | 0.1  | 1.01  | 0.719967 | 0.790519 | 0.891311 | 0.878895 |
| MmugDNA.5031.1.S1_at    | MmugDNA.5031.1  | 4.23 | 4.24  | 0.07 | 0.07 | -1.01 | 0.730169 | 0.302383 | 0.895994 | 0.560109 |
| MmugDNA.5032.1.S1_at    | MmugDNA.5032.1  | 3.68 | 3.84  | 0.06 | 0.09 | -1.12 | 0.143248 | 0.034074 | 0.518489 | 0.228505 |
| MmugDNA.5033.1.S1_at    | MmugDNA.5033.1  | 6.08 | 5.83  | 0.37 | 0.28 | 1.19  | 0.408942 | 0.302434 | 0.729658 | 0.560109 |
| MmugDNA.5034.1.S1_at    | MmugDNA.5034.1  | 8.97 | 9.7   | 0.8  | 0.11 | -1.65 | 0.188978 | 0.110207 | 0.560718 | 0.374349 |
| MmugDNA.5035.1.S1_at    | MmugDNA.5035.1  | 6.6  | 6.57  | 0.13 | 0.06 | 1.02  | 0.180657 | 0.170606 | 0.553878 | 0.447204 |
| MmugDNA.5036.1.S1_at    | MmugDNA.5036.1  | 4.5  | 4.47  | 0.78 | 0.07 | 1.02  | 0.345264 | 0.444859 | 0.68742  | 0.662072 |
| MmugDNA.5038.1.S1_at    | MmugDNA.5038.1  | 4.57 | 4.6   | 0.18 | 0.03 | -1.02 | 0.588723 | 0.920616 | 0.831968 | 0.955258 |
| MmugDNA.5039.1.S1_at    | MmugDNA.5039.1  | 6.89 | 7.19  | 0.46 | 0.11 | -1.23 | 0.329586 | 0.342665 | 0.67648  | 0.588666 |
| MmugDNA.504.1.S1_at     | MmugDNA.504.1   | 5.54 | 5.46  | 0.17 | 0.05 | 1.06  | 0.14975  | 0.419446 | 0.523238 | 0.643474 |
| MmugDNA.5040.1.S1_at    | MmugDNA.5040.1  | 8.3  | 8.07  | 0.53 | 0.33 | 1.17  | 0.553138 | 0.046578 | 0.811981 | 0.260267 |
| MmugDNA.5041.1.S1_at    | MmugDNA.5041.1  | 6.45 | 6.22  | 0.3  | 0.24 | 1.17  | 0.566336 | 0.762189 | 0.819964 | 0.861664 |
| MmugDNA.5042.1.S1_at    | MmugDNA.5042.1  | 4.2  | 4.4   | 0.23 | 0.28 | -1.15 | 0.857021 | 0.445715 | 0.94962  | 0.662489 |
| MmugDNA.5044.1.S1_at    | MmugDNA.5044.1  | 7.35 | 8.46  | 0.8  | 0.24 | -2.16 | 0.268514 | 0.190142 | 0.628847 | 0.465796 |
| MmugDNA.5046.1.S1_at    | MmugDNA.5046.1  | 6.23 | 5.55  | 0.34 | 0.15 | 1.6   | 0.096087 | 0.062227 | 0.464614 | 0.296307 |
| MmugDNA.5047.1.S1_at    | MmugDNA.5047.1  | 7.87 | 8.06  | 0.13 | 0.26 | -1.14 | 0.189966 | 0.140042 | 0.561309 | 0.413386 |
| MmugDNA.5048.1.S1_at    | MmugDNA.5048.1  | 4.7  | 4.8   | 0.05 | 0.15 | -1.07 | 0.165319 | 0.286024 | 0.538018 | 0.547512 |
| MmugDNA.5049.1.S1_at    | MmugDNA.5049.1  | 5.08 | 5.01  | 0.1  | 0.15 | 1.05  | 0.300644 | 0.558816 | 0.655161 | 0.735887 |
| MmugDNA.5050.1.S1_at    | MmugDNA.5050.1  | 7.28 | 7.24  | 0.15 | 0.04 | 1.03  | 0.587398 | 0.871284 | 0.831578 | 0.926843 |
| MmugDNA.5053.1.S1_at    | MmugDNA.5053.1  | 5.88 | 5.97  | 0.22 | 0.18 | -1.06 | 0.337087 | 0.811998 | 0.682214 | 0.891493 |
| MmugDNA.5054.1.S1_at    | MmugDNA.5054.1  | 7.75 | 7.29  | 0.44 | 0.15 | 1.38  | 0.331763 | 0.661785 | 0.678214 | 0.801943 |
| MmugDNA.5055.1.S1_at    | MmugDNA.5055.1  | 4.57 | 4.42  | 0.11 | 0.15 | 1.12  | 0.0977   | 0.078979 | 0.466712 | 0.325986 |
| MmugDNA.5056.1.S1_at    | MmugDNA.5056.1  | 6.82 | 6.16  | 0.79 | 0.22 | 1.58  | 0.186582 | 0.126399 | 0.559164 | 0.396917 |
| MmugDNA.5057.1.S1_s_at  | MmugDNA.5057.1  | 10.4 | 10.34 | 0.36 | 0.13 | 1.04  | 0.405663 | 0.449392 | 0.727426 | 0.665037 |
| MmugDNA.5060.1.S1_at    | MmugDNA.5060.1  | 9.75 | 10.24 | 0.16 | 0.25 | -1.4  | 0.065919 | 0.072765 | 0.421278 | 0.315651 |
| MmugDNA.5061.1.S1_at    | MmugDNA.5061.1  | 9.86 | 9.74  | 0.65 | 0.09 | 1.09  | 0.90516  | 0.955154 | 0.968109 | 0.9746   |
| MmugDNA.5062.1.S1_at    | MmugDNA.5062.1  | 4.94 | 4.89  | 0.25 | 0.03 | 1.03  | 0.516808 | 0.508421 | 0.791667 | 0.703604 |
| MmugDNA.5065.1.S1_at    | MmugDNA.5065.1  | 2.59 | 2.58  | 0.09 | 0.08 | 1.01  | 0.780584 | 0.924338 | 0.919137 | 0.957351 |
| MmugDNA.5065.1.S1_s_at  | MmugDNA.5065.1  | 7.14 | 7.14  | 0.55 | 0.12 | 1     | 0.944768 | 0.425694 | 0.980836 | 0.648009 |
| MmugDNA.5066.1.S1_at    | MmugDNA.5066.1  | 5.57 | 5.63  | 0.61 | 0.17 | -1.04 | 0.460048 | 0.246188 | 0.759901 | 0.515883 |
| MmugDNA.5067.1.S1_at    | MmugDNA.5067.1  | 4.95 | 4.85  | 0.26 | 0.1  | 1.07  | 0.504772 | 0.68954  | 0.785075 | 0.818901 |
| MmugDNA.5068.1.S1_at    | MmugDNA.5068.1  | 7.48 | 7.23  | 0.5  | 0.14 | 1.19  | 0.316646 | 0.452629 | 0.666593 | 0.66723  |
| MmugDNA.5069.1.S1_at    | MmugDNA.5069.1  | 6.5  | 6.5   | 0.18 | 0.14 | 1     | 0.870087 | 0.327155 | 0.954753 | 0.577136 |
| MmugDNA.507.1.S1_at     | MmugDNA.507.1   | 8.38 | 8.37  | 0.11 | 0.14 | 1.01  | 0.432628 | 0.017265 | 0.743962 | 0.166406 |
| MmugDNA.5070.1.S1_at    | MmugDNA.5070.1  | 8.39 | 8.73  | 1.48 | 0.12 | -1.26 | 0.894945 | 0.889164 | 0.964146 | 0.936796 |
| MmugDNA.5071.1.S1_s_at  | MmugDNA.5071.1  | 6.59 | 6.48  | 0.04 | 0.05 | 1.08  | 0.052211 | 0.663506 | 0.392084 | 0.803016 |
| MmugDNA.5072.1.S1_at    | MmugDNA.5072.1  | 7.06 | 5.43  | 0.49 | 0.12 | 3.09  | 0.004965 | 0.008284 | 0.204084 | 0.12078  |
| MmugDNA.5073.1.S1_at    | MmugDNA.5073.1  | 5.01 | 4.82  | 0.07 | 0.08 | 1.14  | 0.179598 | 0.594534 | 0.552935 | 0.758623 |
| MmugDNA.19262.1.S1_at   | MmugDNA.19262.1 | 2.69 | 2.64  | 0.01 | 0.01 | 1.03  | 0.003992 | 0.000048 | 0.198571 | 0.025273 |
| MmugDNA.19262.1.S1_s_at | MmugDNA.19262.1 | 2.95 | 2.95  | 0.09 | 0.1  | -1    | 0.486348 | 0.758661 | 0.774492 | 0.859716 |



|                        |                |       |       |      |      |       |          |          |          |          |
|------------------------|----------------|-------|-------|------|------|-------|----------|----------|----------|----------|
| MmugDNA.5074.1.S1_at   | MmugDNA.5074.1 | 8.94  | 9.25  | 0.42 | 0.09 | -1.24 | 0.211075 | 0.23413  | 0.582141 | 0.505319 |
| MmugDNA.5076.1.S1_at   | MmugDNA.5076.1 | 7.89  | 7.97  | 0.28 | 0.15 | -1.05 | 0.660161 | 0.774227 | 0.865537 | 0.868735 |
| MmugDNA.5078.1.S1_at   | MmugDNA.5078.1 | 7.69  | 7.69  | 0.41 | 0.24 | -1    | 0.334636 | 0.065494 | 0.680478 | 0.301415 |
| MmugDNA.5079.1.S1_at   | MmugDNA.5079.1 | 7     | 6.86  | 0.18 | 0.05 | 1.11  | 0.264102 | 0.508132 | 0.625948 | 0.70337  |
| MmugDNA.508.1.S1_at    | MmugDNA.508.1  | 4     | 3.58  | 0.3  | 0.02 | 1.33  | 0.141838 | 0.138553 | 0.516838 | 0.411557 |
| MmugDNA.5080.1.S1_s_at | MmugDNA.5080.1 | 11.51 | 11.59 | 0.29 | 0.16 | -1.06 | 0.906672 | 0.016254 | 0.968356 | 0.161612 |
| MmugDNA.5081.1.S1_at   | MmugDNA.5081.1 | 2.87  | 2.8   | 0.1  | 0.08 | 1.05  | 0.248507 | 0.185734 | 0.613851 | 0.461631 |
| MmugDNA.5082.1.S1_at   | MmugDNA.5082.1 | 3.26  | 3.3   | 0.16 | 0.32 | -1.03 | 0.319643 | 0.182517 | 0.668882 | 0.459065 |
| MmugDNA.5083.1.S1_at   | MmugDNA.5083.1 | 3.3   | 3.18  | 0.15 | 0.05 | 1.08  | 0.138324 | 0.325111 | 0.51369  | 0.575547 |
| MmugDNA.5084.1.S1_at   | MmugDNA.5084.1 | 5.91  | 5.85  | 0.05 | 0.14 | 1.04  | 0.180365 | 0.226991 | 0.553529 | 0.499286 |
| MmugDNA.5085.1.S1_at   | MmugDNA.5085.1 | 8.68  | 9.57  | 1.21 | 0.18 | -1.86 | 0.894044 | 0.868605 | 0.963672 | 0.925383 |
| MmugDNA.5088.1.S1_at   | MmugDNA.5088.1 | 6.35  | 6.26  | 0.2  | 0.08 | 1.07  | 0.320958 | 0.675637 | 0.669544 | 0.810429 |
| MmugDNA.5089.1.S1_at   | MmugDNA.5089.1 | 8.5   | 8.26  | 0.69 | 0.15 | 1.18  | 0.299936 | 0.144619 | 0.65442  | 0.418466 |
| MmugDNA.509.1.S1_at    | MmugDNA.509.1  | 7     | 7     | 0.06 | 0.01 | -1    | 0.931679 | 0.820371 | 0.977114 | 0.896496 |
| MmugDNA.5092.1.S1_at   | MmugDNA.5092.1 | 8.88  | 8.81  | 0.59 | 0.31 | 1.05  | 0.53309  | 0.493431 | 0.800665 | 0.694107 |
| MmugDNA.5093.1.S1_at   | MmugDNA.5093.1 | 6.89  | 6.78  | 0.23 | 0.17 | 1.08  | 0.937704 | 0.86601  | 0.979059 | 0.923791 |
| MmugDNA.5096.1.S1_at   | MmugDNA.5096.1 | 4.9   | 4.88  | 0.16 | 0.2  | 1.02  | 0.560031 | 0.857579 | 0.816448 | 0.918698 |
| MmugDNA.5097.1.S1_at   | MmugDNA.5097.1 | 5.23  | 5.48  | 0.18 | 0.1  | -1.19 | 0.120301 | 0.12125  | 0.493575 | 0.390351 |
| MmugDNA.5099.1.S1_at   | MmugDNA.5099.1 | 4.19  | 4.27  | 0.42 | 0.2  | -1.06 | 0.63421  | 0.231422 | 0.853953 | 0.503138 |
| MmugDNA.51.1.S1_at     | MmugDNA.51.1   | 11.48 | 11.01 | 0.34 | 0.17 | 1.38  | 0.470567 | 0.615508 | 0.766162 | 0.772025 |
| MmugDNA.5100.1.S1_at   | MmugDNA.5100.1 | 7.92  | 7.59  | 0.64 | 0.12 | 1.26  | 0.917882 | 0.694784 | 0.972062 | 0.822578 |
| MmugDNA.5102.1.S1_at   | MmugDNA.5102.1 | 7.45  | 7.31  | 1.26 | 0.39 | 1.1   | 0.905332 | 0.681074 | 0.968115 | 0.813783 |
| MmugDNA.5104.1.S1_at   | MmugDNA.5104.1 | 3.57  | 3.69  | 0.15 | 0.21 | -1.08 | 0.699695 | 0.588446 | 0.883309 | 0.754925 |
| MmugDNA.5105.1.S1_at   | MmugDNA.5105.1 | 12.78 | 12.79 | 0.09 | 0.04 | -1.01 | 0.937345 | 0.088785 | 0.978916 | 0.342524 |
| MmugDNA.5106.1.S1_at   | MmugDNA.5106.1 | 3.71  | 3.56  | 0.26 | 0.03 | 1.11  | 0.176794 | 0.125836 | 0.549945 | 0.396315 |
| MmugDNA.5107.1.S1_at   | MmugDNA.5107.1 | 11.51 | 11.53 | 0.19 | 0.02 | -1.01 | 0.795637 | 0.752474 | 0.924893 | 0.855897 |
| MmugDNA.5108.1.S1_at   | MmugDNA.5108.1 | 4.67  | 4.54  | 0.1  | 0.12 | 1.1   | 0.060434 | 0.03717  | 0.408186 | 0.237285 |
| MmugDNA.5109.1.S1_at   | MmugDNA.5109.1 | 11.85 | 10.75 | 0.28 | 0.31 | 2.14  | 0.009748 | 0.008199 | 0.243347 | 0.12024  |
| MmugDNA.5110.1.S1_at   | MmugDNA.5110.1 | 12.41 | 12.45 | 0.14 | 0.2  | -1.03 | 0.328485 | 0.256784 | 0.67577  | 0.524607 |
| MmugDNA.5111.1.S1_at   | MmugDNA.5111.1 | 5     | 5.01  | 0.17 | 0.13 | -1.01 | 0.714953 | 0.945314 | 0.889025 | 0.968942 |
| MmugDNA.5113.1.S1_at   | MmugDNA.5113.1 | 4.2   | 4.08  | 0.34 | 0.19 | 1.08  | 0.54699  | 0.555391 | 0.808912 | 0.733767 |
| MmugDNA.5114.1.S1_at   | MmugDNA.5114.1 | 4.26  | 4.26  | 0    | 0.15 | 1     | 0.373901 | 0.678572 | 0.705567 | 0.812261 |
| MmugDNA.5115.1.S1_at   | MmugDNA.5115.1 | 3.34  | 3.33  | 0.16 | 0.13 | 1.01  | 0.481039 | 0.635349 | 0.771639 | 0.785362 |
| MmugDNA.5116.1.S1_at   | MmugDNA.5116.1 | 4.31  | 4.18  | 0.11 | 0.06 | 1.1   | 0.061663 | 0.112453 | 0.411131 | 0.377784 |
| MmugDNA.5117.1.S1_at   | MmugDNA.5117.1 | 10.03 | 10.2  | 0.33 | 0.04 | -1.12 | 0.481778 | 0.40609  | 0.772225 | 0.634197 |
| MmugDNA.5117.1.S1_s_at | MmugDNA.5117.1 | 10.26 | 10.53 | 0.23 | 0.12 | -1.2  | 0.359214 | 0.257879 | 0.697162 | 0.525467 |
| MmugDNA.5118.1.S1_at   | MmugDNA.5118.1 | 5.3   | 5.39  | 0.35 | 0.15 | -1.07 | 0.467503 | 0.595366 | 0.764376 | 0.759091 |
| MmugDNA.5119.1.S1_at   | MmugDNA.5119.1 | 8.93  | 8.27  | 0.7  | 0.08 | 1.58  | 0.388372 | 0.323012 | 0.715274 | 0.574313 |
| MmugDNA.5120.1.S1_at   | MmugDNA.5120.1 | 5.65  | 5.57  | 0.22 | 0.36 | 1.06  | 0.97575  | 0.298084 | 0.992214 | 0.556726 |
| MmugDNA.5121.1.S1_at   | MmugDNA.5121.1 | 9.21  | 9.72  | 0.26 | 0.16 | -1.42 | 0.060661 | 0.201658 | 0.408583 | 0.476208 |
| MmugDNA.5122.1.S1_at   | MmugDNA.5122.1 | 6.36  | 6.52  | 0.12 | 0.13 | -1.11 | 0.140406 | 0.037375 | 0.515777 | 0.237776 |
| MmugDNA.5123.1.S1_at   | MmugDNA.5123.1 | 5.77  | 5.79  | 0.14 | 0.04 | -1.01 | 0.592755 | 0.720269 | 0.833974 | 0.838202 |
| MmugDNA.5124.1.S1_at   | MmugDNA.5124.1 | 4.18  | 4.04  | 0.14 | 0.01 | 1.1   | 0.1737   | 0.21589  | 0.546749 | 0.489536 |

|                        |                |       |       |      |      |       |          |          |          |          |
|------------------------|----------------|-------|-------|------|------|-------|----------|----------|----------|----------|
| MmugDNA.5127.1.S1_at   | MmugDNA.5127.1 | 5.44  | 5.29  | 0.19 | 0.07 | 1.11  | 0.68695  | 0.460852 | 0.877571 | 0.672749 |
| MmugDNA.5128.1.S1_at   | MmugDNA.5128.1 | 8.17  | 8.48  | 0.14 | 0.19 | -1.24 | 0.195541 | 0.149027 | 0.565961 | 0.423337 |
| MmugDNA.513.1.S1_at    | MmugDNA.513.1  | 4.53  | 3.99  | 0.25 | 0.2  | 1.46  | 0.048862 | 0.021443 | 0.384678 | 0.183342 |
| MmugDNA.5131.1.S1_at   | MmugDNA.5131.1 | 6.52  | 6.58  | 0.07 | 0.15 | -1.04 | 0.495545 | 0.333848 | 0.780125 | 0.581995 |
| MmugDNA.5132.1.S1_at   | MmugDNA.5132.1 | 12.25 | 12.5  | 0.31 | 0.24 | -1.2  | 0.158963 | 0.257492 | 0.531703 | 0.525247 |
| MmugDNA.5133.1.S1_at   | MmugDNA.5133.1 | 8.06  | 7.91  | 0.98 | 0.12 | 1.11  | 0.282034 | 0.364771 | 0.640534 | 0.605071 |
| MmugDNA.5135.1.S1_at   | MmugDNA.5135.1 | 3.78  | 3.54  | 0.1  | 0.06 | 1.18  | 0.014099 | 0.358039 | 0.273972 | 0.599604 |
| MmugDNA.5136.1.S1_at   | MmugDNA.5136.1 | 5.06  | 5     | 0.13 | 0.08 | 1.04  | 0.158819 | 0.291161 | 0.531595 | 0.551652 |
| MmugDNA.5138.1.S1_at   | MmugDNA.5138.1 | 4.96  | 4.77  | 0.11 | 0.18 | 1.14  | 0.084596 | 0.021332 | 0.451141 | 0.182834 |
| MmugDNA.5140.1.S1_at   | MmugDNA.5140.1 | 5.78  | 6.29  | 0.16 | 0.28 | -1.42 | 0.123531 | 0.065546 | 0.497016 | 0.301415 |
| MmugDNA.5141.1.S1_at   | MmugDNA.5141.1 | 10.97 | 11.05 | 0.2  | 0.25 | -1.06 | 0.910894 | 0.110683 | 0.969778 | 0.374854 |
| MmugDNA.5142.1.S1_at   | MmugDNA.5142.1 | 2.79  | 3.08  | 0.37 | 0.17 | -1.23 | 0.982508 | 0.533755 | 0.994555 | 0.719857 |
| MmugDNA.5143.1.S1_at   | MmugDNA.5143.1 | 10.88 | 10.86 | 0.36 | 0.25 | 1.02  | 0.890811 | 0.554079 | 0.962492 | 0.732953 |
| MmugDNA.5143.1.S1_s_at | MmugDNA.5143.1 | 11.46 | 11.49 | 0.4  | 0.19 | -1.02 | 0.764045 | 0.478798 | 0.911355 | 0.684733 |
| MmugDNA.5144.1.S1_at   | MmugDNA.5144.1 | 3.19  | 3.15  | 0.03 | 0.08 | 1.03  | 0.410836 | 0.068406 | 0.730954 | 0.307955 |
| MmugDNA.5145.1.S1_at   | MmugDNA.5145.1 | 3.28  | 3.31  | 0.11 | 0.3  | -1.02 | 0.347467 | 0.119834 | 0.68872  | 0.388577 |
| MmugDNA.5147.1.S1_at   | MmugDNA.5147.1 | 9.61  | 9.53  | 0.25 | 0.07 | 1.06  | 0.750424 | 0.415627 | 0.905496 | 0.641007 |
| MmugDNA.5147.1.S1_s_at | MmugDNA.5147.1 | 9.5   | 9.65  | 0.26 | 0.08 | -1.11 | 0.1778   | 0.144648 | 0.550946 | 0.418477 |
| MmugDNA.5148.1.S1_at   | MmugDNA.5148.1 | 9.98  | 9.81  | 0.45 | 0.12 | 1.13  | 0.51628  | 0.774309 | 0.791358 | 0.868751 |
| MmugDNA.5149.1.S1_at   | MmugDNA.5149.1 | 4     | 3.78  | 0.2  | 0.04 | 1.16  | 0.131443 | 0.170895 | 0.505767 | 0.447556 |
| MmugDNA.5150.1.S1_at   | MmugDNA.5150.1 | 5.5   | 5.69  | 0.88 | 0.25 | -1.14 | 0.906873 | 0.401896 | 0.968424 | 0.63109  |
| MmugDNA.5151.1.S1_at   | MmugDNA.5151.1 | 9.48  | 9.02  | 0.28 | 0.06 | 1.37  | 0.11869  | 0.140319 | 0.492161 | 0.413498 |
| MmugDNA.5151.1.S1_x_at | MmugDNA.5151.1 | 9.2   | 8.79  | 0.18 | 0.07 | 1.32  | 0.059081 | 0.119085 | 0.405996 | 0.387386 |
| MmugDNA.5152.1.S1_at   | MmugDNA.5152.1 | 4.47  | 4.72  | 0.22 | 0.12 | -1.18 | 0.077401 | 0.283957 | 0.439366 | 0.546237 |
| MmugDNA.5154.1.S1_at   | MmugDNA.5154.1 | 6.26  | 6.37  | 0.36 | 0.04 | -1.08 | 0.770543 | 0.965183 | 0.914039 | 0.98061  |
| MmugDNA.5156.1.S1_at   | MmugDNA.5156.1 | 10.58 | 10.16 | 0.77 | 0.07 | 1.34  | 0.97072  | 0.205818 | 0.990429 | 0.480083 |
| MmugDNA.5158.1.S1_at   | MmugDNA.5158.1 | 4.68  | 4.66  | 0.22 | 0.59 | 1.01  | 0.456109 | 0.819929 | 0.757721 | 0.896291 |
| MmugDNA.5159.1.S1_x_at | MmugDNA.5159.1 | 6.89  | 7.04  | 0.37 | 0.14 | -1.11 | 0.682297 | 0.395308 | 0.875741 | 0.627396 |
| MmugDNA.516.1.S1_at    | MmugDNA.516.1  | 3.44  | 3.44  | 0.02 | 0.09 | 1     | 0.345498 | 0.566626 | 0.687499 | 0.740707 |
| MmugDNA.5161.1.S1_at   | MmugDNA.5161.1 | 7.22  | 7.29  | 0.08 | 0.17 | -1.05 | 0.540144 | 0.049491 | 0.804251 | 0.267375 |
| MmugDNA.5161.1.S1_x_at | MmugDNA.5161.1 | 7.12  | 7.26  | 0.11 | 0.18 | -1.1  | 0.621384 | 0.018915 | 0.847514 | 0.173025 |
| MmugDNA.5162.1.S1_at   | MmugDNA.5162.1 | 3.61  | 3.53  | 0.1  | 0.19 | 1.06  | 0.615924 | 0.443489 | 0.844679 | 0.661262 |
| MmugDNA.5163.1.S1_at   | MmugDNA.5163.1 | 8.01  | 8.26  | 0.41 | 0.24 | -1.18 | 0.710436 | 0.037326 | 0.887291 | 0.237622 |
| MmugDNA.5164.1.S1_at   | MmugDNA.5164.1 | 6.41  | 6.37  | 0.28 | 0.16 | 1.03  | 0.311772 | 0.067286 | 0.66351  | 0.305408 |
| MmugDNA.5166.1.S1_at   | MmugDNA.5166.1 | 3.51  | 3.35  | 0.08 | 0.1  | 1.12  | 0.095246 | 0.134633 | 0.464131 | 0.406629 |
| MmugDNA.5168.1.S1_at   | MmugDNA.5168.1 | 3.9   | 4.36  | 0.08 | 0.51 | -1.38 | 0.1721   | 0.265609 | 0.545414 | 0.531449 |
| MmugDNA.5171.1.S1_at   | MmugDNA.5171.1 | 5.1   | 5.04  | 0.12 | 0.06 | 1.04  | 0.851087 | 0.050558 | 0.947534 | 0.270222 |
| MmugDNA.5172.1.S1_at   | MmugDNA.5172.1 | 5.22  | 5.82  | 0.03 | 0.15 | -1.52 | 0.002468 | 0.120497 | 0.177304 | 0.38925  |
| MmugDNA.5173.1.S1_at   | MmugDNA.5173.1 | 3.81  | 3.61  | 0.13 | 0.14 | 1.15  | 0.132339 | 0.28567  | 0.506752 | 0.547395 |
| MmugDNA.5175.1.S1_at   | MmugDNA.5175.1 | 5.46  | 5.39  | 0.05 | 0.23 | 1.05  | 0.427066 | 0.400284 | 0.74088  | 0.630158 |
| MmugDNA.5176.1.S1_at   | MmugDNA.5176.1 | 5.26  | 5.22  | 0.35 | 0.08 | 1.03  | 0.80712  | 0.814916 | 0.930053 | 0.893213 |
| MmugDNA.5178.1.S1_at   | MmugDNA.5178.1 | 4.14  | 4.21  | 0.18 | 0.11 | -1.05 | 0.76278  | 0.745674 | 0.91092  | 0.85256  |
| MmugDNA.5180.1.S1_at   | MmugDNA.5180.1 | 3.7   | 3.82  | 0.09 | 0.29 | -1.08 | 0.965375 | 0.17148  | 0.988598 | 0.447895 |

|                        |                |       |       |      |      |       |          |          |          |          |
|------------------------|----------------|-------|-------|------|------|-------|----------|----------|----------|----------|
| MmugDNA.5181.1.S1_at   | MmugDNA.5181.1 | 2.84  | 3.09  | 0.11 | 0.08 | -1.19 | 0.06009  | 0.30872  | 0.407399 | 0.564619 |
| MmugDNA.5182.1.S1_at   | MmugDNA.5182.1 | 8.33  | 8.57  | 0.36 | 0.2  | -1.18 | 0.529643 | 0.598712 | 0.798376 | 0.761089 |
| MmugDNA.5185.1.S1_at   | MmugDNA.5185.1 | 9.27  | 9.69  | 0.46 | 0.13 | -1.34 | 0.145744 | 0.120892 | 0.520572 | 0.389788 |
| MmugDNA.5185.1.S1_s_at | MmugDNA.5185.1 | 8.98  | 9.4   | 0.39 | 0.09 | -1.34 | 0.17377  | 0.140399 | 0.546807 | 0.413586 |
| MmugDNA.5187.1.S1_at   | MmugDNA.5187.1 | 5.6   | 5.29  | 0.29 | 0.24 | 1.23  | 0.570012 | 0.078446 | 0.821866 | 0.325206 |
| MmugDNA.5188.1.S1_at   | MmugDNA.5188.1 | 5.48  | 5.33  | 0.09 | 0.07 | 1.12  | 0.070676 | 0.39014  | 0.42977  | 0.624002 |
| MmugDNA.5189.1.S1_at   | MmugDNA.5189.1 | 3.37  | 3.25  | 0.02 | 0.08 | 1.08  | 0.021965 | 0.012892 | 0.309781 | 0.14622  |
| MmugDNA.519.1.S1_at    | MmugDNA.519.1  | 5.29  | 5.49  | 0.14 | 0.16 | -1.14 | 0.076201 | 0.086124 | 0.43763  | 0.338459 |
| MmugDNA.5190.1.S1_at   | MmugDNA.5190.1 | 4.42  | 4.6   | 0.03 | 0.07 | -1.13 | 0.036646 | 0.125673 | 0.355252 | 0.396249 |
| MmugDNA.5191.1.S1_at   | MmugDNA.5191.1 | 6.52  | 5.96  | 1.74 | 0.4  | 1.47  | 0.484153 | 0.475077 | 0.773472 | 0.681892 |
| MmugDNA.5192.1.S1_at   | MmugDNA.5192.1 | 3.32  | 3.79  | 0.08 | 0.22 | -1.38 | 0.092195 | 0.257385 | 0.460762 | 0.525191 |
| MmugDNA.5193.1.S1_at   | MmugDNA.5193.1 | 10.49 | 10.37 | 0.12 | 0.03 | 1.09  | 0.160115 | 0.075525 | 0.533161 | 0.31995  |
| MmugDNA.5194.1.S1_at   | MmugDNA.5194.1 | 8.88  | 9.04  | 1.36 | 0.04 | -1.12 | 0.660066 | 0.59421  | 0.865536 | 0.758517 |
| MmugDNA.5198.1.S1_at   | MmugDNA.5198.1 | 9.58  | 9.38  | 0.52 | 0.12 | 1.15  | 0.278615 | 0.372963 | 0.637745 | 0.611806 |
| MmugDNA.5199.1.S1_at   | MmugDNA.5199.1 | 9.49  | 9.53  | 0.23 | 0.39 | -1.03 | 0.302942 | 0.811738 | 0.656807 | 0.891337 |
| MmugDNA.52.1.S1_at     | MmugDNA.52.1   | 5.62  | 5.29  | 0.26 | 0.09 | 1.26  | 0.098661 | 0.087774 | 0.468025 | 0.341037 |
| MmugDNA.520.1.S1_at    | MmugDNA.520.1  | 7.22  | 7.06  | 0.24 | 0.07 | 1.11  | 0.163108 | 0.50568  | 0.536035 | 0.702218 |
| MmugDNA.5200.1.S1_at   | MmugDNA.5200.1 | 5.28  | 4.78  | 0.09 | 0.17 | 1.41  | 0.033516 | 0.205482 | 0.346442 | 0.479764 |
| MmugDNA.5202.1.S1_at   | MmugDNA.5202.1 | 3.95  | 3.93  | 0.12 | 0.06 | 1.01  | 0.417704 | 0.967575 | 0.735015 | 0.982093 |
| MmugDNA.5203.1.S1_at   | MmugDNA.5203.1 | 3.48  | 3.46  | 0.19 | 0    | 1.02  | 0.948827 | 0.981089 | 0.982605 | 0.989568 |
| MmugDNA.5204.1.S1_at   | MmugDNA.5204.1 | 10.17 | 9.45  | 0.38 | 0.37 | 1.65  | 0.380684 | 0.004134 | 0.70956  | 0.090937 |
| MmugDNA.5205.1.S1_at   | MmugDNA.5205.1 | 8.2   | 8.07  | 0.38 | 0.11 | 1.1   | 0.744448 | 0.873122 | 0.90255  | 0.927823 |
| MmugDNA.5206.1.S1_at   | MmugDNA.5206.1 | 6.18  | 6.27  | 0.2  | 0.05 | -1.06 | 0.993403 | 0.612835 | 0.99746  | 0.770233 |
| MmugDNA.5207.1.S1_at   | MmugDNA.5207.1 | 4.64  | 4.78  | 0.06 | 0.11 | -1.1  | 0.342516 | 0.306296 | 0.685918 | 0.562919 |
| MmugDNA.5208.1.S1_at   | MmugDNA.5208.1 | 8.15  | 8.97  | 1.33 | 0.23 | -1.77 | 0.131911 | 0.148227 | 0.506356 | 0.422745 |
| MmugDNA.5210.1.S1_at   | MmugDNA.5210.1 | 9.61  | 9.88  | 0.29 | 0.12 | -1.2  | 0.36847  | 0.466337 | 0.703625 | 0.67624  |
| MmugDNA.5211.1.S1_at   | MmugDNA.5211.1 | 11.92 | 11.97 | 0.11 | 0.04 | -1.03 | 0.301476 | 0.595413 | 0.655772 | 0.759091 |
| MmugDNA.5212.1.S1_at   | MmugDNA.5212.1 | 6.44  | 6.45  | 0.12 | 0.11 | -1.01 | 0.270448 | 0.310182 | 0.630334 | 0.565379 |
| MmugDNA.5213.1.S1_at   | MmugDNA.5213.1 | 8.38  | 7.97  | 1.8  | 0.26 | 1.33  | 0.83164  | 0.146566 | 0.939628 | 0.420583 |
| MmugDNA.5214.1.S1_at   | MmugDNA.5214.1 | 5.43  | 5.32  | 0.07 | 0.08 | 1.08  | 0.053266 | 0.058692 | 0.394387 | 0.288956 |
| MmugDNA.5215.1.S1_at   | MmugDNA.5215.1 | 7.21  | 7.55  | 0.76 | 0.65 | -1.27 | 0.948267 | 0.35886  | 0.982212 | 0.600291 |
| MmugDNA.5216.1.S1_at   | MmugDNA.5216.1 | 4.63  | 4.64  | 0.06 | 0.08 | -1    | 0.680739 | 0.336085 | 0.874793 | 0.583652 |
| MmugDNA.5217.1.S1_at   | MmugDNA.5217.1 | 9.58  | 10.15 | 0.49 | 0.07 | -1.49 | 0.121582 | 0.1737   | 0.495204 | 0.450043 |
| MmugDNA.5219.1.S1_at   | MmugDNA.5219.1 | 5.01  | 4.78  | 0.57 | 0.51 | 1.17  | 0.512089 | 0.288988 | 0.789086 | 0.550099 |
| MmugDNA.5220.1.S1_at   | MmugDNA.5220.1 | 4.75  | 4.81  | 0.19 | 0.06 | -1.04 | 0.695704 | 0.875322 | 0.881723 | 0.929211 |
| MmugDNA.5221.1.S1_at   | MmugDNA.5221.1 | 8.1   | 8.24  | 0.43 | 0.17 | -1.1  | 0.400563 | 0.660502 | 0.723841 | 0.801373 |
| MmugDNA.5223.1.S1_at   | MmugDNA.5223.1 | 6.12  | 6.22  | 0.36 | 0.12 | -1.07 | 0.728262 | 0.650791 | 0.895088 | 0.795801 |
| MmugDNA.5224.1.S1_at   | MmugDNA.5224.1 | 4.64  | 4.64  | 0.08 | 0.09 | -1    | 0.862234 | 0.489554 | 0.951449 | 0.691824 |
| MmugDNA.5225.1.S1_at   | MmugDNA.5225.1 | 4.74  | 4.76  | 0.16 | 0.05 | -1.02 | 0.387041 | 0.465494 | 0.714018 | 0.675774 |
| MmugDNA.5226.1.S1_at   | MmugDNA.5226.1 | 5.96  | 5.94  | 0.53 | 0.11 | 1.02  | 0.51727  | 0.72551  | 0.791957 | 0.841043 |
| MmugDNA.5227.1.S1_at   | MmugDNA.5227.1 | 11.2  | 11.78 | 0.11 | 0.1  | -1.49 | 0.004613 | 0.001267 | 0.201101 | 0.055241 |
| MmugDNA.5228.1.S1_at   | MmugDNA.5228.1 | 5.97  | 6.03  | 0.14 | 0.05 | -1.04 | 0.754704 | 0.25592  | 0.907482 | 0.523862 |
| MmugDNA.5229.1.S1_at   | MmugDNA.5229.1 | 10.92 | 10.89 | 0.09 | 0.14 | 1.02  | 0.853617 | 0.024112 | 0.948299 | 0.1945   |

|                        |                |       |       |      |      |       |          |          |          |          |
|------------------------|----------------|-------|-------|------|------|-------|----------|----------|----------|----------|
| MmugDNA.523.1.S1_at    | MmugDNA.523.1  | 4.5   | 4.59  | 0.2  | 0.07 | -1.07 | 0.457092 | 0.26231  | 0.758139 | 0.52863  |
| MmugDNA.5230.1.S1_at   | MmugDNA.5230.1 | 5.51  | 5.3   | 0.56 | 0.36 | 1.16  | 0.57302  | 0.265939 | 0.823428 | 0.531796 |
| MmugDNA.5232.1.S1_at   | MmugDNA.5232.1 | 3.6   | 3.85  | 0.08 | 0.08 | -1.19 | 0.016374 | 0.411179 | 0.287478 | 0.637937 |
| MmugDNA.5233.1.S1_at   | MmugDNA.5233.1 | 3.15  | 3.15  | 0.12 | 0.06 | -1.01 | 0.599874 | 0.875458 | 0.837599 | 0.929259 |
| MmugDNA.5234.1.S1_at   | MmugDNA.5234.1 | 4.14  | 4.06  | 0.1  | 0.04 | 1.06  | 0.700034 | 0.043618 | 0.883386 | 0.253501 |
| MmugDNA.5235.1.S1_at   | MmugDNA.5235.1 | 9.71  | 9.71  | 0.8  | 0.05 | -1    | 0.951859 | 0.990976 | 0.983817 | 0.994928 |
| MmugDNA.5236.1.S1_at   | MmugDNA.5236.1 | 5.08  | 5.08  | 0.14 | 0.11 | -1    | 0.566895 | 0.655775 | 0.820122 | 0.798709 |
| MmugDNA.5237.1.S1_at   | MmugDNA.5237.1 | 3.29  | 3.26  | 0.16 | 0.08 | 1.02  | 0.604701 | 0.783572 | 0.839732 | 0.874671 |
| MmugDNA.524.1.S1_at    | MmugDNA.524.1  | 8.8   | 9.29  | 1.06 | 0.25 | -1.41 | 0.526925 | 0.598091 | 0.796816 | 0.760598 |
| MmugDNA.5240.1.S1_at   | MmugDNA.5240.1 | 5.48  | 5.36  | 0.17 | 0.03 | 1.09  | 0.934347 | 0.964465 | 0.977762 | 0.980225 |
| MmugDNA.5241.1.S1_at   | MmugDNA.5241.1 | 5.58  | 5.75  | 0.12 | 0.22 | -1.12 | 0.118725 | 0.096108 | 0.492161 | 0.353322 |
| MmugDNA.5242.1.S1_at   | MmugDNA.5242.1 | 9.6   | 9.56  | 0.28 | 0.15 | 1.03  | 0.863829 | 0.541763 | 0.952043 | 0.725057 |
| MmugDNA.5242.1.S1_s_at | MmugDNA.5242.1 | 10.25 | 10.25 | 0.3  | 0.15 | -1    | 0.766621 | 0.874748 | 0.912246 | 0.928902 |
| MmugDNA.5243.1.S1_at   | MmugDNA.5243.1 | 6.42  | 6.11  | 0.11 | 0.09 | 1.24  | 0.018074 | 0.059514 | 0.295257 | 0.290548 |
| MmugDNA.5244.1.S1_at   | MmugDNA.5244.1 | 5.02  | 5.23  | 0.16 | 0.13 | -1.16 | 0.074794 | 0.211711 | 0.435313 | 0.485746 |
| MmugDNA.5245.1.S1_at   | MmugDNA.5245.1 | 5.37  | 5.28  | 0.07 | 0.15 | 1.06  | 0.712903 | 0.696409 | 0.888133 | 0.823653 |
| MmugDNA.5246.1.S1_at   | MmugDNA.5246.1 | 3.6   | 3.6   | 0.09 | 0.28 | -1    | 0.971809 | 0.998372 | 0.990806 | 0.999091 |
| MmugDNA.5247.1.S1_at   | MmugDNA.5247.1 | 3.42  | 3.59  | 1.1  | 0.19 | -1.13 | 0.434046 | 0.625408 | 0.744825 | 0.779175 |
| MmugDNA.5248.1.S1_at   | MmugDNA.5248.1 | 3.2   | 3.06  | 0.18 | 0.26 | 1.1   | 0.941588 | 0.245753 | 0.980194 | 0.515519 |
| MmugDNA.5249.1.S1_at   | MmugDNA.5249.1 | 3.09  | 3.03  | 0.28 | 0.17 | 1.04  | 0.561411 | 0.294151 | 0.817219 | 0.553962 |
| MmugDNA.525.1.S1_at    | MmugDNA.525.1  | 4.89  | 4.73  | 0.09 | 0.07 | 1.12  | 0.04454  | 0.063128 | 0.374916 | 0.29795  |
| MmugDNA.5251.1.S1_at   | MmugDNA.5251.1 | 7.21  | 6.95  | 0.19 | 0.07 | 1.2   | 0.091071 | 0.093034 | 0.458927 | 0.3492   |
| MmugDNA.5252.1.S1_at   | MmugDNA.5252.1 | 6.22  | 7.07  | 0.63 | 0.21 | -1.81 | 0.08927  | 0.056188 | 0.457251 | 0.282948 |
| MmugDNA.5254.1.S1_at   | MmugDNA.5254.1 | 7.12  | 6.99  | 0.11 | 0.12 | 1.09  | 0.284009 | 0.680217 | 0.641931 | 0.813309 |
| MmugDNA.5255.1.S1_at   | MmugDNA.5255.1 | 5.34  | 5.08  | 0.68 | 0.47 | 1.19  | 0.539167 | 0.74007  | 0.803644 | 0.849396 |
| MmugDNA.5256.1.S1_at   | MmugDNA.5256.1 | 3.67  | 3.68  | 0.06 | 0.02 | -1.01 | 0.455806 | 0.326891 | 0.757582 | 0.576848 |
| MmugDNA.5257.1.S1_at   | MmugDNA.5257.1 | 4.42  | 4.43  | 0.13 | 0.08 | -1.01 | 0.285206 | 0.788392 | 0.643069 | 0.877619 |
| MmugDNA.5258.1.S1_at   | MmugDNA.5258.1 | 5.01  | 4.84  | 0.38 | 0.12 | 1.12  | 0.52881  | 0.703601 | 0.798077 | 0.828139 |
| MmugDNA.5259.1.S1_at   | MmugDNA.5259.1 | 8.01  | 6.86  | 0.75 | 0.38 | 2.22  | 0.35304  | 0.371672 | 0.693013 | 0.610466 |
| MmugDNA.5260.1.S1_at   | MmugDNA.5260.1 | 6.06  | 5.9   | 0.06 | 0.03 | 1.12  | 0.025755 | 0.443607 | 0.322693 | 0.661336 |
| MmugDNA.5262.1.S1_at   | MmugDNA.5262.1 | 3.65  | 3.74  | 0.65 | 0.19 | -1.06 | 0.679885 | 0.798671 | 0.874376 | 0.884059 |
| MmugDNA.5263.1.S1_at   | MmugDNA.5263.1 | 3.67  | 3.65  | 0.14 | 0.09 | 1.01  | 0.982301 | 0.275349 | 0.994472 | 0.539663 |
| MmugDNA.5266.1.S1_at   | MmugDNA.5266.1 | 3.62  | 3.57  | 0.24 | 0.15 | 1.04  | 0.32966  | 0.618772 | 0.67648  | 0.774185 |
| MmugDNA.5267.1.S1_s_at | MmugDNA.5267.1 | 5.5   | 6.14  | 0.9  | 0.68 | -1.55 | 0.994881 | 0.169317 | 0.998092 | 0.445925 |
| MmugDNA.5268.1.S1_at   | MmugDNA.5268.1 | 5     | 5.31  | 0.35 | 0.55 | -1.24 | 0.446547 | 0.677919 | 0.752779 | 0.811843 |
| MmugDNA.5268.1.S1_s_at | MmugDNA.5268.1 | 8.81  | 8.67  | 0.21 | 0.09 | 1.1   | 0.492166 | 0.769926 | 0.7782   | 0.866376 |
| MmugDNA.527.1.S1_at    | MmugDNA.527.1  | 11.1  | 11.34 | 0.41 | 0.03 | -1.18 | 0.956684 | 0.953456 | 0.985606 | 0.97351  |
| MmugDNA.5270.1.S1_at   | MmugDNA.5270.1 | 7.15  | 6.73  | 0.28 | 0.09 | 1.34  | 0.091244 | 0.167228 | 0.459035 | 0.443684 |
| MmugDNA.5271.1.S1_at   | MmugDNA.5271.1 | 3.72  | 3.72  | 0.14 | 0.11 | 1     | 0.231956 | 0.217661 | 0.599744 | 0.491255 |
| MmugDNA.5272.1.S1_at   | MmugDNA.5272.1 | 6.73  | 5.25  | 0.71 | 0.82 | 2.79  | 0.388566 | 0.322737 | 0.715408 | 0.574043 |
| MmugDNA.5273.1.S1_at   | MmugDNA.5273.1 | 9.08  | 9.95  | 0.35 | 0.27 | -1.83 | 0.057039 | 0.030287 | 0.401454 | 0.215899 |
| MmugDNA.5274.1.S1_at   | MmugDNA.5274.1 | 4.5   | 4.36  | 0.07 | 0.11 | 1.1   | 0.113321 | 0.093854 | 0.486648 | 0.350298 |
| MmugDNA.5275.1.S1_at   | MmugDNA.5275.1 | 5.73  | 5.7   | 0.6  | 0.41 | 1.02  | 0.942273 | 0.989726 | 0.980283 | 0.994108 |

|                        |                |       |       |      |      |       |          |          |          |          |
|------------------------|----------------|-------|-------|------|------|-------|----------|----------|----------|----------|
| MmugDNA.5276.1.S1_at   | MmugDNA.5276.1 | 10.15 | 10.22 | 0.46 | 0.29 | -1.05 | 0.425869 | 0.016908 | 0.74014  | 0.164917 |
| MmugDNA.528.1.S1_at    | MmugDNA.528.1  | 9.55  | 9.64  | 0.17 | 0.03 | -1.06 | 0.370045 | 0.019229 | 0.70447  | 0.174494 |
| MmugDNA.5280.1.S1_at   | MmugDNA.5280.1 | 3.51  | 3.54  | 0.05 | 0.22 | -1.01 | 0.505196 | 0.472059 | 0.785248 | 0.679854 |
| MmugDNA.5282.1.S1_at   | MmugDNA.5282.1 | 3.95  | 3.93  | 0.06 | 0.25 | 1.01  | 0.97415  | 0.988374 | 0.991785 | 0.993461 |
| MmugDNA.5283.1.S1_at   | MmugDNA.5283.1 | 11.07 | 11.07 | 0.1  | 0.03 | 1     | 0.283241 | 0.018418 | 0.641313 | 0.170755 |
| MmugDNA.5284.1.S1_at   | MmugDNA.5284.1 | 10.14 | 9.54  | 0.18 | 0.12 | 1.51  | 0.00474  | 0.002179 | 0.201699 | 0.06901  |
| MmugDNA.5285.1.S1_at   | MmugDNA.5285.1 | 11.46 | 11.5  | 0.1  | 0.2  | -1.03 | 0.391545 | 0.010567 | 0.717597 | 0.134182 |
| MmugDNA.5287.1.S1_at   | MmugDNA.5287.1 | 8.63  | 8.05  | 0.45 | 0.2  | 1.49  | 0.055005 | 0.071691 | 0.397577 | 0.313904 |
| MmugDNA.5289.1.S1_at   | MmugDNA.5289.1 | 8.93  | 8.75  | 0.14 | 0.31 | 1.13  | 0.189298 | 0.212285 | 0.560894 | 0.486197 |
| MmugDNA.529.1.S1_at    | MmugDNA.529.1  | 4.89  | 4.67  | 0.17 | 0.16 | 1.16  | 0.405174 | 0.404512 | 0.727245 | 0.633004 |
| MmugDNA.5291.1.S1_at   | MmugDNA.5291.1 | 12.29 | 12.81 | 0.18 | 0.01 | -1.43 | 0.008142 | 0.002771 | 0.232005 | 0.077863 |
| MmugDNA.5292.1.S1_at   | MmugDNA.5292.1 | 4.25  | 3.97  | 0.31 | 0.18 | 1.22  | 0.462833 | 0.807894 | 0.761819 | 0.889413 |
| MmugDNA.5295.1.S1_s_at | MmugDNA.5295.1 | 5.43  | 5.7   | 0.49 | 0.27 | -1.2  | 0.432905 | 0.49486  | 0.744141 | 0.695137 |
| MmugDNA.5297.1.S1_at   | MmugDNA.5297.1 | 4.08  | 4.12  | 0.44 | 0.06 | -1.03 | 0.679802 | 0.761955 | 0.874376 | 0.861597 |
| MmugDNA.5298.1.S1_at   | MmugDNA.5298.1 | 3.58  | 3.62  | 0.09 | 0.03 | -1.03 | 0.813973 | 0.086589 | 0.932855 | 0.33911  |
| MmugDNA.5300.1.S1_at   | MmugDNA.5300.1 | 4.28  | 4.2   | 0    | 0.09 | 1.06  | 0.410102 | 0.869838 | 0.730583 | 0.926148 |
| MmugDNA.5301.1.S1_at   | MmugDNA.5301.1 | 5.15  | 5.01  | 0.18 | 0.26 | 1.1   | 0.163181 | 0.176429 | 0.536035 | 0.45282  |
| MmugDNA.5302.1.S1_at   | MmugDNA.5302.1 | 9.14  | 8.89  | 0.35 | 0.11 | 1.19  | 0.947471 | 0.411996 | 0.981907 | 0.638434 |
| MmugDNA.5303.1.S1_at   | MmugDNA.5303.1 | 6.86  | 7.58  | 0.65 | 0.11 | -1.65 | 0.108714 | 0.003544 | 0.480976 | 0.085371 |
| MmugDNA.5304.1.S1_at   | MmugDNA.5304.1 | 4.81  | 4.78  | 0.2  | 0.12 | 1.02  | 0.594461 | 0.720728 | 0.834747 | 0.838368 |
| MmugDNA.5305.1.S1_at   | MmugDNA.5305.1 | 8.96  | 9.32  | 0.28 | 0.14 | -1.28 | 0.13446  | 0.076642 | 0.508462 | 0.321918 |
| MmugDNA.5305.1.S1_s_at | MmugDNA.5305.1 | 7.95  | 8.18  | 0.21 | 0.15 | -1.17 | 0.051601 | 0.040539 | 0.390696 | 0.246264 |
| MmugDNA.5306.1.S1_at   | MmugDNA.5306.1 | 5.31  | 5.34  | 0.03 | 0.14 | -1.02 | 0.51053  | 0.273434 | 0.788228 | 0.537863 |
| MmugDNA.5308.1.S1_at   | MmugDNA.5308.1 | 7.96  | 8.51  | 0.48 | 0.19 | -1.46 | 0.336311 | 0.091396 | 0.681664 | 0.34639  |
| MmugDNA.5309.1.S1_at   | MmugDNA.5309.1 | 2.92  | 2.75  | 0.07 | 0.05 | 1.12  | 0.07474  | 0.428216 | 0.435313 | 0.649721 |
| MmugDNA.5310.1.S1_at   | MmugDNA.5310.1 | 5.59  | 5.4   | 0.35 | 0.41 | 1.14  | 0.46843  | 0.869679 | 0.764997 | 0.926106 |
| MmugDNA.5312.1.S1_at   | MmugDNA.5312.1 | 3.65  | 3.5   | 0.15 | 0.15 | 1.11  | 0.549422 | 0.773032 | 0.810299 | 0.868019 |
| MmugDNA.5313.1.S1_at   | MmugDNA.5313.1 | 3.03  | 3.1   | 0.03 | 0.12 | -1.04 | 0.767244 | 0.527623 | 0.912495 | 0.716154 |
| MmugDNA.5314.1.S1_at   | MmugDNA.5314.1 | 7.84  | 7.54  | 0.16 | 0.2  | 1.23  | 0.106858 | 0.140601 | 0.479384 | 0.413833 |
| MmugDNA.5314.1.S1_s_at | MmugDNA.5314.1 | 10.28 | 10.02 | 0.08 | 0.14 | 1.19  | 0.0184   | 0.014951 | 0.297316 | 0.155437 |
| MmugDNA.5315.1.S1_at   | MmugDNA.5315.1 | 5.22  | 5.04  | 0.07 | 0.07 | 1.13  | 0.017869 | 0.053544 | 0.294096 | 0.277021 |
| MmugDNA.5317.1.S1_at   | MmugDNA.5317.1 | 6.55  | 6.33  | 0.08 | 0.18 | 1.16  | 0.169834 | 0.164122 | 0.542773 | 0.440346 |
| MmugDNA.5319.1.S1_at   | MmugDNA.5319.1 | 6.43  | 6.41  | 0.1  | 0.08 | 1.02  | 0.618101 | 0.246132 | 0.845802 | 0.51585  |
| MmugDNA.532.1.S1_at    | MmugDNA.532.1  | 4.57  | 4.56  | 0.26 | 0.12 | 1     | 0.850835 | 0.143019 | 0.947473 | 0.41689  |
| MmugDNA.5320.1.S1_at   | MmugDNA.5320.1 | 9.81  | 9.66  | 0.31 | 0.29 | 1.11  | 0.754499 | 0.635216 | 0.907353 | 0.785279 |
| MmugDNA.5321.1.S1_at   | MmugDNA.5321.1 | 8.59  | 7.99  | 0.38 | 0.16 | 1.52  | 0.041854 | 0.005089 | 0.367362 | 0.099108 |
| MmugDNA.5322.1.S1_at   | MmugDNA.5322.1 | 4.91  | 4.9   | 0.12 | 0.03 | 1.01  | 0.688742 | 0.886003 | 0.878545 | 0.935122 |
| MmugDNA.5323.1.S1_at   | MmugDNA.5323.1 | 3.72  | 3.46  | 0.17 | 0.2  | 1.2   | 0.15796  | 0.139424 | 0.530972 | 0.412714 |
| MmugDNA.5324.1.S1_at   | MmugDNA.5324.1 | 5.23  | 5.22  | 0.57 | 0.16 | 1     | 0.999006 | 0.826766 | 0.999788 | 0.900506 |
| MmugDNA.5325.1.S1_at   | MmugDNA.5325.1 | 2.85  | 2.85  | 0.21 | 0.09 | -1.01 | 0.280364 | 0.285916 | 0.639232 | 0.547484 |
| MmugDNA.5328.1.S1_at   | MmugDNA.5328.1 | 4.96  | 5.08  | 0.14 | 0.09 | -1.09 | 0.92896  | 0.88021  | 0.976332 | 0.931571 |
| MmugDNA.533.1.S1_at    | MmugDNA.533.1  | 5.91  | 5.73  | 0.07 | 0.07 | 1.13  | 0.034836 | 0.056055 | 0.350453 | 0.282647 |
| MmugDNA.5330.1.S1_at   | MmugDNA.5330.1 | 4.6   | 4.59  | 0.08 | 0.05 | 1.01  | 0.722522 | 0.845743 | 0.892352 | 0.912241 |

|                         |                 |       |       |      |      |       |          |          |          |          |
|-------------------------|-----------------|-------|-------|------|------|-------|----------|----------|----------|----------|
| MmugDNA.5332.1.S1_at    | MmugDNA.5332.1  | 5.61  | 5.71  | 0.44 | 0.13 | -1.07 | 0.656514 | 0.849001 | 0.863636 | 0.914252 |
| MmugDNA.5333.1.S1_at    | MmugDNA.5333.1  | 8.59  | 7.65  | 0.67 | 0.26 | 1.92  | 0.178714 | 0.050848 | 0.551531 | 0.27076  |
| MmugDNA.5334.1.S1_at    | MmugDNA.5334.1  | 4.74  | 4.52  | 0.14 | 0.02 | 1.16  | 0.020962 | 0.252829 | 0.30624  | 0.521174 |
| MmugDNA.5335.1.S1_at    | MmugDNA.5335.1  | 9.1   | 9.21  | 0.42 | 0.2  | -1.08 | 0.648482 | 0.66549  | 0.859926 | 0.804009 |
| MmugDNA.5336.1.S1_at    | MmugDNA.5336.1  | 4.46  | 4.38  | 0.2  | 0.04 | 1.06  | 0.788058 | 0.043329 | 0.922084 | 0.252847 |
| MmugDNA.5336.1.S1_x_at  | MmugDNA.5336.1  | 9.64  | 9.55  | 0.16 | 0.05 | 1.06  | 0.954906 | 0.033634 | 0.985039 | 0.227006 |
| MmugDNA.5337.1.S1_at    | MmugDNA.5337.1  | 5.43  | 5.13  | 0.13 | 0.19 | 1.23  | 0.432972 | 0.046122 | 0.744142 | 0.259154 |
| MmugDNA.5339.1.S1_at    | MmugDNA.5339.1  | 11.11 | 10.94 | 0.09 | 0    | 1.12  | 0.013947 | 0.007855 | 0.273301 | 0.118059 |
| MmugDNA.534.1.S1_at     | MmugDNA.534.1   | 5.71  | 5.89  | 0.32 | 0.12 | -1.13 | 0.263097 | 0.41756  | 0.625101 | 0.642252 |
| MmugDNA.5340.1.S1_at    | MmugDNA.5340.1  | 4.46  | 4.29  | 0.15 | 0.05 | 1.12  | 0.066268 | 0.124126 | 0.421926 | 0.394389 |
| MmugDNA.5342.1.S1_at    | MmugDNA.5342.1  | 4.8   | 4.81  | 0.1  | 0.09 | -1.01 | 0.952907 | 0.072562 | 0.984222 | 0.315511 |
| MmugDNA.5346.1.S1_at    | MmugDNA.5346.1  | 5.79  | 6.15  | 0.86 | 0.06 | -1.28 | 0.671987 | 0.338932 | 0.870594 | 0.585891 |
| MmugDNA.5348.1.S1_at    | MmugDNA.5348.1  | 4.07  | 4.19  | 0.12 | 0.12 | -1.09 | 0.099825 | 0.179355 | 0.469818 | 0.455824 |
| MmugDNA.5349.1.S1_at    | MmugDNA.5349.1  | 2.97  | 3.39  | 0.28 | 0.11 | -1.33 | 0.148042 | 0.244119 | 0.522305 | 0.514121 |
| MmugDNA.535.1.S1_at     | MmugDNA.535.1   | 8.8   | 9     | 0.25 | 0.12 | -1.14 | 0.179248 | 0.227967 | 0.552498 | 0.500211 |
| MmugDNA.5350.1.S1_at    | MmugDNA.5350.1  | 6.67  | 5.87  | 0.54 | 0.16 | 1.74  | 0.210813 | 0.558109 | 0.582007 | 0.735404 |
| MmugDNA.5351.1.S1_at    | MmugDNA.5351.1  | 10.56 | 10.78 | 0.36 | 0.18 | -1.17 | 0.432893 | 0.859693 | 0.744141 | 0.920049 |
| MmugDNA.5352.1.S1_at    | MmugDNA.5352.1  | 5.42  | 5.42  | 0.06 | 0.12 | -1    | 0.800796 | 0.75498  | 0.927161 | 0.857383 |
| MmugDNA.5354.1.S1_at    | MmugDNA.5354.1  | 3.73  | 3.64  | 0.06 | 0.22 | 1.07  | 0.669288 | 0.4439   | 0.869483 | 0.661553 |
| MmugDNA.5354.1.S1_x_at  | MmugDNA.5354.1  | 7.34  | 7.27  | 0.11 | 0.16 | 1.05  | 0.982827 | 0.337675 | 0.994764 | 0.584863 |
| MmugDNA.5355.1.S1_at    | MmugDNA.5355.1  | 9.22  | 8.96  | 0.35 | 0.14 | 1.2   | 0.826822 | 0.124113 | 0.938039 | 0.394389 |
| MmugDNA.5356.1.S1_at    | MmugDNA.5356.1  | 5.13  | 5.06  | 0.43 | 0.23 | 1.05  | 0.831308 | 0.549484 | 0.939628 | 0.729879 |
| MmugDNA.5358.1.S1_at    | MmugDNA.5358.1  | 4.05  | 4.09  | 0.02 | 0.3  | -1.02 | 0.848862 | 0.895306 | 0.946889 | 0.940185 |
| MmugDNA.5359.1.S1_at    | MmugDNA.5359.1  | 5.56  | 5.31  | 0.19 | 0.13 | 1.19  | 0.297076 | 0.344955 | 0.652603 | 0.590239 |
| MmugDNA.536.1.S1_at     | MmugDNA.536.1   | 2.98  | 2.94  | 0.03 | 0.05 | 1.03  | 0.579547 | 0.563055 | 0.826489 | 0.738345 |
| MmugDNA.35111.1.S1_s_at | MmugDNA.35111.1 | 14.59 | 14.55 | 0.02 | 0.01 | 1.02  | 0.043732 | 0.169067 | 0.372554 | 0.445593 |
| MmugDNA.5361.1.S1_at    | MmugDNA.5361.1  | 6.69  | 6.74  | 1.31 | 0.32 | -1.03 | 0.944333 | 0.30877  | 0.980654 | 0.56463  |
| MmugDNA.5363.1.S1_at    | MmugDNA.5363.1  | 5.11  | 5.05  | 0.16 | 0.12 | 1.04  | 0.534206 | 0.68512  | 0.80126  | 0.816328 |
| MmugDNA.5364.1.S1_at    | MmugDNA.5364.1  | 3.18  | 3.19  | 0.03 | 0.07 | -1.01 | 0.461961 | 0.551375 | 0.761366 | 0.730922 |
| MmugDNA.5365.1.S1_at    | MmugDNA.5365.1  | 4.44  | 4.4   | 0.5  | 0.12 | 1.03  | 0.384315 | 0.605058 | 0.711947 | 0.764917 |
| MmugDNA.5367.1.S1_at    | MmugDNA.5367.1  | 6.02  | 5.74  | 0.07 | 0.26 | 1.21  | 0.084537 | 0.051624 | 0.451141 | 0.272664 |
| MmugDNA.5368.1.S1_at    | MmugDNA.5368.1  | 6.37  | 6.14  | 1.26 | 0.29 | 1.17  | 0.323166 | 0.170034 | 0.671997 | 0.446784 |
| MmugDNA.5369.1.S1_at    | MmugDNA.5369.1  | 5.98  | 6.5   | 0.96 | 0.21 | -1.43 | 0.37591  | 0.193818 | 0.706657 | 0.468847 |
| MmugDNA.537.1.S1_at     | MmugDNA.537.1   | 4.31  | 4.35  | 0.73 | 0.31 | -1.03 | 0.832665 | 0.757765 | 0.940026 | 0.859014 |
| MmugDNA.537.1.S1_x_at   | MmugDNA.537.1   | 4.48  | 4.73  | 0.72 | 0.1  | -1.19 | 0.72407  | 0.821366 | 0.893041 | 0.897125 |
| MmugDNA.5370.1.S1_at    | MmugDNA.5370.1  | 7.22  | 7.08  | 0.05 | 0.09 | 1.1   | 0.063383 | 0.267347 | 0.415687 | 0.53301  |
| MmugDNA.5371.1.S1_at    | MmugDNA.5371.1  | 6.4   | 6.26  | 0.08 | 0.03 | 1.1   | 0.108939 | 0.098171 | 0.481285 | 0.356253 |
| MmugDNA.5373.1.S1_at    | MmugDNA.5373.1  | 5.88  | 6.03  | 0.46 | 0.06 | -1.11 | 0.613905 | 0.148806 | 0.843708 | 0.423201 |
| MmugDNA.5374.1.S1_at    | MmugDNA.5374.1  | 6.64  | 6.3   | 0.07 | 0.06 | 1.27  | 0.003203 | 0.000723 | 0.191748 | 0.044531 |
| MmugDNA.5375.1.S1_at    | MmugDNA.5375.1  | 2.9   | 2.87  | 0.15 | 0.09 | 1.02  | 0.302243 | 0.51988  | 0.656154 | 0.711367 |
| MmugDNA.5376.1.S1_at    | MmugDNA.5376.1  | 5.02  | 4.79  | 0.06 | 0.03 | 1.18  | 0.003156 | 0.01462  | 0.191107 | 0.154176 |
| MmugDNA.5377.1.S1_at    | MmugDNA.5377.1  | 3.44  | 3.4   | 0.41 | 0.45 | 1.03  | 0.614935 | 0.320526 | 0.844155 | 0.572648 |
| MmugDNA.5378.1.S1_at    | MmugDNA.5378.1  | 4     | 4.32  | 0.33 | 0.1  | -1.25 | 0.751628 | 0.836443 | 0.906112 | 0.906453 |

|                        |                |       |       |      |      |       |          |          |          |          |
|------------------------|----------------|-------|-------|------|------|-------|----------|----------|----------|----------|
| MmugDNA.5379.1.S1_at   | MmugDNA.5379.1 | 5.44  | 5.11  | 0.31 | 0.15 | 1.26  | 0.45022  | 0.072723 | 0.754757 | 0.31565  |
| MmugDNA.538.1.S1_at    | MmugDNA.538.1  | 3.37  | 3.3   | 0.07 | 0.19 | 1.05  | 0.624287 | 0.673291 | 0.848622 | 0.809091 |
| MmugDNA.5380.1.S1_at   | MmugDNA.5380.1 | 10.6  | 9.93  | 0.4  | 0.25 | 1.59  | 0.067118 | 0.129532 | 0.423157 | 0.401036 |
| MmugDNA.5381.1.S1_at   | MmugDNA.5381.1 | 6.01  | 6.99  | 0.36 | 0.33 | -1.96 | 0.016588 | 0.007169 | 0.287478 | 0.113839 |
| MmugDNA.5383.1.S1_at   | MmugDNA.5383.1 | 3.01  | 3.16  | 0.05 | 0.17 | -1.11 | 0.270524 | 0.080761 | 0.630399 | 0.328634 |
| MmugDNA.5384.1.S1_at   | MmugDNA.5384.1 | 3.54  | 3.57  | 0.53 | 0.12 | -1.03 | 0.595736 | 0.648741 | 0.835605 | 0.794433 |
| MmugDNA.5385.1.S1_at   | MmugDNA.5385.1 | 5.91  | 6     | 0.11 | 0.03 | -1.06 | 0.315212 | 0.210446 | 0.665641 | 0.484317 |
| MmugDNA.5387.1.S1_at   | MmugDNA.5387.1 | 3.43  | 3.29  | 0.22 | 0.27 | 1.1   | 0.5336   | 0.723649 | 0.80084  | 0.840028 |
| MmugDNA.5390.1.S1_at   | MmugDNA.5390.1 | 3.15  | 3.06  | 0.05 | 0.09 | 1.07  | 0.450282 | 0.099264 | 0.754759 | 0.357513 |
| MmugDNA.5392.1.S1_at   | MmugDNA.5392.1 | 4.43  | 4.45  | 0.02 | 0.01 | -1.01 | 0.412315 | 0.443458 | 0.731945 | 0.661234 |
| MmugDNA.5393.1.S1_at   | MmugDNA.5393.1 | 7.56  | 7.97  | 0.32 | 0.21 | -1.34 | 0.059414 | 0.08224  | 0.406303 | 0.331091 |
| MmugDNA.5394.1.S1_at   | MmugDNA.5394.1 | 6.81  | 7.15  | 0.26 | 0.19 | -1.26 | 0.127365 | 0.657462 | 0.501548 | 0.799704 |
| MmugDNA.5395.1.S1_at   | MmugDNA.5395.1 | 4.64  | 4.63  | 0.15 | 0    | 1     | 0.592329 | 0.802306 | 0.833845 | 0.886115 |
| MmugDNA.5396.1.S1_at   | MmugDNA.5396.1 | 4.93  | 4.95  | 0.07 | 0.04 | -1.01 | 0.675622 | 0.150324 | 0.872698 | 0.424878 |
| MmugDNA.5397.1.S1_at   | MmugDNA.5397.1 | 4.26  | 4.23  | 0.06 | 0.05 | 1.02  | 0.164436 | 0.037033 | 0.537322 | 0.236886 |
| MmugDNA.5398.1.S1_at   | MmugDNA.5398.1 | 5.35  | 5.37  | 0.07 | 0.03 | -1.01 | 0.675648 | 0.013399 | 0.872698 | 0.148308 |
| MmugDNA.5399.1.S1_at   | MmugDNA.5399.1 | 7.05  | 6.51  | 0.9  | 0.49 | 1.45  | 0.427327 | 0.021921 | 0.740992 | 0.185265 |
| MmugDNA.540.1.S1_at    | MmugDNA.540.1  | 6.25  | 6.22  | 0.07 | 0.05 | 1.02  | 0.72251  | 0.162712 | 0.892352 | 0.43882  |
| MmugDNA.5400.1.S1_at   | MmugDNA.5400.1 | 5.65  | 5.6   | 0.04 | 0.07 | 1.03  | 0.183993 | 0.425175 | 0.556944 | 0.647647 |
| MmugDNA.5401.1.S1_at   | MmugDNA.5401.1 | 3.84  | 3.53  | 0.23 | 0.09 | 1.24  | 0.097012 | 0.154126 | 0.465689 | 0.42887  |
| MmugDNA.5402.1.S1_at   | MmugDNA.5402.1 | 7.69  | 7.46  | 0.08 | 0.06 | 1.17  | 0.051057 | 0.130891 | 0.38886  | 0.403037 |
| MmugDNA.5403.1.S1_at   | MmugDNA.5403.1 | 4.74  | 5.19  | 0.31 | 0.22 | -1.37 | 0.160759 | 0.252853 | 0.533929 | 0.521174 |
| MmugDNA.5405.1.S1_at   | MmugDNA.5405.1 | 4.66  | 4.55  | 0.05 | 0.12 | 1.09  | 0.345194 | 0.614893 | 0.68742  | 0.771609 |
| MmugDNA.5407.1.S1_at   | MmugDNA.5407.1 | 3.85  | 3.64  | 0.11 | 0.14 | 1.16  | 0.118932 | 0.016858 | 0.492469 | 0.16458  |
| MmugDNA.541.1.S1_at    | MmugDNA.541.1  | 6.41  | 6.68  | 0.22 | 0.42 | -1.2  | 0.615956 | 0.338205 | 0.844679 | 0.58536  |
| MmugDNA.5411.1.S1_at   | MmugDNA.5411.1 | 5.77  | 6.87  | 0.8  | 0.03 | -2.14 | 0.251583 | 0.157627 | 0.616712 | 0.433131 |
| MmugDNA.5412.1.S1_at   | MmugDNA.5412.1 | 10.28 | 9.51  | 0.23 | 0.37 | 1.7   | 0.023041 | 0.03544  | 0.314403 | 0.232561 |
| MmugDNA.5412.1.S1_s_at | MmugDNA.5412.1 | 11.49 | 11.33 | 0.3  | 0.17 | 1.12  | 0.162891 | 0.126242 | 0.535867 | 0.396778 |
| MmugDNA.5414.1.S1_at   | MmugDNA.5414.1 | 6.85  | 6.84  | 0.29 | 0.46 | 1.01  | 0.321842 | 0.546462 | 0.670537 | 0.728061 |
| MmugDNA.5416.1.S1_at   | MmugDNA.5416.1 | 9.89  | 11.01 | 0.3  | 0.32 | -2.18 | 0.006744 | 0.003874 | 0.22323  | 0.088587 |
| MmugDNA.5417.1.S1_at   | MmugDNA.5417.1 | 7.11  | 6.79  | 0.24 | 0.2  | 1.24  | 0.611852 | 0.014972 | 0.842618 | 0.155472 |
| MmugDNA.5418.1.S1_at   | MmugDNA.5418.1 | 10.12 | 9.91  | 0.13 | 0.12 | 1.15  | 0.025073 | 0.171944 | 0.320402 | 0.448352 |
| MmugDNA.5419.1.S1_at   | MmugDNA.5419.1 | 7.35  | 6.92  | 0.6  | 0.07 | 1.35  | 0.237544 | 0.212564 | 0.604484 | 0.486502 |
| MmugDNA.542.1.S1_at    | MmugDNA.542.1  | 4.78  | 4.7   | 0.16 | 0.1  | 1.05  | 0.209903 | 0.335649 | 0.581346 | 0.583418 |
| MmugDNA.5420.1.S1_at   | MmugDNA.5420.1 | 10.19 | 10.19 | 1.39 | 0.23 | -1    | 0.721966 | 0.884755 | 0.892112 | 0.93433  |
| MmugDNA.5421.1.S1_at   | MmugDNA.5421.1 | 4.37  | 4.37  | 0.11 | 0.06 | 1     | 0.70048  | 0.144822 | 0.88354  | 0.418704 |
| MmugDNA.5422.1.S1_at   | MmugDNA.5422.1 | 6.63  | 6.79  | 0.93 | 0.25 | -1.12 | 0.26598  | 0.538953 | 0.627047 | 0.723398 |
| MmugDNA.5423.1.S1_at   | MmugDNA.5423.1 | 2.78  | 2.72  | 0.08 | 0.35 | 1.04  | 0.507457 | 0.353879 | 0.78638  | 0.596873 |
| MmugDNA.5424.1.S1_at   | MmugDNA.5424.1 | 5.9   | 5.9   | 0.08 | 0.53 | 1     | 0.913962 | 0.777525 | 0.970812 | 0.870732 |
| MmugDNA.5425.1.S1_at   | MmugDNA.5425.1 | 7.76  | 7.55  | 0.25 | 0.07 | 1.16  | 0.857837 | 0.04368  | 0.94975  | 0.253711 |
| MmugDNA.5426.1.S1_at   | MmugDNA.5426.1 | 6.72  | 6.64  | 0.44 | 0.12 | 1.06  | 0.802266 | 0.131114 | 0.927885 | 0.403084 |
| MmugDNA.5427.1.S1_at   | MmugDNA.5427.1 | 6.62  | 6.19  | 0.38 | 0.15 | 1.34  | 0.051773 | 0.02092  | 0.391277 | 0.181419 |
| MmugDNA.5428.1.S1_at   | MmugDNA.5428.1 | 4.32  | 4.31  | 0.1  | 0.09 | 1.01  | 0.736082 | 0.951977 | 0.899004 | 0.972752 |

|                        |                |       |       |      |      |       |          |          |          |          |
|------------------------|----------------|-------|-------|------|------|-------|----------|----------|----------|----------|
| MmugDNA.5431.1.S1_at   | MmugDNA.5431.1 | 4.52  | 4.37  | 0.16 | 0.26 | 1.11  | 0.140389 | 0.274898 | 0.515777 | 0.53934  |
| MmugDNA.5433.1.S1_at   | MmugDNA.5433.1 | 8.12  | 8.28  | 0.32 | 0.17 | -1.12 | 0.568288 | 0.710213 | 0.820707 | 0.831904 |
| MmugDNA.5434.1.S1_at   | MmugDNA.5434.1 | 10.94 | 11.17 | 0.11 | 0.1  | -1.18 | 0.051226 | 0.026224 | 0.38958  | 0.202916 |
| MmugDNA.5434.1.S1_s_at | MmugDNA.5434.1 | 9.93  | 9.95  | 0.29 | 0.1  | -1.01 | 0.511078 | 0.148843 | 0.788552 | 0.423218 |
| MmugDNA.5437.1.S1_at   | MmugDNA.5437.1 | 4.73  | 5.35  | 0.04 | 0.46 | -1.53 | 0.25474  | 0.450866 | 0.619146 | 0.665869 |
| MmugDNA.5439.1.S1_at   | MmugDNA.5439.1 | 10.76 | 10.8  | 0.1  | 0.03 | -1.03 | 0.730024 | 0.223378 | 0.895942 | 0.496172 |
| MmugDNA.544.1.S1_at    | MmugDNA.544.1  | 3.04  | 3.09  | 0.11 | 0.08 | -1.04 | 0.841931 | 0.010829 | 0.943981 | 0.135705 |
| MmugDNA.5440.1.S1_at   | MmugDNA.5440.1 | 12.34 | 12.42 | 0.25 | 0.01 | -1.06 | 0.749772 | 0.087636 | 0.905303 | 0.340903 |
| MmugDNA.5441.1.S1_at   | MmugDNA.5441.1 | 7.29  | 7.37  | 0.1  | 0.04 | -1.06 | 0.092704 | 0.038281 | 0.461192 | 0.24046  |
| MmugDNA.5442.1.S1_at   | MmugDNA.5442.1 | 3.61  | 3.54  | 0.02 | 0.18 | 1.05  | 0.835657 | 0.713099 | 0.941057 | 0.833638 |
| MmugDNA.5443.1.S1_at   | MmugDNA.5443.1 | 6.58  | 6.58  | 0.21 | 0.04 | 1     | 0.953071 | 0.655938 | 0.984312 | 0.798758 |
| MmugDNA.5444.1.S1_s_at | MmugDNA.5444.1 | 9.69  | 9.14  | 0.36 | 0.03 | 1.46  | 0.074476 | 0.070729 | 0.435313 | 0.31213  |
| MmugDNA.5446.1.S1_at   | MmugDNA.5446.1 | 6.92  | 6.92  | 0.18 | 0.06 | 1.01  | 0.913427 | 0.697207 | 0.97058  | 0.824045 |
| MmugDNA.5449.1.S1_at   | MmugDNA.5449.1 | 5.39  | 5.1   | 0.43 | 0.37 | 1.22  | 0.449002 | 0.673574 | 0.754037 | 0.809284 |
| MmugDNA.545.1.S1_at    | MmugDNA.545.1  | 4.12  | 4.05  | 0.22 | 0.05 | 1.05  | 0.847613 | 0.555696 | 0.946572 | 0.734    |
| MmugDNA.5450.1.S1_at   | MmugDNA.5450.1 | 4.42  | 4.57  | 0.24 | 0.14 | -1.11 | 0.182833 | 0.369634 | 0.555631 | 0.608957 |
| MmugDNA.5451.1.S1_at   | MmugDNA.5451.1 | 6.64  | 6.64  | 0.05 | 0.02 | 1     | 0.262194 | 0.142039 | 0.624399 | 0.415633 |
| MmugDNA.5452.1.S1_at   | MmugDNA.5452.1 | 4.27  | 5.5   | 0.68 | 0.44 | -2.35 | 0.271919 | 0.095398 | 0.631647 | 0.352428 |
| MmugDNA.5454.1.S1_s_at | MmugDNA.5454.1 | 9.01  | 8.93  | 0.9  | 0.13 | 1.06  | 0.78561  | 0.196844 | 0.921215 | 0.471968 |
| MmugDNA.5455.1.S1_at   | MmugDNA.5455.1 | 3.77  | 3.89  | 0.13 | 0.09 | -1.09 | 0.448911 | 0.48371  | 0.754037 | 0.688112 |
| MmugDNA.5456.1.S1_at   | MmugDNA.5456.1 | 5.36  | 7.44  | 0.86 | 0.18 | -4.22 | 0.034649 | 0.003361 | 0.350297 | 0.083405 |
| MmugDNA.5458.1.S1_at   | MmugDNA.5458.1 | 4.13  | 3.73  | 0.16 | 0.08 | 1.32  | 0.04484  | 0.05472  | 0.375225 | 0.279389 |
| MmugDNA.546.1.S1_at    | MmugDNA.546.1  | 11.1  | 10.98 | 0.13 | 0.09 | 1.09  | 0.244931 | 0.016516 | 0.610441 | 0.162717 |
| MmugDNA.5462.1.S1_at   | MmugDNA.5462.1 | 4.29  | 4.36  | 0.28 | 0.13 | -1.05 | 0.848053 | 0.328964 | 0.946629 | 0.578482 |
| MmugDNA.5463.1.S1_at   | MmugDNA.5463.1 | 4.59  | 4.52  | 0.4  | 0.86 | 1.05  | 0.876655 | 0.658886 | 0.957055 | 0.800473 |
| MmugDNA.5465.1.S1_at   | MmugDNA.5465.1 | 7.44  | 8.04  | 0.7  | 0.3  | -1.51 | 0.949573 | 0.99155  | 0.982929 | 0.995297 |
| MmugDNA.5468.1.S1_at   | MmugDNA.5468.1 | 6.07  | 4.7   | 0.25 | 0.39 | 2.6   | 0.019889 | 0.178115 | 0.302615 | 0.454504 |
| MmugDNA.5469.1.S1_at   | MmugDNA.5469.1 | 6.08  | 5.67  | 0.53 | 0.67 | 1.33  | 0.607216 | 0.367985 | 0.840749 | 0.60758  |
| MmugDNA.547.1.S1_at    | MmugDNA.547.1  | 6.17  | 6.53  | 0.66 | 0.04 | -1.28 | 0.422394 | 0.340404 | 0.738123 | 0.586725 |
| MmugDNA.5470.1.S1_at   | MmugDNA.5470.1 | 7.29  | 7.14  | 0.09 | 0.05 | 1.11  | 0.07947  | 0.183169 | 0.442306 | 0.459531 |
| MmugDNA.5471.1.S1_at   | MmugDNA.5471.1 | 9.2   | 9.56  | 0.7  | 0.15 | -1.28 | 0.141396 | 0.088294 | 0.516365 | 0.341721 |
| MmugDNA.5474.1.S1_at   | MmugDNA.5474.1 | 7.39  | 7.25  | 0.13 | 0.18 | 1.1   | 0.169804 | 0.080393 | 0.542758 | 0.328028 |
| MmugDNA.5475.1.S1_at   | MmugDNA.5475.1 | 7.97  | 7.92  | 0.86 | 0.08 | 1.04  | 0.338814 | 0.112419 | 0.683224 | 0.377784 |
| MmugDNA.5476.1.S1_at   | MmugDNA.5476.1 | 3.33  | 3.06  | 0.16 | 0.18 | 1.2   | 0.143148 | 0.424131 | 0.518429 | 0.646737 |
| MmugDNA.5477.1.S1_at   | MmugDNA.5477.1 | 4.33  | 4.39  | 0.84 | 0.34 | -1.05 | 0.819708 | 0.295808 | 0.935061 | 0.555199 |
| MmugDNA.5478.1.S1_at   | MmugDNA.5478.1 | 12.41 | 12.17 | 0.17 | 0.05 | 1.18  | 0.066453 | 0.023277 | 0.422326 | 0.191258 |
| MmugDNA.5479.1.S1_at   | MmugDNA.5479.1 | 4.8   | 4.87  | 0.61 | 0.11 | -1.05 | 0.395052 | 0.543256 | 0.720303 | 0.726012 |
| MmugDNA.548.1.S1_at    | MmugDNA.548.1  | 4.51  | 4.49  | 0.15 | 0.15 | 1.02  | 0.555629 | 0.720892 | 0.813597 | 0.838368 |
| MmugDNA.5480.1.S1_at   | MmugDNA.5480.1 | 6.96  | 8.18  | 2.04 | 0.22 | -2.32 | 0.383481 | 0.54058  | 0.71139  | 0.724459 |
| MmugDNA.5481.1.S1_at   | MmugDNA.5481.1 | 8.8   | 8.75  | 0.19 | 0.18 | 1.03  | 0.757423 | 0.824533 | 0.908621 | 0.89925  |
| MmugDNA.5483.1.S1_at   | MmugDNA.5483.1 | 10.57 | 10.91 | 0.27 | 0.05 | -1.27 | 0.044221 | 0.015772 | 0.374279 | 0.159179 |
| MmugDNA.5484.1.S1_at   | MmugDNA.5484.1 | 4.61  | 4.49  | 0.13 | 0.21 | 1.09  | 0.285563 | 0.38098  | 0.643438 | 0.617476 |
| MmugDNA.5487.1.S1_at   | MmugDNA.5487.1 | 3.66  | 3.78  | 0.59 | 0.09 | -1.09 | 0.975251 | 0.289343 | 0.991912 | 0.550378 |



|                      |                |       |       |      |      |       |          |          |          |          |
|----------------------|----------------|-------|-------|------|------|-------|----------|----------|----------|----------|
| MmugDNA.5489.1.S1_at | MmugDNA.5489.1 | 4.24  | 4.09  | 0.25 | 0.04 | 1.1   | 0.697241 | 0.844713 | 0.882224 | 0.911602 |
| MmugDNA.5490.1.S1_at | MmugDNA.5490.1 | 5.36  | 5.32  | 0.6  | 0.44 | 1.03  | 0.486279 | 0.572184 | 0.774492 | 0.744268 |
| MmugDNA.5491.1.S1_at | MmugDNA.5491.1 | 12.53 | 11.9  | 0.31 | 0.11 | 1.55  | 0.068211 | 0.103149 | 0.425017 | 0.364041 |
| MmugDNA.5493.1.S1_at | MmugDNA.5493.1 | 3.75  | 3.81  | 0.27 | 0.16 | -1.04 | 0.959488 | 0.400666 | 0.98678  | 0.630467 |
| MmugDNA.5494.1.S1_at | MmugDNA.5494.1 | 7.12  | 7.49  | 0.11 | 0.12 | -1.29 | 0.037326 | 0.226376 | 0.357066 | 0.498806 |
| MmugDNA.5495.1.S1_at | MmugDNA.5495.1 | 6.49  | 6.4   | 0.16 | 0.08 | 1.06  | 0.174633 | 0.208121 | 0.547994 | 0.482082 |
| MmugDNA.5496.1.S1_at | MmugDNA.5496.1 | 3.7   | 3.75  | 0.04 | 0.07 | -1.04 | 0.166709 | 0.372535 | 0.539354 | 0.611484 |
| MmugDNA.5497.1.S1_at | MmugDNA.5497.1 | 4.79  | 4.68  | 0.2  | 0.17 | 1.08  | 0.996674 | 0.998083 | 0.998707 | 0.999009 |
| MmugDNA.5498.1.S1_at | MmugDNA.5498.1 | 3.7   | 3.42  | 0.26 | 0.39 | 1.22  | 0.323844 | 0.483451 | 0.672332 | 0.687931 |
| MmugDNA.55.1.S1_at   | MmugDNA.55.1   | 6.36  | 6.45  | 0.27 | 0.21 | -1.07 | 0.644607 | 0.8512   | 0.858561 | 0.915364 |
| MmugDNA.550.1.S1_at  | MmugDNA.550.1  | 3.15  | 3.19  | 0.09 | 0.04 | -1.03 | 0.186056 | 0.35042  | 0.559015 | 0.594161 |
| MmugDNA.5500.1.S1_at | MmugDNA.5500.1 | 4.16  | 4.33  | 0.24 | 0.27 | -1.13 | 0.723615 | 0.037643 | 0.892847 | 0.238465 |
| MmugDNA.5501.1.S1_at | MmugDNA.5501.1 | 4.32  | 4.88  | 0.24 | 0.07 | -1.47 | 0.020346 | 0.033695 | 0.303839 | 0.227173 |
| MmugDNA.5502.1.S1_at | MmugDNA.5502.1 | 9.3   | 9.53  | 1.04 | 0.09 | -1.17 | 0.236978 | 0.354911 | 0.603869 | 0.597466 |
| MmugDNA.5503.1.S1_at | MmugDNA.5503.1 | 5.9   | 5.61  | 0.28 | 0.1  | 1.22  | 0.328594 | 0.470083 | 0.67577  | 0.678572 |
| MmugDNA.5504.1.S1_at | MmugDNA.5504.1 | 7.39  | 6.94  | 0.61 | 0.24 | 1.37  | 0.123259 | 0.065689 | 0.496589 | 0.301631 |
| MmugDNA.5505.1.S1_at | MmugDNA.5505.1 | 6.83  | 6.72  | 0.02 | 0.02 | 1.08  | 0.002407 | 0.041051 | 0.177075 | 0.247372 |
| MmugDNA.5507.1.S1_at | MmugDNA.5507.1 | 5.69  | 5.71  | 0.1  | 0.09 | -1.01 | 0.951268 | 0.988271 | 0.983558 | 0.993458 |
| MmugDNA.5509.1.S1_at | MmugDNA.5509.1 | 12.05 | 12.03 | 0.43 | 0.07 | 1.01  | 0.450646 | 0.374575 | 0.754829 | 0.61291  |
| MmugDNA.551.1.S1_at  | MmugDNA.551.1  | 11.04 | 10.8  | 0.72 | 0.15 | 1.18  | 0.540501 | 0.141616 | 0.804382 | 0.415157 |
| MmugDNA.5511.1.S1_at | MmugDNA.5511.1 | 4.38  | 4.18  | 0.31 | 0.18 | 1.14  | 0.550359 | 0.281082 | 0.810769 | 0.54422  |
| MmugDNA.5512.1.S1_at | MmugDNA.5512.1 | 3.95  | 3.75  | 0.2  | 0.34 | 1.14  | 0.98791  | 0.955744 | 0.995831 | 0.974924 |
| MmugDNA.5513.1.S1_at | MmugDNA.5513.1 | 4.45  | 4.34  | 0.1  | 0.09 | 1.08  | 0.302647 | 0.213137 | 0.656575 | 0.487054 |
| MmugDNA.5515.1.S1_at | MmugDNA.5515.1 | 2.84  | 2.85  | 0.03 | 0.07 | -1    | 0.524225 | 0.286682 | 0.795806 | 0.548077 |
| MmugDNA.5516.1.S1_at | MmugDNA.5516.1 | 4.69  | 4.49  | 0.31 | 0.14 | 1.15  | 0.258648 | 0.141746 | 0.622286 | 0.415331 |
| MmugDNA.552.1.S1_at  | MmugDNA.552.1  | 5.5   | 5.5   | 0.15 | 0.06 | 1     | 0.592343 | 0.677547 | 0.833845 | 0.811678 |
| MmugDNA.5520.1.S1_at | MmugDNA.5520.1 | 4.22  | 4.3   | 0.15 | 0.04 | -1.06 | 0.861714 | 0.721238 | 0.951267 | 0.838629 |
| MmugDNA.5521.1.S1_at | MmugDNA.5521.1 | 12.33 | 12.02 | 0.27 | 0.38 | 1.24  | 0.61707  | 0.306979 | 0.845267 | 0.563427 |
| MmugDNA.5523.1.S1_at | MmugDNA.5523.1 | 4.29  | 4.23  | 0.2  | 0.03 | 1.04  | 0.828362 | 0.570328 | 0.938275 | 0.743056 |
| MmugDNA.5524.1.S1_at | MmugDNA.5524.1 | 6.35  | 5.76  | 1.06 | 0.51 | 1.51  | 0.255425 | 0.05953  | 0.619502 | 0.290548 |
| MmugDNA.5525.1.S1_at | MmugDNA.5525.1 | 4.15  | 3.97  | 0.31 | 0.05 | 1.13  | 0.314511 | 0.553919 | 0.665212 | 0.732896 |
| MmugDNA.5526.1.S1_at | MmugDNA.5526.1 | 3.72  | 3.72  | 0.12 | 0.21 | -1    | 0.731015 | 0.911831 | 0.896368 | 0.950281 |
| MmugDNA.5527.1.S1_at | MmugDNA.5527.1 | 5.09  | 5     | 0.04 | 0.21 | 1.07  | 0.204066 | 0.547246 | 0.5753   | 0.728342 |
| MmugDNA.5528.1.S1_at | MmugDNA.5528.1 | 3.52  | 3.56  | 0.32 | 0.04 | -1.03 | 0.429186 | 0.691436 | 0.742138 | 0.820488 |
| MmugDNA.5529.1.S1_at | MmugDNA.5529.1 | 12.13 | 12.2  | 0.09 | 0.08 | -1.05 | 0.924064 | 0.035423 | 0.974613 | 0.232539 |
| MmugDNA.5530.1.S1_at | MmugDNA.5530.1 | 7.87  | 8.5   | 0.29 | 0.2  | -1.54 | 0.104924 | 0.318528 | 0.476247 | 0.571239 |
| MmugDNA.5531.1.S1_at | MmugDNA.5531.1 | 4.36  | 4.31  | 0.09 | 0.02 | 1.03  | 0.424006 | 0.944808 | 0.739366 | 0.968794 |
| MmugDNA.5532.1.S1_at | MmugDNA.5532.1 | 3.77  | 3.67  | 0.1  | 0.1  | 1.07  | 0.697736 | 0.564618 | 0.882415 | 0.739393 |
| MmugDNA.5533.1.S1_at | MmugDNA.5533.1 | 9.15  | 10.33 | 0.48 | 0.19 | -2.27 | 0.011486 | 0.037774 | 0.255331 | 0.238746 |
| MmugDNA.5535.1.S1_at | MmugDNA.5535.1 | 4.58  | 4.29  | 0.07 | 0.21 | 1.22  | 0.260468 | 0.038575 | 0.623301 | 0.241417 |
| MmugDNA.5538.1.S1_at | MmugDNA.5538.1 | 5.28  | 5.27  | 0.25 | 0.07 | 1     | 0.666878 | 0.822685 | 0.868458 | 0.898006 |
| MmugDNA.554.1.S1_at  | MmugDNA.554.1  | 4.31  | 4.3   | 0.05 | 0.03 | 1     | 0.907254 | 0.015169 | 0.968503 | 0.156504 |
| MmugDNA.5540.1.S1_at | MmugDNA.5540.1 | 4.32  | 4.18  | 0.23 | 0.13 | 1.1   | 0.42802  | 0.54714  | 0.74152  | 0.728314 |

|                        |                |       |       |      |      |       |          |          |          |          |
|------------------------|----------------|-------|-------|------|------|-------|----------|----------|----------|----------|
| MmugDNA.5541.1.S1_at   | MmugDNA.5541.1 | 10.62 | 11.08 | 2.43 | 0.31 | -1.38 | 0.57285  | 0.199422 | 0.823419 | 0.47402  |
| MmugDNA.5543.1.S1_at   | MmugDNA.5543.1 | 11.06 | 10.89 | 0.28 | 0.19 | 1.13  | 0.277728 | 0.404027 | 0.636996 | 0.632558 |
| MmugDNA.5544.1.S1_at   | MmugDNA.5544.1 | 3.62  | 3.52  | 0.15 | 0.07 | 1.07  | 0.480343 | 0.436795 | 0.771141 | 0.65629  |
| MmugDNA.5545.1.S1_at   | MmugDNA.5545.1 | 6.56  | 6.73  | 0.25 | 0.23 | -1.12 | 0.363701 | 0.017496 | 0.700278 | 0.167516 |
| MmugDNA.5546.1.S1_at   | MmugDNA.5546.1 | 3.26  | 3.55  | 0.12 | 0.21 | -1.22 | 0.240068 | 0.568898 | 0.606307 | 0.742129 |
| MmugDNA.5547.1.S1_at   | MmugDNA.5547.1 | 5.17  | 5.22  | 0.02 | 0.05 | -1.04 | 0.12498  | 0.117038 | 0.498917 | 0.384465 |
| MmugDNA.5548.1.S1_at   | MmugDNA.5548.1 | 6.21  | 6.24  | 0.08 | 0.02 | -1.02 | 0.20128  | 0.107134 | 0.57304  | 0.369808 |
| MmugDNA.5549.1.S1_at   | MmugDNA.5549.1 | 6.44  | 6.42  | 0.05 | 0.03 | 1.01  | 0.253622 | 0.775563 | 0.618323 | 0.869402 |
| MmugDNA.555.1.S1_at    | MmugDNA.555.1  | 4.16  | 4.49  | 0.82 | 0.13 | -1.25 | 0.811577 | 0.71329  | 0.931835 | 0.833666 |
| MmugDNA.5550.1.S1_at   | MmugDNA.5550.1 | 10.63 | 10.04 | 1.4  | 0.19 | 1.5   | 0.716116 | 0.510374 | 0.889675 | 0.704868 |
| MmugDNA.5551.1.S1_at   | MmugDNA.5551.1 | 4.71  | 4     | 1.06 | 0.56 | -1.63 | 0.971276 | 0.649026 | 0.990583 | 0.794525 |
| MmugDNA.5554.1.S1_at   | MmugDNA.5554.1 | 3.77  | 3.83  | 0.01 | 0.16 | -1.04 | 0.739909 | 0.871869 | 0.900699 | 0.927098 |
| MmugDNA.5555.1.S1_at   | MmugDNA.5555.1 | 6.27  | 6.14  | 0.43 | 0.14 | 1.1   | 0.921421 | 0.361514 | 0.973373 | 0.602238 |
| MmugDNA.5556.1.S1_at   | MmugDNA.5556.1 | 6.12  | 6.13  | 0.2  | 0.13 | -1.01 | 0.442871 | 0.292426 | 0.750405 | 0.552506 |
| MmugDNA.5557.1.S1_at   | MmugDNA.5557.1 | 10.42 | 10.77 | 0.11 | 0.04 | -1.27 | 0.009894 | 0.014875 | 0.244171 | 0.155055 |
| MmugDNA.5559.1.S1_at   | MmugDNA.5559.1 | 6.06  | 5.96  | 0.07 | 0.12 | 1.07  | 0.224253 | 0.406355 | 0.593438 | 0.634297 |
| MmugDNA.5560.1.S1_at   | MmugDNA.5560.1 | 6.64  | 7.16  | 1.27 | 0.22 | -1.43 | 0.520365 | 0.059468 | 0.793684 | 0.290548 |
| MmugDNA.5560.1.S1_s_at | MmugDNA.5560.1 | 5.47  | 5.89  | 1.19 | 0.15 | -1.34 | 0.529648 | 0.079709 | 0.798376 | 0.326981 |
| MmugDNA.5561.1.S1_at   | MmugDNA.5561.1 | 5.29  | 5.24  | 0.02 | 0.13 | 1.03  | 0.601033 | 0.493419 | 0.838053 | 0.694107 |
| MmugDNA.5562.1.S1_at   | MmugDNA.5562.1 | 8.68  | 8.8   | 1.31 | 0.24 | -1.09 | 0.79928  | 0.091404 | 0.926464 | 0.34639  |
| MmugDNA.5563.1.S1_at   | MmugDNA.5563.1 | 7.34  | 7.65  | 0.29 | 0.04 | -1.24 | 0.410589 | 0.277949 | 0.730828 | 0.541664 |
| MmugDNA.5564.1.S1_at   | MmugDNA.5564.1 | 9.24  | 9.49  | 0.19 | 0.08 | -1.19 | 0.102223 | 0.118464 | 0.472527 | 0.386457 |
| MmugDNA.5566.1.S1_at   | MmugDNA.5566.1 | 4.57  | 4.49  | 0.06 | 0.24 | 1.06  | 0.566275 | 0.83119  | 0.819955 | 0.903172 |
| MmugDNA.5568.1.S1_at   | MmugDNA.5568.1 | 11.93 | 11.41 | 0.11 | 0.13 | 1.43  | 0.010291 | 0.082432 | 0.246929 | 0.331415 |
| MmugDNA.5569.1.S1_at   | MmugDNA.5569.1 | 6.73  | 6.18  | 0.46 | 0.17 | 1.47  | 0.043051 | 0.031172 | 0.371135 | 0.21838  |
| MmugDNA.557.1.S1_at    | MmugDNA.557.1  | 3.87  | 3.9   | 0.23 | 0.02 | -1.02 | 0.568625 | 0.61094  | 0.820925 | 0.768948 |
| MmugDNA.5570.1.S1_at   | MmugDNA.5570.1 | 4.99  | 5     | 0.02 | 0.04 | -1.01 | 0.508008 | 0.354725 | 0.786593 | 0.597422 |
| MmugDNA.5571.1.S1_at   | MmugDNA.5571.1 | 11.67 | 11.82 | 0.19 | 0.04 | -1.11 | 0.275895 | 0.004479 | 0.635438 | 0.093435 |
| MmugDNA.5572.1.S1_at   | MmugDNA.5572.1 | 10.17 | 10.46 | 0.17 | 0.05 | -1.22 | 0.060459 | 0.008085 | 0.408247 | 0.119519 |
| MmugDNA.5573.1.S1_at   | MmugDNA.5573.1 | 4.36  | 4.38  | 0.07 | 0.16 | -1.01 | 0.967544 | 0.069037 | 0.98927  | 0.309017 |
| MmugDNA.5574.1.S1_s_at | MmugDNA.5574.1 | 7.92  | 8.62  | 0.46 | 0.25 | -1.63 | 0.073812 | 0.00165  | 0.434623 | 0.061436 |
| MmugDNA.5575.1.S1_at   | MmugDNA.5575.1 | 3.54  | 3.21  | 0.32 | 0.4  | 1.26  | 0.805238 | 0.451367 | 0.929175 | 0.66617  |
| MmugDNA.5576.1.S1_at   | MmugDNA.5576.1 | 9.54  | 9.4   | 0.09 | 0.09 | 1.1   | 0.247681 | 0.111442 | 0.613245 | 0.376126 |
| MmugDNA.5577.1.S1_at   | MmugDNA.5577.1 | 6.45  | 6.87  | 0.16 | 0.3  | -1.33 | 0.111406 | 0.318918 | 0.484548 | 0.571531 |
| MmugDNA.5578.1.S1_at   | MmugDNA.5578.1 | 3.85  | 3.7   | 0.15 | 0.09 | 1.11  | 0.352286 | 0.296258 | 0.692649 | 0.555423 |
| MmugDNA.5579.1.S1_at   | MmugDNA.5579.1 | 5.02  | 5     | 0.31 | 0.13 | 1.01  | 0.47358  | 0.794156 | 0.767619 | 0.881296 |
| MmugDNA.558.1.S1_at    | MmugDNA.558.1  | 5.99  | 5.8   | 0.26 | 0.39 | 1.14  | 0.58197  | 0.045841 | 0.827791 | 0.258382 |
| MmugDNA.5582.1.S1_s_at | MmugDNA.5582.1 | 9.93  | 10.05 | 0.13 | 0.13 | -1.09 | 0.269198 | 0.362437 | 0.629522 | 0.603016 |
| MmugDNA.5585.1.S1_at   | MmugDNA.5585.1 | 8.62  | 8.51  | 0.27 | 0.08 | 1.09  | 0.3628   | 0.124786 | 0.699596 | 0.395219 |
| MmugDNA.5587.1.S1_at   | MmugDNA.5587.1 | 5.15  | 5.22  | 0.28 | 0.08 | -1.05 | 0.701442 | 0.887628 | 0.883866 | 0.936    |
| MmugDNA.5588.1.S1_x_at | MmugDNA.5588.1 | 6.49  | 6.57  | 0.1  | 0.22 | -1.06 | 0.406558 | 0.589117 | 0.728097 | 0.755393 |
| MmugDNA.5589.1.S1_at   | MmugDNA.5589.1 | 11.05 | 10.4  | 0.32 | 0.2  | 1.57  | 0.090741 | 0.047354 | 0.458873 | 0.262352 |
| MmugDNA.559.1.S1_at    | MmugDNA.559.1  | 7.85  | 7.7   | 1.09 | 0.07 | 1.11  | 0.813985 | 0.356677 | 0.932855 | 0.598516 |

|                         |                 |       |       |      |      |       |          |          |          |          |
|-------------------------|-----------------|-------|-------|------|------|-------|----------|----------|----------|----------|
| MmugDNA.5590.1.S1_at    | MmugDNA.5590.1  | 5.52  | 5.14  | 0.42 | 0.53 | 1.31  | 0.666375 | 0.091759 | 0.868243 | 0.346977 |
| MmugDNA.5591.1.S1_at    | MmugDNA.5591.1  | 3.11  | 2.95  | 0.12 | 0.19 | 1.12  | 0.565766 | 0.23041  | 0.819476 | 0.502199 |
| MmugDNA.5592.1.S1_at    | MmugDNA.5592.1  | 10.63 | 10.92 | 0.11 | 0.14 | -1.22 | 0.04942  | 0.055875 | 0.385474 | 0.282172 |
| MmugDNA.5593.1.S1_at    | MmugDNA.5593.1  | 12.12 | 11.75 | 0.17 | 0.1  | 1.3   | 0.056978 | 0.005494 | 0.401454 | 0.102081 |
| MmugDNA.5595.1.S1_at    | MmugDNA.5595.1  | 5.63  | 5.33  | 0.17 | 0.19 | 1.23  | 0.308026 | 0.078913 | 0.660862 | 0.325912 |
| MmugDNA.5596.1.S1_at    | MmugDNA.5596.1  | 10.83 | 11.51 | 0.41 | 0.07 | -1.6  | 0.165542 | 0.083892 | 0.538348 | 0.334776 |
| MmugDNA.5597.1.S1_at    | MmugDNA.5597.1  | 5.08  | 5.09  | 0.03 | 0.13 | -1.01 | 0.340616 | 0.540568 | 0.684563 | 0.724459 |
| MmugDNA.5598.1.S1_at    | MmugDNA.5598.1  | 9.07  | 8.92  | 0.2  | 0.26 | 1.11  | 0.376672 | 0.437972 | 0.706953 | 0.657057 |
| MmugDNA.5599.1.S1_s_at  | MmugDNA.5599.1  | 12.64 | 12.54 | 0.76 | 0.08 | 1.07  | 0.876166 | 0.595514 | 0.956886 | 0.759091 |
| MmugDNA.56.1.S1_at      | MmugDNA.56.1    | 3.8   | 3.68  | 0.14 | 0.14 | 1.09  | 0.386367 | 0.354831 | 0.713522 | 0.59746  |
| MmugDNA.560.1.S1_at     | MmugDNA.560.1   | 3.68  | 3.67  | 0.15 | 0.04 | 1     | 0.445619 | 0.808942 | 0.752285 | 0.889968 |
| MmugDNA.5602.1.S1_at    | MmugDNA.5602.1  | 7.34  | 7.89  | 0.35 | 0.37 | -1.46 | 0.05781  | 0.162323 | 0.403025 | 0.438466 |
| MmugDNA.5603.1.S1_at    | MmugDNA.5603.1  | 6.87  | 6.15  | 0.59 | 0.14 | 1.64  | 0.123115 | 0.093509 | 0.496589 | 0.349846 |
| MmugDNA.5604.1.S1_at    | MmugDNA.5604.1  | 7.17  | 6.68  | 0.18 | 0.17 | 1.41  | 0.038975 | 0.035159 | 0.360903 | 0.231667 |
| MmugDNA.5605.1.S1_at    | MmugDNA.5605.1  | 12.58 | 12.83 | 0.07 | 0.16 | -1.19 | 0.021536 | 0.133699 | 0.309241 | 0.405647 |
| MmugDNA.20021.1.S1_at   | MmugDNA.20021.1 | 12.62 | 12.9  | 0.05 | 0.14 | -1.21 | 0.030437 | 0.105698 | 0.337918 | 0.3678   |
| MmugDNA.20021.1.S1_s_at | MmugDNA.20021.1 | 13.4  | 13.52 | 0.04 | 0.1  | -1.09 | 0.043483 | 0.150646 | 0.372168 | 0.425195 |
| MmugDNA.20021.1.S1_x_at | MmugDNA.20021.1 | 13    | 13.23 | 0.03 | 0.12 | -1.17 | 0.01509  | 0.08984  | 0.2796   | 0.344058 |
| MmugDNA.5606.1.S1_at    | MmugDNA.5606.1  | 9.6   | 9.58  | 0.55 | 0.18 | 1.02  | 0.827535 | 0.947979 | 0.938039 | 0.970411 |
| MmugDNA.5607.1.S1_at    | MmugDNA.5607.1  | 4.99  | 4.87  | 0.13 | 0.07 | 1.09  | 0.361082 | 0.519217 | 0.698314 | 0.710878 |
| MmugDNA.5608.1.S1_at    | MmugDNA.5608.1  | 10.89 | 9.6   | 0.55 | 0.3  | 2.45  | 0.076588 | 0.146899 | 0.437977 | 0.420934 |
| MmugDNA.5609.1.S1_at    | MmugDNA.5609.1  | 9.95  | 10.3  | 0.55 | 0.07 | -1.27 | 0.969805 | 0.064159 | 0.990053 | 0.299548 |
| MmugDNA.561.1.S1_at     | MmugDNA.561.1   | 5.33  | 5.25  | 0.02 | 0.1  | 1.06  | 0.159925 | 0.74146  | 0.533013 | 0.850285 |
| MmugDNA.5611.1.S1_at    | MmugDNA.5611.1  | 7.06  | 6.98  | 0.08 | 0.06 | 1.06  | 0.576019 | 0.695812 | 0.825049 | 0.823223 |
| MmugDNA.5613.1.S1_at    | MmugDNA.5613.1  | 5.37  | 5.46  | 0.46 | 0.12 | -1.07 | 0.477534 | 0.643543 | 0.76987  | 0.790981 |
| MmugDNA.5615.1.S1_at    | MmugDNA.5615.1  | 6.62  | 6.44  | 0.11 | 0.07 | 1.13  | 0.084449 | 0.162532 | 0.450997 | 0.438649 |
| MmugDNA.5616.1.S1_at    | MmugDNA.5616.1  | 7.44  | 7.75  | 0.69 | 0.1  | -1.24 | 0.560732 | 0.620743 | 0.816958 | 0.775593 |
| MmugDNA.5617.1.S1_at    | MmugDNA.5617.1  | 8.1   | 8.21  | 0.7  | 0.09 | -1.08 | 0.768795 | 0.096367 | 0.913275 | 0.353905 |
| MmugDNA.5619.1.S1_at    | MmugDNA.5619.1  | 11.44 | 11.41 | 1.95 | 0.05 | 1.03  | 0.389992 | 0.536056 | 0.716463 | 0.721454 |
| MmugDNA.5621.1.S1_at    | MmugDNA.5621.1  | 11.48 | 11.05 | 0.53 | 0.05 | 1.34  | 0.71388  | 0.887006 | 0.88857  | 0.93566  |
| MmugDNA.5622.1.S1_at    | MmugDNA.5622.1  | 8.13  | 8.13  | 0.46 | 0.15 | -1    | 0.787537 | 0.02341  | 0.921953 | 0.191786 |
| MmugDNA.5623.1.S1_at    | MmugDNA.5623.1  | 4.42  | 4.41  | 0.09 | 0.17 | 1.01  | 0.760563 | 0.445481 | 0.910074 | 0.662401 |
| MmugDNA.5624.1.S1_at    | MmugDNA.5624.1  | 6.56  | 6.07  | 0.3  | 0.24 | 1.41  | 0.221723 | 0.128683 | 0.591359 | 0.400096 |
| MmugDNA.5625.1.S1_at    | MmugDNA.5625.1  | 4.25  | 4.29  | 0.3  | 0.06 | -1.03 | 0.415285 | 0.311441 | 0.733613 | 0.566456 |
| MmugDNA.5626.1.S1_at    | MmugDNA.5626.1  | 5.03  | 4.85  | 0.15 | 0.25 | 1.13  | 0.168603 | 0.250126 | 0.541341 | 0.519168 |
| MmugDNA.5627.1.S1_at    | MmugDNA.5627.1  | 6.76  | 6.97  | 0.37 | 0.19 | -1.16 | 0.727662 | 0.251443 | 0.894767 | 0.520175 |
| MmugDNA.5629.1.S1_at    | MmugDNA.5629.1  | 2.86  | 2.81  | 0.09 | 0.03 | 1.04  | 0.371333 | 0.545891 | 0.705454 | 0.727697 |
| MmugDNA.5630.1.S1_at    | MmugDNA.5630.1  | 4.93  | 4.79  | 0.3  | 0.25 | 1.1   | 0.45275  | 0.654634 | 0.755901 | 0.798101 |
| MmugDNA.5632.1.S1_at    | MmugDNA.5632.1  | 8.54  | 8.23  | 0.48 | 0.11 | 1.23  | 0.113658 | 0.030042 | 0.486992 | 0.21514  |
| MmugDNA.11172.1.S1_s_at | MmugDNA.11172.1 | 12.21 | 13    | 0.21 | 0.08 | -1.73 | 0.003014 | 0.004258 | 0.19086  | 0.091808 |
| MmugDNA.5634.1.S1_at    | MmugDNA.5634.1  | 4.01  | 3.95  | 0.47 | 0.15 | 1.04  | 0.424503 | 0.594244 | 0.739618 | 0.758517 |
| MmugDNA.5635.1.S1_at    | MmugDNA.5635.1  | 6.24  | 6.25  | 0.16 | 0.13 | -1.01 | 0.935034 | 0.569171 | 0.97801  | 0.742303 |
| MmugDNA.5637.1.S1_at    | MmugDNA.5637.1  | 6     | 5.7   | 0.16 | 0.27 | 1.23  | 0.465174 | 0.410646 | 0.762974 | 0.637463 |

|                        |                |       |       |      |      |       |          |          |          |          |
|------------------------|----------------|-------|-------|------|------|-------|----------|----------|----------|----------|
| MmugDNA.5638.1.S1_at   | MmugDNA.5638.1 | 3.5   | 3.31  | 0.5  | 0.26 | 1.13  | 0.491382 | 0.678259 | 0.777734 | 0.812064 |
| MmugDNA.5640.1.S1_at   | MmugDNA.5640.1 | 4.94  | 5.33  | 1.75 | 0.6  | -1.31 | 0.834658 | 0.415277 | 0.940727 | 0.640769 |
| MmugDNA.5641.1.S1_at   | MmugDNA.5641.1 | 9.4   | 9.34  | 0.06 | 0.14 | 1.04  | 0.18362  | 0.317648 | 0.55651  | 0.570802 |
| MmugDNA.5644.1.S1_at   | MmugDNA.5644.1 | 6.3   | 6.49  | 0.63 | 0.14 | -1.14 | 0.568529 | 0.56256  | 0.820913 | 0.738069 |
| MmugDNA.5647.1.S1_at   | MmugDNA.5647.1 | 6.32  | 6.69  | 0.57 | 0.23 | -1.29 | 0.933021 | 0.995062 | 0.977247 | 0.996929 |
| MmugDNA.5648.1.S1_at   | MmugDNA.5648.1 | 3.72  | 3.83  | 0.21 | 0.44 | -1.08 | 0.606904 | 0.78485  | 0.840731 | 0.875432 |
| MmugDNA.5649.1.S1_at   | MmugDNA.5649.1 | 10.52 | 9.91  | 0.45 | 0.03 | 1.53  | 0.243423 | 0.415636 | 0.609316 | 0.641007 |
| MmugDNA.565.1.S1_at    | MmugDNA.565.1  | 5.91  | 6.36  | 0.33 | 0.41 | -1.36 | 0.416986 | 0.097443 | 0.734647 | 0.355118 |
| MmugDNA.5650.1.S1_at   | MmugDNA.5650.1 | 5.81  | 5.71  | 0.31 | 0.11 | 1.07  | 0.196946 | 0.219065 | 0.567696 | 0.49285  |
| MmugDNA.5651.1.S1_at   | MmugDNA.5651.1 | 9.36  | 10.28 | 0.36 | 0.17 | -1.89 | 0.016688 | 0.009714 | 0.287553 | 0.129718 |
| MmugDNA.5652.1.S1_at   | MmugDNA.5652.1 | 4.2   | 3.99  | 0.03 | 0.2  | -1.16 | 0.507499 | 0.169654 | 0.78638  | 0.446229 |
| MmugDNA.5653.1.S1_at   | MmugDNA.5653.1 | 4.36  | 4.57  | 0.13 | 0.19 | -1.16 | 0.3619   | 0.193594 | 0.698882 | 0.468785 |
| MmugDNA.5659.1.S1_at   | MmugDNA.5659.1 | 4.16  | 4.11  | 0.1  | 0.45 | 1.03  | 0.406182 | 0.194434 | 0.727818 | 0.469521 |
| MmugDNA.566.1.S1_at    | MmugDNA.566.1  | 6.45  | 6.34  | 0.43 | 0.27 | 1.08  | 0.661343 | 0.215214 | 0.866144 | 0.488977 |
| MmugDNA.5660.1.S1_at   | MmugDNA.5660.1 | 7.91  | 8.23  | 0.23 | 0.21 | -1.25 | 0.74573  | 0.031125 | 0.903099 | 0.218175 |
| MmugDNA.5664.1.S1_at   | MmugDNA.5664.1 | 5.31  | 5.45  | 0.41 | 0.26 | -1.11 | 0.678292 | 0.490827 | 0.873961 | 0.692666 |
| MmugDNA.5666.1.S1_at   | MmugDNA.5666.1 | 3.43  | 3.53  | 0.11 | 0.08 | -1.07 | 0.5732   | 0.19389  | 0.823465 | 0.468979 |
| MmugDNA.5667.1.S1_at   | MmugDNA.5667.1 | 4.33  | 4.46  | 0.41 | 0.29 | -1.09 | 0.404522 | 0.511564 | 0.72664  | 0.705677 |
| MmugDNA.5668.1.S1_at   | MmugDNA.5668.1 | 6.58  | 6.6   | 0.18 | 0.07 | -1.01 | 0.305565 | 0.532367 | 0.659011 | 0.719017 |
| MmugDNA.5670.1.S1_at   | MmugDNA.5670.1 | 5.51  | 5.41  | 0.34 | 0.29 | 1.07  | 0.758017 | 0.520843 | 0.908942 | 0.711942 |
| MmugDNA.5672.1.S1_at   | MmugDNA.5672.1 | 5.81  | 5.63  | 0.15 | 0.65 | 1.14  | 0.667578 | 0.770371 | 0.868641 | 0.866595 |
| MmugDNA.5673.1.S1_at   | MmugDNA.5673.1 | 4.72  | 7.25  | 0.48 | 0.24 | -5.8  | 0.001454 | 0.00015  | 0.161412 | 0.029832 |
| MmugDNA.5674.1.S1_at   | MmugDNA.5674.1 | 4.78  | 4.82  | 0.08 | 0.09 | -1.03 | 0.652705 | 0.374815 | 0.86202  | 0.613091 |
| MmugDNA.5675.1.S1_at   | MmugDNA.5675.1 | 8.4   | 8.1   | 0.25 | 0.12 | 1.23  | 0.099069 | 0.058976 | 0.468463 | 0.289669 |
| MmugDNA.5676.1.S1_at   | MmugDNA.5676.1 | 3.46  | 3.34  | 0.05 | 0.05 | 1.09  | 0.056936 | 0.505123 | 0.401454 | 0.70197  |
| MmugDNA.5677.1.S1_at   | MmugDNA.5677.1 | 3.07  | 2.98  | 0.09 | 0.08 | 1.06  | 0.119879 | 0.572412 | 0.493259 | 0.744497 |
| MmugDNA.5679.1.S1_at   | MmugDNA.5679.1 | 4.72  | 4.87  | 0.15 | 0.25 | -1.11 | 0.156601 | 0.316867 | 0.529647 | 0.570214 |
| MmugDNA.568.1.S1_at    | MmugDNA.568.1  | 6.3   | 6.28  | 0.22 | 0.21 | 1.01  | 0.454453 | 0.045385 | 0.756801 | 0.257395 |
| MmugDNA.5680.1.S1_s_at | MmugDNA.5680.1 | 10.39 | 10.45 | 0.6  | 0.13 | -1.04 | 0.998101 | 0.984452 | 0.999386 | 0.991287 |
| MmugDNA.5681.1.S1_at   | MmugDNA.5681.1 | 6.99  | 6.88  | 0.18 | 0.03 | 1.08  | 0.869711 | 0.938527 | 0.954539 | 0.965059 |
| MmugDNA.5682.1.S1_at   | MmugDNA.5682.1 | 4     | 4.02  | 0.3  | 0.17 | -1.01 | 0.653835 | 0.379388 | 0.862462 | 0.61636  |
| MmugDNA.5682.1.S1_x_at | MmugDNA.5682.1 | 5.41  | 5.13  | 0.36 | 0.18 | 1.22  | 0.14754  | 0.147325 | 0.521578 | 0.421537 |
| MmugDNA.5684.1.S1_at   | MmugDNA.5684.1 | 6.74  | 6.72  | 0.13 | 0.09 | 1.01  | 0.671287 | 0.85576  | 0.870263 | 0.917698 |
| MmugDNA.5686.1.S1_at   | MmugDNA.5686.1 | 3.68  | 3.58  | 0.3  | 0.14 | 1.07  | 0.269298 | 0.387128 | 0.629582 | 0.621935 |
| MmugDNA.5687.1.S1_at   | MmugDNA.5687.1 | 9.88  | 9.86  | 0.32 | 0.24 | 1.01  | 0.701018 | 0.641384 | 0.883754 | 0.789506 |
| MmugDNA.5689.1.S1_at   | MmugDNA.5689.1 | 3.96  | 3.92  | 0.24 | 0.06 | 1.02  | 0.94263  | 0.806966 | 0.98031  | 0.888903 |
| MmugDNA.5690.1.S1_at   | MmugDNA.5690.1 | 9.6   | 10.04 | 1.23 | 0.06 | -1.35 | 0.284169 | 0.297214 | 0.642084 | 0.556067 |
| MmugDNA.5690.1.S1_s_at | MmugDNA.5690.1 | 9.83  | 10.26 | 1.31 | 0.11 | -1.34 | 0.225386 | 0.228872 | 0.594611 | 0.501124 |
| MmugDNA.5691.1.S1_at   | MmugDNA.5691.1 | 10.12 | 9.98  | 0.08 | 0.04 | 1.1   | 0.255003 | 0.165175 | 0.619267 | 0.441389 |
| MmugDNA.5692.1.S1_at   | MmugDNA.5692.1 | 6.65  | 6.26  | 0.31 | 0.12 | 1.3   | 0.192048 | 0.165229 | 0.563128 | 0.441399 |
| MmugDNA.5693.1.S1_at   | MmugDNA.5693.1 | 6.32  | 6.08  | 0.05 | 0.09 | 1.17  | 0.054336 | 0.270823 | 0.39629  | 0.536026 |
| MmugDNA.5695.1.S1_at   | MmugDNA.5695.1 | 6.98  | 6.89  | 0.13 | 0.03 | 1.06  | 0.132342 | 0.715033 | 0.506752 | 0.834792 |
| MmugDNA.5696.1.S1_at   | MmugDNA.5696.1 | 8.85  | 8.76  | 0.7  | 0.34 | 1.07  | 0.974205 | 0.287713 | 0.991817 | 0.548977 |

|                        |                |       |       |      |      |       |          |          |          |          |
|------------------------|----------------|-------|-------|------|------|-------|----------|----------|----------|----------|
| MmugDNA.5698.1.S1_x_at | MmugDNA.5698.1 | 6.19  | 6.12  | 0.43 | 0.29 | 1.05  | 0.911307 | 0.243393 | 0.969926 | 0.513425 |
| MmugDNA.5699.1.S1_at   | MmugDNA.5699.1 | 7.13  | 7.03  | 0.75 | 0.27 | 1.07  | 0.536611 | 0.234588 | 0.802417 | 0.505792 |
| MmugDNA.57.1.S1_at     | MmugDNA.57.1   | 6.48  | 5.71  | 0.22 | 0.3  | 1.71  | 0.059064 | 0.137946 | 0.405996 | 0.410912 |
| MmugDNA.570.1.S1_at    | MmugDNA.570.1  | 5.14  | 6.19  | 0.42 | 0.35 | -2.07 | 0.053087 | 0.076184 | 0.394001 | 0.321047 |
| MmugDNA.5700.1.S1_at   | MmugDNA.5700.1 | 2.88  | 2.79  | 0.15 | 0.03 | 1.06  | 0.117409 | 0.058697 | 0.490925 | 0.288956 |
| MmugDNA.5701.1.S1_at   | MmugDNA.5701.1 | 5.22  | 5.07  | 0.14 | 0.12 | 1.11  | 0.113347 | 0.133588 | 0.486648 | 0.405542 |
| MmugDNA.5703.1.S1_at   | MmugDNA.5703.1 | 5.37  | 5.46  | 0.14 | 0.1  | -1.06 | 0.170549 | 0.024522 | 0.543588 | 0.196001 |
| MmugDNA.5706.1.S1_s_at | MmugDNA.5706.1 | 10.91 | 10.82 | 0.74 | 0.03 | 1.06  | 0.905553 | 0.384261 | 0.968177 | 0.619994 |
| MmugDNA.5706.1.S1_x_at | MmugDNA.5706.1 | 4.32  | 3.96  | 0.32 | 0.1  | 1.28  | 0.351929 | 0.374657 | 0.692615 | 0.613    |
| MmugDNA.5707.1.S1_at   | MmugDNA.5707.1 | 11.19 | 11.54 | 0.21 | 0.06 | -1.27 | 0.026097 | 0.01419  | 0.323344 | 0.152173 |
| MmugDNA.5708.1.S1_at   | MmugDNA.5708.1 | 9.1   | 8.59  | 0.28 | 0.32 | 1.42  | 0.050393 | 0.046547 | 0.387101 | 0.260267 |
| MmugDNA.5708.1.S1_s_at | MmugDNA.5708.1 | 11.28 | 11.29 | 0.12 | 0.13 | -1.01 | 0.579256 | 0.614184 | 0.82645  | 0.771143 |
| MmugDNA.5709.1.S1_at   | MmugDNA.5709.1 | 3.47  | 3.19  | 0.16 | 0.15 | 1.22  | 0.250989 | 0.390731 | 0.616109 | 0.624501 |
| MmugDNA.5710.1.S1_at   | MmugDNA.5710.1 | 10.63 | 10.02 | 0.49 | 0.29 | 1.52  | 0.23453  | 0.359164 | 0.601806 | 0.600528 |
| MmugDNA.5712.1.S1_at   | MmugDNA.5712.1 | 8.63  | 8.97  | 0.49 | 0.09 | -1.26 | 0.503658 | 0.003552 | 0.784375 | 0.085398 |
| MmugDNA.5713.1.S1_at   | MmugDNA.5713.1 | 4.79  | 4.54  | 0.39 | 0.3  | 1.19  | 0.345473 | 0.506594 | 0.687499 | 0.702503 |
| MmugDNA.5717.1.S1_at   | MmugDNA.5717.1 | 6.52  | 5.88  | 0.33 | 0.07 | 1.56  | 0.046942 | 0.021683 | 0.379253 | 0.184333 |
| MmugDNA.5718.1.S1_at   | MmugDNA.5718.1 | 7.37  | 7.25  | 0.37 | 0.19 | 1.09  | 0.671836 | 0.051239 | 0.870562 | 0.271799 |
| MmugDNA.5719.1.S1_at   | MmugDNA.5719.1 | 6.98  | 6.89  | 0.04 | 0.03 | 1.06  | 0.039334 | 0.487013 | 0.361498 | 0.690176 |
| MmugDNA.572.1.S1_at    | MmugDNA.572.1  | 3.72  | 3.68  | 0    | 0.12 | 1.03  | 0.480972 | 0.72508  | 0.771639 | 0.840867 |
| MmugDNA.5721.1.S1_at   | MmugDNA.5721.1 | 3.77  | 3.78  | 0.01 | 0.04 | -1    | 0.437725 | 0.271184 | 0.746873 | 0.536264 |
| MmugDNA.5722.1.S1_at   | MmugDNA.5722.1 | 11.26 | 11.55 | 0.24 | 0.07 | -1.22 | 0.103536 | 0.111419 | 0.474343 | 0.376126 |
| MmugDNA.5723.1.S1_at   | MmugDNA.5723.1 | 6.86  | 6.98  | 0.07 | 0.07 | -1.08 | 0.195082 | 0.160753 | 0.565513 | 0.436897 |
| MmugDNA.5724.1.S1_at   | MmugDNA.5724.1 | 6.29  | 6.28  | 0.04 | 0.08 | 1     | 0.415069 | 0.582684 | 0.733524 | 0.751307 |
| MmugDNA.5726.1.S1_at   | MmugDNA.5726.1 | 7.44  | 7.05  | 0.13 | 0.12 | 1.31  | 0.038539 | 0.486018 | 0.359709 | 0.689551 |
| MmugDNA.5727.1.S1_at   | MmugDNA.5727.1 | 4.4   | 4.35  | 0.05 | 0.2  | 1.03  | 0.590998 | 0.283586 | 0.833199 | 0.546021 |
| MmugDNA.5728.1.S1_s_at | MmugDNA.5728.1 | 8.41  | 8.19  | 0.08 | 0.1  | 1.16  | 0.055481 | 0.180005 | 0.398621 | 0.456552 |
| MmugDNA.5730.1.S1_at   | MmugDNA.5730.1 | 5.14  | 5.26  | 0.15 | 0.29 | -1.09 | 0.238407 | 0.226505 | 0.605341 | 0.498987 |
| MmugDNA.5732.1.S1_at   | MmugDNA.5732.1 | 5.21  | 5.12  | 1.33 | 0.26 | 1.07  | 0.977737 | 0.9603   | 0.99273  | 0.977459 |
| MmugDNA.5735.1.S1_at   | MmugDNA.5735.1 | 6.33  | 7.04  | 0.26 | 0.24 | -1.63 | 0.028616 | 0.01673  | 0.332769 | 0.163819 |
| MmugDNA.5737.1.S1_at   | MmugDNA.5737.1 | 9.01  | 9.32  | 0.22 | 0.11 | -1.24 | 0.429041 | 0.28298  | 0.742138 | 0.545692 |
| MmugDNA.5737.1.S1_x_at | MmugDNA.5737.1 | 9.1   | 9.36  | 0.2  | 0.08 | -1.2  | 0.298878 | 0.248212 | 0.65344  | 0.517574 |
| MmugDNA.5739.1.S1_at   | MmugDNA.5739.1 | 6.22  | 5.93  | 0.28 | 0.16 | 1.22  | 0.18278  | 0.273226 | 0.555631 | 0.537788 |
| MmugDNA.574.1.S1_at    | MmugDNA.574.1  | 7.66  | 7.54  | 0.16 | 0.09 | 1.09  | 0.10709  | 0.130439 | 0.47951  | 0.402268 |
| MmugDNA.5740.1.S1_s_at | MmugDNA.5740.1 | 7.59  | 6.88  | 0.36 | 0.04 | 1.64  | 0.023375 | 0.000863 | 0.315239 | 0.047401 |
| MmugDNA.5741.1.S1_at   | MmugDNA.5741.1 | 5.88  | 5.05  | 0.43 | 0.06 | 1.78  | 0.070297 | 0.074667 | 0.428889 | 0.318404 |
| MmugDNA.5743.1.S1_at   | MmugDNA.5743.1 | 3.73  | 3.54  | 0.29 | 0.67 | 1.14  | 0.659403 | 0.344149 | 0.865216 | 0.589739 |
| MmugDNA.5744.1.S1_at   | MmugDNA.5744.1 | 5.95  | 5.72  | 0.67 | 0.11 | 1.17  | 0.630116 | 0.79632  | 0.851878 | 0.882625 |
| MmugDNA.5745.1.S1_at   | MmugDNA.5745.1 | 3.89  | 3.92  | 0.31 | 0.08 | -1.02 | 0.776619 | 0.938292 | 0.917412 | 0.965016 |
| MmugDNA.5748.1.S1_at   | MmugDNA.5748.1 | 6.18  | 5.59  | 0.56 | 0.1  | 1.51  | 0.20654  | 0.139829 | 0.578354 | 0.413131 |
| MmugDNA.5749.1.S1_at   | MmugDNA.5749.1 | 7.1   | 8.27  | 0.69 | 0.38 | -2.25 | 0.166267 | 0.274231 | 0.538973 | 0.538709 |
| MmugDNA.5750.1.S1_at   | MmugDNA.5750.1 | 7.62  | 7.98  | 0.33 | 0.07 | -1.28 | 0.109685 | 0.222687 | 0.482529 | 0.495617 |
| MmugDNA.5751.1.S1_at   | MmugDNA.5751.1 | 8.58  | 8.74  | 0.8  | 0.39 | -1.12 | 0.875038 | 0.930444 | 0.956624 | 0.960476 |

|                        |                |       |       |      |      |       |          |          |          |          |
|------------------------|----------------|-------|-------|------|------|-------|----------|----------|----------|----------|
| MmugDNA.5752.1.S1_at   | MmugDNA.5752.1 | 3.71  | 3.64  | 0.21 | 0.18 | 1.05  | 0.209778 | 0.261328 | 0.581302 | 0.527838 |
| MmugDNA.5753.1.S1_at   | MmugDNA.5753.1 | 5.67  | 5.6   | 0.21 | 0.2  | 1.05  | 0.35279  | 0.629915 | 0.692803 | 0.782013 |
| MmugDNA.5756.1.S1_at   | MmugDNA.5756.1 | 6.16  | 5.94  | 0.51 | 0.35 | 1.17  | 0.629475 | 0.280546 | 0.851663 | 0.543725 |
| MmugDNA.5758.1.S1_at   | MmugDNA.5758.1 | 3.36  | 3.4   | 0.24 | 0.32 | -1.03 | 0.328492 | 0.39337  | 0.67577  | 0.626258 |
| MmugDNA.576.1.S1_at    | MmugDNA.576.1  | 3.29  | 3.2   | 0.14 | 0.06 | 1.07  | 0.96154  | 0.348307 | 0.987441 | 0.592478 |
| MmugDNA.5760.1.S1_at   | MmugDNA.5760.1 | 5.49  | 5.44  | 0.22 | 0.49 | 1.03  | 0.965036 | 0.987966 | 0.988532 | 0.993283 |
| MmugDNA.5762.1.S1_at   | MmugDNA.5762.1 | 11.3  | 11.55 | 0.21 | 0.05 | -1.19 | 0.281573 | 0.364193 | 0.640011 | 0.604513 |
| MmugDNA.5763.1.S1_at   | MmugDNA.5763.1 | 4.82  | 4.85  | 0.05 | 0.1  | -1.02 | 0.238809 | 0.148342 | 0.605452 | 0.422915 |
| MmugDNA.5764.1.S1_at   | MmugDNA.5764.1 | 5.54  | 5.45  | 0.15 | 0.25 | 1.07  | 0.496033 | 0.753816 | 0.780184 | 0.856687 |
| MmugDNA.5765.1.S1_at   | MmugDNA.5765.1 | 4.46  | 4.24  | 0.1  | 0.13 | 1.17  | 0.136553 | 0.075994 | 0.511723 | 0.320676 |
| MmugDNA.5766.1.S1_at   | MmugDNA.5766.1 | 10.57 | 10.07 | 0.72 | 0.09 | 1.42  | 0.240688 | 0.220301 | 0.606937 | 0.493756 |
| MmugDNA.5767.1.S1_at   | MmugDNA.5767.1 | 7.69  | 6.98  | 1.25 | 0.23 | 1.63  | 0.56403  | 0.042135 | 0.81857  | 0.249753 |
| MmugDNA.577.1.S1_at    | MmugDNA.577.1  | 3.71  | 3.62  | 0.12 | 0.17 | 1.06  | 0.949804 | 0.378225 | 0.983047 | 0.615438 |
| MmugDNA.5770.1.S1_at   | MmugDNA.5770.1 | 6.87  | 7.15  | 0.32 | 0.07 | -1.21 | 0.640756 | 0.648794 | 0.856931 | 0.794478 |
| MmugDNA.5771.1.S1_at   | MmugDNA.5771.1 | 4.85  | 4.65  | 0.1  | 0.03 | 1.15  | 0.071096 | 0.550621 | 0.430341 | 0.730605 |
| MmugDNA.5772.1.S1_at   | MmugDNA.5772.1 | 6.19  | 6.19  | 0.19 | 0.1  | -1    | 0.253004 | 0.412442 | 0.617861 | 0.638862 |
| MmugDNA.5773.1.S1_at   | MmugDNA.5773.1 | 5.18  | 5.19  | 0.04 | 0.16 | -1    | 0.357207 | 0.729729 | 0.695575 | 0.843658 |
| MmugDNA.5774.1.S1_at   | MmugDNA.5774.1 | 2.98  | 2.93  | 0.13 | 0.32 | 1.04  | 0.738878 | 0.893566 | 0.900143 | 0.939277 |
| MmugDNA.5775.1.S1_at   | MmugDNA.5775.1 | 7.75  | 7.31  | 0.84 | 0.34 | 1.36  | 0.101327 | 0.034914 | 0.471667 | 0.231062 |
| MmugDNA.5776.1.S1_at   | MmugDNA.5776.1 | 3.37  | 3.42  | 0.14 | 0.05 | -1.04 | 0.72912  | 0.554365 | 0.895623 | 0.733168 |
| MmugDNA.5777.1.S1_at   | MmugDNA.5777.1 | 7.61  | 7.77  | 0.2  | 0.13 | -1.12 | 0.536836 | 0.206352 | 0.802473 | 0.480544 |
| MmugDNA.5779.1.S1_at   | MmugDNA.5779.1 | 5.26  | 4.99  | 0.03 | 0.52 | 1.21  | 0.665293 | 0.622999 | 0.867901 | 0.777444 |
| MmugDNA.578.1.S1_at    | MmugDNA.578.1  | 3.6   | 3.55  | 0.13 | 0.1  | 1.04  | 0.980316 | 0.206096 | 0.993785 | 0.480306 |
| MmugDNA.5782.1.S1_at   | MmugDNA.5782.1 | 5.32  | 5.26  | 0.07 | 0.18 | 1.04  | 0.611343 | 0.951251 | 0.842471 | 0.972381 |
| MmugDNA.5785.1.S1_at   | MmugDNA.5785.1 | 5.66  | 5.48  | 0.01 | 0.15 | 1.13  | 0.098245 | 0.200688 | 0.467704 | 0.47524  |
| MmugDNA.5786.1.S1_at   | MmugDNA.5786.1 | 3.93  | 3.95  | 0.19 | 0.06 | -1.01 | 0.621338 | 0.667475 | 0.847514 | 0.805333 |
| MmugDNA.5787.1.S1_at   | MmugDNA.5787.1 | 3.74  | 3.49  | 0.13 | 0.22 | 1.19  | 0.118783 | 0.105389 | 0.492161 | 0.367262 |
| MmugDNA.5789.1.S1_at   | MmugDNA.5789.1 | 10.6  | 10.48 | 0.19 | 0.05 | 1.09  | 0.148727 | 0.07317  | 0.522734 | 0.316064 |
| MmugDNA.5790.1.S1_at   | MmugDNA.5790.1 | 4.92  | 4.89  | 0.2  | 0.05 | 1.02  | 0.29524  | 0.538891 | 0.651026 | 0.723368 |
| MmugDNA.5791.1.S1_at   | MmugDNA.5791.1 | 6.35  | 6.37  | 0.2  | 0.17 | -1.02 | 0.420405 | 0.183167 | 0.736942 | 0.459531 |
| MmugDNA.5792.1.S1_at   | MmugDNA.5792.1 | 6.1   | 5.93  | 0.15 | 0.06 | 1.13  | 0.147391 | 0.063947 | 0.521578 | 0.29906  |
| MmugDNA.5795.1.S1_at   | MmugDNA.5795.1 | 4.62  | 4.62  | 0.59 | 0.11 | 1.01  | 0.421286 | 0.596006 | 0.73746  | 0.759321 |
| MmugDNA.5797.1.S1_at   | MmugDNA.5797.1 | 7.36  | 7.35  | 0.25 | 0.02 | 1.01  | 0.413149 | 0.419848 | 0.732218 | 0.643733 |
| MmugDNA.5798.1.S1_at   | MmugDNA.5798.1 | 4.72  | 4.71  | 0    | 0.08 | 1.01  | 0.306514 | 0.427654 | 0.659451 | 0.649406 |
| MmugDNA.5799.1.S1_at   | MmugDNA.5799.1 | 6.02  | 5.97  | 0.1  | 0.18 | 1.04  | 0.969225 | 0.215948 | 0.989875 | 0.489582 |
| MmugDNA.58.1.S1_at     | MmugDNA.58.1   | 4.93  | 4.87  | 0.03 | 0.1  | 1.04  | 0.094082 | 0.05377  | 0.463389 | 0.27744  |
| MmugDNA.580.1.S1_at    | MmugDNA.580.1  | 4.85  | 5.55  | 1.13 | 0.75 | -1.61 | 0.832485 | 0.947381 | 0.939889 | 0.970137 |
| MmugDNA.5800.1.S1_at   | MmugDNA.5800.1 | 6.02  | 5.85  | 0.11 | 0.2  | 1.13  | 0.980259 | 0.660135 | 0.993785 | 0.801083 |
| MmugDNA.5801.1.S1_at   | MmugDNA.5801.1 | 3.58  | 3.71  | 0.2  | 0.16 | -1.09 | 0.267731 | 0.415812 | 0.62827  | 0.641133 |
| MmugDNA.5802.1.S1_at   | MmugDNA.5802.1 | 3     | 3.02  | 0.11 | 0.03 | -1.01 | 0.989125 | 0.610725 | 0.995945 | 0.768842 |
| MmugDNA.5804.1.S1_at   | MmugDNA.5804.1 | 5.52  | 5.27  | 0.49 | 0.58 | 1.19  | 0.551321 | 0.279497 | 0.811314 | 0.543055 |
| MmugDNA.5804.1.S1_s_at | MmugDNA.5804.1 | 10.13 | 9.08  | 0.46 | 0.13 | 2.06  | 0.013043 | 0.005889 | 0.266282 | 0.104899 |
| MmugDNA.5805.1.S1_at   | MmugDNA.5805.1 | 6.5   | 6.43  | 0.12 | 0.14 | 1.04  | 0.334541 | 0.144127 | 0.680478 | 0.418024 |

|                         |                 |       |       |      |      |       |          |          |          |          |
|-------------------------|-----------------|-------|-------|------|------|-------|----------|----------|----------|----------|
| MmugDNA.5806.1.S1_at    | MmugDNA.5806.1  | 4.83  | 4.8   | 0.16 | 0.19 | 1.02  | 0.853695 | 0.936249 | 0.948321 | 0.964059 |
| MmugDNA.5808.1.S1_at    | MmugDNA.5808.1  | 5.83  | 5.98  | 0.76 | 0.38 | -1.1  | 0.851345 | 0.972189 | 0.947639 | 0.985008 |
| MmugDNA.581.1.S1_at     | MmugDNA.581.1   | 7.05  | 7.4   | 1.48 | 0.45 | -1.27 | 0.656682 | 0.426406 | 0.863636 | 0.648578 |
| MmugDNA.5810.1.S1_at    | MmugDNA.5810.1  | 4.5   | 4.42  | 0.05 | 0.04 | 1.06  | 0.061016 | 0.849342 | 0.409704 | 0.914489 |
| MmugDNA.5811.1.S1_at    | MmugDNA.5811.1  | 7.32  | 8.01  | 0.46 | 0.06 | -1.62 | 0.170963 | 0.184686 | 0.544107 | 0.460645 |
| MmugDNA.5811.1.S1_s_at  | MmugDNA.5811.1  | 9.47  | 9.74  | 0.46 | 0.09 | -1.2  | 0.358346 | 0.291371 | 0.696372 | 0.551823 |
| MmugDNA.5813.1.S1_at    | MmugDNA.5813.1  | 4.83  | 4.53  | 0.05 | 0.06 | 1.23  | 0.002704 | 0.074318 | 0.184127 | 0.318046 |
| MmugDNA.5814.1.S1_at    | MmugDNA.5814.1  | 4.22  | 4.2   | 0.07 | 0.09 | 1.01  | 0.723152 | 0.702819 | 0.892777 | 0.827716 |
| MmugDNA.5815.1.S1_at    | MmugDNA.5815.1  | 3.82  | 3.89  | 0.32 | 0.17 | -1.05 | 0.873403 | 0.744438 | 0.956189 | 0.852018 |
| MmugDNA.27859.1.S1_s_at | MmugDNA.27859.1 | 3.57  | 3.5   | 0.16 | 0.12 | 1.05  | 0.229538 | 0.302758 | 0.598378 | 0.560307 |
| MmugDNA.5817.1.S1_at    | MmugDNA.5817.1  | 5     | 5.01  | 0.23 | 0.12 | -1.01 | 0.603941 | 0.182092 | 0.8394   | 0.45857  |
| MmugDNA.5818.1.S1_at    | MmugDNA.5818.1  | 3.27  | 3.28  | 0.04 | 0.09 | -1.01 | 0.84475  | 0.123544 | 0.945495 | 0.393629 |
| MmugDNA.5818.1.S1_s_at  | MmugDNA.5818.1  | 6.79  | 6.66  | 0.17 | 0.07 | 1.1   | 0.721392 | 0.399261 | 0.891996 | 0.629735 |
| MmugDNA.582.1.S1_at     | MmugDNA.582.1   | 7.91  | 8.83  | 1.14 | 0.05 | -1.9  | 0.223965 | 0.157382 | 0.593061 | 0.432859 |
| MmugDNA.5820.1.S1_at    | MmugDNA.5820.1  | 11.56 | 10.97 | 0.34 | 0.06 | 1.5   | 0.04     | 0.010114 | 0.362955 | 0.131859 |
| MmugDNA.5821.1.S1_at    | MmugDNA.5821.1  | 2.87  | 2.83  | 0.03 | 0.05 | 1.02  | 0.41887  | 0.934201 | 0.735984 | 0.962662 |
| MmugDNA.5822.1.S1_at    | MmugDNA.5822.1  | 8.33  | 8.87  | 0.52 | 0.26 | -1.46 | 0.067412 | 0.067063 | 0.423738 | 0.304872 |
| MmugDNA.5823.1.S1_at    | MmugDNA.5823.1  | 4.4   | 4.4   | 0.03 | 0.01 | 1     | 0.254855 | 0.925403 | 0.619267 | 0.957803 |
| MmugDNA.5824.1.S1_at    | MmugDNA.5824.1  | 6.55  | 6.35  | 0.47 | 0.22 | 1.15  | 0.128314 | 0.161064 | 0.50293  | 0.437232 |
| MmugDNA.5826.1.S1_at    | MmugDNA.5826.1  | 6.84  | 7.31  | 0.93 | 0.14 | -1.38 | 0.159059 | 0.138064 | 0.53176  | 0.410919 |
| MmugDNA.5828.1.S1_at    | MmugDNA.5828.1  | 10.34 | 10.13 | 0.02 | 0.25 | 1.16  | 0.067398 | 0.127028 | 0.423738 | 0.397828 |
| MmugDNA.5829.1.S1_at    | MmugDNA.5829.1  | 5.05  | 5.21  | 0.2  | 0.04 | -1.12 | 0.285616 | 0.278854 | 0.643438 | 0.542599 |
| MmugDNA.583.1.S1_at     | MmugDNA.583.1   | 7.9   | 7.61  | 0.3  | 0.36 | 1.22  | 0.519117 | 0.469224 | 0.793113 | 0.678155 |
| MmugDNA.5831.1.S1_at    | MmugDNA.5831.1  | 2.94  | 2.93  | 0.11 | 0.03 | 1.01  | 0.821646 | 0.731427 | 0.935606 | 0.84431  |
| MmugDNA.5832.1.S1_at    | MmugDNA.5832.1  | 5.13  | 4.93  | 0.05 | 0.04 | 1.15  | 0.003484 | 0.280282 | 0.195142 | 0.543528 |
| MmugDNA.5834.1.S1_at    | MmugDNA.5834.1  | 4.43  | 4.42  | 0.02 | 0.03 | 1.01  | 0.117981 | 0.369554 | 0.491371 | 0.608927 |
| MmugDNA.5835.1.S1_at    | MmugDNA.5835.1  | 12.94 | 13.01 | 0.24 | 0.02 | -1.05 | 0.588064 | 0.388664 | 0.83181  | 0.622949 |
| MmugDNA.5836.1.S1_at    | MmugDNA.5836.1  | 8.58  | 8.37  | 0.61 | 0.22 | 1.16  | 0.685552 | 0.017118 | 0.876846 | 0.16577  |
| MmugDNA.5838.1.S1_at    | MmugDNA.5838.1  | 5.63  | 5.62  | 0.17 | 0.07 | 1     | 0.878468 | 0.014148 | 0.957748 | 0.15208  |
| MmugDNA.5839.1.S1_at    | MmugDNA.5839.1  | 6.92  | 6.98  | 0.31 | 0.08 | -1.04 | 0.429316 | 0.400968 | 0.742161 | 0.630658 |
| MmugDNA.5840.1.S1_at    | MmugDNA.5840.1  | 3.32  | 3.33  | 0.13 | 0.11 | -1.01 | 0.260498 | 0.294637 | 0.623301 | 0.554306 |
| MmugDNA.30580.1.S1_s_at | MmugDNA.30580.1 | 7.22  | 7.1   | 0.09 | 0.07 | 1.08  | 0.111179 | 0.169463 | 0.484303 | 0.446075 |
| MmugDNA.5846.1.S1_at    | MmugDNA.5846.1  | 9.98  | 10.42 | 0.38 | 0.12 | -1.36 | 0.088383 | 0.018474 | 0.45606  | 0.170946 |
| MmugDNA.5847.1.S1_at    | MmugDNA.5847.1  | 8.37  | 8.18  | 0.62 | 0.12 | 1.14  | 0.951787 | 0.39895  | 0.983817 | 0.629665 |
| MmugDNA.5848.1.S1_at    | MmugDNA.5848.1  | 5.8   | 5.89  | 0.54 | 0.12 | -1.06 | 0.99057  | 0.751315 | 0.996425 | 0.855408 |
| MmugDNA.5849.1.S1_at    | MmugDNA.5849.1  | 4.74  | 4.44  | 0.21 | 0.13 | 1.23  | 0.088654 | 0.093287 | 0.456387 | 0.349412 |
| MmugDNA.5850.1.S1_at    | MmugDNA.5850.1  | 4.68  | 4.89  | 0.19 | 0.18 | -1.16 | 0.326951 | 0.556455 | 0.674612 | 0.734507 |
| MmugDNA.5851.1.S1_at    | MmugDNA.5851.1  | 5.36  | 5.07  | 0.14 | 0.08 | 1.22  | 0.032913 | 0.018685 | 0.345526 | 0.171717 |
| MmugDNA.5851.1.S1_s_at  | MmugDNA.5851.1  | 4.74  | 4.5   | 0.19 | 0.05 | 1.18  | 0.09847  | 0.154012 | 0.467888 | 0.428788 |
| MmugDNA.5852.1.S1_at    | MmugDNA.5852.1  | 7.8   | 7.67  | 0.02 | 0.13 | 1.1   | 0.133826 | 0.145872 | 0.508057 | 0.419888 |
| MmugDNA.5853.1.S1_at    | MmugDNA.5853.1  | 2.63  | 2.63  | 0.02 | 0.08 | -1    | 0.758117 | 0.536822 | 0.908979 | 0.722119 |
| MmugDNA.5854.1.S1_at    | MmugDNA.5854.1  | 3.99  | 4     | 0.02 | 0.22 | -1    | 0.715063 | 0.538646 | 0.889059 | 0.723301 |
| MmugDNA.5855.1.S1_at    | MmugDNA.5855.1  | 11.6  | 11.6  | 0.26 | 0.01 | 1     | 0.417889 | 0.287542 | 0.735196 | 0.54881  |

|                        |                |       |       |      |      |       |          |          |          |          |
|------------------------|----------------|-------|-------|------|------|-------|----------|----------|----------|----------|
| MmugDNA.5858.1.S1_at   | MmugDNA.5858.1 | 4.18  | 3.66  | 0.15 | 0.14 | 1.43  | 0.038035 | 0.07192  | 0.358544 | 0.314293 |
| MmugDNA.5859.1.S1_at   | MmugDNA.5859.1 | 9.23  | 9.59  | 0.69 | 0.2  | -1.28 | 0.423093 | 0.528306 | 0.738788 | 0.716493 |
| MmugDNA.586.1.S1_at    | MmugDNA.586.1  | 4.66  | 4.68  | 0.35 | 0.19 | -1.01 | 0.755487 | 0.396319 | 0.907924 | 0.628097 |
| MmugDNA.5860.1.S1_at   | MmugDNA.5860.1 | 8.05  | 9.3   | 1.19 | 0.39 | -2.38 | 0.186803 | 0.032271 | 0.559225 | 0.222395 |
| MmugDNA.5861.1.S1_at   | MmugDNA.5861.1 | 7.8   | 7.67  | 0.16 | 0.12 | 1.09  | 0.122426 | 0.216638 | 0.495805 | 0.490285 |
| MmugDNA.5863.1.S1_at   | MmugDNA.5863.1 | 8.23  | 7.98  | 0.28 | 0.12 | 1.19  | 0.128493 | 0.135658 | 0.503216 | 0.407798 |
| MmugDNA.5864.1.S1_at   | MmugDNA.5864.1 | 5.78  | 5.38  | 0.15 | 0.22 | 1.32  | 0.139779 | 0.377111 | 0.5153   | 0.614795 |
| MmugDNA.5865.1.S1_at   | MmugDNA.5865.1 | 5.97  | 5.85  | 0.05 | 0.04 | 1.09  | 0.05797  | 0.587844 | 0.403539 | 0.754542 |
| MmugDNA.5866.1.S1_at   | MmugDNA.5866.1 | 5.46  | 6     | 0.43 | 0.37 | -1.45 | 0.156261 | 0.123424 | 0.529536 | 0.393441 |
| MmugDNA.5869.1.S1_s_at | MmugDNA.5869.1 | 10.2  | 10.27 | 0.14 | 0.01 | -1.05 | 0.498859 | 0.61445  | 0.781844 | 0.771275 |
| MmugDNA.587.1.S1_at    | MmugDNA.587.1  | 5.33  | 5.56  | 0.49 | 0.16 | -1.17 | 0.493548 | 0.210519 | 0.778987 | 0.484463 |
| MmugDNA.5870.1.S1_at   | MmugDNA.5870.1 | 4.03  | 4.08  | 0.03 | 0.12 | -1.03 | 0.235064 | 0.365871 | 0.602266 | 0.605774 |
| MmugDNA.5871.1.S1_at   | MmugDNA.5871.1 | 5.72  | 5.68  | 0.14 | 0.11 | 1.03  | 0.355062 | 0.074349 | 0.69464  | 0.318046 |
| MmugDNA.5874.1.S1_at   | MmugDNA.5874.1 | 9.14  | 8.48  | 0.05 | 0.25 | 1.58  | 0.00541  | 0.015667 | 0.208157 | 0.158598 |
| MmugDNA.5878.1.S1_at   | MmugDNA.5878.1 | 3.19  | 3.64  | 0.66 | 0.21 | -1.37 | 0.929839 | 0.747493 | 0.976518 | 0.853149 |
| MmugDNA.5882.1.S1_at   | MmugDNA.5882.1 | 3.39  | 3.34  | 0    | 0.06 | 1.04  | 0.177905 | 0.188514 | 0.551092 | 0.464458 |
| MmugDNA.5883.1.S1_at   | MmugDNA.5883.1 | 4.77  | 4.49  | 0.08 | 0.16 | 1.22  | 0.094381 | 0.125097 | 0.46379  | 0.395506 |
| MmugDNA.5884.1.S1_at   | MmugDNA.5884.1 | 3.4   | 3.4   | 0.13 | 0.12 | 1     | 0.692814 | 0.318574 | 0.880305 | 0.571258 |
| MmugDNA.5886.1.S1_at   | MmugDNA.5886.1 | 10.8  | 10.21 | 0.25 | 0.25 | 1.5   | 0.06083  | 0.023519 | 0.408924 | 0.192225 |
| MmugDNA.5887.1.S1_at   | MmugDNA.5887.1 | 4.35  | 4.28  | 0.04 | 0.07 | 1.05  | 0.13494  | 0.293475 | 0.509107 | 0.55344  |
| MmugDNA.5889.1.S1_at   | MmugDNA.5889.1 | 5.48  | 6.78  | 0.89 | 0.14 | -2.47 | 0.236816 | 0.121884 | 0.603719 | 0.391245 |
| MmugDNA.589.1.S1_at    | MmugDNA.589.1  | 5.43  | 5.39  | 0.03 | 0.09 | 1.03  | 0.838978 | 0.528243 | 0.942429 | 0.716462 |
| MmugDNA.5890.1.S1_at   | MmugDNA.5890.1 | 4.2   | 4.12  | 0.08 | 0.11 | 1.05  | 0.605472 | 0.145415 | 0.839993 | 0.419421 |
| MmugDNA.5891.1.S1_at   | MmugDNA.5891.1 | 6     | 5.97  | 0.07 | 0.15 | 1.02  | 0.660031 | 0.443363 | 0.865536 | 0.661168 |
| MmugDNA.5892.1.S1_at   | MmugDNA.5892.1 | 6.54  | 6.66  | 0.25 | 0.21 | -1.08 | 0.409348 | 0.325555 | 0.729952 | 0.575831 |
| MmugDNA.5893.1.S1_at   | MmugDNA.5893.1 | 4.3   | 4.29  | 0.22 | 0.07 | 1.01  | 0.737792 | 0.807467 | 0.899629 | 0.889121 |
| MmugDNA.5894.1.S1_at   | MmugDNA.5894.1 | 4.62  | 4.44  | 0.19 | 0.1  | 1.13  | 0.139924 | 0.100405 | 0.515501 | 0.359541 |
| MmugDNA.5895.1.S1_at   | MmugDNA.5895.1 | 6.49  | 5.46  | 0.44 | 0.74 | 2.05  | 0.43473  | 0.458675 | 0.745298 | 0.671276 |
| MmugDNA.5896.1.S1_at   | MmugDNA.5896.1 | 10.17 | 10.13 | 0.08 | 0.03 | 1.03  | 0.462111 | 0.460841 | 0.761446 | 0.672749 |
| MmugDNA.5897.1.S1_at   | MmugDNA.5897.1 | 4.96  | 4.28  | 0.33 | 0.19 | 1.6   | 0.030056 | 0.0422   | 0.336449 | 0.24989  |
| MmugDNA.5898.1.S1_at   | MmugDNA.5898.1 | 5.6   | 5.49  | 0.23 | 0.04 | 1.08  | 0.502175 | 0.765695 | 0.783497 | 0.863854 |
| MmugDNA.5899.1.S1_at   | MmugDNA.5899.1 | 7.97  | 8.98  | 1.1  | 0.23 | -2.01 | 0.220459 | 0.286219 | 0.589697 | 0.547725 |
| MmugDNA.5899.1.S1_s_at | MmugDNA.5899.1 | 9.73  | 10.4  | 0.99 | 0.13 | -1.6  | 0.216936 | 0.281587 | 0.586902 | 0.544655 |
| MmugDNA.59.1.S1_at     | MmugDNA.59.1   | 9.09  | 8.21  | 0.28 | 0.26 | 1.84  | 0.009274 | 0.003709 | 0.241866 | 0.0868   |
| MmugDNA.590.1.S1_at    | MmugDNA.590.1  | 6.29  | 6.33  | 0.47 | 0.3  | -1.03 | 0.745519 | 0.222637 | 0.903066 | 0.495617 |
| MmugDNA.5900.1.S1_s_at | MmugDNA.5900.1 | 8.91  | 8.08  | 0.36 | 0.07 | 1.78  | 0.013186 | 0.005599 | 0.266951 | 0.10339  |
| MmugDNA.5902.1.S1_at   | MmugDNA.5902.1 | 3.27  | 3.27  | 0.06 | 0    | 1     | 0.404138 | 0.847462 | 0.726203 | 0.913316 |
| MmugDNA.5903.1.S1_at   | MmugDNA.5903.1 | 9.15  | 9.74  | 0.1  | 0.13 | -1.51 | 0.003492 | 0.000141 | 0.195142 | 0.029307 |
| MmugDNA.5906.1.S1_at   | MmugDNA.5906.1 | 3.45  | 3.42  | 0.08 | 0.18 | 1.02  | 0.397018 | 0.55889  | 0.721621 | 0.735939 |
| MmugDNA.5907.1.S1_at   | MmugDNA.5907.1 | 3.58  | 3.46  | 0.03 | 0.04 | 1.09  | 0.014205 | 0.003008 | 0.274019 | 0.080074 |
| MmugDNA.5908.1.S1_at   | MmugDNA.5908.1 | 5.96  | 6.23  | 1.12 | 0.45 | -1.21 | 0.26276  | 0.483751 | 0.624951 | 0.688112 |
| MmugDNA.5909.1.S1_at   | MmugDNA.5909.1 | 5.26  | 5.19  | 0.1  | 0.05 | 1.05  | 0.42811  | 0.038809 | 0.741605 | 0.241916 |
| MmugDNA.591.1.S1_at    | MmugDNA.591.1  | 3.97  | 3.84  | 0.23 | 0.13 | 1.1   | 0.322504 | 0.364945 | 0.671175 | 0.60517  |



|                        |                |       |       |      |      |       |          |          |          |          |
|------------------------|----------------|-------|-------|------|------|-------|----------|----------|----------|----------|
| MmugDNA.5910.1.S1_at   | MmugDNA.5910.1 | 6.74  | 6.66  | 0.1  | 0.02 | 1.06  | 0.155604 | 0.319131 | 0.528901 | 0.57167  |
| MmugDNA.5911.1.S1_at   | MmugDNA.5911.1 | 6.31  | 6.13  | 0.13 | 0.12 | 1.13  | 0.275204 | 0.085299 | 0.634621 | 0.337139 |
| MmugDNA.5913.1.S1_at   | MmugDNA.5913.1 | 3.79  | 3.76  | 0.08 | 0.11 | 1.01  | 0.433425 | 0.719529 | 0.744486 | 0.83771  |
| MmugDNA.5914.1.S1_at   | MmugDNA.5914.1 | 7.11  | 7.56  | 0.18 | 0.25 | -1.37 | 0.330729 | 0.002736 | 0.677358 | 0.077112 |
| MmugDNA.5915.1.S1_at   | MmugDNA.5915.1 | 4.7   | 4.58  | 0.11 | 0.08 | 1.09  | 0.33989  | 0.233029 | 0.684063 | 0.50445  |
| MmugDNA.5916.1.S1_at   | MmugDNA.5916.1 | 3.17  | 3.22  | 0.14 | 0.16 | -1.04 | 0.515467 | 0.190436 | 0.79089  | 0.465906 |
| MmugDNA.5917.1.S1_at   | MmugDNA.5917.1 | 5.59  | 5.58  | 0.16 | 0    | 1.01  | 0.860872 | 0.786916 | 0.950958 | 0.876732 |
| MmugDNA.5918.1.S1_at   | MmugDNA.5918.1 | 6.29  | 6.02  | 0.62 | 0.36 | 1.21  | 0.764744 | 0.96049  | 0.911553 | 0.97752  |
| MmugDNA.5919.1.S1_at   | MmugDNA.5919.1 | 5.68  | 7.86  | 0.63 | 0.2  | -4.54 | 0.007254 | 0.0098   | 0.226519 | 0.130166 |
| MmugDNA.592.1.S1_at    | MmugDNA.592.1  | 7.77  | 8.47  | 0.97 | 0.31 | -1.63 | 0.126194 | 0.054417 | 0.499905 | 0.278812 |
| MmugDNA.5920.1.S1_at   | MmugDNA.5920.1 | 7.31  | 7.2   | 0.88 | 0.45 | 1.08  | 0.652732 | 0.083527 | 0.86202  | 0.334076 |
| MmugDNA.5921.1.S1_s_at | MmugDNA.5921.1 | 5.88  | 5.72  | 0.18 | 0.06 | 1.11  | 0.292456 | 0.480843 | 0.648844 | 0.686    |
| MmugDNA.5922.1.S1_at   | MmugDNA.5922.1 | 4.91  | 4.56  | 0.14 | 0.21 | 1.27  | 0.220703 | 0.185666 | 0.590041 | 0.46163  |
| MmugDNA.5923.1.S1_at   | MmugDNA.5923.1 | 4.42  | 4.54  | 0.07 | 0.06 | -1.08 | 0.222581 | 0.169042 | 0.592081 | 0.445593 |
| MmugDNA.5923.1.S1_s_at | MmugDNA.5923.1 | 7.75  | 7.71  | 0.09 | 0.07 | 1.03  | 0.392611 | 0.264853 | 0.718502 | 0.530861 |
| MmugDNA.5924.1.S1_at   | MmugDNA.5924.1 | 3.04  | 3.08  | 0.14 | 0.09 | -1.03 | 0.836944 | 0.661103 | 0.941497 | 0.801683 |
| MmugDNA.5925.1.S1_at   | MmugDNA.5925.1 | 7.97  | 8.05  | 0.19 | 0.08 | -1.05 | 0.486554 | 0.002821 | 0.77465  | 0.078275 |
| MmugDNA.5925.1.S1_s_at | MmugDNA.5925.1 | 8.97  | 8.95  | 0.32 | 0.01 | 1.01  | 0.409796 | 0.042231 | 0.730334 | 0.249977 |
| MmugDNA.5926.1.S1_at   | MmugDNA.5926.1 | 6.15  | 6.27  | 0.92 | 0.45 | -1.09 | 0.923119 | 0.444554 | 0.974166 | 0.662072 |
| MmugDNA.5927.1.S1_at   | MmugDNA.5927.1 | 9.21  | 9.26  | 0.3  | 0.01 | -1.04 | 0.951943 | 0.378694 | 0.983822 | 0.615706 |
| MmugDNA.5928.1.S1_at   | MmugDNA.5928.1 | 11.43 | 11.34 | 0.13 | 0.11 | 1.06  | 0.620201 | 0.171248 | 0.847047 | 0.447792 |
| MmugDNA.593.1.S1_at    | MmugDNA.593.1  | 3.51  | 3.51  | 0.02 | 0.14 | 1     | 0.312109 | 0.545928 | 0.66374  | 0.727697 |
| MmugDNA.5931.1.S1_at   | MmugDNA.5931.1 | 8.27  | 8.26  | 0.13 | 0.08 | 1     | 0.937866 | 0.019217 | 0.979112 | 0.174465 |
| MmugDNA.5932.1.S1_at   | MmugDNA.5932.1 | 4.71  | 4.47  | 0.18 | 0.19 | 1.18  | 0.423033 | 0.166852 | 0.73875  | 0.443311 |
| MmugDNA.5934.1.S1_at   | MmugDNA.5934.1 | 11.94 | 11.57 | 0.25 | 0.06 | 1.3   | 0.187604 | 0.035373 | 0.559902 | 0.232358 |
| MmugDNA.5935.1.S1_at   | MmugDNA.5935.1 | 10.23 | 10.15 | 0.33 | 0.07 | 1.05  | 0.448839 | 0.592047 | 0.754037 | 0.757449 |
| MmugDNA.5937.1.S1_at   | MmugDNA.5937.1 | 4.98  | 4.9   | 0.24 | 0.03 | 1.06  | 0.58433  | 0.40357  | 0.829656 | 0.632215 |
| MmugDNA.5938.1.S1_at   | MmugDNA.5938.1 | 6.5   | 5.98  | 0.58 | 0.18 | 1.44  | 0.162435 | 0.264233 | 0.53549  | 0.530301 |
| MmugDNA.594.1.S1_at    | MmugDNA.594.1  | 7.18  | 8.13  | 0.57 | 0.17 | -1.93 | 0.086818 | 0.115154 | 0.454785 | 0.382052 |
| MmugDNA.5941.1.S1_at   | MmugDNA.5941.1 | 6.57  | 6.51  | 0.07 | 0.01 | 1.04  | 0.748531 | 0.972034 | 0.904527 | 0.984889 |
| MmugDNA.5942.1.S1_at   | MmugDNA.5942.1 | 4.05  | 3.81  | 0.04 | 0.3  | 1.19  | 0.709592 | 0.93744  | 0.88699  | 0.964687 |
| MmugDNA.5944.1.S1_at   | MmugDNA.5944.1 | 7.33  | 7.06  | 0.61 | 0.54 | 1.21  | 0.929301 | 0.496157 | 0.976333 | 0.695877 |
| MmugDNA.5945.1.S1_at   | MmugDNA.5945.1 | 10.02 | 10.31 | 0.08 | 0.03 | -1.22 | 0.004225 | 0.002661 | 0.198874 | 0.076254 |
| MmugDNA.5946.1.S1_at   | MmugDNA.5946.1 | 5.08  | 5.41  | 0.26 | 0.06 | -1.26 | 0.185486 | 0.538204 | 0.55851  | 0.72298  |
| MmugDNA.5947.1.S1_at   | MmugDNA.5947.1 | 7.46  | 7.84  | 0.33 | 0.2  | -1.3  | 0.141562 | 0.25089  | 0.516365 | 0.51958  |
| MmugDNA.5948.1.S1_at   | MmugDNA.5948.1 | 4.34  | 4.31  | 0.56 | 0.03 | 1.02  | 0.315446 | 0.323267 | 0.665896 | 0.574408 |
| MmugDNA.5949.1.S1_at   | MmugDNA.5949.1 | 11.41 | 11.68 | 0.4  | 0.32 | -1.2  | 0.363979 | 0.489499 | 0.700336 | 0.691824 |
| MmugDNA.595.1.S1_at    | MmugDNA.595.1  | 3.05  | 3.21  | 0.21 | 0.12 | -1.12 | 0.767344 | 0.720587 | 0.912495 | 0.838346 |
| MmugDNA.5951.1.S1_at   | MmugDNA.5951.1 | 3.72  | 3.68  | 0.65 | 0.25 | 1.03  | 0.355425 | 0.331751 | 0.694725 | 0.580344 |
| MmugDNA.5952.1.S1_at   | MmugDNA.5952.1 | 5.52  | 5.51  | 0.22 | 0.03 | 1.01  | 0.861988 | 0.638822 | 0.951336 | 0.78789  |
| MmugDNA.5953.1.S1_at   | MmugDNA.5953.1 | 3.15  | 3.04  | 0.12 | 0.12 | 1.08  | 0.824916 | 0.916161 | 0.937097 | 0.953065 |
| MmugDNA.5955.1.S1_at   | MmugDNA.5955.1 | 5.61  | 5.77  | 0.17 | 0.11 | -1.12 | 0.426202 | 0.441505 | 0.740255 | 0.659675 |
| MmugDNA.5956.1.S1_at   | MmugDNA.5956.1 | 2.85  | 2.94  | 0.05 | 0.05 | -1.07 | 0.227213 | 0.357922 | 0.596459 | 0.599532 |

|                        |                |       |       |      |      |       |          |          |          |          |
|------------------------|----------------|-------|-------|------|------|-------|----------|----------|----------|----------|
| MmugDNA.5957.1.S1_at   | MmugDNA.5957.1 | 3.91  | 4.33  | 0.11 | 0.32 | -1.34 | 0.097407 | 0.086864 | 0.466348 | 0.339651 |
| MmugDNA.5958.1.S1_at   | MmugDNA.5958.1 | 5.42  | 5.35  | 0.03 | 0.19 | 1.05  | 0.50863  | 0.242134 | 0.787118 | 0.512652 |
| MmugDNA.5959.1.S1_at   | MmugDNA.5959.1 | 4.69  | 4.79  | 0.25 | 0.19 | -1.07 | 0.651071 | 0.849596 | 0.861376 | 0.914595 |
| MmugDNA.596.1.S1_at    | MmugDNA.596.1  | 5.67  | 5.69  | 0.01 | 0.03 | -1.01 | 0.184422 | 0.106108 | 0.557285 | 0.368498 |
| MmugDNA.5960.1.S1_at   | MmugDNA.5960.1 | 8.65  | 8.17  | 0.66 | 0.35 | 1.4   | 0.235087 | 0.200292 | 0.602266 | 0.474689 |
| MmugDNA.5961.1.S1_at   | MmugDNA.5961.1 | 3.87  | 3.9   | 0.06 | 0.2  | -1.02 | 0.35577  | 0.604778 | 0.694889 | 0.764797 |
| MmugDNA.5962.1.S1_at   | MmugDNA.5962.1 | 3.54  | 3.41  | 0.25 | 0.1  | 1.09  | 0.181314 | 0.216825 | 0.554512 | 0.490393 |
| MmugDNA.5964.1.S1_at   | MmugDNA.5964.1 | 7.09  | 7.48  | 1.19 | 0.2  | -1.31 | 0.294531 | 0.492414 | 0.65061  | 0.693534 |
| MmugDNA.5965.1.S1_at   | MmugDNA.5965.1 | 8.68  | 8.4   | 0.27 | 0.28 | 1.22  | 0.511518 | 0.013338 | 0.78871  | 0.148042 |
| MmugDNA.5966.1.S1_at   | MmugDNA.5966.1 | 4.15  | 4.18  | 0.12 | 0.09 | -1.02 | 0.355212 | 0.329208 | 0.69464  | 0.578615 |
| MmugDNA.5967.1.S1_at   | MmugDNA.5967.1 | 7.92  | 8.64  | 0.41 | 0.19 | -1.65 | 0.084896 | 0.012555 | 0.451489 | 0.144501 |
| MmugDNA.5969.1.S1_at   | MmugDNA.5969.1 | 11.82 | 11.65 | 0.11 | 0.05 | 1.12  | 0.099245 | 0.28912  | 0.468747 | 0.55027  |
| MmugDNA.597.1.S1_at    | MmugDNA.597.1  | 4.06  | 4.1   | 0.17 | 0.23 | -1.03 | 0.938712 | 0.052178 | 0.979343 | 0.274032 |
| MmugDNA.5970.1.S1_at   | MmugDNA.5970.1 | 7.18  | 7.79  | 0.45 | 0.02 | -1.53 | 0.232741 | 0.753545 | 0.600193 | 0.856527 |
| MmugDNA.5972.1.S1_at   | MmugDNA.5972.1 | 10.38 | 9.54  | 0.05 | 0.14 | 1.79  | 0.000687 | 0.000398 | 0.146957 | 0.037471 |
| MmugDNA.5973.1.S1_at   | MmugDNA.5973.1 | 13.3  | 13.11 | 0.03 | 0.06 | 1.14  | 0.00497  | 0.001214 | 0.204084 | 0.054455 |
| MmugDNA.5974.1.S1_at   | MmugDNA.5974.1 | 5.88  | 5.82  | 0.24 | 0.09 | 1.04  | 0.510256 | 0.692471 | 0.788065 | 0.821053 |
| MmugDNA.5975.1.S1_at   | MmugDNA.5975.1 | 4.36  | 4.34  | 0.25 | 0.08 | 1.02  | 0.801152 | 0.87937  | 0.927395 | 0.931144 |
| MmugDNA.5977.1.S1_at   | MmugDNA.5977.1 | 3.71  | 3.58  | 0.05 | 0.21 | 1.09  | 0.646991 | 0.80753  | 0.859341 | 0.889173 |
| MmugDNA.5978.1.S1_at   | MmugDNA.5978.1 | 3.58  | 3.57  | 0.29 | 0.23 | 1     | 0.555008 | 0.810783 | 0.813117 | 0.890845 |
| MmugDNA.5979.1.S1_at   | MmugDNA.5979.1 | 5.84  | 6.15  | 0.39 | 0.11 | -1.24 | 0.115173 | 0.112706 | 0.488314 | 0.378322 |
| MmugDNA.598.1.S1_at    | MmugDNA.598.1  | 7.49  | 8.15  | 0.6  | 0.26 | -1.58 | 0.238454 | 0.314239 | 0.605341 | 0.568211 |
| MmugDNA.5980.1.S1_at   | MmugDNA.5980.1 | 5.43  | 5.45  | 0.01 | 0.27 | -1.01 | 0.921115 | 0.765369 | 0.973328 | 0.863627 |
| MmugDNA.5981.1.S1_at   | MmugDNA.5981.1 | 3.71  | 3.69  | 0.13 | 0.12 | 1.01  | 0.277312 | 0.232927 | 0.636787 | 0.50445  |
| MmugDNA.5982.1.S1_at   | MmugDNA.5982.1 | 6.61  | 6.52  | 0.18 | 0.11 | 1.06  | 0.436526 | 0.396822 | 0.746319 | 0.628452 |
| MmugDNA.5983.1.S1_at   | MmugDNA.5983.1 | 3.99  | 3.84  | 0.06 | 0    | 1.1   | 0.020594 | 0.114455 | 0.304935 | 0.381021 |
| MmugDNA.5984.1.S1_at   | MmugDNA.5984.1 | 3.78  | 3.77  | 0.05 | 0.05 | 1     | 0.874566 | 0.984562 | 0.956467 | 0.991313 |
| MmugDNA.5985.1.S1_at   | MmugDNA.5985.1 | 9.95  | 9.04  | 0.18 | 0.05 | 1.87  | 0.001215 | 0.001763 | 0.156386 | 0.063202 |
| MmugDNA.5987.1.S1_at   | MmugDNA.5987.1 | 5.2   | 4.79  | 0.31 | 0.1  | 1.33  | 0.029484 | 0.032485 | 0.334382 | 0.223254 |
| MmugDNA.5989.1.S1_at   | MmugDNA.5989.1 | 3.66  | 3.65  | 0.2  | 0.06 | 1     | 0.501124 | 0.42076  | 0.783101 | 0.64442  |
| MmugDNA.599.1.S1_at    | MmugDNA.599.1  | 10.93 | 10.67 | 0.51 | 0.17 | 1.19  | 0.695663 | 0.356678 | 0.881723 | 0.598516 |
| MmugDNA.5991.1.S1_at   | MmugDNA.5991.1 | 3.61  | 3.62  | 0.03 | 0.06 | -1.01 | 0.767143 | 0.379846 | 0.912485 | 0.616611 |
| MmugDNA.5993.1.S1_at   | MmugDNA.5993.1 | 3.93  | 3.97  | 0.32 | 0.12 | -1.02 | 0.593291 | 0.218794 | 0.834114 | 0.492507 |
| MmugDNA.5994.1.S1_at   | MmugDNA.5994.1 | 5.84  | 6.02  | 0.23 | 0.37 | -1.14 | 0.691946 | 0.668182 | 0.880088 | 0.805827 |
| MmugDNA.5995.1.S1_at   | MmugDNA.5995.1 | 8.8   | 8.94  | 0.18 | 0.02 | -1.11 | 0.363728 | 0.05381  | 0.700278 | 0.2775   |
| MmugDNA.5995.1.S1_s_at | MmugDNA.5995.1 | 9.57  | 9.79  | 0.18 | 0.13 | -1.16 | 0.045909 | 0.063804 | 0.37735  | 0.29906  |
| MmugDNA.5998.1.S1_at   | MmugDNA.5998.1 | 4.41  | 4.24  | 0.2  | 0.07 | 1.13  | 0.334062 | 0.157161 | 0.680021 | 0.432616 |
| MmugDNA.5999.1.S1_at   | MmugDNA.5999.1 | 5.09  | 4.75  | 0.03 | 0.22 | 1.27  | 0.064937 | 0.035877 | 0.419313 | 0.233893 |
| MmugDNA.60.1.S1_at     | MmugDNA.60.1   | 10.35 | 9.73  | 0.57 | 0.06 | 1.54  | 0.132086 | 0.109259 | 0.506546 | 0.37308  |
| MmugDNA.600.1.S1_at    | MmugDNA.600.1  | 7.49  | 7.14  | 0.4  | 0.02 | 1.28  | 0.206473 | 0.258804 | 0.57829  | 0.525954 |
| MmugDNA.6000.1.S1_at   | MmugDNA.6000.1 | 7.08  | 7.06  | 0.61 | 0.27 | 1.01  | 0.999512 | 0.422688 | 0.999871 | 0.645876 |
| MmugDNA.6001.1.S1_at   | MmugDNA.6001.1 | 6.54  | 8     | 0.47 | 0.35 | -2.75 | 0.04103  | 0.195496 | 0.365672 | 0.470351 |
| MmugDNA.6003.1.S1_at   | MmugDNA.6003.1 | 7.42  | 7.01  | 0.46 | 0.5  | 1.33  | 0.752971 | 0.150092 | 0.906896 | 0.424698 |

|                        |                |       |       |      |      |       |          |          |          |          |
|------------------------|----------------|-------|-------|------|------|-------|----------|----------|----------|----------|
| MmugDNA.6004.1.S1_at   | MmugDNA.6004.1 | 4.35  | 4.12  | 0.22 | 0.16 | 1.17  | 0.140565 | 0.184221 | 0.516012 | 0.460382 |
| MmugDNA.6005.1.S1_at   | MmugDNA.6005.1 | 4.91  | 4.88  | 0.07 | 0.19 | 1.02  | 0.26566  | 0.593928 | 0.626818 | 0.758442 |
| MmugDNA.6006.1.S1_at   | MmugDNA.6006.1 | 3.4   | 3.39  | 0.17 | 0.11 | 1.01  | 0.602297 | 0.69392  | 0.838783 | 0.821989 |
| MmugDNA.6008.1.S1_at   | MmugDNA.6008.1 | 4.62  | 4.56  | 0.1  | 0.19 | 1.04  | 0.557991 | 0.928886 | 0.815182 | 0.959449 |
| MmugDNA.6009.1.S1_at   | MmugDNA.6009.1 | 3.16  | 3.16  | 0.19 | 0.08 | 1     | 0.248347 | 0.291313 | 0.613851 | 0.551803 |
| MmugDNA.6011.1.S1_at   | MmugDNA.6011.1 | 8.79  | 8.7   | 0.5  | 0.11 | 1.06  | 0.898125 | 0.312175 | 0.965455 | 0.566915 |
| MmugDNA.6012.1.S1_at   | MmugDNA.6012.1 | 6.29  | 7.37  | 0.74 | 0.23 | -2.12 | 0.164705 | 0.121181 | 0.537466 | 0.390244 |
| MmugDNA.6013.1.S1_at   | MmugDNA.6013.1 | 9.61  | 10.13 | 0.81 | 0.11 | -1.44 | 0.733668 | 0.23608  | 0.897902 | 0.507179 |
| MmugDNA.6014.1.S1_at   | MmugDNA.6014.1 | 3.71  | 3.36  | 0.16 | 0.11 | 1.28  | 0.086795 | 0.429792 | 0.454762 | 0.651036 |
| MmugDNA.6016.1.S1_at   | MmugDNA.6016.1 | 3.43  | 3.35  | 0.01 | 0.06 | 1.06  | 0.0671   | 0.214073 | 0.42315  | 0.487645 |
| MmugDNA.6019.1.S1_at   | MmugDNA.6019.1 | 5.38  | 5.3   | 0.56 | 0.18 | -1.06 | 0.876716 | 0.713865 | 0.957055 | 0.833976 |
| MmugDNA.6020.1.S1_at   | MmugDNA.6020.1 | 9.55  | 9.08  | 0.68 | 0.12 | 1.38  | 0.323452 | 0.43741  | 0.67225  | 0.656699 |
| MmugDNA.6022.1.S1_at   | MmugDNA.6022.1 | 10.82 | 11.19 | 0.08 | 0.1  | -1.29 | 0.005184 | 0.030124 | 0.206146 | 0.215406 |
| MmugDNA.6023.1.S1_at   | MmugDNA.6023.1 | 6.93  | 6.69  | 0.23 | 0.03 | 1.18  | 0.107838 | 0.129308 | 0.480316 | 0.400726 |
| MmugDNA.6024.1.S1_at   | MmugDNA.6024.1 | 4.86  | 4.65  | 0.11 | 0.11 | 1.16  | 0.076848 | 0.23529  | 0.438534 | 0.506336 |
| MmugDNA.6025.1.S1_s_at | MmugDNA.6025.1 | 8.57  | 8.53  | 0.21 | 0.15 | 1.03  | 0.727894 | 0.116136 | 0.894887 | 0.383482 |
| MmugDNA.6026.1.S1_at   | MmugDNA.6026.1 | 7.88  | 9.07  | 0.57 | 0.12 | -2.27 | 0.022333 | 0.03742  | 0.310495 | 0.237777 |
| MmugDNA.6027.1.S1_at   | MmugDNA.6027.1 | 6.07  | 5.82  | 0.3  | 0.07 | 1.19  | 0.680549 | 0.693513 | 0.874731 | 0.82172  |
| MmugDNA.6028.1.S1_at   | MmugDNA.6028.1 | 4.32  | 4.21  | 0.13 | 0.17 | 1.08  | 0.559876 | 0.224629 | 0.816426 | 0.497613 |
| MmugDNA.6029.1.S1_at   | MmugDNA.6029.1 | 4.95  | 4.94  | 0.14 | 0.06 | 1     | 0.5849   | 0.642968 | 0.830132 | 0.79055  |
| MmugDNA.6030.1.S1_at   | MmugDNA.6030.1 | 6.29  | 6.39  | 0.07 | 0.08 | -1.08 | 0.19269  | 0.017733 | 0.563577 | 0.168367 |
| MmugDNA.6031.1.S1_at   | MmugDNA.6031.1 | 3.46  | 3.46  | 0.18 | 0.08 | 1     | 0.643961 | 0.754508 | 0.858328 | 0.857221 |
| MmugDNA.6033.1.S1_at   | MmugDNA.6033.1 | 4.34  | 5.28  | 0.31 | 0.55 | -1.92 | 0.089973 | 0.371254 | 0.457959 | 0.610135 |
| MmugDNA.6034.1.S1_at   | MmugDNA.6034.1 | 4.51  | 4.41  | 0.29 | 0.06 | 1.08  | 0.258681 | 0.526702 | 0.622286 | 0.715627 |
| MmugDNA.6035.1.S1_at   | MmugDNA.6035.1 | 3.22  | 3.29  | 0.07 | 0.07 | -1.05 | 0.199747 | 0.515002 | 0.571494 | 0.708004 |
| MmugDNA.6037.1.S1_at   | MmugDNA.6037.1 | 11.55 | 11.57 | 0.15 | 0.15 | -1.01 | 0.570936 | 0.31562  | 0.822359 | 0.569053 |
| MmugDNA.6038.1.S1_at   | MmugDNA.6038.1 | 2.99  | 3.02  | 0.21 | 0.09 | -1.02 | 0.49324  | 0.370132 | 0.77878  | 0.609369 |
| MmugDNA.6039.1.S1_at   | MmugDNA.6039.1 | 9.45  | 9.99  | 0.09 | 0.06 | -1.45 | 0.000924 | 0.003507 | 0.153739 | 0.08503  |
| MmugDNA.604.1.S1_at    | MmugDNA.604.1  | 12.75 | 12.79 | 0.04 | 0.06 | -1.03 | 0.363549 | 0.042609 | 0.700162 | 0.251035 |
| MmugDNA.6040.1.S1_at   | MmugDNA.6040.1 | 7.08  | 6.95  | 0.63 | 0.11 | 1.1   | 0.551505 | 0.111822 | 0.81144  | 0.376856 |
| MmugDNA.6040.1.S1_s_at | MmugDNA.6040.1 | 7.93  | 7.86  | 0.6  | 0.24 | 1.04  | 0.46214  | 0.142103 | 0.761457 | 0.415685 |
| MmugDNA.6041.1.S1_at   | MmugDNA.6041.1 | 2.94  | 2.95  | 0.13 | 0.02 | -1    | 0.480154 | 0.859761 | 0.771113 | 0.920085 |
| MmugDNA.6043.1.S1_at   | MmugDNA.6043.1 | 3.39  | 3.2   | 0.2  | 0.07 | 1.14  | 0.20322  | 0.378525 | 0.574732 | 0.615564 |
| MmugDNA.6044.1.S1_at   | MmugDNA.6044.1 | 8.55  | 8.14  | 0.25 | 0.08 | 1.32  | 0.215762 | 0.274963 | 0.585813 | 0.539402 |
| MmugDNA.6045.1.S1_at   | MmugDNA.6045.1 | 4.02  | 4     | 0.04 | 0.07 | 1.01  | 0.26084  | 0.513231 | 0.62332  | 0.706851 |
| MmugDNA.6046.1.S1_at   | MmugDNA.6046.1 | 5.69  | 5.55  | 0.01 | 0.05 | 1.1   | 0.032656 | 0.553226 | 0.345045 | 0.73239  |
| MmugDNA.6047.1.S1_at   | MmugDNA.6047.1 | 10.47 | 10.78 | 0.51 | 0.05 | -1.24 | 0.963684 | 0.637422 | 0.988152 | 0.786916 |
| MmugDNA.6049.1.S1_at   | MmugDNA.6049.1 | 6.64  | 6.75  | 0.17 | 0.18 | -1.08 | 0.567498 | 0.631514 | 0.8205   | 0.782845 |
| MmugDNA.605.1.S1_at    | MmugDNA.605.1  | 5.81  | 5.84  | 0.22 | 0.21 | -1.02 | 0.416961 | 0.051085 | 0.734632 | 0.271309 |
| MmugDNA.6050.1.S1_at   | MmugDNA.6050.1 | 4.84  | 4.73  | 0.18 | 0.04 | 1.08  | 0.191632 | 0.288192 | 0.562859 | 0.549454 |
| MmugDNA.6052.1.S1_at   | MmugDNA.6052.1 | 3.79  | 3.73  | 0.08 | 0.1  | 1.05  | 0.160167 | 0.270116 | 0.533251 | 0.535401 |
| MmugDNA.6053.1.S1_at   | MmugDNA.6053.1 | 2.71  | 2.66  | 0    | 0.04 | 1.03  | 0.039582 | 0.127968 | 0.362432 | 0.398904 |
| MmugDNA.6054.1.S1_at   | MmugDNA.6054.1 | 4.74  | 4.88  | 0.13 | 0.13 | -1.1  | 0.883466 | 0.522114 | 0.95964  | 0.712887 |

|                         |                 |       |       |      |      |       |          |          |          |          |
|-------------------------|-----------------|-------|-------|------|------|-------|----------|----------|----------|----------|
| MmugDNA.6055.1.S1_at    | MmugDNA.6055.1  | 5.35  | 5.45  | 0.15 | 0.05 | -1.07 | 0.677431 | 0.291775 | 0.873508 | 0.552054 |
| MmugDNA.6056.1.S1_at    | MmugDNA.6056.1  | 6.14  | 6.06  | 0.09 | 0.13 | 1.06  | 0.670064 | 0.786816 | 0.869803 | 0.876684 |
| MmugDNA.6057.1.S1_at    | MmugDNA.6057.1  | 5.4   | 5.34  | 0.2  | 0.02 | 1.04  | 0.554572 | 0.837706 | 0.8128   | 0.907263 |
| MmugDNA.6058.1.S1_at    | MmugDNA.6058.1  | 7.29  | 6.35  | 0.87 | 0.31 | 1.92  | 0.136328 | 0.085109 | 0.511132 | 0.336936 |
| MmugDNA.6059.1.S1_at    | MmugDNA.6059.1  | 3.06  | 3.04  | 0.07 | 0.08 | 1.02  | 0.786722 | 0.331195 | 0.921642 | 0.579947 |
| MmugDNA.606.1.S1_at     | MmugDNA.606.1   | 11.85 | 11.5  | 0.22 | 0.07 | 1.28  | 0.017011 | 0.000043 | 0.288969 | 0.025273 |
| MmugDNA.6060.1.S1_at    | MmugDNA.6060.1  | 4.2   | 4.31  | 0.18 | 0.04 | -1.08 | 0.866763 | 0.099042 | 0.953168 | 0.357183 |
| MmugDNA.6061.1.S1_at    | MmugDNA.6061.1  | 6.39  | 6.33  | 0.2  | 0.08 | 1.04  | 0.357862 | 0.327471 | 0.695993 | 0.577308 |
| MmugDNA.6062.1.S1_at    | MmugDNA.6062.1  | 4.65  | 4.65  | 0.17 | 0.09 | 1     | 0.705525 | 0.860102 | 0.885355 | 0.920245 |
| MmugDNA.6064.1.S1_at    | MmugDNA.6064.1  | 4.5   | 4.3   | 0.07 | 0.14 | 1.15  | 0.084863 | 0.215852 | 0.451489 | 0.489536 |
| MmugDNA.6065.1.S1_at    | MmugDNA.6065.1  | 5.43  | 5.49  | 0.09 | 0.34 | -1.04 | 0.67983  | 0.259319 | 0.874376 | 0.526418 |
| MmugDNA.6066.1.S1_at    | MmugDNA.6066.1  | 5.64  | 5.42  | 0.05 | 0.13 | 1.17  | 0.130382 | 0.41718  | 0.504689 | 0.642062 |
| MmugDNA.6067.1.S1_at    | MmugDNA.6067.1  | 5.6   | 6.37  | 0.51 | 0.91 | -1.7  | 0.271535 | 0.022811 | 0.631445 | 0.189214 |
| MmugDNA.6068.1.S1_at    | MmugDNA.6068.1  | 10.62 | 10.23 | 0.16 | 0.12 | 1.31  | 0.04766  | 0.085148 | 0.380942 | 0.336978 |
| MmugDNA.6069.1.S1_at    | MmugDNA.6069.1  | 5.97  | 5.22  | 0.59 | 0.27 | 1.67  | 0.12553  | 0.467885 | 0.499523 | 0.677386 |
| MmugDNA.6071.1.S1_at    | MmugDNA.6071.1  | 2.96  | 2.82  | 0.1  | 0.02 | 1.1   | 0.088776 | 0.768529 | 0.456556 | 0.86561  |
| MmugDNA.6072.1.S1_at    | MmugDNA.6072.1  | 9.37  | 8.56  | 0.58 | 0.12 | 1.76  | 0.077974 | 0.052883 | 0.439987 | 0.275541 |
| MmugDNA.6075.1.S1_at    | MmugDNA.6075.1  | 5.79  | 5.27  | 0.46 | 0.32 | 1.44  | 0.093118 | 0.138289 | 0.461879 | 0.411198 |
| MmugDNA.6076.1.S1_at    | MmugDNA.6076.1  | 11    | 10.17 | 1.2  | 0.14 | 1.78  | 0.924424 | 0.403015 | 0.974723 | 0.631795 |
| MmugDNA.6077.1.S1_at    | MmugDNA.6077.1  | 5.47  | 5.68  | 0.84 | 0.36 | -1.15 | 0.416074 | 0.340783 | 0.734059 | 0.586977 |
| MmugDNA.6078.1.S1_at    | MmugDNA.6078.1  | 8.15  | 8.6   | 0.12 | 0.28 | -1.36 | 0.036597 | 0.047721 | 0.355088 | 0.263325 |
| MmugDNA.6079.1.S1_at    | MmugDNA.6079.1  | 4.59  | 4.73  | 0.22 | 0.29 | -1.1  | 0.544893 | 0.723536 | 0.807495 | 0.839934 |
| MmugDNA.608.1.S1_at     | MmugDNA.608.1   | 10.94 | 9.96  | 0.09 | 0.11 | 1.97  | 0.000227 | 0.000767 | 0.123409 | 0.04544  |
| MmugDNA.6081.1.S1_at    | MmugDNA.6081.1  | 4.84  | 4.93  | 0.17 | 0.26 | -1.07 | 0.439855 | 0.449793 | 0.748282 | 0.665276 |
| MmugDNA.6082.1.S1_at    | MmugDNA.6082.1  | 4.73  | 4.6   | 0.24 | 0.09 | 1.1   | 0.386463 | 0.398746 | 0.713581 | 0.62947  |
| MmugDNA.6084.1.S1_at    | MmugDNA.6084.1  | 3.38  | 3.27  | 0.18 | 0.23 | 1.08  | 0.281837 | 0.371304 | 0.64027  | 0.610165 |
| MmugDNA.6085.1.S1_at    | MmugDNA.6085.1  | 5.65  | 5.23  | 0.14 | 0.41 | 1.34  | 0.654903 | 0.51984  | 0.862999 | 0.71135  |
| MmugDNA.6086.1.S1_at    | MmugDNA.6086.1  | 5.09  | 4.35  | 0.44 | 0.22 | 1.67  | 0.266863 | 0.280911 | 0.627652 | 0.544089 |
| MmugDNA.36838.1.S1_at   | MmugDNA.36838.1 | 4.71  | 4.9   | 0.52 | 0.47 | -1.14 | 0.718657 | 0.698891 | 0.890764 | 0.825026 |
| MmugDNA.36838.1.S1_s_at | MmugDNA.36838.1 | 5.67  | 5.5   | 0.04 | 0.22 | 1.12  | 0.245034 | 0.238495 | 0.610441 | 0.5091   |
| MmugDNA.6087.1.S1_at    | MmugDNA.6087.1  | 4.47  | 4.18  | 0.09 | 0.16 | 1.22  | 0.116739 | 0.088521 | 0.490029 | 0.341947 |
| MmugDNA.6088.1.S1_at    | MmugDNA.6088.1  | 7.73  | 7.3   | 0.4  | 0.28 | 1.35  | 0.232549 | 0.645024 | 0.600124 | 0.791993 |
| MmugDNA.6089.1.S1_at    | MmugDNA.6089.1  | 6.06  | 6.27  | 0.15 | 0.11 | -1.15 | 0.217298 | 0.005671 | 0.587227 | 0.103959 |
| MmugDNA.609.1.S1_at     | MmugDNA.609.1   | 8.02  | 7.81  | 0.24 | 0.03 | 1.16  | 0.076475 | 0.091049 | 0.437977 | 0.345842 |
| MmugDNA.6090.1.S1_at    | MmugDNA.6090.1  | 11.54 | 11.89 | 0.13 | 0.04 | -1.28 | 0.007327 | 0.005446 | 0.227558 | 0.101885 |
| MmugDNA.9974.1.S1_s_at  | MmugDNA.9974.1  | 11.96 | 12.19 | 0.27 | 0.1  | -1.17 | 0.063426 | 0.040536 | 0.415717 | 0.246264 |
| MmugDNA.6093.1.S1_at    | MmugDNA.6093.1  | 8.62  | 10.03 | 0.39 | 0.12 | -2.65 | 0.006031 | 0.000873 | 0.214263 | 0.047471 |
| MmugDNA.6094.1.S1_at    | MmugDNA.6094.1  | 4.32  | 4.42  | 0.05 | 0.05 | -1.07 | 0.063478 | 0.053264 | 0.415717 | 0.276463 |
| MmugDNA.6096.1.S1_at    | MmugDNA.6096.1  | 5.54  | 5.54  | 0.11 | 0.36 | -1    | 0.718306 | 0.625691 | 0.890613 | 0.779265 |
| MmugDNA.6098.1.S1_at    | MmugDNA.6098.1  | 5.69  | 4.89  | 0.46 | 0.73 | 1.74  | 0.687033 | 0.358486 | 0.877617 | 0.600011 |
| MmugDNA.6099.1.S1_at    | MmugDNA.6099.1  | 4.11  | 4.18  | 0.3  | 0.31 | -1.05 | 0.31773  | 0.388537 | 0.667521 | 0.622897 |
| MmugDNA.61.1.S1_at      | MmugDNA.61.1    | 3.38  | 3.44  | 0.18 | 0.14 | -1.04 | 0.566665 | 0.566068 | 0.820086 | 0.740228 |
| MmugDNA.610.1.S1_at     | MmugDNA.610.1   | 3.64  | 3.52  | 0.05 | 0.06 | 1.09  | 0.048465 | 0.266326 | 0.38332  | 0.532099 |

|                        |                |       |       |      |      |       |          |          |          |          |
|------------------------|----------------|-------|-------|------|------|-------|----------|----------|----------|----------|
| MmugDNA.6101.1.S1_at   | MmugDNA.6101.1 | 4.23  | 4.21  | 0.07 | 0.02 | 1.01  | 0.577058 | 0.905344 | 0.825346 | 0.946338 |
| MmugDNA.6103.1.S1_at   | MmugDNA.6103.1 | 6.32  | 6.59  | 0.02 | 0.14 | -1.21 | 0.075037 | 0.181612 | 0.435677 | 0.458213 |
| MmugDNA.6105.1.S1_at   | MmugDNA.6105.1 | 7.28  | 7.3   | 0.09 | 0.04 | -1.01 | 0.282491 | 0.807954 | 0.640925 | 0.889436 |
| MmugDNA.6106.1.S1_at   | MmugDNA.6106.1 | 7.84  | 7.8   | 0.59 | 0.17 | 1.02  | 0.782667 | 0.684258 | 0.919991 | 0.815842 |
| MmugDNA.6109.1.S1_s_at | MmugDNA.6109.1 | 9.05  | 9.23  | 0.28 | 0.19 | -1.13 | 0.177544 | 0.109757 | 0.55065  | 0.373701 |
| MmugDNA.611.1.S1_at    | MmugDNA.611.1  | 6.68  | 6.73  | 0.02 | 0.11 | -1.03 | 0.330499 | 0.247329 | 0.677123 | 0.516535 |
| MmugDNA.6112.1.S1_at   | MmugDNA.6112.1 | 3.2   | 3.2   | 0.06 | 0.03 | 1     | 0.24881  | 0.561781 | 0.614173 | 0.737614 |
| MmugDNA.6113.1.S1_at   | MmugDNA.6113.1 | 6.58  | 6.59  | 0.1  | 0.07 | -1.01 | 0.285837 | 0.392535 | 0.643438 | 0.625813 |
| MmugDNA.6114.1.S1_s_at | MmugDNA.6114.1 | 10.16 | 10.44 | 0.11 | 0.16 | -1.21 | 0.158539 | 0.005873 | 0.531563 | 0.10486  |
| MmugDNA.6117.1.S1_at   | MmugDNA.6117.1 | 5.88  | 6.9   | 1.75 | 0.22 | -2.03 | 0.967509 | 0.172424 | 0.98927  | 0.448837 |
| MmugDNA.6118.1.S1_at   | MmugDNA.6118.1 | 4.04  | 4.08  | 0.21 | 0.17 | -1.03 | 0.377437 | 0.54784  | 0.707543 | 0.728723 |
| MmugDNA.6119.1.S1_at   | MmugDNA.6119.1 | 5.34  | 5.15  | 0.12 | 0.15 | 1.14  | 0.18368  | 0.141113 | 0.55651  | 0.414602 |
| MmugDNA.6121.1.S1_at   | MmugDNA.6121.1 | 3.07  | 3.07  | 0.06 | 0.05 | 1     | 0.885381 | 0.404229 | 0.96036  | 0.632691 |
| MmugDNA.6122.1.S1_at   | MmugDNA.6122.1 | 10.27 | 10.11 | 0.13 | 0.11 | 1.12  | 0.166427 | 0.118206 | 0.539168 | 0.386168 |
| MmugDNA.6123.1.S1_at   | MmugDNA.6123.1 | 7.58  | 7.16  | 0.97 | 0.29 | 1.34  | 0.832899 | 0.720183 | 0.94008  | 0.838202 |
| MmugDNA.6124.1.S1_at   | MmugDNA.6124.1 | 7.29  | 6.06  | 0.16 | 0.35 | 2.34  | 0.002944 | 0.003986 | 0.189364 | 0.089791 |
| MmugDNA.6126.1.S1_at   | MmugDNA.6126.1 | 3.41  | 3.53  | 0.12 | 0.13 | -1.09 | 0.227954 | 0.252511 | 0.596782 | 0.521079 |
| MmugDNA.6127.1.S1_s_at | MmugDNA.6127.1 | 9.89  | 9.8   | 0.07 | 0.04 | 1.07  | 0.061947 | 0.249598 | 0.411683 | 0.51865  |
| MmugDNA.6128.1.S1_at   | MmugDNA.6128.1 | 4.61  | 4.54  | 0.22 | 0.17 | 1.05  | 0.407555 | 0.320394 | 0.728672 | 0.572648 |
| MmugDNA.6129.1.S1_at   | MmugDNA.6129.1 | 3.91  | 4.34  | 0.65 | 0.33 | -1.35 | 0.786046 | 0.892103 | 0.921297 | 0.938526 |
| MmugDNA.6130.1.S1_at   | MmugDNA.6130.1 | 5.73  | 5.66  | 0.24 | 0.05 | 1.05  | 0.231042 | 0.398206 | 0.599045 | 0.629257 |
| MmugDNA.6131.1.S1_at   | MmugDNA.6131.1 | 8.37  | 8.97  | 0.14 | 0.1  | -1.52 | 0.003104 | 0.001278 | 0.191107 | 0.055351 |
| MmugDNA.6132.1.S1_at   | MmugDNA.6132.1 | 12.07 | 12.29 | 0.29 | 0.06 | -1.17 | 0.278953 | 0.019518 | 0.637923 | 0.175453 |
| MmugDNA.6134.1.S1_at   | MmugDNA.6134.1 | 4.18  | 4.52  | 0.09 | 0.09 | -1.26 | 0.009421 | 0.013163 | 0.241943 | 0.147338 |
| MmugDNA.6135.1.S1_at   | MmugDNA.6135.1 | 6.26  | 6.39  | 0.39 | 0.03 | -1.09 | 0.425255 | 0.733945 | 0.739948 | 0.845896 |
| MmugDNA.6136.1.S1_at   | MmugDNA.6136.1 | 6.66  | 4.85  | 1.81 | 0.17 | 3.52  | 0.189403 | 0.121294 | 0.560894 | 0.390351 |
| MmugDNA.6137.1.S1_at   | MmugDNA.6137.1 | 5     | 4.68  | 1.3  | 0.74 | 1.24  | 0.872401 | 0.302363 | 0.955759 | 0.560109 |
| MmugDNA.6139.1.S1_at   | MmugDNA.6139.1 | 7.35  | 7.32  | 0.09 | 0.04 | 1.03  | 0.273595 | 0.329737 | 0.633298 | 0.578874 |
| MmugDNA.614.1.S1_at    | MmugDNA.614.1  | 12.26 | 11.91 | 0.35 | 0.18 | 1.27  | 0.14912  | 0.152069 | 0.523005 | 0.42682  |
| MmugDNA.6140.1.S1_at   | MmugDNA.6140.1 | 6.6   | 6.52  | 0.3  | 0.1  | 1.06  | 0.463956 | 0.170053 | 0.762325 | 0.446789 |
| MmugDNA.6141.1.S1_at   | MmugDNA.6141.1 | 8.33  | 7.93  | 0.47 | 0.13 | 1.32  | 0.234344 | 0.01786  | 0.601622 | 0.168774 |
| MmugDNA.6142.1.S1_at   | MmugDNA.6142.1 | 13.41 | 12.69 | 2.76 | 0.24 | 1.64  | 0.674836 | 0.474274 | 0.872212 | 0.68135  |
| MmugDNA.6147.1.S1_at   | MmugDNA.6147.1 | 11.5  | 11.8  | 0.14 | 0.05 | -1.23 | 0.042846 | 0.01251  | 0.370529 | 0.144302 |
| MmugDNA.6147.1.S1_s_at | MmugDNA.6147.1 | 7.66  | 8.04  | 0.15 | 0.08 | -1.3  | 0.018081 | 0.00938  | 0.295257 | 0.127634 |
| MmugDNA.6149.1.S1_at   | MmugDNA.6149.1 | 6.03  | 6.08  | 0.17 | 0.29 | -1.03 | 0.361609 | 0.504198 | 0.698663 | 0.701451 |
| MmugDNA.6153.1.S1_at   | MmugDNA.6153.1 | 3.49  | 4.52  | 0.35 | 0.26 | -2.04 | 0.048728 | 0.069276 | 0.384018 | 0.309468 |
| MmugDNA.6154.1.S1_at   | MmugDNA.6154.1 | 6.4   | 6.24  | 0.09 | 0.04 | 1.12  | 0.055013 | 0.060874 | 0.397577 | 0.293488 |
| MmugDNA.6155.1.S1_at   | MmugDNA.6155.1 | 6.05  | 5.91  | 0.48 | 0.06 | 1.11  | 0.183053 | 0.184427 | 0.555932 | 0.460468 |
| MmugDNA.6156.1.S1_at   | MmugDNA.6156.1 | 2.75  | 2.72  | 0.06 | 0.06 | 1.02  | 0.404167 | 0.443754 | 0.726203 | 0.661433 |
| MmugDNA.6157.1.S1_at   | MmugDNA.6157.1 | 6.12  | 5.3   | 0.82 | 0.38 | 1.76  | 0.289368 | 0.326572 | 0.646114 | 0.576612 |
| MmugDNA.6158.1.S1_at   | MmugDNA.6158.1 | 6.49  | 6.54  | 0.16 | 0.05 | -1.03 | 0.428565 | 0.540646 | 0.741963 | 0.724475 |
| MmugDNA.6160.1.S1_at   | MmugDNA.6160.1 | 4.59  | 4.28  | 0.11 | 0.32 | 1.24  | 0.286073 | 0.381415 | 0.64358  | 0.617681 |
| MmugDNA.6162.1.S1_at   | MmugDNA.6162.1 | 5.41  | 5.43  | 0.12 | 0.18 | -1.01 | 0.692211 | 0.686289 | 0.880095 | 0.816911 |

|                        |                |       |       |      |      |       |          |          |          |          |
|------------------------|----------------|-------|-------|------|------|-------|----------|----------|----------|----------|
| MmugDNA.6163.1.S1_at   | MmugDNA.6163.1 | 6.34  | 6.49  | 0.88 | 0.2  | -1.11 | 0.514337 | 0.153871 | 0.790322 | 0.428509 |
| MmugDNA.6165.1.S1_at   | MmugDNA.6165.1 | 6.31  | 6.18  | 0.13 | 0.12 | 1.09  | 0.122866 | 0.538885 | 0.496242 | 0.723368 |
| MmugDNA.6166.1.S1_at   | MmugDNA.6166.1 | 9.68  | 9.7   | 0.37 | 0.19 | -1.01 | 0.646628 | 0.787371 | 0.859193 | 0.876986 |
| MmugDNA.6168.1.S1_at   | MmugDNA.6168.1 | 9.97  | 9.95  | 0.32 | 0.08 | 1.01  | 0.904249 | 0.190946 | 0.967773 | 0.46629  |
| MmugDNA.6169.1.S1_at   | MmugDNA.6169.1 | 4.08  | 4.47  | 0.47 | 0.32 | -1.32 | 0.590932 | 0.402755 | 0.833168 | 0.631555 |
| MmugDNA.6171.1.S1_at   | MmugDNA.6171.1 | 8.21  | 7.46  | 0.25 | 0.44 | 1.68  | 0.058131 | 0.006607 | 0.403716 | 0.110146 |
| MmugDNA.6172.1.S1_at   | MmugDNA.6172.1 | 4.54  | 4.95  | 0.38 | 0.39 | -1.32 | 0.119835 | 0.466534 | 0.493259 | 0.676374 |
| MmugDNA.6173.1.S1_at   | MmugDNA.6173.1 | 7     | 6.87  | 0.26 | 0.05 | 1.09  | 0.557563 | 0.5602   | 0.814872 | 0.736544 |
| MmugDNA.6174.1.S1_at   | MmugDNA.6174.1 | 12.36 | 12.15 | 0.08 | 0.09 | 1.16  | 0.024745 | 0.010747 | 0.31972  | 0.135385 |
| MmugDNA.6175.1.S1_at   | MmugDNA.6175.1 | 7.65  | 5.93  | 0.8  | 0.53 | 3.29  | 0.063839 | 0.073551 | 0.416646 | 0.316874 |
| MmugDNA.6177.1.S1_at   | MmugDNA.6177.1 | 6.22  | 5.85  | 0.64 | 0.59 | 1.3   | 0.607219 | 0.457661 | 0.840749 | 0.670889 |
| MmugDNA.618.1.S1_at    | MmugDNA.618.1  | 4.93  | 5.09  | 0.55 | 0.19 | -1.12 | 0.945785 | 0.717522 | 0.981128 | 0.836463 |
| MmugDNA.6180.1.S1_at   | MmugDNA.6180.1 | 3.88  | 3.96  | 0.14 | 0.13 | -1.06 | 0.840171 | 0.796531 | 0.943127 | 0.882707 |
| MmugDNA.6181.1.S1_at   | MmugDNA.6181.1 | 9.58  | 9.05  | 0.22 | 0.09 | 1.44  | 0.008092 | 0.016813 | 0.232005 | 0.164291 |
| MmugDNA.6183.1.S1_at   | MmugDNA.6183.1 | 3.51  | 3.52  | 0.1  | 0.07 | -1    | 0.761176 | 0.674771 | 0.910397 | 0.810023 |
| MmugDNA.6184.1.S1_at   | MmugDNA.6184.1 | 3.4   | 3.22  | 0.1  | 0.17 | 1.13  | 0.327867 | 0.328575 | 0.67537  | 0.578148 |
| MmugDNA.6185.1.S1_at   | MmugDNA.6185.1 | 9.43  | 10.05 | 0.43 | 0.07 | -1.54 | 0.092732 | 0.10862  | 0.461192 | 0.372171 |
| MmugDNA.6186.1.S1_at   | MmugDNA.6186.1 | 4.5   | 4.74  | 0.11 | 0.17 | -1.18 | 0.092785 | 0.397604 | 0.461351 | 0.628973 |
| MmugDNA.6189.1.S1_at   | MmugDNA.6189.1 | 4.31  | 4.11  | 0.08 | 0.13 | 1.15  | 0.079257 | 0.077129 | 0.442056 | 0.322675 |
| MmugDNA.619.1.S1_at    | MmugDNA.619.1  | 5.1   | 5.12  | 0.29 | 0.45 | -1.02 | 0.556398 | 0.540262 | 0.814093 | 0.724221 |
| MmugDNA.6190.1.S1_at   | MmugDNA.6190.1 | 4.06  | 3.96  | 0.08 | 0.03 | 1.07  | 0.095201 | 0.112118 | 0.464131 | 0.377398 |
| MmugDNA.6191.1.S1_at   | MmugDNA.6191.1 | 6.16  | 6.15  | 0.05 | 0.06 | 1     | 0.67026  | 0.824882 | 0.86987  | 0.899427 |
| MmugDNA.6192.1.S1_at   | MmugDNA.6192.1 | 7.99  | 7.68  | 0.63 | 0.46 | 1.25  | 0.866446 | 0.990265 | 0.953112 | 0.99446  |
| MmugDNA.6193.1.S1_at   | MmugDNA.6193.1 | 4.81  | 3.72  | 0.62 | 0.17 | 2.14  | 0.052196 | 0.302101 | 0.392084 | 0.560071 |
| MmugDNA.6194.1.S1_s_at | MmugDNA.6194.1 | 6.69  | 6.98  | 0.33 | 0.21 | -1.22 | 0.184226 | 0.021083 | 0.55696  | 0.181869 |
| MmugDNA.6195.1.S1_at   | MmugDNA.6195.1 | 5.73  | 5.55  | 0.06 | 0.06 | 1.13  | 0.052303 | 0.168339 | 0.392084 | 0.444985 |
| MmugDNA.6196.1.S1_at   | MmugDNA.6196.1 | 8.94  | 9.13  | 0.45 | 0.05 | -1.14 | 0.547147 | 0.126974 | 0.808925 | 0.397729 |
| MmugDNA.6197.1.S1_at   | MmugDNA.6197.1 | 7.63  | 8.64  | 0.47 | 0.19 | -2.01 | 0.015882 | 0.151118 | 0.284461 | 0.425795 |
| MmugDNA.6198.1.S1_at   | MmugDNA.6198.1 | 7.47  | 7.6   | 0.19 | 0.06 | -1.1  | 0.07201  | 0.001133 | 0.431899 | 0.053052 |
| MmugDNA.62.1.S1_at     | MmugDNA.62.1   | 7.12  | 6.8   | 1.84 | 0.37 | 1.25  | 0.998273 | 0.321185 | 0.999447 | 0.573111 |
| MmugDNA.620.1.S1_at    | MmugDNA.620.1  | 4.52  | 4.69  | 1.05 | 0.36 | -1.12 | 0.564756 | 0.732348 | 0.81898  | 0.844986 |
| MmugDNA.6200.1.S1_at   | MmugDNA.6200.1 | 4.49  | 4.5   | 0.2  | 0.17 | -1.01 | 0.606991 | 0.242469 | 0.840743 | 0.512835 |
| MmugDNA.6201.1.S1_at   | MmugDNA.6201.1 | 5.65  | 5.83  | 0.64 | 0.34 | -1.13 | 0.624797 | 0.725483 | 0.848966 | 0.841043 |
| MmugDNA.6204.1.S1_at   | MmugDNA.6204.1 | 6.87  | 6.65  | 0.13 | 0.06 | 1.17  | 0.144877 | 0.336213 | 0.520198 | 0.583736 |
| MmugDNA.6207.1.S1_at   | MmugDNA.6207.1 | 4.66  | 4.67  | 0.04 | 0.09 | -1.01 | 0.785447 | 0.589888 | 0.921144 | 0.755987 |
| MmugDNA.6208.1.S1_at   | MmugDNA.6208.1 | 6.11  | 5.59  | 0.17 | 0.1  | 1.43  | 0.004389 | 0.003388 | 0.198874 | 0.083859 |
| MmugDNA.6208.1.S1_s_at | MmugDNA.6208.1 | 9.19  | 8.45  | 0.36 | 0.16 | 1.67  | 0.032533 | 0.007797 | 0.344478 | 0.117765 |
| MmugDNA.6209.1.S1_at   | MmugDNA.6209.1 | 5.88  | 5.6   | 0.1  | 0.08 | 1.22  | 0.042578 | 0.093826 | 0.369605 | 0.350281 |
| MmugDNA.621.1.S1_at    | MmugDNA.621.1  | 11.04 | 11.04 | 0.2  | 0.06 | 1     | 0.924351 | 0.769914 | 0.974666 | 0.866376 |
| MmugDNA.6211.1.S1_at   | MmugDNA.6211.1 | 6.44  | 5.9   | 0.14 | 0.16 | 1.45  | 0.019734 | 0.107942 | 0.302298 | 0.371008 |
| MmugDNA.6213.1.S1_at   | MmugDNA.6213.1 | 9.52  | 9.54  | 0.21 | 0.29 | -1.01 | 0.942644 | 0.248132 | 0.98031  | 0.517567 |
| MmugDNA.6214.1.S1_at   | MmugDNA.6214.1 | 4.79  | 4.34  | 0.24 | 0.17 | 1.36  | 0.272561 | 0.384588 | 0.632303 | 0.62023  |
| MmugDNA.6215.1.S1_at   | MmugDNA.6215.1 | 7.04  | 6.81  | 0.39 | 0.15 | 1.17  | 0.383011 | 0.514449 | 0.71112  | 0.707693 |

|                      |                |       |       |      |      |       |          |          |          |          |
|----------------------|----------------|-------|-------|------|------|-------|----------|----------|----------|----------|
| MmugDNA.6216.1.S1_at | MmugDNA.6216.1 | 5.87  | 6.15  | 0.12 | 0.17 | -1.21 | 0.123136 | 0.536239 | 0.496589 | 0.721587 |
| MmugDNA.6217.1.S1_at | MmugDNA.6217.1 | 4.8   | 4.52  | 0.19 | 0.05 | 1.21  | 0.087125 | 0.066328 | 0.454785 | 0.303194 |
| MmugDNA.6218.1.S1_at | MmugDNA.6218.1 | 7.89  | 8.66  | 0.34 | 0.04 | -1.7  | 0.018461 | 0.018697 | 0.297469 | 0.171742 |
| MmugDNA.6219.1.S1_at | MmugDNA.6219.1 | 7.65  | 7.18  | 0.03 | 0.21 | 1.39  | 0.016626 | 0.017109 | 0.287478 | 0.165744 |
| MmugDNA.622.1.S1_at  | MmugDNA.622.1  | 5.06  | 5.14  | 0.1  | 0.18 | -1.05 | 0.827745 | 0.293643 | 0.938082 | 0.553638 |
| MmugDNA.6220.1.S1_at | MmugDNA.6220.1 | 4.38  | 4.46  | 0.41 | 0.17 | -1.06 | 0.497232 | 0.350438 | 0.781055 | 0.594161 |
| MmugDNA.6222.1.S1_at | MmugDNA.6222.1 | 6.87  | 6.88  | 0.04 | 0.07 | -1    | 0.698502 | 0.886801 | 0.882799 | 0.935553 |
| MmugDNA.6225.1.S1_at | MmugDNA.6225.1 | 4.5   | 4.46  | 0.16 | 0.27 | 1.03  | 0.808045 | 0.949634 | 0.930458 | 0.971202 |
| MmugDNA.6226.1.S1_at | MmugDNA.6226.1 | 5.31  | 6.32  | 0.63 | 0.29 | -2.02 | 0.147498 | 0.257714 | 0.521578 | 0.525343 |
| MmugDNA.6227.1.S1_at | MmugDNA.6227.1 | 11.88 | 9.44  | 0.52 | 0.58 | 5.43  | 0.006258 | 0.000688 | 0.218069 | 0.044166 |
| MmugDNA.6228.1.S1_at | MmugDNA.6228.1 | 10.28 | 10.1  | 0.23 | 0.09 | -1.13 | 0.16047  | 0.390031 | 0.533672 | 0.624002 |
| MmugDNA.623.1.S1_at  | MmugDNA.623.1  | 12.79 | 12.96 | 0.19 | 0.01 | -1.12 | 0.221809 | 0.38372  | 0.591382 | 0.619703 |
| MmugDNA.6231.1.S1_at | MmugDNA.6231.1 | 4.69  | 4.15  | 0.37 | 0.05 | 1.46  | 0.125414 | 0.063647 | 0.499523 | 0.298815 |
| MmugDNA.6232.1.S1_at | MmugDNA.6232.1 | 11.52 | 11.46 | 0.21 | 0.05 | 1.04  | 0.716301 | 0.913182 | 0.889759 | 0.951134 |
| MmugDNA.6233.1.S1_at | MmugDNA.6233.1 | 5.12  | 5.5   | 0.27 | 0.62 | -1.3  | 0.482734 | 0.444546 | 0.772552 | 0.662072 |
| MmugDNA.6234.1.S1_at | MmugDNA.6234.1 | 5.04  | 4.66  | 0.23 | 0.09 | 1.3   | 0.022232 | 0.023401 | 0.310495 | 0.191765 |
| MmugDNA.6236.1.S1_at | MmugDNA.6236.1 | 6.29  | 5.78  | 0.77 | 0.18 | 1.42  | 0.991215 | 0.050689 | 0.996655 | 0.270317 |
| MmugDNA.6237.1.S1_at | MmugDNA.6237.1 | 7.53  | 7.21  | 1.12 | 1.14 | 1.25  | 0.386618 | 0.553421 | 0.713641 | 0.732583 |
| MmugDNA.6238.1.S1_at | MmugDNA.6238.1 | 8.37  | 7.74  | 0.47 | 0.34 | 1.54  | 0.310245 | 0.07563  | 0.662073 | 0.320061 |
| MmugDNA.624.1.S1_at  | MmugDNA.624.1  | 5.4   | 5.46  | 0.17 | 0.18 | -1.04 | 0.775689 | 0.781818 | 0.916804 | 0.873524 |
| MmugDNA.6240.1.S1_at | MmugDNA.6240.1 | 3.37  | 3.28  | 0.18 | 0.19 | 1.06  | 0.191667 | 0.232973 | 0.562859 | 0.50445  |
| MmugDNA.6244.1.S1_at | MmugDNA.6244.1 | 8.21  | 8.22  | 0.2  | 0.02 | -1.01 | 0.353047 | 0.796089 | 0.693013 | 0.882495 |
| MmugDNA.6246.1.S1_at | MmugDNA.6246.1 | 3.69  | 4.14  | 0.54 | 0.21 | -1.37 | 0.608295 | 0.151828 | 0.841093 | 0.426505 |
| MmugDNA.6248.1.S1_at | MmugDNA.6248.1 | 4.66  | 4.58  | 0.23 | 0.18 | 1.06  | 0.567981 | 0.247513 | 0.820586 | 0.516858 |
| MmugDNA.6249.1.S1_at | MmugDNA.6249.1 | 9.35  | 9.13  | 0.06 | 0.23 | 1.16  | 0.410411 | 0.386201 | 0.730749 | 0.621435 |
| MmugDNA.625.1.S1_at  | MmugDNA.625.1  | 4.79  | 4.81  | 0.04 | 0.01 | -1.01 | 0.184245 | 0.477333 | 0.55696  | 0.683422 |
| MmugDNA.6251.1.S1_at | MmugDNA.6251.1 | 6.04  | 6.07  | 0.19 | 0.27 | -1.02 | 0.825449 | 0.867457 | 0.937289 | 0.924699 |
| MmugDNA.6253.1.S1_at | MmugDNA.6253.1 | 4.2   | 4.22  | 0.05 | 0.16 | -1.01 | 0.723451 | 0.216151 | 0.892813 | 0.489701 |
| MmugDNA.6254.1.S1_at | MmugDNA.6254.1 | 3.56  | 3.62  | 0.09 | 0.14 | -1.04 | 0.770993 | 0.960459 | 0.91434  | 0.977507 |
| MmugDNA.6255.1.S1_at | MmugDNA.6255.1 | 4     | 3.74  | 0.34 | 0.19 | 1.2   | 0.852851 | 0.153321 | 0.94811  | 0.428139 |
| MmugDNA.6257.1.S1_at | MmugDNA.6257.1 | 9.5   | 10.39 | 0.98 | 0.04 | -1.86 | 0.583606 | 0.310826 | 0.829134 | 0.565854 |
| MmugDNA.6258.1.S1_at | MmugDNA.6258.1 | 7.34  | 7.63  | 0.36 | 0.1  | -1.22 | 0.084534 | 0.08845  | 0.451141 | 0.341881 |
| MmugDNA.6259.1.S1_at | MmugDNA.6259.1 | 8.09  | 7.54  | 0.2  | 0.51 | 1.47  | 0.455155 | 0.557767 | 0.75733  | 0.735229 |
| MmugDNA.626.1.S1_at  | MmugDNA.626.1  | 4.37  | 4.23  | 0.2  | 0.13 | 1.1   | 0.144755 | 0.285849 | 0.520103 | 0.547484 |
| MmugDNA.6261.1.S1_at | MmugDNA.6261.1 | 5.28  | 5.37  | 0.07 | 0.14 | -1.07 | 0.776108 | 0.525805 | 0.917022 | 0.715217 |
| MmugDNA.6262.1.S1_at | MmugDNA.6262.1 | 3.32  | 3.25  | 0.12 | 0.1  | 1.05  | 0.921993 | 0.864678 | 0.973661 | 0.923276 |
| MmugDNA.6265.1.S1_at | MmugDNA.6265.1 | 5.24  | 5.02  | 0.19 | 0.13 | 1.17  | 0.380822 | 0.493135 | 0.709728 | 0.694001 |
| MmugDNA.6266.1.S1_at | MmugDNA.6266.1 | 3.33  | 3.29  | 0.25 | 0.07 | 1.03  | 0.246998 | 0.441016 | 0.612582 | 0.659267 |
| MmugDNA.6268.1.S1_at | MmugDNA.6268.1 | 7.02  | 6.55  | 0.91 | 0.22 | 1.38  | 0.906978 | 0.921648 | 0.96848  | 0.955801 |
| MmugDNA.627.1.S1_at  | MmugDNA.627.1  | 4.83  | 5.01  | 0.13 | 0.08 | -1.13 | 0.335524 | 0.123268 | 0.681086 | 0.393358 |
| MmugDNA.6271.1.S1_at | MmugDNA.6271.1 | 3.18  | 3.07  | 0.11 | 0.14 | 1.08  | 0.474258 | 0.57923  | 0.767938 | 0.748973 |
| MmugDNA.6272.1.S1_at | MmugDNA.6272.1 | 9.06  | 9.06  | 3.39 | 0.33 | 1     | 0.756933 | 0.33675  | 0.908337 | 0.584083 |
| MmugDNA.6273.1.S1_at | MmugDNA.6273.1 | 6.77  | 6.44  | 0.2  | 0.08 | 1.26  | 0.040909 | 0.090996 | 0.365447 | 0.345755 |

|                        |                |       |       |      |      |       |          |          |          |          |
|------------------------|----------------|-------|-------|------|------|-------|----------|----------|----------|----------|
| MmugDNA.6274.1.S1_at   | MmugDNA.6274.1 | 5.89  | 5.72  | 0.11 | 0.08 | 1.13  | 0.037381 | 0.034863 | 0.357066 | 0.230926 |
| MmugDNA.6275.1.S1_at   | MmugDNA.6275.1 | 8.91  | 8.9   | 0.73 | 0.16 | 1.01  | 0.997112 | 0.761179 | 0.998926 | 0.86123  |
| MmugDNA.6276.1.S1_at   | MmugDNA.6276.1 | 4.54  | 4.54  | 0.08 | 0.05 | 1     | 0.376405 | 0.93962  | 0.706889 | 0.965668 |
| MmugDNA.6278.1.S1_at   | MmugDNA.6278.1 | 5.5   | 5.35  | 0.07 | 0.07 | 1.11  | 0.043705 | 0.020916 | 0.372554 | 0.181415 |
| MmugDNA.6279.1.S1_at   | MmugDNA.6279.1 | 3.94  | 3.98  | 0.1  | 0.25 | -1.03 | 0.338191 | 0.480332 | 0.682759 | 0.68574  |
| MmugDNA.628.1.S1_at    | MmugDNA.628.1  | 5.57  | 5.69  | 0.25 | 0.11 | -1.09 | 0.269342 | 0.176988 | 0.629582 | 0.453416 |
| MmugDNA.6280.1.S1_at   | MmugDNA.6280.1 | 4.15  | 4.53  | 0.29 | 0.36 | -1.3  | 0.561399 | 0.324522 | 0.817219 | 0.57507  |
| MmugDNA.6281.1.S1_at   | MmugDNA.6281.1 | 5.41  | 5.26  | 0.11 | 0.05 | 1.11  | 0.259539 | 0.273653 | 0.622626 | 0.538093 |
| MmugDNA.6283.1.S1_at   | MmugDNA.6283.1 | 10.45 | 10.58 | 0.14 | 0.11 | -1.09 | 0.382783 | 0.134358 | 0.710926 | 0.406603 |
| MmugDNA.6285.1.S1_at   | MmugDNA.6285.1 | 6.6   | 6.45  | 0.17 | 0.09 | 1.11  | 0.174739 | 0.166803 | 0.548031 | 0.443274 |
| MmugDNA.6288.1.S1_at   | MmugDNA.6288.1 | 5.45  | 5.29  | 1.05 | 0.19 | -1.12 | 0.57593  | 0.222979 | 0.825043 | 0.495821 |
| MmugDNA.6289.1.S1_at   | MmugDNA.6289.1 | 12.39 | 12.07 | 0.17 | 0    | 1.24  | 0.104018 | 0.055338 | 0.474656 | 0.281048 |
| MmugDNA.629.1.S1_at    | MmugDNA.629.1  | 4.42  | 4.24  | 0.1  | 0.06 | 1.14  | 0.015274 | 0.166141 | 0.280663 | 0.442694 |
| MmugDNA.6290.1.S1_at   | MmugDNA.6290.1 | 6.75  | 6.66  | 0.15 | 0.12 | 1.07  | 0.349692 | 0.478945 | 0.690721 | 0.684806 |
| MmugDNA.6291.1.S1_at   | MmugDNA.6291.1 | 7.31  | 7.22  | 0.42 | 0.21 | 1.06  | 0.4859   | 0.827843 | 0.774427 | 0.90116  |
| MmugDNA.6292.1.S1_at   | MmugDNA.6292.1 | 5.06  | 5.73  | 1.12 | 0.56 | -1.59 | 0.665699 | 0.450686 | 0.868043 | 0.665844 |
| MmugDNA.6293.1.S1_at   | MmugDNA.6293.1 | 3.23  | 3     | 0.1  | 0.1  | 1.18  | 0.115371 | 0.10584  | 0.488677 | 0.368111 |
| MmugDNA.6294.1.S1_at   | MmugDNA.6294.1 | 5.47  | 5.14  | 0.12 | 0.11 | 1.25  | 0.066362 | 0.146087 | 0.422255 | 0.420092 |
| MmugDNA.6296.1.S1_at   | MmugDNA.6296.1 | 10.47 | 10.34 | 0.2  | 0.08 | 1.09  | 0.299399 | 0.557553 | 0.653793 | 0.73509  |
| MmugDNA.6297.1.S1_at   | MmugDNA.6297.1 | 3.39  | 3.33  | 0.05 | 0.06 | 1.04  | 0.509097 | 0.31263  | 0.787471 | 0.567268 |
| MmugDNA.6298.1.S1_at   | MmugDNA.6298.1 | 3.93  | 3.73  | 0.1  | 0.09 | 1.15  | 0.083418 | 0.165026 | 0.449441 | 0.44123  |
| MmugDNA.6299.1.S1_at   | MmugDNA.6299.1 | 9.62  | 10.13 | 0.53 | 0.05 | -1.43 | 0.537221 | 0.009611 | 0.80265  | 0.129157 |
| MmugDNA.63.1.S1_at     | MmugDNA.63.1   | 4.11  | 4.33  | 0.13 | 0.09 | -1.16 | 0.259919 | 0.334635 | 0.622946 | 0.582581 |
| MmugDNA.630.1.S1_at    | MmugDNA.630.1  | 5.67  | 5.64  | 0.13 | 0.03 | 1.02  | 0.344257 | 0.598722 | 0.686913 | 0.761089 |
| MmugDNA.6300.1.S1_at   | MmugDNA.6300.1 | 7.22  | 7.49  | 0.64 | 0.11 | -1.2  | 0.398136 | 0.422528 | 0.722324 | 0.645745 |
| MmugDNA.6301.1.S1_at   | MmugDNA.6301.1 | 6.44  | 6.13  | 0.36 | 0.5  | 1.24  | 0.517559 | 0.687973 | 0.79217  | 0.817831 |
| MmugDNA.6301.1.S1_s_at | MmugDNA.6301.1 | 9.67  | 9.59  | 0.35 | 0.03 | 1.06  | 0.758971 | 0.414668 | 0.909414 | 0.640456 |
| MmugDNA.6303.1.S1_at   | MmugDNA.6303.1 | 4.43  | 4.48  | 0.03 | 0.38 | -1.03 | 0.600354 | 0.743971 | 0.837848 | 0.851613 |
| MmugDNA.6304.1.S1_at   | MmugDNA.6304.1 | 3.25  | 3.19  | 0.22 | 0.05 | 1.04  | 0.744207 | 0.443417 | 0.902479 | 0.661211 |
| MmugDNA.6305.1.S1_at   | MmugDNA.6305.1 | 4.32  | 3.91  | 0.1  | 0.19 | 1.33  | 0.066863 | 0.081296 | 0.422979 | 0.329351 |
| MmugDNA.6307.1.S1_at   | MmugDNA.6307.1 | 5.87  | 5.88  | 0.1  | 0.05 | -1.01 | 0.783215 | 0.576091 | 0.920185 | 0.74698  |
| MmugDNA.6308.1.S1_at   | MmugDNA.6308.1 | 4.44  | 4.46  | 0.16 | 0.15 | -1.02 | 0.619701 | 0.161555 | 0.84683  | 0.43767  |
| MmugDNA.6309.1.S1_at   | MmugDNA.6309.1 | 4.69  | 4.86  | 0.25 | 0    | -1.12 | 0.822243 | 0.710127 | 0.935933 | 0.831904 |
| MmugDNA.631.1.S1_at    | MmugDNA.631.1  | 3.52  | 3.53  | 0.14 | 0.25 | -1.01 | 0.943669 | 0.89306  | 0.980562 | 0.939012 |
| MmugDNA.6311.1.S1_at   | MmugDNA.6311.1 | 10.15 | 9.56  | 0.62 | 0.06 | 1.5   | 0.604273 | 0.77866  | 0.839615 | 0.871528 |
| MmugDNA.6312.1.S1_at   | MmugDNA.6312.1 | 4.01  | 4.17  | 0.29 | 0.02 | -1.12 | 0.926716 | 0.94162  | 0.97568  | 0.966897 |
| MmugDNA.6315.1.S1_at   | MmugDNA.6315.1 | 3.76  | 3.58  | 0.09 | 0.1  | 1.13  | 0.435934 | 0.104906 | 0.745983 | 0.366451 |
| MmugDNA.632.1.S1_at    | MmugDNA.632.1  | 7.31  | 7.26  | 0.18 | 0.07 | 1.04  | 0.439469 | 0.366747 | 0.748205 | 0.6065   |
| MmugDNA.6320.1.S1_at   | MmugDNA.6320.1 | 6.06  | 7.14  | 0.47 | 0.16 | -2.11 | 0.067185 | 0.059059 | 0.42323  | 0.289927 |
| MmugDNA.6321.1.S1_at   | MmugDNA.6321.1 | 6.6   | 6.56  | 0.09 | 0.11 | 1.03  | 0.297451 | 0.111499 | 0.652772 | 0.376205 |
| MmugDNA.6322.1.S1_at   | MmugDNA.6322.1 | 4.01  | 4.08  | 0.05 | 0.05 | -1.05 | 0.170316 | 0.068894 | 0.543379 | 0.308835 |
| MmugDNA.6323.1.S1_at   | MmugDNA.6323.1 | 5.1   | 5.01  | 0.06 | 0.1  | 1.06  | 0.179822 | 0.583357 | 0.553052 | 0.751729 |
| MmugDNA.6324.1.S1_s_at | MmugDNA.6324.1 | 3.51  | 3.55  | 0.16 | 0.05 | -1.02 | 0.944692 | 0.841526 | 0.980778 | 0.909663 |



|                         |                 |       |       |      |      |       |          |          |          |          |
|-------------------------|-----------------|-------|-------|------|------|-------|----------|----------|----------|----------|
| MmugDNA.6325.1.S1_at    | MmugDNA.6325.1  | 6.79  | 7.17  | 0.43 | 0.05 | -1.3  | 0.67032  | 0.123009 | 0.869878 | 0.392923 |
| MmugDNA.6326.1.S1_at    | MmugDNA.6326.1  | 7.86  | 7.72  | 0.99 | 0.01 | 1.1   | 0.827946 | 0.229597 | 0.938183 | 0.501574 |
| MmugDNA.6327.1.S1_at    | MmugDNA.6327.1  | 4.21  | 4.22  | 0.11 | 0.04 | -1    | 0.397411 | 0.577532 | 0.72174  | 0.747966 |
| MmugDNA.20311.1.S1_s_at | MmugDNA.20311.1 | 10.62 | 10.45 | 0.09 | 0.13 | 1.12  | 0.072772 | 0.077933 | 0.433332 | 0.324277 |
| MmugDNA.6330.1.S1_at    | MmugDNA.6330.1  | 3.83  | 3.77  | 0.06 | 0.09 | 1.04  | 0.884031 | 0.802004 | 0.959789 | 0.885995 |
| MmugDNA.6331.1.S1_at    | MmugDNA.6331.1  | 6.57  | 6.94  | 0.47 | 0.06 | -1.3  | 0.25846  | 0.12424  | 0.622213 | 0.394547 |
| MmugDNA.6333.1.S1_at    | MmugDNA.6333.1  | 5.99  | 6.79  | 0.66 | 0.31 | -1.75 | 0.055543 | 0.465437 | 0.398786 | 0.675748 |
| MmugDNA.6334.1.S1_at    | MmugDNA.6334.1  | 4.8   | 4.54  | 1.46 | 0.26 | 1.2   | 0.225402 | 0.277068 | 0.594611 | 0.541087 |
| MmugDNA.6335.1.S1_at    | MmugDNA.6335.1  | 6.17  | 6.2   | 0.11 | 0.12 | -1.02 | 0.349592 | 0.769777 | 0.690595 | 0.866333 |
| MmugDNA.6336.1.S1_at    | MmugDNA.6336.1  | 8.49  | 8.23  | 0.25 | 0.1  | 1.2   | 0.675158 | 0.495388 | 0.872479 | 0.695435 |
| MmugDNA.6337.1.S1_at    | MmugDNA.6337.1  | 3.77  | 3.73  | 0.05 | 0.08 | -1.03 | 0.892125 | 0.508859 | 0.962988 | 0.703878 |
| MmugDNA.6338.1.S1_at    | MmugDNA.6338.1  | 8.17  | 7.49  | 0.99 | 0.06 | 1.6   | 0.289402 | 0.440826 | 0.646114 | 0.659138 |
| MmugDNA.6339.1.S1_at    | MmugDNA.6339.1  | 5.76  | 5.71  | 0.05 | 0.05 | 1.03  | 0.601981 | 0.219579 | 0.838675 | 0.493192 |
| MmugDNA.634.1.S1_at     | MmugDNA.634.1   | 5.85  | 5.87  | 0.15 | 0.05 | -1.01 | 0.928779 | 0.678735 | 0.976332 | 0.812378 |
| MmugDNA.6340.1.S1_at    | MmugDNA.6340.1  | 8.57  | 8.87  | 0.57 | 0.11 | -1.23 | 0.352844 | 0.562425 | 0.692857 | 0.738025 |
| MmugDNA.6341.1.S1_at    | MmugDNA.6341.1  | 3.44  | 3.48  | 0.31 | 0.05 | -1.03 | 0.409222 | 0.645097 | 0.72983  | 0.792025 |
| MmugDNA.6348.1.S1_at    | MmugDNA.6348.1  | 3.94  | 3.95  | 0.09 | 0.03 | -1.01 | 0.858974 | 0.947654 | 0.950252 | 0.970284 |
| MmugDNA.635.1.S1_at     | MmugDNA.635.1   | 10.57 | 9.89  | 3.54 | 0.11 | 1.6   | 0.581053 | 0.225807 | 0.827363 | 0.498175 |
| MmugDNA.6351.1.S1_at    | MmugDNA.6351.1  | 4.52  | 4.51  | 0.31 | 0.11 | 1     | 0.56475  | 0.070484 | 0.81898  | 0.311777 |
| MmugDNA.6352.1.S1_at    | MmugDNA.6352.1  | 3.48  | 3.45  | 0.18 | 0.24 | 1.02  | 0.395857 | 0.233146 | 0.720803 | 0.504458 |
| MmugDNA.6353.1.S1_at    | MmugDNA.6353.1  | 8.22  | 7.88  | 0.41 | 0.3  | 1.26  | 0.375899 | 0.049221 | 0.706657 | 0.266697 |
| MmugDNA.6354.1.S1_at    | MmugDNA.6354.1  | 9.81  | 9.72  | 0.38 | 0.02 | 1.07  | 0.834742 | 0.337076 | 0.940727 | 0.584337 |
| MmugDNA.6356.1.S1_at    | MmugDNA.6356.1  | 10.2  | 10.04 | 0.23 | 0.02 | 1.12  | 0.097487 | 0.035355 | 0.466487 | 0.232348 |
| MmugDNA.6357.1.S1_at    | MmugDNA.6357.1  | 7.01  | 7.04  | 0.17 | 0.11 | -1.02 | 0.346589 | 0.177353 | 0.688361 | 0.453742 |
| MmugDNA.6358.1.S1_at    | MmugDNA.6358.1  | 7.33  | 7.38  | 0.3  | 0.11 | -1.03 | 0.643875 | 0.83679  | 0.858276 | 0.906717 |
| MmugDNA.6359.1.S1_at    | MmugDNA.6359.1  | 6.47  | 6.47  | 0.01 | 0.28 | 1     | 0.352776 | 0.538433 | 0.692803 | 0.723141 |
| MmugDNA.636.1.S1_at     | MmugDNA.636.1   | 3.68  | 3.83  | 0.08 | 0.13 | -1.11 | 0.248064 | 0.335174 | 0.613685 | 0.582938 |
| MmugDNA.6361.1.S1_at    | MmugDNA.6361.1  | 7.54  | 8.22  | 0.48 | 0.33 | -1.6  | 0.104738 | 0.079362 | 0.475972 | 0.3267   |
| MmugDNA.6362.1.S1_at    | MmugDNA.6362.1  | 5.86  | 5.62  | 0.12 | 0.13 | 1.19  | 0.31164  | 0.126182 | 0.663441 | 0.396748 |
| MmugDNA.6363.1.S1_at    | MmugDNA.6363.1  | 3.67  | 3.58  | 0.01 | 0.06 | 1.07  | 0.100727 | 0.091719 | 0.471582 | 0.346977 |
| MmugDNA.6364.1.S1_at    | MmugDNA.6364.1  | 7.08  | 6.45  | 0.74 | 0.24 | 1.55  | 0.352199 | 0.733117 | 0.692649 | 0.845523 |
| MmugDNA.6365.1.S1_at    | MmugDNA.6365.1  | 6.16  | 6.01  | 0.08 | 0.04 | 1.11  | 0.033464 | 0.217653 | 0.346442 | 0.491255 |
| MmugDNA.6366.1.S1_at    | MmugDNA.6366.1  | 4.44  | 4.68  | 0.35 | 0.14 | -1.18 | 0.841912 | 0.968544 | 0.943979 | 0.982645 |
| MmugDNA.6367.1.S1_at    | MmugDNA.6367.1  | 10.18 | 10.5  | 0.17 | 0.02 | -1.25 | 0.015413 | 0.005918 | 0.281461 | 0.105276 |
| MmugDNA.6369.1.S1_at    | MmugDNA.6369.1  | 2.98  | 2.83  | 0.1  | 0.05 | 1.11  | 0.152838 | 0.390364 | 0.525753 | 0.624156 |
| MmugDNA.637.1.S1_at     | MmugDNA.637.1   | 2.86  | 2.97  | 0.14 | 0.05 | -1.08 | 0.388186 | 0.075886 | 0.715134 | 0.320523 |
| MmugDNA.6370.1.S1_at    | MmugDNA.6370.1  | 6.94  | 5.78  | 0.13 | 0.5  | 2.23  | 0.014805 | 0.000896 | 0.278525 | 0.047868 |
| MmugDNA.6371.1.S1_at    | MmugDNA.6371.1  | 11.48 | 12    | 0.3  | 0.01 | -1.43 | 0.122866 | 0.037115 | 0.496242 | 0.237165 |
| MmugDNA.6373.1.S1_at    | MmugDNA.6373.1  | 5.45  | 5.27  | 0.25 | 0.19 | 1.13  | 0.281379 | 0.544555 | 0.639917 | 0.726948 |
| MmugDNA.6374.1.S1_at    | MmugDNA.6374.1  | 5.77  | 5.57  | 0.07 | 0.11 | 1.15  | 0.078115 | 0.162424 | 0.440229 | 0.438575 |
| MmugDNA.6375.1.S1_at    | MmugDNA.6375.1  | 7.15  | 6.63  | 0.75 | 0.19 | 1.43  | 0.965916 | 0.043309 | 0.988768 | 0.252847 |
| MmugDNA.6377.1.S1_at    | MmugDNA.6377.1  | 2.97  | 3.02  | 0.02 | 0.03 | -1.03 | 0.360104 | 0.060367 | 0.697741 | 0.292291 |
| MmugDNA.6378.1.S1_at    | MmugDNA.6378.1  | 11.68 | 12.06 | 0.46 | 0.07 | -1.3  | 0.279482 | 0.511274 | 0.638358 | 0.705465 |

|                         |                 |       |       |      |      |       |          |          |          |          |
|-------------------------|-----------------|-------|-------|------|------|-------|----------|----------|----------|----------|
| MmugDNA.40297.1.S1_s_at | MmugDNA.40297.1 | 6.09  | 5.77  | 0.12 | 0.08 | 1.25  | 0.075281 | 0.423313 | 0.436118 | 0.646277 |
| MmugDNA.638.1.S1_at     | MmugDNA.638.1   | 8.18  | 8.07  | 0.25 | 0.04 | 1.08  | 0.863865 | 0.314449 | 0.952043 | 0.568319 |
| MmugDNA.6383.1.S1_at    | MmugDNA.6383.1  | 7.13  | 7.02  | 0.44 | 0.1  | 1.09  | 0.571251 | 0.689194 | 0.822619 | 0.818618 |
| MmugDNA.6383.1.S1_s_at  | MmugDNA.6383.1  | 8.26  | 7.82  | 0.91 | 0.26 | 1.35  | 0.668124 | 0.719829 | 0.868924 | 0.837893 |
| MmugDNA.6384.1.S1_at    | MmugDNA.6384.1  | 10.06 | 10.1  | 0.56 | 0.05 | -1.02 | 0.390096 | 0.544128 | 0.716509 | 0.726618 |
| MmugDNA.6386.1.S1_at    | MmugDNA.6386.1  | 10.84 | 10.74 | 0.27 | 0.08 | 1.07  | 0.5048   | 0.602936 | 0.785075 | 0.76382  |
| MmugDNA.6387.1.S1_at    | MmugDNA.6387.1  | 6.63  | 6.64  | 0.06 | 0.11 | -1.01 | 0.564805 | 0.572828 | 0.819003 | 0.744765 |
| MmugDNA.6387.1.S1_x_at  | MmugDNA.6387.1  | 7.67  | 7.83  | 0.11 | 0.06 | -1.12 | 0.185785 | 0.401438 | 0.55867  | 0.631018 |
| MmugDNA.639.1.S1_at     | MmugDNA.639.1   | 7.83  | 7.78  | 0.33 | 0.17 | 1.04  | 0.358022 | 0.436296 | 0.695993 | 0.655923 |
| MmugDNA.6390.1.S1_at    | MmugDNA.6390.1  | 6.56  | 6.48  | 0.24 | 0.24 | 1.06  | 0.614849 | 0.104228 | 0.844085 | 0.365373 |
| MmugDNA.6391.1.S1_at    | MmugDNA.6391.1  | 6.27  | 2.84  | 1.6  | 0.09 | 10.76 | 0.009475 | 0.001898 | 0.242321 | 0.065035 |
| MmugDNA.6392.1.S1_at    | MmugDNA.6392.1  | 7.97  | 7.87  | 0.2  | 0.1  | 1.07  | 0.224577 | 0.115595 | 0.593868 | 0.382674 |
| MmugDNA.6394.1.S1_at    | MmugDNA.6394.1  | 5.96  | 6.93  | 0.61 | 0.03 | -1.95 | 0.127304 | 0.229745 | 0.50152  | 0.501761 |
| MmugDNA.6395.1.S1_at    | MmugDNA.6395.1  | 6.48  | 6.48  | 0.03 | 0.22 | -1    | 0.659252 | 0.74626  | 0.86514  | 0.85272  |
| MmugDNA.6396.1.S1_at    | MmugDNA.6396.1  | 4.96  | 4.8   | 0.11 | 0.16 | 1.12  | 0.288575 | 0.186439 | 0.645614 | 0.462293 |
| MmugDNA.6397.1.S1_at    | MmugDNA.6397.1  | 4.33  | 4.16  | 0.09 | 0.06 | 1.13  | 0.045038 | 0.076869 | 0.375796 | 0.322368 |
| MmugDNA.6399.1.S1_at    | MmugDNA.6399.1  | 5.62  | 5.2   | 0.57 | 0.33 | 1.34  | 0.241865 | 0.221812 | 0.607952 | 0.494948 |
| MmugDNA.64.1.S1_at      | MmugDNA.64.1    | 4.09  | 3.96  | 0.19 | 0.12 | 1.09  | 0.430979 | 0.686083 | 0.74323  | 0.816777 |
| MmugDNA.640.1.S1_at     | MmugDNA.640.1   | 4.03  | 4.02  | 0.04 | 0.08 | 1.01  | 0.504591 | 0.702443 | 0.784911 | 0.827532 |
| MmugDNA.6400.1.S1_at    | MmugDNA.6400.1  | 7.04  | 7.24  | 0.15 | 0.06 | -1.16 | 0.087881 | 0.049139 | 0.455784 | 0.266534 |
| MmugDNA.6401.1.S1_at    | MmugDNA.6401.1  | 8.52  | 8.69  | 0.34 | 0.04 | -1.13 | 0.635231 | 0.354644 | 0.854522 | 0.597326 |
| MmugDNA.6403.1.S1_at    | MmugDNA.6403.1  | 4.43  | 4.38  | 0.05 | 0.14 | 1.03  | 0.977641 | 0.918078 | 0.99272  | 0.954068 |
| MmugDNA.6404.1.S1_at    | MmugDNA.6404.1  | 2.84  | 3.19  | 0.22 | 0.1  | -1.27 | 0.202671 | 0.283052 | 0.574211 | 0.545692 |
| MmugDNA.6405.1.S1_at    | MmugDNA.6405.1  | 4.55  | 4.54  | 0.44 | 0.21 | 1.01  | 0.624658 | 0.045582 | 0.848871 | 0.257666 |
| MmugDNA.6406.1.S1_at    | MmugDNA.6406.1  | 4.92  | 4.99  | 0.09 | 0.11 | -1.05 | 0.681669 | 0.484095 | 0.875365 | 0.688318 |
| MmugDNA.6407.1.S1_at    | MmugDNA.6407.1  | 6.04  | 5.94  | 0.55 | 0.3  | 1.07  | 0.347255 | 0.558161 | 0.688577 | 0.735437 |
| MmugDNA.6409.1.S1_at    | MmugDNA.6409.1  | 6.41  | 6.36  | 0.41 | 0.23 | 1.04  | 0.445068 | 0.488591 | 0.751854 | 0.691222 |
| MmugDNA.6410.1.S1_at    | MmugDNA.6410.1  | 6.18  | 6.19  | 0.06 | 0.16 | -1    | 0.280437 | 0.274733 | 0.639242 | 0.539195 |
| MmugDNA.6411.1.S1_at    | MmugDNA.6411.1  | 5.78  | 5.44  | 0.69 | 0.14 | 1.26  | 0.633525 | 0.250994 | 0.853549 | 0.519638 |
| MmugDNA.6414.1.S1_at    | MmugDNA.6414.1  | 6.48  | 6.39  | 0.19 | 0.02 | 1.07  | 0.792503 | 0.907653 | 0.923911 | 0.947753 |
| MmugDNA.6415.1.S1_at    | MmugDNA.6415.1  | 8.35  | 8.28  | 0.41 | 0.33 | 1.05  | 0.18109  | 0.062595 | 0.554326 | 0.297022 |
| MmugDNA.6417.1.S1_at    | MmugDNA.6417.1  | 6.67  | 6.12  | 1.15 | 0.11 | 1.46  | 0.361394 | 0.375915 | 0.698618 | 0.61375  |
| MmugDNA.6419.1.S1_at    | MmugDNA.6419.1  | 11.35 | 10.41 | 0.61 | 0.29 | 1.91  | 0.040229 | 0.032801 | 0.36348  | 0.22427  |
| MmugDNA.642.1.S1_at     | MmugDNA.642.1   | 4.8   | 4.75  | 0.05 | 0.02 | 1.04  | 0.163826 | 0.611871 | 0.53663  | 0.769622 |
| MmugDNA.6420.1.S1_at    | MmugDNA.6420.1  | 7.98  | 8.03  | 0.13 | 0.17 | -1.04 | 0.563796 | 0.04275  | 0.818372 | 0.251238 |
| MmugDNA.6421.1.S1_at    | MmugDNA.6421.1  | 3.37  | 3.83  | 0.37 | 0.18 | -1.37 | 0.369732 | 0.558807 | 0.704294 | 0.735887 |
| MmugDNA.6422.1.S1_at    | MmugDNA.6422.1  | 7.17  | 7.14  | 0.15 | 0.02 | 1.02  | 0.681342 | 0.366146 | 0.875176 | 0.605941 |
| MmugDNA.6423.1.S1_at    | MmugDNA.6423.1  | 6.09  | 5.96  | 0.28 | 0.27 | 1.09  | 0.66421  | 0.800366 | 0.867648 | 0.885129 |
| MmugDNA.6424.1.S1_at    | MmugDNA.6424.1  | 6.87  | 5.9   | 0.23 | 0.1  | 1.95  | 0.004146 | 0.060642 | 0.198874 | 0.292849 |
| MmugDNA.6425.1.S1_at    | MmugDNA.6425.1  | 3.01  | 2.87  | 0.07 | 0.06 | 1.11  | 0.022797 | 0.646498 | 0.312286 | 0.792953 |
| MmugDNA.6427.1.S1_at    | MmugDNA.6427.1  | 3.48  | 3.6   | 0.62 | 0.03 | -1.09 | 0.578422 | 0.327199 | 0.826202 | 0.577156 |
| MmugDNA.643.1.S1_at     | MmugDNA.643.1   | 5     | 4.82  | 0.03 | 0.12 | 1.13  | 0.080855 | 0.206064 | 0.444899 | 0.480273 |
| MmugDNA.6432.1.S1_at    | MmugDNA.6432.1  | 9.55  | 9.71  | 0.25 | 0.17 | -1.12 | 0.446653 | 0.018536 | 0.752779 | 0.171256 |

|                         |                 |       |       |      |      |       |          |          |          |          |
|-------------------------|-----------------|-------|-------|------|------|-------|----------|----------|----------|----------|
| MmugDNA.6433.1.S1_at    | MmugDNA.6433.1  | 6.74  | 7.4   | 0.31 | 0.17 | -1.59 | 0.019656 | 0.006069 | 0.302163 | 0.106175 |
| MmugDNA.6433.1.S1_x_at  | MmugDNA.6433.1  | 7.07  | 7.47  | 0.36 | 0.06 | -1.32 | 0.049551 | 0.01932  | 0.385783 | 0.174723 |
| MmugDNA.6434.1.S1_at    | MmugDNA.6434.1  | 5.95  | 5.83  | 0.08 | 0.16 | 1.08  | 0.886342 | 0.036457 | 0.960501 | 0.235423 |
| MmugDNA.6437.1.S1_at    | MmugDNA.6437.1  | 3.73  | 3.78  | 0.29 | 0.06 | -1.04 | 0.470743 | 0.651757 | 0.766191 | 0.796356 |
| MmugDNA.6438.1.S1_at    | MmugDNA.6438.1  | 10.57 | 10.6  | 0.03 | 0.11 | -1.02 | 0.632864 | 0.317516 | 0.853367 | 0.57076  |
| MmugDNA.6441.1.S1_at    | MmugDNA.6441.1  | 5.52  | 6.85  | 1.13 | 0.2  | -2.52 | 0.121678 | 0.07533  | 0.495342 | 0.319507 |
| MmugDNA.6442.1.S1_at    | MmugDNA.6442.1  | 6.55  | 6.46  | 0.09 | 0.01 | 1.06  | 0.06898  | 0.023445 | 0.426361 | 0.191956 |
| MmugDNA.6444.1.S1_at    | MmugDNA.6444.1  | 4.7   | 4.8   | 1    | 0.28 | -1.07 | 0.641651 | 0.366967 | 0.857449 | 0.606583 |
| MmugDNA.6445.1.S1_at    | MmugDNA.6445.1  | 5.61  | 5.85  | 0.35 | 0.25 | -1.18 | 0.503241 | 0.166854 | 0.784127 | 0.443311 |
| MmugDNA.6446.1.S1_at    | MmugDNA.6446.1  | 3.46  | 3.47  | 0.07 | 0.18 | -1.01 | 0.605361 | 0.35544  | 0.839958 | 0.597738 |
| MmugDNA.6447.1.S1_at    | MmugDNA.6447.1  | 6.88  | 6.91  | 0.42 | 0.07 | -1.02 | 0.516893 | 0.696622 | 0.79167  | 0.823776 |
| MmugDNA.6448.1.S1_at    | MmugDNA.6448.1  | 2.81  | 2.68  | 0.07 | 0.12 | 1.09  | 0.214776 | 0.553625 | 0.585205 | 0.732748 |
| MmugDNA.6449.1.S1_at    | MmugDNA.6449.1  | 3.06  | 3.22  | 0.16 | 0.42 | -1.12 | 0.212265 | 0.318195 | 0.582812 | 0.571069 |
| MmugDNA.645.1.S1_at     | MmugDNA.645.1   | 4.95  | 4.95  | 0.03 | 0.02 | -1    | 0.202429 | 0.545403 | 0.573893 | 0.727521 |
| MmugDNA.6451.1.S1_at    | MmugDNA.6451.1  | 7.2   | 7.31  | 0.24 | 0.03 | -1.08 | 0.494109 | 0.467416 | 0.779268 | 0.677085 |
| MmugDNA.6454.1.S1_at    | MmugDNA.6454.1  | 8.07  | 8.29  | 0.27 | 0.09 | -1.16 | 0.513287 | 0.205495 | 0.789812 | 0.479772 |
| MmugDNA.6454.1.S1_x_at  | MmugDNA.6454.1  | 7.58  | 7.96  | 0.38 | 0.12 | -1.3  | 0.715683 | 0.288715 | 0.88943  | 0.549856 |
| MmugDNA.6455.1.S1_at    | MmugDNA.6455.1  | 3.93  | 4.99  | 0.76 | 0.4  | -2.09 | 0.240369 | 0.110714 | 0.60669  | 0.374854 |
| MmugDNA.6459.1.S1_at    | MmugDNA.6459.1  | 3.27  | 3.26  | 0.17 | 0.03 | 1.01  | 0.724513 | 0.826455 | 0.893156 | 0.900317 |
| MmugDNA.6460.1.S1_at    | MmugDNA.6460.1  | 3.15  | 3.15  | 0.06 | 0.12 | 1     | 0.470016 | 0.288056 | 0.765832 | 0.549294 |
| MmugDNA.6461.1.S1_at    | MmugDNA.6461.1  | 3.31  | 3.35  | 0    | 0.02 | -1.02 | 0.202145 | 0.022712 | 0.573629 | 0.188723 |
| MmugDNA.6462.1.S1_at    | MmugDNA.6462.1  | 5.28  | 5.31  | 0.14 | 0.05 | -1.02 | 0.856339 | 0.17379  | 0.949323 | 0.450128 |
| MmugDNA.6463.1.S1_at    | MmugDNA.6463.1  | 10.69 | 10.73 | 0.13 | 0.02 | -1.02 | 0.716097 | 0.393863 | 0.889675 | 0.626608 |
| MmugDNA.6464.1.S1_at    | MmugDNA.6464.1  | 6.46  | 6.54  | 0.08 | 0.63 | -1.06 | 0.7131   | 0.986056 | 0.888234 | 0.992099 |
| MmugDNA.6465.1.S1_at    | MmugDNA.6465.1  | 3.74  | 3.92  | 0.23 | 0.19 | -1.14 | 0.653308 | 0.259764 | 0.862325 | 0.526648 |
| MmugDNA.6466.1.S1_at    | MmugDNA.6466.1  | 6.45  | 7.06  | 0.35 | 0.45 | -1.52 | 0.367623 | 0.010457 | 0.7031   | 0.133651 |
| MmugDNA.6467.1.S1_at    | MmugDNA.6467.1  | 3.47  | 3.7   | 0.15 | 0.16 | -1.17 | 0.121991 | 0.340069 | 0.495677 | 0.58653  |
| MmugDNA.6469.1.S1_at    | MmugDNA.6469.1  | 3.08  | 2.75  | 0.15 | 0.12 | 1.25  | 0.08713  | 0.08196  | 0.454785 | 0.330572 |
| MmugDNA.647.1.S1_at     | MmugDNA.647.1   | 2.75  | 2.71  | 0.13 | 0.04 | 1.02  | 0.907995 | 0.153838 | 0.968878 | 0.428506 |
| MmugDNA.6470.1.S1_at    | MmugDNA.6470.1  | 8.06  | 8.23  | 0.21 | 0.13 | -1.13 | 0.740011 | 0.181894 | 0.900699 | 0.45842  |
| MmugDNA.6471.1.S1_at    | MmugDNA.6471.1  | 8.3   | 8.63  | 0.17 | 0.19 | -1.26 | 0.071948 | 0.009758 | 0.431889 | 0.129958 |
| MmugDNA.36463.1.S1_s_at | MmugDNA.36463.1 | 6.24  | 6.57  | 0.34 | 0.19 | -1.26 | 0.243744 | 0.347683 | 0.609656 | 0.592071 |
| MmugDNA.6474.1.S1_at    | MmugDNA.6474.1  | 3.95  | 3.84  | 0.13 | 0.02 | 1.08  | 0.086724 | 0.159224 | 0.454689 | 0.435217 |
| MmugDNA.6475.1.S1_at    | MmugDNA.6475.1  | 5     | 4.61  | 0.09 | 0.15 | 1.3   | 0.027471 | 0.168863 | 0.327829 | 0.445458 |
| MmugDNA.6476.1.S1_at    | MmugDNA.6476.1  | 3.29  | 3.34  | 0.91 | 1.11 | -1.03 | 0.862023 | 0.790397 | 0.951336 | 0.878857 |
| MmugDNA.6479.1.S1_at    | MmugDNA.6479.1  | 5.12  | 5.37  | 0.12 | 0.28 | -1.19 | 0.119548 | 0.232644 | 0.49288  | 0.504359 |
| MmugDNA.648.1.S1_at     | MmugDNA.648.1   | 3.62  | 3.78  | 0.21 | 0.21 | -1.12 | 0.387176 | 0.648639 | 0.714071 | 0.794382 |
| MmugDNA.6480.1.S1_at    | MmugDNA.6480.1  | 6.03  | 5.73  | 0.22 | 0.05 | 1.23  | 0.077424 | 0.198697 | 0.43937  | 0.473391 |
| MmugDNA.6481.1.S1_at    | MmugDNA.6481.1  | 11.65 | 12.16 | 0.15 | 0.01 | -1.42 | 0.004559 | 0.00919  | 0.201051 | 0.126573 |
| MmugDNA.6483.1.S1_at    | MmugDNA.6483.1  | 10.61 | 10.4  | 1.26 | 0.16 | 1.15  | 0.567034 | 0.615919 | 0.820189 | 0.772359 |
| MmugDNA.6484.1.S1_at    | MmugDNA.6484.1  | 10.95 | 11.2  | 0.27 | 0.24 | -1.19 | 0.6584   | 0.092515 | 0.864624 | 0.348471 |
| MmugDNA.6485.1.S1_at    | MmugDNA.6485.1  | 10.5  | 9.77  | 0.53 | 0.14 | 1.66  | 0.114504 | 0.143106 | 0.487606 | 0.417006 |
| MmugDNA.6486.1.S1_at    | MmugDNA.6486.1  | 4.96  | 5.21  | 0.27 | 0.08 | -1.19 | 0.637933 | 0.278402 | 0.85573  | 0.542169 |

|                         |                 |       |      |      |      |       |          |          |          |          |
|-------------------------|-----------------|-------|------|------|------|-------|----------|----------|----------|----------|
| MmugDNA.6487.1.S1_at    | MmugDNA.6487.1  | 4.95  | 4.8  | 0.23 | 0.17 | 1.11  | 0.720544 | 0.834958 | 0.891614 | 0.90553  |
| MmugDNA.6488.1.S1_at    | MmugDNA.6488.1  | 6.97  | 6.79 | 0.15 | 0.05 | 1.13  | 0.211418 | 0.113262 | 0.582388 | 0.379297 |
| MmugDNA.6489.1.S1_at    | MmugDNA.6489.1  | 8.11  | 7.42 | 0.74 | 0.22 | 1.61  | 0.102739 | 0.046942 | 0.473133 | 0.261301 |
| MmugDNA.649.1.S1_at     | MmugDNA.649.1   | 6.08  | 5.87 | 0.19 | 0.08 | 1.16  | 0.12118  | 0.029277 | 0.494816 | 0.213122 |
| MmugDNA.6490.1.S1_at    | MmugDNA.6490.1  | 11.37 | 10.7 | 0.71 | 0.11 | 1.59  | 0.559167 | 0.568492 | 0.815984 | 0.741984 |
| MmugDNA.6491.1.S1_at    | MmugDNA.6491.1  | 4.22  | 4.22 | 0.16 | 0.08 | 1     | 0.635042 | 0.029714 | 0.854507 | 0.214029 |
| MmugDNA.6492.1.S1_at    | MmugDNA.6492.1  | 9.76  | 9.07 | 0.89 | 0.05 | 1.61  | 0.783682 | 0.883761 | 0.920386 | 0.933691 |
| MmugDNA.6493.1.S1_at    | MmugDNA.6493.1  | 7.46  | 7.19 | 0.25 | 0.13 | 1.2   | 0.202864 | 0.009804 | 0.574251 | 0.130166 |
| MmugDNA.6495.1.S1_at    | MmugDNA.6495.1  | 7.93  | 7.94 | 0.36 | 0.09 | -1.01 | 0.537534 | 0.082068 | 0.802735 | 0.33083  |
| MmugDNA.6496.1.S1_at    | MmugDNA.6496.1  | 4.53  | 4.67 | 0.07 | 0.18 | -1.1  | 0.986601 | 0.610889 | 0.99566  | 0.768948 |
| MmugDNA.6497.1.S1_at    | MmugDNA.6497.1  | 5.16  | 5.53 | 0.29 | 0.3  | -1.29 | 0.072768 | 0.406325 | 0.433332 | 0.634276 |
| MmugDNA.6499.1.S1_at    | MmugDNA.6499.1  | 4.12  | 3.95 | 0.18 | 0.08 | 1.13  | 0.218182 | 0.22464  | 0.588113 | 0.497613 |
| MmugDNA.65.1.S1_at      | MmugDNA.65.1    | 3.51  | 3.42 | 0.07 | 0.23 | 1.06  | 0.310329 | 0.089234 | 0.662102 | 0.34333  |
| MmugDNA.650.1.S1_at     | MmugDNA.650.1   | 7.31  | 7.33 | 0.37 | 0.6  | -1.01 | 0.386503 | 0.558454 | 0.713603 | 0.735631 |
| MmugDNA.6500.1.S1_at    | MmugDNA.6500.1  | 11.51 | 11.4 | 0.47 | 0.1  | 1.08  | 0.497212 | 0.812007 | 0.781055 | 0.891493 |
| MmugDNA.6501.1.S1_at    | MmugDNA.6501.1  | 6.64  | 6.89 | 0.19 | 0.01 | -1.19 | 0.247982 | 0.133372 | 0.613615 | 0.405191 |
| MmugDNA.6502.1.S1_at    | MmugDNA.6502.1  | 6.13  | 5.75 | 0.21 | 0.33 | 1.3   | 0.583301 | 0.146207 | 0.82893  | 0.420181 |
| MmugDNA.6503.1.S1_at    | MmugDNA.6503.1  | 4.98  | 5.1  | 0.2  | 0.12 | -1.09 | 0.237041 | 0.347514 | 0.603903 | 0.592019 |
| MmugDNA.6504.1.S1_at    | MmugDNA.6504.1  | 3.18  | 3.61 | 0.24 | 0.17 | -1.35 | 0.128047 | 0.093517 | 0.502449 | 0.349846 |
| MmugDNA.6507.1.S1_at    | MmugDNA.6507.1  | 3.16  | 3.15 | 0.18 | 0.07 | 1.01  | 0.332053 | 0.484412 | 0.678494 | 0.688478 |
| MmugDNA.6508.1.S1_at    | MmugDNA.6508.1  | 4.36  | 4.2  | 0.07 | 0.08 | 1.11  | 0.022291 | 0.018631 | 0.310495 | 0.171647 |
| MmugDNA.6509.1.S1_at    | MmugDNA.6509.1  | 6.23  | 6.19 | 0.04 | 0.07 | 1.03  | 0.149254 | 0.447302 | 0.523098 | 0.663434 |
| MmugDNA.651.1.S1_at     | MmugDNA.651.1   | 2.9   | 2.9  | 0.04 | 0.03 | -1    | 0.895106 | 0.469138 | 0.964244 | 0.678141 |
| MmugDNA.6511.1.S1_at    | MmugDNA.6511.1  | 4.13  | 3.8  | 0.16 | 0.12 | 1.26  | 0.06742  | 0.064176 | 0.423738 | 0.299592 |
| MmugDNA.19287.1.S1_at   | MmugDNA.19287.1 | 5.49  | 5.43 | 0.21 | 0.07 | 1.05  | 0.202355 | 0.240053 | 0.573821 | 0.510742 |
| MmugDNA.19287.1.S1_s_at | MmugDNA.19287.1 | 7.16  | 6.82 | 0.07 | 0.07 | 1.27  | 0.004301 | 0.034828 | 0.198874 | 0.230811 |
| MmugDNA.6513.1.S1_at    | MmugDNA.6513.1  | 8.47  | 7.25 | 0.43 | 0.21 | 2.34  | 0.013448 | 0.006442 | 0.268462 | 0.109051 |
| MmugDNA.6514.1.S1_at    | MmugDNA.6514.1  | 3.17  | 3.18 | 0.03 | 0.07 | -1    | 0.817634 | 0.991815 | 0.934072 | 0.995392 |
| MmugDNA.6515.1.S1_at    | MmugDNA.6515.1  | 5.25  | 5.22 | 0.24 | 0.15 | 1.02  | 0.894404 | 0.419954 | 0.963846 | 0.643765 |
| MmugDNA.6516.1.S1_at    | MmugDNA.6516.1  | 7.22  | 5.72 | 0.19 | 0.3  | 2.82  | 0.001202 | 0.004246 | 0.156386 | 0.091685 |
| MmugDNA.6518.1.S1_at    | MmugDNA.6518.1  | 3.68  | 3.62 | 0.03 | 0.03 | 1.04  | 0.09337  | 0.115154 | 0.462462 | 0.382052 |
| MmugDNA.6519.1.S1_at    | MmugDNA.6519.1  | 9.57  | 9.69 | 0.09 | 0.1  | -1.08 | 0.079396 | 0.075463 | 0.442296 | 0.319857 |
| MmugDNA.652.1.S1_at     | MmugDNA.652.1   | 3     | 2.99 | 0.12 | 0.09 | 1     | 0.254272 | 0.248829 | 0.618749 | 0.517951 |
| MmugDNA.6521.1.S1_at    | MmugDNA.6521.1  | 7.36  | 7.11 | 0.11 | 0.11 | 1.19  | 0.046676 | 0.166405 | 0.378458 | 0.442884 |
| MmugDNA.6523.1.S1_at    | MmugDNA.6523.1  | 5.32  | 5.69 | 0.35 | 0.19 | -1.29 | 0.193493 | 0.24755  | 0.564275 | 0.516895 |
| MmugDNA.6524.1.S1_at    | MmugDNA.6524.1  | 9.74  | 9.13 | 1.24 | 0.15 | 1.53  | 0.76088  | 0.29305  | 0.910188 | 0.552978 |
| MmugDNA.6525.1.S1_at    | MmugDNA.6525.1  | 3.25  | 3.16 | 0.19 | 0.23 | 1.06  | 0.236642 | 0.305717 | 0.603564 | 0.562714 |
| MmugDNA.6526.1.S1_at    | MmugDNA.6526.1  | 8.78  | 8.16 | 0.79 | 0.46 | 1.54  | 0.239153 | 0.043212 | 0.605731 | 0.252647 |
| MmugDNA.6527.1.S1_at    | MmugDNA.6527.1  | 7.1   | 6.94 | 0.5  | 0.1  | 1.12  | 0.719591 | 0.211771 | 0.891124 | 0.485757 |
| MmugDNA.6528.1.S1_at    | MmugDNA.6528.1  | 8.95  | 8.95 | 0.32 | 0.02 | -1    | 0.389397 | 0.605592 | 0.716091 | 0.76535  |
| MmugDNA.6529.1.S1_at    | MmugDNA.6529.1  | 3.62  | 3.64 | 0.61 | 0.07 | -1.01 | 0.972427 | 0.983283 | 0.991061 | 0.990726 |
| MmugDNA.653.1.S1_at     | MmugDNA.653.1   | 7.22  | 7.06 | 0.1  | 0.09 | 1.11  | 0.204658 | 0.144889 | 0.576136 | 0.418784 |
| MmugDNA.6530.1.S1_s_at  | MmugDNA.6530.1  | 8.53  | 9.37 | 0.44 | 0.29 | -1.79 | 0.075633 | 0.007263 | 0.436722 | 0.114334 |

|                      |                |       |       |      |      |       |          |          |          |          |
|----------------------|----------------|-------|-------|------|------|-------|----------|----------|----------|----------|
| MmugDNA.6531.1.S1_at | MmugDNA.6531.1 | 3.71  | 3.62  | 0.1  | 0.06 | 1.07  | 0.084291 | 0.534407 | 0.450927 | 0.720351 |
| MmugDNA.6532.1.S1_at | MmugDNA.6532.1 | 6.1   | 6.14  | 0.27 | 0.12 | -1.03 | 0.708232 | 0.879688 | 0.886591 | 0.931267 |
| MmugDNA.6533.1.S1_at | MmugDNA.6533.1 | 6.97  | 7.56  | 0.62 | 0.33 | -1.51 | 0.401011 | 0.417791 | 0.724096 | 0.642404 |
| MmugDNA.6534.1.S1_at | MmugDNA.6534.1 | 6.31  | 6.26  | 0.06 | 0.1  | 1.04  | 0.776154 | 0.985919 | 0.917025 | 0.99201  |
| MmugDNA.6535.1.S1_at | MmugDNA.6535.1 | 3.38  | 3.28  | 0.08 | 0.08 | 1.07  | 0.182288 | 0.27576  | 0.555371 | 0.540028 |
| MmugDNA.6536.1.S1_at | MmugDNA.6536.1 | 4.83  | 4.77  | 0.1  | 0.04 | 1.05  | 0.796027 | 0.717527 | 0.925023 | 0.836463 |
| MmugDNA.6537.1.S1_at | MmugDNA.6537.1 | 3.17  | 3.17  | 0.03 | 0.05 | 1     | 0.273086 | 0.651745 | 0.632689 | 0.796356 |
| MmugDNA.6538.1.S1_at | MmugDNA.6538.1 | 12.45 | 12.44 | 0.09 | 0.02 | 1.01  | 0.932792 | 0.194091 | 0.977227 | 0.46925  |
| MmugDNA.654.1.S1_at  | MmugDNA.654.1  | 5.58  | 5.58  | 0.17 | 0.24 | 1     | 0.82259  | 0.52979  | 0.936084 | 0.717498 |
| MmugDNA.6541.1.S1_at | MmugDNA.6541.1 | 6.38  | 7.1   | 0.41 | 0.6  | -1.64 | 0.147702 | 0.17182  | 0.521824 | 0.448224 |
| MmugDNA.6543.1.S1_at | MmugDNA.6543.1 | 6.37  | 6.23  | 0.27 | 0.19 | 1.1   | 0.439573 | 0.611344 | 0.748221 | 0.769255 |
| MmugDNA.6544.1.S1_at | MmugDNA.6544.1 | 3.01  | 3.03  | 0.11 | 0.16 | -1.01 | 0.723748 | 0.947909 | 0.892847 | 0.970378 |
| MmugDNA.6545.1.S1_at | MmugDNA.6545.1 | 10.94 | 11.24 | 0.9  | 0.19 | -1.23 | 0.574597 | 0.774434 | 0.824155 | 0.868766 |
| MmugDNA.6546.1.S1_at | MmugDNA.6546.1 | 4.47  | 4.75  | 0.12 | 0.35 | -1.21 | 0.082402 | 0.493089 | 0.447257 | 0.693996 |
| MmugDNA.6547.1.S1_at | MmugDNA.6547.1 | 6.25  | 5.97  | 0.47 | 0.28 | 1.21  | 0.286316 | 0.792803 | 0.64358  | 0.880383 |
| MmugDNA.6548.1.S1_at | MmugDNA.6548.1 | 4.25  | 4.08  | 0.13 | 0.11 | 1.12  | 0.159675 | 0.235434 | 0.532603 | 0.506489 |
| MmugDNA.6549.1.S1_at | MmugDNA.6549.1 | 12.79 | 12.86 | 0.52 | 0.02 | -1.05 | 0.962695 | 0.581594 | 0.987962 | 0.750589 |
| MmugDNA.655.1.S1_at  | MmugDNA.655.1  | 6.36  | 6.18  | 0.12 | 0.22 | 1.13  | 0.167922 | 0.243873 | 0.5405   | 0.514048 |
| MmugDNA.6550.1.S1_at | MmugDNA.6550.1 | 3.01  | 3.93  | 0.6  | 0.13 | -1.9  | 0.127296 | 0.089284 | 0.50152  | 0.343423 |
| MmugDNA.6551.1.S1_at | MmugDNA.6551.1 | 3.47  | 3.56  | 0.13 | 0.06 | -1.07 | 0.863429 | 0.489259 | 0.952018 | 0.691754 |
| MmugDNA.6552.1.S1_at | MmugDNA.6552.1 | 8.21  | 9.05  | 0.11 | 0.17 | -1.79 | 0.004432 | 0.000382 | 0.198874 | 0.037273 |
| MmugDNA.6555.1.S1_at | MmugDNA.6555.1 | 3.46  | 3.67  | 0.21 | 0.1  | -1.16 | 0.155426 | 0.0682   | 0.528651 | 0.307338 |
| MmugDNA.6556.1.S1_at | MmugDNA.6556.1 | 7.59  | 7.11  | 0.82 | 0.37 | 1.39  | 0.090474 | 0.115222 | 0.458706 | 0.3822   |
| MmugDNA.6557.1.S1_at | MmugDNA.6557.1 | 11.52 | 11.28 | 0.1  | 0.12 | 1.18  | 0.041755 | 0.045064 | 0.36716  | 0.256789 |
| MmugDNA.6558.1.S1_at | MmugDNA.6558.1 | 5.82  | 5.84  | 0.23 | 0.15 | -1.01 | 0.582071 | 0.068887 | 0.827894 | 0.308829 |
| MmugDNA.6562.1.S1_at | MmugDNA.6562.1 | 4.02  | 3.9   | 0.09 | 0.07 | 1.09  | 0.090309 | 0.205235 | 0.458493 | 0.479596 |
| MmugDNA.6563.1.S1_at | MmugDNA.6563.1 | 6.79  | 6.45  | 0.57 | 0.24 | 1.26  | 0.982515 | 0.298534 | 0.994555 | 0.557175 |
| MmugDNA.6564.1.S1_at | MmugDNA.6564.1 | 7.48  | 6.56  | 0.41 | 0.22 | 1.89  | 0.025151 | 0.016157 | 0.320548 | 0.161102 |
| MmugDNA.6565.1.S1_at | MmugDNA.6565.1 | 5.22  | 5.5   | 0.18 | 0.11 | -1.22 | 0.173031 | 0.044781 | 0.546142 | 0.256066 |
| MmugDNA.6566.1.S1_at | MmugDNA.6566.1 | 6.08  | 6.5   | 0.49 | 0.15 | -1.34 | 0.224794 | 0.243922 | 0.594045 | 0.514069 |
| MmugDNA.6567.1.S1_at | MmugDNA.6567.1 | 5.82  | 5.69  | 0.14 | 0.03 | 1.09  | 0.676898 | 0.776339 | 0.873333 | 0.869885 |
| MmugDNA.6569.1.S1_at | MmugDNA.6569.1 | 11.07 | 11.11 | 0.55 | 0.07 | -1.03 | 0.939431 | 0.903238 | 0.979532 | 0.945015 |
| MmugDNA.657.1.S1_at  | MmugDNA.657.1  | 6.49  | 6.81  | 0.44 | 0.14 | -1.24 | 0.146291 | 0.411909 | 0.52061  | 0.638434 |
| MmugDNA.6570.1.S1_at | MmugDNA.6570.1 | 11.12 | 11.09 | 0.15 | 0.1  | 1.02  | 0.987974 | 0.282045 | 0.995831 | 0.544937 |
| MmugDNA.6573.1.S1_at | MmugDNA.6573.1 | 3.03  | 2.9   | 0.55 | 0.27 | 1.1   | 0.286135 | 0.269462 | 0.64358  | 0.534767 |
| MmugDNA.6574.1.S1_at | MmugDNA.6574.1 | 7.87  | 8.73  | 0.88 | 0.02 | -1.82 | 0.249201 | 0.233606 | 0.614516 | 0.50492  |
| MmugDNA.6575.1.S1_at | MmugDNA.6575.1 | 3.46  | 3.46  | 0.1  | 0.1  | -1    | 0.745902 | 0.029333 | 0.90313  | 0.213228 |
| MmugDNA.6576.1.S1_at | MmugDNA.6576.1 | 6.26  | 6.68  | 0.98 | 0.35 | -1.34 | 0.519541 | 0.260979 | 0.793229 | 0.527354 |
| MmugDNA.6577.1.S1_at | MmugDNA.6577.1 | 4.37  | 3.76  | 0.26 | 0.1  | 1.52  | 0.0485   | 0.066528 | 0.38332  | 0.303705 |
| MmugDNA.6578.1.S1_at | MmugDNA.6578.1 | 7.68  | 7.46  | 1.16 | 0.29 | 1.17  | 0.528892 | 0.513747 | 0.7981   | 0.707217 |
| MmugDNA.6579.1.S1_at | MmugDNA.6579.1 | 5.63  | 5.6   | 0.11 | 0.08 | 1.02  | 0.386101 | 0.747155 | 0.713295 | 0.853124 |
| MmugDNA.6581.1.S1_at | MmugDNA.6581.1 | 5.5   | 5.63  | 0.08 | 0.05 | -1.1  | 0.143261 | 0.563012 | 0.518489 | 0.738314 |
| MmugDNA.6582.1.S1_at | MmugDNA.6582.1 | 4.55  | 5.84  | 0.98 | 0.4  | -2.44 | 0.36028  | 0.167216 | 0.697842 | 0.443684 |

|                        |                |       |       |      |      |       |          |          |          |          |
|------------------------|----------------|-------|-------|------|------|-------|----------|----------|----------|----------|
| MmugDNA.6584.1.S1_at   | MmugDNA.6584.1 | 8.77  | 8.55  | 0.18 | 0.09 | 1.17  | 0.428974 | 0.249987 | 0.74212  | 0.519009 |
| MmugDNA.6585.1.S1_at   | MmugDNA.6585.1 | 10.33 | 11.24 | 0.93 | 0.12 | -1.88 | 0.226879 | 0.283873 | 0.596276 | 0.546237 |
| MmugDNA.6587.1.S1_at   | MmugDNA.6587.1 | 3.66  | 3.65  | 0.03 | 0.08 | 1.01  | 0.789373 | 0.921877 | 0.92257  | 0.955951 |
| MmugDNA.6588.1.S1_at   | MmugDNA.6588.1 | 4.45  | 4.46  | 0.09 | 0.02 | -1.01 | 0.900751 | 0.671435 | 0.966259 | 0.807907 |
| MmugDNA.6589.1.S1_at   | MmugDNA.6589.1 | 9.61  | 9.91  | 0.15 | 0.23 | -1.23 | 0.094324 | 0.037267 | 0.463769 | 0.237506 |
| MmugDNA.6592.1.S1_at   | MmugDNA.6592.1 | 4.05  | 3.97  | 0.13 | 0.09 | 1.06  | 0.221281 | 0.475257 | 0.59078  | 0.682031 |
| MmugDNA.6593.1.S1_at   | MmugDNA.6593.1 | 7.3   | 7.22  | 0.09 | 0.07 | 1.05  | 0.121098 | 0.237008 | 0.494725 | 0.507675 |
| MmugDNA.6594.1.S1_s_at | MmugDNA.6594.1 | 7.64  | 7.47  | 0.1  | 0.15 | 1.12  | 0.370293 | 0.001111 | 0.704572 | 0.052745 |
| MmugDNA.6595.1.S1_at   | MmugDNA.6595.1 | 4.48  | 4.1   | 0.09 | 0.12 | 1.3   | 0.02107  | 0.036823 | 0.306699 | 0.236413 |
| MmugDNA.6596.1.S1_at   | MmugDNA.6596.1 | 4.43  | 4.3   | 0.07 | 0.08 | 1.09  | 0.060394 | 0.058874 | 0.408067 | 0.289391 |
| MmugDNA.6597.1.S1_at   | MmugDNA.6597.1 | 10.68 | 10.97 | 0.67 | 0.07 | -1.22 | 0.726246 | 0.671932 | 0.894212 | 0.808177 |
| MmugDNA.6598.1.S1_at   | MmugDNA.6598.1 | 7.78  | 7.85  | 0.73 | 0.36 | -1.05 | 0.90997  | 0.419068 | 0.96945  | 0.643266 |
| MmugDNA.6599.1.S1_at   | MmugDNA.6599.1 | 3.79  | 3.78  | 0.15 | 0.12 | 1.01  | 0.569357 | 0.747115 | 0.821436 | 0.853124 |
| MmugDNA.660.1.S1_s_at  | MmugDNA.660.1  | 8.67  | 8.28  | 0.24 | 0.16 | 1.31  | 0.034792 | 0.016    | 0.350364 | 0.160458 |
| MmugDNA.6600.1.S1_at   | MmugDNA.6600.1 | 6.68  | 7.84  | 1.02 | 0.06 | -2.23 | 0.138944 | 0.213215 | 0.514459 | 0.487098 |
| MmugDNA.6602.1.S1_at   | MmugDNA.6602.1 | 5.37  | 5.21  | 0.14 | 0.2  | 1.12  | 0.219833 | 0.201881 | 0.589114 | 0.476373 |
| MmugDNA.6603.1.S1_at   | MmugDNA.6603.1 | 5.43  | 5.43  | 0.14 | 0.19 | -1    | 0.481667 | 0.529428 | 0.772225 | 0.717276 |
| MmugDNA.6604.1.S1_at   | MmugDNA.6604.1 | 4.71  | 4.68  | 0.12 | 0.03 | 1.02  | 0.667559 | 0.472115 | 0.868641 | 0.679861 |
| MmugDNA.6606.1.S1_at   | MmugDNA.6606.1 | 6.15  | 7.37  | 0.44 | 0.18 | -2.33 | 0.018394 | 0.01742  | 0.297316 | 0.167044 |
| MmugDNA.6609.1.S1_at   | MmugDNA.6609.1 | 6.43  | 6.26  | 0.38 | 0.25 | 1.12  | 0.936296 | 0.034762 | 0.978555 | 0.230665 |
| MmugDNA.661.1.S1_at    | MmugDNA.661.1  | 4.74  | 4.61  | 0.17 | 0.09 | 1.09  | 0.289533 | 0.345016 | 0.646199 | 0.590268 |
| MmugDNA.6610.1.S1_at   | MmugDNA.6610.1 | 5.15  | 4.94  | 0.15 | 0.23 | 1.16  | 0.187757 | 0.260776 | 0.559968 | 0.52721  |
| MmugDNA.6611.1.S1_at   | MmugDNA.6611.1 | 9.53  | 9.82  | 0.22 | 0.34 | -1.22 | 0.10347  | 0.001163 | 0.474255 | 0.053615 |
| MmugDNA.6612.1.S1_at   | MmugDNA.6612.1 | 4.08  | 4.2   | 0.06 | 0.14 | -1.09 | 0.227179 | 0.240723 | 0.596459 | 0.511447 |
| MmugDNA.6613.1.S1_s_at | MmugDNA.6613.1 | 10.88 | 10.78 | 0.2  | 0.26 | 1.07  | 0.399279 | 0.541969 | 0.722972 | 0.725169 |
| MmugDNA.6615.1.S1_at   | MmugDNA.6615.1 | 7.24  | 7.27  | 0.13 | 0.2  | -1.02 | 0.522284 | 0.444336 | 0.795143 | 0.66198  |
| MmugDNA.6615.1.S1_x_at | MmugDNA.6615.1 | 5.6   | 5.84  | 0.06 | 0.31 | -1.18 | 0.31195  | 0.455871 | 0.663542 | 0.669664 |
| MmugDNA.6617.1.S1_at   | MmugDNA.6617.1 | 5.61  | 5.56  | 0.08 | 0.16 | 1.03  | 0.470196 | 0.328898 | 0.76595  | 0.578456 |
| MmugDNA.5157.1.S1_s_at | MmugDNA.5157.1 | 7.84  | 8.18  | 0.37 | 0.05 | -1.27 | 0.339073 | 0.529789 | 0.683527 | 0.717498 |
| MmugDNA.6619.1.S1_at   | MmugDNA.6619.1 | 4.82  | 4.97  | 0.52 | 0.08 | -1.11 | 0.671287 | 0.827576 | 0.870263 | 0.901078 |
| MmugDNA.662.1.S1_at    | MmugDNA.662.1  | 5.83  | 5.51  | 0.15 | 0.07 | 1.25  | 0.06515  | 0.192373 | 0.419835 | 0.467835 |
| MmugDNA.6620.1.S1_at   | MmugDNA.6620.1 | 7.61  | 6.51  | 0.89 | 0.25 | 2.14  | 0.088189 | 0.179818 | 0.45606  | 0.456342 |
| MmugDNA.6622.1.S1_at   | MmugDNA.6622.1 | 7.89  | 7.79  | 0.78 | 0.23 | 1.07  | 0.97816  | 0.992681 | 0.992929 | 0.995715 |
| MmugDNA.6624.1.S1_at   | MmugDNA.6624.1 | 7.47  | 7.31  | 0.5  | 0.57 | 1.12  | 0.369303 | 0.594318 | 0.704181 | 0.758574 |
| MmugDNA.6625.1.S1_at   | MmugDNA.6625.1 | 6.77  | 7.19  | 0.15 | 0.29 | -1.34 | 0.18541  | 0.111656 | 0.55849  | 0.376592 |
| MmugDNA.6628.1.S1_at   | MmugDNA.6628.1 | 5.58  | 6.23  | 0.48 | 0.22 | -1.57 | 0.351304 | 0.082089 | 0.691963 | 0.330892 |
| MmugDNA.6629.1.S1_at   | MmugDNA.6629.1 | 3.07  | 3.34  | 0.09 | 0.15 | -1.21 | 0.263254 | 0.099959 | 0.625264 | 0.358768 |
| MmugDNA.663.1.S1_at    | MmugDNA.663.1  | 3.49  | 3.45  | 0.04 | 0.05 | 1.03  | 0.141904 | 0.301616 | 0.516871 | 0.55955  |
| MmugDNA.6630.1.S1_at   | MmugDNA.6630.1 | 9.2   | 9.31  | 0.27 | 0.01 | -1.08 | 0.927464 | 0.241316 | 0.97593  | 0.511952 |
| MmugDNA.6630.1.S1_s_at | MmugDNA.6630.1 | 9.5   | 9.65  | 0.17 | 0.05 | -1.11 | 0.652269 | 0.03221  | 0.862004 | 0.222139 |
| MmugDNA.6632.1.S1_at   | MmugDNA.6632.1 | 6.82  | 7.35  | 0.46 | 0.28 | -1.45 | 0.109378 | 0.044101 | 0.482257 | 0.254323 |
| MmugDNA.6633.1.S1_at   | MmugDNA.6633.1 | 7.16  | 6.99  | 0.05 | 0.14 | 1.12  | 0.1077   | 0.30783  | 0.480288 | 0.56397  |
| MmugDNA.6636.1.S1_at   | MmugDNA.6636.1 | 6.2   | 6.2   | 0.09 | 0.01 | -1    | 0.450794 | 0.370116 | 0.75487  | 0.609369 |

|                        |                |       |       |      |      |       |          |          |          |          |
|------------------------|----------------|-------|-------|------|------|-------|----------|----------|----------|----------|
| MmugDNA.6637.1.S1_s_at | MmugDNA.6637.1 | 10.78 | 10.8  | 0.23 | 0.03 | -1.01 | 0.807567 | 0.000475 | 0.930211 | 0.038572 |
| MmugDNA.6638.1.S1_at   | MmugDNA.6638.1 | 4.8   | 4.81  | 0.58 | 0.14 | -1.01 | 0.338114 | 0.680294 | 0.682759 | 0.813346 |
| MmugDNA.6639.1.S1_at   | MmugDNA.6639.1 | 10.77 | 10.88 | 0.04 | 0.22 | -1.08 | 0.158514 | 0.255071 | 0.531551 | 0.52317  |
| MmugDNA.664.1.S1_at    | MmugDNA.664.1  | 8.41  | 7.51  | 0.16 | 0.4  | 1.87  | 0.012995 | 0.008428 | 0.26612  | 0.121867 |
| MmugDNA.6643.1.S1_at   | MmugDNA.6643.1 | 3.86  | 3.84  | 0.25 | 0.4  | 1.01  | 0.257113 | 0.365871 | 0.620965 | 0.605774 |
| MmugDNA.6644.1.S1_at   | MmugDNA.6644.1 | 4.53  | 4.57  | 0.17 | 0.01 | -1.03 | 0.974777 | 0.99859  | 0.991912 | 0.999247 |
| MmugDNA.6645.1.S1_at   | MmugDNA.6645.1 | 3.96  | 3.94  | 0.15 | 0.14 | 1.01  | 0.478325 | 0.313298 | 0.770076 | 0.567753 |
| MmugDNA.6646.1.S1_at   | MmugDNA.6646.1 | 6.98  | 7.28  | 0.3  | 0.21 | -1.23 | 0.107827 | 0.413535 | 0.480316 | 0.639648 |
| MmugDNA.6647.1.S1_at   | MmugDNA.6647.1 | 4.39  | 4.29  | 0.18 | 0.14 | 1.08  | 0.234891 | 0.265103 | 0.602206 | 0.531    |
| MmugDNA.6648.1.S1_at   | MmugDNA.6648.1 | 8.71  | 9.64  | 0.74 | 0.1  | -1.91 | 0.100693 | 0.075946 | 0.471575 | 0.320634 |
| MmugDNA.6649.1.S1_at   | MmugDNA.6649.1 | 7     | 7.14  | 0.2  | 0.06 | -1.11 | 0.263817 | 0.103789 | 0.62575  | 0.364519 |
| MmugDNA.665.1.S1_at    | MmugDNA.665.1  | 6.59  | 6.6   | 0    | 0.13 | -1.01 | 0.610397 | 0.667696 | 0.841841 | 0.80548  |
| MmugDNA.6651.1.S1_at   | MmugDNA.6651.1 | 4.48  | 4.32  | 0.06 | 0.07 | 1.12  | 0.067689 | 0.336433 | 0.42444  | 0.583831 |
| MmugDNA.6652.1.S1_at   | MmugDNA.6652.1 | 7.75  | 7.64  | 0.19 | 0.12 | 1.07  | 0.238181 | 0.059313 | 0.605262 | 0.29054  |
| MmugDNA.6654.1.S1_at   | MmugDNA.6654.1 | 3.43  | 3.34  | 0.13 | 0.07 | 1.06  | 0.344032 | 0.382758 | 0.686913 | 0.618887 |
| MmugDNA.6658.1.S1_at   | MmugDNA.6658.1 | 10.67 | 10.1  | 0.37 | 0.57 | 1.49  | 0.216502 | 0.273061 | 0.586605 | 0.537644 |
| MmugDNA.666.1.S1_at    | MmugDNA.666.1  | 5.31  | 5.2   | 0.11 | 0.04 | 1.08  | 0.119158 | 0.339342 | 0.492557 | 0.585984 |
| MmugDNA.6661.1.S1_at   | MmugDNA.6661.1 | 4.25  | 3.94  | 0.27 | 0.04 | 1.24  | 0.050266 | 0.09782  | 0.386954 | 0.355639 |
| MmugDNA.6663.1.S1_at   | MmugDNA.6663.1 | 4.35  | 4.31  | 0.25 | 0.14 | 1.03  | 0.766962 | 0.890457 | 0.912422 | 0.93758  |
| MmugDNA.6665.1.S1_at   | MmugDNA.6665.1 | 6.55  | 6.12  | 0.7  | 0.19 | 1.35  | 0.547686 | 0.239203 | 0.809225 | 0.509902 |
| MmugDNA.6666.1.S1_at   | MmugDNA.6666.1 | 5.9   | 6.16  | 0.19 | 0.28 | -1.19 | 0.225835 | 0.279953 | 0.594935 | 0.543359 |
| MmugDNA.6667.1.S1_at   | MmugDNA.6667.1 | 5.2   | 5.12  | 0.5  | 0.16 | 1.06  | 0.858675 | 0.606896 | 0.95008  | 0.76612  |
| MmugDNA.667.1.S1_at    | MmugDNA.667.1  | 6.19  | 6.18  | 0.19 | 0    | 1.01  | 0.441497 | 0.17668  | 0.749389 | 0.453142 |
| MmugDNA.6670.1.S1_at   | MmugDNA.6670.1 | 4.47  | 4.09  | 0.1  | 0.23 | 1.3   | 0.059555 | 0.107533 | 0.406669 | 0.370389 |
| MmugDNA.6671.1.S1_at   | MmugDNA.6671.1 | 6.27  | 6.15  | 0.15 | 0.11 | 1.09  | 0.705422 | 0.370336 | 0.885355 | 0.609407 |
| MmugDNA.6672.1.S1_at   | MmugDNA.6672.1 | 7.2   | 7.26  | 0.25 | 0.17 | -1.04 | 0.51854  | 0.052602 | 0.792717 | 0.274853 |
| MmugDNA.6673.1.S1_at   | MmugDNA.6673.1 | 11.85 | 12.03 | 0.27 | 0.13 | -1.14 | 0.820536 | 0.473392 | 0.935289 | 0.68068  |
| MmugDNA.6676.1.S1_at   | MmugDNA.6676.1 | 5.13  | 5.05  | 0.25 | 0.06 | 1.06  | 0.220467 | 0.300812 | 0.589697 | 0.559039 |
| MmugDNA.668.1.S1_at    | MmugDNA.668.1  | 3.66  | 3.58  | 0.3  | 0.14 | 1.05  | 0.436612 | 0.51005  | 0.746362 | 0.704549 |
| MmugDNA.6680.1.S1_at   | MmugDNA.6680.1 | 4.83  | 4.52  | 0.31 | 0.14 | 1.24  | 0.34767  | 0.809638 | 0.688864 | 0.89027  |
| MmugDNA.6682.1.S1_at   | MmugDNA.6682.1 | 8.1   | 7.78  | 0.12 | 0.09 | 1.25  | 0.01868  | 0.033032 | 0.298184 | 0.225    |
| MmugDNA.6682.1.S1_s_at | MmugDNA.6682.1 | 7.04  | 7.02  | 0.06 | 0.09 | 1.01  | 0.877973 | 0.23756  | 0.957532 | 0.508196 |
| MmugDNA.6684.1.S1_at   | MmugDNA.6684.1 | 5.61  | 5.59  | 0.41 | 0.2  | 1.02  | 0.963486 | 0.973232 | 0.988152 | 0.98548  |
| MmugDNA.6686.1.S1_at   | MmugDNA.6686.1 | 11.01 | 10.39 | 0.22 | 0.21 | 1.54  | 0.037217 | 0.010027 | 0.356948 | 0.131279 |
| MmugDNA.6688.1.S1_at   | MmugDNA.6688.1 | 9.27  | 10.04 | 0.69 | 0.17 | -1.71 | 0.31111  | 0.251505 | 0.662925 | 0.520261 |
| MmugDNA.6689.1.S1_at   | MmugDNA.6689.1 | 3.72  | 3.66  | 0.15 | 0.06 | 1.04  | 0.72117  | 0.762283 | 0.891951 | 0.861726 |
| MmugDNA.669.1.S1_at    | MmugDNA.669.1  | 4.07  | 3.96  | 0.09 | 0.06 | 1.08  | 0.434353 | 0.057234 | 0.745013 | 0.285059 |
| MmugDNA.6690.1.S1_at   | MmugDNA.6690.1 | 8.68  | 8.59  | 0.17 | 0.07 | 1.06  | 0.38696  | 0.033938 | 0.713959 | 0.227853 |
| MmugDNA.6691.1.S1_at   | MmugDNA.6691.1 | 3.84  | 3.86  | 0.09 | 0.1  | -1.01 | 0.700105 | 0.767677 | 0.883403 | 0.86513  |
| MmugDNA.6692.1.S1_at   | MmugDNA.6692.1 | 4.37  | 4.31  | 0.21 | 0.03 | 1.04  | 0.260846 | 0.50049  | 0.62332  | 0.69907  |
| MmugDNA.6693.1.S1_at   | MmugDNA.6693.1 | 9.8   | 10.49 | 0.57 | 0.04 | -1.61 | 0.096846 | 0.109284 | 0.465555 | 0.37308  |
| MmugDNA.6694.1.S1_at   | MmugDNA.6694.1 | 3.46  | 3.37  | 0.45 | 0.2  | 1.07  | 0.448675 | 0.469888 | 0.754021 | 0.678572 |
| MmugDNA.6696.1.S1_at   | MmugDNA.6696.1 | 7.76  | 8.5   | 0.59 | 0.1  | -1.67 | 0.084661 | 0.068482 | 0.451162 | 0.308214 |

|                        |                |       |       |      |      |       |          |          |          |          |
|------------------------|----------------|-------|-------|------|------|-------|----------|----------|----------|----------|
| MmugDNA.6697.1.S1_at   | MmugDNA.6697.1 | 3.72  | 3.51  | 0.25 | 0.03 | 1.15  | 0.208639 | 0.133698 | 0.580358 | 0.405647 |
| MmugDNA.6698.1.S1_at   | MmugDNA.6698.1 | 9.42  | 8.94  | 0.92 | 0.13 | 1.39  | 0.961886 | 0.563942 | 0.987562 | 0.738913 |
| MmugDNA.6699.1.S1_at   | MmugDNA.6699.1 | 10.37 | 10.72 | 0.38 | 0.08 | -1.28 | 0.102137 | 0.025643 | 0.472436 | 0.200834 |
| MmugDNA.67.1.S1_at     | MmugDNA.67.1   | 6.31  | 6.16  | 0.11 | 0.14 | 1.11  | 0.085518 | 0.10192  | 0.452653 | 0.361927 |
| MmugDNA.670.1.S1_at    | MmugDNA.670.1  | 5.86  | 5.75  | 0.42 | 0.07 | 1.08  | 0.7097   | 0.644483 | 0.887017 | 0.791603 |
| MmugDNA.6700.1.S1_at   | MmugDNA.6700.1 | 10.76 | 10.67 | 0.28 | 0.03 | 1.06  | 0.710429 | 0.755172 | 0.887291 | 0.857488 |
| MmugDNA.6701.1.S1_at   | MmugDNA.6701.1 | 6.01  | 6.39  | 0.5  | 0.14 | -1.3  | 0.80254  | 0.366029 | 0.927999 | 0.605891 |
| MmugDNA.6703.1.S1_s_at | MmugDNA.6703.1 | 13.53 | 13.43 | 0.09 | 0.08 | 1.07  | 0.943954 | 0.893541 | 0.980618 | 0.939277 |
| MmugDNA.6704.1.S1_at   | MmugDNA.6704.1 | 11.09 | 10.66 | 1.38 | 0.23 | 1.35  | 0.569534 | 0.070209 | 0.82149  | 0.311194 |
| MmugDNA.6705.1.S1_at   | MmugDNA.6705.1 | 4.32  | 4.43  | 0.47 | 0.42 | -1.08 | 0.783605 | 0.304205 | 0.920384 | 0.561558 |
| MmugDNA.6707.1.S1_at   | MmugDNA.6707.1 | 4.07  | 3.79  | 0.17 | 0.1  | 1.22  | 0.070626 | 0.202733 | 0.4297   | 0.477174 |
| MmugDNA.6708.1.S1_at   | MmugDNA.6708.1 | 7.7   | 7.67  | 0.19 | 0.06 | 1.02  | 0.92881  | 0.591507 | 0.976332 | 0.757033 |
| MmugDNA.6710.1.S1_at   | MmugDNA.6710.1 | 3.44  | 3.45  | 0.02 | 0.06 | -1.01 | 0.623171 | 0.685265 | 0.848128 | 0.816424 |
| MmugDNA.6711.1.S1_at   | MmugDNA.6711.1 | 10.88 | 10.91 | 0.16 | 0.04 | -1.02 | 0.473474 | 0.004428 | 0.767586 | 0.092934 |
| MmugDNA.6712.1.S1_at   | MmugDNA.6712.1 | 4.78  | 4.67  | 0.04 | 0.14 | 1.08  | 0.315584 | 0.117108 | 0.666002 | 0.384552 |
| MmugDNA.6713.1.S1_at   | MmugDNA.6713.1 | 5.89  | 6.29  | 0.37 | 0.05 | -1.32 | 0.136982 | 0.216287 | 0.511963 | 0.489844 |
| MmugDNA.6715.1.S1_at   | MmugDNA.6715.1 | 6.72  | 6.66  | 0.31 | 0.12 | 1.04  | 0.877177 | 0.921439 | 0.957174 | 0.955761 |
| MmugDNA.6716.1.S1_at   | MmugDNA.6716.1 | 5.03  | 4.94  | 0.4  | 0.05 | 1.06  | 0.810376 | 0.755085 | 0.931335 | 0.857447 |
| MmugDNA.6718.1.S1_at   | MmugDNA.6718.1 | 4.53  | 4.2   | 0.26 | 0.05 | 1.26  | 0.141384 | 0.1286   | 0.516365 | 0.400027 |
| MmugDNA.6719.1.S1_at   | MmugDNA.6719.1 | 4.78  | 4.69  | 0.83 | 0.28 | 1.06  | 0.834686 | 0.544093 | 0.940727 | 0.726614 |
| MmugDNA.672.1.S1_at    | MmugDNA.672.1  | 4.29  | 4.24  | 0.09 | 0.02 | 1.03  | 0.198463 | 0.149373 | 0.569807 | 0.423811 |
| MmugDNA.6720.1.S1_at   | MmugDNA.6720.1 | 12.7  | 12.74 | 0.16 | 0.02 | -1.03 | 0.355219 | 0.018947 | 0.69464  | 0.17317  |
| MmugDNA.6721.1.S1_at   | MmugDNA.6721.1 | 6.22  | 6.13  | 0.46 | 0.2  | 1.06  | 0.955465 | 0.240393 | 0.985324 | 0.510966 |
| MmugDNA.6722.1.S1_at   | MmugDNA.6722.1 | 4.69  | 4.08  | 0.31 | 0.6  | 1.53  | 0.69975  | 0.688527 | 0.883309 | 0.818201 |
| MmugDNA.6723.1.S1_at   | MmugDNA.6723.1 | 3.72  | 3.66  | 0.21 | 0.06 | 1.04  | 0.742006 | 0.897335 | 0.901613 | 0.941409 |
| MmugDNA.6725.1.S1_at   | MmugDNA.6725.1 | 7.47  | 8.17  | 0.99 | 0.16 | -1.63 | 0.351552 | 0.156257 | 0.6923   | 0.43161  |
| MmugDNA.6726.1.S1_at   | MmugDNA.6726.1 | 5.45  | 5.36  | 0.13 | 0.25 | 1.07  | 0.200573 | 0.251816 | 0.572378 | 0.520478 |
| MmugDNA.6727.1.S1_at   | MmugDNA.6727.1 | 8.99  | 8.84  | 0.5  | 0.26 | 1.11  | 0.651513 | 0.859165 | 0.861636 | 0.919754 |
| MmugDNA.6729.1.S1_at   | MmugDNA.6729.1 | 5.88  | 5.43  | 0.08 | 0.23 | 1.37  | 0.066581 | 0.11995  | 0.422442 | 0.388671 |
| MmugDNA.673.1.S1_at    | MmugDNA.673.1  | 3.72  | 3.63  | 0.4  | 0.26 | 1.06  | 0.584498 | 0.492578 | 0.82974  | 0.693633 |
| MmugDNA.6732.1.S1_at   | MmugDNA.6732.1 | 8.69  | 8.55  | 0.24 | 0.09 | 1.1   | 0.475763 | 0.18209  | 0.768685 | 0.45857  |
| MmugDNA.6733.1.S1_at   | MmugDNA.6733.1 | 4.73  | 4.46  | 0.34 | 0.16 | 1.21  | 0.154714 | 0.195416 | 0.527946 | 0.470253 |
| MmugDNA.6736.1.S1_at   | MmugDNA.6736.1 | 3.59  | 3.55  | 0.2  | 0.29 | 1.03  | 0.819409 | 0.618815 | 0.934889 | 0.774185 |
| MmugDNA.6737.1.S1_at   | MmugDNA.6737.1 | 3.27  | 3.3   | 0.23 | 0.1  | -1.02 | 0.341142 | 0.356656 | 0.684914 | 0.598516 |
| MmugDNA.6738.1.S1_s_at | MmugDNA.6738.1 | 10.31 | 10.42 | 0.73 | 0.08 | -1.08 | 0.564569 | 0.661085 | 0.818796 | 0.801683 |
| MmugDNA.6740.1.S1_at   | MmugDNA.6740.1 | 6.78  | 6.8   | 0.23 | 0.06 | -1.01 | 0.858784 | 0.714528 | 0.950111 | 0.834386 |
| MmugDNA.6741.1.S1_at   | MmugDNA.6741.1 | 3.93  | 3.88  | 0.09 | 0.21 | 1.04  | 0.478846 | 0.264033 | 0.770271 | 0.530183 |
| MmugDNA.6742.1.S1_at   | MmugDNA.6742.1 | 11.74 | 12.09 | 0.32 | 0.04 | -1.28 | 0.48193  | 0.675168 | 0.772261 | 0.810205 |
| MmugDNA.6743.1.S1_at   | MmugDNA.6743.1 | 8.2   | 7.86  | 0.28 | 0.07 | 1.26  | 0.031916 | 0.003254 | 0.34281  | 0.082277 |
| MmugDNA.6744.1.S1_at   | MmugDNA.6744.1 | 8.01  | 9.13  | 1.02 | 0.25 | -2.17 | 0.177173 | 0.248576 | 0.550212 | 0.51787  |
| MmugDNA.6746.1.S1_at   | MmugDNA.6746.1 | 10.68 | 10.68 | 0.62 | 0.15 | -1    | 0.321124 | 0.430087 | 0.669726 | 0.651143 |
| MmugDNA.6747.1.S1_at   | MmugDNA.6747.1 | 5.11  | 5.09  | 0.36 | 0.48 | 1.01  | 0.438307 | 0.805908 | 0.747277 | 0.888395 |
| MmugDNA.6748.1.S1_at   | MmugDNA.6748.1 | 4     | 3.73  | 0.13 | 0.2  | 1.21  | 0.202844 | 0.266318 | 0.574251 | 0.532099 |



|                        |                |       |       |      |      |       |          |          |          |          |
|------------------------|----------------|-------|-------|------|------|-------|----------|----------|----------|----------|
| MmugDNA.6749.1.S1_at   | MmugDNA.6749.1 | 4.59  | 4.42  | 0.2  | 0.08 | 1.12  | 0.169397 | 0.382043 | 0.542311 | 0.618279 |
| MmugDNA.675.1.S1_at    | MmugDNA.675.1  | 4.93  | 5.52  | 0.52 | 0.04 | -1.5  | 0.138163 | 0.043027 | 0.513671 | 0.252067 |
| MmugDNA.6750.1.S1_at   | MmugDNA.6750.1 | 8.44  | 8.5   | 0.49 | 0.31 | -1.04 | 0.735074 | 0.039909 | 0.898576 | 0.244852 |
| MmugDNA.6751.1.S1_at   | MmugDNA.6751.1 | 5.82  | 5.66  | 0.31 | 0.08 | 1.12  | 0.36589  | 0.59554  | 0.701433 | 0.759091 |
| MmugDNA.6752.1.S1_at   | MmugDNA.6752.1 | 7.98  | 8.73  | 0.25 | 0.08 | -1.68 | 0.015741 | 0.005486 | 0.283526 | 0.102081 |
| MmugDNA.6754.1.S1_at   | MmugDNA.6754.1 | 4.01  | 3.96  | 0.28 | 0.1  | 1.03  | 0.26507  | 0.621007 | 0.626397 | 0.775745 |
| MmugDNA.6755.1.S1_at   | MmugDNA.6755.1 | 7.61  | 7.35  | 0.08 | 0.05 | 1.19  | 0.009935 | 0.40165  | 0.244411 | 0.631068 |
| MmugDNA.6758.1.S1_at   | MmugDNA.6758.1 | 3.94  | 3.98  | 0.03 | 0.03 | -1.03 | 0.104923 | 0.900509 | 0.476247 | 0.943447 |
| MmugDNA.6759.1.S1_at   | MmugDNA.6759.1 | 12    | 12.05 | 0.24 | 0.1  | -1.03 | 0.993112 | 0.039871 | 0.997423 | 0.244835 |
| MmugDNA.676.1.S1_at    | MmugDNA.676.1  | 4.19  | 4.25  | 0.07 | 0.15 | -1.04 | 0.534281 | 0.771697 | 0.80126  | 0.867344 |
| MmugDNA.6762.1.S1_at   | MmugDNA.6762.1 | 10.21 | 10.02 | 0.13 | 0.04 | -1.15 | 0.096696 | 0.604335 | 0.465288 | 0.764566 |
| MmugDNA.6763.1.S1_at   | MmugDNA.6763.1 | 9.49  | 9.05  | 0.14 | 0.15 | 1.35  | 0.026102 | 0.079656 | 0.323344 | 0.326981 |
| MmugDNA.6765.1.S1_at   | MmugDNA.6765.1 | 8.24  | 7.69  | 0.37 | 0.15 | 1.46  | 0.231024 | 0.01819  | 0.599045 | 0.169695 |
| MmugDNA.6767.1.S1_at   | MmugDNA.6767.1 | 3.56  | 3.4   | 0.12 | 0.02 | 1.12  | 0.032185 | 0.142167 | 0.343301 | 0.415754 |
| MmugDNA.6769.1.S1_at   | MmugDNA.6769.1 | 3.55  | 3.54  | 0.19 | 0.08 | 1.01  | 0.413354 | 0.568663 | 0.732218 | 0.742052 |
| MmugDNA.677.1.S1_at    | MmugDNA.677.1  | 5.03  | 5.97  | 0.24 | 0.57 | -1.93 | 0.146018 | 0.266569 | 0.520572 | 0.532301 |
| MmugDNA.6770.1.S1_at   | MmugDNA.6770.1 | 11.35 | 12.22 | 0.8  | 0.01 | -1.83 | 0.131016 | 0.036986 | 0.5054   | 0.236733 |
| MmugDNA.6771.1.S1_at   | MmugDNA.6771.1 | 4.85  | 4.72  | 0.04 | 0.09 | 1.09  | 0.047602 | 0.340226 | 0.380705 | 0.586637 |
| MmugDNA.6773.1.S1_at   | MmugDNA.6773.1 | 6.88  | 6.68  | 0.9  | 0.49 | 1.14  | 0.663352 | 0.656165 | 0.867106 | 0.798919 |
| MmugDNA.6774.1.S1_at   | MmugDNA.6774.1 | 3.64  | 3.56  | 0.04 | 0.3  | 1.06  | 0.615024 | 0.588683 | 0.844186 | 0.755137 |
| MmugDNA.6774.1.S1_s_at | MmugDNA.6774.1 | 5.55  | 5.38  | 0.12 | 0.09 | 1.13  | 0.097014 | 0.389027 | 0.465689 | 0.623288 |
| MmugDNA.6775.1.S1_at   | MmugDNA.6775.1 | 3.73  | 3.92  | 0.32 | 0.31 | -1.14 | 0.926618 | 0.402511 | 0.975645 | 0.631481 |
| MmugDNA.6776.1.S1_at   | MmugDNA.6776.1 | 4.79  | 4.58  | 0.36 | 0.03 | 1.16  | 0.72757  | 0.541915 | 0.894744 | 0.725146 |
| MmugDNA.6777.1.S1_at   | MmugDNA.6777.1 | 3.01  | 3.03  | 0.04 | 0.13 | -1.01 | 0.242796 | 0.305136 | 0.608808 | 0.562255 |
| MmugDNA.678.1.S1_at    | MmugDNA.678.1  | 10.87 | 10.98 | 0.43 | 0.24 | -1.08 | 0.18584  | 0.124248 | 0.55873  | 0.394547 |
| MmugDNA.6780.1.S1_at   | MmugDNA.6780.1 | 9.76  | 9.81  | 0.47 | 0.03 | -1.03 | 0.90033  | 0.986822 | 0.966081 | 0.992556 |
| MmugDNA.6784.1.S1_at   | MmugDNA.6784.1 | 5.02  | 4.26  | 0.51 | 0.59 | 1.69  | 0.372751 | 0.326119 | 0.705567 | 0.576315 |
| MmugDNA.6785.1.S1_at   | MmugDNA.6785.1 | 5.4   | 5.41  | 0.15 | 0.04 | -1.01 | 0.698279 | 0.855152 | 0.882746 | 0.917436 |
| MmugDNA.6787.1.S1_at   | MmugDNA.6787.1 | 8.37  | 8.79  | 0.44 | 0.09 | -1.35 | 0.154871 | 0.027875 | 0.528194 | 0.208455 |
| MmugDNA.6788.1.S1_at   | MmugDNA.6788.1 | 10.88 | 10.47 | 0.07 | 0.21 | 1.33  | 0.032533 | 0.02065  | 0.344478 | 0.180347 |
| MmugDNA.6789.1.S1_at   | MmugDNA.6789.1 | 8.57  | 8.78  | 0.19 | 0.16 | -1.15 | 0.224795 | 0.51211  | 0.594045 | 0.706076 |
| MmugDNA.679.1.S1_at    | MmugDNA.679.1  | 4.69  | 5.46  | 0.46 | 0.22 | -1.71 | 0.090784 | 0.338018 | 0.458873 | 0.585208 |
| MmugDNA.6791.1.S1_at   | MmugDNA.6791.1 | 3.2   | 3.25  | 0.19 | 0.12 | -1.03 | 0.812306 | 0.947242 | 0.932076 | 0.970103 |
| MmugDNA.6792.1.S1_at   | MmugDNA.6792.1 | 4.65  | 4.67  | 0.08 | 0.15 | -1.01 | 0.867581 | 0.700207 | 0.953578 | 0.825987 |
| MmugDNA.6794.1.S1_at   | MmugDNA.6794.1 | 6.84  | 6.75  | 0.69 | 0.28 | 1.07  | 0.367485 | 0.453221 | 0.702988 | 0.66762  |
| MmugDNA.6795.1.S1_at   | MmugDNA.6795.1 | 6.92  | 7.55  | 0.77 | 0.14 | -1.55 | 0.204238 | 0.59616  | 0.575627 | 0.759367 |
| MmugDNA.6796.1.S1_at   | MmugDNA.6796.1 | 6.5   | 6.27  | 0.29 | 0.23 | 1.18  | 0.583633 | 0.002185 | 0.829134 | 0.069035 |
| MmugDNA.6797.1.S1_at   | MmugDNA.6797.1 | 3.25  | 3.24  | 0.12 | 0.17 | 1.01  | 0.554057 | 0.370688 | 0.812439 | 0.609702 |
| MmugDNA.6798.1.S1_at   | MmugDNA.6798.1 | 9.67  | 7.96  | 0.85 | 0.12 | 3.29  | 0.070711 | 0.074342 | 0.42977  | 0.318046 |
| MmugDNA.6799.1.S1_at   | MmugDNA.6799.1 | 4.7   | 4.5   | 0.24 | 0.09 | 1.15  | 0.33565  | 0.607401 | 0.681167 | 0.766391 |
| MmugDNA.680.1.S1_at    | MmugDNA.680.1  | 4.84  | 4.94  | 0.23 | 0.23 | -1.07 | 0.479692 | 0.5977   | 0.770886 | 0.760358 |
| MmugDNA.6800.1.S1_at   | MmugDNA.6800.1 | 7.86  | 8.02  | 0.28 | 0.07 | -1.11 | 0.400177 | 0.641602 | 0.723606 | 0.789624 |
| MmugDNA.6801.1.S1_at   | MmugDNA.6801.1 | 5.02  | 4.83  | 0.26 | 0.13 | 1.14  | 0.069352 | 0.040937 | 0.426951 | 0.247161 |

|                       |                |       |       |      |      |       |          |          |          |          |
|-----------------------|----------------|-------|-------|------|------|-------|----------|----------|----------|----------|
| MmugDNA.6802.1.S1_at  | MmugDNA.6802.1 | 11.81 | 12.02 | 0.13 | 0.05 | -1.16 | 0.194177 | 0.060371 | 0.564806 | 0.292291 |
| MmugDNA.6803.1.S1_at  | MmugDNA.6803.1 | 5.87  | 5.77  | 0.3  | 0.1  | 1.07  | 0.221836 | 0.333938 | 0.5914   | 0.582063 |
| MmugDNA.6804.1.S1_at  | MmugDNA.6804.1 | 7.26  | 7.16  | 0.14 | 0.16 | 1.07  | 0.503858 | 0.598777 | 0.784418 | 0.761123 |
| MmugDNA.6806.1.S1_at  | MmugDNA.6806.1 | 5.63  | 5.01  | 0.91 | 0.93 | 1.53  | 0.941723 | 0.289433 | 0.980207 | 0.55046  |
| MmugDNA.6807.1.S1_at  | MmugDNA.6807.1 | 11.61 | 11.53 | 0.53 | 0.17 | 1.06  | 0.576131 | 0.770905 | 0.825056 | 0.866807 |
| MmugDNA.681.1.S1_s_at | MmugDNA.681.1  | 3.91  | 4.04  | 0.06 | 0.27 | -1.1  | 0.369268 | 0.385551 | 0.704181 | 0.621027 |
| MmugDNA.6810.1.S1_at  | MmugDNA.6810.1 | 4.13  | 3.77  | 0.57 | 0.39 | 1.28  | 0.373304 | 0.580838 | 0.705567 | 0.749953 |
| MmugDNA.6813.1.S1_at  | MmugDNA.6813.1 | 3.97  | 3.95  | 0.17 | 0.13 | 1.01  | 0.448333 | 0.424655 | 0.753886 | 0.647214 |
| MmugDNA.6814.1.S1_at  | MmugDNA.6814.1 | 5.14  | 5.16  | 0.3  | 0.05 | -1.02 | 0.873955 | 0.685058 | 0.956342 | 0.816309 |
| MmugDNA.6816.1.S1_at  | MmugDNA.6816.1 | 4.35  | 5     | 0.37 | 0.11 | -1.57 | 0.033158 | 0.046999 | 0.346294 | 0.261469 |
| MmugDNA.6817.1.S1_at  | MmugDNA.6817.1 | 2.86  | 2.81  | 0.06 | 0.04 | 1.03  | 0.259898 | 0.540758 | 0.622946 | 0.724533 |
| MmugDNA.682.1.S1_at   | MmugDNA.682.1  | 9.21  | 9.13  | 0.57 | 0.09 | 1.05  | 0.972782 | 0.09732  | 0.991136 | 0.355034 |
| MmugDNA.6821.1.S1_at  | MmugDNA.6821.1 | 5.17  | 5.15  | 0.06 | 0.23 | 1.01  | 0.895302 | 0.895398 | 0.964244 | 0.940218 |
| MmugDNA.6822.1.S1_at  | MmugDNA.6822.1 | 4.9   | 5.04  | 0.15 | 0.1  | -1.1  | 0.505879 | 0.609898 | 0.785504 | 0.768204 |
| MmugDNA.6824.1.S1_at  | MmugDNA.6824.1 | 11.3  | 10.87 | 0.25 | 0.08 | 1.35  | 0.041124 | 0.010811 | 0.365675 | 0.135636 |
| MmugDNA.6825.1.S1_at  | MmugDNA.6825.1 | 6.09  | 4.22  | 1.43 | 0.22 | 3.66  | 0.222258 | 0.133091 | 0.591828 | 0.404734 |
| MmugDNA.6826.1.S1_at  | MmugDNA.6826.1 | 5.31  | 5.14  | 0.27 | 0.06 | 1.13  | 0.918048 | 0.993559 | 0.972062 | 0.996218 |
| MmugDNA.6827.1.S1_at  | MmugDNA.6827.1 | 3.38  | 3.19  | 0.07 | 0.08 | 1.14  | 0.021945 | 0.066834 | 0.309781 | 0.304399 |
| MmugDNA.6829.1.S1_at  | MmugDNA.6829.1 | 7.16  | 7.72  | 0.51 | 0.32 | -1.47 | 0.486164 | 0.514717 | 0.774427 | 0.707852 |
| MmugDNA.6830.1.S1_at  | MmugDNA.6830.1 | 5.84  | 7.39  | 0.84 | 0.11 | -2.94 | 0.040027 | 0.03067  | 0.362955 | 0.217148 |
| MmugDNA.6831.1.S1_at  | MmugDNA.6831.1 | 4.87  | 4.98  | 0.15 | 0.09 | -1.07 | 0.274467 | 0.154917 | 0.63386  | 0.429909 |
| MmugDNA.6833.1.S1_at  | MmugDNA.6833.1 | 9.38  | 9.32  | 1.2  | 0.09 | 1.04  | 0.657781 | 0.629374 | 0.864279 | 0.781837 |
| MmugDNA.6834.1.S1_at  | MmugDNA.6834.1 | 5.33  | 5.09  | 0.22 | 0.15 | 1.17  | 0.119972 | 0.13969  | 0.493259 | 0.413029 |
| MmugDNA.6835.1.S1_at  | MmugDNA.6835.1 | 6.35  | 6.69  | 0.61 | 0.2  | -1.27 | 0.631918 | 0.85477  | 0.85263  | 0.917232 |
| MmugDNA.6837.1.S1_at  | MmugDNA.6837.1 | 9.09  | 9.41  | 0.17 | 0.14 | -1.24 | 0.025826 | 0.039605 | 0.32273  | 0.24402  |
| MmugDNA.6838.1.S1_at  | MmugDNA.6838.1 | 8.26  | 8.04  | 0.04 | 0.08 | 1.16  | 0.00737  | 0.002796 | 0.228072 | 0.077966 |
| MmugDNA.6839.1.S1_at  | MmugDNA.6839.1 | 6.44  | 6.1   | 0.31 | 0.34 | 1.26  | 0.397879 | 0.344003 | 0.722119 | 0.58962  |
| MmugDNA.6841.1.S1_at  | MmugDNA.6841.1 | 8.67  | 7.64  | 0.2  | 0.27 | 2.04  | 0.008408 | 0.001049 | 0.233808 | 0.051466 |
| MmugDNA.6843.1.S1_at  | MmugDNA.6843.1 | 6.98  | 7.26  | 0.34 | 0.13 | -1.22 | 0.147629 | 0.1895   | 0.521685 | 0.465237 |
| MmugDNA.6844.1.S1_at  | MmugDNA.6844.1 | 4.94  | 5.03  | 0.12 | 0.14 | -1.06 | 0.885324 | 0.668423 | 0.960354 | 0.805952 |
| MmugDNA.6847.1.S1_at  | MmugDNA.6847.1 | 6.37  | 6.69  | 0.08 | 0.11 | -1.25 | 0.010285 | 0.04282  | 0.246929 | 0.251467 |
| MmugDNA.6848.1.S1_at  | MmugDNA.6848.1 | 14.29 | 14.33 | 0.1  | 0.02 | -1.02 | 0.717785 | 0.574584 | 0.890514 | 0.745995 |
| MmugDNA.685.1.S1_at   | MmugDNA.685.1  | 6.96  | 7.33  | 0.64 | 0.26 | -1.29 | 0.424811 | 0.489906 | 0.739695 | 0.692002 |
| MmugDNA.6850.1.S1_at  | MmugDNA.6850.1 | 9.52  | 9.11  | 0.27 | 0.08 | 1.32  | 0.235697 | 0.27568  | 0.602783 | 0.539923 |
| MmugDNA.6851.1.S1_at  | MmugDNA.6851.1 | 6.72  | 6.59  | 0.08 | 0.03 | 1.09  | 0.048935 | 0.284466 | 0.384962 | 0.546637 |
| MmugDNA.6853.1.S1_at  | MmugDNA.6853.1 | 12.2  | 12.43 | 0.26 | 0.02 | -1.18 | 0.304175 | 0.163749 | 0.657892 | 0.439924 |
| MmugDNA.6855.1.S1_at  | MmugDNA.6855.1 | 4.99  | 4.82  | 0.26 | 0.03 | 1.12  | 0.254532 | 0.129876 | 0.618992 | 0.401509 |
| MmugDNA.6856.1.S1_at  | MmugDNA.6856.1 | 2.5   | 2.56  | 0.03 | 0.07 | -1.04 | 0.43982  | 0.587082 | 0.748282 | 0.753998 |
| MmugDNA.6857.1.S1_at  | MmugDNA.6857.1 | 3.54  | 3.44  | 0.15 | 0.21 | 1.07  | 0.902989 | 0.841933 | 0.967303 | 0.909939 |
| MmugDNA.686.1.S1_at   | MmugDNA.686.1  | 4.5   | 4.62  | 0.57 | 0.19 | -1.09 | 0.598582 | 0.778942 | 0.836987 | 0.871711 |
| MmugDNA.6860.1.S1_at  | MmugDNA.6860.1 | 6.45  | 5.99  | 0.16 | 0.29 | 1.37  | 0.294951 | 0.472574 | 0.650971 | 0.68007  |
| MmugDNA.6861.1.S1_at  | MmugDNA.6861.1 | 7.24  | 6.89  | 0.32 | 0.18 | 1.27  | 0.266429 | 0.423133 | 0.627329 | 0.646165 |
| MmugDNA.6862.1.S1_at  | MmugDNA.6862.1 | 3.5   | 3.42  | 0.17 | 0.1  | 1.06  | 0.588254 | 0.406737 | 0.83181  | 0.634487 |

|                         |                 |       |       |      |      |       |          |          |          |          |
|-------------------------|-----------------|-------|-------|------|------|-------|----------|----------|----------|----------|
| MmugDNA.6863.1.S1_at    | MmugDNA.6863.1  | 11.62 | 11.82 | 0.16 | 0    | -1.14 | 0.125883 | 0.041979 | 0.49972  | 0.249461 |
| MmugDNA.6865.1.S1_at    | MmugDNA.6865.1  | 8.99  | 9.75  | 0.86 | 0.16 | -1.69 | 0.198588 | 0.256083 | 0.56986  | 0.524052 |
| MmugDNA.6868.1.S1_at    | MmugDNA.6868.1  | 4.24  | 4.45  | 0.39 | 0.05 | -1.15 | 0.909063 | 0.065512 | 0.969287 | 0.301415 |
| MmugDNA.687.1.S1_at     | MmugDNA.687.1   | 5.02  | 4.86  | 0.1  | 0.07 | 1.12  | 0.04626  | 0.006973 | 0.377673 | 0.112743 |
| MmugDNA.6870.1.S1_at    | MmugDNA.6870.1  | 8.03  | 8.38  | 0.2  | 0.04 | -1.27 | 0.018382 | 0.009638 | 0.297316 | 0.129267 |
| MmugDNA.6871.1.S1_at    | MmugDNA.6871.1  | 8.66  | 9.06  | 0.37 | 0.02 | -1.32 | 0.403077 | 0.301012 | 0.725452 | 0.559198 |
| MmugDNA.6872.1.S1_at    | MmugDNA.6872.1  | 6.89  | 6.87  | 0.07 | 0.07 | 1.02  | 0.359693 | 0.399119 | 0.697497 | 0.62969  |
| MmugDNA.6874.1.S1_at    | MmugDNA.6874.1  | 8.52  | 8.54  | 0.28 | 0.2  | -1.01 | 0.297202 | 0.411477 | 0.652609 | 0.638191 |
| MmugDNA.6877.1.S1_at    | MmugDNA.6877.1  | 4.68  | 4.45  | 0.62 | 0.35 | 1.17  | 0.827169 | 0.964947 | 0.938039 | 0.980546 |
| MmugDNA.6878.1.S1_at    | MmugDNA.6878.1  | 7.08  | 6.99  | 0.16 | 0.06 | 1.06  | 0.549119 | 0.841505 | 0.810214 | 0.909663 |
| MmugDNA.6879.1.S1_at    | MmugDNA.6879.1  | 10.37 | 9.12  | 0.47 | 0.23 | 2.38  | 0.009002 | 0.003136 | 0.239987 | 0.081639 |
| MmugDNA.688.1.S1_at     | MmugDNA.688.1   | 9.78  | 9.92  | 0.56 | 0.36 | -1.1  | 0.694517 | 0.910146 | 0.881132 | 0.949342 |
| MmugDNA.6881.1.S1_at    | MmugDNA.6881.1  | 5.13  | 5.08  | 0.13 | 0.16 | 1.03  | 0.60807  | 0.721301 | 0.840979 | 0.838683 |
| MmugDNA.6882.1.S1_at    | MmugDNA.6882.1  | 4.31  | 4.24  | 0.13 | 0.14 | 1.05  | 0.832074 | 0.761042 | 0.939756 | 0.861185 |
| MmugDNA.6883.1.S1_at    | MmugDNA.6883.1  | 8.14  | 8.16  | 0.41 | 0.34 | -1.02 | 0.536048 | 0.946484 | 0.802031 | 0.96965  |
| MmugDNA.6885.1.S1_at    | MmugDNA.6885.1  | 4.47  | 4.74  | 0.64 | 0.3  | -1.2  | 0.633256 | 0.195283 | 0.853409 | 0.470253 |
| MmugDNA.6886.1.S1_at    | MmugDNA.6886.1  | 5.14  | 5.08  | 0.59 | 0.38 | 1.05  | 0.380078 | 0.827998 | 0.709362 | 0.901214 |
| MmugDNA.6888.1.S1_at    | MmugDNA.6888.1  | 4.6   | 4.74  | 0.08 | 0.22 | -1.1  | 0.832646 | 0.03435  | 0.940026 | 0.229283 |
| MmugDNA.6889.1.S1_at    | MmugDNA.6889.1  | 4.88  | 5.18  | 0.26 | 0.23 | -1.24 | 0.091211 | 0.151494 | 0.459035 | 0.426223 |
| MmugDNA.689.1.S1_at     | MmugDNA.689.1   | 5.35  | 5.15  | 0.07 | 0.05 | 1.15  | 0.015766 | 0.432316 | 0.283686 | 0.652778 |
| MmugDNA.6893.1.S1_at    | MmugDNA.6893.1  | 13.35 | 13.3  | 0.03 | 0.06 | 1.04  | 0.162349 | 0.113921 | 0.5354   | 0.38018  |
| MmugDNA.6894.1.S1_at    | MmugDNA.6894.1  | 5.84  | 5.72  | 0.16 | 0.11 | 1.09  | 0.12102  | 0.495641 | 0.494696 | 0.695576 |
| MmugDNA.6895.1.S1_at    | MmugDNA.6895.1  | 2.95  | 2.96  | 0.15 | 0.07 | -1.01 | 0.68735  | 0.15746  | 0.877741 | 0.432984 |
| MmugDNA.6895.1.S1_s_at  | MmugDNA.6895.1  | 11.69 | 11.7  | 0.44 | 0.09 | -1.01 | 0.985091 | 0.133301 | 0.995311 | 0.405049 |
| MmugDNA.6895.1.S1_x_at  | MmugDNA.6895.1  | 9.38  | 9.19  | 0.45 | 0.12 | 1.14  | 0.799799 | 0.132382 | 0.926711 | 0.404344 |
| MmugDNA.6896.1.S1_at    | MmugDNA.6896.1  | 7.68  | 7.57  | 0.16 | 0.05 | 1.07  | 0.15434  | 0.241348 | 0.527483 | 0.511952 |
| MmugDNA.6897.1.S1_at    | MmugDNA.6897.1  | 6.67  | 6.67  | 0.17 | 0.08 | 1.01  | 0.950369 | 0.91504  | 0.983308 | 0.952293 |
| MmugDNA.6897.1.S1_x_at  | MmugDNA.6897.1  | 6.58  | 6.56  | 0.16 | 0.04 | 1.01  | 0.933602 | 0.227505 | 0.977537 | 0.499805 |
| MmugDNA.690.1.S1_at     | MmugDNA.690.1   | 9.68  | 9.96  | 0.36 | 0.08 | -1.22 | 0.18564  | 0.010277 | 0.558622 | 0.132736 |
| MmugDNA.6902.1.S1_at    | MmugDNA.6902.1  | 9.46  | 10.56 | 0.36 | 0.07 | -2.15 | 0.004714 | 0.000357 | 0.201699 | 0.037247 |
| MmugDNA.6903.1.S1_at    | MmugDNA.6903.1  | 3.02  | 2.84  | 0.23 | 0.04 | 1.13  | 0.219493 | 0.437628 | 0.588951 | 0.656821 |
| MmugDNA.6904.1.S1_at    | MmugDNA.6904.1  | 4.66  | 4.33  | 0.38 | 0.06 | 1.25  | 0.105321 | 0.093958 | 0.477051 | 0.350467 |
| MmugDNA.21735.1.S1_s_at | MmugDNA.21735.1 | 4.57  | 4.4   | 0.54 | 0.08 | 1.12  | 0.18752  | 0.220408 | 0.559879 | 0.493818 |
| MmugDNA.6906.1.S1_at    | MmugDNA.6906.1  | 5.42  | 5.4   | 0.16 | 0.1  | 1.01  | 0.774676 | 0.546102 | 0.91642  | 0.727769 |
| MmugDNA.6907.1.S1_at    | MmugDNA.6907.1  | 3.77  | 3.6   | 0.04 | 0.1  | 1.12  | 0.108921 | 0.295126 | 0.48128  | 0.554551 |
| MmugDNA.6909.1.S1_at    | MmugDNA.6909.1  | 4.73  | 4.16  | 0.33 | 0.24 | 1.48  | 0.373575 | 0.068837 | 0.705567 | 0.308714 |
| MmugDNA.691.1.S1_at     | MmugDNA.691.1   | 3.36  | 3.23  | 0.24 | 0.12 | 1.1   | 0.516023 | 0.47582  | 0.791221 | 0.682387 |
| MmugDNA.6913.1.S1_at    | MmugDNA.6913.1  | 4.43  | 4.47  | 0.37 | 0.36 | -1.03 | 0.861244 | 0.595447 | 0.951227 | 0.759091 |
| MmugDNA.6914.1.S1_at    | MmugDNA.6914.1  | 9.98  | 10.22 | 0.13 | 0.24 | -1.18 | 0.27026  | 0.621087 | 0.630252 | 0.77579  |
| MmugDNA.6916.1.S1_at    | MmugDNA.6916.1  | 5.27  | 5.01  | 0.07 | 0.11 | 1.19  | 0.053959 | 0.166013 | 0.395633 | 0.442579 |
| MmugDNA.6917.1.S1_at    | MmugDNA.6917.1  | 7.29  | 7.29  | 0.02 | 0.01 | 1     | 0.24149  | 0.735417 | 0.607632 | 0.846919 |
| MmugDNA.6918.1.S1_at    | MmugDNA.6918.1  | 2.6   | 2.85  | 0.11 | 0.22 | -1.18 | 0.153109 | 0.176691 | 0.526207 | 0.453142 |
| MmugDNA.692.1.S1_at     | MmugDNA.692.1   | 3.42  | 3.44  | 0.08 | 0.18 | -1.01 | 0.876261 | 0.329564 | 0.956886 | 0.578781 |

|                        |                |       |       |      |      |       |          |          |          |          |
|------------------------|----------------|-------|-------|------|------|-------|----------|----------|----------|----------|
| MmugDNA.6920.1.S1_at   | MmugDNA.6920.1 | 3.6   | 3.66  | 0.09 | 0.06 | -1.04 | 0.671184 | 0.815152 | 0.870255 | 0.89336  |
| MmugDNA.6921.1.S1_at   | MmugDNA.6921.1 | 6.18  | 5.89  | 0.1  | 0.06 | 1.23  | 0.047067 | 0.045971 | 0.379283 | 0.258818 |
| MmugDNA.6922.1.S1_at   | MmugDNA.6922.1 | 11.82 | 12.04 | 0.3  | 0.05 | -1.16 | 0.263759 | 0.060859 | 0.625638 | 0.293442 |
| MmugDNA.6923.1.S1_at   | MmugDNA.6923.1 | 5.23  | 5.24  | 0.16 | 0.02 | -1.01 | 0.806681 | 0.532774 | 0.929839 | 0.719235 |
| MmugDNA.6924.1.S1_at   | MmugDNA.6924.1 | 7.12  | 7.54  | 0.37 | 0.1  | -1.34 | 0.087896 | 0.113163 | 0.455784 | 0.379184 |
| MmugDNA.6925.1.S1_at   | MmugDNA.6925.1 | 3.19  | 3.11  | 0.2  | 0.04 | 1.06  | 0.142343 | 0.08918  | 0.517463 | 0.343222 |
| MmugDNA.6926.1.S1_at   | MmugDNA.6926.1 | 4.73  | 4.93  | 0.29 | 0.17 | -1.15 | 0.891294 | 0.04473  | 0.962572 | 0.255998 |
| MmugDNA.6927.1.S1_at   | MmugDNA.6927.1 | 8.01  | 8.96  | 1.33 | 0.17 | -1.93 | 0.271376 | 0.077342 | 0.631217 | 0.323141 |
| MmugDNA.6928.1.S1_at   | MmugDNA.6928.1 | 5.05  | 4.72  | 0.14 | 0.17 | 1.26  | 0.093799 | 0.163073 | 0.46321  | 0.439235 |
| MmugDNA.693.1.S1_at    | MmugDNA.693.1  | 2.96  | 2.89  | 0.13 | 0.02 | 1.05  | 0.622681 | 0.713804 | 0.847922 | 0.833937 |
| MmugDNA.6930.1.S1_at   | MmugDNA.6930.1 | 6.42  | 6.38  | 0.06 | 0.14 | 1.02  | 0.256072 | 0.309217 | 0.620064 | 0.564807 |
| MmugDNA.6933.1.S1_at   | MmugDNA.6933.1 | 3.23  | 3.22  | 0.16 | 0    | 1.01  | 0.623744 | 0.757486 | 0.848338 | 0.858849 |
| MmugDNA.6934.1.S1_at   | MmugDNA.6934.1 | 5.88  | 6.27  | 0.75 | 0.06 | -1.3  | 0.928057 | 0.725088 | 0.976259 | 0.840867 |
| MmugDNA.6935.1.S1_at   | MmugDNA.6935.1 | 11.21 | 11.75 | 0.21 | 0.1  | -1.46 | 0.024552 | 0.043322 | 0.319083 | 0.252847 |
| MmugDNA.6935.1.S1_s_at | MmugDNA.6935.1 | 11.45 | 11.79 | 0.23 | 0.11 | -1.26 | 0.089465 | 0.072629 | 0.457657 | 0.315579 |
| MmugDNA.6936.1.S1_at   | MmugDNA.6936.1 | 4.84  | 4.67  | 0.65 | 0.24 | 1.13  | 0.353475 | 0.486368 | 0.693272 | 0.689764 |
| MmugDNA.6937.1.S1_at   | MmugDNA.6937.1 | 4.05  | 4.82  | 0.5  | 0.64 | -1.69 | 0.197302 | 0.397401 | 0.568336 | 0.628812 |
| MmugDNA.6938.1.S1_at   | MmugDNA.6938.1 | 3.62  | 3.57  | 0.18 | 0.09 | 1.04  | 0.878507 | 0.713781 | 0.95775  | 0.833937 |
| MmugDNA.694.1.S1_at    | MmugDNA.694.1  | 3.69  | 3.62  | 0.08 | 0.15 | 1.05  | 0.230116 | 0.308353 | 0.598481 | 0.564428 |
| MmugDNA.6940.1.S1_at   | MmugDNA.6940.1 | 9.09  | 9.15  | 0.66 | 0.07 | -1.05 | 0.884637 | 0.876315 | 0.960117 | 0.92967  |
| MmugDNA.6942.1.S1_at   | MmugDNA.6942.1 | 3.57  | 3.56  | 0.13 | 0.02 | 1     | 0.499125 | 0.697125 | 0.781962 | 0.824045 |
| MmugDNA.6943.1.S1_at   | MmugDNA.6943.1 | 3.59  | 3.66  | 0.11 | 0.08 | -1.05 | 0.50384  | 0.207389 | 0.784418 | 0.481599 |
| MmugDNA.6945.1.S1_at   | MmugDNA.6945.1 | 3.94  | 3.96  | 0.32 | 0.19 | -1.02 | 0.816208 | 0.662253 | 0.933432 | 0.802209 |
| MmugDNA.6946.1.S1_at   | MmugDNA.6946.1 | 6.5   | 6.12  | 0.08 | 0.11 | 1.3   | 0.024023 | 0.014113 | 0.317529 | 0.15195  |
| MmugDNA.6947.1.S1_at   | MmugDNA.6947.1 | 8.96  | 7.48  | 0.9  | 0.12 | 2.79  | 0.142948 | 0.213572 | 0.518166 | 0.48741  |
| MmugDNA.6949.1.S1_at   | MmugDNA.6949.1 | 2.83  | 2.83  | 0.03 | 0.15 | 1     | 0.992462 | 0.523283 | 0.997121 | 0.713635 |
| MmugDNA.695.1.S1_at    | MmugDNA.695.1  | 4.65  | 4.77  | 0.06 | 0.1  | -1.09 | 0.127337 | 0.174635 | 0.501548 | 0.45116  |
| MmugDNA.6950.1.S1_s_at | MmugDNA.6950.1 | 11.13 | 11.1  | 0.22 | 0.13 | 1.02  | 0.760744 | 0.45913  | 0.910166 | 0.671589 |
| MmugDNA.6951.1.S1_at   | MmugDNA.6951.1 | 10.76 | 10.27 | 0.7  | 0.12 | 1.4   | 0.248297 | 0.060426 | 0.613834 | 0.292478 |
| MmugDNA.6952.1.S1_at   | MmugDNA.6952.1 | 5.49  | 5.61  | 1.36 | 0.88 | -1.08 | 0.972011 | 0.654799 | 0.990867 | 0.798154 |
| MmugDNA.6953.1.S1_at   | MmugDNA.6953.1 | 4.98  | 4.85  | 0.13 | 0.06 | 1.09  | 0.201745 | 0.113558 | 0.573323 | 0.379632 |
| MmugDNA.6955.1.S1_at   | MmugDNA.6955.1 | 5.36  | 5.17  | 0.27 | 0.18 | 1.15  | 0.255703 | 0.318455 | 0.619741 | 0.571239 |
| MmugDNA.6957.1.S1_at   | MmugDNA.6957.1 | 7.39  | 8.46  | 0.26 | 0.1  | -2.1  | 0.005697 | 0.054698 | 0.210459 | 0.279343 |
| MmugDNA.6958.1.S1_at   | MmugDNA.6958.1 | 4.64  | 4.46  | 0.53 | 0.47 | 1.13  | 0.700166 | 0.594642 | 0.883438 | 0.758623 |
| MmugDNA.696.1.S1_at    | MmugDNA.696.1  | 4.29  | 4.2   | 0.19 | 0.19 | 1.07  | 0.822671 | 0.86602  | 0.936084 | 0.923791 |
| MmugDNA.6960.1.S1_at   | MmugDNA.6960.1 | 5.99  | 5.86  | 0.24 | 0.09 | 1.1   | 0.722929 | 0.721563 | 0.892623 | 0.838748 |
| MmugDNA.6961.1.S1_s_at | MmugDNA.6961.1 | 9.45  | 9.23  | 0.26 | 0.06 | 1.17  | 0.147421 | 0.237983 | 0.521578 | 0.508528 |
| MmugDNA.6964.1.S1_at   | MmugDNA.6964.1 | 5.35  | 5.14  | 0.07 | 0.09 | 1.16  | 0.016694 | 0.017872 | 0.287563 | 0.168774 |
| MmugDNA.6965.1.S1_at   | MmugDNA.6965.1 | 4.86  | 4.74  | 0.16 | 0.22 | 1.09  | 0.898982 | 0.917543 | 0.965677 | 0.953883 |
| MmugDNA.6966.1.S1_at   | MmugDNA.6966.1 | 4.53  | 4.59  | 0.23 | 0.32 | -1.04 | 0.858456 | 0.447838 | 0.95001  | 0.663881 |
| MmugDNA.6967.1.S1_at   | MmugDNA.6967.1 | 6.51  | 6.79  | 0.65 | 0.07 | -1.21 | 0.405638 | 0.152101 | 0.727426 | 0.426864 |
| MmugDNA.6968.1.S1_at   | MmugDNA.6968.1 | 5.22  | 5.04  | 0.27 | 0.16 | 1.13  | 0.408593 | 0.309679 | 0.729419 | 0.565005 |
| MmugDNA.697.1.S1_at    | MmugDNA.697.1  | 4.38  | 4.25  | 0.28 | 0.06 | 1.1   | 0.348844 | 0.906748 | 0.690077 | 0.947216 |

|                        |                |       |       |      |      |       |          |          |          |          |
|------------------------|----------------|-------|-------|------|------|-------|----------|----------|----------|----------|
| MmugDNA.6970.1.S1_at   | MmugDNA.6970.1 | 7.6   | 8.53  | 0.92 | 0.32 | -1.91 | 0.185845 | 0.271799 | 0.55873  | 0.536577 |
| MmugDNA.6972.1.S1_at   | MmugDNA.6972.1 | 3.36  | 3.67  | 0.23 | 0.08 | -1.24 | 0.10136  | 0.228551 | 0.471667 | 0.500752 |
| MmugDNA.6973.1.S1_at   | MmugDNA.6973.1 | 3.82  | 3.56  | 0.22 | 0.11 | 1.2   | 0.386887 | 0.564801 | 0.713948 | 0.739427 |
| MmugDNA.6977.1.S1_at   | MmugDNA.6977.1 | 5.73  | 5.66  | 0.05 | 0.15 | 1.05  | 0.373521 | 0.329294 | 0.705567 | 0.57869  |
| MmugDNA.698.1.S1_at    | MmugDNA.698.1  | 2.79  | 2.8   | 0.11 | 0.07 | -1    | 0.862536 | 0.665604 | 0.951603 | 0.804075 |
| MmugDNA.6981.1.S1_at   | MmugDNA.6981.1 | 8.63  | 9.07  | 0.41 | 0.04 | -1.36 | 0.457546 | 0.113416 | 0.758364 | 0.379509 |
| MmugDNA.6982.1.S1_at   | MmugDNA.6982.1 | 3.6   | 3.56  | 0.08 | 0.07 | 1.03  | 0.668555 | 0.174634 | 0.86912  | 0.45116  |
| MmugDNA.6984.1.S1_at   | MmugDNA.6984.1 | 5.48  | 5.17  | 0.46 | 0.05 | 1.24  | 0.260347 | 0.406945 | 0.62325  | 0.634629 |
| MmugDNA.6985.1.S1_at   | MmugDNA.6985.1 | 10.4  | 10.04 | 2.63 | 0.38 | 1.29  | 0.58786  | 0.784811 | 0.83181  | 0.875426 |
| MmugDNA.6986.1.S1_at   | MmugDNA.6986.1 | 8.16  | 8.02  | 0.14 | 0.19 | 1.1   | 0.073562 | 0.057303 | 0.434623 | 0.285248 |
| MmugDNA.6987.1.S1_at   | MmugDNA.6987.1 | 4.58  | 4.65  | 0.09 | 0.45 | -1.05 | 0.452112 | 0.828149 | 0.755619 | 0.901214 |
| MmugDNA.6988.1.S1_at   | MmugDNA.6988.1 | 4.66  | 4.66  | 0.4  | 0.32 | 1     | 0.583879 | 0.440739 | 0.829351 | 0.659113 |
| MmugDNA.6989.1.S1_at   | MmugDNA.6989.1 | 6.32  | 6.41  | 0.19 | 0.14 | -1.07 | 0.558075 | 0.423792 | 0.815182 | 0.646542 |
| MmugDNA.6991.1.S1_at   | MmugDNA.6991.1 | 7.48  | 6.84  | 0.62 | 0    | 1.56  | 0.150315 | 0.03119  | 0.523933 | 0.218392 |
| MmugDNA.6992.1.S1_at   | MmugDNA.6992.1 | 9.08  | 9.33  | 0.23 | 0.22 | -1.18 | 0.193581 | 0.187919 | 0.564275 | 0.464026 |
| MmugDNA.6993.1.S1_at   | MmugDNA.6993.1 | 8.25  | 8.31  | 2.48 | 0.36 | -1.04 | 0.880405 | 0.196221 | 0.958594 | 0.471236 |
| MmugDNA.6994.1.S1_at   | MmugDNA.6994.1 | 9.89  | 10.01 | 1.49 | 0.12 | -1.09 | 0.872427 | 0.53587  | 0.955759 | 0.721366 |
| MmugDNA.6995.1.S1_at   | MmugDNA.6995.1 | 10.67 | 10.82 | 0.83 | 0.01 | -1.11 | 0.805544 | 0.659239 | 0.929362 | 0.80063  |
| MmugDNA.6996.1.S1_at   | MmugDNA.6996.1 | 11.1  | 11.21 | 0.25 | 0.09 | -1.08 | 0.884016 | 0.033983 | 0.959789 | 0.227981 |
| MmugDNA.6999.1.S1_at   | MmugDNA.6999.1 | 7.9   | 8.35  | 0.28 | 0.06 | -1.37 | 0.022394 | 0.560306 | 0.310499 | 0.736628 |
| MmugDNA.7.1.S1_at      | MmugDNA.7.1    | 7.59  | 8.01  | 1.55 | 0.41 | -1.34 | 0.755437 | 0.161718 | 0.907908 | 0.437771 |
| MmugDNA.700.1.S1_at    | MmugDNA.700.1  | 4.88  | 5.16  | 0.02 | 0.07 | -1.21 | 0.003902 | 0.346907 | 0.198571 | 0.591725 |
| MmugDNA.7000.1.S1_at   | MmugDNA.7000.1 | 8.62  | 8.92  | 0.33 | 0.05 | -1.23 | 0.21198  | 0.000839 | 0.582752 | 0.046968 |
| MmugDNA.7003.1.S1_at   | MmugDNA.7003.1 | 9.92  | 9.67  | 0.33 | 0.16 | 1.19  | 0.780613 | 0.154534 | 0.919137 | 0.429405 |
| MmugDNA.7004.1.S1_at   | MmugDNA.7004.1 | 3.3   | 3.11  | 0.26 | 0.18 | 1.14  | 0.340211 | 0.351895 | 0.68442  | 0.595331 |
| MmugDNA.7005.1.S1_at   | MmugDNA.7005.1 | 10.63 | 10.38 | 0.3  | 0.09 | 1.2   | 0.260217 | 0.052966 | 0.623127 | 0.275787 |
| MmugDNA.7006.1.S1_at   | MmugDNA.7006.1 | 4.72  | 4.53  | 0.81 | 0.17 | 1.14  | 0.692147 | 0.758331 | 0.880095 | 0.859416 |
| MmugDNA.7008.1.S1_at   | MmugDNA.7008.1 | 5.66  | 6.59  | 0.52 | 0.51 | -1.9  | 0.060583 | 0.098245 | 0.408456 | 0.356289 |
| MmugDNA.7009.1.S1_at   | MmugDNA.7009.1 | 3.4   | 3.52  | 0.13 | 0.13 | -1.09 | 0.552785 | 0.114341 | 0.811917 | 0.380835 |
| MmugDNA.7010.1.S1_at   | MmugDNA.7010.1 | 2.75  | 2.81  | 0.12 | 0.08 | -1.04 | 0.629376 | 0.849453 | 0.851599 | 0.914533 |
| MmugDNA.7011.1.S1_at   | MmugDNA.7011.1 | 3.21  | 3.32  | 0.1  | 0.1  | -1.08 | 0.149673 | 0.343097 | 0.523226 | 0.588883 |
| MmugDNA.7012.1.S1_at   | MmugDNA.7012.1 | 3.77  | 3.66  | 0.09 | 0.14 | 1.08  | 0.372894 | 0.597445 | 0.705567 | 0.760197 |
| MmugDNA.7013.1.S1_at   | MmugDNA.7013.1 | 5.35  | 5.1   | 0.37 | 0.26 | 1.19  | 0.746516 | 0.334175 | 0.903514 | 0.582235 |
| MmugDNA.7013.1.S1_s_at | MmugDNA.7013.1 | 7.21  | 6.94  | 0.59 | 0.14 | 1.2   | 0.96851  | 0.991356 | 0.989702 | 0.995189 |
| MmugDNA.7014.1.S1_at   | MmugDNA.7014.1 | 5.92  | 5.88  | 0.06 | 0.07 | 1.02  | 0.350875 | 0.074532 | 0.691739 | 0.318173 |
| MmugDNA.7016.1.S1_at   | MmugDNA.7016.1 | 9.4   | 9.42  | 0.34 | 0.12 | -1.01 | 0.800701 | 0.701266 | 0.92713  | 0.826775 |
| MmugDNA.7017.1.S1_at   | MmugDNA.7017.1 | 5.02  | 4.31  | 0.9  | 0.65 | 1.64  | 0.25456  | 0.292223 | 0.618992 | 0.552363 |
| MmugDNA.7019.1.S1_at   | MmugDNA.7019.1 | 2.82  | 3.01  | 0.13 | 0.23 | -1.14 | 0.443589 | 0.521024 | 0.750908 | 0.712115 |
| MmugDNA.702.1.S1_at    | MmugDNA.702.1  | 5.34  | 5.08  | 0.17 | 0.29 | 1.2   | 0.454441 | 0.200173 | 0.756801 | 0.474603 |
| MmugDNA.7020.1.S1_at   | MmugDNA.7020.1 | 5.83  | 5.99  | 0.65 | 0.05 | -1.12 | 0.565129 | 0.557374 | 0.819091 | 0.735031 |
| MmugDNA.7022.1.S1_at   | MmugDNA.7022.1 | 4.72  | 4.49  | 0.2  | 0.12 | 1.17  | 0.316878 | 0.014721 | 0.666816 | 0.154415 |
| MmugDNA.7025.1.S1_at   | MmugDNA.7025.1 | 3.03  | 3.04  | 0.07 | 0.08 | -1    | 0.498908 | 0.675707 | 0.781845 | 0.810429 |
| MmugDNA.7026.1.S1_at   | MmugDNA.7026.1 | 4.09  | 4.08  | 0.04 | 0.15 | 1.01  | 0.960728 | 0.26488  | 0.987225 | 0.530874 |

|                         |                 |       |       |      |      |       |          |          |          |          |
|-------------------------|-----------------|-------|-------|------|------|-------|----------|----------|----------|----------|
| MmugDNA.7028.1.S1_at    | MmugDNA.7028.1  | 3.75  | 3.6   | 0.28 | 0.08 | 1.11  | 0.434315 | 0.593409 | 0.744987 | 0.758267 |
| MmugDNA.7030.1.S1_at    | MmugDNA.7030.1  | 4.67  | 4.63  | 0.11 | 0.23 | 1.03  | 0.516965 | 0.343808 | 0.791672 | 0.589508 |
| MmugDNA.7031.1.S1_at    | MmugDNA.7031.1  | 6.58  | 7.78  | 1.12 | 0.14 | -2.29 | 0.45277  | 0.397926 | 0.755901 | 0.629138 |
| MmugDNA.7032.1.S1_at    | MmugDNA.7032.1  | 7.7   | 6.93  | 0.11 | 0.14 | 1.71  | 0.001712 | 0.001163 | 0.166176 | 0.053615 |
| MmugDNA.7033.1.S1_at    | MmugDNA.7033.1  | 9.29  | 9.77  | 0.43 | 0.06 | -1.4  | 0.403586 | 0.056658 | 0.725766 | 0.284094 |
| MmugDNA.7035.1.S1_at    | MmugDNA.7035.1  | 4.07  | 4.13  | 0.17 | 0.2  | -1.04 | 0.739113 | 0.579846 | 0.900366 | 0.74931  |
| MmugDNA.7036.1.S1_at    | MmugDNA.7036.1  | 3.46  | 3.46  | 0.12 | 0.07 | -1    | 0.877861 | 0.904652 | 0.95748  | 0.945969 |
| MmugDNA.7039.1.S1_at    | MmugDNA.7039.1  | 4.9   | 4.9   | 0.32 | 0.62 | 1     | 0.406481 | 0.531308 | 0.727994 | 0.718555 |
| MmugDNA.704.1.S1_at     | MmugDNA.704.1   | 10.07 | 10.58 | 0.47 | 0.15 | -1.42 | 0.06621  | 0.026632 | 0.421918 | 0.204075 |
| MmugDNA.39687.1.S1_s_at | MmugDNA.39687.1 | 12.81 | 12.84 | 0.21 | 0.07 | -1.02 | 0.985344 | 0.98288  | 0.995405 | 0.990601 |
| MmugDNA.7041.1.S1_at    | MmugDNA.7041.1  | 6.79  | 6.78  | 1.07 | 0.28 | 1     | 0.963558 | 0.500071 | 0.988152 | 0.698818 |
| MmugDNA.7042.1.S1_at    | MmugDNA.7042.1  | 5.97  | 5.83  | 0.1  | 0.07 | 1.1   | 0.087765 | 0.272983 | 0.455542 | 0.53761  |
| MmugDNA.7043.1.S1_at    | MmugDNA.7043.1  | 6.53  | 6.37  | 0.19 | 0.06 | 1.12  | 0.145557 | 0.022541 | 0.520527 | 0.187965 |
| MmugDNA.7047.1.S1_at    | MmugDNA.7047.1  | 4.89  | 4.52  | 0.16 | 0.19 | 1.29  | 0.060364 | 0.092189 | 0.408039 | 0.347912 |
| MmugDNA.7048.1.S1_s_at  | MmugDNA.7048.1  | 4.6   | 4.44  | 0.52 | 0.31 | 1.11  | 0.378647 | 0.05323  | 0.708438 | 0.276445 |
| MmugDNA.7049.1.S1_at    | MmugDNA.7049.1  | 6.11  | 6.13  | 0.83 | 0.19 | -1.02 | 0.409052 | 0.418173 | 0.729748 | 0.642638 |
| MmugDNA.7050.1.S1_at    | MmugDNA.7050.1  | 5.82  | 6.14  | 0.23 | 0.36 | -1.25 | 0.162174 | 0.099715 | 0.535244 | 0.358259 |
| MmugDNA.7051.1.S1_at    | MmugDNA.7051.1  | 3.08  | 2.96  | 0.1  | 0.24 | 1.08  | 0.164556 | 0.22296  | 0.537466 | 0.495821 |
| MmugDNA.7053.1.S1_at    | MmugDNA.7053.1  | 4.18  | 3.92  | 0.11 | 0.17 | 1.2   | 0.139156 | 0.26816  | 0.514459 | 0.533876 |
| MmugDNA.7055.1.S1_at    | MmugDNA.7055.1  | 9.63  | 10.87 | 0.41 | 0.43 | -2.36 | 0.012422 | 0.004164 | 0.262146 | 0.091036 |
| MmugDNA.7056.1.S1_at    | MmugDNA.7056.1  | 10.95 | 11.2  | 0.38 | 0.1  | -1.19 | 0.238206 | 0.046716 | 0.605262 | 0.260831 |
| MmugDNA.7056.1.S1_s_at  | MmugDNA.7056.1  | 11.16 | 11.26 | 0.4  | 0.11 | -1.07 | 0.255199 | 0.071037 | 0.61927  | 0.312704 |
| MmugDNA.706.1.S1_at     | MmugDNA.706.1   | 5.85  | 5.79  | 0.18 | 0.04 | 1.05  | 0.483097 | 0.721354 | 0.772862 | 0.838685 |
| MmugDNA.7062.1.S1_at    | MmugDNA.7062.1  | 6.38  | 6.35  | 0.24 | 0.13 | 1.02  | 0.572573 | 0.33746  | 0.823222 | 0.584663 |
| MmugDNA.7063.1.S1_at    | MmugDNA.7063.1  | 4.78  | 4.77  | 0.04 | 0.17 | 1.01  | 0.34593  | 0.442922 | 0.687872 | 0.660827 |
| MmugDNA.7064.1.S1_at    | MmugDNA.7064.1  | 5.81  | 5.68  | 0.53 | 0.73 | 1.09  | 0.993563 | 0.790843 | 0.997507 | 0.87902  |
| MmugDNA.7065.1.S1_at    | MmugDNA.7065.1  | 5.1   | 4.94  | 0.03 | 0.13 | 1.11  | 0.121858 | 0.502269 | 0.495636 | 0.70006  |
| MmugDNA.7067.1.S1_at    | MmugDNA.7067.1  | 10.32 | 9.62  | 0.33 | 0.11 | 1.62  | 0.061594 | 0.017798 | 0.411026 | 0.168575 |
| MmugDNA.7068.1.S1_at    | MmugDNA.7068.1  | 3.91  | 4.01  | 0.11 | 0.25 | -1.07 | 0.564106 | 0.218326 | 0.81857  | 0.491872 |
| MmugDNA.7069.1.S1_at    | MmugDNA.7069.1  | 7.01  | 7.26  | 0.25 | 0.07 | -1.18 | 0.234929 | 0.013539 | 0.602251 | 0.148928 |
| MmugDNA.707.1.S1_at     | MmugDNA.707.1   | 6.2   | 5.85  | 0.35 | 0.04 | 1.27  | 0.460913 | 0.625772 | 0.760635 | 0.779322 |
| MmugDNA.7070.1.S1_at    | MmugDNA.7070.1  | 5.98  | 5.97  | 0.21 | 0.01 | 1.01  | 0.866262 | 0.869553 | 0.953029 | 0.925994 |
| MmugDNA.7073.1.S1_at    | MmugDNA.7073.1  | 4.39  | 4.25  | 0    | 0.1  | 1.1   | 0.137096 | 0.216631 | 0.512022 | 0.490285 |
| MmugDNA.7074.1.S1_at    | MmugDNA.7074.1  | 5.14  | 4.96  | 0.07 | 0.05 | 1.13  | 0.012917 | 0.021009 | 0.265815 | 0.181715 |
| MmugDNA.7075.1.S1_at    | MmugDNA.7075.1  | 4.35  | 4.41  | 0.02 | 0.05 | -1.04 | 0.162614 | 0.509221 | 0.535778 | 0.704032 |
| MmugDNA.7076.1.S1_at    | MmugDNA.7076.1  | 3.36  | 3.38  | 0.16 | 0.04 | -1.02 | 0.432052 | 0.01307  | 0.743696 | 0.14707  |
| MmugDNA.7077.1.S1_x_at  | MmugDNA.7077.1  | 5.98  | 5.3   | 0.25 | 0.24 | 1.6   | 0.042276 | 0.031802 | 0.368858 | 0.220774 |
| MmugDNA.7078.1.S1_at    | MmugDNA.7078.1  | 6.22  | 6.34  | 0.5  | 0.42 | -1.09 | 0.372022 | 0.194761 | 0.705567 | 0.469774 |
| MmugDNA.7079.1.S1_at    | MmugDNA.7079.1  | 7.08  | 7.23  | 0.24 | 0.1  | -1.11 | 0.573115 | 0.106682 | 0.823441 | 0.369237 |
| MmugDNA.708.1.S1_at     | MmugDNA.708.1   | 5.48  | 5.35  | 0.07 | 0.08 | 1.1   | 0.093403 | 0.150735 | 0.462508 | 0.4253   |
| MmugDNA.7080.1.S1_at    | MmugDNA.7080.1  | 4.99  | 4.99  | 0.02 | 0.11 | -1    | 0.631101 | 0.720365 | 0.852361 | 0.838259 |
| MmugDNA.7081.1.S1_at    | MmugDNA.7081.1  | 3.1   | 3.16  | 0.09 | 0.03 | -1.04 | 0.166918 | 0.080396 | 0.539531 | 0.328028 |
| MmugDNA.7082.1.S1_at    | MmugDNA.7082.1  | 5.19  | 5.13  | 0.12 | 0.02 | 1.04  | 0.65782  | 0.951102 | 0.864279 | 0.972319 |

|                        |                |       |       |      |      |       |          |          |          |          |
|------------------------|----------------|-------|-------|------|------|-------|----------|----------|----------|----------|
| MmugDNA.7084.1.S1_at   | MmugDNA.7084.1 | 6.57  | 6.26  | 0.15 | 0.32 | 1.24  | 0.125418 | 0.09949  | 0.499523 | 0.357866 |
| MmugDNA.7085.1.S1_at   | MmugDNA.7085.1 | 5.79  | 5.44  | 0.12 | 0.11 | 1.27  | 0.050088 | 0.186718 | 0.386704 | 0.462497 |
| MmugDNA.7086.1.S1_at   | MmugDNA.7086.1 | 6.46  | 6.31  | 0.02 | 0.09 | 1.11  | 0.014391 | 0.089951 | 0.27544  | 0.344184 |
| MmugDNA.7086.1.S1_s_at | MmugDNA.7086.1 | 7.08  | 6.58  | 0.7  | 0.34 | 1.41  | 0.298293 | 0.319595 | 0.653103 | 0.571885 |
| MmugDNA.7087.1.S1_at   | MmugDNA.7087.1 | 3.21  | 3.17  | 0.05 | 0.08 | 1.03  | 0.615122 | 0.956329 | 0.844202 | 0.975138 |
| MmugDNA.7089.1.S1_at   | MmugDNA.7089.1 | 4.39  | 4.35  | 0.21 | 0.1  | 1.02  | 0.727265 | 0.860681 | 0.894648 | 0.920641 |
| MmugDNA.709.1.S1_at    | MmugDNA.709.1  | 4.43  | 4.44  | 0.1  | 0.02 | -1.01 | 0.987908 | 0.760907 | 0.995831 | 0.86108  |
| MmugDNA.7090.1.S1_at   | MmugDNA.7090.1 | 2.78  | 2.88  | 0.11 | 0.04 | -1.07 | 0.104255 | 0.188199 | 0.475369 | 0.464251 |
| MmugDNA.7091.1.S1_at   | MmugDNA.7091.1 | 6.75  | 6.44  | 0.17 | 0.15 | 1.23  | 0.203904 | 0.239372 | 0.57513  | 0.510039 |
| MmugDNA.7092.1.S1_at   | MmugDNA.7092.1 | 3.47  | 3.13  | 0.28 | 0.05 | 1.27  | 0.11211  | 0.387079 | 0.485224 | 0.621935 |
| MmugDNA.7093.1.S1_at   | MmugDNA.7093.1 | 3.14  | 3.38  | 0.09 | 0.31 | -1.17 | 0.28072  | 0.540144 | 0.639467 | 0.724169 |
| MmugDNA.7094.1.S1_at   | MmugDNA.7094.1 | 3.87  | 3.81  | 0.11 | 0.13 | 1.04  | 0.453746 | 0.67609  | 0.756276 | 0.810704 |
| MmugDNA.7095.1.S1_at   | MmugDNA.7095.1 | 9.68  | 9.82  | 0.29 | 0.03 | -1.1  | 0.946432 | 0.914371 | 0.981426 | 0.951844 |
| MmugDNA.7096.1.S1_at   | MmugDNA.7096.1 | 8.24  | 9.32  | 0.58 | 0.11 | -2.11 | 0.021044 | 0.007553 | 0.306638 | 0.116437 |
| MmugDNA.7097.1.S1_at   | MmugDNA.7097.1 | 4.01  | 4     | 0.12 | 0.03 | 1.01  | 0.970812 | 0.582972 | 0.990457 | 0.751492 |
| MmugDNA.710.1.S1_at    | MmugDNA.710.1  | 3.83  | 3.84  | 0.11 | 0    | -1.01 | 0.458763 | 0.500431 | 0.759072 | 0.699043 |
| MmugDNA.7100.1.S1_at   | MmugDNA.7100.1 | 9.57  | 9.15  | 0.98 | 0.07 | 1.34  | 0.51693  | 0.118093 | 0.791672 | 0.385973 |
| MmugDNA.7101.1.S1_at   | MmugDNA.7101.1 | 4.52  | 4.61  | 0.21 | 0.03 | -1.07 | 0.473184 | 0.224805 | 0.767466 | 0.497617 |
| MmugDNA.7102.1.S1_at   | MmugDNA.7102.1 | 5.57  | 5.25  | 0.24 | 0.43 | 1.25  | 0.350981 | 0.599037 | 0.691768 | 0.761257 |
| MmugDNA.7104.1.S1_at   | MmugDNA.7104.1 | 3.65  | 3.49  | 0.21 | 0.11 | 1.11  | 0.521932 | 0.679866 | 0.794904 | 0.8131   |
| MmugDNA.7105.1.S1_at   | MmugDNA.7105.1 | 9.51  | 9.4   | 0.34 | 0.1  | 1.08  | 0.964707 | 0.025744 | 0.988377 | 0.201029 |
| MmugDNA.711.1.S1_at    | MmugDNA.711.1  | 6.57  | 6.89  | 0.18 | 0.04 | -1.24 | 0.038731 | 0.032501 | 0.360227 | 0.223265 |
| MmugDNA.7110.1.S1_at   | MmugDNA.7110.1 | 3.65  | 3.63  | 0.07 | 0.03 | 1.01  | 0.664406 | 0.306174 | 0.867683 | 0.562889 |
| MmugDNA.7111.1.S1_at   | MmugDNA.7111.1 | 4.93  | 4.87  | 0.04 | 0.04 | 1.05  | 0.106457 | 0.855641 | 0.478853 | 0.917681 |
| MmugDNA.7112.1.S1_at   | MmugDNA.7112.1 | 3.93  | 3.84  | 0.06 | 0.08 | 1.06  | 0.119058 | 0.440773 | 0.492539 | 0.659136 |
| MmugDNA.7113.1.S1_at   | MmugDNA.7113.1 | 3.69  | 3.27  | 0.54 | 0.28 | 1.34  | 0.357471 | 0.580573 | 0.695818 | 0.749782 |
| MmugDNA.7114.1.S1_at   | MmugDNA.7114.1 | 6.68  | 6.38  | 0.46 | 0.17 | 1.24  | 0.919273 | 0.028484 | 0.972508 | 0.21056  |
| MmugDNA.7116.1.S1_at   | MmugDNA.7116.1 | 3.8   | 3.71  | 0.29 | 0.13 | 1.06  | 0.715798 | 0.538062 | 0.88949  | 0.722826 |
| MmugDNA.7119.1.S1_at   | MmugDNA.7119.1 | 3.97  | 4     | 0.2  | 0.05 | -1.02 | 0.539615 | 0.666259 | 0.80393  | 0.804419 |
| MmugDNA.7120.1.S1_at   | MmugDNA.7120.1 | 5.82  | 5.87  | 0.07 | 0.21 | -1.04 | 0.46653  | 0.712379 | 0.763702 | 0.833369 |
| MmugDNA.7122.1.S1_at   | MmugDNA.7122.1 | 3.6   | 3.7   | 0.07 | 0.08 | -1.07 | 0.096724 | 0.418149 | 0.465352 | 0.642638 |
| MmugDNA.7123.1.S1_at   | MmugDNA.7123.1 | 3.64  | 3.81  | 0.11 | 0.3  | -1.12 | 0.137075 | 0.151705 | 0.512022 | 0.426383 |
| MmugDNA.7124.1.S1_at   | MmugDNA.7124.1 | 3.66  | 3.5   | 0.04 | 0.09 | 1.12  | 0.182356 | 0.023144 | 0.555371 | 0.190519 |
| MmugDNA.7125.1.S1_at   | MmugDNA.7125.1 | 9.25  | 8.9   | 0.21 | 0.33 | 1.27  | 0.540785 | 0.058478 | 0.80461  | 0.288549 |
| MmugDNA.7126.1.S1_at   | MmugDNA.7126.1 | 5.03  | 5.01  | 0.08 | 0.24 | 1.01  | 0.64533  | 0.102019 | 0.858731 | 0.362082 |
| MmugDNA.713.1.S1_at    | MmugDNA.713.1  | 7.25  | 6.57  | 0.12 | 0.34 | 1.6   | 0.054498 | 0.144416 | 0.396542 | 0.418323 |
| MmugDNA.7130.1.S1_at   | MmugDNA.7130.1 | 3.65  | 3.61  | 0.32 | 0.28 | 1.02  | 0.48056  | 0.794973 | 0.771267 | 0.881864 |
| MmugDNA.7131.1.S1_at   | MmugDNA.7131.1 | 10.66 | 10.17 | 0.14 | 0.22 | 1.4   | 0.022314 | 0.013603 | 0.310495 | 0.149283 |
| MmugDNA.7132.1.S1_at   | MmugDNA.7132.1 | 5.66  | 5.52  | 0.26 | 0.16 | 1.1   | 0.427054 | 0.020544 | 0.74088  | 0.179837 |
| MmugDNA.7133.1.S1_at   | MmugDNA.7133.1 | 5.86  | 5.84  | 0.23 | 0.21 | 1.01  | 0.275861 | 0.51868  | 0.635416 | 0.710613 |
| MmugDNA.7134.1.S1_at   | MmugDNA.7134.1 | 4.77  | 4.77  | 0.09 | 0.14 | 1     | 0.23745  | 0.525087 | 0.604446 | 0.714766 |
| MmugDNA.7135.1.S1_at   | MmugDNA.7135.1 | 5.61  | 5.46  | 0.27 | 0.18 | 1.11  | 0.928107 | 0.631966 | 0.976259 | 0.783052 |
| MmugDNA.7137.1.S1_s_at | MmugDNA.7137.1 | 7.31  | 7.09  | 0.13 | 0.34 | 1.16  | 0.400015 | 0.061842 | 0.723437 | 0.295514 |

|                        |                |       |       |      |      |       |          |          |          |          |
|------------------------|----------------|-------|-------|------|------|-------|----------|----------|----------|----------|
| MmugDNA.7138.1.S1_at   | MmugDNA.7138.1 | 4.54  | 4.51  | 0.03 | 0.12 | 1.02  | 0.203913 | 0.102118 | 0.57513  | 0.362168 |
| MmugDNA.714.1.S1_at    | MmugDNA.714.1  | 6.69  | 6.65  | 0.36 | 0.02 | 1.03  | 0.277383 | 0.89155  | 0.636839 | 0.938242 |
| MmugDNA.7141.1.S1_at   | MmugDNA.7141.1 | 4.55  | 4.42  | 0.14 | 0.06 | 1.09  | 0.139318 | 0.338934 | 0.51471  | 0.585891 |
| MmugDNA.7142.1.S1_at   | MmugDNA.7142.1 | 6.67  | 6.92  | 0.24 | 0.03 | -1.19 | 0.12539  | 0.158429 | 0.499523 | 0.434313 |
| MmugDNA.7143.1.S1_at   | MmugDNA.7143.1 | 5.95  | 6.02  | 0.11 | 0.12 | -1.05 | 0.419822 | 0.593487 | 0.736572 | 0.758318 |
| MmugDNA.7144.1.S1_at   | MmugDNA.7144.1 | 4.91  | 5.41  | 0.66 | 0.28 | -1.42 | 0.380582 | 0.517969 | 0.70948  | 0.710053 |
| MmugDNA.7145.1.S1_at   | MmugDNA.7145.1 | 11.2  | 11.16 | 0.33 | 0.13 | 1.03  | 0.537033 | 0.019052 | 0.802624 | 0.173688 |
| MmugDNA.7148.1.S1_at   | MmugDNA.7148.1 | 4.29  | 3.97  | 0.74 | 0.06 | 1.25  | 0.493759 | 0.511264 | 0.77903  | 0.705465 |
| MmugDNA.7149.1.S1_at   | MmugDNA.7149.1 | 11.3  | 12.04 | 0.49 | 0.08 | -1.67 | 0.092471 | 0.046775 | 0.461047 | 0.261005 |
| MmugDNA.7149.1.S1_x_at | MmugDNA.7149.1 | 10.62 | 11.35 | 0.5  | 0.07 | -1.66 | 0.117278 | 0.06659  | 0.490908 | 0.303814 |
| MmugDNA.715.1.S1_at    | MmugDNA.715.1  | 4.16  | 4.04  | 0.36 | 0.24 | -1.09 | 0.982243 | 0.692169 | 0.994472 | 0.82091  |
| MmugDNA.7150.1.S1_at   | MmugDNA.7150.1 | 4.49  | 4     | 0.35 | 0.24 | 1.4   | 0.11377  | 0.196156 | 0.487196 | 0.471236 |
| MmugDNA.7151.1.S1_at   | MmugDNA.7151.1 | 6     | 5.86  | 0.1  | 0.35 | 1.1   | 0.982945 | 0.999793 | 0.99478  | 0.999948 |
| MmugDNA.7152.1.S1_at   | MmugDNA.7152.1 | 4.05  | 4.01  | 0.21 | 0.04 | 1.03  | 0.882579 | 0.983262 | 0.959301 | 0.990726 |
| MmugDNA.7153.1.S1_at   | MmugDNA.7153.1 | 5.39  | 5.4   | 0.16 | 0.12 | -1    | 0.410075 | 0.514751 | 0.730583 | 0.707865 |
| MmugDNA.7154.1.S1_at   | MmugDNA.7154.1 | 9.05  | 8.14  | 0.52 | 0.4  | 1.87  | 0.032661 | 0.007714 | 0.345045 | 0.117387 |
| MmugDNA.7155.1.S1_at   | MmugDNA.7155.1 | 8.56  | 8.31  | 0.13 | 0.04 | 1.2   | 0.015966 | 0.037264 | 0.284606 | 0.237506 |
| MmugDNA.7156.1.S1_at   | MmugDNA.7156.1 | 3.8   | 4     | 0.38 | 0.15 | -1.15 | 0.940201 | 0.921092 | 0.979654 | 0.955543 |
| MmugDNA.7158.1.S1_at   | MmugDNA.7158.1 | 5.94  | 6.24  | 0.23 | 0.46 | -1.23 | 0.807471 | 0.978691 | 0.930185 | 0.988411 |
| MmugDNA.716.1.S1_at    | MmugDNA.716.1  | 5.65  | 5.42  | 0.78 | 0.27 | 1.17  | 0.365609 | 0.492879 | 0.701226 | 0.693817 |
| MmugDNA.7160.1.S1_at   | MmugDNA.7160.1 | 3.96  | 3.7   | 0.09 | 0.03 | 1.2   | 0.010622 | 0.181423 | 0.2485   | 0.457923 |
| MmugDNA.7161.1.S1_at   | MmugDNA.7161.1 | 5.1   | 5.07  | 0.17 | 0.05 | 1.02  | 0.312706 | 0.502543 | 0.664198 | 0.700192 |
| MmugDNA.7162.1.S1_at   | MmugDNA.7162.1 | 4.54  | 4.65  | 0.14 | 0.1  | -1.08 | 0.318438 | 0.446002 | 0.668184 | 0.662635 |
| MmugDNA.7163.1.S1_at   | MmugDNA.7163.1 | 4.75  | 4.15  | 0.45 | 0.09 | 1.52  | 0.184174 | 0.411192 | 0.55696  | 0.637937 |
| MmugDNA.7164.1.S1_at   | MmugDNA.7164.1 | 5.13  | 5.66  | 0.7  | 0.72 | -1.44 | 0.147013 | 0.1297   | 0.521545 | 0.401344 |
| MmugDNA.7165.1.S1_at   | MmugDNA.7165.1 | 13.4  | 13.13 | 0.19 | 0.17 | 1.21  | 0.383059 | 0.551356 | 0.71114  | 0.730922 |
| MmugDNA.7166.1.S1_at   | MmugDNA.7166.1 | 3.31  | 3.44  | 0.15 | 0.11 | -1.09 | 0.28917  | 0.176241 | 0.645892 | 0.452718 |
| MmugDNA.7168.1.S1_at   | MmugDNA.7168.1 | 5.76  | 5.42  | 0.13 | 0.18 | 1.26  | 0.024764 | 0.01958  | 0.31972  | 0.17571  |
| MmugDNA.7169.1.S1_at   | MmugDNA.7169.1 | 4.93  | 4.95  | 0.2  | 0.14 | -1.01 | 0.611224 | 0.335745 | 0.842397 | 0.583489 |
| MmugDNA.717.1.S1_at    | MmugDNA.717.1  | 6.33  | 6.2   | 0.06 | 0.06 | 1.09  | 0.092345 | 0.509528 | 0.460762 | 0.704233 |
| MmugDNA.7173.1.S1_at   | MmugDNA.7173.1 | 8.43  | 8.37  | 0.35 | 0.09 | 1.04  | 0.297624 | 0.426589 | 0.652791 | 0.648739 |
| MmugDNA.7174.1.S1_at   | MmugDNA.7174.1 | 3.95  | 4.02  | 0.06 | 0.14 | -1.05 | 0.785359 | 0.856695 | 0.921121 | 0.918126 |
| MmugDNA.7175.1.S1_at   | MmugDNA.7175.1 | 5.26  | 4.97  | 0.13 | 0.09 | 1.22  | 0.055245 | 0.092395 | 0.398125 | 0.348294 |
| MmugDNA.7176.1.S1_at   | MmugDNA.7176.1 | 9.04  | 8.28  | 0.24 | 0.09 | 1.69  | 0.008135 | 0.004764 | 0.232005 | 0.096313 |
| MmugDNA.7179.1.S1_at   | MmugDNA.7179.1 | 4.1   | 4.19  | 0.16 | 0.23 | -1.07 | 0.904473 | 0.177304 | 0.967857 | 0.453742 |
| MmugDNA.718.1.S1_at    | MmugDNA.718.1  | 5.96  | 6.2   | 0.34 | 0.23 | -1.18 | 0.340497 | 0.029648 | 0.684537 | 0.213852 |
| MmugDNA.7180.1.S1_at   | MmugDNA.7180.1 | 6.9   | 6.95  | 0.36 | 0.04 | -1.03 | 0.480916 | 0.102537 | 0.771639 | 0.362875 |
| MmugDNA.7182.1.S1_at   | MmugDNA.7182.1 | 6.33  | 6.36  | 0.45 | 0.06 | -1.02 | 0.877506 | 0.248218 | 0.95739  | 0.517574 |
| MmugDNA.7185.1.S1_at   | MmugDNA.7185.1 | 4.64  | 4.64  | 0.36 | 0.05 | 1     | 0.386625 | 0.531428 | 0.713641 | 0.718636 |
| MmugDNA.7186.1.S1_at   | MmugDNA.7186.1 | 10.12 | 10.28 | 0.2  | 0.02 | -1.12 | 0.712368 | 0.150016 | 0.887958 | 0.424621 |
| MmugDNA.7188.1.S1_at   | MmugDNA.7188.1 | 5.62  | 5.91  | 0.24 | 0.09 | -1.22 | 0.306312 | 0.543026 | 0.659412 | 0.725879 |
| MmugDNA.7189.1.S1_at   | MmugDNA.7189.1 | 10.8  | 10.9  | 0.38 | 0.07 | -1.07 | 0.299017 | 0.475937 | 0.653475 | 0.682387 |
| MmugDNA.719.1.S1_at    | MmugDNA.719.1  | 5.01  | 5.07  | 0.04 | 0.09 | -1.04 | 0.630534 | 0.885658 | 0.851988 | 0.934982 |



|                        |                |       |       |      |      |       |          |          |          |          |
|------------------------|----------------|-------|-------|------|------|-------|----------|----------|----------|----------|
| MmugDNA.7191.1.S1_at   | MmugDNA.7191.1 | 6.64  | 6.56  | 0.31 | 0.04 | 1.05  | 0.677921 | 0.507024 | 0.873818 | 0.702701 |
| MmugDNA.7192.1.S1_at   | MmugDNA.7192.1 | 4.35  | 4.35  | 0.54 | 0.4  | 1     | 0.587641 | 0.600542 | 0.831766 | 0.76217  |
| MmugDNA.7193.1.S1_at   | MmugDNA.7193.1 | 7.77  | 7.96  | 0.21 | 0.09 | -1.14 | 0.909973 | 0.003547 | 0.96945  | 0.085371 |
| MmugDNA.7194.1.S1_at   | MmugDNA.7194.1 | 3.47  | 3.39  | 0.08 | 0.11 | 1.06  | 0.208878 | 0.307086 | 0.580477 | 0.563432 |
| MmugDNA.7195.1.S1_at   | MmugDNA.7195.1 | 6.38  | 6.76  | 0.45 | 0.15 | -1.31 | 0.575415 | 0.70033  | 0.824662 | 0.826073 |
| MmugDNA.7197.1.S1_at   | MmugDNA.7197.1 | 6.63  | 6.45  | 0.11 | 0.1  | 1.13  | 0.254762 | 0.765803 | 0.619161 | 0.86393  |
| MmugDNA.7198.1.S1_at   | MmugDNA.7198.1 | 4.35  | 4.19  | 0.03 | 0.13 | 1.12  | 0.126112 | 0.224781 | 0.499873 | 0.497617 |
| MmugDNA.7199.1.S1_at   | MmugDNA.7199.1 | 3.59  | 4.15  | 0.14 | 0.36 | -1.48 | 0.129788 | 0.366731 | 0.504468 | 0.606498 |
| MmugDNA.72.1.S1_at     | MmugDNA.72.1   | 7.64  | 7.6   | 0.12 | 0.04 | 1.03  | 0.689049 | 0.939048 | 0.878634 | 0.9654   |
| MmugDNA.720.1.S1_at    | MmugDNA.720.1  | 7.16  | 7.19  | 0.35 | 0.14 | -1.02 | 0.435919 | 0.662165 | 0.745982 | 0.802157 |
| MmugDNA.7200.1.S1_at   | MmugDNA.7200.1 | 6.53  | 6.53  | 0.09 | 0.1  | 1     | 0.817228 | 0.715887 | 0.933932 | 0.83531  |
| MmugDNA.7201.1.S1_at   | MmugDNA.7201.1 | 6.96  | 6.65  | 0.24 | 0.16 | 1.24  | 0.210576 | 0.202145 | 0.581872 | 0.476559 |
| MmugDNA.7202.1.S1_at   | MmugDNA.7202.1 | 6.38  | 6.21  | 0.15 | 0.11 | 1.13  | 0.240978 | 0.328531 | 0.607226 | 0.578137 |
| MmugDNA.7203.1.S1_at   | MmugDNA.7203.1 | 6.93  | 6.8   | 1.38 | 0.3  | 1.1   | 0.806959 | 0.578612 | 0.930007 | 0.748595 |
| MmugDNA.7207.1.S1_at   | MmugDNA.7207.1 | 3.3   | 3.11  | 0.2  | 0.09 | 1.14  | 0.250008 | 0.286432 | 0.615473 | 0.547829 |
| MmugDNA.7209.1.S1_at   | MmugDNA.7209.1 | 9.75  | 10.03 | 0.42 | 0.07 | -1.22 | 0.767201 | 0.599597 | 0.912495 | 0.761524 |
| MmugDNA.721.1.S1_at    | MmugDNA.721.1  | 3.68  | 3.61  | 0.13 | 0.16 | 1.06  | 0.369307 | 0.661105 | 0.704181 | 0.801683 |
| MmugDNA.7210.1.S1_at   | MmugDNA.7210.1 | 8.99  | 9.13  | 0.34 | 0.1  | -1.1  | 0.515581 | 0.739315 | 0.790928 | 0.848911 |
| MmugDNA.7211.1.S1_at   | MmugDNA.7211.1 | 4.16  | 4.16  | 0.04 | 0.1  | 1     | 0.429043 | 0.699225 | 0.742138 | 0.825277 |
| MmugDNA.7212.1.S1_at   | MmugDNA.7212.1 | 4.93  | 4.59  | 0.1  | 0.03 | 1.26  | 0.010506 | 0.108717 | 0.248118 | 0.372257 |
| MmugDNA.7213.1.S1_at   | MmugDNA.7213.1 | 11.37 | 11.3  | 0.39 | 0.16 | 1.05  | 0.474409 | 0.555688 | 0.767951 | 0.734    |
| MmugDNA.7214.1.S1_at   | MmugDNA.7214.1 | 4.06  | 3.81  | 0.47 | 0.24 | 1.19  | 0.175693 | 0.224785 | 0.548828 | 0.497617 |
| MmugDNA.7215.1.S1_at   | MmugDNA.7215.1 | 6.84  | 6.67  | 0.16 | 0.27 | 1.12  | 0.322635 | 0.689227 | 0.671289 | 0.818639 |
| MmugDNA.7216.1.S1_at   | MmugDNA.7216.1 | 6.81  | 5.88  | 0.21 | 0.32 | 1.9   | 0.04855  | 0.103453 | 0.383547 | 0.364346 |
| MmugDNA.7217.1.S1_at   | MmugDNA.7217.1 | 5.46  | 6.19  | 0.48 | 0.09 | -1.66 | 0.218033 | 0.092921 | 0.587987 | 0.349024 |
| MmugDNA.7218.1.S1_at   | MmugDNA.7218.1 | 3.02  | 2.96  | 0.11 | 0.16 | 1.04  | 0.604149 | 0.000501 | 0.839511 | 0.038996 |
| MmugDNA.7219.1.S1_at   | MmugDNA.7219.1 | 2.81  | 2.94  | 0.07 | 0.05 | -1.1  | 0.106857 | 0.058642 | 0.479384 | 0.288894 |
| MmugDNA.722.1.S1_at    | MmugDNA.722.1  | 7.37  | 7.57  | 0.7  | 0.3  | -1.15 | 0.94486  | 0.788295 | 0.980852 | 0.877534 |
| MmugDNA.7221.1.S1_at   | MmugDNA.7221.1 | 10.34 | 10.72 | 0.08 | 0.06 | -1.3  | 0.004287 | 0.000143 | 0.198874 | 0.029387 |
| MmugDNA.7223.1.S1_at   | MmugDNA.7223.1 | 6.9   | 6.61  | 0.14 | 0.1  | 1.23  | 0.078681 | 0.070715 | 0.441464 | 0.312128 |
| MmugDNA.7224.1.S1_at   | MmugDNA.7224.1 | 5.58  | 5.35  | 0.18 | 0.05 | 1.17  | 0.199168 | 0.303284 | 0.570832 | 0.560748 |
| MmugDNA.7225.1.S1_at   | MmugDNA.7225.1 | 3.66  | 3.93  | 0.21 | 0.48 | -1.2  | 0.360267 | 0.28469  | 0.697842 | 0.5469   |
| MmugDNA.7226.1.S1_at   | MmugDNA.7226.1 | 7.75  | 7.83  | 0.37 | 0.1  | -1.06 | 0.643505 | 0.526074 | 0.858218 | 0.715374 |
| MmugDNA.7227.1.S1_at   | MmugDNA.7227.1 | 3.5   | 3.24  | 0.23 | 0.26 | 1.2   | 0.554042 | 0.78435  | 0.812439 | 0.87518  |
| MmugDNA.7228.1.S1_at   | MmugDNA.7228.1 | 7.19  | 8.68  | 0.41 | 0.28 | -2.79 | 0.007035 | 0.016666 | 0.225336 | 0.163458 |
| MmugDNA.7229.1.S1_at   | MmugDNA.7229.1 | 9.1   | 6.8   | 0.2  | 0.59 | 4.93  | 0.001848 | 0.000416 | 0.168185 | 0.038093 |
| MmugDNA.723.1.S1_at    | MmugDNA.723.1  | 6.71  | 6.57  | 0.12 | 0.08 | 1.1   | 0.126819 | 0.405473 | 0.500609 | 0.633774 |
| MmugDNA.7230.1.S1_at   | MmugDNA.7230.1 | 12.56 | 12.66 | 0.04 | 0.16 | -1.07 | 0.976752 | 0.991063 | 0.992455 | 0.994978 |
| MmugDNA.7231.1.S1_at   | MmugDNA.7231.1 | 5.93  | 5.68  | 0.54 | 0.06 | 1.19  | 0.183626 | 0.194111 | 0.55651  | 0.469266 |
| MmugDNA.7233.1.S1_at   | MmugDNA.7233.1 | 5.16  | 4.91  | 0.05 | 0.16 | 1.18  | 0.077297 | 0.072963 | 0.439109 | 0.315986 |
| MmugDNA.7234.1.S1_at   | MmugDNA.7234.1 | 4.75  | 4.96  | 0.16 | 0.24 | -1.16 | 0.144304 | 0.178557 | 0.519698 | 0.454802 |
| MmugDNA.7235.1.S1_s_at | MmugDNA.7235.1 | 10.21 | 10.18 | 0.37 | 0.09 | 1.02  | 0.673721 | 0.101175 | 0.871542 | 0.360831 |
| MmugDNA.7236.1.S1_at   | MmugDNA.7236.1 | 3.83  | 3.66  | 0.25 | 0.05 | 1.13  | 0.263057 | 0.172524 | 0.625096 | 0.448864 |

|                         |                 |       |       |      |      |       |          |          |          |          |
|-------------------------|-----------------|-------|-------|------|------|-------|----------|----------|----------|----------|
| MmugDNA.7237.1.S1_at    | MmugDNA.7237.1  | 3.16  | 3.05  | 0.1  | 0.04 | 1.09  | 0.104809 | 0.127243 | 0.476129 | 0.397935 |
| MmugDNA.7240.1.S1_at    | MmugDNA.7240.1  | 2.97  | 2.97  | 0.04 | 0.06 | 1     | 0.490916 | 0.672326 | 0.777361 | 0.808488 |
| MmugDNA.7241.1.S1_at    | MmugDNA.7241.1  | 5.9   | 5.78  | 0.19 | 0.17 | 1.08  | 0.158351 | 0.213632 | 0.531373 | 0.487441 |
| MmugDNA.7242.1.S1_at    | MmugDNA.7242.1  | 5.85  | 5.33  | 0.42 | 0.02 | 1.43  | 0.297442 | 0.255937 | 0.652772 | 0.523874 |
| MmugDNA.7243.1.S1_at    | MmugDNA.7243.1  | 6.91  | 6.57  | 0.11 | 0.12 | 1.26  | 0.082279 | 0.370727 | 0.447083 | 0.609721 |
| MmugDNA.7244.1.S1_at    | MmugDNA.7244.1  | 3.5   | 3.08  | 0.18 | 0.01 | 1.34  | 0.039489 | 0.039385 | 0.362034 | 0.243406 |
| MmugDNA.7245.1.S1_at    | MmugDNA.7245.1  | 9.31  | 9.14  | 1.08 | 0.2  | 1.13  | 0.804501 | 0.140009 | 0.928965 | 0.413333 |
| MmugDNA.7247.1.S1_at    | MmugDNA.7247.1  | 7.35  | 7.45  | 0.1  | 0.12 | -1.07 | 0.342411 | 0.002469 | 0.685795 | 0.073576 |
| MmugDNA.7248.1.S1_s_at  | MmugDNA.7248.1  | 9.63  | 9.49  | 0.07 | 0.21 | 1.11  | 0.166139 | 0.170393 | 0.538903 | 0.447103 |
| MmugDNA.7249.1.S1_at    | MmugDNA.7249.1  | 10.29 | 9.44  | 0.06 | 0.26 | 1.8   | 0.003412 | 0.000481 | 0.194985 | 0.038665 |
| MmugDNA.7251.1.S1_at    | MmugDNA.7251.1  | 8.88  | 8.3   | 1.35 | 0.49 | 1.5   | 0.87173  | 0.921623 | 0.955537 | 0.955794 |
| MmugDNA.7252.1.S1_at    | MmugDNA.7252.1  | 3.36  | 3.19  | 0.03 | 0.05 | 1.12  | 0.005191 | 0.011587 | 0.206146 | 0.139311 |
| MmugDNA.7253.1.S1_at    | MmugDNA.7253.1  | 3.42  | 3.58  | 0.23 | 0.43 | -1.12 | 0.716395 | 0.720343 | 0.88981  | 0.838252 |
| MmugDNA.7255.1.S1_at    | MmugDNA.7255.1  | 4.03  | 3.95  | 0.08 | 0.12 | 1.05  | 0.338305 | 0.664437 | 0.682876 | 0.803396 |
| MmugDNA.7256.1.S1_at    | MmugDNA.7256.1  | 4.12  | 4.14  | 0.04 | 0.21 | -1.02 | 0.864509 | 0.520101 | 0.952391 | 0.711472 |
| MmugDNA.7257.1.S1_at    | MmugDNA.7257.1  | 9.72  | 9.81  | 0.04 | 0.09 | -1.07 | 0.113756 | 0.12837  | 0.487196 | 0.39964  |
| MmugDNA.7258.1.S1_at    | MmugDNA.7258.1  | 3.23  | 3.49  | 0.31 | 0.18 | -1.2  | 0.949416 | 0.869557 | 0.982867 | 0.925994 |
| MmugDNA.7259.1.S1_at    | MmugDNA.7259.1  | 3.37  | 3.26  | 0.13 | 0.18 | 1.08  | 0.474795 | 0.755683 | 0.768229 | 0.85776  |
| MmugDNA.7260.1.S1_at    | MmugDNA.7260.1  | 7.11  | 6.67  | 0.22 | 0.13 | 1.36  | 0.18777  | 0.34705  | 0.559968 | 0.591813 |
| MmugDNA.7261.1.S1_at    | MmugDNA.7261.1  | 12.6  | 12.68 | 0.24 | 0.08 | -1.06 | 0.714057 | 0.387344 | 0.888579 | 0.622027 |
| MmugDNA.7263.1.S1_at    | MmugDNA.7263.1  | 3.27  | 3.59  | 0.29 | 0.09 | -1.25 | 0.12208  | 0.064554 | 0.495677 | 0.300255 |
| MmugDNA.7264.1.S1_at    | MmugDNA.7264.1  | 6.47  | 6.35  | 0.03 | 0.04 | 1.09  | 0.027338 | 0.084805 | 0.327322 | 0.336325 |
| MmugDNA.7265.1.S1_at    | MmugDNA.7265.1  | 3.85  | 3.84  | 0    | 0.08 | 1.01  | 0.49521  | 0.923788 | 0.779889 | 0.957119 |
| MmugDNA.7266.1.S1_at    | MmugDNA.7266.1  | 3.98  | 3.71  | 0.06 | 0.13 | 1.21  | 0.052982 | 0.051875 | 0.39366  | 0.273151 |
| MmugDNA.7267.1.S1_at    | MmugDNA.7267.1  | 5.07  | 4.75  | 0.1  | 0.17 | 1.25  | 0.206675 | 0.495532 | 0.578609 | 0.695527 |
| MmugDNA.7268.1.S1_at    | MmugDNA.7268.1  | 6     | 5.85  | 0.04 | 0.03 | 1.11  | 0.006967 | 0.33266  | 0.225012 | 0.581046 |
| MmugDNA.7269.1.S1_at    | MmugDNA.7269.1  | 4.01  | 3.97  | 0.14 | 0.13 | 1.03  | 0.287788 | 0.406095 | 0.644849 | 0.634197 |
| MmugDNA.727.1.S1_at     | MmugDNA.727.1   | 4.56  | 4.57  | 0.11 | 0.09 | -1.01 | 0.673032 | 0.902894 | 0.871158 | 0.944897 |
| MmugDNA.7270.1.S1_at    | MmugDNA.7270.1  | 10.25 | 10.55 | 0.12 | 0.09 | -1.23 | 0.030645 | 0.002216 | 0.338263 | 0.069424 |
| MmugDNA.7271.1.S1_at    | MmugDNA.7271.1  | 6.88  | 7.61  | 0.74 | 0.17 | -1.66 | 0.659024 | 0.250213 | 0.865035 | 0.519235 |
| MmugDNA.7272.1.S1_at    | MmugDNA.7272.1  | 4.63  | 4.61  | 0.05 | 0.08 | 1.01  | 0.793003 | 0.405134 | 0.924203 | 0.633482 |
| MmugDNA.7273.1.S1_at    | MmugDNA.7273.1  | 3.28  | 3.19  | 0.09 | 0.02 | 1.06  | 0.176138 | 0.630171 | 0.549287 | 0.782181 |
| MmugDNA.16291.1.S1_at   | MmugDNA.16291.1 | 4.28  | 4.47  | 0.34 | 0.04 | -1.14 | 0.346894 | 0.486939 | 0.688435 | 0.690118 |
| MmugDNA.16291.1.S1_s_at | MmugDNA.16291.1 | 4.87  | 4.88  | 0.11 | 0.02 | -1    | 0.987225 | 0.802797 | 0.995831 | 0.886441 |
| MmugDNA.7276.1.S1_at    | MmugDNA.7276.1  | 8.88  | 8.69  | 0.19 | 0.16 | 1.14  | 0.248549 | 0.322998 | 0.613851 | 0.574313 |
| MmugDNA.7277.1.S1_at    | MmugDNA.7277.1  | 11.69 | 11.41 | 0.12 | 0.12 | 1.21  | 0.024253 | 0.016855 | 0.317812 | 0.16458  |
| MmugDNA.728.1.S1_at     | MmugDNA.728.1   | 5.87  | 5.62  | 0.18 | 0.05 | 1.19  | 0.075612 | 0.503718 | 0.436722 | 0.701079 |
| MmugDNA.7281.1.S1_at    | MmugDNA.7281.1  | 3.9   | 3.79  | 0.21 | 0.12 | 1.08  | 0.689688 | 0.843282 | 0.879045 | 0.910767 |
| MmugDNA.7282.1.S1_at    | MmugDNA.7282.1  | 8.72  | 8.87  | 0.49 | 0.18 | -1.1  | 0.463856 | 0.089396 | 0.762278 | 0.343637 |
| MmugDNA.7283.1.S1_at    | MmugDNA.7283.1  | 11.49 | 11.37 | 0.12 | 0.05 | 1.09  | 0.242344 | 0.000867 | 0.608517 | 0.047463 |
| MmugDNA.7284.1.S1_at    | MmugDNA.7284.1  | 8.02  | 8.54  | 0.57 | 0.14 | -1.44 | 0.193474 | 0.016781 | 0.564275 | 0.164091 |
| MmugDNA.7285.1.S1_at    | MmugDNA.7285.1  | 3.92  | 3.72  | 0.12 | 0.12 | 1.15  | 0.103156 | 0.195575 | 0.473929 | 0.470441 |
| MmugDNA.7286.1.S1_s_at  | MmugDNA.7286.1  | 9.92  | 10.03 | 0.21 | 0.14 | -1.08 | 0.701379 | 0.07478  | 0.883866 | 0.318527 |

|                        |                |       |       |      |      |       |          |          |          |          |
|------------------------|----------------|-------|-------|------|------|-------|----------|----------|----------|----------|
| MmugDNA.7288.1.S1_s_at | MmugDNA.7288.1 | 9.53  | 9.7   | 0.32 | 0.03 | -1.12 | 0.132961 | 0.010859 | 0.507241 | 0.13586  |
| MmugDNA.7289.1.S1_at   | MmugDNA.7289.1 | 4.22  | 4.19  | 0.25 | 0.15 | 1.02  | 0.304036 | 0.639878 | 0.657781 | 0.788512 |
| MmugDNA.7290.1.S1_s_at | MmugDNA.7290.1 | 7.27  | 6.57  | 0.95 | 0.39 | 1.62  | 0.464768 | 0.25802  | 0.762686 | 0.52557  |
| MmugDNA.7292.1.S1_at   | MmugDNA.7292.1 | 6.27  | 7     | 1.24 | 0.59 | -1.66 | 0.48596  | 0.088632 | 0.774427 | 0.342167 |
| MmugDNA.7293.1.S1_at   | MmugDNA.7293.1 | 12.23 | 12.12 | 0.83 | 0.16 | 1.08  | 0.724102 | 0.097547 | 0.893041 | 0.355398 |
| MmugDNA.7294.1.S1_at   | MmugDNA.7294.1 | 3.81  | 3.86  | 0.11 | 0.02 | -1.03 | 0.890447 | 0.155549 | 0.96231  | 0.430888 |
| MmugDNA.7295.1.S1_at   | MmugDNA.7295.1 | 6.6   | 6.33  | 0.24 | 0.17 | 1.21  | 0.201586 | 0.206506 | 0.573165 | 0.480571 |
| MmugDNA.7296.1.S1_at   | MmugDNA.7296.1 | 8.56  | 9     | 0.3  | 0.13 | -1.36 | 0.069219 | 0.003484 | 0.426664 | 0.084834 |
| MmugDNA.7298.1.S1_s_at | MmugDNA.7298.1 | 3.44  | 3.51  | 0.15 | 0.04 | -1.05 | 0.676537 | 0.709624 | 0.873146 | 0.831691 |
| MmugDNA.7299.1.S1_at   | MmugDNA.7299.1 | 3.98  | 3.87  | 0.18 | 0.13 | 1.08  | 0.543957 | 0.66624  | 0.806882 | 0.804419 |
| MmugDNA.73.1.S1_s_at   | MmugDNA.73.1   | 11.3  | 11.1  | 0.86 | 0.03 | -1.15 | 0.774859 | 0.927765 | 0.916458 | 0.958984 |
| MmugDNA.730.1.S1_at    | MmugDNA.730.1  | 10.2  | 10.12 | 0.16 | 0.05 | 1.05  | 0.133549 | 0.141813 | 0.508012 | 0.415331 |
| MmugDNA.7300.1.S1_at   | MmugDNA.7300.1 | 11.72 | 11.38 | 0.96 | 0.17 | 1.26  | 0.816433 | 0.855693 | 0.933548 | 0.917683 |
| MmugDNA.7302.1.S1_at   | MmugDNA.7302.1 | 4.84  | 5.1   | 0.47 | 0.09 | -1.2  | 0.411298 | 0.177361 | 0.731285 | 0.453742 |
| MmugDNA.7303.1.S1_at   | MmugDNA.7303.1 | 12.4  | 12.1  | 0.1  | 0.17 | 1.23  | 0.023705 | 0.018631 | 0.316281 | 0.171647 |
| MmugDNA.7304.1.S1_at   | MmugDNA.7304.1 | 10.27 | 10.2  | 0.6  | 0.05 | 1.05  | 0.285726 | 0.425825 | 0.643438 | 0.6481   |
| MmugDNA.7304.1.S1_s_at | MmugDNA.7304.1 | 10.36 | 9.68  | 0.6  | 0.19 | 1.6   | 0.095863 | 0.098009 | 0.46445  | 0.355954 |
| MmugDNA.7305.1.S1_at   | MmugDNA.7305.1 | 11.62 | 11.51 | 0.11 | 0.05 | 1.08  | 0.160953 | 0.087177 | 0.534282 | 0.340133 |
| MmugDNA.7306.1.S1_at   | MmugDNA.7306.1 | 8.05  | 7.97  | 0.57 | 0.11 | 1.06  | 0.797187 | 0.939298 | 0.925393 | 0.965543 |
| MmugDNA.7307.1.S1_at   | MmugDNA.7307.1 | 3.76  | 3.63  | 0.24 | 0.13 | 1.09  | 0.171148 | 0.260007 | 0.544257 | 0.52675  |
| MmugDNA.7308.1.S1_at   | MmugDNA.7308.1 | 6.79  | 6.47  | 0.03 | 0.06 | 1.25  | 0.002191 | 0.053951 | 0.174757 | 0.277769 |
| MmugDNA.7309.1.S1_at   | MmugDNA.7309.1 | 4.51  | 5.32  | 0.04 | 0.37 | -1.76 | 0.018082 | 0.062694 | 0.295257 | 0.297113 |
| MmugDNA.7310.1.S1_at   | MmugDNA.7310.1 | 7.41  | 7.34  | 0.03 | 0.01 | 1.04  | 0.062806 | 0.268958 | 0.413994 | 0.534369 |
| MmugDNA.7311.1.S1_at   | MmugDNA.7311.1 | 3.52  | 3.37  | 0.08 | 0.28 | 1.11  | 0.381893 | 0.497797 | 0.710335 | 0.697071 |
| MmugDNA.7312.1.S1_at   | MmugDNA.7312.1 | 7.68  | 7.99  | 0.04 | 0.36 | -1.25 | 0.066941 | 0.064195 | 0.422979 | 0.299611 |
| MmugDNA.7313.1.S1_at   | MmugDNA.7313.1 | 9.5   | 9.59  | 0.23 | 0.17 | -1.07 | 0.81005  | 0.92169  | 0.931255 | 0.955826 |
| MmugDNA.7314.1.S1_at   | MmugDNA.7314.1 | 7.06  | 6.91  | 0.09 | 0.08 | 1.11  | 0.05427  | 0.039986 | 0.396159 | 0.245173 |
| MmugDNA.7315.1.S1_at   | MmugDNA.7315.1 | 9.66  | 9.61  | 0.12 | 0.1  | 1.04  | 0.289154 | 0.000714 | 0.645892 | 0.044419 |
| MmugDNA.7317.1.S1_at   | MmugDNA.7317.1 | 4.27  | 4.09  | 0.21 | 0.12 | 1.13  | 0.250757 | 0.425277 | 0.615913 | 0.647679 |
| MmugDNA.7318.1.S1_at   | MmugDNA.7318.1 | 5.34  | 5.69  | 0.23 | 0.61 | -1.27 | 0.339449 | 0.514835 | 0.683826 | 0.707919 |
| MmugDNA.7321.1.S1_at   | MmugDNA.7321.1 | 6.14  | 6.04  | 0.06 | 0.12 | 1.07  | 0.450095 | 0.483374 | 0.754693 | 0.687904 |
| MmugDNA.7323.1.S1_at   | MmugDNA.7323.1 | 5.14  | 5.28  | 0.91 | 0.96 | -1.1  | 0.750611 | 0.039782 | 0.905556 | 0.244453 |
| MmugDNA.7324.1.S1_at   | MmugDNA.7324.1 | 5.22  | 5.22  | 0.05 | 0.09 | -1    | 0.429276 | 0.732534 | 0.742138 | 0.845072 |
| MmugDNA.7326.1.S1_at   | MmugDNA.7326.1 | 6.13  | 5.84  | 0.3  | 0.07 | 1.22  | 0.200346 | 0.561434 | 0.572164 | 0.737397 |
| MmugDNA.7327.1.S1_at   | MmugDNA.7327.1 | 4.33  | 4     | 0.1  | 0.13 | 1.26  | 0.025678 | 0.031282 | 0.322444 | 0.218752 |
| MmugDNA.7328.1.S1_at   | MmugDNA.7328.1 | 5.93  | 6.13  | 0.69 | 0.28 | -1.14 | 0.3796   | 0.726409 | 0.709065 | 0.84168  |
| MmugDNA.733.1.S1_at    | MmugDNA.733.1  | 4.18  | 4.15  | 0.21 | 0.51 | 1.02  | 0.300433 | 0.397081 | 0.654974 | 0.628611 |
| MmugDNA.7331.1.S1_at   | MmugDNA.7331.1 | 3.18  | 3.18  | 0.05 | 0.15 | -1    | 0.818692 | 0.947503 | 0.934515 | 0.970206 |
| MmugDNA.7333.1.S1_at   | MmugDNA.7333.1 | 5.79  | 5.6   | 0.15 | 0.14 | 1.14  | 0.766804 | 0.916754 | 0.912401 | 0.9534   |
| MmugDNA.7335.1.S1_at   | MmugDNA.7335.1 | 3.6   | 3.5   | 0.18 | 0.15 | 1.07  | 0.218959 | 0.149995 | 0.588349 | 0.424621 |
| MmugDNA.7336.1.S1_at   | MmugDNA.7336.1 | 5.55  | 7.72  | 0.93 | 0.42 | -4.51 | 0.032202 | 0.041652 | 0.343301 | 0.24887  |
| MmugDNA.7338.1.S1_at   | MmugDNA.7338.1 | 8.23  | 7.83  | 1.03 | 0.24 | 1.32  | 0.351054 | 0.600467 | 0.691811 | 0.762128 |
| MmugDNA.734.1.S1_x_at  | MmugDNA.734.1  | 12.1  | 12.34 | 0.2  | 0.19 | -1.19 | 0.203835 | 0.171705 | 0.57513  | 0.448079 |

|                        |                |       |       |      |      |       |          |          |          |          |
|------------------------|----------------|-------|-------|------|------|-------|----------|----------|----------|----------|
| MmugDNA.7340.1.S1_at   | MmugDNA.7340.1 | 8.5   | 8.46  | 0.35 | 0.1  | 1.03  | 0.772902 | 0.93766  | 0.915516 | 0.964687 |
| MmugDNA.7342.1.S1_at   | MmugDNA.7342.1 | 5.18  | 5.05  | 0.16 | 0.07 | 1.09  | 0.259926 | 0.532235 | 0.622946 | 0.718999 |
| MmugDNA.7343.1.S1_at   | MmugDNA.7343.1 | 6.62  | 6.48  | 0.16 | 0.11 | 1.1   | 0.293802 | 0.231797 | 0.650167 | 0.503592 |
| MmugDNA.7344.1.S1_x_at | MmugDNA.7344.1 | 9.19  | 9.31  | 0.88 | 0.54 | -1.09 | 0.837879 | 0.389309 | 0.941955 | 0.623403 |
| MmugDNA.7345.1.S1_at   | MmugDNA.7345.1 | 8.14  | 8.65  | 0.44 | 0.14 | -1.42 | 0.405301 | 0.354249 | 0.727307 | 0.597105 |
| MmugDNA.7347.1.S1_at   | MmugDNA.7347.1 | 7     | 7.99  | 0.43 | 0.58 | -1.99 | 0.37128  | 0.139479 | 0.705454 | 0.412743 |
| MmugDNA.735.1.S1_at    | MmugDNA.735.1  | 7.03  | 6.93  | 0.48 | 0.43 | 1.07  | 0.867591 | 0.035728 | 0.953578 | 0.233412 |
| MmugDNA.7351.1.S1_at   | MmugDNA.7351.1 | 12.31 | 12.44 | 0.55 | 0.14 | -1.1  | 0.730582 | 0.767627 | 0.896248 | 0.865109 |
| MmugDNA.7352.1.S1_at   | MmugDNA.7352.1 | 5.8   | 5.98  | 0.23 | 0.2  | -1.14 | 0.799348 | 0.949044 | 0.926464 | 0.970812 |
| MmugDNA.7353.1.S1_s_at | MmugDNA.7353.1 | 11.71 | 11.58 | 0.08 | 0.09 | 1.1   | 0.102316 | 0.422131 | 0.472589 | 0.645492 |
| MmugDNA.7354.1.S1_at   | MmugDNA.7354.1 | 4.6   | 3.89  | 0.15 | 0.84 | -1.64 | 0.651526 | 0.8348   | 0.861636 | 0.905439 |
| MmugDNA.7355.1.S1_at   | MmugDNA.7355.1 | 5.83  | 6.83  | 0.52 | 0.11 | -2.01 | 0.065707 | 0.015595 | 0.42084  | 0.158262 |
| MmugDNA.7356.1.S1_at   | MmugDNA.7356.1 | 4.51  | 5.06  | 0.6  | 0.22 | -1.46 | 0.154939 | 0.021652 | 0.528235 | 0.184333 |
| MmugDNA.7358.1.S1_at   | MmugDNA.7358.1 | 6.84  | 6.74  | 0.4  | 0.16 | 1.07  | 0.67707  | 0.131354 | 0.873348 | 0.403466 |
| MmugDNA.736.1.S1_at    | MmugDNA.736.1  | 9.34  | 9.52  | 0.4  | 0.08 | -1.13 | 0.633399 | 0.286191 | 0.853438 | 0.547713 |
| MmugDNA.7360.1.S1_at   | MmugDNA.7360.1 | 11.58 | 11.35 | 0.14 | 0.04 | 1.17  | 0.072237 | 0.021197 | 0.432091 | 0.182325 |
| MmugDNA.7362.1.S1_at   | MmugDNA.7362.1 | 13.59 | 13.67 | 0.42 | 0.06 | -1.06 | 0.30733  | 0.358631 | 0.660206 | 0.600139 |
| MmugDNA.7364.1.S1_at   | MmugDNA.7364.1 | 7.15  | 7.27  | 0.15 | 0.48 | -1.09 | 0.6203   | 0.903646 | 0.84709  | 0.945292 |
| MmugDNA.7366.1.S1_at   | MmugDNA.7366.1 | 7.07  | 6.64  | 0.59 | 0.19 | 1.35  | 0.227279 | 0.280789 | 0.596459 | 0.543952 |
| MmugDNA.7367.1.S1_at   | MmugDNA.7367.1 | 4.92  | 5.24  | 0.13 | 0.42 | -1.25 | 0.151281 | 0.193726 | 0.524506 | 0.468818 |
| MmugDNA.7368.1.S1_at   | MmugDNA.7368.1 | 3.32  | 3.16  | 0.06 | 0.09 | 1.12  | 0.037752 | 0.015103 | 0.357874 | 0.156008 |
| MmugDNA.7369.1.S1_at   | MmugDNA.7369.1 | 3.9   | 3.63  | 0.28 | 0.21 | 1.21  | 0.318373 | 0.034635 | 0.668074 | 0.230247 |
| MmugDNA.737.1.S1_at    | MmugDNA.737.1  | 5.3   | 5.19  | 0.02 | 0.2  | 1.08  | 0.134135 | 0.145006 | 0.508395 | 0.418938 |
| MmugDNA.7370.1.S1_at   | MmugDNA.7370.1 | 6.7   | 6.71  | 0.5  | 0.19 | -1    | 0.64126  | 0.865673 | 0.857213 | 0.923638 |
| MmugDNA.7373.1.S1_at   | MmugDNA.7373.1 | 3.27  | 3.22  | 0.33 | 0.17 | 1.04  | 0.525389 | 0.665122 | 0.796198 | 0.803733 |
| MmugDNA.7374.1.S1_at   | MmugDNA.7374.1 | 3.99  | 4.08  | 0.01 | 0.47 | -1.07 | 0.902143 | 0.984655 | 0.966869 | 0.991346 |
| MmugDNA.7375.1.S1_x_at | MmugDNA.7375.1 | 8.76  | 9.03  | 0.29 | 0.27 | -1.21 | 0.293631 | 0.159088 | 0.649913 | 0.435217 |
| MmugDNA.7378.1.S1_at   | MmugDNA.7378.1 | 5.04  | 4.66  | 0.08 | 0.03 | 1.3   | 0.002572 | 0.005052 | 0.180597 | 0.099022 |
| MmugDNA.7379.1.S1_at   | MmugDNA.7379.1 | 7.61  | 8.14  | 0.2  | 0.25 | -1.44 | 0.031791 | 0.022176 | 0.342447 | 0.186409 |
| MmugDNA.738.1.S1_at    | MmugDNA.738.1  | 10.33 | 8.13  | 1.74 | 0.92 | 4.59  | 0.561285 | 0.477856 | 0.817217 | 0.683843 |
| MmugDNA.7380.1.S1_at   | MmugDNA.7380.1 | 4.19  | 4.21  | 0.13 | 0.15 | -1.01 | 0.829607 | 0.783031 | 0.938862 | 0.874447 |
| MmugDNA.7387.1.S1_at   | MmugDNA.7387.1 | 9.66  | 8.26  | 0.26 | 0.12 | 2.63  | 0.001278 | 0.001973 | 0.157784 | 0.065871 |
| MmugDNA.7388.1.S1_at   | MmugDNA.7388.1 | 7.35  | 7.29  | 0.31 | 0.36 | 1.04  | 0.318506 | 0.078246 | 0.668228 | 0.324785 |
| MmugDNA.7388.1.S1_s_at | MmugDNA.7388.1 | 6.05  | 6.05  | 0.23 | 0.26 | -1    | 0.32034  | 0.202486 | 0.66928  | 0.476812 |
| MmugDNA.7389.1.S1_at   | MmugDNA.7389.1 | 10.97 | 11.03 | 0.34 | 0.07 | -1.04 | 0.891554 | 0.211396 | 0.962681 | 0.48553  |
| MmugDNA.739.1.S1_at    | MmugDNA.739.1  | 4.84  | 4.09  | 0.2  | 0.2  | 1.68  | 0.011573 | 0.175936 | 0.255545 | 0.452486 |
| MmugDNA.7391.1.S1_at   | MmugDNA.7391.1 | 5.21  | 4.41  | 0.27 | 0.42 | 1.74  | 0.083557 | 0.063072 | 0.449622 | 0.297788 |
| MmugDNA.7392.1.S1_at   | MmugDNA.7392.1 | 4.68  | 4.79  | 0.38 | 0.14 | -1.07 | 0.630596 | 0.116901 | 0.852018 | 0.384277 |
| MmugDNA.7394.1.S1_s_at | MmugDNA.7394.1 | 9.46  | 8.6   | 0.83 | 0.16 | 1.82  | 0.438204 | 0.245026 | 0.747231 | 0.514813 |
| MmugDNA.7396.1.S1_at   | MmugDNA.7396.1 | 5.16  | 5.2   | 0.33 | 0.17 | -1.02 | 0.603267 | 0.016095 | 0.83918  | 0.160775 |
| MmugDNA.7398.1.S1_at   | MmugDNA.7398.1 | 4.94  | 5.08  | 0.06 | 0.11 | -1.1  | 0.124276 | 0.105883 | 0.498334 | 0.368175 |
| MmugDNA.7399.1.S1_at   | MmugDNA.7399.1 | 6.13  | 5.59  | 0.3  | 0.23 | 1.46  | 0.140577 | 0.139521 | 0.516012 | 0.412743 |
| MmugDNA.74.1.S1_at     | MmugDNA.74.1   | 5.54  | 5.83  | 0.29 | 0.12 | -1.23 | 0.114825 | 0.192885 | 0.487957 | 0.468379 |

|                         |                 |       |       |      |      |       |          |          |          |          |
|-------------------------|-----------------|-------|-------|------|------|-------|----------|----------|----------|----------|
| MmugDNA.740.1.S1_at     | MmugDNA.740.1   | 6.26  | 6.31  | 0.2  | 0.1  | -1.03 | 0.430206 | 0.432393 | 0.742602 | 0.652819 |
| MmugDNA.7400.1.S1_at    | MmugDNA.7400.1  | 12.92 | 12.62 | 0.36 | 0.08 | 1.23  | 0.669967 | 0.698165 | 0.869803 | 0.824649 |
| MmugDNA.7401.1.S1_at    | MmugDNA.7401.1  | 3.15  | 3.3   | 0.13 | 0.1  | -1.11 | 0.10359  | 0.344313 | 0.474343 | 0.589762 |
| MmugDNA.7402.1.S1_at    | MmugDNA.7402.1  | 12.56 | 12.02 | 0.44 | 0.04 | 1.45  | 0.107359 | 0.10277  | 0.47976  | 0.363305 |
| MmugDNA.7404.1.S1_at    | MmugDNA.7404.1  | 6.03  | 5.96  | 0.12 | 0.05 | 1.05  | 0.126329 | 0.68246  | 0.500104 | 0.814526 |
| MmugDNA.7406.1.S1_at    | MmugDNA.7406.1  | 4.3   | 4.21  | 0.09 | 0.05 | 1.06  | 0.79169  | 0.825724 | 0.923472 | 0.899816 |
| MmugDNA.7409.1.S1_at    | MmugDNA.7409.1  | 6.89  | 6.76  | 0.1  | 0.06 | 1.1   | 0.510621 | 0.017304 | 0.788228 | 0.166509 |
| MmugDNA.741.1.S1_at     | MmugDNA.741.1   | 6.17  | 5.97  | 0.19 | 0.04 | 1.15  | 0.200039 | 0.180884 | 0.571864 | 0.457394 |
| MmugDNA.7410.1.S1_at    | MmugDNA.7410.1  | 10.95 | 10.69 | 0.13 | 0.05 | 1.2   | 0.113282 | 0.014938 | 0.486648 | 0.155342 |
| MmugDNA.7411.1.S1_at    | MmugDNA.7411.1  | 11.91 | 12.02 | 2.06 | 0.35 | -1.08 | 0.672946 | 0.584119 | 0.871072 | 0.752204 |
| MmugDNA.7412.1.S1_at    | MmugDNA.7412.1  | 3.51  | 3.49  | 0.15 | 0.09 | -1.01 | 0.355404 | 0.712073 | 0.694724 | 0.833139 |
| MmugDNA.7414.1.S1_at    | MmugDNA.7414.1  | 7.37  | 7.23  | 0.4  | 0.11 | 1.11  | 0.720982 | 0.863707 | 0.89187  | 0.922638 |
| MmugDNA.7416.1.S1_at    | MmugDNA.7416.1  | 8.5   | 7.6   | 0.26 | 0.05 | 1.87  | 0.004413 | 0.004785 | 0.198874 | 0.096484 |
| MmugDNA.7417.1.S1_at    | MmugDNA.7417.1  | 5.58  | 6.23  | 0.49 | 0.31 | -1.57 | 0.34108  | 0.128412 | 0.684841 | 0.399676 |
| MmugDNA.7419.1.S1_at    | MmugDNA.7419.1  | 7.55  | 7.3   | 0.02 | 0.03 | 1.19  | 0.000106 | 0.092376 | 0.108151 | 0.348294 |
| MmugDNA.35554.1.S1_s_at | MmugDNA.35554.1 | 4.97  | 4.97  | 0.16 | 0.02 | -1.01 | 0.483727 | 0.197691 | 0.773253 | 0.472633 |
| MmugDNA.7420.1.S1_at    | MmugDNA.7420.1  | 4.51  | 4.41  | 0.1  | 0.11 | 1.07  | 0.444089 | 0.533879 | 0.751101 | 0.719914 |
| MmugDNA.7421.1.S1_at    | MmugDNA.7421.1  | 4.55  | 4.33  | 0.21 | 0.27 | 1.17  | 0.15102  | 0.305855 | 0.52444  | 0.562731 |
| MmugDNA.7422.1.S1_at    | MmugDNA.7422.1  | 3.79  | 5.01  | 1.41 | 0.28 | -2.33 | 0.773612 | 0.770813 | 0.915826 | 0.866807 |
| MmugDNA.7424.1.S1_at    | MmugDNA.7424.1  | 5.6   | 5.53  | 0.53 | 0.23 | 1.04  | 0.682475 | 0.584664 | 0.875741 | 0.752482 |
| MmugDNA.7425.1.S1_at    | MmugDNA.7425.1  | 3.69  | 3.9   | 0.09 | 0.03 | -1.16 | 0.021125 | 0.040802 | 0.306884 | 0.246935 |
| MmugDNA.7426.1.S1_at    | MmugDNA.7426.1  | 7.21  | 6.62  | 0.46 | 0.09 | 1.5   | 0.20253  | 0.038865 | 0.574003 | 0.242062 |
| MmugDNA.7427.1.S1_at    | MmugDNA.7427.1  | 11.43 | 10.91 | 0.2  | 0.06 | 1.43  | 0.011582 | 0.000949 | 0.255545 | 0.049129 |
| MmugDNA.7428.1.S1_at    | MmugDNA.7428.1  | 11.08 | 10.87 | 0.36 | 0.06 | 1.15  | 0.535587 | 0.031032 | 0.801869 | 0.218074 |
| MmugDNA.7431.1.S1_at    | MmugDNA.7431.1  | 3.86  | 3.84  | 0.25 | 0.1  | 1.01  | 0.547469 | 0.21514  | 0.809157 | 0.488943 |
| MmugDNA.7433.1.S1_at    | MmugDNA.7433.1  | 10.4  | 10.57 | 0.15 | 0.09 | -1.13 | 0.136826 | 0.002289 | 0.511963 | 0.07045  |
| MmugDNA.7434.1.S1_at    | MmugDNA.7434.1  | 9.1   | 9.19  | 0.42 | 0.2  | -1.06 | 0.596263 | 0.153244 | 0.835825 | 0.428072 |
| MmugDNA.7435.1.S1_at    | MmugDNA.7435.1  | 11.08 | 10.95 | 0.1  | 0.29 | 1.09  | 0.115545 | 0.206985 | 0.488793 | 0.481111 |
| MmugDNA.7436.1.S1_at    | MmugDNA.7436.1  | 5.84  | 5.9   | 0.33 | 0.18 | -1.04 | 0.437722 | 0.033143 | 0.746873 | 0.225324 |
| MmugDNA.7437.1.S1_at    | MmugDNA.7437.1  | 4.29  | 4.16  | 0.07 | 0.08 | 1.1   | 0.086604 | 0.087726 | 0.454468 | 0.340979 |
| MmugDNA.7438.1.S1_at    | MmugDNA.7438.1  | 4.89  | 4.7   | 0.05 | 0.06 | 1.13  | 0.006284 | 0.020458 | 0.218069 | 0.179597 |
| MmugDNA.7439.1.S1_at    | MmugDNA.7439.1  | 7.68  | 7.7   | 0.21 | 0.24 | -1.01 | 0.33153  | 0.101434 | 0.678103 | 0.361205 |
| MmugDNA.744.1.S1_at     | MmugDNA.744.1   | 3.96  | 3.64  | 0.22 | 0.04 | 1.25  | 0.133646 | 0.171635 | 0.508012 | 0.448044 |
| MmugDNA.7440.1.S1_at    | MmugDNA.7440.1  | 4.78  | 4.86  | 0.07 | 0.4  | -1.06 | 0.950325 | 0.043811 | 0.983303 | 0.25387  |
| MmugDNA.7441.1.S1_at    | MmugDNA.7441.1  | 4.98  | 4.87  | 0.15 | 0.13 | 1.08  | 0.521181 | 0.103009 | 0.794371 | 0.363812 |
| MmugDNA.7442.1.S1_at    | MmugDNA.7442.1  | 6.25  | 7.43  | 1.01 | 0.22 | -2.26 | 0.308862 | 0.132345 | 0.661293 | 0.404294 |
| MmugDNA.7443.1.S1_at    | MmugDNA.7443.1  | 11.4  | 11.77 | 0.01 | 0.07 | -1.29 | 0.001574 | 0.000269 | 0.161959 | 0.033826 |
| MmugDNA.7444.1.S1_at    | MmugDNA.7444.1  | 10.01 | 10.48 | 0.49 | 0.14 | -1.38 | 0.2509   | 0.446841 | 0.615977 | 0.663044 |
| MmugDNA.7445.1.S1_at    | MmugDNA.7445.1  | 6.43  | 6.23  | 0.14 | 0.06 | 1.15  | 0.081019 | 0.110643 | 0.445056 | 0.374854 |
| MmugDNA.7446.1.S1_at    | MmugDNA.7446.1  | 11.98 | 12.02 | 0.48 | 0.04 | -1.03 | 0.782071 | 0.568403 | 0.919732 | 0.741962 |
| MmugDNA.7447.1.S1_at    | MmugDNA.7447.1  | 12.84 | 12.63 | 0.16 | 0.09 | 1.15  | 0.040918 | 0.032711 | 0.365456 | 0.223942 |
| MmugDNA.7449.1.S1_at    | MmugDNA.7449.1  | 6.45  | 6.08  | 0.2  | 0.38 | 1.29  | 0.176317 | 0.55726  | 0.549336 | 0.735031 |
| MmugDNA.745.1.S1_at     | MmugDNA.745.1   | 9.91  | 8.65  | 0.4  | 0.29 | 2.4   | 0.014182 | 0.014872 | 0.274019 | 0.155055 |

|                        |                |       |       |      |      |       |          |          |          |          |
|------------------------|----------------|-------|-------|------|------|-------|----------|----------|----------|----------|
| MmugDNA.7450.1.S1_at   | MmugDNA.7450.1 | 5.57  | 5.25  | 0.24 | 0.13 | 1.25  | 0.104034 | 0.190211 | 0.474691 | 0.465854 |
| MmugDNA.7452.1.S1_at   | MmugDNA.7452.1 | 8.85  | 8.51  | 0.27 | 0.05 | 1.27  | 0.227456 | 0.013154 | 0.596578 | 0.147338 |
| MmugDNA.7453.1.S1_at   | MmugDNA.7453.1 | 9.54  | 9.63  | 0.17 | 0.08 | -1.06 | 0.633766 | 0.004281 | 0.853666 | 0.091887 |
| MmugDNA.5796.1.S1_s_at | MmugDNA.5796.1 | 13.32 | 13.3  | 0.08 | 0.01 | 1.01  | 0.621976 | 0.871327 | 0.847631 | 0.926844 |
| MmugDNA.7455.1.S1_at   | MmugDNA.7455.1 | 5.72  | 4.93  | 0.57 | 0.42 | 1.73  | 0.136583 | 0.162999 | 0.511723 | 0.439145 |
| MmugDNA.7456.1.S1_at   | MmugDNA.7456.1 | 3.77  | 4.06  | 0.3  | 0.05 | -1.22 | 0.41767  | 0.176767 | 0.735015 | 0.45319  |
| MmugDNA.7457.1.S1_at   | MmugDNA.7457.1 | 5.04  | 5.23  | 0.38 | 0.03 | -1.14 | 0.267475 | 0.081631 | 0.628168 | 0.329824 |
| MmugDNA.7458.1.S1_at   | MmugDNA.7458.1 | 4.3   | 4.47  | 0.07 | 0.13 | -1.13 | 0.255441 | 0.04282  | 0.619502 | 0.251467 |
| MmugDNA.7459.1.S1_at   | MmugDNA.7459.1 | 5.46  | 5.98  | 0.32 | 0.23 | -1.44 | 0.100349 | 0.034634 | 0.470963 | 0.230247 |
| MmugDNA.7460.1.S1_at   | MmugDNA.7460.1 | 5.87  | 6.18  | 0.18 | 0.23 | -1.24 | 0.084728 | 0.534825 | 0.451298 | 0.720557 |
| MmugDNA.7461.1.S1_at   | MmugDNA.7461.1 | 6.93  | 6.54  | 0.13 | 0.24 | -1.31 | 0.195392 | 0.178239 | 0.565786 | 0.45458  |
| MmugDNA.7464.1.S1_at   | MmugDNA.7464.1 | 10.54 | 9.4   | 0.37 | 0.17 | 2.21  | 0.006447 | 0.000296 | 0.219301 | 0.034892 |
| MmugDNA.7465.1.S1_at   | MmugDNA.7465.1 | 6.23  | 6.15  | 0.11 | 0.11 | 1.06  | 0.186522 | 0.413994 | 0.559164 | 0.639979 |
| MmugDNA.7466.1.S1_at   | MmugDNA.7466.1 | 9.45  | 9.73  | 0.35 | 0.16 | -1.21 | 0.311652 | 0.090434 | 0.663441 | 0.344925 |
| MmugDNA.7467.1.S1_at   | MmugDNA.7467.1 | 5.06  | 5.09  | 0.52 | 0.36 | -1.02 | 0.266165 | 0.5667   | 0.627106 | 0.740724 |
| MmugDNA.7469.1.S1_at   | MmugDNA.7469.1 | 9.77  | 9.76  | 0.11 | 0.08 | 1.01  | 0.302    | 0.360547 | 0.655989 | 0.601613 |
| MmugDNA.747.1.S1_at    | MmugDNA.747.1  | 7.13  | 7.05  | 0.24 | 0.09 | 1.06  | 0.863439 | 0.283939 | 0.952018 | 0.546237 |
| MmugDNA.7470.1.S1_at   | MmugDNA.7470.1 | 6.91  | 7.31  | 0.29 | 0.17 | -1.32 | 0.067457 | 0.119087 | 0.423828 | 0.387386 |
| MmugDNA.7473.1.S1_at   | MmugDNA.7473.1 | 4.12  | 4.3   | 0.25 | 0.06 | -1.13 | 0.643435 | 0.852583 | 0.858218 | 0.916218 |
| MmugDNA.7474.1.S1_at   | MmugDNA.7474.1 | 6.63  | 7.16  | 0.21 | 0.09 | -1.44 | 0.045788 | 0.344224 | 0.377271 | 0.589762 |
| MmugDNA.7475.1.S1_at   | MmugDNA.7475.1 | 3.78  | 3.65  | 0.27 | 0.11 | 1.09  | 0.684662 | 0.863098 | 0.876469 | 0.922237 |
| MmugDNA.7476.1.S1_at   | MmugDNA.7476.1 | 6.12  | 6.06  | 0.11 | 0.02 | 1.05  | 0.27006  | 0.396829 | 0.630217 | 0.628452 |
| MmugDNA.7477.1.S1_at   | MmugDNA.7477.1 | 3.77  | 3.81  | 0.13 | 0.25 | -1.03 | 0.189324 | 0.093317 | 0.560894 | 0.349412 |
| MmugDNA.748.1.S1_at    | MmugDNA.748.1  | 4.65  | 4.04  | 1.2  | 0.81 | 1.52  | 0.786082 | 0.91043  | 0.921302 | 0.949439 |
| MmugDNA.7480.1.S1_at   | MmugDNA.7480.1 | 10.05 | 9.85  | 1    | 0.19 | 1.15  | 0.556366 | 0.106919 | 0.81409  | 0.369499 |
| MmugDNA.7481.1.S1_at   | MmugDNA.7481.1 | 11.63 | 12.09 | 0.22 | 0.02 | -1.38 | 0.056369 | 0.001446 | 0.400047 | 0.05795  |
| MmugDNA.7482.1.S1_at   | MmugDNA.7482.1 | 10.89 | 11.43 | 0.41 | 0.07 | -1.45 | 0.274848 | 0.244103 | 0.634184 | 0.514121 |
| MmugDNA.7484.1.S1_at   | MmugDNA.7484.1 | 5.37  | 5.19  | 0.09 | 0.25 | 1.13  | 0.208275 | 0.279489 | 0.579955 | 0.543055 |
| MmugDNA.7485.1.S1_at   | MmugDNA.7485.1 | 4.12  | 3.97  | 0.28 | 0.32 | 1.11  | 0.230048 | 0.195797 | 0.598481 | 0.470661 |
| MmugDNA.7487.1.S1_at   | MmugDNA.7487.1 | 7.47  | 7.36  | 0.78 | 0.2  | 1.08  | 0.27509  | 0.163894 | 0.634466 | 0.440105 |
| MmugDNA.7488.1.S1_at   | MmugDNA.7488.1 | 8.04  | 7.66  | 0.39 | 0.14 | 1.3   | 0.100814 | 0.045456 | 0.47159  | 0.2575   |
| MmugDNA.7489.1.S1_at   | MmugDNA.7489.1 | 2.79  | 2.77  | 0.1  | 0.04 | 1.01  | 0.730694 | 0.918707 | 0.896248 | 0.954387 |
| MmugDNA.749.1.S1_at    | MmugDNA.749.1  | 11.3  | 12    | 0.66 | 0.05 | -1.62 | 0.052145 | 0.037191 | 0.392084 | 0.237285 |
| MmugDNA.7490.1.S1_at   | MmugDNA.7490.1 | 6.16  | 6.01  | 0.21 | 0.13 | 1.11  | 0.246785 | 0.433273 | 0.6123   | 0.653606 |
| MmugDNA.7491.1.S1_at   | MmugDNA.7491.1 | 3.31  | 3.28  | 0.11 | 0.53 | 1.02  | 0.537179 | 0.724826 | 0.802633 | 0.840693 |
| MmugDNA.7492.1.S1_at   | MmugDNA.7492.1 | 8.36  | 7.78  | 0.79 | 0.16 | 1.49  | 0.944214 | 0.55079  | 0.980647 | 0.730611 |
| MmugDNA.7496.1.S1_at   | MmugDNA.7496.1 | 6.06  | 5.92  | 0.1  | 0.03 | 1.11  | 0.046206 | 0.372752 | 0.377596 | 0.611661 |
| MmugDNA.7498.1.S1_at   | MmugDNA.7498.1 | 7.72  | 7.65  | 0.14 | 0.21 | 1.05  | 0.342363 | 0.647584 | 0.685777 | 0.793568 |
| MmugDNA.75.1.S1_at     | MmugDNA.75.1   | 6.5   | 6.25  | 0.14 | 0.05 | 1.19  | 0.047545 | 0.242704 | 0.380487 | 0.513077 |
| MmugDNA.75.1.S1_x_at   | MmugDNA.75.1   | 6.95  | 6.51  | 0.13 | 0.08 | 1.35  | 0.006343 | 0.002676 | 0.218505 | 0.076408 |
| MmugDNA.750.1.S1_at    | MmugDNA.750.1  | 9.65  | 9.41  | 0.37 | 0.1  | 1.18  | 0.150402 | 0.207578 | 0.523988 | 0.481898 |
| MmugDNA.750.1.S1_s_at  | MmugDNA.750.1  | 9.17  | 8.64  | 0.29 | 0.11 | 1.45  | 0.030064 | 0.030606 | 0.336449 | 0.216887 |
| MmugDNA.7500.1.S1_at   | MmugDNA.7500.1 | 3.54  | 3.67  | 0    | 0.35 | -1.1  | 0.780901 | 0.631758 | 0.919326 | 0.782957 |

|                        |                |       |       |      |      |       |          |          |          |          |
|------------------------|----------------|-------|-------|------|------|-------|----------|----------|----------|----------|
| MmugDNA.7501.1.S1_at   | MmugDNA.7501.1 | 9.03  | 9.53  | 0.66 | 0.11 | -1.41 | 0.096285 | 0.083581 | 0.464892 | 0.334152 |
| MmugDNA.7505.1.S1_at   | MmugDNA.7505.1 | 10.27 | 10.26 | 0.29 | 0.05 | 1.01  | 0.888817 | 0.069052 | 0.961633 | 0.309017 |
| MmugDNA.7507.1.S1_at   | MmugDNA.7507.1 | 4.46  | 4.77  | 0.34 | 0.03 | -1.23 | 0.152011 | 0.344011 | 0.525094 | 0.58962  |
| MmugDNA.7509.1.S1_at   | MmugDNA.7509.1 | 6.71  | 7.75  | 0.8  | 0.61 | -2.06 | 0.444693 | 0.259233 | 0.751461 | 0.526368 |
| MmugDNA.7510.1.S1_at   | MmugDNA.7510.1 | 8.81  | 9.35  | 0.4  | 0.14 | -1.45 | 0.236616 | 0.035464 | 0.603538 | 0.232564 |
| MmugDNA.7511.1.S1_at   | MmugDNA.7511.1 | 7.28  | 7.67  | 0.74 | 0.06 | -1.31 | 0.411133 | 0.056576 | 0.731164 | 0.283871 |
| MmugDNA.7513.1.S1_at   | MmugDNA.7513.1 | 2.92  | 2.9   | 0.2  | 0    | 1.01  | 0.84095  | 0.90584  | 0.943498 | 0.946727 |
| MmugDNA.7514.1.S1_at   | MmugDNA.7514.1 | 4.9   | 5.4   | 1.04 | 0.24 | -1.42 | 0.809359 | 0.919583 | 0.93104  | 0.954848 |
| MmugDNA.7515.1.S1_at   | MmugDNA.7515.1 | 12.89 | 13.1  | 0.06 | 0.03 | -1.15 | 0.006557 | 0.019937 | 0.219791 | 0.177457 |
| MmugDNA.7517.1.S1_at   | MmugDNA.7517.1 | 11.71 | 11.35 | 0.45 | 0.12 | 1.28  | 0.667209 | 0.560045 | 0.868549 | 0.73645  |
| MmugDNA.7518.1.S1_at   | MmugDNA.7518.1 | 4.95  | 4.68  | 0.08 | 0.15 | 1.2   | 0.052063 | 0.100178 | 0.391881 | 0.359191 |
| MmugDNA.7519.1.S1_at   | MmugDNA.7519.1 | 11.71 | 11.88 | 0.08 | 0.09 | -1.12 | 0.023955 | 0.01723  | 0.317529 | 0.166331 |
| MmugDNA.752.1.S1_at    | MmugDNA.752.1  | 11.64 | 11.25 | 0.04 | 0.07 | 1.31  | 0.000996 | 0.00106  | 0.155374 | 0.05171  |
| MmugDNA.7520.1.S1_s_at | MmugDNA.7520.1 | 7.2   | 7.45  | 0.28 | 0.16 | -1.19 | 0.626456 | 0.793291 | 0.849991 | 0.880679 |
| MmugDNA.7523.1.S1_at   | MmugDNA.7523.1 | 3.21  | 3.29  | 0.05 | 0.07 | -1.06 | 0.382518 | 0.144729 | 0.710759 | 0.418549 |
| MmugDNA.7525.1.S1_at   | MmugDNA.7525.1 | 8.72  | 8.7   | 0.18 | 0.11 | 1.02  | 0.885824 | 0.929413 | 0.96038  | 0.959707 |
| MmugDNA.7529.1.S1_at   | MmugDNA.7529.1 | 10.4  | 9.8   | 0.15 | 0.36 | 1.52  | 0.016591 | 0.010078 | 0.287478 | 0.13168  |
| MmugDNA.753.1.S1_at    | MmugDNA.753.1  | 6.03  | 6.14  | 0.32 | 0.09 | -1.08 | 0.511643 | 0.148537 | 0.78878  | 0.423074 |
| MmugDNA.7530.1.S1_at   | MmugDNA.7530.1 | 6.92  | 6.93  | 0    | 0.04 | -1.01 | 0.561016 | 0.494961 | 0.817027 | 0.695223 |
| MmugDNA.7531.1.S1_at   | MmugDNA.7531.1 | 3.68  | 3.64  | 0.35 | 0.41 | 1.03  | 0.519661 | 0.753345 | 0.793297 | 0.856483 |
| MmugDNA.7532.1.S1_at   | MmugDNA.7532.1 | 7.9   | 8.08  | 0.56 | 0.11 | -1.13 | 0.502976 | 0.427048 | 0.784    | 0.649087 |
| MmugDNA.7537.1.S1_at   | MmugDNA.7537.1 | 7.39  | 7.13  | 0.33 | 0.18 | 1.2   | 0.114117 | 0.341602 | 0.487405 | 0.587795 |
| MmugDNA.7538.1.S1_at   | MmugDNA.7538.1 | 4.15  | 4.16  | 0.17 | 0.04 | -1.01 | 0.808417 | 0.684902 | 0.930643 | 0.816234 |
| MmugDNA.7539.1.S1_at   | MmugDNA.7539.1 | 4.5   | 4.22  | 0.08 | 0.06 | 1.22  | 0.019095 | 0.028962 | 0.299783 | 0.212061 |
| MmugDNA.7541.1.S1_at   | MmugDNA.7541.1 | 7.16  | 7.17  | 0.08 | 0.03 | -1.01 | 0.513889 | 0.590282 | 0.790207 | 0.756124 |
| MmugDNA.7543.1.S1_at   | MmugDNA.7543.1 | 6.33  | 7.28  | 0.77 | 0.34 | -1.93 | 0.16388  | 0.168072 | 0.536665 | 0.444666 |
| MmugDNA.7545.1.S1_at   | MmugDNA.7545.1 | 6.78  | 7.15  | 1.25 | 0.47 | -1.29 | 0.350424 | 0.49882  | 0.691263 | 0.697807 |
| MmugDNA.7546.1.S1_at   | MmugDNA.7546.1 | 5.4   | 5.32  | 0.05 | 0.16 | 1.06  | 0.166957 | 0.154821 | 0.539531 | 0.429842 |
| MmugDNA.7547.1.S1_at   | MmugDNA.7547.1 | 3.2   | 3.19  | 0.13 | 0.09 | 1.01  | 0.942831 | 0.983685 | 0.98034  | 0.990902 |
| MmugDNA.755.1.S1_at    | MmugDNA.755.1  | 3.28  | 3.26  | 0.09 | 0.04 | 1.01  | 0.92651  | 0.151341 | 0.97558  | 0.426087 |
| MmugDNA.7552.1.S1_at   | MmugDNA.7552.1 | 5.77  | 6.01  | 0.1  | 0.46 | -1.18 | 0.305525 | 0.275247 | 0.658979 | 0.53963  |
| MmugDNA.7553.1.S1_at   | MmugDNA.7553.1 | 4.08  | 3.92  | 0.07 | 0.08 | 1.12  | 0.035896 | 0.094202 | 0.353707 | 0.350889 |
| MmugDNA.7554.1.S1_at   | MmugDNA.7554.1 | 3.14  | 3.02  | 0.15 | 0.17 | 1.08  | 0.958587 | 0.37485  | 0.986368 | 0.613091 |
| MmugDNA.7555.1.S1_at   | MmugDNA.7555.1 | 3.99  | 4.04  | 0.19 | 0.54 | -1.03 | 0.281449 | 0.383594 | 0.63992  | 0.619556 |
| MmugDNA.7556.1.S1_at   | MmugDNA.7556.1 | 7.42  | 7.34  | 0.59 | 0.1  | 1.05  | 0.921134 | 0.520831 | 0.973328 | 0.711942 |
| MmugDNA.7557.1.S1_at   | MmugDNA.7557.1 | 6.67  | 7.13  | 0.23 | 0.09 | -1.38 | 0.044241 | 0.020963 | 0.374279 | 0.181584 |
| MmugDNA.7558.1.S1_at   | MmugDNA.7558.1 | 4.94  | 4.94  | 0.13 | 0.13 | -1    | 0.985772 | 0.352217 | 0.99547  | 0.595568 |
| MmugDNA.7559.1.S1_at   | MmugDNA.7559.1 | 4.83  | 4.84  | 0.08 | 0.11 | -1.01 | 0.37729  | 0.281849 | 0.70746  | 0.544844 |
| MmugDNA.756.1.S1_at    | MmugDNA.756.1  | 6.54  | 6.42  | 0.92 | 0.06 | 1.09  | 0.484856 | 0.703778 | 0.77382  | 0.828234 |
| MmugDNA.7560.1.S1_at   | MmugDNA.7560.1 | 4.65  | 4.6   | 0.35 | 0.16 | 1.04  | 0.23725  | 0.418887 | 0.604124 | 0.643141 |
| MmugDNA.7561.1.S1_at   | MmugDNA.7561.1 | 3.12  | 3.08  | 0.16 | 0    | 1.02  | 0.771502 | 0.936373 | 0.914657 | 0.964131 |
| MmugDNA.7563.1.S1_at   | MmugDNA.7563.1 | 4.95  | 4.93  | 0.1  | 0.1  | 1.01  | 0.630942 | 0.5153   | 0.852321 | 0.70823  |
| MmugDNA.7564.1.S1_at   | MmugDNA.7564.1 | 3.42  | 3.36  | 0.08 | 0.16 | 1.04  | 0.771822 | 0.823152 | 0.914891 | 0.898361 |

|                        |                |       |       |      |      |       |          |          |          |          |
|------------------------|----------------|-------|-------|------|------|-------|----------|----------|----------|----------|
| MmugDNA.7565.1.S1_at   | MmugDNA.7565.1 | 4.31  | 4.3   | 0.24 | 0.07 | 1.01  | 0.890274 | 0.785988 | 0.962263 | 0.876026 |
| MmugDNA.7567.1.S1_at   | MmugDNA.7567.1 | 9.88  | 9.88  | 0.25 | 0.09 | 1     | 0.975325 | 0.345407 | 0.991931 | 0.590726 |
| MmugDNA.7568.1.S1_at   | MmugDNA.7568.1 | 8.63  | 8.81  | 0.81 | 0.41 | -1.13 | 0.903988 | 0.503422 | 0.967748 | 0.700888 |
| MmugDNA.757.1.S1_at    | MmugDNA.757.1  | 5.38  | 5.31  | 0.12 | 0.19 | 1.05  | 0.205069 | 0.227279 | 0.5768   | 0.499589 |
| MmugDNA.7571.1.S1_at   | MmugDNA.7571.1 | 4.48  | 4.81  | 0.09 | 0.04 | -1.27 | 0.010315 | 0.042081 | 0.246929 | 0.249638 |
| MmugDNA.7572.1.S1_at   | MmugDNA.7572.1 | 5.62  | 5.55  | 0.04 | 0.12 | 1.05  | 0.277914 | 0.101163 | 0.637228 | 0.360831 |
| MmugDNA.7574.1.S1_at   | MmugDNA.7574.1 | 5     | 4.96  | 0.3  | 0.05 | 1.03  | 0.822256 | 0.853777 | 0.935933 | 0.916781 |
| MmugDNA.7575.1.S1_at   | MmugDNA.7575.1 | 4.59  | 4.57  | 0.07 | 0.19 | 1.02  | 0.539852 | 0.724456 | 0.804055 | 0.840485 |
| MmugDNA.7576.1.S1_at   | MmugDNA.7576.1 | 4.15  | 4.4   | 0.26 | 0.24 | -1.19 | 0.258628 | 0.020939 | 0.622286 | 0.181465 |
| MmugDNA.7577.1.S1_at   | MmugDNA.7577.1 | 5.89  | 5.84  | 0.55 | 0.77 | 1.04  | 0.467675 | 0.57046  | 0.764539 | 0.743121 |
| MmugDNA.7578.1.S1_at   | MmugDNA.7578.1 | 6.01  | 5.88  | 0.17 | 0    | -1.09 | 0.229507 | 0.462991 | 0.598339 | 0.674149 |
| MmugDNA.7579.1.S1_at   | MmugDNA.7579.1 | 6.42  | 6.56  | 0.31 | 0.21 | -1.1  | 0.515527 | 0.302262 | 0.790894 | 0.560092 |
| MmugDNA.758.1.S1_at    | MmugDNA.758.1  | 6.84  | 6.67  | 0.32 | 0.17 | 1.13  | 0.963595 | 0.829729 | 0.988152 | 0.902191 |
| MmugDNA.7580.1.S1_at   | MmugDNA.7580.1 | 4.82  | 5.02  | 0.17 | 0.22 | -1.15 | 0.255173 | 0.14613  | 0.619267 | 0.420099 |
| MmugDNA.7581.1.S1_at   | MmugDNA.7581.1 | 3.45  | 3.25  | 0.13 | 0.11 | 1.15  | 0.100594 | 0.069191 | 0.471482 | 0.309298 |
| MmugDNA.7583.1.S1_at   | MmugDNA.7583.1 | 5.56  | 5.01  | 0.29 | 0.13 | 1.47  | 0.039963 | 0.035035 | 0.362955 | 0.231314 |
| MmugDNA.7585.1.S1_at   | MmugDNA.7585.1 | 3.58  | 3.54  | 0.26 | 0.03 | 1.03  | 0.588061 | 0.166337 | 0.83181  | 0.442884 |
| MmugDNA.7586.1.S1_at   | MmugDNA.7586.1 | 9.16  | 10.24 | 0.47 | 0.22 | -2.11 | 0.035213 | 0.093942 | 0.351366 | 0.350453 |
| MmugDNA.7587.1.S1_at   | MmugDNA.7587.1 | 7.41  | 8.19  | 0.34 | 0.21 | -1.72 | 0.070743 | 0.533262 | 0.429834 | 0.719522 |
| MmugDNA.7588.1.S1_at   | MmugDNA.7588.1 | 12.1  | 12.3  | 0.31 | 0.03 | -1.15 | 0.117384 | 0.026796 | 0.490925 | 0.204733 |
| MmugDNA.759.1.S1_at    | MmugDNA.759.1  | 5.42  | 5.45  | 0.24 | 0.17 | -1.02 | 0.64714  | 0.565692 | 0.859341 | 0.740066 |
| MmugDNA.7591.1.S1_at   | MmugDNA.7591.1 | 4.14  | 4.01  | 0.07 | 0.11 | 1.09  | 0.123252 | 0.184419 | 0.496589 | 0.460468 |
| MmugDNA.7592.1.S1_at   | MmugDNA.7592.1 | 4.1   | 4.17  | 0.14 | 0.12 | -1.04 | 0.621359 | 0.409102 | 0.847514 | 0.63615  |
| MmugDNA.7593.1.S1_at   | MmugDNA.7593.1 | 9.15  | 8.05  | 0.47 | 0.12 | 2.15  | 0.040623 | 0.049679 | 0.364613 | 0.267892 |
| MmugDNA.7594.1.S1_at   | MmugDNA.7594.1 | 12.19 | 12.58 | 0.13 | 0.05 | -1.32 | 0.016426 | 0.022372 | 0.287478 | 0.187176 |
| MmugDNA.7595.1.S1_at   | MmugDNA.7595.1 | 7.83  | 7.71  | 0.37 | 0.23 | 1.09  | 0.7018   | 0.516207 | 0.883994 | 0.708757 |
| MmugDNA.7596.1.S1_at   | MmugDNA.7596.1 | 4.44  | 5.23  | 0.59 | 0.56 | -1.72 | 0.484531 | 0.651202 | 0.773673 | 0.796082 |
| MmugDNA.7597.1.S1_at   | MmugDNA.7597.1 | 7.05  | 7.12  | 0.27 | 0.38 | -1.05 | 0.863877 | 0.907022 | 0.952043 | 0.947344 |
| MmugDNA.7598.1.S1_at   | MmugDNA.7598.1 | 3.05  | 2.85  | 0.12 | 0.92 | 1.15  | 0.598517 | 0.745761 | 0.836974 | 0.852562 |
| MmugDNA.760.1.S1_at    | MmugDNA.760.1  | 2.85  | 2.85  | 0.03 | 0.03 | 1     | 1        | 0.852021 | 1        | 0.915853 |
| MmugDNA.7600.1.S1_at   | MmugDNA.7600.1 | 11.86 | 12.09 | 0.26 | 0.05 | -1.18 | 0.624046 | 0.867316 | 0.848468 | 0.924651 |
| MmugDNA.7601.1.S1_s_at | MmugDNA.7601.1 | 10.17 | 9.6   | 0.57 | 0.22 | 1.48  | 0.408398 | 0.642435 | 0.72928  | 0.790222 |
| MmugDNA.7603.1.S1_at   | MmugDNA.7603.1 | 4.12  | 4.52  | 1.04 | 0.06 | -1.31 | 0.548572 | 0.838282 | 0.809836 | 0.907682 |
| MmugDNA.7604.1.S1_at   | MmugDNA.7604.1 | 9.28  | 10.12 | 0.3  | 0.14 | -1.8  | 0.011373 | 0.002765 | 0.254437 | 0.077756 |
| MmugDNA.7605.1.S1_at   | MmugDNA.7605.1 | 6.14  | 6.16  | 0.22 | 0.07 | -1.01 | 0.460704 | 0.302556 | 0.760408 | 0.560201 |
| MmugDNA.7606.1.S1_at   | MmugDNA.7606.1 | 3.83  | 4.02  | 0.07 | 0.19 | -1.14 | 0.706025 | 0.481605 | 0.885526 | 0.686557 |
| MmugDNA.7609.1.S1_at   | MmugDNA.7609.1 | 4.32  | 3.58  | 0.48 | 0.05 | 1.67  | 0.194282 | 0.24198  | 0.564864 | 0.512512 |
| MmugDNA.761.1.S1_at    | MmugDNA.761.1  | 6.03  | 6.46  | 0.45 | 0.32 | -1.34 | 0.635799 | 0.220799 | 0.854754 | 0.494262 |
| MmugDNA.7610.1.S1_at   | MmugDNA.7610.1 | 8.66  | 9.21  | 0.69 | 0.18 | -1.46 | 0.272717 | 0.236475 | 0.632448 | 0.507336 |
| MmugDNA.7611.1.S1_at   | MmugDNA.7611.1 | 3.85  | 3.82  | 0.09 | 0.03 | 1.02  | 0.204468 | 0.275463 | 0.575907 | 0.539697 |
| MmugDNA.7612.1.S1_at   | MmugDNA.7612.1 | 4.15  | 4.96  | 0.55 | 0.69 | -1.75 | 0.121415 | 0.354783 | 0.495101 | 0.597445 |
| MmugDNA.7615.1.S1_at   | MmugDNA.7615.1 | 4     | 3.97  | 0.03 | 0.07 | 1.02  | 0.200113 | 0.13915  | 0.571887 | 0.412266 |
| MmugDNA.7616.1.S1_x_at | MmugDNA.7616.1 | 7.82  | 7.83  | 0.19 | 0.04 | -1.01 | 0.413398 | 0.653557 | 0.732232 | 0.797506 |



|                        |                |       |       |      |      |       |          |          |          |          |
|------------------------|----------------|-------|-------|------|------|-------|----------|----------|----------|----------|
| MmugDNA.7617.1.S1_at   | MmugDNA.7617.1 | 5.84  | 5.6   | 0.27 | 0.17 | 1.18  | 0.313957 | 0.37139  | 0.664932 | 0.610177 |
| MmugDNA.7618.1.S1_at   | MmugDNA.7618.1 | 7.4   | 7.25  | 0.46 | 0.1  | 1.11  | 0.704922 | 0.821402 | 0.885255 | 0.897141 |
| MmugDNA.762.1.S1_at    | MmugDNA.762.1  | 5.92  | 5.94  | 0.11 | 0.04 | -1.01 | 0.382604 | 0.290835 | 0.710805 | 0.551431 |
| MmugDNA.7620.1.S1_at   | MmugDNA.7620.1 | 4.86  | 4.87  | 0.05 | 0.08 | -1    | 0.507088 | 0.329051 | 0.786181 | 0.578482 |
| MmugDNA.7621.1.S1_at   | MmugDNA.7621.1 | 7.97  | 7.76  | 0.76 | 0.21 | 1.16  | 0.893446 | 0.283141 | 0.963467 | 0.545694 |
| MmugDNA.7622.1.S1_at   | MmugDNA.7622.1 | 11.35 | 11.75 | 0.43 | 0.09 | -1.32 | 0.328162 | 0.402603 | 0.675661 | 0.631505 |
| MmugDNA.7623.1.S1_at   | MmugDNA.7623.1 | 8.84  | 8.91  | 1.01 | 0.1  | -1.05 | 0.298414 | 0.37757  | 0.653176 | 0.615012 |
| MmugDNA.7624.1.S1_at   | MmugDNA.7624.1 | 8.52  | 7.92  | 0.2  | 0.29 | 1.51  | 0.090922 | 0.523496 | 0.458873 | 0.71376  |
| MmugDNA.7626.1.S1_at   | MmugDNA.7626.1 | 9.7   | 10.05 | 0.2  | 0.21 | -1.27 | 0.244652 | 0.073657 | 0.610216 | 0.316988 |
| MmugDNA.7627.1.S1_at   | MmugDNA.7627.1 | 3.7   | 3.62  | 0.08 | 0.14 | 1.06  | 0.218532 | 0.125112 | 0.588313 | 0.395531 |
| MmugDNA.7628.1.S1_at   | MmugDNA.7628.1 | 4.53  | 4.66  | 0.15 | 0.22 | -1.1  | 0.701554 | 0.441538 | 0.883924 | 0.659675 |
| MmugDNA.763.1.S1_at    | MmugDNA.763.1  | 2.81  | 2.91  | 0.05 | 0.19 | -1.07 | 0.587228 | 0.525611 | 0.831578 | 0.715149 |
| MmugDNA.7630.1.S1_at   | MmugDNA.7630.1 | 5.54  | 5.6   | 0    | 0.22 | -1.04 | 0.621188 | 0.812508 | 0.847514 | 0.891682 |
| MmugDNA.7631.1.S1_at   | MmugDNA.7631.1 | 6.56  | 6.26  | 0.82 | 0.28 | 1.24  | 0.475704 | 0.029126 | 0.768676 | 0.212733 |
| MmugDNA.7632.1.S1_at   | MmugDNA.7632.1 | 6.8   | 7.99  | 0.33 | 0.44 | -2.28 | 0.026541 | 0.015208 | 0.325323 | 0.156717 |
| MmugDNA.7633.1.S1_at   | MmugDNA.7633.1 | 5.66  | 5.77  | 0.22 | 0.42 | -1.08 | 0.15591  | 0.220258 | 0.529116 | 0.493701 |
| MmugDNA.7634.1.S1_at   | MmugDNA.7634.1 | 8.68  | 7.61  | 0.65 | 0.37 | 2.11  | 0.100598 | 0.026609 | 0.471482 | 0.204008 |
| MmugDNA.7637.1.S1_at   | MmugDNA.7637.1 | 3.08  | 3.1   | 0.17 | 0.22 | -1.01 | 0.429847 | 0.485619 | 0.742392 | 0.68924  |
| MmugDNA.7638.1.S1_at   | MmugDNA.7638.1 | 4.28  | 3.98  | 0.21 | 0.21 | 1.23  | 0.279005 | 0.701521 | 0.637959 | 0.826888 |
| MmugDNA.7640.1.S1_at   | MmugDNA.7640.1 | 6.42  | 6.18  | 0.27 | 0.16 | 1.19  | 0.412906 | 0.058224 | 0.732114 | 0.287988 |
| MmugDNA.7641.1.S1_at   | MmugDNA.7641.1 | 7.73  | 10.53 | 0.72 | 0.17 | -6.94 | 0.003488 | 0.005441 | 0.195142 | 0.101848 |
| MmugDNA.7643.1.S1_at   | MmugDNA.7643.1 | 9.09  | 9.13  | 0.34 | 0.19 | -1.02 | 0.99663  | 0.035825 | 0.998707 | 0.233727 |
| MmugDNA.7644.1.S1_at   | MmugDNA.7644.1 | 10.82 | 10.4  | 0.82 | 0.28 | 1.33  | 0.303406 | 0.121596 | 0.657305 | 0.390723 |
| MmugDNA.7644.1.S1_s_at | MmugDNA.7644.1 | 11.07 | 10.75 | 0.72 | 0.31 | 1.25  | 0.307614 | 0.103863 | 0.660387 | 0.364519 |
| MmugDNA.7645.1.S1_at   | MmugDNA.7645.1 | 3.26  | 3.28  | 0.03 | 0.1  | -1.01 | 0.847485 | 0.504986 | 0.946572 | 0.70197  |
| MmugDNA.7647.1.S1_at   | MmugDNA.7647.1 | 7.6   | 8.36  | 0.45 | 0.07 | -1.69 | 0.090094 | 0.225947 | 0.457992 | 0.49836  |
| MmugDNA.7648.1.S1_at   | MmugDNA.7648.1 | 9.64  | 9.05  | 0.08 | 0.21 | 1.5   | 0.009106 | 0.016374 | 0.241306 | 0.16199  |
| MmugDNA.765.1.S1_at    | MmugDNA.765.1  | 12.44 | 12.8  | 0.26 | 0.08 | -1.28 | 0.046613 | 0.017511 | 0.378317 | 0.167516 |
| MmugDNA.765.1.S1_x_at  | MmugDNA.765.1  | 12.52 | 12.94 | 0.26 | 0.06 | -1.34 | 0.043433 | 0.016646 | 0.372168 | 0.163321 |
| MmugDNA.7650.1.S1_at   | MmugDNA.7650.1 | 4.37  | 5.12  | 0.52 | 0.22 | -1.69 | 0.062149 | 0.122948 | 0.412444 | 0.392923 |
| MmugDNA.7651.1.S1_at   | MmugDNA.7651.1 | 6.97  | 6.88  | 0.15 | 0.1  | 1.07  | 0.088679 | 0.175609 | 0.456387 | 0.45218  |
| MmugDNA.7652.1.S1_at   | MmugDNA.7652.1 | 5.41  | 5.38  | 0.24 | 0.23 | 1.02  | 0.853304 | 0.967846 | 0.948299 | 0.982208 |
| MmugDNA.7653.1.S1_at   | MmugDNA.7653.1 | 4.1   | 4.3   | 0.24 | 0.03 | -1.14 | 0.20452  | 0.260685 | 0.575907 | 0.527199 |
| MmugDNA.7654.1.S1_at   | MmugDNA.7654.1 | 4.98  | 4.8   | 0.15 | 0.12 | 1.13  | 0.33859  | 0.070403 | 0.68316  | 0.311676 |
| MmugDNA.7658.1.S1_at   | MmugDNA.7658.1 | 6.54  | 6.45  | 0.08 | 0.05 | 1.07  | 0.065124 | 0.106168 | 0.419835 | 0.36856  |
| MmugDNA.7659.1.S1_at   | MmugDNA.7659.1 | 3.84  | 3.81  | 0.26 | 0.27 | 1.02  | 0.807779 | 0.879721 | 0.930292 | 0.93128  |
| MmugDNA.766.1.S1_at    | MmugDNA.766.1  | 4.58  | 4.58  | 0.18 | 0.35 | 1.01  | 0.441727 | 0.708325 | 0.749537 | 0.830869 |
| MmugDNA.7660.1.S1_at   | MmugDNA.7660.1 | 9.75  | 9.2   | 0.19 | 0.07 | 1.47  | 0.008513 | 0.013281 | 0.234555 | 0.147922 |
| MmugDNA.7661.1.S1_at   | MmugDNA.7661.1 | 7.35  | 7.25  | 0.08 | 0.26 | 1.07  | 0.69195  | 0.333605 | 0.880088 | 0.581808 |
| MmugDNA.7662.1.S1_s_at | MmugDNA.7662.1 | 6.97  | 6.63  | 0.13 | 0.04 | 1.26  | 0.014034 | 0.007528 | 0.273301 | 0.1163   |
| MmugDNA.7663.1.S1_at   | MmugDNA.7663.1 | 3.67  | 3.68  | 0.12 | 0.24 | -1.01 | 0.726508 | 0.755923 | 0.894367 | 0.8579   |
| MmugDNA.7665.1.S1_at   | MmugDNA.7665.1 | 4.55  | 4.7   | 0.14 | 0.07 | -1.11 | 0.257997 | 0.060368 | 0.621706 | 0.292291 |
| MmugDNA.7666.1.S1_at   | MmugDNA.7666.1 | 6.52  | 6.24  | 0.38 | 0.38 | 1.21  | 0.328652 | 0.697618 | 0.67577  | 0.82429  |

|                        |                |       |       |      |      |       |          |          |          |          |
|------------------------|----------------|-------|-------|------|------|-------|----------|----------|----------|----------|
| MmugDNA.7667.1.S1_at   | MmugDNA.7667.1 | 4.33  | 4.1   | 0.14 | 0.13 | 1.17  | 0.139497 | 0.096478 | 0.514956 | 0.35409  |
| MmugDNA.7668.1.S1_at   | MmugDNA.7668.1 | 4.95  | 4.69  | 0.07 | 0.16 | 1.2   | 0.248912 | 0.411464 | 0.614234 | 0.638189 |
| MmugDNA.767.1.S1_at    | MmugDNA.767.1  | 5.66  | 6.56  | 1.02 | 0.83 | -1.86 | 0.288093 | 0.321968 | 0.645258 | 0.573575 |
| MmugDNA.7670.1.S1_at   | MmugDNA.7670.1 | 11.71 | 11.33 | 0.15 | 0.03 | 1.3   | 0.011284 | 0.00962  | 0.253564 | 0.12918  |
| MmugDNA.7671.1.S1_at   | MmugDNA.7671.1 | 10.86 | 10.57 | 0.56 | 0.08 | 1.22  | 0.384972 | 0.48767  | 0.712306 | 0.690634 |
| MmugDNA.7672.1.S1_at   | MmugDNA.7672.1 | 9.18  | 8.81  | 0.12 | 0.1  | 1.29  | 0.025802 | 0.001303 | 0.32273  | 0.055624 |
| MmugDNA.7673.1.S1_at   | MmugDNA.7673.1 | 9.97  | 9.55  | 0.19 | 0.01 | 1.34  | 0.016516 | 0.017088 | 0.287478 | 0.165617 |
| MmugDNA.7674.1.S1_at   | MmugDNA.7674.1 | 4.09  | 4.11  | 0.16 | 0.13 | -1.01 | 0.704717 | 0.509792 | 0.885183 | 0.704385 |
| MmugDNA.7675.1.S1_at   | MmugDNA.7675.1 | 6.11  | 6.03  | 0.23 | 0.18 | 1.05  | 0.872376 | 0.922202 | 0.955759 | 0.956169 |
| MmugDNA.7676.1.S1_at   | MmugDNA.7676.1 | 3.55  | 3.52  | 0.28 | 0.02 | 1.02  | 0.644146 | 0.851588 | 0.858444 | 0.915583 |
| MmugDNA.7677.1.S1_at   | MmugDNA.7677.1 | 8.72  | 8.18  | 0.31 | 0.09 | 1.46  | 0.031671 | 0.021004 | 0.341694 | 0.181715 |
| MmugDNA.7678.1.S1_at   | MmugDNA.7678.1 | 4.64  | 4.64  | 0.07 | 0.12 | -1    | 0.981137 | 0.718335 | 0.993962 | 0.837002 |
| MmugDNA.7679.1.S1_at   | MmugDNA.7679.1 | 4.15  | 3.64  | 0.96 | 0.15 | 1.43  | 0.222378 | 0.361118 | 0.591943 | 0.60207  |
| MmugDNA.768.1.S1_at    | MmugDNA.768.1  | 4.64  | 4.53  | 0.15 | 0.09 | 1.08  | 0.141293 | 0.166788 | 0.516365 | 0.443274 |
| MmugDNA.7680.1.S1_at   | MmugDNA.7680.1 | 8.05  | 8.06  | 0.08 | 0.11 | -1.01 | 0.720987 | 0.902948 | 0.89187  | 0.944917 |
| MmugDNA.7681.1.S1_at   | MmugDNA.7681.1 | 12.18 | 12.37 | 0.51 | 0.09 | -1.14 | 0.592045 | 0.748414 | 0.833648 | 0.853611 |
| MmugDNA.7682.1.S1_at   | MmugDNA.7682.1 | 4.32  | 4.2   | 0.78 | 0.19 | 1.08  | 0.689478 | 0.808809 | 0.87891  | 0.889895 |
| MmugDNA.7684.1.S1_at   | MmugDNA.7684.1 | 6.02  | 6.38  | 0.09 | 0.33 | -1.29 | 0.564206 | 0.07184  | 0.81857  | 0.314082 |
| MmugDNA.7685.1.S1_at   | MmugDNA.7685.1 | 7.47  | 7.54  | 0.34 | 0.16 | -1.05 | 0.825142 | 0.170413 | 0.937162 | 0.447103 |
| MmugDNA.7685.1.S1_s_at | MmugDNA.7685.1 | 8.39  | 8.53  | 0.57 | 0.28 | -1.1  | 0.94055  | 0.110948 | 0.979747 | 0.375376 |
| MmugDNA.7686.1.S1_at   | MmugDNA.7686.1 | 9.03  | 8.64  | 0.33 | 0.51 | 1.31  | 0.448085 | 0.197776 | 0.753748 | 0.472721 |
| MmugDNA.7687.1.S1_at   | MmugDNA.7687.1 | 8.62  | 8.68  | 0.06 | 0.41 | -1.04 | 0.494812 | 0.633202 | 0.779514 | 0.783995 |
| MmugDNA.7688.1.S1_s_at | MmugDNA.7688.1 | 11.31 | 11.4  | 0.19 | 0.1  | -1.07 | 0.792324 | 0.704237 | 0.923825 | 0.828375 |
| MmugDNA.7689.1.S1_at   | MmugDNA.7689.1 | 6.65  | 6.64  | 0.09 | 0.04 | 1     | 0.320606 | 0.531821 | 0.669445 | 0.718955 |
| MmugDNA.769.1.S1_x_at  | MmugDNA.769.1  | 8.66  | 9.02  | 0.34 | 0.13 | -1.28 | 0.071529 | 0.08852  | 0.431049 | 0.341947 |
| MmugDNA.7690.1.S1_at   | MmugDNA.7690.1 | 8.5   | 8.61  | 1.93 | 0.25 | -1.08 | 0.708288 | 0.537996 | 0.886591 | 0.72281  |
| MmugDNA.7692.1.S1_at   | MmugDNA.7692.1 | 5.55  | 5.57  | 0.06 | 0.06 | -1.01 | 0.550643 | 0.932775 | 0.810925 | 0.961812 |
| MmugDNA.7693.1.S1_at   | MmugDNA.7693.1 | 4.96  | 4.83  | 0.1  | 0.12 | 1.09  | 0.161363 | 0.397498 | 0.534731 | 0.628923 |
| MmugDNA.7695.1.S1_at   | MmugDNA.7695.1 | 10.11 | 10.13 | 0.78 | 0.02 | -1.01 | 0.385352 | 0.335491 | 0.712719 | 0.583317 |
| MmugDNA.7696.1.S1_at   | MmugDNA.7696.1 | 9.6   | 9.57  | 1    | 0.1  | 1.02  | 0.400033 | 0.163542 | 0.723444 | 0.439765 |
| MmugDNA.7697.1.S1_at   | MmugDNA.7697.1 | 4.16  | 4.15  | 0.03 | 0.16 | 1.01  | 0.414109 | 0.641228 | 0.732764 | 0.789506 |
| MmugDNA.77.1.S1_at     | MmugDNA.77.1   | 6.14  | 6.07  | 0.48 | 0.39 | 1.05  | 0.595901 | 0.249173 | 0.83565  | 0.518302 |
| MmugDNA.770.1.S1_at    | MmugDNA.770.1  | 11.06 | 10.91 | 0.21 | 0.14 | 1.11  | 0.20032  | 0.212107 | 0.572164 | 0.486036 |
| MmugDNA.770.1.S1_s_at  | MmugDNA.770.1  | 11.62 | 11.56 | 0.19 | 0.08 | 1.04  | 0.489094 | 0.081727 | 0.775981 | 0.330011 |
| MmugDNA.7700.1.S1_at   | MmugDNA.7700.1 | 6.37  | 6.19  | 0.1  | 0.12 | 1.13  | 0.06791  | 0.239198 | 0.42451  | 0.509902 |
| MmugDNA.7701.1.S1_at   | MmugDNA.7701.1 | 4.94  | 4.82  | 0.21 | 0.05 | 1.08  | 0.552274 | 0.279721 | 0.811712 | 0.543228 |
| MmugDNA.7704.1.S1_at   | MmugDNA.7704.1 | 7.98  | 7.05  | 0.32 | 0.23 | 1.91  | 0.02567  | 0.010451 | 0.322444 | 0.133645 |
| MmugDNA.7705.1.S1_at   | MmugDNA.7705.1 | 3.53  | 3.57  | 0.38 | 0.05 | -1.03 | 0.478257 | 0.571572 | 0.770076 | 0.743837 |
| MmugDNA.7707.1.S1_at   | MmugDNA.7707.1 | 8.56  | 9.2   | 1.18 | 0.17 | -1.57 | 0.452573 | 0.47574  | 0.755901 | 0.682332 |
| MmugDNA.7708.1.S1_at   | MmugDNA.7708.1 | 4.2   | 4.17  | 0.33 | 0.08 | 1.02  | 0.780466 | 0.562852 | 0.919137 | 0.738191 |
| MmugDNA.7709.1.S1_at   | MmugDNA.7709.1 | 4.64  | 4.63  | 0.06 | 0.14 | 1.01  | 0.53424  | 0.105333 | 0.80126  | 0.367168 |
| MmugDNA.771.1.S1_at    | MmugDNA.771.1  | 8.41  | 8.28  | 0.51 | 0.18 | 1.09  | 0.95218  | 0.906586 | 0.983952 | 0.947167 |
| MmugDNA.7710.1.S1_at   | MmugDNA.7710.1 | 4.05  | 4.02  | 0.22 | 0.07 | 1.02  | 0.651236 | 0.667995 | 0.861492 | 0.8057   |

|                        |                |       |       |      |      |       |          |          |          |          |
|------------------------|----------------|-------|-------|------|------|-------|----------|----------|----------|----------|
| MmugDNA.7711.1.S1_at   | MmugDNA.7711.1 | 12.42 | 11.92 | 0.07 | 0.06 | 1.42  | 0.000617 | 0.000603 | 0.143137 | 0.042002 |
| MmugDNA.7712.1.S1_at   | MmugDNA.7712.1 | 3.38  | 3.07  | 0.84 | 0.15 | 1.24  | 0.221772 | 0.336455 | 0.591359 | 0.583831 |
| MmugDNA.7714.1.S1_at   | MmugDNA.7714.1 | 6.42  | 6.24  | 0.22 | 0.12 | 1.13  | 0.92642  | 0.115577 | 0.975571 | 0.382674 |
| MmugDNA.7715.1.S1_at   | MmugDNA.7715.1 | 6.62  | 6.65  | 0.06 | 0.15 | -1.02 | 0.428461 | 0.006875 | 0.741885 | 0.111996 |
| MmugDNA.7716.1.S1_at   | MmugDNA.7716.1 | 3.96  | 4.03  | 0.11 | 0.17 | -1.05 | 0.287012 | 0.369248 | 0.644117 | 0.608691 |
| MmugDNA.7718.1.S1_at   | MmugDNA.7718.1 | 6.58  | 6.64  | 0.17 | 0.15 | -1.04 | 0.638406 | 0.111879 | 0.855923 | 0.376982 |
| MmugDNA.7719.1.S1_at   | MmugDNA.7719.1 | 7.11  | 6.96  | 0.22 | 0.02 | 1.11  | 0.230997 | 0.102085 | 0.599045 | 0.362122 |
| MmugDNA.772.1.S1_at    | MmugDNA.772.1  | 5.27  | 5.25  | 0.14 | 0.13 | 1.01  | 0.986143 | 0.565839 | 0.995541 | 0.740112 |
| MmugDNA.7722.1.S1_at   | MmugDNA.7722.1 | 6.22  | 6.02  | 0.16 | 0.16 | 1.15  | 0.566463 | 0.390283 | 0.820036 | 0.624128 |
| MmugDNA.7723.1.S1_at   | MmugDNA.7723.1 | 7.39  | 8.91  | 0.92 | 0.12 | -2.87 | 0.036459 | 0.00786  | 0.355049 | 0.118059 |
| MmugDNA.7724.1.S1_at   | MmugDNA.7724.1 | 5.83  | 5.83  | 0.17 | 0.01 | 1     | 0.359236 | 0.528046 | 0.697174 | 0.716428 |
| MmugDNA.7725.1.S1_at   | MmugDNA.7725.1 | 4.6   | 4.46  | 0.07 | 0.75 | 1.1   | 0.837617 | 0.955049 | 0.94176  | 0.974534 |
| MmugDNA.7727.1.S1_at   | MmugDNA.7727.1 | 4.2   | 4.24  | 0.2  | 0.12 | -1.03 | 0.400676 | 0.327627 | 0.72394  | 0.577448 |
| MmugDNA.7728.1.S1_at   | MmugDNA.7728.1 | 2.69  | 2.71  | 0.21 | 0.13 | -1.01 | 0.85323  | 0.666278 | 0.948299 | 0.804419 |
| MmugDNA.7730.1.S1_at   | MmugDNA.7730.1 | 4.25  | 4.27  | 0.17 | 0.07 | -1.01 | 0.939098 | 0.630328 | 0.979451 | 0.782213 |
| MmugDNA.7731.1.S1_at   | MmugDNA.7731.1 | 3.45  | 3.82  | 0.5  | 0.34 | -1.29 | 0.523279 | 0.132018 | 0.795531 | 0.404043 |
| MmugDNA.7732.1.S1_at   | MmugDNA.7732.1 | 5.83  | 5.85  | 0.76 | 0.6  | -1.01 | 0.871856 | 0.91971  | 0.955578 | 0.954878 |
| MmugDNA.7733.1.S1_at   | MmugDNA.7733.1 | 9.46  | 9.08  | 1.09 | 0.05 | 1.3   | 0.580689 | 0.148593 | 0.827245 | 0.423175 |
| MmugDNA.7734.1.S1_at   | MmugDNA.7734.1 | 4.09  | 4.06  | 0.28 | 0.18 | 1.02  | 0.760426 | 0.629001 | 0.910056 | 0.781575 |
| MmugDNA.7735.1.S1_at   | MmugDNA.7735.1 | 8.5   | 8.84  | 1.44 | 0.37 | -1.27 | 0.704608 | 0.344427 | 0.885155 | 0.589813 |
| MmugDNA.7736.1.S1_at   | MmugDNA.7736.1 | 6.46  | 6.3   | 0.38 | 0.13 | 1.12  | 0.498489 | 0.321177 | 0.781796 | 0.573111 |
| MmugDNA.7738.1.S1_at   | MmugDNA.7738.1 | 3.33  | 3.52  | 0.17 | 0.39 | -1.14 | 0.159142 | 0.258983 | 0.531816 | 0.5262   |
| MmugDNA.774.1.S1_at    | MmugDNA.774.1  | 5.39  | 5.4   | 0    | 0.14 | -1.01 | 0.599338 | 0.692754 | 0.837381 | 0.821186 |
| MmugDNA.7740.1.S1_at   | MmugDNA.7740.1 | 7.88  | 7.73  | 0.19 | 0.26 | 1.11  | 0.978235 | 0.041564 | 0.992941 | 0.248812 |
| MmugDNA.7741.1.S1_at   | MmugDNA.7741.1 | 3.25  | 3.39  | 0.2  | 0.1  | -1.1  | 0.332467 | 0.467247 | 0.678846 | 0.677016 |
| MmugDNA.7742.1.S1_at   | MmugDNA.7742.1 | 4.15  | 3.52  | 0.45 | 0.3  | 1.55  | 0.243676 | 0.277357 | 0.609595 | 0.541302 |
| MmugDNA.7744.1.S1_at   | MmugDNA.7744.1 | 13.16 | 12.93 | 0.14 | 0.05 | 1.17  | 0.109893 | 0.111827 | 0.482728 | 0.376856 |
| MmugDNA.7747.1.S1_at   | MmugDNA.7747.1 | 3.03  | 2.95  | 0.18 | 0.13 | 1.06  | 0.338074 | 0.304839 | 0.682747 | 0.561994 |
| MmugDNA.775.1.S1_at    | MmugDNA.775.1  | 4.04  | 4.03  | 0.32 | 0.09 | 1.01  | 0.402149 | 0.539473 | 0.724846 | 0.723763 |
| MmugDNA.7750.1.S1_at   | MmugDNA.7750.1 | 13.29 | 13.33 | 0.07 | 0.02 | -1.03 | 0.417548 | 0.270579 | 0.735015 | 0.535837 |
| MmugDNA.7751.1.S1_at   | MmugDNA.7751.1 | 3.56  | 3.57  | 0.05 | 0.05 | -1    | 0.668286 | 0.700464 | 0.868985 | 0.826162 |
| MmugDNA.7753.1.S1_at   | MmugDNA.7753.1 | 6.31  | 6.31  | 0.1  | 0.07 | 1     | 0.235581 | 0.563328 | 0.602691 | 0.738544 |
| MmugDNA.7755.1.S1_at   | MmugDNA.7755.1 | 10.75 | 10.47 | 1.74 | 0.5  | 1.22  | 0.396335 | 0.494397 | 0.721323 | 0.694859 |
| MmugDNA.7757.1.S1_at   | MmugDNA.7757.1 | 3.46  | 3.45  | 0.68 | 0.12 | 1.01  | 0.394979 | 0.624382 | 0.720296 | 0.778581 |
| MmugDNA.7758.1.S1_at   | MmugDNA.7758.1 | 10.16 | 9.69  | 0.2  | 0.11 | 1.38  | 0.012871 | 0.011041 | 0.265776 | 0.136821 |
| MmugDNA.7759.1.S1_at   | MmugDNA.7759.1 | 4.13  | 4.06  | 0.32 | 0.11 | 1.05  | 0.982368 | 0.751545 | 0.994472 | 0.855508 |
| MmugDNA.7760.1.S1_at   | MmugDNA.7760.1 | 5.4   | 5.51  | 0.5  | 0.1  | -1.08 | 0.71211  | 0.466502 | 0.887895 | 0.676346 |
| MmugDNA.7761.1.S1_at   | MmugDNA.7761.1 | 6.87  | 6.1   | 0.64 | 0.3  | 1.71  | 0.263324 | 0.272554 | 0.625264 | 0.537323 |
| MmugDNA.7762.1.S1_at   | MmugDNA.7762.1 | 10.7  | 11.08 | 0.34 | 0.23 | -1.3  | 0.517806 | 0.021852 | 0.792286 | 0.184952 |
| MmugDNA.7763.1.S1_at   | MmugDNA.7763.1 | 11.36 | 11.79 | 0.62 | 0.05 | -1.34 | 0.095813 | 0.118757 | 0.464449 | 0.386819 |
| MmugDNA.7766.1.S1_x_at | MmugDNA.7766.1 | 12.81 | 12.93 | 0.16 | 0.1  | -1.08 | 0.182357 | 0.205399 | 0.555371 | 0.479751 |
| MmugDNA.7767.1.S1_at   | MmugDNA.7767.1 | 4.18  | 4.25  | 0.13 | 0.16 | -1.05 | 0.987892 | 0.974809 | 0.995831 | 0.986245 |
| MmugDNA.7770.1.S1_s_at | MmugDNA.7770.1 | 5.66  | 5.53  | 0.15 | 0.07 | 1.09  | 0.089447 | 0.268989 | 0.457657 | 0.534389 |

|                        |                |       |       |      |      |       |          |          |          |          |
|------------------------|----------------|-------|-------|------|------|-------|----------|----------|----------|----------|
| MmugDNA.7771.1.S1_at   | MmugDNA.7771.1 | 5.75  | 5.65  | 0.17 | 0.21 | 1.08  | 0.598195 | 0.606496 | 0.836817 | 0.765779 |
| MmugDNA.7773.1.S1_at   | MmugDNA.7773.1 | 4.82  | 4.76  | 0.3  | 0.11 | 1.04  | 0.713389 | 0.689702 | 0.88844  | 0.819038 |
| MmugDNA.7774.1.S1_at   | MmugDNA.7774.1 | 5.63  | 5.47  | 0.52 | 0.17 | 1.12  | 0.396152 | 0.500994 | 0.721137 | 0.699368 |
| MmugDNA.7775.1.S1_at   | MmugDNA.7775.1 | 8.32  | 8.44  | 0.32 | 0.1  | -1.09 | 0.485155 | 0.283868 | 0.774084 | 0.546237 |
| MmugDNA.7778.1.S1_at   | MmugDNA.7778.1 | 8.8   | 9.04  | 0.58 | 0.13 | -1.18 | 0.703374 | 0.781204 | 0.884656 | 0.873073 |
| MmugDNA.778.1.S1_at    | MmugDNA.778.1  | 5.43  | 5.26  | 0.24 | 0.07 | 1.13  | 0.419064 | 0.000561 | 0.73608  | 0.041049 |
| MmugDNA.7780.1.S1_at   | MmugDNA.7780.1 | 3.69  | 4.34  | 0.19 | 0.27 | -1.57 | 0.033439 | 0.000769 | 0.346442 | 0.04544  |
| MmugDNA.7781.1.S1_at   | MmugDNA.7781.1 | 4.19  | 3.78  | 0.14 | 0.14 | 1.32  | 0.028561 | 0.017929 | 0.332627 | 0.168998 |
| MmugDNA.7781.1.S1_x_at | MmugDNA.7781.1 | 6.36  | 5.98  | 0.21 | 0.25 | 1.31  | 0.10664  | 0.107862 | 0.479    | 0.370945 |
| MmugDNA.7783.1.S1_at   | MmugDNA.7783.1 | 7.92  | 7.62  | 0.49 | 0.18 | 1.23  | 0.625785 | 0.38957  | 0.849589 | 0.623668 |
| MmugDNA.7785.1.S1_at   | MmugDNA.7785.1 | 11.86 | 11.72 | 0.38 | 0.04 | 1.1   | 0.653663 | 0.276018 | 0.862462 | 0.540071 |
| MmugDNA.7786.1.S1_at   | MmugDNA.7786.1 | 3.48  | 3.45  | 0.16 | 0.23 | 1.02  | 0.630238 | 0.01928  | 0.851919 | 0.174698 |
| MmugDNA.7787.1.S1_at   | MmugDNA.7787.1 | 10.71 | 10.49 | 0.14 | 0.1  | 1.16  | 0.071123 | 0.450756 | 0.430341 | 0.665844 |
| MmugDNA.7788.1.S1_at   | MmugDNA.7788.1 | 4.63  | 4.6   | 0.26 | 0.24 | 1.02  | 0.934403 | 0.262023 | 0.977786 | 0.528374 |
| MmugDNA.7789.1.S1_at   | MmugDNA.7789.1 | 3.87  | 3.85  | 0.18 | 0.03 | 1.02  | 0.346917 | 0.291429 | 0.688435 | 0.551823 |
| MmugDNA.779.1.S1_at    | MmugDNA.779.1  | 5.34  | 5     | 0.34 | 0.1  | 1.26  | 0.172796 | 0.205482 | 0.545887 | 0.479764 |
| MmugDNA.7791.1.S1_at   | MmugDNA.7791.1 | 3.64  | 3.42  | 0.09 | 0.06 | 1.16  | 0.068448 | 0.221827 | 0.42564  | 0.49495  |
| MmugDNA.7792.1.S1_at   | MmugDNA.7792.1 | 8.43  | 8.15  | 0.32 | 0.25 | 1.21  | 0.112334 | 0.159917 | 0.48564  | 0.435987 |
| MmugDNA.7793.1.S1_at   | MmugDNA.7793.1 | 6.52  | 6.48  | 0.32 | 0.18 | 1.03  | 0.382041 | 0.532548 | 0.710398 | 0.719092 |
| MmugDNA.7794.1.S1_at   | MmugDNA.7794.1 | 4.49  | 4.57  | 0.1  | 0.11 | -1.06 | 0.850264 | 0.014106 | 0.947336 | 0.15195  |
| MmugDNA.7795.1.S1_at   | MmugDNA.7795.1 | 10.72 | 10.69 | 0.17 | 0.16 | 1.02  | 0.84803  | 0.173342 | 0.946629 | 0.449791 |
| MmugDNA.7796.1.S1_at   | MmugDNA.7796.1 | 7.47  | 7.82  | 0.99 | 0.11 | -1.28 | 0.614143 | 0.458058 | 0.843828 | 0.671038 |
| MmugDNA.7798.1.S1_at   | MmugDNA.7798.1 | 7.83  | 7.79  | 0.35 | 0.07 | 1.03  | 0.718546 | 0.830966 | 0.890727 | 0.903034 |
| MmugDNA.7799.1.S1_at   | MmugDNA.7799.1 | 3.82  | 3.8   | 0.12 | 0.08 | 1.02  | 0.740221 | 0.779163 | 0.90073  | 0.871904 |
| MmugDNA.78.1.S1_at     | MmugDNA.78.1   | 7.39  | 8.52  | 0.18 | 0.26 | -2.18 | 0.003442 | 0.000229 | 0.195142 | 0.032385 |
| MmugDNA.780.1.S1_at    | MmugDNA.780.1  | 4.92  | 6.49  | 0.97 | 0.28 | -2.99 | 0.07213  | 0.158731 | 0.432038 | 0.434807 |
| MmugDNA.7800.1.S1_at   | MmugDNA.7800.1 | 4.84  | 4.8   | 0.33 | 0.31 | 1.03  | 0.193445 | 0.311714 | 0.564275 | 0.566689 |
| MmugDNA.7801.1.S1_at   | MmugDNA.7801.1 | 6.34  | 6.4   | 0.17 | 0.22 | -1.04 | 0.998057 | 0.604446 | 0.999386 | 0.76464  |
| MmugDNA.7802.1.S1_at   | MmugDNA.7802.1 | 4.85  | 4.86  | 0.04 | 0.02 | -1    | 0.888291 | 0.923942 | 0.961318 | 0.957162 |
| MmugDNA.7802.1.S1_s_at | MmugDNA.7802.1 | 5.68  | 6.29  | 0.35 | 0.22 | -1.53 | 0.113319 | 0.009101 | 0.486648 | 0.125983 |
| MmugDNA.7803.1.S1_at   | MmugDNA.7803.1 | 4.77  | 4.76  | 0.03 | 0.01 | 1.01  | 0.21507  | 0.904375 | 0.585716 | 0.945736 |
| MmugDNA.7804.1.S1_at   | MmugDNA.7804.1 | 2.83  | 2.83  | 0.11 | 0.04 | 1     | 0.883581 | 0.171802 | 0.95964  | 0.448198 |
| MmugDNA.7804.1.S1_s_at | MmugDNA.7804.1 | 2.78  | 2.85  | 0.06 | 0.07 | -1.05 | 0.114765 | 0.158805 | 0.487957 | 0.434896 |
| MmugDNA.7809.1.S1_at   | MmugDNA.7809.1 | 4.5   | 4.06  | 0.91 | 0.09 | 1.36  | 0.429785 | 0.592565 | 0.742367 | 0.757844 |
| MmugDNA.781.1.S1_at    | MmugDNA.781.1  | 3.08  | 3.1   | 0.13 | 0.06 | -1.01 | 0.833857 | 0.575343 | 0.940453 | 0.746448 |
| MmugDNA.7814.1.S1_at   | MmugDNA.7814.1 | 7.56  | 7.84  | 0.3  | 0.08 | -1.21 | 0.198827 | 0.064293 | 0.570289 | 0.299748 |
| MmugDNA.7816.1.S1_at   | MmugDNA.7816.1 | 11.3  | 10.43 | 4.33 | 0.29 | 1.83  | 0.603675 | 0.430572 | 0.839328 | 0.651577 |
| MmugDNA.7816.1.S1_s_at | MmugDNA.7816.1 | 10.54 | 10.09 | 3.34 | 0.29 | 1.36  | 0.662081 | 0.328427 | 0.866635 | 0.578066 |
| MmugDNA.7817.1.S1_at   | MmugDNA.7817.1 | 3.48  | 3.53  | 0.02 | 0.15 | -1.04 | 0.544482 | 0.412254 | 0.807267 | 0.638664 |
| MmugDNA.7818.1.S1_at   | MmugDNA.7818.1 | 5.04  | 5.05  | 0.11 | 0.01 | -1    | 0.362404 | 0.496111 | 0.699302 | 0.695877 |
| MmugDNA.7819.1.S1_at   | MmugDNA.7819.1 | 12.07 | 12.02 | 0.15 | 0.05 | 1.03  | 0.783845 | 0.233707 | 0.920537 | 0.505032 |
| MmugDNA.782.1.S1_s_at  | MmugDNA.782.1  | 10.35 | 10.58 | 0.15 | 0.07 | -1.17 | 0.131432 | 0.092455 | 0.505767 | 0.348346 |
| MmugDNA.7822.1.S1_at   | MmugDNA.7822.1 | 7.5   | 7.43  | 0.79 | 0.26 | 1.05  | 0.803793 | 0.253732 | 0.928583 | 0.522091 |

|                         |                 |       |       |      |      |       |          |          |          |          |
|-------------------------|-----------------|-------|-------|------|------|-------|----------|----------|----------|----------|
| MmugDNA.7823.1.S1_at    | MmugDNA.7823.1  | 3.71  | 3.74  | 0    | 0.07 | -1.02 | 0.691542 | 0.953072 | 0.879864 | 0.973379 |
| MmugDNA.7824.1.S1_at    | MmugDNA.7824.1  | 10.7  | 9.45  | 0.33 | 0.15 | 2.38  | 0.004186 | 0.000933 | 0.198874 | 0.048962 |
| MmugDNA.7825.1.S1_at    | MmugDNA.7825.1  | 3.1   | 3.15  | 0    | 0.11 | -1.03 | 0.446276 | 0.55986  | 0.75262  | 0.736409 |
| MmugDNA.7827.1.S1_at    | MmugDNA.7827.1  | 5.45  | 5.14  | 0.04 | 0.18 | 1.24  | 0.133713 | 0.271315 | 0.508012 | 0.53644  |
| MmugDNA.7829.1.S1_at    | MmugDNA.7829.1  | 6.12  | 5.96  | 0.19 | 0.03 | 1.12  | 0.162078 | 0.068377 | 0.535244 | 0.307955 |
| MmugDNA.7835.1.S1_at    | MmugDNA.7835.1  | 7.61  | 7.67  | 0.87 | 0.62 | -1.04 | 0.890831 | 0.977742 | 0.962492 | 0.98787  |
| MmugDNA.7835.1.S1_s_at  | MmugDNA.7835.1  | 10.13 | 10.64 | 0.81 | 0.07 | -1.42 | 0.576427 | 0.645848 | 0.825166 | 0.792616 |
| MmugDNA.7836.1.S1_at    | MmugDNA.7836.1  | 4.88  | 4.86  | 0.15 | 0    | 1.01  | 0.291577 | 0.320833 | 0.647943 | 0.572849 |
| MmugDNA.7837.1.S1_at    | MmugDNA.7837.1  | 9.25  | 9.73  | 0.07 | 0.06 | -1.39 | 0.001514 | 0.000026 | 0.161549 | 0.020518 |
| MmugDNA.7838.1.S1_at    | MmugDNA.7838.1  | 3.44  | 3.48  | 0.08 | 0.18 | -1.03 | 0.759752 | 0.730698 | 0.909769 | 0.844055 |
| MmugDNA.784.1.S1_at     | MmugDNA.784.1   | 4.43  | 4.35  | 0.06 | 0.12 | 1.06  | 0.2026   | 0.233748 | 0.574165 | 0.50505  |
| MmugDNA.7842.1.S1_at    | MmugDNA.7842.1  | 3.56  | 3.6   | 0.23 | 0.18 | -1.02 | 0.447353 | 0.52683  | 0.753235 | 0.715627 |
| MmugDNA.11210.1.S1_s_at | MmugDNA.11210.1 | 9.28  | 8.91  | 0.48 | 0.16 | 1.29  | 0.565703 | 0.177952 | 0.819429 | 0.45429  |
| MmugDNA.7844.1.S1_at    | MmugDNA.7844.1  | 8.14  | 7.43  | 0.71 | 0.49 | 1.64  | 0.115386 | 0.043619 | 0.488677 | 0.253501 |
| MmugDNA.7845.1.S1_at    | MmugDNA.7845.1  | 3.97  | 3.87  | 0.11 | 0.06 | 1.08  | 0.135823 | 0.327787 | 0.510363 | 0.577604 |
| MmugDNA.7846.1.S1_at    | MmugDNA.7846.1  | 4.03  | 4.03  | 0.7  | 0.02 | -1    | 0.562914 | 0.671434 | 0.817877 | 0.807907 |
| MmugDNA.7847.1.S1_at    | MmugDNA.7847.1  | 4.15  | 4.84  | 0.21 | 0.2  | -1.62 | 0.026746 | 0.021373 | 0.326091 | 0.18304  |
| MmugDNA.7848.1.S1_at    | MmugDNA.7848.1  | 2.98  | 2.97  | 0.1  | 0.28 | 1.01  | 0.924506 | 0.951374 | 0.97475  | 0.972418 |
| MmugDNA.785.1.S1_at     | MmugDNA.785.1   | 5.07  | 5.18  | 0.14 | 0.11 | -1.08 | 0.279525 | 0.385581 | 0.638375 | 0.621038 |
| MmugDNA.7850.1.S1_at    | MmugDNA.7850.1  | 3.13  | 3.23  | 0    | 0.01 | -1.07 | 0.000183 | 4.32E-07 | 0.114006 | 0.005999 |
| MmugDNA.7851.1.S1_at    | MmugDNA.7851.1  | 3.93  | 3.89  | 0.05 | 0.13 | 1.03  | 0.636126 | 0.326704 | 0.854813 | 0.576725 |
| MmugDNA.7853.1.S1_at    | MmugDNA.7853.1  | 4.96  | 4.73  | 0.13 | 0.03 | 1.17  | 0.026197 | 0.04715  | 0.323574 | 0.261745 |
| MmugDNA.7854.1.S1_at    | MmugDNA.7854.1  | 6.72  | 6.54  | 0.12 | 0.08 | 1.14  | 0.051268 | 0.047802 | 0.38958  | 0.263649 |
| MmugDNA.7855.1.S1_at    | MmugDNA.7855.1  | 4     | 4.1   | 0.26 | 0.07 | -1.07 | 0.531302 | 0.219828 | 0.799582 | 0.493388 |
| MmugDNA.7859.1.S1_at    | MmugDNA.7859.1  | 4.41  | 4.94  | 0.21 | 0.39 | -1.44 | 0.060951 | 0.054792 | 0.409371 | 0.279594 |
| MmugDNA.786.1.S1_at     | MmugDNA.786.1   | 7.55  | 7.05  | 0.24 | 0.27 | 1.41  | 0.041467 | 0.167387 | 0.366578 | 0.443785 |
| MmugDNA.7863.1.S1_at    | MmugDNA.7863.1  | 7.4   | 7.37  | 0.13 | 0.02 | 1.02  | 0.660644 | 0.222839 | 0.865819 | 0.495765 |
| MmugDNA.7865.1.S1_at    | MmugDNA.7865.1  | 9.12  | 8.91  | 0.11 | 0.12 | 1.16  | 0.022383 | 0.019505 | 0.310499 | 0.175439 |
| MmugDNA.7867.1.S1_at    | MmugDNA.7867.1  | 4.15  | 4.05  | 0.12 | 0.16 | 1.07  | 0.260396 | 0.536841 | 0.623265 | 0.722119 |
| MmugDNA.7868.1.S1_at    | MmugDNA.7868.1  | 2.71  | 2.68  | 0.16 | 0.04 | 1.02  | 0.321387 | 0.599355 | 0.670064 | 0.761418 |
| MmugDNA.7869.1.S1_at    | MmugDNA.7869.1  | 6.33  | 6.89  | 0.39 | 0.22 | -1.48 | 0.106897 | 0.062527 | 0.479405 | 0.296884 |
| MmugDNA.787.1.S1_at     | MmugDNA.787.1   | 2.96  | 2.95  | 0.09 | 0.16 | 1     | 0.489927 | 0.671841 | 0.776634 | 0.808157 |
| MmugDNA.7870.1.S1_at    | MmugDNA.7870.1  | 5.41  | 4.86  | 0.12 | 0.41 | 1.46  | 0.113798 | 0.40178  | 0.487244 | 0.631068 |
| MmugDNA.7871.1.S1_at    | MmugDNA.7871.1  | 3.95  | 4.02  | 0.11 | 0.26 | -1.05 | 0.639206 | 0.100131 | 0.856229 | 0.359064 |
| MmugDNA.7872.1.S1_at    | MmugDNA.7872.1  | 5.25  | 5.22  | 0.23 | 0.04 | 1.03  | 0.782005 | 0.830379 | 0.919732 | 0.902656 |
| MmugDNA.7873.1.S1_at    | MmugDNA.7873.1  | 7.6   | 7.9   | 1.14 | 0.98 | -1.23 | 0.457459 | 0.396749 | 0.758343 | 0.628438 |
| MmugDNA.7876.1.S1_at    | MmugDNA.7876.1  | 9.7   | 10.02 | 0.3  | 0.05 | -1.25 | 0.135877 | 0.191814 | 0.51042  | 0.467164 |
| MmugDNA.7877.1.S1_at    | MmugDNA.7877.1  | 8.5   | 8.45  | 0.12 | 0.15 | 1.03  | 0.372157 | 0.148731 | 0.705567 | 0.423201 |
| MmugDNA.7879.1.S1_at    | MmugDNA.7879.1  | 7.81  | 8.24  | 0.35 | 0.05 | -1.36 | 0.112475 | 0.110217 | 0.485823 | 0.374349 |
| MmugDNA.788.1.S1_at     | MmugDNA.788.1   | 6.1   | 6.06  | 0.18 | 0.15 | 1.03  | 0.597164 | 0.641981 | 0.83613  | 0.78994  |
| MmugDNA.7882.1.S1_at    | MmugDNA.7882.1  | 3.84  | 4.04  | 0.83 | 0.45 | -1.15 | 0.884988 | 0.925912 | 0.960159 | 0.958059 |
| MmugDNA.7884.1.S1_at    | MmugDNA.7884.1  | 9.53  | 9.58  | 0.28 | 0.15 | -1.04 | 0.819503 | 0.604516 | 0.934935 | 0.764655 |
| MmugDNA.7884.1.S1_s_at  | MmugDNA.7884.1  | 12.04 | 12.04 | 0.2  | 0.07 | -1.01 | 0.96797  | 0.734528 | 0.989418 | 0.84619  |

|                        |                |       |       |      |      |       |          |          |          |          |
|------------------------|----------------|-------|-------|------|------|-------|----------|----------|----------|----------|
| MmugDNA.7885.1.S1_at   | MmugDNA.7885.1 | 4.36  | 4.3   | 0.03 | 0.08 | 1.04  | 0.196073 | 0.104901 | 0.566509 | 0.366451 |
| MmugDNA.7886.1.S1_at   | MmugDNA.7886.1 | 8.19  | 9.85  | 0.13 | 0.03 | -3.16 | 0.000033 | 0.000011 | 0.108151 | 0.016526 |
| MmugDNA.7887.1.S1_at   | MmugDNA.7887.1 | 8.79  | 8.63  | 0.19 | 0.22 | 1.12  | 0.399531 | 0.625038 | 0.723131 | 0.778973 |
| MmugDNA.7888.1.S1_at   | MmugDNA.7888.1 | 5.19  | 5.58  | 0.21 | 0.3  | -1.31 | 0.198092 | 0.02334  | 0.569353 | 0.191537 |
| MmugDNA.789.1.S1_at    | MmugDNA.789.1  | 9.14  | 8.15  | 0.76 | 0.02 | 1.99  | 0.032103 | 0.0039   | 0.343203 | 0.088806 |
| MmugDNA.7892.1.S1_at   | MmugDNA.7892.1 | 5.54  | 5.26  | 0.33 | 0.3  | 1.21  | 0.360344 | 0.539388 | 0.697871 | 0.723743 |
| MmugDNA.7894.1.S1_at   | MmugDNA.7894.1 | 7.55  | 7     | 0.39 | 0.1  | 1.46  | 0.314509 | 0.087477 | 0.665212 | 0.340617 |
| MmugDNA.7895.1.S1_at   | MmugDNA.7895.1 | 6.9   | 6.98  | 0.18 | 0.06 | -1.05 | 0.541477 | 0.845441 | 0.805165 | 0.912071 |
| MmugDNA.7896.1.S1_at   | MmugDNA.7896.1 | 7.37  | 7.24  | 0.22 | 0.05 | 1.09  | 0.659601 | 0.738138 | 0.865323 | 0.848203 |
| MmugDNA.7898.1.S1_s_at | MmugDNA.7898.1 | 12.03 | 11.96 | 0.14 | 0.19 | 1.05  | 0.193554 | 0.268957 | 0.564275 | 0.534369 |
| MmugDNA.7899.1.S1_at   | MmugDNA.7899.1 | 7.64  | 8.04  | 0.34 | 0.11 | -1.32 | 0.119944 | 0.352787 | 0.493259 | 0.596115 |
| MmugDNA.79.1.S1_at     | MmugDNA.79.1   | 6.85  | 6.6   | 0.11 | 0.03 | 1.19  | 0.045583 | 0.046994 | 0.376875 | 0.261469 |
| MmugDNA.7900.1.S1_at   | MmugDNA.7900.1 | 5.75  | 5.79  | 0.18 | 0.11 | -1.03 | 0.470867 | 0.78676  | 0.766231 | 0.876656 |
| MmugDNA.7901.1.S1_at   | MmugDNA.7901.1 | 4.34  | 4.24  | 0.24 | 0.46 | 1.07  | 0.808251 | 0.686476 | 0.930534 | 0.817043 |
| MmugDNA.7904.1.S1_at   | MmugDNA.7904.1 | 3.3   | 3.13  | 0.35 | 0.03 | 1.12  | 0.394995 | 0.566873 | 0.720296 | 0.74084  |
| MmugDNA.7905.1.S1_at   | MmugDNA.7905.1 | 6.04  | 6.34  | 0.18 | 0.11 | -1.23 | 0.072411 | 0.138929 | 0.432302 | 0.412037 |
| MmugDNA.7906.1.S1_at   | MmugDNA.7906.1 | 13.02 | 13.24 | 0.15 | 0.05 | -1.17 | 0.064446 | 0.075916 | 0.418237 | 0.320576 |
| MmugDNA.7908.1.S1_at   | MmugDNA.7908.1 | 12.82 | 12.87 | 0.02 | 0.09 | -1.03 | 0.874864 | 0.427853 | 0.956568 | 0.649582 |
| MmugDNA.7909.1.S1_at   | MmugDNA.7909.1 | 6.76  | 6.85  | 0.16 | 0.18 | -1.06 | 0.621806 | 0.631786 | 0.847631 | 0.782957 |
| MmugDNA.791.1.S1_at    | MmugDNA.791.1  | 5.39  | 5.37  | 0.36 | 0.29 | 1.02  | 0.369206 | 0.501117 | 0.704181 | 0.699443 |
| MmugDNA.7911.1.S1_at   | MmugDNA.7911.1 | 10.93 | 10.48 | 0.4  | 0.18 | 1.37  | 0.136982 | 0.06896  | 0.511963 | 0.308954 |
| MmugDNA.7912.1.S1_at   | MmugDNA.7912.1 | 4.44  | 4.76  | 0.22 | 0.06 | -1.24 | 0.113149 | 0.106512 | 0.486619 | 0.369078 |
| MmugDNA.7914.1.S1_at   | MmugDNA.7914.1 | 3.52  | 3.37  | 0.36 | 0.46 | 1.11  | 0.694217 | 0.751436 | 0.880999 | 0.85549  |
| MmugDNA.7915.1.S1_at   | MmugDNA.7915.1 | 6.75  | 7     | 1.26 | 0.21 | -1.19 | 0.834551 | 0.973088 | 0.940694 | 0.98541  |
| MmugDNA.7918.1.S1_at   | MmugDNA.7918.1 | 3.74  | 3.7   | 0.2  | 0.16 | 1.03  | 0.352513 | 0.427331 | 0.692659 | 0.649175 |
| MmugDNA.7919.1.S1_at   | MmugDNA.7919.1 | 4.65  | 4.67  | 0.05 | 0.13 | -1.01 | 0.616553 | 0.923285 | 0.844997 | 0.95686  |
| MmugDNA.7920.1.S1_at   | MmugDNA.7920.1 | 9.99  | 10.25 | 0.29 | 0.06 | -1.2  | 0.637442 | 0.72569  | 0.855548 | 0.841142 |
| MmugDNA.7921.1.S1_at   | MmugDNA.7921.1 | 3.57  | 3.6   | 0.2  | 0.04 | -1.02 | 0.99011  | 0.70631  | 0.996301 | 0.829634 |
| MmugDNA.7922.1.S1_at   | MmugDNA.7922.1 | 3.4   | 3.36  | 0.51 | 0.17 | 1.02  | 0.396635 | 0.313592 | 0.721525 | 0.567977 |
| MmugDNA.7923.1.S1_at   | MmugDNA.7923.1 | 8.78  | 8.39  | 0.34 | 0.06 | 1.31  | 0.300915 | 0.219547 | 0.655213 | 0.493192 |
| MmugDNA.7925.1.S1_at   | MmugDNA.7925.1 | 9.08  | 9.11  | 0.56 | 0.15 | -1.03 | 0.922725 | 0.78712  | 0.973922 | 0.876835 |
| MmugDNA.7926.1.S1_at   | MmugDNA.7926.1 | 4.57  | 4.44  | 0.79 | 0.16 | 1.1   | 0.743456 | 0.55691  | 0.902124 | 0.734847 |
| MmugDNA.7927.1.S1_at   | MmugDNA.7927.1 | 7.03  | 7.18  | 0.44 | 0.24 | -1.11 | 0.729174 | 0.249111 | 0.895648 | 0.51821  |
| MmugDNA.7928.1.S1_at   | MmugDNA.7928.1 | 2.78  | 2.67  | 0.06 | 0.09 | 1.08  | 0.203811 | 0.468391 | 0.57513  | 0.677714 |
| MmugDNA.7929.1.S1_at   | MmugDNA.7929.1 | 5.03  | 4.95  | 0.22 | 0.15 | 1.06  | 0.478484 | 0.437693 | 0.770085 | 0.656881 |
| MmugDNA.7931.1.S1_at   | MmugDNA.7931.1 | 3.53  | 3.53  | 0.08 | 0.08 | -1    | 0.943074 | 0.6194   | 0.980374 | 0.774634 |
| MmugDNA.7934.1.S1_at   | MmugDNA.7934.1 | 7.14  | 8.08  | 0.75 | 0.15 | -1.91 | 0.34787  | 0.239385 | 0.689079 | 0.510039 |
| MmugDNA.7935.1.S1_at   | MmugDNA.7935.1 | 3.15  | 3.15  | 0.08 | 0.12 | -1    | 0.245744 | 0.292761 | 0.611181 | 0.552783 |
| MmugDNA.7936.1.S1_at   | MmugDNA.7936.1 | 11.83 | 11.83 | 0.42 | 0.06 | 1     | 0.383411 | 0.46862  | 0.711306 | 0.677755 |
| MmugDNA.7937.1.S1_at   | MmugDNA.7937.1 | 6.64  | 6.42  | 0.13 | 0.23 | 1.16  | 0.665992 | 0.386447 | 0.868171 | 0.621593 |
| MmugDNA.7938.1.S1_at   | MmugDNA.7938.1 | 5.07  | 4.84  | 0.3  | 0.28 | 1.17  | 0.292567 | 0.546146 | 0.648901 | 0.727787 |
| MmugDNA.7939.1.S1_at   | MmugDNA.7939.1 | 5.58  | 6.03  | 0.37 | 0.21 | -1.37 | 0.131347 | 0.116341 | 0.505684 | 0.383671 |
| MmugDNA.7941.1.S1_at   | MmugDNA.7941.1 | 7.97  | 8.18  | 0.08 | 0.36 | -1.16 | 0.096126 | 0.037704 | 0.46463  | 0.23859  |

|                        |                |       |       |      |      |       |          |          |          |          |
|------------------------|----------------|-------|-------|------|------|-------|----------|----------|----------|----------|
| MmugDNA.7942.1.S1_at   | MmugDNA.7942.1 | 4.71  | 4.78  | 0.25 | 0.2  | -1.05 | 0.718389 | 0.923456 | 0.890616 | 0.956981 |
| MmugDNA.7943.1.S1_at   | MmugDNA.7943.1 | 4.03  | 4.15  | 0.06 | 0.13 | -1.09 | 0.33104  | 0.457021 | 0.677655 | 0.670619 |
| MmugDNA.7944.1.S1_at   | MmugDNA.7944.1 | 4.83  | 4.7   | 0.07 | 0.09 | 1.09  | 0.109501 | 0.44546  | 0.482292 | 0.662388 |
| MmugDNA.7945.1.S1_at   | MmugDNA.7945.1 | 10.83 | 10.88 | 0.09 | 0.12 | -1.03 | 0.257858 | 0.000585 | 0.621513 | 0.041486 |
| MmugDNA.7946.1.S1_at   | MmugDNA.7946.1 | 4.17  | 3.99  | 0.37 | 0.06 | 1.13  | 0.793923 | 0.899447 | 0.924486 | 0.942858 |
| MmugDNA.7947.1.S1_at   | MmugDNA.7947.1 | 4.01  | 4     | 0.2  | 0.05 | 1.01  | 0.878907 | 0.697245 | 0.95792  | 0.824057 |
| MmugDNA.7949.1.S1_at   | MmugDNA.7949.1 | 4.65  | 4.71  | 0.37 | 0.01 | -1.04 | 0.529306 | 0.750188 | 0.798256 | 0.854731 |
| MmugDNA.795.1.S1_at    | MmugDNA.795.1  | 3.65  | 3.9   | 0.09 | 0.53 | -1.19 | 0.492501 | 0.612978 | 0.778312 | 0.770331 |
| MmugDNA.7952.1.S1_at   | MmugDNA.7952.1 | 7.15  | 7     | 0.15 | 0.07 | 1.11  | 0.155179 | 0.186379 | 0.528509 | 0.46221  |
| MmugDNA.7953.1.S1_at   | MmugDNA.7953.1 | 4.68  | 4.47  | 0.26 | 0.06 | 1.16  | 0.488798 | 0.159151 | 0.775818 | 0.435217 |
| MmugDNA.7954.1.S1_at   | MmugDNA.7954.1 | 4.7   | 4.55  | 0    | 0.05 | 1.11  | 0.004671 | 0.001148 | 0.201699 | 0.05344  |
| MmugDNA.7956.1.S1_at   | MmugDNA.7956.1 | 6.67  | 5.94  | 0.6  | 0.37 | 1.66  | 0.115738 | 0.103739 | 0.489017 | 0.364519 |
| MmugDNA.7957.1.S1_at   | MmugDNA.7957.1 | 9.03  | 9.1   | 0.61 | 0.09 | -1.05 | 0.686725 | 0.015523 | 0.877453 | 0.158053 |
| MmugDNA.7958.1.S1_at   | MmugDNA.7958.1 | 5.24  | 5.32  | 0.15 | 0.22 | -1.06 | 0.886158 | 0.052266 | 0.960486 | 0.274146 |
| MmugDNA.796.1.S1_at    | MmugDNA.796.1  | 3.67  | 3.67  | 0.07 | 0.14 | 1     | 0.65527  | 0.852047 | 0.863101 | 0.915853 |
| MmugDNA.7960.1.S1_at   | MmugDNA.7960.1 | 4.65  | 4.23  | 0.67 | 0.09 | 1.34  | 0.139836 | 0.150748 | 0.515319 | 0.4253   |
| MmugDNA.7961.1.S1_at   | MmugDNA.7961.1 | 7.16  | 7.13  | 0.71 | 0.07 | 1.03  | 0.304599 | 0.390035 | 0.658191 | 0.624002 |
| MmugDNA.7963.1.S1_at   | MmugDNA.7963.1 | 4.56  | 4.66  | 0.19 | 0.08 | -1.07 | 0.335149 | 0.339133 | 0.680744 | 0.585891 |
| MmugDNA.7966.1.S1_at   | MmugDNA.7966.1 | 3.7   | 3.99  | 0.32 | 0.34 | -1.23 | 0.12892  | 0.174697 | 0.503626 | 0.451231 |
| MmugDNA.7967.1.S1_at   | MmugDNA.7967.1 | 5.81  | 5.86  | 0.14 | 0.06 | -1.04 | 0.506405 | 0.585863 | 0.785767 | 0.753074 |
| MmugDNA.7968.1.S1_at   | MmugDNA.7968.1 | 3.98  | 3.31  | 0.26 | 0.44 | 1.59  | 0.197744 | 0.264191 | 0.568817 | 0.530258 |
| MmugDNA.7969.1.S1_at   | MmugDNA.7969.1 | 6.32  | 6.3   | 0.21 | 0.05 | 1.01  | 0.349152 | 0.234886 | 0.690261 | 0.506125 |
| MmugDNA.7970.1.S1_at   | MmugDNA.7970.1 | 4.57  | 4.56  | 0.08 | 0.06 | 1.01  | 0.242139 | 0.292503 | 0.608285 | 0.55258  |
| MmugDNA.7971.1.S1_at   | MmugDNA.7971.1 | 7.3   | 8.55  | 0.98 | 0.26 | -2.37 | 0.046176 | 0.034725 | 0.377596 | 0.230506 |
| MmugDNA.7972.1.S1_at   | MmugDNA.7972.1 | 4.66  | 4.66  | 0.07 | 0.04 | 1     | 0.964606 | 0.870228 | 0.988371 | 0.926373 |
| MmugDNA.7973.1.S1_at   | MmugDNA.7973.1 | 8.24  | 7.65  | 0.27 | 0.23 | 1.5   | 0.049548 | 0.114549 | 0.385783 | 0.381098 |
| MmugDNA.7975.1.S1_at   | MmugDNA.7975.1 | 3.17  | 3.19  | 0.04 | 0.13 | -1.01 | 0.503958 | 0.572724 | 0.784457 | 0.744687 |
| MmugDNA.7976.1.S1_at   | MmugDNA.7976.1 | 4.14  | 4.75  | 0.49 | 0.28 | -1.53 | 0.192384 | 0.233454 | 0.56355  | 0.504809 |
| MmugDNA.7977.1.S1_at   | MmugDNA.7977.1 | 3.46  | 3.45  | 0.01 | 0.08 | 1.01  | 0.856127 | 0.135159 | 0.949177 | 0.407181 |
| MmugDNA.7978.1.S1_at   | MmugDNA.7978.1 | 12.43 | 12.43 | 0.13 | 0.08 | -1    | 0.516645 | 0.555395 | 0.791597 | 0.733767 |
| MmugDNA.7979.1.S1_at   | MmugDNA.7979.1 | 7.13  | 7.12  | 1.15 | 0.46 | 1.01  | 0.893607 | 0.940551 | 0.963483 | 0.966314 |
| MmugDNA.798.1.S1_at    | MmugDNA.798.1  | 5.59  | 6.26  | 0.71 | 0.36 | -1.58 | 0.200634 | 0.193322 | 0.572447 | 0.468656 |
| MmugDNA.7980.1.S1_at   | MmugDNA.7980.1 | 10.43 | 9.58  | 0.26 | 0.19 | 1.8   | 0.019885 | 0.000401 | 0.302615 | 0.037471 |
| MmugDNA.7982.1.S1_at   | MmugDNA.7982.1 | 3.87  | 3.78  | 0.07 | 0.1  | 1.06  | 0.114459 | 0.594244 | 0.487606 | 0.758517 |
| MmugDNA.7983.1.S1_at   | MmugDNA.7983.1 | 11.37 | 11.22 | 0.16 | 0.14 | 1.11  | 0.121184 | 0.0517   | 0.494816 | 0.272905 |
| MmugDNA.7983.1.S1_s_at | MmugDNA.7983.1 | 11.22 | 11.07 | 0.16 | 0.06 | 1.1   | 0.110914 | 0.034105 | 0.48424  | 0.2286   |
| MmugDNA.7985.1.S1_at   | MmugDNA.7985.1 | 6.63  | 6.48  | 0.57 | 0.15 | 1.11  | 0.645294 | 0.401925 | 0.858731 | 0.631097 |
| MmugDNA.7986.1.S1_at   | MmugDNA.7986.1 | 7.74  | 8.01  | 0.69 | 0.11 | -1.21 | 0.887812 | 0.913113 | 0.961188 | 0.951134 |
| MmugDNA.7987.1.S1_at   | MmugDNA.7987.1 | 7.81  | 7.03  | 0.36 | 0.4  | 1.73  | 0.060319 | 0.058315 | 0.407927 | 0.288276 |
| MmugDNA.7989.1.S1_at   | MmugDNA.7989.1 | 8.36  | 9.88  | 0.32 | 0.19 | -2.88 | 0.004304 | 0.338517 | 0.198874 | 0.585516 |
| MmugDNA.7990.1.S1_at   | MmugDNA.7990.1 | 10.52 | 11.33 | 0.17 | 0.72 | -1.75 | 0.138583 | 0.192187 | 0.514011 | 0.467651 |
| MmugDNA.7990.1.S1_s_at | MmugDNA.7990.1 | 12.55 | 12.99 | 0.12 | 0.4  | -1.36 | 0.111191 | 0.063932 | 0.484976 | 0.29906  |
| MmugDNA.7991.1.S1_at   | MmugDNA.7991.1 | 4.06  | 3.96  | 0.25 | 0.04 | 1.07  | 0.569264 | 0.773395 | 0.821324 | 0.868269 |

|                      |                |       |       |      |      |       |          |          |          |          |
|----------------------|----------------|-------|-------|------|------|-------|----------|----------|----------|----------|
| MmugDNA.7992.1.S1_at | MmugDNA.7992.1 | 4.65  | 4.26  | 0.16 | 0.24 | 1.31  | 0.020651 | 0.006798 | 0.305121 | 0.111432 |
| MmugDNA.7994.1.S1_at | MmugDNA.7994.1 | 3.58  | 3.65  | 0.06 | 0.23 | -1.05 | 0.665218 | 0.145894 | 0.867844 | 0.419889 |
| MmugDNA.7995.1.S1_at | MmugDNA.7995.1 | 8.93  | 9.28  | 0.7  | 0.27 | -1.28 | 0.355961 | 0.455632 | 0.694982 | 0.669614 |
| MmugDNA.7997.1.S1_at | MmugDNA.7997.1 | 5.56  | 5.39  | 0.13 | 0.14 | 1.13  | 0.467543 | 0.475001 | 0.764412 | 0.681843 |
| MmugDNA.7998.1.S1_at | MmugDNA.7998.1 | 4.8   | 4.29  | 0.4  | 0.38 | 1.42  | 0.185081 | 0.090055 | 0.558018 | 0.344402 |
| MmugDNA.7999.1.S1_at | MmugDNA.7999.1 | 2.74  | 2.9   | 0.13 | 0.06 | -1.12 | 0.127442 | 0.136207 | 0.501596 | 0.408542 |
| MmugDNA.8.1.S1_at    | MmugDNA.8.1    | 4.68  | 4.44  | 1.19 | 0.15 | 1.18  | 0.56088  | 0.710798 | 0.816958 | 0.832265 |
| MmugDNA.80.1.S1_at   | MmugDNA.80.1   | 10.99 | 10.77 | 0.17 | 0    | 1.17  | 0.03929  | 0.026147 | 0.361498 | 0.202721 |
| MmugDNA.8001.1.S1_at | MmugDNA.8001.1 | 10.63 | 10.02 | 0.31 | 0.02 | 1.53  | 0.068737 | 0.060263 | 0.426    | 0.292143 |
| MmugDNA.8003.1.S1_at | MmugDNA.8003.1 | 5.25  | 4.86  | 0.24 | 0.26 | 1.32  | 0.261647 | 0.728966 | 0.62388  | 0.84333  |
| MmugDNA.8004.1.S1_at | MmugDNA.8004.1 | 10.52 | 10.28 | 0.4  | 0.14 | 1.18  | 0.875766 | 0.939097 | 0.956794 | 0.965412 |
| MmugDNA.8005.1.S1_at | MmugDNA.8005.1 | 7.37  | 7.18  | 0.2  | 0.18 | 1.14  | 0.651205 | 0.489356 | 0.861488 | 0.691792 |
| MmugDNA.8006.1.S1_at | MmugDNA.8006.1 | 8.53  | 8.25  | 0.2  | 0.4  | 1.21  | 0.112819 | 0.134219 | 0.486223 | 0.406454 |
| MmugDNA.8007.1.S1_at | MmugDNA.8007.1 | 7.93  | 9.16  | 1.01 | 0.29 | -2.35 | 0.463727 | 0.521625 | 0.762278 | 0.712514 |
| MmugDNA.8008.1.S1_at | MmugDNA.8008.1 | 4.83  | 5.46  | 0.72 | 0.36 | -1.54 | 0.435761 | 0.060621 | 0.74588  | 0.292801 |
| MmugDNA.8009.1.S1_at | MmugDNA.8009.1 | 7.96  | 8.85  | 0.55 | 0.25 | -1.85 | 0.068013 | 0.033337 | 0.42451  | 0.22626  |
| MmugDNA.801.1.S1_at  | MmugDNA.801.1  | 12.13 | 12.16 | 0.12 | 0.09 | -1.02 | 0.381226 | 0.140238 | 0.709924 | 0.413405 |
| MmugDNA.8010.1.S1_at | MmugDNA.8010.1 | 9.46  | 8.91  | 2.19 | 0.38 | 1.46  | 0.806162 | 0.251749 | 0.929625 | 0.520444 |
| MmugDNA.8011.1.S1_at | MmugDNA.8011.1 | 4.46  | 4.33  | 0.15 | 0.12 | 1.09  | 0.997637 | 0.831151 | 0.999184 | 0.903172 |
| MmugDNA.8012.1.S1_at | MmugDNA.8012.1 | 11.01 | 10.73 | 0.12 | 0.22 | 1.21  | 0.043297 | 0.000475 | 0.371758 | 0.038572 |
| MmugDNA.8013.1.S1_at | MmugDNA.8013.1 | 4.62  | 4.33  | 0.09 | 0.14 | 1.22  | 0.083517 | 0.321311 | 0.449622 | 0.57319  |
| MmugDNA.8014.1.S1_at | MmugDNA.8014.1 | 3.82  | 3.83  | 0.11 | 0.08 | -1.01 | 0.856794 | 0.256178 | 0.949535 | 0.524069 |
| MmugDNA.8015.1.S1_at | MmugDNA.8015.1 | 5.81  | 5.82  | 0.14 | 0.08 | -1.01 | 0.668546 | 0.469583 | 0.86912  | 0.67829  |
| MmugDNA.8016.1.S1_at | MmugDNA.8016.1 | 5.67  | 5.2   | 0.29 | 0.32 | 1.38  | 0.305338 | 0.22083  | 0.65879  | 0.494262 |
| MmugDNA.8017.1.S1_at | MmugDNA.8017.1 | 6.62  | 6.75  | 0.26 | 0.1  | -1.09 | 0.633972 | 0.819962 | 0.853726 | 0.896303 |
| MmugDNA.8018.1.S1_at | MmugDNA.8018.1 | 5.89  | 6.19  | 0.16 | 0.25 | -1.23 | 0.130272 | 0.093934 | 0.504682 | 0.350445 |
| MmugDNA.8019.1.S1_at | MmugDNA.8019.1 | 6.71  | 6.65  | 1.03 | 0.33 | 1.04  | 0.928865 | 0.31715  | 0.976332 | 0.570412 |
| MmugDNA.802.1.S1_at  | MmugDNA.802.1  | 9.63  | 10.09 | 0.18 | 0.06 | -1.37 | 0.021273 | 0.001958 | 0.307431 | 0.065832 |
| MmugDNA.8021.1.S1_at | MmugDNA.8021.1 | 5.45  | 4.82  | 0.57 | 0.19 | 1.55  | 0.304827 | 0.355069 | 0.658467 | 0.59749  |
| MmugDNA.8023.1.S1_at | MmugDNA.8023.1 | 4.69  | 4.53  | 0.13 | 0.01 | 1.11  | 0.114538 | 0.47528  | 0.487606 | 0.682031 |
| MmugDNA.8024.1.S1_at | MmugDNA.8024.1 | 3.72  | 3.84  | 0.18 | 0.01 | -1.09 | 0.087214 | 0.396699 | 0.454785 | 0.628434 |
| MmugDNA.8025.1.S1_at | MmugDNA.8025.1 | 4.28  | 4.13  | 0.09 | 0.11 | 1.11  | 0.263911 | 0.355511 | 0.62583  | 0.597777 |
| MmugDNA.8026.1.S1_at | MmugDNA.8026.1 | 5.58  | 5.56  | 0.06 | 0.14 | 1.01  | 0.297787 | 0.150699 | 0.652791 | 0.425277 |
| MmugDNA.8027.1.S1_at | MmugDNA.8027.1 | 5.02  | 5.26  | 0.13 | 0.19 | -1.18 | 0.148014 | 0.353475 | 0.522278 | 0.596547 |
| MmugDNA.8028.1.S1_at | MmugDNA.8028.1 | 6.77  | 6.75  | 0.1  | 0.13 | 1.02  | 0.393052 | 0.746736 | 0.718937 | 0.852931 |
| MmugDNA.8029.1.S1_at | MmugDNA.8029.1 | 6.04  | 6.53  | 0.24 | 0.05 | -1.41 | 0.032886 | 0.141689 | 0.345526 | 0.415265 |
| MmugDNA.8030.1.S1_at | MmugDNA.8030.1 | 3.16  | 2.94  | 0.08 | 0.11 | 1.16  | 0.205247 | 0.328467 | 0.576972 | 0.57809  |
| MmugDNA.8031.1.S1_at | MmugDNA.8031.1 | 6.74  | 6.9   | 0.48 | 0.22 | -1.11 | 0.735428 | 0.722528 | 0.89872  | 0.839261 |
| MmugDNA.8032.1.S1_at | MmugDNA.8032.1 | 7.26  | 6.91  | 0.92 | 0.17 | 1.28  | 0.49437  | 0.342424 | 0.779424 | 0.58848  |
| MmugDNA.8033.1.S1_at | MmugDNA.8033.1 | 7.07  | 6.92  | 0.08 | 0    | 1.11  | 0.083547 | 0.160027 | 0.449622 | 0.436186 |
| MmugDNA.8034.1.S1_at | MmugDNA.8034.1 | 5.19  | 5.21  | 0.14 | 0.13 | -1.01 | 0.29159  | 0.542029 | 0.647943 | 0.725188 |
| MmugDNA.8035.1.S1_at | MmugDNA.8035.1 | 6.8   | 6.3   | 0.78 | 0.16 | 1.42  | 0.919945 | 0.98556  | 0.972872 | 0.991808 |
| MmugDNA.8036.1.S1_at | MmugDNA.8036.1 | 11.47 | 11.27 | 0.34 | 0.1  | 1.15  | 0.694968 | 0.841737 | 0.881254 | 0.909796 |



|                         |                 |       |       |      |      |       |          |          |          |          |
|-------------------------|-----------------|-------|-------|------|------|-------|----------|----------|----------|----------|
| MmugDNA.8037.1.S1_at    | MmugDNA.8037.1  | 6.09  | 5.64  | 0.42 | 0.06 | 1.37  | 0.141273 | 0.182296 | 0.516365 | 0.458768 |
| MmugDNA.8039.1.S1_at    | MmugDNA.8039.1  | 6.65  | 6.42  | 0.33 | 0.22 | 1.17  | 0.379618 | 0.063239 | 0.709065 | 0.298202 |
| MmugDNA.8040.1.S1_at    | MmugDNA.8040.1  | 10.79 | 10.92 | 0.16 | 0.2  | -1.1  | 0.93385  | 0.010109 | 0.977685 | 0.131859 |
| MmugDNA.8041.1.S1_at    | MmugDNA.8041.1  | 10.61 | 10.82 | 0.2  | 0.07 | -1.15 | 0.123593 | 0.064699 | 0.497069 | 0.300314 |
| MmugDNA.8042.1.S1_at    | MmugDNA.8042.1  | 5.07  | 5.06  | 0.27 | 0.25 | 1     | 0.518157 | 0.775638 | 0.792419 | 0.869465 |
| MmugDNA.8045.1.S1_at    | MmugDNA.8045.1  | 7.15  | 7.46  | 0.26 | 0.07 | -1.24 | 0.112207 | 0.209804 | 0.485383 | 0.483538 |
| MmugDNA.8046.1.S1_at    | MmugDNA.8046.1  | 13.05 | 12.7  | 0.15 | 0.16 | 1.27  | 0.028498 | 0.010493 | 0.332568 | 0.133872 |
| MmugDNA.8047.1.S1_at    | MmugDNA.8047.1  | 4.42  | 4.81  | 0.33 | 0.27 | -1.31 | 0.866023 | 0.897286 | 0.9529   | 0.941396 |
| MmugDNA.805.1.S1_at     | MmugDNA.805.1   | 6.36  | 6.37  | 0.1  | 0.03 | -1.01 | 0.773063 | 0.138314 | 0.915591 | 0.411244 |
| MmugDNA.8050.1.S1_at    | MmugDNA.8050.1  | 11.65 | 10.83 | 0.27 | 0.08 | 1.77  | 0.0062   | 0.002327 | 0.217214 | 0.071272 |
| MmugDNA.8050.1.S1_s_at  | MmugDNA.8050.1  | 10.57 | 9.95  | 0.18 | 0.23 | -1.54 | 0.008491 | 0.001936 | 0.234535 | 0.065795 |
| MmugDNA.8051.1.S1_at    | MmugDNA.8051.1  | 3.15  | 3.15  | 0.16 | 0.15 | -1    | 0.988628 | 0.915653 | 0.995877 | 0.952724 |
| MmugDNA.8052.1.S1_at    | MmugDNA.8052.1  | 5.47  | 6.06  | 0.65 | 0.26 | -1.5  | 0.558928 | 0.392329 | 0.815763 | 0.625731 |
| MmugDNA.8053.1.S1_at    | MmugDNA.8053.1  | 5.28  | 5.07  | 0.15 | 0.21 | 1.16  | 0.055186 | 0.04414  | 0.398095 | 0.254496 |
| MmugDNA.8054.1.S1_at    | MmugDNA.8054.1  | 4.19  | 3.97  | 0.19 | 0.14 | 1.17  | 0.78424  | 0.71626  | 0.920714 | 0.835531 |
| MmugDNA.8055.1.S1_at    | MmugDNA.8055.1  | 4.86  | 4.58  | 0.08 | 1.01 | 1.22  | 0.689382 | 0.904943 | 0.878864 | 0.946143 |
| MmugDNA.806.1.S1_at     | MmugDNA.806.1   | 6.56  | 5.58  | 0.55 | 0.13 | 1.98  | 0.039142 | 0.026156 | 0.361202 | 0.202721 |
| MmugDNA.8060.1.S1_at    | MmugDNA.8060.1  | 8.71  | 9.21  | 0.26 | 0.07 | -1.41 | 0.012452 | 0.001189 | 0.262327 | 0.054071 |
| MmugDNA.8061.1.S1_at    | MmugDNA.8061.1  | 6.91  | 6.35  | 0.14 | 0.26 | 1.47  | 0.032008 | 0.009916 | 0.342916 | 0.130767 |
| MmugDNA.8063.1.S1_at    | MmugDNA.8063.1  | 5.83  | 5.7   | 0.12 | 0.08 | 1.09  | 0.150797 | 0.198549 | 0.524367 | 0.473391 |
| MmugDNA.8065.1.S1_at    | MmugDNA.8065.1  | 3.46  | 3.45  | 0.14 | 0.09 | 1     | 0.637243 | 0.340528 | 0.855434 | 0.586776 |
| MmugDNA.8066.1.S1_at    | MmugDNA.8066.1  | 3.26  | 3.08  | 0.08 | 0.13 | 1.14  | 0.199429 | 0.098189 | 0.571179 | 0.356253 |
| MmugDNA.8067.1.S1_at    | MmugDNA.8067.1  | 3.45  | 3.69  | 0.53 | 0.22 | -1.18 | 0.852742 | 0.865868 | 0.94811  | 0.923757 |
| MmugDNA.8068.1.S1_at    | MmugDNA.8068.1  | 3.96  | 3.68  | 0.12 | 0.09 | 1.22  | 0.040734 | 0.427675 | 0.364864 | 0.649406 |
| MmugDNA.8069.1.S1_at    | MmugDNA.8069.1  | 6.7   | 6.31  | 0.18 | 0.12 | 1.32  | 0.034011 | 0.06746  | 0.347501 | 0.305749 |
| MmugDNA.8071.1.S1_at    | MmugDNA.8071.1  | 5.99  | 6.06  | 0.24 | 0.13 | -1.05 | 0.680312 | 0.758054 | 0.874646 | 0.859249 |
| MmugDNA.8073.1.S1_at    | MmugDNA.8073.1  | 7.51  | 6.78  | 0.53 | 0.04 | 1.67  | 0.155183 | 0.003428 | 0.528509 | 0.084173 |
| MmugDNA.8074.1.S1_at    | MmugDNA.8074.1  | 9.16  | 8.67  | 0.32 | 0.07 | 1.41  | 0.037412 | 0.001003 | 0.357092 | 0.050657 |
| MmugDNA.8078.1.S1_at    | MmugDNA.8078.1  | 6.41  | 5.27  | 0.81 | 0.18 | 2.2   | 0.081089 | 0.04909  | 0.445056 | 0.266518 |
| MmugDNA.8079.1.S1_at    | MmugDNA.8079.1  | 6.02  | 5.87  | 0.19 | 0.04 | 1.11  | 0.175058 | 0.213959 | 0.548031 | 0.487596 |
| MmugDNA.808.1.S1_at     | MmugDNA.808.1   | 4.81  | 4.57  | 0.21 | 0.09 | 1.18  | 0.212214 | 0.310895 | 0.582812 | 0.565881 |
| MmugDNA.8081.1.S1_at    | MmugDNA.8081.1  | 11.23 | 11.42 | 0.51 | 0    | -1.14 | 0.603464 | 0.707068 | 0.839251 | 0.830132 |
| MmugDNA.8082.1.S1_at    | MmugDNA.8082.1  | 4.91  | 4.94  | 0.6  | 0.62 | -1.02 | 0.985227 | 0.972087 | 0.995359 | 0.984924 |
| MmugDNA.8085.1.S1_at    | MmugDNA.8085.1  | 8.52  | 8.15  | 0.27 | 0.14 | 1.29  | 0.164789 | 0.682119 | 0.53747  | 0.814349 |
| MmugDNA.8086.1.S1_at    | MmugDNA.8086.1  | 8.96  | 9.04  | 0.55 | 0.16 | -1.05 | 0.722188 | 0.170979 | 0.892211 | 0.447561 |
| MmugDNA.16345.1.S1_at   | MmugDNA.16345.1 | 8.64  | 8.54  | 0.09 | 0.06 | 1.08  | 0.180367 | 0.428723 | 0.553529 | 0.650287 |
| MmugDNA.16345.1.S1_s_at | MmugDNA.16345.1 | 10.45 | 10.61 | 0.42 | 0.23 | -1.12 | 0.566964 | 0.193676 | 0.820154 | 0.468785 |
| MmugDNA.8087.1.S1_at    | MmugDNA.8087.1  | 3.57  | 3.86  | 0.07 | 0.15 | -1.22 | 0.057123 | 0.254683 | 0.401454 | 0.522987 |
| MmugDNA.8089.1.S1_at    | MmugDNA.8089.1  | 3.31  | 3.25  | 0.12 | 0.08 | 1.04  | 0.922359 | 0.15969  | 0.973786 | 0.435785 |
| MmugDNA.809.1.S1_at     | MmugDNA.809.1   | 7.86  | 8.55  | 0.97 | 0.63 | -1.62 | 0.49168  | 0.106817 | 0.777996 | 0.369425 |
| MmugDNA.8090.1.S1_at    | MmugDNA.8090.1  | 3.64  | 3.52  | 0.48 | 0.04 | 1.09  | 0.736918 | 0.891161 | 0.899286 | 0.937985 |
| MmugDNA.8091.1.S1_at    | MmugDNA.8091.1  | 9.76  | 10.51 | 0.18 | 0.21 | -1.68 | 0.02937  | 0.003894 | 0.334049 | 0.088806 |
| MmugDNA.8092.1.S1_at    | MmugDNA.8092.1  | 4.81  | 5.72  | 0.84 | 0.1  | -1.89 | 0.397309 | 0.353438 | 0.721728 | 0.596547 |

|                      |                |       |       |      |      |       |          |          |          |          |
|----------------------|----------------|-------|-------|------|------|-------|----------|----------|----------|----------|
| MmugDNA.8094.1.S1_at | MmugDNA.8094.1 | 10.15 | 10.53 | 0.2  | 0.32 | -1.3  | 0.732295 | 0.75453  | 0.897044 | 0.857221 |
| MmugDNA.8095.1.S1_at | MmugDNA.8095.1 | 9.1   | 9.49  | 0.31 | 0.23 | -1.3  | 0.205522 | 0.114508 | 0.577367 | 0.381056 |
| MmugDNA.8096.1.S1_at | MmugDNA.8096.1 | 5.42  | 5.42  | 0.41 | 0.27 | 1     | 0.770315 | 0.520762 | 0.913936 | 0.711942 |
| MmugDNA.8097.1.S1_at | MmugDNA.8097.1 | 5.28  | 5.07  | 0.13 | 0.14 | 1.15  | 0.644685 | 0.926132 | 0.858593 | 0.95813  |
| MmugDNA.8098.1.S1_at | MmugDNA.8098.1 | 6.34  | 6.34  | 0.13 | 0.03 | 1     | 0.298769 | 0.648851 | 0.653263 | 0.794491 |
| MmugDNA.8099.1.S1_at | MmugDNA.8099.1 | 4.89  | 4.83  | 0.21 | 0.98 | 1.04  | 0.908842 | 0.565594 | 0.969277 | 0.739997 |
| MmugDNA.81.1.S1_at   | MmugDNA.81.1   | 12.53 | 12.5  | 0.07 | 0.06 | 1.02  | 0.129034 | 0.040535 | 0.503682 | 0.246264 |
| MmugDNA.81.1.S1_s_at | MmugDNA.81.1   | 12.81 | 12.78 | 0.11 | 0.02 | 1.03  | 0.17957  | 0.066578 | 0.552935 | 0.303784 |
| MmugDNA.810.1.S1_at  | MmugDNA.810.1  | 4.78  | 4.79  | 0.08 | 0.03 | -1    | 0.330333 | 0.748577 | 0.676941 | 0.853719 |
| MmugDNA.8101.1.S1_at | MmugDNA.8101.1 | 6.07  | 5.07  | 0.34 | 0.51 | 1.99  | 0.212402 | 0.034934 | 0.582881 | 0.231062 |
| MmugDNA.8103.1.S1_at | MmugDNA.8103.1 | 6.99  | 6.95  | 0.05 | 0.1  | -1.03 | 0.364147 | 0.405369 | 0.700455 | 0.6337   |
| MmugDNA.8104.1.S1_at | MmugDNA.8104.1 | 6.68  | 6.67  | 0.27 | 0.08 | 1     | 0.987374 | 0.54717  | 0.995831 | 0.728314 |
| MmugDNA.8105.1.S1_at | MmugDNA.8105.1 | 7.6   | 8.36  | 0.9  | 0.13 | -1.69 | 0.155803 | 0.211992 | 0.528999 | 0.485975 |
| MmugDNA.8108.1.S1_at | MmugDNA.8108.1 | 4.7   | 4.78  | 0.06 | 0.09 | -1.06 | 0.321731 | 0.296107 | 0.670529 | 0.555339 |
| MmugDNA.8109.1.S1_at | MmugDNA.8109.1 | 7.55  | 7.5   | 0.12 | 0.24 | 1.04  | 0.910123 | 0.476442 | 0.969486 | 0.682725 |
| MmugDNA.811.1.S1_at  | MmugDNA.811.1  | 5.04  | 6.09  | 0.36 | 0.12 | -2.07 | 0.007489 | 0.000549 | 0.229281 | 0.040948 |
| MmugDNA.8110.1.S1_at | MmugDNA.8110.1 | 3.45  | 3.43  | 0.05 | 0.2  | 1.02  | 0.525522 | 0.257635 | 0.796198 | 0.525332 |
| MmugDNA.8112.1.S1_at | MmugDNA.8112.1 | 10.35 | 10.64 | 0.41 | 0.05 | -1.22 | 0.254202 | 0.399563 | 0.61872  | 0.629912 |
| MmugDNA.8113.1.S1_at | MmugDNA.8113.1 | 4.11  | 4.18  | 0.17 | 0.07 | -1.05 | 0.575394 | 0.747423 | 0.824662 | 0.853149 |
| MmugDNA.8114.1.S1_at | MmugDNA.8114.1 | 9.28  | 9.52  | 0.11 | 0.35 | -1.18 | 0.925493 | 0.064563 | 0.975188 | 0.300266 |
| MmugDNA.8115.1.S1_at | MmugDNA.8115.1 | 8.51  | 8.3   | 0.41 | 0.09 | 1.16  | 0.171567 | 0.325524 | 0.544814 | 0.575827 |
| MmugDNA.8116.1.S1_at | MmugDNA.8116.1 | 4.65  | 4.59  | 0.07 | 0.07 | 1.04  | 0.344657 | 0.45729  | 0.686997 | 0.670746 |
| MmugDNA.8117.1.S1_at | MmugDNA.8117.1 | 11.92 | 11.91 | 0.1  | 0.04 | 1     | 0.774285 | 0.78633  | 0.916259 | 0.876293 |
| MmugDNA.8118.1.S1_at | MmugDNA.8118.1 | 6.01  | 5.97  | 0.27 | 0.2  | 1.03  | 0.38064  | 0.81269  | 0.709523 | 0.891789 |
| MmugDNA.8119.1.S1_at | MmugDNA.8119.1 | 5.38  | 5.4   | 0.1  | 0.14 | -1.01 | 0.983455 | 0.293327 | 0.994935 | 0.553239 |
| MmugDNA.812.1.S1_at  | MmugDNA.812.1  | 2.91  | 2.95  | 0.31 | 0.12 | -1.03 | 0.726616 | 0.904888 | 0.894387 | 0.946143 |
| MmugDNA.8120.1.S1_at | MmugDNA.8120.1 | 4.14  | 3.95  | 0.09 | 0.12 | 1.14  | 0.081267 | 0.326392 | 0.445338 | 0.57656  |
| MmugDNA.8121.1.S1_at | MmugDNA.8121.1 | 8.12  | 8.74  | 0.13 | 0.1  | -1.53 | 0.003409 | 0.000118 | 0.194985 | 0.028664 |
| MmugDNA.8122.1.S1_at | MmugDNA.8122.1 | 3.43  | 3.59  | 0.13 | 0.04 | -1.12 | 0.069975 | 0.094414 | 0.428228 | 0.351036 |
| MmugDNA.8124.1.S1_at | MmugDNA.8124.1 | 6.09  | 6.38  | 0.23 | 0.29 | -1.22 | 0.297586 | 0.30404  | 0.652791 | 0.561388 |
| MmugDNA.8125.1.S1_at | MmugDNA.8125.1 | 3.9   | 3.87  | 0.13 | 0.23 | 1.02  | 0.636845 | 0.545853 | 0.855281 | 0.72769  |
| MmugDNA.8126.1.S1_at | MmugDNA.8126.1 | 3.6   | 4.91  | 1.51 | 0.82 | -2.48 | 0.721704 | 0.290634 | 0.892101 | 0.551363 |
| MmugDNA.8127.1.S1_at | MmugDNA.8127.1 | 8.24  | 7.98  | 0.16 | 0.04 | 1.2   | 0.053633 | 0.774359 | 0.395333 | 0.868766 |
| MmugDNA.8128.1.S1_at | MmugDNA.8128.1 | 4.79  | 4.74  | 0.26 | 0.1  | 1.03  | 0.265462 | 0.160631 | 0.626631 | 0.436745 |
| MmugDNA.8129.1.S1_at | MmugDNA.8129.1 | 4.77  | 4.81  | 0.04 | 0.33 | -1.03 | 0.520225 | 0.48694  | 0.793562 | 0.690118 |
| MmugDNA.8130.1.S1_at | MmugDNA.8130.1 | 2.9   | 2.82  | 0.11 | 0.19 | 1.06  | 0.649057 | 0.440303 | 0.860196 | 0.658899 |
| MmugDNA.8131.1.S1_at | MmugDNA.8131.1 | 12.47 | 12.72 | 0.38 | 0.05 | -1.19 | 0.309444 | 0.289303 | 0.661755 | 0.550342 |
| MmugDNA.8135.1.S1_at | MmugDNA.8135.1 | 3.48  | 3.15  | 0.14 | 0.02 | 1.26  | 0.017526 | 0.423094 | 0.292463 | 0.646145 |
| MmugDNA.8136.1.S1_at | MmugDNA.8136.1 | 4.92  | 4.5   | 0.25 | 0.19 | 1.33  | 0.233555 | 0.184544 | 0.601115 | 0.460576 |
| MmugDNA.8137.1.S1_at | MmugDNA.8137.1 | 4.71  | 4.41  | 0.32 | 0.06 | 1.23  | 0.453083 | 0.630318 | 0.755962 | 0.782213 |
| MmugDNA.8138.1.S1_at | MmugDNA.8138.1 | 6.74  | 6.65  | 0.47 | 0.18 | 1.06  | 0.899439 | 0.853753 | 0.965794 | 0.916773 |
| MmugDNA.8139.1.S1_at | MmugDNA.8139.1 | 7.22  | 7.67  | 0.36 | 0.16 | -1.37 | 0.4145   | 0.079587 | 0.733107 | 0.326963 |
| MmugDNA.814.1.S1_at  | MmugDNA.814.1  | 5.6   | 5.38  | 0.11 | 0.12 | 1.16  | 0.218104 | 0.506031 | 0.588076 | 0.702337 |

|                        |                |       |       |      |      |       |          |          |          |          |
|------------------------|----------------|-------|-------|------|------|-------|----------|----------|----------|----------|
| MmugDNA.8142.1.S1_at   | MmugDNA.8142.1 | 5.79  | 5.83  | 0.01 | 0.09 | -1.03 | 0.901742 | 0.463271 | 0.966731 | 0.674323 |
| MmugDNA.8143.1.S1_at   | MmugDNA.8143.1 | 2.91  | 2.86  | 0.23 | 0.06 | 1.03  | 0.456133 | 0.26182  | 0.757737 | 0.528265 |
| MmugDNA.8144.1.S1_at   | MmugDNA.8144.1 | 10.96 | 10.41 | 0.14 | 0.15 | 1.46  | 0.009221 | 0.002961 | 0.241866 | 0.079958 |
| MmugDNA.8147.1.S1_at   | MmugDNA.8147.1 | 4.76  | 4.72  | 0.1  | 0.01 | 1.03  | 0.429405 | 0.634841 | 0.742161 | 0.785041 |
| MmugDNA.8148.1.S1_at   | MmugDNA.8148.1 | 4.26  | 4.2   | 0.04 | 0.03 | 1.04  | 0.587386 | 0.621084 | 0.831578 | 0.77579  |
| MmugDNA.8149.1.S1_at   | MmugDNA.8149.1 | 4.9   | 5.01  | 0.99 | 0.32 | -1.08 | 0.826871 | 0.009352 | 0.938039 | 0.127602 |
| MmugDNA.815.1.S1_at    | MmugDNA.815.1  | 5.69  | 5.7   | 0.09 | 0.05 | -1.01 | 0.739862 | 0.928837 | 0.900699 | 0.959449 |
| MmugDNA.8150.1.S1_at   | MmugDNA.8150.1 | 9.77  | 9.88  | 0.45 | 0.01 | -1.08 | 0.643849 | 0.750333 | 0.858276 | 0.854768 |
| MmugDNA.8151.1.S1_at   | MmugDNA.8151.1 | 3.6   | 3.52  | 0.04 | 0.09 | 1.06  | 0.13841  | 0.163941 | 0.513727 | 0.440105 |
| MmugDNA.8152.1.S1_at   | MmugDNA.8152.1 | 4.56  | 4.55  | 0.1  | 0    | 1.01  | 0.763776 | 0.85702  | 0.911265 | 0.91832  |
| MmugDNA.8152.1.S1_x_at | MmugDNA.8152.1 | 5.01  | 4.92  | 0    | 0.14 | -1.06 | 0.345246 | 0.356698 | 0.68742  | 0.598516 |
| MmugDNA.8153.1.S1_at   | MmugDNA.8153.1 | 4.77  | 4.79  | 0.1  | 0.46 | -1.01 | 0.283373 | 0.197811 | 0.641407 | 0.472721 |
| MmugDNA.8154.1.S1_at   | MmugDNA.8154.1 | 3.92  | 3.73  | 0.1  | 0.16 | 1.14  | 0.28417  | 0.072053 | 0.642084 | 0.314519 |
| MmugDNA.8155.1.S1_at   | MmugDNA.8155.1 | 11.97 | 12.07 | 0.46 | 0.16 | -1.07 | 0.767261 | 0.050928 | 0.912495 | 0.270955 |
| MmugDNA.8156.1.S1_at   | MmugDNA.8156.1 | 6     | 5.96  | 0.14 | 0.16 | 1.02  | 0.37436  | 0.487689 | 0.705837 | 0.690642 |
| MmugDNA.8157.1.S1_at   | MmugDNA.8157.1 | 10.64 | 10.47 | 0.36 | 0.07 | 1.12  | 0.415329 | 0.461061 | 0.733613 | 0.672831 |
| MmugDNA.8158.1.S1_at   | MmugDNA.8158.1 | 8.16  | 8.12  | 0.08 | 0.17 | 1.03  | 0.774293 | 0.019943 | 0.916259 | 0.177463 |
| MmugDNA.8159.1.S1_at   | MmugDNA.8159.1 | 5.49  | 5.42  | 0.07 | 0.02 | 1.05  | 0.127257 | 0.180186 | 0.501449 | 0.456751 |
| MmugDNA.816.1.S1_at    | MmugDNA.816.1  | 5.76  | 5.67  | 0.07 | 0.07 | 1.07  | 0.17731  | 0.29684  | 0.550507 | 0.5558   |
| MmugDNA.8161.1.S1_at   | MmugDNA.8161.1 | 4.9   | 4.91  | 0.03 | 0.09 | -1.01 | 0.662581 | 0.441551 | 0.866906 | 0.659675 |
| MmugDNA.8162.1.S1_at   | MmugDNA.8162.1 | 10.5  | 10.35 | 0.09 | 0.12 | 1.11  | 0.134489 | 0.04942  | 0.508462 | 0.267237 |
| MmugDNA.8163.1.S1_at   | MmugDNA.8163.1 | 4.11  | 4.12  | 0.16 | 0.05 | -1.01 | 0.699372 | 0.337143 | 0.883137 | 0.584348 |
| MmugDNA.8164.1.S1_at   | MmugDNA.8164.1 | 3.54  | 3.52  | 0.05 | 0.08 | 1.01  | 0.397013 | 0.721927 | 0.721621 | 0.838904 |
| MmugDNA.8168.1.S1_at   | MmugDNA.8168.1 | 7.16  | 6.58  | 0.81 | 0.73 | 1.5   | 0.828892 | 0.903515 | 0.938598 | 0.945192 |
| MmugDNA.817.1.S1_at    | MmugDNA.817.1  | 8.89  | 8.59  | 0.18 | 0.16 | 1.23  | 0.099503 | 0.121954 | 0.469245 | 0.391384 |
| MmugDNA.8173.1.S1_at   | MmugDNA.8173.1 | 8.31  | 8.14  | 0.09 | 0.05 | 1.13  | 0.069852 | 0.05773  | 0.427911 | 0.2866   |
| MmugDNA.8175.1.S1_at   | MmugDNA.8175.1 | 9.69  | 10.67 | 0.16 | 0.07 | -1.98 | 0.000662 | 0.000143 | 0.144737 | 0.029387 |
| MmugDNA.8176.1.S1_at   | MmugDNA.8176.1 | 5.35  | 4.84  | 0.37 | 0.15 | 1.42  | 0.196227 | 0.232679 | 0.566736 | 0.504359 |
| MmugDNA.8177.1.S1_at   | MmugDNA.8177.1 | 4.73  | 4.75  | 0.09 | 0.11 | -1.01 | 0.721394 | 0.60152  | 0.891996 | 0.762867 |
| MmugDNA.8178.1.S1_at   | MmugDNA.8178.1 | 5.36  | 5.52  | 0.34 | 0.34 | -1.12 | 0.946642 | 0.146357 | 0.981528 | 0.420368 |
| MmugDNA.8179.1.S1_at   | MmugDNA.8179.1 | 2.91  | 2.91  | 0.03 | 0.03 | -1    | 0.26694  | 0.785234 | 0.627652 | 0.875672 |
| MmugDNA.818.1.S1_at    | MmugDNA.818.1  | 7.67  | 9.08  | 0.63 | 0.14 | -2.65 | 0.045269 | 0.026044 | 0.376169 | 0.202256 |
| MmugDNA.8180.1.S1_at   | MmugDNA.8180.1 | 7.21  | 6.51  | 0.12 | 0.09 | 1.63  | 0.000823 | 0.003421 | 0.151259 | 0.084124 |
| MmugDNA.8181.1.S1_at   | MmugDNA.8181.1 | 3.8   | 3.49  | 0.31 | 0.08 | 1.25  | 0.187818 | 0.072799 | 0.560011 | 0.315651 |
| MmugDNA.8182.1.S1_at   | MmugDNA.8182.1 | 6.4   | 5.54  | 0.24 | 0.13 | 1.81  | 0.008785 | 0.016318 | 0.236944 | 0.161818 |
| MmugDNA.8185.1.S1_at   | MmugDNA.8185.1 | 11.27 | 11.39 | 0.16 | 0.07 | -1.09 | 0.494752 | 0.588936 | 0.779514 | 0.755275 |
| MmugDNA.8185.1.S1_s_at | MmugDNA.8185.1 | 11.17 | 11.23 | 0.2  | 0.05 | -1.04 | 0.995453 | 0.919374 | 0.998279 | 0.954737 |
| MmugDNA.8186.1.S1_s_at | MmugDNA.8186.1 | 7.77  | 7.76  | 1.74 | 0.21 | 1.01  | 0.938575 | 0.339022 | 0.979343 | 0.585891 |
| MmugDNA.8187.1.S1_at   | MmugDNA.8187.1 | 5.32  | 5.47  | 0.8  | 0.61 | -1.11 | 0.726381 | 0.906718 | 0.894295 | 0.947216 |
| MmugDNA.8188.1.S1_at   | MmugDNA.8188.1 | 8.34  | 7.54  | 0.32 | 0.26 | 1.74  | 0.014591 | 0.002515 | 0.276563 | 0.074158 |
| MmugDNA.8189.1.S1_at   | MmugDNA.8189.1 | 7.58  | 7.57  | 0.13 | 0.24 | 1.01  | 0.9237   | 0.082587 | 0.974399 | 0.331785 |
| MmugDNA.8192.1.S1_at   | MmugDNA.8192.1 | 4.6   | 4.32  | 0.55 | 0.28 | 1.22  | 0.857852 | 0.459204 | 0.94975  | 0.671642 |
| MmugDNA.8193.1.S1_at   | MmugDNA.8193.1 | 3.34  | 3.33  | 0.08 | 0    | 1.01  | 0.461623 | 0.660844 | 0.761118 | 0.801604 |

|                        |                |       |       |      |      |       |          |          |          |          |
|------------------------|----------------|-------|-------|------|------|-------|----------|----------|----------|----------|
| MmugDNA.8194.1.S1_at   | MmugDNA.8194.1 | 4.65  | 4.58  | 0.14 | 0.07 | 1.06  | 0.243154 | 0.377526 | 0.609007 | 0.614997 |
| MmugDNA.8196.1.S1_at   | MmugDNA.8196.1 | 8.45  | 9.12  | 0.56 | 0.16 | -1.59 | 0.09142  | 0.157078 | 0.45929  | 0.432547 |
| MmugDNA.82.1.S1_at     | MmugDNA.82.1   | 8.49  | 7.82  | 3.41 | 0.24 | 1.59  | 0.775983 | 0.549796 | 0.916951 | 0.730055 |
| MmugDNA.820.1.S1_at    | MmugDNA.820.1  | 7.55  | 7.98  | 0.74 | 0.09 | -1.34 | 0.905586 | 0.468639 | 0.968185 | 0.677755 |
| MmugDNA.8203.1.S1_at   | MmugDNA.8203.1 | 5.02  | 4.78  | 0.06 | 0.12 | 1.18  | 0.030622 | 0.044966 | 0.338263 | 0.256489 |
| MmugDNA.8204.1.S1_at   | MmugDNA.8204.1 | 4.64  | 4.38  | 0.16 | 0.15 | 1.2   | 0.08232  | 0.125349 | 0.447129 | 0.395994 |
| MmugDNA.8206.1.S1_at   | MmugDNA.8206.1 | 3.48  | 4.42  | 0.28 | 0.45 | -1.92 | 0.046245 | 0.058931 | 0.377673 | 0.289617 |
| MmugDNA.8207.1.S1_at   | MmugDNA.8207.1 | 3.92  | 4.25  | 0.45 | 0.2  | -1.25 | 0.315694 | 0.411044 | 0.666057 | 0.637874 |
| MmugDNA.8212.1.S1_at   | MmugDNA.8212.1 | 9.61  | 9.48  | 0.56 | 0.08 | 1.1   | 0.74931  | 0.043426 | 0.90499  | 0.253043 |
| MmugDNA.8213.1.S1_at   | MmugDNA.8213.1 | 5.77  | 5.63  | 0.11 | 0.2  | 1.1   | 0.131667 | 0.234305 | 0.506119 | 0.505553 |
| MmugDNA.8214.1.S1_at   | MmugDNA.8214.1 | 7.35  | 7.19  | 0.11 | 0.04 | -1.11 | 0.234749 | 0.201722 | 0.602111 | 0.476242 |
| MmugDNA.8215.1.S1_at   | MmugDNA.8215.1 | 11.29 | 11.32 | 0.42 | 0.23 | -1.02 | 0.592729 | 0.058685 | 0.833974 | 0.288956 |
| MmugDNA.8216.1.S1_at   | MmugDNA.8216.1 | 8.89  | 9.23  | 0.32 | 0.3  | -1.27 | 0.107081 | 0.064075 | 0.47951  | 0.299311 |
| MmugDNA.8218.1.S1_at   | MmugDNA.8218.1 | 4.92  | 4.11  | 0.55 | 0.1  | 1.75  | 0.164711 | 0.405924 | 0.537466 | 0.634062 |
| MmugDNA.8219.1.S1_at   | MmugDNA.8219.1 | 10.34 | 10.53 | 0.23 | 0.02 | -1.13 | 0.756535 | 0.005666 | 0.908278 | 0.103959 |
| MmugDNA.822.1.S1_at    | MmugDNA.822.1  | 6.63  | 7.13  | 1    | 0.25 | -1.41 | 0.355346 | 0.437324 | 0.694724 | 0.656613 |
| MmugDNA.8220.1.S1_at   | MmugDNA.8220.1 | 2.98  | 2.98  | 0.15 | 0.17 | 1     | 0.756096 | 0.868581 | 0.908123 | 0.925383 |
| MmugDNA.8222.1.S1_at   | MmugDNA.8222.1 | 7.07  | 6.04  | 0.68 | 0.42 | 2.04  | 0.07612  | 0.07654  | 0.437449 | 0.321619 |
| MmugDNA.8223.1.S1_at   | MmugDNA.8223.1 | 5.4   | 5.41  | 0.24 | 0.02 | -1.01 | 0.86726  | 0.981015 | 0.953465 | 0.989532 |
| MmugDNA.8224.1.S1_at   | MmugDNA.8224.1 | 6.51  | 6.5   | 0.17 | 0.15 | 1     | 0.525053 | 0.650758 | 0.796179 | 0.795801 |
| MmugDNA.8225.1.S1_at   | MmugDNA.8225.1 | 3.83  | 3.73  | 0.24 | 0.07 | 1.07  | 0.644826 | 0.102573 | 0.858614 | 0.362929 |
| MmugDNA.8226.1.S1_s_at | MmugDNA.8226.1 | 7.64  | 7.99  | 0.67 | 0.2  | -1.28 | 0.430182 | 0.590603 | 0.742602 | 0.756315 |
| MmugDNA.8227.1.S1_at   | MmugDNA.8227.1 | 7.96  | 7.63  | 1.11 | 0.64 | 1.25  | 0.387067 | 0.153819 | 0.714027 | 0.428488 |
| MmugDNA.8228.1.S1_at   | MmugDNA.8228.1 | 6.34  | 6.09  | 0.16 | 0.09 | 1.19  | 0.242452 | 0.256381 | 0.608517 | 0.524114 |
| MmugDNA.8229.1.S1_at   | MmugDNA.8229.1 | 7     | 7.18  | 0.32 | 0.09 | -1.13 | 0.992572 | 0.980841 | 0.997203 | 0.989478 |
| MmugDNA.823.1.S1_at    | MmugDNA.823.1  | 5.14  | 4.84  | 0.1  | 0.17 | 1.23  | 0.076439 | 0.182091 | 0.437977 | 0.45857  |
| MmugDNA.8232.1.S1_at   | MmugDNA.8232.1 | 11.57 | 11.98 | 0.18 | 0.09 | -1.33 | 0.012949 | 0.034627 | 0.266031 | 0.230247 |
| MmugDNA.8233.1.S1_at   | MmugDNA.8233.1 | 4.14  | 3.92  | 0.05 | 0.06 | 1.17  | 0.011772 | 0.004118 | 0.257291 | 0.090887 |
| MmugDNA.8234.1.S1_at   | MmugDNA.8234.1 | 8.79  | 8.45  | 0.37 | 0.13 | 1.27  | 0.185019 | 0.214927 | 0.557896 | 0.48886  |
| MmugDNA.8236.1.S1_at   | MmugDNA.8236.1 | 11.37 | 11.6  | 0.12 | 0.09 | -1.17 | 0.139327 | 0.212191 | 0.51471  | 0.486081 |
| MmugDNA.8237.1.S1_at   | MmugDNA.8237.1 | 10.1  | 10.14 | 0.3  | 0.05 | -1.03 | 0.880609 | 0.543214 | 0.958682 | 0.726012 |
| MmugDNA.8237.1.S1_s_at | MmugDNA.8237.1 | 9.84  | 9.68  | 0.22 | 0.04 | 1.11  | 0.248507 | 0.079273 | 0.613851 | 0.326444 |
| MmugDNA.8238.1.S1_at   | MmugDNA.8238.1 | 12.2  | 12.36 | 0.09 | 0.04 | -1.12 | 0.046498 | 0.204507 | 0.378053 | 0.478845 |
| MmugDNA.8238.1.S1_s_at | MmugDNA.8238.1 | 11.89 | 12.08 | 0.12 | 0.04 | -1.14 | 0.048632 | 0.115855 | 0.383721 | 0.382936 |
| MmugDNA.8239.1.S1_at   | MmugDNA.8239.1 | 3.08  | 3.24  | 0.11 | 0.18 | -1.12 | 0.260512 | 0.032417 | 0.623301 | 0.223023 |
| MmugDNA.824.1.S1_at    | MmugDNA.824.1  | 4.06  | 3.78  | 0.3  | 0.07 | 1.22  | 0.188733 | 0.323139 | 0.560684 | 0.574351 |
| MmugDNA.8240.1.S1_at   | MmugDNA.8240.1 | 5.6   | 5.28  | 0.09 | 0.03 | 1.25  | 0.005637 | 0.007444 | 0.209565 | 0.115858 |
| MmugDNA.8241.1.S1_at   | MmugDNA.8241.1 | 2.82  | 2.95  | 0.17 | 0.08 | -1.09 | 0.497286 | 0.775388 | 0.781055 | 0.86928  |
| MmugDNA.8243.1.S1_at   | MmugDNA.8243.1 | 6.86  | 6.77  | 0.41 | 0.26 | 1.06  | 0.971623 | 0.845101 | 0.990709 | 0.911854 |
| MmugDNA.8244.1.S1_at   | MmugDNA.8244.1 | 5.92  | 5.89  | 0.15 | 0.25 | 1.02  | 0.537478 | 0.241668 | 0.802735 | 0.512225 |
| MmugDNA.8246.1.S1_at   | MmugDNA.8246.1 | 5.3   | 5.14  | 0.08 | 0.1  | 1.12  | 0.119584 | 0.171402 | 0.492969 | 0.447862 |
| MmugDNA.8248.1.S1_at   | MmugDNA.8248.1 | 9.61  | 9.62  | 0.21 | 0.05 | -1    | 0.89405  | 0.33187  | 0.963672 | 0.580419 |
| MmugDNA.8249.1.S1_at   | MmugDNA.8249.1 | 4.02  | 4.32  | 0.63 | 0.13 | -1.23 | 0.831155 | 0.965103 | 0.939628 | 0.980591 |

|                         |                 |       |       |      |      |       |          |          |          |          |
|-------------------------|-----------------|-------|-------|------|------|-------|----------|----------|----------|----------|
| MmugDNA.8249.1.S1_s_at  | MmugDNA.8249.1  | 8.45  | 8.51  | 0.79 | 0.06 | -1.05 | 0.909455 | 0.794685 | 0.969434 | 0.881658 |
| MmugDNA.825.1.S1_at     | MmugDNA.825.1   | 5.17  | 4.89  | 0.07 | 0.18 | 1.22  | 0.070141 | 0.07529  | 0.428522 | 0.319441 |
| MmugDNA.8250.1.S1_at    | MmugDNA.8250.1  | 6.32  | 6.15  | 0.08 | 0.21 | 1.13  | 0.665427 | 0.748035 | 0.86797  | 0.853351 |
| MmugDNA.29772.1.S1_s_at | MmugDNA.29772.1 | 6.48  | 6.94  | 0.08 | 0.22 | -1.37 | 0.072047 | 0.050079 | 0.431899 | 0.268916 |
| MmugDNA.8251.1.S1_at    | MmugDNA.8251.1  | 9.56  | 8.52  | 1.04 | 0.06 | 2.05  | 0.167268 | 0.035529 | 0.539832 | 0.232768 |
| MmugDNA.8252.1.S1_at    | MmugDNA.8252.1  | 6.85  | 7.28  | 0.94 | 0.49 | -1.35 | 0.261394 | 0.1735   | 0.623819 | 0.449938 |
| MmugDNA.8252.1.S1_x_at  | MmugDNA.8252.1  | 6.52  | 6.85  | 0.92 | 0.46 | -1.26 | 0.402311 | 0.182879 | 0.724848 | 0.459362 |
| MmugDNA.8255.1.S1_at    | MmugDNA.8255.1  | 9.03  | 8.74  | 0.45 | 0.1  | 1.22  | 0.454713 | 0.194034 | 0.756948 | 0.469151 |
| MmugDNA.8258.1.S1_at    | MmugDNA.8258.1  | 4.11  | 3.8   | 0.46 | 0.09 | 1.24  | 0.220743 | 0.236358 | 0.590084 | 0.507308 |
| MmugDNA.826.1.S1_at     | MmugDNA.826.1   | 5.88  | 5.91  | 0.31 | 0.1  | -1.02 | 0.918824 | 0.508273 | 0.972261 | 0.703492 |
| MmugDNA.8260.1.S1_at    | MmugDNA.8260.1  | 10.16 | 9.7   | 0.19 | 0.14 | 1.37  | 0.030141 | 0.269436 | 0.336644 | 0.534742 |
| MmugDNA.8262.1.S1_at    | MmugDNA.8262.1  | 6.25  | 6.11  | 0.11 | 0.02 | 1.1   | 0.048365 | 0.06532  | 0.38316  | 0.301295 |
| MmugDNA.8264.1.S1_at    | MmugDNA.8264.1  | 5.72  | 5.74  | 0.05 | 0.25 | -1.01 | 0.955892 | 0.910082 | 0.985363 | 0.949319 |
| MmugDNA.8266.1.S1_at    | MmugDNA.8266.1  | 3.93  | 4.04  | 0.31 | 0.07 | -1.08 | 0.576562 | 0.753553 | 0.825166 | 0.856527 |
| MmugDNA.8267.1.S1_at    | MmugDNA.8267.1  | 6.28  | 5.67  | 0.27 | 0.23 | 1.53  | 0.074447 | 0.063896 | 0.435313 | 0.29906  |
| MmugDNA.8269.1.S1_at    | MmugDNA.8269.1  | 6.92  | 6.67  | 0.12 | 0.02 | 1.19  | 0.021621 | 0.078924 | 0.309241 | 0.325912 |
| MmugDNA.827.1.S1_at     | MmugDNA.827.1   | 5.59  | 5.49  | 0.09 | 0.05 | 1.07  | 0.27155  | 0.342217 | 0.631445 | 0.588375 |
| MmugDNA.8270.1.S1_at    | MmugDNA.8270.1  | 4.48  | 4.69  | 0.15 | 0.1  | -1.16 | 0.11732  | 0.16271  | 0.490925 | 0.43882  |
| MmugDNA.8271.1.S1_at    | MmugDNA.8271.1  | 5.7   | 5.7   | 0.04 | 0.01 | 1     | 0.52359  | 0.394142 | 0.795656 | 0.62675  |
| MmugDNA.8272.1.S1_at    | MmugDNA.8272.1  | 9.66  | 9.87  | 0.13 | 0.14 | -1.16 | 0.464556 | 0.010496 | 0.76257  | 0.133872 |
| MmugDNA.8273.1.S1_at    | MmugDNA.8273.1  | 4.61  | 4.62  | 0.08 | 0.08 | -1    | 0.941622 | 0.101838 | 0.980194 | 0.361805 |
| MmugDNA.8274.1.S1_at    | MmugDNA.8274.1  | 8.4   | 8.58  | 0.07 | 0.13 | -1.13 | 0.024889 | 0.018176 | 0.320135 | 0.169673 |
| MmugDNA.8276.1.S1_at    | MmugDNA.8276.1  | 6.35  | 6.42  | 1.41 | 0.23 | -1.05 | 0.635271 | 0.657877 | 0.854522 | 0.800051 |
| MmugDNA.8277.1.S1_s_at  | MmugDNA.8277.1  | 7.89  | 7.95  | 0.4  | 0.03 | -1.04 | 0.300422 | 0.075871 | 0.654974 | 0.320523 |
| MmugDNA.8278.1.S1_at    | MmugDNA.8278.1  | 9.77  | 9.96  | 0.22 | 0.11 | -1.14 | 0.113903 | 0.10902  | 0.487339 | 0.372792 |
| MmugDNA.828.1.S1_at     | MmugDNA.828.1   | 5.95  | 6.51  | 0.27 | 0.54 | -1.47 | 0.220466 | 0.448248 | 0.589697 | 0.664162 |
| MmugDNA.8280.1.S1_at    | MmugDNA.8280.1  | 10.33 | 10.68 | 0.66 | 0.1  | -1.27 | 0.421106 | 0.110719 | 0.737302 | 0.374854 |
| MmugDNA.8281.1.S1_at    | MmugDNA.8281.1  | 5.92  | 5.69  | 0.14 | 0.17 | 1.17  | 0.294195 | 0.418972 | 0.650356 | 0.643191 |
| MmugDNA.8282.1.S1_at    | MmugDNA.8282.1  | 5.46  | 5.46  | 0.18 | 0.12 | 1     | 0.257539 | 0.159447 | 0.621333 | 0.435568 |
| MmugDNA.8284.1.S1_at    | MmugDNA.8284.1  | 4.59  | 5.15  | 0.24 | 0.19 | -1.47 | 0.044285 | 0.032751 | 0.374279 | 0.224042 |
| MmugDNA.8286.1.S1_at    | MmugDNA.8286.1  | 3.81  | 4.03  | 0.31 | 0.36 | -1.17 | 0.218923 | 0.118381 | 0.588341 | 0.3864   |
| MmugDNA.8288.1.S1_at    | MmugDNA.8288.1  | 4.79  | 4.59  | 0.16 | 0.1  | 1.15  | 0.112151 | 0.009775 | 0.485257 | 0.130028 |
| MmugDNA.8289.1.S1_at    | MmugDNA.8289.1  | 6.65  | 6.45  | 0.15 | 0.02 | 1.16  | 0.081146 | 0.129702 | 0.445139 | 0.401344 |
| MmugDNA.829.1.S1_at     | MmugDNA.829.1   | 3.45  | 3.43  | 0.14 | 0.07 | 1.01  | 0.310934 | 0.446212 | 0.662774 | 0.662743 |
| MmugDNA.8290.1.S1_at    | MmugDNA.8290.1  | 6.9   | 6.54  | 0.66 | 0.11 | 1.29  | 0.988441 | 0.746998 | 0.995877 | 0.853119 |
| MmugDNA.8291.1.S1_at    | MmugDNA.8291.1  | 5.79  | 5.73  | 0.19 | 0.09 | 1.04  | 0.958886 | 0.459416 | 0.986529 | 0.671741 |
| MmugDNA.8292.1.S1_at    | MmugDNA.8292.1  | 3.17  | 3.28  | 0.06 | 0.07 | -1.08 | 0.148628 | 0.422465 | 0.522666 | 0.645729 |
| MmugDNA.8293.1.S1_s_at  | MmugDNA.8293.1  | 3.78  | 3.67  | 0.27 | 0.08 | 1.09  | 0.208877 | 0.333231 | 0.580477 | 0.581498 |
| MmugDNA.8294.1.S1_at    | MmugDNA.8294.1  | 5.25  | 5.22  | 0.04 | 0.09 | 1.02  | 0.201793 | 0.258791 | 0.573323 | 0.525949 |
| MmugDNA.8295.1.S1_at    | MmugDNA.8295.1  | 10.33 | 9.38  | 0.18 | 0.12 | 1.94  | 0.001832 | 0.000078 | 0.167772 | 0.027016 |
| MmugDNA.8297.1.S1_at    | MmugDNA.8297.1  | 6.6   | 6.6   | 0.03 | 0.05 | 1     | 0.847971 | 0.63602  | 0.946629 | 0.78583  |
| MmugDNA.8298.1.S1_at    | MmugDNA.8298.1  | 7.28  | 6.79  | 0.26 | 0.26 | 1.41  | 0.192692 | 0.099832 | 0.563577 | 0.358464 |
| MmugDNA.830.1.S1_at     | MmugDNA.830.1   | 7.53  | 7.34  | 0.83 | 0.19 | 1.14  | 0.794102 | 0.256046 | 0.924491 | 0.524016 |

|                        |                |       |       |      |      |       |          |          |          |          |
|------------------------|----------------|-------|-------|------|------|-------|----------|----------|----------|----------|
| MmugDNA.8301.1.S1_at   | MmugDNA.8301.1 | 11.03 | 11.74 | 0.21 | 0.11 | -1.64 | 0.01268  | 0.00199  | 0.263705 | 0.066247 |
| MmugDNA.8302.1.S1_at   | MmugDNA.8302.1 | 7.16  | 7.07  | 0.07 | 0.05 | 1.06  | 0.047512 | 0.038208 | 0.380487 | 0.240171 |
| MmugDNA.8302.1.S1_s_at | MmugDNA.8302.1 | 5.88  | 5.66  | 0.06 | 0.01 | 1.16  | 0.008122 | 0.063393 | 0.232005 | 0.298441 |
| MmugDNA.8304.1.S1_at   | MmugDNA.8304.1 | 9.57  | 10.13 | 0.47 | 0.01 | -1.48 | 0.040847 | 0.014446 | 0.36514  | 0.153383 |
| MmugDNA.8306.1.S1_at   | MmugDNA.8306.1 | 6.48  | 6.92  | 0.05 | 0.54 | -1.36 | 0.230934 | 0.222129 | 0.599045 | 0.495124 |
| MmugDNA.8307.1.S1_at   | MmugDNA.8307.1 | 5.91  | 5.92  | 0.08 | 0.08 | -1.01 | 0.988346 | 0.284374 | 0.995877 | 0.54661  |
| MmugDNA.8309.1.S1_at   | MmugDNA.8309.1 | 7.06  | 6.94  | 0.31 | 0.35 | 1.09  | 0.781234 | 0.853903 | 0.919541 | 0.91686  |
| MmugDNA.831.1.S1_at    | MmugDNA.831.1  | 3.01  | 3.39  | 0.07 | 0.2  | -1.3  | 0.105517 | 0.061198 | 0.477143 | 0.294033 |
| MmugDNA.8310.1.S1_at   | MmugDNA.8310.1 | 6.11  | 5.97  | 0.03 | 0.13 | 1.1   | 0.202388 | 0.296292 | 0.57387  | 0.555423 |
| MmugDNA.8311.1.S1_x_at | MmugDNA.8311.1 | 8.1   | 8.36  | 0.28 | 0.05 | -1.19 | 0.161246 | 0.357505 | 0.534529 | 0.599157 |
| MmugDNA.8312.1.S1_at   | MmugDNA.8312.1 | 10.42 | 10.6  | 0.04 | 0.28 | -1.13 | 0.313264 | 0.052144 | 0.664581 | 0.273955 |
| MmugDNA.8313.1.S1_at   | MmugDNA.8313.1 | 6.87  | 6.73  | 0.06 | 0.1  | 1.1   | 0.054864 | 0.026032 | 0.397122 | 0.202231 |
| MmugDNA.8314.1.S1_at   | MmugDNA.8314.1 | 3.24  | 3.3   | 0.45 | 0.16 | -1.04 | 0.809337 | 0.908975 | 0.93104  | 0.948482 |
| MmugDNA.8315.1.S1_at   | MmugDNA.8315.1 | 5.12  | 4.9   | 0.71 | 0.18 | 1.17  | 0.215164 | 0.179311 | 0.585748 | 0.455755 |
| MmugDNA.8317.1.S1_s_at | MmugDNA.8317.1 | 9.4   | 9.76  | 0.32 | 0.16 | -1.29 | 0.094609 | 0.161134 | 0.463796 | 0.437288 |
| MmugDNA.8319.1.S1_at   | MmugDNA.8319.1 | 3.81  | 3.99  | 0.18 | 0.12 | -1.13 | 0.606005 | 0.277059 | 0.840256 | 0.541087 |
| MmugDNA.832.1.S1_at    | MmugDNA.832.1  | 8.95  | 8.34  | 0.51 | 0.12 | 1.53  | 0.031442 | 0.026738 | 0.341227 | 0.204493 |
| MmugDNA.8320.1.S1_at   | MmugDNA.8320.1 | 4.59  | 4.09  | 0.68 | 0.08 | 1.41  | 0.173121 | 0.136015 | 0.546162 | 0.40834  |
| MmugDNA.8322.1.S1_at   | MmugDNA.8322.1 | 8.15  | 8.48  | 0.4  | 0.16 | -1.26 | 0.161954 | 0.243311 | 0.535244 | 0.513356 |
| MmugDNA.8323.1.S1_at   | MmugDNA.8323.1 | 5.82  | 5.98  | 0.83 | 0.13 | -1.12 | 0.75866  | 0.894332 | 0.90928  | 0.939697 |
| MmugDNA.8325.1.S1_at   | MmugDNA.8325.1 | 5.54  | 5.77  | 0.12 | 0.21 | -1.17 | 0.050809 | 0.025652 | 0.388085 | 0.200834 |
| MmugDNA.8328.1.S1_at   | MmugDNA.8328.1 | 7.49  | 7.45  | 0.1  | 0.14 | 1.03  | 0.900373 | 0.461034 | 0.966088 | 0.672829 |
| MmugDNA.8329.1.S1_at   | MmugDNA.8329.1 | 8.79  | 9.29  | 0.51 | 0.2  | -1.41 | 0.136956 | 0.170161 | 0.511963 | 0.446906 |
| MmugDNA.833.1.S1_at    | MmugDNA.833.1  | 4.49  | 4.48  | 1.2  | 0.25 | 1.01  | 0.338007 | 0.333447 | 0.682728 | 0.581683 |
| MmugDNA.8330.1.S1_at   | MmugDNA.8330.1 | 4.68  | 4.54  | 0.12 | 0.08 | 1.11  | 0.252884 | 0.179159 | 0.617842 | 0.455496 |
| MmugDNA.8331.1.S1_at   | MmugDNA.8331.1 | 4.49  | 4.95  | 0.29 | 0.14 | -1.37 | 0.018577 | 0.108493 | 0.297776 | 0.372066 |
| MmugDNA.8332.1.S1_at   | MmugDNA.8332.1 | 3.76  | 3.31  | 0.58 | 0.71 | 1.37  | 0.622452 | 0.80134  | 0.847802 | 0.885696 |
| MmugDNA.8333.1.S1_at   | MmugDNA.8333.1 | 3.62  | 3.23  | 0.35 | 0.25 | 1.31  | 0.293987 | 0.290208 | 0.650287 | 0.551169 |
| MmugDNA.8334.1.S1_at   | MmugDNA.8334.1 | 5.59  | 5.82  | 0.81 | 0.55 | -1.18 | 0.738519 | 0.757501 | 0.899959 | 0.858849 |
| MmugDNA.8335.1.S1_at   | MmugDNA.8335.1 | 4.1   | 4.03  | 0.19 | 0.19 | 1.05  | 0.346287 | 0.240292 | 0.688005 | 0.510871 |
| MmugDNA.8336.1.S1_at   | MmugDNA.8336.1 | 5.7   | 6.3   | 0.86 | 0.15 | -1.52 | 0.820702 | 0.242517 | 0.935289 | 0.512846 |
| MmugDNA.8337.1.S1_at   | MmugDNA.8337.1 | 4.8   | 4.61  | 0.08 | 0.11 | 1.14  | 0.203881 | 0.261353 | 0.57513  | 0.527858 |
| MmugDNA.8338.1.S1_at   | MmugDNA.8338.1 | 6.36  | 6.45  | 0.79 | 0.08 | -1.06 | 0.527646 | 0.515799 | 0.797177 | 0.708492 |
| MmugDNA.8339.1.S1_at   | MmugDNA.8339.1 | 6.62  | 6.6   | 0.21 | 0.14 | 1.01  | 0.546247 | 0.862247 | 0.808414 | 0.921663 |
| MmugDNA.834.1.S1_at    | MmugDNA.834.1  | 8.77  | 8.1   | 0.29 | 0.17 | 1.58  | 0.017056 | 0.018307 | 0.289048 | 0.170154 |
| MmugDNA.8340.1.S1_at   | MmugDNA.8340.1 | 12.79 | 12.84 | 0.99 | 0.27 | -1.03 | 0.292626 | 0.170761 | 0.648949 | 0.447316 |
| MmugDNA.8341.1.S1_at   | MmugDNA.8341.1 | 4.22  | 4.04  | 0.17 | 0.02 | 1.13  | 0.134241 | 0.243311 | 0.508462 | 0.513356 |
| MmugDNA.8342.1.S1_at   | MmugDNA.8342.1 | 6.77  | 7.07  | 0.08 | 0.1  | -1.23 | 0.036225 | 0.029351 | 0.354703 | 0.213228 |
| MmugDNA.8343.1.S1_at   | MmugDNA.8343.1 | 5.52  | 5.38  | 0.04 | 0.1  | 1.1   | 0.092325 | 0.220633 | 0.460762 | 0.494069 |
| MmugDNA.8344.1.S1_at   | MmugDNA.8344.1 | 9.67  | 9.02  | 0.29 | 0.13 | 1.57  | 0.028886 | 0.065273 | 0.333062 | 0.301239 |
| MmugDNA.8345.1.S1_at   | MmugDNA.8345.1 | 8.86  | 8.44  | 0.55 | 0.22 | 1.34  | 0.237456 | 0.339959 | 0.604446 | 0.586474 |
| MmugDNA.8346.1.S1_at   | MmugDNA.8346.1 | 7.27  | 7.49  | 0.57 | 0.25 | -1.16 | 0.923196 | 0.992042 | 0.974166 | 0.995515 |
| MmugDNA.835.1.S1_at    | MmugDNA.835.1  | 8.19  | 8.05  | 0.2  | 0.19 | 1.1   | 0.448741 | 0.702612 | 0.754037 | 0.827641 |

|                        |                |       |       |      |      |       |          |          |          |          |
|------------------------|----------------|-------|-------|------|------|-------|----------|----------|----------|----------|
| MmugDNA.8350.1.S1_at   | MmugDNA.8350.1 | 10.7  | 10.82 | 0.24 | 0.08 | -1.08 | 0.785794 | 0.801259 | 0.921215 | 0.88568  |
| MmugDNA.8351.1.S1_at   | MmugDNA.8351.1 | 5.02  | 5.1   | 0.33 | 0.24 | -1.05 | 0.660247 | 0.891393 | 0.865556 | 0.938135 |
| MmugDNA.8352.1.S1_at   | MmugDNA.8352.1 | 5.74  | 5.43  | 0.31 | 0.12 | 1.24  | 0.15313  | 0.170096 | 0.526209 | 0.446868 |
| MmugDNA.8353.1.S1_at   | MmugDNA.8353.1 | 7.68  | 7.37  | 0.94 | 0.33 | 1.24  | 0.703995 | 0.837529 | 0.884936 | 0.907127 |
| MmugDNA.8355.1.S1_at   | MmugDNA.8355.1 | 10.27 | 9.86  | 0.41 | 0.05 | 1.32  | 0.557395 | 0.035977 | 0.814694 | 0.234155 |
| MmugDNA.8356.1.S1_at   | MmugDNA.8356.1 | 5.64  | 5.18  | 0.23 | 0.18 | 1.38  | 0.230644 | 0.617105 | 0.598752 | 0.77321  |
| MmugDNA.8359.1.S1_at   | MmugDNA.8359.1 | 8.15  | 8     | 0.12 | 0.12 | 1.11  | 0.198591 | 0.363914 | 0.56986  | 0.604293 |
| MmugDNA.8359.1.S1_x_at | MmugDNA.8359.1 | 7.1   | 7     | 0.17 | 0.11 | 1.07  | 0.377639 | 0.629896 | 0.707613 | 0.782009 |
| MmugDNA.836.1.S1_at    | MmugDNA.836.1  | 6.36  | 6.22  | 0.09 | 0.03 | 1.1   | 0.17851  | 0.014321 | 0.551383 | 0.152764 |
| MmugDNA.8360.1.S1_at   | MmugDNA.8360.1 | 3.6   | 3.59  | 0.14 | 0.05 | 1.01  | 0.456827 | 0.471962 | 0.758051 | 0.679799 |
| MmugDNA.8360.1.S1_x_at | MmugDNA.8360.1 | 3.67  | 3.75  | 0.22 | 0.11 | -1.06 | 0.496152 | 0.713114 | 0.780229 | 0.833638 |
| MmugDNA.8361.1.S1_at   | MmugDNA.8361.1 | 10.79 | 10.62 | 0.74 | 0.18 | 1.12  | 0.775416 | 0.387441 | 0.916747 | 0.62212  |
| MmugDNA.8362.1.S1_at   | MmugDNA.8362.1 | 4.63  | 4.49  | 0.39 | 0.19 | 1.11  | 0.313555 | 0.468938 | 0.664799 | 0.67794  |
| MmugDNA.8363.1.S1_at   | MmugDNA.8363.1 | 9.72  | 10.34 | 0.29 | 0.04 | -1.54 | 0.039119 | 0.016058 | 0.361188 | 0.160565 |
| MmugDNA.8365.1.S1_at   | MmugDNA.8365.1 | 8.29  | 8.23  | 0.16 | 0.18 | 1.04  | 0.684319 | 0.031924 | 0.876411 | 0.221104 |
| MmugDNA.8366.1.S1_at   | MmugDNA.8366.1 | 2.66  | 2.7   | 0.04 | 0.04 | -1.03 | 0.605692 | 0.055742 | 0.840163 | 0.282006 |
| MmugDNA.8367.1.S1_at   | MmugDNA.8367.1 | 3.91  | 4.06  | 0.41 | 0.46 | -1.11 | 0.817819 | 0.737239 | 0.93417  | 0.847869 |
| MmugDNA.8368.1.S1_at   | MmugDNA.8368.1 | 4.25  | 4.18  | 0.18 | 0.27 | 1.05  | 0.548862 | 0.54708  | 0.809994 | 0.728283 |
| MmugDNA.8369.1.S1_at   | MmugDNA.8369.1 | 6.47  | 6.47  | 0.17 | 0.12 | -1    | 0.569595 | 0.342752 | 0.82149  | 0.588712 |
| MmugDNA.837.1.S1_at    | MmugDNA.837.1  | 3.79  | 4.41  | 0.53 | 0.3  | -1.54 | 0.697815 | 0.406403 | 0.882451 | 0.634305 |
| MmugDNA.8370.1.S1_at   | MmugDNA.8370.1 | 5.47  | 5.55  | 0.11 | 0.15 | -1.06 | 0.867898 | 0.582612 | 0.953785 | 0.751269 |
| MmugDNA.8371.1.S1_at   | MmugDNA.8371.1 | 5.79  | 5.68  | 0.09 | 0.07 | 1.08  | 0.108841 | 0.081873 | 0.48125  | 0.330339 |
| MmugDNA.8373.1.S1_at   | MmugDNA.8373.1 | 3.74  | 3.67  | 0.17 | 0.15 | 1.05  | 0.808808 | 0.626316 | 0.930844 | 0.779698 |
| MmugDNA.8374.1.S1_at   | MmugDNA.8374.1 | 7.02  | 7.24  | 0.58 | 0.06 | -1.16 | 0.724857 | 0.47746  | 0.893293 | 0.683498 |
| MmugDNA.8375.1.S1_at   | MmugDNA.8375.1 | 4.78  | 4.69  | 0.15 | 0.12 | 1.07  | 0.318244 | 0.204712 | 0.667936 | 0.479067 |
| MmugDNA.8376.1.S1_at   | MmugDNA.8376.1 | 5.31  | 5.16  | 0.13 | 0.1  | 1.11  | 0.125726 | 0.438462 | 0.499701 | 0.65742  |
| MmugDNA.8377.1.S1_at   | MmugDNA.8377.1 | 5.51  | 5.45  | 0.12 | 0.11 | 1.04  | 0.106549 | 0.222312 | 0.479    | 0.495346 |
| MmugDNA.8378.1.S1_at   | MmugDNA.8378.1 | 9.86  | 10.35 | 0.36 | 0.03 | -1.41 | 0.235606 | 0.069047 | 0.602724 | 0.309017 |
| MmugDNA.8379.1.S1_at   | MmugDNA.8379.1 | 6.97  | 6.62  | 1.02 | 0.62 | 1.27  | 0.508519 | 0.110171 | 0.787062 | 0.374314 |
| MmugDNA.8381.1.S1_at   | MmugDNA.8381.1 | 3.15  | 3.06  | 0.13 | 0.03 | 1.06  | 0.141158 | 0.120632 | 0.51635  | 0.389476 |
| MmugDNA.8382.1.S1_s_at | MmugDNA.8382.1 | 4.73  | 4.75  | 0.24 | 0.08 | -1.01 | 0.9772   | 0.825192 | 0.992615 | 0.899552 |
| MmugDNA.8383.1.S1_at   | MmugDNA.8383.1 | 6.95  | 6.8   | 0.25 | 0.1  | 1.11  | 0.252187 | 0.159918 | 0.61717  | 0.435987 |
| MmugDNA.8385.1.S1_at   | MmugDNA.8385.1 | 4.35  | 4.45  | 0.14 | 0.08 | -1.07 | 0.367586 | 0.035298 | 0.703069 | 0.23215  |
| MmugDNA.8386.1.S1_at   | MmugDNA.8386.1 | 4.35  | 4.37  | 0.13 | 0.14 | -1.01 | 0.886943 | 0.900543 | 0.960715 | 0.943464 |
| MmugDNA.8388.1.S1_at   | MmugDNA.8388.1 | 3.89  | 3.97  | 0.08 | 0.07 | -1.06 | 0.110046 | 0.211994 | 0.482945 | 0.485975 |
| MmugDNA.839.1.S1_at    | MmugDNA.839.1  | 13.33 | 13.37 | 0.06 | 0.11 | -1.03 | 0.8508   | 0.258748 | 0.94746  | 0.525949 |
| MmugDNA.8390.1.S1_at   | MmugDNA.8390.1 | 4.24  | 4.04  | 0.04 | 0.19 | 1.15  | 0.109009 | 0.409776 | 0.481475 | 0.636816 |
| MmugDNA.8394.1.S1_at   | MmugDNA.8394.1 | 8     | 8.49  | 0.39 | 0.14 | -1.4  | 0.093192 | 0.015592 | 0.46207  | 0.158262 |
| MmugDNA.8395.1.S1_at   | MmugDNA.8395.1 | 6.21  | 5.97  | 0.11 | 0.56 | 1.18  | 0.33156  | 0.624261 | 0.678103 | 0.778523 |
| MmugDNA.8396.1.S1_at   | MmugDNA.8396.1 | 5.4   | 5.3   | 0.06 | 0.26 | 1.07  | 0.222907 | 0.360074 | 0.592482 | 0.601204 |
| MmugDNA.8398.1.S1_at   | MmugDNA.8398.1 | 4.39  | 4.25  | 0.24 | 0.09 | 1.1   | 0.271497 | 0.541114 | 0.631443 | 0.72475  |
| MmugDNA.8399.1.S1_at   | MmugDNA.8399.1 | 6.12  | 5.5   | 0.39 | 0.7  | 1.54  | 0.37761  | 0.19416  | 0.707584 | 0.469266 |
| MmugDNA.84.1.S1_at     | MmugDNA.84.1   | 6.17  | 6.18  | 0.13 | 0.04 | -1.01 | 0.583067 | 0.82137  | 0.828755 | 0.897125 |

|                        |                |       |       |      |      |       |          |          |          |          |
|------------------------|----------------|-------|-------|------|------|-------|----------|----------|----------|----------|
| MmugDNA.8400.1.S1_at   | MmugDNA.8400.1 | 8.94  | 9.03  | 0.26 | 0.06 | -1.06 | 0.478317 | 0.616311 | 0.770076 | 0.772571 |
| MmugDNA.8401.1.S1_at   | MmugDNA.8401.1 | 5.42  | 5.54  | 0.22 | 0.16 | -1.08 | 0.379545 | 0.551085 | 0.709048 | 0.730776 |
| MmugDNA.8402.1.S1_at   | MmugDNA.8402.1 | 6.28  | 6.35  | 0.2  | 0.13 | -1.05 | 0.311383 | 0.184513 | 0.663221 | 0.460559 |
| MmugDNA.8404.1.S1_at   | MmugDNA.8404.1 | 3.15  | 3     | 0.26 | 0.12 | 1.12  | 0.441055 | 0.583263 | 0.748952 | 0.751682 |
| MmugDNA.8409.1.S1_at   | MmugDNA.8409.1 | 6.69  | 6.37  | 0.13 | 0.12 | 1.25  | 0.019039 | 0.01025  | 0.29965  | 0.132655 |
| MmugDNA.841.1.S1_at    | MmugDNA.841.1  | 7.45  | 6.78  | 0.72 | 0.21 | 1.59  | 0.057668 | 0.006657 | 0.402592 | 0.110505 |
| MmugDNA.8410.1.S1_at   | MmugDNA.8410.1 | 5.25  | 4.86  | 0.17 | 0.23 | 1.31  | 0.087696 | 0.110018 | 0.455349 | 0.374145 |
| MmugDNA.8411.1.S1_at   | MmugDNA.8411.1 | 6.9   | 7.48  | 1.31 | 0.24 | -1.5  | 0.402731 | 0.528852 | 0.725074 | 0.71692  |
| MmugDNA.8412.1.S1_at   | MmugDNA.8412.1 | 8.31  | 8.17  | 0.14 | 0.08 | 1.1   | 0.256549 | 0.325422 | 0.620567 | 0.575807 |
| MmugDNA.8415.1.S1_at   | MmugDNA.8415.1 | 6.51  | 6.39  | 0.07 | 0.06 | 1.08  | 0.166323 | 0.313767 | 0.538998 | 0.568083 |
| MmugDNA.8416.1.S1_at   | MmugDNA.8416.1 | 3.51  | 3.45  | 0.09 | 0.12 | -1.04 | 0.169725 | 0.257055 | 0.542735 | 0.524781 |
| MmugDNA.8417.1.S1_at   | MmugDNA.8417.1 | 4     | 4.08  | 0.04 | 0.12 | -1.06 | 0.162313 | 0.107834 | 0.53539  | 0.370945 |
| MmugDNA.8419.1.S1_at   | MmugDNA.8419.1 | 5     | 4.76  | 0.22 | 0.07 | 1.18  | 0.130055 | 0.120769 | 0.504648 | 0.389579 |
| MmugDNA.842.1.S1_at    | MmugDNA.842.1  | 5.05  | 4.93  | 0.41 | 0.11 | 1.09  | 0.222534 | 0.258618 | 0.59206  | 0.52584  |
| MmugDNA.8424.1.S1_at   | MmugDNA.8424.1 | 4.27  | 4.17  | 0.14 | 0.16 | 1.07  | 0.184367 | 0.400242 | 0.557226 | 0.630158 |
| MmugDNA.8425.1.S1_at   | MmugDNA.8425.1 | 8.96  | 8.56  | 0.59 | 0.17 | 1.32  | 0.439512 | 0.596466 | 0.748221 | 0.759592 |
| MmugDNA.8426.1.S1_at   | MmugDNA.8426.1 | 8.33  | 8.16  | 0.51 | 0.22 | 1.13  | 0.572317 | 0.416703 | 0.823212 | 0.64167  |
| MmugDNA.8427.1.S1_at   | MmugDNA.8427.1 | 6.05  | 5.84  | 0.18 | 0.07 | 1.16  | 0.033383 | 0.011373 | 0.346442 | 0.138214 |
| MmugDNA.843.1.S1_at    | MmugDNA.843.1  | 7.27  | 7.69  | 0.3  | 0.21 | -1.34 | 0.143994 | 0.164277 | 0.519328 | 0.440539 |
| MmugDNA.8430.1.S1_at   | MmugDNA.8430.1 | 4.16  | 4.47  | 0.37 | 0.35 | -1.24 | 0.133342 | 0.111807 | 0.507921 | 0.376856 |
| MmugDNA.8432.1.S1_at   | MmugDNA.8432.1 | 11.75 | 11.34 | 0.18 | 0.09 | 1.33  | 0.022407 | 0.044625 | 0.310499 | 0.255589 |
| MmugDNA.8433.1.S1_at   | MmugDNA.8433.1 | 3.9   | 4.35  | 0.27 | 0.22 | -1.36 | 0.107366 | 0.24736  | 0.47976  | 0.516579 |
| MmugDNA.8434.1.S1_at   | MmugDNA.8434.1 | 3.93  | 3.99  | 0.18 | 0.1  | -1.05 | 0.850999 | 0.508709 | 0.947516 | 0.703792 |
| MmugDNA.8436.1.S1_at   | MmugDNA.8436.1 | 4.11  | 4.06  | 0.08 | 0.03 | 1.03  | 0.797598 | 0.426677 | 0.925605 | 0.648796 |
| MmugDNA.8437.1.S1_at   | MmugDNA.8437.1 | 3.77  | 3.87  | 0.15 | 0.23 | -1.07 | 0.285237 | 0.198272 | 0.643077 | 0.473234 |
| MmugDNA.8438.1.S1_at   | MmugDNA.8438.1 | 5.43  | 5.3   | 0.23 | 0.08 | 1.1   | 0.799733 | 0.180694 | 0.926711 | 0.457249 |
| MmugDNA.8439.1.S1_at   | MmugDNA.8439.1 | 8.86  | 8.9   | 0.47 | 0.12 | -1.03 | 0.782645 | 0.937395 | 0.919986 | 0.964687 |
| MmugDNA.8440.1.S1_at   | MmugDNA.8440.1 | 3.91  | 3.69  | 0.06 | 0.06 | 1.16  | 0.014107 | 0.147678 | 0.273972 | 0.421999 |
| MmugDNA.8442.1.S1_at   | MmugDNA.8442.1 | 5     | 4.94  | 0.14 | 0.11 | 1.04  | 0.586332 | 0.173118 | 0.83125  | 0.449765 |
| MmugDNA.8443.1.S1_at   | MmugDNA.8443.1 | 5.58  | 5.9   | 0.91 | 0.04 | -1.25 | 0.72781  | 0.891847 | 0.894866 | 0.938333 |
| MmugDNA.8444.1.S1_at   | MmugDNA.8444.1 | 3.15  | 3.15  | 0.03 | 0.08 | 1     | 0.549488 | 0.139209 | 0.81033  | 0.412358 |
| MmugDNA.8445.1.S1_at   | MmugDNA.8445.1 | 3.49  | 3.47  | 0.06 | 0.11 | 1.02  | 0.779267 | 0.590553 | 0.91863  | 0.756311 |
| MmugDNA.8446.1.S1_at   | MmugDNA.8446.1 | 6.43  | 6.34  | 0.09 | 0.25 | 1.07  | 0.754904 | 0.945394 | 0.907518 | 0.968942 |
| MmugDNA.8448.1.S1_at   | MmugDNA.8448.1 | 2.54  | 2.61  | 0.06 | 0.09 | -1.04 | 0.676317 | 0.399357 | 0.873062 | 0.629776 |
| MmugDNA.845.1.S1_at    | MmugDNA.845.1  | 10.95 | 11.23 | 0.19 | 0.12 | -1.21 | 0.16907  | 0.149623 | 0.542051 | 0.424172 |
| MmugDNA.8451.1.S1_at   | MmugDNA.8451.1 | 5.85  | 5.77  | 0.06 | 0.04 | 1.05  | 0.083141 | 0.28999  | 0.448722 | 0.550995 |
| MmugDNA.8452.1.S1_at   | MmugDNA.8452.1 | 6.24  | 5.88  | 0.16 | 0.05 | 1.28  | 0.073133 | 0.074442 | 0.434019 | 0.318062 |
| MmugDNA.8453.1.S1_at   | MmugDNA.8453.1 | 8.17  | 8.1   | 0.1  | 0.02 | 1.05  | 0.12705  | 0.101134 | 0.500933 | 0.360785 |
| MmugDNA.8454.1.S1_at   | MmugDNA.8454.1 | 8.31  | 8.13  | 0.09 | 0.05 | 1.14  | 0.050243 | 0.000351 | 0.386954 | 0.037121 |
| MmugDNA.8457.1.S1_at   | MmugDNA.8457.1 | 11.01 | 10.25 | 0.24 | 0.15 | 1.69  | 0.032655 | 0.019851 | 0.345045 | 0.177189 |
| MmugDNA.8459.1.S1_s_at | MmugDNA.8459.1 | 8.17  | 8.25  | 0.53 | 0.06 | -1.06 | 0.519502 | 0.362961 | 0.793229 | 0.603471 |
| MmugDNA.846.1.S1_at    | MmugDNA.846.1  | 7.98  | 7.88  | 0.09 | 0.1  | 1.07  | 0.264138 | 0.731331 | 0.625948 | 0.844291 |
| MmugDNA.8464.1.S1_at   | MmugDNA.8464.1 | 4.48  | 4.89  | 0.45 | 0.25 | -1.33 | 0.134328 | 0.358102 | 0.508462 | 0.599654 |



|                        |                |       |       |      |      |       |          |          |          |          |
|------------------------|----------------|-------|-------|------|------|-------|----------|----------|----------|----------|
| MmugDNA.8464.1.S1_x_at | MmugDNA.8464.1 | 5.11  | 5.6   | 0.08 | 0.22 | -1.4  | 0.021602 | 0.258723 | 0.309241 | 0.525949 |
| MmugDNA.8465.1.S1_at   | MmugDNA.8465.1 | 3.38  | 3.39  | 0.16 | 0.16 | -1.01 | 0.933197 | 0.535365 | 0.977326 | 0.720907 |
| MmugDNA.8466.1.S1_at   | MmugDNA.8466.1 | 3.76  | 3.68  | 0.08 | 0.12 | 1.06  | 0.735994 | 0.092854 | 0.898991 | 0.349024 |
| MmugDNA.8467.1.S1_at   | MmugDNA.8467.1 | 6.01  | 5.98  | 0.04 | 0.14 | 1.02  | 0.346612 | 0.529815 | 0.688361 | 0.717498 |
| MmugDNA.8469.1.S1_at   | MmugDNA.8469.1 | 5.31  | 5.3   | 0.15 | 0.28 | 1.01  | 0.507915 | 0.748291 | 0.786553 | 0.853508 |
| MmugDNA.847.1.S1_at    | MmugDNA.847.1  | 11.41 | 11.74 | 0.35 | 0.02 | -1.26 | 0.202313 | 0.087948 | 0.573781 | 0.341363 |
| MmugDNA.8470.1.S1_at   | MmugDNA.8470.1 | 3.51  | 3.51  | 0.13 | 0.09 | -1    | 0.664446 | 0.458543 | 0.867683 | 0.671232 |
| MmugDNA.8471.1.S1_at   | MmugDNA.8471.1 | 6.38  | 6.13  | 0.11 | 0.08 | 1.19  | 0.064358 | 0.174932 | 0.418055 | 0.451595 |
| MmugDNA.8472.1.S1_at   | MmugDNA.8472.1 | 5.81  | 6.12  | 0.27 | 0.12 | -1.24 | 0.158016 | 0.065478 | 0.531023 | 0.301415 |
| MmugDNA.8473.1.S1_at   | MmugDNA.8473.1 | 6     | 5.84  | 0.06 | 0.1  | 1.12  | 0.074267 | 0.187681 | 0.435027 | 0.46368  |
| MmugDNA.8474.1.S1_s_at | MmugDNA.8474.1 | 4.19  | 4.09  | 0.13 | 0.14 | -1.07 | 0.960611 | 0.285415 | 0.987216 | 0.547278 |
| MmugDNA.8476.1.S1_at   | MmugDNA.8476.1 | 6.27  | 6.06  | 0.13 | 0.08 | 1.16  | 0.065626 | 0.030367 | 0.420827 | 0.216116 |
| MmugDNA.8477.1.S1_at   | MmugDNA.8477.1 | 6.5   | 6.39  | 0.07 | 0.07 | 1.08  | 0.02732  | 0.006339 | 0.327322 | 0.108136 |
| MmugDNA.8478.1.S1_at   | MmugDNA.8478.1 | 8.38  | 8.87  | 0.6  | 0.11 | -1.4  | 0.258026 | 0.18801  | 0.621748 | 0.4641   |
| MmugDNA.8479.1.S1_at   | MmugDNA.8479.1 | 5.88  | 5.74  | 0.29 | 0.06 | 1.1   | 0.494768 | 0.565008 | 0.779514 | 0.739639 |
| MmugDNA.848.1.S1_at    | MmugDNA.848.1  | 9.74  | 9.48  | 0.25 | 0.07 | 1.2   | 0.082432 | 0.076847 | 0.447269 | 0.322345 |
| MmugDNA.8480.1.S1_at   | MmugDNA.8480.1 | 11.87 | 11.5  | 0.37 | 0.06 | 1.29  | 0.576402 | 0.361073 | 0.825166 | 0.602069 |
| MmugDNA.8482.1.S1_at   | MmugDNA.8482.1 | 3.98  | 3.78  | 0.13 | 0.15 | 1.15  | 0.113026 | 0.136654 | 0.486436 | 0.409207 |
| MmugDNA.8483.1.S1_at   | MmugDNA.8483.1 | 4.97  | 5.51  | 0.59 | 0.11 | -1.46 | 0.600734 | 0.756902 | 0.837959 | 0.858495 |
| MmugDNA.8484.1.S1_at   | MmugDNA.8484.1 | 9.37  | 9.86  | 0.14 | 0.19 | -1.41 | 0.021071 | 0.012399 | 0.306699 | 0.144058 |
| MmugDNA.8485.1.S1_at   | MmugDNA.8485.1 | 3.73  | 3.71  | 0.56 | 0.05 | 1.01  | 0.390302 | 0.630257 | 0.716633 | 0.782195 |
| MmugDNA.8486.1.S1_at   | MmugDNA.8486.1 | 7.34  | 7.95  | 1.85 | 0.27 | -1.52 | 0.604926 | 0.65335  | 0.839754 | 0.7974   |
| MmugDNA.8487.1.S1_at   | MmugDNA.8487.1 | 7.15  | 7.91  | 0.29 | 0.24 | -1.7  | 0.041822 | 0.108084 | 0.367361 | 0.371281 |
| MmugDNA.8489.1.S1_at   | MmugDNA.8489.1 | 10.78 | 11.49 | 0.23 | 0.04 | -1.63 | 0.009571 | 0.003492 | 0.242537 | 0.084984 |
| MmugDNA.849.1.S1_at    | MmugDNA.849.1  | 9.92  | 10.08 | 0.41 | 0.08 | -1.11 | 0.395124 | 0.148754 | 0.720356 | 0.423201 |
| MmugDNA.8490.1.S1_at   | MmugDNA.8490.1 | 5.75  | 5.67  | 0.17 | 0.1  | 1.06  | 0.343205 | 0.863437 | 0.686483 | 0.92245  |
| MmugDNA.8491.1.S1_at   | MmugDNA.8491.1 | 5.15  | 4.95  | 0.07 | 0.07 | 1.15  | 0.01425  | 0.021496 | 0.274327 | 0.183673 |
| MmugDNA.8492.1.S1_at   | MmugDNA.8492.1 | 9.43  | 9.02  | 0.19 | 0.1  | 1.33  | 0.054767 | 0.280192 | 0.397122 | 0.543487 |
| MmugDNA.8493.1.S1_x_at | MmugDNA.8493.1 | 7.24  | 7.16  | 0.24 | 0.04 | 1.06  | 0.66053  | 0.33006  | 0.865778 | 0.578938 |
| MmugDNA.8494.1.S1_at   | MmugDNA.8494.1 | 4.05  | 3.78  | 0.29 | 0.18 | 1.2   | 0.233821 | 0.271911 | 0.601359 | 0.536655 |
| MmugDNA.8495.1.S1_at   | MmugDNA.8495.1 | 4.32  | 4.26  | 0.05 | 0.07 | 1.04  | 0.283292 | 0.1519   | 0.641313 | 0.426547 |
| MmugDNA.85.1.S1_at     | MmugDNA.85.1   | 7     | 6.91  | 0.16 | 0.27 | 1.07  | 0.667129 | 0.292904 | 0.868536 | 0.552857 |
| MmugDNA.850.1.S1_at    | MmugDNA.850.1  | 5.17  | 5.18  | 0.22 | 0.09 | -1.01 | 0.686201 | 0.37999  | 0.877206 | 0.616674 |
| MmugDNA.8500.1.S1_at   | MmugDNA.8500.1 | 5.17  | 5.05  | 0.05 | 0.14 | 1.08  | 0.111088 | 0.116983 | 0.484303 | 0.384379 |
| MmugDNA.8501.1.S1_at   | MmugDNA.8501.1 | 3.5   | 3.35  | 0.21 | 0.08 | 1.11  | 0.269213 | 0.399154 | 0.629522 | 0.62969  |
| MmugDNA.8504.1.S1_at   | MmugDNA.8504.1 | 3.14  | 3.17  | 0.04 | 0.07 | -1.02 | 0.16659  | 0.328205 | 0.539239 | 0.577947 |
| MmugDNA.8505.1.S1_at   | MmugDNA.8505.1 | 4.23  | 3.9   | 0.13 | 0.11 | 1.26  | 0.079448 | 0.165655 | 0.442296 | 0.441925 |
| MmugDNA.8507.1.S1_at   | MmugDNA.8507.1 | 4.84  | 3.28  | 0.88 | 0.79 | 2.95  | 0.195297 | 0.397992 | 0.565686 | 0.629138 |
| MmugDNA.8508.1.S1_at   | MmugDNA.8508.1 | 6.74  | 5.88  | 1.4  | 0.13 | 1.81  | 0.375076 | 0.38489  | 0.706298 | 0.620513 |
| MmugDNA.8512.1.S1_at   | MmugDNA.8512.1 | 11.39 | 11.31 | 0.2  | 0.03 | 1.06  | 0.782329 | 0.941162 | 0.919778 | 0.966652 |
| MmugDNA.8513.1.S1_at   | MmugDNA.8513.1 | 4.5   | 3.57  | 0.05 | 0.27 | 1.91  | 0.008882 | 0.020294 | 0.23823  | 0.178808 |
| MmugDNA.8514.1.S1_at   | MmugDNA.8514.1 | 2.95  | 2.79  | 0.16 | 0.17 | 1.12  | 0.748085 | 0.919375 | 0.904315 | 0.954737 |
| MmugDNA.8516.1.S1_at   | MmugDNA.8516.1 | 6.22  | 6.27  | 0.12 | 0.05 | -1.04 | 0.19742  | 0.279894 | 0.568435 | 0.543342 |

|                        |                |       |       |      |      |       |          |          |          |          |
|------------------------|----------------|-------|-------|------|------|-------|----------|----------|----------|----------|
| MmugDNA.8517.1.S1_at   | MmugDNA.8517.1 | 3.15  | 3.1   | 0.12 | 0.04 | 1.04  | 0.540598 | 0.695142 | 0.804445 | 0.822797 |
| MmugDNA.8518.1.S1_at   | MmugDNA.8518.1 | 3.51  | 3.36  | 0.12 | 0.05 | 1.11  | 0.062791 | 0.154428 | 0.413946 | 0.429313 |
| MmugDNA.8519.1.S1_at   | MmugDNA.8519.1 | 5.3   | 5.23  | 0.1  | 0.09 | 1.06  | 0.181428 | 0.313205 | 0.554659 | 0.567753 |
| MmugDNA.852.1.S1_at    | MmugDNA.852.1  | 4.75  | 4.82  | 0.14 | 0.11 | -1.06 | 0.422243 | 0.507114 | 0.738068 | 0.70277  |
| MmugDNA.8520.1.S1_at   | MmugDNA.8520.1 | 5.45  | 4.75  | 0.39 | 0.49 | 1.62  | 0.131186 | 0.109981 | 0.5054   | 0.374067 |
| MmugDNA.8521.1.S1_at   | MmugDNA.8521.1 | 7.01  | 7.66  | 1.08 | 0.46 | -1.58 | 0.490349 | 0.649893 | 0.776954 | 0.795273 |
| MmugDNA.8522.1.S1_at   | MmugDNA.8522.1 | 4.72  | 4.87  | 0.06 | 0.06 | -1.11 | 0.151185 | 0.050142 | 0.52444  | 0.269087 |
| MmugDNA.8523.1.S1_at   | MmugDNA.8523.1 | 6.07  | 6.04  | 0.12 | 0.15 | 1.02  | 0.182797 | 0.286759 | 0.555631 | 0.548125 |
| MmugDNA.8525.1.S1_at   | MmugDNA.8525.1 | 12.99 | 13.11 | 0.1  | 0.05 | -1.09 | 0.385908 | 0.494545 | 0.713123 | 0.694909 |
| MmugDNA.8526.1.S1_at   | MmugDNA.8526.1 | 5.83  | 5.96  | 0.08 | 0.12 | -1.09 | 0.162116 | 0.215793 | 0.535244 | 0.489536 |
| MmugDNA.8528.1.S1_at   | MmugDNA.8528.1 | 4.41  | 4.41  | 0.07 | 0.06 | -1    | 0.697428 | 0.349904 | 0.882272 | 0.593668 |
| MmugDNA.8529.1.S1_at   | MmugDNA.8529.1 | 13.24 | 13.2  | 1.63 | 0.16 | 1.03  | 0.520491 | 0.239917 | 0.79373  | 0.510627 |
| MmugDNA.853.1.S1_at    | MmugDNA.853.1  | 6.35  | 6.6   | 0.22 | 0.12 | -1.19 | 0.099485 | 0.136873 | 0.469245 | 0.409568 |
| MmugDNA.8531.1.S1_at   | MmugDNA.8531.1 | 3.69  | 3.64  | 0.04 | 0.04 | 1.04  | 0.102338 | 0.173155 | 0.472589 | 0.449765 |
| MmugDNA.8532.1.S1_at   | MmugDNA.8532.1 | 3.46  | 3.16  | 0.13 | 0.15 | 1.23  | 0.067294 | 0.309216 | 0.423412 | 0.564807 |
| MmugDNA.8533.1.S1_at   | MmugDNA.8533.1 | 2.73  | 2.71  | 0.07 | 0.05 | 1.02  | 0.599859 | 0.170477 | 0.837599 | 0.447103 |
| MmugDNA.8535.1.S1_at   | MmugDNA.8535.1 | 4.63  | 4.65  | 0.02 | 0.03 | -1.01 | 0.142049 | 0.582385 | 0.517023 | 0.751018 |
| MmugDNA.8536.1.S1_s_at | MmugDNA.8536.1 | 12.62 | 12.15 | 0.04 | 0.03 | 1.38  | 0.000082 | 0.02205  | 0.108151 | 0.185911 |
| MmugDNA.8537.1.S1_at   | MmugDNA.8537.1 | 13.21 | 13.15 | 0.12 | 0.06 | 1.04  | 0.102254 | 0.166403 | 0.472564 | 0.442884 |
| MmugDNA.8539.1.S1_at   | MmugDNA.8539.1 | 3.85  | 3.85  | 0.05 | 0.1  | 1     | 0.638119 | 0.342874 | 0.85585  | 0.588712 |
| MmugDNA.854.1.S1_at    | MmugDNA.854.1  | 8.08  | 8.22  | 0.04 | 0.04 | -1.1  | 0.029624 | 0.019251 | 0.335208 | 0.174522 |
| MmugDNA.8541.1.S1_at   | MmugDNA.8541.1 | 5.16  | 5.14  | 0.16 | 0.24 | 1.02  | 0.591076 | 0.326723 | 0.833259 | 0.576725 |
| MmugDNA.8542.1.S1_at   | MmugDNA.8542.1 | 6.72  | 6.51  | 0.1  | 0.1  | 1.16  | 0.06051  | 0.089585 | 0.408362 | 0.343811 |
| MmugDNA.8544.1.S1_at   | MmugDNA.8544.1 | 5.48  | 6.69  | 0.49 | 0.28 | -2.32 | 0.019089 | 0.008878 | 0.299783 | 0.124662 |
| MmugDNA.8546.1.S1_at   | MmugDNA.8546.1 | 4.91  | 5.13  | 0.35 | 0.25 | -1.17 | 0.264095 | 0.360219 | 0.625948 | 0.601275 |
| MmugDNA.8547.1.S1_at   | MmugDNA.8547.1 | 6.07  | 5.97  | 0.16 | 0.05 | 1.07  | 0.25707  | 0.318075 | 0.620945 | 0.571046 |
| MmugDNA.8549.1.S1_s_at | MmugDNA.8549.1 | 7.92  | 7.72  | 0.43 | 0.04 | 1.15  | 0.499774 | 0.090064 | 0.782208 | 0.344402 |
| MmugDNA.855.1.S1_at    | MmugDNA.855.1  | 5.18  | 5.2   | 0.23 | 0.11 | -1.01 | 0.289529 | 0.271149 | 0.646199 | 0.536259 |
| MmugDNA.8551.1.S1_at   | MmugDNA.8551.1 | 8.26  | 8.71  | 1.17 | 0.14 | -1.37 | 0.52384  | 0.546696 | 0.795656 | 0.728135 |
| MmugDNA.8553.1.S1_at   | MmugDNA.8553.1 | 8.3   | 8.51  | 0.75 | 0.11 | -1.16 | 0.571745 | 0.058972 | 0.822923 | 0.289669 |
| MmugDNA.8554.1.S1_at   | MmugDNA.8554.1 | 5.06  | 5.04  | 0.09 | 0.11 | 1.01  | 0.187661 | 0.551419 | 0.559909 | 0.730925 |
| MmugDNA.8555.1.S1_at   | MmugDNA.8555.1 | 4.95  | 5.19  | 0.06 | 0.13 | -1.18 | 0.020188 | 0.03526  | 0.303673 | 0.231988 |
| MmugDNA.8556.1.S1_at   | MmugDNA.8556.1 | 10.02 | 10.65 | 2.2  | 0.17 | -1.54 | 0.468012 | 0.159587 | 0.76464  | 0.435785 |
| MmugDNA.8557.1.S1_at   | MmugDNA.8557.1 | 5.13  | 5.03  | 0.09 | 0.04 | 1.07  | 0.230094 | 0.183892 | 0.598481 | 0.460033 |
| MmugDNA.8558.1.S1_at   | MmugDNA.8558.1 | 4.94  | 4.7   | 0.19 | 0.16 | 1.18  | 0.339658 | 0.500338 | 0.68396  | 0.699009 |
| MmugDNA.8559.1.S1_at   | MmugDNA.8559.1 | 8.39  | 9.22  | 0.2  | 0.23 | -1.79 | 0.009491 | 0.018248 | 0.242401 | 0.1699   |
| MmugDNA.856.1.S1_at    | MmugDNA.856.1  | 4.02  | 4.02  | 0.15 | 0.03 | 1     | 0.773066 | 0.652554 | 0.915591 | 0.796833 |
| MmugDNA.8560.1.S1_at   | MmugDNA.8560.1 | 3.47  | 3.39  | 0.05 | 0.09 | 1.06  | 0.211125 | 0.072905 | 0.582141 | 0.315942 |
| MmugDNA.8561.1.S1_at   | MmugDNA.8561.1 | 3.9   | 4.09  | 0.06 | 0.16 | -1.14 | 0.110243 | 0.071776 | 0.483363 | 0.314031 |
| MmugDNA.8562.1.S1_at   | MmugDNA.8562.1 | 7.9   | 8.51  | 0.21 | 0.04 | -1.52 | 0.009385 | 0.004015 | 0.241869 | 0.089976 |
| MmugDNA.8563.1.S1_at   | MmugDNA.8563.1 | 7.57  | 8.2   | 1.04 | 0.19 | -1.55 | 0.258425 | 0.296827 | 0.622212 | 0.5558   |
| MmugDNA.8564.1.S1_at   | MmugDNA.8564.1 | 6.03  | 6.07  | 0.4  | 0.36 | -1.03 | 0.87878  | 0.046066 | 0.95791  | 0.258977 |
| MmugDNA.8565.1.S1_at   | MmugDNA.8565.1 | 4.39  | 4.06  | 0.16 | 0.07 | 1.26  | 0.045226 | 0.039364 | 0.376159 | 0.243406 |

|                      |                |       |       |      |      |       |          |          |          |          |
|----------------------|----------------|-------|-------|------|------|-------|----------|----------|----------|----------|
| MmugDNA.8566.1.S1_at | MmugDNA.8566.1 | 3.45  | 3.45  | 0.04 | 0.05 | 1     | 0.861459 | 0.83805  | 0.951267 | 0.907543 |
| MmugDNA.8567.1.S1_at | MmugDNA.8567.1 | 11.67 | 11.46 | 0.44 | 0.02 | 1.15  | 0.484785 | 0.339727 | 0.773797 | 0.586323 |
| MmugDNA.8568.1.S1_at | MmugDNA.8568.1 | 3.85  | 3.84  | 0.14 | 0.09 | 1     | 0.734747 | 0.91019  | 0.898485 | 0.949342 |
| MmugDNA.8569.1.S1_at | MmugDNA.8569.1 | 6.97  | 6.85  | 0.77 | 0.59 | 1.08  | 0.380432 | 0.646832 | 0.709387 | 0.793143 |
| MmugDNA.857.1.S1_at  | MmugDNA.857.1  | 2.96  | 2.94  | 0.09 | 0.02 | 1.02  | 0.192788 | 0.206111 | 0.563577 | 0.480319 |
| MmugDNA.8570.1.S1_at | MmugDNA.8570.1 | 5     | 4.77  | 0.1  | 0.08 | 1.17  | 0.098279 | 0.654396 | 0.467704 | 0.798021 |
| MmugDNA.8571.1.S1_at | MmugDNA.8571.1 | 10.58 | 10.79 | 0.32 | 0.14 | -1.15 | 0.550463 | 0.126131 | 0.810833 | 0.396734 |
| MmugDNA.8573.1.S1_at | MmugDNA.8573.1 | 9.62  | 9.3   | 0.41 | 0.14 | 1.25  | 0.647067 | 0.292905 | 0.859341 | 0.552857 |
| MmugDNA.8575.1.S1_at | MmugDNA.8575.1 | 4.91  | 4.9   | 0.14 | 0.05 | 1.01  | 0.238274 | 0.137365 | 0.605262 | 0.41029  |
| MmugDNA.8576.1.S1_at | MmugDNA.8576.1 | 3.84  | 3.82  | 0    | 0.06 | 1.02  | 0.60243  | 0.446448 | 0.838819 | 0.662842 |
| MmugDNA.8577.1.S1_at | MmugDNA.8577.1 | 6     | 6.36  | 1.07 | 0.35 | -1.29 | 0.847763 | 0.946778 | 0.946572 | 0.96978  |
| MmugDNA.8579.1.S1_at | MmugDNA.8579.1 | 3.41  | 3.43  | 0.16 | 0.12 | -1.02 | 0.944258 | 0.071753 | 0.980653 | 0.31401  |
| MmugDNA.858.1.S1_at  | MmugDNA.858.1  | 6.33  | 6.29  | 0.28 | 0.13 | 1.03  | 0.216597 | 0.222182 | 0.586674 | 0.495178 |
| MmugDNA.8581.1.S1_at | MmugDNA.8581.1 | 10.25 | 10.66 | 0.89 | 0.15 | -1.33 | 0.455404 | 0.187162 | 0.757444 | 0.46313  |
| MmugDNA.8582.1.S1_at | MmugDNA.8582.1 | 3.36  | 3     | 0.22 | 0.08 | 1.28  | 0.023958 | 0.070661 | 0.317529 | 0.312011 |
| MmugDNA.8583.1.S1_at | MmugDNA.8583.1 | 5.07  | 4.84  | 0.33 | 0.7  | 1.18  | 0.766605 | 0.747755 | 0.912246 | 0.853252 |
| MmugDNA.8584.1.S1_at | MmugDNA.8584.1 | 3.13  | 3.11  | 0.17 | 0.02 | 1.01  | 0.605619 | 0.522407 | 0.840096 | 0.713139 |
| MmugDNA.8585.1.S1_at | MmugDNA.8585.1 | 7.68  | 8.74  | 1.2  | 0.26 | -2.08 | 0.286344 | 0.093435 | 0.643605 | 0.349695 |
| MmugDNA.8586.1.S1_at | MmugDNA.8586.1 | 4.17  | 3.88  | 0.15 | 0.16 | 1.23  | 0.08135  | 0.138102 | 0.445406 | 0.410985 |
| MmugDNA.8587.1.S1_at | MmugDNA.8587.1 | 4.48  | 4.38  | 0.09 | 0.11 | 1.07  | 0.236386 | 0.526537 | 0.603291 | 0.715583 |
| MmugDNA.8588.1.S1_at | MmugDNA.8588.1 | 3.02  | 3.15  | 0.04 | 0.29 | -1.1  | 0.337107 | 0.307842 | 0.682229 | 0.56397  |
| MmugDNA.859.1.S1_at  | MmugDNA.859.1  | 4.44  | 4.38  | 0.33 | 0.2  | 1.05  | 0.75283  | 0.583029 | 0.906817 | 0.751513 |
| MmugDNA.8590.1.S1_at | MmugDNA.8590.1 | 7.88  | 8.53  | 0.45 | 0.03 | -1.56 | 0.226913 | 0.302682 | 0.596299 | 0.560269 |
| MmugDNA.8594.1.S1_at | MmugDNA.8594.1 | 8.22  | 9.16  | 0.58 | 0.13 | -1.91 | 0.157469 | 0.149129 | 0.530565 | 0.423572 |
| MmugDNA.8596.1.S1_at | MmugDNA.8596.1 | 6.58  | 6.59  | 0.37 | 0.22 | -1    | 0.537478 | 0.210357 | 0.802735 | 0.484237 |
| MmugDNA.860.1.S1_at  | MmugDNA.860.1  | 5.31  | 5.2   | 0.23 | 0.33 | 1.08  | 0.62158  | 0.604357 | 0.847584 | 0.764576 |
| MmugDNA.8600.1.S1_at | MmugDNA.8600.1 | 4.78  | 4.66  | 0.02 | 0.1  | 1.09  | 0.106987 | 0.48186  | 0.479496 | 0.686812 |
| MmugDNA.8601.1.S1_at | MmugDNA.8601.1 | 12.89 | 12.87 | 0.04 | 0.02 | 1.01  | 0.109531 | 0.093174 | 0.482328 | 0.34931  |
| MmugDNA.8606.1.S1_at | MmugDNA.8606.1 | 3.91  | 4.18  | 0.23 | 0.21 | -1.21 | 0.4779   | 0.448277 | 0.76987  | 0.664167 |
| MmugDNA.8607.1.S1_at | MmugDNA.8607.1 | 3.95  | 4.1   | 0.12 | 0.22 | -1.11 | 0.229476 | 0.529735 | 0.598339 | 0.717498 |
| MmugDNA.8608.1.S1_at | MmugDNA.8608.1 | 3.33  | 3.35  | 0.04 | 0.15 | -1.01 | 0.792924 | 0.895291 | 0.924196 | 0.940185 |
| MmugDNA.8609.1.S1_at | MmugDNA.8609.1 | 3.22  | 3.3   | 0.23 | 0.03 | -1.06 | 0.693984 | 0.277969 | 0.880942 | 0.541664 |
| MmugDNA.861.1.S1_at  | MmugDNA.861.1  | 2.87  | 3.1   | 0.33 | 0.23 | -1.17 | 0.451947 | 0.571112 | 0.755619 | 0.74355  |
| MmugDNA.8610.1.S1_at | MmugDNA.8610.1 | 4.72  | 4.73  | 0.06 | 0.03 | -1    | 0.665137 | 0.14734  | 0.867812 | 0.421554 |
| MmugDNA.8611.1.S1_at | MmugDNA.8611.1 | 5.02  | 5.07  | 0.38 | 0.04 | -1.03 | 0.436602 | 0.416122 | 0.746362 | 0.64135  |
| MmugDNA.8613.1.S1_at | MmugDNA.8613.1 | 8.71  | 8.86  | 0.22 | 0.12 | -1.11 | 0.122402 | 0.063657 | 0.495771 | 0.298815 |
| MmugDNA.8614.1.S1_at | MmugDNA.8614.1 | 6.48  | 6.22  | 0.19 | 0.16 | 1.2   | 0.306408 | 0.540208 | 0.659434 | 0.724218 |
| MmugDNA.8615.1.S1_at | MmugDNA.8615.1 | 9.22  | 8.94  | 0.5  | 0.21 | 1.22  | 0.304343 | 0.00898  | 0.657987 | 0.125353 |
| MmugDNA.8616.1.S1_at | MmugDNA.8616.1 | 9.69  | 9.44  | 0.56 | 0.04 | 1.19  | 0.477347 | 0.005889 | 0.769812 | 0.104899 |
| MmugDNA.862.1.S1_at  | MmugDNA.862.1  | 8.18  | 8.05  | 0.09 | 0.07 | 1.09  | 0.041777 | 0.1294   | 0.367173 | 0.4008   |
| MmugDNA.8620.1.S1_at | MmugDNA.8620.1 | 5.92  | 5.78  | 0.1  | 0.24 | 1.1   | 0.73698  | 0.414312 | 0.899286 | 0.640189 |
| MmugDNA.8623.1.S1_at | MmugDNA.8623.1 | 12.74 | 12.64 | 0.17 | 0.05 | 1.07  | 0.133791 | 0.069016 | 0.508033 | 0.309017 |
| MmugDNA.8624.1.S1_at | MmugDNA.8624.1 | 9.53  | 9.3   | 0.7  | 0.65 | 1.17  | 0.380488 | 0.297747 | 0.709387 | 0.556395 |

|                        |                |       |       |      |      |       |          |          |          |          |
|------------------------|----------------|-------|-------|------|------|-------|----------|----------|----------|----------|
| MmugDNA.8627.1.S1_at   | MmugDNA.8627.1 | 6.27  | 6.26  | 0.28 | 0.03 | 1.01  | 0.481931 | 0.525447 | 0.772261 | 0.715025 |
| MmugDNA.8628.1.S1_at   | MmugDNA.8628.1 | 5.52  | 5.47  | 0.24 | 0.07 | 1.04  | 0.567376 | 0.813141 | 0.820391 | 0.891951 |
| MmugDNA.8629.1.S1_at   | MmugDNA.8629.1 | 7.52  | 7.75  | 0.94 | 0.41 | -1.17 | 0.74328  | 0.729708 | 0.902055 | 0.843652 |
| MmugDNA.8631.1.S1_at   | MmugDNA.8631.1 | 4.86  | 5.26  | 0.06 | 0.16 | -1.32 | 0.017054 | 0.009786 | 0.289048 | 0.130114 |
| MmugDNA.8632.1.S1_at   | MmugDNA.8632.1 | 8.44  | 8.35  | 0.05 | 0.12 | 1.07  | 0.465766 | 0.300993 | 0.763177 | 0.559198 |
| MmugDNA.8633.1.S1_at   | MmugDNA.8633.1 | 5.02  | 4.97  | 0.11 | 0.03 | 1.04  | 0.689474 | 0.14083  | 0.87891  | 0.414207 |
| MmugDNA.8635.1.S1_s_at | MmugDNA.8635.1 | 9.91  | 10.23 | 0.49 | 0.07 | -1.25 | 0.397995 | 0.209834 | 0.722205 | 0.483581 |
| MmugDNA.8636.1.S1_at   | MmugDNA.8636.1 | 4.58  | 4.47  | 0.07 | 0.12 | 1.08  | 0.625088 | 0.237757 | 0.849207 | 0.50826  |
| MmugDNA.8637.1.S1_at   | MmugDNA.8637.1 | 4.68  | 4.16  | 0.52 | 0.09 | 1.44  | 0.137111 | 0.18085  | 0.512037 | 0.457381 |
| MmugDNA.8638.1.S1_at   | MmugDNA.8638.1 | 3.15  | 3.16  | 0.14 | 0.25 | -1.01 | 0.957827 | 0.982583 | 0.986116 | 0.990376 |
| MmugDNA.864.1.S1_at    | MmugDNA.864.1  | 9.59  | 9.67  | 0.51 | 0.19 | -1.06 | 0.535695 | 0.454805 | 0.801881 | 0.668859 |
| MmugDNA.8641.1.S1_at   | MmugDNA.8641.1 | 5.43  | 5.42  | 0.15 | 0.05 | 1.01  | 0.244072 | 0.798868 | 0.609864 | 0.884147 |
| MmugDNA.8642.1.S1_at   | MmugDNA.8642.1 | 6.2   | 6.56  | 0.54 | 0.06 | -1.28 | 0.541183 | 0.772489 | 0.805021 | 0.867741 |
| MmugDNA.8643.1.S1_at   | MmugDNA.8643.1 | 3.37  | 3.3   | 0.13 | 0.39 | 1.05  | 0.930746 | 0.454231 | 0.97692  | 0.668474 |
| MmugDNA.8644.1.S1_at   | MmugDNA.8644.1 | 3.94  | 4.03  | 0.95 | 0.21 | -1.06 | 0.44443  | 0.595862 | 0.751266 | 0.759258 |
| MmugDNA.8647.1.S1_at   | MmugDNA.8647.1 | 4.45  | 4.38  | 0.09 | 0.03 | 1.04  | 0.133784 | 0.175086 | 0.508033 | 0.45175  |
| MmugDNA.8647.1.S1_x_at | MmugDNA.8647.1 | 4.02  | 3.62  | 0.21 | 0.04 | 1.32  | 0.081041 | 0.068908 | 0.445056 | 0.308844 |
| MmugDNA.8651.1.S1_at   | MmugDNA.8651.1 | 8.6   | 7.92  | 0.22 | 0.11 | 1.61  | 0.019305 | 0.01216  | 0.300531 | 0.142648 |
| MmugDNA.8654.1.S1_at   | MmugDNA.8654.1 | 3.65  | 3.65  | 0.27 | 0.02 | -1    | 0.407533 | 0.145412 | 0.728658 | 0.419421 |
| MmugDNA.8655.1.S1_at   | MmugDNA.8655.1 | 6.04  | 6.13  | 0.2  | 0.08 | -1.07 | 0.841825 | 0.641826 | 0.943937 | 0.789771 |
| MmugDNA.8657.1.S1_at   | MmugDNA.8657.1 | 4.77  | 4.8   | 0.08 | 0.06 | -1.02 | 0.448803 | 0.690021 | 0.754037 | 0.819235 |
| MmugDNA.8659.1.S1_at   | MmugDNA.8659.1 | 3.3   | 3.52  | 0.19 | 0.05 | -1.16 | 0.185984 | 0.618027 | 0.558924 | 0.773852 |
| MmugDNA.866.1.S1_at    | MmugDNA.866.1  | 5.98  | 6.1   | 0.09 | 0.05 | -1.09 | 0.092747 | 0.738765 | 0.461205 | 0.848575 |
| MmugDNA.8661.1.S1_at   | MmugDNA.8661.1 | 2.96  | 2.96  | 0.08 | 0.06 | 1     | 0.78228  | 0.542292 | 0.919741 | 0.725385 |
| MmugDNA.8662.1.S1_at   | MmugDNA.8662.1 | 7.19  | 7.05  | 0.1  | 0.27 | 1.1   | 0.399858 | 0.760375 | 0.723376 | 0.860754 |
| MmugDNA.8664.1.S1_at   | MmugDNA.8664.1 | 7.76  | 8.3   | 0.11 | 0    | -1.45 | 0.001204 | 0.000004 | 0.156386 | 0.014484 |
| MmugDNA.8665.1.S1_at   | MmugDNA.8665.1 | 5.68  | 5.68  | 0    | 0.04 | 1     | 0.373901 | 0.854205 | 0.705567 | 0.916964 |
| MmugDNA.8666.1.S1_at   | MmugDNA.8666.1 | 3.85  | 3.85  | 0.09 | 0.07 | 1     | 0.414318 | 0.502234 | 0.732997 | 0.70006  |
| MmugDNA.8669.1.S1_at   | MmugDNA.8669.1 | 4.88  | 4.9   | 0.25 | 0.21 | -1.02 | 0.981698 | 0.871926 | 0.994195 | 0.927098 |
| MmugDNA.867.1.S1_at    | MmugDNA.867.1  | 4.09  | 3.79  | 0.23 | 0.32 | 1.23  | 0.580676 | 0.720719 | 0.827245 | 0.838368 |
| MmugDNA.8672.1.S1_at   | MmugDNA.8672.1 | 10.84 | 10.71 | 0.35 | 0.21 | 1.09  | 0.599445 | 0.416985 | 0.837382 | 0.641875 |
| MmugDNA.8673.1.S1_at   | MmugDNA.8673.1 | 4.54  | 4.54  | 0.15 | 0.03 | 1     | 0.299249 | 0.453888 | 0.653572 | 0.668329 |
| MmugDNA.8674.1.S1_at   | MmugDNA.8674.1 | 4.85  | 4.67  | 0.21 | 0.05 | 1.13  | 0.0738   | 0.05239  | 0.434623 | 0.274351 |
| MmugDNA.8675.1.S1_at   | MmugDNA.8675.1 | 7.31  | 7.94  | 2.05 | 0.11 | -1.55 | 0.575577 | 0.186572 | 0.824671 | 0.462364 |
| MmugDNA.8678.1.S1_x_at | MmugDNA.8678.1 | 4.09  | 3.74  | 0.36 | 0.11 | 1.27  | 0.062577 | 0.072395 | 0.41335  | 0.315251 |
| MmugDNA.8679.1.S1_at   | MmugDNA.8679.1 | 12.26 | 11.43 | 0.57 | 0.16 | 1.78  | 0.073114 | 0.059185 | 0.434019 | 0.290208 |
| MmugDNA.868.1.S1_at    | MmugDNA.868.1  | 5.81  | 5.63  | 0.24 | 0.02 | 1.13  | 0.09562  | 0.105942 | 0.464229 | 0.36826  |
| MmugDNA.8680.1.S1_at   | MmugDNA.8680.1 | 8.99  | 7.48  | 0.53 | 0.39 | 2.86  | 0.019114 | 0.009015 | 0.299836 | 0.125499 |
| MmugDNA.8681.1.S1_at   | MmugDNA.8681.1 | 9.24  | 9.2   | 0.16 | 0.08 | 1.03  | 0.735916 | 0.947139 | 0.898982 | 0.97002  |
| MmugDNA.8681.1.S1_s_at | MmugDNA.8681.1 | 9.32  | 9.27  | 0.15 | 0.07 | 1.04  | 0.849595 | 0.631254 | 0.947112 | 0.782738 |
| MmugDNA.8682.1.S1_at   | MmugDNA.8682.1 | 6.44  | 6.11  | 0.19 | 0.09 | 1.25  | 0.044077 | 0.030048 | 0.373721 | 0.215155 |
| MmugDNA.8683.1.S1_at   | MmugDNA.8683.1 | 6.49  | 6.45  | 0.14 | 0.17 | 1.03  | 0.313562 | 0.461542 | 0.664799 | 0.673162 |
| MmugDNA.8684.1.S1_at   | MmugDNA.8684.1 | 9.6   | 9.13  | 0.63 | 0.15 | 1.39  | 0.620521 | 0.249228 | 0.84711  | 0.518313 |

|                         |                 |       |       |      |      |       |          |          |          |          |
|-------------------------|-----------------|-------|-------|------|------|-------|----------|----------|----------|----------|
| MmugDNA.8685.1.S1_at    | MmugDNA.8685.1  | 4.83  | 4.82  | 0.09 | 0.1  | 1.01  | 0.284038 | 0.401454 | 0.641948 | 0.631018 |
| MmugDNA.8686.1.S1_at    | MmugDNA.8686.1  | 3.91  | 3.78  | 0.12 | 0.09 | 1.09  | 0.095621 | 0.300098 | 0.464229 | 0.558262 |
| MmugDNA.8687.1.S1_at    | MmugDNA.8687.1  | 3.85  | 3.86  | 0.1  | 0.17 | -1.01 | 0.880715 | 0.664652 | 0.958734 | 0.803476 |
| MmugDNA.8688.1.S1_s_at  | MmugDNA.8688.1  | 9.19  | 9.04  | 0.13 | 0.1  | 1.11  | 0.059868 | 0.008125 | 0.407323 | 0.11972  |
| MmugDNA.8689.1.S1_at    | MmugDNA.8689.1  | 5.67  | 6.64  | 0.32 | 0.22 | -1.95 | 0.025945 | 0.02787  | 0.32273  | 0.208453 |
| MmugDNA.869.1.S1_at     | MmugDNA.869.1   | 5.41  | 5.42  | 0.26 | 0.04 | -1.01 | 0.411524 | 0.415509 | 0.731538 | 0.64091  |
| MmugDNA.8690.1.S1_at    | MmugDNA.8690.1  | 3.04  | 3.04  | 0.03 | 0.06 | -1    | 0.270347 | 0.561913 | 0.630265 | 0.737659 |
| MmugDNA.8692.1.S1_at    | MmugDNA.8692.1  | 3.56  | 3.51  | 0.29 | 0.05 | 1.03  | 0.480949 | 0.788155 | 0.771639 | 0.877471 |
| MmugDNA.8693.1.S1_at    | MmugDNA.8693.1  | 2.85  | 2.84  | 0.07 | 0.12 | 1.01  | 0.222089 | 0.479793 | 0.591686 | 0.68541  |
| MmugDNA.8694.1.S1_at    | MmugDNA.8694.1  | 5.98  | 5.87  | 0.08 | 0.06 | 1.08  | 0.031503 | 0.077881 | 0.341227 | 0.324135 |
| MmugDNA.8696.1.S1_at    | MmugDNA.8696.1  | 10.69 | 11.15 | 0.55 | 0.02 | -1.38 | 0.466962 | 0.037414 | 0.764    | 0.237777 |
| MmugDNA.8698.1.S1_at    | MmugDNA.8698.1  | 6.77  | 6.75  | 0.07 | 0.12 | 1.01  | 0.419887 | 0.814289 | 0.736572 | 0.892914 |
| MmugDNA.8699.1.S1_at    | MmugDNA.8699.1  | 5.87  | 6.02  | 0.1  | 0.45 | -1.11 | 0.523819 | 0.020718 | 0.795656 | 0.180645 |
| MmugDNA.870.1.S1_at     | MmugDNA.870.1   | 5.08  | 4.56  | 0.43 | 0.18 | 1.43  | 0.229694 | 0.365481 | 0.59847  | 0.605587 |
| MmugDNA.8701.1.S1_at    | MmugDNA.8701.1  | 7.21  | 7.23  | 0.69 | 0.44 | -1.01 | 0.571009 | 0.00696  | 0.822383 | 0.112719 |
| MmugDNA.34107.1.S1_s_at | MmugDNA.34107.1 | 12.52 | 12.47 | 0.37 | 0.17 | 1.04  | 0.902042 | 0.988238 | 0.966869 | 0.993443 |
| MmugDNA.8705.1.S1_at    | MmugDNA.8705.1  | 3.47  | 3.39  | 0.49 | 0.18 | 1.06  | 0.713577 | 0.815434 | 0.888484 | 0.893558 |
| MmugDNA.8706.1.S1_at    | MmugDNA.8706.1  | 6.95  | 7.16  | 0.35 | 0.21 | -1.16 | 0.502659 | 0.065301 | 0.783781 | 0.301249 |
| MmugDNA.8707.1.S1_at    | MmugDNA.8707.1  | 7.27  | 7.28  | 0    | 0.07 | -1    | 0.321024 | 0.259447 | 0.669571 | 0.526418 |
| MmugDNA.8708.1.S1_at    | MmugDNA.8708.1  | 9.24  | 9     | 0.41 | 0.18 | 1.19  | 0.48369  | 0.308724 | 0.773253 | 0.564619 |
| MmugDNA.8709.1.S1_s_at  | MmugDNA.8709.1  | 11.64 | 11.34 | 0.27 | 0.06 | 1.23  | 0.048666 | 0.016792 | 0.383893 | 0.164118 |
| MmugDNA.8710.1.S1_at    | MmugDNA.8710.1  | 6.27  | 6.01  | 0.1  | 0.03 | 1.2   | 0.010486 | 0.000362 | 0.24804  | 0.037273 |
| MmugDNA.14508.1.S1_s_at | MmugDNA.14508.1 | 12.78 | 12.77 | 0.09 | 0.06 | 1     | 0.93231  | 0.686745 | 0.977211 | 0.817214 |
| MmugDNA.8713.1.S1_at    | MmugDNA.8713.1  | 5.04  | 4.71  | 0.15 | 0.19 | 1.26  | 0.094372 | 0.0898   | 0.463787 | 0.34404  |
| MmugDNA.8715.1.S1_at    | MmugDNA.8715.1  | 12.17 | 12.54 | 0.25 | 0.09 | -1.29 | 0.026821 | 0.006974 | 0.326468 | 0.112743 |
| MmugDNA.8716.1.S1_at    | MmugDNA.8716.1  | 6.72  | 6.7   | 0.17 | 0.06 | 1.01  | 0.225544 | 0.168483 | 0.594764 | 0.445108 |
| MmugDNA.8717.1.S1_at    | MmugDNA.8717.1  | 4.5   | 4.52  | 0.15 | 0.16 | -1.01 | 0.612307 | 0.652476 | 0.843025 | 0.796793 |
| MmugDNA.8718.1.S1_at    | MmugDNA.8718.1  | 3.92  | 3.84  | 0.18 | 0.13 | 1.06  | 0.344321 | 0.06899  | 0.686913 | 0.309017 |
| MmugDNA.872.1.S1_at     | MmugDNA.872.1   | 3.71  | 4.24  | 0.25 | 0.17 | -1.44 | 0.128673 | 0.213654 | 0.503433 | 0.487441 |
| MmugDNA.8720.1.S1_at    | MmugDNA.8720.1  | 8.72  | 9.97  | 0.47 | 0.11 | -2.37 | 0.008746 | 0.004009 | 0.236496 | 0.089969 |
| MmugDNA.8724.1.S1_at    | MmugDNA.8724.1  | 12.49 | 12.72 | 0.05 | 0.03 | -1.17 | 0.00241  | 0.006727 | 0.177075 | 0.110963 |
| MmugDNA.8726.1.S1_at    | MmugDNA.8726.1  | 7.3   | 6.23  | 0.38 | 0.05 | 2.09  | 0.008502 | 0.094576 | 0.234555 | 0.351353 |
| MmugDNA.8727.1.S1_at    | MmugDNA.8727.1  | 12.04 | 12.11 | 0.22 | 0.09 | -1.05 | 0.886894 | 0.9446   | 0.960715 | 0.968621 |
| MmugDNA.8728.1.S1_at    | MmugDNA.8728.1  | 4.81  | 4.17  | 0.11 | 0.2  | 1.57  | 0.007757 | 0.58533  | 0.230997 | 0.752844 |
| MmugDNA.8729.1.S1_at    | MmugDNA.8729.1  | 5.42  | 5.35  | 0.42 | 0.13 | 1.05  | 0.766496 | 0.120819 | 0.912158 | 0.389657 |
| MmugDNA.873.1.S1_at     | MmugDNA.873.1   | 8.19  | 8.38  | 0.35 | 0.04 | -1.13 | 0.344297 | 0.010359 | 0.686913 | 0.133236 |
| MmugDNA.8730.1.S1_at    | MmugDNA.8730.1  | 4.45  | 4.4   | 0.13 | 0.04 | 1.03  | 0.667619 | 0.52266  | 0.868644 | 0.713295 |
| MmugDNA.8731.1.S1_at    | MmugDNA.8731.1  | 8.87  | 8.86  | 0.61 | 0.26 | 1.01  | 0.915302 | 0.028989 | 0.971186 | 0.212154 |
| MmugDNA.8733.1.S1_at    | MmugDNA.8733.1  | 3.04  | 3.02  | 0.1  | 0.07 | 1.01  | 0.307281 | 0.479739 | 0.660127 | 0.685409 |
| MmugDNA.8736.1.S1_at    | MmugDNA.8736.1  | 3.15  | 3.07  | 0.12 | 0.06 | 1.06  | 0.517545 | 0.337484 | 0.79217  | 0.584686 |
| MmugDNA.8737.1.S1_s_at  | MmugDNA.8737.1  | 6.28  | 6.06  | 0.28 | 0.2  | 1.17  | 0.524058 | 0.705902 | 0.795715 | 0.829555 |
| MmugDNA.8738.1.S1_at    | MmugDNA.8738.1  | 2.95  | 2.95  | 0    | 0.03 | 1     | 0.373901 | 0.810128 | 0.705567 | 0.890539 |
| MmugDNA.8739.1.S1_at    | MmugDNA.8739.1  | 6.35  | 6.4   | 0.38 | 0.51 | -1.04 | 0.624632 | 0.292461 | 0.848871 | 0.552545 |

|                        |                |       |       |      |      |       |          |          |          |          |
|------------------------|----------------|-------|-------|------|------|-------|----------|----------|----------|----------|
| MmugDNA.874.1.S1_at    | MmugDNA.874.1  | 5.42  | 5.1   | 0.38 | 0.18 | 1.25  | 0.708359 | 0.914583 | 0.886591 | 0.951966 |
| MmugDNA.8740.1.S1_at   | MmugDNA.8740.1 | 3.77  | 4     | 0.09 | 0.41 | -1.17 | 0.604675 | 0.242999 | 0.839732 | 0.513356 |
| MmugDNA.8742.1.S1_at   | MmugDNA.8742.1 | 3.87  | 3.79  | 0.13 | 0.03 | 1.06  | 0.081063 | 0.139525 | 0.445056 | 0.412743 |
| MmugDNA.8744.1.S1_at   | MmugDNA.8744.1 | 4.5   | 4.38  | 0.06 | 0.05 | 1.08  | 0.162732 | 0.01475  | 0.535867 | 0.154493 |
| MmugDNA.8745.1.S1_at   | MmugDNA.8745.1 | 2.84  | 2.96  | 0.09 | 0.15 | -1.09 | 0.189319 | 0.298657 | 0.560894 | 0.557252 |
| MmugDNA.8746.1.S1_at   | MmugDNA.8746.1 | 8.42  | 8.84  | 0.24 | 0.06 | -1.33 | 0.035009 | 0.050308 | 0.350898 | 0.269573 |
| MmugDNA.8747.1.S1_at   | MmugDNA.8747.1 | 4.26  | 4.15  | 0.29 | 0.28 | 1.08  | 0.685788 | 0.746676 | 0.876883 | 0.852899 |
| MmugDNA.8748.1.S1_at   | MmugDNA.8748.1 | 10.08 | 9.79  | 1.18 | 0.17 | 1.22  | 0.592551 | 0.691633 | 0.833921 | 0.820648 |
| MmugDNA.8749.1.S1_at   | MmugDNA.8749.1 | 6.27  | 6.35  | 0.29 | 0.06 | -1.05 | 0.523141 | 0.98336  | 0.795458 | 0.990744 |
| MmugDNA.8750.1.S1_at   | MmugDNA.8750.1 | 7.59  | 7.54  | 0.45 | 0.25 | 1.04  | 0.278622 | 0.310026 | 0.637745 | 0.565253 |
| MmugDNA.8751.1.S1_at   | MmugDNA.8751.1 | 7     | 6.81  | 0.28 | 0.16 | -1.14 | 0.201705 | 0.183403 | 0.573304 | 0.459553 |
| MmugDNA.8752.1.S1_at   | MmugDNA.8752.1 | 10.14 | 10.73 | 0.74 | 0.06 | -1.51 | 0.218395 | 0.239778 | 0.588185 | 0.510505 |
| MmugDNA.8753.1.S1_x_at | MmugDNA.8753.1 | 8.45  | 8.44  | 0.26 | 0.13 | 1     | 0.696367 | 0.268195 | 0.882093 | 0.533915 |
| MmugDNA.8754.1.S1_at   | MmugDNA.8754.1 | 4.57  | 4.5   | 0.17 | 0.05 | 1.05  | 0.342143 | 0.484593 | 0.685623 | 0.688576 |
| MmugDNA.8755.1.S1_at   | MmugDNA.8755.1 | 10.54 | 10.83 | 0.15 | 0.06 | -1.22 | 0.015356 | 0.000028 | 0.281111 | 0.02122  |
| MmugDNA.8757.1.S1_at   | MmugDNA.8757.1 | 6.19  | 6.22  | 0.27 | 0.15 | -1.02 | 0.590097 | 0.420231 | 0.832832 | 0.644059 |
| MmugDNA.8759.1.S1_at   | MmugDNA.8759.1 | 7.27  | 7.26  | 0.55 | 0.44 | 1.01  | 0.503333 | 0.466678 | 0.784224 | 0.676425 |
| MmugDNA.8760.1.S1_at   | MmugDNA.8760.1 | 5.79  | 5.26  | 0.29 | 0.09 | 1.44  | 0.050278 | 0.041522 | 0.386954 | 0.24862  |
| MmugDNA.8762.1.S1_at   | MmugDNA.8762.1 | 3.16  | 3.05  | 0.18 | 0.14 | 1.08  | 0.383975 | 0.295883 | 0.711691 | 0.555241 |
| MmugDNA.8763.1.S1_at   | MmugDNA.8763.1 | 5.49  | 5.2   | 0.2  | 0.19 | 1.22  | 0.350621 | 0.47298  | 0.691445 | 0.680272 |
| MmugDNA.8763.1.S1_s_at | MmugDNA.8763.1 | 5.44  | 5.35  | 0.18 | 0.15 | 1.06  | 0.581813 | 0.739247 | 0.827791 | 0.848883 |
| MmugDNA.8764.1.S1_at   | MmugDNA.8764.1 | 3.4   | 3.39  | 0.2  | 0.15 | 1.01  | 0.430679 | 0.651099 | 0.742996 | 0.796031 |
| MmugDNA.8766.1.S1_at   | MmugDNA.8766.1 | 5.62  | 5.47  | 0.4  | 0.03 | 1.11  | 0.550031 | 0.224902 | 0.810587 | 0.497657 |
| MmugDNA.8768.1.S1_at   | MmugDNA.8768.1 | 11.43 | 11.28 | 0.56 | 0.08 | 1.11  | 0.671864 | 0.818656 | 0.870562 | 0.895512 |
| MmugDNA.8769.1.S1_at   | MmugDNA.8769.1 | 8.68  | 8.94  | 0.4  | 0.37 | -1.19 | 0.97065  | 0.932389 | 0.990416 | 0.961695 |
| MmugDNA.8770.1.S1_at   | MmugDNA.8770.1 | 10.64 | 10.64 | 0.23 | 0.09 | -1    | 0.660933 | 0.711473 | 0.865819 | 0.832695 |
| MmugDNA.8771.1.S1_at   | MmugDNA.8771.1 | 7.41  | 8.52  | 0.73 | 0.1  | -2.15 | 0.059958 | 0.026442 | 0.407399 | 0.203765 |
| MmugDNA.8773.1.S1_at   | MmugDNA.8773.1 | 7.44  | 7.16  | 1.45 | 0.28 | 1.22  | 0.476019 | 0.595466 | 0.768871 | 0.759091 |
| MmugDNA.8774.1.S1_at   | MmugDNA.8774.1 | 3.2   | 3.38  | 0.18 | 0.09 | -1.13 | 0.162081 | 0.418832 | 0.535244 | 0.643118 |
| MmugDNA.8775.1.S1_at   | MmugDNA.8775.1 | 7.68  | 7.8   | 1.35 | 0.31 | -1.09 | 0.585672 | 0.363956 | 0.830611 | 0.604326 |
| MmugDNA.8776.1.S1_at   | MmugDNA.8776.1 | 10.12 | 10.45 | 0.12 | 0.07 | -1.26 | 0.033493 | 0.553312 | 0.346442 | 0.73248  |
| MmugDNA.8777.1.S1_at   | MmugDNA.8777.1 | 8.16  | 8.04  | 0.2  | 0.15 | 1.09  | 0.419784 | 0.050883 | 0.736572 | 0.270882 |
| MmugDNA.8779.1.S1_at   | MmugDNA.8779.1 | 8.61  | 8.01  | 1.16 | 0.13 | 1.52  | 0.446206 | 0.350296 | 0.752589 | 0.594034 |
| MmugDNA.878.1.S1_x_at  | MmugDNA.878.1  | 4.07  | 3.9   | 0.16 | 0.06 | 1.13  | 0.254082 | 0.253288 | 0.618638 | 0.521662 |
| MmugDNA.8780.1.S1_at   | MmugDNA.8780.1 | 10.85 | 10.72 | 0.39 | 0.04 | 1.1   | 0.591915 | 0.774629 | 0.833648 | 0.868797 |
| MmugDNA.8782.1.S1_at   | MmugDNA.8782.1 | 4.99  | 4.77  | 0.32 | 0.03 | 1.17  | 0.445242 | 0.680835 | 0.751979 | 0.813597 |
| MmugDNA.8783.1.S1_at   | MmugDNA.8783.1 | 5.68  | 5.96  | 0.13 | 0.34 | -1.21 | 0.314559 | 0.738876 | 0.665231 | 0.848647 |
| MmugDNA.8784.1.S1_at   | MmugDNA.8784.1 | 3.97  | 3.97  | 0.02 | 0.09 | 1.01  | 0.712694 | 0.750529 | 0.888019 | 0.854881 |
| MmugDNA.8785.1.S1_at   | MmugDNA.8785.1 | 5.61  | 4.62  | 0.7  | 0.23 | 1.98  | 0.065689 | 0.032154 | 0.420827 | 0.222021 |
| MmugDNA.8786.1.S1_at   | MmugDNA.8786.1 | 6.96  | 6.82  | 0.19 | 0.43 | 1.1   | 0.761034 | 0.521735 | 0.910284 | 0.712623 |
| MmugDNA.8787.1.S1_at   | MmugDNA.8787.1 | 10.53 | 9.99  | 0.14 | 0.37 | 1.45  | 0.023097 | 0.013687 | 0.314614 | 0.149772 |
| MmugDNA.8788.1.S1_at   | MmugDNA.8788.1 | 5.48  | 5.47  | 0.01 | 0.26 | 1.01  | 0.930579 | 0.458192 | 0.97685  | 0.671077 |
| MmugDNA.8792.1.S1_at   | MmugDNA.8792.1 | 7.5   | 8.06  | 0.29 | 0.01 | -1.48 | 0.025054 | 0.029328 | 0.320402 | 0.213228 |

|                      |                |       |       |      |      |       |          |          |          |          |
|----------------------|----------------|-------|-------|------|------|-------|----------|----------|----------|----------|
| MmugDNA.8795.1.S1_at | MmugDNA.8795.1 | 7.94  | 9.08  | 1.09 | 0.28 | -2.2  | 0.221597 | 0.018267 | 0.591315 | 0.169975 |
| MmugDNA.8796.1.S1_at | MmugDNA.8796.1 | 6.41  | 6.3   | 0.06 | 0.07 | 1.08  | 0.23625  | 0.018496 | 0.603291 | 0.171093 |
| MmugDNA.8798.1.S1_at | MmugDNA.8798.1 | 3.27  | 3.13  | 0.25 | 0.12 | 1.1   | 0.216531 | 0.170416 | 0.586617 | 0.447103 |
| MmugDNA.8799.1.S1_at | MmugDNA.8799.1 | 5.7   | 5.46  | 0.11 | 0.04 | 1.18  | 0.00843  | 0.216337 | 0.233823 | 0.489898 |
| MmugDNA.88.1.S1_at   | MmugDNA.88.1   | 6.52  | 6.66  | 0.51 | 0.35 | -1.1  | 0.933436 | 0.909864 | 0.97744  | 0.949148 |
| MmugDNA.880.1.S1_at  | MmugDNA.880.1  | 7.49  | 7.91  | 0.47 | 0.27 | -1.34 | 0.420528 | 0.853485 | 0.737009 | 0.916634 |
| MmugDNA.8800.1.S1_at | MmugDNA.8800.1 | 4.02  | 4.04  | 0.06 | 0.11 | -1.02 | 0.505851 | 0.21641  | 0.785485 | 0.489999 |
| MmugDNA.8801.1.S1_at | MmugDNA.8801.1 | 3.86  | 3.76  | 0.16 | 0.26 | 1.07  | 0.411396 | 0.392865 | 0.731408 | 0.625868 |
| MmugDNA.8802.1.S1_at | MmugDNA.8802.1 | 7.21  | 7.2   | 0.38 | 0.31 | 1.01  | 0.513825 | 0.742779 | 0.79016  | 0.851023 |
| MmugDNA.8803.1.S1_at | MmugDNA.8803.1 | 5.21  | 5.18  | 0.07 | 0.1  | 1.02  | 0.378106 | 0.422095 | 0.708016 | 0.645462 |
| MmugDNA.8805.1.S1_at | MmugDNA.8805.1 | 6.31  | 6.39  | 0.17 | 0.1  | -1.05 | 0.568835 | 0.006357 | 0.821041 | 0.108372 |
| MmugDNA.8806.1.S1_at | MmugDNA.8806.1 | 11.43 | 11.95 | 0.12 | 0.09 | -1.43 | 0.003627 | 0.000675 | 0.197111 | 0.04413  |
| MmugDNA.8807.1.S1_at | MmugDNA.8807.1 | 6.83  | 6.8   | 0.14 | 0.09 | 1.02  | 0.691183 | 0.54812  | 0.879715 | 0.728892 |
| MmugDNA.8808.1.S1_at | MmugDNA.8808.1 | 5.44  | 5.4   | 0.08 | 0.04 | 1.03  | 0.185996 | 0.395688 | 0.558927 | 0.627623 |
| MmugDNA.8809.1.S1_at | MmugDNA.8809.1 | 10.38 | 10.49 | 0.18 | 0.25 | -1.08 | 0.116109 | 0.134334 | 0.489554 | 0.406603 |
| MmugDNA.881.1.S1_at  | MmugDNA.881.1  | 9.59  | 10.69 | 0.48 | 0.21 | -2.13 | 0.035903 | 0.024942 | 0.353707 | 0.197799 |
| MmugDNA.8810.1.S1_at | MmugDNA.8810.1 | 6.64  | 6.7   | 0.62 | 0.2  | -1.04 | 0.640542 | 0.711881 | 0.856838 | 0.832951 |
| MmugDNA.8813.1.S1_at | MmugDNA.8813.1 | 3.91  | 3.43  | 0.33 | 0.16 | 1.39  | 0.094765 | 0.095108 | 0.463997 | 0.352151 |
| MmugDNA.8814.1.S1_at | MmugDNA.8814.1 | 10.68 | 11.19 | 0.73 | 0.23 | -1.42 | 0.133742 | 0.104601 | 0.508012 | 0.365891 |
| MmugDNA.8815.1.S1_at | MmugDNA.8815.1 | 6.25  | 5.96  | 0.15 | 0.05 | 1.22  | 0.075696 | 0.05947  | 0.436722 | 0.290548 |
| MmugDNA.8816.1.S1_at | MmugDNA.8816.1 | 3.61  | 3.41  | 0.01 | 0.11 | 1.15  | 0.086935 | 0.131075 | 0.454785 | 0.403084 |
| MmugDNA.8818.1.S1_at | MmugDNA.8818.1 | 5.41  | 5.15  | 0.36 | 0.06 | 1.2   | 0.247663 | 0.312367 | 0.613245 | 0.567115 |
| MmugDNA.882.1.S1_at  | MmugDNA.882.1  | 4.99  | 5     | 0.36 | 0.24 | -1    | 0.314275 | 0.359978 | 0.665103 | 0.601195 |
| MmugDNA.8821.1.S1_at | MmugDNA.8821.1 | 5.49  | 5.4   | 0.88 | 0.14 | 1.06  | 0.294124 | 0.366315 | 0.650324 | 0.606072 |
| MmugDNA.8822.1.S1_at | MmugDNA.8822.1 | 7.21  | 7.03  | 0.92 | 0.23 | 1.13  | 0.803115 | 0.095463 | 0.928218 | 0.352482 |
| MmugDNA.8825.1.S1_at | MmugDNA.8825.1 | 9.79  | 9.78  | 0.24 | 0.19 | 1.01  | 0.825715 | 0.013074 | 0.937412 | 0.147079 |
| MmugDNA.8828.1.S1_at | MmugDNA.8828.1 | 5.13  | 5.53  | 0.51 | 0.23 | -1.32 | 0.138787 | 0.41553  | 0.514296 | 0.640923 |
| MmugDNA.8829.1.S1_at | MmugDNA.8829.1 | 10.95 | 10.9  | 0.3  | 0.2  | 1.04  | 0.320697 | 0.35923  | 0.669445 | 0.600537 |
| MmugDNA.883.1.S1_at  | MmugDNA.883.1  | 3.55  | 3.6   | 0.1  | 0.09 | -1.03 | 0.685404 | 0.699091 | 0.876846 | 0.825164 |
| MmugDNA.8830.1.S1_at | MmugDNA.8830.1 | 5.09  | 4.85  | 0.17 | 0.12 | 1.18  | 0.269674 | 0.174926 | 0.629945 | 0.451595 |
| MmugDNA.8831.1.S1_at | MmugDNA.8831.1 | 6.03  | 5.78  | 0    | 0.27 | 1.19  | 0.173369 | 0.561434 | 0.54656  | 0.737397 |
| MmugDNA.8833.1.S1_at | MmugDNA.8833.1 | 12.46 | 12.4  | 0.19 | 0.01 | 1.04  | 0.703719 | 0.571311 | 0.884872 | 0.743642 |
| MmugDNA.8834.1.S1_at | MmugDNA.8834.1 | 8.64  | 8.12  | 0.72 | 0.26 | 1.44  | 0.203389 | 0.152982 | 0.574902 | 0.427792 |
| MmugDNA.8835.1.S1_at | MmugDNA.8835.1 | 2.86  | 2.97  | 0.19 | 0.06 | -1.08 | 0.995484 | 0.829822 | 0.998279 | 0.902225 |
| MmugDNA.8836.1.S1_at | MmugDNA.8836.1 | 8.22  | 8.81  | 0.16 | 0.14 | -1.51 | 0.008842 | 0.001169 | 0.237612 | 0.053679 |
| MmugDNA.8837.1.S1_at | MmugDNA.8837.1 | 8.04  | 8.24  | 0.28 | 0.27 | -1.15 | 0.647756 | 0.301884 | 0.859428 | 0.559811 |
| MmugDNA.8838.1.S1_at | MmugDNA.8838.1 | 4.72  | 4.79  | 0.03 | 0.08 | -1.05 | 0.125456 | 0.354744 | 0.499523 | 0.597422 |
| MmugDNA.8839.1.S1_at | MmugDNA.8839.1 | 4.87  | 4.86  | 0.17 | 0.09 | 1.01  | 0.384166 | 0.530744 | 0.711835 | 0.718104 |
| MmugDNA.884.1.S1_at  | MmugDNA.884.1  | 3.64  | 3.54  | 0.16 | 0.16 | 1.07  | 0.199755 | 0.227357 | 0.571494 | 0.499659 |
| MmugDNA.8840.1.S1_at | MmugDNA.8840.1 | 2.99  | 2.96  | 0.17 | 0.01 | 1.02  | 0.76841  | 0.899297 | 0.913024 | 0.942757 |
| MmugDNA.8841.1.S1_at | MmugDNA.8841.1 | 3.53  | 3.44  | 0.13 | 0.15 | 1.06  | 0.429922 | 0.529774 | 0.742417 | 0.717498 |
| MmugDNA.8842.1.S1_at | MmugDNA.8842.1 | 4.13  | 3.96  | 0.01 | 0.1  | 1.12  | 0.104055 | 0.048824 | 0.474706 | 0.265858 |
| MmugDNA.8843.1.S1_at | MmugDNA.8843.1 | 3.16  | 3.29  | 0.38 | 0.09 | -1.09 | 0.718279 | 0.872077 | 0.890613 | 0.927221 |

|                        |                |       |       |      |      |       |          |          |          |          |
|------------------------|----------------|-------|-------|------|------|-------|----------|----------|----------|----------|
| MmugDNA.8844.1.S1_at   | MmugDNA.8844.1 | 9.98  | 9.5   | 0.49 | 0.35 | 1.39  | 0.81289  | 0.058616 | 0.932245 | 0.288819 |
| MmugDNA.8846.1.S1_at   | MmugDNA.8846.1 | 4.3   | 3.99  | 0.08 | 0.17 | 1.24  | 0.041421 | 0.018925 | 0.366401 | 0.173058 |
| MmugDNA.8847.1.S1_at   | MmugDNA.8847.1 | 6.88  | 6.89  | 0.72 | 0.19 | -1    | 0.814449 | 0.103808 | 0.932974 | 0.364519 |
| MmugDNA.8848.1.S1_at   | MmugDNA.8848.1 | 8.44  | 9.25  | 1.86 | 0.25 | -1.76 | 0.51591  | 0.20797  | 0.791185 | 0.482049 |
| MmugDNA.8849.1.S1_at   | MmugDNA.8849.1 | 8.25  | 8.24  | 0.09 | 0.15 | 1.01  | 0.626545 | 0.816024 | 0.849991 | 0.893871 |
| MmugDNA.885.1.S1_at    | MmugDNA.885.1  | 3.61  | 3.72  | 0.3  | 0.27 | -1.08 | 0.65459  | 0.84353  | 0.862882 | 0.910896 |
| MmugDNA.8852.1.S1_at   | MmugDNA.8852.1 | 8.3   | 9.04  | 0.56 | 0.37 | -1.67 | 0.034209 | 0.006254 | 0.348653 | 0.10728  |
| MmugDNA.8853.1.S1_at   | MmugDNA.8853.1 | 5.43  | 5.18  | 0.07 | 0.06 | 1.19  | 0.005538 | 0.001889 | 0.208157 | 0.065004 |
| MmugDNA.8854.1.S1_at   | MmugDNA.8854.1 | 6.21  | 7.04  | 0.52 | 0.26 | -1.78 | 0.133114 | 0.023542 | 0.507433 | 0.192231 |
| MmugDNA.8856.1.S1_at   | MmugDNA.8856.1 | 5.64  | 4.95  | 0.42 | 0.13 | 1.61  | 0.046052 | 0.011093 | 0.37735  | 0.137051 |
| MmugDNA.8857.1.S1_at   | MmugDNA.8857.1 | 3.99  | 4.01  | 0.27 | 0.15 | -1.02 | 0.505688 | 0.393797 | 0.785398 | 0.626565 |
| MmugDNA.8858.1.S1_at   | MmugDNA.8858.1 | 8.83  | 8.2   | 0.95 | 0.23 | 1.55  | 0.696248 | 0.188596 | 0.882048 | 0.464557 |
| MmugDNA.8859.1.S1_at   | MmugDNA.8859.1 | 3.27  | 3.27  | 0.08 | 0.13 | 1     | 0.23975  | 0.219335 | 0.606154 | 0.493095 |
| MmugDNA.886.1.S1_at    | MmugDNA.886.1  | 6.13  | 6.38  | 0.56 | 0.75 | -1.19 | 0.505284 | 0.11037  | 0.785248 | 0.374541 |
| MmugDNA.8860.1.S1_at   | MmugDNA.8860.1 | 6.86  | 6.72  | 0.16 | 0.11 | 1.11  | 0.211866 | 0.223838 | 0.582715 | 0.496802 |
| MmugDNA.8861.1.S1_at   | MmugDNA.8861.1 | 13.23 | 13.48 | 0.17 | 0.06 | -1.19 | 0.0712   | 0.077712 | 0.430589 | 0.323851 |
| MmugDNA.8862.1.S1_at   | MmugDNA.8862.1 | 7.05  | 6.68  | 0.47 | 0.07 | 1.29  | 0.231755 | 0.636221 | 0.599694 | 0.785986 |
| MmugDNA.8864.1.S1_at   | MmugDNA.8864.1 | 6.37  | 6.09  | 0.1  | 0.12 | 1.21  | 0.02549  | 0.053068 | 0.322263 | 0.27607  |
| MmugDNA.8865.1.S1_at   | MmugDNA.8865.1 | 7.5   | 7.74  | 0.94 | 0.41 | -1.19 | 0.440937 | 0.70266  | 0.748847 | 0.827658 |
| MmugDNA.8867.1.S1_at   | MmugDNA.8867.1 | 6.55  | 6.85  | 0.4  | 0.46 | -1.23 | 0.592657 | 0.009128 | 0.833953 | 0.125994 |
| MmugDNA.8869.1.S1_at   | MmugDNA.8869.1 | 6.84  | 6.77  | 0.03 | 0.05 | 1.05  | 0.092341 | 0.060105 | 0.460762 | 0.291829 |
| MmugDNA.887.1.S1_at    | MmugDNA.887.1  | 11.51 | 11.65 | 0.17 | 0.15 | -1.11 | 0.232489 | 0.069153 | 0.600124 | 0.30917  |
| MmugDNA.8871.1.S1_at   | MmugDNA.8871.1 | 6.71  | 6.6   | 0.54 | 0.11 | 1.07  | 0.632051 | 0.720207 | 0.852686 | 0.838202 |
| MmugDNA.8873.1.S1_s_at | MmugDNA.8873.1 | 14.4  | 14.43 | 0.01 | 0    | -1.02 | 0.003931 | 0.290408 | 0.198571 | 0.551169 |
| MmugDNA.8874.1.S1_at   | MmugDNA.8874.1 | 6.83  | 6.71  | 0.05 | 0.06 | 1.09  | 0.028994 | 0.035551 | 0.333482 | 0.232812 |
| MmugDNA.8875.1.S1_at   | MmugDNA.8875.1 | 6.5   | 6.17  | 0.26 | 0.11 | 1.26  | 0.22329  | 0.249724 | 0.592569 | 0.518832 |
| MmugDNA.8876.1.S1_at   | MmugDNA.8876.1 | 6.26  | 5.98  | 0.25 | 0.12 | 1.21  | 0.214266 | 0.095076 | 0.584673 | 0.352124 |
| MmugDNA.8877.1.S1_at   | MmugDNA.8877.1 | 10.85 | 10.88 | 1.5  | 0.18 | -1.02 | 0.342283 | 0.132606 | 0.685719 | 0.404544 |
| MmugDNA.8878.1.S1_at   | MmugDNA.8878.1 | 5.69  | 5.64  | 0.22 | 0.07 | 1.04  | 0.620368 | 0.315309 | 0.847109 | 0.568939 |
| MmugDNA.888.1.S1_at    | MmugDNA.888.1  | 7.17  | 7.55  | 0.16 | 0.23 | -1.3  | 0.081899 | 0.072999 | 0.446396 | 0.31601  |
| MmugDNA.8880.1.S1_at   | MmugDNA.8880.1 | 5.44  | 5.45  | 0.48 | 0.13 | -1.01 | 0.979456 | 0.357612 | 0.993497 | 0.599228 |
| MmugDNA.8881.1.S1_at   | MmugDNA.8881.1 | 3.25  | 3.31  | 0.14 | 0.07 | -1.04 | 0.501336 | 0.413709 | 0.783143 | 0.639742 |
| MmugDNA.8884.1.S1_at   | MmugDNA.8884.1 | 3.15  | 3.22  | 0.03 | 0.12 | -1.05 | 0.796886 | 0.939904 | 0.925364 | 0.96581  |
| MmugDNA.8885.1.S1_at   | MmugDNA.8885.1 | 12.28 | 12.31 | 0.28 | 0.01 | -1.02 | 0.740843 | 0.367558 | 0.900958 | 0.607217 |
| MmugDNA.8889.1.S1_at   | MmugDNA.8889.1 | 3.81  | 3.79  | 0.08 | 0.08 | 1.01  | 0.342671 | 0.558283 | 0.686031 | 0.735506 |
| MmugDNA.889.1.S1_at    | MmugDNA.889.1  | 5.06  | 5.04  | 0.28 | 0.14 | 1.02  | 0.903505 | 0.057257 | 0.967608 | 0.285098 |
| MmugDNA.8890.1.S1_at   | MmugDNA.8890.1 | 7.04  | 7.2   | 0.18 | 0.16 | -1.12 | 0.164436 | 0.189217 | 0.537322 | 0.464997 |
| MmugDNA.8891.1.S1_at   | MmugDNA.8891.1 | 3.74  | 3.53  | 0.3  | 0.02 | 1.15  | 0.606356 | 0.893596 | 0.840479 | 0.939277 |
| MmugDNA.8892.1.S1_at   | MmugDNA.8892.1 | 4.38  | 4.31  | 0.14 | 0.07 | 1.04  | 0.902362 | 0.85876  | 0.967018 | 0.919572 |
| MmugDNA.8893.1.S1_at   | MmugDNA.8893.1 | 7.58  | 7.92  | 0.47 | 0.03 | -1.27 | 0.093667 | 0.00366  | 0.462994 | 0.086526 |
| MmugDNA.8894.1.S1_at   | MmugDNA.8894.1 | 8.04  | 8.18  | 0.43 | 0.05 | -1.1  | 0.540976 | 0.673412 | 0.804803 | 0.809182 |
| MmugDNA.8897.1.S1_at   | MmugDNA.8897.1 | 5.22  | 4.93  | 0.35 | 0.1  | 1.22  | 0.719864 | 0.96671  | 0.891311 | 0.981489 |
| MmugDNA.8898.1.S1_at   | MmugDNA.8898.1 | 8.8   | 8.25  | 0.12 | 0.33 | 1.47  | 0.05055  | 0.040979 | 0.387518 | 0.247202 |



|                        |                |       |       |      |      |       |          |          |          |          |
|------------------------|----------------|-------|-------|------|------|-------|----------|----------|----------|----------|
| MmugDNA.8899.1.S1_at   | MmugDNA.8899.1 | 6.51  | 6.74  | 0.2  | 0.07 | -1.17 | 0.270263 | 0.341938 | 0.630252 | 0.588008 |
| MmugDNA.89.1.S1_at     | MmugDNA.89.1   | 9.81  | 9.7   | 0.54 | 0.07 | 1.08  | 0.218451 | 0.264265 | 0.588274 | 0.530329 |
| MmugDNA.890.1.S1_at    | MmugDNA.890.1  | 9.67  | 9.45  | 0.22 | 0.18 | 1.17  | 0.240815 | 0.31148  | 0.60709  | 0.566468 |
| MmugDNA.8900.1.S1_at   | MmugDNA.8900.1 | 6.74  | 6.42  | 0.62 | 0.23 | 1.25  | 0.423917 | 0.868891 | 0.739366 | 0.925527 |
| MmugDNA.8901.1.S1_at   | MmugDNA.8901.1 | 6.29  | 6.22  | 0.2  | 0.11 | 1.04  | 0.963585 | 0.872627 | 0.988152 | 0.927581 |
| MmugDNA.8901.1.S1_x_at | MmugDNA.8901.1 | 6.6   | 6.74  | 0.08 | 0.05 | -1.1  | 0.335596 | 0.208288 | 0.681167 | 0.48217  |
| MmugDNA.8902.1.S1_at   | MmugDNA.8902.1 | 10.48 | 10.33 | 0.75 | 0.26 | 1.11  | 0.591677 | 0.198104 | 0.833637 | 0.473108 |
| MmugDNA.8902.1.S1_s_at | MmugDNA.8902.1 | 10.09 | 9.89  | 0.77 | 0.14 | 1.15  | 0.547519 | 0.201199 | 0.809164 | 0.475646 |
| MmugDNA.8904.1.S1_at   | MmugDNA.8904.1 | 5.02  | 5.02  | 0.09 | 0.03 | 1     | 0.248646 | 0.2761   | 0.613979 | 0.540133 |
| MmugDNA.8905.1.S1_at   | MmugDNA.8905.1 | 8.62  | 7.92  | 0.91 | 0.13 | 1.62  | 0.790519 | 0.597998 | 0.922954 | 0.760536 |
| MmugDNA.8907.1.S1_at   | MmugDNA.8907.1 | 5.16  | 5.13  | 0.22 | 0.2  | -1.02 | 0.545921 | 0.587499 | 0.80827  | 0.754278 |
| MmugDNA.8908.1.S1_at   | MmugDNA.8908.1 | 4.45  | 4.29  | 0.1  | 0.13 | 1.12  | 0.770566 | 0.808274 | 0.914039 | 0.889645 |
| MmugDNA.8909.1.S1_at   | MmugDNA.8909.1 | 11.22 | 11.76 | 0.16 | 0.08 | -1.45 | 0.009497 | 0.002984 | 0.242401 | 0.079958 |
| MmugDNA.8910.1.S1_at   | MmugDNA.8910.1 | 5.07  | 5.31  | 0.09 | 0.08 | -1.18 | 0.051409 | 0.090249 | 0.390032 | 0.344664 |
| MmugDNA.8911.1.S1_at   | MmugDNA.8911.1 | 5.53  | 5.41  | 0.26 | 0.08 | 1.09  | 0.167275 | 0.332075 | 0.539832 | 0.580584 |
| MmugDNA.8912.1.S1_at   | MmugDNA.8912.1 | 3.59  | 3.52  | 0.14 | 0.03 | 1.05  | 0.184237 | 0.245999 | 0.55696  | 0.515713 |
| MmugDNA.8914.1.S1_at   | MmugDNA.8914.1 | 10.56 | 9.99  | 0.23 | 0.14 | 1.48  | 0.02216  | 0.002796 | 0.31038  | 0.077966 |
| MmugDNA.8915.1.S1_at   | MmugDNA.8915.1 | 6.78  | 6.54  | 0.17 | 0.11 | 1.18  | 0.060367 | 0.037272 | 0.408039 | 0.237508 |
| MmugDNA.8916.1.S1_at   | MmugDNA.8916.1 | 11.31 | 10.9  | 0.27 | 0.15 | 1.33  | 0.181511 | 0.049681 | 0.554659 | 0.267892 |
| MmugDNA.8917.1.S1_at   | MmugDNA.8917.1 | 4.24  | 4.11  | 0.2  | 0.15 | 1.09  | 0.445567 | 0.005843 | 0.752275 | 0.10467  |
| MmugDNA.8919.1.S1_at   | MmugDNA.8919.1 | 7.04  | 8.39  | 0.48 | 0.16 | -2.55 | 0.01974  | 0.085873 | 0.302304 | 0.338025 |
| MmugDNA.892.1.S1_at    | MmugDNA.892.1  | 6.21  | 7.44  | 0.12 | 0.3  | -2.34 | 0.003645 | 0.002444 | 0.197111 | 0.073201 |
| MmugDNA.8920.1.S1_at   | MmugDNA.8920.1 | 3.97  | 3.92  | 0.17 | 0.04 | 1.04  | 0.594468 | 0.397968 | 0.834747 | 0.629138 |
| MmugDNA.8922.1.S1_at   | MmugDNA.8922.1 | 7.38  | 7.95  | 0.31 | 0.36 | -1.48 | 0.292559 | 0.783514 | 0.648901 | 0.874643 |
| MmugDNA.8923.1.S1_at   | MmugDNA.8923.1 | 4.05  | 3.98  | 0.03 | 0.06 | 1.05  | 0.28431  | 0.707501 | 0.642228 | 0.830363 |
| MmugDNA.8924.1.S1_at   | MmugDNA.8924.1 | 4.52  | 4.49  | 0.09 | 0.24 | 1.02  | 0.529645 | 0.696042 | 0.798376 | 0.823404 |
| MmugDNA.8925.1.S1_at   | MmugDNA.8925.1 | 8.91  | 9.42  | 0.63 | 0.39 | -1.43 | 0.423683 | 0.4983   | 0.739193 | 0.697411 |
| MmugDNA.8928.1.S1_at   | MmugDNA.8928.1 | 5.28  | 5     | 0.54 | 0.03 | 1.21  | 0.787175 | 0.461895 | 0.92182  | 0.673417 |
| MmugDNA.8929.1.S1_at   | MmugDNA.8929.1 | 6.95  | 6.87  | 0.28 | 0.05 | 1.06  | 0.81116  | 0.786194 | 0.93165  | 0.876192 |
| MmugDNA.893.1.S1_at    | MmugDNA.893.1  | 5.87  | 5.57  | 0.31 | 0.13 | 1.23  | 0.184561 | 0.246916 | 0.55734  | 0.516238 |
| MmugDNA.8930.1.S1_at   | MmugDNA.8930.1 | 7.27  | 7.25  | 0.14 | 0.02 | 1.02  | 0.616477 | 0.28733  | 0.844957 | 0.548603 |
| MmugDNA.8931.1.S1_at   | MmugDNA.8931.1 | 4.08  | 4.14  | 0.19 | 0.24 | -1.04 | 0.779356 | 0.030729 | 0.918638 | 0.217179 |
| MmugDNA.8932.1.S1_at   | MmugDNA.8932.1 | 3.02  | 3.09  | 0.07 | 0.11 | -1.05 | 0.941177 | 0.043066 | 0.980018 | 0.252157 |
| MmugDNA.8934.1.S1_at   | MmugDNA.8934.1 | 3.83  | 3.74  | 0.07 | 0.38 | 1.06  | 0.740074 | 0.03674  | 0.900699 | 0.236285 |
| MmugDNA.8937.1.S1_at   | MmugDNA.8937.1 | 5.7   | 5.68  | 0.18 | 0.07 | 1.02  | 0.497793 | 0.615637 | 0.781368 | 0.772121 |
| MmugDNA.8938.1.S1_at   | MmugDNA.8938.1 | 3.57  | 3.67  | 0.07 | 0.4  | -1.07 | 0.259371 | 0.348588 | 0.622607 | 0.59263  |
| MmugDNA.8939.1.S1_at   | MmugDNA.8939.1 | 7.55  | 7.41  | 0.13 | 0.16 | 1.1   | 0.488811 | 0.30473  | 0.775818 | 0.561921 |
| MmugDNA.894.1.S1_at    | MmugDNA.894.1  | 5.65  | 4.37  | 0.47 | 0.09 | 2.42  | 0.005276 | 0.014008 | 0.207075 | 0.151595 |
| MmugDNA.8940.1.S1_at   | MmugDNA.8940.1 | 8.25  | 8.17  | 1.24 | 0.16 | 1.05  | 0.431617 | 0.176097 | 0.743486 | 0.452581 |
| MmugDNA.8941.1.S1_at   | MmugDNA.8941.1 | 4.79  | 4.35  | 0.2  | 0.08 | 1.35  | 0.046655 | 0.061098 | 0.378401 | 0.293958 |
| MmugDNA.8942.1.S1_at   | MmugDNA.8942.1 | 3.55  | 3.56  | 0.11 | 0.05 | -1.01 | 0.513964 | 0.391916 | 0.79023  | 0.625419 |
| MmugDNA.8943.1.S1_at   | MmugDNA.8943.1 | 9.79  | 10.48 | 0.32 | 0.03 | -1.61 | 0.023118 | 0.014568 | 0.314745 | 0.153907 |
| MmugDNA.8944.1.S1_at   | MmugDNA.8944.1 | 5.55  | 5.38  | 0.08 | 0.15 | 1.12  | 0.098938 | 0.425938 | 0.468321 | 0.648127 |

|                        |                |       |       |      |      |       |          |          |          |          |
|------------------------|----------------|-------|-------|------|------|-------|----------|----------|----------|----------|
| MmugDNA.8945.1.S1_at   | MmugDNA.8945.1 | 4.05  | 4.04  | 0.15 | 0.01 | 1.01  | 0.71519  | 0.474385 | 0.889172 | 0.681421 |
| MmugDNA.8946.1.S1_at   | MmugDNA.8946.1 | 11.35 | 10.73 | 0.06 | 0.13 | 1.54  | 0.001214 | 0.000229 | 0.156386 | 0.032385 |
| MmugDNA.8947.1.S1_at   | MmugDNA.8947.1 | 6.86  | 6.97  | 1.2  | 0.31 | -1.08 | 0.947001 | 0.160769 | 0.981593 | 0.436897 |
| MmugDNA.8948.1.S1_at   | MmugDNA.8948.1 | 3.17  | 3.06  | 0.15 | 0.06 | 1.07  | 0.66964  | 0.425198 | 0.869663 | 0.647647 |
| MmugDNA.8949.1.S1_at   | MmugDNA.8949.1 | 7.23  | 6.93  | 0.11 | 0.05 | 1.23  | 0.015972 | 0.024051 | 0.284606 | 0.194384 |
| MmugDNA.8949.1.S1_s_at | MmugDNA.8949.1 | 6.19  | 6.1   | 0.12 | 0.19 | 1.06  | 0.28624  | 0.639758 | 0.64358  | 0.788438 |
| MmugDNA.895.1.S1_s_at  | MmugDNA.895.1  | 12.16 | 12.34 | 0.11 | 0.02 | -1.13 | 0.163261 | 0.114639 | 0.536063 | 0.381156 |
| MmugDNA.8951.1.S1_at   | MmugDNA.8951.1 | 7.71  | 7.64  | 0.45 | 0.08 | 1.05  | 0.232421 | 0.038241 | 0.600124 | 0.240265 |
| MmugDNA.8952.1.S1_at   | MmugDNA.8952.1 | 9.94  | 10.44 | 0.96 | 0.35 | -1.41 | 0.764183 | 0.025084 | 0.911428 | 0.19842  |
| MmugDNA.8953.1.S1_at   | MmugDNA.8953.1 | 3.98  | 3.96  | 0.02 | 0.23 | 1.01  | 0.705185 | 0.82693  | 0.885355 | 0.900611 |
| MmugDNA.8955.1.S1_at   | MmugDNA.8955.1 | 3.3   | 3.2   | 0.03 | 0.1  | -1.07 | 0.209976 | 0.446885 | 0.581475 | 0.663072 |
| MmugDNA.8956.1.S1_at   | MmugDNA.8956.1 | 4.41  | 4.32  | 0.36 | 0.48 | 1.06  | 0.64181  | 0.486236 | 0.857493 | 0.689657 |
| MmugDNA.8957.1.S1_at   | MmugDNA.8957.1 | 11.83 | 11.86 | 0.17 | 0.02 | -1.02 | 0.304902 | 0.606686 | 0.658493 | 0.765928 |
| MmugDNA.8959.1.S1_at   | MmugDNA.8959.1 | 8.49  | 9.43  | 0.53 | 0.26 | -1.92 | 0.145269 | 0.177433 | 0.520407 | 0.453773 |
| MmugDNA.8960.1.S1_at   | MmugDNA.8960.1 | 8.45  | 8.77  | 0.94 | 0.46 | -1.25 | 0.659833 | 0.172709 | 0.865465 | 0.449206 |
| MmugDNA.8961.1.S1_at   | MmugDNA.8961.1 | 10.92 | 11.16 | 0.88 | 0.06 | -1.18 | 0.717522 | 0.894977 | 0.890439 | 0.940055 |
| MmugDNA.8962.1.S1_at   | MmugDNA.8962.1 | 6.48  | 6.47  | 0.14 | 0.04 | 1.01  | 0.961753 | 0.862329 | 0.987532 | 0.921714 |
| MmugDNA.8965.1.S1_at   | MmugDNA.8965.1 | 6.17  | 5.93  | 0.32 | 0.34 | 1.18  | 0.176571 | 0.562007 | 0.549633 | 0.737679 |
| MmugDNA.8967.1.S1_at   | MmugDNA.8967.1 | 4.76  | 4.56  | 0.1  | 0.14 | 1.15  | 0.140398 | 0.111179 | 0.515777 | 0.375798 |
| MmugDNA.8968.1.S1_at   | MmugDNA.8968.1 | 8.29  | 8.32  | 0.16 | 0.07 | -1.02 | 0.622158 | 0.450396 | 0.847666 | 0.665643 |
| MmugDNA.897.1.S1_at    | MmugDNA.897.1  | 4.6   | 4.58  | 0.16 | 0.34 | 1.01  | 0.725887 | 0.428877 | 0.893958 | 0.650408 |
| MmugDNA.8971.1.S1_at   | MmugDNA.8971.1 | 4.46  | 4.57  | 0.36 | 0.47 | -1.08 | 0.647498 | 0.799043 | 0.859364 | 0.884285 |
| MmugDNA.8972.1.S1_at   | MmugDNA.8972.1 | 6.72  | 6.51  | 0.06 | 0.1  | 1.15  | 0.073586 | 0.318029 | 0.434623 | 0.571046 |
| MmugDNA.8973.1.S1_at   | MmugDNA.8973.1 | 3.37  | 3.56  | 0.29 | 0.12 | -1.13 | 0.9309   | 0.765159 | 0.976933 | 0.86347  |
| MmugDNA.8976.1.S1_at   | MmugDNA.8976.1 | 4.09  | 4.03  | 0.07 | 0.14 | 1.05  | 0.368248 | 0.193245 | 0.70351  | 0.468578 |
| MmugDNA.8977.1.S1_at   | MmugDNA.8977.1 | 8.36  | 8.87  | 0.67 | 0.32 | -1.42 | 0.760807 | 0.543651 | 0.910166 | 0.726239 |
| MmugDNA.8978.1.S1_at   | MmugDNA.8978.1 | 6.85  | 6.93  | 0.17 | 0.13 | -1.06 | 0.610284 | 0.715271 | 0.841839 | 0.834959 |
| MmugDNA.8979.1.S1_at   | MmugDNA.8979.1 | 5.22  | 4.88  | 0.38 | 0.28 | 1.27  | 0.902391 | 0.171359 | 0.967018 | 0.447817 |
| MmugDNA.898.1.S1_at    | MmugDNA.898.1  | 6.16  | 6.09  | 0.12 | 0.02 | 1.05  | 0.286628 | 0.780122 | 0.643887 | 0.872514 |
| MmugDNA.8981.1.S1_at   | MmugDNA.8981.1 | 3.36  | 3.6   | 0.21 | 0.08 | -1.18 | 0.231872 | 0.048588 | 0.599694 | 0.265572 |
| MmugDNA.8982.1.S1_at   | MmugDNA.8982.1 | 8.78  | 8.8   | 0.05 | 0.17 | -1.01 | 0.596182 | 0.084846 | 0.835819 | 0.336385 |
| MmugDNA.8983.1.S1_at   | MmugDNA.8983.1 | 7.23  | 7.24  | 0.22 | 0.07 | -1.01 | 0.744135 | 0.848205 | 0.902469 | 0.913822 |
| MmugDNA.8984.1.S1_at   | MmugDNA.8984.1 | 3.38  | 3.33  | 0.11 | 0.09 | 1.03  | 0.174091 | 0.168284 | 0.547067 | 0.444935 |
| MmugDNA.8985.1.S1_at   | MmugDNA.8985.1 | 3.94  | 3.95  | 0.15 | 0.03 | -1.01 | 0.505099 | 0.270451 | 0.785147 | 0.535785 |
| MmugDNA.8986.1.S1_at   | MmugDNA.8986.1 | 3.91  | 3.47  | 0.52 | 0.15 | 1.36  | 0.184904 | 0.192852 | 0.557708 | 0.468376 |
| MmugDNA.8987.1.S1_at   | MmugDNA.8987.1 | 9.89  | 9.57  | 0.95 | 0.03 | 1.24  | 0.602606 | 0.793695 | 0.838892 | 0.881022 |
| MmugDNA.8988.1.S1_at   | MmugDNA.8988.1 | 11.28 | 12.08 | 1.01 | 0.12 | -1.74 | 0.279812 | 0.213822 | 0.638754 | 0.48758  |
| MmugDNA.8989.1.S1_at   | MmugDNA.8989.1 | 9.58  | 9.2   | 0.46 | 0.27 | 1.3   | 0.143994 | 0.194983 | 0.519328 | 0.470138 |
| MmugDNA.8990.1.S1_at   | MmugDNA.8990.1 | 6.69  | 7.33  | 0.41 | 0.16 | -1.56 | 0.087212 | 0.024405 | 0.454785 | 0.19551  |
| MmugDNA.8991.1.S1_at   | MmugDNA.8991.1 | 7.63  | 8.73  | 0.28 | 0.34 | -2.15 | 0.021227 | 0.48043  | 0.307188 | 0.685781 |
| MmugDNA.8992.1.S1_at   | MmugDNA.8992.1 | 6.12  | 6.1   | 0.09 | 0.15 | 1.01  | 0.52015  | 0.098526 | 0.793553 | 0.356636 |
| MmugDNA.8993.1.S1_at   | MmugDNA.8993.1 | 7.54  | 7.68  | 0.23 | 0.19 | -1.1  | 0.772104 | 0.681511 | 0.91501  | 0.814092 |
| MmugDNA.8994.1.S1_at   | MmugDNA.8994.1 | 3.75  | 3.58  | 0.15 | 0.1  | 1.12  | 0.40429  | 0.728516 | 0.726311 | 0.843068 |

|                      |                |       |       |      |      |       |          |          |          |          |
|----------------------|----------------|-------|-------|------|------|-------|----------|----------|----------|----------|
| MmugDNA.8995.1.S1_at | MmugDNA.8995.1 | 5.73  | 5.72  | 0.34 | 0.21 | 1.01  | 0.385715 | 0.62948  | 0.713032 | 0.781895 |
| MmugDNA.8997.1.S1_at | MmugDNA.8997.1 | 12.84 | 13.06 | 0.06 | 0.05 | -1.16 | 0.004779 | 0.001457 | 0.202416 | 0.058186 |
| MmugDNA.8998.1.S1_at | MmugDNA.8998.1 | 3.61  | 3.66  | 0.05 | 0.22 | -1.03 | 0.738406 | 0.921024 | 0.899899 | 0.955491 |
| MmugDNA.8999.1.S1_at | MmugDNA.8999.1 | 5.72  | 5.68  | 0.11 | 0.29 | 1.02  | 0.581882 | 0.382923 | 0.827791 | 0.61902  |
| MmugDNA.9.1.S1_at    | MmugDNA.9.1    | 4.52  | 4.51  | 0.1  | 0.06 | 1     | 0.475222 | 0.760255 | 0.768511 | 0.86071  |
| MmugDNA.90.1.S1_at   | MmugDNA.90.1   | 4.11  | 4.04  | 0.06 | 0.09 | 1.05  | 0.349392 | 0.746055 | 0.690424 | 0.852688 |
| MmugDNA.9003.1.S1_at | MmugDNA.9003.1 | 3.58  | 3.45  | 0.17 | 0.12 | 1.1   | 0.094565 | 0.196249 | 0.463794 | 0.471236 |
| MmugDNA.9005.1.S1_at | MmugDNA.9005.1 | 4.86  | 4.79  | 0.15 | 0.17 | 1.05  | 0.869594 | 0.694144 | 0.954469 | 0.822134 |
| MmugDNA.9007.1.S1_at | MmugDNA.9007.1 | 3.11  | 3.38  | 0.22 | 0.1  | -1.21 | 0.566785 | 0.209239 | 0.820086 | 0.48303  |
| MmugDNA.9008.1.S1_at | MmugDNA.9008.1 | 6.37  | 6.36  | 0.22 | 0.09 | 1.01  | 0.6337   | 0.813943 | 0.853646 | 0.892664 |
| MmugDNA.9009.1.S1_at | MmugDNA.9009.1 | 4.35  | 4.08  | 1.05 | 0.55 | -1.21 | 0.773819 | 0.950977 | 0.915986 | 0.972219 |
| MmugDNA.901.1.S1_at  | MmugDNA.901.1  | 6.41  | 7.09  | 1.01 | 0.04 | -1.6  | 0.629571 | 0.678603 | 0.851663 | 0.81228  |
| MmugDNA.9010.1.S1_at | MmugDNA.9010.1 | 4.17  | 4.07  | 0.19 | 0.09 | 1.08  | 0.453153 | 0.51529  | 0.755962 | 0.70823  |
| MmugDNA.9011.1.S1_at | MmugDNA.9011.1 | 8.32  | 9.35  | 0.78 | 0.04 | -2.03 | 0.256706 | 0.1946   | 0.620662 | 0.469707 |
| MmugDNA.9012.1.S1_at | MmugDNA.9012.1 | 4.47  | 4.43  | 0.7  | 0.21 | 1.03  | 0.908137 | 0.955365 | 0.968997 | 0.974645 |
| MmugDNA.9013.1.S1_at | MmugDNA.9013.1 | 5.49  | 5.23  | 0.25 | 0.01 | 1.2   | 0.493189 | 0.446201 | 0.778772 | 0.662743 |
| MmugDNA.9014.1.S1_at | MmugDNA.9014.1 | 7.27  | 7.11  | 0.2  | 0.24 | 1.12  | 0.357961 | 0.317862 | 0.695993 | 0.571042 |
| MmugDNA.9015.1.S1_at | MmugDNA.9015.1 | 3.96  | 3.7   | 0.21 | 0.34 | 1.2   | 0.726779 | 0.8586   | 0.894472 | 0.919494 |
| MmugDNA.9016.1.S1_at | MmugDNA.9016.1 | 6.13  | 6.63  | 0.2  | 0.1  | -1.41 | 0.018404 | 0.237558 | 0.297316 | 0.508196 |
| MmugDNA.9017.1.S1_at | MmugDNA.9017.1 | 5.19  | 5.88  | 0.41 | 0.11 | -1.62 | 0.022791 | 0.006583 | 0.312286 | 0.109998 |
| MmugDNA.9018.1.S1_at | MmugDNA.9018.1 | 4.42  | 4.35  | 0.28 | 0.2  | 1.05  | 0.371297 | 0.39869  | 0.705454 | 0.629458 |
| MmugDNA.9019.1.S1_at | MmugDNA.9019.1 | 6.76  | 6.9   | 0.89 | 0.42 | -1.1  | 0.362114 | 0.450719 | 0.699036 | 0.665844 |
| MmugDNA.9021.1.S1_at | MmugDNA.9021.1 | 3.74  | 4.09  | 0.34 | 0.27 | -1.27 | 0.249414 | 0.028381 | 0.614753 | 0.210319 |
| MmugDNA.9023.1.S1_at | MmugDNA.9023.1 | 5.53  | 5.56  | 0.08 | 0.11 | -1.02 | 0.353434 | 0.4308   | 0.693252 | 0.651811 |
| MmugDNA.9024.1.S1_at | MmugDNA.9024.1 | 8.77  | 8.98  | 0.41 | 0.19 | -1.16 | 0.89154  | 0.043802 | 0.962681 | 0.25387  |
| MmugDNA.9026.1.S1_at | MmugDNA.9026.1 | 6.1   | 5.85  | 0.09 | 0.12 | 1.18  | 0.027011 | 0.043787 | 0.327141 | 0.25387  |
| MmugDNA.9027.1.S1_at | MmugDNA.9027.1 | 10.68 | 10.85 | 0.22 | 0.02 | -1.12 | 0.245676 | 0.3669   | 0.611181 | 0.606566 |
| MmugDNA.9028.1.S1_at | MmugDNA.9028.1 | 10.3  | 9.78  | 0.33 | 0.02 | 1.43  | 0.020007 | 0.003233 | 0.303174 | 0.08214  |
| MmugDNA.9029.1.S1_at | MmugDNA.9029.1 | 10.33 | 11.15 | 0.37 | 0.11 | -1.76 | 0.026447 | 0.011989 | 0.324765 | 0.141658 |
| MmugDNA.9034.1.S1_at | MmugDNA.9034.1 | 3.74  | 3.68  | 0.1  | 0.06 | 1.04  | 0.428172 | 0.637731 | 0.741644 | 0.787114 |
| MmugDNA.9036.1.S1_at | MmugDNA.9036.1 | 7.22  | 7.2   | 0.08 | 0.19 | 1.02  | 0.485716 | 0.607424 | 0.774425 | 0.766402 |
| MmugDNA.9037.1.S1_at | MmugDNA.9037.1 | 4.15  | 4.33  | 0.07 | 0.25 | -1.13 | 0.97889  | 0.50817  | 0.993188 | 0.703405 |
| MmugDNA.9038.1.S1_at | MmugDNA.9038.1 | 3.92  | 3.86  | 0.06 | 0.07 | 1.04  | 0.149482 | 0.751532 | 0.523226 | 0.855508 |
| MmugDNA.9039.1.S1_at | MmugDNA.9039.1 | 7.76  | 8.46  | 0.68 | 0.44 | -1.62 | 0.266752 | 0.389211 | 0.627644 | 0.623403 |
| MmugDNA.904.1.S1_at  | MmugDNA.904.1  | 8.14  | 8.33  | 0.58 | 0.24 | -1.14 | 0.966856 | 0.84983  | 0.989076 | 0.914673 |
| MmugDNA.9041.1.S1_at | MmugDNA.9041.1 | 9.79  | 9.14  | 0.67 | 0.26 | 1.57  | 0.371353 | 0.511771 | 0.705454 | 0.705797 |
| MmugDNA.9042.1.S1_at | MmugDNA.9042.1 | 3.27  | 3.21  | 0.3  | 0.03 | 1.04  | 0.250809 | 0.161284 | 0.615928 | 0.437434 |
| MmugDNA.9043.1.S1_at | MmugDNA.9043.1 | 5.6   | 5.49  | 0.68 | 0.31 | 1.07  | 0.963535 | 0.024094 | 0.988152 | 0.194493 |
| MmugDNA.9045.1.S1_at | MmugDNA.9045.1 | 10.21 | 10.21 | 0.28 | 0.02 | -1    | 0.353624 | 0.355767 | 0.693411 | 0.597864 |
| MmugDNA.9046.1.S1_at | MmugDNA.9046.1 | 3.18  | 2.99  | 0.07 | 0.09 | 1.14  | 0.093347 | 0.372839 | 0.462462 | 0.611735 |
| MmugDNA.905.1.S1_at  | MmugDNA.905.1  | 4.64  | 5.41  | 0.24 | 0.48 | -1.71 | 0.057211 | 0.063424 | 0.401473 | 0.298441 |
| MmugDNA.9050.1.S1_at | MmugDNA.9050.1 | 3.86  | 3.8   | 0.13 | 0.07 | 1.05  | 0.997487 | 0.666666 | 0.999169 | 0.804716 |
| MmugDNA.9053.1.S1_at | MmugDNA.9053.1 | 6.93  | 6.8   | 0.15 | 0.2  | 1.09  | 0.17344  | 0.395859 | 0.546571 | 0.627743 |

|                        |                |       |       |      |      |       |          |          |          |          |
|------------------------|----------------|-------|-------|------|------|-------|----------|----------|----------|----------|
| MmugDNA.9054.1.S1_at   | MmugDNA.9054.1 | 4.02  | 4.04  | 0.15 | 0.1  | -1.02 | 0.964525 | 0.650559 | 0.988371 | 0.795663 |
| MmugDNA.9057.1.S1_at   | MmugDNA.9057.1 | 9.44  | 9.34  | 1.22 | 0.05 | 1.07  | 0.852116 | 0.323422 | 0.947936 | 0.574466 |
| MmugDNA.9058.1.S1_at   | MmugDNA.9058.1 | 4.34  | 4.27  | 0.15 | 0.07 | 1.05  | 0.498183 | 0.455229 | 0.781608 | 0.669198 |
| MmugDNA.9059.1.S1_at   | MmugDNA.9059.1 | 6.41  | 5.7   | 0.31 | 0.45 | 1.64  | 0.096674 | 0.389256 | 0.465288 | 0.623403 |
| MmugDNA.9060.1.S1_at   | MmugDNA.9060.1 | 7.13  | 6.96  | 0.05 | 0.05 | 1.12  | 0.007423 | 0.031598 | 0.22918  | 0.219905 |
| MmugDNA.9063.1.S1_at   | MmugDNA.9063.1 | 6.73  | 6.59  | 0.24 | 0.24 | 1.11  | 0.177491 | 0.807156 | 0.550585 | 0.888965 |
| MmugDNA.9064.1.S1_at   | MmugDNA.9064.1 | 10.52 | 10.17 | 0.21 | 0.23 | 1.27  | 0.080258 | 0.066541 | 0.443795 | 0.303711 |
| MmugDNA.9065.1.S1_at   | MmugDNA.9065.1 | 6.74  | 6.18  | 1.12 | 0.37 | 1.48  | 0.844586 | 0.397035 | 0.945434 | 0.62859  |
| MmugDNA.9067.1.S1_at   | MmugDNA.9067.1 | 3.85  | 3.66  | 0.05 | 0.12 | 1.13  | 0.204039 | 0.116494 | 0.5753   | 0.383671 |
| MmugDNA.9068.1.S1_at   | MmugDNA.9068.1 | 6.18  | 7.44  | 1.41 | 0.44 | -2.39 | 0.574426 | 0.094294 | 0.824026 | 0.350889 |
| MmugDNA.907.1.S1_at    | MmugDNA.907.1  | 7     | 7.06  | 0.03 | 0.09 | -1.04 | 0.85462  | 0.387829 | 0.948571 | 0.622486 |
| MmugDNA.9070.1.S1_at   | MmugDNA.9070.1 | 11.53 | 12.05 | 1.03 | 0.05 | -1.43 | 0.463565 | 0.601657 | 0.762251 | 0.763001 |
| MmugDNA.9071.1.S1_at   | MmugDNA.9071.1 | 3.85  | 5.11  | 0.59 | 0.75 | -2.4  | 0.172456 | 0.153792 | 0.545738 | 0.428488 |
| MmugDNA.9072.1.S1_at   | MmugDNA.9072.1 | 10.13 | 10.67 | 0.49 | 0.06 | -1.45 | 0.40313  | 0.368433 | 0.725471 | 0.60796  |
| MmugDNA.9073.1.S1_at   | MmugDNA.9073.1 | 4.03  | 4.84  | 0.41 | 0.4  | -1.76 | 0.122232 | 0.119894 | 0.495677 | 0.388593 |
| MmugDNA.9074.1.S1_at   | MmugDNA.9074.1 | 12.17 | 12.15 | 0.39 | 0.07 | 1.02  | 0.883481 | 0.434235 | 0.95964  | 0.654422 |
| MmugDNA.9074.1.S1_x_at | MmugDNA.9074.1 | 11.28 | 11.28 | 0.43 | 0.01 | -1    | 0.717933 | 0.439871 | 0.890572 | 0.658468 |
| MmugDNA.9075.1.S1_at   | MmugDNA.9075.1 | 9.77  | 9.34  | 0.63 | 0.13 | 1.35  | 0.903314 | 0.013468 | 0.967488 | 0.148626 |
| MmugDNA.9076.1.S1_at   | MmugDNA.9076.1 | 4.7   | 4.68  | 0.07 | 0.08 | 1.02  | 0.800074 | 0.367121 | 0.926794 | 0.606799 |
| MmugDNA.9077.1.S1_at   | MmugDNA.9077.1 | 5.47  | 5.08  | 0.01 | 0.25 | 1.31  | 0.16494  | 0.182685 | 0.537666 | 0.459186 |
| MmugDNA.9080.1.S1_at   | MmugDNA.9080.1 | 4.65  | 4.51  | 0.21 | 0.04 | 1.1   | 0.347831 | 0.490008 | 0.689055 | 0.692076 |
| MmugDNA.9081.1.S1_at   | MmugDNA.9081.1 | 7.3   | 7.08  | 0.02 | 0.03 | 1.16  | 0.000644 | 0.002533 | 0.144177 | 0.074302 |
| MmugDNA.9082.1.S1_s_at | MmugDNA.9082.1 | 4.71  | 4.7   | 0.12 | 0.18 | 1.01  | 0.43133  | 0.447313 | 0.743363 | 0.663434 |
| MmugDNA.9084.1.S1_at   | MmugDNA.9084.1 | 7.24  | 7.02  | 0.09 | 0.04 | 1.16  | 0.0124   | 0.004811 | 0.262097 | 0.096859 |
| MmugDNA.9085.1.S1_at   | MmugDNA.9085.1 | 10.09 | 8.81  | 0.69 | 0.16 | 2.43  | 0.022604 | 0.011032 | 0.311427 | 0.136793 |
| MmugDNA.9086.1.S1_at   | MmugDNA.9086.1 | 4.21  | 4.63  | 0.27 | 0.73 | -1.34 | 0.090429 | 0.202025 | 0.458677 | 0.476448 |
| MmugDNA.9087.1.S1_at   | MmugDNA.9087.1 | 5.64  | 5.43  | 0.2  | 0.14 | 1.16  | 0.228612 | 0.519263 | 0.597571 | 0.710923 |
| MmugDNA.9089.1.S1_at   | MmugDNA.9089.1 | 6.29  | 7.51  | 0.47 | 0.13 | -2.34 | 0.033512 | 0.235977 | 0.346442 | 0.507056 |
| MmugDNA.909.1.S1_at    | MmugDNA.909.1  | 8.64  | 9.07  | 0.68 | 0.24 | -1.36 | 0.673741 | 0.904186 | 0.871542 | 0.94565  |
| MmugDNA.9090.1.S1_at   | MmugDNA.9090.1 | 3.17  | 3.27  | 0.11 | 0.04 | -1.07 | 0.442525 | 0.032476 | 0.75017  | 0.223254 |
| MmugDNA.9091.1.S1_at   | MmugDNA.9091.1 | 11.62 | 11.64 | 0.07 | 0.05 | -1.02 | 0.315431 | 0.330867 | 0.665892 | 0.57958  |
| MmugDNA.9092.1.S1_at   | MmugDNA.9092.1 | 4.06  | 3.86  | 0.26 | 0.14 | 1.15  | 0.143583 | 0.183601 | 0.51901  | 0.459681 |
| MmugDNA.9093.1.S1_at   | MmugDNA.9093.1 | 5.75  | 5.25  | 0.38 | 0.26 | 1.41  | 0.098938 | 0.208879 | 0.468321 | 0.482717 |
| MmugDNA.9094.1.S1_at   | MmugDNA.9094.1 | 8.29  | 8.89  | 0.47 | 0.18 | -1.51 | 0.480536 | 0.026401 | 0.771253 | 0.203571 |
| MmugDNA.9096.1.S1_at   | MmugDNA.9096.1 | 7.2   | 7.54  | 0.32 | 0.04 | -1.27 | 0.489125 | 0.446556 | 0.775981 | 0.662862 |
| MmugDNA.9097.1.S1_at   | MmugDNA.9097.1 | 9.53  | 8.97  | 1.08 | 0.09 | 1.47  | 0.337243 | 0.604022 | 0.682275 | 0.764427 |
| MmugDNA.9098.1.S1_at   | MmugDNA.9098.1 | 11.45 | 10.62 | 0.43 | 0.19 | 1.78  | 0.081024 | 0.067356 | 0.445056 | 0.305525 |
| MmugDNA.9099.1.S1_at   | MmugDNA.9099.1 | 6.1   | 6.03  | 0.11 | 0.22 | 1.05  | 0.393682 | 0.496679 | 0.719441 | 0.696119 |
| MmugDNA.9102.1.S1_at   | MmugDNA.9102.1 | 2.97  | 3.01  | 0.18 | 0.07 | -1.02 | 0.865737 | 0.903725 | 0.952762 | 0.945356 |
| MmugDNA.9103.1.S1_at   | MmugDNA.9103.1 | 5.55  | 5.18  | 0.17 | 0.29 | 1.29  | 0.072212 | 0.096997 | 0.432091 | 0.354502 |
| MmugDNA.9104.1.S1_at   | MmugDNA.9104.1 | 9.43  | 10.19 | 0.51 | 0.18 | -1.69 | 0.031521 | 0.005885 | 0.341227 | 0.104899 |
| MmugDNA.9105.1.S1_at   | MmugDNA.9105.1 | 3.14  | 3.15  | 0.13 | 0.06 | -1.01 | 0.932096 | 0.649259 | 0.977141 | 0.794724 |
| MmugDNA.9107.1.S1_at   | MmugDNA.9107.1 | 9.14  | 8.93  | 0.51 | 0.24 | 1.16  | 0.549699 | 0.578207 | 0.810392 | 0.748364 |

|                        |                |       |       |      |      |       |          |          |          |          |
|------------------------|----------------|-------|-------|------|------|-------|----------|----------|----------|----------|
| MmugDNA.9108.1.S1_at   | MmugDNA.9108.1 | 3.4   | 3.28  | 0.19 | 0.18 | 1.09  | 0.913704 | 0.415184 | 0.970679 | 0.640745 |
| MmugDNA.9109.1.S1_at   | MmugDNA.9109.1 | 10.33 | 10.71 | 0.39 | 0.07 | -1.3  | 0.094274 | 0.237662 | 0.463769 | 0.50826  |
| MmugDNA.911.1.S1_at    | MmugDNA.911.1  | 7.58  | 7.93  | 0.09 | 0.22 | -1.27 | 0.019859 | 0.005176 | 0.302615 | 0.099727 |
| MmugDNA.9110.1.S1_at   | MmugDNA.9110.1 | 5.57  | 5.48  | 0.62 | 0.13 | 1.06  | 0.854043 | 0.769399 | 0.948436 | 0.866055 |
| MmugDNA.9111.1.S1_at   | MmugDNA.9111.1 | 3.54  | 3.5   | 0.15 | 0.07 | 1.02  | 0.820434 | 0.542675 | 0.935289 | 0.725667 |
| MmugDNA.9112.1.S1_at   | MmugDNA.9112.1 | 6.97  | 6.81  | 0.18 | 0.03 | 1.11  | 0.530118 | 0.468931 | 0.79872  | 0.67794  |
| MmugDNA.9114.1.S1_at   | MmugDNA.9114.1 | 4.77  | 4.91  | 0.06 | 0.16 | -1.1  | 0.868996 | 0.968451 | 0.95419  | 0.982645 |
| MmugDNA.9115.1.S1_at   | MmugDNA.9115.1 | 5.2   | 5.55  | 0.13 | 0.31 | -1.27 | 0.628354 | 0.262261 | 0.851106 | 0.528586 |
| MmugDNA.9116.1.S1_at   | MmugDNA.9116.1 | 6.18  | 6.2   | 0.18 | 0.03 | -1.01 | 0.434671 | 0.519046 | 0.745245 | 0.710813 |
| MmugDNA.9117.1.S1_at   | MmugDNA.9117.1 | 7.14  | 6.52  | 0.3  | 0.08 | 1.54  | 0.074987 | 0.092392 | 0.435663 | 0.348294 |
| MmugDNA.9118.1.S1_at   | MmugDNA.9118.1 | 6.69  | 6.44  | 0.14 | 0.13 | -1.19 | 0.022124 | 0.070462 | 0.310301 | 0.311777 |
| MmugDNA.9119.1.S1_at   | MmugDNA.9119.1 | 7.07  | 7.54  | 0.58 | 0.07 | -1.38 | 0.314577 | 0.437249 | 0.665231 | 0.656613 |
| MmugDNA.9120.1.S1_at   | MmugDNA.9120.1 | 4.05  | 4.09  | 0.28 | 0.17 | -1.02 | 0.599846 | 0.18178  | 0.837599 | 0.458373 |
| MmugDNA.9121.1.S1_at   | MmugDNA.9121.1 | 4.39  | 4.29  | 0.15 | 0.14 | 1.07  | 0.369471 | 0.542587 | 0.704236 | 0.725615 |
| MmugDNA.9122.1.S1_at   | MmugDNA.9122.1 | 6.9   | 7.26  | 0.21 | 0.2  | -1.28 | 0.49608  | 0.100036 | 0.780189 | 0.358901 |
| MmugDNA.9123.1.S1_at   | MmugDNA.9123.1 | 6.01  | 5.94  | 0.03 | 0.24 | 1.05  | 0.55335  | 0.79837  | 0.812105 | 0.883979 |
| MmugDNA.9124.1.S1_at   | MmugDNA.9124.1 | 7.88  | 7.13  | 0.38 | 0.06 | 1.68  | 0.074543 | 0.248684 | 0.435313 | 0.517917 |
| MmugDNA.9125.1.S1_at   | MmugDNA.9125.1 | 5.04  | 4.78  | 0.29 | 0.08 | 1.2   | 0.342966 | 0.498361 | 0.686205 | 0.697442 |
| MmugDNA.9126.1.S1_at   | MmugDNA.9126.1 | 9.14  | 9.11  | 0.19 | 0.03 | 1.02  | 0.670952 | 0.285886 | 0.870106 | 0.547484 |
| MmugDNA.913.1.S1_at    | MmugDNA.913.1  | 5.39  | 5.95  | 0.37 | 0.16 | -1.48 | 0.113265 | 0.027159 | 0.486648 | 0.205893 |
| MmugDNA.913.1.S1_x_at  | MmugDNA.913.1  | 6.24  | 6.54  | 0.19 | 0.19 | -1.23 | 0.055871 | 0.004509 | 0.399441 | 0.093778 |
| MmugDNA.9146.1.S1_x_at | MmugDNA.9146.1 | 8.24  | 8.41  | 1.59 | 0.1  | -1.12 | 0.749886 | 0.386984 | 0.905306 | 0.621935 |
| MmugDNA.9132.1.S1_at   | MmugDNA.9132.1 | 6.05  | 6.33  | 0.3  | 0.08 | -1.21 | 0.562592 | 0.75178  | 0.817773 | 0.855696 |
| MmugDNA.9134.1.S1_at   | MmugDNA.9134.1 | 4.43  | 5.01  | 0.79 | 0.65 | -1.49 | 0.631593 | 0.548993 | 0.852481 | 0.729509 |
| MmugDNA.9135.1.S1_at   | MmugDNA.9135.1 | 4.19  | 3.89  | 0.15 | 0.1  | 1.24  | 0.043745 | 0.106188 | 0.372554 | 0.36856  |
| MmugDNA.9136.1.S1_at   | MmugDNA.9136.1 | 4.68  | 4.37  | 0.01 | 0.18 | 1.25  | 0.107411 | 0.066032 | 0.47976  | 0.302361 |
| MmugDNA.9138.1.S1_at   | MmugDNA.9138.1 | 4.91  | 5.21  | 0.26 | 0.09 | -1.23 | 0.132078 | 0.034951 | 0.506546 | 0.231062 |
| MmugDNA.9139.1.S1_at   | MmugDNA.9139.1 | 6.02  | 5.99  | 0.11 | 0.06 | 1.02  | 0.883394 | 0.791679 | 0.95964  | 0.879671 |
| MmugDNA.9140.1.S1_at   | MmugDNA.9140.1 | 3.7   | 3.78  | 0.15 | 0.09 | -1.06 | 0.535028 | 0.690197 | 0.801404 | 0.819386 |
| MmugDNA.9142.1.S1_at   | MmugDNA.9142.1 | 3.46  | 3.39  | 0.02 | 0.06 | 1.05  | 0.21293  | 0.155768 | 0.583514 | 0.431134 |
| MmugDNA.9143.1.S1_at   | MmugDNA.9143.1 | 3.58  | 3.56  | 0.32 | 0.09 | 1.01  | 0.320673 | 0.421766 | 0.669445 | 0.645271 |
| MmugDNA.9144.1.S1_at   | MmugDNA.9144.1 | 5.99  | 5.84  | 0.83 | 0.09 | 1.11  | 0.714992 | 0.265076 | 0.889037 | 0.531    |
| MmugDNA.9145.1.S1_at   | MmugDNA.9145.1 | 7.43  | 7.32  | 0.04 | 0.09 | 1.09  | 0.110376 | 0.64069  | 0.483363 | 0.789053 |
| MmugDNA.9149.1.S1_at   | MmugDNA.9149.1 | 3.45  | 3.38  | 0.04 | 0.09 | 1.05  | 0.223936 | 0.10022  | 0.593038 | 0.359205 |
| MmugDNA.915.1.S1_at    | MmugDNA.915.1  | 2.94  | 2.82  | 0.09 | 0.06 | 1.08  | 0.095612 | 0.093238 | 0.464229 | 0.349352 |
| MmugDNA.9150.1.S1_at   | MmugDNA.9150.1 | 9.26  | 9.15  | 0.25 | 0.22 | 1.08  | 0.400819 | 0.524963 | 0.723949 | 0.714673 |
| MmugDNA.9152.1.S1_at   | MmugDNA.9152.1 | 9.67  | 9.49  | 0.19 | 0.22 | 1.13  | 0.300754 | 0.397269 | 0.65518  | 0.628773 |
| MmugDNA.9153.1.S1_at   | MmugDNA.9153.1 | 6.8   | 7.65  | 0.66 | 0.25 | -1.81 | 0.15006  | 0.302584 | 0.523569 | 0.560201 |
| MmugDNA.9153.1.S1_s_at | MmugDNA.9153.1 | 7.2   | 7.94  | 0.7  | 0.4  | -1.66 | 0.347187 | 0.62654  | 0.688563 | 0.779856 |
| MmugDNA.9154.1.S1_at   | MmugDNA.9154.1 | 9.87  | 9.91  | 0.04 | 0.13 | -1.03 | 0.936966 | 0.93041  | 0.978849 | 0.960461 |
| MmugDNA.9155.1.S1_s_at | MmugDNA.9155.1 | 9.6   | 9.45  | 0.79 | 0.39 | 1.11  | 0.180186 | 0.028409 | 0.553357 | 0.210385 |
| MmugDNA.9156.1.S1_at   | MmugDNA.9156.1 | 10.2  | 10.22 | 0.28 | 0.11 | -1.02 | 0.898054 | 0.951135 | 0.965442 | 0.972323 |
| MmugDNA.9157.1.S1_at   | MmugDNA.9157.1 | 7.4   | 8.28  | 0.69 | 0.1  | -1.83 | 0.260712 | 0.280525 | 0.623301 | 0.54372  |

|                        |                |       |       |      |      |       |          |          |          |          |
|------------------------|----------------|-------|-------|------|------|-------|----------|----------|----------|----------|
| MmugDNA.9159.1.S1_at   | MmugDNA.9159.1 | 3.76  | 3.62  | 0.11 | 0.07 | 1.1   | 0.069959 | 0.062666 | 0.4282   | 0.297037 |
| MmugDNA.9160.1.S1_at   | MmugDNA.9160.1 | 2.9   | 2.96  | 0.31 | 0.08 | -1.04 | 0.415546 | 0.531415 | 0.733656 | 0.718636 |
| MmugDNA.9161.1.S1_at   | MmugDNA.9161.1 | 3.79  | 3.8   | 0    | 0.08 | -1.01 | 0.704059 | 0.987373 | 0.884936 | 0.992932 |
| MmugDNA.9162.1.S1_at   | MmugDNA.9162.1 | 3.13  | 2.96  | 0.11 | 0.02 | 1.13  | 0.056101 | 0.06164  | 0.399441 | 0.295095 |
| MmugDNA.9163.1.S1_at   | MmugDNA.9163.1 | 4.37  | 4.37  | 0    | 0.04 | -1    | 0.38704  | 0.975973 | 0.714018 | 0.986856 |
| MmugDNA.9165.1.S1_at   | MmugDNA.9165.1 | 9.66  | 9.49  | 0.44 | 0    | 1.13  | 0.368661 | 0.321167 | 0.703807 | 0.573111 |
| MmugDNA.9166.1.S1_at   | MmugDNA.9166.1 | 5.61  | 5.25  | 0.18 | 0.04 | 1.28  | 0.07705  | 0.118921 | 0.438911 | 0.38714  |
| MmugDNA.9167.1.S1_at   | MmugDNA.9167.1 | 6.74  | 7.02  | 0.48 | 0.21 | -1.22 | 0.983677 | 0.999637 | 0.995094 | 0.999864 |
| MmugDNA.9168.1.S1_at   | MmugDNA.9168.1 | 5.71  | 5.69  | 0.13 | 0.16 | 1.01  | 0.543639 | 0.355066 | 0.8067   | 0.59749  |
| MmugDNA.9169.1.S1_at   | MmugDNA.9169.1 | 6.16  | 6.02  | 0.11 | 0.1  | 1.11  | 0.076737 | 0.12664  | 0.438134 | 0.397295 |
| MmugDNA.917.1.S1_at    | MmugDNA.917.1  | 4.39  | 4.5   | 0.18 | 0.09 | -1.08 | 0.414431 | 0.20903  | 0.733034 | 0.482823 |
| MmugDNA.9170.1.S1_at   | MmugDNA.9170.1 | 8.14  | 8.84  | 0.59 | 0.21 | -1.63 | 0.161928 | 0.131086 | 0.535244 | 0.403084 |
| MmugDNA.9171.1.S1_s_at | MmugDNA.9171.1 | 13.23 | 13.17 | 0.18 | 0.07 | 1.05  | 0.586421 | 0.597548 | 0.831285 | 0.760237 |
| MmugDNA.9173.1.S1_at   | MmugDNA.9173.1 | 9.05  | 9.03  | 0.07 | 0.06 | 1.01  | 0.533372 | 0.16776  | 0.80084  | 0.444297 |
| MmugDNA.9174.1.S1_at   | MmugDNA.9174.1 | 3.75  | 3.88  | 0.05 | 0.12 | -1.1  | 0.425155 | 0.090726 | 0.739897 | 0.345205 |
| MmugDNA.9175.1.S1_s_at | MmugDNA.9175.1 | 8.09  | 9.38  | 0.74 | 0.06 | -2.44 | 0.113292 | 0.026354 | 0.486648 | 0.203321 |
| MmugDNA.9176.1.S1_at   | MmugDNA.9176.1 | 12.35 | 12.57 | 0.17 | 0.09 | -1.17 | 0.253405 | 0.383162 | 0.618161 | 0.619153 |
| MmugDNA.9178.1.S1_at   | MmugDNA.9178.1 | 7.2   | 7.36  | 0.49 | 0.25 | -1.12 | 0.74611  | 0.676503 | 0.903229 | 0.81095  |
| MmugDNA.918.1.S1_at    | MmugDNA.918.1  | 7.13  | 7.44  | 0.11 | 0.11 | -1.24 | 0.021923 | 0.103199 | 0.309781 | 0.364123 |
| MmugDNA.9180.1.S1_at   | MmugDNA.9180.1 | 8.01  | 7.27  | 0.33 | 0.07 | 1.67  | 0.047096 | 0.088312 | 0.379283 | 0.341721 |
| MmugDNA.9181.1.S1_at   | MmugDNA.9181.1 | 10.08 | 10.26 | 0.58 | 0.1  | -1.13 | 0.700564 | 0.397829 | 0.883597 | 0.629126 |
| MmugDNA.9182.1.S1_at   | MmugDNA.9182.1 | 4.78  | 4.34  | 0.25 | 0.17 | 1.35  | 0.083152 | 0.098411 | 0.448736 | 0.356531 |
| MmugDNA.9183.1.S1_at   | MmugDNA.9183.1 | 7.43  | 7.01  | 0.8  | 0.19 | 1.34  | 0.388279 | 0.542883 | 0.715185 | 0.725834 |
| MmugDNA.9184.1.S1_at   | MmugDNA.9184.1 | 5.22  | 5.58  | 0.34 | 0.27 | -1.28 | 0.278703 | 0.397293 | 0.63782  | 0.628775 |
| MmugDNA.9185.1.S1_at   | MmugDNA.9185.1 | 9.88  | 11.07 | 0.43 | 0.19 | -2.29 | 0.025799 | 0.017909 | 0.32273  | 0.168944 |
| MmugDNA.9186.1.S1_at   | MmugDNA.9186.1 | 10.8  | 10.96 | 0.91 | 0.15 | -1.12 | 0.685549 | 0.754714 | 0.876846 | 0.85732  |
| MmugDNA.9187.1.S1_at   | MmugDNA.9187.1 | 4.68  | 4.59  | 0.14 | 0.05 | 1.06  | 0.456439 | 0.144172 | 0.75784  | 0.418037 |
| MmugDNA.9188.1.S1_at   | MmugDNA.9188.1 | 6.76  | 6.75  | 0.23 | 0.08 | 1     | 0.786346 | 0.506964 | 0.921411 | 0.702692 |
| MmugDNA.9189.1.S1_at   | MmugDNA.9189.1 | 3.15  | 3.35  | 0.53 | 0.34 | -1.14 | 0.860757 | 0.768174 | 0.950901 | 0.865413 |
| MmugDNA.919.1.S1_at    | MmugDNA.919.1  | 2.88  | 2.76  | 0.05 | 0.06 | 1.08  | 0.087236 | 0.233891 | 0.454785 | 0.505169 |
| MmugDNA.9190.1.S1_at   | MmugDNA.9190.1 | 3.74  | 3.92  | 0.27 | 0.09 | -1.13 | 0.109105 | 0.112811 | 0.481684 | 0.37844  |
| MmugDNA.9191.1.S1_at   | MmugDNA.9191.1 | 3.85  | 3.75  | 0.35 | 0.3  | 1.07  | 0.624195 | 0.719254 | 0.848562 | 0.837537 |
| MmugDNA.9193.1.S1_at   | MmugDNA.9193.1 | 12.99 | 13.1  | 0.24 | 0.01 | -1.08 | 0.306711 | 0.033417 | 0.659654 | 0.22646  |
| MmugDNA.9194.1.S1_at   | MmugDNA.9194.1 | 11.64 | 11.74 | 0.06 | 0.03 | -1.07 | 0.089575 | 0.659178 | 0.457723 | 0.800594 |
| MmugDNA.9196.1.S1_at   | MmugDNA.9196.1 | 10.1  | 9.85  | 0.25 | 0.06 | 1.19  | 0.164664 | 0.066716 | 0.537466 | 0.304114 |
| MmugDNA.9196.1.S1_s_at | MmugDNA.9196.1 | 11.69 | 11.68 | 0.08 | 0.01 | 1     | 0.435405 | 0.738996 | 0.745679 | 0.848711 |
| MmugDNA.9197.1.S1_at   | MmugDNA.9197.1 | 8.46  | 8.44  | 0.23 | 0.26 | 1.02  | 0.815507 | 0.200127 | 0.933137 | 0.474603 |
| MmugDNA.9198.1.S1_at   | MmugDNA.9198.1 | 5.02  | 4.92  | 0.22 | 0.1  | 1.07  | 0.695821 | 0.401665 | 0.881741 | 0.631068 |
| MmugDNA.92.1.S1_at     | MmugDNA.92.1   | 6.4   | 7.11  | 1.36 | 0.48 | -1.64 | 0.416787 | 0.605006 | 0.734521 | 0.764917 |
| MmugDNA.920.1.S1_at    | MmugDNA.920.1  | 7.05  | 6.29  | 0.22 | 0.27 | 1.68  | 0.040313 | 0.092827 | 0.363929 | 0.349024 |
| MmugDNA.9200.1.S1_at   | MmugDNA.9200.1 | 4.77  | 4.77  | 0.03 | 0.07 | -1    | 0.245339 | 0.089792 | 0.610777 | 0.34404  |
| MmugDNA.9201.1.S1_at   | MmugDNA.9201.1 | 10.53 | 10.32 | 0.22 | 0.11 | 1.16  | 0.282356 | 0.005345 | 0.640907 | 0.101089 |
| MmugDNA.9202.1.S1_at   | MmugDNA.9202.1 | 9     | 9.07  | 0.52 | 0.09 | -1.05 | 0.866569 | 0.656921 | 0.953134 | 0.799401 |

|                        |                |       |       |      |      |       |          |          |          |          |
|------------------------|----------------|-------|-------|------|------|-------|----------|----------|----------|----------|
| MmugDNA.9203.1.S1_at   | MmugDNA.9203.1 | 12.71 | 12.81 | 0.07 | 0.03 | -1.07 | 0.094311 | 0.001652 | 0.463769 | 0.061436 |
| MmugDNA.9204.1.S1_at   | MmugDNA.9204.1 | 4.46  | 4.38  | 0.38 | 0.19 | 1.06  | 0.516936 | 0.696932 | 0.791672 | 0.824002 |
| MmugDNA.9205.1.S1_at   | MmugDNA.9205.1 | 3.6   | 3.4   | 0.04 | 0.03 | 1.15  | 0.002173 | 0.021525 | 0.174757 | 0.183771 |
| MmugDNA.9207.1.S1_at   | MmugDNA.9207.1 | 4.36  | 4.79  | 0.31 | 0.25 | -1.35 | 0.384876 | 0.913646 | 0.712263 | 0.951422 |
| MmugDNA.9208.1.S1_at   | MmugDNA.9208.1 | 5.86  | 5.87  | 0.12 | 0.01 | -1.01 | 0.574691 | 0.632625 | 0.824212 | 0.783666 |
| MmugDNA.921.1.S1_at    | MmugDNA.921.1  | 4.5   | 3.94  | 0.56 | 0.49 | 1.47  | 0.519024 | 0.70719  | 0.793034 | 0.830201 |
| MmugDNA.9211.1.S1_at   | MmugDNA.9211.1 | 9.12  | 9.68  | 0.72 | 0.13 | -1.48 | 0.722254 | 0.916974 | 0.892227 | 0.95361  |
| MmugDNA.9212.1.S1_at   | MmugDNA.9212.1 | 6.49  | 7.25  | 0.96 | 0.06 | -1.69 | 0.737299 | 0.447806 | 0.899426 | 0.66388  |
| MmugDNA.9213.1.S1_at   | MmugDNA.9213.1 | 8.75  | 8.48  | 0.36 | 0.03 | 1.2   | 0.155284 | 0.105334 | 0.528594 | 0.367168 |
| MmugDNA.9214.1.S1_at   | MmugDNA.9214.1 | 6.9   | 6.81  | 0.21 | 0.18 | 1.07  | 0.115865 | 0.123486 | 0.489311 | 0.393518 |
| MmugDNA.9215.1.S1_s_at | MmugDNA.9215.1 | 10.56 | 10.14 | 0.16 | 0.49 | -1.34 | 0.05663  | 0.110668 | 0.400931 | 0.374854 |
| MmugDNA.9216.1.S1_s_at | MmugDNA.9216.1 | 11.17 | 10.91 | 0.22 | 0.14 | 1.2   | 0.296445 | 0.762186 | 0.652086 | 0.861664 |
| MmugDNA.9217.1.S1_at   | MmugDNA.9217.1 | 5.97  | 5.75  | 0.65 | 0.14 | 1.16  | 0.204845 | 0.229515 | 0.576448 | 0.501534 |
| MmugDNA.922.1.S1_at    | MmugDNA.922.1  | 4.5   | 4.38  | 0.07 | 0.06 | 1.09  | 0.079146 | 0.074475 | 0.442054 | 0.318151 |
| MmugDNA.9220.1.S1_at   | MmugDNA.9220.1 | 4.28  | 4.33  | 0.11 | 0.22 | -1.04 | 0.376899 | 0.505327 | 0.707179 | 0.702073 |
| MmugDNA.9221.1.S1_at   | MmugDNA.9221.1 | 9.89  | 10.08 | 0.94 | 0.15 | -1.14 | 0.255656 | 0.120914 | 0.619709 | 0.38981  |
| MmugDNA.9223.1.S1_at   | MmugDNA.9223.1 | 3.85  | 3.84  | 0.11 | 0    | 1.01  | 0.765696 | 0.917197 | 0.911899 | 0.953758 |
| MmugDNA.9224.1.S1_at   | MmugDNA.9224.1 | 5.97  | 5.97  | 0.15 | 0.14 | -1    | 0.988612 | 0.154506 | 0.995877 | 0.429396 |
| MmugDNA.9226.1.S1_at   | MmugDNA.9226.1 | 3.11  | 3.06  | 0.09 | 0.02 | 1.03  | 0.870253 | 0.586011 | 0.954816 | 0.753172 |
| MmugDNA.9228.1.S1_at   | MmugDNA.9228.1 | 3.45  | 3.74  | 0.25 | 0.15 | -1.22 | 0.246031 | 0.130938 | 0.611435 | 0.403037 |
| MmugDNA.9229.1.S1_at   | MmugDNA.9229.1 | 5.51  | 5.71  | 0.59 | 0.28 | -1.15 | 0.947811 | 0.327482 | 0.982079 | 0.577308 |
| MmugDNA.923.1.S1_at    | MmugDNA.923.1  | 12.18 | 11.86 | 0.25 | 0.03 | 1.25  | 0.08839  | 0.003394 | 0.45606  | 0.083959 |
| MmugDNA.9230.1.S1_at   | MmugDNA.9230.1 | 7.54  | 7.46  | 0.66 | 0.11 | 1.06  | 0.47358  | 0.15233  | 0.767619 | 0.427072 |
| MmugDNA.9231.1.S1_at   | MmugDNA.9231.1 | 7.75  | 6.9   | 0.66 | 0.47 | 1.8   | 0.075405 | 0.116301 | 0.436562 | 0.383671 |
| MmugDNA.9232.1.S1_at   | MmugDNA.9232.1 | 7.26  | 7.53  | 0.46 | 0.16 | -1.21 | 0.79421  | 0.319602 | 0.924511 | 0.571885 |
| MmugDNA.9233.1.S1_at   | MmugDNA.9233.1 | 10.13 | 10.05 | 0.28 | 0.14 | 1.05  | 0.727166 | 0.541236 | 0.894637 | 0.724781 |
| MmugDNA.9236.1.S1_at   | MmugDNA.9236.1 | 3.07  | 2.95  | 0.14 | 0.07 | 1.09  | 0.714449 | 0.32542  | 0.888774 | 0.575807 |
| MmugDNA.9237.1.S1_at   | MmugDNA.9237.1 | 6.31  | 5.93  | 0.15 | 0.08 | 1.3   | 0.021791 | 0.005177 | 0.309672 | 0.099727 |
| MmugDNA.9239.1.S1_at   | MmugDNA.9239.1 | 4.39  | 4.39  | 0.22 | 0.25 | 1     | 0.516041 | 0.054566 | 0.791221 | 0.279115 |
| MmugDNA.924.1.S1_at    | MmugDNA.924.1  | 10.54 | 10.64 | 0.08 | 0.08 | -1.07 | 0.048167 | 0.04686  | 0.382528 | 0.261272 |
| MmugDNA.9240.1.S1_at   | MmugDNA.9240.1 | 7.25  | 7.33  | 0.34 | 0.37 | -1.06 | 0.402172 | 0.536216 | 0.724846 | 0.721574 |
| MmugDNA.9242.1.S1_at   | MmugDNA.9242.1 | 9.21  | 9.31  | 0.35 | 0.08 | -1.07 | 0.817208 | 0.315609 | 0.93393  | 0.569053 |
| MmugDNA.9243.1.S1_at   | MmugDNA.9243.1 | 7.05  | 6.2   | 0.48 | 0.28 | 1.79  | 0.032469 | 0.05753  | 0.344399 | 0.285919 |
| MmugDNA.9244.1.S1_at   | MmugDNA.9244.1 | 3.01  | 2.96  | 0.29 | 0.11 | 1.03  | 0.616492 | 0.771759 | 0.844957 | 0.867344 |
| MmugDNA.9245.1.S1_at   | MmugDNA.9245.1 | 8.03  | 8.16  | 0.51 | 0.12 | -1.1  | 0.815659 | 0.144075 | 0.933219 | 0.417963 |
| MmugDNA.9247.1.S1_at   | MmugDNA.9247.1 | 6.46  | 6.38  | 0.07 | 0.4  | 1.06  | 0.98729  | 0.990484 | 0.995831 | 0.994623 |
| MmugDNA.9249.1.S1_at   | MmugDNA.9249.1 | 11.73 | 12.25 | 0.25 | 0.04 | -1.44 | 0.063378 | 0.063917 | 0.415687 | 0.29906  |
| MmugDNA.925.1.S1_at    | MmugDNA.925.1  | 11.25 | 11.43 | 0.1  | 0.09 | -1.14 | 0.056242 | 0.132219 | 0.399699 | 0.404274 |
| MmugDNA.9250.1.S1_at   | MmugDNA.9250.1 | 7.93  | 8.89  | 1.17 | 0.33 | -1.95 | 0.730425 | 0.917911 | 0.896184 | 0.954027 |
| MmugDNA.9252.1.S1_at   | MmugDNA.9252.1 | 4.31  | 3.45  | 0.38 | 0.26 | 1.82  | 0.043035 | 0.009434 | 0.371135 | 0.127948 |
| MmugDNA.9254.1.S1_at   | MmugDNA.9254.1 | 7.2   | 7.49  | 0.3  | 0.15 | -1.22 | 0.77004  | 0.727138 | 0.913889 | 0.842187 |
| MmugDNA.9255.1.S1_at   | MmugDNA.9255.1 | 4.23  | 4.29  | 0.16 | 0.06 | -1.05 | 0.711783 | 0.918065 | 0.887709 | 0.954068 |
| MmugDNA.9256.1.S1_at   | MmugDNA.9256.1 | 5.9   | 5.82  | 0.22 | 0.17 | 1.06  | 0.79879  | 0.326779 | 0.926306 | 0.576782 |

|                        |                |       |       |      |      |       |          |          |          |          |
|------------------------|----------------|-------|-------|------|------|-------|----------|----------|----------|----------|
| MmugDNA.9258.1.S1_at   | MmugDNA.9258.1 | 3.54  | 3.47  | 0.04 | 0.07 | 1.05  | 0.154344 | 0.247954 | 0.527483 | 0.517431 |
| MmugDNA.9259.1.S1_at   | MmugDNA.9259.1 | 7.13  | 6.7   | 0.58 | 0.16 | 1.35  | 0.521794 | 0.639483 | 0.794832 | 0.788314 |
| MmugDNA.926.1.S1_at    | MmugDNA.926.1  | 7.35  | 7.93  | 0.39 | 0.07 | -1.49 | 0.05718  | 0.021271 | 0.401473 | 0.182573 |
| MmugDNA.9260.1.S1_at   | MmugDNA.9260.1 | 5.95  | 5.84  | 0.05 | 0.18 | 1.08  | 0.963578 | 0.850922 | 0.988152 | 0.91522  |
| MmugDNA.9261.1.S1_at   | MmugDNA.9261.1 | 4.38  | 4.47  | 0.22 | 0.3  | -1.06 | 0.775542 | 0.052373 | 0.916777 | 0.274345 |
| MmugDNA.9263.1.S1_at   | MmugDNA.9263.1 | 9.43  | 8.93  | 0.21 | 0.37 | 1.41  | 0.044355 | 0.037444 | 0.374567 | 0.237777 |
| MmugDNA.9264.1.S1_at   | MmugDNA.9264.1 | 7.46  | 7.29  | 0.09 | 0.02 | 1.13  | 0.054525 | 0.181407 | 0.396542 | 0.457923 |
| MmugDNA.9267.1.S1_at   | MmugDNA.9267.1 | 3.27  | 3.34  | 0.15 | 0.39 | -1.05 | 0.669147 | 0.73238  | 0.869371 | 0.844986 |
| MmugDNA.9268.1.S1_at   | MmugDNA.9268.1 | 9.12  | 8.89  | 0.06 | 0.09 | 1.17  | 0.035433 | 0.037319 | 0.352096 | 0.237622 |
| MmugDNA.927.1.S1_at    | MmugDNA.927.1  | 3.4   | 3.39  | 0.18 | 0.07 | 1.01  | 0.692187 | 0.340928 | 0.880095 | 0.587035 |
| MmugDNA.9270.1.S1_at   | MmugDNA.9270.1 | 10.82 | 10.9  | 0.21 | 0.14 | -1.05 | 0.333392 | 0.033081 | 0.679601 | 0.225106 |
| MmugDNA.9271.1.S1_at   | MmugDNA.9271.1 | 6.28  | 5.85  | 0.44 | 0.12 | 1.34  | 0.39864  | 0.467697 | 0.722582 | 0.677207 |
| MmugDNA.9272.1.S1_at   | MmugDNA.9272.1 | 3.97  | 3.68  | 0.75 | 0.13 | 1.22  | 0.176874 | 0.079642 | 0.549947 | 0.326981 |
| MmugDNA.9273.1.S1_at   | MmugDNA.9273.1 | 5.54  | 5.55  | 0.27 | 0.14 | -1.01 | 0.672554 | 0.914221 | 0.871025 | 0.951773 |
| MmugDNA.9274.1.S1_at   | MmugDNA.9274.1 | 9.12  | 9.32  | 1.4  | 0.06 | -1.16 | 0.791765 | 0.151748 | 0.923474 | 0.426392 |
| MmugDNA.9275.1.S1_at   | MmugDNA.9275.1 | 4.48  | 4.79  | 0.23 | 0.28 | -1.25 | 0.095088 | 0.004826 | 0.464131 | 0.096904 |
| MmugDNA.9276.1.S1_at   | MmugDNA.9276.1 | 6.43  | 6.65  | 0.76 | 0.06 | -1.16 | 0.695374 | 0.869773 | 0.881536 | 0.926118 |
| MmugDNA.9277.1.S1_at   | MmugDNA.9277.1 | 4.71  | 4.8   | 0.22 | 0.11 | -1.07 | 0.31509  | 0.869412 | 0.665641 | 0.92597  |
| MmugDNA.9278.1.S1_at   | MmugDNA.9278.1 | 4.81  | 4.71  | 0.05 | 0.05 | 1.07  | 0.069298 | 0.225208 | 0.426773 | 0.497865 |
| MmugDNA.9279.1.S1_at   | MmugDNA.9279.1 | 4.74  | 4.42  | 0.29 | 0.27 | 1.25  | 0.776704 | 0.096848 | 0.917412 | 0.354254 |
| MmugDNA.9280.1.S1_at   | MmugDNA.9280.1 | 4.79  | 4.73  | 0.17 | 0.03 | 1.05  | 0.581663 | 0.147157 | 0.827791 | 0.421376 |
| MmugDNA.9281.1.S1_at   | MmugDNA.9281.1 | 6.95  | 6.9   | 0.19 | 0.06 | 1.03  | 0.686599 | 0.888258 | 0.877418 | 0.93629  |
| MmugDNA.9283.1.S1_at   | MmugDNA.9283.1 | 6.29  | 6.19  | 0.34 | 0.16 | 1.07  | 0.702954 | 0.885635 | 0.884538 | 0.934982 |
| MmugDNA.9286.1.S1_at   | MmugDNA.9286.1 | 5.26  | 5.4   | 0.41 | 0.35 | -1.1  | 0.324336 | 0.46032  | 0.672562 | 0.672177 |
| MmugDNA.9288.1.S1_at   | MmugDNA.9288.1 | 7.46  | 7.63  | 0.3  | 0.44 | -1.13 | 0.55078  | 0.411901 | 0.811036 | 0.638434 |
| MmugDNA.9289.1.S1_at   | MmugDNA.9289.1 | 4.4   | 4.39  | 0.05 | 0.2  | 1     | 0.471657 | 0.045236 | 0.76658  | 0.257005 |
| MmugDNA.929.1.S1_at    | MmugDNA.929.1  | 5     | 4.72  | 0.31 | 0.16 | 1.21  | 0.379036 | 0.656078 | 0.708548 | 0.798847 |
| MmugDNA.9290.1.S1_s_at | MmugDNA.9290.1 | 3.38  | 3.38  | 0.06 | 0.03 | 1     | 0.539088 | 0.425266 | 0.803644 | 0.647679 |
| MmugDNA.9292.1.S1_at   | MmugDNA.9292.1 | 7.83  | 8.21  | 0.19 | 0.15 | -1.29 | 0.290644 | 0.413714 | 0.647273 | 0.639742 |
| MmugDNA.9296.1.S1_at   | MmugDNA.9296.1 | 6.59  | 6.54  | 0.3  | 0.26 | 1.03  | 0.764768 | 0.873538 | 0.911557 | 0.928102 |
| MmugDNA.9298.1.S1_at   | MmugDNA.9298.1 | 10.53 | 10.19 | 0.48 | 0.09 | 1.27  | 0.81936  | 0.276201 | 0.934874 | 0.540183 |
| MmugDNA.9299.1.S1_at   | MmugDNA.9299.1 | 2.75  | 2.67  | 0.07 | 0.23 | 1.06  | 0.661902 | 0.831958 | 0.866598 | 0.90356  |
| MmugDNA.93.1.S1_at     | MmugDNA.93.1   | 6.93  | 6.77  | 0.09 | 0.05 | 1.12  | 0.10213  | 0.358849 | 0.472436 | 0.600291 |
| MmugDNA.930.1.S1_at    | MmugDNA.930.1  | 3.81  | 3.72  | 0.15 | 0.04 | 1.06  | 0.835158 | 0.937463 | 0.940884 | 0.964687 |
| MmugDNA.9300.1.S1_at   | MmugDNA.9300.1 | 6.2   | 5.32  | 0.05 | 0.37 | 1.84  | 0.039215 | 0.061785 | 0.361483 | 0.295327 |
| MmugDNA.9303.1.S1_at   | MmugDNA.9303.1 | 5.4   | 5.41  | 0.3  | 0.3  | -1.01 | 0.30307  | 0.074619 | 0.656954 | 0.318303 |
| MmugDNA.9305.1.S1_at   | MmugDNA.9305.1 | 6.02  | 6.08  | 0.29 | 0.29 | -1.04 | 0.900892 | 0.896344 | 0.966371 | 0.940817 |
| MmugDNA.9306.1.S1_at   | MmugDNA.9306.1 | 4.65  | 4.77  | 0.12 | 0.09 | -1.08 | 0.546362 | 0.172149 | 0.808448 | 0.448529 |
| MmugDNA.9307.1.S1_x_at | MmugDNA.9307.1 | 12.19 | 12.11 | 0.25 | 0.12 | 1.06  | 0.990599 | 0.942157 | 0.996425 | 0.967154 |
| MmugDNA.9308.1.S1_at   | MmugDNA.9308.1 | 6.76  | 6.16  | 0.42 | 0.25 | 1.52  | 0.081187 | 0.136926 | 0.445179 | 0.409677 |
| MmugDNA.9309.1.S1_at   | MmugDNA.9309.1 | 5.07  | 4.95  | 0.13 | 0.08 | 1.09  | 0.180028 | 0.693476 | 0.553172 | 0.821713 |
| MmugDNA.931.1.S1_at    | MmugDNA.931.1  | 4.37  | 4.43  | 0.32 | 0.14 | -1.04 | 0.716512 | 0.869525 | 0.889896 | 0.925994 |
| MmugDNA.9310.1.S1_s_at | MmugDNA.9310.1 | 6.47  | 6.29  | 0.13 | 0.11 | 1.13  | 0.115576 | 0.202804 | 0.488835 | 0.477284 |



|                        |                |       |       |      |      |       |          |          |          |          |
|------------------------|----------------|-------|-------|------|------|-------|----------|----------|----------|----------|
| MmugDNA.9312.1.S1_at   | MmugDNA.9312.1 | 4.81  | 4.68  | 0.12 | 0.14 | 1.09  | 0.574158 | 0.20027  | 0.823843 | 0.474689 |
| MmugDNA.9314.1.S1_at   | MmugDNA.9314.1 | 4.23  | 4.23  | 0.08 | 0.1  | -1    | 0.620184 | 0.730688 | 0.847047 | 0.844055 |
| MmugDNA.9316.1.S1_at   | MmugDNA.9316.1 | 7.22  | 6.92  | 0.24 | 0.07 | 1.23  | 0.444006 | 0.220461 | 0.751068 | 0.493818 |
| MmugDNA.9317.1.S1_at   | MmugDNA.9317.1 | 7.64  | 7.67  | 0.01 | 0.16 | -1.02 | 0.497176 | 0.855087 | 0.781055 | 0.91741  |
| MmugDNA.9318.1.S1_at   | MmugDNA.9318.1 | 9.26  | 9.63  | 0.23 | 0.12 | -1.29 | 0.032416 | 0.003603 | 0.344245 | 0.085876 |
| MmugDNA.9319.1.S1_at   | MmugDNA.9319.1 | 4.96  | 4.74  | 0.15 | 0.13 | 1.16  | 0.27678  | 0.796938 | 0.636451 | 0.882822 |
| MmugDNA.932.1.S1_at    | MmugDNA.932.1  | 4.42  | 4.32  | 0.2  | 0.21 | 1.07  | 0.777408 | 0.347814 | 0.9176   | 0.592161 |
| MmugDNA.9321.1.S1_at   | MmugDNA.9321.1 | 4.26  | 4.4   | 0.19 | 0.19 | -1.1  | 0.229328 | 0.377694 | 0.598246 | 0.615086 |
| MmugDNA.9323.1.S1_at   | MmugDNA.9323.1 | 10.88 | 10.84 | 0.04 | 0.01 | 1.03  | 0.190979 | 0.001138 | 0.562184 | 0.053148 |
| MmugDNA.9324.1.S1_at   | MmugDNA.9324.1 | 4.92  | 4.87  | 0.05 | 0.08 | 1.03  | 0.155272 | 0.496713 | 0.528587 | 0.696148 |
| MmugDNA.9327.1.S1_at   | MmugDNA.9327.1 | 3.41  | 3.4   | 0.03 | 0.11 | -1.01 | 0.454891 | 0.564741 | 0.757172 | 0.739425 |
| MmugDNA.9328.1.S1_at   | MmugDNA.9328.1 | 6.03  | 6.06  | 0.09 | 0.02 | -1.02 | 0.754355 | 0.973337 | 0.907331 | 0.985515 |
| MmugDNA.9331.1.S1_at   | MmugDNA.9331.1 | 6.87  | 7.17  | 0.14 | 0.31 | -1.23 | 0.177942 | 0.219576 | 0.551142 | 0.493192 |
| MmugDNA.9332.1.S1_at   | MmugDNA.9332.1 | 11.32 | 11.66 | 0.37 | 0.11 | -1.27 | 0.61343  | 0.027654 | 0.843466 | 0.207659 |
| MmugDNA.9334.1.S1_at   | MmugDNA.9334.1 | 7.97  | 8.11  | 0.1  | 0.43 | -1.1  | 0.731122 | 0.206793 | 0.89641  | 0.480945 |
| MmugDNA.9337.1.S1_at   | MmugDNA.9337.1 | 11.52 | 11.3  | 0.01 | 0.05 | 1.17  | 0.001094 | 0.000152 | 0.156386 | 0.029832 |
| MmugDNA.9340.1.S1_at   | MmugDNA.9340.1 | 6.46  | 6.26  | 0.25 | 0.05 | 1.15  | 0.258508 | 0.371412 | 0.622247 | 0.610191 |
| MmugDNA.9341.1.S1_at   | MmugDNA.9341.1 | 3.52  | 3.56  | 0.38 | 0.38 | -1.03 | 0.77274  | 0.680101 | 0.915488 | 0.813208 |
| MmugDNA.9343.1.S1_at   | MmugDNA.9343.1 | 5.83  | 5.83  | 0.01 | 0.03 | -1    | 0.205731 | 0.138203 | 0.577556 | 0.411149 |
| MmugDNA.9344.1.S1_at   | MmugDNA.9344.1 | 3.36  | 3.26  | 0.21 | 0.05 | 1.07  | 0.324019 | 0.427509 | 0.672429 | 0.649302 |
| MmugDNA.9345.1.S1_at   | MmugDNA.9345.1 | 11.13 | 11.04 | 0.09 | 0.15 | 1.07  | 0.329474 | 0.051875 | 0.676387 | 0.273151 |
| MmugDNA.9346.1.S1_at   | MmugDNA.9346.1 | 6.82  | 6.67  | 0.2  | 0.13 | 1.11  | 0.343402 | 0.275686 | 0.686631 | 0.539923 |
| MmugDNA.9348.1.S1_at   | MmugDNA.9348.1 | 3.5   | 3.38  | 0.2  | 0.1  | 1.09  | 0.262038 | 0.345834 | 0.624246 | 0.590997 |
| MmugDNA.935.1.S1_x_at  | MmugDNA.935.1  | 10.81 | 11.11 | 0.19 | 0.17 | -1.23 | 0.28744  | 0.346675 | 0.644587 | 0.591516 |
| MmugDNA.9350.1.S1_at   | MmugDNA.9350.1 | 5.26  | 5.26  | 0.17 | 0.05 | 1     | 0.527262 | 0.111799 | 0.797084 | 0.376856 |
| MmugDNA.9353.1.S1_at   | MmugDNA.9353.1 | 9.75  | 10.59 | 0.56 | 0.1  | -1.79 | 0.078508 | 0.085934 | 0.441146 | 0.338115 |
| MmugDNA.9354.1.S1_at   | MmugDNA.9354.1 | 12.86 | 12.88 | 0.22 | 0.13 | -1.01 | 0.215243 | 0.079123 | 0.585748 | 0.32625  |
| MmugDNA.9354.1.S1_x_at | MmugDNA.9354.1 | 12.89 | 12.95 | 0.18 | 0.08 | -1.04 | 0.144151 | 0.028655 | 0.519528 | 0.210956 |
| MmugDNA.9355.1.S1_at   | MmugDNA.9355.1 | 5.6   | 5.5   | 0.39 | 0.44 | 1.07  | 0.784018 | 0.626346 | 0.920602 | 0.779698 |
| MmugDNA.9357.1.S1_at   | MmugDNA.9357.1 | 6.47  | 6.68  | 0.43 | 0.43 | -1.16 | 0.115124 | 0.370977 | 0.488314 | 0.609964 |
| MmugDNA.9358.1.S1_at   | MmugDNA.9358.1 | 4.03  | 4.41  | 0.22 | 0.24 | -1.31 | 0.057701 | 0.043622 | 0.402635 | 0.253501 |
| MmugDNA.9359.1.S1_at   | MmugDNA.9359.1 | 6.7   | 6.4   | 0.31 | 0.1  | 1.24  | 0.190601 | 0.054464 | 0.561788 | 0.278959 |
| MmugDNA.936.1.S1_at    | MmugDNA.936.1  | 6.25  | 6.11  | 0.56 | 0.14 | 1.1   | 0.61815  | 0.347631 | 0.845802 | 0.592039 |
| MmugDNA.9360.1.S1_at   | MmugDNA.9360.1 | 3.84  | 3.77  | 0    | 0.04 | 1.05  | 0.1061   | 0.236363 | 0.478296 | 0.507308 |
| MmugDNA.9361.1.S1_at   | MmugDNA.9361.1 | 6.59  | 6.58  | 0.09 | 0.08 | 1     | 0.894092 | 0.434076 | 0.963672 | 0.654223 |
| MmugDNA.9362.1.S1_at   | MmugDNA.9362.1 | 7.34  | 7.73  | 0.71 | 0.21 | -1.31 | 0.938446 | 0.845635 | 0.979273 | 0.912169 |
| MmugDNA.9365.1.S1_at   | MmugDNA.9365.1 | 9.64  | 9.23  | 0.31 | 0.12 | 1.33  | 0.046019 | 0.028401 | 0.37735  | 0.210374 |
| MmugDNA.9366.1.S1_at   | MmugDNA.9366.1 | 6.61  | 6.55  | 0.12 | 0.07 | 1.04  | 0.815485 | 0.66872  | 0.933137 | 0.806133 |
| MmugDNA.9367.1.S1_at   | MmugDNA.9367.1 | 4.77  | 4.71  | 0.31 | 0.51 | 1.04  | 0.544773 | 0.729253 | 0.807475 | 0.843541 |
| MmugDNA.937.1.S1_at    | MmugDNA.937.1  | 4.73  | 4.67  | 0.33 | 0.15 | 1.04  | 0.575504 | 0.007465 | 0.824671 | 0.115888 |
| MmugDNA.9370.1.S1_at   | MmugDNA.9370.1 | 4.05  | 3.96  | 0.07 | 0.05 | 1.06  | 0.175142 | 0.726432 | 0.548031 | 0.841687 |
| MmugDNA.9371.1.S1_at   | MmugDNA.9371.1 | 9.17  | 9.11  | 0.29 | 0.03 | 1.05  | 0.577636 | 0.122921 | 0.825827 | 0.392923 |
| MmugDNA.9372.1.S1_at   | MmugDNA.9372.1 | 5.9   | 5.65  | 0.16 | 0.3  | 1.2   | 0.163744 | 0.13475  | 0.536523 | 0.40678  |

|                        |                |       |       |      |      |       |          |          |          |          |
|------------------------|----------------|-------|-------|------|------|-------|----------|----------|----------|----------|
| MmugDNA.9373.1.S1_at   | MmugDNA.9373.1 | 7.7   | 8.64  | 0.25 | 0.26 | -1.92 | 0.019915 | 0.011725 | 0.302615 | 0.140206 |
| MmugDNA.9374.1.S1_s_at | MmugDNA.9374.1 | 9.26  | 8.59  | 1.02 | 0.56 | 1.59  | 0.140118 | 0.144185 | 0.515581 | 0.41805  |
| MmugDNA.9375.1.S1_at   | MmugDNA.9375.1 | 8.68  | 7.96  | 0.4  | 0.24 | 1.64  | 0.02404  | 0.073747 | 0.317529 | 0.317093 |
| MmugDNA.9376.1.S1_at   | MmugDNA.9376.1 | 5.67  | 5.41  | 0.25 | 0.06 | 1.19  | 0.139594 | 0.215002 | 0.515028 | 0.488898 |
| MmugDNA.9377.1.S1_at   | MmugDNA.9377.1 | 5.73  | 5.62  | 0.29 | 0.13 | 1.08  | 0.218718 | 0.23599  | 0.588341 | 0.507056 |
| MmugDNA.9378.1.S1_at   | MmugDNA.9378.1 | 6.51  | 6.33  | 0.12 | 0.2  | 1.13  | 0.283089 | 0.308586 | 0.641278 | 0.564575 |
| MmugDNA.9379.1.S1_at   | MmugDNA.9379.1 | 4.04  | 4.38  | 0.33 | 0.08 | -1.26 | 0.387609 | 0.107005 | 0.714518 | 0.36958  |
| MmugDNA.938.1.S1_at    | MmugDNA.938.1  | 7.88  | 7.99  | 0.33 | 0.09 | -1.08 | 0.483707 | 0.639429 | 0.773253 | 0.788289 |
| MmugDNA.9380.1.S1_at   | MmugDNA.9380.1 | 4.94  | 4.67  | 0.15 | 0.07 | 1.2   | 0.069186 | 0.132793 | 0.426664 | 0.404544 |
| MmugDNA.9381.1.S1_at   | MmugDNA.9381.1 | 3.33  | 3.32  | 0.04 | 0.03 | 1     | 0.813615 | 0.089588 | 0.93266  | 0.343811 |
| MmugDNA.9382.1.S1_at   | MmugDNA.9382.1 | 3.44  | 3.48  | 0.09 | 0.26 | -1.02 | 0.664506 | 0.817622 | 0.867683 | 0.894787 |
| MmugDNA.9383.1.S1_at   | MmugDNA.9383.1 | 5.26  | 4.92  | 0.04 | 0.08 | 1.26  | 0.003491 | 0.329746 | 0.195142 | 0.578874 |
| MmugDNA.9384.1.S1_at   | MmugDNA.9384.1 | 12.4  | 12.37 | 0.14 | 0.09 | 1.02  | 0.551725 | 0.852522 | 0.81144  | 0.916196 |
| MmugDNA.9385.1.S1_at   | MmugDNA.9385.1 | 5.99  | 5.97  | 0.07 | 0.05 | 1.02  | 0.244969 | 0.305927 | 0.610441 | 0.562732 |
| MmugDNA.9386.1.S1_at   | MmugDNA.9386.1 | 5.45  | 5.5   | 0.13 | 0.14 | -1.04 | 0.473367 | 0.737966 | 0.767506 | 0.848158 |
| MmugDNA.9387.1.S1_at   | MmugDNA.9387.1 | 5.01  | 4.86  | 0.1  | 0.05 | 1.11  | 0.142237 | 0.301251 | 0.517202 | 0.559356 |
| MmugDNA.9389.1.S1_at   | MmugDNA.9389.1 | 2.85  | 2.84  | 0.05 | 0.13 | 1.01  | 0.37664  | 0.434382 | 0.706953 | 0.654536 |
| MmugDNA.939.1.S1_at    | MmugDNA.939.1  | 10.56 | 10.15 | 0.17 | 0.24 | 1.32  | 0.019354 | 0.001467 | 0.300575 | 0.058401 |
| MmugDNA.9390.1.S1_at   | MmugDNA.9390.1 | 3.62  | 3.72  | 0.16 | 0.41 | -1.07 | 0.41648  | 0.648148 | 0.734327 | 0.794002 |
| MmugDNA.9391.1.S1_at   | MmugDNA.9391.1 | 6.47  | 6.2   | 0.18 | 0.07 | 1.21  | 0.235178 | 0.398538 | 0.602266 | 0.629458 |
| MmugDNA.9392.1.S1_at   | MmugDNA.9392.1 | 12.4  | 12.23 | 1.02 | 0.04 | 1.12  | 0.524834 | 0.678872 | 0.796137 | 0.812474 |
| MmugDNA.9393.1.S1_at   | MmugDNA.9393.1 | 5.25  | 5.25  | 0    | 0.05 | 1     | 0.700386 | 0.927938 | 0.883486 | 0.959116 |
| MmugDNA.9396.1.S1_at   | MmugDNA.9396.1 | 10.29 | 9.72  | 0.2  | 0.11 | 1.48  | 0.012457 | 0.015243 | 0.262327 | 0.156859 |
| MmugDNA.9397.1.S1_at   | MmugDNA.9397.1 | 4.02  | 3.78  | 0.02 | 0.05 | 1.19  | 0.001545 | 0.004746 | 0.161959 | 0.096064 |
| MmugDNA.9398.1.S1_at   | MmugDNA.9398.1 | 11.85 | 12.14 | 0.22 | 0.17 | -1.23 | 0.278721 | 0.012346 | 0.637833 | 0.143697 |
| MmugDNA.9399.1.S1_at   | MmugDNA.9399.1 | 6.45  | 6.5   | 0.15 | 0.03 | -1.04 | 0.607444 | 0.663911 | 0.840884 | 0.803242 |
| MmugDNA.940.1.S1_at    | MmugDNA.940.1  | 2.82  | 3.38  | 0.5  | 0.1  | -1.47 | 0.331852 | 0.202888 | 0.678336 | 0.477312 |
| MmugDNA.9402.1.S1_at   | MmugDNA.9402.1 | 11.74 | 11.8  | 0.1  | 0.03 | -1.04 | 0.31178  | 0.27716  | 0.66351  | 0.541154 |
| MmugDNA.9402.1.S1_s_at | MmugDNA.9402.1 | 10.26 | 10.18 | 0.2  | 0.03 | 1.06  | 0.367772 | 0.228143 | 0.703298 | 0.500327 |
| MmugDNA.9405.1.S1_at   | MmugDNA.9405.1 | 8.39  | 8.83  | 0.54 | 0.32 | -1.35 | 0.771829 | 0.159915 | 0.914891 | 0.435987 |
| MmugDNA.9406.1.S1_at   | MmugDNA.9406.1 | 7.14  | 7.87  | 0.5  | 0.22 | -1.66 | 0.105591 | 0.535173 | 0.477345 | 0.720821 |
| MmugDNA.9407.1.S1_at   | MmugDNA.9407.1 | 4.12  | 3.73  | 0.14 | 0.14 | 1.32  | 0.041192 | 0.071315 | 0.365734 | 0.313345 |
| MmugDNA.9408.1.S1_at   | MmugDNA.9408.1 | 2.87  | 2.95  | 0.11 | 0.12 | -1.06 | 0.675829 | 0.499752 | 0.87277  | 0.698494 |
| MmugDNA.9409.1.S1_at   | MmugDNA.9409.1 | 4.47  | 4.44  | 0.03 | 0.04 | 1.02  | 0.381466 | 0.958443 | 0.710102 | 0.976452 |
| MmugDNA.9410.1.S1_at   | MmugDNA.9410.1 | 5.8   | 5.87  | 0.3  | 0.01 | -1.05 | 0.718374 | 0.933086 | 0.890616 | 0.962002 |
| MmugDNA.9411.1.S1_at   | MmugDNA.9411.1 | 4.78  | 4.77  | 0.14 | 0.17 | 1.01  | 0.909206 | 0.884839 | 0.969305 | 0.934382 |
| MmugDNA.9412.1.S1_at   | MmugDNA.9412.1 | 3.33  | 3.31  | 0.38 | 0.1  | 1.02  | 0.886389 | 0.96382  | 0.960501 | 0.979909 |
| MmugDNA.9414.1.S1_at   | MmugDNA.9414.1 | 3.61  | 3.55  | 0.34 | 0.13 | 1.04  | 0.264305 | 0.423108 | 0.626029 | 0.646145 |
| MmugDNA.9416.1.S1_at   | MmugDNA.9416.1 | 3.16  | 2.9   | 0.17 | 0.1  | 1.2   | 0.081595 | 0.094674 | 0.445568 | 0.351481 |
| MmugDNA.9418.1.S1_at   | MmugDNA.9418.1 | 13.29 | 13.33 | 0.09 | 0.05 | -1.03 | 0.505452 | 0.130096 | 0.785377 | 0.401724 |
| MmugDNA.9419.1.S1_at   | MmugDNA.9419.1 | 3.08  | 3.08  | 0.05 | 0.15 | 1     | 0.622899 | 0.830591 | 0.847979 | 0.902794 |
| MmugDNA.942.1.S1_at    | MmugDNA.942.1  | 6.32  | 6.21  | 0.11 | 0.19 | 1.08  | 0.630389 | 0.537035 | 0.851961 | 0.722236 |
| MmugDNA.9421.1.S1_at   | MmugDNA.9421.1 | 11.02 | 11    | 0.64 | 0.14 | 1.01  | 0.801505 | 0.37601  | 0.927649 | 0.613815 |

|                         |                 |       |       |      |      |       |          |          |          |          |
|-------------------------|-----------------|-------|-------|------|------|-------|----------|----------|----------|----------|
| MmugDNA.9423.1.S1_at    | MmugDNA.9423.1  | 6.93  | 6.54  | 0.51 | 0.23 | 1.31  | 0.172177 | 0.197265 | 0.54555  | 0.472213 |
| MmugDNA.9425.1.S1_at    | MmugDNA.9425.1  | 3.91  | 3.9   | 0.15 | 0.05 | 1.01  | 0.786399 | 0.87873  | 0.921428 | 0.930817 |
| MmugDNA.9426.1.S1_at    | MmugDNA.9426.1  | 2.86  | 2.87  | 0.07 | 0.14 | -1.01 | 0.596252 | 0.523005 | 0.835825 | 0.713429 |
| MmugDNA.9427.1.S1_at    | MmugDNA.9427.1  | 11.44 | 10.57 | 1.21 | 0.21 | 1.82  | 0.936671 | 0.139761 | 0.978754 | 0.413109 |
| MmugDNA.9428.1.S1_at    | MmugDNA.9428.1  | 4.2   | 4.1   | 0.11 | 0.09 | 1.08  | 0.167636 | 0.181124 | 0.54021  | 0.457582 |
| MmugDNA.9429.1.S1_at    | MmugDNA.9429.1  | 12.57 | 12.61 | 0.16 | 0.16 | -1.03 | 0.310258 | 0.008204 | 0.662073 | 0.120272 |
| MmugDNA.943.1.S1_at     | MmugDNA.943.1   | 4.81  | 4.52  | 0.1  | 0.12 | 1.22  | 0.025195 | 0.235783 | 0.320761 | 0.506949 |
| MmugDNA.9430.1.S1_at    | MmugDNA.9430.1  | 5.04  | 4.87  | 0.07 | 0.1  | 1.12  | 0.222145 | 0.45969  | 0.591742 | 0.671948 |
| MmugDNA.9431.1.S1_at    | MmugDNA.9431.1  | 3.56  | 3.26  | 0.06 | 0.21 | 1.23  | 0.238181 | 0.219703 | 0.605262 | 0.493336 |
| MmugDNA.9432.1.S1_at    | MmugDNA.9432.1  | 5.35  | 5.23  | 0.03 | 0.15 | 1.09  | 0.066902 | 0.315506 | 0.422979 | 0.569004 |
| MmugDNA.9436.1.S1_at    | MmugDNA.9436.1  | 6.44  | 7.07  | 0.08 | 0.23 | -1.54 | 0.00742  | 0.014004 | 0.22918  | 0.151595 |
| MmugDNA.9437.1.S1_at    | MmugDNA.9437.1  | 10.94 | 10.88 | 0.06 | 0.05 | 1.04  | 0.090121 | 0.001067 | 0.457992 | 0.051835 |
| MmugDNA.9439.1.S1_at    | MmugDNA.9439.1  | 4.6   | 4.53  | 0    | 0.12 | 1.05  | 0.466017 | 0.420656 | 0.763317 | 0.644323 |
| MmugDNA.944.1.S1_at     | MmugDNA.944.1   | 12.54 | 12.36 | 0.08 | 0.14 | 1.13  | 0.218582 | 0.243115 | 0.588313 | 0.513356 |
| MmugDNA.9441.1.S1_at    | MmugDNA.9441.1  | 10.36 | 10.44 | 0.67 | 0.31 | -1.05 | 0.212711 | 0.022188 | 0.583216 | 0.186424 |
| MmugDNA.9443.1.S1_at    | MmugDNA.9443.1  | 3.18  | 3.1   | 0.17 | 0.06 | 1.05  | 0.898273 | 0.514846 | 0.965455 | 0.707919 |
| MmugDNA.9444.1.S1_at    | MmugDNA.9444.1  | 7     | 6.49  | 0.78 | 1.13 | 1.43  | 0.894284 | 0.292243 | 0.96378  | 0.552363 |
| MmugDNA.9445.1.S1_at    | MmugDNA.9445.1  | 9.96  | 10.17 | 0.07 | 0.11 | -1.15 | 0.021149 | 0.008269 | 0.306888 | 0.12078  |
| MmugDNA.9445.1.S1_s_at  | MmugDNA.9445.1  | 8.71  | 8.68  | 0.15 | 0.12 | 1.03  | 0.989187 | 0.386503 | 0.995988 | 0.621626 |
| MmugDNA.9446.1.S1_at    | MmugDNA.9446.1  | 4.61  | 4.55  | 0.12 | 0.04 | 1.05  | 0.593109 | 0.746556 | 0.834072 | 0.852872 |
| MmugDNA.9447.1.S1_at    | MmugDNA.9447.1  | 7.35  | 7.4   | 0.63 | 0.13 | -1.04 | 0.475434 | 0.003228 | 0.768639 | 0.082124 |
| MmugDNA.9448.1.S1_at    | MmugDNA.9448.1  | 4.89  | 4.69  | 0.39 | 0.06 | 1.15  | 0.247137 | 0.443434 | 0.612582 | 0.661218 |
| MmugDNA.9449.1.S1_at    | MmugDNA.9449.1  | 6.81  | 7.23  | 0.09 | 0.19 | -1.34 | 0.015953 | 0.000034 | 0.284606 | 0.023031 |
| MmugDNA.945.1.S1_s_at   | MmugDNA.945.1   | 3.32  | 3.25  | 0.26 | 0.15 | 1.05  | 0.225564 | 0.368614 | 0.594764 | 0.608107 |
| MmugDNA.9450.1.S1_at    | MmugDNA.9450.1  | 4.24  | 5.08  | 0.11 | 0.07 | -1.79 | 0.000438 | 0.000383 | 0.139393 | 0.037273 |
| MmugDNA.9451.1.S1_at    | MmugDNA.9451.1  | 4.57  | 4.51  | 0.1  | 0.04 | 1.04  | 0.307266 | 0.653253 | 0.660122 | 0.797335 |
| MmugDNA.9453.1.S1_at    | MmugDNA.9453.1  | 9.45  | 8.97  | 0.91 | 0.04 | 1.4   | 0.4095   | 0.185608 | 0.730101 | 0.461574 |
| MmugDNA.9454.1.S1_at    | MmugDNA.9454.1  | 9.6   | 9.95  | 0.3  | 0.14 | -1.28 | 0.213209 | 0.239729 | 0.583803 | 0.510443 |
| MmugDNA.9455.1.S1_at    | MmugDNA.9455.1  | 6.65  | 6.57  | 0.74 | 0.27 | 1.06  | 0.332203 | 0.027625 | 0.678721 | 0.207522 |
| MmugDNA.9457.1.S1_at    | MmugDNA.9457.1  | 9.01  | 9.01  | 0.06 | 0.03 | 1     | 0.614981 | 0.729589 | 0.844155 | 0.843613 |
| MmugDNA.9458.1.S1_at    | MmugDNA.9458.1  | 6.88  | 7.14  | 0.49 | 0.06 | -1.2  | 0.965777 | 0.370517 | 0.988741 | 0.609573 |
| MmugDNA.9459.1.S1_x_at  | MmugDNA.9459.1  | 3.99  | 4     | 0.24 | 0.11 | -1.01 | 0.747369 | 0.233094 | 0.903959 | 0.504456 |
| MmugDNA.946.1.S1_at     | MmugDNA.946.1   | 6.9   | 6.89  | 0.29 | 0.21 | 1     | 0.790771 | 0.323453 | 0.922991 | 0.574466 |
| MmugDNA.9460.1.S1_at    | MmugDNA.9460.1  | 4.35  | 4.13  | 0.11 | 0.2  | 1.17  | 0.431891 | 0.65292  | 0.74367  | 0.797125 |
| MmugDNA.9461.1.S1_at    | MmugDNA.9461.1  | 3.59  | 3.94  | 0.15 | 0.11 | -1.27 | 0.081409 | 0.052747 | 0.445406 | 0.275315 |
| MmugDNA.9463.1.S1_at    | MmugDNA.9463.1  | 3.37  | 3.35  | 0.12 | 0.08 | 1.02  | 0.44847  | 0.265628 | 0.753886 | 0.531468 |
| MmugDNA.9464.1.S1_at    | MmugDNA.9464.1  | 8.95  | 8.67  | 0.09 | 0.23 | 1.21  | 0.369928 | 0.229234 | 0.704429 | 0.501527 |
| MmugDNA.9467.1.S1_at    | MmugDNA.9467.1  | 6.26  | 6.45  | 1.05 | 0.02 | -1.14 | 0.526106 | 0.722824 | 0.796442 | 0.839457 |
| MmugDNA.9468.1.S1_at    | MmugDNA.9468.1  | 3.45  | 3.32  | 0.09 | 0.26 | 1.09  | 0.166206 | 0.194448 | 0.538949 | 0.469533 |
| MmugDNA.18446.1.S1_s_at | MmugDNA.18446.1 | 10.21 | 10.87 | 0.98 | 0.44 | -1.58 | 0.215375 | 0.286802 | 0.585748 | 0.548149 |
| MmugDNA.9472.1.S1_at    | MmugDNA.9472.1  | 9.58  | 9.25  | 0.64 | 0.23 | 1.25  | 0.752525 | 0.203301 | 0.906593 | 0.477517 |
| MmugDNA.9473.1.S1_at    | MmugDNA.9473.1  | 11.06 | 10.55 | 2.79 | 0.23 | 1.42  | 0.704457 | 0.11571  | 0.885155 | 0.382814 |
| MmugDNA.9474.1.S1_at    | MmugDNA.9474.1  | 3.33  | 3.22  | 0.03 | 0.4  | 1.08  | 0.640036 | 0.842513 | 0.856487 | 0.910315 |

|                      |                |       |       |      |      |       |          |          |          |          |
|----------------------|----------------|-------|-------|------|------|-------|----------|----------|----------|----------|
| MmugDNA.9475.1.S1_at | MmugDNA.9475.1 | 8.19  | 8.6   | 1.49 | 0.42 | -1.33 | 0.665701 | 0.050156 | 0.868043 | 0.269105 |
| MmugDNA.9476.1.S1_at | MmugDNA.9476.1 | 5.69  | 5.4   | 0.13 | 0.24 | 1.22  | 0.110915 | 0.116818 | 0.48424  | 0.384133 |
| MmugDNA.9477.1.S1_at | MmugDNA.9477.1 | 4.25  | 3.98  | 1.15 | 0.63 | 1.21  | 0.888221 | 0.348526 | 0.961263 | 0.592609 |
| MmugDNA.9478.1.S1_at | MmugDNA.9478.1 | 3.41  | 4.91  | 1.03 | 0.99 | -2.83 | 0.21834  | 0.126102 | 0.58818  | 0.39672  |
| MmugDNA.9480.1.S1_at | MmugDNA.9480.1 | 3.76  | 3.75  | 0.17 | 0.31 | 1.01  | 0.947966 | 0.99039  | 0.98212  | 0.994548 |
| MmugDNA.9482.1.S1_at | MmugDNA.9482.1 | 5.35  | 5.27  | 0.26 | 0.29 | 1.06  | 0.297939 | 0.424581 | 0.652791 | 0.647146 |
| MmugDNA.9483.1.S1_at | MmugDNA.9483.1 | 7.37  | 6.61  | 0.41 | 0.19 | 1.69  | 0.05857  | 0.004044 | 0.404746 | 0.090281 |
| MmugDNA.9484.1.S1_at | MmugDNA.9484.1 | 6.02  | 6.08  | 0.08 | 0.08 | -1.04 | 0.930851 | 0.880272 | 0.97692  | 0.931571 |
| MmugDNA.9485.1.S1_at | MmugDNA.9485.1 | 5.3   | 5.12  | 0.38 | 0.1  | 1.14  | 0.142792 | 0.151417 | 0.517889 | 0.426121 |
| MmugDNA.9486.1.S1_at | MmugDNA.9486.1 | 7.23  | 6.83  | 0.99 | 0.18 | 1.32  | 0.632203 | 0.029448 | 0.852783 | 0.213368 |
| MmugDNA.9487.1.S1_at | MmugDNA.9487.1 | 9.86  | 9.78  | 0.24 | 0.02 | -1.06 | 0.586576 | 0.780018 | 0.831389 | 0.872435 |
| MmugDNA.9489.1.S1_at | MmugDNA.9489.1 | 3.58  | 3.18  | 0.73 | 0.22 | 1.32  | 0.226175 | 0.233159 | 0.595306 | 0.504458 |
| MmugDNA.949.1.S1_at  | MmugDNA.949.1  | 8.06  | 7.71  | 0.82 | 0.05 | 1.27  | 0.446463 | 0.508909 | 0.752767 | 0.703911 |
| MmugDNA.9490.1.S1_at | MmugDNA.9490.1 | 4.57  | 4.55  | 0.21 | 0.21 | 1.01  | 0.990114 | 0.999369 | 0.996301 | 0.999769 |
| MmugDNA.9492.1.S1_at | MmugDNA.9492.1 | 7.63  | 7.66  | 0.59 | 0.09 | -1.02 | 0.407862 | 0.263748 | 0.729025 | 0.530052 |
| MmugDNA.9493.1.S1_at | MmugDNA.9493.1 | 8.08  | 7.81  | 0.69 | 0.24 | 1.21  | 0.379368 | 0.122523 | 0.708918 | 0.392427 |
| MmugDNA.9494.1.S1_at | MmugDNA.9494.1 | 6.96  | 7.11  | 0.35 | 0.17 | -1.11 | 0.806439 | 0.366732 | 0.929767 | 0.606498 |
| MmugDNA.9498.1.S1_at | MmugDNA.9498.1 | 8.36  | 9.34  | 1.3  | 0.06 | -1.97 | 0.109476 | 0.069994 | 0.482287 | 0.310761 |
| MmugDNA.9499.1.S1_at | MmugDNA.9499.1 | 7.45  | 7.79  | 0.28 | 0.26 | -1.26 | 0.451842 | 0.082245 | 0.755571 | 0.331091 |
| MmugDNA.95.1.S1_at   | MmugDNA.95.1   | 6.99  | 7.01  | 0.2  | 0.06 | -1.01 | 0.946949 | 0.638844 | 0.981582 | 0.787894 |
| MmugDNA.9501.1.S1_at | MmugDNA.9501.1 | 3.45  | 3.22  | 0.18 | 0.14 | 1.17  | 0.280897 | 0.141937 | 0.639554 | 0.415477 |
| MmugDNA.9502.1.S1_at | MmugDNA.9502.1 | 6.54  | 6.44  | 0.12 | 0.1  | 1.08  | 0.221193 | 0.190499 | 0.590573 | 0.465906 |
| MmugDNA.9503.1.S1_at | MmugDNA.9503.1 | 5.7   | 5.64  | 0.55 | 0.21 | 1.04  | 0.881618 | 0.092675 | 0.959065 | 0.348751 |
| MmugDNA.9504.1.S1_at | MmugDNA.9504.1 | 6.27  | 6.07  | 0.36 | 0.24 | 1.15  | 0.527124 | 0.865684 | 0.796935 | 0.923638 |
| MmugDNA.9505.1.S1_at | MmugDNA.9505.1 | 4.78  | 4.76  | 0.21 | 0.1  | 1.01  | 0.839924 | 0.933751 | 0.943103 | 0.9623   |
| MmugDNA.9506.1.S1_at | MmugDNA.9506.1 | 9.08  | 9.17  | 0.07 | 0.34 | -1.07 | 0.641996 | 0.210376 | 0.857628 | 0.48426  |
| MmugDNA.9507.1.S1_at | MmugDNA.9507.1 | 9.6   | 9.57  | 0.45 | 0.17 | 1.02  | 0.944564 | 0.129363 | 0.980747 | 0.400748 |
| MmugDNA.9508.1.S1_at | MmugDNA.9508.1 | 5.97  | 6.51  | 0.75 | 0.5  | -1.45 | 0.199577 | 0.264149 | 0.571471 | 0.530214 |
| MmugDNA.9509.1.S1_at | MmugDNA.9509.1 | 5.17  | 5.22  | 0.11 | 0.09 | -1.03 | 0.291537 | 0.002115 | 0.647943 | 0.068023 |
| MmugDNA.951.1.S1_at  | MmugDNA.951.1  | 8.42  | 9.71  | 0.77 | 0.23 | -2.45 | 0.048433 | 0.041623 | 0.383306 | 0.24887  |
| MmugDNA.9510.1.S1_at | MmugDNA.9510.1 | 5.74  | 5.5   | 0    | 0.14 | 1.18  | 0.116248 | 0.065342 | 0.489568 | 0.30137  |
| MmugDNA.9511.1.S1_at | MmugDNA.9511.1 | 4.61  | 4.26  | 0.64 | 0.11 | 1.27  | 0.182813 | 0.065824 | 0.555631 | 0.301933 |
| MmugDNA.9512.1.S1_at | MmugDNA.9512.1 | 3.07  | 3.14  | 0.08 | 0.15 | -1.05 | 0.549684 | 0.497617 | 0.810392 | 0.696935 |
| MmugDNA.9514.1.S1_at | MmugDNA.9514.1 | 10.38 | 10.68 | 0.2  | 0.14 | -1.23 | 0.092638 | 0.037208 | 0.461192 | 0.237285 |
| MmugDNA.9516.1.S1_at | MmugDNA.9516.1 | 10.21 | 9.76  | 0.07 | 0.13 | 1.36  | 0.010653 | 0.218442 | 0.249034 | 0.492009 |
| MmugDNA.9518.1.S1_at | MmugDNA.9518.1 | 5.23  | 4.77  | 0.89 | 0.02 | 1.38  | 0.428344 | 0.285557 | 0.741782 | 0.547395 |
| MmugDNA.9519.1.S1_at | MmugDNA.9519.1 | 3.84  | 3.53  | 0.42 | 0.25 | 1.24  | 0.229312 | 0.081556 | 0.598234 | 0.329764 |
| MmugDNA.952.1.S1_at  | MmugDNA.952.1  | 10.84 | 10.3  | 0.59 | 0.21 | 1.46  | 0.366329 | 0.521166 | 0.701752 | 0.712273 |
| MmugDNA.9520.1.S1_at | MmugDNA.9520.1 | 6.12  | 6.36  | 0.46 | 0.16 | -1.17 | 0.223256 | 0.302758 | 0.592569 | 0.560307 |
| MmugDNA.9525.1.S1_at | MmugDNA.9525.1 | 11.67 | 11.56 | 0.17 | 0.12 | 1.08  | 0.476033 | 0.060616 | 0.768871 | 0.292801 |
| MmugDNA.9527.1.S1_at | MmugDNA.9527.1 | 6.63  | 5.9   | 0.4  | 0.3  | 1.66  | 0.070298 | 0.005072 | 0.428889 | 0.09907  |
| MmugDNA.9530.1.S1_at | MmugDNA.9530.1 | 3.31  | 3.4   | 0.08 | 0.01 | -1.07 | 0.399663 | 0.914766 | 0.72327  | 0.9521   |
| MmugDNA.9531.1.S1_at | MmugDNA.9531.1 | 3.94  | 3.8   | 0.16 | 0.06 | 1.1   | 0.117119 | 0.113123 | 0.490492 | 0.379122 |

|                        |                |       |       |      |      |       |          |          |          |          |
|------------------------|----------------|-------|-------|------|------|-------|----------|----------|----------|----------|
| MmugDNA.9532.1.S1_at   | MmugDNA.9532.1 | 3.83  | 3.83  | 0.02 | 0    | 1     | 0.334635 | 0.889819 | 0.680478 | 0.937225 |
| MmugDNA.9533.1.S1_at   | MmugDNA.9533.1 | 5.58  | 5.58  | 0.09 | 0.11 | 1     | 0.423565 | 0.52727  | 0.739193 | 0.715915 |
| MmugDNA.9534.1.S1_at   | MmugDNA.9534.1 | 8.35  | 8.27  | 0.81 | 0.58 | 1.06  | 0.861402 | 0.737092 | 0.951266 | 0.847795 |
| MmugDNA.9535.1.S1_at   | MmugDNA.9535.1 | 3.34  | 3.33  | 0.13 | 0.06 | 1     | 0.729365 | 0.69715  | 0.895742 | 0.824045 |
| MmugDNA.9538.1.S1_at   | MmugDNA.9538.1 | 4.68  | 4.27  | 0.5  | 0.03 | 1.33  | 0.265207 | 0.261269 | 0.626397 | 0.527739 |
| MmugDNA.9539.1.S1_at   | MmugDNA.9539.1 | 10.39 | 8.8   | 0.09 | 0.12 | 3.01  | 0.000043 | 0.000009 | 0.108151 | 0.016421 |
| MmugDNA.9540.1.S1_at   | MmugDNA.9540.1 | 4.45  | 4.23  | 0.32 | 0.15 | 1.17  | 0.200088 | 0.534737 | 0.571873 | 0.720524 |
| MmugDNA.9541.1.S1_at   | MmugDNA.9541.1 | 4.74  | 4.51  | 0.15 | 0.3  | 1.18  | 0.350662 | 0.364156 | 0.691501 | 0.604488 |
| MmugDNA.9542.1.S1_at   | MmugDNA.9542.1 | 5.86  | 5.83  | 0.32 | 0.17 | 1.02  | 0.593898 | 0.177381 | 0.834479 | 0.453742 |
| MmugDNA.9543.1.S1_at   | MmugDNA.9543.1 | 4.27  | 4     | 0.19 | 0.23 | 1.21  | 0.134435 | 0.183645 | 0.508462 | 0.459681 |
| MmugDNA.9544.1.S1_at   | MmugDNA.9544.1 | 3.73  | 3.81  | 0.16 | 0.11 | -1.05 | 0.907411 | 0.744829 | 0.968588 | 0.852198 |
| MmugDNA.9547.1.S1_at   | MmugDNA.9547.1 | 3.51  | 3.44  | 0.03 | 0.19 | 1.05  | 0.395397 | 0.513385 | 0.720458 | 0.706881 |
| MmugDNA.9549.1.S1_at   | MmugDNA.9549.1 | 7.07  | 7.76  | 0.55 | 0.11 | -1.61 | 0.127704 | 0.042661 | 0.50202  | 0.251037 |
| MmugDNA.955.1.S1_at    | MmugDNA.955.1  | 6.85  | 6.84  | 0.05 | 0.05 | 1     | 0.912228 | 0.147833 | 0.970255 | 0.42217  |
| MmugDNA.9550.1.S1_at   | MmugDNA.9550.1 | 8.85  | 8.71  | 0.23 | 0.09 | 1.1   | 0.26664  | 0.316615 | 0.627504 | 0.569963 |
| MmugDNA.9551.1.S1_at   | MmugDNA.9551.1 | 12.67 | 12.33 | 0.07 | 0.12 | 1.27  | 0.011936 | 0.003679 | 0.257858 | 0.086591 |
| MmugDNA.9552.1.S1_at   | MmugDNA.9552.1 | 5.48  | 5.33  | 0.3  | 0.36 | 1.12  | 0.933657 | 0.559708 | 0.977575 | 0.736365 |
| MmugDNA.9554.1.S1_at   | MmugDNA.9554.1 | 2.84  | 2.84  | 0.15 | 0.08 | 1     | 0.578694 | 0.633476 | 0.826289 | 0.784173 |
| MmugDNA.956.1.S1_s_at  | MmugDNA.956.1  | 9.12  | 9.58  | 0.95 | 0.07 | -1.37 | 0.459218 | 0.446407 | 0.759338 | 0.662842 |
| MmugDNA.9561.1.S1_at   | MmugDNA.9561.1 | 8.91  | 8.84  | 0.46 | 0.11 | 1.05  | 0.667036 | 0.27932  | 0.868458 | 0.542962 |
| MmugDNA.9562.1.S1_at   | MmugDNA.9562.1 | 3.68  | 3.66  | 0.17 | 0.04 | 1.01  | 0.695041 | 0.67798  | 0.881262 | 0.811865 |
| MmugDNA.9563.1.S1_at   | MmugDNA.9563.1 | 5.3   | 5.69  | 0.2  | 0.43 | -1.31 | 0.16381  | 0.165652 | 0.53663  | 0.441925 |
| MmugDNA.9564.1.S1_at   | MmugDNA.9564.1 | 5.09  | 5.53  | 0.81 | 0.46 | -1.35 | 0.963012 | 0.750829 | 0.988102 | 0.855074 |
| MmugDNA.9565.1.S1_at   | MmugDNA.9565.1 | 7.12  | 6.94  | 0.17 | 0.08 | 1.13  | 0.114254 | 0.108328 | 0.487606 | 0.371601 |
| MmugDNA.9566.1.S1_at   | MmugDNA.9566.1 | 6.04  | 5.76  | 0.33 | 0.08 | 1.21  | 0.711432 | 0.733727 | 0.887632 | 0.845822 |
| MmugDNA.9567.1.S1_at   | MmugDNA.9567.1 | 6.14  | 6.5   | 0.3  | 0.11 | -1.29 | 0.304935 | 0.187865 | 0.658513 | 0.463959 |
| MmugDNA.9568.1.S1_at   | MmugDNA.9568.1 | 2.93  | 3.06  | 0.73 | 0.04 | -1.09 | 0.502036 | 0.713161 | 0.783497 | 0.833655 |
| MmugDNA.9569.1.S1_at   | MmugDNA.9569.1 | 3.67  | 3.38  | 0.14 | 0.12 | 1.22  | 0.176366 | 0.068124 | 0.549355 | 0.307181 |
| MmugDNA.957.1.S1_x_at  | MmugDNA.957.1  | 12.84 | 12.83 | 0.27 | 0.21 | 1.01  | 0.508474 | 0.645001 | 0.787038 | 0.791993 |
| MmugDNA.9570.1.S1_at   | MmugDNA.9570.1 | 3.47  | 3.42  | 0.02 | 0.06 | 1.04  | 0.055852 | 0.167271 | 0.399441 | 0.443684 |
| MmugDNA.9571.1.S1_at   | MmugDNA.9571.1 | 11.26 | 9.64  | 0.18 | 0.17 | 3.08  | 0.000423 | 0.000057 | 0.137028 | 0.025666 |
| MmugDNA.9573.1.S1_at   | MmugDNA.9573.1 | 4.15  | 4.93  | 0.23 | 0.22 | -1.71 | 0.021782 | 0.244755 | 0.309672 | 0.514615 |
| MmugDNA.9574.1.S1_at   | MmugDNA.9574.1 | 3.21  | 3.13  | 0.14 | 0.07 | 1.06  | 0.259571 | 0.234076 | 0.622626 | 0.505319 |
| MmugDNA.9576.1.S1_at   | MmugDNA.9576.1 | 2.99  | 3.01  | 0.18 | 0.07 | -1.01 | 0.966803 | 0.95076  | 0.989067 | 0.972034 |
| MmugDNA.9577.1.S1_s_at | MmugDNA.9577.1 | 9.91  | 9.56  | 0.21 | 0.18 | 1.27  | 0.054797 | 0.019318 | 0.397122 | 0.174723 |
| MmugDNA.9579.1.S1_at   | MmugDNA.9579.1 | 3.52  | 2.99  | 0.14 | 0.26 | 1.44  | 0.05522  | 0.123056 | 0.398095 | 0.393015 |
| MmugDNA.9579.1.S1_x_at | MmugDNA.9579.1 | 3.2   | 3.01  | 0.15 | 0.24 | 1.14  | 0.452878 | 0.314348 | 0.755901 | 0.568273 |
| MmugDNA.958.1.S1_at    | MmugDNA.958.1  | 5.94  | 5.98  | 0.2  | 0.08 | -1.03 | 0.454375 | 0.526483 | 0.756743 | 0.715574 |
| MmugDNA.9583.1.S1_at   | MmugDNA.9583.1 | 5.93  | 5.91  | 0.43 | 0.2  | 1.02  | 0.461229 | 0.607536 | 0.760848 | 0.766417 |
| MmugDNA.9584.1.S1_at   | MmugDNA.9584.1 | 3.34  | 3.35  | 0.18 | 0.05 | -1.01 | 0.623392 | 0.412039 | 0.848224 | 0.638463 |
| MmugDNA.9585.1.S1_at   | MmugDNA.9585.1 | 7.5   | 7.72  | 0.74 | 0.23 | -1.17 | 0.479127 | 0.312301 | 0.770536 | 0.567015 |
| MmugDNA.9586.1.S1_at   | MmugDNA.9586.1 | 3.95  | 4.05  | 0.17 | 0.05 | -1.07 | 0.984614 | 0.100585 | 0.995256 | 0.359845 |
| MmugDNA.9587.1.S1_at   | MmugDNA.9587.1 | 8.32  | 8.37  | 0.27 | 0.05 | -1.04 | 0.862923 | 0.37517  | 0.951792 | 0.613238 |

|                      |                |       |       |      |      |       |          |          |          |          |
|----------------------|----------------|-------|-------|------|------|-------|----------|----------|----------|----------|
| MmugDNA.9589.1.S1_at | MmugDNA.9589.1 | 4.55  | 4.29  | 0.09 | 0.07 | 1.2   | 0.016724 | 0.088901 | 0.287809 | 0.34275  |
| MmugDNA.959.1.S1_at  | MmugDNA.959.1  | 8.67  | 8.64  | 0.26 | 0.06 | 1.02  | 0.375476 | 0.178304 | 0.706515 | 0.45464  |
| MmugDNA.9590.1.S1_at | MmugDNA.9590.1 | 11.24 | 10.69 | 0.34 | 0.41 | 1.46  | 0.302939 | 0.08982  | 0.656807 | 0.34404  |
| MmugDNA.9593.1.S1_at | MmugDNA.9593.1 | 3.88  | 3.85  | 0.21 | 0.51 | 1.02  | 0.781154 | 0.183081 | 0.919522 | 0.459493 |
| MmugDNA.9594.1.S1_at | MmugDNA.9594.1 | 3.34  | 3.42  | 0.19 | 0.17 | -1.06 | 0.607777 | 0.049653 | 0.840971 | 0.267876 |
| MmugDNA.9596.1.S1_at | MmugDNA.9596.1 | 3.8   | 3.78  | 0.21 | 0.17 | 1.01  | 0.53746  | 0.785138 | 0.802735 | 0.875623 |
| MmugDNA.9598.1.S1_at | MmugDNA.9598.1 | 7.88  | 8.29  | 0.37 | 0.16 | -1.32 | 0.435449 | 0.162175 | 0.745684 | 0.438335 |
| MmugDNA.9599.1.S1_at | MmugDNA.9599.1 | 4.29  | 4.29  | 0.09 | 0.08 | -1    | 0.516845 | 0.789451 | 0.791667 | 0.878377 |
| MmugDNA.96.1.S1_at   | MmugDNA.96.1   | 9.99  | 9.01  | 0.68 | 0.02 | 1.96  | 0.2121   | 0.132647 | 0.582812 | 0.404544 |
| MmugDNA.960.1.S1_at  | MmugDNA.960.1  | 8.56  | 8.23  | 0.48 | 0.14 | 1.26  | 0.880211 | 0.974903 | 0.958521 | 0.986264 |
| MmugDNA.9602.1.S1_at | MmugDNA.9602.1 | 8.79  | 8.72  | 0.72 | 0.23 | -1.05 | 0.237954 | 0.305982 | 0.605101 | 0.562732 |
| MmugDNA.9606.1.S1_at | MmugDNA.9606.1 | 10.13 | 9.98  | 0.33 | 0.16 | 1.11  | 0.356973 | 0.189642 | 0.695386 | 0.465297 |
| MmugDNA.9608.1.S1_at | MmugDNA.9608.1 | 8.86  | 9.38  | 0.46 | 0.05 | -1.43 | 0.31699  | 0.469275 | 0.666916 | 0.678191 |
| MmugDNA.9609.1.S1_at | MmugDNA.9609.1 | 7.19  | 7.85  | 1.2  | 0.23 | -1.58 | 0.78638  | 0.102778 | 0.921426 | 0.363305 |
| MmugDNA.961.1.S1_at  | MmugDNA.961.1  | 6.57  | 6.51  | 0.2  | 0.1  | 1.04  | 0.234827 | 0.357115 | 0.602132 | 0.598798 |
| MmugDNA.9611.1.S1_at | MmugDNA.9611.1 | 8.12  | 8.35  | 0.52 | 0    | -1.17 | 0.691192 | 0.611794 | 0.879715 | 0.769583 |
| MmugDNA.9613.1.S1_at | MmugDNA.9613.1 | 8.62  | 7.94  | 0.11 | 0.13 | 1.61  | 0.002288 | 0.001724 | 0.174757 | 0.062886 |
| MmugDNA.9616.1.S1_at | MmugDNA.9616.1 | 11.98 | 12.86 | 0.27 | 0.05 | -1.84 | 0.005316 | 0.001393 | 0.207623 | 0.057005 |
| MmugDNA.9617.1.S1_at | MmugDNA.9617.1 | 4.18  | 3.94  | 0.3  | 0.08 | 1.18  | 0.292089 | 0.407103 | 0.648392 | 0.634734 |
| MmugDNA.9618.1.S1_at | MmugDNA.9618.1 | 5.4   | 5.45  | 0.21 | 0.03 | -1.03 | 0.462773 | 0.36169  | 0.761753 | 0.602419 |
| MmugDNA.9619.1.S1_at | MmugDNA.9619.1 | 10.9  | 11.07 | 0.14 | 0.09 | -1.13 | 0.141554 | 0.151315 | 0.516365 | 0.426073 |
| MmugDNA.962.1.S1_at  | MmugDNA.962.1  | 10.71 | 11.26 | 0.6  | 0.01 | -1.46 | 0.29452  | 0.49659  | 0.65061  | 0.696119 |
| MmugDNA.9620.1.S1_at | MmugDNA.9620.1 | 8.27  | 7.95  | 0.85 | 0.22 | 1.24  | 0.686362 | 0.49611  | 0.877356 | 0.695877 |
| MmugDNA.9621.1.S1_at | MmugDNA.9621.1 | 5.55  | 5.47  | 0.03 | 0.11 | 1.06  | 0.383222 | 0.840793 | 0.711259 | 0.909237 |
| MmugDNA.9622.1.S1_at | MmugDNA.9622.1 | 9.17  | 8.43  | 0.53 | 0.22 | 1.67  | 0.084386 | 0.015155 | 0.450953 | 0.156391 |
| MmugDNA.9624.1.S1_at | MmugDNA.9624.1 | 5.99  | 4.94  | 0.38 | 0.27 | 2.08  | 0.013717 | 0.041383 | 0.271077 | 0.248067 |
| MmugDNA.9625.1.S1_at | MmugDNA.9625.1 | 10.12 | 10.01 | 0.52 | 0.15 | 1.08  | 0.691857 | 0.569525 | 0.880061 | 0.742452 |
| MmugDNA.9626.1.S1_at | MmugDNA.9626.1 | 9.01  | 9.2   | 0.15 | 0.12 | -1.14 | 0.075764 | 0.000133 | 0.436784 | 0.029087 |
| MmugDNA.9627.1.S1_at | MmugDNA.9627.1 | 8.24  | 8.31  | 1.44 | 0.12 | -1.05 | 0.961556 | 0.122939 | 0.987441 | 0.392923 |
| MmugDNA.9628.1.S1_at | MmugDNA.9628.1 | 3.59  | 3.63  | 0.1  | 0.06 | -1.03 | 0.395749 | 0.593023 | 0.720706 | 0.758    |
| MmugDNA.963.1.S1_at  | MmugDNA.963.1  | 7     | 6.53  | 0.47 | 0.29 | 1.38  | 0.074088 | 0.064021 | 0.434846 | 0.299166 |
| MmugDNA.9630.1.S1_at | MmugDNA.9630.1 | 5.05  | 5.1   | 0.1  | 0.18 | -1.03 | 0.391177 | 0.351547 | 0.717502 | 0.595094 |
| MmugDNA.9633.1.S1_at | MmugDNA.9633.1 | 6.77  | 6.69  | 0.1  | 0.15 | 1.05  | 0.540322 | 0.581991 | 0.804343 | 0.750784 |
| MmugDNA.9635.1.S1_at | MmugDNA.9635.1 | 7.96  | 8.27  | 0.37 | 0.23 | -1.24 | 0.241827 | 0.038779 | 0.607952 | 0.241916 |
| MmugDNA.9636.1.S1_at | MmugDNA.9636.1 | 5.02  | 5.05  | 0.33 | 0.04 | -1.02 | 0.383309 | 0.391643 | 0.711306 | 0.625282 |
| MmugDNA.9637.1.S1_at | MmugDNA.9637.1 | 4.11  | 3.69  | 0.4  | 0.14 | 1.33  | 0.155161 | 0.193815 | 0.528509 | 0.468847 |
| MmugDNA.9638.1.S1_at | MmugDNA.9638.1 | 5.27  | 5.29  | 0.17 | 0.07 | -1.01 | 0.988673 | 0.403648 | 0.995877 | 0.632266 |
| MmugDNA.9640.1.S1_at | MmugDNA.9640.1 | 5.28  | 5.2   | 0.08 | 0.08 | 1.06  | 0.603926 | 0.271695 | 0.8394   | 0.536577 |
| MmugDNA.9641.1.S1_at | MmugDNA.9641.1 | 10.5  | 10.62 | 0.29 | 0.09 | -1.09 | 0.966714 | 0.061648 | 0.989053 | 0.295095 |
| MmugDNA.9643.1.S1_at | MmugDNA.9643.1 | 5.06  | 5.05  | 0.09 | 0    | 1     | 0.940166 | 0.994157 | 0.979649 | 0.996438 |
| MmugDNA.9644.1.S1_at | MmugDNA.9644.1 | 3.86  | 4.05  | 0.12 | 0.08 | -1.14 | 0.069385 | 0.156838 | 0.426951 | 0.432372 |
| MmugDNA.9645.1.S1_at | MmugDNA.9645.1 | 5.01  | 4.9   | 0.07 | 0.15 | 1.08  | 0.293453 | 0.437123 | 0.649776 | 0.656547 |
| MmugDNA.9647.1.S1_at | MmugDNA.9647.1 | 3.2   | 2.85  | 0.17 | 0.06 | 1.27  | 0.071787 | 0.178954 | 0.431548 | 0.455243 |

|                        |                |       |       |      |      |       |          |          |          |          |
|------------------------|----------------|-------|-------|------|------|-------|----------|----------|----------|----------|
| MmugDNA.965.1.S1_at    | MmugDNA.965.1  | 11.41 | 11.82 | 0.17 | 0.02 | -1.33 | 0.034567 | 0.015699 | 0.350124 | 0.158742 |
| MmugDNA.9651.1.S1_at   | MmugDNA.9651.1 | 3.73  | 3.92  | 0.2  | 0.16 | -1.14 | 0.279985 | 0.700351 | 0.638821 | 0.826079 |
| MmugDNA.9653.1.S1_at   | MmugDNA.9653.1 | 9.07  | 9.55  | 0.39 | 0.13 | -1.4  | 0.339021 | 0.378146 | 0.68351  | 0.615438 |
| MmugDNA.9654.1.S1_at   | MmugDNA.9654.1 | 9.03  | 9.12  | 0.28 | 0.35 | -1.06 | 0.587835 | 0.794181 | 0.83181  | 0.881296 |
| MmugDNA.9655.1.S1_at   | MmugDNA.9655.1 | 9.95  | 9.06  | 0.1  | 0.21 | 1.84  | 0.003183 | 0.006599 | 0.191107 | 0.110088 |
| MmugDNA.9656.1.S1_at   | MmugDNA.9656.1 | 8.07  | 7.81  | 0.08 | 0.09 | 1.2   | 0.021192 | 0.140576 | 0.307109 | 0.413822 |
| MmugDNA.9657.1.S1_at   | MmugDNA.9657.1 | 5.28  | 4.92  | 0.13 | 0.18 | 1.28  | 0.061898 | 0.203772 | 0.411683 | 0.478031 |
| MmugDNA.9658.1.S1_at   | MmugDNA.9658.1 | 4.76  | 4.93  | 0    | 0.15 | -1.12 | 0.042746 | 0.024357 | 0.370345 | 0.195335 |
| MmugDNA.966.1.S1_at    | MmugDNA.966.1  | 6.48  | 6.37  | 0.14 | 0.08 | 1.09  | 0.171224 | 0.254208 | 0.54441  | 0.52252  |
| MmugDNA.9660.1.S1_at   | MmugDNA.9660.1 | 4.61  | 4.29  | 0.35 | 0.27 | 1.25  | 0.509816 | 0.650786 | 0.787835 | 0.795801 |
| MmugDNA.9661.1.S1_s_at | MmugDNA.9661.1 | 9.27  | 9.93  | 1.94 | 0.25 | -1.59 | 0.607994 | 0.065064 | 0.840979 | 0.301009 |
| MmugDNA.9663.1.S1_at   | MmugDNA.9663.1 | 6.01  | 6.2   | 0.12 | 0.13 | -1.13 | 0.471187 | 0.211991 | 0.766384 | 0.485975 |
| MmugDNA.9664.1.S1_s_at | MmugDNA.9664.1 | 8.81  | 8.43  | 0.29 | 0.22 | 1.31  | 0.064331 | 0.077406 | 0.418055 | 0.323204 |
| MmugDNA.9665.1.S1_at   | MmugDNA.9665.1 | 5.46  | 5.39  | 0.04 | 0.06 | 1.05  | 0.098674 | 0.435429 | 0.468025 | 0.655194 |
| MmugDNA.9666.1.S1_at   | MmugDNA.9666.1 | 5.87  | 5.58  | 0.02 | 1.04 | 1.22  | 0.668629 | 0.239079 | 0.86912  | 0.509827 |
| MmugDNA.9667.1.S1_at   | MmugDNA.9667.1 | 8.75  | 8.78  | 0.48 | 0.14 | -1.02 | 0.714132 | 0.116409 | 0.888631 | 0.383671 |
| MmugDNA.9669.1.S1_at   | MmugDNA.9669.1 | 6.07  | 6.02  | 0.27 | 0.1  | 1.04  | 0.384779 | 0.660469 | 0.712207 | 0.801351 |
| MmugDNA.967.1.S1_at    | MmugDNA.967.1  | 4.4   | 4.46  | 0.25 | 0.05 | -1.04 | 0.570256 | 0.854518 | 0.821966 | 0.917099 |
| MmugDNA.9670.1.S1_at   | MmugDNA.9670.1 | 4.48  | 4.34  | 0.16 | 0.17 | 1.1   | 0.112178 | 0.140423 | 0.485335 | 0.413589 |
| MmugDNA.9671.1.S1_at   | MmugDNA.9671.1 | 3.71  | 3.62  | 0.19 | 0.09 | 1.06  | 0.509645 | 0.258598 | 0.787766 | 0.52584  |
| MmugDNA.9672.1.S1_s_at | MmugDNA.9672.1 | 7.35  | 8     | 0.38 | 0.08 | -1.58 | 0.124549 | 0.024344 | 0.49855  | 0.195284 |
| MmugDNA.9673.1.S1_at   | MmugDNA.9673.1 | 6.69  | 6.36  | 0.06 | 0.15 | 1.26  | 0.038493 | 0.165392 | 0.359469 | 0.441544 |
| MmugDNA.9674.1.S1_at   | MmugDNA.9674.1 | 3.52  | 3.56  | 0.23 | 0.16 | -1.03 | 0.917018 | 0.988321 | 0.971915 | 0.993461 |
| MmugDNA.9675.1.S1_at   | MmugDNA.9675.1 | 4.2   | 4.3   | 0.18 | 0.08 | -1.07 | 0.604937 | 0.07754  | 0.839754 | 0.323421 |
| MmugDNA.9676.1.S1_at   | MmugDNA.9676.1 | 4.77  | 4.7   | 0.05 | 0.12 | 1.05  | 0.438949 | 0.587071 | 0.747715 | 0.753998 |
| MmugDNA.9676.1.S1_s_at | MmugDNA.9676.1 | 6.25  | 5.9   | 0.17 | 0.23 | 1.28  | 0.249724 | 0.599846 | 0.615117 | 0.761621 |
| MmugDNA.9677.1.S1_at   | MmugDNA.9677.1 | 9.81  | 9.65  | 0.79 | 0.22 | 1.12  | 0.530915 | 0.127699 | 0.799314 | 0.398581 |
| MmugDNA.9678.1.S1_at   | MmugDNA.9678.1 | 6.93  | 6.81  | 0.43 | 0.14 | 1.08  | 0.745658 | 0.212197 | 0.903095 | 0.486081 |
| MmugDNA.968.1.S1_at    | MmugDNA.968.1  | 4.16  | 3.96  | 0.33 | 0.43 | 1.15  | 0.989267 | 0.362726 | 0.995994 | 0.603245 |
| MmugDNA.9680.1.S1_at   | MmugDNA.9680.1 | 3.91  | 3.93  | 0.21 | 0.06 | -1.01 | 0.882022 | 0.585723 | 0.95911  | 0.753003 |
| MmugDNA.9681.1.S1_at   | MmugDNA.9681.1 | 5.77  | 5.68  | 0.25 | 0.07 | 1.06  | 0.198114 | 0.31539  | 0.569361 | 0.568939 |
| MmugDNA.9684.1.S1_at   | MmugDNA.9684.1 | 5.64  | 5.58  | 0.11 | 0.13 | 1.04  | 0.268327 | 0.228272 | 0.628784 | 0.50046  |
| MmugDNA.9685.1.S1_at   | MmugDNA.9685.1 | 4.99  | 5.58  | 0.06 | 0.26 | -1.5  | 0.057314 | 0.093211 | 0.401913 | 0.34931  |
| MmugDNA.9687.1.S1_at   | MmugDNA.9687.1 | 3     | 3.24  | 0.3  | 0.4  | -1.18 | 0.823114 | 0.858719 | 0.936204 | 0.919548 |
| MmugDNA.9688.1.S1_at   | MmugDNA.9688.1 | 12.08 | 12.25 | 0.11 | 0.06 | -1.12 | 0.211205 | 0.029862 | 0.582141 | 0.214491 |
| MmugDNA.969.1.S1_at    | MmugDNA.969.1  | 3.57  | 3.47  | 0.1  | 0.1  | 1.07  | 0.611806 | 0.149849 | 0.842611 | 0.424463 |
| MmugDNA.9690.1.S1_at   | MmugDNA.9690.1 | 3.91  | 3.82  | 0.02 | 0.07 | 1.07  | 0.166488 | 0.170411 | 0.539189 | 0.447103 |
| MmugDNA.9691.1.S1_at   | MmugDNA.9691.1 | 8.51  | 8.6   | 0.34 | 0.07 | -1.06 | 0.533442 | 0.837744 | 0.80084  | 0.907286 |
| MmugDNA.9692.1.S1_at   | MmugDNA.9692.1 | 3.92  | 3.72  | 0.42 | 0.16 | 1.15  | 0.257277 | 0.309331 | 0.621021 | 0.564912 |
| MmugDNA.9693.1.S1_at   | MmugDNA.9693.1 | 2.68  | 2.73  | 0.06 | 0.1  | -1.04 | 0.336524 | 0.69169  | 0.681909 | 0.820652 |
| MmugDNA.9694.1.S1_at   | MmugDNA.9694.1 | 5.28  | 5.48  | 0.49 | 0.08 | -1.15 | 0.69265  | 0.481351 | 0.880215 | 0.686374 |
| MmugDNA.9695.1.S1_at   | MmugDNA.9695.1 | 7.61  | 7.58  | 0.28 | 0.05 | 1.02  | 0.651026 | 0.984534 | 0.861338 | 0.991307 |
| MmugDNA.9696.1.S1_at   | MmugDNA.9696.1 | 8.23  | 8.59  | 0.11 | 0.03 | -1.29 | 0.002381 | 0.012731 | 0.177065 | 0.145429 |

|                         |                 |       |       |      |      |       |          |          |          |          |
|-------------------------|-----------------|-------|-------|------|------|-------|----------|----------|----------|----------|
| MmugDNA.9698.1.S1_at    | MmugDNA.9698.1  | 2.87  | 2.8   | 0.15 | 0.05 | 1.05  | 0.4466   | 0.612124 | 0.752779 | 0.769787 |
| MmugDNA.9699.1.S1_at    | MmugDNA.9699.1  | 3.15  | 3.12  | 0.08 | 0.19 | 1.02  | 0.980438 | 0.809095 | 0.993785 | 0.889995 |
| MmugDNA.97.1.S1_at      | MmugDNA.97.1    | 8.45  | 7.7   | 0.42 | 0.09 | 1.68  | 0.12548  | 0.155541 | 0.499523 | 0.430888 |
| MmugDNA.970.1.S1_at     | MmugDNA.970.1   | 5.81  | 5.79  | 0.12 | 0.08 | 1.01  | 0.380109 | 0.330196 | 0.709362 | 0.579016 |
| MmugDNA.9700.1.S1_s_at  | MmugDNA.9700.1  | 14.57 | 14.57 | 0.04 | 0.03 | -1    | 0.576755 | 0.833182 | 0.825166 | 0.904313 |
| MmugDNA.9702.1.S1_at    | MmugDNA.9702.1  | 6.6   | 6.59  | 0.23 | 0.13 | 1     | 0.973546 | 0.946733 | 0.99138  | 0.96978  |
| MmugDNA.9704.1.S1_at    | MmugDNA.9704.1  | 5.46  | 6.22  | 0.51 | 0.11 | -1.69 | 0.054011 | 0.005004 | 0.395688 | 0.098557 |
| MmugDNA.9706.1.S1_at    | MmugDNA.9706.1  | 6.28  | 6.17  | 0.15 | 0.03 | 1.08  | 0.233226 | 0.305287 | 0.600731 | 0.562255 |
| MmugDNA.9707.1.S1_at    | MmugDNA.9707.1  | 12.14 | 12.38 | 0.6  | 0.06 | -1.18 | 0.216225 | 0.180583 | 0.586342 | 0.457191 |
| MmugDNA.9708.1.S1_at    | MmugDNA.9708.1  | 4.18  | 4.09  | 0.06 | 0.05 | 1.06  | 0.144595 | 0.193695 | 0.519872 | 0.468785 |
| MmugDNA.9709.1.S1_at    | MmugDNA.9709.1  | 6.31  | 6.23  | 0.28 | 0.06 | -1.05 | 0.584065 | 0.507334 | 0.829433 | 0.702917 |
| MmugDNA.9710.1.S1_at    | MmugDNA.9710.1  | 10.8  | 11.07 | 0.4  | 0.11 | -1.21 | 0.426218 | 0.663408 | 0.740398 | 0.803    |
| MmugDNA.9711.1.S1_s_at  | MmugDNA.9711.1  | 6.64  | 7.51  | 0.17 | 0.15 | -1.82 | 0.00279  | 0.00136  | 0.185499 | 0.056687 |
| MmugDNA.9712.1.S1_at    | MmugDNA.9712.1  | 5.04  | 4.97  | 0.08 | 0.06 | 1.05  | 0.370861 | 0.525767 | 0.705098 | 0.715217 |
| MmugDNA.9714.1.S1_at    | MmugDNA.9714.1  | 6.62  | 6.86  | 0.35 | 0.12 | -1.19 | 0.562642 | 0.729293 | 0.817773 | 0.843541 |
| MmugDNA.9715.1.S1_at    | MmugDNA.9715.1  | 4.22  | 3.62  | 0.59 | 0.04 | 1.51  | 0.49545  | 0.676001 | 0.780058 | 0.810632 |
| MmugDNA.9716.1.S1_at    | MmugDNA.9716.1  | 6.28  | 7.12  | 0.62 | 0.26 | -1.8  | 0.095265 | 0.010796 | 0.464131 | 0.135584 |
| MmugDNA.9717.1.S1_at    | MmugDNA.9717.1  | 5.1   | 4.99  | 0.3  | 0.06 | 1.08  | 0.60131  | 0.601244 | 0.838121 | 0.762609 |
| MmugDNA.9718.1.S1_at    | MmugDNA.9718.1  | 8.09  | 8.88  | 0.74 | 0.26 | -1.73 | 0.065651 | 0.210543 | 0.420827 | 0.484477 |
| MmugDNA.9719.1.S1_at    | MmugDNA.9719.1  | 4.12  | 3.9   | 0.09 | 0.1  | 1.17  | 0.044274 | 0.056505 | 0.374279 | 0.28368  |
| MmugDNA.972.1.S1_at     | MmugDNA.972.1   | 7.3   | 7.57  | 0.9  | 0.03 | -1.21 | 0.600911 | 0.785793 | 0.838005 | 0.875967 |
| MmugDNA.9721.1.S1_at    | MmugDNA.9721.1  | 9.34  | 7.77  | 0.41 | 0.08 | 2.98  | 0.004891 | 0.054077 | 0.203301 | 0.277914 |
| MmugDNA.9722.1.S1_at    | MmugDNA.9722.1  | 4.82  | 4.74  | 0.1  | 0.29 | 1.06  | 0.209161 | 0.251006 | 0.580715 | 0.519638 |
| MmugDNA.9724.1.S1_at    | MmugDNA.9724.1  | 4.71  | 4.83  | 0.08 | 0.08 | -1.09 | 0.086396 | 0.200215 | 0.454054 | 0.474678 |
| MmugDNA.9726.1.S1_at    | MmugDNA.9726.1  | 5.76  | 5.82  | 0.01 | 0.15 | -1.05 | 0.426342 | 0.117594 | 0.740427 | 0.38531  |
| MmugDNA.9727.1.S1_at    | MmugDNA.9727.1  | 3.52  | 3.47  | 0.04 | 0.18 | 1.03  | 0.755965 | 0.41786  | 0.90805  | 0.642449 |
| MmugDNA.9729.1.S1_at    | MmugDNA.9729.1  | 6.39  | 6.44  | 0.01 | 0.07 | -1.04 | 0.252101 | 0.750027 | 0.617122 | 0.854659 |
| MmugDNA.973.1.S1_at     | MmugDNA.973.1   | 5.54  | 5.54  | 0.12 | 0.03 | 1     | 0.801865 | 0.842096 | 0.927767 | 0.910036 |
| MmugDNA.9732.1.S1_at    | MmugDNA.9732.1  | 10.89 | 8.06  | 0.85 | 1.04 | 7.07  | 0.030678 | 0.003483 | 0.338263 | 0.084834 |
| MmugDNA.9733.1.S1_at    | MmugDNA.9733.1  | 7.56  | 7.86  | 0.66 | 0.08 | -1.24 | 0.564868 | 0.911335 | 0.81905  | 0.950008 |
| MmugDNA.9734.1.S1_at    | MmugDNA.9734.1  | 6.28  | 6.26  | 0.24 | 0.32 | 1.01  | 0.502158 | 0.780293 | 0.783497 | 0.872577 |
| MmugDNA.9735.1.S1_at    | MmugDNA.9735.1  | 3.62  | 3.54  | 0.19 | 0.6  | 1.06  | 0.565097 | 0.320889 | 0.819091 | 0.572869 |
| MmugDNA.9736.1.S1_at    | MmugDNA.9736.1  | 8.23  | 7.67  | 0.37 | 0.15 | 1.47  | 0.118138 | 0.031589 | 0.491528 | 0.219905 |
| MmugDNA.9738.1.S1_at    | MmugDNA.9738.1  | 5.47  | 5.33  | 0.25 | 0.16 | 1.1   | 0.095221 | 0.029608 | 0.464131 | 0.213742 |
| MmugDNA.9739.1.S1_at    | MmugDNA.9739.1  | 3.7   | 3.61  | 0.04 | 0.09 | 1.06  | 0.12053  | 0.400237 | 0.493938 | 0.630158 |
| MmugDNA.974.1.S1_at     | MmugDNA.974.1   | 7.28  | 7.61  | 0.36 | 0.03 | -1.26 | 0.446698 | 0.607875 | 0.752779 | 0.766631 |
| MmugDNA.20440.1.S1_s_at | MmugDNA.20440.1 | 8.02  | 8.28  | 0.4  | 0    | -1.2  | 0.448647 | 0.749734 | 0.753997 | 0.854564 |
| MmugDNA.9743.1.S1_at    | MmugDNA.9743.1  | 3.66  | 3.8   | 0.23 | 0.34 | -1.11 | 0.117539 | 0.256379 | 0.490984 | 0.524114 |
| MmugDNA.9746.1.S1_at    | MmugDNA.9746.1  | 3.2   | 3.19  | 0.14 | 0.12 | 1.01  | 0.387194 | 0.541226 | 0.714076 | 0.724781 |
| MmugDNA.9747.1.S1_at    | MmugDNA.9747.1  | 6.27  | 6.09  | 0.15 | 0.1  | 1.13  | 0.520416 | 0.477409 | 0.793717 | 0.683463 |
| MmugDNA.9748.1.S1_at    | MmugDNA.9748.1  | 4.6   | 4.68  | 0.04 | 0.12 | -1.06 | 0.922269 | 0.063135 | 0.973786 | 0.29795  |
| MmugDNA.9749.1.S1_at    | MmugDNA.9749.1  | 9.84  | 10.27 | 0.22 | 0.05 | -1.35 | 0.046084 | 0.012945 | 0.37735  | 0.146418 |
| MmugDNA.9751.1.S1_at    | MmugDNA.9751.1  | 5.52  | 5.14  | 0.35 | 0.15 | 1.29  | 0.315683 | 0.279883 | 0.666057 | 0.543342 |



|                        |                |       |       |      |      |       |          |          |          |          |
|------------------------|----------------|-------|-------|------|------|-------|----------|----------|----------|----------|
| MmugDNA.9752.1.S1_at   | MmugDNA.9752.1 | 5.75  | 6.02  | 0.44 | 0.08 | -1.21 | 0.294816 | 0.539209 | 0.65094  | 0.723613 |
| MmugDNA.9753.1.S1_at   | MmugDNA.9753.1 | 5.84  | 5.87  | 0.38 | 0.32 | -1.02 | 0.426865 | 0.458407 | 0.740751 | 0.671165 |
| MmugDNA.9754.1.S1_at   | MmugDNA.9754.1 | 6.53  | 6.3   | 0.44 | 0.15 | 1.17  | 0.451465 | 0.374456 | 0.755176 | 0.6129   |
| MmugDNA.9756.1.S1_at   | MmugDNA.9756.1 | 2.58  | 2.9   | 0.07 | 0.16 | -1.25 | 0.021919 | 0.258564 | 0.309781 | 0.525819 |
| MmugDNA.9757.1.S1_at   | MmugDNA.9757.1 | 11.97 | 12.02 | 0.18 | 0.05 | -1.04 | 0.619318 | 0.83732  | 0.846591 | 0.90705  |
| MmugDNA.9758.1.S1_at   | MmugDNA.9758.1 | 6.49  | 6.39  | 0.29 | 0.08 | 1.07  | 0.664688 | 0.007519 | 0.867683 | 0.116291 |
| MmugDNA.9759.1.S1_at   | MmugDNA.9759.1 | 3.88  | 3.72  | 0.13 | 0.14 | 1.11  | 0.174209 | 0.646025 | 0.547341 | 0.792676 |
| MmugDNA.976.1.S1_at    | MmugDNA.976.1  | 9.16  | 9.5   | 0.49 | 0.43 | -1.26 | 0.391952 | 0.145531 | 0.718015 | 0.419442 |
| MmugDNA.9761.1.S1_at   | MmugDNA.9761.1 | 4.45  | 4.36  | 0.12 | 0.08 | 1.06  | 0.768056 | 0.586365 | 0.912802 | 0.753444 |
| MmugDNA.9762.1.S1_at   | MmugDNA.9762.1 | 5.26  | 5.22  | 0.18 | 0.11 | 1.03  | 0.700626 | 0.701382 | 0.883597 | 0.826814 |
| MmugDNA.9763.1.S1_at   | MmugDNA.9763.1 | 4.03  | 3.92  | 0.07 | 0.12 | 1.08  | 0.67323  | 0.070082 | 0.871201 | 0.31098  |
| MmugDNA.9764.1.S1_at   | MmugDNA.9764.1 | 4.07  | 3.96  | 0.04 | 0.06 | 1.07  | 0.196798 | 0.601013 | 0.567547 | 0.762462 |
| MmugDNA.9765.1.S1_at   | MmugDNA.9765.1 | 3.57  | 3.53  | 0.13 | 0.19 | 1.03  | 0.532024 | 0.415126 | 0.799992 | 0.640713 |
| MmugDNA.9767.1.S1_at   | MmugDNA.9767.1 | 7.19  | 7.43  | 0.15 | 0.12 | -1.18 | 0.032409 | 0.100931 | 0.344245 | 0.360509 |
| MmugDNA.9769.1.S1_at   | MmugDNA.9769.1 | 6.82  | 6.74  | 0.08 | 0.15 | 1.06  | 0.516076 | 0.379969 | 0.791221 | 0.616659 |
| MmugDNA.9770.1.S1_at   | MmugDNA.9770.1 | 8.83  | 8.8   | 0.48 | 0.29 | 1.02  | 0.656998 | 0.001289 | 0.863835 | 0.055585 |
| MmugDNA.9771.1.S1_at   | MmugDNA.9771.1 | 8.51  | 9.08  | 0.57 | 0.32 | -1.48 | 0.363661 | 0.017323 | 0.700278 | 0.166509 |
| MmugDNA.9772.1.S1_at   | MmugDNA.9772.1 | 3.4   | 3.2   | 0.18 | 0.01 | 1.15  | 0.398422 | 0.376475 | 0.722489 | 0.614293 |
| MmugDNA.9773.1.S1_at   | MmugDNA.9773.1 | 3.13  | 3     | 0.1  | 0.03 | 1.09  | 0.110913 | 0.400229 | 0.48424  | 0.630158 |
| MmugDNA.9775.1.S1_at   | MmugDNA.9775.1 | 3.68  | 3.57  | 0.1  | 0.04 | 1.08  | 0.230035 | 0.335047 | 0.598481 | 0.582851 |
| MmugDNA.9776.1.S1_at   | MmugDNA.9776.1 | 6.82  | 5.52  | 0.34 | 0.31 | 2.46  | 0.025606 | 0.021072 | 0.322382 | 0.181869 |
| MmugDNA.9777.1.S1_at   | MmugDNA.9777.1 | 3.44  | 3.45  | 0.22 | 0.03 | -1    | 0.944018 | 0.996645 | 0.980618 | 0.99808  |
| MmugDNA.978.1.S1_at    | MmugDNA.978.1  | 5.5   | 5.47  | 0.2  | 0.11 | 1.02  | 0.908749 | 0.21264  | 0.969262 | 0.48659  |
| MmugDNA.9781.1.S1_at   | MmugDNA.9781.1 | 3.73  | 3.37  | 0.14 | 0.03 | 1.28  | 0.015881 | 0.067504 | 0.284461 | 0.305843 |
| MmugDNA.9784.1.S1_at   | MmugDNA.9784.1 | 3.88  | 3.92  | 0.1  | 0.04 | -1.03 | 0.18313  | 0.385784 | 0.556057 | 0.621079 |
| MmugDNA.9785.1.S1_at   | MmugDNA.9785.1 | 7.66  | 7.92  | 0.51 | 0.17 | -1.2  | 0.471331 | 0.217679 | 0.766509 | 0.491274 |
| MmugDNA.9786.1.S1_at   | MmugDNA.9786.1 | 3.51  | 3.58  | 0.18 | 0.05 | -1.05 | 0.727258 | 0.688458 | 0.894648 | 0.818166 |
| MmugDNA.9788.1.S1_at   | MmugDNA.9788.1 | 4.21  | 4.25  | 0.16 | 0.15 | -1.03 | 0.943269 | 0.482865 | 0.980435 | 0.68765  |
| MmugDNA.9789.1.S1_at   | MmugDNA.9789.1 | 7.66  | 7.64  | 0.5  | 0.37 | 1.01  | 0.480354 | 0.887064 | 0.771141 | 0.935666 |
| MmugDNA.9790.1.S1_at   | MmugDNA.9790.1 | 5.75  | 5.5   | 0.08 | 0.1  | 1.18  | 0.051131 | 0.069867 | 0.389207 | 0.31043  |
| MmugDNA.9791.1.S1_at   | MmugDNA.9791.1 | 6.67  | 6.79  | 0.35 | 0.1  | -1.09 | 0.682255 | 0.865444 | 0.87572  | 0.923596 |
| MmugDNA.9792.1.S1_at   | MmugDNA.9792.1 | 3.85  | 3.81  | 0.03 | 0    | 1.02  | 0.194049 | 0.541961 | 0.564621 | 0.725169 |
| MmugDNA.9794.1.S1_at   | MmugDNA.9794.1 | 3.8   | 3.9   | 0.03 | 0.04 | -1.07 | 0.054093 | 0.018796 | 0.395944 | 0.172349 |
| MmugDNA.9795.1.S1_at   | MmugDNA.9795.1 | 5.19  | 5.07  | 0.12 | 0.05 | 1.08  | 0.116857 | 0.254438 | 0.490029 | 0.522732 |
| MmugDNA.9796.1.S1_at   | MmugDNA.9796.1 | 5.18  | 5.09  | 0.18 | 0.05 | 1.06  | 0.359776 | 0.398017 | 0.697545 | 0.629138 |
| MmugDNA.9797.1.S1_at   | MmugDNA.9797.1 | 3.57  | 3.44  | 0.14 | 0.04 | 1.09  | 0.622597 | 0.014688 | 0.847873 | 0.154371 |
| MmugDNA.9798.1.S1_at   | MmugDNA.9798.1 | 4.6   | 4.78  | 0.41 | 0.15 | -1.14 | 0.479448 | 0.462341 | 0.770746 | 0.673695 |
| MmugDNA.98.1.S1_at     | MmugDNA.98.1   | 5.42  | 4.94  | 0.59 | 0.16 | 1.39  | 0.42668  | 0.412758 | 0.740672 | 0.63909  |
| MmugDNA.980.1.S1_at    | MmugDNA.980.1  | 5.05  | 4.88  | 0.2  | 0.11 | 1.12  | 0.967957 | 0.392209 | 0.989418 | 0.625652 |
| MmugDNA.9800.1.S1_at   | MmugDNA.9800.1 | 8.36  | 7.9   | 0.4  | 0.31 | 1.38  | 0.084398 | 0.045288 | 0.450953 | 0.25714  |
| MmugDNA.9803.1.S1_at   | MmugDNA.9803.1 | 8.68  | 8.24  | 0.18 | 0.23 | 1.36  | 0.025625 | 0.085233 | 0.322382 | 0.337096 |
| MmugDNA.9804.1.S1_s_at | MmugDNA.9804.1 | 3.39  | 3.39  | 0.1  | 0.18 | 1.01  | 0.994405 | 0.454104 | 0.997897 | 0.668398 |
| MmugDNA.9805.1.S1_at   | MmugDNA.9805.1 | 6.37  | 6.43  | 0.12 | 0.1  | -1.04 | 0.676506 | 0.972338 | 0.873146 | 0.985083 |

|                        |                |       |       |      |      |       |          |          |          |          |
|------------------------|----------------|-------|-------|------|------|-------|----------|----------|----------|----------|
| MmugDNA.9806.1.S1_at   | MmugDNA.9806.1 | 11.38 | 11.26 | 0.44 | 0.08 | 1.08  | 0.56789  | 0.235357 | 0.820586 | 0.506412 |
| MmugDNA.9808.1.S1_at   | MmugDNA.9808.1 | 6.3   | 6.27  | 0.05 | 0.12 | 1.02  | 0.241894 | 0.287806 | 0.607952 | 0.549064 |
| MmugDNA.981.1.S1_at    | MmugDNA.981.1  | 2.98  | 2.96  | 0.09 | 0.19 | 1.01  | 0.723645 | 0.837025 | 0.892847 | 0.906826 |
| MmugDNA.9810.1.S1_s_at | MmugDNA.9810.1 | 11.95 | 12.23 | 0.41 | 0.11 | -1.21 | 0.29069  | 0.358555 | 0.647278 | 0.60007  |
| MmugDNA.9811.1.S1_s_at | MmugDNA.9811.1 | 10.84 | 10.8  | 0.15 | 0.24 | 1.02  | 0.355351 | 0.002473 | 0.694724 | 0.073576 |
| MmugDNA.9812.1.S1_at   | MmugDNA.9812.1 | 4.45  | 4.41  | 0.22 | 0.22 | 1.02  | 0.715999 | 0.579662 | 0.889675 | 0.749254 |
| MmugDNA.9813.1.S1_at   | MmugDNA.9813.1 | 12.58 | 12.62 | 0.09 | 0.12 | -1.03 | 0.688813 | 0.000463 | 0.878555 | 0.038572 |
| MmugDNA.9814.1.S1_at   | MmugDNA.9814.1 | 7.17  | 6.91  | 0.46 | 0.26 | 1.2   | 0.852471 | 0.316284 | 0.947963 | 0.569785 |
| MmugDNA.9815.1.S1_at   | MmugDNA.9815.1 | 5.73  | 4.92  | 1.53 | 0.22 | 1.75  | 0.946428 | 0.585194 | 0.981426 | 0.752781 |
| MmugDNA.9816.1.S1_at   | MmugDNA.9816.1 | 6.51  | 6.58  | 0.04 | 0.06 | -1.05 | 0.109485 | 0.67431  | 0.482287 | 0.809716 |
| MmugDNA.9817.1.S1_at   | MmugDNA.9817.1 | 6.77  | 7.1   | 0.48 | 0.49 | -1.26 | 0.491891 | 0.712619 | 0.778032 | 0.833428 |
| MmugDNA.9818.1.S1_at   | MmugDNA.9818.1 | 5.1   | 4.99  | 0.1  | 0.03 | 1.08  | 0.211108 | 0.333743 | 0.582141 | 0.581904 |
| MmugDNA.9819.1.S1_at   | MmugDNA.9819.1 | 3.57  | 3.52  | 0.24 | 0.14 | 1.04  | 0.900491 | 0.218233 | 0.966137 | 0.491764 |
| MmugDNA.982.1.S1_at    | MmugDNA.982.1  | 6.31  | 6.09  | 0.19 | 0.32 | 1.17  | 0.367419 | 0.476506 | 0.702896 | 0.682743 |
| MmugDNA.9820.1.S1_at   | MmugDNA.9820.1 | 5.29  | 4.47  | 0.15 | 0.1  | 1.77  | 0.00141  | 0.000299 | 0.160065 | 0.034892 |
| MmugDNA.9821.1.S1_at   | MmugDNA.9821.1 | 3.04  | 3.07  | 0.09 | 0.18 | -1.02 | 0.744656 | 0.646727 | 0.902626 | 0.793089 |
| MmugDNA.9825.1.S1_at   | MmugDNA.9825.1 | 3.82  | 3.65  | 0.08 | 0.09 | 1.13  | 0.156698 | 0.162631 | 0.529833 | 0.438724 |
| MmugDNA.9826.1.S1_at   | MmugDNA.9826.1 | 6.32  | 6.48  | 0.18 | 0.36 | -1.12 | 0.794491 | 0.347627 | 0.924569 | 0.592039 |
| MmugDNA.9828.1.S1_at   | MmugDNA.9828.1 | 10.29 | 10.71 | 0.17 | 0.03 | -1.34 | 0.038213 | 0.026787 | 0.358577 | 0.204724 |
| MmugDNA.9828.1.S1_s_at | MmugDNA.9828.1 | 8.3   | 8.49  | 0.32 | 0.11 | -1.15 | 0.392174 | 0.21914  | 0.7181   | 0.492868 |
| MmugDNA.983.1.S1_at    | MmugDNA.983.1  | 3.94  | 4.06  | 0.22 | 0.07 | -1.09 | 0.777043 | 0.562469 | 0.917443 | 0.738025 |
| MmugDNA.9830.1.S1_at   | MmugDNA.9830.1 | 5.86  | 6.63  | 0.69 | 0.38 | -1.7  | 0.414171 | 0.365604 | 0.732818 | 0.605617 |
| MmugDNA.9831.1.S1_at   | MmugDNA.9831.1 | 6.85  | 7.25  | 0.27 | 0.07 | -1.32 | 0.075172 | 0.001921 | 0.436118 | 0.06556  |
| MmugDNA.9832.1.S1_at   | MmugDNA.9832.1 | 10.23 | 10.76 | 0.84 | 0.12 | -1.45 | 0.352226 | 0.503349 | 0.692649 | 0.700823 |
| MmugDNA.9833.1.S1_at   | MmugDNA.9833.1 | 12.82 | 13.23 | 0.16 | 0.11 | -1.33 | 0.027789 | 0.001665 | 0.329243 | 0.061711 |
| MmugDNA.9834.1.S1_at   | MmugDNA.9834.1 | 6.38  | 6.39  | 0.12 | 0    | -1.01 | 0.542893 | 0.846349 | 0.806045 | 0.912548 |
| MmugDNA.9835.1.S1_at   | MmugDNA.9835.1 | 4.14  | 4.15  | 0.2  | 0.05 | -1.01 | 0.98907  | 0.830697 | 0.995916 | 0.902872 |
| MmugDNA.9836.1.S1_at   | MmugDNA.9836.1 | 4.22  | 4.23  | 0.1  | 0.11 | -1.01 | 0.518366 | 0.44627  | 0.792648 | 0.662743 |
| MmugDNA.9837.1.S1_at   | MmugDNA.9837.1 | 2.68  | 2.6   | 0.23 | 0.06 | 1.06  | 0.297902 | 0.340266 | 0.652791 | 0.586661 |
| MmugDNA.9838.1.S1_at   | MmugDNA.9838.1 | 11.9  | 11.42 | 0.53 | 0.22 | 1.39  | 0.143452 | 0.166174 | 0.51875  | 0.442738 |
| MmugDNA.9838.1.S1_x_at | MmugDNA.9838.1 | 11.91 | 11.37 | 0.51 | 0.2  | 1.45  | 0.112004 | 0.120428 | 0.485105 | 0.38925  |
| MmugDNA.9839.1.S1_at   | MmugDNA.9839.1 | 4.64  | 4.78  | 0.14 | 0.41 | -1.1  | 0.763736 | 0.815195 | 0.911265 | 0.893385 |
| MmugDNA.984.1.S1_at    | MmugDNA.984.1  | 3.96  | 3.72  | 0.03 | 0.3  | 1.19  | 0.598407 | 0.605459 | 0.836965 | 0.765238 |
| MmugDNA.9840.1.S1_at   | MmugDNA.9840.1 | 4.65  | 5.06  | 0.11 | 0.21 | -1.33 | 0.039266 | 0.045801 | 0.361498 | 0.258337 |
| MmugDNA.9841.1.S1_at   | MmugDNA.9841.1 | 2.78  | 2.85  | 0.03 | 0.02 | -1.05 | 0.025304 | 0.091322 | 0.32131  | 0.346281 |
| MmugDNA.9842.1.S1_at   | MmugDNA.9842.1 | 4.84  | 4.71  | 0.09 | 0.17 | 1.09  | 0.887864 | 0.079647 | 0.961191 | 0.326981 |
| MmugDNA.9843.1.S1_at   | MmugDNA.9843.1 | 4.78  | 4.77  | 0.15 | 0.08 | 1     | 0.842007 | 0.778663 | 0.944025 | 0.871528 |
| MmugDNA.9844.1.S1_at   | MmugDNA.9844.1 | 5.93  | 6     | 0.08 | 0.15 | -1.04 | 0.854573 | 0.337553 | 0.948538 | 0.584728 |
| MmugDNA.9846.1.S1_at   | MmugDNA.9846.1 | 3.96  | 3.74  | 0.23 | 0.04 | 1.16  | 0.207053 | 0.126797 | 0.578774 | 0.397446 |
| MmugDNA.9847.1.S1_at   | MmugDNA.9847.1 | 6.45  | 6.33  | 0.16 | 0.15 | 1.09  | 0.387128 | 0.168557 | 0.71407  | 0.445172 |
| MmugDNA.9848.1.S1_at   | MmugDNA.9848.1 | 4.1   | 4.14  | 0.11 | 0.09 | -1.02 | 0.741711 | 0.074825 | 0.90146  | 0.318614 |
| MmugDNA.985.1.S1_at    | MmugDNA.985.1  | 8.61  | 8.64  | 1.18 | 0.15 | -1.02 | 0.422189 | 0.325716 | 0.738059 | 0.57602  |
| MmugDNA.9850.1.S1_at   | MmugDNA.9850.1 | 3.9   | 3.78  | 0.22 | 0.07 | 1.09  | 0.340522 | 0.523883 | 0.684537 | 0.714052 |

|                        |                |       |       |      |      |       |          |          |          |          |
|------------------------|----------------|-------|-------|------|------|-------|----------|----------|----------|----------|
| MmugDNA.9852.1.S1_at   | MmugDNA.9852.1 | 3     | 3.08  | 0.02 | 0.12 | -1.06 | 0.85405  | 0.387103 | 0.948436 | 0.621935 |
| MmugDNA.9855.1.S1_at   | MmugDNA.9855.1 | 12.04 | 11.88 | 0.22 | 0.06 | 1.12  | 0.196726 | 0.305456 | 0.567378 | 0.562418 |
| MmugDNA.9857.1.S1_at   | MmugDNA.9857.1 | 10.45 | 10.65 | 0.22 | 0.08 | -1.14 | 0.267403 | 0.067736 | 0.628121 | 0.306344 |
| MmugDNA.9857.1.S1_s_at | MmugDNA.9857.1 | 11.69 | 11.88 | 0.18 | 0.04 | -1.14 | 0.06596  | 0.028058 | 0.421335 | 0.20903  |
| MmugDNA.9858.1.S1_at   | MmugDNA.9858.1 | 10.71 | 10.94 | 0.27 | 0.05 | -1.18 | 0.596963 | 0.789662 | 0.83613  | 0.87847  |
| MmugDNA.9859.1.S1_at   | MmugDNA.9859.1 | 6.91  | 6.07  | 0.25 | 0.28 | 1.8   | 0.018266 | 0.002702 | 0.296007 | 0.076461 |
| MmugDNA.986.1.S1_at    | MmugDNA.986.1  | 3.91  | 3.89  | 0.1  | 0.13 | 1.01  | 0.864182 | 0.139352 | 0.952247 | 0.412568 |
| MmugDNA.9861.1.S1_at   | MmugDNA.9861.1 | 6.93  | 6.21  | 0.63 | 0.3  | 1.65  | 0.136915 | 0.010203 | 0.511963 | 0.132451 |
| MmugDNA.9862.1.S1_at   | MmugDNA.9862.1 | 6.18  | 5.98  | 0.29 | 0.01 | 1.15  | 0.261619 | 0.204183 | 0.62388  | 0.478507 |
| MmugDNA.9864.1.S1_at   | MmugDNA.9864.1 | 3.81  | 3.9   | 0.11 | 0.19 | -1.06 | 0.293894 | 0.623265 | 0.650208 | 0.777666 |
| MmugDNA.9865.1.S1_at   | MmugDNA.9865.1 | 4.55  | 4.55  | 0.18 | 0.11 | -1    | 0.631495 | 0.720384 | 0.852417 | 0.838261 |
| MmugDNA.9866.1.S1_at   | MmugDNA.9866.1 | 6.52  | 4.54  | 0.64 | 0.09 | 3.94  | 0.013875 | 0.001418 | 0.272841 | 0.057458 |
| MmugDNA.9867.1.S1_at   | MmugDNA.9867.1 | 8.95  | 9.22  | 0.3  | 0.14 | -1.21 | 0.232172 | 0.01029  | 0.600068 | 0.132841 |
| MmugDNA.9868.1.S1_at   | MmugDNA.9868.1 | 6.07  | 6.24  | 0.48 | 0.14 | -1.12 | 0.716885 | 0.569283 | 0.890108 | 0.742375 |
| MmugDNA.9869.1.S1_at   | MmugDNA.9869.1 | 6.73  | 6.8   | 0.6  | 0.45 | -1.05 | 0.875164 | 0.052224 | 0.956634 | 0.274065 |
| MmugDNA.987.1.S1_at    | MmugDNA.987.1  | 5.63  | 5.67  | 0.16 | 0.24 | -1.03 | 0.498315 | 0.960015 | 0.781634 | 0.977394 |
| MmugDNA.9870.1.S1_at   | MmugDNA.9870.1 | 6.93  | 6.76  | 0.13 | 0.04 | 1.12  | 0.094973 | 0.123326 | 0.464131 | 0.393386 |
| MmugDNA.9871.1.S1_at   | MmugDNA.9871.1 | 9.91  | 9.64  | 0.17 | 0.15 | 1.21  | 0.133247 | 0.007064 | 0.50772  | 0.113284 |
| MmugDNA.9875.1.S1_at   | MmugDNA.9875.1 | 10.37 | 10.27 | 0.43 | 0.21 | 1.07  | 0.970962 | 0.540828 | 0.990513 | 0.724572 |
| MmugDNA.9876.1.S1_s_at | MmugDNA.9876.1 | 4.51  | 4.55  | 0.2  | 0.58 | -1.03 | 0.633271 | 0.81214  | 0.853409 | 0.89155  |
| MmugDNA.9879.1.S1_at   | MmugDNA.9879.1 | 3.95  | 4.01  | 0.05 | 0.08 | -1.04 | 0.880103 | 0.870259 | 0.958462 | 0.926387 |
| MmugDNA.988.1.S1_at    | MmugDNA.988.1  | 9.87  | 9.74  | 0.09 | 0.15 | 1.1   | 0.156535 | 0.047335 | 0.529581 | 0.2623   |
| MmugDNA.9880.1.S1_at   | MmugDNA.9880.1 | 3.72  | 3.53  | 0.49 | 0.17 | 1.14  | 0.665499 | 0.677229 | 0.86797  | 0.811535 |
| MmugDNA.9881.1.S1_s_at | MmugDNA.9881.1 | 10.59 | 10.31 | 0.22 | 0.04 | 1.22  | 0.113516 | 0.109588 | 0.486829 | 0.373525 |
| MmugDNA.9882.1.S1_at   | MmugDNA.9882.1 | 5.62  | 5.71  | 0.12 | 0.08 | -1.06 | 0.578432 | 0.448766 | 0.826202 | 0.664601 |
| MmugDNA.9882.1.S1_s_at | MmugDNA.9882.1 | 3.83  | 3.73  | 0.11 | 0.09 | 1.07  | 0.363827 | 0.37551  | 0.700307 | 0.613453 |
| MmugDNA.9884.1.S1_at   | MmugDNA.9884.1 | 5.55  | 5.43  | 0.15 | 0.05 | 1.09  | 0.157244 | 0.158242 | 0.530382 | 0.43403  |
| MmugDNA.9885.1.S1_at   | MmugDNA.9885.1 | 5.87  | 5.51  | 0.27 | 0.11 | 1.29  | 0.088496 | 0.271483 | 0.45606  | 0.536512 |
| MmugDNA.9886.1.S1_at   | MmugDNA.9886.1 | 8.13  | 8.12  | 0.08 | 0.08 | 1.01  | 0.437683 | 0.347099 | 0.746873 | 0.591815 |
| MmugDNA.9888.1.S1_at   | MmugDNA.9888.1 | 6.75  | 6.79  | 0.61 | 0.04 | -1.03 | 0.902246 | 0.958119 | 0.966941 | 0.976277 |
| MmugDNA.989.1.S1_at    | MmugDNA.989.1  | 5.56  | 5.37  | 0.16 | 0.14 | 1.14  | 0.399323 | 0.722724 | 0.723024 | 0.839378 |
| MmugDNA.9890.1.S1_at   | MmugDNA.9890.1 | 3.13  | 3.45  | 0.24 | 0.87 | -1.25 | 0.220896 | 0.261602 | 0.590217 | 0.528068 |
| MmugDNA.9891.1.S1_at   | MmugDNA.9891.1 | 4.41  | 4.51  | 0.34 | 0.06 | -1.08 | 0.685041 | 0.395186 | 0.876682 | 0.627379 |
| MmugDNA.9893.1.S1_at   | MmugDNA.9893.1 | 10.2  | 11.03 | 0.49 | 0.07 | -1.78 | 0.036338 | 0.026428 | 0.35477  | 0.203748 |
| MmugDNA.9894.1.S1_at   | MmugDNA.9894.1 | 5.48  | 5.37  | 0.24 | 0.14 | 1.08  | 0.501278 | 0.125677 | 0.783112 | 0.396249 |
| MmugDNA.9895.1.S1_at   | MmugDNA.9895.1 | 4.98  | 4.82  | 0.13 | 0.03 | 1.11  | 0.080745 | 0.177121 | 0.444813 | 0.453611 |
| MmugDNA.9896.1.S1_at   | MmugDNA.9896.1 | 8.99  | 8.98  | 0.09 | 0.01 | 1.01  | 0.269733 | 0.707704 | 0.629945 | 0.830472 |
| MmugDNA.9897.1.S1_at   | MmugDNA.9897.1 | 4.5   | 4.5   | 0.24 | 0    | -1    | 0.389923 | 0.547558 | 0.716422 | 0.728511 |
| MmugDNA.9900.1.S1_at   | MmugDNA.9900.1 | 12.46 | 8.93  | 0.32 | 0.8  | 11.57 | 0.002441 | 0.000267 | 0.177103 | 0.033786 |
| MmugDNA.9901.1.S1_at   | MmugDNA.9901.1 | 7.1   | 6.99  | 0.38 | 0.17 | 1.07  | 0.690777 | 0.008849 | 0.87959  | 0.124493 |
| MmugDNA.9902.1.S1_s_at | MmugDNA.9902.1 | 5.37  | 4.36  | 0.31 | 0.31 | 2.01  | 0.045865 | 0.056749 | 0.37735  | 0.284362 |
| MmugDNA.9903.1.S1_at   | MmugDNA.9903.1 | 3.55  | 3.38  | 0.14 | 0.14 | 1.13  | 0.432502 | 0.361182 | 0.743915 | 0.60207  |
| MmugDNA.9903.1.S1_x_at | MmugDNA.9903.1 | 3.32  | 3.28  | 0.08 | 0.17 | 1.03  | 0.945935 | 0.342247 | 0.9812   | 0.588375 |

|                        |                |       |       |      |      |       |          |          |          |          |
|------------------------|----------------|-------|-------|------|------|-------|----------|----------|----------|----------|
| MmugDNA.9904.1.S1_at   | MmugDNA.9904.1 | 6.16  | 6.49  | 0.53 | 0.04 | -1.25 | 0.874382 | 0.84329  | 0.956448 | 0.910767 |
| MmugDNA.9905.1.S1_at   | MmugDNA.9905.1 | 11.21 | 11.21 | 0.27 | 0.13 | -1    | 0.927387 | 0.92002  | 0.97593  | 0.954993 |
| MmugDNA.9907.1.S1_at   | MmugDNA.9907.1 | 4.64  | 4.66  | 0.14 | 0.15 | -1.02 | 0.657827 | 0.262388 | 0.864279 | 0.528655 |
| MmugDNA.9908.1.S1_at   | MmugDNA.9908.1 | 8.27  | 8.08  | 0.19 | 0.16 | 1.14  | 0.534126 | 0.490262 | 0.8012   | 0.692302 |
| MmugDNA.991.1.S1_at    | MmugDNA.991.1  | 4.41  | 4.45  | 0.17 | 0.07 | -1.03 | 0.691769 | 0.542642 | 0.880045 | 0.725641 |
| MmugDNA.9911.1.S1_at   | MmugDNA.9911.1 | 6.65  | 7.38  | 0.44 | 0.51 | -1.66 | 0.334545 | 0.03566  | 0.680478 | 0.233228 |
| MmugDNA.9912.1.S1_at   | MmugDNA.9912.1 | 11.01 | 9.48  | 0.38 | 0.43 | 2.9   | 0.016364 | 0.001722 | 0.287478 | 0.062866 |
| MmugDNA.9913.1.S1_at   | MmugDNA.9913.1 | 4.13  | 4.14  | 0.19 | 0.16 | -1.01 | 0.810085 | 0.325945 | 0.931255 | 0.576213 |
| MmugDNA.9914.1.S1_at   | MmugDNA.9914.1 | 4.39  | 5.1   | 0.77 | 0.57 | -1.63 | 0.459948 | 0.421567 | 0.759871 | 0.645171 |
| MmugDNA.9915.1.S1_at   | MmugDNA.9915.1 | 10.42 | 10.54 | 0.16 | 0.14 | -1.09 | 0.834757 | 0.553758 | 0.940727 | 0.732795 |
| MmugDNA.9916.1.S1_at   | MmugDNA.9916.1 | 4.54  | 4.48  | 0.02 | 0.35 | 1.04  | 0.51074  | 0.312596 | 0.788283 | 0.567268 |
| MmugDNA.9918.1.S1_at   | MmugDNA.9918.1 | 8.3   | 7.74  | 0.22 | 0.08 | 1.48  | 0.016123 | 0.000057 | 0.285918 | 0.025666 |
| MmugDNA.9919.1.S1_at   | MmugDNA.9919.1 | 9.5   | 8.77  | 0.24 | 0.04 | 1.67  | 0.005792 | 0.003675 | 0.211798 | 0.086568 |
| MmugDNA.992.1.S1_at    | MmugDNA.992.1  | 4.42  | 4.44  | 0.44 | 0.48 | -1.02 | 0.585222 | 0.762226 | 0.830366 | 0.861687 |
| MmugDNA.9921.1.S1_at   | MmugDNA.9921.1 | 12.02 | 12.01 | 0.09 | 0.04 | 1.01  | 0.974611 | 0.141552 | 0.991912 | 0.415063 |
| MmugDNA.9923.1.S1_at   | MmugDNA.9923.1 | 7.13  | 7.16  | 0.01 | 0.3  | -1.02 | 0.524461 | 0.760004 | 0.79589  | 0.860519 |
| MmugDNA.9924.1.S1_at   | MmugDNA.9924.1 | 3.25  | 3.25  | 0.07 | 0.19 | -1    | 0.782255 | 0.539574 | 0.919732 | 0.723833 |
| MmugDNA.9926.1.S1_x_at | MmugDNA.9926.1 | 4.88  | 4.96  | 0.7  | 0.43 | -1.06 | 0.954867 | 0.104295 | 0.985034 | 0.365501 |
| MmugDNA.9927.1.S1_at   | MmugDNA.9927.1 | 4.6   | 4.6   | 0.12 | 0.22 | -1    | 0.248423 | 0.323903 | 0.613851 | 0.574658 |
| MmugDNA.9928.1.S1_at   | MmugDNA.9928.1 | 6.1   | 5.82  | 0.27 | 0.32 | 1.22  | 0.168364 | 0.658926 | 0.540968 | 0.800473 |
| MmugDNA.9929.1.S1_at   | MmugDNA.9929.1 | 3.84  | 4.13  | 0.07 | 0.17 | -1.22 | 0.215075 | 0.125377 | 0.585716 | 0.396008 |
| MmugDNA.993.1.S1_at    | MmugDNA.993.1  | 10.27 | 10.71 | 0.65 | 0.22 | -1.36 | 0.467047 | 0.573261 | 0.764099 | 0.744991 |
| MmugDNA.9931.1.S1_at   | MmugDNA.9931.1 | 2.98  | 2.84  | 0.17 | 0.1  | 1.1   | 0.516589 | 0.156636 | 0.791556 | 0.432134 |
| MmugDNA.9932.1.S1_at   | MmugDNA.9932.1 | 4.36  | 3.94  | 0.15 | 0.09 | 1.34  | 0.009191 | 0.357069 | 0.241866 | 0.59875  |
| MmugDNA.9934.1.S1_at   | MmugDNA.9934.1 | 5.39  | 5.17  | 0.04 | 0.02 | 1.17  | 0.000848 | 0.433692 | 0.153739 | 0.65392  |
| MmugDNA.9935.1.S1_at   | MmugDNA.9935.1 | 9.41  | 9.59  | 1.03 | 0.11 | -1.13 | 0.721721 | 0.893917 | 0.892101 | 0.939452 |
| MmugDNA.9936.1.S1_s_at | MmugDNA.9936.1 | 12.5  | 12.51 | 0.07 | 0.1  | -1.01 | 0.456723 | 0.347582 | 0.758051 | 0.592019 |
| MmugDNA.9937.1.S1_at   | MmugDNA.9937.1 | 3.39  | 3.39  | 0    | 0    | 1     | 0.230952 | 0.662057 | 0.599045 | 0.802105 |
| MmugDNA.9938.1.S1_at   | MmugDNA.9938.1 | 5.02  | 5.04  | 0.15 | 0.06 | -1.02 | 0.643793 | 0.689692 | 0.858276 | 0.819038 |
| MmugDNA.994.1.S1_at    | MmugDNA.994.1  | 5.16  | 5.25  | 0.17 | 0.04 | -1.07 | 0.83017  | 0.414593 | 0.93912  | 0.640431 |
| MmugDNA.9941.1.S1_at   | MmugDNA.9941.1 | 6.81  | 6.8   | 0.58 | 0.4  | 1.01  | 0.969174 | 0.399271 | 0.989875 | 0.629735 |
| MmugDNA.9945.1.S1_at   | MmugDNA.9945.1 | 4.19  | 3.92  | 0.29 | 0.21 | 1.2   | 0.135158 | 0.172491 | 0.50918  | 0.448864 |
| MmugDNA.9946.1.S1_at   | MmugDNA.9946.1 | 9.5   | 9.8   | 0.24 | 0.08 | -1.23 | 0.094649 | 0.043792 | 0.463796 | 0.25387  |
| MmugDNA.9947.1.S1_at   | MmugDNA.9947.1 | 5.37  | 5.39  | 0.16 | 0.26 | -1.01 | 0.963502 | 0.507153 | 0.988152 | 0.702788 |
| MmugDNA.9948.1.S1_at   | MmugDNA.9948.1 | 4.27  | 4.19  | 0.31 | 0.04 | 1.06  | 0.253204 | 0.38277  | 0.617925 | 0.618887 |
| MmugDNA.9949.1.S1_at   | MmugDNA.9949.1 | 5     | 4.86  | 0.1  | 0.07 | 1.1   | 0.097437 | 0.445635 | 0.466372 | 0.662468 |
| MmugDNA.995.1.S1_at    | MmugDNA.995.1  | 5.14  | 5.14  | 0.09 | 0.07 | -1    | 0.558115 | 0.943672 | 0.815182 | 0.96797  |
| MmugDNA.9950.1.S1_at   | MmugDNA.9950.1 | 4.71  | 4.96  | 0.48 | 0.41 | -1.19 | 0.760578 | 0.463764 | 0.910074 | 0.674656 |
| MmugDNA.9952.1.S1_at   | MmugDNA.9952.1 | 9.47  | 9.81  | 0.35 | 0.07 | -1.26 | 0.463955 | 0.661127 | 0.762325 | 0.801687 |
| MmugDNA.9953.1.S1_at   | MmugDNA.9953.1 | 5.89  | 6.12  | 0.54 | 0.15 | -1.17 | 0.456945 | 0.808278 | 0.758051 | 0.889645 |
| MmugDNA.9954.1.S1_at   | MmugDNA.9954.1 | 4.04  | 4.15  | 0.1  | 0.09 | -1.08 | 0.131149 | 0.407455 | 0.5054   | 0.635032 |
| MmugDNA.9955.1.S1_at   | MmugDNA.9955.1 | 6.33  | 6.63  | 0.27 | 0.12 | -1.23 | 0.660848 | 0.14725  | 0.865819 | 0.421464 |
| MmugDNA.9956.1.S1_at   | MmugDNA.9956.1 | 7.17  | 7.11  | 0.15 | 0    | 1.04  | 0.250101 | 0.052171 | 0.615476 | 0.274023 |

|                          |                  |       |       |      |      |       |          |          |          |          |
|--------------------------|------------------|-------|-------|------|------|-------|----------|----------|----------|----------|
| MmugDNA.9957.1.S1_at     | MmugDNA.9957.1   | 4.82  | 4.61  | 0.23 | 0.14 | 1.16  | 0.460307 | 0.139528 | 0.760108 | 0.412743 |
| MmugDNA.9959.1.S1_at     | MmugDNA.9959.1   | 5.74  | 6.19  | 1.2  | 0.23 | -1.37 | 0.575206 | 0.334988 | 0.824603 | 0.582768 |
| MmugDNA.996.1.S1_at      | MmugDNA.996.1    | 4.41  | 4.54  | 0.4  | 0.65 | -1.1  | 0.729369 | 0.562628 | 0.895742 | 0.7381   |
| MmugDNA.9960.1.S1_at     | MmugDNA.9960.1   | 3.52  | 3.26  | 0.14 | 0.11 | 1.2   | 0.329593 | 0.173128 | 0.67648  | 0.449765 |
| MmugDNA.9961.1.S1_at     | MmugDNA.9961.1   | 5.63  | 5.56  | 0.11 | 0.07 | 1.05  | 0.199393 | 0.247621 | 0.571138 | 0.517002 |
| MmugDNA.9962.1.S1_at     | MmugDNA.9962.1   | 3.77  | 3.76  | 0.07 | 0.04 | 1.01  | 0.677261 | 0.220206 | 0.873403 | 0.493655 |
| MmugDNA.9963.1.S1_at     | MmugDNA.9963.1   | 9.98  | 9.26  | 0.67 | 0.31 | 1.65  | 0.215936 | 0.313607 | 0.586043 | 0.567977 |
| MmugDNA.9964.1.S1_at     | MmugDNA.9964.1   | 10.5  | 9.82  | 1.03 | 0.08 | 1.6   | 0.873771 | 0.870398 | 0.956275 | 0.926446 |
| MmugDNA.9965.1.S1_at     | MmugDNA.9965.1   | 4.01  | 3.95  | 0.12 | 0.17 | 1.05  | 0.972342 | 0.919363 | 0.99102  | 0.954737 |
| MmugDNA.9966.1.S1_at     | MmugDNA.9966.1   | 10.82 | 10.76 | 0.26 | 0.04 | 1.04  | 0.657567 | 0.199252 | 0.864123 | 0.473946 |
| MmugDNA.9971.1.S1_at     | MmugDNA.9971.1   | 7.5   | 7.47  | 0.2  | 0.04 | -1.02 | 0.827437 | 0.602454 | 0.938039 | 0.763411 |
| MmugDNA.9972.1.S1_at     | MmugDNA.9972.1   | 6.01  | 6.09  | 0.08 | 0.09 | -1.06 | 0.254547 | 0.647516 | 0.618992 | 0.793521 |
| MmugDNA.9975.1.S1_at     | MmugDNA.9975.1   | 7.82  | 7.49  | 0.21 | 0.1  | 1.25  | 0.030089 | 0.020458 | 0.336449 | 0.179597 |
| MmugDNA.9976.1.S1_s_at   | MmugDNA.9976.1   | 6.08  | 6.09  | 0.15 | 0.05 | -1    | 0.289141 | 0.392844 | 0.645892 | 0.625854 |
| MmugDNA.9979.1.S1_at     | MmugDNA.9979.1   | 6.44  | 6.36  | 0.07 | 0.03 | 1.06  | 0.146553 | 0.470119 | 0.520912 | 0.678572 |
| MmugDNA.9980.1.S1_at     | MmugDNA.9980.1   | 5.38  | 6.14  | 0.34 | 0.17 | -1.69 | 0.022407 | 0.16506  | 0.310499 | 0.441242 |
| MmugDNA.9981.1.S1_at     | MmugDNA.9981.1   | 5.38  | 4.66  | 0.64 | 0.35 | 1.64  | 0.086489 | 0.066733 | 0.454228 | 0.304149 |
| MmugDNA.9982.1.S1_at     | MmugDNA.9982.1   | 5.21  | 5.01  | 0.29 | 0.17 | 1.15  | 0.487092 | 0.738305 | 0.774859 | 0.848258 |
| MmugDNA.9983.1.S1_at     | MmugDNA.9983.1   | 10.89 | 10.66 | 0.01 | 0.15 | 1.18  | 0.03048  | 0.003243 | 0.338092 | 0.082187 |
| MmugDNA.9984.1.S1_at     | MmugDNA.9984.1   | 3.65  | 3.53  | 0.14 | 0.03 | 1.08  | 0.075908 | 0.187486 | 0.436934 | 0.463586 |
| MmugDNA.9985.1.S1_at     | MmugDNA.9985.1   | 2.93  | 2.93  | 0.14 | 0.06 | 1     | 0.592921 | 0.15511  | 0.834001 | 0.430237 |
| MmugDNA.9986.1.S1_at     | MmugDNA.9986.1   | 11.48 | 11.38 | 0.16 | 0.08 | 1.07  | 0.629705 | 0.281226 | 0.851663 | 0.544374 |
| MmugDNA.34805.1.S1_s_at  | MmugDNA.34805.1  | 11.97 | 12.07 | 0.15 | 0.01 | -1.07 | 0.333358 | 0.202135 | 0.679591 | 0.476557 |
| MmugDNA.9987.1.S1_at     | MmugDNA.9987.1   | 5.27  | 5.11  | 0.21 | 0.16 | 1.11  | 0.218349 | 0.263084 | 0.58818  | 0.529402 |
| MmugDNA.9988.1.S1_at     | MmugDNA.9988.1   | 6.32  | 6.14  | 0.15 | 0.12 | 1.13  | 0.114613 | 0.184462 | 0.487684 | 0.460481 |
| MmugDNA.9989.1.S1_at     | MmugDNA.9989.1   | 6.93  | 6.97  | 0.38 | 0.04 | -1.03 | 0.890824 | 0.245337 | 0.962492 | 0.515132 |
| MmugDNA.999.1.S1_at      | MmugDNA.999.1    | 7.94  | 6.51  | 1.11 | 0.22 | 2.68  | 0.072758 | 0.043646 | 0.433332 | 0.253581 |
| MmugDNA.9990.1.S1_at     | MmugDNA.9990.1   | 6.54  | 5.62  | 0.87 | 1.18 | 1.9   | 0.794938 | 0.382966 | 0.92471  | 0.61903  |
| MmugDNA.9991.1.S1_at     | MmugDNA.9991.1   | 4.67  | 4.53  | 0.12 | 0.17 | 1.1   | 0.996648 | 0.614563 | 0.998707 | 0.771322 |
| MmugDNA.9993.1.S1_at     | MmugDNA.9993.1   | 4.66  | 4.01  | 0.42 | 0.33 | 1.56  | 0.216211 | 0.162796 | 0.586342 | 0.438915 |
| MmugDNA.9995.1.S1_at     | MmugDNA.9995.1   | 3.26  | 3.34  | 0.06 | 0.06 | -1.05 | 0.2045   | 0.591661 | 0.575907 | 0.757176 |
| MmugDNA.9996.1.S1_x_at   | MmugDNA.9996.1   | 7.69  | 8.43  | 0.08 | 0.23 | -1.67 | 0.003138 | 0.004381 | 0.191107 | 0.092641 |
| MmugDNA.9998.1.S1_at     | MmugDNA.9998.1   | 4.89  | 4.89  | 0.21 | 0.23 | 1     | 0.964674 | 0.255438 | 0.988371 | 0.523461 |
| MmugDNA.9999.1.S1_at     | MmugDNA.9999.1   | 9.16  | 9     | 0.16 | 0.12 | 1.12  | 0.554818 | 0.281554 | 0.813014 | 0.54464  |
| MmuMitochon.3.1.S1_s_at  | MmuMitochon.3.1  | 14.14 | 14.22 | 0.04 | 0.03 | -1.05 | 0.106675 | 0.087365 | 0.479008 | 0.340477 |
| MmuMitochon.4.1.S1_at    | MmuMitochon.4.1  | 13.96 | 14.01 | 0.04 | 0.07 | -1.04 | 0.227096 | 0.105253 | 0.596459 | 0.366999 |
| MmuMitochon.6.1.S1_s_at  | MmuMitochon.6.1  | 14.43 | 14.42 | 0.01 | 0.04 | 1     | 0.549594 | 0.122982 | 0.810392 | 0.392923 |
| MmuMitochon.10.1.S1_s_at | MmuMitochon.10.1 | 14.32 | 14.36 | 0.05 | 0.07 | -1.02 | 0.220946 | 0.08164  | 0.590217 | 0.329836 |
| MmuMitochon.13.1.S1_at   | MmuMitochon.13.1 | 13.8  | 13.77 | 0.13 | 0.07 | 1.02  | 0.372955 | 0.365752 | 0.705567 | 0.605685 |
| AY588945.CDS1.S1_s_at    | AY588945.CDS1    | 5.92  | 5.75  | 0.13 | 0.01 | 1.13  | 0.1113   | 0.118104 | 0.484508 | 0.385979 |
| AY588945.CDS2.S1_s_at    | AY588945.CDS2    | 4.68  | 4.3   | 0.24 | 0.15 | 1.29  | 0.087693 | 0.064723 | 0.455349 | 0.300314 |
| AY588945.CDS3.S1_s_at    | AY588945.CDS3    | 4.16  | 4.04  | 0.14 | 0.08 | 1.09  | 0.143906 | 0.120573 | 0.519289 | 0.389378 |
| AY588945.CDS4.S1_s_at    | AY588945.CDS4    | 3.1   | 3.19  | 0.2  | 0.05 | -1.07 | 0.725703 | 0.353361 | 0.893814 | 0.596477 |

|                        |                 |      |      |      |      |       |          |          |          |          |
|------------------------|-----------------|------|------|------|------|-------|----------|----------|----------|----------|
| AY588945.CDS6.S1_at    | AY588945.CDS6   | 3.9  | 3.89 | 0.16 | 0.04 | 1     | 0.969199 | 0.828669 | 0.989875 | 0.901558 |
| AY588945.CDS6.S1_s_at  | AY588945.CDS6   | 3.64 | 3.34 | 0.09 | 0.17 | 1.23  | 0.081561 | 0.129417 | 0.445514 | 0.400822 |
| AY588945.CDS7.S1_s_at  | AY588945.CDS7   | 3.18 | 3.19 | 0.12 | 0.09 | -1.01 | 0.556827 | 0.251814 | 0.814405 | 0.520478 |
| AY588945.CDS8.S1_at    | AY588945.CDS8   | 3.53 | 3.52 | 0.16 | 0.08 | 1     | 0.954581 | 0.975356 | 0.984902 | 0.986553 |
| AY588945.CDS9.S1_s_at  | AY588945.CDS9   | 4.52 | 4.37 | 0.22 | 0.19 | 1.11  | 0.461985 | 0.68258  | 0.76137  | 0.814624 |
| NC-004455.CDS1.S1_at   | NC-004455.CDS1  | 5.07 | 4.97 | 0.16 | 0.06 | 1.07  | 0.17204  | 0.192948 | 0.545354 | 0.468455 |
| NC-004455.CDS2.S1_at   | NC-004455.CDS2  | 4.14 | 3.88 | 0.28 | 0.12 | 1.2   | 0.343234 | 0.501334 | 0.686508 | 0.69951  |
| NC-004455.CDS3.S1_at   | NC-004455.CDS3  | 2.88 | 2.91 | 0.16 | 0.09 | -1.02 | 0.68453  | 0.734301 | 0.87645  | 0.846058 |
| NC-004455.CDS4.S1_at   | NC-004455.CDS4  | 4.36 | 4.31 | 0.03 | 0.07 | 1.03  | 0.164735 | 0.301706 | 0.537466 | 0.559643 |
| NC-004455.CDS5.S1_at   | NC-004455.CDS5  | 3.2  | 3.15 | 0.05 | 0.1  | 1.03  | 0.301084 | 0.176491 | 0.655304 | 0.452836 |
| NC-004455.CDS6.S1_at   | NC-004455.CDS6  | 3.65 | 3.64 | 0.26 | 0.21 | 1     | 0.547693 | 0.674278 | 0.809225 | 0.809716 |
| NC-004455.CDS7.S1_at   | NC-004455.CDS7  | 4.69 | 4.42 | 0.15 | 0.12 | 1.21  | 0.170019 | 0.193332 | 0.54302  | 0.468657 |
| NC-004455.CDS8.S1_at   | NC-004455.CDS8  | 3.9  | 3.9  | 0.15 | 0.05 | 1     | 0.271585 | 0.323986 | 0.631445 | 0.574672 |
| NC-001870.CDS5.S1_at   | NC-001870.CDS5  | 4.35 | 4.25 | 0.26 | 0.04 | 1.08  | 0.445682 | 0.265259 | 0.752285 | 0.531232 |
| NC-001870.CDS6.S1_at   | NC-001870.CDS6  | 3.52 | 3.38 | 0.06 | 0.02 | 1.1   | 0.008299 | 0.002421 | 0.23244  | 0.073056 |
| NC-001870.CDS7.S1_s_at | NC-001870.CDS7  | 3.62 | 3.57 | 0.17 | 0.12 | 1.03  | 0.705757 | 0.887695 | 0.885355 | 0.93601  |
| NC-001870.CDS8.S1_at   | NC-001870.CDS8  | 3.34 | 3.13 | 0.19 | 0.05 | 1.16  | 0.292396 | 0.389789 | 0.648793 | 0.623851 |
| NC-001870.CDS8.S1_x_at | NC-001870.CDS8  | 3.33 | 3.22 | 0.08 | 0.09 | 1.08  | 0.085407 | 0.075169 | 0.452653 | 0.319373 |
| NC-001870.CDS9.S1_at   | NC-001870.CDS9  | 4.24 | 4.1  | 0.26 | 0.03 | 1.1   | 0.572477 | 0.636451 | 0.823222 | 0.786176 |
| NC-001798.CDS1.S1_s_at | NC-001798.CDS1  | 7.8  | 7.61 | 0.12 | 0.05 | 1.14  | 0.088258 | 0.029814 | 0.45606  | 0.214326 |
| NC-001798.CDS2.S1_s_at | NC-001798.CDS2  | 5.91 | 5.67 | 0.15 | 0.13 | 1.18  | 0.218018 | 0.199879 | 0.587987 | 0.474559 |
| NC-001798.CDS3.S1_at   | NC-001798.CDS3  | 5.2  | 4.79 | 0.25 | 0.18 | 1.32  | 0.112581 | 0.110526 | 0.485877 | 0.374742 |
| NC-001798.CDS4.S1_at   | NC-001798.CDS4  | 5.14 | 5.06 | 0.22 | 0.03 | 1.06  | 0.37252  | 0.430015 | 0.705567 | 0.65111  |
| NC-001798.CDS5.S1_at   | NC-001798.CDS5  | 3.9  | 3.85 | 0.21 | 0.11 | 1.04  | 0.383686 | 0.296505 | 0.711503 | 0.555528 |
| NC-001798.CDS6.S1_at   | NC-001798.CDS6  | 5.94 | 5.82 | 0.11 | 0.03 | 1.08  | 0.155425 | 0.060599 | 0.528651 | 0.292776 |
| NC-001798.CDS7.S1_at   | NC-001798.CDS7  | 3.87 | 3.7  | 0.1  | 0.21 | 1.12  | 0.170196 | 0.152191 | 0.543323 | 0.426978 |
| NC-001798.CDS8.S1_at   | NC-001798.CDS8  | 4.51 | 4.52 | 0.18 | 0.04 | -1    | 0.511469 | 0.233055 | 0.78871  | 0.50445  |
| NC-001798.CDS9.S1_at   | NC-001798.CDS9  | 5.34 | 5.31 | 0.35 | 0.13 | 1.02  | 0.334211 | 0.29642  | 0.680143 | 0.555525 |
| NC-001798.CDS10.S1_at  | NC-001798.CDS10 | 5.96 | 5.84 | 0.07 | 0.09 | 1.09  | 0.366597 | 0.576367 | 0.702101 | 0.747202 |
| NC-001798.CDS11.S1_at  | NC-001798.CDS11 | 6.22 | 6.05 | 0.09 | 0.02 | 1.12  | 0.04585  | 0.021524 | 0.37735  | 0.183771 |
| NC-001798.CDS12.S1_at  | NC-001798.CDS12 | 4.87 | 4.69 | 0.28 | 0.06 | 1.13  | 0.774169 | 0.467072 | 0.916175 | 0.676825 |
| NC-001798.CDS13.S1_at  | NC-001798.CDS13 | 4.74 | 4.82 | 0.3  | 0.11 | -1.06 | 0.831122 | 0.350286 | 0.939628 | 0.594034 |
| NC-001798.CDS14.S1_at  | NC-001798.CDS14 | 5.63 | 5.58 | 0.04 | 0.02 | 1.03  | 0.238827 | 0.051542 | 0.605452 | 0.272451 |
| NC-001798.CDS15.S1_at  | NC-001798.CDS15 | 5.8  | 5.53 | 0.17 | 0.23 | 1.2   | 0.477339 | 0.195314 | 0.769812 | 0.470253 |
| NC-001798.CDS16.S1_at  | NC-001798.CDS16 | 4.78 | 4.84 | 0.16 | 0.18 | -1.04 | 0.830046 | 0.423361 | 0.939039 | 0.646277 |
| NC-001798.CDS17.S1_at  | NC-001798.CDS17 | 5.94 | 6.01 | 0.11 | 0.08 | -1.05 | 0.763817 | 0.947768 | 0.911287 | 0.970346 |
| NC-001798.CDS18.S1_at  | NC-001798.CDS18 | 5.98 | 5.95 | 0.4  | 0.09 | 1.02  | 0.276243 | 0.224777 | 0.635878 | 0.497617 |
| NC-001798.CDS19.S1_at  | NC-001798.CDS19 | 4.88 | 4.8  | 0.32 | 0.13 | 1.05  | 0.259285 | 0.247123 | 0.622607 | 0.516289 |
| NC-001798.CDS20.S1_at  | NC-001798.CDS20 | 6.26 | 6.15 | 0.17 | 0.13 | 1.08  | 0.443964 | 0.199699 | 0.751068 | 0.474335 |
| NC-001798.CDS21.S1_at  | NC-001798.CDS21 | 6.4  | 6.27 | 0.18 | 0.11 | 1.09  | 0.176059 | 0.122647 | 0.549159 | 0.392596 |
| NC-001798.CDS22.S1_at  | NC-001798.CDS22 | 5.63 | 5.58 | 0.12 | 0    | 1.04  | 0.422891 | 0.713892 | 0.738587 | 0.833976 |
| NC-001798.CDS23.S1_at  | NC-001798.CDS23 | 5.89 | 6.04 | 0.24 | 0.17 | -1.11 | 0.642458 | 0.631451 | 0.857755 | 0.782839 |
| NC-001798.CDS24.S1_at  | NC-001798.CDS24 | 5.75 | 5.75 | 0    | 0.02 | 1     | 0.472461 | 0.36381  | 0.767074 | 0.604189 |

|                         |                 |      |      |      |      |       |          |          |          |          |
|-------------------------|-----------------|------|------|------|------|-------|----------|----------|----------|----------|
| NC-001798.CDS25.S1_at   | NC-001798.CDS25 | 6.45 | 6.28 | 0.05 | 0.08 | 1.13  | 0.040229 | 0.005777 | 0.36348  | 0.104378 |
| NC-001798.CDS26.S1_at   | NC-001798.CDS26 | 3.88 | 3.93 | 0.02 | 0.07 | -1.04 | 0.15857  | 0.046202 | 0.531588 | 0.259359 |
| NC-001798.CDS27.S1_at   | NC-001798.CDS27 | 4.61 | 4.49 | 0.31 | 0.06 | 1.09  | 0.567752 | 0.196002 | 0.820586 | 0.471005 |
| NC-001798.CDS28.S1_s_at | NC-001798.CDS28 | 5.49 | 5.25 | 0.21 | 0.05 | 1.18  | 0.51865  | 0.62049  | 0.792794 | 0.775449 |
| NC-001798.CDS30.S1_at   | NC-001798.CDS30 | 6.13 | 6.07 | 0.06 | 0.12 | 1.04  | 0.374964 | 0.522181 | 0.706256 | 0.712941 |
| NC-001798.CDS31.S1_at   | NC-001798.CDS31 | 3.56 | 3.55 | 0.08 | 0.14 | 1.01  | 0.536587 | 0.742406 | 0.802417 | 0.850798 |
| NC-001798.CDS32.S1_at   | NC-001798.CDS32 | 7.39 | 7.17 | 0.09 | 0.02 | 1.17  | 0.040869 | 0.029695 | 0.365199 | 0.214029 |
| NC-001798.CDS33.S1_at   | NC-001798.CDS33 | 4.44 | 4.37 | 0.04 | 0.13 | 1.05  | 0.20287  | 0.329786 | 0.574251 | 0.578874 |
| NC-001798.CDS34.S1_at   | NC-001798.CDS34 | 5.28 | 4.76 | 0.15 | 0.05 | 1.43  | 0.008663 | 0.006981 | 0.236048 | 0.112771 |
| NC-001798.CDS35.S1_at   | NC-001798.CDS35 | 4.79 | 4.49 | 0.13 | 0.18 | 1.23  | 0.094859 | 0.139756 | 0.464075 | 0.413109 |
| NC-001798.CDS36.S1_at   | NC-001798.CDS36 | 4.3  | 4.31 | 0.18 | 0    | -1.01 | 0.43168  | 0.347356 | 0.743542 | 0.591967 |
| NC-001798.CDS37.S1_at   | NC-001798.CDS37 | 6.64 | 6.67 | 0.15 | 0.1  | -1.02 | 0.329537 | 0.546005 | 0.676438 | 0.727708 |
| NC-001798.CDS38.S1_at   | NC-001798.CDS38 | 4.84 | 4.72 | 0.21 | 0.06 | 1.09  | 0.502623 | 0.484186 | 0.783781 | 0.688399 |
| NC-001798.CDS39.S1_at   | NC-001798.CDS39 | 4.7  | 4.64 | 0.23 | 0.03 | 1.04  | 0.472345 | 0.565838 | 0.767001 | 0.740112 |
| NC-001798.CDS40.S1_at   | NC-001798.CDS40 | 6.49 | 6.47 | 0.24 | 0.14 | 1.02  | 0.784066 | 0.673225 | 0.920613 | 0.809084 |
| NC-001798.CDS41.S1_at   | NC-001798.CDS41 | 6.14 | 6.05 | 0.09 | 0.11 | 1.06  | 0.151579 | 0.146895 | 0.524628 | 0.420934 |
| NC-001798.CDS42.S1_at   | NC-001798.CDS42 | 4.64 | 4.17 | 0.26 | 0.19 | 1.39  | 0.10207  | 0.105239 | 0.472436 | 0.366999 |
| NC-001798.CDS43.S1_at   | NC-001798.CDS43 | 5.54 | 5.54 | 0    | 0.05 | 1     | 0.394694 | 0.757685 | 0.719972 | 0.858941 |
| NC-001798.CDS44.S1_at   | NC-001798.CDS44 | 5.51 | 5.21 | 0.15 | 0.1  | 1.23  | 0.08721  | 0.040689 | 0.454785 | 0.24665  |
| NC-001798.CDS45.S1_at   | NC-001798.CDS45 | 6.66 | 6.58 | 0.1  | 0.06 | 1.06  | 0.134436 | 0.237742 | 0.508462 | 0.50826  |
| NC-001798.CDS46.S1_at   | NC-001798.CDS46 | 6.17 | 6.13 | 0.07 | 0.05 | 1.03  | 0.186163 | 0.364844 | 0.559096 | 0.605139 |
| NC-001798.CDS47.S1_at   | NC-001798.CDS47 | 5.43 | 5.34 | 0.08 | 0    | 1.06  | 0.119554 | 0.321874 | 0.49288  | 0.573523 |
| NC-001798.CDS48.S1_at   | NC-001798.CDS48 | 4.21 | 4.08 | 0.2  | 0.05 | 1.1   | 0.388556 | 0.496145 | 0.715408 | 0.695877 |
| NC-001798.CDS49.S1_at   | NC-001798.CDS49 | 4.97 | 4.96 | 0.22 | 0.05 | 1     | 0.851608 | 0.85666  | 0.947639 | 0.918123 |
| NC-001798.CDS50.S1_at   | NC-001798.CDS50 | 5.37 | 5.37 | 0.2  | 0.16 | 1     | 0.236352 | 0.243975 | 0.603291 | 0.514069 |
| NC-001798.CDS52.S1_at   | NC-001798.CDS52 | 6.08 | 6.01 | 0.02 | 0.01 | 1.05  | 0.006226 | 0.035342 | 0.217603 | 0.232294 |
| NC-001798.CDS53.S1_at   | NC-001798.CDS53 | 4.86 | 4.77 | 0.12 | 0    | 1.07  | 0.202144 | 0.088566 | 0.573629 | 0.342004 |
| NC-001798.CDS54.S1_at   | NC-001798.CDS54 | 7.04 | 6.94 | 0.23 | 0.08 | 1.08  | 0.436373 | 0.717234 | 0.746306 | 0.836332 |
| NC-001798.CDS55.S1_at   | NC-001798.CDS55 | 7.07 | 6.95 | 0.09 | 0.02 | 1.09  | 0.091222 | 0.180242 | 0.459035 | 0.456804 |
| NC-001798.CDS56.S1_at   | NC-001798.CDS56 | 5.55 | 5.42 | 0.08 | 0    | 1.09  | 0.02512  | 0.054907 | 0.320458 | 0.279775 |
| NC-001798.CDS57.S1_at   | NC-001798.CDS57 | 3.62 | 3.49 | 0.19 | 0.16 | 1.09  | 0.223371 | 0.322301 | 0.592569 | 0.573907 |
| NC-001798.CDS58.S1_at   | NC-001798.CDS58 | 4.67 | 4.32 | 0.26 | 0.04 | 1.27  | 0.097282 | 0.031775 | 0.466086 | 0.220698 |
| NC-001798.CDS59.S1_at   | NC-001798.CDS59 | 5.28 | 5.36 | 0.17 | 0.11 | -1.06 | 0.74561  | 0.151613 | 0.903078 | 0.426354 |
| NC-001798.CDS60.S1_at   | NC-001798.CDS60 | 5.7  | 5.6  | 0.12 | 0.04 | 1.07  | 0.25016  | 0.242449 | 0.615476 | 0.512835 |
| NC-001798.CDS63.S1_s_at | NC-001798.CDS63 | 7.58 | 7.42 | 0.07 | 0.07 | 1.12  | 0.043889 | 0.031085 | 0.373038 | 0.218117 |
| NC-001798.CDS64.S1_at   | NC-001798.CDS64 | 6.39 | 6.34 | 0.11 | 0.09 | 1.04  | 0.576664 | 0.564703 | 0.825166 | 0.739425 |
| NC-001798.CDS65.S1_at   | NC-001798.CDS65 | 5.72 | 5.43 | 0.31 | 0.12 | 1.22  | 0.43851  | 0.60049  | 0.747368 | 0.762128 |
| NC-001798.CDS66.S1_at   | NC-001798.CDS66 | 6.59 | 6.54 | 0.11 | 0.1  | 1.03  | 0.293423 | 0.581746 | 0.649776 | 0.750738 |
| NC-001798.CDS67.S1_at   | NC-001798.CDS67 | 6.87 | 6.76 | 0.16 | 0.08 | 1.07  | 0.597143 | 0.224103 | 0.83613  | 0.497092 |
| NC-001798.CDS68.S1_at   | NC-001798.CDS68 | 5.95 | 5.88 | 0.08 | 0.1  | 1.05  | 0.144982 | 0.201785 | 0.520238 | 0.476367 |
| NC-001798.CDS69.S1_at   | NC-001798.CDS69 | 5.63 | 5.51 | 0.14 | 0.11 | 1.08  | 0.261885 | 0.028187 | 0.624136 | 0.2095   |
| NC-001798.CDS70.S1_at   | NC-001798.CDS70 | 5.7  | 5.38 | 0.16 | 0.12 | 1.25  | 0.071567 | 0.117965 | 0.431049 | 0.385858 |
| NC-001798.CDS71.S1_at   | NC-001798.CDS71 | 7.12 | 6.97 | 0.12 | 0.09 | 1.11  | 0.280045 | 0.462923 | 0.638871 | 0.674149 |

|                         |                 |      |      |      |      |       |          |          |          |          |
|-------------------------|-----------------|------|------|------|------|-------|----------|----------|----------|----------|
| NC-001798.CDS72.S1_at   | NC-001798.CDS72 | 5.22 | 5.17 | 0.05 | 0.17 | 1.03  | 0.174774 | 0.28531  | 0.548031 | 0.547196 |
| NC-001798.CDS73.S1_at   | NC-001798.CDS73 | 6.08 | 6.09 | 0.08 | 0.12 | -1.01 | 0.748551 | 0.68036  | 0.904527 | 0.813388 |
| NC-001798.CDS74.S1_at   | NC-001798.CDS74 | 6.15 | 6.16 | 0.08 | 0.03 | -1.01 | 0.732164 | 0.594668 | 0.897011 | 0.758623 |
| NC-001798.CDS75.S1_at   | NC-001798.CDS75 | 7.55 | 7.54 | 0.18 | 0.04 | 1.01  | 0.325913 | 0.663943 | 0.673523 | 0.803246 |
| NC-001798.CDS75.S1_s_at | NC-001798.CDS75 | 5.42 | 5.44 | 0.09 | 0.02 | -1.02 | 0.559337 | 0.67027  | 0.816094 | 0.807201 |
| NC-001798.CDS76.S1_at   | NC-001798.CDS76 | 6.45 | 6.23 | 0.14 | 0.06 | 1.17  | 0.090045 | 0.045124 | 0.457992 | 0.256974 |
| NC-001862.CDS1.S1_at    | NC-001862.CDS1  | 4.52 | 4.64 | 0.12 | 0.1  | -1.08 | 0.560569 | 0.744365 | 0.816804 | 0.85199  |
| NC-001862.CDS2.S1_at    | NC-001862.CDS2  | 3.87 | 3.89 | 0.06 | 0.18 | -1.02 | 0.831751 | 0.835044 | 0.939628 | 0.905549 |
| NC-001401.CDS1.S1_s_at  | NC-001401.CDS1  | 5.1  | 4.7  | 0.3  | 0.16 | 1.32  | 0.295038 | 0.227668 | 0.650971 | 0.499923 |
| NC-001401.CDS5.S1_at    | NC-001401.CDS5  | 4.72 | 4.53 | 0.03 | 0.1  | 1.14  | 0.077779 | 0.155534 | 0.439884 | 0.430888 |
| NC-001542.CDS1.S1_at    | NC-001542.CDS1  | 3.08 | 3.1  | 0.1  | 0.04 | -1.01 | 0.729218 | 0.659054 | 0.89566  | 0.800504 |
| NC-001542.CDS2.S1_at    | NC-001542.CDS2  | 3.61 | 3.62 | 0.25 | 0.12 | -1.01 | 0.622464 | 0.709893 | 0.847802 | 0.831863 |
| NC-001542.CDS3.S1_at    | NC-001542.CDS3  | 3.89 | 3.74 | 0.11 | 0.02 | 1.11  | 0.052017 | 0.531046 | 0.391724 | 0.718384 |
| NC-001542.CDS4.S1_at    | NC-001542.CDS4  | 3.64 | 3.61 | 0.15 | 0.05 | 1.02  | 0.639719 | 0.29128  | 0.856326 | 0.551803 |
| NC-001542.CDS5.S1_at    | NC-001542.CDS5  | 3.96 | 3.83 | 0.04 | 0.18 | 1.09  | 0.862179 | 0.712939 | 0.951428 | 0.833562 |
| NC-001710.CDS1.S1_at    | NC-001710.CDS1  | 4    | 3.89 | 0.06 | 0.04 | 1.08  | 0.070979 | 0.184152 | 0.430118 | 0.460379 |
| NC-001669.CDS1.S1_at    | NC-001669.CDS1  | 4.04 | 3.65 | 0.2  | 0.07 | 1.31  | 0.02721  | 0.013729 | 0.327322 | 0.150093 |
| NC-001669.CDS2.S1_at    | NC-001669.CDS2  | 3.62 | 3.62 | 0.06 | 0.11 | -1    | 0.371376 | 0.734088 | 0.705454 | 0.845896 |
| NC-001669.CDS3.S1_s_at  | NC-001669.CDS3  | 3.96 | 3.94 | 0.16 | 0.13 | 1.02  | 0.879422 | 0.598938 | 0.958214 | 0.761244 |
| NC-001669.CDS5.S1_at    | NC-001669.CDS5  | 4.63 | 4.46 | 0.13 | 0.18 | 1.13  | 0.477912 | 0.195654 | 0.76987  | 0.470491 |
| NC-003401.CDS1.S1_at    | NC-003401.CDS1  | 3.28 | 3.28 | 0.09 | 0.07 | -1.01 | 0.875089 | 0.055318 | 0.956628 | 0.281024 |
| NC-003401.CDS2.S1_at    | NC-003401.CDS2  | 3.77 | 3.72 | 0.09 | 0.07 | 1.04  | 0.216667 | 0.318675 | 0.586753 | 0.571315 |
| NC-003401.CDS3.S1_at    | NC-003401.CDS3  | 2.99 | 3.05 | 0.11 | 0.07 | -1.05 | 0.559459 | 0.888321 | 0.816154 | 0.93632  |
| NC-003401.CDS4.S1_at    | NC-003401.CDS4  | 5.31 | 5.18 | 0.03 | 0.15 | 1.09  | 0.095302 | 0.10137  | 0.464131 | 0.36112  |
| NC-003401.CDS5.S1_at    | NC-003401.CDS5  | 3.79 | 3.82 | 0.28 | 0.11 | -1.02 | 0.723177 | 0.404897 | 0.892777 | 0.633393 |
| NC-003401.CDS6.S1_at    | NC-003401.CDS6  | 5.12 | 5    | 0.19 | 0.1  | 1.08  | 0.146437 | 0.495036 | 0.520747 | 0.695291 |
| NC-003401.CDS7.S1_at    | NC-003401.CDS7  | 4.57 | 4.62 | 0.08 | 0.16 | -1.03 | 0.82053  | 0.345472 | 0.935289 | 0.590746 |
| NC-003401.CDS8.S1_at    | NC-003401.CDS8  | 4.69 | 4.28 | 0.19 | 0.25 | 1.33  | 0.443975 | 0.354958 | 0.751068 | 0.597466 |
| NC-003401.CDS9.S1_at    | NC-003401.CDS9  | 4.54 | 4.5  | 0.09 | 0.02 | 1.03  | 0.439644 | 0.420343 | 0.748263 | 0.644099 |
| NC-003401.CDS10.S1_at   | NC-003401.CDS10 | 4.25 | 3.91 | 0.22 | 0.1  | 1.27  | 0.087374 | 0.145483 | 0.454796 | 0.419424 |
| NC-003401.CDS11.S1_at   | NC-003401.CDS11 | 4.75 | 4.63 | 0.07 | 0.09 | 1.09  | 0.115081 | 0.6042   | 0.488314 | 0.764542 |
| NC-003401.CDS12.S1_at   | NC-003401.CDS12 | 3.3  | 3.28 | 0.07 | 0.16 | 1.01  | 0.766336 | 0.694741 | 0.912101 | 0.822545 |
| NC-003401.CDS13.S1_at   | NC-003401.CDS13 | 5.48 | 5.35 | 0.05 | 0.07 | 1.1   | 0.053176 | 0.043144 | 0.394158 | 0.252421 |
| NC-003401.CDS14.S1_at   | NC-003401.CDS14 | 6.63 | 6.63 | 0.2  | 0.08 | 1     | 0.37903  | 0.537548 | 0.708548 | 0.722606 |
| NC-003401.CDS15.S1_at   | NC-003401.CDS15 | 4.57 | 4.46 | 0.24 | 0.12 | 1.08  | 0.327568 | 0.442446 | 0.675137 | 0.660417 |
| NC-003401.CDS16.S1_at   | NC-003401.CDS16 | 4.93 | 4.81 | 0.25 | 0.18 | 1.09  | 0.259905 | 0.362964 | 0.622946 | 0.603471 |
| NC-003401.CDS17.S1_at   | NC-003401.CDS17 | 4.46 | 4.32 | 0.17 | 0.16 | 1.1   | 0.129494 | 0.20548  | 0.504238 | 0.479764 |
| NC-003401.CDS18.S1_at   | NC-003401.CDS18 | 3.51 | 3.4  | 0.12 | 0.33 | 1.08  | 0.873825 | 0.671857 | 0.956314 | 0.808158 |
| NC-003401.CDS19.S1_at   | NC-003401.CDS19 | 4.44 | 4.29 | 0.14 | 0.06 | 1.1   | 0.045276 | 0.032236 | 0.376169 | 0.222213 |
| NC-003401.CDS19.S1_s_at | NC-003401.CDS19 | 3.94 | 3.9  | 0.05 | 0.06 | 1.03  | 0.531577 | 0.385385 | 0.799779 | 0.620818 |
| NC-003401.CDS20.S1_at   | NC-003401.CDS20 | 3.69 | 3.44 | 0.1  | 0.14 | 1.2   | 0.172893 | 0.208001 | 0.54603  | 0.482049 |
| NC-003401.CDS21.S1_at   | NC-003401.CDS21 | 3.07 | 3.05 | 0.15 | 0.08 | 1.01  | 0.480951 | 0.582256 | 0.771639 | 0.750921 |
| NC-003401.CDS22.S1_at   | NC-003401.CDS22 | 4    | 3.91 | 0.08 | 0.01 | 1.07  | 0.119906 | 0.110695 | 0.493259 | 0.374854 |



|                         |                 |      |      |      |      |       |          |          |          |          |
|-------------------------|-----------------|------|------|------|------|-------|----------|----------|----------|----------|
| NC-003401.CDS23.S1_at   | NC-003401.CDS23 | 3.27 | 3.12 | 0.22 | 0.09 | 1.11  | 0.180052 | 0.213861 | 0.553172 | 0.48758  |
| NC-003401.CDS24.S1_at   | NC-003401.CDS24 | 4.43 | 4.42 | 0.17 | 0.11 | 1.01  | 0.393867 | 0.511377 | 0.71953  | 0.705534 |
| NC-003401.CDS25.S1_at   | NC-003401.CDS25 | 5.06 | 4.99 | 0.06 | 0.04 | 1.05  | 0.040967 | 0.041964 | 0.365582 | 0.24943  |
| NC-003401.CDS26.S1_at   | NC-003401.CDS26 | 5.31 | 5.44 | 0.21 | 0.11 | -1.09 | 0.651305 | 0.812303 | 0.861519 | 0.891561 |
| NC-003401.CDS27.S1_at   | NC-003401.CDS27 | 3.79 | 3.79 | 0.16 | 0.11 | 1     | 0.785014 | 0.539963 | 0.920961 | 0.723995 |
| NC-003401.CDS28.S1_at   | NC-003401.CDS28 | 3.66 | 3.72 | 0.21 | 0.03 | -1.04 | 0.645735 | 0.777137 | 0.858801 | 0.870521 |
| NC-003401.CDS29.S1_at   | NC-003401.CDS29 | 3.52 | 3.18 | 0.21 | 0.1  | 1.27  | 0.075033 | 0.096614 | 0.435677 | 0.354145 |
| NC-003401.CDS30.S1_at   | NC-003401.CDS30 | 3.44 | 3.39 | 0.15 | 0.06 | 1.04  | 0.928887 | 0.53763  | 0.976332 | 0.722616 |
| NC-003401.CDS31.S1_at   | NC-003401.CDS31 | 5.19 | 5.05 | 0.06 | 0.09 | 1.1   | 0.145692 | 0.065417 | 0.520555 | 0.301415 |
| NC-003401.CDS32.S1_at   | NC-003401.CDS32 | 3.76 | 3.66 | 0.06 | 0.01 | 1.07  | 0.100503 | 0.670611 | 0.471309 | 0.807444 |
| NC-003401.CDS33.S1_at   | NC-003401.CDS33 | 4.3  | 4.37 | 0.11 | 0.2  | -1.06 | 0.836999 | 0.287483 | 0.941526 | 0.548718 |
| NC-003401.CDS34.S1_at   | NC-003401.CDS34 | 3.99 | 3.92 | 0.07 | 0.01 | 1.05  | 0.12428  | 0.05934  | 0.498334 | 0.29054  |
| NC-003401.CDS35.S1_at   | NC-003401.CDS35 | 3.77 | 3.83 | 0.2  | 0.07 | -1.04 | 0.899923 | 0.021438 | 0.965989 | 0.183342 |
| NC-003401.CDS36.S1_at   | NC-003401.CDS36 | 4.5  | 4.55 | 0.08 | 0.11 | -1.03 | 0.884376 | 0.850611 | 0.959932 | 0.915016 |
| NC-003401.CDS37.S1_at   | NC-003401.CDS37 | 3.67 | 3.35 | 0.14 | 0.08 | 1.25  | 0.031092 | 0.015464 | 0.339678 | 0.157878 |
| NC-003401.CDS38.S1_at   | NC-003401.CDS38 | 3.56 | 3.65 | 0.16 | 0.12 | -1.07 | 0.597442 | 0.729338 | 0.836302 | 0.843541 |
| NC-003401.CDS38.S1_x_at | NC-003401.CDS38 | 3.01 | 3.01 | 0.05 | 0.11 | 1     | 0.930378 | 0.937835 | 0.976792 | 0.964734 |
| NC-003401.CDS39.S1_at   | NC-003401.CDS39 | 3.47 | 3.47 | 0.04 | 0.05 | 1     | 0.528116 | 0.844323 | 0.797476 | 0.911376 |
| NC-003401.CDS40.S1_at   | NC-003401.CDS40 | 4.92 | 4.87 | 0.2  | 0.07 | 1.03  | 0.426843 | 0.523886 | 0.740751 | 0.714052 |
| NC-003401.CDS41.S1_at   | NC-003401.CDS41 | 5.53 | 5.48 | 0.25 | 0.11 | 1.04  | 0.294511 | 0.21109  | 0.65061  | 0.4851   |
| NC-003401.CDS42.S1_at   | NC-003401.CDS42 | 4.96 | 5.04 | 0.25 | 0.18 | -1.06 | 0.405623 | 0.431294 | 0.727426 | 0.652249 |
| NC-003401.CDS43.S1_at   | NC-003401.CDS43 | 3.25 | 3.14 | 0.1  | 0.1  | 1.08  | 0.226827 | 0.078228 | 0.596222 | 0.324765 |
| NC-003401.CDS44.S1_at   | NC-003401.CDS44 | 4.25 | 4.28 | 0.15 | 0.28 | -1.02 | 0.60901  | 0.226756 | 0.84151  | 0.499176 |
| NC-003401.CDS45.S1_at   | NC-003401.CDS45 | 4.66 | 4.52 | 0.34 | 0.1  | 1.1   | 0.25824  | 0.260035 | 0.622122 | 0.52675  |
| NC-003401.CDS46.S1_at   | NC-003401.CDS46 | 4.36 | 4.22 | 0.06 | 0.2  | 1.1   | 0.422157 | 0.289851 | 0.73803  | 0.550831 |
| NC-003401.CDS47.S1_at   | NC-003401.CDS47 | 3.51 | 3.43 | 0.14 | 0.04 | 1.05  | 0.324105 | 0.346219 | 0.67252  | 0.591201 |
| NC-003401.CDS48.S1_at   | NC-003401.CDS48 | 4.96 | 4.65 | 0.31 | 0.07 | 1.24  | 0.20674  | 0.124797 | 0.578729 | 0.395219 |
| NC-003401.CDS49.S1_at   | NC-003401.CDS49 | 4.09 | 4.1  | 0.02 | 0.1  | -1.01 | 0.74984  | 0.646076 | 0.905303 | 0.792676 |
| NC-003401.CDS50.S1_at   | NC-003401.CDS50 | 4.94 | 4.99 | 0.19 | 0    | -1.04 | 0.65582  | 0.522835 | 0.863317 | 0.713416 |
| NC-003401.CDS51.S1_at   | NC-003401.CDS51 | 5.22 | 5.03 | 0.27 | 0.06 | 1.14  | 0.375666 | 0.253431 | 0.7066   | 0.521736 |
| NC-003401.CDS52.S1_at   | NC-003401.CDS52 | 5.7  | 5.46 | 0.15 | 0.06 | 1.19  | 0.085235 | 0.094602 | 0.452315 | 0.351371 |
| NC-003401.CDS53.S1_at   | NC-003401.CDS53 | 5.42 | 5.39 | 0.12 | 0    | 1.02  | 0.596112 | 0.919652 | 0.835789 | 0.954874 |
| NC-003401.CDS54.S1_at   | NC-003401.CDS54 | 4.76 | 4.56 | 0.18 | 0.11 | 1.15  | 0.277434 | 0.386693 | 0.636861 | 0.621864 |
| NC-003401.CDS55.S1_at   | NC-003401.CDS55 | 3.36 | 3.2  | 0.11 | 0.02 | 1.12  | 0.024525 | 0.087022 | 0.319083 | 0.339889 |
| NC-003401.CDS56.S1_at   | NC-003401.CDS56 | 3.76 | 3.84 | 0.14 | 0    | -1.06 | 0.488326 | 0.849975 | 0.775492 | 0.914673 |
| NC-003401.CDS57.S1_at   | NC-003401.CDS57 | 4.86 | 4.69 | 0.17 | 0.15 | 1.12  | 0.681046 | 0.707615 | 0.874927 | 0.830424 |
| NC-003401.CDS58.S1_at   | NC-003401.CDS58 | 4.13 | 4.05 | 0.19 | 0.09 | 1.06  | 0.539985 | 0.546982 | 0.804169 | 0.728283 |
| NC-003401.CDS59.S1_at   | NC-003401.CDS59 | 4.22 | 3.9  | 0.27 | 0.09 | 1.25  | 0.173691 | 0.206516 | 0.546749 | 0.480571 |
| NC-003401.CDS60.S1_at   | NC-003401.CDS60 | 4.09 | 3.98 | 0.1  | 0.25 | 1.08  | 0.90204  | 0.39402  | 0.966869 | 0.626734 |
| NC-003401.CDS61.S1_at   | NC-003401.CDS61 | 4.4  | 4.37 | 0.22 | 0.01 | 1.03  | 0.286853 | 0.468445 | 0.643994 | 0.677714 |
| NC-003401.CDS62.S1_at   | NC-003401.CDS62 | 5.37 | 5.44 | 0.16 | 0.18 | -1.05 | 0.712856 | 0.876359 | 0.888122 | 0.929679 |
| NC-003401.CDS63.S1_at   | NC-003401.CDS63 | 2.85 | 2.86 | 0.06 | 0.05 | -1.01 | 0.427986 | 0.737601 | 0.74152  | 0.847993 |
| NC-003401.CDS64.S1_at   | NC-003401.CDS64 | 5.53 | 5.42 | 0.15 | 0.09 | 1.07  | 0.266646 | 0.461297 | 0.627504 | 0.672971 |

|                       |                 |      |      |      |      |       |          |          |          |          |
|-----------------------|-----------------|------|------|------|------|-------|----------|----------|----------|----------|
| NC-003401.CDS65.S1_at | NC-003401.CDS65 | 5.21 | 5.24 | 0.04 | 0.12 | -1.02 | 0.976523 | 0.862214 | 0.992376 | 0.921663 |
| NC-003401.CDS66.S1_at | NC-003401.CDS66 | 5.42 | 5.42 | 0.1  | 0    | 1.01  | 0.621833 | 0.549215 | 0.847631 | 0.729705 |
| NC-003401.CDS67.S1_at | NC-003401.CDS67 | 5.21 | 5.09 | 0.1  | 0.15 | 1.08  | 0.290781 | 0.511842 | 0.647362 | 0.705797 |
| NC-003401.CDS68.S1_at | NC-003401.CDS68 | 4.91 | 4.56 | 0.16 | 0.17 | 1.28  | 0.171514 | 0.297247 | 0.544814 | 0.556067 |
| NC-003401.CDS69.S1_at | NC-003401.CDS69 | 7.06 | 6.88 | 0.15 | 0.1  | 1.13  | 0.370595 | 0.141078 | 0.704908 | 0.414592 |
| NC-003401.CDS70.S1_at | NC-003401.CDS70 | 4.71 | 4.59 | 0.2  | 0.04 | 1.09  | 0.343668 | 0.436415 | 0.686779 | 0.655988 |
| NC-003401.CDS71.S1_at | NC-003401.CDS71 | 5.45 | 5.46 | 0.02 | 0.07 | -1    | 0.298751 | 0.408745 | 0.653263 | 0.6359   |
| NC-003401.CDS72.S1_at | NC-003401.CDS72 | 4.74 | 4.63 | 0.18 | 0.05 | 1.08  | 0.110114 | 0.168897 | 0.483108 | 0.445458 |
| NC-003401.CDS73.S1_at | NC-003401.CDS73 | 3.8  | 3.69 | 0.06 | 0.2  | 1.08  | 0.181992 | 0.364783 | 0.555102 | 0.605072 |
| NC-003401.CDS74.S1_at | NC-003401.CDS74 | 3.53 | 3.45 | 0.09 | 0.12 | 1.05  | 0.230313 | 0.221809 | 0.598481 | 0.494948 |
| NC-003401.CDS75.S1_at | NC-003401.CDS75 | 3.99 | 4.1  | 0.11 | 0.13 | -1.08 | 0.360068 | 0.210737 | 0.697741 | 0.48478  |
| NC-003401.CDS76.S1_at | NC-003401.CDS76 | 4.96 | 4.96 | 0.02 | 0.05 | -1    | 0.24893  | 0.319244 | 0.614249 | 0.571722 |
| NC-003401.CDS77.S1_at | NC-003401.CDS77 | 3.88 | 3.89 | 0.18 | 0.08 | -1.01 | 0.854165 | 0.970721 | 0.948437 | 0.98405  |
| NC-003401.CDS78.S1_at | NC-003401.CDS78 | 4.43 | 4.33 | 0.13 | 0.12 | 1.08  | 0.232505 | 0.206134 | 0.600124 | 0.480348 |
| NC-003401.CDS79.S1_at | NC-003401.CDS79 | 3.1  | 3.11 | 0.08 | 0.01 | -1.01 | 0.857344 | 0.593567 | 0.949683 | 0.758329 |
| NC-003401.CDS80.S1_at | NC-003401.CDS80 | 5.49 | 5.43 | 0.05 | 0.07 | 1.05  | 0.118326 | 0.138167 | 0.491809 | 0.411086 |
| NC-003401.CDS81.S1_at | NC-003401.CDS81 | 4.28 | 4.14 | 0.15 | 0.1  | 1.1   | 0.613964 | 0.79874  | 0.843764 | 0.884072 |
| NC-003401.CDS82.S1_at | NC-003401.CDS82 | 5.78 | 5.78 | 0.08 | 0.08 | -1    | 0.467423 | 0.625623 | 0.76435  | 0.779265 |
| NC-003401.CDS83.S1_at | NC-003401.CDS83 | 7.14 | 7.04 | 0.08 | 0.1  | 1.07  | 0.235149 | 0.14658  | 0.602266 | 0.420591 |
| NC-003401.CDS84.S1_at | NC-003401.CDS84 | 5.9  | 5.87 | 0.06 | 0.12 | 1.02  | 0.55007  | 0.84255  | 0.81061  | 0.910315 |
| NC-003401.CDS85.S1_at | NC-003401.CDS85 | 4.19 | 4.21 | 0.29 | 0.11 | -1.01 | 0.702081 | 0.886243 | 0.884146 | 0.935248 |
| NC-003401.CDS86.S1_at | NC-003401.CDS86 | 3.65 | 3.69 | 0.14 | 0.1  | -1.03 | 0.758811 | 0.306199 | 0.909359 | 0.562901 |
| NC-003401.CDS87.S1_at | NC-003401.CDS87 | 4.18 | 3.94 | 0.12 | 0.06 | 1.18  | 0.04997  | 0.039715 | 0.386663 | 0.244271 |
| NC-003401.CDS88.S1_at | NC-003401.CDS88 | 5.15 | 5.17 | 0.25 | 0.05 | -1.01 | 0.987537 | 0.81926  | 0.995831 | 0.895838 |
| NC-003401.CDS89.S1_at | NC-003401.CDS89 | 4.99 | 4.54 | 0.17 | 0.14 | 1.36  | 0.047787 | 0.031896 | 0.381152 | 0.220981 |
| NC-004367.CDS1.S1_at  | NC-004367.CDS1  | 4.37 | 4.52 | 0.1  | 0.14 | -1.11 | 0.193201 | 0.261017 | 0.56416  | 0.527371 |
| NC-004367.CDS2.S1_at  | NC-004367.CDS2  | 4.58 | 4.65 | 0.12 | 0.1  | -1.05 | 0.576592 | 0.487537 | 0.825166 | 0.690559 |
| NC-004367.CDS3.S1_at  | NC-004367.CDS3  | 3.57 | 3.42 | 0.26 | 0.17 | 1.11  | 0.163444 | 0.196849 | 0.53621  | 0.471968 |
| NC-004367.CDS4.S1_at  | NC-004367.CDS4  | 5.65 | 5.64 | 0.07 | 0.06 | 1     | 0.372553 | 0.337375 | 0.705567 | 0.584592 |
| NC-004367.CDS5.S1_at  | NC-004367.CDS5  | 3.94 | 3.87 | 0.12 | 0.02 | 1.05  | 0.364305 | 0.529869 | 0.700517 | 0.717526 |
| NC-004367.CDS6.S1_at  | NC-004367.CDS6  | 4.2  | 4.28 | 0.1  | 0.16 | -1.06 | 0.561651 | 0.796109 | 0.817254 | 0.882495 |
| NC-004367.CDS7.S1_at  | NC-004367.CDS7  | 3.48 | 3.47 | 0.16 | 0.14 | 1     | 0.617556 | 0.468947 | 0.845473 | 0.67794  |
| NC-004367.CDS8.S1_at  | NC-004367.CDS8  | 3.59 | 3.59 | 0.07 | 0.1  | 1     | 0.60732  | 0.748121 | 0.840779 | 0.853384 |
| NC-004367.CDS9.S1_at  | NC-004367.CDS9  | 4.15 | 4.01 | 0.09 | 0.09 | 1.1   | 0.109899 | 0.062795 | 0.482728 | 0.297193 |
| NC-004367.CDS10.S1_at | NC-004367.CDS10 | 3.95 | 3.95 | 0.01 | 0.1  | 1     | 0.955831 | 0.989587 | 0.985355 | 0.994062 |
| NC-004367.CDS11.S1_at | NC-004367.CDS11 | 3.81 | 3.61 | 0.2  | 0.14 | 1.15  | 0.164773 | 0.190266 | 0.537466 | 0.465904 |
| NC-004367.CDS12.S1_at | NC-004367.CDS12 | 4.61 | 4.37 | 0.22 | 0.07 | 1.18  | 0.467835 | 0.565922 | 0.764607 | 0.740165 |
| NC-004367.CDS13.S1_at | NC-004367.CDS13 | 3.84 | 3.85 | 0.17 | 0.16 | -1.01 | 0.597081 | 0.742336 | 0.83613  | 0.850754 |
| NC-004367.CDS14.S1_at | NC-004367.CDS14 | 4.32 | 4.3  | 0.11 | 0.1  | 1.01  | 0.632641 | 0.646796 | 0.853134 | 0.793117 |
| NC-004367.CDS15.S1_at | NC-004367.CDS15 | 4.39 | 4.31 | 0.18 | 0.02 | 1.06  | 0.166401 | 0.110605 | 0.539119 | 0.374854 |
| NC-004367.CDS16.S1_at | NC-004367.CDS16 | 3.26 | 3.18 | 0.23 | 0.07 | 1.06  | 0.88326  | 0.876835 | 0.95964  | 0.92983  |
| NC-004367.CDS17.S1_at | NC-004367.CDS17 | 3.57 | 3.49 | 0.27 | 0.05 | 1.06  | 0.255131 | 0.396649 | 0.619267 | 0.628434 |
| NC-004367.CDS18.S1_at | NC-004367.CDS18 | 4.31 | 4.31 | 0.21 | 0.09 | -1    | 0.945384 | 0.995967 | 0.980927 | 0.997533 |

|                       |                 |      |      |      |      |       |          |          |          |          |
|-----------------------|-----------------|------|------|------|------|-------|----------|----------|----------|----------|
| NC-004367.CDS19.S1_at | NC-004367.CDS19 | 3.92 | 3.93 | 0.06 | 0.21 | -1.01 | 0.892316 | 0.784917 | 0.963014 | 0.875471 |
| NC-004367.CDS20.S1_at | NC-004367.CDS20 | 4.93 | 4.45 | 0.27 | 0.27 | 1.4   | 0.244991 | 0.314205 | 0.610441 | 0.568185 |
| NC-004367.CDS21.S1_at | NC-004367.CDS21 | 4.19 | 4.19 | 0.13 | 0.12 | 1     | 0.989981 | 0.965833 | 0.996285 | 0.980843 |
| NC-004367.CDS22.S1_at | NC-004367.CDS22 | 4.54 | 4.61 | 0.36 | 0.04 | -1.05 | 0.614325 | 0.810562 | 0.843887 | 0.890812 |
| NC-004367.CDS23.S1_at | NC-004367.CDS23 | 2.93 | 2.86 | 0.08 | 0.06 | 1.05  | 0.139533 | 0.195387 | 0.514956 | 0.470253 |
| NC-004367.CDS24.S1_at | NC-004367.CDS24 | 3.87 | 3.51 | 0.21 | 0.23 | 1.29  | 0.131387 | 0.286019 | 0.505699 | 0.547512 |
| NC-004367.CDS25.S1_at | NC-004367.CDS25 | 4.18 | 4.15 | 0.03 | 0.14 | 1.02  | 0.76793  | 0.371913 | 0.912714 | 0.610729 |
| NC-004367.CDS26.S1_at | NC-004367.CDS26 | 3.8  | 3.78 | 0.1  | 0.07 | 1.02  | 0.963468 | 0.805341 | 0.988152 | 0.888113 |
| NC-004367.CDS27.S1_at | NC-004367.CDS27 | 3.71 | 3.62 | 0.06 | 0.08 | 1.07  | 0.124317 | 0.248618 | 0.498371 | 0.517917 |
| NC-004367.CDS28.S1_at | NC-004367.CDS28 | 3.85 | 3.84 | 0.23 | 0.03 | 1.01  | 0.871235 | 0.979962 | 0.955279 | 0.989229 |
| NC-004367.CDS29.S1_at | NC-004367.CDS29 | 4.41 | 4.27 | 0.13 | 0.16 | 1.1   | 0.131965 | 0.148016 | 0.506435 | 0.422416 |
| NC-004367.CDS30.S1_at | NC-004367.CDS30 | 4.58 | 4.47 | 0.23 | 0.14 | 1.08  | 0.807636 | 0.41278  | 0.930244 | 0.639105 |
| NC-004367.CDS31.S1_at | NC-004367.CDS31 | 4.4  | 4.41 | 0.21 | 0.06 | -1.01 | 0.43725  | 0.474528 | 0.746719 | 0.681511 |
| NC-004367.CDS32.S1_at | NC-004367.CDS32 | 2.85 | 2.83 | 0.09 | 0.13 | 1.02  | 0.446953 | 0.656422 | 0.752941 | 0.799082 |
| NC-004367.CDS33.S1_at | NC-004367.CDS33 | 3.7  | 3.42 | 0.38 | 0.24 | 1.21  | 0.621098 | 0.814494 | 0.847506 | 0.892948 |
| NC-004367.CDS34.S1_at | NC-004367.CDS34 | 4.1  | 3.96 | 0.04 | 0.05 | 1.1   | 0.009733 | 0.030813 | 0.243347 | 0.217376 |
| NC-004367.CDS35.S1_at | NC-004367.CDS35 | 3.67 | 3.7  | 0.15 | 0.07 | -1.02 | 0.630612 | 0.699249 | 0.852018 | 0.825277 |
| NC-004367.CDS36.S1_at | NC-004367.CDS36 | 3.14 | 3.08 | 0.23 | 0.07 | 1.04  | 0.740084 | 0.931439 | 0.900699 | 0.961034 |
| NC-004367.CDS37.S1_at | NC-004367.CDS37 | 5.11 | 5.05 | 0.17 | 0.05 | 1.05  | 0.719757 | 0.451954 | 0.891267 | 0.666717 |
| NC-004367.CDS38.S1_at | NC-004367.CDS38 | 3.36 | 3.28 | 0.18 | 0.15 | 1.06  | 0.610277 | 0.802301 | 0.841839 | 0.886115 |
| NC-004367.CDS39.S1_at | NC-004367.CDS39 | 3.53 | 3.3  | 0.12 | 0.18 | 1.17  | 0.65971  | 0.451818 | 0.865377 | 0.66662  |
| NC-004367.CDS40.S1_at | NC-004367.CDS40 | 3.57 | 3.46 | 0.15 | 0.02 | 1.08  | 0.342871 | 0.088424 | 0.686197 | 0.341877 |
| NC-004367.CDS41.S1_at | NC-004367.CDS41 | 3.44 | 3.25 | 0.14 | 0.06 | 1.14  | 0.059882 | 0.044126 | 0.407323 | 0.254441 |
| NC-004367.CDS42.S1_at | NC-004367.CDS42 | 3.87 | 3.65 | 0.12 | 0.05 | 1.16  | 0.091047 | 0.057088 | 0.458927 | 0.284945 |
| NC-004367.CDS43.S1_at | NC-004367.CDS43 | 3.24 | 3.24 | 0.09 | 0.09 | 1     | 0.2302   | 0.290927 | 0.598481 | 0.551499 |
| NC-004367.CDS44.S1_at | NC-004367.CDS44 | 3.47 | 3.23 | 0.15 | 0.13 | 1.18  | 0.083953 | 0.154138 | 0.45018  | 0.42887  |
| NC-004367.CDS45.S1_at | NC-004367.CDS45 | 5.18 | 4.95 | 0.34 | 0.12 | 1.18  | 0.62904  | 0.675033 | 0.851386 | 0.810141 |
| NC-004367.CDS46.S1_at | NC-004367.CDS46 | 4.45 | 4.15 | 0.39 | 0.02 | 1.23  | 0.537814 | 0.559275 | 0.802899 | 0.736207 |
| NC-004367.CDS47.S1_at | NC-004367.CDS47 | 4.45 | 4.1  | 0.27 | 0.09 | 1.27  | 0.060943 | 0.103549 | 0.409371 | 0.364346 |
| NC-004367.CDS48.S1_at | NC-004367.CDS48 | 3.54 | 3.39 | 0.15 | 0.07 | 1.11  | 0.320128 | 0.224588 | 0.669154 | 0.497613 |
| NC-004367.CDS49.S1_at | NC-004367.CDS49 | 3.88 | 3.49 | 0.11 | 0.09 | 1.31  | 0.014179 | 0.008584 | 0.274019 | 0.122976 |
| NC-004367.CDS50.S1_at | NC-004367.CDS50 | 5.27 | 5.22 | 0.17 | 0.01 | 1.04  | 0.189858 | 0.337972 | 0.561226 | 0.585166 |
| NC-004367.CDS51.S1_at | NC-004367.CDS51 | 3.32 | 3.38 | 0.09 | 0.06 | -1.04 | 0.855029 | 0.648731 | 0.948681 | 0.794433 |
| NC-004367.CDS52.S1_at | NC-004367.CDS52 | 4.66 | 4.57 | 0.04 | 0.03 | 1.07  | 0.045915 | 0.015831 | 0.37735  | 0.159537 |
| NC-004367.CDS53.S1_at | NC-004367.CDS53 | 3.46 | 3.4  | 0.06 | 0.1  | 1.04  | 0.454625 | 0.756829 | 0.756874 | 0.858443 |
| NC-004367.CDS54.S1_at | NC-004367.CDS54 | 4.6  | 4.47 | 0.04 | 0.08 | 1.09  | 0.077759 | 0.430027 | 0.439884 | 0.65111  |
| NC-004367.CDS55.S1_at | NC-004367.CDS55 | 3.59 | 3.57 | 0.15 | 0    | 1.02  | 0.519175 | 0.87021  | 0.793113 | 0.926372 |
| NC-004367.CDS56.S1_at | NC-004367.CDS56 | 2.95 | 2.87 | 0.03 | 0.09 | 1.06  | 0.659578 | 0.912319 | 0.865323 | 0.950583 |
| NC-004367.CDS57.S1_at | NC-004367.CDS57 | 3.68 | 3.72 | 0.2  | 0.06 | -1.03 | 0.917202 | 0.532938 | 0.97197  | 0.719308 |
| NC-004367.CDS58.S1_at | NC-004367.CDS58 | 5.7  | 5.45 | 0.14 | 0.06 | 1.19  | 0.073397 | 0.465058 | 0.434422 | 0.675549 |
| NC-004367.CDS59.S1_at | NC-004367.CDS59 | 3.33 | 3.32 | 0.08 | 0.06 | 1.01  | 0.188684 | 0.23254  | 0.560598 | 0.504337 |
| NC-004367.CDS60.S1_at | NC-004367.CDS60 | 3.62 | 3.37 | 0.2  | 0.11 | 1.19  | 0.108294 | 0.093181 | 0.480728 | 0.34931  |
| NC-004367.CDS61.S1_at | NC-004367.CDS61 | 3.29 | 3.2  | 0.03 | 0.04 | 1.07  | 0.061814 | 0.199886 | 0.411556 | 0.474559 |

|                         |                 |      |      |      |      |       |          |          |          |          |
|-------------------------|-----------------|------|------|------|------|-------|----------|----------|----------|----------|
| NC-004367.CDS62.S1_at   | NC-004367.CDS62 | 4.81 | 4.87 | 0.14 | 0.08 | -1.04 | 0.515971 | 0.574028 | 0.791221 | 0.745547 |
| NC-004367.CDS63.S1_at   | NC-004367.CDS63 | 5.49 | 5.43 | 0.02 | 0.05 | 1.04  | 0.127275 | 0.620979 | 0.501483 | 0.775745 |
| NC-004367.CDS64.S1_at   | NC-004367.CDS64 | 3.33 | 3.28 | 0.07 | 0.1  | 1.03  | 0.692083 | 0.900641 | 0.880095 | 0.943473 |
| NC-004367.CDS65.S1_at   | NC-004367.CDS65 | 3.59 | 3.77 | 0.04 | 0.16 | -1.13 | 0.162853 | 0.037707 | 0.535867 | 0.23859  |
| NC-004367.CDS66.S1_at   | NC-004367.CDS66 | 4.09 | 4.01 | 0.15 | 0.32 | 1.06  | 0.184543 | 0.252752 | 0.557319 | 0.521174 |
| NC-004367.CDS67.S1_at   | NC-004367.CDS67 | 2.98 | 2.81 | 0.16 | 0.04 | 1.12  | 0.164677 | 0.156899 | 0.537466 | 0.432372 |
| NC-004367.CDS68.S1_at   | NC-004367.CDS68 | 4.47 | 4.36 | 0.03 | 0.08 | 1.07  | 0.10777  | 0.209251 | 0.480288 | 0.483303 |
| NC-004367.CDS69.S1_at   | NC-004367.CDS69 | 4.78 | 4.95 | 0.15 | 0.29 | -1.12 | 0.670532 | 0.713531 | 0.869943 | 0.833812 |
| NC-004367.CDS70.S1_at   | NC-004367.CDS70 | 4.03 | 3.86 | 0.09 | 0.12 | 1.13  | 0.141447 | 0.176114 | 0.516365 | 0.452581 |
| NC-004367.CDS71.S1_at   | NC-004367.CDS71 | 5.26 | 5.05 | 0.32 | 0.01 | 1.16  | 0.884106 | 0.78584  | 0.959791 | 0.875982 |
| NC-004367.CDS72.S1_at   | NC-004367.CDS72 | 5.18 | 5.05 | 0.13 | 0.16 | 1.1   | 0.130887 | 0.203016 | 0.505301 | 0.477343 |
| NC-006146.CDS1.S1_s_at  | NC-006146.CDS1  | 3.44 | 3.3  | 0.06 | 0.05 | 1.1   | 0.026297 | 0.020111 | 0.323826 | 0.178118 |
| NC-006146.CDS3.S1_at    | NC-006146.CDS3  | 4.24 | 4.16 | 0.14 | 0.05 | 1.05  | 0.103608 | 0.115754 | 0.474343 | 0.382814 |
| NC-006146.CDS4.S1_at    | NC-006146.CDS4  | 4.6  | 4.49 | 0.34 | 0.05 | 1.07  | 0.478341 | 0.561629 | 0.770076 | 0.73751  |
| NC-006146.CDS5.S1_at    | NC-006146.CDS5  | 5.58 | 5.44 | 0.19 | 0.16 | 1.1   | 0.331671 | 0.446712 | 0.678153 | 0.662889 |
| NC-006146.CDS6.S1_at    | NC-006146.CDS6  | 4.59 | 4.51 | 0.02 | 0.05 | 1.06  | 0.048007 | 0.504011 | 0.381764 | 0.701269 |
| NC-006146.CDS7.S1_at    | NC-006146.CDS7  | 3.87 | 3.76 | 0.14 | 0.07 | 1.08  | 0.435997 | 0.728907 | 0.746002 | 0.8433   |
| NC-006146.CDS8.S1_at    | NC-006146.CDS8  | 4.93 | 5.08 | 0.2  | 0.13 | -1.11 | 0.684558 | 0.380327 | 0.87645  | 0.616984 |
| NC-006146.CDS9.S1_at    | NC-006146.CDS9  | 3.77 | 3.73 | 0    | 0.05 | 1.03  | 0.202302 | 0.079903 | 0.57378  | 0.327207 |
| NC-006146.CDS10.S1_at   | NC-006146.CDS10 | 6.2  | 6.1  | 0.17 | 0.07 | 1.07  | 0.581504 | 0.457439 | 0.827689 | 0.670842 |
| NC-006146.CDS11.S1_at   | NC-006146.CDS11 | 4.4  | 4.26 | 0.21 | 0.14 | 1.11  | 0.96209  | 0.536368 | 0.987667 | 0.721688 |
| NC-006146.CDS12.S1_at   | NC-006146.CDS12 | 6.27 | 6.03 | 0.24 | 0.05 | 1.19  | 0.277177 | 0.588962 | 0.636753 | 0.755275 |
| NC-006146.CDS13.S1_at   | NC-006146.CDS13 | 3.87 | 4.01 | 0.22 | 0.08 | -1.1  | 0.963739 | 0.599527 | 0.98817  | 0.761473 |
| NC-006146.CDS14.S1_at   | NC-006146.CDS14 | 7.24 | 6.93 | 0.12 | 0.12 | 1.24  | 0.033944 | 0.025499 | 0.347468 | 0.200333 |
| NC-006146.CDS14.S1_x_at | NC-006146.CDS14 | 7.17 | 7.12 | 0.04 | 0.07 | 1.04  | 0.532967 | 0.236692 | 0.800589 | 0.507459 |
| NC-006146.CDS15.S1_at   | NC-006146.CDS15 | 5.05 | 5.07 | 0.19 | 0.14 | -1.01 | 0.910722 | 0.651414 | 0.969753 | 0.796212 |
| NC-006146.CDS16.S1_at   | NC-006146.CDS16 | 5.22 | 5.18 | 0.11 | 0.08 | 1.02  | 0.267555 | 0.347036 | 0.628193 | 0.59181  |
| NC-006146.CDS17.S1_at   | NC-006146.CDS17 | 5.23 | 4.99 | 0.13 | 0.03 | 1.18  | 0.089813 | 0.111939 | 0.457893 | 0.387887 |
| NC-006146.CDS18.S1_at   | NC-006146.CDS18 | 5.94 | 5.89 | 0.08 | 0.08 | 1.04  | 0.437911 | 0.917984 | 0.747043 | 0.954061 |
| NC-006146.CDS19.S1_at   | NC-006146.CDS19 | 4.99 | 4.87 | 0.11 | 0.13 | 1.09  | 0.12219  | 0.246675 | 0.495677 | 0.516025 |
| NC-006146.CDS20.S1_at   | NC-006146.CDS20 | 6.25 | 6.25 | 0.04 | 0.03 | 1     | 0.239228 | 0.607712 | 0.605741 | 0.766491 |
| NC-006146.CDS21.S1_at   | NC-006146.CDS21 | 5.75 | 5.65 | 0.2  | 0.05 | 1.07  | 0.460591 | 0.379143 | 0.760274 | 0.616132 |
| NC-006146.CDS22.S1_at   | NC-006146.CDS22 | 6.87 | 6.88 | 0.16 | 0.16 | -1    | 0.240286 | 0.339116 | 0.606654 | 0.585891 |
| NC-006146.CDS23.S1_at   | NC-006146.CDS23 | 6.29 | 5.89 | 0.21 | 0.08 | 1.32  | 0.039321 | 0.147208 | 0.361498 | 0.421455 |
| NC-006146.CDS24.S1_at   | NC-006146.CDS24 | 4.72 | 4.58 | 0.14 | 0.07 | 1.1   | 0.201614 | 0.149353 | 0.573214 | 0.423811 |
| NC-006146.CDS25.S1_at   | NC-006146.CDS25 | 6.21 | 6.2  | 0.22 | 0.03 | 1.01  | 0.82053  | 0.944929 | 0.935289 | 0.968827 |
| NC-006146.CDS26.S1_at   | NC-006146.CDS26 | 4.81 | 4.67 | 0.11 | 0.08 | 1.1   | 0.092732 | 0.108602 | 0.461192 | 0.372171 |
| NC-006146.CDS27.S1_s_at | NC-006146.CDS27 | 6.78 | 6.73 | 0.1  | 0    | 1.04  | 0.229511 | 0.460416 | 0.598339 | 0.672279 |
| NC-006146.CDS28.S1_at   | NC-006146.CDS28 | 5.71 | 5.65 | 0.19 | 0    | 1.04  | 0.87739  | 0.833361 | 0.957302 | 0.904429 |
| NC-006146.CDS29.S1_at   | NC-006146.CDS29 | 4.82 | 4.85 | 0.18 | 0.02 | -1.02 | 0.656126 | 0.680525 | 0.863476 | 0.813481 |
| NC-006146.CDS30.S1_at   | NC-006146.CDS30 | 4.15 | 4.18 | 0.05 | 0.22 | -1.02 | 0.636223 | 0.344351 | 0.854813 | 0.589762 |
| NC-006146.CDS31.S1_at   | NC-006146.CDS31 | 2.91 | 3.03 | 0.11 | 0.26 | -1.09 | 0.263451 | 0.360529 | 0.625387 | 0.601613 |
| NC-006146.CDS32.S1_at   | NC-006146.CDS32 | 5.56 | 5.54 | 0.16 | 0.05 | 1.01  | 0.809322 | 0.974108 | 0.93104  | 0.98586  |

|                       |                 |      |      |      |      |       |          |          |          |          |
|-----------------------|-----------------|------|------|------|------|-------|----------|----------|----------|----------|
| NC-006146.CDS33.S1_at | NC-006146.CDS33 | 6.34 | 6.15 | 0.09 | 0.11 | 1.14  | 0.070946 | 0.050361 | 0.430067 | 0.269658 |
| NC-006146.CDS34.S1_at | NC-006146.CDS34 | 6.41 | 6.34 | 0.2  | 0.04 | 1.05  | 0.194308 | 0.203868 | 0.564869 | 0.478102 |
| NC-006146.CDS35.S1_at | NC-006146.CDS35 | 5.65 | 5.74 | 0.21 | 0.08 | -1.06 | 0.307557 | 0.315876 | 0.660317 | 0.569327 |
| NC-006146.CDS36.S1_at | NC-006146.CDS36 | 3.38 | 3.19 | 0.1  | 0.08 | 1.14  | 0.064629 | 0.065912 | 0.418466 | 0.302129 |
| NC-006146.CDS37.S1_at | NC-006146.CDS37 | 4.62 | 4.63 | 0.02 | 0.12 | -1.01 | 0.64072  | 0.217463 | 0.856931 | 0.491035 |
| NC-006146.CDS38.S1_at | NC-006146.CDS38 | 4.88 | 4.81 | 0.16 | 0.02 | 1.05  | 0.280575 | 0.570306 | 0.639336 | 0.743056 |
| NC-006146.CDS39.S1_at | NC-006146.CDS39 | 5.84 | 5.78 | 0.1  | 0    | 1.04  | 0.371728 | 0.273927 | 0.705567 | 0.538452 |
| NC-006146.CDS40.S1_at | NC-006146.CDS40 | 5.53 | 5.32 | 0.01 | 0.19 | 1.15  | 0.13688  | 0.136573 | 0.511963 | 0.409084 |
| NC-006146.CDS41.S1_at | NC-006146.CDS41 | 4.82 | 5.02 | 0.06 | 0.09 | -1.15 | 0.144646 | 0.094291 | 0.519974 | 0.350889 |
| NC-006146.CDS42.S1_at | NC-006146.CDS42 | 5.15 | 5.13 | 0.15 | 0    | 1.01  | 0.652598 | 0.85504  | 0.86202  | 0.917395 |
| NC-006146.CDS43.S1_at | NC-006146.CDS43 | 5.59 | 5.47 | 0.11 | 0.08 | -1.09 | 0.143425 | 0.178248 | 0.518743 | 0.45458  |
| NC-006146.CDS44.S1_at | NC-006146.CDS44 | 6.98 | 6.76 | 0.08 | 0.11 | 1.16  | 0.232386 | 0.254289 | 0.600124 | 0.522606 |
| NC-006146.CDS45.S1_at | NC-006146.CDS45 | 3.78 | 3.89 | 0.1  | 0.06 | -1.07 | 0.605121 | 0.351271 | 0.839779 | 0.594937 |
| NC-006146.CDS46.S1_at | NC-006146.CDS46 | 3.39 | 3.47 | 0.16 | 0.14 | -1.06 | 0.98558  | 0.456469 | 0.995461 | 0.670188 |
| NC-006146.CDS47.S1_at | NC-006146.CDS47 | 4.85 | 4.54 | 0.15 | 0.1  | 1.25  | 0.049527 | 0.127959 | 0.385783 | 0.398901 |
| NC-006146.CDS48.S1_at | NC-006146.CDS48 | 4.94 | 4.76 | 0.21 | 0.03 | 1.13  | 0.229712 | 0.129165 | 0.59847  | 0.400611 |
| NC-006146.CDS49.S1_at | NC-006146.CDS49 | 5.22 | 5.04 | 0.03 | 0.13 | 1.14  | 0.218764 | 0.537904 | 0.588341 | 0.722779 |
| NC-006146.CDS50.S1_at | NC-006146.CDS50 | 5.45 | 5.47 | 0.32 | 0.07 | -1.01 | 0.395859 | 0.633139 | 0.720803 | 0.783969 |
| NC-006146.CDS51.S1_at | NC-006146.CDS51 | 3.92 | 3.93 | 0.17 | 0.2  | -1    | 0.854267 | 0.291608 | 0.948458 | 0.551985 |
| NC-006146.CDS52.S1_at | NC-006146.CDS52 | 5.73 | 5.53 | 0.17 | 0.01 | 1.15  | 0.106523 | 0.108277 | 0.478992 | 0.371557 |
| NC-006146.CDS53.S1_at | NC-006146.CDS53 | 4.57 | 4.67 | 0.09 | 0.11 | -1.07 | 0.688419 | 0.620755 | 0.878322 | 0.775593 |
| NC-006146.CDS54.S1_at | NC-006146.CDS54 | 6.17 | 5.92 | 0.13 | 0.13 | 1.19  | 0.191961 | 0.385115 | 0.563029 | 0.620662 |
| NC-006146.CDS55.S1_at | NC-006146.CDS55 | 5.76 | 5.72 | 0.2  | 0.06 | 1.03  | 0.244586 | 0.256338 | 0.610139 | 0.524114 |
| NC-006146.CDS56.S1_at | NC-006146.CDS56 | 6.51 | 6.26 | 0.08 | 0.05 | 1.19  | 0.015693 | 0.009437 | 0.28333  | 0.127948 |
| NC-006146.CDS57.S1_at | NC-006146.CDS57 | 6.04 | 5.83 | 0.18 | 0.04 | 1.16  | 0.138901 | 0.073574 | 0.514459 | 0.316905 |
| NC-006146.CDS58.S1_at | NC-006146.CDS58 | 6.02 | 5.83 | 0.1  | 0.07 | 1.14  | 0.074481 | 0.131152 | 0.435313 | 0.403153 |
| NC-006146.CDS59.S1_at | NC-006146.CDS59 | 5.27 | 5.21 | 0.12 | 0.05 | 1.04  | 0.345502 | 0.095682 | 0.687499 | 0.3527   |
| NC-006146.CDS60.S1_at | NC-006146.CDS60 | 5    | 4.99 | 0.17 | 0.07 | 1     | 0.567373 | 0.817168 | 0.820391 | 0.894545 |
| NC-006146.CDS61.S1_at | NC-006146.CDS61 | 4.44 | 4.43 | 0.15 | 0.01 | 1.01  | 0.33289  | 0.184453 | 0.679338 | 0.46048  |
| NC-006146.CDS62.S1_at | NC-006146.CDS62 | 3.95 | 3.96 | 0.12 | 0.09 | -1.01 | 0.647506 | 0.103781 | 0.859364 | 0.364519 |
| NC-006146.CDS63.S1_at | NC-006146.CDS63 | 7.72 | 7.58 | 0.09 | 0.01 | 1.1   | 0.104353 | 0.502255 | 0.475417 | 0.70006  |
| NC-006146.CDS64.S1_at | NC-006146.CDS64 | 6.77 | 6.68 | 0.11 | 0.09 | 1.06  | 0.372968 | 0.470027 | 0.705567 | 0.678572 |
| NC-006146.CDS65.S1_at | NC-006146.CDS65 | 4.08 | 3.81 | 0.1  | 0.05 | 1.2   | 0.056244 | 0.204694 | 0.399699 | 0.479056 |
| NC-006146.CDS66.S1_at | NC-006146.CDS66 | 4.57 | 4.53 | 0.07 | 0.01 | 1.03  | 0.2778   | 0.0674   | 0.637076 | 0.305662 |
| NC-006146.CDS67.S1_at | NC-006146.CDS67 | 6.19 | 6.15 | 0.02 | 0.07 | 1.03  | 0.189363 | 0.244019 | 0.560894 | 0.514069 |
| NC-006146.CDS68.S1_at | NC-006146.CDS68 | 5.56 | 5.47 | 0.21 | 0.03 | 1.06  | 0.446037 | 0.689643 | 0.75256  | 0.819004 |
| NC-006146.CDS69.S1_at | NC-006146.CDS69 | 4.8  | 4.54 | 0.3  | 0.01 | 1.2   | 0.631665 | 0.672612 | 0.852513 | 0.808661 |
| NC-006146.CDS70.S1_at | NC-006146.CDS70 | 5.9  | 5.71 | 0.1  | 0.04 | 1.13  | 0.090824 | 0.312427 | 0.458873 | 0.567185 |
| NC-006146.CDS71.S1_at | NC-006146.CDS71 | 6.56 | 6.41 | 0.12 | 0.05 | 1.1   | 0.079538 | 0.040488 | 0.44233  | 0.246264 |
| NC-006146.CDS72.S1_at | NC-006146.CDS72 | 5.35 | 5.29 | 0.06 | 0.12 | 1.05  | 0.621849 | 0.893551 | 0.847631 | 0.939277 |
| NC-006146.CDS73.S1_at | NC-006146.CDS73 | 5.46 | 5.47 | 0.13 | 0.11 | -1.01 | 0.530479 | 0.757606 | 0.799059 | 0.858926 |
| NC-006146.CDS74.S1_at | NC-006146.CDS74 | 5.03 | 5.05 | 0.08 | 0.28 | -1.02 | 0.778316 | 0.76339  | 0.918226 | 0.862471 |
| NC-006146.CDS75.S1_at | NC-006146.CDS75 | 6.38 | 6.38 | 0.15 | 0.02 | 1     | 0.450286 | 0.145573 | 0.754759 | 0.419456 |

|                         |                 |      |      |      |      |       |          |          |          |          |
|-------------------------|-----------------|------|------|------|------|-------|----------|----------|----------|----------|
| NC-006146.CDS76.S1_at   | NC-006146.CDS76 | 6.25 | 6.12 | 0.1  | 0.05 | 1.09  | 0.11407  | 0.595646 | 0.487405 | 0.759132 |
| NC-006146.CDS77.S1_at   | NC-006146.CDS77 | 5.25 | 5.17 | 0.13 | 0.06 | 1.05  | 0.997422 | 0.070407 | 0.999142 | 0.311676 |
| NC-006146.CDS78.S1_at   | NC-006146.CDS78 | 5.29 | 5.34 | 0.15 | 0.22 | -1.03 | 0.754256 | 0.537707 | 0.907331 | 0.722661 |
| NC-006146.CDS79.S1_at   | NC-006146.CDS79 | 7.13 | 7    | 0.18 | 0.22 | 1.09  | 0.566568 | 0.816911 | 0.820086 | 0.894398 |
| NC-006146.CDS80.S1_at   | NC-006146.CDS80 | 5.23 | 5.15 | 0.38 | 0.08 | 1.05  | 0.831757 | 0.821293 | 0.939628 | 0.897125 |
| NC-001345.CDS1.S1_at    | NC-001345.CDS1  | 6.01 | 5.79 | 0.09 | 0.09 | 1.17  | 0.028645 | 0.033661 | 0.332815 | 0.227052 |
| NC-001345.CDS2.S1_at    | NC-001345.CDS2  | 5.25 | 5.13 | 0.13 | 0.05 | 1.09  | 0.180631 | 0.089673 | 0.553858 | 0.343848 |
| NC-001345.CDS3.S1_at    | NC-001345.CDS3  | 5.58 | 5.44 | 0.03 | 0.07 | 1.1   | 0.116079 | 0.225511 | 0.489554 | 0.498147 |
| NC-001345.CDS4.S1_at    | NC-001345.CDS4  | 5.76 | 5.7  | 0.2  | 0.05 | 1.04  | 0.431361 | 0.507574 | 0.743363 | 0.703118 |
| NC-001345.CDS5.S1_at    | NC-001345.CDS5  | 3.7  | 3.57 | 0.14 | 0.1  | 1.09  | 0.160813 | 0.262747 | 0.534047 | 0.529086 |
| NC-001345.CDS6.S1_s_at  | NC-001345.CDS6  | 5.95 | 5.85 | 0.23 | 0.09 | 1.07  | 0.400695 | 0.624193 | 0.723941 | 0.778475 |
| NC-001345.CDS18.S1_at   | NC-001345.CDS18 | 5.69 | 5.58 | 0.14 | 0.11 | 1.08  | 0.128666 | 0.483065 | 0.503433 | 0.687687 |
| NC-001345.CDS19.S1_at   | NC-001345.CDS19 | 3.57 | 3.66 | 0.08 | 0.07 | -1.07 | 0.282835 | 0.265152 | 0.641032 | 0.531078 |
| NC-001345.CDS20.S1_at   | NC-001345.CDS20 | 4.27 | 4.25 | 0.16 | 0.09 | 1.01  | 0.49416  | 0.721023 | 0.779281 | 0.838471 |
| NC-001345.CDS21.S1_at   | NC-001345.CDS21 | 5.77 | 5.77 | 0.08 | 0.15 | 1     | 0.782238 | 0.925263 | 0.919732 | 0.957727 |
| NC-001345.CDS22.S1_at   | NC-001345.CDS22 | 4.56 | 4.66 | 0.34 | 0.14 | -1.07 | 0.513299 | 0.445781 | 0.789812 | 0.662505 |
| NC-001345.CDS23.S1_at   | NC-001345.CDS23 | 6.54 | 6.15 | 0.06 | 0.09 | 1.31  | 0.006996 | 0.119405 | 0.225012 | 0.387903 |
| NC-001345.CDS24.S1_at   | NC-001345.CDS24 | 3.81 | 3.68 | 0.16 | 0.13 | 1.09  | 0.363078 | 0.606986 | 0.699801 | 0.766178 |
| NC-001345.CDS25.S1_at   | NC-001345.CDS25 | 3.1  | 3.1  | 0    | 0.22 | -1    | 0.996891 | 0.515781 | 0.998838 | 0.708485 |
| NC-001345.CDS26.S1_at   | NC-001345.CDS26 | 6.76 | 6.65 | 0.09 | 0.08 | 1.08  | 0.127948 | 0.159731 | 0.502422 | 0.43585  |
| NC-001345.CDS27.S1_at   | NC-001345.CDS27 | 3.94 | 3.91 | 0.08 | 0.11 | 1.02  | 0.904176 | 0.551551 | 0.967773 | 0.731027 |
| NC-001345.CDS28.S1_at   | NC-001345.CDS28 | 4.99 | 4.64 | 0.18 | 0.02 | 1.28  | 0.040394 | 0.124414 | 0.36428  | 0.394857 |
| NC-001345.CDS29.S1_at   | NC-001345.CDS29 | 6.2  | 6.09 | 0.17 | 0.04 | 1.08  | 0.148424 | 0.175003 | 0.522567 | 0.451647 |
| NC-001345.CDS30.S1_at   | NC-001345.CDS30 | 6.53 | 6.48 | 0.11 | 0.14 | 1.04  | 0.456032 | 0.288381 | 0.757664 | 0.549656 |
| NC-001345.CDS31.S1_at   | NC-001345.CDS31 | 4.95 | 4.94 | 0.52 | 0.08 | 1     | 0.423252 | 0.271488 | 0.73892  | 0.536512 |
| NC-001345.CDS32.S1_at   | NC-001345.CDS32 | 5.58 | 5.6  | 0.01 | 0.04 | -1.02 | 0.384641 | 0.408834 | 0.712173 | 0.6359   |
| NC-001345.CDS33.S1_at   | NC-001345.CDS33 | 5.74 | 5.93 | 0.27 | 0.1  | -1.14 | 0.800874 | 0.910538 | 0.927209 | 0.949476 |
| NC-001345.CDS34.S1_at   | NC-001345.CDS34 | 4.87 | 4.76 | 0.18 | 0.26 | 1.08  | 0.31903  | 0.320096 | 0.668492 | 0.572459 |
| NC-001345.CDS35.S1_at   | NC-001345.CDS35 | 5.75 | 5.54 | 0.11 | 0.08 | 1.15  | 0.065277 | 0.141313 | 0.420223 | 0.414874 |
| NC-001345.CDS36.S1_at   | NC-001345.CDS36 | 4.48 | 4.37 | 0.38 | 0.07 | 1.08  | 0.527691 | 0.524701 | 0.797222 | 0.714514 |
| NC-001345.CDS37.S1_at   | NC-001345.CDS37 | 5.17 | 5.17 | 0    | 0.02 | 1     | 0.415856 | 0.353344 | 0.73381  | 0.596477 |
| NC-001345.CDS38.S1_at   | NC-001345.CDS38 | 4.82 | 4.63 | 0.18 | 0.05 | 1.14  | 0.40195  | 0.220867 | 0.724779 | 0.494262 |
| NC-001345.CDS39.S1_at   | NC-001345.CDS39 | 5.82 | 5.54 | 0.14 | 0.1  | 1.21  | 0.065916 | 0.248635 | 0.421278 | 0.517917 |
| NC-001345.CDS40.S1_s_at | NC-001345.CDS40 | 4.77 | 4.71 | 0.13 | 0.13 | 1.04  | 0.266487 | 0.401522 | 0.627354 | 0.631068 |
| NC-001345.CDS41.S1_at   | NC-001345.CDS41 | 4.93 | 4.84 | 0.29 | 0.05 | 1.07  | 0.617713 | 0.747679 | 0.8456   | 0.853234 |
| NC-001345.CDS42.S1_at   | NC-001345.CDS42 | 3.17 | 3.16 | 0.09 | 0.11 | 1.01  | 0.35483  | 0.177989 | 0.694435 | 0.454339 |
| NC-001345.CDS43.S1_at   | NC-001345.CDS43 | 5.19 | 5.15 | 0.19 | 0.03 | 1.03  | 0.251382 | 0.240365 | 0.616657 | 0.510952 |
| NC-001345.CDS44.S1_at   | NC-001345.CDS44 | 4.59 | 4.59 | 0.02 | 0.08 | -1    | 0.590825 | 0.266255 | 0.833111 | 0.532078 |
| NC-001345.CDS45.S1_at   | NC-001345.CDS45 | 4.38 | 4.3  | 0.01 | 0.08 | 1.06  | 0.03972  | 0.127724 | 0.362432 | 0.398581 |
| NC-001345.CDS46.S1_at   | NC-001345.CDS46 | 3.9  | 3.91 | 0.12 | 0.12 | -1.01 | 0.469025 | 0.527146 | 0.765373 | 0.715861 |
| NC-001345.CDS47.S1_at   | NC-001345.CDS47 | 5.59 | 5.44 | 0.08 | 0.08 | 1.11  | 0.071962 | 0.243917 | 0.431889 | 0.514069 |
| NC-001345.CDS48.S1_at   | NC-001345.CDS48 | 4.56 | 4.58 | 0.22 | 0.03 | -1.02 | 0.579049 | 0.76244  | 0.826375 | 0.861818 |
| NC-001345.CDS49.S1_at   | NC-001345.CDS49 | 5.64 | 5.56 | 0.08 | 0.08 | 1.06  | 0.577486 | 0.073594 | 0.825728 | 0.316945 |

|                         |                 |      |      |      |      |       |          |          |          |          |
|-------------------------|-----------------|------|------|------|------|-------|----------|----------|----------|----------|
| NC-001345.CDS51.S1_at   | NC-001345.CDS51 | 4.27 | 4.45 | 0.17 | 0.18 | -1.13 | 0.548751 | 0.509504 | 0.809898 | 0.704233 |
| NC-001345.CDS52.S1_at   | NC-001345.CDS52 | 3.32 | 3.24 | 0.02 | 0.1  | 1.06  | 0.222683 | 0.411754 | 0.592169 | 0.638434 |
| NC-001345.CDS53.S1_at   | NC-001345.CDS53 | 5.05 | 4.75 | 0.18 | 0.1  | 1.23  | 0.071946 | 0.090377 | 0.431889 | 0.344827 |
| NC-001345.CDS54.S1_at   | NC-001345.CDS54 | 3.79 | 3.58 | 0.07 | 0.11 | 1.16  | 0.036666 | 0.103293 | 0.35527  | 0.364143 |
| NC-001345.CDS55.S1_at   | NC-001345.CDS55 | 3.95 | 3.98 | 0.14 | 0.04 | -1.02 | 0.450752 | 0.593763 | 0.754859 | 0.758418 |
| NC-001345.CDS56.S1_at   | NC-001345.CDS56 | 5.64 | 5.63 | 0.15 | 0.07 | 1.01  | 0.878906 | 0.972845 | 0.95792  | 0.985352 |
| NC-001345.CDS57.S1_at   | NC-001345.CDS57 | 6.15 | 6.1  | 0.15 | 0.02 | 1.04  | 0.235321 | 0.275878 | 0.602374 | 0.540035 |
| NC-001345.CDS58.S1_at   | NC-001345.CDS58 | 5.85 | 5.7  | 0.17 | 0.16 | 1.11  | 0.13772  | 0.165669 | 0.513441 | 0.441925 |
| NC-001345.CDS59.S1_at   | NC-001345.CDS59 | 4.42 | 4.44 | 0.03 | 0.13 | -1.01 | 0.567797 | 0.585385 | 0.820586 | 0.752844 |
| NC-001345.CDS60.S1_at   | NC-001345.CDS60 | 3.33 | 3.38 | 0.07 | 0.02 | -1.03 | 0.907037 | 0.431497 | 0.968482 | 0.652415 |
| NC-001345.CDS61.S1_at   | NC-001345.CDS61 | 5.69 | 5.52 | 0.24 | 0.05 | -1.13 | 0.098416 | 0.268501 | 0.467888 | 0.534123 |
| NC-001345.CDS62.S1_at   | NC-001345.CDS62 | 4.53 | 4.11 | 0.29 | 0.17 | 1.34  | 0.106793 | 0.192179 | 0.479384 | 0.467651 |
| NC-001345.CDS63.S1_at   | NC-001345.CDS63 | 4.95 | 4.65 | 0.21 | 0.23 | 1.23  | 0.186515 | 0.287057 | 0.559164 | 0.548359 |
| NC-001345.CDS64.S1_at   | NC-001345.CDS64 | 3.98 | 3.89 | 0.09 | 0.05 | 1.06  | 0.210149 | 0.310357 | 0.581555 | 0.565552 |
| NC-001345.CDS65.S1_at   | NC-001345.CDS65 | 2.71 | 2.71 | 0    | 0    | 1     | 1        | 0.421875 | 1        | 0.645369 |
| NC-001345.CDS65.S1_s_at | NC-001345.CDS65 | 4.23 | 4.09 | 0.08 | 0.03 | 1.1   | 0.191911 | 0.278076 | 0.563006 | 0.541754 |
| NC-001345.CDS66.S1_at   | NC-001345.CDS66 | 5.91 | 5.73 | 0.04 | 0.11 | 1.14  | 0.15502  | 0.303741 | 0.528378 | 0.561148 |
| NC-001345.CDS67.S1_at   | NC-001345.CDS67 | 4.65 | 4.65 | 0.17 | 0.07 | 1     | 0.25175  | 0.403959 | 0.61695  | 0.63254  |
| NC-001345.CDS68.S1_at   | NC-001345.CDS68 | 5.56 | 5.6  | 0.09 | 0.03 | -1.03 | 0.955964 | 0.873521 | 0.985363 | 0.928102 |
| NC-001345.CDS69.S1_at   | NC-001345.CDS69 | 5.19 | 4.84 | 0.06 | 0.24 | 1.27  | 0.118317 | 0.088057 | 0.491809 | 0.341547 |
| NC-001345.CDS70.S1_at   | NC-001345.CDS70 | 4.02 | 4.05 | 0.06 | 0.18 | -1.03 | 0.294143 | 0.415252 | 0.650324 | 0.640769 |
| NC-001345.CDS71.S1_at   | NC-001345.CDS71 | 4.75 | 4.5  | 0.04 | 0.09 | 1.18  | 0.013164 | 0.217878 | 0.266951 | 0.491408 |
| NC-001345.CDS72.S1_at   | NC-001345.CDS72 | 6.08 | 5.89 | 0.16 | 0.06 | 1.14  | 0.075137 | 0.259892 | 0.436064 | 0.526748 |
| NC-001345.CDS73.S1_at   | NC-001345.CDS73 | 4.11 | 3.85 | 0.12 | 0.1  | 1.2   | 0.042945 | 0.020063 | 0.371035 | 0.177928 |
| NC-001345.CDS74.S1_at   | NC-001345.CDS74 | 4.94 | 4.81 | 0.18 | 0.06 | 1.09  | 0.377239 | 0.388455 | 0.707423 | 0.622858 |
| NC-001345.CDS75.S1_at   | NC-001345.CDS75 | 4.05 | 4.02 | 0.04 | 0.11 | 1.02  | 0.407371 | 0.488281 | 0.728597 | 0.691036 |
| NC-001345.CDS76.S1_at   | NC-001345.CDS76 | 3.77 | 3.68 | 0.21 | 0.06 | 1.06  | 0.620821 | 0.667483 | 0.847287 | 0.805333 |
| NC-001345.CDS77.S1_at   | NC-001345.CDS77 | 4.2  | 4.17 | 0.12 | 0.02 | 1.02  | 0.243033 | 0.43175  | 0.608888 | 0.652537 |
| NC-001345.CDS78.S1_at   | NC-001345.CDS78 | 5.13 | 5.18 | 0.06 | 0.03 | -1.04 | 0.118979 | 0.175265 | 0.492508 | 0.452059 |
| NC-001345.CDS79.S1_at   | NC-001345.CDS79 | 6.89 | 6.69 | 0.1  | 0.05 | 1.14  | 0.059978 | 0.162634 | 0.407399 | 0.438724 |
| NC-001345.CDS80.S1_at   | NC-001345.CDS80 | 5.79 | 5.76 | 0.11 | 0    | 1.02  | 0.732161 | 0.539177 | 0.897011 | 0.723588 |
| NC-001345.CDS81.S1_s_at | NC-001345.CDS81 | 6.33 | 6.21 | 0.1  | 0.06 | 1.08  | 0.096871 | 0.653892 | 0.465555 | 0.797692 |
| NC-001345.CDS83.S1_at   | NC-001345.CDS83 | 4.43 | 4.28 | 0.08 | 0.09 | 1.1   | 0.248769 | 0.257888 | 0.614138 | 0.525467 |
| NC-001345.CDS84.S1_at   | NC-001345.CDS84 | 3.78 | 3.79 | 0.07 | 0.15 | -1    | 0.767129 | 0.734008 | 0.912485 | 0.845896 |
| NC-001345.CDS85.S1_at   | NC-001345.CDS85 | 5.19 | 5.11 | 0.22 | 0.17 | 1.05  | 0.980359 | 0.477771 | 0.993785 | 0.683777 |
| NC-001345.CDS86.S1_at   | NC-001345.CDS86 | 6.1  | 6.1  | 0.04 | 0.02 | 1     | 0.668159 | 0.327728 | 0.868924 | 0.577549 |
| NC-001345.CDS87.S1_at   | NC-001345.CDS87 | 4.09 | 4.08 | 0.05 | 0.03 | 1.01  | 0.905421 | 0.266931 | 0.968115 | 0.532473 |
| NC-001345.CDS88.S1_at   | NC-001345.CDS88 | 5.54 | 5.53 | 0.12 | 0.08 | 1.01  | 0.210401 | 0.372716 | 0.581688 | 0.611661 |
| NC-001345.CDS89.S1_at   | NC-001345.CDS89 | 5.75 | 5.54 | 0.15 | 0.11 | 1.16  | 0.107343 | 0.129022 | 0.47976  | 0.400513 |
| NC-001345.CDS90.S1_at   | NC-001345.CDS90 | 4.48 | 4.28 | 0.1  | 0.16 | 1.15  | 0.162897 | 0.080659 | 0.535867 | 0.328444 |
| NC-001345.CDS91.S1_at   | NC-001345.CDS91 | 4.99 | 4.74 | 0.15 | 0.09 | 1.19  | 0.07159  | 0.081988 | 0.431049 | 0.330661 |
| NC-001345.CDS92.S1_at   | NC-001345.CDS92 | 6.38 | 6.3  | 0.18 | 0.05 | 1.05  | 0.405586 | 0.650748 | 0.727426 | 0.795801 |
| NC-001345.CDS93.S1_at   | NC-001345.CDS93 | 5.13 | 4.87 | 0.1  | 0.14 | 1.2   | 0.074702 | 0.069242 | 0.435313 | 0.309436 |

|                        |                 |      |      |      |      |       |          |          |          |          |
|------------------------|-----------------|------|------|------|------|-------|----------|----------|----------|----------|
| NC-001345.CDS94.S1_at  | NC-001345.CDS94 | 4.01 | 3.97 | 0.21 | 0.02 | 1.02  | 0.251536 | 0.406513 | 0.616712 | 0.634382 |
| NC-006150.CDS1.S1_at   | NC-006150.CDS1  | 5.06 | 4.84 | 0.2  | 0.04 | 1.17  | 0.147506 | 0.243058 | 0.521578 | 0.513356 |
| NC-006150.CDS2.S1_s_at | NC-006150.CDS2  | 5.65 | 5.53 | 0.16 | 0.09 | 1.09  | 0.144029 | 0.215927 | 0.519414 | 0.489556 |
| NC-006150.CDS3.S1_at   | NC-006150.CDS3  | 4.13 | 3.98 | 0.08 | 0    | 1.11  | 0.03278  | 0.023998 | 0.345393 | 0.194183 |
| NC-006150.CDS4.S1_at   | NC-006150.CDS4  | 5    | 4.86 | 0.31 | 0.11 | 1.11  | 0.462631 | 0.213794 | 0.761724 | 0.487564 |
| NC-006150.CDS5.S1_at   | NC-006150.CDS5  | 6.18 | 5.96 | 0.2  | 0.15 | 1.17  | 0.273559 | 0.295139 | 0.633298 | 0.554551 |
| NC-006150.CDS6.S1_at   | NC-006150.CDS6  | 2.78 | 2.72 | 0.03 | 0.1  | 1.04  | 0.30739  | 0.261978 | 0.660255 | 0.52836  |
| NC-006150.CDS7.S1_at   | NC-006150.CDS7  | 3.28 | 3.26 | 0.1  | 0.03 | 1.02  | 0.393407 | 0.393197 | 0.71919  | 0.626132 |
| NC-006150.CDS8.S1_at   | NC-006150.CDS8  | 3.87 | 3.78 | 0.12 | 0.11 | 1.07  | 0.301682 | 0.306267 | 0.655909 | 0.562907 |
| NC-006150.CDS9.S1_at   | NC-006150.CDS9  | 2.93 | 2.96 | 0.21 | 0.1  | -1.02 | 0.337894 | 0.475309 | 0.682728 | 0.682031 |
| NC-006150.CDS10.S1_at  | NC-006150.CDS10 | 3.39 | 3.49 | 0.22 | 0.07 | -1.07 | 0.635704 | 0.26955  | 0.854692 | 0.534821 |
| NC-006150.CDS11.S1_at  | NC-006150.CDS11 | 5.21 | 4.97 | 0.07 | 0.12 | 1.18  | 0.072306 | 0.339977 | 0.432116 | 0.586486 |
| NC-006150.CDS12.S1_at  | NC-006150.CDS12 | 3.46 | 3.46 | 0.08 | 0.12 | -1    | 0.983818 | 0.973665 | 0.995094 | 0.985648 |
| NC-006150.CDS13.S1_at  | NC-006150.CDS13 | 3.62 | 3.58 | 0.05 | 0.04 | 1.03  | 0.089881 | 0.103848 | 0.457893 | 0.364519 |
| NC-006150.CDS14.S1_at  | NC-006150.CDS14 | 4.25 | 3.83 | 0.26 | 0.1  | 1.34  | 0.122264 | 0.088172 | 0.495677 | 0.341721 |
| NC-006150.CDS15.S1_at  | NC-006150.CDS15 | 5.01 | 4.8  | 0.18 | 0.13 | 1.15  | 0.134029 | 0.128007 | 0.508283 | 0.39898  |
| NC-006150.CDS16.S1_at  | NC-006150.CDS16 | 3.86 | 3.88 | 0.22 | 0.08 | -1.01 | 0.800312 | 0.33226  | 0.92687  | 0.580717 |
| NC-006150.CDS17.S1_at  | NC-006150.CDS17 | 4.17 | 3.99 | 0.15 | 0.06 | 1.13  | 0.268423 | 0.413296 | 0.628814 | 0.639586 |
| NC-006150.CDS18.S1_at  | NC-006150.CDS18 | 4.5  | 4.59 | 0.1  | 0.12 | -1.06 | 0.384259 | 0.809153 | 0.711893 | 0.889995 |
| NC-006150.CDS19.S1_at  | NC-006150.CDS19 | 3.05 | 2.91 | 0.09 | 0.13 | 1.1   | 0.276297 | 0.407921 | 0.635937 | 0.635304 |
| NC-006150.CDS20.S1_at  | NC-006150.CDS20 | 3.67 | 3.69 | 0.1  | 0.19 | -1.01 | 0.90913  | 0.727244 | 0.969287 | 0.84224  |
| NC-006150.CDS21.S1_at  | NC-006150.CDS21 | 2.8  | 2.76 | 0.03 | 0    | 1.03  | 0.125471 | 0.351354 | 0.499523 | 0.595026 |
| NC-006150.CDS22.S1_at  | NC-006150.CDS22 | 3.23 | 3.03 | 0.23 | 0.07 | 1.15  | 0.092026 | 0.134176 | 0.460597 | 0.406421 |
| NC-006150.CDS23.S1_at  | NC-006150.CDS23 | 3.33 | 3.33 | 0.06 | 0.06 | 1     | 0.975073 | 0.584675 | 0.991912 | 0.752482 |
| NC-006150.CDS24.S1_at  | NC-006150.CDS24 | 3.46 | 3.5  | 0.01 | 0.03 | -1.03 | 0.178337 | 0.097088 | 0.551301 | 0.354605 |
| NC-006150.CDS25.S1_at  | NC-006150.CDS25 | 3.33 | 3.4  | 0.07 | 0.08 | -1.05 | 0.227047 | 0.342884 | 0.596459 | 0.588712 |
| NC-006150.CDS26.S1_at  | NC-006150.CDS26 | 3.84 | 3.84 | 0.02 | 0    | -1    | 0.769887 | 0.120158 | 0.913889 | 0.388915 |
| NC-006150.CDS27.S1_at  | NC-006150.CDS27 | 3.21 | 3.11 | 0.13 | 0.09 | 1.07  | 0.147054 | 0.169852 | 0.521545 | 0.446544 |
| NC-006150.CDS28.S1_at  | NC-006150.CDS28 | 3.07 | 2.99 | 0.09 | 0.01 | 1.06  | 0.17508  | 0.136035 | 0.548031 | 0.408363 |
| NC-006150.CDS29.S1_at  | NC-006150.CDS29 | 2.93 | 2.93 | 0.09 | 0    | -1    | 0.948234 | 0.998392 | 0.982204 | 0.999091 |
| NC-006150.CDS30.S1_at  | NC-006150.CDS30 | 5.36 | 5.32 | 0.09 | 0    | 1.03  | 0.252955 | 0.249579 | 0.617861 | 0.518645 |
| NC-006150.CDS31.S1_at  | NC-006150.CDS31 | 3.67 | 3.55 | 0.14 | 0.15 | 1.09  | 0.316033 | 0.206708 | 0.666258 | 0.480799 |
| NC-006150.CDS32.S1_at  | NC-006150.CDS32 | 4.37 | 4.35 | 0.22 | 0.06 | 1.01  | 0.350304 | 0.077236 | 0.691193 | 0.322852 |
| NC-006150.CDS33.S1_at  | NC-006150.CDS33 | 4.02 | 3.9  | 0.22 | 0.19 | 1.09  | 0.240731 | 0.372674 | 0.606966 | 0.611617 |
| NC-006150.CDS34.S1_at  | NC-006150.CDS34 | 5.94 | 5.74 | 0.17 | 0.11 | 1.14  | 0.114053 | 0.131438 | 0.487405 | 0.403584 |
| NC-006150.CDS35.S1_at  | NC-006150.CDS35 | 4.15 | 3.93 | 0.12 | 0.04 | 1.17  | 0.030467 | 0.11175  | 0.338016 | 0.376787 |
| NC-006150.CDS36.S1_at  | NC-006150.CDS36 | 4.25 | 4.37 | 0.19 | 0.2  | -1.08 | 0.516434 | 0.621387 | 0.791459 | 0.775982 |
| NC-006150.CDS37.S1_at  | NC-006150.CDS37 | 3.91 | 3.87 | 0.1  | 0.09 | 1.03  | 0.40709  | 0.605726 | 0.72852  | 0.765429 |
| NC-006150.CDS38.S1_at  | NC-006150.CDS38 | 4.41 | 4.39 | 0.22 | 0.22 | 1.02  | 0.832727 | 0.720404 | 0.940026 | 0.838261 |
| NC-006150.CDS39.S1_at  | NC-006150.CDS39 | 3.12 | 2.97 | 0.09 | 0.11 | 1.11  | 0.130828 | 0.052237 | 0.505266 | 0.274065 |
| NC-006150.CDS40.S1_at  | NC-006150.CDS40 | 3.7  | 3.28 | 0.22 | 0.07 | 1.34  | 0.067731 | 0.03281  | 0.42444  | 0.22427  |
| NC-006150.CDS41.S1_at  | NC-006150.CDS41 | 4.01 | 3.94 | 0.16 | 0.07 | 1.05  | 0.29647  | 0.397507 | 0.652086 | 0.628923 |
| NC-006150.CDS42.S1_at  | NC-006150.CDS42 | 4.77 | 4.75 | 0.25 | 0.13 | 1.02  | 0.687857 | 0.723797 | 0.877963 | 0.840126 |



|                         |                 |      |      |      |      |       |          |          |          |          |
|-------------------------|-----------------|------|------|------|------|-------|----------|----------|----------|----------|
| NC-006150.CDS43.S1_at   | NC-006150.CDS43 | 3.83 | 3.63 | 0.12 | 0.12 | 1.15  | 0.135937 | 0.259466 | 0.510454 | 0.526418 |
| NC-006150.CDS44.S1_at   | NC-006150.CDS44 | 4.44 | 4.22 | 0.07 | 0.05 | 1.16  | 0.027506 | 0.016278 | 0.327829 | 0.161661 |
| NC-006150.CDS45.S1_at   | NC-006150.CDS45 | 3.95 | 3.5  | 0.24 | 0.1  | 1.36  | 0.054825 | 0.039964 | 0.397122 | 0.245076 |
| NC-006150.CDS46.S1_at   | NC-006150.CDS46 | 3.39 | 3.29 | 0.04 | 0.17 | 1.07  | 0.464452 | 0.663721 | 0.762534 | 0.803122 |
| NC-006150.CDS47.S1_at   | NC-006150.CDS47 | 5.59 | 5.42 | 0.19 | 0.01 | 1.12  | 0.198763 | 0.089871 | 0.570197 | 0.344073 |
| NC-006150.CDS48.S1_at   | NC-006150.CDS48 | 3.98 | 3.88 | 0.14 | 0.09 | 1.07  | 0.918337 | 0.953186 | 0.972108 | 0.973457 |
| NC-006150.CDS49.S1_at   | NC-006150.CDS49 | 3.96 | 3.95 | 0.2  | 0.01 | 1.01  | 0.372936 | 0.195127 | 0.705567 | 0.470241 |
| NC-006150.CDS50.S1_at   | NC-006150.CDS50 | 4.63 | 4.39 | 0.03 | 0.15 | 1.18  | 0.038401 | 0.092501 | 0.359238 | 0.348445 |
| NC-006150.CDS51.S1_s_at | NC-006150.CDS51 | 4.52 | 4.51 | 0.19 | 0.08 | 1     | 0.603356 | 0.312167 | 0.83918  | 0.566915 |
| NC-006150.CDS52.S1_at   | NC-006150.CDS52 | 3.4  | 3.26 | 0.03 | 0.12 | 1.1   | 0.077304 | 0.18684  | 0.439109 | 0.462703 |
| NC-006150.CDS53.S1_at   | NC-006150.CDS53 | 4.83 | 4.71 | 0.21 | 0.03 | 1.09  | 0.481106 | 0.655684 | 0.771722 | 0.7987   |
| NC-006150.CDS54.S1_at   | NC-006150.CDS54 | 2.94 | 2.74 | 0.16 | 0.1  | 1.15  | 0.262333 | 0.160974 | 0.624611 | 0.437116 |
| NC-006150.CDS55.S1_at   | NC-006150.CDS55 | 4.35 | 4.32 | 0.02 | 0.14 | 1.02  | 0.532837 | 0.727633 | 0.800513 | 0.842488 |
| NC-006150.CDS56.S1_at   | NC-006150.CDS56 | 2.84 | 2.99 | 0.01 | 0.13 | -1.1  | 0.421884 | 0.483306 | 0.737802 | 0.687887 |
| NC-006150.CDS57.S1_at   | NC-006150.CDS57 | 4.81 | 4.86 | 0.07 | 0.02 | -1.04 | 0.075286 | 0.018551 | 0.436118 | 0.171365 |
| NC-006150.CDS58.S1_s_at | NC-006150.CDS58 | 5.02 | 4.89 | 0.17 | 0.12 | 1.09  | 0.445275 | 0.627899 | 0.751987 | 0.780849 |
| NC-006150.CDS59.S1_at   | NC-006150.CDS59 | 4.54 | 4.32 | 0.15 | 0.06 | 1.16  | 0.070699 | 0.052322 | 0.42977  | 0.274201 |
| NC-006150.CDS60.S1_at   | NC-006150.CDS60 | 4.41 | 4.36 | 0.23 | 0.09 | 1.03  | 0.321919 | 0.654418 | 0.67054  | 0.798021 |
| NC-006150.CDS61.S1_at   | NC-006150.CDS61 | 3.55 | 3.52 | 0.13 | 0.03 | 1.02  | 0.35369  | 0.257081 | 0.693411 | 0.524783 |
| NC-006150.CDS62.S1_at   | NC-006150.CDS62 | 3.92 | 3.78 | 0.17 | 0.07 | 1.1   | 0.43363  | 0.140661 | 0.744547 | 0.413964 |
| NC-006150.CDS63.S1_at   | NC-006150.CDS63 | 3.99 | 4    | 0.12 | 0    | -1.01 | 0.54294  | 0.278931 | 0.806071 | 0.542661 |
| NC-006150.CDS64.S1_at   | NC-006150.CDS64 | 4.74 | 4.71 | 0.17 | 0.13 | 1.02  | 0.80113  | 0.48724  | 0.927395 | 0.690358 |
| NC-006150.CDS65.S1_at   | NC-006150.CDS65 | 4.88 | 4.75 | 0.1  | 0.01 | 1.09  | 0.147214 | 0.042607 | 0.521578 | 0.251035 |
| NC-006150.CDS66.S1_at   | NC-006150.CDS66 | 5.66 | 5.5  | 0.12 | 0.09 | 1.11  | 0.160196 | 0.122978 | 0.533273 | 0.392923 |
| NC-006150.CDS67.S1_at   | NC-006150.CDS67 | 4.14 | 4.21 | 0.08 | 0.14 | -1.05 | 0.747844 | 0.248    | 0.904205 | 0.517487 |
| NC-006150.CDS68.S1_at   | NC-006150.CDS68 | 3.84 | 3.86 | 0.11 | 0.11 | -1.01 | 0.628386 | 0.715509 | 0.851106 | 0.83509  |
| NC-006150.CDS69.S1_at   | NC-006150.CDS69 | 4.14 | 3.86 | 0.15 | 0.07 | 1.21  | 0.050981 | 0.021984 | 0.388526 | 0.185566 |
| NC-006150.CDS70.S1_at   | NC-006150.CDS70 | 3.7  | 3.68 | 0.12 | 0.05 | 1.02  | 0.348926 | 0.157204 | 0.690079 | 0.432684 |
| NC-006150.CDS71.S1_at   | NC-006150.CDS71 | 3.77 | 3.67 | 0.11 | 0.07 | 1.08  | 0.11927  | 0.255016 | 0.492749 | 0.52317  |
| NC-006150.CDS72.S1_at   | NC-006150.CDS72 | 4    | 3.78 | 0.08 | 0.08 | 1.17  | 0.037273 | 0.080952 | 0.357061 | 0.328993 |
| NC-006150.CDS73.S1_at   | NC-006150.CDS73 | 3.64 | 3.67 | 0.22 | 0.15 | -1.02 | 0.647486 | 0.784619 | 0.859364 | 0.875303 |
| NC-006150.CDS74.S1_at   | NC-006150.CDS74 | 4.85 | 4.56 | 0.12 | 0.14 | 1.23  | 0.101229 | 0.12216  | 0.471667 | 0.391819 |
| NC-006150.CDS75.S1_at   | NC-006150.CDS75 | 4.2  | 4.2  | 0.07 | 0.01 | 1     | 0.297073 | 0.529747 | 0.652603 | 0.717498 |
| NC-006150.CDS76.S1_at   | NC-006150.CDS76 | 5.2  | 5.08 | 0.21 | 0.1  | 1.09  | 0.385194 | 0.517019 | 0.712501 | 0.709375 |
| NC-006150.CDS77.S1_at   | NC-006150.CDS77 | 5.65 | 5.55 | 0.06 | 0.09 | 1.07  | 0.38272  | 0.178944 | 0.710861 | 0.455243 |
| NC-006150.CDS78.S1_at   | NC-006150.CDS78 | 3.15 | 2.88 | 0.12 | 0.18 | 1.2   | 0.201522 | 0.216295 | 0.573165 | 0.489844 |
| NC-006150.CDS79.S1_at   | NC-006150.CDS79 | 5.73 | 5.35 | 0.05 | 0.15 | 1.31  | 0.014305 | 0.010192 | 0.274633 | 0.132348 |
| NC-006150.CDS80.S1_at   | NC-006150.CDS80 | 4.68 | 4.54 | 0.14 | 0.12 | 1.1   | 0.316634 | 0.415996 | 0.666593 | 0.641323 |
| NC-006150.CDS81.S1_at   | NC-006150.CDS81 | 4.26 | 4.26 | 0.22 | 0    | -1.01 | 0.397967 | 0.56663  | 0.722205 | 0.740707 |
| NC-006150.CDS82.S1_at   | NC-006150.CDS82 | 3.99 | 3.8  | 0.21 | 0.05 | 1.14  | 0.205727 | 0.132741 | 0.577556 | 0.404544 |
| NC-006150.CDS83.S1_at   | NC-006150.CDS83 | 4.85 | 4.75 | 0.31 | 0.07 | 1.07  | 0.557887 | 0.712445 | 0.815053 | 0.833371 |
| NC-006150.CDS84.S1_at   | NC-006150.CDS84 | 3.81 | 3.79 | 0.15 | 0.12 | 1.01  | 0.813409 | 0.717521 | 0.932551 | 0.836463 |
| NC-006150.CDS85.S1_at   | NC-006150.CDS85 | 3.8  | 3.79 | 0.09 | 0.09 | 1.01  | 0.405711 | 0.539498 | 0.727426 | 0.723763 |

|                          |                  |      |      |      |      |       |          |          |          |          |
|--------------------------|------------------|------|------|------|------|-------|----------|----------|----------|----------|
| NC-006150.CDS86.S1_at    | NC-006150.CDS86  | 3.09 | 3.15 | 0.03 | 0    | -1.04 | 0.117283 | 0.66616  | 0.490908 | 0.804415 |
| NC-006150.CDS87.S1_at    | NC-006150.CDS87  | 3.94 | 3.84 | 0.11 | 0.22 | 1.07  | 0.547126 | 0.700587 | 0.808925 | 0.826284 |
| NC-006150.CDS88.S1_at    | NC-006150.CDS88  | 3.44 | 3.51 | 0.17 | 0.07 | -1.05 | 0.590283 | 0.239769 | 0.832832 | 0.510505 |
| NC-006150.CDS89.S1_at    | NC-006150.CDS89  | 3.53 | 3.53 | 0.21 | 0.03 | 1.01  | 0.861829 | 0.87904  | 0.95128  | 0.930992 |
| NC-006150.CDS90.S1_at    | NC-006150.CDS90  | 3.7  | 3.46 | 0.03 | 0.04 | 1.18  | 0.00216  | 0.004898 | 0.174757 | 0.097632 |
| NC-006150.CDS91.S1_at    | NC-006150.CDS91  | 5.26 | 5.06 | 0.19 | 0.16 | 1.15  | 0.209146 | 0.254977 | 0.580715 | 0.52317  |
| NC-006150.CDS92.S1_at    | NC-006150.CDS92  | 4.94 | 4.87 | 0.13 | 0    | 1.05  | 0.134638 | 0.048257 | 0.508533 | 0.264727 |
| NC-006150.CDS93.S1_at    | NC-006150.CDS93  | 3.81 | 3.71 | 0.28 | 0.06 | 1.07  | 0.699332 | 0.864733 | 0.883137 | 0.923286 |
| NC-006150.CDS94.S1_at    | NC-006150.CDS94  | 7.04 | 6.97 | 0.1  | 0.02 | 1.05  | 0.302595 | 0.454227 | 0.656542 | 0.668474 |
| NC-006150.CDS95.S1_at    | NC-006150.CDS95  | 6.2  | 6.18 | 0.18 | 0.02 | 1.02  | 0.288294 | 0.556935 | 0.645409 | 0.734847 |
| NC-006150.CDS96.S1_at    | NC-006150.CDS96  | 5.44 | 5.46 | 0.11 | 0.2  | -1.01 | 0.932304 | 0.648971 | 0.977211 | 0.794525 |
| NC-006150.CDS97.S1_at    | NC-006150.CDS97  | 5.29 | 5.28 | 0    | 0.12 | 1.01  | 0.333987 | 0.338196 | 0.679986 | 0.58536  |
| NC-006150.CDS98.S1_at    | NC-006150.CDS98  | 5.88 | 5.65 | 0.17 | 0.11 | 1.17  | 0.095483 | 0.096697 | 0.464229 | 0.35417  |
| NC-006150.CDS99.S1_at    | NC-006150.CDS99  | 5.04 | 4.91 | 0.03 | 0.09 | 1.1   | 0.033104 | 0.171518 | 0.346165 | 0.447895 |
| NC-006150.CDS100.S1_at   | NC-006150.CDS100 | 3.31 | 3.13 | 0.06 | 0.13 | 1.13  | 0.254347 | 0.515944 | 0.618808 | 0.708598 |
| NC-006150.CDS101.S1_at   | NC-006150.CDS101 | 3.25 | 3.3  | 0.12 | 0.11 | -1.04 | 0.250237 | 0.450406 | 0.615549 | 0.665643 |
| NC-006150.CDS102.S1_at   | NC-006150.CDS102 | 3.24 | 3.18 | 0.13 | 0.01 | 1.04  | 0.290246 | 0.38665  | 0.646873 | 0.621814 |
| NC-006150.CDS103.S1_at   | NC-006150.CDS103 | 3.26 | 3.37 | 0.25 | 0.02 | -1.08 | 0.847646 | 0.83488  | 0.946572 | 0.905483 |
| NC-006150.CDS104.S1_at   | NC-006150.CDS104 | 6.23 | 6.13 | 0.13 | 0.07 | 1.07  | 0.213491 | 0.215222 | 0.584081 | 0.488977 |
| NC-006150.CDS105.S1_at   | NC-006150.CDS105 | 3.21 | 3.3  | 0.13 | 0.07 | -1.06 | 0.378232 | 0.402212 | 0.708122 | 0.631247 |
| NC-006150.CDS106.S1_at   | NC-006150.CDS106 | 4.9  | 4.94 | 0.12 | 0.17 | -1.03 | 0.529772 | 0.537822 | 0.798514 | 0.722758 |
| NC-006150.CDS107.S1_at   | NC-006150.CDS107 | 4.34 | 4.37 | 0.25 | 0.03 | -1.03 | 0.575291 | 0.588796 | 0.824614 | 0.755149 |
| NC-006150.CDS108.S1_at   | NC-006150.CDS108 | 5.41 | 5.34 | 0.31 | 0.08 | 1.05  | 0.756396 | 0.892736 | 0.908234 | 0.938818 |
| NC-006150.CDS109.S1_at   | NC-006150.CDS109 | 3.86 | 3.88 | 0.22 | 0.12 | -1.01 | 0.974615 | 0.796394 | 0.991912 | 0.882647 |
| NC-006150.CDS110.S1_at   | NC-006150.CDS110 | 3.93 | 3.89 | 0.11 | 0.14 | 1.03  | 0.903731 | 0.842999 | 0.967655 | 0.91057  |
| NC-006150.CDS111.S1_at   | NC-006150.CDS111 | 3.65 | 3.65 | 0.11 | 0.23 | 1     | 0.666642 | 0.127242 | 0.868394 | 0.397935 |
| NC-006150.CDS112.S1_at   | NC-006150.CDS112 | 3.98 | 3.98 | 0.09 | 0.01 | -1    | 0.939126 | 0.657985 | 0.97946  | 0.80013  |
| NC-006150.CDS113.S1_at   | NC-006150.CDS113 | 5.48 | 5.33 | 0.06 | 0.16 | 1.11  | 0.145446 | 0.260463 | 0.52043  | 0.527006 |
| NC-006150.CDS114.S1_at   | NC-006150.CDS114 | 5.76 | 5.75 | 0.22 | 0.16 | 1.01  | 0.55683  | 0.764452 | 0.814405 | 0.863114 |
| NC-006150.CDS115.S1_at   | NC-006150.CDS115 | 4.58 | 4.63 | 0.07 | 0.09 | -1.03 | 0.977739 | 0.076402 | 0.99273  | 0.321372 |
| NC-006150.CDS116.S1_at   | NC-006150.CDS116 | 3.58 | 3.62 | 0.11 | 0.09 | -1.03 | 0.729236 | 0.565432 | 0.895662 | 0.739886 |
| NC-006150.CDS117.S1_at   | NC-006150.CDS117 | 4.79 | 4.71 | 0.12 | 0.19 | 1.05  | 0.708741 | 0.691713 | 0.886591 | 0.820652 |
| NC-006150.CDS118.S1_at   | NC-006150.CDS118 | 4.39 | 4.34 | 0.07 | 0.16 | 1.04  | 0.905416 | 0.375094 | 0.968115 | 0.613186 |
| NC-006150.CDS119.S1_s_at | NC-006150.CDS119 | 4.17 | 3.95 | 0.18 | 0.01 | 1.16  | 0.095196 | 0.341249 | 0.464131 | 0.587344 |
| NC-006150.CDS120.S1_at   | NC-006150.CDS120 | 5.37 | 5.38 | 0.27 | 0.04 | -1    | 0.383227 | 0.423898 | 0.711259 | 0.646571 |
| NC-006150.CDS121.S1_at   | NC-006150.CDS121 | 4.99 | 4.81 | 0.06 | 0.03 | 1.13  | 0.013213 | 0.020803 | 0.266951 | 0.180908 |
| NC-006150.CDS122.S1_at   | NC-006150.CDS122 | 4.84 | 4.75 | 0.18 | 0.12 | 1.06  | 0.779505 | 0.890831 | 0.918705 | 0.937722 |
| NC-006150.CDS123.S1_at   | NC-006150.CDS123 | 3.79 | 3.81 | 0.1  | 0.1  | -1.01 | 0.358395 | 0.198724 | 0.696372 | 0.473391 |
| NC-006150.CDS124.S1_at   | NC-006150.CDS124 | 4    | 4.04 | 0.3  | 0.21 | -1.03 | 0.722542 | 0.909124 | 0.892352 | 0.948563 |
| NC-006150.CDS125.S1_at   | NC-006150.CDS125 | 4.76 | 4.54 | 0.17 | 0.16 | 1.17  | 0.390404 | 0.6036   | 0.716734 | 0.764204 |
| NC-006150.CDS126.S1_at   | NC-006150.CDS126 | 3.71 | 3.5  | 0.24 | 0.24 | 1.16  | 0.469723 | 0.625468 | 0.765623 | 0.779182 |
| NC-006150.CDS127.S1_at   | NC-006150.CDS127 | 3.47 | 3.52 | 0.21 | 0.13 | -1.04 | 0.986579 | 0.982463 | 0.995657 | 0.99036  |
| NC-006150.CDS128.S1_at   | NC-006150.CDS128 | 4.87 | 4.68 | 0.03 | 0.06 | 1.14  | 0.013326 | 0.011851 | 0.26777  | 0.140973 |

|                          |                  |      |      |      |      |       |          |          |          |          |
|--------------------------|------------------|------|------|------|------|-------|----------|----------|----------|----------|
| NC-006150.CDS129.S1_at   | NC-006150.CDS129 | 3.85 | 3.85 | 0.13 | 0.07 | -1    | 0.928111 | 0.788927 | 0.976259 | 0.878011 |
| NC-006150.CDS130.S1_at   | NC-006150.CDS130 | 5.27 | 5.25 | 0.13 | 0.02 | 1.01  | 0.256887 | 0.355163 | 0.620749 | 0.597552 |
| NC-006150.CDS131.S1_at   | NC-006150.CDS131 | 4.95 | 4.96 | 0.04 | 0.39 | -1.01 | 0.983227 | 0.91586  | 0.994908 | 0.952836 |
| NC-006150.CDS132.S1_at   | NC-006150.CDS132 | 5.74 | 5.57 | 0.28 | 0.07 | 1.12  | 0.297487 | 0.298661 | 0.652776 | 0.557252 |
| NC-006150.CDS133.S1_at   | NC-006150.CDS133 | 4.01 | 3.83 | 0.23 | 0.03 | 1.13  | 0.385066 | 0.307357 | 0.712381 | 0.563634 |
| NC-006150.CDS134.S1_at   | NC-006150.CDS134 | 4.44 | 4.33 | 0.1  | 0.08 | 1.08  | 0.152153 | 0.332795 | 0.525249 | 0.58121  |
| NC-006150.CDS135.S1_at   | NC-006150.CDS135 | 3.38 | 3.28 | 0.12 | 0.01 | 1.07  | 0.23361  | 0.114061 | 0.601158 | 0.380421 |
| NC-006150.CDS136.S1_at   | NC-006150.CDS136 | 5.09 | 4.85 | 0.23 | 0.15 | 1.18  | 0.437232 | 0.17841  | 0.746719 | 0.454778 |
| NC-006150.CDS137.S1_at   | NC-006150.CDS137 | 3.71 | 3.4  | 0.29 | 0    | 1.25  | 0.137705 | 0.106241 | 0.51342  | 0.368652 |
| NC-006150.CDS138.S1_at   | NC-006150.CDS138 | 3.79 | 3.9  | 0.19 | 0.02 | -1.08 | 0.938263 | 0.951476 | 0.979247 | 0.972503 |
| NC-006150.CDS139.S1_at   | NC-006150.CDS139 | 4.74 | 4.68 | 0.08 | 0.13 | 1.04  | 0.316361 | 0.554265 | 0.666473 | 0.733111 |
| NC-006150.CDS140.S1_at   | NC-006150.CDS140 | 4.91 | 4.84 | 0.03 | 0.11 | 1.05  | 0.093515 | 0.123332 | 0.462739 | 0.393386 |
| NC-006150.CDS141.S1_at   | NC-006150.CDS141 | 4.25 | 4.23 | 0.18 | 0.09 | 1.01  | 0.557701 | 0.621932 | 0.81503  | 0.776497 |
| NC-006150.CDS142.S1_at   | NC-006150.CDS142 | 5.22 | 5.19 | 0.09 | 0.1  | 1.02  | 0.613457 | 0.390141 | 0.843466 | 0.624002 |
| NC-006150.CDS143.S1_at   | NC-006150.CDS143 | 3.67 | 3.55 | 0.14 | 0.05 | 1.09  | 0.216954 | 0.094142 | 0.586902 | 0.350851 |
| NC-006150.CDS144.S1_at   | NC-006150.CDS144 | 3.15 | 3.08 | 0.16 | 0.13 | 1.05  | 0.432083 | 0.620643 | 0.743696 | 0.775525 |
| NC-006150.CDS145.S1_s_at | NC-006150.CDS145 | 7.28 | 7.31 | 0.14 | 0.05 | -1.02 | 0.809099 | 0.698472 | 0.931038 | 0.82482  |
| NC-006150.CDS146.S1_at   | NC-006150.CDS146 | 5.06 | 5    | 0.1  | 0.02 | 1.04  | 0.190772 | 0.139844 | 0.561793 | 0.413131 |
| NC-006150.CDS147.S1_at   | NC-006150.CDS147 | 4.03 | 4.02 | 0.26 | 0.08 | 1.01  | 0.646276 | 0.798937 | 0.859027 | 0.884205 |
| NC-006150.CDS148.S1_at   | NC-006150.CDS148 | 3.41 | 3.32 | 0.07 | 0.06 | 1.06  | 0.18447  | 0.450388 | 0.557285 | 0.665643 |
| NC-006150.CDS149.S1_s_at | NC-006150.CDS149 | 3.93 | 3.78 | 0.1  | 0.13 | 1.11  | 0.116274 | 0.281345 | 0.489568 | 0.544391 |
| NC-006150.CDS150.S1_at   | NC-006150.CDS150 | 2.87 | 2.87 | 0.03 | 0.05 | -1    | 0.246179 | 0.149355 | 0.611572 | 0.423811 |
| NC-006150.CDS151.S1_at   | NC-006150.CDS151 | 4.96 | 4.88 | 0.09 | 0.28 | 1.06  | 0.298839 | 0.231284 | 0.653381 | 0.502954 |
| NC-006150.CDS152.S1_at   | NC-006150.CDS152 | 4.03 | 3.86 | 0.2  | 0.05 | 1.13  | 0.074506 | 0.162135 | 0.435313 | 0.438282 |
| NC-006150.CDS153.S1_at   | NC-006150.CDS153 | 3.88 | 3.82 | 0.23 | 0.25 | 1.04  | 0.537507 | 0.765534 | 0.802735 | 0.863726 |
| NC-006150.CDS154.S1_at   | NC-006150.CDS154 | 4.28 | 3.93 | 0.15 | 0.13 | 1.27  | 0.171665 | 0.143142 | 0.544918 | 0.417029 |
| NC-006150.CDS155.S1_at   | NC-006150.CDS155 | 3.21 | 2.99 | 0.19 | 0.14 | 1.16  | 0.54226  | 0.60041  | 0.805613 | 0.762128 |
| NC-006150.CDS156.S1_at   | NC-006150.CDS156 | 3.29 | 3.29 | 0.18 | 0.07 | 1     | 0.750107 | 0.907378 | 0.905347 | 0.947602 |
| NC-006150.CDS157.S1_at   | NC-006150.CDS157 | 5.53 | 5.46 | 0.06 | 0.14 | 1.05  | 0.105643 | 0.293324 | 0.477409 | 0.553239 |
| NC-006150.CDS158.S1_at   | NC-006150.CDS158 | 4.82 | 4.72 | 0.04 | 0.1  | 1.07  | 0.121536 | 0.063321 | 0.495145 | 0.298315 |
| NC-006150.CDS159.S1_at   | NC-006150.CDS159 | 4.36 | 4.21 | 0.05 | 0.05 | 1.11  | 0.044568 | 0.005821 | 0.374916 | 0.104661 |
| NC-006150.CDS160.S1_at   | NC-006150.CDS160 | 4.17 | 4.14 | 0.14 | 0.11 | 1.02  | 0.553095 | 0.160184 | 0.811981 | 0.436308 |
| NC-006150.CDS161.S1_at   | NC-006150.CDS161 | 4.15 | 4.17 | 0.1  | 0.13 | -1.02 | 0.584078 | 0.798565 | 0.829433 | 0.884032 |
| NC-006150.CDS162.S1_at   | NC-006150.CDS162 | 6.32 | 6.37 | 0.13 | 0.08 | -1.03 | 0.453333 | 0.079996 | 0.756033 | 0.327352 |
| NC-006150.CDS163.S1_at   | NC-006150.CDS163 | 3.43 | 3.42 | 0.2  | 0.16 | 1.01  | 0.945261 | 0.986829 | 0.980924 | 0.992556 |
| NC-006150.CDS164.S1_at   | NC-006150.CDS164 | 4.5  | 4.48 | 0.22 | 0.03 | 1.01  | 0.551947 | 0.70806  | 0.811556 | 0.83065  |
| NC-006150.CDS165.S1_at   | NC-006150.CDS165 | 5.37 | 5.36 | 0.1  | 0.3  | 1.01  | 0.985149 | 0.977698 | 0.995334 | 0.987864 |
| NC-006150.CDS166.S1_at   | NC-006150.CDS166 | 4.46 | 4.21 | 0.13 | 0    | 1.19  | 0.030675 | 0.054832 | 0.338263 | 0.279675 |
| NC-006150.CDS167.S1_at   | NC-006150.CDS167 | 3.99 | 4    | 0.21 | 0.22 | -1.01 | 0.409535 | 0.602309 | 0.730133 | 0.763318 |
| NC-006150.CDS168.S1_at   | NC-006150.CDS168 | 3.6  | 3.49 | 0.13 | 0.1  | 1.07  | 0.274462 | 0.175748 | 0.63386  | 0.452344 |
| NC-006150.CDS169.S1_at   | NC-006150.CDS169 | 3.23 | 3.31 | 0.14 | 0.09 | -1.06 | 0.898276 | 0.356585 | 0.965455 | 0.598459 |
| NC-006150.CDS170.S1_at   | NC-006150.CDS170 | 5.27 | 4.87 | 0.27 | 0.02 | 1.32  | 0.184457 | 0.246311 | 0.557285 | 0.515889 |
| NC-006150.CDS171.S1_at   | NC-006150.CDS171 | 5.69 | 5.62 | 0.29 | 0.05 | 1.05  | 0.43418  | 0.235888 | 0.744883 | 0.507056 |

|                          |                  |      |      |      |      |       |          |          |          |          |
|--------------------------|------------------|------|------|------|------|-------|----------|----------|----------|----------|
| NC-006150.CDS172.S1_at   | NC-006150.CDS172 | 5.2  | 5.26 | 0.3  | 0.02 | -1.04 | 0.499775 | 0.672558 | 0.782208 | 0.808633 |
| NC-006150.CDS172.S1_s_at | NC-006150.CDS172 | 4.57 | 4.44 | 0.11 | 0.11 | 1.1   | 0.22385  | 0.499609 | 0.59298  | 0.698424 |
| NC-006150.CDS173.S1_at   | NC-006150.CDS173 | 3.29 | 3.4  | 0.24 | 0.13 | -1.08 | 0.587084 | 0.752751 | 0.831568 | 0.855968 |
| NC-006150.CDS174.S1_at   | NC-006150.CDS174 | 4.72 | 4.7  | 0.1  | 0.18 | 1.02  | 0.651587 | 0.698757 | 0.861671 | 0.824973 |
| NC-006150.CDS175.S1_at   | NC-006150.CDS175 | 5.76 | 5.66 | 0.2  | 0.1  | 1.08  | 0.424533 | 0.334962 | 0.739618 | 0.58275  |
| NC-006150.CDS176.S1_at   | NC-006150.CDS176 | 5.99 | 5.68 | 0.2  | 0.05 | 1.24  | 0.12228  | 0.167251 | 0.495677 | 0.443684 |
| NC-006150.CDS177.S1_at   | NC-006150.CDS177 | 4.68 | 4.57 | 0.16 | 0.22 | 1.08  | 0.215556 | 0.277627 | 0.585748 | 0.541628 |
| NC-006150.CDS178.S1_at   | NC-006150.CDS178 | 4.09 | 4.18 | 0.24 | 0.04 | -1.07 | 0.7394   | 0.74923  | 0.900509 | 0.854266 |
| NC-006150.CDS179.S1_at   | NC-006150.CDS179 | 3.31 | 3.3  | 0.13 | 0.06 | 1.01  | 0.635564 | 0.400216 | 0.854591 | 0.630158 |
| NC-006150.CDS180.S1_at   | NC-006150.CDS180 | 5.04 | 5.07 | 0.1  | 0.03 | -1.02 | 0.5336   | 0.661199 | 0.80084  | 0.801687 |
| NC-006150.CDS181.S1_at   | NC-006150.CDS181 | 3.02 | 2.78 | 0.1  | 0.07 | 1.18  | 0.055968 | 0.072206 | 0.399441 | 0.31474  |
| NC-006150.CDS182.S1_at   | NC-006150.CDS182 | 3.94 | 3.94 | 0.11 | 0.15 | 1     | 0.973444 | 0.979977 | 0.991367 | 0.989229 |
| NC-006150.CDS183.S1_at   | NC-006150.CDS183 | 5.22 | 5.21 | 0.13 | 0.05 | 1.01  | 0.664117 | 0.822608 | 0.86761  | 0.89799  |
| NC-006150.CDS184.S1_at   | NC-006150.CDS184 | 3.96 | 3.57 | 0.23 | 0    | 1.31  | 0.122628 | 0.085596 | 0.496146 | 0.337588 |
| NC-006150.CDS185.S1_at   | NC-006150.CDS185 | 4.98 | 4.72 | 0.12 | 0.03 | 1.2   | 0.075515 | 0.156259 | 0.436722 | 0.43161  |
| NC-006150.CDS186.S1_s_at | NC-006150.CDS186 | 4.64 | 4.54 | 0.09 | 0.02 | 1.07  | 0.160975 | 0.04267  | 0.534308 | 0.251037 |
| NC-006150.CDS187.S1_at   | NC-006150.CDS187 | 3.42 | 3.53 | 0.1  | 0.12 | -1.08 | 0.424129 | 0.574974 | 0.739432 | 0.746216 |
| NC-006150.CDS188.S1_at   | NC-006150.CDS188 | 3.02 | 3.01 | 0.03 | 0.04 | 1.01  | 0.294883 | 0.367654 | 0.650971 | 0.607357 |
| NC-006150.CDS188.S1_s_at | NC-006150.CDS188 | 3.7  | 3.71 | 0.1  | 0.04 | -1.01 | 0.353332 | 0.137513 | 0.693208 | 0.410482 |
| NC-006150.CDS189.S1_at   | NC-006150.CDS189 | 4.27 | 4.32 | 0.02 | 0.08 | -1.03 | 0.949225 | 0.679414 | 0.9828   | 0.812809 |
| NC-006150.CDS190.S1_at   | NC-006150.CDS190 | 2.85 | 2.78 | 0.06 | 0.11 | 1.05  | 0.632354 | 0.169526 | 0.852926 | 0.446167 |
| NC-006150.CDS191.S1_at   | NC-006150.CDS191 | 4.14 | 3.96 | 0.1  | 0    | 1.13  | 0.109651 | 0.128148 | 0.482529 | 0.399148 |
| NC-006150.CDS192.S1_at   | NC-006150.CDS192 | 3.28 | 3.23 | 0.05 | 0.02 | 1.04  | 0.039687 | 0.018115 | 0.362432 | 0.169609 |
| NC-006150.CDS193.S1_at   | NC-006150.CDS193 | 4.06 | 3.65 | 0.11 | 0.14 | 1.33  | 0.027534 | 0.02971  | 0.327829 | 0.214029 |
| NC-006150.CDS194.S1_at   | NC-006150.CDS194 | 3.63 | 3.53 | 0.27 | 0.12 | 1.07  | 0.372618 | 0.565427 | 0.705567 | 0.739886 |
| NC-006150.CDS195.S1_at   | NC-006150.CDS195 | 3.64 | 3.72 | 0.37 | 0.1  | -1.06 | 0.809785 | 0.755286 | 0.931163 | 0.857546 |
| NC-006150.CDS196.S1_at   | NC-006150.CDS196 | 2.89 | 2.91 | 0.03 | 0.05 | -1.01 | 0.210436 | 0.339913 | 0.581688 | 0.586449 |
| NC-006150.CDS197.S1_at   | NC-006150.CDS197 | 4.69 | 4.6  | 0.15 | 0.18 | 1.06  | 0.934674 | 0.4632   | 0.977904 | 0.674269 |
| NC-006150.CDS198.S1_at   | NC-006150.CDS198 | 4.73 | 4.74 | 0.24 | 0.11 | -1.01 | 0.762232 | 0.889056 | 0.910836 | 0.936779 |
| NC-006150.CDS199.S1_at   | NC-006150.CDS199 | 2.96 | 2.92 | 0.04 | 0.1  | 1.02  | 0.503622 | 0.845798 | 0.784375 | 0.912246 |
| NC-006150.CDS200.S1_s_at | NC-006150.CDS200 | 4.71 | 4.6  | 0.2  | 0.1  | 1.08  | 0.16033  | 0.189021 | 0.533335 | 0.464897 |
| NC-006150.CDS201.S1_s_at | NC-006150.CDS201 | 4.6  | 4.46 | 0.08 | 0.06 | 1.1   | 0.028969 | 0.032488 | 0.333482 | 0.223254 |
| NC-006150.CDS202.S1_at   | NC-006150.CDS202 | 3.51 | 3.42 | 0.09 | 0.07 | 1.07  | 0.353557 | 0.424544 | 0.693381 | 0.647141 |
| NC-006150.CDS203.S1_at   | NC-006150.CDS203 | 3.27 | 3.2  | 0.2  | 0.04 | 1.05  | 0.697142 | 0.416399 | 0.882223 | 0.641587 |
| NC-006150.CDS204.S1_at   | NC-006150.CDS204 | 5.5  | 5.32 | 0.26 | 0.15 | 1.13  | 0.194134 | 0.222113 | 0.564764 | 0.495113 |
| NC-006150.CDS205.S1_at   | NC-006150.CDS205 | 5.36 | 5.32 | 0.06 | 0.13 | 1.02  | 0.236122 | 0.434692 | 0.603112 | 0.654756 |
| NC-006150.CDS206.S1_s_at | NC-006150.CDS206 | 5.26 | 5.17 | 0.09 | 0.07 | 1.06  | 0.102915 | 0.052407 | 0.473381 | 0.274414 |
| NC-006150.CDS207.S1_at   | NC-006150.CDS207 | 4.11 | 4.12 | 0.24 | 0.15 | -1.01 | 0.918834 | 0.819546 | 0.972261 | 0.896039 |
| NC-006150.CDS208.S1_at   | NC-006150.CDS208 | 3.82 | 3.85 | 0.04 | 0.12 | -1.02 | 0.490204 | 0.521546 | 0.776794 | 0.712483 |
| NC-006150.CDS209.S1_at   | NC-006150.CDS209 | 4.15 | 4.15 | 0.09 | 0.1  | 1     | 0.501921 | 0.612384 | 0.783483 | 0.770014 |
| NC-006150.CDS210.S1_at   | NC-006150.CDS210 | 3.52 | 3.48 | 0.29 | 0.1  | 1.02  | 0.552579 | 0.602221 | 0.811888 | 0.763226 |
| NC-006150.CDS211.S1_at   | NC-006150.CDS211 | 3.72 | 3.77 | 0.09 | 0.1  | -1.04 | 0.511243 | 0.661712 | 0.78856  | 0.801903 |
| NC-006150.CDS212.S1_at   | NC-006150.CDS212 | 3.78 | 3.68 | 0.23 | 0.13 | 1.07  | 0.315901 | 0.429302 | 0.666243 | 0.650754 |

|                          |                  |       |       |      |      |       |          |          |          |          |
|--------------------------|------------------|-------|-------|------|------|-------|----------|----------|----------|----------|
| NC-006150.CDS213.S1_at   | NC-006150.CDS213 | 4.24  | 4.24  | 0.16 | 0.15 | 1     | 0.987143 | 0.304933 | 0.995808 | 0.562064 |
| NC-006150.CDS214.S1_at   | NC-006150.CDS214 | 4.27  | 4.19  | 0.12 | 0.04 | 1.06  | 0.103356 | 0.0896   | 0.474122 | 0.343811 |
| NC-006150.CDS215.S1_s_at | NC-006150.CDS215 | 4.47  | 4.58  | 0.13 | 0.02 | -1.08 | 0.546051 | 0.759248 | 0.808283 | 0.860036 |
| NC-006150.CDS216.S1_at   | NC-006150.CDS216 | 3.78  | 3.73  | 0.09 | 0.01 | 1.04  | 0.113872 | 0.097371 | 0.487339 | 0.355074 |
| NC-006150.CDS217.S1_at   | NC-006150.CDS217 | 4.76  | 4.55  | 0.11 | 0.04 | 1.16  | 0.041022 | 0.1164   | 0.365672 | 0.383671 |
| NC-006150.CDS218.S1_at   | NC-006150.CDS218 | 4.79  | 4.63  | 0.1  | 0.01 | 1.11  | 0.086272 | 0.086115 | 0.453862 | 0.338448 |
| NC-006150.CDS219.S1_at   | NC-006150.CDS219 | 4.13  | 4.33  | 0.08 | 0.16 | -1.15 | 0.529366 | 0.154598 | 0.79827  | 0.429489 |
| NC-006150.CDS220.S1_at   | NC-006150.CDS220 | 4.84  | 4.73  | 0.1  | 0.09 | 1.08  | 0.103099 | 0.112174 | 0.4739   | 0.37752  |
| NC-006150.CDS221.S1_at   | NC-006150.CDS221 | 5     | 4.85  | 0.12 | 0.1  | 1.11  | 0.433885 | 0.509487 | 0.744719 | 0.704232 |
| NC-006150.CDS222.S1_at   | NC-006150.CDS222 | 4.1   | 3.94  | 0.26 | 0.13 | 1.12  | 0.295265 | 0.392588 | 0.651026 | 0.625813 |
| NC-006150.CDS222.S1_s_at | NC-006150.CDS222 | 3.34  | 3.23  | 0.08 | 0.22 | 1.08  | 0.979878 | 0.902658 | 0.993606 | 0.944707 |
| NC-006150.CDS223.S1_at   | NC-006150.CDS223 | 4.62  | 4.37  | 0.3  | 0.14 | 1.2   | 0.417338 | 0.630665 | 0.734845 | 0.782345 |
| NC-001781.CDS1.S1_at     | NC-001781.CDS1   | 3.4   | 3.39  | 0.11 | 0.06 | 1.01  | 0.765098 | 0.182272 | 0.911696 | 0.458766 |
| NC-001781.CDS2.S1_at     | NC-001781.CDS2   | 3.23  | 3.2   | 0.12 | 0.16 | 1.02  | 0.590744 | 0.766563 | 0.833058 | 0.864391 |
| NC-001781.CDS3.S1_at     | NC-001781.CDS3   | 3.63  | 3.34  | 0.14 | 0.06 | 1.22  | 0.033942 | 0.019901 | 0.347468 | 0.177357 |
| NC-001781.CDS4.S1_at     | NC-001781.CDS4   | 4.71  | 4.52  | 0.18 | 0.07 | 1.14  | 0.085844 | 0.100223 | 0.453025 | 0.359205 |
| NC-001781.CDS5.S1_at     | NC-001781.CDS5   | 3.2   | 3.15  | 0.15 | 0.1  | 1.04  | 0.663995 | 0.600488 | 0.867567 | 0.762128 |
| NC-001781.CDS6.S1_at     | NC-001781.CDS6   | 2.47  | 2.62  | 0.08 | 0.08 | -1.11 | 0.431131 | 0.596727 | 0.74323  | 0.759776 |
| NC-001781.CDS7.S1_at     | NC-001781.CDS7   | 4.19  | 4.19  | 0.09 | 0.11 | -1    | 0.510033 | 0.929503 | 0.787923 | 0.959749 |
| NC-001781.CDS8.S1_at     | NC-001781.CDS8   | 3.58  | 3.57  | 0.13 | 0    | 1.01  | 0.880593 | 0.53312  | 0.958682 | 0.719436 |
| NC-001781.CDS9.S1_at     | NC-001781.CDS9   | 3.72  | 3.63  | 0.19 | 0.12 | 1.07  | 0.234747 | 0.366897 | 0.602111 | 0.606566 |
| NC-001781.CDS10.S1_at    | NC-001781.CDS10  | 2.65  | 2.66  | 0.1  | 0.05 | -1    | 0.719318 | 0.655444 | 0.890921 | 0.798546 |
| NC-001781.CDS11.S1_at    | NC-001781.CDS11  | 2.65  | 2.69  | 0.11 | 0.12 | -1.02 | 0.939696 | 0.229353 | 0.979532 | 0.501527 |
| NC-004148.CDS1.S1_at     | NC-004148.CDS1   | 4.7   | 4.52  | 0.06 | 0.12 | 1.13  | 0.031035 | 0.116688 | 0.339397 | 0.383864 |
| NC-004148.CDS2.S1_at     | NC-004148.CDS2   | 2.95  | 2.84  | 0.1  | 0.03 | 1.08  | 0.327948 | 0.408342 | 0.675483 | 0.635622 |
| NC-004148.CDS3.S1_at     | NC-004148.CDS3   | 3.51  | 3.45  | 0.09 | 0.04 | 1.04  | 0.268559 | 0.334539 | 0.628857 | 0.582504 |
| NC-004148.CDS4.S1_at     | NC-004148.CDS4   | 4.58  | 4.61  | 0.1  | 0.18 | -1.02 | 0.317136 | 0.420582 | 0.666951 | 0.644279 |
| NC-004148.CDS5.S1_at     | NC-004148.CDS5   | 4.28  | 4.12  | 0.19 | 0.09 | 1.12  | 0.156234 | 0.300932 | 0.529536 | 0.559178 |
| NC-004148.CDS6.S1_at     | NC-004148.CDS6   | 3.31  | 3.45  | 0.09 | 0.15 | -1.1  | 0.605819 | 0.492712 | 0.840193 | 0.693724 |
| NC-004148.CDS7.S1_at     | NC-004148.CDS7   | 3.2   | 2.9   | 0.07 | 0.15 | 1.22  | 0.11707  | 0.061455 | 0.490364 | 0.294706 |
| NC-004148.CDS8.S1_at     | NC-004148.CDS8   | 6.37  | 6.22  | 0.28 | 0.05 | 1.11  | 0.267387 | 0.353172 | 0.628121 | 0.596432 |
| NC-004148.CDS9.S1_at     | NC-004148.CDS9   | 3.35  | 3.29  | 0.12 | 0.19 | 1.05  | 0.897804 | 0.983323 | 0.965324 | 0.990726 |
| Mmu.10692.1.A1_at        | Mmu.10692.1      | 12.42 | 12.49 | 0.26 | 0.04 | -1.05 | 0.650047 | 0.552318 | 0.860714 | 0.731658 |
| Mmu.10692.1.S1_at        | Mmu.10692.1      | 12.16 | 12.09 | 0.25 | 0.04 | 1.05  | 0.506891 | 0.40846  | 0.786064 | 0.635694 |
| MmuSTS.1.1.S1_at         | MmuSTS.1.1       | 3.75  | 3.94  | 0.11 | 0.02 | -1.14 | 0.041672 | 0.222446 | 0.367007 | 0.495516 |
| MmuSTS.10.1.S1_at        | MmuSTS.10.1      | 9.68  | 9.62  | 0.29 | 0.04 | 1.04  | 0.745421 | 0.067307 | 0.903015 | 0.305414 |
| MmuSTS.100.1.S1_at       | MmuSTS.100.1     | 4.24  | 4.23  | 0.09 | 0.05 | 1.01  | 0.293935 | 0.437316 | 0.650244 | 0.656613 |
| MmuSTS.1000.1.S1_at      | MmuSTS.1000.1    | 10.84 | 10.97 | 0.29 | 0.09 | -1.09 | 0.703798 | 0.877062 | 0.884872 | 0.92994  |
| MmuSTS.1001.1.S1_at      | MmuSTS.1001.1    | 11.85 | 11.86 | 0.03 | 0.04 | -1    | 0.417664 | 0.86637  | 0.735015 | 0.923996 |
| MmuSTS.1002.1.S1_at      | MmuSTS.1002.1    | 13.02 | 12.87 | 0.12 | 0.03 | 1.11  | 0.030928 | 0.042488 | 0.339277 | 0.25075  |
| MmuSTS.1003.1.S1_at      | MmuSTS.1003.1    | 9.79  | 9.95  | 0.34 | 0.11 | -1.12 | 0.225265 | 0.309236 | 0.594525 | 0.564807 |
| MmuSTS.1004.1.S1_at      | MmuSTS.1004.1    | 3.72  | 3.86  | 0.13 | 0.05 | -1.1  | 0.119174 | 0.165169 | 0.492582 | 0.441389 |
| MmuSTS.1005.1.S1_at      | MmuSTS.1005.1    | 4.66  | 5.01  | 0.32 | 0.08 | -1.28 | 0.431092 | 0.689041 | 0.74323  | 0.81851  |

|                       |               |       |       |      |      |       |          |          |          |          |
|-----------------------|---------------|-------|-------|------|------|-------|----------|----------|----------|----------|
| MmuSTS.1006.1.S1_at   | MmuSTS.1006.1 | 11.57 | 11.37 | 0.15 | 0.11 | 1.16  | 0.153369 | 0.272562 | 0.526445 | 0.537323 |
| MmuSTS.1007.1.S1_at   | MmuSTS.1007.1 | 9.23  | 9.49  | 0.62 | 0.26 | -1.2  | 0.551667 | 0.041645 | 0.81144  | 0.24887  |
| MmuSTS.1008.1.S1_at   | MmuSTS.1008.1 | 5.8   | 5.94  | 0.66 | 0.04 | -1.1  | 0.805066 | 0.920222 | 0.929121 | 0.95511  |
| MmuSTS.1009.1.S1_at   | MmuSTS.1009.1 | 8.91  | 9.16  | 0.19 | 0.03 | -1.19 | 0.112038 | 0.014141 | 0.485123 | 0.15208  |
| MmuSTS.101.1.S1_at    | MmuSTS.101.1  | 8.02  | 7.86  | 1.09 | 0.01 | 1.12  | 0.966984 | 0.968752 | 0.989102 | 0.982788 |
| MmuSTS.1010.1.S1_at   | MmuSTS.1010.1 | 5.18  | 5.53  | 0.14 | 0.07 | -1.27 | 0.019515 | 0.004223 | 0.301474 | 0.091422 |
| MmuSTS.1011.1.S1_at   | MmuSTS.1011.1 | 5.78  | 5.32  | 0.65 | 0.16 | 1.37  | 0.108556 | 0.086558 | 0.480777 | 0.33911  |
| MmuSTS.1012.1.S1_at   | MmuSTS.1012.1 | 10.62 | 9.92  | 0.55 | 0.12 | 1.62  | 0.127456 | 0.088035 | 0.501596 | 0.341547 |
| MmuSTS.1013.1.S1_at   | MmuSTS.1013.1 | 6.42  | 6.25  | 0.84 | 0.27 | 1.13  | 0.727743 | 0.787531 | 0.894825 | 0.877072 |
| MmuSTS.1014.1.S1_at   | MmuSTS.1014.1 | 4.5   | 4.54  | 0.12 | 0.17 | -1.02 | 0.960837 | 0.791298 | 0.987225 | 0.879433 |
| MmuSTS.1015.1.S1_s_at | MmuSTS.1015.1 | 3.05  | 3.1   | 0.05 | 0.07 | -1.04 | 0.578571 | 0.292855 | 0.826218 | 0.552837 |
| MmuSTS.1016.1.S1_at   | MmuSTS.1016.1 | 10.66 | 10.78 | 0.45 | 0.09 | -1.08 | 0.838022 | 0.69784  | 0.941963 | 0.824445 |
| MmuSTS.1017.1.S1_at   | MmuSTS.1017.1 | 12.84 | 12.78 | 0.2  | 0.17 | 1.05  | 0.870957 | 0.905624 | 0.95519  | 0.946574 |
| MmuSTS.1018.1.S1_at   | MmuSTS.1018.1 | 7.26  | 7.8   | 0.11 | 0.16 | -1.46 | 0.01305  | 0.007462 | 0.266282 | 0.115888 |
| MmuSTS.1019.1.S1_s_at | MmuSTS.1019.1 | 3.61  | 3.96  | 0.05 | 0.28 | -1.28 | 0.143974 | 0.135021 | 0.519328 | 0.406995 |
| MmuSTS.102.1.S1_at    | MmuSTS.102.1  | 10.56 | 10.08 | 0.28 | 0.04 | 1.39  | 0.036911 | 0.028551 | 0.356221 | 0.210768 |
| MmuSTS.1020.1.S1_s_at | MmuSTS.1020.1 | 5.86  | 5.6   | 0.12 | 0.14 | 1.2   | 0.030583 | 0.018422 | 0.338095 | 0.170755 |
| MmuSTS.1021.1.S1_at   | MmuSTS.1021.1 | 7.62  | 8.1   | 0.93 | -0.2 | -1.4  | 0.537494 | 0.273031 | 0.802735 | 0.537644 |
| MmuSTS.1022.1.S1_at   | MmuSTS.1022.1 | 6.32  | 6.11  | 0.07 | 0.1  | 1.16  | 0.03473  | 0.060593 | 0.350358 | 0.292774 |
| MmuSTS.1023.1.S1_at   | MmuSTS.1023.1 | 7.45  | 7.62  | 0.63 | 0.35 | -1.12 | 0.672936 | 0.78846  | 0.871072 | 0.877644 |
| MmuSTS.1024.1.S1_at   | MmuSTS.1024.1 | 7.17  | 7.98  | 0.16 | 0.14 | -1.75 | 0.002238 | 0.019839 | 0.174757 | 0.177164 |
| MmuSTS.1025.1.S1_at   | MmuSTS.1025.1 | 9.48  | 9.19  | 0.68 | 0.29 | 1.22  | 0.243929 | 0.132731 | 0.609715 | 0.404544 |
| MmuSTS.1026.1.S1_at   | MmuSTS.1026.1 | 9.14  | 9.21  | 0.78 | 0.15 | -1.06 | 0.863506 | 0.927421 | 0.952018 | 0.958778 |
| MmuSTS.1027.1.S1_at   | MmuSTS.1027.1 | 9.69  | 9.75  | 0.28 | 0.09 | -1.05 | 0.937794 | 0.317006 | 0.979095 | 0.570298 |
| MmuSTS.1028.1.S1_at   | MmuSTS.1028.1 | 8.14  | 7.92  | 1.37 | 0.28 | 1.17  | 0.521228 | 0.013383 | 0.794371 | 0.14827  |
| MmuSTS.1029.1.S1_at   | MmuSTS.1029.1 | 9.53  | 9.76  | 0.29 | 0.12 | -1.17 | 0.337544 | 0.031051 | 0.682433 | 0.218115 |
| MmuSTS.103.1.S1_at    | MmuSTS.103.1  | 7.32  | 8.19  | 0.79 | 0.03 | -1.82 | 0.134459 | 0.034141 | 0.508462 | 0.228692 |
| MmuSTS.1030.1.S1_at   | MmuSTS.1030.1 | 9.13  | 9.55  | 0.39 | 0.14 | -1.34 | 0.089076 | 0.14934  | 0.456902 | 0.423811 |
| MmuSTS.1031.1.S1_at   | MmuSTS.1031.1 | 5.38  | 5.26  | 0.13 | 0.12 | 1.09  | 0.131971 | 0.144849 | 0.506435 | 0.418736 |
| MmuSTS.1032.1.S1_at   | MmuSTS.1032.1 | 7.64  | 8.24  | 0.23 | 0.23 | -1.52 | 0.033058 | 0.140409 | 0.345994 | 0.413589 |
| MmuSTS.1033.1.S1_at   | MmuSTS.1033.1 | 11.04 | 10.77 | 0.25 | 0.08 | 1.21  | 0.135306 | 0.198706 | 0.509424 | 0.473391 |
| MmuSTS.1034.1.S1_at   | MmuSTS.1034.1 | 8.52  | 8.95  | 0.05 | 0.1  | -1.35 | 0.00472  | 0.065241 | 0.201699 | 0.301239 |
| MmuSTS.1035.1.S1_s_at | MmuSTS.1035.1 | 5.77  | 5.22  | 0.44 | 0.18 | 1.47  | 0.1885   | 0.421395 | 0.560489 | 0.644994 |
| MmuSTS.1036.1.S1_at   | MmuSTS.1036.1 | 5.33  | 5.09  | 0.79 | 0.21 | 1.18  | 0.470897 | 0.780565 | 0.766231 | 0.872678 |
| MmuSTS.1037.1.S1_at   | MmuSTS.1037.1 | 9.32  | 9.2   | 0.65 | 0.2  | 1.08  | 0.749482 | 0.473433 | 0.905052 | 0.680697 |
| MmuSTS.1038.1.S1_at   | MmuSTS.1038.1 | 7.91  | 7.83  | 0.16 | 0.06 | 1.06  | 0.810614 | 0.009374 | 0.93135  | 0.127634 |
| MmuSTS.1039.1.S1_at   | MmuSTS.1039.1 | 9.74  | 9.5   | 0.42 | 0.09 | 1.17  | 0.099925 | 0.008664 | 0.470104 | 0.123486 |
| MmuSTS.104.1.S1_at    | MmuSTS.104.1  | 9.73  | 9.8   | 0.28 | 0.07 | -1.05 | 0.302574 | 0.006201 | 0.656525 | 0.106821 |
| MmuSTS.1040.1.S1_at   | MmuSTS.1040.1 | 6.44  | 7.21  | 0.76 | 0.04 | -1.7  | 0.324016 | 0.147711 | 0.672429 | 0.422007 |
| MmuSTS.1041.1.S1_at   | MmuSTS.1041.1 | 9.98  | 9.05  | 0.93 | 0.34 | 1.9   | 0.161054 | 0.013057 | 0.534338 | 0.146997 |
| MmuSTS.1042.1.S1_at   | MmuSTS.1042.1 | 9.96  | 10.19 | 0.21 | 0.1  | -1.17 | 0.09074  | 0.073278 | 0.458873 | 0.316233 |
| MmuSTS.1043.1.S1_at   | MmuSTS.1043.1 | 3.53  | 3.37  | 0.11 | 0.11 | 1.12  | 0.100663 | 0.28711  | 0.471575 | 0.5484   |
| MmuSTS.1044.1.S1_at   | MmuSTS.1044.1 | 6.77  | 6.53  | 0.29 | 0.04 | 1.18  | 0.477278 | 0.697563 | 0.769812 | 0.824244 |

|                       |               |       |       |      |      |       |          |          |          |          |
|-----------------------|---------------|-------|-------|------|------|-------|----------|----------|----------|----------|
| MmuSTS.1045.1.S1_at   | MmuSTS.1045.1 | 5.6   | 5.55  | 0.03 | 0.07 | 1.04  | 0.201188 | 0.102433 | 0.573015 | 0.362627 |
| MmuSTS.1046.1.S1_at   | MmuSTS.1046.1 | 4.62  | 4.55  | 0.09 | 0.08 | 1.05  | 0.15096  | 0.252964 | 0.52444  | 0.521261 |
| MmuSTS.1047.1.S1_at   | MmuSTS.1047.1 | 5.52  | 5.58  | 0.07 | 0.05 | -1.04 | 0.143235 | 0.030833 | 0.518489 | 0.21742  |
| MmuSTS.1048.1.S1_at   | MmuSTS.1048.1 | 11.91 | 12.26 | 0.25 | 0.24 | -1.28 | 0.079434 | 0.156398 | 0.442296 | 0.431702 |
| MmuSTS.1049.1.S1_at   | MmuSTS.1049.1 | 6.31  | 6.21  | 0.06 | 0.06 | 1.07  | 0.112521 | 0.341621 | 0.485852 | 0.587796 |
| MmuSTS.105.1.S1_s_at  | MmuSTS.105.1  | 3.15  | 3.15  | 0.15 | 0.04 | 1     | 0.777157 | 0.747384 | 0.917466 | 0.853149 |
| MmuSTS.1050.1.S1_at   | MmuSTS.1050.1 | 7.58  | 7.44  | 0.1  | 0.19 | 1.1   | 0.363062 | 0.03136  | 0.699794 | 0.219062 |
| MmuSTS.1051.1.S1_at   | MmuSTS.1051.1 | 2.79  | 2.92  | 0.08 | 0.12 | -1.1  | 0.44561  | 0.301295 | 0.752285 | 0.559356 |
| MmuSTS.1052.1.S1_s_at | MmuSTS.1052.1 | 6.42  | 6.33  | 0.13 | 0.01 | 1.06  | 0.107333 | 0.396691 | 0.47976  | 0.628434 |
| MmuSTS.1053.1.S1_at   | MmuSTS.1053.1 | 12.77 | 12.98 | 0.08 | 0    | -1.16 | 0.029367 | 0.011732 | 0.334049 | 0.140259 |
| MmuSTS.1054.1.S1_at   | MmuSTS.1054.1 | 5.38  | 5.78  | 0.37 | 0.13 | -1.32 | 0.667623 | 0.201442 | 0.868644 | 0.475963 |
| MmuSTS.1055.1.S1_at   | MmuSTS.1055.1 | 8.95  | 8.64  | 0.13 | 0.2  | 1.24  | 0.035778 | 0.021412 | 0.353107 | 0.183283 |
| MmuSTS.1056.1.S1_at   | MmuSTS.1056.1 | 10.73 | 10.69 | 0.51 | 0.15 | 1.03  | 0.829747 | 0.450238 | 0.938862 | 0.66558  |
| MmuSTS.1057.1.S1_at   | MmuSTS.1057.1 | 6.99  | 6.79  | 0.12 | 0.18 | 1.15  | 0.481619 | 0.347943 | 0.772225 | 0.592209 |
| MmuSTS.1058.1.S1_at   | MmuSTS.1058.1 | 4.05  | 4.13  | 0.35 | 0.12 | -1.05 | 0.597527 | 0.44647  | 0.836399 | 0.662842 |
| MmuSTS.1059.1.S1_at   | MmuSTS.1059.1 | 9.62  | 9.63  | 0.23 | 0.13 | -1.01 | 0.440349 | 0.084637 | 0.748445 | 0.33618  |
| MmuSTS.106.1.S1_at    | MmuSTS.106.1  | 12.35 | 12.06 | 0.24 | 0.06 | 1.23  | 0.04127  | 0.008927 | 0.365958 | 0.124951 |
| MmuSTS.1060.1.S1_at   | MmuSTS.1060.1 | 8.45  | 7.79  | 0.82 | 0.18 | 1.58  | 0.477856 | 0.587018 | 0.76987  | 0.753952 |
| MmuSTS.1061.1.S1_at   | MmuSTS.1061.1 | 11.36 | 11.31 | 0.11 | 0.06 | 1.03  | 0.526157 | 0.169535 | 0.796453 | 0.446167 |
| MmuSTS.1062.1.S1_at   | MmuSTS.1062.1 | 10.28 | 11.07 | 0.16 | 0.04 | -1.73 | 0.00123  | 0.000136 | 0.156419 | 0.029179 |
| MmuSTS.1063.1.S1_at   | MmuSTS.1063.1 | 13.59 | 13.73 | 0.02 | 0.04 | -1.1  | 0.013119 | 0.045471 | 0.266768 | 0.2575   |
| MmuSTS.1064.1.S1_at   | MmuSTS.1064.1 | 8.93  | 9.12  | 0.56 | 0.08 | -1.14 | 0.593687 | 0.780986 | 0.834382 | 0.872934 |
| MmuSTS.1065.1.S1_at   | MmuSTS.1065.1 | 6.34  | 6.4   | 0.21 | 0.06 | -1.04 | 0.658792 | 0.263511 | 0.86486  | 0.529826 |
| MmuSTS.1066.1.S1_at   | MmuSTS.1066.1 | 4.5   | 4.55  | 0.28 | 0.04 | -1.03 | 0.53088  | 0.696604 | 0.799314 | 0.823774 |
| MmuSTS.1067.1.S1_at   | MmuSTS.1067.1 | 7.64  | 7.64  | 0.67 | 0.01 | 1     | 0.980585 | 0.205259 | 0.993839 | 0.479599 |
| MmuSTS.1068.1.S1_at   | MmuSTS.1068.1 | 9.23  | 9.36  | 0.21 | 0.12 | -1.1  | 0.429279 | 0.671188 | 0.742138 | 0.807707 |
| MmuSTS.1069.1.S1_at   | MmuSTS.1069.1 | 9.22  | 9.61  | 0.18 | 0.04 | -1.31 | 0.016534 | 0.038229 | 0.287478 | 0.240249 |
| MmuSTS.107.1.S1_at    | MmuSTS.107.1  | 9.47  | 9.37  | 1.13 | 0.58 | 1.07  | 0.987208 | 0.489689 | 0.995831 | 0.691862 |
| MmuSTS.1070.1.S1_at   | MmuSTS.1070.1 | 3.36  | 3.35  | 0.12 | 0.03 | 1.01  | 0.581521 | 0.604163 | 0.827691 | 0.764542 |
| MmuSTS.1071.1.S1_at   | MmuSTS.1071.1 | 8.9   | 9.94  | 1.08 | 0.14 | -2.06 | 0.535844 | 0.633055 | 0.801985 | 0.783905 |
| MmuSTS.1072.1.S1_at   | MmuSTS.1072.1 | 6.2   | 5.88  | 0.23 | 0.23 | 1.25  | 0.304367 | 0.227161 | 0.657995 | 0.499517 |
| MmuSTS.1073.1.S1_at   | MmuSTS.1073.1 | 7.12  | 7.57  | 0.68 | 0.15 | -1.37 | 0.754167 | 0.593921 | 0.907331 | 0.758442 |
| MmuSTS.1074.1.S1_at   | MmuSTS.1074.1 | 6.48  | 6.35  | 0.1  | 0.06 | 1.1   | 0.18132  | 0.41685  | 0.554512 | 0.641776 |
| MmuSTS.1075.1.S1_at   | MmuSTS.1075.1 | 11.5  | 11.47 | 0.34 | 0.19 | 1.02  | 0.511201 | 0.703738 | 0.78856  | 0.828214 |
| MmuSTS.1076.1.S1_at   | MmuSTS.1076.1 | 6.71  | 7.03  | 0.48 | 0.33 | -1.26 | 0.891938 | 0.071351 | 0.96296  | 0.313391 |
| MmuSTS.1077.1.S1_at   | MmuSTS.1077.1 | 5.61  | 6.12  | 0.63 | 0.52 | -1.42 | 0.298963 | 0.168104 | 0.653465 | 0.444698 |
| MmuSTS.1078.1.S1_at   | MmuSTS.1078.1 | 5.95  | 6.33  | 0.12 | 0.16 | -1.31 | 0.080964 | 0.068645 | 0.445056 | 0.308548 |
| MmuSTS.1079.1.S1_at   | MmuSTS.1079.1 | 10.21 | 10.61 | 0.65 | 0.06 | -1.32 | 0.322599 | 0.390085 | 0.671289 | 0.624002 |
| MmuSTS.108.1.S1_at    | MmuSTS.108.1  | 8.85  | 8.72  | 0.25 | 0.03 | 1.1   | 0.811618 | 0.736579 | 0.931835 | 0.847627 |
| MmuSTS.1080.1.S1_at   | MmuSTS.1080.1 | 6.65  | 6.67  | 0.16 | 0.11 | -1.02 | 0.319854 | 0.568162 | 0.669028 | 0.741859 |
| MmuSTS.1081.1.S1_at   | MmuSTS.1081.1 | 7.4   | 6.96  | 1.03 | 0.4  | 1.36  | 0.433217 | 0.140125 | 0.744296 | 0.413394 |
| MmuSTS.1082.1.S1_at   | MmuSTS.1082.1 | 5.08  | 5.13  | 0.02 | 0.11 | -1.03 | 0.586241 | 0.484082 | 0.831211 | 0.688318 |
| MmuSTS.1083.1.S1_at   | MmuSTS.1083.1 | 3.66  | 3.76  | 0.05 | 0.1  | -1.07 | 0.154712 | 0.493724 | 0.527946 | 0.694316 |

|                       |               |       |       |      |      |       |          |          |          |          |
|-----------------------|---------------|-------|-------|------|------|-------|----------|----------|----------|----------|
| MmuSTS.1084.1.S1_at   | MmuSTS.1084.1 | 5.34  | 5.08  | 0.12 | 0.26 | 1.19  | 0.246481 | 0.470277 | 0.611952 | 0.678582 |
| MmuSTS.1085.1.S1_at   | MmuSTS.1085.1 | 6.77  | 6.65  | 0.17 | 0.08 | 1.09  | 0.789288 | 0.427288 | 0.922523 | 0.649175 |
| MmuSTS.1086.1.S1_at   | MmuSTS.1086.1 | 10.47 | 10.32 | 0.19 | 0.1  | 1.1   | 0.215297 | 0.045547 | 0.585748 | 0.257596 |
| MmuSTS.1087.1.S1_at   | MmuSTS.1087.1 | 9.27  | 9.67  | 0.26 | 0.1  | -1.32 | 0.074067 | 0.005385 | 0.434845 | 0.101199 |
| MmuSTS.1088.1.S1_at   | MmuSTS.1088.1 | 8.44  | 8.37  | 0.41 | 0.1  | 1.05  | 0.537974 | 0.00382  | 0.802959 | 0.08794  |
| MmuSTS.1089.1.S1_at   | MmuSTS.1089.1 | 11.28 | 12.31 | 1.07 | 0.08 | -2.04 | 0.141396 | 0.081515 | 0.516365 | 0.329764 |
| MmuSTS.109.1.S1_at    | MmuSTS.109.1  | 11.21 | 10.37 | 0.99 | 0.43 | 1.8   | 0.267317 | 0.027043 | 0.628089 | 0.205639 |
| MmuSTS.1090.1.S1_at   | MmuSTS.1090.1 | 4.96  | 4.97  | 0.45 | 0.63 | -1.01 | 0.540332 | 0.574895 | 0.804343 | 0.746177 |
| MmuSTS.1091.1.S1_at   | MmuSTS.1091.1 | 7.31  | 7.61  | 0.16 | 0.07 | -1.23 | 0.041217 | 0.054713 | 0.365734 | 0.279379 |
| MmuSTS.1092.1.S1_at   | MmuSTS.1092.1 | 5.72  | 5.55  | 0.15 | 0.21 | 1.13  | 0.113733 | 0.112463 | 0.487196 | 0.377793 |
| MmuSTS.1093.1.S1_at   | MmuSTS.1093.1 | 13    | 12.46 | 0.3  | 0.15 | -1.45 | 0.037041 | 0.042665 | 0.356628 | 0.251037 |
| MmuSTS.1094.1.S1_at   | MmuSTS.1094.1 | 10.57 | 10.14 | 0.28 | 0.12 | 1.35  | 0.046832 | 0.049175 | 0.378847 | 0.266577 |
| MmuSTS.1095.1.S1_at   | MmuSTS.1095.1 | 10.59 | 10.27 | 1.26 | 0.1  | 1.25  | 0.773464 | 0.081132 | 0.915801 | 0.32931  |
| MmuSTS.1096.1.S1_at   | MmuSTS.1096.1 | 6.57  | 6.82  | 0.11 | 0.17 | -1.19 | 0.30381  | 0.036721 | 0.657614 | 0.236221 |
| MmuSTS.1097.1.S1_at   | MmuSTS.1097.1 | 6.44  | 4.24  | 1.61 | 0.57 | 4.6   | 0.130149 | 0.078022 | 0.504663 | 0.324416 |
| MmuSTS.1098.1.S1_at   | MmuSTS.1098.1 | 10.8  | 10.4  | 0.28 | 0.22 | 1.32  | 0.063527 | 0.029238 | 0.415717 | 0.212898 |
| MmuSTS.1099.1.S1_at   | MmuSTS.1099.1 | 8.57  | 9.01  | 0.18 | 0.13 | -1.35 | 0.044452 | 0.001635 | 0.374916 | 0.061167 |
| MmuSTS.11.1.S1_at     | MmuSTS.11.1   | 6.18  | 6.13  | 0.05 | 0.06 | 1.03  | 0.605832 | 0.117052 | 0.840193 | 0.384489 |
| MmuSTS.110.1.S1_at    | MmuSTS.110.1  | 9.81  | 9.26  | 0.12 | 0.19 | 1.46  | 0.009306 | 0.004981 | 0.241866 | 0.098393 |
| MmuSTS.1100.1.S1_at   | MmuSTS.1100.1 | 8.69  | 9     | 0.23 | 0.06 | -1.24 | 0.106157 | 0.014144 | 0.478418 | 0.15208  |
| MmuSTS.1101.1.S1_at   | MmuSTS.1101.1 | 7.19  | 7.67  | 0.31 | 0.07 | -1.4  | 0.211164 | 0.078411 | 0.582141 | 0.325189 |
| MmuSTS.1102.1.S1_at   | MmuSTS.1102.1 | 8.07  | 8.61  | 0.26 | 0.23 | -1.46 | 0.042243 | 0.029304 | 0.368818 | 0.21321  |
| MmuSTS.1103.1.S1_at   | MmuSTS.1103.1 | 10.36 | 10.31 | 0.09 | 0.1  | 1.03  | 0.799465 | 0.747121 | 0.926551 | 0.853124 |
| MmuSTS.1104.1.S1_at   | MmuSTS.1104.1 | 6.9   | 6.71  | 0.48 | 0.1  | 1.14  | 0.545339 | 0.60354  | 0.807751 | 0.764201 |
| MmuSTS.1105.1.S1_at   | MmuSTS.1105.1 | 4.07  | 3.87  | 0.14 | 0.17 | 1.15  | 0.142081 | 0.080715 | 0.517046 | 0.328583 |
| MmuSTS.1106.1.S1_at   | MmuSTS.1106.1 | 10.6  | 10.74 | 1.44 | 0.14 | -1.1  | 0.858192 | 0.613969 | 0.949904 | 0.77098  |
| MmuSTS.1107.1.S1_at   | MmuSTS.1107.1 | 10.66 | 10.66 | 0.25 | 0.01 | 1     | 0.392109 | 0.584387 | 0.718056 | 0.75242  |
| MmuSTS.1108.1.S1_at   | MmuSTS.1108.1 | 3.61  | 3.6   | 0.13 | 0.05 | 1     | 0.963644 | 0.374357 | 0.988152 | 0.61282  |
| MmuSTS.1109.1.S1_at   | MmuSTS.1109.1 | 9.96  | 9.37  | 0.06 | 0.31 | 1.51  | 0.017205 | 0.0299   | 0.289858 | 0.214615 |
| MmuSTS.111.1.S1_at    | MmuSTS.111.1  | 4.16  | 4.15  | 0.03 | 0.23 | 1.01  | 0.797138 | 0.90245  | 0.925393 | 0.944564 |
| MmuSTS.1110.1.S1_at   | MmuSTS.1110.1 | 4.29  | 3.98  | 0.23 | 0.03 | 1.25  | 0.128099 | 0.096442 | 0.502558 | 0.35409  |
| MmuSTS.1111.1.S1_at   | MmuSTS.1111.1 | 4.09  | 3.96  | 0.28 | 0.07 | 1.09  | 0.265967 | 0.518601 | 0.627047 | 0.710549 |
| MmuSTS.1112.1.S1_at   | MmuSTS.1112.1 | 6.93  | 7.01  | 0.09 | 0.38 | -1.06 | 0.753802 | 0.093855 | 0.907201 | 0.350298 |
| MmuSTS.1113.1.S1_at   | MmuSTS.1113.1 | 9.4   | 9.69  | 0.69 | 0.19 | -1.23 | 0.5867   | 0.543531 | 0.831415 | 0.726187 |
| MmuSTS.1114.1.S1_at   | MmuSTS.1114.1 | 6.34  | 6.44  | 0.12 | 0.21 | -1.07 | 0.108619 | 0.220968 | 0.480791 | 0.494389 |
| MmuSTS.1115.1.S1_at   | MmuSTS.1115.1 | 4.16  | 3.18  | 0.56 | 0.13 | 1.98  | 0.117764 | 0.06104  | 0.491055 | 0.29389  |
| MmuSTS.1116.1.S1_at   | MmuSTS.1116.1 | 9.76  | 9.11  | 1.82 | 0.22 | 1.57  | 0.694658 | 0.625226 | 0.881132 | 0.779064 |
| MmuSTS.1117.1.S1_at   | MmuSTS.1117.1 | 9.18  | 9.43  | 0.34 | 0.16 | -1.19 | 0.820182 | 0.381332 | 0.935286 | 0.617657 |
| MmuSTS.1118.1.S1_at   | MmuSTS.1118.1 | 7.08  | 7.08  | 0.22 | 0.02 | 1     | 0.955737 | 0.258242 | 0.985346 | 0.52558  |
| MmuSTS.1119.1.S1_at   | MmuSTS.1119.1 | 11.48 | 11.35 | 0.59 | 0.08 | 1.09  | 0.711926 | 0.579296 | 0.887745 | 0.74904  |
| MmuSTS.112.1.S1_at    | MmuSTS.112.1  | 6.71  | 7.11  | 0.43 | 0.22 | -1.32 | 0.188571 | 0.001844 | 0.560489 | 0.064452 |
| MmuSTS.1120.1.S1_s_at | MmuSTS.1120.1 | 7.59  | 7.59  | 1.16 | 0.08 | 1     | 0.97527  | 0.544276 | 0.991912 | 0.726717 |
| MmuSTS.1121.1.S1_at   | MmuSTS.1121.1 | 6.82  | 7.86  | 0.19 | 0.2  | -2.06 | 0.001903 | 0.000185 | 0.16995  | 0.030511 |



|                       |               |       |       |      |      |       |          |          |          |          |
|-----------------------|---------------|-------|-------|------|------|-------|----------|----------|----------|----------|
| MmuSTS.1122.1.S1_at   | MmuSTS.1122.1 | 4.03  | 3.99  | 0.1  | 0.05 | 1.02  | 0.337899 | 0.687142 | 0.682728 | 0.817466 |
| MmuSTS.1123.1.S1_at   | MmuSTS.1123.1 | 11.65 | 11.65 | 0.16 | 0.04 | -1    | 0.836286 | 0.906073 | 0.941202 | 0.946856 |
| MmuSTS.1124.1.S1_at   | MmuSTS.1124.1 | 9     | 9.17  | 0.12 | 0.08 | -1.12 | 0.613577 | 0.001585 | 0.843587 | 0.060358 |
| MmuSTS.1125.1.S1_at   | MmuSTS.1125.1 | 11.72 | 12    | 0.55 | 0.05 | -1.21 | 0.499718 | 0.0963   | 0.782208 | 0.353755 |
| MmuSTS.1126.1.S1_at   | MmuSTS.1126.1 | 3.19  | 2.88  | 0.18 | 0.1  | 1.23  | 0.287514 | 0.38392  | 0.644595 | 0.61978  |
| MmuSTS.1127.1.S1_at   | MmuSTS.1127.1 | 7.4   | 7.89  | 1.85 | 0.49 | -1.41 | 0.719018 | 0.105676 | 0.890852 | 0.367779 |
| MmuSTS.1128.1.S1_at   | MmuSTS.1128.1 | 4.81  | 4.74  | 0.31 | 0.11 | 1.04  | 0.811895 | 0.372985 | 0.931988 | 0.611823 |
| MmuSTS.1129.1.S1_at   | MmuSTS.1129.1 | 5.91  | 5.9   | 0.06 | 0.03 | 1.01  | 0.445473 | 0.71806  | 0.752226 | 0.836848 |
| MmuSTS.113.1.S1_at    | MmuSTS.113.1  | 7.29  | 7.47  | 0.14 | 0.02 | -1.14 | 0.076975 | 0.685435 | 0.438889 | 0.81652  |
| MmuSTS.1130.1.S1_at   | MmuSTS.1130.1 | 6.48  | 6.59  | 0.76 | 0.06 | -1.08 | 0.833938 | 0.375887 | 0.94048  | 0.613746 |
| MmuSTS.1131.1.S1_at   | MmuSTS.1131.1 | 5.38  | 5.84  | 0.82 | 0.43 | -1.38 | 0.85715  | 0.338851 | 0.94963  | 0.585891 |
| MmuSTS.1132.1.S1_s_at | MmuSTS.1132.1 | 3.56  | 3.46  | 0.22 | 0.03 | 1.07  | 0.264778 | 0.348449 | 0.626175 | 0.592593 |
| MmuSTS.1133.1.S1_at   | MmuSTS.1133.1 | 8.3   | 7.88  | 0.54 | 0.33 | 1.34  | 0.121035 | 0.010583 | 0.494696 | 0.134213 |
| MmuSTS.1134.1.S1_at   | MmuSTS.1134.1 | 10.77 | 10.82 | 0.02 | 0.08 | -1.04 | 0.161427 | 0.265705 | 0.534763 | 0.531561 |
| MmuSTS.1135.1.S1_at   | MmuSTS.1135.1 | 9.85  | 9.66  | 0.26 | 0.1  | 1.14  | 0.218804 | 0.110662 | 0.588341 | 0.374854 |
| MmuSTS.1136.1.S1_at   | MmuSTS.1136.1 | 9.13  | 9.53  | 3.05 | 0.4  | -1.33 | 0.486176 | 0.244896 | 0.774427 | 0.514728 |
| MmuSTS.1137.1.S1_at   | MmuSTS.1137.1 | 10.73 | 10.82 | 0.19 | 0.06 | -1.06 | 0.925978 | 0.037198 | 0.975372 | 0.237285 |
| MmuSTS.1138.1.S1_at   | MmuSTS.1138.1 | 5.75  | 5.59  | 0.24 | 0.03 | 1.12  | 0.405837 | 0.380717 | 0.727533 | 0.61738  |
| MmuSTS.1139.1.S1_at   | MmuSTS.1139.1 | 6.82  | 7.29  | 0.05 | 0.08 | -1.39 | 0.000993 | 0.118401 | 0.155374 | 0.3864   |
| MmuSTS.114.1.S1_at    | MmuSTS.114.1  | 10.59 | 11.02 | 0.78 | 0.16 | -1.34 | 0.387266 | 0.048386 | 0.714159 | 0.265126 |
| MmuSTS.1140.1.S1_at   | MmuSTS.1140.1 | 4.87  | 4.58  | 0.18 | 0.08 | 1.22  | 0.227887 | 0.250258 | 0.596693 | 0.519282 |
| MmuSTS.1141.1.S1_at   | MmuSTS.1141.1 | 4.35  | 4.33  | 0.08 | 0.09 | 1.01  | 0.878279 | 0.647539 | 0.957601 | 0.793531 |
| MmuSTS.1142.1.S1_at   | MmuSTS.1142.1 | 9.66  | 10.35 | 0.3  | 0.06 | -1.62 | 0.028872 | 0.081282 | 0.333062 | 0.329351 |
| MmuSTS.1143.1.S1_at   | MmuSTS.1143.1 | 5.93  | 5.26  | 0.36 | 0.09 | 1.6   | 0.022035 | 0.049528 | 0.309781 | 0.267481 |
| MmuSTS.1144.1.S1_at   | MmuSTS.1144.1 | 8.37  | 7.63  | 0.72 | 0.06 | 1.67  | 0.161999 | 0.015072 | 0.535244 | 0.1559   |
| MmuSTS.1145.1.S1_at   | MmuSTS.1145.1 | 11.59 | 11.37 | 0.31 | 0.04 | 1.16  | 0.285926 | 0.042685 | 0.643508 | 0.251049 |
| MmuSTS.1146.1.S1_at   | MmuSTS.1146.1 | 6.91  | 7.15  | 0.51 | 0.03 | -1.18 | 0.848663 | 0.726761 | 0.946817 | 0.841963 |
| MmuSTS.1147.1.S1_at   | MmuSTS.1147.1 | 5.52  | 5.39  | 0.06 | 0.18 | 1.09  | 0.833759 | 0.169323 | 0.940402 | 0.445925 |
| MmuSTS.1148.1.S1_at   | MmuSTS.1148.1 | 8.82  | 8.68  | 0.11 | 0.1  | 1.1   | 0.188571 | 0.000137 | 0.560489 | 0.029184 |
| MmuSTS.1149.1.S1_at   | MmuSTS.1149.1 | 9.61  | 9.48  | 0.14 | 0.1  | 1.09  | 0.506912 | 0.25177  | 0.786064 | 0.520444 |
| MmuSTS.115.1.S1_s_at  | MmuSTS.115.1  | 10.64 | 10.2  | 0.33 | 0.35 | 1.35  | 0.534918 | 0.053251 | 0.801404 | 0.276449 |
| MmuSTS.1150.1.S1_at   | MmuSTS.1150.1 | 7     | 7.9   | 0.74 | 0.12 | -1.86 | 0.10977  | 0.014095 | 0.482607 | 0.15195  |
| MmuSTS.1151.1.S1_at   | MmuSTS.1151.1 | 7.02  | 7.25  | 0.08 | 0.13 | -1.17 | 0.038813 | 0.008902 | 0.36035  | 0.124825 |
| MmuSTS.1152.1.S1_at   | MmuSTS.1152.1 | 11.61 | 11.5  | 0.18 | 0.13 | 1.08  | 0.123325 | 0.366768 | 0.496589 | 0.6065   |
| MmuSTS.1153.1.S1_at   | MmuSTS.1153.1 | 4.04  | 4.42  | 0.12 | 0.15 | -1.3  | 0.029311 | 0.006011 | 0.334049 | 0.106068 |
| MmuSTS.1154.1.S1_at   | MmuSTS.1154.1 | 5.15  | 5.11  | 0.21 | 0.16 | 1.03  | 0.863375 | 0.97591  | 0.952018 | 0.986856 |
| MmuSTS.1155.1.S1_at   | MmuSTS.1155.1 | 4.15  | 3.89  | 0.32 | 0.32 | 1.19  | 0.15833  | 0.286079 | 0.531334 | 0.547578 |
| MmuSTS.1156.1.S1_at   | MmuSTS.1156.1 | 4.89  | 5.41  | 0.52 | 0.16 | -1.44 | 0.406918 | 0.606246 | 0.728395 | 0.765727 |
| MmuSTS.1157.1.S1_at   | MmuSTS.1157.1 | 4.65  | 4.68  | 0.11 | 0.16 | -1.02 | 0.458065 | 0.207581 | 0.758638 | 0.481898 |
| MmuSTS.1158.1.S1_at   | MmuSTS.1158.1 | 10.69 | 10.68 | 0.11 | 0.08 | 1.01  | 0.718047 | 0.328972 | 0.890613 | 0.578482 |
| MmuSTS.1159.1.S1_at   | MmuSTS.1159.1 | 5.65  | 5.76  | 0.21 | 0.06 | -1.08 | 0.353387 | 0.232063 | 0.693234 | 0.503781 |
| MmuSTS.116.1.S1_at    | MmuSTS.116.1  | 10.17 | 10.58 | 0.07 | 0.08 | -1.32 | 0.003148 | 0.001792 | 0.191107 | 0.063581 |
| MmuSTS.1160.1.S1_at   | MmuSTS.1160.1 | 8.58  | 9.27  | 0.26 | 0.05 | -1.62 | 0.01038  | 0.004951 | 0.247292 | 0.098015 |

|                       |               |       |       |      |      |       |          |          |          |          |
|-----------------------|---------------|-------|-------|------|------|-------|----------|----------|----------|----------|
| MmuSTS.1161.1.S1_at   | MmuSTS.1161.1 | 10.5  | 10.93 | 0.87 | 0.05 | -1.35 | 0.381591 | 0.221732 | 0.710135 | 0.494901 |
| MmuSTS.1162.1.S1_at   | MmuSTS.1162.1 | 11.57 | 12.19 | 0.39 | 0.11 | -1.54 | 0.074784 | 0.034691 | 0.435313 | 0.230454 |
| MmuSTS.1163.1.S1_at   | MmuSTS.1163.1 | 5.02  | 5.02  | 0.27 | 0.01 | -1    | 0.790704 | 0.248698 | 0.922991 | 0.517917 |
| MmuSTS.1164.1.S1_at   | MmuSTS.1164.1 | 9.91  | 9.46  | 0.61 | 0.41 | 1.37  | 0.075423 | 0.004991 | 0.436562 | 0.098466 |
| MmuSTS.1165.1.S1_at   | MmuSTS.1165.1 | 8.43  | 8.64  | 0.23 | 0.18 | -1.16 | 0.425593 | 0.323178 | 0.740112 | 0.574396 |
| MmuSTS.1166.1.S1_at   | MmuSTS.1166.1 | 4.27  | 4.45  | 0.11 | 0.14 | -1.13 | 0.134546 | 0.095716 | 0.508462 | 0.352735 |
| MmuSTS.1167.1.S1_at   | MmuSTS.1167.1 | 6.43  | 6.18  | 0.22 | 0.37 | 1.19  | 0.753609 | 0.699898 | 0.907114 | 0.825803 |
| MmuSTS.1168.1.S1_at   | MmuSTS.1168.1 | 8.54  | 8.46  | 1.34 | 0.15 | 1.05  | 0.983367 | 0.127251 | 0.994928 | 0.397935 |
| MmuSTS.1169.1.S1_at   | MmuSTS.1169.1 | 7.6   | 7.71  | 0.34 | 0.01 | -1.08 | 0.984228 | 0.980124 | 0.995199 | 0.989236 |
| MmuSTS.117.1.S1_at    | MmuSTS.117.1  | 8.96  | 9.13  | 0.24 | 0.03 | -1.12 | 0.108156 | 0.125834 | 0.480558 | 0.396315 |
| MmuSTS.1170.1.S1_at   | MmuSTS.1170.1 | 6.68  | 6.62  | 0.29 | 0.12 | -1.05 | 0.34478  | 0.176426 | 0.687051 | 0.45282  |
| MmuSTS.1171.1.S1_at   | MmuSTS.1171.1 | 4.7   | 4.69  | 0.49 | 0.05 | 1.01  | 0.893189 | 0.717952 | 0.963441 | 0.836759 |
| MmuSTS.1172.1.S1_at   | MmuSTS.1172.1 | 12.5  | 12.45 | 0.23 | 0.03 | 1.04  | 0.93317  | 0.247031 | 0.977317 | 0.516238 |
| MmuSTS.1173.1.S1_at   | MmuSTS.1173.1 | 8.33  | 8.76  | 0.42 | 0.14 | -1.35 | 0.057469 | 0.029109 | 0.40213  | 0.212733 |
| MmuSTS.1174.1.S1_at   | MmuSTS.1174.1 | 12.22 | 12.07 | 0.18 | 0.16 | 1.1   | 0.075597 | 0.021881 | 0.436722 | 0.185137 |
| MmuSTS.1175.1.S1_at   | MmuSTS.1175.1 | 3.38  | 3.39  | 0.05 | 0.11 | -1.01 | 0.853114 | 0.826821 | 0.948233 | 0.900529 |
| MmuSTS.1176.1.S1_at   | MmuSTS.1176.1 | 5.5   | 5.28  | 0.19 | 0.07 | 1.16  | 0.370728 | 0.530191 | 0.704995 | 0.717779 |
| MmuSTS.1177.1.S1_at   | MmuSTS.1177.1 | 3.75  | 3.7   | 0.03 | 0.14 | 1.04  | 0.297726 | 0.58357  | 0.652791 | 0.751826 |
| MmuSTS.1178.1.S1_at   | MmuSTS.1178.1 | 4.37  | 4.37  | 0.05 | 0.01 | -1    | 0.99235  | 0.690415 | 0.997028 | 0.81956  |
| MmuSTS.1179.1.S1_s_at | MmuSTS.1179.1 | 2.92  | 2.91  | 0.05 | 0.05 | 1.01  | 0.695441 | 0.782524 | 0.881578 | 0.874147 |
| MmuSTS.118.1.S1_at    | MmuSTS.118.1  | 10.37 | 10.6  | 0.67 | 0.3  | -1.17 | 0.666467 | 0.187495 | 0.868243 | 0.463586 |
| MmuSTS.1180.1.S1_at   | MmuSTS.1180.1 | 10.72 | 11.05 | 0.16 | 0.06 | -1.26 | 0.077515 | 0.167375 | 0.439588 | 0.443785 |
| MmuSTS.1181.1.S1_at   | MmuSTS.1181.1 | 8.21  | 8.58  | 0.1  | 0.09 | -1.3  | 0.008382 | 0.003616 | 0.233808 | 0.086033 |
| MmuSTS.1182.1.S1_at   | MmuSTS.1182.1 | 10.32 | 10.42 | 0.01 | 0.04 | -1.07 | 0.024126 | 0.861946 | 0.317812 | 0.921546 |
| MmuSTS.1183.1.S1_at   | MmuSTS.1183.1 | 10.65 | 10.19 | 1.33 | 0.4  | 1.37  | 0.730387 | 0.05258  | 0.896159 | 0.274848 |
| MmuSTS.1184.1.S1_at   | MmuSTS.1184.1 | 8.63  | 9.64  | 1.21 | 0.07 | -2.01 | 0.242343 | 0.314703 | 0.608517 | 0.568449 |
| MmuSTS.1185.1.S1_at   | MmuSTS.1185.1 | 8.56  | 8.69  | 1.2  | 0.22 | -1.1  | 0.809445 | 0.297264 | 0.93104  | 0.556067 |
| MmuSTS.1186.1.S1_at   | MmuSTS.1186.1 | 10.41 | 10.51 | 0.64 | 0.08 | -1.07 | 0.84446  | 0.390074 | 0.945337 | 0.624002 |
| MmuSTS.1187.1.S1_at   | MmuSTS.1187.1 | 8.24  | 7.32  | 0.64 | 0.45 | 1.9   | 0.206981 | 0.491481 | 0.578774 | 0.693004 |
| MmuSTS.1188.1.S1_at   | MmuSTS.1188.1 | 10.58 | 9.61  | 0.29 | 0.22 | 1.96  | 0.00919  | 0.001368 | 0.241866 | 0.056902 |
| MmuSTS.1189.1.S1_at   | MmuSTS.1189.1 | 7.57  | 6.75  | 0.43 | 0.16 | 1.76  | 0.046663 | 0.176466 | 0.378405 | 0.452836 |
| MmuSTS.119.1.S1_at    | MmuSTS.119.1  | 10.38 | 10.42 | 0.05 | 0.04 | -1.03 | 0.166834 | 0.03027  | 0.539457 | 0.215828 |
| MmuSTS.1190.1.S1_at   | MmuSTS.1190.1 | 8.25  | 8.5   | 0.56 | 0.03 | -1.19 | 0.82819  | 0.79729  | 0.938215 | 0.883122 |
| MmuSTS.1191.1.S1_at   | MmuSTS.1191.1 | 7.51  | 7.78  | 0.3  | 0.26 | -1.21 | 0.44682  | 0.059837 | 0.752889 | 0.291286 |
| MmuSTS.1192.1.S1_at   | MmuSTS.1192.1 | 10.39 | 10.61 | 0.88 | 0.05 | -1.16 | 0.72458  | 0.891699 | 0.89318  | 0.938272 |
| MmuSTS.1193.1.S1_at   | MmuSTS.1193.1 | 12.77 | 12.23 | 0.25 | 0.21 | 1.45  | 0.042742 | 0.076876 | 0.370345 | 0.322368 |
| MmuSTS.1194.1.S1_at   | MmuSTS.1194.1 | 9.64  | 9.02  | 0.06 | 0.04 | 1.54  | 0.000112 | 0.000132 | 0.108151 | 0.029087 |
| MmuSTS.1195.1.S1_at   | MmuSTS.1195.1 | 5.19  | 5.11  | 0.31 | 0.21 | 1.06  | 0.389106 | 0.407551 | 0.715919 | 0.63505  |
| MmuSTS.1196.1.S1_at   | MmuSTS.1196.1 | 4.74  | 4.15  | 0.59 | 0.05 | 1.51  | 0.169707 | 0.127203 | 0.542712 | 0.397935 |
| MmuSTS.1197.1.S1_s_at | MmuSTS.1197.1 | 4.46  | 4.42  | 0.04 | 0.04 | 1.03  | 0.313656 | 0.353454 | 0.664799 | 0.596547 |
| MmuSTS.1198.1.S1_at   | MmuSTS.1198.1 | 6.11  | 6.05  | 0.03 | 0.13 | 1.04  | 0.401657 | 0.701435 | 0.724554 | 0.826841 |
| MmuSTS.1199.1.S1_at   | MmuSTS.1199.1 | 3.3   | 3.22  | 0.16 | 0.06 | 1.06  | 0.147068 | 0.127125 | 0.521545 | 0.397922 |
| MmuSTS.12.1.S1_at     | MmuSTS.12.1   | 7.2   | 7.15  | 0.19 | 0.17 | 1.03  | 0.332198 | 0.545343 | 0.678721 | 0.727505 |

|                     |               |       |       |      |      |       |          |          |          |          |
|---------------------|---------------|-------|-------|------|------|-------|----------|----------|----------|----------|
| MmuSTS.120.1.S1_at  | MmuSTS.120.1  | 6.91  | 7.53  | 0.5  | 0.05 | -1.53 | 0.321945 | 0.428062 | 0.67054  | 0.649619 |
| MmuSTS.1200.1.S1_at | MmuSTS.1200.1 | 8.54  | 8.75  | 1.41 | 0.25 | -1.16 | 0.841738 | 0.096812 | 0.943905 | 0.354207 |
| MmuSTS.1201.1.S1_at | MmuSTS.1201.1 | 9.03  | 9.21  | 0.27 | 0.03 | -1.13 | 0.141696 | 0.002974 | 0.516602 | 0.079958 |
| MmuSTS.1202.1.S1_at | MmuSTS.1202.1 | 7.6   | 7.98  | 0.17 | 0.12 | -1.3  | 0.029176 | 0.034914 | 0.333974 | 0.231062 |
| MmuSTS.1203.1.S1_at | MmuSTS.1203.1 | 12.56 | 12.79 | 0.58 | 0.04 | -1.17 | 0.475558 | 0.674769 | 0.768676 | 0.810023 |
| MmuSTS.1204.1.S1_at | MmuSTS.1204.1 | 8.2   | 8.01  | 0.85 | 0.3  | 1.14  | 0.463811 | 0.049829 | 0.762278 | 0.268305 |
| MmuSTS.1205.1.S1_at | MmuSTS.1205.1 | 3.65  | 3.44  | 0.11 | 0.03 | 1.15  | 0.088015 | 0.062677 | 0.456029 | 0.29706  |
| MmuSTS.1206.1.S1_at | MmuSTS.1206.1 | 4.32  | 4.16  | 0.14 | 0.08 | 1.11  | 0.189408 | 0.640082 | 0.560894 | 0.78869  |
| MmuSTS.1207.1.S1_at | MmuSTS.1207.1 | 4.79  | 4.62  | 0.13 | 0.08 | 1.13  | 0.070736 | 0.342836 | 0.429834 | 0.588712 |
| MmuSTS.1208.1.S1_at | MmuSTS.1208.1 | 8.06  | 7.69  | 0.16 | 0.2  | 1.3   | 0.053904 | 0.014068 | 0.395633 | 0.151858 |
| MmuSTS.1209.1.S1_at | MmuSTS.1209.1 | 10.27 | 10.34 | 0.29 | 0.16 | -1.05 | 0.753507 | 0.119248 | 0.907059 | 0.387751 |
| MmuSTS.121.1.S1_at  | MmuSTS.121.1  | 10.92 | 10.93 | 0.41 | 0.12 | -1    | 0.882527 | 0.375024 | 0.959284 | 0.613186 |
| MmuSTS.1210.1.S1_at | MmuSTS.1210.1 | 7.16  | 7.19  | 0.1  | 0.05 | -1.02 | 0.257142 | 0.079392 | 0.621005 | 0.32676  |
| MmuSTS.1211.1.S1_at | MmuSTS.1211.1 | 7.59  | 8.27  | 0.34 | 0.46 | -1.6  | 0.190186 | 0.195594 | 0.561403 | 0.470441 |
| MmuSTS.1212.1.S1_at | MmuSTS.1212.1 | 4.5   | 4.57  | 0.13 | 0.11 | -1.05 | 0.564116 | 0.562078 | 0.81857  | 0.737747 |
| MmuSTS.1213.1.S1_at | MmuSTS.1213.1 | 5.83  | 5.7   | 0.21 | 0.11 | 1.09  | 0.719825 | 0.867781 | 0.891306 | 0.924867 |
| MmuSTS.1214.1.S1_at | MmuSTS.1214.1 | 4.26  | 4.3   | 0.22 | 0.11 | -1.03 | 0.30949  | 0.325073 | 0.661766 | 0.575545 |
| MmuSTS.1215.1.S1_at | MmuSTS.1215.1 | 9.53  | 9.53  | 0.13 | 0.05 | 1     | 0.620696 | 0.003824 | 0.847208 | 0.08794  |
| MmuSTS.1216.1.S1_at | MmuSTS.1216.1 | 5.48  | 5.5   | 0.12 | 0.19 | -1.01 | 0.760723 | 0.926755 | 0.910166 | 0.958404 |
| MmuSTS.1217.1.S1_at | MmuSTS.1217.1 | 11.26 | 11.34 | 0.22 | 0.05 | -1.06 | 0.846361 | 0.673194 | 0.946139 | 0.809066 |
| MmuSTS.1218.1.S1_at | MmuSTS.1218.1 | 5.42  | 5.23  | 0.3  | 0.32 | 1.14  | 0.809444 | 0.193222 | 0.93104  | 0.468578 |
| MmuSTS.1219.1.S1_at | MmuSTS.1219.1 | 4.04  | 4.05  | 0.09 | 0.07 | -1.01 | 0.734523 | 0.239059 | 0.898442 | 0.509827 |
| MmuSTS.122.1.S1_at  | MmuSTS.122.1  | 6.44  | 7.87  | 1.59 | 0.11 | -2.7  | 0.193696 | 0.242463 | 0.564275 | 0.512835 |
| MmuSTS.1220.1.S1_at | MmuSTS.1220.1 | 12.42 | 12.54 | 0.39 | 0.02 | -1.09 | 0.201366 | 0.03936  | 0.57304  | 0.243406 |
| MmuSTS.1221.1.S1_at | MmuSTS.1221.1 | 3.31  | 3.21  | 0.06 | 0.04 | 1.07  | 0.210622 | 0.778809 | 0.581872 | 0.871617 |
| MmuSTS.1222.1.S1_at | MmuSTS.1222.1 | 7.84  | 7.81  | 0.78 | 0.3  | 1.02  | 0.990815 | 0.939736 | 0.996546 | 0.965752 |
| MmuSTS.1223.1.S1_at | MmuSTS.1223.1 | 11.78 | 13.16 | 0.4  | 0.13 | -2.62 | 0.004534 | 0.001641 | 0.200736 | 0.06124  |
| MmuSTS.1224.1.S1_at | MmuSTS.1224.1 | 5.22  | 5.04  | 0.14 | 0.08 | 1.13  | 0.102751 | 0.468411 | 0.473133 | 0.677714 |
| MmuSTS.1225.1.S1_at | MmuSTS.1225.1 | 6.94  | 4.23  | 1.13 | 0.59 | 6.55  | 0.049638 | 0.028364 | 0.385845 | 0.21025  |
| MmuSTS.1226.1.S1_at | MmuSTS.1226.1 | 10.15 | 10.42 | 2.23 | 0.34 | -1.21 | 0.652151 | 0.422501 | 0.861985 | 0.645729 |
| MmuSTS.1227.1.S1_at | MmuSTS.1227.1 | 10.63 | 10.41 | 0.29 | 0.11 | 1.17  | 0.246376 | 0.320136 | 0.611834 | 0.572472 |
| MmuSTS.1228.1.S1_at | MmuSTS.1228.1 | 10.51 | 10.36 | 0.39 | 0.03 | 1.11  | 0.193048 | 0.406934 | 0.563873 | 0.634629 |
| MmuSTS.1229.1.S1_at | MmuSTS.1229.1 | 3.75  | 4.1   | 0.44 | 0.38 | -1.27 | 0.326638 | 0.420471 | 0.67423  | 0.644171 |
| MmuSTS.123.1.S1_at  | MmuSTS.123.1  | 10.54 | 10.55 | 0.59 | 0.08 | -1    | 0.887956 | 0.275863 | 0.961205 | 0.540035 |
| MmuSTS.1230.1.S1_at | MmuSTS.1230.1 | 3.94  | 4.05  | 0.14 | 0.12 | -1.08 | 0.290205 | 0.584498 | 0.646851 | 0.752435 |
| MmuSTS.1231.1.S1_at | MmuSTS.1231.1 | 11.18 | 10.9  | 0.14 | 0.05 | 1.21  | 0.03085  | 0.023399 | 0.338919 | 0.191765 |
| MmuSTS.1232.1.S1_at | MmuSTS.1232.1 | 7.85  | 7.5   | 0.72 | 0.83 | 1.28  | 0.89873  | 0.748724 | 0.965615 | 0.853837 |
| MmuSTS.1233.1.S1_at | MmuSTS.1233.1 | 8.62  | 8.77  | 0.48 | 0.26 | -1.11 | 0.577692 | 0.036629 | 0.825866 | 0.235943 |
| MmuSTS.1234.1.S1_at | MmuSTS.1234.1 | 8.28  | 8.89  | 0.62 | 0.07 | -1.52 | 0.183595 | 0.139016 | 0.55651  | 0.412153 |
| MmuSTS.1235.1.S1_at | MmuSTS.1235.1 | 8.48  | 8.34  | 0.4  | 0.1  | 1.1   | 0.719307 | 0.317768 | 0.890921 | 0.570922 |
| MmuSTS.1236.1.S1_at | MmuSTS.1236.1 | 7.68  | 8.32  | 0.63 | 0.07 | -1.55 | 0.157462 | 0.056296 | 0.530565 | 0.283274 |
| MmuSTS.1237.1.S1_at | MmuSTS.1237.1 | 8.02  | 8.86  | 0.85 | 0.11 | -1.79 | 0.177771 | 0.239583 | 0.550946 | 0.510247 |
| MmuSTS.1238.1.S1_at | MmuSTS.1238.1 | 7.86  | 8.25  | 0.63 | 0.19 | -1.31 | 0.119133 | 0.069464 | 0.492552 | 0.309778 |

|                       |               |       |       |      |      |       |          |          |          |          |
|-----------------------|---------------|-------|-------|------|------|-------|----------|----------|----------|----------|
| MmuSTS.1239.1.S1_at   | MmuSTS.1239.1 | 5.72  | 6.37  | 1.21 | 0.54 | -1.57 | 0.552005 | 0.248699 | 0.811583 | 0.517917 |
| MmuSTS.124.1.S1_at    | MmuSTS.124.1  | 6.66  | 6.88  | 0.14 | 0.19 | -1.17 | 0.134319 | 0.484625 | 0.508462 | 0.68858  |
| MmuSTS.1240.1.S1_at   | MmuSTS.1240.1 | 12.3  | 12.65 | 0.15 | 0.16 | -1.28 | 0.119893 | 0.124556 | 0.493259 | 0.394987 |
| MmuSTS.1241.1.S1_at   | MmuSTS.1241.1 | 9     | 9.11  | 0.06 | 0.06 | -1.08 | 0.039745 | 0.006501 | 0.362514 | 0.109521 |
| MmuSTS.1242.1.S1_s_at | MmuSTS.1242.1 | 5.19  | 5.11  | 0.04 | 0.07 | 1.06  | 0.182808 | 0.301023 | 0.555631 | 0.559198 |
| MmuSTS.1243.1.S1_at   | MmuSTS.1243.1 | 3.54  | 3.58  | 0.21 | 0.16 | -1.03 | 0.840508 | 0.706425 | 0.943326 | 0.829634 |
| MmuSTS.1244.1.S1_at   | MmuSTS.1244.1 | 10.19 | 10.33 | 0.35 | 0.08 | -1.1  | 0.499215 | 0.820337 | 0.781984 | 0.89648  |
| MmuSTS.1245.1.S1_at   | MmuSTS.1245.1 | 8.99  | 8.2   | 0.5  | 0.33 | 1.73  | 0.083317 | 0.002047 | 0.449112 | 0.066887 |
| MmuSTS.1246.1.S1_at   | MmuSTS.1246.1 | 8.45  | 8.52  | 0.85 | 0.16 | -1.05 | 0.955594 | 0.415139 | 0.985346 | 0.640713 |
| MmuSTS.1247.1.S1_at   | MmuSTS.1247.1 | 6.64  | 6.87  | 0.28 | 0.55 | -1.17 | 0.547216 | 0.321426 | 0.808942 | 0.573207 |
| MmuSTS.1248.1.S1_at   | MmuSTS.1248.1 | 8.76  | 9.08  | 0.06 | 0.08 | -1.25 | 0.004622 | 0.316033 | 0.201101 | 0.569488 |
| MmuSTS.1249.1.S1_at   | MmuSTS.1249.1 | 10.87 | 10.8  | 0.16 | 0.04 | 1.05  | 0.521839 | 0.147618 | 0.794855 | 0.421901 |
| MmuSTS.125.1.S1_at    | MmuSTS.125.1  | 4.33  | 4.51  | 0.36 | 0.4  | -1.13 | 0.154368 | 0.185776 | 0.527483 | 0.461631 |
| MmuSTS.1250.1.S1_at   | MmuSTS.1250.1 | 8.49  | 8.86  | 0.7  | 0.06 | -1.29 | 0.396996 | 0.2218   | 0.721621 | 0.494948 |
| MmuSTS.1251.1.S1_at   | MmuSTS.1251.1 | 4.79  | 5.47  | 0.17 | 0.19 | -1.6  | 0.006396 | 0.00587  | 0.218859 | 0.104856 |
| MmuSTS.1252.1.S1_at   | MmuSTS.1252.1 | 6.36  | 6.36  | 0.05 | 0.08 | -1    | 0.48818  | 0.545506 | 0.775435 | 0.727564 |
| MmuSTS.1253.1.S1_at   | MmuSTS.1253.1 | 10.23 | 9.94  | 0.12 | 0.3  | 1.22  | 0.479832 | 0.001279 | 0.770896 | 0.055351 |
| MmuSTS.1254.1.S1_at   | MmuSTS.1254.1 | 6.73  | 6.67  | 0.17 | 0.1  | 1.04  | 0.640445 | 0.553432 | 0.856752 | 0.732583 |
| MmuSTS.1255.1.S1_at   | MmuSTS.1255.1 | 6.16  | 6.54  | 0.31 | 0.09 | -1.3  | 0.122836 | 0.307349 | 0.496214 | 0.563634 |
| MmuSTS.1256.1.S1_at   | MmuSTS.1256.1 | 3.42  | 3.4   | 0.12 | 0.17 | 1.02  | 0.574916 | 0.726324 | 0.824394 | 0.841617 |
| MmuSTS.1257.1.S1_at   | MmuSTS.1257.1 | 10.28 | 10.05 | 0.3  | 0.08 | 1.17  | 0.228656 | 0.369201 | 0.597571 | 0.608669 |
| MmuSTS.1258.1.S1_at   | MmuSTS.1258.1 | 7.69  | 8.42  | 1.29 | 0.25 | -1.66 | 0.351662 | 0.177686 | 0.692445 | 0.454073 |
| MmuSTS.1259.1.S1_at   | MmuSTS.1259.1 | 6.85  | 7.11  | 0.31 | 0.28 | -1.2  | 0.533009 | 0.294682 | 0.800589 | 0.554326 |
| MmuSTS.126.1.S1_at    | MmuSTS.126.1  | 5.6   | 5.59  | 0.1  | 0.08 | 1.01  | 0.338376 | 0.384791 | 0.682907 | 0.620428 |
| MmuSTS.1260.1.S1_at   | MmuSTS.1260.1 | 4.94  | 5.07  | 0.47 | 0.09 | -1.09 | 0.700939 | 0.130381 | 0.883717 | 0.402234 |
| MmuSTS.1261.1.S1_at   | MmuSTS.1261.1 | 9.4   | 9.56  | 0.92 | 0.2  | -1.11 | 0.970369 | 0.060606 | 0.990282 | 0.292783 |
| MmuSTS.1262.1.S1_at   | MmuSTS.1262.1 | 8.36  | 8.43  | 0.07 | 0.19 | -1.05 | 0.312609 | 0.227253 | 0.664138 | 0.499574 |
| MmuSTS.1263.1.S1_at   | MmuSTS.1263.1 | 5.9   | 6.02  | 0.11 | 0.12 | -1.08 | 0.857499 | 0.50996  | 0.949729 | 0.704535 |
| MmuSTS.1264.1.S1_at   | MmuSTS.1264.1 | 7.67  | 7.85  | 0.37 | 0.21 | -1.14 | 0.885869 | 0.029852 | 0.960398 | 0.214481 |
| MmuSTS.1265.1.S1_at   | MmuSTS.1265.1 | 5.34  | 5.72  | 0.09 | 0.13 | -1.3  | 0.011791 | 0.003981 | 0.257504 | 0.089711 |
| MmuSTS.1266.1.S1_s_at | MmuSTS.1266.1 | 8.55  | 9.1   | 0.92 | 0.14 | -1.46 | 0.324928 | 0.44721  | 0.672925 | 0.663391 |
| MmuSTS.1267.1.S1_at   | MmuSTS.1267.1 | 4.51  | 4.47  | 0.03 | 0.25 | 1.03  | 0.235637 | 0.365708 | 0.602775 | 0.605684 |
| MmuSTS.1268.1.S1_at   | MmuSTS.1268.1 | 10.37 | 11.09 | 0.98 | 0.1  | -1.65 | 0.328232 | 0.143617 | 0.675701 | 0.417526 |
| MmuSTS.1269.1.S1_at   | MmuSTS.1269.1 | 6.96  | 6.91  | 0.16 | 0.05 | 1.03  | 0.343546 | 0.384286 | 0.686766 | 0.619994 |
| MmuSTS.127.1.S1_at    | MmuSTS.127.1  | 6.71  | 6.68  | 0.06 | 0.06 | 1.02  | 0.893289 | 0.904283 | 0.963467 | 0.945683 |
| MmuSTS.1270.1.S1_at   | MmuSTS.1270.1 | 5.09  | 4.78  | 0.41 | 0.06 | 1.24  | 0.193677 | 0.110973 | 0.564275 | 0.375405 |
| MmuSTS.1271.1.S1_at   | MmuSTS.1271.1 | 10.42 | 10.93 | 1.75 | 0.2  | -1.42 | 0.463456 | 0.627085 | 0.762191 | 0.780185 |
| MmuSTS.1272.1.S1_at   | MmuSTS.1272.1 | 8.74  | 8.75  | 0.79 | 0.44 | -1.01 | 0.61775  | 0.823904 | 0.845608 | 0.898817 |
| MmuSTS.1273.1.S1_at   | MmuSTS.1273.1 | 10.63 | 10.34 | 1.19 | 0.11 | 1.23  | 0.58555  | 0.045054 | 0.830549 | 0.256789 |
| MmuSTS.1274.1.S1_at   | MmuSTS.1274.1 | 8.63  | 8.68  | 0.41 | 0.17 | -1.03 | 0.400471 | 0.538719 | 0.723823 | 0.723323 |
| MmuSTS.1275.1.S1_at   | MmuSTS.1275.1 | 9.77  | 9.71  | 0.2  | 0.09 | 1.04  | 0.965299 | 0.562594 | 0.988598 | 0.738076 |
| MmuSTS.1276.1.S1_at   | MmuSTS.1276.1 | 3.6   | 3.63  | 0.17 | 0.18 | -1.02 | 0.341231 | 0.326386 | 0.68504  | 0.57656  |
| MmuSTS.1277.1.S1_at   | MmuSTS.1277.1 | 6.49  | 6.64  | 0.34 | 0.06 | -1.11 | 0.97971  | 0.147716 | 0.993574 | 0.422007 |

|                     |               |       |       |      |      |       |          |          |          |          |
|---------------------|---------------|-------|-------|------|------|-------|----------|----------|----------|----------|
| MmuSTS.1278.1.S1_at | MmuSTS.1278.1 | 11.3  | 11.34 | 0.25 | 0.07 | -1.03 | 0.690712 | 0.808065 | 0.879579 | 0.889504 |
| MmuSTS.1279.1.S1_at | MmuSTS.1279.1 | 8.24  | 7.45  | 0.31 | 0.08 | 1.73  | 0.038683 | 0.000141 | 0.360112 | 0.029307 |
| MmuSTS.128.1.S1_at  | MmuSTS.128.1  | 3.93  | 3.86  | 0.19 | 0.06 | 1.05  | 0.440207 | 0.450034 | 0.748401 | 0.665446 |
| MmuSTS.1280.1.S1_at | MmuSTS.1280.1 | 11.53 | 11.56 | 0.59 | 0.14 | -1.02 | 0.868523 | 0.853061 | 0.953968 | 0.916487 |
| MmuSTS.1281.1.S1_at | MmuSTS.1281.1 | 9.36  | 9.24  | 0.66 | 0.29 | 1.09  | 0.532787 | 0.037178 | 0.800482 | 0.237285 |
| MmuSTS.1282.1.S1_at | MmuSTS.1282.1 | 9.46  | 8.37  | 1.19 | 0.37 | 2.14  | 0.66286  | 0.36358  | 0.866986 | 0.603986 |
| MmuSTS.1283.1.S1_at | MmuSTS.1283.1 | 10.06 | 10.73 | 0.45 | 0.07 | -1.6  | 0.16104  | 0.001119 | 0.534327 | 0.052924 |
| MmuSTS.1284.1.S1_at | MmuSTS.1284.1 | 10.62 | 10.35 | 0.15 | 0.06 | 1.21  | 0.055161 | 0.308669 | 0.398095 | 0.56461  |
| MmuSTS.1285.1.S1_at | MmuSTS.1285.1 | 5.37  | 4.81  | 0.23 | 0.08 | 1.48  | 0.033805 | 0.007755 | 0.347296 | 0.117622 |
| MmuSTS.1286.1.S1_at | MmuSTS.1286.1 | 7.9   | 8.26  | 0.54 | 0.13 | -1.29 | 0.386594 | 0.257838 | 0.713641 | 0.525467 |
| MmuSTS.1287.1.S1_at | MmuSTS.1287.1 | 8.17  | 7.86  | 0.47 | 0.19 | 1.24  | 0.119388 | 0.159617 | 0.492852 | 0.435785 |
| MmuSTS.1288.1.S1_at | MmuSTS.1288.1 | 8.82  | 8.64  | 0.2  | 0.08 | 1.14  | 0.163549 | 0.450346 | 0.536326 | 0.665643 |
| MmuSTS.1289.1.S1_at | MmuSTS.1289.1 | 10.13 | 10.2  | 0.12 | 0.03 | -1.05 | 0.474292 | 0.22003  | 0.767951 | 0.49344  |
| MmuSTS.129.1.S1_at  | MmuSTS.129.1  | 3.57  | 3.67  | 0.21 | 0.17 | -1.07 | 0.26754  | 0.519102 | 0.628193 | 0.710813 |
| MmuSTS.1290.1.S1_at | MmuSTS.1290.1 | 3.42  | 3.5   | 0.16 | 0.3  | -1.06 | 0.355303 | 0.406363 | 0.694708 | 0.634297 |
| MmuSTS.1291.1.S1_at | MmuSTS.1291.1 | 9.12  | 9.61  | 0.24 | 0.06 | -1.4  | 0.03811  | 0.017292 | 0.358577 | 0.166482 |
| MmuSTS.1292.1.S1_at | MmuSTS.1292.1 | 7.84  | 7.59  | 0.34 | 0.19 | 1.19  | 0.759757 | 0.209508 | 0.909769 | 0.48315  |
| MmuSTS.1293.1.S1_at | MmuSTS.1293.1 | 6.03  | 5.86  | 0.24 | 0.13 | 1.12  | 0.366071 | 0.271396 | 0.701553 | 0.536507 |
| MmuSTS.1294.1.S1_at | MmuSTS.1294.1 | 7.55  | 7.57  | 0.61 | 0.21 | -1.02 | 0.95352  | 0.298233 | 0.984509 | 0.556931 |
| MmuSTS.1295.1.S1_at | MmuSTS.1295.1 | 7.41  | 7.75  | 0.09 | 0.32 | -1.26 | 0.060476 | 0.045971 | 0.408306 | 0.258818 |
| MmuSTS.1296.1.S1_at | MmuSTS.1296.1 | 6.61  | 6.51  | 0.19 | 0.07 | 1.08  | 0.409224 | 0.578275 | 0.72983  | 0.748372 |
| MmuSTS.1297.1.S1_at | MmuSTS.1297.1 | 4.92  | 4.94  | 0.32 | 0.28 | -1.02 | 0.864355 | 0.300055 | 0.952338 | 0.558262 |
| MmuSTS.1298.1.S1_at | MmuSTS.1298.1 | 8.13  | 8.84  | 1.28 | 0.17 | -1.63 | 0.189721 | 0.246987 | 0.561075 | 0.516238 |
| MmuSTS.1299.1.S1_at | MmuSTS.1299.1 | 10.21 | 9.15  | 0.38 | 0.18 | 2.08  | 0.011624 | 0.009327 | 0.255776 | 0.12747  |
| MmuSTS.13.1.S1_at   | MmuSTS.13.1   | 7.63  | 6.99  | 0.52 | 0.21 | 1.56  | 0.339309 | 0.010094 | 0.683778 | 0.131794 |
| MmuSTS.130.1.S1_at  | MmuSTS.130.1  | 12.24 | 12.39 | 0.36 | 0.04 | -1.11 | 0.555752 | 0.696286 | 0.813643 | 0.823545 |
| MmuSTS.1300.1.S1_at | MmuSTS.1300.1 | 5.96  | 5.88  | 0.13 | 0.02 | 1.05  | 0.342023 | 0.777758 | 0.685567 | 0.87086  |
| MmuSTS.1301.1.S1_at | MmuSTS.1301.1 | 4.59  | 5.18  | 1.59 | 0.1  | -1.5  | 0.733535 | 0.908494 | 0.897791 | 0.948205 |
| MmuSTS.1302.1.S1_at | MmuSTS.1302.1 | 11.02 | 10.82 | 0.22 | 0.08 | 1.15  | 0.142516 | 0.13981  | 0.517603 | 0.413131 |
| MmuSTS.1303.1.S1_at | MmuSTS.1303.1 | 7.64  | 7.33  | 0.21 | 0.25 | 1.24  | 0.818997 | 0.134902 | 0.934641 | 0.406878 |
| MmuSTS.1304.1.S1_at | MmuSTS.1304.1 | 10.45 | 10.47 | 0.53 | 0.18 | -1.01 | 0.608577 | 0.345508 | 0.841285 | 0.590747 |
| MmuSTS.1305.1.S1_at | MmuSTS.1305.1 | 12.09 | 11.45 | 0.39 | 0.21 | 1.56  | 0.07876  | 0.020504 | 0.441464 | 0.179742 |
| MmuSTS.1306.1.S1_at | MmuSTS.1306.1 | 10.45 | 10.12 | 1.05 | 0.02 | 1.25  | 0.763919 | 0.925949 | 0.911316 | 0.958059 |
| MmuSTS.1307.1.S1_at | MmuSTS.1307.1 | 10.29 | 10.8  | 0.45 | 0.32 | -1.42 | 0.446753 | 0.14076  | 0.752824 | 0.414117 |
| MmuSTS.1308.1.S1_at | MmuSTS.1308.1 | 12.45 | 12.47 | 0.43 | 0.06 | -1.01 | 0.855276 | 0.59073  | 0.948797 | 0.756437 |
| MmuSTS.1309.1.S1_at | MmuSTS.1309.1 | 4.44  | 5.31  | 0.2  | 0.3  | -1.82 | 0.030577 | 0.014327 | 0.338095 | 0.152764 |
| MmuSTS.131.1.S1_at  | MmuSTS.131.1  | 4     | 3.97  | 0.15 | 0.07 | 1.02  | 0.593992 | 0.495361 | 0.834566 | 0.695433 |
| MmuSTS.1310.1.S1_at | MmuSTS.1310.1 | 3.89  | 3.78  | 0.08 | 0.04 | 1.08  | 0.160686 | 0.236099 | 0.533821 | 0.507179 |
| MmuSTS.1311.1.S1_at | MmuSTS.1311.1 | 4.94  | 5.16  | 0.41 | 0.08 | -1.16 | 0.928279 | 0.40001  | 0.976259 | 0.630158 |
| MmuSTS.1312.1.S1_at | MmuSTS.1312.1 | 9.05  | 8.97  | 0.82 | 0.14 | 1.05  | 0.840606 | 0.712723 | 0.943395 | 0.8335   |
| MmuSTS.1313.1.S1_at | MmuSTS.1313.1 | 7.79  | 7.63  | 0.55 | 0.05 | 1.11  | 0.574396 | 0.134383 | 0.824006 | 0.406603 |
| MmuSTS.1314.1.S1_at | MmuSTS.1314.1 | 10.36 | 9.75  | 0.64 | 0.11 | 1.53  | 0.590651 | 0.735577 | 0.832962 | 0.846993 |
| MmuSTS.1315.1.S1_at | MmuSTS.1315.1 | 6.3   | 6.28  | 0.07 | 0.28 | 1.02  | 0.983987 | 0.313654 | 0.99515  | 0.568009 |

|                       |               |       |       |      |      |       |          |          |          |          |
|-----------------------|---------------|-------|-------|------|------|-------|----------|----------|----------|----------|
| MmuSTS.1316.1.S1_at   | MmuSTS.1316.1 | 6.49  | 5.85  | 0.83 | 0.29 | 1.55  | 0.765432 | 0.485098 | 0.911816 | 0.688913 |
| MmuSTS.1317.1.S1_at   | MmuSTS.1317.1 | 11.89 | 11.95 | 0.2  | 0.01 | -1.04 | 0.602756 | 0.032087 | 0.838986 | 0.221733 |
| MmuSTS.1318.1.S1_at   | MmuSTS.1318.1 | 8.18  | 8.33  | 0.14 | 0.09 | -1.11 | 0.409152 | 0.441639 | 0.72983  | 0.659769 |
| MmuSTS.1319.1.S1_at   | MmuSTS.1319.1 | 3.74  | 3.68  | 0.1  | 0.08 | 1.04  | 0.603337 | 0.257707 | 0.83918  | 0.525343 |
| MmuSTS.132.1.S1_s_at  | MmuSTS.132.1  | 5.3   | 5.21  | 0.14 | 0.16 | 1.06  | 0.572363 | 0.250465 | 0.823212 | 0.519391 |
| MmuSTS.1320.1.S1_at   | MmuSTS.1320.1 | 9.46  | 10.18 | 0.74 | 0.26 | -1.65 | 0.276194 | 0.018665 | 0.635848 | 0.171716 |
| MmuSTS.1321.1.S1_at   | MmuSTS.1321.1 | 3.96  | 3.92  | 0.24 | 0.17 | 1.03  | 0.421335 | 0.583419 | 0.737521 | 0.751772 |
| MmuSTS.1322.1.S1_at   | MmuSTS.1322.1 | 4.11  | 4     | 0.2  | 0.05 | 1.08  | 0.376596 | 0.439814 | 0.706946 | 0.658439 |
| MmuSTS.1323.1.S1_at   | MmuSTS.1323.1 | 12.33 | 11.84 | 0.76 | 0.11 | 1.4   | 0.812578 | 0.303615 | 0.932103 | 0.561073 |
| MmuSTS.1324.1.S1_at   | MmuSTS.1324.1 | 9.32  | 9.38  | 0.48 | 0.11 | -1.04 | 0.61731  | 0.669175 | 0.845362 | 0.806492 |
| MmuSTS.1325.1.S1_at   | MmuSTS.1325.1 | 8.23  | 8.34  | 0.39 | 0.11 | -1.08 | 0.367982 | 0.04537  | 0.703469 | 0.257378 |
| MmuSTS.1326.1.S1_at   | MmuSTS.1326.1 | 8.98  | 8.9   | 0.18 | 0.02 | 1.06  | 0.675605 | 0.355009 | 0.872698 | 0.597466 |
| MmuSTS.1327.1.S1_at   | MmuSTS.1327.1 | 6.45  | 6.69  | 0.41 | 0.1  | -1.18 | 0.851282 | 0.915852 | 0.947639 | 0.952836 |
| MmuSTS.1328.1.S1_at   | MmuSTS.1328.1 | 8.91  | 9.16  | 0.19 | 0.05 | -1.19 | 0.097012 | 0.192211 | 0.465689 | 0.467665 |
| MmuSTS.1329.1.S1_at   | MmuSTS.1329.1 | 12.6  | 12.59 | 0.06 | 0.03 | 1.01  | 0.597009 | 0.646009 | 0.83613  | 0.792676 |
| MmuSTS.133.1.S1_at    | MmuSTS.133.1  | 13.82 | 14.03 | 0.07 | 0.05 | -1.16 | 0.04893  | 0.028569 | 0.384962 | 0.210791 |
| MmuSTS.1330.1.S1_at   | MmuSTS.1330.1 | 9.96  | 9.35  | 0.34 | 0.17 | 1.52  | 0.051432 | 0.005726 | 0.390055 | 0.104271 |
| MmuSTS.1331.1.S1_at   | MmuSTS.1331.1 | 3.89  | 3.98  | 0.1  | 0.13 | -1.07 | 0.978518 | 0.868783 | 0.993032 | 0.925437 |
| MmuSTS.1332.1.S1_at   | MmuSTS.1332.1 | 8.88  | 8.27  | 0.08 | 0.18 | 1.53  | 0.010358 | 0.038645 | 0.246974 | 0.241683 |
| MmuSTS.1333.1.S1_at   | MmuSTS.1333.1 | 6.54  | 6.79  | 0.31 | 0.18 | -1.2  | 0.14482  | 0.040413 | 0.520103 | 0.246134 |
| MmuSTS.1334.1.S1_at   | MmuSTS.1334.1 | 5.89  | 7.15  | 0.26 | 0.28 | -2.4  | 0.007121 | 0.011562 | 0.225651 | 0.139171 |
| MmuSTS.1335.1.S1_at   | MmuSTS.1335.1 | 8.25  | 8.31  | 0.22 | 0.24 | -1.05 | 0.747299 | 0.010205 | 0.903943 | 0.132451 |
| MmuSTS.1336.1.S1_at   | MmuSTS.1336.1 | 12.91 | 12.73 | 0.04 | 0.06 | 1.14  | 0.014625 | 0.001496 | 0.276821 | 0.058967 |
| MmuSTS.1336.1.S1_s_at | MmuSTS.1336.1 | 12.76 | 12.75 | 0.1  | 0.06 | 1.01  | 0.205902 | 0.042598 | 0.577821 | 0.251035 |
| MmuSTS.1337.1.S1_at   | MmuSTS.1337.1 | 5     | 4.82  | 0.15 | 0.06 | 1.13  | 0.13779  | 0.149589 | 0.513574 | 0.424115 |
| MmuSTS.1338.1.S1_at   | MmuSTS.1338.1 | 5.02  | 4.94  | 0.19 | 0.15 | 1.06  | 0.748141 | 0.960403 | 0.904327 | 0.977488 |
| MmuSTS.1339.1.S1_at   | MmuSTS.1339.1 | 9.94  | 10.45 | 0.2  | 0.17 | -1.42 | 0.022722 | 0.004355 | 0.312165 | 0.092417 |
| MmuSTS.134.1.S1_at    | MmuSTS.134.1  | 7.02  | 6.25  | 0.67 | 0.29 | 1.71  | 0.627194 | 0.128251 | 0.850393 | 0.399362 |
| MmuSTS.1340.1.S1_at   | MmuSTS.1340.1 | 11.79 | 11.82 | 0.06 | 0    | -1.02 | 0.155204 | 0.091264 | 0.528509 | 0.346275 |
| MmuSTS.1341.1.S1_at   | MmuSTS.1341.1 | 9.03  | 9.66  | 0.6  | 0.05 | -1.55 | 0.142502 | 0.237958 | 0.517603 | 0.508495 |
| MmuSTS.1342.1.S1_at   | MmuSTS.1342.1 | 6.43  | 6.45  | 0.27 | 0.09 | -1.01 | 0.321319 | 0.428836 | 0.670027 | 0.650408 |
| MmuSTS.1343.1.S1_at   | MmuSTS.1343.1 | 12.91 | 11.57 | 0.5  | 0.27 | 2.53  | 0.013997 | 0.111285 | 0.273301 | 0.375963 |
| MmuSTS.1344.1.S1_at   | MmuSTS.1344.1 | 6.86  | 7.22  | 0.64 | 0.29 | -1.28 | 0.613432 | 0.171415 | 0.843466 | 0.447874 |
| MmuSTS.1345.1.S1_at   | MmuSTS.1345.1 | 12.68 | 12.69 | 1.26 | 0.09 | -1.01 | 0.575192 | 0.165203 | 0.824603 | 0.441389 |
| MmuSTS.1346.1.S1_at   | MmuSTS.1346.1 | 10.9  | 11.15 | 0.15 | 0.06 | -1.19 | 0.055648 | 0.050605 | 0.398946 | 0.270317 |
| MmuSTS.1347.1.S1_at   | MmuSTS.1347.1 | 12.24 | 11.13 | 0.29 | 0.28 | 2.16  | 0.015148 | 0.001683 | 0.2796   | 0.062108 |
| MmuSTS.1348.1.S1_at   | MmuSTS.1348.1 | 7.19  | 7.4   | 1.79 | 0.21 | -1.16 | 0.775062 | 0.098835 | 0.916574 | 0.357002 |
| MmuSTS.1349.1.S1_at   | MmuSTS.1349.1 | 8.2   | 9.33  | 0.57 | 0.07 | -2.18 | 0.070569 | 0.115099 | 0.429614 | 0.381985 |
| MmuSTS.135.1.S1_s_at  | MmuSTS.135.1  | 3.94  | 3.89  | 0.06 | 0.01 | 1.04  | 0.151463 | 0.442263 | 0.524608 | 0.660309 |
| MmuSTS.1350.1.S1_at   | MmuSTS.1350.1 | 7.49  | 8.25  | 0.76 | 0.07 | -1.68 | 0.526955 | 0.352896 | 0.796838 | 0.596217 |
| MmuSTS.1351.1.S1_at   | MmuSTS.1351.1 | 7.35  | 6.33  | 0.44 | 0.35 | 2.03  | 0.030617 | 0.064771 | 0.338263 | 0.300439 |
| MmuSTS.1352.1.S1_at   | MmuSTS.1352.1 | 5.09  | 4.71  | 0.17 | 0.11 | 1.31  | 0.058439 | 0.064248 | 0.404396 | 0.299692 |
| MmuSTS.1353.1.S1_at   | MmuSTS.1353.1 | 4.81  | 4.75  | 0.13 | 0.06 | 1.04  | 0.171979 | 0.498204 | 0.545311 | 0.697351 |

|                       |               |       |       |      |      |       |          |          |          |          |
|-----------------------|---------------|-------|-------|------|------|-------|----------|----------|----------|----------|
| MmuSTS.1354.1.S1_at   | MmuSTS.1354.1 | 7.08  | 7.06  | 0.81 | 0.47 | 1.02  | 0.660264 | 0.344877 | 0.865556 | 0.590208 |
| MmuSTS.1355.1.S1_at   | MmuSTS.1355.1 | 12.12 | 12.07 | 0.15 | 0.03 | 1.04  | 0.607285 | 0.54273  | 0.840774 | 0.725703 |
| MmuSTS.1356.1.S1_at   | MmuSTS.1356.1 | 6.31  | 6.26  | 0.46 | 0.3  | 1.04  | 0.643273 | 0.354986 | 0.85819  | 0.597466 |
| MmuSTS.1357.1.S1_s_at | MmuSTS.1357.1 | 7.11  | 7.53  | 0.4  | 0.11 | -1.34 | 0.331681 | 0.00509  | 0.678153 | 0.099108 |
| MmuSTS.1358.1.S1_at   | MmuSTS.1358.1 | 3.04  | 3.11  | 0.08 | 0.25 | -1.05 | 0.79674  | 0.474746 | 0.925303 | 0.681695 |
| MmuSTS.1358.1.S1_x_at | MmuSTS.1358.1 | 2.88  | 2.98  | 0.1  | 0.08 | -1.07 | 0.148235 | 0.084601 | 0.522535 | 0.336098 |
| MmuSTS.1359.1.S1_at   | MmuSTS.1359.1 | 10.17 | 9.45  | 0.96 | 0.07 | 1.65  | 0.279002 | 0.314675 | 0.637959 | 0.568437 |
| MmuSTS.136.1.S1_at    | MmuSTS.136.1  | 9.32  | 9.68  | 0.32 | 0.05 | -1.29 | 0.413565 | 0.524183 | 0.732384 | 0.714207 |
| MmuSTS.1360.1.S1_at   | MmuSTS.1360.1 | 12.88 | 12.77 | 0.32 | 0.06 | 1.08  | 0.501895 | 0.043213 | 0.783483 | 0.252647 |
| MmuSTS.1361.1.S1_at   | MmuSTS.1361.1 | 9     | 8.87  | 0.83 | 0.2  | 1.09  | 0.618473 | 0.122056 | 0.845965 | 0.391558 |
| MmuSTS.1362.1.S1_at   | MmuSTS.1362.1 | 11.18 | 10.94 | 0.14 | 0.01 | -1.19 | 0.03636  | 0.026686 | 0.35477  | 0.204241 |
| MmuSTS.1363.1.S1_at   | MmuSTS.1363.1 | 5.45  | 5.58  | 0.82 | 0.13 | -1.09 | 0.764313 | 0.437388 | 0.911428 | 0.656684 |
| MmuSTS.1364.1.S1_at   | MmuSTS.1364.1 | 13    | 12.99 | 0.3  | 0.03 | 1.01  | 0.838369 | 0.946644 | 0.942185 | 0.969766 |
| MmuSTS.1365.1.S1_s_at | MmuSTS.1365.1 | 11.55 | 9.28  | 0.18 | 0.5  | 4.81  | 0.00165  | 0.000314 | 0.163176 | 0.035198 |
| MmuSTS.1366.1.S1_at   | MmuSTS.1366.1 | 12.49 | 12.33 | 0.13 | 0.2  | 1.12  | 0.22469  | 0.091594 | 0.593942 | 0.346713 |
| MmuSTS.1367.1.S1_at   | MmuSTS.1367.1 | 11.69 | 11.29 | 0.13 | 0.22 | 1.32  | 0.032438 | 0.093102 | 0.344399 | 0.349292 |
| MmuSTS.1368.1.S1_at   | MmuSTS.1368.1 | 9.26  | 10.35 | 0.96 | 0.13 | -2.14 | 0.423737 | 0.587232 | 0.739193 | 0.7541   |
| MmuSTS.1369.1.S1_at   | MmuSTS.1369.1 | 10.33 | 10.37 | 0.16 | 0.04 | -1.02 | 0.335452 | 0.180862 | 0.681042 | 0.457391 |
| MmuSTS.137.1.S1_at    | MmuSTS.137.1  | 7.53  | 7.57  | 0.25 | 0.06 | -1.02 | 0.762605 | 0.059913 | 0.91092  | 0.291408 |
| MmuSTS.1370.1.S1_at   | MmuSTS.1370.1 | 10.27 | 10.19 | 0.45 | 0.22 | 1.05  | 0.404267 | 0.001248 | 0.726307 | 0.054879 |
| MmuSTS.1371.1.S1_at   | MmuSTS.1371.1 | 5.73  | 5.59  | 0.08 | 0.08 | 1.1   | 0.20107  | 0.018292 | 0.572836 | 0.170097 |
| MmuSTS.1372.1.S1_at   | MmuSTS.1372.1 | 4.63  | 4.43  | 0.04 | 0.16 | 1.14  | 0.462523 | 0.402311 | 0.761674 | 0.631347 |
| MmuSTS.1373.1.S1_at   | MmuSTS.1373.1 | 7.57  | 7.94  | 0.37 | 0.27 | -1.3  | 0.278894 | 0.170918 | 0.637923 | 0.447561 |
| MmuSTS.1374.1.S1_at   | MmuSTS.1374.1 | 12.23 | 12.26 | 0.2  | 0.07 | -1.02 | 0.865003 | 0.758974 | 0.952556 | 0.859942 |
| MmuSTS.1375.1.S1_at   | MmuSTS.1375.1 | 12.68 | 12.53 | 0.13 | 0.01 | 1.12  | 0.142117 | 0.069736 | 0.517105 | 0.310191 |
| MmuSTS.1376.1.S1_at   | MmuSTS.1376.1 | 6.44  | 6.4   | 0.28 | 0.08 | 1.03  | 0.405716 | 0.029987 | 0.727426 | 0.214956 |
| MmuSTS.1377.1.S1_at   | MmuSTS.1377.1 | 5.42  | 5.47  | 0.21 | 0.25 | -1.04 | 0.305072 | 0.212504 | 0.658583 | 0.486502 |
| MmuSTS.1378.1.S1_at   | MmuSTS.1378.1 | 4.95  | 6.17  | 0.39 | 0.22 | -2.33 | 0.008842 | 0.006593 | 0.237612 | 0.110053 |
| MmuSTS.1379.1.S1_at   | MmuSTS.1379.1 | 7.06  | 7.3   | 0.68 | 0.17 | -1.18 | 0.611056 | 0.674883 | 0.842323 | 0.810065 |
| MmuSTS.138.1.S1_at    | MmuSTS.138.1  | 9.71  | 9.49  | 1    | 0.17 | 1.16  | 0.995935 | 0.233045 | 0.998352 | 0.50445  |
| MmuSTS.1380.1.S1_at   | MmuSTS.1380.1 | 9.54  | 7.57  | 1.98 | 0.13 | 3.94  | 0.210591 | 0.069235 | 0.581872 | 0.309436 |
| MmuSTS.1381.1.S1_at   | MmuSTS.1381.1 | 3.65  | 3.7   | 0.12 | 0.07 | -1.03 | 0.421602 | 0.573435 | 0.737563 | 0.745125 |
| MmuSTS.1382.1.S1_at   | MmuSTS.1382.1 | 3.15  | 3.41  | 0.53 | 0.41 | -1.19 | 0.652078 | 0.348594 | 0.86196  | 0.59263  |
| MmuSTS.1383.1.S1_at   | MmuSTS.1383.1 | 6.54  | 6.56  | 0.56 | 0.28 | -1.01 | 0.555952 | 0.434612 | 0.813822 | 0.654747 |
| MmuSTS.1384.1.S1_at   | MmuSTS.1384.1 | 7.14  | 7.78  | 0.27 | 0.24 | -1.56 | 0.110931 | 0.197726 | 0.48424  | 0.472633 |
| MmuSTS.1385.1.S1_at   | MmuSTS.1385.1 | 8.79  | 8.83  | 1.27 | 0.33 | -1.03 | 0.992191 | 0.175483 | 0.996928 | 0.452157 |
| MmuSTS.1386.1.S1_at   | MmuSTS.1386.1 | 6.47  | 6.22  | 0.28 | 0.22 | 1.19  | 0.512486 | 0.709677 | 0.789449 | 0.831736 |
| MmuSTS.1387.1.S1_at   | MmuSTS.1387.1 | 5.78  | 6.11  | 0.13 | 0.08 | -1.26 | 0.076701 | 0.03089  | 0.438075 | 0.217584 |
| MmuSTS.1388.1.S1_at   | MmuSTS.1388.1 | 5.59  | 5.51  | 0.06 | 0.02 | 1.06  | 0.079021 | 0.394077 | 0.441671 | 0.626734 |
| MmuSTS.1389.1.S1_at   | MmuSTS.1389.1 | 6.44  | 6.44  | 0.11 | 0.02 | 1.01  | 0.333469 | 0.120573 | 0.679631 | 0.389378 |
| MmuSTS.139.1.S1_at    | MmuSTS.139.1  | 10.2  | 9.8   | 3.14 | 0.22 | 1.32  | 0.666217 | 0.325162 | 0.868243 | 0.575591 |
| MmuSTS.1390.1.S1_at   | MmuSTS.1390.1 | 6.1   | 5.84  | 0.43 | 0.18 | 1.2   | 0.376489 | 0.61276  | 0.706899 | 0.770189 |
| MmuSTS.1391.1.S1_at   | MmuSTS.1391.1 | 3.78  | 3.84  | 0.02 | 0.19 | -1.04 | 0.68087  | 0.463777 | 0.874873 | 0.674656 |

|                       |               |       |       |      |      |       |          |          |          |          |
|-----------------------|---------------|-------|-------|------|------|-------|----------|----------|----------|----------|
| MmuSTS.1392.1.S1_at   | MmuSTS.1392.1 | 9.22  | 7.8   | 0.36 | 0.48 | 2.66  | 0.015119 | 0.013994 | 0.2796   | 0.151593 |
| MmuSTS.1393.1.S1_at   | MmuSTS.1393.1 | 5.26  | 5.13  | 0.08 | 0.07 | 1.09  | 0.194655 | 0.031184 | 0.565144 | 0.21838  |
| MmuSTS.1394.1.S1_at   | MmuSTS.1394.1 | 5.33  | 5.2   | 0.07 | 0.05 | 1.09  | 0.082382 | 0.086181 | 0.447257 | 0.338568 |
| MmuSTS.1395.1.S1_at   | MmuSTS.1395.1 | 12.79 | 12.47 | 0.29 | 0.02 | 1.25  | 0.344763 | 0.090727 | 0.687049 | 0.345205 |
| MmuSTS.1396.1.S1_s_at | MmuSTS.1396.1 | 9.31  | 9.25  | 0.18 | 0.11 | 1.04  | 0.602595 | 0.4391   | 0.838892 | 0.657854 |
| MmuSTS.1397.1.S1_at   | MmuSTS.1397.1 | 10.06 | 10.72 | 1.64 | 0.22 | -1.59 | 0.542085 | 0.176435 | 0.805501 | 0.45282  |
| MmuSTS.1398.1.S1_at   | MmuSTS.1398.1 | 10.16 | 10.91 | 1.04 | 0.07 | -1.68 | 0.287881 | 0.178585 | 0.644955 | 0.454817 |
| MmuSTS.1399.1.S1_at   | MmuSTS.1399.1 | 10.84 | 10.53 | 1.3  | 0.21 | 1.24  | 0.840693 | 0.185933 | 0.943406 | 0.461772 |
| MmuSTS.14.1.S1_at     | MmuSTS.14.1   | 10.02 | 10.16 | 0.26 | 0.06 | -1.1  | 0.581959 | 0.015343 | 0.827791 | 0.157315 |
| MmuSTS.140.1.S1_at    | MmuSTS.140.1  | 5.75  | 5.23  | 0.14 | 0.16 | 1.44  | 0.009268 | 0.002843 | 0.241866 | 0.078566 |
| MmuSTS.1400.1.S1_at   | MmuSTS.1400.1 | 5.02  | 5.02  | 0.08 | 0.11 | -1    | 0.845419 | 0.043753 | 0.945862 | 0.25387  |
| MmuSTS.1401.1.S1_at   | MmuSTS.1401.1 | 6.24  | 6.16  | 0.16 | 0.09 | 1.05  | 0.23706  | 0.16737  | 0.603903 | 0.443785 |
| MmuSTS.1402.1.S1_at   | MmuSTS.1402.1 | 2.7   | 2.9   | 0.22 | 0.12 | -1.15 | 0.844901 | 0.820985 | 0.945566 | 0.896977 |
| MmuSTS.1403.1.S1_s_at | MmuSTS.1403.1 | 5.79  | 5.61  | 0.09 | 0.1  | 1.13  | 0.189252 | 0.275363 | 0.560874 | 0.539663 |
| MmuSTS.1404.1.S1_at   | MmuSTS.1404.1 | 4.45  | 4.39  | 0.1  | 0.16 | 1.04  | 0.856303 | 0.737713 | 0.949322 | 0.848062 |
| MmuSTS.1405.1.S1_at   | MmuSTS.1405.1 | 6.72  | 6.22  | 0.62 | 0.03 | 1.42  | 0.251823 | 0.123313 | 0.616976 | 0.393386 |
| MmuSTS.1406.1.S1_at   | MmuSTS.1406.1 | 10.96 | 9.76  | 0.61 | 0.33 | 2.29  | 0.047648 | 0.026749 | 0.3809   | 0.204493 |
| MmuSTS.1407.1.S1_at   | MmuSTS.1407.1 | 8.81  | 8.7   | 0.27 | 0.13 | 1.08  | 0.398356 | 0.000235 | 0.722463 | 0.03241  |
| MmuSTS.1408.1.S1_at   | MmuSTS.1408.1 | 6.94  | 6.89  | 0.17 | 0.09 | 1.03  | 0.669965 | 0.8883   | 0.869803 | 0.936315 |
| MmuSTS.1409.1.S1_at   | MmuSTS.1409.1 | 5.07  | 5.54  | 0.22 | 0.21 | -1.39 | 0.072176 | 0.197869 | 0.432091 | 0.472805 |
| MmuSTS.141.1.S1_at    | MmuSTS.141.1  | 9.77  | 9.86  | 0.08 | 0.16 | -1.06 | 0.445574 | 0.147603 | 0.752275 | 0.421901 |
| MmuSTS.1410.1.S1_at   | MmuSTS.1410.1 | 11.77 | 11.4  | 1.62 | 0.05 | 1.3   | 0.59037  | 0.638403 | 0.832841 | 0.787631 |
| MmuSTS.1411.1.S1_at   | MmuSTS.1411.1 | 7.58  | 8.13  | 0.89 | 0.26 | -1.47 | 0.234095 | 0.259689 | 0.601531 | 0.526583 |
| MmuSTS.1412.1.S1_at   | MmuSTS.1412.1 | 5.71  | 5.6   | 0.57 | 0.14 | 1.08  | 0.72186  | 0.246491 | 0.892101 | 0.515917 |
| MmuSTS.1413.1.S1_at   | MmuSTS.1413.1 | 6.38  | 6.26  | 0.17 | 0.11 | 1.09  | 0.893297 | 0.943642 | 0.963467 | 0.967966 |
| MmuSTS.1414.1.S1_at   | MmuSTS.1414.1 | 11.57 | 11.13 | 0.57 | 0.09 | 1.36  | 0.175122 | 0.004967 | 0.548031 | 0.098202 |
| MmuSTS.1415.1.S1_at   | MmuSTS.1415.1 | 10.84 | 11.07 | 0.19 | 0.17 | -1.18 | 0.156226 | 0.015059 | 0.529536 | 0.155852 |
| MmuSTS.1416.1.S1_at   | MmuSTS.1416.1 | 6     | 3.55  | 1.32 | 0.25 | 5.47  | 0.034039 | 0.017787 | 0.347625 | 0.168549 |
| MmuSTS.1417.1.S1_at   | MmuSTS.1417.1 | 12.45 | 12.37 | 0.13 | 0.07 | 1.06  | 0.975025 | 0.887931 | 0.991912 | 0.936115 |
| MmuSTS.1418.1.S1_at   | MmuSTS.1418.1 | 8.54  | 8.67  | 0.11 | 0.25 | -1.09 | 0.601686 | 0.698612 | 0.838512 | 0.824912 |
| MmuSTS.1419.1.S1_at   | MmuSTS.1419.1 | 4.8   | 5.78  | 0.68 | 0.45 | -1.98 | 0.291066 | 0.148668 | 0.647526 | 0.423201 |
| MmuSTS.142.1.S1_at    | MmuSTS.142.1  | 10.81 | 10.83 | 0.37 | 0.06 | -1.02 | 0.337758 | 0.20332  | 0.682671 | 0.477521 |
| MmuSTS.1420.1.S1_at   | MmuSTS.1420.1 | 6.71  | 7.09  | 0.72 | 0.34 | -1.3  | 0.250388 | 0.455922 | 0.615561 | 0.669712 |
| MmuSTS.1421.1.S1_at   | MmuSTS.1421.1 | 6.77  | 6.45  | 0.21 | 0.1  | 1.25  | 0.118533 | 0.089146 | 0.491933 | 0.343188 |
| MmuSTS.1422.1.S1_at   | MmuSTS.1422.1 | 8.77  | 8.46  | 0.3  | 0.12 | 1.24  | 0.164685 | 0.069352 | 0.537466 | 0.309558 |
| MmuSTS.1423.1.S1_at   | MmuSTS.1423.1 | 5.28  | 5.04  | 0.06 | 0.04 | 1.18  | 0.009208 | 0.040072 | 0.241866 | 0.245388 |
| MmuSTS.1424.1.S1_at   | MmuSTS.1424.1 | 6.51  | 7.48  | 1.82 | 0.51 | -1.96 | 0.438601 | 0.316561 | 0.747368 | 0.569938 |
| MmuSTS.1425.1.S1_at   | MmuSTS.1425.1 | 5.16  | 6.06  | 0.26 | 0.04 | -1.86 | 0.003692 | 0.030483 | 0.197111 | 0.216624 |
| MmuSTS.1426.1.S1_at   | MmuSTS.1426.1 | 13.38 | 13.37 | 0.14 | 0.03 | 1.01  | 0.860349 | 0.158305 | 0.950769 | 0.434043 |
| MmuSTS.1427.1.S1_at   | MmuSTS.1427.1 | 12.64 | 12.67 | 0.13 | 0.01 | -1.02 | 0.665512 | 0.185453 | 0.86797  | 0.461494 |
| MmuSTS.1428.1.S1_at   | MmuSTS.1428.1 | 11.68 | 12.21 | 0.41 | 0.04 | -1.45 | 0.075018 | 0.084776 | 0.435663 | 0.336285 |
| MmuSTS.1429.1.S1_at   | MmuSTS.1429.1 | 9.37  | 9.77  | 1.21 | 0.48 | -1.32 | 0.187573 | 0.070814 | 0.559893 | 0.31231  |
| MmuSTS.143.1.S1_at    | MmuSTS.143.1  | 7.52  | 8.78  | 1    | 0.15 | -2.39 | 0.105695 | 0.160683 | 0.477409 | 0.436758 |



|                       |               |       |       |      |      |       |          |          |          |          |
|-----------------------|---------------|-------|-------|------|------|-------|----------|----------|----------|----------|
| MmuSTS.1430.1.S1_at   | MmuSTS.1430.1 | 11.27 | 10.45 | 0.97 | 0.12 | 1.76  | 0.586604 | 0.773127 | 0.831389 | 0.868084 |
| MmuSTS.1431.1.S1_at   | MmuSTS.1431.1 | 12.39 | 12.06 | 0.36 | 0.04 | 1.25  | 0.658744 | 0.178803 | 0.864839 | 0.455099 |
| MmuSTS.1432.1.S1_at   | MmuSTS.1432.1 | 12.67 | 12.57 | 0.11 | 0.03 | 1.07  | 0.627496 | 0.050452 | 0.850557 | 0.269897 |
| MmuSTS.1433.1.S1_at   | MmuSTS.1433.1 | 5.07  | 4.29  | 0.78 | 0.1  | 1.71  | 0.164613 | 0.017166 | 0.537466 | 0.165989 |
| MmuSTS.1434.1.S1_at   | MmuSTS.1434.1 | 12.99 | 13.02 | 0.11 | 0.08 | -1.02 | 0.323986 | 0.446485 | 0.672429 | 0.662842 |
| MmuSTS.1434.1.S1_s_at | MmuSTS.1434.1 | 14.3  | 14.29 | 0.02 | 0.01 | 1.01  | 0.110214 | 0.265728 | 0.483363 | 0.531586 |
| MmuSTS.1434.1.S1_x_at | MmuSTS.1434.1 | 13.63 | 13.67 | 0.1  | 0.06 | -1.03 | 0.306499 | 0.534792 | 0.659451 | 0.720557 |
| MmuSTS.1435.1.S1_at   | MmuSTS.1435.1 | 13.58 | 13.71 | 0.1  | 0.02 | -1.09 | 0.072907 | 0.067669 | 0.433744 | 0.306199 |
| MmuSTS.1436.1.S1_at   | MmuSTS.1436.1 | 5.38  | 5.65  | 0.22 | 0.19 | -1.21 | 0.379288 | 0.044942 | 0.708818 | 0.256489 |
| MmuSTS.1437.1.S1_at   | MmuSTS.1437.1 | 13.02 | 12.73 | 3.08 | 0.17 | 1.23  | 0.479465 | 0.346909 | 0.77075  | 0.591725 |
| MmuSTS.1438.1.S1_at   | MmuSTS.1438.1 | 8.05  | 9.09  | 0.47 | 0.06 | -2.05 | 0.022136 | 0.014665 | 0.31032  | 0.154231 |
| MmuSTS.1439.1.S1_at   | MmuSTS.1439.1 | 10.33 | 10    | 0.17 | 0.09 | 1.26  | 0.046053 | 0.000015 | 0.37735  | 0.018351 |
| MmuSTS.144.1.S1_at    | MmuSTS.144.1  | 9.61  | 9.98  | 0.23 | 0.07 | -1.3  | 0.172832 | 0.000048 | 0.545967 | 0.025273 |
| MmuSTS.1440.1.S1_at   | MmuSTS.1440.1 | 8.13  | 7.15  | 0.3  | 0.06 | 1.96  | 0.004427 | 0.001645 | 0.198874 | 0.061345 |
| MmuSTS.1441.1.S1_at   | MmuSTS.1441.1 | 5.66  | 5.9   | 0.54 | 0.35 | -1.18 | 0.768336 | 0.207975 | 0.912989 | 0.482049 |
| MmuSTS.1442.1.S1_at   | MmuSTS.1442.1 | 5.2   | 5.34  | 0.03 | 0.41 | -1.1  | 0.554581 | 0.377228 | 0.8128   | 0.61485  |
| MmuSTS.1443.1.S1_at   | MmuSTS.1443.1 | 11.3  | 10.38 | 0.12 | 0.05 | 1.9   | 0.000218 | 0.000009 | 0.120771 | 0.016421 |
| MmuSTS.1444.1.S1_at   | MmuSTS.1444.1 | 10.6  | 10.81 | 1.78 | 0.25 | -1.16 | 0.773581 | 0.282676 | 0.915826 | 0.54543  |
| MmuSTS.1445.1.S1_at   | MmuSTS.1445.1 | 10.58 | 10.65 | 0.58 | 0.26 | -1.05 | 0.456869 | 0.035023 | 0.758051 | 0.231264 |
| MmuSTS.1446.1.S1_at   | MmuSTS.1446.1 | 5.56  | 5.57  | 0.05 | 0.13 | -1.01 | 0.825299 | 0.926483 | 0.937201 | 0.958312 |
| MmuSTS.1447.1.S1_at   | MmuSTS.1447.1 | 7.34  | 8     | 2.03 | 0.44 | -1.58 | 0.614388 | 0.377353 | 0.843931 | 0.6149   |
| MmuSTS.1448.1.S1_at   | MmuSTS.1448.1 | 9.42  | 9.01  | 2.33 | 0.38 | 1.33  | 0.97182  | 0.35009  | 0.990806 | 0.593862 |
| MmuSTS.1449.1.S1_at   | MmuSTS.1449.1 | 11.28 | 11.25 | 0.19 | 0.06 | 1.02  | 0.945881 | 0.078774 | 0.981164 | 0.325725 |
| MmuSTS.145.1.S1_at    | MmuSTS.145.1  | 6.59  | 6.61  | 0.26 | 0.08 | -1.02 | 0.650258 | 0.866052 | 0.860839 | 0.923791 |
| MmuSTS.1450.1.S1_at   | MmuSTS.1450.1 | 10.55 | 10.77 | 0.12 | 0.05 | -1.17 | 0.04077  | 0.000242 | 0.365087 | 0.032681 |
| MmuSTS.1451.1.S1_at   | MmuSTS.1451.1 | 10.39 | 10.67 | 0.11 | 0.06 | -1.22 | 0.033894 | 0.002278 | 0.347468 | 0.07037  |
| MmuSTS.1452.1.S1_at   | MmuSTS.1452.1 | 3.51  | 3.49  | 0.16 | 0.03 | 1.01  | 0.318966 | 0.590173 | 0.668492 | 0.756117 |
| MmuSTS.1453.1.S1_at   | MmuSTS.1453.1 | 8.69  | 9.6   | 0.31 | 0.02 | -1.88 | 0.006897 | 0.001662 | 0.224141 | 0.061704 |
| MmuSTS.1454.1.S1_at   | MmuSTS.1454.1 | 9.1   | 8.12  | 1.17 | 0.19 | 1.97  | 0.108095 | 0.07751  | 0.480558 | 0.323421 |
| MmuSTS.1455.1.S1_at   | MmuSTS.1455.1 | 11.04 | 10.91 | 0.28 | 0.07 | 1.09  | 0.615438 | 0.025004 | 0.844453 | 0.198121 |
| MmuSTS.1456.1.S1_at   | MmuSTS.1456.1 | 10.44 | 9.44  | 0.55 | 0.16 | 1.99  | 0.041061 | 0.007521 | 0.365672 | 0.116291 |
| MmuSTS.1457.1.S1_at   | MmuSTS.1457.1 | 8.61  | 8.07  | 0.31 | 0.06 | 1.46  | 0.044522 | 0.008611 | 0.374916 | 0.123102 |
| MmuSTS.1458.1.S1_at   | MmuSTS.1458.1 | 8.33  | 8.23  | 0.36 | 0.03 | 1.07  | 0.920728 | 0.767978 | 0.973155 | 0.865284 |
| MmuSTS.1459.1.S1_at   | MmuSTS.1459.1 | 6.7   | 6.66  | 0.18 | 0.19 | 1.03  | 0.664918 | 0.019353 | 0.867733 | 0.1748   |
| MmuSTS.146.1.S1_at    | MmuSTS.146.1  | 11.83 | 11.79 | 0.14 | 0.06 | 1.03  | 0.654101 | 0.239946 | 0.862576 | 0.510627 |
| MmuSTS.1460.1.S1_at   | MmuSTS.1460.1 | 10.71 | 11.02 | 0.25 | 0.07 | -1.24 | 0.225593 | 0.178255 | 0.594769 | 0.45458  |
| MmuSTS.1461.1.S1_at   | MmuSTS.1461.1 | 10.5  | 10.75 | 0.38 | 0.01 | -1.19 | 0.853984 | 0.849443 | 0.948436 | 0.914533 |
| MmuSTS.1462.1.S1_at   | MmuSTS.1462.1 | 6.36  | 7.32  | 0.9  | 0.66 | -1.94 | 0.163095 | 0.1538   | 0.536035 | 0.428488 |
| MmuSTS.1463.1.S1_at   | MmuSTS.1463.1 | 11.02 | 10.96 | 0.44 | 0.09 | 1.04  | 0.925279 | 0.812147 | 0.975138 | 0.89155  |
| MmuSTS.1464.1.S1_at   | MmuSTS.1464.1 | 5.47  | 5.34  | 0.1  | 0.12 | 1.09  | 0.566663 | 0.255065 | 0.820086 | 0.52317  |
| MmuSTS.1465.1.S1_at   | MmuSTS.1465.1 | 11.73 | 11.75 | 0.22 | 0.1  | -1.01 | 0.22099  | 0.415905 | 0.590242 | 0.641239 |
| MmuSTS.1466.1.S1_s_at | MmuSTS.1466.1 | 3.97  | 4.02  | 0.1  | 0.11 | -1.03 | 0.816757 | 0.814898 | 0.933716 | 0.893213 |
| MmuSTS.1467.1.S1_at   | MmuSTS.1467.1 | 5.97  | 5.79  | 0.08 | 0.04 | 1.13  | 0.061141 | 0.127786 | 0.41013  | 0.398644 |

|                     |               |       |       |      |      |       |          |          |          |          |
|---------------------|---------------|-------|-------|------|------|-------|----------|----------|----------|----------|
| MmuSTS.1468.1.S1_at | MmuSTS.1468.1 | 9.58  | 9.38  | 0.27 | 0.05 | 1.15  | 0.398733 | 0.000244 | 0.722726 | 0.032798 |
| MmuSTS.1469.1.S1_at | MmuSTS.1469.1 | 9.6   | 11    | 0.56 | 0.16 | -2.65 | 0.031991 | 0.01763  | 0.342916 | 0.167839 |
| MmuSTS.147.1.S1_at  | MmuSTS.147.1  | 7.51  | 6.55  | 1.57 | 0.12 | 1.94  | 0.370628 | 0.437453 | 0.70492  | 0.656745 |
| MmuSTS.1470.1.S1_at | MmuSTS.1470.1 | 3.65  | 3.52  | 0.09 | 0.08 | 1.1   | 0.032899 | 0.036642 | 0.345526 | 0.235943 |
| MmuSTS.1471.1.S1_at | MmuSTS.1471.1 | 5.33  | 5.31  | 0.16 | 0.07 | 1.02  | 0.968083 | 0.784652 | 0.989447 | 0.875304 |
| MmuSTS.1472.1.S1_at | MmuSTS.1472.1 | 5.51  | 5.5   | 0.81 | 0.49 | 1     | 0.621384 | 0.391851 | 0.847514 | 0.625384 |
| MmuSTS.1473.1.S1_at | MmuSTS.1473.1 | 4.11  | 4.19  | 0.17 | 0.21 | -1.06 | 0.938164 | 0.603626 | 0.979247 | 0.764215 |
| MmuSTS.1474.1.S1_at | MmuSTS.1474.1 | 10.17 | 10.06 | 0.87 | 0.35 | 1.08  | 0.477032 | 0.036901 | 0.76966  | 0.236575 |
| MmuSTS.1475.1.S1_at | MmuSTS.1475.1 | 11.72 | 11.9  | 0.1  | 0.08 | -1.13 | 0.132835 | 0.101704 | 0.507035 | 0.361562 |
| MmuSTS.1476.1.S1_at | MmuSTS.1476.1 | 10.13 | 10.01 | 0.25 | 0.07 | 1.09  | 0.365693 | 0.505689 | 0.701312 | 0.702218 |
| MmuSTS.1477.1.S1_at | MmuSTS.1477.1 | 10.96 | 11    | 0.54 | 0.14 | -1.03 | 0.753059 | 0.181083 | 0.906948 | 0.457577 |
| MmuSTS.1478.1.S1_at | MmuSTS.1478.1 | 4.13  | 4.5   | 0.41 | 0.13 | -1.29 | 0.452883 | 0.178514 | 0.755901 | 0.454778 |
| MmuSTS.1479.1.S1_at | MmuSTS.1479.1 | 8.38  | 7.93  | 1.18 | 0.25 | 1.37  | 0.554996 | 0.08619  | 0.813117 | 0.338568 |
| MmuSTS.148.1.S1_at  | MmuSTS.148.1  | 11.78 | 11.78 | 0.49 | 0.06 | 1.01  | 0.920378 | 0.941458 | 0.972913 | 0.966805 |
| MmuSTS.1480.1.S1_at | MmuSTS.1480.1 | 4.75  | 4.74  | 0.03 | 0.22 | 1.01  | 0.608439 | 0.804743 | 0.841222 | 0.887712 |
| MmuSTS.1481.1.S1_at | MmuSTS.1481.1 | 4.74  | 4.61  | 0.12 | 0.12 | 1.09  | 0.243688 | 0.08958  | 0.609595 | 0.343811 |
| MmuSTS.1482.1.S1_at | MmuSTS.1482.1 | 10.61 | 10.91 | 0.26 | 0.13 | -1.22 | 0.261456 | 0.278164 | 0.623844 | 0.541805 |
| MmuSTS.1483.1.S1_at | MmuSTS.1483.1 | 8.14  | 7.62  | 0.19 | 0.2  | 1.44  | 0.028565 | 0.015698 | 0.332627 | 0.158742 |
| MmuSTS.1484.1.S1_at | MmuSTS.1484.1 | 7.15  | 6.8   | 0.53 | 0.28 | 1.27  | 0.931502 | 0.341677 | 0.97706  | 0.587796 |
| MmuSTS.1485.1.S1_at | MmuSTS.1485.1 | 6.72  | 8.5   | 0.48 | 0.1  | -3.43 | 0.0027   | 0.000212 | 0.184127 | 0.032262 |
| MmuSTS.1486.1.S1_at | MmuSTS.1486.1 | 11.04 | 11.02 | 0.14 | 0.13 | 1.01  | 0.756711 | 0.930328 | 0.908337 | 0.960394 |
| MmuSTS.1487.1.S1_at | MmuSTS.1487.1 | 8.5   | 9.21  | 0.45 | 0.1  | -1.63 | 0.134275 | 0.056059 | 0.508462 | 0.282647 |
| MmuSTS.1488.1.S1_at | MmuSTS.1488.1 | 8.38  | 8.6   | 0.03 | 0.14 | -1.17 | 0.054991 | 0.029171 | 0.397577 | 0.212798 |
| MmuSTS.1489.1.S1_at | MmuSTS.1489.1 | 11.01 | 11.63 | 0.29 | 0.04 | -1.54 | 0.047245 | 0.009341 | 0.379823 | 0.127598 |
| MmuSTS.149.1.S1_at  | MmuSTS.149.1  | 6.5   | 6.08  | 0.41 | 0.11 | 1.34  | 0.138658 | 0.033552 | 0.514023 | 0.226764 |
| MmuSTS.1490.1.S1_at | MmuSTS.1490.1 | 11.48 | 11.32 | 0.81 | 0.04 | 1.12  | 0.580356 | 0.432194 | 0.82699  | 0.652775 |
| MmuSTS.1491.1.S1_at | MmuSTS.1491.1 | 10.04 | 9.78  | 0.2  | 0.07 | 1.19  | 0.089125 | 0.011028 | 0.456902 | 0.136793 |
| MmuSTS.1492.1.S1_at | MmuSTS.1492.1 | 9.38  | 8.54  | 0.13 | 0.14 | 1.79  | 0.002148 | 0.026746 | 0.174757 | 0.204493 |
| MmuSTS.1493.1.S1_at | MmuSTS.1493.1 | 7.8   | 8.39  | 0.3  | 0.02 | -1.51 | 0.022336 | 0.006091 | 0.310495 | 0.106327 |
| MmuSTS.1494.1.S1_at | MmuSTS.1494.1 | 11.68 | 11.81 | 0.08 | 0.09 | -1.09 | 0.095512 | 0.36569  | 0.464229 | 0.605684 |
| MmuSTS.1495.1.S1_at | MmuSTS.1495.1 | 7.21  | 7.76  | 0.66 | 0.15 | -1.47 | 0.521474 | 0.692963 | 0.794543 | 0.821324 |
| MmuSTS.1496.1.S1_at | MmuSTS.1496.1 | 12.27 | 11.96 | 0.13 | 0.16 | 1.24  | 0.027037 | 0.016949 | 0.327141 | 0.165073 |
| MmuSTS.1497.1.S1_at | MmuSTS.1497.1 | 7.55  | 7.74  | 0.11 | 0.29 | -1.14 | 0.917871 | 0.955164 | 0.972062 | 0.9746   |
| MmuSTS.1498.1.S1_at | MmuSTS.1498.1 | 11.43 | 10.99 | 0.12 | 0.11 | 1.36  | 0.009522 | 0.051235 | 0.242426 | 0.271799 |
| MmuSTS.1499.1.S1_at | MmuSTS.1499.1 | 11.48 | 11.18 | 0.18 | 0.02 | 1.23  | 0.053064 | 0.040739 | 0.393954 | 0.246735 |
| MmuSTS.15.1.S1_at   | MmuSTS.15.1   | 10.44 | 9.4   | 0.32 | 0.35 | 2.05  | 0.014334 | 0.000329 | 0.274855 | 0.035806 |
| MmuSTS.150.1.S1_at  | MmuSTS.150.1  | 8.26  | 8.91  | 0.27 | 0.17 | -1.57 | 0.100602 | 0.007637 | 0.471482 | 0.116928 |
| MmuSTS.1500.1.S1_at | MmuSTS.1500.1 | 12.91 | 12.67 | 0.19 | 0.12 | 1.18  | 0.082264 | 0.237763 | 0.447052 | 0.50826  |
| MmuSTS.1501.1.S1_at | MmuSTS.1501.1 | 11.95 | 11.31 | 0.2  | 0.07 | 1.56  | 0.005198 | 0.001743 | 0.206146 | 0.062895 |
| MmuSTS.1502.1.S1_at | MmuSTS.1502.1 | 8.41  | 8.62  | 0.35 | 0.25 | -1.15 | 0.321822 | 0.017355 | 0.670537 | 0.166751 |
| MmuSTS.1503.1.S1_at | MmuSTS.1503.1 | 7.9   | 7.56  | 0.47 | 0.25 | 1.27  | 0.259226 | 0.249623 | 0.622598 | 0.518682 |
| MmuSTS.1504.1.S1_at | MmuSTS.1504.1 | 12.73 | 12.31 | 0.86 | 0.03 | 1.34  | 0.909828 | 0.460063 | 0.96945  | 0.671989 |
| MmuSTS.1505.1.S1_at | MmuSTS.1505.1 | 5.07  | 6.67  | 0.6  | 0.41 | -3.03 | 0.053686 | 0.014221 | 0.39535  | 0.152283 |

|                       |               |       |       |      |      |       |          |          |          |          |
|-----------------------|---------------|-------|-------|------|------|-------|----------|----------|----------|----------|
| MmuSTS.1506.1.S1_at   | MmuSTS.1506.1 | 7.34  | 8.43  | 0.6  | 0.11 | -2.13 | 0.040694 | 0.018068 | 0.364778 | 0.169379 |
| MmuSTS.1507.1.S1_at   | MmuSTS.1507.1 | 8.6   | 8.65  | 0.41 | 0.25 | -1.04 | 0.310939 | 0.118424 | 0.662774 | 0.386431 |
| MmuSTS.1508.1.S1_at   | MmuSTS.1508.1 | 7.98  | 8.2   | 0.31 | 0.29 | -1.16 | 0.444628 | 0.291949 | 0.7514   | 0.552156 |
| MmuSTS.1509.1.S1_at   | MmuSTS.1509.1 | 6.82  | 6.47  | 0.13 | 0.05 | 1.27  | 0.030084 | 0.018119 | 0.336449 | 0.169609 |
| MmuSTS.151.1.S1_at    | MmuSTS.151.1  | 7.28  | 9.41  | 0.68 | 0.17 | -4.37 | 0.01248  | 0.003603 | 0.262327 | 0.085876 |
| MmuSTS.1510.1.S1_at   | MmuSTS.1510.1 | 11.57 | 11.97 | 0.1  | 0.23 | -1.32 | 0.039977 | 0.040819 | 0.362955 | 0.246981 |
| MmuSTS.1511.1.S1_at   | MmuSTS.1511.1 | 9.38  | 8.53  | 0.29 | 0.16 | 1.8   | 0.012259 | 0.007009 | 0.260951 | 0.113    |
| MmuSTS.1512.1.S1_at   | MmuSTS.1512.1 | 10.61 | 11.12 | 0.2  | 0.06 | -1.42 | 0.006899 | 0.002203 | 0.224141 | 0.069315 |
| MmuSTS.1513.1.S1_at   | MmuSTS.1513.1 | 10.5  | 10.8  | 0.2  | 0.03 | -1.23 | 0.02164  | 0.10645  | 0.309241 | 0.368999 |
| MmuSTS.1514.1.S1_at   | MmuSTS.1514.1 | 9.79  | 10.11 | 0.87 | 0.23 | -1.25 | 0.750161 | 0.568054 | 0.905347 | 0.741761 |
| MmuSTS.1515.1.S1_at   | MmuSTS.1515.1 | 4.69  | 5.32  | 0.57 | 0.59 | -1.54 | 0.322122 | 0.508107 | 0.670797 | 0.70337  |
| MmuSTS.1516.1.S1_at   | MmuSTS.1516.1 | 8.88  | 9.24  | 0.38 | 0.04 | -1.28 | 0.216537 | 0.354076 | 0.586617 | 0.597048 |
| MmuSTS.1517.1.S1_at   | MmuSTS.1517.1 | 7.94  | 8.72  | 0.11 | 0.18 | -1.72 | 0.00219  | 0.00736  | 0.174757 | 0.115215 |
| MmuSTS.1518.1.S1_at   | MmuSTS.1518.1 | 6.86  | 7.48  | 0.48 | 0.22 | -1.54 | 0.171675 | 0.120987 | 0.544918 | 0.389975 |
| MmuSTS.1519.1.S1_at   | MmuSTS.1519.1 | 8.73  | 8.68  | 0.59 | 0.06 | 1.04  | 0.67858  | 0.888019 | 0.874071 | 0.936169 |
| MmuSTS.152.1.S1_at    | MmuSTS.152.1  | 10.47 | 10.9  | 0.37 | 0.16 | -1.34 | 0.200871 | 0.22632  | 0.572594 | 0.498781 |
| MmuSTS.1520.1.S1_at   | MmuSTS.1520.1 | 11.11 | 11.44 | 0.57 | 0.07 | -1.25 | 0.890056 | 0.383034 | 0.962147 | 0.619068 |
| MmuSTS.1521.1.S1_at   | MmuSTS.1521.1 | 3.82  | 3.81  | 0.32 | 0.28 | 1     | 0.412707 | 0.436756 | 0.732098 | 0.656276 |
| MmuSTS.1522.1.S1_at   | MmuSTS.1522.1 | 7.34  | 7.5   | 0.07 | 0.45 | -1.12 | 0.597177 | 0.473386 | 0.83613  | 0.68068  |
| MmuSTS.1523.1.S1_at   | MmuSTS.1523.1 | 13.43 | 13.51 | 3.15 | 0.12 | -1.06 | 0.373388 | 0.329946 | 0.705567 | 0.578874 |
| MmuSTS.1524.1.S1_at   | MmuSTS.1524.1 | 10.87 | 11.01 | 0.03 | 0.08 | -1.1  | 0.024514 | 0.020509 | 0.319083 | 0.179742 |
| MmuSTS.1525.1.S1_at   | MmuSTS.1525.1 | 6.45  | 6.36  | 1.09 | 0.27 | 1.06  | 0.809552 | 0.238817 | 0.931057 | 0.509485 |
| MmuSTS.1526.1.S1_at   | MmuSTS.1526.1 | 12.51 | 12.48 | 0.17 | 0.03 | 1.02  | 0.61817  | 0.461827 | 0.845802 | 0.673361 |
| MmuSTS.1527.1.S1_at   | MmuSTS.1527.1 | 12.52 | 12.46 | 0.02 | 0.06 | 1.04  | 0.254312 | 0.003228 | 0.618749 | 0.082124 |
| MmuSTS.1528.1.S1_at   | MmuSTS.1528.1 | 11.19 | 11.04 | 0.12 | 0.04 | 1.11  | 0.112015 | 0.1356   | 0.485105 | 0.407742 |
| MmuSTS.1529.1.S1_at   | MmuSTS.1529.1 | 12.78 | 12.76 | 0.17 | 0.02 | 1.01  | 0.879637 | 0.366761 | 0.958264 | 0.6065   |
| MmuSTS.153.1.S1_at    | MmuSTS.153.1  | 9.67  | 10.3  | 0.28 | 0.09 | -1.55 | 0.023961 | 0.01286  | 0.317529 | 0.14601  |
| MmuSTS.1530.1.S1_at   | MmuSTS.1530.1 | 5.84  | 5.76  | 0.13 | 0.22 | 1.06  | 0.999668 | 0.900243 | 0.999934 | 0.943337 |
| MmuSTS.1531.1.S1_at   | MmuSTS.1531.1 | 6.08  | 6.05  | 0.23 | 0.2  | 1.03  | 0.715384 | 0.00659  | 0.889268 | 0.110037 |
| MmuSTS.1532.1.S1_at   | MmuSTS.1532.1 | 8.71  | 8.57  | 0.08 | 0.2  | 1.1   | 0.268672 | 0.430538 | 0.628969 | 0.651544 |
| MmuSTS.1533.1.S1_at   | MmuSTS.1533.1 | 8.08  | 8.17  | 0.21 | 0.04 | -1.06 | 0.508417 | 0.316396 | 0.786972 | 0.569809 |
| MmuSTS.1533.1.S1_s_at | MmuSTS.1533.1 | 11.9  | 12.09 | 0.21 | 0.02 | -1.15 | 0.163223 | 0.184369 | 0.536063 | 0.460458 |
| MmuSTS.1534.1.S1_at   | MmuSTS.1534.1 | 9.26  | 8.86  | 0.11 | 0.18 | 1.32  | 0.069335 | 0.000656 | 0.42692  | 0.043559 |
| MmuSTS.1535.1.S1_at   | MmuSTS.1535.1 | 9.47  | 9.07  | 0.5  | 0.19 | 1.32  | 0.307514 | 0.007316 | 0.660255 | 0.114875 |
| MmuSTS.1536.1.S1_at   | MmuSTS.1536.1 | 5.18  | 5.11  | 0.15 | 0.12 | 1.05  | 0.550537 | 0.531362 | 0.810838 | 0.718591 |
| MmuSTS.1537.1.S1_at   | MmuSTS.1537.1 | 12.8  | 12.6  | 0.31 | 0.14 | 1.15  | 0.288147 | 0.07423  | 0.645269 | 0.318046 |
| MmuSTS.1538.1.S1_at   | MmuSTS.1538.1 | 6.71  | 7.79  | 0.44 | 0.2  | -2.11 | 0.024582 | 0.009582 | 0.319173 | 0.129001 |
| MmuSTS.1539.1.S1_at   | MmuSTS.1539.1 | 12.49 | 12.49 | 0.21 | 0.04 | 1     | 0.484646 | 0.002684 | 0.773768 | 0.076408 |
| MmuSTS.154.1.S1_x_at  | MmuSTS.154.1  | 4.57  | 4.1   | 0.36 | 0.08 | 1.39  | 0.084418 | 0.455816 | 0.450991 | 0.669659 |
| MmuSTS.1540.1.S1_at   | MmuSTS.1540.1 | 9.58  | 9.49  | 0.23 | 0.05 | 1.06  | 0.247588 | 0.134003 | 0.613245 | 0.406197 |
| MmuSTS.1541.1.S1_at   | MmuSTS.1541.1 | 10.53 | 11.03 | 0.2  | 0.14 | -1.42 | 0.029252 | 0.071943 | 0.333974 | 0.314293 |
| MmuSTS.1542.1.S1_at   | MmuSTS.1542.1 | 11.7  | 11.4  | 0.22 | 0.12 | 1.23  | 0.132261 | 0.01243  | 0.506752 | 0.144098 |
| MmuSTS.1543.1.S1_at   | MmuSTS.1543.1 | 3.4   | 3.28  | 0.15 | 0.03 | 1.08  | 0.72949  | 0.955964 | 0.895786 | 0.975016 |

|                       |               |       |       |      |      |       |          |          |          |          |
|-----------------------|---------------|-------|-------|------|------|-------|----------|----------|----------|----------|
| MmuSTS.1544.1.S1_at   | MmuSTS.1544.1 | 4.24  | 4.72  | 0.37 | 0.37 | -1.39 | 0.457927 | 0.577481 | 0.758619 | 0.747923 |
| MmuSTS.1545.1.S1_at   | MmuSTS.1545.1 | 7.88  | 7.92  | 0.49 | 0.07 | -1.03 | 0.587017 | 0.671012 | 0.831568 | 0.807635 |
| MmuSTS.1546.1.S1_at   | MmuSTS.1546.1 | 10.92 | 9.56  | 0.88 | 0.16 | 2.57  | 0.19595  | 0.274011 | 0.566321 | 0.538517 |
| MmuSTS.1547.1.S1_at   | MmuSTS.1547.1 | 3.57  | 3.59  | 0.06 | 0.05 | -1.02 | 0.470653 | 0.228179 | 0.766172 | 0.500351 |
| MmuSTS.1547.1.S1_s_at | MmuSTS.1547.1 | 5.49  | 5.34  | 0.43 | 0.07 | 1.11  | 0.412978 | 0.635584 | 0.732147 | 0.785437 |
| MmuSTS.1547.1.S1_x_at | MmuSTS.1547.1 | 4.21  | 4.22  | 0.17 | 0.11 | -1.01 | 0.704049 | 0.308803 | 0.884936 | 0.56463  |
| MmuSTS.1548.1.S1_at   | MmuSTS.1548.1 | 6     | 5.77  | 0.53 | 0.26 | 1.17  | 0.780376 | 0.671495 | 0.919137 | 0.807948 |
| MmuSTS.1549.1.S1_at   | MmuSTS.1549.1 | 10.49 | 10.83 | 0.42 | 0.11 | -1.26 | 0.903737 | 0.643782 | 0.967655 | 0.791128 |
| MmuSTS.155.1.S1_at    | MmuSTS.155.1  | 4.73  | 4.73  | 0.1  | 0.2  | -1    | 0.32098  | 0.268627 | 0.669558 | 0.534138 |
| MmuSTS.1550.1.S1_at   | MmuSTS.1550.1 | 10.85 | 10.87 | 0.12 | 0.06 | -1.01 | 0.653631 | 0.756472 | 0.862462 | 0.858223 |
| MmuSTS.1551.1.S1_at   | MmuSTS.1551.1 | 11.54 | 10.68 | 0.25 | 0.22 | -1.81 | 0.010434 | 0.00121  | 0.247969 | 0.054455 |
| MmuSTS.1552.1.S1_x_at | MmuSTS.1552.1 | 7.9   | 7.71  | 0.12 | 0.07 | 1.14  | 0.065507 | 0.053152 | 0.420827 | 0.276345 |
| MmuSTS.1553.1.S1_at   | MmuSTS.1553.1 | 8.1   | 8.54  | 0.19 | 0.03 | -1.36 | 0.009237 | 0.001863 | 0.241866 | 0.064697 |
| MmuSTS.1554.1.S1_at   | MmuSTS.1554.1 | 9.2   | 9.01  | 0.54 | 0.04 | 1.14  | 0.614827 | 0.274046 | 0.844082 | 0.538527 |
| MmuSTS.1555.1.S1_at   | MmuSTS.1555.1 | 10.44 | 10.93 | 0.5  | 0.13 | -1.41 | 0.645205 | 0.669964 | 0.858728 | 0.806982 |
| MmuSTS.1556.1.S1_at   | MmuSTS.1556.1 | 7.89  | 7.39  | 0.28 | 0.26 | 1.42  | 0.049543 | 0.012807 | 0.385783 | 0.145832 |
| MmuSTS.1557.1.S1_at   | MmuSTS.1557.1 | 11.15 | 10.88 | 0.35 | 0.1  | 1.21  | 0.4008   | 0.549252 | 0.723941 | 0.729737 |
| MmuSTS.1558.1.S1_at   | MmuSTS.1558.1 | 8.89  | 8.79  | 0.26 | 0.36 | 1.07  | 0.91726  | 0.008142 | 0.97197  | 0.119736 |
| MmuSTS.1559.1.S1_at   | MmuSTS.1559.1 | 10.62 | 11.29 | 0.05 | 0.09 | -1.59 | 0.000341 | 0.116709 | 0.137028 | 0.383888 |
| MmuSTS.156.1.S1_at    | MmuSTS.156.1  | 11.52 | 10.97 | 0.29 | 0.05 | 1.46  | 0.037838 | 0.021079 | 0.358028 | 0.181869 |
| MmuSTS.1560.1.S1_at   | MmuSTS.1560.1 | 7.52  | 7.75  | 0.65 | 0.1  | -1.17 | 0.554907 | 0.96014  | 0.813059 | 0.977408 |
| MmuSTS.1561.1.S1_s_at | MmuSTS.1561.1 | 12.61 | 12.39 | 0.1  | 0.05 | 1.16  | 0.028976 | 0.016977 | 0.333482 | 0.165195 |
| MmuSTS.1562.1.S1_at   | MmuSTS.1562.1 | 3.14  | 3.5   | 0.16 | 0.15 | -1.29 | 0.098871 | 0.072879 | 0.468274 | 0.315928 |
| MmuSTS.1563.1.S1_at   | MmuSTS.1563.1 | 9.3   | 9.29  | 0.64 | 0.26 | 1.01  | 0.765365 | 0.024642 | 0.911776 | 0.196442 |
| MmuSTS.1564.1.S1_at   | MmuSTS.1564.1 | 8.88  | 9.29  | 2.64 | 0.34 | -1.33 | 0.520078 | 0.155379 | 0.793498 | 0.430771 |
| MmuSTS.1565.1.S1_at   | MmuSTS.1565.1 | 7.15  | 7.03  | 0.75 | 0.22 | 1.08  | 0.786586 | 0.018885 | 0.921566 | 0.172872 |
| MmuSTS.1566.1.S1_at   | MmuSTS.1566.1 | 5.45  | 6.92  | 1.38 | 0.27 | -2.77 | 0.551337 | 0.13915  | 0.811314 | 0.412266 |
| MmuSTS.1567.1.S1_at   | MmuSTS.1567.1 | 8.81  | 8.6   | 0.27 | 0.17 | 1.16  | 0.532407 | 0.665348 | 0.800287 | 0.803901 |
| MmuSTS.1568.1.S1_at   | MmuSTS.1568.1 | 4.76  | 4.58  | 0.13 | 0.1  | 1.13  | 0.307185 | 0.404997 | 0.660096 | 0.633428 |
| MmuSTS.1569.1.S1_at   | MmuSTS.1569.1 | 3.66  | 3.62  | 0.38 | 0.22 | 1.02  | 0.385963 | 0.548451 | 0.713136 | 0.729185 |
| MmuSTS.157.1.S1_at    | MmuSTS.157.1  | 6.33  | 6.35  | 0.23 | 0.27 | -1.02 | 0.286948 | 0.010909 | 0.644004 | 0.136002 |
| MmuSTS.1570.1.S1_at   | MmuSTS.1570.1 | 9.85  | 10.13 | 0.43 | 0    | -1.21 | 0.316247 | 0.285107 | 0.666364 | 0.547098 |
| MmuSTS.1571.1.S1_at   | MmuSTS.1571.1 | 10.04 | 9.99  | 0.25 | 0.14 | 1.04  | 0.169145 | 0.002703 | 0.542061 | 0.076461 |
| MmuSTS.1572.1.S1_at   | MmuSTS.1572.1 | 9.54  | 9.52  | 0.36 | 0.07 | 1.01  | 0.995602 | 0.709791 | 0.998302 | 0.831832 |
| MmuSTS.1573.1.S1_at   | MmuSTS.1573.1 | 10.59 | 10.46 | 0.09 | 0.11 | 1.09  | 0.149032 | 0.038143 | 0.522942 | 0.239936 |
| MmuSTS.1574.1.S1_at   | MmuSTS.1574.1 | 7.53  | 7.36  | 0.1  | 0.09 | 1.12  | 0.087598 | 0.032213 | 0.455349 | 0.222139 |
| MmuSTS.1575.1.S1_at   | MmuSTS.1575.1 | 3.39  | 3.36  | 0.15 | 0.11 | 1.02  | 0.805898 | 0.830992 | 0.929557 | 0.903044 |
| MmuSTS.1576.1.S1_at   | MmuSTS.1576.1 | 4.34  | 4.82  | 0.26 | 0.18 | -1.4  | 0.1878   | 0.1846   | 0.560011 | 0.460628 |
| MmuSTS.1577.1.S1_at   | MmuSTS.1577.1 | 10.25 | 9.97  | 0.56 | 0.07 | 1.21  | 0.321755 | 0.068934 | 0.670529 | 0.308909 |
| MmuSTS.1578.1.S1_at   | MmuSTS.1578.1 | 11.13 | 11.22 | 0.48 | 0.09 | -1.06 | 0.961156 | 0.083673 | 0.987225 | 0.334346 |
| MmuSTS.1579.1.S1_at   | MmuSTS.1579.1 | 8.87  | 9.55  | 0.52 | 0.21 | -1.6  | 0.227571 | 0.281564 | 0.596693 | 0.54464  |
| MmuSTS.158.1.S1_at    | MmuSTS.158.1  | 6.6   | 6.62  | 1.07 | 0.07 | -1.01 | 0.969797 | 0.648168 | 0.990053 | 0.794002 |
| MmuSTS.1580.1.S1_at   | MmuSTS.1580.1 | 10.2  | 10.38 | 0.94 | 0.23 | -1.13 | 0.595857 | 0.385653 | 0.835646 | 0.621079 |

|                       |               |       |       |      |      |       |          |          |          |          |
|-----------------------|---------------|-------|-------|------|------|-------|----------|----------|----------|----------|
| MmuSTS.1581.1.S1_at   | MmuSTS.1581.1 | 12.5  | 12.41 | 2.07 | 0.23 | 1.06  | 0.475698 | 0.170182 | 0.768676 | 0.446906 |
| MmuSTS.1582.1.S1_s_at | MmuSTS.1582.1 | 8.42  | 7.82  | 0.19 | 0.54 | 1.51  | 0.144508 | 0.1358   | 0.519872 | 0.407979 |
| MmuSTS.1583.1.S1_at   | MmuSTS.1583.1 | 7.02  | 7.7   | 0.06 | 0.21 | -1.6  | 0.004105 | 0.000259 | 0.198572 | 0.033501 |
| MmuSTS.1584.1.S1_at   | MmuSTS.1584.1 | 10.34 | 10.89 | 0.26 | 0.05 | -1.46 | 0.01086  | 0.002246 | 0.250539 | 0.069739 |
| MmuSTS.1585.1.S1_at   | MmuSTS.1585.1 | 5.96  | 6.28  | 0.16 | 0.13 | -1.25 | 0.124526 | 0.220673 | 0.49855  | 0.494087 |
| MmuSTS.1586.1.S1_at   | MmuSTS.1586.1 | 4.72  | 4.7   | 0.07 | 0.08 | 1.01  | 0.181039 | 0.491882 | 0.554326 | 0.693275 |
| MmuSTS.1587.1.S1_at   | MmuSTS.1587.1 | 5.01  | 5.06  | 0.33 | 0.12 | -1.04 | 0.36577  | 0.563892 | 0.701331 | 0.738913 |
| MmuSTS.1588.1.S1_at   | MmuSTS.1588.1 | 10.17 | 10.59 | 0.12 | 0.12 | -1.33 | 0.010306 | 0.004159 | 0.246929 | 0.091036 |
| MmuSTS.1589.1.S1_at   | MmuSTS.1589.1 | 10.91 | 10.91 | 0.29 | 0.07 | 1     | 0.307431 | 0.634381 | 0.660255 | 0.784774 |
| MmuSTS.159.1.S1_at    | MmuSTS.159.1  | 10.25 | 10.7  | 0.92 | 0.06 | -1.37 | 0.486706 | 0.052559 | 0.774667 | 0.274848 |
| MmuSTS.1590.1.S1_at   | MmuSTS.1590.1 | 10.27 | 9.5   | 0.35 | 0.15 | 1.7   | 0.015071 | 0.018796 | 0.2796   | 0.172349 |
| MmuSTS.1591.1.S1_at   | MmuSTS.1591.1 | 12.99 | 12.77 | 0.38 | 0.12 | 1.17  | 0.809748 | 0.713279 | 0.931163 | 0.833666 |
| MmuSTS.1592.1.S1_at   | MmuSTS.1592.1 | 5.44  | 5.87  | 0.41 | 0.22 | -1.35 | 0.184129 | 0.224061 | 0.55696  | 0.497048 |
| MmuSTS.1593.1.S1_at   | MmuSTS.1593.1 | 11.51 | 11.56 | 0.18 | 0.08 | -1.04 | 0.869067 | 0.561177 | 0.954233 | 0.737224 |
| MmuSTS.1594.1.S1_at   | MmuSTS.1594.1 | 10.19 | 10.92 | 0.63 | 0.07 | -1.65 | 0.151297 | 0.182038 | 0.524506 | 0.45857  |
| MmuSTS.1595.1.S1_at   | MmuSTS.1595.1 | 12.06 | 11.56 | 0.24 | 0.06 | 1.41  | 0.023773 | 0.002467 | 0.316721 | 0.073576 |
| MmuSTS.1596.1.S1_at   | MmuSTS.1596.1 | 7.66  | 7.5   | 0.31 | 0.13 | 1.12  | 0.49762  | 0.323809 | 0.781216 | 0.574609 |
| MmuSTS.1597.1.S1_at   | MmuSTS.1597.1 | 11.66 | 11.81 | 0.18 | 0.01 | -1.1  | 0.077788 | 0.17245  | 0.439884 | 0.448864 |
| MmuSTS.1598.1.S1_at   | MmuSTS.1598.1 | 5.13  | 5.06  | 0.06 | 0.07 | 1.05  | 0.285226 | 0.32621  | 0.643077 | 0.576411 |
| MmuSTS.1599.1.S1_at   | MmuSTS.1599.1 | 3.35  | 3.61  | 0.21 | 0.37 | -1.2  | 0.333739 | 0.677705 | 0.679885 | 0.811777 |
| MmuSTS.16.1.S1_s_at   | MmuSTS.16.1   | 14.2  | 14.16 | 0.18 | 0.02 | 1.03  | 0.744466 | 0.14063  | 0.90255  | 0.413897 |
| MmuSTS.16.1.S1_x_at   | MmuSTS.16.1   | 9.57  | 9.49  | 0.14 | 0.08 | 1.06  | 0.336702 | 0.099293 | 0.682087 | 0.357562 |
| MmuSTS.160.1.S1_at    | MmuSTS.160.1  | 5.2   | 5.11  | 0.33 | 0.01 | 1.07  | 0.945007 | 0.413566 | 0.980852 | 0.639648 |
| MmuSTS.1600.1.S1_at   | MmuSTS.1600.1 | 7     | 6.62  | 0.23 | 0.45 | 1.31  | 0.991358 | 0.062002 | 0.996656 | 0.295878 |
| MmuSTS.1601.1.S1_at   | MmuSTS.1601.1 | 7.96  | 7.61  | 0.32 | 0.1  | 1.28  | 0.133575 | 0.093326 | 0.508012 | 0.349412 |
| MmuSTS.1602.1.S1_at   | MmuSTS.1602.1 | 6.16  | 6.14  | 0.18 | 0.02 | 1.02  | 0.31129  | 0.455017 | 0.663162 | 0.66903  |
| MmuSTS.1603.1.S1_at   | MmuSTS.1603.1 | 4.04  | 4.86  | 0.3  | 0.46 | -1.77 | 0.097438 | 0.129751 | 0.466372 | 0.401362 |
| MmuSTS.1604.1.S1_at   | MmuSTS.1604.1 | 3.51  | 3.35  | 0.17 | 0.17 | 1.12  | 0.121215 | 0.170343 | 0.494848 | 0.447103 |
| MmuSTS.1605.1.S1_at   | MmuSTS.1605.1 | 5.53  | 5.6   | 0.05 | 0.15 | -1.05 | 0.894076 | 0.475252 | 0.963672 | 0.682031 |
| MmuSTS.1606.1.S1_at   | MmuSTS.1606.1 | 5.18  | 5.84  | 1.45 | 0.32 | -1.57 | 0.481828 | 0.58586  | 0.772261 | 0.753074 |
| MmuSTS.1607.1.S1_at   | MmuSTS.1607.1 | 8.22  | 9.34  | 0.23 | 0.47 | -2.17 | 0.016356 | 0.01369  | 0.287478 | 0.14978  |
| MmuSTS.1608.1.S1_at   | MmuSTS.1608.1 | 10.86 | 11.56 | 0.19 | 0.06 | -1.62 | 0.003067 | 0.005129 | 0.191107 | 0.099421 |
| MmuSTS.1609.1.S1_at   | MmuSTS.1609.1 | 6.78  | 6.77  | 0.22 | 0.2  | 1     | 0.988469 | 0.999081 | 0.995877 | 0.999573 |
| MmuSTS.161.1.S1_at    | MmuSTS.161.1  | 7.4   | 8.2   | 0.02 | 0.17 | -1.74 | 0.000912 | 0.000326 | 0.153739 | 0.035633 |
| MmuSTS.1610.1.S1_at   | MmuSTS.1610.1 | 11.02 | 10.25 | 0.47 | 0.17 | 1.71  | 0.150401 | 0.154623 | 0.523988 | 0.429518 |
| MmuSTS.1611.1.S1_at   | MmuSTS.1611.1 | 11.84 | 11.41 | 0.37 | 0.07 | 1.35  | 0.369631 | 0.5648   | 0.704264 | 0.739427 |
| MmuSTS.1612.1.S1_at   | MmuSTS.1612.1 | 7.3   | 6.82  | 1.96 | 0.3  | 1.39  | 0.891121 | 0.194696 | 0.962566 | 0.469765 |
| MmuSTS.1613.1.S1_at   | MmuSTS.1613.1 | 10.8  | 9.72  | 0.3  | 0.17 | 2.11  | 0.006979 | 0.001591 | 0.225012 | 0.06044  |
| MmuSTS.1614.1.S1_at   | MmuSTS.1614.1 | 11.48 | 11.87 | 0.18 | 0.08 | -1.32 | 0.036119 | 0.03391  | 0.354389 | 0.227771 |
| MmuSTS.1615.1.S1_at   | MmuSTS.1615.1 | 6.23  | 6.11  | 0.03 | 0.03 | 1.09  | 0.008637 | 0.52821  | 0.236048 | 0.716462 |
| MmuSTS.1616.1.S1_at   | MmuSTS.1616.1 | 4.32  | 4.25  | 0.11 | 0.01 | 1.05  | 0.913519 | 0.936485 | 0.970603 | 0.964171 |
| MmuSTS.1617.1.S1_at   | MmuSTS.1617.1 | 8.75  | 8.63  | 0.37 | 0    | 1.09  | 0.208336 | 0.048096 | 0.580006 | 0.26436  |
| MmuSTS.1618.1.S1_at   | MmuSTS.1618.1 | 10.79 | 10.95 | 0.18 | 0.05 | -1.12 | 0.291023 | 0.000306 | 0.647518 | 0.034918 |

|                       |               |       |       |      |      |       |          |          |          |          |
|-----------------------|---------------|-------|-------|------|------|-------|----------|----------|----------|----------|
| MmuSTS.1619.1.S1_at   | MmuSTS.1619.1 | 9.19  | 9.34  | 0.15 | 0.35 | -1.11 | 0.295029 | 0.004917 | 0.650971 | 0.097749 |
| MmuSTS.162.1.S1_at    | MmuSTS.162.1  | 6.89  | 8.12  | 0.94 | 0.34 | -2.35 | 0.171366 | 0.172008 | 0.544591 | 0.448404 |
| MmuSTS.1620.1.S1_at   | MmuSTS.1620.1 | 11.2  | 10.59 | 0.08 | 0.18 | 1.53  | 0.006969 | 0.109477 | 0.225012 | 0.373337 |
| MmuSTS.1621.1.S1_at   | MmuSTS.1621.1 | 4.41  | 4.24  | 0.03 | 0.11 | 1.13  | 0.050214 | 0.078096 | 0.386906 | 0.324578 |
| MmuSTS.1622.1.S1_s_at | MmuSTS.1622.1 | 3.79  | 3.77  | 0.2  | 0.21 | 1.01  | 0.683066 | 0.857141 | 0.876006 | 0.918378 |
| MmuSTS.1623.1.S1_at   | MmuSTS.1623.1 | 4.24  | 4.74  | 0.25 | 0.05 | -1.42 | 0.092659 | 0.031978 | 0.461192 | 0.221216 |
| MmuSTS.1624.1.S1_s_at | MmuSTS.1624.1 | 4.4   | 4.19  | 0.17 | 0.06 | 1.16  | 0.290789 | 0.415289 | 0.647362 | 0.640769 |
| MmuSTS.1625.1.S1_at   | MmuSTS.1625.1 | 3.17  | 3.01  | 0.13 | 0.09 | 1.12  | 0.086469 | 0.074721 | 0.454228 | 0.318465 |
| MmuSTS.1626.1.S1_at   | MmuSTS.1626.1 | 9.16  | 9.09  | 0.45 | 0.03 | 1.05  | 0.868862 | 0.898777 | 0.954083 | 0.942417 |
| MmuSTS.1627.1.S1_at   | MmuSTS.1627.1 | 11.73 | 11.82 | 0.1  | 0.05 | -1.06 | 0.372531 | 0.638254 | 0.705567 | 0.787493 |
| MmuSTS.1628.1.S1_at   | MmuSTS.1628.1 | 3.28  | 3.24  | 0.1  | 0.07 | -1.03 | 0.829273 | 0.957859 | 0.938748 | 0.976177 |
| MmuSTS.1629.1.S1_at   | MmuSTS.1629.1 | 4.47  | 4.1   | 0.21 | 0.01 | 1.29  | 0.0234   | 0.024227 | 0.315397 | 0.194908 |
| MmuSTS.163.1.S1_at    | MmuSTS.163.1  | 3.32  | 3.39  | 0.2  | 0.01 | -1.05 | 0.703    | 0.824624 | 0.884538 | 0.899309 |
| MmuSTS.1630.1.S1_s_at | MmuSTS.1630.1 | 6.66  | 6.57  | 0.09 | 0.05 | 1.06  | 0.222563 | 0.34076  | 0.592079 | 0.586956 |
| MmuSTS.1631.1.S1_s_at | MmuSTS.1631.1 | 7.62  | 7.43  | 0.08 | 0.08 | 1.14  | 0.028117 | 0.131305 | 0.330603 | 0.403407 |
| MmuSTS.1632.1.S1_s_at | MmuSTS.1632.1 | 3.95  | 4.06  | 0.12 | 0.07 | -1.08 | 0.584115 | 0.774721 | 0.829463 | 0.868833 |
| MmuSTS.1633.1.S1_at   | MmuSTS.1633.1 | 5.48  | 5.52  | 0.25 | 0.06 | -1.02 | 0.52754  | 0.504308 | 0.797158 | 0.701474 |
| MmuSTS.1634.1.S1_at   | MmuSTS.1634.1 | 3.57  | 3.56  | 0.15 | 0.01 | 1     | 0.391622 | 0.34967  | 0.717611 | 0.593563 |
| MmuSTS.1635.1.S1_at   | MmuSTS.1635.1 | 6.26  | 6.29  | 0.13 | 0.09 | -1.02 | 0.44832  | 0.301337 | 0.753886 | 0.559366 |
| MmuSTS.1636.1.S1_at   | MmuSTS.1636.1 | 4.11  | 4.16  | 0.03 | 0.05 | -1.03 | 0.13826  | 0.241533 | 0.513671 | 0.512152 |
| MmuSTS.1637.1.S1_at   | MmuSTS.1637.1 | 3.16  | 3.18  | 0.1  | 0.1  | -1.01 | 0.949052 | 0.95733  | 0.982717 | 0.975845 |
| MmuSTS.1638.1.S1_at   | MmuSTS.1638.1 | 3.89  | 3.74  | 0.05 | 0.57 | 1.11  | 0.601964 | 0.798384 | 0.838675 | 0.883979 |
| MmuSTS.1639.1.S1_at   | MmuSTS.1639.1 | 6.06  | 5.99  | 0.07 | 0.06 | 1.05  | 0.218786 | 0.704615 | 0.588341 | 0.828649 |
| MmuSTS.164.1.S1_at    | MmuSTS.164.1  | 8.83  | 8.2   | 1.26 | 0.43 | 1.54  | 0.757002 | 0.186631 | 0.908344 | 0.462425 |
| MmuSTS.1640.1.S1_at   | MmuSTS.1640.1 | 11.75 | 11.97 | 0.46 | 0.03 | -1.16 | 0.15705  | 0.078707 | 0.530266 | 0.325673 |
| MmuSTS.1641.1.S1_at   | MmuSTS.1641.1 | 6.36  | 6.16  | 0.2  | 0.23 | 1.15  | 0.149376 | 0.191658 | 0.523208 | 0.466936 |
| MmuSTS.1642.1.S1_at   | MmuSTS.1642.1 | 6.22  | 5.96  | 0.11 | 0.04 | 1.2   | 0.016608 | 0.073292 | 0.287478 | 0.316241 |
| MmuSTS.1643.1.S1_at   | MmuSTS.1643.1 | 6.3   | 6.4   | 0.13 | 0.1  | -1.07 | 0.963584 | 0.930115 | 0.988152 | 0.96025  |
| MmuSTS.1644.1.S1_at   | MmuSTS.1644.1 | 10.2  | 10.7  | 0.05 | 0.09 | -1.41 | 0.001182 | 0.002696 | 0.156386 | 0.076455 |
| MmuSTS.1645.1.S1_at   | MmuSTS.1645.1 | 5.25  | 5.27  | 0.05 | 0.06 | -1.01 | 0.394285 | 0.808786 | 0.719675 | 0.889895 |
| MmuSTS.1646.1.S1_at   | MmuSTS.1646.1 | 11.17 | 11.08 | 0.15 | 0.05 | 1.07  | 0.469821 | 0.304239 | 0.765678 | 0.561558 |
| MmuSTS.1647.1.S1_at   | MmuSTS.1647.1 | 4.45  | 4.2   | 0.16 | 0.09 | 1.19  | 0.120362 | 0.133569 | 0.49361  | 0.405542 |
| MmuSTS.1648.1.S1_at   | MmuSTS.1648.1 | 8.75  | 9.55  | 0.25 | 0.06 | -1.74 | 0.005343 | 0.001062 | 0.207831 | 0.051766 |
| MmuSTS.1649.1.S1_at   | MmuSTS.1649.1 | 7.8   | 7.17  | 1.54 | 1.76 | 1.55  | 0.728648 | 0.939446 | 0.895285 | 0.965611 |
| MmuSTS.165.1.S1_at    | MmuSTS.165.1  | 10.32 | 11.09 | 0.47 | 0.12 | -1.71 | 0.016179 | 0.009124 | 0.286419 | 0.125994 |
| MmuSTS.1650.1.S1_at   | MmuSTS.1650.1 | 9.32  | 9.34  | 0.09 | 0.08 | -1.01 | 0.809756 | 0.021699 | 0.931163 | 0.184333 |
| MmuSTS.1651.1.S1_at   | MmuSTS.1651.1 | 8.74  | 9.76  | 0.3  | 0.07 | -2.03 | 0.008687 | 0.000305 | 0.236048 | 0.034907 |
| MmuSTS.1652.1.S1_at   | MmuSTS.1652.1 | 9.03  | 9.57  | 0.47 | 0.21 | -1.46 | 0.140716 | 0.168741 | 0.51617  | 0.445379 |
| MmuSTS.1653.1.S1_at   | MmuSTS.1653.1 | 9.34  | 8.73  | 0.44 | 0.61 | 1.53  | 0.983777 | 0.009047 | 0.995094 | 0.1257   |
| MmuSTS.1654.1.S1_at   | MmuSTS.1654.1 | 2.72  | 2.61  | 0.12 | 0.07 | 1.08  | 0.258054 | 0.071879 | 0.621788 | 0.314181 |
| MmuSTS.1654.1.S1_s_at | MmuSTS.1654.1 | 5.03  | 5.02  | 0.08 | 0.01 | 1     | 0.818963 | 0.678934 | 0.934641 | 0.81252  |
| MmuSTS.1655.1.S1_at   | MmuSTS.1655.1 | 12.02 | 12.43 | 0.16 | 0.02 | -1.33 | 0.011834 | 0.000402 | 0.257666 | 0.037471 |
| MmuSTS.1656.1.S1_at   | MmuSTS.1656.1 | 5.49  | 5.66  | 0.22 | 0.03 | -1.13 | 0.595452 | 0.821313 | 0.835419 | 0.897125 |

|                       |               |       |       |      |      |       |          |          |          |          |
|-----------------------|---------------|-------|-------|------|------|-------|----------|----------|----------|----------|
| MmuSTS.1657.1.S1_at   | MmuSTS.1657.1 | 5.55  | 5.36  | 0.08 | 0.09 | 1.14  | 0.05659  | 0.125096 | 0.400779 | 0.395506 |
| MmuSTS.1658.1.S1_at   | MmuSTS.1658.1 | 8.46  | 8.36  | 0.16 | 0.07 | 1.07  | 0.297993 | 0.021195 | 0.652803 | 0.182325 |
| MmuSTS.1659.1.S1_at   | MmuSTS.1659.1 | 12.06 | 12.03 | 0.69 | 0.13 | 1.02  | 0.831981 | 0.176846 | 0.93974  | 0.453284 |
| MmuSTS.166.1.S1_at    | MmuSTS.166.1  | 13.23 | 13.1  | 0.15 | 0.17 | 1.09  | 0.652762 | 0.032352 | 0.86202  | 0.222667 |
| MmuSTS.1660.1.S1_at   | MmuSTS.1660.1 | 8.33  | 8.95  | 0.29 | 0.06 | -1.54 | 0.026681 | 0.000574 | 0.325897 | 0.041171 |
| MmuSTS.1661.1.S1_at   | MmuSTS.1661.1 | 6.22  | 6.22  | 0.22 | 0.04 | -1    | 0.764196 | 0.258568 | 0.911428 | 0.525819 |
| MmuSTS.1662.1.S1_at   | MmuSTS.1662.1 | 6.61  | 6.81  | 0.08 | 0.18 | -1.15 | 0.200627 | 0.100432 | 0.572447 | 0.359541 |
| MmuSTS.1663.1.S1_at   | MmuSTS.1663.1 | 8.96  | 8.88  | 0.23 | 0.14 | 1.06  | 0.647004 | 0.004923 | 0.859341 | 0.097801 |
| MmuSTS.1664.1.S1_at   | MmuSTS.1664.1 | 5.77  | 6.56  | 0.69 | 0.4  | -1.73 | 0.4369   | 0.549955 | 0.746613 | 0.730193 |
| MmuSTS.1665.1.S1_at   | MmuSTS.1665.1 | 9.07  | 9.25  | 0.25 | 0.1  | -1.14 | 0.400512 | 0.547997 | 0.723841 | 0.72884  |
| MmuSTS.1666.1.S1_at   | MmuSTS.1666.1 | 6.07  | 6.05  | 0.19 | 0.06 | -1.01 | 0.345041 | 0.528755 | 0.68735  | 0.716808 |
| MmuSTS.1667.1.S1_at   | MmuSTS.1667.1 | 4.92  | 4.91  | 0.09 | 0.04 | 1.01  | 0.287517 | 0.75282  | 0.644595 | 0.855977 |
| MmuSTS.1668.1.S1_at   | MmuSTS.1668.1 | 11.16 | 10.45 | 0.2  | 0.14 | 1.63  | 0.006422 | 0.010753 | 0.219166 | 0.135417 |
| MmuSTS.1669.1.S1_at   | MmuSTS.1669.1 | 7.34  | 6.85  | 0.43 | 0.14 | 1.4   | 0.116336 | 0.081186 | 0.489568 | 0.329351 |
| MmuSTS.167.1.S1_at    | MmuSTS.167.1  | 11.66 | 11.92 | 0.14 | 0.05 | -1.2  | 0.05173  | 0.181816 | 0.391209 | 0.458382 |
| MmuSTS.1670.1.S1_at   | MmuSTS.1670.1 | 8.12  | 9.16  | 0.3  | 0.09 | -2.06 | 0.002468 | 0.029451 | 0.177304 | 0.213368 |
| MmuSTS.1671.1.S1_at   | MmuSTS.1671.1 | 12.33 | 12.28 | 0.25 | 0.02 | 1.04  | 0.744931 | 0.550756 | 0.902816 | 0.730611 |
| MmuSTS.1672.1.S1_at   | MmuSTS.1672.1 | 5.89  | 6.06  | 0.32 | 0.16 | -1.12 | 0.645693 | 0.786368 | 0.858801 | 0.876293 |
| MmuSTS.1673.1.S1_at   | MmuSTS.1673.1 | 12.38 | 12.34 | 0.09 | 0.01 | 1.03  | 0.594441 | 0.002477 | 0.834747 | 0.073576 |
| MmuSTS.1674.1.S1_at   | MmuSTS.1674.1 | 10.94 | 11.08 | 0.15 | 0.2  | -1.1  | 0.997081 | 0.981758 | 0.998914 | 0.989984 |
| MmuSTS.1675.1.S1_at   | MmuSTS.1675.1 | 12.03 | 12.12 | 0.18 | 0.05 | -1.07 | 0.636757 | 0.743888 | 0.855278 | 0.85159  |
| MmuSTS.1676.1.S1_at   | MmuSTS.1676.1 | 8.9   | 9.64  | 0.54 | 0.16 | -1.67 | 0.078461 | 0.050383 | 0.441003 | 0.269722 |
| MmuSTS.1677.1.S1_at   | MmuSTS.1677.1 | 3.55  | 3.31  | 0.1  | 0.09 | 1.18  | 0.032621 | 0.011774 | 0.345041 | 0.140572 |
| MmuSTS.1678.1.S1_at   | MmuSTS.1678.1 | 7.07  | 7.19  | 0.35 | 0.15 | -1.09 | 0.5092   | 0.763194 | 0.787544 | 0.862339 |
| MmuSTS.1679.1.S1_at   | MmuSTS.1679.1 | 7.22  | 7.4   | 0.56 | 0.18 | -1.13 | 0.980845 | 0.283518 | 0.993918 | 0.545959 |
| MmuSTS.168.1.S1_s_at  | MmuSTS.168.1  | 10.99 | 10.27 | 0.47 | 0.08 | 1.65  | 0.062666 | 0.014206 | 0.413501 | 0.152207 |
| MmuSTS.168.1.S1_x_at  | MmuSTS.168.1  | 10.37 | 9.5   | 0.39 | 0.04 | 1.82  | 0.018085 | 0.002137 | 0.295257 | 0.06842  |
| MmuSTS.1680.1.S1_s_at | MmuSTS.1680.1 | 4.89  | 4.69  | 0.09 | 0.04 | 1.15  | 0.010201 | 0.009076 | 0.246929 | 0.125944 |
| MmuSTS.1681.1.S1_at   | MmuSTS.1681.1 | 7.72  | 7.55  | 0.33 | 0.1  | 1.12  | 0.323563 | 0.430325 | 0.672279 | 0.651371 |
| MmuSTS.1682.1.S1_at   | MmuSTS.1682.1 | 12.07 | 11.99 | 0.61 | 0.03 | 1.05  | 0.721143 | 0.773603 | 0.891938 | 0.868402 |
| MmuSTS.1683.1.S1_at   | MmuSTS.1683.1 | 8.31  | 8.61  | 0.23 | 0.03 | -1.24 | 0.087028 | 0.006155 | 0.454785 | 0.106774 |
| MmuSTS.1684.1.S1_at   | MmuSTS.1684.1 | 8.14  | 8.68  | 0.4  | 0.2  | -1.46 | 0.29534  | 0.178138 | 0.651062 | 0.454508 |
| MmuSTS.1685.1.S1_at   | MmuSTS.1685.1 | 7.79  | 8.23  | 0.13 | 0.22 | -1.35 | 0.026703 | 0.003762 | 0.325965 | 0.087395 |
| MmuSTS.1686.1.S1_at   | MmuSTS.1686.1 | 5.99  | 5.91  | 0.11 | 0.07 | 1.06  | 0.153435 | 0.145485 | 0.526539 | 0.419424 |
| MmuSTS.1687.1.S1_at   | MmuSTS.1687.1 | 12.02 | 11.98 | 0.3  | 0.08 | 1.03  | 0.851044 | 0.051215 | 0.947526 | 0.271799 |
| MmuSTS.1688.1.S1_at   | MmuSTS.1688.1 | 3.62  | 3.66  | 0.12 | 0.04 | -1.03 | 0.297379 | 0.095467 | 0.652737 | 0.352482 |
| MmuSTS.1689.1.S1_at   | MmuSTS.1689.1 | 9.3   | 9.33  | 0.68 | 0.25 | -1.03 | 0.898035 | 0.011344 | 0.965441 | 0.13815  |
| MmuSTS.169.1.S1_at    | MmuSTS.169.1  | 7.88  | 7.55  | 0.38 | 0.05 | 1.26  | 0.205974 | 0.263962 | 0.5779   | 0.530153 |
| MmuSTS.1690.1.S1_at   | MmuSTS.1690.1 | 5.87  | 5.8   | 0.07 | 0.02 | 1.05  | 0.191511 | 0.899627 | 0.562859 | 0.942903 |
| MmuSTS.1691.1.S1_at   | MmuSTS.1691.1 | 4.16  | 4.43  | 0.54 | 0.11 | -1.2  | 0.895708 | 0.986498 | 0.964355 | 0.992355 |
| MmuSTS.1692.1.S1_at   | MmuSTS.1692.1 | 9     | 8.99  | 0.18 | 0.04 | 1.01  | 0.960276 | 0.382609 | 0.987127 | 0.618778 |
| MmuSTS.1693.1.S1_at   | MmuSTS.1693.1 | 6.04  | 7.49  | 0.51 | 0.13 | -2.75 | 0.015063 | 0.171338 | 0.2796   | 0.447813 |
| MmuSTS.1694.1.S1_at   | MmuSTS.1694.1 | 9.09  | 9.13  | 0.17 | 0.06 | -1.03 | 0.729396 | 0.806882 | 0.895753 | 0.888872 |

|                       |               |       |       |      |      |       |          |          |          |          |
|-----------------------|---------------|-------|-------|------|------|-------|----------|----------|----------|----------|
| MmuSTS.1695.1.S1_at   | MmuSTS.1695.1 | 10.38 | 10.74 | 0.16 | 0.06 | -1.29 | 0.075588 | 0.024419 | 0.436722 | 0.195563 |
| MmuSTS.1696.1.S1_at   | MmuSTS.1696.1 | 2.77  | 2.89  | 0.01 | 0.14 | -1.08 | 0.192764 | 0.271792 | 0.563577 | 0.536577 |
| MmuSTS.1697.1.S1_at   | MmuSTS.1697.1 | 11.96 | 12.22 | 0.25 | 0.03 | -1.2  | 0.179299 | 0.249111 | 0.552498 | 0.51821  |
| MmuSTS.1698.1.S1_s_at | MmuSTS.1698.1 | 6.35  | 6.16  | 0.81 | 0.32 | 1.14  | 0.711231 | 0.422393 | 0.887567 | 0.645722 |
| MmuSTS.1699.1.S1_at   | MmuSTS.1699.1 | 6.8   | 6.7   | 0.15 | 0.06 | 1.08  | 0.167804 | 0.281071 | 0.540451 | 0.54422  |
| MmuSTS.17.1.S1_at     | MmuSTS.17.1   | 9.19  | 9.52  | 0.26 | 0.03 | -1.26 | 0.092562 | 0.053844 | 0.461192 | 0.277598 |
| MmuSTS.170.1.S1_at    | MmuSTS.170.1  | 8.08  | 8.16  | 0.25 | 0.12 | -1.05 | 0.853555 | 0.481406 | 0.948299 | 0.686434 |
| MmuSTS.1700.1.S1_at   | MmuSTS.1700.1 | 10.35 | 10.29 | 0.32 | 0.05 | 1.04  | 0.215305 | 0.443871 | 0.585748 | 0.661533 |
| MmuSTS.1701.1.S1_at   | MmuSTS.1701.1 | 8.48  | 8.39  | 0.91 | 0.35 | 1.06  | 0.742472 | 0.330462 | 0.901798 | 0.579193 |
| MmuSTS.1702.1.S1_at   | MmuSTS.1702.1 | 10    | 10.17 | 0.4  | 0.05 | -1.12 | 0.889943 | 0.369206 | 0.962084 | 0.608669 |
| MmuSTS.1703.1.S1_at   | MmuSTS.1703.1 | 4.98  | 4.92  | 0.09 | 0.08 | 1.04  | 0.402125 | 0.610792 | 0.724846 | 0.768889 |
| MmuSTS.1704.1.S1_at   | MmuSTS.1704.1 | 5.45  | 5.51  | 0.15 | 0.05 | -1.04 | 0.954533 | 0.494216 | 0.984902 | 0.69475  |
| MmuSTS.1705.1.S1_at   | MmuSTS.1705.1 | 10.08 | 9.75  | 0.3  | 0.13 | 1.26  | 0.397289 | 0.168895 | 0.721717 | 0.445458 |
| MmuSTS.1706.1.S1_at   | MmuSTS.1706.1 | 2.99  | 2.92  | 0.08 | 0.15 | 1.05  | 0.91255  | 0.980707 | 0.970287 | 0.989447 |
| MmuSTS.1707.1.S1_at   | MmuSTS.1707.1 | 8.78  | 9.33  | 0.54 | 0.11 | -1.47 | 0.47418  | 0.201649 | 0.767936 | 0.476208 |
| MmuSTS.1708.1.S1_at   | MmuSTS.1708.1 | 9.95  | 10.14 | 0.52 | 0.06 | -1.13 | 0.607875 | 0.015106 | 0.840979 | 0.156008 |
| MmuSTS.1709.1.S1_at   | MmuSTS.1709.1 | 11.61 | 11.61 | 1.96 | 0.17 | -1    | 0.758332 | 0.305907 | 0.909074 | 0.562732 |
| MmuSTS.171.1.S1_at    | MmuSTS.171.1  | 7.35  | 7.03  | 0.83 | 0.11 | 1.25  | 0.178504 | 0.230559 | 0.551383 | 0.50226  |
| MmuSTS.1710.1.S1_at   | MmuSTS.1710.1 | 5.83  | 5.68  | 0.04 | 0.07 | 1.11  | 0.030317 | 0.000711 | 0.33739  | 0.044419 |
| MmuSTS.1711.1.S1_at   | MmuSTS.1711.1 | 3.59  | 3.61  | 0.22 | 0.02 | -1.01 | 0.442955 | 0.445728 | 0.750466 | 0.662489 |
| MmuSTS.1712.1.S1_at   | MmuSTS.1712.1 | 11.13 | 11.45 | 0.31 | 0.11 | -1.25 | 0.17189  | 0.005682 | 0.545239 | 0.103959 |
| MmuSTS.1713.1.S1_at   | MmuSTS.1713.1 | 3.13  | 3.19  | 0.08 | 0.17 | -1.04 | 0.580949 | 0.039084 | 0.827323 | 0.242995 |
| MmuSTS.1714.1.S1_s_at | MmuSTS.1714.1 | 8.86  | 8.89  | 0.26 | 0.05 | -1.02 | 0.594764 | 0.202412 | 0.83491  | 0.476765 |
| MmuSTS.1715.1.S1_at   | MmuSTS.1715.1 | 4.07  | 4.21  | 0.06 | 0.24 | -1.1  | 0.270063 | 0.406201 | 0.630217 | 0.634213 |
| MmuSTS.1716.1.S1_at   | MmuSTS.1716.1 | 6.42  | 6.55  | 1.21 | 0.23 | -1.1  | 0.670069 | 0.772488 | 0.869803 | 0.867741 |
| MmuSTS.1717.1.S1_at   | MmuSTS.1717.1 | 7.22  | 7.49  | 0.53 | 0.31 | -1.2  | 0.227617 | 0.038733 | 0.596693 | 0.241835 |
| MmuSTS.1718.1.S1_at   | MmuSTS.1718.1 | 3.2   | 3.06  | 0.08 | 0.06 | 1.1   | 0.239724 | 0.547004 | 0.606154 | 0.728283 |
| MmuSTS.1719.1.S1_at   | MmuSTS.1719.1 | 9.42  | 9.5   | 0.12 | 0.11 | -1.05 | 0.470186 | 0.267848 | 0.76595  | 0.533607 |
| MmuSTS.172.1.S1_at    | MmuSTS.172.1  | 13.29 | 13.18 | 0.25 | 0.01 | 1.07  | 0.932639 | 0.70408  | 0.977227 | 0.828326 |
| MmuSTS.1720.1.S1_at   | MmuSTS.1720.1 | 7.07  | 7.54  | 0.29 | 0.26 | -1.39 | 0.048812 | 0.161938 | 0.384455 | 0.438029 |
| MmuSTS.1721.1.S1_at   | MmuSTS.1721.1 | 8.98  | 9     | 0.92 | 0.16 | -1.02 | 0.931904 | 0.182741 | 0.977118 | 0.459215 |
| MmuSTS.1722.1.S1_at   | MmuSTS.1722.1 | 13.67 | 13.75 | 0.04 | 0.03 | -1.06 | 0.271766 | 0.000228 | 0.631538 | 0.032385 |
| MmuSTS.1723.1.S1_at   | MmuSTS.1723.1 | 8.59  | 9.26  | 0.79 | 0.15 | -1.59 | 0.26535  | 0.255138 | 0.626435 | 0.52317  |
| MmuSTS.1724.1.S1_at   | MmuSTS.1724.1 | 7.69  | 8.1   | 0.15 | 0.1  | -1.33 | 0.007797 | 0.002378 | 0.230997 | 0.072042 |
| MmuSTS.1725.1.S1_at   | MmuSTS.1725.1 | 9.49  | 10.6  | 0.6  | 0.01 | -2.16 | 0.033379 | 0.010999 | 0.346442 | 0.136623 |
| MmuSTS.1726.1.S1_at   | MmuSTS.1726.1 | 10.56 | 10.22 | 0.58 | 0.2  | 1.26  | 0.918138 | 0.97086  | 0.972069 | 0.984115 |
| MmuSTS.1727.1.S1_at   | MmuSTS.1727.1 | 7.44  | 7.83  | 0.42 | 0.12 | -1.3  | 0.153317 | 0.126448 | 0.526421 | 0.396995 |
| MmuSTS.1728.1.S1_s_at | MmuSTS.1728.1 | 3.79  | 3.75  | 0.11 | 0.04 | 1.03  | 0.174084 | 0.209224 | 0.547067 | 0.48303  |
| MmuSTS.1729.1.S1_at   | MmuSTS.1729.1 | 4.72  | 4.75  | 0.11 | 0.05 | -1.03 | 0.698145 | 0.004422 | 0.882657 | 0.092904 |
| MmuSTS.173.1.S1_at    | MmuSTS.173.1  | 3.59  | 3.61  | 0.36 | 0.08 | -1.01 | 0.998821 | 0.244447 | 0.999691 | 0.514295 |
| MmuSTS.1730.1.S1_at   | MmuSTS.1730.1 | 6.48  | 7.25  | 1.57 | 0.45 | -1.7  | 0.506229 | 0.092564 | 0.785704 | 0.348519 |
| MmuSTS.1731.1.S1_at   | MmuSTS.1731.1 | 5.35  | 5.18  | 0.05 | 0.04 | 1.12  | 0.015323 | 0.199474 | 0.281008 | 0.474069 |
| MmuSTS.1732.1.S1_at   | MmuSTS.1732.1 | 4.44  | 4.28  | 0.38 | 0.1  | 1.11  | 0.409247 | 0.136684 | 0.729846 | 0.409226 |



|                       |               |       |       |      |      |       |          |          |          |          |
|-----------------------|---------------|-------|-------|------|------|-------|----------|----------|----------|----------|
| MmuSTS.1733.1.S1_at   | MmuSTS.1733.1 | 12.57 | 11.39 | 1.12 | 0.15 | 2.27  | 0.447857 | 0.443115 | 0.753612 | 0.661002 |
| MmuSTS.1734.1.S1_at   | MmuSTS.1734.1 | 8.02  | 8.38  | 0.88 | 0.23 | -1.28 | 0.872433 | 0.066382 | 0.955759 | 0.30331  |
| MmuSTS.1735.1.S1_at   | MmuSTS.1735.1 | 9.99  | 9.76  | 0.23 | 0.04 | 1.17  | 0.132732 | 0.089517 | 0.506998 | 0.343811 |
| MmuSTS.1736.1.S1_at   | MmuSTS.1736.1 | 10.08 | 10.54 | 2.82 | 0.24 | -1.37 | 0.482318 | 0.079433 | 0.772308 | 0.326766 |
| MmuSTS.1737.1.S1_s_at | MmuSTS.1737.1 | 4.49  | 4.4   | 0.15 | 0.13 | 1.07  | 0.211557 | 0.272668 | 0.582565 | 0.537433 |
| MmuSTS.1738.1.S1_s_at | MmuSTS.1738.1 | 8.96  | 9.15  | 1.41 | 0.47 | -1.14 | 0.356773 | 0.170636 | 0.695253 | 0.447219 |
| MmuSTS.1739.1.S1_at   | MmuSTS.1739.1 | 11.57 | 11.92 | 0.32 | 0.06 | -1.27 | 0.151436 | 0.184692 | 0.524547 | 0.460645 |
| MmuSTS.174.1.S1_at    | MmuSTS.174.1  | 9.15  | 9.85  | 0.43 | 0.03 | -1.62 | 0.046081 | 0.040004 | 0.37735  | 0.245193 |
| MmuSTS.1740.1.S1_at   | MmuSTS.1740.1 | 4.68  | 4.56  | 0.14 | 0.03 | 1.09  | 0.15496  | 0.161374 | 0.528235 | 0.437556 |
| MmuSTS.1741.1.S1_at   | MmuSTS.1741.1 | 6.23  | 6.29  | 0.68 | 0.15 | -1.04 | 0.766927 | 0.129058 | 0.912422 | 0.400548 |
| MmuSTS.1742.1.S1_at   | MmuSTS.1742.1 | 6.33  | 6.2   | 0.09 | 0.05 | 1.1   | 0.174729 | 0.497581 | 0.548031 | 0.696935 |
| MmuSTS.1743.1.S1_at   | MmuSTS.1743.1 | 10.56 | 11.36 | 0.67 | 0.02 | -1.74 | 0.163117 | 0.261815 | 0.536035 | 0.528265 |
| MmuSTS.1744.1.S1_at   | MmuSTS.1744.1 | 12.39 | 12.33 | 0.76 | 0.06 | 1.04  | 0.45321  | 0.11966  | 0.755962 | 0.388324 |
| MmuSTS.1745.1.S1_at   | MmuSTS.1745.1 | 4.68  | 7.54  | 0.69 | 0.23 | -7.23 | 0.004025 | 0.002324 | 0.198571 | 0.071237 |
| MmuSTS.1746.1.S1_at   | MmuSTS.1746.1 | 11.32 | 11.6  | 0.71 | 0.08 | -1.21 | 0.47765  | 0.615409 | 0.76987  | 0.771963 |
| MmuSTS.1747.1.S1_at   | MmuSTS.1747.1 | 7.39  | 7.98  | 0.92 | 0.12 | -1.5  | 0.446139 | 0.285242 | 0.752589 | 0.547165 |
| MmuSTS.1748.1.S1_at   | MmuSTS.1748.1 | 3.19  | 3.01  | 0.31 | 0.1  | 1.13  | 0.135853 | 0.132605 | 0.510365 | 0.404544 |
| MmuSTS.1749.1.S1_at   | MmuSTS.1749.1 | 9.64  | 10.06 | 0.23 | 0.04 | -1.34 | 0.040292 | 0.043071 | 0.363858 | 0.252157 |
| MmuSTS.175.1.S1_s_at  | MmuSTS.175.1  | 6.16  | 6.15  | 0.13 | 0.32 | 1     | 0.939946 | 0.992623 | 0.979562 | 0.995715 |
| MmuSTS.1750.1.S1_at   | MmuSTS.1750.1 | 9     | 9.49  | 0.72 | 0.16 | -1.4  | 0.778102 | 0.107708 | 0.918101 | 0.370776 |
| MmuSTS.1751.1.S1_at   | MmuSTS.1751.1 | 4.02  | 4.14  | 0.29 | 0.32 | -1.08 | 0.96715  | 0.828691 | 0.989187 | 0.901558 |
| MmuSTS.1752.1.S1_at   | MmuSTS.1752.1 | 2.91  | 3.39  | 0.13 | 0.19 | -1.4  | 0.050093 | 0.011255 | 0.386704 | 0.138053 |
| MmuSTS.1753.1.S1_at   | MmuSTS.1753.1 | 3.19  | 3.98  | 0.22 | 0.32 | -1.73 | 0.095936 | 0.050875 | 0.464469 | 0.270873 |
| MmuSTS.1754.1.S1_at   | MmuSTS.1754.1 | 11.44 | 11.38 | 0.11 | 0.14 | 1.04  | 0.452055 | 0.073117 | 0.755619 | 0.316064 |
| MmuSTS.1755.1.S1_at   | MmuSTS.1755.1 | 7.22  | 7.07  | 0.11 | 0.16 | 1.11  | 0.42279  | 0.515477 | 0.738503 | 0.708325 |
| MmuSTS.1756.1.S1_at   | MmuSTS.1756.1 | 8.85  | 8.83  | 1.41 | 0.11 | 1.02  | 0.821857 | 0.85797  | 0.935682 | 0.919035 |
| MmuSTS.1757.1.S1_at   | MmuSTS.1757.1 | 5.89  | 5.58  | 0.3  | 0.94 | 1.24  | 0.487707 | 0.523102 | 0.775172 | 0.713481 |
| MmuSTS.1758.1.S1_at   | MmuSTS.1758.1 | 6.23  | 6.62  | 0.49 | 0.08 | -1.31 | 0.825617 | 0.898758 | 0.937359 | 0.942416 |
| MmuSTS.1759.1.S1_at   | MmuSTS.1759.1 | 3.78  | 3.73  | 0.07 | 0.07 | 1.03  | 0.141552 | 0.112359 | 0.516365 | 0.377686 |
| MmuSTS.176.1.S1_at    | MmuSTS.176.1  | 4.44  | 4.34  | 0.09 | 0.05 | 1.07  | 0.106625 | 0.165222 | 0.479    | 0.441399 |
| MmuSTS.1760.1.S1_at   | MmuSTS.1760.1 | 9.51  | 9.72  | 1.38 | 0.26 | -1.16 | 0.810066 | 0.578928 | 0.931255 | 0.748776 |
| MmuSTS.1761.1.S1_at   | MmuSTS.1761.1 | 7.24  | 9.55  | 1.12 | 0.2  | -4.94 | 0.024078 | 0.02457  | 0.31775  | 0.196149 |
| MmuSTS.1762.1.S1_at   | MmuSTS.1762.1 | 7.19  | 8.88  | 1.2  | 0.19 | -3.25 | 0.073228 | 0.156864 | 0.434073 | 0.432372 |
| MmuSTS.1763.1.S1_at   | MmuSTS.1763.1 | 4.95  | 4.89  | 0    | 0.2  | 1.05  | 0.531836 | 0.23028  | 0.799963 | 0.502102 |
| MmuSTS.1764.1.S1_at   | MmuSTS.1764.1 | 5.25  | 5.16  | 0.11 | 0.03 | 1.06  | 0.448978 | 0.757656 | 0.754037 | 0.858927 |
| MmuSTS.1765.1.S1_at   | MmuSTS.1765.1 | 7.05  | 7.85  | 1    | 0.15 | -1.75 | 0.239491 | 0.316653 | 0.605979 | 0.569984 |
| MmuSTS.1766.1.S1_at   | MmuSTS.1766.1 | 6.94  | 6.91  | 0.17 | 0.1  | 1.02  | 0.92453  | 0.052863 | 0.974757 | 0.275521 |
| MmuSTS.1767.1.S1_at   | MmuSTS.1767.1 | 7.02  | 6.97  | 0.03 | 0.07 | 1.04  | 0.253695 | 0.000165 | 0.618323 | 0.030511 |
| MmuSTS.1768.1.S1_at   | MmuSTS.1768.1 | 6.2   | 6.53  | 0.51 | 0.15 | -1.26 | 0.451492 | 0.101889 | 0.755176 | 0.36188  |
| MmuSTS.1769.1.S1_at   | MmuSTS.1769.1 | 9.04  | 8.25  | 1.62 | 0.2  | 1.74  | 0.912065 | 0.440481 | 0.970255 | 0.658967 |
| MmuSTS.177.1.S1_at    | MmuSTS.177.1  | 7.65  | 7.76  | 0.51 | 0.3  | -1.07 | 0.630306 | 0.856832 | 0.851919 | 0.918214 |
| MmuSTS.1770.1.S1_at   | MmuSTS.1770.1 | 13.65 | 13.32 | 0.48 | 0.09 | 1.26  | 0.351877 | 0.053648 | 0.692553 | 0.277225 |
| MmuSTS.1771.1.S1_at   | MmuSTS.1771.1 | 4.97  | 5.16  | 0.25 | 0.02 | -1.14 | 0.627403 | 0.725345 | 0.850539 | 0.840981 |

|                       |               |       |       |      |      |       |          |          |          |          |
|-----------------------|---------------|-------|-------|------|------|-------|----------|----------|----------|----------|
| MmuSTS.1772.1.S1_at   | MmuSTS.1772.1 | 3.7   | 3.69  | 0.04 | 0.05 | 1.01  | 0.781952 | 0.121662 | 0.919716 | 0.39084  |
| MmuSTS.1772.1.S1_s_at | MmuSTS.1772.1 | 4.66  | 4.52  | 0.12 | 0.1  | 1.1   | 0.20929  | 0.802029 | 0.580794 | 0.885995 |
| MmuSTS.1773.1.S1_at   | MmuSTS.1773.1 | 3.94  | 3.96  | 0.01 | 0.07 | -1.01 | 0.985009 | 0.612954 | 0.995288 | 0.770327 |
| MmuSTS.1774.1.S1_at   | MmuSTS.1774.1 | 6.82  | 6.94  | 0.27 | 0.09 | -1.09 | 0.538069 | 0.683532 | 0.803016 | 0.815375 |
| MmuSTS.1775.1.S1_at   | MmuSTS.1775.1 | 9.34  | 9.93  | 0.68 | 0.17 | -1.5  | 0.816718 | 0.022376 | 0.933716 | 0.187176 |
| MmuSTS.1776.1.S1_at   | MmuSTS.1776.1 | 9     | 10.69 | 0.31 | 0.19 | -3.22 | 0.000875 | 0.002671 | 0.153739 | 0.076408 |
| MmuSTS.1777.1.S1_s_at | MmuSTS.1777.1 | 3.85  | 4.58  | 1.14 | 0.36 | -1.66 | 0.872474 | 0.68766  | 0.955759 | 0.81766  |
| MmuSTS.1778.1.S1_at   | MmuSTS.1778.1 | 8.98  | 8.32  | 3.03 | 0.38 | 1.58  | 0.793705 | 0.530739 | 0.924414 | 0.718104 |
| MmuSTS.1779.1.S1_at   | MmuSTS.1779.1 | 8.72  | 8.65  | 0.35 | 0.15 | 1.05  | 0.8881   | 0.00149  | 0.961251 | 0.058951 |
| MmuSTS.178.1.S1_at    | MmuSTS.178.1  | 3.24  | 3.19  | 0.22 | 0.14 | 1.04  | 0.841406 | 0.936919 | 0.943773 | 0.964449 |
| MmuSTS.1780.1.S1_at   | MmuSTS.1780.1 | 8.97  | 9.32  | 0.29 | 0.05 | -1.27 | 0.041316 | 0.244115 | 0.366103 | 0.514121 |
| MmuSTS.1781.1.S1_at   | MmuSTS.1781.1 | 6.33  | 6.32  | 0.41 | 0.17 | 1.01  | 0.966795 | 0.42379  | 0.989067 | 0.646542 |
| MmuSTS.1782.1.S1_at   | MmuSTS.1782.1 | 7.9   | 7.54  | 0.37 | 0.29 | 1.28  | 0.094652 | 0.05198  | 0.463796 | 0.273453 |
| MmuSTS.1783.1.S1_at   | MmuSTS.1783.1 | 9.44  | 9.98  | 0.42 | 0.03 | -1.46 | 0.2155   | 0.283051 | 0.585748 | 0.545692 |
| MmuSTS.1784.1.S1_at   | MmuSTS.1784.1 | 8.97  | 9.24  | 0.33 | 0.06 | -1.21 | 0.074736 | 0.053232 | 0.435313 | 0.276445 |
| MmuSTS.1785.1.S1_s_at | MmuSTS.1785.1 | 3.61  | 3.54  | 0.04 | 0.1  | 1.05  | 0.230262 | 0.080463 | 0.598481 | 0.328159 |
| MmuSTS.1786.1.S1_s_at | MmuSTS.1786.1 | 3.31  | 3.32  | 0.07 | 0.01 | -1    | 0.829413 | 0.602073 | 0.938794 | 0.763172 |
| MmuSTS.1787.1.S1_at   | MmuSTS.1787.1 | 11.1  | 11.73 | 0.16 | 0.07 | -1.55 | 0.00384  | 0.003507 | 0.198541 | 0.08503  |
| MmuSTS.1788.1.S1_s_at | MmuSTS.1788.1 | 4.17  | 4.2   | 0.01 | 0.16 | -1.02 | 0.563435 | 0.399668 | 0.818252 | 0.629933 |
| MmuSTS.1789.1.S1_at   | MmuSTS.1789.1 | 8.61  | 8.8   | 0.22 | 0.07 | -1.14 | 0.098493 | 0.166652 | 0.467905 | 0.443133 |
| MmuSTS.179.1.S1_at    | MmuSTS.179.1  | 3.98  | 4.03  | 0.08 | 0.07 | -1.03 | 0.560049 | 0.915303 | 0.816452 | 0.952467 |
| MmuSTS.1790.1.S1_at   | MmuSTS.1790.1 | 11.16 | 10.83 | 0.91 | 0.23 | 1.26  | 0.592471 | 0.085975 | 0.833893 | 0.338116 |
| MmuSTS.1791.1.S1_s_at | MmuSTS.1791.1 | 11.83 | 11.82 | 0.15 | 0.05 | 1.01  | 0.808956 | 0.242181 | 0.930899 | 0.512669 |
| MmuSTS.1792.1.S1_at   | MmuSTS.1792.1 | 12.05 | 12.13 | 0.19 | 0.04 | -1.06 | 0.725922 | 0.788085 | 0.893959 | 0.87743  |
| MmuSTS.1793.1.S1_at   | MmuSTS.1793.1 | 6.73  | 7.93  | 0.88 | 0.38 | -2.3  | 0.098764 | 0.100962 | 0.468167 | 0.360525 |
| MmuSTS.1794.1.S1_at   | MmuSTS.1794.1 | 9.04  | 10.3  | 0.35 | 0.3  | -2.39 | 0.009519 | 0.002898 | 0.242426 | 0.079107 |
| MmuSTS.1795.1.S1_at   | MmuSTS.1795.1 | 7.85  | 7.18  | 0.26 | 0.2  | 1.6   | 0.09174  | 0.095652 | 0.45996  | 0.35269  |
| MmuSTS.1796.1.S1_at   | MmuSTS.1796.1 | 6.89  | 7.9   | 0.58 | 0.06 | -2.01 | 0.046777 | 0.03106  | 0.37872  | 0.218115 |
| MmuSTS.1797.1.S1_at   | MmuSTS.1797.1 | 5.93  | 6.05  | 0.43 | 0.23 | -1.08 | 0.759998 | 0.605018 | 0.909812 | 0.764917 |
| MmuSTS.1798.1.S1_at   | MmuSTS.1798.1 | 9.13  | 10.15 | 0.8  | 0.09 | -2.03 | 0.286294 | 0.424257 | 0.64358  | 0.646853 |
| MmuSTS.1799.1.S1_at   | MmuSTS.1799.1 | 10.29 | 10.44 | 0.1  | 0.12 | -1.11 | 0.157861 | 0.00085  | 0.530818 | 0.047089 |
| MmuSTS.18.1.S1_at     | MmuSTS.18.1   | 3.85  | 3.9   | 0.05 | 0.04 | -1.04 | 0.117515 | 0.372366 | 0.490983 | 0.611263 |
| MmuSTS.180.1.S1_at    | MmuSTS.180.1  | 8.53  | 9.19  | 0.23 | 0.11 | -1.58 | 0.00743  | 0.003703 | 0.22918  | 0.086769 |
| MmuSTS.1800.1.S1_at   | MmuSTS.1800.1 | 3.45  | 3.27  | 0.1  | 0.28 | 1.13  | 0.416155 | 0.402499 | 0.734069 | 0.631481 |
| MmuSTS.1800.1.S1_s_at | MmuSTS.1800.1 | 3.76  | 3.52  | 0.21 | 0.28 | 1.18  | 0.325819 | 0.544568 | 0.673486 | 0.726948 |
| MmuSTS.1800.1.S1_x_at | MmuSTS.1800.1 | 5.12  | 4.77  | 0.14 | 0.6  | 1.27  | 0.549033 | 0.817144 | 0.810145 | 0.894545 |
| MmuSTS.1801.1.S1_at   | MmuSTS.1801.1 | 12.49 | 12.96 | 0.4  | 0.05 | -1.38 | 0.050421 | 0.018169 | 0.387138 | 0.169673 |
| MmuSTS.1802.1.S1_at   | MmuSTS.1802.1 | 10.55 | 11.08 | 0.15 | 0.1  | -1.45 | 0.01496  | 0.036252 | 0.279062 | 0.235    |
| MmuSTS.1803.1.S1_at   | MmuSTS.1803.1 | 6.94  | 5.78  | 0.71 | 0.31 | 2.24  | 0.054285 | 0.076226 | 0.396159 | 0.321127 |
| MmuSTS.1804.1.S1_at   | MmuSTS.1804.1 | 6.35  | 6.24  | 0.05 | 0.05 | 1.08  | 0.029871 | 0.020484 | 0.336071 | 0.179669 |
| MmuSTS.1805.1.S1_at   | MmuSTS.1805.1 | 9.72  | 8.73  | 0.46 | 0.06 | 1.99  | 0.018022 | 0.010797 | 0.294907 | 0.135584 |
| MmuSTS.1806.1.S1_at   | MmuSTS.1806.1 | 9.73  | 10.58 | 0.98 | 0.05 | -1.81 | 0.198984 | 0.235858 | 0.570523 | 0.50704  |
| MmuSTS.1807.1.S1_at   | MmuSTS.1807.1 | 8.9   | 8.9   | 0.11 | 0.04 | -1    | 0.974617 | 0.774999 | 0.991912 | 0.869027 |

|                       |               |       |       |      |      |       |          |          |          |          |
|-----------------------|---------------|-------|-------|------|------|-------|----------|----------|----------|----------|
| MmuSTS.1808.1.S1_at   | MmuSTS.1808.1 | 7.2   | 7.87  | 0.61 | 0.06 | -1.59 | 0.126245 | 0.141387 | 0.499941 | 0.414874 |
| MmuSTS.1809.1.S1_at   | MmuSTS.1809.1 | 4.06  | 3.93  | 0.19 | 0.23 | 1.09  | 0.981584 | 0.587852 | 0.994146 | 0.754542 |
| MmuSTS.181.1.S1_at    | MmuSTS.181.1  | 11.3  | 11.73 | 0.1  | 0.04 | -1.35 | 0.00406  | 0.00348  | 0.198571 | 0.084834 |
| MmuSTS.1810.1.S1_at   | MmuSTS.1810.1 | 11.37 | 10.57 | 0.34 | 0.25 | 1.75  | 0.025802 | 0.010087 | 0.32273  | 0.131765 |
| MmuSTS.1811.1.S1_at   | MmuSTS.1811.1 | 11.66 | 11.6  | 0.33 | 0.13 | 1.05  | 0.201794 | 0.191476 | 0.573323 | 0.466821 |
| MmuSTS.1812.1.S1_at   | MmuSTS.1812.1 | 10.64 | 10.32 | 0.26 | 0.12 | 1.25  | 0.101573 | 0.254217 | 0.47185  | 0.52252  |
| MmuSTS.1813.1.S1_at   | MmuSTS.1813.1 | 8.31  | 8.26  | 2.42 | 0.34 | 1.04  | 0.776822 | 0.085476 | 0.917412 | 0.337473 |
| MmuSTS.1814.1.S1_at   | MmuSTS.1814.1 | 5.74  | 5.45  | 0.22 | 0.13 | 1.22  | 0.118666 | 0.290339 | 0.492161 | 0.551169 |
| MmuSTS.1815.1.S1_at   | MmuSTS.1815.1 | 3.18  | 3.08  | 0.19 | 0.04 | 1.07  | 0.855788 | 0.128489 | 0.949014 | 0.399822 |
| MmuSTS.1816.1.S1_at   | MmuSTS.1816.1 | 10.37 | 9.23  | 0.53 | 0.23 | 2.2   | 0.058521 | 0.012643 | 0.404644 | 0.14505  |
| MmuSTS.1817.1.S1_at   | MmuSTS.1817.1 | 12.48 | 12.47 | 0.23 | 0.1  | -1.01 | 0.582802 | 0.009909 | 0.828555 | 0.130731 |
| MmuSTS.1818.1.S1_s_at | MmuSTS.1818.1 | 5.94  | 5.84  | 0.07 | 0.06 | 1.07  | 0.163214 | 0.181704 | 0.536063 | 0.458313 |
| MmuSTS.1819.1.S1_a_at | MmuSTS.1819.1 | 7.18  | 7.14  | 0.13 | 0.01 | 1.02  | 0.214201 | 0.024144 | 0.584673 | 0.194543 |
| MmuSTS.1819.1.S1_at   | MmuSTS.1819.1 | 3.41  | 3.41  | 0.07 | 0.05 | -1    | 0.866796 | 0.752093 | 0.95318  | 0.855744 |
| MmuSTS.182.1.S1_at    | MmuSTS.182.1  | 6.02  | 7.58  | 0.93 | 0.23 | -2.94 | 0.136594 | 0.371693 | 0.511723 | 0.610481 |
| MmuSTS.1820.1.S1_at   | MmuSTS.1820.1 | 5.82  | 5.79  | 0.03 | 0.03 | 1.02  | 0.202931 | 0.603583 | 0.574301 | 0.764204 |
| MmuSTS.1821.1.S1_at   | MmuSTS.1821.1 | 4.61  | 4.48  | 0.04 | 0.11 | 1.09  | 0.103731 | 0.094532 | 0.474343 | 0.351296 |
| MmuSTS.1822.1.S1_at   | MmuSTS.1822.1 | 11.06 | 11.34 | 0.12 | 0.08 | -1.22 | 0.125606 | 0.003811 | 0.499523 | 0.08794  |
| MmuSTS.1823.1.S1_at   | MmuSTS.1823.1 | 8.51  | 9.58  | 1.91 | 0.24 | -2.11 | 0.374865 | 0.100029 | 0.706144 | 0.3589   |
| MmuSTS.1824.1.S1_at   | MmuSTS.1824.1 | 6.69  | 6.04  | 0.19 | 0.04 | 1.56  | 0.005039 | 0.001973 | 0.204763 | 0.065871 |
| MmuSTS.1825.1.S1_at   | MmuSTS.1825.1 | 9.06  | 9.15  | 0.14 | 0.13 | -1.06 | 0.851109 | 0.115261 | 0.947539 | 0.382262 |
| MmuSTS.1826.1.S1_at   | MmuSTS.1826.1 | 11.93 | 10.97 | 0.72 | 0.34 | 1.94  | 0.089159 | 0.044441 | 0.456902 | 0.25521  |
| MmuSTS.1827.1.S1_at   | MmuSTS.1827.1 | 9.47  | 10.11 | 0.16 | 0.12 | -1.56 | 0.003903 | 0.001781 | 0.198571 | 0.063434 |
| MmuSTS.1828.1.S1_at   | MmuSTS.1828.1 | 6.09  | 6.34  | 0.26 | 0.22 | -1.19 | 0.70807  | 0.638508 | 0.886513 | 0.78765  |
| MmuSTS.1829.1.S1_at   | MmuSTS.1829.1 | 8.31  | 8.36  | 0.42 | 0.13 | -1.04 | 0.968706 | 0.523421 | 0.989723 | 0.713713 |
| MmuSTS.183.1.S1_at    | MmuSTS.183.1  | 7.06  | 7.14  | 0.91 | 0.14 | -1.06 | 0.542031 | 0.639061 | 0.805464 | 0.788038 |
| MmuSTS.1830.1.S1_at   | MmuSTS.1830.1 | 11.31 | 11.28 | 0.18 | 0.07 | 1.02  | 0.766383 | 0.572802 | 0.912127 | 0.74476  |
| MmuSTS.1831.1.S1_at   | MmuSTS.1831.1 | 10.85 | 10.68 | 0.25 | 0.03 | 1.13  | 0.358668 | 0.215228 | 0.696531 | 0.488977 |
| MmuSTS.1832.1.S1_at   | MmuSTS.1832.1 | 9.75  | 10.13 | 0.25 | 0.19 | -1.3  | 0.076552 | 0.025743 | 0.437977 | 0.201029 |
| MmuSTS.1833.1.S1_at   | MmuSTS.1833.1 | 4.2   | 4.21  | 0.13 | 0.1  | -1    | 0.247694 | 0.24571  | 0.613245 | 0.515496 |
| MmuSTS.1834.1.S1_at   | MmuSTS.1834.1 | 3.57  | 3.59  | 0.16 | 0.07 | -1.01 | 0.872452 | 0.604973 | 0.955759 | 0.764917 |
| MmuSTS.1835.1.S1_at   | MmuSTS.1835.1 | 3.86  | 3.81  | 0.03 | 0.05 | 1.03  | 0.178337 | 0.828094 | 0.551301 | 0.901214 |
| MmuSTS.1836.1.S1_at   | MmuSTS.1836.1 | 3.32  | 3.23  | 0.18 | 0.11 | 1.06  | 0.516975 | 0.480269 | 0.791672 | 0.68574  |
| MmuSTS.1837.1.S1_at   | MmuSTS.1837.1 | 10.39 | 10.19 | 0.59 | 0.11 | 1.14  | 0.65033  | 0.833805 | 0.86087  | 0.904744 |
| MmuSTS.1838.1.S1_at   | MmuSTS.1838.1 | 9.16  | 9.32  | 0.24 | 0.09 | -1.12 | 0.913102 | 0.685469 | 0.970415 | 0.816523 |
| MmuSTS.1839.1.S1_at   | MmuSTS.1839.1 | 2.87  | 2.88  | 0.04 | 0.13 | -1.01 | 0.481639 | 0.326423 | 0.772225 | 0.576576 |
| MmuSTS.184.1.S1_at    | MmuSTS.184.1  | 9     | 8.7   | 0.28 | 0.05 | 1.23  | 0.066657 | 0.055502 | 0.422542 | 0.281404 |
| MmuSTS.1840.1.S1_at   | MmuSTS.1840.1 | 10.63 | 10.66 | 0.01 | 0.11 | -1.02 | 0.601609 | 0.900596 | 0.838465 | 0.943473 |
| MmuSTS.1841.1.S1_at   | MmuSTS.1841.1 | 12.68 | 12.26 | 0.21 | 0.12 | 1.34  | 0.014868 | 0.00231  | 0.278597 | 0.070884 |
| MmuSTS.1842.1.S1_at   | MmuSTS.1842.1 | 9.93  | 9.28  | 0.45 | 0.17 | 1.57  | 0.230245 | 0.037945 | 0.598481 | 0.239302 |
| MmuSTS.1843.1.S1_at   | MmuSTS.1843.1 | 5.1   | 5.37  | 0.24 | 0.17 | -1.21 | 0.14706  | 0.026613 | 0.521545 | 0.204008 |
| MmuSTS.1844.1.S1_at   | MmuSTS.1844.1 | 5.39  | 5.46  | 0.08 | 0.18 | -1.05 | 0.557768 | 0.20926  | 0.815038 | 0.48303  |
| MmuSTS.1845.1.S1_at   | MmuSTS.1845.1 | 8.81  | 7.46  | 0.27 | 0.24 | 2.56  | 0.002783 | 0.000883 | 0.185369 | 0.047602 |

|                       |               |       |       |      |      |       |          |          |          |          |
|-----------------------|---------------|-------|-------|------|------|-------|----------|----------|----------|----------|
| MmuSTS.1846.1.S1_s_at | MmuSTS.1846.1 | 4.61  | 4.52  | 0.05 | 0.11 | 1.06  | 0.972986 | 0.991457 | 0.991192 | 0.995223 |
| MmuSTS.1847.1.S1_at   | MmuSTS.1847.1 | 8.47  | 8.85  | 0.42 | 0.1  | -1.3  | 0.304569 | 0.300769 | 0.658179 | 0.558978 |
| MmuSTS.1848.1.S1_at   | MmuSTS.1848.1 | 8.5   | 8.77  | 0.23 | 0.14 | -1.21 | 0.075784 | 0.00443  | 0.436784 | 0.092937 |
| MmuSTS.1849.1.S1_at   | MmuSTS.1849.1 | 4.95  | 5.36  | 0.79 | 0.42 | -1.33 | 0.379684 | 0.315725 | 0.709082 | 0.569148 |
| MmuSTS.185.1.S1_at    | MmuSTS.185.1  | 8.31  | 7.58  | 0.26 | 0.33 | 1.66  | 0.117179 | 0.001575 | 0.490706 | 0.060185 |
| MmuSTS.1850.1.S1_at   | MmuSTS.1850.1 | 8.64  | 7.67  | 1.02 | 0.07 | 1.96  | 0.551172 | 0.557412 | 0.811279 | 0.735031 |
| MmuSTS.1851.1.S1_at   | MmuSTS.1851.1 | 13.28 | 13.32 | 0.07 | 0.05 | -1.03 | 0.088389 | 0.016488 | 0.45606  | 0.162562 |
| MmuSTS.1852.1.S1_at   | MmuSTS.1852.1 | 8.38  | 8.13  | 0.38 | 0.14 | 1.19  | 0.236926 | 0.014507 | 0.603824 | 0.153682 |
| MmuSTS.1853.1.S1_at   | MmuSTS.1853.1 | 9.46  | 9.61  | 0.29 | 0.05 | -1.11 | 0.668674 | 0.219818 | 0.869132 | 0.493388 |
| MmuSTS.1854.1.S1_at   | MmuSTS.1854.1 | 10.17 | 10.84 | 0.66 | 0.11 | -1.59 | 0.588884 | 0.780147 | 0.832011 | 0.872524 |
| MmuSTS.1855.1.S1_at   | MmuSTS.1855.1 | 12.92 | 13.13 | 0.3  | 0.03 | -1.16 | 0.323887 | 0.260567 | 0.672332 | 0.527084 |
| MmuSTS.1856.1.S1_at   | MmuSTS.1856.1 | 4.22  | 3.93  | 0.19 | 0.29 | 1.22  | 0.39982  | 0.339876 | 0.723357 | 0.586417 |
| MmuSTS.1857.1.S1_at   | MmuSTS.1857.1 | 5.93  | 5.87  | 0.08 | 0.12 | 1.04  | 0.573321 | 0.313941 | 0.823551 | 0.568121 |
| MmuSTS.1858.1.S1_at   | MmuSTS.1858.1 | 9.24  | 9.13  | 0.72 | 0.11 | 1.08  | 0.958644 | 0.562794 | 0.986389 | 0.738167 |
| MmuSTS.1859.1.S1_at   | MmuSTS.1859.1 | 10.05 | 9.84  | 0.55 | 0.15 | 1.15  | 0.475745 | 0.404959 | 0.768685 | 0.633415 |
| MmuSTS.186.1.S1_at    | MmuSTS.186.1  | 5.87  | 5.75  | 0.14 | 0.07 | 1.09  | 0.154274 | 0.347795 | 0.527483 | 0.592154 |
| MmuSTS.1860.1.S1_at   | MmuSTS.1860.1 | 6.15  | 6.36  | 0.22 | 0.35 | -1.16 | 0.150291 | 0.183657 | 0.523933 | 0.459681 |
| MmuSTS.1861.1.S1_at   | MmuSTS.1861.1 | 6.14  | 6     | 0.14 | 0.05 | 1.1   | 0.155618 | 0.243595 | 0.528915 | 0.513729 |
| MmuSTS.1862.1.S1_at   | MmuSTS.1862.1 | 5.5   | 5.36  | 0.03 | 0.04 | 1.1   | 0.011422 | 0.291712 | 0.254838 | 0.552054 |
| MmuSTS.1863.1.S1_at   | MmuSTS.1863.1 | 6.59  | 6.47  | 0.05 | 0.06 | 1.08  | 0.035249 | 0.355124 | 0.351463 | 0.597508 |
| MmuSTS.1864.1.S1_at   | MmuSTS.1864.1 | 6.29  | 6.93  | 0.13 | 0.14 | -1.56 | 0.003881 | 0.00005  | 0.198571 | 0.025273 |
| MmuSTS.1865.1.S1_at   | MmuSTS.1865.1 | 3.67  | 3.69  | 0.13 | 0.12 | -1.01 | 0.969311 | 0.408128 | 0.989889 | 0.635476 |
| MmuSTS.1866.1.S1_at   | MmuSTS.1866.1 | 3.86  | 3.59  | 0.12 | 0.4  | 1.2   | 0.761246 | 0.663949 | 0.910425 | 0.803246 |
| MmuSTS.1866.1.S1_s_at | MmuSTS.1866.1 | 3.5   | 3.6   | 0.13 | 0.05 | -1.08 | 0.567397 | 0.855577 | 0.8204   | 0.917669 |
| MmuSTS.1867.1.S1_at   | MmuSTS.1867.1 | 11.58 | 11.37 | 0.06 | 0.13 | 1.16  | 0.084952 | 0.095426 | 0.451555 | 0.352453 |
| MmuSTS.1868.1.S1_at   | MmuSTS.1868.1 | 12.79 | 12.93 | 0.02 | 0.08 | -1.1  | 0.038273 | 0.001178 | 0.358719 | 0.05381  |
| MmuSTS.1869.1.S1_at   | MmuSTS.1869.1 | 3.2   | 3.1   | 0.12 | 0.07 | 1.07  | 0.989032 | 0.998689 | 0.995916 | 0.999294 |
| MmuSTS.187.1.S1_at    | MmuSTS.187.1  | 9.2   | 9.38  | 0.22 | 0.08 | -1.13 | 0.059408 | 0.008407 | 0.406303 | 0.121726 |
| MmuSTS.1870.1.S1_at   | MmuSTS.1870.1 | 5.54  | 5.08  | 0.51 | 0.17 | 1.38  | 0.192125 | 0.146174 | 0.563197 | 0.420124 |
| MmuSTS.1871.1.S1_at   | MmuSTS.1871.1 | 8.28  | 8.53  | 0.42 | 0.08 | -1.19 | 0.928457 | 0.168869 | 0.976259 | 0.445458 |
| MmuSTS.1872.1.S1_at   | MmuSTS.1872.1 | 8.03  | 7.81  | 2.01 | 0.26 | 1.16  | 0.891967 | 0.230848 | 0.962971 | 0.502545 |
| MmuSTS.1873.1.S1_at   | MmuSTS.1873.1 | 12.02 | 11.95 | 0.13 | 0.04 | 1.05  | 0.11981  | 0.007332 | 0.493259 | 0.115015 |
| MmuSTS.1874.1.S1_at   | MmuSTS.1874.1 | 5.41  | 6.11  | 0.53 | 0.5  | -1.62 | 0.816696 | 0.279496 | 0.933716 | 0.543055 |
| MmuSTS.1875.1.S1_s_at | MmuSTS.1875.1 | 6.26  | 5.99  | 0.59 | 0.25 | 1.21  | 0.515347 | 0.004135 | 0.79089  | 0.090937 |
| MmuSTS.1876.1.S1_at   | MmuSTS.1876.1 | 8.09  | 8.88  | 0.7  | 0.19 | -1.73 | 0.40414  | 0.21908  | 0.726203 | 0.49285  |
| MmuSTS.1877.1.S1_at   | MmuSTS.1877.1 | 9.75  | 10.15 | 0.46 | 0.08 | -1.32 | 0.255613 | 0.350671 | 0.61969  | 0.594403 |
| MmuSTS.1878.1.S1_at   | MmuSTS.1878.1 | 3.76  | 3.72  | 0.2  | 0.03 | 1.03  | 0.617179 | 0.464445 | 0.845329 | 0.675068 |
| MmuSTS.1879.1.S1_at   | MmuSTS.1879.1 | 4.73  | 4.86  | 0.26 | 0.2  | -1.09 | 0.107744 | 0.002034 | 0.480288 | 0.066885 |
| MmuSTS.188.1.S1_at    | MmuSTS.188.1  | 4.68  | 4.65  | 0.15 | 0.07 | 1.02  | 0.193931 | 0.193539 | 0.564486 | 0.468785 |
| MmuSTS.1880.1.S1_at   | MmuSTS.1880.1 | 12.32 | 12.18 | 0.19 | 0.05 | 1.1   | 0.429042 | 0.575256 | 0.742138 | 0.746427 |
| MmuSTS.1881.1.S1_at   | MmuSTS.1881.1 | 12.87 | 12.61 | 0.51 | 0.07 | 1.2   | 0.612439 | 0.709941 | 0.843052 | 0.831879 |
| MmuSTS.1882.1.S1_s_at | MmuSTS.1882.1 | 6.53  | 6.87  | 0.46 | 0.18 | -1.26 | 0.565969 | 0.204861 | 0.819702 | 0.479224 |
| MmuSTS.1883.1.S1_at   | MmuSTS.1883.1 | 11.97 | 11.99 | 0.11 | 0.04 | -1.01 | 0.535333 | 0.442528 | 0.801658 | 0.660487 |

|                        |                |       |       |      |      |       |          |          |          |          |
|------------------------|----------------|-------|-------|------|------|-------|----------|----------|----------|----------|
| MmuSTS.1884.1.S1_at    | MmuSTS.1884.1  | 7.31  | 6.59  | 0.36 | 0.43 | 1.64  | 0.050815 | 0.019237 | 0.388085 | 0.174494 |
| MmuSTS.1885.1.S1_at    | MmuSTS.1885.1  | 6.54  | 6.45  | 0.25 | 0.05 | 1.06  | 0.886383 | 0.929238 | 0.960501 | 0.959644 |
| MmuSTS.1886.1.S1_at    | MmuSTS.1886.1  | 6.14  | 5.98  | 0.05 | 0.06 | 1.11  | 0.015676 | 0.314198 | 0.28333  | 0.568185 |
| MmugDNA.2662.1.S1_s_at | MmugDNA.2662.1 | 4.05  | 3.81  | 0.16 | 0.06 | 1.18  | 0.182779 | 0.164911 | 0.555631 | 0.441219 |
| MmuSTS.1889.1.S1_at    | MmuSTS.1889.1  | 9.33  | 8.73  | 0.86 | 0.09 | 1.51  | 0.833713 | 0.217808 | 0.940371 | 0.491376 |
| MmuSTS.189.1.S1_at     | MmuSTS.189.1   | 3.73  | 3.73  | 0.01 | 0.18 | 1     | 0.898664 | 0.392458 | 0.965615 | 0.625813 |
| MmuSTS.1890.1.S1_at    | MmuSTS.1890.1  | 12.36 | 12.84 | 1.34 | 0.1  | -1.39 | 0.499036 | 0.296359 | 0.781906 | 0.555492 |
| MmuSTS.1891.1.S1_at    | MmuSTS.1891.1  | 11.22 | 11.42 | 0.27 | 0.09 | -1.16 | 0.194456 | 0.140848 | 0.565072 | 0.414237 |
| MmuSTS.1892.1.S1_at    | MmuSTS.1892.1  | 10.98 | 11.02 | 0.14 | 0.05 | -1.03 | 0.46999  | 0.414793 | 0.765832 | 0.640456 |
| MmuSTS.1893.1.S1_s_at  | MmuSTS.1893.1  | 7.7   | 7.1   | 1.64 | 0.76 | 1.52  | 0.508001 | 0.318943 | 0.786593 | 0.571532 |
| MmuSTS.1894.1.S1_at    | MmuSTS.1894.1  | 10.32 | 9.42  | 0.47 | 0.18 | -1.86 | 0.032155 | 0.00815  | 0.343204 | 0.119754 |
| MmuSTS.1895.1.S1_at    | MmuSTS.1895.1  | 9.03  | 10.9  | 0.4  | 0.5  | -3.65 | 0.008167 | 0.241188 | 0.232005 | 0.511821 |
| MmuSTS.1896.1.S1_at    | MmuSTS.1896.1  | 6.68  | 6.59  | 0.14 | 0.01 | 1.06  | 0.291264 | 0.340921 | 0.647751 | 0.587035 |
| MmuSTS.1897.1.S1_at    | MmuSTS.1897.1  | 8.27  | 8.39  | 0.41 | 0.15 | -1.08 | 0.63513  | 0.147301 | 0.854522 | 0.421493 |
| MmuSTS.1898.1.S1_at    | MmuSTS.1898.1  | 3.24  | 3.16  | 0.08 | 0.23 | 1.06  | 0.886052 | 0.944109 | 0.960449 | 0.968306 |
| MmuSTS.1899.1.S1_at    | MmuSTS.1899.1  | 2.9   | 2.86  | 0.12 | 0.07 | 1.02  | 0.522337 | 0.659747 | 0.795143 | 0.800854 |
| MmuSTS.19.1.S1_at      | MmuSTS.19.1    | 9.99  | 10.27 | 2.85 | 0.24 | -1.21 | 0.588367 | 0.361933 | 0.831903 | 0.602709 |
| MmuSTS.190.1.S1_at     | MmuSTS.190.1   | 9.79  | 9.55  | 0.39 | 0.2  | 1.18  | 0.117819 | 0.008137 | 0.491168 | 0.119736 |
| MmuSTS.1900.1.S1_at    | MmuSTS.1900.1  | 3.39  | 3.38  | 0.08 | 0.08 | 1.01  | 0.184659 | 0.523908 | 0.557393 | 0.714064 |
| MmuSTS.1901.1.S1_at    | MmuSTS.1901.1  | 4.02  | 4.33  | 0.2  | 0.09 | -1.24 | 0.076328 | 0.075772 | 0.437977 | 0.320348 |
| MmuSTS.1902.1.S1_s_at  | MmuSTS.1902.1  | 4.28  | 4.14  | 0.05 | 0.11 | 1.1   | 0.103798 | 0.060168 | 0.47451  | 0.291882 |
| MmuSTS.1903.1.S1_at    | MmuSTS.1903.1  | 6.47  | 6.11  | 0.2  | 0.16 | 1.28  | 0.077732 | 0.351722 | 0.439884 | 0.595164 |
| MmuSTS.1904.1.S1_at    | MmuSTS.1904.1  | 6.87  | 7.14  | 0.52 | 0.08 | -1.2  | 0.975081 | 0.173504 | 0.991912 | 0.449938 |
| MmuSTS.1905.1.S1_at    | MmuSTS.1905.1  | 4.91  | 5.04  | 0.16 | 0.07 | -1.09 | 0.482049 | 0.18316  | 0.772274 | 0.459531 |
| MmuSTS.1906.1.S1_at    | MmuSTS.1906.1  | 4.09  | 4.04  | 0.13 | 0.14 | 1.04  | 0.99574  | 0.987537 | 0.998312 | 0.993022 |
| MmuSTS.1907.1.S1_at    | MmuSTS.1907.1  | 5.59  | 5.71  | 0.09 | 0.14 | -1.09 | 0.672286 | 0.939088 | 0.870853 | 0.965412 |
| MmuSTS.1908.1.S1_at    | MmuSTS.1908.1  | 5.1   | 5.24  | 0.22 | 0.41 | -1.1  | 0.664702 | 0.926618 | 0.867683 | 0.958372 |
| MmuSTS.1909.1.S1_at    | MmuSTS.1909.1  | 7.98  | 7.6   | 0.48 | 0.11 | 1.3   | 0.823346 | 0.22791  | 0.936294 | 0.500211 |
| MmuSTS.191.1.S1_at     | MmuSTS.191.1   | 8.53  | 8.79  | 1.76 | 0.17 | -1.2  | 0.769977 | 0.221816 | 0.913889 | 0.494948 |
| MmuSTS.1910.1.S1_at    | MmuSTS.1910.1  | 4.5   | 4.45  | 0.13 | 0.01 | 1.03  | 0.552795 | 0.449193 | 0.811917 | 0.664892 |
| MmuSTS.1911.1.S1_at    | MmuSTS.1911.1  | 9.84  | 9.82  | 0.77 | 0.06 | 1.02  | 0.956924 | 0.974614 | 0.985732 | 0.986197 |
| MmuSTS.1912.1.S1_at    | MmuSTS.1912.1  | 10.92 | 11.12 | 0.09 | 0.12 | -1.15 | 0.129779 | 0.009483 | 0.504468 | 0.12821  |
| MmuSTS.1913.1.S1_at    | MmuSTS.1913.1  | 10.79 | 10.75 | 0.13 | 0.08 | 1.02  | 0.191068 | 0.23172  | 0.562344 | 0.503551 |
| MmuSTS.1914.1.S1_at    | MmuSTS.1914.1  | 9.76  | 10.14 | 0.26 | 0.1  | -1.3  | 0.06393  | 0.108614 | 0.416821 | 0.372171 |
| MmuSTS.1915.1.S1_at    | MmuSTS.1915.1  | 4.46  | 4.69  | 0.48 | 0.55 | -1.17 | 0.753125 | 0.442306 | 0.906985 | 0.660336 |
| MmuSTS.1916.1.S1_at    | MmuSTS.1916.1  | 3.24  | 3.33  | 0.07 | 0.18 | -1.07 | 0.449652 | 0.469576 | 0.754534 | 0.67829  |
| MmuSTS.1917.1.S1_at    | MmuSTS.1917.1  | 5.36  | 5.85  | 0.2  | 0.16 | -1.4  | 0.03132  | 0.166687 | 0.340964 | 0.443163 |
| MmuSTS.1918.1.S1_at    | MmuSTS.1918.1  | 5.9   | 6.39  | 0.65 | 0.13 | -1.41 | 0.210611 | 0.045942 | 0.581872 | 0.258786 |
| MmuSTS.1919.1.S1_at    | MmuSTS.1919.1  | 7.26  | 6.93  | 0.36 | 0.07 | 1.26  | 0.475664 | 0.559655 | 0.768676 | 0.736365 |
| MmuSTS.192.1.S1_at     | MmuSTS.192.1   | 7.56  | 8.02  | 0.34 | 0.11 | -1.37 | 0.154315 | 0.040409 | 0.527483 | 0.246134 |
| MmuSTS.1920.1.S1_at    | MmuSTS.1920.1  | 8.27  | 7.65  | 0.47 | 0.03 | 1.53  | 0.079981 | 0.032618 | 0.443128 | 0.223644 |
| MmuSTS.1921.1.S1_at    | MmuSTS.1921.1  | 4.89  | 4.75  | 0.24 | 0.13 | 1.1   | 0.153233 | 0.364458 | 0.526393 | 0.604837 |
| MmuSTS.1923.1.S1_at    | MmuSTS.1923.1  | 11.98 | 11.07 | 0.88 | 0.21 | 1.87  | 0.39845  | 0.575909 | 0.722497 | 0.746847 |

|                      |               |       |       |      |      |       |          |          |          |          |
|----------------------|---------------|-------|-------|------|------|-------|----------|----------|----------|----------|
| MmuSTS.1924.1.S1_at  | MmuSTS.1924.1 | 7.98  | 8.71  | 0.45 | 0.28 | -1.65 | 0.036069 | 0.026555 | 0.354225 | 0.203915 |
| MmuSTS.1925.1.S1_at  | MmuSTS.1925.1 | 13.93 | 13.67 | 0.24 | 0.14 | 1.2   | 0.233745 | 0.00409  | 0.60129  | 0.09055  |
| MmuSTS.1926.1.S1_at  | MmuSTS.1926.1 | 7.53  | 7.44  | 0.21 | 0.07 | 1.06  | 0.550344 | 0.093109 | 0.810769 | 0.349292 |
| MmuSTS.1927.1.S1_at  | MmuSTS.1927.1 | 7.06  | 6.8   | 1.41 | 0.13 | 1.19  | 0.937165 | 0.186665 | 0.978872 | 0.462459 |
| MmuSTS.1928.1.S1_at  | MmuSTS.1928.1 | 10.04 | 10.74 | 1.55 | 0.22 | -1.62 | 0.647598 | 0.850696 | 0.859364 | 0.915051 |
| MmuSTS.1929.1.S1_at  | MmuSTS.1929.1 | 12.75 | 12.24 | 1.18 | 0.15 | 1.42  | 0.808181 | 0.852911 | 0.930512 | 0.916372 |
| MmuSTS.193.1.S1_s_at | MmuSTS.193.1  | 10.8  | 10.88 | 0.04 | 0.1  | -1.06 | 0.920352 | 0.044048 | 0.972913 | 0.254195 |
| MmuSTS.1930.1.S1_at  | MmuSTS.1930.1 | 11.82 | 11.47 | 0.76 | 0.03 | 1.27  | 0.873886 | 0.370465 | 0.95634  | 0.609543 |
| MmuSTS.1931.1.S1_at  | MmuSTS.1931.1 | 12.44 | 12.44 | 0.23 | 0.07 | -1.01 | 0.787829 | 0.759285 | 0.922045 | 0.860036 |
| MmuSTS.1932.1.S1_at  | MmuSTS.1932.1 | 9.59  | 9.41  | 0.92 | 0.14 | 1.13  | 0.867285 | 0.362369 | 0.953465 | 0.602965 |
| MmuSTS.1933.1.S1_at  | MmuSTS.1933.1 | 3.1   | 3.71  | 0.2  | 0.25 | -1.53 | 0.049515 | 0.02413  | 0.385783 | 0.1945   |
| MmuSTS.1934.1.S1_at  | MmuSTS.1934.1 | 10.83 | 10.39 | 0.32 | 0.24 | 1.36  | 0.220213 | 0.061774 | 0.589475 | 0.295327 |
| MmuSTS.1935.1.S1_at  | MmuSTS.1935.1 | 10.78 | 10.59 | 0.21 | 0.24 | 1.14  | 0.199727 | 0.194712 | 0.571494 | 0.469765 |
| MmuSTS.1936.1.S1_at  | MmuSTS.1936.1 | 9.81  | 9.99  | 0.18 | 0.07 | -1.14 | 0.178583 | 0.036869 | 0.551383 | 0.23648  |
| MmuSTS.1937.1.S1_at  | MmuSTS.1937.1 | 6.98  | 7.41  | 0.57 | 0.09 | -1.35 | 0.531953 | 0.734437 | 0.799992 | 0.846141 |
| MmuSTS.1938.1.S1_at  | MmuSTS.1938.1 | 4.2   | 4.35  | 0.2  | 0.05 | -1.11 | 0.827742 | 0.957439 | 0.938082 | 0.975899 |
| MmuSTS.1939.1.S1_at  | MmuSTS.1939.1 | 4.2   | 4.27  | 0.28 | 0.17 | -1.05 | 0.959026 | 0.666131 | 0.986548 | 0.804415 |
| MmuSTS.194.1.S1_at   | MmuSTS.194.1  | 4.82  | 4.7   | 0.48 | 0.24 | 1.09  | 0.409659 | 0.738504 | 0.730237 | 0.848349 |
| MmuSTS.1940.1.S1_at  | MmuSTS.1940.1 | 9.37  | 10.49 | 0.66 | 0.05 | -2.16 | 0.051407 | 0.036633 | 0.390032 | 0.235943 |
| MmuSTS.1941.1.S1_at  | MmuSTS.1941.1 | 4.88  | 5.65  | 1.19 | 0.32 | -1.7  | 0.603147 | 0.389035 | 0.839133 | 0.623288 |
| MmuSTS.1942.1.S1_at  | MmuSTS.1942.1 | 4.55  | 4.57  | 0.2  | 0.06 | -1.01 | 0.603288 | 0.601083 | 0.83918  | 0.762496 |
| MmuSTS.1943.1.S1_at  | MmuSTS.1943.1 | 13.11 | 13.17 | 0.4  | 0.01 | -1.05 | 0.589007 | 0.767425 | 0.832095 | 0.864956 |
| MmuSTS.1944.1.S1_at  | MmuSTS.1944.1 | 7.92  | 8.04  | 1.36 | 0.26 | -1.09 | 0.998535 | 0.413194 | 0.999593 | 0.639484 |
| MmuSTS.1945.1.S1_at  | MmuSTS.1945.1 | 7.66  | 8.14  | 0.51 | 0.21 | -1.4  | 0.230264 | 0.24728  | 0.598481 | 0.516473 |
| MmuSTS.1946.1.S1_at  | MmuSTS.1946.1 | 12.03 | 12.37 | 0.23 | 0    | -1.27 | 0.05518  | 0.02366  | 0.398095 | 0.192574 |
| MmuSTS.1947.1.S1_at  | MmuSTS.1947.1 | 3.82  | 3.5   | 0.22 | 0.07 | 1.25  | 0.06011  | 0.203407 | 0.407399 | 0.477634 |
| MmuSTS.1948.1.S1_at  | MmuSTS.1948.1 | 7.27  | 7.16  | 0.17 | 0.2  | 1.08  | 0.753251 | 0.911739 | 0.907008 | 0.950257 |
| MmuSTS.1949.1.S1_at  | MmuSTS.1949.1 | 2.94  | 2.87  | 0.07 | 0.07 | 1.05  | 0.064914 | 0.086633 | 0.41922  | 0.339176 |
| MmuSTS.195.1.S1_at   | MmuSTS.195.1  | 5.65  | 5.49  | 0.17 | 0.03 | 1.12  | 0.182032 | 0.438838 | 0.555125 | 0.657715 |
| MmuSTS.1950.1.S1_at  | MmuSTS.1950.1 | 5.6   | 5.49  | 0.28 | 0.05 | 1.08  | 0.478503 | 0.795064 | 0.770085 | 0.881926 |
| MmuSTS.1951.1.S1_at  | MmuSTS.1951.1 | 4.93  | 4.8   | 0.08 | 0.07 | 1.09  | 0.289658 | 0.062258 | 0.646342 | 0.296325 |
| MmuSTS.1952.1.S1_at  | MmuSTS.1952.1 | 8.93  | 7.57  | 0.56 | 0.37 | 2.57  | 0.028802 | 0.009765 | 0.333062 | 0.129971 |
| MmuSTS.1953.1.S1_at  | MmuSTS.1953.1 | 9.51  | 8.49  | 1.01 | 0.39 | 2.02  | 0.521163 | 0.067765 | 0.794371 | 0.306425 |
| MmuSTS.1954.1.S1_at  | MmuSTS.1954.1 | 4.79  | 4.82  | 0.91 | 0.18 | -1.02 | 0.933525 | 0.135    | 0.977475 | 0.40698  |
| MmuSTS.1955.1.S1_at  | MmuSTS.1955.1 | 11.14 | 10.95 | 0.16 | 0.28 | 1.15  | 0.900189 | 0.000685 | 0.966012 | 0.044166 |
| MmuSTS.1956.1.S1_at  | MmuSTS.1956.1 | 13.14 | 13.18 | 0.08 | 0.07 | -1.03 | 0.669973 | 0.158524 | 0.869803 | 0.434442 |
| MmuSTS.1957.1.S1_at  | MmuSTS.1957.1 | 9.27  | 9.99  | 1.63 | 0.23 | -1.65 | 0.542964 | 0.163957 | 0.806082 | 0.440107 |
| MmuSTS.1958.1.S1_at  | MmuSTS.1958.1 | 8.21  | 8.57  | 1.36 | 0.21 | -1.28 | 0.682167 | 0.264764 | 0.87565  | 0.530791 |
| MmuSTS.1959.1.S1_at  | MmuSTS.1959.1 | 4.39  | 4.41  | 0.03 | 0.05 | -1.02 | 0.164384 | 0.427226 | 0.537322 | 0.649175 |
| MmuSTS.196.1.S1_at   | MmuSTS.196.1  | 11.34 | 11.53 | 0.12 | 0.04 | -1.14 | 0.05525  | 0.286734 | 0.398125 | 0.548112 |
| MmuSTS.1960.1.S1_at  | MmuSTS.1960.1 | 5.6   | 5.52  | 0.18 | 0.1  | 1.06  | 0.335444 | 0.876045 | 0.681042 | 0.929533 |
| MmuSTS.1961.1.S1_at  | MmuSTS.1961.1 | 4.19  | 4.23  | 0.06 | 0.05 | -1.03 | 0.726487 | 0.077189 | 0.894363 | 0.322773 |
| MmuSTS.1962.1.S1_at  | MmuSTS.1962.1 | 10.59 | 9.87  | 0.2  | 0.09 | 1.65  | 0.00585  | 0.004122 | 0.211798 | 0.090887 |

|                     |               |       |       |      |      |       |          |          |          |          |
|---------------------|---------------|-------|-------|------|------|-------|----------|----------|----------|----------|
| MmuSTS.1963.1.S1_at | MmuSTS.1963.1 | 11.07 | 11.48 | 0.69 | 0.13 | -1.33 | 0.095591 | 0.018865 | 0.464229 | 0.172781 |
| MmuSTS.1964.1.S1_at | MmuSTS.1964.1 | 10.33 | 10.88 | 0.17 | 0.09 | -1.46 | 0.016218 | 0.005248 | 0.286783 | 0.100352 |
| MmuSTS.1965.1.S1_at | MmuSTS.1965.1 | 8.87  | 9.11  | 0.1  | 0.04 | -1.18 | 0.026954 | 0.384433 | 0.326847 | 0.620107 |
| MmuSTS.1966.1.S1_at | MmuSTS.1966.1 | 9.24  | 9.73  | 0.23 | 0.16 | -1.4  | 0.029778 | 0.001375 | 0.335945 | 0.05691  |
| MmuSTS.1967.1.S1_at | MmuSTS.1967.1 | 10.44 | 9.82  | 3.5  | 0.28 | 1.53  | 0.606527 | 0.257086 | 0.840496 | 0.524783 |
| MmuSTS.1968.1.S1_at | MmuSTS.1968.1 | 9.19  | 9.19  | 1.14 | 0.18 | 1     | 0.997934 | 0.752215 | 0.999327 | 0.855787 |
| MmuSTS.1969.1.S1_at | MmuSTS.1969.1 | 11.21 | 11.26 | 0.41 | 0.13 | -1.04 | 0.738015 | 0.895011 | 0.899775 | 0.940055 |
| MmuSTS.197.1.S1_at  | MmuSTS.197.1  | 9.57  | 9.58  | 0.14 | 0.17 | -1.01 | 0.784324 | 0.000107 | 0.920715 | 0.028099 |
| MmuSTS.1970.1.S1_at | MmuSTS.1970.1 | 8.69  | 8.04  | 0.46 | 0.26 | 1.57  | 0.124926 | 0.069337 | 0.498917 | 0.309558 |
| MmuSTS.1971.1.S1_at | MmuSTS.1971.1 | 11.11 | 12.16 | 0.25 | 0.04 | -2.07 | 0.001876 | 0.015323 | 0.168981 | 0.157164 |
| MmuSTS.1972.1.S1_at | MmuSTS.1972.1 | 7.21  | 7.1   | 0.1  | 0.05 | -1.08 | 0.126124 | 0.544917 | 0.499873 | 0.727184 |
| MmuSTS.1973.1.S1_at | MmuSTS.1973.1 | 7.77  | 7.75  | 0.9  | 0.3  | 1.02  | 0.381967 | 0.073132 | 0.710335 | 0.316064 |
| MmuSTS.1974.1.S1_at | MmuSTS.1974.1 | 5.75  | 5.67  | 0.12 | 0.1  | 1.06  | 0.170456 | 0.150923 | 0.543539 | 0.425523 |
| MmuSTS.1975.1.S1_at | MmuSTS.1975.1 | 7.62  | 7.77  | 1.07 | 0.27 | -1.11 | 0.885519 | 0.488742 | 0.96038  | 0.691338 |
| MmuSTS.1976.1.S1_at | MmuSTS.1976.1 | 5.8   | 5.64  | 0.13 | 0.03 | 1.12  | 0.084056 | 0.076991 | 0.45029  | 0.322421 |
| MmuSTS.1977.1.S1_at | MmuSTS.1977.1 | 9.13  | 8.5   | 0.8  | 0.18 | 1.55  | 0.589503 | 0.163087 | 0.832373 | 0.439249 |
| MmuSTS.1978.1.S1_at | MmuSTS.1978.1 | 7.07  | 7.62  | 1.31 | 0.35 | -1.47 | 0.64893  | 0.286221 | 0.860173 | 0.547725 |
| MmuSTS.1979.1.S1_at | MmuSTS.1979.1 | 10.43 | 10.7  | 0.44 | 0.04 | -1.21 | 0.945006 | 0.343155 | 0.980852 | 0.588905 |
| MmuSTS.198.1.S1_at  | MmuSTS.198.1  | 3.11  | 2.89  | 0.07 | 0.08 | 1.17  | 0.026877 | 0.025444 | 0.326584 | 0.200043 |
| MmuSTS.1980.1.S1_at | MmuSTS.1980.1 | 4.24  | 4.06  | 0.14 | 0.32 | 1.13  | 0.667177 | 0.83449  | 0.868543 | 0.905226 |
| MmuSTS.1981.1.S1_at | MmuSTS.1981.1 | 8.38  | 8.35  | 2.83 | 0.27 | 1.02  | 0.442372 | 0.307544 | 0.750032 | 0.563781 |
| MmuSTS.1982.1.S1_at | MmuSTS.1982.1 | 10.49 | 10.83 | 2.27 | 0.24 | -1.27 | 0.664065 | 0.46105  | 0.867581 | 0.672831 |
| MmuSTS.1983.1.S1_at | MmuSTS.1983.1 | 3.06  | 3.07  | 0.13 | 0.12 | -1.01 | 0.721222 | 0.735465 | 0.891962 | 0.846919 |
| MmuSTS.1984.1.S1_at | MmuSTS.1984.1 | 7.44  | 6.57  | 0.27 | 0.12 | 1.82  | 0.003063 | 0.003509 | 0.191107 | 0.08503  |
| MmuSTS.1985.1.S1_at | MmuSTS.1985.1 | 8.98  | 9.67  | 0.22 | 0.27 | -1.61 | 0.02053  | 0.006241 | 0.304274 | 0.107169 |
| MmuSTS.1986.1.S1_at | MmuSTS.1986.1 | 6.5   | 6.26  | 0.14 | 0.09 | 1.18  | 0.066716 | 0.078207 | 0.422542 | 0.324752 |
| MmuSTS.1987.1.S1_at | MmuSTS.1987.1 | 11.23 | 11.25 | 0.08 | 0    | -1.01 | 0.794545 | 0.003823 | 0.924579 | 0.08794  |
| MmuSTS.1988.1.S1_at | MmuSTS.1988.1 | 6.45  | 6.24  | 0.41 | 0.38 | 1.16  | 0.904127 | 0.64456  | 0.967773 | 0.791661 |
| MmuSTS.1989.1.S1_at | MmuSTS.1989.1 | 5.58  | 5.61  | 0.15 | 0.07 | -1.02 | 0.963712 | 0.975465 | 0.988161 | 0.986626 |
| MmuSTS.199.1.S1_at  | MmuSTS.199.1  | 10.47 | 9.21  | 1.62 | 0.22 | 2.4   | 0.649283 | 0.69628  | 0.860245 | 0.823545 |
| MmuSTS.1990.1.S1_at | MmuSTS.1990.1 | 6.24  | 6.23  | 0.12 | 0.09 | 1.01  | 0.934009 | 0.458219 | 0.977707 | 0.671077 |
| MmuSTS.1991.1.S1_at | MmuSTS.1991.1 | 8     | 7.94  | 0.51 | 0.37 | 1.05  | 0.543024 | 0.063872 | 0.806127 | 0.29906  |
| MmuSTS.1992.1.S1_at | MmuSTS.1992.1 | 7.77  | 8.96  | 1.04 | 0.15 | -2.29 | 0.1074   | 0.063588 | 0.47976  | 0.298703 |
| MmuSTS.1993.1.S1_at | MmuSTS.1993.1 | 5.42  | 6.22  | 0.45 | 0.67 | -1.74 | 0.748928 | 0.355125 | 0.904734 | 0.597508 |
| MmuSTS.1994.1.S1_at | MmuSTS.1994.1 | 4.67  | 4.49  | 0.04 | 0.17 | 1.13  | 0.087248 | 0.190398 | 0.454785 | 0.465906 |
| MmuSTS.1995.1.S1_at | MmuSTS.1995.1 | 11.29 | 11.54 | 0.53 | 0.13 | -1.18 | 0.130134 | 0.034353 | 0.504663 | 0.229283 |
| MmuSTS.1996.1.S1_at | MmuSTS.1996.1 | 10.82 | 10.9  | 0.23 | 0.13 | -1.06 | 0.700162 | 0.58135  | 0.883438 | 0.750417 |
| MmuSTS.1997.1.S1_at | MmuSTS.1997.1 | 10.49 | 9.52  | 0.56 | 0.3  | 1.96  | 0.021341 | 0.028482 | 0.307829 | 0.21056  |
| MmuSTS.1998.1.S1_at | MmuSTS.1998.1 | 10.18 | 9.37  | 1.05 | 0.49 | 1.75  | 0.59652  | 0.03691  | 0.836007 | 0.236593 |
| MmuSTS.1999.1.S1_at | MmuSTS.1999.1 | 9.07  | 8.75  | 0.36 | 0.07 | 1.25  | 0.510602 | 0.01556  | 0.788228 | 0.158132 |
| MmuSTS.2.1.S1_at    | MmuSTS.2.1    | 4.03  | 4.01  | 0.2  | 0.03 | 1.01  | 0.698951 | 0.679888 | 0.882969 | 0.8131   |
| MmuSTS.20.1.S1_at   | MmuSTS.20.1   | 10.1  | 9.82  | 2.48 | 0.16 | 1.21  | 0.721371 | 0.488422 | 0.891996 | 0.691144 |
| MmuSTS.200.1.S1_at  | MmuSTS.200.1  | 10.61 | 9.94  | 0.7  | 0.06 | 1.59  | 0.187134 | 0.037957 | 0.559729 | 0.239302 |

|                       |               |       |       |      |      |       |          |          |          |          |
|-----------------------|---------------|-------|-------|------|------|-------|----------|----------|----------|----------|
| MmuSTS.2000.1.S1_at   | MmuSTS.2000.1 | 5.95  | 5.42  | 0.15 | 0.41 | 1.45  | 0.033462 | 0.013983 | 0.346442 | 0.151585 |
| MmuSTS.2001.1.S1_at   | MmuSTS.2001.1 | 11.93 | 11.84 | 0.04 | 0.04 | 1.06  | 0.029804 | 0.349403 | 0.335991 | 0.593406 |
| MmuSTS.2002.1.S1_at   | MmuSTS.2002.1 | 2.73  | 3.01  | 0.18 | 0.08 | -1.22 | 0.113906 | 0.010945 | 0.487339 | 0.13621  |
| MmuSTS.2003.1.S1_at   | MmuSTS.2003.1 | 3.04  | 3.05  | 0.11 | 0.04 | -1.01 | 0.533293 | 0.756718 | 0.80084  | 0.858361 |
| MmuSTS.2004.1.S1_at   | MmuSTS.2004.1 | 4.74  | 4.62  | 0.14 | 0.13 | 1.09  | 0.075452 | 0.954854 | 0.907353 | 0.974414 |
| MmuSTS.2005.1.S1_at   | MmuSTS.2005.1 | 6.12  | 5.96  | 0.22 | 0.09 | 1.12  | 0.066032 | 0.058223 | 0.421613 | 0.287988 |
| MmuSTS.2006.1.S1_at   | MmuSTS.2006.1 | 12.65 | 12.79 | 0.14 | 0.05 | -1.11 | 0.133884 | 0.259162 | 0.50813  | 0.526264 |
| MmuSTS.2007.1.S1_at   | MmuSTS.2007.1 | 6.84  | 7.5   | 0.24 | 0.03 | -1.58 | 0.020909 | 0.089343 | 0.305941 | 0.343595 |
| MmuSTS.2008.1.S1_at   | MmuSTS.2008.1 | 7.19  | 7.45  | 0.22 | 0.12 | -1.2  | 0.272049 | 0.063826 | 0.631836 | 0.29906  |
| MmuSTS.2009.1.S1_at   | MmuSTS.2009.1 | 6.67  | 7.05  | 0.07 | 0.07 | -1.3  | 0.004606 | 0.208598 | 0.201051 | 0.48252  |
| MmuSTS.201.1.S1_at    | MmuSTS.201.1  | 4.91  | 3.54  | 0.33 | 0.25 | 2.57  | 0.004329 | 0.000799 | 0.198874 | 0.04607  |
| MmuSTS.2010.1.S1_at   | MmuSTS.2010.1 | 4.56  | 4.72  | 0.35 | 0.11 | -1.12 | 0.402326 | 0.676113 | 0.724848 | 0.810713 |
| MmuSTS.2012.1.S1_at   | MmuSTS.2012.1 | 3.64  | 3.69  | 0.33 | 0.05 | -1.04 | 0.780106 | 0.929032 | 0.919011 | 0.959562 |
| MmuSTS.2013.1.S1_at   | MmuSTS.2013.1 | 7.89  | 8.54  | 0.51 | 0.19 | -1.57 | 0.165298 | 0.267539 | 0.538018 | 0.533272 |
| MmuSTS.2014.1.S1_at   | MmuSTS.2014.1 | 2.79  | 2.78  | 0.38 | 0.17 | 1     | 0.545273 | 0.332986 | 0.807742 | 0.581326 |
| MmuSTS.2014.1.S1_x_at | MmuSTS.2014.1 | 2.69  | 2.8   | 0.41 | 0.14 | -1.08 | 0.661194 | 0.364318 | 0.866006 | 0.604662 |
| MmuSTS.2015.1.S1_at   | MmuSTS.2015.1 | 5.54  | 5.48  | 0.05 | 0.04 | 1.04  | 0.129748 | 0.200291 | 0.504468 | 0.474689 |
| MmuSTS.2016.1.S1_at   | MmuSTS.2016.1 | 5.29  | 5.03  | 0.14 | 0.09 | 1.19  | 0.057672 | 0.022555 | 0.402592 | 0.187981 |
| MmuSTS.2017.1.S1_at   | MmuSTS.2017.1 | 4.69  | 4.65  | 0.19 | 0.03 | 1.02  | 0.736963 | 0.777202 | 0.899286 | 0.870556 |
| MmuSTS.2018.1.S1_at   | MmuSTS.2018.1 | 6.11  | 6.2   | 0.09 | 0.07 | -1.06 | 0.447484 | 0.845318 | 0.753312 | 0.911994 |
| MmuSTS.2019.1.S1_at   | MmuSTS.2019.1 | 5.14  | 5.38  | 0.1  | 0.11 | -1.19 | 0.105688 | 0.095219 | 0.477409 | 0.35218  |
| MmuSTS.202.1.S1_s_at  | MmuSTS.202.1  | 4.75  | 3.86  | 0.91 | 0.6  | 1.85  | 0.317504 | 0.318613 | 0.667356 | 0.571258 |
| MmuSTS.2020.1.S1_at   | MmuSTS.2020.1 | 12.2  | 12.11 | 0.28 | 0.09 | 1.07  | 0.983781 | 0.27912  | 0.995094 | 0.542807 |
| MmuSTS.2021.1.S1_at   | MmuSTS.2021.1 | 4.73  | 4.38  | 0.13 | 0.11 | 1.28  | 0.063132 | 0.092437 | 0.415058 | 0.348329 |
| MmuSTS.2022.1.S1_at   | MmuSTS.2022.1 | 6.54  | 6.97  | 1.56 | 0.21 | -1.35 | 0.609499 | 0.673133 | 0.841773 | 0.809011 |
| MmuSTS.2024.1.S1_at   | MmuSTS.2024.1 | 7.81  | 8.01  | 0.48 | 0.13 | -1.15 | 0.588769 | 0.072986 | 0.831968 | 0.315986 |
| MmuSTS.2025.1.S1_at   | MmuSTS.2025.1 | 11.1  | 10.31 | 0.78 | 0.41 | 1.72  | 0.541762 | 0.079803 | 0.805248 | 0.327113 |
| MmuSTS.2026.1.S1_at   | MmuSTS.2026.1 | 10.52 | 10.59 | 0.18 | 0.05 | -1.05 | 0.563106 | 0.628009 | 0.818043 | 0.780911 |
| MmuSTS.2027.1.S1_at   | MmuSTS.2027.1 | 7.11  | 6.97  | 0.23 | 0.14 | 1.1   | 0.272659 | 0.008143 | 0.632447 | 0.119736 |
| MmuSTS.2028.1.S1_at   | MmuSTS.2028.1 | 4.27  | 4.06  | 0.18 | 0.17 | 1.16  | 0.269727 | 0.382531 | 0.629945 | 0.618735 |
| MmuSTS.2029.1.S1_at   | MmuSTS.2029.1 | 9.19  | 8.68  | 0.18 | 0.1  | 1.42  | 0.025705 | 0.00007  | 0.322523 | 0.025812 |
| MmuSTS.203.1.S1_at    | MmuSTS.203.1  | 4.02  | 3.59  | 0.27 | 0.03 | 1.35  | 0.146485 | 0.180942 | 0.520749 | 0.457418 |
| MmuSTS.2030.1.S1_at   | MmuSTS.2030.1 | 9.21  | 9.65  | 0.65 | 0.12 | -1.35 | 0.708853 | 0.887458 | 0.886591 | 0.935867 |
| MmuSTS.2031.1.S1_at   | MmuSTS.2031.1 | 9.39  | 8.99  | 0.24 | 0.06 | 1.32  | 0.047247 | 0.000364 | 0.379823 | 0.037273 |
| MmuSTS.2032.1.S1_at   | MmuSTS.2032.1 | 4.02  | 3.83  | 0.31 | 0.31 | 1.14  | 0.678492 | 0.737581 | 0.874048 | 0.847993 |
| MmuSTS.2033.1.S1_at   | MmuSTS.2033.1 | 5.01  | 5.21  | 0.43 | 0.17 | -1.15 | 0.890396 | 0.964613 | 0.96231  | 0.980347 |
| MmuSTS.2034.1.S1_at   | MmuSTS.2034.1 | 8.21  | 8.57  | 0.4  | 0.04 | -1.28 | 0.317819 | 0.152579 | 0.667596 | 0.427435 |
| MmuSTS.2035.1.S1_at   | MmuSTS.2035.1 | 12.34 | 12.51 | 0.96 | 0.13 | -1.13 | 0.796742 | 0.435407 | 0.925303 | 0.655194 |
| MmuSTS.2036.1.S1_at   | MmuSTS.2036.1 | 9.07  | 9.54  | 0.59 | 0.01 | -1.38 | 0.728912 | 0.925236 | 0.895514 | 0.957718 |
| MmuSTS.2037.1.S1_at   | MmuSTS.2037.1 | 11.24 | 10.88 | 0.57 | 0.05 | 1.28  | 0.325654 | 0.165665 | 0.673403 | 0.441925 |
| MmuSTS.2038.1.S1_at   | MmuSTS.2038.1 | 5.27  | 5.29  | 0.45 | 0.05 | -1.02 | 0.615051 | 0.636317 | 0.844186 | 0.786047 |
| MmuSTS.2039.1.S1_at   | MmuSTS.2039.1 | 9.83  | 10.46 | 0.38 | 0.04 | -1.55 | 0.126023 | 0.0883   | 0.499751 | 0.341721 |
| MmuSTS.204.1.S1_at    | MmuSTS.204.1  | 11.19 | 11.01 | 0.38 | 0.16 | 1.13  | 0.117583 | 0.136382 | 0.490984 | 0.408839 |



|                       |               |       |       |      |      |       |          |          |          |          |
|-----------------------|---------------|-------|-------|------|------|-------|----------|----------|----------|----------|
| MmuSTS.2040.1.S1_at   | MmuSTS.2040.1 | 8.64  | 9     | 0.14 | 0.05 | -1.29 | 0.00637  | 0.001316 | 0.218572 | 0.055939 |
| MmuSTS.2041.1.S1_at   | MmuSTS.2041.1 | 8.21  | 8.41  | 0.37 | 0.12 | -1.14 | 0.453903 | 0.307611 | 0.756364 | 0.563785 |
| MmuSTS.2042.1.S1_at   | MmuSTS.2042.1 | 7.96  | 8.51  | 0.53 | 0.06 | -1.47 | 0.163536 | 0.215693 | 0.536326 | 0.489487 |
| MmuSTS.2043.1.S1_at   | MmuSTS.2043.1 | 5.91  | 6.24  | 0.04 | 0.22 | -1.26 | 0.06149  | 0.000062 | 0.410846 | 0.025666 |
| MmuSTS.2044.1.S1_at   | MmuSTS.2044.1 | 7.18  | 8.01  | 0.44 | 0.33 | -1.79 | 0.121429 | 0.146831 | 0.495101 | 0.42088  |
| MmuSTS.2045.1.S1_at   | MmuSTS.2045.1 | 7.72  | 7.33  | 0.27 | 0.12 | 1.32  | 0.076752 | 0.077431 | 0.438176 | 0.323236 |
| MmuSTS.2046.1.S1_at   | MmuSTS.2046.1 | 10.12 | 9.97  | 0.11 | 0.04 | 1.12  | 0.070849 | 0.073897 | 0.430067 | 0.31727  |
| MmuSTS.2047.1.S1_at   | MmuSTS.2047.1 | 4.75  | 4.76  | 0.36 | 0.41 | -1.01 | 0.875956 | 0.759399 | 0.956844 | 0.860081 |
| MmuSTS.2048.1.S1_at   | MmuSTS.2048.1 | 5.3   | 5.18  | 0.11 | 0.11 | 1.08  | 0.288429 | 0.190909 | 0.645518 | 0.466269 |
| MmuSTS.2049.1.S1_at   | MmuSTS.2049.1 | 12.6  | 12.6  | 0.52 | 0.02 | 1     | 0.514378 | 0.475457 | 0.790322 | 0.682155 |
| MmuSTS.205.1.S1_at    | MmuSTS.205.1  | 7.63  | 7.27  | 0.5  | 0.2  | -1.29 | 0.321237 | 0.354897 | 0.669932 | 0.597466 |
| MmuSTS.2050.1.S1_at   | MmuSTS.2050.1 | 3.18  | 3.15  | 0.05 | 0.02 | 1.02  | 0.306195 | 0.406537 | 0.659271 | 0.634382 |
| MmuSTS.2051.1.S1_at   | MmuSTS.2051.1 | 10.57 | 10.5  | 0.62 | 0.06 | 1.05  | 0.838526 | 0.963992 | 0.942267 | 0.980028 |
| MmuSTS.2052.1.S1_at   | MmuSTS.2052.1 | 9.87  | 9.81  | 0.38 | 0.08 | 1.04  | 0.83518  | 0.350923 | 0.940884 | 0.594639 |
| MmuSTS.2053.1.S1_at   | MmuSTS.2053.1 | 5.93  | 5.15  | 0.34 | 0.26 | 1.72  | 0.034932 | 0.05519  | 0.350632 | 0.280555 |
| MmuSTS.2054.1.S1_at   | MmuSTS.2054.1 | 6.25  | 6.69  | 0.66 | 0.15 | -1.35 | 0.324482 | 0.510318 | 0.672695 | 0.704827 |
| MmuSTS.2055.1.S1_at   | MmuSTS.2055.1 | 4.23  | 4.11  | 0.75 | 0.5  | 1.08  | 0.78506  | 0.919819 | 0.920961 | 0.954916 |
| MmuSTS.2056.1.S1_at   | MmuSTS.2056.1 | 7.07  | 7.13  | 0.13 | 0.07 | -1.04 | 0.499628 | 0.121713 | 0.782139 | 0.390956 |
| MmuSTS.2057.1.S1_at   | MmuSTS.2057.1 | 9.34  | 9.61  | 0.48 | 0.28 | -1.2  | 0.865233 | 0.791775 | 0.952585 | 0.879741 |
| MmuSTS.2058.1.S1_at   | MmuSTS.2058.1 | 7.04  | 7.61  | 0.78 | 0.29 | -1.49 | 0.974869 | 0.062057 | 0.991912 | 0.29597  |
| MmuSTS.2059.1.S1_at   | MmuSTS.2059.1 | 6.84  | 6.27  | 0.82 | 0.17 | 1.49  | 0.995908 | 0.648013 | 0.998345 | 0.793947 |
| MmuSTS.206.1.S1_at    | MmuSTS.206.1  | 12.55 | 12.42 | 0.04 | 0.14 | 1.1   | 0.049444 | 0.03367  | 0.385474 | 0.227066 |
| MmuSTS.2060.1.S1_at   | MmuSTS.2060.1 | 7.08  | 7.3   | 0.36 | 0.11 | -1.16 | 0.470471 | 0.742669 | 0.766162 | 0.851023 |
| MmuSTS.2061.1.S1_at   | MmuSTS.2061.1 | 10.51 | 11.03 | 0.62 | 0.01 | -1.43 | 0.13339  | 0.065676 | 0.507921 | 0.301631 |
| MmuSTS.2062.1.S1_at   | MmuSTS.2062.1 | 4.81  | 4.69  | 0.1  | 0.22 | 1.09  | 0.339377 | 0.048366 | 0.683826 | 0.265081 |
| MmuSTS.2063.1.S1_at   | MmuSTS.2063.1 | 11.5  | 11.85 | 0.26 | 0.06 | -1.27 | 0.088507 | 0.100791 | 0.45606  | 0.360239 |
| MmuSTS.2064.1.S1_at   | MmuSTS.2064.1 | 12.83 | 12.74 | 0.55 | 0.06 | 1.06  | 0.473286 | 0.086591 | 0.767506 | 0.33911  |
| MmuSTS.2065.1.S1_at   | MmuSTS.2065.1 | 9.52  | 10.47 | 1.25 | 0.15 | -1.93 | 0.243687 | 0.029109 | 0.609595 | 0.212733 |
| MmuSTS.2065.1.S1_s_at | MmuSTS.2065.1 | 9.52  | 10.35 | 1.28 | 0.23 | -1.78 | 0.341463 | 0.035151 | 0.685061 | 0.231645 |
| MmuSTS.2065.1.S1_x_at | MmuSTS.2065.1 | 9.88  | 10.77 | 1.17 | 0.17 | -1.85 | 0.255245 | 0.029236 | 0.61931  | 0.212898 |
| MmuSTS.2066.1.S1_at   | MmuSTS.2066.1 | 10.49 | 10.73 | 0.37 | 0.14 | -1.18 | 0.251334 | 0.004317 | 0.616622 | 0.092178 |
| MmuSTS.2067.1.S1_at   | MmuSTS.2067.1 | 7.3   | 7.33  | 0.4  | 0.11 | -1.02 | 0.559803 | 0.047468 | 0.816426 | 0.262486 |
| MmuSTS.2068.1.S1_at   | MmuSTS.2068.1 | 7.72  | 8.39  | 0.4  | 0.38 | -1.59 | 0.107215 | 0.187059 | 0.47976  | 0.462983 |
| MmuSTS.2069.1.S1_at   | MmuSTS.2069.1 | 10.08 | 9.76  | 0.17 | 0.09 | 1.24  | 0.110362 | 0.000324 | 0.483363 | 0.035587 |
| MmuSTS.207.1.S1_at    | MmuSTS.207.1  | 8.05  | 7.79  | 1.4  | 0.12 | 1.2   | 0.774    | 0.660705 | 0.916098 | 0.80151  |
| MmuSTS.2070.1.S1_s_at | MmuSTS.2070.1 | 7.88  | 8.26  | 0.33 | 0.02 | -1.3  | 0.039602 | 0.014965 | 0.362432 | 0.155453 |
| MmuSTS.2071.1.S1_at   | MmuSTS.2071.1 | 8.17  | 7.89  | 0.46 | 0.24 | 1.21  | 0.711943 | 0.00347  | 0.887746 | 0.084806 |
| MmuSTS.2073.1.S1_at   | MmuSTS.2073.1 | 11.86 | 12.05 | 1    | 0.06 | -1.14 | 0.749976 | 0.14819  | 0.905339 | 0.422745 |
| MmuSTS.2074.1.S1_at   | MmuSTS.2074.1 | 10.88 | 11.39 | 0.22 | 0.02 | -1.43 | 0.033665 | 0.005861 | 0.34712  | 0.104856 |
| MmuSTS.2075.1.S1_at   | MmuSTS.2075.1 | 5.18  | 5.18  | 0.26 | 0.42 | 1     | 0.988352 | 0.920551 | 0.995877 | 0.955234 |
| MmuSTS.2076.1.S1_at   | MmuSTS.2076.1 | 5.05  | 5.07  | 0    | 0.11 | -1.02 | 0.60547  | 0.802709 | 0.839993 | 0.886441 |
| MmuSTS.2077.1.S1_at   | MmuSTS.2077.1 | 6.22  | 6.01  | 0.07 | 0.03 | 1.16  | 0.010316 | 0.025518 | 0.246929 | 0.200389 |
| MmuSTS.2078.1.S1_at   | MmuSTS.2078.1 | 4.8   | 4.85  | 0.4  | 0.5  | -1.04 | 0.739949 | 0.519633 | 0.900699 | 0.711208 |

|                       |               |       |       |      |      |       |          |          |          |          |
|-----------------------|---------------|-------|-------|------|------|-------|----------|----------|----------|----------|
| MmuSTS.2079.1.S1_at   | MmuSTS.2079.1 | 6.99  | 7.59  | 0.28 | 0.19 | -1.52 | 0.032192 | 0.028264 | 0.343301 | 0.209854 |
| MmuSTS.208.1.S1_at    | MmuSTS.208.1  | 5.41  | 6.36  | 0.39 | 0.12 | -1.93 | 0.02879  | 0.018054 | 0.333062 | 0.169372 |
| MmuSTS.2080.1.S1_at   | MmuSTS.2080.1 | 3.59  | 3.4   | 0.25 | 0.12 | 1.14  | 0.627291 | 0.524135 | 0.850453 | 0.714207 |
| MmuSTS.2081.1.S1_at   | MmuSTS.2081.1 | 9.05  | 8.34  | 0.54 | 0.07 | 1.63  | 0.073868 | 0.01129  | 0.434623 | 0.138076 |
| MmuSTS.2082.1.S1_at   | MmuSTS.2082.1 | 9.35  | 9.13  | 0.1  | 0.12 | 1.17  | 0.018621 | 0.022956 | 0.298116 | 0.189548 |
| MmuSTS.2083.1.S1_at   | MmuSTS.2083.1 | 11.74 | 12.02 | 0.18 | 0.13 | -1.22 | 0.426554 | 0.403204 | 0.740608 | 0.631996 |
| MmuSTS.2084.1.S1_at   | MmuSTS.2084.1 | 12.66 | 12.76 | 0.6  | 0.02 | -1.07 | 0.261507 | 0.160379 | 0.623872 | 0.436528 |
| MmuSTS.2085.1.S1_at   | MmuSTS.2085.1 | 4.61  | 4.7   | 0.58 | 0.6  | -1.07 | 0.479507 | 0.761749 | 0.770772 | 0.861459 |
| MmuSTS.2086.1.S1_at   | MmuSTS.2086.1 | 6.97  | 7.71  | 0.33 | 0.11 | -1.67 | 0.045903 | 0.042753 | 0.37735  | 0.251238 |
| MmuSTS.2087.1.S1_at   | MmuSTS.2087.1 | 3.57  | 3.78  | 0.29 | 0.53 | -1.16 | 0.589725 | 0.369408 | 0.832621 | 0.608809 |
| MmuSTS.2088.1.S1_at   | MmuSTS.2088.1 | 8.21  | 8.74  | 0.32 | 0.12 | -1.45 | 0.202262 | 0.454546 | 0.573733 | 0.668668 |
| MmuSTS.2089.1.S1_at   | MmuSTS.2089.1 | 8.24  | 8.36  | 0.84 | 0.27 | -1.08 | 0.740523 | 0.388566 | 0.90086  | 0.622897 |
| MmuSTS.209.1.S1_at    | MmuSTS.209.1  | 7.74  | 7.37  | 0.33 | 0.08 | 1.29  | 0.501392 | 0.980392 | 0.783207 | 0.989333 |
| MmuSTS.2090.1.S1_at   | MmuSTS.2090.1 | 6.49  | 6.31  | 0.62 | 0.17 | 1.14  | 0.680533 | 0.834422 | 0.874731 | 0.905171 |
| MmuSTS.2091.1.S1_at   | MmuSTS.2091.1 | 11.64 | 11.58 | 0.37 | 0.01 | 1.04  | 0.796502 | 0.633242 | 0.925188 | 0.784025 |
| MmuSTS.2092.1.S1_at   | MmuSTS.2092.1 | 6.62  | 7.22  | 0.28 | 0.14 | -1.52 | 0.076958 | 0.101858 | 0.438889 | 0.361836 |
| MmuSTS.2093.1.S1_at   | MmuSTS.2093.1 | 11.75 | 11.23 | 0.21 | 0.02 | 1.44  | 0.014162 | 0.00145  | 0.274019 | 0.057999 |
| MmuSTS.2094.1.S1_at   | MmuSTS.2094.1 | 11.19 | 11.26 | 0.24 | 0.02 | -1.05 | 0.681453 | 0.509194 | 0.875286 | 0.704028 |
| MmuSTS.2095.1.S1_at   | MmuSTS.2095.1 | 3.26  | 3.15  | 0.2  | 0.07 | 1.08  | 0.288412 | 0.182633 | 0.645509 | 0.459167 |
| MmuSTS.2096.1.S1_at   | MmuSTS.2096.1 | 7.3   | 7.64  | 1.16 | 0.12 | -1.27 | 0.627059 | 0.769383 | 0.850335 | 0.866055 |
| MmuSTS.2097.1.S1_s_at | MmuSTS.2097.1 | 4.82  | 4.81  | 0.08 | 0.15 | 1.01  | 0.361509 | 0.176266 | 0.698663 | 0.452718 |
| MmuSTS.2098.1.S1_at   | MmuSTS.2098.1 | 10.32 | 10.45 | 0.31 | 0.13 | -1.1  | 0.624414 | 0.523322 | 0.84873  | 0.713653 |
| MmuSTS.2099.1.S1_at   | MmuSTS.2099.1 | 9.41  | 9.83  | 0.2  | 0.21 | -1.34 | 0.035491 | 0.040979 | 0.35215  | 0.247202 |
| MmuSTS.21.1.S1_at     | MmuSTS.21.1   | 9.69  | 9.65  | 0.05 | 0.11 | 1.03  | 0.609833 | 0.553549 | 0.841773 | 0.732701 |
| MmuSTS.210.1.S1_at    | MmuSTS.210.1  | 3.67  | 3.48  | 0.14 | 0.13 | 1.14  | 0.092805 | 0.089888 | 0.461373 | 0.344073 |
| MmuSTS.2100.1.S1_at   | MmuSTS.2100.1 | 4.98  | 5.78  | 0.81 | 0.68 | -1.73 | 0.278805 | 0.392292 | 0.637886 | 0.625694 |
| MmuSTS.2100.1.S1_x_at | MmuSTS.2100.1 | 4.58  | 5.38  | 0.59 | 0.52 | -1.74 | 0.295006 | 0.417409 | 0.650971 | 0.642209 |
| MmuSTS.2101.1.S1_at   | MmuSTS.2101.1 | 12.79 | 13.1  | 0.07 | 0.05 | -1.24 | 0.004798 | 0.005035 | 0.202502 | 0.098963 |
| MmuSTS.2102.1.S1_at   | MmuSTS.2102.1 | 7.21  | 7.67  | 0.85 | 0.11 | -1.37 | 0.943204 | 0.970149 | 0.980425 | 0.983714 |
| MmuSTS.2103.1.S1_at   | MmuSTS.2103.1 | 12.68 | 12.96 | 0.39 | 0.08 | -1.22 | 0.359413 | 0.33578  | 0.697237 | 0.583515 |
| MmuSTS.2104.1.S1_at   | MmuSTS.2104.1 | 5.07  | 4.89  | 0.74 | 0.18 | 1.13  | 0.383503 | 0.640528 | 0.71139  | 0.78899  |
| MmuSTS.2105.1.S1_s_at | MmuSTS.2105.1 | 7.43  | 7.34  | 0.19 | 0.1  | 1.06  | 0.89316  | 0.280739 | 0.963441 | 0.543935 |
| MmuSTS.2106.1.S1_at   | MmuSTS.2106.1 | 9.03  | 9.3   | 0.16 | 0.29 | -1.2  | 0.130468 | 0.025808 | 0.504764 | 0.201375 |
| MmuSTS.2107.1.S1_at   | MmuSTS.2107.1 | 8.71  | 9.39  | 0.78 | 0.1  | -1.6  | 0.465892 | 0.626218 | 0.763252 | 0.779684 |
| MmuSTS.2108.1.S1_s_at | MmuSTS.2108.1 | 11.43 | 11.42 | 0.03 | 0.02 | 1.01  | 0.572658 | 0.083926 | 0.823323 | 0.334824 |
| MmuSTS.2109.1.S1_at   | MmuSTS.2109.1 | 9.75  | 9.61  | 0.52 | 0.27 | 1.1   | 0.989064 | 0.493508 | 0.995916 | 0.694195 |
| MmuSTS.211.1.S1_s_at  | MmuSTS.211.1  | 4.25  | 4.01  | 0.15 | 0.08 | 1.18  | 0.077305 | 0.338047 | 0.439109 | 0.585223 |
| MmuSTS.2110.1.S1_at   | MmuSTS.2110.1 | 10.65 | 10.91 | 0.09 | 0.13 | -1.2  | 0.033935 | 0.011569 | 0.347468 | 0.139219 |
| MmuSTS.2111.1.S1_at   | MmuSTS.2111.1 | 11.89 | 12.36 | 0.15 | 0.02 | -1.38 | 0.006196 | 0.005238 | 0.217213 | 0.100294 |
| MmuSTS.2112.1.S1_at   | MmuSTS.2112.1 | 11.66 | 12.06 | 0.14 | 0.04 | -1.32 | 0.0079   | 0.00111  | 0.231366 | 0.052745 |
| MmuSTS.2113.1.S1_at   | MmuSTS.2113.1 | 7.72  | 7.77  | 0.26 | 0.14 | -1.03 | 0.896822 | 0.063482 | 0.964942 | 0.298441 |
| MmuSTS.2114.1.S1_at   | MmuSTS.2114.1 | 10.16 | 10.41 | 0.15 | 0.08 | -1.2  | 0.023218 | 0.003763 | 0.314809 | 0.087395 |
| MmuSTS.2115.1.S1_at   | MmuSTS.2115.1 | 12.84 | 12.82 | 0.73 | 0.08 | 1.02  | 0.415538 | 0.403696 | 0.733656 | 0.632319 |

|                       |               |       |       |      |      |       |          |          |          |          |
|-----------------------|---------------|-------|-------|------|------|-------|----------|----------|----------|----------|
| MmuSTS.2116.1.S1_at   | MmuSTS.2116.1 | 8.08  | 7.71  | 0.27 | 0.03 | 1.29  | 0.264543 | 0.407558 | 0.626029 | 0.63505  |
| MmuSTS.2117.1.S1_at   | MmuSTS.2117.1 | 12.42 | 12.49 | 0.27 | 0.06 | -1.05 | 0.344289 | 0.056454 | 0.686913 | 0.283516 |
| MmuSTS.2118.1.S1_at   | MmuSTS.2118.1 | 7.69  | 7.1   | 0.7  | 0.12 | 1.51  | 0.202157 | 0.075182 | 0.573629 | 0.319384 |
| MmuSTS.2119.1.S1_at   | MmuSTS.2119.1 | 10.56 | 10.63 | 0.56 | 0.08 | -1.05 | 0.976545 | 0.750382 | 0.992376 | 0.854787 |
| MmuSTS.212.1.S1_at    | MmuSTS.212.1  | 7.86  | 8.6   | 0.49 | 0.09 | -1.67 | 0.048089 | 0.04686  | 0.382173 | 0.261272 |
| MmuSTS.2120.1.S1_at   | MmuSTS.2120.1 | 9.68  | 10.02 | 0.22 | 0.04 | -1.27 | 0.178004 | 0.008305 | 0.551187 | 0.120929 |
| MmuSTS.2121.1.S1_at   | MmuSTS.2121.1 | 5.75  | 5.63  | 0.15 | 0.15 | 1.09  | 0.14386  | 0.333491 | 0.519184 | 0.581694 |
| MmuSTS.2122.1.S1_at   | MmuSTS.2122.1 | 7.56  | 7.97  | 0.79 | 0.15 | -1.33 | 0.395911 | 0.473673 | 0.720823 | 0.680935 |
| MmuSTS.2123.1.S1_at   | MmuSTS.2123.1 | 7.23  | 7.16  | 0.41 | 0.52 | 1.05  | 0.765041 | 0.360251 | 0.911696 | 0.60129  |
| MmuSTS.2124.1.S1_at   | MmuSTS.2124.1 | 10.65 | 10.79 | 0.11 | 0.02 | -1.1  | 0.073613 | 0.535989 | 0.434623 | 0.721454 |
| MmuSTS.2125.1.S1_at   | MmuSTS.2125.1 | 10.9  | 10.49 | 0.68 | 0.08 | -1.33 | 0.56076  | 0.566255 | 0.816958 | 0.740362 |
| MmuSTS.2126.1.S1_s_at | MmuSTS.2126.1 | 8.65  | 8.8   | 0.98 | 0.22 | -1.11 | 0.827445 | 0.371453 | 0.938039 | 0.610204 |
| MmuSTS.2127.1.S1_at   | MmuSTS.2127.1 | 4.98  | 5.05  | 0.02 | 0.08 | -1.05 | 0.215651 | 0.053505 | 0.585748 | 0.276963 |
| MmuSTS.2128.1.S1_at   | MmuSTS.2128.1 | 4.48  | 4.5   | 0.04 | 0.09 | -1.01 | 0.459752 | 0.027524 | 0.759799 | 0.207161 |
| MmuSTS.2129.1.S1_at   | MmuSTS.2129.1 | 10.67 | 10.63 | 0.2  | 0.14 | 1.03  | 0.946131 | 0.506982 | 0.981288 | 0.702698 |
| MmuSTS.213.1.S1_at    | MmuSTS.213.1  | 11.52 | 11.64 | 0.34 | 0.02 | -1.09 | 0.590927 | 0.349575 | 0.833168 | 0.593539 |
| MmuSTS.2130.1.S1_s_at | MmuSTS.2130.1 | 7.2   | 7.23  | 1.26 | 0.22 | -1.02 | 0.922629 | 0.274802 | 0.973908 | 0.53925  |
| MmuSTS.2131.1.S1_s_at | MmuSTS.2131.1 | 5.33  | 5.31  | 0.09 | 0.15 | 1.02  | 0.441333 | 0.93552  | 0.749251 | 0.96359  |
| MmuSTS.2131.1.S1_x_at | MmuSTS.2131.1 | 7.88  | 7.68  | 0.12 | 0.06 | 1.15  | 0.151434 | 0.303558 | 0.524547 | 0.561022 |
| MmuSTS.2132.1.S1_s_at | MmuSTS.2132.1 | 12    | 12.34 | 0.6  | 0.19 | -1.27 | 0.416342 | 0.383881 | 0.734276 | 0.61978  |
| MmuSTS.2133.1.S1_at   | MmuSTS.2133.1 | 8.48  | 8.51  | 0.06 | 0.05 | -1.02 | 0.315609 | 0.00435  | 0.666014 | 0.092371 |
| MmuSTS.2134.1.S1_at   | MmuSTS.2134.1 | 11.08 | 11.53 | 0.35 | 0.11 | -1.36 | 0.041108 | 0.032616 | 0.365675 | 0.223644 |
| MmuSTS.2135.1.S1_at   | MmuSTS.2135.1 | 8.24  | 9.3   | 0.45 | 0.18 | -2.09 | 0.021465 | 0.017277 | 0.308864 | 0.166459 |
| MmuSTS.2136.1.S1_at   | MmuSTS.2136.1 | 9.57  | 8.93  | 0.61 | 0.34 | 1.56  | 0.075529 | 0.141778 | 0.436722 | 0.415331 |
| MmuSTS.2137.1.S1_at   | MmuSTS.2137.1 | 8.11  | 8.29  | 0.26 | 0.02 | -1.13 | 0.56863  | 0.028836 | 0.820925 | 0.211661 |
| MmuSTS.2138.1.S1_at   | MmuSTS.2138.1 | 11.51 | 11.55 | 0.78 | 0.01 | -1.03 | 0.344425 | 0.067085 | 0.686913 | 0.304939 |
| MmuSTS.2139.1.S1_at   | MmuSTS.2139.1 | 7.89  | 8.05  | 0.36 | 0.17 | -1.12 | 0.470611 | 0.34235  | 0.766172 | 0.588413 |
| MmuSTS.214.1.S1_at    | MmuSTS.214.1  | 3.27  | 3.06  | 0.19 | 0.08 | 1.15  | 0.207791 | 0.294725 | 0.579372 | 0.554345 |
| MmuSTS.2140.1.S1_at   | MmuSTS.2140.1 | 3.9   | 3.88  | 0    | 0.1  | 1.01  | 0.845808 | 0.969556 | 0.945918 | 0.98334  |
| MmuSTS.2141.1.S1_at   | MmuSTS.2141.1 | 7.62  | 7.74  | 0.38 | 0.07 | -1.09 | 0.927507 | 0.243517 | 0.97593  | 0.513585 |
| MmuSTS.2142.1.S1_at   | MmuSTS.2142.1 | 9.67  | 9.72  | 0.6  | 0.03 | -1.03 | 0.876726 | 0.801688 | 0.957055 | 0.885902 |
| MmuSTS.2143.1.S1_at   | MmuSTS.2143.1 | 4.76  | 4.39  | 0.18 | 0.38 | 1.29  | 0.158225 | 0.277905 | 0.531211 | 0.541664 |
| MmuSTS.2144.1.S1_at   | MmuSTS.2144.1 | 10.66 | 10.23 | 0.36 | 0.16 | 1.34  | 0.093363 | 0.477353 | 0.462462 | 0.683422 |
| MmuSTS.2145.1.S1_at   | MmuSTS.2145.1 | 6.55  | 6.34  | 0.21 | 0.13 | 1.15  | 0.522893 | 0.434608 | 0.795346 | 0.654747 |
| MmuSTS.2146.1.S1_at   | MmuSTS.2146.1 | 9.45  | 9     | 0.46 | 0.02 | 1.37  | 0.191589 | 0.057522 | 0.562859 | 0.285907 |
| MmuSTS.2147.1.S1_at   | MmuSTS.2147.1 | 12    | 12.24 | 0.14 | 0.02 | -1.18 | 0.127591 | 0.025981 | 0.501756 | 0.202105 |
| MmuSTS.2148.1.S1_at   | MmuSTS.2148.1 | 3.97  | 3.9   | 0.2  | 0.03 | 1.05  | 0.47772  | 0.661537 | 0.76987  | 0.801856 |
| MmuSTS.2149.1.S1_at   | MmuSTS.2149.1 | 10.5  | 10.58 | 0.31 | 0.18 | -1.06 | 0.446572 | 0.56258  | 0.752779 | 0.738076 |
| MmuSTS.215.1.S1_at    | MmuSTS.215.1  | 8.9   | 7.9   | 2.08 | 0.23 | 2     | 0.507773 | 0.220374 | 0.786553 | 0.493783 |
| MmuSTS.2150.1.S1_at   | MmuSTS.2150.1 | 9.54  | 8.01  | 1.34 | 0.37 | 2.9   | 0.09437  | 0.233317 | 0.463787 | 0.50468  |
| MmuSTS.2151.1.S1_at   | MmuSTS.2151.1 | 11.22 | 10.79 | 0.41 | 0.14 | 1.35  | 0.13278  | 0.009142 | 0.506999 | 0.126119 |
| MmuSTS.2152.1.S1_at   | MmuSTS.2152.1 | 9.17  | 8.48  | 0.14 | 0.3  | 1.61  | 0.052852 | 0.005329 | 0.393368 | 0.100928 |
| MmuSTS.2153.1.S1_at   | MmuSTS.2153.1 | 9.12  | 9.11  | 0.15 | 0.23 | 1.01  | 0.51983  | 0.35438  | 0.793373 | 0.597166 |

|                       |               |       |       |      |      |       |          |          |          |          |
|-----------------------|---------------|-------|-------|------|------|-------|----------|----------|----------|----------|
| MmuSTS.2154.1.S1_at   | MmuSTS.2154.1 | 8.22  | 8.44  | 1.52 | 0.21 | -1.17 | 0.857229 | 0.569082 | 0.949645 | 0.742239 |
| MmuSTS.2155.1.S1_at   | MmuSTS.2155.1 | 8.17  | 8.32  | 0.79 | 0.34 | -1.1  | 0.725908 | 0.880908 | 0.893959 | 0.932018 |
| MmuSTS.2156.1.S1_at   | MmuSTS.2156.1 | 11.29 | 11.73 | 0.39 | 0.09 | -1.36 | 0.313511 | 0.435425 | 0.664784 | 0.655194 |
| MmuSTS.2156.1.S1_x_at | MmuSTS.2156.1 | 11.17 | 11.66 | 0.41 | 0.11 | -1.41 | 0.261375 | 0.363783 | 0.623819 | 0.604189 |
| MmuSTS.2157.1.S1_at   | MmuSTS.2157.1 | 8.66  | 8.3   | 0.69 | 0.27 | 1.28  | 0.319675 | 0.605939 | 0.668882 | 0.765547 |
| MmuSTS.2158.1.S1_at   | MmuSTS.2158.1 | 11.01 | 11.29 | 0.29 | 0.09 | -1.21 | 0.418933 | 0.658948 | 0.736038 | 0.800473 |
| MmuSTS.2159.1.S1_at   | MmuSTS.2159.1 | 3.88  | 4.02  | 0.09 | 0.18 | -1.1  | 0.543942 | 0.375076 | 0.806882 | 0.613186 |
| MmuSTS.216.1.S1_s_at  | MmuSTS.216.1  | 3.33  | 3.42  | 0    | 0.01 | -1.07 | 0.000137 | 0.002696 | 0.111942 | 0.076455 |
| MmuSTS.2160.1.S1_at   | MmuSTS.2160.1 | 5.52  | 5.51  | 0.25 | 0.03 | 1.01  | 0.976175 | 0.984947 | 0.992259 | 0.991478 |
| MmuSTS.2161.1.S1_at   | MmuSTS.2161.1 | 5.6   | 5.4   | 0.18 | 0.06 | 1.15  | 0.224277 | 0.276228 | 0.593443 | 0.540183 |
| MmuSTS.2162.1.S1_at   | MmuSTS.2162.1 | 6.26  | 7.28  | 0.48 | 0.08 | -2.03 | 0.041137 | 0.036323 | 0.365675 | 0.235105 |
| MmuSTS.2163.1.S1_at   | MmuSTS.2163.1 | 10.24 | 10.34 | 0.46 | 0.32 | -1.08 | 0.401619 | 0.556301 | 0.724554 | 0.734487 |
| MmuSTS.2164.1.S1_at   | MmuSTS.2164.1 | 10.54 | 10.31 | 0.27 | 0.35 | 1.17  | 0.881273 | 0.001735 | 0.958986 | 0.062895 |
| MmuSTS.2164.1.S1_s_at | MmuSTS.2164.1 | 9.61  | 9.34  | 0.35 | 0.37 | 1.2   | 0.910994 | 0.002072 | 0.969789 | 0.067389 |
| MmuSTS.2165.1.S1_at   | MmuSTS.2165.1 | 11.79 | 11.89 | 0.09 | 0.06 | -1.07 | 0.353863 | 0.442792 | 0.693507 | 0.660759 |
| MmuSTS.2166.1.S1_at   | MmuSTS.2166.1 | 7.67  | 7.32  | 1.07 | 0.31 | 1.27  | 0.587176 | 0.793377 | 0.831578 | 0.880744 |
| MmuSTS.2167.1.S1_s_at | MmuSTS.2167.1 | 8.63  | 9.15  | 0.53 | 0.04 | -1.43 | 0.174996 | 0.119598 | 0.548031 | 0.388247 |
| MmuSTS.2168.1.S1_at   | MmuSTS.2168.1 | 8.7   | 8.25  | 0.21 | 0.07 | 1.36  | 0.025689 | 0.016528 | 0.322497 | 0.162745 |
| MmuSTS.2169.1.S1_at   | MmuSTS.2169.1 | 11.6  | 11.05 | 0.17 | 0.1  | 1.46  | 0.013418 | 0.000626 | 0.268462 | 0.042692 |
| MmuSTS.217.1.S1_at    | MmuSTS.217.1  | 3.44  | 3.3   | 0.14 | 0.13 | 1.1   | 0.212278 | 0.287793 | 0.582812 | 0.549064 |
| MmuSTS.2170.1.S1_at   | MmuSTS.2170.1 | 10.6  | 10.56 | 0.16 | 0.04 | 1.03  | 0.51677  | 0.126255 | 0.791667 | 0.39678  |
| MmuSTS.2171.1.S1_at   | MmuSTS.2171.1 | 11.5  | 11.66 | 0.25 | 0.06 | -1.11 | 0.32517  | 0.430238 | 0.673069 | 0.651295 |
| MmuSTS.2172.1.S1_at   | MmuSTS.2172.1 | 9.65  | 9.25  | 0.5  | 0.01 | 1.31  | 0.740161 | 0.729467 | 0.900721 | 0.843541 |
| MmuSTS.2173.1.S1_at   | MmuSTS.2173.1 | 7.78  | 8.34  | 0.52 | 0.23 | -1.48 | 0.176785 | 0.195246 | 0.549945 | 0.470253 |
| MmuSTS.2174.1.S1_at   | MmuSTS.2174.1 | 10.38 | 10.43 | 0.66 | 0.1  | -1.04 | 0.328572 | 0.399043 | 0.67577  | 0.62969  |
| MmuSTS.2175.1.S1_at   | MmuSTS.2175.1 | 8.5   | 8.73  | 0.72 | 0.26 | -1.17 | 0.514714 | 0.325194 | 0.790586 | 0.575598 |
| MmuSTS.2176.1.S1_at   | MmuSTS.2176.1 | 4.21  | 4.41  | 0.18 | 0.02 | -1.15 | 0.198705 | 0.697196 | 0.570106 | 0.824045 |
| MmuSTS.2177.1.S1_at   | MmuSTS.2177.1 | 3.52  | 3.99  | 0.17 | 0.22 | -1.39 | 0.039165 | 0.030213 | 0.361205 | 0.21576  |
| MmuSTS.2178.1.S1_at   | MmuSTS.2178.1 | 5.86  | 5.43  | 0.27 | 0.19 | 1.35  | 0.204893 | 0.387348 | 0.576522 | 0.622027 |
| MmuSTS.2179.1.S1_at   | MmuSTS.2179.1 | 7.55  | 8     | 0.84 | 0.34 | -1.36 | 0.303955 | 0.167009 | 0.657774 | 0.443466 |
| MmuSTS.218.1.S1_at    | MmuSTS.218.1  | 11.77 | 11.76 | 0.09 | 0.08 | 1.01  | 0.990037 | 0.00409  | 0.996301 | 0.09055  |
| MmuSTS.2180.1.S1_at   | MmuSTS.2180.1 | 6.2   | 8.29  | 1.46 | 0.62 | -4.25 | 0.078555 | 0.028681 | 0.441197 | 0.211057 |
| MmuSTS.2181.1.S1_at   | MmuSTS.2181.1 | 5.75  | 5.85  | 0.28 | 0.09 | -1.08 | 0.755907 | 0.805028 | 0.90805  | 0.887934 |
| MmuSTS.2182.1.S1_at   | MmuSTS.2182.1 | 7.68  | 8.42  | 0.05 | 0.12 | -1.67 | 0.000885 | 0.008027 | 0.153739 | 0.119047 |
| MmuSTS.2183.1.S1_at   | MmuSTS.2183.1 | 8     | 9.04  | 0.52 | 0.15 | -2.06 | 0.034723 | 0.008702 | 0.350358 | 0.123697 |
| MmuSTS.2184.1.S1_at   | MmuSTS.2184.1 | 5.47  | 4.97  | 0.67 | 0.09 | 1.42  | 0.751337 | 0.29869  | 0.905926 | 0.55727  |
| MmuSTS.2185.1.S1_at   | MmuSTS.2185.1 | 10.91 | 11.4  | 0.33 | 0.12 | -1.41 | 0.090868 | 0.00903  | 0.458873 | 0.125559 |
| MmuSTS.2186.1.S1_at   | MmuSTS.2186.1 | 8.76  | 9.13  | 0.58 | 0.11 | -1.29 | 0.597435 | 0.383126 | 0.836302 | 0.619153 |
| MmuSTS.2187.1.S1_at   | MmuSTS.2187.1 | 9.83  | 9.78  | 0.15 | 0.04 | 1.03  | 0.522084 | 0.315588 | 0.795067 | 0.569053 |
| MmuSTS.2188.1.S1_at   | MmuSTS.2188.1 | 3.28  | 3.2   | 0.07 | 0.02 | 1.05  | 0.054402 | 0.00381  | 0.396392 | 0.08794  |
| MmuSTS.2189.1.S1_at   | MmuSTS.2189.1 | 13.05 | 13.12 | 0.09 | 0.01 | -1.05 | 0.605239 | 0.748309 | 0.839877 | 0.85351  |
| MmuSTS.219.1.S1_at    | MmuSTS.219.1  | 3.87  | 3.77  | 0.15 | 0.1  | 1.07  | 0.664231 | 0.777376 | 0.867648 | 0.87064  |
| MmuSTS.2190.1.S1_at   | MmuSTS.2190.1 | 2.84  | 2.91  | 0.31 | 0.12 | -1.05 | 0.576103 | 0.575549 | 0.825056 | 0.746587 |

|                     |               |       |       |      |      |       |          |          |          |          |
|---------------------|---------------|-------|-------|------|------|-------|----------|----------|----------|----------|
| MmuSTS.2191.1.S1_at | MmuSTS.2191.1 | 9.36  | 8.58  | 0.3  | 0.14 | 1.71  | 0.00691  | 0.001955 | 0.224141 | 0.065813 |
| MmuSTS.2192.1.S1_at | MmuSTS.2192.1 | 11.59 | 11.3  | 0.35 | 0.06 | 1.22  | 0.072812 | 0.106612 | 0.433468 | 0.36916  |
| MmuSTS.2193.1.S1_at | MmuSTS.2193.1 | 11.69 | 11.35 | 1    | 0.32 | 1.27  | 0.467751 | 0.071291 | 0.764607 | 0.313335 |
| MmuSTS.2194.1.S1_at | MmuSTS.2194.1 | 4.74  | 4.69  | 0.06 | 0.14 | 1.03  | 0.686581 | 0.60094  | 0.877418 | 0.762424 |
| MmuSTS.2195.1.S1_at | MmuSTS.2195.1 | 10.57 | 9.84  | 0.29 | 0.18 | 1.65  | 0.03747  | 0.069552 | 0.357167 | 0.309848 |
| MmuSTS.2196.1.S1_at | MmuSTS.2196.1 | 4.64  | 4.7   | 0.12 | 0.2  | -1.05 | 0.320788 | 0.428117 | 0.669445 | 0.649676 |
| MmuSTS.2197.1.S1_at | MmuSTS.2197.1 | 7.82  | 8.09  | 0.38 | 0.03 | -1.21 | 0.425683 | 0.278532 | 0.740112 | 0.542311 |
| MmuSTS.2198.1.S1_at | MmuSTS.2198.1 | 8.6   | 8.68  | 0.72 | 0.31 | -1.05 | 0.907214 | 0.945083 | 0.968503 | 0.968834 |
| MmuSTS.2199.1.S1_at | MmuSTS.2199.1 | 4.13  | 4.32  | 0.15 | 0.18 | -1.14 | 0.195999 | 0.287654 | 0.566419 | 0.548886 |
| MmuSTS.22.1.S1_at   | MmuSTS.22.1   | 9.05  | 9.35  | 0.5  | 0.09 | -1.23 | 0.389952 | 0.137967 | 0.716422 | 0.410912 |
| MmuSTS.220.1.S1_at  | MmuSTS.220.1  | 10.57 | 10.95 | 0.22 | 0.12 | -1.3  | 0.069879 | 0.000911 | 0.427911 | 0.048322 |
| MmuSTS.2200.1.S1_at | MmuSTS.2200.1 | 10.09 | 10.08 | 0.49 | 0.12 | 1.01  | 0.591754 | 0.593144 | 0.833648 | 0.758096 |
| MmuSTS.2201.1.S1_at | MmuSTS.2201.1 | 3.43  | 3.52  | 0.12 | 0.03 | -1.06 | 0.191127 | 0.361906 | 0.562456 | 0.602682 |
| MmuSTS.2202.1.S1_at | MmuSTS.2202.1 | 7.04  | 8.07  | 0.94 | 0.23 | -2.04 | 0.139532 | 0.073611 | 0.514956 | 0.316945 |
| MmuSTS.2203.1.S1_at | MmuSTS.2203.1 | 6.99  | 5.91  | 0.74 | 0.11 | 2.12  | 0.198228 | 0.281598 | 0.569466 | 0.544655 |
| MmuSTS.2205.1.S1_at | MmuSTS.2205.1 | 3.31  | 3.35  | 0.04 | 0.07 | -1.03 | 0.532416 | 0.180812 | 0.800287 | 0.457306 |
| MmuSTS.2206.1.S1_at | MmuSTS.2206.1 | 9.92  | 9.87  | 0.19 | 0.07 | 1.04  | 0.37546  | 0.586332 | 0.70651  | 0.753438 |
| MmuSTS.2207.1.S1_at | MmuSTS.2207.1 | 11.8  | 10.63 | 0.97 | 0.08 | 2.25  | 0.355596 | 0.453861 | 0.694743 | 0.668321 |
| MmuSTS.2208.1.S1_at | MmuSTS.2208.1 | 8.7   | 7.84  | 0.13 | 0.13 | 1.81  | 0.00068  | 0.000084 | 0.146807 | 0.027016 |
| MmuSTS.2209.1.S1_at | MmuSTS.2209.1 | 10.13 | 9.84  | 0.29 | 0.07 | 1.22  | 0.069067 | 0.226484 | 0.426529 | 0.498961 |
| MmuSTS.221.1.S1_at  | MmuSTS.221.1  | 5.65  | 5.5   | 0.26 | 0.21 | 1.11  | 0.942686 | 0.394117 | 0.98031  | 0.62675  |
| MmuSTS.2210.1.S1_at | MmuSTS.2210.1 | 8.77  | 8.89  | 0.18 | 0.03 | -1.09 | 0.617383 | 0.334078 | 0.845362 | 0.582104 |
| MmuSTS.2211.1.S1_at | MmuSTS.2211.1 | 5.99  | 5.99  | 0.06 | 0.05 | 1     | 0.56828  | 0.283798 | 0.820707 | 0.546209 |
| MmuSTS.2212.1.S1_at | MmuSTS.2212.1 | 8.99  | 9.34  | 0.34 | 0.03 | -1.27 | 0.142879 | 0.104468 | 0.518022 | 0.365719 |
| MmuSTS.2213.1.S1_at | MmuSTS.2213.1 | 8.35  | 9.03  | 0.74 | 0.16 | -1.59 | 0.141081 | 0.16458  | 0.516345 | 0.440829 |
| MmuSTS.2214.1.S1_at | MmuSTS.2214.1 | 8.65  | 8.81  | 0.57 | 0.24 | -1.12 | 0.647513 | 0.009838 | 0.859364 | 0.130274 |
| MmuSTS.2215.1.S1_at | MmuSTS.2215.1 | 10.39 | 9.82  | 1    | 0.07 | 1.49  | 0.553708 | 0.718941 | 0.812271 | 0.83732  |
| MmuSTS.2216.1.S1_at | MmuSTS.2216.1 | 8.33  | 8.7   | 0.46 | 0.06 | -1.29 | 0.118058 | 0.045744 | 0.491371 | 0.258221 |
| MmuSTS.2217.1.S1_at | MmuSTS.2217.1 | 3.51  | 3.41  | 0.05 | 0.13 | 1.07  | 0.565091 | 0.740645 | 0.819091 | 0.84983  |
| MmuSTS.2218.1.S1_at | MmuSTS.2218.1 | 11.79 | 11.59 | 0.17 | 0.16 | 1.15  | 0.094837 | 0.001839 | 0.464075 | 0.064374 |
| MmuSTS.2219.1.S1_at | MmuSTS.2219.1 | 9.46  | 10.11 | 0.14 | 0.08 | -1.57 | 0.002869 | 0.006853 | 0.187837 | 0.11185  |
| MmuSTS.222.1.S1_at  | MmuSTS.222.1  | 4.89  | 4.89  | 0.1  | 0.08 | 1     | 0.768971 | 0.881394 | 0.9134   | 0.932335 |
| MmuSTS.2220.1.S1_at | MmuSTS.2220.1 | 8.27  | 8.33  | 0.06 | 0.08 | -1.05 | 0.336071 | 0.009928 | 0.681441 | 0.130813 |
| MmuSTS.2221.1.S1_at | MmuSTS.2221.1 | 10.67 | 11.18 | 0.4  | 0.08 | -1.43 | 0.09167  | 0.065259 | 0.45996  | 0.301239 |
| MmuSTS.2222.1.S1_at | MmuSTS.2222.1 | 3.88  | 3.45  | 0.22 | 0.19 | 1.35  | 0.1628   | 0.545751 | 0.535867 | 0.727653 |
| MmuSTS.2223.1.S1_at | MmuSTS.2223.1 | 7.62  | 7.27  | 0.28 | 0.18 | 1.28  | 0.24564  | 0.363163 | 0.611181 | 0.60356  |
| MmuSTS.2224.1.S1_at | MmuSTS.2224.1 | 5.72  | 5.72  | 0.15 | 0.04 | 1     | 0.531249 | 0.105248 | 0.799582 | 0.366999 |
| MmuSTS.2225.1.S1_at | MmuSTS.2225.1 | 7.93  | 7.5   | 0.35 | 0.06 | 1.35  | 0.121565 | 0.094283 | 0.495204 | 0.350889 |
| MmuSTS.2226.1.S1_at | MmuSTS.2226.1 | 12.23 | 12.49 | 0.13 | 0.07 | -1.19 | 0.101519 | 0.00171  | 0.471806 | 0.062657 |
| MmuSTS.2227.1.S1_at | MmuSTS.2227.1 | 8.25  | 9.62  | 0.81 | 0.06 | -2.58 | 0.027979 | 0.039685 | 0.330017 | 0.244271 |
| MmuSTS.2228.1.S1_at | MmuSTS.2228.1 | 9.38  | 9.19  | 0.45 | 0.05 | 1.14  | 0.723358 | 0.760662 | 0.892813 | 0.860963 |
| MmuSTS.2229.1.S1_at | MmuSTS.2229.1 | 8.91  | 9.22  | 1.34 | 0.19 | -1.24 | 0.727807 | 0.275627 | 0.894866 | 0.539867 |
| MmuSTS.223.1.S1_at  | MmuSTS.223.1  | 3.57  | 3.56  | 0.01 | 0.08 | 1.01  | 0.282502 | 0.466235 | 0.640925 | 0.676201 |

|                       |               |       |       |      |      |       |          |          |          |          |
|-----------------------|---------------|-------|-------|------|------|-------|----------|----------|----------|----------|
| MmuSTS.2230.1.S1_at   | MmuSTS.2230.1 | 5.21  | 4.83  | 1.12 | 0.38 | 1.3   | 0.87294  | 0.339683 | 0.955939 | 0.586266 |
| MmuSTS.2231.1.S1_at   | MmuSTS.2231.1 | 2.97  | 3.14  | 0.09 | 0.18 | -1.12 | 0.14342  | 0.116223 | 0.518743 | 0.38353  |
| MmuSTS.2232.1.S1_at   | MmuSTS.2232.1 | 11.16 | 11.58 | 0.09 | 0.05 | -1.33 | 0.001833 | 0.000134 | 0.167772 | 0.029087 |
| MmuSTS.2233.1.S1_at   | MmuSTS.2233.1 | 10.43 | 10.5  | 0.17 | 0.22 | -1.05 | 0.491717 | 0.855468 | 0.778026 | 0.9176   |
| MmuSTS.2234.1.S1_at   | MmuSTS.2234.1 | 8.54  | 8.4   | 0.3  | 0.02 | 1.1   | 0.216091 | 0.39992  | 0.58626  | 0.63009  |
| MmuSTS.2235.1.S1_at   | MmuSTS.2235.1 | 4.47  | 4.48  | 0.03 | 0.07 | -1.01 | 0.365543 | 0.717254 | 0.701174 | 0.836332 |
| MmuSTS.2236.1.S1_at   | MmuSTS.2236.1 | 7.13  | 6.77  | 0.17 | 0.18 | 1.28  | 0.033316 | 0.033452 | 0.346442 | 0.226517 |
| MmuSTS.2237.1.S1_at   | MmuSTS.2237.1 | 3.21  | 3.28  | 0.08 | 0.08 | -1.05 | 0.732075 | 0.657016 | 0.896996 | 0.799401 |
| MmuSTS.2238.1.S1_at   | MmuSTS.2238.1 | 7.58  | 7.55  | 0.58 | 0.17 | 1.02  | 0.815389 | 0.040278 | 0.933137 | 0.245902 |
| MmuSTS.2239.1.S1_at   | MmuSTS.2239.1 | 8.84  | 9.11  | 0.46 | 0.02 | -1.2  | 0.418721 | 0.657957 | 0.735894 | 0.800122 |
| MmuSTS.224.1.S1_at    | MmuSTS.224.1  | 7.36  | 7.27  | 0.62 | 0.38 | 1.07  | 0.70378  | 0.864994 | 0.884872 | 0.923442 |
| MmuSTS.2240.1.S1_at   | MmuSTS.2240.1 | 8.81  | 8.38  | 0.7  | 0.05 | 1.35  | 0.380016 | 0.235058 | 0.709343 | 0.506267 |
| MmuSTS.2241.1.S1_at   | MmuSTS.2241.1 | 8.83  | 9.2   | 0.26 | 0.09 | -1.29 | 0.098652 | 0.090056 | 0.468025 | 0.344402 |
| MmuSTS.2242.1.S1_at   | MmuSTS.2242.1 | 11    | 11.16 | 0.18 | 0.13 | -1.11 | 0.122123 | 0.001296 | 0.495677 | 0.055585 |
| MmuSTS.2243.1.S1_at   | MmuSTS.2243.1 | 8.87  | 9.25  | 0.28 | 0.08 | -1.3  | 0.12491  | 0.137896 | 0.498917 | 0.410846 |
| MmuSTS.2244.1.S1_at   | MmuSTS.2244.1 | 9.82  | 10.03 | 0.47 | 0.27 | -1.16 | 0.552432 | 0.017551 | 0.81184  | 0.167634 |
| MmuSTS.2245.1.S1_at   | MmuSTS.2245.1 | 6.9   | 6.68  | 0.18 | 0.06 | 1.16  | 0.039293 | 0.003824 | 0.361498 | 0.08794  |
| MmuSTS.2246.1.S1_at   | MmuSTS.2246.1 | 7.72  | 8.42  | 1.48 | 0.26 | -1.63 | 0.431319 | 0.128827 | 0.743363 | 0.400277 |
| MmuSTS.2247.1.S1_at   | MmuSTS.2247.1 | 5.57  | 5.71  | 0.18 | 0.18 | -1.1  | 0.352349 | 0.23576  | 0.692649 | 0.506934 |
| MmuSTS.2248.1.S1_at   | MmuSTS.2248.1 | 8.72  | 8.77  | 0.2  | 0.16 | -1.04 | 0.789072 | 0.000249 | 0.922489 | 0.03313  |
| MmuSTS.2249.1.S1_at   | MmuSTS.2249.1 | 10.83 | 10.52 | 0.24 | 0.02 | 1.24  | 0.269504 | 0.054312 | 0.629743 | 0.27854  |
| MmuSTS.225.1.S1_at    | MmuSTS.225.1  | 12.71 | 12.35 | 0.14 | 0.12 | 1.28  | 0.053681 | 0.063412 | 0.39535  | 0.298441 |
| MmuSTS.2250.1.S1_at   | MmuSTS.2250.1 | 10.35 | 9.94  | 0.63 | 0.13 | 1.33  | 0.517431 | 0.228749 | 0.792043 | 0.501005 |
| MmuSTS.2251.1.S1_at   | MmuSTS.2251.1 | 11.8  | 11.72 | 0.14 | 0.01 | 1.05  | 0.831939 | 0.003402 | 0.939713 | 0.084004 |
| MmuSTS.2252.1.S1_at   | MmuSTS.2252.1 | 11.13 | 11.43 | 0.14 | 0.12 | -1.24 | 0.013269 | 0.015756 | 0.26723  | 0.159048 |
| MmuSTS.2253.1.S1_at   | MmuSTS.2253.1 | 8.73  | 9.57  | 0.17 | 0.25 | -1.79 | 0.00781  | 0.018582 | 0.230997 | 0.171539 |
| MmuSTS.2254.1.S1_at   | MmuSTS.2254.1 | 5.52  | 5.4   | 0.09 | 0.11 | 1.08  | 0.171814 | 0.364509 | 0.545129 | 0.604846 |
| MmuSTS.2255.1.S1_at   | MmuSTS.2255.1 | 6.31  | 6.42  | 0.38 | 0.18 | -1.07 | 0.457518 | 0.377185 | 0.758364 | 0.614825 |
| MmuSTS.2256.1.S1_at   | MmuSTS.2256.1 | 4.24  | 3.82  | 0.34 | 0.19 | 1.33  | 0.134983 | 0.422909 | 0.509124 | 0.646083 |
| MmuSTS.2257.1.S1_at   | MmuSTS.2257.1 | 6.09  | 5.93  | 0.23 | 0.14 | 1.12  | 0.501096 | 0.234685 | 0.783101 | 0.505897 |
| MmuSTS.2258.1.S1_s_at | MmuSTS.2258.1 | 12.24 | 11.98 | 0.09 | 0.06 | 1.2   | 0.01578  | 0.004709 | 0.283742 | 0.095492 |
| MmuSTS.2258.1.S1_x_at | MmuSTS.2258.1 | 12.32 | 12.21 | 0.14 | 0.05 | 1.08  | 0.951894 | 0.993875 | 0.983817 | 0.996306 |
| MmuSTS.2259.1.S1_at   | MmuSTS.2259.1 | 7.52  | 7.46  | 0.03 | 0.03 | 1.04  | 0.036905 | 0.259855 | 0.356221 | 0.526735 |
| MmuSTS.226.1.S1_at    | MmuSTS.226.1  | 6.82  | 6.44  | 1.97 | 0.51 | 1.3   | 0.785168 | 0.293856 | 0.921034 | 0.553861 |
| MmuSTS.2260.1.S1_at   | MmuSTS.2260.1 | 4.52  | 4.34  | 0.35 | 0.26 | 1.13  | 0.571634 | 0.792053 | 0.822859 | 0.879814 |
| MmuSTS.2261.1.S1_at   | MmuSTS.2261.1 | 3.43  | 3.87  | 0.19 | 0.09 | -1.35 | 0.021475 | 0.008467 | 0.30887  | 0.122057 |
| MmuSTS.2262.1.S1_at   | MmuSTS.2262.1 | 4.63  | 4.66  | 0.15 | 0.25 | -1.02 | 0.720518 | 0.783359 | 0.891614 | 0.874571 |
| MmuSTS.2263.1.S1_at   | MmuSTS.2263.1 | 7.3   | 6.74  | 1.42 | 0.35 | 1.47  | 0.804462 | 0.255013 | 0.928962 | 0.52317  |
| MmuSTS.2264.1.S1_at   | MmuSTS.2264.1 | 9.65  | 9.9   | 0.22 | 0.29 | -1.19 | 0.113551 | 0.131319 | 0.48689  | 0.403407 |
| MmuSTS.2265.1.S1_at   | MmuSTS.2265.1 | 6.14  | 6.24  | 0.29 | 0.29 | -1.07 | 0.585463 | 0.774891 | 0.830549 | 0.868962 |
| MmuSTS.2266.1.S1_at   | MmuSTS.2266.1 | 10.47 | 10.96 | 0.43 | 0.02 | -1.41 | 0.403501 | 0.354549 | 0.725709 | 0.59726  |
| MmuSTS.2267.1.S1_s_at | MmuSTS.2267.1 | 13.32 | 13.25 | 0.05 | 0.04 | 1.05  | 0.057879 | 0.150882 | 0.40327  | 0.425476 |
| MmuSTS.2268.1.S1_at   | MmuSTS.2268.1 | 9.99  | 9.71  | 0.35 | 0.12 | 1.21  | 0.243301 | 0.334886 | 0.609204 | 0.58275  |

|                       |               |       |       |      |      |       |          |          |          |          |
|-----------------------|---------------|-------|-------|------|------|-------|----------|----------|----------|----------|
| MmuSTS.2269.1.S1_at   | MmuSTS.2269.1 | 9.67  | 9.32  | 0.17 | 0.19 | 1.27  | 0.080892 | 0.11466  | 0.445038 | 0.381202 |
| MmuSTS.227.1.S1_at    | MmuSTS.227.1  | 10.9  | 10.96 | 0.22 | 0.19 | -1.04 | 0.690851 | 0.561644 | 0.879631 | 0.73751  |
| MmuSTS.2270.1.S1_at   | MmuSTS.2270.1 | 9.34  | 9.56  | 0.25 | 0.15 | -1.16 | 0.122502 | 0.047416 | 0.495926 | 0.262476 |
| MmuSTS.2271.1.S1_at   | MmuSTS.2271.1 | 9.42  | 9.64  | 0.37 | 0.08 | -1.16 | 0.954793 | 0.854033 | 0.985012 | 0.91692  |
| MmuSTS.2272.1.S1_at   | MmuSTS.2272.1 | 12.56 | 12.16 | 0.27 | 0.1  | 1.32  | 0.22245  | 0.44373  | 0.591989 | 0.661427 |
| MmuSTS.2273.1.S1_at   | MmuSTS.2273.1 | 7.01  | 6.72  | 0.38 | 0.1  | 1.22  | 0.262479 | 0.446311 | 0.624678 | 0.66276  |
| MmuSTS.2274.1.S1_at   | MmuSTS.2274.1 | 8.01  | 8.5   | 0.07 | 0.1  | -1.41 | 0.001888 | 0.000266 | 0.169422 | 0.033786 |
| MmuSTS.2275.1.S1_s_at | MmuSTS.2275.1 | 7.82  | 7.47  | 0.11 | 0.22 | 1.28  | 0.184135 | 0.486328 | 0.55696  | 0.689731 |
| MmuSTS.2276.1.S1_at   | MmuSTS.2276.1 | 13.13 | 12.84 | 0.22 | 0.02 | 1.22  | 0.18123  | 0.053533 | 0.554504 | 0.277016 |
| MmuSTS.2276.1.S1_x_at | MmuSTS.2276.1 | 13.06 | 12.71 | 0.23 | 0.02 | 1.27  | 0.170101 | 0.062289 | 0.543149 | 0.296416 |
| MmuSTS.2277.1.S1_at   | MmuSTS.2277.1 | 10.61 | 10.33 | 0.42 | 0.14 | -1.21 | 0.369579 | 0.175617 | 0.704264 | 0.45218  |
| MmuSTS.2278.1.S1_at   | MmuSTS.2278.1 | 11.17 | 11.59 | 0.4  | 0.07 | -1.33 | 0.486094 | 0.753716 | 0.774427 | 0.856634 |
| MmuSTS.2279.1.S1_at   | MmuSTS.2279.1 | 8.23  | 9.28  | 0.56 | 0.24 | -2.06 | 0.021729 | 0.014664 | 0.309332 | 0.154231 |
| MmuSTS.228.1.S1_at    | MmuSTS.228.1  | 6.9   | 6.36  | 0.85 | 0.17 | 1.46  | 0.945598 | 0.636154 | 0.981063 | 0.785938 |
| MmuSTS.2280.1.S1_at   | MmuSTS.2280.1 | 12.88 | 12.62 | 0.26 | 0.09 | 1.2   | 0.36807  | 0.007245 | 0.703497 | 0.114309 |
| MmuSTS.2281.1.S1_at   | MmuSTS.2281.1 | 9.42  | 9.51  | 0.32 | 0.03 | -1.06 | 0.63151  | 0.726641 | 0.852417 | 0.841892 |
| MmuSTS.2282.1.S1_at   | MmuSTS.2282.1 | 6.7   | 6.85  | 0.27 | 0.03 | -1.11 | 0.906465 | 0.98584  | 0.968353 | 0.991957 |
| MmuSTS.2283.1.S1_at   | MmuSTS.2283.1 | 9.85  | 9.97  | 0.35 | 0.13 | -1.09 | 0.922423 | 0.856445 | 0.973798 | 0.917996 |
| MmuSTS.2284.1.S1_s_at | MmuSTS.2284.1 | 3.41  | 3.4   | 0.39 | 0.08 | 1.01  | 0.623494 | 0.402476 | 0.848264 | 0.631481 |
| MmuSTS.2285.1.S1_at   | MmuSTS.2285.1 | 6.4   | 6.64  | 0.27 | 0.21 | -1.17 | 0.305451 | 0.013833 | 0.658926 | 0.150838 |
| MmuSTS.2286.1.S1_at   | MmuSTS.2286.1 | 8.31  | 7.48  | 0.8  | 0.23 | 1.77  | 0.47151  | 0.632051 | 0.76658  | 0.78312  |
| MmuSTS.2287.1.S1_at   | MmuSTS.2287.1 | 12.17 | 11.75 | 0.71 | 0.24 | 1.34  | 0.809483 | 0.147607 | 0.93104  | 0.421901 |
| MmuSTS.2288.1.S1_at   | MmuSTS.2288.1 | 13.37 | 13.45 | 0.08 | 0.01 | -1.06 | 0.140944 | 0.258026 | 0.516345 | 0.52557  |
| MmuSTS.2289.1.S1_at   | MmuSTS.2289.1 | 9.35  | 9.55  | 0.15 | 0.06 | -1.15 | 0.149821 | 0.12441  | 0.523349 | 0.394857 |
| MmuSTS.229.1.S1_at    | MmuSTS.229.1  | 4.76  | 5.22  | 1.15 | 0.45 | -1.37 | 0.85531  | 0.745277 | 0.948797 | 0.852332 |
| MmuSTS.2290.1.S1_at   | MmuSTS.2290.1 | 5.13  | 5     | 0.1  | 0.1  | 1.09  | 0.169105 | 0.261696 | 0.542061 | 0.528137 |
| MmuSTS.2291.1.S1_at   | MmuSTS.2291.1 | 10    | 9.37  | 0.34 | 0.11 | 1.54  | 0.072845 | 0.198515 | 0.433517 | 0.473391 |
| MmuSTS.2292.1.S1_at   | MmuSTS.2292.1 | 7.11  | 7.48  | 0.17 | 0.03 | -1.29 | 0.034626 | 0.001007 | 0.350134 | 0.050657 |
| MmuSTS.2293.1.S1_at   | MmuSTS.2293.1 | 9.05  | 8.29  | 0.69 | 0.08 | 1.7   | 0.406897 | 0.459173 | 0.728384 | 0.671633 |
| MmuSTS.2294.1.S1_at   | MmuSTS.2294.1 | 7.24  | 7.04  | 0.11 | 0.12 | 1.15  | 0.468707 | 0.000584 | 0.765067 | 0.041486 |
| MmuSTS.2295.1.S1_at   | MmuSTS.2295.1 | 10.75 | 10.45 | 0.24 | 0.15 | 1.23  | 0.270927 | 0.421066 | 0.630866 | 0.644721 |
| MmuSTS.2295.1.S1_x_at | MmuSTS.2295.1 | 10.73 | 10.44 | 0.29 | 0.17 | 1.22  | 0.430115 | 0.504629 | 0.742602 | 0.701754 |
| MmuSTS.2296.1.S1_at   | MmuSTS.2296.1 | 11.52 | 11.75 | 0.27 | 0.03 | -1.17 | 0.248507 | 0.079252 | 0.613851 | 0.326444 |
| MmuSTS.2297.1.S1_at   | MmuSTS.2297.1 | 4.38  | 4.45  | 0.12 | 0.11 | -1.05 | 0.478693 | 0.349707 | 0.770142 | 0.593566 |
| MmuSTS.2298.1.S1_at   | MmuSTS.2298.1 | 7.93  | 8.96  | 0.64 | 0.19 | -2.04 | 0.165532 | 0.054665 | 0.538347 | 0.279311 |
| MmuSTS.2299.1.S1_at   | MmuSTS.2299.1 | 8.23  | 8.17  | 0.25 | 0.03 | 1.04  | 0.756742 | 0.898626 | 0.908337 | 0.942296 |
| MmuSTS.23.1.S1_at     | MmuSTS.23.1   | 3.52  | 3.33  | 0.12 | 0.6  | 1.14  | 0.64617  | 0.848355 | 0.859027 | 0.913909 |
| MmuSTS.230.1.S1_at    | MmuSTS.230.1  | 5.5   | 4.54  | 0.29 | 0.51 | 1.95  | 0.215634 | 0.136096 | 0.585748 | 0.408396 |
| MmuSTS.2300.1.S1_at   | MmuSTS.2300.1 | 9.05  | 8.46  | 0.34 | 0.07 | 1.51  | 0.046119 | 0.002883 | 0.377411 | 0.078985 |
| MmuSTS.2301.1.S1_at   | MmuSTS.2301.1 | 9.1   | 8.87  | 0.16 | 0.18 | 1.17  | 0.117698 | 0.192003 | 0.491034 | 0.467382 |
| MmuSTS.2302.1.S1_at   | MmuSTS.2302.1 | 10.52 | 10.73 | 0.24 | 0.06 | -1.15 | 0.294401 | 0.013115 | 0.650593 | 0.147286 |
| MmuSTS.2303.1.S1_s_at | MmuSTS.2303.1 | 9.03  | 9.58  | 0.23 | 0.18 | -1.47 | 0.018112 | 0.000443 | 0.295257 | 0.038359 |
| MmuSTS.2304.1.S1_at   | MmuSTS.2304.1 | 12.77 | 12.58 | 0.16 | 0.04 | 1.14  | 0.375099 | 0.535128 | 0.706298 | 0.720807 |

|                      |               |       |       |      |      |       |          |          |          |          |
|----------------------|---------------|-------|-------|------|------|-------|----------|----------|----------|----------|
| MmuSTS.2305.1.S1_at  | MmuSTS.2305.1 | 12.81 | 12.59 | 0.17 | 0.06 | 1.17  | 0.462301 | 0.517927 | 0.761528 | 0.710031 |
| MmuSTS.2306.1.S1_at  | MmuSTS.2306.1 | 11.41 | 11.24 | 0.11 | 0.05 | 1.12  | 0.079683 | 0.11929  | 0.442575 | 0.387799 |
| MmuSTS.2307.1.S1_at  | MmuSTS.2307.1 | 5.21  | 5.75  | 0.78 | 0.27 | -1.45 | 0.629004 | 0.423596 | 0.851379 | 0.646459 |
| MmuSTS.2308.1.S1_at  | MmuSTS.2308.1 | 6.17  | 5.71  | 0.19 | 0.25 | 1.37  | 0.123304 | 0.182211 | 0.496589 | 0.458739 |
| MmuSTS.2309.1.S1_at  | MmuSTS.2309.1 | 3.29  | 3.25  | 0.04 | 0.06 | 1.02  | 0.973477 | 0.85946  | 0.991367 | 0.919962 |
| MmuSTS.231.1.S1_at   | MmuSTS.231.1  | 4.86  | 4.8   | 0.09 | 0.19 | 1.04  | 0.443599 | 0.508888 | 0.750908 | 0.7039   |
| MmuSTS.231.1.S1_x_at | MmuSTS.231.1  | 4.97  | 5.01  | 0.21 | 0.19 | -1.03 | 0.802296 | 0.467997 | 0.927885 | 0.677474 |
| MmuSTS.2310.1.S1_at  | MmuSTS.2310.1 | 5.06  | 4.93  | 0.05 | 0.1  | 1.09  | 0.195097 | 0.614339 | 0.565513 | 0.771206 |
| MmuSTS.2311.1.S1_at  | MmuSTS.2311.1 | 5.95  | 5.92  | 0.25 | 0    | 1.02  | 0.815071 | 0.940693 | 0.933137 | 0.966415 |
| MmuSTS.2312.1.S1_at  | MmuSTS.2312.1 | 7.81  | 9.41  | 0.43 | 0.05 | -3.03 | 0.006396 | 0.007463 | 0.218859 | 0.115888 |
| MmuSTS.2313.1.S1_at  | MmuSTS.2313.1 | 3.32  | 3.32  | 0.03 | 0.07 | 1     | 0.275661 | 0.149861 | 0.635147 | 0.424468 |
| MmuSTS.2314.1.S1_at  | MmuSTS.2314.1 | 4.82  | 4.6   | 0.14 | 0.21 | 1.16  | 0.161237 | 0.053007 | 0.534529 | 0.275891 |
| MmuSTS.2315.1.S1_at  | MmuSTS.2315.1 | 12.64 | 12.73 | 0.08 | 0.04 | -1.07 | 0.126663 | 0.084277 | 0.500599 | 0.335465 |
| MmuSTS.2316.1.S1_at  | MmuSTS.2316.1 | 11    | 11.2  | 0.08 | 0.07 | -1.14 | 0.012311 | 0.021425 | 0.261378 | 0.183331 |
| MmuSTS.2317.1.S1_at  | MmuSTS.2317.1 | 3.97  | 3.97  | 0.01 | 0    | 1     | 0.357244 | 0.079554 | 0.695575 | 0.326897 |
| MmuSTS.2318.1.S1_at  | MmuSTS.2318.1 | 9.14  | 8.85  | 0.28 | 0.14 | 1.22  | 0.131719 | 0.00278  | 0.506153 | 0.077966 |
| MmuSTS.2319.1.S1_at  | MmuSTS.2319.1 | 3.89  | 4.85  | 0.2  | 0.58 | -1.94 | 0.044679 | 0.052852 | 0.374916 | 0.275521 |
| MmuSTS.232.1.S1_at   | MmuSTS.232.1  | 6.99  | 6.85  | 0.51 | 0.19 | 1.1   | 0.972299 | 0.792213 | 0.991019 | 0.879931 |
| MmuSTS.2320.1.S1_at  | MmuSTS.2320.1 | 4.31  | 4.31  | 0.05 | 0.09 | 1     | 0.88458  | 0.946194 | 0.96011  | 0.969447 |
| MmuSTS.2321.1.S1_at  | MmuSTS.2321.1 | 14.03 | 14.09 | 0.44 | 0.04 | -1.04 | 0.290059 | 0.387839 | 0.646655 | 0.622486 |
| MmuSTS.2322.1.S1_at  | MmuSTS.2322.1 | 3.16  | 3.21  | 0.31 | 0.27 | -1.03 | 0.940894 | 0.896475 | 0.979891 | 0.940899 |
| MmuSTS.2323.1.S1_at  | MmuSTS.2323.1 | 11.99 | 11.91 | 0.44 | 0.13 | 1.06  | 0.760488 | 0.096694 | 0.910074 | 0.35417  |
| MmuSTS.2324.1.S1_at  | MmuSTS.2324.1 | 13.23 | 13.16 | 0.07 | 0.02 | 1.05  | 0.330639 | 0.009463 | 0.677328 | 0.128094 |
| MmuSTS.2325.1.S1_at  | MmuSTS.2325.1 | 12.97 | 13.1  | 0.13 | 0.05 | -1.1  | 0.15107  | 0.194041 | 0.52444  | 0.469151 |
| MmuSTS.2326.1.S1_at  | MmuSTS.2326.1 | 12.23 | 12.14 | 0.02 | 0.07 | 1.07  | 0.171124 | 0.031552 | 0.544246 | 0.219708 |
| MmuSTS.2327.1.S1_at  | MmuSTS.2327.1 | 8     | 7.54  | 0.32 | 0.12 | 1.38  | 0.126464 | 0.156278 | 0.500304 | 0.43161  |
| MmuSTS.2328.1.S1_at  | MmuSTS.2328.1 | 4.6   | 4.51  | 0.53 | 0.19 | 1.06  | 0.583586 | 0.729343 | 0.829134 | 0.843541 |
| MmuSTS.2329.1.S1_at  | MmuSTS.2329.1 | 6.93  | 6.62  | 0.39 | 0.27 | 1.24  | 0.30474  | 0.319275 | 0.658333 | 0.571722 |
| MmuSTS.233.1.S1_at   | MmuSTS.233.1  | 4.46  | 4.34  | 0.05 | 0.12 | 1.08  | 0.108137 | 0.212363 | 0.480558 | 0.486315 |
| MmuSTS.2330.1.S1_at  | MmuSTS.2330.1 | 9.89  | 9.48  | 0.52 | 0.24 | 1.33  | 0.696691 | 0.346184 | 0.882169 | 0.591195 |
| MmuSTS.2331.1.S1_at  | MmuSTS.2331.1 | 6.75  | 7.63  | 1.04 | 0.24 | -1.85 | 0.227767 | 0.103707 | 0.596693 | 0.364519 |
| MmuSTS.2332.1.S1_at  | MmuSTS.2332.1 | 6.28  | 5.98  | 0.17 | 0.22 | 1.23  | 0.169157 | 0.167808 | 0.542061 | 0.44438  |
| MmuSTS.2333.1.S1_at  | MmuSTS.2333.1 | 10.02 | 10.17 | 0.33 | 0.12 | -1.11 | 0.627071 | 0.656354 | 0.850335 | 0.799062 |
| MmuSTS.2334.1.S1_at  | MmuSTS.2334.1 | 7.62  | 7.37  | 0.9  | 0.18 | 1.19  | 0.791456 | 0.267736 | 0.923383 | 0.533525 |
| MmuSTS.2335.1.S1_at  | MmuSTS.2335.1 | 11.86 | 12.04 | 0.14 | 0.09 | -1.14 | 0.181956 | 0.046389 | 0.555022 | 0.259896 |
| MmuSTS.2336.1.S1_at  | MmuSTS.2336.1 | 11.4  | 11.11 | 0.06 | 0.05 | 1.23  | 0.003742 | 0.002036 | 0.197739 | 0.066885 |
| MmuSTS.2337.1.S1_at  | MmuSTS.2337.1 | 8.22  | 8.53  | 0.4  | 0.15 | -1.24 | 0.307155 | 0.423913 | 0.660096 | 0.646571 |
| MmuSTS.2338.1.S1_at  | MmuSTS.2338.1 | 3.01  | 2.75  | 0.06 | 0.04 | 1.2   | 0.003899 | 0.014076 | 0.198571 | 0.151885 |
| MmuSTS.2339.1.S1_at  | MmuSTS.2339.1 | 12.7  | 12.75 | 0.33 | 0.02 | -1.03 | 0.894816 | 0.201836 | 0.964059 | 0.476367 |
| MmuSTS.234.1.S1_at   | MmuSTS.234.1  | 10.17 | 10.07 | 0.3  | 0.12 | 1.07  | 0.476714 | 0.568012 | 0.769364 | 0.74176  |
| MmuSTS.2340.1.S1_at  | MmuSTS.2340.1 | 9.29  | 8.75  | 0.68 | 0.3  | 1.46  | 0.401927 | 0.171381 | 0.724762 | 0.447852 |
| MmuSTS.2341.1.S1_at  | MmuSTS.2341.1 | 9.1   | 8.12  | 0.2  | 0.08 | 1.97  | 0.002155 | 0.001135 | 0.174757 | 0.053082 |
| MmuSTS.2342.1.S1_at  | MmuSTS.2342.1 | 9.43  | 9.87  | 0.76 | 0.02 | -1.35 | 0.380387 | 0.467561 | 0.709387 | 0.67714  |



|                       |               |       |       |      |      |       |          |          |          |          |
|-----------------------|---------------|-------|-------|------|------|-------|----------|----------|----------|----------|
| MmuSTS.2343.1.S1_at   | MmuSTS.2343.1 | 8.06  | 8.23  | 0.31 | 0.16 | -1.12 | 0.721899 | 0.805885 | 0.892101 | 0.888395 |
| MmuSTS.2344.1.S1_at   | MmuSTS.2344.1 | 12.75 | 12.83 | 0.06 | 0.03 | -1.06 | 0.040141 | 0.016606 | 0.363462 | 0.163117 |
| MmuSTS.2345.1.S1_at   | MmuSTS.2345.1 | 6.37  | 7     | 0.18 | 0.41 | -1.54 | 0.329024 | 0.004552 | 0.676156 | 0.094327 |
| MmuSTS.2346.1.S1_at   | MmuSTS.2346.1 | 11.68 | 11.55 | 0.26 | 0.07 | 1.09  | 0.959973 | 0.980445 | 0.986981 | 0.989333 |
| MmuSTS.2346.1.S1_s_at | MmuSTS.2346.1 | 12.01 | 11.85 | 0.23 | 0.06 | 1.12  | 0.525678 | 0.747459 | 0.796365 | 0.853149 |
| MmuSTS.2347.1.S1_at   | MmuSTS.2347.1 | 6.87  | 7.01  | 0.15 | 0.03 | -1.1  | 0.154466 | 0.320716 | 0.527576 | 0.572811 |
| MmuSTS.2348.1.S1_at   | MmuSTS.2348.1 | 6.02  | 6.35  | 0.14 | 0.2  | -1.26 | 0.377926 | 0.564716 | 0.7079   | 0.739425 |
| MmuSTS.2349.1.S1_at   | MmuSTS.2349.1 | 9.43  | 9.44  | 0.11 | 0.02 | -1    | 0.361047 | 0.484891 | 0.698314 | 0.688838 |
| MmuSTS.235.1.S1_at    | MmuSTS.235.1  | 12.22 | 12.03 | 0.1  | 0.18 | 1.14  | 0.089392 | 0.096266 | 0.457564 | 0.353654 |
| MmuSTS.2350.1.S1_at   | MmuSTS.2350.1 | 5.48  | 4.56  | 0.6  | 0.27 | 1.9   | 0.139317 | 0.085497 | 0.51471  | 0.337495 |
| MmuSTS.2351.1.S1_s_at | MmuSTS.2351.1 | 6.58  | 7.26  | 1.03 | 0.45 | -1.6  | 0.372662 | 0.149723 | 0.705567 | 0.424334 |
| MmuSTS.2352.1.S1_at   | MmuSTS.2352.1 | 5.7   | 5.51  | 0.25 | 0.32 | 1.13  | 0.948154 | 0.666476 | 0.982191 | 0.804596 |
| MmuSTS.2353.1.S1_at   | MmuSTS.2353.1 | 5.88  | 5.64  | 0.19 | 0.06 | 1.18  | 0.314341 | 0.527543 | 0.665127 | 0.716154 |
| MmuSTS.2354.1.S1_at   | MmuSTS.2354.1 | 8.37  | 9.02  | 0.13 | 0.01 | -1.57 | 0.000613 | 0.031708 | 0.143137 | 0.220493 |
| MmuSTS.2355.1.S1_at   | MmuSTS.2355.1 | 10.45 | 10.83 | 0.35 | 0.1  | -1.3  | 0.614002 | 0.496056 | 0.843775 | 0.695877 |
| MmuSTS.2356.1.S1_at   | MmuSTS.2356.1 | 4.05  | 4.05  | 0.12 | 0.06 | 1     | 0.924697 | 0.998071 | 0.974823 | 0.999009 |
| MmuSTS.2357.1.S1_s_at | MmuSTS.2357.1 | 14.38 | 14.35 | 0.06 | 0.05 | 1.02  | 0.562905 | 0.782218 | 0.817877 | 0.873842 |
| MmuSTS.2357.1.S1_x_at | MmuSTS.2357.1 | 14.48 | 14.43 | 0.04 | 0.04 | 1.04  | 0.457344 | 0.845247 | 0.758326 | 0.911955 |
| MmuSTS.2358.1.S1_at   | MmuSTS.2358.1 | 8.61  | 7.83  | 0.65 | 0.16 | 1.72  | 0.318714 | 0.594083 | 0.668252 | 0.758517 |
| MmuSTS.2359.1.S1_at   | MmuSTS.2359.1 | 13.81 | 13.75 | 1.31 | 0.1  | 1.04  | 0.494592 | 0.292528 | 0.779478 | 0.55258  |
| MmuSTS.236.1.S1_at    | MmuSTS.236.1  | 11.89 | 11.76 | 0.37 | 0.06 | 1.1   | 0.651825 | 0.037359 | 0.86186  | 0.237723 |
| MmuSTS.2360.1.S1_at   | MmuSTS.2360.1 | 9.55  | 9.85  | 1.36 | 0.39 | -1.23 | 0.717246 | 0.862925 | 0.890326 | 0.922071 |
| MmuSTS.2361.1.S1_at   | MmuSTS.2361.1 | 11.73 | 12.19 | 1.1  | 0.16 | -1.38 | 0.497296 | 0.008306 | 0.781055 | 0.120929 |
| MmuSTS.2362.1.S1_at   | MmuSTS.2362.1 | 5.36  | 5.35  | 0.35 | 0.22 | 1.01  | 0.374251 | 0.733615 | 0.705837 | 0.845775 |
| MmuSTS.2363.1.S1_at   | MmuSTS.2363.1 | 12.69 | 12.56 | 0.47 | 0.02 | 1.09  | 0.660796 | 0.202252 | 0.865819 | 0.476665 |
| MmuSTS.2364.1.S1_at   | MmuSTS.2364.1 | 10.33 | 10.54 | 0.2  | 0.17 | -1.16 | 0.369736 | 0.030482 | 0.704294 | 0.216624 |
| MmuSTS.2365.1.S1_at   | MmuSTS.2365.1 | 9.85  | 10.2  | 0.33 | 0.05 | -1.27 | 0.159837 | 0.169605 | 0.532873 | 0.446204 |
| MmuSTS.2366.1.S1_at   | MmuSTS.2366.1 | 3.97  | 3.85  | 0.08 | 0.04 | 1.08  | 0.0808   | 0.182244 | 0.444846 | 0.458762 |
| MmuSTS.2367.1.S1_at   | MmuSTS.2367.1 | 6.49  | 6.43  | 0.07 | 0    | 1.04  | 0.076102 | 0.06856  | 0.437449 | 0.308382 |
| MmuSTS.2368.1.S1_at   | MmuSTS.2368.1 | 4.79  | 3.98  | 0.69 | 0.51 | 1.75  | 0.249311 | 0.170116 | 0.614644 | 0.446868 |
| MmuSTS.2369.1.S1_at   | MmuSTS.2369.1 | 4.11  | 3.89  | 0.61 | 0.44 | 1.16  | 0.400612 | 0.523844 | 0.723891 | 0.71405  |
| MmuSTS.237.1.S1_s_at  | MmuSTS.237.1  | 5.38  | 5.37  | 0.06 | 0.07 | 1.01  | 0.414097 | 0.769315 | 0.732764 | 0.866034 |
| MmuSTS.2370.1.S1_at   | MmuSTS.2370.1 | 6.57  | 6.47  | 0.17 | 0.02 | 1.07  | 0.30759  | 0.560434 | 0.660362 | 0.736669 |
| MmuSTS.2371.1.S1_at   | MmuSTS.2371.1 | 11.97 | 12.22 | 0.24 | 0.02 | -1.19 | 0.419519 | 0.074561 | 0.736303 | 0.318185 |
| MmuSTS.2372.1.S1_at   | MmuSTS.2372.1 | 9.71  | 10.25 | 0.29 | 0.05 | -1.45 | 0.05683  | 0.006793 | 0.401254 | 0.111388 |
| MmuSTS.2373.1.S1_at   | MmuSTS.2373.1 | 8.98  | 8.44  | 2.68 | 0.33 | 1.45  | 0.95542  | 0.292863 | 0.985312 | 0.552837 |
| MmuSTS.2374.1.S1_at   | MmuSTS.2374.1 | 8.41  | 8.87  | 0.21 | 0.1  | -1.38 | 0.00856  | 0.004775 | 0.235156 | 0.09642  |
| MmuSTS.2375.1.S1_at   | MmuSTS.2375.1 | 8.71  | 8.52  | 0.16 | 0.03 | 1.14  | 0.046365 | 0.100074 | 0.377925 | 0.358965 |
| MmuSTS.2376.1.S1_at   | MmuSTS.2376.1 | 12.61 | 12.79 | 0.26 | 0.02 | -1.13 | 0.136087 | 0.156727 | 0.510627 | 0.432216 |
| MmuSTS.2377.1.S1_at   | MmuSTS.2377.1 | 4.32  | 4.35  | 0.03 | 0.09 | -1.02 | 0.534715 | 0.509308 | 0.801404 | 0.704094 |
| MmuSTS.2377.1.S1_s_at | MmuSTS.2377.1 | 11.63 | 11.67 | 0.08 | 0.07 | -1.03 | 0.685758 | 0.680419 | 0.876883 | 0.813441 |
| MmuSTS.2378.1.S1_at   | MmuSTS.2378.1 | 7.18  | 7.18  | 0.07 | 0.02 | 1     | 0.509008 | 0.474884 | 0.787411 | 0.681784 |
| MmuSTS.2379.1.S1_at   | MmuSTS.2379.1 | 10.09 | 10.37 | 0.61 | 0.17 | -1.21 | 0.721334 | 0.85872  | 0.891996 | 0.919548 |

|                       |               |       |       |      |      |       |          |          |          |          |
|-----------------------|---------------|-------|-------|------|------|-------|----------|----------|----------|----------|
| MmuSTS.238.1.S1_at    | MmuSTS.238.1  | 9.05  | 9.81  | 0.1  | 0.05 | -1.69 | 0.000466 | 0.001639 | 0.140406 | 0.061228 |
| MmuSTS.2380.1.S1_at   | MmuSTS.2380.1 | 4.52  | 4.38  | 0.16 | 0.12 | 1.1   | 0.267397 | 0.294288 | 0.628121 | 0.55407  |
| MmuSTS.2381.1.S1_at   | MmuSTS.2381.1 | 9.4   | 9.19  | 0.48 | 0.02 | 1.16  | 0.491997 | 0.002161 | 0.778086 | 0.068763 |
| MmuSTS.2382.1.S1_at   | MmuSTS.2382.1 | 6.84  | 6.79  | 0.47 | 0.15 | 1.03  | 0.942264 | 0.30935  | 0.980283 | 0.564912 |
| MmuSTS.2383.1.S1_at   | MmuSTS.2383.1 | 11.1  | 11.15 | 0.25 | 0.14 | -1.04 | 0.372593 | 0.217754 | 0.705567 | 0.491309 |
| MmuSTS.2384.1.S1_at   | MmuSTS.2384.1 | 8.2   | 8.59  | 2.08 | 0.4  | -1.31 | 0.759833 | 0.160448 | 0.909769 | 0.436569 |
| MmuSTS.2385.1.S1_at   | MmuSTS.2385.1 | 3.46  | 3.34  | 0.11 | 0.19 | 1.09  | 0.917327 | 0.779429 | 0.97197  | 0.87211  |
| MmuSTS.2386.1.S1_at   | MmuSTS.2386.1 | 8.22  | 8.45  | 0.72 | 0.32 | -1.18 | 0.834891 | 0.538038 | 0.940771 | 0.722826 |
| MmuSTS.2387.1.S1_at   | MmuSTS.2387.1 | 5.06  | 4.88  | 0.17 | 0.16 | 1.14  | 0.10123  | 0.048416 | 0.471667 | 0.265262 |
| MmuSTS.2388.1.S1_at   | MmuSTS.2388.1 | 2.88  | 2.96  | 0.14 | 0.02 | -1.06 | 0.45903  | 0.677824 | 0.759258 | 0.811825 |
| MmuSTS.2389.1.S1_at   | MmuSTS.2389.1 | 4.41  | 4.31  | 0.49 | 0.04 | 1.08  | 0.378491 | 0.596918 | 0.708363 | 0.75993  |
| MmuSTS.239.1.S1_at    | MmuSTS.239.1  | 9.28  | 10.23 | 0.45 | 0.02 | -1.93 | 0.054369 | 0.001224 | 0.396336 | 0.054593 |
| MmuSTS.2390.1.S1_at   | MmuSTS.2390.1 | 9.61  | 10.05 | 0.3  | 0.01 | -1.36 | 0.024608 | 0.001121 | 0.319173 | 0.052924 |
| MmuSTS.2391.1.S1_at   | MmuSTS.2391.1 | 4.56  | 4.45  | 0.09 | 0.08 | 1.08  | 0.206673 | 0.101696 | 0.578609 | 0.361562 |
| MmuSTS.2392.1.S1_at   | MmuSTS.2392.1 | 5.81  | 7.48  | 0.98 | 0.3  | -3.18 | 0.09743  | 0.012409 | 0.466372 | 0.144066 |
| MmuSTS.2393.1.S1_at   | MmuSTS.2393.1 | 9.96  | 9.84  | 1.09 | 0.22 | 1.09  | 0.71984  | 0.172664 | 0.891306 | 0.449141 |
| MmuSTS.2394.1.S1_at   | MmuSTS.2394.1 | 10.06 | 10.26 | 0.57 | 0.05 | -1.15 | 0.654523 | 0.20481  | 0.862855 | 0.479209 |
| MmuSTS.2395.1.S1_at   | MmuSTS.2395.1 | 5.71  | 5.6   | 0.12 | 0.12 | 1.08  | 0.361951 | 0.143511 | 0.698882 | 0.417449 |
| MmuSTS.2396.1.S1_at   | MmuSTS.2396.1 | 10.79 | 10.87 | 0.33 | 0.17 | -1.06 | 0.469111 | 0.726756 | 0.765466 | 0.841963 |
| MmuSTS.2397.1.S1_s_at | MmuSTS.2397.1 | 7.66  | 7.34  | 1.21 | 0.15 | 1.25  | 0.668763 | 0.236359 | 0.869159 | 0.507308 |
| MmuSTS.2398.1.S1_at   | MmuSTS.2398.1 | 2.87  | 2.89  | 0.06 | 0.07 | -1.01 | 0.378119 | 0.08635  | 0.708016 | 0.338791 |
| MmuSTS.2399.1.S1_at   | MmuSTS.2399.1 | 11.59 | 11.2  | 0.13 | 0.13 | 1.31  | 0.011807 | 0.021832 | 0.257504 | 0.184811 |
| MmuSTS.24.1.S1_at     | MmuSTS.24.1   | 5.32  | 5.22  | 0.77 | 0.28 | 1.07  | 0.676272 | 0.522029 | 0.873043 | 0.712827 |
| MmuSTS.240.1.S1_at    | MmuSTS.240.1  | 2.93  | 2.93  | 0.1  | 0    | -1    | 0.617028 | 0.347539 | 0.845238 | 0.592019 |
| MmuSTS.2400.1.S1_at   | MmuSTS.2400.1 | 8.14  | 8.75  | 0.05 | 0.13 | -1.52 | 0.002627 | 0.004213 | 0.181779 | 0.091368 |
| MmuSTS.2401.1.S1_at   | MmuSTS.2401.1 | 11.98 | 12.12 | 0.12 | 0.04 | -1.1  | 0.147508 | 0.53383  | 0.521578 | 0.719904 |
| MmuSTS.2401.1.S1_s_at | MmuSTS.2401.1 | 10.6  | 10.51 | 0.09 | 0.04 | 1.06  | 0.118803 | 0.014395 | 0.492204 | 0.153146 |
| MmuSTS.2402.1.S1_at   | MmuSTS.2402.1 | 13.02 | 12.9  | 0.36 | 0.19 | 1.09  | 0.361616 | 0.003618 | 0.698663 | 0.086035 |
| MmuSTS.2403.1.S1_at   | MmuSTS.2403.1 | 6.8   | 7.52  | 0.7  | 0.07 | -1.64 | 0.050614 | 0.033391 | 0.387563 | 0.226396 |
| MmuSTS.2404.1.S1_at   | MmuSTS.2404.1 | 4.14  | 3.89  | 0.25 | 0.24 | 1.19  | 0.198301 | 0.250543 | 0.569559 | 0.519391 |
| MmuSTS.2405.1.S1_at   | MmuSTS.2405.1 | 7.85  | 9.02  | 0.04 | 0.22 | -2.25 | 0.001242 | 0.00336  | 0.15692  | 0.083405 |
| MmuSTS.2406.1.S1_at   | MmuSTS.2406.1 | 6.01  | 5.89  | 0.17 | 0.13 | 1.09  | 0.341545 | 0.497301 | 0.685072 | 0.696622 |
| MmuSTS.2407.1.S1_at   | MmuSTS.2407.1 | 6.35  | 5.89  | 0.12 | 0.15 | 1.37  | 0.012181 | 0.070632 | 0.260124 | 0.311944 |
| MmuSTS.2408.1.S1_at   | MmuSTS.2408.1 | 9.65  | 8.93  | 0.29 | 0.22 | 1.64  | 0.032533 | 0.06121  | 0.344478 | 0.294035 |
| MmuSTS.2408.1.S1_s_at | MmuSTS.2408.1 | 9.67  | 9.13  | 0.29 | 0.11 | 1.46  | 0.053945 | 0.114464 | 0.395633 | 0.381021 |
| MmuSTS.2409.1.S1_at   | MmuSTS.2409.1 | 5.16  | 4.55  | 0.35 | 0.09 | 1.53  | 0.03504  | 0.028958 | 0.350898 | 0.212059 |
| MmuSTS.2409.1.S1_s_at | MmuSTS.2409.1 | 5.22  | 5.11  | 0.11 | 0.06 | 1.08  | 0.166655 | 0.384183 | 0.539303 | 0.619939 |
| MmuSTS.241.1.S1_at    | MmuSTS.241.1  | 5.99  | 5.59  | 0.19 | 0.15 | 1.32  | 0.036509 | 0.039714 | 0.355049 | 0.244271 |
| MmuSTS.2410.1.S1_at   | MmuSTS.2410.1 | 3.76  | 3.52  | 0.5  | 0.07 | 1.18  | 0.370774 | 0.551415 | 0.704995 | 0.730925 |
| MmuSTS.2411.1.S1_at   | MmuSTS.2411.1 | 6.65  | 5.35  | 1.2  | 0.22 | 2.46  | 0.123001 | 0.059892 | 0.49656  | 0.291386 |
| MmuSTS.2412.1.S1_at   | MmuSTS.2412.1 | 7.66  | 7.86  | 0.39 | 0.02 | -1.15 | 0.655974 | 0.633462 | 0.8634   | 0.784173 |
| MmuSTS.2413.1.S1_at   | MmuSTS.2413.1 | 6.52  | 6.44  | 0.17 | 0.07 | 1.06  | 0.169447 | 0.484499 | 0.542403 | 0.688522 |
| MmuSTS.2414.1.S1_at   | MmuSTS.2414.1 | 12.39 | 12.1  | 0.22 | 0.1  | 1.22  | 0.296888 | 0.326727 | 0.652518 | 0.576725 |

|                       |               |       |       |      |      |       |          |          |          |          |
|-----------------------|---------------|-------|-------|------|------|-------|----------|----------|----------|----------|
| MmuSTS.2415.1.S1_at   | MmuSTS.2415.1 | 5.97  | 5.94  | 0.03 | 0.03 | 1.02  | 0.291026 | 0.896466 | 0.647518 | 0.940899 |
| MmuSTS.2416.1.S1_at   | MmuSTS.2416.1 | 4.17  | 4.19  | 0.1  | 0.06 | -1.01 | 0.865997 | 0.305458 | 0.952896 | 0.562418 |
| MmuSTS.2417.1.S1_at   | MmuSTS.2417.1 | 4.78  | 4.91  | 0.55 | 0.09 | -1.09 | 0.854409 | 0.970712 | 0.948496 | 0.98405  |
| MmuSTS.2418.1.S1_at   | MmuSTS.2418.1 | 8.05  | 8.45  | 0.15 | 0.15 | -1.33 | 0.085976 | 0.203081 | 0.453337 | 0.477343 |
| MmuSTS.2419.1.S1_at   | MmuSTS.2419.1 | 5.11  | 5.08  | 0.41 | 0.15 | 1.02  | 0.537426 | 0.803579 | 0.802735 | 0.886984 |
| MmuSTS.242.1.S1_at    | MmuSTS.242.1  | 7.01  | 6.92  | 0.09 | 0.03 | 1.07  | 0.088835 | 0.373182 | 0.456567 | 0.612033 |
| MmuSTS.242.1.S1_x_at  | MmuSTS.242.1  | 6.69  | 6.64  | 0.03 | 0.03 | 1.03  | 0.096766 | 0.735112 | 0.465459 | 0.846715 |
| MmuSTS.2420.1.S1_at   | MmuSTS.2420.1 | 11.35 | 11.1  | 0.25 | 0.07 | 1.19  | 0.166494 | 0.006184 | 0.539189 | 0.106774 |
| MmuSTS.2421.1.S1_at   | MmuSTS.2421.1 | 4.24  | 4.24  | 0.16 | 0.06 | -1    | 0.342111 | 0.634353 | 0.685584 | 0.784758 |
| MmuSTS.2422.1.S1_at   | MmuSTS.2422.1 | 12.44 | 12.42 | 0.34 | 0.04 | 1.01  | 0.915426 | 0.843324 | 0.971229 | 0.910772 |
| MmuSTS.2423.1.S1_at   | MmuSTS.2423.1 | 6.65  | 7.1   | 0.42 | 0    | -1.37 | 0.265599 | 0.145458 | 0.626763 | 0.419421 |
| MmuSTS.2424.1.S1_at   | MmuSTS.2424.1 | 6.04  | 6.03  | 0.27 | 0.07 | 1     | 0.513859 | 0.32744  | 0.790189 | 0.577284 |
| MmuSTS.2425.1.S1_at   | MmuSTS.2425.1 | 5.25  | 5.2   | 0.08 | 0.07 | 1.04  | 0.191508 | 0.432906 | 0.562859 | 0.65324  |
| MmuSTS.2426.1.S1_at   | MmuSTS.2426.1 | 8.74  | 8.73  | 0.56 | 0.12 | 1.01  | 0.281522 | 0.245437 | 0.640011 | 0.515213 |
| MmuSTS.2427.1.S1_at   | MmuSTS.2427.1 | 9.1   | 9.8   | 0.43 | 0.13 | -1.63 | 0.149505 | 0.206464 | 0.523226 | 0.480571 |
| MmuSTS.2428.1.S1_at   | MmuSTS.2428.1 | 4.31  | 4.22  | 0.08 | 0.06 | 1.06  | 0.178443 | 0.169227 | 0.551369 | 0.445815 |
| MmuSTS.2429.1.S1_at   | MmuSTS.2429.1 | 5.5   | 5.38  | 0.41 | 0.1  | 1.09  | 0.774436 | 0.526671 | 0.916327 | 0.715627 |
| MmuSTS.243.1.S1_at    | MmuSTS.243.1  | 6.6   | 7.05  | 0.19 | 0.16 | -1.37 | 0.032143 | 0.000536 | 0.343204 | 0.040439 |
| MmuSTS.2430.1.S1_at   | MmuSTS.2430.1 | 7.98  | 7.98  | 0.46 | 0.06 | 1     | 0.984671 | 0.190889 | 0.995256 | 0.466264 |
| MmuSTS.2431.1.S1_at   | MmuSTS.2431.1 | 4.06  | 4.02  | 0.16 | 0.13 | 1.03  | 0.840383 | 0.612591 | 0.943285 | 0.770091 |
| MmuSTS.2432.1.S1_s_at | MmuSTS.2432.1 | 6.06  | 5.98  | 0.22 | 0.22 | 1.05  | 0.675156 | 0.851433 | 0.872479 | 0.915468 |
| MmuSTS.2433.1.S1_at   | MmuSTS.2433.1 | 10.32 | 9.83  | 0.11 | 0.07 | 1.4   | 0.007533 | 0.000088 | 0.229281 | 0.027016 |
| MmuSTS.2434.1.S1_at   | MmuSTS.2434.1 | 7.95  | 8.43  | 0.6  | 0.21 | -1.39 | 0.177768 | 0.030113 | 0.550946 | 0.215388 |
| MmuSTS.2435.1.S1_at   | MmuSTS.2435.1 | 4.1   | 3.98  | 0.23 | 0.05 | 1.09  | 0.939242 | 0.436855 | 0.979532 | 0.656331 |
| MmuSTS.2436.1.S1_at   | MmuSTS.2436.1 | 4.72  | 4.7   | 0.42 | 0.24 | 1.01  | 0.932949 | 0.051078 | 0.977247 | 0.271296 |
| MmuSTS.2437.1.S1_at   | MmuSTS.2437.1 | 4.32  | 4.25  | 0.11 | 0.12 | 1.05  | 0.228124 | 0.452547 | 0.597018 | 0.667147 |
| MmuSTS.2438.1.S1_at   | MmuSTS.2438.1 | 3.21  | 3.18  | 0.06 | 0.12 | 1.02  | 0.848585 | 0.867344 | 0.946803 | 0.924663 |
| MmuSTS.2439.1.S1_at   | MmuSTS.2439.1 | 5.43  | 5.59  | 0.52 | 0.16 | -1.11 | 0.213701 | 0.35589  | 0.584304 | 0.597869 |
| MmuSTS.244.1.S1_at    | MmuSTS.244.1  | 9.4   | 9.86  | 0.93 | 0.27 | -1.38 | 0.613014 | 0.280098 | 0.843339 | 0.543369 |
| MmuSTS.2440.1.S1_at   | MmuSTS.2440.1 | 8.95  | 9.44  | 0.86 | 0.28 | -1.41 | 0.2039   | 0.016581 | 0.57513  | 0.163023 |
| MmuSTS.2441.1.S1_at   | MmuSTS.2441.1 | 11.15 | 11.15 | 0.24 | 0.06 | 1.01  | 0.87983  | 0.733221 | 0.958318 | 0.845568 |
| MmuSTS.2442.1.S1_at   | MmuSTS.2442.1 | 4.58  | 4.42  | 0.16 | 0.01 | 1.11  | 0.5562   | 0.532103 | 0.814002 | 0.718995 |
| MmuSTS.2443.1.S1_at   | MmuSTS.2443.1 | 6.05  | 6.04  | 0.1  | 0.06 | 1.01  | 0.20846  | 0.156206 | 0.580185 | 0.43161  |
| MmuSTS.2444.1.S1_at   | MmuSTS.2444.1 | 5.13  | 4.87  | 0.06 | 0.06 | 1.2   | 0.004992 | 0.001329 | 0.204243 | 0.056205 |
| MmuSTS.2445.1.S1_at   | MmuSTS.2445.1 | 7.13  | 7.42  | 0.34 | 0.09 | -1.22 | 0.13228  | 0.123768 | 0.506752 | 0.393908 |
| MmuSTS.2446.1.S1_at   | MmuSTS.2446.1 | 5.83  | 5.99  | 1.16 | 0.25 | -1.11 | 0.849969 | 0.140339 | 0.947267 | 0.413522 |
| MmuSTS.2447.1.S1_at   | MmuSTS.2447.1 | 11.02 | 10.4  | 1.31 | 0.12 | 1.54  | 0.706537 | 0.515609 | 0.885774 | 0.708449 |
| MmuSTS.2448.1.S1_at   | MmuSTS.2448.1 | 4.64  | 4.67  | 0.08 | 0.19 | -1.02 | 0.200249 | 0.256256 | 0.572075 | 0.524079 |
| MmuSTS.2449.1.S1_at   | MmuSTS.2449.1 | 3.91  | 3.79  | 0.09 | 0.1  | 1.09  | 0.114369 | 0.185273 | 0.487606 | 0.461194 |
| MmuSTS.245.1.S1_at    | MmuSTS.245.1  | 10.41 | 10.22 | 0.53 | 0.1  | 1.14  | 0.55086  | 0.748454 | 0.811063 | 0.853639 |
| MmuSTS.2450.1.S1_at   | MmuSTS.2450.1 | 8.61  | 8.17  | 0.56 | 0.07 | 1.36  | 0.397254 | 0.106099 | 0.721717 | 0.368498 |
| MmuSTS.2451.1.S1_at   | MmuSTS.2451.1 | 5.29  | 5.31  | 0.53 | 0.19 | -1.01 | 0.804782 | 0.681218 | 0.929036 | 0.813862 |
| MmuSTS.2452.1.S1_at   | MmuSTS.2452.1 | 8.79  | 8.91  | 1.19 | 0.09 | -1.08 | 0.423671 | 0.519486 | 0.739193 | 0.711062 |

|                     |               |       |       |      |      |       |          |          |          |          |
|---------------------|---------------|-------|-------|------|------|-------|----------|----------|----------|----------|
| MmuSTS.2453.1.S1_at | MmuSTS.2453.1 | 5.01  | 4.88  | 0.3  | 0.42 | 1.1   | 0.720711 | 0.144435 | 0.891717 | 0.418323 |
| MmuSTS.2454.1.S1_at | MmuSTS.2454.1 | 5.35  | 5.21  | 0.08 | 0.09 | 1.1   | 0.056061 | 0.049881 | 0.399441 | 0.268445 |
| MmuSTS.2455.1.S1_at | MmuSTS.2455.1 | 11.12 | 10.94 | 0.14 | 0.06 | 1.14  | 0.132424 | 0.001775 | 0.506752 | 0.0634   |
| MmuSTS.2456.1.S1_at | MmuSTS.2456.1 | 12.61 | 12.79 | 0.11 | 0.03 | -1.13 | 0.052288 | 0.003777 | 0.392084 | 0.087503 |
| MmuSTS.2457.1.S1_at | MmuSTS.2457.1 | 10.11 | 10.29 | 2.52 | 0.31 | -1.13 | 0.631483 | 0.223843 | 0.852417 | 0.496802 |
| MmuSTS.2458.1.S1_at | MmuSTS.2458.1 | 6.03  | 5.62  | 0.37 | 0.25 | 1.33  | 0.154418 | 0.356021 | 0.527551 | 0.598012 |
| MmuSTS.2459.1.S1_at | MmuSTS.2459.1 | 10.9  | 10.45 | 0.27 | 0.08 | 1.37  | 0.121257 | 0.222975 | 0.494848 | 0.495821 |
| MmuSTS.246.1.S1_at  | MmuSTS.246.1  | 10.78 | 11    | 0.14 | 0.17 | -1.17 | 0.253672 | 0.16006  | 0.618323 | 0.436231 |
| MmuSTS.2460.1.S1_at | MmuSTS.2460.1 | 7.14  | 8.12  | 0.25 | 0.04 | -1.97 | 0.002758 | 0.000108 | 0.185352 | 0.028099 |
| MmuSTS.2461.1.S1_at | MmuSTS.2461.1 | 9.07  | 9.16  | 0.32 | 0.14 | -1.07 | 0.462669 | 0.62974  | 0.761724 | 0.781989 |
| MmuSTS.2462.1.S1_at | MmuSTS.2462.1 | 10.58 | 10.44 | 0.32 | 0.06 | 1.1   | 0.787265 | 0.076835 | 0.921858 | 0.322319 |
| MmuSTS.2463.1.S1_at | MmuSTS.2463.1 | 4.92  | 4.53  | 0.21 | 0.07 | 1.31  | 0.08634  | 0.139067 | 0.453939 | 0.412165 |
| MmuSTS.2464.1.S1_at | MmuSTS.2464.1 | 9.1   | 7.23  | 0.22 | 0.78 | 3.67  | 0.014654 | 0.003373 | 0.277041 | 0.083569 |
| MmuSTS.2465.1.S1_at | MmuSTS.2465.1 | 5.15  | 4.94  | 0.1  | 0.09 | 1.15  | 0.135969 | 0.344515 | 0.510492 | 0.589905 |
| MmuSTS.2466.1.S1_at | MmuSTS.2466.1 | 5.03  | 5.03  | 0.02 | 0.05 | -1    | 0.258823 | 0.414304 | 0.622286 | 0.640189 |
| MmuSTS.2467.1.S1_at | MmuSTS.2467.1 | 11.36 | 11.24 | 0.65 | 0.11 | 1.09  | 0.567892 | 0.593994 | 0.820586 | 0.758509 |
| MmuSTS.2468.1.S1_at | MmuSTS.2468.1 | 11.36 | 11.38 | 0.12 | 0.03 | -1.01 | 0.525998 | 0.155892 | 0.796442 | 0.431279 |
| MmuSTS.2469.1.S1_at | MmuSTS.2469.1 | 5.06  | 4.73  | 0.09 | 0.09 | 1.25  | 0.018978 | 0.01451  | 0.299402 | 0.153682 |
| MmuSTS.247.1.S1_at  | MmuSTS.247.1  | 9.97  | 9.72  | 0.36 | 0.13 | 1.18  | 0.621833 | 0.012838 | 0.847631 | 0.145955 |
| MmuSTS.2470.1.S1_at | MmuSTS.2470.1 | 10.27 | 10.33 | 0.14 | 0.16 | -1.04 | 0.73513  | 0.095387 | 0.898576 | 0.352428 |
| MmuSTS.2471.1.S1_at | MmuSTS.2471.1 | 4.93  | 4.58  | 0.82 | 0.6  | 1.28  | 0.435785 | 0.527699 | 0.745886 | 0.716221 |
| MmuSTS.2472.1.S1_at | MmuSTS.2472.1 | 5.99  | 5.95  | 0.08 | 0.14 | 1.03  | 0.735789 | 0.957143 | 0.89895  | 0.975767 |
| MmuSTS.2473.1.S1_at | MmuSTS.2473.1 | 9.08  | 8.04  | 0.97 | 0.16 | 2.06  | 0.189904 | 0.102881 | 0.561291 | 0.363508 |
| MmuSTS.2474.1.S1_at | MmuSTS.2474.1 | 8.38  | 8.75  | 0.34 | 0.06 | -1.29 | 0.132595 | 0.023716 | 0.506908 | 0.192852 |
| MmuSTS.2475.1.S1_at | MmuSTS.2475.1 | 4.81  | 4.76  | 0.24 | 0.08 | 1.03  | 0.699601 | 0.842242 | 0.883295 | 0.910143 |
| MmuSTS.2476.1.S1_at | MmuSTS.2476.1 | 9.07  | 8.87  | 0.42 | 0.21 | 1.15  | 0.165095 | 0.124468 | 0.537704 | 0.394865 |
| MmuSTS.2477.1.S1_at | MmuSTS.2477.1 | 8.94  | 9.67  | 0.66 | 0.21 | -1.65 | 0.090232 | 0.004327 | 0.458233 | 0.092251 |
| MmuSTS.2478.1.S1_at | MmuSTS.2478.1 | 11.66 | 12.51 | 0.62 | 0.08 | -1.8  | 0.073754 | 0.055903 | 0.434623 | 0.282209 |
| MmuSTS.2479.1.S1_at | MmuSTS.2479.1 | 6.73  | 6.6   | 0.18 | 0.1  | 1.09  | 0.304897 | 0.456287 | 0.658493 | 0.670064 |
| MmuSTS.248.1.S1_at  | MmuSTS.248.1  | 6.39  | 5.83  | 0.37 | 0.3  | 1.47  | 0.041514 | 0.100931 | 0.366704 | 0.360509 |
| MmuSTS.2480.1.S1_at | MmuSTS.2480.1 | 5.34  | 7.28  | 1.17 | 0.24 | -3.85 | 0.048346 | 0.022271 | 0.383068 | 0.1867   |
| MmuSTS.2481.1.S1_at | MmuSTS.2481.1 | 10.33 | 10.54 | 0.19 | 0.02 | -1.16 | 0.114052 | 0.087252 | 0.487405 | 0.340237 |
| MmuSTS.2482.1.S1_at | MmuSTS.2482.1 | 9.82  | 10.18 | 0.84 | 0.06 | -1.28 | 0.690325 | 0.870392 | 0.879445 | 0.926446 |
| MmuSTS.2483.1.S1_at | MmuSTS.2483.1 | 5.06  | 5.59  | 0.14 | 0.09 | -1.45 | 0.00467  | 0.001893 | 0.201699 | 0.065004 |
| MmuSTS.2484.1.S1_at | MmuSTS.2484.1 | 6.08  | 6.03  | 0.08 | 0    | 1.04  | 0.094882 | 0.015825 | 0.464131 | 0.159503 |
| MmuSTS.2485.1.S1_at | MmuSTS.2485.1 | 6.71  | 6.71  | 0.05 | 0.1  | -1    | 0.467956 | 0.626385 | 0.764607 | 0.779719 |
| MmuSTS.2486.1.S1_at | MmuSTS.2486.1 | 9.11  | 8.59  | 1.25 | 0.59 | 1.43  | 0.697235 | 0.859556 | 0.882224 | 0.919999 |
| MmuSTS.2487.1.S1_at | MmuSTS.2487.1 | 5.7   | 5.43  | 0.34 | 0.08 | 1.21  | 0.209201 | 0.273605 | 0.580725 | 0.538053 |
| MmuSTS.2488.1.S1_at | MmuSTS.2488.1 | 10.54 | 10.46 | 0.29 | 0.08 | 1.05  | 0.675882 | 0.425892 | 0.872796 | 0.6481   |
| MmuSTS.2489.1.S1_at | MmuSTS.2489.1 | 4.2   | 4.18  | 0.16 | 0.07 | 1.01  | 0.218361 | 0.310567 | 0.588183 | 0.565771 |
| MmuSTS.249.1.S1_at  | MmuSTS.249.1  | 10.49 | 11.21 | 3.08 | 0.18 | -1.65 | 0.407961 | 0.275906 | 0.729102 | 0.540035 |
| MmuSTS.2490.1.S1_at | MmuSTS.2490.1 | 3.57  | 3.42  | 0.15 | 0.23 | 1.11  | 0.827383 | 0.957548 | 0.938039 | 0.975954 |
| MmuSTS.2491.1.S1_at | MmuSTS.2491.1 | 6.04  | 5.94  | 0.11 | 0.1  | 1.07  | 0.175137 | 0.198765 | 0.548031 | 0.473391 |

|                       |               |       |       |      |      |       |          |          |          |          |
|-----------------------|---------------|-------|-------|------|------|-------|----------|----------|----------|----------|
| MmuSTS.2492.1.S1_at   | MmuSTS.2492.1 | 7.28  | 7.58  | 0.24 | 0.14 | -1.23 | 0.084799 | 0.128137 | 0.451403 | 0.399148 |
| MmuSTS.2493.1.S1_at   | MmuSTS.2493.1 | 5.07  | 4.51  | 0.23 | 0.08 | 1.47  | 0.039612 | 0.005601 | 0.362432 | 0.10339  |
| MmuSTS.2494.1.S1_at   | MmuSTS.2494.1 | 5.81  | 5.73  | 0.11 | 0.31 | 1.06  | 0.884923 | 0.669853 | 0.960159 | 0.806933 |
| MmuSTS.2495.1.S1_at   | MmuSTS.2495.1 | 4.86  | 5.57  | 0.9  | 0.1  | -1.63 | 0.433835 | 0.127889 | 0.744656 | 0.398825 |
| MmuSTS.2496.1.S1_at   | MmuSTS.2496.1 | 8.5   | 8.75  | 0.37 | 0.08 | -1.19 | 0.403777 | 0.092236 | 0.725934 | 0.347992 |
| MmuSTS.2497.1.S1_at   | MmuSTS.2497.1 | 5.35  | 5.1   | 0.19 | 0.02 | 1.19  | 0.124474 | 0.061116 | 0.498544 | 0.293975 |
| MmuSTS.2498.1.S1_at   | MmuSTS.2498.1 | 7.96  | 8.2   | 0.38 | 0.16 | -1.18 | 0.449932 | 0.126042 | 0.754621 | 0.396714 |
| MmuSTS.2499.1.S1_at   | MmuSTS.2499.1 | 2.89  | 2.95  | 0.02 | 0.14 | -1.04 | 0.595315 | 0.456191 | 0.835317 | 0.66996  |
| MmuSTS.25.1.S1_at     | MmuSTS.25.1   | 5.26  | 5.12  | 0.07 | 0.09 | 1.1   | 0.553218 | 0.898499 | 0.812025 | 0.94222  |
| MmuSTS.250.1.S1_at    | MmuSTS.250.1  | 7.51  | 7.52  | 0.19 | 0.15 | -1.01 | 0.485764 | 0.644049 | 0.774425 | 0.791291 |
| MmuSTS.2500.1.S1_at   | MmuSTS.2500.1 | 7.26  | 7.48  | 0.69 | 0.12 | -1.16 | 0.746725 | 0.27501  | 0.903705 | 0.539419 |
| MmuSTS.2501.1.S1_at   | MmuSTS.2501.1 | 11.22 | 10.94 | 0.23 | 0.07 | 1.22  | 0.342696 | 0.187599 | 0.686054 | 0.463628 |
| MmuSTS.2502.1.S1_at   | MmuSTS.2502.1 | 6.23  | 6.29  | 0.15 | 0.17 | -1.05 | 0.793187 | 0.965657 | 0.924226 | 0.980751 |
| MmuSTS.2503.1.S1_at   | MmuSTS.2503.1 | 8.94  | 10.03 | 1.35 | 0.42 | -2.13 | 0.470908 | 0.169684 | 0.766231 | 0.446263 |
| MmuSTS.2504.1.S1_at   | MmuSTS.2504.1 | 8.86  | 8.96  | 1.42 | 0.17 | -1.07 | 0.990162 | 0.11605  | 0.996306 | 0.383268 |
| MmuSTS.2505.1.S1_at   | MmuSTS.2505.1 | 6.93  | 6.1   | 0.63 | 0.27 | 1.78  | 0.47445  | 0.027413 | 0.767967 | 0.206759 |
| MmuSTS.2506.1.S1_s_at | MmuSTS.2506.1 | 6.94  | 7.63  | 1.26 | 0.21 | -1.61 | 0.970473 | 0.735626 | 0.990336 | 0.847031 |
| MmuSTS.2507.1.S1_at   | MmuSTS.2507.1 | 8.59  | 8.28  | 0.19 | 0.1  | 1.24  | 0.03782  | 0.030073 | 0.358028 | 0.215243 |
| MmuSTS.2508.1.S1_at   | MmuSTS.2508.1 | 7.97  | 7.5   | 0.4  | 0.2  | 1.39  | 0.099637 | 0.02655  | 0.469263 | 0.203915 |
| MmuSTS.2509.1.S1_at   | MmuSTS.2509.1 | 12.1  | 12.22 | 0.16 | 0.13 | -1.08 | 0.197645 | 0.333154 | 0.568625 | 0.581452 |
| MmuSTS.251.1.S1_at    | MmuSTS.251.1  | 10.74 | 11    | 0.51 | 0.12 | -1.19 | 0.292486 | 0.260789 | 0.648857 | 0.52721  |
| MmuSTS.2510.1.S1_at   | MmuSTS.2510.1 | 11.56 | 11.07 | 1.12 | 0.12 | 1.41  | 0.837219 | 0.193981 | 0.94155  | 0.469113 |
| MmuSTS.2511.1.S1_at   | MmuSTS.2511.1 | 10.05 | 9.84  | 0.26 | 0.01 | 1.15  | 0.289032 | 0.052379 | 0.645892 | 0.274345 |
| MmuSTS.2512.1.S1_at   | MmuSTS.2512.1 | 9.77  | 10.13 | 0.8  | 0.15 | -1.28 | 0.537089 | 0.148803 | 0.802624 | 0.423201 |
| MmuSTS.2513.1.S1_at   | MmuSTS.2513.1 | 10.66 | 10.33 | 1.14 | 0.36 | 1.26  | 0.62845  | 0.0907   | 0.851106 | 0.345151 |
| MmuSTS.2514.1.S1_at   | MmuSTS.2514.1 | 9.97  | 10.65 | 1.67 | 0.13 | -1.6  | 0.381942 | 0.233452 | 0.710335 | 0.504809 |
| MmuSTS.2515.1.S1_at   | MmuSTS.2515.1 | 3.6   | 3.67  | 0.05 | 0.18 | -1.05 | 0.54877  | 0.536907 | 0.809903 | 0.722119 |
| MmuSTS.2516.1.S1_at   | MmuSTS.2516.1 | 7.61  | 7.44  | 0.88 | 0.16 | 1.13  | 0.794807 | 0.655498 | 0.924682 | 0.798583 |
| MmuSTS.2517.1.S1_at   | MmuSTS.2517.1 | 13.01 | 13.02 | 0.08 | 0.02 | -1.01 | 0.568172 | 0.253547 | 0.820687 | 0.521873 |
| MmuSTS.2518.1.S1_s_at | MmuSTS.2518.1 | 11.63 | 11.01 | 0.19 | 0.17 | 1.54  | 0.019818 | 0.013556 | 0.302615 | 0.149001 |
| MmuSTS.2519.1.S1_at   | MmuSTS.2519.1 | 13.58 | 13.57 | 0.16 | 0.03 | 1.01  | 0.600856 | 0.548998 | 0.838005 | 0.729509 |
| MmuSTS.252.1.S1_at    | MmuSTS.252.1  | 3.38  | 3.37  | 0.06 | 0.13 | 1     | 0.857045 | 0.299102 | 0.94962  | 0.557663 |
| MmuSTS.2520.1.S1_at   | MmuSTS.2520.1 | 11.59 | 11.19 | 0.15 | 0.11 | 1.32  | 0.023063 | 0.015581 | 0.314562 | 0.158192 |
| MmuSTS.2521.1.S1_at   | MmuSTS.2521.1 | 5.88  | 6.08  | 0.26 | 0.03 | -1.15 | 0.806643 | 0.84958  | 0.929839 | 0.914595 |
| MmuSTS.2522.1.S1_at   | MmuSTS.2522.1 | 6.57  | 6.63  | 0.21 | 0.21 | -1.04 | 0.293568 | 0.183824 | 0.649839 | 0.459909 |
| MmuSTS.2523.1.S1_at   | MmuSTS.2523.1 | 6.35  | 6.54  | 0.36 | 0.31 | -1.13 | 0.60872  | 0.496644 | 0.841329 | 0.696119 |
| MmuSTS.2524.1.S1_at   | MmuSTS.2524.1 | 4.27  | 5.23  | 0.3  | 0.22 | -1.94 | 0.023656 | 0.155513 | 0.316279 | 0.430888 |
| MmuSTS.2525.1.S1_at   | MmuSTS.2525.1 | 3.65  | 3.36  | 0.22 | 0.03 | 1.22  | 0.324183 | 0.116423 | 0.672526 | 0.383671 |
| MmuSTS.2526.1.S1_at   | MmuSTS.2526.1 | 11.39 | 11.45 | 0.32 | 0.07 | -1.05 | 0.960405 | 0.798415 | 0.987202 | 0.883979 |
| MmuSTS.2527.1.S1_at   | MmuSTS.2527.1 | 11.47 | 11.64 | 0.37 | 0.06 | -1.12 | 0.50524  | 0.466684 | 0.785248 | 0.676425 |
| MmuSTS.2528.1.S1_at   | MmuSTS.2528.1 | 3.87  | 3.73  | 0.56 | 0.15 | 1.1   | 0.23803  | 0.322448 | 0.605206 | 0.573985 |
| MmuSTS.2529.1.S1_at   | MmuSTS.2529.1 | 12.76 | 12.7  | 0.17 | 0.12 | 1.04  | 0.178975 | 0.241538 | 0.552029 | 0.512152 |
| MmuSTS.253.1.S1_at    | MmuSTS.253.1  | 10.73 | 10.32 | 0.55 | 0.21 | 1.33  | 0.282821 | 0.246079 | 0.641027 | 0.515827 |

|                       |               |       |       |      |      |       |          |          |          |          |
|-----------------------|---------------|-------|-------|------|------|-------|----------|----------|----------|----------|
| MmuSTS.2530.1.S1_at   | MmuSTS.2530.1 | 5.54  | 5.56  | 0.19 | 0.03 | -1.02 | 0.939274 | 0.699871 | 0.979532 | 0.82579  |
| MmuSTS.2531.1.S1_at   | MmuSTS.2531.1 | 6.02  | 5.88  | 0.4  | 0.11 | 1.1   | 0.611832 | 0.584607 | 0.842611 | 0.752482 |
| MmuSTS.2532.1.S1_at   | MmuSTS.2532.1 | 11.9  | 11.92 | 1.06 | 0.08 | -1.01 | 0.441651 | 0.556368 | 0.749506 | 0.734507 |
| MmuSTS.2533.1.S1_at   | MmuSTS.2533.1 | 12.32 | 12.71 | 0.48 | 0.01 | -1.31 | 0.073775 | 0.022243 | 0.434623 | 0.18659  |
| MmuSTS.622.1.S1_s_at  | MmuSTS.622.1  | 3.36  | 3.27  | 0.01 | 0.07 | 1.07  | 0.055145 | 0.05752  | 0.398095 | 0.285907 |
| MmuSTS.622.1.S1_x_at  | MmuSTS.622.1  | 4.97  | 4.86  | 0.04 | 0.07 | 1.07  | 0.164447 | 0.043481 | 0.537322 | 0.253152 |
| MmuSTS.623.1.S1_at    | MmuSTS.623.1  | 4.11  | 3.99  | 0.09 | 0.02 | 1.08  | 0.105962 | 0.059602 | 0.477816 | 0.290696 |
| MmuSTS.623.1.S1_s_at  | MmuSTS.623.1  | 3.39  | 3.23  | 0.08 | 0.11 | 1.11  | 0.221662 | 0.123272 | 0.591319 | 0.393358 |
| MmuSTS.623.1.S1_x_at  | MmuSTS.623.1  | 3.46  | 3.46  | 0.16 | 0.11 | -1    | 0.597802 | 0.835557 | 0.836527 | 0.905864 |
| MmuSTS.2536.1.S1_at   | MmuSTS.2536.1 | 3.72  | 3.6   | 0.1  | 0.09 | 1.08  | 0.341962 | 0.51109  | 0.685567 | 0.705383 |
| MmuSTS.2537.1.S1_at   | MmuSTS.2537.1 | 11.4  | 11.63 | 0.48 | 0.23 | -1.17 | 0.598724 | 0.033499 | 0.837099 | 0.226577 |
| MmuSTS.2538.1.S1_at   | MmuSTS.2538.1 | 11.12 | 11.31 | 0.4  | 0.27 | -1.14 | 0.52594  | 0.011552 | 0.796442 | 0.139091 |
| MmuSTS.2539.1.S1_at   | MmuSTS.2539.1 | 7.3   | 7.13  | 0.08 | 0.01 | 1.12  | 0.049219 | 0.345999 | 0.385423 | 0.59115  |
| MmuSTS.254.1.S1_at    | MmuSTS.254.1  | 5.09  | 5.08  | 0.29 | 0.73 | 1     | 0.275984 | 0.202327 | 0.635532 | 0.476691 |
| MmuSTS.2540.1.S1_at   | MmuSTS.2540.1 | 9.24  | 9.38  | 0.92 | 0.22 | -1.1  | 0.811978 | 0.414898 | 0.932004 | 0.640509 |
| MmuSTS.2541.1.S1_at   | MmuSTS.2541.1 | 9.74  | 9.16  | 0.99 | 0.18 | 1.5   | 0.825061 | 0.093148 | 0.93711  | 0.349303 |
| MmuSTS.2542.1.S1_at   | MmuSTS.2542.1 | 3.46  | 3.67  | 0.12 | 0.09 | -1.16 | 0.190068 | 0.283994 | 0.561346 | 0.546237 |
| MmuSTS.2543.1.S1_at   | MmuSTS.2543.1 | 3.24  | 3.28  | 0.07 | 0.14 | -1.03 | 0.319471 | 0.413218 | 0.668733 | 0.639484 |
| MmuSTS.2544.1.S1_at   | MmuSTS.2544.1 | 11.63 | 11.36 | 0.2  | 0.06 | 1.21  | 0.044597 | 0.040806 | 0.374916 | 0.246935 |
| MmuSTS.2545.1.S1_at   | MmuSTS.2545.1 | 8.73  | 8.72  | 0.18 | 0.05 | 1.01  | 0.266967 | 0.409711 | 0.627652 | 0.636759 |
| MmuSTS.2546.1.S1_at   | MmuSTS.2546.1 | 4.39  | 4.37  | 0.47 | 0.05 | 1.01  | 0.906673 | 0.768758 | 0.968356 | 0.865653 |
| MmuSTS.2547.1.S1_at   | MmuSTS.2547.1 | 10.07 | 10.26 | 0.21 | 0.03 | -1.13 | 0.638723 | 0.756548 | 0.856034 | 0.858235 |
| MmuSTS.2548.1.S1_at   | MmuSTS.2548.1 | 9.44  | 9.26  | 0.28 | 0.11 | 1.13  | 0.511554 | 0.103289 | 0.78871  | 0.364143 |
| MmuSTS.2549.1.S1_at   | MmuSTS.2549.1 | 10.46 | 10.34 | 0.32 | 0.09 | 1.09  | 0.707415 | 0.030474 | 0.886113 | 0.216624 |
| MmuSTS.255.1.S1_at    | MmuSTS.255.1  | 10.8  | 11.12 | 0.11 | 0.12 | -1.25 | 0.04639  | 0.022817 | 0.377929 | 0.189214 |
| MmuSTS.2550.1.S1_at   | MmuSTS.2550.1 | 6.04  | 5.85  | 0.11 | 0.25 | 1.14  | 0.32549  | 0.348591 | 0.673334 | 0.59263  |
| MmuSTS.2551.1.S1_at   | MmuSTS.2551.1 | 10.17 | 10.44 | 0.34 | 0.08 | -1.2  | 0.910956 | 0.314486 | 0.969779 | 0.568367 |
| MmuSTS.2552.1.S1_x_at | MmuSTS.2552.1 | 12.47 | 12.55 | 0.27 | 0.1  | -1.06 | 0.148408 | 0.259954 | 0.522567 | 0.52675  |
| MmuSTS.2553.1.S1_at   | MmuSTS.2553.1 | 5.72  | 6.08  | 0.27 | 0.15 | -1.29 | 0.194397 | 0.547175 | 0.564999 | 0.728314 |
| MmuSTS.2554.1.S1_at   | MmuSTS.2554.1 | 9.62  | 10.25 | 0.67 | 0.34 | -1.55 | 0.320807 | 0.282366 | 0.669445 | 0.545076 |
| MmuSTS.2555.1.S1_at   | MmuSTS.2555.1 | 10.22 | 10.48 | 0.12 | 0.13 | -1.2  | 0.060339 | 0.292036 | 0.407956 | 0.552201 |
| MmuSTS.2556.1.S1_at   | MmuSTS.2556.1 | 10.59 | 10.58 | 0.62 | 0.15 | 1.01  | 0.99918  | 0.998229 | 0.999788 | 0.999079 |
| MmuSTS.2557.1.S1_at   | MmuSTS.2557.1 | 8.66  | 9.04  | 0.46 | 0.25 | -1.3  | 0.902024 | 0.006011 | 0.966869 | 0.106068 |
| MmuSTS.2558.1.S1_at   | MmuSTS.2558.1 | 12.34 | 12.38 | 0.06 | 0.04 | -1.03 | 0.572572 | 0.080645 | 0.823222 | 0.328444 |
| MmuSTS.2559.1.S1_at   | MmuSTS.2559.1 | 8.46  | 8.38  | 0.32 | 0.03 | 1.06  | 0.693218 | 0.544202 | 0.880472 | 0.726643 |
| MmuSTS.256.1.S1_at    | MmuSTS.256.1  | 8.09  | 7.91  | 0.41 | 0.04 | 1.13  | 0.277999 | 0.350704 | 0.637256 | 0.59442  |
| MmuSTS.2560.1.S1_at   | MmuSTS.2560.1 | 7.94  | 8.7   | 0.95 | 0.11 | -1.69 | 0.261306 | 0.375301 | 0.623819 | 0.613336 |
| MmuSTS.2561.1.S1_at   | MmuSTS.2561.1 | 7.08  | 7.14  | 0.31 | 0.05 | -1.04 | 0.560348 | 0.299884 | 0.81664  | 0.558158 |
| MmuSTS.2562.1.S1_s_at | MmuSTS.2562.1 | 10.05 | 9.77  | 0.16 | 0.04 | 1.21  | 0.052541 | 0.179518 | 0.392658 | 0.455998 |
| MmuSTS.2563.1.S1_at   | MmuSTS.2563.1 | 8.62  | 9.22  | 0.31 | 0.08 | -1.52 | 0.062326 | 0.032964 | 0.412992 | 0.224771 |
| MmuSTS.2564.1.S1_at   | MmuSTS.2564.1 | 11.43 | 11.52 | 0.17 | 0.11 | -1.06 | 0.303588 | 0.048425 | 0.657406 | 0.265282 |
| MmuSTS.2565.1.S1_at   | MmuSTS.2565.1 | 9.04  | 10.36 | 0.42 | 0.17 | -2.51 | 0.006881 | 0.000872 | 0.224141 | 0.047471 |
| MmuSTS.2566.1.S1_at   | MmuSTS.2566.1 | 12.8  | 12.41 | 0.13 | 0.13 | 1.31  | 0.024306 | 0.010245 | 0.317812 | 0.132655 |

|                       |               |       |       |      |      |       |          |          |          |          |
|-----------------------|---------------|-------|-------|------|------|-------|----------|----------|----------|----------|
| MmuSTS.2567.1.S1_s_at | MmuSTS.2567.1 | 9.49  | 9.5   | 0.07 | 0.07 | -1.01 | 0.647208 | 0.007991 | 0.859341 | 0.118791 |
| MmuSTS.2568.1.S1_at   | MmuSTS.2568.1 | 11.9  | 11.98 | 0.08 | 0.07 | -1.06 | 0.26227  | 0.231325 | 0.624516 | 0.503024 |
| MmuSTS.2569.1.S1_at   | MmuSTS.2569.1 | 9.04  | 9.19  | 0.27 | 0.06 | -1.11 | 0.455562 | 0.016936 | 0.757455 | 0.165006 |
| MmuSTS.257.1.S1_at    | MmuSTS.257.1  | 12.1  | 11.87 | 0.12 | 0.04 | 1.17  | 0.011384 | 0.003202 | 0.254582 | 0.082015 |
| MmuSTS.2570.1.S1_at   | MmuSTS.2570.1 | 5.86  | 5.73  | 0.12 | 0.08 | 1.09  | 0.113891 | 0.178836 | 0.487339 | 0.455141 |
| MmuSTS.2570.1.S1_x_at | MmuSTS.2570.1 | 5.64  | 5.48  | 0.03 | 0.07 | 1.11  | 0.01062  | 0.017657 | 0.2485   | 0.168002 |
| MmuSTS.2571.1.S1_at   | MmuSTS.2571.1 | 7.77  | 7.87  | 0.24 | 0.03 | -1.07 | 0.51265  | 0.444272 | 0.789481 | 0.661926 |
| MmuSTS.2572.1.S1_at   | MmuSTS.2572.1 | 4.58  | 4.39  | 0.09 | 0.19 | 1.14  | 0.433189 | 0.479597 | 0.744296 | 0.685315 |
| MmuSTS.2573.1.S1_at   | MmuSTS.2573.1 | 9.81  | 9.91  | 0.24 | 0.02 | -1.07 | 0.520504 | 0.076948 | 0.79373  | 0.322421 |
| MmuSTS.2574.1.S1_at   | MmuSTS.2574.1 | 3.72  | 4.08  | 0.18 | 0.2  | -1.28 | 0.091013 | 0.212546 | 0.458927 | 0.486502 |
| MmuSTS.2575.1.S1_at   | MmuSTS.2575.1 | 11.82 | 11.42 | 0.58 | 0.07 | -1.32 | 0.760216 | 0.516334 | 0.909887 | 0.708858 |
| MmuSTS.2576.1.S1_at   | MmuSTS.2576.1 | 7.73  | 7.66  | 0.12 | 0.06 | 1.05  | 0.37327  | 0.543828 | 0.705567 | 0.726382 |
| MmuSTS.2577.1.S1_at   | MmuSTS.2577.1 | 11.19 | 11.42 | 0.09 | 0.04 | -1.17 | 0.040203 | 0.000184 | 0.36348  | 0.030511 |
| MmuSTS.2578.1.S1_at   | MmuSTS.2578.1 | 4.62  | 5.02  | 0.24 | 0.15 | -1.32 | 0.215444 | 0.098409 | 0.585748 | 0.356531 |
| MmuSTS.2579.1.S1_at   | MmuSTS.2579.1 | 9.17  | 9.13  | 0.58 | 0.04 | 1.03  | 0.58723  | 0.056954 | 0.831578 | 0.284751 |
| MmuSTS.258.1.S1_at    | MmuSTS.258.1  | 10.69 | 10.62 | 0.18 | 0.11 | 1.05  | 0.666996 | 0.679355 | 0.868458 | 0.812775 |
| MmuSTS.2580.1.S1_at   | MmuSTS.2580.1 | 11.33 | 11.38 | 0.2  | 0.05 | -1.03 | 0.596943 | 0.597437 | 0.83613  | 0.760197 |
| MmuSTS.2581.1.S1_s_at | MmuSTS.2581.1 | 9.66  | 9.98  | 0.35 | 0    | -1.25 | 0.126746 | 0.016448 | 0.500599 | 0.162439 |
| MmuSTS.2582.1.S1_at   | MmuSTS.2582.1 | 5.36  | 5.95  | 1.01 | 0.42 | -1.5  | 0.216924 | 0.139943 | 0.586902 | 0.413295 |
| MmuSTS.2583.1.S1_at   | MmuSTS.2583.1 | 3.27  | 3.37  | 0.57 | 0.12 | -1.07 | 0.5215   | 0.541619 | 0.794545 | 0.725033 |
| MmuSTS.2584.1.S1_at   | MmuSTS.2584.1 | 10.29 | 10.49 | 0.33 | 0.03 | -1.15 | 0.864695 | 0.187407 | 0.952416 | 0.46345  |
| MmuSTS.2585.1.S1_at   | MmuSTS.2585.1 | 9.27  | 9.16  | 1.92 | 0.21 | 1.08  | 0.988471 | 0.248666 | 0.995877 | 0.517917 |
| MmuSTS.2586.1.S1_at   | MmuSTS.2586.1 | 10.35 | 10.19 | 0.16 | 0.06 | 1.12  | 0.183643 | 0.292005 | 0.55651  | 0.552163 |
| MmuSTS.2587.1.S1_at   | MmuSTS.2587.1 | 10.66 | 10.86 | 0.33 | 0.19 | -1.15 | 0.792352 | 0.586916 | 0.923837 | 0.753896 |
| MmuSTS.2588.1.S1_at   | MmuSTS.2588.1 | 11.69 | 11.94 | 0.22 | 0.07 | -1.19 | 0.071554 | 0.029685 | 0.431049 | 0.214029 |
| MmuSTS.2589.1.S1_at   | MmuSTS.2589.1 | 11.36 | 11.38 | 0.09 | 0.04 | -1.01 | 0.27699  | 0.072775 | 0.636653 | 0.315651 |
| MmuSTS.259.1.S1_at    | MmuSTS.259.1  | 10.31 | 10.55 | 0.26 | 0.06 | -1.18 | 0.575319 | 0.747167 | 0.824614 | 0.853124 |
| MmuSTS.2590.1.S1_at   | MmuSTS.2590.1 | 12.28 | 12.62 | 0.21 | 0.02 | -1.26 | 0.139443 | 0.167906 | 0.514872 | 0.444485 |
| MmuSTS.2591.1.S1_at   | MmuSTS.2591.1 | 10.68 | 10.71 | 0.37 | 0.18 | -1.02 | 0.481503 | 0.548014 | 0.772171 | 0.728843 |
| MmuSTS.2592.1.S1_at   | MmuSTS.2592.1 | 11.41 | 11.35 | 0.55 | 0    | 1.05  | 0.927982 | 0.991019 | 0.976259 | 0.994952 |
| MmuSTS.2593.1.S1_at   | MmuSTS.2593.1 | 12.29 | 12.07 | 0.14 | 0.06 | 1.16  | 0.032586 | 0.005359 | 0.344811 | 0.101092 |
| MmuSTS.2594.1.S1_at   | MmuSTS.2594.1 | 4.74  | 4.45  | 0.1  | 0.12 | 1.22  | 0.056861 | 0.093325 | 0.401332 | 0.349412 |
| MmuSTS.2595.1.S1_at   | MmuSTS.2595.1 | 5.02  | 5.16  | 0.29 | 0.1  | -1.1  | 0.599508 | 0.617793 | 0.837382 | 0.773705 |
| MmuSTS.2596.1.S1_at   | MmuSTS.2596.1 | 10.36 | 10.27 | 0.22 | 0.15 | 1.06  | 0.74941  | 0.501156 | 0.905021 | 0.699449 |
| MmuSTS.2597.1.S1_at   | MmuSTS.2597.1 | 10.74 | 10.64 | 0.51 | 0.13 | 1.07  | 0.985193 | 0.887451 | 0.995359 | 0.935867 |
| MmuSTS.2598.1.S1_at   | MmuSTS.2598.1 | 10.06 | 10.3  | 0.57 | 0.11 | -1.18 | 0.703067 | 0.695411 | 0.884538 | 0.822978 |
| MmuSTS.2599.1.S1_at   | MmuSTS.2599.1 | 8.76  | 9     | 0.57 | 0.07 | -1.18 | 0.522117 | 0.836967 | 0.795075 | 0.906826 |
| MmuSTS.26.1.S1_at     | MmuSTS.26.1   | 11.47 | 11.47 | 0.22 | 0.03 | -1    | 0.76207  | 0.690459 | 0.910776 | 0.819587 |
| MmuSTS.260.1.S1_at    | MmuSTS.260.1  | 5.09  | 5.03  | 0.6  | 0.12 | 1.04  | 0.942044 | 0.738933 | 0.980252 | 0.848676 |
| MmuSTS.2600.1.S1_at   | MmuSTS.2600.1 | 9.02  | 8.53  | 0.51 | 0.14 | 1.4   | 0.160862 | 0.013089 | 0.534169 | 0.14718  |
| MmuSTS.2601.1.S1_at   | MmuSTS.2601.1 | 6.75  | 7.17  | 0.34 | 0.24 | -1.34 | 0.077229 | 0.032206 | 0.439109 | 0.222139 |
| MmuSTS.2602.1.S1_at   | MmuSTS.2602.1 | 8.77  | 8.87  | 0.03 | 0.04 | -1.08 | 0.011914 | 0.454668 | 0.257858 | 0.668763 |
| MmuSTS.2603.1.S1_at   | MmuSTS.2603.1 | 12.04 | 12.07 | 0.48 | 0.35 | -1.02 | 0.355482 | 0.255949 | 0.694743 | 0.523879 |

|                       |               |       |       |      |      |       |          |          |          |          |
|-----------------------|---------------|-------|-------|------|------|-------|----------|----------|----------|----------|
| MmuSTS.2604.1.S1_at   | MmuSTS.2604.1 | 12.84 | 12.64 | 0.19 | 0.06 | 1.15  | 0.541785 | 0.054099 | 0.805259 | 0.277914 |
| MmuSTS.2605.1.S1_at   | MmuSTS.2605.1 | 7.77  | 7.63  | 0.08 | 0.14 | 1.1   | 0.126409 | 0.281566 | 0.500227 | 0.54464  |
| MmuSTS.2606.1.S1_at   | MmuSTS.2606.1 | 11.23 | 11.97 | 0.55 | 0.18 | -1.67 | 0.085754 | 0.01605  | 0.452974 | 0.160532 |
| MmuSTS.2607.1.S1_at   | MmuSTS.2607.1 | 6.58  | 7.14  | 0.05 | 0.2  | -1.48 | 0.009837 | 0.004733 | 0.244005 | 0.095831 |
| MmuSTS.2608.1.S1_at   | MmuSTS.2608.1 | 6.26  | 6.02  | 0.27 | 0.12 | 1.18  | 0.216975 | 0.047892 | 0.586931 | 0.263751 |
| MmuSTS.2609.1.S1_at   | MmuSTS.2609.1 | 9.75  | 9.98  | 0.42 | 0.18 | -1.17 | 0.112462 | 0.061004 | 0.485808 | 0.293811 |
| MmuSTS.261.1.S1_at    | MmuSTS.261.1  | 4.4   | 4.41  | 0.36 | 0.14 | -1.01 | 0.970696 | 0.057764 | 0.990424 | 0.286677 |
| MmuSTS.2610.1.S1_at   | MmuSTS.2610.1 | 7.17  | 7.56  | 0.34 | 0.14 | -1.3  | 0.154852 | 0.166169 | 0.528178 | 0.442738 |
| MmuSTS.2611.1.S1_at   | MmuSTS.2611.1 | 10.4  | 10.9  | 0.34 | 0.18 | -1.42 | 0.04791  | 0.008313 | 0.381551 | 0.120929 |
| MmuSTS.2612.1.S1_at   | MmuSTS.2612.1 | 6.44  | 6.32  | 0.09 | 0.09 | 1.09  | 0.088336 | 0.489794 | 0.45606  | 0.691918 |
| MmuSTS.2613.1.S1_at   | MmuSTS.2613.1 | 8.21  | 8.79  | 0.69 | 0.2  | -1.49 | 0.189871 | 0.173794 | 0.561226 | 0.450128 |
| MmuSTS.2614.1.S1_at   | MmuSTS.2614.1 | 12.49 | 12.64 | 0.16 | 0.04 | -1.11 | 0.085921 | 0.097742 | 0.45318  | 0.355598 |
| MmuSTS.2614.1.S1_s_at | MmuSTS.2614.1 | 11.52 | 11.8  | 0.22 | 0.03 | -1.22 | 0.074291 | 0.093126 | 0.435027 | 0.349303 |
| MmuSTS.2614.1.S1_x_at | MmuSTS.2614.1 | 12.24 | 12.36 | 0.18 | 0.03 | -1.08 | 0.098248 | 0.118372 | 0.467704 | 0.386398 |
| MmuSTS.2615.1.S1_at   | MmuSTS.2615.1 | 12.5  | 12.59 | 0.16 | 0.04 | -1.06 | 0.494673 | 0.332994 | 0.779514 | 0.581326 |
| MmuSTS.2616.1.S1_at   | MmuSTS.2616.1 | 3.88  | 3.75  | 0.14 | 0.03 | 1.1   | 0.078532 | 0.050308 | 0.441146 | 0.269573 |
| MmuSTS.2617.1.S1_at   | MmuSTS.2617.1 | 6.98  | 7.56  | 0.76 | 0.3  | -1.5  | 0.978001 | 0.826712 | 0.992929 | 0.900485 |
| MmuSTS.2618.1.S1_at   | MmuSTS.2618.1 | 6.72  | 6.74  | 0.33 | 0.2  | -1.01 | 0.971549 | 0.733295 | 0.990709 | 0.84558  |
| MmuSTS.2619.1.S1_at   | MmuSTS.2619.1 | 8.11  | 8     | 0.34 | 0.36 | 1.08  | 0.779371 | 0.40955  | 0.918638 | 0.636566 |
| MmuSTS.262.1.S1_at    | MmuSTS.262.1  | 10.42 | 10.28 | 0.35 | 0.07 | 1.1   | 0.651128 | 0.539262 | 0.86143  | 0.723665 |
| MmuSTS.2620.1.S1_at   | MmuSTS.2620.1 | 10.09 | 10.4  | 0.43 | 0.07 | -1.24 | 0.295089 | 0.403793 | 0.651016 | 0.632386 |
| MmuSTS.2621.1.S1_at   | MmuSTS.2621.1 | 10.92 | 11.08 | 0.36 | 0.1  | -1.11 | 0.654075 | 0.410451 | 0.862576 | 0.637311 |
| MmuSTS.2622.1.S1_at   | MmuSTS.2622.1 | 7.76  | 8.33  | 0.45 | 0.24 | -1.49 | 0.176159 | 0.034712 | 0.549319 | 0.230506 |
| MmuSTS.2623.1.S1_at   | MmuSTS.2623.1 | 6.07  | 6.23  | 0.05 | 0.14 | -1.11 | 0.15292  | 0.083967 | 0.525866 | 0.334885 |
| MmuSTS.2624.1.S1_at   | MmuSTS.2624.1 | 10.03 | 9.83  | 0.29 | 0.03 | 1.15  | 0.795419 | 0.092455 | 0.92485  | 0.348346 |
| MmuSTS.2625.1.S1_at   | MmuSTS.2625.1 | 9.14  | 9.26  | 0.18 | 0.25 | -1.09 | 0.664952 | 0.756476 | 0.867733 | 0.858223 |
| MmuSTS.2626.1.S1_at   | MmuSTS.2626.1 | 9.15  | 9     | 0.37 | 0.15 | 1.11  | 0.259589 | 0.416774 | 0.622626 | 0.64171  |
| MmuSTS.2627.1.S1_at   | MmuSTS.2627.1 | 5.12  | 6.13  | 0.26 | 0.25 | -2    | 0.008832 | 0.003483 | 0.237612 | 0.084834 |
| MmuSTS.2628.1.S1_at   | MmuSTS.2628.1 | 9.58  | 9.84  | 0.87 | 0.06 | -1.2  | 0.462977 | 0.225284 | 0.761921 | 0.497892 |
| MmuSTS.2629.1.S1_at   | MmuSTS.2629.1 | 6.49  | 6.65  | 1.43 | 0.38 | -1.11 | 0.682369 | 0.81314  | 0.875741 | 0.891951 |
| MmuSTS.263.1.S1_at    | MmuSTS.263.1  | 11.95 | 12.28 | 0.12 | 0.23 | -1.25 | 0.434933 | 0.011281 | 0.745356 | 0.138076 |
| MmuSTS.2630.1.S1_at   | MmuSTS.2630.1 | 9.83  | 9.62  | 0.66 | 0.13 | 1.16  | 0.503563 | 0.206528 | 0.784375 | 0.480571 |
| MmuSTS.2631.1.S1_at   | MmuSTS.2631.1 | 3.51  | 3.4   | 0.03 | 0.05 | 1.08  | 0.014192 | 0.157156 | 0.274019 | 0.432616 |
| MmuSTS.2632.1.S1_at   | MmuSTS.2632.1 | 4.91  | 5     | 0.1  | 0.23 | -1.06 | 0.203423 | 0.002907 | 0.574923 | 0.079157 |
| MmuSTS.2633.1.S1_at   | MmuSTS.2633.1 | 7.98  | 8.18  | 0.43 | 0.24 | -1.14 | 0.646063 | 0.036946 | 0.859007 | 0.236659 |
| MmuSTS.2634.1.S1_at   | MmuSTS.2634.1 | 9.31  | 9.7   | 0.11 | 0.08 | -1.31 | 0.006246 | 0.003499 | 0.217806 | 0.08503  |
| MmuSTS.2635.1.S1_at   | MmuSTS.2635.1 | 6.5   | 7.17  | 1.34 | 0.2  | -1.59 | 0.394256 | 0.431736 | 0.719675 | 0.652535 |
| MmuSTS.2636.1.S1_at   | MmuSTS.2636.1 | 9.04  | 9.05  | 0.07 | 0.05 | -1.01 | 0.801831 | 0.006057 | 0.927767 | 0.106152 |
| MmuSTS.2637.1.S1_at   | MmuSTS.2637.1 | 7.18  | 8.15  | 1.41 | 0.15 | -1.95 | 0.214749 | 0.352042 | 0.585191 | 0.595426 |
| MmuSTS.2638.1.S1_at   | MmuSTS.2638.1 | 5.29  | 5.33  | 0.58 | 0.6  | -1.03 | 0.93501  | 0.300227 | 0.978004 | 0.558443 |
| MmuSTS.2639.1.S1_at   | MmuSTS.2639.1 | 3.92  | 3.89  | 0.18 | 0.09 | 1.02  | 0.694876 | 0.168044 | 0.881222 | 0.444641 |
| MmuSTS.264.1.S1_at    | MmuSTS.264.1  | 4.58  | 4.66  | 0.47 | 0.17 | -1.06 | 0.563547 | 0.394774 | 0.818294 | 0.627208 |
| MmuSTS.2640.1.S1_at   | MmuSTS.2640.1 | 10.58 | 10.47 | 0.31 | 0.19 | 1.08  | 0.450662 | 0.789565 | 0.754829 | 0.878449 |



|                       |               |       |       |      |      |       |          |          |          |          |
|-----------------------|---------------|-------|-------|------|------|-------|----------|----------|----------|----------|
| MmuSTS.2641.1.S1_at   | MmuSTS.2641.1 | 8.77  | 9.79  | 1.1  | 0.24 | -2.03 | 0.223704 | 0.1169   | 0.592842 | 0.384277 |
| MmuSTS.2642.1.S1_at   | MmuSTS.2642.1 | 7.32  | 7.68  | 0.23 | 0.09 | -1.28 | 0.096023 | 0.102405 | 0.464614 | 0.36259  |
| MmuSTS.2643.1.S1_at   | MmuSTS.2643.1 | 11.46 | 10.98 | 0.12 | 0.13 | 1.39  | 0.005397 | 0.007126 | 0.208157 | 0.113654 |
| MmuSTS.2643.1.S1_x_at | MmuSTS.2643.1 | 11.42 | 10.94 | 0.1  | 0.13 | 1.4   | 0.006812 | 0.011959 | 0.223952 | 0.141475 |
| MmuSTS.2644.1.S1_s_at | MmuSTS.2644.1 | 4.05  | 3.77  | 0.15 | 0.05 | 1.21  | 0.117677 | 0.168935 | 0.491034 | 0.44549  |
| MmuSTS.2645.1.S1_at   | MmuSTS.2645.1 | 10.61 | 10.66 | 0.42 | 0.13 | -1.04 | 0.824188 | 0.001697 | 0.936573 | 0.062399 |
| MmuSTS.2646.1.S1_at   | MmuSTS.2646.1 | 8.26  | 8.16  | 0.44 | 0.1  | 1.08  | 0.327392 | 0.490665 | 0.675065 | 0.692649 |
| MmuSTS.2647.1.S1_at   | MmuSTS.2647.1 | 9.57  | 9.03  | 0.1  | 0.22 | 1.45  | 0.031939 | 0.006037 | 0.342835 | 0.106089 |
| MmuSTS.2648.1.S1_at   | MmuSTS.2648.1 | 9.85  | 9.83  | 0.28 | 0.12 | 1.01  | 0.856791 | 0.051619 | 0.949535 | 0.272664 |
| MmuSTS.2649.1.S1_at   | MmuSTS.2649.1 | 10.12 | 8.92  | 0.35 | 0.43 | 2.3   | 0.021032 | 0.030662 | 0.306554 | 0.217142 |
| MmuSTS.265.1.S1_at    | MmuSTS.265.1  | 9.78  | 10.12 | 0.36 | 0.07 | -1.26 | 0.06223  | 0.029436 | 0.412841 | 0.213368 |
| MmuSTS.2650.1.S1_at   | MmuSTS.2650.1 | 4.11  | 5.89  | 0.7  | 0.41 | -3.43 | 0.024824 | 0.012217 | 0.319921 | 0.142932 |
| MmuSTS.2651.1.S1_at   | MmuSTS.2651.1 | 10.1  | 10.43 | 0.37 | 0.09 | -1.25 | 0.301525 | 0.456448 | 0.655783 | 0.670188 |
| MmuSTS.2652.1.S1_at   | MmuSTS.2652.1 | 7.46  | 7.11  | 0.36 | 0.08 | 1.28  | 0.058057 | 0.025062 | 0.403678 | 0.198332 |
| MmuSTS.2653.1.S1_at   | MmuSTS.2653.1 | 9.43  | 9.66  | 0.57 | 0.03 | -1.17 | 0.583246 | 0.792411 | 0.828875 | 0.880041 |
| MmuSTS.2654.1.S1_at   | MmuSTS.2654.1 | 7.66  | 7.87  | 0.22 | 0.1  | -1.16 | 0.133947 | 0.49659  | 0.50813  | 0.696119 |
| MmuSTS.2655.1.S1_at   | MmuSTS.2655.1 | 10.62 | 11.22 | 0.29 | 0.06 | -1.51 | 0.033348 | 0.263849 | 0.346442 | 0.5301   |
| MmuSTS.2656.1.S1_at   | MmuSTS.2656.1 | 9.56  | 10.02 | 0.1  | 0.1  | -1.37 | 0.003883 | 0.00427  | 0.198571 | 0.091847 |
| MmuSTS.2657.1.S1_at   | MmuSTS.2657.1 | 12.4  | 13.01 | 0.29 | 0.05 | -1.53 | 0.035566 | 0.010018 | 0.352361 | 0.131262 |
| MmuSTS.2658.1.S1_at   | MmuSTS.2658.1 | 10.17 | 10.35 | 0.41 | 0.04 | -1.13 | 0.239145 | 0.141187 | 0.605731 | 0.414709 |
| MmuSTS.2659.1.S1_at   | MmuSTS.2659.1 | 9.01  | 9.26  | 0.19 | 0.2  | -1.19 | 0.182042 | 0.102009 | 0.555125 | 0.362076 |
| MmuSTS.266.1.S1_at    | MmuSTS.266.1  | 3.43  | 3.43  | 0.26 | 0.23 | -1    | 0.475664 | 0.38426  | 0.768676 | 0.619994 |
| MmuSTS.2660.1.S1_at   | MmuSTS.2660.1 | 10.71 | 10.67 | 0.67 | 0.05 | 1.03  | 0.914939 | 0.992524 | 0.970985 | 0.995715 |
| MmuSTS.2661.1.S1_at   | MmuSTS.2661.1 | 12.6  | 12.21 | 2.47 | 0.21 | 1.32  | 0.617096 | 0.34901  | 0.84528  | 0.593033 |
| MmuSTS.2662.1.S1_at   | MmuSTS.2662.1 | 4.33  | 4.13  | 0.3  | 0.1  | 1.15  | 0.222425 | 0.32911  | 0.591979 | 0.578482 |
| MmuSTS.2663.1.S1_at   | MmuSTS.2663.1 | 3.08  | 3.06  | 0.22 | 0.22 | 1.02  | 0.653841 | 0.872325 | 0.862462 | 0.927429 |
| MmuSTS.2664.1.S1_at   | MmuSTS.2664.1 | 6.55  | 6.49  | 0.52 | 0.07 | 1.04  | 0.67665  | 0.533596 | 0.87321  | 0.719808 |
| MmuSTS.2665.1.S1_at   | MmuSTS.2665.1 | 4.16  | 4.1   | 0.16 | 0.16 | 1.04  | 0.328098 | 0.554556 | 0.675589 | 0.733264 |
| MmuSTS.2666.1.S1_at   | MmuSTS.2666.1 | 3.44  | 3.7   | 0.18 | 0.16 | -1.2  | 0.306096 | 0.277295 | 0.659271 | 0.54125  |
| MmuSTS.2667.1.S1_at   | MmuSTS.2667.1 | 10.8  | 10.96 | 0.16 | 0.19 | -1.12 | 0.134631 | 0.268526 | 0.508533 | 0.534123 |
| MmuSTS.2668.1.S1_s_at | MmuSTS.2668.1 | 9.18  | 9.49  | 0.04 | 0.1  | -1.24 | 0.005867 | 0.003223 | 0.211798 | 0.082115 |
| MmuSTS.2669.1.S1_at   | MmuSTS.2669.1 | 7.81  | 7.11  | 1.6  | 0.09 | 1.62  | 0.536842 | 0.270998 | 0.802473 | 0.536124 |
| MmuSTS.267.1.S1_at    | MmuSTS.267.1  | 11.04 | 10.79 | 0.35 | 0.21 | 1.19  | 0.126062 | 0.024329 | 0.499796 | 0.195238 |
| MmuSTS.2670.1.S1_at   | MmuSTS.2670.1 | 8.16  | 7.48  | 1.56 | 0.23 | 1.6   | 0.664736 | 0.817158 | 0.867683 | 0.894545 |
| MmuSTS.2671.1.S1_at   | MmuSTS.2671.1 | 6.24  | 6.17  | 0.28 | 0.28 | 1.05  | 0.364477 | 0.303088 | 0.700603 | 0.56055  |
| MmuSTS.2672.1.S1_at   | MmuSTS.2672.1 | 11.21 | 10.82 | 0.64 | 0.22 | 1.31  | 0.82398  | 0.01761  | 0.936506 | 0.167797 |
| MmuSTS.2673.1.S1_at   | MmuSTS.2673.1 | 5.81  | 4.28  | 1.46 | 0.42 | 2.9   | 0.148217 | 0.171282 | 0.522535 | 0.447809 |
| MmuSTS.2674.1.S1_at   | MmuSTS.2674.1 | 3.2   | 4.04  | 0.13 | 0.78 | -1.79 | 0.133944 | 0.105104 | 0.50813  | 0.366755 |
| MmuSTS.2675.1.S1_s_at | MmuSTS.2675.1 | 11.05 | 11.17 | 0.37 | 0.09 | -1.09 | 0.401812 | 0.667449 | 0.724703 | 0.805333 |
| MmuSTS.2676.1.S1_at   | MmuSTS.2676.1 | 3.83  | 3.73  | 0.1  | 0.08 | 1.07  | 0.259607 | 0.438348 | 0.622626 | 0.657341 |
| MmuSTS.2677.1.S1_at   | MmuSTS.2677.1 | 6.23  | 6.5   | 0.17 | 0.16 | -1.2  | 0.316557 | 0.121831 | 0.666494 | 0.391122 |
| MmuSTS.2678.1.S1_at   | MmuSTS.2678.1 | 3.36  | 3.37  | 0.07 | 0.09 | -1    | 0.931754 | 0.720587 | 0.977114 | 0.838346 |
| MmuSTS.2679.1.S1_at   | MmuSTS.2679.1 | 8.06  | 8.37  | 0.19 | 0.06 | -1.24 | 0.201171 | 0.013849 | 0.573015 | 0.150924 |

|                       |               |       |       |      |      |       |          |          |          |          |
|-----------------------|---------------|-------|-------|------|------|-------|----------|----------|----------|----------|
| MmuSTS.268.1.S1_at    | MmuSTS.268.1  | 9.43  | 9.94  | 0.71 | 0.06 | -1.42 | 0.884602 | 0.916654 | 0.96011  | 0.953352 |
| MmuSTS.2680.1.S1_at   | MmuSTS.2680.1 | 8.43  | 8.86  | 1.68 | 0.37 | -1.34 | 0.531406 | 0.244449 | 0.799612 | 0.514295 |
| MmuSTS.2681.1.S1_at   | MmuSTS.2681.1 | 3.27  | 3.01  | 0.16 | 0.26 | 1.2   | 0.771709 | 0.862152 | 0.914819 | 0.921655 |
| MmuSTS.2682.1.S1_at   | MmuSTS.2682.1 | 10.81 | 10.75 | 0.44 | 0.05 | 1.05  | 0.829219 | 0.20183  | 0.938708 | 0.476367 |
| MmuSTS.2683.1.S1_at   | MmuSTS.2683.1 | 5.47  | 5.43  | 0.02 | 0.05 | 1.03  | 0.864279 | 0.009446 | 0.952286 | 0.128022 |
| MmuSTS.2684.1.S1_at   | MmuSTS.2684.1 | 5.79  | 5.66  | 0.04 | 0.1  | 1.09  | 0.037668 | 0.164988 | 0.35775  | 0.44123  |
| MmuSTS.2685.1.S1_s_at | MmuSTS.2685.1 | 5.99  | 5.49  | 0.65 | 0.23 | 1.42  | 0.128161 | 0.645891 | 0.502726 | 0.792632 |
| MmuSTS.2686.1.S1_at   | MmuSTS.2686.1 | 5.96  | 5.84  | 0.11 | 0.08 | 1.08  | 0.132476 | 0.416406 | 0.506752 | 0.641587 |
| MmuSTS.2687.1.S1_at   | MmuSTS.2687.1 | 6.39  | 6.31  | 0.14 | 0.15 | 1.06  | 0.168501 | 0.142627 | 0.541113 | 0.416343 |
| MmuSTS.2688.1.S1_at   | MmuSTS.2688.1 | 4.25  | 4.61  | 0.12 | 0.2  | -1.28 | 0.078395 | 0.096999 | 0.441003 | 0.354502 |
| MmuSTS.2689.1.S1_at   | MmuSTS.2689.1 | 9.04  | 9.11  | 0.52 | 0.04 | -1.05 | 0.281386 | 0.432604 | 0.639917 | 0.653025 |
| MmuSTS.269.1.S1_at    | MmuSTS.269.1  | 11.7  | 11.76 | 0.04 | 0.03 | -1.04 | 0.12518  | 0.002872 | 0.499284 | 0.078904 |
| MmuSTS.2690.1.S1_at   | MmuSTS.2690.1 | 8.09  | 7.92  | 0.2  | 0.08 | 1.12  | 0.276522 | 0.77447  | 0.636049 | 0.868766 |
| MmuSTS.2691.1.S1_at   | MmuSTS.2691.1 | 4.13  | 4.19  | 0.19 | 0.04 | -1.04 | 0.755187 | 0.784669 | 0.907732 | 0.875304 |
| MmuSTS.2692.1.S1_at   | MmuSTS.2692.1 | 10.07 | 10.28 | 0.66 | 0.14 | -1.16 | 0.173344 | 0.126744 | 0.54656  | 0.397433 |
| MmuSTS.2693.1.S1_at   | MmuSTS.2693.1 | 5.87  | 5.28  | 0.61 | 0.35 | 1.5   | 0.638036 | 0.015053 | 0.855783 | 0.155825 |
| MmuSTS.2694.1.S1_at   | MmuSTS.2694.1 | 10.56 | 10.33 | 0.24 | 0.06 | 1.17  | 0.502232 | 0.710207 | 0.783497 | 0.831904 |
| MmuSTS.2695.1.S1_at   | MmuSTS.2695.1 | 3.77  | 3.68  | 0.09 | 0.15 | 1.06  | 0.154199 | 0.1823   | 0.527483 | 0.458768 |
| MmuSTS.2696.1.S1_at   | MmuSTS.2696.1 | 6.61  | 6.44  | 0.75 | 0.31 | 1.13  | 0.641298 | 0.607317 | 0.857226 | 0.766358 |
| MmuSTS.2697.1.S1_at   | MmuSTS.2697.1 | 10.08 | 10.35 | 0.12 | 0.07 | -1.2  | 0.013324 | 0.01168  | 0.26777  | 0.140078 |
| MmuSTS.2698.1.S1_at   | MmuSTS.2698.1 | 7.48  | 7.62  | 0.56 | 0.15 | -1.1  | 0.955969 | 0.962606 | 0.985363 | 0.979014 |
| MmuSTS.2698.1.S1_x_at | MmuSTS.2698.1 | 7.63  | 7.83  | 0.6  | 0.22 | -1.15 | 0.853673 | 0.965324 | 0.948321 | 0.980657 |
| MmuSTS.2699.1.S1_at   | MmuSTS.2699.1 | 9.81  | 9.64  | 0.05 | 0.21 | 1.12  | 0.388393 | 0.001857 | 0.715274 | 0.064677 |
| MmuSTS.27.1.S1_at     | MmuSTS.27.1   | 3.78  | 3.68  | 0.19 | 0.13 | 1.07  | 0.253879 | 0.520126 | 0.618601 | 0.711472 |
| MmuSTS.270.1.S1_at    | MmuSTS.270.1  | 6.59  | 6.57  | 0.24 | 0.15 | 1.01  | 0.393698 | 0.724415 | 0.719446 | 0.840474 |
| MmuSTS.2700.1.S1_at   | MmuSTS.2700.1 | 9.41  | 9.36  | 0.29 | 0.05 | 1.03  | 0.650078 | 0.000886 | 0.860714 | 0.047602 |
| MmuSTS.2701.1.S1_at   | MmuSTS.2701.1 | 3.75  | 4.87  | 0.69 | 0.29 | -2.18 | 0.231199 | 0.267934 | 0.599133 | 0.533658 |
| MmuSTS.2702.1.S1_at   | MmuSTS.2702.1 | 12.76 | 12.74 | 0.09 | 0.02 | 1.01  | 0.772814 | 0.78561  | 0.91551  | 0.875891 |
| MmuSTS.2703.1.S1_s_at | MmuSTS.2703.1 | 9.42  | 9.47  | 0.02 | 0.04 | -1.04 | 0.051806 | 0.000054 | 0.391413 | 0.025666 |
| MmuSTS.2704.1.S1_at   | MmuSTS.2704.1 | 7.55  | 6.64  | 0.34 | 0.2  | 1.88  | 0.025607 | 0.027095 | 0.322382 | 0.205797 |
| MmuSTS.2705.1.S1_at   | MmuSTS.2705.1 | 4.11  | 4.08  | 0.66 | 0.22 | 1.02  | 0.82494  | 0.730755 | 0.937097 | 0.844055 |
| MmuSTS.2706.1.S1_at   | MmuSTS.2706.1 | 11.76 | 11.86 | 0.43 | 0.06 | -1.07 | 0.235993 | 0.302624 | 0.603072 | 0.560201 |
| MmuSTS.2707.1.S1_at   | MmuSTS.2707.1 | 10.15 | 9.92  | 0.08 | 0.05 | 1.17  | 0.008425 | 0.000286 | 0.233823 | 0.034857 |
| MmuSTS.2708.1.S1_at   | MmuSTS.2708.1 | 10.32 | 10.21 | 0.44 | 0.22 | 1.08  | 0.657577 | 0.301783 | 0.864123 | 0.559722 |
| MmuSTS.2709.1.S1_at   | MmuSTS.2709.1 | 5.73  | 5.6   | 0.13 | 0.1  | 1.09  | 0.106664 | 0.205221 | 0.479    | 0.479596 |
| MmuSTS.271.1.S1_at    | MmuSTS.271.1  | 7.95  | 8.18  | 1.02 | 0.08 | -1.17 | 0.727545 | 0.904923 | 0.894744 | 0.946143 |
| MmuSTS.2710.1.S1_at   | MmuSTS.2710.1 | 11.14 | 10.54 | 0.96 | 0.06 | 1.51  | 0.94031  | 0.369658 | 0.979691 | 0.608957 |
| MmuSTS.2711.1.S1_at   | MmuSTS.2711.1 | 11.22 | 10.88 | 0.24 | 0.13 | 1.27  | 0.026676 | 0.011792 | 0.325897 | 0.140625 |
| MmuSTS.2712.1.S1_at   | MmuSTS.2712.1 | 9.4   | 10.07 | 0.6  | 0.04 | -1.6  | 0.189667 | 0.283416 | 0.561075 | 0.54594  |
| MmuSTS.2713.1.S1_at   | MmuSTS.2713.1 | 5.13  | 5.25  | 0.37 | 0.13 | -1.09 | 0.187467 | 0.314096 | 0.559787 | 0.568185 |
| MmuSTS.2714.1.S1_at   | MmuSTS.2714.1 | 8.09  | 7.13  | 0.49 | 0.24 | 1.94  | 0.095246 | 0.065363 | 0.464131 | 0.301409 |
| MmuSTS.2715.1.S1_at   | MmuSTS.2715.1 | 5.8   | 5.41  | 0.31 | 0.17 | 1.31  | 0.259993 | 0.175863 | 0.622946 | 0.452475 |
| MmuSTS.2716.1.S1_at   | MmuSTS.2716.1 | 4.29  | 4.55  | 0.59 | 0.05 | -1.2  | 0.826007 | 0.5742   | 0.937613 | 0.745679 |

|                       |               |       |       |      |      |       |          |          |          |          |
|-----------------------|---------------|-------|-------|------|------|-------|----------|----------|----------|----------|
| MmuSTS.2717.1.S1_at   | MmuSTS.2717.1 | 9.31  | 9.6   | 0.41 | 0.07 | -1.21 | 0.38116  | 0.207017 | 0.709924 | 0.481115 |
| MmuSTS.2718.1.S1_at   | MmuSTS.2718.1 | 8.27  | 8.88  | 1.03 | 0.13 | -1.53 | 0.429056 | 0.229186 | 0.742138 | 0.501487 |
| MmuSTS.2719.1.S1_at   | MmuSTS.2719.1 | 12.49 | 12.53 | 0.01 | 0.12 | -1.03 | 0.194904 | 0.099872 | 0.565263 | 0.358557 |
| MmuSTS.272.1.S1_at    | MmuSTS.272.1  | 4.61  | 4.57  | 0.17 | 0.16 | 1.03  | 0.395163 | 0.591679 | 0.720356 | 0.75718  |
| MmuSTS.2720.1.S1_at   | MmuSTS.2720.1 | 10.23 | 9.8   | 0.47 | 0.09 | 1.35  | 0.527887 | 0.059763 | 0.797358 | 0.291114 |
| MmuSTS.2721.1.S1_at   | MmuSTS.2721.1 | 4.17  | 4.22  | 0.23 | 0.06 | -1.04 | 0.449218 | 0.559342 | 0.754212 | 0.736241 |
| MmuSTS.2722.1.S1_at   | MmuSTS.2722.1 | 7.55  | 7.34  | 0.18 | 0.07 | 1.16  | 0.096659 | 0.200412 | 0.465288 | 0.474782 |
| MmuSTS.2723.1.S1_at   | MmuSTS.2723.1 | 11.29 | 11.55 | 0.18 | 0.03 | -1.2  | 0.067809 | 0.042587 | 0.42446  | 0.251035 |
| MmuSTS.2724.1.S1_at   | MmuSTS.2724.1 | 7.83  | 8.28  | 0.61 | 0.11 | -1.37 | 0.75934  | 0.195144 | 0.909584 | 0.470241 |
| MmuSTS.2725.1.S1_at   | MmuSTS.2725.1 | 8.32  | 8.57  | 0.16 | 0.09 | -1.19 | 0.078438 | 0.041785 | 0.441003 | 0.248981 |
| MmuSTS.2726.1.S1_at   | MmuSTS.2726.1 | 10.29 | 9.95  | 0.52 | 0.11 | 1.27  | 0.396098 | 0.494402 | 0.721066 | 0.694859 |
| MmuSTS.2727.1.S1_at   | MmuSTS.2727.1 | 5.72  | 5.49  | 0.17 | 0.19 | 1.17  | 0.21693  | 0.196521 | 0.586902 | 0.471577 |
| MmuSTS.2728.1.S1_at   | MmuSTS.2728.1 | 8.19  | 8.44  | 0.13 | 0.11 | -1.19 | 0.07014  | 0.199325 | 0.428522 | 0.474002 |
| MmuSTS.2729.1.S1_at   | MmuSTS.2729.1 | 6.22  | 6.9   | 0.88 | 0.14 | -1.6  | 0.72572  | 0.375418 | 0.893814 | 0.613405 |
| MmuSTS.2729.1.S1_s_at | MmuSTS.2729.1 | 8.6   | 9.22  | 0.72 | 0.02 | -1.54 | 0.663439 | 0.363159 | 0.867123 | 0.60356  |
| MmuSTS.273.1.S1_at    | MmuSTS.273.1  | 7.37  | 7.13  | 0.14 | 0.03 | 1.18  | 0.039231 | 0.280028 | 0.361498 | 0.543369 |
| MmuSTS.2730.1.S1_at   | MmuSTS.2730.1 | 6.86  | 7.02  | 0.16 | 0.49 | -1.12 | 0.261439 | 0.089404 | 0.623831 | 0.343637 |
| MmuSTS.2731.1.S1_at   | MmuSTS.2731.1 | 6.87  | 6.53  | 0.14 | 0.23 | 1.27  | 0.185738 | 0.940944 | 0.558625 | 0.966553 |
| MmuSTS.2731.1.S1_x_at | MmuSTS.2731.1 | 8.36  | 8.25  | 0.08 | 0.15 | 1.07  | 0.586627 | 0.964089 | 0.8314   | 0.980052 |
| MmuSTS.2732.1.S1_s_at | MmuSTS.2732.1 | 4.68  | 4.69  | 0.2  | 0.08 | -1.01 | 0.650082 | 0.760356 | 0.860714 | 0.860754 |
| MmuSTS.2733.1.S1_at   | MmuSTS.2733.1 | 4.35  | 4.4   | 0.03 | 0.01 | -1.03 | 0.200567 | 0.181726 | 0.572378 | 0.458324 |
| MmuSTS.2734.1.S1_at   | MmuSTS.2734.1 | 4.21  | 3.89  | 0.13 | 0.24 | 1.25  | 0.181713 | 0.10667  | 0.554854 | 0.369222 |
| MmuSTS.2735.1.S1_at   | MmuSTS.2735.1 | 5.1   | 4.97  | 0.08 | 0.08 | 1.09  | 0.268904 | 0.221904 | 0.629195 | 0.495019 |
| MmuSTS.2736.1.S1_at   | MmuSTS.2736.1 | 11.31 | 11.47 | 0.34 | 0.1  | -1.12 | 0.78404  | 0.108858 | 0.920602 | 0.372477 |
| MmuSTS.2737.1.S1_at   | MmuSTS.2737.1 | 11.17 | 9.37  | 4.33 | 0.27 | 3.47  | 0.815262 | 0.486676 | 0.933137 | 0.690002 |
| MmuSTS.2738.1.S1_at   | MmuSTS.2738.1 | 8.93  | 10.02 | 0.64 | 0.04 | -2.13 | 0.044874 | 0.17852  | 0.375242 | 0.454778 |
| MmuSTS.2739.1.S1_at   | MmuSTS.2739.1 | 11.04 | 10.2  | 0.66 | 0.32 | 1.79  | 0.079268 | 0.225578 | 0.442056 | 0.498155 |
| MmuSTS.274.1.S1_at    | MmuSTS.274.1  | 11.78 | 10.96 | 1.13 | 0.05 | 1.76  | 0.785926 | 0.93924  | 0.921241 | 0.965522 |
| MmuSTS.2740.1.S1_at   | MmuSTS.2740.1 | 9.77  | 9.53  | 0.52 | 0.21 | 1.18  | 0.716261 | 0.009452 | 0.889751 | 0.128022 |
| MmuSTS.2741.1.S1_at   | MmuSTS.2741.1 | 11.46 | 11.74 | 0.41 | 0.08 | -1.22 | 0.252355 | 0.070733 | 0.617313 | 0.31213  |
| MmuSTS.2742.1.S1_at   | MmuSTS.2742.1 | 10.55 | 10.02 | 0.81 | 0.05 | 1.44  | 0.327612 | 0.554274 | 0.675137 | 0.733111 |
| MmuSTS.2743.1.S1_at   | MmuSTS.2743.1 | 9.38  | 9.46  | 0.59 | 0.22 | -1.06 | 0.993062 | 0.988656 | 0.997423 | 0.993595 |
| MmuSTS.2744.1.S1_at   | MmuSTS.2744.1 | 8.88  | 8.15  | 1.45 | 0.08 | 1.65  | 0.914658 | 0.863897 | 0.970895 | 0.922755 |
| MmuSTS.2745.1.S1_at   | MmuSTS.2745.1 | 5.88  | 5.81  | 0.23 | 0.08 | 1.05  | 0.47806  | 0.613824 | 0.769934 | 0.77088  |
| MmuSTS.2746.1.S1_at   | MmuSTS.2746.1 | 4.72  | 4.74  | 0.18 | 0.07 | -1.01 | 0.488033 | 0.800075 | 0.775353 | 0.885075 |
| MmuSTS.2747.1.S1_s_at | MmuSTS.2747.1 | 12.46 | 12.43 | 0.2  | 0.1  | 1.02  | 0.340346 | 0.139034 | 0.684511 | 0.412159 |
| MmuSTS.2748.1.S1_at   | MmuSTS.2748.1 | 11.26 | 11.5  | 0.25 | 0.05 | -1.18 | 0.122248 | 0.030363 | 0.495677 | 0.216116 |
| MmuSTS.2749.1.S1_at   | MmuSTS.2749.1 | 10.03 | 10.53 | 0.42 | 0.27 | -1.41 | 0.340406 | 0.3186   | 0.684528 | 0.571258 |
| MmuSTS.275.1.S1_at    | MmuSTS.275.1  | 11.37 | 11.31 | 0.17 | 0.03 | 1.04  | 0.662108 | 0.877694 | 0.866635 | 0.930219 |
| MmuSTS.2750.1.S1_at   | MmuSTS.2750.1 | 8.17  | 8.81  | 0.51 | 0.11 | -1.56 | 0.114538 | 0.078513 | 0.487606 | 0.325285 |
| MmuSTS.2751.1.S1_at   | MmuSTS.2751.1 | 5.5   | 5.4   | 0.17 | 0.21 | 1.07  | 0.158624 | 0.213297 | 0.531588 | 0.487187 |
| MmuSTS.2752.1.S1_at   | MmuSTS.2752.1 | 13.17 | 13.24 | 0.68 | 0.03 | -1.05 | 0.646916 | 0.515772 | 0.85932  | 0.708485 |
| MmuSTS.2753.1.S1_at   | MmuSTS.2753.1 | 6.21  | 6.54  | 0.26 | 0.1  | -1.26 | 0.257243 | 0.354966 | 0.621021 | 0.597466 |

|                       |               |       |       |      |      |       |          |          |          |          |
|-----------------------|---------------|-------|-------|------|------|-------|----------|----------|----------|----------|
| MmuSTS.2754.1.S1_at   | MmuSTS.2754.1 | 9.03  | 8.97  | 0.2  | 0.03 | 1.04  | 0.705114 | 0.899737 | 0.885355 | 0.942937 |
| MmuSTS.2755.1.S1_s_at | MmuSTS.2755.1 | 11.5  | 11.6  | 0.07 | 0.03 | -1.07 | 0.069577 | 0.053507 | 0.427443 | 0.276963 |
| MmuSTS.2756.1.S1_s_at | MmuSTS.2756.1 | 12.09 | 12.1  | 0.12 | 0.03 | -1.01 | 0.594589 | 0.76861  | 0.83481  | 0.865637 |
| MmuSTS.2757.1.S1_at   | MmuSTS.2757.1 | 10.11 | 10.01 | 0.16 | 0.1  | 1.07  | 0.138515 | 0.095362 | 0.513941 | 0.35239  |
| MmuSTS.2758.1.S1_at   | MmuSTS.2758.1 | 6.19  | 5.86  | 0.07 | 0.22 | 1.26  | 0.101369 | 0.312998 | 0.471667 | 0.567594 |
| MmuSTS.2759.1.S1_at   | MmuSTS.2759.1 | 10.56 | 10.8  | 0.31 | 0.2  | -1.18 | 0.194807 | 0.019008 | 0.565198 | 0.173576 |
| MmuSTS.276.1.S1_at    | MmuSTS.276.1  | 6.78  | 6.39  | 0.47 | 0.32 | 1.31  | 0.75173  | 0.037483 | 0.906152 | 0.237853 |
| MmuSTS.2760.1.S1_at   | MmuSTS.2760.1 | 4.22  | 5.25  | 1.11 | 0.48 | -2.04 | 0.232439 | 0.339058 | 0.600124 | 0.585891 |
| MmuSTS.2761.1.S1_s_at | MmuSTS.2761.1 | 5.65  | 5.6   | 0.14 | 0.04 | 1.03  | 0.570133 | 0.501361 | 0.821883 | 0.699529 |
| MmuSTS.2762.1.S1_s_at | MmuSTS.2762.1 | 11.4  | 11.28 | 0.1  | 0.05 | 1.09  | 0.062286 | 0.140166 | 0.412841 | 0.413405 |
| MmuSTS.2763.1.S1_at   | MmuSTS.2763.1 | 11.85 | 12.32 | 0.49 | 0.13 | -1.38 | 0.266944 | 0.36113  | 0.627652 | 0.60207  |
| MmuSTS.2764.1.S1_at   | MmuSTS.2764.1 | 7.32  | 7.45  | 0.25 | 0.32 | -1.1  | 0.976406 | 0.635978 | 0.992343 | 0.785812 |
| MmuSTS.2765.1.S1_at   | MmuSTS.2765.1 | 9.29  | 9.27  | 0.62 | 0.02 | 1.01  | 0.557859 | 0.390118 | 0.815043 | 0.624002 |
| MmuSTS.2766.1.S1_at   | MmuSTS.2766.1 | 9.76  | 10.05 | 3.17 | 0.27 | -1.23 | 0.532705 | 0.199107 | 0.800478 | 0.473707 |
| MmuSTS.2767.1.S1_at   | MmuSTS.2767.1 | 4.17  | 4.08  | 0.06 | 0.13 | 1.06  | 0.94956  | 0.965687 | 0.982929 | 0.980751 |
| MmuSTS.2768.1.S1_at   | MmuSTS.2768.1 | 7.12  | 8.49  | 1.61 | 0.71 | -2.58 | 0.354021 | 0.377803 | 0.69361  | 0.615203 |
| MmuSTS.2769.1.S1_s_at | MmuSTS.2769.1 | 3.14  | 3.33  | 0.21 | 0.06 | -1.14 | 0.741027 | 0.837452 | 0.9011   | 0.907122 |
| MmuSTS.277.1.S1_at    | MmuSTS.277.1  | 9.02  | 9.98  | 0.46 | 0.06 | -1.95 | 0.025116 | 0.004609 | 0.320458 | 0.094873 |
| MmuSTS.2770.1.S1_at   | MmuSTS.2770.1 | 4.78  | 4.56  | 0.53 | 0.22 | 1.17  | 0.670794 | 0.531163 | 0.870072 | 0.718451 |
| MmuSTS.2771.1.S1_at   | MmuSTS.2771.1 | 3.69  | 3.67  | 0.21 | 0.04 | 1.01  | 0.259627 | 0.206335 | 0.622626 | 0.480524 |
| MmuSTS.2772.1.S1_at   | MmuSTS.2772.1 | 8.35  | 8.44  | 1.25 | 0.25 | -1.07 | 0.974911 | 0.642767 | 0.991912 | 0.790476 |
| MmuSTS.2773.1.S1_at   | MmuSTS.2773.1 | 9.34  | 8.26  | 0.42 | 0.18 | 2.12  | 0.006273 | 0.003194 | 0.218069 | 0.08199  |
| MmuSTS.2774.1.S1_at   | MmuSTS.2774.1 | 3.5   | 3.34  | 0.1  | 0.13 | 1.11  | 0.440035 | 0.73322  | 0.748282 | 0.845568 |
| MmuSTS.2775.1.S1_at   | MmuSTS.2775.1 | 12.11 | 12.72 | 0.26 | 0.08 | -1.53 | 0.042588 | 0.047882 | 0.369605 | 0.263751 |
| MmuSTS.2776.1.S1_at   | MmuSTS.2776.1 | 4.49  | 4.73  | 0.45 | 0.06 | -1.19 | 0.474621 | 0.091345 | 0.768127 | 0.346281 |
| MmuSTS.2777.1.S1_at   | MmuSTS.2777.1 | 8.49  | 9.24  | 0.78 | 0.1  | -1.68 | 0.071056 | 0.018173 | 0.430341 | 0.169673 |
| MmuSTS.2778.1.S1_at   | MmuSTS.2778.1 | 10.94 | 10.81 | 0.25 | 0.1  | 1.1   | 0.311539 | 0.378302 | 0.663343 | 0.615438 |
| MmuSTS.2779.1.S1_at   | MmuSTS.2779.1 | 7.38  | 7.71  | 0.59 | 0.1  | -1.25 | 0.404884 | 0.526735 | 0.726978 | 0.715627 |
| MmuSTS.278.1.S1_at    | MmuSTS.278.1  | 10.73 | 10.91 | 0.27 | 0.05 | -1.13 | 0.373971 | 0.492129 | 0.705639 | 0.693457 |
| MmuSTS.2780.1.S1_at   | MmuSTS.2780.1 | 4.69  | 4.92  | 0.6  | 0.55 | -1.17 | 0.942648 | 0.410642 | 0.98031  | 0.637463 |
| MmuSTS.2781.1.S1_at   | MmuSTS.2781.1 | 10.82 | 10.9  | 0.38 | 0.06 | -1.06 | 0.2645   | 0.133303 | 0.626029 | 0.405049 |
| MmuSTS.2782.1.S1_at   | MmuSTS.2782.1 | 7.84  | 8.04  | 0.47 | 0.04 | -1.14 | 0.75314  | 0.636917 | 0.906985 | 0.786458 |
| MmuSTS.2783.1.S1_at   | MmuSTS.2783.1 | 3.51  | 3.34  | 0.12 | 0.05 | 1.12  | 0.114515 | 0.112801 | 0.487606 | 0.37844  |
| MmuSTS.2784.1.S1_at   | MmuSTS.2784.1 | 6.66  | 6.1   | 0.41 | 0.32 | 1.48  | 0.062741 | 0.136449 | 0.413772 | 0.408866 |
| MmuSTS.2785.1.S1_at   | MmuSTS.2785.1 | 5.06  | 5.03  | 0.1  | 0.05 | 1.03  | 0.272952 | 0.022842 | 0.632545 | 0.189246 |
| MmuSTS.2786.1.S1_at   | MmuSTS.2786.1 | 3.91  | 3.92  | 0.4  | 0.11 | -1.01 | 0.883849 | 0.945744 | 0.959789 | 0.969149 |
| MmuSTS.2787.1.S1_at   | MmuSTS.2787.1 | 5.38  | 5.25  | 0.09 | 0.05 | 1.09  | 0.09693  | 0.393592 | 0.465626 | 0.626497 |
| MmuSTS.2788.1.S1_at   | MmuSTS.2788.1 | 7.39  | 8.15  | 0.74 | 0.2  | -1.7  | 0.514219 | 0.744277 | 0.790322 | 0.851927 |
| MmuSTS.2789.1.S1_at   | MmuSTS.2789.1 | 10.77 | 11.25 | 0.26 | 0.02 | -1.4  | 0.091735 | 0.048248 | 0.45996  | 0.264724 |
| MmuSTS.279.1.S1_at    | MmuSTS.279.1  | 11.82 | 11.83 | 0.23 | 0.14 | -1    | 0.623582 | 0.248092 | 0.848284 | 0.517567 |
| MmuSTS.2790.1.S1_at   | MmuSTS.2790.1 | 9.46  | 9.78  | 0.26 | 0.21 | -1.25 | 0.210982 | 0.355857 | 0.582056 | 0.597864 |
| MmuSTS.2791.1.S1_at   | MmuSTS.2791.1 | 8.19  | 7.73  | 0.38 | 0.08 | 1.38  | 0.098289 | 0.015228 | 0.467704 | 0.156798 |
| MmuSTS.2793.1.S1_at   | MmuSTS.2793.1 | 4.81  | 4.8   | 0.14 | 0.09 | 1     | 0.904566 | 0.606365 | 0.967857 | 0.765747 |

|                       |               |       |       |      |      |       |          |          |          |          |
|-----------------------|---------------|-------|-------|------|------|-------|----------|----------|----------|----------|
| MmuSTS.2794.1.S1_at   | MmuSTS.2794.1 | 8.58  | 8.58  | 0.48 | 0.53 | 1     | 0.479804 | 0.178047 | 0.770896 | 0.454422 |
| MmuSTS.2795.1.S1_at   | MmuSTS.2795.1 | 10.96 | 11.82 | 1.82 | 0.24 | -1.82 | 0.42728  | 0.07549  | 0.740974 | 0.319875 |
| MmuSTS.2796.1.S1_at   | MmuSTS.2796.1 | 7.83  | 7.99  | 0.23 | 0.12 | -1.11 | 0.909874 | 0.048282 | 0.96945  | 0.2648   |
| MmuSTS.2797.1.S1_at   | MmuSTS.2797.1 | 9.29  | 8.23  | 0.62 | 0.38 | 2.1   | 0.060091 | 0.036204 | 0.407399 | 0.234837 |
| MmuSTS.2798.1.S1_at   | MmuSTS.2798.1 | 8.36  | 9.05  | 0.3  | 0.18 | -1.62 | 0.015142 | 0.090101 | 0.2796   | 0.344402 |
| MmuSTS.2799.1.S1_at   | MmuSTS.2799.1 | 5.31  | 5.32  | 0.03 | 0.08 | -1.01 | 0.462751 | 0.240022 | 0.761749 | 0.510717 |
| MmuSTS.28.1.S1_at     | MmuSTS.28.1   | 6.17  | 6.2   | 0.4  | 0.1  | -1.02 | 0.909951 | 0.473205 | 0.96945  | 0.68054  |
| MmuSTS.280.1.S1_at    | MmuSTS.280.1  | 6.52  | 6.33  | 0.13 | 0.24 | 1.14  | 0.291038 | 0.006552 | 0.647518 | 0.109707 |
| MmuSTS.2800.1.S1_at   | MmuSTS.2800.1 | 10.34 | 10.59 | 2    | 0.2  | -1.19 | 0.730334 | 0.331555 | 0.896115 | 0.580182 |
| MmuSTS.2801.1.S1_at   | MmuSTS.2801.1 | 9.56  | 9.65  | 0.22 | 0.09 | -1.07 | 0.187871 | 0.285014 | 0.560014 | 0.547095 |
| MmuSTS.2802.1.S1_at   | MmuSTS.2802.1 | 5.93  | 5.99  | 0.26 | 0.07 | -1.05 | 0.697238 | 0.037717 | 0.882224 | 0.238593 |
| MmuSTS.2803.1.S1_at   | MmuSTS.2803.1 | 9.57  | 10.19 | 0.08 | 0.05 | -1.53 | 0.000289 | 0.000049 | 0.132733 | 0.025273 |
| MmuSTS.2804.1.S1_at   | MmuSTS.2804.1 | 4.39  | 4.23  | 0.46 | 0.76 | 1.11  | 0.917676 | 0.969456 | 0.97205  | 0.983275 |
| MmuSTS.2805.1.S1_at   | MmuSTS.2805.1 | 3.58  | 3.71  | 0.58 | 0.15 | -1.09 | 0.746455 | 0.488127 | 0.903467 | 0.690902 |
| MmuSTS.2806.1.S1_at   | MmuSTS.2806.1 | 4.24  | 4.28  | 0.14 | 0.07 | -1.03 | 0.604624 | 0.554529 | 0.839707 | 0.733264 |
| MmuSTS.2807.1.S1_at   | MmuSTS.2807.1 | 11.22 | 10.63 | 0.72 | 0.16 | 1.51  | 0.240003 | 0.321055 | 0.60621  | 0.573046 |
| MmuSTS.2808.1.S1_s_at | MmuSTS.2808.1 | 12.65 | 12.42 | 0.21 | 0.06 | 1.17  | 0.129405 | 0.066875 | 0.504211 | 0.304533 |
| MmuSTS.2809.1.S1_at   | MmuSTS.2809.1 | 10.23 | 9.98  | 0.6  | 0.04 | 1.19  | 0.271076 | 0.140494 | 0.630963 | 0.413704 |
| MmuSTS.281.1.S1_s_at  | MmuSTS.281.1  | 7.33  | 7.29  | 0.19 | 0.09 | 1.03  | 0.211619 | 0.315317 | 0.582623 | 0.568939 |
| MmuSTS.2810.1.S1_at   | MmuSTS.2810.1 | 11.9  | 11.26 | 0.93 | 0.04 | 1.56  | 0.825041 | 0.94708  | 0.937107 | 0.969997 |
| MmuSTS.2811.1.S1_s_at | MmuSTS.2811.1 | 8.91  | 8.01  | 0.07 | 0.19 | 1.86  | 0.001414 | 0.000438 | 0.160073 | 0.038359 |
| MmuSTS.2812.1.S1_at   | MmuSTS.2812.1 | 4.06  | 3.96  | 0.08 | 0.2  | 1.07  | 0.93127  | 0.21702  | 0.97705  | 0.490646 |
| MmuSTS.2813.1.S1_at   | MmuSTS.2813.1 | 5.57  | 5.57  | 0.01 | 0.15 | 1     | 0.381105 | 0.735874 | 0.709924 | 0.847202 |
| MmuSTS.2814.1.S1_at   | MmuSTS.2814.1 | 5.27  | 5.29  | 0.06 | 0.13 | -1.01 | 0.828274 | 0.877308 | 0.938273 | 0.930089 |
| MmuSTS.2815.1.S1_at   | MmuSTS.2815.1 | 3.19  | 3.14  | 0.14 | 0.05 | 1.03  | 0.341125 | 0.493678 | 0.684907 | 0.694288 |
| MmuSTS.2816.1.S1_at   | MmuSTS.2816.1 | 8.7   | 9.88  | 2.47 | 0.16 | -2.27 | 0.382648 | 0.229154 | 0.710805 | 0.501438 |
| MmuSTS.2817.1.S1_at   | MmuSTS.2817.1 | 9.82  | 10.16 | 0.48 | 0.22 | -1.27 | 0.863701 | 0.096582 | 0.952043 | 0.354126 |
| MmuSTS.2818.1.S1_at   | MmuSTS.2818.1 | 10.71 | 11.18 | 0.17 | 0.06 | -1.38 | 0.008391 | 0.001045 | 0.233808 | 0.051426 |
| MmuSTS.2819.1.S1_at   | MmuSTS.2819.1 | 5.27  | 5.34  | 1.07 | 0.21 | -1.05 | 0.356969 | 0.342703 | 0.695386 | 0.588666 |
| MmuSTS.282.1.S1_s_at  | MmuSTS.282.1  | 6.04  | 5.97  | 0.04 | 0.02 | 1.06  | 0.037256 | 0.739111 | 0.357058 | 0.848806 |
| MmuSTS.2820.1.S1_at   | MmuSTS.2820.1 | 9.85  | 10.14 | 0.31 | 0.1  | -1.22 | 0.236383 | 0.146104 | 0.603291 | 0.420092 |
| MmuSTS.2821.1.S1_at   | MmuSTS.2821.1 | 12.18 | 11.57 | 3.39 | 0.23 | 1.52  | 0.570114 | 0.31155  | 0.821883 | 0.566532 |
| MmuSTS.2822.1.S1_at   | MmuSTS.2822.1 | 6.02  | 5.78  | 1.04 | 0.15 | 1.18  | 0.508343 | 0.026983 | 0.786904 | 0.205465 |
| MmuSTS.2823.1.S1_at   | MmuSTS.2823.1 | 8     | 7.96  | 0.29 | 0.1  | 1.03  | 0.806096 | 0.0098   | 0.92957  | 0.130166 |
| MmuSTS.2824.1.S1_at   | MmuSTS.2824.1 | 7.27  | 8.25  | 0.61 | 0.06 | -1.98 | 0.160651 | 0.471049 | 0.533821 | 0.679172 |
| MmuSTS.2825.1.S1_at   | MmuSTS.2825.1 | 4.28  | 4.16  | 0.09 | 0.06 | 1.09  | 0.159659 | 0.201111 | 0.532583 | 0.475519 |
| MmuSTS.2826.1.S1_at   | MmuSTS.2826.1 | 8.19  | 8.48  | 0.27 | 0.05 | -1.22 | 0.068827 | 0.003434 | 0.426107 | 0.084252 |
| MmuSTS.2827.1.S1_at   | MmuSTS.2827.1 | 4.07  | 3.76  | 0.13 | 0.08 | 1.24  | 0.049997 | 0.045763 | 0.386663 | 0.258277 |
| MmuSTS.2828.1.S1_at   | MmuSTS.2828.1 | 3.1   | 3.29  | 0.03 | 0.19 | -1.14 | 0.279106 | 0.450416 | 0.637997 | 0.665643 |
| MmuSTS.2829.1.S1_at   | MmuSTS.2829.1 | 8.11  | 8.43  | 0.32 | 0.23 | -1.25 | 0.313912 | 0.152544 | 0.664925 | 0.427426 |
| MmuSTS.283.1.S1_at    | MmuSTS.283.1  | 4.73  | 4.63  | 0.1  | 0.06 | 1.07  | 0.283566 | 0.501492 | 0.641408 | 0.699675 |
| MmuSTS.2830.1.S1_at   | MmuSTS.2830.1 | 9.85  | 10.26 | 0.88 | 0.18 | -1.33 | 0.479504 | 0.237039 | 0.770772 | 0.507722 |
| MmuSTS.2831.1.S1_at   | MmuSTS.2831.1 | 11.23 | 11.38 | 1.96 | 0.21 | -1.11 | 0.750494 | 0.215168 | 0.905496 | 0.488943 |

|                     |               |       |       |      |      |       |          |          |          |          |
|---------------------|---------------|-------|-------|------|------|-------|----------|----------|----------|----------|
| MmuSTS.2832.1.S1_at | MmuSTS.2832.1 | 5.47  | 5.28  | 0.25 | 0.05 | 1.14  | 0.25538  | 0.522136 | 0.619438 | 0.712899 |
| MmuSTS.2833.1.S1_at | MmuSTS.2833.1 | 9.77  | 10.23 | 0.52 | 0.07 | -1.38 | 0.166116 | 0.404504 | 0.538897 | 0.633004 |
| MmuSTS.2834.1.S1_at | MmuSTS.2834.1 | 3.72  | 3.59  | 0.17 | 0.19 | 1.1   | 0.4708   | 0.621474 | 0.766191 | 0.776054 |
| MmuSTS.2835.1.S1_at | MmuSTS.2835.1 | 3.33  | 3.33  | 0.09 | 0.1  | 1     | 0.712273 | 0.171696 | 0.887927 | 0.448078 |
| MmuSTS.2836.1.S1_at | MmuSTS.2836.1 | 13.31 | 13.42 | 0.05 | 0.02 | -1.08 | 0.017271 | 0.007631 | 0.290304 | 0.116869 |
| MmuSTS.2837.1.S1_at | MmuSTS.2837.1 | 9.41  | 9.55  | 0.57 | 0.03 | -1.1  | 0.691829 | 0.794918 | 0.880061 | 0.881843 |
| MmuSTS.2838.1.S1_at | MmuSTS.2838.1 | 10.12 | 10.5  | 0.27 | 0.09 | -1.31 | 0.115952 | 0.080896 | 0.48949  | 0.328864 |
| MmuSTS.2839.1.S1_at | MmuSTS.2839.1 | 2.74  | 2.79  | 0.08 | 0.03 | -1.04 | 0.855422 | 0.82799  | 0.948864 | 0.901214 |
| MmuSTS.284.1.S1_at  | MmuSTS.284.1  | 6.19  | 6.19  | 0.04 | 0.03 | 1     | 0.655414 | 0.244679 | 0.863101 | 0.514512 |
| MmuSTS.2840.1.S1_at | MmuSTS.2840.1 | 4.36  | 4.17  | 0.03 | 0.05 | 1.14  | 0.003021 | 0.020775 | 0.19086  | 0.180849 |
| MmuSTS.2841.1.S1_at | MmuSTS.2841.1 | 6.04  | 6.11  | 0.12 | 0.2  | -1.05 | 0.581805 | 0.436206 | 0.827791 | 0.655879 |
| MmuSTS.2842.1.S1_at | MmuSTS.2842.1 | 9.18  | 6.89  | 0.58 | 0.32 | 4.91  | 0.009303 | 0.002028 | 0.241866 | 0.066885 |
| MmuSTS.2843.1.S1_at | MmuSTS.2843.1 | 13.34 | 13.3  | 0.03 | 0.06 | 1.03  | 0.172706 | 0.250534 | 0.545872 | 0.519391 |
| MmuSTS.2844.1.S1_at | MmuSTS.2844.1 | 12.28 | 11.99 | 0.39 | 0.06 | 1.22  | 0.86145  | 0.67377  | 0.951267 | 0.809446 |
| MmuSTS.2845.1.S1_at | MmuSTS.2845.1 | 9.36  | 10.13 | 0.36 | 0.14 | -1.7  | 0.016195 | 0.001881 | 0.286528 | 0.064979 |
| MmuSTS.2846.1.S1_at | MmuSTS.2846.1 | 13.48 | 13.2  | 0.14 | 0.04 | 1.21  | 0.057852 | 0.030911 | 0.403172 | 0.217651 |
| MmuSTS.2847.1.S1_at | MmuSTS.2847.1 | 10.41 | 9.89  | 0.75 | 0.14 | 1.43  | 0.260691 | 0.334456 | 0.623301 | 0.582455 |
| MmuSTS.2848.1.S1_at | MmuSTS.2848.1 | 8.89  | 8.96  | 0.21 | 0.07 | -1.04 | 0.910675 | 0.100956 | 0.969723 | 0.360525 |
| MmuSTS.2849.1.S1_at | MmuSTS.2849.1 | 12.11 | 12.56 | 2.02 | 0.17 | -1.37 | 0.436396 | 0.363718 | 0.746306 | 0.604138 |
| MmuSTS.285.1.S1_at  | MmuSTS.285.1  | 11.53 | 11.33 | 0.29 | 0.1  | 1.14  | 0.38503  | 0.641436 | 0.71236  | 0.78954  |
| MmuSTS.2850.1.S1_at | MmuSTS.2850.1 | 4.24  | 4.08  | 0.06 | 0.07 | 1.11  | 0.036552 | 0.031778 | 0.355049 | 0.220698 |
| MmuSTS.2851.1.S1_at | MmuSTS.2851.1 | 11.87 | 11.81 | 0.24 | 0.06 | 1.04  | 0.622161 | 0.417292 | 0.847666 | 0.642141 |
| MmuSTS.2852.1.S1_at | MmuSTS.2852.1 | 10.17 | 10.06 | 0.6  | 0.06 | 1.08  | 0.771885 | 0.673702 | 0.914891 | 0.809382 |
| MmuSTS.2853.1.S1_at | MmuSTS.2853.1 | 6.34  | 7.49  | 1.35 | 0.17 | -2.22 | 0.229705 | 0.118065 | 0.59847  | 0.385921 |
| MmuSTS.2854.1.S1_at | MmuSTS.2854.1 | 12.51 | 12.61 | 0.21 | 0.02 | -1.07 | 0.74578  | 0.924501 | 0.903099 | 0.957386 |
| MmuSTS.2855.1.S1_at | MmuSTS.2855.1 | 8.47  | 7.27  | 0.8  | 0.31 | 2.3   | 0.13505  | 0.153713 | 0.50914  | 0.428413 |
| MmuSTS.2856.1.S1_at | MmuSTS.2856.1 | 8.21  | 8.31  | 0.76 | 0.13 | -1.07 | 0.912397 | 0.680703 | 0.970266 | 0.81356  |
| MmuSTS.2857.1.S1_at | MmuSTS.2857.1 | 9.18  | 8.99  | 0.16 | 0.13 | 1.14  | 0.079167 | 0.042314 | 0.442056 | 0.250297 |
| MmuSTS.2858.1.S1_at | MmuSTS.2858.1 | 7.23  | 7.76  | 0.26 | 0.1  | -1.45 | 0.023787 | 0.006827 | 0.316761 | 0.111597 |
| MmuSTS.2859.1.S1_at | MmuSTS.2859.1 | 5.76  | 5.61  | 0.39 | 0.31 | 1.11  | 0.831424 | 0.710807 | 0.939628 | 0.832265 |
| MmuSTS.286.1.S1_at  | MmuSTS.286.1  | 3.57  | 3.45  | 0.12 | 0.06 | 1.08  | 0.209839 | 0.230338 | 0.581324 | 0.502112 |
| MmuSTS.2860.1.S1_at | MmuSTS.2860.1 | 13.71 | 13.87 | 0.11 | 0.03 | -1.12 | 0.19767  | 0.030319 | 0.568636 | 0.216032 |
| MmuSTS.2861.1.S1_at | MmuSTS.2861.1 | 5.38  | 5.3   | 0.42 | 0.23 | 1.05  | 0.896972 | 0.29293  | 0.964979 | 0.552885 |
| MmuSTS.2862.1.S1_at | MmuSTS.2862.1 | 10.52 | 10.29 | 1.53 | 0.27 | 1.17  | 0.763571 | 0.976258 | 0.911265 | 0.987069 |
| MmuSTS.2863.1.S1_at | MmuSTS.2863.1 | 5.4   | 5.39  | 0.1  | 0.11 | 1.01  | 0.776195 | 0.827911 | 0.917033 | 0.901197 |
| MmuSTS.2864.1.S1_at | MmuSTS.2864.1 | 6.71  | 7.22  | 0.33 | 0.28 | -1.43 | 0.527611 | 0.410338 | 0.797158 | 0.637216 |
| MmuSTS.2865.1.S1_at | MmuSTS.2865.1 | 4.87  | 4.68  | 0.18 | 0.15 | 1.14  | 0.209735 | 0.26689  | 0.581302 | 0.53244  |
| MmuSTS.2866.1.S1_at | MmuSTS.2866.1 | 12.11 | 11.88 | 0.6  | 0.01 | 1.17  | 0.56649  | 0.444647 | 0.820052 | 0.662072 |
| MmuSTS.2867.1.S1_at | MmuSTS.2867.1 | 8.06  | 8.95  | 0.04 | 0.07 | -1.86 | 0.000046 | 0.035151 | 0.108151 | 0.231645 |
| MmuSTS.2868.1.S1_at | MmuSTS.2868.1 | 12.04 | 12.23 | 0.19 | 0.09 | -1.14 | 0.84217  | 0.151879 | 0.944083 | 0.426512 |
| MmuSTS.2869.1.S1_at | MmuSTS.2869.1 | 4.68  | 3.45  | 1.1  | 0.37 | 2.34  | 0.139027 | 0.078111 | 0.514459 | 0.324578 |
| MmuSTS.287.1.S1_at  | MmuSTS.287.1  | 10.23 | 10.02 | 0.28 | 0.19 | 1.16  | 0.803624 | 0.239702 | 0.92854  | 0.510405 |
| MmuSTS.2870.1.S1_at | MmuSTS.2870.1 | 8.52  | 8.63  | 2.31 | 0.23 | -1.08 | 0.927505 | 0.950347 | 0.97593  | 0.971738 |

|                       |               |       |       |      |      |       |          |          |          |          |
|-----------------------|---------------|-------|-------|------|------|-------|----------|----------|----------|----------|
| MmuSTS.2871.1.S1_at   | MmuSTS.2871.1 | 3.42  | 3.4   | 0.01 | 0.05 | 1.01  | 0.547504 | 0.74031  | 0.809164 | 0.849596 |
| MmuSTS.2872.1.S1_at   | MmuSTS.2872.1 | 9.61  | 9.96  | 0.21 | 0.03 | -1.28 | 0.101016 | 0.220518 | 0.47159  | 0.493885 |
| MmuSTS.2873.1.S1_at   | MmuSTS.2873.1 | 6.89  | 6.32  | 0.74 | 0.32 | 1.49  | 0.334814 | 0.194386 | 0.680656 | 0.46947  |
| MmuSTS.2874.1.S1_at   | MmuSTS.2874.1 | 5.89  | 7.61  | 1.03 | 0.19 | -3.3  | 0.048009 | 0.197117 | 0.381764 | 0.472213 |
| MmuSTS.2875.1.S1_at   | MmuSTS.2875.1 | 4.25  | 4.18  | 0.22 | 0.03 | 1.05  | 0.389353 | 0.455867 | 0.716085 | 0.669664 |
| MmuSTS.2876.1.S1_at   | MmuSTS.2876.1 | 8.51  | 8.45  | 0.29 | 0.26 | 1.04  | 0.683713 | 0.566767 | 0.876187 | 0.74076  |
| MmuSTS.2877.1.S1_at   | MmuSTS.2877.1 | 6.17  | 6.03  | 0.31 | 0.04 | 1.1   | 0.411755 | 0.507773 | 0.731654 | 0.703325 |
| MmuSTS.2878.1.S1_at   | MmuSTS.2878.1 | 6.32  | 7.46  | 0.95 | 0.33 | -2.21 | 0.132371 | 0.151104 | 0.506752 | 0.425782 |
| MmuSTS.2879.1.S1_at   | MmuSTS.2879.1 | 10.25 | 11.03 | 0.46 | 0.11 | -1.72 | 0.112668 | 0.107873 | 0.486043 | 0.370945 |
| MmuSTS.288.1.S1_at    | MmuSTS.288.1  | 13.24 | 13.23 | 0.19 | 0.02 | 1     | 0.408167 | 0.457475 | 0.729194 | 0.670862 |
| MmuSTS.2880.1.S1_at   | MmuSTS.2880.1 | 6.42  | 6.17  | 0.4  | 0.14 | -1.19 | 0.36503  | 0.48561  | 0.700784 | 0.68924  |
| MmuSTS.2881.1.S1_at   | MmuSTS.2881.1 | 11.84 | 12.32 | 0.29 | 0.1  | -1.39 | 0.034555 | 0.017147 | 0.350124 | 0.165888 |
| MmuSTS.2882.1.S1_at   | MmuSTS.2882.1 | 11.41 | 10.32 | 0.35 | 0.1  | 2.12  | 0.01312  | 0.014698 | 0.266768 | 0.154371 |
| MmuSTS.2883.1.S1_s_at | MmuSTS.2883.1 | 6.48  | 6.89  | 0.59 | 0.11 | -1.33 | 0.366595 | 0.040401 | 0.702101 | 0.246134 |
| MmuSTS.2884.1.S1_at   | MmuSTS.2884.1 | 6.64  | 6.45  | 0.44 | 0.07 | 1.15  | 0.278575 | 0.053091 | 0.637745 | 0.276139 |
| MmuSTS.2885.1.S1_at   | MmuSTS.2885.1 | 4.09  | 4.01  | 0.29 | 0.04 | 1.06  | 0.657674 | 0.859208 | 0.864207 | 0.919754 |
| MmuSTS.2886.1.S1_at   | MmuSTS.2886.1 | 4.14  | 4.1   | 0.01 | 0.01 | 1.03  | 0.000626 | 0.04251  | 0.143353 | 0.250786 |
| MmuSTS.2887.1.S1_at   | MmuSTS.2887.1 | 12.55 | 12.65 | 0.15 | 0.02 | -1.08 | 0.187294 | 0.085732 | 0.559729 | 0.337761 |
| MmuSTS.2888.1.S1_at   | MmuSTS.2888.1 | 9.2   | 8.69  | 0.21 | 0.1  | 1.42  | 0.016557 | 0.011128 | 0.287478 | 0.137286 |
| MmuSTS.2889.1.S1_at   | MmuSTS.2889.1 | 3.93  | 3.84  | 0.23 | 0.15 | 1.06  | 0.455309 | 0.448634 | 0.757353 | 0.664474 |
| MmuSTS.289.1.S1_at    | MmuSTS.289.1  | 7.34  | 7.06  | 0.25 | 0.05 | 1.21  | 0.113978 | 0.093933 | 0.487339 | 0.350445 |
| MmuSTS.2890.1.S1_at   | MmuSTS.2890.1 | 7.74  | 7.66  | 0.34 | 0.13 | 1.06  | 0.431385 | 0.361308 | 0.743363 | 0.602104 |
| MmuSTS.2891.1.S1_at   | MmuSTS.2891.1 | 5.42  | 5.26  | 0.27 | 0.09 | 1.12  | 0.12178  | 0.127658 | 0.495488 | 0.398581 |
| MmuSTS.2892.1.S1_at   | MmuSTS.2892.1 | 7.56  | 7.73  | 0.07 | 0.04 | -1.13 | 0.024651 | 0.070272 | 0.319333 | 0.311342 |
| MmuSTS.2893.1.S1_at   | MmuSTS.2893.1 | 9.53  | 9.38  | 0.41 | 0.15 | 1.11  | 0.368346 | 0.717256 | 0.703567 | 0.836332 |
| MmuSTS.2894.1.S1_at   | MmuSTS.2894.1 | 12.26 | 12.2  | 0.05 | 0.13 | 1.04  | 0.983183 | 0.993214 | 0.994889 | 0.995946 |
| MmuSTS.2895.1.S1_at   | MmuSTS.2895.1 | 8.48  | 8.58  | 0.53 | 0.27 | -1.07 | 0.536591 | 0.725526 | 0.802417 | 0.841043 |
| MmuSTS.2896.1.S1_s_at | MmuSTS.2896.1 | 5.76  | 6.1   | 0.44 | 0.41 | -1.26 | 0.422225 | 0.015731 | 0.738068 | 0.158922 |
| MmuSTS.2897.1.S1_at   | MmuSTS.2897.1 | 6.9   | 7.5   | 1.07 | 0.52 | -1.52 | 0.256631 | 0.115541 | 0.620603 | 0.38267  |
| MmuSTS.2898.1.S1_at   | MmuSTS.2898.1 | 8.07  | 7.88  | 0.68 | 0.21 | 1.14  | 0.465457 | 0.269939 | 0.763035 | 0.53521  |
| MmuSTS.2899.1.S1_at   | MmuSTS.2899.1 | 3.68  | 3.65  | 0.05 | 0.04 | 1.02  | 0.300443 | 0.581942 | 0.654974 | 0.750784 |
| MmuSTS.29.1.S1_at     | MmuSTS.29.1   | 4.16  | 3.88  | 0.45 | 0.25 | 1.21  | 0.437395 | 0.593863 | 0.746793 | 0.758418 |
| MmuSTS.290.1.S1_at    | MmuSTS.290.1  | 6.49  | 6.45  | 0.09 | 0.09 | 1.03  | 0.125895 | 0.255002 | 0.49972  | 0.52317  |
| MmuSTS.2900.1.S1_at   | MmuSTS.2900.1 | 5.88  | 5.75  | 0.21 | 0.24 | 1.09  | 0.497805 | 0.552532 | 0.781368 | 0.731829 |
| MmuSTS.2901.1.S1_at   | MmuSTS.2901.1 | 12.46 | 12.43 | 0.22 | 0.03 | 1.03  | 0.49724  | 0.51258  | 0.781055 | 0.706419 |
| MmuSTS.2902.1.S1_s_at | MmuSTS.2902.1 | 11.54 | 11.52 | 0.15 | 0.06 | 1.01  | 0.9095   | 0.977066 | 0.969434 | 0.987527 |
| MmuSTS.2903.1.S1_at   | MmuSTS.2903.1 | 9.39  | 9.71  | 0.82 | 0.24 | -1.25 | 0.733163 | 0.264145 | 0.897503 | 0.530214 |
| MmuSTS.2904.1.S1_at   | MmuSTS.2904.1 | 3.34  | 3.18  | 0.07 | 0.05 | 1.12  | 0.027295 | 0.241644 | 0.327322 | 0.512225 |
| MmuSTS.2905.1.S1_at   | MmuSTS.2905.1 | 5.43  | 5.23  | 0.05 | 0.07 | 1.15  | 0.014389 | 0.102204 | 0.27544  | 0.362326 |
| MmuSTS.2906.1.S1_at   | MmuSTS.2906.1 | 9.14  | 9.98  | 1.25 | 0.08 | -1.79 | 0.30508  | 0.21507  | 0.658583 | 0.488912 |
| MmuSTS.2907.1.S1_at   | MmuSTS.2907.1 | 10.69 | 10.6  | 0.2  | 0.03 | 1.07  | 0.517354 | 0.797735 | 0.791973 | 0.883466 |
| MmuSTS.2908.1.S1_at   | MmuSTS.2908.1 | 6.6   | 6.39  | 0.14 | 0.08 | 1.15  | 0.096701 | 0.11565  | 0.465288 | 0.382714 |
| MmuSTS.2909.1.S1_at   | MmuSTS.2909.1 | 6.74  | 7.16  | 0.78 | 0.14 | -1.34 | 0.359722 | 0.493633 | 0.697502 | 0.694288 |

|                       |               |       |       |      |      |       |          |          |          |          |
|-----------------------|---------------|-------|-------|------|------|-------|----------|----------|----------|----------|
| MmuSTS.291.1.S1_s_at  | MmuSTS.291.1  | 4.22  | 4.2   | 0.02 | 0.04 | 1.01  | 0.179262 | 0.438961 | 0.552498 | 0.657787 |
| MmuSTS.2910.1.S1_at   | MmuSTS.2910.1 | 5.64  | 5.69  | 0.13 | 0.1  | -1.03 | 0.62073  | 0.83075  | 0.847208 | 0.902874 |
| MmuSTS.2911.1.S1_at   | MmuSTS.2911.1 | 4.21  | 4.16  | 0.24 | 0.09 | 1.04  | 0.742363 | 0.771734 | 0.901728 | 0.867344 |
| MmuSTS.2912.1.S1_at   | MmuSTS.2912.1 | 10.36 | 10.04 | 1.05 | 0.11 | 1.25  | 0.644941 | 0.054319 | 0.85869  | 0.278551 |
| MmuSTS.2913.1.S1_at   | MmuSTS.2913.1 | 4.25  | 4.28  | 0.07 | 0.03 | -1.02 | 0.472714 | 0.531219 | 0.767224 | 0.718508 |
| MmuSTS.2914.1.S1_at   | MmuSTS.2914.1 | 11.45 | 11.08 | 0.16 | 0.29 | 1.29  | 0.082002 | 0.014729 | 0.446681 | 0.154415 |
| MmuSTS.2915.1.S1_at   | MmuSTS.2915.1 | 6.26  | 6.68  | 0.84 | 0.14 | -1.33 | 0.972925 | 0.479377 | 0.991155 | 0.685126 |
| MmuSTS.2916.1.S1_at   | MmuSTS.2916.1 | 4.93  | 6.82  | 0.34 | 0.53 | -3.73 | 0.003918 | 0.138552 | 0.198571 | 0.411557 |
| MmuSTS.2917.1.S1_s_at | MmuSTS.2917.1 | 5.87  | 6.14  | 1.88 | 0.41 | -1.2  | 0.857037 | 0.977846 | 0.94962  | 0.9879   |
| MmuSTS.2918.1.S1_at   | MmuSTS.2918.1 | 12.69 | 12.46 | 0.08 | 0.11 | 1.17  | 0.084598 | 0.000506 | 0.451141 | 0.039185 |
| MmuSTS.2919.1.S1_s_at | MmuSTS.2919.1 | 9.54  | 9.55  | 2.54 | 0.34 | -1    | 0.787114 | 0.296769 | 0.92182  | 0.555779 |
| MmuSTS.292.1.S1_at    | MmuSTS.292.1  | 5.04  | 4.69  | 0.14 | 0.18 | 1.28  | 0.072468 | 0.078851 | 0.432494 | 0.325837 |
| MmuSTS.2920.1.S1_at   | MmuSTS.2920.1 | 11.53 | 11.78 | 0.85 | 0.02 | -1.19 | 0.449752 | 0.283366 | 0.754607 | 0.545922 |
| MmuSTS.2921.1.S1_at   | MmuSTS.2921.1 | 3.84  | 4.2   | 0.21 | 0.16 | -1.28 | 0.039384 | 0.030713 | 0.361653 | 0.217148 |
| MmuSTS.2922.1.S1_at   | MmuSTS.2922.1 | 9.69  | 9.68  | 0.16 | 0.22 | 1     | 0.794878 | 0.90414  | 0.924696 | 0.945621 |
| MmuSTS.2923.1.S1_at   | MmuSTS.2923.1 | 4.24  | 4.23  | 0.15 | 0.13 | 1.01  | 0.409995 | 0.557387 | 0.73049  | 0.735031 |
| MmuSTS.2924.1.S1_at   | MmuSTS.2924.1 | 6.87  | 6.82  | 0.21 | 0.03 | 1.04  | 0.237505 | 0.189263 | 0.604473 | 0.465043 |
| MmuSTS.2925.1.S1_at   | MmuSTS.2925.1 | 3.79  | 3.29  | 0.42 | 0.11 | 1.4   | 0.119494 | 0.10604  | 0.492875 | 0.368427 |
| MmuSTS.2926.1.S1_at   | MmuSTS.2926.1 | 4.92  | 5.01  | 0.14 | 0.13 | -1.06 | 0.218146 | 0.301842 | 0.588113 | 0.559788 |
| MmuSTS.2927.1.S1_at   | MmuSTS.2927.1 | 6.72  | 6.6   | 0.07 | 0.07 | 1.09  | 0.066393 | 0.325981 | 0.422255 | 0.576235 |
| MmuSTS.2928.1.S1_at   | MmuSTS.2928.1 | 3.38  | 3.11  | 0.14 | 0.14 | 1.21  | 0.111058 | 0.125653 | 0.484303 | 0.396249 |
| MmuSTS.2929.1.S1_at   | MmuSTS.2929.1 | 5.04  | 4.97  | 0.46 | 0.3  | 1.05  | 0.594994 | 0.344286 | 0.83502  | 0.589762 |
| MmuSTS.293.1.S1_s_at  | MmuSTS.293.1  | 3.3   | 3.04  | 0.22 | 0.05 | 1.2   | 0.317705 | 0.561678 | 0.667521 | 0.73751  |
| MmuSTS.2930.1.S1_at   | MmuSTS.2930.1 | 3.56  | 3.49  | 0.05 | 0.02 | 1.05  | 0.085653 | 0.073628 | 0.452706 | 0.316952 |
| MmuSTS.2931.1.S1_at   | MmuSTS.2931.1 | 5.43  | 5.34  | 0.5  | 0.15 | 1.07  | 0.200752 | 0.073151 | 0.572488 | 0.316064 |
| MmuSTS.2932.1.S1_at   | MmuSTS.2932.1 | 6.02  | 5.76  | 0.27 | 0.04 | 1.2   | 0.507039 | 0.348609 | 0.786128 | 0.592637 |
| MmuSTS.2933.1.S1_at   | MmuSTS.2933.1 | 5.72  | 5.6   | 0.09 | 0.2  | 1.08  | 0.671232 | 0.900889 | 0.870255 | 0.943591 |
| MmuSTS.2934.1.S1_at   | MmuSTS.2934.1 | 10.1  | 10.16 | 0.41 | 0.13 | -1.04 | 0.855278 | 0.003908 | 0.948797 | 0.088806 |
| MmuSTS.2935.1.S1_at   | MmuSTS.2935.1 | 5.94  | 6.14  | 0.44 | 0.22 | -1.15 | 0.283583 | 0.398507 | 0.641408 | 0.629458 |
| MmuSTS.2936.1.S1_at   | MmuSTS.2936.1 | 4.99  | 4.81  | 0.16 | 0.04 | 1.13  | 0.131423 | 0.10412  | 0.505767 | 0.365152 |
| MmuSTS.2937.1.S1_at   | MmuSTS.2937.1 | 5.9   | 6.25  | 0.21 | 0.42 | -1.28 | 0.156719 | 0.132888 | 0.529849 | 0.404544 |
| MmuSTS.2938.1.S1_at   | MmuSTS.2938.1 | 11.72 | 10.52 | 0.23 | 0.39 | 2.29  | 0.009253 | 0.010486 | 0.241866 | 0.133872 |
| MmuSTS.2939.1.S1_at   | MmuSTS.2939.1 | 6.08  | 5.91  | 0.07 | 0.05 | 1.13  | 0.026008 | 0.070611 | 0.322977 | 0.311913 |
| MmuSTS.294.1.S1_s_at  | MmuSTS.294.1  | 4.78  | 4.77  | 0.11 | 0.11 | 1.01  | 0.207052 | 0.311945 | 0.578774 | 0.566833 |
| MmuSTS.2940.1.S1_at   | MmuSTS.2940.1 | 8.52  | 9.34  | 2.22 | 0.41 | -1.77 | 0.498716 | 0.166932 | 0.781838 | 0.443415 |
| MmuSTS.2941.1.S1_at   | MmuSTS.2941.1 | 7.95  | 8.33  | 1.14 | 0.06 | -1.3  | 0.595883 | 0.755186 | 0.835646 | 0.857488 |
| MmuSTS.2942.1.S1_at   | MmuSTS.2942.1 | 10.9  | 10.79 | 0.14 | 0.05 | 1.08  | 0.980814 | 0.039381 | 0.993918 | 0.243406 |
| MmuSTS.2943.1.S1_at   | MmuSTS.2943.1 | 10.4  | 10.19 | 0.3  | 0.04 | 1.15  | 0.896571 | 0.086318 | 0.96479  | 0.338771 |
| MmuSTS.2944.1.S1_at   | MmuSTS.2944.1 | 9     | 9.37  | 0.6  | 0.08 | -1.29 | 0.589909 | 0.787798 | 0.832714 | 0.877294 |
| MmuSTS.2945.1.S1_s_at | MmuSTS.2945.1 | 3.64  | 4.51  | 0.14 | 0.57 | -1.83 | 0.179281 | 0.1585   | 0.552498 | 0.434442 |
| MmuSTS.2946.1.S1_at   | MmuSTS.2946.1 | 8.45  | 8.79  | 0.3  | 0.31 | -1.27 | 0.542723 | 0.73617  | 0.805983 | 0.847335 |
| MmuSTS.2947.1.S1_at   | MmuSTS.2947.1 | 11.87 | 10.8  | 1.08 | 0.12 | 2.09  | 0.175656 | 0.029623 | 0.548781 | 0.213783 |
| MmuSTS.2948.1.S1_at   | MmuSTS.2948.1 | 6.1   | 5.74  | 0.38 | 0.18 | 1.28  | 0.601122 | 0.859164 | 0.838101 | 0.919754 |



|                      |               |       |       |      |      |       |          |          |          |          |
|----------------------|---------------|-------|-------|------|------|-------|----------|----------|----------|----------|
| MmuSTS.2949.1.S1_at  | MmuSTS.2949.1 | 11.39 | 11.19 | 0.1  | 0.18 | 1.15  | 0.149703 | 0.304073 | 0.523226 | 0.561408 |
| MmuSTS.295.1.S1_s_at | MmuSTS.295.1  | 4.34  | 4.27  | 0.15 | 0.02 | 1.05  | 0.216458 | 0.495028 | 0.586564 | 0.695291 |
| MmuSTS.2950.1.S1_at  | MmuSTS.2950.1 | 10.96 | 11    | 0.11 | 0.05 | -1.02 | 0.453434 | 0.271515 | 0.75608  | 0.536545 |
| MmuSTS.2951.1.S1_at  | MmuSTS.2951.1 | 12.37 | 12.56 | 0.07 | 0.02 | -1.14 | 0.00509  | 0.000449 | 0.204981 | 0.038539 |
| MmuSTS.2952.1.S1_at  | MmuSTS.2952.1 | 10.86 | 10.21 | 1.09 | 0.3  | 1.56  | 0.291973 | 0.089835 | 0.648347 | 0.344058 |
| MmuSTS.2953.1.S1_at  | MmuSTS.2953.1 | 10.63 | 11.01 | 0.85 | 0.23 | -1.3  | 0.972368 | 0.085019 | 0.991021 | 0.336744 |
| MmuSTS.2954.1.S1_at  | MmuSTS.2954.1 | 3.45  | 3.36  | 0.29 | 0.1  | 1.06  | 0.248898 | 0.326553 | 0.614228 | 0.576612 |
| MmuSTS.2955.1.S1_at  | MmuSTS.2955.1 | 7.35  | 7.28  | 0.68 | 0.4  | 1.05  | 0.940779 | 0.589298 | 0.979855 | 0.755536 |
| MmuSTS.2956.1.S1_at  | MmuSTS.2956.1 | 13.12 | 12.78 | 2.6  | 0.14 | 1.26  | 0.514168 | 0.339506 | 0.790322 | 0.586095 |
| MmuSTS.2957.1.S1_at  | MmuSTS.2957.1 | 8.22  | 8.77  | 0.3  | 0.03 | -1.46 | 0.031381 | 0.022071 | 0.341212 | 0.185927 |
| MmuSTS.2958.1.S1_at  | MmuSTS.2958.1 | 10.81 | 11.2  | 0.91 | 0.04 | -1.32 | 0.472382 | 0.577391 | 0.767039 | 0.747893 |
| MmuSTS.2959.1.S1_at  | MmuSTS.2959.1 | 4.67  | 4.13  | 0.27 | 0.46 | 1.46  | 0.084291 | 0.099681 | 0.450927 | 0.358211 |
| MmuSTS.296.1.S1_s_at | MmuSTS.296.1  | 5.78  | 5.64  | 0.08 | 0.03 | 1.1   | 0.12422  | 0.136668 | 0.498334 | 0.409207 |
| MmuSTS.2960.1.S1_at  | MmuSTS.2960.1 | 3.43  | 3.2   | 0.17 | 0.24 | 1.17  | 0.492203 | 0.449165 | 0.778212 | 0.664892 |
| MmuSTS.2961.1.S1_at  | MmuSTS.2961.1 | 7.5   | 7.66  | 0.12 | 0.09 | -1.12 | 0.724104 | 0.408233 | 0.893041 | 0.635527 |
| MmuSTS.2962.1.S1_at  | MmuSTS.2962.1 | 6.34  | 6.75  | 0.21 | 0.28 | -1.32 | 0.129818 | 0.022823 | 0.504468 | 0.189227 |
| MmuSTS.2963.1.S1_at  | MmuSTS.2963.1 | 4.85  | 4.6   | 0.15 | 0.16 | 1.19  | 0.126701 | 0.121158 | 0.500599 | 0.390217 |
| MmuSTS.2964.1.S1_at  | MmuSTS.2964.1 | 4.67  | 4.41  | 0.11 | 0.32 | 1.2   | 0.740158 | 0.051462 | 0.900721 | 0.272242 |
| MmuSTS.2965.1.S1_at  | MmuSTS.2965.1 | 4.06  | 3.95  | 0.12 | 0.16 | 1.09  | 0.187209 | 0.250597 | 0.559729 | 0.51941  |
| MmuSTS.2966.1.S1_at  | MmuSTS.2966.1 | 5.95  | 5.53  | 0.22 | 0.03 | 1.33  | 0.062528 | 0.049359 | 0.413307 | 0.267081 |
| MmuSTS.2967.1.S1_at  | MmuSTS.2967.1 | 8.04  | 7.86  | 1.25 | 0.13 | 1.14  | 0.867131 | 0.842665 | 0.953429 | 0.910333 |
| MmuSTS.2968.1.S1_at  | MmuSTS.2968.1 | 6.87  | 7.37  | 0.25 | 0.13 | -1.41 | 0.042805 | 0.214756 | 0.3704   | 0.48862  |
| MmuSTS.2969.1.S1_at  | MmuSTS.2969.1 | 3.28  | 3.29  | 0.13 | 0.49 | -1.01 | 0.355842 | 0.482311 | 0.694889 | 0.687186 |
| MmuSTS.297.1.S1_at   | MmuSTS.297.1  | 5.06  | 4.84  | 0.12 | 0.09 | 1.16  | 0.070921 | 0.078427 | 0.430067 | 0.325193 |
| MmuSTS.2970.1.S1_at  | MmuSTS.2970.1 | 11.4  | 11.73 | 0.32 | 0.09 | -1.25 | 0.157556 | 0.040331 | 0.530588 | 0.245973 |
| MmuSTS.2971.1.S1_at  | MmuSTS.2971.1 | 8.66  | 8.5   | 0.59 | 0.09 | 1.11  | 0.482094 | 0.584354 | 0.772274 | 0.752414 |
| MmuSTS.2972.1.S1_at  | MmuSTS.2972.1 | 13.67 | 13.63 | 0.19 | 0.07 | 1.02  | 0.978368 | 0.33404  | 0.993001 | 0.582104 |
| MmuSTS.2973.1.S1_at  | MmuSTS.2973.1 | 10.8  | 10.88 | 0.22 | 0.09 | -1.06 | 0.556259 | 0.822304 | 0.814002 | 0.89777  |
| MmuSTS.2974.1.S1_at  | MmuSTS.2974.1 | 9.2   | 9.01  | 0.39 | 0.09 | 1.14  | 0.74363  | 0.923968 | 0.902191 | 0.957162 |
| MmuSTS.2975.1.S1_at  | MmuSTS.2975.1 | 5.47  | 5.76  | 0.55 | 0.42 | -1.23 | 0.442569 | 0.509607 | 0.750221 | 0.704267 |
| MmuSTS.2976.1.S1_at  | MmuSTS.2976.1 | 10.28 | 10.83 | 0.25 | 0.08 | -1.46 | 0.057136 | 0.040017 | 0.401454 | 0.245241 |
| MmuSTS.2977.1.S1_at  | MmuSTS.2977.1 | 10.84 | 9.42  | 0.33 | 0.38 | 2.67  | 0.012552 | 0.005941 | 0.263116 | 0.105436 |
| MmuSTS.2978.1.S1_at  | MmuSTS.2978.1 | 11.86 | 11.82 | 0.16 | 0.1  | 1.03  | 0.428859 | 0.75219  | 0.742105 | 0.855787 |
| MmuSTS.2979.1.S1_at  | MmuSTS.2979.1 | 7.27  | 7.32  | 0.09 | 0.03 | -1.04 | 0.448947 | 0.728668 | 0.754037 | 0.843151 |
| MmuSTS.298.1.S1_at   | MmuSTS.298.1  | 8.29  | 8.82  | 0.91 | 0.05 | -1.44 | 0.971577 | 0.128079 | 0.990709 | 0.399072 |
| MmuSTS.2980.1.S1_at  | MmuSTS.2980.1 | 11.79 | 11.68 | 0.28 | 0.1  | 1.08  | 0.440342 | 0.355021 | 0.748445 | 0.597466 |
| MmuSTS.2981.1.S1_at  | MmuSTS.2981.1 | 11.43 | 11.5  | 0.15 | 0.08 | -1.05 | 0.961107 | 0.139949 | 0.987225 | 0.413295 |
| MmuSTS.2982.1.S1_at  | MmuSTS.2982.1 | 10.04 | 9.83  | 0.2  | 0.05 | 1.15  | 0.072992 | 0.041893 | 0.433769 | 0.249206 |
| MmuSTS.2983.1.S1_at  | MmuSTS.2983.1 | 9.89  | 9.72  | 0.06 | 0.23 | 1.12  | 0.175427 | 0.358706 | 0.548364 | 0.600178 |
| MmuSTS.2984.1.S1_at  | MmuSTS.2984.1 | 4.52  | 4.43  | 0.22 | 0.03 | 1.06  | 0.450027 | 0.410329 | 0.754663 | 0.637216 |
| MmuSTS.2985.1.S1_at  | MmuSTS.2985.1 | 5.8   | 4.86  | 0.53 | 0.1  | 1.92  | 0.013999 | 0.006013 | 0.273301 | 0.106069 |
| MmuSTS.2986.1.S1_at  | MmuSTS.2986.1 | 7.94  | 8.63  | 0.48 | 0.11 | -1.61 | 0.227822 | 0.173511 | 0.596693 | 0.449938 |
| MmuSTS.2987.1.S1_at  | MmuSTS.2987.1 | 12.09 | 12.15 | 0.1  | 0.04 | -1.04 | 0.528339 | 0.347398 | 0.797609 | 0.591987 |

|                       |               |       |       |      |      |       |          |          |          |          |
|-----------------------|---------------|-------|-------|------|------|-------|----------|----------|----------|----------|
| MmuSTS.2988.1.S1_at   | MmuSTS.2988.1 | 8.17  | 8.49  | 0.34 | 0.03 | -1.25 | 0.170662 | 0.158222 | 0.543714 | 0.43403  |
| MmuSTS.2989.1.S1_at   | MmuSTS.2989.1 | 10.63 | 10.56 | 0.68 | 0.17 | 1.05  | 0.368392 | 0.041066 | 0.703604 | 0.247375 |
| MmuSTS.299.1.S1_at    | MmuSTS.299.1  | 7.49  | 7.04  | 0.55 | 0.29 | 1.37  | 0.298649 | 0.144704 | 0.653263 | 0.418546 |
| MmuSTS.2990.1.S1_at   | MmuSTS.2990.1 | 6.73  | 7.05  | 0.61 | 0.05 | -1.25 | 0.429164 | 0.630737 | 0.742138 | 0.78239  |
| MmuSTS.2991.1.S1_at   | MmuSTS.2991.1 | 9.49  | 7.84  | 0.2  | 0.23 | 3.15  | 0.000727 | 0.00008  | 0.148688 | 0.027016 |
| MmuSTS.2992.1.S1_at   | MmuSTS.2992.1 | 5.47  | 5.69  | 0.39 | 0.23 | -1.17 | 0.628679 | 0.840801 | 0.851223 | 0.909237 |
| MmuSTS.2993.1.S1_at   | MmuSTS.2993.1 | 11.39 | 11.63 | 0.18 | 0.05 | -1.18 | 0.067683 | 0.052464 | 0.42444  | 0.274577 |
| MmuSTS.2994.1.S1_at   | MmuSTS.2994.1 | 10.89 | 10.97 | 0.22 | 0.1  | -1.05 | 0.776134 | 0.495885 | 0.917022 | 0.695781 |
| MmuSTS.2995.1.S1_at   | MmuSTS.2995.1 | 12.5  | 12.8  | 0.18 | 0.02 | -1.23 | 0.136781 | 0.044064 | 0.511963 | 0.254195 |
| MmuSTS.2996.1.S1_at   | MmuSTS.2996.1 | 6.47  | 6.73  | 0.6  | 0.05 | -1.2  | 0.879738 | 0.816996 | 0.958307 | 0.894454 |
| MmuSTS.2997.1.S1_at   | MmuSTS.2997.1 | 6.3   | 6.42  | 0.12 | 0.15 | -1.09 | 0.277561 | 0.194836 | 0.636861 | 0.46989  |
| MmuSTS.2998.1.S1_at   | MmuSTS.2998.1 | 4.2   | 4.19  | 0.16 | 0.11 | 1.01  | 0.313409 | 0.175229 | 0.664755 | 0.452011 |
| MmuSTS.2999.1.S1_at   | MmuSTS.2999.1 | 11.23 | 11.26 | 0.13 | 0.07 | -1.02 | 0.305675 | 0.142398 | 0.65906  | 0.415965 |
| MmuSTS.3.1.S1_at      | MmuSTS.3.1    | 3.92  | 4.07  | 0.03 | 0.13 | -1.11 | 0.057899 | 0.374178 | 0.403325 | 0.612678 |
| MmuSTS.30.1.S1_s_at   | MmuSTS.30.1   | 8.58  | 9.37  | 0.18 | 0.14 | -1.72 | 0.006529 | 0.001041 | 0.219791 | 0.051426 |
| MmuSTS.3000.1.S1_at   | MmuSTS.3000.1 | 7.82  | 6.22  | 0.92 | 0.78 | 3.04  | 0.114994 | 0.017054 | 0.488167 | 0.165465 |
| MmuSTS.3001.1.S1_at   | MmuSTS.3001.1 | 8.91  | 9.15  | 0.42 | 0.05 | -1.18 | 0.654757 | 0.849115 | 0.862949 | 0.914337 |
| MmuSTS.3002.1.S1_at   | MmuSTS.3002.1 | 9.64  | 9.67  | 0.17 | 0.05 | -1.03 | 0.667764 | 0.260224 | 0.868742 | 0.526807 |
| MmuSTS.3003.1.S1_at   | MmuSTS.3003.1 | 10.34 | 10.31 | 0.12 | 0.12 | 1.02  | 0.339284 | 0.6758   | 0.683755 | 0.810503 |
| MmuSTS.3004.1.S1_at   | MmuSTS.3004.1 | 9.05  | 8.87  | 0.34 | 0.09 | 1.13  | 0.66218  | 0.062776 | 0.86666  | 0.297193 |
| MmuSTS.3005.1.S1_at   | MmuSTS.3005.1 | 5.03  | 5.09  | 0.13 | 0.12 | -1.05 | 0.574577 | 0.156027 | 0.824155 | 0.431444 |
| MmuSTS.3006.1.S1_at   | MmuSTS.3006.1 | 8.89  | 9.5   | 0.28 | 0.28 | -1.52 | 0.222036 | 0.063946 | 0.591629 | 0.29906  |
| MmuSTS.3007.1.S1_at   | MmuSTS.3007.1 | 11.56 | 11.65 | 0.34 | 0.04 | -1.07 | 0.877711 | 0.661699 | 0.957399 | 0.801903 |
| MmuSTS.3008.1.S1_s_at | MmuSTS.3008.1 | 4.07  | 4.06  | 0.06 | 0.07 | 1.01  | 0.269372 | 0.442405 | 0.629603 | 0.660391 |
| MmuSTS.3009.1.S1_at   | MmuSTS.3009.1 | 10.21 | 10.11 | 0.52 | 0.11 | 1.07  | 0.918036 | 0.039016 | 0.972062 | 0.242715 |
| MmuSTS.301.1.S1_s_at  | MmuSTS.301.1  | 4     | 3.9   | 0.11 | 0.1  | 1.07  | 0.371505 | 0.390377 | 0.705567 | 0.624156 |
| MmuSTS.3010.1.S1_at   | MmuSTS.3010.1 | 6.9   | 7.21  | 0.53 | 0.16 | -1.24 | 0.364916 | 0.53474  | 0.700775 | 0.720524 |
| MmuSTS.3011.1.S1_at   | MmuSTS.3011.1 | 10.27 | 9.94  | 0.24 | 0.03 | 1.26  | 0.113737 | 0.161842 | 0.487196 | 0.437937 |
| MmuSTS.3012.1.S1_at   | MmuSTS.3012.1 | 6.87  | 6.8   | 0.16 | 0.01 | 1.05  | 0.146158 | 0.093523 | 0.520572 | 0.349846 |
| MmuSTS.3013.1.S1_at   | MmuSTS.3013.1 | 7.22  | 7.52  | 0.45 | 0.33 | -1.23 | 0.413963 | 0.253321 | 0.732685 | 0.521662 |
| MmuSTS.3014.1.S1_at   | MmuSTS.3014.1 | 4.04  | 3.91  | 0.07 | 0.12 | 1.09  | 0.07636  | 0.078317 | 0.437977 | 0.324955 |
| MmuSTS.3015.1.S1_at   | MmuSTS.3015.1 | 9.26  | 8.82  | 0.41 | 0.3  | 1.35  | 0.184038 | 0.522967 | 0.55695  | 0.713429 |
| MmuSTS.3016.1.S1_at   | MmuSTS.3016.1 | 4.91  | 5.13  | 0.26 | 0.3  | -1.16 | 0.86109  | 0.695463 | 0.95112  | 0.822995 |
| MmuSTS.3017.1.S1_at   | MmuSTS.3017.1 | 9     | 8.75  | 0.18 | 0.18 | 1.18  | 0.355021 | 0.141862 | 0.69464  | 0.415372 |
| MmuSTS.3018.1.S1_at   | MmuSTS.3018.1 | 6.89  | 6.79  | 0.35 | 0.19 | 1.07  | 0.421604 | 0.441285 | 0.737563 | 0.659483 |
| MmuSTS.3019.1.S1_at   | MmuSTS.3019.1 | 5.03  | 5.16  | 0.34 | 0.3  | -1.09 | 0.131593 | 0.414201 | 0.505989 | 0.640124 |
| MmuSTS.3020.1.S1_at   | MmuSTS.3020.1 | 3.76  | 3.68  | 0.09 | 0.03 | 1.06  | 0.151682 | 0.503854 | 0.524628 | 0.701193 |
| MmuSTS.3020.1.S1_s_at | MmuSTS.3020.1 | 5.53  | 5.51  | 0.16 | 0.15 | 1.01  | 0.496149 | 0.566026 | 0.780229 | 0.740192 |
| MmuSTS.3021.1.S1_at   | MmuSTS.3021.1 | 10.65 | 10.83 | 0.14 | 0.1  | -1.13 | 0.139033 | 0.013528 | 0.514459 | 0.148875 |
| MmuSTS.3022.1.S1_at   | MmuSTS.3022.1 | 3.59  | 3.51  | 0.22 | 0.28 | 1.06  | 0.577143 | 0.86717  | 0.825353 | 0.924514 |
| MmuSTS.3023.1.S1_at   | MmuSTS.3023.1 | 5.65  | 5.43  | 0.03 | 0.06 | 1.16  | 0.007715 | 0.010898 | 0.230943 | 0.135939 |
| MmuSTS.3024.1.S1_at   | MmuSTS.3024.1 | 12.26 | 12.98 | 0.21 | 0.07 | -1.65 | 0.005273 | 0.002202 | 0.207075 | 0.069315 |
| MmuSTS.3025.1.S1_at   | MmuSTS.3025.1 | 8.85  | 10.03 | 0.94 | 0.1  | -2.27 | 0.179237 | 0.170532 | 0.552498 | 0.447177 |

|                       |               |       |       |      |      |       |          |          |          |          |
|-----------------------|---------------|-------|-------|------|------|-------|----------|----------|----------|----------|
| MmuSTS.3026.1.S1_at   | MmuSTS.3026.1 | 5.59  | 4.73  | 0.93 | 0.3  | 1.82  | 0.172886 | 0.334226 | 0.54603  | 0.582266 |
| MmuSTS.3027.1.S1_at   | MmuSTS.3027.1 | 6.6   | 6.59  | 0.25 | 0.06 | 1.01  | 0.38903  | 0.370332 | 0.715919 | 0.609407 |
| MmuSTS.3028.1.S1_at   | MmuSTS.3028.1 | 10.41 | 10.44 | 0.51 | 0.14 | -1.03 | 0.884124 | 0.039508 | 0.959791 | 0.243706 |
| MmuSTS.3029.1.S1_at   | MmuSTS.3029.1 | 12.11 | 12.17 | 0.44 | 0.07 | -1.05 | 0.815624 | 0.87925  | 0.933219 | 0.9311   |
| MmuSTS.3030.1.S1_at   | MmuSTS.3030.1 | 11.87 | 10.93 | 0.63 | 0.34 | 1.93  | 0.187153 | 0.012144 | 0.559729 | 0.142633 |
| MmuSTS.3031.1.S1_at   | MmuSTS.3031.1 | 6.97  | 7.65  | 0.5  | 0.18 | -1.61 | 0.040321 | 0.027937 | 0.363938 | 0.208628 |
| MmuSTS.3032.1.S1_at   | MmuSTS.3032.1 | 11.56 | 11.86 | 0.71 | 0.06 | -1.23 | 0.161775 | 0.175929 | 0.535175 | 0.452486 |
| MmuSTS.3033.1.S1_at   | MmuSTS.3033.1 | 8     | 8.02  | 0.37 | 0.12 | -1.01 | 0.994103 | 0.911965 | 0.997784 | 0.950333 |
| MmuSTS.3034.1.S1_at   | MmuSTS.3034.1 | 11.04 | 11.13 | 0.36 | 0.17 | -1.07 | 0.982387 | 0.856088 | 0.994472 | 0.917842 |
| MmuSTS.3035.1.S1_at   | MmuSTS.3035.1 | 10.92 | 11.14 | 0.16 | 0.09 | -1.17 | 0.192318 | 0.003319 | 0.563481 | 0.082861 |
| MmuSTS.3036.1.S1_at   | MmuSTS.3036.1 | 8.38  | 8.31  | 0.49 | 0.34 | -1.05 | 0.526897 | 0.004579 | 0.796797 | 0.094474 |
| MmuSTS.3037.1.S1_at   | MmuSTS.3037.1 | 5.16  | 5.28  | 0.5  | 0.11 | -1.09 | 0.668056 | 0.462432 | 0.868887 | 0.673754 |
| MmuSTS.3038.1.S1_at   | MmuSTS.3038.1 | 11.95 | 11.82 | 0.12 | 0.04 | 1.09  | 0.110095 | 0.30123  | 0.483091 | 0.559356 |
| MmuSTS.3039.1.S1_at   | MmuSTS.3039.1 | 8.8   | 8.68  | 0.44 | 0.15 | 1.09  | 0.713997 | 0.464251 | 0.88857  | 0.674983 |
| MmuSTS.304.1.S1_at    | MmuSTS.304.1  | 11.29 | 11.2  | 0.15 | 0.14 | 1.06  | 0.546032 | 0.122079 | 0.808283 | 0.39161  |
| MmuSTS.3040.1.S1_at   | MmuSTS.3040.1 | 9.09  | 9.18  | 0.13 | 0.1  | -1.06 | 0.831687 | 0.607693 | 0.939628 | 0.766491 |
| MmuSTS.3041.1.S1_at   | MmuSTS.3041.1 | 11.57 | 11.7  | 0.21 | 0.07 | -1.09 | 0.831396 | 0.978468 | 0.939628 | 0.988282 |
| MmuSTS.3042.1.S1_at   | MmuSTS.3042.1 | 11.28 | 11.5  | 0.18 | 0.02 | -1.17 | 0.110407 | 0.012278 | 0.483407 | 0.143352 |
| MmuSTS.3043.1.S1_at   | MmuSTS.3043.1 | 6.15  | 6.05  | 0.06 | 0.06 | 1.07  | 0.125398 | 0.195422 | 0.499523 | 0.470253 |
| MmuSTS.3044.1.S1_at   | MmuSTS.3044.1 | 6.39  | 6.24  | 0.22 | 0.1  | 1.11  | 0.233298 | 0.347449 | 0.600774 | 0.592019 |
| MmuSTS.3045.1.S1_at   | MmuSTS.3045.1 | 7.47  | 8.01  | 0.74 | 0.06 | -1.45 | 0.79874  | 0.214236 | 0.926306 | 0.487856 |
| MmuSTS.3046.1.S1_at   | MmuSTS.3046.1 | 11.07 | 11.33 | 0.27 | 0.03 | -1.2  | 0.501559 | 0.593875 | 0.783353 | 0.758418 |
| MmuSTS.3047.1.S1_at   | MmuSTS.3047.1 | 12.55 | 12.76 | 0.11 | 0.04 | -1.15 | 0.046209 | 0.035237 | 0.377596 | 0.231952 |
| MmuSTS.3048.1.S1_at   | MmuSTS.3048.1 | 12.25 | 12.29 | 0.36 | 0.04 | -1.03 | 0.643044 | 0.251182 | 0.857999 | 0.519899 |
| MmuSTS.3049.1.S1_at   | MmuSTS.3049.1 | 2.85  | 2.92  | 0.08 | 0.03 | -1.05 | 0.210541 | 0.194736 | 0.581872 | 0.469774 |
| MmuSTS.305.1.S1_at    | MmuSTS.305.1  | 7.01  | 6.96  | 0.15 | 0.01 | 1.03  | 0.218931 | 0.457398 | 0.588341 | 0.670819 |
| MmuSTS.3050.1.S1_at   | MmuSTS.3050.1 | 10.26 | 10.65 | 0.33 | 0.06 | -1.31 | 0.173462 | 0.225758 | 0.546571 | 0.498159 |
| MmuSTS.3051.1.S1_at   | MmuSTS.3051.1 | 10.75 | 10.46 | 0.1  | 0.11 | 1.23  | 0.040588 | 0.231529 | 0.364613 | 0.503325 |
| MmuSTS.3052.1.S1_at   | MmuSTS.3052.1 | 8.09  | 7.92  | 0.16 | 0.08 | 1.12  | 0.120565 | 0.089902 | 0.494002 | 0.344073 |
| MmuSTS.3053.1.S1_at   | MmuSTS.3053.1 | 8.9   | 8.8   | 0.13 | 0.2  | 1.07  | 0.586016 | 0.578732 | 0.831002 | 0.748611 |
| MmuSTS.3054.1.S1_at   | MmuSTS.3054.1 | 10.75 | 10.62 | 0.11 | 0.14 | 1.09  | 0.064762 | 0.269027 | 0.418746 | 0.534425 |
| MmuSTS.3055.1.S1_at   | MmuSTS.3055.1 | 11.18 | 11.18 | 0.28 | 0.03 | 1     | 0.403481 | 0.131926 | 0.725709 | 0.403977 |
| MmuSTS.3056.1.S1_at   | MmuSTS.3056.1 | 4.12  | 4.18  | 0.37 | 0.24 | -1.04 | 0.70245  | 0.471003 | 0.884233 | 0.679162 |
| MmuSTS.3057.1.S1_at   | MmuSTS.3057.1 | 8.46  | 8.8   | 0.14 | 0.17 | -1.27 | 0.046617 | 0.005357 | 0.378317 | 0.101092 |
| MmuSTS.3058.1.S1_at   | MmuSTS.3058.1 | 7.25  | 7.58  | 0.29 | 0.11 | -1.25 | 0.200172 | 0.064255 | 0.571973 | 0.299692 |
| MmuSTS.3059.1.S1_s_at | MmuSTS.3059.1 | 13.27 | 13.28 | 0.12 | 0.06 | -1.01 | 0.886907 | 0.215329 | 0.960715 | 0.489062 |
| MmuSTS.306.1.S1_at    | MmuSTS.306.1  | 6.86  | 6.71  | 0.11 | 0.14 | 1.1   | 0.236163 | 0.418264 | 0.603177 | 0.642702 |
| MmuSTS.3060.1.S1_at   | MmuSTS.3060.1 | 11.21 | 11.13 | 0.78 | 0.14 | 1.06  | 0.564384 | 0.054516 | 0.818708 | 0.278993 |
| MmuSTS.3061.1.S1_at   | MmuSTS.3061.1 | 11.17 | 10.58 | 0.12 | 0.13 | 1.51  | 0.005348 | 0.00127  | 0.207901 | 0.055241 |
| MmuSTS.3062.1.S1_at   | MmuSTS.3062.1 | 10.07 | 10.43 | 0.08 | 0.02 | -1.29 | 0.002712 | 0.024536 | 0.184127 | 0.196025 |
| MmuSTS.3063.1.S1_at   | MmuSTS.3063.1 | 6.65  | 7.34  | 0.12 | 0.05 | -1.61 | 0.000584 | 0.000058 | 0.143137 | 0.025666 |
| MmuSTS.3064.1.S1_at   | MmuSTS.3064.1 | 9.56  | 9.57  | 0.35 | 0.31 | -1.01 | 0.24511  | 0.011983 | 0.610494 | 0.141658 |
| MmuSTS.3065.1.S1_at   | MmuSTS.3065.1 | 11.44 | 11.75 | 0.15 | 0.07 | -1.24 | 0.0203   | 0.014799 | 0.303799 | 0.154768 |

|                      |               |       |       |      |      |       |          |          |          |          |
|----------------------|---------------|-------|-------|------|------|-------|----------|----------|----------|----------|
| MmuSTS.3066.1.S1_at  | MmuSTS.3066.1 | 7.49  | 7.33  | 0.18 | 0.12 | 1.11  | 0.21888  | 0.246954 | 0.588341 | 0.516238 |
| MmuSTS.3067.1.S1_at  | MmuSTS.3067.1 | 8.36  | 8.99  | 0.37 | 0.01 | -1.55 | 0.042109 | 0.016013 | 0.368438 | 0.160458 |
| MmuSTS.3068.1.S1_at  | MmuSTS.3068.1 | 10.56 | 10.71 | 0.09 | 0.19 | -1.1  | 0.696957 | 0.567985 | 0.882175 | 0.74176  |
| MmuSTS.3069.1.S1_at  | MmuSTS.3069.1 | 6.74  | 5.95  | 0.45 | 0.13 | 1.73  | 0.042628 | 0.029124 | 0.369787 | 0.212733 |
| MmuSTS.307.1.S1_at   | MmuSTS.307.1  | 11.31 | 11.45 | 0.47 | 0.22 | -1.1  | 0.93724  | 0.07162  | 0.978872 | 0.313735 |
| MmuSTS.3070.1.S1_at  | MmuSTS.3070.1 | 11.68 | 11.97 | 0.02 | 0.05 | -1.22 | 0.000826 | 0.000125 | 0.151259 | 0.029087 |
| MmuSTS.3071.1.S1_at  | MmuSTS.3071.1 | 4.46  | 4.39  | 0.09 | 0.21 | 1.05  | 0.96219  | 0.597814 | 0.987708 | 0.760411 |
| MmuSTS.3072.1.S1_at  | MmuSTS.3072.1 | 3.73  | 3.71  | 0.09 | 0.02 | 1.01  | 0.982386 | 0.74599  | 0.994472 | 0.852688 |
| MmuSTS.3073.1.S1_at  | MmuSTS.3073.1 | 5.19  | 5.16  | 0.15 | 0.1  | 1.02  | 0.582464 | 0.624324 | 0.828307 | 0.778564 |
| MmuSTS.3074.1.S1_at  | MmuSTS.3074.1 | 9.3   | 9.75  | 0.06 | 0.05 | -1.37 | 0.000568 | 0.001091 | 0.143137 | 0.052283 |
| MmuSTS.3075.1.S1_at  | MmuSTS.3075.1 | 6.99  | 6.85  | 0.23 | 0.03 | 1.11  | 0.904912 | 0.841352 | 0.968088 | 0.909628 |
| MmuSTS.3076.1.S1_at  | MmuSTS.3076.1 | 3.76  | 3.65  | 0.05 | 0.06 | 1.08  | 0.080074 | 0.365582 | 0.443397 | 0.605617 |
| MmuSTS.3077.1.S1_at  | MmuSTS.3077.1 | 12.72 | 12.61 | 0.53 | 0    | 1.08  | 0.565524 | 0.760173 | 0.819327 | 0.860657 |
| MmuSTS.3078.1.S1_at  | MmuSTS.3078.1 | 5.51  | 5.81  | 0.18 | 0.09 | -1.23 | 0.02733  | 0.045194 | 0.327322 | 0.256979 |
| MmuSTS.3079.1.S1_at  | MmuSTS.3079.1 | 9.4   | 9.59  | 0.22 | 0.16 | -1.14 | 0.283027 | 0.003474 | 0.641193 | 0.084834 |
| MmuSTS.308.1.S1_at   | MmuSTS.308.1  | 8.21  | 7.5   | 0.47 | 0.44 | 1.63  | 0.116921 | 0.028884 | 0.490067 | 0.211763 |
| MmuSTS.3080.1.S1_at  | MmuSTS.3080.1 | 7.47  | 8.01  | 0.12 | 0.03 | -1.46 | 0.001759 | 0.000174 | 0.167444 | 0.030511 |
| MmuSTS.3081.1.S1_at  | MmuSTS.3081.1 | 11.93 | 11.85 | 0.14 | 0.05 | 1.06  | 0.763049 | 0.531045 | 0.91101  | 0.718384 |
| MmuSTS.3082.1.S1_at  | MmuSTS.3082.1 | 12.94 | 12.81 | 0.15 | 0.09 | 1.09  | 0.132769 | 0.132416 | 0.506999 | 0.404409 |
| MmuSTS.3083.1.S1_at  | MmuSTS.3083.1 | 12.88 | 13.04 | 0.09 | 0.03 | -1.12 | 0.046994 | 0.063947 | 0.379253 | 0.29906  |
| MmuSTS.3084.1.S1_at  | MmuSTS.3084.1 | 12.61 | 11.93 | 0.38 | 0.18 | 1.6   | 0.038656 | 0.011987 | 0.360067 | 0.141658 |
| MmuSTS.3085.1.S1_at  | MmuSTS.3085.1 | 11.18 | 10.8  | 0.2  | 0.03 | 1.31  | 0.03266  | 0.000935 | 0.345045 | 0.048962 |
| MmuSTS.3086.1.S1_at  | MmuSTS.3086.1 | 9.56  | 10.35 | 0.32 | 0.08 | -1.72 | 0.01685  | 0.005488 | 0.288837 | 0.102081 |
| MmuSTS.3087.1.S1_at  | MmuSTS.3087.1 | 10.56 | 11.1  | 0.09 | 0.13 | -1.44 | 0.008498 | 0.000267 | 0.234555 | 0.033786 |
| MmuSTS.3088.1.S1_at  | MmuSTS.3088.1 | 8.4   | 10.47 | 0.99 | 0.04 | -4.2  | 0.057034 | 0.026528 | 0.401454 | 0.203899 |
| MmuSTS.3089.1.S1_at  | MmuSTS.3089.1 | 6.82  | 7.27  | 0.3  | 0.06 | -1.37 | 0.189738 | 0.279727 | 0.561075 | 0.543228 |
| MmuSTS.309.1.S1_s at | MmuSTS.309.1  | 2.77  | 2.68  | 0.06 | 0.21 | 1.06  | 0.997015 | 0.950758 | 0.998914 | 0.972034 |
| MmuSTS.3090.1.S1_at  | MmuSTS.3090.1 | 8.62  | 9.05  | 1.76 | 0.08 | -1.35 | 0.661222 | 0.845057 | 0.866006 | 0.911824 |
| MmuSTS.3091.1.S1_at  | MmuSTS.3091.1 | 12.81 | 12.92 | 0.01 | 0.07 | -1.08 | 0.131851 | 0.000101 | 0.506276 | 0.027996 |
| MmuSTS.3092.1.S1_at  | MmuSTS.3092.1 | 6.64  | 6.83  | 0.23 | 0.07 | -1.14 | 0.491282 | 0.602831 | 0.777687 | 0.763752 |
| MmuSTS.3093.1.S1_at  | MmuSTS.3093.1 | 8.4   | 8.74  | 0.29 | 0.02 | -1.27 | 0.130404 | 0.021667 | 0.504689 | 0.184333 |
| MmuSTS.3094.1.S1_at  | MmuSTS.3094.1 | 3.83  | 3.82  | 0.04 | 0.11 | 1.01  | 0.48168  | 0.673637 | 0.772225 | 0.809337 |
| MmuSTS.3095.1.S1_at  | MmuSTS.3095.1 | 6.19  | 5.54  | 2.02 | 0.24 | 1.57  | 0.638356 | 0.240941 | 0.855923 | 0.51164  |
| MmuSTS.3096.1.S1_at  | MmuSTS.3096.1 | 5.83  | 6.03  | 1.03 | 0.04 | -1.15 | 0.540385 | 0.741306 | 0.804374 | 0.850237 |
| MmuSTS.3097.1.S1_at  | MmuSTS.3097.1 | 9.66  | 9.37  | 0.47 | 0.09 | 1.23  | 0.819065 | 0.812596 | 0.934698 | 0.89176  |
| MmuSTS.3098.1.S1_at  | MmuSTS.3098.1 | 9.84  | 9.92  | 0.29 | 0.12 | -1.06 | 0.99133  | 0.000381 | 0.996655 | 0.037273 |
| MmuSTS.3099.1.S1_at  | MmuSTS.3099.1 | 9.01  | 9.64  | 0.31 | 0.12 | -1.55 | 0.00962  | 0.004068 | 0.243006 | 0.090288 |
| MmuSTS.31.1.S1_at    | MmuSTS.31.1   | 7.05  | 7.17  | 0.29 | 0.04 | -1.09 | 0.699797 | 0.885979 | 0.883309 | 0.935119 |
| MmuSTS.310.1.S1_at   | MmuSTS.310.1  | 7.35  | 6.84  | 0.94 | 0.08 | 1.43  | 0.128857 | 0.178676 | 0.503618 | 0.454929 |
| MmuSTS.3100.1.S1_at  | MmuSTS.3100.1 | 11.79 | 11.59 | 0.14 | 0.05 | 1.15  | 0.161323 | 0.005566 | 0.534712 | 0.103068 |
| MmuSTS.3101.1.S1_at  | MmuSTS.3101.1 | 5.87  | 5.04  | 0.94 | 0.2  | 1.78  | 0.204961 | 0.079558 | 0.576619 | 0.326897 |
| MmuSTS.3102.1.S1_at  | MmuSTS.3102.1 | 3.18  | 3.11  | 0.26 | 0.06 | 1.06  | 0.490337 | 0.790066 | 0.776954 | 0.878655 |
| MmuSTS.3103.1.S1_at  | MmuSTS.3103.1 | 10.38 | 10.32 | 0.39 | 0.04 | 1.04  | 0.815509 | 0.113808 | 0.933137 | 0.380052 |

|                       |               |       |       |      |      |        |          |          |          |          |
|-----------------------|---------------|-------|-------|------|------|--------|----------|----------|----------|----------|
| MmuSTS.3104.1.S1_at   | MmuSTS.3104.1 | 10.6  | 9.91  | 0.6  | 0.14 | 1.62   | 0.15828  | 0.008219 | 0.531214 | 0.12044  |
| MmuSTS.3105.1.S1_at   | MmuSTS.3105.1 | 8.08  | 8.81  | 0.09 | 0.15 | -1.65  | 0.001635 | 0.112279 | 0.162459 | 0.377561 |
| MmuSTS.3106.1.S1_at   | MmuSTS.3106.1 | 12.45 | 12.42 | 0.3  | 0.05 | 1.02   | 0.824199 | 0.654611 | 0.936573 | 0.79809  |
| MmuSTS.3107.1.S1_at   | MmuSTS.3107.1 | 9.74  | 10.37 | 0.23 | 0.15 | -1.55  | 0.030534 | 0.019319 | 0.338095 | 0.174723 |
| MmuSTS.3108.1.S1_at   | MmuSTS.3108.1 | 3.29  | 3.21  | 0.02 | 0.13 | 1.05   | 0.499604 | 0.38708  | 0.782125 | 0.621935 |
| MmuSTS.3109.1.S1_at   | MmuSTS.3109.1 | 10.51 | 10.25 | 0.9  | 0.11 | 1.2    | 0.616999 | 0.486403 | 0.845238 | 0.689764 |
| MmuSTS.311.1.S1_at    | MmuSTS.311.1  | 10.33 | 10.48 | 0.29 | 0.03 | -1.1   | 0.499445 | 0.070668 | 0.782061 | 0.312011 |
| MmuSTS.3110.1.S1_at   | MmuSTS.3110.1 | 12.41 | 12.17 | 0.14 | 0.05 | 1.18   | 0.122754 | 0.060361 | 0.496206 | 0.292291 |
| MmuSTS.3111.1.S1_at   | MmuSTS.3111.1 | 10.42 | 10.56 | 0.16 | 0.07 | -1.1   | 0.982266 | 0.882599 | 0.994472 | 0.933083 |
| MmuSTS.3112.1.S1_at   | MmuSTS.3112.1 | 8.83  | 9.34  | 0.15 | 0.08 | -1.42  | 0.016441 | 0.004348 | 0.287478 | 0.092371 |
| MmuSTS.3113.1.S1_at   | MmuSTS.3113.1 | 3.36  | 3.98  | 0.18 | 0.24 | -1.53  | 0.050558 | 0.318136 | 0.387526 | 0.571046 |
| MmuSTS.3114.1.S1_at   | MmuSTS.3114.1 | 9.99  | 9.82  | 0.17 | 0.24 | 1.12   | 0.827379 | 0.000833 | 0.938039 | 0.046851 |
| MmuSTS.3115.1.S1_at   | MmuSTS.3115.1 | 6.26  | 6.2   | 0.14 | 0.07 | 1.04   | 0.591112 | 0.245144 | 0.833275 | 0.514901 |
| MmuSTS.3116.1.S1_at   | MmuSTS.3116.1 | 11.35 | 10.46 | 0.53 | 0.31 | 1.85   | 0.040016 | 0.012752 | 0.362955 | 0.145496 |
| MmuSTS.3117.1.S1_at   | MmuSTS.3117.1 | 13.33 | 13.26 | 0.24 | 0.03 | 1.05   | 0.611345 | 0.82492  | 0.842471 | 0.899441 |
| MmuSTS.3118.1.S1_at   | MmuSTS.3118.1 | 9.02  | 9.05  | 0.38 | 0.09 | -1.03  | 0.980884 | 0.882603 | 0.993918 | 0.933083 |
| MmuSTS.3119.1.S1_at   | MmuSTS.3119.1 | 10.1  | 9.81  | 0.4  | 0.08 | 1.23   | 0.26387  | 0.021366 | 0.62583  | 0.183015 |
| MmuSTS.312.1.S1_at    | MmuSTS.312.1  | 11.47 | 11.94 | 0.05 | 0.04 | -1.39  | 0.000157 | 0.000012 | 0.112332 | 0.016526 |
| MmuSTS.3120.1.S1_at   | MmuSTS.3120.1 | 9.27  | 9.28  | 0.44 | 0.03 | -1.01  | 0.964435 | 0.623805 | 0.988371 | 0.778193 |
| MmuSTS.3121.1.S1_at   | MmuSTS.3121.1 | 3.78  | 3.64  | 0.15 | 0.06 | 1.1    | 0.152569 | 0.148313 | 0.525558 | 0.422869 |
| MmuSTS.3122.1.S1_at   | MmuSTS.3122.1 | 9.21  | 8.68  | 1.15 | 0.22 | 1.44   | 0.549041 | 0.756481 | 0.810145 | 0.858223 |
| MmuSTS.3123.1.S1_at   | MmuSTS.3123.1 | 3.15  | 3.16  | 0.16 | 0.06 | -1.01  | 0.495306 | 0.551045 | 0.779921 | 0.730772 |
| MmuSTS.3124.1.S1_at   | MmuSTS.3124.1 | 8.41  | 8.56  | 0.24 | 0.15 | -1.11  | 0.3044   | 0.074317 | 0.658029 | 0.318046 |
| MmuSTS.3125.1.S1_s_at | MmuSTS.3125.1 | 11.99 | 11.95 | 0.04 | 0.07 | 1.03   | 0.195359 | 0.727429 | 0.565774 | 0.842336 |
| MmuSTS.3126.1.S1_at   | MmuSTS.3126.1 | 5.55  | 5.4   | 0.07 | 0.03 | 1.11   | 0.10698  | 0.349831 | 0.479496 | 0.593595 |
| MmuSTS.3127.1.S1_at   | MmuSTS.3127.1 | 9.72  | 9.76  | 0.31 | 0.06 | -1.03  | 0.256957 | 0.381772 | 0.620842 | 0.617972 |
| MmuSTS.3128.1.S1_at   | MmuSTS.3128.1 | 8.15  | 9.17  | 0.72 | 0.23 | -2.03  | 0.101553 | 0.176254 | 0.47184  | 0.452718 |
| MmuSTS.3129.1.S1_at   | MmuSTS.3129.1 | 8.88  | 11.1  | 0.73 | 0.3  | -4.65  | 0.020862 | 0.031931 | 0.305672 | 0.221119 |
| MmuSTS.313.1.S1_at    | MmuSTS.313.1  | 11.59 | 11.96 | 0.36 | 0.03 | -1.3   | 0.186486 | 0.159207 | 0.559164 | 0.435217 |
| MmuSTS.3130.1.S1_at   | MmuSTS.3130.1 | 7.79  | 8.7   | 2.55 | 0.62 | -1.88  | 0.515442 | 0.168953 | 0.79089  | 0.445515 |
| MmuSTS.3131.1.S1_at   | MmuSTS.3131.1 | 6.09  | 10.15 | 0.95 | 0.12 | -16.61 | 0.003367 | 0.008752 | 0.194985 | 0.124009 |
| MmuSTS.3132.1.S1_at   | MmuSTS.3132.1 | 4.2   | 3.8   | 0.39 | 0.05 | 1.32   | 0.166759 | 0.082509 | 0.539419 | 0.331625 |
| MmuSTS.3133.1.S1_at   | MmuSTS.3133.1 | 11.15 | 12.31 | 1    | 0.15 | -2.23  | 0.136408 | 0.231883 | 0.511324 | 0.503594 |
| MmuSTS.3134.1.S1_at   | MmuSTS.3134.1 | 9.37  | 9.83  | 0.54 | 0.11 | -1.38  | 0.195474 | 0.160078 | 0.56589  | 0.436234 |
| MmuSTS.3135.1.S1_at   | MmuSTS.3135.1 | 10.33 | 11.51 | 1.08 | 0.21 | -2.28  | 0.373574 | 0.059114 | 0.705567 | 0.290056 |
| MmuSTS.3136.1.S1_at   | MmuSTS.3136.1 | 7.52  | 8.66  | 0.33 | 0.13 | -2.21  | 0.00913  | 0.095178 | 0.241574 | 0.35218  |
| MmuSTS.3137.1.S1_at   | MmuSTS.3137.1 | 5.33  | 5.22  | 0.19 | 0.07 | 1.07   | 0.162863 | 0.241117 | 0.535867 | 0.511749 |
| MmuSTS.3138.1.S1_at   | MmuSTS.3138.1 | 6.8   | 6.73  | 0.11 | 0.07 | 1.05   | 0.157818 | 0.073278 | 0.53073  | 0.316233 |
| MmuSTS.3139.1.S1_at   | MmuSTS.3139.1 | 8.8   | 8.94  | 0.22 | 0.06 | -1.1   | 0.952786 | 0.806696 | 0.9842   | 0.888775 |
| MmuSTS.314.1.S1_at    | MmuSTS.314.1  | 5.49  | 5.24  | 0.41 | 0.32 | 1.19   | 0.423017 | 0.762545 | 0.73875  | 0.861881 |
| MmuSTS.3140.1.S1_at   | MmuSTS.3140.1 | 10.31 | 10.16 | 0.3  | 0.06 | 1.11   | 0.365059 | 0.379596 | 0.700784 | 0.616523 |
| MmuSTS.3141.1.S1_at   | MmuSTS.3141.1 | 5.47  | 5.56  | 0.04 | 0.11 | -1.07  | 0.188962 | 0.417471 | 0.560718 | 0.64224  |
| MmuSTS.3142.1.S1_at   | MmuSTS.3142.1 | 7.3   | 7.59  | 0.35 | 0.08 | -1.22  | 0.225398 | 0.472695 | 0.594611 | 0.68007  |

|                       |               |       |       |      |      |       |          |          |          |          |
|-----------------------|---------------|-------|-------|------|------|-------|----------|----------|----------|----------|
| MmuSTS.3143.1.S1_at   | MmuSTS.3143.1 | 6.5   | 6.96  | 0.42 | 0.47 | -1.38 | 0.452364 | 0.832835 | 0.755778 | 0.90408  |
| MmuSTS.3144.1.S1_at   | MmuSTS.3144.1 | 11.14 | 11.3  | 0.2  | 0.08 | -1.12 | 0.370325 | 0.040045 | 0.704572 | 0.245307 |
| MmuSTS.3145.1.S1_at   | MmuSTS.3145.1 | 11.31 | 11.36 | 0.3  | 0.01 | -1.03 | 0.482495 | 0.095352 | 0.772474 | 0.35239  |
| MmuSTS.3146.1.S1_s_at | MmuSTS.3146.1 | 10.03 | 10.12 | 0.6  | 0.2  | -1.07 | 0.98401  | 0.021945 | 0.995154 | 0.185351 |
| MmuSTS.3147.1.S1_at   | MmuSTS.3147.1 | 7.2   | 6.81  | 0.91 | 0.09 | 1.3   | 0.162078 | 0.034722 | 0.535244 | 0.230506 |
| MmuSTS.3148.1.S1_at   | MmuSTS.3148.1 | 8.09  | 8     | 0.39 | 0.33 | 1.06  | 0.704719 | 0.005766 | 0.885183 | 0.104378 |
| MmuSTS.3149.1.S1_at   | MmuSTS.3149.1 | 7.11  | 7.16  | 0.11 | 0.01 | -1.04 | 0.427251 | 0.386451 | 0.740974 | 0.621593 |
| MmuSTS.315.1.S1_at    | MmuSTS.315.1  | 4.91  | 5.14  | 0.27 | 0.11 | -1.17 | 0.456375 | 0.83698  | 0.75784  | 0.906826 |
| MmuSTS.3150.1.S1_at   | MmuSTS.3150.1 | 6.53  | 6.81  | 0.36 | 0.53 | -1.21 | 0.93237  | 0.325908 | 0.977227 | 0.576181 |
| MmuSTS.3151.1.S1_at   | MmuSTS.3151.1 | 3.03  | 3.1   | 0.09 | 0.13 | -1.05 | 0.463603 | 0.600398 | 0.762265 | 0.762128 |
| MmuSTS.3152.1.S1_at   | MmuSTS.3152.1 | 4.3   | 4.22  | 0.2  | 0.14 | -1.05 | 0.317039 | 0.408928 | 0.666916 | 0.63601  |
| MmuSTS.3153.1.S1_s_at | MmuSTS.3153.1 | 3.83  | 3.78  | 0.06 | 0.06 | 1.03  | 0.693993 | 0.32389  | 0.880942 | 0.574656 |
| MmuSTS.3154.1.S1_s_at | MmuSTS.3154.1 | 3.28  | 3.28  | 0.02 | 0.03 | 1     | 0.50649  | 0.484746 | 0.785876 | 0.68867  |
| MmuSTS.3155.1.S1_at   | MmuSTS.3155.1 | 5.13  | 5.18  | 0.16 | 0.19 | -1.04 | 0.95939  | 0.975148 | 0.986754 | 0.986437 |
| MmuSTS.3156.1.S1_at   | MmuSTS.3156.1 | 5.92  | 5.87  | 0.38 | 0.14 | 1.04  | 0.203404 | 0.189304 | 0.574902 | 0.465078 |
| MmuSTS.3157.1.S1_at   | MmuSTS.3157.1 | 5.86  | 5.45  | 1.02 | 0.36 | 1.33  | 0.463322 | 0.325251 | 0.762124 | 0.575648 |
| MmuSTS.3158.1.S1_at   | MmuSTS.3158.1 | 9.35  | 10.53 | 1.03 | 0.27 | -2.27 | 0.521432 | 0.741832 | 0.794521 | 0.850509 |
| MmuSTS.3159.1.S1_at   | MmuSTS.3159.1 | 3.19  | 3.19  | 0.1  | 0.1  | -1    | 0.726359 | 0.68915  | 0.894295 | 0.818618 |
| MmuSTS.316.1.S1_at    | MmuSTS.316.1  | 9.98  | 10.58 | 0.88 | 0.1  | -1.51 | 0.24557  | 0.076724 | 0.611179 | 0.322136 |
| MmuSTS.316.1.S1_s_at  | MmuSTS.316.1  | 9.99  | 10.51 | 0.77 | 0.11 | -1.44 | 0.233236 | 0.065266 | 0.600731 | 0.301239 |
| MmuSTS.3160.1.S1_at   | MmuSTS.3160.1 | 4.62  | 4.6   | 0.05 | 0.19 | 1.02  | 0.232192 | 0.302892 | 0.600074 | 0.560356 |
| MmuSTS.3161.1.S1_at   | MmuSTS.3161.1 | 9.37  | 9.54  | 0.4  | 0.07 | -1.13 | 0.600706 | 0.362513 | 0.837959 | 0.603067 |
| MmuSTS.3162.1.S1_at   | MmuSTS.3162.1 | 10.31 | 10.49 | 0.23 | 0.06 | -1.13 | 0.262189 | 0.237411 | 0.624399 | 0.508117 |
| MmuSTS.3163.1.S1_at   | MmuSTS.3163.1 | 9.89  | 10.25 | 0.95 | 0.08 | -1.28 | 0.564461 | 0.58204  | 0.818716 | 0.750784 |
| MmuSTS.3164.1.S1_at   | MmuSTS.3164.1 | 12.72 | 12.71 | 1.61 | 0.22 | 1.01  | 0.611627 | 0.13172  | 0.84257  | 0.403854 |
| MmuSTS.3165.1.S1_at   | MmuSTS.3165.1 | 10.66 | 10.73 | 0.43 | 0.03 | -1.05 | 0.522487 | 0.057001 | 0.795143 | 0.284868 |
| MmuSTS.3166.1.S1_s_at | MmuSTS.3166.1 | 4.39  | 3.77  | 0.6  | 0.29 | 1.53  | 0.111812 | 0.439464 | 0.48497  | 0.6582   |
| MmuSTS.3167.1.S1_at   | MmuSTS.3167.1 | 7.73  | 7.77  | 0.25 | 0.11 | -1.02 | 0.87515  | 0.257464 | 0.956634 | 0.52521  |
| MmuSTS.3168.1.S1_at   | MmuSTS.3168.1 | 8.57  | 8.25  | 0.06 | 0.04 | 1.24  | 0.002095 | 0.007509 | 0.174757 | 0.116291 |
| MmuSTS.3169.1.S1_at   | MmuSTS.3169.1 | 3.14  | 3.07  | 0.04 | 0.07 | 1.04  | 0.353205 | 0.465304 | 0.693204 | 0.675704 |
| MmuSTS.317.1.S1_at    | MmuSTS.317.1  | 10.14 | 9.95  | 0.33 | 0.08 | 1.14  | 0.094741 | 0.087552 | 0.463921 | 0.340753 |
| MmuSTS.3170.1.S1_at   | MmuSTS.3170.1 | 10.08 | 10.6  | 0.26 | 0.07 | -1.43 | 0.019466 | 0.012191 | 0.30143  | 0.14287  |
| MmuSTS.3171.1.S1_at   | MmuSTS.3171.1 | 8.29  | 7.94  | 0.15 | 0.12 | 1.27  | 0.039999 | 0.08903  | 0.362955 | 0.342893 |
| MmuSTS.3172.1.S1_at   | MmuSTS.3172.1 | 4.17  | 3.81  | 0.25 | 0.12 | 1.29  | 0.122096 | 0.277727 | 0.495677 | 0.541648 |
| MmuSTS.3173.1.S1_at   | MmuSTS.3173.1 | 9.59  | 9.37  | 0.34 | 0.07 | 1.16  | 0.650974 | 0.458902 | 0.861334 | 0.671498 |
| MmuSTS.3174.1.S1_at   | MmuSTS.3174.1 | 9.84  | 10.28 | 0.63 | 0.21 | -1.36 | 0.131725 | 0.198585 | 0.506153 | 0.473391 |
| MmuSTS.3175.1.S1_at   | MmuSTS.3175.1 | 11.12 | 10.38 | 0.46 | 0.03 | 1.67  | 0.133049 | 0.131211 | 0.507404 | 0.403252 |
| MmuSTS.3176.1.S1_at   | MmuSTS.3176.1 | 11.44 | 11.49 | 1.19 | 0.15 | -1.04 | 0.876867 | 0.313611 | 0.95711  | 0.567977 |
| MmuSTS.3177.1.S1_at   | MmuSTS.3177.1 | 10.93 | 11.24 | 0.11 | 0.07 | -1.24 | 0.04499  | 0.023598 | 0.375619 | 0.192397 |
| MmuSTS.3178.1.S1_at   | MmuSTS.3178.1 | 12.57 | 12.39 | 0.35 | 0.01 | 1.13  | 0.610081 | 0.370257 | 0.841839 | 0.609406 |
| MmuSTS.3179.1.S1_at   | MmuSTS.3179.1 | 9.02  | 9.21  | 2.03 | 0.13 | -1.14 | 0.706312 | 0.307597 | 0.885704 | 0.563785 |
| MmuSTS.318.1.S1_at    | MmuSTS.318.1  | 7.31  | 7.71  | 0.36 | 0.09 | -1.32 | 0.132293 | 0.121475 | 0.506752 | 0.39062  |
| MmuSTS.3180.1.S1_at   | MmuSTS.3180.1 | 11.52 | 11.38 | 0.34 | 0.12 | 1.1   | 0.169779 | 0.018098 | 0.542744 | 0.169516 |

|                       |               |       |       |      |      |       |          |          |          |          |
|-----------------------|---------------|-------|-------|------|------|-------|----------|----------|----------|----------|
| MmuSTS.3181.1.S1_at   | MmuSTS.3181.1 | 7.44  | 8.03  | 0.67 | 0.08 | -1.5  | 0.680093 | 0.036991 | 0.874538 | 0.236733 |
| MmuSTS.3182.1.S1_s_at | MmuSTS.3182.1 | 11.21 | 11.22 | 0.29 | 0.12 | -1.01 | 0.253024 | 0.247238 | 0.617861 | 0.516446 |
| MmuSTS.3183.1.S1_at   | MmuSTS.3183.1 | 10.94 | 11.08 | 0.06 | 0.04 | -1.1  | 0.080746 | 0.090344 | 0.444813 | 0.34479  |
| MmuSTS.3184.1.S1_at   | MmuSTS.3184.1 | 11.38 | 11.79 | 1.1  | 0.16 | -1.33 | 0.539574 | 0.70846  | 0.803895 | 0.830919 |
| MmuSTS.3185.1.S1_at   | MmuSTS.3185.1 | 8.64  | 8.2   | 0.8  | 0.17 | 1.36  | 0.382829 | 0.225868 | 0.710964 | 0.498248 |
| MmuSTS.3186.1.S1_at   | MmuSTS.3186.1 | 11.39 | 11.24 | 0.09 | 0.1  | 1.1   | 0.120721 | 0.126227 | 0.494185 | 0.396754 |
| MmuSTS.3187.1.S1_at   | MmuSTS.3187.1 | 9.1   | 8.86  | 0.07 | 0.33 | 1.18  | 0.123527 | 0.124845 | 0.497016 | 0.395219 |
| MmuSTS.3188.1.S1_at   | MmuSTS.3188.1 | 9.2   | 9.28  | 0.62 | 0.12 | -1.06 | 0.37717  | 0.226769 | 0.707423 | 0.499176 |
| MmuSTS.3189.1.S1_at   | MmuSTS.3189.1 | 10.73 | 11.09 | 0.04 | 0.04 | -1.29 | 0.000287 | 0.000065 | 0.132733 | 0.025805 |
| MmuSTS.319.1.S1_at    | MmuSTS.319.1  | 5.91  | 5.22  | 0.2  | 0.12 | 1.61  | 0.005457 | 0.001338 | 0.208157 | 0.056366 |
| MmuSTS.3190.1.S1_at   | MmuSTS.3190.1 | 4.77  | 4.85  | 0.05 | 0.1  | -1.06 | 0.210815 | 0.016286 | 0.582007 | 0.161712 |
| MmuSTS.3191.1.S1_at   | MmuSTS.3191.1 | 8.68  | 8.55  | 0.34 | 0.1  | 1.1   | 0.503044 | 0.033237 | 0.784008 | 0.225803 |
| MmuSTS.3192.1.S1_at   | MmuSTS.3192.1 | 10.18 | 10.25 | 0.2  | 0.13 | -1.05 | 0.737908 | 0.617273 | 0.899668 | 0.773326 |
| MmuSTS.3193.1.S1_at   | MmuSTS.3193.1 | 11.44 | 12.1  | 0.35 | 0.04 | -1.57 | 0.081134 | 0.079614 | 0.445139 | 0.326981 |
| MmuSTS.3194.1.S1_at   | MmuSTS.3194.1 | 8.76  | 7.96  | 0.08 | 0.18 | 1.74  | 0.004573 | 0.00154  | 0.201051 | 0.05949  |
| MmuSTS.3195.1.S1_at   | MmuSTS.3195.1 | 5.78  | 5.7   | 0.05 | 0.06 | 1.06  | 0.145472 | 0.343814 | 0.52043  | 0.589508 |
| MmuSTS.3196.1.S1_at   | MmuSTS.3196.1 | 8.44  | 8.46  | 0.02 | 0.15 | -1.01 | 0.843793 | 0.388511 | 0.944946 | 0.622897 |
| MmuSTS.3197.1.S1_at   | MmuSTS.3197.1 | 8.3   | 10.27 | 1.14 | 0.18 | -3.89 | 0.044171 | 0.018182 | 0.374158 | 0.169673 |
| MmuSTS.3198.1.S1_at   | MmuSTS.3198.1 | 9.04  | 9.47  | 0.47 | 0.25 | -1.35 | 0.543724 | 0.722138 | 0.806758 | 0.839044 |
| MmuSTS.3199.1.S1_at   | MmuSTS.3199.1 | 8.8   | 8.79  | 0.4  | 0.09 | 1     | 0.995324 | 0.309846 | 0.998216 | 0.565046 |
| MmuSTS.32.1.S1_at     | MmuSTS.32.1   | 9.75  | 9.05  | 0.94 | 0.4  | 1.62  | 0.918759 | 0.806176 | 0.972261 | 0.88857  |
| MmuSTS.320.1.S1_at    | MmuSTS.320.1  | 5.89  | 5.84  | 0.2  | 0.06 | 1.04  | 0.446292 | 0.797385 | 0.752623 | 0.883171 |
| MmuSTS.3200.1.S1_at   | MmuSTS.3200.1 | 9.93  | 9.63  | 0.18 | 0.1  | 1.23  | 0.057056 | 0.126549 | 0.401454 | 0.397149 |
| MmuSTS.3201.1.S1_at   | MmuSTS.3201.1 | 10.9  | 10.82 | 0.28 | 0.14 | 1.05  | 0.247114 | 0.310113 | 0.612582 | 0.565333 |
| MmuSTS.3202.1.S1_at   | MmuSTS.3202.1 | 8.76  | 9.1   | 1.31 | 0.24 | -1.26 | 0.654644 | 0.54485  | 0.862882 | 0.727178 |
| MmuSTS.3203.1.S1_at   | MmuSTS.3203.1 | 12.42 | 12.65 | 0.45 | 0.02 | -1.17 | 0.96762  | 0.269101 | 0.989309 | 0.534447 |
| MmuSTS.3204.1.S1_at   | MmuSTS.3204.1 | 10.52 | 10.49 | 1.12 | 0.06 | 1.03  | 0.910929 | 0.55779  | 0.969778 | 0.73524  |
| MmuSTS.3205.1.S1_at   | MmuSTS.3205.1 | 8.65  | 8.88  | 0.27 | 0.07 | -1.17 | 0.219732 | 0.138888 | 0.589083 | 0.412037 |
| MmuSTS.3206.1.S1_at   | MmuSTS.3206.1 | 11.28 | 10.55 | 0.08 | 0.12 | 1.66  | 0.000846 | 0.000155 | 0.153739 | 0.030072 |
| MmuSTS.3207.1.S1_at   | MmuSTS.3207.1 | 10.47 | 10.83 | 0.12 | 0.19 | -1.28 | 0.12113  | 0.098108 | 0.494751 | 0.356202 |
| MmuSTS.3208.1.S1_at   | MmuSTS.3208.1 | 10.42 | 10.93 | 0.32 | 0.08 | -1.42 | 0.083605 | 0.011303 | 0.449622 | 0.138076 |
| MmuSTS.3209.1.S1_at   | MmuSTS.3209.1 | 12.13 | 12.28 | 0.1  | 0.02 | -1.11 | 0.043832 | 0.152617 | 0.372715 | 0.427435 |
| MmuSTS.321.1.S1_s_at  | MmuSTS.321.1  | 11.16 | 10.52 | 0.34 | 0.12 | 1.56  | 0.071716 | 0.040528 | 0.431368 | 0.246264 |
| MmuSTS.3210.1.S1_at   | MmuSTS.3210.1 | 4.57  | 4.57  | 0    | 0.01 | 1     | 0.631074 | 0.775099 | 0.852361 | 0.869048 |
| MmuSTS.3211.1.S1_at   | MmuSTS.3211.1 | 9.47  | 9.25  | 0.37 | 0.13 | 1.17  | 0.300827 | 0.565165 | 0.65518  | 0.739748 |
| MmuSTS.3212.1.S1_at   | MmuSTS.3212.1 | 5.7   | 6.43  | 1.33 | 0.11 | -1.66 | 0.413238 | 0.64259  | 0.732218 | 0.790343 |
| MmuSTS.3213.1.S1_at   | MmuSTS.3213.1 | 9.96  | 10.09 | 0.31 | 0.08 | -1.09 | 0.451009 | 0.529476 | 0.755    | 0.717289 |
| MmuSTS.3214.1.S1_at   | MmuSTS.3214.1 | 9.51  | 9.19  | 0.5  | 0.3  | 1.25  | 0.084375 | 0.044013 | 0.450953 | 0.254195 |
| MmuSTS.3215.1.S1_at   | MmuSTS.3215.1 | 9.42  | 9.28  | 0.42 | 0.02 | 1.1   | 0.574696 | 0.449113 | 0.824212 | 0.664892 |
| MmuSTS.3216.1.S1_at   | MmuSTS.3216.1 | 4.29  | 4.12  | 0.24 | 0.05 | 1.12  | 0.344216 | 0.612606 | 0.686913 | 0.770091 |
| MmuSTS.3217.1.S1_at   | MmuSTS.3217.1 | 13.35 | 12.4  | 0.18 | 0.14 | 1.93  | 0.002811 | 0.010543 | 0.185983 | 0.134072 |
| MmuSTS.3218.1.S1_at   | MmuSTS.3218.1 | 10.69 | 10.39 | 0.31 | 0.07 | 1.23  | 0.048877 | 0.00309  | 0.384733 | 0.081194 |
| MmuSTS.3219.1.S1_at   | MmuSTS.3219.1 | 9.21  | 9.36  | 0.18 | 0.03 | -1.11 | 0.075046 | 0.011779 | 0.43568  | 0.140575 |

|                       |               |       |       |      |      |       |          |          |          |          |
|-----------------------|---------------|-------|-------|------|------|-------|----------|----------|----------|----------|
| MmuSTS.322.1.S1_at    | MmuSTS.322.1  | 5.34  | 5.27  | 0.18 | 0.06 | 1.05  | 0.346119 | 0.674359 | 0.687873 | 0.809748 |
| MmuSTS.3220.1.S1_at   | MmuSTS.3220.1 | 8.49  | 8.59  | 0.45 | 0.12 | -1.07 | 0.706084 | 0.020723 | 0.885558 | 0.180645 |
| MmuSTS.3221.1.S1_at   | MmuSTS.3221.1 | 5.35  | 4.99  | 0.18 | 0.14 | 1.28  | 0.139931 | 0.134247 | 0.515501 | 0.406457 |
| MmuSTS.3222.1.S1_at   | MmuSTS.3222.1 | 9.08  | 8.93  | 0.53 | 0.08 | 1.11  | 0.649874 | 0.204447 | 0.860654 | 0.478821 |
| MmuSTS.3223.1.S1_at   | MmuSTS.3223.1 | 9.72  | 9.57  | 0.49 | 0.07 | 1.11  | 0.373273 | 0.152654 | 0.705567 | 0.427483 |
| MmuSTS.3224.1.S1_at   | MmuSTS.3224.1 | 7.93  | 9.54  | 2.4  | 0.14 | -3.06 | 0.248995 | 0.130666 | 0.61432  | 0.402666 |
| MmuSTS.3225.1.S1_at   | MmuSTS.3225.1 | 9.96  | 9.76  | 0.24 | 0.09 | 1.15  | 0.092961 | 0.015715 | 0.461637 | 0.158858 |
| MmuSTS.3226.1.S1_at   | MmuSTS.3226.1 | 5.99  | 5.96  | 0.16 | 0.14 | 1.02  | 0.359931 | 0.600289 | 0.697657 | 0.762019 |
| MmuSTS.3227.1.S1_at   | MmuSTS.3227.1 | 9.42  | 9.66  | 0.28 | 0.14 | -1.18 | 0.219001 | 0.017412 | 0.588406 | 0.166995 |
| MmuSTS.3228.1.S1_at   | MmuSTS.3228.1 | 7.55  | 7.33  | 0.23 | 0.06 | 1.16  | 0.148401 | 0.079549 | 0.522567 | 0.326897 |
| MmuSTS.3229.1.S1_at   | MmuSTS.3229.1 | 5.34  | 5.79  | 0.97 | 0.31 | -1.37 | 0.891038 | 0.979875 | 0.962566 | 0.989228 |
| MmuSTS.323.1.S1_at    | MmuSTS.323.1  | 6.42  | 6.48  | 0.03 | 0.16 | -1.04 | 0.812015 | 0.509129 | 0.932004 | 0.704012 |
| MmuSTS.3230.1.S1_at   | MmuSTS.3230.1 | 5.1   | 4.85  | 0.41 | 0.27 | 1.19  | 0.446268 | 0.319425 | 0.75262  | 0.571762 |
| MmuSTS.3231.1.S1_at   | MmuSTS.3231.1 | 7.58  | 7.35  | 0.09 | 0.12 | 1.17  | 0.096541 | 0.116685 | 0.465152 | 0.383864 |
| MmuSTS.3232.1.S1_at   | MmuSTS.3232.1 | 5.5   | 4.94  | 0.16 | 0.04 | 1.47  | 0.008736 | 0.013046 | 0.236496 | 0.14696  |
| MmuSTS.3233.1.S1_at   | MmuSTS.3233.1 | 5.79  | 5.61  | 0.26 | 0.02 | 1.13  | 0.313279 | 0.211608 | 0.664587 | 0.485681 |
| MmuSTS.3234.1.S1_at   | MmuSTS.3234.1 | 8.86  | 9.39  | 0.76 | 0.1  | -1.45 | 0.839479 | 0.009474 | 0.942786 | 0.128164 |
| MmuSTS.3235.1.S1_at   | MmuSTS.3235.1 | 3.44  | 3.36  | 0.2  | 0.05 | 1.06  | 0.499741 | 0.291987 | 0.782208 | 0.552163 |
| MmuSTS.3236.1.S1_at   | MmuSTS.3236.1 | 11.84 | 11.89 | 0.06 | 0.06 | -1.04 | 0.841648 | 0.004064 | 0.943862 | 0.090288 |
| MmuSTS.3237.1.S1_at   | MmuSTS.3237.1 | 8.36  | 9.41  | 0.34 | 0.11 | -2.06 | 0.00346  | 0.00018  | 0.195142 | 0.030511 |
| MmuSTS.3238.1.S1_at   | MmuSTS.3238.1 | 9.65  | 10.14 | 0.74 | 0.04 | -1.4  | 0.798179 | 0.144682 | 0.925957 | 0.418546 |
| MmuSTS.3239.1.S1_at   | MmuSTS.3239.1 | 10.68 | 9.33  | 1.46 | 0.4  | 2.55  | 0.206967 | 0.091344 | 0.578774 | 0.346281 |
| MmuSTS.324.1.S1_at    | MmuSTS.324.1  | 12.87 | 12.81 | 0.22 | 0.04 | 1.04  | 0.545704 | 0.160962 | 0.808147 | 0.437116 |
| MmuSTS.3240.1.S1_at   | MmuSTS.3240.1 | 10.34 | 10.36 | 0.69 | 0.09 | -1.01 | 0.915711 | 0.445252 | 0.971302 | 0.662338 |
| MmuSTS.3241.1.S1_at   | MmuSTS.3241.1 | 9.24  | 8.95  | 0.07 | 0.06 | 1.22  | 0.005318 | 0.05441  | 0.207623 | 0.278799 |
| MmuSTS.3242.1.S1_at   | MmuSTS.3242.1 | 12.92 | 12.64 | 0.37 | 0.04 | 1.22  | 0.676793 | 0.728343 | 0.873268 | 0.84296  |
| MmuSTS.3243.1.S1_at   | MmuSTS.3243.1 | 12.68 | 12.49 | 0.26 | 0.04 | 1.14  | 0.463853 | 0.335517 | 0.762278 | 0.583326 |
| MmuSTS.3244.1.S1_at   | MmuSTS.3244.1 | 11.93 | 12.19 | 0.87 | 0.12 | -1.2  | 0.248198 | 0.126376 | 0.613703 | 0.396902 |
| MmuSTS.3245.1.S1_at   | MmuSTS.3245.1 | 11.13 | 10.99 | 0.1  | 0.03 | 1.11  | 0.054026 | 0.156466 | 0.395693 | 0.431846 |
| MmuSTS.3246.1.S1_at   | MmuSTS.3246.1 | 11.69 | 11.24 | 0.4  | 0.07 | 1.37  | 0.05372  | 0.006955 | 0.39536  | 0.112678 |
| MmuSTS.3247.1.S1_at   | MmuSTS.3247.1 | 8.88  | 8.71  | 0.3  | 0.08 | 1.12  | 0.614786 | 0.327605 | 0.844066 | 0.577448 |
| MmuSTS.3248.1.S1_at   | MmuSTS.3248.1 | 10.4  | 10.37 | 0.11 | 0.19 | 1.02  | 0.662974 | 0.197819 | 0.867013 | 0.472721 |
| MmuSTS.3249.1.S1_at   | MmuSTS.3249.1 | 8.41  | 8.61  | 1.45 | 0.25 | -1.15 | 0.827312 | 0.539167 | 0.938039 | 0.723588 |
| MmuSTS.325.1.S1_at    | MmuSTS.325.1  | 3.87  | 3.77  | 0.13 | 0.12 | 1.07  | 0.408192 | 0.707797 | 0.729194 | 0.830472 |
| MmuSTS.325.1.S1_s_at  | MmuSTS.325.1  | 5.15  | 5.19  | 0.16 | 0.2  | -1.03 | 0.597152 | 0.75695  | 0.83613  | 0.858495 |
| MmuSTS.3250.1.S1_at   | MmuSTS.3250.1 | 10.83 | 10.97 | 0.26 | 0.01 | -1.1  | 0.127929 | 0.080655 | 0.502422 | 0.328444 |
| MmuSTS.3251.1.S1_at   | MmuSTS.3251.1 | 11.38 | 11.28 | 2.59 | 0.26 | 1.07  | 0.657571 | 0.190371 | 0.864123 | 0.465906 |
| MmuSTS.3252.1.S1_at   | MmuSTS.3252.1 | 8.33  | 8.38  | 1.89 | 0.17 | -1.04 | 0.867771 | 0.190219 | 0.95372  | 0.465854 |
| MmuSTS.3253.1.S1_s_at | MmuSTS.3253.1 | 13.05 | 12.05 | 0.29 | 0.13 | 1.99  | 0.005187 | 0.033803 | 0.206146 | 0.227489 |
| MmuSTS.3254.1.S1_at   | MmuSTS.3254.1 | 7.62  | 7.22  | 0.49 | 0.3  | 1.33  | 0.429534 | 0.72393  | 0.742215 | 0.840188 |
| MmuSTS.3255.1.S1_at   | MmuSTS.3255.1 | 6.37  | 6.3   | 0.51 | 0.36 | 1.05  | 0.918325 | 0.917809 | 0.972108 | 0.954011 |
| MmuSTS.3256.1.S1_at   | MmuSTS.3256.1 | 11.67 | 11.68 | 0.38 | 0.05 | -1.01 | 0.983524 | 0.805093 | 0.994986 | 0.887962 |
| MmuSTS.3257.1.S1_at   | MmuSTS.3257.1 | 6.18  | 6.04  | 0.33 | 0.16 | 1.1   | 0.339842 | 0.011048 | 0.684042 | 0.136843 |



|                       |               |       |       |      |      |       |          |          |          |          |
|-----------------------|---------------|-------|-------|------|------|-------|----------|----------|----------|----------|
| MmuSTS.3258.1.S1_at   | MmuSTS.3258.1 | 6.73  | 6.59  | 0.3  | 0.11 | 1.1   | 0.24399  | 0.310693 | 0.609747 | 0.565787 |
| MmuSTS.3259.1.S1_at   | MmuSTS.3259.1 | 7.96  | 7.34  | 0.24 | 0.25 | 1.54  | 0.07297  | 0.299705 | 0.433769 | 0.558037 |
| MmuSTS.326.1.S1_at    | MmuSTS.326.1  | 12.42 | 12.51 | 0.14 | 0.04 | -1.06 | 0.270039 | 0.213884 | 0.630217 | 0.48758  |
| MmuSTS.3260.1.S1_at   | MmuSTS.3260.1 | 4.36  | 4.49  | 0.13 | 0.06 | -1.1  | 0.523955 | 0.594672 | 0.795715 | 0.758623 |
| MmuSTS.3261.1.S1_at   | MmuSTS.3261.1 | 10.63 | 10.68 | 0.5  | 0.11 | -1.03 | 0.859212 | 0.082219 | 0.950315 | 0.331091 |
| MmuSTS.3262.1.S1_at   | MmuSTS.3262.1 | 10.67 | 10.3  | 0.15 | 0.14 | 1.3   | 0.02584  | 0.017871 | 0.32273  | 0.168774 |
| MmuSTS.3263.1.S1_at   | MmuSTS.3263.1 | 10.74 | 10.7  | 0.34 | 0.32 | 1.03  | 0.921204 | 0.400916 | 0.973328 | 0.630658 |
| MmuSTS.3264.1.S1_at   | MmuSTS.3264.1 | 13.13 | 13.44 | 0.51 | 0.1  | -1.24 | 0.189444 | 0.028536 | 0.560916 | 0.210754 |
| MmuSTS.3265.1.S1_at   | MmuSTS.3265.1 | 7.52  | 7.95  | 0.43 | 0.09 | -1.35 | 0.224642 | 0.228151 | 0.593878 | 0.500327 |
| MmuSTS.3266.1.S1_at   | MmuSTS.3266.1 | 12.34 | 12.77 | 0.15 | 0.06 | -1.35 | 0.009237 | 0.040097 | 0.241866 | 0.245388 |
| MmuSTS.3267.1.S1_at   | MmuSTS.3267.1 | 3.82  | 3.96  | 0.13 | 0.24 | -1.1  | 0.159423 | 0.385125 | 0.532266 | 0.620662 |
| MmuSTS.3268.1.S1_at   | MmuSTS.3268.1 | 10.47 | 10.79 | 0.3  | 0.06 | -1.25 | 0.122595 | 0.047431 | 0.496133 | 0.262486 |
| MmuSTS.3269.1.S1_at   | MmuSTS.3269.1 | 9.6   | 10.12 | 1.16 | 0.25 | -1.43 | 0.596635 | 0.114562 | 0.836057 | 0.38111  |
| MmuSTS.3270.1.S1_at   | MmuSTS.3270.1 | 8.26  | 8.69  | 0.09 | 0.32 | -1.35 | 0.149593 | 0.057652 | 0.523226 | 0.286366 |
| MmuSTS.3270.1.S1_s_at | MmuSTS.3270.1 | 7.85  | 8.18  | 0.06 | 0.22 | -1.26 | 0.065036 | 0.027502 | 0.419691 | 0.207161 |
| MmuSTS.3271.1.S1_at   | MmuSTS.3271.1 | 9.49  | 9.6   | 0.32 | 0.07 | -1.08 | 0.743452 | 0.41351  | 0.902124 | 0.639648 |
| MmuSTS.3272.1.S1_at   | MmuSTS.3272.1 | 8.39  | 8.42  | 0.94 | 0.15 | -1.02 | 0.63819  | 0.257304 | 0.855896 | 0.525108 |
| MmuSTS.3273.1.S1_at   | MmuSTS.3273.1 | 8.16  | 8.48  | 0.54 | 0.2  | -1.25 | 0.972753 | 0.973533 | 0.991136 | 0.985633 |
| MmuSTS.3274.1.S1_at   | MmuSTS.3274.1 | 10.7  | 10.62 | 0.42 | 0.17 | 1.05  | 0.795918 | 0.23435  | 0.924996 | 0.505629 |
| MmuSTS.3275.1.S1_at   | MmuSTS.3275.1 | 11.39 | 11.46 | 0.41 | 0.04 | -1.05 | 0.766231 | 0.001944 | 0.912101 | 0.065813 |
| MmuSTS.3276.1.S1_at   | MmuSTS.3276.1 | 10.92 | 10.85 | 0.15 | 0.05 | 1.05  | 0.300816 | 0.301014 | 0.65518  | 0.559198 |
| MmuSTS.3277.1.S1_at   | MmuSTS.3277.1 | 8.64  | 8.98  | 0.18 | 0.13 | -1.27 | 0.133443 | 0.148951 | 0.507925 | 0.423294 |
| MmuSTS.3278.1.S1_at   | MmuSTS.3278.1 | 9.25  | 9.31  | 0.2  | 0.09 | -1.04 | 0.717789 | 0.311397 | 0.890514 | 0.566451 |
| MmuSTS.3279.1.S1_at   | MmuSTS.3279.1 | 7.44  | 7.46  | 0.24 | 0.19 | -1.01 | 0.415132 | 0.160903 | 0.733561 | 0.437116 |
| MmuSTS.328.1.S1_at    | MmuSTS.328.1  | 6.88  | 6.78  | 0.14 | 0.16 | 1.07  | 0.575217 | 0.692042 | 0.824603 | 0.82091  |
| MmuSTS.328.1.S1_s_at  | MmuSTS.328.1  | 5.5   | 5.33  | 0.19 | 0.02 | 1.12  | 0.196997 | 0.505058 | 0.567781 | 0.70197  |
| MmuSTS.3280.1.S1_at   | MmuSTS.3280.1 | 5.16  | 5.74  | 0.61 | 0.05 | -1.49 | 0.180305 | 0.032275 | 0.553467 | 0.222396 |
| MmuSTS.3281.1.S1_at   | MmuSTS.3281.1 | 9.71  | 10.09 | 0.37 | 0.3  | -1.3  | 0.083573 | 0.116682 | 0.449622 | 0.383864 |
| MmuSTS.3282.1.S1_at   | MmuSTS.3282.1 | 5.9   | 5.73  | 0.27 | 0.13 | 1.12  | 0.249425 | 0.051845 | 0.614753 | 0.273151 |
| MmuSTS.3283.1.S1_at   | MmuSTS.3283.1 | 7.49  | 7.57  | 0.27 | 0.38 | -1.06 | 0.318597 | 0.494517 | 0.668228 | 0.694909 |
| MmuSTS.3284.1.S1_at   | MmuSTS.3284.1 | 7.8   | 7.43  | 1.13 | 0.05 | 1.3   | 0.612337 | 0.545925 | 0.843031 | 0.727697 |
| MmuSTS.3285.1.S1_at   | MmuSTS.3285.1 | 9.65  | 9.78  | 1.34 | 0.19 | -1.09 | 0.926089 | 0.368648 | 0.975389 | 0.608143 |
| MmuSTS.3286.1.S1_at   | MmuSTS.3286.1 | 6.94  | 6.69  | 0.09 | 0.08 | 1.19  | 0.010813 | 0.081229 | 0.250389 | 0.329351 |
| MmuSTS.3287.1.S1_at   | MmuSTS.3287.1 | 9.04  | 8.91  | 0.15 | 0.08 | 1.09  | 0.256313 | 0.385245 | 0.620399 | 0.620709 |
| MmuSTS.3288.1.S1_at   | MmuSTS.3288.1 | 8.28  | 10.05 | 0.84 | 0.23 | -3.43 | 0.030722 | 0.044611 | 0.338443 | 0.255589 |
| MmuSTS.3289.1.S1_at   | MmuSTS.3289.1 | 9.23  | 9.3   | 0.22 | 0.02 | -1.05 | 0.705795 | 0.812761 | 0.885363 | 0.891794 |
| MmuSTS.329.1.S1_at    | MmuSTS.329.1  | 5.03  | 4.91  | 0.09 | 0.05 | 1.09  | 0.178562 | 0.599041 | 0.551383 | 0.761257 |
| MmuSTS.3290.1.S1_at   | MmuSTS.3290.1 | 4.82  | 5.6   | 0.26 | 0.27 | -1.72 | 0.040218 | 0.002194 | 0.36348  | 0.069206 |
| MmuSTS.3291.1.S1_at   | MmuSTS.3291.1 | 12.04 | 11.77 | 0.48 | 0.1  | 1.21  | 0.747197 | 0.218664 | 0.903916 | 0.492361 |
| MmuSTS.3292.1.S1_at   | MmuSTS.3292.1 | 12.2  | 12.62 | 0.57 | 0.07 | -1.34 | 0.168975 | 0.101323 | 0.541912 | 0.361094 |
| MmuSTS.3293.1.S1_at   | MmuSTS.3293.1 | 3.28  | 3.07  | 0.22 | 0.11 | 1.16  | 0.351378 | 0.639675 | 0.692009 | 0.788389 |
| MmuSTS.3294.1.S1_at   | MmuSTS.3294.1 | 5.53  | 5.25  | 0.56 | 1.15 | 1.21  | 0.904297 | 0.521605 | 0.967773 | 0.712505 |
| MmuSTS.3295.1.S1_at   | MmuSTS.3295.1 | 3.18  | 3.14  | 0.11 | 0.07 | 1.03  | 0.815684 | 0.638746 | 0.933219 | 0.787827 |

|                       |               |       |       |      |      |       |          |          |          |          |
|-----------------------|---------------|-------|-------|------|------|-------|----------|----------|----------|----------|
| MmuSTS.3296.1.S1_at   | MmuSTS.3296.1 | 7.04  | 6.97  | 0.23 | 0.2  | 1.04  | 0.178476 | 0.123589 | 0.551383 | 0.393637 |
| MmuSTS.3297.1.S1_at   | MmuSTS.3297.1 | 11.28 | 11.29 | 0.29 | 0.07 | -1    | 0.343312 | 0.341225 | 0.686535 | 0.587336 |
| MmuSTS.3298.1.S1_at   | MmuSTS.3298.1 | 7.06  | 7.48  | 0.52 | 0.19 | -1.34 | 0.388764 | 0.402036 | 0.715649 | 0.631153 |
| MmuSTS.3299.1.S1_at   | MmuSTS.3299.1 | 10.08 | 9.72  | 0.99 | 0.18 | 1.28  | 0.736509 | 0.933513 | 0.899163 | 0.962216 |
| MmuSTS.33.1.S1_at     | MmuSTS.33.1   | 9.4   | 9.35  | 0.49 | 0.37 | 1.03  | 0.283398 | 0.646578 | 0.641407 | 0.792965 |
| MmuSTS.330.1.S1_s_at  | MmuSTS.330.1  | 3.1   | 2.94  | 0.15 | 0.15 | 1.12  | 0.368189 | 0.489562 | 0.70351  | 0.691824 |
| MmuSTS.3300.1.S1_at   | MmuSTS.3300.1 | 12.36 | 12.55 | 0.17 | 0.04 | -1.14 | 0.152212 | 0.025566 | 0.525262 | 0.200612 |
| MmuSTS.3301.1.S1_s_at | MmuSTS.3301.1 | 13.43 | 13.5  | 0.09 | 0.06 | -1.05 | 0.328031 | 0.162389 | 0.675524 | 0.438575 |
| MmuSTS.3302.1.S1_at   | MmuSTS.3302.1 | 11.47 | 11.42 | 0.42 | 0.09 | 1.03  | 0.319968 | 0.339091 | 0.669028 | 0.585891 |
| MmuSTS.3303.1.S1_at   | MmuSTS.3303.1 | 6.26  | 6.45  | 1.78 | 0.13 | -1.15 | 0.750785 | 0.902383 | 0.905556 | 0.94454  |
| MmuSTS.3304.1.S1_at   | MmuSTS.3304.1 | 11.41 | 11.29 | 0.22 | 0.09 | 1.09  | 0.152073 | 0.112478 | 0.525208 | 0.377815 |
| MmuSTS.3305.1.S1_at   | MmuSTS.3305.1 | 9.67  | 10.02 | 1.8  | 0.15 | -1.27 | 0.645113 | 0.418202 | 0.858716 | 0.642663 |
| MmuSTS.3306.1.S1_at   | MmuSTS.3306.1 | 6.54  | 6.48  | 0.19 | 0.08 | 1.05  | 0.263981 | 0.60637  | 0.625857 | 0.765747 |
| MmuSTS.3306.1.S1_s_at | MmuSTS.3306.1 | 6.47  | 6.46  | 0.26 | 0.09 | 1.01  | 0.675964 | 0.280599 | 0.872796 | 0.543772 |
| MmuSTS.3307.1.S1_at   | MmuSTS.3307.1 | 9.88  | 10.45 | 1.39 | 0.21 | -1.49 | 0.534894 | 0.325277 | 0.801404 | 0.575648 |
| MmuSTS.3308.1.S1_at   | MmuSTS.3308.1 | 8.25  | 8.16  | 0.3  | 0.16 | 1.06  | 0.523189 | 0.021907 | 0.795463 | 0.185235 |
| MmuSTS.3309.1.S1_at   | MmuSTS.3309.1 | 8.87  | 8.58  | 0.47 | 0.18 | 1.22  | 0.55032  | 0.295449 | 0.810765 | 0.554885 |
| MmuSTS.331.1.S1_s_at  | MmuSTS.331.1  | 4.07  | 3.83  | 0.19 | 0.13 | 1.18  | 0.241186 | 0.173849 | 0.60739  | 0.450133 |
| MmuSTS.3310.1.S1_at   | MmuSTS.3310.1 | 9.05  | 9.25  | 0.27 | 0.06 | -1.15 | 0.109843 | 0.016011 | 0.482728 | 0.160458 |
| MmuSTS.3311.1.S1_at   | MmuSTS.3311.1 | 9     | 10.16 | 0.26 | 0.09 | -2.24 | 0.002366 | 0.000517 | 0.176928 | 0.039588 |
| MmuSTS.3312.1.S1_at   | MmuSTS.3312.1 | 10.5  | 10.72 | 0.57 | 0.23 | -1.17 | 0.950936 | 0.069089 | 0.983356 | 0.309061 |
| MmuSTS.3313.1.S1_at   | MmuSTS.3313.1 | 11.39 | 11.65 | 0.09 | 0.04 | -1.2  | 0.004171 | 0.001383 | 0.198874 | 0.056947 |
| MmuSTS.3314.1.S1_at   | MmuSTS.3314.1 | 8.7   | 8.68  | 0.42 | 0.47 | 1.01  | 0.301967 | 0.479637 | 0.655989 | 0.685331 |
| MmuSTS.3315.1.S1_at   | MmuSTS.3315.1 | 7.69  | 7.62  | 0.14 | 0.04 | 1.05  | 0.523998 | 0.151716 | 0.795715 | 0.426383 |
| MmuSTS.3316.1.S1_at   | MmuSTS.3316.1 | 8.93  | 8.65  | 0.42 | 0.06 | 1.21  | 0.487551 | 0.706577 | 0.775077 | 0.829757 |
| MmuSTS.3317.1.S1_at   | MmuSTS.3317.1 | 12.2  | 12.96 | 0.92 | 0.15 | -1.7  | 0.207358 | 0.204618 | 0.578933 | 0.478993 |
| MmuSTS.3318.1.S1_at   | MmuSTS.3318.1 | 9.46  | 9.56  | 0.33 | 0.19 | -1.07 | 0.52254  | 0.000702 | 0.795143 | 0.04424  |
| MmuSTS.3319.1.S1_at   | MmuSTS.3319.1 | 9.8   | 10.45 | 0.82 | 0.14 | -1.58 | 0.312761 | 0.137271 | 0.664208 | 0.410165 |
| MmuSTS.332.1.S1_s_at  | MmuSTS.332.1  | 3.44  | 3.45  | 0.06 | 0.14 | -1.01 | 0.827499 | 0.375882 | 0.938039 | 0.613746 |
| MmuSTS.3320.1.S1_at   | MmuSTS.3320.1 | 9.07  | 9.68  | 0.48 | 0.44 | -1.53 | 0.186419 | 0.010835 | 0.559101 | 0.135705 |
| MmuSTS.3321.1.S1_at   | MmuSTS.3321.1 | 13.03 | 12.96 | 0.15 | 0.04 | 1.05  | 0.573023 | 0.073273 | 0.823428 | 0.316233 |
| MmuSTS.3322.1.S1_at   | MmuSTS.3322.1 | 10.86 | 10.87 | 0.59 | 0.15 | -1.01 | 0.41877  | 0.454565 | 0.735911 | 0.668668 |
| MmuSTS.3323.1.S1_at   | MmuSTS.3323.1 | 10.3  | 10.42 | 0.43 | 0.11 | -1.09 | 0.211202 | 0.543282 | 0.582141 | 0.726012 |
| MmuSTS.3324.1.S1_at   | MmuSTS.3324.1 | 9.75  | 8.96  | 2.81 | 0.3  | 1.73  | 0.907269 | 0.307408 | 0.968503 | 0.563649 |
| MmuSTS.3325.1.S1_at   | MmuSTS.3325.1 | 3.63  | 3.69  | 0.14 | 0.09 | -1.04 | 0.416443 | 0.690277 | 0.734327 | 0.819463 |
| MmuSTS.3326.1.S1_at   | MmuSTS.3326.1 | 5.92  | 7.18  | 1.47 | 0.59 | -2.4  | 0.380501 | 0.310361 | 0.709387 | 0.565552 |
| MmuSTS.3327.1.S1_at   | MmuSTS.3327.1 | 8.33  | 8.5   | 0.25 | 0.54 | -1.13 | 0.290778 | 0.001522 | 0.647362 | 0.059307 |
| MmuSTS.3328.1.S1_at   | MmuSTS.3328.1 | 8.89  | 8.93  | 0.33 | 0.04 | -1.03 | 0.923453 | 0.002899 | 0.97434  | 0.079107 |
| MmuSTS.3329.1.S1_at   | MmuSTS.3329.1 | 10.67 | 10.62 | 0.7  | 0.18 | 1.04  | 0.631929 | 0.411869 | 0.85263  | 0.638434 |
| MmuSTS.333.1.S1_at    | MmuSTS.333.1  | 3.96  | 3.98  | 0.1  | 0.03 | -1.01 | 0.4372   | 0.267771 | 0.746719 | 0.533553 |
| MmuSTS.3330.1.S1_at   | MmuSTS.3330.1 | 6.62  | 6.38  | 0.56 | 0.24 | 1.18  | 0.32288  | 0.193046 | 0.671692 | 0.468554 |
| MmuSTS.3331.1.S1_at   | MmuSTS.3331.1 | 6.47  | 6.45  | 0.15 | 0.09 | 1.01  | 0.372833 | 0.248278 | 0.705567 | 0.517596 |
| MmuSTS.3332.1.S1_at   | MmuSTS.3332.1 | 9.5   | 9.25  | 0.34 | 0.02 | 1.19  | 0.158932 | 0.062363 | 0.531703 | 0.296504 |

|                       |               |       |       |      |      |       |          |          |          |          |
|-----------------------|---------------|-------|-------|------|------|-------|----------|----------|----------|----------|
| MmuSTS.3333.1.S1_at   | MmuSTS.3333.1 | 10.5  | 10.01 | 0.28 | 0.08 | 1.4   | 0.045464 | 0.042968 | 0.376492 | 0.251849 |
| MmuSTS.3334.1.S1_at   | MmuSTS.3334.1 | 7.37  | 6.88  | 1.82 | 0.23 | 1.4   | 0.765052 | 0.926627 | 0.911696 | 0.958372 |
| MmuSTS.3335.1.S1_at   | MmuSTS.3335.1 | 10.06 | 10.44 | 0.46 | 0.13 | -1.3  | 0.254573 | 0.202934 | 0.618992 | 0.477343 |
| MmuSTS.3336.1.S1_at   | MmuSTS.3336.1 | 8.19  | 8.41  | 0.68 | 0.18 | -1.16 | 0.628389 | 0.463838 | 0.851106 | 0.674663 |
| MmuSTS.3337.1.S1_at   | MmuSTS.3337.1 | 11.31 | 11.46 | 0.2  | 0.03 | -1.11 | 0.316016 | 0.610573 | 0.666249 | 0.76874  |
| MmuSTS.3338.1.S1_at   | MmuSTS.3338.1 | 7.38  | 7.43  | 0.15 | 0.02 | -1.03 | 0.68729  | 0.671256 | 0.877686 | 0.807748 |
| MmuSTS.3339.1.S1_at   | MmuSTS.3339.1 | 7.21  | 7.74  | 0.75 | 0.18 | -1.44 | 0.096054 | 0.333973 | 0.464614 | 0.582063 |
| MmuSTS.334.1.S1_s_at  | MmuSTS.334.1  | 3.73  | 3.68  | 0.13 | 0.06 | 1.03  | 0.622716 | 0.720246 | 0.847926 | 0.838202 |
| MmuSTS.3340.1.S1_at   | MmuSTS.3340.1 | 9.35  | 8.15  | 0.45 | 0.3  | 2.29  | 0.026676 | 0.028889 | 0.325897 | 0.211763 |
| MmuSTS.3341.1.S1_at   | MmuSTS.3341.1 | 3.07  | 3.05  | 0.05 | 0.05 | 1.01  | 0.383524 | 0.848988 | 0.711403 | 0.914252 |
| MmuSTS.3342.1.S1_at   | MmuSTS.3342.1 | 10.09 | 10.23 | 0.51 | 0.01 | -1.1  | 0.762095 | 0.781413 | 0.910776 | 0.873256 |
| MmuSTS.3342.1.S1_s_at | MmuSTS.3342.1 | 10.88 | 11.16 | 0.5  | 0.03 | -1.22 | 0.472584 | 0.593822 | 0.767132 | 0.758418 |
| MmuSTS.3343.1.S1_at   | MmuSTS.3343.1 | 6.56  | 6.88  | 0.21 | 0.14 | -1.25 | 0.069695 | 0.155621 | 0.427525 | 0.430977 |
| MmuSTS.3344.1.S1_at   | MmuSTS.3344.1 | 2.81  | 2.75  | 0.05 | 0.3  | 1.04  | 0.63641  | 0.824773 | 0.85499  | 0.89939  |
| MmuSTS.3345.1.S1_at   | MmuSTS.3345.1 | 7.62  | 7.67  | 0.36 | 0.1  | -1.03 | 0.808414 | 0.185253 | 0.930643 | 0.461194 |
| MmuSTS.3346.1.S1_at   | MmuSTS.3346.1 | 3.79  | 3.64  | 0.1  | 0.12 | 1.11  | 0.094817 | 0.162562 | 0.464075 | 0.438708 |
| MmuSTS.3347.1.S1_at   | MmuSTS.3347.1 | 5.39  | 5.36  | 0.12 | 0.02 | 1.03  | 0.863399 | 0.975937 | 0.952018 | 0.986856 |
| MmuSTS.3348.1.S1_at   | MmuSTS.3348.1 | 6.11  | 5.42  | 0.88 | 0.24 | 1.61  | 0.090095 | 0.082639 | 0.457992 | 0.331917 |
| MmuSTS.3349.1.S1_at   | MmuSTS.3349.1 | 8.15  | 8.22  | 1.95 | 0.49 | -1.05 | 0.812913 | 0.254947 | 0.932245 | 0.52317  |
| MmuSTS.335.1.S1_at    | MmuSTS.335.1  | 4.53  | 4.69  | 0.07 | 0.1  | -1.12 | 0.122886 | 0.00723  | 0.496285 | 0.114199 |
| MmuSTS.3350.1.S1_at   | MmuSTS.3350.1 | 3.72  | 3.69  | 0.11 | 0.14 | 1.02  | 0.963191 | 0.770343 | 0.988152 | 0.866591 |
| MmuSTS.3351.1.S1_at   | MmuSTS.3351.1 | 13.24 | 13.2  | 0.02 | 0.02 | 1.02  | 0.107933 | 0.000677 | 0.480453 | 0.04413  |
| MmuSTS.3352.1.S1_at   | MmuSTS.3352.1 | 6.36  | 6.3   | 0.11 | 0.15 | 1.05  | 0.20579  | 0.333807 | 0.577662 | 0.581974 |
| MmuSTS.3353.1.S1_at   | MmuSTS.3353.1 | 7.95  | 7.25  | 2.16 | 0.52 | 1.62  | 0.675788 | 0.116964 | 0.872746 | 0.384343 |
| MmuSTS.3354.1.S1_at   | MmuSTS.3354.1 | 11.38 | 12.43 | 1.01 | 0.15 | -2.07 | 0.537973 | 0.152766 | 0.802959 | 0.427571 |
| MmuSTS.3355.1.S1_at   | MmuSTS.3355.1 | 5.06  | 5.09  | 0.26 | 0.15 | -1.02 | 0.863966 | 0.834955 | 0.952088 | 0.90553  |
| MmuSTS.3356.1.S1_at   | MmuSTS.3356.1 | 6.79  | 7.19  | 1.24 | 0.36 | -1.31 | 0.705869 | 0.163061 | 0.885404 | 0.439224 |
| MmuSTS.3357.1.S1_at   | MmuSTS.3357.1 | 4.18  | 4.22  | 0.05 | 0.04 | -1.03 | 0.093749 | 0.115658 | 0.46305  | 0.382714 |
| MmuSTS.3358.1.S1_at   | MmuSTS.3358.1 | 9.07  | 10.45 | 0.96 | 0.18 | -2.61 | 0.087604 | 0.077852 | 0.455349 | 0.324093 |
| MmuSTS.3359.1.S1_at   | MmuSTS.3359.1 | 6.23  | 6.06  | 0.1  | 0.07 | 1.12  | 0.032459 | 0.049741 | 0.344399 | 0.268104 |
| MmuSTS.336.1.S1_at    | MmuSTS.336.1  | 4.81  | 4.82  | 0.13 | 0.06 | -1.01 | 0.828429 | 0.706401 | 0.938275 | 0.829634 |
| MmuSTS.3360.1.S1_at   | MmuSTS.3360.1 | 5.77  | 5.85  | 0.55 | 0.25 | -1.06 | 0.842144 | 0.351712 | 0.944083 | 0.595164 |
| MmuSTS.3361.1.S1_at   | MmuSTS.3361.1 | 13.24 | 13.15 | 0.76 | 0.13 | 1.07  | 0.919293 | 0.063199 | 0.972508 | 0.298119 |
| MmuSTS.3362.1.S1_at   | MmuSTS.3362.1 | 10.33 | 9.7   | 1.93 | 0.16 | 1.55  | 0.688833 | 0.872672 | 0.878555 | 0.927592 |
| MmuSTS.3363.1.S1_at   | MmuSTS.3363.1 | 6.63  | 7.47  | 0.44 | 0.1  | -1.78 | 0.08218  | 0.06196  | 0.447052 | 0.295759 |
| MmuSTS.3364.1.S1_at   | MmuSTS.3364.1 | 7     | 7.66  | 0.15 | 0.15 | -1.58 | 0.004063 | 0.223125 | 0.198571 | 0.49588  |
| MmuSTS.3365.1.S1_at   | MmuSTS.3365.1 | 11.29 | 11.63 | 0.1  | 0.07 | -1.26 | 0.00536  | 0.000511 | 0.208157 | 0.039357 |
| MmuSTS.3366.1.S1_at   | MmuSTS.3366.1 | 8.42  | 8.49  | 0.04 | 0.02 | -1.04 | 0.07934  | 0.007797 | 0.442205 | 0.117765 |
| MmuSTS.3367.1.S1_at   | MmuSTS.3367.1 | 3.81  | 3.83  | 0.13 | 0.14 | -1.02 | 0.900325 | 0.99452  | 0.966081 | 0.996631 |
| MmuSTS.3368.1.S1_at   | MmuSTS.3368.1 | 11.62 | 10.95 | 0.61 | 0.15 | 1.58  | 0.116398 | 0.113671 | 0.489622 | 0.379818 |
| MmuSTS.3369.1.S1_at   | MmuSTS.3369.1 | 11.28 | 11.05 | 0.23 | 0.04 | 1.17  | 0.18168  | 0.019062 | 0.554854 | 0.173688 |
| MmuSTS.337.1.S1_at    | MmuSTS.337.1  | 4.95  | 4.92  | 0.14 | 0.07 | 1.02  | 0.802848 | 0.668819 | 0.928105 | 0.806227 |
| MmuSTS.3370.1.S1_at   | MmuSTS.3370.1 | 8.94  | 9.5   | 0.61 | 0.17 | -1.47 | 0.162722 | 0.175492 | 0.535867 | 0.452157 |

|                       |               |       |       |      |      |       |          |          |          |          |
|-----------------------|---------------|-------|-------|------|------|-------|----------|----------|----------|----------|
| MmuSTS.3371.1.S1_at   | MmuSTS.3371.1 | 11.47 | 11.92 | 0.48 | 0.06 | -1.36 | 0.119733 | 0.103858 | 0.493259 | 0.364519 |
| MmuSTS.3372.1.S1_at   | MmuSTS.3372.1 | 6.35  | 6.11  | 0.14 | 0.14 | 1.18  | 0.107633 | 0.248842 | 0.480252 | 0.517951 |
| MmuSTS.3373.1.S1_at   | MmuSTS.3373.1 | 10.83 | 11.28 | 2.45 | 0.25 | -1.37 | 0.499503 | 0.217656 | 0.7821   | 0.491255 |
| MmuSTS.3373.1.S1_s_at | MmuSTS.3373.1 | 9.65  | 10.24 | 2.29 | 0.25 | -1.5  | 0.509971 | 0.188848 | 0.787917 | 0.464789 |
| MmuSTS.3374.1.S1_at   | MmuSTS.3374.1 | 8.18  | 8.73  | 2.11 | 0.45 | -1.46 | 0.637317 | 0.632842 | 0.85549  | 0.783788 |
| MmuSTS.3375.1.S1_at   | MmuSTS.3375.1 | 10.95 | 10.36 | 2.84 | 0.36 | 1.5   | 0.813135 | 0.232879 | 0.932369 | 0.50445  |
| MmuSTS.3376.1.S1_at   | MmuSTS.3376.1 | 12.82 | 12.91 | 0.09 | 0.04 | -1.06 | 0.241565 | 0.37209  | 0.60769  | 0.610943 |
| MmuSTS.3377.1.S1_at   | MmuSTS.3377.1 | 12.56 | 12.38 | 0.13 | 0.04 | 1.13  | 0.104982 | 0.002341 | 0.476463 | 0.071588 |
| MmuSTS.3378.1.S1_at   | MmuSTS.3378.1 | 7.95  | 8.46  | 0.65 | 0.36 | -1.42 | 0.828464 | 0.851757 | 0.938275 | 0.915746 |
| MmuSTS.3379.1.S1_at   | MmuSTS.3379.1 | 13.18 | 13.18 | 0.03 | 0.02 | -1    | 0.710568 | 0.43753  | 0.887344 | 0.656769 |
| MmuSTS.338.1.S1_at    | MmuSTS.338.1  | 5.61  | 5.58  | 0.18 | 0.08 | -1.02 | 0.655673 | 0.850687 | 0.863273 | 0.915051 |
| MmuSTS.3380.1.S1_at   | MmuSTS.3380.1 | 9.33  | 9.63  | 0.15 | 0.05 | -1.23 | 0.020024 | 0.000036 | 0.303308 | 0.023031 |
| MmuSTS.3381.1.S1_at   | MmuSTS.3381.1 | 6.2   | 5.36  | 0.6  | 0.21 | 1.79  | 0.045196 | 0.011804 | 0.376019 | 0.140698 |
| MmuSTS.3382.1.S1_at   | MmuSTS.3382.1 | 4.24  | 4.91  | 0.56 | 0.31 | -1.59 | 0.138006 | 0.27274  | 0.513671 | 0.537479 |
| MmuSTS.3383.1.S1_at   | MmuSTS.3383.1 | 7.38  | 7.25  | 0.38 | 0.28 | 1.09  | 0.722525 | 0.004146 | 0.892352 | 0.09103  |
| MmuSTS.3384.1.S1_at   | MmuSTS.3384.1 | 10.9  | 10.93 | 0.23 | 0.09 | -1.02 | 0.396335 | 0.259142 | 0.721323 | 0.526264 |
| MmuSTS.3385.1.S1_at   | MmuSTS.3385.1 | 9.07  | 8.91  | 0.09 | 0.04 | 1.11  | 0.032819 | 0.062987 | 0.345393 | 0.297633 |
| MmuSTS.3386.1.S1_at   | MmuSTS.3386.1 | 9.94  | 9.74  | 0.8  | 0.28 | 1.16  | 0.242198 | 0.162845 | 0.608342 | 0.438966 |
| MmuSTS.3387.1.S1_at   | MmuSTS.3387.1 | 11.62 | 10.61 | 2.1  | 0.29 | 2.02  | 0.998624 | 0.501255 | 0.999607 | 0.699458 |
| MmuSTS.3388.1.S1_at   | MmuSTS.3388.1 | 2.94  | 2.9   | 0.1  | 0.11 | 1.02  | 0.30203  | 0.433406 | 0.655989 | 0.653676 |
| MmuSTS.3389.1.S1_at   | MmuSTS.3389.1 | 3.73  | 3.84  | 0.16 | 0.09 | -1.08 | 0.559784 | 0.324241 | 0.816426 | 0.57488  |
| MmuSTS.3390.1.S1_at   | MmuSTS.3390.1 | 8.71  | 9.01  | 0.08 | 0.1  | -1.23 | 0.045506 | 0.036514 | 0.376595 | 0.235526 |
| MmuSTS.3391.1.S1_at   | MmuSTS.3391.1 | 9.55  | 9.5   | 0.38 | 0.21 | 1.03  | 0.584388 | 0.745793 | 0.829672 | 0.852572 |
| MmuSTS.3392.1.S1_at   | MmuSTS.3392.1 | 12.59 | 12.58 | 0.1  | 0.03 | 1     | 0.405576 | 0.683868 | 0.727426 | 0.815591 |
| MmuSTS.3393.1.S1_at   | MmuSTS.3393.1 | 9.76  | 9.37  | 0.17 | 0.08 | 1.31  | 0.015378 | 0.007962 | 0.281283 | 0.118702 |
| MmuSTS.3394.1.S1_at   | MmuSTS.3394.1 | 6.74  | 6.3   | 0.38 | 0.28 | 1.36  | 0.138153 | 0.670509 | 0.513671 | 0.807399 |
| MmuSTS.3395.1.S1_at   | MmuSTS.3395.1 | 7.66  | 7.13  | 0.7  | 0.24 | 1.45  | 0.298737 | 0.070204 | 0.653263 | 0.311194 |
| MmuSTS.3396.1.S1_at   | MmuSTS.3396.1 | 6.42  | 6.41  | 0.26 | 0.08 | 1.01  | 0.346967 | 0.297825 | 0.688451 | 0.5565   |
| MmuSTS.3397.1.S1_at   | MmuSTS.3397.1 | 4.24  | 4.86  | 0.49 | 0.1  | -1.54 | 0.123562 | 0.018019 | 0.497016 | 0.169255 |
| MmuSTS.3398.1.S1_at   | MmuSTS.3398.1 | 2.97  | 2.97  | 0.31 | 0.11 | -1    | 0.383877 | 0.532071 | 0.711584 | 0.718995 |
| MmuSTS.3399.1.S1_at   | MmuSTS.3399.1 | 6.82  | 6.94  | 0.82 | 0.08 | -1.09 | 0.634118 | 0.802621 | 0.853884 | 0.886389 |
| MmuSTS.34.1.S1_at     | MmuSTS.34.1   | 10.92 | 11.19 | 0.29 | 0.23 | -1.21 | 0.469315 | 0.217743 | 0.765531 | 0.491309 |
| MmuSTS.340.1.S1_at    | MmuSTS.340.1  | 12.06 | 12.29 | 0.1  | 0.05 | -1.18 | 0.026583 | 0.000099 | 0.325381 | 0.027996 |
| MmuSTS.3400.1.S1_at   | MmuSTS.3400.1 | 12.37 | 11.52 | 0.22 | 0.39 | 1.81  | 0.023546 | 0.00796  | 0.31615  | 0.118702 |
| MmuSTS.3401.1.S1_at   | MmuSTS.3401.1 | 8.5   | 8.6   | 1.66 | 0.14 | -1.07 | 0.950153 | 0.10419  | 0.98328  | 0.365326 |
| MmuSTS.3401.1.S1_s_at | MmuSTS.3401.1 | 9.99  | 10.1  | 1.95 | 0.26 | -1.08 | 0.873754 | 0.112687 | 0.956275 | 0.378284 |
| MmuSTS.3402.1.S1_at   | MmuSTS.3402.1 | 9.87  | 8.98  | 0.28 | 0.16 | 1.85  | 0.006003 | 0.001343 | 0.21386  | 0.056396 |
| MmuSTS.3403.1.S1_at   | MmuSTS.3403.1 | 8.8   | 8.41  | 0.73 | 0.28 | 1.31  | 0.484658 | 0.446243 | 0.773768 | 0.662743 |
| MmuSTS.3404.1.S1_at   | MmuSTS.3404.1 | 9.67  | 9.79  | 0.12 | 0.37 | -1.09 | 0.971609 | 0.285052 | 0.990709 | 0.547095 |
| MmuSTS.3405.1.S1_at   | MmuSTS.3405.1 | 11.23 | 10.87 | 0.4  | 0.05 | 1.28  | 0.169957 | 0.254312 | 0.542953 | 0.522613 |
| MmuSTS.3406.1.S1_at   | MmuSTS.3406.1 | 9.53  | 9.58  | 0.02 | 0.03 | -1.03 | 0.106951 | 0.013126 | 0.479433 | 0.147338 |
| MmuSTS.3407.1.S1_at   | MmuSTS.3407.1 | 9.83  | 9.73  | 0.26 | 0.19 | 1.07  | 0.58104  | 0.393246 | 0.827363 | 0.626174 |
| MmuSTS.3408.1.S1_at   | MmuSTS.3408.1 | 9.69  | 9.8   | 0.47 | 0.24 | -1.08 | 0.528249 | 0.00301  | 0.797586 | 0.080074 |

|                       |               |       |       |      |      |       |          |          |          |          |
|-----------------------|---------------|-------|-------|------|------|-------|----------|----------|----------|----------|
| MmuSTS.3409.1.S1_at   | MmuSTS.3409.1 | 8.09  | 7.71  | 1    | 0.06 | 1.3   | 0.757853 | 0.425113 | 0.90887  | 0.647579 |
| MmuSTS.341.1.S1_at    | MmuSTS.341.1  | 9.52  | 10.6  | 0.15 | 0.15 | -2.1  | 0.000766 | 0.000064 | 0.15004  | 0.025805 |
| MmuSTS.3410.1.S1_at   | MmuSTS.3410.1 | 10.26 | 10.55 | 0.18 | 0.13 | -1.22 | 0.093647 | 0.031024 | 0.462937 | 0.218074 |
| MmuSTS.3411.1.S1_at   | MmuSTS.3411.1 | 10.54 | 9.97  | 0.32 | 0.08 | 1.48  | 0.04154  | 0.037681 | 0.366776 | 0.23859  |
| MmuSTS.3412.1.S1_s_at | MmuSTS.3412.1 | 10.42 | 10.39 | 0.07 | 0.09 | 1.02  | 0.508837 | 0.200946 | 0.787315 | 0.475426 |
| MmuSTS.3413.1.S1_at   | MmuSTS.3413.1 | 4.85  | 4.73  | 0.04 | 0.06 | 1.08  | 0.03771  | 0.399925 | 0.357804 | 0.63009  |
| MmuSTS.3414.1.S1_at   | MmuSTS.3414.1 | 11.21 | 10.97 | 0.11 | 0.01 | 1.18  | 0.025468 | 0.271473 | 0.322259 | 0.536512 |
| MmuSTS.3415.1.S1_at   | MmuSTS.3415.1 | 7.7   | 8.59  | 0.4  | 0.09 | -1.84 | 0.023549 | 0.006739 | 0.31615  | 0.110984 |
| MmuSTS.3416.1.S1_at   | MmuSTS.3416.1 | 4.41  | 4.45  | 0.09 | 0.15 | -1.03 | 0.799012 | 0.960591 | 0.92641  | 0.977548 |
| MmuSTS.3417.1.S1_at   | MmuSTS.3417.1 | 7.4   | 7.86  | 0.1  | 0.13 | -1.38 | 0.010316 | 0.013891 | 0.246929 | 0.151189 |
| MmuSTS.3418.1.S1_at   | MmuSTS.3418.1 | 8.3   | 7.56  | 0.29 | 0.19 | -1.67 | 0.009724 | 0.00148  | 0.243347 | 0.058699 |
| MmuSTS.3419.1.S1_at   | MmuSTS.3419.1 | 4.78  | 4.73  | 0.25 | 0.21 | 1.04  | 0.618117 | 0.795967 | 0.845802 | 0.882469 |
| MmuSTS.342.1.S1_s_at  | MmuSTS.342.1  | 10.6  | 10.54 | 0.13 | 0.04 | 1.04  | 0.306534 | 0.74653  | 0.65946  | 0.852872 |
| MmuSTS.3420.1.S1_at   | MmuSTS.3420.1 | 9.3   | 8.88  | 0.57 | 0.26 | 1.34  | 0.105394 | 0.053298 | 0.477051 | 0.276463 |
| MmuSTS.3421.1.S1_at   | MmuSTS.3421.1 | 7.22  | 7.17  | 0.03 | 0.05 | 1.04  | 0.336027 | 0.365679 | 0.681441 | 0.605684 |
| MmuSTS.3422.1.S1_at   | MmuSTS.3422.1 | 6.62  | 6.44  | 0.16 | 0.04 | 1.13  | 0.2933   | 0.658989 | 0.649681 | 0.800475 |
| MmuSTS.3423.1.S1_at   | MmuSTS.3423.1 | 7.62  | 9.08  | 0.62 | 0.03 | -2.75 | 0.039122 | 0.02079  | 0.361188 | 0.1809   |
| MmuSTS.3424.1.S1_at   | MmuSTS.3424.1 | 5.77  | 5.72  | 0.21 | 0.03 | 1.03  | 0.261488 | 0.268713 | 0.623872 | 0.534138 |
| MmuSTS.3425.1.S1_at   | MmuSTS.3425.1 | 3.63  | 3.78  | 0.1  | 0.32 | -1.1  | 0.507147 | 0.235787 | 0.78619  | 0.506949 |
| MmuSTS.3426.1.S1_at   | MmuSTS.3426.1 | 4.16  | 4.36  | 0.48 | 0.15 | -1.15 | 0.609323 | 0.303008 | 0.841744 | 0.560461 |
| MmuSTS.3427.1.S1_at   | MmuSTS.3427.1 | 12.85 | 13.01 | 0.19 | 0.03 | -1.12 | 0.223713 | 0.286978 | 0.592842 | 0.548246 |
| MmuSTS.3428.1.S1_at   | MmuSTS.3428.1 | 4.7   | 4.46  | 0.23 | 0.07 | 1.19  | 0.412362 | 0.223843 | 0.731945 | 0.496802 |
| MmuSTS.3429.1.S1_at   | MmuSTS.3429.1 | 10.85 | 11.49 | 0.61 | 0.08 | -1.56 | 0.337407 | 0.164869 | 0.682344 | 0.441191 |
| MmuSTS.343.1.S1_at    | MmuSTS.343.1  | 12.01 | 12.07 | 0.08 | 0.03 | -1.04 | 0.780021 | 0.639229 | 0.918949 | 0.788125 |
| MmuSTS.3430.1.S1_at   | MmuSTS.3430.1 | 9.57  | 10.09 | 0.57 | 0.05 | -1.44 | 0.534928 | 0.462363 | 0.801404 | 0.673709 |
| MmuSTS.3431.1.S1_at   | MmuSTS.3431.1 | 12.59 | 12.95 | 0.51 | 0.02 | -1.29 | 0.307706 | 0.435272 | 0.660531 | 0.655127 |
| MmuSTS.3432.1.S1_at   | MmuSTS.3432.1 | 12.33 | 12.61 | 0.51 | 0.02 | -1.21 | 0.465858 | 0.619724 | 0.763236 | 0.774893 |
| MmuSTS.3433.1.S1_at   | MmuSTS.3433.1 | 13.41 | 13.55 | 0.28 | 0.02 | -1.1  | 0.39998  | 0.229496 | 0.723437 | 0.501527 |
| MmuSTS.3434.1.S1_at   | MmuSTS.3434.1 | 9.1   | 8.49  | 1.45 | 0.14 | 1.53  | 0.488477 | 0.784972 | 0.775568 | 0.875511 |
| MmuSTS.3435.1.S1_at   | MmuSTS.3435.1 | 13.3  | 13.41 | 0.39 | 0.04 | -1.08 | 0.474183 | 0.658623 | 0.767936 | 0.800453 |
| MmuSTS.3436.1.S1_at   | MmuSTS.3436.1 | 8.74  | 9.5   | 0.83 | 0.08 | -1.69 | 0.204503 | 0.22352  | 0.575907 | 0.496363 |
| MmuSTS.3437.1.S1_at   | MmuSTS.3437.1 | 7.85  | 7.39  | 0.55 | 0.05 | 1.38  | 0.661933 | 0.686516 | 0.866615 | 0.817053 |
| MmuSTS.3438.1.S1_at   | MmuSTS.3438.1 | 9.42  | 8.69  | 0.84 | 0.09 | 1.66  | 0.640231 | 0.831421 | 0.856628 | 0.903343 |
| MmuSTS.3439.1.S1_at   | MmuSTS.3439.1 | 13.62 | 13.67 | 0.1  | 0.05 | -1.03 | 0.686699 | 0.031408 | 0.877453 | 0.219107 |
| MmuSTS.344.1.S1_at    | MmuSTS.344.1  | 11.79 | 11.7  | 0.04 | 0.08 | 1.06  | 0.392588 | 0.193636 | 0.718485 | 0.468785 |
| MmuSTS.3440.1.S1_at   | MmuSTS.3440.1 | 12.73 | 12.96 | 0.03 | 0.11 | -1.17 | 0.010012 | 0.000089 | 0.245352 | 0.027016 |
| MmuSTS.3441.1.S1_at   | MmuSTS.3441.1 | 4.75  | 5.12  | 0.29 | 0.36 | -1.29 | 0.190471 | 0.164127 | 0.561786 | 0.440346 |
| MmuSTS.3442.1.S1_at   | MmuSTS.3442.1 | 8.76  | 9.5   | 1.6  | 0.33 | -1.67 | 0.568797 | 0.14703  | 0.821041 | 0.421149 |
| MmuSTS.3443.1.S1_at   | MmuSTS.3443.1 | 8.36  | 8.86  | 1.29 | 0.23 | -1.41 | 0.405306 | 0.575303 | 0.727307 | 0.74643  |
| MmuSTS.3444.1.S1_at   | MmuSTS.3444.1 | 6.24  | 6.46  | 0.86 | 0.52 | -1.17 | 0.829541 | 0.284107 | 0.93885  | 0.546319 |
| MmuSTS.3445.1.S1_at   | MmuSTS.3445.1 | 9.72  | 10.54 | 0.46 | 0.16 | -1.77 | 0.172709 | 0.190955 | 0.545872 | 0.46629  |
| MmuSTS.3446.1.S1_at   | MmuSTS.3446.1 | 10.91 | 10.73 | 0.4  | 0.09 | 1.14  | 0.475769 | 0.143147 | 0.768685 | 0.417029 |
| MmuSTS.3447.1.S1_at   | MmuSTS.3447.1 | 6.92  | 7.25  | 0.28 | 0.31 | -1.26 | 0.250292 | 0.32192  | 0.615561 | 0.573567 |

|                       |               |       |       |      |      |       |          |          |          |          |
|-----------------------|---------------|-------|-------|------|------|-------|----------|----------|----------|----------|
| MmuSTS.3448.1.S1_at   | MmuSTS.3448.1 | 10.4  | 10.87 | 0.1  | 0.08 | -1.38 | 0.00331  | 0.000521 | 0.194511 | 0.039743 |
| MmuSTS.3449.1.S1_at   | MmuSTS.3449.1 | 11.89 | 12.36 | 0.08 | 0.02 | -1.39 | 0.000641 | 0.000252 | 0.144177 | 0.033325 |
| MmuSTS.345.1.S1_at    | MmuSTS.345.1  | 11    | 10.97 | 0.33 | 0.07 | 1.02  | 0.785691 | 0.002504 | 0.921215 | 0.074108 |
| MmuSTS.3450.1.S1_at   | MmuSTS.3450.1 | 10.01 | 10.63 | 0.42 | 0.03 | -1.54 | 0.025342 | 0.013513 | 0.321423 | 0.148824 |
| MmuSTS.3451.1.S1_at   | MmuSTS.3451.1 | 10.62 | 11.07 | 0.17 | 0.07 | -1.37 | 0.015616 | 0.00196  | 0.283008 | 0.065832 |
| MmuSTS.3452.1.S1_at   | MmuSTS.3452.1 | 8.59  | 9.13  | 0.22 | 0.11 | -1.45 | 0.027943 | 0.003413 | 0.330017 | 0.084071 |
| MmuSTS.3453.1.S1_at   | MmuSTS.3453.1 | 10.97 | 11.1  | 1.38 | 0.06 | -1.1  | 0.788045 | 0.109092 | 0.922084 | 0.372869 |
| MmuSTS.3454.1.S1_at   | MmuSTS.3454.1 | 12.52 | 12.66 | 0.1  | 0.03 | -1.1  | 0.349202 | 0.013255 | 0.690261 | 0.147707 |
| MmuSTS.3455.1.S1_at   | MmuSTS.3455.1 | 6.27  | 6.36  | 0.28 | 0    | -1.06 | 0.686801 | 0.794987 | 0.877508 | 0.881864 |
| MmuSTS.3456.1.S1_at   | MmuSTS.3456.1 | 9.21  | 9.96  | 0.3  | 0.05 | -1.68 | 0.010837 | 0.010132 | 0.250427 | 0.131974 |
| MmuSTS.3457.1.S1_at   | MmuSTS.3457.1 | 8.87  | 8.03  | 0.4  | 0.08 | -1.79 | 0.012567 | 0.002604 | 0.263116 | 0.075487 |
| MmuSTS.3458.1.S1_at   | MmuSTS.3458.1 | 12.62 | 12.28 | 0.35 | 0.07 | 1.27  | 0.488454 | 0.570795 | 0.775568 | 0.74337  |
| MmuSTS.3459.1.S1_at   | MmuSTS.3459.1 | 6.14  | 6.36  | 0.12 | 0.12 | -1.17 | 0.036138 | 0.042846 | 0.354443 | 0.251589 |
| MmuSTS.346.1.S1_at    | MmuSTS.346.1  | 3.36  | 3.15  | 0.31 | 0.06 | 1.16  | 0.34573  | 0.501072 | 0.687742 | 0.699435 |
| MmuSTS.3460.1.S1_s_at | MmuSTS.3460.1 | 12.52 | 12.64 | 0.24 | 0.05 | -1.09 | 0.415096 | 0.659771 | 0.733547 | 0.800854 |
| MmuSTS.3460.1.S1_x_at | MmuSTS.3460.1 | 12.91 | 13.01 | 0.27 | 0.07 | -1.07 | 0.55497  | 0.645795 | 0.813117 | 0.792588 |
| MmuSTS.3461.1.S1_at   | MmuSTS.3461.1 | 5.2   | 5.08  | 0.47 | 0.19 | 1.09  | 0.432557 | 0.465479 | 0.743936 | 0.675774 |
| MmuSTS.3462.1.S1_at   | MmuSTS.3462.1 | 8.32  | 8.42  | 0.12 | 0.1  | -1.07 | 0.096225 | 0.478042 | 0.464755 | 0.684055 |
| MmuSTS.3463.1.S1_at   | MmuSTS.3463.1 | 9.88  | 9.72  | 0.05 | 0.04 | 1.11  | 0.013117 | 0.270743 | 0.266768 | 0.53602  |
| MmuSTS.3464.1.S1_at   | MmuSTS.3464.1 | 7.75  | 7.96  | 0.5  | 0.18 | -1.15 | 0.950607 | 0.354348 | 0.983335 | 0.597166 |
| MmuSTS.3465.1.S1_at   | MmuSTS.3465.1 | 9.29  | 9.93  | 0.45 | 0.25 | -1.57 | 0.08327  | 0.078556 | 0.449053 | 0.325285 |
| MmuSTS.3466.1.S1_at   | MmuSTS.3466.1 | 9.12  | 9     | 0.29 | 0.16 | 1.09  | 0.895513 | 0.044617 | 0.964244 | 0.255589 |
| MmuSTS.3467.1.S1_at   | MmuSTS.3467.1 | 8.43  | 8.41  | 0.27 | 0.09 | 1.01  | 0.797532 | 0.062712 | 0.92559  | 0.297117 |
| MmuSTS.3468.1.S1_at   | MmuSTS.3468.1 | 8.18  | 7.32  | 0.28 | 0.31 | 1.81  | 0.014554 | 0.006254 | 0.276396 | 0.10728  |
| MmuSTS.3469.1.S1_at   | MmuSTS.3469.1 | 9.49  | 9.72  | 0.28 | 0.02 | -1.18 | 0.650254 | 0.854706 | 0.860839 | 0.91719  |
| MmuSTS.347.1.S1_at    | MmuSTS.347.1  | 3.75  | 3.68  | 0.8  | 0.54 | 1.05  | 0.870818 | 0.34496  | 0.955116 | 0.590239 |
| MmuSTS.3470.1.S1_at   | MmuSTS.3470.1 | 11.63 | 11.34 | 0.21 | 0.09 | 1.22  | 0.262783 | 0.015042 | 0.624951 | 0.155766 |
| MmuSTS.3471.1.S1_at   | MmuSTS.3471.1 | 11.27 | 10.65 | 0.22 | 0.25 | 1.54  | 0.018533 | 0.005879 | 0.297536 | 0.104899 |
| MmuSTS.3471.1.S1_s_at | MmuSTS.3471.1 | 11.72 | 11.09 | 0.22 | 0.17 | 1.55  | 0.010694 | 0.006563 | 0.249245 | 0.109857 |
| MmuSTS.3472.1.S1_at   | MmuSTS.3472.1 | 9.25  | 10.15 | 0.21 | 0.1  | -1.87 | 0.003419 | 0.00017  | 0.194985 | 0.030511 |
| MmuSTS.3473.1.S1_at   | MmuSTS.3473.1 | 6.35  | 5.9   | 0.36 | 0.38 | 1.37  | 0.187913 | 0.217851 | 0.560014 | 0.491406 |
| MmuSTS.3474.1.S1_at   | MmuSTS.3474.1 | 7.23  | 7.73  | 0.47 | 0.05 | -1.41 | 0.515961 | 0.03903  | 0.791221 | 0.242772 |
| MmuSTS.3475.1.S1_at   | MmuSTS.3475.1 | 7.03  | 7.93  | 0.27 | 0.12 | -1.86 | 0.005501 | 0.106887 | 0.208157 | 0.369499 |
| MmuSTS.3476.1.S1_at   | MmuSTS.3476.1 | 12.44 | 12.53 | 0.08 | 0.04 | -1.07 | 0.376706 | 0.007259 | 0.706973 | 0.114309 |
| MmuSTS.3477.1.S1_at   | MmuSTS.3477.1 | 11.44 | 11.3  | 0.09 | 0.08 | 1.1   | 0.099821 | 0.387348 | 0.469818 | 0.622027 |
| MmuSTS.3478.1.S1_at   | MmuSTS.3478.1 | 9.9   | 10.53 | 1.01 | 0.21 | -1.55 | 0.312495 | 0.090748 | 0.664096 | 0.345227 |
| MmuSTS.3479.1.S1_at   | MmuSTS.3479.1 | 6.81  | 6.51  | 0.27 | 0.08 | 1.23  | 0.136297 | 0.254717 | 0.511081 | 0.522987 |
| MmuSTS.348.1.S1_at    | MmuSTS.348.1  | 4.25  | 4.12  | 0.1  | 0.04 | 1.09  | 0.167013 | 0.326889 | 0.539612 | 0.576848 |
| MmuSTS.3480.1.S1_at   | MmuSTS.3480.1 | 11.5  | 11.7  | 0.06 | 0.06 | -1.15 | 0.047307 | 0.004967 | 0.379841 | 0.098202 |
| MmuSTS.3481.1.S1_at   | MmuSTS.3481.1 | 4.35  | 4.4   | 0.45 | 0.13 | -1.03 | 0.573418 | 0.111948 | 0.823609 | 0.377063 |
| MmuSTS.3481.1.S1_x_at | MmuSTS.3481.1 | 5.05  | 5.15  | 0.42 | 0.07 | -1.07 | 0.615702 | 0.060161 | 0.844597 | 0.291882 |
| MmuSTS.3482.1.S1_at   | MmuSTS.3482.1 | 4.26  | 4.05  | 0.04 | 0.16 | 1.16  | 0.242744 | 0.174421 | 0.60879  | 0.450894 |
| MmuSTS.3483.1.S1_at   | MmuSTS.3483.1 | 10.84 | 10.92 | 0.11 | 0.02 | -1.06 | 0.162142 | 0.179673 | 0.535244 | 0.456149 |

|                       |               |       |       |      |      |       |          |          |          |          |
|-----------------------|---------------|-------|-------|------|------|-------|----------|----------|----------|----------|
| MmuSTS.3484.1.S1_at   | MmuSTS.3484.1 | 7.09  | 7.05  | 0.23 | 0.39 | 1.02  | 0.81788  | 0.796624 | 0.93417  | 0.882754 |
| MmuSTS.3485.1.S1_at   | MmuSTS.3485.1 | 12.96 | 12.92 | 0.3  | 0.03 | 1.03  | 0.840864 | 0.892372 | 0.943484 | 0.938624 |
| MmuSTS.3486.1.S1_s_at | MmuSTS.3486.1 | 9.25  | 8.59  | 0.38 | 0.05 | 1.57  | 0.095942 | 0.036861 | 0.464469 | 0.23648  |
| MmuSTS.3487.1.S1_at   | MmuSTS.3487.1 | 6.47  | 7.4   | 0.45 | 0.25 | -1.9  | 0.145573 | 0.136588 | 0.520527 | 0.409084 |
| MmuSTS.3488.1.S1_at   | MmuSTS.3488.1 | 12.16 | 11.46 | 2.8  | 0.22 | 1.62  | 0.609287 | 0.279083 | 0.841716 | 0.542782 |
| MmuSTS.3488.1.S1_s_at | MmuSTS.3488.1 | 11.8  | 11.39 | 2.68 | 0.16 | 1.33  | 0.685815 | 0.279159 | 0.876883 | 0.542814 |
| MmuSTS.3488.1.S1_x_at | MmuSTS.3488.1 | 12.1  | 11.29 | 2.88 | 0.16 | 1.76  | 0.654128 | 0.330274 | 0.862576 | 0.579044 |
| MmuSTS.3489.1.S1_at   | MmuSTS.3489.1 | 13.13 | 13.04 | 2.77 | 0.1  | 1.06  | 0.407266 | 0.241755 | 0.728545 | 0.512327 |
| MmuSTS.349.1.S1_at    | MmuSTS.349.1  | 9.34  | 9.32  | 0.04 | 0.07 | 1.02  | 0.822309 | 0.156025 | 0.935935 | 0.431444 |
| MmuSTS.3490.1.S1_at   | MmuSTS.3490.1 | 8.31  | 8.19  | 1.45 | 0.24 | 1.09  | 0.953899 | 0.362352 | 0.984675 | 0.602965 |
| MmuSTS.3491.1.S1_at   | MmuSTS.3491.1 | 9.08  | 9.07  | 1.15 | 0.21 | 1.01  | 0.981137 | 0.311309 | 0.993962 | 0.566361 |
| MmuSTS.3492.1.S1_at   | MmuSTS.3492.1 | 11.23 | 11.59 | 0.16 | 0.03 | -1.29 | 0.019888 | 0.000198 | 0.302615 | 0.031116 |
| MmuSTS.3493.1.S1_at   | MmuSTS.3493.1 | 10.42 | 10.64 | 0.56 | 0.03 | -1.16 | 0.563395 | 0.549482 | 0.818216 | 0.729879 |
| MmuSTS.3494.1.S1_at   | MmuSTS.3494.1 | 6.32  | 6.26  | 0.04 | 0.06 | 1.04  | 0.080121 | 0.192974 | 0.443423 | 0.468455 |
| MmuSTS.3495.1.S1_at   | MmuSTS.3495.1 | 5.89  | 6.79  | 0.07 | 0.07 | -1.87 | 0.000095 | 0.000464 | 0.108151 | 0.038572 |
| MmuSTS.3496.1.S1_at   | MmuSTS.3496.1 | 8.02  | 8.06  | 0.21 | 0.14 | -1.03 | 0.989913 | 0.485459 | 0.996264 | 0.68914  |
| MmuSTS.3497.1.S1_at   | MmuSTS.3497.1 | 6.64  | 6.7   | 0.38 | 0.07 | -1.04 | 0.620309 | 0.80628  | 0.84709  | 0.888642 |
| MmuSTS.3498.1.S1_at   | MmuSTS.3498.1 | 8.75  | 8.96  | 0.21 | 0.12 | -1.16 | 0.114728 | 0.089879 | 0.487941 | 0.344073 |
| MmuSTS.3499.1.S1_at   | MmuSTS.3499.1 | 7.22  | 9.02  | 0.49 | 0.22 | -3.46 | 0.008031 | 0.009656 | 0.232005 | 0.129267 |
| MmuSTS.35.1.S1_at     | MmuSTS.35.1   | 11.02 | 10.93 | 0.31 | 0.02 | 1.06  | 0.471977 | 0.572977 | 0.766784 | 0.744895 |
| MmuSTS.350.1.S1_at    | MmuSTS.350.1  | 8.26  | 8.57  | 0.17 | 0.1  | -1.25 | 0.085517 | 0.248703 | 0.452653 | 0.517917 |
| MmuSTS.3500.1.S1_at   | MmuSTS.3500.1 | 11.55 | 11.83 | 0.04 | 0.15 | -1.21 | 0.103058 | 0.287811 | 0.473774 | 0.549064 |
| MmuSTS.3501.1.S1_at   | MmuSTS.3501.1 | 10.06 | 9.77  | 0.88 | 0.12 | 1.22  | 0.672892 | 0.244326 | 0.871072 | 0.514184 |
| MmuSTS.3502.1.S1_at   | MmuSTS.3502.1 | 7.16  | 7.37  | 0.19 | 0.14 | -1.15 | 0.100783 | 0.325744 | 0.47159  | 0.57602  |
| MmuSTS.3503.1.S1_at   | MmuSTS.3503.1 | 4.02  | 4.31  | 0.05 | 0.32 | -1.22 | 0.245952 | 0.530736 | 0.611421 | 0.718104 |
| MmuSTS.3504.1.S1_at   | MmuSTS.3504.1 | 9.99  | 10.24 | 0.45 | 0.24 | -1.19 | 0.164973 | 0.056763 | 0.537689 | 0.284379 |
| MmuSTS.3505.1.S1_at   | MmuSTS.3505.1 | 6.46  | 6.28  | 0.3  | 0.08 | 1.13  | 0.095881 | 0.014859 | 0.46445  | 0.155055 |
| MmuSTS.3506.1.S1_at   | MmuSTS.3506.1 | 12.93 | 12.82 | 0.2  | 0.03 | 1.08  | 0.286812 | 0.141008 | 0.643994 | 0.414507 |
| MmuSTS.3507.1.S1_at   | MmuSTS.3507.1 | 5.93  | 5.88  | 0.06 | 0.09 | 1.04  | 0.229593 | 0.458273 | 0.598458 | 0.671096 |
| MmuSTS.3508.1.S1_at   | MmuSTS.3508.1 | 6.4   | 6.25  | 0.15 | 0.43 | 1.11  | 0.738133 | 0.389041 | 0.899775 | 0.623288 |
| MmuSTS.3509.1.S1_at   | MmuSTS.3509.1 | 6.19  | 6.78  | 0.67 | 0.3  | -1.51 | 0.928972 | 0.066974 | 0.976332 | 0.304829 |
| MmuSTS.351.1.S1_at    | MmuSTS.351.1  | 5.77  | 6     | 0.32 | 0.19 | -1.17 | 0.767269 | 0.486199 | 0.912495 | 0.689643 |
| MmuSTS.3510.1.S1_at   | MmuSTS.3510.1 | 3.31  | 3.22  | 0.13 | 0.09 | 1.07  | 0.331514 | 0.186531 | 0.678103 | 0.462364 |
| MmuSTS.3511.1.S1_at   | MmuSTS.3511.1 | 8.2   | 8.15  | 0.37 | 0.13 | 1.04  | 0.363557 | 0.435336 | 0.700162 | 0.65516  |
| MmuSTS.3512.1.S1_at   | MmuSTS.3512.1 | 10.2  | 10.21 | 0.14 | 0.07 | -1    | 0.726485 | 0.000552 | 0.894363 | 0.040948 |
| MmuSTS.3513.1.S1_at   | MmuSTS.3513.1 | 9.06  | 8.26  | 0.3  | 0.36 | 1.74  | 0.077943 | 0.080593 | 0.439987 | 0.328367 |
| MmuSTS.3514.1.S1_at   | MmuSTS.3514.1 | 6.71  | 6.33  | 0.21 | 0.14 | 1.3   | 0.14942  | 0.20071  | 0.523226 | 0.47524  |
| MmuSTS.3515.1.S1_at   | MmuSTS.3515.1 | 8.92  | 9.1   | 0.17 | 0.13 | -1.13 | 0.087005 | 0.077357 | 0.454785 | 0.323153 |
| MmuSTS.3516.1.S1_at   | MmuSTS.3516.1 | 6.29  | 6.18  | 0.3  | 0.16 | 1.08  | 0.259445 | 0.44936  | 0.622626 | 0.665021 |
| MmuSTS.3517.1.S1_at   | MmuSTS.3517.1 | 6.22  | 6.21  | 0.07 | 0.01 | 1.01  | 0.760553 | 0.470257 | 0.910074 | 0.678575 |
| MmuSTS.3518.1.S1_at   | MmuSTS.3518.1 | 3.94  | 3.87  | 0.04 | 0.07 | 1.05  | 0.293522 | 0.373452 | 0.649839 | 0.612267 |
| MmuSTS.3519.1.S1_at   | MmuSTS.3519.1 | 8.28  | 8.76  | 0.76 | 0.28 | -1.4  | 0.51788  | 0.197358 | 0.792289 | 0.472304 |
| MmuSTS.352.1.S1_s_at  | MmuSTS.352.1  | 5.23  | 5.66  | 0.13 | 0.73 | -1.35 | 0.356601 | 0.049783 | 0.695204 | 0.268194 |

|                       |               |       |       |      |      |       |          |          |          |          |
|-----------------------|---------------|-------|-------|------|------|-------|----------|----------|----------|----------|
| MmuSTS.3520.1.S1_at   | MmuSTS.3520.1 | 7.81  | 7.86  | 0.59 | 0.19 | -1.04 | 0.716084 | 0.771979 | 0.889675 | 0.867436 |
| MmuSTS.3521.1.S1_at   | MmuSTS.3521.1 | 8.99  | 8.93  | 0.15 | 0.1  | 1.04  | 0.684485 | 0.000885 | 0.87645  | 0.047602 |
| MmuSTS.3522.1.S1_at   | MmuSTS.3522.1 | 8.11  | 7.21  | 0.59 | 0.4  | 1.87  | 0.059597 | 0.057369 | 0.406669 | 0.285522 |
| MmuSTS.3523.1.S1_at   | MmuSTS.3523.1 | 7.8   | 7.45  | 0.22 | 0.14 | 1.27  | 0.279447 | 0.141406 | 0.638333 | 0.414874 |
| MmuSTS.3524.1.S1_at   | MmuSTS.3524.1 | 8.42  | 8.17  | 0.38 | 0.2  | 1.19  | 0.1446   | 0.043387 | 0.519872 | 0.25294  |
| MmuSTS.3525.1.S1_at   | MmuSTS.3525.1 | 4.05  | 4.26  | 0.11 | 0.09 | -1.16 | 0.137327 | 0.231569 | 0.512587 | 0.503367 |
| MmuSTS.3526.1.S1_at   | MmuSTS.3526.1 | 9.09  | 8.85  | 0.1  | 0.19 | 1.18  | 0.127842 | 0.009376 | 0.502292 | 0.127634 |
| MmuSTS.3527.1.S1_at   | MmuSTS.3527.1 | 5.86  | 6.91  | 1.46 | 0.28 | -2.08 | 0.368538 | 0.38853  | 0.703705 | 0.622897 |
| MmuSTS.3528.1.S1_at   | MmuSTS.3528.1 | 8.71  | 9.79  | 0.76 | 0.16 | -2.11 | 0.10756  | 0.247414 | 0.480045 | 0.516672 |
| MmuSTS.3529.1.S1_at   | MmuSTS.3529.1 | 5.05  | 4.44  | 0.37 | 0.12 | 1.53  | 0.103863 | 0.171322 | 0.474583 | 0.447809 |
| MmuSTS.353.1.S1_s_at  | MmuSTS.353.1  | 7.81  | 8.27  | 0.92 | 0.3  | -1.38 | 0.52313  | 0.075193 | 0.795458 | 0.319384 |
| MmuSTS.3530.1.S1_at   | MmuSTS.3530.1 | 5.46  | 5.34  | 0.1  | 0.03 | 1.08  | 0.119496 | 0.369851 | 0.492875 | 0.609138 |
| MmuSTS.3531.1.S1_at   | MmuSTS.3531.1 | 8.7   | 8.92  | 0.26 | 0.11 | -1.16 | 0.313598 | 0.77999  | 0.664799 | 0.872428 |
| MmuSTS.3531.1.S1_s_at | MmuSTS.3531.1 | 9.93  | 10.11 | 0.63 | 0.06 | -1.13 | 0.695768 | 0.815844 | 0.88174  | 0.893781 |
| MmuSTS.3532.1.S1_at   | MmuSTS.3532.1 | 12.94 | 12.52 | 2.68 | 0.22 | 1.34  | 0.567189 | 0.273902 | 0.820323 | 0.538452 |
| MmuSTS.3533.1.S1_at   | MmuSTS.3533.1 | 12.69 | 12.4  | 0.14 | 0.12 | 1.22  | 0.061063 | 0.051069 | 0.40992  | 0.271281 |
| MmuSTS.3534.1.S1_at   | MmuSTS.3534.1 | 5.67  | 5.76  | 0.14 | 0.04 | -1.07 | 0.472706 | 0.109935 | 0.767224 | 0.374008 |
| MmuSTS.3535.1.S1_at   | MmuSTS.3535.1 | 6.08  | 6.04  | 0.19 | 0.07 | 1.03  | 0.851338 | 0.973756 | 0.947639 | 0.985656 |
| MmuSTS.3536.1.S1_at   | MmuSTS.3536.1 | 10.89 | 10.46 | 0.8  | 0.05 | 1.35  | 0.43135  | 0.63244  | 0.743363 | 0.783528 |
| MmuSTS.3537.1.S1_at   | MmuSTS.3537.1 | 8.67  | 8.87  | 0.36 | 0.18 | -1.14 | 0.44039  | 0.709535 | 0.748466 | 0.831686 |
| MmuSTS.3538.1.S1_at   | MmuSTS.3538.1 | 11.36 | 11.3  | 0.29 | 0.05 | 1.04  | 0.630855 | 0.379491 | 0.852225 | 0.616413 |
| MmuSTS.3539.1.S1_at   | MmuSTS.3539.1 | 7.71  | 7.62  | 0.13 | 0.04 | 1.06  | 0.576454 | 0.776662 | 0.825166 | 0.870173 |
| MmuSTS.354.1.S1_at    | MmuSTS.354.1  | 6.36  | 6.43  | 0.24 | 0.19 | -1.05 | 0.752923 | 0.022583 | 0.906887 | 0.188092 |
| MmuSTS.3540.1.S1_at   | MmuSTS.3540.1 | 8.49  | 8.6   | 0.18 | 0.51 | -1.08 | 0.588364 | 0.849986 | 0.831903 | 0.914673 |
| MmuSTS.3541.1.S1_at   | MmuSTS.3541.1 | 7.03  | 7.27  | 1.43 | 0.25 | -1.18 | 0.67057  | 0.161517 | 0.869943 | 0.437651 |
| MmuSTS.3542.1.S1_at   | MmuSTS.3542.1 | 3.67  | 3.3   | 0.12 | 0.16 | 1.29  | 0.02866  | 0.13761  | 0.332917 | 0.410562 |
| MmuSTS.3543.1.S1_at   | MmuSTS.3543.1 | 9.94  | 9.31  | 0.38 | 0.27 | 1.55  | 0.027734 | 0.004338 | 0.328954 | 0.092354 |
| MmuSTS.3544.1.S1_at   | MmuSTS.3544.1 | 10.02 | 9.94  | 0.52 | 0.15 | 1.06  | 0.904477 | 0.390857 | 0.967857 | 0.624588 |
| MmuSTS.3545.1.S1_at   | MmuSTS.3545.1 | 6.91  | 7.21  | 0.88 | 0.3  | -1.23 | 0.708173 | 0.028884 | 0.886591 | 0.211763 |
| MmuSTS.3546.1.S1_at   | MmuSTS.3546.1 | 10.31 | 10.44 | 0.32 | 0.08 | -1.09 | 0.45113  | 0.609831 | 0.755027 | 0.768137 |
| MmuSTS.3547.1.S1_at   | MmuSTS.3547.1 | 2.86  | 2.85  | 0.06 | 0.08 | 1     | 0.493596 | 0.701    | 0.779001 | 0.826611 |
| MmuSTS.3548.1.S1_at   | MmuSTS.3548.1 | 7.47  | 7.71  | 0.25 | 0.03 | -1.18 | 0.227859 | 0.168273 | 0.596693 | 0.444935 |
| MmuSTS.3549.1.S1_at   | MmuSTS.3549.1 | 3.48  | 3.42  | 0.14 | 0.02 | 1.05  | 0.462094 | 0.431136 | 0.761442 | 0.652151 |
| MmuSTS.355.1.S1_at    | MmuSTS.355.1  | 12.76 | 12.53 | 0.25 | 0.06 | 1.17  | 0.100371 | 0.115102 | 0.471025 | 0.381985 |
| MmuSTS.3550.1.S1_s_at | MmuSTS.3550.1 | 13.29 | 13.36 | 0.47 | 0.05 | -1.05 | 0.272703 | 0.183805 | 0.632448 | 0.459882 |
| MmuSTS.3551.1.S1_at   | MmuSTS.3551.1 | 8.04  | 7.97  | 0.29 | 0.11 | 1.05  | 0.839943 | 0.965197 | 0.943103 | 0.98061  |
| MmuSTS.3552.1.S1_at   | MmuSTS.3552.1 | 5.52  | 5.68  | 0.19 | 0.02 | -1.11 | 0.783549 | 0.539945 | 0.920353 | 0.723995 |
| MmuSTS.3552.1.S1_x_at | MmuSTS.3552.1 | 5.85  | 5.9   | 0.25 | 0.05 | -1.03 | 0.788687 | 0.553134 | 0.922466 | 0.73239  |
| MmuSTS.3553.1.S1_at   | MmuSTS.3553.1 | 3.68  | 3.78  | 0.23 | 0.15 | -1.08 | 0.801182 | 0.568992 | 0.927395 | 0.742216 |
| MmuSTS.3554.1.S1_at   | MmuSTS.3554.1 | 9.45  | 9.17  | 2.62 | 0.25 | 1.21  | 0.855174 | 0.223422 | 0.948787 | 0.496227 |
| MmuSTS.3555.1.S1_at   | MmuSTS.3555.1 | 8.88  | 9.33  | 0.47 | 0.02 | -1.37 | 0.173866 | 0.103594 | 0.546898 | 0.364346 |
| MmuSTS.3556.1.S1_at   | MmuSTS.3556.1 | 5.96  | 6.5   | 0.81 | 0.32 | -1.46 | 0.178655 | 0.167099 | 0.551451 | 0.4436   |
| MmuSTS.3557.1.S1_at   | MmuSTS.3557.1 | 9.41  | 9.66  | 0.95 | 0.14 | -1.19 | 0.660933 | 0.151384 | 0.865819 | 0.426104 |



|                       |               |       |       |      |      |       |          |          |          |          |
|-----------------------|---------------|-------|-------|------|------|-------|----------|----------|----------|----------|
| MmuSTS.3558.1.S1_at   | MmuSTS.3558.1 | 6.55  | 6.4   | 0.12 | 0.05 | 1.11  | 0.133682 | 0.479211 | 0.508012 | 0.685022 |
| MmuSTS.3559.1.S1_at   | MmuSTS.3559.1 | 11.64 | 11.19 | 0.2  | 0.29 | 1.36  | 0.034458 | 0.009185 | 0.350047 | 0.126554 |
| MmuSTS.356.1.S1_s_at  | MmuSTS.356.1  | 11.75 | 12.04 | 0.29 | 0.05 | -1.23 | 0.197802 | 0.658988 | 0.568831 | 0.800475 |
| MmuSTS.3560.1.S1_x_at | MmuSTS.3560.1 | 8.5   | 8.43  | 0.38 | 0.16 | 1.05  | 0.276117 | 0.103498 | 0.635764 | 0.364346 |
| MmuSTS.3561.1.S1_at   | MmuSTS.3561.1 | 11.35 | 11.88 | 0.6  | 0.13 | -1.44 | 0.206775 | 0.256164 | 0.578736 | 0.524069 |
| MmuSTS.3562.1.S1_at   | MmuSTS.3562.1 | 11.09 | 11.41 | 0.09 | 0.03 | -1.24 | 0.004011 | 0.000051 | 0.198571 | 0.025333 |
| MmuSTS.3563.1.S1_at   | MmuSTS.3563.1 | 7.31  | 6.98  | 0.12 | 0.18 | 1.26  | 0.04123  | 0.184685 | 0.365746 | 0.460645 |
| MmuSTS.3564.1.S1_at   | MmuSTS.3564.1 | 7.27  | 7.17  | 0.03 | 0.04 | 1.08  | 0.045688 | 0.125344 | 0.376977 | 0.395994 |
| MmuSTS.3564.1.S1_x_at | MmuSTS.3564.1 | 7.11  | 7.11  | 0.03 | 0.16 | -1    | 0.363891 | 0.559679 | 0.700307 | 0.736365 |
| MmuSTS.3565.1.S1_at   | MmuSTS.3565.1 | 6.88  | 7.72  | 0.27 | 0.28 | -1.79 | 0.030861 | 0.016025 | 0.338971 | 0.160532 |
| MmuSTS.3566.1.S1_at   | MmuSTS.3566.1 | 7.6   | 7.41  | 0.47 | 0.06 | -1.14 | 0.55548  | 0.134406 | 0.813493 | 0.406603 |
| MmuSTS.3567.1.S1_at   | MmuSTS.3567.1 | 10.82 | 11.9  | 0.41 | 0.14 | -2.11 | 0.013234 | 0.124997 | 0.267027 | 0.395386 |
| MmuSTS.3568.1.S1_at   | MmuSTS.3568.1 | 6.47  | 7.57  | 1.64 | 0.17 | -2.15 | 0.328647 | 0.492748 | 0.67577  | 0.693756 |
| MmuSTS.3569.1.S1_at   | MmuSTS.3569.1 | 8.83  | 11.14 | 2.81 | 0.32 | -4.96 | 0.16729  | 0.123207 | 0.539847 | 0.393273 |
| MmuSTS.357.1.S1_s_at  | MmuSTS.357.1  | 8.57  | 9.03  | 0.31 | 0.28 | -1.37 | 0.057204 | 0.048507 | 0.401473 | 0.265472 |
| MmuSTS.3570.1.S1_at   | MmuSTS.3570.1 | 10.04 | 11.01 | 2.06 | 0.11 | -1.96 | 0.381095 | 0.51946  | 0.709924 | 0.711062 |
| MmuSTS.3571.1.S1_s_at | MmuSTS.3571.1 | 10.02 | 11.19 | 1.43 | 0.1  | -2.25 | 0.180321 | 0.409051 | 0.553472 | 0.636113 |
| MmuSTS.3572.1.S1_at   | MmuSTS.3572.1 | 7.81  | 8.63  | 0.75 | 0.05 | -1.76 | 0.066239 | 0.027703 | 0.421918 | 0.20785  |
| MmuSTS.3573.1.S1_at   | MmuSTS.3573.1 | 3.4   | 3.46  | 0.59 | 0.35 | -1.05 | 0.440542 | 0.517617 | 0.748529 | 0.709722 |
| MmuSTS.3574.1.S1_at   | MmuSTS.3574.1 | 9.25  | 9.12  | 0.34 | 0.13 | 1.1   | 0.561513 | 0.017128 | 0.817232 | 0.165775 |
| MmuSTS.3575.1.S1_at   | MmuSTS.3575.1 | 7.13  | 5.9   | 0.56 | 0.27 | 2.34  | 0.027856 | 0.07653  | 0.329666 | 0.321612 |
| MmuSTS.3576.1.S1_at   | MmuSTS.3576.1 | 9.69  | 9.55  | 0.2  | 0.15 | 1.1   | 0.4116   | 0.001211 | 0.73155  | 0.054455 |
| MmuSTS.3577.1.S1_at   | MmuSTS.3577.1 | 4.09  | 4.65  | 0.33 | 0.2  | -1.47 | 0.294164 | 0.420993 | 0.650324 | 0.644662 |
| MmuSTS.3578.1.S1_at   | MmuSTS.3578.1 | 5.72  | 5.79  | 0.04 | 0.09 | -1.05 | 0.792255 | 0.176005 | 0.923784 | 0.452526 |
| MmuSTS.3579.1.S1_at   | MmuSTS.3579.1 | 6.56  | 7.74  | 0.85 | 0.09 | -2.26 | 0.075579 | 0.10571  | 0.436722 | 0.3678   |
| MmuSTS.358.1.S1_at    | MmuSTS.358.1  | 5.73  | 5.74  | 0.03 | 0.08 | -1.01 | 0.620302 | 0.216103 | 0.84709  | 0.489686 |
| MmuSTS.3580.1.S1_at   | MmuSTS.3580.1 | 7.51  | 7.51  | 0.06 | 0.03 | 1     | 0.791778 | 0.068792 | 0.923474 | 0.308711 |
| MmuSTS.3581.1.S1_at   | MmuSTS.3581.1 | 3.27  | 3.16  | 0.08 | 0.09 | 1.08  | 0.146959 | 0.294178 | 0.521545 | 0.553974 |
| MmuSTS.3582.1.S1_at   | MmuSTS.3582.1 | 14.08 | 13.86 | 0.26 | 0.02 | 1.17  | 0.448803 | 0.032767 | 0.754037 | 0.224122 |
| MmuSTS.3583.1.S1_at   | MmuSTS.3583.1 | 12.55 | 12.7  | 0.39 | 0.14 | -1.11 | 0.341286 | 0.053897 | 0.685051 | 0.277685 |
| MmuSTS.3584.1.S1_at   | MmuSTS.3584.1 | 3.52  | 3.41  | 0.06 | 0.04 | 1.08  | 0.037049 | 0.039131 | 0.356628 | 0.243056 |
| MmuSTS.3585.1.S1_at   | MmuSTS.3585.1 | 5.03  | 4.87  | 0.33 | 0.11 | 1.12  | 0.475042 | 0.170539 | 0.768329 | 0.447177 |
| MmuSTS.3586.1.S1_at   | MmuSTS.3586.1 | 3.77  | 3.77  | 0.09 | 0.02 | 1     | 0.87555  | 0.841749 | 0.956756 | 0.909796 |
| MmuSTS.3587.1.S1_at   | MmuSTS.3587.1 | 7.67  | 7.42  | 2.07 | 0.24 | 1.19  | 0.889681 | 0.131533 | 0.961988 | 0.403658 |
| MmuSTS.3588.1.S1_at   | MmuSTS.3588.1 | 6.25  | 6.17  | 0.08 | 0.2  | 1.06  | 0.601211 | 0.184873 | 0.838121 | 0.460776 |
| MmuSTS.3589.1.S1_at   | MmuSTS.3589.1 | 10.8  | 11.09 | 0.42 | 0.07 | -1.22 | 0.414014 | 0.567146 | 0.732736 | 0.741068 |
| MmuSTS.359.1.S1_at    | MmuSTS.359.1  | 10.87 | 10.67 | 0.21 | 0.16 | 1.15  | 0.168071 | 0.000442 | 0.540683 | 0.038359 |
| MmuSTS.3590.1.S1_at   | MmuSTS.3590.1 | 3.75  | 3.68  | 0.04 | 0.02 | 1.05  | 0.110807 | 0.309226 | 0.484198 | 0.564807 |
| MmuSTS.3591.1.S1_s_at | MmuSTS.3591.1 | 13.27 | 13.36 | 0.04 | 0.07 | -1.06 | 0.042906 | 0.062463 | 0.370927 | 0.296717 |
| MmuSTS.3592.1.S1_at   | MmuSTS.3592.1 | 9.76  | 10.36 | 0.27 | 0.05 | -1.52 | 0.020514 | 0.028558 | 0.304231 | 0.210768 |
| MmuSTS.3593.1.S1_at   | MmuSTS.3593.1 | 7.92  | 7.57  | 0.09 | 0.08 | 1.27  | 0.007362 | 0.019795 | 0.228072 | 0.176951 |
| MmuSTS.3594.1.S1_at   | MmuSTS.3594.1 | 5.04  | 5.56  | 0.57 | 0.18 | -1.43 | 0.074937 | 0.010842 | 0.435653 | 0.135758 |
| MmuSTS.3595.1.S1_at   | MmuSTS.3595.1 | 5.79  | 5.71  | 0.12 | 0.07 | 1.05  | 0.312432 | 0.573402 | 0.664042 | 0.745119 |

|                       |               |       |       |      |      |       |          |          |          |          |
|-----------------------|---------------|-------|-------|------|------|-------|----------|----------|----------|----------|
| MmuSTS.3596.1.S1_at   | MmuSTS.3596.1 | 5.62  | 5     | 0.16 | 0.08 | 1.54  | 0.008196 | 0.126162 | 0.232005 | 0.396742 |
| MmuSTS.3597.1.S1_at   | MmuSTS.3597.1 | 3.44  | 3.37  | 0.09 | 0.1  | 1.05  | 0.196445 | 0.228294 | 0.567086 | 0.500467 |
| MmuSTS.3598.1.S1_s_at | MmuSTS.3598.1 | 9.55  | 9.76  | 0.5  | 0.42 | -1.16 | 0.931671 | 0.013301 | 0.977114 | 0.14803  |
| MmuSTS.3599.1.S1_at   | MmuSTS.3599.1 | 7.23  | 7.59  | 0.68 | 0.06 | -1.29 | 0.98808  | 0.995963 | 0.995831 | 0.997533 |
| MmuSTS.36.1.S1_at     | MmuSTS.36.1   | 11.96 | 12.11 | 0.13 | 0.08 | -1.11 | 0.286843 | 0.230673 | 0.643994 | 0.502381 |
| MmuSTS.360.1.S1_at    | MmuSTS.360.1  | 7.37  | 7.24  | 0.71 | 0.1  | 1.09  | 0.742171 | 0.657032 | 0.901638 | 0.799401 |
| MmuSTS.3600.1.S1_at   | MmuSTS.3600.1 | 11.76 | 11.79 | 0.81 | 0.2  | -1.02 | 0.888098 | 0.132114 | 0.961251 | 0.404131 |
| MmuSTS.3601.1.S1_at   | MmuSTS.3601.1 | 12.22 | 12.28 | 0.19 | 0.03 | -1.04 | 0.625024 | 0.396866 | 0.849145 | 0.62846  |
| MmuSTS.3602.1.S1_at   | MmuSTS.3602.1 | 9.81  | 9.75  | 0.04 | 0.06 | 1.04  | 0.413824 | 0.801543 | 0.732545 | 0.885828 |
| MmuSTS.3603.1.S1_at   | MmuSTS.3603.1 | 8.49  | 8.33  | 0.46 | 0.2  | 1.12  | 0.57105  | 0.003549 | 0.822419 | 0.085371 |
| MmuSTS.3604.1.S1_at   | MmuSTS.3604.1 | 5.58  | 7.29  | 1.28 | 0.42 | -3.28 | 0.38982  | 0.019348 | 0.71637  | 0.174785 |
| MmuSTS.3605.1.S1_at   | MmuSTS.3605.1 | 7.18  | 6.5   | 0.96 | 0.26 | 1.59  | 0.285114 | 0.573479 | 0.643069 | 0.745164 |
| MmuSTS.3606.1.S1_at   | MmuSTS.3606.1 | 10.81 | 10.61 | 0.32 | 0.01 | 1.15  | 0.20903  | 0.232117 | 0.580617 | 0.503844 |
| MmuSTS.3607.1.S1_at   | MmuSTS.3607.1 | 11.17 | 10.9  | 0.55 | 0.11 | 1.21  | 0.76718  | 0.629713 | 0.912495 | 0.781989 |
| MmuSTS.3608.1.S1_at   | MmuSTS.3608.1 | 9.64  | 10.19 | 1.76 | 0.1  | -1.46 | 0.510238 | 0.319339 | 0.78806  | 0.571724 |
| MmuSTS.3609.1.S1_at   | MmuSTS.3609.1 | 9.7   | 9.7   | 1.33 | 0.26 | -1    | 0.906753 | 0.150421 | 0.968356 | 0.424955 |
| MmuSTS.361.1.A1_at    | MmuSTS.361.1  | 9.41  | 9.71  | 0.38 | 0.25 | -1.23 | 0.567989 | 0.005977 | 0.820586 | 0.105736 |
| MmuSTS.361.1.S1_at    | MmuSTS.361.1  | 8.24  | 8.43  | 0.35 | 0.2  | -1.14 | 0.696625 | 0.003961 | 0.882169 | 0.089522 |
| MmuSTS.3610.1.S1_at   | MmuSTS.3610.1 | 13.47 | 13.54 | 0.44 | 0.02 | -1.05 | 0.382635 | 0.540267 | 0.710805 | 0.724221 |
| MmuSTS.3610.1.S1_x_at | MmuSTS.3610.1 | 13.27 | 13.33 | 0.49 | 0.02 | -1.04 | 0.50085  | 0.700262 | 0.782994 | 0.826029 |
| MmuSTS.3611.1.S1_at   | MmuSTS.3611.1 | 9.93  | 9.87  | 0.49 | 0.03 | 1.04  | 0.485268 | 0.655287 | 0.774171 | 0.798399 |
| MmuSTS.3612.1.S1_at   | MmuSTS.3612.1 | 8.28  | 7.93  | 0.63 | 0.22 | 1.28  | 0.357744 | 0.450851 | 0.695993 | 0.665869 |
| MmuSTS.3613.1.S1_at   | MmuSTS.3613.1 | 4.13  | 4.12  | 0.57 | 0.16 | 1.01  | 0.417728 | 0.681907 | 0.735028 | 0.814226 |
| MmuSTS.3614.1.S1_at   | MmuSTS.3614.1 | 3.89  | 3.66  | 0.19 | 0.06 | 1.17  | 0.0567   | 0.086634 | 0.401061 | 0.339176 |
| MmuSTS.3615.1.S1_at   | MmuSTS.3615.1 | 11.48 | 11.3  | 0.88 | 0.98 | 1.13  | 0.502216 | 0.596196 | 0.783497 | 0.759376 |
| MmuSTS.3616.1.S1_at   | MmuSTS.3616.1 | 6.38  | 5.78  | 0.01 | 0.43 | 1.52  | 0.077997 | 0.108491 | 0.439987 | 0.372066 |
| MmuSTS.3617.1.S1_at   | MmuSTS.3617.1 | 10.75 | 11.31 | 0.56 | 0.27 | -1.48 | 0.458808 | 0.159268 | 0.75908  | 0.435283 |
| MmuSTS.3618.1.S1_at   | MmuSTS.3618.1 | 12.37 | 12.52 | 0.49 | 0.22 | -1.11 | 0.887298 | 0.155617 | 0.960923 | 0.430977 |
| MmuSTS.3619.1.S1_at   | MmuSTS.3619.1 | 10.28 | 10.2  | 0.03 | 0.03 | 1.06  | 0.097717 | 0.613967 | 0.466712 | 0.77098  |
| MmuSTS.362.1.S1_at    | MmuSTS.362.1  | 6.67  | 6.66  | 0.09 | 0.07 | 1.01  | 0.853915 | 0.747773 | 0.948426 | 0.853252 |
| MmuSTS.362.1.S1_s_at  | MmuSTS.362.1  | 4.31  | 4.23  | 0    | 0.05 | 1.06  | 0.040791 | 0.011413 | 0.365122 | 0.138384 |
| MmuSTS.3620.1.S1_at   | MmuSTS.3620.1 | 11.17 | 10.73 | 0.34 | 0.19 | 1.35  | 0.588072 | 0.767117 | 0.83181  | 0.864712 |
| MmuSTS.3621.1.S1_at   | MmuSTS.3621.1 | 11.88 | 11.16 | 1.98 | 0.15 | 1.64  | 0.705567 | 0.77496  | 0.885355 | 0.869002 |
| MmuSTS.3622.1.S1_at   | MmuSTS.3622.1 | 9.31  | 9.27  | 0.11 | 0.09 | 1.03  | 0.467303 | 0.82724  | 0.764285 | 0.9008   |
| MmuSTS.3623.1.S1_at   | MmuSTS.3623.1 | 4.74  | 4.69  | 0.1  | 0.16 | 1.04  | 0.922875 | 0.944842 | 0.974033 | 0.968794 |
| MmuSTS.3624.1.S1_at   | MmuSTS.3624.1 | 8.55  | 8.32  | 0.11 | 0.22 | 1.17  | 0.078297 | 0.042854 | 0.440666 | 0.251591 |
| MmuSTS.3625.1.S1_at   | MmuSTS.3625.1 | 11.09 | 11.09 | 0.17 | 0.07 | 1     | 0.850365 | 0.673261 | 0.947348 | 0.809084 |
| MmuSTS.3626.1.S1_at   | MmuSTS.3626.1 | 9.72  | 9.14  | 0.17 | 0.13 | 1.5   | 0.009042 | 0.027545 | 0.240577 | 0.207227 |
| MmuSTS.3627.1.S1_at   | MmuSTS.3627.1 | 8.29  | 7.45  | 0.41 | 0.44 | 1.79  | 0.330351 | 0.431711 | 0.676952 | 0.652516 |
| MmuSTS.3628.1.S1_at   | MmuSTS.3628.1 | 8.17  | 7.97  | 0.07 | 0.26 | 1.14  | 0.595761 | 0.00038  | 0.835605 | 0.037273 |
| MmuSTS.3629.1.S1_at   | MmuSTS.3629.1 | 6.67  | 6.42  | 0.34 | 0.1  | 1.2   | 0.995327 | 0.267959 | 0.998216 | 0.533687 |
| MmuSTS.363.1.S1_s_at  | MmuSTS.363.1  | 2.75  | 2.71  | 0.04 | 0.03 | 1.03  | 0.417747 | 0.464707 | 0.735038 | 0.675374 |
| MmuSTS.3630.1.S1_at   | MmuSTS.3630.1 | 3.14  | 3.15  | 0.2  | 0.05 | -1    | 0.448059 | 0.389721 | 0.753744 | 0.623783 |

|                       |               |       |       |      |      |       |          |          |          |          |
|-----------------------|---------------|-------|-------|------|------|-------|----------|----------|----------|----------|
| MmuSTS.3631.1.S1_at   | MmuSTS.3631.1 | 10.54 | 10.89 | 0.47 | 0.26 | -1.28 | 0.251931 | 0.079906 | 0.616976 | 0.327207 |
| MmuSTS.3632.1.S1_at   | MmuSTS.3632.1 | 5.29  | 5.04  | 0.49 | 0.16 | 1.19  | 0.375325 | 0.566398 | 0.706463 | 0.740513 |
| MmuSTS.3633.1.S1_at   | MmuSTS.3633.1 | 12.06 | 12.05 | 0.35 | 0.08 | 1.01  | 0.861653 | 0.307744 | 0.951267 | 0.563932 |
| MmuSTS.3634.1.S1_s_at | MmuSTS.3634.1 | 6.53  | 6.53  | 0.9  | 0.13 | 1     | 0.328274 | 0.419448 | 0.675717 | 0.643474 |
| MmuSTS.3635.1.S1_at   | MmuSTS.3635.1 | 10.95 | 11.31 | 0.33 | 0.11 | -1.28 | 0.505633 | 0.461683 | 0.785398 | 0.673237 |
| MmuSTS.3636.1.S1_at   | MmuSTS.3636.1 | 9.64  | 10.22 | 0.3  | 0.02 | -1.5  | 0.067718 | 0.092643 | 0.42444  | 0.34868  |
| MmuSTS.3637.1.S1_at   | MmuSTS.3637.1 | 6.04  | 6.81  | 0.46 | 0.15 | -1.71 | 0.100946 | 0.257579 | 0.47159  | 0.525302 |
| MmuSTS.3638.1.S1_at   | MmuSTS.3638.1 | 10.72 | 8.07  | 0.43 | 0.51 | 6.29  | 0.003564 | 0.000371 | 0.196915 | 0.037273 |
| MmuSTS.3639.1.S1_at   | MmuSTS.3639.1 | 12.18 | 11.89 | 0.54 | 0.1  | 1.23  | 0.418203 | 0.371447 | 0.735441 | 0.610204 |
| MmuSTS.364.1.S1_at    | MmuSTS.364.1  | 6.95  | 7.17  | 0.91 | 0.21 | -1.17 | 0.533852 | 0.381111 | 0.801035 | 0.617478 |
| MmuSTS.3640.1.S1_at   | MmuSTS.3640.1 | 4.87  | 4.97  | 0.39 | 0.39 | -1.07 | 0.373072 | 0.601683 | 0.705567 | 0.763001 |
| MmuSTS.3641.1.S1_at   | MmuSTS.3641.1 | 4.9   | 4.89  | 0.35 | 0.15 | 1.01  | 0.452208 | 0.208291 | 0.75566  | 0.48217  |
| MmuSTS.3642.1.S1_at   | MmuSTS.3642.1 | 6.87  | 7.92  | 0.7  | 0.11 | -2.07 | 0.119264 | 0.32011  | 0.492749 | 0.572464 |
| MmuSTS.3643.1.S1_at   | MmuSTS.3643.1 | 10.35 | 10.13 | 2.61 | 0.26 | 1.16  | 0.807332 | 0.301474 | 0.930145 | 0.559522 |
| MmuSTS.3644.1.S1_at   | MmuSTS.3644.1 | 6.22  | 5.67  | 0.57 | 0.55 | 1.46  | 0.266075 | 0.134631 | 0.627106 | 0.406629 |
| MmuSTS.3645.1.S1_at   | MmuSTS.3645.1 | 6.88  | 6.81  | 0.98 | 0.46 | 1.05  | 0.827052 | 0.472033 | 0.938039 | 0.679835 |
| MmuSTS.3646.1.S1_at   | MmuSTS.3646.1 | 9.26  | 8.16  | 0.41 | 0.66 | 2.15  | 0.077085 | 0.097798 | 0.438911 | 0.355639 |
| MmuSTS.3647.1.S1_at   | MmuSTS.3647.1 | 6.76  | 6.91  | 0.74 | 0.38 | -1.11 | 0.586368 | 0.055507 | 0.831277 | 0.281404 |
| MmuSTS.3648.1.S1_at   | MmuSTS.3648.1 | 13.04 | 13.01 | 0.11 | 0.06 | 1.01  | 0.944545 | 0.364598 | 0.980747 | 0.604917 |
| MmuSTS.3649.1.S1_at   | MmuSTS.3649.1 | 6.94  | 7.14  | 0.71 | 0.43 | -1.15 | 0.926837 | 0.945368 | 0.975766 | 0.968942 |
| MmuSTS.365.1.S1_s_at  | MmuSTS.365.1  | 3.21  | 3.04  | 0.1  | 0.1  | 1.13  | 0.19856  | 0.134664 | 0.56986  | 0.406638 |
| MmuSTS.3650.1.S1_at   | MmuSTS.3650.1 | 9.73  | 9.37  | 1.15 | 0.04 | 1.29  | 0.698479 | 0.244231 | 0.882799 | 0.514167 |
| MmuSTS.3651.1.S1_at   | MmuSTS.3651.1 | 8.4   | 8.27  | 0.39 | 0.2  | 1.09  | 0.654057 | 0.859255 | 0.862576 | 0.919785 |
| MmuSTS.3652.1.S1_at   | MmuSTS.3652.1 | 7.35  | 6.74  | 0.28 | 0.21 | 1.53  | 0.158999 | 0.018918 | 0.531755 | 0.173025 |
| MmuSTS.3653.1.S1_at   | MmuSTS.3653.1 | 4.11  | 4.23  | 0.09 | 0.15 | -1.09 | 0.165336 | 0.257295 | 0.538041 | 0.525108 |
| MmuSTS.3654.1.S1_at   | MmuSTS.3654.1 | 6.36  | 6.69  | 0.42 | 0.41 | -1.26 | 0.817344 | 0.039654 | 0.933935 | 0.244239 |
| MmuSTS.3655.1.S1_at   | MmuSTS.3655.1 | 9.83  | 10.34 | 1    | 0.16 | -1.43 | 0.868257 | 0.357022 | 0.953843 | 0.598737 |
| MmuSTS.3656.1.S1_at   | MmuSTS.3656.1 | 9.32  | 10.02 | 0.57 | 0.13 | -1.63 | 0.144234 | 0.172191 | 0.51962  | 0.448608 |
| MmuSTS.3657.1.S1_at   | MmuSTS.3657.1 | 4.87  | 4.89  | 0.05 | 0.08 | -1.02 | 0.176747 | 0.379734 | 0.549927 | 0.616543 |
| MmuSTS.3658.1.S1_at   | MmuSTS.3658.1 | 9.89  | 10.33 | 0.35 | 0.13 | -1.35 | 0.200667 | 0.256279 | 0.572447 | 0.524079 |
| MmuSTS.3659.1.S1_at   | MmuSTS.3659.1 | 4.95  | 4.93  | 0.09 | 0.02 | 1.02  | 0.29719  | 0.4236   | 0.652609 | 0.646459 |
| MmuSTS.366.1.S1_at    | MmuSTS.366.1  | 6.4   | 6.19  | 0.2  | 0.04 | 1.16  | 0.344612 | 0.303637 | 0.686997 | 0.561088 |
| MmuSTS.3660.1.S1_at   | MmuSTS.3660.1 | 9.05  | 8.49  | 0.61 | 0.13 | 1.47  | 0.179621 | 0.038551 | 0.552974 | 0.241325 |
| MmuSTS.3661.1.S1_at   | MmuSTS.3661.1 | 11.1  | 11.45 | 0.05 | 0.02 | -1.27 | 0.000374 | 0.000743 | 0.137028 | 0.044964 |
| MmuSTS.3662.1.S1_at   | MmuSTS.3662.1 | 11.4  | 11.47 | 0.31 | 0.04 | -1.04 | 0.784878 | 0.346764 | 0.920961 | 0.591536 |
| MmuSTS.3663.1.S1_at   | MmuSTS.3663.1 | 7     | 6.89  | 0.26 | 0.1  | 1.08  | 0.53091  | 0.774234 | 0.799314 | 0.868735 |
| MmuSTS.3664.1.S1_at   | MmuSTS.3664.1 | 10.19 | 10.24 | 0.09 | 0.15 | -1.04 | 0.975071 | 0.706089 | 0.991912 | 0.829633 |
| MmuSTS.3665.1.S1_at   | MmuSTS.3665.1 | 12.84 | 12.9  | 0.03 | 0    | -1.05 | 0.084393 | 0.013337 | 0.450953 | 0.148042 |
| MmuSTS.3666.1.S1_at   | MmuSTS.3666.1 | 10.35 | 10.09 | 0.24 | 0.14 | 1.2   | 0.205211 | 0.107355 | 0.576964 | 0.370219 |
| MmuSTS.3667.1.S1_at   | MmuSTS.3667.1 | 7.89  | 8.04  | 0.12 | 0.05 | -1.11 | 0.118069 | 0.248706 | 0.491371 | 0.517917 |
| MmuSTS.3668.1.S1_at   | MmuSTS.3668.1 | 7.75  | 8.46  | 0.91 | 0.15 | -1.63 | 0.354845 | 0.269048 | 0.69444  | 0.534425 |
| MmuSTS.3669.1.S1_at   | MmuSTS.3669.1 | 4.48  | 5.49  | 0.27 | 0.13 | -2.01 | 0.004235 | 0.000211 | 0.198874 | 0.032262 |
| MmuSTS.367.1.S1_s_at  | MmuSTS.367.1  | 3.35  | 3.27  | 0.07 | 0.06 | 1.06  | 0.476482 | 0.170946 | 0.76916  | 0.447561 |

|                       |               |       |       |      |      |       |          |          |          |          |
|-----------------------|---------------|-------|-------|------|------|-------|----------|----------|----------|----------|
| MmuSTS.3670.1.S1_at   | MmuSTS.3670.1 | 5.54  | 5.35  | 0.07 | 0.12 | 1.15  | 0.076041 | 0.082995 | 0.437231 | 0.332692 |
| MmuSTS.3671.1.S1_at   | MmuSTS.3671.1 | 4.88  | 3.54  | 1.62 | 0.27 | 2.54  | 0.244281 | 0.18784  | 0.60991  | 0.46394  |
| MmuSTS.3672.1.S1_at   | MmuSTS.3672.1 | 8.08  | 8.44  | 0.45 | 0.1  | -1.28 | 0.285461 | 0.009358 | 0.643438 | 0.127602 |
| MmuSTS.3673.1.S1_at   | MmuSTS.3673.1 | 11.83 | 11.82 | 0.21 | 0.06 | 1.01  | 0.891421 | 0.961829 | 0.962578 | 0.978471 |
| MmuSTS.3674.1.S1_at   | MmuSTS.3674.1 | 3.84  | 3.68  | 0.13 | 0.09 | 1.12  | 0.41303  | 0.540441 | 0.732147 | 0.724383 |
| MmuSTS.3675.1.S1_at   | MmuSTS.3675.1 | 7.77  | 7.68  | 0.33 | 0.16 | 1.06  | 0.706401 | 0.009008 | 0.885755 | 0.125499 |
| MmuSTS.3676.1.S1_at   | MmuSTS.3676.1 | 8.8   | 9.36  | 0.28 | 0.45 | -1.47 | 0.118839 | 0.009547 | 0.492313 | 0.128745 |
| MmuSTS.3677.1.S1_at   | MmuSTS.3677.1 | 7.39  | 7.8   | 0.48 | 0.14 | -1.33 | 0.835984 | 0.345322 | 0.941202 | 0.59062  |
| MmuSTS.3678.1.S1_at   | MmuSTS.3678.1 | 5.03  | 5.06  | 0.06 | 0.06 | -1.02 | 0.989255 | 0.128957 | 0.995994 | 0.400429 |
| MmuSTS.3679.1.S1_at   | MmuSTS.3679.1 | 7.39  | 7.66  | 0.33 | 0.12 | -1.2  | 0.72835  | 0.03557  | 0.895142 | 0.232813 |
| MmuSTS.368.1.S1_at    | MmuSTS.368.1  | 3.86  | 3.84  | 0.09 | 0.03 | -1.02 | 0.656217 | 0.924527 | 0.863495 | 0.957386 |
| MmuSTS.3680.1.S1_at   | MmuSTS.3680.1 | 5.12  | 5.49  | 0.06 | 0.13 | -1.29 | 0.021793 | 0.297449 | 0.309672 | 0.556105 |
| MmuSTS.3681.1.S1_at   | MmuSTS.3681.1 | 11.91 | 11.84 | 0.12 | 0.17 | 1.05  | 0.11875  | 0.118915 | 0.492161 | 0.38714  |
| MmuSTS.3682.1.S1_x_at | MmuSTS.3682.1 | 9.24  | 9.92  | 0.34 | 0.15 | -1.61 | 0.089065 | 0.257535 | 0.456902 | 0.525294 |
| MmuSTS.3683.1.S1_at   | MmuSTS.3683.1 | 6.57  | 6.51  | 0.14 | 0.28 | 1.04  | 0.736969 | 0.000957 | 0.899286 | 0.049342 |
| MmuSTS.3684.1.S1_at   | MmuSTS.3684.1 | 5.78  | 5.72  | 0.1  | 0.11 | 1.05  | 0.858452 | 0.940553 | 0.95001  | 0.966314 |
| MmuSTS.3685.1.S1_at   | MmuSTS.3685.1 | 6.35  | 6.22  | 0.18 | 0.03 | 1.09  | 0.422056 | 0.643102 | 0.737952 | 0.790678 |
| MmuSTS.3686.1.S1_at   | MmuSTS.3686.1 | 9.37  | 9.51  | 0.58 | 0.16 | -1.1  | 0.222953 | 0.408964 | 0.59253  | 0.636048 |
| MmuSTS.3687.1.S1_at   | MmuSTS.3687.1 | 4.74  | 4.76  | 0.13 | 0.08 | -1.02 | 0.588461 | 0.838856 | 0.831946 | 0.908118 |
| MmuSTS.3688.1.S1_at   | MmuSTS.3688.1 | 7.86  | 6.98  | 1.69 | 0.38 | 1.84  | 0.450041 | 0.338394 | 0.754663 | 0.585432 |
| MmuSTS.3689.1.S1_at   | MmuSTS.3689.1 | 6.97  | 7.31  | 0.33 | 0.13 | -1.27 | 0.499136 | 0.176439 | 0.781962 | 0.45282  |
| MmuSTS.369.1.S1_s_at  | MmuSTS.369.1  | 4.64  | 4.47  | 0.11 | 0.03 | 1.13  | 0.148975 | 0.152801 | 0.52291  | 0.427601 |
| MmuSTS.3690.1.S1_at   | MmuSTS.3690.1 | 13.16 | 13.24 | 0.38 | 0.06 | -1.06 | 0.707832 | 0.349912 | 0.886299 | 0.593668 |
| MmuSTS.3691.1.S1_at   | MmuSTS.3691.1 | 10    | 10.78 | 0.58 | 0.21 | -1.71 | 0.062911 | 0.010451 | 0.414275 | 0.133645 |
| MmuSTS.3692.1.S1_at   | MmuSTS.3692.1 | 11.95 | 11.98 | 0.25 | 0.09 | -1.02 | 0.806894 | 0.26094  | 0.929983 | 0.527351 |
| MmuSTS.3693.1.S1_at   | MmuSTS.3693.1 | 6.98  | 7.11  | 0.95 | 0.26 | -1.09 | 0.826909 | 0.245558 | 0.938039 | 0.515348 |
| MmuSTS.3694.1.S1_at   | MmuSTS.3694.1 | 7.66  | 7.51  | 0.57 | 0.14 | 1.11  | 0.315773 | 0.457265 | 0.666097 | 0.670746 |
| MmuSTS.3695.1.S1_at   | MmuSTS.3695.1 | 11.01 | 10.81 | 0.1  | 0.06 | 1.15  | 0.060446 | 0.017857 | 0.408213 | 0.168774 |
| MmuSTS.3695.1.S1_s_at | MmuSTS.3695.1 | 12.02 | 11.84 | 0.08 | 0.06 | 1.13  | 0.177805 | 0.037226 | 0.550946 | 0.237329 |
| MmuSTS.3696.1.S1_at   | MmuSTS.3696.1 | 10.99 | 11.29 | 0.55 | 0.11 | -1.22 | 0.552651 | 0.733776 | 0.811917 | 0.845859 |
| MmuSTS.3697.1.S1_at   | MmuSTS.3697.1 | 12.14 | 12.23 | 0.08 | 0.02 | -1.06 | 0.354686 | 0.065883 | 0.694211 | 0.302126 |
| MmuSTS.3698.1.S1_at   | MmuSTS.3698.1 | 13.21 | 13.28 | 0.05 | 0.02 | -1.05 | 0.074767 | 0.235258 | 0.435313 | 0.506307 |
| MmuSTS.3699.1.S1_at   | MmuSTS.3699.1 | 6.58  | 6.39  | 0.15 | 0.29 | 1.15  | 0.276781 | 0.04581  | 0.636451 | 0.258337 |
| MmuSTS.37.1.S1_at     | MmuSTS.37.1   | 10.27 | 10.12 | 0.26 | 0.05 | 1.11  | 0.386784 | 0.109696 | 0.713794 | 0.373675 |
| MmuSTS.370.1.S1_at    | MmuSTS.370.1  | 5.45  | 5.68  | 0.32 | 0.16 | -1.17 | 0.906251 | 0.449648 | 0.968295 | 0.665155 |
| MmuSTS.3700.1.S1_at   | MmuSTS.3700.1 | 12.51 | 12.66 | 0.02 | 0.03 | -1.11 | 0.004346 | 0.009239 | 0.198874 | 0.126946 |
| MmuSTS.3701.1.S1_at   | MmuSTS.3701.1 | 3.86  | 3.95  | 0.14 | 0.16 | -1.06 | 0.267949 | 0.617103 | 0.628304 | 0.77321  |
| MmuSTS.3702.1.S1_at   | MmuSTS.3702.1 | 10.74 | 11.04 | 0.19 | 0.09 | -1.23 | 0.052232 | 0.077406 | 0.392084 | 0.323204 |
| MmuSTS.3703.1.S1_at   | MmuSTS.3703.1 | 3.15  | 3.21  | 0.01 | 0.04 | -1.04 | 0.303987 | 0.436555 | 0.657774 | 0.656048 |
| MmuSTS.3704.1.S1_at   | MmuSTS.3704.1 | 10    | 10.08 | 0.33 | 0.13 | -1.06 | 0.907962 | 0.080697 | 0.968862 | 0.328537 |
| MmuSTS.3705.1.S1_at   | MmuSTS.3705.1 | 7.52  | 7.01  | 0.33 | 0.37 | 1.42  | 0.125024 | 0.001065 | 0.49897  | 0.051835 |
| MmuSTS.3706.1.S1_at   | MmuSTS.3706.1 | 11.33 | 11.5  | 0.34 | 0.04 | -1.12 | 0.493497 | 0.3159   | 0.778977 | 0.569327 |
| MmuSTS.3707.1.S1_at   | MmuSTS.3707.1 | 11.11 | 10.05 | 0.24 | 0.38 | 2.09  | 0.011658 | 0.052438 | 0.256051 | 0.274524 |

|                        |                |       |       |      |      |        |          |          |          |          |
|------------------------|----------------|-------|-------|------|------|--------|----------|----------|----------|----------|
| MmuSTS.3708.1.S1_at    | MmuSTS.3708.1  | 5.68  | 5.95  | 0.05 | 0.06 | -1.2   | 0.005715 | 0.001965 | 0.210666 | 0.065838 |
| MmuSTS.3709.1.S1_at    | MmuSTS.3709.1  | 5.26  | 5.02  | 0.08 | 0.08 | 1.18   | 0.028241 | 0.022732 | 0.33163  | 0.188776 |
| MmuSTS.371.1.S1_at     | MmuSTS.371.1   | 3.57  | 3.57  | 0.17 | 0.07 | 1.01   | 0.920063 | 0.525881 | 0.972913 | 0.715223 |
| MmuSTS.3710.1.S1_at    | MmuSTS.3710.1  | 11.62 | 11.67 | 0.1  | 0.02 | -1.03  | 0.656969 | 0.39959  | 0.863818 | 0.629912 |
| MmuSTS.3711.1.S1_s_at  | MmuSTS.3711.1  | 10.72 | 10.6  | 0.12 | 0.09 | 1.09   | 0.94227  | 0.329552 | 0.980283 | 0.578781 |
| MmuSTS.3712.1.S1_at    | MmuSTS.3712.1  | 12.31 | 12.17 | 0.12 | 0.06 | 1.1    | 0.215934 | 0.0207   | 0.586043 | 0.180639 |
| MmuSTS.3713.1.S1_at    | MmuSTS.3713.1  | 10.84 | 10.82 | 0.48 | 0.1  | 1.01   | 0.735191 | 0.138422 | 0.898588 | 0.411336 |
| MmuSTS.3714.1.S1_at    | MmuSTS.3714.1  | 12.45 | 12.32 | 0.45 | 0.06 | 1.1    | 0.582838 | 0.821282 | 0.828562 | 0.897125 |
| MmuSTS.3715.1.S1_at    | MmuSTS.3715.1  | 5.22  | 5.63  | 0.36 | 0.07 | -1.33  | 0.208722 | 0.019914 | 0.580466 | 0.17744  |
| MmuSTS.3716.1.S1_at    | MmuSTS.3716.1  | 4.17  | 4.06  | 0.72 | 0.07 | 1.08   | 0.27919  | 0.326617 | 0.638077 | 0.576649 |
| MmuSTS.3717.1.S1_at    | MmuSTS.3717.1  | 12.66 | 12.72 | 0.53 | 0    | -1.04  | 0.304726 | 0.393812 | 0.658331 | 0.626565 |
| MmuSTS.3718.1.S1_at    | MmuSTS.3718.1  | 9.75  | 8.66  | 0.36 | 0.4  | 2.13   | 0.027427 | 0.005315 | 0.327679 | 0.100896 |
| MmuSTS.3719.1.S1_at    | MmuSTS.3719.1  | 9.75  | 6.69  | 1.64 | 0.11 | 8.36   | 0.08846  | 0.087295 | 0.45606  | 0.340327 |
| MmuSTS.372.1.S1_at     | MmuSTS.372.1   | 3.11  | 3.05  | 0.07 | 0.16 | 1.04   | 0.183289 | 0.312633 | 0.556264 | 0.567268 |
| MmunewRS.336.1.S1_at   | MmunewRS.336.1 | 3.78  | 3.6   | 0.05 | 0.27 | 1.14   | 0.288183 | 0.295905 | 0.645272 | 0.555241 |
| MmunewRS.336.1.S1_s_at | MmunewRS.336.1 | 5.55  | 5.54  | 0.09 | 0.07 | 1      | 0.219585 | 0.539334 | 0.589062 | 0.723689 |
| MmuSTS.3720.1.S1_at    | MmuSTS.3720.1  | 8.11  | 9.35  | 2.06 | 0.33 | -2.35  | 0.323054 | 0.027869 | 0.671928 | 0.208453 |
| MmuSTS.3721.1.S1_at    | MmuSTS.3721.1  | 9.43  | 8.08  | 0.19 | 0.41 | 2.56   | 0.007184 | 0.266324 | 0.226471 | 0.532099 |
| MmuSTS.3722.1.S1_at    | MmuSTS.3722.1  | 11.19 | 9.45  | 1    | 0.49 | 3.33   | 0.05017  | 0.005404 | 0.386848 | 0.101457 |
| MmuSTS.3723.1.S1_at    | MmuSTS.3723.1  | 13.76 | 13.83 | 0.12 | 0.01 | -1.04  | 0.398328 | 0.28506  | 0.722451 | 0.547095 |
| MmuSTS.3724.1.S1_at    | MmuSTS.3724.1  | 10.88 | 10.78 | 0.14 | 0.08 | 1.08   | 0.594007 | 0.001594 | 0.834566 | 0.06044  |
| MmuSTS.3725.1.S1_at    | MmuSTS.3725.1  | 9.91  | 9.34  | 0.28 | 0.25 | 1.49   | 0.022391 | 0.001388 | 0.310499 | 0.057005 |
| MmuSTS.3726.1.S1_at    | MmuSTS.3726.1  | 6.71  | 6.77  | 1.07 | 0.17 | -1.04  | 0.97866  | 0.465    | 0.993049 | 0.675534 |
| MmuSTS.3727.1.S1_at    | MmuSTS.3727.1  | 10.23 | 10.58 | 1.72 | 0.19 | -1.27  | 0.642987 | 0.127017 | 0.857999 | 0.397816 |
| MmuSTS.3728.1.S1_at    | MmuSTS.3728.1  | 5.42  | 5.39  | 0.05 | 0.07 | 1.02   | 0.63013  | 0.196317 | 0.851878 | 0.47127  |
| MmuSTS.3729.1.S1_at    | MmuSTS.3729.1  | 10.17 | 10.61 | 0.48 | 0.41 | -1.36  | 0.333017 | 0.488768 | 0.679412 | 0.691355 |
| MmuSTS.3730.1.S1_at    | MmuSTS.3730.1  | 9.48  | 10.15 | 0.2  | 0.06 | -1.58  | 0.010355 | 0.008103 | 0.246974 | 0.119551 |
| MmuSTS.3731.1.S1_at    | MmuSTS.3731.1  | 8.15  | 9.31  | 0.65 | 0.15 | -2.24  | 0.0372   | 0.036934 | 0.356914 | 0.236659 |
| MmuSTS.3732.1.S1_s_at  | MmuSTS.3732.1  | 12.47 | 12.53 | 0.14 | 0.03 | -1.05  | 0.531749 | 0.217361 | 0.799855 | 0.490978 |
| MmuSTS.3733.1.S1_at    | MmuSTS.3733.1  | 4.83  | 4.75  | 0.03 | 0.05 | 1.06   | 0.03457  | 0.102508 | 0.350124 | 0.362796 |
| MmuSTS.3733.1.S1_s_at  | MmuSTS.3733.1  | 6.13  | 6.09  | 0.24 | 0.07 | 1.03   | 0.263422 | 0.322306 | 0.625372 | 0.573907 |
| MmuSTS.3734.1.S1_at    | MmuSTS.3734.1  | 2.96  | 2.95  | 0.02 | 0.1  | 1      | 0.899633 | 0.669715 | 0.965902 | 0.806829 |
| MmuSTS.3735.1.S1_at    | MmuSTS.3735.1  | 6.91  | 6.95  | 0.15 | 0.09 | -1.03  | 0.736973 | 0.485081 | 0.899286 | 0.688913 |
| MmuSTS.3736.1.S1_at    | MmuSTS.3736.1  | 11.83 | 11.84 | 0.17 | 0.04 | -1.01  | 0.393908 | 0.712859 | 0.719549 | 0.833557 |
| MmuSTS.3737.1.S1_at    | MmuSTS.3737.1  | 11.94 | 11.33 | 2.95 | 0.24 | 1.53   | 0.5724   | 0.247003 | 0.82322  | 0.516238 |
| MmuSTS.3738.1.S1_at    | MmuSTS.3738.1  | 11.38 | 11.09 | 0.83 | 0.04 | 1.22   | 0.677037 | 0.087859 | 0.873333 | 0.341218 |
| MmuSTS.3739.1.S1_at    | MmuSTS.3739.1  | 8.65  | 8.97  | 1.6  | 0.46 | -1.25  | 0.935161 | 0.120468 | 0.978066 | 0.38925  |
| MmuSTS.374.1.S1_at     | MmuSTS.374.1   | 6.04  | 6.23  | 0.4  | 0.26 | -1.13  | 0.770147 | 0.107324 | 0.913903 | 0.370219 |
| MmuSTS.3740.1.S1_s_at  | MmuSTS.3740.1  | 6.08  | 6.16  | 0.11 | 0.04 | -1.06  | 0.307515 | 0.112345 | 0.660255 | 0.377686 |
| MmuSTS.3741.1.S1_at    | MmuSTS.3741.1  | 6.96  | 10.38 | 1.09 | 0.31 | -10.67 | 0.009018 | 0.017015 | 0.240177 | 0.165348 |
| MmuSTS.3742.1.S1_at    | MmuSTS.3742.1  | 11.23 | 10.48 | 0.5  | 0.41 | 1.68   | 0.050256 | 0.076394 | 0.386954 | 0.321372 |
| MmuSTS.3743.1.S1_at    | MmuSTS.3743.1  | 6.34  | 6.36  | 0.25 | 0.05 | -1.01  | 0.7952   | 0.763456 | 0.924811 | 0.862471 |
| MmuSTS.3744.1.S1_at    | MmuSTS.3744.1  | 10.14 | 9.8   | 0.15 | 0.04 | 1.26   | 0.012565 | 0.003619 | 0.263116 | 0.086035 |

|                     |               |       |       |      |      |       |          |          |          |          |
|---------------------|---------------|-------|-------|------|------|-------|----------|----------|----------|----------|
| MmuSTS.3745.1.S1_at | MmuSTS.3745.1 | 6.02  | 6.73  | 1.02 | 0.39 | -1.64 | 0.345387 | 0.111126 | 0.687499 | 0.375714 |
| MmuSTS.3746.1.S1_at | MmuSTS.3746.1 | 7.56  | 6.84  | 0.64 | 0.49 | 1.64  | 0.40261  | 0.081478 | 0.725018 | 0.329735 |
| MmuSTS.3747.1.S1_at | MmuSTS.3747.1 | 10.29 | 9.95  | 0.2  | 0.11 | 1.26  | 0.121919 | 0.011513 | 0.495636 | 0.138773 |
| MmuSTS.3748.1.S1_at | MmuSTS.3748.1 | 5.64  | 5.64  | 0.17 | 0.17 | 1     | 0.950096 | 0.173824 | 0.98324  | 0.450128 |
| MmuSTS.3749.1.S1_at | MmuSTS.3749.1 | 6.96  | 6.91  | 0.07 | 0.26 | 1.03  | 0.839244 | 0.112792 | 0.942609 | 0.37844  |
| MmuSTS.375.1.S1_at  | MmuSTS.375.1  | 6.12  | 6.37  | 1.8  | 0.19 | -1.19 | 0.832255 | 0.174437 | 0.939789 | 0.450911 |
| MmuSTS.3750.1.S1_at | MmuSTS.3750.1 | 13.33 | 13.34 | 0.46 | 0.04 | -1.01 | 0.387899 | 0.410834 | 0.714828 | 0.637644 |
| MmuSTS.3751.1.S1_at | MmuSTS.3751.1 | 9     | 8.96  | 1.49 | 0.34 | 1.03  | 0.61265  | 0.071609 | 0.843101 | 0.313717 |
| MmuSTS.3752.1.S1_at | MmuSTS.3752.1 | 7.68  | 8.63  | 0.16 | 0.11 | -1.93 | 0.002036 | 0.014197 | 0.173807 | 0.152173 |
| MmuSTS.3753.1.S1_at | MmuSTS.3753.1 | 4.35  | 5.19  | 0.33 | 0.51 | -1.79 | 0.187131 | 0.107075 | 0.559729 | 0.369728 |
| MmuSTS.3754.1.S1_at | MmuSTS.3754.1 | 9.78  | 9.31  | 0.28 | 0.08 | 1.38  | 0.096113 | 0.12795  | 0.46463  | 0.398894 |
| MmuSTS.3755.1.S1_at | MmuSTS.3755.1 | 8.81  | 9.07  | 0.26 | 0.08 | -1.19 | 0.191479 | 0.271979 | 0.562859 | 0.53674  |
| MmuSTS.3756.1.S1_at | MmuSTS.3756.1 | 5.97  | 5.91  | 0.03 | 0.04 | 1.04  | 0.068605 | 0.555239 | 0.425941 | 0.733763 |
| MmuSTS.3757.1.S1_at | MmuSTS.3757.1 | 8.14  | 8.44  | 0.6  | 0.14 | -1.23 | 0.188906 | 0.20867  | 0.560718 | 0.482544 |
| MmuSTS.3758.1.S1_at | MmuSTS.3758.1 | 13.24 | 13.21 | 0.02 | 0.03 | 1.02  | 0.117699 | 0.07224  | 0.491034 | 0.314836 |
| MmuSTS.3759.1.S1_at | MmuSTS.3759.1 | 12.3  | 12.33 | 0.04 | 0.12 | -1.02 | 0.746269 | 0.252113 | 0.90336  | 0.520787 |
| MmuSTS.376.1.S1_at  | MmuSTS.376.1  | 12.29 | 12.32 | 0.21 | 0.03 | -1.02 | 0.431134 | 0.013615 | 0.74323  | 0.149362 |
| MmuSTS.3760.1.S1_at | MmuSTS.3760.1 | 8.24  | 8.2   | 0.01 | 0.05 | 1.02  | 0.31939  | 0.170452 | 0.668706 | 0.447103 |
| MmuSTS.3761.1.S1_at | MmuSTS.3761.1 | 3.78  | 3.68  | 0.1  | 0.22 | 1.07  | 0.208388 | 0.353066 | 0.580083 | 0.596363 |
| MmuSTS.3762.1.S1_at | MmuSTS.3762.1 | 3.47  | 3.64  | 0.2  | 0.21 | -1.12 | 0.447967 | 0.103676 | 0.753716 | 0.364465 |
| MmuSTS.3763.1.S1_at | MmuSTS.3763.1 | 12.26 | 12.47 | 0.12 | 0.04 | -1.16 | 0.040484 | 0.058215 | 0.364533 | 0.287988 |
| MmuSTS.3764.1.S1_at | MmuSTS.3764.1 | 2.87  | 3.1   | 0.03 | 0.08 | -1.17 | 0.009502 | 0.001397 | 0.242401 | 0.057005 |
| MmuSTS.3765.1.S1_at | MmuSTS.3765.1 | 8.85  | 9.26  | 0.92 | 0.06 | -1.33 | 0.571555 | 0.454227 | 0.822833 | 0.668474 |
| MmuSTS.3766.1.S1_at | MmuSTS.3766.1 | 7.18  | 8.38  | 0.67 | 0.34 | -2.3  | 0.082829 | 0.496979 | 0.44803  | 0.696338 |
| MmuSTS.3767.1.S1_at | MmuSTS.3767.1 | 7.12  | 5.96  | 0.74 | 0.43 | 2.24  | 0.057411 | 0.016478 | 0.402072 | 0.162551 |
| MmuSTS.3768.1.S1_at | MmuSTS.3768.1 | 7.63  | 7.66  | 0.2  | 0.06 | -1.02 | 0.687735 | 0.640966 | 0.877924 | 0.789319 |
| MmuSTS.3769.1.S1_at | MmuSTS.3769.1 | 5.26  | 6.3   | 0.81 | 0.36 | -2.05 | 0.099418 | 0.136522 | 0.469094 | 0.409003 |
| MmuSTS.377.1.S1_at  | MmuSTS.377.1  | 5.13  | 5.11  | 0.25 | 0.06 | 1.02  | 0.848178 | 0.967516 | 0.946669 | 0.98208  |
| MmuSTS.3770.1.S1_at | MmuSTS.3770.1 | 7.25  | 7.24  | 0.2  | 0.05 | 1.01  | 0.367594 | 0.287237 | 0.703069 | 0.548526 |
| MmuSTS.3771.1.S1_at | MmuSTS.3771.1 | 10.11 | 9.96  | 0.1  | 0.06 | 1.11  | 0.044039 | 0.08439  | 0.373552 | 0.335713 |
| MmuSTS.3772.1.S1_at | MmuSTS.3772.1 | 9.74  | 9.7   | 0.39 | 0.07 | 1.03  | 0.312563 | 0.533862 | 0.664138 | 0.71991  |
| MmuSTS.3773.1.S1_at | MmuSTS.3773.1 | 12.32 | 12.34 | 0.15 | 0.03 | -1.01 | 0.74432  | 0.023712 | 0.902542 | 0.192852 |
| MmuSTS.3774.1.S1_at | MmuSTS.3774.1 | 7.76  | 8.23  | 0.41 | 0.11 | -1.39 | 0.39648  | 0.557068 | 0.721487 | 0.73493  |
| MmuSTS.3775.1.S1_at | MmuSTS.3775.1 | 9.1   | 8.47  | 0.31 | 0.13 | 1.55  | 0.017863 | 0.005669 | 0.294096 | 0.103959 |
| MmuSTS.3776.1.S1_at | MmuSTS.3776.1 | 6.77  | 6.29  | 0.64 | 0.26 | 1.39  | 0.618039 | 0.077036 | 0.845782 | 0.322481 |
| MmuSTS.3777.1.S1_at | MmuSTS.3777.1 | 9.31  | 8.81  | 0.46 | 0.19 | 1.42  | 0.194684 | 0.086573 | 0.565144 | 0.33911  |
| MmuSTS.3778.1.S1_at | MmuSTS.3778.1 | 12.72 | 12.21 | 0.09 | 0.09 | 1.42  | 0.002325 | 0.00032  | 0.17599  | 0.035423 |
| MmuSTS.3779.1.S1_at | MmuSTS.3779.1 | 3.04  | 3.14  | 0.18 | 0.12 | -1.08 | 0.976365 | 0.492239 | 0.99232  | 0.693477 |
| MmuSTS.378.1.S1_at  | MmuSTS.378.1  | 3.64  | 3.74  | 0.08 | 0.5  | -1.07 | 0.313463 | 0.518263 | 0.664764 | 0.710344 |
| MmuSTS.3780.1.S1_at | MmuSTS.3780.1 | 10.95 | 11.55 | 0.13 | 0.09 | -1.51 | 0.002033 | 0.027277 | 0.173807 | 0.206458 |
| MmuSTS.3781.1.S1_at | MmuSTS.3781.1 | 10.04 | 9.65  | 0.85 | 0.02 | 1.32  | 0.477671 | 0.275134 | 0.76987  | 0.539542 |
| MmuSTS.3782.1.S1_at | MmuSTS.3782.1 | 6     | 7.23  | 0.88 | 0.22 | -2.35 | 0.09281  | 0.088265 | 0.461373 | 0.341721 |
| MmuSTS.3783.1.S1_at | MmuSTS.3783.1 | 3.15  | 3.17  | 0.07 | 0.11 | -1.02 | 0.475855 | 0.24095  | 0.768735 | 0.51164  |

|                       |               |       |       |      |      |       |          |          |          |          |
|-----------------------|---------------|-------|-------|------|------|-------|----------|----------|----------|----------|
| MmuSTS.3784.1.S1_at   | MmuSTS.3784.1 | 4.9   | 5.13  | 0.1  | 0.14 | -1.17 | 0.068819 | 0.339929 | 0.426107 | 0.586449 |
| MmuSTS.3785.1.S1_at   | MmuSTS.3785.1 | 6.69  | 6.48  | 1.14 | 0.26 | 1.15  | 0.89256  | 0.638875 | 0.963185 | 0.787897 |
| MmuSTS.3786.1.S1_at   | MmuSTS.3786.1 | 5.81  | 5.46  | 0.46 | 0.11 | 1.27  | 0.287023 | 0.433528 | 0.644117 | 0.653805 |
| MmuSTS.3787.1.S1_at   | MmuSTS.3787.1 | 6.31  | 6.4   | 0.14 | 0.18 | -1.06 | 0.679721 | 0.000531 | 0.874357 | 0.040186 |
| MmuSTS.3788.1.S1_at   | MmuSTS.3788.1 | 10.28 | 10.46 | 0.22 | 0.05 | -1.14 | 0.359672 | 0.583288 | 0.697497 | 0.751682 |
| MmuSTS.3789.1.S1_at   | MmuSTS.3789.1 | 7.52  | 8.42  | 0.2  | 0.34 | -1.86 | 0.030568 | 0.196525 | 0.338095 | 0.471577 |
| MmuSTS.379.1.S1_at    | MmuSTS.379.1  | 9     | 9.09  | 0.98 | 0.13 | -1.07 | 0.99995  | 0.132299 | 1        | 0.404294 |
| MmuSTS.3790.1.S1_at   | MmuSTS.3790.1 | 5.23  | 5.23  | 0.21 | 0.05 | -1    | 0.947928 | 0.991376 | 0.982111 | 0.995189 |
| MmuSTS.3791.1.S1_at   | MmuSTS.3791.1 | 9.15  | 9.25  | 0.35 | 0.13 | -1.07 | 0.712443 | 0.209603 | 0.887958 | 0.483271 |
| MmuSTS.3792.1.S1_at   | MmuSTS.3792.1 | 5.95  | 5.98  | 0.04 | 0.05 | -1.02 | 0.437967 | 0.853749 | 0.747043 | 0.916773 |
| MmuSTS.3793.1.S1_at   | MmuSTS.3793.1 | 4.21  | 4.2   | 0.18 | 0.04 | -1.01 | 0.344123 | 0.385708 | 0.686913 | 0.621079 |
| MmuSTS.3794.1.S1_at   | MmuSTS.3794.1 | 11.04 | 11.27 | 0.59 | 0.05 | -1.18 | 0.438853 | 0.474134 | 0.74759  | 0.681302 |
| MmuSTS.3795.1.S1_at   | MmuSTS.3795.1 | 10.93 | 11.47 | 0.23 | 0.09 | -1.46 | 0.046096 | 0.014737 | 0.37735  | 0.154455 |
| MmuSTS.3796.1.S1_at   | MmuSTS.3796.1 | 8.91  | 9.19  | 0.17 | 0.08 | -1.21 | 0.026382 | 0.00179  | 0.32457  | 0.063581 |
| MmuSTS.3797.1.S1_at   | MmuSTS.3797.1 | 11.78 | 11.9  | 0.13 | 0.05 | -1.09 | 0.291293 | 0.080483 | 0.647759 | 0.328159 |
| MmuSTS.3798.1.S1_at   | MmuSTS.3798.1 | 9.4   | 9.45  | 0.14 | 0.01 | -1.03 | 0.484136 | 0.444853 | 0.773472 | 0.662072 |
| MmuSTS.3799.1.S1_at   | MmuSTS.3799.1 | 9.67  | 9.43  | 0.24 | 0.14 | 1.18  | 0.126776 | 0.00776  | 0.500599 | 0.117626 |
| MmuSTS.38.1.S1_at     | MmuSTS.38.1   | 8.51  | 8.52  | 0.03 | 0.02 | -1.01 | 0.737724 | 0.675157 | 0.899629 | 0.810205 |
| MmuSTS.380.1.S1_at    | MmuSTS.380.1  | 4.46  | 5.06  | 0.75 | 0.1  | -1.52 | 0.61122  | 0.721725 | 0.842397 | 0.838808 |
| MmuSTS.3800.1.S1_at   | MmuSTS.3800.1 | 12.92 | 12.83 | 0.28 | 0.05 | 1.06  | 0.521084 | 0.222955 | 0.794322 | 0.495821 |
| MmuSTS.3801.1.S1_at   | MmuSTS.3801.1 | 13.14 | 12.97 | 0.18 | 0.04 | 1.13  | 0.259819 | 0.022278 | 0.622814 | 0.186724 |
| MmuSTS.3802.1.S1_at   | MmuSTS.3802.1 | 3.81  | 3.53  | 0.14 | 0.22 | 1.22  | 0.282693 | 0.368073 | 0.641025 | 0.607669 |
| MmuSTS.3803.1.S1_at   | MmuSTS.3803.1 | 8.97  | 9.07  | 0.1  | 0.12 | -1.07 | 0.289701 | 0.223565 | 0.646342 | 0.49642  |
| MmuSTS.3804.1.S1_at   | MmuSTS.3804.1 | 7.43  | 7.93  | 0.54 | 0.15 | -1.41 | 0.143264 | 0.190845 | 0.518489 | 0.466228 |
| MmuSTS.3805.1.S1_at   | MmuSTS.3805.1 | 8.81  | 8.79  | 0.23 | 0.06 | 1.02  | 0.867303 | 0.98542  | 0.953465 | 0.991761 |
| MmuSTS.3806.1.S1_at   | MmuSTS.3806.1 | 12.07 | 11.72 | 0.16 | 0.13 | 1.28  | 0.028745 | 0.016993 | 0.333062 | 0.165285 |
| MmuSTS.3807.1.S1_at   | MmuSTS.3807.1 | 7.5   | 7.33  | 0.38 | 0.2  | 1.13  | 0.793728 | 0.006827 | 0.924414 | 0.111597 |
| MmuSTS.3808.1.S1_at   | MmuSTS.3808.1 | 8.63  | 8.88  | 0.26 | 0.13 | -1.19 | 0.122565 | 0.046125 | 0.496093 | 0.259154 |
| MmuSTS.3809.1.S1_at   | MmuSTS.3809.1 | 5.57  | 6.07  | 0.38 | 0.27 | -1.41 | 0.668688 | 0.587488 | 0.869132 | 0.754278 |
| MmuSTS.381.1.S1_at    | MmuSTS.381.1  | 8.42  | 8.44  | 0.23 | 0.12 | -1.02 | 0.317731 | 0.005824 | 0.667521 | 0.104661 |
| MmuSTS.3810.1.S1_s_at | MmuSTS.3810.1 | 3.54  | 3.54  | 0.12 | 0.01 | 1.01  | 0.677135 | 0.654966 | 0.873361 | 0.7982   |
| MmuSTS.3811.1.S1_at   | MmuSTS.3811.1 | 9.54  | 8.96  | 0.39 | 0.1  | 1.5   | 0.067216 | 0.070782 | 0.423286 | 0.312275 |
| MmuSTS.3812.1.S1_at   | MmuSTS.3812.1 | 10.68 | 11.06 | 0.6  | 0.14 | -1.3  | 0.42127  | 0.594508 | 0.73746  | 0.758623 |
| MmuSTS.3813.1.S1_at   | MmuSTS.3813.1 | 7.38  | 7.57  | 0.42 | 0.07 | -1.14 | 0.244629 | 0.330258 | 0.610187 | 0.579044 |
| MmuSTS.3814.1.S1_at   | MmuSTS.3814.1 | 8.62  | 8.04  | 0.37 | 0.32 | 1.49  | 0.04383  | 0.087571 | 0.372715 | 0.3408   |
| MmuSTS.3815.1.S1_at   | MmuSTS.3815.1 | 11.73 | 11.83 | 0.54 | 0.03 | -1.07 | 0.834714 | 0.346765 | 0.940727 | 0.591536 |
| MmuSTS.3816.1.S1_at   | MmuSTS.3816.1 | 10.16 | 10.75 | 0.97 | 0.01 | -1.51 | 0.333993 | 0.367894 | 0.679986 | 0.607469 |
| MmuSTS.3817.1.S1_at   | MmuSTS.3817.1 | 4.6   | 6.3   | 0.21 | 0.04 | -3.25 | 0.000184 | 0.000178 | 0.114006 | 0.030511 |
| MmuSTS.3818.1.S1_at   | MmuSTS.3818.1 | 5.32  | 5.29  | 0.24 | 0.14 | 1.02  | 0.5409   | 0.445283 | 0.804745 | 0.662338 |
| MmuSTS.3819.1.S1_at   | MmuSTS.3819.1 | 11.56 | 12.34 | 1.23 | 0.05 | -1.72 | 0.151665 | 0.107655 | 0.524628 | 0.370618 |
| MmuSTS.382.1.S1_at    | MmuSTS.382.1  | 3.06  | 3.38  | 0.17 | 0.29 | -1.25 | 0.254885 | 0.419307 | 0.619267 | 0.643445 |
| MmuSTS.3820.1.S1_at   | MmuSTS.3820.1 | 10.55 | 10.4  | 0.26 | 0.1  | 1.11  | 0.959045 | 0.029111 | 0.986548 | 0.212733 |
| MmuSTS.3821.1.S1_at   | MmuSTS.3821.1 | 7.5   | 7.57  | 0.28 | 0.17 | -1.05 | 0.660307 | 0.729862 | 0.865559 | 0.84372  |

|                       |               |       |       |      |      |       |          |          |          |          |
|-----------------------|---------------|-------|-------|------|------|-------|----------|----------|----------|----------|
| MmuSTS.3822.1.S1_at   | MmuSTS.3822.1 | 9.44  | 9.2   | 0.33 | 0.03 | 1.18  | 0.845939 | 0.392185 | 0.945947 | 0.625652 |
| MmuSTS.3823.1.S1_at   | MmuSTS.3823.1 | 3.73  | 3.73  | 0.19 | 0.03 | -1.01 | 0.90519  | 0.988046 | 0.968109 | 0.993307 |
| MmuSTS.3824.1.S1_at   | MmuSTS.3824.1 | 9.04  | 8.27  | 0.4  | 0.18 | 1.71  | 0.020875 | 0.01122  | 0.305672 | 0.137971 |
| MmuSTS.3825.1.S1_at   | MmuSTS.3825.1 | 3.24  | 4.02  | 0.98 | 0.72 | -1.72 | 0.822563 | 0.350461 | 0.936084 | 0.594161 |
| MmuSTS.3826.1.S1_at   | MmuSTS.3826.1 | 6.66  | 7.21  | 1.1  | 0.35 | -1.46 | 0.960052 | 0.75462  | 0.986981 | 0.85725  |
| MmuSTS.3827.1.S1_at   | MmuSTS.3827.1 | 9.51  | 9.21  | 1.52 | 0.32 | 1.23  | 0.793362 | 0.112237 | 0.92426  | 0.37754  |
| MmuSTS.3828.1.S1_at   | MmuSTS.3828.1 | 11.75 | 11.64 | 0.61 | 0.02 | 1.08  | 0.816108 | 0.425881 | 0.933378 | 0.6481   |
| MmuSTS.3829.1.S1_at   | MmuSTS.3829.1 | 8.28  | 8.72  | 0.06 | 0.15 | -1.35 | 0.010214 | 0.031344 | 0.246929 | 0.219013 |
| MmuSTS.383.1.S1_at    | MmuSTS.383.1  | 3.56  | 3.47  | 0.13 | 0.11 | 1.06  | 0.404828 | 0.090914 | 0.726978 | 0.345543 |
| MmuSTS.3830.1.S1_at   | MmuSTS.3830.1 | 8.55  | 8.17  | 1.11 | 0.29 | 1.3   | 0.456555 | 0.316533 | 0.757961 | 0.569938 |
| MmuSTS.3831.1.S1_at   | MmuSTS.3831.1 | 7.26  | 7.32  | 0.68 | 0.57 | -1.04 | 0.823147 | 0.893283 | 0.936204 | 0.939163 |
| MmuSTS.3832.1.S1_at   | MmuSTS.3832.1 | 3.12  | 3.28  | 0.07 | 0.31 | -1.12 | 0.381243 | 0.429704 | 0.709924 | 0.65099  |
| MmuSTS.3833.1.S1_at   | MmuSTS.3833.1 | 4.42  | 3.95  | 0.18 | 0.03 | 1.39  | 0.018691 | 0.046929 | 0.298184 | 0.261301 |
| MmuSTS.3834.1.S1_at   | MmuSTS.3834.1 | 11.84 | 11.54 | 0.12 | 0.09 | 1.23  | 0.045631 | 0.159921 | 0.376875 | 0.435987 |
| MmuSTS.3835.1.S1_at   | MmuSTS.3835.1 | 7.7   | 8.61  | 0.94 | 0.3  | -1.88 | 0.202902 | 0.426579 | 0.574279 | 0.648739 |
| MmuSTS.3836.1.S1_at   | MmuSTS.3836.1 | 9.23  | 8.38  | 0.14 | 0.26 | 1.8   | 0.008687 | 0.001741 | 0.236048 | 0.062895 |
| MmuSTS.3837.1.S1_at   | MmuSTS.3837.1 | 8.9   | 7.38  | 1.5  | 0.39 | 2.86  | 0.128608 | 0.19715  | 0.503395 | 0.472213 |
| MmuSTS.3838.1.S1_at   | MmuSTS.3838.1 | 3.14  | 3.88  | 1.62 | 0.66 | -1.68 | 0.967396 | 0.789947 | 0.989259 | 0.878631 |
| MmuSTS.3839.1.S1_s_at | MmuSTS.3839.1 | 3.24  | 2.97  | 0.22 | 0.11 | 1.2   | 0.238714 | 0.341978 | 0.605393 | 0.588058 |
| MmuSTS.384.1.S1_at    | MmuSTS.384.1  | 7.01  | 6.81  | 0.1  | 0.01 | 1.16  | 0.029527 | 0.065473 | 0.334607 | 0.301415 |
| MmuSTS.3840.1.S1_at   | MmuSTS.3840.1 | 5.47  | 5.36  | 0.32 | 0.03 | 1.08  | 0.694072 | 0.063683 | 0.880942 | 0.298842 |
| MmuSTS.3841.1.S1_at   | MmuSTS.3841.1 | 2.87  | 2.86  | 0.03 | 0.09 | 1.01  | 0.606623 | 0.87802  | 0.840563 | 0.930359 |
| MmuSTS.3842.1.S1_at   | MmuSTS.3842.1 | 12.91 | 13.21 | 0.18 | 0.09 | -1.23 | 0.107684 | 0.019123 | 0.480288 | 0.174027 |
| MmuSTS.3843.1.S1_at   | MmuSTS.3843.1 | 5.58  | 5.47  | 0.15 | 0.11 | 1.08  | 0.150825 | 0.175    | 0.524381 | 0.451647 |
| MmuSTS.3844.1.S1_at   | MmuSTS.3844.1 | 5.89  | 5.82  | 0.11 | 0.15 | 1.05  | 0.931209 | 0.288977 | 0.977025 | 0.550098 |
| MmuSTS.3845.1.S1_at   | MmuSTS.3845.1 | 11.27 | 11.27 | 0.41 | 0.16 | -1.01 | 0.744637 | 0.86751  | 0.902624 | 0.924699 |
| MmuSTS.3846.1.S1_at   | MmuSTS.3846.1 | 5.71  | 5.59  | 0.18 | 0.12 | 1.08  | 0.357686 | 0.149555 | 0.695982 | 0.424095 |
| MmuSTS.3847.1.S1_s_at | MmuSTS.3847.1 | 8.32  | 8.43  | 0.44 | 0.07 | -1.08 | 0.692198 | 0.309372 | 0.880095 | 0.564912 |
| MmuSTS.3848.1.S1_at   | MmuSTS.3848.1 | 8.35  | 8.92  | 0.09 | 0.19 | -1.49 | 0.01382  | 0.008396 | 0.2724   | 0.121673 |
| MmuSTS.3849.1.S1_at   | MmuSTS.3849.1 | 11.06 | 11.8  | 0.8  | 0.16 | -1.68 | 0.122717 | 0.043111 | 0.496146 | 0.252277 |
| MmuSTS.385.1.S1_at    | MmuSTS.385.1  | 3.95  | 4.05  | 0.08 | 0.11 | -1.07 | 0.126641 | 0.01818  | 0.500599 | 0.169673 |
| MmuSTS.3850.1.S1_at   | MmuSTS.3850.1 | 9.14  | 9.39  | 0.5  | 0.31 | -1.19 | 0.724984 | 0.802296 | 0.893334 | 0.886115 |
| MmuSTS.3851.1.S1_at   | MmuSTS.3851.1 | 10.4  | 10.64 | 0.11 | 0.04 | -1.18 | 0.012605 | 0.0607   | 0.26329  | 0.292943 |
| MmuSTS.3852.1.S1_at   | MmuSTS.3852.1 | 5.18  | 5.17  | 0.05 | 0.1  | 1.01  | 0.414385 | 0.842705 | 0.733034 | 0.910346 |
| MmuSTS.3853.1.S1_at   | MmuSTS.3853.1 | 10.12 | 10.52 | 0.39 | 0.04 | -1.32 | 0.502122 | 0.077116 | 0.783497 | 0.322673 |
| MmuSTS.3854.1.S1_at   | MmuSTS.3854.1 | 13.58 | 13.54 | 0.11 | 0.04 | 1.03  | 0.734893 | 0.541652 | 0.8985   | 0.725033 |
| MmuSTS.3855.1.S1_at   | MmuSTS.3855.1 | 5.8   | 5.72  | 0.13 | 0.08 | 1.05  | 0.157036 | 0.424764 | 0.530266 | 0.64727  |
| MmuSTS.3856.1.S1_at   | MmuSTS.3856.1 | 7.91  | 8.88  | 0.88 | 0.44 | -1.96 | 0.264681 | 0.842602 | 0.626029 | 0.910315 |
| MmuSTS.3857.1.S1_at   | MmuSTS.3857.1 | 3.84  | 4.23  | 0.13 | 0.2  | -1.32 | 0.038879 | 0.050026 | 0.360459 | 0.2689   |
| MmuSTS.3858.1.S1_at   | MmuSTS.3858.1 | 3.78  | 3.77  | 0.05 | 0.04 | 1.01  | 0.777766 | 0.63668  | 0.917813 | 0.78633  |
| MmuSTS.3859.1.S1_at   | MmuSTS.3859.1 | 4.93  | 4.94  | 0.37 | 0.08 | -1    | 0.492119 | 0.3415   | 0.778149 | 0.587676 |
| MmuSTS.386.1.S1_at    | MmuSTS.386.1  | 10.98 | 11.15 | 1.32 | 0.29 | -1.13 | 0.942726 | 0.291896 | 0.98031  | 0.552116 |
| MmuSTS.3860.1.S1_at   | MmuSTS.3860.1 | 7.88  | 7.78  | 0.14 | 0.15 | 1.07  | 0.2971   | 0.4686   | 0.652603 | 0.677755 |



|                       |               |       |       |      |      |       |          |          |          |          |
|-----------------------|---------------|-------|-------|------|------|-------|----------|----------|----------|----------|
| MmuSTS.3861.1.S1_at   | MmuSTS.3861.1 | 11.82 | 11.61 | 0.42 | 0.1  | 1.16  | 0.931761 | 0.880464 | 0.977114 | 0.931694 |
| MmuSTS.3862.1.S1_at   | MmuSTS.3862.1 | 6.04  | 9.27  | 1.1  | 0.4  | -9.39 | 0.008759 | 0.012755 | 0.236545 | 0.145496 |
| MmuSTS.3863.1.S1_at   | MmuSTS.3863.1 | 6.22  | 6.27  | 0.08 | 0.05 | -1.04 | 0.73266  | 0.378427 | 0.897303 | 0.615443 |
| MmuSTS.3864.1.S1_at   | MmuSTS.3864.1 | 7.52  | 8.03  | 0.22 | 0.18 | -1.42 | 0.015937 | 0.009903 | 0.284606 | 0.130717 |
| MmuSTS.3865.1.S1_at   | MmuSTS.3865.1 | 11.79 | 11.95 | 0.34 | 0.03 | -1.12 | 0.956842 | 0.997579 | 0.985709 | 0.99875  |
| MmuSTS.3866.1.S1_at   | MmuSTS.3866.1 | 7.92  | 8.71  | 0.52 | 0.36 | -1.74 | 0.216854 | 0.054481 | 0.586873 | 0.278959 |
| MmuSTS.3867.1.S1_at   | MmuSTS.3867.1 | 5.51  | 5.48  | 0.15 | 0.07 | 1.02  | 0.279983 | 0.405116 | 0.638821 | 0.633482 |
| MmuSTS.3868.1.S1_at   | MmuSTS.3868.1 | 4.38  | 4.38  | 0.4  | 0.08 | -1    | 0.605411 | 0.785568 | 0.839983 | 0.875882 |
| MmuSTS.3869.1.S1_at   | MmuSTS.3869.1 | 7.01  | 6.05  | 0.54 | 0.39 | 1.94  | 0.135566 | 0.285238 | 0.510048 | 0.547165 |
| MmuSTS.387.1.S1_at    | MmuSTS.387.1  | 12.33 | 12.75 | 0.81 | 0.05 | -1.34 | 0.371749 | 0.500159 | 0.705567 | 0.698908 |
| MmuSTS.3870.1.S1_at   | MmuSTS.3870.1 | 9.07  | 8.32  | 0.44 | 0.12 | 1.68  | 0.048841 | 0.054385 | 0.384564 | 0.278784 |
| MmuSTS.3871.1.S1_at   | MmuSTS.3871.1 | 8.3   | 8.25  | 0.57 | 0.19 | 1.03  | 0.388601 | 0.506166 | 0.715448 | 0.702359 |
| MmuSTS.3872.1.S1_at   | MmuSTS.3872.1 | 9.43  | 8.71  | 0.28 | 0.15 | 1.65  | 0.022633 | 0.197499 | 0.311674 | 0.472476 |
| MmuSTS.3873.1.S1_at   | MmuSTS.3873.1 | 3.31  | 3.31  | 0.25 | 0.08 | -1    | 0.385207 | 0.52545  | 0.712501 | 0.715025 |
| MmuSTS.3874.1.S1_at   | MmuSTS.3874.1 | 12.03 | 11.46 | 1.59 | 0.19 | 1.49  | 0.827426 | 0.529358 | 0.938039 | 0.717257 |
| MmuSTS.3875.1.S1_at   | MmuSTS.3875.1 | 4.15  | 4.02  | 0.16 | 0.03 | 1.1   | 0.6674   | 0.852569 | 0.868621 | 0.916218 |
| MmuSTS.3876.1.S1_at   | MmuSTS.3876.1 | 3.17  | 3.01  | 0.07 | 0.1  | 1.12  | 0.021679 | 0.321293 | 0.309332 | 0.573184 |
| MmuSTS.3877.1.S1_at   | MmuSTS.3877.1 | 3.05  | 3.39  | 0.14 | 0.29 | -1.26 | 0.121361 | 0.12008  | 0.494968 | 0.388792 |
| MmuSTS.3878.1.S1_at   | MmuSTS.3878.1 | 9.11  | 9.17  | 0.11 | 0.05 | -1.04 | 0.590632 | 0.016693 | 0.832962 | 0.163599 |
| MmuSTS.3879.1.S1_at   | MmuSTS.3879.1 | 12.25 | 11.22 | 0.21 | 0.3  | 2.03  | 0.005452 | 0.000947 | 0.208157 | 0.049071 |
| MmuSTS.388.1.S1_at    | MmuSTS.388.1  | 6.33  | 6.16  | 0.11 | 0.07 | 1.13  | 0.05875  | 0.107561 | 0.405368 | 0.37046  |
| MmuSTS.3880.1.S1_at   | MmuSTS.3880.1 | 10.42 | 11.08 | 0.43 | 0.05 | -1.58 | 0.072197 | 0.040099 | 0.432091 | 0.245388 |
| MmuSTS.3881.1.S1_at   | MmuSTS.3881.1 | 7.63  | 7.63  | 0.21 | 0.09 | 1     | 0.706584 | 0.848949 | 0.885782 | 0.914251 |
| MmuSTS.3882.1.S1_at   | MmuSTS.3882.1 | 6.43  | 6.85  | 0.12 | 0.03 | -1.34 | 0.005156 | 0.000027 | 0.20572  | 0.02079  |
| MmuSTS.3883.1.S1_s_at | MmuSTS.3883.1 | 7.17  | 7.17  | 0.19 | 0.06 | -1    | 0.667034 | 0.600987 | 0.868458 | 0.762462 |
| MmuSTS.3884.1.S1_at   | MmuSTS.3884.1 | 10.53 | 10.57 | 0.34 | 0.06 | -1.03 | 0.281278 | 0.090095 | 0.63989  | 0.344402 |
| MmuSTS.3885.1.S1_at   | MmuSTS.3885.1 | 11.95 | 11.64 | 0.07 | 0.16 | 1.24  | 0.02401  | 0.011134 | 0.317529 | 0.137297 |
| MmuSTS.3886.1.S1_at   | MmuSTS.3886.1 | 5.69  | 5.97  | 0.4  | 0.12 | -1.22 | 0.488781 | 0.043063 | 0.775818 | 0.252157 |
| MmuSTS.3887.1.S1_at   | MmuSTS.3887.1 | 9.99  | 10.09 | 1.16 | 0.33 | -1.07 | 0.926983 | 0.393694 | 0.975766 | 0.626522 |
| MmuSTS.3888.1.S1_at   | MmuSTS.3888.1 | 8     | 7.42  | 0.49 | 0.06 | 1.49  | 0.039605 | 0.04873  | 0.362432 | 0.265744 |
| MmuSTS.3889.1.S1_at   | MmuSTS.3889.1 | 9.38  | 9.88  | 0.21 | 0.11 | -1.42 | 0.054265 | 0.042572 | 0.396159 | 0.251009 |
| MmuSTS.389.1.S1_at    | MmuSTS.389.1  | 3.32  | 3.29  | 0.17 | 0.07 | 1.02  | 0.921588 | 0.760628 | 0.973461 | 0.860949 |
| MmuSTS.389.1.S1_s_at  | MmuSTS.389.1  | 3.64  | 3.61  | 0.13 | 0.15 | 1.02  | 0.83278  | 0.958517 | 0.940026 | 0.976506 |
| MmuSTS.3890.1.S1_at   | MmuSTS.3890.1 | 8.06  | 8.3   | 0.05 | 0.17 | -1.18 | 0.054277 | 0.020904 | 0.396159 | 0.181404 |
| MmuSTS.3891.1.S1_at   | MmuSTS.3891.1 | 11.85 | 11.88 | 0.61 | 0.03 | -1.02 | 0.369644 | 0.355374 | 0.704264 | 0.597738 |
| MmuSTS.3892.1.S1_at   | MmuSTS.3892.1 | 9.36  | 9.36  | 0.8  | 0.08 | -1    | 0.827473 | 0.774375 | 0.938039 | 0.868766 |
| MmuSTS.3893.1.S1_at   | MmuSTS.3893.1 | 5.95  | 5.86  | 0.11 | 0.09 | 1.06  | 0.61314  | 0.768105 | 0.843382 | 0.865354 |
| MmuSTS.3894.1.S1_at   | MmuSTS.3894.1 | 10.95 | 10.54 | 0.35 | 0.15 | 1.33  | 0.370715 | 0.558182 | 0.704995 | 0.735446 |
| MmuSTS.3895.1.S1_at   | MmuSTS.3895.1 | 6.09  | 5.87  | 0.14 | 0.01 | 1.17  | 0.134663 | 0.332504 | 0.508533 | 0.580932 |
| MmuSTS.3896.1.S1_at   | MmuSTS.3896.1 | 6.7   | 7.06  | 0.14 | 0.13 | -1.28 | 0.094465 | 0.005451 | 0.463794 | 0.101934 |
| MmuSTS.3897.1.S1_at   | MmuSTS.3897.1 | 7.48  | 8.48  | 0.14 | 0.11 | -2    | 0.000713 | 0.019434 | 0.147936 | 0.175133 |
| MmuSTS.3898.1.S1_at   | MmuSTS.3898.1 | 5.7   | 5.85  | 0.87 | 0.26 | -1.11 | 0.947845 | 0.916478 | 0.982079 | 0.953262 |
| MmuSTS.3899.1.S1_at   | MmuSTS.3899.1 | 9.22  | 9.34  | 0.41 | 0.07 | -1.09 | 0.722026 | 0.931755 | 0.892154 | 0.961247 |

|                       |               |       |       |      |      |       |          |          |          |          |
|-----------------------|---------------|-------|-------|------|------|-------|----------|----------|----------|----------|
| MmuSTS.39.1.S1_at     | MmuSTS.39.1   | 5.33  | 5.01  | 0.35 | 0.13 | 1.25  | 0.355817 | 0.481315 | 0.694889 | 0.686365 |
| MmuSTS.390.1.S1_at    | MmuSTS.390.1  | 4.62  | 4.78  | 0.17 | 0.14 | -1.12 | 0.478666 | 0.507852 | 0.770122 | 0.703358 |
| MmuSTS.3900.1.S1_at   | MmuSTS.3900.1 | 9.13  | 9.33  | 0.51 | 0.09 | -1.15 | 0.656026 | 0.3893   | 0.863416 | 0.623403 |
| MmuSTS.3901.1.S1_at   | MmuSTS.3901.1 | 6.86  | 7.48  | 0.42 | 0.19 | -1.53 | 0.333792 | 0.726892 | 0.679885 | 0.842011 |
| MmuSTS.3902.1.S1_at   | MmuSTS.3902.1 | 11.26 | 11.5  | 0.23 | 0.09 | -1.18 | 0.061737 | 0.044891 | 0.411419 | 0.256424 |
| MmuSTS.3903.1.S1_at   | MmuSTS.3903.1 | 11.1  | 11.06 | 0.3  | 0.02 | 1.02  | 0.817119 | 0.698345 | 0.933852 | 0.82478  |
| MmuSTS.3904.1.S1_at   | MmuSTS.3904.1 | 4.92  | 4.85  | 0.13 | 0.06 | 1.05  | 0.230301 | 0.168998 | 0.598481 | 0.445567 |
| MmuSTS.3905.1.S1_at   | MmuSTS.3905.1 | 6.47  | 6.09  | 1.22 | 0.2  | 1.3   | 0.415691 | 0.288594 | 0.733788 | 0.549827 |
| MmuSTS.3906.1.S1_at   | MmuSTS.3906.1 | 10.34 | 9.94  | 0.32 | 0.15 | 1.32  | 0.130073 | 0.180755 | 0.504648 | 0.457294 |
| MmuSTS.3907.1.S1_at   | MmuSTS.3907.1 | 10.69 | 10.68 | 0.02 | 0.04 | 1.01  | 0.70252  | 0.018608 | 0.884276 | 0.171539 |
| MmuSTS.3908.1.S1_at   | MmuSTS.3908.1 | 13.44 | 13.64 | 0.4  | 0.04 | -1.15 | 0.336313 | 0.42315  | 0.681664 | 0.646172 |
| MmuSTS.3909.1.S1_at   | MmuSTS.3909.1 | 4.56  | 4.54  | 0.64 | 0.06 | 1.01  | 0.495466 | 0.692935 | 0.780059 | 0.821308 |
| MmuSTS.391.1.S1_at    | MmuSTS.391.1  | 5.07  | 5.03  | 0.15 | 0.05 | 1.03  | 0.608747 | 0.734938 | 0.841344 | 0.846588 |
| MmuSTS.3910.1.S1_at   | MmuSTS.3910.1 | 7.31  | 7.6   | 0.55 | 0.11 | -1.22 | 0.669695 | 0.894423 | 0.869663 | 0.939731 |
| MmuSTS.3911.1.S1_at   | MmuSTS.3911.1 | 9.15  | 8.62  | 0.16 | 0.14 | 1.45  | 0.004409 | 0.001032 | 0.198874 | 0.051297 |
| MmuSTS.3912.1.S1_at   | MmuSTS.3912.1 | 8.86  | 9.01  | 1.87 | 0.16 | -1.11 | 0.868627 | 0.165009 | 0.954022 | 0.44123  |
| MmuSTS.3913.1.S1_at   | MmuSTS.3913.1 | 7.96  | 7.43  | 0.18 | 0.17 | 1.44  | 0.038488 | 0.239353 | 0.359469 | 0.510039 |
| MmuSTS.3914.1.S1_at   | MmuSTS.3914.1 | 5.44  | 5.4   | 0.31 | 0.05 | 1.03  | 0.372848 | 0.584851 | 0.705567 | 0.75256  |
| MmuSTS.3915.1.S1_at   | MmuSTS.3915.1 | 10.66 | 11.09 | 0.13 | 0.05 | -1.35 | 0.009933 | 0.000563 | 0.244411 | 0.041049 |
| MmuSTS.3916.1.S1_at   | MmuSTS.3916.1 | 10.08 | 10.16 | 0.18 | 0.1  | -1.05 | 0.497786 | 0.721222 | 0.781368 | 0.838628 |
| MmuSTS.3917.1.S1_at   | MmuSTS.3917.1 | 12.8  | 12.92 | 0.17 | 0.1  | -1.09 | 0.694815 | 0.315092 | 0.881208 | 0.568838 |
| MmuSTS.3918.1.S1_at   | MmuSTS.3918.1 | 10.94 | 9.57  | 1.38 | 0.68 | 2.59  | 0.836736 | 0.079331 | 0.94137  | 0.326621 |
| MmuSTS.3919.1.S1_s_at | MmuSTS.3919.1 | 10.99 | 11.1  | 1.11 | 0.11 | -1.08 | 0.842443 | 0.289253 | 0.944281 | 0.550293 |
| MmuSTS.392.1.S1_s_at  | MmuSTS.392.1  | 4.64  | 4.53  | 0.04 | 0.04 | 1.08  | 0.106837 | 0.378308 | 0.479384 | 0.615438 |
| MmuSTS.3920.1.S1_at   | MmuSTS.3920.1 | 7.77  | 7.8   | 0.11 | 0.14 | -1.02 | 0.819383 | 0.416042 | 0.934879 | 0.641342 |
| MmuSTS.3921.1.S1_at   | MmuSTS.3921.1 | 11.11 | 10.98 | 0.61 | 0.1  | 1.1   | 0.915698 | 0.973266 | 0.971302 | 0.985495 |
| MmuSTS.3922.1.S1_at   | MmuSTS.3922.1 | 9.23  | 8.94  | 0.31 | 0.08 | 1.23  | 0.145128 | 0.175372 | 0.520309 | 0.452114 |
| MmuSTS.3923.1.S1_at   | MmuSTS.3923.1 | 10.16 | 10.35 | 0.21 | 0.05 | -1.14 | 0.179337 | 0.001862 | 0.552525 | 0.064697 |
| MmuSTS.3924.1.S1_at   | MmuSTS.3924.1 | 11.64 | 12.02 | 0.08 | 0.03 | -1.3  | 0.001117 | 0.020157 | 0.156386 | 0.178414 |
| MmuSTS.3925.1.S1_at   | MmuSTS.3925.1 | 8.92  | 9.91  | 0.99 | 0.16 | -1.99 | 0.190526 | 0.0504   | 0.561786 | 0.269732 |
| MmuSTS.3926.1.S1_at   | MmuSTS.3926.1 | 11.36 | 11.04 | 0.14 | 0.13 | 1.25  | 0.059965 | 0.004277 | 0.407399 | 0.091847 |
| MmuSTS.3926.1.S1_s_at | MmuSTS.3926.1 | 12.51 | 12.6  | 0.2  | 0.03 | -1.06 | 0.724083 | 0.025804 | 0.893041 | 0.201375 |
| MmuSTS.3927.1.S1_s_at | MmuSTS.3927.1 | 8.89  | 9.03  | 0.14 | 0.11 | -1.1  | 0.253415 | 0.42218  | 0.618161 | 0.645549 |
| MmuSTS.3928.1.S1_at   | MmuSTS.3928.1 | 13.52 | 13.54 | 0.09 | 0.04 | -1.02 | 0.57514  | 0.179478 | 0.824588 | 0.455939 |
| MmuSTS.3929.1.S1_at   | MmuSTS.3929.1 | 10.47 | 10.29 | 0.08 | 0.29 | 1.13  | 0.931443 | 0.428755 | 0.97706  | 0.650316 |
| MmuSTS.393.1.S1_s_at  | MmuSTS.393.1  | 4.99  | 4.87  | 0.13 | 0.03 | 1.08  | 0.482099 | 0.681747 | 0.772274 | 0.814127 |
| MmuSTS.3930.1.S1_at   | MmuSTS.3930.1 | 7.16  | 7.64  | 0.55 | 0.46 | -1.39 | 0.818084 | 0.314509 | 0.934249 | 0.568372 |
| MmuSTS.3931.1.S1_at   | MmuSTS.3931.1 | 11.94 | 12.25 | 0.8  | 0.08 | -1.24 | 0.577885 | 0.741514 | 0.82603  | 0.850328 |
| MmuSTS.3932.1.S1_at   | MmuSTS.3932.1 | 7.81  | 8.59  | 0.9  | 0.29 | -1.71 | 0.478263 | 0.191021 | 0.770076 | 0.46629  |
| MmuSTS.3933.1.S1_at   | MmuSTS.3933.1 | 11.74 | 10.98 | 0.08 | 0.23 | 1.7   | 0.002548 | 0.000183 | 0.180074 | 0.030511 |
| MmuSTS.3934.1.S1_at   | MmuSTS.3934.1 | 4.45  | 4.24  | 0.09 | 0.14 | 1.15  | 0.055475 | 0.165192 | 0.398621 | 0.441389 |
| MmuSTS.3935.1.S1_at   | MmuSTS.3935.1 | 7.34  | 7.45  | 0.62 | 0.06 | -1.08 | 0.854349 | 0.272619 | 0.948469 | 0.537379 |
| MmuSTS.3935.1.S1_s_at | MmuSTS.3935.1 | 8.4   | 8.66  | 0.67 | 0.1  | -1.2  | 0.565127 | 0.180538 | 0.819091 | 0.457138 |

|                       |               |       |       |      |      |       |          |          |          |          |
|-----------------------|---------------|-------|-------|------|------|-------|----------|----------|----------|----------|
| MmuSTS.3936.1.S1_at   | MmuSTS.3936.1 | 5.48  | 7.89  | 1.46 | 0.61 | -5.33 | 0.138716 | 0.061945 | 0.514139 | 0.295734 |
| MmuSTS.3937.1.S1_at   | MmuSTS.3937.1 | 10.49 | 10.97 | 0.99 | 0.05 | -1.4  | 0.449973 | 0.153195 | 0.754621 | 0.428023 |
| MmuSTS.3938.1.S1_at   | MmuSTS.3938.1 | 9.92  | 9.95  | 0.34 | 0.06 | -1.02 | 0.440134 | 0.149983 | 0.748349 | 0.424617 |
| MmuSTS.3939.1.S1_at   | MmuSTS.3939.1 | 7.56  | 7.37  | 0.15 | 0.1  | 1.14  | 0.271753 | 0.222186 | 0.631538 | 0.495178 |
| MmuSTS.394.1.S1_s_at  | MmuSTS.394.1  | 4.36  | 4.59  | 0.19 | 0.07 | -1.17 | 0.359692 | 0.434787 | 0.697497 | 0.654826 |
| MmuSTS.3940.1.S1_at   | MmuSTS.3940.1 | 10.8  | 10.75 | 0.3  | 0.14 | 1.04  | 0.489695 | 0.030977 | 0.776454 | 0.217853 |
| MmuSTS.3941.1.S1_at   | MmuSTS.3941.1 | 10.58 | 10.71 | 0.42 | 0.05 | -1.09 | 0.202532 | 0.200238 | 0.574003 | 0.474689 |
| MmuSTS.3942.1.S1_at   | MmuSTS.3942.1 | 4.38  | 4.84  | 0.15 | 0.52 | -1.38 | 0.162911 | 0.121826 | 0.535867 | 0.391122 |
| MmuSTS.3943.1.S1_at   | MmuSTS.3943.1 | 7.74  | 8.09  | 0.86 | 0.29 | -1.28 | 0.71379  | 0.844698 | 0.888519 | 0.911602 |
| MmuSTS.3944.1.S1_at   | MmuSTS.3944.1 | 11.11 | 10.93 | 0.21 | 0.08 | 1.13  | 0.227284 | 0.051052 | 0.596459 | 0.271214 |
| MmuSTS.3945.1.S1_at   | MmuSTS.3945.1 | 4.95  | 5.38  | 0.74 | 0.22 | -1.35 | 0.817597 | 0.209387 | 0.93405  | 0.483069 |
| MmuSTS.3946.1.S1_at   | MmuSTS.3946.1 | 9.58  | 9.85  | 1.61 | 0.32 | -1.21 | 0.868778 | 0.22566  | 0.954083 | 0.498155 |
| MmuSTS.3947.1.S1_at   | MmuSTS.3947.1 | 10.75 | 10.81 | 0.13 | 0.04 | -1.04 | 0.661213 | 0.269847 | 0.866006 | 0.535135 |
| MmuSTS.3948.1.S1_at   | MmuSTS.3948.1 | 9.7   | 9.35  | 0.22 | 0.39 | 1.28  | 0.36974  | 0.658828 | 0.704294 | 0.800473 |
| MmuSTS.3949.1.S1_at   | MmuSTS.3949.1 | 11.38 | 11.24 | 0.14 | 0.02 | 1.1   | 0.308672 | 0.269046 | 0.661287 | 0.534425 |
| MmuSTS.395.1.S1_s_at  | MmuSTS.395.1  | 5.27  | 5.48  | 0.23 | 0.15 | -1.16 | 0.295605 | 0.126454 | 0.651318 | 0.396995 |
| MmuSTS.3950.1.S1_at   | MmuSTS.3950.1 | 10.41 | 10.85 | 0.25 | 0.03 | -1.35 | 0.072224 | 0.033559 | 0.432091 | 0.226764 |
| MmuSTS.3951.1.S1_at   | MmuSTS.3951.1 | 6.35  | 6.93  | 0.83 | 0.73 | -1.5  | 0.728017 | 0.880479 | 0.894913 | 0.931694 |
| MmuSTS.3952.1.S1_at   | MmuSTS.3952.1 | 8.37  | 8.59  | 0.11 | 0.09 | -1.17 | 0.15447  | 0.07483  | 0.527576 | 0.318614 |
| MmuSTS.3953.1.S1_s_at | MmuSTS.3953.1 | 9.1   | 9.04  | 0.14 | 0.1  | 1.04  | 0.810496 | 0.949673 | 0.931338 | 0.97122  |
| MmuSTS.3954.1.S1_at   | MmuSTS.3954.1 | 7.49  | 8.49  | 0.37 | 0.16 | -2    | 0.008211 | 0.002005 | 0.232005 | 0.066428 |
| MmuSTS.3955.1.S1_at   | MmuSTS.3955.1 | 9.55  | 9.66  | 0.45 | 0.02 | -1.08 | 0.610888 | 0.278702 | 0.84219  | 0.542416 |
| MmuSTS.3956.1.S1_at   | MmuSTS.3956.1 | 8.99  | 9.18  | 0.3  | 0.02 | -1.14 | 0.354103 | 0.073246 | 0.693679 | 0.316225 |
| MmuSTS.3957.1.S1_at   | MmuSTS.3957.1 | 11.99 | 11.98 | 0.24 | 0.02 | 1     | 0.96068  | 0.556951 | 0.987225 | 0.73485  |
| MmuSTS.3958.1.S1_at   | MmuSTS.3958.1 | 9.53  | 9.67  | 0.38 | 0.11 | -1.1  | 0.451407 | 0.252564 | 0.755167 | 0.521128 |
| MmuSTS.3959.1.S1_at   | MmuSTS.3959.1 | 6.95  | 7.04  | 0.08 | 0.09 | -1.07 | 0.220927 | 0.39802  | 0.590217 | 0.629138 |
| MmuSTS.396.1.S1_at    | MmuSTS.396.1  | 3.71  | 3.63  | 0.09 | 0.09 | 1.06  | 0.489133 | 0.205077 | 0.775981 | 0.479391 |
| MmuSTS.3960.1.S1_at   | MmuSTS.3960.1 | 11.09 | 11.5  | 0.56 | 0.21 | -1.33 | 0.35186  | 0.415699 | 0.692553 | 0.641033 |
| MmuSTS.3961.1.S1_at   | MmuSTS.3961.1 | 5.04  | 5.06  | 0.04 | 0.11 | -1.01 | 0.361989 | 0.312925 | 0.698907 | 0.567524 |
| MmuSTS.3962.1.S1_at   | MmuSTS.3962.1 | 11.9  | 10.47 | 0.28 | 0.17 | 2.71  | 0.003563 | 0.000391 | 0.196915 | 0.03746  |
| MmuSTS.3963.1.S1_at   | MmuSTS.3963.1 | 2.74  | 2.69  | 0.21 | 0.04 | 1.04  | 0.669494 | 0.739747 | 0.869627 | 0.849223 |
| MmuSTS.3964.1.S1_at   | MmuSTS.3964.1 | 9.19  | 8.39  | 1.21 | 0.09 | 1.74  | 0.204773 | 0.257542 | 0.576337 | 0.525294 |
| MmuSTS.3965.1.S1_at   | MmuSTS.3965.1 | 11.32 | 11.13 | 2.02 | 0.2  | 1.14  | 0.790737 | 0.9382   | 0.922991 | 0.964949 |
| MmuSTS.3966.1.S1_at   | MmuSTS.3966.1 | 6.58  | 7.46  | 0.25 | 0.1  | -1.85 | 0.00653  | 0.014452 | 0.219791 | 0.153403 |
| MmuSTS.3967.1.S1_at   | MmuSTS.3967.1 | 6.49  | 6.48  | 0.94 | 0.03 | 1.01  | 0.804846 | 0.229395 | 0.929036 | 0.501527 |
| MmuSTS.3968.1.S1_at   | MmuSTS.3968.1 | 8.67  | 9.61  | 0.64 | 0.1  | -1.92 | 0.068453 | 0.10363  | 0.42564  | 0.364426 |
| MmuSTS.3969.1.S1_at   | MmuSTS.3969.1 | 5.87  | 7.14  | 0.6  | 0.21 | -2.42 | 0.020983 | 0.026017 | 0.306271 | 0.202179 |
| MmuSTS.397.1.S1_s_at  | MmuSTS.397.1  | 5.61  | 5.57  | 0.08 | 0.03 | 1.03  | 0.405499 | 0.266229 | 0.727426 | 0.532045 |
| MmuSTS.3970.1.S1_at   | MmuSTS.3970.1 | 5.46  | 5.45  | 0.14 | 0.04 | 1.01  | 0.495247 | 0.281334 | 0.779907 | 0.544391 |
| MmuSTS.3971.1.S1_at   | MmuSTS.3971.1 | 13.83 | 13.93 | 0.7  | 0.09 | -1.07 | 0.56125  | 0.20487  | 0.817194 | 0.479224 |
| MmuSTS.3972.1.S1_at   | MmuSTS.3972.1 | 9.62  | 9.87  | 0.84 | 0.22 | -1.18 | 0.966745 | 0.742735 | 0.989065 | 0.851023 |
| MmuSTS.3973.1.S1_at   | MmuSTS.3973.1 | 12.05 | 11.5  | 0.37 | 0.02 | 1.47  | 0.04772  | 0.0011   | 0.381135 | 0.052486 |
| MmuSTS.3974.1.S1_at   | MmuSTS.3974.1 | 10.35 | 10.46 | 0.62 | 0.1  | -1.07 | 0.232018 | 0.392723 | 0.59986  | 0.62583  |

|                       |               |       |       |      |      |       |          |          |          |          |
|-----------------------|---------------|-------|-------|------|------|-------|----------|----------|----------|----------|
| MmuSTS.3975.1.S1_at   | MmuSTS.3975.1 | 2.96  | 2.97  | 0.16 | 0.04 | -1.01 | 0.93581  | 0.590174 | 0.978396 | 0.756117 |
| MmuSTS.3975.1.S1_x_at | MmuSTS.3975.1 | 3.95  | 3.83  | 0.06 | 0.06 | 1.09  | 0.071868 | 0.127635 | 0.431735 | 0.398571 |
| MmuSTS.3976.1.S1_at   | MmuSTS.3976.1 | 11.25 | 11.15 | 0.32 | 0.03 | 1.07  | 0.625594 | 0.418125 | 0.849478 | 0.642619 |
| MmuSTS.3977.1.S1_at   | MmuSTS.3977.1 | 10.33 | 10.68 | 0.28 | 0.06 | -1.28 | 0.241689 | 0.140198 | 0.607859 | 0.413405 |
| MmuSTS.3978.1.S1_at   | MmuSTS.3978.1 | 13.52 | 13.53 | 0.07 | 0.01 | -1.01 | 0.865857 | 0.086947 | 0.952802 | 0.339802 |
| MmuSTS.3979.1.S1_at   | MmuSTS.3979.1 | 9.86  | 10.2  | 1.47 | 0.28 | -1.26 | 0.823145 | 0.101144 | 0.936204 | 0.360794 |
| MmuSTS.398.1.S1_s_at  | MmuSTS.398.1  | 3.44  | 3.49  | 0.14 | 0.05 | -1.04 | 0.535851 | 0.144046 | 0.801985 | 0.417912 |
| MmuSTS.3980.1.S1_at   | MmuSTS.3980.1 | 9.82  | 10.15 | 0.81 | 0.18 | -1.26 | 0.182441 | 0.400994 | 0.555421 | 0.630658 |
| MmuSTS.3981.1.S1_at   | MmuSTS.3981.1 | 5.89  | 6.07  | 0.56 | 0.2  | -1.13 | 0.665476 | 0.450149 | 0.86797  | 0.665505 |
| MmuSTS.3982.1.S1_at   | MmuSTS.3982.1 | 8.17  | 7.25  | 0.63 | 0.07 | 1.89  | 0.066361 | 0.057244 | 0.422255 | 0.285059 |
| MmuSTS.3983.1.S1_at   | MmuSTS.3983.1 | 6.18  | 6.41  | 0.36 | 0.11 | -1.17 | 0.365229 | 0.138372 | 0.700955 | 0.411244 |
| MmuSTS.3984.1.S1_at   | MmuSTS.3984.1 | 10.18 | 10.14 | 0.43 | 0.21 | 1.03  | 0.873997 | 0.035243 | 0.956344 | 0.23196  |
| MmuSTS.3985.1.S1_at   | MmuSTS.3985.1 | 5.67  | 5.62  | 1.15 | 0.37 | 1.04  | 0.907934 | 0.264481 | 0.968853 | 0.530437 |
| MmuSTS.3986.1.S1_at   | MmuSTS.3986.1 | 2.71  | 2.73  | 0.13 | 0    | -1.01 | 0.455673 | 0.636669 | 0.757545 | 0.78633  |
| MmuSTS.3987.1.S1_at   | MmuSTS.3987.1 | 7.05  | 7.26  | 0.43 | 0.08 | -1.16 | 0.978185 | 0.75726  | 0.992929 | 0.858672 |
| MmuSTS.3988.1.S1_at   | MmuSTS.3988.1 | 11.9  | 11.19 | 2.55 | 0.31 | 1.64  | 0.710688 | 0.156149 | 0.887398 | 0.43161  |
| MmuSTS.3989.1.S1_at   | MmuSTS.3989.1 | 11.59 | 11.98 | 0.47 | 0.06 | -1.31 | 0.277551 | 0.134122 | 0.636861 | 0.406393 |
| MmuSTS.399.1.S1_s_at  | MmuSTS.399.1  | 3.66  | 3.59  | 0.06 | 0.03 | 1.05  | 0.087328 | 0.03971  | 0.454785 | 0.244271 |
| MmuSTS.3990.1.S1_at   | MmuSTS.3990.1 | 10.27 | 10.08 | 0.64 | 0.09 | 1.13  | 0.750581 | 0.89132  | 0.905551 | 0.938078 |
| MmuSTS.3991.1.S1_at   | MmuSTS.3991.1 | 10.98 | 11.13 | 0.18 | 0.04 | -1.11 | 0.854201 | 0.746248 | 0.948444 | 0.85272  |
| MmuSTS.3992.1.S1_at   | MmuSTS.3992.1 | 12.07 | 12.33 | 0.17 | 0.03 | -1.19 | 0.035925 | 0.021095 | 0.353731 | 0.181869 |
| MmuSTS.3993.1.S1_at   | MmuSTS.3993.1 | 6.87  | 6.78  | 0.29 | 0.12 | 1.07  | 0.142336 | 0.031033 | 0.517463 | 0.218074 |
| MmuSTS.3994.1.S1_at   | MmuSTS.3994.1 | 7.66  | 6.92  | 0.94 | 0.35 | 1.67  | 0.223807 | 0.012103 | 0.592971 | 0.142307 |
| MmuSTS.3995.1.S1_at   | MmuSTS.3995.1 | 5.79  | 5.67  | 0.12 | 0.15 | 1.09  | 0.608615 | 0.73813  | 0.841286 | 0.848203 |
| MmuSTS.3996.1.S1_s_at | MmuSTS.3996.1 | 10.57 | 10.9  | 0.39 | 0.11 | -1.26 | 0.145048 | 0.253226 | 0.520238 | 0.521614 |
| MmuSTS.3997.1.S1_at   | MmuSTS.3997.1 | 10.06 | 8.54  | 0.72 | 0.16 | 2.86  | 0.07098  | 0.003994 | 0.430118 | 0.089884 |
| MmuSTS.3998.1.S1_at   | MmuSTS.3998.1 | 7.61  | 7.41  | 0.64 | 0.12 | 1.15  | 0.596061 | 0.109686 | 0.83574  | 0.373675 |
| MmuSTS.3999.1.S1_at   | MmuSTS.3999.1 | 3.4   | 3.18  | 0.03 | 0.11 | 1.17  | 0.033978 | 0.070877 | 0.347469 | 0.312373 |
| MmuSTS.4.1.S1_at      | MmuSTS.4.1    | 5.93  | 5.99  | 0.1  | 0.06 | -1.04 | 0.905959 | 0.427037 | 0.968196 | 0.649087 |
| MmuSTS.40.1.S1_at     | MmuSTS.40.1   | 10.71 | 10.42 | 0.3  | 0.07 | 1.23  | 0.526487 | 0.454287 | 0.796632 | 0.66849  |
| MmuSTS.400.1.S1_s_at  | MmuSTS.400.1  | 4.6   | 4.64  | 0.18 | 0.02 | -1.03 | 0.591192 | 0.355597 | 0.83329  | 0.597844 |
| MmuSTS.4000.1.S1_at   | MmuSTS.4000.1 | 7.76  | 7.48  | 0.71 | 0.26 | 1.22  | 0.955924 | 0.85076  | 0.985363 | 0.915085 |
| MmuSTS.4001.1.S1_at   | MmuSTS.4001.1 | 5.32  | 5.33  | 0.14 | 0.12 | -1.01 | 0.852926 | 0.980076 | 0.94811  | 0.989236 |
| MmuSTS.4002.1.S1_at   | MmuSTS.4002.1 | 11.33 | 10.8  | 1.28 | 0.34 | 1.44  | 0.464397 | 0.650967 | 0.762534 | 0.795942 |
| MmuSTS.4003.1.S1_at   | MmuSTS.4003.1 | 5.43  | 6.5   | 0.39 | 0.3  | -2.1  | 0.010274 | 0.000714 | 0.246929 | 0.044419 |
| MmuSTS.4004.1.S1_at   | MmuSTS.4004.1 | 13.46 | 13.41 | 0.16 | 0.09 | 1.03  | 0.678093 | 0.007919 | 0.873899 | 0.11857  |
| MmuSTS.4005.1.S1_at   | MmuSTS.4005.1 | 12.57 | 12.39 | 0.39 | 0.02 | 1.14  | 0.840141 | 0.780669 | 0.943127 | 0.872739 |
| MmuSTS.4006.1.S1_at   | MmuSTS.4006.1 | 4.86  | 4.69  | 0.11 | 0.08 | 1.12  | 0.043074 | 0.247293 | 0.371135 | 0.516479 |
| MmuSTS.4007.1.S1_at   | MmuSTS.4007.1 | 10.42 | 9.48  | 0.49 | 0.06 | 1.92  | 0.027649 | 0.017916 | 0.328458 | 0.168983 |
| MmuSTS.4008.1.S1_at   | MmuSTS.4008.1 | 6.32  | 5.92  | 0.12 | 0.1  | 1.31  | 0.041124 | 0.051399 | 0.365675 | 0.272185 |
| MmuSTS.4009.1.S1_s_at | MmuSTS.4009.1 | 5.71  | 5.62  | 0.18 | 0.02 | 1.07  | 0.129179 | 0.164855 | 0.503876 | 0.44118  |
| MmuSTS.401.1.S1_at    | MmuSTS.401.1  | 6.04  | 5.42  | 0.23 | 0.3  | 1.54  | 0.076932 | 0.115535 | 0.43887  | 0.38267  |
| MmuSTS.401.1.S1_s_at  | MmuSTS.401.1  | 4.79  | 4.84  | 0.22 | 0.02 | -1.03 | 0.888396 | 0.646156 | 0.961354 | 0.792676 |

|                       |               |       |       |      |      |       |          |          |          |          |
|-----------------------|---------------|-------|-------|------|------|-------|----------|----------|----------|----------|
| MmuSTS.4010.1.S1_at   | MmuSTS.4010.1 | 9.7   | 9.83  | 0.26 | 0.07 | -1.09 | 0.765452 | 0.085281 | 0.911819 | 0.337119 |
| MmuSTS.4011.1.S1_at   | MmuSTS.4011.1 | 10.68 | 10.97 | 0.05 | 0.08 | -1.23 | 0.003342 | 0.001398 | 0.194985 | 0.057005 |
| MmuSTS.4012.1.S1_at   | MmuSTS.4012.1 | 10.61 | 10.27 | 0.27 | 0.05 | 1.26  | 0.092725 | 0.001818 | 0.461192 | 0.063958 |
| MmuSTS.4013.1.S1_at   | MmuSTS.4013.1 | 10.97 | 10.78 | 0.1  | 0.03 | 1.14  | 0.079942 | 0.344711 | 0.443024 | 0.59007  |
| MmuSTS.4014.1.S1_at   | MmuSTS.4014.1 | 4.74  | 4.64  | 0.14 | 0.18 | 1.07  | 0.137078 | 0.075003 | 0.512022 | 0.319064 |
| MmuSTS.4015.1.S1_s_at | MmuSTS.4015.1 | 4.51  | 4.4   | 0.3  | 0.04 | 1.08  | 0.154093 | 0.21611  | 0.527462 | 0.489686 |
| MmuSTS.4016.1.S1_at   | MmuSTS.4016.1 | 11.68 | 11.64 | 0.08 | 0.08 | 1.03  | 0.292451 | 0.004351 | 0.648844 | 0.092371 |
| MmuSTS.4017.1.S1_at   | MmuSTS.4017.1 | 8.92  | 9.47  | 0.63 | 0.24 | -1.47 | 0.382966 | 0.539918 | 0.711067 | 0.723995 |
| MmuSTS.4018.1.S1_at   | MmuSTS.4018.1 | 4.55  | 4.42  | 0.19 | 0.16 | 1.09  | 0.176263 | 0.218379 | 0.549326 | 0.491929 |
| MmuSTS.4019.1.S1_at   | MmuSTS.4019.1 | 7.1   | 4.28  | 1.23 | 0.26 | 7.06  | 0.018324 | 0.004324 | 0.296693 | 0.092241 |
| MmuSTS.402.1.S1_s_at  | MmuSTS.402.1  | 4.46  | 4.78  | 0.27 | 0.11 | -1.25 | 0.101104 | 0.138012 | 0.471663 | 0.410919 |
| MmuSTS.4020.1.S1_at   | MmuSTS.4020.1 | 12.13 | 10.48 | 0.49 | 0.05 | 3.12  | 0.003633 | 0.00076  | 0.197111 | 0.04544  |
| MmuSTS.4021.1.S1_at   | MmuSTS.4021.1 | 3.48  | 3.32  | 0.22 | 0.08 | 1.11  | 0.088192 | 0.060782 | 0.45606  | 0.29326  |
| MmuSTS.4022.1.S1_at   | MmuSTS.4022.1 | 6.18  | 7.07  | 0.18 | 0.2  | -1.85 | 0.002187 | 0.001399 | 0.174757 | 0.057005 |
| MmuSTS.4023.1.S1_at   | MmuSTS.4023.1 | 11.28 | 12.06 | 0.09 | 0.11 | -1.71 | 0.001275 | 0.000247 | 0.157784 | 0.032979 |
| MmuSTS.4024.1.S1_at   | MmuSTS.4024.1 | 2.93  | 2.87  | 0.21 | 0.06 | 1.04  | 0.269764 | 0.653245 | 0.62995  | 0.797335 |
| MmuSTS.4025.1.S1_at   | MmuSTS.4025.1 | 12.19 | 11.56 | 0.61 | 0.13 | 1.55  | 0.174232 | 0.244947 | 0.547348 | 0.514752 |
| MmuSTS.4026.1.S1_at   | MmuSTS.4026.1 | 7.22  | 6.12  | 0.31 | 0.54 | 2.14  | 0.039047 | 0.190335 | 0.360942 | 0.465906 |
| MmuSTS.4027.1.S1_at   | MmuSTS.4027.1 | 5.37  | 5.21  | 0.69 | 0.04 | 1.11  | 0.222339 | 0.255889 | 0.591869 | 0.523862 |
| MmuSTS.4028.1.S1_at   | MmuSTS.4028.1 | 8.96  | 9.1   | 0.43 | 0.02 | -1.1  | 0.81255  | 0.286958 | 0.932103 | 0.548246 |
| MmuSTS.4029.1.S1_at   | MmuSTS.4029.1 | 12.15 | 11.77 | 0.18 | 0.2  | 1.3   | 0.057126 | 0.003412 | 0.401454 | 0.084071 |
| MmuSTS.403.1.S1_at    | MmuSTS.403.1  | 2.98  | 2.76  | 0.25 | 0.05 | 1.17  | 0.264047 | 0.326189 | 0.625948 | 0.576393 |
| MmuSTS.403.1.S1_s_at  | MmuSTS.403.1  | 4.47  | 4.3   | 0.11 | 0.06 | 1.13  | 0.052106 | 0.044364 | 0.392084 | 0.255119 |
| MmuSTS.4030.1.S1_at   | MmuSTS.4030.1 | 12.76 | 12.98 | 0.17 | 0.04 | -1.17 | 0.088578 | 0.076501 | 0.456267 | 0.321584 |
| MmuSTS.4031.1.S1_s_at | MmuSTS.4031.1 | 2.98  | 2.89  | 0.11 | 0.08 | 1.07  | 0.442193 | 0.663153 | 0.749897 | 0.80284  |
| MmuSTS.4032.1.S1_at   | MmuSTS.4032.1 | 11.31 | 10.7  | 3.24 | 0.34 | 1.52  | 0.647907 | 0.199989 | 0.859534 | 0.474603 |
| MmuSTS.4033.1.S1_at   | MmuSTS.4033.1 | 7.65  | 8.25  | 1.32 | 0.16 | -1.52 | 0.424826 | 0.18737  | 0.739695 | 0.463386 |
| MmuSTS.4034.1.S1_at   | MmuSTS.4034.1 | 8.88  | 8.93  | 3.24 | 0.72 | -1.03 | 0.813366 | 0.236244 | 0.932522 | 0.507252 |
| MmuSTS.4035.1.S1_at   | MmuSTS.4035.1 | 7.32  | 7.21  | 0.09 | 0.02 | 1.08  | 0.094363 | 0.308667 | 0.463787 | 0.56461  |
| MmuSTS.4036.1.S1_at   | MmuSTS.4036.1 | 13.04 | 12.34 | 0.69 | 0.15 | 1.63  | 0.523356 | 0.066367 | 0.795606 | 0.303265 |
| MmuSTS.4037.1.S1_at   | MmuSTS.4037.1 | 8.79  | 7.41  | 0.65 | 0.33 | 2.6   | 0.033457 | 0.022804 | 0.346442 | 0.189194 |
| MmuSTS.4038.1.S1_at   | MmuSTS.4038.1 | 4.16  | 4.27  | 0.18 | 0.31 | -1.08 | 0.739249 | 0.908141 | 0.900428 | 0.947949 |
| MmuSTS.4039.1.S1_at   | MmuSTS.4039.1 | 4.54  | 3.88  | 1.31 | 0.06 | 1.57  | 0.326275 | 0.302259 | 0.673797 | 0.560092 |
| MmuSTS.404.1.S1_at    | MmuSTS.404.1  | 4.15  | 4.31  | 0.12 | 0.13 | -1.11 | 0.560843 | 0.664468 | 0.816958 | 0.803396 |
| MmuSTS.4040.1.S1_at   | MmuSTS.4040.1 | 7.58  | 7.06  | 0.18 | 0.22 | 1.43  | 0.097093 | 0.102621 | 0.46573  | 0.362991 |
| MmuSTS.4041.1.S1_at   | MmuSTS.4041.1 | 12.19 | 11.41 | 0.25 | 0.12 | 1.73  | 0.010565 | 0.005366 | 0.248239 | 0.101135 |
| MmuSTS.4042.1.S1_at   | MmuSTS.4042.1 | 7.99  | 7.47  | 0.89 | 0.27 | 1.44  | 0.511063 | 0.429637 | 0.788552 | 0.650973 |
| MmuSTS.4043.1.S1_at   | MmuSTS.4043.1 | 9.87  | 10.09 | 0.88 | 0.13 | -1.16 | 0.684381 | 0.509322 | 0.87645  | 0.704095 |
| MmuSTS.4044.1.S1_at   | MmuSTS.4044.1 | 10    | 9.92  | 0.18 | 0.05 | 1.06  | 0.846837 | 0.312963 | 0.94629  | 0.567554 |
| MmuSTS.4045.1.S1_at   | MmuSTS.4045.1 | 6.23  | 4.8   | 0.81 | 0.29 | 2.69  | 0.185127 | 0.119852 | 0.558126 | 0.388577 |
| MmuSTS.4046.1.S1_at   | MmuSTS.4046.1 | 9.35  | 7.81  | 0.37 | 0.32 | 2.91  | 0.007778 | 0.008614 | 0.230997 | 0.123108 |
| MmuSTS.4047.1.S1_at   | MmuSTS.4047.1 | 6.67  | 7.26  | 1.6  | 0.22 | -1.51 | 0.550894 | 0.406716 | 0.811067 | 0.634487 |
| MmuSTS.4049.1.S1_at   | MmuSTS.4049.1 | 6.35  | 6.54  | 0.2  | 0.07 | -1.14 | 0.249656 | 0.326851 | 0.615064 | 0.576848 |

|                       |               |       |       |      |      |       |          |          |          |          |
|-----------------------|---------------|-------|-------|------|------|-------|----------|----------|----------|----------|
| MmuSTS.405.1.S1_at    | MmuSTS.405.1  | 6.15  | 5.98  | 0.16 | 0.07 | 1.12  | 0.157147 | 0.359034 | 0.530266 | 0.600414 |
| MmuSTS.405.1.S1_s_at  | MmuSTS.405.1  | 5.7   | 5.57  | 0.09 | 0.15 | 1.1   | 0.125571 | 0.251787 | 0.499523 | 0.520459 |
| MmuSTS.4050.1.S1_at   | MmuSTS.4050.1 | 3.63  | 3.29  | 0.44 | 0.17 | 1.27  | 0.273561 | 0.266937 | 0.633298 | 0.532473 |
| MmuSTS.4051.1.S1_at   | MmuSTS.4051.1 | 8.86  | 8.94  | 0.37 | 0.04 | -1.05 | 0.980863 | 0.999542 | 0.993918 | 0.999859 |
| MmuSTS.4052.1.S1_at   | MmuSTS.4052.1 | 5.38  | 5.42  | 0.51 | 0.19 | -1.03 | 0.977223 | 0.291935 | 0.99262  | 0.552156 |
| MmuSTS.4053.1.S1_at   | MmuSTS.4053.1 | 7.53  | 7.22  | 1.52 | 0.55 | 1.24  | 0.589395 | 0.085304 | 0.83233  | 0.337139 |
| MmuSTS.4054.1.S1_at   | MmuSTS.4054.1 | 8.27  | 8.24  | 0.26 | 0.21 | 1.02  | 0.539308 | 0.567864 | 0.803708 | 0.741693 |
| MmuSTS.4055.1.S1_at   | MmuSTS.4055.1 | 10.6  | 10.84 | 0.52 | 0.24 | -1.18 | 0.534933 | 0.28619  | 0.801404 | 0.547713 |
| MmuSTS.4056.1.S1_at   | MmuSTS.4056.1 | 3.43  | 3.45  | 0.11 | 0.02 | -1.01 | 0.655898 | 0.564367 | 0.86336  | 0.739211 |
| MmuSTS.4057.1.S1_at   | MmuSTS.4057.1 | 7.91  | 7.67  | 0.09 | 0.04 | 1.18  | 0.006991 | 0.001471 | 0.225012 | 0.058457 |
| MmuSTS.4058.1.S1_at   | MmuSTS.4058.1 | 9.9   | 9.65  | 0.34 | 0.02 | -1.19 | 0.260109 | 0.043997 | 0.623011 | 0.254195 |
| MmuSTS.4059.1.S1_at   | MmuSTS.4059.1 | 8.34  | 7.95  | 0.22 | 0.06 | 1.31  | 0.058    | 0.001525 | 0.403659 | 0.059307 |
| MmuSTS.406.1.S1_at    | MmuSTS.406.1  | 3.42  | 3.35  | 0.17 | 0.05 | 1.05  | 0.561987 | 0.327128 | 0.817542 | 0.577136 |
| MmuSTS.4060.1.S1_at   | MmuSTS.4060.1 | 6.09  | 5.9   | 0.13 | 0.02 | 1.14  | 0.115548 | 0.111314 | 0.488793 | 0.375989 |
| MmuSTS.4061.1.S1_s_at | MmuSTS.4061.1 | 3.54  | 3.52  | 0.07 | 0.07 | 1.01  | 0.96525  | 0.229953 | 0.988588 | 0.501802 |
| MmuSTS.4063.1.S1_at   | MmuSTS.4063.1 | 9.94  | 10.04 | 0.23 | 0.06 | -1.07 | 0.711605 | 0.265434 | 0.887684 | 0.531363 |
| MmuSTS.4064.1.S1_at   | MmuSTS.4064.1 | 5.73  | 6.06  | 0.53 | 0.33 | -1.26 | 0.946775 | 0.70413  | 0.981556 | 0.828337 |
| MmuSTS.4065.1.S1_at   | MmuSTS.4065.1 | 7.8   | 6.71  | 0.17 | 0.16 | 2.13  | 0.001101 | 0.000216 | 0.156386 | 0.032385 |
| MmuSTS.4066.1.S1_at   | MmuSTS.4066.1 | 7.25  | 7.37  | 0.27 | 0.13 | -1.09 | 0.424518 | 0.587254 | 0.739618 | 0.754106 |
| MmuSTS.4067.1.S1_at   | MmuSTS.4067.1 | 4.55  | 4.6   | 0.07 | 0.21 | -1.04 | 0.536006 | 0.718424 | 0.802014 | 0.837032 |
| MmuSTS.4068.1.S1_at   | MmuSTS.4068.1 | 7.02  | 7     | 0.3  | 0.25 | 1.02  | 0.358736 | 0.155167 | 0.696626 | 0.430328 |
| MmuSTS.4069.1.S1_at   | MmuSTS.4069.1 | 3.39  | 3.41  | 0.27 | 0.14 | -1.02 | 0.942424 | 0.770084 | 0.980289 | 0.866476 |
| MmuSTS.407.1.S1_s_at  | MmuSTS.407.1  | 4.03  | 4.05  | 0.12 | 0.05 | -1.02 | 0.838955 | 0.957519 | 0.942422 | 0.975944 |
| MmuSTS.4070.1.S1_at   | MmuSTS.4070.1 | 3.77  | 3.53  | 0.56 | 0.21 | 1.18  | 0.331227 | 0.542455 | 0.677909 | 0.725516 |
| MmuSTS.4071.1.S1_at   | MmuSTS.4071.1 | 7.48  | 7.38  | 0.79 | 0.31 | 1.07  | 0.899829 | 0.783549 | 0.965989 | 0.874664 |
| MmuSTS.4072.1.S1_at   | MmuSTS.4072.1 | 10.14 | 10.46 | 0.27 | 0.32 | -1.25 | 0.674801 | 0.233413 | 0.872212 | 0.504761 |
| MmuSTS.4073.1.S1_at   | MmuSTS.4073.1 | 11.42 | 10.82 | 0.04 | 0.16 | 1.51  | 0.004083 | 0.000372 | 0.198571 | 0.037273 |
| MmuSTS.4074.1.S1_at   | MmuSTS.4074.1 | 7.66  | 7.94  | 0.78 | 0.14 | -1.21 | 0.593376 | 0.785971 | 0.834154 | 0.876026 |
| MmuSTS.4075.1.S1_at   | MmuSTS.4075.1 | 7.03  | 7.45  | 0.24 | 0.03 | -1.34 | 0.022227 | 0.069729 | 0.310495 | 0.310191 |
| MmuSTS.4076.1.S1_at   | MmuSTS.4076.1 | 6.81  | 6.57  | 0.53 | 0.2  | 1.18  | 0.613481 | 0.747819 | 0.843476 | 0.853252 |
| MmuSTS.4077.1.S1_at   | MmuSTS.4077.1 | 10.64 | 10.88 | 0.23 | 0.02 | -1.19 | 0.148806 | 0.029983 | 0.522743 | 0.214956 |
| MmuSTS.4078.1.S1_at   | MmuSTS.4078.1 | 6.81  | 6.89  | 0.12 | 0.17 | -1.06 | 0.265788 | 0.301571 | 0.626907 | 0.55955  |
| MmuSTS.4079.1.S1_at   | MmuSTS.4079.1 | 10.18 | 10.27 | 0.11 | 0.02 | -1.06 | 0.255758 | 0.295943 | 0.61975  | 0.555241 |
| MmuSTS.408.1.S1_at    | MmuSTS.408.1  | 10.2  | 9.24  | 2.85 | 0.25 | 1.95  | 0.993155 | 0.132494 | 0.997423 | 0.404544 |
| MmuSTS.4080.1.S1_at   | MmuSTS.4080.1 | 9.62  | 9.38  | 0.73 | 0.25 | 1.18  | 0.42576  | 0.232291 | 0.740112 | 0.504024 |
| MmuSTS.4081.1.S1_at   | MmuSTS.4081.1 | 5.14  | 4.41  | 0.79 | 0.14 | 1.66  | 0.565356 | 0.613473 | 0.819183 | 0.770558 |
| MmuSTS.4082.1.S1_at   | MmuSTS.4082.1 | 7.56  | 7.97  | 0.27 | 0.04 | -1.33 | 0.159966 | 0.161113 | 0.533013 | 0.437279 |
| MmuSTS.4083.1.S1_at   | MmuSTS.4083.1 | 7.9   | 7.59  | 0.83 | 0.13 | 1.24  | 0.573712 | 0.338927 | 0.823742 | 0.585891 |
| MmuSTS.4084.1.S1_at   | MmuSTS.4084.1 | 7.67  | 7.16  | 0.47 | 0.25 | 1.42  | 0.273828 | 0.004867 | 0.633464 | 0.097453 |
| MmuSTS.4085.1.S1_at   | MmuSTS.4085.1 | 12.1  | 12.75 | 0.48 | 0.05 | -1.57 | 0.267354 | 0.374465 | 0.628121 | 0.6129   |
| MmuSTS.4086.1.S1_at   | MmuSTS.4086.1 | 10.68 | 9.61  | 0.46 | 0.2  | 2.1   | 0.048428 | 0.010867 | 0.383306 | 0.135879 |
| MmuSTS.4087.1.S1_at   | MmuSTS.4087.1 | 10.1  | 8.55  | 0.38 | 0.38 | 2.92  | 0.023691 | 0.002876 | 0.316281 | 0.078929 |
| MmuSTS.4088.1.S1_at   | MmuSTS.4088.1 | 9.75  | 10.33 | 0.36 | 0.11 | -1.5  | 0.05772  | 0.042632 | 0.402678 | 0.251037 |

|                       |               |       |       |      |      |       |          |          |          |          |
|-----------------------|---------------|-------|-------|------|------|-------|----------|----------|----------|----------|
| MmuSTS.4089.1.S1_at   | MmuSTS.4089.1 | 10.43 | 10.5  | 0.25 | 0.01 | -1.05 | 0.69252  | 0.784987 | 0.880115 | 0.875511 |
| MmuSTS.409.1.S1_at    | MmuSTS.409.1  | 4.24  | 4.19  | 0.09 | 0.03 | 1.04  | 0.28646  | 0.634245 | 0.643702 | 0.784729 |
| MmuSTS.4090.1.S1_at   | MmuSTS.4090.1 | 4.38  | 4.56  | 0.23 | 0.1  | -1.13 | 0.781823 | 0.043178 | 0.919592 | 0.252554 |
| MmuSTS.4091.1.S1_at   | MmuSTS.4091.1 | 9.69  | 10.39 | 2.57 | 0.31 | -1.62 | 0.453012 | 0.396341 | 0.755962 | 0.628112 |
| MmuSTS.4092.1.S1_at   | MmuSTS.4092.1 | 7.59  | 7.23  | 0.36 | 0.19 | 1.29  | 0.112673 | 0.008959 | 0.486043 | 0.125097 |
| MmuSTS.4093.1.S1_at   | MmuSTS.4093.1 | 6.98  | 7.2   | 0.74 | 1.04 | -1.17 | 0.318591 | 0.147353 | 0.668228 | 0.421554 |
| MmuSTS.4094.1.S1_at   | MmuSTS.4094.1 | 7.68  | 8.14  | 0.85 | 0.27 | -1.37 | 0.874234 | 0.823109 | 0.956448 | 0.898356 |
| MmuSTS.4095.1.S1_at   | MmuSTS.4095.1 | 7.31  | 6.4   | 0.36 | 0.2  | 1.87  | 0.013439 | 0.015727 | 0.268462 | 0.158912 |
| MmuSTS.4096.1.S1_at   | MmuSTS.4096.1 | 10.66 | 11.23 | 0.62 | 0.11 | -1.48 | 0.699374 | 0.242053 | 0.883137 | 0.512624 |
| MmuSTS.4097.1.S1_at   | MmuSTS.4097.1 | 9.93  | 10.51 | 0.37 | 0.03 | -1.5  | 0.069072 | 0.026381 | 0.426529 | 0.203474 |
| MmuSTS.4098.1.S1_at   | MmuSTS.4098.1 | 8.9   | 9.29  | 0.2  | 0.11 | -1.31 | 0.040413 | 0.005073 | 0.364336 | 0.09907  |
| MmuSTS.4099.1.S1_at   | MmuSTS.4099.1 | 10.49 | 9.61  | 0.32 | 0.16 | 1.84  | 0.019254 | 0.007123 | 0.300345 | 0.113654 |
| MmuSTS.41.1.S1_at     | MmuSTS.41.1   | 6.5   | 6.4   | 0.05 | 0.11 | 1.07  | 0.171227 | 0.185415 | 0.54441  | 0.461443 |
| MmuSTS.410.1.S1_at    | MmuSTS.410.1  | 10.31 | 9.49  | 0.17 | 0.14 | 1.77  | 0.002225 | 0.000132 | 0.174757 | 0.029087 |
| MmuSTS.4100.1.S1_at   | MmuSTS.4100.1 | 5.01  | 5     | 0.11 | 0.05 | 1     | 0.939715 | 0.15334  | 0.979532 | 0.428139 |
| MmuSTS.4101.1.S1_at   | MmuSTS.4101.1 | 7.48  | 7.26  | 0.07 | 0.04 | 1.17  | 0.011133 | 0.271138 | 0.252486 | 0.536259 |
| MmuSTS.4102.1.S1_at   | MmuSTS.4102.1 | 12.19 | 12.12 | 0.1  | 0.03 | 1.05  | 0.427578 | 0.918016 | 0.741242 | 0.954068 |
| MmuSTS.4103.1.S1_at   | MmuSTS.4103.1 | 11.64 | 11.76 | 0.22 | 0.01 | -1.09 | 0.953412 | 0.99318  | 0.984455 | 0.995946 |
| MmuSTS.4104.1.S1_at   | MmuSTS.4104.1 | 10.17 | 10.08 | 0.24 | 0.1  | 1.06  | 0.395232 | 0.229757 | 0.720403 | 0.501761 |
| MmuSTS.4105.1.S1_at   | MmuSTS.4105.1 | 6.86  | 6.72  | 0.4  | 0.14 | 1.11  | 0.525153 | 0.725219 | 0.796179 | 0.840945 |
| MmuSTS.4106.1.S1_s_at | MmuSTS.4106.1 | 9     | 9.13  | 0.8  | 0.1  | -1.09 | 0.490703 | 0.018225 | 0.777256 | 0.169777 |
| MmuSTS.4107.1.S1_at   | MmuSTS.4107.1 | 6.58  | 6.18  | 0.14 | 0.16 | 1.32  | 0.02429  | 0.094541 | 0.317812 | 0.351296 |
| MmuSTS.4108.1.S1_at   | MmuSTS.4108.1 | 5.3   | 5.18  | 0.03 | 0.07 | 1.09  | 0.033273 | 0.090388 | 0.346442 | 0.344834 |
| MmuSTS.4109.1.S1_at   | MmuSTS.4109.1 | 9.54  | 9.7   | 0.41 | 0.3  | -1.12 | 0.20904  | 0.000959 | 0.580617 | 0.049342 |
| MmuSTS.411.1.S1_at    | MmuSTS.411.1  | 7.18  | 7.56  | 0.68 | 0.22 | -1.3  | 0.623157 | 0.475047 | 0.848128 | 0.681872 |
| MmuSTS.4110.1.S1_at   | MmuSTS.4110.1 | 7.26  | 7.32  | 0.14 | 0.11 | -1.04 | 0.924772 | 0.066639 | 0.974857 | 0.303959 |
| MmuSTS.4111.1.S1_at   | MmuSTS.4111.1 | 4.95  | 5.02  | 0.88 | 0.33 | -1.05 | 0.8279   | 0.944984 | 0.938183 | 0.968834 |
| MmuSTS.4112.1.S1_at   | MmuSTS.4112.1 | 13.63 | 14.01 | 0.25 | 0.05 | -1.3  | 0.068873 | 0.022209 | 0.426231 | 0.186513 |
| MmuSTS.4113.1.S1_at   | MmuSTS.4113.1 | 8.07  | 8.18  | 0.47 | 0.32 | -1.08 | 0.979183 | 0.206505 | 0.993351 | 0.480571 |
| MmuSTS.4114.1.S1_at   | MmuSTS.4114.1 | 5.24  | 5.39  | 0.35 | 0.37 | -1.11 | 0.297796 | 0.427672 | 0.652791 | 0.649406 |
| MmuSTS.4115.1.S1_s_at | MmuSTS.4115.1 | 10.68 | 10.71 | 0.74 | 0.35 | -1.02 | 0.500022 | 0.111025 | 0.782311 | 0.37554  |
| MmuSTS.4116.1.S1_at   | MmuSTS.4116.1 | 10.17 | 10.08 | 1.02 | 0.08 | 1.06  | 0.983429 | 0.684511 | 0.994928 | 0.81598  |
| MmuSTS.4117.1.S1_at   | MmuSTS.4117.1 | 9.85  | 9.54  | 0.25 | 0.12 | 1.24  | 0.496401 | 0.349331 | 0.780416 | 0.593355 |
| MmuSTS.4118.1.S1_s_at | MmuSTS.4118.1 | 3.77  | 3.25  | 0.13 | 0.21 | 1.44  | 0.046265 | 0.353264 | 0.377673 | 0.596477 |
| MmuSTS.4119.1.S1_at   | MmuSTS.4119.1 | 4.58  | 4.49  | 0.1  | 0.04 | 1.07  | 0.294632 | 0.449082 | 0.650731 | 0.664892 |
| MmuSTS.412.1.S1_at    | MmuSTS.412.1  | 5.58  | 5.96  | 1    | 0.11 | -1.31 | 0.761267 | 0.230139 | 0.910425 | 0.502007 |
| MmuSTS.4120.1.S1_s_at | MmuSTS.4120.1 | 7.32  | 8.07  | 0.26 | 0.26 | -1.69 | 0.012355 | 0.005631 | 0.261875 | 0.103694 |
| MmuSTS.4121.1.S1_at   | MmuSTS.4121.1 | 8.02  | 7.36  | 0.33 | 0.16 | 1.57  | 0.017385 | 0.009841 | 0.291474 | 0.130274 |
| MmuSTS.4122.1.S1_at   | MmuSTS.4122.1 | 10.78 | 11.17 | 0.37 | 0.04 | -1.31 | 0.068402 | 0.017932 | 0.425568 | 0.168998 |
| MmuSTS.4123.1.S1_at   | MmuSTS.4123.1 | 9.72  | 9.52  | 0.44 | 0.09 | 1.14  | 0.310014 | 0.125195 | 0.661926 | 0.395674 |
| MmuSTS.4124.1.S1_at   | MmuSTS.4124.1 | 11.52 | 10.8  | 0.36 | 0.39 | 1.66  | 0.138267 | 0.194542 | 0.513671 | 0.469632 |
| MmuSTS.4125.1.S1_at   | MmuSTS.4125.1 | 4.94  | 4.49  | 0.29 | 0.31 | 1.37  | 0.399969 | 0.306611 | 0.723437 | 0.563185 |
| MmuSTS.4126.1.S1_at   | MmuSTS.4126.1 | 13.33 | 13.36 | 0.1  | 0.02 | -1.02 | 0.688079 | 0.795501 | 0.878062 | 0.882189 |

|                      |               |       |       |      |      |       |          |          |          |          |
|----------------------|---------------|-------|-------|------|------|-------|----------|----------|----------|----------|
| MmuSTS.4127.1.S1_at  | MmuSTS.4127.1 | 11.84 | 11.56 | 0.23 | 0.08 | 1.21  | 0.152454 | 0.17829  | 0.52546  | 0.454627 |
| MmuSTS.4128.1.S1_at  | MmuSTS.4128.1 | 5.41  | 5.57  | 0.16 | 0.04 | -1.12 | 0.505526 | 0.125515 | 0.785389 | 0.396226 |
| MmuSTS.4129.1.S1_at  | MmuSTS.4129.1 | 12.63 | 12.38 | 0.21 | 0.04 | 1.19  | 0.315092 | 0.372753 | 0.665641 | 0.611661 |
| MmuSTS.413.1.S1_at   | MmuSTS.413.1  | 4.16  | 4.12  | 0.27 | 0.1  | 1.03  | 0.835229 | 0.580257 | 0.940896 | 0.749616 |
| MmuSTS.4130.1.S1_at  | MmuSTS.4130.1 | 13.5  | 13.53 | 0.08 | 0    | -1.02 | 0.488296 | 0.657394 | 0.775467 | 0.799695 |
| MmuSTS.4131.1.S1_at  | MmuSTS.4131.1 | 11.48 | 12.04 | 0.15 | 0.1  | -1.47 | 0.011042 | 0.000976 | 0.252123 | 0.049854 |
| MmuSTS.4132.1.S1_at  | MmuSTS.4132.1 | 9.46  | 9.2   | 0.05 | 0.19 | 1.2   | 0.071334 | 0.081553 | 0.430731 | 0.329764 |
| MmuSTS.4133.1.S1_at  | MmuSTS.4133.1 | 13.11 | 13.26 | 0.5  | 0.04 | -1.11 | 0.384528 | 0.215669 | 0.712067 | 0.489477 |
| MmuSTS.4134.1.S1_at  | MmuSTS.4134.1 | 3.62  | 3.44  | 0.1  | 0.04 | 1.13  | 0.116802 | 0.432306 | 0.490029 | 0.652778 |
| MmuSTS.4135.1.S1_at  | MmuSTS.4135.1 | 9.26  | 10.17 | 0.55 | 0.02 | -1.88 | 0.132143 | 0.142069 | 0.50669  | 0.415655 |
| MmuSTS.4136.1.S1_at  | MmuSTS.4136.1 | 9.32  | 9.18  | 0.21 | 0.1  | 1.1   | 0.795568 | 0.000841 | 0.924888 | 0.047013 |
| MmuSTS.4137.1.S1_at  | MmuSTS.4137.1 | 9.75  | 10.26 | 0.48 | 0.03 | -1.42 | 0.413703 | 0.710316 | 0.732521 | 0.831912 |
| MmuSTS.4138.1.S1_at  | MmuSTS.4138.1 | 10.22 | 9.56  | 1.01 | 0.44 | 1.58  | 0.131111 | 0.015174 | 0.5054   | 0.15652  |
| MmuSTS.4139.1.S1_at  | MmuSTS.4139.1 | 3.46  | 4.86  | 0.46 | 0.24 | -2.64 | 0.009728 | 0.002289 | 0.243347 | 0.07045  |
| MmuSTS.414.1.S1_s_at | MmuSTS.414.1  | 7.72  | 7.86  | 0.55 | 0.1  | -1.1  | 0.738183 | 0.925682 | 0.8998   | 0.957937 |
| MmuSTS.4140.1.S1_at  | MmuSTS.4140.1 | 5.21  | 5.12  | 0.08 | 0.06 | 1.06  | 0.238768 | 0.520987 | 0.605393 | 0.712102 |
| MmuSTS.4141.1.S1_at  | MmuSTS.4141.1 | 5.2   | 5.48  | 0.48 | 0.21 | -1.22 | 0.753823 | 0.008132 | 0.907201 | 0.11972  |
| MmuSTS.4142.1.S1_at  | MmuSTS.4142.1 | 8.03  | 7.4   | 0.52 | 0.11 | 1.55  | 0.153314 | 0.096755 | 0.526421 | 0.354171 |
| MmuSTS.4143.1.S1_at  | MmuSTS.4143.1 | 5.83  | 6.24  | 0.23 | 0.01 | -1.33 | 0.03849  | 0.000848 | 0.359469 | 0.047089 |
| MmuSTS.4144.1.S1_at  | MmuSTS.4144.1 | 11.59 | 12.01 | 0.41 | 0.04 | -1.34 | 0.131709 | 0.200727 | 0.506153 | 0.47524  |
| MmuSTS.4145.1.S1_at  | MmuSTS.4145.1 | 8.52  | 9.18  | 0.05 | 0.15 | -1.58 | 0.001571 | 0.000232 | 0.161959 | 0.03241  |
| MmuSTS.4146.1.S1_at  | MmuSTS.4146.1 | 7.24  | 8.98  | 1.25 | 0.5  | -3.33 | 0.134512 | 0.115012 | 0.508462 | 0.38182  |
| MmuSTS.4147.1.S1_at  | MmuSTS.4147.1 | 4.24  | 4.37  | 0.13 | 0.03 | -1.09 | 0.739096 | 0.142194 | 0.900366 | 0.415754 |
| MmuSTS.4148.1.S1_at  | MmuSTS.4148.1 | 9.37  | 9.38  | 0.14 | 0.07 | -1.01 | 0.642717 | 0.002969 | 0.857894 | 0.079958 |
| MmuSTS.4149.1.S1_at  | MmuSTS.4149.1 | 7.73  | 7.93  | 0.16 | 0.22 | -1.15 | 0.150868 | 0.181828 | 0.524381 | 0.458385 |
| MmuSTS.415.1.S1_at   | MmuSTS.415.1  | 6.24  | 5.83  | 0.28 | 0.45 | 1.33  | 0.132366 | 0.200874 | 0.506752 | 0.475369 |
| MmuSTS.4150.1.S1_at  | MmuSTS.4150.1 | 11.06 | 11.54 | 0.29 | 0.1  | -1.4  | 0.021056 | 0.019677 | 0.306644 | 0.176276 |
| MmuSTS.4151.1.S1_at  | MmuSTS.4151.1 | 11.53 | 11.44 | 0.26 | 0.11 | 1.07  | 0.942896 | 0.273252 | 0.980356 | 0.537788 |
| MmuSTS.4152.1.S1_at  | MmuSTS.4152.1 | 5.51  | 5.51  | 0.18 | 0.13 | 1     | 0.446592 | 0.44225  | 0.752779 | 0.660308 |
| MmuSTS.4153.1.S1_at  | MmuSTS.4153.1 | 3.39  | 3.35  | 0.07 | 0.1  | 1.03  | 0.293849 | 0.616088 | 0.65018  | 0.772461 |
| MmuSTS.4154.1.S1_at  | MmuSTS.4154.1 | 10.28 | 10.2  | 0.24 | 0.17 | 1.06  | 0.1303   | 0.130941 | 0.504682 | 0.403037 |
| MmuSTS.4155.1.S1_at  | MmuSTS.4155.1 | 8.33  | 8.23  | 0.42 | 0.22 | 1.07  | 0.653761 | 0.625057 | 0.862462 | 0.778973 |
| MmuSTS.4156.1.S1_at  | MmuSTS.4156.1 | 4.06  | 4.18  | 0.14 | 0.12 | -1.09 | 0.618475 | 0.746634 | 0.845965 | 0.852888 |
| MmuSTS.4157.1.S1_at  | MmuSTS.4157.1 | 11.95 | 11.71 | 0.31 | 0.23 | 1.18  | 0.74829  | 0.013093 | 0.904363 | 0.14718  |
| MmuSTS.4158.1.S1_at  | MmuSTS.4158.1 | 10.19 | 10.01 | 0.13 | 0.02 | 1.13  | 0.309622 | 0.029523 | 0.661815 | 0.213506 |
| MmuSTS.4159.1.S1_at  | MmuSTS.4159.1 | 12.08 | 12.16 | 0.17 | 0.14 | -1.06 | 0.641644 | 0.243251 | 0.857449 | 0.513356 |
| MmuSTS.416.1.S1_at   | MmuSTS.416.1  | 11.89 | 12.03 | 0.29 | 0.04 | -1.1  | 0.421535 | 0.37757  | 0.737563 | 0.615012 |
| MmuSTS.4160.1.S1_at  | MmuSTS.4160.1 | 5.83  | 5.81  | 0.12 | 0.13 | 1.01  | 0.560433 | 0.803862 | 0.816681 | 0.887148 |
| MmuSTS.4161.1.S1_at  | MmuSTS.4161.1 | 10.29 | 10.57 | 0.1  | 0    | -1.21 | 0.008798 | 0.001206 | 0.237083 | 0.054389 |
| MmuSTS.4162.1.S1_at  | MmuSTS.4162.1 | 10.99 | 11.27 | 0.12 | 0.08 | -1.22 | 0.018211 | 0.055256 | 0.295507 | 0.280809 |
| MmuSTS.4163.1.S1_at  | MmuSTS.4163.1 | 10.52 | 10.78 | 0.08 | 0.01 | -1.19 | 0.008479 | 0.006892 | 0.234441 | 0.112203 |
| MmuSTS.4164.1.S1_at  | MmuSTS.4164.1 | 7.71  | 8.38  | 0.96 | 0.1  | -1.59 | 0.325015 | 0.226893 | 0.67293  | 0.499276 |
| MmuSTS.4165.1.S1_at  | MmuSTS.4165.1 | 4.02  | 3.95  | 0.2  | 0.12 | 1.05  | 0.352694 | 0.244121 | 0.692718 | 0.514121 |



|                       |               |       |       |      |      |       |          |          |          |          |
|-----------------------|---------------|-------|-------|------|------|-------|----------|----------|----------|----------|
| MmuSTS.4166.1.S1_at   | MmuSTS.4166.1 | 6.05  | 6.86  | 0.54 | 0.22 | -1.75 | 0.099838 | 0.290022 | 0.469818 | 0.551016 |
| MmuSTS.4167.1.S1_at   | MmuSTS.4167.1 | 10.45 | 10.67 | 0.2  | 0.03 | -1.16 | 0.039758 | 0.01201  | 0.362565 | 0.141846 |
| MmuSTS.4168.1.S1_at   | MmuSTS.4168.1 | 6.13  | 6.92  | 0.37 | 0.37 | -1.73 | 0.293399 | 0.028013 | 0.649776 | 0.208903 |
| MmuSTS.4169.1.S1_at   | MmuSTS.4169.1 | 11.97 | 12.54 | 0.15 | 0.07 | -1.49 | 0.004685 | 0.00023  | 0.201699 | 0.032385 |
| MmuSTS.417.1.S1_at    | MmuSTS.417.1  | 8.73  | 8.93  | 1.87 | 0.54 | -1.15 | 0.692981 | 0.104811 | 0.880403 | 0.366313 |
| MmuSTS.4170.1.S1_at   | MmuSTS.4170.1 | 11.78 | 11.95 | 0.41 | 0.21 | -1.13 | 0.889164 | 0.399148 | 0.96181  | 0.62969  |
| MmuSTS.4171.1.S1_at   | MmuSTS.4171.1 | 10.69 | 10.27 | 0.21 | 0.03 | 1.33  | 0.06651  | 0.013468 | 0.422351 | 0.148626 |
| MmuSTS.4172.1.S1_at   | MmuSTS.4172.1 | 7.34  | 7.51  | 0.16 | 0.12 | -1.13 | 0.335102 | 0.084409 | 0.680744 | 0.335713 |
| MmuSTS.4173.1.S1_at   | MmuSTS.4173.1 | 6.23  | 7.08  | 0.73 | 0.15 | -1.81 | 0.111801 | 0.071331 | 0.48497  | 0.313366 |
| MmuSTS.4174.1.S1_at   | MmuSTS.4174.1 | 9.63  | 10.02 | 0.44 | 0.35 | -1.31 | 0.157994 | 0.181532 | 0.530982 | 0.458087 |
| MmuSTS.4175.1.S1_at   | MmuSTS.4175.1 | 3.54  | 3.49  | 0.19 | 0.02 | 1.04  | 0.526394 | 0.761592 | 0.796544 | 0.861459 |
| MmuSTS.4176.1.S1_at   | MmuSTS.4176.1 | 10.82 | 11.12 | 1.74 | 0.14 | -1.23 | 0.654594 | 0.172987 | 0.862882 | 0.449625 |
| MmuSTS.4177.1.S1_at   | MmuSTS.4177.1 | 3.39  | 3.36  | 0.17 | 0.05 | 1.03  | 0.47142  | 0.601842 | 0.76658  | 0.763113 |
| MmuSTS.4178.1.S1_at   | MmuSTS.4178.1 | 6.74  | 5.72  | 0.96 | 0.49 | 2.04  | 0.316084 | 0.032936 | 0.666313 | 0.224663 |
| MmuSTS.4179.1.S1_at   | MmuSTS.4179.1 | 10.19 | 10.57 | 0.15 | 0.16 | -1.3  | 0.111674 | 0.120107 | 0.484896 | 0.38882  |
| MmuSTS.418.1.S1_s_at  | MmuSTS.418.1  | 3.6   | 3.59  | 0.32 | 0.04 | 1.01  | 0.969006 | 0.710474 | 0.989849 | 0.832042 |
| MmuSTS.4180.1.S1_at   | MmuSTS.4180.1 | 11.76 | 11.5  | 0.13 | 0.04 | 1.2   | 0.029012 | 0.124872 | 0.333482 | 0.395219 |
| MmuSTS.4181.1.S1_at   | MmuSTS.4181.1 | 9.29  | 9.56  | 0.21 | 0.14 | -1.21 | 0.325659 | 0.180804 | 0.673403 | 0.457306 |
| MmuSTS.4182.1.S1_at   | MmuSTS.4182.1 | 6.47  | 6.91  | 0.55 | 0.14 | -1.36 | 0.287253 | 0.00177  | 0.644369 | 0.063359 |
| MmuSTS.4183.1.S1_at   | MmuSTS.4183.1 | 6.96  | 6.97  | 0.02 | 0.08 | -1    | 0.520989 | 0.453303 | 0.794223 | 0.667688 |
| MmuSTS.4184.1.S1_at   | MmuSTS.4184.1 | 7.87  | 8.19  | 0.13 | 0.03 | -1.25 | 0.022555 | 0.000067 | 0.311401 | 0.025805 |
| MmuSTS.4185.1.S1_at   | MmuSTS.4185.1 | 10.21 | 10.49 | 1.09 | 0.06 | -1.21 | 0.734559 | 0.92722  | 0.898442 | 0.958627 |
| MmuSTS.4186.1.S1_at   | MmuSTS.4186.1 | 10.1  | 10.34 | 0.13 | 0.05 | -1.18 | 0.013669 | 0.014017 | 0.270367 | 0.151595 |
| MmuSTS.4187.1.S1_at   | MmuSTS.4187.1 | 8.88  | 9.45  | 0.66 | 0.19 | -1.49 | 0.639189 | 0.203195 | 0.856229 | 0.477415 |
| MmuSTS.4188.1.S1_at   | MmuSTS.4188.1 | 4.78  | 4.64  | 0.14 | 0.08 | 1.1   | 0.402349 | 0.322609 | 0.724848 | 0.574023 |
| MmuSTS.4189.1.S1_at   | MmuSTS.4189.1 | 7.07  | 7.59  | 0.43 | 0.7  | -1.44 | 0.900163 | 0.970782 | 0.966012 | 0.984072 |
| MmuSTS.4189.1.S1_s_at | MmuSTS.4189.1 | 7.71  | 7.99  | 0.33 | 0.36 | -1.21 | 0.739775 | 0.358317 | 0.900699 | 0.599823 |
| MmuSTS.419.1.S1_s_at  | MmuSTS.419.1  | 3.12  | 2.94  | 0.07 | 0.19 | 1.13  | 0.802493 | 0.814448 | 0.927969 | 0.892923 |
| MmuSTS.4190.1.S1_at   | MmuSTS.4190.1 | 12.46 | 12.45 | 0.07 | 0.06 | 1     | 0.941176 | 0.993997 | 0.980018 | 0.996372 |
| MmuSTS.4191.1.S1_at   | MmuSTS.4191.1 | 5.17  | 5.45  | 0.18 | 0.11 | -1.21 | 0.193621 | 0.164893 | 0.564275 | 0.441213 |
| MmuSTS.4192.1.S1_at   | MmuSTS.4192.1 | 9.71  | 10.67 | 0.48 | 0.17 | -1.94 | 0.123413 | 0.040325 | 0.496707 | 0.245973 |
| MmuSTS.4193.1.S1_at   | MmuSTS.4193.1 | 9.59  | 10.43 | 0.48 | 0.2  | -1.79 | 0.071466 | 0.003045 | 0.431049 | 0.080462 |
| MmuSTS.4194.1.S1_at   | MmuSTS.4194.1 | 3.94  | 3.72  | 0.24 | 0.06 | 1.16  | 0.315584 | 0.246133 | 0.666002 | 0.51585  |
| MmuSTS.4194.1.S1_s_at | MmuSTS.4194.1 | 3.35  | 3.42  | 0.09 | 0.17 | -1.05 | 0.41537  | 0.339205 | 0.733613 | 0.585918 |
| MmuSTS.4195.1.S1_at   | MmuSTS.4195.1 | 11.32 | 11.39 | 1.76 | 0.13 | -1.05 | 0.794295 | 0.133347 | 0.924532 | 0.405139 |
| MmuSTS.4196.1.S1_at   | MmuSTS.4196.1 | 4.43  | 4.42  | 0.24 | 0.08 | 1.01  | 0.376076 | 0.183024 | 0.706657 | 0.459493 |
| MmuSTS.4197.1.S1_at   | MmuSTS.4197.1 | 3.98  | 3.74  | 0.63 | 0.19 | 1.18  | 0.192703 | 0.239177 | 0.563577 | 0.509902 |
| MmuSTS.4198.1.S1_at   | MmuSTS.4198.1 | 4.77  | 4.82  | 0.07 | 0.12 | -1.04 | 0.759831 | 0.242752 | 0.909769 | 0.5131   |
| MmuSTS.4199.1.S1_at   | MmuSTS.4199.1 | 6.34  | 6.34  | 0.12 | 0.12 | 1     | 0.538585 | 0.874932 | 0.803372 | 0.929042 |
| MmuSTS.42.1.S1_at     | MmuSTS.42.1   | 2.88  | 2.91  | 0.06 | 0.06 | -1.02 | 0.620212 | 0.474261 | 0.847047 | 0.68135  |
| MmuSTS.42.1.S1_s_at   | MmuSTS.42.1   | 4.13  | 3.83  | 0.15 | 0.06 | 1.23  | 0.031107 | 0.101087 | 0.339751 | 0.360724 |
| MmuSTS.420.1.S1_s_at  | MmuSTS.420.1  | 3.22  | 3.19  | 0.06 | 0.01 | 1.02  | 0.555075 | 0.220795 | 0.813148 | 0.494262 |
| MmuSTS.4200.1.S1_at   | MmuSTS.4200.1 | 5.76  | 4.43  | 1.05 | 0.2  | 2.52  | 0.096501 | 0.016423 | 0.465152 | 0.162253 |

|                       |               |       |       |      |      |       |          |          |          |          |
|-----------------------|---------------|-------|-------|------|------|-------|----------|----------|----------|----------|
| MmuSTS.4200.1.S1_x_at | MmuSTS.4200.1 | 5.84  | 4.74  | 1.08 | 0.16 | 2.14  | 0.189764 | 0.023735 | 0.561075 | 0.192893 |
| MmuSTS.4201.1.S1_at   | MmuSTS.4201.1 | 10.06 | 10.96 | 0.44 | 0.17 | -1.86 | 0.038237 | 0.062249 | 0.358577 | 0.296325 |
| MmuSTS.4202.1.S1_at   | MmuSTS.4202.1 | 5.2   | 5.07  | 0.15 | 0.09 | 1.09  | 0.547868 | 0.279025 | 0.809245 | 0.542782 |
| MmuSTS.4203.1.S1_at   | MmuSTS.4203.1 | 6.4   | 6.28  | 0.17 | 0.04 | 1.08  | 0.433538 | 0.749564 | 0.74451  | 0.854499 |
| MmuSTS.4204.1.S1_at   | MmuSTS.4204.1 | 7.14  | 7.31  | 0.14 | 0.04 | -1.12 | 0.095056 | 0.124843 | 0.464131 | 0.395219 |
| MmuSTS.4205.1.S1_at   | MmuSTS.4205.1 | 9.23  | 9.66  | 1.25 | 0.04 | -1.34 | 0.567734 | 0.686686 | 0.820586 | 0.817182 |
| MmuSTS.4206.1.S1_at   | MmuSTS.4206.1 | 7.48  | 7.93  | 0.27 | 0.06 | -1.36 | 0.134387 | 0.039527 | 0.508462 | 0.243753 |
| MmuSTS.4207.1.S1_at   | MmuSTS.4207.1 | 6.32  | 6.06  | 0.42 | 0.47 | 1.2   | 0.542654 | 0.760175 | 0.805939 | 0.860657 |
| MmuSTS.4208.1.S1_at   | MmuSTS.4208.1 | 4.83  | 4.94  | 0.25 | 0.33 | -1.08 | 0.449327 | 0.20501  | 0.754301 | 0.479296 |
| MmuSTS.4209.1.S1_at   | MmuSTS.4209.1 | 10    | 10.27 | 0.28 | 0.04 | -1.21 | 0.180039 | 0.216872 | 0.553172 | 0.490478 |
| MmuSTS.421.1.S1_at    | MmuSTS.421.1  | 10.33 | 9.74  | 0.2  | 0.12 | -1.51 | 0.012133 | 0.012102 | 0.259732 | 0.142307 |
| MmuSTS.4210.1.S1_at   | MmuSTS.4210.1 | 7.1   | 6.83  | 0.17 | 0.14 | 1.21  | 0.487196 | 0.573657 | 0.774932 | 0.745229 |
| MmuSTS.4211.1.S1_at   | MmuSTS.4211.1 | 5.09  | 5.05  | 0.19 | 0.02 | 1.03  | 0.757346 | 0.531037 | 0.908621 | 0.718384 |
| MmuSTS.4212.1.S1_at   | MmuSTS.4212.1 | 12.21 | 11.92 | 0.06 | 0.15 | 1.22  | 0.012135 | 0.061642 | 0.259732 | 0.295095 |
| MmuSTS.4213.1.S1_at   | MmuSTS.4213.1 | 7.93  | 7.33  | 0.15 | 0.09 | 1.52  | 0.004322 | 0.000066 | 0.198874 | 0.025805 |
| MmuSTS.4214.1.S1_at   | MmuSTS.4214.1 | 6.33  | 6.47  | 0.78 | 0.18 | -1.1  | 0.913299 | 0.503258 | 0.970503 | 0.700751 |
| MmuSTS.4215.1.S1_at   | MmuSTS.4215.1 | 7.78  | 7.14  | 0.15 | 0.13 | 1.55  | 0.007163 | 0.023643 | 0.226342 | 0.192558 |
| MmuSTS.4216.1.S1_at   | MmuSTS.4216.1 | 11.99 | 10.87 | 0.17 | 0.18 | 2.17  | 0.002259 | 0.009762 | 0.174757 | 0.129961 |
| MmuSTS.4217.1.S1_at   | MmuSTS.4217.1 | 11.64 | 11.54 | 0.25 | 0.05 | 1.07  | 0.489331 | 0.026463 | 0.776085 | 0.203812 |
| MmuSTS.4218.1.S1_at   | MmuSTS.4218.1 | 2.85  | 2.81  | 0.02 | 0.08 | 1.03  | 0.715266 | 0.665072 | 0.889207 | 0.803733 |
| MmuSTS.4219.1.S1_at   | MmuSTS.4219.1 | 9.87  | 9.61  | 0.28 | 0.05 | 1.2   | 0.442669 | 0.357234 | 0.750271 | 0.598864 |
| MmuSTS.422.1.S1_at    | MmuSTS.422.1  | 9.96  | 9.8   | 0.69 | 0.06 | 1.12  | 0.583485 | 0.299418 | 0.829103 | 0.557788 |
| MmuSTS.4220.1.S1_at   | MmuSTS.4220.1 | 3.01  | 3.11  | 0.17 | 0.04 | -1.07 | 0.719975 | 0.675079 | 0.891311 | 0.810146 |
| MmuSTS.4221.1.S1_at   | MmuSTS.4221.1 | 8.15  | 8.16  | 0.4  | 0.2  | -1.01 | 0.724436 | 0.53055  | 0.893143 | 0.718042 |
| MmuSTS.4222.1.S1_at   | MmuSTS.4222.1 | 9.19  | 9.79  | 1.46 | 0.39 | -1.52 | 0.608852 | 0.163518 | 0.841357 | 0.439751 |
| MmuSTS.4223.1.S1_at   | MmuSTS.4223.1 | 8.24  | 8.34  | 0.74 | 0.12 | -1.07 | 0.868855 | 0.847377 | 0.954083 | 0.913303 |
| MmuSTS.4224.1.S1_at   | MmuSTS.4224.1 | 9.49  | 8.84  | 0.39 | 0.12 | 1.56  | 0.145368 | 0.12267  | 0.520409 | 0.392645 |
| MmuSTS.4225.1.S1_at   | MmuSTS.4225.1 | 10.56 | 10.25 | 0.4  | 0.33 | 1.24  | 0.311968 | 0.43629  | 0.663542 | 0.655923 |
| MmuSTS.4226.1.S1_at   | MmuSTS.4226.1 | 8.58  | 8.84  | 0.11 | 0.18 | -1.19 | 0.062592 | 0.140181 | 0.41336  | 0.413405 |
| MmuSTS.4227.1.S1_at   | MmuSTS.4227.1 | 10.53 | 10.15 | 0.56 | 0.39 | 1.3   | 0.701039 | 0.522975 | 0.883757 | 0.713429 |
| MmuSTS.4228.1.S1_at   | MmuSTS.4228.1 | 12.69 | 12.54 | 0.23 | 0.04 | 1.11  | 0.776652 | 0.050146 | 0.917412 | 0.269087 |
| MmuSTS.4229.1.S1_at   | MmuSTS.4229.1 | 7.93  | 8.16  | 0.17 | 0.13 | -1.17 | 0.318909 | 0.000021 | 0.668481 | 0.019635 |
| MmuSTS.423.1.S1_at    | MmuSTS.423.1  | 7.12  | 6.33  | 0.31 | 0.16 | 1.73  | 0.028726 | 0.399455 | 0.333062 | 0.629799 |
| MmuSTS.4230.1.S1_at   | MmuSTS.4230.1 | 8.6   | 8.64  | 0.1  | 0.07 | -1.03 | 0.636203 | 0.151908 | 0.854813 | 0.426547 |
| MmuSTS.4231.1.S1_at   | MmuSTS.4231.1 | 3.36  | 4.71  | 1.36 | 0.29 | -2.54 | 0.647147 | 0.858522 | 0.859341 | 0.919428 |
| MmuSTS.4232.1.S1_at   | MmuSTS.4232.1 | 6.18  | 6.1   | 0.14 | 0.08 | 1.05  | 0.098381 | 0.052193 | 0.467876 | 0.274036 |
| MmuSTS.4233.1.S1_at   | MmuSTS.4233.1 | 9.36  | 9.51  | 0.54 | 0.1  | -1.11 | 0.544444 | 0.41447  | 0.807237 | 0.640342 |
| MmuSTS.4234.1.S1_at   | MmuSTS.4234.1 | 5.34  | 5.24  | 0.06 | 0.06 | 1.07  | 0.134993 | 0.381523 | 0.509124 | 0.617702 |
| MmuSTS.4235.1.S1_s_at | MmuSTS.4235.1 | 3.85  | 3.67  | 0.12 | 0.16 | 1.13  | 0.09658  | 0.062859 | 0.465275 | 0.297418 |
| MmuSTS.4236.1.S1_at   | MmuSTS.4236.1 | 6.98  | 6.96  | 0.14 | 0.05 | 1.01  | 0.327649 | 0.568402 | 0.675137 | 0.741962 |
| MmuSTS.4237.1.S1_at   | MmuSTS.4237.1 | 6.35  | 5.5   | 1.49 | 0.22 | 1.81  | 0.356697 | 0.428915 | 0.695204 | 0.650409 |
| MmuSTS.4238.1.S1_at   | MmuSTS.4238.1 | 3.98  | 3.87  | 0.11 | 0.11 | 1.07  | 0.384969 | 0.081021 | 0.712306 | 0.329172 |
| MmuSTS.4239.1.S1_at   | MmuSTS.4239.1 | 7.82  | 7.7   | 1.62 | 0.19 | 1.09  | 0.926657 | 0.273873 | 0.975657 | 0.538438 |

|                       |               |       |       |      |      |       |          |          |          |          |
|-----------------------|---------------|-------|-------|------|------|-------|----------|----------|----------|----------|
| MmuSTS.424.1.S1_s_at  | MmuSTS.424.1  | 3.93  | 3.87  | 0.06 | 0.03 | 1.05  | 0.156899 | 0.039687 | 0.530153 | 0.244271 |
| MmuSTS.4240.1.S1_at   | MmuSTS.4240.1 | 4.37  | 4.25  | 0.1  | 0.05 | 1.09  | 0.101288 | 0.385133 | 0.471667 | 0.620662 |
| MmuSTS.4241.1.S1_at   | MmuSTS.4241.1 | 5.4   | 5.14  | 0.09 | 0.11 | 1.19  | 0.047234 | 0.072198 | 0.379823 | 0.31474  |
| MmuSTS.4242.1.S1_at   | MmuSTS.4242.1 | 9.84  | 9.91  | 0.07 | 0.02 | -1.05 | 0.538144 | 0.313501 | 0.803016 | 0.567926 |
| MmuSTS.4243.1.S1_at   | MmuSTS.4243.1 | 9.14  | 9.26  | 0.1  | 0.08 | -1.09 | 0.209918 | 0.26558  | 0.581346 | 0.531432 |
| MmuSTS.4243.1.S1_s_at | MmuSTS.4243.1 | 9.99  | 10.23 | 0.05 | 0.09 | -1.18 | 0.042271 | 0.12131  | 0.368858 | 0.390351 |
| MmuSTS.4244.1.S1_at   | MmuSTS.4244.1 | 11.36 | 11.56 | 0.34 | 0.13 | -1.15 | 0.45248  | 0.480839 | 0.755825 | 0.686    |
| MmuSTS.4245.1.S1_at   | MmuSTS.4245.1 | 8.48  | 8.61  | 0.93 | 0.12 | -1.09 | 0.931576 | 0.48099  | 0.9771   | 0.686044 |
| MmuSTS.4246.1.S1_at   | MmuSTS.4246.1 | 12.12 | 11.73 | 0.29 | 0.03 | 1.31  | 0.070931 | 0.062606 | 0.430067 | 0.297022 |
| MmuSTS.4247.1.S1_at   | MmuSTS.4247.1 | 6.32  | 6.38  | 0.44 | 0.23 | -1.04 | 0.719275 | 0.391729 | 0.890921 | 0.625301 |
| MmuSTS.4248.1.S1_at   | MmuSTS.4248.1 | 9.4   | 9.53  | 0.32 | 0.26 | -1.09 | 0.917617 | 0.795529 | 0.972048 | 0.882189 |
| MmuSTS.4249.1.S1_at   | MmuSTS.4249.1 | 13.16 | 13.03 | 0.25 | 0.08 | 1.09  | 0.145961 | 0.195363 | 0.520572 | 0.470253 |
| MmuSTS.425.1.S1_at    | MmuSTS.425.1  | 4.24  | 4.07  | 0.12 | 0.01 | 1.12  | 0.078067 | 0.36525  | 0.440121 | 0.605412 |
| MmuSTS.4250.1.S1_at   | MmuSTS.4250.1 | 9.78  | 9.32  | 0.48 | 0.36 | 1.38  | 0.220957 | 0.00664  | 0.590217 | 0.110449 |
| MmuSTS.4251.1.S1_at   | MmuSTS.4251.1 | 10.98 | 10.19 | 0.75 | 0.1  | 1.73  | 0.103258 | 0.131529 | 0.474048 | 0.403658 |
| MmuSTS.4252.1.S1_at   | MmuSTS.4252.1 | 7.75  | 7.57  | 0.62 | 0.02 | 1.13  | 0.91268  | 0.944929 | 0.970322 | 0.968827 |
| MmuSTS.4253.1.S1_at   | MmuSTS.4253.1 | 6.86  | 6.98  | 0.12 | 0.2  | -1.09 | 0.166356 | 0.068725 | 0.539008 | 0.308711 |
| MmuSTS.4254.1.S1_at   | MmuSTS.4254.1 | 11.86 | 12.24 | 0.45 | 0.12 | -1.3  | 0.235013 | 0.331457 | 0.602266 | 0.580121 |
| MmuSTS.4255.1.S1_at   | MmuSTS.4255.1 | 9.58  | 9.97  | 0.74 | 0.18 | -1.31 | 0.776676 | 0.170451 | 0.917412 | 0.447103 |
| MmuSTS.4256.1.S1_at   | MmuSTS.4256.1 | 9.11  | 8.6   | 0.56 | 0.1  | 1.42  | 0.62282  | 0.143956 | 0.847958 | 0.41787  |
| MmuSTS.4257.1.S1_at   | MmuSTS.4257.1 | 11.09 | 11.1  | 0.17 | 0.08 | -1.01 | 0.923133 | 0.165383 | 0.974166 | 0.441544 |
| MmuSTS.4258.1.S1_at   | MmuSTS.4258.1 | 11.98 | 11.72 | 0.49 | 0.02 | 1.2   | 0.938869 | 0.597389 | 0.979343 | 0.760182 |
| MmuSTS.4259.1.S1_at   | MmuSTS.4259.1 | 5.52  | 5.6   | 0.12 | 0.11 | -1.06 | 0.859702 | 0.825646 | 0.9504   | 0.899784 |
| MmuSTS.426.1.S1_at    | MmuSTS.426.1  | 5.36  | 5.72  | 0.15 | 0.22 | -1.28 | 0.413305 | 0.022974 | 0.732218 | 0.189592 |
| MmuSTS.4260.1.S1_at   | MmuSTS.4260.1 | 11.32 | 10.33 | 0.37 | 0.18 | 1.99  | 0.023131 | 0.031073 | 0.314781 | 0.218117 |
| MmuSTS.4261.1.S1_at   | MmuSTS.4261.1 | 6.88  | 6.15  | 0.67 | 0.05 | 1.65  | 0.145705 | 0.255858 | 0.520555 | 0.523854 |
| MmuSTS.4262.1.S1_at   | MmuSTS.4262.1 | 7.54  | 7.56  | 0.04 | 0.09 | -1.01 | 0.573845 | 0.944175 | 0.823753 | 0.968355 |
| MmuSTS.4263.1.S1_at   | MmuSTS.4263.1 | 3.97  | 3.96  | 0    | 0.05 | 1     | 0.276981 | 0.498777 | 0.636653 | 0.697765 |
| MmuSTS.4264.1.S1_at   | MmuSTS.4264.1 | 8.08  | 8.04  | 0.28 | 0.33 | 1.03  | 0.287671 | 0.024201 | 0.644777 | 0.194795 |
| MmuSTS.4265.1.S1_at   | MmuSTS.4265.1 | 10.04 | 10.34 | 1.11 | 0.12 | -1.23 | 0.63848  | 0.711072 | 0.855943 | 0.8324   |
| MmuSTS.4266.1.S1_at   | MmuSTS.4266.1 | 4.07  | 4.13  | 0.15 | 0.08 | -1.04 | 0.401721 | 0.734114 | 0.724599 | 0.845896 |
| MmuSTS.4267.1.S1_at   | MmuSTS.4267.1 | 7.11  | 7.23  | 0.53 | 0.1  | -1.09 | 0.826504 | 0.942729 | 0.937842 | 0.967499 |
| MmuSTS.4268.1.S1_at   | MmuSTS.4268.1 | 7.76  | 8.17  | 0.7  | 0.13 | -1.33 | 0.453912 | 0.525959 | 0.756364 | 0.715291 |
| MmuSTS.4269.1.S1_at   | MmuSTS.4269.1 | 7.71  | 7.89  | 0.59 | 0.27 | -1.14 | 0.726205 | 0.827912 | 0.894182 | 0.901197 |
| MmuSTS.427.1.S1_s_at  | MmuSTS.427.1  | 3.89  | 3.89  | 0.04 | 0.03 | 1     | 0.184233 | 0.866823 | 0.55696  | 0.924317 |
| MmuSTS.4270.1.S1_at   | MmuSTS.4270.1 | 3.79  | 4.17  | 0.12 | 0.08 | -1.3  | 0.029542 | 0.028307 | 0.334706 | 0.21008  |
| MmuSTS.4271.1.S1_at   | MmuSTS.4271.1 | 10.33 | 10.24 | 0.69 | 0.09 | 1.07  | 0.707815 | 0.904331 | 0.886299 | 0.945708 |
| MmuSTS.4272.1.S1_at   | MmuSTS.4272.1 | 7.1   | 7.55  | 0.33 | 0.27 | -1.37 | 0.344385 | 0.459882 | 0.686913 | 0.671989 |
| MmuSTS.4273.1.S1_at   | MmuSTS.4273.1 | 12.09 | 12.2  | 0.18 | 0.03 | -1.08 | 0.421475 | 0.169559 | 0.737563 | 0.446179 |
| MmuSTS.4274.1.S1_at   | MmuSTS.4274.1 | 6.72  | 6.3   | 0.26 | 0.23 | 1.34  | 0.077972 | 0.228887 | 0.439987 | 0.501124 |
| MmuSTS.4275.1.S1_at   | MmuSTS.4275.1 | 10.41 | 10.87 | 0.18 | 0.15 | -1.38 | 0.00893  | 0.000986 | 0.238998 | 0.050145 |
| MmuSTS.4276.1.S1_at   | MmuSTS.4276.1 | 10.27 | 10.34 | 0.28 | 0.13 | -1.05 | 0.26244  | 0.137826 | 0.624669 | 0.41079  |
| MmuSTS.4277.1.S1_at   | MmuSTS.4277.1 | 3.55  | 3.54  | 0.16 | 0.09 | 1.01  | 0.569067 | 0.539114 | 0.821151 | 0.723558 |

|                       |               |       |       |      |      |       |          |          |          |          |
|-----------------------|---------------|-------|-------|------|------|-------|----------|----------|----------|----------|
| MmuSTS.4278.1.S1_at   | MmuSTS.4278.1 | 5.15  | 5.2   | 0.17 | 0.03 | -1.04 | 0.578938 | 0.896154 | 0.826338 | 0.940656 |
| MmuSTS.4279.1.S1_at   | MmuSTS.4279.1 | 6.13  | 7.82  | 1.09 | 0.1  | -3.24 | 0.179461 | 0.16785  | 0.552738 | 0.444426 |
| MmuSTS.428.1.S1_s_at  | MmuSTS.428.1  | 3.76  | 3.63  | 0.12 | 0.03 | 1.09  | 0.149846 | 0.082241 | 0.523349 | 0.331091 |
| MmuSTS.4280.1.S1_s_at | MmuSTS.4280.1 | 12.06 | 11.88 | 0.19 | 0.06 | 1.13  | 0.566839 | 0.676524 | 0.820086 | 0.81095  |
| MmuSTS.4281.1.S1_at   | MmuSTS.4281.1 | 8.6   | 8.89  | 0.77 | 0.16 | -1.23 | 0.470147 | 0.459437 | 0.76595  | 0.671741 |
| MmuSTS.4282.1.S1_at   | MmuSTS.4282.1 | 9.41  | 8.29  | 1.79 | 0.1  | 2.17  | 0.367807 | 0.246516 | 0.703298 | 0.515917 |
| MmuSTS.4283.1.S1_at   | MmuSTS.4283.1 | 8.47  | 8.61  | 0.69 | 0.11 | -1.1  | 0.316766 | 0.014957 | 0.666687 | 0.155453 |
| MmuSTS.4284.1.S1_at   | MmuSTS.4284.1 | 11.04 | 11.24 | 0.19 | 0.04 | -1.15 | 0.457618 | 0.354342 | 0.758364 | 0.597166 |
| MmuSTS.4285.1.S1_at   | MmuSTS.4285.1 | 10.72 | 10.84 | 0.05 | 0.04 | -1.08 | 0.135048 | 0.007817 | 0.50914  | 0.117908 |
| MmuSTS.4286.1.S1_at   | MmuSTS.4286.1 | 6.32  | 6.11  | 0.38 | 0.05 | 1.15  | 0.978268 | 0.944585 | 0.992956 | 0.968621 |
| MmuSTS.4287.1.S1_at   | MmuSTS.4287.1 | 8.25  | 8.56  | 0.1  | 0.02 | -1.24 | 0.006275 | 0.000083 | 0.218069 | 0.027016 |
| MmuSTS.4288.1.S1_at   | MmuSTS.4288.1 | 9.78  | 9.95  | 0.12 | 0.05 | -1.12 | 0.062621 | 0.075551 | 0.413449 | 0.319982 |
| MmuSTS.4289.1.S1_at   | MmuSTS.4289.1 | 6.76  | 6.89  | 0.23 | 0.01 | -1.09 | 0.430431 | 0.005165 | 0.742767 | 0.09972  |
| MmuSTS.429.1.S1_at    | MmuSTS.429.1  | 3.88  | 3.81  | 0.11 | 0.07 | 1.05  | 0.52676  | 0.142349 | 0.796797 | 0.415923 |
| MmuSTS.4290.1.S1_at   | MmuSTS.4290.1 | 8.49  | 8.68  | 0.53 | 0.07 | -1.14 | 0.938151 | 0.854172 | 0.979247 | 0.916964 |
| MmuSTS.4291.1.S1_at   | MmuSTS.4291.1 | 7.98  | 7.99  | 0.02 | 0.05 | -1    | 0.819185 | 0.784003 | 0.934737 | 0.874963 |
| MmuSTS.4292.1.S1_at   | MmuSTS.4292.1 | 12.67 | 12.58 | 0.16 | 0.01 | 1.07  | 0.238551 | 0.294006 | 0.605359 | 0.553909 |
| MmuSTS.4293.1.S1_at   | MmuSTS.4293.1 | 6.13  | 6.15  | 0.11 | 0.04 | -1.01 | 0.610591 | 0.144648 | 0.841977 | 0.418477 |
| MmuSTS.4294.1.S1_at   | MmuSTS.4294.1 | 11.75 | 11.68 | 0.05 | 0.04 | 1.05  | 0.166824 | 0.000852 | 0.539457 | 0.047136 |
| MmuSTS.4295.1.S1_at   | MmuSTS.4295.1 | 9.99  | 8.79  | 0.14 | 0.16 | 2.3   | 0.000538 | 0.000338 | 0.143137 | 0.036485 |
| MmuSTS.4296.1.S1_at   | MmuSTS.4296.1 | 11.32 | 11.29 | 0.35 | 0.15 | 1.02  | 0.569048 | 0.342535 | 0.821147 | 0.588543 |
| MmuSTS.4297.1.S1_at   | MmuSTS.4297.1 | 11.82 | 11.46 | 0.13 | 0.06 | 1.28  | 0.017493 | 0.018191 | 0.292066 | 0.169695 |
| MmuSTS.4298.1.S1_at   | MmuSTS.4298.1 | 7.07  | 7.31  | 0.46 | 0.1  | -1.18 | 0.278909 | 0.432287 | 0.637923 | 0.652778 |
| MmuSTS.4299.1.S1_at   | MmuSTS.4299.1 | 7.88  | 8.05  | 0.3  | 0.05 | -1.12 | 0.624571 | 0.090889 | 0.848871 | 0.345525 |
| MmuSTS.43.1.S1_at     | MmuSTS.43.1   | 11.2  | 10.76 | 0.25 | 0.05 | 1.35  | 0.149732 | 0.021046 | 0.523238 | 0.181869 |
| MmuSTS.430.1.S1_at    | MmuSTS.430.1  | 3.24  | 3.25  | 0.06 | 0.13 | -1.01 | 0.675676 | 0.87019  | 0.872698 | 0.926372 |
| MmuSTS.4300.1.S1_at   | MmuSTS.4300.1 | 9     | 9.73  | 0.38 | 0.16 | -1.65 | 0.138097 | 0.125097 | 0.513671 | 0.395506 |
| MmuSTS.4301.1.S1_at   | MmuSTS.4301.1 | 10.02 | 10.28 | 1.01 | 0.05 | -1.2  | 0.920224 | 0.963891 | 0.972913 | 0.979963 |
| MmuSTS.4302.1.S1_at   | MmuSTS.4302.1 | 5.59  | 4.98  | 0.47 | 0.11 | 1.53  | 0.076626 | 0.096221 | 0.437977 | 0.353541 |
| MmuSTS.4303.1.S1_at   | MmuSTS.4303.1 | 8.93  | 8.71  | 0.14 | 0.12 | 1.16  | 0.268577 | 0.219941 | 0.628857 | 0.49344  |
| MmuSTS.4304.1.S1_at   | MmuSTS.4304.1 | 5.45  | 6.02  | 0.76 | 0.39 | -1.49 | 0.240637 | 0.322071 | 0.606937 | 0.573662 |
| MmuSTS.4305.1.S1_at   | MmuSTS.4305.1 | 10.97 | 11.41 | 0.28 | 0.15 | -1.35 | 0.02587  | 0.017323 | 0.32273  | 0.166509 |
| MmuSTS.4306.1.S1_at   | MmuSTS.4306.1 | 7.59  | 6.96  | 1.44 | 0.18 | 1.55  | 0.478562 | 0.516567 | 0.770117 | 0.709034 |
| MmuSTS.4307.1.S1_at   | MmuSTS.4307.1 | 8.52  | 9.16  | 0.43 | 0.14 | -1.55 | 0.073282 | 0.063194 | 0.434215 | 0.298119 |
| MmuSTS.4308.1.S1_s_at | MmuSTS.4308.1 | 10.94 | 10.6  | 2.77 | 0.28 | 1.26  | 0.627072 | 0.351069 | 0.850335 | 0.594752 |
| MmuSTS.4309.1.S1_at   | MmuSTS.4309.1 | 6.64  | 5.89  | 0.09 | 0.29 | 1.68  | 0.018131 | 0.002841 | 0.295378 | 0.078566 |
| MmuSTS.431.1.S1_at    | MmuSTS.431.1  | 5.02  | 4.84  | 0.12 | 0.01 | 1.13  | 0.079618 | 0.297985 | 0.442496 | 0.556695 |
| MmuSTS.431.1.S1_s_at  | MmuSTS.431.1  | 3.41  | 3.34  | 0.14 | 0.09 | 1.05  | 0.504223 | 0.409496 | 0.784627 | 0.636528 |
| MmuSTS.4310.1.S1_at   | MmuSTS.4310.1 | 8.4   | 7.38  | 0.6  | 0.46 | 2.02  | 0.332254 | 0.014248 | 0.678724 | 0.152403 |
| MmuSTS.4311.1.S1_at   | MmuSTS.4311.1 | 5.4   | 5.26  | 0.36 | 0.62 | 1.1   | 0.318848 | 0.008714 | 0.668408 | 0.123746 |
| MmuSTS.4311.1.S1_x_at | MmuSTS.4311.1 | 5.75  | 5.53  | 0.24 | 0.53 | 1.16  | 0.172971 | 0.011861 | 0.546108 | 0.140973 |
| MmuSTS.4312.1.S1_at   | MmuSTS.4312.1 | 9.03  | 9.08  | 0.73 | 0.11 | -1.04 | 0.474938 | 0.620155 | 0.768239 | 0.775248 |
| MmuSTS.4313.1.S1_at   | MmuSTS.4313.1 | 11.64 | 11.89 | 2.51 | 0.3  | -1.19 | 0.434186 | 0.195767 | 0.744883 | 0.470637 |

|                       |               |       |       |      |      |       |          |          |          |          |
|-----------------------|---------------|-------|-------|------|------|-------|----------|----------|----------|----------|
| MmuSTS.4314.1.S1_at   | MmuSTS.4314.1 | 3.28  | 3.26  | 0.03 | 0.03 | 1.02  | 0.151084 | 0.620568 | 0.52444  | 0.77549  |
| MmuSTS.4315.1.S1_at   | MmuSTS.4315.1 | 9.83  | 10.05 | 0.12 | 0.15 | -1.17 | 0.026631 | 0.002349 | 0.325592 | 0.07161  |
| MmuSTS.4316.1.S1_at   | MmuSTS.4316.1 | 11.88 | 12    | 0.05 | 0.05 | -1.08 | 0.039454 | 0.053792 | 0.362032 | 0.277457 |
| MmuSTS.4316.1.S1_s_at | MmuSTS.4316.1 | 11.14 | 11.28 | 0.02 | 0.05 | -1.11 | 0.010068 | 0.009435 | 0.246058 | 0.127948 |
| MmuSTS.4317.1.S1_at   | MmuSTS.4317.1 | 12.12 | 11.29 | 0.4  | 0.33 | 1.78  | 0.054142 | 0.002222 | 0.396047 | 0.069434 |
| MmuSTS.4318.1.S1_at   | MmuSTS.4318.1 | 10.02 | 10.02 | 0.51 | 0.05 | 1     | 0.725187 | 0.570524 | 0.893407 | 0.743151 |
| MmuSTS.4319.1.S1_s_at | MmuSTS.4319.1 | 7.11  | 7.25  | 0.37 | 0.17 | -1.1  | 0.380314 | 0.271405 | 0.709387 | 0.536507 |
| MmuSTS.432.1.S1_at    | MmuSTS.432.1  | 3.17  | 3.23  | 0.14 | 0.13 | -1.04 | 0.497209 | 0.658312 | 0.781055 | 0.800259 |
| MmuSTS.432.1.S1_s_at  | MmuSTS.432.1  | 3.05  | 3.07  | 0    | 0.13 | -1.01 | 0.753855 | 0.907372 | 0.907201 | 0.947602 |
| MmuSTS.4320.1.S1_at   | MmuSTS.4320.1 | 6.03  | 6.14  | 0.53 | 0.2  | -1.08 | 0.40288  | 0.420381 | 0.725243 | 0.644099 |
| MmuSTS.4321.1.S1_at   | MmuSTS.4321.1 | 12.28 | 12.71 | 0.56 | 0.08 | -1.34 | 0.253907 | 0.105216 | 0.618601 | 0.366982 |
| MmuSTS.4322.1.S1_at   | MmuSTS.4322.1 | 7.04  | 7.45  | 0.71 | 0.17 | -1.33 | 0.982011 | 0.750258 | 0.99435  | 0.854766 |
| MmuSTS.4323.1.S1_at   | MmuSTS.4323.1 | 9.84  | 9.28  | 0.18 | 0.11 | 1.48  | 0.007585 | 0.008368 | 0.229596 | 0.121371 |
| MmuSTS.4324.1.S1_at   | MmuSTS.4324.1 | 4.73  | 4.31  | 0.5  | 0.21 | 1.34  | 0.459994 | 0.375594 | 0.7599   | 0.613533 |
| MmuSTS.4325.1.S1_at   | MmuSTS.4325.1 | 3.57  | 3.43  | 0.17 | 0.1  | 1.1   | 0.96159  | 0.128293 | 0.987441 | 0.399469 |
| MmuSTS.4326.1.S1_at   | MmuSTS.4326.1 | 11.6  | 11.02 | 0.11 | 0.02 | 1.49  | 0.000806 | 0.008224 | 0.15004  | 0.120459 |
| MmuSTS.4327.1.S1_at   | MmuSTS.4327.1 | 5.63  | 5.63  | 0.26 | 0.2  | -1    | 0.267801 | 0.2411   | 0.62827  | 0.511749 |
| MmuSTS.4328.1.S1_at   | MmuSTS.4328.1 | 13.45 | 13.31 | 0.4  | 0.03 | 1.1   | 0.667876 | 0.198481 | 0.868778 | 0.473391 |
| MmuSTS.4328.1.S1_x_at | MmuSTS.4328.1 | 13.56 | 13.47 | 0.42 | 0.03 | 1.06  | 0.55651  | 0.203022 | 0.814144 | 0.477343 |
| MmuSTS.4329.1.S1_at   | MmuSTS.4329.1 | 12.48 | 12.36 | 0.32 | 0.21 | 1.08  | 0.377488 | 0.032883 | 0.707555 | 0.224478 |
| MmuSTS.433.1.S1_s_at  | MmuSTS.433.1  | 4.06  | 4.2   | 0.01 | 0.11 | -1.1  | 0.264569 | 0.09275  | 0.626029 | 0.34896  |
| MmuSTS.4330.1.S1_at   | MmuSTS.4330.1 | 12.14 | 11.13 | 0.48 | 0.37 | 2.01  | 0.20609  | 0.27215  | 0.578104 | 0.536939 |
| MmuSTS.4331.1.S1_at   | MmuSTS.4331.1 | 7.71  | 8.45  | 0.46 | 0.09 | -1.67 | 0.052496 | 0.003096 | 0.392585 | 0.081194 |
| MmuSTS.4332.1.S1_at   | MmuSTS.4332.1 | 12.26 | 12.51 | 0.36 | 0.02 | -1.19 | 0.175915 | 0.114336 | 0.549047 | 0.380835 |
| MmuSTS.4333.1.S1_at   | MmuSTS.4333.1 | 6.24  | 6.49  | 0.2  | 0.14 | -1.19 | 0.058031 | 0.051862 | 0.403663 | 0.273151 |
| MmuSTS.4334.1.S1_at   | MmuSTS.4334.1 | 8.2   | 7.9   | 0.46 | 0.34 | 1.23  | 0.268454 | 0.334671 | 0.628814 | 0.582581 |
| MmuSTS.4335.1.S1_at   | MmuSTS.4335.1 | 8.54  | 8.7   | 0.17 | 0.02 | -1.11 | 0.194735 | 0.240259 | 0.565144 | 0.510851 |
| MmuSTS.4336.1.S1_at   | MmuSTS.4336.1 | 10.98 | 10.32 | 0.48 | 0.12 | 1.58  | 0.11029  | 0.025165 | 0.483363 | 0.198794 |
| MmuSTS.4337.1.S1_at   | MmuSTS.4337.1 | 8.07  | 8.22  | 0.7  | 0.22 | -1.11 | 0.865749 | 0.907867 | 0.952762 | 0.947871 |
| MmuSTS.4338.1.S1_at   | MmuSTS.4338.1 | 6.25  | 6.1   | 0.16 | 0.07 | 1.1   | 0.66795  | 0.648542 | 0.868813 | 0.794319 |
| MmuSTS.4339.1.S1_at   | MmuSTS.4339.1 | 7.37  | 7.26  | 1.72 | 0.24 | 1.08  | 0.986885 | 0.132801 | 0.995774 | 0.404544 |
| MmuSTS.434.1.S1_at    | MmuSTS.434.1  | 3.57  | 3.42  | 0.02 | 0.07 | 1.11  | 0.02041  | 0.079799 | 0.303985 | 0.327113 |
| MmuSTS.4340.1.S1_at   | MmuSTS.4340.1 | 4.28  | 4.26  | 0.14 | 0.53 | 1.01  | 0.818638 | 0.645633 | 0.934473 | 0.792444 |
| MmuSTS.4341.1.S1_at   | MmuSTS.4341.1 | 11.21 | 10.73 | 0.18 | 0.06 | 1.39  | 0.030164 | 0.063672 | 0.336644 | 0.298832 |
| MmuSTS.4342.1.S1_at   | MmuSTS.4342.1 | 4.85  | 4.01  | 0.7  | 0.24 | 1.79  | 0.116815 | 0.101517 | 0.490029 | 0.361343 |
| MmuSTS.4343.1.S1_at   | MmuSTS.4343.1 | 6.46  | 6.32  | 0.06 | 0.1  | 1.1   | 0.151183 | 0.371076 | 0.52444  | 0.609998 |
| MmuSTS.4344.1.S1_at   | MmuSTS.4344.1 | 12.48 | 12.44 | 0.47 | 0.12 | 1.03  | 0.823901 | 0.659546 | 0.936497 | 0.800801 |
| MmuSTS.4345.1.S1_at   | MmuSTS.4345.1 | 8.02  | 8.01  | 0.63 | 0.04 | 1.01  | 0.861373 | 0.916312 | 0.951266 | 0.953126 |
| MmuSTS.4346.1.S1_at   | MmuSTS.4346.1 | 8.36  | 8.96  | 0.25 | 0.03 | -1.51 | 0.024586 | 0.007252 | 0.319173 | 0.114309 |
| MmuSTS.4347.1.S1_at   | MmuSTS.4347.1 | 5.4   | 5.39  | 0.15 | 0.07 | 1.01  | 0.43833  | 0.652049 | 0.747277 | 0.796529 |
| MmuSTS.4348.1.S1_at   | MmuSTS.4348.1 | 6.84  | 7.09  | 0.07 | 0.03 | -1.19 | 0.011961 | 0.022007 | 0.257858 | 0.18564  |
| MmuSTS.4349.1.S1_at   | MmuSTS.4349.1 | 11.6  | 11.58 | 0.17 | 0.09 | 1.01  | 0.589303 | 0.027117 | 0.832298 | 0.205797 |
| MmuSTS.435.1.S1_at    | MmuSTS.435.1  | 2.97  | 2.95  | 0.08 | 0.13 | 1.02  | 0.190125 | 0.113017 | 0.561348 | 0.378885 |

|                       |               |       |       |      |      |       |          |          |          |          |
|-----------------------|---------------|-------|-------|------|------|-------|----------|----------|----------|----------|
| MmuSTS.4350.1.S1_at   | MmuSTS.4350.1 | 6.61  | 6.91  | 0.31 | 0.16 | -1.23 | 0.274781 | 0.05616  | 0.634142 | 0.282888 |
| MmuSTS.4351.1.S1_at   | MmuSTS.4351.1 | 12.8  | 12.76 | 0.18 | 0.01 | 1.03  | 0.921695 | 0.252521 | 0.973516 | 0.521079 |
| MmuSTS.4352.1.S1_at   | MmuSTS.4352.1 | 3.33  | 3.42  | 0.27 | 0.15 | -1.07 | 0.791504 | 0.204492 | 0.923399 | 0.478845 |
| MmuSTS.4353.1.S1_at   | MmuSTS.4353.1 | 4.68  | 4.92  | 0.68 | 0.58 | -1.18 | 0.596127 | 0.694988 | 0.835789 | 0.822709 |
| MmuSTS.4354.1.S1_at   | MmuSTS.4354.1 | 6.56  | 7.31  | 0.91 | 0.42 | -1.68 | 0.302482 | 0.629257 | 0.656433 | 0.781747 |
| MmuSTS.4355.1.S1_at   | MmuSTS.4355.1 | 10.83 | 11.27 | 0.24 | 0.06 | -1.35 | 0.102528 | 0.302777 | 0.472772 | 0.560307 |
| MmuSTS.4356.1.S1_at   | MmuSTS.4356.1 | 4.38  | 4.39  | 0.1  | 0.07 | -1.01 | 0.43654  | 0.588763 | 0.746319 | 0.755137 |
| MmuSTS.4357.1.S1_at   | MmuSTS.4357.1 | 11.4  | 11.42 | 0.29 | 0.14 | -1.01 | 0.278499 | 0.386256 | 0.637712 | 0.621469 |
| MmuSTS.4358.1.S1_at   | MmuSTS.4358.1 | 6.2   | 6.18  | 0.06 | 0.04 | 1.01  | 0.615653 | 0.778891 | 0.844574 | 0.871673 |
| MmuSTS.4359.1.S1_at   | MmuSTS.4359.1 | 4.83  | 4.64  | 0.07 | 0.12 | 1.14  | 0.142606 | 0.040752 | 0.517642 | 0.246735 |
| MmuSTS.436.1.S1_s_at  | MmuSTS.436.1  | 4.96  | 4.77  | 0.1  | 0.06 | -1.13 | 0.221934 | 0.153407 | 0.591507 | 0.42827  |
| MmuSTS.4360.1.S1_at   | MmuSTS.4360.1 | 4.15  | 5.34  | 0.87 | 0.22 | -2.27 | 0.253354 | 0.151585 | 0.618098 | 0.426333 |
| MmuSTS.4361.1.S1_at   | MmuSTS.4361.1 | 11.1  | 11.61 | 0.35 | 0.05 | -1.43 | 0.068981 | 0.021673 | 0.426361 | 0.184333 |
| MmuSTS.4362.1.S1_at   | MmuSTS.4362.1 | 5.65  | 5.56  | 0.41 | 0.29 | 1.07  | 0.932703 | 0.687693 | 0.977227 | 0.817662 |
| MmuSTS.4363.1.S1_at   | MmuSTS.4363.1 | 12.5  | 12.59 | 0.09 | 0.06 | -1.06 | 0.357811 | 0.496622 | 0.695993 | 0.696119 |
| MmuSTS.4364.1.S1_at   | MmuSTS.4364.1 | 10.91 | 10.74 | 0.69 | 0.24 | 1.13  | 0.563837 | 0.248553 | 0.818386 | 0.517842 |
| MmuSTS.4365.1.S1_at   | MmuSTS.4365.1 | 6.05  | 6.02  | 0.21 | 0.09 | 1.02  | 0.368244 | 0.464149 | 0.70351  | 0.674916 |
| MmuSTS.4366.1.S1_at   | MmuSTS.4366.1 | 6.43  | 7.65  | 0.31 | 0.27 | -2.32 | 0.011924 | 0.004169 | 0.257858 | 0.091036 |
| MmuSTS.4367.1.S1_at   | MmuSTS.4367.1 | 9.28  | 9.62  | 0.41 | 0.13 | -1.27 | 0.147367 | 0.208904 | 0.521578 | 0.482721 |
| MmuSTS.4368.1.S1_at   | MmuSTS.4368.1 | 10.24 | 9.25  | 0.66 | 0.16 | 1.99  | 0.149599 | 0.003704 | 0.523226 | 0.086769 |
| MmuSTS.4369.1.S1_at   | MmuSTS.4369.1 | 10.14 | 10.12 | 0.02 | 0.11 | 1.02  | 0.857191 | 0.275901 | 0.94963  | 0.540035 |
| MmuSTS.437.1.S1_at    | MmuSTS.437.1  | 6     | 6.09  | 0.18 | 0.08 | -1.07 | 0.864498 | 0.770615 | 0.952391 | 0.866798 |
| MmuSTS.4370.1.S1_at   | MmuSTS.4370.1 | 9.35  | 8.53  | 3.12 | 0.36 | 1.76  | 0.989496 | 0.317461 | 0.996071 | 0.570681 |
| MmuSTS.4371.1.S1_at   | MmuSTS.4371.1 | 2.84  | 2.79  | 0.18 | 0.09 | 1.03  | 0.452906 | 0.10236  | 0.755901 | 0.362527 |
| MmuSTS.4372.1.S1_at   | MmuSTS.4372.1 | 11.09 | 11.61 | 0.73 | 0.04 | -1.44 | 0.27984  | 0.2505   | 0.638791 | 0.519391 |
| MmuSTS.4373.1.S1_at   | MmuSTS.4373.1 | 3.63  | 3.65  | 0.16 | 0.04 | -1.01 | 0.431394 | 0.211284 | 0.743363 | 0.485418 |
| MmuSTS.4374.1.S1_at   | MmuSTS.4374.1 | 6.27  | 7.35  | 0.86 | 0.22 | -2.11 | 0.121082 | 0.090562 | 0.494725 | 0.345026 |
| MmuSTS.4375.1.S1_at   | MmuSTS.4375.1 | 8.97  | 8.69  | 0.43 | 0.14 | 1.21  | 0.714708 | 0.188949 | 0.888892 | 0.464854 |
| MmuSTS.4376.1.S1_at   | MmuSTS.4376.1 | 9.42  | 9.78  | 0.16 | 0.03 | -1.28 | 0.050684 | 0.063034 | 0.38765  | 0.297739 |
| MmuSTS.4377.1.S1_at   | MmuSTS.4377.1 | 3.2   | 3.14  | 0.13 | 0.2  | 1.04  | 0.697302 | 0.427984 | 0.882224 | 0.649602 |
| MmuSTS.4377.1.S1_s_at | MmuSTS.4377.1 | 2.93  | 2.93  | 0.01 | 0.1  | -1    | 0.959994 | 0.480302 | 0.986981 | 0.68574  |
| MmuSTS.4378.1.S1_at   | MmuSTS.4378.1 | 7.42  | 8.16  | 0.37 | 0.07 | -1.67 | 0.02232  | 0.052588 | 0.310495 | 0.274848 |
| MmuSTS.4379.1.S1_at   | MmuSTS.4379.1 | 6.67  | 6.8   | 0.71 | 0.33 | -1.09 | 0.876063 | 0.096807 | 0.956886 | 0.354207 |
| MmuSTS.438.1.S1_at    | MmuSTS.438.1  | 6.39  | 6.14  | 0.38 | 0.21 | 1.18  | 0.219671 | 0.21013  | 0.589083 | 0.483968 |
| MmuSTS.4380.1.S1_at   | MmuSTS.4380.1 | 3.64  | 3.59  | 0.01 | 0.03 | 1.03  | 0.248686 | 0.245863 | 0.614048 | 0.51552  |
| MmuSTS.4381.1.S1_at   | MmuSTS.4381.1 | 4.59  | 4.44  | 0.06 | 0.09 | 1.11  | 0.066264 | 0.051423 | 0.421926 | 0.272204 |
| MmuSTS.4382.1.S1_at   | MmuSTS.4382.1 | 6.24  | 5.91  | 0.95 | 0.4  | 1.26  | 0.551248 | 0.05434  | 0.811314 | 0.278605 |
| MmuSTS.4383.1.S1_at   | MmuSTS.4383.1 | 7.63  | 8.89  | 0.88 | 0.43 | -2.4  | 0.113096 | 0.058396 | 0.486556 | 0.288407 |
| MmuSTS.4384.1.S1_at   | MmuSTS.4384.1 | 4.68  | 3.9   | 1.12 | 0.43 | 1.72  | 0.283749 | 0.137998 | 0.64153  | 0.410919 |
| MmuSTS.4385.1.S1_at   | MmuSTS.4385.1 | 5.78  | 5.76  | 0.12 | 0.06 | 1.02  | 0.450104 | 0.782692 | 0.754693 | 0.874202 |
| MmuSTS.4386.1.S1_at   | MmuSTS.4386.1 | 5.67  | 5.7   | 0.12 | 0.01 | -1.02 | 0.878248 | 0.738422 | 0.957601 | 0.848292 |
| MmuSTS.4387.1.S1_at   | MmuSTS.4387.1 | 7.19  | 6.95  | 0.35 | 0.04 | 1.18  | 0.357093 | 0.53554  | 0.69549  | 0.721087 |
| MmuSTS.4388.1.S1_at   | MmuSTS.4388.1 | 9.82  | 9.73  | 0.29 | 0.11 | 1.06  | 0.663179 | 0.010943 | 0.867106 | 0.13621  |

|                     |               |       |       |      |      |       |          |          |          |          |
|---------------------|---------------|-------|-------|------|------|-------|----------|----------|----------|----------|
| MmuSTS.4389.1.S1_at | MmuSTS.4389.1 | 5.67  | 5.17  | 0.72 | 0.32 | 1.41  | 0.182236 | 0.226863 | 0.555371 | 0.499276 |
| MmuSTS.439.1.S1_at  | MmuSTS.439.1  | 9.24  | 8.89  | 0.17 | 0.11 | 1.27  | 0.09585  | 0.201374 | 0.464449 | 0.47589  |
| MmuSTS.4390.1.S1_at | MmuSTS.4390.1 | 4.37  | 4.18  | 0.25 | 0.15 | 1.14  | 0.069609 | 0.193641 | 0.427443 | 0.468785 |
| MmuSTS.4391.1.S1_at | MmuSTS.4391.1 | 4.47  | 4.57  | 0.09 | 0.35 | -1.07 | 0.453449 | 0.69897  | 0.75608  | 0.825058 |
| MmuSTS.4392.1.S1_at | MmuSTS.4392.1 | 10.26 | 10.19 | 0.37 | 0.05 | 1.05  | 0.977178 | 0.937697 | 0.992615 | 0.964687 |
| MmuSTS.4393.1.S1_at | MmuSTS.4393.1 | 4.2   | 4.28  | 0.25 | 0.25 | -1.05 | 0.403924 | 0.131406 | 0.726061 | 0.403577 |
| MmuSTS.4394.1.S1_at | MmuSTS.4394.1 | 8.48  | 7.63  | 0.39 | 0.15 | 1.79  | 0.041641 | 0.00982  | 0.367007 | 0.130205 |
| MmuSTS.4395.1.S1_at | MmuSTS.4395.1 | 6.43  | 6.75  | 0.38 | 0.3  | -1.25 | 0.127243 | 0.253608 | 0.501431 | 0.521956 |
| MmuSTS.4396.1.S1_at | MmuSTS.4396.1 | 5.12  | 5.12  | 0.02 | 0.04 | -1    | 0.38642  | 0.885691 | 0.713564 | 0.934982 |
| MmuSTS.4397.1.S1_at | MmuSTS.4397.1 | 8.47  | 8.46  | 0.09 | 0.13 | 1.01  | 0.995751 | 0.987512 | 0.998312 | 0.993022 |
| MmuSTS.4398.1.S1_at | MmuSTS.4398.1 | 3.69  | 3.69  | 0.05 | 0.21 | -1    | 0.805654 | 0.913912 | 0.929413 | 0.951568 |
| MmuSTS.4399.1.S1_at | MmuSTS.4399.1 | 9.12  | 8.72  | 0.34 | 0.31 | 1.32  | 0.272064 | 0.000895 | 0.631843 | 0.047825 |
| MmuSTS.44.1.S1_at   | MmuSTS.44.1   | 11.2  | 11.12 | 0.09 | 0.27 | 1.05  | 0.493017 | 0.11899  | 0.778657 | 0.387269 |
| MmuSTS.440.1.S1_at  | MmuSTS.440.1  | 4.25  | 5.54  | 0.22 | 0.21 | -2.45 | 0.002452 | 0.01123  | 0.177297 | 0.138014 |
| MmuSTS.4400.1.S1_at | MmuSTS.4400.1 | 3.43  | 3.34  | 0.09 | 0.11 | 1.06  | 0.456469 | 0.34005  | 0.757867 | 0.586516 |
| MmuSTS.4401.1.S1_at | MmuSTS.4401.1 | 3.56  | 3.64  | 0.07 | 0.08 | -1.06 | 0.381383 | 0.039165 | 0.710049 | 0.243072 |
| MmuSTS.4402.1.S1_at | MmuSTS.4402.1 | 4.14  | 4.02  | 0.53 | 0.16 | 1.09  | 0.572565 | 0.423473 | 0.823222 | 0.646367 |
| MmuSTS.4403.1.S1_at | MmuSTS.4403.1 | 9.66  | 9.69  | 0.41 | 0.07 | -1.02 | 0.738638 | 0.832666 | 0.900053 | 0.904017 |
| MmuSTS.4404.1.S1_at | MmuSTS.4404.1 | 3.35  | 3.14  | 0.16 | 0.04 | 1.16  | 0.187462 | 0.268904 | 0.559787 | 0.534356 |
| MmuSTS.4405.1.S1_at | MmuSTS.4405.1 | 4.62  | 4.63  | 0.09 | 0.04 | -1.01 | 0.785841 | 0.171658 | 0.921215 | 0.448044 |
| MmuSTS.4406.1.S1_at | MmuSTS.4406.1 | 10.31 | 10.61 | 0.59 | 0.02 | -1.23 | 0.56548  | 0.403595 | 0.819292 | 0.632235 |
| MmuSTS.4407.1.S1_at | MmuSTS.4407.1 | 8.88  | 8.6   | 0.85 | 0.11 | 1.21  | 0.53966  | 0.121571 | 0.80393  | 0.390688 |
| MmuSTS.4408.1.S1_at | MmuSTS.4408.1 | 11.79 | 11.77 | 0.44 | 0.16 | 1.01  | 0.335398 | 0.471522 | 0.681011 | 0.6795   |
| MmuSTS.4409.1.S1_at | MmuSTS.4409.1 | 12.31 | 12.4  | 0.06 | 0.02 | -1.07 | 0.145217 | 0.002883 | 0.520328 | 0.078985 |
| MmuSTS.441.1.S1_at  | MmuSTS.441.1  | 4.98  | 4.84  | 0.13 | 0.01 | 1.1   | 0.108879 | 0.159895 | 0.48125  | 0.435987 |
| MmuSTS.4410.1.S1_at | MmuSTS.4410.1 | 6.96  | 8.17  | 0.73 | 0.15 | -2.32 | 0.145159 | 0.120635 | 0.520309 | 0.389476 |
| MmuSTS.4411.1.S1_at | MmuSTS.4411.1 | 13.24 | 12.91 | 0.12 | 0.05 | 1.25  | 0.013997 | 0.005595 | 0.273301 | 0.10339  |
| MmuSTS.4412.1.S1_at | MmuSTS.4412.1 | 8.25  | 8.2   | 0.26 | 0.16 | 1.04  | 0.897817 | 0.334944 | 0.965324 | 0.58275  |
| MmuSTS.4413.1.S1_at | MmuSTS.4413.1 | 3.31  | 3.22  | 0.04 | 0.07 | 1.07  | 0.169905 | 0.153714 | 0.542818 | 0.428413 |
| MmuSTS.4414.1.S1_at | MmuSTS.4414.1 | 12.38 | 11.42 | 0.17 | 0.21 | 1.95  | 0.00426  | 0.002999 | 0.198874 | 0.079958 |
| MmuSTS.4415.1.S1_at | MmuSTS.4415.1 | 10.66 | 10.63 | 0.08 | 0.13 | 1.02  | 0.426291 | 0.284234 | 0.740427 | 0.546461 |
| MmuSTS.4416.1.S1_at | MmuSTS.4416.1 | 4.9   | 4.73  | 0.18 | 0.06 | 1.13  | 0.432961 | 0.760812 | 0.744142 | 0.861028 |
| MmuSTS.4417.1.S1_at | MmuSTS.4417.1 | 11.88 | 12    | 0.23 | 0.08 | -1.09 | 0.696716 | 0.039067 | 0.882175 | 0.242914 |
| MmuSTS.4418.1.S1_at | MmuSTS.4418.1 | 5.72  | 5.63  | 0.03 | 0.08 | 1.06  | 0.143784 | 0.346123 | 0.519062 | 0.591186 |
| MmuSTS.4419.1.S1_at | MmuSTS.4419.1 | 10.15 | 9.28  | 0.77 | 0.51 | 1.83  | 0.356698 | 0.654981 | 0.695204 | 0.7982   |
| MmuSTS.442.1.S1_at  | MmuSTS.442.1  | 8.7   | 8.79  | 0.39 | 0.18 | -1.07 | 0.723282 | 0.081264 | 0.892777 | 0.329351 |
| MmuSTS.4420.1.S1_at | MmuSTS.4420.1 | 9.72  | 9.35  | 0.27 | 0.08 | 1.29  | 0.354689 | 0.000073 | 0.694211 | 0.026477 |
| MmuSTS.4421.1.S1_at | MmuSTS.4421.1 | 11.81 | 11.6  | 0.19 | 0.21 | 1.15  | 0.115373 | 0.014638 | 0.488677 | 0.154176 |
| MmuSTS.4422.1.S1_at | MmuSTS.4422.1 | 8.65  | 8.89  | 2.05 | 0.28 | -1.19 | 0.693716 | 0.438718 | 0.880765 | 0.657639 |
| MmuSTS.4423.1.S1_at | MmuSTS.4423.1 | 6.6   | 6.92  | 0.14 | 0.03 | -1.25 | 0.022379 | 0.023239 | 0.310499 | 0.191096 |
| MmuSTS.4424.1.S1_at | MmuSTS.4424.1 | 11.35 | 10    | 0.67 | 0.07 | 2.55  | 0.024249 | 0.004299 | 0.317812 | 0.092019 |
| MmuSTS.4425.1.S1_at | MmuSTS.4425.1 | 8.98  | 9.84  | 0.77 | 0.05 | -1.82 | 0.337244 | 0.109605 | 0.682275 | 0.373559 |
| MmuSTS.4426.1.S1_at | MmuSTS.4426.1 | 8.8   | 8.9   | 0.27 | 0.17 | -1.07 | 0.972241 | 0.097753 | 0.991006 | 0.355611 |

|                       |               |       |       |      |      |       |          |          |          |          |
|-----------------------|---------------|-------|-------|------|------|-------|----------|----------|----------|----------|
| MmuSTS.4427.1.S1_at   | MmuSTS.4427.1 | 3.93  | 4.01  | 0.12 | 0.3  | -1.06 | 0.579359 | 0.451354 | 0.82645  | 0.666168 |
| MmuSTS.4428.1.S1_at   | MmuSTS.4428.1 | 10.58 | 10.6  | 0.05 | 0.07 | -1.01 | 0.655203 | 0.024593 | 0.86308  | 0.196239 |
| MmuSTS.4429.1.S1_at   | MmuSTS.4429.1 | 6.21  | 6.47  | 0.34 | 0.11 | -1.2  | 0.153259 | 0.109156 | 0.526415 | 0.373015 |
| MmuSTS.443.1.S1_at    | MmuSTS.443.1  | 10.61 | 11.15 | 0.2  | 0.05 | -1.45 | 0.008054 | 0.001784 | 0.232005 | 0.063434 |
| MmuSTS.4430.1.S1_at   | MmuSTS.4430.1 | 8.23  | 7.18  | 0.36 | 0.1  | 2.07  | 0.008689 | 0.027527 | 0.236048 | 0.207161 |
| MmuSTS.4431.1.S1_at   | MmuSTS.4431.1 | 4.55  | 4.32  | 0.18 | 0.13 | 1.18  | 0.05779  | 0.15411  | 0.402989 | 0.42887  |
| MmuSTS.4432.1.S1_at   | MmuSTS.4432.1 | 9.48  | 8.96  | 0.23 | 0.06 | 1.43  | 0.023152 | 0.001584 | 0.314809 | 0.060358 |
| MmuSTS.4433.1.S1_at   | MmuSTS.4433.1 | 7.63  | 7.33  | 0.56 | 0.25 | 1.23  | 0.57761  | 0.221369 | 0.825827 | 0.494644 |
| MmuSTS.4434.1.S1_at   | MmuSTS.4434.1 | 3.28  | 3.26  | 0.13 | 0.15 | 1.01  | 0.283107 | 0.475715 | 0.641291 | 0.682332 |
| MmuSTS.4435.1.S1_at   | MmuSTS.4435.1 | 8.19  | 8.02  | 0.45 | 0.05 | 1.12  | 0.183772 | 0.236083 | 0.556596 | 0.507179 |
| MmuSTS.4436.1.S1_at   | MmuSTS.4436.1 | 4.01  | 3.71  | 0.23 | 0.16 | -1.23 | 0.050063 | 0.048931 | 0.386663 | 0.265988 |
| MmuSTS.4437.1.S1_at   | MmuSTS.4437.1 | 9.92  | 9.99  | 0.15 | 0.09 | -1.05 | 0.556939 | 0.497026 | 0.814405 | 0.696385 |
| MmuSTS.4438.1.S1_at   | MmuSTS.4438.1 | 4.84  | 4.64  | 0.2  | 0.16 | 1.15  | 0.281862 | 0.426952 | 0.640282 | 0.649072 |
| MmuSTS.4439.1.S1_at   | MmuSTS.4439.1 | 4.1   | 4.14  | 0.17 | 0.04 | -1.03 | 0.601988 | 0.49944  | 0.838675 | 0.698289 |
| MmuSTS.444.1.S1_at    | MmuSTS.444.1  | 6.8   | 6.21  | 0.22 | 0.04 | 1.51  | 0.015406 | 0.006201 | 0.281461 | 0.106821 |
| MmuSTS.4440.1.S1_at   | MmuSTS.4440.1 | 7.56  | 7.38  | 0.06 | 0.05 | 1.14  | 0.013775 | 0.03207  | 0.271822 | 0.22165  |
| MmuSTS.4441.1.S1_at   | MmuSTS.4441.1 | 11.9  | 12.2  | 0.15 | 0.05 | -1.23 | 0.011295 | 0.002637 | 0.253564 | 0.075979 |
| MmuSTS.4442.1.S1_at   | MmuSTS.4442.1 | 4.18  | 4.13  | 0.17 | 0.06 | 1.04  | 0.338046 | 0.348963 | 0.682743 | 0.59297  |
| MmuSTS.4443.1.S1_s_at | MmuSTS.4443.1 | 5.95  | 6.1   | 1.13 | 0.45 | -1.11 | 0.372032 | 0.247524 | 0.705567 | 0.516859 |
| MmuSTS.4444.1.S1_at   | MmuSTS.4444.1 | 5.23  | 4.55  | 0.97 | 0.82 | 1.6   | 0.386519 | 0.644703 | 0.713603 | 0.7918   |
| MmuSTS.4445.1.S1_at   | MmuSTS.4445.1 | 12.19 | 11.57 | 0.26 | 0.09 | 1.53  | 0.018832 | 0.043495 | 0.298593 | 0.25316  |
| MmuSTS.4446.1.S1_at   | MmuSTS.4446.1 | 3.36  | 3.28  | 0.16 | 0.07 | 1.05  | 0.294976 | 0.479307 | 0.650971 | 0.685088 |
| MmuSTS.4447.1.S1_at   | MmuSTS.4447.1 | 4.06  | 4.32  | 0.32 | 0.29 | -1.2  | 0.244985 | 0.458221 | 0.610441 | 0.671077 |
| MmuSTS.4448.1.S1_at   | MmuSTS.4448.1 | 3.25  | 3.2   | 0.03 | 0.13 | 1.04  | 0.472941 | 0.667325 | 0.767334 | 0.805297 |
| MmuSTS.4449.1.S1_at   | MmuSTS.4449.1 | 7.74  | 7.61  | 0.09 | 0.06 | 1.09  | 0.106376 | 0.255489 | 0.478837 | 0.523505 |
| MmuSTS.445.1.S1_at    | MmuSTS.445.1  | 4.84  | 4.97  | 0.19 | 0.04 | -1.1  | 0.1054   | 0.380502 | 0.477051 | 0.617165 |
| MmuSTS.4450.1.S1_at   | MmuSTS.4450.1 | 4.23  | 3.96  | 0.05 | 0.08 | 1.2   | 0.023878 | 0.141812 | 0.317453 | 0.415331 |
| MmuSTS.4451.1.S1_at   | MmuSTS.4451.1 | 4.45  | 4.43  | 0.16 | 0.05 | 1.01  | 0.293638 | 0.242159 | 0.649913 | 0.512652 |
| MmuSTS.4452.1.S1_at   | MmuSTS.4452.1 | 10.48 | 10.24 | 0.91 | 0.28 | 1.18  | 0.588799 | 0.560384 | 0.831968 | 0.736645 |
| MmuSTS.4453.1.S1_at   | MmuSTS.4453.1 | 8.94  | 9.04  | 0.1  | 0.05 | -1.07 | 0.135638 | 0.202739 | 0.510119 | 0.477174 |
| MmuSTS.4454.1.S1_at   | MmuSTS.4454.1 | 10.01 | 10.37 | 0.18 | 0.09 | -1.28 | 0.069571 | 0.084324 | 0.427443 | 0.335578 |
| MmuSTS.4455.1.S1_at   | MmuSTS.4455.1 | 7.59  | 8.12  | 1.24 | 0.11 | -1.44 | 0.163295 | 0.09766  | 0.536063 | 0.355554 |
| MmuSTS.4456.1.S1_at   | MmuSTS.4456.1 | 3.36  | 3.18  | 0.38 | 0.2  | 1.14  | 0.398793 | 0.576656 | 0.722745 | 0.747307 |
| MmuSTS.4457.1.S1_at   | MmuSTS.4457.1 | 3.72  | 3.66  | 0.07 | 0.1  | 1.04  | 0.664969 | 0.338267 | 0.867733 | 0.585417 |
| MmuSTS.4458.1.S1_at   | MmuSTS.4458.1 | 8.98  | 9.28  | 2.03 | 0.14 | -1.23 | 0.736092 | 0.253104 | 0.899004 | 0.521426 |
| MmuSTS.4459.1.S1_at   | MmuSTS.4459.1 | 9.65  | 10.09 | 0.25 | 0.02 | -1.35 | 0.044913 | 0.005293 | 0.375329 | 0.100738 |
| MmuSTS.446.1.S1_at    | MmuSTS.446.1  | 6.13  | 6.04  | 0.07 | 0.13 | 1.07  | 0.410523 | 0.626293 | 0.730749 | 0.779698 |
| MmuSTS.4460.1.S1_at   | MmuSTS.4460.1 | 11.71 | 11.75 | 0.18 | 0.11 | -1.03 | 0.828995 | 0.079051 | 0.938657 | 0.326117 |
| MmuSTS.4461.1.S1_at   | MmuSTS.4461.1 | 8.31  | 8.69  | 0.28 | 0.04 | -1.3  | 0.067887 | 0.05618  | 0.42451  | 0.282948 |
| MmuSTS.4462.1.S1_at   | MmuSTS.4462.1 | 5.97  | 5.85  | 0.08 | 0.09 | 1.09  | 0.066894 | 0.046062 | 0.422979 | 0.258977 |
| MmuSTS.4463.1.S1_at   | MmuSTS.4463.1 | 11.88 | 11.97 | 0.28 | 0.02 | -1.06 | 0.639763 | 0.395575 | 0.856331 | 0.627566 |
| MmuSTS.4464.1.S1_at   | MmuSTS.4464.1 | 3.36  | 3.31  | 0.04 | 0.09 | 1.03  | 0.712514 | 0.422723 | 0.887958 | 0.645895 |
| MmuSTS.4465.1.S1_at   | MmuSTS.4465.1 | 9.21  | 9.31  | 0.65 | 0.3  | -1.07 | 0.870672 | 0.288501 | 0.955059 | 0.549786 |



|                       |               |       |       |      |      |       |          |          |          |          |
|-----------------------|---------------|-------|-------|------|------|-------|----------|----------|----------|----------|
| MmuSTS.4466.1.S1_at   | MmuSTS.4466.1 | 4.93  | 4.82  | 0.23 | 0.04 | 1.07  | 0.135843 | 0.129677 | 0.510364 | 0.401322 |
| MmuSTS.4467.1.S1_at   | MmuSTS.4467.1 | 11.17 | 11.29 | 0.21 | 0.07 | -1.09 | 0.412039 | 0.244781 | 0.731887 | 0.514629 |
| MmuSTS.4468.1.S1_at   | MmuSTS.4468.1 | 9.3   | 8.86  | 0.65 | 0.17 | 1.36  | 0.07992  | 0.004305 | 0.443024 | 0.092019 |
| MmuSTS.4469.1.S1_at   | MmuSTS.4469.1 | 12.99 | 13.05 | 0.15 | 0.04 | -1.04 | 0.465307 | 0.013137 | 0.763035 | 0.147338 |
| MmuSTS.4469.1.S1_s_at | MmuSTS.4469.1 | 9.59  | 9.15  | 0.48 | 0.23 | 1.36  | 0.373006 | 0.015536 | 0.705567 | 0.158053 |
| MmuSTS.447.1.S1_at    | MmuSTS.447.1  | 7.93  | 8.06  | 0.33 | 0.36 | -1.09 | 0.971438 | 0.022415 | 0.990664 | 0.187375 |
| MmuSTS.4470.1.S1_at   | MmuSTS.4470.1 | 11.97 | 12.24 | 0.92 | 0.08 | -1.21 | 0.618334 | 0.188046 | 0.845915 | 0.464144 |
| MmuSTS.4471.1.S1_at   | MmuSTS.4471.1 | 4.25  | 4.26  | 0.18 | 0.11 | -1.01 | 0.823739 | 0.861579 | 0.936367 | 0.921322 |
| MmuSTS.4472.1.S1_at   | MmuSTS.4472.1 | 8.28  | 7.79  | 0.13 | 0.08 | 1.4   | 0.004291 | 0.001879 | 0.198874 | 0.064979 |
| MmuSTS.4473.1.S1_at   | MmuSTS.4473.1 | 7.26  | 6.9   | 0.21 | 0.09 | 1.28  | 0.069992 | 0.070254 | 0.428254 | 0.311287 |
| MmuSTS.4474.1.S1_at   | MmuSTS.4474.1 | 10.91 | 10.38 | 0.36 | 0.1  | 1.44  | 0.156091 | 0.152797 | 0.529456 | 0.427601 |
| MmuSTS.4475.1.S1_at   | MmuSTS.4475.1 | 10.02 | 10.2  | 0.3  | 0.11 | -1.13 | 0.85724  | 0.895614 | 0.949645 | 0.940329 |
| MmuSTS.4476.1.S1_at   | MmuSTS.4476.1 | 3.54  | 3.34  | 0.09 | 0.1  | 1.14  | 0.048079 | 0.05358  | 0.382163 | 0.277127 |
| MmuSTS.4477.1.S1_at   | MmuSTS.4477.1 | 11.35 | 11.54 | 0.18 | 0.02 | -1.14 | 0.155414 | 0.006467 | 0.528651 | 0.109304 |
| MmuSTS.4478.1.S1_at   | MmuSTS.4478.1 | 13.78 | 13.75 | 0.07 | 0.02 | 1.02  | 0.811306 | 0.460193 | 0.931713 | 0.672102 |
| MmuSTS.4479.1.S1_s_at | MmuSTS.4479.1 | 6.09  | 6.03  | 0.09 | 0.05 | 1.04  | 0.124607 | 0.17086  | 0.4987   | 0.447509 |
| MmuSTS.448.1.S1_at    | MmuSTS.448.1  | 8.22  | 8.44  | 0.3  | 0.34 | -1.16 | 0.480353 | 0.70273  | 0.771141 | 0.827685 |
| MmuSTS.4480.1.S1_at   | MmuSTS.4480.1 | 12.32 | 12.43 | 0.29 | 0.03 | -1.08 | 0.579936 | 0.576014 | 0.826742 | 0.746933 |
| MmuSTS.4481.1.S1_at   | MmuSTS.4481.1 | 12.08 | 12.01 | 0.1  | 0.07 | 1.05  | 0.150815 | 0.153442 | 0.524381 | 0.42827  |
| MmuSTS.4482.1.S1_at   | MmuSTS.4482.1 | 6.97  | 7.07  | 0.52 | 0.21 | -1.07 | 0.938084 | 0.791418 | 0.979244 | 0.879492 |
| MmuSTS.4483.1.S1_s_at | MmuSTS.4483.1 | 4.52  | 4.29  | 0.04 | 0.14 | 1.17  | 0.064205 | 0.057    | 0.417801 | 0.284868 |
| MmuSTS.4484.1.S1_at   | MmuSTS.4484.1 | 9.82  | 9.16  | 0.28 | 0.19 | 1.58  | 0.019143 | 0.001545 | 0.299936 | 0.05949  |
| MmuSTS.4485.1.S1_at   | MmuSTS.4485.1 | 3.73  | 3.88  | 0.04 | 0.15 | -1.11 | 0.170208 | 0.247276 | 0.543328 | 0.516473 |
| MmuSTS.4486.1.S1_at   | MmuSTS.4486.1 | 4.62  | 4.95  | 0.23 | 0.17 | -1.26 | 0.279044 | 0.276309 | 0.637997 | 0.540303 |
| MmuSTS.4487.1.S1_at   | MmuSTS.4487.1 | 10.58 | 10.74 | 0.2  | 0.25 | -1.11 | 0.966435 | 0.5622   | 0.988997 | 0.737871 |
| MmuSTS.4488.1.S1_at   | MmuSTS.4488.1 | 5.99  | 5.81  | 0.38 | 0.2  | 1.14  | 0.539191 | 0.746533 | 0.803644 | 0.852872 |
| MmuSTS.4489.1.S1_at   | MmuSTS.4489.1 | 5.73  | 5.7   | 0.02 | 0.08 | 1.02  | 0.651401 | 0.024644 | 0.861618 | 0.196442 |
| MmuSTS.449.1.S1_at    | MmuSTS.449.1  | 7.37  | 7.49  | 0.32 | 0.09 | -1.08 | 0.194089 | 0.256504 | 0.564696 | 0.524275 |
| MmuSTS.4490.1.S1_at   | MmuSTS.4490.1 | 5.14  | 5.27  | 0.14 | 0.15 | -1.09 | 0.339381 | 0.601923 | 0.683826 | 0.763122 |
| MmuSTS.4491.1.S1_at   | MmuSTS.4491.1 | 4     | 4.11  | 0.4  | 0.23 | -1.08 | 0.456273 | 0.668384 | 0.757808 | 0.805938 |
| MmuSTS.4492.1.S1_at   | MmuSTS.4492.1 | 5.42  | 5.68  | 0.49 | 0.26 | -1.2  | 0.105119 | 0.074295 | 0.476837 | 0.318046 |
| MmuSTS.4493.1.S1_at   | MmuSTS.4493.1 | 11.98 | 12.14 | 0.22 | 0.05 | -1.12 | 0.309676 | 0.425657 | 0.661815 | 0.648    |
| MmuSTS.4494.1.S1_at   | MmuSTS.4494.1 | 6.28  | 6.08  | 0.19 | 0.08 | 1.15  | 0.087711 | 0.0635   | 0.455349 | 0.298444 |
| MmuSTS.4495.1.S1_at   | MmuSTS.4495.1 | 4.3   | 4.97  | 0.22 | 0.43 | -1.59 | 0.060821 | 0.109227 | 0.408918 | 0.37308  |
| MmuSTS.4496.1.S1_at   | MmuSTS.4496.1 | 6.07  | 6.67  | 0.55 | 0.75 | -1.51 | 0.564337 | 0.234679 | 0.818662 | 0.505897 |
| MmuSTS.4497.1.S1_at   | MmuSTS.4497.1 | 3.14  | 3.13  | 0.12 | 0.06 | 1.01  | 0.454368 | 0.766118 | 0.756743 | 0.86411  |
| MmuSTS.4498.1.S1_at   | MmuSTS.4498.1 | 8.19  | 7.83  | 0.58 | 0.09 | 1.28  | 0.29701  | 0.097347 | 0.652567 | 0.355066 |
| MmuSTS.4499.1.S1_at   | MmuSTS.4499.1 | 8.84  | 9.53  | 0.3  | 0.19 | -1.62 | 0.015285 | 0.011894 | 0.280666 | 0.141204 |
| MmuSTS.45.1.S1_at     | MmuSTS.45.1   | 8.37  | 8.7   | 0.29 | 0.08 | -1.26 | 0.133723 | 0.156205 | 0.508012 | 0.43161  |
| MmuSTS.450.1.S1_at    | MmuSTS.450.1  | 9.49  | 9.52  | 0.53 | 0.12 | -1.02 | 0.89497  | 0.127171 | 0.964146 | 0.397922 |
| MmuSTS.4500.1.S1_at   | MmuSTS.4500.1 | 8.5   | 9.23  | 0.64 | 0.11 | -1.66 | 0.381716 | 0.290139 | 0.71026  | 0.551134 |
| MmuSTS.4501.1.S1_at   | MmuSTS.4501.1 | 8.61  | 8.82  | 0.22 | 0.22 | -1.16 | 0.843868 | 0.062416 | 0.94497  | 0.296669 |
| MmuSTS.4502.1.S1_at   | MmuSTS.4502.1 | 9.02  | 9.33  | 0.38 | 0.07 | -1.25 | 0.162104 | 0.223465 | 0.535244 | 0.49626  |

|                       |               |       |       |      |      |       |          |          |          |          |
|-----------------------|---------------|-------|-------|------|------|-------|----------|----------|----------|----------|
| MmuSTS.4503.1.S1_at   | MmuSTS.4503.1 | 9.62  | 9.48  | 0.3  | 0.19 | 1.1   | 0.405497 | 0.351591 | 0.727426 | 0.595109 |
| MmuSTS.4504.1.S1_at   | MmuSTS.4504.1 | 9.09  | 9.16  | 0.11 | 0.16 | -1.05 | 0.533929 | 0.318807 | 0.801101 | 0.571379 |
| MmuSTS.4505.1.S1_at   | MmuSTS.4505.1 | 10.19 | 10.18 | 0.04 | 0.06 | 1     | 0.791969 | 0.060895 | 0.923559 | 0.293504 |
| MmuSTS.4506.1.S1_at   | MmuSTS.4506.1 | 10.64 | 10.95 | 0.25 | 0.1  | -1.24 | 0.030918 | 0.113823 | 0.339244 | 0.380062 |
| MmuSTS.4507.1.S1_at   | MmuSTS.4507.1 | 10.27 | 10.49 | 0.25 | 0.14 | -1.16 | 0.369509 | 0.000118 | 0.704236 | 0.028664 |
| MmuSTS.4508.1.S1_at   | MmuSTS.4508.1 | 11.63 | 12.28 | 0.24 | 0.05 | -1.56 | 0.010192 | 0.040777 | 0.246929 | 0.246842 |
| MmuSTS.4509.1.S1_at   | MmuSTS.4509.1 | 4.15  | 4.13  | 0.13 | 0.03 | 1.02  | 0.301134 | 0.459268 | 0.655365 | 0.671678 |
| MmuSTS.451.1.S1_at    | MmuSTS.451.1  | 9.53  | 9.34  | 0.06 | 0.13 | 1.14  | 0.032903 | 0.002214 | 0.345526 | 0.069424 |
| MmuSTS.4510.1.S1_at   | MmuSTS.4510.1 | 5.85  | 5.64  | 0.09 | 0.08 | 1.16  | 0.039597 | 0.066343 | 0.362432 | 0.303207 |
| MmuSTS.4511.1.S1_at   | MmuSTS.4511.1 | 8.01  | 8.24  | 0.56 | 0.17 | -1.17 | 0.830516 | 0.156941 | 0.939336 | 0.432372 |
| MmuSTS.4512.1.S1_at   | MmuSTS.4512.1 | 4.49  | 4.8   | 0.16 | 0.17 | -1.24 | 0.163248 | 0.192567 | 0.536063 | 0.46807  |
| MmuSTS.4513.1.S1_at   | MmuSTS.4513.1 | 10.03 | 10.62 | 0.36 | 0.05 | -1.5  | 0.136118 | 0.02148  | 0.510655 | 0.183627 |
| MmuSTS.4514.1.S1_at   | MmuSTS.4514.1 | 7.64  | 8.51  | 0.62 | 0.3  | -1.83 | 0.429462 | 0.252301 | 0.742163 | 0.52096  |
| MmuSTS.4515.1.S1_at   | MmuSTS.4515.1 | 12.56 | 12.64 | 0.33 | 0.03 | -1.05 | 0.987137 | 0.15827  | 0.995808 | 0.43403  |
| MmuSTS.4516.1.S1_at   | MmuSTS.4516.1 | 9.41  | 9.74  | 0.23 | 0.08 | -1.26 | 0.055828 | 0.006403 | 0.399441 | 0.108767 |
| MmuSTS.4517.1.S1_at   | MmuSTS.4517.1 | 8.35  | 8.67  | 0.08 | 0.16 | -1.26 | 0.014434 | 0.025332 | 0.275474 | 0.199522 |
| MmuSTS.4518.1.S1_at   | MmuSTS.4518.1 | 6.63  | 6.88  | 0.57 | 0.15 | -1.18 | 0.642035 | 0.534631 | 0.857628 | 0.720477 |
| MmuSTS.4519.1.S1_at   | MmuSTS.4519.1 | 12.98 | 12.96 | 0.41 | 0.15 | 1.01  | 0.254467 | 0.378809 | 0.618957 | 0.615795 |
| MmuSTS.452.1.S1_at    | MmuSTS.452.1  | 4.33  | 4.29  | 0.13 | 0.06 | 1.02  | 0.161145 | 0.265956 | 0.534439 | 0.531796 |
| MmuSTS.4520.1.S1_at   | MmuSTS.4520.1 | 7.79  | 7.14  | 0.48 | 0.09 | 1.57  | 0.080747 | 0.00477  | 0.444813 | 0.096363 |
| MmuSTS.4521.1.S1_at   | MmuSTS.4521.1 | 4.86  | 4.83  | 0.21 | 0.17 | 1.02  | 0.976241 | 0.324825 | 0.992281 | 0.575369 |
| MmuSTS.4522.1.S1_at   | MmuSTS.4522.1 | 7.92  | 8.14  | 0.4  | 0.18 | -1.16 | 0.14955  | 0.194489 | 0.523226 | 0.46959  |
| MmuSTS.4523.1.S1_at   | MmuSTS.4523.1 | 6.36  | 6.31  | 0.08 | 0.02 | 1.03  | 0.807877 | 0.268624 | 0.930332 | 0.534138 |
| MmuSTS.4524.1.S1_at   | MmuSTS.4524.1 | 6.67  | 7.44  | 1.21 | 0.22 | -1.71 | 0.29771  | 0.56933  | 0.652791 | 0.742375 |
| MmuSTS.4525.1.S1_at   | MmuSTS.4525.1 | 5.82  | 5.8   | 0.16 | 0.2  | 1.02  | 0.617681 | 0.797947 | 0.845578 | 0.883664 |
| MmuSTS.4526.1.S1_at   | MmuSTS.4526.1 | 10.4  | 9.76  | 2.59 | 0.36 | 1.56  | 0.898192 | 0.247005 | 0.965455 | 0.516238 |
| MmuSTS.4527.1.S1_at   | MmuSTS.4527.1 | 7.61  | 7.62  | 0.3  | 0.06 | -1.01 | 0.931919 | 0.898869 | 0.977118 | 0.942457 |
| MmuSTS.4528.1.S1_at   | MmuSTS.4528.1 | 7.65  | 6.99  | 0.77 | 0.21 | 1.58  | 0.226586 | 0.066195 | 0.595885 | 0.302797 |
| MmuSTS.4529.1.S1_at   | MmuSTS.4529.1 | 3.15  | 3.06  | 0.31 | 0.16 | 1.06  | 0.263725 | 0.456699 | 0.625638 | 0.670408 |
| MmuSTS.453.1.S1_at    | MmuSTS.453.1  | 10.53 | 10.58 | 0.51 | 0.07 | -1.04 | 0.765948 | 0.098635 | 0.911981 | 0.356743 |
| MmuSTS.4530.1.S1_at   | MmuSTS.4530.1 | 11.8  | 11.96 | 0.3  | 0.04 | -1.12 | 0.403623 | 0.441853 | 0.725766 | 0.659939 |
| MmuSTS.4531.1.S1_at   | MmuSTS.4531.1 | 9.24  | 10.02 | 0.38 | 0.16 | -1.71 | 0.075781 | 0.048861 | 0.436784 | 0.265858 |
| MmuSTS.4532.1.S1_at   | MmuSTS.4532.1 | 10.81 | 10.61 | 0.11 | 0.09 | 1.15  | 0.044368 | 0.052853 | 0.374567 | 0.275521 |
| MmuSTS.4533.1.S1_at   | MmuSTS.4533.1 | 8.77  | 9.24  | 0.13 | 0.13 | -1.38 | 0.018388 | 0.000091 | 0.297316 | 0.027225 |
| MmuSTS.4534.1.S1_at   | MmuSTS.4534.1 | 8.62  | 9.46  | 3    | 0.36 | -1.79 | 0.417829 | 0.245582 | 0.735158 | 0.515348 |
| MmuSTS.4535.1.S1_at   | MmuSTS.4535.1 | 7.18  | 8.07  | 0.6  | 0.21 | -1.86 | 0.028629 | 0.017903 | 0.332804 | 0.168922 |
| MmuSTS.4536.1.S1_at   | MmuSTS.4536.1 | 7.73  | 7.83  | 0.37 | 0.11 | -1.07 | 0.694295 | 0.806609 | 0.881056 | 0.888732 |
| MmuSTS.4537.1.S1_at   | MmuSTS.4537.1 | 8.07  | 8.8   | 1.63 | 0.22 | -1.66 | 0.51647  | 0.138835 | 0.791464 | 0.412015 |
| MmuSTS.4538.1.S1_at   | MmuSTS.4538.1 | 11.84 | 12.03 | 0.35 | 0.06 | -1.14 | 0.989005 | 0.998055 | 0.995916 | 0.999009 |
| MmuSTS.4539.1.S1_s_at | MmuSTS.4539.1 | 3.39  | 3.36  | 0.06 | 0.08 | 1.02  | 0.538529 | 0.918431 | 0.803333 | 0.95425  |
| MmuSTS.454.1.S1_at    | MmuSTS.454.1  | 10    | 9.09  | 0.69 | 0.11 | 1.88  | 0.090793 | 0.039614 | 0.458873 | 0.244052 |
| MmuSTS.4540.1.S1_at   | MmuSTS.4540.1 | 8.87  | 9.04  | 0.41 | 0.07 | -1.13 | 0.156174 | 0.259299 | 0.529536 | 0.526418 |
| MmuSTS.4541.1.S1_at   | MmuSTS.4541.1 | 3.16  | 3.07  | 0.07 | 0.02 | 1.07  | 0.031909 | 0.049523 | 0.34281  | 0.267481 |

|                       |               |       |       |      |      |       |          |          |          |          |
|-----------------------|---------------|-------|-------|------|------|-------|----------|----------|----------|----------|
| MmuSTS.4542.1.S1_at   | MmuSTS.4542.1 | 10.1  | 9.98  | 0.54 | 0.12 | 1.09  | 0.630963 | 0.658841 | 0.852329 | 0.800473 |
| MmuSTS.4543.1.S1_at   | MmuSTS.4543.1 | 5.55  | 6.68  | 1.51 | 0.43 | -2.19 | 0.186715 | 0.276664 | 0.559225 | 0.540596 |
| MmuSTS.4544.1.S1_at   | MmuSTS.4544.1 | 5.95  | 5.62  | 0.24 | 0.12 | 1.25  | 0.126328 | 0.167222 | 0.500104 | 0.443684 |
| MmuSTS.4545.1.S1_at   | MmuSTS.4545.1 | 4.23  | 4.23  | 0.07 | 0.16 | -1    | 0.744619 | 0.931823 | 0.902623 | 0.961265 |
| MmuSTS.4546.1.S1_at   | MmuSTS.4546.1 | 10.74 | 11.39 | 0.2  | 0.03 | -1.58 | 0.005098 | 0.002167 | 0.204981 | 0.068824 |
| MmuSTS.4547.1.S1_at   | MmuSTS.4547.1 | 4.13  | 3.7   | 0.6  | 0.12 | 1.34  | 0.274677 | 0.124693 | 0.634012 | 0.39513  |
| MmuSTS.4548.1.S1_at   | MmuSTS.4548.1 | 6.66  | 5.82  | 0.84 | 0.14 | 1.79  | 0.191351 | 0.112643 | 0.562801 | 0.378183 |
| MmuSTS.4549.1.S1_at   | MmuSTS.4549.1 | 6.06  | 6.17  | 0.3  | 0.08 | -1.08 | 0.720791 | 0.963186 | 0.891774 | 0.979435 |
| MmuSTS.455.1.S1_s_at  | MmuSTS.455.1  | 3.82  | 3.83  | 0.03 | 0.02 | -1    | 0.313922 | 0.15825  | 0.664925 | 0.43403  |
| MmuSTS.4550.1.S1_at   | MmuSTS.4550.1 | 4.1   | 4.11  | 0.1  | 0    | -1.01 | 0.482334 | 0.095168 | 0.77231  | 0.35218  |
| MmuSTS.4551.1.S1_at   | MmuSTS.4551.1 | 8.96  | 6.09  | 1.03 | 0.9  | 7.32  | 0.038213 | 0.030619 | 0.358577 | 0.216919 |
| MmuSTS.4552.1.S1_at   | MmuSTS.4552.1 | 6.52  | 6.32  | 0.11 | 0.07 | 1.14  | 0.0749   | 0.090816 | 0.43559  | 0.345355 |
| MmuSTS.4553.1.S1_at   | MmuSTS.4553.1 | 11.52 | 11.68 | 1.06 | 0.06 | -1.11 | 0.771152 | 0.228032 | 0.914377 | 0.500228 |
| MmuSTS.4554.1.S1_at   | MmuSTS.4554.1 | 10.18 | 10.76 | 0.15 | 0.15 | -1.5  | 0.00841  | 0.002443 | 0.233808 | 0.073201 |
| MmuSTS.4555.1.S1_at   | MmuSTS.4555.1 | 3.61  | 3.17  | 0.53 | 1.9  | 1.36  | 0.61447  | 0.757174 | 0.843969 | 0.858648 |
| MmuSTS.4556.1.S1_at   | MmuSTS.4556.1 | 6.27  | 6.08  | 0.07 | 0.12 | 1.14  | 0.03829  | 0.041995 | 0.358719 | 0.249463 |
| MmuSTS.4557.1.S1_at   | MmuSTS.4557.1 | 5.74  | 5.52  | 0.19 | 0.07 | 1.17  | 0.390722 | 0.284967 | 0.716935 | 0.547071 |
| MmuSTS.4558.1.S1_at   | MmuSTS.4558.1 | 6.62  | 6.89  | 0.01 | 0.07 | -1.2  | 0.001782 | 0.164998 | 0.167444 | 0.44123  |
| MmuSTS.4559.1.S1_at   | MmuSTS.4559.1 | 9.12  | 8.62  | 0.26 | 0.16 | 1.41  | 0.035337 | 0.042212 | 0.351775 | 0.24989  |
| MmuSTS.456.1.S1_at    | MmuSTS.456.1  | 8.87  | 8.55  | 0.02 | 0.12 | 1.24  | 0.005289 | 0.044246 | 0.207431 | 0.25493  |
| MmuSTS.4560.1.S1_at   | MmuSTS.4560.1 | 5.66  | 5.55  | 0.19 | 0.12 | 1.08  | 0.618956 | 0.584103 | 0.846305 | 0.752201 |
| MmuSTS.4561.1.S1_at   | MmuSTS.4561.1 | 5.35  | 5.34  | 0.16 | 0.08 | 1     | 0.231454 | 0.126489 | 0.599368 | 0.397038 |
| MmuSTS.4562.1.S1_at   | MmuSTS.4562.1 | 10.46 | 10.21 | 1.07 | 0.29 | 1.19  | 0.450569 | 0.130939 | 0.754829 | 0.403037 |
| MmuSTS.4563.1.S1_at   | MmuSTS.4563.1 | 3.79  | 3.73  | 0.07 | 0.15 | 1.04  | 0.437905 | 0.476344 | 0.747043 | 0.682695 |
| MmuSTS.4564.1.S1_at   | MmuSTS.4564.1 | 9.71  | 9.22  | 0.33 | 0.2  | 1.4   | 0.223217 | 0.369744 | 0.592569 | 0.609048 |
| MmuSTS.4565.1.S1_at   | MmuSTS.4565.1 | 8.34  | 8.43  | 1.67 | 0.25 | -1.07 | 0.485751 | 0.659852 | 0.774425 | 0.800897 |
| MmuSTS.4566.1.S1_at   | MmuSTS.4566.1 | 4.25  | 4.34  | 0.22 | 0.17 | -1.07 | 0.953076 | 0.770617 | 0.984312 | 0.866798 |
| MmuSTS.4567.1.S1_at   | MmuSTS.4567.1 | 12.55 | 12.44 | 2.89 | 0.22 | 1.08  | 0.453079 | 0.26025  | 0.755962 | 0.526807 |
| MmuSTS.4568.1.S1_at   | MmuSTS.4568.1 | 12.19 | 12.21 | 0.03 | 0.04 | -1.02 | 0.820372 | 0.965538 | 0.935289 | 0.980739 |
| MmuSTS.4569.1.S1_at   | MmuSTS.4569.1 | 11.02 | 11.25 | 0.2  | 0.07 | -1.18 | 0.220044 | 0.457699 | 0.589114 | 0.670897 |
| MmuSTS.457.1.S1_at    | MmuSTS.457.1  | 5.76  | 5.63  | 0.21 | 0    | 1.1   | 0.342014 | 0.179613 | 0.685567 | 0.456042 |
| MmuSTS.457.1.S1_s_at  | MmuSTS.457.1  | 5.39  | 5.34  | 0.2  | 0.13 | 1.03  | 0.702693 | 0.851475 | 0.884378 | 0.91548  |
| MmuSTS.4570.1.S1_at   | MmuSTS.4570.1 | 5.22  | 5.31  | 0.11 | 0.07 | -1.07 | 0.865557 | 0.686503 | 0.952645 | 0.817053 |
| MmuSTS.4571.1.S1_s_at | MmuSTS.4571.1 | 3.8   | 3.91  | 0.2  | 0.08 | -1.08 | 0.373434 | 0.547268 | 0.705567 | 0.728346 |
| MmuSTS.4572.1.S1_at   | MmuSTS.4572.1 | 8.82  | 8.72  | 0.41 | 0.08 | 1.07  | 0.641471 | 0.006904 | 0.857344 | 0.11226  |
| MmuSTS.4573.1.S1_at   | MmuSTS.4573.1 | 7.82  | 6.96  | 1    | 0.24 | 1.81  | 0.262463 | 0.042379 | 0.624678 | 0.250533 |
| MmuSTS.4574.1.S1_at   | MmuSTS.4574.1 | 9.06  | 9.24  | 0.38 | 0.05 | -1.13 | 0.193773 | 0.314437 | 0.564353 | 0.568319 |
| MmuSTS.4575.1.S1_at   | MmuSTS.4575.1 | 12.11 | 11.5  | 0.19 | 0.04 | 1.52  | 0.012046 | 0.002731 | 0.258759 | 0.077041 |
| MmuSTS.4576.1.S1_at   | MmuSTS.4576.1 | 6.56  | 6.36  | 0.1  | 0.02 | 1.14  | 0.084342 | 0.311174 | 0.450953 | 0.566215 |
| MmuSTS.4577.1.S1_at   | MmuSTS.4577.1 | 12.03 | 11.79 | 0.26 | 0.02 | 1.18  | 0.158463 | 0.249857 | 0.531551 | 0.518876 |
| MmuSTS.4578.1.S1_at   | MmuSTS.4578.1 | 12.08 | 12.12 | 0.2  | 0.05 | -1.03 | 0.565914 | 0.476899 | 0.819644 | 0.683011 |
| MmuSTS.4579.1.S1_at   | MmuSTS.4579.1 | 11.36 | 11.31 | 0.21 | 0.14 | 1.04  | 0.230635 | 0.007354 | 0.598752 | 0.115197 |
| MmuSTS.458.1.S1_s_at  | MmuSTS.458.1  | 3.13  | 3.16  | 0.04 | 0.12 | -1.02 | 0.504219 | 0.663553 | 0.784627 | 0.803017 |

|                       |               |       |       |      |      |       |          |          |          |          |
|-----------------------|---------------|-------|-------|------|------|-------|----------|----------|----------|----------|
| MmuSTS.4580.1.S1_at   | MmuSTS.4580.1 | 4.22  | 4.04  | 0.33 | 0.27 | 1.14  | 0.339812 | 0.345705 | 0.684042 | 0.590854 |
| MmuSTS.4581.1.S1_at   | MmuSTS.4581.1 | 8.95  | 10.86 | 1.57 | 0.19 | -3.75 | 0.382143 | 0.205004 | 0.710505 | 0.479296 |
| MmuSTS.4582.1.S1_at   | MmuSTS.4582.1 | 5.54  | 5.5   | 0.17 | 0.12 | 1.03  | 0.318486 | 0.454292 | 0.668228 | 0.66849  |
| MmuSTS.4583.1.S1_at   | MmuSTS.4583.1 | 10.34 | 10.71 | 0.33 | 0.38 | -1.29 | 0.125915 | 0.081368 | 0.49972  | 0.329516 |
| MmuSTS.4584.1.S1_at   | MmuSTS.4584.1 | 6.36  | 6.69  | 0.17 | 0.26 | -1.26 | 0.246159 | 0.18915  | 0.611552 | 0.464997 |
| MmuSTS.4585.1.S1_at   | MmuSTS.4585.1 | 4.81  | 4.6   | 0.38 | 0.11 | 1.15  | 0.46233  | 0.200297 | 0.761546 | 0.474689 |
| MmuSTS.4586.1.S1_at   | MmuSTS.4586.1 | 6.35  | 5.75  | 0.49 | 0.09 | 1.51  | 0.342946 | 0.176431 | 0.686205 | 0.45282  |
| MmuSTS.4587.1.S1_at   | MmuSTS.4587.1 | 7.2   | 6.82  | 0.48 | 0.08 | 1.3   | 0.201321 | 0.201062 | 0.57304  | 0.475509 |
| MmuSTS.4588.1.S1_at   | MmuSTS.4588.1 | 4.11  | 3.69  | 0.14 | 0.13 | 1.34  | 0.037754 | 0.03605  | 0.357874 | 0.234272 |
| MmuSTS.4589.1.S1_at   | MmuSTS.4589.1 | 9.12  | 9.33  | 1.01 | 0.15 | -1.16 | 0.215375 | 0.144799 | 0.585748 | 0.418661 |
| MmuSTS.459.1.S1_at    | MmuSTS.459.1  | 7.93  | 7.32  | 0.34 | 0.17 | 1.52  | 0.07272  | 0.130337 | 0.433315 | 0.402172 |
| MmuSTS.4590.1.S1_at   | MmuSTS.4590.1 | 8.68  | 10.2  | 1.56 | 0.29 | -2.86 | 0.203129 | 0.194699 | 0.574646 | 0.469765 |
| MmuSTS.4591.1.S1_at   | MmuSTS.4591.1 | 9.13  | 9.37  | 0.14 | 0.15 | -1.18 | 0.095838 | 0.095375 | 0.464449 | 0.352414 |
| MmuSTS.4592.1.S1_at   | MmuSTS.4592.1 | 4.42  | 4.28  | 0.13 | 0.07 | 1.1   | 0.157968 | 0.517489 | 0.530972 | 0.709615 |
| MmuSTS.4593.1.S1_at   | MmuSTS.4593.1 | 9.25  | 9.52  | 0.21 | 0.14 | -1.21 | 0.108578 | 0.418984 | 0.480777 | 0.643191 |
| MmuSTS.4594.1.S1_at   | MmuSTS.4594.1 | 11.11 | 11.86 | 0.32 | 0.06 | -1.68 | 0.046368 | 0.055508 | 0.377925 | 0.281404 |
| MmuSTS.4595.1.S1_at   | MmuSTS.4595.1 | 9.99  | 10.25 | 1.19 | 0.23 | -1.2  | 0.885966 | 0.032043 | 0.960416 | 0.221577 |
| MmuSTS.4596.1.S1_at   | MmuSTS.4596.1 | 5.17  | 5.76  | 0.62 | 0.14 | -1.51 | 0.243379 | 0.117167 | 0.609284 | 0.384627 |
| MmuSTS.4597.1.S1_at   | MmuSTS.4597.1 | 7.24  | 7.11  | 0.31 | 0.28 | 1.09  | 0.369351 | 0.525153 | 0.704215 | 0.714766 |
| MmuSTS.4598.1.S1_at   | MmuSTS.4598.1 | 11.46 | 11.13 | 0.42 | 0.25 | 1.25  | 0.18942  | 0.220791 | 0.560897 | 0.494262 |
| MmuSTS.4599.1.S1_at   | MmuSTS.4599.1 | 10    | 10.16 | 0.11 | 0.04 | -1.12 | 0.055933 | 0.080935 | 0.399441 | 0.328973 |
| MmuSTS.46.1.S1_at     | MmuSTS.46.1   | 9.67  | 9.92  | 0.21 | 0.11 | -1.19 | 0.042654 | 0.001574 | 0.369842 | 0.060185 |
| MmuSTS.460.1.S1_s_at  | MmuSTS.460.1  | 3.6   | 3.44  | 0.04 | 0.04 | 1.12  | 0.00313  | 0.00112  | 0.191107 | 0.052924 |
| MmuSTS.4600.1.S1_at   | MmuSTS.4600.1 | 9.37  | 9.54  | 0.15 | 0.04 | -1.12 | 0.410128 | 0.849471 | 0.730604 | 0.914534 |
| MmuSTS.4601.1.S1_at   | MmuSTS.4601.1 | 3.99  | 3.84  | 0.18 | 0.09 | 1.11  | 0.4382   | 0.448099 | 0.747231 | 0.664016 |
| MmuSTS.4602.1.S1_at   | MmuSTS.4602.1 | 6     | 5.89  | 0.49 | 0.22 | 1.08  | 0.399426 | 0.641306 | 0.723115 | 0.789506 |
| MmuSTS.4603.1.S1_x_at | MmuSTS.4603.1 | 8.2   | 6.82  | 2.43 | 0.29 | 2.59  | 0.523508 | 0.366529 | 0.795656 | 0.606274 |
| MmuSTS.4604.1.S1_at   | MmuSTS.4604.1 | 7.29  | 6.53  | 1.63 | 0.2  | 1.69  | 0.521203 | 0.110665 | 0.794371 | 0.374854 |
| MmuSTS.4605.1.S1_at   | MmuSTS.4605.1 | 7.47  | 7.23  | 0.1  | 0.04 | 1.18  | 0.014977 | 0.189545 | 0.279083 | 0.465281 |
| MmuSTS.4606.1.S1_at   | MmuSTS.4606.1 | 9.04  | 8.69  | 0.62 | 0.31 | 1.28  | 0.112646 | 0.003579 | 0.486043 | 0.085582 |
| MmuSTS.4607.1.S1_at   | MmuSTS.4607.1 | 6.01  | 6     | 0.11 | 0.07 | 1.01  | 0.388235 | 0.816526 | 0.715159 | 0.894202 |
| MmuSTS.4608.1.S1_at   | MmuSTS.4608.1 | 5.54  | 5.05  | 0.36 | 0.17 | 1.41  | 0.101408 | 0.074394 | 0.471667 | 0.318058 |
| MmuSTS.4609.1.S1_at   | MmuSTS.4609.1 | 4.25  | 4.03  | 1.12 | 0.2  | 1.17  | 0.630074 | 0.592295 | 0.851878 | 0.757674 |
| MmuSTS.461.1.S1_s_at  | MmuSTS.461.1  | 4.34  | 4.27  | 0.12 | 0.08 | 1.05  | 0.320851 | 0.457612 | 0.669445 | 0.670889 |
| MmuSTS.4610.1.S1_at   | MmuSTS.4610.1 | 9.9   | 9.95  | 0.3  | 0.03 | -1.04 | 0.483488 | 0.27117  | 0.773104 | 0.536263 |
| MmuSTS.4611.1.S1_at   | MmuSTS.4611.1 | 7.44  | 7.44  | 0.09 | 0.02 | 1     | 0.366881 | 0.351534 | 0.702346 | 0.595094 |
| MmuSTS.4612.1.S1_at   | MmuSTS.4612.1 | 8.13  | 8.01  | 0.49 | 0.1  | 1.09  | 0.934767 | 0.137388 | 0.977918 | 0.410318 |
| MmuSTS.4613.1.S1_at   | MmuSTS.4613.1 | 10.63 | 10.58 | 0.58 | 0.03 | 1.04  | 0.420192 | 0.180941 | 0.736808 | 0.457418 |
| MmuSTS.4614.1.S1_at   | MmuSTS.4614.1 | 9.49  | 10.04 | 0.29 | 0.07 | -1.47 | 0.114345 | 0.073375 | 0.487606 | 0.316469 |
| MmuSTS.4615.1.S1_at   | MmuSTS.4615.1 | 12.57 | 12.72 | 0.19 | 0.05 | -1.11 | 0.266487 | 0.010682 | 0.627354 | 0.134971 |
| MmuSTS.4616.1.S1_at   | MmuSTS.4616.1 | 11.21 | 11.25 | 0.25 | 0.08 | -1.03 | 0.789435 | 0.078378 | 0.92257  | 0.325077 |
| MmuSTS.4617.1.S1_at   | MmuSTS.4617.1 | 11.33 | 11.38 | 0.29 | 0.21 | -1.04 | 0.178299 | 0.265518 | 0.551301 | 0.531409 |
| MmuSTS.4618.1.S1_at   | MmuSTS.4618.1 | 3.18  | 3.2   | 0.11 | 0.02 | -1.01 | 0.663363 | 0.695493 | 0.867106 | 0.823012 |

|                       |               |       |       |      |      |       |          |          |          |          |
|-----------------------|---------------|-------|-------|------|------|-------|----------|----------|----------|----------|
| MmuSTS.4619.1.S1_at   | MmuSTS.4619.1 | 5.45  | 5.76  | 1.3  | 0.11 | -1.24 | 0.589969 | 0.543404 | 0.832721 | 0.726105 |
| MmuSTS.462.1.S1_at    | MmuSTS.462.1  | 3.43  | 3.35  | 0.08 | 0.04 | 1.06  | 0.107772 | 0.068051 | 0.480288 | 0.307142 |
| MmuSTS.4620.1.S1_at   | MmuSTS.4620.1 | 9.45  | 9.8   | 0.21 | 0.03 | -1.27 | 0.101429 | 0.072601 | 0.471667 | 0.315526 |
| MmuSTS.4621.1.S1_at   | MmuSTS.4621.1 | 11.86 | 11.82 | 0.18 | 0.14 | 1.02  | 0.172791 | 0.220186 | 0.545887 | 0.493655 |
| MmuSTS.4622.1.S1_at   | MmuSTS.4622.1 | 8.68  | 9.33  | 0.24 | 0.02 | -1.58 | 0.007238 | 0.008275 | 0.226509 | 0.12078  |
| MmuSTS.4623.1.S1_at   | MmuSTS.4623.1 | 6.38  | 5.85  | 1    | 0.13 | 1.45  | 0.516077 | 0.248315 | 0.791221 | 0.5176   |
| MmuSTS.4624.1.S1_at   | MmuSTS.4624.1 | 9.04  | 9.02  | 0.48 | 0.13 | 1.02  | 0.353867 | 0.38091  | 0.693507 | 0.617426 |
| MmuSTS.4625.1.S1_at   | MmuSTS.4625.1 | 3.69  | 3.78  | 0.2  | 0.1  | -1.07 | 0.836455 | 0.940589 | 0.941249 | 0.966326 |
| MmuSTS.4626.1.S1_at   | MmuSTS.4626.1 | 8.23  | 7.84  | 0.35 | 0.26 | 1.31  | 0.116812 | 0.101629 | 0.490029 | 0.361529 |
| MmuSTS.4627.1.S1_at   | MmuSTS.4627.1 | 9.88  | 9.81  | 0.43 | 0.13 | 1.05  | 0.813869 | 0.818134 | 0.932816 | 0.895106 |
| MmuSTS.4628.1.S1_at   | MmuSTS.4628.1 | 11.54 | 11.62 | 0.31 | 0.01 | -1.06 | 0.878229 | 0.686366 | 0.957601 | 0.816948 |
| MmuSTS.4629.1.S1_at   | MmuSTS.4629.1 | 5.71  | 5.72  | 0.05 | 0.11 | -1    | 0.858062 | 0.977649 | 0.949859 | 0.987833 |
| MmuSTS.463.1.S1_s_at  | MmuSTS.463.1  | 3.85  | 3.83  | 0.11 | 0.15 | 1.02  | 0.679379 | 0.476245 | 0.874274 | 0.682616 |
| MmuSTS.4630.1.S1_at   | MmuSTS.4630.1 | 9.74  | 9.9   | 0.36 | 0.14 | -1.12 | 0.588713 | 0.004127 | 0.831968 | 0.090887 |
| MmuSTS.4631.1.S1_at   | MmuSTS.4631.1 | 10.96 | 10.82 | 0.23 | 0.19 | 1.1   | 0.861973 | 0.145457 | 0.951336 | 0.419421 |
| MmuSTS.4632.1.S1_at   | MmuSTS.4632.1 | 5.48  | 5.44  | 0.08 | 0.08 | 1.02  | 0.812432 | 0.962085 | 0.932078 | 0.978692 |
| MmuSTS.4633.1.S1_at   | MmuSTS.4633.1 | 6.66  | 7.93  | 1.58 | 0.14 | -2.4  | 0.24306  | 0.290266 | 0.608888 | 0.551169 |
| MmuSTS.4634.1.S1_x_at | MmuSTS.4634.1 | 13.86 | 13.79 | 0.26 | 0.04 | 1.05  | 0.862689 | 0.983234 | 0.951672 | 0.990726 |
| MmuSTS.4635.1.S1_at   | MmuSTS.4635.1 | 9.14  | 9.03  | 0.37 | 0.08 | 1.08  | 0.622255 | 0.141785 | 0.847678 | 0.415331 |
| MmuSTS.4636.1.S1_at   | MmuSTS.4636.1 | 6.21  | 6.16  | 0.15 | 0.03 | 1.04  | 0.201056 | 0.346729 | 0.572827 | 0.591536 |
| MmuSTS.4637.1.S1_at   | MmuSTS.4637.1 | 10.31 | 10.49 | 0.51 | 0.22 | -1.13 | 0.359388 | 0.142149 | 0.697237 | 0.41575  |
| MmuSTS.4638.1.S1_at   | MmuSTS.4638.1 | 6.97  | 7.09  | 0.16 | 0.03 | -1.09 | 0.213529 | 0.026916 | 0.584124 | 0.205227 |
| MmuSTS.4639.1.S1_at   | MmuSTS.4639.1 | 6.55  | 6.27  | 0.47 | 0.26 | 1.21  | 0.477269 | 0.01751  | 0.769812 | 0.167516 |
| MmuSTS.464.1.S1_at    | MmuSTS.464.1  | 3.21  | 3.36  | 0.21 | 0.12 | -1.1  | 0.22514  | 0.305268 | 0.594388 | 0.562255 |
| MmuSTS.4640.1.S1_at   | MmuSTS.4640.1 | 3.49  | 3.23  | 0.13 | 0.04 | 1.2   | 0.023211 | 0.180058 | 0.314809 | 0.456601 |
| MmuSTS.4640.1.S1_s_at | MmuSTS.4640.1 | 4.52  | 4.14  | 0.14 | 0.1  | 1.3   | 0.054307 | 0.276634 | 0.396212 | 0.540596 |
| MmuSTS.4641.1.S1_at   | MmuSTS.4641.1 | 5.19  | 5.17  | 0.1  | 0.1  | 1.01  | 0.334311 | 0.280095 | 0.680268 | 0.543369 |
| MmuSTS.4642.1.S1_at   | MmuSTS.4642.1 | 5.59  | 5.57  | 0.71 | 0.2  | 1.02  | 0.933367 | 0.102944 | 0.977395 | 0.363634 |
| MmuSTS.4643.1.S1_at   | MmuSTS.4643.1 | 5.67  | 5.5   | 0.17 | 0.08 | 1.13  | 0.501592 | 0.564773 | 0.783364 | 0.739427 |
| MmuSTS.4644.1.S1_at   | MmuSTS.4644.1 | 7.1   | 6.36  | 0.44 | 0.27 | 1.67  | 0.077073 | 0.088165 | 0.438911 | 0.341721 |
| MmuSTS.4645.1.S1_at   | MmuSTS.4645.1 | 10.28 | 10.07 | 0.31 | 0.08 | 1.16  | 0.333611 | 0.437567 | 0.679759 | 0.656785 |
| MmuSTS.4646.1.S1_at   | MmuSTS.4646.1 | 9.06  | 11.1  | 1.04 | 0.19 | -4.11 | 0.079183 | 0.076992 | 0.442056 | 0.322421 |
| MmuSTS.4647.1.S1_at   | MmuSTS.4647.1 | 3.21  | 3.2   | 0.01 | 0.02 | 1     | 0.19352  | 0.072594 | 0.564275 | 0.315519 |
| MmuSTS.4648.1.S1_at   | MmuSTS.4648.1 | 6.14  | 6.1   | 0.22 | 0.18 | 1.03  | 0.982395 | 0.996923 | 0.994472 | 0.99822  |
| MmuSTS.4649.1.S1_at   | MmuSTS.4649.1 | 5.11  | 4.81  | 0.37 | 0.07 | 1.23  | 0.231884 | 0.38576  | 0.599694 | 0.621079 |
| MmuSTS.465.1.S1_s_at  | MmuSTS.465.1  | 4.33  | 4.39  | 0.07 | 0.04 | -1.04 | 0.227164 | 0.285946 | 0.596459 | 0.547505 |
| MmuSTS.4650.1.S1_at   | MmuSTS.4650.1 | 11.39 | 11.6  | 0.26 | 0.12 | -1.16 | 0.219944 | 0.167911 | 0.589114 | 0.444485 |
| MmuSTS.4651.1.S1_at   | MmuSTS.4651.1 | 4.49  | 4.56  | 0.52 | 0.41 | -1.05 | 0.631236 | 0.692143 | 0.852417 | 0.82091  |
| MmuSTS.4652.1.S1_at   | MmuSTS.4652.1 | 5.4   | 5.37  | 0.16 | 0.16 | 1.02  | 0.450886 | 0.513927 | 0.754931 | 0.707322 |
| MmuSTS.4653.1.S1_at   | MmuSTS.4653.1 | 4.12  | 4.09  | 0.05 | 0.09 | 1.02  | 0.691839 | 0.808992 | 0.880061 | 0.889981 |
| MmuSTS.4654.1.S1_at   | MmuSTS.4654.1 | 3.69  | 3.68  | 0.1  | 0.07 | 1.01  | 0.679351 | 0.945627 | 0.874274 | 0.969098 |
| MmuSTS.4655.1.S1_at   | MmuSTS.4655.1 | 7.02  | 6.87  | 1.12 | 0.41 | 1.12  | 0.775894 | 0.68401  | 0.916923 | 0.81565  |
| MmuSTS.4656.1.S1_at   | MmuSTS.4656.1 | 8.51  | 7.8   | 0.06 | 0.13 | 1.64  | 0.000862 | 0.000127 | 0.153739 | 0.029087 |

|                       |               |       |       |      |      |       |          |          |          |          |
|-----------------------|---------------|-------|-------|------|------|-------|----------|----------|----------|----------|
| MmuSTS.4657.1.S1_at   | MmuSTS.4657.1 | 5.17  | 5.42  | 0.35 | 0.21 | -1.19 | 0.363782 | 0.5757   | 0.700307 | 0.746728 |
| MmuSTS.4658.1.S1_at   | MmuSTS.4658.1 | 13.37 | 12.74 | 0.32 | 0.09 | 1.54  | 0.08083  | 0.07717  | 0.444846 | 0.322751 |
| MmuSTS.4659.1.S1_at   | MmuSTS.4659.1 | 10.15 | 10.31 | 1.07 | 0.11 | -1.12 | 0.719177 | 0.799642 | 0.890866 | 0.884762 |
| MmuSTS.466.1.S1_at    | MmuSTS.466.1  | 9.63  | 9.83  | 2.4  | 0.32 | -1.15 | 0.595703 | 0.195516 | 0.835605 | 0.470351 |
| MmuSTS.4660.1.S1_at   | MmuSTS.4660.1 | 10.78 | 8.99  | 0.56 | 0.41 | 3.47  | 0.00582  | 0.013019 | 0.211798 | 0.146821 |
| MmuSTS.4661.1.S1_at   | MmuSTS.4661.1 | 8.24  | 9.87  | 1.39 | 0.31 | -3.09 | 0.131306 | 0.041705 | 0.505606 | 0.24887  |
| MmuSTS.4662.1.S1_at   | MmuSTS.4662.1 | 10.02 | 10.23 | 0.48 | 0.2  | -1.15 | 0.698676 | 0.640162 | 0.882848 | 0.788733 |
| MmuSTS.4663.1.S1_at   | MmuSTS.4663.1 | 10.61 | 9.98  | 1.06 | 0.11 | 1.54  | 0.439529 | 0.058197 | 0.748221 | 0.287988 |
| MmuSTS.4664.1.S1_at   | MmuSTS.4664.1 | 12.8  | 13.05 | 0.3  | 0.14 | -1.19 | 0.985446 | 0.022142 | 0.995448 | 0.186249 |
| MmuSTS.4666.1.S1_at   | MmuSTS.4666.1 | 10.09 | 10.64 | 1.12 | 0.08 | -1.46 | 0.463761 | 0.156199 | 0.762278 | 0.43161  |
| MmuSTS.4667.1.S1_at   | MmuSTS.4667.1 | 9.03  | 9.54  | 1.09 | 0.11 | -1.42 | 0.473172 | 0.214025 | 0.767466 | 0.487633 |
| MmuSTS.4668.1.S1_at   | MmuSTS.4668.1 | 7.08  | 6.94  | 0.1  | 0.03 | 1.1   | 0.033683 | 0.227936 | 0.34712  | 0.500211 |
| MmuSTS.4669.1.S1_at   | MmuSTS.4669.1 | 4.12  | 4.03  | 0.24 | 0.29 | 1.06  | 0.524017 | 0.290157 | 0.795715 | 0.551134 |
| MmuSTS.467.1.S1_at    | MmuSTS.467.1  | 11.73 | 11.19 | 0.98 | 0.24 | 1.45  | 0.805013 | 0.158285 | 0.929121 | 0.43403  |
| MmuSTS.4670.1.S1_s_at | MmuSTS.4670.1 | 5.12  | 5.08  | 0.17 | 0.05 | 1.03  | 0.803734 | 0.82     | 0.928583 | 0.896303 |
| MmuSTS.4671.1.S1_at   | MmuSTS.4671.1 | 5.82  | 5.61  | 1.12 | 0.14 | 1.16  | 0.631047 | 0.442501 | 0.852361 | 0.660478 |
| MmuSTS.4672.1.S1_at   | MmuSTS.4672.1 | 6.39  | 5.53  | 1    | 0.12 | 1.83  | 0.195379 | 0.332325 | 0.565786 | 0.580754 |
| MmuSTS.4673.1.S1_at   | MmuSTS.4673.1 | 7.1   | 7.18  | 0.18 | 0.07 | -1.06 | 0.870278 | 0.168139 | 0.954825 | 0.444724 |
| MmuSTS.4674.1.S1_at   | MmuSTS.4674.1 | 11.39 | 11.58 | 0.35 | 0.03 | -1.14 | 0.37698  | 0.434653 | 0.707256 | 0.654756 |
| MmuSTS.4675.1.S1_at   | MmuSTS.4675.1 | 13.55 | 13.56 | 0.14 | 0.06 | -1.01 | 0.782136 | 0.580801 | 0.919732 | 0.749953 |
| MmuSTS.4676.1.S1_at   | MmuSTS.4676.1 | 9.41  | 8.33  | 0.39 | 0.1  | 2.12  | 0.020133 | 0.016316 | 0.303673 | 0.161818 |
| MmuSTS.4677.1.S1_at   | MmuSTS.4677.1 | 8.78  | 8.03  | 0.76 | 0.08 | 1.68  | 0.51435  | 0.220427 | 0.790322 | 0.493818 |
| MmuSTS.4678.1.S1_at   | MmuSTS.4678.1 | 8.4   | 8.68  | 0.85 | 0.05 | -1.21 | 0.602185 | 0.750825 | 0.838766 | 0.855074 |
| MmuSTS.4679.1.S1_s_at | MmuSTS.4679.1 | 3.81  | 3.63  | 0.19 | 0.11 | 1.13  | 0.918211 | 0.703743 | 0.972089 | 0.828214 |
| MmuSTS.468.1.S1_at    | MmuSTS.468.1  | 9.41  | 9.44  | 0.25 | 0.02 | -1.02 | 0.561588 | 0.113327 | 0.817232 | 0.379419 |
| MmuSTS.4680.1.S1_at   | MmuSTS.4680.1 | 7     | 5.11  | 0.41 | 0.68 | 3.7   | 0.012917 | 0.000602 | 0.265815 | 0.041985 |
| MmuSTS.4681.1.S1_at   | MmuSTS.4681.1 | 10.16 | 10.05 | 0.99 | 0.07 | 1.08  | 0.865345 | 0.234041 | 0.952614 | 0.505312 |
| MmuSTS.4682.1.S1_s_at | MmuSTS.4682.1 | 10.87 | 10.69 | 0.22 | 0.06 | 1.13  | 0.324685 | 0.411887 | 0.672781 | 0.638434 |
| MmuSTS.4683.1.S1_at   | MmuSTS.4683.1 | 12.82 | 12.65 | 0.17 | 0.07 | 1.13  | 0.105307 | 0.032664 | 0.477051 | 0.223791 |
| MmuSTS.4684.1.S1_at   | MmuSTS.4684.1 | 8.61  | 8.61  | 0.05 | 0.13 | 1     | 0.321925 | 0.000905 | 0.67054  | 0.048084 |
| MmuSTS.4685.1.S1_at   | MmuSTS.4685.1 | 11.38 | 11.13 | 0.01 | 0.08 | 1.19  | 0.011836 | 0.000039 | 0.257666 | 0.023828 |
| MmuSTS.4686.1.S1_at   | MmuSTS.4686.1 | 4.31  | 4.38  | 0.16 | 0.08 | -1.05 | 0.483765 | 0.610629 | 0.773275 | 0.76874  |
| MmuSTS.4687.1.S1_at   | MmuSTS.4687.1 | 11.8  | 11.61 | 0.31 | 0.02 | 1.14  | 0.345236 | 0.503986 | 0.68742  | 0.701267 |
| MmuSTS.4688.1.S1_at   | MmuSTS.4688.1 | 9.32  | 9.6   | 0.4  | 0.16 | -1.21 | 0.34422  | 0.456925 | 0.686913 | 0.67059  |
| MmuSTS.4689.1.S1_at   | MmuSTS.4689.1 | 5.73  | 6.78  | 0.31 | 0.06 | -2.06 | 0.010683 | 0.000885 | 0.249245 | 0.047602 |
| MmuSTS.469.1.S1_s_at  | MmuSTS.469.1  | 4.34  | 4.03  | 0.41 | 0.36 | 1.24  | 0.186417 | 0.090521 | 0.559101 | 0.345015 |
| MmuSTS.4690.1.S1_at   | MmuSTS.4690.1 | 10.4  | 9.34  | 1.34 | 0.15 | 2.08  | 0.652926 | 0.314273 | 0.862104 | 0.568254 |
| MmuSTS.4691.1.S1_at   | MmuSTS.4691.1 | 12.02 | 11.91 | 0.54 | 0.2  | 1.09  | 0.415005 | 0.026095 | 0.733489 | 0.20248  |
| MmuSTS.4692.1.S1_at   | MmuSTS.4692.1 | 3.87  | 3.88  | 0.05 | 0    | -1    | 0.443369 | 0.672499 | 0.750691 | 0.808599 |
| MmuSTS.4693.1.S1_at   | MmuSTS.4693.1 | 10.17 | 10.1  | 0.31 | 0.02 | 1.05  | 0.716407 | 0.103539 | 0.88981  | 0.364346 |
| MmuSTS.4694.1.S1_at   | MmuSTS.4694.1 | 12.67 | 12.39 | 0.09 | 0.06 | 1.21  | 0.00779  | 0.040537 | 0.230997 | 0.246264 |
| MmuSTS.4695.1.S1_at   | MmuSTS.4695.1 | 10.05 | 10.33 | 0.08 | 0.09 | -1.21 | 0.009932 | 0.005362 | 0.244411 | 0.101092 |
| MmuSTS.4696.1.S1_at   | MmuSTS.4696.1 | 10.88 | 10.38 | 0.38 | 0.05 | 1.41  | 0.093829 | 0.141326 | 0.463304 | 0.414874 |

|                       |               |       |       |      |      |       |          |          |          |          |
|-----------------------|---------------|-------|-------|------|------|-------|----------|----------|----------|----------|
| MmuSTS.4697.1.S1_at   | MmuSTS.4697.1 | 12.84 | 11.7  | 0.5  | 0.08 | 2.2   | 0.050347 | 0.047069 | 0.386982 | 0.261469 |
| MmuSTS.4698.1.S1_at   | MmuSTS.4698.1 | 6.24  | 6.73  | 0.18 | 0.18 | -1.4  | 0.058038 | 0.014848 | 0.403663 | 0.154971 |
| MmuSTS.4699.1.S1_at   | MmuSTS.4699.1 | 10.31 | 9.46  | 0.5  | 0.21 | 1.8   | 0.062384 | 0.093766 | 0.413027 | 0.350241 |
| MmuSTS.47.1.S1_at     | MmuSTS.47.1   | 5.78  | 5.72  | 0.14 | 0.12 | 1.04  | 0.474804 | 0.621173 | 0.768229 | 0.775813 |
| MmuSTS.470.1.S1_at    | MmuSTS.470.1  | 12.63 | 12.49 | 0.11 | 0.06 | 1.1   | 0.336787 | 0.078596 | 0.682118 | 0.325343 |
| MmuSTS.4700.1.S1_at   | MmuSTS.4700.1 | 8.08  | 7.58  | 0.28 | 0.06 | 1.42  | 0.035649 | 0.075407 | 0.35285  | 0.319705 |
| MmuSTS.4701.1.S1_at   | MmuSTS.4701.1 | 5.45  | 5.32  | 0.12 | 0.09 | 1.09  | 0.169231 | 0.169611 | 0.542076 | 0.446204 |
| MmuSTS.4702.1.S1_at   | MmuSTS.4702.1 | 3.91  | 4.1   | 0.08 | 0.08 | -1.14 | 0.056925 | 0.228113 | 0.401454 | 0.500298 |
| MmuSTS.4703.1.S1_at   | MmuSTS.4703.1 | 6.79  | 7.2   | 0.31 | 0.17 | -1.34 | 0.295742 | 0.008696 | 0.651408 | 0.123683 |
| MmuSTS.4704.1.S1_at   | MmuSTS.4704.1 | 11.69 | 11.69 | 0.26 | 0.05 | 1     | 0.305673 | 0.38622  | 0.65906  | 0.621444 |
| MmuSTS.4705.1.S1_at   | MmuSTS.4705.1 | 3.26  | 3.26  | 0.11 | 0.1  | 1     | 0.547363 | 0.861368 | 0.809053 | 0.921151 |
| MmuSTS.4706.1.S1_at   | MmuSTS.4706.1 | 9.34  | 9.24  | 0.08 | 0.11 | 1.07  | 0.090714 | 0.005805 | 0.458873 | 0.104597 |
| MmuSTS.4707.1.S1_at   | MmuSTS.4707.1 | 8.31  | 8.7   | 0.36 | 0.07 | -1.32 | 0.143212 | 0.10739  | 0.518489 | 0.370219 |
| MmuSTS.4708.1.S1_at   | MmuSTS.4708.1 | 6.33  | 6.22  | 0.02 | 0.19 | 1.08  | 0.360571 | 0.008696 | 0.697965 | 0.123683 |
| MmuSTS.4709.1.S1_s_at | MmuSTS.4709.1 | 12.69 | 12.76 | 0.11 | 0.04 | -1.05 | 0.604838 | 0.705876 | 0.83974  | 0.829555 |
| MmuSTS.471.1.S1_at    | MmuSTS.471.1  | 9.51  | 9.81  | 0.56 | 0.03 | -1.23 | 0.559697 | 0.293603 | 0.816367 | 0.5536   |
| MmuSTS.4710.1.S1_at   | MmuSTS.4710.1 | 13.54 | 13.61 | 0.06 | 0.04 | -1.05 | 0.166264 | 0.072958 | 0.538973 | 0.315986 |
| MmuSTS.4711.1.S1_at   | MmuSTS.4711.1 | 11.51 | 11.05 | 0.22 | 0.14 | 1.38  | 0.095909 | 0.135468 | 0.464469 | 0.407554 |
| MmuSTS.4712.1.S1_at   | MmuSTS.4712.1 | 13.34 | 13.37 | 0.04 | 0.02 | -1.02 | 0.511892 | 0.016618 | 0.788933 | 0.163117 |
| MmuSTS.4713.1.S1_at   | MmuSTS.4713.1 | 11.77 | 11.51 | 0.2  | 0.15 | 1.2   | 0.092816 | 0.018635 | 0.461373 | 0.171648 |
| MmuSTS.4714.1.S1_at   | MmuSTS.4714.1 | 11.13 | 11.72 | 0.52 | 0.09 | -1.51 | 0.338228 | 0.329944 | 0.682773 | 0.578874 |
| MmuSTS.4715.1.S1_at   | MmuSTS.4715.1 | 9.03  | 9.75  | 0.04 | 0.15 | -1.65 | 0.001343 | 0.000711 | 0.159096 | 0.044419 |
| MmuSTS.4716.1.S1_at   | MmuSTS.4716.1 | 9.37  | 9.88  | 0.21 | 0.05 | -1.43 | 0.014432 | 0.001307 | 0.275474 | 0.055656 |
| MmuSTS.4717.1.S1_at   | MmuSTS.4717.1 | 5.3   | 5.32  | 0.52 | 0.13 | -1.02 | 0.688167 | 0.413061 | 0.878127 | 0.63939  |
| MmuSTS.4718.1.S1_at   | MmuSTS.4718.1 | 4.59  | 4.58  | 0.13 | 0.16 | 1     | 0.592088 | 0.821648 | 0.833686 | 0.897303 |
| MmuSTS.4719.1.S1_at   | MmuSTS.4719.1 | 7.6   | 7.91  | 0.29 | 0.2  | -1.24 | 0.249544 | 0.010564 | 0.614932 | 0.134181 |
| MmuSTS.472.1.S1_at    | MmuSTS.472.1  | 12.55 | 12.8  | 0.57 | 0.11 | -1.18 | 0.484905 | 0.009268 | 0.77383  | 0.127089 |
| MmuSTS.4720.1.S1_at   | MmuSTS.4720.1 | 4.8   | 4.72  | 0.59 | 0.5  | 1.05  | 0.936094 | 0.510536 | 0.978518 | 0.704999 |
| MmuSTS.4721.1.S1_at   | MmuSTS.4721.1 | 8.74  | 9.18  | 0.54 | 0.15 | -1.36 | 0.061819 | 0.027332 | 0.411556 | 0.206625 |
| MmuSTS.4722.1.S1_at   | MmuSTS.4722.1 | 10.79 | 10.64 | 0.06 | 0.04 | 1.11  | 0.013506 | 0.000562 | 0.269429 | 0.041049 |
| MmuSTS.4723.1.S1_at   | MmuSTS.4723.1 | 4.87  | 5.01  | 0.24 | 0.38 | -1.1  | 0.919667 | 0.492347 | 0.972712 | 0.693485 |
| MmuSTS.4724.1.S1_at   | MmuSTS.4724.1 | 9.74  | 9.72  | 0.13 | 0.05 | 1.01  | 0.822456 | 0.94568  | 0.936042 | 0.969126 |
| MmuSTS.4725.1.S1_at   | MmuSTS.4725.1 | 11.79 | 11.91 | 0.45 | 0.16 | -1.09 | 0.306168 | 0.448065 | 0.659271 | 0.663986 |
| MmuSTS.4726.1.S1_at   | MmuSTS.4726.1 | 9.78  | 9.87  | 0.36 | 0.16 | -1.06 | 0.881469 | 0.925513 | 0.959052 | 0.957833 |
| MmuSTS.4727.1.S1_s_at | MmuSTS.4727.1 | 7.55  | 8.72  | 0.17 | 0.2  | -2.26 | 0.001599 | 0.006125 | 0.162459 | 0.106581 |
| MmuSTS.4728.1.S1_at   | MmuSTS.4728.1 | 8.55  | 8.94  | 0.23 | 0.01 | -1.3  | 0.125913 | 0.002087 | 0.49972  | 0.067506 |
| MmuSTS.4729.1.S1_at   | MmuSTS.4729.1 | 8.9   | 9.17  | 0.24 | 0.05 | -1.21 | 0.043296 | 0.021801 | 0.371758 | 0.184765 |
| MmuSTS.473.1.S1_at    | MmuSTS.473.1  | 6.42  | 6.15  | 0.05 | 0.12 | 1.21  | 0.04783  | 0.035908 | 0.381321 | 0.234002 |
| MmuSTS.4730.1.S1_at   | MmuSTS.4730.1 | 9.31  | 9.61  | 0.46 | 0.15 | -1.23 | 0.224595 | 0.284435 | 0.593868 | 0.546637 |
| MmuSTS.4731.1.S1_at   | MmuSTS.4731.1 | 9.92  | 9.85  | 0.31 | 0.05 | 1.05  | 0.570802 | 0.14875  | 0.822287 | 0.423201 |
| MmuSTS.4732.1.S1_at   | MmuSTS.4732.1 | 5.92  | 5.93  | 0.07 | 0.13 | -1.01 | 0.282028 | 0.370289 | 0.640534 | 0.609406 |
| MmuSTS.4733.1.S1_at   | MmuSTS.4733.1 | 11.87 | 11.81 | 0.12 | 0.04 | 1.04  | 0.163177 | 0.246095 | 0.536035 | 0.515832 |
| MmuSTS.4734.1.S1_at   | MmuSTS.4734.1 | 10.37 | 10.2  | 0.19 | 0.07 | 1.12  | 0.433752 | 0.153285 | 0.744621 | 0.428139 |

|                       |               |       |       |      |      |       |          |          |          |          |
|-----------------------|---------------|-------|-------|------|------|-------|----------|----------|----------|----------|
| MmuSTS.4735.1.S1_at   | MmuSTS.4735.1 | 8.59  | 8.77  | 0.25 | 0.12 | -1.13 | 0.405636 | 0.554017 | 0.727426 | 0.73293  |
| MmuSTS.4736.1.S1_at   | MmuSTS.4736.1 | 5.75  | 5.94  | 0.3  | 0.17 | -1.15 | 0.662054 | 0.291028 | 0.866635 | 0.551574 |
| MmuSTS.4737.1.S1_at   | MmuSTS.4737.1 | 10.11 | 10.81 | 0.29 | 0.04 | -1.62 | 0.007746 | 0.016217 | 0.230997 | 0.161389 |
| MmuSTS.4738.1.S1_at   | MmuSTS.4738.1 | 7.97  | 8.32  | 2.84 | 0.54 | -1.28 | 0.581055 | 0.303536 | 0.827363 | 0.561005 |
| MmuSTS.4739.1.S1_at   | MmuSTS.4739.1 | 6.98  | 7.29  | 0.94 | 0.06 | -1.24 | 0.889463 | 0.293677 | 0.961918 | 0.553665 |
| MmuSTS.474.1.S1_at    | MmuSTS.474.1  | 8.27  | 8.59  | 0.19 | 0.05 | -1.25 | 0.173331 | 0.045985 | 0.54656  | 0.258838 |
| MmuSTS.4740.1.S1_at   | MmuSTS.4740.1 | 11.54 | 12.19 | 2.86 | 0.26 | -1.57 | 0.347034 | 0.253803 | 0.688506 | 0.52217  |
| MmuSTS.4741.1.S1_at   | MmuSTS.4741.1 | 10.68 | 8.91  | 1    | 0.64 | 3.41  | 0.055807 | 0.010347 | 0.399433 | 0.133184 |
| MmuSTS.4742.1.S1_at   | MmuSTS.4742.1 | 7.86  | 7.53  | 0.17 | 0.37 | 1.26  | 0.074821 | 0.213136 | 0.435313 | 0.487054 |
| MmuSTS.4743.1.S1_at   | MmuSTS.4743.1 | 6.17  | 6.03  | 0.11 | 0.15 | 1.1   | 0.134249 | 0.145403 | 0.508462 | 0.419421 |
| MmuSTS.4744.1.S1_at   | MmuSTS.4744.1 | 9.93  | 9.85  | 0.44 | 0.11 | -1.06 | 0.364601 | 0.221348 | 0.700616 | 0.494644 |
| MmuSTS.4745.1.S1_at   | MmuSTS.4745.1 | 8.87  | 9.34  | 0.56 | 0.12 | -1.38 | 0.180327 | 0.22579  | 0.553472 | 0.498159 |
| MmuSTS.4745.1.S1_s_at | MmuSTS.4745.1 | 10.23 | 10.69 | 0.49 | 0.04 | -1.38 | 0.116305 | 0.119737 | 0.489568 | 0.388481 |
| MmuSTS.4746.1.S1_at   | MmuSTS.4746.1 | 9.51  | 9.45  | 0.19 | 0.12 | 1.04  | 0.625354 | 0.839454 | 0.84933  | 0.908523 |
| MmuSTS.4747.1.S1_at   | MmuSTS.4747.1 | 9.72  | 9.68  | 0.08 | 0.04 | 1.03  | 0.93094  | 0.042917 | 0.976936 | 0.251759 |
| MmuSTS.4747.1.S1_s_at | MmuSTS.4747.1 | 10.23 | 10.31 | 0.12 | 0.02 | -1.05 | 0.117577 | 0.022848 | 0.490984 | 0.189246 |
| MmuSTS.4748.1.S1_at   | MmuSTS.4748.1 | 7.98  | 7.25  | 0.29 | 0.16 | 1.65  | 0.012663 | 0.148665 | 0.263546 | 0.423201 |
| MmuSTS.4749.1.S1_at   | MmuSTS.4749.1 | 9.22  | 9.27  | 0.26 | 0.1  | -1.04 | 0.609749 | 0.709481 | 0.841773 | 0.831671 |
| MmuSTS.475.1.S1_at    | MmuSTS.475.1  | 12.17 | 12.13 | 0.09 | 0.09 | 1.02  | 0.482139 | 0.505513 | 0.772274 | 0.702189 |
| MmuSTS.4750.1.S1_at   | MmuSTS.4750.1 | 10.61 | 10.72 | 0.05 | 0.03 | -1.08 | 0.033065 | 0.010182 | 0.345994 | 0.132317 |
| MmuSTS.4751.1.S1_at   | MmuSTS.4751.1 | 8.55  | 8.7   | 0.44 | 0.2  | -1.11 | 0.968485 | 0.761187 | 0.989696 | 0.86123  |
| MmuSTS.4752.1.S1_at   | MmuSTS.4752.1 | 9.52  | 9.65  | 0.32 | 0.08 | -1.09 | 0.490838 | 0.024901 | 0.777332 | 0.197685 |
| MmuSTS.4753.1.S1_at   | MmuSTS.4753.1 | 6.06  | 7.16  | 1.19 | 0.16 | -2.15 | 0.33358  | 0.393604 | 0.679759 | 0.626497 |
| MmuSTS.4754.1.S1_at   | MmuSTS.4754.1 | 11.01 | 10.61 | 0.44 | 0.03 | 1.31  | 0.22826  | 0.256562 | 0.597168 | 0.524321 |
| MmuSTS.4755.1.S1_at   | MmuSTS.4755.1 | 3.61  | 3.48  | 0.08 | 0.14 | 1.09  | 0.154014 | 0.323322 | 0.527325 | 0.574443 |
| MmuSTS.4756.1.S1_at   | MmuSTS.4756.1 | 7.37  | 7.52  | 0.18 | 0.02 | -1.11 | 0.19967  | 0.316082 | 0.571494 | 0.569541 |
| MmuSTS.4757.1.S1_at   | MmuSTS.4757.1 | 12.72 | 12.42 | 0.29 | 0.17 | 1.23  | 0.811585 | 0.129272 | 0.931835 | 0.400682 |
| MmuSTS.4758.1.S1_at   | MmuSTS.4758.1 | 12.08 | 12.16 | 0.11 | 0.04 | -1.06 | 0.184881 | 0.105494 | 0.55767  | 0.367413 |
| MmuSTS.4759.1.S1_at   | MmuSTS.4759.1 | 11.76 | 11.92 | 0.09 | 0.04 | -1.11 | 0.036781 | 0.218933 | 0.355785 | 0.492716 |
| MmuSTS.476.1.S1_s_at  | MmuSTS.476.1  | 4.37  | 4.25  | 0.06 | 0.02 | 1.09  | 0.025623 | 0.579964 | 0.322382 | 0.749354 |
| MmuSTS.4760.1.S1_at   | MmuSTS.4760.1 | 10.1  | 10.09 | 0.11 | 0.16 | 1.01  | 0.757047 | 0.346299 | 0.908357 | 0.59124  |
| MmuSTS.4761.1.S1_at   | MmuSTS.4761.1 | 3.32  | 3.2   | 0.14 | 0.17 | 1.09  | 0.176936 | 0.206551 | 0.549992 | 0.480584 |
| MmuSTS.4762.1.S1_at   | MmuSTS.4762.1 | 9.86  | 9.62  | 0.39 | 0.31 | 1.19  | 0.778032 | 0.025952 | 0.918054 | 0.20198  |
| MmuSTS.4763.1.S1_at   | MmuSTS.4763.1 | 9.1   | 9.4   | 0.44 | 0.21 | -1.23 | 0.596002 | 0.057834 | 0.835679 | 0.286866 |
| MmuSTS.4764.1.S1_at   | MmuSTS.4764.1 | 12.42 | 12.07 | 0.4  | 0.08 | 1.28  | 0.416851 | 0.49466  | 0.734559 | 0.69497  |
| MmuSTS.4765.1.S1_at   | MmuSTS.4765.1 | 8.34  | 8.13  | 0.22 | 0.21 | 1.15  | 0.13289  | 0.013951 | 0.507129 | 0.151468 |
| MmuSTS.4766.1.S1_at   | MmuSTS.4766.1 | 8.49  | 8.31  | 0.86 | 0.15 | 1.14  | 0.851548 | 0.405886 | 0.947639 | 0.634037 |
| MmuSTS.4767.1.S1_at   | MmuSTS.4767.1 | 7.7   | 7.94  | 0.31 | 0.05 | -1.18 | 0.743272 | 0.839453 | 0.902055 | 0.908523 |
| MmuSTS.4768.1.S1_at   | MmuSTS.4768.1 | 11.72 | 11.89 | 0.2  | 0.06 | -1.12 | 0.073563 | 0.064427 | 0.434623 | 0.300001 |
| MmuSTS.4769.1.S1_at   | MmuSTS.4769.1 | 7.48  | 7.84  | 0.37 | 0.17 | -1.29 | 0.134429 | 0.060489 | 0.508462 | 0.292569 |
| MmuSTS.477.1.S1_s_at  | MmuSTS.477.1  | 4.47  | 4.45  | 0.09 | 0.09 | 1.01  | 0.732776 | 0.885178 | 0.897352 | 0.934628 |
| MmuSTS.4770.1.S1_at   | MmuSTS.4770.1 | 8.16  | 8.38  | 0.4  | 0.06 | -1.16 | 0.938688 | 0.612517 | 0.979343 | 0.770071 |
| MmuSTS.4771.1.S1_at   | MmuSTS.4771.1 | 6.73  | 6.76  | 0.01 | 0.2  | -1.02 | 0.816893 | 0.691706 | 0.933751 | 0.820652 |



|                      |               |       |       |      |      |       |          |          |          |          |
|----------------------|---------------|-------|-------|------|------|-------|----------|----------|----------|----------|
| MmuSTS.4772.1.S1_at  | MmuSTS.4772.1 | 7.81  | 7.41  | 0.8  | 0.11 | 1.32  | 0.505684 | 0.320431 | 0.785398 | 0.572648 |
| MmuSTS.4773.1.S1_at  | MmuSTS.4773.1 | 11.57 | 12.01 | 0.3  | 0.01 | -1.36 | 0.061571 | 0.021442 | 0.411026 | 0.183342 |
| MmuSTS.4774.1.S1_at  | MmuSTS.4774.1 | 7.61  | 7.75  | 0.19 | 0.12 | -1.11 | 0.550925 | 0.011337 | 0.811083 | 0.138125 |
| MmuSTS.4775.1.S1_at  | MmuSTS.4775.1 | 8.24  | 9.23  | 0.7  | 0.11 | -1.99 | 0.071806 | 0.066354 | 0.431612 | 0.303235 |
| MmuSTS.4776.1.S1_at  | MmuSTS.4776.1 | 10.87 | 11.28 | 0.28 | 0.17 | -1.33 | 0.082394 | 0.035368 | 0.447257 | 0.232348 |
| MmuSTS.4777.1.S1_at  | MmuSTS.4777.1 | 4.56  | 4.28  | 0.38 | 0.06 | 1.21  | 0.317081 | 0.425871 | 0.666924 | 0.6481   |
| MmuSTS.4778.1.S1_at  | MmuSTS.4778.1 | 7.02  | 7.63  | 0.55 | 0.59 | -1.53 | 0.549646 | 0.762031 | 0.810392 | 0.861597 |
| MmuSTS.4779.1.S1_at  | MmuSTS.4779.1 | 7.85  | 7.41  | 0.24 | 0.18 | 1.36  | 0.146369 | 0.009091 | 0.520747 | 0.125944 |
| MmuSTS.478.1.S1_s_at | MmuSTS.478.1  | 4.77  | 4.76  | 0.23 | 0.1  | 1.01  | 0.844822 | 0.828721 | 0.94551  | 0.901558 |
| MmuSTS.4780.1.S1_at  | MmuSTS.4780.1 | 4.74  | 4.85  | 0.1  | 0.03 | -1.08 | 0.369461 | 0.81098  | 0.704236 | 0.890949 |
| MmuSTS.4781.1.S1_at  | MmuSTS.4781.1 | 10.01 | 10.34 | 0.16 | 0.08 | -1.26 | 0.028107 | 0.031859 | 0.330564 | 0.220909 |
| MmuSTS.4782.1.S1_at  | MmuSTS.4782.1 | 12.11 | 11.65 | 0.05 | 0.17 | 1.38  | 0.006148 | 0.067953 | 0.216392 | 0.306905 |
| MmuSTS.4783.1.S1_at  | MmuSTS.4783.1 | 8.19  | 8.44  | 0.12 | 0.12 | -1.19 | 0.051618 | 0.104346 | 0.390696 | 0.36558  |
| MmuSTS.4784.1.S1_at  | MmuSTS.4784.1 | 12.93 | 13.14 | 0.17 | 0.02 | -1.15 | 0.317482 | 0.106935 | 0.667356 | 0.369499 |
| MmuSTS.4785.1.S1_at  | MmuSTS.4785.1 | 9.68  | 9.97  | 0.85 | 0.08 | -1.22 | 0.776861 | 0.931409 | 0.917413 | 0.961034 |
| MmuSTS.4786.1.S1_at  | MmuSTS.4786.1 | 6.34  | 7.48  | 0.61 | 0.12 | -2.21 | 0.041543 | 0.01392  | 0.366776 | 0.151344 |
| MmuSTS.4787.1.S1_at  | MmuSTS.4787.1 | 10.56 | 11.05 | 0.23 | 0.14 | -1.41 | 0.026195 | 0.003546 | 0.323574 | 0.085371 |
| MmuSTS.4788.1.S1_at  | MmuSTS.4788.1 | 7.34  | 7.09  | 0.05 | 0.21 | 1.19  | 0.032775 | 0.01968  | 0.345393 | 0.176276 |
| MmuSTS.4789.1.S1_at  | MmuSTS.4789.1 | 8.25  | 8.19  | 0.3  | 0.06 | 1.05  | 0.987999 | 0.027763 | 0.995831 | 0.208034 |
| MmuSTS.479.1.S1_s_at | MmuSTS.479.1  | 4.83  | 4.82  | 0.08 | 0.06 | 1.01  | 0.544934 | 0.470232 | 0.807533 | 0.678572 |
| MmuSTS.4790.1.S1_at  | MmuSTS.4790.1 | 8.26  | 8.43  | 0.4  | 0.22 | -1.12 | 0.68283  | 0.46947  | 0.875927 | 0.678248 |
| MmuSTS.4791.1.S1_at  | MmuSTS.4791.1 | 6.33  | 7.12  | 0.34 | 0.15 | -1.74 | 0.01113  | 0.003739 | 0.252486 | 0.08718  |
| MmuSTS.4792.1.S1_at  | MmuSTS.4792.1 | 6.73  | 7.77  | 0.94 | 0.12 | -2.06 | 0.145132 | 0.129236 | 0.520309 | 0.400635 |
| MmuSTS.4793.1.S1_at  | MmuSTS.4793.1 | 8.55  | 7.98  | 0.47 | 0.19 | 1.48  | 0.294167 | 0.370288 | 0.650324 | 0.609406 |
| MmuSTS.4794.1.S1_at  | MmuSTS.4794.1 | 10.15 | 10.68 | 0.23 | 0.02 | -1.44 | 0.019138 | 0.002046 | 0.299936 | 0.066887 |
| MmuSTS.4795.1.S1_at  | MmuSTS.4795.1 | 3.47  | 3.36  | 0.12 | 0.05 | 1.08  | 0.849574 | 0.862708 | 0.947112 | 0.921951 |
| MmuSTS.4796.1.S1_at  | MmuSTS.4796.1 | 7.99  | 8.55  | 2.36 | 0.28 | -1.47 | 0.514311 | 0.351264 | 0.790322 | 0.594937 |
| MmuSTS.4797.1.S1_at  | MmuSTS.4797.1 | 11.24 | 10.96 | 0.38 | 0.08 | 1.21  | 0.268867 | 0.382976 | 0.629195 | 0.61903  |
| MmuSTS.4798.1.S1_at  | MmuSTS.4798.1 | 5.29  | 5.53  | 0.41 | 0.26 | -1.18 | 0.666987 | 0.869306 | 0.868458 | 0.925876 |
| MmuSTS.4799.1.S1_at  | MmuSTS.4799.1 | 5.59  | 5.42  | 0.22 | 0.08 | 1.12  | 0.143226 | 0.343276 | 0.518489 | 0.589026 |
| MmuSTS.48.1.S1_at    | MmuSTS.48.1   | 11.43 | 11.46 | 0.3  | 0.07 | -1.02 | 0.893466 | 0.710547 | 0.963469 | 0.832109 |
| MmuSTS.480.1.S1_s_at | MmuSTS.480.1  | 4.56  | 4.48  | 0.02 | 0.03 | 1.05  | 0.057976 | 0.241137 | 0.403539 | 0.511749 |
| MmuSTS.4800.1.S1_at  | MmuSTS.4800.1 | 3.4   | 3.33  | 0.1  | 0.1  | 1.05  | 0.449975 | 0.726902 | 0.754621 | 0.842011 |
| MmuSTS.4801.1.S1_at  | MmuSTS.4801.1 | 3.81  | 4.01  | 0.74 | 0.26 | -1.15 | 0.634318 | 0.71101  | 0.854043 | 0.832375 |
| MmuSTS.4802.1.S1_at  | MmuSTS.4802.1 | 5.76  | 5.68  | 0.08 | 0.08 | 1.06  | 0.501181 | 0.166384 | 0.783112 | 0.442884 |
| MmuSTS.4803.1.S1_at  | MmuSTS.4803.1 | 12.58 | 13.12 | 0.72 | 0.05 | -1.45 | 0.344014 | 0.464294 | 0.686913 | 0.674993 |
| MmuSTS.4804.1.S1_at  | MmuSTS.4804.1 | 5.32  | 5.31  | 0.09 | 0.16 | 1.01  | 0.753988 | 0.048443 | 0.907261 | 0.26532  |
| MmuSTS.4805.1.S1_at  | MmuSTS.4805.1 | 8.03  | 7.11  | 0.04 | 0.35 | 1.9   | 0.014879 | 0.003041 | 0.278597 | 0.080419 |
| MmuSTS.4806.1.S1_at  | MmuSTS.4806.1 | 7.36  | 8.65  | 0.51 | 0.21 | -2.44 | 0.035459 | 0.023269 | 0.352096 | 0.191218 |
| MmuSTS.4807.1.S1_at  | MmuSTS.4807.1 | 6.59  | 6.47  | 0.11 | 0.01 | 1.09  | 0.170362 | 0.299458 | 0.543424 | 0.557907 |
| MmuSTS.4808.1.S1_at  | MmuSTS.4808.1 | 6.93  | 6.79  | 0.06 | 0.04 | 1.1   | 0.070622 | 0.385783 | 0.4297   | 0.621079 |
| MmuSTS.4809.1.S1_at  | MmuSTS.4809.1 | 9.37  | 10.21 | 0.31 | 0.04 | -1.79 | 0.009769 | 0.010266 | 0.243347 | 0.132661 |
| MmuSTS.481.1.S1_s_at | MmuSTS.481.1  | 4.16  | 4.26  | 0.11 | 0.27 | -1.08 | 0.232744 | 0.360155 | 0.600193 | 0.601268 |

|                        |                |       |       |      |      |       |          |          |          |          |
|------------------------|----------------|-------|-------|------|------|-------|----------|----------|----------|----------|
| MmuSTS.4810.1.S1_at    | MmuSTS.4810.1  | 10.55 | 10.68 | 0.07 | 0.13 | -1.09 | 0.06803  | 0.00533  | 0.42451  | 0.100928 |
| MmuSTS.4811.1.S1_at    | MmuSTS.4811.1  | 10.6  | 10.04 | 0.21 | 0.1  | 1.47  | 0.007497 | 0.001156 | 0.229281 | 0.053615 |
| MmuSTS.4812.1.S1_at    | MmuSTS.4812.1  | 2.93  | 2.91  | 0.11 | 0.04 | 1.01  | 0.275493 | 0.394528 | 0.634981 | 0.627068 |
| MmuSTS.4813.1.S1_at    | MmuSTS.4813.1  | 4.75  | 4.12  | 0.38 | 0.11 | 1.55  | 0.13012  | 0.345981 | 0.504663 | 0.59115  |
| MmuSTS.4814.1.S1_at    | MmuSTS.4814.1  | 4.16  | 3.95  | 0.24 | 0.15 | 1.15  | 0.154695 | 0.439859 | 0.527946 | 0.658468 |
| MmuSTS.4815.1.S1_at    | MmuSTS.4815.1  | 6.75  | 5.08  | 2.72 | 0.5  | 3.17  | 0.477903 | 0.05039  | 0.76987  | 0.269732 |
| MmuSTS.4816.1.S1_at    | MmuSTS.4816.1  | 12.85 | 11.95 | 0.24 | 0.34 | 1.87  | 0.019586 | 0.003544 | 0.301696 | 0.085371 |
| MmuSTS.4817.1.S1_at    | MmuSTS.4817.1  | 2.97  | 2.94  | 0.09 | 0.13 | 1.02  | 0.9751   | 0.278006 | 0.991912 | 0.541696 |
| MmuSTS.4818.1.S1_at    | MmuSTS.4818.1  | 3.9   | 4.38  | 0.07 | 0.5  | -1.4  | 0.232414 | 0.454957 | 0.600124 | 0.669021 |
| MmuSTS.4819.1.S1_at    | MmuSTS.4819.1  | 7.7   | 9.11  | 0.62 | 0.25 | -2.67 | 0.012983 | 0.007153 | 0.26612  | 0.113788 |
| MmuSTS.482.1.S1_at     | MmuSTS.482.1   | 6     | 5.81  | 0.11 | 0.16 | -1.14 | 0.136963 | 0.135751 | 0.511963 | 0.407925 |
| MmuSTS.482.1.S1_s_at   | MmuSTS.482.1   | 4.75  | 4.83  | 0.01 | 0.08 | -1.06 | 0.325095 | 0.76936  | 0.673015 | 0.866048 |
| MmuSTS.4820.1.S1_at    | MmuSTS.4820.1  | 4.85  | 5.11  | 0.15 | 0.24 | -1.2  | 0.071078 | 0.283058 | 0.430341 | 0.545692 |
| MmuSTS.4821.1.S1_at    | MmuSTS.4821.1  | 9.41  | 9.26  | 0.91 | 0.04 | 1.11  | 0.617742 | 0.067836 | 0.845608 | 0.306639 |
| MmuSTS.4822.1.S1_at    | MmuSTS.4822.1  | 12.23 | 12.47 | 0.33 | 0.08 | -1.18 | 0.651949 | 0.077438 | 0.861891 | 0.323236 |
| MmuSTS.4823.1.S1_at    | MmuSTS.4823.1  | 7.38  | 6.76  | 2.11 | 0.17 | 1.53  | 0.669151 | 0.289748 | 0.869371 | 0.550776 |
| MmuSTS.4824.1.S1_at    | MmuSTS.4824.1  | 4.75  | 5.11  | 0.29 | 0.13 | -1.28 | 0.109449 | 0.001893 | 0.482287 | 0.065004 |
| MmuSTS.4825.1.S1_at    | MmuSTS.4825.1  | 6.31  | 6.4   | 0.18 | 0.2  | -1.06 | 0.287299 | 0.449416 | 0.644392 | 0.665054 |
| MmuSTS.4826.1.S1_at    | MmuSTS.4826.1  | 11.87 | 9.84  | 0.61 | 0.48 | 4.09  | 0.017163 | 0.010168 | 0.289699 | 0.13217  |
| MmuSTS.4827.1.S1_at    | MmuSTS.4827.1  | 6.52  | 7     | 0.26 | 0.32 | -1.4  | 0.238238 | 0.13085  | 0.605262 | 0.403037 |
| MmuSTS.4828.1.S1_at    | MmuSTS.4828.1  | 6.97  | 6.64  | 0.76 | 0.61 | 1.26  | 0.828402 | 0.093195 | 0.938275 | 0.34931  |
| MmuSTS.4829.1.S1_at    | MmuSTS.4829.1  | 9.07  | 9.39  | 0.36 | 0.15 | -1.25 | 0.238991 | 0.695967 | 0.60548  | 0.823362 |
| MmuSTS.483.1.S1_s_at   | MmuSTS.483.1   | 3.47  | 3.43  | 0.05 | 0.21 | 1.03  | 0.45152  | 0.436488 | 0.755176 | 0.656022 |
| MmuSTS.4830.1.S1_at    | MmuSTS.4830.1  | 4.08  | 4.01  | 0.07 | 0.36 | 1.05  | 0.32022  | 0.431828 | 0.669207 | 0.6526   |
| MmuSTS.4831.1.S1_at    | MmuSTS.4831.1  | 6.49  | 6.73  | 0.09 | 0.06 | -1.18 | 0.019165 | 0.039999 | 0.299936 | 0.245193 |
| MmuSTS.4832.1.S1_at    | MmuSTS.4832.1  | 6.37  | 6.22  | 0.09 | 0.15 | 1.11  | 0.112913 | 0.405476 | 0.486223 | 0.633774 |
| MmuSTS.4833.1.S1_at    | MmuSTS.4833.1  | 6.04  | 5.97  | 0.1  | 0.02 | 1.05  | 0.21229  | 0.489479 | 0.582816 | 0.691824 |
| MmuSTS.4834.1.S1_at    | MmuSTS.4834.1  | 6.54  | 6.68  | 0.65 | 0.86 | -1.1  | 0.644739 | 0.046645 | 0.858593 | 0.260499 |
| MmuSTS.4835.1.S1_at    | MmuSTS.4835.1  | 9.3   | 8.95  | 0.25 | 0.08 | 1.28  | 0.073264 | 0.034276 | 0.434186 | 0.229049 |
| MmuSTS.4836.1.S1_at    | MmuSTS.4836.1  | 12.69 | 9.29  | 1.4  | 0.17 | 10.56 | 0.025063 | 0.023668 | 0.320402 | 0.192612 |
| MmuSTS.4837.1.S1_at    | MmuSTS.4837.1  | 11.84 | 12.03 | 0.52 | 0.19 | -1.14 | 0.878396 | 0.108196 | 0.957708 | 0.371557 |
| MmuSTS.4838.1.S1_at    | MmuSTS.4838.1  | 10.12 | 10.74 | 0.41 | 0.13 | -1.54 | 0.139244 | 0.205759 | 0.514693 | 0.48007  |
| MmuSTS.4839.1.S1_at    | MmuSTS.4839.1  | 12.8  | 12.73 | 0.7  | 0.04 | 1.04  | 0.730969 | 0.746185 | 0.896353 | 0.852688 |
| MmuSTS.484.1.S1_s_at   | MmuSTS.484.1   | 4.32  | 4.13  | 0.07 | 0.16 | 1.14  | 0.157133 | 0.387606 | 0.530266 | 0.622234 |
| MmuSTS.4840.1.S1_at    | MmuSTS.4840.1  | 3.98  | 3.73  | 0.08 | 0.03 | 1.18  | 0.01241  | 0.075511 | 0.262097 | 0.319939 |
| MmuSTS.4841.1.S1_at    | MmuSTS.4841.1  | 5.22  | 5.19  | 0.1  | 0.05 | 1.02  | 0.337263 | 0.679888 | 0.682275 | 0.8131   |
| MmuSTS.4842.1.S1_at    | MmuSTS.4842.1  | 9.18  | 8.33  | 2.82 | 0.37 | 1.8   | 0.944953 | 0.322916 | 0.980852 | 0.574257 |
| MmuSTS.4843.1.S1_at    | MmuSTS.4843.1  | 10.63 | 11.03 | 0.53 | 0.03 | -1.32 | 0.19386  | 0.138274 | 0.564465 | 0.411198 |
| MmuSTS.4844.1.S1_at    | MmuSTS.4844.1  | 13.24 | 13.04 | 0.88 | 0.01 | 1.15  | 0.570682 | 0.650071 | 0.822247 | 0.795399 |
| MmuSTS.4845.1.S1_at    | MmuSTS.4845.1  | 4.51  | 4.34  | 0.09 | 0.09 | 1.13  | 0.037468 | 0.033643 | 0.357167 | 0.227006 |
| MmuSTS.485.1.S1_at     | MmuSTS.485.1   | 5.43  | 5     | 0.02 | 0.05 | 1.35  | 0.000192 | 0.189895 | 0.114029 | 0.465424 |
| MmunewRS.696.1.S1_at   | MmunewRS.696.1 | 3.21  | 3.19  | 0.01 | 0.01 | 1.01  | 0.572907 | 0.491324 | 0.823428 | 0.692931 |
| MmunewRS.696.1.S1_s_at | MmunewRS.696.1 | 3.26  | 3.32  | 0.01 | 0.08 | -1.04 | 0.24522  | 0.809533 | 0.610623 | 0.890191 |

|                      |              |       |       |      |      |       |          |          |          |          |
|----------------------|--------------|-------|-------|------|------|-------|----------|----------|----------|----------|
| MmuSTS.486.1.S1_at   | MmuSTS.486.1 | 10.93 | 10.78 | 0.11 | 0.28 | 1.11  | 0.405493 | 0.289136 | 0.727426 | 0.550283 |
| MmuSTS.487.1.S1_at   | MmuSTS.487.1 | 11.19 | 10.87 | 0.28 | 0.05 | 1.25  | 0.094165 | 0.134871 | 0.463506 | 0.406878 |
| MmuSTS.488.1.S1_at   | MmuSTS.488.1 | 9.06  | 9.08  | 0.2  | 0.03 | -1.02 | 0.954645 | 0.605671 | 0.98492  | 0.765377 |
| MmuSTS.489.1.S1_s_at | MmuSTS.489.1 | 10.7  | 10.83 | 0.35 | 0.08 | -1.1  | 0.788952 | 0.925752 | 0.922472 | 0.95799  |
| MmuSTS.49.1.S1_at    | MmuSTS.49.1  | 9.46  | 9.88  | 0.32 | 0.11 | -1.34 | 0.148343 | 0.05049  | 0.522567 | 0.270049 |
| MmuSTS.490.1.S1_at   | MmuSTS.490.1 | 11.12 | 10.96 | 0.34 | 0.08 | 1.12  | 0.471518 | 0.417535 | 0.76658  | 0.642252 |
| MmuSTS.491.1.S1_at   | MmuSTS.491.1 | 12.11 | 12.13 | 0.31 | 0.16 | -1.01 | 0.630705 | 0.008672 | 0.852089 | 0.123535 |
| MmuSTS.492.1.S1_at   | MmuSTS.492.1 | 9.31  | 9.96  | 0.81 | 0.12 | -1.57 | 0.526184 | 0.043843 | 0.796454 | 0.254002 |
| MmuSTS.493.1.S1_at   | MmuSTS.493.1 | 7.65  | 7.6   | 0.46 | 0.03 | 1.03  | 0.729879 | 0.548714 | 0.895868 | 0.729333 |
| MmuSTS.494.1.S1_at   | MmuSTS.494.1 | 5.43  | 5.3   | 0.1  | 0.11 | 1.09  | 0.346951 | 0.129213 | 0.688445 | 0.400635 |
| MmuSTS.495.1.S1_at   | MmuSTS.495.1 | 9.9   | 9.77  | 0.12 | 0.03 | -1.09 | 0.101477 | 0.002061 | 0.471735 | 0.0672   |
| MmuSTS.496.1.S1_s_at | MmuSTS.496.1 | 3.27  | 3.14  | 0.04 | 0.15 | 1.09  | 0.502577 | 0.667664 | 0.783762 | 0.805472 |
| MmuSTS.497.1.S1_s_at | MmuSTS.497.1 | 3.98  | 4.01  | 0.14 | 0.05 | -1.02 | 0.649226 | 0.719229 | 0.860245 | 0.837526 |
| MmuSTS.498.1.S1_at   | MmuSTS.498.1 | 4.24  | 4.17  | 0.22 | 0.15 | 1.04  | 0.888563 | 0.271635 | 0.961514 | 0.536577 |
| MmuSTS.499.1.S1_at   | MmuSTS.499.1 | 3.4   | 3.18  | 0.04 | 0.05 | 1.16  | 0.003998 | 0.011074 | 0.198571 | 0.137002 |
| MmuSTS.5.1.S1_at     | MmuSTS.5.1   | 5.78  | 7.26  | 0.76 | 0.28 | -2.78 | 0.095607 | 0.101775 | 0.464229 | 0.361653 |
| MmuSTS.50.1.S1_at    | MmuSTS.50.1  | 10.05 | 9.86  | 0.95 | 0.19 | 1.14  | 0.868219 | 0.958197 | 0.953843 | 0.976332 |
| MmuSTS.500.1.S1_s_at | MmuSTS.500.1 | 3.69  | 3.63  | 0.17 | 0.01 | 1.04  | 0.622866 | 0.921186 | 0.847967 | 0.955622 |
| MmuSTS.501.1.S1_at   | MmuSTS.501.1 | 3.32  | 3.24  | 0.06 | 0.09 | 1.05  | 0.125327 | 0.172494 | 0.499501 | 0.448864 |
| MmuSTS.502.1.S1_s_at | MmuSTS.502.1 | 3.33  | 3.37  | 0    | 0.04 | -1.03 | 0.155696 | 0.097043 | 0.528929 | 0.354531 |
| MmuSTS.503.1.S1_s_at | MmuSTS.503.1 | 4.75  | 4.71  | 0.35 | 0.02 | 1.03  | 0.846268 | 0.954245 | 0.946134 | 0.973995 |
| MmuSTS.504.1.S1_s_at | MmuSTS.504.1 | 3.72  | 3.6   | 0.05 | 0.14 | 1.09  | 0.603251 | 0.788553 | 0.83918  | 0.877729 |
| MmuSTS.505.1.S1_s_at | MmuSTS.505.1 | 4.19  | 4.2   | 0.05 | 0.13 | -1.01 | 0.804649 | 0.976475 | 0.929002 | 0.987202 |
| MmuSTS.506.1.S1_at   | MmuSTS.506.1 | 4.82  | 5.42  | 0.1  | 0.25 | -1.51 | 0.013644 | 0.02861  | 0.270251 | 0.210901 |
| MmuSTS.507.1.S1_s_at | MmuSTS.507.1 | 6.68  | 6.79  | 0.23 | 0.15 | -1.08 | 0.903945 | 0.705201 | 0.967741 | 0.829062 |
| MmuSTS.508.1.S1_at   | MmuSTS.508.1 | 7.76  | 8.85  | 0.07 | 0.09 | -2.12 | 0.0001   | 0.000061 | 0.108151 | 0.025666 |
| MmuSTS.509.1.S1_at   | MmuSTS.509.1 | 4.62  | 4.36  | 0.11 | 0.06 | 1.19  | 0.027347 | 0.019419 | 0.327322 | 0.175117 |
| MmuSTS.51.1.S1_at    | MmuSTS.51.1  | 9.89  | 10.06 | 0.31 | 0.06 | -1.13 | 0.994801 | 0.522076 | 0.998057 | 0.712853 |
| MmuSTS.510.1.S1_at   | MmuSTS.510.1 | 11.82 | 11.61 | 0.29 | 0.06 | 1.16  | 0.175659 | 0.173177 | 0.548781 | 0.44977  |
| MmuSTS.511.1.S1_s_at | MmuSTS.511.1 | 7.37  | 6.98  | 0.45 | 0.18 | 1.31  | 0.155791 | 0.174665 | 0.528999 | 0.451216 |
| MmuSTS.512.1.S1_at   | MmuSTS.512.1 | 14.11 | 13.83 | 0.08 | 0.07 | 1.22  | 0.007814 | 0.030296 | 0.230997 | 0.215937 |
| MmuSTS.513.1.S1_at   | MmuSTS.513.1 | 11.25 | 11.27 | 0.31 | 0.21 | -1.01 | 0.634455 | 0.841513 | 0.854063 | 0.909663 |
| MmuSTS.514.1.S1_at   | MmuSTS.514.1 | 11.05 | 10.98 | 0.18 | 0.06 | 1.05  | 0.638569 | 0.373533 | 0.855989 | 0.612327 |
| MmuSTS.515.1.S1_at   | MmuSTS.515.1 | 11.89 | 11.61 | 0.49 | 0.06 | 1.22  | 0.390641 | 0.162299 | 0.716882 | 0.438447 |
| MmuSTS.516.1.S1_s_at | MmuSTS.516.1 | 4.13  | 4.01  | 0.16 | 0.13 | 1.09  | 0.266322 | 0.196916 | 0.627215 | 0.472072 |
| MmuSTS.517.1.S1_at   | MmuSTS.517.1 | 3.05  | 3.01  | 0.14 | 0.06 | 1.03  | 0.777098 | 0.419568 | 0.917443 | 0.643528 |
| MmuSTS.517.1.S1_s_at | MmuSTS.517.1 | 4.2   | 4.23  | 0.25 | 0.04 | -1.02 | 0.398388 | 0.492039 | 0.722489 | 0.693403 |
| MmuSTS.518.1.S1_s_at | MmuSTS.518.1 | 4.51  | 4.47  | 0.08 | 0.04 | 1.03  | 0.643316 | 0.620766 | 0.858192 | 0.775593 |
| MmuSTS.519.1.S1_s_at | MmuSTS.519.1 | 5     | 4.78  | 0.12 | 0.12 | 1.17  | 0.109408 | 0.188643 | 0.482257 | 0.464569 |
| MmuSTS.52.1.S1_at    | MmuSTS.52.1  | 3.15  | 3.04  | 0.18 | 0.07 | 1.08  | 0.529801 | 0.77574  | 0.798514 | 0.869526 |
| MmuSTS.520.1.S1_s_at | MmuSTS.520.1 | 3.55  | 3.58  | 0.13 | 0.08 | -1.02 | 0.474347 | 0.623962 | 0.767951 | 0.778285 |
| MmuSTS.521.1.S1_s_at | MmuSTS.521.1 | 4.41  | 4.49  | 0.14 | 0.11 | -1.06 | 0.358399 | 0.272039 | 0.696372 | 0.536838 |
| MmuSTS.522.1.S1_at   | MmuSTS.522.1 | 3.8   | 3.8   | 0.04 | 0.01 | 1     | 0.260723 | 0.238213 | 0.623301 | 0.508825 |

|                      |              |       |       |      |      |       |          |          |          |          |
|----------------------|--------------|-------|-------|------|------|-------|----------|----------|----------|----------|
| MmuSTS.523.1.S1_at   | MmuSTS.523.1 | 4.84  | 5     | 0.18 | 0.2  | -1.12 | 0.31166  | 0.585696 | 0.663441 | 0.752987 |
| MmuSTS.523.1.S1_s_at | MmuSTS.523.1 | 3.05  | 2.93  | 0.02 | 0.16 | 1.08  | 0.256776 | 0.389178 | 0.620689 | 0.623403 |
| MmuSTS.525.1.S1_s_at | MmuSTS.525.1 | 2.86  | 2.87  | 0.09 | 0.03 | -1    | 0.637478 | 0.737114 | 0.855554 | 0.847802 |
| MmuSTS.526.1.S1_at   | MmuSTS.526.1 | 12.12 | 12.15 | 0.22 | 0.02 | -1.02 | 0.88231  | 0.158071 | 0.959179 | 0.433851 |
| MmuSTS.527.1.S1_at   | MmuSTS.527.1 | 3.86  | 5.27  | 0.57 | 0.02 | -2.67 | 0.028491 | 0.087691 | 0.332568 | 0.340941 |
| MmuSTS.528.1.S1_at   | MmuSTS.528.1 | 7.93  | 8.13  | 0.57 | 0.12 | -1.15 | 0.676788 | 0.040543 | 0.873268 | 0.246264 |
| MmuSTS.529.1.S1_at   | MmuSTS.529.1 | 11.48 | 11.86 | 0.74 | 0.03 | -1.31 | 0.414105 | 0.506277 | 0.732764 | 0.702368 |
| MmuSTS.53.1.S1_at    | MmuSTS.53.1  | 6.27  | 6.09  | 0.06 | 0.1  | 1.13  | 0.042802 | 0.084932 | 0.3704   | 0.336552 |
| MmuSTS.530.1.S1_at   | MmuSTS.530.1 | 4.85  | 5.49  | 0.02 | 0.25 | -1.56 | 0.024319 | 0.008604 | 0.317812 | 0.123072 |
| MmuSTS.531.1.S1_at   | MmuSTS.531.1 | 8.14  | 7.76  | 0.64 | 0.32 | 1.31  | 0.248446 | 0.012784 | 0.613851 | 0.145715 |
| MmuSTS.532.1.S1_at   | MmuSTS.532.1 | 5.62  | 5.53  | 0.12 | 0.12 | 1.07  | 0.258788 | 0.416598 | 0.622286 | 0.641647 |
| MmuSTS.533.1.S1_at   | MmuSTS.533.1 | 13.25 | 13.03 | 0.43 | 0.03 | 1.17  | 0.968336 | 0.240242 | 0.989602 | 0.510851 |
| MmuSTS.534.1.S1_at   | MmuSTS.534.1 | 8.17  | 8.21  | 0.67 | 0.25 | -1.03 | 0.986896 | 0.822403 | 0.995774 | 0.897826 |
| MmuSTS.535.1.S1_at   | MmuSTS.535.1 | 8.88  | 8.88  | 1.3  | 0.26 | -1    | 0.924261 | 0.068194 | 0.974666 | 0.307336 |
| MmuSTS.536.1.S1_s_at | MmuSTS.536.1 | 3.56  | 3.53  | 0.17 | 0.13 | 1.02  | 0.976132 | 0.469587 | 0.992259 | 0.67829  |
| MmuSTS.537.1.S1_s_at | MmuSTS.537.1 | 3.18  | 3.21  | 0.09 | 0.11 | -1.03 | 0.717562 | 0.906748 | 0.890446 | 0.947216 |
| MmuSTS.538.1.S1_at   | MmuSTS.538.1 | 3.67  | 3.88  | 0.16 | 0.01 | -1.16 | 0.031395 | 0.127233 | 0.341227 | 0.397935 |
| MmuSTS.538.1.S1_s_at | MmuSTS.538.1 | 3.35  | 3.43  | 0.07 | 0.39 | -1.06 | 0.252171 | 0.305865 | 0.61717  | 0.562731 |
| MmuSTS.539.1.S1_at   | MmuSTS.539.1 | 6.63  | 7.07  | 0.51 | 0.26 | -1.36 | 0.299895 | 0.313432 | 0.654365 | 0.567879 |
| MmuSTS.54.1.S1_at    | MmuSTS.54.1  | 12.87 | 12.72 | 0.27 | 0.11 | 1.11  | 0.988654 | 0.043956 | 0.995877 | 0.254126 |
| MmuSTS.54.1.S1_s_at  | MmuSTS.54.1  | 13.41 | 13.05 | 0.31 | 0.05 | 1.28  | 0.321931 | 0.02165  | 0.67054  | 0.184333 |
| MmuSTS.540.1.S1_at   | MmuSTS.540.1 | 8.47  | 8.67  | 0.21 | 0.15 | -1.15 | 0.412859 | 0.234363 | 0.732114 | 0.505636 |
| MmuSTS.541.1.S1_at   | MmuSTS.541.1 | 9.73  | 9.84  | 0.24 | 0.14 | -1.08 | 0.990309 | 0.671502 | 0.996406 | 0.807948 |
| MmuSTS.542.1.S1_at   | MmuSTS.542.1 | 11.94 | 12.1  | 0.45 | 0.17 | -1.12 | 0.868198 | 0.225645 | 0.953843 | 0.498155 |
| MmuSTS.543.1.S1_at   | MmuSTS.543.1 | 7.07  | 7.57  | 2.63 | 0.46 | -1.42 | 0.747473 | 0.117587 | 0.904011 | 0.38531  |
| MmuSTS.544.1.S1_at   | MmuSTS.544.1 | 4.74  | 4.55  | 0.07 | 0.08 | 1.14  | 0.043185 | 0.045489 | 0.371555 | 0.2575   |
| MmuSTS.545.1.S1_at   | MmuSTS.545.1 | 9.85  | 10    | 1.05 | 0.14 | -1.11 | 0.743681 | 0.096106 | 0.902193 | 0.353322 |
| MmuSTS.546.1.S1_at   | MmuSTS.546.1 | 6.06  | 5.61  | 0.63 | 0.39 | 1.37  | 0.300281 | 0.356767 | 0.654847 | 0.598574 |
| MmuSTS.547.1.S1_at   | MmuSTS.547.1 | 4.82  | 5.81  | 0.56 | 0.33 | -1.99 | 0.133563 | 0.066043 | 0.508012 | 0.302387 |
| MmuSTS.548.1.S1_at   | MmuSTS.548.1 | 4.23  | 4.22  | 0.16 | 0.11 | 1.01  | 0.89079  | 0.427473 | 0.962492 | 0.649302 |
| MmuSTS.549.1.S1_at   | MmuSTS.549.1 | 8.38  | 8.55  | 0.23 | 0.13 | -1.13 | 0.40712  | 0.000389 | 0.728529 | 0.037374 |
| MmuSTS.55.1.S1_at    | MmuSTS.55.1  | 12.08 | 11.79 | 0.14 | 0.06 | 1.22  | 0.034255 | 0.047597 | 0.348988 | 0.262953 |
| MmuSTS.550.1.S1_s_at | MmuSTS.550.1 | 6.85  | 6.69  | 0.07 | 0.06 | 1.12  | 0.028552 | 0.077182 | 0.332627 | 0.322773 |
| MmuSTS.551.1.S1_at   | MmuSTS.551.1 | 6.88  | 6.8   | 0.09 | 0.08 | 1.06  | 0.160157 | 0.554969 | 0.533251 | 0.733559 |
| MmuSTS.552.1.S1_at   | MmuSTS.552.1 | 10.39 | 10.33 | 1.4  | 0.2  | 1.04  | 0.406353 | 0.188428 | 0.727915 | 0.464416 |
| MmuSTS.553.1.S1_at   | MmuSTS.553.1 | 4.65  | 4.94  | 0.12 | 0.22 | -1.22 | 0.198038 | 0.54227  | 0.56923  | 0.725385 |
| MmuSTS.554.1.S1_at   | MmuSTS.554.1 | 5.37  | 5.46  | 0.25 | 0.01 | -1.06 | 0.57654  | 0.486956 | 0.825166 | 0.690122 |
| MmuSTS.555.1.S1_at   | MmuSTS.555.1 | 4.03  | 4.01  | 0.34 | 0.13 | 1.02  | 0.360828 | 0.259345 | 0.698193 | 0.526418 |
| MmuSTS.556.1.S1_at   | MmuSTS.556.1 | 9.29  | 9.48  | 0.38 | 0.07 | -1.15 | 0.145175 | 0.425448 | 0.520309 | 0.647848 |
| MmuSTS.557.1.S1_at   | MmuSTS.557.1 | 6.47  | 6.33  | 0.09 | 0.03 | 1.1   | 0.051269 | 0.109205 | 0.38958  | 0.37308  |
| MmuSTS.558.1.S1_at   | MmuSTS.558.1 | 7.54  | 6.94  | 2.3  | 0.37 | 1.52  | 0.845443 | 0.397838 | 0.945862 | 0.629126 |
| MmuSTS.559.1.S1_at   | MmuSTS.559.1 | 10.59 | 10.68 | 0.11 | 0.09 | -1.07 | 0.452925 | 0.492671 | 0.755901 | 0.693708 |
| MmuSTS.56.1.S1_at    | MmuSTS.56.1  | 10.34 | 9.86  | 2.85 | 0.26 | 1.39  | 0.689393 | 0.284444 | 0.878864 | 0.546637 |

|                      |              |       |       |      |      |       |          |          |          |          |
|----------------------|--------------|-------|-------|------|------|-------|----------|----------|----------|----------|
| MmuSTS.560.1.S1_at   | MmuSTS.560.1 | 8.15  | 7.4   | 0.29 | 0.31 | 1.69  | 0.021131 | 0.013582 | 0.306888 | 0.14912  |
| MmuSTS.561.1.S1_at   | MmuSTS.561.1 | 3.66  | 3.6   | 0.16 | 0.04 | 1.04  | 0.567713 | 0.078547 | 0.820586 | 0.325285 |
| MmuSTS.562.1.S1_at   | MmuSTS.562.1 | 10.38 | 10.71 | 0.6  | 0.09 | -1.26 | 0.260595 | 0.10876  | 0.623301 | 0.372285 |
| MmuSTS.563.1.S1_at   | MmuSTS.563.1 | 6.11  | 5.97  | 0.5  | 0.27 | 1.11  | 0.385733 | 0.154605 | 0.713032 | 0.429489 |
| MmuSTS.564.1.S1_at   | MmuSTS.564.1 | 5.68  | 5.41  | 0.22 | 0.06 | 1.2   | 0.359934 | 0.102285 | 0.697657 | 0.362395 |
| MmuSTS.565.1.S1_s_at | MmuSTS.565.1 | 6.68  | 6.43  | 0.11 | 0.08 | 1.19  | 0.043763 | 0.116844 | 0.372554 | 0.384188 |
| MmuSTS.566.1.S1_at   | MmuSTS.566.1 | 8.23  | 8.14  | 0.05 | 0.1  | 1.06  | 0.107996 | 0.044957 | 0.480459 | 0.256489 |
| MmuSTS.567.1.S1_at   | MmuSTS.567.1 | 6.62  | 4.93  | 1.71 | 0.48 | 3.25  | 0.647881 | 0.578558 | 0.859522 | 0.748589 |
| MmuSTS.568.1.S1_at   | MmuSTS.568.1 | 12.01 | 12.2  | 0.04 | 0.05 | -1.14 | 0.009233 | 0.005486 | 0.241866 | 0.102081 |
| MmuSTS.569.1.S1_at   | MmuSTS.569.1 | 3.38  | 3.16  | 0.18 | 0.04 | 1.16  | 0.153637 | 0.192509 | 0.526757 | 0.467958 |
| MmuSTS.57.1.S1_at    | MmuSTS.57.1  | 4.12  | 4.05  | 0.32 | 0.17 | -1.05 | 0.728135 | 0.683856 | 0.894996 | 0.815591 |
| MmuSTS.570.1.S1_at   | MmuSTS.570.1 | 7.92  | 8.05  | 0.24 | 0.03 | -1.1  | 0.280731 | 0.003256 | 0.639467 | 0.082277 |
| MmuSTS.571.1.S1_at   | MmuSTS.571.1 | 4.85  | 4.84  | 0.16 | 0.12 | 1.01  | 0.817254 | 0.698111 | 0.933935 | 0.824615 |
| MmuSTS.572.1.S1_at   | MmuSTS.572.1 | 5.04  | 8.27  | 1.76 | 0.31 | -9.36 | 0.098301 | 0.044013 | 0.467704 | 0.254195 |
| MmuSTS.573.1.S1_at   | MmuSTS.573.1 | 3.99  | 4.1   | 0.04 | 0.22 | -1.08 | 0.817425 | 0.741853 | 0.933935 | 0.850515 |
| MmuSTS.574.1.S1_at   | MmuSTS.574.1 | 13    | 13.28 | 0.1  | 0.03 | -1.21 | 0.00533  | 0.048808 | 0.207642 | 0.265858 |
| MmuSTS.575.1.S1_at   | MmuSTS.575.1 | 4.84  | 4.64  | 0.08 | 0.15 | 1.15  | 0.086141 | 0.04765  | 0.453704 | 0.263138 |
| MmuSTS.576.1.S1_at   | MmuSTS.576.1 | 3.81  | 3.81  | 0.08 | 0.06 | -1    | 0.348622 | 0.424985 | 0.689949 | 0.647458 |
| MmuSTS.577.1.S1_at   | MmuSTS.577.1 | 10.9  | 10.4  | 0.31 | 0.01 | 1.41  | 0.040239 | 0.003686 | 0.363506 | 0.086591 |
| MmuSTS.578.1.S1_at   | MmuSTS.578.1 | 3.14  | 3.11  | 0.11 | 0.06 | 1.02  | 0.197508 | 0.47268  | 0.568449 | 0.68007  |
| MmuSTS.579.1.S1_at   | MmuSTS.579.1 | 5.93  | 5.96  | 0.14 | 0.21 | -1.03 | 0.849111 | 0.792688 | 0.946949 | 0.880287 |
| MmuSTS.58.1.S1_s_at  | MmuSTS.58.1  | 10.89 | 11.3  | 0.29 | 0.02 | -1.33 | 0.215764 | 0.249488 | 0.585813 | 0.518532 |
| MmuSTS.580.1.S1_at   | MmuSTS.580.1 | 4.49  | 4.67  | 0.16 | 0.16 | -1.13 | 0.811815 | 0.617734 | 0.931957 | 0.773649 |
| MmuSTS.581.1.S1_at   | MmuSTS.581.1 | 10.11 | 10.07 | 0.31 | 0.13 | 1.02  | 0.730609 | 0.017633 | 0.896248 | 0.167841 |
| MmuSTS.582.1.S1_at   | MmuSTS.582.1 | 6.25  | 5.89  | 0.38 | 0.19 | 1.28  | 0.539821 | 0.724827 | 0.804055 | 0.840693 |
| MmuSTS.583.1.S1_at   | MmuSTS.583.1 | 3.47  | 3.44  | 0.05 | 0.09 | 1.02  | 0.372881 | 0.435909 | 0.705567 | 0.655618 |
| MmuSTS.584.1.S1_at   | MmuSTS.584.1 | 6.47  | 6.66  | 0.42 | 0.22 | -1.15 | 0.503012 | 0.746872 | 0.784001 | 0.853023 |
| MmuSTS.585.1.S1_at   | MmuSTS.585.1 | 10.97 | 10.93 | 1.11 | 0.03 | 1.03  | 0.401129 | 0.35935  | 0.724131 | 0.600641 |
| MmuSTS.586.1.S1_at   | MmuSTS.586.1 | 13.39 | 13.39 | 0.14 | 0.02 | 1     | 0.80891  | 0.717797 | 0.930866 | 0.836614 |
| MmuSTS.587.1.S1_at   | MmuSTS.587.1 | 12.96 | 12.94 | 0.24 | 0.01 | 1.01  | 0.928185 | 0.065581 | 0.976259 | 0.301476 |
| MmuSTS.588.1.S1_at   | MmuSTS.588.1 | 13.13 | 13.35 | 0.14 | 0.03 | -1.16 | 0.045048 | 0.014345 | 0.375796 | 0.152894 |
| MmuSTS.589.1.S1_at   | MmuSTS.589.1 | 4.12  | 5.39  | 0.61 | 0.88 | -2.42 | 0.045519 | 0.02811  | 0.376595 | 0.209286 |
| MmuSTS.59.1.S1_at    | MmuSTS.59.1  | 6.76  | 6.44  | 0.49 | 0.11 | 1.25  | 0.950021 | 0.739068 | 0.9832   | 0.848775 |
| MmuSTS.590.1.S1_at   | MmuSTS.590.1 | 3.92  | 4.67  | 0.36 | 0.84 | -1.68 | 0.069371 | 0.068096 | 0.426951 | 0.307142 |
| MmuSTS.591.1.S1_at   | MmuSTS.591.1 | 5.21  | 5.26  | 0.17 | 0.12 | -1.04 | 0.401197 | 0.468639 | 0.724139 | 0.677755 |
| MmuSTS.592.1.S1_at   | MmuSTS.592.1 | 5.81  | 5.62  | 0.06 | 0.07 | 1.14  | 0.054485 | 0.282083 | 0.396542 | 0.544937 |
| MmuSTS.593.1.S1_at   | MmuSTS.593.1 | 3.88  | 3.76  | 0.09 | 0.05 | 1.09  | 0.041562 | 0.026821 | 0.366776 | 0.204901 |
| MmuSTS.594.1.S1_at   | MmuSTS.594.1 | 3.98  | 3.94  | 0.07 | 0.1  | 1.03  | 0.312352 | 0.422371 | 0.663932 | 0.645709 |
| MmuSTS.595.1.S1_at   | MmuSTS.595.1 | 5.17  | 5.03  | 0.55 | 0.55 | 1.11  | 0.323629 | 0.445239 | 0.672279 | 0.662338 |
| MmuSTS.596.1.S1_at   | MmuSTS.596.1 | 8.89  | 9.8   | 0.52 | 0.14 | -1.87 | 0.04091  | 0.024578 | 0.365447 | 0.196149 |
| MmuSTS.597.1.S1_at   | MmuSTS.597.1 | 3.87  | 3.94  | 0.07 | 0.07 | -1.04 | 0.684081 | 0.840181 | 0.876319 | 0.908919 |
| MmuSTS.597.1.S1_s_at | MmuSTS.597.1 | 11.46 | 11.05 | 0.14 | 0.08 | 1.33  | 0.006208 | 0.001349 | 0.217351 | 0.056546 |
| MmuSTS.598.1.S1_at   | MmuSTS.598.1 | 6.06  | 6.03  | 0.31 | 0.18 | 1.02  | 0.537589 | 0.840225 | 0.802735 | 0.908948 |

|                      |              |       |       |      |      |       |          |          |          |          |
|----------------------|--------------|-------|-------|------|------|-------|----------|----------|----------|----------|
| MmuSTS.599.1.S1_at   | MmuSTS.599.1 | 8.77  | 8.29  | 0.86 | 0.26 | 1.4   | 0.523733 | 0.454257 | 0.795656 | 0.66849  |
| MmuSTS.6.1.S1_at     | MmuSTS.6.1   | 11.97 | 11.64 | 0.64 | 0.22 | 1.26  | 0.726562 | 0.153681 | 0.894387 | 0.428413 |
| MmuSTS.60.1.S1_at    | MmuSTS.60.1  | 10.21 | 10.16 | 0.26 | 0.18 | 1.04  | 0.955948 | 0.166748 | 0.985363 | 0.443215 |
| MmuSTS.600.1.S1_at   | MmuSTS.600.1 | 5.16  | 5.57  | 0.35 | 0.05 | -1.33 | 0.376953 | 0.295445 | 0.707245 | 0.554885 |
| MmuSTS.601.1.S1_at   | MmuSTS.601.1 | 4.47  | 4.4   | 0.03 | 0.11 | 1.05  | 0.943732 | 0.209555 | 0.98057  | 0.483234 |
| MmuSTS.602.1.S1_at   | MmuSTS.602.1 | 9.53  | 11    | 0.38 | 0.07 | -2.77 | 0.005754 | 0.000571 | 0.211377 | 0.041171 |
| MmuSTS.603.1.S1_at   | MmuSTS.603.1 | 10.06 | 11.3  | 0.35 | 0.01 | -2.36 | 0.003629 | 0.000051 | 0.197111 | 0.025273 |
| MmuSTS.604.1.S1_at   | MmuSTS.604.1 | 5.59  | 6.35  | 0.3  | 0.17 | -1.69 | 0.008681 | 0.01052  | 0.236048 | 0.13398  |
| MmuSTS.605.1.S1_at   | MmuSTS.605.1 | 8.88  | 8.83  | 0.36 | 0.31 | 1.04  | 0.829344 | 0.373088 | 0.938768 | 0.611955 |
| MmuSTS.606.1.S1_at   | MmuSTS.606.1 | 13.24 | 12.86 | 0.23 | 0.11 | 1.3   | 0.056731 | 0.050241 | 0.401061 | 0.269432 |
| MmuSTS.607.1.S1_at   | MmuSTS.607.1 | 6.24  | 6.25  | 0.03 | 0.13 | -1.01 | 0.435593 | 0.622357 | 0.745762 | 0.776862 |
| MmuSTS.608.1.S1_at   | MmuSTS.608.1 | 12.25 | 12.54 | 0.02 | 0.04 | -1.22 | 0.000561 | 0.000321 | 0.143137 | 0.035462 |
| MmuSTS.609.1.S1_at   | MmuSTS.609.1 | 4.84  | 4.78  | 0.11 | 0.11 | 1.04  | 0.317661 | 0.111236 | 0.667511 | 0.375882 |
| MmuSTS.61.1.S1_at    | MmuSTS.61.1  | 9.64  | 9.26  | 0.39 | 0.09 | 1.3   | 0.573823 | 0.002999 | 0.823742 | 0.079958 |
| MmuSTS.610.1.S1_at   | MmuSTS.610.1 | 5.66  | 5.74  | 0.43 | 0.29 | -1.05 | 0.545619 | 0.12915  | 0.808072 | 0.400611 |
| MmuSTS.611.1.S1_at   | MmuSTS.611.1 | 3.17  | 3.14  | 0.09 | 0.11 | 1.02  | 0.365309 | 0.394968 | 0.701002 | 0.627216 |
| MmuSTS.612.1.S1_at   | MmuSTS.612.1 | 7.75  | 7.69  | 0.52 | 0.12 | 1.05  | 0.693617 | 0.864589 | 0.880681 | 0.923249 |
| MmuSTS.613.1.S1_at   | MmuSTS.613.1 | 2.89  | 2.87  | 0.15 | 0.07 | 1.01  | 0.90595  | 0.347037 | 0.968196 | 0.59181  |
| MmuSTS.614.1.S1_at   | MmuSTS.614.1 | 8.41  | 8.54  | 0.78 | 0.42 | -1.09 | 0.793449 | 0.008926 | 0.924329 | 0.124951 |
| MmuSTS.615.1.S1_at   | MmuSTS.615.1 | 11.22 | 12.54 | 1.25 | 0.15 | -2.51 | 0.140239 | 0.062609 | 0.515581 | 0.297022 |
| MmuSTS.616.1.S1_at   | MmuSTS.616.1 | 5.92  | 6.06  | 0.35 | 0.08 | -1.1  | 0.500595 | 0.310684 | 0.782726 | 0.565787 |
| MmuSTS.617.1.S1_at   | MmuSTS.617.1 | 12.02 | 12.21 | 0.18 | 0.11 | -1.14 | 0.123254 | 0.624976 | 0.496589 | 0.778972 |
| MmuSTS.619.1.S1_at   | MmuSTS.619.1 | 5.26  | 5.14  | 0.08 | 0.04 | 1.09  | 0.091207 | 0.160976 | 0.459035 | 0.437116 |
| MmuSTS.62.1.S1_at    | MmuSTS.62.1  | 11.87 | 11.72 | 0.42 | 0.09 | 1.11  | 0.447219 | 0.265996 | 0.753177 | 0.531815 |
| MmuSTS.620.1.S1_at   | MmuSTS.620.1 | 2.71  | 2.73  | 0.16 | 0.02 | -1.01 | 0.506214 | 0.52919  | 0.785704 | 0.717207 |
| MmuSTS.621.1.S1_x_at | MmuSTS.621.1 | 2.61  | 2.62  | 0.04 | 0.08 | -1.01 | 0.569475 | 0.370631 | 0.82149  | 0.609664 |
| MmuSTS.624.1.S1_at   | MmuSTS.624.1 | 3.32  | 3.31  | 0.03 | 0.05 | 1.01  | 0.451928 | 0.820323 | 0.755619 | 0.89648  |
| MmuSTS.624.1.S1_s_at | MmuSTS.624.1 | 3.29  | 3.28  | 0.09 | 0.07 | 1.01  | 0.283658 | 0.41355  | 0.641413 | 0.639648 |
| MmuSTS.625.1.S1_at   | MmuSTS.625.1 | 4.75  | 4.59  | 0.17 | 0.06 | 1.12  | 0.802133 | 0.884875 | 0.927856 | 0.934401 |
| MmuSTS.626.1.S1_at   | MmuSTS.626.1 | 11.41 | 11.25 | 0.23 | 0.01 | 1.12  | 0.208258 | 0.405709 | 0.579938 | 0.633894 |
| MmuSTS.627.1.S1_at   | MmuSTS.627.1 | 4.8   | 4.6   | 0.1  | 0.04 | 1.15  | 0.131952 | 0.378167 | 0.506434 | 0.615438 |
| MmuSTS.628.1.S1_at   | MmuSTS.628.1 | 10.89 | 11.03 | 1.05 | 0.11 | -1.1  | 0.846719 | 0.274297 | 0.94629  | 0.538751 |
| MmuSTS.629.1.S1_at   | MmuSTS.629.1 | 8.75  | 8.56  | 0.6  | 0.13 | 1.14  | 0.533192 | 0.07257  | 0.800767 | 0.315511 |
| MmuSTS.63.1.S1_at    | MmuSTS.63.1  | 6.01  | 6.61  | 0.85 | 0.18 | -1.52 | 0.320829 | 0.473916 | 0.669445 | 0.681111 |
| MmuSTS.630.1.S1_at   | MmuSTS.630.1 | 6.46  | 6.34  | 0.2  | 0.1  | 1.08  | 0.662112 | 0.874989 | 0.866635 | 0.929084 |
| MmuSTS.631.1.S1_at   | MmuSTS.631.1 | 12.1  | 12.05 | 0.89 | 0.07 | 1.03  | 0.701788 | 0.878558 | 0.883994 | 0.930686 |
| MmuSTS.632.1.S1_at   | MmuSTS.632.1 | 9.69  | 10.79 | 0.57 | 0.09 | -2.15 | 0.092035 | 0.009378 | 0.460597 | 0.127634 |
| MmuSTS.633.1.S1_at   | MmuSTS.633.1 | 10.25 | 10.16 | 0.57 | 0.09 | 1.06  | 0.592548 | 0.820823 | 0.833921 | 0.896833 |
| MmuSTS.634.1.S1_at   | MmuSTS.634.1 | 6.95  | 8.18  | 0.51 | 0.39 | -2.35 | 0.123234 | 0.023905 | 0.496589 | 0.193679 |
| MmuSTS.635.1.S1_at   | MmuSTS.635.1 | 5     | 4.78  | 0.86 | 0.1  | 1.16  | 0.220311 | 0.180654 | 0.589618 | 0.457245 |
| MmuSTS.636.1.S1_at   | MmuSTS.636.1 | 7.75  | 6.96  | 0.48 | 0.3  | 1.73  | 0.170766 | 0.234245 | 0.543739 | 0.505485 |
| MmuSTS.636.1.S1_s_at | MmuSTS.636.1 | 6.73  | 6.16  | 0.39 | 0.63 | 1.48  | 0.43872  | 0.574227 | 0.747459 | 0.745688 |
| MmuSTS.637.1.S1_at   | MmuSTS.637.1 | 4.32  | 4.28  | 0.14 | 0.13 | 1.03  | 0.787176 | 0.921932 | 0.92182  | 0.955975 |

|                      |              |       |       |      |      |       |          |          |          |          |
|----------------------|--------------|-------|-------|------|------|-------|----------|----------|----------|----------|
| MmuSTS.638.1.S1_at   | MmuSTS.638.1 | 4.01  | 4.76  | 0.27 | 0.26 | -1.68 | 0.050113 | 0.017758 | 0.386751 | 0.168392 |
| MmuSTS.639.1.S1_at   | MmuSTS.639.1 | 7.92  | 7.87  | 0.42 | 0.41 | 1.04  | 0.485545 | 0.395158 | 0.774378 | 0.627379 |
| MmuSTS.64.1.S1_at    | MmuSTS.64.1  | 11.99 | 12.16 | 0.77 | 0.23 | -1.13 | 0.422121 | 0.35449  | 0.738013 | 0.597257 |
| MmuSTS.640.1.S1_at   | MmuSTS.640.1 | 6.37  | 6.24  | 0.08 | 0.12 | 1.09  | 0.333819 | 0.400044 | 0.67989  | 0.630158 |
| MmuSTS.641.1.S1_at   | MmuSTS.641.1 | 8.41  | 6.26  | 1.73 | 0.62 | 4.42  | 0.484849 | 0.407606 | 0.77382  | 0.635057 |
| MmuSTS.642.1.S1_at   | MmuSTS.642.1 | 3.45  | 3.39  | 0.3  | 0.1  | 1.05  | 0.229479 | 0.211647 | 0.598339 | 0.485681 |
| MmuSTS.643.1.S1_at   | MmuSTS.643.1 | 9.54  | 9.54  | 0.59 | 0.21 | 1     | 0.787988 | 0.033136 | 0.922084 | 0.225324 |
| MmuSTS.644.1.S1_at   | MmuSTS.644.1 | 8.77  | 8.77  | 0.07 | 0.14 | 1     | 0.416482 | 0.001148 | 0.734327 | 0.05344  |
| MmuSTS.645.1.S1_at   | MmuSTS.645.1 | 10.48 | 10.85 | 0.09 | 0.06 | -1.3  | 0.007638 | 0.007685 | 0.230325 | 0.117153 |
| MmuSTS.646.1.S1_at   | MmuSTS.646.1 | 7.26  | 6.92  | 0.45 | 0.15 | 1.26  | 0.073613 | 0.006297 | 0.434623 | 0.107763 |
| MmuSTS.647.1.S1_at   | MmuSTS.647.1 | 3.9   | 4.33  | 0.53 | 0.14 | -1.35 | 0.613788 | 0.647059 | 0.843679 | 0.793279 |
| MmuSTS.648.1.S1_at   | MmuSTS.648.1 | 10.68 | 10.86 | 0.73 | 0.01 | -1.13 | 0.596196 | 0.498354 | 0.835819 | 0.697442 |
| MmuSTS.649.1.S1_at   | MmuSTS.649.1 | 7     | 7.03  | 0.05 | 0.11 | -1.02 | 0.404461 | 0.685771 | 0.726557 | 0.816612 |
| MmuSTS.65.1.S1_at    | MmuSTS.65.1  | 8.62  | 8.66  | 0.15 | 0.12 | -1.03 | 0.767133 | 0.801248 | 0.912485 | 0.88568  |
| MmuSTS.650.1.S1_at   | MmuSTS.650.1 | 7.18  | 7.88  | 0.49 | 0.38 | -1.62 | 0.143427 | 0.012819 | 0.518743 | 0.145864 |
| MmuSTS.651.1.S1_at   | MmuSTS.651.1 | 11.41 | 11.37 | 0.84 | 0.22 | 1.03  | 0.552274 | 0.345845 | 0.811712 | 0.590998 |
| MmuSTS.652.1.S1_at   | MmuSTS.652.1 | 9.37  | 9.3   | 2.26 | 0.1  | 1.05  | 0.667906 | 0.429702 | 0.868778 | 0.65099  |
| MmuSTS.652.1.S1_s_at | MmuSTS.652.1 | 7.95  | 7.69  | 1.93 | 0.17 | 1.2   | 0.909554 | 0.391418 | 0.969434 | 0.625086 |
| MmuSTS.653.1.S1_at   | MmuSTS.653.1 | 6.7   | 6.51  | 0.27 | 0.01 | 1.14  | 0.265718 | 0.388775 | 0.626849 | 0.62307  |
| MmuSTS.654.1.S1_at   | MmuSTS.654.1 | 5.06  | 5.17  | 0.06 | 0.06 | -1.08 | 0.3294   | 0.299219 | 0.676319 | 0.557769 |
| MmuSTS.655.1.S1_at   | MmuSTS.655.1 | 6.18  | 6.62  | 0.14 | 0.08 | -1.35 | 0.034848 | 0.000011 | 0.350453 | 0.016526 |
| MmuSTS.656.1.S1_at   | MmuSTS.656.1 | 3.98  | 3.98  | 0.09 | 0.06 | 1     | 0.449189 | 0.653841 | 0.754212 | 0.797692 |
| MmuSTS.657.1.S1_at   | MmuSTS.657.1 | 10.8  | 10.8  | 0.25 | 0.21 | 1     | 0.73261  | 0.040032 | 0.897283 | 0.245254 |
| MmuSTS.658.1.S1_at   | MmuSTS.658.1 | 10.25 | 10.1  | 0.18 | 0.12 | 1.11  | 0.217041 | 0.12543  | 0.58699  | 0.396079 |
| MmuSTS.659.1.S1_at   | MmuSTS.659.1 | 6.97  | 7.02  | 0.18 | 0.04 | -1.03 | 0.692462 | 0.442448 | 0.880095 | 0.660417 |
| MmuSTS.66.1.S1_at    | MmuSTS.66.1  | 6.34  | 7.27  | 1.85 | 0.19 | -1.9  | 0.345112 | 0.093039 | 0.68735  | 0.3492   |
| MmuSTS.660.1.S1_at   | MmuSTS.660.1 | 3.71  | 3.7   | 0.25 | 0.07 | 1.01  | 0.366973 | 0.5114   | 0.702468 | 0.705547 |
| MmuSTS.661.1.S1_at   | MmuSTS.661.1 | 7.64  | 8.72  | 0.64 | 0.09 | -2.11 | 0.11189  | 0.124089 | 0.484976 | 0.394389 |
| MmuSTS.662.1.S1_at   | MmuSTS.662.1 | 7.16  | 6.9   | 0.07 | 0.11 | 1.2   | 0.030893 | 0.103796 | 0.339178 | 0.364519 |
| MmuSTS.663.1.S1_at   | MmuSTS.663.1 | 6.33  | 6.05  | 0.23 | 0.22 | 1.21  | 0.189997 | 0.190735 | 0.561309 | 0.466168 |
| MmuSTS.663.1.S1_x_at | MmuSTS.663.1 | 6.09  | 6.03  | 0.27 | 0.14 | 1.04  | 0.509363 | 0.333805 | 0.787587 | 0.581974 |
| MmuSTS.664.1.S1_at   | MmuSTS.664.1 | 11.57 | 11.05 | 0.54 | 0.3  | 1.43  | 0.136943 | 0.029343 | 0.511963 | 0.213228 |
| MmuSTS.665.1.S1_at   | MmuSTS.665.1 | 12.54 | 12.55 | 0.3  | 0.02 | -1    | 0.486084 | 0.14956  | 0.774427 | 0.424095 |
| MmuSTS.666.1.S1_at   | MmuSTS.666.1 | 7.57  | 8.36  | 0.34 | 0.05 | -1.73 | 0.015271 | 0.001816 | 0.280663 | 0.063958 |
| MmuSTS.667.1.S1_at   | MmuSTS.667.1 | 7.7   | 7.55  | 0.07 | 0.2  | 1.11  | 0.157364 | 0.038382 | 0.530565 | 0.240813 |
| MmuSTS.668.1.S1_at   | MmuSTS.668.1 | 6.77  | 6.8   | 0.21 | 0.23 | -1.03 | 0.799288 | 0.211809 | 0.926464 | 0.485784 |
| MmuSTS.669.1.S1_at   | MmuSTS.669.1 | 7.54  | 7.34  | 0.1  | 0.02 | 1.15  | 0.038827 | 0.098111 | 0.36035  | 0.356202 |
| MmuSTS.67.1.S1_at    | MmuSTS.67.1  | 5.81  | 5.92  | 0.09 | 0.1  | -1.08 | 0.103219 | 0.547024 | 0.474032 | 0.728283 |
| MmuSTS.670.1.S1_at   | MmuSTS.670.1 | 12.07 | 11.87 | 0.07 | 0.05 | 1.14  | 0.009985 | 0.000643 | 0.245189 | 0.042928 |
| MmuSTS.671.1.S1_at   | MmuSTS.671.1 | 6.35  | 6.51  | 0.4  | 0.27 | -1.11 | 0.766182 | 0.53185  | 0.912101 | 0.718957 |
| MmuSTS.672.1.S1_at   | MmuSTS.672.1 | 8.03  | 8.23  | 0.23 | 0.07 | -1.14 | 0.057331 | 0.014096 | 0.401913 | 0.15195  |
| MmuSTS.673.1.S1_at   | MmuSTS.673.1 | 9.68  | 10.24 | 0.24 | 0.05 | -1.47 | 0.039343 | 0.000194 | 0.361498 | 0.030888 |
| MmuSTS.673.1.S1_s_at | MmuSTS.673.1 | 8.88  | 9.53  | 0.29 | 0.05 | -1.57 | 0.039499 | 0.000236 | 0.362034 | 0.03241  |

|                      |              |       |       |      |      |       |          |          |          |          |
|----------------------|--------------|-------|-------|------|------|-------|----------|----------|----------|----------|
| MmuSTS.674.1.S1_at   | MmuSTS.674.1 | 10.08 | 10.48 | 0.16 | 0.16 | -1.32 | 0.020143 | 0.037093 | 0.303673 | 0.237141 |
| MmuSTS.675.1.S1_at   | MmuSTS.675.1 | 12.59 | 12.62 | 0.14 | 0.06 | -1.02 | 0.83724  | 0.249228 | 0.94155  | 0.518313 |
| MmuSTS.676.1.S1_at   | MmuSTS.676.1 | 6.05  | 5.48  | 0.84 | 0.27 | 1.48  | 0.287169 | 0.201855 | 0.644253 | 0.476373 |
| MmuSTS.677.1.S1_at   | MmuSTS.677.1 | 6.36  | 6.34  | 0.46 | 0.21 | 1.01  | 0.664052 | 0.853437 | 0.867581 | 0.916601 |
| MmuSTS.678.1.S1_at   | MmuSTS.678.1 | 3.2   | 3.03  | 0.05 | 0.01 | 1.12  | 0.003472 | 0.003094 | 0.195142 | 0.081194 |
| MmuSTS.679.1.S1_at   | MmuSTS.679.1 | 6.75  | 6.44  | 1.44 | 0.4  | 1.23  | 0.752345 | 0.576405 | 0.906439 | 0.747202 |
| MmuSTS.68.1.S1_at    | MmuSTS.68.1  | 9.93  | 11.57 | 3.76 | 0.33 | -3.11 | 0.175884 | 0.108442 | 0.549037 | 0.371943 |
| MmuSTS.680.1.S1_at   | MmuSTS.680.1 | 3.58  | 3.41  | 0.18 | 0.19 | 1.12  | 0.362857 | 0.139729 | 0.69968  | 0.413083 |
| MmuSTS.681.1.S1_at   | MmuSTS.681.1 | 7.95  | 7.59  | 1.58 | 0.13 | 1.28  | 0.788325 | 0.542446 | 0.922213 | 0.725516 |
| MmuSTS.682.1.S1_at   | MmuSTS.682.1 | 7.02  | 6.62  | 0.79 | 0.15 | 1.32  | 0.251578 | 0.06523  | 0.616712 | 0.301239 |
| MmuSTS.683.1.S1_at   | MmuSTS.683.1 | 5.53  | 5.66  | 0.12 | 0.08 | -1.09 | 0.172316 | 0.002681 | 0.545696 | 0.076408 |
| MmuSTS.684.1.S1_at   | MmuSTS.684.1 | 5.79  | 5.68  | 1.17 | 0.23 | 1.08  | 0.751126 | 0.455731 | 0.905795 | 0.669659 |
| MmuSTS.685.1.S1_at   | MmuSTS.685.1 | 8.23  | 8.48  | 0.16 | 0.13 | -1.19 | 0.073408 | 0.061645 | 0.434422 | 0.295095 |
| MmuSTS.686.1.S1_at   | MmuSTS.686.1 | 4.92  | 4.75  | 1.56 | 0.24 | 1.12  | 0.609106 | 0.416633 | 0.841525 | 0.64165  |
| MmuSTS.687.1.S1_at   | MmuSTS.687.1 | 3.82  | 3.63  | 0.08 | 0.02 | 1.14  | 0.012385 | 0.260729 | 0.262097 | 0.52721  |
| MmuSTS.688.1.S1_at   | MmuSTS.688.1 | 8.52  | 8     | 1.27 | 0.14 | 1.44  | 0.576716 | 0.376045 | 0.825166 | 0.613853 |
| MmuSTS.689.1.S1_at   | MmuSTS.689.1 | 7.52  | 8.29  | 0.59 | 0.24 | -1.71 | 0.213091 | 0.06883  | 0.583683 | 0.308714 |
| MmuSTS.690.1.S1_at   | MmuSTS.690.1 | 10.69 | 9.12  | 1.18 | 0.54 | 2.97  | 0.299985 | 0.660122 | 0.654453 | 0.801083 |
| MmuSTS.691.1.S1_at   | MmuSTS.691.1 | 11.26 | 11    | 0.29 | 0.01 | 1.2   | 0.176258 | 0.18257  | 0.549326 | 0.459065 |
| MmuSTS.692.1.S1_at   | MmuSTS.692.1 | 4.26  | 3.98  | 0.46 | 0.32 | 1.21  | 0.420271 | 0.516821 | 0.736853 | 0.70925  |
| MmuSTS.693.1.S1_at   | MmuSTS.693.1 | 12.06 | 11.97 | 0.05 | 0.13 | 1.07  | 0.105326 | 0.024125 | 0.477051 | 0.1945   |
| MmuSTS.694.1.S1_at   | MmuSTS.694.1 | 6.82  | 6.42  | 0.32 | 0.4  | 1.32  | 0.280562 | 0.440389 | 0.639333 | 0.658939 |
| MmuSTS.695.1.S1_at   | MmuSTS.695.1 | 7.16  | 6.84  | 1.14 | 0.2  | 1.25  | 0.541498 | 0.072908 | 0.805165 | 0.315942 |
| MmuSTS.696.1.S1_at   | MmuSTS.696.1 | 10.87 | 10.8  | 0.14 | 0.06 | 1.05  | 0.286116 | 0.263454 | 0.64358  | 0.529764 |
| MmuSTS.697.1.S1_at   | MmuSTS.697.1 | 11.1  | 10.69 | 0.19 | 0.15 | 1.33  | 0.04281  | 0.025512 | 0.3704   | 0.200366 |
| MmuSTS.698.1.S1_at   | MmuSTS.698.1 | 7.59  | 7.21  | 0.09 | 0.15 | 1.3   | 0.01555  | 0.007197 | 0.282681 | 0.114062 |
| MmuSTS.699.1.S1_at   | MmuSTS.699.1 | 5.91  | 5.79  | 2.14 | 0.35 | 1.08  | 0.977876 | 0.139548 | 0.992844 | 0.412779 |
| MmuSTS.7.1.S1_at     | MmuSTS.7.1   | 7.69  | 8.14  | 0.31 | 0.29 | -1.37 | 0.065117 | 0.094292 | 0.419835 | 0.350889 |
| MmuSTS.70.1.S1_at    | MmuSTS.70.1  | 6.41  | 6.37  | 0.17 | 0.04 | 1.03  | 0.502122 | 0.177852 | 0.783497 | 0.454167 |
| MmuSTS.700.1.S1_at   | MmuSTS.700.1 | 8.27  | 8.21  | 1.86 | 0.24 | 1.04  | 0.964053 | 0.282248 | 0.988243 | 0.544991 |
| MmuSTS.701.1.S1_at   | MmuSTS.701.1 | 9.88  | 8.59  | 0.59 | 0.19 | 2.45  | 0.030035 | 0.011283 | 0.336449 | 0.138076 |
| MmuSTS.702.1.S1_at   | MmuSTS.702.1 | 12    | 12.01 | 1.13 | 0.2  | -1    | 0.973053 | 0.017089 | 0.99122  | 0.165617 |
| MmuSTS.703.1.S1_at   | MmuSTS.703.1 | 7.61  | 8.15  | 1.51 | 0.11 | -1.46 | 0.568744 | 0.33365  | 0.821041 | 0.581819 |
| MmuSTS.704.1.S1_at   | MmuSTS.704.1 | 10.75 | 9.49  | 1.07 | 0.35 | 2.4   | 0.113386 | 0.247852 | 0.486722 | 0.51728  |
| MmuSTS.705.1.S1_at   | MmuSTS.705.1 | 10.58 | 11.36 | 0.36 | 0.05 | -1.72 | 0.018526 | 0.007158 | 0.297536 | 0.113788 |
| MmuSTS.706.1.S1_at   | MmuSTS.706.1 | 6.12  | 6.57  | 0.55 | 0.07 | -1.36 | 0.668295 | 0.720847 | 0.868985 | 0.838368 |
| MmuSTS.707.1.S1_at   | MmuSTS.707.1 | 7.65  | 7.48  | 0.23 | 0.04 | 1.12  | 0.269181 | 0.251393 | 0.629522 | 0.520132 |
| MmuSTS.708.1.S1_at   | MmuSTS.708.1 | 8.08  | 8.04  | 1.23 | 0.16 | 1.03  | 0.947107 | 0.148213 | 0.981645 | 0.422745 |
| MmuSTS.709.1.S1_s_at | MmuSTS.709.1 | 4.06  | 3.86  | 0.16 | 0.05 | 1.15  | 0.105822 | 0.166618 | 0.477611 | 0.443115 |
| MmuSTS.71.1.S1_at    | MmuSTS.71.1  | 12.01 | 12.18 | 0.1  | 0.03 | -1.12 | 0.141809 | 0.070138 | 0.516824 | 0.311033 |
| MmuSTS.710.1.S1_at   | MmuSTS.710.1 | 11.07 | 11.31 | 0.59 | 0.03 | -1.18 | 0.421198 | 0.45405  | 0.737403 | 0.668394 |
| MmuSTS.711.1.S1_at   | MmuSTS.711.1 | 5.6   | 5.11  | 0.8  | 0.13 | 1.41  | 0.315329 | 0.398682 | 0.665729 | 0.629458 |
| MmuSTS.712.1.S1_at   | MmuSTS.712.1 | 3.84  | 3.89  | 0.07 | 0.08 | -1.03 | 0.494745 | 0.537556 | 0.779514 | 0.722606 |



|                      |              |       |       |      |      |       |          |          |          |          |
|----------------------|--------------|-------|-------|------|------|-------|----------|----------|----------|----------|
| MmuSTS.713.1.S1_at   | MmuSTS.713.1 | 7.39  | 8.06  | 0.61 | 0.07 | -1.59 | 0.134353 | 0.174593 | 0.508462 | 0.451097 |
| MmuSTS.713.1.S1_x_at | MmuSTS.713.1 | 7.41  | 8.05  | 0.52 | 0.09 | -1.56 | 0.108952 | 0.102038 | 0.481302 | 0.362102 |
| MmuSTS.714.1.S1_at   | MmuSTS.714.1 | 7.91  | 8.94  | 0.87 | 0.24 | -2.04 | 0.502925 | 0.009057 | 0.783991 | 0.125799 |
| MmuSTS.715.1.S1_at   | MmuSTS.715.1 | 12.61 | 12.75 | 0.18 | 0.01 | -1.1  | 0.250822 | 0.285779 | 0.615928 | 0.547484 |
| MmuSTS.716.1.S1_at   | MmuSTS.716.1 | 5.74  | 5.81  | 0.13 | 0.01 | -1.05 | 0.966141 | 0.919241 | 0.988888 | 0.954653 |
| MmuSTS.717.1.S1_at   | MmuSTS.717.1 | 4.92  | 5.5   | 1.37 | 0.37 | -1.49 | 0.540288 | 0.24988  | 0.804343 | 0.518876 |
| MmuSTS.718.1.S1_at   | MmuSTS.718.1 | 11.32 | 11.32 | 2.82 | 0.26 | -1    | 0.434889 | 0.240893 | 0.745353 | 0.511584 |
| MmuSTS.719.1.S1_at   | MmuSTS.719.1 | 9.38  | 9.18  | 0.96 | 0.04 | 1.15  | 0.794794 | 0.747247 | 0.924682 | 0.853149 |
| MmuSTS.72.1.S1_at    | MmuSTS.72.1  | 11.35 | 11.54 | 0.93 | 0.02 | -1.14 | 0.557506 | 0.756371 | 0.814834 | 0.858223 |
| MmuSTS.720.1.S1_at   | MmuSTS.720.1 | 5.08  | 4.68  | 0.22 | 0.13 | 1.32  | 0.030556 | 0.064944 | 0.338095 | 0.300855 |
| MmuSTS.721.1.S1_at   | MmuSTS.721.1 | 11.16 | 10.24 | 3.78 | 0.26 | -1.89 | 0.648932 | 0.283221 | 0.860173 | 0.545783 |
| MmuSTS.722.1.S1_at   | MmuSTS.722.1 | 8.21  | 8.85  | 0.58 | 0.04 | -1.56 | 0.046207 | 0.002483 | 0.377596 | 0.073652 |
| MmuSTS.723.1.S1_at   | MmuSTS.723.1 | 10.8  | 10.88 | 0.17 | 0.14 | -1.06 | 0.869871 | 0.775981 | 0.954595 | 0.869682 |
| MmuSTS.725.1.S1_at   | MmuSTS.725.1 | 11.45 | 11.68 | 0.09 | 0.03 | -1.18 | 0.028773 | 0.024621 | 0.333062 | 0.19635  |
| MmuSTS.726.1.S1_at   | MmuSTS.726.1 | 5.77  | 5.81  | 0.14 | 0.03 | -1.03 | 0.658338 | 0.871263 | 0.864586 | 0.92684  |
| MmuSTS.727.1.S1_at   | MmuSTS.727.1 | 7.45  | 8.48  | 0.37 | 0.18 | -2.04 | 0.017122 | 0.024111 | 0.28928  | 0.1945   |
| MmuSTS.728.1.S1_at   | MmuSTS.728.1 | 10.2  | 9.86  | 0.12 | 0.17 | 1.27  | 0.087344 | 0.125206 | 0.454785 | 0.395684 |
| MmuSTS.729.1.S1_at   | MmuSTS.729.1 | 10.04 | 10.51 | 0.43 | 0.13 | -1.38 | 0.148142 | 0.195251 | 0.522416 | 0.470253 |
| MmuSTS.73.1.S1_s_at  | MmuSTS.73.1  | 10.83 | 10.91 | 0.25 | 0.02 | -1.06 | 0.597073 | 0.487159 | 0.83613  | 0.690281 |
| MmuSTS.730.1.S1_at   | MmuSTS.730.1 | 11.41 | 11.39 | 0.1  | 0.06 | 1.02  | 0.984812 | 0.06321  | 0.995256 | 0.298119 |
| MmuSTS.731.1.S1_at   | MmuSTS.731.1 | 11.45 | 11.41 | 0.19 | 0.03 | 1.03  | 0.206381 | 0.420496 | 0.578153 | 0.644185 |
| MmuSTS.732.1.S1_at   | MmuSTS.732.1 | 5.84  | 5.48  | 0.33 | 0.11 | 1.28  | 0.151696 | 0.263008 | 0.524628 | 0.529397 |
| MmuSTS.733.1.S1_at   | MmuSTS.733.1 | 9.21  | 9.27  | 0.3  | 0.07 | -1.04 | 0.1949   | 0.245879 | 0.565263 | 0.51552  |
| MmuSTS.734.1.S1_at   | MmuSTS.734.1 | 13.44 | 13.46 | 0.05 | 0.05 | -1.02 | 0.65657  | 0.757184 | 0.863636 | 0.858648 |
| MmuSTS.735.1.S1_at   | MmuSTS.735.1 | 7.3   | 7.62  | 0.57 | 0.05 | -1.25 | 0.427577 | 0.424151 | 0.741242 | 0.646747 |
| MmuSTS.736.1.S1_at   | MmuSTS.736.1 | 11.74 | 11.54 | 0.16 | 0.06 | 1.15  | 0.365622 | 0.064692 | 0.701226 | 0.300314 |
| MmuSTS.737.1.S1_at   | MmuSTS.737.1 | 10.75 | 10.79 | 0.25 | 0.08 | -1.03 | 0.794053 | 0.564045 | 0.924489 | 0.738956 |
| MmuSTS.738.1.S1_at   | MmuSTS.738.1 | 3.48  | 3.57  | 0.08 | 0.01 | -1.06 | 0.049863 | 0.047359 | 0.386432 | 0.262353 |
| MmuSTS.739.1.S1_at   | MmuSTS.739.1 | 5.79  | 5.76  | 0.19 | 0.07 | 1.02  | 0.745036 | 0.30896  | 0.902839 | 0.564656 |
| MmuSTS.74.1.S1_at    | MmuSTS.74.1  | 10.31 | 10.39 | 0.52 | 0.09 | -1.06 | 0.909864 | 0.71107  | 0.96945  | 0.8324   |
| MmuSTS.740.1.S1_at   | MmuSTS.740.1 | 12.3  | 12.54 | 0.22 | 0.05 | -1.18 | 0.134648 | 0.18233  | 0.508533 | 0.458787 |
| MmuSTS.741.1.S1_at   | MmuSTS.741.1 | 3.85  | 3.84  | 0.09 | 0.03 | 1     | 0.855983 | 0.595741 | 0.949147 | 0.759208 |
| MmuSTS.742.1.S1_at   | MmuSTS.742.1 | 4.98  | 4.91  | 0.2  | 0.06 | 1.05  | 0.415833 | 0.692531 | 0.73381  | 0.821061 |
| MmuSTS.743.1.S1_at   | MmuSTS.743.1 | 11.29 | 11.66 | 0.38 | 0.08 | -1.3  | 0.164945 | 0.091553 | 0.537666 | 0.346652 |
| MmuSTS.744.1.S1_at   | MmuSTS.744.1 | 11.56 | 11.39 | 0.22 | 0.09 | 1.13  | 0.182756 | 0.198491 | 0.555631 | 0.473391 |
| MmuSTS.745.1.S1_at   | MmuSTS.745.1 | 4.21  | 4.27  | 0.91 | 0.27 | -1.04 | 0.651289 | 0.00442  | 0.861519 | 0.092904 |
| MmuSTS.746.1.S1_at   | MmuSTS.746.1 | 9.36  | 9.17  | 0.71 | 0.1  | 1.14  | 0.76126  | 0.670347 | 0.910425 | 0.807242 |
| MmuSTS.747.1.S1_at   | MmuSTS.747.1 | 8.94  | 9.38  | 0.44 | 0.14 | -1.36 | 0.313297 | 0.416093 | 0.664597 | 0.64135  |
| MmuSTS.748.1.S1_at   | MmuSTS.748.1 | 5.17  | 4.94  | 0.08 | 0.03 | 1.17  | 0.020197 | 0.042674 | 0.303673 | 0.251037 |
| MmuSTS.749.1.S1_at   | MmuSTS.749.1 | 10.08 | 11.3  | 0.23 | 0.16 | -2.34 | 0.002578 | 0.000287 | 0.180775 | 0.034857 |
| MmuSTS.75.1.S1_at    | MmuSTS.75.1  | 5.24  | 5.23  | 0.05 | 0.06 | 1.01  | 0.78345  | 0.652938 | 0.920277 | 0.797125 |
| MmuSTS.750.1.S1_at   | MmuSTS.750.1 | 4.6   | 4.27  | 0.1  | 0.15 | 1.26  | 0.036178 | 0.100762 | 0.354633 | 0.360174 |
| MmuSTS.751.1.S1_at   | MmuSTS.751.1 | 7.36  | 7.49  | 0.59 | 0.2  | -1.09 | 0.368773 | 0.275533 | 0.703807 | 0.539743 |

|                      |              |       |       |      |      |       |          |          |          |          |
|----------------------|--------------|-------|-------|------|------|-------|----------|----------|----------|----------|
| MmuSTS.752.1.S1_at   | MmuSTS.752.1 | 13.48 | 13.46 | 0.2  | 0    | 1.01  | 0.856635 | 0.934374 | 0.9495   | 0.962766 |
| MmuSTS.753.1.S1_at   | MmuSTS.753.1 | 6.89  | 6.88  | 0.06 | 0.1  | 1.01  | 0.62041  | 0.848572 | 0.84711  | 0.91405  |
| MmuSTS.754.1.S1_at   | MmuSTS.754.1 | 7.36  | 6.35  | 0.97 | 0.15 | 2.01  | 0.463774 | 0.126089 | 0.762278 | 0.39672  |
| MmuSTS.755.1.S1_at   | MmuSTS.755.1 | 6.38  | 5.82  | 0.27 | 0.19 | 1.47  | 0.079201 | 0.13706  | 0.442056 | 0.409836 |
| MmuSTS.756.1.S1_at   | MmuSTS.756.1 | 5.44  | 5.22  | 0.14 | 0.04 | 1.17  | 0.057975 | 0.153093 | 0.403539 | 0.428011 |
| MmuSTS.757.1.S1_at   | MmuSTS.757.1 | 9.86  | 9.87  | 0.44 | 0.07 | -1.01 | 0.411754 | 0.028503 | 0.731654 | 0.210658 |
| MmuSTS.758.1.S1_at   | MmuSTS.758.1 | 7.15  | 7.09  | 0.37 | 0.05 | 1.05  | 0.274388 | 0.274607 | 0.633792 | 0.539059 |
| MmuSTS.759.1.S1_at   | MmuSTS.759.1 | 4.58  | 4.47  | 0.12 | 0.27 | 1.09  | 0.836226 | 0.982216 | 0.941202 | 0.990289 |
| MmuSTS.76.1.S1_at    | MmuSTS.76.1  | 5.92  | 6.17  | 0.14 | 0.06 | -1.19 | 0.073752 | 0.06904  | 0.434623 | 0.309017 |
| MmuSTS.76.1.S1_x_at  | MmuSTS.76.1  | 6.23  | 6.22  | 0.1  | 0.03 | 1.01  | 0.486296 | 0.695823 | 0.774492 | 0.823223 |
| MmuSTS.760.1.S1_at   | MmuSTS.760.1 | 10.01 | 10.11 | 0.08 | 0.05 | -1.08 | 0.04923  | 0.031379 | 0.385423 | 0.219065 |
| MmuSTS.761.1.S1_at   | MmuSTS.761.1 | 2.94  | 2.88  | 0.12 | 0.09 | 1.04  | 0.1128   | 0.202    | 0.486223 | 0.476444 |
| MmuSTS.762.1.S1_at   | MmuSTS.762.1 | 4.26  | 4.01  | 0.24 | 0.31 | 1.19  | 0.807404 | 0.942887 | 0.930145 | 0.967564 |
| MmuSTS.763.1.S1_at   | MmuSTS.763.1 | 11.8  | 12.14 | 0.12 | 0.06 | -1.27 | 0.020125 | 0.024044 | 0.303673 | 0.194371 |
| MmuSTS.764.1.S1_at   | MmuSTS.764.1 | 10.84 | 10.85 | 0.26 | 0.14 | -1    | 0.81834  | 0.723638 | 0.934334 | 0.840028 |
| MmuSTS.765.1.S1_at   | MmuSTS.765.1 | 6.92  | 7.04  | 0.09 | 0.08 | -1.09 | 0.319699 | 0.087846 | 0.668882 | 0.341218 |
| MmuSTS.766.1.S1_at   | MmuSTS.766.1 | 5.88  | 6.01  | 0.17 | 0.02 | -1.1  | 0.257017 | 0.248498 | 0.620913 | 0.517769 |
| MmuSTS.767.1.S1_at   | MmuSTS.767.1 | 7.03  | 6.92  | 0.06 | 0.03 | 1.08  | 0.067214 | 0.256614 | 0.423286 | 0.524408 |
| MmuSTS.768.1.S1_at   | MmuSTS.768.1 | 4.49  | 4.28  | 0.09 | 0.11 | 1.16  | 0.113406 | 0.087589 | 0.486722 | 0.340846 |
| MmuSTS.769.1.S1_at   | MmuSTS.769.1 | 12.16 | 10.58 | 1.81 | 1    | 2.99  | 0.685843 | 0.119494 | 0.876898 | 0.388143 |
| MmuSTS.77.1.S1_at    | MmuSTS.77.1  | 11.19 | 10.81 | 0.16 | 0.12 | 1.3   | 0.045384 | 0.059357 | 0.376374 | 0.29054  |
| MmuSTS.770.1.S1_at   | MmuSTS.770.1 | 7.53  | 7.45  | 0.18 | 0.13 | 1.06  | 0.602914 | 0.050599 | 0.839074 | 0.270317 |
| MmuSTS.771.1.S1_at   | MmuSTS.771.1 | 11.44 | 11.28 | 0.29 | 0.04 | 1.12  | 0.391362 | 0.482268 | 0.717533 | 0.687144 |
| MmuSTS.772.1.S1_at   | MmuSTS.772.1 | 10.32 | 9.54  | 0.81 | 0.33 | 1.71  | 0.821288 | 0.157003 | 0.935561 | 0.432467 |
| MmuSTS.773.1.S1_at   | MmuSTS.773.1 | 11.07 | 11.13 | 0.12 | 0.12 | -1.04 | 0.324591 | 0.043546 | 0.672781 | 0.253261 |
| MmuSTS.774.1.S1_at   | MmuSTS.774.1 | 3.56  | 3.57  | 0.08 | 0.01 | -1.01 | 0.933374 | 0.998819 | 0.977395 | 0.999367 |
| MmuSTS.775.1.S1_at   | MmuSTS.775.1 | 3.57  | 3.42  | 0.15 | 0.01 | 1.11  | 0.52013  | 0.72077  | 0.793553 | 0.838368 |
| MmuSTS.776.1.S1_at   | MmuSTS.776.1 | 5.78  | 5.75  | 0.12 | 0.08 | 1.02  | 0.500034 | 0.621194 | 0.782311 | 0.775813 |
| MmuSTS.777.1.S1_at   | MmuSTS.777.1 | 4.74  | 4.7   | 0.05 | 0.21 | 1.03  | 0.270129 | 0.410012 | 0.630217 | 0.63704  |
| MmuSTS.778.1.S1_at   | MmuSTS.778.1 | 3.04  | 2.85  | 0.93 | 0.05 | 1.14  | 0.256774 | 0.343936 | 0.620689 | 0.589617 |
| MmuSTS.779.1.S1_at   | MmuSTS.779.1 | 5.17  | 5.68  | 0.45 | 0.19 | -1.43 | 0.089801 | 0.285378 | 0.457893 | 0.547227 |
| MmuSTS.78.1.S1_at    | MmuSTS.78.1  | 6.01  | 5.75  | 0.09 | 0.42 | 1.2   | 0.249476 | 0.112783 | 0.61481  | 0.37844  |
| MmuSTS.780.1.S1_s_at | MmuSTS.780.1 | 4.22  | 4.04  | 0.06 | 0.22 | 1.13  | 0.665941 | 0.46929  | 0.868171 | 0.678193 |
| MmuSTS.781.1.S1_at   | MmuSTS.781.1 | 4.43  | 4.49  | 0.09 | 0.18 | -1.04 | 0.467187 | 0.489076 | 0.764189 | 0.691588 |
| MmuSTS.782.1.S1_at   | MmuSTS.782.1 | 4.81  | 4.85  | 0.12 | 0.1  | -1.02 | 0.922655 | 0.415152 | 0.973908 | 0.640713 |
| MmuSTS.783.1.S1_at   | MmuSTS.783.1 | 3.55  | 3.63  | 0.06 | 0.26 | -1.06 | 0.426577 | 0.430352 | 0.740608 | 0.651374 |
| MmuSTS.784.1.S1_at   | MmuSTS.784.1 | 3.57  | 3.62  | 0.1  | 0.23 | -1.04 | 0.591324 | 0.802024 | 0.833385 | 0.885995 |
| MmuSTS.785.1.S1_at   | MmuSTS.785.1 | 9.9   | 9.69  | 0.33 | 0.02 | 1.16  | 0.165366 | 0.203478 | 0.538073 | 0.477701 |
| MmuSTS.786.1.S1_at   | MmuSTS.786.1 | 4.12  | 3.93  | 0.11 | 0.09 | 1.14  | 0.156466 | 0.094897 | 0.529581 | 0.352    |
| MmuSTS.787.1.S1_at   | MmuSTS.787.1 | 7.69  | 7.65  | 0.1  | 0.03 | 1.03  | 0.388716 | 0.006366 | 0.715611 | 0.108489 |
| MmuSTS.788.1.S1_at   | MmuSTS.788.1 | 6.31  | 6.21  | 0.06 | 0.06 | 1.07  | 0.06815  | 0.340488 | 0.424968 | 0.586776 |
| MmuSTS.789.1.S1_at   | MmuSTS.789.1 | 9.61  | 9.14  | 0.32 | 0.29 | 1.39  | 0.08638  | 0.220379 | 0.454016 | 0.493783 |
| MmuSTS.79.1.S1_at    | MmuSTS.79.1  | 11.18 | 11.03 | 0.18 | 0.1  | 1.11  | 0.43929  | 0.759063 | 0.748046 | 0.859979 |

|                      |              |       |       |      |      |       |          |          |          |          |
|----------------------|--------------|-------|-------|------|------|-------|----------|----------|----------|----------|
| MmuSTS.790.1.S1_at   | MmuSTS.790.1 | 7.19  | 7.28  | 0.15 | 0.03 | -1.06 | 0.31555  | 0.571851 | 0.666002 | 0.744056 |
| MmuSTS.791.1.S1_at   | MmuSTS.791.1 | 8.69  | 7.38  | 0.21 | 0.49 | 2.48  | 0.005576 | 0.037777 | 0.208782 | 0.238746 |
| MmuSTS.792.1.S1_at   | MmuSTS.792.1 | 10.61 | 10.43 | 0.49 | 0.18 | 1.13  | 0.525339 | 0.730663 | 0.796198 | 0.844055 |
| MmuSTS.793.1.S1_at   | MmuSTS.793.1 | 11.75 | 12.6  | 0.66 | 0.06 | -1.8  | 0.125805 | 0.09818  | 0.49972  | 0.356253 |
| MmuSTS.794.1.S1_at   | MmuSTS.794.1 | 5.5   | 5.38  | 0.14 | 0.07 | 1.09  | 0.585692 | 0.784451 | 0.830611 | 0.875181 |
| MmuSTS.795.1.S1_at   | MmuSTS.795.1 | 8.89  | 9.59  | 1.76 | 0.28 | -1.63 | 0.210853 | 0.264491 | 0.582007 | 0.530437 |
| MmuSTS.796.1.S1_at   | MmuSTS.796.1 | 8.33  | 7.86  | 0.46 | 0.02 | 1.39  | 0.098258 | 0.074507 | 0.467704 | 0.318173 |
| MmuSTS.797.1.S1_at   | MmuSTS.797.1 | 4.19  | 3.92  | 0.25 | 0.15 | 1.21  | 0.155158 | 0.240716 | 0.528509 | 0.511447 |
| MmuSTS.798.1.S1_at   | MmuSTS.798.1 | 8.98  | 9.81  | 0.58 | 0.08 | -1.77 | 0.215676 | 0.132518 | 0.585769 | 0.404544 |
| MmuSTS.799.1.S1_at   | MmuSTS.799.1 | 3.16  | 2.9   | 0.26 | 0.04 | 1.19  | 0.131151 | 0.147655 | 0.5054   | 0.421957 |
| MmuSTS.8.1.S1_at     | MmuSTS.8.1   | 11.96 | 11.49 | 0.39 | 0.21 | -1.39 | 0.391296 | 0.020311 | 0.717502 | 0.178899 |
| MmuSTS.80.1.S1_at    | MmuSTS.80.1  | 10.18 | 10.11 | 0.53 | 0.06 | 1.04  | 0.897662 | 0.925797 | 0.965276 | 0.958018 |
| MmuSTS.800.1.S1_at   | MmuSTS.800.1 | 7.31  | 7.93  | 0.48 | 0.12 | -1.54 | 0.111082 | 0.150129 | 0.484303 | 0.424714 |
| MmuSTS.801.1.S1_s_at | MmuSTS.801.1 | 7.85  | 8.84  | 1.49 | 0.15 | -1.99 | 0.873257 | 0.202219 | 0.956084 | 0.476628 |
| MmuSTS.802.1.S1_at   | MmuSTS.802.1 | 3.92  | 3.83  | 0.2  | 0.09 | 1.07  | 0.39411  | 0.449184 | 0.719612 | 0.664892 |
| MmuSTS.803.1.S1_at   | MmuSTS.803.1 | 6.38  | 6.91  | 1.49 | 0.35 | -1.45 | 0.564071 | 0.131459 | 0.81857  | 0.403584 |
| MmuSTS.804.1.S1_at   | MmuSTS.804.1 | 5.01  | 4.97  | 0.03 | 0.03 | 1.03  | 0.124751 | 0.275833 | 0.498863 | 0.540035 |
| MmuSTS.805.1.S1_at   | MmuSTS.805.1 | 11.67 | 11.9  | 0.28 | 0.15 | -1.18 | 0.747287 | 0.888769 | 0.903943 | 0.936623 |
| MmuSTS.806.1.S1_at   | MmuSTS.806.1 | 9.7   | 9.94  | 0.17 | 0.32 | -1.18 | 0.141747 | 0.179087 | 0.516701 | 0.455436 |
| MmuSTS.807.1.S1_at   | MmuSTS.807.1 | 3.81  | 4.19  | 0.29 | 0.4  | -1.3  | 0.252577 | 0.278081 | 0.617552 | 0.541754 |
| MmuSTS.808.1.S1_at   | MmuSTS.808.1 | 10.69 | 11.69 | 0.3  | 0.12 | -2    | 0.003471 | 0.000752 | 0.195142 | 0.045271 |
| MmuSTS.809.1.S1_at   | MmuSTS.809.1 | 11.36 | 11.76 | 0.19 | 0.1  | -1.32 | 0.04035  | 0.064707 | 0.36407  | 0.300314 |
| MmuSTS.81.1.S1_at    | MmuSTS.81.1  | 2.76  | 2.78  | 0.04 | 0.04 | -1.01 | 0.576632 | 0.065601 | 0.825166 | 0.301514 |
| MmuSTS.810.1.S1_at   | MmuSTS.810.1 | 7.21  | 7.45  | 0.49 | 0.05 | -1.18 | 0.455852 | 0.46209  | 0.75759  | 0.673537 |
| MmuSTS.811.1.S1_at   | MmuSTS.811.1 | 5.9   | 5.84  | 0.07 | 0.06 | 1.04  | 0.38036  | 0.498116 | 0.709387 | 0.697266 |
| MmuSTS.812.1.S1_at   | MmuSTS.812.1 | 5.73  | 5.6   | 0.13 | 0.04 | 1.09  | 0.252713 | 0.534372 | 0.617731 | 0.720341 |
| MmuSTS.813.1.S1_at   | MmuSTS.813.1 | 12.2  | 11.83 | 0.1  | 0.23 | 1.29  | 0.065132 | 0.003893 | 0.419835 | 0.088806 |
| MmuSTS.814.1.S1_s_at | MmuSTS.814.1 | 5.1   | 5.16  | 0.47 | 0.38 | -1.04 | 0.40713  | 0.431457 | 0.728529 | 0.652374 |
| MmuSTS.815.1.S1_at   | MmuSTS.815.1 | 8.69  | 9.03  | 0.33 | 0.01 | -1.27 | 0.241083 | 0.040909 | 0.607331 | 0.247161 |
| MmuSTS.816.1.S1_at   | MmuSTS.816.1 | 9.13  | 8.98  | 0.05 | 0.07 | 1.11  | 0.037511 | 0.049627 | 0.35724  | 0.267843 |
| MmuSTS.817.1.S1_at   | MmuSTS.817.1 | 6.65  | 6.92  | 0.42 | 0.08 | -1.2  | 0.249095 | 0.660816 | 0.614389 | 0.801589 |
| MmuSTS.818.1.S1_at   | MmuSTS.818.1 | 5.95  | 6.47  | 0.57 | 0.31 | -1.44 | 0.0836   | 0.019168 | 0.449622 | 0.1742   |
| MmuSTS.819.1.S1_at   | MmuSTS.819.1 | 6.9   | 7.2   | 0.46 | 0.22 | -1.23 | 0.497168 | 0.31312  | 0.781055 | 0.567684 |
| MmuSTS.82.1.S1_at    | MmuSTS.82.1  | 9.72  | 10.01 | 0.01 | 0.06 | -1.22 | 0.000653 | 0.013863 | 0.144737 | 0.150985 |
| MmuSTS.820.1.S1_at   | MmuSTS.820.1 | 8.88  | 9.07  | 0.42 | 0.08 | -1.15 | 0.290912 | 0.280342 | 0.64744  | 0.543556 |
| MmuSTS.821.1.S1_at   | MmuSTS.821.1 | 9.42  | 9.96  | 0.26 | 0.03 | -1.45 | 0.022921 | 0.00088  | 0.313298 | 0.047602 |
| MmuSTS.822.1.S1_at   | MmuSTS.822.1 | 12.09 | 12.31 | 0.59 | 0.08 | -1.17 | 0.478197 | 0.613239 | 0.770076 | 0.770484 |
| MmuSTS.823.1.S1_at   | MmuSTS.823.1 | 8.77  | 9.64  | 0.71 | 0.16 | -1.83 | 0.143354 | 0.100651 | 0.518712 | 0.360009 |
| MmuSTS.824.1.S1_at   | MmuSTS.824.1 | 9.56  | 9.67  | 0.25 | 0.05 | -1.08 | 0.708373 | 0.075033 | 0.886591 | 0.31917  |
| MmuSTS.825.1.S1_at   | MmuSTS.825.1 | 10.73 | 10.18 | 0.04 | 0.16 | 1.46  | 0.004931 | 0.006333 | 0.203775 | 0.108074 |
| MmuSTS.825.1.S1_x_at | MmuSTS.825.1 | 10.58 | 10.13 | 0.07 | 0.17 | 1.37  | 0.005792 | 0.006625 | 0.211798 | 0.110304 |
| MmuSTS.826.1.S1_at   | MmuSTS.826.1 | 5.71  | 5.73  | 0.09 | 0.13 | -1.01 | 0.272114 | 0.087665 | 0.631905 | 0.340941 |
| MmuSTS.827.1.S1_at   | MmuSTS.827.1 | 2.93  | 2.94  | 0.06 | 0.03 | -1    | 0.975254 | 0.840642 | 0.991912 | 0.909176 |

|                      |              |       |       |      |      |       |          |          |          |          |
|----------------------|--------------|-------|-------|------|------|-------|----------|----------|----------|----------|
| MmuSTS.827.1.S1_s_at | MmuSTS.827.1 | 3.76  | 3.75  | 0.01 | 0.04 | 1.01  | 0.238072 | 0.240233 | 0.605216 | 0.510851 |
| MmuSTS.828.1.S1_at   | MmuSTS.828.1 | 7.42  | 7.65  | 0.16 | 0.27 | -1.17 | 0.73547  | 0.104482 | 0.898725 | 0.36573  |
| MmuSTS.829.1.S1_at   | MmuSTS.829.1 | 6.21  | 6.91  | 0.57 | 0.3  | -1.62 | 0.114622 | 0.020083 | 0.487684 | 0.178007 |
| MmuSTS.83.1.S1_at    | MmuSTS.83.1  | 9.6   | 10.49 | 0.74 | 0.11 | -1.86 | 0.340896 | 0.262616 | 0.684799 | 0.528973 |
| MmuSTS.830.1.S1_at   | MmuSTS.830.1 | 11    | 10.49 | 2.72 | 0.21 | 1.42  | 0.667129 | 0.166083 | 0.868536 | 0.442666 |
| MmuSTS.831.1.S1_at   | MmuSTS.831.1 | 11.54 | 12.46 | 0.14 | 0.15 | -1.9  | 0.002226 | 0.000505 | 0.174757 | 0.039158 |
| MmuSTS.832.1.S1_at   | MmuSTS.832.1 | 7.42  | 7.74  | 0.23 | 0.13 | -1.25 | 0.055906 | 0.191489 | 0.399441 | 0.466823 |
| MmuSTS.833.1.S1_s_at | MmuSTS.833.1 | 10.85 | 10.69 | 0.03 | 0.07 | 1.12  | 0.017546 | 0.128472 | 0.29261  | 0.399814 |
| MmuSTS.834.1.S1_at   | MmuSTS.834.1 | 12.34 | 12.27 | 0.21 | 0.05 | 1.05  | 0.64544  | 0.245186 | 0.858779 | 0.514949 |
| MmuSTS.835.1.S1_at   | MmuSTS.835.1 | 10.12 | 11.04 | 0.97 | 0.19 | -1.9  | 0.225873 | 0.160623 | 0.594935 | 0.436745 |
| MmuSTS.836.1.S1_at   | MmuSTS.836.1 | 4.38  | 3.36  | 0.35 | 0.14 | 2.04  | 0.019096 | 0.019013 | 0.299783 | 0.173596 |
| MmuSTS.837.1.S1_at   | MmuSTS.837.1 | 10.71 | 10.66 | 0.21 | 0.06 | 1.04  | 0.252341 | 0.5093   | 0.617313 | 0.704094 |
| MmuSTS.838.1.S1_at   | MmuSTS.838.1 | 8.54  | 9.34  | 0.1  | 0.33 | -1.74 | 0.035656 | 0.010774 | 0.352855 | 0.135471 |
| MmuSTS.839.1.S1_at   | MmuSTS.839.1 | 7.62  | 7.26  | 0.37 | 0.25 | 1.29  | 0.317175 | 0.139249 | 0.66699  | 0.412427 |
| MmuSTS.84.1.S1_at    | MmuSTS.84.1  | 5.13  | 5.02  | 0.66 | 0.41 | 1.08  | 0.603192 | 0.334618 | 0.839167 | 0.582581 |
| MmuSTS.840.1.S1_at   | MmuSTS.840.1 | 12.36 | 12.11 | 0.2  | 0.02 | 1.19  | 0.096626 | 0.056956 | 0.465288 | 0.284751 |
| MmuSTS.841.1.S1_at   | MmuSTS.841.1 | 10.39 | 10.18 | 0.1  | 0.03 | 1.16  | 0.009461 | 0.000451 | 0.242283 | 0.038539 |
| MmuSTS.842.1.S1_at   | MmuSTS.842.1 | 7.59  | 7.78  | 0.28 | 0.03 | -1.14 | 0.264503 | 0.051294 | 0.626029 | 0.271872 |
| MmuSTS.843.1.S1_at   | MmuSTS.843.1 | 7.12  | 6.46  | 0.47 | 0.14 | 1.58  | 0.098545 | 0.34974  | 0.467982 | 0.593566 |
| MmuSTS.844.1.S1_at   | MmuSTS.844.1 | 10.73 | 10.95 | 2.09 | 0.23 | -1.16 | 0.686875 | 0.491491 | 0.87756  | 0.693004 |
| MmuSTS.845.1.S1_at   | MmuSTS.845.1 | 5.51  | 5.46  | 0.53 | 0.25 | 1.04  | 0.887037 | 0.392565 | 0.960769 | 0.625813 |
| MmuSTS.846.1.S1_at   | MmuSTS.846.1 | 5.77  | 5.73  | 0.13 | 0.12 | 1.03  | 0.451499 | 0.81005  | 0.755176 | 0.890518 |
| MmuSTS.847.1.S1_at   | MmuSTS.847.1 | 9.18  | 9.36  | 0.27 | 0.08 | -1.13 | 0.426598 | 0.29051  | 0.740608 | 0.55123  |
| MmuSTS.848.1.S1_s_at | MmuSTS.848.1 | 8.23  | 8.09  | 1.08 | 0.07 | 1.1   | 0.776174 | 0.936002 | 0.917029 | 0.963932 |
| MmuSTS.849.1.S1_at   | MmuSTS.849.1 | 4.61  | 5.36  | 0.32 | 0.6  | -1.69 | 0.573519 | 0.604014 | 0.823642 | 0.764427 |
| MmuSTS.85.1.S1_s_at  | MmuSTS.85.1  | 6.82  | 7.35  | 1.73 | 0.24 | -1.45 | 0.61386  | 0.069962 | 0.843708 | 0.31072  |
| MmuSTS.850.1.S1_at   | MmuSTS.850.1 | 6.83  | 6.91  | 0.35 | 0.09 | -1.05 | 0.768617 | 0.164836 | 0.913202 | 0.441152 |
| MmuSTS.851.1.S1_at   | MmuSTS.851.1 | 11.55 | 11.45 | 0.07 | 0.12 | 1.07  | 0.1303   | 0.214125 | 0.504682 | 0.487729 |
| MmuSTS.852.1.S1_at   | MmuSTS.852.1 | 5.07  | 5.03  | 0.19 | 0.1  | 1.02  | 0.57151  | 0.359134 | 0.82279  | 0.600506 |
| MmuSTS.853.1.S1_at   | MmuSTS.853.1 | 12.27 | 12.33 | 0.41 | 0.09 | -1.04 | 0.54437  | 0.505322 | 0.807196 | 0.702073 |
| MmuSTS.854.1.S1_at   | MmuSTS.854.1 | 6.1   | 6.17  | 0.21 | 0.2  | -1.05 | 0.373321 | 0.526147 | 0.705567 | 0.715401 |
| MmuSTS.854.1.S1_s_at | MmuSTS.854.1 | 6.99  | 7.12  | 0.47 | 0.36 | -1.09 | 0.403534 | 0.271304 | 0.725712 | 0.53644  |
| MmuSTS.855.1.S1_at   | MmuSTS.855.1 | 7.35  | 7.3   | 0.07 | 0.02 | 1.03  | 0.294159 | 0.744657 | 0.650324 | 0.852121 |
| MmuSTS.856.1.S1_at   | MmuSTS.856.1 | 5.55  | 5     | 0.63 | 0.2  | 1.46  | 0.10702  | 0.130547 | 0.47951  | 0.402412 |
| MmuSTS.857.1.S1_at   | MmuSTS.857.1 | 9     | 9.22  | 0.31 | 0.07 | -1.16 | 0.261796 | 0.335939 | 0.62407  | 0.583577 |
| MmuSTS.858.1.S1_at   | MmuSTS.858.1 | 5.52  | 6     | 0.11 | 0.48 | -1.39 | 0.155165 | 0.010536 | 0.528509 | 0.134072 |
| MmuSTS.859.1.S1_at   | MmuSTS.859.1 | 2.94  | 2.9   | 0.15 | 0.1  | 1.03  | 0.707403 | 0.70831  | 0.886113 | 0.830869 |
| MmuSTS.86.1.S1_at    | MmuSTS.86.1  | 11.12 | 6.66  | 3.97 | 0.25 | 22    | 0.413837 | 0.54961  | 0.732545 | 0.729956 |
| MmuSTS.86.1.S1_x_at  | MmuSTS.86.1  | 11.14 | 6.76  | 4.02 | 0.36 | 20.78 | 0.45911  | 0.608486 | 0.759258 | 0.767082 |
| MmuSTS.860.1.S1_s_at | MmuSTS.860.1 | 8.46  | 8.56  | 0.7  | 0.19 | -1.07 | 0.898744 | 0.259604 | 0.965615 | 0.526525 |
| MmuSTS.861.1.S1_at   | MmuSTS.861.1 | 8.97  | 9.29  | 0.75 | 0.18 | -1.25 | 0.541001 | 0.71473  | 0.804818 | 0.8345   |
| MmuSTS.861.1.S1_s_at | MmuSTS.861.1 | 8.34  | 8.5   | 0.6  | 0.14 | -1.11 | 0.724372 | 0.643013 | 0.893143 | 0.790587 |
| MmuSTS.862.1.S1_at   | MmuSTS.862.1 | 4.79  | 4.93  | 0.39 | 0.32 | -1.1  | 0.477292 | 0.771849 | 0.769812 | 0.867372 |

|                      |              |       |       |      |      |       |          |          |          |          |
|----------------------|--------------|-------|-------|------|------|-------|----------|----------|----------|----------|
| MmuSTS.863.1.S1_at   | MmuSTS.863.1 | 7.28  | 7.32  | 0.63 | 0.06 | -1.03 | 0.424732 | 0.142747 | 0.739622 | 0.416625 |
| MmuSTS.864.1.S1_at   | MmuSTS.864.1 | 10.56 | 10.76 | 0.22 | 0.09 | -1.15 | 0.205521 | 0.080199 | 0.577367 | 0.327801 |
| MmuSTS.865.1.S1_at   | MmuSTS.865.1 | 5.86  | 6.03  | 0.26 | 0.07 | -1.12 | 0.499763 | 0.556718 | 0.782208 | 0.734725 |
| MmuSTS.866.1.S1_at   | MmuSTS.866.1 | 4.26  | 4.37  | 0.79 | 0.08 | -1.08 | 0.447672 | 0.53602  | 0.753437 | 0.721454 |
| MmuSTS.867.1.S1_at   | MmuSTS.867.1 | 5.96  | 5.93  | 0.08 | 0.09 | 1.02  | 0.195165 | 0.489674 | 0.565616 | 0.691862 |
| MmuSTS.868.1.S1_at   | MmuSTS.868.1 | 9.31  | 9.69  | 0.18 | 0.12 | -1.3  | 0.081066 | 0.215372 | 0.445056 | 0.489067 |
| MmuSTS.869.1.S1_at   | MmuSTS.869.1 | 6.83  | 7.73  | 0.38 | 0.14 | -1.87 | 0.031491 | 0.012354 | 0.341227 | 0.14376  |
| MmuSTS.87.1.S1_at    | MmuSTS.87.1  | 13.47 | 13.26 | 1.24 | 0.09 | 1.16  | 0.526714 | 0.163168 | 0.796797 | 0.439303 |
| MmuSTS.870.1.S1_at   | MmuSTS.870.1 | 8.46  | 8.71  | 0.31 | 0.1  | -1.19 | 0.158615 | 0.123922 | 0.531588 | 0.394201 |
| MmuSTS.871.1.S1_at   | MmuSTS.871.1 | 10.01 | 10.38 | 0.43 | 0.01 | -1.29 | 0.198939 | 0.098928 | 0.570451 | 0.357049 |
| MmuSTS.872.1.S1_at   | MmuSTS.872.1 | 4.45  | 4.26  | 0.21 | 0.09 | -1.14 | 0.561565 | 0.304857 | 0.817232 | 0.561994 |
| MmuSTS.873.1.S1_at   | MmuSTS.873.1 | 9.86  | 10.06 | 0.07 | 0.08 | -1.15 | 0.020729 | 0.007659 | 0.305611 | 0.117089 |
| MmuSTS.874.1.S1_at   | MmuSTS.874.1 | 4.64  | 4.49  | 0.14 | 0.06 | 1.11  | 0.132465 | 0.130896 | 0.506752 | 0.403037 |
| MmuSTS.875.1.S1_at   | MmuSTS.875.1 | 4.85  | 4.66  | 0.15 | 0.06 | 1.14  | 0.179979 | 0.184454 | 0.553155 | 0.46048  |
| MmuSTS.876.1.S1_at   | MmuSTS.876.1 | 8.97  | 9.35  | 0.16 | 0.3  | -1.3  | 0.048723 | 0.041005 | 0.384018 | 0.247202 |
| MmuSTS.877.1.S1_at   | MmuSTS.877.1 | 11.91 | 12.08 | 0.54 | 0.08 | -1.12 | 0.64932  | 0.547072 | 0.860264 | 0.728283 |
| MmuSTS.878.1.S1_s_at | MmuSTS.878.1 | 12.01 | 12.08 | 0.42 | 0.1  | -1.05 | 0.830553 | 0.222503 | 0.939352 | 0.495581 |
| MmuSTS.879.1.S1_at   | MmuSTS.879.1 | 11.11 | 11.03 | 0.17 | 0.1  | 1.06  | 0.917475 | 0.710262 | 0.972005 | 0.831904 |
| MmuSTS.88.1.S1_at    | MmuSTS.88.1  | 9.42  | 9.73  | 0.23 | 0.15 | -1.24 | 0.341345 | 0.3181   | 0.685051 | 0.571046 |
| MmuSTS.880.1.S1_at   | MmuSTS.880.1 | 9.28  | 8.65  | 0.35 | 0.08 | 1.55  | 0.040584 | 0.009377 | 0.364613 | 0.127634 |
| MmuSTS.881.1.S1_at   | MmuSTS.881.1 | 11.99 | 12.34 | 0.23 | 0.09 | -1.28 | 0.27865  | 0.128667 | 0.637754 | 0.400083 |
| MmuSTS.882.1.S1_at   | MmuSTS.882.1 | 9.24  | 9.53  | 0.29 | 0.05 | -1.22 | 0.055696 | 0.003246 | 0.399024 | 0.082187 |
| MmuSTS.883.1.S1_at   | MmuSTS.883.1 | 8.22  | 7.68  | 0.23 | 0.3  | 1.46  | 0.03346  | 0.025393 | 0.346442 | 0.199747 |
| MmuSTS.884.1.S1_at   | MmuSTS.884.1 | 5.3   | 5.38  | 0.17 | 0.05 | -1.06 | 0.857031 | 0.276579 | 0.94962  | 0.540591 |
| MmuSTS.885.1.S1_at   | MmuSTS.885.1 | 9.42  | 9.92  | 0.19 | 0.05 | -1.41 | 0.032845 | 0.005634 | 0.345393 | 0.103705 |
| MmuSTS.886.1.S1_at   | MmuSTS.886.1 | 9.23  | 9.54  | 0.38 | 0.06 | -1.24 | 0.224437 | 0.038368 | 0.593639 | 0.240795 |
| MmuSTS.887.1.S1_at   | MmuSTS.887.1 | 4.82  | 4.73  | 0.13 | 0.08 | 1.06  | 0.850318 | 0.958409 | 0.947346 | 0.976452 |
| MmuSTS.888.1.S1_at   | MmuSTS.888.1 | 10.59 | 11.08 | 0.21 | 0.05 | -1.4  | 0.044964 | 0.044024 | 0.375515 | 0.254195 |
| MmuSTS.889.1.S1_at   | MmuSTS.889.1 | 6.74  | 8.67  | 0.34 | 0.61 | -3.83 | 0.008534 | 0.088907 | 0.234969 | 0.34275  |
| MmuSTS.89.1.S1_at    | MmuSTS.89.1  | 3.86  | 3.55  | 0.16 | 0.07 | 1.24  | 0.047866 | 0.016743 | 0.381444 | 0.163889 |
| MmuSTS.890.1.S1_at   | MmuSTS.890.1 | 6.06  | 7.55  | 0.47 | 0.35 | -2.81 | 0.007846 | 0.001887 | 0.231023 | 0.065004 |
| MmuSTS.891.1.S1_at   | MmuSTS.891.1 | 10.5  | 10.63 | 1.26 | 0.09 | -1.09 | 0.73492  | 0.777571 | 0.898509 | 0.870732 |
| MmuSTS.892.1.S1_at   | MmuSTS.892.1 | 6.21  | 6.2   | 0.14 | 0.07 | 1.01  | 0.645644 | 0.497859 | 0.858801 | 0.697071 |
| MmuSTS.893.1.S1_s_at | MmuSTS.893.1 | 5.76  | 6.96  | 0.74 | 0.16 | -2.3  | 0.064446 | 0.024351 | 0.418237 | 0.195315 |
| MmuSTS.894.1.S1_at   | MmuSTS.894.1 | 5.44  | 5.72  | 0.05 | 0.23 | -1.21 | 0.120788 | 0.004216 | 0.494347 | 0.091375 |
| MmuSTS.895.1.S1_at   | MmuSTS.895.1 | 5.82  | 5.43  | 0.33 | 0.27 | 1.31  | 0.392023 | 0.062892 | 0.718015 | 0.297494 |
| MmuSTS.896.1.S1_at   | MmuSTS.896.1 | 8.21  | 8.24  | 0.47 | 0.05 | -1.02 | 0.969971 | 0.948322 | 0.990067 | 0.970536 |
| MmuSTS.897.1.S1_at   | MmuSTS.897.1 | 8.06  | 8.7   | 0.69 | 0.23 | -1.56 | 0.420603 | 0.28921  | 0.737035 | 0.550293 |
| MmuSTS.898.1.S1_at   | MmuSTS.898.1 | 7.79  | 7.95  | 0.6  | 0.33 | -1.12 | 0.536382 | 0.061069 | 0.802281 | 0.293952 |
| MmuSTS.899.1.S1_at   | MmuSTS.899.1 | 7.84  | 7.23  | 1.22 | 0.04 | 1.53  | 0.423743 | 0.218538 | 0.739193 | 0.492142 |
| MmuSTS.9.1.S1_at     | MmuSTS.9.1   | 13.07 | 13.07 | 0.02 | 0.01 | -1.01 | 0.46969  | 0.752621 | 0.765623 | 0.855965 |
| MmuSTS.90.1.S1_at    | MmuSTS.90.1  | 8.99  | 10.44 | 0.55 | 0.1  | -2.73 | 0.022344 | 0.046172 | 0.310499 | 0.259313 |
| MmuSTS.900.1.S1_at   | MmuSTS.900.1 | 7.48  | 7.45  | 0.08 | 0.11 | 1.02  | 0.574127 | 0.225469 | 0.823843 | 0.498129 |

|                      |              |       |       |      |      |       |          |          |          |          |
|----------------------|--------------|-------|-------|------|------|-------|----------|----------|----------|----------|
| MmuSTS.901.1.S1_at   | MmuSTS.901.1 | 10.44 | 11.02 | 0.2  | 0.14 | -1.49 | 0.021544 | 0.044313 | 0.309241 | 0.255021 |
| MmuSTS.902.1.S1_at   | MmuSTS.902.1 | 6.47  | 6.47  | 0.21 | 0.08 | 1     | 0.556799 | 0.804918 | 0.814405 | 0.88785  |
| MmuSTS.903.1.S1_at   | MmuSTS.903.1 | 6.91  | 6.91  | 0.56 | 0.35 | 1     | 0.653031 | 0.04253  | 0.862124 | 0.250848 |
| MmuSTS.904.1.S1_at   | MmuSTS.904.1 | 6.21  | 7.59  | 0.64 | 0.4  | -2.62 | 0.103331 | 0.110482 | 0.474122 | 0.374684 |
| MmuSTS.905.1.S1_at   | MmuSTS.905.1 | 10.73 | 10.97 | 0.89 | 0.14 | -1.18 | 0.234282 | 0.082929 | 0.601579 | 0.332465 |
| MmuSTS.906.1.S1_at   | MmuSTS.906.1 | 4.19  | 4.2   | 0.13 | 0.08 | -1.01 | 0.710168 | 0.692364 | 0.887263 | 0.820984 |
| MmuSTS.907.1.S1_at   | MmuSTS.907.1 | 4.14  | 4.13  | 0.2  | 0.02 | 1.01  | 0.314426 | 0.277966 | 0.665151 | 0.541664 |
| MmuSTS.908.1.S1_at   | MmuSTS.908.1 | 5.91  | 5.96  | 0.23 | 0.06 | -1.04 | 0.244278 | 0.429115 | 0.60991  | 0.65062  |
| MmuSTS.909.1.S1_at   | MmuSTS.909.1 | 3.67  | 3.53  | 0.23 | 0.21 | 1.1   | 0.492297 | 0.028349 | 0.77824  | 0.210223 |
| MmuSTS.91.1.S1_at    | MmuSTS.91.1  | 7.43  | 7.96  | 1.7  | 0.13 | -1.44 | 0.43232  | 0.393684 | 0.74388  | 0.626522 |
| MmuSTS.910.1.S1_at   | MmuSTS.910.1 | 8.57  | 8.66  | 0.84 | 0.23 | -1.06 | 0.838215 | 0.960331 | 0.942032 | 0.977459 |
| MmuSTS.911.1.S1_at   | MmuSTS.911.1 | 11.43 | 10.74 | 0.61 | 0.23 | 1.61  | 0.191992 | 0.058485 | 0.563029 | 0.288549 |
| MmuSTS.912.1.S1_at   | MmuSTS.912.1 | 5.71  | 5.75  | 0.76 | 0.33 | -1.03 | 0.91724  | 0.98674  | 0.97197  | 0.992539 |
| MmuSTS.913.1.S1_at   | MmuSTS.913.1 | 12.29 | 12.66 | 0.06 | 0.07 | -1.29 | 0.002828 | 0.013661 | 0.186624 | 0.149641 |
| MmuSTS.914.1.S1_at   | MmuSTS.914.1 | 4.82  | 4.81  | 0.16 | 0.18 | 1     | 0.429212 | 0.581781 | 0.742138 | 0.750765 |
| MmuSTS.915.1.S1_at   | MmuSTS.915.1 | 10.99 | 11.83 | 0.35 | 0.09 | -1.79 | 0.016565 | 0.006253 | 0.287478 | 0.10728  |
| MmuSTS.916.1.S1_at   | MmuSTS.916.1 | 12.56 | 12.13 | 0.12 | 0.04 | 1.35  | 0.002892 | 0.000225 | 0.187888 | 0.032385 |
| MmuSTS.917.1.S1_at   | MmuSTS.917.1 | 7.2   | 7.23  | 0.21 | 0.08 | -1.02 | 0.361648 | 0.203071 | 0.698674 | 0.477343 |
| MmuSTS.918.1.S1_at   | MmuSTS.918.1 | 6.65  | 7.94  | 0.81 | 0.12 | -2.45 | 0.067705 | 0.027469 | 0.42444  | 0.207063 |
| MmuSTS.918.1.S1_s_at | MmuSTS.918.1 | 8.07  | 8.66  | 0.5  | 0.32 | -1.5  | 0.138174 | 0.183397 | 0.513671 | 0.459553 |
| MmuSTS.919.1.S1_at   | MmuSTS.919.1 | 9.52  | 9.01  | 0.32 | 0.52 | 1.43  | 0.052041 | 0.075777 | 0.391793 | 0.320348 |
| MmuSTS.92.1.S1_at    | MmuSTS.92.1  | 11.67 | 10.5  | 0.22 | 0.13 | 2.25  | 0.001052 | 0.00194  | 0.155464 | 0.065813 |
| MmuSTS.920.1.S1_at   | MmuSTS.920.1 | 4.78  | 5.19  | 0.61 | 0.57 | -1.33 | 0.928189 | 0.025578 | 0.976259 | 0.20065  |
| MmuSTS.921.1.S1_at   | MmuSTS.921.1 | 11.63 | 10.25 | 0.34 | 0.63 | 2.6   | 0.026746 | 0.061133 | 0.326091 | 0.293981 |
| MmuSTS.922.1.S1_at   | MmuSTS.922.1 | 2.88  | 2.83  | 0.31 | 0.03 | 1.03  | 0.50426  | 0.637015 | 0.784627 | 0.786561 |
| MmuSTS.923.1.S1_at   | MmuSTS.923.1 | 7.95  | 6.58  | 1.1  | 1    | 2.58  | 0.084342 | 0.007965 | 0.450953 | 0.118702 |
| MmuSTS.924.1.S1_at   | MmuSTS.924.1 | 9.16  | 10.19 | 0.61 | 0.11 | -2.04 | 0.016656 | 0.0142   | 0.287478 | 0.152173 |
| MmuSTS.925.1.S1_at   | MmuSTS.925.1 | 9.91  | 9.38  | 0.55 | 0.31 | 1.44  | 0.359255 | 0.199962 | 0.697184 | 0.474603 |
| MmuSTS.926.1.S1_at   | MmuSTS.926.1 | 9.65  | 9.77  | 0.14 | 0.03 | -1.09 | 0.080404 | 0.024167 | 0.444064 | 0.194633 |
| MmuSTS.927.1.S1_at   | MmuSTS.927.1 | 9.86  | 8.64  | 0.31 | 0.11 | 2.32  | 0.003587 | 0.002902 | 0.197111 | 0.079116 |
| MmuSTS.928.1.S1_at   | MmuSTS.928.1 | 8.08  | 8.33  | 0.29 | 0.16 | -1.19 | 0.799845 | 0.132931 | 0.926711 | 0.404616 |
| MmuSTS.929.1.S1_at   | MmuSTS.929.1 | 10.91 | 11.36 | 0.95 | 0.23 | -1.37 | 0.597219 | 0.063844 | 0.836158 | 0.29906  |
| MmuSTS.93.1.S1_at    | MmuSTS.93.1  | 9.84  | 8.9   | 1.52 | 0.16 | 1.92  | 0.468156 | 0.237644 | 0.764756 | 0.50826  |
| MmuSTS.930.1.S1_at   | MmuSTS.930.1 | 8.06  | 8.14  | 0.96 | 0.16 | -1.06 | 0.920087 | 0.503912 | 0.972913 | 0.701193 |
| MmuSTS.931.1.S1_at   | MmuSTS.931.1 | 4.9   | 4.83  | 0.09 | 0.04 | 1.05  | 0.443698 | 0.603268 | 0.750982 | 0.764037 |
| MmuSTS.932.1.S1_s_at | MmuSTS.932.1 | 3.21  | 3.22  | 0.64 | 1.08 | -1.01 | 0.732908 | 0.708674 | 0.897467 | 0.831025 |
| MmuSTS.933.1.S1_at   | MmuSTS.933.1 | 5.89  | 6.29  | 0.67 | 0.17 | -1.32 | 0.301827 | 0.548855 | 0.655978 | 0.729463 |
| MmuSTS.934.1.S1_at   | MmuSTS.934.1 | 12.1  | 11.09 | 1.15 | 0.18 | 2.01  | 0.584591 | 0.213107 | 0.829783 | 0.487054 |
| MmuSTS.935.1.S1_at   | MmuSTS.935.1 | 8.66  | 8.94  | 0.4  | 0.02 | -1.21 | 0.311613 | 0.046529 | 0.663441 | 0.260221 |
| MmuSTS.936.1.S1_at   | MmuSTS.936.1 | 6.67  | 6.68  | 0.18 | 0.14 | -1.01 | 0.909066 | 0.285979 | 0.969287 | 0.547506 |
| MmuSTS.937.1.S1_at   | MmuSTS.937.1 | 12.87 | 12.23 | 1.06 | 0.05 | 1.56  | 0.965056 | 0.511846 | 0.988532 | 0.705797 |
| MmuSTS.938.1.S1_at   | MmuSTS.938.1 | 3.32  | 3.3   | 0.07 | 0.09 | 1.01  | 0.777169 | 0.952466 | 0.917466 | 0.973066 |
| MmuSTS.939.1.S1_at   | MmuSTS.939.1 | 3.74  | 3.64  | 0.08 | 0.07 | 1.07  | 0.113289 | 0.15174  | 0.486648 | 0.426392 |

|                      |              |       |       |      |      |       |          |          |          |          |
|----------------------|--------------|-------|-------|------|------|-------|----------|----------|----------|----------|
| MmuSTS.94.1.S1_at    | MmuSTS.94.1  | 12.69 | 12.47 | 0.39 | 0.06 | 1.16  | 0.497986 | 0.638234 | 0.781511 | 0.787493 |
| MmuSTS.940.1.S1_at   | MmuSTS.940.1 | 12.69 | 12.76 | 0.51 | 0.14 | -1.05 | 0.92382  | 0.249245 | 0.974455 | 0.518324 |
| MmuSTS.941.1.S1_at   | MmuSTS.941.1 | 7.68  | 7.33  | 0.61 | 0.24 | 1.27  | 0.241907 | 0.017738 | 0.607952 | 0.168367 |
| MmuSTS.942.1.S1_at   | MmuSTS.942.1 | 7.56  | 7.56  | 1.04 | 0.14 | 1.01  | 0.945015 | 0.246862 | 0.980852 | 0.516233 |
| MmuSTS.943.1.S1_at   | MmuSTS.943.1 | 11.59 | 11.29 | 0.8  | 0.1  | 1.23  | 0.530903 | 0.280516 | 0.799314 | 0.54372  |
| MmuSTS.944.1.S1_at   | MmuSTS.944.1 | 8.71  | 8.41  | 0.23 | 0.1  | 1.23  | 0.230993 | 0.065469 | 0.599045 | 0.301415 |
| MmuSTS.945.1.S1_at   | MmuSTS.945.1 | 5.39  | 5.33  | 0.24 | 0.26 | 1.04  | 0.738114 | 0.304329 | 0.899775 | 0.561645 |
| MmuSTS.946.1.S1_at   | MmuSTS.946.1 | 9.33  | 8.99  | 0.44 | 0.07 | 1.26  | 0.351756 | 0.036022 | 0.692512 | 0.234255 |
| MmuSTS.947.1.S1_at   | MmuSTS.947.1 | 8.31  | 8.51  | 0.17 | 0.36 | -1.15 | 0.91087  | 0.733332 | 0.969778 | 0.845598 |
| MmuSTS.948.1.S1_at   | MmuSTS.948.1 | 9.1   | 9.61  | 0.62 | 0.03 | -1.43 | 0.201643 | 0.109503 | 0.573263 | 0.373339 |
| MmuSTS.949.1.S1_at   | MmuSTS.949.1 | 4.29  | 5.11  | 1.06 | 0.22 | -1.77 | 0.325282 | 0.496571 | 0.673112 | 0.696119 |
| MmuSTS.95.1.S1_at    | MmuSTS.95.1  | 9.95  | 9.84  | 0.68 | 0.24 | 1.08  | 0.297845 | 0.004617 | 0.652791 | 0.094942 |
| MmuSTS.950.1.S1_at   | MmuSTS.950.1 | 10.63 | 10.57 | 0.37 | 0.06 | 1.05  | 0.646614 | 0.681519 | 0.859193 | 0.814092 |
| MmuSTS.951.1.S1_at   | MmuSTS.951.1 | 7.5   | 7.75  | 0.24 | 0.05 | -1.19 | 0.205604 | 0.041844 | 0.577416 | 0.249172 |
| MmuSTS.952.1.S1_at   | MmuSTS.952.1 | 9.94  | 9.87  | 0.34 | 0.09 | 1.05  | 0.960897 | 0.201486 | 0.987225 | 0.476026 |
| MmuSTS.953.1.S1_at   | MmuSTS.953.1 | 7.01  | 7.23  | 0.27 | 0.05 | -1.16 | 0.707394 | 0.303433 | 0.886113 | 0.560914 |
| MmuSTS.954.1.S1_at   | MmuSTS.954.1 | 12.1  | 11.99 | 0.13 | 0.09 | 1.08  | 0.13329  | 0.462129 | 0.50781  | 0.673568 |
| MmuSTS.955.1.S1_at   | MmuSTS.955.1 | 11.47 | 11.94 | 0.29 | 0.04 | -1.39 | 0.163937 | 0.044069 | 0.536665 | 0.254198 |
| MmuSTS.956.1.S1_at   | MmuSTS.956.1 | 11.87 | 12.01 | 0.11 | 0.04 | -1.1  | 0.12468  | 0.003332 | 0.498771 | 0.083001 |
| MmuSTS.957.1.S1_at   | MmuSTS.957.1 | 12.4  | 12.38 | 0.14 | 0.13 | 1.01  | 0.841538 | 0.976464 | 0.94378  | 0.987202 |
| MmuSTS.958.1.S1_at   | MmuSTS.958.1 | 10.09 | 10.45 | 0.39 | 0.09 | -1.28 | 0.577949 | 0.808365 | 0.82603  | 0.889697 |
| MmuSTS.959.1.S1_at   | MmuSTS.959.1 | 10.92 | 11.09 | 0.18 | 0.01 | -1.13 | 0.446177 | 0.342381 | 0.752589 | 0.588445 |
| MmuSTS.96.1.S1_at    | MmuSTS.96.1  | 3.79  | 3.72  | 0.07 | 0.02 | 1.05  | 0.102633 | 0.055013 | 0.472874 | 0.280018 |
| MmuSTS.960.1.S1_at   | MmuSTS.960.1 | 12.07 | 11.98 | 0.13 | 0.06 | 1.07  | 0.869183 | 0.054599 | 0.954244 | 0.279201 |
| MmuSTS.961.1.S1_at   | MmuSTS.961.1 | 12.45 | 12.56 | 0.07 | 0.09 | -1.07 | 0.192522 | 0.025623 | 0.563577 | 0.200834 |
| MmuSTS.962.1.S1_at   | MmuSTS.962.1 | 10.66 | 10.34 | 0.1  | 0.06 | 1.24  | 0.017867 | 0.078109 | 0.294096 | 0.324578 |
| MmuSTS.963.1.S1_at   | MmuSTS.963.1 | 2.73  | 2.68  | 0.03 | 0.13 | 1.03  | 0.492046 | 0.480875 | 0.778088 | 0.686    |
| MmuSTS.963.1.S1_x_at | MmuSTS.963.1 | 2.79  | 2.72  | 0.08 | 0.03 | 1.05  | 0.272947 | 0.301613 | 0.632545 | 0.55955  |
| MmuSTS.964.1.S1_at   | MmuSTS.964.1 | 6.82  | 6.7   | 0.16 | 0.1  | 1.09  | 0.47563  | 0.190993 | 0.768676 | 0.46629  |
| MmuSTS.965.1.S1_at   | MmuSTS.965.1 | 12.21 | 12.17 | 0.08 | 0.06 | 1.03  | 0.602105 | 0.462184 | 0.838742 | 0.673601 |
| MmuSTS.966.1.S1_at   | MmuSTS.966.1 | 10.81 | 10.81 | 0.25 | 0.07 | 1     | 0.496131 | 0.52578  | 0.780229 | 0.715217 |
| MmuSTS.967.1.S1_at   | MmuSTS.967.1 | 4.7   | 4.78  | 0.16 | 0.07 | -1.06 | 0.266627 | 0.616532 | 0.627504 | 0.772748 |
| MmuSTS.968.1.S1_at   | MmuSTS.968.1 | 3.45  | 3.33  | 0.2  | 0.23 | 1.08  | 0.932233 | 0.993803 | 0.977191 | 0.996274 |
| MmuSTS.969.1.S1_at   | MmuSTS.969.1 | 7.43  | 7.64  | 0.56 | 0.05 | -1.16 | 0.30295  | 0.027835 | 0.656807 | 0.208365 |
| MmuSTS.97.1.S1_at    | MmuSTS.97.1  | 5.85  | 5.99  | 0.11 | 0.23 | -1.11 | 0.605911 | 0.886851 | 0.840202 | 0.935553 |
| MmuSTS.970.1.S1_at   | MmuSTS.970.1 | 11.27 | 11.39 | 1.03 | 0.13 | -1.09 | 0.664534 | 0.36264  | 0.867683 | 0.603188 |
| MmuSTS.971.1.S1_at   | MmuSTS.971.1 | 5.67  | 5.64  | 0.18 | 0.08 | 1.02  | 0.813307 | 0.877933 | 0.932515 | 0.930322 |
| MmuSTS.972.1.S1_at   | MmuSTS.972.1 | 6.09  | 6.49  | 0.23 | 0.08 | -1.32 | 0.074585 | 0.008522 | 0.435313 | 0.122518 |
| MmuSTS.973.1.S1_s_at | MmuSTS.973.1 | 5.87  | 5.97  | 0.57 | 0.5  | -1.07 | 0.628967 | 0.004068 | 0.851379 | 0.090288 |
| MmuSTS.974.1.S1_at   | MmuSTS.974.1 | 10.72 | 10.89 | 0.12 | 0.04 | -1.12 | 0.028394 | 0.003775 | 0.332362 | 0.08749  |
| MmuSTS.975.1.S1_at   | MmuSTS.975.1 | 7.34  | 7.21  | 0.09 | 0.03 | 1.1   | 0.040563 | 0.00675  | 0.364613 | 0.11113  |
| MmuSTS.976.1.S1_at   | MmuSTS.976.1 | 8.24  | 8.5   | 0.29 | 0.12 | -1.19 | 0.17749  | 0.010257 | 0.550585 | 0.132655 |
| MmuSTS.977.1.S1_at   | MmuSTS.977.1 | 6.06  | 5.98  | 0.22 | 0.09 | 1.06  | 0.592248 | 0.385939 | 0.833822 | 0.621161 |

|                         |                 |       |       |      |      |       |          |          |          |          |
|-------------------------|-----------------|-------|-------|------|------|-------|----------|----------|----------|----------|
| MmuSTS.978.1.S1_at      | MmuSTS.978.1    | 8.57  | 8.27  | 0.3  | 0.14 | 1.24  | 0.31257  | 0.52748  | 0.664138 | 0.716154 |
| MmuSTS.979.1.S1_at      | MmuSTS.979.1    | 12.96 | 12.86 | 0.13 | 0.03 | 1.07  | 0.456909 | 0.687574 | 0.758051 | 0.81762  |
| MmuSTS.98.1.S1_at       | MmuSTS.98.1     | 9.89  | 10.26 | 0.27 | 0.07 | -1.29 | 0.037018 | 0.03627  | 0.356628 | 0.235    |
| MmuSTS.980.1.S1_s_at    | MmuSTS.980.1    | 7.26  | 7.25  | 0.05 | 0.08 | 1.01  | 0.868516 | 0.830812 | 0.953968 | 0.902905 |
| MmuSTS.981.1.S1_s_at    | MmuSTS.981.1    | 4.62  | 4.61  | 0.13 | 0.06 | 1     | 0.852788 | 0.560069 | 0.94811  | 0.736464 |
| MmuSTS.982.1.S1_at      | MmuSTS.982.1    | 10.58 | 11.38 | 0.71 | 0.26 | -1.74 | 0.588077 | 0.44962  | 0.83181  | 0.665151 |
| MmuSTS.983.1.S1_at      | MmuSTS.983.1    | 8.03  | 9.08  | 0.79 | 0.16 | -2.06 | 0.141984 | 0.514056 | 0.516979 | 0.707422 |
| MmuSTS.984.1.S1_at      | MmuSTS.984.1    | 6.54  | 6.48  | 0.12 | 0.02 | 1.04  | 0.865836 | 0.32744  | 0.952802 | 0.577284 |
| MmuSTS.985.1.S1_at      | MmuSTS.985.1    | 4.38  | 5.09  | 1.1  | 0.42 | -1.63 | 0.671933 | 0.129176 | 0.870573 | 0.400611 |
| MmuSTS.986.1.S1_at      | MmuSTS.986.1    | 5.85  | 5.7   | 0.19 | 0.19 | 1.11  | 0.955338 | 0.971365 | 0.985312 | 0.984419 |
| MmuSTS.987.1.S1_at      | MmuSTS.987.1    | 4.46  | 4.27  | 0.22 | 0.02 | -1.14 | 0.552513 | 0.801711 | 0.811888 | 0.885902 |
| MmuSTS.988.1.S1_at      | MmuSTS.988.1    | 4.96  | 5.48  | 0.31 | 0.16 | -1.44 | 0.03384  | 0.093052 | 0.347296 | 0.3492   |
| MmuSTS.989.1.S1_at      | MmuSTS.989.1    | 10.69 | 10.37 | 0.26 | 0.11 | 1.25  | 0.159126 | 0.121794 | 0.531811 | 0.391074 |
| MmuSTS.99.1.S1_at       | MmuSTS.99.1     | 3.2   | 3.03  | 0.08 | 0.05 | 1.12  | 0.030729 | 0.088185 | 0.338443 | 0.341721 |
| MmuSTS.990.1.S1_at      | MmuSTS.990.1    | 11.04 | 11.43 | 0.52 | 0.09 | -1.31 | 0.469619 | 0.482231 | 0.765623 | 0.687128 |
| MmuSTS.991.1.S1_at      | MmuSTS.991.1    | 10.76 | 10.71 | 3.01 | 0.23 | 1.04  | 0.534923 | 0.31438  | 0.801404 | 0.56831  |
| MmuSTS.992.1.S1_at      | MmuSTS.992.1    | 11.06 | 11.46 | 0.17 | 0.05 | -1.32 | 0.02348  | 0.004967 | 0.315758 | 0.098202 |
| MmuSTS.993.1.S1_at      | MmuSTS.993.1    | 3.22  | 3.39  | 0.23 | 0.04 | -1.13 | 0.768133 | 0.452695 | 0.912812 | 0.667253 |
| MmuSTS.994.1.S1_at      | MmuSTS.994.1    | 7.64  | 7.91  | 0.28 | 0.06 | -1.21 | 0.42253  | 0.624302 | 0.738218 | 0.778555 |
| MmuSTS.995.1.S1_at      | MmuSTS.995.1    | 6.97  | 7.55  | 0.1  | 0.03 | -1.49 | 0.000679 | 0.000139 | 0.146807 | 0.029296 |
| MmuSTS.996.1.S1_at      | MmuSTS.996.1    | 11.84 | 11.81 | 0.11 | 0.12 | 1.02  | 0.423433 | 0.003176 | 0.739103 | 0.081873 |
| MmuSTS.997.1.S1_at      | MmuSTS.997.1    | 5.02  | 4.85  | 0.11 | 0.09 | 1.12  | 0.065677 | 0.048816 | 0.420827 | 0.265858 |
| MmuSTS.998.1.S1_at      | MmuSTS.998.1    | 5.77  | 6.07  | 0.09 | 0.15 | -1.23 | 0.109401 | 0.326094 | 0.482257 | 0.576315 |
| MmuSTS.999.1.S1_at      | MmuSTS.999.1    | 10.9  | 10.26 | 0.57 | 0.08 | 1.55  | 0.138578 | 0.182021 | 0.514011 | 0.458566 |
| MmugDNA.10.1.S1_s_at    | MmugDNA.10.1    | 6.27  | 6.3   | 0.09 | 0.13 | -1.02 | 0.977001 | 0.653578 | 0.992518 | 0.797512 |
| MmugDNA.100.1.S1_at     | MmugDNA.100.1   | 6.03  | 5.69  | 1.58 | 0.26 | 1.26  | 0.677093 | 0.644034 | 0.873357 | 0.791291 |
| MmugDNA.10000.1.S1_at   | MmugDNA.10000.1 | 12.61 | 12.74 | 0.4  | 0.13 | -1.09 | 0.817312 | 0.675682 | 0.933935 | 0.810429 |
| MmugDNA.10001.1.S1_at   | MmugDNA.10001.1 | 10.25 | 10.55 | 0.27 | 0.1  | -1.23 | 0.155435 | 0.128609 | 0.528651 | 0.400031 |
| MmugDNA.10004.1.S1_at   | MmugDNA.10004.1 | 3.45  | 3.42  | 0.01 | 0.02 | 1.02  | 0.111046 | 0.706114 | 0.484303 | 0.829634 |
| MmugDNA.10006.1.S1_at   | MmugDNA.10006.1 | 11.93 | 12.14 | 0.18 | 0.04 | -1.16 | 0.178209 | 0.059769 | 0.551301 | 0.291114 |
| MmugDNA.10008.1.S1_at   | MmugDNA.10008.1 | 11.08 | 10.39 | 0.51 | 0.06 | 1.62  | 0.242826 | 0.010024 | 0.608808 | 0.131279 |
| MmugDNA.10011.1.S1_at   | MmugDNA.10011.1 | 8.98  | 8.85  | 0.49 | 0.19 | 1.09  | 0.44565  | 0.003661 | 0.752285 | 0.086526 |
| MmugDNA.10012.1.S1_at   | MmugDNA.10012.1 | 5.45  | 5.3   | 0.86 | 0.85 | 1.11  | 0.729311 | 0.376157 | 0.895733 | 0.613978 |
| MmugDNA.10014.1.S1_s_at | MmugDNA.10014.1 | 10.38 | 9.22  | 0.09 | 0.23 | 2.23  | 0.00145  | 0.002129 | 0.161412 | 0.068239 |
| MmugDNA.10018.1.S1_at   | MmugDNA.10018.1 | 9.69  | 9.71  | 1.11 | 0.19 | -1.01 | 0.30101  | 0.034171 | 0.655304 | 0.228728 |
| MmugDNA.10025.1.S1_at   | MmugDNA.10025.1 | 12.57 | 12.72 | 0.29 | 0.05 | -1.11 | 0.427069 | 0.2595   | 0.74088  | 0.526418 |
| MmugDNA.10031.1.S1_at   | MmugDNA.10031.1 | 12.49 | 12.25 | 0.43 | 0.05 | 1.18  | 0.975975 | 0.999127 | 0.992259 | 0.999599 |
| MmugDNA.10032.1.S1_at   | MmugDNA.10032.1 | 3.76  | 3.57  | 0.14 | 0.08 | 1.14  | 0.12561  | 0.194757 | 0.499523 | 0.469774 |
| MmugDNA.10033.1.S1_at   | MmugDNA.10033.1 | 10.5  | 10.39 | 0.26 | 0.16 | 1.08  | 0.647654 | 0.544098 | 0.859364 | 0.726614 |
| MmugDNA.10040.1.S1_at   | MmugDNA.10040.1 | 8.92  | 8.84  | 0.27 | 0.31 | 1.06  | 0.886713 | 0.001166 | 0.96068  | 0.053615 |
| MmugDNA.10044.1.S1_at   | MmugDNA.10044.1 | 7.16  | 7.45  | 0.06 | 0.06 | -1.22 | 0.009588 | 0.000022 | 0.24276  | 0.019635 |
| MmugDNA.10059.1.S1_at   | MmugDNA.10059.1 | 9.44  | 9.43  | 0.34 | 0.04 | 1.01  | 0.40897  | 0.012815 | 0.729673 | 0.145843 |
| MmugDNA.10064.1.S1_at   | MmugDNA.10064.1 | 3.44  | 3.28  | 0.09 | 0.1  | 1.11  | 0.066071 | 0.057814 | 0.421668 | 0.286845 |



|                         |                 |       |       |      |      |       |          |          |          |          |
|-------------------------|-----------------|-------|-------|------|------|-------|----------|----------|----------|----------|
| MmugDNA.10069.1.S1_at   | MmugDNA.10069.1 | 8.26  | 8.78  | 0.41 | 0.2  | -1.44 | 0.281742 | 0.080782 | 0.640218 | 0.328657 |
| MmugDNA.10073.1.S1_s_at | MmugDNA.10073.1 | 11.84 | 11.84 | 0.39 | 0.1  | -1    | 0.716633 | 0.034232 | 0.88994  | 0.228869 |
| MmugDNA.10078.1.S1_at   | MmugDNA.10078.1 | 5.86  | 5.8   | 0.08 | 0.08 | 1.04  | 0.407626 | 0.245813 | 0.728775 | 0.515519 |
| MmugDNA.10084.1.S1_at   | MmugDNA.10084.1 | 10.37 | 10.05 | 0.28 | 0.1  | 1.25  | 0.139136 | 0.36889  | 0.514459 | 0.608429 |
| MmugDNA.10096.1.S1_at   | MmugDNA.10096.1 | 10.63 | 10.26 | 0.23 | 0.03 | 1.29  | 0.081866 | 0.1313   | 0.446396 | 0.403407 |
| MmugDNA.10101.1.S1_at   | MmugDNA.10101.1 | 4.56  | 4.56  | 0.09 | 0.09 | -1    | 0.980078 | 0.867436 | 0.993744 | 0.924699 |
| MmugDNA.10110.1.S1_at   | MmugDNA.10110.1 | 13.09 | 12.91 | 2.77 | 0.14 | 1.13  | 0.444549 | 0.195243 | 0.751314 | 0.470253 |
| MmugDNA.10114.1.S1_at   | MmugDNA.10114.1 | 9.08  | 9.96  | 1.26 | 0.17 | -1.85 | 0.282497 | 0.310552 | 0.640925 | 0.565771 |
| MmugDNA.10116.1.S1_at   | MmugDNA.10116.1 | 9.24  | 8.99  | 0.23 | 0.46 | 1.19  | 0.924315 | 0.13086  | 0.974666 | 0.403037 |
| MmugDNA.10119.1.S1_at   | MmugDNA.10119.1 | 4.28  | 4.31  | 0.2  | 0.11 | -1.02 | 0.584427 | 0.800318 | 0.829683 | 0.885129 |
| MmugDNA.1012.1.S1_at    | MmugDNA.1012.1  | 12.74 | 12.7  | 0.12 | 0.09 | -1.02 | 0.397839 | 0.112538 | 0.722112 | 0.377928 |
| MmugDNA.10122.1.S1_at   | MmugDNA.10122.1 | 9.84  | 10.18 | 0.42 | 0.03 | -1.27 | 0.691108 | 0.288712 | 0.879715 | 0.549856 |
| MmugDNA.10130.1.S1_at   | MmugDNA.10130.1 | 12.17 | 11.23 | 0.32 | 0.37 | 1.92  | 0.024537 | 0.006649 | 0.319083 | 0.110505 |
| MmugDNA.10134.1.S1_at   | MmugDNA.10134.1 | 10.48 | 10.3  | 0.13 | 0.2  | 1.13  | 0.055206 | 0.079207 | 0.398095 | 0.32639  |
| MmugDNA.10137.1.S1_at   | MmugDNA.10137.1 | 4.85  | 5.13  | 0.4  | 0.17 | -1.21 | 0.881882 | 0.848458 | 0.95911  | 0.913984 |
| MmugDNA.10138.1.S1_at   | MmugDNA.10138.1 | 9.42  | 9.29  | 0.07 | 0.2  | 1.1   | 0.155965 | 0.292636 | 0.52921  | 0.552705 |
| MmugDNA.10150.1.S1_s_at | MmugDNA.10150.1 | 5.41  | 5.27  | 0.05 | 0.09 | 1.1   | 0.175293 | 0.295369 | 0.548245 | 0.554814 |
| MmugDNA.10153.1.S1_at   | MmugDNA.10153.1 | 3.44  | 3.42  | 0.13 | 0.06 | 1.02  | 0.277356 | 0.355808 | 0.636803 | 0.597864 |
| MmugDNA.10156.1.S1_at   | MmugDNA.10156.1 | 11.12 | 10.04 | 1.42 | 0.07 | 2.11  | 0.757333 | 0.404674 | 0.908621 | 0.633175 |
| MmugDNA.10158.1.S1_at   | MmugDNA.10158.1 | 10.79 | 11.41 | 0.26 | 0.17 | -1.53 | 0.030677 | 0.038034 | 0.338263 | 0.239596 |
| MmugDNA.10162.1.S1_at   | MmugDNA.10162.1 | 6.51  | 6.12  | 0.31 | 0.1  | 1.31  | 0.10052  | 0.044436 | 0.471309 | 0.25521  |
| MmugDNA.10177.1.S1_at   | MmugDNA.10177.1 | 9.56  | 9.26  | 0.61 | 0.04 | 1.23  | 0.421112 | 0.309558 | 0.737302 | 0.564987 |
| MmugDNA.10182.1.S1_at   | MmugDNA.10182.1 | 11.46 | 11.6  | 0.12 | 0.24 | -1.1  | 0.970687 | 0.012003 | 0.990424 | 0.141798 |
| MmugDNA.10186.1.S1_at   | MmugDNA.10186.1 | 10.26 | 10.31 | 0.23 | 0.16 | -1.04 | 0.603805 | 0.000257 | 0.839359 | 0.033501 |
| MmugDNA.10195.1.S1_at   | MmugDNA.10195.1 | 10.62 | 10.46 | 0.14 | 0.06 | 1.11  | 0.110368 | 0.000203 | 0.483363 | 0.03171  |
| MmugDNA.10196.1.S1_at   | MmugDNA.10196.1 | 11.39 | 11.59 | 0.08 | 0.04 | -1.15 | 0.014182 | 0.114316 | 0.274019 | 0.380835 |
| MmugDNA.10197.1.S1_at   | MmugDNA.10197.1 | 8.36  | 8.2   | 1.6  | 0.12 | 1.12  | 0.842001 | 0.183317 | 0.944025 | 0.459553 |
| MmugDNA.10200.1.S1_at   | MmugDNA.10200.1 | 7.1   | 7.35  | 1.42 | 0.45 | -1.19 | 0.957517 | 0.381979 | 0.985977 | 0.618252 |
| MmugDNA.10209.1.S1_at   | MmugDNA.10209.1 | 8.57  | 7.47  | 0.35 | 0.5  | 2.13  | 0.020845 | 0.052863 | 0.305672 | 0.275521 |
| MmugDNA.10212.1.S1_at   | MmugDNA.10212.1 | 5.79  | 5.63  | 0.21 | 0.06 | 1.11  | 0.446613 | 0.103418 | 0.752779 | 0.364309 |
| MmugDNA.10214.1.S1_at   | MmugDNA.10214.1 | 6.52  | 6.56  | 0.17 | 0.01 | -1.03 | 0.575774 | 0.766671 | 0.824888 | 0.864438 |
| MmugDNA.10216.1.S1_at   | MmugDNA.10216.1 | 7.12  | 7.07  | 0.1  | 0.07 | 1.03  | 0.894507 | 0.728324 | 0.963846 | 0.842956 |
| MmugDNA.10218.1.S1_at   | MmugDNA.10218.1 | 7.31  | 7.38  | 0.14 | 0.17 | -1.05 | 0.236919 | 0.310737 | 0.603824 | 0.565809 |
| MmugDNA.10220.1.S1_at   | MmugDNA.10220.1 | 8.72  | 9.07  | 0.53 | 0.08 | -1.28 | 0.883548 | 0.040354 | 0.95964  | 0.245984 |
| MmugDNA.10222.1.S1_at   | MmugDNA.10222.1 | 11.72 | 12.2  | 0.44 | 0.13 | -1.39 | 0.606833 | 0.501559 | 0.840686 | 0.699719 |
| MmugDNA.10223.1.S1_at   | MmugDNA.10223.1 | 9.15  | 9.72  | 0.27 | 0.38 | -1.49 | 0.069854 | 0.01347  | 0.427911 | 0.148626 |
| MmugDNA.10227.1.S1_at   | MmugDNA.10227.1 | 4.45  | 5.01  | 0.65 | 0.35 | -1.48 | 0.898375 | 0.073018 | 0.965455 | 0.316017 |
| MmugDNA.10236.1.S1_at   | MmugDNA.10236.1 | 9.61  | 9.69  | 0.45 | 0.05 | -1.06 | 0.538432 | 0.317604 | 0.803257 | 0.570787 |
| MmugDNA.10240.1.S1_at   | MmugDNA.10240.1 | 5.79  | 5.57  | 0.28 | 0.02 | 1.17  | 0.503473 | 0.687856 | 0.784372 | 0.817746 |
| MmugDNA.10243.1.S1_at   | MmugDNA.10243.1 | 9.64  | 9.86  | 0.14 | 0.1  | -1.16 | 0.096856 | 0.007905 | 0.465555 | 0.118524 |
| MmugDNA.10249.1.S1_at   | MmugDNA.10249.1 | 10.48 | 10.8  | 1.54 | 0.21 | -1.25 | 0.253615 | 0.116377 | 0.618323 | 0.383671 |
| MmugDNA.10253.1.S1_at   | MmugDNA.10253.1 | 8.14  | 8.25  | 0.32 | 0.07 | -1.08 | 0.708857 | 0.582389 | 0.886591 | 0.751018 |
| MmugDNA.10257.1.S1_at   | MmugDNA.10257.1 | 6.18  | 6.65  | 0.5  | 0.29 | -1.39 | 0.23686  | 0.238093 | 0.603771 | 0.50868  |

|                       |                 |       |       |      |      |       |          |          |          |          |
|-----------------------|-----------------|-------|-------|------|------|-------|----------|----------|----------|----------|
| MmugDNA.10259.1.S1_at | MmugDNA.10259.1 | 10.54 | 10.65 | 0.29 | 0.07 | -1.09 | 0.378037 | 0.526286 | 0.707991 | 0.715497 |
| MmugDNA.10260.1.S1_at | MmugDNA.10260.1 | 10.84 | 11.4  | 0.77 | 0.1  | -1.48 | 0.181728 | 0.159033 | 0.554854 | 0.435217 |
| MmugDNA.10261.1.S1_at | MmugDNA.10261.1 | 8.62  | 8.37  | 0.18 | 0.11 | 1.19  | 0.086451 | 0.055767 | 0.454228 | 0.282044 |
| MmugDNA.10267.1.S1_at | MmugDNA.10267.1 | 4.25  | 4.14  | 0.14 | 0.17 | 1.08  | 0.27782  | 0.102134 | 0.637095 | 0.362199 |
| MmugDNA.10269.1.S1_at | MmugDNA.10269.1 | 9.49  | 9.94  | 0.52 | 0.04 | -1.36 | 0.242152 | 0.241038 | 0.608285 | 0.511657 |
| MmugDNA.1027.1.S1_at  | MmugDNA.1027.1  | 9.53  | 8.68  | 0.9  | 0.42 | 1.81  | 0.872047 | 0.052156 | 0.955674 | 0.273967 |
| MmugDNA.10271.1.S1_at | MmugDNA.10271.1 | 6.04  | 5.9   | 0.11 | 0.08 | 1.1   | 0.034818 | 0.048376 | 0.350422 | 0.265095 |
| MmugDNA.10272.1.S1_at | MmugDNA.10272.1 | 7.66  | 7.63  | 0.56 | 0.13 | 1.02  | 0.932583 | 0.257454 | 0.977227 | 0.52521  |
| MmugDNA.10274.1.S1_at | MmugDNA.10274.1 | 3.92  | 3.93  | 0.1  | 0.12 | -1    | 0.452637 | 0.579735 | 0.755901 | 0.74927  |
| MmugDNA.10278.1.S1_at | MmugDNA.10278.1 | 4.46  | 4.08  | 0.15 | 0.03 | 1.3   | 0.03653  | 0.426672 | 0.355049 | 0.648796 |
| MmugDNA.1028.1.S1_at  | MmugDNA.1028.1  | 13.98 | 14.01 | 1.36 | 0.11 | -1.02 | 0.438365 | 0.144046 | 0.747289 | 0.417912 |
| MmugDNA.10283.1.S1_at | MmugDNA.10283.1 | 5.52  | 5.4   | 0.1  | 0.09 | 1.09  | 0.149923 | 0.238531 | 0.523408 | 0.509122 |
| MmugDNA.10284.1.S1_at | MmugDNA.10284.1 | 6.9   | 8.17  | 0.42 | 0.08 | -2.41 | 0.005849 | 0.001542 | 0.211798 | 0.05949  |
| MmugDNA.10286.1.S1_at | MmugDNA.10286.1 | 11.25 | 11.54 | 0.49 | 0.06 | -1.23 | 0.37223  | 0.364196 | 0.705567 | 0.604513 |
| MmugDNA.10287.1.S1_at | MmugDNA.10287.1 | 7.29  | 7.29  | 0.05 | 0.02 | -1    | 0.981392 | 0.778807 | 0.994028 | 0.871617 |
| MmugDNA.10288.1.S1_at | MmugDNA.10288.1 | 7.92  | 8     | 0.08 | 0.08 | -1.05 | 0.598289 | 0.104524 | 0.836867 | 0.365803 |
| MmugDNA.10302.1.S1_at | MmugDNA.10302.1 | 10.8  | 10.72 | 0.32 | 0.04 | 1.05  | 0.860156 | 0.044031 | 0.950679 | 0.254195 |
| MmugDNA.10306.1.S1_at | MmugDNA.10306.1 | 7.71  | 7.58  | 0.07 | 0.18 | 1.1   | 0.08613  | 0.051427 | 0.453703 | 0.272204 |
| MmugDNA.10307.1.S1_at | MmugDNA.10307.1 | 7.75  | 7.94  | 0.44 | 0.12 | -1.14 | 0.969607 | 0.969199 | 0.990023 | 0.98309  |
| MmugDNA.10311.1.S1_at | MmugDNA.10311.1 | 5.03  | 4.91  | 0.77 | 0.17 | 1.09  | 0.669624 | 0.511842 | 0.869663 | 0.705797 |
| MmugDNA.10320.1.S1_at | MmugDNA.10320.1 | 9.1   | 9.88  | 0.19 | 0.21 | -1.72 | 0.012885 | 0.011524 | 0.265776 | 0.138822 |
| MmugDNA.10322.1.S1_at | MmugDNA.10322.1 | 3.77  | 4.09  | 0.23 | 0.15 | -1.25 | 0.487638 | 0.352488 | 0.775141 | 0.595743 |
| MmugDNA.10327.1.S1_at | MmugDNA.10327.1 | 8.41  | 7.8   | 0.32 | 0.22 | 1.53  | 0.108028 | 0.097007 | 0.480475 | 0.354507 |
| MmugDNA.10328.1.S1_at | MmugDNA.10328.1 | 11.23 | 11.6  | 0.46 | 0.03 | -1.29 | 0.244724 | 0.116187 | 0.610301 | 0.383524 |
| MmugDNA.10331.1.S1_at | MmugDNA.10331.1 | 11.33 | 11.69 | 0.06 | 0.14 | -1.29 | 0.036234 | 0.077837 | 0.354729 | 0.324079 |
| MmugDNA.10333.1.S1_at | MmugDNA.10333.1 | 9.25  | 9.3   | 0.33 | 0.1  | -1.03 | 0.552324 | 0.164454 | 0.811726 | 0.440678 |
| MmugDNA.10334.1.S1_at | MmugDNA.10334.1 | 8.54  | 8.81  | 0.22 | 0.22 | -1.21 | 0.619939 | 0.011717 | 0.846932 | 0.140206 |
| MmugDNA.10335.1.S1_at | MmugDNA.10335.1 | 8.97  | 9.52  | 0.33 | 0.07 | -1.46 | 0.050308 | 0.102648 | 0.386954 | 0.363001 |
| MmugDNA.10338.1.S1_at | MmugDNA.10338.1 | 9.11  | 9.13  | 0.42 | 0.05 | -1.01 | 0.870665 | 0.578556 | 0.955059 | 0.748589 |
| MmugDNA.10345.1.S1_at | MmugDNA.10345.1 | 8.6   | 8.76  | 0.06 | 0.05 | -1.12 | 0.024737 | 0.278935 | 0.31972  | 0.542661 |
| MmugDNA.10347.1.S1_at | MmugDNA.10347.1 | 4.33  | 5.17  | 0.21 | 0.3  | -1.8  | 0.033411 | 0.050247 | 0.346442 | 0.269432 |
| MmugDNA.10349.1.S1_at | MmugDNA.10349.1 | 9.7   | 9.58  | 0.49 | 0.18 | 1.09  | 0.478515 | 0.666111 | 0.770085 | 0.804415 |
| MmugDNA.10350.1.S1_at | MmugDNA.10350.1 | 9.01  | 9.7   | 0.1  | 0.03 | -1.6  | 0.000469 | 0.000365 | 0.140406 | 0.037273 |
| MmugDNA.10356.1.S1_at | MmugDNA.10356.1 | 9.89  | 10.68 | 0.58 | 0.01 | -1.73 | 0.24251  | 0.293018 | 0.608517 | 0.552978 |
| MmugDNA.10357.1.S1_at | MmugDNA.10357.1 | 6.94  | 6.88  | 0.11 | 0.07 | 1.05  | 0.661751 | 0.456159 | 0.8665   | 0.669949 |
| MmugDNA.10363.1.S1_at | MmugDNA.10363.1 | 10.07 | 10.29 | 0.13 | 0.17 | -1.16 | 0.242813 | 0.291502 | 0.608808 | 0.551864 |
| MmugDNA.10369.1.S1_at | MmugDNA.10369.1 | 6.51  | 7.68  | 0.61 | 0.34 | -2.24 | 0.020858 | 0.023545 | 0.305672 | 0.192231 |
| MmugDNA.1037.1.S1_at  | MmugDNA.1037.1  | 5.15  | 5.06  | 0.07 | 0.07 | 1.06  | 0.045642 | 0.260362 | 0.376875 | 0.526915 |
| MmugDNA.10370.1.S1_at | MmugDNA.10370.1 | 10.07 | 10.64 | 0.15 | 0.08 | -1.48 | 0.005142 | 0.000291 | 0.205615 | 0.034892 |
| MmugDNA.10371.1.S1_at | MmugDNA.10371.1 | 7.94  | 8.16  | 0.48 | 0.17 | -1.16 | 0.808528 | 0.035774 | 0.930689 | 0.233489 |
| MmugDNA.10383.1.S1_at | MmugDNA.10383.1 | 6.06  | 5.98  | 0.09 | 0.06 | 1.06  | 0.095519 | 0.401274 | 0.464229 | 0.630898 |
| MmugDNA.10385.1.S1_at | MmugDNA.10385.1 | 3.66  | 3.82  | 0.31 | 0.08 | -1.11 | 0.578218 | 0.553151 | 0.826177 | 0.73239  |
| MmugDNA.10386.1.S1_at | MmugDNA.10386.1 | 8.8   | 8.81  | 0.07 | 0.01 | -1    | 0.835608 | 0.006463 | 0.941057 | 0.109304 |

|                         |                 |       |       |      |      |       |          |          |          |          |
|-------------------------|-----------------|-------|-------|------|------|-------|----------|----------|----------|----------|
| MmugDNA.10387.1.S1_at   | MmugDNA.10387.1 | 7.09  | 6.93  | 0.12 | 0.08 | 1.12  | 0.069952 | 0.146742 | 0.4282   | 0.42078  |
| MmugDNA.10389.1.S1_at   | MmugDNA.10389.1 | 10.94 | 10.98 | 0.48 | 0.03 | -1.03 | 0.308566 | 0.287373 | 0.661248 | 0.548636 |
| MmugDNA.10390.1.S1_at   | MmugDNA.10390.1 | 12.04 | 11.94 | 0.08 | 0.01 | 1.07  | 0.050677 | 0.284896 | 0.38765  | 0.54701  |
| MmugDNA.10394.1.S1_at   | MmugDNA.10394.1 | 9.28  | 9.52  | 0.38 | 0.1  | -1.18 | 0.808863 | 0.395495 | 0.930844 | 0.627504 |
| MmugDNA.10395.1.S1_at   | MmugDNA.10395.1 | 8.88  | 8.78  | 0.2  | 0.16 | 1.07  | 0.480234 | 0.090105 | 0.771116 | 0.344402 |
| MmugDNA.10397.1.S1_at   | MmugDNA.10397.1 | 7.2   | 7.55  | 0.62 | 0.16 | -1.28 | 0.760824 | 0.83816  | 0.910166 | 0.907587 |
| MmugDNA.10398.1.S1_at   | MmugDNA.10398.1 | 9.61  | 10.12 | 0.18 | 0.16 | -1.43 | 0.01316  | 0.01393  | 0.266951 | 0.151382 |
| MmugDNA.10398.1.S1_s_at | MmugDNA.10398.1 | 8.37  | 8.67  | 0.06 | 0.02 | -1.23 | 0.001669 | 0.00151  | 0.164008 | 0.059146 |
| MmugDNA.10399.1.S1_at   | MmugDNA.10399.1 | 9.91  | 10.51 | 0.41 | 0.53 | -1.51 | 0.081557 | 0.253477 | 0.445514 | 0.521768 |
| MmugDNA.1040.1.S1_at    | MmugDNA.1040.1  | 8.61  | 8.13  | 0.36 | 0.35 | 1.4   | 0.251917 | 0.353181 | 0.616976 | 0.596432 |
| MmugDNA.10403.1.S1_at   | MmugDNA.10403.1 | 10.3  | 10.86 | 0.42 | 0.05 | -1.48 | 0.072315 | 0.104052 | 0.432116 | 0.364988 |
| MmugDNA.10405.1.S1_at   | MmugDNA.10405.1 | 11.93 | 11.43 | 0.24 | 0.14 | 1.42  | 0.048487 | 0.007745 | 0.38332  | 0.117619 |
| MmugDNA.10410.1.S1_at   | MmugDNA.10410.1 | 8.11  | 7.88  | 0.58 | 0.07 | 1.17  | 0.508565 | 0.072531 | 0.787109 | 0.31548  |
| MmugDNA.10411.1.S1_at   | MmugDNA.10411.1 | 9.12  | 8.58  | 0.25 | 0.23 | 1.45  | 0.036933 | 0.029816 | 0.356221 | 0.214326 |
| MmugDNA.10415.1.S1_at   | MmugDNA.10415.1 | 6.01  | 6.03  | 0.2  | 0.17 | -1.01 | 0.417846 | 0.44843  | 0.735162 | 0.664264 |
| MmugDNA.10417.1.S1_at   | MmugDNA.10417.1 | 5.29  | 5.74  | 0.72 | 0.59 | -1.37 | 0.462582 | 0.00822  | 0.761708 | 0.12044  |
| MmugDNA.10421.1.S1_at   | MmugDNA.10421.1 | 12.13 | 11.65 | 0.93 | 0.11 | 1.39  | 0.529032 | 0.066911 | 0.798106 | 0.304608 |
| MmugDNA.10422.1.S1_s_at | MmugDNA.10422.1 | 6.36  | 5.98  | 0.56 | 0.17 | 1.29  | 0.464469 | 0.306452 | 0.762534 | 0.563029 |
| MmugDNA.10423.1.S1_at   | MmugDNA.10423.1 | 10.97 | 11.21 | 0.3  | 0.02 | -1.18 | 0.280233 | 0.28254  | 0.639123 | 0.545266 |
| MmugDNA.10424.1.S1_at   | MmugDNA.10424.1 | 5.3   | 5.47  | 0.9  | 0.07 | -1.13 | 0.89932  | 0.362018 | 0.965794 | 0.602727 |
| MmugDNA.10425.1.S1_at   | MmugDNA.10425.1 | 7.64  | 7.72  | 0.17 | 0.05 | -1.06 | 0.550384 | 0.796123 | 0.810769 | 0.882495 |
| MmugDNA.10426.1.S1_at   | MmugDNA.10426.1 | 9.51  | 10.52 | 1.09 | 0.33 | -2.02 | 0.298065 | 0.174369 | 0.652872 | 0.450824 |
| MmugDNA.10429.1.S1_at   | MmugDNA.10429.1 | 7.77  | 8.09  | 0.12 | 0.07 | -1.25 | 0.038242 | 0.26872  | 0.358577 | 0.534138 |
| MmugDNA.10432.1.S1_at   | MmugDNA.10432.1 | 12.48 | 12.49 | 0.17 | 0.1  | -1.01 | 0.423625 | 0.127179 | 0.739193 | 0.397923 |
| MmugDNA.10435.1.S1_at   | MmugDNA.10435.1 | 11.7  | 10.52 | 0.57 | 0.29 | 2.26  | 0.111648 | 0.016095 | 0.484896 | 0.160775 |
| MmugDNA.10443.1.S1_s_at | MmugDNA.10443.1 | 8.24  | 8.92  | 0.47 | 0.16 | -1.59 | 0.086989 | 0.092933 | 0.454785 | 0.349029 |
| MmugDNA.10444.1.S1_at   | MmugDNA.10444.1 | 13.72 | 13.76 | 0.07 | 0.01 | -1.03 | 0.261515 | 0.023022 | 0.623872 | 0.189836 |
| MmugDNA.10445.1.S1_at   | MmugDNA.10445.1 | 10.87 | 10.95 | 0.64 | 0.04 | -1.05 | 0.851192 | 0.902206 | 0.947571 | 0.944402 |
| MmugDNA.10446.1.S1_at   | MmugDNA.10446.1 | 10.68 | 10.85 | 0.46 | 0.04 | -1.13 | 0.491237 | 0.065227 | 0.777663 | 0.301239 |
| MmugDNA.10448.1.S1_at   | MmugDNA.10448.1 | 10.19 | 10.18 | 0.33 | 0.22 | 1.01  | 0.786036 | 0.533694 | 0.921297 | 0.719848 |
| MmugDNA.10450.1.S1_at   | MmugDNA.10450.1 | 7.5   | 7.67  | 0.14 | 0.11 | -1.13 | 0.095168 | 0.154776 | 0.464131 | 0.42979  |
| MmugDNA.10452.1.S1_at   | MmugDNA.10452.1 | 7.77  | 7.13  | 0.12 | 0.23 | 1.56  | 0.006375 | 0.00416  | 0.218572 | 0.091036 |
| MmugDNA.10453.1.S1_at   | MmugDNA.10453.1 | 3.98  | 3.92  | 0.25 | 0.03 | 1.04  | 0.71641  | 0.030186 | 0.88981  | 0.215679 |
| MmugDNA.10458.1.S1_at   | MmugDNA.10458.1 | 9.95  | 9.96  | 0.81 | 0.05 | -1.01 | 0.987027 | 0.497085 | 0.995808 | 0.696431 |
| MmugDNA.10459.1.S1_at   | MmugDNA.10459.1 | 11.33 | 11.21 | 1.06 | 0.19 | 1.09  | 0.498259 | 0.435285 | 0.781633 | 0.655127 |
| MmugDNA.10463.1.S1_at   | MmugDNA.10463.1 | 7.23  | 7.35  | 0.21 | 0.08 | -1.09 | 0.27797  | 0.374097 | 0.637256 | 0.612678 |
| MmugDNA.10464.1.S1_at   | MmugDNA.10464.1 | 6.16  | 5.92  | 0.16 | 0.1  | 1.18  | 0.152588 | 0.293214 | 0.525558 | 0.553144 |
| MmugDNA.10467.1.S1_x_at | MmugDNA.10467.1 | 3.34  | 3.45  | 0.24 | 0.03 | -1.08 | 0.399098 | 0.320849 | 0.722883 | 0.572849 |
| MmugDNA.10468.1.S1_at   | MmugDNA.10468.1 | 3.4   | 3.34  | 0.03 | 0.22 | 1.05  | 0.263505 | 0.166876 | 0.625457 | 0.443334 |
| MmugDNA.10474.1.S1_at   | MmugDNA.10474.1 | 6.23  | 6.24  | 0.07 | 0.08 | -1    | 0.376598 | 0.213131 | 0.706946 | 0.487054 |
| MmugDNA.10477.1.S1_at   | MmugDNA.10477.1 | 7.26  | 7.62  | 0.27 | 0.21 | -1.29 | 0.03121  | 0.022283 | 0.340329 | 0.186724 |
| MmugDNA.10481.1.S1_at   | MmugDNA.10481.1 | 7.54  | 8.03  | 1.99 | 0.36 | -1.41 | 0.703553 | 0.192449 | 0.884755 | 0.467952 |
| MmugDNA.10482.1.S1_at   | MmugDNA.10482.1 | 5.05  | 4.91  | 0.42 | 0.09 | 1.11  | 0.217194 | 0.316482 | 0.587151 | 0.569889 |

|                         |                 |       |       |      |      |       |          |          |          |          |
|-------------------------|-----------------|-------|-------|------|------|-------|----------|----------|----------|----------|
| MmugDNA.10491.1.S1_at   | MmugDNA.10491.1 | 8.13  | 7.91  | 0.69 | 0.15 | 1.17  | 0.404123 | 0.320396 | 0.726203 | 0.572648 |
| MmugDNA.10494.1.S1_at   | MmugDNA.10494.1 | 11.9  | 12.09 | 0.09 | 0.01 | -1.13 | 0.048337 | 0.018042 | 0.383054 | 0.169372 |
| MmugDNA.1050.1.S1_s_at  | MmugDNA.1050.1  | 4.09  | 4.09  | 0.05 | 0.08 | -1    | 0.832967 | 0.974134 | 0.940095 | 0.985864 |
| MmugDNA.10506.1.S1_at   | MmugDNA.10506.1 | 11.51 | 10.94 | 0.02 | 0.14 | 1.48  | 0.001453 | 0.00018  | 0.161412 | 0.030511 |
| MmugDNA.1051.1.S1_at    | MmugDNA.1051.1  | 5.18  | 6.03  | 0.14 | 0.29 | -1.81 | 0.017949 | 0.004694 | 0.294681 | 0.095363 |
| MmugDNA.10512.1.S1_at   | MmugDNA.10512.1 | 3.57  | 3.43  | 0.15 | 0.06 | 1.1   | 0.301855 | 0.120646 | 0.655978 | 0.389476 |
| MmugDNA.10525.1.S1_at   | MmugDNA.10525.1 | 6.74  | 6.89  | 0.34 | 0.07 | -1.11 | 0.511811 | 0.745952 | 0.7889   | 0.852688 |
| MmugDNA.10526.1.S1_at   | MmugDNA.10526.1 | 11.73 | 11.48 | 1.05 | 0.22 | 1.19  | 0.617151 | 0.037749 | 0.845312 | 0.238716 |
| MmugDNA.10528.1.S1_at   | MmugDNA.10528.1 | 6.54  | 7.14  | 0.37 | 0.12 | -1.52 | 0.0274   | 0.012507 | 0.327584 | 0.144302 |
| MmugDNA.10530.1.S1_at   | MmugDNA.10530.1 | 5.49  | 5.45  | 0.01 | 0.1  | 1.03  | 0.716918 | 0.907962 | 0.890127 | 0.947889 |
| MmugDNA.10531.1.S1_at   | MmugDNA.10531.1 | 4.88  | 5.1   | 0.22 | 0.19 | -1.17 | 0.319119 | 0.246468 | 0.668551 | 0.515899 |
| MmugDNA.10542.1.S1_at   | MmugDNA.10542.1 | 8.68  | 8.75  | 0.58 | 0.32 | -1.05 | 0.358173 | 0.53605  | 0.696132 | 0.721454 |
| MmugDNA.10548.1.S1_at   | MmugDNA.10548.1 | 8.02  | 8.25  | 0.37 | 0.13 | -1.18 | 0.245283 | 0.368727 | 0.610723 | 0.608236 |
| MmugDNA.10549.1.S1_at   | MmugDNA.10549.1 | 6.24  | 6.21  | 0.16 | 0.01 | 1.02  | 0.779244 | 0.94998  | 0.918623 | 0.971462 |
| MmugDNA.1056.1.S1_at    | MmugDNA.1056.1  | 9.35  | 9.82  | 0.25 | 0.1  | -1.38 | 0.089419 | 0.041893 | 0.457656 | 0.249206 |
| MmugDNA.10563.1.S1_at   | MmugDNA.10563.1 | 8.68  | 9.08  | 0.91 | 0.19 | -1.32 | 0.628473 | 0.458894 | 0.851106 | 0.671498 |
| MmugDNA.10570.1.S1_at   | MmugDNA.10570.1 | 8.58  | 9.36  | 0.99 | 0.11 | -1.71 | 0.700345 | 0.903142 | 0.883486 | 0.94497  |
| MmugDNA.10574.1.S1_at   | MmugDNA.10574.1 | 7.52  | 7.76  | 0.32 | 0.1  | -1.18 | 0.402318 | 0.543633 | 0.724848 | 0.726239 |
| MmugDNA.10575.1.S1_at   | MmugDNA.10575.1 | 8.96  | 8.77  | 0.35 | 0.37 | 1.14  | 0.496602 | 0.029534 | 0.780662 | 0.213525 |
| MmugDNA.10578.1.S1_at   | MmugDNA.10578.1 | 12.96 | 13.01 | 0.14 | 0.09 | -1.04 | 0.682921 | 0.024736 | 0.876006 | 0.196967 |
| MmugDNA.10587.1.S1_at   | MmugDNA.10587.1 | 6.64  | 6.96  | 0.2  | 0.13 | -1.25 | 0.059692 | 0.120004 | 0.406705 | 0.388672 |
| MmugDNA.10588.1.S1_at   | MmugDNA.10588.1 | 11.86 | 11.94 | 0.39 | 0.01 | -1.06 | 0.446695 | 0.34713  | 0.752779 | 0.591815 |
| MmugDNA.10589.1.S1_at   | MmugDNA.10589.1 | 6.01  | 6.43  | 0.17 | 0.07 | -1.33 | 0.02431  | 0.000289 | 0.317812 | 0.034892 |
| MmugDNA.10594.1.S1_at   | MmugDNA.10594.1 | 8.04  | 8.1   | 0.05 | 0.1  | -1.04 | 0.228231 | 0.363668 | 0.597168 | 0.604075 |
| MmugDNA.10599.1.S1_at   | MmugDNA.10599.1 | 4.4   | 4.22  | 0.22 | 0.03 | 1.13  | 0.723111 | 0.905805 | 0.892777 | 0.946726 |
| MmugDNA.10610.1.S1_s_at | MmugDNA.10610.1 | 11.42 | 11.41 | 0.15 | 0.05 | 1.01  | 0.309963 | 0.006658 | 0.661926 | 0.110505 |
| MmugDNA.10611.1.S1_at   | MmugDNA.10611.1 | 6.68  | 6.05  | 0.76 | 0.16 | 1.54  | 0.38141  | 0.133551 | 0.710065 | 0.405525 |
| MmugDNA.10614.1.S1_at   | MmugDNA.10614.1 | 3.07  | 3.19  | 0.3  | 0.14 | -1.09 | 0.60002  | 0.465695 | 0.837654 | 0.675863 |
| MmugDNA.10628.1.S1_at   | MmugDNA.10628.1 | 11.63 | 11.49 | 0.15 | 0.06 | 1.11  | 0.239771 | 0.003018 | 0.606158 | 0.080204 |
| MmugDNA.10637.1.S1_at   | MmugDNA.10637.1 | 7.99  | 7.95  | 0.11 | 0.03 | 1.03  | 0.18616  | 0.523975 | 0.559096 | 0.714099 |
| MmugDNA.10638.1.S1_at   | MmugDNA.10638.1 | 13.21 | 12.99 | 0.07 | 0.06 | 1.16  | 0.018024 | 0.200797 | 0.294907 | 0.47529  |
| MmugDNA.1064.1.S1_at    | MmugDNA.1064.1  | 4.33  | 4.08  | 0.38 | 0.4  | 1.19  | 0.761024 | 0.817436 | 0.910284 | 0.894694 |
| MmugDNA.10640.1.S1_s_at | MmugDNA.10640.1 | 9.27  | 10.05 | 0.77 | 0.14 | -1.72 | 0.479195 | 0.393734 | 0.770622 | 0.626534 |
| MmugDNA.10643.1.S1_s_at | MmugDNA.10643.1 | 11.58 | 12.85 | 0.35 | 0.05 | -2.42 | 0.003397 | 0.006213 | 0.194985 | 0.106916 |
| MmugDNA.10647.1.S1_at   | MmugDNA.10647.1 | 3.47  | 3.47  | 0.02 | 0.08 | -1    | 0.292261 | 0.705454 | 0.648604 | 0.829222 |
| MmugDNA.10649.1.S1_at   | MmugDNA.10649.1 | 12.3  | 12.14 | 0.38 | 0.09 | 1.12  | 0.466774 | 0.13989  | 0.763876 | 0.413192 |
| MmugDNA.10663.1.S1_at   | MmugDNA.10663.1 | 5.11  | 5.47  | 0.2  | 0.12 | -1.29 | 0.014272 | 0.046563 | 0.274559 | 0.260267 |
| MmugDNA.10666.1.S1_at   | MmugDNA.10666.1 | 11.28 | 11.47 | 0.14 | 0.1  | -1.14 | 0.292031 | 0.173188 | 0.648376 | 0.449773 |
| MmugDNA.10668.1.S1_at   | MmugDNA.10668.1 | 4.58  | 4.82  | 0.15 | 0.02 | -1.18 | 0.162364 | 0.057849 | 0.5354   | 0.286898 |
| MmugDNA.1067.1.S1_s_at  | MmugDNA.1067.1  | 11.45 | 11.42 | 0.2  | 0.04 | 1.02  | 0.276694 | 0.324592 | 0.636362 | 0.575149 |
| MmugDNA.10675.1.S1_at   | MmugDNA.10675.1 | 11.76 | 11.79 | 0.1  | 0.1  | -1.02 | 0.24027  | 0.523814 | 0.606641 | 0.714044 |
| MmugDNA.10676.1.S1_s_at | MmugDNA.10676.1 | 9.78  | 9.82  | 0.42 | 0.14 | -1.02 | 0.244116 | 0.280073 | 0.60991  | 0.543369 |
| MmugDNA.10679.1.S1_at   | MmugDNA.10679.1 | 12.85 | 12.83 | 0.05 | 0.03 | 1.02  | 0.667307 | 0.022669 | 0.868553 | 0.188607 |

|                         |                 |       |       |      |      |       |          |          |          |          |
|-------------------------|-----------------|-------|-------|------|------|-------|----------|----------|----------|----------|
| MmugDNA.1068.1.S1_at    | MmugDNA.1068.1  | 12.86 | 12.33 | 0.67 | 0.17 | 1.44  | 0.375546 | 0.324263 | 0.706527 | 0.574893 |
| MmugDNA.10680.1.S1_at   | MmugDNA.10680.1 | 9.75  | 9.94  | 0.24 | 0.25 | -1.14 | 0.80019  | 0.095196 | 0.92683  | 0.35218  |
| MmugDNA.10682.1.S1_at   | MmugDNA.10682.1 | 6.05  | 6.04  | 0.19 | 0.08 | 1.01  | 0.236889 | 0.245779 | 0.603787 | 0.515519 |
| MmugDNA.10684.1.S1_at   | MmugDNA.10684.1 | 5.94  | 6.02  | 0.14 | 0.12 | -1.06 | 0.517348 | 0.238612 | 0.791973 | 0.509233 |
| MmugDNA.10685.1.S1_at   | MmugDNA.10685.1 | 6.88  | 7.46  | 0.17 | 0.28 | -1.5  | 0.040848 | 0.062949 | 0.36514  | 0.297579 |
| MmugDNA.10688.1.S1_at   | MmugDNA.10688.1 | 7.48  | 7.58  | 0.25 | 0.07 | -1.08 | 0.582684 | 0.225667 | 0.82851  | 0.498155 |
| MmugDNA.10692.1.S1_at   | MmugDNA.10692.1 | 11.35 | 11.54 | 0.23 | 0.06 | -1.14 | 0.417407 | 0.053745 | 0.734928 | 0.277384 |
| MmugDNA.10695.1.S1_at   | MmugDNA.10695.1 | 7.01  | 6.97  | 0.05 | 0.16 | 1.03  | 0.781331 | 0.394954 | 0.919573 | 0.627216 |
| MmugDNA.10698.1.S1_at   | MmugDNA.10698.1 | 6.99  | 6.83  | 0.04 | 0.14 | 1.12  | 0.283678 | 0.421973 | 0.641431 | 0.645406 |
| MmugDNA.10699.1.S1_at   | MmugDNA.10699.1 | 3.07  | 2.99  | 0.08 | 0.09 | 1.06  | 0.439417 | 0.731071 | 0.748153 | 0.844197 |
| MmugDNA.107.1.S1_at     | MmugDNA.107.1   | 4.18  | 4.2   | 0.25 | 0.14 | -1.01 | 0.684879 | 0.901614 | 0.876588 | 0.944007 |
| MmugDNA.10707.1.S1_at   | MmugDNA.10707.1 | 7.87  | 8     | 0.21 | 0.1  | -1.09 | 0.607317 | 0.283744 | 0.840779 | 0.546185 |
| MmugDNA.10708.1.S1_at   | MmugDNA.10708.1 | 12.48 | 12.28 | 0.15 | 0.07 | 1.15  | 0.250822 | 0.33346  | 0.615928 | 0.581683 |
| MmugDNA.10710.1.S1_at   | MmugDNA.10710.1 | 4.9   | 4.8   | 0.24 | 0.03 | 1.07  | 0.144093 | 0.236147 | 0.519461 | 0.507188 |
| MmugDNA.10712.1.S1_at   | MmugDNA.10712.1 | 8.88  | 7.45  | 0.28 | 0.49 | 2.7   | 0.008044 | 0.001298 | 0.232005 | 0.055585 |
| MmugDNA.10727.1.S1_at   | MmugDNA.10727.1 | 10.26 | 10.15 | 0.62 | 0.02 | 1.08  | 0.597017 | 0.121484 | 0.83613  | 0.390624 |
| MmugDNA.10728.1.S1_at   | MmugDNA.10728.1 | 12.49 | 12.44 | 0.05 | 0.04 | 1.04  | 0.174701 | 0.040677 | 0.548031 | 0.246631 |
| MmugDNA.10734.1.S1_at   | MmugDNA.10734.1 | 7.42  | 8.17  | 0.24 | 0.08 | -1.68 | 0.006935 | 0.022864 | 0.224361 | 0.189271 |
| MmugDNA.10736.1.S1_at   | MmugDNA.10736.1 | 6.34  | 6     | 0.1  | 0.09 | 1.26  | 0.01711  | 0.043242 | 0.289267 | 0.252677 |
| MmugDNA.10741.1.S1_s_at | MmugDNA.10741.1 | 12.06 | 11.95 | 0.14 | 0.07 | 1.08  | 0.147476 | 0.19321  | 0.521578 | 0.468578 |
| MmugDNA.10743.1.S1_at   | MmugDNA.10743.1 | 11.71 | 12.3  | 0.1  | 0.03 | -1.51 | 0.00055  | 0.000865 | 0.143137 | 0.047425 |
| MmugDNA.10745.1.S1_at   | MmugDNA.10745.1 | 3.66  | 3.64  | 0.04 | 0.06 | 1.02  | 0.875858 | 0.923678 | 0.956816 | 0.95708  |
| MmugDNA.10754.1.S1_at   | MmugDNA.10754.1 | 7.48  | 7.35  | 0.12 | 0.02 | 1.1   | 0.109217 | 0.030843 | 0.48203  | 0.217427 |
| MmugDNA.1076.1.S1_at    | MmugDNA.1076.1  | 11.36 | 11.32 | 0.1  | 0.03 | 1.03  | 0.89535  | 0.003241 | 0.964244 | 0.082187 |
| MmugDNA.10763.1.S1_at   | MmugDNA.10763.1 | 3.63  | 3.55  | 0.03 | 0.04 | 1.05  | 0.093932 | 0.709073 | 0.463304 | 0.831303 |
| MmugDNA.10764.1.S1_at   | MmugDNA.10764.1 | 3.75  | 3.68  | 0.07 | 0.09 | 1.05  | 0.464846 | 0.795766 | 0.762723 | 0.882339 |
| MmugDNA.10769.1.S1_at   | MmugDNA.10769.1 | 6.01  | 5.91  | 0.09 | 0.05 | 1.07  | 0.177606 | 0.176037 | 0.55065  | 0.452526 |
| MmugDNA.1077.1.S1_at    | MmugDNA.1077.1  | 5.98  | 5.79  | 0.04 | 0.14 | 1.14  | 0.113961 | 0.194526 | 0.487339 | 0.469632 |
| MmugDNA.10771.1.S1_at   | MmugDNA.10771.1 | 8.89  | 9.13  | 0.33 | 0.23 | -1.18 | 0.742979 | 0.095999 | 0.901935 | 0.353302 |
| MmugDNA.10773.1.S1_at   | MmugDNA.10773.1 | 7.42  | 7.24  | 0.13 | 0.07 | 1.13  | 0.178654 | 0.21748  | 0.551451 | 0.491035 |
| MmugDNA.10776.1.S1_at   | MmugDNA.10776.1 | 4.93  | 4.9   | 0.03 | 0.04 | 1.02  | 0.842398 | 0.258299 | 0.944264 | 0.525596 |
| MmugDNA.10777.1.S1_at   | MmugDNA.10777.1 | 3.92  | 3.92  | 0.1  | 0.09 | -1    | 0.977163 | 0.936582 | 0.992615 | 0.964214 |
| MmugDNA.10778.1.S1_at   | MmugDNA.10778.1 | 10.65 | 9.84  | 0.26 | 0.5  | 1.75  | 0.210113 | 0.004778 | 0.581555 | 0.09644  |
| MmugDNA.10783.1.S1_at   | MmugDNA.10783.1 | 10.28 | 10.16 | 0.14 | 0.03 | 1.09  | 0.070231 | 0.010554 | 0.428837 | 0.134149 |
| MmugDNA.10790.1.S1_at   | MmugDNA.10790.1 | 11.5  | 11.66 | 0.22 | 0.2  | -1.11 | 0.210424 | 0.437328 | 0.581688 | 0.656613 |
| MmugDNA.10791.1.S1_at   | MmugDNA.10791.1 | 4.52  | 4.63  | 0.26 | 0.22 | -1.08 | 0.67703  | 0.248919 | 0.873333 | 0.517972 |
| MmugDNA.10796.1.S1_at   | MmugDNA.10796.1 | 5.75  | 5.89  | 0.22 | 0.08 | -1.1  | 0.873969 | 0.628319 | 0.956342 | 0.781112 |
| MmugDNA.10807.1.S1_at   | MmugDNA.10807.1 | 5.43  | 5.34  | 0.12 | 0.09 | 1.06  | 0.329873 | 0.441359 | 0.676654 | 0.659552 |
| MmugDNA.1081.1.S1_at    | MmugDNA.1081.1  | 10.05 | 9.52  | 0.63 | 0.16 | 1.43  | 0.269233 | 0.046057 | 0.629528 | 0.258977 |
| MmugDNA.10811.1.S1_at   | MmugDNA.10811.1 | 3.47  | 3.38  | 0.2  | 0.06 | 1.07  | 0.434849 | 0.554486 | 0.745353 | 0.733245 |
| MmugDNA.10812.1.S1_at   | MmugDNA.10812.1 | 9.65  | 9.75  | 0.01 | 0.06 | -1.07 | 0.01663  | 0.011034 | 0.287478 | 0.136793 |
| MmugDNA.10819.1.S1_at   | MmugDNA.10819.1 | 3.36  | 3.31  | 0.11 | 0.05 | 1.03  | 0.474181 | 0.253902 | 0.767936 | 0.522257 |
| MmugDNA.10823.1.S1_at   | MmugDNA.10823.1 | 4.98  | 4.75  | 0.19 | 0.19 | 1.18  | 0.463377 | 0.084196 | 0.762124 | 0.33527  |

|                         |                 |       |       |      |      |       |          |          |          |          |
|-------------------------|-----------------|-------|-------|------|------|-------|----------|----------|----------|----------|
| MmugDNA.10829.1.S1_at   | MmugDNA.10829.1 | 5.36  | 5.49  | 0.55 | 0.17 | -1.09 | 0.770042 | 0.012323 | 0.913889 | 0.143659 |
| MmugDNA.10840.1.S1_at   | MmugDNA.10840.1 | 4.77  | 5.15  | 1.31 | 0.56 | -1.3  | 0.67472  | 0.856743 | 0.872212 | 0.918137 |
| MmugDNA.10844.1.S1_at   | MmugDNA.10844.1 | 11.25 | 11.57 | 0.15 | 0.02 | -1.25 | 0.022322 | 0.005691 | 0.310495 | 0.104029 |
| MmugDNA.10850.1.S1_at   | MmugDNA.10850.1 | 5.33  | 5.14  | 0.11 | 0.11 | 1.14  | 0.123302 | 0.532713 | 0.496589 | 0.719203 |
| MmugDNA.10855.1.S1_at   | MmugDNA.10855.1 | 10.67 | 10.32 | 0.63 | 0.05 | 1.27  | 0.608975 | 0.047539 | 0.841484 | 0.262717 |
| MmugDNA.10863.1.S1_at   | MmugDNA.10863.1 | 7.4   | 7.4   | 0.15 | 0.02 | 1     | 0.91222  | 0.348001 | 0.970255 | 0.592215 |
| MmugDNA.10869.1.S1_at   | MmugDNA.10869.1 | 11.19 | 11.35 | 0.29 | 0.11 | -1.12 | 0.30241  | 0.414815 | 0.656357 | 0.640456 |
| MmugDNA.10872.1.S1_at   | MmugDNA.10872.1 | 10.33 | 11    | 0.12 | 0.1  | -1.59 | 0.001452 | 0.000438 | 0.161412 | 0.038359 |
| MmugDNA.10874.1.S1_s_at | MmugDNA.10874.1 | 5.33  | 5.31  | 0.14 | 0.07 | 1.01  | 0.230064 | 0.44664  | 0.598481 | 0.66287  |
| MmugDNA.10875.1.S1_at   | MmugDNA.10875.1 | 8.79  | 8.89  | 0.4  | 0.18 | -1.07 | 0.824776 | 0.725085 | 0.937078 | 0.840867 |
| MmugDNA.10876.1.S1_at   | MmugDNA.10876.1 | 10.13 | 10.48 | 0.08 | 0.04 | -1.27 | 0.001806 | 0.000843 | 0.167444 | 0.047013 |
| MmugDNA.10878.1.S1_at   | MmugDNA.10878.1 | 10.47 | 9.78  | 0.85 | 0.24 | 1.61  | 0.179731 | 0.035467 | 0.553052 | 0.232564 |
| MmugDNA.10883.1.S1_at   | MmugDNA.10883.1 | 9.4   | 9.65  | 0.25 | 0.03 | -1.19 | 0.188397 | 0.038689 | 0.560439 | 0.24169  |
| MmugDNA.10884.1.S1_at   | MmugDNA.10884.1 | 11.27 | 11.74 | 0.47 | 0.04 | -1.38 | 0.488371 | 0.100858 | 0.775522 | 0.360398 |
| MmugDNA.10889.1.S1_at   | MmugDNA.10889.1 | 2.87  | 2.82  | 0.12 | 0.15 | 1.04  | 0.67479  | 0.87124  | 0.872212 | 0.926834 |
| MmugDNA.10893.1.S1_at   | MmugDNA.10893.1 | 4.29  | 4.3   | 0.44 | 0.32 | -1    | 0.505211 | 0.37963  | 0.785248 | 0.616523 |
| MmugDNA.10896.1.S1_at   | MmugDNA.10896.1 | 4.58  | 4.8   | 0.26 | 0.21 | -1.16 | 0.721893 | 0.392019 | 0.892101 | 0.625519 |
| MmugDNA.10899.1.S1_at   | MmugDNA.10899.1 | 7.56  | 8.26  | 0.18 | 0.08 | -1.63 | 0.005446 | 0.000398 | 0.208157 | 0.037471 |
| MmugDNA.10899.1.S1_s_at | MmugDNA.10899.1 | 7.27  | 7.95  | 0.4  | 0.11 | -1.6  | 0.050967 | 0.018638 | 0.388526 | 0.171648 |
| MmugDNA.10900.1.S1_at   | MmugDNA.10900.1 | 9.17  | 9.42  | 0.61 | 0.22 | -1.18 | 0.324763 | 0.274954 | 0.672829 | 0.539402 |
| MmugDNA.10904.1.S1_at   | MmugDNA.10904.1 | 5.95  | 5.91  | 0.17 | 0.11 | 1.03  | 0.506377 | 0.874326 | 0.785767 | 0.928622 |
| MmugDNA.10906.1.S1_at   | MmugDNA.10906.1 | 9.34  | 8.63  | 0.63 | 0.22 | 1.64  | 0.160658 | 0.048785 | 0.533821 | 0.26581  |
| MmugDNA.10907.1.S1_at   | MmugDNA.10907.1 | 11.57 | 11.01 | 0.21 | 0.11 | 1.47  | 0.013225 | 0.005577 | 0.266951 | 0.103193 |
| MmugDNA.10908.1.S1_at   | MmugDNA.10908.1 | 11.66 | 11.34 | 0.08 | 0.1  | 1.25  | 0.007871 | 0.050504 | 0.231047 | 0.270066 |
| MmugDNA.1091.1.S1_at    | MmugDNA.1091.1  | 8.05  | 7.96  | 0.4  | 0.31 | 1.06  | 0.781693 | 0.071317 | 0.919573 | 0.313345 |
| MmugDNA.10911.1.S1_at   | MmugDNA.10911.1 | 10.66 | 8.52  | 1.23 | 0.42 | 4.4   | 0.176985 | 0.236634 | 0.550088 | 0.50743  |
| MmugDNA.10912.1.S1_at   | MmugDNA.10912.1 | 7.49  | 6.7   | 0.45 | 0.41 | 1.73  | 0.12521  | 0.135454 | 0.49934  | 0.407535 |
| MmugDNA.1092.1.S1_at    | MmugDNA.1092.1  | 8.28  | 7.53  | 0.33 | 0.16 | 1.68  | 0.018617 | 0.01913  | 0.298116 | 0.174059 |
| MmugDNA.10921.1.S1_at   | MmugDNA.10921.1 | 11.28 | 11.44 | 0.15 | 0.01 | -1.12 | 0.045601 | 0.004633 | 0.376875 | 0.094988 |
| MmugDNA.10922.1.S1_at   | MmugDNA.10922.1 | 11.95 | 12.35 | 0.27 | 0.14 | -1.32 | 0.091277 | 0.234103 | 0.459035 | 0.505319 |
| MmugDNA.10923.1.S1_at   | MmugDNA.10923.1 | 8.61  | 7.97  | 0.63 | 0.5  | 1.55  | 0.212957 | 0.05517  | 0.58352  | 0.280519 |
| MmugDNA.10925.1.S1_at   | MmugDNA.10925.1 | 6.2   | 6.35  | 0.79 | 0.24 | -1.11 | 0.271063 | 0.382309 | 0.63096  | 0.618482 |
| MmugDNA.10926.1.S1_at   | MmugDNA.10926.1 | 11.13 | 11.25 | 0.26 | 0.04 | -1.09 | 0.331228 | 0.281919 | 0.677909 | 0.544864 |
| MmugDNA.10928.1.S1_at   | MmugDNA.10928.1 | 10.46 | 9.94  | 0.29 | 0.17 | 1.44  | 0.092297 | 0.111039 | 0.460762 | 0.375566 |
| MmugDNA.1093.1.S1_at    | MmugDNA.1093.1  | 11.16 | 10.94 | 0.33 | 0.1  | 1.16  | 0.080531 | 0.0065   | 0.444394 | 0.109521 |
| MmugDNA.10931.1.S1_at   | MmugDNA.10931.1 | 10.13 | 10.25 | 0.33 | 0.04 | -1.08 | 0.600485 | 0.167276 | 0.837899 | 0.443684 |
| MmugDNA.10937.1.S1_at   | MmugDNA.10937.1 | 4.21  | 4.09  | 0.08 | 0.09 | 1.09  | 0.165102 | 0.446072 | 0.537704 | 0.662684 |
| MmugDNA.1094.1.S1_at    | MmugDNA.1094.1  | 5.54  | 5.36  | 0.06 | 0.02 | 1.14  | 0.010872 | 0.258316 | 0.250539 | 0.5256   |
| MmugDNA.10940.1.S1_at   | MmugDNA.10940.1 | 3.9   | 4     | 0.01 | 0.13 | -1.07 | 0.636096 | 0.940559 | 0.854813 | 0.966314 |
| MmugDNA.10942.1.S1_at   | MmugDNA.10942.1 | 7.56  | 7.65  | 1.78 | 0.53 | -1.07 | 0.978055 | 0.871975 | 0.992929 | 0.927131 |
| MmugDNA.10943.1.S1_at   | MmugDNA.10943.1 | 5.67  | 6.77  | 0.65 | 0.08 | -2.15 | 0.053603 | 0.027502 | 0.395221 | 0.207161 |
| MmugDNA.10946.1.S1_at   | MmugDNA.10946.1 | 5.49  | 5.56  | 0.15 | 0.18 | -1.05 | 0.471675 | 0.000945 | 0.76658  | 0.049054 |
| MmugDNA.1096.1.S1_at    | MmugDNA.1096.1  | 9.78  | 9.82  | 0.38 | 0.07 | -1.02 | 0.799238 | 0.004896 | 0.926464 | 0.097632 |

|                         |                 |       |       |      |      |       |          |          |          |          |
|-------------------------|-----------------|-------|-------|------|------|-------|----------|----------|----------|----------|
| MmugDNA.10975.1.S1_at   | MmugDNA.10975.1 | 4.51  | 4.8   | 0.24 | 0.2  | -1.22 | 0.246047 | 0.272974 | 0.611445 | 0.53761  |
| MmugDNA.10976.1.S1_at   | MmugDNA.10976.1 | 12.9  | 13.04 | 0.06 | 0.02 | -1.1  | 0.038423 | 0.033904 | 0.359251 | 0.227771 |
| MmugDNA.10977.1.S1_at   | MmugDNA.10977.1 | 10.36 | 10.45 | 0.42 | 0.02 | -1.06 | 0.67546  | 0.880981 | 0.872698 | 0.932039 |
| MmugDNA.10979.1.S1_at   | MmugDNA.10979.1 | 7.86  | 9.03  | 0.73 | 0.17 | -2.24 | 0.15879  | 0.22106  | 0.531595 | 0.494471 |
| MmugDNA.10981.1.S1_at   | MmugDNA.10981.1 | 11.31 | 11.59 | 0.11 | 0.01 | -1.21 | 0.029415 | 0.0051   | 0.334078 | 0.099108 |
| MmugDNA.10986.1.S1_s_at | MmugDNA.10986.1 | 10.42 | 10.9  | 0.55 | 0.17 | -1.39 | 0.335873 | 0.490665 | 0.681296 | 0.692649 |
| MmugDNA.1099.1.S1_at    | MmugDNA.1099.1  | 4.35  | 3.92  | 0.43 | 0.33 | 1.34  | 0.425867 | 0.710763 | 0.74014  | 0.832259 |
| MmugDNA.10990.1.S1_at   | MmugDNA.10990.1 | 6.76  | 7.34  | 0.22 | 0.1  | -1.49 | 0.007507 | 0.009819 | 0.229281 | 0.130205 |
| MmugDNA.10995.1.S1_at   | MmugDNA.10995.1 | 12.47 | 12.48 | 0.1  | 0.01 | -1.01 | 0.895415 | 0.255121 | 0.964244 | 0.52317  |
| MmugDNA.10998.1.S1_at   | MmugDNA.10998.1 | 9.45  | 10.03 | 0.36 | 0.06 | -1.5  | 0.059134 | 0.042657 | 0.406096 | 0.251037 |
| MmugDNA.11001.1.S1_at   | MmugDNA.11001.1 | 10.29 | 10.68 | 0.26 | 0.1  | -1.31 | 0.090865 | 0.101445 | 0.458873 | 0.36121  |
| MmugDNA.11002.1.S1_at   | MmugDNA.11002.1 | 8.92  | 7.94  | 0.92 | 0.18 | 1.97  | 0.154757 | 0.039472 | 0.528059 | 0.243642 |
| MmugDNA.11003.1.S1_at   | MmugDNA.11003.1 | 7.28  | 7.01  | 0.76 | 0.41 | 1.21  | 0.902584 | 0.081076 | 0.967108 | 0.329249 |
| MmugDNA.11004.1.S1_at   | MmugDNA.11004.1 | 4.37  | 4.31  | 0.08 | 0.11 | 1.05  | 0.206531 | 0.181533 | 0.578354 | 0.458087 |
| MmugDNA.11009.1.S1_at   | MmugDNA.11009.1 | 11.82 | 11.32 | 0.6  | 0.08 | 1.42  | 0.678298 | 0.876941 | 0.873961 | 0.929868 |
| MmugDNA.11020.1.S1_at   | MmugDNA.11020.1 | 9.61  | 10.31 | 0.34 | 0.11 | -1.63 | 0.048898 | 0.058045 | 0.38484  | 0.287507 |
| MmugDNA.11026.1.S1_at   | MmugDNA.11026.1 | 12.33 | 12.16 | 0.12 | 0.03 | 1.12  | 0.061678 | 0.064864 | 0.41131  | 0.300719 |
| MmugDNA.11027.1.S1_at   | MmugDNA.11027.1 | 7.96  | 9.62  | 0.31 | 0.19 | -3.15 | 0.00293  | 0.003167 | 0.188924 | 0.081793 |
| MmugDNA.11032.1.S1_at   | MmugDNA.11032.1 | 6.31  | 6.84  | 0.34 | 0.16 | -1.44 | 0.072917 | 0.013155 | 0.433752 | 0.147338 |
| MmugDNA.11035.1.S1_at   | MmugDNA.11035.1 | 6.96  | 7.7   | 0.2  | 0.05 | -1.66 | 0.008186 | 0.041616 | 0.232005 | 0.24887  |
| MmugDNA.11036.1.S1_at   | MmugDNA.11036.1 | 11.98 | 12.05 | 0.15 | 0.13 | -1.05 | 0.233648 | 0.315744 | 0.601206 | 0.569157 |
| MmugDNA.11040.1.S1_at   | MmugDNA.11040.1 | 10.81 | 10.7  | 0.2  | 0.09 | 1.08  | 0.627678 | 0.408412 | 0.850661 | 0.635685 |
| MmugDNA.11044.1.S1_at   | MmugDNA.11044.1 | 4.31  | 4.03  | 0.22 | 0.12 | 1.21  | 0.083797 | 0.113102 | 0.449693 | 0.379073 |
| MmugDNA.11045.1.S1_at   | MmugDNA.11045.1 | 3     | 2.95  | 0.12 | 0.06 | 1.04  | 0.528902 | 0.736032 | 0.7981   | 0.847309 |
| MmugDNA.11045.1.S1_s_at | MmugDNA.11045.1 | 6.71  | 6.76  | 0.86 | 0.04 | -1.04 | 0.602665 | 0.781117 | 0.838904 | 0.873036 |
| MmugDNA.11046.1.S1_at   | MmugDNA.11046.1 | 10.87 | 10.1  | 0.25 | 0.27 | 1.7   | 0.02998  | 0.031005 | 0.336449 | 0.217993 |
| MmugDNA.11047.1.S1_at   | MmugDNA.11047.1 | 9.33  | 9.69  | 0.2  | 0.23 | -1.28 | 0.499246 | 0.715679 | 0.781984 | 0.835159 |
| MmugDNA.11048.1.S1_at   | MmugDNA.11048.1 | 5.31  | 5.07  | 0.19 | 0.11 | 1.18  | 0.266182 | 0.133294 | 0.627106 | 0.405049 |
| MmugDNA.11049.1.S1_at   | MmugDNA.11049.1 | 4.1   | 4.08  | 0.03 | 0.15 | 1.01  | 0.972812 | 0.952487 | 0.991136 | 0.973066 |
| MmugDNA.11051.1.S1_at   | MmugDNA.11051.1 | 8.75  | 8.95  | 0.68 | 0.1  | -1.15 | 0.887668 | 0.308082 | 0.961096 | 0.564219 |
| MmugDNA.11052.1.S1_at   | MmugDNA.11052.1 | 11.57 | 11.46 | 0.14 | 0.02 | 1.08  | 0.240677 | 0.224847 | 0.606937 | 0.497653 |
| MmugDNA.11058.1.S1_at   | MmugDNA.11058.1 | 12.02 | 12.14 | 0.05 | 0.01 | -1.08 | 0.006556 | 0.005889 | 0.219791 | 0.104899 |
| MmugDNA.1106.1.S1_at    | MmugDNA.1106.1  | 8.4   | 8.59  | 1.02 | 0.2  | -1.13 | 0.907901 | 0.947276 | 0.968853 | 0.970103 |
| MmugDNA.11064.1.S1_at   | MmugDNA.11064.1 | 9.31  | 9.6   | 0.24 | 0.05 | -1.22 | 0.113196 | 0.175616 | 0.486648 | 0.45218  |
| MmugDNA.11066.1.S1_at   | MmugDNA.11066.1 | 12.11 | 12.34 | 0.32 | 0.18 | -1.17 | 0.807355 | 0.369291 | 0.930145 | 0.6087   |
| MmugDNA.11072.1.S1_at   | MmugDNA.11072.1 | 10.63 | 10.99 | 0.19 | 0.04 | -1.29 | 0.013657 | 0.004447 | 0.270367 | 0.092958 |
| MmugDNA.11073.1.S1_at   | MmugDNA.11073.1 | 3.73  | 3.59  | 0.07 | 0.04 | 1.11  | 0.08728  | 0.300717 | 0.454785 | 0.558959 |
| MmugDNA.11075.1.S1_at   | MmugDNA.11075.1 | 3.41  | 3.36  | 0.15 | 0.11 | 1.04  | 0.794683 | 0.269279 | 0.924622 | 0.534534 |
| MmugDNA.11078.1.S1_at   | MmugDNA.11078.1 | 5.84  | 5.59  | 0.35 | 0.09 | 1.19  | 0.239998 | 0.338118 | 0.60621  | 0.585286 |
| MmugDNA.11078.1.S1_s_at | MmugDNA.11078.1 | 6.43  | 5.75  | 0.45 | 0.08 | 1.61  | 0.069247 | 0.059353 | 0.426711 | 0.29054  |
| MmugDNA.11079.1.S1_at   | MmugDNA.11079.1 | 8.74  | 8.4   | 0.57 | 0.27 | 1.27  | 0.389691 | 0.272855 | 0.716272 | 0.537586 |
| MmugDNA.11084.1.S1_at   | MmugDNA.11084.1 | 2.91  | 3.04  | 0.51 | 0.16 | -1.09 | 0.455534 | 0.665457 | 0.757444 | 0.80399  |
| MmugDNA.11088.1.S1_at   | MmugDNA.11088.1 | 6.84  | 6.18  | 0.18 | 0.27 | 1.59  | 0.036041 | 0.055893 | 0.354142 | 0.282185 |

|                         |                 |       |       |      |      |       |          |          |          |          |
|-------------------------|-----------------|-------|-------|------|------|-------|----------|----------|----------|----------|
| MmugDNA.11092.1.S1_at   | MmugDNA.11092.1 | 8.25  | 7.66  | 0.74 | 0.55 | 1.51  | 0.913291 | 0.688274 | 0.970503 | 0.818009 |
| MmugDNA.11095.1.S1_at   | MmugDNA.11095.1 | 5.39  | 5.23  | 0.17 | 0.05 | 1.12  | 0.328585 | 0.62342  | 0.67577  | 0.777776 |
| MmugDNA.111.1.S1_at     | MmugDNA.111.1   | 7.84  | 8.41  | 0.61 | 0.39 | -1.48 | 0.172185 | 0.088287 | 0.54555  | 0.341721 |
| MmugDNA.11101.1.S1_at   | MmugDNA.11101.1 | 8.7   | 8.48  | 0.68 | 0.19 | 1.16  | 0.419227 | 0.32689  | 0.736167 | 0.576848 |
| MmugDNA.11105.1.S1_at   | MmugDNA.11105.1 | 8.57  | 8.62  | 0.62 | 0.17 | -1.04 | 0.530336 | 0.668669 | 0.798957 | 0.806111 |
| MmugDNA.11108.1.S1_at   | MmugDNA.11108.1 | 9.11  | 9.16  | 0.39 | 0.06 | -1.04 | 0.863231 | 0.425876 | 0.952006 | 0.6481   |
| MmugDNA.11112.1.S1_at   | MmugDNA.11112.1 | 5.2   | 5.29  | 0.12 | 0.03 | -1.07 | 0.646515 | 0.82224  | 0.859096 | 0.897741 |
| MmugDNA.11115.1.S1_at   | MmugDNA.11115.1 | 7.19  | 7.25  | 0.62 | 0.21 | -1.04 | 0.743648 | 0.695339 | 0.902191 | 0.82295  |
| MmugDNA.11115.1.S1_s_at | MmugDNA.11115.1 | 8.84  | 9.23  | 1.09 | 0.17 | -1.31 | 0.30542  | 0.297321 | 0.658886 | 0.556071 |
| MmugDNA.11117.1.S1_at   | MmugDNA.11117.1 | 6.83  | 7.86  | 0.49 | 0.1  | -2.05 | 0.052038 | 0.006177 | 0.391793 | 0.106774 |
| MmugDNA.11132.1.S1_at   | MmugDNA.11132.1 | 6.64  | 6.62  | 0.09 | 0.05 | 1.02  | 0.474227 | 0.832713 | 0.767936 | 0.904023 |
| MmugDNA.11134.1.S1_at   | MmugDNA.11134.1 | 8.82  | 9.46  | 0.72 | 0.15 | -1.56 | 0.670874 | 0.670283 | 0.870106 | 0.807201 |
| MmugDNA.1114.1.S1_at    | MmugDNA.1114.1  | 3.92  | 3.59  | 0.14 | 0.03 | 1.26  | 0.042937 | 0.021006 | 0.371035 | 0.181715 |
| MmugDNA.11143.1.S1_at   | MmugDNA.11143.1 | 11.8  | 12.05 | 0.24 | 0.09 | -1.19 | 0.534076 | 0.054701 | 0.801189 | 0.279343 |
| MmugDNA.11163.1.S1_at   | MmugDNA.11163.1 | 10.54 | 10.58 | 0.63 | 0.16 | -1.03 | 0.547741 | 0.528471 | 0.809225 | 0.716643 |
| MmugDNA.11165.1.S1_at   | MmugDNA.11165.1 | 5.23  | 5.17  | 0.01 | 0.05 | 1.04  | 0.07478  | 0.184578 | 0.435313 | 0.460617 |
| MmugDNA.11168.1.S1_at   | MmugDNA.11168.1 | 12.35 | 12.58 | 0.08 | 0.03 | -1.17 | 0.012879 | 0.019391 | 0.265776 | 0.175022 |
| MmugDNA.11171.1.S1_at   | MmugDNA.11171.1 | 11.01 | 11.1  | 0.46 | 0.03 | -1.06 | 0.675529 | 0.053611 | 0.872698 | 0.277182 |
| MmugDNA.11176.1.S1_at   | MmugDNA.11176.1 | 6.49  | 7.33  | 0.49 | 0.24 | -1.8  | 0.077447 | 0.08353  | 0.439391 | 0.334076 |
| MmugDNA.11192.1.S1_at   | MmugDNA.11192.1 | 7.13  | 6.84  | 0.26 | 0.13 | 1.22  | 0.179984 | 0.248345 | 0.553155 | 0.5176   |
| MmugDNA.11197.1.S1_at   | MmugDNA.11197.1 | 10.84 | 11.07 | 0.23 | 0.12 | -1.17 | 0.356101 | 0.693692 | 0.695045 | 0.821874 |
| MmugDNA.1120.1.S1_at    | MmugDNA.1120.1  | 8.27  | 9.55  | 2.31 | 0.36 | -2.43 | 0.317872 | 0.221928 | 0.667632 | 0.495019 |
| MmugDNA.11204.1.S1_at   | MmugDNA.11204.1 | 7.43  | 8.14  | 0.41 | 0.07 | -1.63 | 0.104548 | 0.001684 | 0.475639 | 0.062108 |
| MmugDNA.11206.1.S1_at   | MmugDNA.11206.1 | 12.07 | 12.1  | 0.06 | 0.12 | -1.02 | 0.898155 | 0.890751 | 0.965455 | 0.937717 |
| MmugDNA.11207.1.S1_at   | MmugDNA.11207.1 | 8.75  | 8.54  | 0.43 | 0.07 | 1.16  | 0.308797 | 0.213572 | 0.661293 | 0.48741  |
| MmugDNA.11216.1.S1_at   | MmugDNA.11216.1 | 12.44 | 12.53 | 0.07 | 0.04 | -1.06 | 0.135118 | 0.039664 | 0.50916  | 0.244271 |
| MmugDNA.11219.1.S1_at   | MmugDNA.11219.1 | 11.92 | 11.98 | 0.16 | 0.06 | -1.04 | 0.320483 | 0.141479 | 0.669365 | 0.415019 |
| MmugDNA.11223.1.S1_at   | MmugDNA.11223.1 | 5.06  | 4.91  | 0.16 | 0.04 | 1.11  | 0.192695 | 0.131451 | 0.563577 | 0.403584 |
| MmugDNA.11235.1.S1_at   | MmugDNA.11235.1 | 3.11  | 3.46  | 0.11 | 0.07 | -1.28 | 0.024098 | 0.05485  | 0.317812 | 0.279693 |
| MmugDNA.11237.1.S1_at   | MmugDNA.11237.1 | 8.88  | 9.31  | 0.53 | 0.18 | -1.35 | 0.092429 | 0.093535 | 0.460926 | 0.349846 |
| MmugDNA.11238.1.S1_at   | MmugDNA.11238.1 | 7.94  | 8.47  | 0.56 | 0.1  | -1.45 | 0.225531 | 0.132869 | 0.594764 | 0.404544 |
| MmugDNA.11243.1.S1_at   | MmugDNA.11243.1 | 9.12  | 8.74  | 0.15 | 0.13 | 1.3   | 0.040111 | 0.034796 | 0.36334  | 0.230686 |
| MmugDNA.11251.1.S1_at   | MmugDNA.11251.1 | 12.72 | 12.92 | 0.4  | 0.13 | -1.15 | 0.516903 | 0.046877 | 0.79167  | 0.261272 |
| MmugDNA.11254.1.S1_at   | MmugDNA.11254.1 | 7.55  | 7.49  | 0.12 | 0.05 | 1.04  | 0.169603 | 0.496142 | 0.542592 | 0.695877 |
| MmugDNA.11257.1.S1_s_at | MmugDNA.11257.1 | 10.57 | 10.88 | 0.44 | 0.19 | -1.24 | 0.692229 | 0.706624 | 0.880095 | 0.829794 |
| MmugDNA.11259.1.S1_at   | MmugDNA.11259.1 | 3.41  | 3.39  | 0.06 | 0.06 | 1.01  | 0.991325 | 0.183318 | 0.996655 | 0.459553 |
| MmugDNA.11263.1.S1_at   | MmugDNA.11263.1 | 2.97  | 4.57  | 0.32 | 0.64 | -3.03 | 0.027614 | 0.052569 | 0.328297 | 0.274848 |
| MmugDNA.11273.1.S1_at   | MmugDNA.11273.1 | 11.12 | 11.22 | 0.09 | 0.04 | -1.08 | 0.262847 | 0.001963 | 0.624987 | 0.065832 |
| MmugDNA.11279.1.S1_at   | MmugDNA.11279.1 | 6.66  | 6.69  | 0.05 | 0.05 | -1.02 | 0.234752 | 0.185054 | 0.602111 | 0.460891 |
| MmugDNA.11281.1.S1_at   | MmugDNA.11281.1 | 9.76  | 9.86  | 0.38 | 0.1  | -1.08 | 0.761358 | 0.442319 | 0.910491 | 0.660336 |
| MmugDNA.11286.1.S1_at   | MmugDNA.11286.1 | 6.89  | 6.79  | 0.12 | 0.16 | 1.07  | 0.211729 | 0.17341  | 0.582625 | 0.449918 |
| MmugDNA.11287.1.S1_s_at | MmugDNA.11287.1 | 13.39 | 13.41 | 0.42 | 0.03 | -1.01 | 0.633864 | 0.587313 | 0.853695 | 0.754131 |
| MmugDNA.11294.1.S1_at   | MmugDNA.11294.1 | 9.96  | 9.22  | 0.46 | 0.19 | 1.67  | 0.167397 | 0.025095 | 0.540065 | 0.19845  |



|                         |                 |       |       |      |      |       |          |          |          |          |
|-------------------------|-----------------|-------|-------|------|------|-------|----------|----------|----------|----------|
| MmugDNA.11298.1.S1_at   | MmugDNA.11298.1 | 6.41  | 7.41  | 0.67 | 0.18 | -2.01 | 0.121068 | 0.142238 | 0.494725 | 0.415754 |
| MmugDNA.113.1.S1_at     | MmugDNA.113.1   | 6.69  | 8.54  | 0.38 | 0.1  | -3.59 | 0.001979 | 0.000461 | 0.17214  | 0.038572 |
| MmugDNA.11300.1.S1_at   | MmugDNA.11300.1 | 8.55  | 7.29  | 0.32 | 0.12 | 2.39  | 0.002864 | 0.001711 | 0.187837 | 0.062657 |
| MmugDNA.11301.1.S1_at   | MmugDNA.11301.1 | 7.17  | 9.48  | 0.5  | 0.28 | -4.94 | 0.005039 | 0.027115 | 0.204763 | 0.205797 |
| MmugDNA.11309.1.S1_at   | MmugDNA.11309.1 | 2.87  | 2.88  | 0.02 | 0.03 | -1    | 0.355885 | 0.190415 | 0.694906 | 0.465906 |
| MmugDNA.11310.1.S1_at   | MmugDNA.11310.1 | 8.22  | 7.81  | 0.84 | 0.28 | 1.33  | 0.692854 | 0.914292 | 0.880305 | 0.951813 |
| MmugDNA.11311.1.S1_at   | MmugDNA.11311.1 | 9.33  | 9.24  | 0.07 | 0.1  | 1.07  | 0.231431 | 0.409471 | 0.599368 | 0.636521 |
| MmugDNA.11314.1.S1_at   | MmugDNA.11314.1 | 4.14  | 3.97  | 0.19 | 0.09 | 1.13  | 0.15894  | 0.283164 | 0.531703 | 0.545694 |
| MmugDNA.11315.1.S1_at   | MmugDNA.11315.1 | 7.89  | 8.11  | 0.24 | 0.31 | -1.17 | 0.391783 | 0.773743 | 0.717806 | 0.868448 |
| MmugDNA.11316.1.S1_at   | MmugDNA.11316.1 | 11.14 | 11.2  | 0.97 | 0.14 | -1.04 | 0.736396 | 0.739166 | 0.899133 | 0.848851 |
| MmugDNA.11320.1.S1_at   | MmugDNA.11320.1 | 7.86  | 9.41  | 0.44 | 0.18 | -2.93 | 0.002624 | 0.000372 | 0.181779 | 0.037273 |
| MmugDNA.11321.1.S1_at   | MmugDNA.11321.1 | 10.45 | 10.73 | 0.37 | 0.11 | -1.21 | 0.655    | 0.085662 | 0.863003 | 0.337744 |
| MmugDNA.11327.1.S1_s_at | MmugDNA.11327.1 | 6.24  | 6.23  | 0.06 | 0.06 | 1.01  | 0.561061 | 0.790005 | 0.817071 | 0.878631 |
| MmugDNA.11328.1.S1_at   | MmugDNA.11328.1 | 11.15 | 10.06 | 0.91 | 0.37 | 2.12  | 0.102267 | 0.272794 | 0.472583 | 0.537505 |
| MmugDNA.11332.1.S1_at   | MmugDNA.11332.1 | 8.96  | 8.84  | 0.59 | 0.06 | 1.09  | 0.55288  | 0.182732 | 0.811917 | 0.459215 |
| MmugDNA.11336.1.S1_at   | MmugDNA.11336.1 | 6.27  | 6.47  | 0.14 | 0.1  | -1.15 | 0.106465 | 0.20489  | 0.478853 | 0.479227 |
| MmugDNA.11338.1.S1_at   | MmugDNA.11338.1 | 6.59  | 6.51  | 0.09 | 0.06 | 1.06  | 0.383499 | 0.032888 | 0.71139  | 0.224486 |
| MmugDNA.11341.1.S1_s_at | MmugDNA.11341.1 | 7.17  | 6.9   | 0.13 | 0.34 | 1.2   | 0.753529 | 0.714139 | 0.907059 | 0.834155 |
| MmugDNA.11342.1.S1_at   | MmugDNA.11342.1 | 8.69  | 9.21  | 0.49 | 0.53 | -1.43 | 0.123082 | 0.13034  | 0.496589 | 0.402172 |
| MmugDNA.11346.1.S1_at   | MmugDNA.11346.1 | 9.72  | 10.02 | 0.15 | 0.07 | -1.24 | 0.090965 | 0.138236 | 0.458897 | 0.411198 |
| MmugDNA.11347.1.S1_at   | MmugDNA.11347.1 | 3.8   | 3.65  | 0.04 | 0.22 | 1.11  | 0.914009 | 0.724083 | 0.970812 | 0.840308 |
| MmugDNA.11349.1.S1_at   | MmugDNA.11349.1 | 13.15 | 13.13 | 0.26 | 0.08 | 1.01  | 0.914378 | 0.549715 | 0.970837 | 0.730002 |
| MmugDNA.11350.1.S1_at   | MmugDNA.11350.1 | 8.62  | 9.06  | 0.67 | 0.09 | -1.36 | 0.086639 | 0.169456 | 0.454519 | 0.446075 |
| MmugDNA.11351.1.S1_at   | MmugDNA.11351.1 | 7.66  | 6.46  | 1.43 | 0.37 | 2.3   | 0.259191 | 0.12508  | 0.622592 | 0.395506 |
| MmugDNA.11352.1.S1_at   | MmugDNA.11352.1 | 7.82  | 7.18  | 0.27 | 0.25 | 1.56  | 0.033474 | 0.058885 | 0.346442 | 0.289418 |
| MmugDNA.11353.1.S1_at   | MmugDNA.11353.1 | 8.85  | 8.43  | 3.07 | 0.27 | 1.34  | 0.935389 | 0.306541 | 0.978149 | 0.563095 |
| MmugDNA.11355.1.S1_at   | MmugDNA.11355.1 | 6.77  | 7.73  | 0.74 | 0.17 | -1.94 | 0.120562 | 0.034792 | 0.494002 | 0.230686 |
| MmugDNA.11358.1.S1_at   | MmugDNA.11358.1 | 9.16  | 9.59  | 0.08 | 0.21 | -1.35 | 0.015942 | 0.007948 | 0.284606 | 0.118702 |
| MmugDNA.1136.1.S1_at    | MmugDNA.1136.1  | 12.7  | 12.94 | 0.18 | 0.03 | -1.18 | 0.244842 | 0.29998  | 0.610372 | 0.558262 |
| MmugDNA.11360.1.S1_at   | MmugDNA.11360.1 | 7.72  | 7.11  | 0.12 | 0.15 | 1.52  | 0.003118 | 0.000813 | 0.191107 | 0.046271 |
| MmugDNA.11362.1.S1_at   | MmugDNA.11362.1 | 5.71  | 6.21  | 0.27 | 0.07 | -1.41 | 0.044653 | 0.129029 | 0.374916 | 0.400513 |
| MmugDNA.11364.1.S1_at   | MmugDNA.11364.1 | 9.61  | 9.04  | 0.26 | 0.32 | 1.49  | 0.375082 | 0.000574 | 0.706298 | 0.041171 |
| MmugDNA.11365.1.S1_at   | MmugDNA.11365.1 | 13.77 | 13.79 | 0.41 | 0.07 | -1.01 | 0.897735 | 0.329815 | 0.965296 | 0.578874 |
| MmugDNA.11366.1.S1_at   | MmugDNA.11366.1 | 3.5   | 3.52  | 0.12 | 0.17 | -1.01 | 0.711699 | 0.345656 | 0.887702 | 0.590854 |
| MmugDNA.11368.1.S1_at   | MmugDNA.11368.1 | 3.27  | 3.23  | 0.06 | 0.06 | 1.03  | 0.612369 | 0.922292 | 0.843043 | 0.956244 |
| MmugDNA.11369.1.S1_at   | MmugDNA.11369.1 | 3.18  | 3.07  | 0.24 | 0.1  | 1.08  | 0.176827 | 0.249466 | 0.549945 | 0.518532 |
| MmugDNA.11375.1.S1_at   | MmugDNA.11375.1 | 9.12  | 8.56  | 0.94 | 0.43 | 1.47  | 0.743203 | 0.275317 | 0.902055 | 0.539663 |
| MmugDNA.11378.1.S1_at   | MmugDNA.11378.1 | 10.76 | 11    | 0.18 | 0.1  | -1.19 | 0.159254 | 0.114772 | 0.531932 | 0.381311 |
| MmugDNA.11379.1.S1_at   | MmugDNA.11379.1 | 12.77 | 12.82 | 0.18 | 0.08 | -1.04 | 0.419408 | 0.537123 | 0.736296 | 0.722298 |
| MmugDNA.11380.1.S1_at   | MmugDNA.11380.1 | 4.1   | 3.98  | 0.08 | 0.02 | 1.09  | 0.088438 | 0.184949 | 0.45606  | 0.460776 |
| MmugDNA.11386.1.S1_at   | MmugDNA.11386.1 | 10.35 | 10.94 | 0.15 | 0.12 | -1.51 | 0.010576 | 0.008282 | 0.24838  | 0.12078  |
| MmugDNA.11387.1.S1_at   | MmugDNA.11387.1 | 7.01  | 7.01  | 0.03 | 0.07 | -1    | 0.553023 | 0.916179 | 0.811981 | 0.953065 |
| MmugDNA.11389.1.S1_at   | MmugDNA.11389.1 | 9.82  | 9.92  | 1.83 | 0.12 | -1.07 | 0.857666 | 0.425762 | 0.949729 | 0.648082 |

|                         |                 |       |       |      |      |       |          |          |          |          |
|-------------------------|-----------------|-------|-------|------|------|-------|----------|----------|----------|----------|
| MmugDNA.11398.1.S1_s_at | MmugDNA.11398.1 | 9.12  | 9.23  | 0.31 | 0.11 | -1.08 | 0.85265  | 0.037709 | 0.948073 | 0.23859  |
| MmugDNA.11406.1.S1_at   | MmugDNA.11406.1 | 9.98  | 10.36 | 0.55 | 0.06 | -1.29 | 0.863774 | 0.849843 | 0.952043 | 0.914673 |
| MmugDNA.11419.1.S1_at   | MmugDNA.11419.1 | 9.39  | 8.98  | 0.08 | 0.13 | 1.32  | 0.007726 | 0.022624 | 0.230997 | 0.188352 |
| MmugDNA.11424.1.S1_at   | MmugDNA.11424.1 | 8.07  | 7.8   | 1.75 | 0.52 | 1.2   | 0.81469  | 0.858906 | 0.933137 | 0.919654 |
| MmugDNA.11426.1.S1_at   | MmugDNA.11426.1 | 3.14  | 3.13  | 0.05 | 0.08 | 1.01  | 0.475297 | 0.874052 | 0.768515 | 0.928462 |
| MmugDNA.11427.1.S1_at   | MmugDNA.11427.1 | 3.77  | 3.84  | 0.03 | 0.09 | -1.05 | 0.234697 | 0.317965 | 0.602061 | 0.571046 |
| MmugDNA.11430.1.S1_at   | MmugDNA.11430.1 | 9.53  | 10.19 | 2.21 | 0.29 | -1.58 | 0.596996 | 0.299317 | 0.83613  | 0.557811 |
| MmugDNA.11438.1.S1_at   | MmugDNA.11438.1 | 7.16  | 7.2   | 0.22 | 0.02 | -1.03 | 0.515034 | 0.440898 | 0.790752 | 0.659138 |
| MmugDNA.11456.1.S1_at   | MmugDNA.11456.1 | 11.33 | 11.15 | 0.25 | 0.13 | 1.14  | 0.837314 | 0.547296 | 0.941594 | 0.728364 |
| MmugDNA.1146.1.S1_at    | MmugDNA.1146.1  | 11.64 | 11.92 | 0.12 | 0.02 | -1.22 | 0.007676 | 0.00202  | 0.230571 | 0.06682  |
| MmugDNA.11461.1.S1_at   | MmugDNA.11461.1 | 7.88  | 7.67  | 0.14 | 0.14 | -1.16 | 0.098068 | 0.103729 | 0.467483 | 0.364519 |
| MmugDNA.11462.1.S1_at   | MmugDNA.11462.1 | 9.85  | 10.15 | 0.05 | 0.04 | -1.23 | 0.00144  | 0.000049 | 0.161412 | 0.025273 |
| MmugDNA.11463.1.S1_at   | MmugDNA.11463.1 | 4.87  | 4.68  | 0.11 | 0.06 | 1.15  | 0.086274 | 0.09858  | 0.453862 | 0.356709 |
| MmugDNA.11465.1.S1_at   | MmugDNA.11465.1 | 6.79  | 6.52  | 0.11 | 0.14 | 1.21  | 0.036761 | 0.071594 | 0.355728 | 0.313714 |
| MmugDNA.11466.1.S1_at   | MmugDNA.11466.1 | 3.61  | 5.53  | 0.52 | 0.16 | -3.78 | 0.00442  | 0.018687 | 0.198874 | 0.171717 |
| MmugDNA.11468.1.S1_at   | MmugDNA.11468.1 | 8.58  | 8.62  | 0.19 | 0.03 | -1.03 | 0.591901 | 0.350615 | 0.833648 | 0.594364 |
| MmugDNA.11486.1.S1_at   | MmugDNA.11486.1 | 5.78  | 5.74  | 0.08 | 0.06 | 1.03  | 0.23646  | 0.610868 | 0.603346 | 0.768948 |
| MmugDNA.11494.1.S1_at   | MmugDNA.11494.1 | 5.47  | 5.48  | 0.05 | 0.01 | -1.01 | 0.497126 | 0.222598 | 0.781055 | 0.495617 |
| MmugDNA.11508.1.S1_at   | MmugDNA.11508.1 | 4.27  | 4.15  | 0.34 | 0.02 | 1.09  | 0.538756 | 0.16868  | 0.803474 | 0.445352 |
| MmugDNA.11509.1.S1_at   | MmugDNA.11509.1 | 8.12  | 7.8   | 0.16 | 0.05 | 1.25  | 0.124948 | 0.152161 | 0.498917 | 0.426919 |
| MmugDNA.11516.1.S1_at   | MmugDNA.11516.1 | 9.7   | 9.69  | 0.52 | 0.2  | 1.01  | 0.812232 | 0.724577 | 0.932076 | 0.840552 |
| MmugDNA.11519.1.S1_at   | MmugDNA.11519.1 | 9.3   | 9.33  | 0.69 | 0.03 | -1.02 | 0.849069 | 0.973121 | 0.946949 | 0.985424 |
| MmugDNA.11527.1.S1_at   | MmugDNA.11527.1 | 4.62  | 4.41  | 0.2  | 0.13 | 1.16  | 0.267494 | 0.430898 | 0.628184 | 0.651894 |
| MmugDNA.11532.1.S1_at   | MmugDNA.11532.1 | 10.55 | 10.53 | 0.52 | 0.15 | 1.01  | 0.928485 | 0.46609  | 0.976259 | 0.676117 |
| MmugDNA.11533.1.S1_at   | MmugDNA.11533.1 | 3.26  | 3.4   | 0.03 | 0.17 | -1.1  | 0.159529 | 0.156238 | 0.532487 | 0.43161  |
| MmugDNA.11535.1.S1_at   | MmugDNA.11535.1 | 10.68 | 11.12 | 0.3  | 0.1  | -1.35 | 0.040812 | 0.074819 | 0.36514  | 0.318614 |
| MmugDNA.11539.1.S1_at   | MmugDNA.11539.1 | 7.51  | 7.01  | 0.2  | 0.1  | 1.42  | 0.016988 | 0.015976 | 0.288969 | 0.160458 |
| MmugDNA.1154.1.S1_at    | MmugDNA.1154.1  | 9.78  | 10    | 1.23 | 0.18 | -1.16 | 0.955642 | 0.748678 | 0.985346 | 0.853802 |
| MmugDNA.11541.1.S1_at   | MmugDNA.11541.1 | 4.71  | 4.55  | 0.42 | 0.27 | 1.12  | 0.643731 | 0.380434 | 0.858276 | 0.617091 |
| MmugDNA.11549.1.S1_at   | MmugDNA.11549.1 | 8.11  | 8.74  | 0.53 | 0.07 | -1.55 | 0.149536 | 0.076515 | 0.523226 | 0.321589 |
| MmugDNA.11555.1.S1_at   | MmugDNA.11555.1 | 10.04 | 10.52 | 0.41 | 0.2  | -1.39 | 0.203852 | 0.247772 | 0.57513  | 0.517199 |
| MmugDNA.11557.1.S1_at   | MmugDNA.11557.1 | 10.68 | 10.9  | 0.21 | 0.26 | -1.16 | 0.270159 | 0.000642 | 0.630217 | 0.042928 |
| MmugDNA.1156.1.S1_at    | MmugDNA.1156.1  | 4.62  | 4.7   | 0.19 | 0.13 | -1.06 | 0.487089 | 0.166694 | 0.774859 | 0.443163 |
| MmugDNA.11564.1.S1_at   | MmugDNA.11564.1 | 7.67  | 7.55  | 0.1  | 0.01 | 1.09  | 0.080518 | 0.085578 | 0.444394 | 0.337567 |
| MmugDNA.11570.1.S1_at   | MmugDNA.11570.1 | 8.02  | 7.71  | 0.47 | 0.36 | 1.24  | 0.152167 | 0.112855 | 0.525249 | 0.378487 |
| MmugDNA.11575.1.S1_at   | MmugDNA.11575.1 | 8.22  | 8.21  | 0.15 | 0.08 | 1.01  | 0.473527 | 0.297987 | 0.767617 | 0.556695 |
| MmugDNA.11580.1.S1_at   | MmugDNA.11580.1 | 7.86  | 8.3   | 0.32 | 0.18 | -1.36 | 0.027023 | 0.022863 | 0.327141 | 0.189271 |
| MmugDNA.11582.1.S1_at   | MmugDNA.11582.1 | 7.2   | 7.69  | 0.81 | 0.1  | -1.41 | 0.45938  | 0.120449 | 0.75948  | 0.38925  |
| MmugDNA.11583.1.S1_at   | MmugDNA.11583.1 | 10.71 | 10.82 | 0.85 | 0.11 | -1.08 | 0.610843 | 0.182682 | 0.842149 | 0.459186 |
| MmugDNA.11585.1.S1_at   | MmugDNA.11585.1 | 6.84  | 6.96  | 0.19 | 0.24 | -1.08 | 0.639796 | 0.017505 | 0.856331 | 0.167516 |
| MmugDNA.11589.1.S1_at   | MmugDNA.11589.1 | 7.28  | 6.8   | 0.65 | 0.19 | 1.4   | 0.14751  | 0.293231 | 0.521578 | 0.553156 |
| MmugDNA.11591.1.S1_s_at | MmugDNA.11591.1 | 6.53  | 6.28  | 0.93 | 0.27 | 1.19  | 0.556987 | 0.244687 | 0.814433 | 0.514512 |
| MmugDNA.11594.1.S1_at   | MmugDNA.11594.1 | 5.37  | 5.27  | 0.11 | 0.15 | 1.07  | 0.153388 | 0.318151 | 0.526445 | 0.571046 |

|                         |                 |       |       |      |      |       |          |          |          |          |
|-------------------------|-----------------|-------|-------|------|------|-------|----------|----------|----------|----------|
| MmugDNA.11595.1.S1_at   | MmugDNA.11595.1 | 9.57  | 9.66  | 0.2  | 0.07 | -1.06 | 0.627142 | 0.816596 | 0.850382 | 0.894202 |
| MmugDNA.1160.1.S1_at    | MmugDNA.1160.1  | 6.22  | 5.96  | 0.23 | 0.09 | 1.2   | 0.078785 | 0.104565 | 0.441464 | 0.365816 |
| MmugDNA.11601.1.S1_at   | MmugDNA.11601.1 | 8.85  | 8.94  | 0.22 | 0.14 | -1.07 | 0.118667 | 0.151771 | 0.492161 | 0.426413 |
| MmugDNA.11605.1.S1_at   | MmugDNA.11605.1 | 4.55  | 4.51  | 0.16 | 0.07 | 1.02  | 0.619172 | 0.772659 | 0.846458 | 0.867785 |
| MmugDNA.11610.1.S1_at   | MmugDNA.11610.1 | 12.07 | 12.29 | 0.25 | 0.03 | -1.17 | 0.15122  | 0.187336 | 0.52444  | 0.463366 |
| MmugDNA.11614.1.S1_at   | MmugDNA.11614.1 | 11.62 | 11.79 | 1.23 | 0.18 | -1.13 | 0.699442 | 0.060182 | 0.88316  | 0.291882 |
| MmugDNA.11618.1.S1_at   | MmugDNA.11618.1 | 12.85 | 12.66 | 0.05 | 0.1  | 1.14  | 0.030229 | 0.074729 | 0.337005 | 0.318465 |
| MmugDNA.11618.1.S1_s_at | MmugDNA.11618.1 | 13.18 | 13.06 | 0.01 | 0.07 | 1.09  | 0.024554 | 0.055704 | 0.319083 | 0.281853 |
| MmugDNA.1162.1.S1_at    | MmugDNA.1162.1  | 12.45 | 12.4  | 0.82 | 0    | 1.03  | 0.708435 | 0.881174 | 0.886591 | 0.932188 |
| MmugDNA.11622.1.S1_at   | MmugDNA.11622.1 | 9.78  | 9.51  | 0.37 | 0.1  | 1.2   | 0.152771 | 0.069455 | 0.525696 | 0.309778 |
| MmugDNA.11623.1.S1_at   | MmugDNA.11623.1 | 8.29  | 7.69  | 0.43 | 0.21 | -1.51 | 0.072561 | 0.03366  | 0.432756 | 0.227052 |
| MmugDNA.11624.1.S1_at   | MmugDNA.11624.1 | 6.07  | 6.19  | 0.06 | 0.16 | -1.08 | 0.910463 | 0.912206 | 0.969634 | 0.950522 |
| MmugDNA.11625.1.S1_at   | MmugDNA.11625.1 | 7.61  | 8.53  | 0.99 | 0.25 | -1.89 | 0.146046 | 0.061514 | 0.520572 | 0.294835 |
| MmugDNA.11626.1.S1_at   | MmugDNA.11626.1 | 9.43  | 9.67  | 0.16 | 0.13 | -1.18 | 0.049199 | 0.066524 | 0.385423 | 0.303705 |
| MmugDNA.11627.1.S1_at   | MmugDNA.11627.1 | 5.29  | 5.17  | 0.04 | 0.11 | 1.08  | 0.253099 | 0.497472 | 0.617917 | 0.696806 |
| MmugDNA.11630.1.S1_at   | MmugDNA.11630.1 | 9.34  | 9.64  | 0.35 | 0.11 | -1.23 | 0.07761  | 0.081651 | 0.43966  | 0.329836 |
| MmugDNA.11631.1.S1_s_at | MmugDNA.11631.1 | 4.52  | 5.02  | 0.64 | 0.26 | -1.41 | 0.244261 | 0.817371 | 0.60991  | 0.89468  |
| MmugDNA.11635.1.S1_at   | MmugDNA.11635.1 | 3.78  | 3.53  | 0.19 | 0.01 | 1.19  | 0.118124 | 0.012054 | 0.491511 | 0.142044 |
| MmugDNA.11637.1.S1_at   | MmugDNA.11637.1 | 7.44  | 7.63  | 0.28 | 0.05 | -1.14 | 0.325868 | 0.515385 | 0.67351  | 0.708274 |
| MmugDNA.11637.1.S1_s_at | MmugDNA.11637.1 | 7.38  | 7.81  | 0.64 | 0.01 | -1.35 | 0.321808 | 0.492583 | 0.670537 | 0.693633 |
| MmugDNA.11639.1.S1_at   | MmugDNA.11639.1 | 10.81 | 9.89  | 0.14 | 0.23 | 1.89  | 0.003022 | 0.001133 | 0.19086  | 0.053052 |
| MmugDNA.11647.1.S1_at   | MmugDNA.11647.1 | 5.25  | 5.74  | 0.45 | 0.22 | -1.41 | 0.151093 | 0.136169 | 0.52444  | 0.408498 |
| MmugDNA.11648.1.S1_at   | MmugDNA.11648.1 | 6.59  | 6.41  | 0.08 | 0.1  | 1.13  | 0.035012 | 0.039932 | 0.350898 | 0.244926 |
| MmugDNA.11649.1.S1_at   | MmugDNA.11649.1 | 11.55 | 11.45 | 0.33 | 0.02 | 1.07  | 0.662741 | 0.877027 | 0.866912 | 0.92994  |
| MmugDNA.11650.1.S1_at   | MmugDNA.11650.1 | 5.52  | 6.54  | 1.12 | 0.2  | -2.03 | 0.675691 | 0.906865 | 0.872698 | 0.947253 |
| MmugDNA.11652.1.S1_at   | MmugDNA.11652.1 | 11.48 | 11.05 | 0.07 | 0.08 | 1.35  | 0.002171 | 0.000044 | 0.174757 | 0.025273 |
| MmugDNA.11653.1.S1_at   | MmugDNA.11653.1 | 8.56  | 9.12  | 0.23 | 0.07 | -1.47 | 0.025373 | 0.010776 | 0.321511 | 0.135471 |
| MmugDNA.11654.1.S1_at   | MmugDNA.11654.1 | 5.99  | 5.84  | 0.16 | 0.1  | 1.11  | 0.364982 | 0.729451 | 0.700775 | 0.843541 |
| MmugDNA.11655.1.S1_at   | MmugDNA.11655.1 | 5.95  | 5.84  | 0.07 | 0.08 | 1.08  | 0.149669 | 0.445591 | 0.523226 | 0.662468 |
| MmugDNA.11660.1.S1_at   | MmugDNA.11660.1 | 8.53  | 8.39  | 0.29 | 0.05 | 1.1   | 0.145295 | 0.039709 | 0.520409 | 0.244271 |
| MmugDNA.11661.1.S1_at   | MmugDNA.11661.1 | 11.03 | 10.58 | 0.32 | 0.03 | 1.37  | 0.073906 | 0.009481 | 0.434623 | 0.12821  |
| MmugDNA.11662.1.S1_at   | MmugDNA.11662.1 | 4.24  | 4.67  | 0.31 | 0.01 | -1.35 | 0.196899 | 0.087715 | 0.567663 | 0.340964 |
| MmugDNA.1167.1.S1_at    | MmugDNA.1167.1  | 10.47 | 10.19 | 0.13 | 0.11 | 1.21  | 0.070821 | 0.003819 | 0.430067 | 0.08794  |
| MmugDNA.11672.1.S1_at   | MmugDNA.11672.1 | 10.3  | 9.29  | 0.47 | 0.48 | 2.01  | 0.087425 | 0.214422 | 0.454892 | 0.488132 |
| MmugDNA.11673.1.S1_at   | MmugDNA.11673.1 | 5.36  | 5.5   | 0.52 | 0.13 | -1.1  | 0.541425 | 0.448632 | 0.805165 | 0.664474 |
| MmugDNA.11680.1.S1_at   | MmugDNA.11680.1 | 8.59  | 8.64  | 1.77 | 0.18 | -1.04 | 0.904652 | 0.276215 | 0.96793  | 0.540183 |
| MmugDNA.11681.1.S1_at   | MmugDNA.11681.1 | 5.41  | 5.37  | 0.05 | 0.12 | 1.03  | 0.374334 | 0.538445 | 0.705837 | 0.723141 |
| MmugDNA.11684.1.S1_at   | MmugDNA.11684.1 | 9.8   | 9.54  | 0.47 | 0.06 | 1.2   | 0.789511 | 0.04969  | 0.92257  | 0.267908 |
| MmugDNA.11685.1.S1_at   | MmugDNA.11685.1 | 9.9   | 9.95  | 0.19 | 0.14 | -1.04 | 0.714467 | 0.006895 | 0.888775 | 0.11222  |
| MmugDNA.11691.1.S1_at   | MmugDNA.11691.1 | 7.81  | 7.79  | 0.08 | 0.02 | 1.01  | 0.95005  | 0.166839 | 0.983211 | 0.443311 |
| MmugDNA.11692.1.S1_at   | MmugDNA.11692.1 | 11.14 | 11.4  | 0.8  | 0.22 | -1.2  | 0.7209   | 0.340242 | 0.891828 | 0.586637 |
| MmugDNA.11693.1.S1_at   | MmugDNA.11693.1 | 12.34 | 12.6  | 0.19 | 0.11 | -1.2  | 0.284547 | 0.16711  | 0.642352 | 0.4436   |
| MmugDNA.11694.1.S1_at   | MmugDNA.11694.1 | 8.48  | 8.39  | 0.2  | 0.05 | 1.07  | 0.531698 | 0.229154 | 0.799836 | 0.501438 |

|                       |                 |       |       |      |      |       |          |          |          |          |
|-----------------------|-----------------|-------|-------|------|------|-------|----------|----------|----------|----------|
| MmugDNA.11699.1.S1_at | MmugDNA.11699.1 | 9.31  | 9.53  | 0.16 | 0.03 | -1.16 | 0.179822 | 0.008495 | 0.553052 | 0.122289 |
| MmugDNA.1170.1.S1_at  | MmugDNA.1170.1  | 7.12  | 7.34  | 0.48 | 0.22 | -1.17 | 0.520795 | 0.095962 | 0.794066 | 0.353252 |
| MmugDNA.11701.1.S1_at | MmugDNA.11701.1 | 5.9   | 6.34  | 0.37 | 0.23 | -1.36 | 0.167267 | 0.255545 | 0.539832 | 0.523538 |
| MmugDNA.11702.1.S1_at | MmugDNA.11702.1 | 5.22  | 4.97  | 0.06 | 0.15 | 1.19  | 0.089485 | 0.040901 | 0.457657 | 0.247161 |
| MmugDNA.11708.1.S1_at | MmugDNA.11708.1 | 8.52  | 8.06  | 0.26 | 0.23 | 1.38  | 0.04145  | 0.068065 | 0.366555 | 0.307142 |
| MmugDNA.11712.1.S1_at | MmugDNA.11712.1 | 9.77  | 9.91  | 0.4  | 0.2  | -1.1  | 0.221757 | 0.289204 | 0.591359 | 0.550293 |
| MmugDNA.11720.1.S1_at | MmugDNA.11720.1 | 7.68  | 8.19  | 0.27 | 0.07 | -1.43 | 0.052728 | 0.006502 | 0.39295  | 0.109521 |
| MmugDNA.11728.1.S1_at | MmugDNA.11728.1 | 5.66  | 5.27  | 0.33 | 0.29 | 1.31  | 0.209381 | 0.160917 | 0.580868 | 0.437116 |
| MmugDNA.11729.1.S1_at | MmugDNA.11729.1 | 6     | 7.12  | 0.53 | 0.26 | -2.16 | 0.012263 | 0.021491 | 0.260951 | 0.183661 |
| MmugDNA.11735.1.S1_at | MmugDNA.11735.1 | 9.64  | 9     | 0.54 | 0.15 | 1.56  | 0.139962 | 0.09322  | 0.51558  | 0.34931  |
| MmugDNA.11741.1.S1_at | MmugDNA.11741.1 | 7.64  | 7.91  | 0.45 | 0.09 | -1.2  | 0.463351 | 0.658285 | 0.762124 | 0.800244 |
| MmugDNA.11746.1.S1_at | MmugDNA.11746.1 | 7.02  | 8.08  | 0.85 | 0.43 | -2.08 | 0.090311 | 0.099181 | 0.458493 | 0.357379 |
| MmugDNA.11748.1.S1_at | MmugDNA.11748.1 | 8.7   | 8.89  | 0.76 | 0.03 | -1.14 | 0.747059 | 0.485191 | 0.90386  | 0.688969 |
| MmugDNA.11754.1.S1_at | MmugDNA.11754.1 | 9.33  | 8.82  | 0.05 | 0.09 | 1.42  | 0.001018 | 0.003167 | 0.155374 | 0.081793 |
| MmugDNA.11756.1.S1_at | MmugDNA.11756.1 | 4.12  | 4.05  | 0.16 | 0.1  | 1.04  | 0.222332 | 0.395037 | 0.591869 | 0.627268 |
| MmugDNA.11758.1.S1_at | MmugDNA.11758.1 | 10    | 10.38 | 0.26 | 0.08 | -1.3  | 0.111126 | 0.01554  | 0.484303 | 0.158053 |
| MmugDNA.11759.1.S1_at | MmugDNA.11759.1 | 12.88 | 12.88 | 0.11 | 0.09 | -1    | 0.44944  | 0.735773 | 0.754372 | 0.847144 |
| MmugDNA.11763.1.S1_at | MmugDNA.11763.1 | 6.99  | 7.93  | 0.31 | 0.15 | -1.92 | 0.008165 | 0.013931 | 0.232005 | 0.151382 |
| MmugDNA.11765.1.S1_at | MmugDNA.11765.1 | 5.73  | 7.15  | 1.61 | 0.34 | -2.68 | 0.264643 | 0.07576  | 0.626029 | 0.320348 |
| MmugDNA.11770.1.S1_at | MmugDNA.11770.1 | 5.96  | 6.94  | 0.42 | 0.08 | -1.97 | 0.007527 | 0.002365 | 0.229281 | 0.0718   |
| MmugDNA.11773.1.S1_at | MmugDNA.11773.1 | 10.5  | 10.77 | 0.16 | 0.15 | -1.21 | 0.044687 | 0.005178 | 0.374916 | 0.099727 |
| MmugDNA.11779.1.S1_at | MmugDNA.11779.1 | 8.33  | 8.69  | 0.09 | 0.4  | -1.28 | 0.069152 | 0.053626 | 0.426656 | 0.277224 |
| MmugDNA.11781.1.S1_at | MmugDNA.11781.1 | 8.4   | 8.76  | 1.86 | 0.38 | -1.29 | 0.742133 | 0.456895 | 0.901638 | 0.670565 |
| MmugDNA.11783.1.S1_at | MmugDNA.11783.1 | 10.59 | 10.35 | 0.35 | 0.1  | 1.18  | 0.447419 | 0.416069 | 0.753298 | 0.641342 |
| MmugDNA.11787.1.S1_at | MmugDNA.11787.1 | 5.08  | 5.05  | 0.19 | 0.08 | 1.02  | 0.727622 | 0.881499 | 0.894744 | 0.932382 |
| MmugDNA.11788.1.S1_at | MmugDNA.11788.1 | 9.28  | 9.52  | 0.29 | 0.08 | -1.18 | 0.537956 | 0.736267 | 0.802959 | 0.8474   |
| MmugDNA.1179.1.S1_at  | MmugDNA.1179.1  | 7.77  | 7.59  | 0.7  | 0.36 | 1.13  | 0.68513  | 0.339039 | 0.87671  | 0.585891 |
| MmugDNA.11791.1.S1_at | MmugDNA.11791.1 | 6.71  | 7.25  | 0.52 | 0.17 | -1.45 | 0.365782 | 0.078305 | 0.701331 | 0.324949 |
| MmugDNA.11793.1.S1_at | MmugDNA.11793.1 | 7.37  | 7.51  | 0.25 | 0.15 | -1.1  | 0.426848 | 0.489115 | 0.740751 | 0.691616 |
| MmugDNA.11795.1.S1_at | MmugDNA.11795.1 | 5.99  | 6.04  | 0.4  | 0.3  | -1.04 | 0.67174  | 0.014433 | 0.87055  | 0.153335 |
| MmugDNA.11797.1.S1_at | MmugDNA.11797.1 | 6.3   | 6.04  | 0.37 | 0.17 | 1.19  | 0.116499 | 0.105088 | 0.489679 | 0.366755 |
| MmugDNA.11799.1.S1_at | MmugDNA.11799.1 | 9.88  | 10.53 | 0.55 | 0.21 | -1.57 | 0.134549 | 0.150812 | 0.508462 | 0.425335 |
| MmugDNA.11801.1.S1_at | MmugDNA.11801.1 | 3.77  | 3.77  | 0.13 | 0.03 | 1     | 0.881602 | 0.993024 | 0.959065 | 0.995888 |
| MmugDNA.11809.1.S1_at | MmugDNA.11809.1 | 12.18 | 12.47 | 0.21 | 0.07 | -1.22 | 0.065697 | 0.066914 | 0.420827 | 0.304608 |
| MmugDNA.11811.1.S1_at | MmugDNA.11811.1 | 9.69  | 10.5  | 0.52 | 0.05 | -1.75 | 0.058799 | 0.004303 | 0.405424 | 0.092019 |
| MmugDNA.11814.1.S1_at | MmugDNA.11814.1 | 9     | 10.33 | 0.54 | 0.05 | -2.52 | 0.030631 | 0.007211 | 0.338263 | 0.11412  |
| MmugDNA.11817.1.S1_at | MmugDNA.11817.1 | 12.23 | 12.06 | 0.14 | 0.1  | 1.13  | 0.161244 | 0.028603 | 0.534529 | 0.210901 |
| MmugDNA.11818.1.S1_at | MmugDNA.11818.1 | 5.75  | 6.28  | 0.34 | 0.1  | -1.44 | 0.046424 | 0.000295 | 0.377929 | 0.034892 |
| MmugDNA.11820.1.S1_at | MmugDNA.11820.1 | 3.72  | 4.65  | 0.71 | 0.34 | -1.91 | 0.506656 | 0.564292 | 0.785932 | 0.739149 |
| MmugDNA.11824.1.S1_at | MmugDNA.11824.1 | 2.78  | 2.68  | 0.08 | 0.01 | 1.07  | 0.305024 | 0.407704 | 0.658544 | 0.635135 |
| MmugDNA.11825.1.S1_at | MmugDNA.11825.1 | 4.22  | 4.23  | 0.06 | 0.02 | -1.01 | 0.652462 | 0.839063 | 0.862008 | 0.908268 |
| MmugDNA.1183.1.S1_at  | MmugDNA.1183.1  | 7.5   | 7.45  | 0.07 | 0.04 | 1.03  | 0.419588 | 0.729447 | 0.736366 | 0.843541 |
| MmugDNA.11837.1.S1_at | MmugDNA.11837.1 | 5.86  | 5.97  | 0.19 | 0.26 | -1.08 | 0.182562 | 0.051738 | 0.555631 | 0.272993 |

|                         |                 |       |       |      |      |       |          |          |          |          |
|-------------------------|-----------------|-------|-------|------|------|-------|----------|----------|----------|----------|
| MmugDNA.1184.1.S1_at    | MmugDNA.1184.1  | 6.42  | 6.3   | 0.21 | 0.08 | 1.09  | 0.16477  | 0.198562 | 0.537466 | 0.473391 |
| MmugDNA.11843.1.S1_at   | MmugDNA.11843.1 | 10.21 | 9.68  | 0.67 | 0.08 | 1.44  | 0.243415 | 0.387869 | 0.609316 | 0.622486 |
| MmugDNA.11846.1.S1_at   | MmugDNA.11846.1 | 5.85  | 6.29  | 0.19 | 0.17 | -1.36 | 0.018726 | 0.439392 | 0.298184 | 0.658142 |
| MmugDNA.11848.1.S1_at   | MmugDNA.11848.1 | 12.31 | 12.5  | 0.23 | 0.02 | -1.15 | 0.360831 | 0.246687 | 0.698193 | 0.51603  |
| MmugDNA.11853.1.S1_at   | MmugDNA.11853.1 | 3.4   | 3.41  | 0.06 | 0.09 | -1.01 | 0.359217 | 0.607465 | 0.697162 | 0.766417 |
| MmugDNA.11858.1.S1_at   | MmugDNA.11858.1 | 6.01  | 6.01  | 0.16 | 0.06 | -1    | 0.286863 | 0.213131 | 0.643994 | 0.487054 |
| MmugDNA.11863.1.S1_at   | MmugDNA.11863.1 | 8.68  | 8.75  | 1.26 | 0.12 | -1.05 | 0.884716 | 0.953355 | 0.960159 | 0.97351  |
| MmugDNA.11864.1.S1_at   | MmugDNA.11864.1 | 8.8   | 8.85  | 0.13 | 0.14 | -1.03 | 0.811633 | 0.360005 | 0.931835 | 0.601198 |
| MmugDNA.11868.1.S1_at   | MmugDNA.11868.1 | 10.66 | 10.64 | 0.23 | 0.09 | 1.01  | 0.647502 | 0.815859 | 0.859364 | 0.893781 |
| MmugDNA.11873.1.S1_s_at | MmugDNA.11873.1 | 10.28 | 10.07 | 1.2  | 0.17 | 1.16  | 0.778432 | 0.83327  | 0.918259 | 0.904386 |
| MmugDNA.11879.1.S1_at   | MmugDNA.11879.1 | 9.67  | 10.09 | 0.69 | 0.2  | -1.35 | 0.386137 | 0.198535 | 0.713295 | 0.473391 |
| MmugDNA.11884.1.S1_at   | MmugDNA.11884.1 | 6.03  | 5.81  | 0.23 | 0.06 | 1.17  | 0.081102 | 0.146058 | 0.445078 | 0.420073 |
| MmugDNA.11886.1.S1_at   | MmugDNA.11886.1 | 9.38  | 8.89  | 0.45 | 0.07 | 1.4   | 0.151185 | 0.128726 | 0.52444  | 0.400135 |
| MmugDNA.11889.1.S1_at   | MmugDNA.11889.1 | 8.74  | 8.98  | 0.21 | 0.05 | -1.18 | 0.177169 | 0.012161 | 0.550212 | 0.142648 |
| MmugDNA.11890.1.S1_at   | MmugDNA.11890.1 | 10.12 | 10.1  | 0.49 | 0.22 | 1.02  | 0.241403 | 0.248346 | 0.607596 | 0.5176   |
| MmugDNA.11891.1.S1_at   | MmugDNA.11891.1 | 10.06 | 9.59  | 0.79 | 0.22 | 1.39  | 0.830322 | 0.135087 | 0.939211 | 0.407128 |
| MmugDNA.11893.1.S1_at   | MmugDNA.11893.1 | 10.51 | 10.44 | 0.35 | 0.11 | 1.05  | 0.19332  | 0.244275 | 0.564275 | 0.514184 |
| MmugDNA.11895.1.S1_at   | MmugDNA.11895.1 | 13.03 | 13.03 | 0.06 | 0.03 | 1     | 0.556848 | 0.828428 | 0.814405 | 0.901406 |
| MmugDNA.11896.1.S1_at   | MmugDNA.11896.1 | 5.06  | 5     | 0.07 | 0.06 | 1.04  | 0.162828 | 0.47472  | 0.535867 | 0.681695 |
| MmugDNA.11898.1.S1_at   | MmugDNA.11898.1 | 8     | 8.77  | 0.92 | 0.1  | -1.7  | 0.23007  | 0.106866 | 0.598481 | 0.369489 |
| MmugDNA.119.1.S1_at     | MmugDNA.119.1   | 6.16  | 7.18  | 0.9  | 0.16 | -2.03 | 0.124314 | 0.054536 | 0.498371 | 0.279042 |
| MmugDNA.11911.1.S1_at   | MmugDNA.11911.1 | 3.99  | 3.85  | 0.29 | 0.01 | 1.1   | 0.350145 | 0.618148 | 0.691084 | 0.773929 |
| MmugDNA.11913.1.S1_at   | MmugDNA.11913.1 | 5.52  | 5.24  | 0.15 | 0.04 | 1.22  | 0.031891 | 0.105658 | 0.34281  | 0.367776 |
| MmugDNA.11915.1.S1_at   | MmugDNA.11915.1 | 8.48  | 7.71  | 0.58 | 0.19 | 1.7   | 0.081641 | 0.071749 | 0.445723 | 0.31401  |
| MmugDNA.11918.1.S1_s_at | MmugDNA.11918.1 | 11.43 | 10.89 | 0.31 | 0.18 | 1.46  | 0.150056 | 0.130074 | 0.523569 | 0.401724 |
| MmugDNA.11934.1.S1_at   | MmugDNA.11934.1 | 11.28 | 11.14 | 0.14 | 0.02 | 1.11  | 0.21175  | 0.01801  | 0.582625 | 0.169233 |
| MmugDNA.11937.1.S1_at   | MmugDNA.11937.1 | 4.9   | 4.24  | 0.19 | 0.08 | 1.58  | 0.003298 | 0.1266   | 0.194357 | 0.397214 |
| MmugDNA.11945.1.S1_at   | MmugDNA.11945.1 | 12.04 | 11.63 | 0.05 | 0.18 | 1.33  | 0.009896 | 0.001946 | 0.244171 | 0.065813 |
| MmugDNA.11966.1.S1_at   | MmugDNA.11966.1 | 7.73  | 7.69  | 0.18 | 0.02 | 1.03  | 0.711557 | 0.025539 | 0.887684 | 0.200461 |
| MmugDNA.11970.1.S1_at   | MmugDNA.11970.1 | 8.67  | 9.73  | 0.23 | 0.05 | -2.09 | 0.001807 | 0.000564 | 0.167444 | 0.041049 |
| MmugDNA.11974.1.S1_at   | MmugDNA.11974.1 | 10.24 | 9.84  | 0.72 | 0.13 | 1.32  | 0.323609 | 0.371805 | 0.672279 | 0.610589 |
| MmugDNA.11978.1.S1_at   | MmugDNA.11978.1 | 13.77 | 13.77 | 0.07 | 0.04 | -1    | 0.251409 | 0.277556 | 0.616657 | 0.54152  |
| MmugDNA.11979.1.S1_at   | MmugDNA.11979.1 | 13.48 | 13.4  | 0.04 | 0.08 | 1.06  | 0.4551   | 0.801202 | 0.75733  | 0.885679 |
| MmugDNA.1198.1.S1_at    | MmugDNA.1198.1  | 9.46  | 9.84  | 0.58 | 0.23 | -1.3  | 0.23662  | 0.161418 | 0.603538 | 0.437604 |
| MmugDNA.11985.1.S1_at   | MmugDNA.11985.1 | 11.24 | 11.12 | 0.2  | 0.03 | 1.09  | 0.245603 | 0.329313 | 0.611179 | 0.578703 |
| MmugDNA.11989.1.S1_at   | MmugDNA.11989.1 | 5.5   | 5.09  | 0.28 | 0.3  | 1.34  | 0.336902 | 0.216158 | 0.682166 | 0.489701 |
| MmugDNA.11993.1.S1_at   | MmugDNA.11993.1 | 10.92 | 10.22 | 0.05 | 0.11 | 1.62  | 0.000597 | 0.001423 | 0.143137 | 0.057604 |
| MmugDNA.11998.1.S1_at   | MmugDNA.11998.1 | 11.27 | 10.21 | 0.35 | 0.21 | 2.1   | 0.012738 | 0.001752 | 0.264285 | 0.063106 |
| MmugDNA.12003.1.S1_s_at | MmugDNA.12003.1 | 4.98  | 4.93  | 0.27 | 0.11 | 1.04  | 0.800815 | 0.699396 | 0.927161 | 0.825344 |
| MmugDNA.12007.1.S1_at   | MmugDNA.12007.1 | 8.72  | 8.11  | 0.33 | 0.24 | 1.52  | 0.200056 | 0.022987 | 0.571864 | 0.189624 |
| MmugDNA.12008.1.S1_at   | MmugDNA.12008.1 | 6.08  | 5.97  | 0.06 | 0.1  | 1.08  | 0.069744 | 0.338198 | 0.427657 | 0.58536  |
| MmugDNA.1201.1.S1_at    | MmugDNA.1201.1  | 8.56  | 7.58  | 1.06 | 0.38 | 1.98  | 0.728489 | 0.660932 | 0.895243 | 0.801637 |
| MmugDNA.12013.1.S1_at   | MmugDNA.12013.1 | 3.82  | 3.93  | 0.24 | 0.11 | -1.09 | 0.901515 | 0.438501 | 0.966591 | 0.657459 |

|                       |                 |       |       |      |      |       |          |          |          |          |
|-----------------------|-----------------|-------|-------|------|------|-------|----------|----------|----------|----------|
| MmugDNA.12016.1.S1_at | MmugDNA.12016.1 | 11.64 | 10.93 | 0.08 | 0.11 | 1.64  | 0.001349 | 0.000088 | 0.159096 | 0.027016 |
| MmugDNA.12019.1.S1_at | MmugDNA.12019.1 | 8.61  | 8.89  | 0.18 | 0.09 | -1.21 | 0.11762  | 0.000609 | 0.491008 | 0.042176 |
| MmugDNA.12026.1.S1_at | MmugDNA.12026.1 | 6.14  | 6.09  | 0.09 | 0.03 | 1.04  | 0.122933 | 0.123707 | 0.496359 | 0.393843 |
| MmugDNA.12033.1.S1_at | MmugDNA.12033.1 | 10.34 | 10.4  | 0.43 | 0.1  | -1.05 | 0.977124 | 0.597118 | 0.992615 | 0.760092 |
| MmugDNA.12046.1.S1_at | MmugDNA.12046.1 | 3.91  | 3.79  | 0.05 | 0.08 | 1.09  | 0.024198 | 0.089804 | 0.317812 | 0.34404  |
| MmugDNA.1206.1.S1_at  | MmugDNA.1206.1  | 7.81  | 7.9   | 0.16 | 0.11 | -1.07 | 0.783024 | 0.835891 | 0.920107 | 0.906115 |
| MmugDNA.12060.1.S1_at | MmugDNA.12060.1 | 9.37  | 9.68  | 0.12 | 0.13 | -1.24 | 0.043542 | 0.405352 | 0.372168 | 0.633693 |
| MmugDNA.12065.1.S1_at | MmugDNA.12065.1 | 9.98  | 10.19 | 2.04 | 0.3  | -1.15 | 0.705754 | 0.134901 | 0.885355 | 0.406878 |
| MmugDNA.12067.1.S1_at | MmugDNA.12067.1 | 7.27  | 7.19  | 0.48 | 0.26 | 1.06  | 0.657313 | 0.519102 | 0.86397  | 0.710813 |
| MmugDNA.12069.1.S1_at | MmugDNA.12069.1 | 10.37 | 11.17 | 0.6  | 0.05 | -1.73 | 0.07788  | 0.036034 | 0.439987 | 0.234255 |
| MmugDNA.12070.1.S1_at | MmugDNA.12070.1 | 4.74  | 4.78  | 0.3  | 0.05 | -1.03 | 0.97982  | 0.135679 | 0.993597 | 0.407841 |
| MmugDNA.12071.1.S1_at | MmugDNA.12071.1 | 12.26 | 12.38 | 0.14 | 0.1  | -1.09 | 0.399099 | 0.000766 | 0.722883 | 0.04544  |
| MmugDNA.12073.1.S1_at | MmugDNA.12073.1 | 7.78  | 7.63  | 0.05 | 0.07 | 1.11  | 0.036651 | 0.443835 | 0.355252 | 0.661517 |
| MmugDNA.12075.1.S1_at | MmugDNA.12075.1 | 9.19  | 10.2  | 0.26 | 0.09 | -2.01 | 0.004551 | 0.000032 | 0.201014 | 0.022097 |
| MmugDNA.12082.1.S1_at | MmugDNA.12082.1 | 7.05  | 7.6   | 0.36 | 0.13 | -1.47 | 0.195678 | 0.048641 | 0.565981 | 0.265613 |
| MmugDNA.12087.1.S1_at | MmugDNA.12087.1 | 9.28  | 9.62  | 0.22 | 0.09 | -1.26 | 0.047195 | 0.285839 | 0.379749 | 0.547484 |
| MmugDNA.12090.1.S1_at | MmugDNA.12090.1 | 6.3   | 6.04  | 0.17 | 0.09 | 1.2   | 0.080015 | 0.006431 | 0.443256 | 0.108902 |
| MmugDNA.12091.1.S1_at | MmugDNA.12091.1 | 10.1  | 9.12  | 0.36 | 0.12 | 1.97  | 0.018738 | 0.007513 | 0.298277 | 0.116291 |
| MmugDNA.12094.1.S1_at | MmugDNA.12094.1 | 4.92  | 5.58  | 1.09 | 0.4  | -1.57 | 0.432485 | 0.16287  | 0.743915 | 0.438966 |
| MmugDNA.12109.1.S1_at | MmugDNA.12109.1 | 9.15  | 9.45  | 0.3  | 0.42 | -1.23 | 0.263618 | 0.005229 | 0.625586 | 0.100184 |
| MmugDNA.12110.1.S1_at | MmugDNA.12110.1 | 3.25  | 3.48  | 0.18 | 0.11 | -1.17 | 0.620719 | 0.478239 | 0.847208 | 0.684243 |
| MmugDNA.12114.1.S1_at | MmugDNA.12114.1 | 10.13 | 10.62 | 0.07 | 0.11 | -1.4  | 0.002107 | 0.004542 | 0.174757 | 0.094165 |
| MmugDNA.12128.1.S1_at | MmugDNA.12128.1 | 9.1   | 8.88  | 0.2  | 0.02 | 1.17  | 0.108553 | 0.161172 | 0.480777 | 0.437346 |
| MmugDNA.12134.1.S1_at | MmugDNA.12134.1 | 11.99 | 11.6  | 0.23 | 0.15 | 1.31  | 0.061082 | 0.00911  | 0.409957 | 0.125983 |
| MmugDNA.12136.1.S1_at | MmugDNA.12136.1 | 7.04  | 7.17  | 0.54 | 0.21 | -1.1  | 0.228609 | 0.322723 | 0.597571 | 0.574043 |
| MmugDNA.12139.1.S1_at | MmugDNA.12139.1 | 6.37  | 5.96  | 0.18 | 0.08 | 1.32  | 0.024812 | 0.012454 | 0.31992  | 0.14417  |
| MmugDNA.12140.1.S1_at | MmugDNA.12140.1 | 8.76  | 8.95  | 0.59 | 0.08 | -1.13 | 0.182878 | 0.13238  | 0.555686 | 0.404344 |
| MmugDNA.12141.1.S1_at | MmugDNA.12141.1 | 5.33  | 5.75  | 0.41 | 0.28 | -1.33 | 0.384976 | 0.748985 | 0.712306 | 0.85406  |
| MmugDNA.12148.1.S1_at | MmugDNA.12148.1 | 5.68  | 5.29  | 0.19 | 0.16 | 1.31  | 0.223156 | 0.280333 | 0.592569 | 0.543556 |
| MmugDNA.12150.1.S1_at | MmugDNA.12150.1 | 5.29  | 5.32  | 0.36 | 0.06 | -1.02 | 0.3754   | 0.61804  | 0.706463 | 0.773852 |
| MmugDNA.12151.1.S1_at | MmugDNA.12151.1 | 8.22  | 8.9   | 0.4  | 0.2  | -1.6  | 0.092678 | 0.00118  | 0.461192 | 0.053826 |
| MmugDNA.12153.1.S1_at | MmugDNA.12153.1 | 6.76  | 6.81  | 0.55 | 0.15 | -1.03 | 0.344667 | 0.479789 | 0.686997 | 0.68541  |
| MmugDNA.12156.1.S1_at | MmugDNA.12156.1 | 8.57  | 8.75  | 0.3  | 0.09 | -1.13 | 0.201308 | 0.078569 | 0.57304  | 0.325285 |
| MmugDNA.12161.1.S1_at | MmugDNA.12161.1 | 12.77 | 12.78 | 0.08 | 0.02 | -1.01 | 0.848865 | 0.057065 | 0.946889 | 0.284945 |
| MmugDNA.12165.1.S1_at | MmugDNA.12165.1 | 11.36 | 11.54 | 0.15 | 0.1  | -1.14 | 0.035941 | 0.089017 | 0.353759 | 0.342876 |
| MmugDNA.12166.1.S1_at | MmugDNA.12166.1 | 11.12 | 11.1  | 0.48 | 0.11 | 1.01  | 0.549391 | 0.475404 | 0.810299 | 0.682125 |
| MmugDNA.1217.1.S1_at  | MmugDNA.1217.1  | 5.62  | 8.45  | 0.46 | 0.29 | -7.1  | 0.001182 | 0.000068 | 0.156386 | 0.025805 |
| MmugDNA.12175.1.S1_at | MmugDNA.12175.1 | 8.74  | 8.65  | 0.09 | 0.19 | 1.07  | 0.50184  | 0.000093 | 0.783444 | 0.027285 |
| MmugDNA.12184.1.S1_at | MmugDNA.12184.1 | 3.66  | 3.65  | 0.02 | 0.02 | 1.01  | 0.601256 | 0.230435 | 0.838121 | 0.502204 |
| MmugDNA.12190.1.S1_at | MmugDNA.12190.1 | 6.39  | 6.37  | 0.08 | 0.05 | 1.01  | 0.25293  | 0.373535 | 0.617861 | 0.612327 |
| MmugDNA.12193.1.S1_at | MmugDNA.12193.1 | 10.53 | 10.86 | 0.14 | 0.16 | -1.26 | 0.06927  | 0.00116  | 0.426757 | 0.053615 |
| MmugDNA.12200.1.S1_at | MmugDNA.12200.1 | 5.7   | 6.1   | 0.09 | 0.39 | -1.32 | 0.489809 | 0.576463 | 0.776518 | 0.747241 |
| MmugDNA.12202.1.S1_at | MmugDNA.12202.1 | 8.21  | 8.67  | 0.21 | 0.15 | -1.38 | 0.036399 | 0.041033 | 0.35477  | 0.247319 |

|                        |                 |       |       |      |      |       |          |          |          |          |
|------------------------|-----------------|-------|-------|------|------|-------|----------|----------|----------|----------|
| MmugDNA.12206.1.S1_at  | MmugDNA.12206.1 | 9.5   | 9.13  | 0.23 | 0.14 | 1.29  | 0.379957 | 0.02336  | 0.709317 | 0.191577 |
| MmugDNA.12215.1.S1_at  | MmugDNA.12215.1 | 4.8   | 5.25  | 0.81 | 0.29 | -1.36 | 0.77402  | 0.556394 | 0.916101 | 0.734507 |
| MmugDNA.12218.1.S1_at  | MmugDNA.12218.1 | 9.55  | 10.35 | 0.21 | 0.08 | -1.74 | 0.004833 | 0.000768 | 0.202685 | 0.04544  |
| MmugDNA.12219.1.S1_at  | MmugDNA.12219.1 | 2.68  | 2.6   | 0.06 | 0.05 | 1.05  | 0.311712 | 0.094959 | 0.663471 | 0.352054 |
| MmugDNA.1222.1.S1_at   | MmugDNA.1222.1  | 4.92  | 4.87  | 0.05 | 0.08 | 1.04  | 0.197377 | 0.347749 | 0.568435 | 0.592107 |
| MmugDNA.12222.1.S1_at  | MmugDNA.12222.1 | 3.83  | 3.76  | 0.19 | 0.17 | 1.05  | 0.944693 | 0.186408 | 0.980778 | 0.46226  |
| MmugDNA.12226.1.S1_at  | MmugDNA.12226.1 | 10.96 | 10.8  | 0.34 | 0.07 | 1.12  | 0.200675 | 0.457852 | 0.572447 | 0.670983 |
| MmugDNA.12228.1.S1_at  | MmugDNA.12228.1 | 8.23  | 7.79  | 0.31 | 0.09 | 1.35  | 0.023953 | 0.018421 | 0.317529 | 0.170755 |
| MmugDNA.12229.1.S1_at  | MmugDNA.12229.1 | 9.55  | 9.45  | 0.37 | 0.14 | 1.07  | 0.483321 | 0.636888 | 0.773041 | 0.786441 |
| MmugDNA.1223.1.S1_at   | MmugDNA.1223.1  | 9.94  | 10.58 | 0.08 | 0.1  | -1.56 | 0.001135 | 0.00136  | 0.156386 | 0.056687 |
| MmugDNA.12234.1.S1_at  | MmugDNA.12234.1 | 10.45 | 10.24 | 0.13 | 0.06 | -1.16 | 0.104897 | 0.221799 | 0.476242 | 0.494948 |
| MmugDNA.12239.1.S1_at  | MmugDNA.12239.1 | 9.61  | 9.4   | 0.34 | 0.35 | 1.16  | 0.230725 | 0.039814 | 0.598905 | 0.244569 |
| MmugDNA.1225.1.S1_x_at | MmugDNA.1225.1  | 11.81 | 12.03 | 0.12 | 0.15 | -1.16 | 0.125504 | 0.240297 | 0.499523 | 0.510871 |
| MmugDNA.12251.1.S1_at  | MmugDNA.12251.1 | 11.96 | 12.29 | 0.39 | 0.03 | -1.25 | 0.563768 | 0.496442 | 0.818372 | 0.69607  |
| MmugDNA.12262.1.S1_at  | MmugDNA.12262.1 | 11.2  | 11.64 | 0.16 | 0.02 | -1.36 | 0.01653  | 0.032944 | 0.287478 | 0.224663 |
| MmugDNA.12264.1.S1_at  | MmugDNA.12264.1 | 3.96  | 3.88  | 0.23 | 0.04 | 1.05  | 0.489249 | 0.411509 | 0.776032 | 0.638215 |
| MmugDNA.1227.1.S1_s_at | MmugDNA.1227.1  | 9.29  | 9.29  | 0.46 | 0.21 | -1    | 0.720273 | 0.119265 | 0.891488 | 0.387769 |
| MmugDNA.12277.1.S1_at  | MmugDNA.12277.1 | 11.62 | 11.25 | 0.33 | 0.28 | 1.29  | 0.567946 | 0.00183  | 0.820586 | 0.064224 |
| MmugDNA.12290.1.S1_at  | MmugDNA.12290.1 | 5.04  | 4.86  | 0.13 | 0.07 | 1.13  | 0.117875 | 0.130094 | 0.491287 | 0.401724 |
| MmugDNA.12293.1.S1_at  | MmugDNA.12293.1 | 7.55  | 7.76  | 0.13 | 0.17 | -1.15 | 0.133086 | 0.238688 | 0.507433 | 0.509376 |
| MmugDNA.12296.1.S1_at  | MmugDNA.12296.1 | 7.86  | 7.58  | 0.09 | 0.05 | 1.22  | 0.018528 | 0.012928 | 0.297536 | 0.146343 |
| MmugDNA.12302.1.S1_at  | MmugDNA.12302.1 | 11.83 | 12    | 0.16 | 0.03 | -1.12 | 0.049423 | 0.102552 | 0.385474 | 0.362904 |
| MmugDNA.12305.1.S1_at  | MmugDNA.12305.1 | 12.93 | 13.12 | 0.11 | 0.01 | -1.14 | 0.046506 | 0.001733 | 0.378066 | 0.062895 |
| MmugDNA.12314.1.S1_at  | MmugDNA.12314.1 | 11.87 | 11.97 | 0.22 | 0.07 | -1.08 | 0.731761 | 0.05429  | 0.896887 | 0.278485 |
| MmugDNA.12315.1.S1_at  | MmugDNA.12315.1 | 7.1   | 6.95  | 0.08 | 0.03 | 1.11  | 0.091071 | 0.204571 | 0.458927 | 0.478946 |
| MmugDNA.12321.1.S1_at  | MmugDNA.12321.1 | 12.54 | 12.64 | 0.21 | 0.03 | -1.07 | 0.88225  | 0.061798 | 0.959161 | 0.295352 |
| MmugDNA.12328.1.S1_at  | MmugDNA.12328.1 | 11.21 | 11.17 | 0.07 | 0.04 | 1.03  | 0.1763   | 0.130519 | 0.549336 | 0.402373 |
| MmugDNA.12334.1.S1_at  | MmugDNA.12334.1 | 9.9   | 9.99  | 0.19 | 0.16 | -1.06 | 0.994733 | 0.480335 | 0.998037 | 0.68574  |
| MmugDNA.12342.1.S1_at  | MmugDNA.12342.1 | 6.78  | 6.42  | 0.19 | 0.29 | 1.28  | 0.151602 | 0.699433 | 0.524628 | 0.825365 |
| MmugDNA.12349.1.S1_at  | MmugDNA.12349.1 | 4.2   | 4.22  | 0.14 | 0.41 | -1.01 | 0.432505 | 0.33306  | 0.743915 | 0.581374 |
| MmugDNA.12350.1.S1_at  | MmugDNA.12350.1 | 6.51  | 6.41  | 0.11 | 0.05 | 1.08  | 0.122069 | 0.400805 | 0.495677 | 0.630649 |
| MmugDNA.12352.1.S1_at  | MmugDNA.12352.1 | 3.37  | 3.3   | 0.12 | 0.14 | 1.05  | 0.751889 | 0.946999 | 0.906228 | 0.969952 |
| MmugDNA.12353.1.S1_at  | MmugDNA.12353.1 | 5.45  | 6.24  | 0.26 | 0.26 | -1.73 | 0.029948 | 0.00347  | 0.336426 | 0.084806 |
| MmugDNA.12354.1.S1_at  | MmugDNA.12354.1 | 5.76  | 5.65  | 0.49 | 0.15 | 1.08  | 0.280038 | 0.277762 | 0.638871 | 0.541664 |
| MmugDNA.12361.1.S1_at  | MmugDNA.12361.1 | 5.83  | 5.79  | 0.07 | 0.09 | 1.03  | 0.629662 | 0.071398 | 0.851663 | 0.313518 |
| MmugDNA.12365.1.S1_at  | MmugDNA.12365.1 | 9.61  | 9.35  | 0.53 | 0.06 | 1.2   | 0.316532 | 0.103584 | 0.666494 | 0.364346 |
| MmugDNA.12371.1.S1_at  | MmugDNA.12371.1 | 6.02  | 6.62  | 0.74 | 0.41 | -1.52 | 0.40731  | 0.610903 | 0.728579 | 0.768948 |
| MmugDNA.12373.1.S1_at  | MmugDNA.12373.1 | 6.39  | 6.32  | 0.18 | 0.16 | 1.05  | 0.278208 | 0.569954 | 0.637417 | 0.742751 |
| MmugDNA.12374.1.S1_at  | MmugDNA.12374.1 | 10.22 | 9.36  | 0.32 | 0.09 | 1.82  | 0.008478 | 0.001755 | 0.234441 | 0.063111 |
| MmugDNA.12376.1.S1_at  | MmugDNA.12376.1 | 11.5  | 11.4  | 0.32 | 0.12 | 1.07  | 0.70138  | 0.590166 | 0.883866 | 0.756117 |
| MmugDNA.12382.1.S1_at  | MmugDNA.12382.1 | 10.97 | 11.23 | 0.52 | 0.1  | -1.2  | 0.727217 | 0.509094 | 0.894637 | 0.703993 |
| MmugDNA.12383.1.S1_at  | MmugDNA.12383.1 | 10.32 | 10.37 | 0.25 | 0.05 | -1.03 | 0.536625 | 0.534833 | 0.802417 | 0.720557 |
| MmugDNA.12386.1.S1_at  | MmugDNA.12386.1 | 9.81  | 9.57  | 0.28 | 0.19 | 1.18  | 0.211679 | 0.195417 | 0.582625 | 0.470253 |

|                         |                 |       |       |      |      |       |          |          |          |          |
|-------------------------|-----------------|-------|-------|------|------|-------|----------|----------|----------|----------|
| MmugDNA.12390.1.S1_s_at | MmugDNA.12390.1 | 13.04 | 12.86 | 0.09 | 0.03 | 1.13  | 0.020877 | 0.012196 | 0.305672 | 0.142872 |
| MmugDNA.12391.1.S1_at   | MmugDNA.12391.1 | 4.63  | 4.61  | 0.05 | 0.08 | 1.01  | 0.608409 | 0.468566 | 0.841222 | 0.677755 |
| MmugDNA.12393.1.S1_at   | MmugDNA.12393.1 | 9.03  | 9.65  | 0.55 | 0.16 | -1.53 | 0.306764 | 0.036473 | 0.659706 | 0.235458 |
| MmugDNA.12399.1.S1_at   | MmugDNA.12399.1 | 12.03 | 12.21 | 0.03 | 0.02 | -1.13 | 0.001578 | 0.015577 | 0.161959 | 0.158192 |
| MmugDNA.12408.1.S1_at   | MmugDNA.12408.1 | 7.02  | 6.92  | 0.22 | 0.09 | 1.07  | 0.526535 | 0.623357 | 0.79668  | 0.777726 |
| MmugDNA.12426.1.S1_at   | MmugDNA.12426.1 | 7.84  | 8.06  | 0.16 | 0.1  | -1.17 | 0.120301 | 0.1777   | 0.493575 | 0.454073 |
| MmugDNA.12436.1.S1_at   | MmugDNA.12436.1 | 6.81  | 7.99  | 0.47 | 0.26 | -2.26 | 0.042737 | 0.055053 | 0.370345 | 0.280138 |
| MmugDNA.1244.1.S1_at    | MmugDNA.1244.1  | 8.44  | 8.99  | 0.89 | 0.16 | -1.46 | 0.804249 | 0.943265 | 0.928797 | 0.967814 |
| MmugDNA.12443.1.S1_at   | MmugDNA.12443.1 | 9.12  | 8.86  | 0.89 | 0.15 | 1.19  | 0.699987 | 0.217449 | 0.88338  | 0.491035 |
| MmugDNA.12446.1.S1_at   | MmugDNA.12446.1 | 13.28 | 13.55 | 0.19 | 0.1  | -1.2  | 0.061966 | 0.009525 | 0.411707 | 0.128521 |
| MmugDNA.12450.1.S1_s_at | MmugDNA.12450.1 | 8.08  | 8.02  | 0.04 | 0.06 | 1.05  | 0.298222 | 0.862838 | 0.653059 | 0.922029 |
| MmugDNA.12450.1.S1_x_at | MmugDNA.12450.1 | 5.59  | 5.59  | 0.02 | 0.03 | -1    | 0.265071 | 0.794756 | 0.626397 | 0.881719 |
| MmugDNA.12459.1.S1_at   | MmugDNA.12459.1 | 6.64  | 6.82  | 0.45 | 0.19 | -1.14 | 0.52736  | 0.457529 | 0.797084 | 0.670864 |
| MmugDNA.12461.1.S1_at   | MmugDNA.12461.1 | 8.58  | 8.53  | 0.23 | 0.17 | 1.04  | 0.610133 | 0.805127 | 0.841839 | 0.887962 |
| MmugDNA.12465.1.S1_at   | MmugDNA.12465.1 | 4.51  | 4.39  | 0.22 | 0.19 | 1.09  | 0.959458 | 0.581363 | 0.98678  | 0.750417 |
| MmugDNA.12469.1.S1_at   | MmugDNA.12469.1 | 5.15  | 5.11  | 0.11 | 0.18 | 1.03  | 0.796122 | 0.056186 | 0.925049 | 0.282948 |
| MmugDNA.12478.1.S1_at   | MmugDNA.12478.1 | 12.85 | 12.71 | 0.06 | 0.1  | 1.1   | 0.093464 | 0.009402 | 0.462593 | 0.127832 |
| MmugDNA.1248.1.S1_at    | MmugDNA.1248.1  | 8.38  | 8.53  | 0.33 | 0.12 | -1.11 | 0.615669 | 0.121352 | 0.844574 | 0.390389 |
| MmugDNA.12480.1.S1_at   | MmugDNA.12480.1 | 12.31 | 12.07 | 0.23 | 0.12 | 1.18  | 0.669121 | 0.581872 | 0.869371 | 0.750784 |
| MmugDNA.12483.1.S1_at   | MmugDNA.12483.1 | 4.6   | 4.5   | 0.28 | 0.12 | 1.07  | 0.396598 | 0.724573 | 0.721517 | 0.840552 |
| MmugDNA.12484.1.S1_at   | MmugDNA.12484.1 | 10.09 | 10.03 | 0.29 | 0.05 | 1.04  | 0.264847 | 0.405319 | 0.626252 | 0.633679 |
| MmugDNA.12487.1.S1_at   | MmugDNA.12487.1 | 6.84  | 7.36  | 0.52 | 0.04 | -1.43 | 0.498536 | 0.798738 | 0.781796 | 0.884072 |
| MmugDNA.12490.1.S1_at   | MmugDNA.12490.1 | 7.56  | 7.31  | 0.48 | 0.02 | 1.19  | 0.69098  | 0.003668 | 0.879715 | 0.086563 |
| MmugDNA.125.1.S1_at     | MmugDNA.125.1   | 5.41  | 5.83  | 0.28 | 0.1  | -1.33 | 0.079631 | 0.081393 | 0.442511 | 0.329571 |
| MmugDNA.12501.1.S1_at   | MmugDNA.12501.1 | 8.88  | 8.99  | 0.05 | 0.12 | -1.08 | 0.070097 | 0.150996 | 0.428522 | 0.425628 |
| MmugDNA.12503.1.S1_at   | MmugDNA.12503.1 | 4.35  | 4.23  | 0    | 0.08 | 1.09  | 0.056476 | 0.092961 | 0.400268 | 0.349059 |
| MmugDNA.12505.1.S1_at   | MmugDNA.12505.1 | 12.7  | 12.29 | 0.03 | 0.08 | 1.33  | 0.001017 | 0.000276 | 0.155374 | 0.034199 |
| MmugDNA.1251.1.S1_at    | MmugDNA.1251.1  | 12.05 | 11.42 | 0.33 | 0.14 | 1.55  | 0.075536 | 0.281537 | 0.436722 | 0.54464  |
| MmugDNA.12511.1.S1_at   | MmugDNA.12511.1 | 4.65  | 4.45  | 0.38 | 0.27 | 1.14  | 0.911095 | 0.02035  | 0.969818 | 0.179112 |
| MmugDNA.12515.1.S1_at   | MmugDNA.12515.1 | 3.88  | 3.83  | 0.18 | 0.14 | 1.03  | 0.772828 | 0.937685 | 0.91551  | 0.964687 |
| MmugDNA.12524.1.S1_at   | MmugDNA.12524.1 | 9.38  | 8.19  | 0.75 | 0.13 | 2.29  | 0.02079  | 0.134967 | 0.305611 | 0.406951 |
| MmugDNA.12529.1.S1_at   | MmugDNA.12529.1 | 5.41  | 4.77  | 0.32 | 0.08 | 1.57  | 0.064338 | 0.048483 | 0.418055 | 0.265407 |
| MmugDNA.12530.1.S1_at   | MmugDNA.12530.1 | 11.14 | 11.4  | 0.17 | 0.07 | -1.2  | 0.072984 | 0.240572 | 0.433769 | 0.511229 |
| MmugDNA.12533.1.S1_at   | MmugDNA.12533.1 | 5.05  | 5.03  | 0.09 | 0.14 | 1.02  | 0.383418 | 0.803276 | 0.711306 | 0.88676  |
| MmugDNA.12535.1.S1_at   | MmugDNA.12535.1 | 8.36  | 8.83  | 0.57 | 0.08 | -1.38 | 0.679373 | 0.668017 | 0.874274 | 0.805702 |
| MmugDNA.12539.1.S1_s_at | MmugDNA.12539.1 | 6.39  | 6.47  | 0.29 | 0.21 | -1.06 | 0.68481  | 0.310671 | 0.876588 | 0.565787 |
| MmugDNA.12540.1.S1_at   | MmugDNA.12540.1 | 9.43  | 10.24 | 0.08 | 0.13 | -1.75 | 0.000811 | 0.016496 | 0.15004  | 0.162577 |
| MmugDNA.12543.1.S1_at   | MmugDNA.12543.1 | 11.84 | 10.83 | 0.17 | 0.31 | 2.02  | 0.009106 | 0.012798 | 0.241306 | 0.145832 |
| MmugDNA.12544.1.S1_at   | MmugDNA.12544.1 | 8.98  | 8.51  | 0.72 | 0.37 | 1.39  | 0.143685 | 0.139851 | 0.519054 | 0.413131 |
| MmugDNA.12546.1.S1_at   | MmugDNA.12546.1 | 13.1  | 12.92 | 0.07 | 0.09 | 1.13  | 0.035081 | 0.034725 | 0.35097  | 0.230506 |
| MmugDNA.12548.1.S1_at   | MmugDNA.12548.1 | 12.48 | 12.46 | 0.05 | 0.03 | 1.02  | 0.498585 | 0.016503 | 0.781804 | 0.162611 |
| MmugDNA.12549.1.S1_at   | MmugDNA.12549.1 | 10.12 | 10.02 | 0.21 | 0.19 | 1.07  | 0.264496 | 0.262363 | 0.626029 | 0.528655 |
| MmugDNA.12550.1.S1_at   | MmugDNA.12550.1 | 3.89  | 3.95  | 0.08 | 0.09 | -1.04 | 0.1724   | 0.23052  | 0.545696 | 0.502251 |



|                         |                 |       |       |      |      |       |          |          |          |          |
|-------------------------|-----------------|-------|-------|------|------|-------|----------|----------|----------|----------|
| MmugDNA.12551.1.S1_at   | MmugDNA.12551.1 | 9.38  | 8.63  | 2.63 | 0.23 | 1.68  | 0.653677 | 0.514608 | 0.862462 | 0.707767 |
| MmugDNA.12551.1.S1_s_at | MmugDNA.12551.1 | 4.62  | 4.03  | 0.89 | 0.05 | 1.51  | 0.315945 | 0.285665 | 0.666243 | 0.547395 |
| MmugDNA.12555.1.S1_at   | MmugDNA.12555.1 | 5.79  | 5.77  | 0.07 | 0.02 | 1.01  | 0.843178 | 0.220864 | 0.944529 | 0.494262 |
| MmugDNA.12556.1.S1_at   | MmugDNA.12556.1 | 3.56  | 3.59  | 0.18 | 0.06 | -1.02 | 0.72338  | 0.833343 | 0.892813 | 0.904427 |
| MmugDNA.12557.1.S1_at   | MmugDNA.12557.1 | 6.36  | 6.38  | 0.27 | 0.32 | -1.01 | 0.761756 | 0.38259  | 0.910682 | 0.618766 |
| MmugDNA.12559.1.S1_at   | MmugDNA.12559.1 | 9.49  | 9.74  | 0.08 | 0.07 | -1.19 | 0.029005 | 0.08776  | 0.333482 | 0.341027 |
| MmugDNA.12560.1.S1_at   | MmugDNA.12560.1 | 8.66  | 8.21  | 0.92 | 0.7  | 1.36  | 0.526328 | 0.134647 | 0.796483 | 0.406629 |
| MmugDNA.12563.1.S1_at   | MmugDNA.12563.1 | 4.91  | 4.8   | 0.09 | 0.04 | 1.08  | 0.14582  | 0.318517 | 0.520572 | 0.571239 |
| MmugDNA.12564.1.S1_at   | MmugDNA.12564.1 | 8.2   | 8.57  | 0.53 | 0.09 | -1.29 | 0.587826 | 0.611384 | 0.83181  | 0.769286 |
| MmugDNA.12567.1.S1_at   | MmugDNA.12567.1 | 11.9  | 12.38 | 0.17 | 0.09 | -1.39 | 0.009405 | 0.012497 | 0.241869 | 0.144302 |
| MmugDNA.12568.1.S1_at   | MmugDNA.12568.1 | 7.37  | 7.88  | 0.12 | 0.05 | -1.43 | 0.002741 | 0.00008  | 0.185352 | 0.027016 |
| MmugDNA.1257.1.S1_at    | MmugDNA.1257.1  | 11.43 | 11.56 | 0.27 | 0.06 | -1.1  | 0.31177  | 0.027823 | 0.66351  | 0.208337 |
| MmugDNA.12570.1.S1_at   | MmugDNA.12570.1 | 8.42  | 8.68  | 0.54 | 0.23 | -1.2  | 0.443056 | 0.011652 | 0.750521 | 0.139826 |
| MmugDNA.12571.1.S1_at   | MmugDNA.12571.1 | 8.15  | 8.11  | 0.09 | 0.03 | 1.03  | 0.326184 | 0.907674 | 0.67374  | 0.947753 |
| MmugDNA.12573.1.S1_at   | MmugDNA.12573.1 | 12    | 11.76 | 0.14 | 0.12 | 1.17  | 0.024624 | 0.039764 | 0.319208 | 0.244402 |
| MmugDNA.12577.1.S1_at   | MmugDNA.12577.1 | 8.55  | 8.03  | 0.36 | 0.15 | 1.43  | 0.077884 | 0.072078 | 0.439987 | 0.314519 |
| MmugDNA.12587.1.S1_at   | MmugDNA.12587.1 | 3.52  | 3.42  | 0.13 | 0.14 | 1.06  | 0.299945 | 0.331411 | 0.65442  | 0.580076 |
| MmugDNA.12592.1.S1_at   | MmugDNA.12592.1 | 12.41 | 12.5  | 0.29 | 0.03 | -1.07 | 0.516086 | 0.579569 | 0.791221 | 0.749192 |
| MmugDNA.12593.1.S1_at   | MmugDNA.12593.1 | 12.19 | 12.09 | 0.17 | 0.09 | 1.07  | 0.24659  | 0.282821 | 0.61204  | 0.545524 |
| MmugDNA.12595.1.S1_at   | MmugDNA.12595.1 | 12.52 | 12.57 | 0.14 | 0.07 | -1.04 | 0.325808 | 0.329467 | 0.673486 | 0.578781 |
| MmugDNA.12596.1.S1_at   | MmugDNA.12596.1 | 6.54  | 6.79  | 0.32 | 0.22 | -1.19 | 0.131873 | 0.146883 | 0.506278 | 0.420934 |
| MmugDNA.12598.1.S1_at   | MmugDNA.12598.1 | 9.71  | 9.49  | 0.21 | 0.14 | 1.17  | 0.474857 | 0.353299 | 0.768229 | 0.596477 |
| MmugDNA.12599.1.S1_at   | MmugDNA.12599.1 | 11.87 | 11.58 | 0.18 | 0.09 | 1.23  | 0.043777 | 0.045348 | 0.372554 | 0.257279 |
| MmugDNA.126.1.S1_at     | MmugDNA.126.1   | 8.26  | 8.14  | 0.61 | 0.06 | 1.08  | 0.575288 | 0.796846 | 0.824614 | 0.882814 |
| MmugDNA.1260.1.S1_at    | MmugDNA.1260.1  | 9.87  | 9.31  | 0.58 | 0.12 | 1.47  | 0.142217 | 0.167053 | 0.517202 | 0.443535 |
| MmugDNA.12602.1.S1_at   | MmugDNA.12602.1 | 8.94  | 8.41  | 0.17 | 0.14 | 1.44  | 0.010165 | 0.017586 | 0.246929 | 0.167721 |
| MmugDNA.12604.1.S1_at   | MmugDNA.12604.1 | 9.3   | 9.99  | 0.1  | 0.11 | -1.61 | 0.001372 | 0.04676  | 0.159096 | 0.260948 |
| MmugDNA.12610.1.S1_at   | MmugDNA.12610.1 | 10.78 | 10.5  | 0.14 | 0.26 | 1.21  | 0.458556 | 0.506849 | 0.758944 | 0.702624 |
| MmugDNA.12611.1.S1_at   | MmugDNA.12611.1 | 10.51 | 10.5  | 0.34 | 0.03 | 1.01  | 0.944296 | 0.424342 | 0.980654 | 0.646926 |
| MmugDNA.12617.1.S1_at   | MmugDNA.12617.1 | 10.27 | 10.97 | 0.36 | 0.07 | -1.62 | 0.06001  | 0.072779 | 0.407399 | 0.315651 |
| MmugDNA.1262.1.S1_at    | MmugDNA.1262.1  | 4.63  | 4.64  | 0.21 | 0.14 | -1    | 0.531869 | 0.6125   | 0.799982 | 0.770071 |
| MmugDNA.12622.1.S1_at   | MmugDNA.12622.1 | 6.12  | 7.01  | 0.94 | 0.07 | -1.85 | 0.139089 | 0.305951 | 0.514459 | 0.562732 |
| MmugDNA.12623.1.S1_at   | MmugDNA.12623.1 | 9.23  | 9.81  | 0.39 | 0.02 | -1.49 | 0.06675  | 0.011785 | 0.422643 | 0.140575 |
| MmugDNA.12624.1.S1_at   | MmugDNA.12624.1 | 10.24 | 10.56 | 0.86 | 0.22 | -1.25 | 0.632451 | 0.210249 | 0.852958 | 0.484073 |
| MmugDNA.12625.1.S1_at   | MmugDNA.12625.1 | 6.56  | 7.24  | 1.27 | 0.48 | -1.61 | 0.432691 | 0.31792  | 0.744047 | 0.571046 |
| MmugDNA.12627.1.S1_at   | MmugDNA.12627.1 | 5.14  | 5.34  | 0.14 | 0.06 | -1.15 | 0.119313 | 0.026985 | 0.492749 | 0.205465 |
| MmugDNA.12628.1.S1_at   | MmugDNA.12628.1 | 5.27  | 5.47  | 0.49 | 0.9  | -1.15 | 0.473196 | 0.130273 | 0.767466 | 0.402037 |
| MmugDNA.12634.1.S1_at   | MmugDNA.12634.1 | 5.6   | 5.56  | 0.18 | 0.03 | 1.03  | 0.593838 | 0.736968 | 0.834469 | 0.847779 |
| MmugDNA.12640.1.S1_at   | MmugDNA.12640.1 | 5.89  | 6.37  | 0.34 | 0.24 | -1.39 | 0.297579 | 0.037417 | 0.652791 | 0.237777 |
| MmugDNA.12648.1.S1_at   | MmugDNA.12648.1 | 10.97 | 11.47 | 0.62 | 0.17 | -1.42 | 0.264583 | 0.022549 | 0.626029 | 0.187981 |
| MmugDNA.1265.1.S1_at    | MmugDNA.1265.1  | 8.36  | 7.94  | 0.28 | 0.06 | 1.34  | 0.146662 | 0.191095 | 0.521007 | 0.466364 |
| MmugDNA.12657.1.S1_at   | MmugDNA.12657.1 | 4.66  | 4.68  | 0.12 | 0.16 | -1.02 | 0.957431 | 0.798589 | 0.985977 | 0.884032 |
| MmugDNA.12666.1.S1_at   | MmugDNA.12666.1 | 10.22 | 10.75 | 0.29 | 0.12 | -1.44 | 0.022095 | 0.026584 | 0.310243 | 0.203998 |

|                         |                 |       |       |      |      |       |          |          |          |          |
|-------------------------|-----------------|-------|-------|------|------|-------|----------|----------|----------|----------|
| MmugDNA.12666.1.S1_s_at | MmugDNA.12666.1 | 10.37 | 10.97 | 0.28 | 0.1  | -1.52 | 0.022243 | 0.017316 | 0.310495 | 0.166509 |
| MmugDNA.12688.1.S1_at   | MmugDNA.12688.1 | 9.55  | 9.53  | 0.15 | 0.03 | 1.02  | 0.271602 | 0.542944 | 0.631445 | 0.725861 |
| MmugDNA.1269.1.S1_at    | MmugDNA.1269.1  | 8.03  | 8.19  | 0.11 | 0.03 | -1.11 | 0.02733  | 0.054561 | 0.327322 | 0.279114 |
| MmugDNA.12691.1.S1_at   | MmugDNA.12691.1 | 9.57  | 10.33 | 0.09 | 0.07 | -1.69 | 0.000387 | 0.000028 | 0.137028 | 0.021152 |
| MmugDNA.1270.1.S1_at    | MmugDNA.1270.1  | 2.97  | 3.08  | 0.07 | 0.06 | -1.08 | 0.567707 | 0.084733 | 0.820586 | 0.336218 |
| MmugDNA.12703.1.S1_at   | MmugDNA.12703.1 | 7.6   | 7.97  | 0.35 | 0.12 | -1.3  | 0.643664 | 0.098519 | 0.858218 | 0.356636 |
| MmugDNA.12711.1.S1_at   | MmugDNA.12711.1 | 8.14  | 7.75  | 0.13 | 0.16 | 1.31  | 0.074315 | 0.000266 | 0.435067 | 0.033786 |
| MmugDNA.12725.1.S1_at   | MmugDNA.12725.1 | 7.79  | 7.08  | 0.65 | 0.05 | 1.64  | 0.044929 | 0.001415 | 0.375402 | 0.057432 |
| MmugDNA.12728.1.S1_at   | MmugDNA.12728.1 | 6.15  | 5.99  | 0.33 | 0.09 | 1.11  | 0.367217 | 0.5013   | 0.702778 | 0.699499 |
| MmugDNA.12736.1.S1_at   | MmugDNA.12736.1 | 6.85  | 6.79  | 0.12 | 0.05 | 1.04  | 0.12456  | 0.354948 | 0.49855  | 0.597466 |
| MmugDNA.12737.1.S1_at   | MmugDNA.12737.1 | 10.93 | 10.83 | 0.05 | 0.06 | -1.08 | 0.127782 | 0.102399 | 0.502206 | 0.36259  |
| MmugDNA.12738.1.S1_at   | MmugDNA.12738.1 | 3.11  | 3.11  | 0.04 | 0.01 | 1     | 0.318687 | 0.938489 | 0.668228 | 0.965059 |
| MmugDNA.12740.1.S1_at   | MmugDNA.12740.1 | 6.18  | 6.04  | 0.29 | 0.03 | 1.1   | 0.145341 | 0.108796 | 0.520409 | 0.37236  |
| MmugDNA.12743.1.S1_at   | MmugDNA.12743.1 | 10.58 | 10.66 | 1.19 | 0.08 | -1.06 | 0.863851 | 0.525628 | 0.952043 | 0.715154 |
| MmugDNA.12745.1.S1_at   | MmugDNA.12745.1 | 7.36  | 6.21  | 1.42 | 0.12 | 2.22  | 0.252637 | 0.375673 | 0.617603 | 0.613577 |
| MmugDNA.12748.1.S1_at   | MmugDNA.12748.1 | 3.85  | 3.99  | 0.21 | 0.09 | -1.1  | 0.372064 | 0.507984 | 0.705567 | 0.703358 |
| MmugDNA.12749.1.S1_s_at | MmugDNA.12749.1 | 11.94 | 11.81 | 0.4  | 0.05 | 1.09  | 0.697805 | 0.009324 | 0.882451 | 0.127466 |
| MmugDNA.12751.1.S1_at   | MmugDNA.12751.1 | 4.91  | 4.74  | 0.03 | 0.1  | 1.12  | 0.044903 | 0.068874 | 0.375307 | 0.308799 |
| MmugDNA.12757.1.S1_s_at | MmugDNA.12757.1 | 6.95  | 7.25  | 0.36 | 0.09 | -1.23 | 0.698083 | 0.278565 | 0.882642 | 0.542327 |
| MmugDNA.12759.1.S1_at   | MmugDNA.12759.1 | 6.74  | 6.66  | 0.13 | 0.03 | 1.06  | 0.459844 | 0.626834 | 0.759823 | 0.780001 |
| MmugDNA.12780.1.S1_at   | MmugDNA.12780.1 | 5.42  | 5.58  | 0.48 | 0.12 | -1.11 | 0.543234 | 0.772044 | 0.806287 | 0.867462 |
| MmugDNA.12786.1.S1_at   | MmugDNA.12786.1 | 6.43  | 7.02  | 0.83 | 0.31 | -1.51 | 0.185253 | 0.185178 | 0.558325 | 0.461071 |
| MmugDNA.12791.1.S1_at   | MmugDNA.12791.1 | 10.07 | 10.57 | 0.35 | 0.14 | -1.41 | 0.297877 | 0.149252 | 0.652791 | 0.42373  |
| MmugDNA.12792.1.S1_at   | MmugDNA.12792.1 | 4.42  | 4.15  | 0.15 | 0.07 | 1.21  | 0.048151 | 0.101684 | 0.382492 | 0.361562 |
| MmugDNA.12795.1.S1_at   | MmugDNA.12795.1 | 12.1  | 12.11 | 0.07 | 0.03 | -1.01 | 0.785483 | 0.096061 | 0.921144 | 0.353319 |
| MmugDNA.12797.1.S1_at   | MmugDNA.12797.1 | 5.49  | 5.19  | 0.27 | 0.26 | 1.23  | 0.148808 | 0.152146 | 0.522743 | 0.426919 |
| MmugDNA.128.1.S1_at     | MmugDNA.128.1   | 5.95  | 5.99  | 0.15 | 0.1  | -1.03 | 0.557121 | 0.678942 | 0.814507 | 0.81252  |
| MmugDNA.12801.1.S1_at   | MmugDNA.12801.1 | 7.88  | 7.74  | 0.03 | 0.03 | 1.1   | 0.008067 | 0.414133 | 0.232005 | 0.640063 |
| MmugDNA.12803.1.S1_s_at | MmugDNA.12803.1 | 11.55 | 11.44 | 0.14 | 0.09 | 1.08  | 0.839957 | 0.082932 | 0.943103 | 0.332465 |
| MmugDNA.12810.1.S1_at   | MmugDNA.12810.1 | 3.4   | 3.45  | 0.11 | 0.06 | -1.04 | 0.455218 | 0.005178 | 0.757332 | 0.099727 |
| MmugDNA.12811.1.S1_at   | MmugDNA.12811.1 | 4.49  | 4.41  | 0.15 | 0.01 | 1.06  | 0.39799  | 0.538051 | 0.722205 | 0.722826 |
| MmugDNA.12823.1.S1_at   | MmugDNA.12823.1 | 9.94  | 9.53  | 0.24 | 0.06 | 1.33  | 0.048111 | 0.004877 | 0.382294 | 0.097507 |
| MmugDNA.12828.1.S1_at   | MmugDNA.12828.1 | 6.65  | 6.75  | 0.62 | 0.14 | -1.08 | 0.310291 | 0.302213 | 0.662073 | 0.560092 |
| MmugDNA.12835.1.S1_at   | MmugDNA.12835.1 | 7.32  | 7.39  | 0.33 | 0.11 | -1.04 | 0.559188 | 0.242501 | 0.815984 | 0.51284  |
| MmugDNA.12836.1.S1_at   | MmugDNA.12836.1 | 5.45  | 5.67  | 0.29 | 0.42 | -1.17 | 0.734825 | 0.528235 | 0.898497 | 0.716462 |
| MmugDNA.12841.1.S1_at   | MmugDNA.12841.1 | 8.56  | 8.72  | 0.97 | 0.43 | -1.11 | 0.800975 | 0.189419 | 0.927281 | 0.465117 |
| MmugDNA.12851.1.S1_at   | MmugDNA.12851.1 | 10.39 | 10.92 | 0.2  | 0.19 | -1.45 | 0.020294 | 0.049879 | 0.303799 | 0.268445 |
| MmugDNA.12854.1.S1_at   | MmugDNA.12854.1 | 9.66  | 8.33  | 0.3  | 0.16 | 2.51  | 0.003354 | 0.000498 | 0.194985 | 0.038955 |
| MmugDNA.12855.1.S1_at   | MmugDNA.12855.1 | 7.38  | 7.56  | 0.08 | 0.02 | -1.13 | 0.036397 | 0.334223 | 0.35477  | 0.582266 |
| MmugDNA.12857.1.S1_at   | MmugDNA.12857.1 | 10.67 | 10.98 | 1.24 | 0.28 | -1.24 | 0.599022 | 0.168668 | 0.83725  | 0.445352 |
| MmugDNA.1286.1.S1_at    | MmugDNA.1286.1  | 11.4  | 11.38 | 0.14 | 0.08 | 1.02  | 0.577649 | 0.04239  | 0.825827 | 0.250533 |
| MmugDNA.12863.1.S1_at   | MmugDNA.12863.1 | 10.42 | 10.13 | 0.39 | 0.13 | 1.22  | 0.765696 | 0.152255 | 0.911899 | 0.427045 |
| MmugDNA.12865.1.S1_at   | MmugDNA.12865.1 | 9.85  | 9.72  | 0.29 | 0.01 | 1.09  | 0.484699 | 0.024894 | 0.773772 | 0.197685 |

|                         |                 |       |       |      |      |       |          |          |          |          |
|-------------------------|-----------------|-------|-------|------|------|-------|----------|----------|----------|----------|
| MmugDNA.12866.1.S1_at   | MmugDNA.12866.1 | 5.33  | 5.29  | 0.19 | 0.01 | 1.03  | 0.466045 | 0.598605 | 0.763317 | 0.760996 |
| MmugDNA.12873.1.S1_at   | MmugDNA.12873.1 | 7.18  | 7.35  | 0.26 | 0.08 | -1.12 | 0.917601 | 0.917593 | 0.972048 | 0.953897 |
| MmugDNA.12875.1.S1_at   | MmugDNA.12875.1 | 6.01  | 5.9   | 0.11 | 0.01 | 1.08  | 0.150655 | 0.448819 | 0.524234 | 0.664636 |
| MmugDNA.12878.1.S1_at   | MmugDNA.12878.1 | 8.43  | 9.18  | 0.1  | 0.03 | -1.67 | 0.000329 | 0.012681 | 0.137028 | 0.145201 |
| MmugDNA.12880.1.S1_at   | MmugDNA.12880.1 | 5.46  | 5.35  | 0.08 | 0.06 | 1.08  | 0.28777  | 0.424516 | 0.644849 | 0.647118 |
| MmugDNA.12881.1.S1_at   | MmugDNA.12881.1 | 8.06  | 8.64  | 0.5  | 0.32 | -1.5  | 0.268163 | 0.114336 | 0.628527 | 0.380835 |
| MmugDNA.12885.1.S1_at   | MmugDNA.12885.1 | 5.48  | 5.31  | 0.11 | 0.08 | 1.12  | 0.203283 | 0.340042 | 0.574813 | 0.586516 |
| MmugDNA.12889.1.S1_at   | MmugDNA.12889.1 | 8.59  | 8.47  | 0.38 | 0.06 | 1.09  | 0.599233 | 0.193246 | 0.837324 | 0.468578 |
| MmugDNA.12896.1.S1_at   | MmugDNA.12896.1 | 6.16  | 6.01  | 0.12 | 0.06 | 1.11  | 0.192706 | 0.01795  | 0.563577 | 0.168998 |
| MmugDNA.1290.1.S1_at    | MmugDNA.1290.1  | 13.64 | 13.68 | 0.05 | 0.04 | -1.03 | 0.146337 | 0.229613 | 0.520698 | 0.501574 |
| MmugDNA.12900.1.S1_at   | MmugDNA.12900.1 | 10.78 | 10.86 | 0.15 | 0.11 | -1.06 | 0.336297 | 0.085236 | 0.681664 | 0.337096 |
| MmugDNA.12904.1.S1_at   | MmugDNA.12904.1 | 4.93  | 4.87  | 0.23 | 0.03 | 1.04  | 0.65325  | 0.739796 | 0.86229  | 0.849224 |
| MmugDNA.12904.1.S1_x_at | MmugDNA.12904.1 | 4.86  | 4.77  | 0.08 | 0.09 | 1.06  | 0.567683 | 0.831418 | 0.820586 | 0.903343 |
| MmugDNA.12908.1.S1_at   | MmugDNA.12908.1 | 6.36  | 7.21  | 0.28 | 0.21 | -1.8  | 0.049261 | 0.159092 | 0.385423 | 0.435217 |
| MmugDNA.12914.1.S1_at   | MmugDNA.12914.1 | 8.65  | 8.56  | 1.29 | 0.29 | 1.06  | 0.920309 | 0.339363 | 0.972913 | 0.586    |
| MmugDNA.12923.1.S1_at   | MmugDNA.12923.1 | 10.48 | 10.2  | 0.11 | 0.06 | 1.21  | 0.015973 | 0.000174 | 0.284606 | 0.030511 |
| MmugDNA.12924.1.S1_at   | MmugDNA.12924.1 | 6.88  | 6.71  | 0.22 | 0.12 | 1.12  | 0.30822  | 0.243098 | 0.660917 | 0.513356 |
| MmugDNA.1294.1.S1_s_at  | MmugDNA.1294.1  | 4.23  | 4.3   | 0.24 | 0.3  | -1.05 | 0.646274 | 0.779961 | 0.859027 | 0.872426 |
| MmugDNA.12943.1.S1_at   | MmugDNA.12943.1 | 8.36  | 8.82  | 0.09 | 0.07 | -1.38 | 0.001919 | 0.000136 | 0.170174 | 0.029179 |
| MmugDNA.12944.1.S1_at   | MmugDNA.12944.1 | 10.32 | 9.56  | 0.8  | 0.17 | 1.7   | 0.677041 | 0.826986 | 0.873333 | 0.900654 |
| MmugDNA.1295.1.S1_at    | MmugDNA.1295.1  | 10.86 | 11.08 | 0.63 | 0.2  | -1.17 | 0.443562 | 0.62853  | 0.750908 | 0.781248 |
| MmugDNA.12951.1.S1_at   | MmugDNA.12951.1 | 8.79  | 8.85  | 0.35 | 0.12 | -1.05 | 0.265009 | 0.227396 | 0.626381 | 0.499659 |
| MmugDNA.12952.1.S1_at   | MmugDNA.12952.1 | 6.14  | 6.14  | 0.19 | 0.17 | -1    | 0.554668 | 0.599481 | 0.812844 | 0.761468 |
| MmugDNA.12954.1.S1_at   | MmugDNA.12954.1 | 6.31  | 7.72  | 0.65 | 0.49 | -2.65 | 0.0757   | 0.096639 | 0.436722 | 0.354145 |
| MmugDNA.12958.1.S1_at   | MmugDNA.12958.1 | 7.69  | 8.05  | 0.18 | 0.03 | -1.29 | 0.08028  | 0.240848 | 0.443795 | 0.511547 |
| MmugDNA.1296.1.S1_at    | MmugDNA.1296.1  | 5.68  | 6.3   | 1.4  | 0.32 | -1.53 | 0.470963 | 0.141101 | 0.766288 | 0.414602 |
| MmugDNA.12968.1.S1_at   | MmugDNA.12968.1 | 12.06 | 12.09 | 0.12 | 0.17 | -1.02 | 0.246483 | 0.452689 | 0.611952 | 0.667253 |
| MmugDNA.12969.1.S1_at   | MmugDNA.12969.1 | 6.69  | 7.09  | 0.44 | 0.06 | -1.32 | 0.264579 | 0.033384 | 0.626029 | 0.226396 |
| MmugDNA.1297.1.S1_at    | MmugDNA.1297.1  | 9.5   | 9.2   | 0.35 | 0.08 | 1.23  | 0.639592 | 0.547244 | 0.85626  | 0.728342 |
| MmugDNA.12971.1.S1_at   | MmugDNA.12971.1 | 8.96  | 8.97  | 0.12 | 0.05 | -1.01 | 0.827627 | 0.958866 | 0.938069 | 0.976695 |
| MmugDNA.12973.1.S1_at   | MmugDNA.12973.1 | 5.56  | 5.71  | 0.79 | 0.12 | -1.11 | 0.770159 | 0.937628 | 0.913903 | 0.964687 |
| MmugDNA.12975.1.S1_at   | MmugDNA.12975.1 | 4.12  | 4.15  | 0.19 | 0.4  | -1.02 | 0.809443 | 0.921804 | 0.93104  | 0.955925 |
| MmugDNA.12977.1.S1_at   | MmugDNA.12977.1 | 4.7   | 4.71  | 1.25 | 0.17 | -1.01 | 0.337301 | 0.388605 | 0.682275 | 0.622917 |
| MmugDNA.12989.1.A1_at   | MmugDNA.12989.1 | 4.39  | 4.06  | 0.38 | 0.06 | 1.26  | 0.405824 | 0.378819 | 0.727533 | 0.615795 |
| MmugDNA.12989.1.S1_at   | MmugDNA.12989.1 | 4.91  | 4.73  | 0.28 | 0.04 | 1.13  | 0.641436 | 0.163199 | 0.857319 | 0.439324 |
| MmugDNA.12994.1.S1_at   | MmugDNA.12994.1 | 9.55  | 9.93  | 0.56 | 0.07 | -1.3  | 0.821648 | 0.226957 | 0.935606 | 0.499276 |
| MmugDNA.12996.1.S1_at   | MmugDNA.12996.1 | 7.99  | 8.14  | 0.16 | 0.12 | -1.11 | 0.6662   | 0.915869 | 0.868243 | 0.952836 |
| MmugDNA.12997.1.S1_at   | MmugDNA.12997.1 | 12.72 | 12.7  | 0.51 | 0.09 | 1.01  | 0.936004 | 0.538856 | 0.978468 | 0.723368 |
| MmugDNA.12999.1.S1_at   | MmugDNA.12999.1 | 7.04  | 7.05  | 0.03 | 0.16 | -1.01 | 0.642022 | 0.355397 | 0.857628 | 0.597738 |
| MmugDNA.13001.1.S1_at   | MmugDNA.13001.1 | 5.66  | 5.71  | 0.18 | 0.02 | -1.04 | 0.69392  | 0.928801 | 0.880918 | 0.959449 |
| MmugDNA.1301.1.S1_at    | MmugDNA.1301.1  | 6.71  | 6.48  | 0.28 | 0.04 | 1.17  | 0.262761 | 0.114065 | 0.624951 | 0.380421 |
| MmugDNA.13010.1.S1_at   | MmugDNA.13010.1 | 11.53 | 11.46 | 0.42 | 0.05 | 1.05  | 0.879499 | 0.565785 | 0.958239 | 0.740112 |
| MmugDNA.13011.1.S1_at   | MmugDNA.13011.1 | 7.05  | 6.95  | 0.56 | 0.14 | 1.07  | 0.796691 | 0.538356 | 0.925303 | 0.723074 |

|                         |                 |       |       |      |      |       |          |          |          |          |
|-------------------------|-----------------|-------|-------|------|------|-------|----------|----------|----------|----------|
| MmugDNA.13019.1.S1_at   | MmugDNA.13019.1 | 2.98  | 2.9   | 0.06 | 0.95 | 1.05  | 0.471793 | 0.61426  | 0.766635 | 0.77118  |
| MmugDNA.13023.1.S1_at   | MmugDNA.13023.1 | 5.61  | 4.51  | 0.67 | 0.05 | 2.15  | 0.056727 | 0.043237 | 0.401061 | 0.252677 |
| MmugDNA.13025.1.S1_at   | MmugDNA.13025.1 | 3.15  | 3.14  | 0.05 | 0.09 | 1.01  | 0.633639 | 0.866828 | 0.853631 | 0.924317 |
| MmugDNA.1303.1.S1_at    | MmugDNA.1303.1  | 3.68  | 3.54  | 0.15 | 0.05 | 1.11  | 0.078432 | 0.128351 | 0.441003 | 0.399618 |
| MmugDNA.1303.1.S1_s_at  | MmugDNA.1303.1  | 4.14  | 3.88  | 0.11 | 0.08 | 1.2   | 0.066716 | 0.053358 | 0.422542 | 0.27654  |
| MmugDNA.13030.1.S1_at   | MmugDNA.13030.1 | 5.03  | 5.03  | 0.17 | 0.06 | 1     | 0.620425 | 0.783611 | 0.84711  | 0.874696 |
| MmugDNA.13032.1.S1_at   | MmugDNA.13032.1 | 5.91  | 5.93  | 0.07 | 0.29 | -1.01 | 0.756186 | 0.593418 | 0.90814  | 0.758267 |
| MmugDNA.13034.1.S1_at   | MmugDNA.13034.1 | 13.83 | 13.86 | 0.02 | 0.06 | -1.02 | 0.391972 | 0.724357 | 0.718015 | 0.840457 |
| MmugDNA.13037.1.S1_at   | MmugDNA.13037.1 | 6.64  | 6.88  | 0.17 | 0.22 | -1.18 | 0.116265 | 0.155969 | 0.489568 | 0.431376 |
| MmugDNA.13039.1.S1_at   | MmugDNA.13039.1 | 12.71 | 12.75 | 0.05 | 0.06 | -1.02 | 0.834183 | 0.891806 | 0.940528 | 0.938309 |
| MmugDNA.13040.1.S1_at   | MmugDNA.13040.1 | 2.85  | 2.9   | 0.1  | 0.03 | -1.03 | 0.378291 | 0.587304 | 0.708156 | 0.754131 |
| MmugDNA.13044.1.S1_at   | MmugDNA.13044.1 | 7.92  | 8.1   | 0.51 | 0.12 | -1.14 | 0.485729 | 0.100577 | 0.774425 | 0.359845 |
| MmugDNA.13046.1.S1_at   | MmugDNA.13046.1 | 7.05  | 7.86  | 0.44 | 0.34 | -1.75 | 0.0925   | 0.216074 | 0.461062 | 0.489679 |
| MmugDNA.13052.1.S1_at   | MmugDNA.13052.1 | 11.74 | 11.59 | 0.5  | 0.1  | 1.11  | 0.632539 | 0.418462 | 0.85304  | 0.642876 |
| MmugDNA.13053.1.S1_at   | MmugDNA.13053.1 | 7.69  | 8.29  | 0.39 | 0.12 | -1.52 | 0.057722 | 0.041589 | 0.402678 | 0.248831 |
| MmugDNA.13057.1.S1_at   | MmugDNA.13057.1 | 7.07  | 6.96  | 0.1  | 0.02 | 1.08  | 0.096701 | 0.098623 | 0.465288 | 0.356743 |
| MmugDNA.13058.1.S1_at   | MmugDNA.13058.1 | 4.76  | 4.49  | 0.09 | 0.13 | 1.21  | 0.020778 | 0.123978 | 0.305611 | 0.394262 |
| MmugDNA.13061.1.S1_at   | MmugDNA.13061.1 | 7.14  | 7.06  | 0.08 | 0.05 | 1.06  | 0.893035 | 0.215616 | 0.963416 | 0.489397 |
| MmugDNA.13064.1.S1_at   | MmugDNA.13064.1 | 4.94  | 5.03  | 0.54 | 0.1  | -1.07 | 0.537386 | 0.745005 | 0.802735 | 0.852261 |
| MmugDNA.13074.1.S1_at   | MmugDNA.13074.1 | 11.34 | 10.8  | 0.69 | 0.05 | 1.46  | 0.320177 | 0.600552 | 0.669177 | 0.76217  |
| MmugDNA.13076.1.S1_at   | MmugDNA.13076.1 | 4.7   | 5.18  | 0.85 | 0.37 | -1.4  | 0.726398 | 0.901214 | 0.894295 | 0.943829 |
| MmugDNA.13077.1.S1_at   | MmugDNA.13077.1 | 5.59  | 5.28  | 0.11 | 0.11 | 1.24  | 0.025522 | 0.184121 | 0.322263 | 0.460323 |
| MmugDNA.13085.1.S1_at   | MmugDNA.13085.1 | 6.97  | 6.83  | 0.21 | 0.08 | 1.1   | 0.374541 | 0.281531 | 0.705935 | 0.54464  |
| MmugDNA.13096.1.S1_x_at | MmugDNA.13096.1 | 11.43 | 12.25 | 0.82 | 0.15 | -1.77 | 0.162238 | 0.143671 | 0.535276 | 0.417555 |
| MmugDNA.13097.1.S1_at   | MmugDNA.13097.1 | 9.66  | 9.71  | 0.06 | 0.04 | -1.04 | 0.218546 | 0.000131 | 0.588313 | 0.029087 |
| MmugDNA.13099.1.S1_at   | MmugDNA.13099.1 | 4.9   | 5.29  | 1.77 | 0.76 | -1.31 | 0.88374  | 0.613434 | 0.959774 | 0.770528 |
| MmugDNA.131.1.S1_at     | MmugDNA.131.1   | 9.14  | 9.5   | 0.33 | 0.09 | -1.29 | 0.118907 | 0.241893 | 0.492404 | 0.512489 |
| MmugDNA.1310.1.S1_at    | MmugDNA.1310.1  | 8.49  | 7.9   | 1.18 | 0.03 | 1.51  | 0.533344 | 0.122021 | 0.80084  | 0.391468 |
| MmugDNA.13102.1.S1_at   | MmugDNA.13102.1 | 11.57 | 11.56 | 0.06 | 0.1  | 1     | 0.558577 | 0.137923 | 0.815475 | 0.410892 |
| MmugDNA.13104.1.S1_at   | MmugDNA.13104.1 | 7.88  | 8.03  | 0.16 | 0.13 | -1.11 | 0.921153 | 0.857558 | 0.973328 | 0.918694 |
| MmugDNA.13120.1.S1_at   | MmugDNA.13120.1 | 9.73  | 9.74  | 0.14 | 0.11 | -1    | 0.345069 | 0.112717 | 0.68735  | 0.378336 |
| MmugDNA.13121.1.S1_at   | MmugDNA.13121.1 | 4.85  | 4.78  | 0.25 | 0.69 | 1.05  | 0.333602 | 0.268822 | 0.679759 | 0.534258 |
| MmugDNA.13127.1.S1_at   | MmugDNA.13127.1 | 8.88  | 9.16  | 0.36 | 0.04 | -1.22 | 0.662348 | 0.838074 | 0.866731 | 0.90755  |
| MmugDNA.13140.1.S1_at   | MmugDNA.13140.1 | 6.16  | 6.38  | 0.88 | 0.06 | -1.16 | 0.692373 | 0.854311 | 0.880095 | 0.917018 |
| MmugDNA.13151.1.S1_at   | MmugDNA.13151.1 | 6.59  | 7.35  | 1.05 | 0.38 | -1.7  | 0.282856 | 0.372308 | 0.641051 | 0.611225 |
| MmugDNA.13156.1.S1_at   | MmugDNA.13156.1 | 13.04 | 12.83 | 0.28 | 0.04 | 1.15  | 0.254997 | 0.001207 | 0.619267 | 0.054389 |
| MmugDNA.13162.1.S1_at   | MmugDNA.13162.1 | 6.8   | 6.71  | 0.3  | 0.33 | 1.06  | 0.778382 | 0.945066 | 0.918259 | 0.968834 |
| MmugDNA.13165.1.S1_at   | MmugDNA.13165.1 | 5.53  | 5.3   | 0.04 | 0.02 | 1.17  | 0.001313 | 0.020527 | 0.158997 | 0.179788 |
| MmugDNA.13172.1.S1_at   | MmugDNA.13172.1 | 10.85 | 10.79 | 0.38 | 0.01 | 1.04  | 0.775407 | 0.685808 | 0.916747 | 0.816612 |
| MmugDNA.13173.1.S1_at   | MmugDNA.13173.1 | 10.78 | 10.84 | 0.79 | 0.02 | -1.05 | 0.317448 | 0.033139 | 0.667352 | 0.225324 |
| MmugDNA.13177.1.S1_at   | MmugDNA.13177.1 | 11.29 | 11.53 | 0.22 | 0.13 | -1.18 | 0.182566 | 0.171205 | 0.555631 | 0.447792 |
| MmugDNA.13178.1.S1_at   | MmugDNA.13178.1 | 8.4   | 8.44  | 0.37 | 0.09 | -1.03 | 0.484053 | 0.165548 | 0.773469 | 0.441872 |
| MmugDNA.13179.1.S1_at   | MmugDNA.13179.1 | 4.52  | 5.66  | 0.45 | 0.41 | -2.21 | 0.015061 | 0.00801  | 0.2796   | 0.118982 |

|                         |                 |       |       |      |      |       |          |          |          |          |
|-------------------------|-----------------|-------|-------|------|------|-------|----------|----------|----------|----------|
| MmugDNA.13185.1.S1_at   | MmugDNA.13185.1 | 5.5   | 5.52  | 0.11 | 0.03 | -1.01 | 0.895297 | 0.983167 | 0.964244 | 0.990726 |
| MmugDNA.13186.1.S1_at   | MmugDNA.13186.1 | 2.96  | 3.01  | 0.06 | 0.03 | -1.04 | 0.420203 | 0.05728  | 0.736808 | 0.285187 |
| MmugDNA.13188.1.S1_at   | MmugDNA.13188.1 | 6.03  | 5.98  | 0.14 | 0.01 | 1.03  | 0.251823 | 0.37125  | 0.616976 | 0.610135 |
| MmugDNA.13189.1.S1_at   | MmugDNA.13189.1 | 9.49  | 9.73  | 0.65 | 0.1  | -1.17 | 0.608067 | 0.357685 | 0.840979 | 0.599297 |
| MmugDNA.13197.1.S1_at   | MmugDNA.13197.1 | 2.95  | 2.95  | 0.03 | 0.05 | -1    | 0.277547 | 0.372415 | 0.636861 | 0.611306 |
| MmugDNA.132.1.S1_at     | MmugDNA.132.1   | 3.36  | 3.66  | 0.24 | 0.56 | -1.23 | 0.105378 | 0.09788  | 0.477051 | 0.355678 |
| MmugDNA.13201.1.S1_at   | MmugDNA.13201.1 | 11.42 | 11.27 | 0.17 | 0.15 | 1.11  | 0.499145 | 0.715173 | 0.781962 | 0.834894 |
| MmugDNA.13218.1.S1_at   | MmugDNA.13218.1 | 6.23  | 5.79  | 0.59 | 0.46 | 1.36  | 0.625127 | 0.858093 | 0.849207 | 0.919063 |
| MmugDNA.13224.1.S1_at   | MmugDNA.13224.1 | 5.93  | 6.01  | 0.31 | 0.14 | -1.06 | 0.907586 | 0.962035 | 0.968677 | 0.978659 |
| MmugDNA.13227.1.S1_at   | MmugDNA.13227.1 | 11.28 | 10.88 | 0.1  | 0.09 | 1.32  | 0.009468 | 0.00868  | 0.242283 | 0.123557 |
| MmugDNA.13230.1.S1_at   | MmugDNA.13230.1 | 5.23  | 5.22  | 0.13 | 0.07 | -1.01 | 0.197486 | 0.440701 | 0.568443 | 0.659076 |
| MmugDNA.13231.1.S1_at   | MmugDNA.13231.1 | 4.76  | 4.73  | 0.11 | 0.1  | 1.03  | 0.69491  | 0.918081 | 0.881223 | 0.954068 |
| MmugDNA.13233.1.S1_at   | MmugDNA.13233.1 | 9.72  | 10.28 | 1.11 | 0.1  | -1.47 | 0.630114 | 0.835149 | 0.851878 | 0.905607 |
| MmugDNA.13242.1.S1_at   | MmugDNA.13242.1 | 9.7   | 9.69  | 0.32 | 0.09 | 1     | 0.306597 | 0.444596 | 0.659542 | 0.662072 |
| MmugDNA.13252.1.S1_at   | MmugDNA.13252.1 | 3.84  | 3.55  | 0.25 | 0.07 | 1.22  | 0.393811 | 0.51565  | 0.719504 | 0.708451 |
| MmugDNA.13266.1.S1_at   | MmugDNA.13266.1 | 6.39  | 6.06  | 0.25 | 0.04 | 1.26  | 0.152439 | 0.028517 | 0.52544  | 0.210725 |
| MmugDNA.13269.1.S1_at   | MmugDNA.13269.1 | 10    | 9.89  | 0.4  | 0.37 | 1.08  | 0.69851  | 0.024263 | 0.882799 | 0.194952 |
| MmugDNA.1327.1.S1_at    | MmugDNA.1327.1  | 6.45  | 6.34  | 0.04 | 0.08 | 1.07  | 0.227244 | 0.506054 | 0.596459 | 0.702351 |
| MmugDNA.13270.1.S1_at   | MmugDNA.13270.1 | 11.59 | 11.3  | 0.23 | 0.17 | 1.22  | 0.080563 | 0.041284 | 0.444432 | 0.247995 |
| MmugDNA.13273.1.S1_at   | MmugDNA.13273.1 | 6.12  | 6.19  | 0.12 | 0.21 | -1.05 | 0.958445 | 0.22493  | 0.986346 | 0.497696 |
| MmugDNA.13277.1.S1_at   | MmugDNA.13277.1 | 6.41  | 6.99  | 0.36 | 0.3  | -1.49 | 0.148142 | 0.104456 | 0.522416 | 0.365719 |
| MmugDNA.13284.1.S1_at   | MmugDNA.13284.1 | 8.73  | 8.75  | 0.06 | 0.04 | -1.01 | 0.621445 | 0.180583 | 0.847527 | 0.457191 |
| MmugDNA.13285.1.S1_at   | MmugDNA.13285.1 | 12.82 | 12.08 | 0.38 | 0.18 | 1.67  | 0.037263 | 0.031202 | 0.357058 | 0.218421 |
| MmugDNA.13290.1.S1_at   | MmugDNA.13290.1 | 8.66  | 8.69  | 0.4  | 0.04 | -1.02 | 0.54692  | 0.680878 | 0.808912 | 0.813622 |
| MmugDNA.13293.1.S1_at   | MmugDNA.13293.1 | 9.27  | 9.36  | 0.21 | 0.08 | -1.07 | 0.710724 | 0.616043 | 0.887398 | 0.772446 |
| MmugDNA.13299.1.S1_at   | MmugDNA.13299.1 | 4.75  | 4.59  | 0.18 | 0.12 | 1.12  | 0.157786 | 0.368806 | 0.53073  | 0.608313 |
| MmugDNA.133.1.S1_at     | MmugDNA.133.1   | 6.02  | 6.78  | 0.41 | 0.13 | -1.7  | 0.07253  | 0.039593 | 0.432622 | 0.244002 |
| MmugDNA.13300.1.S1_s_at | MmugDNA.13300.1 | 9.03  | 9.34  | 2.11 | 0.19 | -1.25 | 0.657616 | 0.173794 | 0.864153 | 0.450128 |
| MmugDNA.13302.1.S1_at   | MmugDNA.13302.1 | 4.42  | 4.66  | 0.48 | 0.23 | -1.18 | 0.129503 | 0.157076 | 0.504238 | 0.432547 |
| MmugDNA.13303.1.S1_s_at | MmugDNA.13303.1 | 12.23 | 11.93 | 0.03 | 0.13 | 1.23  | 0.017921 | 0.014175 | 0.294439 | 0.152173 |
| MmugDNA.13304.1.S1_at   | MmugDNA.13304.1 | 7.28  | 7.77  | 0.74 | 0.23 | -1.4  | 0.886661 | 0.76656  | 0.96068  | 0.864391 |
| MmugDNA.13306.1.S1_at   | MmugDNA.13306.1 | 10.52 | 9.25  | 1.1  | 0.29 | 2.41  | 0.154968 | 0.15418  | 0.528235 | 0.428941 |
| MmugDNA.13308.1.S1_at   | MmugDNA.13308.1 | 6.21  | 5.64  | 0.24 | 0.18 | 1.48  | 0.029331 | 0.001111 | 0.334049 | 0.052745 |
| MmugDNA.13312.1.S1_at   | MmugDNA.13312.1 | 10.61 | 10.88 | 0.21 | 0.07 | -1.21 | 0.308795 | 0.386261 | 0.661293 | 0.621469 |
| MmugDNA.13320.1.S1_at   | MmugDNA.13320.1 | 10.98 | 10.91 | 0.27 | 0.01 | 1.05  | 0.521919 | 0.724734 | 0.794904 | 0.840659 |
| MmugDNA.13325.1.S1_at   | MmugDNA.13325.1 | 9.97  | 9.43  | 0.21 | 0.28 | 1.46  | 0.023081 | 0.008363 | 0.314591 | 0.121327 |
| MmugDNA.13327.1.S1_at   | MmugDNA.13327.1 | 5.44  | 5.23  | 0.09 | 0.07 | 1.16  | 0.073578 | 0.162918 | 0.434623 | 0.439062 |
| MmugDNA.13329.1.S1_at   | MmugDNA.13329.1 | 10.5  | 10.41 | 0.22 | 0.01 | 1.07  | 0.486946 | 0.047745 | 0.774859 | 0.263394 |
| MmugDNA.13332.1.S1_at   | MmugDNA.13332.1 | 3.74  | 3.74  | 0.06 | 0.04 | 1     | 0.980469 | 0.430696 | 0.993785 | 0.651691 |
| MmugDNA.13338.1.S1_at   | MmugDNA.13338.1 | 8.12  | 8.54  | 0.35 | 0.08 | -1.34 | 0.171315 | 0.002075 | 0.544492 | 0.067389 |
| MmugDNA.13339.1.S1_at   | MmugDNA.13339.1 | 10.7  | 10.93 | 0.33 | 0.16 | -1.17 | 0.766344 | 0.865128 | 0.912101 | 0.923484 |
| MmugDNA.13346.1.S1_at   | MmugDNA.13346.1 | 11.34 | 10.98 | 0.24 | 0.02 | 1.29  | 0.075926 | 0.035198 | 0.436934 | 0.231787 |
| MmugDNA.13349.1.S1_at   | MmugDNA.13349.1 | 5.16  | 5.18  | 0.08 | 0.13 | -1.01 | 0.883502 | 0.868266 | 0.95964  | 0.925234 |

|                         |                 |       |       |      |      |       |          |          |          |          |
|-------------------------|-----------------|-------|-------|------|------|-------|----------|----------|----------|----------|
| MmugDNA.1335.1.S1_at    | MmugDNA.1335.1  | 5.18  | 5     | 0.39 | 0.19 | 1.13  | 0.27464  | 0.110139 | 0.633979 | 0.374244 |
| MmugDNA.13352.1.S1_at   | MmugDNA.13352.1 | 9.76  | 10.38 | 0.42 | 0.11 | -1.55 | 0.13033  | 0.150108 | 0.504682 | 0.42471  |
| MmugDNA.13352.1.S1_s_at | MmugDNA.13352.1 | 9.69  | 10.17 | 0.53 | 0.19 | -1.4  | 0.364183 | 0.348425 | 0.700459 | 0.592591 |
| MmugDNA.13355.1.S1_at   | MmugDNA.13355.1 | 4.45  | 4.44  | 0    | 0.1  | 1.01  | 0.79609  | 0.635421 | 0.925049 | 0.785405 |
| MmugDNA.13356.1.S1_at   | MmugDNA.13356.1 | 11.98 | 12.08 | 0.05 | 0.04 | -1.07 | 0.133341 | 0.378267 | 0.507921 | 0.615438 |
| MmugDNA.13366.1.S1_at   | MmugDNA.13366.1 | 11.02 | 11.17 | 2.89 | 0.18 | -1.11 | 0.51392  | 0.196216 | 0.790215 | 0.471236 |
| MmugDNA.13380.1.S1_at   | MmugDNA.13380.1 | 7.62  | 7.68  | 0.41 | 0.18 | -1.04 | 0.500931 | 0.814992 | 0.78303  | 0.893221 |
| MmugDNA.13381.1.S1_at   | MmugDNA.13381.1 | 7.55  | 7.88  | 0.35 | 0.11 | -1.26 | 0.266833 | 0.015219 | 0.627644 | 0.156741 |
| MmugDNA.13382.1.S1_at   | MmugDNA.13382.1 | 10.28 | 10.28 | 0.15 | 0.19 | 1     | 0.876395 | 0.048923 | 0.956919 | 0.26597  |
| MmugDNA.13386.1.S1_at   | MmugDNA.13386.1 | 8.83  | 9.53  | 0.54 | 0.06 | -1.62 | 0.052784 | 0.006429 | 0.39321  | 0.108902 |
| MmugDNA.13391.1.S1_at   | MmugDNA.13391.1 | 7.67  | 7.68  | 0.48 | 0.16 | -1.01 | 0.615858 | 0.036086 | 0.844679 | 0.234414 |
| MmugDNA.13394.1.S1_at   | MmugDNA.13394.1 | 7.17  | 5.47  | 2.02 | 0.19 | 3.24  | 0.260236 | 0.172107 | 0.623127 | 0.448529 |
| MmugDNA.13397.1.S1_x_at | MmugDNA.13397.1 | 10.22 | 9.64  | 2.2  | 0.08 | 1.49  | 0.962205 | 0.209447 | 0.987708 | 0.483069 |
| MmugDNA.13398.1.S1_at   | MmugDNA.13398.1 | 4.85  | 4.99  | 0.07 | 0.13 | -1.1  | 0.264618 | 0.090535 | 0.626029 | 0.345015 |
| MmugDNA.134.1.S1_at     | MmugDNA.134.1   | 11.78 | 11.91 | 0.33 | 0.05 | -1.1  | 0.558102 | 0.789066 | 0.815182 | 0.878078 |
| MmugDNA.13400.1.S1_at   | MmugDNA.13400.1 | 11.54 | 12.03 | 0.52 | 0.24 | -1.41 | 0.068097 | 0.054084 | 0.424723 | 0.277914 |
| MmugDNA.13400.1.S1_s_at | MmugDNA.13400.1 | 10.89 | 11.15 | 0.63 | 0.01 | -1.2  | 0.224817 | 0.183707 | 0.594045 | 0.459766 |
| MmugDNA.13402.1.S1_at   | MmugDNA.13402.1 | 9.23  | 8.65  | 0.37 | 0.1  | 1.5   | 0.089319 | 0.242403 | 0.457453 | 0.51282  |
| MmugDNA.13403.1.S1_at   | MmugDNA.13403.1 | 12.99 | 12.49 | 2.69 | 0.12 | 1.41  | 0.567233 | 0.351942 | 0.820335 | 0.595335 |
| MmugDNA.13406.1.S1_at   | MmugDNA.13406.1 | 5.99  | 6.15  | 0.06 | 0.12 | -1.12 | 0.065071 | 0.245789 | 0.419717 | 0.515519 |
| MmugDNA.13407.1.S1_at   | MmugDNA.13407.1 | 6.08  | 5.82  | 0.17 | 0.08 | 1.19  | 0.133726 | 0.010873 | 0.508012 | 0.135892 |
| MmugDNA.13408.1.S1_at   | MmugDNA.13408.1 | 9.95  | 9.85  | 0.72 | 0.12 | 1.07  | 0.71271  | 0.70305  | 0.888019 | 0.827866 |
| MmugDNA.1341.1.S1_at    | MmugDNA.1341.1  | 8.52  | 8.8   | 0.54 | 0.13 | -1.21 | 0.653565 | 0.42847  | 0.862453 | 0.650015 |
| MmugDNA.13417.1.S1_at   | MmugDNA.13417.1 | 6.88  | 6.57  | 0.26 | 0.19 | 1.23  | 0.298772 | 0.293103 | 0.653263 | 0.553014 |
| MmugDNA.13418.1.S1_at   | MmugDNA.13418.1 | 9.22  | 9.59  | 0.31 | 0.09 | -1.29 | 0.111854 | 0.161688 | 0.48497  | 0.437771 |
| MmugDNA.13422.1.S1_at   | MmugDNA.13422.1 | 9.71  | 8.91  | 2.42 | 0.23 | 1.74  | 0.861259 | 0.255034 | 0.951227 | 0.52317  |
| MmugDNA.13424.1.S1_a_at | MmugDNA.13424.1 | 11.49 | 11.01 | 1.38 | 0.13 | 1.4   | 0.871151 | 0.077461 | 0.955222 | 0.323279 |
| MmugDNA.13424.1.S1_at   | MmugDNA.13424.1 | 10.23 | 9.54  | 1.5  | 0.12 | 1.61  | 0.901245 | 0.039126 | 0.966477 | 0.243056 |
| MmugDNA.13426.1.S1_at   | MmugDNA.13426.1 | 8.07  | 8.63  | 0.53 | 0.25 | -1.48 | 0.276365 | 0.186568 | 0.635937 | 0.462364 |
| MmugDNA.13428.1.S1_at   | MmugDNA.13428.1 | 4.46  | 4.37  | 0.13 | 0.21 | 1.07  | 0.937189 | 1.98E-07 | 0.978872 | 0.005999 |
| MmugDNA.13432.1.S1_at   | MmugDNA.13432.1 | 5.5   | 5.83  | 0.54 | 0.15 | -1.26 | 0.477495 | 0.413741 | 0.769855 | 0.639751 |
| MmugDNA.13436.1.S1_s_at | MmugDNA.13436.1 | 8.49  | 8.46  | 0.34 | 0.03 | 1.02  | 0.319847 | 0.122964 | 0.669028 | 0.392923 |
| MmugDNA.13439.1.S1_at   | MmugDNA.13439.1 | 5.94  | 5.77  | 0.12 | 0.09 | 1.12  | 0.063937 | 0.305975 | 0.416821 | 0.562732 |
| MmugDNA.1344.1.S1_at    | MmugDNA.1344.1  | 4.29  | 4.34  | 0.17 | 0.04 | -1.04 | 0.879995 | 0.980877 | 0.958404 | 0.989478 |
| MmugDNA.13444.1.S1_at   | MmugDNA.13444.1 | 6.62  | 6.59  | 0.33 | 0.1  | 1.02  | 0.823335 | 0.296024 | 0.936294 | 0.555295 |
| MmugDNA.13445.1.S1_at   | MmugDNA.13445.1 | 5.05  | 5.05  | 0.25 | 0.13 | 1     | 0.683939 | 0.303975 | 0.876251 | 0.561344 |
| MmugDNA.13455.1.S1_at   | MmugDNA.13455.1 | 11.31 | 11    | 0.5  | 0.05 | 1.24  | 0.256597 | 0.266746 | 0.620603 | 0.53241  |
| MmugDNA.13467.1.S1_at   | MmugDNA.13467.1 | 11.36 | 11.48 | 0.08 | 0.11 | -1.09 | 0.045798 | 0.024491 | 0.377285 | 0.19587  |
| MmugDNA.13472.1.S1_at   | MmugDNA.13472.1 | 6.22  | 6.05  | 0.27 | 0.03 | 1.12  | 0.469492 | 0.72208  | 0.765568 | 0.838998 |
| MmugDNA.13481.1.S1_at   | MmugDNA.13481.1 | 11.98 | 12.51 | 0.23 | 0.03 | -1.43 | 0.01642  | 0.005927 | 0.287478 | 0.105331 |
| MmugDNA.13482.1.S1_at   | MmugDNA.13482.1 | 9.73  | 9.67  | 0.15 | 0.06 | 1.05  | 0.752588 | 0.923927 | 0.906629 | 0.957162 |
| MmugDNA.13486.1.S1_at   | MmugDNA.13486.1 | 8.6   | 8.3   | 1.48 | 0.03 | 1.23  | 0.85235  | 0.552412 | 0.947963 | 0.731728 |
| MmugDNA.13488.1.S1_at   | MmugDNA.13488.1 | 9.84  | 10.21 | 0.48 | 0.14 | -1.29 | 0.503086 | 0.008915 | 0.784024 | 0.12491  |

|                         |                 |       |       |      |      |       |          |          |          |          |
|-------------------------|-----------------|-------|-------|------|------|-------|----------|----------|----------|----------|
| MmugDNA.13490.1.S1_at   | MmugDNA.13490.1 | 2.91  | 2.93  | 0.02 | 0.1  | -1.01 | 0.781595 | 0.751836 | 0.919573 | 0.855698 |
| MmugDNA.13493.1.S1_at   | MmugDNA.13493.1 | 5.1   | 5.28  | 0.59 | 0.09 | -1.13 | 0.718699 | 0.701332 | 0.890773 | 0.826814 |
| MmugDNA.13498.1.S1_at   | MmugDNA.13498.1 | 12.35 | 12.81 | 0.48 | 0.03 | -1.37 | 0.189669 | 0.249864 | 0.561075 | 0.518876 |
| MmugDNA.13510.1.S1_at   | MmugDNA.13510.1 | 11.71 | 11.82 | 0.19 | 0.03 | -1.08 | 0.857851 | 0.891623 | 0.94975  | 0.938242 |
| MmugDNA.13513.1.S1_at   | MmugDNA.13513.1 | 10.91 | 11.2  | 0.22 | 0.08 | -1.22 | 0.105459 | 0.183447 | 0.477116 | 0.459574 |
| MmugDNA.1352.1.S1_at    | MmugDNA.1352.1  | 10.45 | 11.04 | 0.1  | 0.05 | -1.51 | 0.000741 | 0.001173 | 0.148988 | 0.053791 |
| MmugDNA.13520.1.S1_at   | MmugDNA.13520.1 | 6.81  | 6.46  | 0.13 | 0.16 | 1.27  | 0.034851 | 0.016372 | 0.350453 | 0.16199  |
| MmugDNA.13524.1.S1_at   | MmugDNA.13524.1 | 7.63  | 7.58  | 0.26 | 0.11 | 1.04  | 0.634592 | 0.800121 | 0.8541   | 0.885076 |
| MmugDNA.13528.1.S1_at   | MmugDNA.13528.1 | 5.52  | 5.41  | 0.12 | 0.03 | 1.09  | 0.088738 | 0.11564  | 0.456425 | 0.382714 |
| MmugDNA.1353.1.S1_at    | MmugDNA.1353.1  | 5.77  | 6.55  | 1.02 | 0.21 | -1.72 | 0.333715 | 0.268886 | 0.679885 | 0.534345 |
| MmugDNA.13531.1.S1_at   | MmugDNA.13531.1 | 12.36 | 12.55 | 1.61 | 0.16 | -1.14 | 0.750138 | 0.22841  | 0.905347 | 0.500587 |
| MmugDNA.13532.1.S1_at   | MmugDNA.13532.1 | 7.43  | 7.69  | 0.44 | 0.05 | -1.2  | 0.338417 | 0.079184 | 0.682926 | 0.32639  |
| MmugDNA.13536.1.S1_at   | MmugDNA.13536.1 | 12.84 | 12.96 | 0.28 | 0.05 | -1.08 | 0.904479 | 0.693531 | 0.967857 | 0.82172  |
| MmugDNA.13538.1.S1_at   | MmugDNA.13538.1 | 6.91  | 6.82  | 0.27 | 0    | 1.07  | 0.189605 | 0.130076 | 0.561075 | 0.401724 |
| MmugDNA.13544.1.S1_at   | MmugDNA.13544.1 | 11.26 | 11.1  | 0.48 | 0.04 | 1.11  | 0.617978 | 0.737814 | 0.845774 | 0.848096 |
| MmugDNA.13559.1.S1_at   | MmugDNA.13559.1 | 12.84 | 13.05 | 0.05 | 0.11 | -1.16 | 0.065372 | 0.331848 | 0.420577 | 0.580411 |
| MmugDNA.13561.1.S1_at   | MmugDNA.13561.1 | 11.28 | 11.25 | 0.17 | 0.12 | 1.02  | 0.321381 | 0.392177 | 0.670064 | 0.625652 |
| MmugDNA.13565.1.S1_at   | MmugDNA.13565.1 | 10.54 | 10.33 | 0.19 | 0.26 | 1.16  | 0.992149 | 0.000422 | 0.996928 | 0.038266 |
| MmugDNA.13568.1.S1_at   | MmugDNA.13568.1 | 7.43  | 7.08  | 0.18 | 0.06 | 1.28  | 0.032814 | 0.079868 | 0.345393 | 0.327203 |
| MmugDNA.13568.1.S1_s_at | MmugDNA.13568.1 | 5.96  | 6     | 0.18 | 0.07 | -1.03 | 0.843993 | 0.271101 | 0.945004 | 0.536259 |
| MmugDNA.13569.1.S1_at   | MmugDNA.13569.1 | 11.94 | 12.48 | 0.23 | 0.07 | -1.45 | 0.048604 | 0.011084 | 0.383721 | 0.137039 |
| MmugDNA.13571.1.S1_at   | MmugDNA.13571.1 | 6.54  | 6.56  | 0.16 | 0.11 | -1.01 | 0.570312 | 0.814055 | 0.821984 | 0.892736 |
| MmugDNA.13584.1.S1_at   | MmugDNA.13584.1 | 9.71  | 9.57  | 0.18 | 0.19 | 1.11  | 0.526317 | 0.001593 | 0.796483 | 0.06044  |
| MmugDNA.13590.1.S1_at   | MmugDNA.13590.1 | 7.69  | 8.03  | 1.87 | 0.24 | -1.26 | 0.767586 | 0.277396 | 0.912495 | 0.541326 |
| MmugDNA.13593.1.S1_at   | MmugDNA.13593.1 | 8.28  | 8.09  | 0.67 | 0.05 | 1.14  | 0.306273 | 0.224594 | 0.659381 | 0.497613 |
| MmugDNA.13596.1.S1_at   | MmugDNA.13596.1 | 10.35 | 10.44 | 0.17 | 0.06 | -1.06 | 0.547106 | 0.090464 | 0.808925 | 0.344952 |
| MmugDNA.13605.1.S1_at   | MmugDNA.13605.1 | 5.4   | 5.31  | 0.06 | 0.15 | 1.06  | 0.334097 | 0.242239 | 0.680042 | 0.51267  |
| MmugDNA.13612.1.S1_at   | MmugDNA.13612.1 | 7.29  | 7.23  | 0.26 | 0.08 | 1.04  | 0.260735 | 0.299255 | 0.623301 | 0.557769 |
| MmugDNA.13613.1.S1_at   | MmugDNA.13613.1 | 5.09  | 5.1   | 0.18 | 0.06 | -1.01 | 0.551664 | 0.828707 | 0.81144  | 0.901558 |
| MmugDNA.13617.1.S1_at   | MmugDNA.13617.1 | 7.67  | 7.81  | 0.26 | 0.17 | -1.1  | 0.901135 | 0.985584 | 0.966467 | 0.991812 |
| MmugDNA.13619.1.S1_at   | MmugDNA.13619.1 | 4.28  | 4.33  | 0.04 | 0.01 | -1.03 | 0.135062 | 0.038063 | 0.50914  | 0.239717 |
| MmugDNA.13620.1.S1_at   | MmugDNA.13620.1 | 6.07  | 5.98  | 0.38 | 0.21 | 1.07  | 0.641402 | 0.747725 | 0.857305 | 0.853252 |
| MmugDNA.13622.1.S1_at   | MmugDNA.13622.1 | 4.43  | 4.54  | 0.08 | 0.1  | -1.08 | 0.42374  | 0.601956 | 0.739193 | 0.763127 |
| MmugDNA.13625.1.S1_at   | MmugDNA.13625.1 | 11.89 | 12.08 | 0.16 | 0.02 | -1.14 | 0.084144 | 0.035466 | 0.450548 | 0.232564 |
| MmugDNA.13625.1.S1_s_at | MmugDNA.13625.1 | 11.16 | 11.36 | 0.15 | 0.02 | -1.14 | 0.101044 | 0.019836 | 0.47159  | 0.177162 |
| MmugDNA.13626.1.S1_at   | MmugDNA.13626.1 | 10.14 | 9.95  | 0.52 | 0.26 | 1.14  | 0.940764 | 0.345976 | 0.979855 | 0.59115  |
| MmugDNA.13627.1.S1_at   | MmugDNA.13627.1 | 4     | 4.09  | 0.42 | 0.08 | -1.07 | 0.650495 | 0.889122 | 0.860959 | 0.936796 |
| MmugDNA.13628.1.S1_at   | MmugDNA.13628.1 | 6.26  | 7.89  | 0.63 | 0.55 | -3.09 | 0.032945 | 0.032604 | 0.345526 | 0.223643 |
| MmugDNA.13630.1.S1_at   | MmugDNA.13630.1 | 3.66  | 3.66  | 0.51 | 0.16 | 1     | 0.515389 | 0.623076 | 0.79089  | 0.777502 |
| MmugDNA.13631.1.S1_at   | MmugDNA.13631.1 | 8.64  | 8.96  | 0.25 | 0.13 | -1.25 | 0.07787  | 0.318441 | 0.439987 | 0.571239 |
| MmugDNA.13631.1.S1_s_at | MmugDNA.13631.1 | 9.97  | 10.27 | 0.24 | 0.13 | -1.24 | 0.070552 | 0.182468 | 0.429592 | 0.459057 |
| MmugDNA.13634.1.S1_at   | MmugDNA.13634.1 | 10.22 | 10.06 | 0.17 | 0.18 | 1.12  | 0.780461 | 0.518023 | 0.919137 | 0.710089 |
| MmugDNA.13638.1.S1_at   | MmugDNA.13638.1 | 10.8  | 10.86 | 1.14 | 0.18 | -1.05 | 0.9811   | 0.099217 | 0.993962 | 0.357394 |

|                         |                 |       |       |      |      |       |          |          |          |          |
|-------------------------|-----------------|-------|-------|------|------|-------|----------|----------|----------|----------|
| MmugDNA.13640.1.S1_at   | MmugDNA.13640.1 | 6     | 5.91  | 0.15 | 0.03 | 1.07  | 0.402653 | 0.664568 | 0.725018 | 0.803448 |
| MmugDNA.13644.1.S1_at   | MmugDNA.13644.1 | 5.08  | 5.03  | 0.13 | 0.1  | 1.03  | 0.317015 | 0.651948 | 0.666916 | 0.796529 |
| MmugDNA.13648.1.S1_at   | MmugDNA.13648.1 | 6.2   | 6.42  | 0.15 | 0.14 | -1.16 | 0.084835 | 0.064691 | 0.451419 | 0.300314 |
| MmugDNA.13654.1.S1_at   | MmugDNA.13654.1 | 11.29 | 11.39 | 0.19 | 0.1  | -1.07 | 0.592026 | 0.005648 | 0.833648 | 0.103804 |
| MmugDNA.13655.1.S1_s_at | MmugDNA.13655.1 | 8.22  | 8.21  | 0.22 | 0.03 | 1.01  | 0.788871 | 0.950146 | 0.922472 | 0.971594 |
| MmugDNA.13662.1.S1_at   | MmugDNA.13662.1 | 4.89  | 4.89  | 0.14 | 0.1  | 1     | 0.668534 | 0.115775 | 0.86912  | 0.382814 |
| MmugDNA.13663.1.S1_at   | MmugDNA.13663.1 | 11.56 | 11.69 | 0.17 | 0.03 | -1.09 | 0.810805 | 0.813168 | 0.931427 | 0.891963 |
| MmugDNA.13664.1.S1_at   | MmugDNA.13664.1 | 10.53 | 10.55 | 0.05 | 0.04 | -1.02 | 0.209388 | 0.441721 | 0.580868 | 0.659854 |
| MmugDNA.13666.1.S1_at   | MmugDNA.13666.1 | 3.58  | 3.55  | 0.17 | 0.05 | 1.02  | 0.272787 | 0.444585 | 0.632514 | 0.662072 |
| MmugDNA.13667.1.S1_at   | MmugDNA.13667.1 | 8.53  | 8.14  | 0.23 | 0.37 | 1.31  | 0.132446 | 0.125847 | 0.506752 | 0.396315 |
| MmugDNA.13667.1.S1_x_at | MmugDNA.13667.1 | 8.43  | 8.05  | 0.1  | 0.28 | 1.3   | 0.046575 | 0.053602 | 0.378317 | 0.277182 |
| MmugDNA.13670.1.S1_at   | MmugDNA.13670.1 | 10.26 | 10.38 | 0.1  | 0.05 | -1.09 | 0.213279 | 0.60688  | 0.583803 | 0.766118 |
| MmugDNA.13674.1.S1_at   | MmugDNA.13674.1 | 5.61  | 5.87  | 0.31 | 0.24 | -1.19 | 0.795874 | 0.208646 | 0.924994 | 0.482544 |
| MmugDNA.13679.1.S1_at   | MmugDNA.13679.1 | 6.59  | 6.45  | 0.14 | 0.04 | 1.1   | 0.238296 | 0.580383 | 0.605262 | 0.749646 |
| MmugDNA.13690.1.S1_at   | MmugDNA.13690.1 | 11.21 | 11.1  | 0.7  | 0.13 | 1.09  | 0.689804 | 0.633996 | 0.879092 | 0.784594 |
| MmugDNA.13693.1.S1_at   | MmugDNA.13693.1 | 8.89  | 9.66  | 0.06 | 0.03 | -1.7  | 0.000039 | 0.008358 | 0.108151 | 0.121281 |
| MmugDNA.13694.1.S1_at   | MmugDNA.13694.1 | 11.38 | 11.34 | 0.26 | 0.03 | 1.03  | 0.995733 | 0.848651 | 0.998312 | 0.914061 |
| MmugDNA.13696.1.S1_at   | MmugDNA.13696.1 | 10.96 | 11.1  | 0.05 | 0.16 | -1.1  | 0.078999 | 0.112187 | 0.441671 | 0.377537 |
| MmugDNA.13699.1.S1_at   | MmugDNA.13699.1 | 12.69 | 12.69 | 0.21 | 0.02 | -1    | 0.994643 | 0.134581 | 0.997984 | 0.406629 |
| MmugDNA.13699.1.S1_s_at | MmugDNA.13699.1 | 12.06 | 12.01 | 0.19 | 0.03 | 1.03  | 0.6711   | 0.074555 | 0.870234 | 0.318185 |
| MmugDNA.137.1.S1_at     | MmugDNA.137.1   | 7.99  | 8.05  | 0.38 | 0.05 | -1.05 | 0.694545 | 0.748536 | 0.881132 | 0.853696 |
| MmugDNA.13701.1.S1_at   | MmugDNA.13701.1 | 5.1   | 5.09  | 0.09 | 0.1  | 1.01  | 0.854245 | 0.557345 | 0.948453 | 0.735031 |
| MmugDNA.13702.1.S1_at   | MmugDNA.13702.1 | 12.71 | 12.67 | 0.24 | 0.06 | 1.03  | 0.586181 | 0.144157 | 0.831191 | 0.418037 |
| MmugDNA.13708.1.S1_at   | MmugDNA.13708.1 | 10.34 | 9.78  | 0.13 | 0.08 | 1.48  | 0.003928 | 0.019541 | 0.198571 | 0.175536 |
| MmugDNA.1371.1.S1_at    | MmugDNA.1371.1  | 7.72  | 7.04  | 0.31 | 0.11 | 1.6   | 0.018713 | 0.001232 | 0.298184 | 0.05478  |
| MmugDNA.13713.1.S1_at   | MmugDNA.13713.1 | 8.19  | 7.19  | 0.47 | 0.04 | 1.99  | 0.057316 | 0.055839 | 0.401913 | 0.282161 |
| MmugDNA.13716.1.S1_s_at | MmugDNA.13716.1 | 11.58 | 11.45 | 0.35 | 0.09 | 1.09  | 0.165899 | 0.023833 | 0.538623 | 0.193372 |
| MmugDNA.13718.1.S1_at   | MmugDNA.13718.1 | 7.08  | 7.04  | 0.25 | 0.02 | 1.03  | 0.518061 | 0.761049 | 0.792409 | 0.861185 |
| MmugDNA.13719.1.S1_at   | MmugDNA.13719.1 | 11.71 | 11.73 | 0.21 | 0.07 | -1.01 | 0.481027 | 0.506266 | 0.771639 | 0.702368 |
| MmugDNA.13723.1.S1_at   | MmugDNA.13723.1 | 11.59 | 11.74 | 0.05 | 0.12 | -1.11 | 0.129015 | 0.324434 | 0.503646 | 0.575042 |
| MmugDNA.13723.1.S1_s_at | MmugDNA.13723.1 | 12.19 | 12.19 | 0.07 | 0.12 | -1    | 0.342319 | 0.224241 | 0.685741 | 0.497164 |
| MmugDNA.13727.1.S1_at   | MmugDNA.13727.1 | 10.25 | 10.89 | 0.44 | 0.21 | -1.56 | 0.398025 | 0.544882 | 0.722235 | 0.727183 |
| MmugDNA.13729.1.S1_at   | MmugDNA.13729.1 | 6.51  | 6.49  | 0.01 | 0.05 | 1.01  | 0.536758 | 0.082141 | 0.802473 | 0.330937 |
| MmugDNA.13734.1.S1_at   | MmugDNA.13734.1 | 8.42  | 8.44  | 0.35 | 0.03 | -1.01 | 0.8207   | 0.958425 | 0.935289 | 0.976452 |
| MmugDNA.13739.1.S1_at   | MmugDNA.13739.1 | 11.26 | 11.29 | 0.24 | 0.12 | -1.02 | 0.984866 | 0.817532 | 0.995256 | 0.894746 |
| MmugDNA.13740.1.S1_at   | MmugDNA.13740.1 | 3.06  | 3.06  | 0.1  | 0.08 | -1    | 0.6525   | 0.825555 | 0.862013 | 0.899762 |
| MmugDNA.13742.1.S1_at   | MmugDNA.13742.1 | 11.05 | 10.96 | 0.28 | 0.11 | 1.07  | 0.353444 | 0.134872 | 0.693252 | 0.406878 |
| MmugDNA.13742.1.S1_s_at | MmugDNA.13742.1 | 11.19 | 11.15 | 0.22 | 0.12 | 1.03  | 0.690181 | 0.185919 | 0.87934  | 0.461772 |
| MmugDNA.13744.1.S1_at   | MmugDNA.13744.1 | 3.22  | 3.15  | 0.27 | 0.16 | 1.05  | 0.156509 | 0.228748 | 0.529581 | 0.501005 |
| MmugDNA.13750.1.S1_at   | MmugDNA.13750.1 | 10.02 | 10.32 | 0.19 | 0.18 | -1.23 | 0.125697 | 0.119813 | 0.499685 | 0.388577 |
| MmugDNA.13752.1.S1_at   | MmugDNA.13752.1 | 9.42  | 9.68  | 0.12 | 0.22 | -1.2  | 0.054162 | 0.005048 | 0.396099 | 0.099019 |
| MmugDNA.13753.1.S1_at   | MmugDNA.13753.1 | 4.2   | 4.08  | 0.03 | 0.14 | 1.08  | 0.170184 | 0.234878 | 0.543323 | 0.506125 |
| MmugDNA.13754.1.S1_at   | MmugDNA.13754.1 | 5.85  | 5.65  | 0.1  | 0.09 | 1.15  | 0.057221 | 0.085818 | 0.401473 | 0.337901 |



|                         |                 |       |       |      |      |       |          |          |          |          |
|-------------------------|-----------------|-------|-------|------|------|-------|----------|----------|----------|----------|
| MmugDNA.13757.1.S1_at   | MmugDNA.13757.1 | 11.13 | 11.73 | 3.53 | 0.24 | -1.52 | 0.330119 | 0.193752 | 0.676844 | 0.468828 |
| MmugDNA.13758.1.S1_at   | MmugDNA.13758.1 | 11.16 | 11.63 | 0.26 | 0.01 | -1.39 | 0.035249 | 0.048866 | 0.351463 | 0.265858 |
| MmugDNA.13760.1.S1_at   | MmugDNA.13760.1 | 11.25 | 12.19 | 0.32 | 0.1  | -1.92 | 0.008676 | 0.004046 | 0.236048 | 0.090281 |
| MmugDNA.13767.1.S1_at   | MmugDNA.13767.1 | 8.33  | 6.57  | 0.28 | 1.07 | 3.4   | 0.023235 | 0.002626 | 0.314809 | 0.075772 |
| MmugDNA.13774.1.S1_at   | MmugDNA.13774.1 | 12.41 | 12.61 | 0.02 | 0.2  | -1.15 | 0.060224 | 0.241607 | 0.407754 | 0.512212 |
| MmugDNA.13776.1.S1_s_at | MmugDNA.13776.1 | 12.26 | 12.16 | 0.15 | 0.14 | 1.08  | 0.638031 | 0.289251 | 0.855783 | 0.550293 |
| MmugDNA.13777.1.S1_at   | MmugDNA.13777.1 | 8.24  | 8.14  | 1.12 | 0.12 | 1.08  | 0.852048 | 0.467427 | 0.947906 | 0.677085 |
| MmugDNA.1378.1.S1_at    | MmugDNA.1378.1  | 4.45  | 4.55  | 0.09 | 0.17 | -1.07 | 0.244247 | 0.29175  | 0.60991  | 0.552054 |
| MmugDNA.13783.1.S1_at   | MmugDNA.13783.1 | 6.51  | 6.52  | 0.19 | 0.1  | -1    | 0.633323 | 0.253375 | 0.853423 | 0.521701 |
| MmugDNA.13790.1.S1_at   | MmugDNA.13790.1 | 12.05 | 12.12 | 0.13 | 0.09 | -1.05 | 0.289146 | 0.389347 | 0.645892 | 0.62342  |
| MmugDNA.13792.1.S1_at   | MmugDNA.13792.1 | 6.7   | 6.64  | 0.12 | 0.06 | -1.04 | 0.316398 | 0.072799 | 0.666473 | 0.315651 |
| MmugDNA.13802.1.S1_at   | MmugDNA.13802.1 | 12.63 | 12.95 | 0.26 | 0.12 | -1.25 | 0.058993 | 0.056564 | 0.405865 | 0.283838 |
| MmugDNA.13806.1.S1_at   | MmugDNA.13806.1 | 5.28  | 5.41  | 0.43 | 0.45 | -1.1  | 0.454369 | 0.395432 | 0.756743 | 0.627474 |
| MmugDNA.13810.1.S1_at   | MmugDNA.13810.1 | 13.46 | 13.25 | 0.3  | 0.1  | 1.16  | 0.856081 | 0.221485 | 0.949177 | 0.494795 |
| MmugDNA.13815.1.S1_at   | MmugDNA.13815.1 | 10.08 | 10.21 | 0.37 | 0.15 | -1.09 | 0.139674 | 0.248148 | 0.515094 | 0.517567 |
| MmugDNA.13828.1.S1_at   | MmugDNA.13828.1 | 4.22  | 6.18  | 0.14 | 0.07 | -3.89 | 0.000025 | 0.008715 | 0.108151 | 0.123746 |
| MmugDNA.13832.1.S1_s_at | MmugDNA.13832.1 | 10.85 | 10.7  | 0.21 | 0.01 | 1.11  | 0.24503  | 0.599497 | 0.610441 | 0.76147  |
| MmugDNA.13833.1.S1_at   | MmugDNA.13833.1 | 10.04 | 9.09  | 0.21 | 0.15 | 1.92  | 0.005001 | 0.002414 | 0.204319 | 0.072905 |
| MmugDNA.13836.1.S1_at   | MmugDNA.13836.1 | 7.34  | 7.45  | 0.13 | 0.1  | -1.08 | 0.228659 | 0.059011 | 0.597571 | 0.289764 |
| MmugDNA.13838.1.S1_at   | MmugDNA.13838.1 | 8.63  | 8.89  | 0.67 | 0.27 | -1.2  | 0.882558 | 0.725263 | 0.959298 | 0.840954 |
| MmugDNA.13842.1.S1_at   | MmugDNA.13842.1 | 10.2  | 9.81  | 0.14 | 0.14 | 1.3   | 0.013443 | 0.005593 | 0.268462 | 0.10339  |
| MmugDNA.13848.1.S1_at   | MmugDNA.13848.1 | 6.68  | 6.8   | 0.23 | 0.07 | -1.09 | 0.939915 | 0.972968 | 0.979551 | 0.985389 |
| MmugDNA.13852.1.S1_at   | MmugDNA.13852.1 | 8     | 7.89  | 0.23 | 0.08 | 1.08  | 0.176275 | 0.236078 | 0.549326 | 0.507179 |
| MmugDNA.13861.1.S1_at   | MmugDNA.13861.1 | 4.86  | 4.47  | 0.85 | 0.07 | 1.31  | 0.262726 | 0.290521 | 0.624951 | 0.551231 |
| MmugDNA.13869.1.S1_x_at | MmugDNA.13869.1 | 3.77  | 3.71  | 0.06 | 0.06 | 1.04  | 0.618906 | 0.129426 | 0.846305 | 0.400827 |
| MmugDNA.13872.1.S1_at   | MmugDNA.13872.1 | 6.54  | 7     | 0.51 | 0.24 | -1.37 | 0.378874 | 0.356229 | 0.708471 | 0.598166 |
| MmugDNA.13873.1.S1_at   | MmugDNA.13873.1 | 8.26  | 8.99  | 0.21 | 0.14 | -1.67 | 0.006626 | 0.001906 | 0.220844 | 0.065148 |
| MmugDNA.13874.1.S1_at   | MmugDNA.13874.1 | 3.9   | 3.76  | 0.03 | 0.09 | 1.11  | 0.049431 | 0.077929 | 0.385474 | 0.324277 |
| MmugDNA.13875.1.S1_at   | MmugDNA.13875.1 | 12.71 | 12.62 | 0.1  | 0.05 | 1.06  | 0.977355 | 0.133024 | 0.992685 | 0.40469  |
| MmugDNA.13881.1.S1_at   | MmugDNA.13881.1 | 6.77  | 7.16  | 0.24 | 0.16 | -1.3  | 0.34429  | 0.039907 | 0.686913 | 0.244852 |
| MmugDNA.13882.1.S1_at   | MmugDNA.13882.1 | 8.39  | 8.1   | 0.53 | 0.07 | 1.22  | 0.406312 | 0.171305 | 0.727915 | 0.447809 |
| MmugDNA.13883.1.S1_at   | MmugDNA.13883.1 | 4.04  | 4.06  | 0.15 | 0.08 | -1.02 | 0.427888 | 0.616347 | 0.741454 | 0.772571 |
| MmugDNA.13886.1.S1_at   | MmugDNA.13886.1 | 7.08  | 7.2   | 0.47 | 0.01 | -1.09 | 0.750446 | 0.080882 | 0.905496 | 0.328858 |
| MmugDNA.13893.1.S1_at   | MmugDNA.13893.1 | 12.11 | 12.12 | 0.1  | 0.15 | -1    | 0.425207 | 0.506572 | 0.739924 | 0.702503 |
| MmugDNA.139.1.S1_at     | MmugDNA.139.1   | 11.44 | 11.64 | 0.24 | 0.16 | -1.15 | 0.427762 | 0.457175 | 0.741365 | 0.670746 |
| MmugDNA.13900.1.S1_at   | MmugDNA.13900.1 | 3.87  | 3.76  | 0.2  | 0.12 | 1.08  | 0.478407 | 0.505832 | 0.77008  | 0.702218 |
| MmugDNA.1391.1.S1_at    | MmugDNA.1391.1  | 7.41  | 7.37  | 0.74 | 0.49 | 1.02  | 0.685154 | 0.170393 | 0.87671  | 0.447103 |
| MmugDNA.13911.1.S1_s_at | MmugDNA.13911.1 | 10.57 | 10.32 | 0.31 | 0.08 | 1.18  | 0.065749 | 0.056838 | 0.420945 | 0.284531 |
| MmugDNA.13913.1.S1_at   | MmugDNA.13913.1 | 9.15  | 9.23  | 0.36 | 0.15 | -1.06 | 0.627641 | 0.497847 | 0.850661 | 0.697071 |
| MmugDNA.13914.1.S1_at   | MmugDNA.13914.1 | 7.8   | 6.86  | 0.47 | 0.13 | 1.91  | 0.039116 | 0.00309  | 0.361188 | 0.081194 |
| MmugDNA.13916.1.S1_at   | MmugDNA.13916.1 | 10.62 | 11.42 | 0.5  | 0.08 | -1.74 | 0.026871 | 0.008309 | 0.326584 | 0.120929 |
| MmugDNA.13917.1.S1_at   | MmugDNA.13917.1 | 7.81  | 8     | 0.24 | 0.23 | -1.14 | 0.389955 | 0.01355  | 0.716422 | 0.149001 |
| MmugDNA.13932.1.S1_at   | MmugDNA.13932.1 | 6.53  | 6.8   | 0.25 | 0.11 | -1.21 | 0.156128 | 0.215152 | 0.529456 | 0.488943 |

|                         |                 |       |       |      |      |       |          |          |          |          |
|-------------------------|-----------------|-------|-------|------|------|-------|----------|----------|----------|----------|
| MmugDNA.13933.1.S1_at   | MmugDNA.13933.1 | 12.79 | 12.69 | 0.73 | 0.1  | 1.07  | 0.501033 | 0.391231 | 0.783101 | 0.624922 |
| MmugDNA.1394.1.S1_at    | MmugDNA.1394.1  | 10.58 | 10.39 | 0.25 | 0.22 | 1.14  | 0.545432 | 0.005408 | 0.807818 | 0.10146  |
| MmugDNA.13945.1.S1_at   | MmugDNA.13945.1 | 6.37  | 6.24  | 0.06 | 0.08 | 1.09  | 0.090357 | 0.085337 | 0.458536 | 0.337219 |
| MmugDNA.13946.1.S1_at   | MmugDNA.13946.1 | 5.46  | 5.36  | 0.14 | 0.18 | 1.07  | 0.256643 | 0.328684 | 0.620603 | 0.578213 |
| MmugDNA.1395.1.S1_at    | MmugDNA.1395.1  | 6.37  | 6.36  | 0.09 | 0.13 | 1     | 0.871024 | 0.910901 | 0.955206 | 0.949723 |
| MmugDNA.13953.1.S1_at   | MmugDNA.13953.1 | 11.05 | 11.07 | 0.3  | 0.08 | -1.01 | 0.963936 | 0.791801 | 0.988182 | 0.879751 |
| MmugDNA.13954.1.S1_at   | MmugDNA.13954.1 | 7.72  | 7.71  | 0.1  | 0.12 | 1.01  | 0.28628  | 0.77068  | 0.64358  | 0.866801 |
| MmugDNA.13955.1.S1_at   | MmugDNA.13955.1 | 12.04 | 12.03 | 0.08 | 0.05 | 1.01  | 0.7887   | 0.09153  | 0.922466 | 0.346614 |
| MmugDNA.13957.1.S1_at   | MmugDNA.13957.1 | 10.36 | 9.84  | 1    | 0.11 | 1.43  | 0.990066 | 0.741071 | 0.996301 | 0.850126 |
| MmugDNA.13958.1.S1_at   | MmugDNA.13958.1 | 6.37  | 6.53  | 0.88 | 0.23 | -1.12 | 0.944384 | 0.991686 | 0.980668 | 0.995392 |
| MmugDNA.13973.1.S1_at   | MmugDNA.13973.1 | 7.08  | 7.39  | 0.11 | 0.04 | -1.24 | 0.021113 | 0.056198 | 0.306884 | 0.282972 |
| MmugDNA.13976.1.S1_at   | MmugDNA.13976.1 | 4.07  | 4.24  | 0.1  | 0.06 | -1.13 | 0.14596  | 0.578937 | 0.520572 | 0.748776 |
| MmugDNA.13979.1.S1_at   | MmugDNA.13979.1 | 8.45  | 7.36  | 0.18 | 0.22 | 2.13  | 0.004046 | 0.000694 | 0.198571 | 0.044179 |
| MmugDNA.13983.1.S1_at   | MmugDNA.13983.1 | 6.65  | 6.77  | 0.15 | 0.07 | -1.09 | 0.249692 | 0.173335 | 0.615097 | 0.449791 |
| MmugDNA.13984.1.S1_at   | MmugDNA.13984.1 | 7.8   | 7.75  | 0.22 | 0.07 | 1.03  | 0.54171  | 0.664458 | 0.805219 | 0.803396 |
| MmugDNA.13992.1.S1_at   | MmugDNA.13992.1 | 10.04 | 10.1  | 0.24 | 0.09 | -1.04 | 0.622034 | 0.029191 | 0.847631 | 0.212884 |
| MmugDNA.13999.1.S1_at   | MmugDNA.13999.1 | 5.45  | 6.32  | 0.65 | 0.17 | -1.82 | 0.219596 | 0.09634  | 0.589062 | 0.353827 |
| MmugDNA.14006.1.S1_at   | MmugDNA.14006.1 | 5.54  | 7.36  | 0.32 | 0.12 | -3.53 | 0.000938 | 0.000282 | 0.153739 | 0.034568 |
| MmugDNA.14009.1.S1_s_at | MmugDNA.14009.1 | 9.85  | 10.04 | 0.48 | 0.09 | -1.14 | 0.795862 | 0.00268  | 0.924994 | 0.076408 |
| MmugDNA.14011.1.S1_s_at | MmugDNA.14011.1 | 4.01  | 3.49  | 0.46 | 0.14 | 1.44  | 0.206759 | 0.281878 | 0.578736 | 0.544844 |
| MmugDNA.14020.1.S1_at   | MmugDNA.14020.1 | 8.9   | 8.45  | 0.33 | 0.07 | 1.36  | 0.104099 | 0.274496 | 0.474823 | 0.538987 |
| MmugDNA.14022.1.S1_at   | MmugDNA.14022.1 | 6.08  | 6.04  | 0.18 | 0.13 | 1.03  | 0.603017 | 0.453262 | 0.839107 | 0.667661 |
| MmugDNA.14031.1.S1_at   | MmugDNA.14031.1 | 12.76 | 12.86 | 0.1  | 0.08 | -1.07 | 0.519585 | 0.280992 | 0.793262 | 0.544166 |
| MmugDNA.14033.1.S1_at   | MmugDNA.14033.1 | 2.86  | 2.99  | 0.19 | 0.07 | -1.09 | 0.673178 | 0.311577 | 0.871201 | 0.566537 |
| MmugDNA.14037.1.S1_at   | MmugDNA.14037.1 | 5.97  | 5.86  | 0.06 | 0.03 | 1.08  | 0.146191 | 0.244335 | 0.520572 | 0.514184 |
| MmugDNA.14045.1.S1_at   | MmugDNA.14045.1 | 4.78  | 4.77  | 0.29 | 0.06 | 1.01  | 0.343486 | 0.40769  | 0.686725 | 0.635135 |
| MmugDNA.14046.1.A1_at   | MmugDNA.14046.1 | 6.12  | 5.91  | 0.31 | 0.07 | 1.16  | 0.246569 | 0.344069 | 0.61204  | 0.58962  |
| MmugDNA.14046.1.S1_at   | MmugDNA.14046.1 | 5.97  | 5.87  | 0.08 | 0.03 | 1.07  | 0.085271 | 0.658547 | 0.452366 | 0.800401 |
| MmugDNA.14048.1.S1_at   | MmugDNA.14048.1 | 13.12 | 13.1  | 0.1  | 0.08 | 1.01  | 0.672673 | 0.854633 | 0.871051 | 0.917159 |
| MmugDNA.14052.1.S1_at   | MmugDNA.14052.1 | 7.05  | 7     | 0.18 | 0.03 | 1.03  | 0.531931 | 0.697973 | 0.799992 | 0.824551 |
| MmugDNA.14052.1.S1_s_at | MmugDNA.14052.1 | 5.84  | 6.52  | 0.08 | 0.54 | -1.61 | 0.039171 | 0.015423 | 0.361205 | 0.157699 |
| MmugDNA.14054.1.S1_at   | MmugDNA.14054.1 | 12.57 | 12.31 | 0.08 | 0.06 | 1.2   | 0.018641 | 0.028112 | 0.298177 | 0.209286 |
| MmugDNA.14061.1.S1_at   | MmugDNA.14061.1 | 4     | 4.03  | 0.08 | 0.18 | -1.02 | 0.547846 | 0.115544 | 0.809245 | 0.38267  |
| MmugDNA.14067.1.S1_at   | MmugDNA.14067.1 | 4.26  | 4.32  | 0.11 | 0.12 | -1.04 | 0.556243 | 0.738315 | 0.814002 | 0.848258 |
| MmugDNA.14068.1.S1_at   | MmugDNA.14068.1 | 12.09 | 12.45 | 0.51 | 0.07 | -1.29 | 0.297865 | 0.416703 | 0.652791 | 0.64167  |
| MmugDNA.14075.1.S1_at   | MmugDNA.14075.1 | 9.51  | 9.85  | 0.11 | 0.12 | -1.27 | 0.027185 | 0.00019  | 0.327322 | 0.030754 |
| MmugDNA.14076.1.S1_at   | MmugDNA.14076.1 | 6.68  | 7.02  | 0.59 | 0.33 | -1.27 | 0.590038 | 0.001995 | 0.832796 | 0.066264 |
| MmugDNA.14076.1.S1_s_at | MmugDNA.14076.1 | 7.29  | 7.27  | 0.53 | 0.34 | 1.02  | 0.730616 | 0.002643 | 0.896248 | 0.076012 |
| MmugDNA.14078.1.S1_at   | MmugDNA.14078.1 | 11.03 | 11.09 | 0.13 | 0.05 | -1.04 | 0.934938 | 0.525789 | 0.977948 | 0.715217 |
| MmugDNA.14080.1.S1_at   | MmugDNA.14080.1 | 7.2   | 7.21  | 0.13 | 0.08 | -1.01 | 0.750758 | 0.417553 | 0.905556 | 0.642252 |
| MmugDNA.14081.1.S1_at   | MmugDNA.14081.1 | 11.21 | 11.54 | 0.16 | 0.03 | -1.26 | 0.071099 | 0.004159 | 0.430341 | 0.091036 |
| MmugDNA.14088.1.S1_at   | MmugDNA.14088.1 | 10.61 | 10.59 | 0.2  | 0.06 | 1.01  | 0.319086 | 0.357375 | 0.668541 | 0.598986 |
| MmugDNA.14089.1.S1_at   | MmugDNA.14089.1 | 7.41  | 7.61  | 1.14 | 0.26 | -1.15 | 0.936217 | 0.620933 | 0.978537 | 0.775708 |

|                         |                 |       |       |      |      |       |          |          |          |          |
|-------------------------|-----------------|-------|-------|------|------|-------|----------|----------|----------|----------|
| MmugDNA.14090.1.S1_at   | MmugDNA.14090.1 | 8.06  | 8.03  | 0.23 | 0.06 | 1.02  | 0.619951 | 0.809833 | 0.846932 | 0.890412 |
| MmugDNA.14093.1.S1_at   | MmugDNA.14093.1 | 10.99 | 10.93 | 0.27 | 0.11 | 1.04  | 0.737347 | 0.386972 | 0.899459 | 0.621935 |
| MmugDNA.14096.1.S1_at   | MmugDNA.14096.1 | 3.6   | 3.45  | 0.16 | 0.07 | 1.11  | 0.368859 | 0.54764  | 0.703835 | 0.728583 |
| MmugDNA.14099.1.S1_at   | MmugDNA.14099.1 | 9.6   | 9.53  | 0.29 | 0.07 | 1.05  | 0.884221 | 0.05912  | 0.959863 | 0.290056 |
| MmugDNA.14109.1.S1_at   | MmugDNA.14109.1 | 7.16  | 6.73  | 0.19 | 0.3  | 1.34  | 0.090122 | 0.183377 | 0.457992 | 0.459553 |
| MmugDNA.14110.1.S1_at   | MmugDNA.14110.1 | 11.98 | 11.86 | 0.32 | 0.04 | 1.09  | 0.638145 | 0.615041 | 0.855862 | 0.771703 |
| MmugDNA.14118.1.S1_at   | MmugDNA.14118.1 | 8.07  | 8.6   | 0.46 | 0.06 | -1.44 | 0.375687 | 0.119674 | 0.7066   | 0.388324 |
| MmugDNA.1412.1.S1_at    | MmugDNA.1412.1  | 4.74  | 4.87  | 0.06 | 0.07 | -1.09 | 0.119903 | 0.247644 | 0.493259 | 0.517028 |
| MmugDNA.14121.1.S1_at   | MmugDNA.14121.1 | 5.15  | 5.48  | 0.22 | 0.42 | -1.26 | 0.396564 | 0.222721 | 0.721517 | 0.495669 |
| MmugDNA.14123.1.S1_at   | MmugDNA.14123.1 | 9.41  | 10.06 | 0.38 | 0.13 | -1.57 | 0.051379 | 0.017068 | 0.390032 | 0.165561 |
| MmugDNA.14124.1.S1_at   | MmugDNA.14124.1 | 10.22 | 10.36 | 0.38 | 0.39 | -1.1  | 0.816355 | 0.511918 | 0.933499 | 0.705856 |
| MmugDNA.14128.1.S1_at   | MmugDNA.14128.1 | 3.87  | 3.77  | 0.27 | 0.42 | 1.07  | 0.900116 | 0.332882 | 0.966012 | 0.581266 |
| MmugDNA.14132.1.S1_at   | MmugDNA.14132.1 | 10.94 | 11    | 1.1  | 0.08 | -1.04 | 0.893105 | 0.390127 | 0.963441 | 0.624002 |
| MmugDNA.14137.1.S1_at   | MmugDNA.14137.1 | 13.54 | 13.42 | 0.08 | 0.09 | 1.09  | 0.0493   | 0.078769 | 0.385423 | 0.325725 |
| MmugDNA.14139.1.S1_at   | MmugDNA.14139.1 | 7.54  | 7.76  | 0.05 | 0.06 | -1.17 | 0.006228 | 0.011949 | 0.217603 | 0.141415 |
| MmugDNA.1414.1.S1_at    | MmugDNA.1414.1  | 6.06  | 6.28  | 0.28 | 0.19 | -1.16 | 0.739988 | 0.022562 | 0.900699 | 0.187982 |
| MmugDNA.14145.1.S1_s_at | MmugDNA.14145.1 | 7.31  | 7.21  | 0.43 | 0.34 | 1.07  | 0.64209  | 0.212378 | 0.857628 | 0.486325 |
| MmugDNA.14147.1.S1_at   | MmugDNA.14147.1 | 6.43  | 6.33  | 0.13 | 0.05 | 1.07  | 0.091275 | 0.189533 | 0.459035 | 0.465277 |
| MmugDNA.14151.1.S1_at   | MmugDNA.14151.1 | 11.57 | 11.31 | 0.35 | 0.15 | 1.2   | 0.196498 | 0.285972 | 0.567086 | 0.547506 |
| MmugDNA.14154.1.S1_at   | MmugDNA.14154.1 | 10.69 | 10.67 | 0.15 | 0.08 | 1.02  | 0.676957 | 0.945197 | 0.873333 | 0.968914 |
| MmugDNA.14155.1.S1_at   | MmugDNA.14155.1 | 7.71  | 7.8   | 0.97 | 0.21 | -1.06 | 0.919462 | 0.232167 | 0.972575 | 0.503874 |
| MmugDNA.1416.1.S1_at    | MmugDNA.1416.1  | 7.8   | 8.06  | 0.23 | 0.12 | -1.2  | 0.45294  | 0.323731 | 0.755901 | 0.574587 |
| MmugDNA.14168.1.S1_at   | MmugDNA.14168.1 | 8.42  | 8.87  | 0.14 | 0.09 | -1.37 | 0.006771 | 0.091095 | 0.223856 | 0.345932 |
| MmugDNA.14171.1.S1_s_at | MmugDNA.14171.1 | 9.69  | 10.23 | 0.34 | 0.16 | -1.45 | 0.238923 | 0.324327 | 0.60548  | 0.574924 |
| MmugDNA.14172.1.S1_at   | MmugDNA.14172.1 | 6.25  | 6.39  | 0.37 | 0.08 | -1.1  | 0.469636 | 0.683169 | 0.765623 | 0.815172 |
| MmugDNA.14174.1.S1_at   | MmugDNA.14174.1 | 3.02  | 3.05  | 0.05 | 0.09 | -1.02 | 0.98305  | 0.167415 | 0.994849 | 0.443785 |
| MmugDNA.14178.1.S1_at   | MmugDNA.14178.1 | 3.88  | 3.87  | 0.12 | 0.12 | 1.01  | 0.32838  | 0.477447 | 0.67577  | 0.683498 |
| MmugDNA.14185.1.S1_at   | MmugDNA.14185.1 | 3.88  | 3.65  | 0.19 | 0.1  | 1.18  | 0.381505 | 0.106207 | 0.710122 | 0.368585 |
| MmugDNA.14188.1.S1_at   | MmugDNA.14188.1 | 5.05  | 4.89  | 0.04 | 0.15 | 1.12  | 0.191556 | 0.289869 | 0.562859 | 0.550831 |
| MmugDNA.14192.1.S1_at   | MmugDNA.14192.1 | 6.7   | 7.36  | 0.99 | 0.15 | -1.58 | 0.100696 | 0.212114 | 0.471575 | 0.486036 |
| MmugDNA.14193.1.S1_at   | MmugDNA.14193.1 | 11.58 | 11.33 | 0.47 | 0.1  | 1.18  | 0.59281  | 0.481332 | 0.833974 | 0.686365 |
| MmugDNA.14194.1.S1_at   | MmugDNA.14194.1 | 11.92 | 11.98 | 0.09 | 0.02 | -1.04 | 0.171289 | 0.055359 | 0.544459 | 0.281125 |
| MmugDNA.14203.1.S1_at   | MmugDNA.14203.1 | 6.55  | 6.52  | 0.17 | 0.08 | 1.02  | 0.937694 | 0.917278 | 0.979059 | 0.953776 |
| MmugDNA.14204.1.S1_at   | MmugDNA.14204.1 | 8.75  | 10.25 | 1.71 | 0.23 | -2.83 | 0.176025 | 0.101387 | 0.549155 | 0.36112  |
| MmugDNA.14206.1.S1_at   | MmugDNA.14206.1 | 5.11  | 5.16  | 0.05 | 0.15 | -1.03 | 0.61588  | 0.727245 | 0.844679 | 0.84224  |
| MmugDNA.14209.1.S1_at   | MmugDNA.14209.1 | 6.52  | 6.49  | 0.04 | 0.02 | 1.02  | 0.143246 | 0.437904 | 0.518489 | 0.657026 |
| MmugDNA.1421.1.S1_at    | MmugDNA.1421.1  | 10.2  | 10.78 | 0.54 | 0.1  | -1.49 | 0.141145 | 0.127932 | 0.516345 | 0.398887 |
| MmugDNA.14210.1.S1_at   | MmugDNA.14210.1 | 12.88 | 12.66 | 0.06 | 0.04 | 1.16  | 0.005416 | 0.203638 | 0.208157 | 0.47789  |
| MmugDNA.14211.1.S1_at   | MmugDNA.14211.1 | 6.6   | 6.49  | 0.17 | 0.02 | 1.07  | 0.272169 | 0.365336 | 0.631921 | 0.605468 |
| MmugDNA.14213.1.S1_at   | MmugDNA.14213.1 | 11.52 | 11.45 | 0.21 | 0.12 | 1.05  | 0.456358 | 0.233828 | 0.75784  | 0.505169 |
| MmugDNA.14218.1.S1_at   | MmugDNA.14218.1 | 6.07  | 5.99  | 0.41 | 0.3  | 1.06  | 0.628862 | 0.851811 | 0.851318 | 0.915767 |
| MmugDNA.14227.1.S1_at   | MmugDNA.14227.1 | 10.94 | 11.69 | 2.39 | 0.3  | -1.68 | 0.475789 | 0.312708 | 0.768685 | 0.567299 |
| MmugDNA.14230.1.S1_at   | MmugDNA.14230.1 | 10.21 | 9.97  | 0.58 | 0.18 | 1.18  | 0.396701 | 0.236386 | 0.721542 | 0.507308 |

|                         |                 |       |       |      |      |        |          |          |          |          |
|-------------------------|-----------------|-------|-------|------|------|--------|----------|----------|----------|----------|
| MmugDNA.14231.1.S1_at   | MmugDNA.14231.1 | 7.01  | 5.98  | 0.85 | 0.45 | 2.03   | 0.122118 | 0.010569 | 0.495677 | 0.134182 |
| MmugDNA.14233.1.S1_at   | MmugDNA.14233.1 | 11.5  | 11.43 | 0.12 | 0.05 | 1.05   | 0.579342 | 0.000877 | 0.82645  | 0.047586 |
| MmugDNA.14234.1.S1_at   | MmugDNA.14234.1 | 13.71 | 13.62 | 0.35 | 0.09 | 1.06   | 0.552868 | 0.3752   | 0.811917 | 0.613249 |
| MmugDNA.1424.1.S1_at    | MmugDNA.1424.1  | 5.93  | 5.89  | 0.08 | 0.03 | 1.03   | 0.426256 | 0.884682 | 0.740398 | 0.934321 |
| MmugDNA.14243.1.S1_at   | MmugDNA.14243.1 | 5.87  | 5.92  | 0.18 | 0.16 | -1.04  | 0.700405 | 0.814968 | 0.883486 | 0.893221 |
| MmugDNA.14245.1.S1_at   | MmugDNA.14245.1 | 5.52  | 5.65  | 0.17 | 0.04 | -1.1   | 0.88972  | 0.623243 | 0.961988 | 0.777656 |
| MmugDNA.14253.1.S1_at   | MmugDNA.14253.1 | 4.39  | 4.25  | 0.12 | 0.09 | 1.1    | 0.102634 | 0.102909 | 0.472874 | 0.363558 |
| MmugDNA.14255.1.S1_at   | MmugDNA.14255.1 | 9.03  | 9.54  | 0.08 | 0.1  | -1.43  | 0.002068 | 0.00228  | 0.174088 | 0.07037  |
| MmugDNA.14256.1.S1_at   | MmugDNA.14256.1 | 12.31 | 12.28 | 0.04 | 0.04 | 1.02   | 0.105136 | 0.104035 | 0.476838 | 0.36495  |
| MmugDNA.14257.1.S1_at   | MmugDNA.14257.1 | 10.39 | 10.6  | 0.46 | 0.05 | -1.15  | 0.867288 | 0.066175 | 0.953465 | 0.302783 |
| MmugDNA.14258.1.S1_s_at | MmugDNA.14258.1 | 13.49 | 13.44 | 0.21 | 0.01 | 1.03   | 0.664917 | 0.866858 | 0.867733 | 0.92433  |
| MmugDNA.14260.1.S1_at   | MmugDNA.14260.1 | 4.49  | 4.25  | 0.13 | 0.02 | 1.18   | 0.030383 | 0.003906 | 0.337508 | 0.088806 |
| MmugDNA.14261.1.S1_at   | MmugDNA.14261.1 | 5.68  | 5.68  | 0.09 | 0.03 | -1     | 0.901372 | 0.947887 | 0.966513 | 0.970378 |
| MmugDNA.14268.1.S1_at   | MmugDNA.14268.1 | 10.01 | 10.2  | 0.37 | 0.07 | -1.14  | 0.385504 | 0.606325 | 0.712865 | 0.765746 |
| MmugDNA.14272.1.S1_at   | MmugDNA.14272.1 | 3.53  | 3.41  | 0.06 | 0.08 | 1.09   | 0.171835 | 0.223324 | 0.545162 | 0.49612  |
| MmugDNA.14282.1.S1_at   | MmugDNA.14282.1 | 5.03  | 4.81  | 0.32 | 0.1  | 1.16   | 0.145855 | 0.203441 | 0.520572 | 0.477634 |
| MmugDNA.14285.1.S1_at   | MmugDNA.14285.1 | 9.06  | 10.03 | 0.7  | 0.01 | -1.95  | 0.234952 | 0.143296 | 0.602251 | 0.417283 |
| MmugDNA.14287.1.S1_at   | MmugDNA.14287.1 | 5.62  | 5.24  | 0.14 | 0.04 | 1.3    | 0.032975 | 0.096873 | 0.345601 | 0.354286 |
| MmugDNA.14289.1.S1_at   | MmugDNA.14289.1 | 9.66  | 10.03 | 0.46 | 0.15 | -1.29  | 0.094008 | 0.002783 | 0.463368 | 0.077966 |
| MmugDNA.14290.1.S1_at   | MmugDNA.14290.1 | 11.03 | 10.89 | 1    | 0.19 | 1.1    | 0.820786 | 0.273782 | 0.935289 | 0.538287 |
| MmugDNA.14297.1.S1_at   | MmugDNA.14297.1 | 4.14  | 4.21  | 0.05 | 0.11 | -1.05  | 0.573945 | 0.7125   | 0.823778 | 0.833383 |
| MmugDNA.14298.1.S1_at   | MmugDNA.14298.1 | 6.96  | 7.33  | 0.45 | 0.14 | -1.29  | 0.7734   | 0.042467 | 0.915791 | 0.250702 |
| MmugDNA.14300.1.S1_at   | MmugDNA.14300.1 | 10.19 | 10.03 | 0.2  | 0.07 | 1.12   | 0.079027 | 0.18477  | 0.441671 | 0.460661 |
| MmugDNA.14303.1.S1_at   | MmugDNA.14303.1 | 8.25  | 10.13 | 3.11 | 0.3  | -3.69  | 0.203531 | 0.260503 | 0.574984 | 0.527026 |
| MmugDNA.14306.1.S1_at   | MmugDNA.14306.1 | 7.63  | 8.66  | 1.28 | 0.4  | -2.04  | 0.349771 | 0.147744 | 0.690827 | 0.42203  |
| MmugDNA.14307.1.S1_at   | MmugDNA.14307.1 | 9.55  | 9.5   | 0.56 | 0.13 | 1.03   | 0.286941 | 0.170576 | 0.644004 | 0.447204 |
| MmugDNA.14308.1.S1_at   | MmugDNA.14308.1 | 7.35  | 7.62  | 0.65 | 0.16 | -1.21  | 0.450481 | 0.649077 | 0.754829 | 0.794569 |
| MmugDNA.14310.1.S1_at   | MmugDNA.14310.1 | 11.83 | 11.95 | 0.35 | 0.06 | -1.09  | 0.875369 | 0.09603  | 0.956729 | 0.353302 |
| MmugDNA.14314.1.S1_at   | MmugDNA.14314.1 | 4.28  | 4.92  | 0.35 | 0.67 | -1.55  | 0.592607 | 0.761763 | 0.833923 | 0.861459 |
| MmugDNA.14318.1.S1_at   | MmugDNA.14318.1 | 5.23  | 5.14  | 0.18 | 0.04 | 1.06   | 0.361258 | 0.330156 | 0.698432 | 0.578987 |
| MmugDNA.14326.1.S1_at   | MmugDNA.14326.1 | 5.35  | 5.04  | 0.34 | 0.16 | 1.24   | 0.149706 | 0.141825 | 0.523226 | 0.415331 |
| MmugDNA.14327.1.S1_at   | MmugDNA.14327.1 | 10.65 | 9.97  | 0.67 | 0.06 | 1.6    | 0.176815 | 0.055075 | 0.549945 | 0.280198 |
| MmugDNA.14329.1.S1_at   | MmugDNA.14329.1 | 9.69  | 9.57  | 0.07 | 0.15 | 1.09   | 0.716022 | 0.375399 | 0.889675 | 0.613405 |
| MmugDNA.14333.1.S1_at   | MmugDNA.14333.1 | 6.8   | 6.59  | 0.05 | 0.12 | 1.16   | 0.087911 | 0.171484 | 0.455784 | 0.447895 |
| MmugDNA.14338.1.S1_at   | MmugDNA.14338.1 | 7.08  | 6.99  | 0.15 | 0.05 | 1.06   | 0.113308 | 0.150188 | 0.486648 | 0.424841 |
| MmugDNA.14341.1.S1_at   | MmugDNA.14341.1 | 3.64  | 3.45  | 0.09 | 0.09 | 1.14   | 0.033238 | 0.022155 | 0.346442 | 0.186325 |
| MmugDNA.14342.1.S1_at   | MmugDNA.14342.1 | 10.12 | 9.95  | 2.73 | 0.33 | 1.13   | 0.801733 | 0.248772 | 0.927736 | 0.517931 |
| MmugDNA.14347.1.S1_s_at | MmugDNA.14347.1 | 5.15  | 9.91  | 0.1  | 0.37 | -27.23 | 0.000023 | 0.000497 | 0.108151 | 0.038955 |
| MmugDNA.14350.1.S1_at   | MmugDNA.14350.1 | 9.81  | 9.16  | 0.73 | 0.2  | 1.57   | 0.468551 | 0.19876  | 0.764997 | 0.473391 |
| MmugDNA.14352.1.S1_at   | MmugDNA.14352.1 | 8.87  | 9.47  | 0.62 | 0.19 | -1.52  | 0.233482 | 0.019989 | 0.601071 | 0.177571 |
| MmugDNA.14355.1.S1_at   | MmugDNA.14355.1 | 8.18  | 8.62  | 0.43 | 0.03 | -1.37  | 0.127805 | 0.024612 | 0.502223 | 0.196308 |
| MmugDNA.14356.1.S1_at   | MmugDNA.14356.1 | 8.95  | 8.77  | 0.24 | 0.03 | 1.13   | 0.294635 | 0.118874 | 0.650731 | 0.387068 |
| MmugDNA.14359.1.S1_at   | MmugDNA.14359.1 | 7.61  | 7.24  | 0.35 | 0.05 | 1.29   | 0.184946 | 0.049053 | 0.557792 | 0.266406 |

|                         |                 |       |       |      |      |       |          |          |          |          |
|-------------------------|-----------------|-------|-------|------|------|-------|----------|----------|----------|----------|
| MmugDNA.14361.1.S1_at   | MmugDNA.14361.1 | 8.17  | 8.35  | 0.51 | 0.13 | -1.13 | 0.611646 | 0.132734 | 0.84257  | 0.404544 |
| MmugDNA.14370.1.S1_at   | MmugDNA.14370.1 | 3.21  | 3.03  | 0.07 | 0.12 | 1.14  | 0.265414 | 0.403276 | 0.626556 | 0.631998 |
| MmugDNA.14372.1.S1_at   | MmugDNA.14372.1 | 5.61  | 5.43  | 0.1  | 0.05 | 1.13  | 0.057421 | 0.077232 | 0.402072 | 0.322852 |
| MmugDNA.14373.1.S1_at   | MmugDNA.14373.1 | 3.66  | 3.46  | 0.1  | 0.11 | 1.15  | 0.143272 | 0.186111 | 0.518489 | 0.461934 |
| MmugDNA.14375.1.S1_at   | MmugDNA.14375.1 | 12.02 | 11.35 | 2.62 | 0.13 | 1.59  | 0.72306  | 0.290642 | 0.892742 | 0.551363 |
| MmugDNA.1438.1.S1_at    | MmugDNA.1438.1  | 5.49  | 5.57  | 0.5  | 0.17 | -1.06 | 0.534532 | 0.694987 | 0.801404 | 0.822709 |
| MmugDNA.14380.1.S1_at   | MmugDNA.14380.1 | 13.78 | 13.55 | 0.24 | 0.14 | 1.17  | 0.220413 | 0.061763 | 0.589697 | 0.295327 |
| MmugDNA.14382.1.S1_at   | MmugDNA.14382.1 | 4.65  | 4.61  | 0.16 | 0.01 | 1.03  | 0.227525 | 0.336417 | 0.596631 | 0.583831 |
| MmugDNA.14385.1.S1_at   | MmugDNA.14385.1 | 3.53  | 3.61  | 0.16 | 0.07 | -1.05 | 0.278889 | 0.426791 | 0.637923 | 0.648883 |
| MmugDNA.14387.1.S1_at   | MmugDNA.14387.1 | 12.45 | 12.68 | 0.13 | 0.02 | -1.18 | 0.090148 | 0.073553 | 0.458008 | 0.316874 |
| MmugDNA.14388.1.S1_at   | MmugDNA.14388.1 | 9.33  | 9.14  | 0.3  | 0.03 | -1.14 | 0.561356 | 0.783216 | 0.817219 | 0.874547 |
| MmugDNA.14394.1.S1_at   | MmugDNA.14394.1 | 11.28 | 11.91 | 0    | 0.06 | -1.54 | 0.000071 | 0.001493 | 0.108151 | 0.058967 |
| MmugDNA.14396.1.S1_at   | MmugDNA.14396.1 | 8.34  | 8.41  | 0.09 | 0.18 | -1.05 | 0.279706 | 0.002542 | 0.63865  | 0.074521 |
| MmugDNA.144.1.S1_at     | MmugDNA.144.1   | 10.78 | 10.74 | 0.19 | 0.09 | 1.03  | 0.974559 | 0.276828 | 0.991912 | 0.540757 |
| MmugDNA.14400.1.S1_at   | MmugDNA.14400.1 | 10.93 | 10.85 | 0.14 | 0.04 | 1.06  | 0.751947 | 0.938097 | 0.906228 | 0.964929 |
| MmugDNA.14401.1.S1_at   | MmugDNA.14401.1 | 6.99  | 7.13  | 0.65 | 0.32 | -1.09 | 0.843646 | 0.648171 | 0.944855 | 0.794002 |
| MmugDNA.14404.1.S1_at   | MmugDNA.14404.1 | 8.94  | 9.05  | 3.01 | 0.27 | -1.08 | 0.65469  | 0.260457 | 0.862882 | 0.527006 |
| MmugDNA.14407.1.S1_at   | MmugDNA.14407.1 | 7.88  | 7.99  | 0.34 | 0.05 | -1.08 | 0.195244 | 0.229905 | 0.565674 | 0.501802 |
| MmugDNA.14408.1.S1_at   | MmugDNA.14408.1 | 9.26  | 9.2   | 0.21 | 0.25 | 1.05  | 0.836441 | 0.028043 | 0.941249 | 0.208977 |
| MmugDNA.14410.1.S1_at   | MmugDNA.14410.1 | 7.71  | 7.79  | 0.27 | 0    | -1.06 | 0.678254 | 0.880223 | 0.873961 | 0.931571 |
| MmugDNA.14412.1.S1_at   | MmugDNA.14412.1 | 6.19  | 6.56  | 0.27 | 0.15 | -1.29 | 0.096209 | 0.062537 | 0.464755 | 0.296906 |
| MmugDNA.14416.1.S1_at   | MmugDNA.14416.1 | 9.64  | 9.32  | 1    | 0.21 | 1.25  | 0.6048   | 0.666146 | 0.83974  | 0.804415 |
| MmugDNA.14438.1.S1_at   | MmugDNA.14438.1 | 8.77  | 10.51 | 1.05 | 0.02 | -3.33 | 0.136734 | 0.062904 | 0.511963 | 0.297495 |
| MmugDNA.14440.1.S1_at   | MmugDNA.14440.1 | 11.25 | 11.07 | 0.18 | 0.05 | 1.13  | 0.074272 | 0.011388 | 0.435027 | 0.13824  |
| MmugDNA.14443.1.S1_at   | MmugDNA.14443.1 | 3.39  | 3.65  | 0.54 | 0.39 | -1.2  | 0.781241 | 0.925917 | 0.919541 | 0.958059 |
| MmugDNA.14453.1.S1_at   | MmugDNA.14453.1 | 7.76  | 6.9   | 0.82 | 0.66 | 1.81  | 0.473537 | 0.004447 | 0.767617 | 0.092958 |
| MmugDNA.14455.1.S1_at   | MmugDNA.14455.1 | 4.94  | 4.98  | 0.31 | 0.18 | -1.03 | 0.553927 | 0.177203 | 0.812365 | 0.453647 |
| MmugDNA.14456.1.S1_at   | MmugDNA.14456.1 | 5.47  | 5.21  | 1.89 | 0.23 | 1.19  | 0.676517 | 0.74182  | 0.873146 | 0.850509 |
| MmugDNA.14458.1.S1_at   | MmugDNA.14458.1 | 8.76  | 8.9   | 0.39 | 0.15 | -1.1  | 0.560083 | 0.106627 | 0.816457 | 0.36916  |
| MmugDNA.14459.1.S1_at   | MmugDNA.14459.1 | 8.18  | 8.12  | 0.2  | 0.15 | 1.04  | 0.942863 | 0.048769 | 0.98034  | 0.265793 |
| MmugDNA.14461.1.S1_at   | MmugDNA.14461.1 | 4.97  | 4.89  | 0.1  | 0.05 | 1.06  | 0.164677 | 0.35147  | 0.537466 | 0.595084 |
| MmugDNA.14463.1.S1_at   | MmugDNA.14463.1 | 6.44  | 5.69  | 0.52 | 0.11 | 1.69  | 0.169538 | 0.097023 | 0.542559 | 0.354531 |
| MmugDNA.14464.1.S1_at   | MmugDNA.14464.1 | 11.36 | 10.88 | 0.24 | 0.1  | 1.4   | 0.041977 | 0.032093 | 0.367952 | 0.221745 |
| MmugDNA.14465.1.S1_at   | MmugDNA.14465.1 | 6.61  | 6.42  | 0.53 | 0.13 | 1.14  | 0.601149 | 0.672902 | 0.838113 | 0.80887  |
| MmugDNA.14480.1.S1_at   | MmugDNA.14480.1 | 9.72  | 10.2  | 0.67 | 0.17 | -1.39 | 0.425685 | 0.585611 | 0.740112 | 0.752934 |
| MmugDNA.14483.1.S1_at   | MmugDNA.14483.1 | 11.34 | 11.15 | 0.22 | 0.02 | 1.14  | 0.079526 | 0.027161 | 0.442306 | 0.205893 |
| MmugDNA.14484.1.S1_at   | MmugDNA.14484.1 | 10.97 | 11.07 | 0.17 | 0.08 | -1.07 | 0.833656 | 0.30414  | 0.940366 | 0.561492 |
| MmugDNA.14499.1.S1_at   | MmugDNA.14499.1 | 8.04  | 8.27  | 0.41 | 0.38 | -1.17 | 0.498889 | 0.50807  | 0.781844 | 0.703358 |
| MmugDNA.1450.1.S1_at    | MmugDNA.1450.1  | 8.44  | 8.95  | 0.83 | 0.15 | -1.42 | 0.391324 | 0.160373 | 0.717502 | 0.436528 |
| MmugDNA.14501.1.S1_at   | MmugDNA.14501.1 | 10.62 | 10.85 | 0.16 | 0.1  | -1.17 | 0.082715 | 0.077761 | 0.447936 | 0.323917 |
| MmugDNA.14502.1.S1_s_at | MmugDNA.14502.1 | 9.46  | 9.6   | 0.18 | 0.15 | -1.1  | 0.325618 | 0.210731 | 0.673403 | 0.48478  |
| MmugDNA.14505.1.S1_at   | MmugDNA.14505.1 | 8.47  | 8.72  | 0.61 | 0.12 | -1.19 | 0.503115 | 0.614304 | 0.784046 | 0.771206 |
| MmugDNA.14506.1.S1_at   | MmugDNA.14506.1 | 11.26 | 11.43 | 0.11 | 0.03 | -1.13 | 0.056596 | 0.0153   | 0.400779 | 0.157071 |

|                         |                 |       |       |      |      |       |          |          |          |          |
|-------------------------|-----------------|-------|-------|------|------|-------|----------|----------|----------|----------|
| MmugDNA.14507.1.S1_at   | MmugDNA.14507.1 | 9.05  | 9.46  | 0.21 | 0.07 | -1.32 | 0.04677  | 0.009802 | 0.37872  | 0.130166 |
| MmugDNA.14520.1.S1_at   | MmugDNA.14520.1 | 4.22  | 4.22  | 0.06 | 0.11 | -1    | 0.4902   | 0.21319  | 0.776794 | 0.487069 |
| MmugDNA.14527.1.S1_at   | MmugDNA.14527.1 | 4.65  | 4.58  | 0.02 | 0.04 | 1.05  | 0.047741 | 0.139319 | 0.381152 | 0.412518 |
| MmugDNA.1453.1.S1_at    | MmugDNA.1453.1  | 9.73  | 9.17  | 0.13 | 0.19 | 1.47  | 0.014105 | 0.008145 | 0.273972 | 0.119736 |
| MmugDNA.14530.1.S1_at   | MmugDNA.14530.1 | 11.02 | 10.82 | 0.09 | 0.08 | 1.14  | 0.044318 | 0.376248 | 0.374395 | 0.614089 |
| MmugDNA.14531.1.S1_at   | MmugDNA.14531.1 | 6.77  | 6.57  | 0.12 | 0.09 | 1.15  | 0.18804  | 0.184087 | 0.560199 | 0.460306 |
| MmugDNA.14532.1.S1_at   | MmugDNA.14532.1 | 5.31  | 5.17  | 0.08 | 0.06 | 1.1   | 0.049139 | 0.105258 | 0.385273 | 0.366999 |
| MmugDNA.1454.1.S1_at    | MmugDNA.1454.1  | 8.97  | 9.24  | 0.39 | 0.07 | -1.2  | 0.295983 | 0.142308 | 0.65167  | 0.415848 |
| MmugDNA.14543.1.S1_at   | MmugDNA.14543.1 | 10.71 | 11.58 | 1.14 | 0.11 | -1.83 | 0.339403 | 0.449719 | 0.683826 | 0.665204 |
| MmugDNA.14544.1.S1_at   | MmugDNA.14544.1 | 13.37 | 12.76 | 2.03 | 0.19 | 1.52  | 0.714311 | 0.278128 | 0.888728 | 0.541783 |
| MmugDNA.14546.1.S1_at   | MmugDNA.14546.1 | 6.95  | 6.83  | 0.12 | 0.04 | -1.09 | 0.099092 | 0.105055 | 0.468468 | 0.366736 |
| MmugDNA.14551.1.S1_at   | MmugDNA.14551.1 | 12.45 | 12.11 | 3.87 | 0.27 | 1.26  | 0.487107 | 0.214035 | 0.774859 | 0.487633 |
| MmugDNA.14555.1.S1_at   | MmugDNA.14555.1 | 5.07  | 4.71  | 0.29 | 0.17 | 1.29  | 0.621434 | 0.74768  | 0.847527 | 0.853234 |
| MmugDNA.1456.1.S1_at    | MmugDNA.1456.1  | 8.98  | 9.15  | 0.31 | 0.06 | -1.12 | 0.587266 | 0.019967 | 0.831578 | 0.17752  |
| MmugDNA.14562.1.S1_at   | MmugDNA.14562.1 | 9.71  | 10.25 | 0.11 | 0.04 | -1.45 | 0.001631 | 0.000195 | 0.162459 | 0.030949 |
| MmugDNA.14563.1.S1_at   | MmugDNA.14563.1 | 5.76  | 5.55  | 0.1  | 0.14 | 1.16  | 0.067156 | 0.078801 | 0.4232   | 0.325757 |
| MmugDNA.14571.1.S1_s_at | MmugDNA.14571.1 | 9.55  | 9.34  | 0.08 | 0    | 1.16  | 0.005048 | 0.000146 | 0.204763 | 0.029509 |
| MmugDNA.14572.1.S1_at   | MmugDNA.14572.1 | 11.09 | 11.51 | 0.07 | 0.03 | -1.34 | 0.000398 | 0.000182 | 0.137028 | 0.030511 |
| MmugDNA.14573.1.S1_at   | MmugDNA.14573.1 | 7.39  | 7.8   | 0.47 | 0.18 | -1.33 | 0.187936 | 0.206513 | 0.560014 | 0.480571 |
| MmugDNA.14577.1.S1_at   | MmugDNA.14577.1 | 13.22 | 13.16 | 0.23 | 0.02 | 1.05  | 0.642921 | 0.22125  | 0.85798  | 0.49459  |
| MmugDNA.14583.1.S1_at   | MmugDNA.14583.1 | 7.81  | 7.8   | 0.02 | 0.06 | 1.01  | 0.283498 | 0.655123 | 0.641407 | 0.798309 |
| MmugDNA.14588.1.S1_at   | MmugDNA.14588.1 | 11.73 | 11.8  | 0.21 | 0.05 | -1.04 | 0.704489 | 0.884659 | 0.885155 | 0.934321 |
| MmugDNA.14592.1.S1_at   | MmugDNA.14592.1 | 11.68 | 11.66 | 0.13 | 0.24 | 1.01  | 0.655893 | 0.855915 | 0.86336  | 0.917744 |
| MmugDNA.14593.1.S1_at   | MmugDNA.14593.1 | 9.78  | 10.51 | 0.27 | 0.14 | -1.65 | 0.007839 | 0.001205 | 0.231023 | 0.054389 |
| MmugDNA.146.1.S1_at     | MmugDNA.146.1   | 5.89  | 5.89  | 0.1  | 0.02 | -1    | 0.540736 | 0.437224 | 0.80456  | 0.656606 |
| MmugDNA.1460.1.S1_at    | MmugDNA.1460.1  | 9.48  | 9.54  | 1.09 | 0.14 | -1.04 | 0.987953 | 0.385745 | 0.995831 | 0.621079 |
| MmugDNA.14601.1.S1_at   | MmugDNA.14601.1 | 12.35 | 11.98 | 0.22 | 0.02 | 1.3   | 0.12312  | 0.287945 | 0.496589 | 0.549227 |
| MmugDNA.14609.1.S1_at   | MmugDNA.14609.1 | 6.75  | 8.06  | 2.06 | 0.42 | -2.48 | 0.551624 | 0.733488 | 0.81144  | 0.845679 |
| MmugDNA.14617.1.S1_at   | MmugDNA.14617.1 | 8.78  | 9.26  | 1.05 | 0.25 | -1.39 | 0.687036 | 0.577842 | 0.877617 | 0.748148 |
| MmugDNA.14617.1.S1_s_at | MmugDNA.14617.1 | 8.56  | 9.18  | 1.03 | 0.24 | -1.54 | 0.600151 | 0.374903 | 0.837736 | 0.613144 |
| MmugDNA.14620.1.S1_at   | MmugDNA.14620.1 | 12.2  | 12.5  | 0.29 | 0.05 | -1.23 | 0.056399 | 0.043789 | 0.400155 | 0.25387  |
| MmugDNA.14623.1.S1_at   | MmugDNA.14623.1 | 9.63  | 9.76  | 0.36 | 0.03 | -1.09 | 0.990396 | 0.955407 | 0.996425 | 0.974655 |
| MmugDNA.14626.1.S1_at   | MmugDNA.14626.1 | 10.31 | 10.25 | 0.28 | 0.13 | 1.04  | 0.895447 | 0.881934 | 0.964244 | 0.932674 |
| MmugDNA.14631.1.S1_at   | MmugDNA.14631.1 | 10.53 | 11.05 | 0.23 | 0.06 | -1.43 | 0.02239  | 0.000686 | 0.310499 | 0.044166 |
| MmugDNA.14637.1.S1_at   | MmugDNA.14637.1 | 6.15  | 7.34  | 0.35 | 0.37 | -2.28 | 0.018565 | 0.065357 | 0.29767  | 0.301409 |
| MmugDNA.14644.1.S1_at   | MmugDNA.14644.1 | 4.84  | 4.65  | 0.21 | 0.2  | 1.15  | 0.213338 | 0.294758 | 0.583844 | 0.554345 |
| MmugDNA.1465.1.S1_at    | MmugDNA.1465.1  | 4.71  | 3.87  | 0.57 | 0.1  | 1.79  | 0.12745  | 0.09664  | 0.501596 | 0.354145 |
| MmugDNA.14651.1.S1_at   | MmugDNA.14651.1 | 8.87  | 7.77  | 1.04 | 0.48 | 2.14  | 0.115448 | 0.036913 | 0.488779 | 0.236593 |
| MmugDNA.14656.1.S1_at   | MmugDNA.14656.1 | 7     | 9.18  | 1.08 | 0.12 | -4.54 | 0.076734 | 0.069046 | 0.438134 | 0.309017 |
| MmugDNA.14658.1.S1_at   | MmugDNA.14658.1 | 10.09 | 10.58 | 0.4  | 0.26 | -1.41 | 0.211727 | 0.25388  | 0.582625 | 0.522233 |
| MmugDNA.14659.1.S1_at   | MmugDNA.14659.1 | 8.65  | 7.99  | 0.02 | 0.07 | 1.58  | 0.0001   | 0.000005 | 0.108151 | 0.015647 |
| MmugDNA.14660.1.S1_at   | MmugDNA.14660.1 | 11.75 | 11.84 | 0.06 | 0.09 | -1.06 | 0.300751 | 0.754564 | 0.65518  | 0.857242 |
| MmugDNA.14670.1.S1_at   | MmugDNA.14670.1 | 6.84  | 6.8   | 0.27 | 0.08 | 1.03  | 0.304544 | 0.146772 | 0.658179 | 0.420799 |

|                         |                 |       |       |      |      |       |          |          |          |          |
|-------------------------|-----------------|-------|-------|------|------|-------|----------|----------|----------|----------|
| MmugDNA.14671.1.S1_at   | MmugDNA.14671.1 | 9.86  | 9.99  | 0.29 | 0.08 | -1.09 | 0.420389 | 0.036669 | 0.736938 | 0.235973 |
| MmugDNA.14673.1.S1_at   | MmugDNA.14673.1 | 8.79  | 8.7   | 0.46 | 0.23 | 1.06  | 0.825028 | 0.608661 | 0.937107 | 0.767185 |
| MmugDNA.14675.1.S1_at   | MmugDNA.14675.1 | 12.36 | 12.32 | 0.73 | 0.16 | 1.03  | 0.338714 | 0.168447 | 0.683213 | 0.445092 |
| MmugDNA.14678.1.S1_at   | MmugDNA.14678.1 | 6.22  | 6.11  | 0.09 | 0.02 | 1.08  | 0.127613 | 0.027726 | 0.501806 | 0.207965 |
| MmugDNA.14684.1.S1_at   | MmugDNA.14684.1 | 11.32 | 11.04 | 0.14 | 0.13 | 1.22  | 0.028994 | 0.025848 | 0.333482 | 0.201605 |
| MmugDNA.14686.1.S1_s_at | MmugDNA.14686.1 | 11.9  | 11.65 | 0.13 | 0.05 | 1.19  | 0.064073 | 0.003766 | 0.417391 | 0.087404 |
| MmugDNA.14691.1.S1_at   | MmugDNA.14691.1 | 9.59  | 10.07 | 1.12 | 0.17 | -1.4  | 0.517356 | 0.117068 | 0.791973 | 0.384494 |
| MmugDNA.147.1.S1_at     | MmugDNA.147.1   | 3.18  | 3.27  | 0.08 | 0.08 | -1.06 | 0.203849 | 0.074247 | 0.57513  | 0.318046 |
| MmugDNA.14700.1.S1_at   | MmugDNA.14700.1 | 7.72  | 7.68  | 0.33 | 0.29 | 1.03  | 0.604503 | 0.183542 | 0.83963  | 0.459681 |
| MmugDNA.14702.1.S1_at   | MmugDNA.14702.1 | 9.09  | 9.31  | 0.13 | 0.13 | -1.16 | 0.079365 | 0.024941 | 0.442296 | 0.197799 |
| MmugDNA.14704.1.S1_at   | MmugDNA.14704.1 | 11.05 | 10.78 | 0.11 | 0.06 | -1.21 | 0.017734 | 0.021697 | 0.293545 | 0.184333 |
| MmugDNA.14711.1.S1_at   | MmugDNA.14711.1 | 6.7   | 8.15  | 1.55 | 0.25 | -2.72 | 0.183656 | 0.190926 | 0.55651  | 0.466269 |
| MmugDNA.14712.1.S1_at   | MmugDNA.14712.1 | 8.44  | 8.59  | 0.79 | 0.21 | -1.11 | 0.961073 | 0.029805 | 0.987225 | 0.214318 |
| MmugDNA.1472.1.S1_at    | MmugDNA.1472.1  | 9.53  | 9.61  | 0.97 | 0.16 | -1.06 | 0.403468 | 0.604106 | 0.725709 | 0.764496 |
| MmugDNA.1472.1.S1_s_at  | MmugDNA.1472.1  | 8.8   | 9.15  | 1.05 | 0.16 | -1.27 | 0.472733 | 0.650517 | 0.767224 | 0.795663 |
| MmugDNA.14720.1.S1_at   | MmugDNA.14720.1 | 3.19  | 3.19  | 0.19 | 0.21 | -1    | 0.982963 | 0.866927 | 0.99478  | 0.924385 |
| MmugDNA.14721.1.S1_at   | MmugDNA.14721.1 | 7.63  | 7.96  | 0.93 | 0.2  | -1.26 | 0.921997 | 0.127163 | 0.973661 | 0.397922 |
| MmugDNA.14722.1.S1_at   | MmugDNA.14722.1 | 5.7   | 5.38  | 0.11 | 0.1  | 1.25  | 0.020232 | 0.159804 | 0.303799 | 0.435871 |
| MmugDNA.14725.1.S1_at   | MmugDNA.14725.1 | 5.32  | 5.6   | 0.35 | 0.21 | -1.21 | 0.221861 | 0.335627 | 0.591401 | 0.583403 |
| MmugDNA.14726.1.S1_at   | MmugDNA.14726.1 | 7     | 6.99  | 0.14 | 0.04 | 1.01  | 0.298554 | 0.656408 | 0.653176 | 0.799082 |
| MmugDNA.14729.1.S1_at   | MmugDNA.14729.1 | 6.41  | 6.27  | 0.45 | 0.03 | 1.1   | 0.213255 | 0.201368 | 0.583803 | 0.47589  |
| MmugDNA.14730.1.S1_at   | MmugDNA.14730.1 | 4.91  | 4.49  | 0.17 | 0.19 | 1.33  | 0.130287 | 0.498987 | 0.504682 | 0.69793  |
| MmugDNA.14733.1.S1_at   | MmugDNA.14733.1 | 9.92  | 10.24 | 0.96 | 0.11 | -1.25 | 0.694618 | 0.334942 | 0.881132 | 0.58275  |
| MmugDNA.14737.1.S1_at   | MmugDNA.14737.1 | 8.05  | 8.22  | 0.35 | 0.3  | -1.13 | 0.886694 | 0.384576 | 0.96068  | 0.62023  |
| MmugDNA.14743.1.S1_at   | MmugDNA.14743.1 | 5.22  | 5.06  | 0.14 | 0.1  | 1.12  | 0.233545 | 0.391449 | 0.601115 | 0.625086 |
| MmugDNA.1475.1.S1_at    | MmugDNA.1475.1  | 6.19  | 6.66  | 0.34 | 0.13 | -1.38 | 0.063986 | 0.074395 | 0.417003 | 0.318058 |
| MmugDNA.14753.1.S1_at   | MmugDNA.14753.1 | 10.87 | 10.89 | 0.41 | 0.05 | -1.01 | 0.859511 | 0.966667 | 0.9504   | 0.98148  |
| MmugDNA.14762.1.S1_at   | MmugDNA.14762.1 | 5.7   | 6.75  | 0.22 | 0.52 | -2.07 | 0.067387 | 0.027561 | 0.423738 | 0.207319 |
| MmugDNA.14765.1.S1_at   | MmugDNA.14765.1 | 12.6  | 12.52 | 0.43 | 0.08 | 1.06  | 0.689386 | 0.301987 | 0.878864 | 0.559929 |
| MmugDNA.14767.1.S1_at   | MmugDNA.14767.1 | 5.9   | 6.04  | 0.14 | 0.68 | -1.11 | 0.426888 | 0.015667 | 0.740765 | 0.158598 |
| MmugDNA.14769.1.S1_at   | MmugDNA.14769.1 | 9.38  | 9.79  | 0.29 | 0.15 | -1.33 | 0.432585 | 0.306958 | 0.743936 | 0.563427 |
| MmugDNA.14770.1.S1_at   | MmugDNA.14770.1 | 7.84  | 8.6   | 0.95 | 0.34 | -1.69 | 0.291006 | 0.012038 | 0.647518 | 0.142019 |
| MmugDNA.14772.1.S1_at   | MmugDNA.14772.1 | 9.47  | 10.73 | 0.6  | 0.08 | -2.39 | 0.024803 | 0.013803 | 0.31992  | 0.150578 |
| MmugDNA.14773.1.S1_at   | MmugDNA.14773.1 | 8.88  | 9.98  | 0.75 | 0.08 | -2.14 | 0.223225 | 0.103354 | 0.592569 | 0.36423  |
| MmugDNA.14778.1.S1_at   | MmugDNA.14778.1 | 11.18 | 11.06 | 0.2  | 0.05 | 1.09  | 0.945412 | 0.06261  | 0.980927 | 0.297022 |
| MmugDNA.14791.1.S1_at   | MmugDNA.14791.1 | 6.17  | 6.41  | 0.31 | 0.01 | -1.18 | 0.256682 | 0.177171 | 0.620636 | 0.453631 |
| MmugDNA.14803.1.S1_s_at | MmugDNA.14803.1 | 9.81  | 10.63 | 0.39 | 0.07 | -1.77 | 0.019224 | 0.010102 | 0.300345 | 0.131859 |
| MmugDNA.1481.1.S1_at    | MmugDNA.1481.1  | 5.04  | 4.85  | 0.09 | 0.08 | 1.14  | 0.031243 | 0.081722 | 0.340477 | 0.330011 |
| MmugDNA.14810.1.S1_at   | MmugDNA.14810.1 | 11.66 | 11.54 | 0.15 | 0.18 | 1.09  | 0.349129 | 0.384739 | 0.690254 | 0.620363 |
| MmugDNA.14815.1.S1_at   | MmugDNA.14815.1 | 3.6   | 3.63  | 0.2  | 0.11 | -1.02 | 0.820661 | 0.740402 | 0.935289 | 0.849642 |
| MmugDNA.14817.1.S1_at   | MmugDNA.14817.1 | 12.92 | 12.97 | 0.06 | 0.02 | -1.04 | 0.066094 | 0.098652 | 0.421668 | 0.356743 |
| MmugDNA.14819.1.S1_at   | MmugDNA.14819.1 | 11.51 | 12    | 0.11 | 0.08 | -1.4  | 0.004596 | 0.003673 | 0.201051 | 0.086568 |
| MmugDNA.14821.1.S1_at   | MmugDNA.14821.1 | 3.24  | 2.91  | 0.19 | 0.13 | 1.26  | 0.310077 | 0.223735 | 0.661991 | 0.496672 |

|                         |                 |       |       |      |      |       |          |          |          |          |
|-------------------------|-----------------|-------|-------|------|------|-------|----------|----------|----------|----------|
| MmugDNA.14822.1.S1_at   | MmugDNA.14822.1 | 8.83  | 9.22  | 0.24 | 0.08 | -1.31 | 0.054656 | 0.009667 | 0.397122 | 0.129379 |
| MmugDNA.14824.1.S1_at   | MmugDNA.14824.1 | 5.2   | 5.29  | 0.45 | 0.13 | -1.07 | 0.763771 | 0.248296 | 0.911265 | 0.5176   |
| MmugDNA.14825.1.S1_at   | MmugDNA.14825.1 | 5.9   | 5.71  | 0.09 | 0.1  | 1.14  | 0.059784 | 0.136709 | 0.40703  | 0.409259 |
| MmugDNA.14826.1.S1_at   | MmugDNA.14826.1 | 9.06  | 9.06  | 0.05 | 0.1  | 1     | 0.651548 | 0.028143 | 0.86164  | 0.209306 |
| MmugDNA.1483.1.S1_at    | MmugDNA.1483.1  | 8.29  | 8.15  | 0.87 | 0.06 | 1.1   | 0.836272 | 0.965657 | 0.941202 | 0.980751 |
| MmugDNA.14830.1.S1_at   | MmugDNA.14830.1 | 5.43  | 5.07  | 0.29 | 0.03 | 1.28  | 0.361064 | 0.143151 | 0.698314 | 0.417029 |
| MmugDNA.14831.1.S1_at   | MmugDNA.14831.1 | 6.9   | 6.75  | 0.12 | 0.04 | 1.11  | 0.102592 | 0.201953 | 0.472846 | 0.476412 |
| MmugDNA.14832.1.S1_at   | MmugDNA.14832.1 | 13.07 | 12.74 | 0.23 | 0.11 | 1.26  | 0.082422 | 0.074525 | 0.447261 | 0.318173 |
| MmugDNA.14835.1.S1_at   | MmugDNA.14835.1 | 11.66 | 11.94 | 0.7  | 0.16 | -1.21 | 0.899441 | 0.228528 | 0.965794 | 0.500752 |
| MmugDNA.14838.1.S1_at   | MmugDNA.14838.1 | 5.04  | 4.91  | 0.11 | 0.12 | 1.1   | 0.12951  | 0.289392 | 0.504238 | 0.550431 |
| MmugDNA.14839.1.S1_at   | MmugDNA.14839.1 | 6.82  | 7.01  | 0.24 | 0.18 | -1.14 | 0.067766 | 0.294462 | 0.42446  | 0.554212 |
| MmugDNA.14842.1.S1_at   | MmugDNA.14842.1 | 5.49  | 5.74  | 0.51 | 0.38 | -1.2  | 0.907458 | 0.127888 | 0.968619 | 0.398825 |
| MmugDNA.14844.1.S1_at   | MmugDNA.14844.1 | 12.57 | 12.46 | 0.18 | 0.07 | 1.08  | 0.391722 | 0.252593 | 0.717759 | 0.521145 |
| MmugDNA.14849.1.S1_at   | MmugDNA.14849.1 | 10.2  | 10.15 | 0.11 | 0.16 | 1.04  | 0.339843 | 0.315432 | 0.684042 | 0.568949 |
| MmugDNA.1485.1.S1_at    | MmugDNA.1485.1  | 12.14 | 12.2  | 1.73 | 0.2  | -1.05 | 0.759442 | 0.226931 | 0.90964  | 0.499276 |
| MmugDNA.14852.1.S1_at   | MmugDNA.14852.1 | 4.63  | 4.57  | 0.04 | 0.03 | 1.04  | 0.144068 | 0.696593 | 0.519461 | 0.823774 |
| MmugDNA.14853.1.S1_at   | MmugDNA.14853.1 | 6.01  | 5.81  | 0.18 | 0.01 | 1.14  | 0.428815 | 0.341757 | 0.742105 | 0.587862 |
| MmugDNA.14857.1.S1_at   | MmugDNA.14857.1 | 4.7   | 4.55  | 0.25 | 0.08 | 1.11  | 0.291371 | 0.462864 | 0.647853 | 0.674149 |
| MmugDNA.14858.1.S1_at   | MmugDNA.14858.1 | 4.06  | 4.04  | 0.05 | 0.08 | 1.01  | 0.419785 | 0.768953 | 0.736572 | 0.865764 |
| MmugDNA.14860.1.S1_at   | MmugDNA.14860.1 | 11.04 | 11.33 | 0.51 | 0.1  | -1.22 | 0.35621  | 0.090761 | 0.69508  | 0.345227 |
| MmugDNA.14861.1.S1_at   | MmugDNA.14861.1 | 12.45 | 12.31 | 0.07 | 0.02 | 1.1   | 0.015279 | 0.002476 | 0.280663 | 0.073576 |
| MmugDNA.14862.1.S1_at   | MmugDNA.14862.1 | 6.69  | 7.16  | 0.93 | 0.22 | -1.38 | 0.140957 | 0.166783 | 0.516345 | 0.443274 |
| MmugDNA.14866.1.S1_at   | MmugDNA.14866.1 | 10.91 | 11.44 | 0.41 | 0.06 | -1.44 | 0.119811 | 0.108661 | 0.493259 | 0.372171 |
| MmugDNA.14866.1.S1_s_at | MmugDNA.14866.1 | 11.28 | 11.74 | 0.38 | 0.08 | -1.37 | 0.134411 | 0.131039 | 0.508462 | 0.40306  |
| MmugDNA.14872.1.S1_at   | MmugDNA.14872.1 | 7.36  | 7.39  | 0.16 | 0.36 | -1.02 | 0.348619 | 0.591617 | 0.689949 | 0.757155 |
| MmugDNA.14876.1.S1_at   | MmugDNA.14876.1 | 5.3   | 5.92  | 0.46 | 0.4  | -1.54 | 0.389219 | 0.254745 | 0.715989 | 0.523015 |
| MmugDNA.14886.1.S1_at   | MmugDNA.14886.1 | 9.29  | 9.88  | 0.77 | 0.2  | -1.5  | 0.229119 | 0.20424  | 0.598088 | 0.478541 |
| MmugDNA.14893.1.S1_at   | MmugDNA.14893.1 | 11.5  | 11.77 | 0.04 | 0.03 | -1.2  | 0.001159 | 0.00002  | 0.156386 | 0.019635 |
| MmugDNA.14897.1.S1_at   | MmugDNA.14897.1 | 13.01 | 13.18 | 0.05 | 0.15 | -1.12 | 0.584258 | 0.0003   | 0.8296   | 0.034892 |
| MmugDNA.14899.1.S1_at   | MmugDNA.14899.1 | 4.89  | 4.77  | 0.1  | 0.18 | 1.09  | 0.29814  | 0.579868 | 0.652962 | 0.749321 |
| MmugDNA.14908.1.S1_at   | MmugDNA.14908.1 | 6.37  | 6.19  | 0.15 | 0.06 | 1.13  | 0.13816  | 0.241925 | 0.513671 | 0.512489 |
| MmugDNA.14909.1.S1_at   | MmugDNA.14909.1 | 7.83  | 8.53  | 0.49 | 0.07 | -1.62 | 0.075249 | 0.099736 | 0.436118 | 0.358288 |
| MmugDNA.14912.1.S1_at   | MmugDNA.14912.1 | 4.97  | 6.18  | 0.93 | 0.33 | -2.31 | 0.203235 | 0.395423 | 0.574732 | 0.627474 |
| MmugDNA.14912.1.S1_s_at | MmugDNA.14912.1 | 4.99  | 5.02  | 0.04 | 0.22 | -1.02 | 0.547834 | 0.784464 | 0.809245 | 0.875181 |
| MmugDNA.14913.1.S1_at   | MmugDNA.14913.1 | 12.38 | 13.18 | 0.1  | 0.03 | -1.74 | 0.000161 | 0.000403 | 0.112332 | 0.037471 |
| MmugDNA.14920.1.S1_at   | MmugDNA.14920.1 | 7.37  | 7.41  | 0.26 | 0.06 | -1.03 | 0.375704 | 0.517281 | 0.7066   | 0.709435 |
| MmugDNA.14925.1.S1_at   | MmugDNA.14925.1 | 6.51  | 6.37  | 0.34 | 0.33 | 1.1   | 0.971701 | 0.021076 | 0.990761 | 0.181869 |
| MmugDNA.14929.1.S1_at   | MmugDNA.14929.1 | 10.98 | 10.73 | 0.21 | 0.05 | 1.19  | 0.388017 | 0.02992  | 0.714947 | 0.214643 |
| MmugDNA.1493.1.S1_at    | MmugDNA.1493.1  | 6.38  | 6.73  | 0.28 | 0.31 | -1.27 | 0.378553 | 0.535354 | 0.708405 | 0.720907 |
| MmugDNA.1494.1.S1_at    | MmugDNA.1494.1  | 11.98 | 11.88 | 0.06 | 0.07 | 1.07  | 0.35719  | 0.033103 | 0.695575 | 0.225221 |
| MmugDNA.14944.1.S1_at   | MmugDNA.14944.1 | 10.01 | 10.17 | 0.23 | 0.09 | -1.12 | 0.884941 | 0.040835 | 0.960159 | 0.246981 |
| MmugDNA.14944.1.S1_s_at | MmugDNA.14944.1 | 8.04  | 8     | 0.2  | 0.16 | 1.03  | 0.297816 | 0.087855 | 0.652791 | 0.341218 |
| MmugDNA.14945.1.S1_at   | MmugDNA.14945.1 | 12.8  | 12.86 | 0.11 | 0.07 | -1.04 | 0.770982 | 0.813576 | 0.91434  | 0.892313 |



|                         |                 |       |       |      |      |       |          |          |          |          |
|-------------------------|-----------------|-------|-------|------|------|-------|----------|----------|----------|----------|
| MmugDNA.14946.1.S1_at   | MmugDNA.14946.1 | 8.48  | 8.13  | 0.38 | 0.13 | 1.27  | 0.093623 | 0.130458 | 0.462863 | 0.4023   |
| MmugDNA.14947.1.S1_at   | MmugDNA.14947.1 | 10.05 | 10.8  | 0.36 | 0.16 | -1.69 | 0.022221 | 0.016602 | 0.310495 | 0.163117 |
| MmugDNA.14949.1.S1_at   | MmugDNA.14949.1 | 3.06  | 3.12  | 0.11 | 0.19 | -1.04 | 0.144282 | 0.173136 | 0.519687 | 0.449765 |
| MmugDNA.14950.1.S1_at   | MmugDNA.14950.1 | 12.77 | 12.7  | 0.2  | 0.02 | 1.05  | 0.667575 | 0.817771 | 0.868641 | 0.894834 |
| MmugDNA.14951.1.S1_s_at | MmugDNA.14951.1 | 11.55 | 11.8  | 0.02 | 0.05 | -1.19 | 0.003037 | 0.008952 | 0.191043 | 0.125082 |
| MmugDNA.14954.1.S1_at   | MmugDNA.14954.1 | 10.47 | 10.57 | 0.17 | 0.09 | -1.07 | 0.547008 | 0.691824 | 0.808912 | 0.82074  |
| MmugDNA.14955.1.S1_at   | MmugDNA.14955.1 | 8.5   | 10.03 | 0.35 | 0.05 | -2.89 | 0.001756 | 0.00311  | 0.167444 | 0.081305 |
| MmugDNA.14959.1.S1_at   | MmugDNA.14959.1 | 10.83 | 10.59 | 0.5  | 0.12 | 1.18  | 0.862029 | 0.014922 | 0.951336 | 0.155285 |
| MmugDNA.14962.1.S1_at   | MmugDNA.14962.1 | 9.86  | 10.72 | 0.59 | 0.18 | -1.81 | 0.065563 | 0.035136 | 0.420827 | 0.231645 |
| MmugDNA.14964.1.S1_at   | MmugDNA.14964.1 | 10.57 | 10.2  | 1.28 | 0.06 | 1.29  | 0.754855 | 0.377952 | 0.907518 | 0.615264 |
| MmugDNA.14967.1.S1_at   | MmugDNA.14967.1 | 9.12  | 9.06  | 0.28 | 0.13 | -1.04 | 0.805232 | 0.587113 | 0.929175 | 0.75402  |
| MmugDNA.14970.1.S1_at   | MmugDNA.14970.1 | 4.82  | 4.76  | 0.05 | 0.08 | 1.04  | 0.316946 | 0.667674 | 0.666879 | 0.805472 |
| MmugDNA.14973.1.S1_at   | MmugDNA.14973.1 | 9.23  | 9.25  | 0.05 | 0.15 | -1.02 | 0.489118 | 0.000009 | 0.775981 | 0.016421 |
| MmugDNA.14978.1.S1_at   | MmugDNA.14978.1 | 5.69  | 6.18  | 0.04 | 0.45 | -1.4  | 0.424387 | 0.500413 | 0.739564 | 0.699036 |
| MmugDNA.1498.1.S1_at    | MmugDNA.1498.1  | 11.13 | 10.74 | 0.17 | 0.03 | 1.31  | 0.018448 | 0.009039 | 0.297425 | 0.125644 |
| MmugDNA.14982.1.S1_at   | MmugDNA.14982.1 | 9.94  | 10.2  | 0.06 | 0.07 | -1.19 | 0.005118 | 0.000313 | 0.205468 | 0.035198 |
| MmugDNA.14985.1.S1_at   | MmugDNA.14985.1 | 6.87  | 6.87  | 0.72 | 0.33 | 1     | 0.96003  | 0.617862 | 0.986981 | 0.773736 |
| MmugDNA.14989.1.S1_at   | MmugDNA.14989.1 | 5.35  | 5.21  | 0.28 | 0.06 | 1.1   | 0.357887 | 0.400333 | 0.695993 | 0.630169 |
| MmugDNA.1499.1.S1_at    | MmugDNA.1499.1  | 11.5  | 11.63 | 1.18 | 0.1  | -1.1  | 0.873024 | 0.477324 | 0.955973 | 0.683422 |
| MmugDNA.14992.1.S1_at   | MmugDNA.14992.1 | 5.29  | 5.09  | 0.09 | 0.11 | 1.15  | 0.070467 | 0.183626 | 0.429374 | 0.459681 |
| MmugDNA.14995.1.S1_at   | MmugDNA.14995.1 | 9.62  | 9.57  | 1.09 | 0.13 | 1.04  | 0.928979 | 0.827801 | 0.976332 | 0.901152 |
| MmugDNA.14999.1.S1_at   | MmugDNA.14999.1 | 5.89  | 5.83  | 0.08 | 0.03 | 1.04  | 0.318519 | 0.484517 | 0.668228 | 0.688529 |
| MmugDNA.150.1.S1_at     | MmugDNA.150.1   | 12.35 | 12.38 | 0.15 | 0.03 | -1.02 | 0.910242 | 0.717648 | 0.969563 | 0.836515 |
| MmugDNA.15002.1.S1_at   | MmugDNA.15002.1 | 9.45  | 9.67  | 1.19 | 0.03 | -1.16 | 0.793013 | 0.613288 | 0.924203 | 0.770491 |
| MmugDNA.15004.1.S1_at   | MmugDNA.15004.1 | 11.91 | 12.47 | 0.52 | 0.02 | -1.47 | 0.219595 | 0.061119 | 0.589062 | 0.293975 |
| MmugDNA.1501.1.S1_at    | MmugDNA.1501.1  | 12.62 | 12.28 | 0.93 | 0.04 | 1.27  | 0.706716 | 0.475025 | 0.885887 | 0.681859 |
| MmugDNA.15010.1.S1_at   | MmugDNA.15010.1 | 9.31  | 9.56  | 0.46 | 0.07 | -1.19 | 0.428706 | 0.084663 | 0.742021 | 0.33618  |
| MmugDNA.15014.1.S1_at   | MmugDNA.15014.1 | 8.31  | 8.76  | 0.1  | 0.22 | -1.37 | 0.010238 | 0.004403 | 0.246929 | 0.092846 |
| MmugDNA.15020.1.S1_at   | MmugDNA.15020.1 | 12.3  | 12.42 | 0.15 | 0.05 | -1.09 | 0.604839 | 0.081158 | 0.83974  | 0.329346 |
| MmugDNA.15022.1.S1_at   | MmugDNA.15022.1 | 8.98  | 8.48  | 0.2  | 0.12 | 1.41  | 0.013672 | 0.001961 | 0.270367 | 0.065832 |
| MmugDNA.15037.1.S1_at   | MmugDNA.15037.1 | 13.05 | 12.87 | 0.06 | 0.05 | 1.14  | 0.007465 | 0.001212 | 0.229281 | 0.054455 |
| MmugDNA.15045.1.S1_at   | MmugDNA.15045.1 | 4.79  | 4.76  | 0.18 | 0.08 | 1.02  | 0.895799 | 0.114679 | 0.964355 | 0.381227 |
| MmugDNA.15046.1.S1_at   | MmugDNA.15046.1 | 9.93  | 11.68 | 0.93 | 0.18 | -3.36 | 0.033489 | 0.054054 | 0.346442 | 0.277914 |
| MmugDNA.1505.1.S1_at    | MmugDNA.1505.1  | 11.3  | 11.39 | 0.16 | 0.08 | -1.07 | 0.31476  | 0.097206 | 0.665512 | 0.354886 |
| MmugDNA.15052.1.S1_at   | MmugDNA.15052.1 | 8.11  | 8.11  | 0.05 | 0.15 | 1     | 0.940481 | 0.004978 | 0.979714 | 0.098369 |
| MmugDNA.15054.1.S1_x_at | MmugDNA.15054.1 | 7.24  | 7.18  | 0.08 | 0.09 | 1.05  | 0.561504 | 0.06348  | 0.817232 | 0.298441 |
| MmugDNA.15055.1.S1_at   | MmugDNA.15055.1 | 5.37  | 5.18  | 0.2  | 0.06 | 1.14  | 0.142399 | 0.369935 | 0.517562 | 0.609164 |
| MmugDNA.15058.1.S1_at   | MmugDNA.15058.1 | 7.4   | 8.09  | 0.9  | 0.31 | -1.61 | 0.985671 | 0.923968 | 0.995461 | 0.957162 |
| MmugDNA.15062.1.S1_at   | MmugDNA.15062.1 | 9.91  | 10.46 | 0.56 | 0.15 | -1.46 | 0.141022 | 0.232159 | 0.516345 | 0.503874 |
| MmugDNA.15063.1.S1_s_at | MmugDNA.15063.1 | 7.84  | 6.88  | 0.38 | 0.14 | 1.95  | 0.023977 | 0.009086 | 0.317529 | 0.125944 |
| MmugDNA.15064.1.S1_at   | MmugDNA.15064.1 | 5.1   | 5.1   | 0.06 | 0.02 | 1.01  | 0.916009 | 0.994969 | 0.97133  | 0.996893 |
| MmugDNA.15075.1.S1_at   | MmugDNA.15075.1 | 8.01  | 7.95  | 1.99 | 0.49 | 1.04  | 0.998301 | 0.894334 | 0.999454 | 0.939697 |
| MmugDNA.15076.1.S1_at   | MmugDNA.15076.1 | 13.42 | 13.47 | 0.07 | 0.02 | -1.03 | 0.329218 | 0.111279 | 0.676256 | 0.375963 |

|                         |                 |       |       |      |      |       |          |          |          |          |
|-------------------------|-----------------|-------|-------|------|------|-------|----------|----------|----------|----------|
| MmugDNA.15079.1.S1_at   | MmugDNA.15079.1 | 3.79  | 3.85  | 0.09 | 0.33 | -1.04 | 0.502699 | 0.725726 | 0.783813 | 0.841146 |
| MmugDNA.15079.1.S1_s_at | MmugDNA.15079.1 | 4.25  | 3.97  | 0.21 | 0.32 | 1.21  | 0.527489 | 0.582059 | 0.797132 | 0.750784 |
| MmugDNA.15084.1.S1_s_at | MmugDNA.15084.1 | 13.46 | 13.26 | 2.61 | 0.13 | 1.15  | 0.456637 | 0.260967 | 0.758026 | 0.527351 |
| MmugDNA.15086.1.S1_at   | MmugDNA.15086.1 | 9.31  | 9.48  | 0.15 | 0.24 | -1.12 | 0.32677  | 0.264351 | 0.674399 | 0.530385 |
| MmugDNA.15089.1.S1_at   | MmugDNA.15089.1 | 5.74  | 5.9   | 0.47 | 0.39 | -1.12 | 0.341015 | 0.378293 | 0.68484  | 0.615438 |
| MmugDNA.1509.1.S1_s_at  | MmugDNA.1509.1  | 10.2  | 10.42 | 0.29 | 0.08 | -1.17 | 0.193346 | 0.476632 | 0.564275 | 0.682812 |
| MmugDNA.15092.1.S1_at   | MmugDNA.15092.1 | 9.5   | 8.72  | 0.48 | 0.13 | 1.71  | 0.195949 | 0.190528 | 0.566321 | 0.465906 |
| MmugDNA.15101.1.S1_at   | MmugDNA.15101.1 | 5.96  | 5.88  | 0.06 | 0.02 | 1.06  | 0.225553 | 0.355234 | 0.594764 | 0.597576 |
| MmugDNA.15113.1.S1_at   | MmugDNA.15113.1 | 7.92  | 7.42  | 0.42 | 0.2  | 1.42  | 0.543427 | 0.633714 | 0.806498 | 0.784372 |
| MmugDNA.15114.1.S1_at   | MmugDNA.15114.1 | 8.48  | 9.28  | 0.39 | 0.13 | -1.74 | 0.04738  | 0.003573 | 0.380079 | 0.085556 |
| MmugDNA.15120.1.A1_at   | MmugDNA.15120.1 | 7.51  | 7.79  | 0.28 | 0.07 | -1.21 | 0.250559 | 0.443384 | 0.615742 | 0.66118  |
| MmugDNA.15120.1.S1_at   | MmugDNA.15120.1 | 6.98  | 6.97  | 0.24 | 0.18 | 1.01  | 0.263906 | 0.679231 | 0.62583  | 0.81275  |
| MmugDNA.15126.1.S1_at   | MmugDNA.15126.1 | 7.32  | 7.62  | 0.44 | 0.11 | -1.23 | 0.696878 | 0.240079 | 0.882175 | 0.510776 |
| MmugDNA.15127.1.S1_at   | MmugDNA.15127.1 | 9.54  | 9.34  | 0.39 | 0.28 | 1.15  | 0.691032 | 0.661279 | 0.879715 | 0.801687 |
| MmugDNA.15132.1.S1_at   | MmugDNA.15132.1 | 4.94  | 5.45  | 0.62 | 0.34 | -1.42 | 0.872081 | 0.099868 | 0.955677 | 0.358557 |
| MmugDNA.15135.1.S1_at   | MmugDNA.15135.1 | 3.59  | 3.46  | 0.06 | 0.05 | 1.1   | 0.091332 | 0.722886 | 0.459138 | 0.839474 |
| MmugDNA.15141.1.S1_at   | MmugDNA.15141.1 | 3.17  | 3.14  | 0.05 | 0.08 | 1.02  | 0.665934 | 0.929199 | 0.868171 | 0.959644 |
| MmugDNA.15141.1.S1_s_at | MmugDNA.15141.1 | 3.48  | 3.34  | 0.18 | 0.12 | 1.1   | 0.749139 | 0.839125 | 0.904866 | 0.908316 |
| MmugDNA.15148.1.S1_at   | MmugDNA.15148.1 | 5.09  | 5.11  | 0.18 | 0.03 | -1.01 | 0.939448 | 0.933502 | 0.979532 | 0.962216 |
| MmugDNA.1515.1.S1_at    | MmugDNA.1515.1  | 6.16  | 6.77  | 1.51 | 0.42 | -1.52 | 0.570774 | 0.155694 | 0.822287 | 0.431054 |
| MmugDNA.15150.1.S1_at   | MmugDNA.15150.1 | 10.4  | 9.94  | 0.21 | 0.14 | 1.37  | 0.072307 | 0.013354 | 0.432116 | 0.148152 |
| MmugDNA.15152.1.S1_at   | MmugDNA.15152.1 | 11.17 | 10.75 | 0.2  | 0.02 | 1.34  | 0.052885 | 0.263812 | 0.393413 | 0.530086 |
| MmugDNA.15153.1.S1_at   | MmugDNA.15153.1 | 11.63 | 11.57 | 1.32 | 0.33 | 1.04  | 0.431368 | 0.157422 | 0.743363 | 0.432911 |
| MmugDNA.15155.1.S1_at   | MmugDNA.15155.1 | 5.37  | 5.78  | 0.8  | 0.47 | -1.33 | 0.64518  | 0.279749 | 0.858718 | 0.543232 |
| MmugDNA.15162.1.S1_at   | MmugDNA.15162.1 | 6.33  | 6.29  | 0.13 | 0.02 | 1.03  | 0.367052 | 0.089499 | 0.702567 | 0.343811 |
| MmugDNA.15162.1.S1_s_at | MmugDNA.15162.1 | 6.19  | 5.97  | 0.21 | 0.1  | 1.17  | 0.270693 | 0.184997 | 0.630562 | 0.460814 |
| MmugDNA.15167.1.S1_at   | MmugDNA.15167.1 | 4.84  | 4.76  | 0.2  | 0.07 | 1.06  | 0.547727 | 0.629746 | 0.809225 | 0.781989 |
| MmugDNA.15170.1.S1_s_at | MmugDNA.15170.1 | 5.11  | 5.29  | 0.52 | 0.05 | -1.13 | 0.18167  | 0.256161 | 0.554854 | 0.524069 |
| MmugDNA.15175.1.S1_at   | MmugDNA.15175.1 | 12.96 | 12.89 | 0.18 | 0.05 | 1.05  | 0.390113 | 0.584724 | 0.71651  | 0.752515 |
| MmugDNA.15176.1.S1_at   | MmugDNA.15176.1 | 8.72  | 8.83  | 0.21 | 0.01 | -1.08 | 0.464665 | 0.49873  | 0.762636 | 0.697733 |
| MmugDNA.15178.1.S1_at   | MmugDNA.15178.1 | 10.99 | 11.27 | 0.19 | 0.03 | -1.21 | 0.027199 | 0.154857 | 0.327322 | 0.429849 |
| MmugDNA.15193.1.S1_at   | MmugDNA.15193.1 | 5.49  | 5.12  | 0.03 | 0.23 | 1.29  | 0.140054 | 0.263852 | 0.515581 | 0.5301   |
| MmugDNA.15194.1.S1_at   | MmugDNA.15194.1 | 9.47  | 9.22  | 1.1  | 0.37 | 1.19  | 0.786892 | 0.900995 | 0.921699 | 0.943658 |
| MmugDNA.15195.1.S1_at   | MmugDNA.15195.1 | 5.87  | 6.43  | 0.57 | 0.56 | -1.48 | 0.28444  | 0.063859 | 0.642301 | 0.29906  |
| MmugDNA.15195.1.S1_s_at | MmugDNA.15195.1 | 5.7   | 5.82  | 0.58 | 0.36 | -1.09 | 0.945079 | 0.739623 | 0.980852 | 0.849117 |
| MmugDNA.15205.1.S1_at   | MmugDNA.15205.1 | 10.19 | 10.34 | 0.19 | 0.04 | -1.11 | 0.371339 | 0.015669 | 0.705454 | 0.158598 |
| MmugDNA.15208.1.S1_at   | MmugDNA.15208.1 | 4.65  | 4.62  | 0.33 | 0.17 | 1.02  | 0.581983 | 0.833108 | 0.827791 | 0.90427  |
| MmugDNA.15209.1.S1_at   | MmugDNA.15209.1 | 11.07 | 11.09 | 0.34 | 0.06 | -1.02 | 0.547848 | 0.399807 | 0.809245 | 0.630016 |
| MmugDNA.15212.1.S1_at   | MmugDNA.15212.1 | 7.67  | 8.32  | 0.31 | 0.48 | -1.57 | 0.580996 | 0.026392 | 0.827345 | 0.203529 |
| MmugDNA.15218.1.S1_at   | MmugDNA.15218.1 | 11.66 | 11.46 | 0.11 | 0.17 | 1.15  | 0.037421 | 0.069545 | 0.357092 | 0.309848 |
| MmugDNA.15222.1.S1_at   | MmugDNA.15222.1 | 13.2  | 13.2  | 0.17 | 0.01 | -1    | 0.963916 | 0.918758 | 0.988182 | 0.954387 |
| MmugDNA.15225.1.S1_at   | MmugDNA.15225.1 | 5.94  | 5.96  | 0.15 | 0.05 | -1.01 | 0.510102 | 0.837146 | 0.787989 | 0.906917 |
| MmugDNA.15227.1.S1_at   | MmugDNA.15227.1 | 13.29 | 13.29 | 0.02 | 0.01 | -1    | 0.635416 | 0.369237 | 0.854544 | 0.608691 |

|                         |                 |       |       |      |      |       |          |          |          |          |
|-------------------------|-----------------|-------|-------|------|------|-------|----------|----------|----------|----------|
| MmugDNA.15229.1.S1_at   | MmugDNA.15229.1 | 9.33  | 9.68  | 0.14 | 0.16 | -1.28 | 0.043866 | 0.106938 | 0.372949 | 0.369499 |
| MmugDNA.15233.1.S1_at   | MmugDNA.15233.1 | 8.99  | 9.56  | 0.49 | 0.2  | -1.48 | 0.098485 | 0.049468 | 0.467905 | 0.267334 |
| MmugDNA.15234.1.S1_at   | MmugDNA.15234.1 | 12.39 | 12.13 | 0.41 | 0.06 | 1.19  | 0.375422 | 0.073132 | 0.706463 | 0.316064 |
| MmugDNA.15236.1.S1_at   | MmugDNA.15236.1 | 5.72  | 6.72  | 0.12 | 0.65 | -2    | 0.059509 | 0.13892  | 0.406657 | 0.412037 |
| MmugDNA.15238.1.S1_at   | MmugDNA.15238.1 | 4.66  | 4.32  | 0.16 | 0.2  | 1.26  | 0.081261 | 0.086796 | 0.445338 | 0.339559 |
| MmugDNA.15239.1.S1_at   | MmugDNA.15239.1 | 7.21  | 7.91  | 0.17 | 0.02 | -1.62 | 0.002047 | 0.000077 | 0.173807 | 0.027016 |
| MmugDNA.15240.1.S1_at   | MmugDNA.15240.1 | 6.32  | 6.23  | 0.2  | 0.09 | 1.07  | 0.647818 | 0.877782 | 0.859466 | 0.930256 |
| MmugDNA.15241.1.S1_at   | MmugDNA.15241.1 | 7.36  | 6.32  | 0.6  | 0.2  | 2.06  | 0.125952 | 0.040228 | 0.49972  | 0.245805 |
| MmugDNA.15244.1.S1_at   | MmugDNA.15244.1 | 8.24  | 8.24  | 0.98 | 0.11 | 1     | 0.963821 | 0.652175 | 0.988182 | 0.796592 |
| MmugDNA.15245.1.S1_at   | MmugDNA.15245.1 | 10.74 | 10.33 | 0.04 | 0.07 | 1.33  | 0.000706 | 0.000097 | 0.147476 | 0.027841 |
| MmugDNA.15250.1.S1_at   | MmugDNA.15250.1 | 11.29 | 10.74 | 0.43 | 0.27 | -1.46 | 0.301725 | 0.005039 | 0.655973 | 0.098963 |
| MmugDNA.15251.1.S1_at   | MmugDNA.15251.1 | 9.58  | 9.58  | 0.2  | 0.11 | 1     | 0.792437 | 0.68324  | 0.923885 | 0.81521  |
| MmugDNA.15258.1.S1_at   | MmugDNA.15258.1 | 5.29  | 5.17  | 0.03 | 0.13 | 1.09  | 0.254663 | 0.207252 | 0.61912  | 0.481388 |
| MmugDNA.15259.1.S1_at   | MmugDNA.15259.1 | 9.54  | 10.09 | 0.31 | 0.03 | -1.46 | 0.109668 | 0.039109 | 0.482529 | 0.24303  |
| MmugDNA.1526.1.S1_at    | MmugDNA.1526.1  | 7.64  | 7.55  | 0.64 | 0.14 | 1.06  | 0.529342 | 0.260763 | 0.798256 | 0.52721  |
| MmugDNA.15260.1.S1_at   | MmugDNA.15260.1 | 6.67  | 7.2   | 0.24 | 0.11 | -1.44 | 0.030561 | 0.001123 | 0.338095 | 0.052924 |
| MmugDNA.15261.1.S1_at   | MmugDNA.15261.1 | 10.06 | 9.78  | 0.56 | 0.19 | 1.21  | 0.352275 | 0.108777 | 0.692649 | 0.372322 |
| MmugDNA.15263.1.S1_at   | MmugDNA.15263.1 | 10.95 | 11.09 | 0.4  | 0.04 | -1.1  | 0.693592 | 0.014098 | 0.880681 | 0.15195  |
| MmugDNA.15267.1.S1_at   | MmugDNA.15267.1 | 11.02 | 10.62 | 0.73 | 0.08 | 1.32  | 0.415308 | 0.249775 | 0.733613 | 0.518876 |
| MmugDNA.15271.1.S1_at   | MmugDNA.15271.1 | 6.97  | 6.48  | 0.32 | 0.13 | 1.41  | 0.073913 | 0.1074   | 0.434623 | 0.370219 |
| MmugDNA.15279.1.S1_at   | MmugDNA.15279.1 | 11.45 | 11.64 | 0.11 | 0.15 | -1.14 | 0.059267 | 0.020245 | 0.406296 | 0.178671 |
| MmugDNA.1528.1.S1_at    | MmugDNA.1528.1  | 5.47  | 6.95  | 0.81 | 0.32 | -2.78 | 0.116401 | 0.126312 | 0.489622 | 0.396786 |
| MmugDNA.15281.1.S1_at   | MmugDNA.15281.1 | 6.19  | 6.24  | 0.15 | 0.17 | -1.03 | 0.153178 | 0.20171  | 0.526339 | 0.476237 |
| MmugDNA.15285.1.S1_at   | MmugDNA.15285.1 | 9.81  | 9.69  | 0.41 | 0.09 | 1.09  | 0.580095 | 0.758789 | 0.826842 | 0.859824 |
| MmugDNA.15286.1.S1_at   | MmugDNA.15286.1 | 11.61 | 11.06 | 0.14 | 0.18 | 1.46  | 0.012238 | 0.000472 | 0.260865 | 0.038572 |
| MmugDNA.15288.1.S1_at   | MmugDNA.15288.1 | 3.91  | 3.68  | 0.24 | 0.04 | 1.17  | 0.320674 | 0.438174 | 0.669445 | 0.657196 |
| MmugDNA.15292.1.S1_at   | MmugDNA.15292.1 | 12.58 | 12.92 | 0.06 | 0.07 | -1.26 | 0.002409 | 0.039443 | 0.177075 | 0.243592 |
| MmugDNA.15293.1.S1_at   | MmugDNA.15293.1 | 4.6   | 4.56  | 0.19 | 0.21 | 1.03  | 0.936903 | 0.994516 | 0.978842 | 0.996631 |
| MmugDNA.15296.1.S1_at   | MmugDNA.15296.1 | 13.23 | 13.27 | 0.23 | 0.02 | -1.03 | 0.710058 | 0.224598 | 0.887237 | 0.497613 |
| MmugDNA.15298.1.S1_at   | MmugDNA.15298.1 | 10.79 | 10.36 | 0.6  | 0.13 | 1.35  | 0.244477 | 0.041674 | 0.61     | 0.24887  |
| MmugDNA.15298.1.S1_x_at | MmugDNA.15298.1 | 10.63 | 10.17 | 0.6  | 0.12 | 1.37  | 0.223451 | 0.03514  | 0.592569 | 0.231645 |
| MmugDNA.15299.1.S1_at   | MmugDNA.15299.1 | 12.99 | 12.52 | 0.29 | 0.05 | 1.38  | 0.057686 | 0.040206 | 0.402592 | 0.24575  |
| MmugDNA.15305.1.S1_at   | MmugDNA.15305.1 | 10.54 | 10.48 | 0.17 | 0.25 | 1.05  | 0.643206 | 0.025337 | 0.858122 | 0.199522 |
| MmugDNA.15307.1.S1_at   | MmugDNA.15307.1 | 3.63  | 3.79  | 0.13 | 0.34 | -1.12 | 0.574133 | 0.197648 | 0.823843 | 0.47262  |
| MmugDNA.15309.1.S1_at   | MmugDNA.15309.1 | 12.04 | 11.82 | 0.16 | 0.07 | 1.16  | 0.055894 | 0.051594 | 0.399441 | 0.272614 |
| MmugDNA.15310.1.S1_at   | MmugDNA.15310.1 | 13.04 | 13.25 | 0.19 | 0.06 | -1.16 | 0.191428 | 0.016964 | 0.562859 | 0.165103 |
| MmugDNA.15314.1.S1_at   | MmugDNA.15314.1 | 11.21 | 11.29 | 0.25 | 0.06 | -1.05 | 0.546224 | 0.284936 | 0.808414 | 0.547047 |
| MmugDNA.15315.1.S1_at   | MmugDNA.15315.1 | 7.8   | 7.66  | 0.25 | 0.35 | 1.1   | 0.458286 | 0.340823 | 0.758668 | 0.586978 |
| MmugDNA.15317.1.S1_at   | MmugDNA.15317.1 | 10.64 | 10.78 | 0.37 | 0.07 | -1.1  | 0.526626 | 0.406669 | 0.796773 | 0.634475 |
| MmugDNA.15319.1.S1_at   | MmugDNA.15319.1 | 6.84  | 7.63  | 0.83 | 0.24 | -1.73 | 0.270409 | 0.443607 | 0.630298 | 0.661336 |
| MmugDNA.15328.1.S1_at   | MmugDNA.15328.1 | 9.25  | 9.65  | 1.65 | 0.11 | -1.32 | 0.541471 | 0.499501 | 0.805165 | 0.69832  |
| MmugDNA.15329.1.S1_at   | MmugDNA.15329.1 | 11.65 | 11.46 | 0.22 | 0.03 | 1.15  | 0.154164 | 0.291849 | 0.527483 | 0.552086 |
| MmugDNA.1533.1.S1_at    | MmugDNA.1533.1  | 11.19 | 11.03 | 2.52 | 0.27 | 1.12  | 0.67702  | 0.159652 | 0.873333 | 0.435785 |

|                         |                 |       |       |      |      |       |          |          |          |          |
|-------------------------|-----------------|-------|-------|------|------|-------|----------|----------|----------|----------|
| MmugDNA.15331.1.S1_s_at | MmugDNA.15331.1 | 8.62  | 8.54  | 0.15 | 0.06 | 1.06  | 0.716975 | 0.117879 | 0.890136 | 0.38579  |
| MmugDNA.15333.1.S1_at   | MmugDNA.15333.1 | 4.87  | 4.87  | 0.2  | 0.13 | -1.01 | 0.677773 | 0.435115 | 0.873679 | 0.655021 |
| MmugDNA.15334.1.S1_s_at | MmugDNA.15334.1 | 12.47 | 12.43 | 0.28 | 0.11 | 1.03  | 0.745067 | 0.028614 | 0.902855 | 0.210901 |
| MmugDNA.15336.1.S1_at   | MmugDNA.15336.1 | 12.87 | 12.62 | 0.13 | 0.06 | 1.18  | 0.052683 | 0.001075 | 0.392818 | 0.051908 |
| MmugDNA.15337.1.S1_s_at | MmugDNA.15337.1 | 7.35  | 7.73  | 0.15 | 0.04 | -1.3  | 0.011613 | 0.012711 | 0.255776 | 0.145355 |
| MmugDNA.15343.1.S1_at   | MmugDNA.15343.1 | 10.08 | 10.44 | 0.22 | 0.2  | -1.28 | 0.094115 | 0.009122 | 0.463389 | 0.125994 |
| MmugDNA.15345.1.S1_at   | MmugDNA.15345.1 | 6.44  | 6.2   | 0.66 | 0.21 | 1.18  | 0.666761 | 0.452022 | 0.868398 | 0.666754 |
| MmugDNA.15348.1.S1_at   | MmugDNA.15348.1 | 9.77  | 9.28  | 0.59 | 0.2  | 1.4   | 0.246145 | 0.165099 | 0.611552 | 0.441318 |
| MmugDNA.15352.1.S1_at   | MmugDNA.15352.1 | 10.81 | 11    | 0.25 | 0.14 | -1.14 | 0.129104 | 0.103344 | 0.503785 | 0.36422  |
| MmugDNA.15352.1.S1_s_at | MmugDNA.15352.1 | 11.57 | 11.64 | 0.3  | 0.09 | -1.06 | 0.230862 | 0.144422 | 0.599045 | 0.418323 |
| MmugDNA.15354.1.S1_at   | MmugDNA.15354.1 | 3.58  | 3.61  | 0.01 | 0.07 | -1.02 | 0.843181 | 0.472099 | 0.944529 | 0.679861 |
| MmugDNA.15357.1.S1_at   | MmugDNA.15357.1 | 5.93  | 6.24  | 0.75 | 0.08 | -1.24 | 0.8017   | 0.897664 | 0.927736 | 0.941624 |
| MmugDNA.15358.1.S1_at   | MmugDNA.15358.1 | 12.5  | 12.6  | 0.11 | 0.01 | -1.07 | 0.218831 | 0.381101 | 0.588341 | 0.617478 |
| MmugDNA.15359.1.S1_at   | MmugDNA.15359.1 | 13.06 | 12.56 | 0.21 | 0.1  | 1.42  | 0.038757 | 0.032141 | 0.36035  | 0.221991 |
| MmugDNA.15359.1.S1_s_at | MmugDNA.15359.1 | 13.06 | 12.69 | 0.19 | 0.17 | 1.29  | 0.053134 | 0.05477  | 0.394058 | 0.279535 |
| MmugDNA.15361.1.S1_at   | MmugDNA.15361.1 | 7.9   | 7.42  | 0.27 | 0.1  | 1.39  | 0.143549 | 0.088187 | 0.518958 | 0.341721 |
| MmugDNA.15364.1.S1_at   | MmugDNA.15364.1 | 9.48  | 10.03 | 0.46 | 0.02 | -1.46 | 0.143744 | 0.042244 | 0.519057 | 0.249997 |
| MmugDNA.15370.1.S1_at   | MmugDNA.15370.1 | 5.6   | 5.78  | 0.78 | 0.18 | -1.14 | 0.612926 | 0.808314 | 0.843269 | 0.889665 |
| MmugDNA.15374.1.S1_at   | MmugDNA.15374.1 | 10.18 | 9.88  | 0.27 | 0.06 | 1.23  | 0.140548 | 0.076948 | 0.516012 | 0.322421 |
| MmugDNA.15379.1.S1_at   | MmugDNA.15379.1 | 4.53  | 4.37  | 0.1  | 0.13 | 1.12  | 0.08244  | 0.520305 | 0.447269 | 0.711612 |
| MmugDNA.15380.1.S1_at   | MmugDNA.15380.1 | 3.37  | 3.24  | 0.19 | 0.09 | 1.09  | 0.612228 | 0.648995 | 0.842951 | 0.794525 |
| MmugDNA.15397.1.S1_at   | MmugDNA.15397.1 | 11.15 | 11.07 | 0.06 | 0.05 | 1.05  | 0.376667 | 0.024029 | 0.706953 | 0.194351 |
| MmugDNA.15398.1.S1_at   | MmugDNA.15398.1 | 9.07  | 9.14  | 0.5  | 0.31 | -1.05 | 0.322546 | 0.369561 | 0.671216 | 0.608927 |
| MmugDNA.15399.1.S1_at   | MmugDNA.15399.1 | 12.58 | 12.68 | 0.24 | 0.11 | -1.07 | 0.424245 | 0.660927 | 0.739497 | 0.801637 |
| MmugDNA.154.1.S1_at     | MmugDNA.154.1   | 8.18  | 7.84  | 0.26 | 0.25 | 1.27  | 0.148173 | 0.224266 | 0.522429 | 0.497164 |
| MmugDNA.1540.1.S1_at    | MmugDNA.1540.1  | 9.59  | 9.92  | 0.27 | 0.05 | -1.26 | 0.196652 | 0.150571 | 0.567314 | 0.425106 |
| MmugDNA.15405.1.S1_at   | MmugDNA.15405.1 | 3.99  | 3.88  | 0.14 | 0.05 | 1.08  | 0.292048 | 0.171873 | 0.648376 | 0.448295 |
| MmugDNA.15409.1.S1_at   | MmugDNA.15409.1 | 8.29  | 7.48  | 0.3  | 0.19 | 1.75  | 0.018874 | 0.00035  | 0.298593 | 0.037097 |
| MmugDNA.15418.1.S1_at   | MmugDNA.15418.1 | 5.46  | 5.32  | 0.18 | 0.1  | 1.11  | 0.162377 | 0.089359 | 0.5354   | 0.343611 |
| MmugDNA.15419.1.S1_at   | MmugDNA.15419.1 | 4.55  | 4.64  | 0.24 | 0.06 | -1.06 | 0.618655 | 0.123435 | 0.846145 | 0.393452 |
| MmugDNA.15422.1.S1_at   | MmugDNA.15422.1 | 9.5   | 9.75  | 1.96 | 0.24 | -1.18 | 0.743039 | 0.143755 | 0.901935 | 0.417583 |
| MmugDNA.15424.1.S1_at   | MmugDNA.15424.1 | 9.58  | 9.65  | 0.11 | 0.13 | -1.05 | 0.61194  | 0.417714 | 0.842651 | 0.642382 |
| MmugDNA.15428.1.S1_at   | MmugDNA.15428.1 | 9.8   | 9.72  | 0.1  | 0.11 | 1.06  | 0.699339 | 0.020253 | 0.883137 | 0.178702 |
| MmugDNA.15428.1.S1_s_at | MmugDNA.15428.1 | 10.77 | 10.73 | 0.09 | 0.08 | 1.03  | 0.985654 | 0.012232 | 0.995461 | 0.142996 |
| MmugDNA.1543.1.S1_at    | MmugDNA.1543.1  | 5.03  | 4.66  | 0.4  | 0.2  | 1.29  | 0.207119 | 0.669434 | 0.578774 | 0.806626 |
| MmugDNA.1544.1.S1_at    | MmugDNA.1544.1  | 9.89  | 10.13 | 0.32 | 0.2  | -1.18 | 0.100828 | 0.207499 | 0.47159  | 0.481813 |
| MmugDNA.15444.1.S1_at   | MmugDNA.15444.1 | 7.33  | 7.33  | 0.16 | 0.06 | 1     | 0.742239 | 0.61688  | 0.901638 | 0.773019 |
| MmugDNA.15445.1.S1_at   | MmugDNA.15445.1 | 7.71  | 8.17  | 0.66 | 0.1  | -1.38 | 0.380994 | 0.257463 | 0.709857 | 0.52521  |
| MmugDNA.15446.1.S1_at   | MmugDNA.15446.1 | 7.26  | 7.85  | 0.48 | 0.17 | -1.5  | 0.136586 | 0.133707 | 0.511723 | 0.405647 |
| MmugDNA.15453.1.S1_s_at | MmugDNA.15453.1 | 5.52  | 5.59  | 0.5  | 0.15 | -1.05 | 0.541571 | 0.578741 | 0.805185 | 0.748611 |
| MmugDNA.15455.1.S1_at   | MmugDNA.15455.1 | 9.83  | 9.91  | 0.16 | 0.01 | -1.06 | 0.972094 | 0.035078 | 0.990913 | 0.231478 |
| MmugDNA.1546.1.S1_at    | MmugDNA.1546.1  | 8.53  | 8.43  | 0.19 | 0.26 | 1.07  | 0.788307 | 0.763547 | 0.922213 | 0.86248  |
| MmugDNA.15469.1.S1_at   | MmugDNA.15469.1 | 5.27  | 4.94  | 0.24 | 0.1  | 1.26  | 0.160218 | 0.161846 | 0.533273 | 0.437937 |

|                         |                 |       |       |      |      |       |          |          |          |          |
|-------------------------|-----------------|-------|-------|------|------|-------|----------|----------|----------|----------|
| MmugDNA.15472.1.S1_at   | MmugDNA.15472.1 | 9.72  | 8.59  | 0.52 | 0.06 | 2.18  | 0.021797 | 0.006143 | 0.309672 | 0.10676  |
| MmugDNA.15476.1.S1_at   | MmugDNA.15476.1 | 6.47  | 7.16  | 1.03 | 0.26 | -1.61 | 0.398278 | 0.2874   | 0.722436 | 0.548657 |
| MmugDNA.15481.1.S1_at   | MmugDNA.15481.1 | 4.22  | 4.19  | 0.06 | 0.09 | 1.02  | 0.98856  | 0.042947 | 0.995877 | 0.251793 |
| MmugDNA.15482.1.S1_at   | MmugDNA.15482.1 | 5.37  | 5.1   | 0.46 | 0.08 | 1.2   | 0.279776 | 0.300015 | 0.63872  | 0.558262 |
| MmugDNA.15485.1.S1_at   | MmugDNA.15485.1 | 8.25  | 8.55  | 0.12 | 0.13 | -1.23 | 0.025672 | 0.002275 | 0.322444 | 0.070332 |
| MmugDNA.15490.1.S1_at   | MmugDNA.15490.1 | 9.88  | 10.32 | 0.49 | 0.22 | -1.36 | 0.568293 | 0.5777   | 0.820707 | 0.748038 |
| MmugDNA.15500.1.S1_at   | MmugDNA.15500.1 | 5.69  | 5.59  | 0.11 | 0.12 | 1.07  | 0.72216  | 0.928583 | 0.892211 | 0.959399 |
| MmugDNA.15501.1.S1_at   | MmugDNA.15501.1 | 11.01 | 10.82 | 0.49 | 0.18 | 1.14  | 0.173929 | 0.008562 | 0.546898 | 0.122771 |
| MmugDNA.15504.1.S1_at   | MmugDNA.15504.1 | 7.31  | 7.17  | 0.08 | 0.09 | 1.1   | 0.344311 | 0.02209  | 0.686913 | 0.185972 |
| MmugDNA.15505.1.S1_at   | MmugDNA.15505.1 | 5.28  | 5.15  | 0.15 | 0.08 | 1.09  | 0.277675 | 0.169517 | 0.636957 | 0.446167 |
| MmugDNA.15506.1.S1_at   | MmugDNA.15506.1 | 5.33  | 5.38  | 0.23 | 0.12 | -1.03 | 0.895382 | 0.97253  | 0.964244 | 0.985221 |
| MmugDNA.15509.1.S1_at   | MmugDNA.15509.1 | 4.87  | 4.61  | 0.5  | 0.11 | 1.2   | 0.440557 | 0.515904 | 0.748529 | 0.708562 |
| MmugDNA.15512.1.S1_at   | MmugDNA.15512.1 | 7.4   | 7.19  | 0.12 | 0.26 | 1.16  | 0.352613 | 0.031305 | 0.692659 | 0.21885  |
| MmugDNA.15512.1.S1_s_at | MmugDNA.15512.1 | 6.69  | 6.53  | 0.2  | 0.41 | 1.12  | 0.835137 | 0.07539  | 0.940884 | 0.319693 |
| MmugDNA.15515.1.S1_at   | MmugDNA.15515.1 | 11.26 | 11.46 | 1.07 | 0.24 | -1.15 | 0.888839 | 0.220569 | 0.961638 | 0.49398  |
| MmugDNA.15518.1.S1_at   | MmugDNA.15518.1 | 5.29  | 5.12  | 0.07 | 0.07 | 1.12  | 0.042302 | 0.077733 | 0.368868 | 0.323851 |
| MmugDNA.15523.1.S1_at   | MmugDNA.15523.1 | 5.31  | 5.18  | 0.15 | 0.04 | 1.09  | 0.07579  | 0.094064 | 0.436784 | 0.350707 |
| MmugDNA.15525.1.S1_at   | MmugDNA.15525.1 | 5.11  | 5.11  | 0.09 | 0.07 | 1     | 0.780416 | 0.64726  | 0.919137 | 0.793355 |
| MmugDNA.15528.1.S1_at   | MmugDNA.15528.1 | 5.67  | 5.9   | 0.17 | 0.14 | -1.17 | 0.357519 | 0.412936 | 0.695886 | 0.639254 |
| MmugDNA.15530.1.S1_at   | MmugDNA.15530.1 | 10.01 | 9.14  | 0.5  | 0.21 | 1.83  | 0.077623 | 0.045321 | 0.439681 | 0.257202 |
| MmugDNA.15536.1.S1_at   | MmugDNA.15536.1 | 11.58 | 11.14 | 0.31 | 0.17 | 1.36  | 0.099358 | 0.133303 | 0.468936 | 0.405049 |
| MmugDNA.15537.1.S1_at   | MmugDNA.15537.1 | 12.7  | 12.25 | 0.18 | 0.14 | 1.36  | 0.027211 | 0.024605 | 0.327322 | 0.196276 |
| MmugDNA.1554.1.S1_at    | MmugDNA.1554.1  | 11.71 | 11.53 | 0.09 | 0.09 | 1.13  | 0.070258 | 0.002291 | 0.428889 | 0.07045  |
| MmugDNA.15540.1.S1_at   | MmugDNA.15540.1 | 9.39  | 9.42  | 1.28 | 0.23 | -1.02 | 0.961535 | 0.291993 | 0.987441 | 0.552163 |
| MmugDNA.15544.1.S1_at   | MmugDNA.15544.1 | 6.41  | 7.4   | 0.48 | 0.17 | -1.98 | 0.052578 | 0.003368 | 0.392678 | 0.083517 |
| MmugDNA.15548.1.S1_at   | MmugDNA.15548.1 | 10.81 | 10.99 | 0.21 | 0.08 | -1.14 | 0.086072 | 0.015889 | 0.453615 | 0.159934 |
| MmugDNA.1555.1.S1_at    | MmugDNA.1555.1  | 6.03  | 6.03  | 0.37 | 0.21 | 1     | 0.766685 | 0.886817 | 0.912281 | 0.935553 |
| MmugDNA.15554.1.S1_at   | MmugDNA.15554.1 | 5.86  | 5.77  | 0.36 | 0.06 | 1.07  | 0.228538 | 0.181428 | 0.59754  | 0.457923 |
| MmugDNA.15556.1.S1_at   | MmugDNA.15556.1 | 12.21 | 12.25 | 0.26 | 0.09 | -1.03 | 0.679315 | 0.746028 | 0.874274 | 0.852688 |
| MmugDNA.15556.1.S1_s_at | MmugDNA.15556.1 | 11.79 | 11.82 | 0.24 | 0.09 | -1.02 | 0.60296  | 0.466279 | 0.839083 | 0.676227 |
| MmugDNA.15559.1.S1_at   | MmugDNA.15559.1 | 4.46  | 4.25  | 0.06 | 0.12 | 1.16  | 0.024881 | 0.085221 | 0.320135 | 0.337096 |
| MmugDNA.15560.1.S1_at   | MmugDNA.15560.1 | 11.27 | 10.76 | 1.03 | 0.13 | 1.43  | 0.868204 | 0.246536 | 0.953843 | 0.515917 |
| MmugDNA.15563.1.S1_at   | MmugDNA.15563.1 | 12.97 | 13.3  | 0.19 | 0.05 | -1.26 | 0.046748 | 0.033526 | 0.37872  | 0.226727 |
| MmugDNA.15565.1.S1_at   | MmugDNA.15565.1 | 9.39  | 8.69  | 0.41 | 0.24 | 1.63  | 0.050286 | 0.024035 | 0.386954 | 0.194358 |
| MmugDNA.15566.1.S1_at   | MmugDNA.15566.1 | 12.2  | 12.24 | 0.32 | 0.09 | -1.02 | 0.772111 | 0.232955 | 0.91501  | 0.50445  |
| MmugDNA.15567.1.S1_at   | MmugDNA.15567.1 | 11.19 | 11.78 | 0.24 | 0.06 | -1.5  | 0.01762  | 0.032225 | 0.292913 | 0.222167 |
| MmugDNA.15568.1.S1_at   | MmugDNA.15568.1 | 7.5   | 7.62  | 0.36 | 0.06 | -1.09 | 0.710437 | 0.702561 | 0.887291 | 0.827615 |
| MmugDNA.15573.1.S1_s_at | MmugDNA.15573.1 | 12.91 | 12.67 | 0.69 | 0.04 | 1.18  | 0.708859 | 0.799391 | 0.886591 | 0.884559 |
| MmugDNA.15573.1.S1_x_at | MmugDNA.15573.1 | 9.49  | 9.19  | 0.74 | 0.03 | 1.24  | 0.8808   | 0.939826 | 0.958787 | 0.965805 |
| MmugDNA.15574.1.S1_at   | MmugDNA.15574.1 | 5.85  | 5.64  | 0.2  | 0.09 | 1.16  | 0.293728 | 0.370435 | 0.650059 | 0.609512 |
| MmugDNA.15575.1.S1_at   | MmugDNA.15575.1 | 7.3   | 7.39  | 0.13 | 0.06 | -1.06 | 0.519429 | 0.242455 | 0.793172 | 0.512835 |
| MmugDNA.15576.1.S1_at   | MmugDNA.15576.1 | 7.98  | 6.94  | 1.48 | 0.12 | 2.06  | 0.296577 | 0.235132 | 0.652213 | 0.50629  |
| MmugDNA.15583.1.S1_at   | MmugDNA.15583.1 | 7.13  | 6.95  | 0.11 | 0.11 | 1.13  | 0.060101 | 0.117872 | 0.407399 | 0.38579  |

|                        |                 |       |       |      |      |       |          |          |          |          |
|------------------------|-----------------|-------|-------|------|------|-------|----------|----------|----------|----------|
| MmugDNA.15585.1.S1_at  | MmugDNA.15585.1 | 9.05  | 8.16  | 0.49 | 0.27 | 1.85  | 0.130281 | 0.000437 | 0.504682 | 0.038359 |
| MmugDNA.15586.1.S1_at  | MmugDNA.15586.1 | 10.39 | 10.72 | 0.7  | 0.15 | -1.25 | 0.759743 | 0.162066 | 0.909769 | 0.438173 |
| MmugDNA.15587.1.S1_at  | MmugDNA.15587.1 | 6.8   | 6.42  | 0.25 | 0.18 | 1.3   | 0.158753 | 0.236242 | 0.531595 | 0.507252 |
| MmugDNA.15589.1.S1_at  | MmugDNA.15589.1 | 11.11 | 11.36 | 1.02 | 0.05 | -1.19 | 0.66701  | 0.804487 | 0.868458 | 0.887566 |
| MmugDNA.15592.1.S1_at  | MmugDNA.15592.1 | 8.6   | 9.13  | 0.15 | 0.23 | -1.44 | 0.016577 | 0.000842 | 0.287478 | 0.047013 |
| MmugDNA.15593.1.S1_at  | MmugDNA.15593.1 | 10.32 | 10.62 | 0.76 | 0.06 | -1.23 | 0.540056 | 0.687088 | 0.804248 | 0.817434 |
| MmugDNA.15594.1.S1_at  | MmugDNA.15594.1 | 7.33  | 7.22  | 0.12 | 0.12 | 1.08  | 0.801527 | 0.384111 | 0.927649 | 0.619926 |
| MmugDNA.15596.1.S1_at  | MmugDNA.15596.1 | 6.44  | 7.43  | 0.68 | 0.07 | -1.99 | 0.07316  | 0.073068 | 0.434019 | 0.316017 |
| MmugDNA.156.1.S1_at    | MmugDNA.156.1   | 6.5   | 6.33  | 0.11 | 0.06 | 1.13  | 0.053994 | 0.132811 | 0.395633 | 0.404544 |
| MmugDNA.15603.1.S1_at  | MmugDNA.15603.1 | 11.64 | 11.6  | 0.46 | 0.03 | 1.03  | 0.804877 | 0.858806 | 0.929036 | 0.919602 |
| MmugDNA.15604.1.S1_at  | MmugDNA.15604.1 | 10.41 | 10.53 | 0.17 | 0.1  | -1.09 | 0.485206 | 0.05397  | 0.774118 | 0.27777  |
| MmugDNA.15605.1.S1_at  | MmugDNA.15605.1 | 11.5  | 11.32 | 0.34 | 0.09 | 1.13  | 0.443272 | 0.103124 | 0.750657 | 0.364026 |
| MmugDNA.15608.1.S1_at  | MmugDNA.15608.1 | 2.94  | 2.92  | 0.07 | 0.12 | 1.01  | 0.653538 | 0.307835 | 0.862438 | 0.56397  |
| MmugDNA.15610.1.S1_at  | MmugDNA.15610.1 | 5.25  | 4.86  | 0.25 | 0.12 | 1.31  | 0.052151 | 0.076513 | 0.392084 | 0.321589 |
| MmugDNA.15611.1.S1_at  | MmugDNA.15611.1 | 6.88  | 7.21  | 1.2  | 0.27 | -1.25 | 0.714934 | 0.264804 | 0.889025 | 0.530803 |
| MmugDNA.15615.1.S1_at  | MmugDNA.15615.1 | 11.38 | 11.41 | 0.08 | 0.03 | -1.02 | 0.909739 | 0.748494 | 0.96945  | 0.853666 |
| MmugDNA.15616.1.S1_at  | MmugDNA.15616.1 | 8.62  | 8.96  | 0.13 | 0.05 | -1.27 | 0.008916 | 0.00604  | 0.238897 | 0.106089 |
| MmugDNA.15617.1.S1_at  | MmugDNA.15617.1 | 8.12  | 8.5   | 1.01 | 0.34 | -1.3  | 0.781725 | 0.923495 | 0.919573 | 0.956997 |
| MmugDNA.15620.1.S1_at  | MmugDNA.15620.1 | 12.15 | 12.24 | 0.13 | 0.04 | -1.06 | 0.485574 | 0.000489 | 0.774398 | 0.038921 |
| MmugDNA.15621.1.S1_at  | MmugDNA.15621.1 | 7     | 6.24  | 0.33 | 0.23 | 1.7   | 0.025921 | 0.001576 | 0.32273  | 0.060185 |
| MmugDNA.15625.1.S1_at  | MmugDNA.15625.1 | 7.9   | 8.17  | 0.09 | 0.17 | -1.2  | 0.043257 | 0.012776 | 0.371655 | 0.145663 |
| MmugDNA.15626.1.S1_at  | MmugDNA.15626.1 | 3.71  | 3.6   | 0.28 | 0.11 | 1.08  | 0.556244 | 0.743679 | 0.814002 | 0.851456 |
| MmugDNA.1563.1.S1_at   | MmugDNA.1563.1  | 7.99  | 7.53  | 0.2  | 0.17 | 1.38  | 0.081021 | 0.049152 | 0.445056 | 0.266534 |
| MmugDNA.1563.1.S1_s_at | MmugDNA.1563.1  | 7.65  | 6.63  | 0.65 | 0.39 | 2.03  | 0.095366 | 0.072978 | 0.464184 | 0.315986 |
| MmugDNA.15631.1.S1_at  | MmugDNA.15631.1 | 6.02  | 5.8   | 0.06 | 0.06 | 1.16  | 0.008412 | 0.101799 | 0.233808 | 0.361714 |
| MmugDNA.15633.1.S1_at  | MmugDNA.15633.1 | 10.16 | 10.55 | 0.07 | 0.15 | -1.31 | 0.022709 | 0.100966 | 0.312142 | 0.360525 |
| MmugDNA.15634.1.S1_at  | MmugDNA.15634.1 | 5.37  | 5.03  | 0.48 | 0.14 | 1.27  | 0.262383 | 0.198848 | 0.624639 | 0.473475 |
| MmugDNA.15637.1.S1_at  | MmugDNA.15637.1 | 4.56  | 4.55  | 0.01 | 0.04 | 1     | 0.335525 | 0.580303 | 0.681086 | 0.749618 |
| MmugDNA.15638.1.S1_at  | MmugDNA.15638.1 | 9.35  | 9.69  | 0.72 | 0.07 | -1.26 | 0.407694 | 0.538308 | 0.728823 | 0.723028 |
| MmugDNA.1564.1.S1_at   | MmugDNA.1564.1  | 3.79  | 3.25  | 0.1  | 0.07 | 1.46  | 0.00146  | 0.026172 | 0.161412 | 0.202785 |
| MmugDNA.15641.1.S1_at  | MmugDNA.15641.1 | 10.73 | 10.86 | 0.05 | 0.06 | -1.1  | 0.022006 | 0.019309 | 0.309781 | 0.174723 |
| MmugDNA.15646.1.S1_at  | MmugDNA.15646.1 | 3.37  | 3.28  | 0.02 | 0.05 | 1.06  | 0.06151  | 0.208661 | 0.410885 | 0.482544 |
| MmugDNA.15647.1.S1_at  | MmugDNA.15647.1 | 4.85  | 5.06  | 0.31 | 0.23 | -1.15 | 0.671583 | 0.375312 | 0.870464 | 0.613336 |
| MmugDNA.15656.1.S1_at  | MmugDNA.15656.1 | 12.75 | 12.62 | 0.27 | 0.05 | 1.09  | 0.841536 | 0.302308 | 0.94378  | 0.560092 |
| MmugDNA.1566.1.S1_at   | MmugDNA.1566.1  | 6.7   | 6.3   | 0.18 | 0.21 | 1.32  | 0.140381 | 0.297374 | 0.515777 | 0.556072 |
| MmugDNA.15660.1.S1_at  | MmugDNA.15660.1 | 7.02  | 6.9   | 0.07 | 0.07 | 1.08  | 0.238677 | 0.469931 | 0.605393 | 0.678572 |
| MmugDNA.15661.1.S1_at  | MmugDNA.15661.1 | 5.84  | 5.98  | 0.11 | 0.31 | -1.11 | 0.869839 | 0.526755 | 0.954581 | 0.715627 |
| MmugDNA.15662.1.S1_at  | MmugDNA.15662.1 | 5.46  | 5.24  | 0.05 | 0.05 | 1.16  | 0.015115 | 0.025379 | 0.2796   | 0.199678 |
| MmugDNA.15664.1.S1_at  | MmugDNA.15664.1 | 7.33  | 7.01  | 0.1  | 0.12 | 1.24  | 0.046277 | 0.04086  | 0.377679 | 0.247004 |
| MmugDNA.15665.1.S1_at  | MmugDNA.15665.1 | 5.9   | 6.06  | 0.25 | 0.22 | -1.12 | 0.397059 | 0.527651 | 0.721621 | 0.716174 |
| MmugDNA.15666.1.S1_at  | MmugDNA.15666.1 | 3.69  | 3.49  | 0.28 | 0.11 | 1.15  | 0.317513 | 0.154795 | 0.667356 | 0.429813 |
| MmugDNA.15667.1.S1_at  | MmugDNA.15667.1 | 11.91 | 11.91 | 0.03 | 0.02 | 1     | 0.224204 | 0.604761 | 0.593369 | 0.764797 |
| MmugDNA.1567.1.S1_at   | MmugDNA.1567.1  | 8.55  | 9.23  | 2.26 | 0.3  | -1.6  | 0.556438 | 0.194784 | 0.814119 | 0.469807 |

|                         |                 |       |       |      |      |       |          |          |          |          |
|-------------------------|-----------------|-------|-------|------|------|-------|----------|----------|----------|----------|
| MmugDNA.15671.1.S1_at   | MmugDNA.15671.1 | 3.86  | 3.68  | 0.3  | 0.02 | 1.13  | 0.98295  | 0.992159 | 0.99478  | 0.99553  |
| MmugDNA.15679.1.S1_at   | MmugDNA.15679.1 | 5.19  | 5.15  | 0.05 | 0.09 | 1.03  | 0.258797 | 0.31068  | 0.622286 | 0.565787 |
| MmugDNA.1568.1.S1_at    | MmugDNA.1568.1  | 11.23 | 11.5  | 0.09 | 0.03 | -1.21 | 0.018896 | 0.09684  | 0.298593 | 0.354254 |
| MmugDNA.15682.1.S1_at   | MmugDNA.15682.1 | 4.13  | 4.12  | 0.01 | 0.09 | 1.01  | 0.462578 | 0.498087 | 0.761708 | 0.697261 |
| MmugDNA.15691.1.S1_s_at | MmugDNA.15691.1 | 8.22  | 8.64  | 0.57 | 0.14 | -1.33 | 0.611479 | 0.213469 | 0.842565 | 0.487369 |
| MmugDNA.15693.1.S1_at   | MmugDNA.15693.1 | 10.6  | 11.4  | 0.38 | 0.18 | -1.74 | 0.031901 | 0.03455  | 0.34281  | 0.229979 |
| MmugDNA.15696.1.S1_at   | MmugDNA.15696.1 | 5.23  | 5.45  | 0.25 | 0.06 | -1.16 | 0.39754  | 0.307817 | 0.721771 | 0.56397  |
| MmugDNA.15700.1.S1_s_at | MmugDNA.15700.1 | 9.21  | 8.79  | 0.89 | 0.19 | 1.34  | 0.419027 | 0.072645 | 0.73604  | 0.315579 |
| MmugDNA.15703.1.S1_at   | MmugDNA.15703.1 | 9.45  | 9.8   | 0.56 | 0.17 | -1.28 | 0.433934 | 0.08631  | 0.744754 | 0.338771 |
| MmugDNA.15706.1.S1_at   | MmugDNA.15706.1 | 10.3  | 10.54 | 0.38 | 0.21 | -1.18 | 0.354502 | 0.523446 | 0.694035 | 0.713714 |
| MmugDNA.15708.1.S1_s_at | MmugDNA.15708.1 | 11.89 | 12.09 | 0.34 | 0.07 | -1.15 | 0.337793 | 0.275243 | 0.682702 | 0.53963  |
| MmugDNA.15709.1.S1_at   | MmugDNA.15709.1 | 5.14  | 4.79  | 0.14 | 0.13 | 1.27  | 0.088893 | 0.106384 | 0.456644 | 0.36895  |
| MmugDNA.15710.1.S1_at   | MmugDNA.15710.1 | 8.38  | 8.45  | 0.26 | 0.12 | -1.05 | 0.912724 | 0.5369   | 0.970322 | 0.722119 |
| MmugDNA.15715.1.S1_at   | MmugDNA.15715.1 | 11.87 | 11.73 | 0.11 | 0.03 | 1.1   | 0.121725 | 0.066321 | 0.495432 | 0.303189 |
| MmugDNA.15719.1.S1_at   | MmugDNA.15719.1 | 9.79  | 10.83 | 0.3  | 0.07 | -2.06 | 0.007861 | 0.005471 | 0.231047 | 0.102081 |
| MmugDNA.15721.1.S1_at   | MmugDNA.15721.1 | 8.12  | 8.13  | 0.19 | 0.05 | -1.01 | 0.881325 | 0.006161 | 0.959023 | 0.106774 |
| MmugDNA.15723.1.S1_at   | MmugDNA.15723.1 | 10.42 | 10.8  | 0.39 | 0.19 | -1.3  | 0.428872 | 0.715635 | 0.742105 | 0.835159 |
| MmugDNA.15726.1.S1_at   | MmugDNA.15726.1 | 4.36  | 4.34  | 0.07 | 0.31 | 1.01  | 0.330663 | 0.604451 | 0.677328 | 0.76464  |
| MmugDNA.15732.1.S1_at   | MmugDNA.15732.1 | 2.93  | 2.96  | 0.09 | 0.1  | -1.03 | 0.59018  | 0.24321  | 0.832832 | 0.513356 |
| MmugDNA.15733.1.S1_at   | MmugDNA.15733.1 | 5.42  | 5.19  | 0.21 | 0.03 | 1.17  | 0.104046 | 0.337319 | 0.474703 | 0.584533 |
| MmugDNA.15740.1.S1_at   | MmugDNA.15740.1 | 11.16 | 11.01 | 0.1  | 0.1  | 1.11  | 0.122667 | 0.250521 | 0.496146 | 0.519391 |
| MmugDNA.15744.1.S1_at   | MmugDNA.15744.1 | 4.49  | 4.35  | 0.01 | 0.15 | 1.1   | 0.138636 | 0.831922 | 0.514023 | 0.90356  |
| MmugDNA.15746.1.S1_at   | MmugDNA.15746.1 | 6.5   | 6.2   | 0.31 | 0.18 | 1.23  | 0.144832 | 0.033298 | 0.52011  | 0.226087 |
| MmugDNA.15747.1.S1_at   | MmugDNA.15747.1 | 11.86 | 11.6  | 0.14 | 0.05 | 1.2   | 0.041157 | 0.070516 | 0.365675 | 0.311777 |
| MmugDNA.15751.1.S1_at   | MmugDNA.15751.1 | 8.28  | 8.51  | 0.21 | 0.09 | -1.17 | 0.161541 | 0.000346 | 0.534843 | 0.037    |
| MmugDNA.15752.1.S1_at   | MmugDNA.15752.1 | 9.86  | 9.04  | 0.38 | 0.26 | 1.77  | 0.045999 | 0.092533 | 0.37735  | 0.348504 |
| MmugDNA.15754.1.S1_at   | MmugDNA.15754.1 | 8.71  | 9.22  | 0.1  | 0.07 | -1.42 | 0.001326 | 0.000001 | 0.158997 | 0.007307 |
| MmugDNA.15759.1.S1_at   | MmugDNA.15759.1 | 12.31 | 12.25 | 0.03 | 0.08 | 1.05  | 0.088462 | 0.000023 | 0.45606  | 0.019635 |
| MmugDNA.15760.1.S1_at   | MmugDNA.15760.1 | 13.24 | 11.69 | 0.71 | 0.39 | 2.92  | 0.083766 | 0.063413 | 0.449639 | 0.298441 |
| MmugDNA.15762.1.S1_at   | MmugDNA.15762.1 | 9.73  | 10.27 | 2.43 | 0.19 | -1.45 | 0.552789 | 0.228305 | 0.811917 | 0.500471 |
| MmugDNA.15770.1.S1_at   | MmugDNA.15770.1 | 6.95  | 6.89  | 0.15 | 0.02 | 1.04  | 0.2604   | 0.24878  | 0.623265 | 0.517931 |
| MmugDNA.15775.1.S1_at   | MmugDNA.15775.1 | 9.51  | 9.6   | 0.18 | 0.09 | -1.07 | 0.201339 | 0.214366 | 0.57304  | 0.488047 |
| MmugDNA.15780.1.S1_at   | MmugDNA.15780.1 | 11.91 | 12.04 | 0.24 | 0.1  | -1.1  | 0.704095 | 0.440114 | 0.884952 | 0.658719 |
| MmugDNA.15782.1.S1_at   | MmugDNA.15782.1 | 10.32 | 10.57 | 1.2  | 0.23 | -1.19 | 0.837034 | 0.111685 | 0.941546 | 0.37664  |
| MmugDNA.15793.1.S1_at   | MmugDNA.15793.1 | 6.28  | 6.23  | 0.17 | 0.11 | 1.04  | 0.424414 | 0.664083 | 0.739564 | 0.803247 |
| MmugDNA.15802.1.S1_at   | MmugDNA.15802.1 | 11.98 | 12.03 | 0.21 | 0.03 | -1.03 | 0.708824 | 0.285883 | 0.886591 | 0.547484 |
| MmugDNA.15804.1.S1_at   | MmugDNA.15804.1 | 11.37 | 11.17 | 0.15 | 0.11 | 1.15  | 0.089497 | 0.193094 | 0.457657 | 0.468554 |
| MmugDNA.15809.1.S1_at   | MmugDNA.15809.1 | 7.28  | 7.05  | 0.14 | 0.02 | 1.17  | 0.11674  | 0.034345 | 0.490029 | 0.229283 |
| MmugDNA.15811.1.S1_at   | MmugDNA.15811.1 | 9.63  | 9.16  | 0.14 | 0.04 | 1.38  | 0.007977 | 0.000261 | 0.232005 | 0.033678 |
| MmugDNA.15817.1.S1_at   | MmugDNA.15817.1 | 3.67  | 3.69  | 0.08 | 0.08 | -1.02 | 0.705719 | 0.900404 | 0.885355 | 0.94344  |
| MmugDNA.15818.1.S1_at   | MmugDNA.15818.1 | 6.37  | 6.46  | 0.21 | 0.09 | -1.07 | 0.397519 | 0.133107 | 0.721771 | 0.404734 |
| MmugDNA.15820.1.S1_at   | MmugDNA.15820.1 | 7.9   | 8.83  | 0.98 | 0.37 | -1.91 | 0.277037 | 0.546663 | 0.636653 | 0.728135 |
| MmugDNA.15821.1.S1_at   | MmugDNA.15821.1 | 10.97 | 9.94  | 0.29 | 0.14 | 2.04  | 0.005233 | 0.005804 | 0.206348 | 0.104597 |

|                         |                 |       |       |      |      |       |          |          |          |          |
|-------------------------|-----------------|-------|-------|------|------|-------|----------|----------|----------|----------|
| MmugDNA.1583.1.S1_at    | MmugDNA.1583.1  | 4.07  | 3.75  | 0.22 | 0.09 | 1.25  | 0.213432 | 0.250197 | 0.58398  | 0.519222 |
| MmugDNA.15835.1.S1_at   | MmugDNA.15835.1 | 10.06 | 9.36  | 0.88 | 0.32 | 1.63  | 0.745771 | 0.069758 | 0.903099 | 0.31026  |
| MmugDNA.15837.1.S1_at   | MmugDNA.15837.1 | 5.99  | 6.57  | 0.6  | 0.09 | -1.49 | 0.560773 | 0.603943 | 0.816958 | 0.764419 |
| MmugDNA.15841.1.S1_at   | MmugDNA.15841.1 | 13.83 | 13.58 | 0.12 | 0.05 | 1.19  | 0.023252 | 0.01208  | 0.314809 | 0.14216  |
| MmugDNA.15847.1.S1_at   | MmugDNA.15847.1 | 10.36 | 10.3  | 0.44 | 0.03 | 1.04  | 0.701071 | 0.870549 | 0.883757 | 0.926446 |
| MmugDNA.15851.1.S1_at   | MmugDNA.15851.1 | 10.65 | 10.39 | 0.59 | 0.04 | 1.2   | 0.843777 | 0.051693 | 0.944946 | 0.272892 |
| MmugDNA.15857.1.S1_s_at | MmugDNA.15857.1 | 9.94  | 9.95  | 0.36 | 0.21 | -1.01 | 0.91645  | 0.062335 | 0.971609 | 0.296503 |
| MmugDNA.15859.1.S1_at   | MmugDNA.15859.1 | 10.36 | 10.32 | 0.13 | 0.15 | 1.03  | 0.464392 | 0.657056 | 0.762534 | 0.799413 |
| MmugDNA.15859.1.S1_s_at | MmugDNA.15859.1 | 11.04 | 11.07 | 0.11 | 0.07 | -1.02 | 0.816946 | 0.822318 | 0.933792 | 0.89777  |
| MmugDNA.15860.1.S1_at   | MmugDNA.15860.1 | 4.82  | 5.8   | 0.53 | 0.47 | -1.97 | 0.177969 | 0.439014 | 0.551163 | 0.657802 |
| MmugDNA.15861.1.S1_s_at | MmugDNA.15861.1 | 12.28 | 12.42 | 0.04 | 0.11 | -1.11 | 0.100989 | 0.00205  | 0.47159  | 0.066887 |
| MmugDNA.15865.1.S1_at   | MmugDNA.15865.1 | 10.28 | 9.84  | 2.24 | 0.2  | 1.35  | 0.94848  | 0.236622 | 0.982317 | 0.50743  |
| MmugDNA.15867.1.S1_at   | MmugDNA.15867.1 | 5.89  | 6.56  | 0.39 | 0.27 | -1.59 | 0.054739 | 0.040985 | 0.397122 | 0.247202 |
| MmugDNA.15869.1.S1_at   | MmugDNA.15869.1 | 6.22  | 6.05  | 0.05 | 0.02 | 1.12  | 0.010781 | 0.029364 | 0.250181 | 0.213234 |
| MmugDNA.15878.1.S1_at   | MmugDNA.15878.1 | 12.87 | 12.8  | 0.04 | 0.04 | 1.04  | 0.295413 | 0.445885 | 0.651089 | 0.662593 |
| MmugDNA.15881.1.S1_at   | MmugDNA.15881.1 | 12.85 | 12.84 | 0.14 | 0.03 | 1.01  | 0.825119 | 0.925964 | 0.937155 | 0.958059 |
| MmugDNA.15884.1.S1_at   | MmugDNA.15884.1 | 3.1   | 3.11  | 0.03 | 0.05 | -1.01 | 0.285036 | 0.18103  | 0.642951 | 0.457529 |
| MmugDNA.15887.1.S1_at   | MmugDNA.15887.1 | 8.89  | 9.25  | 0.13 | 0.18 | -1.28 | 0.088907 | 0.063271 | 0.456674 | 0.298244 |
| MmugDNA.15888.1.S1_at   | MmugDNA.15888.1 | 4.51  | 4.85  | 0.31 | 0.44 | -1.27 | 0.521752 | 0.45845  | 0.794797 | 0.671168 |
| MmugDNA.1589.1.S1_at    | MmugDNA.1589.1  | 10.37 | 10.13 | 1.13 | 0.12 | 1.18  | 0.668444 | 0.336924 | 0.869115 | 0.584156 |
| MmugDNA.15890.1.S1_at   | MmugDNA.15890.1 | 4.15  | 4.52  | 1.39 | 0.33 | -1.3  | 0.648344 | 0.49231  | 0.859825 | 0.693485 |
| MmugDNA.15898.1.S1_at   | MmugDNA.15898.1 | 10.1  | 10.18 | 0.48 | 0.14 | -1.06 | 0.755085 | 0.505419 | 0.907692 | 0.702133 |
| MmugDNA.15898.1.S1_s_at | MmugDNA.15898.1 | 12.54 | 12.67 | 0.57 | 0.14 | -1.09 | 0.720218 | 0.341837 | 0.891467 | 0.587929 |
| MmugDNA.159.1.S1_at     | MmugDNA.159.1   | 6.26  | 6.25  | 0.02 | 0.11 | 1.01  | 0.296901 | 0.508109 | 0.652518 | 0.70337  |
| MmugDNA.15904.1.S1_at   | MmugDNA.15904.1 | 7.89  | 8.14  | 1.12 | 0.18 | -1.19 | 0.241695 | 0.301321 | 0.607859 | 0.559356 |
| MmugDNA.15906.1.S1_at   | MmugDNA.15906.1 | 11.15 | 11.51 | 0.37 | 0.02 | -1.28 | 0.28361  | 0.286942 | 0.641408 | 0.548246 |
| MmugDNA.15911.1.S1_at   | MmugDNA.15911.1 | 6.61  | 6.42  | 0.18 | 0.03 | 1.15  | 0.464364 | 0.655807 | 0.762534 | 0.798709 |
| MmugDNA.15912.1.S1_at   | MmugDNA.15912.1 | 9.57  | 10.11 | 0.9  | 0.21 | -1.45 | 0.418776 | 0.255665 | 0.735911 | 0.523619 |
| MmugDNA.15913.1.S1_at   | MmugDNA.15913.1 | 11.53 | 11.66 | 0.17 | 0.26 | -1.09 | 0.234357 | 0.124706 | 0.601622 | 0.39513  |
| MmugDNA.15916.1.S1_at   | MmugDNA.15916.1 | 8.28  | 8.75  | 1.01 | 0.3  | -1.39 | 0.660811 | 0.257054 | 0.865819 | 0.524781 |
| MmugDNA.15917.1.S1_at   | MmugDNA.15917.1 | 5.3   | 5.18  | 0.08 | 0.03 | 1.09  | 0.04245  | 0.00887  | 0.369047 | 0.12465  |
| MmugDNA.15918.1.S1_at   | MmugDNA.15918.1 | 12.97 | 13.19 | 0.12 | 0.09 | -1.17 | 0.247648 | 0.056392 | 0.613245 | 0.283382 |
| MmugDNA.15921.1.S1_at   | MmugDNA.15921.1 | 5.01  | 5.08  | 0.05 | 0.05 | -1.05 | 0.12679  | 0.309544 | 0.500609 | 0.564987 |
| MmugDNA.15923.1.S1_at   | MmugDNA.15923.1 | 9.05  | 9.5   | 0.67 | 0.18 | -1.36 | 0.417941 | 0.446613 | 0.735231 | 0.66287  |
| MmugDNA.15927.1.S1_at   | MmugDNA.15927.1 | 9.13  | 8.5   | 0.17 | 0.3  | 1.54  | 0.037907 | 0.009802 | 0.358232 | 0.130166 |
| MmugDNA.15932.1.S1_at   | MmugDNA.15932.1 | 7.91  | 8.2   | 0.29 | 0.07 | -1.22 | 0.506333 | 0.011239 | 0.785754 | 0.138014 |
| MmugDNA.15938.1.S1_at   | MmugDNA.15938.1 | 10.64 | 10.69 | 0.12 | 0.12 | -1.04 | 0.692705 | 0.90979  | 0.880222 | 0.949108 |
| MmugDNA.15940.1.S1_at   | MmugDNA.15940.1 | 10.93 | 11.36 | 3.59 | 0.42 | -1.35 | 0.348097 | 0.052913 | 0.689374 | 0.275647 |
| MmugDNA.15943.1.S1_at   | MmugDNA.15943.1 | 9.29  | 9.14  | 0.05 | 0.05 | 1.11  | 0.037284 | 0.090696 | 0.357061 | 0.345151 |
| MmugDNA.15943.1.S1_s_at | MmugDNA.15943.1 | 9.52  | 9.44  | 0.18 | 0.07 | 1.05  | 0.174966 | 0.360025 | 0.548031 | 0.601198 |
| MmugDNA.15943.1.S1_x_at | MmugDNA.15943.1 | 9.29  | 9.19  | 0.03 | 0.03 | 1.08  | 0.008655 | 0.106706 | 0.236048 | 0.369298 |
| MmugDNA.15944.1.S1_at   | MmugDNA.15944.1 | 4.74  | 4.89  | 0.09 | 0.1  | -1.11 | 0.294999 | 0.16526  | 0.650971 | 0.441459 |
| MmugDNA.15948.1.S1_at   | MmugDNA.15948.1 | 4.99  | 4.85  | 0.12 | 0.04 | 1.1   | 0.126653 | 0.476476 | 0.500599 | 0.682725 |



|                         |                 |       |       |      |      |       |          |          |          |          |
|-------------------------|-----------------|-------|-------|------|------|-------|----------|----------|----------|----------|
| MmugDNA.15949.1.S1_at   | MmugDNA.15949.1 | 3.97  | 4.09  | 0.2  | 0.24 | -1.09 | 0.923619 | 0.205978 | 0.97438  | 0.480222 |
| MmugDNA.15954.1.S1_at   | MmugDNA.15954.1 | 11.3  | 11.22 | 0.16 | 0.09 | 1.05  | 0.490883 | 0.195233 | 0.777359 | 0.470253 |
| MmugDNA.15955.1.S1_at   | MmugDNA.15955.1 | 7.58  | 8.72  | 0.17 | 0.09 | -2.21 | 0.000728 | 0.000407 | 0.148688 | 0.037601 |
| MmugDNA.15957.1.S1_at   | MmugDNA.15957.1 | 8.82  | 8.75  | 0.53 | 0.08 | 1.05  | 0.759583 | 0.264999 | 0.909706 | 0.530973 |
| MmugDNA.15959.1.S1_at   | MmugDNA.15959.1 | 7.58  | 7.16  | 0.49 | 0.3  | 1.34  | 0.30134  | 0.175722 | 0.655705 | 0.452344 |
| MmugDNA.1596.1.S1_at    | MmugDNA.1596.1  | 13.27 | 13.28 | 0.23 | 0.02 | -1.01 | 0.759091 | 0.482494 | 0.909468 | 0.687323 |
| MmugDNA.15960.1.S1_at   | MmugDNA.15960.1 | 11.18 | 11.07 | 0.07 | 0.05 | 1.08  | 0.08444  | 0.036198 | 0.450991 | 0.234829 |
| MmugDNA.15961.1.S1_at   | MmugDNA.15961.1 | 9.24  | 9.59  | 0.08 | 0.08 | -1.27 | 0.005099 | 0.007575 | 0.204981 | 0.116509 |
| MmugDNA.15962.1.S1_at   | MmugDNA.15962.1 | 6.89  | 6.54  | 0.23 | 0.25 | 1.27  | 0.409087 | 0.023557 | 0.729757 | 0.192238 |
| MmugDNA.15978.1.S1_at   | MmugDNA.15978.1 | 3.62  | 3.55  | 0.3  | 0.21 | 1.04  | 0.996078 | 0.892402 | 0.998439 | 0.938637 |
| MmugDNA.15983.1.S1_at   | MmugDNA.15983.1 | 10.37 | 9.81  | 0.02 | 0.18 | 1.48  | 0.005543 | 0.00427  | 0.208157 | 0.091847 |
| MmugDNA.15984.1.S1_at   | MmugDNA.15984.1 | 11.67 | 11.54 | 0.21 | 0.05 | 1.1   | 0.89552  | 0.727291 | 0.964244 | 0.84224  |
| MmugDNA.1599.1.S1_at    | MmugDNA.1599.1  | 12.87 | 12.89 | 0.16 | 0.08 | -1.01 | 0.635107 | 0.43519  | 0.854519 | 0.655058 |
| MmugDNA.15993.1.S1_at   | MmugDNA.15993.1 | 11.53 | 10.46 | 0.44 | 0.14 | 2.11  | 0.025246 | 0.010951 | 0.320823 | 0.136223 |
| MmugDNA.15994.1.S1_at   | MmugDNA.15994.1 | 10.95 | 11.18 | 0.29 | 0.14 | -1.17 | 0.255354 | 0.35652  | 0.619432 | 0.598459 |
| MmugDNA.15997.1.S1_s_at | MmugDNA.15997.1 | 7.98  | 7.83  | 3.23 | 0.41 | 1.11  | 0.812523 | 0.181639 | 0.932102 | 0.458236 |
| MmugDNA.16.1.S1_at      | MmugDNA.16.1    | 7.15  | 7.15  | 0.2  | 0.17 | 1     | 0.41024  | 0.401769 | 0.730705 | 0.631068 |
| MmugDNA.16002.1.S1_at   | MmugDNA.16002.1 | 8.12  | 7.78  | 0.13 | 0.03 | 1.27  | 0.009386 | 0.000841 | 0.241869 | 0.047013 |
| MmugDNA.1601.1.S1_at    | MmugDNA.1601.1  | 7.07  | 7.06  | 0.06 | 0.1  | 1     | 0.892405 | 0.91872  | 0.96309  | 0.954387 |
| MmugDNA.16010.1.S1_at   | MmugDNA.16010.1 | 4.59  | 4.49  | 0.14 | 0.13 | 1.07  | 0.670278 | 0.415222 | 0.869873 | 0.640766 |
| MmugDNA.16011.1.S1_at   | MmugDNA.16011.1 | 10.88 | 10.89 | 0.29 | 0.1  | -1.01 | 0.867832 | 0.11801  | 0.953764 | 0.385881 |
| MmugDNA.16012.1.S1_at   | MmugDNA.16012.1 | 7.2   | 7.19  | 0.26 | 0.13 | 1     | 0.865166 | 0.00491  | 0.952585 | 0.097662 |
| MmugDNA.16013.1.S1_at   | MmugDNA.16013.1 | 5.35  | 5.55  | 0.04 | 0.08 | -1.15 | 0.013016 | 0.002208 | 0.266166 | 0.069408 |
| MmugDNA.16021.1.S1_at   | MmugDNA.16021.1 | 4.73  | 4.64  | 0.31 | 0.02 | 1.07  | 0.703099 | 0.630668 | 0.884538 | 0.782345 |
| MmugDNA.16022.1.S1_at   | MmugDNA.16022.1 | 4.99  | 4.89  | 0.38 | 0.15 | 1.07  | 0.891571 | 0.552304 | 0.962681 | 0.731658 |
| MmugDNA.16024.1.S1_at   | MmugDNA.16024.1 | 10.43 | 10.08 | 0.3  | 0.29 | 1.28  | 0.51543  | 0.149134 | 0.79089  | 0.423572 |
| MmugDNA.16025.1.S1_at   | MmugDNA.16025.1 | 8.64  | 8.56  | 0.78 | 0.14 | 1.06  | 0.862667 | 0.97463  | 0.951672 | 0.986197 |
| MmugDNA.16028.1.S1_at   | MmugDNA.16028.1 | 12    | 12.27 | 0.39 | 0.3  | -1.2  | 0.708684 | 0.511791 | 0.886591 | 0.705797 |
| MmugDNA.1603.1.S1_at    | MmugDNA.1603.1  | 5.5   | 5.37  | 0.13 | 0.04 | 1.1   | 0.141445 | 0.300727 | 0.516365 | 0.558959 |
| MmugDNA.16031.1.S1_at   | MmugDNA.16031.1 | 11.06 | 10.83 | 0.64 | 0.06 | 1.17  | 0.541912 | 0.076367 | 0.805357 | 0.321368 |
| MmugDNA.16040.1.S1_at   | MmugDNA.16040.1 | 9.37  | 9.49  | 1.87 | 0.16 | -1.09 | 0.753152 | 0.371832 | 0.906985 | 0.610615 |
| MmugDNA.16041.1.S1_at   | MmugDNA.16041.1 | 5.46  | 6.03  | 0.39 | 0.33 | -1.48 | 0.077964 | 0.061174 | 0.439987 | 0.293981 |
| MmugDNA.16045.1.S1_at   | MmugDNA.16045.1 | 13.94 | 13.8  | 0.28 | 0.03 | 1.1   | 0.876866 | 0.406404 | 0.95711  | 0.634305 |
| MmugDNA.16048.1.S1_at   | MmugDNA.16048.1 | 10.98 | 10.84 | 0.21 | 0.09 | 1.1   | 0.402042 | 0.100807 | 0.724787 | 0.360275 |
| MmugDNA.16049.1.S1_at   | MmugDNA.16049.1 | 9.31  | 10.06 | 0.39 | 0.11 | -1.69 | 0.09386  | 0.063973 | 0.463304 | 0.299066 |
| MmugDNA.16050.1.S1_at   | MmugDNA.16050.1 | 3.29  | 3.12  | 0.13 | 0.06 | 1.12  | 0.347543 | 0.45312  | 0.688793 | 0.667551 |
| MmugDNA.16051.1.S1_at   | MmugDNA.16051.1 | 3.82  | 3.64  | 0.1  | 0.03 | 1.14  | 0.021945 | 0.257754 | 0.309781 | 0.525376 |
| MmugDNA.16052.1.S1_at   | MmugDNA.16052.1 | 8.7   | 8.69  | 0.16 | 0.08 | 1.01  | 0.584322 | 0.661211 | 0.829656 | 0.801687 |
| MmugDNA.16053.1.S1_at   | MmugDNA.16053.1 | 12.09 | 11.98 | 0.14 | 0.03 | 1.08  | 0.266231 | 0.299278 | 0.627106 | 0.557769 |
| MmugDNA.16054.1.S1_at   | MmugDNA.16054.1 | 11.35 | 10.83 | 0.34 | 0.03 | 1.43  | 0.066407 | 0.067053 | 0.422255 | 0.304872 |
| MmugDNA.16057.1.S1_at   | MmugDNA.16057.1 | 5.5   | 5.61  | 0.05 | 0.11 | -1.08 | 0.524033 | 0.583785 | 0.795715 | 0.751989 |
| MmugDNA.16058.1.S1_at   | MmugDNA.16058.1 | 9.17  | 9.33  | 0.15 | 0.11 | -1.11 | 0.108774 | 0.067331 | 0.481112 | 0.305482 |
| MmugDNA.16059.1.S1_at   | MmugDNA.16059.1 | 3.59  | 3.55  | 0.05 | 0.01 | 1.03  | 0.110044 | 0.750309 | 0.482945 | 0.854766 |

|                         |                 |       |       |      |      |       |          |          |          |          |
|-------------------------|-----------------|-------|-------|------|------|-------|----------|----------|----------|----------|
| MmugDNA.1606.1.S1_at    | MmugDNA.1606.1  | 5.57  | 5.41  | 0.1  | 0.07 | 1.12  | 0.059516 | 0.358769 | 0.406657 | 0.600237 |
| MmugDNA.16060.1.S1_at   | MmugDNA.16060.1 | 4.03  | 4.14  | 0.07 | 0.07 | -1.08 | 0.272242 | 0.667672 | 0.631981 | 0.805472 |
| MmugDNA.16062.1.S1_at   | MmugDNA.16062.1 | 11.74 | 11.81 | 0.11 | 0.09 | -1.04 | 0.439029 | 0.048661 | 0.74777  | 0.265613 |
| MmugDNA.16063.1.S1_at   | MmugDNA.16063.1 | 11.48 | 11.5  | 0.61 | 0.09 | -1.02 | 0.832779 | 0.950713 | 0.940026 | 0.972024 |
| MmugDNA.16069.1.S1_at   | MmugDNA.16069.1 | 9.65  | 10.47 | 0.41 | 0.04 | -1.77 | 0.044821 | 0.029705 | 0.375225 | 0.214029 |
| MmugDNA.16075.1.S1_at   | MmugDNA.16075.1 | 5.93  | 5.79  | 0.32 | 0.08 | 1.1   | 0.641302 | 0.548689 | 0.857226 | 0.729318 |
| MmugDNA.16079.1.S1_at   | MmugDNA.16079.1 | 11.03 | 10.81 | 0.52 | 0.08 | 1.17  | 0.454238 | 0.040998 | 0.756657 | 0.247202 |
| MmugDNA.1608.1.S1_at    | MmugDNA.1608.1  | 6.98  | 7.11  | 0.43 | 0.09 | -1.1  | 0.398857 | 0.332442 | 0.722745 | 0.58087  |
| MmugDNA.16086.1.S1_at   | MmugDNA.16086.1 | 3.62  | 3.63  | 0.1  | 0.21 | -1    | 0.926448 | 0.896998 | 0.975571 | 0.941205 |
| MmugDNA.16089.1.S1_at   | MmugDNA.16089.1 | 7.07  | 6.98  | 0.18 | 0.08 | 1.07  | 0.254892 | 0.190449 | 0.619267 | 0.465906 |
| MmugDNA.1609.1.S1_at    | MmugDNA.1609.1  | 10.75 | 10.68 | 0.38 | 0.21 | -1.05 | 0.263134 | 0.276712 | 0.625138 | 0.540618 |
| MmugDNA.16092.1.S1_at   | MmugDNA.16092.1 | 8.95  | 9.68  | 0.08 | 0.15 | -1.66 | 0.001773 | 0.000067 | 0.167444 | 0.025805 |
| MmugDNA.16097.1.S1_at   | MmugDNA.16097.1 | 8.92  | 9.1   | 0.11 | 0.15 | -1.14 | 0.317832 | 0.061099 | 0.667596 | 0.293958 |
| MmugDNA.16098.1.S1_at   | MmugDNA.16098.1 | 3.44  | 3.34  | 0.06 | 0.05 | 1.08  | 0.09591  | 0.165359 | 0.464469 | 0.441544 |
| MmugDNA.16101.1.S1_at   | MmugDNA.16101.1 | 10.46 | 10.52 | 0.21 | 0.06 | -1.04 | 0.443382 | 0.104767 | 0.750691 | 0.366208 |
| MmugDNA.16104.1.S1_at   | MmugDNA.16104.1 | 6.89  | 7.11  | 0.77 | 0.24 | -1.17 | 0.903865 | 0.01594  | 0.967712 | 0.160254 |
| MmugDNA.16105.1.S1_at   | MmugDNA.16105.1 | 10.77 | 11.45 | 0.55 | 0.18 | -1.6  | 0.471963 | 0.050612 | 0.766784 | 0.270317 |
| MmugDNA.16113.1.S1_at   | MmugDNA.16113.1 | 12.13 | 12.44 | 0.14 | 0.04 | -1.24 | 0.009823 | 0.02013  | 0.244005 | 0.17825  |
| MmugDNA.16116.1.S1_at   | MmugDNA.16116.1 | 5.25  | 5.35  | 0.32 | 0.02 | -1.07 | 0.632152 | 0.641335 | 0.852779 | 0.789506 |
| MmugDNA.16118.1.S1_at   | MmugDNA.16118.1 | 9.09  | 9.14  | 0.73 | 0.3  | -1.03 | 0.638965 | 0.085979 | 0.856133 | 0.338116 |
| MmugDNA.16122.1.S1_at   | MmugDNA.16122.1 | 4.48  | 4.41  | 0.04 | 0.08 | 1.05  | 0.117829 | 0.39544  | 0.491173 | 0.627474 |
| MmugDNA.16127.1.S1_at   | MmugDNA.16127.1 | 6.85  | 6.91  | 0.27 | 0.1  | -1.04 | 0.830265 | 0.109973 | 0.939167 | 0.374065 |
| MmugDNA.16131.1.S1_at   | MmugDNA.16131.1 | 11.1  | 11.1  | 0.13 | 0.08 | -1.01 | 0.514378 | 0.130621 | 0.790322 | 0.402594 |
| MmugDNA.16132.1.S1_at   | MmugDNA.16132.1 | 5.38  | 5.66  | 0.25 | 0.02 | -1.22 | 0.101768 | 0.14595  | 0.472011 | 0.419967 |
| MmugDNA.16137.1.S1_at   | MmugDNA.16137.1 | 11.22 | 11.54 | 0.38 | 0.04 | -1.25 | 0.310265 | 0.139789 | 0.662073 | 0.413122 |
| MmugDNA.1614.1.S1_at    | MmugDNA.1614.1  | 10.56 | 10.51 | 1.06 | 0.21 | 1.04  | 0.836065 | 0.593721 | 0.941202 | 0.758417 |
| MmugDNA.16140.1.S1_at   | MmugDNA.16140.1 | 10.49 | 10.13 | 0.2  | 0.04 | 1.28  | 0.100507 | 0.094112 | 0.471309 | 0.35079  |
| MmugDNA.16142.1.S1_at   | MmugDNA.16142.1 | 6.36  | 6.99  | 0.14 | 0.09 | -1.54 | 0.00404  | 0.164955 | 0.198571 | 0.44123  |
| MmugDNA.16143.1.S1_at   | MmugDNA.16143.1 | 7.96  | 7.89  | 0.34 | 0.14 | 1.04  | 0.545774 | 0.156278 | 0.808169 | 0.43161  |
| MmugDNA.16144.1.S1_at   | MmugDNA.16144.1 | 7.63  | 7.59  | 0.37 | 0.2  | 1.03  | 0.560964 | 0.48778  | 0.817    | 0.690669 |
| MmugDNA.16148.1.S1_at   | MmugDNA.16148.1 | 9.59  | 9.65  | 0.36 | 0.19 | -1.05 | 0.96631  | 0.828996 | 0.988971 | 0.901691 |
| MmugDNA.16150.1.S1_at   | MmugDNA.16150.1 | 4.96  | 4.89  | 0.11 | 0.31 | 1.05  | 0.787511 | 0.742121 | 0.921953 | 0.850618 |
| MmugDNA.16156.1.S1_at   | MmugDNA.16156.1 | 5.56  | 5.18  | 0.04 | 0.4  | 1.29  | 0.629554 | 0.593849 | 0.851663 | 0.758418 |
| MmugDNA.16158.1.S1_at   | MmugDNA.16158.1 | 9.17  | 7.04  | 2.68 | 0.18 | 4.37  | 0.413003 | 0.261399 | 0.732147 | 0.527887 |
| MmugDNA.16159.1.S1_at   | MmugDNA.16159.1 | 7.78  | 7.83  | 0.79 | 0.26 | -1.03 | 0.932835 | 0.020154 | 0.977227 | 0.178414 |
| MmugDNA.16160.1.S1_at   | MmugDNA.16160.1 | 10.14 | 10.88 | 0.55 | 0.16 | -1.67 | 0.07191  | 0.051163 | 0.431859 | 0.27167  |
| MmugDNA.16162.1.S1_at   | MmugDNA.16162.1 | 3.68  | 3.75  | 0.34 | 0.03 | -1.05 | 0.558219 | 0.500163 | 0.815182 | 0.698908 |
| MmugDNA.16165.1.S1_at   | MmugDNA.16165.1 | 6.14  | 6.03  | 0.1  | 0.27 | 1.08  | 0.711007 | 0.386784 | 0.887436 | 0.621895 |
| MmugDNA.16166.1.S1_at   | MmugDNA.16166.1 | 5.21  | 5.18  | 0.52 | 0.49 | 1.01  | 0.632391 | 0.71499  | 0.852926 | 0.834761 |
| MmugDNA.16168.1.S1_at   | MmugDNA.16168.1 | 10.8  | 11.15 | 0.24 | 0.1  | -1.27 | 0.070434 | 0.02699  | 0.429233 | 0.205476 |
| MmugDNA.16168.1.S1_s_at | MmugDNA.16168.1 | 10.48 | 10.79 | 0.36 | 0.04 | -1.24 | 0.552494 | 0.07522  | 0.811886 | 0.319399 |
| MmugDNA.16169.1.S1_at   | MmugDNA.16169.1 | 8.73  | 8.25  | 2.34 | 0.63 | 1.39  | 0.834439 | 0.083812 | 0.940648 | 0.334648 |
| MmugDNA.1617.1.S1_at    | MmugDNA.1617.1  | 6.28  | 6.26  | 1.34 | 0.13 | 1.01  | 0.923596 | 0.629468 | 0.974374 | 0.781895 |

|                         |                 |       |       |      |      |       |          |          |          |          |
|-------------------------|-----------------|-------|-------|------|------|-------|----------|----------|----------|----------|
| MmugDNA.16170.1.S1_s_at | MmugDNA.16170.1 | 12.33 | 12.79 | 0.16 | 0.07 | -1.37 | 0.012174 | 0.027629 | 0.260124 | 0.207522 |
| MmugDNA.16173.1.S1_at   | MmugDNA.16173.1 | 9.34  | 9.95  | 0.5  | 0.01 | -1.53 | 0.100536 | 0.163492 | 0.47134  | 0.439731 |
| MmugDNA.16179.1.S1_at   | MmugDNA.16179.1 | 4.81  | 4.79  | 0.39 | 0.34 | 1.01  | 0.991818 | 0.928815 | 0.996849 | 0.959449 |
| MmugDNA.1618.1.S1_at    | MmugDNA.1618.1  | 5.9   | 5.88  | 0.11 | 0.03 | 1.01  | 0.408857 | 0.676953 | 0.72957  | 0.81126  |
| MmugDNA.16181.1.S1_at   | MmugDNA.16181.1 | 6.95  | 7.19  | 0.41 | 0.11 | -1.18 | 0.385414 | 0.401606 | 0.712733 | 0.631068 |
| MmugDNA.16183.1.S1_at   | MmugDNA.16183.1 | 9.19  | 9.23  | 0.3  | 0.11 | -1.02 | 0.73378  | 0.092416 | 0.897905 | 0.348296 |
| MmugDNA.16185.1.S1_at   | MmugDNA.16185.1 | 13    | 12.98 | 0.12 | 0.1  | 1.01  | 0.524326 | 0.102073 | 0.795835 | 0.362122 |
| MmugDNA.16186.1.S1_at   | MmugDNA.16186.1 | 10.25 | 10.09 | 0.59 | 0.21 | 1.12  | 0.805576 | 0.458373 | 0.929362 | 0.671165 |
| MmugDNA.16187.1.S1_at   | MmugDNA.16187.1 | 9.44  | 9.2   | 0.29 | 0.06 | 1.18  | 0.242671 | 0.018127 | 0.608692 | 0.169609 |
| MmugDNA.16188.1.S1_at   | MmugDNA.16188.1 | 8.18  | 8.25  | 0.05 | 0.11 | -1.05 | 0.351316 | 0.231049 | 0.691963 | 0.502774 |
| MmugDNA.16189.1.S1_at   | MmugDNA.16189.1 | 4.48  | 4.24  | 0.1  | 0.13 | 1.18  | 0.058321 | 0.127728 | 0.40405  | 0.398581 |
| MmugDNA.16193.1.S1_at   | MmugDNA.16193.1 | 12.57 | 12.53 | 0.09 | 0.05 | 1.03  | 0.53754  | 0.819716 | 0.802735 | 0.896133 |
| MmugDNA.1620.1.S1_s_at  | MmugDNA.1620.1  | 6.87  | 6.73  | 0.09 | 0.07 | 1.1   | 0.148541 | 0.085749 | 0.522567 | 0.337761 |
| MmugDNA.16200.1.S1_at   | MmugDNA.16200.1 | 9.54  | 10.02 | 0.22 | 0.08 | -1.4  | 0.018837 | 0.040399 | 0.298593 | 0.246134 |
| MmugDNA.16202.1.S1_at   | MmugDNA.16202.1 | 7.64  | 7.94  | 0.43 | 0.16 | -1.23 | 0.880599 | 0.006646 | 0.958682 | 0.110505 |
| MmugDNA.1621.1.S1_at    | MmugDNA.1621.1  | 3.14  | 3.1   | 0.07 | 0.03 | 1.03  | 0.667694 | 0.001203 | 0.868672 | 0.054389 |
| MmugDNA.16210.1.S1_at   | MmugDNA.16210.1 | 10.38 | 9.9   | 0.8  | 0.05 | 1.4   | 0.396399 | 0.462654 | 0.721388 | 0.673983 |
| MmugDNA.16211.1.S1_at   | MmugDNA.16211.1 | 4.31  | 4.13  | 0.24 | 0.11 | 1.14  | 0.266782 | 0.121221 | 0.627644 | 0.390348 |
| MmugDNA.16213.1.S1_at   | MmugDNA.16213.1 | 5.15  | 5.49  | 0.17 | 0.38 | -1.26 | 0.241389 | 0.049168 | 0.607596 | 0.266566 |
| MmugDNA.16214.1.S1_at   | MmugDNA.16214.1 | 12.59 | 12.65 | 0.06 | 0.02 | -1.05 | 0.111309 | 0.14137  | 0.484508 | 0.414874 |
| MmugDNA.16217.1.S1_at   | MmugDNA.16217.1 | 4.31  | 4.43  | 0.16 | 0.28 | -1.09 | 0.57695  | 0.483975 | 0.825252 | 0.688262 |
| MmugDNA.16234.1.S1_at   | MmugDNA.16234.1 | 8.65  | 8.7   | 0.16 | 0.09 | -1.04 | 0.482768 | 0.080563 | 0.77256  | 0.328319 |
| MmugDNA.16240.1.S1_at   | MmugDNA.16240.1 | 11.35 | 12.05 | 0.06 | 0.05 | -1.63 | 0.000115 | 0.000676 | 0.108151 | 0.04413  |
| MmugDNA.16245.1.S1_at   | MmugDNA.16245.1 | 6.77  | 6.68  | 0.19 | 0.19 | 1.06  | 0.280529 | 0.108072 | 0.639288 | 0.371281 |
| MmugDNA.16253.1.S1_at   | MmugDNA.16253.1 | 8.96  | 9.02  | 1.22 | 0.06 | -1.04 | 0.836485 | 0.217468 | 0.941249 | 0.491035 |
| MmugDNA.16253.1.S1_s_at | MmugDNA.16253.1 | 8.21  | 8.53  | 1.55 | 0.06 | -1.25 | 0.507905 | 0.16729  | 0.786553 | 0.443697 |
| MmugDNA.16255.1.S1_at   | MmugDNA.16255.1 | 10.25 | 10.42 | 2.38 | 0.11 | -1.12 | 0.652283 | 0.340637 | 0.862004 | 0.586801 |
| MmugDNA.16262.1.S1_at   | MmugDNA.16262.1 | 3.44  | 3.42  | 0.12 | 0.27 | 1.01  | 0.39068  | 0.464438 | 0.716929 | 0.675068 |
| MmugDNA.16266.1.S1_at   | MmugDNA.16266.1 | 2.77  | 2.81  | 0.08 | 0.06 | -1.02 | 0.683183 | 0.451192 | 0.876089 | 0.666085 |
| MmugDNA.16266.1.S1_s_at | MmugDNA.16266.1 | 3.67  | 3.49  | 0.08 | 0.08 | 1.14  | 0.045986 | 0.035553 | 0.37735  | 0.232812 |
| MmugDNA.16268.1.S1_at   | MmugDNA.16268.1 | 12.75 | 12.58 | 0.34 | 0.07 | 1.13  | 0.420903 | 0.399141 | 0.737135 | 0.62969  |
| MmugDNA.16268.1.S1_s_at | MmugDNA.16268.1 | 12.68 | 12.5  | 0.31 | 0.07 | 1.13  | 0.320938 | 0.411996 | 0.669544 | 0.638434 |
| MmugDNA.1627.1.S1_at    | MmugDNA.1627.1  | 4.52  | 4.54  | 0.05 | 0.08 | -1.02 | 0.252888 | 0.140818 | 0.617842 | 0.414202 |
| MmugDNA.16274.1.S1_at   | MmugDNA.16274.1 | 6.47  | 6.61  | 0.75 | 0.12 | -1.11 | 0.834899 | 0.952872 | 0.940771 | 0.973271 |
| MmugDNA.16279.1.S1_at   | MmugDNA.16279.1 | 6.92  | 7.06  | 0.12 | 0.08 | -1.1  | 0.495847 | 0.055423 | 0.780141 | 0.281318 |
| MmugDNA.16280.1.S1_at   | MmugDNA.16280.1 | 10.82 | 10.62 | 0.27 | 0.09 | 1.15  | 0.812304 | 0.217961 | 0.932076 | 0.491553 |
| MmugDNA.16282.1.S1_x_at | MmugDNA.16282.1 | 4.37  | 4.45  | 0.11 | 0.13 | -1.06 | 0.21553  | 0.329007 | 0.585748 | 0.578482 |
| MmugDNA.16297.1.S1_at   | MmugDNA.16297.1 | 8.95  | 7.65  | 1.12 | 0.12 | 2.46  | 0.11771  | 0.104104 | 0.491034 | 0.365122 |
| MmugDNA.1631.1.S1_at    | MmugDNA.1631.1  | 6.57  | 6.05  | 1.03 | 0.11 | 1.43  | 0.465572 | 0.594585 | 0.763035 | 0.758623 |
| MmugDNA.16314.1.S1_at   | MmugDNA.16314.1 | 9.05  | 8.48  | 0.28 | 0.12 | 1.49  | 0.08373  | 0.16145  | 0.449639 | 0.437604 |
| MmugDNA.16318.1.S1_at   | MmugDNA.16318.1 | 6.49  | 6.3   | 0.34 | 0.03 | 1.14  | 0.941476 | 0.08118  | 0.980113 | 0.329351 |
| MmugDNA.1632.1.S1_at    | MmugDNA.1632.1  | 7.32  | 6.68  | 0.38 | 0.46 | 1.56  | 0.11443  | 0.130972 | 0.487606 | 0.403037 |
| MmugDNA.16321.1.S1_at   | MmugDNA.16321.1 | 6.96  | 6.95  | 0.32 | 0.09 | 1.01  | 0.926912 | 0.346042 | 0.975766 | 0.59115  |

|                         |                 |       |       |      |      |       |          |          |          |          |
|-------------------------|-----------------|-------|-------|------|------|-------|----------|----------|----------|----------|
| MmugDNA.16323.1.S1_at   | MmugDNA.16323.1 | 10.38 | 10.41 | 0.18 | 0.06 | -1.02 | 0.389063 | 0.16674  | 0.715919 | 0.443215 |
| MmugDNA.16327.1.S1_at   | MmugDNA.16327.1 | 10.31 | 9.88  | 0.6  | 0.22 | 1.35  | 0.234946 | 0.231186 | 0.602251 | 0.5029   |
| MmugDNA.16332.1.S1_at   | MmugDNA.16332.1 | 5.51  | 5.44  | 0.04 | 0.02 | 1.05  | 0.058597 | 0.215855 | 0.404785 | 0.489536 |
| MmugDNA.16335.1.S1_at   | MmugDNA.16335.1 | 7.77  | 8.04  | 0.32 | 0.01 | -1.21 | 0.465705 | 0.38276  | 0.763142 | 0.618887 |
| MmugDNA.16337.1.S1_at   | MmugDNA.16337.1 | 7.42  | 7.08  | 0.08 | 0.09 | 1.26  | 0.009389 | 0.236972 | 0.241869 | 0.507675 |
| MmugDNA.16340.1.S1_s_at | MmugDNA.16340.1 | 9     | 9.52  | 1.03 | 0.36 | -1.43 | 0.881444 | 0.208417 | 0.959052 | 0.482316 |
| MmugDNA.16343.1.S1_at   | MmugDNA.16343.1 | 8.51  | 8.03  | 0.47 | 0.2  | 1.4   | 0.045779 | 0.033852 | 0.377261 | 0.227639 |
| MmugDNA.16349.1.S1_at   | MmugDNA.16349.1 | 5.11  | 6.51  | 1.74 | 0.28 | -2.64 | 0.786207 | 0.836744 | 0.921386 | 0.906703 |
| MmugDNA.16356.1.S1_at   | MmugDNA.16356.1 | 13.13 | 13.21 | 0.03 | 0.05 | -1.06 | 0.275674 | 0.018895 | 0.635149 | 0.172935 |
| MmugDNA.16362.1.S1_at   | MmugDNA.16362.1 | 5.4   | 5.26  | 0.06 | 0.09 | 1.1   | 0.177386 | 0.188532 | 0.550581 | 0.464458 |
| MmugDNA.16364.1.S1_at   | MmugDNA.16364.1 | 9.98  | 10.39 | 0.37 | 0.08 | -1.33 | 0.096814 | 0.040189 | 0.465555 | 0.245709 |
| MmugDNA.16366.1.S1_at   | MmugDNA.16366.1 | 8.4   | 9.26  | 0.47 | 0.14 | -1.83 | 0.05191  | 0.034992 | 0.3916   | 0.231175 |
| MmugDNA.16367.1.S1_at   | MmugDNA.16367.1 | 7.31  | 6.32  | 1.5  | 0.08 | 1.99  | 0.335002 | 0.096525 | 0.680736 | 0.354096 |
| MmugDNA.16368.1.S1_at   | MmugDNA.16368.1 | 6.99  | 6.87  | 0.01 | 0.01 | 1.09  | 0.000272 | 0.000572 | 0.130983 | 0.041171 |
| MmugDNA.16370.1.S1_at   | MmugDNA.16370.1 | 6.8   | 6.95  | 0.44 | 0.05 | -1.11 | 0.710321 | 0.089395 | 0.887279 | 0.343637 |
| MmugDNA.16372.1.S1_at   | MmugDNA.16372.1 | 8.36  | 8.36  | 0.07 | 0.03 | 1     | 0.965921 | 0.003661 | 0.988768 | 0.086526 |
| MmugDNA.16382.1.S1_at   | MmugDNA.16382.1 | 5.43  | 5.36  | 0.09 | 0.03 | 1.05  | 0.300301 | 0.401868 | 0.654847 | 0.63109  |
| MmugDNA.16387.1.S1_at   | MmugDNA.16387.1 | 6.58  | 7.66  | 1.02 | 0.3  | -2.11 | 0.191661 | 0.218421 | 0.562859 | 0.491983 |
| MmugDNA.1639.1.S1_at    | MmugDNA.1639.1  | 11.79 | 12.35 | 0.29 | 0.02 | -1.47 | 0.038488 | 0.036402 | 0.359469 | 0.235284 |
| MmugDNA.16390.1.S1_at   | MmugDNA.16390.1 | 8.35  | 8.63  | 0.04 | 0.06 | -1.21 | 0.002753 | 0.10175  | 0.185352 | 0.361627 |
| MmugDNA.16400.1.S1_at   | MmugDNA.16400.1 | 10.06 | 9.76  | 1.13 | 0.19 | 1.23  | 0.886951 | 0.645605 | 0.960715 | 0.792428 |
| MmugDNA.16404.1.S1_at   | MmugDNA.16404.1 | 4.49  | 4.54  | 0.08 | 0.09 | -1.03 | 0.360183 | 0.186025 | 0.697768 | 0.461878 |
| MmugDNA.16407.1.S1_at   | MmugDNA.16407.1 | 4.27  | 4.18  | 0.04 | 0.03 | 1.07  | 0.02904  | 0.282088 | 0.333519 | 0.544937 |
| MmugDNA.16412.1.S1_at   | MmugDNA.16412.1 | 2.87  | 2.88  | 0.01 | 0.1  | -1.01 | 0.964109 | 0.974699 | 0.988243 | 0.986238 |
| MmugDNA.16420.1.S1_at   | MmugDNA.16420.1 | 11.68 | 11.84 | 0.43 | 0.03 | -1.12 | 0.566289 | 0.355454 | 0.819955 | 0.597738 |
| MmugDNA.16421.1.S1_s_at | MmugDNA.16421.1 | 9.68  | 9.25  | 0.98 | 0.06 | 1.35  | 0.479393 | 0.117012 | 0.770726 | 0.384405 |
| MmugDNA.16424.1.S1_at   | MmugDNA.16424.1 | 9.55  | 9.62  | 0.92 | 0.14 | -1.05 | 0.929345 | 0.247764 | 0.976333 | 0.517199 |
| MmugDNA.16426.1.S1_at   | MmugDNA.16426.1 | 10.76 | 10.74 | 0.18 | 0.36 | 1.01  | 0.592845 | 0.006709 | 0.833974 | 0.110872 |
| MmugDNA.16427.1.S1_at   | MmugDNA.16427.1 | 3.56  | 3.4   | 0.09 | 0.04 | 1.12  | 0.038338 | 0.04276  | 0.358936 | 0.251253 |
| MmugDNA.16431.1.S1_at   | MmugDNA.16431.1 | 12.05 | 12.19 | 0.36 | 0.01 | -1.1  | 0.548964 | 0.492803 | 0.810076 | 0.6938   |
| MmugDNA.16432.1.S1_at   | MmugDNA.16432.1 | 6.2   | 6.13  | 0.21 | 0.02 | 1.05  | 0.976555 | 0.969805 | 0.992376 | 0.983498 |
| MmugDNA.16433.1.S1_at   | MmugDNA.16433.1 | 4.52  | 4.33  | 0.08 | 0.08 | 1.14  | 0.073162 | 0.040954 | 0.434019 | 0.247202 |
| MmugDNA.16447.1.S1_at   | MmugDNA.16447.1 | 8.69  | 8.53  | 0.31 | 0.04 | 1.12  | 0.464339 | 0.630551 | 0.762534 | 0.782306 |
| MmugDNA.16448.1.S1_at   | MmugDNA.16448.1 | 6.72  | 7     | 0.31 | 0.43 | -1.21 | 0.799308 | 0.977324 | 0.926464 | 0.987656 |
| MmugDNA.16449.1.S1_at   | MmugDNA.16449.1 | 9.92  | 10.25 | 0.27 | 0.01 | -1.26 | 0.09126  | 0.050982 | 0.459035 | 0.27106  |
| MmugDNA.16450.1.S1_at   | MmugDNA.16450.1 | 7.87  | 7.84  | 0.2  | 0.11 | 1.02  | 0.807315 | 0.945468 | 0.930145 | 0.968984 |
| MmugDNA.16451.1.S1_s_at | MmugDNA.16451.1 | 13.9  | 13.74 | 0.04 | 0.02 | 1.12  | 0.002266 | 0.0002   | 0.174757 | 0.031344 |
| MmugDNA.16454.1.S1_s_at | MmugDNA.16454.1 | 11.15 | 11.59 | 0.36 | 0.22 | -1.36 | 0.065415 | 0.019549 | 0.420625 | 0.175563 |
| MmugDNA.16458.1.S1_at   | MmugDNA.16458.1 | 7.46  | 7.31  | 0.51 | 0.18 | 1.11  | 0.528775 | 0.843665 | 0.798061 | 0.910936 |
| MmugDNA.16459.1.S1_at   | MmugDNA.16459.1 | 12.41 | 12.43 | 0.15 | 0.06 | -1.01 | 0.326709 | 0.018982 | 0.674324 | 0.173405 |
| MmugDNA.16464.1.S1_at   | MmugDNA.16464.1 | 8.02  | 8.59  | 0.01 | 0.11 | -1.48 | 0.001625 | 0.000061 | 0.162459 | 0.025666 |
| MmugDNA.16466.1.S1_at   | MmugDNA.16466.1 | 7.82  | 5.43  | 0.52 | 0.36 | 5.25  | 0.002417 | 0.000537 | 0.177075 | 0.040439 |
| MmugDNA.16469.1.S1_at   | MmugDNA.16469.1 | 9.2   | 9.75  | 0.21 | 0.07 | -1.47 | 0.032308 | 0.097735 | 0.343723 | 0.355598 |

|                         |                 |       |       |      |      |       |          |          |          |          |
|-------------------------|-----------------|-------|-------|------|------|-------|----------|----------|----------|----------|
| MmugDNA.16474.1.S1_at   | MmugDNA.16474.1 | 11.56 | 11.83 | 0.91 | 0.13 | -1.2  | 0.627198 | 0.202507 | 0.850393 | 0.476819 |
| MmugDNA.16474.1.S1_s_at | MmugDNA.16474.1 | 11.97 | 12.17 | 0.87 | 0.12 | -1.15 | 0.732967 | 0.208017 | 0.897471 | 0.482049 |
| MmugDNA.16476.1.S1_at   | MmugDNA.16476.1 | 8.88  | 8.56  | 0.2  | 0.18 | 1.24  | 0.22055  | 0.207522 | 0.589765 | 0.481824 |
| MmugDNA.16477.1.S1_at   | MmugDNA.16477.1 | 13.3  | 13.56 | 0.21 | 0.03 | -1.2  | 0.036609 | 0.02549  | 0.355108 | 0.200313 |
| MmugDNA.16478.1.S1_at   | MmugDNA.16478.1 | 13.44 | 13.37 | 0.13 | 0.09 | 1.05  | 0.202102 | 0.32551  | 0.573629 | 0.575827 |
| MmugDNA.16480.1.S1_at   | MmugDNA.16480.1 | 3.41  | 3.9   | 0.21 | 0.09 | -1.4  | 0.036569 | 0.000457 | 0.355088 | 0.038572 |
| MmugDNA.16484.1.S1_at   | MmugDNA.16484.1 | 7.07  | 6.64  | 0.4  | 0.05 | 1.34  | 0.180582 | 0.104228 | 0.553774 | 0.365373 |
| MmugDNA.16490.1.S1_at   | MmugDNA.16490.1 | 12.56 | 12.72 | 0.42 | 0.05 | -1.12 | 0.43481  | 0.029082 | 0.745337 | 0.212721 |
| MmugDNA.16493.1.S1_at   | MmugDNA.16493.1 | 4.82  | 4.62  | 0.12 | 0.08 | 1.15  | 0.089899 | 0.115238 | 0.457894 | 0.38221  |
| MmugDNA.16495.1.S1_at   | MmugDNA.16495.1 | 11.36 | 11.68 | 0.21 | 0.04 | -1.24 | 0.18499  | 0.033383 | 0.557841 | 0.226396 |
| MmugDNA.16497.1.S1_at   | MmugDNA.16497.1 | 4.21  | 4.22  | 0.03 | 0.09 | -1.01 | 0.297352 | 0.275204 | 0.652737 | 0.53962  |
| MmugDNA.1650.1.S1_at    | MmugDNA.1650.1  | 8.59  | 8.41  | 0.34 | 0.1  | 1.13  | 0.219239 | 0.231842 | 0.588688 | 0.503592 |
| MmugDNA.16500.1.S1_at   | MmugDNA.16500.1 | 4.73  | 4.72  | 0.14 | 0.06 | 1.01  | 0.221056 | 0.435832 | 0.590384 | 0.65554  |
| MmugDNA.16520.1.S1_at   | MmugDNA.16520.1 | 2.81  | 2.89  | 0.05 | 0.03 | -1.05 | 0.118055 | 0.067064 | 0.491371 | 0.304872 |
| MmugDNA.16529.1.S1_at   | MmugDNA.16529.1 | 11.57 | 11.64 | 0.07 | 0.02 | -1.05 | 0.456964 | 0.732898 | 0.758051 | 0.845436 |
| MmugDNA.1653.1.S1_at    | MmugDNA.1653.1  | 5.53  | 5.46  | 0.16 | 0.15 | 1.05  | 0.86475  | 0.979053 | 0.952416 | 0.988666 |
| MmugDNA.16530.1.S1_at   | MmugDNA.16530.1 | 6.72  | 5.89  | 0.71 | 0.13 | 1.78  | 0.122807 | 0.147628 | 0.496214 | 0.421901 |
| MmugDNA.16541.1.S1_at   | MmugDNA.16541.1 | 7.27  | 7.48  | 0.2  | 0.06 | -1.16 | 0.139042 | 0.124766 | 0.514459 | 0.395215 |
| MmugDNA.16554.1.S1_at   | MmugDNA.16554.1 | 5.63  | 5.13  | 0.23 | 0.88 | 1.41  | 0.962966 | 0.197232 | 0.988098 | 0.472213 |
| MmugDNA.16556.1.S1_at   | MmugDNA.16556.1 | 10.95 | 11.05 | 1.2  | 0.12 | -1.07 | 0.827304 | 0.144559 | 0.938039 | 0.418424 |
| MmugDNA.16558.1.S1_at   | MmugDNA.16558.1 | 7.84  | 8.03  | 0.98 | 0.07 | -1.14 | 0.739334 | 0.473924 | 0.900473 | 0.681111 |
| MmugDNA.1656.1.S1_at    | MmugDNA.1656.1  | 7.39  | 7.57  | 0.11 | 0.29 | -1.13 | 0.969916 | 0.457692 | 0.990053 | 0.670897 |
| MmugDNA.16560.1.S1_at   | MmugDNA.16560.1 | 4.82  | 4.62  | 0.02 | 0.09 | 1.15  | 0.009828 | 0.00505  | 0.244005 | 0.099019 |
| MmugDNA.16563.1.S1_at   | MmugDNA.16563.1 | 3.72  | 3.38  | 0.07 | 0.05 | 1.27  | 0.003281 | 0.008278 | 0.194357 | 0.12078  |
| MmugDNA.16575.1.S1_at   | MmugDNA.16575.1 | 4.09  | 4.58  | 0.07 | 0.32 | -1.41 | 0.064312 | 0.119666 | 0.418034 | 0.388324 |
| MmugDNA.16579.1.S1_at   | MmugDNA.16579.1 | 7.4   | 8.45  | 0.43 | 0.22 | -2.08 | 0.041136 | 0.05823  | 0.365675 | 0.287988 |
| MmugDNA.16579.1.S1_s_at | MmugDNA.16579.1 | 6.6   | 8.26  | 0.5  | 0.13 | -3.16 | 0.006072 | 0.025503 | 0.215157 | 0.200333 |
| MmugDNA.16582.1.S1_at   | MmugDNA.16582.1 | 10.11 | 10.26 | 0.27 | 0.05 | -1.1  | 0.158092 | 0.071822 | 0.531053 | 0.314082 |
| MmugDNA.16586.1.S1_at   | MmugDNA.16586.1 | 4.66  | 4.35  | 0.14 | 0.03 | 1.23  | 0.05876  | 0.092859 | 0.405368 | 0.349024 |
| MmugDNA.16593.1.S1_at   | MmugDNA.16593.1 | 11.17 | 11.16 | 0.18 | 0.03 | 1.01  | 0.389084 | 0.010873 | 0.715919 | 0.135892 |
| MmugDNA.16597.1.S1_at   | MmugDNA.16597.1 | 6.72  | 6.5   | 0.19 | 0.03 | 1.16  | 0.345405 | 0.324781 | 0.687499 | 0.575311 |
| MmugDNA.16603.1.S1_at   | MmugDNA.16603.1 | 11.95 | 11.52 | 0.36 | 0.21 | 1.34  | 0.062676 | 0.044267 | 0.413501 | 0.254932 |
| MmugDNA.16608.1.S1_at   | MmugDNA.16608.1 | 9.75  | 8.22  | 0.31 | 0.34 | 2.89  | 0.001967 | 0.000636 | 0.172129 | 0.042882 |
| MmugDNA.1661.1.S1_s_at  | MmugDNA.1661.1  | 10.99 | 11.51 | 0.68 | 0.02 | -1.43 | 0.218581 | 0.276374 | 0.588313 | 0.540334 |
| MmugDNA.16610.1.S1_at   | MmugDNA.16610.1 | 8.73  | 8.86  | 0.43 | 0.08 | -1.1  | 0.923383 | 0.986203 | 0.974293 | 0.992172 |
| MmugDNA.16614.1.S1_at   | MmugDNA.16614.1 | 5.1   | 4.91  | 0.31 | 0.16 | 1.14  | 0.609071 | 0.56253  | 0.841525 | 0.738055 |
| MmugDNA.16617.1.S1_at   | MmugDNA.16617.1 | 6.17  | 5.57  | 0.41 | 0.07 | 1.51  | 0.079425 | 0.060936 | 0.442296 | 0.293629 |
| MmugDNA.16620.1.S1_at   | MmugDNA.16620.1 | 5.74  | 5.63  | 0.13 | 0.15 | 1.07  | 0.285606 | 0.322119 | 0.643438 | 0.573728 |
| MmugDNA.16625.1.S1_at   | MmugDNA.16625.1 | 10.06 | 9.91  | 0.16 | 0.1  | 1.11  | 0.310613 | 0.419421 | 0.662474 | 0.643471 |
| MmugDNA.16626.1.S1_at   | MmugDNA.16626.1 | 6.38  | 7.8   | 0.12 | 0.09 | -2.67 | 0.0001   | 0.000431 | 0.108151 | 0.038359 |
| MmugDNA.16643.1.S1_at   | MmugDNA.16643.1 | 9.22  | 8.79  | 0.02 | 0.17 | 1.34  | 0.010527 | 0.011088 | 0.248118 | 0.137048 |
| MmugDNA.16645.1.S1_at   | MmugDNA.16645.1 | 7.28  | 7.15  | 0.16 | 0.13 | 1.1   | 0.131274 | 0.159101 | 0.505559 | 0.435217 |
| MmugDNA.16649.1.S1_at   | MmugDNA.16649.1 | 3.51  | 3.46  | 0.05 | 0.01 | 1.04  | 0.089099 | 0.134644 | 0.456902 | 0.406629 |

|                         |                 |       |       |      |      |       |          |          |          |          |
|-------------------------|-----------------|-------|-------|------|------|-------|----------|----------|----------|----------|
| MmugDNA.16657.1.S1_at   | MmugDNA.16657.1 | 11.65 | 11.73 | 0.17 | 0.03 | -1.06 | 0.824853 | 0.165636 | 0.937095 | 0.441925 |
| MmugDNA.16663.1.S1_at   | MmugDNA.16663.1 | 7.16  | 7.27  | 0.07 | 0.1  | -1.08 | 0.08709  | 0.025906 | 0.454785 | 0.201728 |
| MmugDNA.16668.1.S1_at   | MmugDNA.16668.1 | 12.53 | 12.73 | 0.49 | 0.07 | -1.15 | 0.499258 | 0.237203 | 0.781984 | 0.507928 |
| MmugDNA.1667.1.S1_at    | MmugDNA.1667.1  | 5.96  | 5.85  | 0.89 | 0.15 | 1.08  | 0.994681 | 0.836292 | 0.998004 | 0.90636  |
| MmugDNA.16672.1.S1_at   | MmugDNA.16672.1 | 3.53  | 3.56  | 0    | 0.06 | -1.02 | 0.790014 | 0.812409 | 0.922759 | 0.891629 |
| MmugDNA.16676.1.S1_at   | MmugDNA.16676.1 | 9.26  | 10.05 | 0.36 | 0.16 | -1.73 | 0.025579 | 0.005495 | 0.322382 | 0.102081 |
| MmugDNA.16677.1.S1_at   | MmugDNA.16677.1 | 8.78  | 7.93  | 0.64 | 0.3  | 1.8   | 0.064387 | 0.06903  | 0.41806  | 0.309017 |
| MmugDNA.1668.1.S1_at    | MmugDNA.1668.1  | 5.15  | 4.72  | 0.2  | 0.11 | 1.35  | 0.124953 | 0.191939 | 0.498917 | 0.467295 |
| MmugDNA.16680.1.S1_at   | MmugDNA.16680.1 | 10.97 | 10.69 | 0.92 | 0.19 | 1.21  | 0.558187 | 0.093889 | 0.815182 | 0.350402 |
| MmugDNA.16683.1.S1_at   | MmugDNA.16683.1 | 9.05  | 9.29  | 1.26 | 0.28 | -1.17 | 0.904321 | 0.153714 | 0.967773 | 0.428413 |
| MmugDNA.16694.1.S1_at   | MmugDNA.16694.1 | 9.43  | 9.13  | 0.28 | 0.04 | 1.23  | 0.05474  | 0.024109 | 0.397122 | 0.1945   |
| MmugDNA.16696.1.S1_s_at | MmugDNA.16696.1 | 10.22 | 9.72  | 0.06 | 0.17 | 1.42  | 0.018418 | 0.000291 | 0.297395 | 0.034892 |
| MmugDNA.16698.1.S1_at   | MmugDNA.16698.1 | 12.77 | 12.82 | 0.21 | 0.09 | -1.04 | 0.315105 | 0.231903 | 0.665641 | 0.503597 |
| MmugDNA.167.1.S1_at     | MmugDNA.167.1   | 12.39 | 12.43 | 1.2  | 0.17 | -1.03 | 0.848416 | 0.634751 | 0.946776 | 0.785012 |
| MmugDNA.1670.1.S1_at    | MmugDNA.1670.1  | 10.07 | 10.69 | 0.53 | 0.08 | -1.54 | 0.096964 | 0.053323 | 0.465662 | 0.276481 |
| MmugDNA.16701.1.S1_at   | MmugDNA.16701.1 | 10.08 | 9.71  | 0.33 | 0.19 | 1.29  | 0.098568 | 0.097047 | 0.468009 | 0.354531 |
| MmugDNA.16709.1.S1_s_at | MmugDNA.16709.1 | 11.24 | 11.51 | 0.22 | 0.17 | -1.21 | 0.063701 | 0.16532  | 0.416311 | 0.441514 |
| MmugDNA.16710.1.S1_at   | MmugDNA.16710.1 | 12.92 | 12.85 | 0.03 | 0.14 | 1.05  | 0.823055 | 0.919528 | 0.9362   | 0.954822 |
| MmugDNA.16722.1.S1_at   | MmugDNA.16722.1 | 11.77 | 11.38 | 0.04 | 0.16 | 1.3   | 0.031363 | 0.002513 | 0.341154 | 0.074158 |
| MmugDNA.16729.1.S1_at   | MmugDNA.16729.1 | 3.29  | 3.34  | 0.08 | 0.17 | -1.04 | 0.300928 | 0.457297 | 0.655213 | 0.670746 |
| MmugDNA.1673.1.S1_at    | MmugDNA.1673.1  | 6     | 5.53  | 0.53 | 0.35 | 1.38  | 0.650436 | 0.737002 | 0.860924 | 0.847784 |
| MmugDNA.16732.1.S1_at   | MmugDNA.16732.1 | 5.76  | 5.68  | 0.16 | 0.08 | 1.06  | 0.181754 | 0.311166 | 0.554854 | 0.566215 |
| MmugDNA.16733.1.S1_at   | MmugDNA.16733.1 | 5.55  | 5.73  | 0.24 | 0.27 | -1.14 | 0.418195 | 0.11214  | 0.735441 | 0.377431 |
| MmugDNA.16736.1.S1_at   | MmugDNA.16736.1 | 6.01  | 5.98  | 0.21 | 0.23 | 1.02  | 0.792474 | 0.06391  | 0.923897 | 0.29906  |
| MmugDNA.16738.1.S1_at   | MmugDNA.16738.1 | 4.89  | 4.79  | 0.1  | 0.15 | 1.07  | 0.188191 | 0.400881 | 0.560303 | 0.630658 |
| MmugDNA.16747.1.S1_at   | MmugDNA.16747.1 | 11.03 | 10.78 | 0.09 | 0.09 | 1.19  | 0.039865 | 0.05713  | 0.362793 | 0.284945 |
| MmugDNA.16748.1.S1_at   | MmugDNA.16748.1 | 8.09  | 7.52  | 0.38 | 0.25 | 1.49  | 0.146198 | 0.246898 | 0.520572 | 0.516238 |
| MmugDNA.1675.1.S1_at    | MmugDNA.1675.1  | 10.42 | 10.04 | 0.36 | 0.08 | 1.3   | 0.368712 | 0.487728 | 0.703807 | 0.690658 |
| MmugDNA.16750.1.S1_at   | MmugDNA.16750.1 | 6.81  | 7.11  | 0.43 | 0.12 | -1.23 | 0.843278 | 0.032597 | 0.94461  | 0.223643 |
| MmugDNA.16751.1.S1_at   | MmugDNA.16751.1 | 6.08  | 5.93  | 0.17 | 0.01 | 1.11  | 0.209056 | 0.106846 | 0.580632 | 0.369467 |
| MmugDNA.16753.1.S1_at   | MmugDNA.16753.1 | 10.25 | 10.3  | 0.21 | 0.16 | -1.03 | 0.958471 | 0.010556 | 0.986346 | 0.134149 |
| MmugDNA.16755.1.S1_at   | MmugDNA.16755.1 | 7.38  | 8.17  | 0.35 | 0.2  | -1.73 | 0.071564 | 0.220777 | 0.431049 | 0.494262 |
| MmugDNA.16756.1.S1_at   | MmugDNA.16756.1 | 9.55  | 9.7   | 0.23 | 0.33 | -1.11 | 0.341032 | 0.423448 | 0.684841 | 0.646347 |
| MmugDNA.16758.1.S1_at   | MmugDNA.16758.1 | 5.14  | 5.37  | 0.28 | 0.05 | -1.17 | 0.802206 | 0.713743 | 0.927856 | 0.833937 |
| MmugDNA.16763.1.S1_at   | MmugDNA.16763.1 | 12.11 | 11.67 | 0.1  | 0.2  | 1.36  | 0.008876 | 0.007565 | 0.238188 | 0.116437 |
| MmugDNA.16765.1.S1_at   | MmugDNA.16765.1 | 12.25 | 11.33 | 0.65 | 0.51 | 1.9   | 0.611902 | 0.270031 | 0.842626 | 0.535332 |
| MmugDNA.16766.1.S1_at   | MmugDNA.16766.1 | 10.48 | 10.33 | 0.79 | 0.08 | 1.11  | 0.726961 | 0.670944 | 0.894589 | 0.807629 |
| MmugDNA.1677.1.S1_at    | MmugDNA.1677.1  | 10.31 | 9.77  | 0.24 | 0.12 | 1.45  | 0.028418 | 0.032435 | 0.332479 | 0.223088 |
| MmugDNA.16773.1.S1_at   | MmugDNA.16773.1 | 9.44  | 9.32  | 0.05 | 0.07 | 1.09  | 0.048204 | 0.010497 | 0.382571 | 0.133872 |
| MmugDNA.16776.1.S1_at   | MmugDNA.16776.1 | 7.68  | 5.62  | 1.38 | 0.3  | 4.17  | 0.247701 | 0.328074 | 0.613245 | 0.577851 |
| MmugDNA.16779.1.S1_at   | MmugDNA.16779.1 | 6.38  | 6.59  | 0.26 | 0.08 | -1.16 | 0.596811 | 0.02619  | 0.836126 | 0.202804 |
| MmugDNA.16785.1.S1_s_at | MmugDNA.16785.1 | 4.85  | 4.79  | 0.08 | 0.07 | 1.04  | 0.692246 | 0.462539 | 0.880095 | 0.673854 |
| MmugDNA.16788.1.S1_at   | MmugDNA.16788.1 | 5.99  | 5.88  | 0.09 | 0.05 | 1.08  | 0.130074 | 0.135128 | 0.504648 | 0.407131 |

|                         |                 |       |       |      |      |       |          |          |          |          |
|-------------------------|-----------------|-------|-------|------|------|-------|----------|----------|----------|----------|
| MmugDNA.1679.1.S1_at    | MmugDNA.1679.1  | 9.38  | 9.06  | 2.5  | 0.22 | 1.25  | 0.835832 | 0.561227 | 0.941194 | 0.737235 |
| MmugDNA.16791.1.S1_at   | MmugDNA.16791.1 | 9.9   | 9.56  | 0.02 | 0.09 | 1.26  | 0.003296 | 0.001739 | 0.194357 | 0.062895 |
| MmugDNA.16796.1.S1_at   | MmugDNA.16796.1 | 10.33 | 10.88 | 0.64 | 0.06 | -1.47 | 0.200772 | 0.20577  | 0.572488 | 0.48007  |
| MmugDNA.16801.1.S1_at   | MmugDNA.16801.1 | 8.35  | 7.91  | 1.95 | 0.31 | 1.36  | 0.995772 | 0.282201 | 0.998312 | 0.544949 |
| MmugDNA.16802.1.S1_at   | MmugDNA.16802.1 | 9.89  | 9.94  | 0.18 | 0.11 | -1.03 | 0.408089 | 0.562675 | 0.729179 | 0.7381   |
| MmugDNA.16807.1.S1_at   | MmugDNA.16807.1 | 5.94  | 5.82  | 0.05 | 0.02 | 1.09  | 0.013992 | 0.184242 | 0.273301 | 0.460382 |
| MmugDNA.16810.1.S1_at   | MmugDNA.16810.1 | 11.33 | 11.56 | 0.29 | 0.12 | -1.17 | 0.152986 | 0.159161 | 0.52592  | 0.435217 |
| MmugDNA.16812.1.S1_at   | MmugDNA.16812.1 | 7.4   | 7.29  | 0.1  | 0.13 | 1.08  | 0.943499 | 0.296573 | 0.980509 | 0.555566 |
| MmugDNA.16814.1.S1_at   | MmugDNA.16814.1 | 13.03 | 13.19 | 0.12 | 0.03 | -1.11 | 0.043008 | 0.01741  | 0.371135 | 0.166995 |
| MmugDNA.16816.1.S1_at   | MmugDNA.16816.1 | 6.97  | 6.96  | 0.3  | 0.13 | 1     | 0.91298  | 0.024771 | 0.970415 | 0.197156 |
| MmugDNA.1682.1.S1_at    | MmugDNA.1682.1  | 8.11  | 8.38  | 1.76 | 0.28 | -1.2  | 0.841444 | 0.23273  | 0.943775 | 0.504378 |
| MmugDNA.16820.1.S1_at   | MmugDNA.16820.1 | 6.51  | 7.73  | 0.95 | 0.1  | -2.33 | 0.079109 | 0.101314 | 0.44198  | 0.361094 |
| MmugDNA.16823.1.S1_at   | MmugDNA.16823.1 | 6.51  | 6.12  | 1.44 | 1.01 | 1.31  | 0.702457 | 0.035937 | 0.884233 | 0.234032 |
| MmugDNA.16833.1.S1_at   | MmugDNA.16833.1 | 8.11  | 9.06  | 0.4  | 0.1  | -1.94 | 0.023528 | 0.000232 | 0.316091 | 0.03241  |
| MmugDNA.16840.1.S1_at   | MmugDNA.16840.1 | 9.53  | 10.04 | 0.35 | 0.24 | -1.43 | 0.507268 | 0.690946 | 0.786229 | 0.820018 |
| MmugDNA.16842.1.S1_at   | MmugDNA.16842.1 | 12.77 | 12.79 | 0.01 | 0.08 | -1.01 | 0.533633 | 0.841919 | 0.800854 | 0.909939 |
| MmugDNA.16849.1.S1_at   | MmugDNA.16849.1 | 7.65  | 8.68  | 0.57 | 0.1  | -2.04 | 0.034365 | 0.006062 | 0.349771 | 0.106159 |
| MmugDNA.16850.1.S1_at   | MmugDNA.16850.1 | 7.26  | 7.19  | 0.51 | 0.03 | 1.06  | 0.677368 | 0.873803 | 0.873498 | 0.928235 |
| MmugDNA.16852.1.S1_at   | MmugDNA.16852.1 | 4.76  | 4.28  | 1    | 0.32 | 1.4   | 0.491332 | 0.246945 | 0.777734 | 0.516238 |
| MmugDNA.16855.1.S1_at   | MmugDNA.16855.1 | 9.75  | 9.34  | 1.45 | 0.44 | 1.32  | 0.95166  | 0.468689 | 0.98376  | 0.677808 |
| MmugDNA.16857.1.S1_at   | MmugDNA.16857.1 | 10.37 | 10.7  | 0.19 | 0.08 | -1.25 | 0.025937 | 0.041937 | 0.32273  | 0.249397 |
| MmugDNA.16863.1.S1_at   | MmugDNA.16863.1 | 7.25  | 7.54  | 0.62 | 0.15 | -1.23 | 0.199641 | 0.351838 | 0.571494 | 0.595274 |
| MmugDNA.16869.1.S1_at   | MmugDNA.16869.1 | 12.39 | 12.45 | 0.15 | 0.05 | -1.04 | 0.471692 | 0.316401 | 0.76658  | 0.569809 |
| MmugDNA.16873.1.S1_at   | MmugDNA.16873.1 | 10.16 | 9.6   | 0.05 | 0.1  | 1.47  | 0.000797 | 0.042    | 0.15004  | 0.249463 |
| MmugDNA.16874.1.S1_s_at | MmugDNA.16874.1 | 9.77  | 9.47  | 0.91 | 0.27 | 1.23  | 0.650744 | 0.135609 | 0.86118  | 0.407744 |
| MmugDNA.16876.1.S1_at   | MmugDNA.16876.1 | 3.41  | 3.44  | 0.16 | 0.06 | -1.02 | 0.7037   | 0.749725 | 0.884872 | 0.854564 |
| MmugDNA.16878.1.S1_at   | MmugDNA.16878.1 | 7.25  | 7.69  | 0.96 | 0.2  | -1.35 | 0.413531 | 0.317567 | 0.732347 | 0.570774 |
| MmugDNA.16883.1.S1_at   | MmugDNA.16883.1 | 13.13 | 12.91 | 0.25 | 0.04 | 1.17  | 0.19424  | 0.250403 | 0.564864 | 0.519391 |
| MmugDNA.16884.1.S1_s_at | MmugDNA.16884.1 | 11.14 | 10.83 | 0.19 | 0.19 | 1.24  | 0.561321 | 0.074458 | 0.817219 | 0.318106 |
| MmugDNA.16885.1.S1_at   | MmugDNA.16885.1 | 4.31  | 4.19  | 0.16 | 0.12 | 1.09  | 0.084498 | 0.163545 | 0.451076 | 0.439765 |
| MmugDNA.16895.1.S1_at   | MmugDNA.16895.1 | 9.73  | 9.58  | 0.59 | 0.1  | 1.11  | 0.518254 | 0.281911 | 0.792523 | 0.544864 |
| MmugDNA.16896.1.S1_at   | MmugDNA.16896.1 | 7.03  | 7.39  | 0.41 | 0.39 | -1.29 | 0.376157 | 0.506551 | 0.706678 | 0.702503 |
| MmugDNA.16897.1.S1_x_at | MmugDNA.16897.1 | 5.29  | 5.11  | 0.13 | 0.07 | 1.13  | 0.115959 | 0.183656 | 0.48949  | 0.459681 |
| MmugDNA.16902.1.S1_at   | MmugDNA.16902.1 | 11.2  | 10.4  | 0.43 | 0.27 | 1.74  | 0.074389 | 0.007424 | 0.435308 | 0.115848 |
| MmugDNA.16904.1.S1_at   | MmugDNA.16904.1 | 6.92  | 6.59  | 0.25 | 0.34 | 1.26  | 0.33955  | 0.197196 | 0.68383  | 0.472213 |
| MmugDNA.16905.1.S1_at   | MmugDNA.16905.1 | 4.03  | 4     | 0.15 | 0.14 | 1.02  | 0.600024 | 0.616334 | 0.837654 | 0.772571 |
| MmugDNA.16906.1.S1_at   | MmugDNA.16906.1 | 12.89 | 12.64 | 0.07 | 0.06 | 1.19  | 0.011823 | 0.095099 | 0.257631 | 0.352151 |
| MmugDNA.16908.1.S1_at   | MmugDNA.16908.1 | 2.88  | 2.7   | 0.07 | 0.07 | 1.13  | 0.067407 | 0.075152 | 0.423738 | 0.319339 |
| MmugDNA.16908.1.S1_x_at | MmugDNA.16908.1 | 4.53  | 4.3   | 0.15 | 0.04 | 1.17  | 0.078593 | 0.079763 | 0.441343 | 0.327052 |
| MmugDNA.16909.1.S1_at   | MmugDNA.16909.1 | 10.77 | 10.51 | 0.38 | 0.05 | 1.2   | 0.223074 | 0.052463 | 0.592569 | 0.274577 |
| MmugDNA.16910.1.S1_at   | MmugDNA.16910.1 | 11.05 | 11.03 | 0.16 | 0.12 | 1.02  | 0.895802 | 0.972248 | 0.964355 | 0.985011 |
| MmugDNA.16912.1.S1_s_at | MmugDNA.16912.1 | 10.22 | 10.45 | 0.49 | 0.2  | -1.17 | 0.352599 | 0.168487 | 0.692659 | 0.445108 |
| MmugDNA.16913.1.S1_at   | MmugDNA.16913.1 | 12.7  | 12.8  | 0.08 | 0.03 | -1.07 | 0.160201 | 0.234118 | 0.533273 | 0.505319 |

|                         |                 |       |       |      |      |       |          |          |          |          |
|-------------------------|-----------------|-------|-------|------|------|-------|----------|----------|----------|----------|
| MmugDNA.16920.1.S1_at   | MmugDNA.16920.1 | 6.53  | 6.52  | 0.2  | 0.27 | 1     | 0.23042  | 0.225822 | 0.598513 | 0.498187 |
| MmugDNA.16923.1.S1_at   | MmugDNA.16923.1 | 6.39  | 6.45  | 0.15 | 0.13 | -1.04 | 0.216216 | 0.371169 | 0.586342 | 0.610113 |
| MmugDNA.16950.1.S1_at   | MmugDNA.16950.1 | 2.81  | 2.81  | 0.15 | 0.06 | -1    | 0.97658  | 0.974791 | 0.992376 | 0.986245 |
| MmugDNA.16958.1.S1_at   | MmugDNA.16958.1 | 9.77  | 9.3   | 0.48 | 0.04 | 1.39  | 0.158284 | 0.225591 | 0.531214 | 0.498155 |
| MmugDNA.16965.1.S1_at   | MmugDNA.16965.1 | 4.68  | 4.54  | 0.06 | 0.06 | 1.1   | 0.093921 | 0.100187 | 0.463304 | 0.359195 |
| MmugDNA.16971.1.S1_at   | MmugDNA.16971.1 | 3.65  | 3.53  | 0.19 | 0.03 | 1.09  | 0.273246 | 0.387011 | 0.632948 | 0.621935 |
| MmugDNA.16972.1.S1_at   | MmugDNA.16972.1 | 4.43  | 4.39  | 0.02 | 0.02 | 1.03  | 0.230242 | 0.24128  | 0.598481 | 0.511911 |
| MmugDNA.16980.1.S1_at   | MmugDNA.16980.1 | 6.6   | 6.48  | 0.15 | 0.12 | 1.08  | 0.377916 | 0.149692 | 0.7079   | 0.424291 |
| MmugDNA.16982.1.S1_at   | MmugDNA.16982.1 | 9.53  | 9.29  | 0.49 | 0.14 | 1.18  | 0.895496 | 0.129905 | 0.964244 | 0.401511 |
| MmugDNA.16983.1.S1_at   | MmugDNA.16983.1 | 3.7   | 3.63  | 0.04 | 0.13 | 1.05  | 0.337873 | 0.03248  | 0.682728 | 0.223254 |
| MmugDNA.1699.1.S1_at    | MmugDNA.1699.1  | 5.53  | 5.52  | 0.18 | 0.24 | 1     | 0.601813 | 0.409378 | 0.838575 | 0.636452 |
| MmugDNA.170.1.S1_at     | MmugDNA.170.1   | 4.08  | 4.01  | 0.19 | 0.02 | 1.05  | 0.174026 | 0.343134 | 0.546993 | 0.588897 |
| MmugDNA.17002.1.S1_at   | MmugDNA.17002.1 | 11.16 | 11.14 | 0.18 | 0.05 | 1.01  | 0.902106 | 0.002862 | 0.966869 | 0.078756 |
| MmugDNA.17004.1.S1_at   | MmugDNA.17004.1 | 8.2   | 8.19  | 0.5  | 0.06 | 1     | 0.984157 | 0.924043 | 0.995199 | 0.957178 |
| MmugDNA.17005.1.S1_at   | MmugDNA.17005.1 | 9     | 9.83  | 0.58 | 0.09 | -1.78 | 0.065321 | 0.090906 | 0.420402 | 0.345537 |
| MmugDNA.17006.1.S1_at   | MmugDNA.17006.1 | 8.3   | 8.77  | 0.22 | 0.05 | -1.38 | 0.028493 | 0.000679 | 0.332568 | 0.04413  |
| MmugDNA.1701.1.S1_at    | MmugDNA.1701.1  | 5.92  | 6.25  | 0.28 | 0.22 | -1.26 | 0.489758 | 0.506784 | 0.776518 | 0.702575 |
| MmugDNA.17013.1.S1_at   | MmugDNA.17013.1 | 5.39  | 5.26  | 0.17 | 0.08 | 1.09  | 0.734744 | 0.768652 | 0.898485 | 0.865638 |
| MmugDNA.17016.1.S1_at   | MmugDNA.17016.1 | 7.42  | 8.56  | 0.36 | 0.18 | -2.2  | 0.007772 | 0.071276 | 0.230997 | 0.313318 |
| MmugDNA.17017.1.S1_at   | MmugDNA.17017.1 | 9.41  | 11.01 | 1.08 | 0.1  | -3.03 | 0.058927 | 0.048942 | 0.405776 | 0.266021 |
| MmugDNA.1702.1.S1_at    | MmugDNA.1702.1  | 9.92  | 9.12  | 0.82 | 0.34 | 1.74  | 0.186367 | 0.041871 | 0.559101 | 0.249187 |
| MmugDNA.17021.1.S1_at   | MmugDNA.17021.1 | 11.67 | 11.54 | 0.15 | 0.1  | 1.09  | 0.247134 | 0.13421  | 0.612582 | 0.406453 |
| MmugDNA.17025.1.S1_at   | MmugDNA.17025.1 | 11.34 | 11.3  | 0.13 | 0.07 | 1.03  | 0.61019  | 0.110299 | 0.841839 | 0.374403 |
| MmugDNA.17029.1.S1_at   | MmugDNA.17029.1 | 12.31 | 11.85 | 0.29 | 0.02 | 1.38  | 0.064233 | 0.032677 | 0.417874 | 0.223827 |
| MmugDNA.17029.1.S1_s_at | MmugDNA.17029.1 | 13.24 | 13.07 | 0.2  | 0.02 | 1.13  | 0.196296 | 0.055964 | 0.56681  | 0.28236  |
| MmugDNA.17031.1.S1_at   | MmugDNA.17031.1 | 9.45  | 9.83  | 0.13 | 0.24 | -1.31 | 0.046458 | 0.029851 | 0.377929 | 0.214481 |
| MmugDNA.17034.1.S1_at   | MmugDNA.17034.1 | 8.56  | 8.99  | 1.09 | 0.19 | -1.35 | 0.573156 | 0.46557  | 0.823465 | 0.675811 |
| MmugDNA.17036.1.S1_at   | MmugDNA.17036.1 | 8     | 6.97  | 1.54 | 0.21 | 2.04  | 0.378107 | 0.507991 | 0.708016 | 0.703358 |
| MmugDNA.17038.1.S1_at   | MmugDNA.17038.1 | 7.51  | 7.51  | 0.04 | 0.04 | 1     | 0.61069  | 0.225121 | 0.841982 | 0.497779 |
| MmugDNA.17039.1.S1_at   | MmugDNA.17039.1 | 5.18  | 5.36  | 0.23 | 0.04 | -1.13 | 0.293409 | 0.124458 | 0.649776 | 0.394865 |
| MmugDNA.17044.1.S1_at   | MmugDNA.17044.1 | 10.14 | 11.12 | 0.77 | 0.09 | -1.97 | 0.329913 | 0.272167 | 0.676657 | 0.536939 |
| MmugDNA.17048.1.S1_at   | MmugDNA.17048.1 | 10.93 | 11.02 | 0.23 | 0.11 | -1.07 | 0.845781 | 0.920548 | 0.94591  | 0.955234 |
| MmugDNA.17049.1.S1_at   | MmugDNA.17049.1 | 4.05  | 3.95  | 0.22 | 0.04 | 1.07  | 0.262636 | 0.514913 | 0.624887 | 0.707937 |
| MmugDNA.17051.1.S1_at   | MmugDNA.17051.1 | 6.71  | 6.56  | 0.17 | 0.02 | 1.11  | 0.138942 | 0.224756 | 0.514459 | 0.497617 |
| MmugDNA.17052.1.S1_at   | MmugDNA.17052.1 | 6.23  | 6.83  | 0.17 | 0.14 | -1.51 | 0.005561 | 0.002075 | 0.208492 | 0.067389 |
| MmugDNA.17053.1.S1_at   | MmugDNA.17053.1 | 9.14  | 8.83  | 0.1  | 0.05 | 1.24  | 0.013221 | 0.014108 | 0.266951 | 0.15195  |
| MmugDNA.17056.1.S1_at   | MmugDNA.17056.1 | 8.23  | 8.24  | 0.07 | 0.01 | -1.01 | 0.666056 | 0.689802 | 0.868209 | 0.819112 |
| MmugDNA.17056.1.S1_s_at | MmugDNA.17056.1 | 4.96  | 5.18  | 0.48 | 0.16 | -1.16 | 0.525515 | 0.384075 | 0.796198 | 0.619926 |
| MmugDNA.17065.1.S1_at   | MmugDNA.17065.1 | 9.19  | 9.77  | 0.74 | 0.02 | -1.5  | 0.244547 | 0.266737 | 0.610092 | 0.53241  |
| MmugDNA.17068.1.S1_at   | MmugDNA.17068.1 | 6.44  | 6.33  | 0.08 | 0.04 | 1.08  | 0.14831  | 0.014154 | 0.522567 | 0.152107 |
| MmugDNA.17069.1.S1_at   | MmugDNA.17069.1 | 9.42  | 9.27  | 0.18 | 0.09 | 1.11  | 0.165087 | 0.042693 | 0.537704 | 0.251049 |
| MmugDNA.17072.1.S1_at   | MmugDNA.17072.1 | 10.45 | 11    | 0.05 | 0.15 | -1.46 | 0.002904 | 0.003616 | 0.188033 | 0.086033 |
| MmugDNA.17072.1.S1_x_at | MmugDNA.17072.1 | 10.18 | 10.76 | 0.1  | 0.12 | -1.49 | 0.003685 | 0.001616 | 0.197111 | 0.06074  |



|                         |                 |       |       |      |      |       |          |          |          |          |
|-------------------------|-----------------|-------|-------|------|------|-------|----------|----------|----------|----------|
| MmugDNA.17073.1.S1_at   | MmugDNA.17073.1 | 5.58  | 5.63  | 0.1  | 0.09 | -1.04 | 0.420542 | 0.539755 | 0.737009 | 0.723926 |
| MmugDNA.17075.1.S1_at   | MmugDNA.17075.1 | 4.85  | 4.83  | 0.09 | 0.14 | 1.02  | 0.547399 | 0.766081 | 0.809077 | 0.864102 |
| MmugDNA.17083.1.S1_at   | MmugDNA.17083.1 | 12.49 | 12.68 | 0.04 | 0.04 | -1.14 | 0.003742 | 0.000373 | 0.197739 | 0.037273 |
| MmugDNA.17084.1.S1_at   | MmugDNA.17084.1 | 6.36  | 7.49  | 0.81 | 0.2  | -2.18 | 0.246426 | 0.261859 | 0.611924 | 0.528265 |
| MmugDNA.17093.1.S1_at   | MmugDNA.17093.1 | 6.76  | 6.89  | 0.38 | 0.15 | -1.09 | 0.710132 | 0.098181 | 0.887263 | 0.356253 |
| MmugDNA.17097.1.S1_at   | MmugDNA.17097.1 | 5.23  | 4.97  | 0.39 | 0.15 | 1.2   | 0.525807 | 0.065767 | 0.796442 | 0.301767 |
| MmugDNA.17099.1.S1_at   | MmugDNA.17099.1 | 7.74  | 7.79  | 0.08 | 0.04 | -1.04 | 0.733348 | 0.401816 | 0.897584 | 0.631075 |
| MmugDNA.17100.1.S1_at   | MmugDNA.17100.1 | 9.01  | 9.37  | 0.68 | 0.03 | -1.29 | 0.125625 | 0.010833 | 0.499523 | 0.135705 |
| MmugDNA.17105.1.S1_at   | MmugDNA.17105.1 | 12.27 | 12.25 | 0.05 | 0.07 | 1.01  | 0.447774 | 0.621185 | 0.753559 | 0.775813 |
| MmugDNA.17109.1.S1_at   | MmugDNA.17109.1 | 7.44  | 7.45  | 0.55 | 0.43 | -1.01 | 0.306032 | 0.307142 | 0.659264 | 0.563487 |
| MmugDNA.1711.1.S1_at    | MmugDNA.1711.1  | 7.57  | 7.79  | 0.18 | 0.12 | -1.17 | 0.156221 | 0.000025 | 0.529536 | 0.020254 |
| MmugDNA.17111.1.S1_at   | MmugDNA.17111.1 | 5.56  | 5.36  | 0.12 | 0.15 | 1.15  | 0.295353 | 0.195004 | 0.651062 | 0.470146 |
| MmugDNA.17113.1.S1_at   | MmugDNA.17113.1 | 5.34  | 5.73  | 0.82 | 0.37 | -1.31 | 0.553785 | 0.765549 | 0.812271 | 0.863726 |
| MmugDNA.17118.1.S1_at   | MmugDNA.17118.1 | 8.98  | 8.08  | 0.37 | 0.16 | 1.87  | 0.055429 | 0.173619 | 0.398621 | 0.449965 |
| MmugDNA.17122.1.S1_at   | MmugDNA.17122.1 | 4.35  | 4.26  | 0.03 | 0.05 | 1.07  | 0.071276 | 0.202131 | 0.430629 | 0.476557 |
| MmugDNA.17125.1.S1_at   | MmugDNA.17125.1 | 6.83  | 6.83  | 0.17 | 0.04 | 1     | 0.912844 | 0.76037  | 0.970366 | 0.860754 |
| MmugDNA.17135.1.S1_at   | MmugDNA.17135.1 | 10.47 | 10.23 | 0.41 | 0.07 | 1.18  | 0.362033 | 0.06557  | 0.698933 | 0.301476 |
| MmugDNA.1714.1.S1_at    | MmugDNA.1714.1  | 6.94  | 6.84  | 0.07 | 0.08 | 1.07  | 0.09632  | 0.559827 | 0.465021 | 0.736394 |
| MmugDNA.17140.1.S1_at   | MmugDNA.17140.1 | 6.51  | 6.38  | 0.13 | 0.04 | 1.09  | 0.094785 | 0.206422 | 0.464049 | 0.480571 |
| MmugDNA.17142.1.S1_at   | MmugDNA.17142.1 | 6.96  | 6.82  | 0.12 | 0.06 | 1.1   | 0.107174 | 0.258069 | 0.47974  | 0.525574 |
| MmugDNA.17143.1.S1_x_at | MmugDNA.17143.1 | 5.93  | 6.09  | 0.41 | 0.14 | -1.12 | 0.846856 | 0.088442 | 0.946291 | 0.341877 |
| MmugDNA.1715.1.S1_at    | MmugDNA.1715.1  | 6.81  | 7.51  | 0.36 | 0.26 | -1.63 | 0.030079 | 0.01615  | 0.336449 | 0.161087 |
| MmugDNA.17158.1.S1_at   | MmugDNA.17158.1 | 3.69  | 3.6   | 0.03 | 0.09 | 1.07  | 0.233805 | 0.304603 | 0.601347 | 0.561838 |
| MmugDNA.17159.1.S1_at   | MmugDNA.17159.1 | 8.87  | 9.47  | 1.06 | 0.05 | -1.52 | 0.984738 | 0.999621 | 0.995256 | 0.999864 |
| MmugDNA.17159.1.S1_s_at | MmugDNA.17159.1 | 10.25 | 10.2  | 0.98 | 0.13 | 1.04  | 0.783277 | 0.855318 | 0.920187 | 0.917526 |
| MmugDNA.17164.1.S1_s_at | MmugDNA.17164.1 | 6.39  | 6.16  | 0.31 | 0.19 | 1.17  | 0.340668 | 0.56454  | 0.684574 | 0.739363 |
| MmugDNA.17182.1.S1_at   | MmugDNA.17182.1 | 3.17  | 2.97  | 0.18 | 0.13 | 1.15  | 0.422529 | 0.346303 | 0.738218 | 0.59124  |
| MmugDNA.17188.1.S1_at   | MmugDNA.17188.1 | 7.38  | 7.43  | 0.11 | 0.08 | -1.04 | 0.111373 | 0.034382 | 0.484548 | 0.229382 |
| MmugDNA.17189.1.S1_at   | MmugDNA.17189.1 | 4.64  | 4.83  | 0.1  | 0.43 | -1.14 | 0.128002 | 0.203627 | 0.502449 | 0.47789  |
| MmugDNA.17193.1.S1_at   | MmugDNA.17193.1 | 6.91  | 6.58  | 0.36 | 0.06 | 1.26  | 0.188407 | 0.114011 | 0.560439 | 0.38036  |
| MmugDNA.17196.1.S1_at   | MmugDNA.17196.1 | 12.25 | 11.94 | 0.3  | 0.21 | 1.24  | 0.909148 | 0.122901 | 0.969287 | 0.392923 |
| MmugDNA.17198.1.S1_at   | MmugDNA.17198.1 | 3.24  | 3.14  | 0.42 | 0.07 | 1.07  | 0.192779 | 0.403488 | 0.563577 | 0.632164 |
| MmugDNA.17201.1.S1_at   | MmugDNA.17201.1 | 5.28  | 6.31  | 0.32 | 0.06 | -2.04 | 0.011519 | 0.002237 | 0.255545 | 0.069642 |
| MmugDNA.17203.1.S1_at   | MmugDNA.17203.1 | 12.41 | 12.51 | 0.1  | 0.01 | -1.07 | 0.186404 | 0.120662 | 0.559101 | 0.389476 |
| MmugDNA.17205.1.S1_at   | MmugDNA.17205.1 | 5.95  | 5.8   | 0.12 | 0.01 | 1.11  | 0.360646 | 0.56457  | 0.698039 | 0.739366 |
| MmugDNA.17209.1.S1_at   | MmugDNA.17209.1 | 6.01  | 5.96  | 0.12 | 0.05 | 1.03  | 0.375786 | 0.297424 | 0.706657 | 0.556086 |
| MmugDNA.1721.1.S1_at    | MmugDNA.1721.1  | 7.24  | 7.45  | 0.63 | 0.19 | -1.16 | 0.450489 | 0.093051 | 0.754829 | 0.3492   |
| MmugDNA.17212.1.S1_at   | MmugDNA.17212.1 | 3.15  | 3.25  | 0.17 | 0.16 | -1.07 | 0.531335 | 0.802722 | 0.799582 | 0.886441 |
| MmugDNA.17213.1.S1_at   | MmugDNA.17213.1 | 5.53  | 5.2   | 0.21 | 0.06 | 1.26  | 0.08477  | 0.078721 | 0.45134  | 0.325673 |
| MmugDNA.17216.1.S1_at   | MmugDNA.17216.1 | 5.31  | 5.29  | 0.19 | 0.04 | 1.02  | 0.699139 | 0.282172 | 0.883066 | 0.544937 |
| MmugDNA.17218.1.S1_at   | MmugDNA.17218.1 | 9.48  | 8.7   | 0.88 | 0.08 | 1.72  | 0.31451  | 0.501207 | 0.665212 | 0.699449 |
| MmugDNA.17219.1.S1_at   | MmugDNA.17219.1 | 7.46  | 7.5   | 0.11 | 0.28 | -1.03 | 0.938849 | 0.004145 | 0.979343 | 0.091027 |
| MmugDNA.17220.1.S1_at   | MmugDNA.17220.1 | 6.93  | 6.79  | 0.04 | 0.06 | 1.1   | 0.066251 | 0.551794 | 0.421918 | 0.731221 |

|                         |                 |       |       |      |      |       |          |          |          |          |
|-------------------------|-----------------|-------|-------|------|------|-------|----------|----------|----------|----------|
| MmugDNA.17221.1.S1_at   | MmugDNA.17221.1 | 7.31  | 7.54  | 0.27 | 0.14 | -1.17 | 0.986232 | 0.0542   | 0.995557 | 0.278211 |
| MmugDNA.17224.1.A1_at   | MmugDNA.17224.1 | 6.56  | 6.51  | 0.06 | 0.04 | 1.03  | 0.198366 | 0.518366 | 0.569615 | 0.71038  |
| MmugDNA.17224.1.S1_at   | MmugDNA.17224.1 | 6.87  | 6.74  | 0.04 | 0.02 | 1.09  | 0.009552 | 0.680783 | 0.242426 | 0.813594 |
| MmugDNA.17225.1.S1_at   | MmugDNA.17225.1 | 11.06 | 11.08 | 0.12 | 0.05 | -1.02 | 0.567885 | 0.091354 | 0.820586 | 0.346281 |
| MmugDNA.17229.1.S1_at   | MmugDNA.17229.1 | 5.91  | 5.86  | 0.13 | 0.08 | 1.03  | 0.56218  | 0.880455 | 0.817608 | 0.931694 |
| MmugDNA.17238.1.S1_at   | MmugDNA.17238.1 | 10.73 | 11.21 | 0.77 | 0.26 | -1.39 | 0.553561 | 0.061182 | 0.812258 | 0.293981 |
| MmugDNA.17241.1.S1_at   | MmugDNA.17241.1 | 5.97  | 5.92  | 0.2  | 0.06 | 1.04  | 0.601883 | 0.823161 | 0.838633 | 0.898361 |
| MmugDNA.17242.1.S1_at   | MmugDNA.17242.1 | 9.42  | 10.4  | 0.46 | 0.1  | -1.98 | 0.05076  | 0.079438 | 0.387959 | 0.326766 |
| MmugDNA.17250.1.S1_at   | MmugDNA.17250.1 | 3.32  | 3.32  | 0.08 | 0.04 | -1.01 | 0.495104 | 0.144712 | 0.779748 | 0.418546 |
| MmugDNA.17253.1.S1_at   | MmugDNA.17253.1 | 9.63  | 9.87  | 0.54 | 0.21 | -1.18 | 0.854806 | 0.308322 | 0.948598 | 0.564425 |
| MmugDNA.17254.1.S1_at   | MmugDNA.17254.1 | 6.05  | 5.91  | 0.1  | 0.07 | 1.1   | 0.302727 | 0.803796 | 0.656634 | 0.887124 |
| MmugDNA.17256.1.S1_at   | MmugDNA.17256.1 | 4.57  | 4.36  | 0.06 | 0.15 | 1.16  | 0.109078 | 0.144376 | 0.481684 | 0.418323 |
| MmugDNA.17259.1.S1_at   | MmugDNA.17259.1 | 8.82  | 8.99  | 0.59 | 0.27 | -1.12 | 0.972656 | 0.889799 | 0.991123 | 0.937223 |
| MmugDNA.17269.1.S1_at   | MmugDNA.17269.1 | 7.42  | 7.77  | 0.11 | 0.02 | -1.28 | 0.010623 | 0.000689 | 0.2485   | 0.044166 |
| MmugDNA.17277.1.S1_at   | MmugDNA.17277.1 | 8.89  | 8.89  | 0.48 | 0.24 | 1     | 0.66092  | 0.188591 | 0.865819 | 0.464557 |
| MmugDNA.17286.1.S1_at   | MmugDNA.17286.1 | 11.89 | 12.27 | 0.32 | 0.06 | -1.31 | 0.20286  | 0.394421 | 0.574251 | 0.626982 |
| MmugDNA.17292.1.S1_at   | MmugDNA.17292.1 | 7.01  | 7.35  | 0.37 | 0.05 | -1.27 | 0.133873 | 0.131083 | 0.508125 | 0.403084 |
| MmugDNA.17294.1.S1_at   | MmugDNA.17294.1 | 7.5   | 7.63  | 0.52 | 0.03 | -1.1  | 0.765296 | 0.166231 | 0.911736 | 0.442777 |
| MmugDNA.17295.1.S1_at   | MmugDNA.17295.1 | 10.67 | 10.3  | 0.69 | 0.03 | 1.29  | 0.839161 | 0.951681 | 0.942574 | 0.972543 |
| MmugDNA.17299.1.S1_at   | MmugDNA.17299.1 | 3.31  | 3.23  | 0.1  | 0.08 | 1.05  | 0.474416 | 0.141414 | 0.767951 | 0.414874 |
| MmugDNA.173.1.S1_at     | MmugDNA.173.1   | 7.07  | 6.86  | 0.12 | 0.04 | 1.15  | 0.124996 | 0.14789  | 0.498935 | 0.422263 |
| MmugDNA.17300.1.S1_s_at | MmugDNA.17300.1 | 6.97  | 6.69  | 0.43 | 0.23 | 1.22  | 0.897512 | 0.973696 | 0.965207 | 0.985648 |
| MmugDNA.17319.1.S1_at   | MmugDNA.17319.1 | 12.22 | 12.37 | 0.3  | 0.1  | -1.11 | 0.853902 | 0.899877 | 0.948426 | 0.943047 |
| MmugDNA.17322.1.S1_at   | MmugDNA.17322.1 | 6.64  | 6.57  | 0.03 | 0.05 | 1.05  | 0.054816 | 0.377494 | 0.397122 | 0.614984 |
| MmugDNA.17329.1.S1_at   | MmugDNA.17329.1 | 10.21 | 10.01 | 1    | 0.33 | 1.15  | 0.410488 | 0.006916 | 0.730749 | 0.112399 |
| MmugDNA.1734.1.S1_at    | MmugDNA.1734.1  | 5.52  | 5.29  | 0.19 | 0.16 | 1.17  | 0.236374 | 0.256891 | 0.603291 | 0.52471  |
| MmugDNA.17344.1.S1_at   | MmugDNA.17344.1 | 6.76  | 5.82  | 0.4  | 0.23 | 1.92  | 0.026916 | 0.028579 | 0.326584 | 0.210834 |
| MmugDNA.17348.1.S1_at   | MmugDNA.17348.1 | 12.14 | 12.46 | 0.04 | 0.02 | -1.25 | 0.000173 | 0.001887 | 0.112975 | 0.065004 |
| MmugDNA.17350.1.S1_at   | MmugDNA.17350.1 | 11.4  | 11.89 | 0.32 | 0.01 | -1.4  | 0.170779 | 0.088614 | 0.543739 | 0.342165 |
| MmugDNA.17360.1.S1_at   | MmugDNA.17360.1 | 6.71  | 6.63  | 0.09 | 0.03 | 1.06  | 0.238662 | 0.678419 | 0.605393 | 0.812189 |
| MmugDNA.17362.1.S1_at   | MmugDNA.17362.1 | 12.01 | 11.52 | 0.28 | 0.04 | 1.41  | 0.109356 | 0.065689 | 0.482257 | 0.301631 |
| MmugDNA.17365.1.S1_at   | MmugDNA.17365.1 | 13.12 | 12.52 | 2.75 | 0.15 | 1.52  | 0.627461 | 0.508384 | 0.850547 | 0.70359  |
| MmugDNA.17366.1.S1_s_at | MmugDNA.17366.1 | 9.59  | 9.94  | 0.17 | 0.23 | -1.28 | 0.043274 | 0.027632 | 0.371738 | 0.207522 |
| MmugDNA.17369.1.S1_at   | MmugDNA.17369.1 | 3.83  | 3.75  | 0.09 | 0.04 | 1.05  | 0.090348 | 0.11158  | 0.458536 | 0.376407 |
| MmugDNA.17373.1.S1_at   | MmugDNA.17373.1 | 4.63  | 4.46  | 0.09 | 0.12 | 1.13  | 0.0605   | 0.20279  | 0.408362 | 0.477273 |
| MmugDNA.17384.1.S1_at   | MmugDNA.17384.1 | 8.7   | 8.94  | 0.28 | 0.18 | -1.18 | 0.282387 | 0.171065 | 0.640907 | 0.447601 |
| MmugDNA.17390.1.S1_at   | MmugDNA.17390.1 | 4.24  | 4.08  | 0.12 | 0.13 | 1.11  | 0.459116 | 0.457261 | 0.759258 | 0.670746 |
| MmugDNA.17393.1.S1_at   | MmugDNA.17393.1 | 10.68 | 10.88 | 0.32 | 0.09 | -1.15 | 0.303768 | 0.016396 | 0.657604 | 0.162135 |
| MmugDNA.17395.1.S1_at   | MmugDNA.17395.1 | 12.05 | 13.02 | 0.49 | 0.12 | -1.96 | 0.037707 | 0.030193 | 0.357804 | 0.215693 |
| MmugDNA.17397.1.S1_at   | MmugDNA.17397.1 | 5.26  | 5.37  | 0.53 | 0.14 | -1.08 | 0.426557 | 0.327657 | 0.740608 | 0.577464 |
| MmugDNA.17400.1.S1_at   | MmugDNA.17400.1 | 11.06 | 10.75 | 0.16 | 0.06 | 1.24  | 0.023836 | 0.004204 | 0.317081 | 0.091368 |
| MmugDNA.17406.1.S1_at   | MmugDNA.17406.1 | 5.28  | 4.9   | 0.27 | 0.08 | 1.3   | 0.068161 | 0.034178 | 0.424968 | 0.228728 |
| MmugDNA.17407.1.S1_at   | MmugDNA.17407.1 | 6.74  | 6.56  | 0.33 | 0.15 | 1.13  | 0.663982 | 0.806722 | 0.867567 | 0.888783 |

|                         |                 |       |       |      |      |       |          |          |          |          |
|-------------------------|-----------------|-------|-------|------|------|-------|----------|----------|----------|----------|
| MmugDNA.17409.1.S1_s_at | MmugDNA.17409.1 | 11.19 | 10.65 | 0.42 | 0.11 | 1.45  | 0.227822 | 0.227625 | 0.596693 | 0.499898 |
| MmugDNA.17413.1.S1_at   | MmugDNA.17413.1 | 10.04 | 9.96  | 0.66 | 0.13 | 1.05  | 0.672806 | 0.467447 | 0.871072 | 0.677085 |
| MmugDNA.17419.1.S1_at   | MmugDNA.17419.1 | 5.08  | 4.98  | 0.01 | 0.05 | 1.07  | 0.01884  | 0.211513 | 0.298593 | 0.48563  |
| MmugDNA.1742.1.S1_at    | MmugDNA.1742.1  | 10.91 | 11.2  | 0.11 | 0.05 | -1.22 | 0.026296 | 0.101708 | 0.323826 | 0.361562 |
| MmugDNA.17422.1.S1_at   | MmugDNA.17422.1 | 4.66  | 4.64  | 0.3  | 0.06 | 1.01  | 0.448704 | 0.602105 | 0.754021 | 0.763172 |
| MmugDNA.17426.1.S1_at   | MmugDNA.17426.1 | 10.23 | 10.65 | 1.33 | 0.11 | -1.34 | 0.31193  | 0.159366 | 0.663542 | 0.435417 |
| MmugDNA.17430.1.S1_at   | MmugDNA.17430.1 | 11.24 | 10.97 | 0.06 | 0.15 | 1.2   | 0.043532 | 0.014876 | 0.372168 | 0.155055 |
| MmugDNA.17430.1.S1_s_at | MmugDNA.17430.1 | 10.55 | 10.29 | 0.11 | 0.19 | 1.2   | 0.053695 | 0.041334 | 0.39535  | 0.247995 |
| MmugDNA.17433.1.S1_at   | MmugDNA.17433.1 | 10.09 | 10.75 | 0.31 | 0.04 | -1.58 | 0.052839 | 0.004643 | 0.393368 | 0.095    |
| MmugDNA.17444.1.S1_at   | MmugDNA.17444.1 | 8.31  | 9.16  | 0.41 | 0.13 | -1.81 | 0.028583 | 0.028634 | 0.332627 | 0.210901 |
| MmugDNA.17448.1.S1_at   | MmugDNA.17448.1 | 12.04 | 12.26 | 0.1  | 0.06 | -1.16 | 0.045354 | 0.069254 | 0.376335 | 0.309453 |
| MmugDNA.17450.1.S1_at   | MmugDNA.17450.1 | 9.18  | 9.9   | 0.2  | 0.04 | -1.64 | 0.003623 | 0.000768 | 0.197111 | 0.04544  |
| MmugDNA.17451.1.S1_at   | MmugDNA.17451.1 | 6.72  | 6.79  | 0.69 | 0.26 | -1.05 | 0.864085 | 0.886875 | 0.952179 | 0.93556  |
| MmugDNA.17453.1.S1_at   | MmugDNA.17453.1 | 5.95  | 5.87  | 0.04 | 0.17 | 1.05  | 0.341351 | 0.273294 | 0.685051 | 0.537788 |
| MmugDNA.17463.1.S1_at   | MmugDNA.17463.1 | 8.04  | 7.94  | 0.2  | 0.11 | 1.07  | 0.16894  | 0.54145  | 0.541897 | 0.724928 |
| MmugDNA.17467.1.S1_at   | MmugDNA.17467.1 | 11.61 | 11.65 | 0.26 | 0.16 | -1.03 | 0.505959 | 0.363308 | 0.785583 | 0.60371  |
| MmugDNA.17468.1.S1_at   | MmugDNA.17468.1 | 4.74  | 4.95  | 0.75 | 0.56 | -1.15 | 0.423436 | 0.676636 | 0.739103 | 0.811009 |
| MmugDNA.17469.1.S1_at   | MmugDNA.17469.1 | 9.51  | 9.82  | 0.22 | 0.45 | -1.24 | 0.196394 | 0.325787 | 0.567032 | 0.576049 |
| MmugDNA.17470.1.S1_at   | MmugDNA.17470.1 | 11.81 | 11.69 | 0.26 | 0.14 | 1.09  | 0.783327 | 0.941959 | 0.920198 | 0.96711  |
| MmugDNA.1748.1.S1_at    | MmugDNA.1748.1  | 7.19  | 7.3   | 0.68 | 0.26 | -1.08 | 0.44836  | 0.12005  | 0.753886 | 0.388733 |
| MmugDNA.17485.1.S1_at   | MmugDNA.17485.1 | 3.54  | 3.41  | 0.27 | 0.16 | 1.09  | 0.356092 | 0.511207 | 0.695045 | 0.705447 |
| MmugDNA.17492.1.S1_at   | MmugDNA.17492.1 | 5.95  | 5.81  | 0.04 | 0.13 | 1.11  | 0.100188 | 0.112842 | 0.470543 | 0.378467 |
| MmugDNA.17497.1.S1_at   | MmugDNA.17497.1 | 6.81  | 6.93  | 0.15 | 0.4  | -1.09 | 0.220012 | 0.083822 | 0.589114 | 0.334662 |
| MmugDNA.17499.1.S1_at   | MmugDNA.17499.1 | 4.02  | 4.11  | 0.06 | 0.18 | -1.06 | 0.493766 | 0.752277 | 0.77903  | 0.855787 |
| MmugDNA.17503.1.S1_at   | MmugDNA.17503.1 | 11.08 | 11.09 | 0.17 | 0.01 | -1.01 | 0.452375 | 0.15005  | 0.755778 | 0.424693 |
| MmugDNA.17505.1.S1_at   | MmugDNA.17505.1 | 6.99  | 7.11  | 0.19 | 0.03 | -1.09 | 0.129003 | 0.099483 | 0.503646 | 0.357862 |
| MmugDNA.17506.1.S1_at   | MmugDNA.17506.1 | 12.65 | 12.6  | 0.31 | 0.07 | 1.03  | 0.420779 | 0.480221 | 0.737084 | 0.68574  |
| MmugDNA.17511.1.S1_at   | MmugDNA.17511.1 | 5.83  | 5.49  | 0.62 | 0.11 | 1.26  | 0.331894 | 0.391094 | 0.678336 | 0.624833 |
| MmugDNA.17513.1.S1_at   | MmugDNA.17513.1 | 11.67 | 12.28 | 0.63 | 0.11 | -1.53 | 0.15012  | 0.182334 | 0.523642 | 0.458787 |
| MmugDNA.17518.1.S1_at   | MmugDNA.17518.1 | 9.13  | 9.29  | 0.3  | 0.12 | -1.12 | 0.243029 | 0.036866 | 0.608888 | 0.23648  |
| MmugDNA.17519.1.S1_at   | MmugDNA.17519.1 | 5.52  | 5.38  | 0.4  | 0.14 | 1.1   | 0.401632 | 0.535063 | 0.724554 | 0.720775 |
| MmugDNA.1752.1.S1_s_at  | MmugDNA.1752.1  | 5.89  | 5.89  | 0.28 | 0.13 | 1     | 0.253689 | 0.287435 | 0.618323 | 0.548683 |
| MmugDNA.17523.1.S1_at   | MmugDNA.17523.1 | 5.91  | 5.87  | 0.14 | 0.03 | 1.03  | 0.377792 | 0.351884 | 0.7078   | 0.595331 |
| MmugDNA.17526.1.S1_at   | MmugDNA.17526.1 | 7.99  | 7.97  | 0.04 | 0.01 | 1.01  | 0.24991  | 0.442364 | 0.615347 | 0.660366 |
| MmugDNA.17527.1.S1_at   | MmugDNA.17527.1 | 11.51 | 11.38 | 0.17 | 0.02 | 1.09  | 0.338758 | 0.483296 | 0.683213 | 0.687887 |
| MmugDNA.17530.1.S1_at   | MmugDNA.17530.1 | 11.83 | 12.05 | 0.29 | 0.01 | -1.17 | 0.082808 | 0.005724 | 0.44803  | 0.104271 |
| MmugDNA.17531.1.S1_at   | MmugDNA.17531.1 | 11.71 | 11.6  | 0.1  | 0.05 | 1.08  | 0.173113 | 0.009502 | 0.546162 | 0.128379 |
| MmugDNA.17533.1.S1_at   | MmugDNA.17533.1 | 13    | 12.86 | 0.08 | 0.12 | 1.1   | 0.240106 | 0.113533 | 0.606372 | 0.379632 |
| MmugDNA.17537.1.S1_at   | MmugDNA.17537.1 | 5.05  | 4.94  | 0.04 | 0.07 | 1.08  | 0.117459 | 0.551703 | 0.490925 | 0.731155 |
| MmugDNA.17538.1.S1_at   | MmugDNA.17538.1 | 6.74  | 6.75  | 0.09 | 0.03 | -1    | 0.467838 | 0.180427 | 0.764607 | 0.457077 |
| MmugDNA.17539.1.S1_at   | MmugDNA.17539.1 | 8.88  | 8.65  | 1.11 | 0.1  | 1.17  | 0.753159 | 0.338422 | 0.906985 | 0.585432 |
| MmugDNA.17542.1.S1_at   | MmugDNA.17542.1 | 4.12  | 3.75  | 0.05 | 0.06 | 1.29  | 0.001279 | 0.001835 | 0.157784 | 0.064337 |
| MmugDNA.17547.1.S1_at   | MmugDNA.17547.1 | 9.29  | 9     | 0.69 | 0.12 | 1.22  | 0.433434 | 0.540725 | 0.744486 | 0.724514 |

|                         |                 |       |       |      |      |       |          |          |          |          |
|-------------------------|-----------------|-------|-------|------|------|-------|----------|----------|----------|----------|
| MmugDNA.17554.1.S1_at   | MmugDNA.17554.1 | 6.33  | 4.32  | 1.84 | 0.11 | 4.04  | 0.144796 | 0.110644 | 0.520103 | 0.374854 |
| MmugDNA.17555.1.S1_at   | MmugDNA.17555.1 | 4.34  | 4.43  | 0.12 | 0.25 | -1.06 | 0.221399 | 0.428894 | 0.591006 | 0.650409 |
| MmugDNA.17562.1.S1_at   | MmugDNA.17562.1 | 6.87  | 7.1   | 0.46 | 0.03 | -1.17 | 0.601705 | 0.738819 | 0.838517 | 0.848618 |
| MmugDNA.17562.1.S1_s_at | MmugDNA.17562.1 | 7.56  | 7.67  | 0.36 | 0.02 | -1.08 | 0.660237 | 0.830344 | 0.865556 | 0.902644 |
| MmugDNA.17567.1.S1_at   | MmugDNA.17567.1 | 8.37  | 8.56  | 0.35 | 0.15 | -1.14 | 0.307915 | 0.401414 | 0.660765 | 0.631018 |
| MmugDNA.17568.1.S1_at   | MmugDNA.17568.1 | 10.17 | 11.24 | 0.16 | 0.05 | -2.1  | 0.000344 | 0.000499 | 0.137028 | 0.038955 |
| MmugDNA.17571.1.S1_at   | MmugDNA.17571.1 | 3.54  | 3.47  | 0.15 | 0.06 | 1.05  | 0.185747 | 0.218973 | 0.558625 | 0.492722 |
| MmugDNA.17573.1.S1_at   | MmugDNA.17573.1 | 12.6  | 12.66 | 0.05 | 0.04 | -1.04 | 0.118081 | 0.185631 | 0.491371 | 0.461588 |
| MmugDNA.17574.1.S1_at   | MmugDNA.17574.1 | 6.1   | 5.96  | 0.08 | 0.03 | 1.1   | 0.06038  | 0.090118 | 0.408067 | 0.344424 |
| MmugDNA.17575.1.S1_at   | MmugDNA.17575.1 | 9.96  | 10.49 | 0.15 | 0.04 | -1.45 | 0.004102 | 0.001718 | 0.198572 | 0.062797 |
| MmugDNA.17579.1.S1_at   | MmugDNA.17579.1 | 7.16  | 6.91  | 0.18 | 0.11 | -1.19 | 0.036711 | 0.000083 | 0.355378 | 0.027016 |
| MmugDNA.17583.1.S1_at   | MmugDNA.17583.1 | 11.38 | 11.7  | 0.08 | 0.04 | -1.25 | 0.003137 | 0.006685 | 0.191107 | 0.110612 |
| MmugDNA.17585.1.S1_at   | MmugDNA.17585.1 | 8.29  | 8.73  | 0.21 | 0.23 | -1.36 | 0.033953 | 0.010039 | 0.347468 | 0.131334 |
| MmugDNA.17587.1.S1_at   | MmugDNA.17587.1 | 7.66  | 7.45  | 0.02 | 0.15 | 1.15  | 0.092942 | 0.220469 | 0.461637 | 0.493818 |
| MmugDNA.17599.1.S1_at   | MmugDNA.17599.1 | 6.51  | 7.16  | 0.31 | 0.06 | -1.57 | 0.026158 | 0.018239 | 0.323523 | 0.169844 |
| MmugDNA.176.1.S1_at     | MmugDNA.176.1   | 3.54  | 3.51  | 0    | 0.02 | 1.02  | 0.108876 | 0.008866 | 0.48125  | 0.12465  |
| MmugDNA.1760.1.S1_s_at  | MmugDNA.1760.1  | 10.71 | 10.83 | 0.04 | 0.12 | -1.09 | 0.081969 | 0.033748 | 0.44659  | 0.227391 |
| MmugDNA.17601.1.S1_at   | MmugDNA.17601.1 | 5.56  | 4.88  | 0.72 | 0.44 | 1.59  | 0.123602 | 0.067044 | 0.497069 | 0.304872 |
| MmugDNA.17603.1.S1_at   | MmugDNA.17603.1 | 10.07 | 10.51 | 0.36 | 0.08 | -1.35 | 0.143374 | 0.134366 | 0.518743 | 0.406603 |
| MmugDNA.17604.1.S1_at   | MmugDNA.17604.1 | 8.61  | 8.59  | 0.25 | 0.34 | 1.01  | 0.363747 | 0.292284 | 0.700278 | 0.552389 |
| MmugDNA.17606.1.S1_at   | MmugDNA.17606.1 | 5.47  | 5.53  | 0.82 | 0.2  | -1.04 | 0.498279 | 0.174956 | 0.781633 | 0.451599 |
| MmugDNA.1761.1.S1_at    | MmugDNA.1761.1  | 11.39 | 11.36 | 0.18 | 0.08 | 1.03  | 0.460545 | 0.247228 | 0.760265 | 0.516446 |
| MmugDNA.17612.1.S1_at   | MmugDNA.17612.1 | 2.78  | 3.09  | 0.09 | 0.14 | -1.24 | 0.035682 | 0.318966 | 0.352932 | 0.57154  |
| MmugDNA.17614.1.S1_at   | MmugDNA.17614.1 | 4.67  | 4.39  | 0.26 | 0.47 | 1.21  | 0.994594 | 0.057067 | 0.997963 | 0.284945 |
| MmugDNA.17617.1.S1_s_at | MmugDNA.17617.1 | 9.04  | 8.72  | 0.21 | 0.1  | 1.25  | 0.338339 | 0.002347 | 0.682891 | 0.07161  |
| MmugDNA.17624.1.S1_at   | MmugDNA.17624.1 | 8.38  | 9.05  | 0.94 | 0.04 | -1.59 | 0.821831 | 0.672942 | 0.935673 | 0.808874 |
| MmugDNA.17625.1.S1_at   | MmugDNA.17625.1 | 7.89  | 8.31  | 0.17 | 0.18 | -1.34 | 0.020624 | 0.006899 | 0.305121 | 0.112257 |
| MmugDNA.1763.1.S1_at    | MmugDNA.1763.1  | 8.16  | 9.4   | 0.36 | 0.04 | -2.36 | 0.004636 | 0.001522 | 0.201164 | 0.059307 |
| MmugDNA.17632.1.S1_at   | MmugDNA.17632.1 | 9.91  | 9.98  | 0.13 | 0.07 | -1.04 | 0.766991 | 0.550711 | 0.912422 | 0.730611 |
| MmugDNA.17636.1.S1_at   | MmugDNA.17636.1 | 10.35 | 11.12 | 0.46 | 0.06 | -1.7  | 0.119742 | 0.06904  | 0.493259 | 0.309017 |
| MmugDNA.17640.1.S1_at   | MmugDNA.17640.1 | 7.29  | 7.08  | 0.35 | 0.11 | 1.16  | 0.433772 | 0.511372 | 0.744621 | 0.705534 |
| MmugDNA.17642.1.S1_at   | MmugDNA.17642.1 | 5.46  | 5.16  | 0.04 | 0.08 | 1.23  | 0.002985 | 0.003362 | 0.190762 | 0.083405 |
| MmugDNA.17643.1.S1_at   | MmugDNA.17643.1 | 4.74  | 4.85  | 0.41 | 0.15 | -1.08 | 0.863478 | 0.54798  | 0.952018 | 0.72884  |
| MmugDNA.17644.1.S1_s_at | MmugDNA.17644.1 | 12.09 | 11.77 | 0.86 | 0.16 | 1.25  | 0.613426 | 0.043063 | 0.843466 | 0.252157 |
| MmugDNA.17655.1.S1_at   | MmugDNA.17655.1 | 12.86 | 12.65 | 0.09 | 0.05 | 1.16  | 0.057132 | 0.455991 | 0.401454 | 0.669758 |
| MmugDNA.17657.1.S1_at   | MmugDNA.17657.1 | 12.59 | 12.83 | 0.26 | 0.04 | -1.19 | 0.261963 | 0.299012 | 0.624194 | 0.557628 |
| MmugDNA.17658.1.S1_at   | MmugDNA.17658.1 | 12.01 | 12.09 | 0.14 | 0.02 | -1.06 | 0.119773 | 0.087839 | 0.493259 | 0.341218 |
| MmugDNA.17659.1.S1_at   | MmugDNA.17659.1 | 11.31 | 11.34 | 0.6  | 0.19 | -1.02 | 0.747225 | 0.774926 | 0.903916 | 0.868983 |
| MmugDNA.17662.1.S1_s_at | MmugDNA.17662.1 | 10.02 | 10.21 | 0.06 | 0.02 | -1.14 | 0.003999 | 0.028622 | 0.198571 | 0.210901 |
| MmugDNA.17663.1.S1_at   | MmugDNA.17663.1 | 4.6   | 4.59  | 0.03 | 0.06 | 1.01  | 0.809706 | 0.993164 | 0.931153 | 0.995946 |
| MmugDNA.17664.1.S1_at   | MmugDNA.17664.1 | 6.28  | 6.23  | 0.1  | 0.01 | 1.04  | 0.347088 | 0.660369 | 0.68852  | 0.801285 |
| MmugDNA.17671.1.S1_at   | MmugDNA.17671.1 | 7.5   | 7.56  | 0.07 | 0.11 | -1.04 | 0.988767 | 0.010587 | 0.995895 | 0.134213 |
| MmugDNA.17676.1.S1_at   | MmugDNA.17676.1 | 2.69  | 3.02  | 0.13 | 0.05 | -1.25 | 0.035126 | 0.032583 | 0.351071 | 0.223585 |

|                         |                 |       |       |      |      |       |          |          |          |          |
|-------------------------|-----------------|-------|-------|------|------|-------|----------|----------|----------|----------|
| MmugDNA.17681.1.S1_at   | MmugDNA.17681.1 | 7.38  | 7.21  | 0.23 | 0.13 | 1.12  | 0.191034 | 0.038219 | 0.562274 | 0.240217 |
| MmugDNA.17682.1.S1_at   | MmugDNA.17682.1 | 5.21  | 5.26  | 0.01 | 0.07 | -1.03 | 0.077589 | 0.029371 | 0.43966  | 0.213239 |
| MmugDNA.17684.1.S1_at   | MmugDNA.17684.1 | 8.23  | 9.36  | 1.01 | 0.24 | -2.2  | 0.115793 | 0.278142 | 0.489123 | 0.541783 |
| MmugDNA.17686.1.S1_at   | MmugDNA.17686.1 | 13.23 | 13.31 | 0.19 | 0.04 | -1.06 | 0.427869 | 0.055986 | 0.74145  | 0.282442 |
| MmugDNA.17689.1.S1_at   | MmugDNA.17689.1 | 7.4   | 7.39  | 0.08 | 0.02 | 1.01  | 0.682689 | 0.622993 | 0.875873 | 0.777444 |
| MmugDNA.17690.1.S1_at   | MmugDNA.17690.1 | 5.06  | 5.05  | 0.16 | 0.05 | 1.01  | 0.894422 | 0.671957 | 0.963846 | 0.808177 |
| MmugDNA.17693.1.S1_at   | MmugDNA.17693.1 | 9.45  | 10.06 | 0.3  | 0.15 | -1.53 | 0.049347 | 0.008282 | 0.385474 | 0.12078  |
| MmugDNA.17696.1.S1_at   | MmugDNA.17696.1 | 7.61  | 7.93  | 0.18 | 0.05 | -1.25 | 0.041391 | 0.145408 | 0.366275 | 0.419421 |
| MmugDNA.17696.1.S1_s_at | MmugDNA.17696.1 | 8.15  | 8.36  | 0.21 | 0.12 | -1.16 | 0.62719  | 0.144948 | 0.850393 | 0.418862 |
| MmugDNA.17699.1.S1_at   | MmugDNA.17699.1 | 6     | 5.91  | 0.16 | 0.03 | 1.06  | 0.103159 | 0.253124 | 0.473929 | 0.521447 |
| MmugDNA.17704.1.S1_at   | MmugDNA.17704.1 | 13.35 | 13.28 | 0.54 | 0.09 | -1.05 | 0.947066 | 0.659664 | 0.981622 | 0.800835 |
| MmugDNA.17705.1.S1_s_at | MmugDNA.17705.1 | 6.25  | 6.16  | 0.16 | 0.04 | 1.06  | 0.615179 | 0.286742 | 0.844222 | 0.548112 |
| MmugDNA.17709.1.S1_at   | MmugDNA.17709.1 | 12    | 11.99 | 0.04 | 0.09 | 1.01  | 0.874887 | 0.000802 | 0.956568 | 0.04607  |
| MmugDNA.17715.1.S1_at   | MmugDNA.17715.1 | 11.82 | 11.79 | 0.1  | 0.2  | 1.02  | 0.572057 | 0.036846 | 0.823145 | 0.236451 |
| MmugDNA.17727.1.S1_at   | MmugDNA.17727.1 | 7.24  | 7.21  | 0.9  | 0.15 | 1.02  | 0.872714 | 0.928977 | 0.955811 | 0.959524 |
| MmugDNA.17728.1.S1_at   | MmugDNA.17728.1 | 7.06  | 7.11  | 0.15 | 0.25 | -1.03 | 0.904292 | 0.801915 | 0.967773 | 0.885989 |
| MmugDNA.17730.1.S1_at   | MmugDNA.17730.1 | 10.79 | 10.38 | 0.3  | 0.23 | 1.33  | 0.05226  | 0.053961 | 0.392084 | 0.27777  |
| MmugDNA.17734.1.S1_at   | MmugDNA.17734.1 | 2.8   | 2.71  | 0.05 | 0.04 | 1.07  | 0.118068 | 0.059477 | 0.491371 | 0.290548 |
| MmugDNA.17735.1.S1_at   | MmugDNA.17735.1 | 7.49  | 7.79  | 0.49 | 0.1  | -1.23 | 0.566697 | 0.113251 | 0.820086 | 0.379287 |
| MmugDNA.17736.1.S1_at   | MmugDNA.17736.1 | 11.55 | 12.22 | 0.67 | 0.06 | -1.59 | 0.100012 | 0.061418 | 0.470251 | 0.294688 |
| MmugDNA.17737.1.S1_at   | MmugDNA.17737.1 | 4.65  | 4.75  | 0.26 | 0.07 | -1.07 | 0.815112 | 0.510508 | 0.933137 | 0.704979 |
| MmugDNA.17738.1.S1_at   | MmugDNA.17738.1 | 7.21  | 7.09  | 0.13 | 0.08 | 1.08  | 0.98292  | 0.021116 | 0.99478  | 0.181927 |
| MmugDNA.17750.1.S1_at   | MmugDNA.17750.1 | 10.56 | 10.56 | 0.12 | 0.1  | -1    | 0.559211 | 0.476858 | 0.815995 | 0.683007 |
| MmugDNA.17758.1.S1_at   | MmugDNA.17758.1 | 8.81  | 7.18  | 0.6  | 0.55 | 3.09  | 0.026903 | 0.044406 | 0.326584 | 0.255192 |
| MmugDNA.1776.1.S1_at    | MmugDNA.1776.1  | 9.12  | 8.21  | 0.58 | 0.54 | 1.87  | 0.421223 | 0.028147 | 0.737423 | 0.209306 |
| MmugDNA.17760.1.S1_at   | MmugDNA.17760.1 | 5.09  | 5.98  | 1.16 | 0.17 | -1.86 | 0.543426 | 0.440614 | 0.806498 | 0.659029 |
| MmugDNA.17762.1.S1_at   | MmugDNA.17762.1 | 7.11  | 7.05  | 0.24 | 0.13 | 1.05  | 0.799718 | 0.038862 | 0.926711 | 0.242062 |
| MmugDNA.17762.1.S1_s_at | MmugDNA.17762.1 | 7.59  | 7.32  | 0.45 | 0.1  | 1.2   | 0.373501 | 0.020276 | 0.705567 | 0.178742 |
| MmugDNA.17764.1.S1_at   | MmugDNA.17764.1 | 7.08  | 7.98  | 0.21 | 0.15 | -1.87 | 0.003656 | 0.001467 | 0.197111 | 0.058401 |
| MmugDNA.17769.1.S1_at   | MmugDNA.17769.1 | 5.2   | 4.86  | 0.26 | 0.11 | 1.26  | 0.319228 | 0.4995   | 0.668673 | 0.69832  |
| MmugDNA.17773.1.S1_at   | MmugDNA.17773.1 | 8.53  | 9.27  | 0.19 | 0.04 | -1.67 | 0.001554 | 0.002075 | 0.161959 | 0.067389 |
| MmugDNA.17779.1.S1_at   | MmugDNA.17779.1 | 12.29 | 11.48 | 0.92 | 0.07 | 1.75  | 0.637146 | 0.820998 | 0.855394 | 0.896977 |
| MmugDNA.17781.1.S1_at   | MmugDNA.17781.1 | 12.91 | 12.87 | 0.33 | 0.04 | 1.03  | 0.483078 | 0.080232 | 0.772862 | 0.32783  |
| MmugDNA.17782.1.S1_at   | MmugDNA.17782.1 | 11.36 | 11.24 | 0.27 | 0.11 | 1.09  | 0.248539 | 0.100743 | 0.613851 | 0.360154 |
| MmugDNA.1779.1.S1_at    | MmugDNA.1779.1  | 6.03  | 6.07  | 0.36 | 0.1  | -1.03 | 0.474546 | 0.492249 | 0.768047 | 0.693477 |
| MmugDNA.17791.1.S1_at   | MmugDNA.17791.1 | 6.84  | 7.81  | 1.41 | 0.13 | -1.96 | 0.46697  | 0.677452 | 0.764    | 0.81167  |
| MmugDNA.17793.1.S1_at   | MmugDNA.17793.1 | 3.78  | 3.73  | 0.08 | 0.01 | 1.04  | 0.165682 | 0.477543 | 0.538504 | 0.683599 |
| MmugDNA.17798.1.S1_at   | MmugDNA.17798.1 | 3.76  | 3.68  | 0.03 | 0.1  | 1.06  | 0.684624 | 0.396745 | 0.876464 | 0.628438 |
| MmugDNA.17805.1.S1_at   | MmugDNA.17805.1 | 4.74  | 4.56  | 0.15 | 0.12 | 1.13  | 0.152829 | 0.333196 | 0.525753 | 0.581467 |
| MmugDNA.17819.1.S1_at   | MmugDNA.17819.1 | 7.67  | 7.66  | 1.33 | 0.05 | 1.01  | 0.985712 | 0.348804 | 0.995461 | 0.592834 |
| MmugDNA.17826.1.S1_at   | MmugDNA.17826.1 | 6.97  | 6.84  | 0.18 | 0.13 | 1.1   | 0.547591 | 0.133664 | 0.809224 | 0.405612 |
| MmugDNA.17828.1.S1_at   | MmugDNA.17828.1 | 8.59  | 8.69  | 0.31 | 0.25 | -1.07 | 0.970561 | 0.181126 | 0.990362 | 0.457582 |
| MmugDNA.17829.1.S1_at   | MmugDNA.17829.1 | 6.11  | 5.96  | 0.05 | 0.04 | 1.11  | 0.032535 | 0.278736 | 0.344478 | 0.542441 |

|                         |                 |       |       |      |      |       |          |          |          |          |
|-------------------------|-----------------|-------|-------|------|------|-------|----------|----------|----------|----------|
| MmugDNA.17832.1.S1_at   | MmugDNA.17832.1 | 11.39 | 11.35 | 0.31 | 0.05 | 1.03  | 0.910755 | 0.848973 | 0.969768 | 0.914252 |
| MmugDNA.17834.1.S1_at   | MmugDNA.17834.1 | 5.76  | 5.26  | 0.29 | 0.04 | 1.41  | 0.080316 | 0.035658 | 0.443903 | 0.233228 |
| MmugDNA.17835.1.S1_at   | MmugDNA.17835.1 | 6.61  | 6.48  | 0.82 | 0.18 | 1.09  | 0.619304 | 0.729169 | 0.846591 | 0.843509 |
| MmugDNA.17837.1.S1_at   | MmugDNA.17837.1 | 8.75  | 8.63  | 0.17 | 0.17 | 1.08  | 0.78176  | 0.885943 | 0.919573 | 0.935118 |
| MmugDNA.17838.1.S1_at   | MmugDNA.17838.1 | 11.02 | 11.12 | 0.14 | 0.05 | -1.07 | 0.463036 | 0.503614 | 0.761921 | 0.700988 |
| MmugDNA.17840.1.S1_at   | MmugDNA.17840.1 | 8.21  | 7.52  | 0.45 | 0.21 | 1.61  | 0.049596 | 0.003939 | 0.385822 | 0.089266 |
| MmugDNA.17842.1.S1_at   | MmugDNA.17842.1 | 10.41 | 10.54 | 0.23 | 0.12 | -1.09 | 0.130413 | 0.000176 | 0.504689 | 0.030511 |
| MmugDNA.17843.1.S1_at   | MmugDNA.17843.1 | 6.75  | 6.64  | 0.13 | 0.06 | 1.08  | 0.147248 | 0.120933 | 0.521578 | 0.389847 |
| MmugDNA.17848.1.S1_at   | MmugDNA.17848.1 | 12.35 | 12.6  | 0.07 | 0.04 | -1.18 | 0.004372 | 0.00048  | 0.198874 | 0.038665 |
| MmugDNA.17851.1.S1_at   | MmugDNA.17851.1 | 12.11 | 12.02 | 0.33 | 0.09 | 1.06  | 0.537827 | 0.132899 | 0.802899 | 0.404544 |
| MmugDNA.17855.1.S1_at   | MmugDNA.17855.1 | 12.39 | 12.38 | 0.02 | 0.06 | -1.01 | 0.950203 | 0.995412 | 0.98328  | 0.997147 |
| MmugDNA.17858.1.S1_at   | MmugDNA.17858.1 | 7.19  | 7.56  | 0.8  | 0.11 | -1.29 | 0.481967 | 0.658536 | 0.772261 | 0.800401 |
| MmugDNA.17859.1.S1_at   | MmugDNA.17859.1 | 9.48  | 9.7   | 0.43 | 0.12 | -1.17 | 0.483992 | 0.062308 | 0.773436 | 0.296445 |
| MmugDNA.17860.1.S1_at   | MmugDNA.17860.1 | 12.78 | 12.79 | 0.13 | 0.04 | -1.01 | 0.531255 | 0.231614 | 0.799582 | 0.503403 |
| MmugDNA.17862.1.A1_at   | MmugDNA.17862.1 | 4.78  | 4.53  | 0.11 | 0.09 | 1.19  | 0.056975 | 0.125695 | 0.401454 | 0.396249 |
| MmugDNA.17862.1.S1_at   | MmugDNA.17862.1 | 4.64  | 4.64  | 0.17 | 0.03 | 1     | 0.824469 | 0.8904   | 0.936798 | 0.937539 |
| MmugDNA.17865.1.S1_at   | MmugDNA.17865.1 | 6.01  | 5.33  | 0.11 | 0.08 | 1.61  | 0.00091  | 0.00024  | 0.153739 | 0.032579 |
| MmugDNA.17867.1.S1_at   | MmugDNA.17867.1 | 9.82  | 9.69  | 0.12 | 0.08 | 1.1   | 0.38715  | 0.10864  | 0.71407  | 0.372171 |
| MmugDNA.17879.1.S1_at   | MmugDNA.17879.1 | 8.08  | 8.18  | 0.47 | 0.13 | -1.07 | 0.761578 | 0.594462 | 0.910578 | 0.758623 |
| MmugDNA.17881.1.S1_at   | MmugDNA.17881.1 | 7.46  | 7.51  | 0.38 | 0.12 | -1.03 | 0.431994 | 0.469582 | 0.743696 | 0.67829  |
| MmugDNA.17884.1.S1_at   | MmugDNA.17884.1 | 9.7   | 9.33  | 0.27 | 0.09 | 1.28  | 0.032999 | 0.02439  | 0.34579  | 0.195507 |
| MmugDNA.17885.1.S1_at   | MmugDNA.17885.1 | 7.41  | 8     | 0.49 | 0.08 | -1.51 | 0.182666 | 0.014325 | 0.555631 | 0.152764 |
| MmugDNA.17887.1.S1_s_at | MmugDNA.17887.1 | 11.33 | 11.69 | 0.42 | 0.02 | -1.28 | 0.655092 | 0.642291 | 0.863003 | 0.790122 |
| MmugDNA.17893.1.S1_at   | MmugDNA.17893.1 | 14.72 | 14.73 | 0.01 | 0.01 | -1.01 | 0.071561 | 0.354513 | 0.431049 | 0.59726  |
| MmugDNA.179.1.S1_at     | MmugDNA.179.1   | 13.07 | 13.07 | 0.03 | 0.03 | 1     | 0.914514 | 0.504931 | 0.970879 | 0.701953 |
| MmugDNA.1790.1.S1_at    | MmugDNA.1790.1  | 3.78  | 3.48  | 0.45 | 0.28 | 1.23  | 0.662273 | 0.062085 | 0.866677 | 0.29606  |
| MmugDNA.17906.1.S1_at   | MmugDNA.17906.1 | 11.6  | 11.53 | 0.12 | 0.05 | 1.05  | 0.343644 | 0.153107 | 0.686779 | 0.428011 |
| MmugDNA.17907.1.S1_at   | MmugDNA.17907.1 | 9.61  | 9.73  | 0.53 | 0.09 | -1.09 | 0.719175 | 0.878881 | 0.890866 | 0.930872 |
| MmugDNA.17907.1.S1_s_at | MmugDNA.17907.1 | 10.68 | 10.93 | 0.62 | 0.13 | -1.19 | 0.454676 | 0.674376 | 0.756933 | 0.809751 |
| MmugDNA.17909.1.S1_at   | MmugDNA.17909.1 | 9.05  | 9.46  | 0.72 | 0.12 | -1.34 | 0.121506 | 0.012445 | 0.495106 | 0.14417  |
| MmugDNA.17910.1.S1_at   | MmugDNA.17910.1 | 10.89 | 11.01 | 0.39 | 0.1  | -1.08 | 0.931811 | 0.241208 | 0.977114 | 0.511821 |
| MmugDNA.17919.1.S1_at   | MmugDNA.17919.1 | 4.73  | 4.71  | 0.02 | 0.14 | 1.01  | 0.736417 | 0.674577 | 0.899133 | 0.809882 |
| MmugDNA.17925.1.S1_at   | MmugDNA.17925.1 | 11.38 | 12.12 | 0.48 | 0.11 | -1.66 | 0.070587 | 0.039191 | 0.429614 | 0.243089 |
| MmugDNA.17931.1.S1_at   | MmugDNA.17931.1 | 8.6   | 9.1   | 0.07 | 0.06 | -1.41 | 0.001036 | 0.002955 | 0.155374 | 0.079945 |
| MmugDNA.17938.1.S1_at   | MmugDNA.17938.1 | 11.84 | 12.38 | 2.71 | 0.25 | -1.45 | 0.366134 | 0.063809 | 0.701648 | 0.29906  |
| MmugDNA.17939.1.S1_at   | MmugDNA.17939.1 | 5.3   | 5.13  | 0.03 | 0.02 | 1.13  | 0.001023 | 0.064152 | 0.155374 | 0.29954  |
| MmugDNA.17940.1.S1_at   | MmugDNA.17940.1 | 11.59 | 11.52 | 0.08 | 0.11 | 1.05  | 0.149033 | 0.731399 | 0.522942 | 0.84431  |
| MmugDNA.17941.1.S1_at   | MmugDNA.17941.1 | 11.52 | 10.54 | 1    | 0.2  | 1.98  | 0.1448   | 0.103234 | 0.520103 | 0.364143 |
| MmugDNA.17943.1.S1_at   | MmugDNA.17943.1 | 11.92 | 11.44 | 0.45 | 0.26 | 1.39  | 0.267843 | 0.024813 | 0.628278 | 0.197371 |
| MmugDNA.17947.1.S1_at   | MmugDNA.17947.1 | 6.16  | 7.44  | 0.46 | 0.08 | -2.42 | 0.010864 | 0.007924 | 0.250539 | 0.11857  |
| MmugDNA.17950.1.S1_s_at | MmugDNA.17950.1 | 7.77  | 8.23  | 1.03 | 0.14 | -1.38 | 0.742973 | 0.014783 | 0.901935 | 0.154635 |
| MmugDNA.17951.1.S1_at   | MmugDNA.17951.1 | 7.4   | 7.53  | 0.85 | 0.28 | -1.09 | 0.490745 | 0.625494 | 0.777256 | 0.779196 |
| MmugDNA.17952.1.S1_at   | MmugDNA.17952.1 | 4.18  | 4.1   | 0.08 | 0.04 | 1.06  | 0.139041 | 0.282268 | 0.514459 | 0.544999 |

|                         |                 |       |       |      |      |       |          |          |          |          |
|-------------------------|-----------------|-------|-------|------|------|-------|----------|----------|----------|----------|
| MmugDNA.17963.1.S1_at   | MmugDNA.17963.1 | 4.9   | 4.85  | 0.07 | 0.15 | 1.03  | 0.743022 | 0.980141 | 0.901935 | 0.989236 |
| MmugDNA.17965.1.S1_at   | MmugDNA.17965.1 | 13.19 | 12.92 | 0.59 | 0.09 | 1.21  | 0.656668 | 0.315618 | 0.863636 | 0.569053 |
| MmugDNA.17967.1.S1_at   | MmugDNA.17967.1 | 3.74  | 3.67  | 0.47 | 0.06 | 1.05  | 0.244824 | 0.19598  | 0.61037  | 0.470976 |
| MmugDNA.17968.1.S1_at   | MmugDNA.17968.1 | 6.83  | 7.26  | 0.21 | 0.25 | -1.35 | 0.08815  | 0.03272  | 0.45606  | 0.223956 |
| MmugDNA.17969.1.S1_at   | MmugDNA.17969.1 | 4.06  | 4.02  | 0.19 | 0.03 | 1.03  | 0.519054 | 0.282357 | 0.793058 | 0.545076 |
| MmugDNA.17969.1.S1_s_at | MmugDNA.17969.1 | 3.62  | 3.68  | 0.39 | 0.08 | -1.04 | 0.915057 | 0.921463 | 0.971014 | 0.955761 |
| MmugDNA.17977.1.S1_at   | MmugDNA.17977.1 | 12.31 | 12.09 | 1.83 | 0.02 | 1.16  | 0.477789 | 0.650849 | 0.76987  | 0.795849 |
| MmugDNA.1798.1.S1_at    | MmugDNA.1798.1  | 3.07  | 2.97  | 0.24 | 0.09 | 1.07  | 0.267149 | 0.153118 | 0.627823 | 0.428011 |
| MmugDNA.17986.1.S1_at   | MmugDNA.17986.1 | 10.56 | 10.55 | 1.18 | 0.2  | 1.01  | 0.965156 | 0.404078 | 0.988542 | 0.632599 |
| MmugDNA.17986.1.S1_s_at | MmugDNA.17986.1 | 10.71 | 10.67 | 0.99 | 0.17 | 1.03  | 0.884878 | 0.375329 | 0.960159 | 0.613336 |
| MmugDNA.17991.1.S1_at   | MmugDNA.17991.1 | 12.04 | 11.74 | 0.38 | 0.14 | 1.23  | 0.203178 | 0.082417 | 0.574732 | 0.331381 |
| MmugDNA.17992.1.S1_at   | MmugDNA.17992.1 | 5.96  | 5.89  | 0.02 | 0.55 | 1.05  | 0.470897 | 0.590422 | 0.766231 | 0.756223 |
| MmugDNA.17994.1.S1_at   | MmugDNA.17994.1 | 5.98  | 5.83  | 0.47 | 0.14 | 1.11  | 0.308758 | 0.613112 | 0.661293 | 0.770416 |
| MmugDNA.17995.1.S1_at   | MmugDNA.17995.1 | 7.03  | 6.91  | 0.2  | 0.17 | 1.09  | 0.511784 | 0.710253 | 0.7889   | 0.831904 |
| MmugDNA.17996.1.S1_at   | MmugDNA.17996.1 | 5.81  | 5.66  | 0.14 | 0.03 | 1.11  | 0.123267 | 0.180462 | 0.496589 | 0.457115 |
| MmugDNA.17997.1.S1_at   | MmugDNA.17997.1 | 6.41  | 6.87  | 0.82 | 0.12 | -1.38 | 0.130071 | 0.232364 | 0.504648 | 0.504088 |
| MmugDNA.17998.1.S1_at   | MmugDNA.17998.1 | 13.48 | 13.38 | 0.08 | 0.03 | 1.08  | 0.432801 | 0.062769 | 0.744125 | 0.297193 |
| MmugDNA.180.1.S1_at     | MmugDNA.180.1   | 4.23  | 4.14  | 0.07 | 0.12 | 1.06  | 0.624504 | 0.335533 | 0.848808 | 0.583326 |
| MmugDNA.1800.1.S1_at    | MmugDNA.1800.1  | 9.35  | 9.8   | 0.52 | 0.23 | -1.37 | 0.633845 | 0.168326 | 0.85369  | 0.444973 |
| MmugDNA.18001.1.S1_at   | MmugDNA.18001.1 | 6.93  | 8.16  | 0.71 | 0.09 | -2.35 | 0.039994 | 0.027925 | 0.362955 | 0.208597 |
| MmugDNA.18006.1.S1_at   | MmugDNA.18006.1 | 10.35 | 10.52 | 0.22 | 0.08 | -1.13 | 0.405763 | 0.615127 | 0.727487 | 0.771756 |
| MmugDNA.18010.1.S1_at   | MmugDNA.18010.1 | 6.34  | 6.3   | 0.12 | 0.13 | 1.03  | 0.315615 | 0.689889 | 0.666014 | 0.819167 |
| MmugDNA.18011.1.S1_at   | MmugDNA.18011.1 | 10.69 | 11.07 | 0.27 | 0.01 | -1.3  | 0.208313 | 0.138954 | 0.580006 | 0.412048 |
| MmugDNA.18013.1.S1_at   | MmugDNA.18013.1 | 8.31  | 8.63  | 1.57 | 0.24 | -1.25 | 0.704016 | 0.22422  | 0.884936 | 0.497164 |
| MmugDNA.18015.1.S1_at   | MmugDNA.18015.1 | 11.71 | 11.52 | 2.27 | 0.21 | 1.14  | 0.732996 | 0.229749 | 0.897482 | 0.501761 |
| MmugDNA.1802.1.S1_at    | MmugDNA.1802.1  | 5.13  | 5.09  | 0.09 | 0.05 | 1.03  | 0.505049 | 0.932182 | 0.785138 | 0.961538 |
| MmugDNA.18026.1.S1_at   | MmugDNA.18026.1 | 3.57  | 3.49  | 0.02 | 0.08 | 1.06  | 0.160645 | 0.117605 | 0.533821 | 0.38531  |
| MmugDNA.18028.1.S1_at   | MmugDNA.18028.1 | 5.27  | 5.19  | 0.39 | 0.16 | 1.05  | 0.546524 | 0.631391 | 0.808553 | 0.782816 |
| MmugDNA.18031.1.S1_at   | MmugDNA.18031.1 | 5.24  | 5.04  | 0.04 | 0.25 | 1.16  | 0.081393 | 0.06279  | 0.445406 | 0.297193 |
| MmugDNA.18032.1.S1_at   | MmugDNA.18032.1 | 3.74  | 3.82  | 0.26 | 0.09 | -1.06 | 0.885406 | 0.732935 | 0.96036  | 0.84546  |
| MmugDNA.18039.1.S1_at   | MmugDNA.18039.1 | 12.8  | 12.93 | 0.42 | 0.03 | -1.09 | 0.203236 | 0.184196 | 0.574732 | 0.460382 |
| MmugDNA.18046.1.S1_at   | MmugDNA.18046.1 | 10.08 | 10.22 | 0.21 | 0.02 | -1.1  | 0.900713 | 0.280604 | 0.966257 | 0.543772 |
| MmugDNA.18055.1.S1_at   | MmugDNA.18055.1 | 10.72 | 10.83 | 0.42 | 0.11 | -1.08 | 0.807372 | 0.79075  | 0.930145 | 0.878973 |
| MmugDNA.18060.1.S1_at   | MmugDNA.18060.1 | 7.31  | 7.25  | 0.08 | 0.01 | 1.05  | 0.101893 | 0.3891   | 0.472267 | 0.623345 |
| MmugDNA.18065.1.S1_at   | MmugDNA.18065.1 | 5.54  | 5.4   | 0.74 | 0.07 | 1.1   | 0.538107 | 0.436555 | 0.803016 | 0.656048 |
| MmugDNA.18069.1.S1_at   | MmugDNA.18069.1 | 9.62  | 9.91  | 0.38 | 0.06 | -1.22 | 0.495451 | 0.165385 | 0.780058 | 0.441544 |
| MmugDNA.18070.1.S1_at   | MmugDNA.18070.1 | 9.83  | 9.3   | 0.67 | 0.08 | 1.44  | 0.355443 | 0.009923 | 0.694736 | 0.130787 |
| MmugDNA.18070.1.S1_s_at | MmugDNA.18070.1 | 11.4  | 10.84 | 0.54 | 0.04 | 1.48  | 0.326797 | 0.01133  | 0.674427 | 0.138076 |
| MmugDNA.18083.1.S1_at   | MmugDNA.18083.1 | 10.77 | 10.91 | 0.14 | 0.04 | -1.1  | 0.075421 | 0.001797 | 0.436562 | 0.063638 |
| MmugDNA.18087.1.S1_at   | MmugDNA.18087.1 | 11.11 | 10.96 | 0.37 | 0.02 | 1.11  | 0.739941 | 0.682324 | 0.900699 | 0.814506 |
| MmugDNA.18095.1.S1_at   | MmugDNA.18095.1 | 12.01 | 11.51 | 0.29 | 0.17 | 1.42  | 0.044796 | 0.002443 | 0.37512  | 0.073201 |
| MmugDNA.18096.1.S1_at   | MmugDNA.18096.1 | 10.81 | 11.1  | 0.2  | 0.19 | -1.22 | 0.180289 | 0.163153 | 0.553467 | 0.439303 |
| MmugDNA.18099.1.S1_at   | MmugDNA.18099.1 | 8.74  | 9.7   | 1.63 | 0.14 | -1.95 | 0.360952 | 0.292963 | 0.698248 | 0.552926 |

|                         |                 |       |       |      |      |       |          |          |          |          |
|-------------------------|-----------------|-------|-------|------|------|-------|----------|----------|----------|----------|
| MmugDNA.18100.1.S1_at   | MmugDNA.18100.1 | 13.44 | 13.68 | 0.37 | 0.06 | -1.18 | 0.357837 | 0.316416 | 0.695993 | 0.569809 |
| MmugDNA.18105.1.S1_at   | MmugDNA.18105.1 | 5.49  | 4.79  | 1.19 | 0.04 | 1.63  | 0.355158 | 0.21428  | 0.69464  | 0.487894 |
| MmugDNA.18111.1.S1_s_at | MmugDNA.18111.1 | 5.23  | 5.1   | 0.53 | 0.39 | 1.09  | 0.896253 | 0.979306 | 0.964545 | 0.988845 |
| MmugDNA.18112.1.S1_at   | MmugDNA.18112.1 | 8.17  | 7.98  | 0.38 | 0.12 | 1.14  | 0.470534 | 0.694867 | 0.766162 | 0.822638 |
| MmugDNA.18113.1.S1_s_at | MmugDNA.18113.1 | 6.07  | 6.02  | 0.31 | 0.02 | 1.04  | 0.765527 | 0.873092 | 0.911862 | 0.927823 |
| MmugDNA.18114.1.S1_at   | MmugDNA.18114.1 | 5.34  | 5.06  | 0.92 | 0.23 | 1.21  | 0.289602 | 0.007738 | 0.646284 | 0.11758  |
| MmugDNA.1812.1.S1_at    | MmugDNA.1812.1  | 5.36  | 5.22  | 0.16 | 0.05 | 1.1   | 0.457388 | 0.417539 | 0.758343 | 0.642252 |
| MmugDNA.18122.1.S1_at   | MmugDNA.18122.1 | 10.2  | 10.49 | 0.64 | 0.21 | -1.22 | 0.857807 | 0.913236 | 0.94975  | 0.951146 |
| MmugDNA.18123.1.S1_at   | MmugDNA.18123.1 | 11.69 | 11.27 | 0.19 | 0.13 | 1.34  | 0.044494 | 0.001505 | 0.374916 | 0.0591   |
| MmugDNA.18124.1.S1_at   | MmugDNA.18124.1 | 3.14  | 3.1   | 0.14 | 0.02 | 1.03  | 0.510982 | 0.823094 | 0.788449 | 0.898356 |
| MmugDNA.18127.1.S1_at   | MmugDNA.18127.1 | 6.3   | 6.13  | 1.42 | 0.18 | -1.12 | 0.871315 | 0.864867 | 0.955328 | 0.923362 |
| MmugDNA.18128.1.S1_at   | MmugDNA.18128.1 | 5.26  | 5.59  | 0.23 | 0.14 | -1.26 | 0.058497 | 0.223845 | 0.404566 | 0.496802 |
| MmugDNA.18130.1.S1_at   | MmugDNA.18130.1 | 7.04  | 7.08  | 0.24 | 0.07 | -1.03 | 0.945343 | 0.949817 | 0.980927 | 0.971332 |
| MmugDNA.18134.1.S1_at   | MmugDNA.18134.1 | 6.29  | 7.51  | 0.95 | 0.32 | -2.34 | 0.260324 | 0.188413 | 0.62325  | 0.464416 |
| MmugDNA.18136.1.S1_at   | MmugDNA.18136.1 | 3.4   | 3.37  | 0.05 | 0.03 | 1.02  | 0.415812 | 0.675986 | 0.73381  | 0.810632 |
| MmugDNA.18138.1.S1_at   | MmugDNA.18138.1 | 5.88  | 6.03  | 0.45 | 0.05 | -1.11 | 0.764918 | 0.34322  | 0.911676 | 0.588968 |
| MmugDNA.18141.1.S1_at   | MmugDNA.18141.1 | 11.96 | 12.39 | 0.21 | 0.04 | -1.34 | 0.023761 | 0.012525 | 0.316649 | 0.144385 |
| MmugDNA.18150.1.S1_at   | MmugDNA.18150.1 | 6.81  | 6.25  | 0.15 | 0.03 | 1.47  | 0.003543 | 0.000111 | 0.196915 | 0.028099 |
| MmugDNA.18158.1.S1_at   | MmugDNA.18158.1 | 8.5   | 8.86  | 0.65 | 0.13 | -1.28 | 0.412454 | 0.049011 | 0.731995 | 0.266257 |
| MmugDNA.18163.1.S1_at   | MmugDNA.18163.1 | 7.56  | 8.18  | 0.56 | 0.1  | -1.54 | 0.14737  | 0.165576 | 0.521578 | 0.44189  |
| MmugDNA.18169.1.S1_at   | MmugDNA.18169.1 | 10.45 | 10.26 | 0.14 | 0.14 | 1.14  | 0.378945 | 0.032329 | 0.708502 | 0.222602 |
| MmugDNA.18179.1.S1_at   | MmugDNA.18179.1 | 6.98  | 6.71  | 0.07 | 0.07 | 1.2   | 0.018192 | 0.077037 | 0.295482 | 0.322481 |
| MmugDNA.18181.1.S1_at   | MmugDNA.18181.1 | 10.99 | 10.9  | 0.2  | 0.1  | 1.07  | 0.138906 | 0.075938 | 0.514459 | 0.320634 |
| MmugDNA.18185.1.S1_at   | MmugDNA.18185.1 | 12.24 | 12.11 | 0.1  | 0.11 | 1.1   | 0.148536 | 0.188751 | 0.522567 | 0.464735 |
| MmugDNA.18186.1.S1_at   | MmugDNA.18186.1 | 5.22  | 4.94  | 0.2  | 0.06 | 1.21  | 0.096011 | 0.115809 | 0.464614 | 0.382854 |
| MmugDNA.18187.1.S1_s_at | MmugDNA.18187.1 | 8.64  | 8.42  | 0.35 | 0.01 | 1.17  | 0.334849 | 0.114356 | 0.680656 | 0.380861 |
| MmugDNA.18189.1.S1_at   | MmugDNA.18189.1 | 11.9  | 12.08 | 0.48 | 0.1  | -1.14 | 0.914534 | 0.784601 | 0.970879 | 0.875301 |
| MmugDNA.18191.1.S1_at   | MmugDNA.18191.1 | 11.4  | 11.79 | 0.14 | 0.08 | -1.31 | 0.012939 | 0.047297 | 0.266025 | 0.262176 |
| MmugDNA.18192.1.S1_at   | MmugDNA.18192.1 | 12.05 | 12.14 | 0.14 | 0.06 | -1.06 | 0.399846 | 0.532351 | 0.723376 | 0.719017 |
| MmugDNA.18193.1.S1_at   | MmugDNA.18193.1 | 12.28 | 11.67 | 2.26 | 0.1  | 1.52  | 0.626989 | 0.43124  | 0.850306 | 0.652233 |
| MmugDNA.18195.1.S1_at   | MmugDNA.18195.1 | 6.08  | 6.03  | 0.07 | 0.04 | 1.03  | 0.270474 | 0.537872 | 0.630338 | 0.722773 |
| MmugDNA.18199.1.S1_at   | MmugDNA.18199.1 | 7.71  | 7.39  | 0.6  | 0.14 | 1.24  | 0.541248 | 0.325188 | 0.805026 | 0.575598 |
| MmugDNA.182.1.S1_at     | MmugDNA.182.1   | 3.59  | 3.61  | 0.12 | 0.02 | -1.01 | 0.800896 | 0.204723 | 0.927214 | 0.479071 |
| MmugDNA.1820.1.S1_at    | MmugDNA.1820.1  | 10.63 | 10.34 | 0.06 | 0.18 | 1.23  | 0.040022 | 0.052926 | 0.362955 | 0.275685 |
| MmugDNA.18216.1.S1_at   | MmugDNA.18216.1 | 9.76  | 9.82  | 0.39 | 0.03 | -1.04 | 0.730831 | 0.880437 | 0.896252 | 0.931694 |
| MmugDNA.18224.1.S1_at   | MmugDNA.18224.1 | 9.63  | 10.09 | 2.72 | 0.33 | -1.38 | 0.48708  | 0.199023 | 0.774859 | 0.473614 |
| MmugDNA.18227.1.S1_at   | MmugDNA.18227.1 | 10.89 | 10.84 | 0.49 | 0.27 | 1.04  | 0.53894  | 0.010734 | 0.803644 | 0.135307 |
| MmugDNA.18228.1.S1_at   | MmugDNA.18228.1 | 4.74  | 4.59  | 0.14 | 0.03 | 1.11  | 0.18868  | 0.395412 | 0.560598 | 0.627474 |
| MmugDNA.18233.1.S1_at   | MmugDNA.18233.1 | 7.75  | 8.56  | 0.34 | 0.48 | -1.75 | 0.081334 | 0.129223 | 0.445406 | 0.400635 |
| MmugDNA.18235.1.S1_at   | MmugDNA.18235.1 | 13.11 | 13.43 | 0.76 | 0.03 | -1.25 | 0.324304 | 0.245434 | 0.672562 | 0.515213 |
| MmugDNA.18236.1.S1_at   | MmugDNA.18236.1 | 5.78  | 5.71  | 0.06 | 0.07 | 1.05  | 0.905097 | 0.580847 | 0.968109 | 0.749953 |
| MmugDNA.1824.1.S1_at    | MmugDNA.1824.1  | 7.5   | 7.4   | 0.14 | 0.09 | 1.07  | 0.214079 | 0.468256 | 0.58463  | 0.6777   |
| MmugDNA.18241.1.S1_at   | MmugDNA.18241.1 | 11.56 | 11.75 | 0.04 | 0.08 | -1.14 | 0.009626 | 0.060772 | 0.243006 | 0.29326  |



|                         |                 |       |       |      |      |       |          |          |          |          |
|-------------------------|-----------------|-------|-------|------|------|-------|----------|----------|----------|----------|
| MmugDNA.18254.1.S1_at   | MmugDNA.18254.1 | 5.8   | 5.82  | 0.08 | 0.07 | -1.02 | 0.987244 | 0.364562 | 0.995831 | 0.604915 |
| MmugDNA.18259.1.S1_at   | MmugDNA.18259.1 | 11.56 | 11.63 | 0.13 | 0.1  | -1.05 | 0.565562 | 0.850507 | 0.819359 | 0.914979 |
| MmugDNA.18263.1.S1_at   | MmugDNA.18263.1 | 11.06 | 10.71 | 0.23 | 0.16 | 1.28  | 0.095684 | 0.058544 | 0.4643   | 0.288669 |
| MmugDNA.18270.1.S1_at   | MmugDNA.18270.1 | 7.25  | 7.58  | 0.39 | 0.06 | -1.26 | 0.653101 | 0.029805 | 0.862185 | 0.214318 |
| MmugDNA.18278.1.S1_at   | MmugDNA.18278.1 | 13.17 | 13.08 | 0.15 | 0.02 | 1.06  | 0.385837 | 0.371024 | 0.713055 | 0.609964 |
| MmugDNA.18279.1.S1_at   | MmugDNA.18279.1 | 11.85 | 12.64 | 0.28 | 0.03 | -1.72 | 0.019109 | 0.007037 | 0.299836 | 0.113112 |
| MmugDNA.1828.1.S1_at    | MmugDNA.1828.1  | 10.99 | 11.46 | 2.98 | 0.11 | -1.39 | 0.391546 | 0.191139 | 0.717597 | 0.4664   |
| MmugDNA.18280.1.S1_at   | MmugDNA.18280.1 | 4.21  | 4.08  | 0.01 | 0.07 | 1.1   | 0.025198 | 0.030528 | 0.320761 | 0.216711 |
| MmugDNA.18281.1.S1_s_at | MmugDNA.18281.1 | 11.03 | 11.24 | 0.1  | 0.01 | -1.16 | 0.053168 | 0.014817 | 0.394156 | 0.154879 |
| MmugDNA.18290.1.S1_at   | MmugDNA.18290.1 | 10.7  | 11.19 | 0.2  | 0.15 | -1.41 | 0.033763 | 0.156429 | 0.347257 | 0.431767 |
| MmugDNA.18294.1.S1_at   | MmugDNA.18294.1 | 6.7   | 6.63  | 0.12 | 0.09 | -1.05 | 0.443072 | 0.762032 | 0.750521 | 0.861597 |
| MmugDNA.18297.1.S1_at   | MmugDNA.18297.1 | 10.97 | 10.81 | 0.42 | 0.09 | 1.12  | 0.509998 | 0.653866 | 0.78792  | 0.797692 |
| MmugDNA.1830.1.S1_at    | MmugDNA.1830.1  | 11.23 | 10.92 | 0.2  | 0.1  | 1.24  | 0.069527 | 0.073096 | 0.427368 | 0.316064 |
| MmugDNA.18301.1.S1_at   | MmugDNA.18301.1 | 9.83  | 9.78  | 0.61 | 0.1  | 1.04  | 0.985641 | 0.306434 | 0.995461 | 0.563029 |
| MmugDNA.18309.1.S1_at   | MmugDNA.18309.1 | 4.79  | 5.96  | 0.49 | 1.75 | -2.26 | 0.318946 | 0.402552 | 0.668481 | 0.631481 |
| MmugDNA.1832.1.S1_at    | MmugDNA.1832.1  | 11.28 | 10.88 | 3.29 | 0.2  | 1.32  | 0.5193   | 0.234989 | 0.793113 | 0.506162 |
| MmugDNA.18323.1.S1_at   | MmugDNA.18323.1 | 4.13  | 3.88  | 0.2  | 0.16 | 1.19  | 0.211597 | 0.259649 | 0.582623 | 0.526538 |
| MmugDNA.18326.1.S1_at   | MmugDNA.18326.1 | 11.06 | 11.32 | 0.08 | 0.04 | -1.2  | 0.008117 | 0.058688 | 0.232005 | 0.288956 |
| MmugDNA.1833.1.S1_at    | MmugDNA.1833.1  | 9.52  | 9.75  | 0.24 | 0.09 | -1.17 | 0.177144 | 0.054085 | 0.550212 | 0.277914 |
| MmugDNA.18332.1.S1_at   | MmugDNA.18332.1 | 5.6   | 5.68  | 0.17 | 0.07 | -1.05 | 0.185908 | 0.445171 | 0.558823 | 0.662331 |
| MmugDNA.18333.1.S1_at   | MmugDNA.18333.1 | 6.22  | 5.72  | 1.34 | 0.11 | 1.41  | 0.61048  | 0.226223 | 0.841868 | 0.498692 |
| MmugDNA.18333.1.S1_x_at | MmugDNA.18333.1 | 6.14  | 5.89  | 1.47 | 0.21 | 1.19  | 0.784733 | 0.258117 | 0.920945 | 0.525574 |
| MmugDNA.18335.1.S1_at   | MmugDNA.18335.1 | 12.82 | 12.64 | 0.1  | 0.08 | 1.13  | 0.080635 | 0.065898 | 0.444593 | 0.302129 |
| MmugDNA.18337.1.S1_at   | MmugDNA.18337.1 | 8.36  | 8.6   | 0.23 | 0.21 | -1.18 | 0.050297 | 0.150407 | 0.386954 | 0.424951 |
| MmugDNA.18346.1.S1_at   | MmugDNA.18346.1 | 4.38  | 4.42  | 0.03 | 0.01 | -1.03 | 0.145603 | 0.705099 | 0.520555 | 0.828994 |
| MmugDNA.18347.1.S1_at   | MmugDNA.18347.1 | 10.49 | 10.03 | 0.3  | 0.22 | 1.38  | 0.118434 | 0.163436 | 0.491933 | 0.439629 |
| MmugDNA.18348.1.S1_at   | MmugDNA.18348.1 | 6.53  | 7.21  | 0.08 | 0.06 | -1.6  | 0.000388 | 0.034783 | 0.137028 | 0.230686 |
| MmugDNA.18349.1.S1_at   | MmugDNA.18349.1 | 3.33  | 3.53  | 0.06 | 0.18 | -1.15 | 0.190695 | 0.152502 | 0.561788 | 0.427329 |
| MmugDNA.18350.1.S1_at   | MmugDNA.18350.1 | 7.83  | 7.37  | 0.17 | 0.19 | 1.37  | 0.020324 | 0.017515 | 0.303816 | 0.167516 |
| MmugDNA.18351.1.S1_at   | MmugDNA.18351.1 | 7.09  | 7.56  | 0.57 | 0.24 | -1.38 | 0.828066 | 0.663514 | 0.938183 | 0.803016 |
| MmugDNA.18353.1.S1_at   | MmugDNA.18353.1 | 10.36 | 10.18 | 0.14 | 0.09 | 1.13  | 0.496165 | 0.451209 | 0.780229 | 0.666085 |
| MmugDNA.18354.1.S1_at   | MmugDNA.18354.1 | 5.73  | 6.66  | 0.74 | 0.05 | -1.91 | 0.103979 | 0.44424  | 0.474656 | 0.661897 |
| MmugDNA.18355.1.S1_at   | MmugDNA.18355.1 | 2.81  | 2.69  | 0.1  | 0.01 | 1.08  | 0.135636 | 0.252459 | 0.510119 | 0.521073 |
| MmugDNA.18357.1.S1_at   | MmugDNA.18357.1 | 10.45 | 10.54 | 0.32 | 0.37 | -1.07 | 0.354034 | 0.017292 | 0.69361  | 0.166482 |
| MmugDNA.18358.1.S1_at   | MmugDNA.18358.1 | 9.09  | 8.74  | 0.45 | 0.1  | 1.27  | 0.885821 | 0.883037 | 0.96038  | 0.93328  |
| MmugDNA.18359.1.S1_at   | MmugDNA.18359.1 | 6.07  | 6.01  | 0.16 | 0.01 | 1.04  | 0.813019 | 0.134369 | 0.932327 | 0.406603 |
| MmugDNA.18361.1.S1_s_at | MmugDNA.18361.1 | 8.93  | 8.92  | 1.01 | 0.23 | 1.01  | 0.899836 | 0.225484 | 0.965989 | 0.498129 |
| MmugDNA.18363.1.S1_at   | MmugDNA.18363.1 | 9.93  | 9.44  | 0.97 | 0.23 | 1.4   | 0.437619 | 0.053692 | 0.746873 | 0.277304 |
| MmugDNA.18366.1.S1_at   | MmugDNA.18366.1 | 8.57  | 8.96  | 0.2  | 0.13 | -1.31 | 0.06669  | 0.045252 | 0.422542 | 0.257066 |
| MmugDNA.1837.1.S1_at    | MmugDNA.1837.1  | 6.01  | 5.99  | 0.19 | 0.12 | 1.01  | 0.248994 | 0.400218 | 0.61432  | 0.630158 |
| MmugDNA.18373.1.S1_at   | MmugDNA.18373.1 | 6.92  | 6.85  | 0.06 | 0.05 | 1.05  | 0.414113 | 0.134984 | 0.732764 | 0.406955 |
| MmugDNA.18374.1.S1_at   | MmugDNA.18374.1 | 8.49  | 9.11  | 0.32 | 0.13 | -1.54 | 0.054665 | 0.030081 | 0.397122 | 0.215243 |
| MmugDNA.18376.1.S1_at   | MmugDNA.18376.1 | 3.91  | 3.91  | 0.04 | 0.05 | -1    | 0.445842 | 0.926038 | 0.752392 | 0.958117 |

|                         |                 |       |       |      |      |       |          |          |          |          |
|-------------------------|-----------------|-------|-------|------|------|-------|----------|----------|----------|----------|
| MmugDNA.18378.1.S1_at   | MmugDNA.18378.1 | 9.96  | 10.67 | 0.31 | 0.06 | -1.63 | 0.017825 | 0.020715 | 0.293979 | 0.180645 |
| MmugDNA.18382.1.S1_at   | MmugDNA.18382.1 | 9.37  | 9.46  | 0.11 | 0.07 | -1.06 | 0.317056 | 0.090657 | 0.666924 | 0.345151 |
| MmugDNA.18385.1.S1_at   | MmugDNA.18385.1 | 10.65 | 10.28 | 0.29 | 0.07 | 1.29  | 0.095208 | 0.108729 | 0.464131 | 0.372257 |
| MmugDNA.18391.1.S1_at   | MmugDNA.18391.1 | 10.12 | 10.75 | 0.94 | 0.05 | -1.54 | 0.329376 | 0.19309  | 0.676319 | 0.468554 |
| MmugDNA.18398.1.S1_at   | MmugDNA.18398.1 | 4.73  | 5.12  | 0.27 | 0.21 | -1.31 | 0.093525 | 0.221911 | 0.462739 | 0.495019 |
| MmugDNA.18399.1.S1_at   | MmugDNA.18399.1 | 6.19  | 7.63  | 2.52 | 0.44 | -2.72 | 0.395347 | 0.279369 | 0.72044  | 0.543012 |
| MmugDNA.18401.1.S1_s_at | MmugDNA.18401.1 | 10.16 | 9.97  | 0.62 | 0.09 | 1.14  | 0.336795 | 0.439486 | 0.682118 | 0.6582   |
| MmugDNA.18407.1.S1_at   | MmugDNA.18407.1 | 5.33  | 5.29  | 0.08 | 0.06 | 1.03  | 0.348475 | 0.760613 | 0.689787 | 0.860949 |
| MmugDNA.1841.1.S1_at    | MmugDNA.1841.1  | 12.73 | 12.66 | 0.34 | 0.05 | 1.05  | 0.529444 | 0.425312 | 0.798296 | 0.647696 |
| MmugDNA.18412.1.S1_at   | MmugDNA.18412.1 | 7.07  | 7.04  | 0.28 | 0.21 | 1.03  | 0.928944 | 0.876003 | 0.976332 | 0.929526 |
| MmugDNA.18413.1.S1_at   | MmugDNA.18413.1 | 10.66 | 11.29 | 0.06 | 0.07 | -1.55 | 0.000404 | 0.000082 | 0.137028 | 0.027016 |
| MmugDNA.18414.1.S1_at   | MmugDNA.18414.1 | 9.7   | 10.21 | 0.3  | 0.07 | -1.42 | 0.111572 | 0.066334 | 0.484854 | 0.303194 |
| MmugDNA.18415.1.S1_at   | MmugDNA.18415.1 | 10.24 | 10.5  | 0.48 | 0.11 | -1.2  | 0.750281 | 0.295652 | 0.905427 | 0.555108 |
| MmugDNA.18423.1.S1_at   | MmugDNA.18423.1 | 3.33  | 3.1   | 0.07 | 0.16 | 1.18  | 0.352079 | 0.536182 | 0.692649 | 0.721547 |
| MmugDNA.18425.1.S1_at   | MmugDNA.18425.1 | 5.2   | 5.2   | 0.06 | 0.05 | 1     | 0.967219 | 0.084619 | 0.989205 | 0.336144 |
| MmugDNA.18426.1.S1_at   | MmugDNA.18426.1 | 9.38  | 9.06  | 0.35 | 0.11 | 1.25  | 0.096115 | 0.072353 | 0.46463  | 0.315146 |
| MmugDNA.18431.1.S1_at   | MmugDNA.18431.1 | 7.84  | 7.55  | 0.44 | 0.27 | 1.23  | 0.625298 | 0.563256 | 0.849286 | 0.738506 |
| MmugDNA.18432.1.S1_at   | MmugDNA.18432.1 | 8.18  | 7.99  | 1.8  | 0.33 | 1.14  | 0.752817 | 0.193099 | 0.906817 | 0.468554 |
| MmugDNA.18434.1.S1_at   | MmugDNA.18434.1 | 8.98  | 9.16  | 0.23 | 0.1  | -1.14 | 0.189376 | 0.309645 | 0.560894 | 0.564991 |
| MmugDNA.18435.1.S1_x_at | MmugDNA.18435.1 | 11.59 | 11.88 | 0.16 | 0.1  | -1.22 | 0.099289 | 0.237673 | 0.46876  | 0.50826  |
| MmugDNA.18441.1.S1_at   | MmugDNA.18441.1 | 3.73  | 3.64  | 0.11 | 0.08 | 1.06  | 0.705772 | 0.35498  | 0.885355 | 0.597466 |
| MmugDNA.18445.1.S1_at   | MmugDNA.18445.1 | 9.29  | 9.47  | 1.86 | 0.23 | -1.13 | 0.798956 | 0.17469  | 0.926372 | 0.451231 |
| MmugDNA.18451.1.S1_at   | MmugDNA.18451.1 | 13.04 | 13.06 | 0.24 | 0.01 | -1.01 | 0.492334 | 0.170608 | 0.77824  | 0.447204 |
| MmugDNA.18453.1.S1_at   | MmugDNA.18453.1 | 5.98  | 5.92  | 0.19 | 0.11 | 1.04  | 0.571708 | 0.835664 | 0.822897 | 0.905942 |
| MmugDNA.18455.1.S1_at   | MmugDNA.18455.1 | 7.39  | 7.33  | 0.13 | 0.07 | 1.04  | 0.227779 | 0.538878 | 0.596693 | 0.723368 |
| MmugDNA.18457.1.S1_at   | MmugDNA.18457.1 | 7.08  | 7.2   | 0.08 | 0.25 | -1.09 | 0.452267 | 0.047416 | 0.755732 | 0.262476 |
| MmugDNA.18458.1.S1_at   | MmugDNA.18458.1 | 8.32  | 8.5   | 0.29 | 0.07 | -1.13 | 0.342787 | 0.407111 | 0.686105 | 0.634734 |
| MmugDNA.18461.1.S1_at   | MmugDNA.18461.1 | 8.65  | 9.67  | 0.28 | 0.05 | -2.02 | 0.00408  | 0.001383 | 0.198571 | 0.056947 |
| MmugDNA.18463.1.S1_at   | MmugDNA.18463.1 | 8.55  | 8.32  | 0.66 | 0.19 | 1.17  | 0.735938 | 0.976576 | 0.898982 | 0.987237 |
| MmugDNA.18465.1.S1_at   | MmugDNA.18465.1 | 5.56  | 5.69  | 0.18 | 1.03 | -1.1  | 0.29393  | 0.405061 | 0.650244 | 0.63348  |
| MmugDNA.1847.1.S1_at    | MmugDNA.1847.1  | 13.74 | 13.95 | 0.12 | 0.03 | -1.15 | 0.054429 | 0.049589 | 0.396501 | 0.267692 |
| MmugDNA.18473.1.S1_at   | MmugDNA.18473.1 | 4.85  | 5.28  | 0.04 | 0.32 | -1.35 | 0.081255 | 0.073741 | 0.445338 | 0.317089 |
| MmugDNA.18474.1.S1_s_at | MmugDNA.18474.1 | 10.4  | 9.19  | 0.47 | 0.12 | 2.31  | 0.035094 | 0.026561 | 0.35097  | 0.203915 |
| MmugDNA.18477.1.S1_at   | MmugDNA.18477.1 | 8.72  | 8.81  | 0.23 | 0.1  | -1.07 | 0.344465 | 0.33766  | 0.686941 | 0.584856 |
| MmugDNA.18481.1.S1_at   | MmugDNA.18481.1 | 6.4   | 6.03  | 0.22 | 0.08 | 1.29  | 0.052188 | 0.12936  | 0.392084 | 0.400748 |
| MmugDNA.18483.1.S1_at   | MmugDNA.18483.1 | 6.59  | 6.79  | 0.22 | 0.37 | -1.15 | 0.668041 | 0.177599 | 0.868887 | 0.453962 |
| MmugDNA.18486.1.S1_s_at | MmugDNA.18486.1 | 12.46 | 12.09 | 0.64 | 0.14 | 1.3   | 0.124742 | 0.224439 | 0.498863 | 0.497441 |
| MmugDNA.18488.1.S1_at   | MmugDNA.18488.1 | 5.33  | 5.23  | 0.08 | 0.02 | 1.08  | 0.041767 | 0.248156 | 0.36716  | 0.517567 |
| MmugDNA.18490.1.S1_at   | MmugDNA.18490.1 | 9.83  | 10.02 | 0.43 | 0.12 | -1.14 | 0.413476 | 0.492884 | 0.732278 | 0.693817 |
| MmugDNA.18495.1.S1_at   | MmugDNA.18495.1 | 11.74 | 11.55 | 0.05 | 0.03 | 1.14  | 0.007547 | 0.000011 | 0.229394 | 0.016526 |
| MmugDNA.18498.1.S1_at   | MmugDNA.18498.1 | 8.21  | 8.01  | 1.69 | 0.2  | 1.15  | 0.826457 | 0.203082 | 0.937809 | 0.477343 |
| MmugDNA.18499.1.S1_at   | MmugDNA.18499.1 | 7.35  | 7.29  | 0.18 | 0.03 | 1.04  | 0.516315 | 0.736389 | 0.791388 | 0.847485 |
| MmugDNA.18500.1.S1_at   | MmugDNA.18500.1 | 3.88  | 3.83  | 0.44 | 0.23 | 1.03  | 0.792102 | 0.918418 | 0.923647 | 0.95425  |

|                         |                 |       |       |      |      |       |          |          |          |          |
|-------------------------|-----------------|-------|-------|------|------|-------|----------|----------|----------|----------|
| MmugDNA.18502.1.S1_at   | MmugDNA.18502.1 | 12.64 | 12.35 | 0.12 | 0.05 | 1.23  | 0.049395 | 0.001739 | 0.385474 | 0.062895 |
| MmugDNA.18508.1.S1_at   | MmugDNA.18508.1 | 10.4  | 10.11 | 0.2  | 0    | 1.23  | 0.060247 | 0.016202 | 0.407794 | 0.16133  |
| MmugDNA.18510.1.S1_at   | MmugDNA.18510.1 | 9.43  | 9.52  | 0.2  | 0.08 | -1.07 | 0.646454 | 0.183404 | 0.859051 | 0.459553 |
| MmugDNA.18511.1.S1_at   | MmugDNA.18511.1 | 11.72 | 12.23 | 0.49 | 0.05 | -1.42 | 0.270899 | 0.256517 | 0.630857 | 0.524275 |
| MmugDNA.18513.1.S1_s_at | MmugDNA.18513.1 | 12.9  | 13.04 | 0.02 | 0.11 | -1.1  | 0.078226 | 0.403375 | 0.440443 | 0.632083 |
| MmugDNA.18515.1.S1_at   | MmugDNA.18515.1 | 7.93  | 8.48  | 0.29 | 0.09 | -1.46 | 0.041362 | 0.03196  | 0.366275 | 0.221191 |
| MmugDNA.18516.1.S1_at   | MmugDNA.18516.1 | 9.65  | 9.98  | 0.27 | 0.09 | -1.26 | 0.052361 | 0.051927 | 0.392196 | 0.273337 |
| MmugDNA.18519.1.S1_at   | MmugDNA.18519.1 | 3.44  | 3.74  | 0.41 | 0.17 | -1.23 | 0.375419 | 0.237732 | 0.706463 | 0.50826  |
| MmugDNA.18520.1.S1_at   | MmugDNA.18520.1 | 11.58 | 11.6  | 0.45 | 0.09 | -1.02 | 0.920627 | 0.655279 | 0.973107 | 0.798399 |
| MmugDNA.18528.1.S1_at   | MmugDNA.18528.1 | 10.48 | 10.73 | 0.68 | 0.07 | -1.2  | 0.636703 | 0.811071 | 0.85523  | 0.890975 |
| MmugDNA.18538.1.S1_at   | MmugDNA.18538.1 | 10.03 | 9.7   | 1.06 | 0.21 | -1.26 | 0.590912 | 0.199357 | 0.833168 | 0.474002 |
| MmugDNA.18538.1.S1_s_at | MmugDNA.18538.1 | 10.28 | 9.87  | 1.11 | 0.22 | 1.33  | 0.463395 | 0.205275 | 0.762124 | 0.479599 |
| MmugDNA.18539.1.S1_at   | MmugDNA.18539.1 | 7.44  | 7.66  | 0.25 | 0.08 | -1.17 | 0.124454 | 0.404517 | 0.498542 | 0.633004 |
| MmugDNA.18541.1.S1_at   | MmugDNA.18541.1 | 10.29 | 10.02 | 0.38 | 0.05 | 1.21  | 0.247457 | 0.035424 | 0.613105 | 0.232539 |
| MmugDNA.18544.1.S1_at   | MmugDNA.18544.1 | 7.56  | 7.23  | 0.47 | 0.13 | 1.26  | 0.157002 | 0.186027 | 0.530266 | 0.461878 |
| MmugDNA.18548.1.S1_at   | MmugDNA.18548.1 | 10.28 | 10.03 | 0.72 | 0.17 | 1.19  | 0.819566 | 0.04607  | 0.934967 | 0.258977 |
| MmugDNA.18551.1.S1_at   | MmugDNA.18551.1 | 7.55  | 8.41  | 0.8  | 0.2  | -1.83 | 0.566238 | 0.24498  | 0.819955 | 0.514782 |
| MmugDNA.18552.1.S1_at   | MmugDNA.18552.1 | 11.02 | 10.93 | 0.29 | 0.05 | 1.07  | 0.633481 | 0.665107 | 0.853527 | 0.803733 |
| MmugDNA.18555.1.S1_at   | MmugDNA.18555.1 | 7.49  | 7.7   | 0.01 | 0.06 | -1.16 | 0.004422 | 0.009676 | 0.198874 | 0.129405 |
| MmugDNA.18556.1.S1_at   | MmugDNA.18556.1 | 11.11 | 10.44 | 1.7  | 0.41 | 1.59  | 0.630281 | 0.143412 | 0.851919 | 0.41743  |
| MmugDNA.18557.1.S1_at   | MmugDNA.18557.1 | 5.28  | 5.13  | 0.15 | 0.18 | 1.11  | 0.156474 | 0.174238 | 0.529581 | 0.450573 |
| MmugDNA.18559.1.S1_at   | MmugDNA.18559.1 | 11.76 | 11.75 | 0.09 | 0.14 | 1.01  | 0.452643 | 0.114496 | 0.755901 | 0.381041 |
| MmugDNA.18563.1.S1_at   | MmugDNA.18563.1 | 5.12  | 5.07  | 0.06 | 0.01 | 1.03  | 0.176076 | 0.308849 | 0.549159 | 0.564656 |
| MmugDNA.18566.1.S1_at   | MmugDNA.18566.1 | 5.7   | 5.72  | 0.15 | 0.05 | -1.01 | 0.522736 | 0.772967 | 0.795304 | 0.867983 |
| MmugDNA.18569.1.S1_at   | MmugDNA.18569.1 | 7.28  | 7.38  | 0.65 | 0.35 | -1.07 | 0.501296 | 0.152719 | 0.783112 | 0.427571 |
| MmugDNA.1857.1.S1_at    | MmugDNA.1857.1  | 3.27  | 3.29  | 0.1  | 0.09 | -1.02 | 0.815865 | 0.480774 | 0.933242 | 0.686    |
| MmugDNA.18573.1.S1_at   | MmugDNA.18573.1 | 6.18  | 5.95  | 0.14 | 0.19 | 1.17  | 0.079436 | 0.143395 | 0.442296 | 0.417409 |
| MmugDNA.18574.1.S1_at   | MmugDNA.18574.1 | 3.33  | 3.19  | 0.04 | 0.01 | 1.1   | 0.006476 | 0.145415 | 0.21945  | 0.419421 |
| MmugDNA.18578.1.S1_at   | MmugDNA.18578.1 | 9.98  | 10.04 | 0.51 | 0.17 | -1.04 | 0.219881 | 0.332043 | 0.589114 | 0.580568 |
| MmugDNA.18584.1.S1_at   | MmugDNA.18584.1 | 10.17 | 10.29 | 0.42 | 0.14 | -1.08 | 0.473705 | 0.517911 | 0.767701 | 0.710027 |
| MmugDNA.18585.1.S1_at   | MmugDNA.18585.1 | 5.39  | 5.34  | 0.03 | 0.03 | 1.03  | 0.053531 | 0.191879 | 0.394865 | 0.467257 |
| MmugDNA.18586.1.S1_at   | MmugDNA.18586.1 | 9.47  | 9.21  | 0.01 | 0.09 | 1.2   | 0.003406 | 0.000025 | 0.194985 | 0.020254 |
| MmugDNA.18588.1.S1_at   | MmugDNA.18588.1 | 8.6   | 8.39  | 0.22 | 0.11 | 1.15  | 0.141115 | 0.411077 | 0.516345 | 0.637877 |
| MmugDNA.18590.1.S1_at   | MmugDNA.18590.1 | 13.42 | 13.47 | 0.11 | 0.02 | -1.04 | 0.27027  | 0.254138 | 0.630252 | 0.522439 |
| MmugDNA.18592.1.S1_at   | MmugDNA.18592.1 | 6     | 6.23  | 0.72 | 0.22 | -1.17 | 0.95039  | 0.977578 | 0.983308 | 0.987812 |
| MmugDNA.18593.1.S1_at   | MmugDNA.18593.1 | 12    | 11.87 | 0.16 | 0.07 | 1.1   | 0.162295 | 0.173017 | 0.535388 | 0.449661 |
| MmugDNA.18595.1.S1_at   | MmugDNA.18595.1 | 8.81  | 8.86  | 0.6  | 0.09 | -1.03 | 0.948475 | 0.276604 | 0.982317 | 0.540596 |
| MmugDNA.18597.1.S1_at   | MmugDNA.18597.1 | 5.52  | 5.6   | 0.12 | 0.07 | -1.06 | 0.820078 | 0.026315 | 0.935275 | 0.203232 |
| MmugDNA.1860.1.S1_at    | MmugDNA.1860.1  | 6.83  | 6.52  | 0.69 | 0.14 | 1.24  | 0.337664 | 0.043296 | 0.682571 | 0.252847 |
| MmugDNA.18600.1.S1_at   | MmugDNA.18600.1 | 4.35  | 4.17  | 0.13 | 0.13 | 1.13  | 0.141496 | 0.077789 | 0.516365 | 0.323933 |
| MmugDNA.18606.1.S1_at   | MmugDNA.18606.1 | 4.16  | 4.16  | 0.18 | 0.05 | 1     | 0.974607 | 0.66989  | 0.991912 | 0.806933 |
| MmugDNA.18607.1.S1_at   | MmugDNA.18607.1 | 8.06  | 7.94  | 0.09 | 0.04 | 1.09  | 0.040652 | 0.227737 | 0.364778 | 0.499979 |
| MmugDNA.18611.1.S1_at   | MmugDNA.18611.1 | 12.34 | 12.64 | 0.14 | 0.1  | -1.23 | 0.068009 | 0.031262 | 0.42451  | 0.218668 |

|                         |                 |       |       |      |      |       |          |          |          |          |
|-------------------------|-----------------|-------|-------|------|------|-------|----------|----------|----------|----------|
| MmugDNA.18611.1.S1_x_at | MmugDNA.18611.1 | 12.06 | 12.41 | 0.1  | 0.08 | -1.28 | 0.01888  | 0.01133  | 0.298593 | 0.138076 |
| MmugDNA.18612.1.S1_at   | MmugDNA.18612.1 | 10.76 | 11.07 | 0.68 | 0.16 | -1.24 | 0.35782  | 0.467669 | 0.695993 | 0.677207 |
| MmugDNA.18614.1.S1_at   | MmugDNA.18614.1 | 10.81 | 10.72 | 0.08 | 0.04 | 1.07  | 0.040605 | 0.004151 | 0.364613 | 0.091036 |
| MmugDNA.18615.1.S1_at   | MmugDNA.18615.1 | 9.34  | 9.98  | 0.09 | 0.07 | -1.56 | 0.000507 | 0.000108 | 0.143137 | 0.028099 |
| MmugDNA.18621.1.S1_at   | MmugDNA.18621.1 | 4.09  | 4.04  | 0.22 | 0.14 | 1.03  | 0.706598 | 0.790768 | 0.885782 | 0.878973 |
| MmugDNA.18630.1.S1_at   | MmugDNA.18630.1 | 8.8   | 8.52  | 0.51 | 0.04 | 1.21  | 0.400488 | 0.127827 | 0.723823 | 0.398723 |
| MmugDNA.18631.1.S1_at   | MmugDNA.18631.1 | 4.59  | 4.86  | 0.22 | 0.21 | -1.21 | 0.277025 | 0.381046 | 0.636653 | 0.617478 |
| MmugDNA.18633.1.S1_at   | MmugDNA.18633.1 | 3.82  | 4.96  | 0.78 | 0.19 | -2.2  | 0.28319  | 0.557565 | 0.641313 | 0.73509  |
| MmugDNA.18635.1.S1_at   | MmugDNA.18635.1 | 13.02 | 12.98 | 0.15 | 0.02 | 1.03  | 0.59204  | 0.763525 | 0.833648 | 0.862473 |
| MmugDNA.18638.1.S1_s_at | MmugDNA.18638.1 | 6.91  | 6.97  | 0.32 | 0.1  | -1.05 | 0.92103  | 0.110891 | 0.97328  | 0.375256 |
| MmugDNA.18643.1.S1_s_at | MmugDNA.18643.1 | 11.74 | 11.65 | 0.21 | 0.07 | 1.06  | 0.418702 | 0.795758 | 0.735885 | 0.882339 |
| MmugDNA.18645.1.S1_at   | MmugDNA.18645.1 | 8.28  | 8.58  | 0.58 | 0.07 | -1.24 | 0.421802 | 0.578535 | 0.737752 | 0.748589 |
| MmugDNA.18647.1.S1_s_at | MmugDNA.18647.1 | 7.28  | 6.94  | 0.13 | 0.11 | 1.26  | 0.055801 | 0.098504 | 0.399433 | 0.356636 |
| MmugDNA.18648.1.S1_at   | MmugDNA.18648.1 | 7.29  | 8.04  | 0.51 | 0.23 | -1.68 | 0.130814 | 0.050315 | 0.505266 | 0.269573 |
| MmugDNA.1865.1.S1_at    | MmugDNA.1865.1  | 7.4   | 7.49  | 0.24 | 0.11 | -1.06 | 0.375355 | 0.589038 | 0.706463 | 0.755336 |
| MmugDNA.18650.1.S1_at   | MmugDNA.18650.1 | 4.72  | 4.54  | 0.13 | 0.07 | 1.13  | 0.138637 | 0.357169 | 0.514023 | 0.598831 |
| MmugDNA.18652.1.S1_at   | MmugDNA.18652.1 | 6.97  | 8.36  | 0.15 | 0.24 | -2.62 | 0.001489 | 0.000074 | 0.161549 | 0.0265   |
| MmugDNA.18653.1.S1_at   | MmugDNA.18653.1 | 7.36  | 6.41  | 0.75 | 0.15 | 1.92  | 0.180571 | 0.183358 | 0.553774 | 0.459553 |
| MmugDNA.18655.1.S1_at   | MmugDNA.18655.1 | 10.69 | 11.12 | 0.4  | 0.1  | -1.34 | 0.141639 | 0.014728 | 0.516503 | 0.154415 |
| MmugDNA.18657.1.S1_s_at | MmugDNA.18657.1 | 5.25  | 5.24  | 0.08 | 0.12 | 1.01  | 0.419933 | 0.248218 | 0.736603 | 0.517574 |
| MmugDNA.18659.1.S1_at   | MmugDNA.18659.1 | 8.39  | 9     | 0.6  | 0.38 | -1.52 | 0.395053 | 0.294917 | 0.720303 | 0.554462 |
| MmugDNA.1866.1.S1_at    | MmugDNA.1866.1  | 10.8  | 10.61 | 0.24 | 0.12 | 1.14  | 0.347521 | 0.291938 | 0.688775 | 0.552156 |
| MmugDNA.18662.1.S1_at   | MmugDNA.18662.1 | 3.79  | 4.25  | 0.06 | 0.6  | -1.38 | 0.239678 | 0.095613 | 0.606154 | 0.352645 |
| MmugDNA.18664.1.S1_at   | MmugDNA.18664.1 | 3.89  | 4.08  | 0.08 | 0.06 | -1.14 | 0.117339 | 0.551436 | 0.490925 | 0.73093  |
| MmugDNA.18665.1.S1_at   | MmugDNA.18665.1 | 12.26 | 12.11 | 0.17 | 0.01 | 1.11  | 0.543686 | 0.542915 | 0.806747 | 0.725841 |
| MmugDNA.18667.1.S1_at   | MmugDNA.18667.1 | 12.39 | 11.32 | 0.05 | 0.22 | 2.09  | 0.001354 | 0.003462 | 0.159096 | 0.084734 |
| MmugDNA.18668.1.S1_at   | MmugDNA.18668.1 | 5.52  | 5.46  | 0.07 | 0.02 | 1.04  | 0.933116 | 0.187566 | 0.97728  | 0.463628 |
| MmugDNA.18670.1.S1_s_at | MmugDNA.18670.1 | 10.43 | 10.93 | 0.49 | 0.08 | -1.41 | 0.217669 | 0.132663 | 0.587574 | 0.404544 |
| MmugDNA.18673.1.S1_at   | MmugDNA.18673.1 | 12.43 | 12.35 | 0.07 | 0.03 | 1.05  | 0.109854 | 0.140124 | 0.482728 | 0.413394 |
| MmugDNA.18674.1.S1_at   | MmugDNA.18674.1 | 6.64  | 7.24  | 0.84 | 0.9  | -1.52 | 0.423465 | 0.246164 | 0.739103 | 0.515874 |
| MmugDNA.18681.1.S1_at   | MmugDNA.18681.1 | 7.98  | 7.82  | 0.8  | 0.16 | 1.12  | 0.97738  | 0.871918 | 0.992685 | 0.927098 |
| MmugDNA.18682.1.S1_at   | MmugDNA.18682.1 | 10.35 | 10.54 | 0.1  | 0.05 | -1.14 | 0.042344 | 0.038147 | 0.368919 | 0.239936 |
| MmugDNA.18684.1.S1_at   | MmugDNA.18684.1 | 7.03  | 6.78  | 0.26 | 0.09 | 1.19  | 0.074277 | 0.216574 | 0.435027 | 0.490224 |
| MmugDNA.18687.1.S1_at   | MmugDNA.18687.1 | 10.58 | 11.57 | 0.14 | 0.09 | -1.99 | 0.000552 | 0.000384 | 0.143137 | 0.037273 |
| MmugDNA.18688.1.S1_at   | MmugDNA.18688.1 | 9.49  | 9.88  | 0.15 | 0.24 | -1.31 | 0.074135 | 0.029766 | 0.43493  | 0.214185 |
| MmugDNA.18690.1.S1_at   | MmugDNA.18690.1 | 5.78  | 6.37  | 0.21 | 0.03 | -1.51 | 0.008265 | 0.002684 | 0.232164 | 0.076408 |
| MmugDNA.18698.1.S1_at   | MmugDNA.18698.1 | 11.94 | 11.18 | 0.39 | 0.04 | 1.69  | 0.068338 | 0.06265  | 0.425273 | 0.297022 |
| MmugDNA.18699.1.S1_at   | MmugDNA.18699.1 | 6.94  | 6.55  | 0.51 | 0.45 | 1.31  | 0.754315 | 0.90513  | 0.907331 | 0.94617  |
| MmugDNA.18701.1.S1_at   | MmugDNA.18701.1 | 4     | 4.01  | 0.06 | 0.04 | -1    | 0.892938 | 0.696163 | 0.963354 | 0.823455 |
| MmugDNA.18704.1.S1_at   | MmugDNA.18704.1 | 7.61  | 8.84  | 1.02 | 0.33 | -2.35 | 0.48615  | 0.234954 | 0.774427 | 0.506146 |
| MmugDNA.18707.1.S1_at   | MmugDNA.18707.1 | 3.24  | 3.11  | 0.16 | 0.12 | 1.09  | 0.637058 | 0.071333 | 0.855338 | 0.313366 |
| MmugDNA.18715.1.S1_at   | MmugDNA.18715.1 | 8.5   | 8.19  | 0.23 | 0.04 | 1.24  | 0.254172 | 0.371163 | 0.61872  | 0.610113 |
| MmugDNA.18717.1.S1_at   | MmugDNA.18717.1 | 3.04  | 2.95  | 0.09 | 0.04 | 1.07  | 0.228769 | 0.559743 | 0.59773  | 0.736365 |

|                         |                 |       |       |      |      |       |          |          |          |          |
|-------------------------|-----------------|-------|-------|------|------|-------|----------|----------|----------|----------|
| MmugDNA.18722.1.S1_at   | MmugDNA.18722.1 | 5.28  | 4.39  | 1    | 0.37 | 1.86  | 0.197416 | 0.292233 | 0.568435 | 0.552363 |
| MmugDNA.18724.1.S1_at   | MmugDNA.18724.1 | 3.68  | 3.65  | 0.03 | 0.09 | 1.02  | 0.19248  | 0.218209 | 0.563577 | 0.491764 |
| MmugDNA.18724.1.S1_s_at | MmugDNA.18724.1 | 6.23  | 7.15  | 0.87 | 0.19 | -1.89 | 0.237768 | 0.343721 | 0.604841 | 0.589444 |
| MmugDNA.18724.1.S1_x_at | MmugDNA.18724.1 | 3.95  | 4.18  | 0.1  | 0.16 | -1.18 | 0.258588 | 0.310205 | 0.622286 | 0.565386 |
| MmugDNA.1873.1.S1_at    | MmugDNA.1873.1  | 7.09  | 7.35  | 0.2  | 0.22 | -1.2  | 0.236802 | 0.075084 | 0.603719 | 0.319283 |
| MmugDNA.18730.1.S1_at   | MmugDNA.18730.1 | 11.23 | 11.09 | 0.21 | 0.02 | 1.1   | 0.374156 | 0.141197 | 0.705764 | 0.414709 |
| MmugDNA.18734.1.S1_at   | MmugDNA.18734.1 | 5.79  | 6.36  | 0.36 | 0.14 | -1.48 | 0.055746 | 0.08083  | 0.399274 | 0.32875  |
| MmugDNA.18735.1.S1_at   | MmugDNA.18735.1 | 10.87 | 10.88 | 0.05 | 0.06 | -1.01 | 0.911358 | 0.815798 | 0.969946 | 0.893771 |
| MmugDNA.18741.1.S1_at   | MmugDNA.18741.1 | 5.16  | 5.31  | 0.27 | 0.02 | -1.11 | 0.352637 | 0.17562  | 0.692659 | 0.45218  |
| MmugDNA.18744.1.S1_at   | MmugDNA.18744.1 | 6.09  | 6.02  | 0.13 | 0.24 | 1.05  | 0.212479 | 0.204631 | 0.582995 | 0.478995 |
| MmugDNA.18748.1.S1_at   | MmugDNA.18748.1 | 4.42  | 4.53  | 0.1  | 0.07 | -1.08 | 0.557206 | 0.225747 | 0.814531 | 0.498159 |
| MmugDNA.1875.1.S1_at    | MmugDNA.1875.1  | 11.26 | 11.5  | 0.14 | 0.01 | -1.18 | 0.035374 | 0.012841 | 0.351775 | 0.145955 |
| MmugDNA.18751.1.S1_at   | MmugDNA.18751.1 | 3.74  | 3.62  | 0.15 | 0.04 | 1.09  | 0.283204 | 0.277706 | 0.641313 | 0.541648 |
| MmugDNA.18752.1.S1_at   | MmugDNA.18752.1 | 8.79  | 8.51  | 0.4  | 0.13 | 1.21  | 0.215468 | 0.329575 | 0.585748 | 0.578781 |
| MmugDNA.18755.1.S1_at   | MmugDNA.18755.1 | 4.06  | 4.28  | 0.05 | 0.13 | -1.17 | 0.062579 | 0.083994 | 0.41335  | 0.3349   |
| MmugDNA.18756.1.S1_at   | MmugDNA.18756.1 | 9.14  | 9.68  | 0.19 | 0.02 | -1.45 | 0.007924 | 0.001666 | 0.231562 | 0.061711 |
| MmugDNA.18757.1.S1_at   | MmugDNA.18757.1 | 9.69  | 9.46  | 0.53 | 0.25 | 1.17  | 0.824139 | 0.519706 | 0.936573 | 0.711271 |
| MmugDNA.18759.1.S1_at   | MmugDNA.18759.1 | 5.55  | 6.24  | 0.24 | 0.3  | -1.62 | 0.041459 | 0.036534 | 0.366573 | 0.235621 |
| MmugDNA.1876.1.S1_at    | MmugDNA.1876.1  | 6.84  | 7.22  | 0.08 | 0.15 | -1.3  | 0.017152 | 0.159182 | 0.289596 | 0.435217 |
| MmugDNA.18760.1.S1_at   | MmugDNA.18760.1 | 8.59  | 8.66  | 0.18 | 0.03 | -1.05 | 0.642122 | 0.06017  | 0.857628 | 0.291882 |
| MmugDNA.18770.1.S1_at   | MmugDNA.18770.1 | 13.35 | 13.42 | 0.16 | 0.04 | -1.05 | 0.29111  | 0.349225 | 0.647537 | 0.593263 |
| MmugDNA.18774.1.S1_at   | MmugDNA.18774.1 | 5.32  | 5.5   | 0.31 | 0.08 | -1.14 | 0.477893 | 0.312578 | 0.76987  | 0.567268 |
| MmugDNA.18776.1.S1_at   | MmugDNA.18776.1 | 7.43  | 7.63  | 0.67 | 0.07 | -1.14 | 0.673195 | 0.222569 | 0.871201 | 0.495615 |
| MmugDNA.18777.1.S1_at   | MmugDNA.18777.1 | 12.45 | 12.63 | 0.09 | 0.07 | -1.13 | 0.0568   | 0.021126 | 0.401111 | 0.181957 |
| MmugDNA.18793.1.S1_at   | MmugDNA.18793.1 | 6.66  | 6.66  | 0.03 | 0.01 | -1    | 0.912579 | 0.162604 | 0.970287 | 0.43872  |
| MmugDNA.18794.1.S1_at   | MmugDNA.18794.1 | 11.58 | 10.73 | 0.9  | 0.23 | 1.8   | 0.552091 | 0.049775 | 0.811632 | 0.26818  |
| MmugDNA.18796.1.S1_at   | MmugDNA.18796.1 | 4.74  | 4.54  | 0.14 | 0.08 | 1.15  | 0.188548 | 0.178196 | 0.560489 | 0.454531 |
| MmugDNA.18799.1.S1_at   | MmugDNA.18799.1 | 7.13  | 6.58  | 1.07 | 0.13 | 1.46  | 0.347    | 0.159667 | 0.688491 | 0.435785 |
| MmugDNA.1880.1.S1_at    | MmugDNA.1880.1  | 8.59  | 9.59  | 0.62 | 0.18 | -1.99 | 0.078403 | 0.097391 | 0.441003 | 0.355097 |
| MmugDNA.18802.1.S1_at   | MmugDNA.18802.1 | 6.34  | 6.16  | 0.04 | 0.04 | 1.13  | 0.002906 | 0.017747 | 0.188033 | 0.168367 |
| MmugDNA.18804.1.S1_at   | MmugDNA.18804.1 | 8.34  | 7.15  | 1.03 | 0.33 | 2.28  | 0.49319  | 0.478445 | 0.778772 | 0.684481 |
| MmugDNA.18807.1.S1_at   | MmugDNA.18807.1 | 7.49  | 7.43  | 0.58 | 0.42 | 1.04  | 0.726048 | 0.161115 | 0.894072 | 0.437279 |
| MmugDNA.18817.1.S1_at   | MmugDNA.18817.1 | 4.97  | 4.99  | 0.44 | 0.31 | -1.01 | 0.476725 | 0.366788 | 0.769364 | 0.606502 |
| MmugDNA.1882.1.S1_s_at  | MmugDNA.1882.1  | 10.73 | 10.57 | 0.04 | 0.17 | 1.12  | 0.658879 | 0.434404 | 0.864931 | 0.654546 |
| MmugDNA.18823.1.S1_at   | MmugDNA.18823.1 | 6.72  | 6.7   | 0.09 | 0.04 | 1.01  | 0.186194 | 0.221277 | 0.559101 | 0.4946   |
| MmugDNA.18826.1.S1_at   | MmugDNA.18826.1 | 4.27  | 4.39  | 0.11 | 0.17 | -1.09 | 0.941338 | 0.432532 | 0.980066 | 0.65297  |
| MmugDNA.18827.1.S1_at   | MmugDNA.18827.1 | 9.96  | 9.98  | 0.27 | 0.1  | -1.01 | 0.522588 | 0.041033 | 0.79517  | 0.247319 |
| MmugDNA.18828.1.S1_at   | MmugDNA.18828.1 | 12.17 | 12.16 | 0.36 | 0.1  | 1.01  | 0.983383 | 0.999634 | 0.994928 | 0.999864 |
| MmugDNA.18830.1.S1_at   | MmugDNA.18830.1 | 12    | 10.75 | 1.67 | 0.06 | 2.38  | 0.780276 | 0.154485 | 0.919087 | 0.429395 |
| MmugDNA.18834.1.S1_at   | MmugDNA.18834.1 | 5.83  | 6.83  | 1.84 | 0.46 | -1.99 | 0.472463 | 0.207937 | 0.767074 | 0.482049 |
| MmugDNA.18840.1.S1_at   | MmugDNA.18840.1 | 7.42  | 7.65  | 0.61 | 0.03 | -1.17 | 0.445094 | 0.617979 | 0.751874 | 0.773846 |
| MmugDNA.18843.1.S1_at   | MmugDNA.18843.1 | 10.55 | 10.2  | 0.29 | 0.04 | 1.27  | 0.109234 | 0.007667 | 0.482063 | 0.117109 |
| MmugDNA.18844.1.S1_at   | MmugDNA.18844.1 | 5.05  | 4.73  | 0.94 | 0.16 | 1.25  | 0.477011 | 0.404071 | 0.76966  | 0.632599 |

|                         |                 |       |       |      |      |       |          |          |          |          |
|-------------------------|-----------------|-------|-------|------|------|-------|----------|----------|----------|----------|
| MmugDNA.18845.1.S1_at   | MmugDNA.18845.1 | 4.92  | 4.7   | 0.17 | 0.19 | 1.17  | 0.117959 | 0.154647 | 0.491346 | 0.429562 |
| MmugDNA.18846.1.S1_at   | MmugDNA.18846.1 | 8.84  | 8.65  | 0.46 | 0.09 | 1.14  | 0.803384 | 0.929685 | 0.928371 | 0.9599   |
| MmugDNA.18857.1.S1_at   | MmugDNA.18857.1 | 6.95  | 7.44  | 0.09 | 0.14 | -1.4  | 0.009458 | 0.025646 | 0.242283 | 0.200834 |
| MmugDNA.18860.1.S1_at   | MmugDNA.18860.1 | 4.8   | 4.93  | 0.56 | 0.13 | -1.09 | 0.892752 | 0.933351 | 0.963274 | 0.962162 |
| MmugDNA.18863.1.S1_at   | MmugDNA.18863.1 | 3.12  | 2.98  | 0.13 | 0.16 | 1.1   | 0.849637 | 0.751909 | 0.947112 | 0.855714 |
| MmugDNA.18864.1.S1_at   | MmugDNA.18864.1 | 6.54  | 6.38  | 0.09 | 0.1  | 1.12  | 0.237788 | 0.265681 | 0.604841 | 0.531553 |
| MmugDNA.18866.1.S1_at   | MmugDNA.18866.1 | 5.33  | 5.33  | 0.15 | 0.05 | -1.01 | 0.551761 | 0.790415 | 0.81144  | 0.878858 |
| MmugDNA.18867.1.S1_at   | MmugDNA.18867.1 | 8.5   | 8.51  | 0.12 | 0.11 | -1    | 0.822784 | 0.342339 | 0.936094 | 0.588413 |
| MmugDNA.18869.1.S1_at   | MmugDNA.18869.1 | 5.06  | 5.09  | 0.14 | 0.02 | -1.02 | 0.491882 | 0.713324 | 0.778032 | 0.833681 |
| MmugDNA.1887.1.S1_at    | MmugDNA.1887.1  | 9.63  | 9.77  | 0.61 | 0.14 | -1.1  | 0.329638 | 0.456616 | 0.67648  | 0.670304 |
| MmugDNA.18872.1.S1_at   | MmugDNA.18872.1 | 11.11 | 11.58 | 0.21 | 0.02 | -1.39 | 0.024543 | 0.026154 | 0.319083 | 0.202721 |
| MmugDNA.18873.1.S1_at   | MmugDNA.18873.1 | 10.61 | 10.74 | 0.61 | 0.15 | -1.09 | 0.369489 | 0.52807  | 0.704236 | 0.71643  |
| MmugDNA.18878.1.S1_at   | MmugDNA.18878.1 | 7.93  | 8.23  | 0.08 | 0.08 | -1.23 | 0.018212 | 0.010391 | 0.295507 | 0.133359 |
| MmugDNA.18880.1.S1_at   | MmugDNA.18880.1 | 8.12  | 7.75  | 0.14 | 0.16 | 1.29  | 0.024216 | 0.021814 | 0.317812 | 0.184771 |
| MmugDNA.18890.1.S1_at   | MmugDNA.18890.1 | 7.77  | 8.04  | 0.93 | 0.24 | -1.21 | 0.619839 | 0.205538 | 0.846932 | 0.47981  |
| MmugDNA.18892.1.S1_s_at | MmugDNA.18892.1 | 6.28  | 6.03  | 0.19 | 0.07 | 1.19  | 0.412292 | 0.733833 | 0.731945 | 0.845891 |
| MmugDNA.18897.1.S1_at   | MmugDNA.18897.1 | 4.82  | 4.77  | 0.17 | 0.05 | 1.04  | 0.889049 | 0.924549 | 0.961785 | 0.957386 |
| MmugDNA.18903.1.S1_at   | MmugDNA.18903.1 | 7.04  | 7     | 0.43 | 0.09 | 1.03  | 0.893915 | 0.959338 | 0.963639 | 0.976949 |
| MmugDNA.18905.1.S1_at   | MmugDNA.18905.1 | 7.63  | 7.62  | 0.14 | 0.09 | 1.01  | 0.707205 | 0.351421 | 0.88608  | 0.595054 |
| MmugDNA.18907.1.S1_at   | MmugDNA.18907.1 | 5.53  | 5.53  | 0.14 | 0.01 | 1     | 0.661471 | 0.670735 | 0.866268 | 0.807469 |
| MmugDNA.18909.1.S1_at   | MmugDNA.18909.1 | 5.46  | 5.37  | 0.1  | 0.18 | 1.06  | 0.662942 | 0.757506 | 0.867013 | 0.858849 |
| MmugDNA.18913.1.S1_at   | MmugDNA.18913.1 | 9.7   | 9.85  | 0.05 | 0.03 | -1.11 | 0.007311 | 0.001319 | 0.227232 | 0.055996 |
| MmugDNA.18917.1.S1_at   | MmugDNA.18917.1 | 9.92  | 9.89  | 0.07 | 0.1  | 1.02  | 0.976164 | 0.551674 | 0.992259 | 0.731153 |
| MmugDNA.18923.1.S1_at   | MmugDNA.18923.1 | 7.24  | 7.44  | 0.27 | 0.06 | -1.15 | 0.98652  | 0.169643 | 0.995654 | 0.446221 |
| MmugDNA.18925.1.S1_at   | MmugDNA.18925.1 | 4.53  | 4.3   | 0.21 | 0.32 | 1.17  | 0.797632 | 0.905072 | 0.925624 | 0.946165 |
| MmugDNA.18928.1.S1_at   | MmugDNA.18928.1 | 7.21  | 7.93  | 2.03 | 0.38 | -1.65 | 0.511557 | 0.204509 | 0.78871  | 0.478845 |
| MmugDNA.18937.1.S1_at   | MmugDNA.18937.1 | 5.68  | 5.58  | 0.34 | 0.2  | 1.07  | 0.928549 | 0.173494 | 0.976288 | 0.449938 |
| MmugDNA.18940.1.S1_at   | MmugDNA.18940.1 | 3.78  | 3.67  | 0.21 | 0.07 | 1.08  | 0.384215 | 0.294058 | 0.711853 | 0.553912 |
| MmugDNA.18942.1.S1_at   | MmugDNA.18942.1 | 8.33  | 8.28  | 0.15 | 0.04 | 1.03  | 0.635219 | 0.021013 | 0.854522 | 0.18172  |
| MmugDNA.18948.1.S1_at   | MmugDNA.18948.1 | 11.47 | 11.19 | 0.11 | 0.16 | 1.21  | 0.051923 | 0.0492   | 0.3916   | 0.266627 |
| MmugDNA.18953.1.S1_at   | MmugDNA.18953.1 | 9.2   | 9.36  | 0.25 | 0.19 | -1.11 | 0.50367  | 0.031944 | 0.784375 | 0.221125 |
| MmugDNA.18955.1.S1_at   | MmugDNA.18955.1 | 10.2  | 10.63 | 0.21 | 0.06 | -1.36 | 0.043583 | 0.001125 | 0.372206 | 0.052924 |
| MmugDNA.18956.1.S1_s_at | MmugDNA.18956.1 | 10.68 | 10.23 | 0.16 | 0.11 | 1.37  | 0.037494 | 0.028043 | 0.357206 | 0.208977 |
| MmugDNA.18958.1.S1_at   | MmugDNA.18958.1 | 9.08  | 8.57  | 0.25 | 0.13 | 1.43  | 0.024001 | 0.01945  | 0.317529 | 0.175136 |
| MmugDNA.18969.1.S1_at   | MmugDNA.18969.1 | 12.09 | 11.94 | 0.07 | 0.04 | 1.12  | 0.04849  | 0.036946 | 0.38332  | 0.236659 |
| MmugDNA.18970.1.S1_at   | MmugDNA.18970.1 | 6.6   | 6.84  | 0.36 | 0.11 | -1.18 | 0.328945 | 0.111393 | 0.676135 | 0.376126 |
| MmugDNA.18973.1.S1_at   | MmugDNA.18973.1 | 10.89 | 10.65 | 0.65 | 0.03 | 1.18  | 0.549358 | 0.452044 | 0.810299 | 0.666759 |
| MmugDNA.18980.1.S1_at   | MmugDNA.18980.1 | 6.48  | 6.01  | 0.08 | 0.21 | 1.38  | 0.051657 | 0.053939 | 0.390844 | 0.277766 |
| MmugDNA.18990.1.S1_at   | MmugDNA.18990.1 | 5.57  | 5.98  | 0.72 | 0.61 | -1.33 | 0.764453 | 0.917916 | 0.911492 | 0.954027 |
| MmugDNA.18991.1.S1_at   | MmugDNA.18991.1 | 9.62  | 9.67  | 0.6  | 0.19 | -1.03 | 0.913577 | 0.604303 | 0.970603 | 0.764558 |
| MmugDNA.18992.1.S1_at   | MmugDNA.18992.1 | 6.78  | 6.79  | 0.05 | 0.1  | -1.01 | 0.507892 | 0.662594 | 0.786553 | 0.802443 |
| MmugDNA.18993.1.S1_at   | MmugDNA.18993.1 | 5.35  | 5.02  | 0.33 | 0.09 | 1.26  | 0.1907   | 0.141954 | 0.561788 | 0.415503 |
| MmugDNA.18996.1.S1_at   | MmugDNA.18996.1 | 10.58 | 10.44 | 0.13 | 0.07 | 1.1   | 0.63044  | 0.093478 | 0.851961 | 0.34983  |

|                         |                 |       |       |      |      |       |          |          |          |          |
|-------------------------|-----------------|-------|-------|------|------|-------|----------|----------|----------|----------|
| MmugDNA.18998.1.S1_at   | MmugDNA.18998.1 | 8.58  | 8.62  | 0.28 | 0.01 | -1.03 | 0.498604 | 0.607346 | 0.78181  | 0.766359 |
| MmugDNA.18999.1.S1_at   | MmugDNA.18999.1 | 9.92  | 8.27  | 0.77 | 0.5  | 3.14  | 0.059739 | 0.142905 | 0.406922 | 0.416854 |
| MmugDNA.19000.1.S1_at   | MmugDNA.19000.1 | 4.6   | 4.57  | 0.1  | 0.02 | 1.02  | 0.810075 | 0.953039 | 0.931255 | 0.973379 |
| MmugDNA.19005.1.S1_at   | MmugDNA.19005.1 | 7.79  | 8.39  | 0.15 | 0.24 | -1.51 | 0.037529 | 0.063187 | 0.357309 | 0.298115 |
| MmugDNA.19008.1.S1_at   | MmugDNA.19008.1 | 12.76 | 12.23 | 0.83 | 0.21 | 1.45  | 0.78758  | 0.561023 | 0.921953 | 0.737076 |
| MmugDNA.19013.1.S1_s_at | MmugDNA.19013.1 | 3.93  | 3.63  | 0.06 | 0.1  | 1.23  | 0.010259 | 0.047017 | 0.246929 | 0.261469 |
| MmugDNA.19017.1.S1_at   | MmugDNA.19017.1 | 4.18  | 4.26  | 0.16 | 0.12 | -1.06 | 0.517696 | 0.40007  | 0.792242 | 0.630158 |
| MmugDNA.19022.1.S1_at   | MmugDNA.19022.1 | 4.45  | 4.25  | 0.42 | 0.33 | 1.15  | 0.964302 | 0.735172 | 0.988358 | 0.846748 |
| MmugDNA.19026.1.S1_at   | MmugDNA.19026.1 | 5.51  | 5.28  | 0.06 | 0.11 | 1.17  | 0.081438 | 0.464858 | 0.445406 | 0.675463 |
| MmugDNA.19033.1.S1_at   | MmugDNA.19033.1 | 3.56  | 3.56  | 0.08 | 0.09 | -1    | 0.895472 | 0.610264 | 0.964244 | 0.7685   |
| MmugDNA.19039.1.S1_at   | MmugDNA.19039.1 | 4.26  | 4.31  | 0.11 | 0.13 | -1.04 | 0.829958 | 0.901776 | 0.93898  | 0.944082 |
| MmugDNA.19040.1.S1_at   | MmugDNA.19040.1 | 9.87  | 9.45  | 0.11 | 0.09 | 1.34  | 0.007304 | 0.007806 | 0.227133 | 0.117858 |
| MmugDNA.19043.1.S1_at   | MmugDNA.19043.1 | 10.59 | 10.34 | 0.22 | 0.53 | 1.19  | 0.879018 | 0.249448 | 0.957933 | 0.518532 |
| MmugDNA.19047.1.S1_at   | MmugDNA.19047.1 | 11.73 | 11.8  | 0.22 | 0.04 | -1.04 | 0.905962 | 0.820008 | 0.968196 | 0.896303 |
| MmugDNA.19049.1.S1_at   | MmugDNA.19049.1 | 10.11 | 9.92  | 0.3  | 0.04 | 1.14  | 0.088299 | 0.10992  | 0.45606  | 0.37398  |
| MmugDNA.19050.1.S1_at   | MmugDNA.19050.1 | 12.02 | 12.35 | 0.75 | 0.14 | -1.26 | 0.534772 | 0.225639 | 0.801404 | 0.498155 |
| MmugDNA.19051.1.S1_at   | MmugDNA.19051.1 | 12.16 | 12    | 0.08 | 0.16 | 1.12  | 0.313993 | 0.764562 | 0.66498  | 0.863128 |
| MmugDNA.19056.1.S1_at   | MmugDNA.19056.1 | 10.43 | 9.94  | 1.3  | 0.19 | 1.4   | 0.682515 | 0.153725 | 0.875756 | 0.428413 |
| MmugDNA.19066.1.S1_at   | MmugDNA.19066.1 | 10.81 | 10.38 | 3.55 | 0.52 | 1.35  | 0.63941  | 0.341391 | 0.85626  | 0.587526 |
| MmugDNA.19068.1.S1_x_at | MmugDNA.19068.1 | 3.91  | 3.89  | 0.19 | 0.05 | 1.01  | 0.46304  | 0.321351 | 0.761921 | 0.57319  |
| MmugDNA.19069.1.S1_at   | MmugDNA.19069.1 | 9.61  | 10.06 | 0.15 | 0.15 | -1.37 | 0.020596 | 0.044906 | 0.304935 | 0.256424 |
| MmugDNA.19070.1.S1_at   | MmugDNA.19070.1 | 7.84  | 7.91  | 0.51 | 0.23 | -1.05 | 0.366259 | 0.288347 | 0.701752 | 0.549631 |
| MmugDNA.19074.1.S1_at   | MmugDNA.19074.1 | 7.73  | 8.04  | 0.34 | 0.14 | -1.24 | 0.616353 | 0.618181 | 0.84491  | 0.77393  |
| MmugDNA.19075.1.S1_at   | MmugDNA.19075.1 | 7.23  | 7.24  | 0.09 | 0.04 | -1    | 0.936279 | 0.532873 | 0.978555 | 0.719273 |
| MmugDNA.19086.1.S1_at   | MmugDNA.19086.1 | 7.03  | 7.25  | 2.08 | 0.24 | -1.16 | 0.690562 | 0.24347  | 0.879504 | 0.513527 |
| MmugDNA.19092.1.S1_at   | MmugDNA.19092.1 | 11.52 | 11.57 | 0.12 | 0.04 | -1.04 | 0.167859 | 0.155521 | 0.5405   | 0.430888 |
| MmugDNA.19096.1.S1_at   | MmugDNA.19096.1 | 3.26  | 3.42  | 0.07 | 0.09 | -1.12 | 0.0715   | 0.054859 | 0.431049 | 0.279693 |
| MmugDNA.19097.1.S1_at   | MmugDNA.19097.1 | 7.58  | 7.63  | 0.27 | 0.26 | -1.03 | 0.927107 | 0.99375  | 0.97582  | 0.996274 |
| MmugDNA.1910.1.S1_at    | MmugDNA.1910.1  | 8.46  | 8.7   | 0.3  | 0.03 | -1.18 | 0.710868 | 0.22192  | 0.88743  | 0.495019 |
| MmugDNA.19107.1.S1_at   | MmugDNA.19107.1 | 9.68  | 9.77  | 0.04 | 0.07 | -1.06 | 0.352124 | 0.09674  | 0.692649 | 0.354171 |
| MmugDNA.19109.1.S1_at   | MmugDNA.19109.1 | 6.95  | 7.28  | 0.66 | 0.22 | -1.26 | 0.611604 | 0.032621 | 0.84257  | 0.223644 |
| MmugDNA.1911.1.S1_at    | MmugDNA.1911.1  | 9.01  | 9.33  | 0.21 | 0.15 | -1.25 | 0.035774 | 0.160117 | 0.353107 | 0.436296 |
| MmugDNA.19111.1.S1_at   | MmugDNA.19111.1 | 12.6  | 12.18 | 0.81 | 0.16 | 1.34  | 0.782928 | 0.37688  | 0.920107 | 0.614628 |
| MmugDNA.19112.1.S1_at   | MmugDNA.19112.1 | 3.33  | 3.25  | 0.05 | 0.11 | 1.06  | 0.132691 | 0.303655 | 0.506936 | 0.561088 |
| MmugDNA.19113.1.S1_at   | MmugDNA.19113.1 | 13.23 | 12.49 | 0.3  | 0.4  | 1.66  | 0.043071 | 0.014647 | 0.371135 | 0.154213 |
| MmugDNA.19120.1.S1_at   | MmugDNA.19120.1 | 6.39  | 4.9   | 1.15 | 0.31 | 2.82  | 0.157809 | 0.195379 | 0.53073  | 0.470253 |
| MmugDNA.19123.1.S1_at   | MmugDNA.19123.1 | 5.96  | 6.53  | 0.78 | 0.28 | -1.48 | 0.101819 | 0.101601 | 0.472121 | 0.361498 |
| MmugDNA.19125.1.S1_at   | MmugDNA.19125.1 | 3.71  | 3.65  | 0.11 | 0.2  | 1.05  | 0.71881  | 0.486563 | 0.890773 | 0.689898 |
| MmugDNA.19126.1.S1_at   | MmugDNA.19126.1 | 4.9   | 3.82  | 0.93 | 0.71 | 2.11  | 0.263547 | 0.048674 | 0.62553  | 0.265629 |
| MmugDNA.19127.1.S1_s_at | MmugDNA.19127.1 | 11.08 | 11.42 | 0.17 | 0.06 | -1.26 | 0.056302 | 0.069689 | 0.399837 | 0.310164 |
| MmugDNA.19132.1.S1_at   | MmugDNA.19132.1 | 9.93  | 10.61 | 0.24 | 0.07 | -1.6  | 0.018811 | 0.057732 | 0.298593 | 0.2866   |
| MmugDNA.19138.1.S1_at   | MmugDNA.19138.1 | 7.75  | 7.34  | 0.2  | 0.1  | 1.33  | 0.138085 | 0.34245  | 0.513671 | 0.588507 |
| MmugDNA.19145.1.S1_at   | MmugDNA.19145.1 | 11.96 | 12.83 | 1.05 | 0.1  | -1.84 | 0.163729 | 0.144906 | 0.536523 | 0.418811 |

|                         |                 |       |       |      |      |       |          |          |          |          |
|-------------------------|-----------------|-------|-------|------|------|-------|----------|----------|----------|----------|
| MmugDNA.19153.1.S1_at   | MmugDNA.19153.1 | 7.16  | 7.18  | 0.09 | 0.04 | -1.01 | 0.43469  | 0.377396 | 0.745254 | 0.6149   |
| MmugDNA.1916.1.S1_at    | MmugDNA.1916.1  | 5.9   | 5.58  | 0.27 | 0.31 | 1.25  | 0.12243  | 0.768063 | 0.495805 | 0.865344 |
| MmugDNA.19161.1.S1_at   | MmugDNA.19161.1 | 9.22  | 9.32  | 0.95 | 0.14 | -1.07 | 0.84849  | 0.7146   | 0.946776 | 0.834435 |
| MmugDNA.19162.1.S1_at   | MmugDNA.19162.1 | 4.55  | 4.58  | 0    | 0.17 | -1.02 | 0.993355 | 0.993337 | 0.997445 | 0.99605  |
| MmugDNA.19166.1.S1_at   | MmugDNA.19166.1 | 11.31 | 11.38 | 0.13 | 0.05 | -1.05 | 0.51875  | 0.296283 | 0.792822 | 0.555423 |
| MmugDNA.19167.1.S1_at   | MmugDNA.19167.1 | 4.15  | 4.7   | 0.15 | 0.69 | -1.47 | 0.152642 | 0.119244 | 0.525558 | 0.387751 |
| MmugDNA.19168.1.S1_at   | MmugDNA.19168.1 | 8.38  | 8.56  | 0.19 | 0.01 | -1.14 | 0.162356 | 0.030241 | 0.5354   | 0.215784 |
| MmugDNA.19170.1.S1_at   | MmugDNA.19170.1 | 10.67 | 10.88 | 0.63 | 0.13 | -1.15 | 0.439236 | 0.03014  | 0.748019 | 0.215467 |
| MmugDNA.19183.1.S1_at   | MmugDNA.19183.1 | 5.47  | 5.54  | 0.08 | 0.08 | -1.06 | 0.120508 | 0.271724 | 0.493916 | 0.536577 |
| MmugDNA.1920.1.S1_at    | MmugDNA.1920.1  | 10.49 | 10.2  | 0.07 | 0.09 | 1.23  | 0.011602 | 0.191246 | 0.255776 | 0.466553 |
| MmugDNA.19203.1.S1_at   | MmugDNA.19203.1 | 13.14 | 13.18 | 0.21 | 0.06 | -1.03 | 0.673845 | 0.854509 | 0.871612 | 0.917099 |
| MmugDNA.19204.1.S1_at   | MmugDNA.19204.1 | 11.88 | 12.33 | 0.3  | 0.05 | -1.37 | 0.15544  | 0.012344 | 0.528651 | 0.143697 |
| MmugDNA.19207.1.S1_at   | MmugDNA.19207.1 | 12.98 | 13.04 | 0.1  | 0.02 | -1.05 | 0.410509 | 0.285352 | 0.730749 | 0.547198 |
| MmugDNA.19208.1.S1_at   | MmugDNA.19208.1 | 10.99 | 11.23 | 0.17 | 0.07 | -1.18 | 0.266436 | 0.125759 | 0.627329 | 0.396313 |
| MmugDNA.19209.1.S1_s_at | MmugDNA.19209.1 | 8.86  | 8.4   | 1.89 | 0.33 | 1.38  | 0.71831  | 0.023249 | 0.890613 | 0.191114 |
| MmugDNA.19214.1.S1_at   | MmugDNA.19214.1 | 6.63  | 6.53  | 0.18 | 0.04 | 1.07  | 0.108968 | 0.227729 | 0.481332 | 0.499979 |
| MmugDNA.19217.1.S1_at   | MmugDNA.19217.1 | 6.63  | 7.74  | 2.5  | 0.34 | -2.17 | 0.526305 | 0.746442 | 0.796483 | 0.852816 |
| MmugDNA.19219.1.S1_at   | MmugDNA.19219.1 | 6.97  | 7.67  | 0.69 | 0.39 | -1.62 | 0.551294 | 0.775652 | 0.811314 | 0.869465 |
| MmugDNA.19220.1.S1_at   | MmugDNA.19220.1 | 5.81  | 5.65  | 0.29 | 0.1  | 1.12  | 0.428545 | 0.576092 | 0.74196  | 0.74698  |
| MmugDNA.19222.1.S1_at   | MmugDNA.19222.1 | 4.07  | 5.05  | 0.21 | 0.03 | -1.98 | 0.001202 | 0.000012 | 0.156386 | 0.016526 |
| MmugDNA.19224.1.S1_at   | MmugDNA.19224.1 | 11.99 | 12.34 | 0.12 | 0.03 | -1.27 | 0.010087 | 0.000804 | 0.246421 | 0.04607  |
| MmugDNA.19225.1.S1_at   | MmugDNA.19225.1 | 6.31  | 6.43  | 1.17 | 0.3  | -1.09 | 0.686413 | 0.242586 | 0.877372 | 0.51293  |
| MmugDNA.19229.1.S1_at   | MmugDNA.19229.1 | 10.18 | 9.98  | 0.08 | 0.1  | 1.15  | 0.063349 | 0.464375 | 0.415687 | 0.67504  |
| MmugDNA.19230.1.S1_at   | MmugDNA.19230.1 | 11.59 | 11.44 | 0.11 | 0.05 | 1.11  | 0.094807 | 0.680545 | 0.464072 | 0.813481 |
| MmugDNA.19230.1.S1_s_at | MmugDNA.19230.1 | 10.94 | 10.53 | 0.11 | 0.07 | 1.32  | 0.005066 | 0.177354 | 0.204969 | 0.453742 |
| MmugDNA.19231.1.S1_at   | MmugDNA.19231.1 | 5.65  | 5.25  | 1.34 | 0.25 | 1.31  | 0.664557 | 0.888382 | 0.867683 | 0.936346 |
| MmugDNA.19233.1.S1_at   | MmugDNA.19233.1 | 9.13  | 9.1   | 0.18 | 0.02 | 1.02  | 0.645131 | 0.648068 | 0.858718 | 0.793977 |
| MmugDNA.19236.1.S1_at   | MmugDNA.19236.1 | 11.56 | 11.75 | 0.22 | 0.02 | -1.14 | 0.590575 | 0.724241 | 0.832911 | 0.840433 |
| MmugDNA.19238.1.S1_at   | MmugDNA.19238.1 | 11.18 | 11.58 | 0.73 | 0.07 | -1.32 | 0.22385  | 0.279911 | 0.59298  | 0.543342 |
| MmugDNA.19242.1.S1_at   | MmugDNA.19242.1 | 11.43 | 11.7  | 0.04 | 0.1  | -1.21 | 0.015822 | 0.11009  | 0.284247 | 0.374221 |
| MmugDNA.19246.1.S1_s_at | MmugDNA.19246.1 | 9.18  | 8.53  | 0.4  | 0.24 | 1.57  | 0.043073 | 0.003091 | 0.371135 | 0.081194 |
| MmugDNA.19250.1.S1_at   | MmugDNA.19250.1 | 5.23  | 5.13  | 0.07 | 0.18 | 1.07  | 0.509281 | 0.884961 | 0.787587 | 0.934455 |
| MmugDNA.19252.1.S1_at   | MmugDNA.19252.1 | 9.96  | 10.66 | 0.33 | 0.18 | -1.63 | 0.018479 | 0.006665 | 0.297469 | 0.11055  |
| MmugDNA.19254.1.S1_at   | MmugDNA.19254.1 | 4.51  | 4.64  | 0.21 | 0.34 | -1.09 | 0.485615 | 0.768964 | 0.774398 | 0.865764 |
| MmugDNA.19255.1.S1_at   | MmugDNA.19255.1 | 3.38  | 3.41  | 0.08 | 0.13 | -1.02 | 0.93796  | 0.458018 | 0.979152 | 0.671022 |
| MmugDNA.19258.1.S1_at   | MmugDNA.19258.1 | 3.62  | 3.56  | 0.02 | 0.07 | 1.04  | 0.286705 | 0.09492  | 0.643923 | 0.352044 |
| MmugDNA.19264.1.S1_at   | MmugDNA.19264.1 | 13.12 | 12.9  | 0.08 | 0.03 | 1.17  | 0.019023 | 0.039284 | 0.29965  | 0.243338 |
| MmugDNA.19265.1.S1_at   | MmugDNA.19265.1 | 11.84 | 11.89 | 0.14 | 0.06 | -1.04 | 0.881481 | 0.266306 | 0.959052 | 0.532099 |
| MmugDNA.19266.1.S1_at   | MmugDNA.19266.1 | 5.44  | 6.3   | 1.6  | 0.26 | -1.82 | 0.415339 | 0.043683 | 0.733613 | 0.253711 |
| MmugDNA.1927.1.S1_at    | MmugDNA.1927.1  | 9.92  | 10.95 | 0.2  | 0.08 | -2.04 | 0.001139 | 0.000141 | 0.156386 | 0.029307 |
| MmugDNA.19272.1.S1_s_at | MmugDNA.19272.1 | 10.03 | 10.04 | 0.23 | 0.24 | -1    | 0.932003 | 0.002248 | 0.977118 | 0.069739 |
| MmugDNA.19276.1.S1_at   | MmugDNA.19276.1 | 10.6  | 10.79 | 0.16 | 0.21 | -1.14 | 0.130202 | 0.508972 | 0.504663 | 0.703967 |
| MmugDNA.19282.1.S1_at   | MmugDNA.19282.1 | 13.39 | 13.41 | 0.04 | 0.07 | -1.02 | 0.151431 | 0.293447 | 0.524547 | 0.553405 |



|                         |                 |       |       |      |      |       |          |          |          |          |
|-------------------------|-----------------|-------|-------|------|------|-------|----------|----------|----------|----------|
| MmugDNA.19284.1.S1_at   | MmugDNA.19284.1 | 5.51  | 5.88  | 0.33 | 0.09 | -1.29 | 0.048509 | 0.310748 | 0.38332  | 0.565809 |
| MmugDNA.19286.1.S1_at   | MmugDNA.19286.1 | 7.89  | 7.86  | 0.61 | 0.24 | 1.02  | 0.39053  | 0.578225 | 0.716814 | 0.748369 |
| MmugDNA.1929.1.S1_at    | MmugDNA.1929.1  | 7.92  | 7.92  | 0.28 | 0.24 | 1     | 0.548167 | 0.571689 | 0.809556 | 0.743916 |
| MmugDNA.19295.1.S1_at   | MmugDNA.19295.1 | 8.61  | 8.88  | 0.18 | 0.05 | -1.21 | 0.140792 | 0.200828 | 0.5163   | 0.475342 |
| MmugDNA.19298.1.S1_at   | MmugDNA.19298.1 | 10.05 | 8.5   | 1.03 | 0.32 | 2.94  | 0.072737 | 0.027122 | 0.433332 | 0.205797 |
| MmugDNA.19300.1.S1_at   | MmugDNA.19300.1 | 8.94  | 9.32  | 0.39 | 0.13 | -1.31 | 0.72668  | 0.72729  | 0.894392 | 0.84224  |
| MmugDNA.19301.1.S1_at   | MmugDNA.19301.1 | 11.6  | 11.26 | 0.19 | 0.02 | 1.27  | 0.080759 | 0.077266 | 0.444813 | 0.322945 |
| MmugDNA.19302.1.S1_at   | MmugDNA.19302.1 | 7.33  | 8.31  | 0.71 | 0.1  | -1.97 | 0.075251 | 0.027948 | 0.436118 | 0.208684 |
| MmugDNA.19311.1.S1_at   | MmugDNA.19311.1 | 10.12 | 10.52 | 0.08 | 0.11 | -1.32 | 0.008644 | 0.026675 | 0.236048 | 0.204238 |
| MmugDNA.19315.1.S1_at   | MmugDNA.19315.1 | 7.21  | 7.07  | 0.11 | 0.28 | 1.1   | 0.573004 | 0.003926 | 0.823428 | 0.089123 |
| MmugDNA.19316.1.S1_at   | MmugDNA.19316.1 | 5.99  | 6.28  | 0.09 | 0.06 | -1.22 | 0.009314 | 0.098379 | 0.241866 | 0.356513 |
| MmugDNA.19318.1.S1_at   | MmugDNA.19318.1 | 11.54 | 11.69 | 0.27 | 0.06 | -1.11 | 0.166795 | 0.121742 | 0.539457 | 0.391024 |
| MmugDNA.19320.1.S1_at   | MmugDNA.19320.1 | 3.65  | 3.65  | 0.05 | 0    | 1     | 0.384138 | 0.952514 | 0.711835 | 0.973066 |
| MmugDNA.19320.1.S1_x_at | MmugDNA.19320.1 | 3.62  | 3.49  | 0.07 | 0.01 | 1.09  | 0.034079 | 0.523826 | 0.347865 | 0.714044 |
| MmugDNA.19324.1.S1_at   | MmugDNA.19324.1 | 10.09 | 10.09 | 0.55 | 0.26 | 1     | 0.882411 | 0.00658  | 0.959217 | 0.109973 |
| MmugDNA.19331.1.S1_at   | MmugDNA.19331.1 | 8.17  | 8.91  | 1.02 | 0.05 | -1.67 | 0.285821 | 0.1809   | 0.643438 | 0.457397 |
| MmugDNA.19332.1.S1_at   | MmugDNA.19332.1 | 4.82  | 3.4   | 1.06 | 0.44 | 2.68  | 0.120366 | 0.181383 | 0.49361  | 0.457918 |
| MmugDNA.1934.1.S1_at    | MmugDNA.1934.1  | 4.95  | 4.78  | 0.32 | 0.09 | 1.13  | 0.433085 | 0.590868 | 0.744201 | 0.75649  |
| MmugDNA.19341.1.S1_at   | MmugDNA.19341.1 | 4.67  | 4.69  | 0.1  | 0.05 | -1.02 | 0.621327 | 0.896656 | 0.847514 | 0.94094  |
| MmugDNA.19342.1.S1_at   | MmugDNA.19342.1 | 3.28  | 3.33  | 0.22 | 0.06 | -1.04 | 0.745332 | 0.097423 | 0.902969 | 0.355097 |
| MmugDNA.19347.1.S1_at   | MmugDNA.19347.1 | 6.38  | 7     | 0.82 | 0.12 | -1.54 | 0.487103 | 0.63364  | 0.774859 | 0.784317 |
| MmugDNA.19348.1.S1_at   | MmugDNA.19348.1 | 7.14  | 7.02  | 0.04 | 0.04 | 1.08  | 0.010605 | 0.362782 | 0.2485   | 0.603287 |
| MmugDNA.19349.1.S1_at   | MmugDNA.19349.1 | 7.42  | 7.61  | 0.11 | 0.1  | -1.14 | 0.089159 | 0.082338 | 0.456902 | 0.331312 |
| MmugDNA.19352.1.S1_at   | MmugDNA.19352.1 | 3.33  | 3.26  | 0.21 | 0.12 | 1.05  | 0.436636 | 0.477349 | 0.746362 | 0.683422 |
| MmugDNA.19353.1.S1_at   | MmugDNA.19353.1 | 10.17 | 10.15 | 0.1  | 0.05 | 1.01  | 0.494489 | 0.230859 | 0.779472 | 0.502546 |
| MmugDNA.19358.1.S1_at   | MmugDNA.19358.1 | 5.8   | 5.64  | 0.14 | 0.11 | 1.11  | 0.227752 | 0.436342 | 0.596693 | 0.655923 |
| MmugDNA.19361.1.S1_at   | MmugDNA.19361.1 | 5.89  | 5.83  | 0.17 | 0.09 | 1.04  | 0.44447  | 0.3295   | 0.751266 | 0.578781 |
| MmugDNA.19362.1.S1_s_at | MmugDNA.19362.1 | 4.69  | 5.04  | 0.13 | 0.36 | -1.28 | 0.356561 | 0.342796 | 0.695204 | 0.588712 |
| MmugDNA.19370.1.S1_at   | MmugDNA.19370.1 | 6.42  | 7.15  | 0.12 | 0.15 | -1.66 | 0.001727 | 0.00038  | 0.166176 | 0.037273 |
| MmugDNA.19377.1.S1_at   | MmugDNA.19377.1 | 13.87 | 13.93 | 0.42 | 0.08 | -1.04 | 0.628982 | 0.174594 | 0.851379 | 0.451097 |
| MmugDNA.19380.1.S1_at   | MmugDNA.19380.1 | 10.69 | 10.88 | 0.53 | 0.09 | -1.14 | 0.71494  | 0.060069 | 0.889025 | 0.291761 |
| MmugDNA.19382.1.S1_at   | MmugDNA.19382.1 | 5.61  | 6.66  | 0.6  | 0.33 | -2.08 | 0.051843 | 0.052585 | 0.391521 | 0.274848 |
| MmugDNA.19383.1.S1_at   | MmugDNA.19383.1 | 9.89  | 10.07 | 0.16 | 0.02 | -1.14 | 0.041594 | 0.002037 | 0.366909 | 0.066885 |
| MmugDNA.19385.1.S1_at   | MmugDNA.19385.1 | 11.89 | 11.77 | 0.18 | 0.1  | 1.09  | 0.234116 | 0.336852 | 0.601531 | 0.584113 |
| MmugDNA.19388.1.S1_at   | MmugDNA.19388.1 | 7.44  | 7.19  | 0.19 | 0.07 | 1.19  | 0.102843 | 0.211769 | 0.473259 | 0.485757 |
| MmugDNA.1939.1.S1_at    | MmugDNA.1939.1  | 9.13  | 9.76  | 1.55 | 0.27 | -1.55 | 0.498892 | 0.212294 | 0.781844 | 0.486197 |
| MmugDNA.19390.1.S1_at   | MmugDNA.19390.1 | 5.35  | 5.08  | 0.08 | 0.1  | 1.2   | 0.046572 | 0.259477 | 0.378317 | 0.526418 |
| MmugDNA.19394.1.S1_at   | MmugDNA.19394.1 | 10.88 | 10.73 | 0.22 | 0.11 | 1.11  | 0.843311 | 0.135206 | 0.944627 | 0.407275 |
| MmugDNA.19402.1.S1_at   | MmugDNA.19402.1 | 12.03 | 12.45 | 0.46 | 0.03 | -1.33 | 0.190769 | 0.002281 | 0.561793 | 0.07037  |
| MmugDNA.1941.1.S1_at    | MmugDNA.1941.1  | 4.1   | 4.1   | 0.29 | 0.12 | 1     | 0.992863 | 0.982419 | 0.997353 | 0.99036  |
| MmugDNA.19411.1.S1_at   | MmugDNA.19411.1 | 4.59  | 6.44  | 0.48 | 0.48 | -3.61 | 0.014996 | 0.013631 | 0.2791   | 0.149433 |
| MmugDNA.19417.1.S1_at   | MmugDNA.19417.1 | 11.17 | 10.16 | 1.61 | 0.15 | 2.01  | 0.991953 | 0.091465 | 0.996875 | 0.346492 |
| MmugDNA.19418.1.S1_at   | MmugDNA.19418.1 | 4.39  | 4.33  | 0.05 | 0.08 | 1.04  | 0.179806 | 0.823182 | 0.553052 | 0.898361 |

|                         |                 |       |       |      |      |       |          |          |          |          |
|-------------------------|-----------------|-------|-------|------|------|-------|----------|----------|----------|----------|
| MmugDNA.1942.1.S1_at    | MmugDNA.1942.1  | 12.47 | 12.2  | 0.28 | 0.12 | 1.21  | 0.348619 | 0.02131  | 0.689949 | 0.182738 |
| MmugDNA.19420.1.S1_at   | MmugDNA.19420.1 | 10.23 | 8.88  | 0.18 | 0.11 | 2.55  | 0.000395 | 0.000018 | 0.137028 | 0.019635 |
| MmugDNA.19428.1.S1_at   | MmugDNA.19428.1 | 7.55  | 7.9   | 2.55 | 0.41 | -1.27 | 0.472755 | 0.513835 | 0.767224 | 0.707281 |
| MmugDNA.19430.1.S1_at   | MmugDNA.19430.1 | 10.91 | 10.86 | 0.46 | 0.05 | 1.04  | 0.8709   | 0.964288 | 0.955149 | 0.98014  |
| MmugDNA.19435.1.S1_at   | MmugDNA.19435.1 | 5.46  | 5.87  | 0.2  | 0.05 | -1.33 | 0.074407 | 0.018465 | 0.435313 | 0.170923 |
| MmugDNA.19435.1.S1_s_at | MmugDNA.19435.1 | 12.26 | 12.64 | 0.2  | 0.12 | -1.3  | 0.076146 | 0.117601 | 0.4375   | 0.38531  |
| MmugDNA.19438.1.S1_at   | MmugDNA.19438.1 | 10.54 | 10.47 | 0.3  | 0.04 | 1.05  | 0.725523 | 0.016179 | 0.893676 | 0.161214 |
| MmugDNA.19443.1.S1_at   | MmugDNA.19443.1 | 9.3   | 7.64  | 1.49 | 0.1  | 3.15  | 0.418245 | 0.276745 | 0.735441 | 0.540655 |
| MmugDNA.19449.1.S1_at   | MmugDNA.19449.1 | 11.48 | 11.48 | 0.26 | 0.06 | 1     | 0.729615 | 0.098635 | 0.895824 | 0.356743 |
| MmugDNA.19449.1.S1_s_at | MmugDNA.19449.1 | 11.19 | 11.24 | 0.28 | 0.04 | -1.03 | 0.533204 | 0.08592  | 0.800767 | 0.338084 |
| MmugDNA.19455.1.S1_at   | MmugDNA.19455.1 | 10.71 | 10.82 | 0.19 | 0.06 | -1.08 | 0.332445 | 0.418893 | 0.678846 | 0.643141 |
| MmugDNA.19456.1.S1_at   | MmugDNA.19456.1 | 13.3  | 13    | 0.21 | 0.13 | 1.23  | 0.106607 | 0.010692 | 0.479    | 0.135065 |
| MmugDNA.19457.1.S1_at   | MmugDNA.19457.1 | 13.48 | 13.61 | 0.05 | 0.06 | -1.09 | 0.044568 | 0.055625 | 0.374916 | 0.281649 |
| MmugDNA.19457.1.S1_s_at | MmugDNA.19457.1 | 13.69 | 13.74 | 0.09 | 0.03 | -1.04 | 0.10126  | 0.056715 | 0.471667 | 0.284246 |
| MmugDNA.19463.1.S1_s_at | MmugDNA.19463.1 | 3.37  | 3.25  | 0.13 | 0.87 | 1.09  | 0.510857 | 0.70532  | 0.788393 | 0.829145 |
| MmugDNA.19464.1.S1_at   | MmugDNA.19464.1 | 11.58 | 12.06 | 0.01 | 0.03 | -1.39 | 0.000018 | 0.000036 | 0.108151 | 0.023031 |
| MmugDNA.19475.1.S1_at   | MmugDNA.19475.1 | 10.31 | 10.73 | 0.5  | 0.07 | -1.33 | 0.13709  | 0.05554  | 0.512022 | 0.281454 |
| MmugDNA.19481.1.S1_at   | MmugDNA.19481.1 | 6     | 5.84  | 0.25 | 0.06 | 1.12  | 0.537523 | 0.662422 | 0.802735 | 0.802321 |
| MmugDNA.19484.1.S1_at   | MmugDNA.19484.1 | 5.67  | 6.69  | 1.31 | 0.65 | -2.03 | 0.91764  | 0.771084 | 0.972048 | 0.866936 |
| MmugDNA.19486.1.S1_at   | MmugDNA.19486.1 | 4.98  | 4.92  | 0.44 | 0.34 | 1.04  | 0.87176  | 0.785611 | 0.955537 | 0.875891 |
| MmugDNA.19488.1.S1_at   | MmugDNA.19488.1 | 7.24  | 7.57  | 0.49 | 0.14 | -1.26 | 0.868586 | 0.003414 | 0.953998 | 0.084071 |
| MmugDNA.19492.1.S1_at   | MmugDNA.19492.1 | 4.03  | 3.6   | 0.09 | 0.48 | 1.34  | 0.753977 | 0.292139 | 0.907261 | 0.552299 |
| MmugDNA.195.1.S1_at     | MmugDNA.195.1   | 11.32 | 10.99 | 0.13 | 0.18 | 1.26  | 0.028555 | 0.018351 | 0.332627 | 0.170347 |
| MmugDNA.19506.1.S1_at   | MmugDNA.19506.1 | 4.16  | 4.3   | 0.32 | 0.05 | -1.1  | 0.774618 | 0.94809  | 0.91642  | 0.970446 |
| MmugDNA.19512.1.S1_at   | MmugDNA.19512.1 | 7.71  | 10.34 | 0.54 | 0.32 | -6.2  | 0.002219 | 0.003296 | 0.174757 | 0.082571 |
| MmugDNA.19513.1.S1_at   | MmugDNA.19513.1 | 3.75  | 3.6   | 0.09 | 0.09 | 1.11  | 0.055329 | 0.473505 | 0.39842  | 0.680769 |
| MmugDNA.19515.1.S1_at   | MmugDNA.19515.1 | 3.83  | 3.83  | 0.22 | 0.09 | -1    | 0.255882 | 0.408558 | 0.61986  | 0.635752 |
| MmugDNA.19520.1.S1_at   | MmugDNA.19520.1 | 11.32 | 11.61 | 0.59 | 0.26 | -1.22 | 0.631644 | 0.01014  | 0.852513 | 0.131979 |
| MmugDNA.19530.1.S1_at   | MmugDNA.19530.1 | 4.03  | 4.36  | 0.12 | 0.39 | -1.26 | 0.147805 | 0.085807 | 0.52196  | 0.337901 |
| MmugDNA.19533.1.S1_at   | MmugDNA.19533.1 | 10.99 | 11.14 | 0.88 | 0.1  | -1.11 | 0.713405 | 0.23305  | 0.88844  | 0.50445  |
| MmugDNA.19534.1.S1_at   | MmugDNA.19534.1 | 4.01  | 3.88  | 0.18 | 0.09 | 1.09  | 0.538744 | 0.625747 | 0.803474 | 0.779309 |
| MmugDNA.19538.1.S1_at   | MmugDNA.19538.1 | 3.74  | 3.52  | 0.2  | 0.16 | 1.17  | 0.570871 | 0.826028 | 0.822316 | 0.900052 |
| MmugDNA.19540.1.S1_at   | MmugDNA.19540.1 | 10.07 | 10.55 | 0.07 | 0.24 | -1.39 | 0.03503  | 0.017535 | 0.350898 | 0.167632 |
| MmugDNA.19543.1.S1_at   | MmugDNA.19543.1 | 8.38  | 8.8   | 0.21 | 0.07 | -1.33 | 0.079418 | 0.114193 | 0.442296 | 0.380758 |
| MmugDNA.19546.1.S1_at   | MmugDNA.19546.1 | 4.49  | 4.97  | 0.2  | 0.12 | -1.39 | 0.032721 | 0.014292 | 0.34527  | 0.152639 |
| MmugDNA.19551.1.S1_at   | MmugDNA.19551.1 | 8.21  | 8.32  | 0.03 | 0.03 | -1.08 | 0.015591 | 0.037404 | 0.282748 | 0.237776 |
| MmugDNA.19552.1.S1_s_at | MmugDNA.19552.1 | 11.03 | 10.96 | 0.05 | 0.03 | 1.05  | 0.037865 | 0.044589 | 0.358096 | 0.255578 |
| MmugDNA.19553.1.S1_at   | MmugDNA.19553.1 | 8.32  | 8.19  | 0.44 | 0.18 | 1.1   | 0.848003 | 0.057783 | 0.946629 | 0.286744 |
| MmugDNA.19556.1.S1_at   | MmugDNA.19556.1 | 8.31  | 9.42  | 0.73 | 0.03 | -2.15 | 0.073055 | 0.046227 | 0.433939 | 0.259397 |
| MmugDNA.19561.1.S1_at   | MmugDNA.19561.1 | 3.61  | 3.34  | 0.08 | 0.1  | 1.21  | 0.033426 | 0.090695 | 0.346442 | 0.345151 |
| MmugDNA.19562.1.S1_at   | MmugDNA.19562.1 | 8.52  | 8.32  | 0.2  | 0.22 | 1.15  | 0.210274 | 0.266636 | 0.581624 | 0.532396 |
| MmugDNA.19566.1.S1_at   | MmugDNA.19566.1 | 4.93  | 4.7   | 0.6  | 0.18 | 1.18  | 0.507437 | 0.065168 | 0.786376 | 0.301239 |
| MmugDNA.19567.1.S1_at   | MmugDNA.19567.1 | 10.66 | 10.63 | 1.29 | 0.11 | 1.02  | 0.410599 | 0.529104 | 0.730828 | 0.717134 |

|                         |                 |       |       |      |      |       |          |          |          |          |
|-------------------------|-----------------|-------|-------|------|------|-------|----------|----------|----------|----------|
| MmugDNA.19567.1.S1_s_at | MmugDNA.19567.1 | 10.1  | 10.05 | 1.18 | 0.05 | 1.03  | 0.786839 | 0.792989 | 0.921699 | 0.880435 |
| MmugDNA.19574.1.S1_at   | MmugDNA.19574.1 | 6.29  | 6.17  | 0.96 | 0.38 | 1.08  | 0.973821 | 0.146852 | 0.991535 | 0.42088  |
| MmugDNA.19575.1.S1_at   | MmugDNA.19575.1 | 3.84  | 3.74  | 0.21 | 0.06 | 1.08  | 0.505567 | 0.766653 | 0.785389 | 0.864438 |
| MmugDNA.19576.1.S1_at   | MmugDNA.19576.1 | 6.8   | 6.94  | 0.31 | 0.26 | -1.11 | 0.253042 | 0.132828 | 0.617861 | 0.404544 |
| MmugDNA.19577.1.S1_at   | MmugDNA.19577.1 | 6.73  | 7     | 0.57 | 0.74 | -1.21 | 0.618052 | 0.319425 | 0.845782 | 0.571762 |
| MmugDNA.19579.1.S1_at   | MmugDNA.19579.1 | 3.73  | 3.68  | 0.11 | 0.11 | 1.04  | 0.167563 | 0.384128 | 0.540101 | 0.619926 |
| MmugDNA.19580.1.S1_at   | MmugDNA.19580.1 | 9.93  | 11.02 | 1.13 | 0.09 | -2.13 | 0.165514 | 0.186595 | 0.538324 | 0.462398 |
| MmugDNA.19581.1.S1_at   | MmugDNA.19581.1 | 8.14  | 8.21  | 0.49 | 0.03 | -1.05 | 0.831745 | 0.532162 | 0.939628 | 0.718995 |
| MmugDNA.19586.1.S1_at   | MmugDNA.19586.1 | 3.43  | 3.25  | 0.12 | 0.11 | 1.13  | 0.323833 | 0.403244 | 0.672332 | 0.631996 |
| MmugDNA.19588.1.S1_at   | MmugDNA.19588.1 | 10.93 | 10.99 | 0.06 | 0.13 | -1.04 | 0.137816 | 0.135357 | 0.513584 | 0.40745  |
| MmugDNA.19594.1.S1_at   | MmugDNA.19594.1 | 10.21 | 10.15 | 0.25 | 0.12 | -1.05 | 0.932741 | 0.023461 | 0.977227 | 0.191956 |
| MmugDNA.19598.1.S1_at   | MmugDNA.19598.1 | 8.73  | 9     | 0.12 | 0.09 | -1.21 | 0.030035 | 0.113929 | 0.336449 | 0.380184 |
| MmugDNA.19599.1.S1_at   | MmugDNA.19599.1 | 8.35  | 8.45  | 0.2  | 0.03 | -1.07 | 0.95593  | 0.988989 | 0.985363 | 0.993708 |
| MmugDNA.19601.1.S1_at   | MmugDNA.19601.1 | 6.78  | 6.1   | 0.83 | 0.12 | 1.6   | 0.166357 | 0.208052 | 0.539008 | 0.482049 |
| MmugDNA.19604.1.S1_at   | MmugDNA.19604.1 | 5.03  | 5.83  | 0.87 | 0.37 | -1.74 | 0.242434 | 0.375169 | 0.608517 | 0.613238 |
| MmugDNA.19605.1.S1_at   | MmugDNA.19605.1 | 5.96  | 6.39  | 0.39 | 0.2  | -1.35 | 0.268921 | 0.504689 | 0.629195 | 0.701774 |
| MmugDNA.1961.1.S1_at    | MmugDNA.1961.1  | 4.5   | 4.52  | 0.12 | 0.04 | -1.01 | 0.489243 | 0.402529 | 0.776032 | 0.631481 |
| MmugDNA.19613.1.S1_at   | MmugDNA.19613.1 | 11.04 | 11.15 | 0.03 | 0.09 | -1.08 | 0.310218 | 0.237421 | 0.662073 | 0.508117 |
| MmugDNA.19614.1.S1_at   | MmugDNA.19614.1 | 8.96  | 9.45  | 0.44 | 0.13 | -1.4  | 0.212734 | 0.001889 | 0.583216 | 0.065004 |
| MmugDNA.19615.1.S1_at   | MmugDNA.19615.1 | 4.16  | 3.88  | 0.09 | 0.05 | 1.21  | 0.023703 | 0.048651 | 0.316281 | 0.265613 |
| MmugDNA.19622.1.S1_at   | MmugDNA.19622.1 | 5.89  | 5.79  | 0.44 | 0.14 | 1.07  | 0.242212 | 0.566176 | 0.608349 | 0.740296 |
| MmugDNA.19644.1.S1_at   | MmugDNA.19644.1 | 10.16 | 10.02 | 1.22 | 0.15 | 1.11  | 0.971352 | 0.55793  | 0.990635 | 0.735297 |
| MmugDNA.19651.1.S1_at   | MmugDNA.19651.1 | 7.4   | 7.16  | 0.72 | 0.4  | 1.18  | 0.264679 | 0.121541 | 0.626029 | 0.390665 |
| MmugDNA.19653.1.S1_at   | MmugDNA.19653.1 | 8.23  | 8.24  | 0.76 | 0.17 | -1    | 0.666908 | 0.651652 | 0.868458 | 0.796301 |
| MmugDNA.19660.1.S1_s_at | MmugDNA.19660.1 | 9.85  | 10.55 | 0.46 | 0.09 | -1.62 | 0.15849  | 0.01647  | 0.531551 | 0.162534 |
| MmugDNA.19663.1.S1_at   | MmugDNA.19663.1 | 9.73  | 10.05 | 0.04 | 0.03 | -1.25 | 0.000443 | 0.016744 | 0.139797 | 0.163889 |
| MmugDNA.19666.1.S1_at   | MmugDNA.19666.1 | 5.88  | 5.57  | 0.11 | 0.08 | 1.24  | 0.023467 | 0.017599 | 0.315664 | 0.167721 |
| MmugDNA.1967.1.S1_at    | MmugDNA.1967.1  | 8.56  | 8.26  | 0.24 | 0.1  | 1.23  | 0.06556  | 0.004003 | 0.420827 | 0.089969 |
| MmugDNA.19671.1.S1_at   | MmugDNA.19671.1 | 4.79  | 4.59  | 0.02 | 0.04 | 1.15  | 0.001168 | 0.015615 | 0.156386 | 0.158353 |
| MmugDNA.19674.1.S1_at   | MmugDNA.19674.1 | 9.74  | 10.04 | 0.36 | 0.08 | -1.23 | 0.133133 | 0.160074 | 0.507468 | 0.436234 |
| MmugDNA.19677.1.S1_at   | MmugDNA.19677.1 | 5.29  | 5.23  | 0.18 | 0.02 | 1.04  | 0.230058 | 0.290493 | 0.598481 | 0.55123  |
| MmugDNA.19679.1.S1_at   | MmugDNA.19679.1 | 13.43 | 13.24 | 0.02 | 0.08 | 1.14  | 0.008168 | 0.017893 | 0.232005 | 0.16888  |
| MmugDNA.19682.1.S1_at   | MmugDNA.19682.1 | 10.6  | 10.31 | 0.16 | 0.09 | 1.22  | 0.054495 | 0.036097 | 0.396542 | 0.234417 |
| MmugDNA.19685.1.S1_at   | MmugDNA.19685.1 | 8.4   | 8.84  | 0.21 | 0.07 | -1.36 | 0.020278 | 0.031119 | 0.303799 | 0.218175 |
| MmugDNA.19685.1.S1_s_at | MmugDNA.19685.1 | 9.45  | 9.86  | 0.17 | 0.12 | -1.33 | 0.036214 | 0.048727 | 0.354703 | 0.265744 |
| MmugDNA.19686.1.S1_at   | MmugDNA.19686.1 | 7.49  | 8     | 0.23 | 0.05 | -1.43 | 0.046914 | 0.033294 | 0.37917  | 0.226086 |
| MmugDNA.19691.1.S1_at   | MmugDNA.19691.1 | 11.17 | 11.44 | 3.33 | 0.23 | -1.21 | 0.365535 | 0.213221 | 0.701174 | 0.487098 |
| MmugDNA.197.1.S1_at     | MmugDNA.197.1   | 10.35 | 10.44 | 1.02 | 0.09 | -1.07 | 0.378835 | 0.345761 | 0.708471 | 0.590931 |
| MmugDNA.19701.1.S1_at   | MmugDNA.19701.1 | 5.66  | 5.58  | 0.15 | 0.03 | 1.06  | 0.353827 | 0.377238 | 0.693507 | 0.61485  |
| MmugDNA.19704.1.S1_at   | MmugDNA.19704.1 | 12.18 | 12.33 | 0.1  | 0.09 | -1.11 | 0.582279 | 0.838733 | 0.82808  | 0.908041 |
| MmugDNA.19706.1.S1_s_at | MmugDNA.19706.1 | 12.86 | 12.83 | 0.09 | 0.08 | 1.02  | 0.862521 | 0.893315 | 0.951603 | 0.939163 |
| MmugDNA.19712.1.S1_at   | MmugDNA.19712.1 | 4.1   | 3.92  | 0.23 | 0.11 | 1.13  | 0.68246  | 0.011848 | 0.875741 | 0.140973 |
| MmugDNA.19714.1.S1_at   | MmugDNA.19714.1 | 11.29 | 10.93 | 0.27 | 0.05 | 1.28  | 0.102374 | 0.194814 | 0.472589 | 0.46986  |

|                         |                 |       |       |      |      |       |          |          |          |          |
|-------------------------|-----------------|-------|-------|------|------|-------|----------|----------|----------|----------|
| MmugDNA.19718.1.S1_at   | MmugDNA.19718.1 | 10    | 10.22 | 0.4  | 0.38 | -1.17 | 0.316683 | 0.065742 | 0.666645 | 0.301766 |
| MmugDNA.19725.1.S1_at   | MmugDNA.19725.1 | 12.56 | 12.29 | 0.5  | 0.08 | 1.21  | 0.326153 | 0.291051 | 0.673733 | 0.551574 |
| MmugDNA.19727.1.S1_at   | MmugDNA.19727.1 | 10.76 | 10.93 | 0.73 | 0.07 | -1.13 | 0.672006 | 0.809976 | 0.870597 | 0.890518 |
| MmugDNA.19729.1.S1_at   | MmugDNA.19729.1 | 11.19 | 11.63 | 0.3  | 0.03 | -1.36 | 0.067965 | 0.02433  | 0.42451  | 0.195238 |
| MmugDNA.19736.1.S1_at   | MmugDNA.19736.1 | 6.3   | 6.86  | 0.9  | 0.25 | -1.47 | 0.407518 | 0.162819 | 0.728656 | 0.438932 |
| MmugDNA.19738.1.S1_at   | MmugDNA.19738.1 | 10.89 | 10.63 | 0.1  | 0.05 | 1.19  | 0.01195  | 0.026902 | 0.257858 | 0.205158 |
| MmugDNA.19748.1.S1_at   | MmugDNA.19748.1 | 11.56 | 11.66 | 0.93 | 0.01 | -1.07 | 0.898    | 0.96527  | 0.965424 | 0.980629 |
| MmugDNA.1975.1.S1_at    | MmugDNA.1975.1  | 6.8   | 6.74  | 0.28 | 0.05 | 1.04  | 0.216745 | 0.172402 | 0.586817 | 0.448837 |
| MmugDNA.19751.1.S1_at   | MmugDNA.19751.1 | 5.16  | 5.23  | 0.12 | 0.03 | -1.05 | 0.759343 | 0.744565 | 0.909584 | 0.852091 |
| MmugDNA.19752.1.S1_at   | MmugDNA.19752.1 | 3.96  | 3.62  | 0.22 | 0.17 | 1.27  | 0.087285 | 0.098446 | 0.454785 | 0.356564 |
| MmugDNA.19754.1.S1_at   | MmugDNA.19754.1 | 8.82  | 9.22  | 0.37 | 0.17 | -1.31 | 0.554615 | 0.742764 | 0.812812 | 0.851023 |
| MmugDNA.19755.1.S1_at   | MmugDNA.19755.1 | 9.62  | 9.09  | 0.21 | 0.08 | 1.44  | 0.008557 | 0.000789 | 0.235156 | 0.045969 |
| MmugDNA.19756.1.S1_at   | MmugDNA.19756.1 | 5.69  | 5.63  | 0.03 | 0.05 | 1.04  | 0.333186 | 0.014159 | 0.679469 | 0.152107 |
| MmugDNA.19760.1.S1_at   | MmugDNA.19760.1 | 3.21  | 3.25  | 0.04 | 0.12 | -1.03 | 0.553918 | 0.42136  | 0.812365 | 0.644994 |
| MmugDNA.19765.1.S1_at   | MmugDNA.19765.1 | 11.62 | 11.93 | 0.07 | 0.1  | -1.25 | 0.007643 | 0.000254 | 0.230362 | 0.033475 |
| MmugDNA.19768.1.S1_at   | MmugDNA.19768.1 | 9.14  | 9.09  | 0.11 | 0.22 | 1.04  | 0.828849 | 0.000144 | 0.938569 | 0.029509 |
| MmugDNA.19769.1.S1_at   | MmugDNA.19769.1 | 5.22  | 5.28  | 0.05 | 0.41 | -1.04 | 0.328695 | 0.545163 | 0.67577  | 0.727411 |
| MmugDNA.19770.1.S1_at   | MmugDNA.19770.1 | 6.23  | 6.4   | 0.37 | 0.06 | -1.12 | 0.864679 | 0.960319 | 0.952416 | 0.977459 |
| MmugDNA.19770.1.S1_s_at | MmugDNA.19770.1 | 6.56  | 6.78  | 0.67 | 0.09 | -1.16 | 0.720531 | 0.785359 | 0.891614 | 0.875741 |
| MmugDNA.19774.1.S1_at   | MmugDNA.19774.1 | 9.81  | 10.32 | 0.27 | 0.06 | -1.42 | 0.04151  | 0.003437 | 0.366704 | 0.084282 |
| MmugDNA.19777.1.S1_s_at | MmugDNA.19777.1 | 13.59 | 13.46 | 0.06 | 0.12 | 1.1   | 0.057061 | 0.058802 | 0.401454 | 0.289228 |
| MmugDNA.19784.1.S1_at   | MmugDNA.19784.1 | 11.73 | 11.9  | 0.27 | 0.07 | -1.13 | 0.561405 | 0.759152 | 0.817219 | 0.859995 |
| MmugDNA.19786.1.S1_at   | MmugDNA.19786.1 | 7.88  | 8.49  | 0.48 | 0.18 | -1.52 | 0.164322 | 0.196576 | 0.537322 | 0.471608 |
| MmugDNA.19791.1.S1_at   | MmugDNA.19791.1 | 7     | 6.46  | 0.75 | 0.36 | 1.45  | 0.350428 | 0.472395 | 0.691263 | 0.679986 |
| MmugDNA.19799.1.S1_at   | MmugDNA.19799.1 | 6.18  | 6.14  | 0.09 | 0.06 | 1.03  | 0.432929 | 0.559213 | 0.744141 | 0.736143 |
| MmugDNA.198.1.S1_at     | MmugDNA.198.1   | 9.45  | 10.23 | 0.18 | 0.12 | -1.72 | 0.004842 | 0.000157 | 0.202685 | 0.030199 |
| MmugDNA.19801.1.S1_at   | MmugDNA.19801.1 | 3.05  | 3.06  | 0.12 | 0.07 | -1.01 | 0.290706 | 0.346877 | 0.647278 | 0.591709 |
| MmugDNA.19809.1.S1_at   | MmugDNA.19809.1 | 5.29  | 5.3   | 0.14 | 0.06 | -1.01 | 0.44728  | 0.639843 | 0.753177 | 0.788487 |
| MmugDNA.19810.1.S1_at   | MmugDNA.19810.1 | 9.62  | 10.02 | 0.2  | 0.09 | -1.32 | 0.035962 | 0.014057 | 0.353759 | 0.151841 |
| MmugDNA.19811.1.S1_at   | MmugDNA.19811.1 | 3.93  | 4.02  | 0.06 | 0.06 | -1.07 | 0.315723 | 0.000881 | 0.666057 | 0.047602 |
| MmugDNA.19823.1.S1_at   | MmugDNA.19823.1 | 9.44  | 9.3   | 0.47 | 0.31 | 1.1   | 0.142811 | 0.004403 | 0.517889 | 0.092846 |
| MmugDNA.19824.1.S1_at   | MmugDNA.19824.1 | 6.13  | 6.68  | 0.79 | 0.24 | -1.47 | 0.249436 | 0.308051 | 0.614753 | 0.56421  |
| MmugDNA.19827.1.S1_at   | MmugDNA.19827.1 | 8.97  | 8.97  | 0.23 | 0.06 | -1    | 0.847362 | 0.721951 | 0.946525 | 0.838904 |
| MmugDNA.19830.1.S1_at   | MmugDNA.19830.1 | 5.7   | 5.71  | 0.02 | 0.16 | -1    | 0.31502  | 0.181332 | 0.665641 | 0.457834 |
| MmugDNA.19835.1.S1_s_at | MmugDNA.19835.1 | 11.32 | 11.33 | 0.15 | 0.08 | -1.01 | 0.212474 | 0.274547 | 0.582995 | 0.53901  |
| MmugDNA.19836.1.S1_at   | MmugDNA.19836.1 | 7.83  | 7.56  | 0.32 | 0.06 | 1.21  | 0.078128 | 0.058987 | 0.440229 | 0.289676 |
| MmugDNA.19837.1.S1_at   | MmugDNA.19837.1 | 8.55  | 9.24  | 0.09 | 0.11 | -1.61 | 0.001088 | 0.000139 | 0.156386 | 0.029307 |
| MmugDNA.19838.1.S1_at   | MmugDNA.19838.1 | 5.03  | 5.05  | 0.08 | 0.21 | -1.01 | 0.645882 | 0.530053 | 0.858896 | 0.717721 |
| MmugDNA.19839.1.S1_at   | MmugDNA.19839.1 | 7.84  | 7.59  | 0.03 | 0.03 | 1.19  | 0.000976 | 0.002221 | 0.155374 | 0.069434 |
| MmugDNA.19840.1.S1_at   | MmugDNA.19840.1 | 4.68  | 5.87  | 0.33 | 0.08 | -2.28 | 0.004259 | 0.049016 | 0.198874 | 0.266257 |
| MmugDNA.19841.1.S1_at   | MmugDNA.19841.1 | 8.47  | 9.09  | 0.23 | 0.1  | -1.53 | 0.019843 | 0.011397 | 0.302615 | 0.138253 |
| MmugDNA.19842.1.S1_at   | MmugDNA.19842.1 | 9.26  | 6.26  | 0.35 | 1.18 | 8     | 0.009351 | 0.004556 | 0.241869 | 0.094355 |
| MmugDNA.19857.1.S1_at   | MmugDNA.19857.1 | 11.68 | 12.02 | 0.17 | 0.05 | -1.26 | 0.018876 | 0.019886 | 0.298593 | 0.177357 |

|                         |                 |       |       |      |      |       |          |          |          |          |
|-------------------------|-----------------|-------|-------|------|------|-------|----------|----------|----------|----------|
| MmugDNA.19858.1.S1_at   | MmugDNA.19858.1 | 11.04 | 11.11 | 0.12 | 0.04 | -1.05 | 0.339224 | 0.414748 | 0.683685 | 0.640456 |
| MmugDNA.19864.1.S1_at   | MmugDNA.19864.1 | 10.04 | 9.84  | 0.42 | 0.06 | 1.15  | 0.949144 | 0.12916  | 0.982772 | 0.400611 |
| MmugDNA.19867.1.S1_at   | MmugDNA.19867.1 | 9.95  | 10.46 | 0.2  | 0.08 | -1.42 | 0.007137 | 0.002988 | 0.225651 | 0.079958 |
| MmugDNA.1987.1.S1_at    | MmugDNA.1987.1  | 11.02 | 10.2  | 2.6  | 0.16 | 1.76  | 0.938759 | 0.479116 | 0.979343 | 0.684942 |
| MmugDNA.19871.1.S1_at   | MmugDNA.19871.1 | 10.65 | 10.79 | 0.11 | 0.03 | -1.1  | 0.034201 | 0.020859 | 0.348641 | 0.181218 |
| MmugDNA.19875.1.S1_at   | MmugDNA.19875.1 | 9.34  | 9.47  | 0.17 | 0.06 | -1.09 | 0.256372 | 0.220991 | 0.620399 | 0.494389 |
| MmugDNA.19881.1.S1_at   | MmugDNA.19881.1 | 10.45 | 10.39 | 0.12 | 0.18 | 1.05  | 0.442669 | 0.52944  | 0.750271 | 0.717276 |
| MmugDNA.19883.1.S1_at   | MmugDNA.19883.1 | 9.32  | 9.88  | 0.36 | 0.16 | -1.47 | 0.309331 | 0.146368 | 0.661672 | 0.420368 |
| MmugDNA.19884.1.S1_at   | MmugDNA.19884.1 | 4.59  | 4.66  | 0.06 | 0.13 | -1.05 | 0.763649 | 0.779575 | 0.911265 | 0.872217 |
| MmugDNA.19888.1.S1_at   | MmugDNA.19888.1 | 10.61 | 10.22 | 0.47 | 0.06 | 1.31  | 0.670077 | 0.0508   | 0.869803 | 0.270583 |
| MmugDNA.19899.1.S1_at   | MmugDNA.19899.1 | 4.19  | 4.29  | 0.06 | 0.14 | -1.08 | 0.950827 | 0.483118 | 0.983338 | 0.687725 |
| MmugDNA.19902.1.S1_at   | MmugDNA.19902.1 | 3.38  | 3.43  | 0.21 | 0.01 | -1.04 | 0.614522 | 0.358657 | 0.84397  | 0.600164 |
| MmugDNA.19908.1.S1_at   | MmugDNA.19908.1 | 4.44  | 4.87  | 0.32 | 0.51 | -1.34 | 0.33429  | 0.749882 | 0.680268 | 0.854631 |
| MmugDNA.19909.1.S1_at   | MmugDNA.19909.1 | 5.91  | 6.54  | 0.19 | 0.21 | -1.55 | 0.017638 | 0.005329 | 0.292934 | 0.100928 |
| MmugDNA.19910.1.S1_s_at | MmugDNA.19910.1 | 10.11 | 10.07 | 0.04 | 0.11 | 1.02  | 0.70192  | 0.172429 | 0.884026 | 0.448837 |
| MmugDNA.19915.1.S1_at   | MmugDNA.19915.1 | 9.1   | 9.74  | 0.56 | 0.09 | -1.56 | 0.042962 | 0.019415 | 0.371106 | 0.175117 |
| MmugDNA.19921.1.S1_at   | MmugDNA.19921.1 | 7.17  | 6.9   | 1.08 | 0.18 | 1.21  | 0.569563 | 0.187741 | 0.82149  | 0.463739 |
| MmugDNA.19923.1.S1_at   | MmugDNA.19923.1 | 9.16  | 9.81  | 0.09 | 0.24 | -1.56 | 0.027819 | 0.468407 | 0.329316 | 0.677714 |
| MmugDNA.19924.1.S1_at   | MmugDNA.19924.1 | 8.91  | 8.68  | 0.22 | 0.02 | 1.17  | 0.447206 | 0.101544 | 0.753177 | 0.361393 |
| MmugDNA.1993.1.S1_at    | MmugDNA.1993.1  | 8.34  | 7.38  | 0.61 | 0.14 | 1.95  | 0.019129 | 0.005797 | 0.299936 | 0.104597 |
| MmugDNA.19937.1.S1_at   | MmugDNA.19937.1 | 6.01  | 6.5   | 0.57 | 0.33 | -1.41 | 0.134966 | 0.189072 | 0.509124 | 0.464897 |
| MmugDNA.19938.1.S1_at   | MmugDNA.19938.1 | 7.65  | 7.74  | 0.32 | 0.13 | -1.06 | 0.45865  | 0.747932 | 0.759008 | 0.853333 |
| MmugDNA.1994.1.S1_at    | MmugDNA.1994.1  | 9.04  | 9.01  | 0.38 | 0.08 | 1.02  | 0.749257 | 0.042918 | 0.904987 | 0.251759 |
| MmugDNA.19940.1.S1_at   | MmugDNA.19940.1 | 4.53  | 4.63  | 0.08 | 0.17 | -1.07 | 0.658442 | 0.745734 | 0.864636 | 0.85256  |
| MmugDNA.19941.1.S1_at   | MmugDNA.19941.1 | 4.72  | 4.55  | 0.15 | 0.09 | 1.12  | 0.654225 | 0.925822 | 0.862677 | 0.958025 |
| MmugDNA.19948.1.S1_at   | MmugDNA.19948.1 | 8.57  | 8.44  | 0.29 | 0.03 | 1.09  | 0.699812 | 0.664051 | 0.883309 | 0.803247 |
| MmugDNA.19950.1.S1_at   | MmugDNA.19950.1 | 7.57  | 7.68  | 0.66 | 0.14 | -1.08 | 0.918341 | 0.485481 | 0.972108 | 0.68914  |
| MmugDNA.19953.1.S1_at   | MmugDNA.19953.1 | 5.61  | 5.34  | 0.23 | 0.07 | 1.21  | 0.183126 | 0.258189 | 0.556057 | 0.525574 |
| MmugDNA.19954.1.S1_at   | MmugDNA.19954.1 | 6.61  | 6.59  | 0.24 | 0.17 | 1.02  | 0.42798  | 0.234482 | 0.74152  | 0.505674 |
| MmugDNA.19955.1.S1_at   | MmugDNA.19955.1 | 4.33  | 4.9   | 0.26 | 0.43 | -1.48 | 0.0683   | 0.066603 | 0.425182 | 0.303842 |
| MmugDNA.19956.1.S1_at   | MmugDNA.19956.1 | 9.69  | 10.25 | 0.21 | 0.06 | -1.48 | 0.013025 | 0.09825  | 0.266166 | 0.356289 |
| MmugDNA.19961.1.S1_at   | MmugDNA.19961.1 | 6.98  | 7.84  | 1.05 | 0.05 | -1.82 | 0.312289 | 0.377148 | 0.663896 | 0.614819 |
| MmugDNA.19965.1.S1_at   | MmugDNA.19965.1 | 7.78  | 8.62  | 0.43 | 0.07 | -1.79 | 0.090362 | 0.135102 | 0.458536 | 0.407128 |
| MmugDNA.19966.1.S1_at   | MmugDNA.19966.1 | 5.15  | 4.79  | 0.27 | 0.11 | 1.28  | 0.176363 | 0.759318 | 0.549355 | 0.860036 |
| MmugDNA.1997.1.S1_at    | MmugDNA.1997.1  | 8.34  | 8.15  | 0.06 | 0.2  | 1.14  | 0.423959 | 0.283251 | 0.739366 | 0.545822 |
| MmugDNA.19972.1.S1_at   | MmugDNA.19972.1 | 12.05 | 12.28 | 0.55 | 0.06 | -1.17 | 0.501235 | 0.215042 | 0.783112 | 0.488898 |
| MmugDNA.19974.1.S1_at   | MmugDNA.19974.1 | 3.19  | 3.02  | 0.02 | 0.08 | 1.13  | 0.019656 | 0.382254 | 0.302163 | 0.618438 |
| MmugDNA.19979.1.S1_at   | MmugDNA.19979.1 | 8.56  | 8.94  | 1.19 | 0.19 | -1.31 | 0.566559 | 0.21945  | 0.820086 | 0.493156 |
| MmugDNA.19988.1.S1_at   | MmugDNA.19988.1 | 7.94  | 7.16  | 1.35 | 0.16 | 1.72  | 0.34548  | 0.428904 | 0.687499 | 0.650409 |
| MmugDNA.19992.1.S1_at   | MmugDNA.19992.1 | 11.37 | 11.48 | 0.56 | 0.06 | -1.07 | 0.874628 | 0.247073 | 0.956493 | 0.516259 |
| MmugDNA.19997.1.S1_s_at | MmugDNA.19997.1 | 12.13 | 12.34 | 0.23 | 0.2  | -1.16 | 0.336233 | 0.009583 | 0.681633 | 0.129001 |
| MmugDNA.19998.1.S1_at   | MmugDNA.19998.1 | 3.26  | 3.19  | 0.1  | 0.13 | 1.04  | 0.7288   | 0.60655  | 0.895418 | 0.765811 |
| MmugDNA.19999.1.S1_at   | MmugDNA.19999.1 | 10.86 | 10.96 | 0.08 | 0.06 | -1.07 | 0.152347 | 0.670993 | 0.525329 | 0.807635 |

|                         |                 |       |       |      |      |       |          |          |          |          |
|-------------------------|-----------------|-------|-------|------|------|-------|----------|----------|----------|----------|
| MmugDNA.20000.1.S1_s_at | MmugDNA.20000.1 | 5.72  | 6.85  | 0.4  | 0.27 | -2.19 | 0.054349 | 0.098743 | 0.39629  | 0.356828 |
| MmugDNA.20003.1.S1_at   | MmugDNA.20003.1 | 10.02 | 9.96  | 0.19 | 0.08 | 1.05  | 0.941331 | 0.000886 | 0.980066 | 0.047602 |
| MmugDNA.20004.1.S1_at   | MmugDNA.20004.1 | 12.9  | 12.93 | 0.08 | 0.1  | -1.02 | 0.759762 | 0.830536 | 0.909769 | 0.902753 |
| MmugDNA.20005.1.S1_at   | MmugDNA.20005.1 | 10.98 | 11.66 | 0.52 | 0.11 | -1.6  | 0.076118 | 0.069613 | 0.437449 | 0.309956 |
| MmugDNA.20012.1.S1_at   | MmugDNA.20012.1 | 9.18  | 9.59  | 0.49 | 0.11 | -1.32 | 0.295113 | 0.070988 | 0.651016 | 0.312602 |
| MmugDNA.20022.1.S1_at   | MmugDNA.20022.1 | 11.44 | 11.87 | 0.37 | 0.08 | -1.35 | 0.109673 | 0.096501 | 0.482529 | 0.35409  |
| MmugDNA.20022.1.S1_s_at | MmugDNA.20022.1 | 11.91 | 12.35 | 0.33 | 0.05 | -1.35 | 0.094538 | 0.066803 | 0.463794 | 0.304363 |
| MmugDNA.20031.1.S1_at   | MmugDNA.20031.1 | 12.31 | 12.22 | 0.36 | 0.17 | 1.07  | 0.412792 | 0.262341 | 0.732098 | 0.528633 |
| MmugDNA.20037.1.S1_at   | MmugDNA.20037.1 | 9.44  | 9.3   | 0.62 | 0.16 | 1.1   | 0.578798 | 0.818684 | 0.826307 | 0.895523 |
| MmugDNA.20046.1.S1_at   | MmugDNA.20046.1 | 8.43  | 7.91  | 0.22 | 0.1  | 1.43  | 0.018485 | 0.133066 | 0.297469 | 0.404726 |
| MmugDNA.20047.1.S1_at   | MmugDNA.20047.1 | 12.4  | 12.41 | 0.15 | 0.02 | -1.01 | 0.790391 | 0.022757 | 0.922945 | 0.188918 |
| MmugDNA.20050.1.S1_at   | MmugDNA.20050.1 | 12.83 | 12.71 | 0.24 | 0.12 | 1.08  | 0.270728 | 0.478658 | 0.630569 | 0.684657 |
| MmugDNA.20051.1.S1_at   | MmugDNA.20051.1 | 3.23  | 3.19  | 0.08 | 0.03 | 1.03  | 0.808091 | 0.965545 | 0.93047  | 0.980739 |
| MmugDNA.20054.1.S1_at   | MmugDNA.20054.1 | 4.1   | 4.27  | 0.24 | 0.06 | -1.12 | 0.196568 | 0.240318 | 0.567194 | 0.510874 |
| MmugDNA.20055.1.S1_at   | MmugDNA.20055.1 | 8.82  | 8.45  | 0.25 | 0.21 | 1.29  | 0.086093 | 0.000286 | 0.453681 | 0.034857 |
| MmugDNA.20066.1.S1_at   | MmugDNA.20066.1 | 11.64 | 11.09 | 0.29 | 0.15 | 1.47  | 0.060631 | 0.012422 | 0.408574 | 0.144095 |
| MmugDNA.20067.1.S1_at   | MmugDNA.20067.1 | 7.45  | 6.39  | 0.45 | 0.19 | 2.09  | 0.015984 | 0.004471 | 0.284693 | 0.09331  |
| MmugDNA.20073.1.S1_at   | MmugDNA.20073.1 | 8.63  | 9.24  | 0.75 | 0.1  | -1.53 | 0.213735 | 0.166132 | 0.584304 | 0.442694 |
| MmugDNA.20079.1.S1_at   | MmugDNA.20079.1 | 12.27 | 12.52 | 0.41 | 0.07 | -1.19 | 0.399148 | 0.177012 | 0.722884 | 0.453444 |
| MmugDNA.20085.1.S1_at   | MmugDNA.20085.1 | 4.06  | 3.93  | 0.39 | 0.23 | 1.09  | 0.743432 | 0.792859 | 0.902124 | 0.880387 |
| MmugDNA.20090.1.S1_at   | MmugDNA.20090.1 | 8.87  | 9.11  | 0.22 | 0.08 | -1.19 | 0.082038 | 0.15522  | 0.446738 | 0.430451 |
| MmugDNA.20095.1.S1_at   | MmugDNA.20095.1 | 4.29  | 4.2   | 0.43 | 0.2  | 1.07  | 0.208177 | 0.126295 | 0.579837 | 0.396786 |
| MmugDNA.201.1.S1_s_at   | MmugDNA.201.1   | 7.89  | 7.74  | 0.24 | 0.14 | 1.11  | 0.45221  | 0.454122 | 0.75566  | 0.668407 |
| MmugDNA.2010.1.S1_at    | MmugDNA.2010.1  | 10.1  | 10.12 | 0.09 | 0.05 | -1.02 | 0.551786 | 0.013582 | 0.811454 | 0.14912  |
| MmugDNA.20106.1.S1_at   | MmugDNA.20106.1 | 11.61 | 10.42 | 0.32 | 0.01 | 2.27  | 0.006078 | 0.000716 | 0.215208 | 0.044419 |
| MmugDNA.20110.1.S1_at   | MmugDNA.20110.1 | 10.07 | 10.25 | 0.3  | 0.18 | -1.14 | 0.520502 | 0.007725 | 0.79373  | 0.117463 |
| MmugDNA.20111.1.S1_at   | MmugDNA.20111.1 | 13.16 | 13.12 | 0.1  | 0.08 | 1.03  | 0.304895 | 0.045852 | 0.658493 | 0.258389 |
| MmugDNA.20117.1.S1_at   | MmugDNA.20117.1 | 8.94  | 9.28  | 1.13 | 0.15 | -1.27 | 0.727191 | 0.217583 | 0.894637 | 0.491183 |
| MmugDNA.20126.1.S1_at   | MmugDNA.20126.1 | 10.81 | 10.91 | 0.11 | 0.24 | -1.07 | 0.250149 | 0.02845  | 0.615476 | 0.210466 |
| MmugDNA.20127.1.S1_at   | MmugDNA.20127.1 | 8.97  | 9.57  | 1.14 | 0.12 | -1.52 | 0.420312 | 0.385371 | 0.736876 | 0.620818 |
| MmugDNA.20128.1.S1_s_at | MmugDNA.20128.1 | 12.75 | 12.65 | 0.16 | 0.07 | 1.07  | 0.356446 | 0.490437 | 0.695154 | 0.692457 |
| MmugDNA.20129.1.S1_at   | MmugDNA.20129.1 | 13.36 | 13.18 | 0.21 | 0.07 | 1.14  | 0.197585 | 0.093753 | 0.568546 | 0.350241 |
| MmugDNA.2013.1.S1_at    | MmugDNA.2013.1  | 3.59  | 3.39  | 0.13 | 0.38 | 1.15  | 0.683478 | 0.85425  | 0.876134 | 0.916971 |
| MmugDNA.20131.1.S1_at   | MmugDNA.20131.1 | 10.3  | 10.26 | 0.22 | 0.08 | 1.03  | 0.432388 | 0.044196 | 0.74389  | 0.254709 |
| MmugDNA.20134.1.S1_at   | MmugDNA.20134.1 | 12.68 | 12.99 | 0.04 | 0.03 | -1.24 | 0.000741 | 0.000979 | 0.148988 | 0.049927 |
| MmugDNA.2014.1.S1_at    | MmugDNA.2014.1  | 8.84  | 8.47  | 0.48 | 0.16 | 1.29  | 0.104283 | 0.05126  | 0.475417 | 0.271825 |
| MmugDNA.20144.1.S1_at   | MmugDNA.20144.1 | 11.29 | 11.41 | 0.17 | 0.08 | -1.09 | 0.75368  | 0.510881 | 0.907158 | 0.70525  |
| MmugDNA.20145.1.S1_at   | MmugDNA.20145.1 | 5.24  | 6.03  | 0.6  | 0.48 | -1.73 | 0.128924 | 0.488242 | 0.503626 | 0.691    |
| MmugDNA.20146.1.S1_at   | MmugDNA.20146.1 | 5.47  | 5.17  | 0.15 | 0.16 | 1.23  | 0.089007 | 0.167377 | 0.456831 | 0.443785 |
| MmugDNA.20150.1.S1_at   | MmugDNA.20150.1 | 11.02 | 10.91 | 0.13 | 0.07 | 1.08  | 0.141993 | 0.022473 | 0.516979 | 0.187564 |
| MmugDNA.20157.1.S1_at   | MmugDNA.20157.1 | 8.7   | 9.41  | 2.15 | 0.27 | -1.64 | 0.670882 | 0.606583 | 0.870106 | 0.765834 |
| MmugDNA.20158.1.S1_at   | MmugDNA.20158.1 | 3.66  | 4.76  | 1.23 | 0.2  | -2.14 | 0.371627 | 0.154474 | 0.705567 | 0.429395 |
| MmugDNA.20158.1.S1_s_at | MmugDNA.20158.1 | 5.33  | 5.7   | 1.06 | 0.13 | -1.29 | 0.650725 | 0.232174 | 0.861176 | 0.503874 |

|                       |                 |       |       |      |      |       |          |          |          |          |
|-----------------------|-----------------|-------|-------|------|------|-------|----------|----------|----------|----------|
| MmugDNA.20159.1.S1_at | MmugDNA.20159.1 | 7.27  | 8.06  | 0.26 | 0.09 | -1.73 | 0.016109 | 0.100082 | 0.285918 | 0.358968 |
| MmugDNA.20164.1.S1_at | MmugDNA.20164.1 | 6.29  | 6.21  | 0.13 | 0.02 | 1.06  | 0.107969 | 0.305588 | 0.480459 | 0.562504 |
| MmugDNA.20165.1.S1_at | MmugDNA.20165.1 | 5.77  | 5.14  | 0.35 | 0.16 | 1.54  | 0.050762 | 0.025008 | 0.387959 | 0.198121 |
| MmugDNA.20170.1.S1_at | MmugDNA.20170.1 | 5.6   | 4.31  | 0.19 | 0.2  | 2.45  | 0.001289 | 0.000621 | 0.157784 | 0.042498 |
| MmugDNA.20174.1.S1_at | MmugDNA.20174.1 | 3.17  | 3.25  | 0.13 | 0.06 | -1.06 | 0.908303 | 0.297008 | 0.969112 | 0.555957 |
| MmugDNA.20175.1.S1_at | MmugDNA.20175.1 | 10.93 | 10.43 | 0.29 | 0.05 | 1.41  | 0.031834 | 0.093777 | 0.342545 | 0.350256 |
| MmugDNA.20177.1.S1_at | MmugDNA.20177.1 | 10.29 | 9.97  | 0.47 | 0.08 | 1.24  | 0.291089 | 0.229379 | 0.647526 | 0.501527 |
| MmugDNA.20179.1.S1_at | MmugDNA.20179.1 | 10.49 | 10.33 | 0.5  | 0.07 | 1.12  | 0.74475  | 0.550447 | 0.902692 | 0.730443 |
| MmugDNA.20182.1.S1_at | MmugDNA.20182.1 | 8.4   | 7.73  | 0.91 | 0.26 | 1.6   | 0.784772 | 0.254049 | 0.920949 | 0.522387 |
| MmugDNA.20184.1.S1_at | MmugDNA.20184.1 | 5.62  | 5.59  | 0.16 | 0.02 | 1.02  | 0.255146 | 0.208977 | 0.619267 | 0.482763 |
| MmugDNA.20192.1.S1_at | MmugDNA.20192.1 | 6.52  | 6.2   | 0.28 | 0.12 | 1.25  | 0.147439 | 0.208122 | 0.521578 | 0.482082 |
| MmugDNA.20193.1.S1_at | MmugDNA.20193.1 | 12.3  | 12.15 | 0.22 | 0.02 | 1.11  | 0.089607 | 0.003937 | 0.457723 | 0.089257 |
| MmugDNA.20195.1.S1_at | MmugDNA.20195.1 | 7.16  | 7.11  | 0.04 | 0.05 | 1.03  | 0.530666 | 0.087326 | 0.799181 | 0.3404   |
| MmugDNA.20197.1.S1_at | MmugDNA.20197.1 | 10.54 | 10.69 | 0.45 | 0.03 | -1.11 | 0.62176  | 0.388245 | 0.847631 | 0.622692 |
| MmugDNA.20198.1.S1_at | MmugDNA.20198.1 | 11.49 | 11.15 | 0.13 | 0.01 | 1.27  | 0.026268 | 0.000213 | 0.323826 | 0.032361 |
| MmugDNA.202.1.S1_at   | MmugDNA.202.1   | 3.61  | 3.62  | 0.05 | 0.04 | -1.01 | 0.573582 | 0.579896 | 0.823642 | 0.749335 |
| MmugDNA.20201.1.S1_at | MmugDNA.20201.1 | 6.94  | 7.06  | 0.4  | 0.04 | -1.09 | 0.778794 | 0.94329  | 0.918438 | 0.967814 |
| MmugDNA.20203.1.S1_at | MmugDNA.20203.1 | 7.44  | 7.39  | 0.34 | 0.1  | 1.03  | 0.413122 | 0.553851 | 0.732218 | 0.732845 |
| MmugDNA.20206.1.S1_at | MmugDNA.20206.1 | 4.1   | 3.93  | 0.12 | 0.02 | 1.13  | 0.116791 | 0.302282 | 0.490029 | 0.560092 |
| MmugDNA.2021.1.S1_at  | MmugDNA.2021.1  | 8.38  | 9.04  | 0.2  | 0.14 | -1.58 | 0.014126 | 0.039774 | 0.274019 | 0.24444  |
| MmugDNA.20219.1.S1_at | MmugDNA.20219.1 | 8.86  | 9.85  | 0.85 | 0.1  | -1.99 | 0.141906 | 0.169336 | 0.516871 | 0.445925 |
| MmugDNA.20220.1.S1_at | MmugDNA.20220.1 | 6.03  | 5.17  | 1.25 | 0.17 | 1.81  | 0.206255 | 0.12581  | 0.578142 | 0.396313 |
| MmugDNA.20221.1.S1_at | MmugDNA.20221.1 | 6.25  | 6.15  | 0.17 | 0.08 | 1.08  | 0.220764 | 0.281825 | 0.590084 | 0.544844 |
| MmugDNA.20227.1.S1_at | MmugDNA.20227.1 | 8.45  | 7.51  | 0.45 | 0.32 | 1.92  | 0.100064 | 0.047495 | 0.470321 | 0.262554 |
| MmugDNA.20234.1.S1_at | MmugDNA.20234.1 | 4.5   | 4.18  | 0.36 | 0.05 | 1.24  | 0.614332 | 0.57907  | 0.843887 | 0.748857 |
| MmugDNA.20241.1.S1_at | MmugDNA.20241.1 | 12.54 | 12.42 | 0.13 | 0.02 | 1.09  | 0.173679 | 0.163648 | 0.546749 | 0.439841 |
| MmugDNA.2026.1.S1_at  | MmugDNA.2026.1  | 9.58  | 9.78  | 1.11 | 0.14 | -1.15 | 0.821437 | 0.612048 | 0.935582 | 0.76972  |
| MmugDNA.2027.1.S1_at  | MmugDNA.2027.1  | 7.25  | 7.05  | 0.21 | 0.14 | 1.15  | 0.294724 | 0.076579 | 0.65084  | 0.32173  |
| MmugDNA.20271.1.S1_at | MmugDNA.20271.1 | 10.89 | 10.94 | 0.58 | 0.23 | -1.03 | 0.891676 | 0.12555  | 0.962756 | 0.396226 |
| MmugDNA.20272.1.S1_at | MmugDNA.20272.1 | 12.05 | 12.78 | 0.78 | 0.11 | -1.66 | 0.600214 | 0.711005 | 0.837764 | 0.832375 |
| MmugDNA.20275.1.S1_at | MmugDNA.20275.1 | 11.17 | 11.64 | 1.08 | 0.12 | -1.39 | 0.788083 | 0.849833 | 0.922093 | 0.914673 |
| MmugDNA.20278.1.S1_at | MmugDNA.20278.1 | 13.54 | 13.62 | 0.19 | 0.03 | -1.06 | 0.450529 | 0.86522  | 0.754829 | 0.923533 |
| MmugDNA.20287.1.S1_at | MmugDNA.20287.1 | 3.35  | 3.49  | 0.35 | 0.07 | -1.11 | 0.824696 | 0.922335 | 0.937018 | 0.95627  |
| MmugDNA.2029.1.S1_at  | MmugDNA.2029.1  | 3.69  | 3.7   | 0.06 | 0.19 | -1    | 0.743706 | 0.147783 | 0.902199 | 0.422072 |
| MmugDNA.20291.1.S1_at | MmugDNA.20291.1 | 5.69  | 5.07  | 0.43 | 0.53 | 1.53  | 0.226272 | 0.014121 | 0.595413 | 0.152004 |
| MmugDNA.20292.1.S1_at | MmugDNA.20292.1 | 8.68  | 8.82  | 0.29 | 0.1  | -1.1  | 0.63687  | 0.814353 | 0.855281 | 0.892923 |
| MmugDNA.20299.1.S1_at | MmugDNA.20299.1 | 6.17  | 6.29  | 0.37 | 0.06 | -1.08 | 0.638854 | 0.448269 | 0.856054 | 0.664167 |
| MmugDNA.20302.1.S1_at | MmugDNA.20302.1 | 8.75  | 8.98  | 1.43 | 0.23 | -1.17 | 0.543876 | 0.729352 | 0.80687  | 0.843541 |
| MmugDNA.20303.1.S1_at | MmugDNA.20303.1 | 3.74  | 3.64  | 0.02 | 0.11 | 1.07  | 0.312174 | 0.514333 | 0.663761 | 0.707645 |
| MmugDNA.20304.1.S1_at | MmugDNA.20304.1 | 11.05 | 10.74 | 0.24 | 0.02 | 1.24  | 0.141625 | 0.190307 | 0.516489 | 0.465906 |
| MmugDNA.20306.1.S1_at | MmugDNA.20306.1 | 11.53 | 11.65 | 0.15 | 0.18 | -1.08 | 0.753852 | 0.117608 | 0.907201 | 0.38531  |
| MmugDNA.20308.1.S1_at | MmugDNA.20308.1 | 11.19 | 12.1  | 0.12 | 0.03 | -1.88 | 0.000282 | 0.001188 | 0.132073 | 0.054071 |
| MmugDNA.20313.1.S1_at | MmugDNA.20313.1 | 10.75 | 10.62 | 2.83 | 0.3  | 1.09  | 0.602061 | 0.245275 | 0.838703 | 0.515052 |

|                         |                 |       |       |      |      |       |          |          |          |          |
|-------------------------|-----------------|-------|-------|------|------|-------|----------|----------|----------|----------|
| MmugDNA.20319.1.S1_at   | MmugDNA.20319.1 | 4.69  | 4.06  | 0.34 | 0.18 | 1.55  | 0.070658 | 0.079254 | 0.42977  | 0.326444 |
| MmugDNA.20321.1.S1_at   | MmugDNA.20321.1 | 8.21  | 8.78  | 0.38 | 0.1  | -1.48 | 0.200807 | 0.247116 | 0.572488 | 0.516289 |
| MmugDNA.20325.1.S1_s_at | MmugDNA.20325.1 | 9.12  | 8.42  | 0.46 | 0.29 | 1.63  | 0.080106 | 0.014296 | 0.443423 | 0.152643 |
| MmugDNA.20327.1.S1_at   | MmugDNA.20327.1 | 13.02 | 13.16 | 0.11 | 0.05 | -1.1  | 0.095151 | 0.003815 | 0.464131 | 0.08794  |
| MmugDNA.20327.1.S1_s_at | MmugDNA.20327.1 | 11.09 | 11.16 | 0.11 | 0.04 | -1.05 | 0.879761 | 0.002217 | 0.958307 | 0.069424 |
| MmugDNA.20328.1.S1_at   | MmugDNA.20328.1 | 10.3  | 10.23 | 0.09 | 0.03 | 1.06  | 0.446413 | 0.530555 | 0.752754 | 0.718042 |
| MmugDNA.20328.1.S1_s_at | MmugDNA.20328.1 | 10.56 | 10.77 | 0.15 | 0.13 | -1.16 | 0.142045 | 0.303566 | 0.517023 | 0.561022 |
| MmugDNA.20333.1.S1_at   | MmugDNA.20333.1 | 4.29  | 4.21  | 0.2  | 0.21 | 1.06  | 0.873577 | 0.147016 | 0.956238 | 0.421133 |
| MmugDNA.20342.1.S1_at   | MmugDNA.20342.1 | 9.03  | 10    | 0.2  | 0.12 | -1.96 | 0.002775 | 0.000117 | 0.185369 | 0.028664 |
| MmugDNA.20348.1.S1_at   | MmugDNA.20348.1 | 3.11  | 3.11  | 0.14 | 0.06 | 1     | 0.999378 | 0.985108 | 0.99987  | 0.991531 |
| MmugDNA.20349.1.S1_at   | MmugDNA.20349.1 | 3.08  | 3.19  | 0.13 | 0.07 | -1.08 | 0.514893 | 0.703507 | 0.790695 | 0.828103 |
| MmugDNA.20350.1.S1_at   | MmugDNA.20350.1 | 8.46  | 9.89  | 0.26 | 0.13 | -2.71 | 0.001331 | 0.001952 | 0.159096 | 0.065813 |
| MmugDNA.20354.1.S1_at   | MmugDNA.20354.1 | 4.7   | 4.59  | 0.65 | 0.14 | 1.08  | 0.651446 | 0.200957 | 0.861635 | 0.475426 |
| MmugDNA.20357.1.S1_at   | MmugDNA.20357.1 | 11.58 | 11.08 | 0.42 | 0.25 | 1.41  | 0.057186 | 0.023775 | 0.401473 | 0.193037 |
| MmugDNA.20359.1.S1_at   | MmugDNA.20359.1 | 8.36  | 8.51  | 0.12 | 0.21 | -1.11 | 0.158119 | 0.005683 | 0.531066 | 0.103959 |
| MmugDNA.20364.1.S1_at   | MmugDNA.20364.1 | 5.41  | 5.35  | 0.17 | 0.13 | 1.04  | 0.453919 | 0.729328 | 0.756364 | 0.843541 |
| MmugDNA.20373.1.S1_at   | MmugDNA.20373.1 | 9.97  | 9.65  | 0.24 | 0.07 | 1.25  | 0.025747 | 0.129958 | 0.322693 | 0.401533 |
| MmugDNA.20377.1.S1_at   | MmugDNA.20377.1 | 9.97  | 9.89  | 0.29 | 0.16 | 1.06  | 0.835436 | 0.900939 | 0.941022 | 0.943618 |
| MmugDNA.20378.1.S1_at   | MmugDNA.20378.1 | 5.71  | 5.62  | 0.16 | 0.08 | 1.06  | 0.170195 | 0.412571 | 0.543323 | 0.638941 |
| MmugDNA.20379.1.S1_at   | MmugDNA.20379.1 | 8.92  | 9.29  | 0.54 | 0.11 | -1.29 | 0.310958 | 0.137802 | 0.662774 | 0.410769 |
| MmugDNA.2038.1.S1_at    | MmugDNA.2038.1  | 4.78  | 4.79  | 0.04 | 0.16 | -1.01 | 0.952551 | 0.635437 | 0.98407  | 0.785405 |
| MmugDNA.20380.1.S1_at   | MmugDNA.20380.1 | 10.65 | 10.88 | 0.3  | 0.12 | -1.17 | 0.990343 | 0.871072 | 0.996406 | 0.926785 |
| MmugDNA.20381.1.S1_at   | MmugDNA.20381.1 | 5.63  | 5.45  | 0.33 | 0    | 1.13  | 0.383263 | 0.095427 | 0.711269 | 0.352453 |
| MmugDNA.20386.1.S1_at   | MmugDNA.20386.1 | 5.3   | 5.12  | 0.3  | 0.12 | 1.13  | 0.288571 | 0.107749 | 0.645614 | 0.370816 |
| MmugDNA.20397.1.S1_at   | MmugDNA.20397.1 | 9.83  | 9.16  | 0.29 | 0.28 | 1.6   | 0.115535 | 0.000599 | 0.488793 | 0.041969 |
| MmugDNA.20399.1.S1_at   | MmugDNA.20399.1 | 5.17  | 5.12  | 0.14 | 0.09 | 1.04  | 0.445969 | 0.597775 | 0.752511 | 0.760398 |
| MmugDNA.204.1.S1_at     | MmugDNA.204.1   | 6.95  | 6.02  | 0.56 | 0.12 | 1.91  | 0.118048 | 0.00203  | 0.491371 | 0.066885 |
| MmugDNA.20405.1.S1_at   | MmugDNA.20405.1 | 5.34  | 7.3   | 0.36 | 0.08 | -3.91 | 0.001206 | 0.001077 | 0.156386 | 0.051912 |
| MmugDNA.20415.1.S1_at   | MmugDNA.20415.1 | 5.09  | 4.98  | 0.08 | 0.07 | 1.08  | 0.178512 | 0.438964 | 0.551383 | 0.657787 |
| MmugDNA.20416.1.S1_s_at | MmugDNA.20416.1 | 11.05 | 10.97 | 0.1  | 0.05 | 1.06  | 0.397733 | 0.115369 | 0.722027 | 0.382394 |
| MmugDNA.20418.1.S1_at   | MmugDNA.20418.1 | 5.29  | 5.23  | 0.08 | 0.1  | 1.04  | 0.789751 | 0.453592 | 0.922635 | 0.668035 |
| MmugDNA.20420.1.S1_at   | MmugDNA.20420.1 | 5.92  | 5.93  | 0.1  | 0.06 | -1    | 0.453226 | 0.281024 | 0.755962 | 0.544179 |
| MmugDNA.20421.1.S1_at   | MmugDNA.20421.1 | 4.42  | 4.43  | 0.03 | 0.04 | -1.01 | 0.402012 | 0.844823 | 0.724787 | 0.911684 |
| MmugDNA.20423.1.S1_at   | MmugDNA.20423.1 | 6.11  | 5.87  | 0.07 | 0.12 | 1.18  | 0.078798 | 0.107778 | 0.441464 | 0.370847 |
| MmugDNA.20425.1.S1_at   | MmugDNA.20425.1 | 5.44  | 5.42  | 0.14 | 0.03 | 1.02  | 0.823467 | 0.742063 | 0.936294 | 0.850608 |
| MmugDNA.20427.1.S1_at   | MmugDNA.20427.1 | 7.18  | 7.05  | 0.14 | 0.03 | 1.1   | 0.244386 | 0.023212 | 0.609956 | 0.190932 |
| MmugDNA.20427.1.S1_x_at | MmugDNA.20427.1 | 7.63  | 7.47  | 0.12 | 0.06 | 1.11  | 0.208658 | 0.001271 | 0.58038  | 0.055241 |
| MmugDNA.20430.1.S1_at   | MmugDNA.20430.1 | 12.99 | 12.73 | 0.17 | 0.04 | 1.2   | 0.094554 | 0.373759 | 0.463794 | 0.61241  |
| MmugDNA.2044.1.S1_at    | MmugDNA.2044.1  | 9.89  | 10.43 | 0.44 | 0.13 | -1.45 | 0.139089 | 0.181765 | 0.514459 | 0.458373 |
| MmugDNA.20442.1.S1_at   | MmugDNA.20442.1 | 10.18 | 10.29 | 0.99 | 0.05 | -1.08 | 0.851834 | 0.088237 | 0.947748 | 0.341721 |
| MmugDNA.20447.1.S1_at   | MmugDNA.20447.1 | 13.02 | 12.97 | 0.32 | 0.06 | 1.04  | 0.956449 | 0.595386 | 0.985548 | 0.759091 |
| MmugDNA.20449.1.S1_at   | MmugDNA.20449.1 | 4.24  | 4.27  | 0.01 | 0.12 | -1.02 | 0.622445 | 0.829111 | 0.847802 | 0.90176  |
| MmugDNA.20453.1.S1_at   | MmugDNA.20453.1 | 12.73 | 12.6  | 0.2  | 0.01 | 1.09  | 0.337236 | 0.086451 | 0.682275 | 0.338938 |



|                         |                 |       |       |      |      |       |          |          |          |          |
|-------------------------|-----------------|-------|-------|------|------|-------|----------|----------|----------|----------|
| MmugDNA.20454.1.S1_at   | MmugDNA.20454.1 | 5.17  | 5.48  | 0.42 | 0.17 | -1.24 | 0.387885 | 0.087095 | 0.714828 | 0.340073 |
| MmugDNA.20455.1.S1_at   | MmugDNA.20455.1 | 9.36  | 8.66  | 0.58 | 0.02 | 1.63  | 0.037333 | 0.002613 | 0.357066 | 0.075662 |
| MmugDNA.20457.1.S1_at   | MmugDNA.20457.1 | 5.01  | 5.3   | 0.18 | 0.19 | -1.23 | 0.056976 | 0.073724 | 0.401454 | 0.317071 |
| MmugDNA.20459.1.S1_at   | MmugDNA.20459.1 | 11.92 | 12.19 | 0.06 | 0.05 | -1.21 | 0.002737 | 0.003518 | 0.185352 | 0.085137 |
| MmugDNA.20465.1.S1_at   | MmugDNA.20465.1 | 8.84  | 9.01  | 0.61 | 0.27 | -1.12 | 0.903723 | 0.723731 | 0.967655 | 0.840105 |
| MmugDNA.20467.1.S1_at   | MmugDNA.20467.1 | 7.74  | 8.42  | 2.27 | 0.35 | -1.6  | 0.531006 | 0.148528 | 0.799375 | 0.423074 |
| MmugDNA.20470.1.S1_at   | MmugDNA.20470.1 | 10.2  | 9.67  | 0.58 | 0.12 | 1.44  | 0.189975 | 0.123188 | 0.561309 | 0.393257 |
| MmugDNA.20473.1.S1_at   | MmugDNA.20473.1 | 3.46  | 3.37  | 0.28 | 0.11 | 1.06  | 0.623101 | 0.879381 | 0.848101 | 0.931144 |
| MmugDNA.20482.1.S1_at   | MmugDNA.20482.1 | 9.94  | 10.99 | 1.45 | 0.04 | -2.08 | 0.272004 | 0.183932 | 0.631761 | 0.46007  |
| MmugDNA.20487.1.S1_at   | MmugDNA.20487.1 | 4.41  | 5.97  | 0.21 | 0.55 | -2.94 | 0.008613 | 0.003868 | 0.235933 | 0.088475 |
| MmugDNA.20489.1.S1_at   | MmugDNA.20489.1 | 3.36  | 3.4   | 0.08 | 0.07 | -1.02 | 0.607521 | 0.594416 | 0.840946 | 0.758623 |
| MmugDNA.20492.1.S1_at   | MmugDNA.20492.1 | 13.19 | 13.05 | 0.23 | 0.05 | 1.1   | 0.997338 | 0.745133 | 0.999096 | 0.852267 |
| MmugDNA.20494.1.S1_at   | MmugDNA.20494.1 | 11.79 | 11.07 | 0.26 | 0.08 | 1.64  | 0.014375 | 0.0072   | 0.275341 | 0.114071 |
| MmugDNA.20496.1.S1_at   | MmugDNA.20496.1 | 6.65  | 6.5   | 0.17 | 0.16 | 1.1   | 0.382478 | 0.594151 | 0.710759 | 0.758517 |
| MmugDNA.20496.1.S1_s_at | MmugDNA.20496.1 | 3.38  | 3.4   | 0.62 | 0.24 | -1.02 | 0.638796 | 0.55656  | 0.856034 | 0.734609 |
| MmugDNA.2050.1.S1_at    | MmugDNA.2050.1  | 5.95  | 5.85  | 0.14 | 0.55 | 1.07  | 0.541569 | 0.480987 | 0.805185 | 0.686044 |
| MmugDNA.20505.1.S1_at   | MmugDNA.20505.1 | 8.74  | 8.58  | 0.27 | 0.1  | 1.11  | 0.988634 | 0.040372 | 0.995877 | 0.246054 |
| MmugDNA.20512.1.S1_at   | MmugDNA.20512.1 | 4.97  | 5.18  | 0.15 | 0.07 | -1.16 | 0.241854 | 0.306441 | 0.607952 | 0.563029 |
| MmugDNA.20516.1.S1_at   | MmugDNA.20516.1 | 4.41  | 4.41  | 0.07 | 0.04 | 1.01  | 0.863784 | 0.64492  | 0.952043 | 0.791938 |
| MmugDNA.20518.1.S1_at   | MmugDNA.20518.1 | 10.01 | 10.16 | 0.22 | 0.24 | -1.11 | 0.222777 | 0.146529 | 0.592343 | 0.420581 |
| MmugDNA.20520.1.S1_at   | MmugDNA.20520.1 | 12.28 | 11.82 | 0.18 | 0.12 | 1.37  | 0.036823 | 0.007039 | 0.355874 | 0.113112 |
| MmugDNA.20521.1.S1_at   | MmugDNA.20521.1 | 12.22 | 12.45 | 0.08 | 0.12 | -1.18 | 0.031299 | 0.03344  | 0.340817 | 0.226517 |
| MmugDNA.20535.1.S1_at   | MmugDNA.20535.1 | 9.74  | 10.4  | 0.22 | 0.11 | -1.58 | 0.00531  | 0.01196  | 0.207623 | 0.141475 |
| MmugDNA.2054.1.S1_at    | MmugDNA.2054.1  | 7.52  | 7.25  | 0.99 | 0.55 | 1.2   | 0.382247 | 0.032639 | 0.710505 | 0.223694 |
| MmugDNA.20540.1.S1_at   | MmugDNA.20540.1 | 8.91  | 8.15  | 0.46 | 0.15 | 1.69  | 0.038989 | 0.048368 | 0.36091  | 0.265081 |
| MmugDNA.20542.1.S1_at   | MmugDNA.20542.1 | 11.45 | 11.78 | 0.3  | 0.14 | -1.26 | 0.509013 | 0.42339  | 0.787411 | 0.646277 |
| MmugDNA.20549.1.S1_at   | MmugDNA.20549.1 | 6.78  | 6.68  | 0.14 | 0.03 | 1.07  | 0.178163 | 0.010812 | 0.551301 | 0.135636 |
| MmugDNA.2055.1.S1_at    | MmugDNA.2055.1  | 13.95 | 13.89 | 0.22 | 0.04 | 1.04  | 0.931785 | 0.471531 | 0.977114 | 0.6795   |
| MmugDNA.20560.1.S1_at   | MmugDNA.20560.1 | 7.05  | 7.57  | 0.48 | 0.19 | -1.44 | 0.140718 | 0.042676 | 0.51617  | 0.251037 |
| MmugDNA.20561.1.S1_at   | MmugDNA.20561.1 | 5.28  | 5.25  | 2.25 | 0.2  | 1.02  | 0.73934  | 0.892218 | 0.900473 | 0.938574 |
| MmugDNA.20570.1.S1_at   | MmugDNA.20570.1 | 9.93  | 9.84  | 0.21 | 0.19 | 1.06  | 0.573814 | 0.62978  | 0.823742 | 0.781989 |
| MmugDNA.20573.1.S1_at   | MmugDNA.20573.1 | 6.09  | 6.3   | 0.13 | 0.13 | -1.16 | 0.488075 | 0.168138 | 0.775396 | 0.444724 |
| MmugDNA.20574.1.S1_at   | MmugDNA.20574.1 | 8.36  | 8.62  | 0.65 | 0.21 | -1.2  | 0.622655 | 0.097983 | 0.847922 | 0.355882 |
| MmugDNA.20577.1.S1_at   | MmugDNA.20577.1 | 5.64  | 5.63  | 0.17 | 0.06 | 1.01  | 0.921189 | 0.988078 | 0.973328 | 0.99332  |
| MmugDNA.20581.1.S1_at   | MmugDNA.20581.1 | 3.76  | 3.75  | 0.01 | 0.07 | 1     | 0.838115 | 0.200119 | 0.941979 | 0.474603 |
| MmugDNA.20586.1.S1_at   | MmugDNA.20586.1 | 8.41  | 8.24  | 0.31 | 0.36 | 1.12  | 0.457432 | 0.481113 | 0.758343 | 0.686152 |
| MmugDNA.20588.1.S1_at   | MmugDNA.20588.1 | 10.25 | 10.43 | 0.34 | 0.05 | -1.13 | 0.24049  | 0.040356 | 0.60682  | 0.245984 |
| MmugDNA.20598.1.S1_at   | MmugDNA.20598.1 | 10.67 | 11.13 | 0.11 | 0.04 | -1.38 | 0.002605 | 0.003867 | 0.181648 | 0.088475 |
| MmugDNA.20601.1.S1_at   | MmugDNA.20601.1 | 9.07  | 9.52  | 0.41 | 0.09 | -1.37 | 0.396281 | 0.354762 | 0.721299 | 0.597429 |
| MmugDNA.20601.1.S1_s_at | MmugDNA.20601.1 | 9.37  | 9.73  | 0.37 | 0.03 | -1.28 | 0.538996 | 0.298062 | 0.803644 | 0.556707 |
| MmugDNA.20602.1.S1_at   | MmugDNA.20602.1 | 12.22 | 12.39 | 0.19 | 0.08 | -1.12 | 0.160947 | 0.17357  | 0.534282 | 0.449956 |
| MmugDNA.20604.1.S1_at   | MmugDNA.20604.1 | 13.51 | 13.47 | 0.3  | 0.08 | 1.03  | 0.874419 | 0.064344 | 0.956448 | 0.29983  |
| MmugDNA.20610.1.S1_at   | MmugDNA.20610.1 | 7.63  | 8.11  | 0.52 | 0.21 | -1.39 | 0.340385 | 0.274886 | 0.684513 | 0.53934  |

|                         |                 |       |       |      |      |       |          |          |          |          |
|-------------------------|-----------------|-------|-------|------|------|-------|----------|----------|----------|----------|
| MmugDNA.20611.1.S1_at   | MmugDNA.20611.1 | 9.85  | 9.18  | 0.2  | 0.14 | 1.59  | 0.015164 | 0.003095 | 0.279785 | 0.081194 |
| MmugDNA.20612.1.S1_at   | MmugDNA.20612.1 | 10.84 | 10.94 | 0.15 | 0.11 | -1.08 | 0.7605   | 0.026498 | 0.910074 | 0.203897 |
| MmugDNA.20616.1.S1_at   | MmugDNA.20616.1 | 4.49  | 4.63  | 0.37 | 0.18 | -1.1  | 0.833879 | 0.405448 | 0.940457 | 0.633767 |
| MmugDNA.20636.1.S1_at   | MmugDNA.20636.1 | 4.69  | 4.61  | 0.25 | 0.28 | 1.06  | 0.361583 | 0.510497 | 0.698663 | 0.704979 |
| MmugDNA.20650.1.S1_at   | MmugDNA.20650.1 | 6.06  | 6.02  | 0.12 | 0.09 | 1.03  | 0.347712 | 0.287585 | 0.688895 | 0.548871 |
| MmugDNA.2066.1.S1_at    | MmugDNA.2066.1  | 7.33  | 8.12  | 1.5  | 0.08 | -1.73 | 0.412714 | 0.174275 | 0.732098 | 0.450648 |
| MmugDNA.2066.1.S1_s_at  | MmugDNA.2066.1  | 8.19  | 8.51  | 1.42 | 0.1  | -1.25 | 0.755501 | 0.213644 | 0.907924 | 0.487441 |
| MmugDNA.20660.1.S1_at   | MmugDNA.20660.1 | 8.93  | 8.65  | 0.21 | 0.04 | 1.22  | 0.052964 | 0.082905 | 0.393634 | 0.332446 |
| MmugDNA.20669.1.S1_at   | MmugDNA.20669.1 | 7.34  | 7.6   | 0.95 | 0.05 | -1.19 | 0.71637  | 0.886834 | 0.88981  | 0.935553 |
| MmugDNA.20670.1.S1_at   | MmugDNA.20670.1 | 11    | 11.2  | 0.13 | 0.12 | -1.15 | 0.07649  | 0.006378 | 0.437977 | 0.108551 |
| MmugDNA.20670.1.S1_s_at | MmugDNA.20670.1 | 10.3  | 10.21 | 0.17 | 0.09 | -1.06 | 0.857158 | 0.062962 | 0.94963  | 0.297586 |
| MmugDNA.20671.1.S1_at   | MmugDNA.20671.1 | 10.4  | 10.7  | 0.55 | 0.3  | -1.23 | 0.684585 | 0.007677 | 0.876455 | 0.117153 |
| MmugDNA.20672.1.S1_at   | MmugDNA.20672.1 | 10.62 | 10.82 | 0.3  | 0.04 | -1.15 | 0.187912 | 0.185848 | 0.560014 | 0.461695 |
| MmugDNA.20675.1.S1_at   | MmugDNA.20675.1 | 9.23  | 9.7   | 0.55 | 0.19 | -1.39 | 0.140855 | 0.164445 | 0.516345 | 0.440678 |
| MmugDNA.20683.1.S1_at   | MmugDNA.20683.1 | 7.13  | 8.14  | 0.52 | 0.02 | -2.02 | 0.032205 | 0.001507 | 0.343301 | 0.0591   |
| MmugDNA.20685.1.S1_at   | MmugDNA.20685.1 | 9.01  | 9.17  | 0.19 | 0.09 | -1.12 | 0.708348 | 0.507458 | 0.886591 | 0.703026 |
| MmugDNA.20686.1.S1_at   | MmugDNA.20686.1 | 4.26  | 4     | 0.18 | 0.13 | 1.2   | 0.202084 | 0.396611 | 0.573629 | 0.628434 |
| MmugDNA.20687.1.S1_at   | MmugDNA.20687.1 | 5.41  | 5.47  | 0.47 | 0.35 | -1.04 | 0.381173 | 0.450691 | 0.709924 | 0.665844 |
| MmugDNA.20693.1.S1_at   | MmugDNA.20693.1 | 10.64 | 11.25 | 1.76 | 0.15 | -1.52 | 0.328678 | 0.180787 | 0.67577  | 0.457306 |
| MmugDNA.20694.1.S1_at   | MmugDNA.20694.1 | 9.08  | 9.26  | 0.19 | 0.09 | -1.13 | 0.111933 | 0.383394 | 0.484976 | 0.619384 |
| MmugDNA.20698.1.S1_at   | MmugDNA.20698.1 | 6.61  | 8.33  | 0.64 | 0.04 | -3.31 | 0.00951  | 0.013708 | 0.242401 | 0.149947 |
| MmugDNA.20702.1.S1_at   | MmugDNA.20702.1 | 7.19  | 7.08  | 0.03 | 0.07 | 1.08  | 0.04859  | 0.059288 | 0.383721 | 0.290528 |
| MmugDNA.20706.1.S1_at   | MmugDNA.20706.1 | 5.55  | 5.91  | 0.11 | 0.29 | -1.28 | 0.094604 | 0.025212 | 0.463796 | 0.19911  |
| MmugDNA.2071.1.S1_at    | MmugDNA.2071.1  | 8.17  | 7.88  | 0.38 | 0.14 | 1.22  | 0.191908 | 0.012337 | 0.563006 | 0.143659 |
| MmugDNA.20711.1.A1_at   | MmugDNA.20711.1 | 6.58  | 6.59  | 0.16 | 0.06 | -1.01 | 0.698409 | 0.480013 | 0.88278  | 0.685613 |
| MmugDNA.20711.1.S1_at   | MmugDNA.20711.1 | 6.33  | 6.28  | 0.17 | 0.07 | 1.03  | 0.429172 | 0.703791 | 0.742138 | 0.828234 |
| MmugDNA.20719.1.S1_s_at | MmugDNA.20719.1 | 12.83 | 12.94 | 0.01 | 0.03 | -1.08 | 0.005378 | 0.002846 | 0.208157 | 0.078601 |
| MmugDNA.2072.1.S1_at    | MmugDNA.2072.1  | 5.85  | 5.92  | 0.24 | 0.09 | -1.05 | 0.771257 | 0.358441 | 0.914428 | 0.599994 |
| MmugDNA.20725.1.S1_at   | MmugDNA.20725.1 | 6.88  | 7.01  | 0.17 | 0.07 | -1.09 | 0.327647 | 0.122629 | 0.675137 | 0.392564 |
| MmugDNA.20726.1.S1_at   | MmugDNA.20726.1 | 6.97  | 6.81  | 0.12 | 0.11 | 1.12  | 0.072094 | 0.106176 | 0.432014 | 0.36856  |
| MmugDNA.20728.1.S1_at   | MmugDNA.20728.1 | 11.6  | 11.53 | 0.14 | 0.05 | 1.05  | 0.178289 | 0.061096 | 0.551301 | 0.293958 |
| MmugDNA.20730.1.S1_at   | MmugDNA.20730.1 | 8.85  | 8.83  | 0.18 | 0.1  | 1.02  | 0.771044 | 0.810006 | 0.91436  | 0.890518 |
| MmugDNA.20731.1.S1_at   | MmugDNA.20731.1 | 10.44 | 10.33 | 0.34 | 0.07 | 1.07  | 0.359054 | 0.027592 | 0.697042 | 0.207431 |
| MmugDNA.20732.1.S1_at   | MmugDNA.20732.1 | 11.11 | 10.2  | 0.37 | 0.11 | 1.88  | 0.014592 | 0.009922 | 0.276563 | 0.130787 |
| MmugDNA.20734.1.S1_at   | MmugDNA.20734.1 | 10.21 | 10.25 | 0.32 | 0.02 | -1.03 | 0.257626 | 0.123263 | 0.621338 | 0.393358 |
| MmugDNA.20738.1.S1_at   | MmugDNA.20738.1 | 7.15  | 7.52  | 0.58 | 0.3  | -1.3  | 0.14988  | 0.260467 | 0.523408 | 0.527006 |
| MmugDNA.20764.1.S1_at   | MmugDNA.20764.1 | 8.53  | 7.95  | 0.31 | 0.25 | 1.49  | 0.158961 | 0.133017 | 0.531703 | 0.40469  |
| MmugDNA.20768.1.S1_at   | MmugDNA.20768.1 | 8.63  | 9.1   | 2.78 | 0.32 | -1.38 | 0.567685 | 0.068104 | 0.820586 | 0.307142 |
| MmugDNA.20770.1.S1_s_at | MmugDNA.20770.1 | 11.86 | 12.19 | 0.31 | 0.02 | -1.26 | 0.077705 | 0.042506 | 0.439817 | 0.250786 |
| MmugDNA.20776.1.S1_at   | MmugDNA.20776.1 | 9.17  | 9.06  | 0.09 | 0.04 | 1.08  | 0.124749 | 0.201797 | 0.498863 | 0.476367 |
| MmugDNA.20780.1.S1_at   | MmugDNA.20780.1 | 6.41  | 5.89  | 0.27 | 0.11 | 1.44  | 0.038374 | 0.031418 | 0.359112 | 0.219107 |
| MmugDNA.20784.1.S1_at   | MmugDNA.20784.1 | 11.78 | 12.07 | 0.61 | 0.1  | -1.22 | 0.47442  | 0.110448 | 0.767951 | 0.374684 |
| MmugDNA.20790.1.S1_at   | MmugDNA.20790.1 | 6.68  | 6.59  | 0.14 | 0.11 | 1.06  | 0.158661 | 0.29826  | 0.531588 | 0.556931 |

|                         |                 |       |       |      |      |       |          |          |          |          |
|-------------------------|-----------------|-------|-------|------|------|-------|----------|----------|----------|----------|
| MmugDNA.20794.1.S1_at   | MmugDNA.20794.1 | 6.97  | 6.72  | 0.51 | 0.12 | 1.19  | 0.421834 | 0.607509 | 0.737784 | 0.766417 |
| MmugDNA.208.1.S1_at     | MmugDNA.208.1   | 8.28  | 7.28  | 0.48 | 0.23 | 1.99  | 0.014013 | 0.001176 | 0.273301 | 0.05381  |
| MmugDNA.20800.1.S1_at   | MmugDNA.20800.1 | 11.14 | 11.93 | 0.85 | 0.02 | -1.73 | 0.570985 | 0.466047 | 0.822371 | 0.676096 |
| MmugDNA.20802.1.S1_at   | MmugDNA.20802.1 | 9.67  | 10.57 | 0.08 | 0.06 | -1.86 | 0.000138 | 0.000007 | 0.111942 | 0.016421 |
| MmugDNA.20810.1.S1_s_at | MmugDNA.20810.1 | 7.39  | 7.25  | 0.07 | 0.05 | 1.1   | 0.04736  | 0.04431  | 0.380034 | 0.255021 |
| MmugDNA.20819.1.S1_at   | MmugDNA.20819.1 | 8.95  | 9.3   | 0.59 | 0.21 | -1.28 | 0.516036 | 0.330164 | 0.791221 | 0.578987 |
| MmugDNA.20819.1.S1_s_at | MmugDNA.20819.1 | 8.42  | 8.66  | 0.5  | 0.18 | -1.18 | 0.961    | 0.350686 | 0.987225 | 0.594409 |
| MmugDNA.20825.1.S1_at   | MmugDNA.20825.1 | 4.95  | 4.91  | 0.08 | 0.03 | 1.03  | 0.658988 | 0.514895 | 0.865035 | 0.707931 |
| MmugDNA.2083.1.S1_at    | MmugDNA.2083.1  | 10.32 | 10.2  | 0.39 | 0.13 | 1.09  | 0.367579 | 0.555842 | 0.703069 | 0.734119 |
| MmugDNA.20834.1.S1_at   | MmugDNA.20834.1 | 9.72  | 10.2  | 0.28 | 0.08 | -1.4  | 0.033995 | 0.014837 | 0.347481 | 0.154918 |
| MmugDNA.20835.1.S1_at   | MmugDNA.20835.1 | 5.59  | 5.37  | 0.23 | 0.13 | -1.17 | 0.072013 | 0.139695 | 0.431899 | 0.413029 |
| MmugDNA.20839.1.S1_at   | MmugDNA.20839.1 | 12.09 | 12.31 | 0.09 | 0.04 | -1.16 | 0.011716 | 0.0036   | 0.256742 | 0.085874 |
| MmugDNA.20840.1.S1_at   | MmugDNA.20840.1 | 6.83  | 6.65  | 0.08 | 0.02 | 1.14  | 0.018791 | 0.191158 | 0.298593 | 0.466426 |
| MmugDNA.20842.1.S1_at   | MmugDNA.20842.1 | 9.2   | 9.21  | 0.29 | 0.03 | -1.01 | 0.411444 | 0.584941 | 0.731446 | 0.752584 |
| MmugDNA.20843.1.S1_at   | MmugDNA.20843.1 | 8.94  | 8.69  | 0.23 | 0.06 | 1.18  | 0.146088 | 0.149439 | 0.520572 | 0.423893 |
| MmugDNA.20848.1.S1_at   | MmugDNA.20848.1 | 12.41 | 12.61 | 0.12 | 0.01 | -1.15 | 0.054653 | 0.005351 | 0.397122 | 0.101092 |
| MmugDNA.20855.1.S1_at   | MmugDNA.20855.1 | 3.13  | 3.12  | 0.06 | 0.03 | 1     | 0.260124 | 0.348003 | 0.623011 | 0.592215 |
| MmugDNA.2086.1.S1_at    | MmugDNA.2086.1  | 6.96  | 6.73  | 0.46 | 0.05 | 1.17  | 0.42552  | 0.177745 | 0.740112 | 0.454107 |
| MmugDNA.20861.1.S1_at   | MmugDNA.20861.1 | 11.73 | 10.91 | 0.49 | 0.03 | 1.76  | 0.129267 | 0.007365 | 0.504035 | 0.115268 |
| MmugDNA.20865.1.S1_at   | MmugDNA.20865.1 | 12.72 | 12.72 | 0.12 | 0.05 | -1    | 0.584998 | 0.145857 | 0.830162 | 0.419888 |
| MmugDNA.20871.1.S1_at   | MmugDNA.20871.1 | 12.53 | 12.68 | 0.19 | 0.04 | -1.11 | 0.206294 | 0.083995 | 0.578142 | 0.3349   |
| MmugDNA.20880.1.S1_at   | MmugDNA.20880.1 | 6.12  | 6.13  | 0.19 | 0.03 | -1.01 | 0.5307   | 0.289727 | 0.799187 | 0.550776 |
| MmugDNA.20885.1.S1_at   | MmugDNA.20885.1 | 10.79 | 11.31 | 0.31 | 0.12 | -1.43 | 0.18676  | 0.068347 | 0.559225 | 0.307894 |
| MmugDNA.20899.1.S1_at   | MmugDNA.20899.1 | 6.53  | 6.45  | 0.7  | 0.35 | 1.06  | 0.805768 | 0.724405 | 0.929464 | 0.840474 |
| MmugDNA.209.1.S1_at     | MmugDNA.209.1   | 6.64  | 6.92  | 0.03 | 0.04 | -1.21 | 0.000765 | 0.003748 | 0.15004  | 0.087236 |
| MmugDNA.20906.1.S1_at   | MmugDNA.20906.1 | 6.78  | 7.83  | 0.93 | 0.34 | -2.08 | 0.138988 | 0.169332 | 0.514459 | 0.445925 |
| MmugDNA.20907.1.S1_at   | MmugDNA.20907.1 | 10.31 | 10.63 | 1.13 | 0.07 | -1.25 | 0.598465 | 0.093827 | 0.836974 | 0.350281 |
| MmugDNA.20916.1.S1_at   | MmugDNA.20916.1 | 8.38  | 9.04  | 0.18 | 0.11 | -1.59 | 0.007681 | 0.007782 | 0.230571 | 0.117732 |
| MmugDNA.20928.1.S1_at   | MmugDNA.20928.1 | 12.13 | 11.52 | 0.28 | 0.08 | 1.53  | 0.023069 | 0.007562 | 0.314565 | 0.116437 |
| MmugDNA.2093.1.S1_at    | MmugDNA.2093.1  | 3.69  | 3.7   | 0.05 | 0.01 | -1    | 0.270623 | 0.35058  | 0.630519 | 0.594324 |
| MmugDNA.20932.1.S1_at   | MmugDNA.20932.1 | 9.14  | 9.35  | 0.48 | 0.15 | -1.15 | 0.700051 | 0.855207 | 0.883386 | 0.917457 |
| MmugDNA.20957.1.S1_at   | MmugDNA.20957.1 | 10.39 | 10.94 | 0.29 | 0.05 | -1.46 | 0.031381 | 0.011045 | 0.341212 | 0.136837 |
| MmugDNA.20958.1.S1_at   | MmugDNA.20958.1 | 11.64 | 11.36 | 0.83 | 0.2  | 1.22  | 0.572136 | 0.666257 | 0.823145 | 0.804419 |
| MmugDNA.20963.1.S1_at   | MmugDNA.20963.1 | 4.89  | 4.58  | 0.18 | 0.21 | 1.24  | 0.095581 | 0.148912 | 0.464229 | 0.423284 |
| MmugDNA.20979.1.S1_at   | MmugDNA.20979.1 | 13.8  | 13.79 | 0.12 | 0.01 | 1.01  | 0.742664 | 0.889139 | 0.901884 | 0.936796 |
| MmugDNA.20983.1.S1_at   | MmugDNA.20983.1 | 6.76  | 7.46  | 0.54 | 0.09 | -1.62 | 0.232569 | 0.047157 | 0.600124 | 0.261755 |
| MmugDNA.20986.1.S1_s_at | MmugDNA.20986.1 | 9.87  | 10.04 | 0.65 | 0.14 | -1.12 | 0.631985 | 0.172082 | 0.852641 | 0.448508 |
| MmugDNA.20995.1.S1_at   | MmugDNA.20995.1 | 11.34 | 10.67 | 2.99 | 0.28 | 1.59  | 0.775515 | 0.2998   | 0.916777 | 0.558081 |
| MmugDNA.21.1.S1_at      | MmugDNA.21.1    | 10.74 | 10.67 | 0.42 | 0.06 | 1.04  | 0.74944  | 0.916517 | 0.905021 | 0.953266 |
| MmugDNA.210.1.S1_at     | MmugDNA.210.1   | 7.81  | 5.73  | 2.21 | 0.26 | 4.23  | 0.335937 | 0.533747 | 0.681398 | 0.719857 |
| MmugDNA.21002.1.S1_at   | MmugDNA.21002.1 | 10.48 | 10.66 | 0.11 | 0.07 | -1.14 | 0.140051 | 0.019101 | 0.515581 | 0.173887 |
| MmugDNA.21004.1.S1_at   | MmugDNA.21004.1 | 4.72  | 4.6   | 0.12 | 0.04 | 1.09  | 0.299198 | 0.510045 | 0.653571 | 0.704549 |
| MmugDNA.21005.1.S1_at   | MmugDNA.21005.1 | 7.52  | 7.48  | 0.1  | 0.09 | 1.03  | 0.709477 | 0.082171 | 0.886951 | 0.331021 |

|                         |                 |       |       |      |      |       |          |          |          |          |
|-------------------------|-----------------|-------|-------|------|------|-------|----------|----------|----------|----------|
| MmugDNA.21007.1.S1_s_at | MmugDNA.21007.1 | 13.85 | 13.68 | 0.17 | 0.03 | 1.12  | 0.455469 | 0.472328 | 0.757444 | 0.679963 |
| MmugDNA.21009.1.S1_at   | MmugDNA.21009.1 | 5.35  | 5.49  | 0.04 | 0.29 | -1.11 | 0.387512 | 0.603592 | 0.714388 | 0.764204 |
| MmugDNA.2101.1.S1_at    | MmugDNA.2101.1  | 13.14 | 13.19 | 0.68 | 0.01 | -1.03 | 0.732035 | 0.545525 | 0.896978 | 0.727564 |
| MmugDNA.21013.1.S1_at   | MmugDNA.21013.1 | 7     | 6.85  | 0.11 | 0.07 | 1.11  | 0.102003 | 0.369319 | 0.472436 | 0.6087   |
| MmugDNA.21023.1.S1_at   | MmugDNA.21023.1 | 10.83 | 10.79 | 0.01 | 0.1  | 1.02  | 0.706986 | 0.868585 | 0.886005 | 0.925383 |
| MmugDNA.21026.1.S1_at   | MmugDNA.21026.1 | 5.91  | 5.86  | 0.13 | 0.03 | 1.04  | 0.488785 | 0.960331 | 0.775818 | 0.977459 |
| MmugDNA.21032.1.S1_at   | MmugDNA.21032.1 | 13.11 | 13.14 | 0.51 | 0.05 | -1.02 | 0.399522 | 0.53994  | 0.723131 | 0.723995 |
| MmugDNA.21038.1.S1_at   | MmugDNA.21038.1 | 4.14  | 4.18  | 0.31 | 0.04 | -1.03 | 0.59454  | 0.683922 | 0.834804 | 0.815618 |
| MmugDNA.21041.1.S1_at   | MmugDNA.21041.1 | 9.94  | 10.15 | 0.69 | 0.06 | -1.16 | 0.637414 | 0.837525 | 0.855548 | 0.907127 |
| MmugDNA.21042.1.S1_at   | MmugDNA.21042.1 | 6.14  | 6.08  | 0.07 | 0.09 | 1.04  | 0.288683 | 0.155833 | 0.645686 | 0.431211 |
| MmugDNA.21047.1.S1_at   | MmugDNA.21047.1 | 10.24 | 10.27 | 0.35 | 0.16 | -1.02 | 0.356625 | 0.069793 | 0.695204 | 0.310331 |
| MmugDNA.21051.1.S1_at   | MmugDNA.21051.1 | 3.83  | 3.53  | 0.01 | 0.47 | 1.24  | 0.804154 | 0.558855 | 0.928759 | 0.73591  |
| MmugDNA.21058.1.S1_at   | MmugDNA.21058.1 | 8.46  | 9.21  | 0.72 | 0.16 | -1.68 | 0.553744 | 0.574057 | 0.812271 | 0.745566 |
| MmugDNA.21059.1.S1_at   | MmugDNA.21059.1 | 10.93 | 10.67 | 0.66 | 0.06 | 1.19  | 0.834398 | 0.022872 | 0.940622 | 0.189285 |
| MmugDNA.21065.1.S1_at   | MmugDNA.21065.1 | 7.73  | 6.9   | 0.37 | 0.17 | 1.78  | 0.037157 | 0.038668 | 0.356778 | 0.24169  |
| MmugDNA.21067.1.S1_at   | MmugDNA.21067.1 | 12.51 | 12.17 | 0.41 | 0.02 | 1.27  | 0.698332 | 0.443613 | 0.882746 | 0.661336 |
| MmugDNA.21071.1.S1_at   | MmugDNA.21071.1 | 13.15 | 13.26 | 0.15 | 0.03 | -1.08 | 0.200637 | 0.324235 | 0.572447 | 0.57488  |
| MmugDNA.21074.1.S1_at   | MmugDNA.21074.1 | 12.96 | 12.69 | 0.43 | 0.05 | 1.21  | 0.471492 | 0.053278 | 0.76658  | 0.276463 |
| MmugDNA.21077.1.S1_at   | MmugDNA.21077.1 | 10.18 | 9.92  | 0.76 | 0.08 | 1.2   | 0.778829 | 0.744837 | 0.918438 | 0.852198 |
| MmugDNA.2108.1.S1_s_at  | MmugDNA.2108.1  | 8.22  | 8.47  | 1.13 | 0.24 | -1.19 | 0.707397 | 0.382009 | 0.886113 | 0.618258 |
| MmugDNA.21080.1.S1_at   | MmugDNA.21080.1 | 5.5   | 5.98  | 0.49 | 0.48 | -1.39 | 0.274297 | 0.400266 | 0.633792 | 0.630158 |
| MmugDNA.21082.1.S1_at   | MmugDNA.21082.1 | 3.21  | 3.2   | 0.01 | 0.15 | 1.01  | 0.81816  | 0.869079 | 0.934249 | 0.925671 |
| MmugDNA.21084.1.S1_at   | MmugDNA.21084.1 | 4.22  | 4.15  | 0.02 | 0.09 | 1.05  | 0.183527 | 0.199401 | 0.55651  | 0.474002 |
| MmugDNA.21085.1.S1_at   | MmugDNA.21085.1 | 4.44  | 4.39  | 0.16 | 0.07 | 1.03  | 0.419863 | 0.500683 | 0.736572 | 0.699229 |
| MmugDNA.21086.1.S1_at   | MmugDNA.21086.1 | 5.74  | 5.56  | 0.11 | 0.03 | 1.13  | 0.156563 | 0.432713 | 0.529581 | 0.653094 |
| MmugDNA.21088.1.S1_at   | MmugDNA.21088.1 | 5.62  | 5.49  | 0.08 | 0.09 | 1.09  | 0.111049 | 0.303301 | 0.484303 | 0.560748 |
| MmugDNA.2109.1.S1_at    | MmugDNA.2109.1  | 6.43  | 6.65  | 0.29 | 0.06 | -1.17 | 0.625305 | 0.775044 | 0.849286 | 0.869035 |
| MmugDNA.21090.1.S1_at   | MmugDNA.21090.1 | 4.98  | 4.97  | 0.03 | 0.16 | 1     | 0.800724 | 0.708678 | 0.927137 | 0.831025 |
| MmugDNA.21095.1.S1_at   | MmugDNA.21095.1 | 10.22 | 9.89  | 1.07 | 0.18 | 1.26  | 0.68363  | 0.27292  | 0.876134 | 0.53761  |
| MmugDNA.21098.1.S1_at   | MmugDNA.21098.1 | 5.71  | 5.87  | 0.14 | 0.11 | -1.12 | 0.268837 | 0.373967 | 0.629184 | 0.612588 |
| MmugDNA.211.1.S1_at     | MmugDNA.211.1   | 6.83  | 6.69  | 0.18 | 0.28 | 1.11  | 0.664022 | 0.811031 | 0.867567 | 0.890966 |
| MmugDNA.21100.1.S1_at   | MmugDNA.21100.1 | 6.8   | 6.77  | 0.5  | 0.12 | 1.02  | 0.487405 | 0.012447 | 0.775077 | 0.14417  |
| MmugDNA.21104.1.S1_at   | MmugDNA.21104.1 | 7.11  | 9.26  | 0.46 | 0.28 | -4.44 | 0.002887 | 0.001975 | 0.187888 | 0.065871 |
| MmugDNA.21105.1.S1_at   | MmugDNA.21105.1 | 9.31  | 10.12 | 0.23 | 0.14 | -1.75 | 0.008131 | 0.003989 | 0.232005 | 0.089804 |
| MmugDNA.21108.1.S1_at   | MmugDNA.21108.1 | 7.27  | 6.62  | 0.57 | 0.14 | 1.56  | 0.121902 | 0.134472 | 0.495636 | 0.406626 |
| MmugDNA.21109.1.S1_at   | MmugDNA.21109.1 | 11.65 | 12.07 | 0.37 | 0.14 | -1.34 | 0.604107 | 0.172107 | 0.839485 | 0.448529 |
| MmugDNA.21118.1.S1_at   | MmugDNA.21118.1 | 6.26  | 6.02  | 0.08 | 0.04 | 1.18  | 0.023975 | 0.039153 | 0.317529 | 0.243072 |
| MmugDNA.2112.1.S1_at    | MmugDNA.2112.1  | 7.73  | 7.85  | 0.42 | 0.22 | -1.08 | 0.609831 | 0.60192  | 0.841773 | 0.763122 |
| MmugDNA.21120.1.S1_at   | MmugDNA.21120.1 | 6.24  | 6.32  | 0.65 | 0.26 | -1.05 | 0.508621 | 0.885103 | 0.787118 | 0.934567 |
| MmugDNA.21122.1.S1_at   | MmugDNA.21122.1 | 4.99  | 4.77  | 0.17 | 0.04 | 1.16  | 0.232467 | 0.46582  | 0.600124 | 0.675969 |
| MmugDNA.21125.1.S1_at   | MmugDNA.21125.1 | 7.66  | 7.97  | 1.03 | 0.09 | -1.24 | 0.430703 | 0.415143 | 0.742996 | 0.640713 |
| MmugDNA.21125.1.S1_s_at | MmugDNA.21125.1 | 7.51  | 7.69  | 0.23 | 0.07 | -1.14 | 0.737366 | 0.341671 | 0.899462 | 0.587796 |
| MmugDNA.21126.1.S1_at   | MmugDNA.21126.1 | 5.63  | 5.21  | 0.15 | 0.03 | 1.34  | 0.022094 | 0.026495 | 0.310243 | 0.203897 |

|                         |                 |       |       |      |      |       |          |          |          |          |
|-------------------------|-----------------|-------|-------|------|------|-------|----------|----------|----------|----------|
| MmugDNA.21127.1.S1_at   | MmugDNA.21127.1 | 7.34  | 7.79  | 0.78 | 0.38 | -1.37 | 0.458446 | 0.029309 | 0.758837 | 0.21321  |
| MmugDNA.21128.1.S1_at   | MmugDNA.21128.1 | 13.09 | 12.91 | 0.24 | 0.04 | 1.14  | 0.718812 | 0.864636 | 0.890773 | 0.923264 |
| MmugDNA.21136.1.S1_at   | MmugDNA.21136.1 | 13.37 | 13.51 | 0.38 | 0.03 | -1.1  | 0.272197 | 0.023457 | 0.631959 | 0.191956 |
| MmugDNA.21138.1.S1_at   | MmugDNA.21138.1 | 11.48 | 11.49 | 0.2  | 0.04 | -1.01 | 0.86049  | 0.907606 | 0.950834 | 0.947753 |
| MmugDNA.21144.1.S1_at   | MmugDNA.21144.1 | 4.09  | 3.97  | 0.09 | 0.26 | 1.09  | 0.966788 | 0.997791 | 0.989067 | 0.998906 |
| MmugDNA.21145.1.S1_s_at | MmugDNA.21145.1 | 6.76  | 6.75  | 0.12 | 0.07 | 1.01  | 0.346097 | 0.557242 | 0.687873 | 0.735031 |
| MmugDNA.21146.1.S1_at   | MmugDNA.21146.1 | 12.36 | 12.32 | 0.14 | 0.11 | 1.03  | 0.336522 | 0.00923  | 0.681909 | 0.126903 |
| MmugDNA.21148.1.S1_at   | MmugDNA.21148.1 | 11.46 | 10.51 | 0.45 | 0.41 | 1.93  | 0.040386 | 0.002883 | 0.364273 | 0.078985 |
| MmugDNA.2115.1.S1_at    | MmugDNA.2115.1  | 13.07 | 13.04 | 0.19 | 0.07 | 1.02  | 0.786308 | 0.150764 | 0.921403 | 0.425322 |
| MmugDNA.21150.1.S1_at   | MmugDNA.21150.1 | 6.57  | 6.44  | 0.14 | 0.11 | 1.09  | 0.25147  | 0.593504 | 0.616712 | 0.758322 |
| MmugDNA.21158.1.S1_at   | MmugDNA.21158.1 | 4.11  | 4.13  | 0.11 | 0.05 | -1.02 | 0.507562 | 0.37581  | 0.786432 | 0.613697 |
| MmugDNA.21162.1.S1_at   | MmugDNA.21162.1 | 10.36 | 11.03 | 0.16 | 0.1  | -1.6  | 0.003919 | 0.001035 | 0.198571 | 0.051314 |
| MmugDNA.21164.1.S1_at   | MmugDNA.21164.1 | 7.7   | 7.81  | 0.7  | 0.05 | -1.08 | 0.837222 | 0.207249 | 0.94155  | 0.481388 |
| MmugDNA.21166.1.S1_at   | MmugDNA.21166.1 | 6.18  | 6     | 0.31 | 0.03 | 1.13  | 0.37849  | 0.486403 | 0.708363 | 0.689764 |
| MmugDNA.21171.1.S1_at   | MmugDNA.21171.1 | 5.6   | 5.63  | 0.72 | 0.3  | -1.02 | 0.964109 | 0.936153 | 0.988243 | 0.963987 |
| MmugDNA.21188.1.S1_at   | MmugDNA.21188.1 | 6.38  | 6.56  | 0.27 | 0.09 | -1.13 | 0.166237 | 0.144567 | 0.538973 | 0.418425 |
| MmugDNA.21189.1.S1_at   | MmugDNA.21189.1 | 6.13  | 6.1   | 0.8  | 0.09 | 1.02  | 0.77575  | 0.236241 | 0.916815 | 0.507252 |
| MmugDNA.21195.1.S1_at   | MmugDNA.21195.1 | 8.89  | 8.98  | 0.47 | 0.1  | -1.07 | 0.522988 | 0.00959  | 0.795413 | 0.129058 |
| MmugDNA.21199.1.S1_at   | MmugDNA.21199.1 | 5.93  | 5.76  | 0.58 | 0.11 | 1.13  | 0.730748 | 0.272054 | 0.896248 | 0.536847 |
| MmugDNA.21211.1.S1_at   | MmugDNA.21211.1 | 7.47  | 7.95  | 0.74 | 0.09 | -1.39 | 0.104013 | 0.244314 | 0.474656 | 0.514184 |
| MmugDNA.21214.1.S1_at   | MmugDNA.21214.1 | 7.94  | 7.94  | 0.37 | 0.18 | -1    | 0.863492 | 0.042596 | 0.952018 | 0.251035 |
| MmugDNA.21216.1.S1_at   | MmugDNA.21216.1 | 10.67 | 10.94 | 0.25 | 0.06 | -1.21 | 0.0493   | 0.058373 | 0.385423 | 0.288369 |
| MmugDNA.21230.1.S1_at   | MmugDNA.21230.1 | 12.69 | 12.75 | 0.09 | 0.04 | -1.05 | 0.866072 | 0.072646 | 0.952919 | 0.315579 |
| MmugDNA.21234.1.S1_at   | MmugDNA.21234.1 | 5.43  | 5.44  | 0.04 | 0.09 | -1    | 0.463849 | 0.390979 | 0.762278 | 0.62469  |
| MmugDNA.21236.1.S1_at   | MmugDNA.21236.1 | 9.61  | 9.43  | 0.07 | 0.08 | 1.13  | 0.021332 | 0.004531 | 0.307781 | 0.094006 |
| MmugDNA.2124.1.S1_at    | MmugDNA.2124.1  | 13.69 | 13.67 | 0.06 | 0.09 | 1.01  | 0.164412 | 0.030806 | 0.537322 | 0.217376 |
| MmugDNA.21240.1.S1_at   | MmugDNA.21240.1 | 7.21  | 7.07  | 0.08 | 0.01 | 1.1   | 0.11981  | 0.356802 | 0.493259 | 0.598603 |
| MmugDNA.21242.1.S1_at   | MmugDNA.21242.1 | 8.09  | 8.56  | 1.55 | 0.2  | -1.39 | 0.585708 | 0.120693 | 0.830611 | 0.389548 |
| MmugDNA.21246.1.S1_at   | MmugDNA.21246.1 | 12.65 | 12.67 | 0.12 | 0.04 | -1.02 | 0.265751 | 0.351037 | 0.626849 | 0.594737 |
| MmugDNA.21250.1.S1_at   | MmugDNA.21250.1 | 8.5   | 8.67  | 1.16 | 0.17 | -1.12 | 0.927247 | 0.49074  | 0.97587  | 0.692666 |
| MmugDNA.21252.1.S1_at   | MmugDNA.21252.1 | 5.06  | 4.8   | 0.08 | 0.06 | 1.2   | 0.017191 | 0.390753 | 0.289858 | 0.624518 |
| MmugDNA.21266.1.S1_at   | MmugDNA.21266.1 | 9.69  | 9.56  | 0.52 | 0.17 | 1.09  | 0.678694 | 0.524292 | 0.874119 | 0.714254 |
| MmugDNA.21266.1.S1_s_at | MmugDNA.21266.1 | 9.32  | 9.49  | 0.62 | 0.18 | -1.13 | 0.989077 | 0.915835 | 0.995916 | 0.952836 |
| MmugDNA.21269.1.S1_at   | MmugDNA.21269.1 | 6.17  | 5.84  | 0.15 | 0.11 | 1.26  | 0.08281  | 0.216557 | 0.44803  | 0.490207 |
| MmugDNA.21270.1.S1_at   | MmugDNA.21270.1 | 5.17  | 5.03  | 0.23 | 0.06 | 1.1   | 0.487411 | 0.631222 | 0.775077 | 0.782734 |
| MmugDNA.21273.1.S1_at   | MmugDNA.21273.1 | 8.7   | 6.14  | 1.29 | 0.64 | 5.88  | 0.022187 | 0.01659  | 0.310495 | 0.163051 |
| MmugDNA.21274.1.S1_at   | MmugDNA.21274.1 | 11.17 | 11.37 | 0.21 | 0.1  | -1.15 | 0.823966 | 0.525823 | 0.936506 | 0.715217 |
| MmugDNA.21275.1.S1_at   | MmugDNA.21275.1 | 7     | 7.77  | 0.51 | 0.07 | -1.71 | 0.062427 | 0.016862 | 0.413147 | 0.164584 |
| MmugDNA.21276.1.S1_at   | MmugDNA.21276.1 | 7.42  | 8.25  | 0.63 | 0.22 | -1.78 | 0.127944 | 0.015406 | 0.502422 | 0.157628 |
| MmugDNA.21283.1.S1_at   | MmugDNA.21283.1 | 9.81  | 9.17  | 0.21 | 0.34 | 1.56  | 0.061755 | 0.101074 | 0.41144  | 0.360724 |
| MmugDNA.21287.1.S1_at   | MmugDNA.21287.1 | 5.88  | 5.71  | 0.08 | 0.03 | 1.13  | 0.01215  | 0.005456 | 0.259945 | 0.101952 |
| MmugDNA.21289.1.S1_at   | MmugDNA.21289.1 | 12.51 | 12.63 | 0.18 | 0.06 | -1.08 | 0.832061 | 0.713107 | 0.939756 | 0.833638 |
| MmugDNA.213.1.S1_at     | MmugDNA.213.1   | 7.98  | 7.23  | 0.29 | 0.22 | 1.69  | 0.026624 | 0.109512 | 0.325592 | 0.373339 |

|                         |                 |       |       |      |      |       |          |          |          |          |
|-------------------------|-----------------|-------|-------|------|------|-------|----------|----------|----------|----------|
| MmugDNA.2130.1.S1_at    | MmugDNA.2130.1  | 10.08 | 10.31 | 0.31 | 0.06 | -1.18 | 0.796732 | 0.202516 | 0.925303 | 0.476819 |
| MmugDNA.21300.1.S1_at   | MmugDNA.21300.1 | 4     | 3.91  | 0.12 | 0.13 | 1.07  | 0.83241  | 0.012633 | 0.939855 | 0.145027 |
| MmugDNA.21315.1.S1_at   | MmugDNA.21315.1 | 10.9  | 11.02 | 0.35 | 0.05 | -1.09 | 0.391879 | 0.664277 | 0.717958 | 0.803298 |
| MmugDNA.21317.1.S1_at   | MmugDNA.21317.1 | 9.83  | 10.01 | 0.86 | 0.02 | -1.13 | 0.514046 | 0.377893 | 0.790236 | 0.615264 |
| MmugDNA.21338.1.S1_at   | MmugDNA.21338.1 | 9.9   | 8.97  | 0.32 | 0.32 | 1.9   | 0.023756 | 0.004721 | 0.316649 | 0.095706 |
| MmugDNA.21339.1.S1_at   | MmugDNA.21339.1 | 11.93 | 12    | 0.15 | 0.18 | -1.05 | 0.941856 | 0.867039 | 0.980207 | 0.924449 |
| MmugDNA.2134.1.S1_at    | MmugDNA.2134.1  | 7.76  | 8.12  | 0.47 | 0.03 | -1.28 | 0.578336 | 0.674869 | 0.826202 | 0.810065 |
| MmugDNA.21346.1.S1_at   | MmugDNA.21346.1 | 10.73 | 11.73 | 0.58 | 0.28 | -2    | 0.032676 | 0.010984 | 0.345141 | 0.136546 |
| MmugDNA.21347.1.S1_s_at | MmugDNA.21347.1 | 12.38 | 12.23 | 0.07 | 0.11 | 1.11  | 0.449666 | 0.096221 | 0.754534 | 0.353541 |
| MmugDNA.21353.1.S1_at   | MmugDNA.21353.1 | 4.04  | 3.76  | 0.39 | 0.41 | 1.21  | 0.602874 | 0.594208 | 0.839074 | 0.758517 |
| MmugDNA.21353.1.S1_s_at | MmugDNA.21353.1 | 5.44  | 5.35  | 0.4  | 0.19 | -1.06 | 0.769318 | 0.608395 | 0.913562 | 0.767074 |
| MmugDNA.21371.1.S1_at   | MmugDNA.21371.1 | 5.1   | 6.32  | 1.16 | 0.74 | -2.32 | 0.587846 | 0.213733 | 0.83181  | 0.487551 |
| MmugDNA.21376.1.S1_s_at | MmugDNA.21376.1 | 10.78 | 10.84 | 0.22 | 0.07 | -1.04 | 0.446542 | 0.741821 | 0.752779 | 0.850509 |
| MmugDNA.21377.1.S1_at   | MmugDNA.21377.1 | 9.88  | 9.56  | 0.22 | 0.35 | 1.25  | 0.938876 | 0.027254 | 0.979343 | 0.206326 |
| MmugDNA.21380.1.S1_at   | MmugDNA.21380.1 | 12.88 | 13.18 | 0.25 | 0.05 | -1.23 | 0.13357  | 0.182895 | 0.508012 | 0.459365 |
| MmugDNA.21382.1.S1_at   | MmugDNA.21382.1 | 11.52 | 11.52 | 0.21 | 0.07 | -1    | 0.438315 | 0.033479 | 0.747277 | 0.226577 |
| MmugDNA.21386.1.S1_at   | MmugDNA.21386.1 | 7.06  | 7.14  | 0.2  | 0.25 | -1.06 | 0.816396 | 0.031728 | 0.933526 | 0.22055  |
| MmugDNA.21387.1.S1_at   | MmugDNA.21387.1 | 6.26  | 6.25  | 0.33 | 0.02 | 1.01  | 0.348404 | 0.451399 | 0.689697 | 0.666186 |
| MmugDNA.21391.1.S1_at   | MmugDNA.21391.1 | 5.67  | 5.54  | 0.11 | 0.04 | 1.09  | 0.145719 | 0.446581 | 0.520555 | 0.662862 |
| MmugDNA.2140.1.S1_at    | MmugDNA.2140.1  | 10.47 | 10.42 | 0.1  | 0.05 | 1.04  | 0.986196 | 0.847515 | 0.995557 | 0.913321 |
| MmugDNA.21403.1.S1_at   | MmugDNA.21403.1 | 9.42  | 9.23  | 0.16 | 0.21 | 1.14  | 0.298311 | 0.000119 | 0.653103 | 0.028664 |
| MmugDNA.21404.1.S1_at   | MmugDNA.21404.1 | 8.6   | 8.67  | 0.4  | 0.07 | -1.05 | 0.451266 | 0.632957 | 0.755064 | 0.783881 |
| MmugDNA.21407.1.S1_at   | MmugDNA.21407.1 | 10.24 | 10.68 | 0.71 | 0.1  | -1.36 | 0.423772 | 0.418076 | 0.739218 | 0.642582 |
| MmugDNA.21410.1.S1_at   | MmugDNA.21410.1 | 6.39  | 6.59  | 0.04 | 0.14 | -1.15 | 0.028255 | 0.007831 | 0.33163  | 0.117929 |
| MmugDNA.21414.1.S1_at   | MmugDNA.21414.1 | 9.67  | 9.42  | 0.45 | 0.24 | 1.2   | 0.671395 | 0.707468 | 0.870346 | 0.830361 |
| MmugDNA.2142.1.S1_at    | MmugDNA.2142.1  | 8.22  | 8.11  | 0.08 | 0.08 | 1.08  | 0.424412 | 0.00654  | 0.739564 | 0.109652 |
| MmugDNA.21423.1.S1_at   | MmugDNA.21423.1 | 7.27  | 6.91  | 0.1  | 0.17 | 1.28  | 0.049288 | 0.140274 | 0.385423 | 0.413448 |
| MmugDNA.21431.1.S1_at   | MmugDNA.21431.1 | 5.68  | 5.94  | 0.36 | 0.26 | -1.2  | 0.414614 | 0.111976 | 0.733197 | 0.37707  |
| MmugDNA.21435.1.S1_at   | MmugDNA.21435.1 | 12.79 | 12.84 | 0.08 | 0.03 | -1.04 | 0.267018 | 0.236565 | 0.627652 | 0.507364 |
| MmugDNA.21436.1.S1_at   | MmugDNA.21436.1 | 9.51  | 9.92  | 0.18 | 0.02 | -1.32 | 0.049551 | 0.178439 | 0.385783 | 0.454778 |
| MmugDNA.21439.1.S1_at   | MmugDNA.21439.1 | 13.41 | 13.14 | 2.3  | 0.13 | 1.2   | 0.481711 | 0.355711 | 0.772225 | 0.597864 |
| MmugDNA.21441.1.S1_at   | MmugDNA.21441.1 | 13.2  | 13.12 | 0.07 | 0.03 | 1.06  | 0.404675 | 0.009402 | 0.726817 | 0.127832 |
| MmugDNA.21446.1.S1_at   | MmugDNA.21446.1 | 6.62  | 6.7   | 0.25 | 0.17 | -1.06 | 0.662466 | 0.88272  | 0.866799 | 0.93317  |
| MmugDNA.2145.1.S1_at    | MmugDNA.2145.1  | 11.8  | 11.67 | 0.75 | 0.13 | 1.09  | 0.515641 | 0.171511 | 0.790971 | 0.447895 |
| MmugDNA.21462.1.S1_at   | MmugDNA.21462.1 | 9.21  | 8.89  | 0.39 | 0.05 | 1.25  | 0.271311 | 0.000344 | 0.631176 | 0.036921 |
| MmugDNA.21467.1.S1_at   | MmugDNA.21467.1 | 8.71  | 8.89  | 0.15 | 0.11 | -1.14 | 0.308409 | 0.730878 | 0.661045 | 0.844119 |
| MmugDNA.21472.1.S1_at   | MmugDNA.21472.1 | 10.83 | 10.76 | 0.13 | 0.06 | 1.05  | 0.154359 | 0.104639 | 0.527483 | 0.365941 |
| MmugDNA.21476.1.S1_at   | MmugDNA.21476.1 | 11.7  | 11.52 | 0.08 | 0.05 | 1.13  | 0.034626 | 0.043676 | 0.350134 | 0.253711 |
| MmugDNA.21483.1.S1_at   | MmugDNA.21483.1 | 8.5   | 9.26  | 0.36 | 0.14 | -1.69 | 0.032344 | 0.017544 | 0.343902 | 0.167632 |
| MmugDNA.21487.1.S1_at   | MmugDNA.21487.1 | 8.69  | 8.94  | 0.92 | 0.19 | -1.19 | 0.317144 | 0.32147  | 0.666951 | 0.573226 |
| MmugDNA.21489.1.S1_at   | MmugDNA.21489.1 | 11.92 | 11.84 | 0.13 | 0.05 | 1.06  | 0.641604 | 0.015048 | 0.857434 | 0.155803 |
| MmugDNA.21492.1.S1_at   | MmugDNA.21492.1 | 11.16 | 11.34 | 0.02 | 0.06 | -1.13 | 0.005852 | 0.115987 | 0.211798 | 0.383164 |
| MmugDNA.2150.1.S1_at    | MmugDNA.2150.1  | 6.7   | 7.81  | 0.97 | 0.11 | -2.16 | 0.425099 | 0.408844 | 0.739823 | 0.6359   |

|                         |                 |       |       |      |      |       |          |          |          |          |
|-------------------------|-----------------|-------|-------|------|------|-------|----------|----------|----------|----------|
| MmugDNA.21502.1.S1_at   | MmugDNA.21502.1 | 10.13 | 10.57 | 0.08 | 0.16 | -1.36 | 0.008214 | 0.011451 | 0.232005 | 0.13846  |
| MmugDNA.21510.1.S1_at   | MmugDNA.21510.1 | 12.83 | 12.97 | 0.36 | 0.04 | -1.1  | 0.624306 | 0.46658  | 0.848627 | 0.676398 |
| MmugDNA.21515.1.S1_at   | MmugDNA.21515.1 | 10.44 | 10.13 | 0.35 | 0.07 | 1.24  | 0.373569 | 0.00117  | 0.705567 | 0.053714 |
| MmugDNA.21516.1.S1_at   | MmugDNA.21516.1 | 10.9  | 11.37 | 0.56 | 0.08 | -1.38 | 0.769429 | 0.49323  | 0.913654 | 0.694009 |
| MmugDNA.21518.1.S1_at   | MmugDNA.21518.1 | 11.28 | 11.44 | 0.98 | 0.06 | -1.12 | 0.79369  | 0.902392 | 0.924414 | 0.94454  |
| MmugDNA.21523.1.S1_at   | MmugDNA.21523.1 | 5.8   | 5.61  | 0.12 | 0.04 | 1.14  | 0.039335 | 0.13281  | 0.361498 | 0.404544 |
| MmugDNA.21524.1.S1_at   | MmugDNA.21524.1 | 7.2   | 7.6   | 0.55 | 0.11 | -1.32 | 0.93061  | 0.208024 | 0.97685  | 0.482049 |
| MmugDNA.21524.1.S1_s_at | MmugDNA.21524.1 | 7.97  | 8.01  | 0.47 | 0.09 | -1.03 | 0.570382 | 0.458545 | 0.822018 | 0.671232 |
| MmugDNA.21525.1.S1_at   | MmugDNA.21525.1 | 7.54  | 7.41  | 0.44 | 0.17 | 1.09  | 0.648096 | 0.069526 | 0.859721 | 0.309848 |
| MmugDNA.21525.1.S1_s_at | MmugDNA.21525.1 | 8     | 7.75  | 0.35 | 0.27 | 1.18  | 0.43693  | 0.060669 | 0.746613 | 0.292876 |
| MmugDNA.21526.1.S1_at   | MmugDNA.21526.1 | 4.51  | 4.48  | 0.29 | 0.05 | -1.02 | 0.490161 | 0.662859 | 0.776773 | 0.802631 |
| MmugDNA.21528.1.S1_at   | MmugDNA.21528.1 | 6.89  | 6.88  | 0.04 | 0.03 | 1.01  | 0.72328  | 0.987255 | 0.892777 | 0.992852 |
| MmugDNA.21529.1.S1_at   | MmugDNA.21529.1 | 9.04  | 9.65  | 0.27 | 0.15 | -1.53 | 0.071934 | 0.137984 | 0.431889 | 0.410912 |
| MmugDNA.21530.1.S1_at   | MmugDNA.21530.1 | 3.23  | 3.29  | 0.02 | 0.04 | -1.04 | 0.151919 | 0.012725 | 0.525051 | 0.145429 |
| MmugDNA.21534.1.S1_at   | MmugDNA.21534.1 | 11.65 | 11.58 | 0.18 | 0.03 | 1.05  | 0.936178 | 0.687193 | 0.978537 | 0.817509 |
| MmugDNA.21539.1.S1_at   | MmugDNA.21539.1 | 3.92  | 3.85  | 0.1  | 0.15 | 1.05  | 0.758086 | 0.646542 | 0.908979 | 0.792953 |
| MmugDNA.21540.1.S1_at   | MmugDNA.21540.1 | 13.44 | 13.39 | 1.05 | 0.08 | 1.03  | 0.40346  | 0.305396 | 0.725709 | 0.562397 |
| MmugDNA.21543.1.S1_at   | MmugDNA.21543.1 | 11.47 | 11.4  | 0.27 | 0.08 | 1.05  | 0.725111 | 0.007864 | 0.893356 | 0.118072 |
| MmugDNA.21546.1.S1_at   | MmugDNA.21546.1 | 11.91 | 12.15 | 0.34 | 0.08 | -1.18 | 0.264403 | 0.175245 | 0.626029 | 0.452027 |
| MmugDNA.21551.1.S1_at   | MmugDNA.21551.1 | 4.05  | 4     | 0.06 | 0.07 | 1.03  | 0.271009 | 0.769774 | 0.630919 | 0.866333 |
| MmugDNA.21552.1.S1_at   | MmugDNA.21552.1 | 10.2  | 10.14 | 0.12 | 0.06 | 1.04  | 0.964773 | 0.000961 | 0.988406 | 0.049342 |
| MmugDNA.21555.1.S1_at   | MmugDNA.21555.1 | 5.71  | 5.53  | 0.17 | 0.14 | 1.13  | 0.39054  | 0.007235 | 0.716814 | 0.11424  |
| MmugDNA.21556.1.S1_at   | MmugDNA.21556.1 | 10.04 | 10.19 | 0.3  | 0.07 | -1.11 | 0.437061 | 0.012559 | 0.746719 | 0.144501 |
| MmugDNA.21561.1.S1_at   | MmugDNA.21561.1 | 5.38  | 5.38  | 0.08 | 0.06 | -1    | 0.4855   | 0.747372 | 0.774354 | 0.853149 |
| MmugDNA.21562.1.S1_at   | MmugDNA.21562.1 | 5.43  | 5.95  | 0.72 | 0.24 | -1.43 | 0.292532 | 0.314301 | 0.648901 | 0.568263 |
| MmugDNA.21566.1.S1_at   | MmugDNA.21566.1 | 7.69  | 7.58  | 0.21 | 0.05 | 1.07  | 0.320961 | 0.344187 | 0.669544 | 0.589762 |
| MmugDNA.21567.1.S1_at   | MmugDNA.21567.1 | 8.95  | 8.64  | 0.13 | 0.02 | 1.24  | 0.04487  | 0.001024 | 0.375242 | 0.051079 |
| MmugDNA.21575.1.S1_at   | MmugDNA.21575.1 | 10.04 | 9.51  | 1.04 | 0.31 | 1.45  | 0.551701 | 0.441269 | 0.81144  | 0.659477 |
| MmugDNA.21586.1.S1_at   | MmugDNA.21586.1 | 12.98 | 12.99 | 0.4  | 0.06 | -1.01 | 0.603203 | 0.073358 | 0.839167 | 0.316469 |
| MmugDNA.21589.1.S1_at   | MmugDNA.21589.1 | 6.67  | 7.1   | 0.59 | 0.1  | -1.35 | 0.223335 | 0.188231 | 0.592569 | 0.464251 |
| MmugDNA.2159.1.S1_at    | MmugDNA.2159.1  | 6.83  | 6.8   | 0.09 | 0.05 | 1.02  | 0.793824 | 0.556243 | 0.924471 | 0.734449 |
| MmugDNA.21590.1.S1_at   | MmugDNA.21590.1 | 2.92  | 3.06  | 0.07 | 0.2  | -1.1  | 0.440565 | 0.477608 | 0.748529 | 0.683636 |
| MmugDNA.21590.1.S1_x_at | MmugDNA.21590.1 | 3.28  | 3.4   | 0.12 | 0.27 | -1.09 | 0.375357 | 0.451054 | 0.706463 | 0.666004 |
| MmugDNA.21593.1.S1_at   | MmugDNA.21593.1 | 3.89  | 3.85  | 0.05 | 0.03 | 1.03  | 0.283227 | 0.296139 | 0.641313 | 0.555339 |
| MmugDNA.21599.1.S1_at   | MmugDNA.21599.1 | 10.89 | 11.32 | 0.61 | 0.08 | -1.35 | 0.386722 | 0.309973 | 0.713705 | 0.565227 |
| MmugDNA.21602.1.S1_at   | MmugDNA.21602.1 | 11.99 | 11.69 | 0.25 | 0.08 | 1.24  | 0.055219 | 0.012122 | 0.398095 | 0.142442 |
| MmugDNA.21603.1.S1_at   | MmugDNA.21603.1 | 6.28  | 6.11  | 0.13 | 0.02 | 1.12  | 0.131476 | 0.299551 | 0.505858 | 0.557945 |
| MmugDNA.21607.1.S1_at   | MmugDNA.21607.1 | 5.85  | 5.77  | 0.12 | 0.03 | 1.06  | 0.309753 | 0.356191 | 0.661815 | 0.598158 |
| MmugDNA.21608.1.S1_at   | MmugDNA.21608.1 | 10.13 | 10.01 | 0.07 | 0.02 | 1.09  | 0.045706 | 0.317854 | 0.377029 | 0.571042 |
| MmugDNA.2161.1.S1_at    | MmugDNA.2161.1  | 4.63  | 4.87  | 0.24 | 0.15 | -1.18 | 0.368221 | 0.469922 | 0.70351  | 0.678572 |
| MmugDNA.21612.1.S1_at   | MmugDNA.21612.1 | 7.47  | 7.94  | 0.21 | 0.05 | -1.38 | 0.020203 | 0.007585 | 0.303683 | 0.11658  |
| MmugDNA.2162.1.S1_at    | MmugDNA.2162.1  | 10.05 | 9.81  | 0.31 | 0.01 | 1.19  | 0.259584 | 0.520774 | 0.622626 | 0.711942 |
| MmugDNA.21620.1.S1_at   | MmugDNA.21620.1 | 7.83  | 7.87  | 0.21 | 0.04 | -1.03 | 0.872647 | 0.705462 | 0.955797 | 0.829222 |

|                         |                 |       |       |      |      |       |          |          |          |          |
|-------------------------|-----------------|-------|-------|------|------|-------|----------|----------|----------|----------|
| MmugDNA.21621.1.S1_s_at | MmugDNA.21621.1 | 11.01 | 10.76 | 0.22 | 0.12 | 1.19  | 0.292825 | 0.326001 | 0.649118 | 0.576235 |
| MmugDNA.21622.1.S1_at   | MmugDNA.21622.1 | 6.5   | 6.75  | 0.23 | 0.04 | -1.19 | 0.125566 | 0.035877 | 0.499523 | 0.233893 |
| MmugDNA.21629.1.S1_at   | MmugDNA.21629.1 | 4.22  | 4.16  | 0.02 | 0.12 | 1.04  | 0.281937 | 0.361085 | 0.640396 | 0.602069 |
| MmugDNA.21630.1.S1_at   | MmugDNA.21630.1 | 9.67  | 10.18 | 0.17 | 0.06 | -1.42 | 0.009741 | 0.002005 | 0.243347 | 0.066428 |
| MmugDNA.21633.1.S1_at   | MmugDNA.21633.1 | 8.9   | 9.15  | 0.73 | 0.03 | -1.19 | 0.709335 | 0.886648 | 0.886836 | 0.935519 |
| MmugDNA.21634.1.S1_at   | MmugDNA.21634.1 | 12    | 11.61 | 0.16 | 0.02 | 1.32  | 0.03106  | 0.100746 | 0.339539 | 0.360154 |
| MmugDNA.21636.1.S1_at   | MmugDNA.21636.1 | 6.38  | 6.32  | 0.15 | 0.09 | 1.04  | 0.384152 | 0.587205 | 0.711835 | 0.754083 |
| MmugDNA.21651.1.S1_at   | MmugDNA.21651.1 | 12.76 | 12.85 | 0.07 | 0.04 | -1.06 | 0.041077 | 0.010274 | 0.365672 | 0.132734 |
| MmugDNA.21655.1.S1_at   | MmugDNA.21655.1 | 5.79  | 5.31  | 1.25 | 0.15 | 1.39  | 0.52493  | 0.27182  | 0.796168 | 0.536584 |
| MmugDNA.21661.1.S1_at   | MmugDNA.21661.1 | 12.2  | 12.34 | 0.16 | 0.07 | -1.11 | 0.339947 | 0.543652 | 0.684096 | 0.726239 |
| MmugDNA.21665.1.S1_at   | MmugDNA.21665.1 | 12.8  | 12.43 | 0.12 | 0.12 | 1.29  | 0.02115  | 0.009107 | 0.306888 | 0.125983 |
| MmugDNA.2167.1.S1_at    | MmugDNA.2167.1  | 6.76  | 6.65  | 0.42 | 0.1  | 1.08  | 0.511263 | 0.548981 | 0.788561 | 0.729509 |
| MmugDNA.21671.1.S1_at   | MmugDNA.21671.1 | 10.38 | 10.39 | 0.6  | 0.16 | -1.01 | 0.384694 | 0.040096 | 0.712173 | 0.245388 |
| MmugDNA.2168.1.S1_at    | MmugDNA.2168.1  | 5.8   | 6.23  | 0.78 | 0.19 | -1.34 | 0.939673 | 0.828652 | 0.979532 | 0.901558 |
| MmugDNA.21682.1.S1_at   | MmugDNA.21682.1 | 9.09  | 9.52  | 0.57 | 0.02 | -1.35 | 0.615068 | 0.803402 | 0.844188 | 0.886844 |
| MmugDNA.21684.1.S1_at   | MmugDNA.21684.1 | 11.1  | 11    | 0.64 | 0.04 | 1.07  | 0.878989 | 0.690345 | 0.95792  | 0.819507 |
| MmugDNA.21691.1.S1_at   | MmugDNA.21691.1 | 11.53 | 11.43 | 0.1  | 0.08 | 1.08  | 0.966664 | 0.46994  | 0.989053 | 0.678572 |
| MmugDNA.21692.1.S1_at   | MmugDNA.21692.1 | 9.51  | 9.37  | 0.08 | 0.06 | 1.1   | 0.364945 | 0.070439 | 0.700775 | 0.311737 |
| MmugDNA.21695.1.S1_at   | MmugDNA.21695.1 | 13.02 | 12.88 | 0.02 | 0.04 | 1.11  | 0.003928 | 0.133994 | 0.198571 | 0.406194 |
| MmugDNA.21697.1.S1_at   | MmugDNA.21697.1 | 12.38 | 12.37 | 0.21 | 0.04 | 1.01  | 0.421016 | 0.272174 | 0.737205 | 0.536939 |
| MmugDNA.21699.1.S1_at   | MmugDNA.21699.1 | 8.02  | 7.56  | 0.43 | 0.11 | 1.38  | 0.118417 | 0.004204 | 0.491933 | 0.091368 |
| MmugDNA.2170.1.S1_at    | MmugDNA.2170.1  | 4.93  | 5.44  | 0.77 | 0.36 | -1.43 | 0.950523 | 0.322847 | 0.983327 | 0.574192 |
| MmugDNA.21701.1.S1_at   | MmugDNA.21701.1 | 12.88 | 12.88 | 0.31 | 0.04 | -1    | 0.826624 | 0.482454 | 0.937918 | 0.687298 |
| MmugDNA.21702.1.S1_at   | MmugDNA.21702.1 | 9.2   | 9.57  | 0.25 | 0.03 | -1.3  | 0.071109 | 0.088243 | 0.430341 | 0.341721 |
| MmugDNA.21705.1.A1_at   | MmugDNA.21705.1 | 5.74  | 5.65  | 0.27 | 0.1  | 1.06  | 0.508773 | 0.638887 | 0.787246 | 0.787897 |
| MmugDNA.21705.1.S1_at   | MmugDNA.21705.1 | 5.62  | 5.59  | 0.33 | 0.05 | 1.02  | 0.892612 | 0.932618 | 0.963196 | 0.961739 |
| MmugDNA.21706.1.S1_at   | MmugDNA.21706.1 | 6.78  | 7.66  | 0.6  | 0.02 | -1.84 | 0.059113 | 0.058509 | 0.406055 | 0.288585 |
| MmugDNA.21708.1.S1_at   | MmugDNA.21708.1 | 6.68  | 6.56  | 1.07 | 0.64 | 1.08  | 0.562452 | 0.060526 | 0.8177   | 0.292664 |
| MmugDNA.21714.1.S1_at   | MmugDNA.21714.1 | 12.32 | 12.42 | 0.11 | 0.06 | -1.07 | 0.253495 | 0.000468 | 0.61827  | 0.038572 |
| MmugDNA.21719.1.S1_at   | MmugDNA.21719.1 | 9.05  | 9.12  | 0.16 | 0.07 | -1.05 | 0.358101 | 0.276539 | 0.696048 | 0.540552 |
| MmugDNA.2172.1.S1_at    | MmugDNA.2172.1  | 12.95 | 13.16 | 0.08 | 0.01 | -1.16 | 0.032951 | 0.023903 | 0.345526 | 0.193679 |
| MmugDNA.21722.1.S1_at   | MmugDNA.21722.1 | 6.77  | 7.78  | 0.29 | 0.46 | -2.02 | 0.074335 | 0.025681 | 0.435137 | 0.200834 |
| MmugDNA.21723.1.S1_at   | MmugDNA.21723.1 | 10.98 | 11.48 | 0.19 | 0.05 | -1.41 | 0.024668 | 0.138907 | 0.319407 | 0.412037 |
| MmugDNA.21725.1.S1_at   | MmugDNA.21725.1 | 11.42 | 11.27 | 0.19 | 0.09 | 1.11  | 0.282589 | 0.317082 | 0.640996 | 0.570347 |
| MmugDNA.21726.1.S1_at   | MmugDNA.21726.1 | 5.82  | 5.17  | 0.51 | 0.08 | 1.56  | 0.068757 | 0.029348 | 0.426022 | 0.213228 |
| MmugDNA.2173.1.S1_at    | MmugDNA.2173.1  | 9.77  | 9.47  | 0.27 | 0.07 | 1.24  | 0.21558  | 0.270446 | 0.585748 | 0.535785 |
| MmugDNA.21737.1.S1_at   | MmugDNA.21737.1 | 7.94  | 7.2   | 1.14 | 0.36 | 1.67  | 0.302703 | 0.267995 | 0.656634 | 0.533738 |
| MmugDNA.21738.1.S1_at   | MmugDNA.21738.1 | 5.56  | 5.2   | 0.23 | 0.24 | 1.28  | 0.100325 | 0.106298 | 0.470959 | 0.368766 |
| MmugDNA.21740.1.S1_at   | MmugDNA.21740.1 | 6.47  | 7.06  | 0.78 | 0.08 | -1.51 | 0.334051 | 0.385144 | 0.680021 | 0.620662 |
| MmugDNA.21745.1.S1_at   | MmugDNA.21745.1 | 11.41 | 12.01 | 0.59 | 0.2  | -1.51 | 0.062183 | 0.064424 | 0.412613 | 0.300001 |
| MmugDNA.21748.1.S1_at   | MmugDNA.21748.1 | 5.29  | 5.19  | 0.2  | 0.03 | 1.07  | 0.462949 | 0.572555 | 0.761901 | 0.744566 |
| MmugDNA.21749.1.S1_at   | MmugDNA.21749.1 | 5.17  | 5.23  | 0.05 | 0.05 | -1.04 | 0.925259 | 0.218816 | 0.975138 | 0.492537 |
| MmugDNA.2175.1.S1_at    | MmugDNA.2175.1  | 12.71 | 12.54 | 0.09 | 0.08 | 1.12  | 0.204998 | 0.118577 | 0.576643 | 0.38654  |



|                         |                 |       |       |      |      |       |          |          |          |          |
|-------------------------|-----------------|-------|-------|------|------|-------|----------|----------|----------|----------|
| MmugDNA.21756.1.S1_at   | MmugDNA.21756.1 | 11.27 | 11.24 | 0.23 | 0.17 | 1.02  | 0.683494 | 0.150227 | 0.876134 | 0.42486  |
| MmugDNA.2176.1.S1_at    | MmugDNA.2176.1  | 9.42  | 8.32  | 0.67 | 0.19 | 2.14  | 0.021056 | 0.00282  | 0.306644 | 0.078275 |
| MmugDNA.21762.1.S1_at   | MmugDNA.21762.1 | 11.53 | 11.89 | 0.46 | 0.05 | -1.28 | 0.277019 | 0.111343 | 0.636653 | 0.376045 |
| MmugDNA.21768.1.S1_at   | MmugDNA.21768.1 | 6.6   | 6.45  | 0.36 | 0.18 | 1.11  | 0.511926 | 0.478232 | 0.788945 | 0.684243 |
| MmugDNA.21787.1.S1_at   | MmugDNA.21787.1 | 4.42  | 4.32  | 0.1  | 0.05 | 1.07  | 0.112823 | 0.209439 | 0.486223 | 0.483069 |
| MmugDNA.21795.1.S1_at   | MmugDNA.21795.1 | 6.35  | 5.7   | 0.28 | 0.22 | 1.58  | 0.139842 | 0.165205 | 0.515319 | 0.441389 |
| MmugDNA.21803.1.S1_at   | MmugDNA.21803.1 | 10.64 | 10.77 | 1.19 | 0.11 | -1.09 | 0.779682 | 0.654374 | 0.918789 | 0.798021 |
| MmugDNA.21806.1.S1_at   | MmugDNA.21806.1 | 3.5   | 3.67  | 0.24 | 0.14 | -1.13 | 0.308663 | 0.361428 | 0.661287 | 0.602201 |
| MmugDNA.21807.1.S1_at   | MmugDNA.21807.1 | 11.23 | 11.51 | 0.42 | 0.05 | -1.21 | 0.396878 | 0.594446 | 0.721565 | 0.758623 |
| MmugDNA.21809.1.S1_at   | MmugDNA.21809.1 | 11.93 | 12.03 | 0.24 | 0.02 | -1.08 | 0.907083 | 0.988849 | 0.968482 | 0.993642 |
| MmugDNA.21811.1.S1_at   | MmugDNA.21811.1 | 6.72  | 7.24  | 0.38 | 0.33 | -1.43 | 0.716158 | 0.368185 | 0.889685 | 0.607793 |
| MmugDNA.21814.1.S1_at   | MmugDNA.21814.1 | 5.96  | 6.5   | 0.5  | 0.33 | -1.46 | 0.844464 | 0.355746 | 0.945337 | 0.597864 |
| MmugDNA.21818.1.S1_at   | MmugDNA.21818.1 | 4.38  | 4.47  | 0.09 | 0.06 | -1.06 | 0.648322 | 0.768087 | 0.859825 | 0.865352 |
| MmugDNA.21826.1.S1_at   | MmugDNA.21826.1 | 5.47  | 6.63  | 0.29 | 0.21 | -2.24 | 0.009152 | 0.011619 | 0.241781 | 0.139603 |
| MmugDNA.21829.1.S1_at   | MmugDNA.21829.1 | 7.85  | 7.91  | 0.32 | 0.08 | -1.04 | 0.780654 | 0.942246 | 0.919142 | 0.967221 |
| MmugDNA.21835.1.S1_s_at | MmugDNA.21835.1 | 8.51  | 8.52  | 0.28 | 0.36 | -1.01 | 0.78333  | 0.222859 | 0.920198 | 0.495769 |
| MmugDNA.21839.1.S1_at   | MmugDNA.21839.1 | 8.35  | 8.06  | 0.57 | 0.44 | 1.22  | 0.813691 | 0.834302 | 0.932693 | 0.905078 |
| MmugDNA.2184.1.S1_at    | MmugDNA.2184.1  | 4.55  | 4.26  | 0.21 | 0.34 | 1.22  | 0.222015 | 0.159658 | 0.591614 | 0.435785 |
| MmugDNA.21840.1.S1_at   | MmugDNA.21840.1 | 10.01 | 10.28 | 0.12 | 0.1  | -1.2  | 0.084668 | 0.045156 | 0.451162 | 0.256979 |
| MmugDNA.21844.1.S1_at   | MmugDNA.21844.1 | 8.43  | 8.04  | 1.16 | 0.22 | 1.31  | 0.614146 | 0.056552 | 0.843828 | 0.283835 |
| MmugDNA.21847.1.S1_at   | MmugDNA.21847.1 | 6.2   | 5.99  | 0.18 | 0.14 | 1.16  | 0.826953 | 0.941975 | 0.938039 | 0.96711  |
| MmugDNA.2185.1.S1_at    | MmugDNA.2185.1  | 10.51 | 10.29 | 0.64 | 0.02 | 1.16  | 0.913617 | 0.737192 | 0.970626 | 0.847855 |
| MmugDNA.21852.1.S1_at   | MmugDNA.21852.1 | 6.86  | 7.31  | 0.78 | 0.06 | -1.37 | 0.363647 | 0.230757 | 0.700278 | 0.502451 |
| MmugDNA.2186.1.S1_at    | MmugDNA.2186.1  | 11.33 | 11    | 0.13 | 0.04 | 1.25  | 0.016673 | 0.011623 | 0.287478 | 0.13962  |
| MmugDNA.21865.1.S1_at   | MmugDNA.21865.1 | 9.84  | 9.86  | 0.26 | 0.05 | -1.01 | 0.847344 | 0.90085  | 0.946525 | 0.943581 |
| MmugDNA.21866.1.S1_at   | MmugDNA.21866.1 | 7.18  | 7.59  | 1.07 | 0.15 | -1.34 | 0.611762 | 0.115568 | 0.842611 | 0.382674 |
| MmugDNA.21867.1.S1_at   | MmugDNA.21867.1 | 11.48 | 11.92 | 0.11 | 0.16 | -1.36 | 0.012817 | 0.171061 | 0.265262 | 0.447601 |
| MmugDNA.21867.1.S1_s_at | MmugDNA.21867.1 | 10.72 | 9.93  | 0.17 | 0.13 | 1.73  | 0.007235 | 0.015601 | 0.226509 | 0.158262 |
| MmugDNA.21868.1.S1_at   | MmugDNA.21868.1 | 6.17  | 6.13  | 0.37 | 0.36 | 1.02  | 0.536922 | 0.321694 | 0.802544 | 0.573346 |
| MmugDNA.2187.1.S1_at    | MmugDNA.2187.1  | 12.85 | 12.75 | 0.03 | 0.02 | 1.07  | 0.005636 | 0.43037  | 0.209565 | 0.651383 |
| MmugDNA.21870.1.S1_at   | MmugDNA.21870.1 | 9.32  | 9.27  | 0.22 | 0.07 | 1.03  | 0.240608 | 0.303005 | 0.606937 | 0.560461 |
| MmugDNA.21873.1.S1_at   | MmugDNA.21873.1 | 2.72  | 2.82  | 0.02 | 0.1  | -1.07 | 0.213056 | 0.476189 | 0.583667 | 0.682566 |
| MmugDNA.21875.1.S1_at   | MmugDNA.21875.1 | 4.82  | 4.57  | 0.06 | 0.15 | 1.19  | 0.059274 | 0.599212 | 0.406296 | 0.761365 |
| MmugDNA.21876.1.S1_at   | MmugDNA.21876.1 | 4.02  | 4.03  | 0.18 | 0.1  | -1.01 | 0.914313 | 0.98179  | 0.970825 | 0.989993 |
| MmugDNA.21878.1.S1_at   | MmugDNA.21878.1 | 11.63 | 11.66 | 0.17 | 0.08 | -1.02 | 0.480186 | 0.432364 | 0.771113 | 0.652794 |
| MmugDNA.21887.1.S1_at   | MmugDNA.21887.1 | 10.92 | 11.21 | 0.25 | 0.18 | -1.22 | 0.108285 | 0.033288 | 0.480728 | 0.226074 |
| MmugDNA.21889.1.S1_at   | MmugDNA.21889.1 | 3.75  | 3.74  | 0.07 | 0.06 | 1.01  | 0.850863 | 0.983427 | 0.947485 | 0.99078  |
| MmugDNA.21894.1.S1_at   | MmugDNA.21894.1 | 4.36  | 4.28  | 0.05 | 0.05 | 1.06  | 0.278768 | 0.715589 | 0.637886 | 0.835127 |
| MmugDNA.21895.1.S1_at   | MmugDNA.21895.1 | 6.02  | 5.28  | 1.26 | 0.11 | 1.66  | 0.397167 | 0.509102 | 0.721708 | 0.703993 |
| MmugDNA.21899.1.S1_at   | MmugDNA.21899.1 | 10.77 | 10.6  | 0.24 | 0.01 | 1.12  | 0.107414 | 0.043379 | 0.47976  | 0.25294  |
| MmugDNA.219.1.S1_at     | MmugDNA.219.1   | 4.31  | 4.41  | 0.32 | 0.09 | -1.08 | 0.147945 | 0.158783 | 0.522184 | 0.43488  |
| MmugDNA.21904.1.S1_at   | MmugDNA.21904.1 | 10.82 | 10.87 | 0.26 | 0.09 | -1.04 | 0.413855 | 0.135595 | 0.732554 | 0.407742 |
| MmugDNA.21912.1.S1_at   | MmugDNA.21912.1 | 10.06 | 8.76  | 0.86 | 0.43 | 2.47  | 0.037021 | 0.049123 | 0.356628 | 0.266534 |

|                         |                 |       |       |      |      |       |          |          |          |          |
|-------------------------|-----------------|-------|-------|------|------|-------|----------|----------|----------|----------|
| MmugDNA.21920.1.S1_at   | MmugDNA.21920.1 | 5.02  | 4.87  | 0.13 | 0.05 | 1.11  | 0.07227  | 0.023067 | 0.432116 | 0.190066 |
| MmugDNA.21924.1.S1_at   | MmugDNA.21924.1 | 12.24 | 12.01 | 0.18 | 0.06 | 1.18  | 0.096869 | 0.108042 | 0.465555 | 0.37127  |
| MmugDNA.21928.1.S1_at   | MmugDNA.21928.1 | 7.02  | 7.02  | 0.06 | 0.07 | 1     | 0.450227 | 0.748045 | 0.754757 | 0.853351 |
| MmugDNA.21934.1.S1_at   | MmugDNA.21934.1 | 5.96  | 5.86  | 0.03 | 0.14 | 1.08  | 0.086338 | 0.119158 | 0.453939 | 0.387553 |
| MmugDNA.21945.1.S1_at   | MmugDNA.21945.1 | 13.57 | 13.26 | 0.1  | 0.06 | 1.23  | 0.017653 | 0.012218 | 0.292958 | 0.142932 |
| MmugDNA.21947.1.S1_at   | MmugDNA.21947.1 | 9.88  | 10.36 | 0.23 | 0.06 | -1.39 | 0.011672 | 0.017867 | 0.256146 | 0.168774 |
| MmugDNA.21948.1.S1_at   | MmugDNA.21948.1 | 6.11  | 6.93  | 1.62 | 0.5  | -1.76 | 0.933048 | 0.429248 | 0.977247 | 0.650729 |
| MmugDNA.21953.1.S1_at   | MmugDNA.21953.1 | 9.76  | 10.05 | 1.56 | 0.37 | -1.22 | 0.847247 | 0.080997 | 0.946516 | 0.329124 |
| MmugDNA.21954.1.S1_at   | MmugDNA.21954.1 | 6.13  | 5.99  | 0.18 | 0.15 | 1.1   | 0.415409 | 0.11222  | 0.733634 | 0.377537 |
| MmugDNA.21955.1.S1_at   | MmugDNA.21955.1 | 11.29 | 9.4   | 1.08 | 0.57 | 3.71  | 0.1446   | 0.047451 | 0.519872 | 0.262486 |
| MmugDNA.21974.1.S1_at   | MmugDNA.21974.1 | 4.05  | 3.91  | 0.26 | 0.08 | 1.1   | 0.187583 | 0.207674 | 0.559893 | 0.481906 |
| MmugDNA.21987.1.S1_at   | MmugDNA.21987.1 | 10.94 | 11.35 | 0.1  | 0.05 | -1.33 | 0.002217 | 0.004839 | 0.174757 | 0.097041 |
| MmugDNA.21989.1.S1_at   | MmugDNA.21989.1 | 11.38 | 10.84 | 0.08 | 0.08 | 1.45  | 0.001216 | 0.001582 | 0.156386 | 0.060356 |
| MmugDNA.21994.1.S1_at   | MmugDNA.21994.1 | 12.33 | 12.82 | 0.1  | 0.09 | -1.4  | 0.002357 | 0.000773 | 0.176862 | 0.045568 |
| MmugDNA.21995.1.S1_at   | MmugDNA.21995.1 | 9.93  | 10.28 | 0.38 | 0.15 | -1.28 | 0.626234 | 0.047853 | 0.849893 | 0.263679 |
| MmugDNA.21995.1.S1_s_at | MmugDNA.21995.1 | 9.89  | 10.12 | 0.41 | 0.11 | -1.17 | 0.947657 | 0.056777 | 0.981984 | 0.284379 |
| MmugDNA.21998.1.S1_at   | MmugDNA.21998.1 | 8.03  | 8.64  | 0.56 | 0.01 | -1.52 | 0.172087 | 0.069275 | 0.545406 | 0.309468 |
| MmugDNA.2200.1.S1_s_at  | MmugDNA.2200.1  | 4.25  | 4.15  | 0.27 | 0.23 | 1.07  | 0.309404 | 0.30761  | 0.661718 | 0.563785 |
| MmugDNA.22001.1.S1_at   | MmugDNA.22001.1 | 3.36  | 3.4   | 0.06 | 0.06 | -1.03 | 0.861878 | 0.1044   | 0.951313 | 0.365697 |
| MmugDNA.2201.1.S1_at    | MmugDNA.2201.1  | 10.56 | 10.4  | 0.2  | 0.09 | 1.12  | 0.094397 | 0.136783 | 0.463794 | 0.40939  |
| MmugDNA.22018.1.S1_at   | MmugDNA.22018.1 | 5.54  | 5.42  | 0.07 | 0.01 | 1.09  | 0.10232  | 0.225218 | 0.472589 | 0.497865 |
| MmugDNA.22020.1.S1_at   | MmugDNA.22020.1 | 4.33  | 4.73  | 0.16 | 0.12 | -1.31 | 0.071729 | 0.19781  | 0.431388 | 0.472721 |
| MmugDNA.22021.1.S1_at   | MmugDNA.22021.1 | 11.12 | 11.12 | 0.11 | 0.03 | -1    | 0.988791 | 0.13619  | 0.995895 | 0.408517 |
| MmugDNA.22026.1.S1_at   | MmugDNA.22026.1 | 5.1   | 5.62  | 0.41 | 0.16 | -1.43 | 0.327618 | 0.426705 | 0.675137 | 0.648808 |
| MmugDNA.22052.1.S1_at   | MmugDNA.22052.1 | 8.57  | 9.46  | 0.02 | 0.26 | -1.85 | 0.003804 | 0.000528 | 0.198521 | 0.040039 |
| MmugDNA.22055.1.S1_at   | MmugDNA.22055.1 | 3.73  | 4.56  | 0.28 | 0.32 | -1.77 | 0.025507 | 0.051031 | 0.322263 | 0.271214 |
| MmugDNA.22057.1.S1_at   | MmugDNA.22057.1 | 5.18  | 4.54  | 0.76 | 0.47 | 1.56  | 0.549828 | 0.328436 | 0.810447 | 0.578066 |
| MmugDNA.22059.1.S1_at   | MmugDNA.22059.1 | 7.31  | 7.24  | 0.72 | 0.06 | 1.05  | 0.688063 | 0.785906 | 0.878062 | 0.87599  |
| MmugDNA.22060.1.S1_at   | MmugDNA.22060.1 | 6.7   | 6.4   | 0.16 | 0.09 | 1.23  | 0.04913  | 0.051285 | 0.385273 | 0.271872 |
| MmugDNA.22063.1.S1_at   | MmugDNA.22063.1 | 11.32 | 12    | 0.81 | 0.16 | -1.6  | 0.808622 | 0.435502 | 0.930737 | 0.655256 |
| MmugDNA.22066.1.S1_at   | MmugDNA.22066.1 | 10.13 | 10.19 | 0.24 | 0.12 | -1.04 | 0.94091  | 0.175444 | 0.979891 | 0.452157 |
| MmugDNA.22068.1.S1_at   | MmugDNA.22068.1 | 9.94  | 9.9   | 0.27 | 0.06 | 1.03  | 0.932648 | 0.1146   | 0.977227 | 0.381156 |
| MmugDNA.22069.1.S1_at   | MmugDNA.22069.1 | 5.76  | 5.67  | 0.09 | 0.07 | 1.07  | 0.092041 | 0.119867 | 0.460597 | 0.388577 |
| MmugDNA.2207.1.S1_at    | MmugDNA.2207.1  | 7.87  | 8.02  | 0.81 | 0.1  | -1.11 | 0.503622 | 0.255674 | 0.784375 | 0.523619 |
| MmugDNA.22074.1.S1_at   | MmugDNA.22074.1 | 4.03  | 4.02  | 0.02 | 0.02 | 1.01  | 0.712584 | 0.329766 | 0.887961 | 0.578874 |
| MmugDNA.22075.1.S1_at   | MmugDNA.22075.1 | 10.48 | 10.38 | 0.31 | 0.33 | 1.07  | 0.334636 | 0.042342 | 0.680478 | 0.250382 |
| MmugDNA.22077.1.S1_at   | MmugDNA.22077.1 | 7.46  | 6.88  | 2.24 | 0.25 | 1.49  | 0.760748 | 0.148243 | 0.910166 | 0.422745 |
| MmugDNA.22079.1.S1_at   | MmugDNA.22079.1 | 6.29  | 6.44  | 0.1  | 0.13 | -1.1  | 0.733976 | 0.176286 | 0.898081 | 0.452726 |
| MmugDNA.22083.1.S1_at   | MmugDNA.22083.1 | 3.88  | 3.83  | 0.15 | 0.17 | 1.03  | 0.761569 | 0.926752 | 0.910578 | 0.958404 |
| MmugDNA.22091.1.S1_at   | MmugDNA.22091.1 | 10.61 | 10.22 | 3.21 | 0.23 | 1.3   | 0.512673 | 0.289187 | 0.789481 | 0.550293 |
| MmugDNA.22094.1.S1_at   | MmugDNA.22094.1 | 5.09  | 6.45  | 1.29 | 0.31 | -2.56 | 0.536204 | 0.636733 | 0.802181 | 0.78635  |
| MmugDNA.22095.1.S1_at   | MmugDNA.22095.1 | 7.46  | 8.12  | 1.09 | 0.15 | -1.58 | 0.383406 | 0.097034 | 0.711306 | 0.354531 |
| MmugDNA.22096.1.S1_at   | MmugDNA.22096.1 | 12.95 | 12.98 | 0.66 | 0.01 | -1.02 | 0.942254 | 0.14685  | 0.980283 | 0.42088  |

|                         |                 |       |       |      |      |       |          |          |          |          |
|-------------------------|-----------------|-------|-------|------|------|-------|----------|----------|----------|----------|
| MmugDNA.22097.1.S1_at   | MmugDNA.22097.1 | 5.68  | 6.11  | 0.12 | 0.31 | -1.35 | 0.088844 | 0.175705 | 0.456567 | 0.452333 |
| MmugDNA.22098.1.S1_at   | MmugDNA.22098.1 | 8.58  | 8.17  | 0.52 | 0.59 | 1.32  | 0.207578 | 0.033451 | 0.579194 | 0.226517 |
| MmugDNA.22099.1.S1_at   | MmugDNA.22099.1 | 12.67 | 12.75 | 0.1  | 0.06 | -1.06 | 0.129935 | 0.255912 | 0.504648 | 0.523862 |
| MmugDNA.2210.1.S1_at    | MmugDNA.2210.1  | 11.18 | 11.64 | 0.77 | 0.04 | -1.38 | 0.117759 | 0.029882 | 0.491055 | 0.21455  |
| MmugDNA.22110.1.S1_at   | MmugDNA.22110.1 | 10.96 | 11.46 | 1.22 | 0.09 | -1.42 | 0.472298 | 0.513107 | 0.767001 | 0.706759 |
| MmugDNA.22111.1.S1_at   | MmugDNA.22111.1 | 8.84  | 9.38  | 0.32 | 0.08 | -1.46 | 0.182098 | 0.271541 | 0.555194 | 0.536547 |
| MmugDNA.22112.1.S1_at   | MmugDNA.22112.1 | 4.35  | 4.41  | 0.28 | 0.22 | -1.04 | 0.679701 | 0.896555 | 0.874353 | 0.940905 |
| MmugDNA.22115.1.S1_at   | MmugDNA.22115.1 | 10.17 | 9.44  | 0.06 | 0.09 | 1.66  | 0.000314 | 0.000173 | 0.137028 | 0.030511 |
| MmugDNA.22116.1.S1_at   | MmugDNA.22116.1 | 7.63  | 8.87  | 2.05 | 0.3  | -2.37 | 0.128514 | 0.187348 | 0.503253 | 0.463373 |
| MmugDNA.22118.1.S1_at   | MmugDNA.22118.1 | 8.23  | 8.75  | 1.11 | 0.09 | -1.43 | 0.378647 | 0.457143 | 0.708438 | 0.670743 |
| MmugDNA.22119.1.S1_at   | MmugDNA.22119.1 | 10.44 | 10.51 | 0.22 | 0.07 | -1.05 | 0.374717 | 0.167521 | 0.706043 | 0.443968 |
| MmugDNA.22121.1.S1_at   | MmugDNA.22121.1 | 9.99  | 10.21 | 0.65 | 0.23 | -1.17 | 0.861481 | 0.057998 | 0.951267 | 0.287327 |
| MmugDNA.22125.1.S1_at   | MmugDNA.22125.1 | 9.63  | 10    | 0.57 | 0.1  | -1.3  | 0.272685 | 0.085383 | 0.632448 | 0.337278 |
| MmugDNA.22131.1.S1_at   | MmugDNA.22131.1 | 8.06  | 7.64  | 0.21 | 0.15 | 1.34  | 0.123792 | 0.163561 | 0.497339 | 0.439765 |
| MmugDNA.22132.1.S1_at   | MmugDNA.22132.1 | 9.22  | 9.56  | 0.34 | 0.04 | -1.27 | 0.476247 | 0.639457 | 0.769056 | 0.788306 |
| MmugDNA.22134.1.S1_at   | MmugDNA.22134.1 | 10.53 | 10.36 | 0.06 | 0.1  | 1.12  | 0.083879 | 0.225377 | 0.449948 | 0.498017 |
| MmugDNA.2214.1.S1_at    | MmugDNA.2214.1  | 8.65  | 9.06  | 0.66 | 0.17 | -1.33 | 0.445154 | 0.554126 | 0.751905 | 0.732988 |
| MmugDNA.22140.1.S1_at   | MmugDNA.22140.1 | 5.36  | 5.3   | 0.08 | 0.02 | 1.04  | 0.093915 | 0.103499 | 0.463304 | 0.364346 |
| MmugDNA.22143.1.S1_at   | MmugDNA.22143.1 | 6.83  | 6.99  | 0.19 | 0.03 | -1.12 | 0.090894 | 0.039181 | 0.458873 | 0.243081 |
| MmugDNA.22148.1.S1_at   | MmugDNA.22148.1 | 3.39  | 3.3   | 0.01 | 0.01 | 1.07  | 0.000344 | 0.036665 | 0.137028 | 0.235973 |
| MmugDNA.2215.1.S1_at    | MmugDNA.2215.1  | 7.23  | 7.3   | 0.51 | 0.16 | -1.05 | 0.844071 | 0.098247 | 0.945036 | 0.356289 |
| MmugDNA.2215.1.S1_x_at  | MmugDNA.2215.1  | 6.77  | 6.94  | 0.48 | 0.12 | -1.12 | 0.813528 | 0.073766 | 0.932627 | 0.317123 |
| MmugDNA.22154.1.S1_at   | MmugDNA.22154.1 | 12.39 | 12.4  | 0.09 | 0.22 | -1.01 | 0.892994 | 0.798359 | 0.963392 | 0.883979 |
| MmugDNA.22156.1.S1_at   | MmugDNA.22156.1 | 4.21  | 3.79  | 0.34 | 0.36 | 1.34  | 0.290289 | 0.135725 | 0.646889 | 0.407917 |
| MmugDNA.22160.1.S1_at   | MmugDNA.22160.1 | 7.84  | 8.29  | 2.6  | 0.38 | -1.36 | 0.626128 | 0.332858 | 0.849814 | 0.581266 |
| MmugDNA.22165.1.S1_at   | MmugDNA.22165.1 | 7.68  | 7.77  | 0.56 | 0.13 | -1.07 | 0.96961  | 0.742905 | 0.990023 | 0.851074 |
| MmugDNA.22167.1.S1_at   | MmugDNA.22167.1 | 8.33  | 8.69  | 0.09 | 0.06 | -1.28 | 0.004084 | 0.085055 | 0.198571 | 0.336812 |
| MmugDNA.22170.1.S1_at   | MmugDNA.22170.1 | 9.17  | 8.78  | 0.64 | 0.14 | 1.32  | 0.261334 | 0.035427 | 0.623819 | 0.232539 |
| MmugDNA.22172.1.S1_at   | MmugDNA.22172.1 | 8.25  | 9.03  | 0.52 | 0.11 | -1.72 | 0.073954 | 0.082139 | 0.434665 | 0.330937 |
| MmugDNA.22174.1.S1_at   | MmugDNA.22174.1 | 3.08  | 2.98  | 0.11 | 0.09 | 1.07  | 0.697734 | 0.302753 | 0.882415 | 0.560307 |
| MmugDNA.22175.1.S1_s_at | MmugDNA.22175.1 | 5.87  | 5.9   | 0.03 | 0.04 | -1.02 | 0.156127 | 0.595269 | 0.529456 | 0.759074 |
| MmugDNA.22176.1.S1_at   | MmugDNA.22176.1 | 11.75 | 11.98 | 0.05 | 0.08 | -1.17 | 0.014144 | 0.003037 | 0.274019 | 0.080386 |
| MmugDNA.22178.1.S1_at   | MmugDNA.22178.1 | 5.24  | 4.77  | 0.44 | 0.32 | 1.38  | 0.147262 | 0.105218 | 0.521578 | 0.366982 |
| MmugDNA.2218.1.S1_at    | MmugDNA.2218.1  | 6.05  | 5.78  | 0.15 | 0.31 | 1.21  | 0.320268 | 0.419633 | 0.669207 | 0.643571 |
| MmugDNA.22186.1.S1_at   | MmugDNA.22186.1 | 4.61  | 4.55  | 0.17 | 0.19 | 1.04  | 0.783001 | 0.314109 | 0.920107 | 0.568185 |
| MmugDNA.22190.1.S1_at   | MmugDNA.22190.1 | 12.6  | 12.43 | 0.11 | 0.08 | 1.13  | 0.024477 | 0.002627 | 0.31887  | 0.075772 |
| MmugDNA.22191.1.S1_at   | MmugDNA.22191.1 | 4.51  | 4.14  | 0.18 | 0.1  | 1.29  | 0.032259 | 0.054999 | 0.343536 | 0.279974 |
| MmugDNA.22192.1.S1_at   | MmugDNA.22192.1 | 12.47 | 12.67 | 0.54 | 0.12 | -1.15 | 0.694846 | 0.659724 | 0.881222 | 0.800854 |
| MmugDNA.22195.1.S1_at   | MmugDNA.22195.1 | 5.63  | 5.77  | 0.71 | 0.23 | -1.11 | 0.848962 | 0.408781 | 0.946892 | 0.6359   |
| MmugDNA.22197.1.S1_at   | MmugDNA.22197.1 | 4.64  | 4.54  | 0.45 | 0.13 | 1.07  | 0.952496 | 0.478706 | 0.984067 | 0.684691 |
| MmugDNA.22199.1.S1_at   | MmugDNA.22199.1 | 11.58 | 11.55 | 0.85 | 0.18 | 1.02  | 0.804671 | 0.936557 | 0.929002 | 0.964214 |
| MmugDNA.2220.1.S1_at    | MmugDNA.2220.1  | 11.17 | 10.87 | 0.14 | 0.06 | 1.24  | 0.015703 | 0.003354 | 0.28333  | 0.083359 |
| MmugDNA.22200.1.S1_at   | MmugDNA.22200.1 | 11.13 | 11.13 | 0.28 | 0.09 | 1     | 0.981648 | 0.524879 | 0.994173 | 0.714635 |

|                         |                 |       |       |      |      |       |          |          |          |          |
|-------------------------|-----------------|-------|-------|------|------|-------|----------|----------|----------|----------|
| MmugDNA.22200.1.S1_s_at | MmugDNA.22200.1 | 11.88 | 11.97 | 0.24 | 0.07 | -1.07 | 0.66412  | 0.593237 | 0.86761  | 0.758138 |
| MmugDNA.22218.1.S1_at   | MmugDNA.22218.1 | 7.88  | 7.9   | 0.11 | 0.06 | -1.02 | 0.905229 | 0.577103 | 0.968109 | 0.74764  |
| MmugDNA.22218.1.S1_s_at | MmugDNA.22218.1 | 6.25  | 6.12  | 0.07 | 0.16 | 1.09  | 0.358458 | 0.539608 | 0.696379 | 0.723854 |
| MmugDNA.22221.1.S1_at   | MmugDNA.22221.1 | 12.42 | 12.4  | 0.03 | 0.12 | 1.01  | 0.291735 | 0.002142 | 0.648076 | 0.06849  |
| MmugDNA.22224.1.S1_at   | MmugDNA.22224.1 | 12.39 | 12.23 | 0.05 | 0.06 | 1.11  | 0.056268 | 0.097699 | 0.399708 | 0.355581 |
| MmugDNA.22229.1.S1_at   | MmugDNA.22229.1 | 6.25  | 6.09  | 0.23 | 0.12 | 1.12  | 0.200008 | 0.767326 | 0.571864 | 0.864882 |
| MmugDNA.2223.1.S1_at    | MmugDNA.2223.1  | 4.48  | 4.67  | 0.13 | 0.09 | -1.14 | 0.151707 | 0.055543 | 0.524628 | 0.281328 |
| MmugDNA.22231.1.S1_at   | MmugDNA.22231.1 | 5.15  | 5.11  | 0    | 0.04 | 1.03  | 0.130476 | 0.709926 | 0.504764 | 0.831879 |
| MmugDNA.22233.1.S1_at   | MmugDNA.22233.1 | 3.5   | 3.5   | 0.13 | 0.04 | -1.01 | 0.432136 | 0.841863 | 0.743709 | 0.909901 |
| MmugDNA.22235.1.S1_at   | MmugDNA.22235.1 | 10.06 | 10.46 | 1.28 | 0.21 | -1.32 | 0.717607 | 0.664219 | 0.890477 | 0.803247 |
| MmugDNA.22240.1.S1_at   | MmugDNA.22240.1 | 7.08  | 7.07  | 0.12 | 0.03 | 1     | 0.349565 | 0.676406 | 0.690595 | 0.810935 |
| MmugDNA.22241.1.S1_at   | MmugDNA.22241.1 | 10.61 | 11.22 | 0.19 | 0.1  | -1.53 | 0.010939 | 0.001223 | 0.250796 | 0.054593 |
| MmugDNA.22244.1.S1_at   | MmugDNA.22244.1 | 10.71 | 10.49 | 0.34 | 0.06 | 1.17  | 0.917078 | 0.348721 | 0.97196  | 0.592732 |
| MmugDNA.22246.1.S1_at   | MmugDNA.22246.1 | 12.11 | 11.98 | 0.01 | 0.05 | 1.09  | 0.034339 | 0.393714 | 0.349641 | 0.626522 |
| MmugDNA.22248.1.S1_at   | MmugDNA.22248.1 | 7.72  | 7.57  | 0.1  | 0.02 | 1.12  | 0.042361 | 0.037942 | 0.368985 | 0.239302 |
| MmugDNA.2225.1.S1_at    | MmugDNA.2225.1  | 10.4  | 10.4  | 0.65 | 0.08 | -1    | 0.975127 | 0.990023 | 0.991912 | 0.994311 |
| MmugDNA.22251.1.S1_at   | MmugDNA.22251.1 | 10.29 | 10.48 | 0.41 | 0.04 | -1.14 | 0.970152 | 0.626753 | 0.990155 | 0.779979 |
| MmugDNA.22252.1.S1_at   | MmugDNA.22252.1 | 12.28 | 12.51 | 0.31 | 0.08 | -1.18 | 0.083338 | 0.067895 | 0.449143 | 0.306745 |
| MmugDNA.22262.1.S1_at   | MmugDNA.22262.1 | 3.31  | 3.19  | 0.23 | 0.17 | 1.09  | 0.758677 | 0.846114 | 0.90928  | 0.912389 |
| MmugDNA.22263.1.S1_x_at | MmugDNA.22263.1 | 5.81  | 5.92  | 0.27 | 0.66 | -1.08 | 0.1931   | 0.302103 | 0.563929 | 0.560071 |
| MmugDNA.22266.1.S1_at   | MmugDNA.22266.1 | 4.93  | 4.89  | 0.08 | 0.09 | 1.02  | 0.345987 | 0.695827 | 0.687873 | 0.823223 |
| MmugDNA.22266.1.S1_x_at | MmugDNA.22266.1 | 4.84  | 4.95  | 0.12 | 0.05 | -1.08 | 0.498418 | 0.703236 | 0.781727 | 0.827928 |
| MmugDNA.22279.1.S1_at   | MmugDNA.22279.1 | 6.64  | 6.38  | 0.5  | 0.01 | 1.19  | 0.424053 | 0.473839 | 0.739366 | 0.681082 |
| MmugDNA.22282.1.S1_at   | MmugDNA.22282.1 | 11.5  | 11.32 | 0.26 | 0.04 | 1.13  | 0.844677 | 0.320443 | 0.945495 | 0.572648 |
| MmugDNA.22284.1.S1_at   | MmugDNA.22284.1 | 5.03  | 5.18  | 0.02 | 0.15 | -1.11 | 0.158456 | 0.127993 | 0.531551 | 0.398959 |
| MmugDNA.22285.1.S1_at   | MmugDNA.22285.1 | 6.13  | 5.96  | 0.08 | 0.15 | 1.12  | 0.334824 | 0.670687 | 0.680656 | 0.807467 |
| MmugDNA.22287.1.S1_at   | MmugDNA.22287.1 | 5.93  | 6.81  | 0.39 | 0.28 | -1.84 | 0.022202 | 0.014594 | 0.310495 | 0.154067 |
| MmugDNA.22295.1.S1_at   | MmugDNA.22295.1 | 5.71  | 5.17  | 0.73 | 0.9  | 1.45  | 0.335178 | 0.47931  | 0.680744 | 0.685088 |
| MmugDNA.22298.1.S1_at   | MmugDNA.22298.1 | 7.38  | 7.7   | 0.26 | 0.07 | -1.24 | 0.326585 | 0.298646 | 0.674163 | 0.557252 |
| MmugDNA.223.1.S1_at     | MmugDNA.223.1   | 6.47  | 6.34  | 1.23 | 0.66 | 1.09  | 0.564849 | 0.771358 | 0.819044 | 0.867153 |
| MmugDNA.2230.1.S1_at    | MmugDNA.2230.1  | 8.26  | 8.43  | 0.24 | 0.1  | -1.12 | 0.603115 | 0.745726 | 0.83911  | 0.85256  |
| MmugDNA.22301.1.S1_at   | MmugDNA.22301.1 | 3.99  | 3.95  | 0.04 | 0.02 | 1.02  | 0.344098 | 0.441802 | 0.686913 | 0.659938 |
| MmugDNA.22309.1.S1_at   | MmugDNA.22309.1 | 6.7   | 6.53  | 1.51 | 0.2  | 1.13  | 0.483616 | 0.055788 | 0.773239 | 0.282044 |
| MmugDNA.22312.1.S1_at   | MmugDNA.22312.1 | 8.61  | 8.62  | 0.28 | 0.05 | -1.01 | 0.949752 | 0.933826 | 0.983047 | 0.962332 |
| MmugDNA.22314.1.S1_at   | MmugDNA.22314.1 | 10.62 | 11.1  | 0.27 | 0.07 | -1.39 | 0.082757 | 0.106991 | 0.448001 | 0.369557 |
| MmugDNA.22319.1.S1_at   | MmugDNA.22319.1 | 6.91  | 6.99  | 0.38 | 0.12 | -1.06 | 0.72428  | 0.936472 | 0.893143 | 0.964171 |
| MmugDNA.22328.1.S1_at   | MmugDNA.22328.1 | 5.79  | 5.71  | 0.15 | 0.03 | 1.06  | 0.20301  | 0.260082 | 0.574415 | 0.52675  |
| MmugDNA.22332.1.S1_at   | MmugDNA.22332.1 | 11.63 | 12.14 | 0.07 | 0.03 | -1.42 | 0.000312 | 0.001304 | 0.137028 | 0.055628 |
| MmugDNA.22343.1.S1_at   | MmugDNA.22343.1 | 13.16 | 13.19 | 0.05 | 0.03 | -1.02 | 0.147076 | 0.171246 | 0.521545 | 0.447792 |
| MmugDNA.22343.1.S1_s_at | MmugDNA.22343.1 | 12.39 | 12.3  | 0.12 | 0.05 | 1.06  | 0.647079 | 0.835547 | 0.859341 | 0.905864 |
| MmugDNA.22344.1.S1_at   | MmugDNA.22344.1 | 13.04 | 13.03 | 0.08 | 0.07 | 1     | 0.620465 | 0.017585 | 0.84711  | 0.167721 |
| MmugDNA.22345.1.S1_at   | MmugDNA.22345.1 | 5.38  | 5.27  | 0.04 | 0.05 | 1.08  | 0.062849 | 0.565366 | 0.414178 | 0.739877 |
| MmugDNA.22346.1.S1_at   | MmugDNA.22346.1 | 12.39 | 12.5  | 0.16 | 0.07 | -1.08 | 0.984657 | 0.976969 | 0.995256 | 0.987472 |

|                         |                 |       |       |      |      |       |          |          |          |          |
|-------------------------|-----------------|-------|-------|------|------|-------|----------|----------|----------|----------|
| MmugDNA.22354.1.S1_at   | MmugDNA.22354.1 | 8.56  | 8.96  | 0.45 | 0.07 | -1.32 | 0.145205 | 0.10237  | 0.520318 | 0.362527 |
| MmugDNA.22359.1.S1_at   | MmugDNA.22359.1 | 9.61  | 9.63  | 0.63 | 0.24 | -1.02 | 0.898466 | 0.224244 | 0.965532 | 0.497164 |
| MmugDNA.22360.1.S1_at   | MmugDNA.22360.1 | 8.76  | 8.86  | 0.88 | 0.2  | -1.07 | 0.89633  | 0.356994 | 0.964569 | 0.598736 |
| MmugDNA.22360.1.S1_s_at | MmugDNA.22360.1 | 10.52 | 10.82 | 0.81 | 0.08 | -1.23 | 0.58022  | 0.62888  | 0.826923 | 0.781499 |
| MmugDNA.22362.1.S1_at   | MmugDNA.22362.1 | 13.28 | 13.09 | 0.08 | 0.02 | 1.14  | 0.018189 | 0.014373 | 0.295482 | 0.15304  |
| MmugDNA.22364.1.S1_at   | MmugDNA.22364.1 | 12.7  | 12.54 | 0.09 | 0.07 | 1.12  | 0.030846 | 0.027    | 0.338919 | 0.2055   |
| MmugDNA.22366.1.S1_at   | MmugDNA.22366.1 | 7.82  | 7.42  | 0.06 | 0.02 | 1.32  | 0.000401 | 0.004759 | 0.137028 | 0.096243 |
| MmugDNA.22371.1.S1_at   | MmugDNA.22371.1 | 13.45 | 13.49 | 0.02 | 0.01 | -1.03 | 0.039459 | 0.801466 | 0.362032 | 0.885779 |
| MmugDNA.22373.1.S1_at   | MmugDNA.22373.1 | 6.71  | 7.72  | 0.56 | 0.06 | -2.01 | 0.037783 | 0.043789 | 0.358018 | 0.25387  |
| MmugDNA.22376.1.S1_at   | MmugDNA.22376.1 | 7.62  | 7.7   | 2.24 | 0.28 | -1.06 | 0.692683 | 0.442902 | 0.880215 | 0.660816 |
| MmugDNA.22380.1.S1_at   | MmugDNA.22380.1 | 5.05  | 4.97  | 0.52 | 0.18 | -1.05 | 0.849687 | 0.390564 | 0.947112 | 0.624329 |
| MmugDNA.22383.1.S1_at   | MmugDNA.22383.1 | 5.82  | 5.85  | 0.11 | 0.02 | -1.02 | 0.516472 | 0.462139 | 0.791464 | 0.673568 |
| MmugDNA.22387.1.S1_at   | MmugDNA.22387.1 | 5.29  | 5.15  | 0.08 | 0.03 | 1.1   | 0.054459 | 0.245887 | 0.396542 | 0.51552  |
| MmugDNA.22388.1.S1_at   | MmugDNA.22388.1 | 7.38  | 7.35  | 0.22 | 0.06 | 1.02  | 0.929602 | 0.248864 | 0.976476 | 0.517951 |
| MmugDNA.22389.1.S1_at   | MmugDNA.22389.1 | 3.72  | 3.72  | 0.46 | 0.28 | 1     | 0.944123 | 0.968926 | 0.980647 | 0.982889 |
| MmugDNA.22392.1.S1_at   | MmugDNA.22392.1 | 5.76  | 5.64  | 0.14 | 0.05 | 1.09  | 0.116118 | 0.314862 | 0.489554 | 0.568619 |
| MmugDNA.2240.1.S1_at    | MmugDNA.2240.1  | 9.16  | 9     | 0.27 | 0.05 | 1.11  | 0.407453 | 0.11552  | 0.728597 | 0.38267  |
| MmugDNA.22401.1.S1_at   | MmugDNA.22401.1 | 4.76  | 4.66  | 0.1  | 0.06 | 1.08  | 0.180734 | 0.3969   | 0.554068 | 0.628464 |
| MmugDNA.22407.1.S1_at   | MmugDNA.22407.1 | 9.06  | 8.45  | 0.66 | 0.12 | 1.53  | 0.169557 | 0.004166 | 0.542559 | 0.091036 |
| MmugDNA.22418.1.S1_at   | MmugDNA.22418.1 | 8.78  | 8.96  | 0.53 | 0.01 | -1.13 | 0.570729 | 0.260667 | 0.822271 | 0.527199 |
| MmugDNA.22421.1.S1_at   | MmugDNA.22421.1 | 3.41  | 3.3   | 0.11 | 0.04 | 1.08  | 0.090846 | 0.230105 | 0.458873 | 0.501982 |
| MmugDNA.22422.1.S1_at   | MmugDNA.22422.1 | 8.18  | 8.43  | 0.67 | 0.18 | -1.19 | 0.520795 | 0.31195  | 0.794066 | 0.566833 |
| MmugDNA.22426.1.S1_at   | MmugDNA.22426.1 | 8.88  | 8.94  | 2.78 | 0.2  | -1.04 | 0.74421  | 0.162458 | 0.902479 | 0.438575 |
| MmugDNA.22429.1.S1_at   | MmugDNA.22429.1 | 10.19 | 10.55 | 0.24 | 0.06 | -1.29 | 0.04778  | 0.026733 | 0.381152 | 0.204492 |
| MmugDNA.22431.1.S1_s_at | MmugDNA.22431.1 | 4.94  | 4.79  | 0.44 | 0.08 | 1.11  | 0.835107 | 0.860314 | 0.94088  | 0.920379 |
| MmugDNA.22446.1.S1_at   | MmugDNA.22446.1 | 7.18  | 8.4   | 0.38 | 0.11 | -2.32 | 0.005867 | 0.013155 | 0.211798 | 0.147338 |
| MmugDNA.2245.1.S1_at    | MmugDNA.2245.1  | 11.07 | 11.42 | 0.13 | 0.08 | -1.27 | 0.018544 | 0.133861 | 0.297536 | 0.405882 |
| MmugDNA.22453.1.S1_at   | MmugDNA.22453.1 | 4.63  | 4.61  | 0.16 | 0.16 | 1.02  | 0.902622 | 0.06399  | 0.967127 | 0.299074 |
| MmugDNA.22455.1.S1_at   | MmugDNA.22455.1 | 9.48  | 9.35  | 0.21 | 0.03 | 1.1   | 0.324121 | 0.298029 | 0.672526 | 0.556695 |
| MmugDNA.22456.1.S1_at   | MmugDNA.22456.1 | 9.04  | 8.85  | 1.56 | 0.32 | 1.14  | 0.277266 | 0.394156 | 0.636787 | 0.62675  |
| MmugDNA.22456.1.S1_s_at | MmugDNA.22456.1 | 9.19  | 9.33  | 1.65 | 0.47 | -1.1  | 0.34063  | 0.492195 | 0.684563 | 0.693477 |
| MmugDNA.22464.1.S1_at   | MmugDNA.22464.1 | 6.48  | 7.06  | 0.26 | 0.07 | -1.5  | 0.045138 | 0.122326 | 0.375796 | 0.392032 |
| MmugDNA.22467.1.S1_at   | MmugDNA.22467.1 | 9.83  | 9.97  | 0.46 | 0.24 | -1.1  | 0.757891 | 0.431547 | 0.908875 | 0.652437 |
| MmugDNA.2247.1.S1_at    | MmugDNA.2247.1  | 7.59  | 7.54  | 0.21 | 0.23 | 1.03  | 0.80724  | 0.740865 | 0.930119 | 0.849975 |
| MmugDNA.22474.1.S1_at   | MmugDNA.22474.1 | 6.65  | 6.36  | 0.34 | 0.05 | 1.22  | 0.069829 | 0.177752 | 0.427911 | 0.454107 |
| MmugDNA.22479.1.S1_at   | MmugDNA.22479.1 | 10.1  | 9.91  | 1.61 | 0.11 | 1.14  | 0.948076 | 0.48672  | 0.98218  | 0.690047 |
| MmugDNA.22481.1.S1_at   | MmugDNA.22481.1 | 8.45  | 8.21  | 0.29 | 0.08 | 1.18  | 0.254206 | 0.076378 | 0.61872  | 0.321368 |
| MmugDNA.22485.1.S1_at   | MmugDNA.22485.1 | 10.56 | 10.65 | 0.39 | 0.26 | -1.06 | 0.920105 | 0.371393 | 0.972913 | 0.610177 |
| MmugDNA.22487.1.S1_at   | MmugDNA.22487.1 | 9.92  | 10.18 | 0.4  | 0.06 | -1.2  | 0.104575 | 0.074137 | 0.475679 | 0.31781  |
| MmugDNA.22495.1.S1_at   | MmugDNA.22495.1 | 10.95 | 10.43 | 0.18 | 0.13 | 1.43  | 0.005602 | 0.001742 | 0.209258 | 0.062895 |
| MmugDNA.22500.1.S1_at   | MmugDNA.22500.1 | 6.42  | 6.3   | 0.06 | 0.06 | 1.09  | 0.053487 | 0.308242 | 0.394803 | 0.564378 |
| MmugDNA.22502.1.S1_at   | MmugDNA.22502.1 | 4.39  | 4.37  | 0.05 | 0.08 | 1.01  | 0.270157 | 0.315607 | 0.630217 | 0.569053 |
| MmugDNA.22505.1.S1_at   | MmugDNA.22505.1 | 6.62  | 6.72  | 0.12 | 0.02 | -1.07 | 0.089913 | 0.155019 | 0.457894 | 0.430053 |

|                         |                 |       |       |      |      |       |          |          |          |          |
|-------------------------|-----------------|-------|-------|------|------|-------|----------|----------|----------|----------|
| MmugDNA.22509.1.S1_at   | MmugDNA.22509.1 | 7.11  | 6.82  | 0.1  | 0.11 | 1.22  | 0.033237 | 0.040164 | 0.346442 | 0.245709 |
| MmugDNA.22512.1.S1_at   | MmugDNA.22512.1 | 7.79  | 7.86  | 0.13 | 0.13 | -1.05 | 0.457405 | 0.629064 | 0.758343 | 0.781597 |
| MmugDNA.22518.1.S1_at   | MmugDNA.22518.1 | 8.39  | 8.8   | 0.4  | 0.17 | -1.33 | 0.130805 | 0.005136 | 0.505266 | 0.099462 |
| MmugDNA.2252.1.S1_at    | MmugDNA.2252.1  | 13.32 | 13.56 | 0.18 | 0.05 | -1.18 | 0.025726 | 0.003178 | 0.322653 | 0.081873 |
| MmugDNA.22520.1.S1_at   | MmugDNA.22520.1 | 12.25 | 12.48 | 0.23 | 0.04 | -1.17 | 0.205546 | 0.01449  | 0.577376 | 0.153669 |
| MmugDNA.22526.1.S1_at   | MmugDNA.22526.1 | 4.84  | 4.59  | 0.13 | 0.1  | 1.19  | 0.116943 | 0.557912 | 0.490067 | 0.735292 |
| MmugDNA.22532.1.S1_at   | MmugDNA.22532.1 | 4.08  | 4.26  | 0.09 | 0.14 | -1.13 | 0.610979 | 0.097215 | 0.842293 | 0.354886 |
| MmugDNA.22537.1.S1_s_at | MmugDNA.22537.1 | 11.7  | 12.17 | 0.36 | 0.11 | -1.38 | 0.207138 | 0.433621 | 0.578774 | 0.65387  |
| MmugDNA.22543.1.S1_at   | MmugDNA.22543.1 | 6.19  | 6.38  | 0.32 | 0.1  | -1.14 | 0.349963 | 0.005756 | 0.69105  | 0.104378 |
| MmugDNA.22545.1.S1_at   | MmugDNA.22545.1 | 12.91 | 12.71 | 0.22 | 0.02 | 1.15  | 0.185712 | 0.003859 | 0.558625 | 0.088378 |
| MmugDNA.22546.1.S1_at   | MmugDNA.22546.1 | 6.83  | 6.9   | 0.08 | 0.15 | -1.05 | 0.374752 | 0.539135 | 0.706082 | 0.723569 |
| MmugDNA.22549.1.S1_at   | MmugDNA.22549.1 | 8.76  | 9.05  | 0.23 | 0.11 | -1.23 | 0.323064 | 0.326286 | 0.671928 | 0.576452 |
| MmugDNA.2255.1.S1_at    | MmugDNA.2255.1  | 9     | 7.31  | 1.4  | 0.06 | 3.21  | 0.166158 | 0.034788 | 0.538903 | 0.230686 |
| MmugDNA.22554.1.S1_at   | MmugDNA.22554.1 | 11.59 | 11.7  | 0.25 | 0.07 | -1.08 | 0.629122 | 0.268593 | 0.851386 | 0.534138 |
| MmugDNA.22554.1.S1_s_at | MmugDNA.22554.1 | 8.67  | 8.56  | 0.19 | 0.05 | 1.08  | 0.718821 | 0.214748 | 0.890773 | 0.48862  |
| MmugDNA.22560.1.S1_at   | MmugDNA.22560.1 | 9.95  | 9.76  | 0.37 | 0.09 | 1.14  | 0.308467 | 0.302879 | 0.661144 | 0.560356 |
| MmugDNA.22568.1.S1_at   | MmugDNA.22568.1 | 12.51 | 12.43 | 0.05 | 0.04 | 1.06  | 0.019654 | 0.129284 | 0.302163 | 0.400692 |
| MmugDNA.22569.1.S1_at   | MmugDNA.22569.1 | 5.8   | 5.71  | 0.1  | 0.09 | 1.07  | 0.53681  | 0.701269 | 0.802473 | 0.826775 |
| MmugDNA.22573.1.S1_at   | MmugDNA.22573.1 | 6.18  | 5.61  | 0.27 | 0.03 | 1.48  | 0.050884 | 0.064531 | 0.388276 | 0.300255 |
| MmugDNA.22579.1.S1_at   | MmugDNA.22579.1 | 10.2  | 10.25 | 1.9  | 0.14 | -1.04 | 0.912606 | 0.229108 | 0.970287 | 0.501438 |
| MmugDNA.2258.1.S1_at    | MmugDNA.2258.1  | 11.07 | 12.07 | 0.12 | 0.11 | -2.01 | 0.000498 | 0.000685 | 0.143137 | 0.044166 |
| MmugDNA.22582.1.S1_at   | MmugDNA.22582.1 | 7.7   | 6.85  | 0.89 | 0.73 | 1.8   | 0.629914 | 0.50449  | 0.85178  | 0.701617 |
| MmugDNA.2259.1.S1_at    | MmugDNA.2259.1  | 11.38 | 11.16 | 0.29 | 0.09 | 1.16  | 0.760807 | 0.681629 | 0.910166 | 0.814092 |
| MmugDNA.22594.1.S1_at   | MmugDNA.22594.1 | 6.77  | 6.77  | 0.12 | 0.05 | 1     | 0.82639  | 0.970533 | 0.937773 | 0.983953 |
| MmugDNA.22595.1.S1_at   | MmugDNA.22595.1 | 11.03 | 10.96 | 0.14 | 0.05 | 1.05  | 0.285168 | 0.000717 | 0.643069 | 0.044419 |
| MmugDNA.22596.1.S1_at   | MmugDNA.22596.1 | 6.82  | 6.75  | 0.21 | 0.08 | 1.05  | 0.658356 | 0.571653 | 0.864588 | 0.743888 |
| MmugDNA.22596.1.S1_s_at | MmugDNA.22596.1 | 6.94  | 6.9   | 0.47 | 0.03 | 1.03  | 0.497061 | 0.608777 | 0.781055 | 0.767285 |
| MmugDNA.22597.1.S1_at   | MmugDNA.22597.1 | 6.73  | 6.69  | 0.11 | 0.05 | 1.03  | 0.892255 | 0.992608 | 0.962988 | 0.995715 |
| MmugDNA.226.1.S1_at     | MmugDNA.226.1   | 8.04  | 8.21  | 0.63 | 0.13 | -1.12 | 0.944213 | 0.825065 | 0.980647 | 0.899488 |
| MmugDNA.22607.1.S1_at   | MmugDNA.22607.1 | 10.2  | 11.09 | 0.54 | 0.23 | -1.85 | 0.123036 | 0.219474 | 0.496589 | 0.493156 |
| MmugDNA.22609.1.S1_at   | MmugDNA.22609.1 | 9.75  | 9.55  | 0.83 | 0.3  | 1.15  | 0.80589  | 0.494896 | 0.929557 | 0.695168 |
| MmugDNA.22610.1.S1_at   | MmugDNA.22610.1 | 4.12  | 4.01  | 0.04 | 0.18 | 1.08  | 0.145724 | 0.255694 | 0.520555 | 0.52364  |
| MmugDNA.22617.1.S1_at   | MmugDNA.22617.1 | 3.54  | 3.48  | 0.01 | 0.06 | 1.05  | 0.124256 | 0.065843 | 0.498334 | 0.301996 |
| MmugDNA.22619.1.S1_at   | MmugDNA.22619.1 | 8.32  | 8.16  | 1.58 | 0.19 | 1.11  | 0.932564 | 0.434679 | 0.977227 | 0.654756 |
| MmugDNA.22619.1.S1_x_at | MmugDNA.22619.1 | 7.69  | 7.48  | 1.28 | 0.25 | 1.16  | 0.758551 | 0.279879 | 0.909232 | 0.543342 |
| MmugDNA.22620.1.S1_at   | MmugDNA.22620.1 | 6.29  | 6.09  | 0.2  | 0.05 | 1.15  | 0.124436 | 0.048634 | 0.498516 | 0.265602 |
| MmugDNA.22622.1.S1_at   | MmugDNA.22622.1 | 6.4   | 6.57  | 0.35 | 0.01 | -1.13 | 0.48434  | 0.34805  | 0.773551 | 0.59222  |
| MmugDNA.22627.1.S1_at   | MmugDNA.22627.1 | 4.54  | 4.52  | 0.17 | 0.26 | 1.01  | 0.88833  | 0.681719 | 0.961322 | 0.814123 |
| MmugDNA.22629.1.S1_at   | MmugDNA.22629.1 | 6.01  | 6.63  | 1.09 | 0.54 | -1.53 | 0.666198 | 0.622124 | 0.868243 | 0.77667  |
| MmugDNA.22631.1.S1_at   | MmugDNA.22631.1 | 8.93  | 9.98  | 0.18 | 0    | -2.08 | 0.000478 | 0.000037 | 0.142033 | 0.023168 |
| MmugDNA.22632.1.S1_at   | MmugDNA.22632.1 | 5.18  | 5.46  | 0.12 | 0.1  | -1.21 | 0.040985 | 0.559525 | 0.36567  | 0.736353 |
| MmugDNA.22634.1.S1_at   | MmugDNA.22634.1 | 8.83  | 8.55  | 0.1  | 0.04 | 1.21  | 0.02752  | 0.281957 | 0.327829 | 0.544868 |
| MmugDNA.22640.1.S1_at   | MmugDNA.22640.1 | 10.22 | 10.92 | 0.95 | 0.15 | -1.62 | 0.23991  | 0.095647 | 0.606208 | 0.35269  |

|                         |                 |       |       |      |      |       |          |          |          |          |
|-------------------------|-----------------|-------|-------|------|------|-------|----------|----------|----------|----------|
| MmugDNA.22642.1.S1_at   | MmugDNA.22642.1 | 8.22  | 7.72  | 0.24 | 0.1  | 1.41  | 0.027925 | 0.027279 | 0.330017 | 0.206458 |
| MmugDNA.2265.1.S1_at    | MmugDNA.2265.1  | 11.3  | 11.5  | 0.06 | 0.07 | -1.15 | 0.011199 | 0.042437 | 0.252783 | 0.250663 |
| MmugDNA.22655.1.S1_at   | MmugDNA.22655.1 | 6.35  | 6.44  | 0.17 | 0.15 | -1.06 | 0.288881 | 0.373669 | 0.645883 | 0.612403 |
| MmugDNA.22659.1.S1_at   | MmugDNA.22659.1 | 11.74 | 12.18 | 0.83 | 0.15 | -1.35 | 0.482151 | 0.536002 | 0.772274 | 0.721454 |
| MmugDNA.2266.1.S1_at    | MmugDNA.2266.1  | 2.93  | 2.92  | 0.14 | 0.02 | 1.01  | 0.933854 | 0.939036 | 0.977685 | 0.9654   |
| MmugDNA.22660.1.S1_at   | MmugDNA.22660.1 | 6.37  | 6.33  | 0.2  | 0.11 | 1.03  | 0.713756 | 0.857993 | 0.888497 | 0.919035 |
| MmugDNA.22663.1.S1_at   | MmugDNA.22663.1 | 4.57  | 4.41  | 0.1  | 0.13 | 1.12  | 0.121861 | 0.260071 | 0.495636 | 0.52675  |
| MmugDNA.22665.1.S1_at   | MmugDNA.22665.1 | 8.39  | 8.89  | 0.39 | 0.11 | -1.42 | 0.11633  | 0.02651  | 0.489568 | 0.203899 |
| MmugDNA.22679.1.S1_at   | MmugDNA.22679.1 | 8.73  | 9.41  | 0.47 | 0.09 | -1.6  | 0.135537 | 0.189903 | 0.510014 | 0.465424 |
| MmugDNA.22688.1.S1_at   | MmugDNA.22688.1 | 4.18  | 4.22  | 0.06 | 0.35 | -1.03 | 0.357235 | 0.460718 | 0.695575 | 0.672646 |
| MmugDNA.2269.1.S1_at    | MmugDNA.2269.1  | 13.39 | 13.41 | 0.14 | 0.02 | -1.02 | 0.865456 | 0.388324 | 0.952638 | 0.62274  |
| MmugDNA.22692.1.S1_at   | MmugDNA.22692.1 | 11.04 | 11.11 | 0.62 | 0.21 | -1.05 | 0.341246 | 0.072586 | 0.685045 | 0.315511 |
| MmugDNA.22693.1.S1_at   | MmugDNA.22693.1 | 7.4   | 6.9   | 0.27 | 0.09 | 1.41  | 0.0344   | 0.039731 | 0.349795 | 0.244323 |
| MmugDNA.22711.1.S1_at   | MmugDNA.22711.1 | 9.08  | 9.61  | 0.4  | 0.13 | -1.45 | 0.090924 | 0.026047 | 0.458873 | 0.202256 |
| MmugDNA.22712.1.S1_at   | MmugDNA.22712.1 | 7.91  | 8.78  | 0.43 | 0.16 | -1.83 | 0.069525 | 0.026113 | 0.427368 | 0.202544 |
| MmugDNA.22722.1.S1_at   | MmugDNA.22722.1 | 7.6   | 7.5   | 0.06 | 0.15 | 1.08  | 0.102377 | 0.369041 | 0.472589 | 0.608583 |
| MmugDNA.22726.1.S1_at   | MmugDNA.22726.1 | 9.58  | 9.64  | 0.42 | 0.02 | -1.05 | 0.697159 | 0.850567 | 0.882223 | 0.914988 |
| MmugDNA.22731.1.S1_at   | MmugDNA.22731.1 | 6.17  | 6.04  | 0.05 | 0.1  | 1.1   | 0.215791 | 0.521759 | 0.585825 | 0.712623 |
| MmugDNA.22735.1.S1_at   | MmugDNA.22735.1 | 11.45 | 11.35 | 0.24 | 0.02 | 1.07  | 0.817896 | 0.710207 | 0.93417  | 0.831904 |
| MmugDNA.22736.1.S1_at   | MmugDNA.22736.1 | 4.92  | 4.75  | 0.32 | 0.09 | 1.13  | 0.323453 | 0.420979 | 0.67225  | 0.644662 |
| MmugDNA.22748.1.S1_at   | MmugDNA.22748.1 | 9.09  | 9.34  | 1.34 | 0.2  | -1.19 | 0.842887 | 0.17301  | 0.944391 | 0.449661 |
| MmugDNA.22756.1.S1_at   | MmugDNA.22756.1 | 11.43 | 11.1  | 0.1  | 0.09 | 1.26  | 0.016585 | 0.004001 | 0.287478 | 0.089969 |
| MmugDNA.22762.1.S1_at   | MmugDNA.22762.1 | 13.13 | 12.83 | 0.31 | 0.05 | 1.23  | 0.487542 | 0.444346 | 0.775077 | 0.66198  |
| MmugDNA.22769.1.S1_at   | MmugDNA.22769.1 | 9.56  | 10.18 | 0.79 | 0.14 | -1.54 | 0.738865 | 0.560738 | 0.900143 | 0.736921 |
| MmugDNA.22782.1.S1_at   | MmugDNA.22782.1 | 7.24  | 7.34  | 0.02 | 0.14 | -1.07 | 0.190674 | 0.216688 | 0.561788 | 0.490311 |
| MmugDNA.22783.1.S1_at   | MmugDNA.22783.1 | 11.74 | 11.31 | 0.39 | 0.15 | 1.35  | 0.057022 | 0.044318 | 0.401454 | 0.255021 |
| MmugDNA.22786.1.S1_at   | MmugDNA.22786.1 | 13.5  | 13.47 | 0.04 | 0.08 | 1.02  | 0.256405 | 0.000676 | 0.620399 | 0.04413  |
| MmugDNA.22787.1.S1_at   | MmugDNA.22787.1 | 10.16 | 10.4  | 0.13 | 0.37 | -1.18 | 0.124761 | 0.000693 | 0.498863 | 0.044166 |
| MmugDNA.22788.1.S1_s_at | MmugDNA.22788.1 | 11.07 | 11.75 | 2.09 | 0.17 | -1.6  | 0.391742 | 0.081503 | 0.717759 | 0.329764 |
| MmugDNA.2279.1.S1_at    | MmugDNA.2279.1  | 7.86  | 7.99  | 0.1  | 0    | -1.1  | 0.045954 | 0.080906 | 0.37735  | 0.328883 |
| MmugDNA.22792.1.S1_at   | MmugDNA.22792.1 | 4.51  | 4.47  | 0.13 | 0.08 | 1.02  | 0.788963 | 0.607537 | 0.922472 | 0.766417 |
| MmugDNA.22798.1.S1_at   | MmugDNA.22798.1 | 3.89  | 3.85  | 0.34 | 0.18 | 1.03  | 0.875276 | 0.642053 | 0.956677 | 0.789995 |
| MmugDNA.228.1.S1_at     | MmugDNA.228.1   | 11.64 | 10.49 | 0.69 | 0.13 | 2.22  | 0.041565 | 0.031058 | 0.366776 | 0.218115 |
| MmugDNA.2280.1.S1_at    | MmugDNA.2280.1  | 4.64  | 4.75  | 0.11 | 0.12 | -1.08 | 0.939688 | 0.917801 | 0.979532 | 0.954011 |
| MmugDNA.22804.1.S1_at   | MmugDNA.22804.1 | 12.02 | 12.15 | 0.06 | 0.02 | -1.1  | 0.020787 | 0.040064 | 0.305611 | 0.245388 |
| MmugDNA.22805.1.S1_at   | MmugDNA.22805.1 | 11.26 | 11.31 | 0.14 | 0.07 | -1.03 | 0.442058 | 0.642752 | 0.749811 | 0.790476 |
| MmugDNA.22807.1.S1_at   | MmugDNA.22807.1 | 3.45  | 3.47  | 0.09 | 0.14 | -1.02 | 0.602368 | 0.329071 | 0.838783 | 0.578482 |
| MmugDNA.2281.1.S1_at    | MmugDNA.2281.1  | 6.88  | 7.12  | 0.54 | 0.19 | -1.18 | 0.767743 | 0.913189 | 0.912595 | 0.951134 |
| MmugDNA.22810.1.S1_at   | MmugDNA.22810.1 | 6.57  | 6.09  | 0.67 | 0.27 | 1.39  | 0.412007 | 0.219095 | 0.731856 | 0.49285  |
| MmugDNA.22811.1.S1_at   | MmugDNA.22811.1 | 4.16  | 4.12  | 0.12 | 0.24 | 1.02  | 0.548572 | 0.749378 | 0.809836 | 0.85438  |
| MmugDNA.2282.1.S1_at    | MmugDNA.2282.1  | 11.35 | 11.58 | 0.57 | 0.11 | -1.17 | 0.762472 | 0.00506  | 0.91092  | 0.09907  |
| MmugDNA.22821.1.S1_at   | MmugDNA.22821.1 | 5.4   | 5.16  | 0.15 | 0.04 | 1.18  | 0.161383 | 0.145532 | 0.534731 | 0.419442 |
| MmugDNA.22822.1.S1_at   | MmugDNA.22822.1 | 9.01  | 8.4   | 0.47 | 0.16 | 1.53  | 0.201567 | 0.257369 | 0.573165 | 0.525179 |

|                         |                 |       |       |      |      |       |          |          |          |          |
|-------------------------|-----------------|-------|-------|------|------|-------|----------|----------|----------|----------|
| MmugDNA.22836.1.S1_s_at | MmugDNA.22836.1 | 10.53 | 9.89  | 0.31 | 0.11 | 1.55  | 0.029762 | 0.074945 | 0.335925 | 0.318924 |
| MmugDNA.22850.1.S1_at   | MmugDNA.22850.1 | 9.27  | 9.83  | 0.16 | 0.06 | -1.47 | 0.00757  | 0.001533 | 0.229596 | 0.059437 |
| MmugDNA.22851.1.S1_at   | MmugDNA.22851.1 | 8.02  | 8.39  | 0.29 | 0.1  | -1.29 | 0.132399 | 0.118248 | 0.506752 | 0.386244 |
| MmugDNA.22853.1.S1_at   | MmugDNA.22853.1 | 7.86  | 7.97  | 0.31 | 0.04 | -1.08 | 0.15747  | 0.245542 | 0.530565 | 0.515347 |
| MmugDNA.22856.1.S1_at   | MmugDNA.22856.1 | 12.26 | 11.51 | 0.28 | 0.17 | 1.67  | 0.0168   | 0.001145 | 0.288545 | 0.053384 |
| MmugDNA.2286.1.S1_s_at  | MmugDNA.2286.1  | 6.12  | 5.99  | 0.03 | 0.06 | 1.1   | 0.021654 | 0.238516 | 0.309241 | 0.509112 |
| MmugDNA.22860.1.S1_at   | MmugDNA.22860.1 | 10.19 | 10.19 | 0.17 | 0.04 | -1    | 0.814293 | 0.343747 | 0.932961 | 0.589457 |
| MmugDNA.22863.1.S1_s_at | MmugDNA.22863.1 | 12.71 | 12.83 | 0.08 | 0.1  | -1.09 | 0.17277  | 0.021074 | 0.545887 | 0.181869 |
| MmugDNA.22866.1.S1_at   | MmugDNA.22866.1 | 11.14 | 11.25 | 0.11 | 0.13 | -1.08 | 0.365955 | 0.260697 | 0.701433 | 0.527199 |
| MmugDNA.22867.1.S1_at   | MmugDNA.22867.1 | 10.62 | 10.99 | 0.23 | 0.13 | -1.29 | 0.028934 | 0.018651 | 0.333394 | 0.171653 |
| MmugDNA.22871.1.S1_at   | MmugDNA.22871.1 | 3.75  | 3.73  | 0.08 | 0.08 | 1.02  | 0.285972 | 0.319177 | 0.643508 | 0.571688 |
| MmugDNA.22875.1.S1_at   | MmugDNA.22875.1 | 10.95 | 10.68 | 0.13 | 0.11 | 1.21  | 0.078046 | 0.161539 | 0.440107 | 0.43767  |
| MmugDNA.22876.1.S1_at   | MmugDNA.22876.1 | 3.07  | 3.03  | 0.17 | 0.07 | 1.02  | 0.996497 | 0.68532  | 0.998707 | 0.816457 |
| MmugDNA.22878.1.S1_at   | MmugDNA.22878.1 | 9.5   | 10.74 | 0.65 | 0.2  | -2.36 | 0.045652 | 0.305759 | 0.376875 | 0.562731 |
| MmugDNA.2288.1.S1_at    | MmugDNA.2288.1  | 4.49  | 4.75  | 0.49 | 0.2  | -1.2  | 0.991591 | 0.229449 | 0.9967   | 0.501527 |
| MmugDNA.22888.1.S1_at   | MmugDNA.22888.1 | 10.92 | 11.34 | 1.08 | 0.05 | -1.34 | 0.361849 | 0.472423 | 0.698847 | 0.67999  |
| MmugDNA.2289.1.S1_at    | MmugDNA.2289.1  | 3.49  | 3.65  | 0.43 | 0.16 | -1.12 | 0.724465 | 0.320631 | 0.893143 | 0.572718 |
| MmugDNA.2290.1.S1_at    | MmugDNA.2290.1  | 7.72  | 6.85  | 0.35 | 0.09 | 1.82  | 0.023629 | 0.008033 | 0.316279 | 0.119091 |
| MmugDNA.22901.1.S1_at   | MmugDNA.22901.1 | 8.61  | 8.23  | 1.02 | 0.07 | 1.3   | 0.570833 | 0.196718 | 0.82229  | 0.471783 |
| MmugDNA.2291.1.S1_at    | MmugDNA.2291.1  | 5.54  | 5.19  | 0.81 | 0.75 | 1.27  | 0.423469 | 0.666803 | 0.739103 | 0.804789 |
| MmugDNA.2292.1.S1_at    | MmugDNA.2292.1  | 5.77  | 6.98  | 0.94 | 0.06 | -2.32 | 0.256269 | 0.033485 | 0.620399 | 0.226577 |
| MmugDNA.22923.1.S1_at   | MmugDNA.22923.1 | 12.12 | 12.43 | 0.23 | 0.03 | -1.24 | 0.036272 | 0.06516  | 0.35477  | 0.301238 |
| MmugDNA.22929.1.S1_at   | MmugDNA.22929.1 | 13.97 | 13.91 | 0.03 | 0.05 | 1.04  | 0.137685 | 0.521023 | 0.513418 | 0.712115 |
| MmugDNA.22932.1.S1_at   | MmugDNA.22932.1 | 9.72  | 10.35 | 0.72 | 0.18 | -1.54 | 0.290349 | 0.053495 | 0.646912 | 0.276963 |
| MmugDNA.22934.1.S1_at   | MmugDNA.22934.1 | 11.64 | 11.39 | 0.1  | 0.14 | 1.19  | 0.024289 | 0.016923 | 0.317812 | 0.164991 |
| MmugDNA.22936.1.S1_at   | MmugDNA.22936.1 | 12.75 | 12.63 | 0.11 | 0.02 | 1.09  | 0.358267 | 0.398648 | 0.696289 | 0.629458 |
| MmugDNA.2294.1.S1_at    | MmugDNA.2294.1  | 7.21  | 7.38  | 0.12 | 0.05 | -1.13 | 0.043219 | 0.162006 | 0.371614 | 0.438108 |
| MmugDNA.22941.1.S1_at   | MmugDNA.22941.1 | 6.14  | 6.09  | 0.2  | 0.06 | 1.03  | 0.924287 | 0.948934 | 0.974666 | 0.97078  |
| MmugDNA.22947.1.S1_s_at | MmugDNA.22947.1 | 12.57 | 12.36 | 0.2  | 0.05 | 1.15  | 0.514903 | 0.694319 | 0.790695 | 0.822254 |
| MmugDNA.22950.1.S1_at   | MmugDNA.22950.1 | 6.44  | 6.45  | 0.11 | 0.1  | -1.01 | 0.614338 | 0.144203 | 0.843887 | 0.418082 |
| MmugDNA.22955.1.S1_at   | MmugDNA.22955.1 | 12.57 | 12.4  | 0.06 | 0.03 | 1.12  | 0.020452 | 0.060675 | 0.303985 | 0.292876 |
| MmugDNA.22958.1.S1_at   | MmugDNA.22958.1 | 11.9  | 12.36 | 0.15 | 0.06 | -1.38 | 0.005235 | 0.002701 | 0.206348 | 0.076461 |
| MmugDNA.22965.1.S1_at   | MmugDNA.22965.1 | 10    | 9.78  | 0.56 | 0.07 | 1.16  | 0.518215 | 0.448211 | 0.792485 | 0.664144 |
| MmugDNA.22967.1.S1_at   | MmugDNA.22967.1 | 11.89 | 12.2  | 0.31 | 0.03 | -1.24 | 0.501784 | 0.255067 | 0.783444 | 0.52317  |
| MmugDNA.22972.1.S1_at   | MmugDNA.22972.1 | 9.09  | 9.21  | 0.26 | 0.04 | -1.09 | 0.578753 | 0.464259 | 0.826289 | 0.674983 |
| MmugDNA.22975.1.S1_at   | MmugDNA.22975.1 | 11.84 | 11.99 | 0.5  | 0.07 | -1.11 | 0.531684 | 0.045705 | 0.799836 | 0.258049 |
| MmugDNA.22985.1.S1_at   | MmugDNA.22985.1 | 11.02 | 10.68 | 0.09 | 0.14 | 1.26  | 0.020739 | 0.01732  | 0.305611 | 0.166509 |
| MmugDNA.22986.1.S1_at   | MmugDNA.22986.1 | 5.57  | 5.58  | 0.06 | 0.03 | -1.01 | 0.775716 | 0.093326 | 0.916815 | 0.349412 |
| MmugDNA.2299.1.S1_at    | MmugDNA.2299.1  | 10.11 | 9.33  | 0.41 | 0.17 | 1.71  | 0.023364 | 0.017074 | 0.315173 | 0.165589 |
| MmugDNA.22991.1.S1_at   | MmugDNA.22991.1 | 12.5  | 12.64 | 0.16 | 0.07 | -1.1  | 0.282046 | 0.438648 | 0.640534 | 0.657605 |
| MmugDNA.2300.1.S1_at    | MmugDNA.2300.1  | 12.8  | 12.66 | 0.39 | 0.13 | 1.1   | 0.377974 | 0.327657 | 0.707914 | 0.577464 |
| MmugDNA.23003.1.S1_s_at | MmugDNA.23003.1 | 13.12 | 13.03 | 0.09 | 0.01 | 1.06  | 0.494017 | 0.046575 | 0.779169 | 0.260267 |
| MmugDNA.23007.1.S1_at   | MmugDNA.23007.1 | 7.18  | 7.35  | 0.15 | 0.29 | -1.12 | 0.383324 | 0.00452  | 0.711306 | 0.093971 |



|                         |                 |       |       |      |      |       |          |          |          |          |
|-------------------------|-----------------|-------|-------|------|------|-------|----------|----------|----------|----------|
| MmugDNA.23015.1.S1_at   | MmugDNA.23015.1 | 10.59 | 10.83 | 0.3  | 0.1  | -1.18 | 0.079375 | 0.14871  | 0.442296 | 0.423201 |
| MmugDNA.23021.1.S1_at   | MmugDNA.23021.1 | 7.12  | 6.95  | 0.04 | 0.05 | 1.13  | 0.011373 | 0.183716 | 0.254437 | 0.459769 |
| MmugDNA.23023.1.S1_at   | MmugDNA.23023.1 | 7.76  | 7.87  | 0.23 | 0.16 | -1.08 | 0.480501 | 0.000973 | 0.771243 | 0.049791 |
| MmugDNA.23027.1.S1_at   | MmugDNA.23027.1 | 10.94 | 11.15 | 0.23 | 0.04 | -1.16 | 0.21598  | 0.569337 | 0.586068 | 0.742375 |
| MmugDNA.23028.1.S1_at   | MmugDNA.23028.1 | 12.07 | 11.93 | 0.19 | 0.03 | 1.1   | 0.124412 | 0.249451 | 0.498504 | 0.518532 |
| MmugDNA.2304.1.S1_at    | MmugDNA.2304.1  | 7.55  | 7.62  | 0.11 | 0.05 | -1.05 | 0.81458  | 0.571754 | 0.933055 | 0.743982 |
| MmugDNA.23040.1.S1_at   | MmugDNA.23040.1 | 4.98  | 3.8   | 0.38 | 0.26 | 2.28  | 0.017221 | 0.00492  | 0.290017 | 0.097771 |
| MmugDNA.23041.1.S1_at   | MmugDNA.23041.1 | 9.3   | 9.09  | 0.19 | 0.14 | 1.15  | 0.055865 | 0.111628 | 0.399441 | 0.376546 |
| MmugDNA.23042.1.S1_at   | MmugDNA.23042.1 | 7.21  | 7.15  | 0.48 | 0.07 | 1.04  | 0.897089 | 0.498856 | 0.964979 | 0.697821 |
| MmugDNA.23045.1.S1_at   | MmugDNA.23045.1 | 5.78  | 5.56  | 0.41 | 0.72 | 1.16  | 0.659289 | 0.87675  | 0.865147 | 0.92982  |
| MmugDNA.23046.1.S1_at   | MmugDNA.23046.1 | 3.94  | 3.92  | 0.1  | 0.02 | -1.01 | 0.231848 | 0.461567 | 0.599694 | 0.673162 |
| MmugDNA.23047.1.S1_at   | MmugDNA.23047.1 | 5.28  | 5.21  | 0.14 | 0.12 | 1.05  | 0.255136 | 0.386043 | 0.619267 | 0.621296 |
| MmugDNA.23049.1.S1_at   | MmugDNA.23049.1 | 7.41  | 7.35  | 0.08 | 0.08 | 1.04  | 0.18449  | 0.209314 | 0.557285 | 0.483038 |
| MmugDNA.23053.1.S1_at   | MmugDNA.23053.1 | 7.42  | 7.55  | 0.17 | 0.04 | -1.09 | 0.274337 | 0.409947 | 0.633792 | 0.636977 |
| MmugDNA.23058.1.S1_at   | MmugDNA.23058.1 | 8.05  | 8.2   | 0.43 | 0.02 | -1.1  | 0.718114 | 0.820139 | 0.890613 | 0.896336 |
| MmugDNA.2306.1.S1_s_at  | MmugDNA.2306.1  | 7.49  | 8.31  | 0.84 | 0.13 | -1.77 | 0.153286 | 0.192357 | 0.526421 | 0.467834 |
| MmugDNA.23060.1.S1_s_at | MmugDNA.23060.1 | 6.21  | 6.48  | 0.05 | 0.06 | -1.21 | 0.003183 | 0.031262 | 0.191107 | 0.218668 |
| MmugDNA.23064.1.S1_at   | MmugDNA.23064.1 | 8.4   | 8.29  | 0.11 | 0.15 | 1.08  | 0.172702 | 0.143526 | 0.545872 | 0.417469 |
| MmugDNA.23068.1.S1_s_at | MmugDNA.23068.1 | 12.01 | 11.88 | 0.17 | 0.01 | 1.09  | 0.27977  | 0.188523 | 0.63872  | 0.464458 |
| MmugDNA.23070.1.S1_at   | MmugDNA.23070.1 | 5.24  | 5.22  | 0.03 | 0.13 | 1.02  | 0.424156 | 0.629654 | 0.739432 | 0.781989 |
| MmugDNA.23075.1.S1_at   | MmugDNA.23075.1 | 4.58  | 4.69  | 0.42 | 0.05 | -1.08 | 0.758992 | 0.412111 | 0.909414 | 0.638537 |
| MmugDNA.23080.1.S1_at   | MmugDNA.23080.1 | 9.4   | 9.42  | 1.03 | 0.06 | -1.01 | 0.960744 | 0.916328 | 0.987225 | 0.953126 |
| MmugDNA.23082.1.S1_at   | MmugDNA.23082.1 | 10.01 | 9.89  | 1.05 | 0.07 | 1.08  | 0.914226 | 0.28844  | 0.970825 | 0.549749 |
| MmugDNA.23088.1.S1_at   | MmugDNA.23088.1 | 12.38 | 12.5  | 0.23 | 0.15 | -1.08 | 0.918087 | 0.046721 | 0.972062 | 0.260831 |
| MmugDNA.2309.1.S1_at    | MmugDNA.2309.1  | 10.72 | 10.55 | 0.1  | 0.19 | 1.13  | 0.371281 | 0.44806  | 0.705454 | 0.663986 |
| MmugDNA.23095.1.S1_at   | MmugDNA.23095.1 | 7.45  | 7.23  | 0.19 | 0.03 | 1.17  | 0.117019 | 0.162413 | 0.490268 | 0.438575 |
| MmugDNA.23098.1.S1_at   | MmugDNA.23098.1 | 8.97  | 8.44  | 0.39 | 0.14 | 1.44  | 0.259401 | 0.081446 | 0.622607 | 0.329632 |
| MmugDNA.23108.1.S1_at   | MmugDNA.23108.1 | 10.52 | 11.01 | 1.23 | 0.1  | -1.4  | 0.433492 | 0.215025 | 0.744491 | 0.488898 |
| MmugDNA.23115.1.S1_at   | MmugDNA.23115.1 | 6.67  | 6.54  | 0.1  | 0.04 | 1.1   | 0.047422 | 0.150816 | 0.380246 | 0.425335 |
| MmugDNA.23120.1.S1_at   | MmugDNA.23120.1 | 7.86  | 8.46  | 0.87 | 0.29 | -1.52 | 0.357255 | 0.449476 | 0.695575 | 0.665087 |
| MmugDNA.23121.1.S1_at   | MmugDNA.23121.1 | 6.61  | 6.56  | 0.03 | 0.02 | 1.04  | 0.024843 | 0.110537 | 0.320087 | 0.374755 |
| MmugDNA.23128.1.S1_s_at | MmugDNA.23128.1 | 8.15  | 8.65  | 0.1  | 0.04 | -1.41 | 0.001212 | 0.002611 | 0.156386 | 0.075645 |
| MmugDNA.23129.1.S1_at   | MmugDNA.23129.1 | 3.74  | 3.56  | 0.22 | 0.23 | 1.13  | 0.53165  | 0.646034 | 0.799819 | 0.792676 |
| MmugDNA.23133.1.S1_at   | MmugDNA.23133.1 | 4.68  | 4.6   | 0.09 | 0.11 | 1.05  | 0.253918 | 0.081689 | 0.618601 | 0.329928 |
| MmugDNA.23136.1.S1_at   | MmugDNA.23136.1 | 3.29  | 3.21  | 0.16 | 0.07 | 1.06  | 0.192801 | 0.306006 | 0.563577 | 0.562757 |
| MmugDNA.23137.1.S1_at   | MmugDNA.23137.1 | 7.74  | 7.47  | 0.61 | 0.25 | 1.21  | 0.286213 | 0.477678 | 0.64358  | 0.6837   |
| MmugDNA.2314.1.S1_at    | MmugDNA.2314.1  | 5.44  | 5.45  | 0.19 | 0.09 | -1.01 | 0.282963 | 0.347437 | 0.641162 | 0.592019 |
| MmugDNA.23143.1.S1_at   | MmugDNA.23143.1 | 10.75 | 10.74 | 0.78 | 0.04 | 1.01  | 0.612518 | 0.145212 | 0.843094 | 0.419214 |
| MmugDNA.23149.1.S1_at   | MmugDNA.23149.1 | 4.32  | 3.82  | 0.21 | 0.1  | 1.41  | 0.019574 | 0.003408 | 0.301679 | 0.084071 |
| MmugDNA.2315.1.S1_at    | MmugDNA.2315.1  | 9     | 8.74  | 0.4  | 0.06 | 1.19  | 0.169872 | 0.350261 | 0.542785 | 0.594012 |
| MmugDNA.23158.1.S1_at   | MmugDNA.23158.1 | 8.17  | 7.82  | 0.31 | 0.22 | 1.28  | 0.837715 | 0.254718 | 0.941813 | 0.522987 |
| MmugDNA.2316.1.S1_s_at  | MmugDNA.2316.1  | 13.79 | 13.53 | 0.52 | 0.09 | 1.2   | 0.905231 | 0.721988 | 0.968109 | 0.838928 |
| MmugDNA.23160.1.S1_at   | MmugDNA.23160.1 | 4.48  | 4.43  | 0.46 | 0.37 | 1.04  | 0.49164  | 0.709897 | 0.777973 | 0.831863 |

|                         |                 |       |       |      |      |       |          |          |          |          |
|-------------------------|-----------------|-------|-------|------|------|-------|----------|----------|----------|----------|
| MmugDNA.23162.1.S1_at   | MmugDNA.23162.1 | 3.3   | 3.77  | 0.11 | 0.52 | -1.39 | 0.476269 | 0.687292 | 0.769056 | 0.817535 |
| MmugDNA.2317.1.S1_at    | MmugDNA.2317.1  | 11.62 | 11.53 | 0.18 | 0.03 | 1.07  | 0.175312 | 0.395482 | 0.548245 | 0.627503 |
| MmugDNA.23173.1.S1_at   | MmugDNA.23173.1 | 6.89  | 8.58  | 0.29 | 0.08 | -3.22 | 0.000909 | 0.000283 | 0.153739 | 0.034683 |
| MmugDNA.23174.1.S1_at   | MmugDNA.23174.1 | 10.55 | 10.4  | 0.44 | 0.09 | 1.11  | 0.703185 | 0.334492 | 0.884538 | 0.582498 |
| MmugDNA.23177.1.S1_at   | MmugDNA.23177.1 | 10.22 | 11.11 | 0.58 | 0.19 | -1.85 | 0.094806 | 0.008743 | 0.464072 | 0.123975 |
| MmugDNA.23179.1.S1_at   | MmugDNA.23179.1 | 3.75  | 3.58  | 0.22 | 0.2  | 1.12  | 0.164438 | 0.192512 | 0.537322 | 0.467958 |
| MmugDNA.23181.1.S1_at   | MmugDNA.23181.1 | 7.39  | 7.79  | 0.42 | 0.16 | -1.32 | 0.258515 | 0.467015 | 0.622247 | 0.676774 |
| MmugDNA.23182.1.S1_at   | MmugDNA.23182.1 | 5.71  | 5.7   | 0.22 | 0.05 | 1.01  | 0.347446 | 0.455733 | 0.688705 | 0.669659 |
| MmugDNA.23183.1.S1_at   | MmugDNA.23183.1 | 11.76 | 11.43 | 0.72 | 0.06 | 1.26  | 0.792716 | 0.193637 | 0.924072 | 0.468785 |
| MmugDNA.23187.1.S1_at   | MmugDNA.23187.1 | 2.85  | 2.86  | 0.1  | 0.04 | -1    | 0.630298 | 0.599083 | 0.851919 | 0.761287 |
| MmugDNA.23195.1.S1_at   | MmugDNA.23195.1 | 3.95  | 4.12  | 0.31 | 0.42 | -1.13 | 0.978106 | 0.805648 | 0.992929 | 0.888316 |
| MmugDNA.23197.1.S1_at   | MmugDNA.23197.1 | 3.37  | 3.37  | 0.02 | 0.05 | 1     | 0.776975 | 0.028386 | 0.917442 | 0.210319 |
| MmugDNA.232.1.S1_at     | MmugDNA.232.1   | 12.48 | 12.54 | 0.38 | 0.05 | -1.05 | 0.725684 | 0.55642  | 0.893811 | 0.734507 |
| MmugDNA.2320.1.S1_at    | MmugDNA.2320.1  | 7.53  | 7.1   | 0.41 | 0.28 | 1.35  | 0.150608 | 0.020785 | 0.524209 | 0.180899 |
| MmugDNA.23200.1.S1_at   | MmugDNA.23200.1 | 10.52 | 10.14 | 0.8  | 0.19 | 1.3   | 0.877653 | 0.642232 | 0.957399 | 0.790086 |
| MmugDNA.23202.1.S1_at   | MmugDNA.23202.1 | 8.55  | 8.92  | 0.21 | 0.23 | -1.29 | 0.313393 | 0.482498 | 0.664925 | 0.687323 |
| MmugDNA.23207.1.S1_at   | MmugDNA.23207.1 | 10.06 | 9.6   | 3    | 0.33 | 1.38  | 0.668602 | 0.245832 | 0.86912  | 0.515519 |
| MmugDNA.2321.1.S1_at    | MmugDNA.2321.1  | 10.63 | 11.18 | 0.51 | 0.26 | -1.46 | 0.752112 | 0.038328 | 0.906281 | 0.240641 |
| MmugDNA.23211.1.S1_at   | MmugDNA.23211.1 | 9.72  | 10.02 | 0.27 | 0.3  | -1.23 | 0.135558 | 0.00243  | 0.510048 | 0.073093 |
| MmugDNA.23216.1.S1_at   | MmugDNA.23216.1 | 4.5   | 4.51  | 0.01 | 0.09 | -1.01 | 0.5887   | 0.482878 | 0.831968 | 0.68765  |
| MmugDNA.23217.1.S1_at   | MmugDNA.23217.1 | 11.42 | 10.49 | 0.42 | 0.11 | 1.92  | 0.036914 | 0.011312 | 0.356221 | 0.138076 |
| MmugDNA.23222.1.S1_at   | MmugDNA.23222.1 | 9.8   | 9.79  | 0.07 | 0.03 | 1.01  | 0.979862 | 0.89657  | 0.993606 | 0.940905 |
| MmugDNA.23234.1.S1_at   | MmugDNA.23234.1 | 6.13  | 6.06  | 0.15 | 0.01 | 1.05  | 0.218768 | 0.120471 | 0.588341 | 0.38925  |
| MmugDNA.23236.1.S1_at   | MmugDNA.23236.1 | 6.86  | 6.88  | 0.08 | 0.14 | -1.01 | 0.380143 | 0.433384 | 0.709362 | 0.653662 |
| MmugDNA.2324.1.S1_at    | MmugDNA.2324.1  | 8.62  | 8.53  | 0.66 | 0.02 | 1.07  | 0.635009 | 0.790532 | 0.854497 | 0.878895 |
| MmugDNA.23243.1.S1_at   | MmugDNA.23243.1 | 5.06  | 5.24  | 0.28 | 0.5  | -1.14 | 0.927005 | 0.992255 | 0.975766 | 0.995588 |
| MmugDNA.23245.1.S1_at   | MmugDNA.23245.1 | 3.18  | 3.25  | 0.05 | 0.09 | -1.05 | 0.453772 | 0.403818 | 0.756276 | 0.632393 |
| MmugDNA.23247.1.S1_at   | MmugDNA.23247.1 | 11.12 | 10.47 | 0.25 | 0.06 | 1.56  | 0.011276 | 0.004219 | 0.253564 | 0.091392 |
| MmugDNA.23250.1.S1_at   | MmugDNA.23250.1 | 11.61 | 11.19 | 0.81 | 0.21 | 1.34  | 0.435963 | 0.173342 | 0.746002 | 0.449791 |
| MmugDNA.23251.1.S1_at   | MmugDNA.23251.1 | 10.75 | 10.82 | 0.39 | 0.07 | -1.05 | 0.926446 | 0.127716 | 0.975571 | 0.398581 |
| MmugDNA.23254.1.A1_at   | MmugDNA.23254.1 | 2.97  | 2.91  | 0.05 | 0.06 | 1.04  | 0.132804 | 0.015081 | 0.507035 | 0.155923 |
| MmugDNA.23254.1.S1_at   | MmugDNA.23254.1 | 3.31  | 3.3   | 0.06 | 0.05 | 1.01  | 0.410264 | 0.325756 | 0.730705 | 0.57602  |
| MmugDNA.23256.1.S1_at   | MmugDNA.23256.1 | 9.02  | 9.21  | 0.66 | 0.11 | -1.14 | 0.24287  | 0.048904 | 0.608808 | 0.265919 |
| MmugDNA.23262.1.S1_at   | MmugDNA.23262.1 | 8.72  | 9.01  | 0.14 | 0.04 | -1.22 | 0.060011 | 0.308961 | 0.407399 | 0.564656 |
| MmugDNA.23267.1.S1_at   | MmugDNA.23267.1 | 10.41 | 10.65 | 0.21 | 0.04 | -1.18 | 0.118365 | 0.003136 | 0.491891 | 0.081639 |
| MmugDNA.23271.1.S1_at   | MmugDNA.23271.1 | 9.1   | 8.98  | 0.25 | 0.02 | 1.08  | 0.380165 | 0.595585 | 0.709369 | 0.759091 |
| MmugDNA.23271.1.S1_s_at | MmugDNA.23271.1 | 10.86 | 10.83 | 0.23 | 0.04 | 1.02  | 0.64574  | 0.836166 | 0.858801 | 0.9063   |
| MmugDNA.23289.1.S1_at   | MmugDNA.23289.1 | 5.52  | 5.77  | 0.21 | 0.19 | -1.19 | 0.155536 | 0.222191 | 0.528837 | 0.495178 |
| MmugDNA.23290.1.S1_at   | MmugDNA.23290.1 | 7.49  | 7.66  | 1.3  | 0.16 | -1.12 | 0.831855 | 0.054667 | 0.939678 | 0.279311 |
| MmugDNA.23292.1.S1_at   | MmugDNA.23292.1 | 9.55  | 8.92  | 0.28 | 0.34 | 1.55  | 0.059294 | 0.049267 | 0.406296 | 0.266828 |
| MmugDNA.2330.1.S1_at    | MmugDNA.2330.1  | 9.96  | 9.94  | 0.14 | 0.06 | 1.01  | 0.625872 | 0.410502 | 0.849641 | 0.637352 |
| MmugDNA.23303.1.S1_at   | MmugDNA.23303.1 | 13.59 | 13.63 | 0.01 | 0    | -1.03 | 0.011223 | 0.031972 | 0.253113 | 0.2212   |
| MmugDNA.23304.1.S1_at   | MmugDNA.23304.1 | 10.78 | 10.37 | 1    | 0.23 | 1.32  | 0.424254 | 0.038339 | 0.739497 | 0.240682 |

|                         |                 |       |       |      |      |       |          |          |          |          |
|-------------------------|-----------------|-------|-------|------|------|-------|----------|----------|----------|----------|
| MmugDNA.23307.1.S1_at   | MmugDNA.23307.1 | 8.68  | 8.84  | 0.49 | 0.04 | -1.12 | 0.472159 | 0.054893 | 0.766889 | 0.279748 |
| MmugDNA.2331.1.S1_at    | MmugDNA.2331.1  | 6.7   | 6.21  | 0.32 | 0.22 | 1.4   | 0.103818 | 0.117242 | 0.474525 | 0.384777 |
| MmugDNA.23322.1.S1_at   | MmugDNA.23322.1 | 12.3  | 12.45 | 0.23 | 0.01 | -1.11 | 0.335693 | 0.403716 | 0.681167 | 0.632331 |
| MmugDNA.23326.1.S1_at   | MmugDNA.23326.1 | 6     | 5.83  | 0.18 | 0.15 | 1.12  | 0.537143 | 0.105054 | 0.802624 | 0.366736 |
| MmugDNA.23326.1.S1_x_at | MmugDNA.23326.1 | 7.91  | 7.86  | 0.15 | 0.1  | 1.04  | 0.757678 | 0.099466 | 0.908764 | 0.357827 |
| MmugDNA.23328.1.S1_at   | MmugDNA.23328.1 | 6.68  | 6.71  | 0.09 | 0.09 | -1.02 | 0.796683 | 0.489869 | 0.925303 | 0.691972 |
| MmugDNA.2333.1.S1_at    | MmugDNA.2333.1  | 11.35 | 11.97 | 0.19 | 0.06 | -1.54 | 0.003887 | 0.041253 | 0.198571 | 0.247995 |
| MmugDNA.2333.1.S1_s_at  | MmugDNA.2333.1  | 11.46 | 11.95 | 0.27 | 0.06 | -1.41 | 0.025765 | 0.036374 | 0.322693 | 0.235146 |
| MmugDNA.23334.1.S1_at   | MmugDNA.23334.1 | 11    | 10.87 | 0.22 | 0.05 | 1.1   | 0.127376 | 0.215237 | 0.501548 | 0.488977 |
| MmugDNA.23337.1.S1_at   | MmugDNA.23337.1 | 11.65 | 12.13 | 0.28 | 0.08 | -1.4  | 0.122506 | 0.026455 | 0.495926 | 0.203779 |
| MmugDNA.2334.1.S1_at    | MmugDNA.2334.1  | 7.26  | 7.42  | 0.7  | 0.19 | -1.12 | 0.65285  | 0.390805 | 0.862069 | 0.624547 |
| MmugDNA.23346.1.S1_at   | MmugDNA.23346.1 | 11.64 | 11.9  | 0.23 | 0.01 | -1.2  | 0.360001 | 0.482964 | 0.697741 | 0.687687 |
| MmugDNA.23352.1.S1_at   | MmugDNA.23352.1 | 8.84  | 8.79  | 0.66 | 0.18 | 1.03  | 0.872388 | 0.876649 | 0.955759 | 0.929744 |
| MmugDNA.23356.1.S1_at   | MmugDNA.23356.1 | 6.48  | 7.23  | 0.51 | 0.09 | -1.69 | 0.149478 | 0.300159 | 0.523226 | 0.558356 |
| MmugDNA.23358.1.S1_at   | MmugDNA.23358.1 | 13.26 | 13.41 | 0.13 | 0.05 | -1.12 | 0.57584  | 0.045116 | 0.824958 | 0.256956 |
| MmugDNA.2337.1.S1_at    | MmugDNA.2337.1  | 5.23  | 5.01  | 0.31 | 0.07 | 1.17  | 0.180998 | 0.612044 | 0.554276 | 0.76972  |
| MmugDNA.23373.1.S1_at   | MmugDNA.23373.1 | 5.96  | 5.84  | 0.02 | 0.02 | 1.09  | 0.001499 | 0.099342 | 0.161549 | 0.35761  |
| MmugDNA.23378.1.S1_at   | MmugDNA.23378.1 | 6.33  | 7.25  | 0.53 | 0.35 | -1.9  | 0.038231 | 0.182698 | 0.358577 | 0.459186 |
| MmugDNA.23379.1.S1_at   | MmugDNA.23379.1 | 11.22 | 11.44 | 0.14 | 0.09 | -1.17 | 0.157933 | 0.061687 | 0.530947 | 0.295135 |
| MmugDNA.2338.1.S1_at    | MmugDNA.2338.1  | 5.64  | 6.2   | 0.94 | 0.24 | -1.47 | 0.228302 | 0.29571  | 0.597189 | 0.555138 |
| MmugDNA.23387.1.S1_at   | MmugDNA.23387.1 | 7.39  | 8.06  | 0.21 | 0.44 | -1.59 | 0.214005 | 0.013481 | 0.584533 | 0.148688 |
| MmugDNA.23388.1.S1_at   | MmugDNA.23388.1 | 2.67  | 2.72  | 0.06 | 0.07 | -1.04 | 0.566324 | 0.045202 | 0.819964 | 0.256979 |
| MmugDNA.23392.1.S1_at   | MmugDNA.23392.1 | 9.97  | 9.51  | 0.15 | 0.1  | 1.37  | 0.010483 | 0.202433 | 0.24804  | 0.476772 |
| MmugDNA.23403.1.A1_at   | MmugDNA.23403.1 | 5.79  | 6.05  | 0.26 | 0.1  | -1.2  | 0.478949 | 0.479025 | 0.770364 | 0.684885 |
| MmugDNA.23403.1.S1_at   | MmugDNA.23403.1 | 5.67  | 5.53  | 0.09 | 0.17 | 1.1   | 0.898866 | 0.929425 | 0.965648 | 0.959707 |
| MmugDNA.23405.1.S1_s_at | MmugDNA.23405.1 | 11.86 | 11.91 | 0.23 | 0.07 | -1.04 | 0.731248 | 0.719604 | 0.896508 | 0.837761 |
| MmugDNA.23407.1.S1_at   | MmugDNA.23407.1 | 11.06 | 10.97 | 0.01 | 0.08 | 1.06  | 0.202733 | 0.11322  | 0.574251 | 0.379229 |
| MmugDNA.23414.1.S1_at   | MmugDNA.23414.1 | 6.61  | 6.49  | 0.1  | 0.04 | 1.09  | 0.288375 | 0.421666 | 0.645508 | 0.645222 |
| MmugDNA.23423.1.S1_at   | MmugDNA.23423.1 | 9.88  | 9.72  | 0.12 | 0.1  | 1.12  | 0.065833 | 0.201128 | 0.421138 | 0.475519 |
| MmugDNA.23424.1.S1_at   | MmugDNA.23424.1 | 9.46  | 9.5   | 0.33 | 0.06 | -1.03 | 0.904957 | 0.781656 | 0.968099 | 0.87342  |
| MmugDNA.23425.1.S1_at   | MmugDNA.23425.1 | 10.57 | 10.59 | 1.45 | 0.28 | -1.02 | 0.93826  | 0.568597 | 0.979247 | 0.742052 |
| MmugDNA.23428.1.S1_at   | MmugDNA.23428.1 | 11.81 | 11.98 | 0.21 | 0.05 | -1.13 | 0.239961 | 0.135514 | 0.606208 | 0.407621 |
| MmugDNA.23431.1.S1_at   | MmugDNA.23431.1 | 6.55  | 6.47  | 0.12 | 0.17 | 1.06  | 0.371611 | 0.75263  | 0.705567 | 0.855965 |
| MmugDNA.23434.1.S1_at   | MmugDNA.23434.1 | 13.44 | 13.51 | 0.04 | 0.02 | -1.05 | 0.0834   | 0.002866 | 0.449388 | 0.078799 |
| MmugDNA.23436.1.S1_at   | MmugDNA.23436.1 | 3.23  | 3.19  | 0.12 | 0.06 | 1.03  | 0.993836 | 0.782665 | 0.99766  | 0.874202 |
| MmugDNA.23445.1.S1_at   | MmugDNA.23445.1 | 7.82  | 7.83  | 0.19 | 0.04 | -1.01 | 0.91607  | 0.001392 | 0.971354 | 0.057005 |
| MmugDNA.23448.1.S1_at   | MmugDNA.23448.1 | 6.46  | 6.45  | 0.12 | 0.01 | 1.01  | 0.760599 | 0.239589 | 0.910077 | 0.510247 |
| MmugDNA.23451.1.S1_at   | MmugDNA.23451.1 | 5.69  | 4.38  | 0.94 | 0.1  | 2.48  | 0.23136  | 0.566988 | 0.599368 | 0.740935 |
| MmugDNA.2347.1.S1_s_at  | MmugDNA.2347.1  | 11.09 | 11.18 | 0.32 | 0.07 | -1.07 | 0.700934 | 0.010422 | 0.883717 | 0.133525 |
| MmugDNA.23473.1.S1_at   | MmugDNA.23473.1 | 5.8   | 5.73  | 0.16 | 0.03 | 1.05  | 0.822721 | 0.208889 | 0.936084 | 0.482717 |
| MmugDNA.23474.1.S1_at   | MmugDNA.23474.1 | 5.06  | 4.99  | 0.07 | 0.01 | 1.05  | 0.193399 | 0.006266 | 0.564275 | 0.107376 |
| MmugDNA.23486.1.S1_at   | MmugDNA.23486.1 | 6.75  | 6.63  | 0.11 | 0.06 | 1.09  | 0.120925 | 0.129966 | 0.494576 | 0.401533 |
| MmugDNA.23489.1.S1_at   | MmugDNA.23489.1 | 4.62  | 4.59  | 0.06 | 0.17 | 1.02  | 0.36955  | 0.50578  | 0.704264 | 0.702218 |

|                         |                 |       |       |      |      |       |          |          |          |          |
|-------------------------|-----------------|-------|-------|------|------|-------|----------|----------|----------|----------|
| MmugDNA.23492.1.S1_at   | MmugDNA.23492.1 | 5.08  | 5.02  | 0.14 | 0.13 | 1.04  | 0.592806 | 0.609659 | 0.833974 | 0.767957 |
| MmugDNA.23498.1.S1_at   | MmugDNA.23498.1 | 10.27 | 10.35 | 0.17 | 0.05 | -1.06 | 0.14852  | 0.092784 | 0.522567 | 0.348989 |
| MmugDNA.235.1.S1_at     | MmugDNA.235.1   | 6.69  | 6.54  | 0.12 | 0.04 | 1.11  | 0.089798 | 0.144171 | 0.457893 | 0.418037 |
| MmugDNA.23500.1.S1_at   | MmugDNA.23500.1 | 12.44 | 12.17 | 0.83 | 0.03 | 1.21  | 0.663613 | 0.402204 | 0.867226 | 0.631247 |
| MmugDNA.23501.1.S1_at   | MmugDNA.23501.1 | 12.68 | 12.64 | 0.39 | 0    | 1.03  | 0.46383  | 0.509022 | 0.762278 | 0.703967 |
| MmugDNA.23510.1.S1_at   | MmugDNA.23510.1 | 4     | 4.09  | 0.22 | 0.15 | -1.07 | 0.97252  | 0.090867 | 0.991099 | 0.345474 |
| MmugDNA.23511.1.S1_at   | MmugDNA.23511.1 | 6.46  | 6.8   | 0.52 | 0.19 | -1.26 | 0.868811 | 0.501896 | 0.954083 | 0.699953 |
| MmugDNA.23513.1.S1_at   | MmugDNA.23513.1 | 6.01  | 5.98  | 0.14 | 0.25 | 1.02  | 0.394247 | 0.421187 | 0.719675 | 0.644807 |
| MmugDNA.23514.1.S1_at   | MmugDNA.23514.1 | 5.78  | 5.75  | 0.14 | 0.06 | 1.02  | 0.922189 | 0.871016 | 0.973784 | 0.926745 |
| MmugDNA.23515.1.S1_at   | MmugDNA.23515.1 | 11.68 | 12.13 | 0.15 | 0.03 | -1.37 | 0.005924 | 0.003709 | 0.21232  | 0.0868   |
| MmugDNA.23523.1.S1_at   | MmugDNA.23523.1 | 11.76 | 11.79 | 0.09 | 0.03 | -1.02 | 0.500199 | 0.254698 | 0.782384 | 0.522987 |
| MmugDNA.23523.1.S1_s_at | MmugDNA.23523.1 | 11.27 | 11.1  | 0.14 | 0.11 | 1.13  | 0.099179 | 0.078154 | 0.468572 | 0.324634 |
| MmugDNA.23535.1.S1_at   | MmugDNA.23535.1 | 5.57  | 5.52  | 0.09 | 0.05 | 1.03  | 0.599287 | 0.928669 | 0.837333 | 0.959449 |
| MmugDNA.23538.1.S1_at   | MmugDNA.23538.1 | 6.46  | 6.62  | 0.02 | 0.07 | -1.12 | 0.025118 | 0.226748 | 0.320458 | 0.499176 |
| MmugDNA.23542.1.S1_at   | MmugDNA.23542.1 | 9.57  | 9.5   | 0.26 | 0.05 | 1.05  | 0.242461 | 0.189203 | 0.608517 | 0.464997 |
| MmugDNA.23556.1.S1_at   | MmugDNA.23556.1 | 8.78  | 8.67  | 0.66 | 0.22 | 1.08  | 0.515163 | 0.400025 | 0.790792 | 0.630158 |
| MmugDNA.23559.1.S1_at   | MmugDNA.23559.1 | 7.85  | 8.57  | 0.84 | 0.2  | -1.65 | 0.266247 | 0.614332 | 0.627106 | 0.771206 |
| MmugDNA.23560.1.S1_at   | MmugDNA.23560.1 | 7.59  | 7.69  | 0.42 | 0.26 | -1.07 | 0.887842 | 0.077054 | 0.961188 | 0.322498 |
| MmugDNA.23564.1.S1_at   | MmugDNA.23564.1 | 11.32 | 11.49 | 0.87 | 0.03 | -1.13 | 0.368811 | 0.38952  | 0.703826 | 0.623635 |
| MmugDNA.23564.1.S1_s_at | MmugDNA.23564.1 | 9.01  | 9.37  | 1.05 | 0.02 | -1.28 | 0.541662 | 0.236769 | 0.805212 | 0.507513 |
| MmugDNA.23567.1.S1_at   | MmugDNA.23567.1 | 8.78  | 8.66  | 0.59 | 0.07 | 1.09  | 0.705361 | 0.487308 | 0.885355 | 0.690398 |
| MmugDNA.23572.1.S1_s_at | MmugDNA.23572.1 | 9.27  | 8.94  | 0.37 | 0.14 | 1.26  | 0.343034 | 0.468165 | 0.686289 | 0.677624 |
| MmugDNA.23575.1.S1_at   | MmugDNA.23575.1 | 9.99  | 10.7  | 0.73 | 0.04 | -1.63 | 0.212728 | 0.246914 | 0.583216 | 0.516238 |
| MmugDNA.23577.1.S1_at   | MmugDNA.23577.1 | 10.35 | 10.15 | 0.25 | 0.07 | 1.15  | 0.200548 | 0.108632 | 0.572378 | 0.372171 |
| MmugDNA.23582.1.S1_at   | MmugDNA.23582.1 | 8.46  | 7.57  | 0.72 | 0.22 | 1.86  | 0.459014 | 0.270965 | 0.759258 | 0.536099 |
| MmugDNA.23582.1.S1_s_at | MmugDNA.23582.1 | 9.11  | 8.45  | 0.65 | 0.33 | 1.58  | 0.82922  | 0.350794 | 0.938708 | 0.594515 |
| MmugDNA.23583.1.S1_at   | MmugDNA.23583.1 | 6.53  | 6.51  | 0.8  | 0.08 | 1.01  | 0.955792 | 0.890542 | 0.985346 | 0.937632 |
| MmugDNA.23584.1.S1_at   | MmugDNA.23584.1 | 9.62  | 9.66  | 0.19 | 0.17 | -1.03 | 0.788733 | 0.104956 | 0.922466 | 0.366527 |
| MmugDNA.23586.1.S1_at   | MmugDNA.23586.1 | 11.7  | 11.9  | 0.23 | 0.05 | -1.15 | 0.663004 | 0.93857  | 0.867031 | 0.965059 |
| MmugDNA.23588.1.S1_at   | MmugDNA.23588.1 | 6.3   | 6.41  | 0.52 | 0.21 | -1.08 | 0.837348 | 0.735465 | 0.941594 | 0.846919 |
| MmugDNA.23592.1.S1_at   | MmugDNA.23592.1 | 4.94  | 4.67  | 0.13 | 0.23 | 1.21  | 0.42238  | 0.437544 | 0.738123 | 0.656769 |
| MmugDNA.23593.1.S1_at   | MmugDNA.23593.1 | 8.42  | 7.99  | 0.43 | 0.14 | 1.35  | 0.160288 | 0.211924 | 0.533335 | 0.48594  |
| MmugDNA.23596.1.S1_at   | MmugDNA.23596.1 | 8.89  | 9.09  | 0.16 | 0.14 | -1.15 | 0.185395 | 0.146005 | 0.55849  | 0.420006 |
| MmugDNA.23596.1.S1_s_at | MmugDNA.23596.1 | 10.42 | 10.47 | 0.14 | 0.1  | -1.04 | 0.715285 | 0.642941 | 0.889207 | 0.79055  |
| MmugDNA.23603.1.S1_at   | MmugDNA.23603.1 | 12.21 | 12.53 | 0.21 | 0.06 | -1.24 | 0.127685 | 0.317276 | 0.502014 | 0.570504 |
| MmugDNA.23607.1.S1_at   | MmugDNA.23607.1 | 2.97  | 2.99  | 0.14 | 0.11 | -1.02 | 0.250135 | 0.339133 | 0.615476 | 0.585891 |
| MmugDNA.23609.1.S1_at   | MmugDNA.23609.1 | 7.57  | 6.85  | 0.81 | 0.18 | 1.65  | 0.621888 | 0.577097 | 0.847631 | 0.74764  |
| MmugDNA.23615.1.S1_at   | MmugDNA.23615.1 | 11.64 | 11.2  | 0.43 | 0.08 | 1.36  | 0.47634  | 0.388739 | 0.769097 | 0.623031 |
| MmugDNA.23619.1.S1_at   | MmugDNA.23619.1 | 11.44 | 11.06 | 0.09 | 0.16 | 1.29  | 0.01126  | 0.001083 | 0.253508 | 0.05215  |
| MmugDNA.23628.1.S1_at   | MmugDNA.23628.1 | 11.21 | 11.91 | 0.4  | 0.08 | -1.62 | 0.147339 | 0.027886 | 0.521578 | 0.208455 |
| MmugDNA.23630.1.S1_at   | MmugDNA.23630.1 | 5.59  | 5.57  | 0.16 | 0.09 | 1.01  | 0.754324 | 0.027696 | 0.907331 | 0.207837 |
| MmugDNA.23634.1.S1_at   | MmugDNA.23634.1 | 5.37  | 5.3   | 0.15 | 0.01 | 1.05  | 0.255839 | 0.144047 | 0.619785 | 0.417912 |
| MmugDNA.23639.1.S1_at   | MmugDNA.23639.1 | 10.44 | 9.92  | 0.5  | 0.5  | 1.44  | 0.61447  | 0.019178 | 0.843969 | 0.1742   |

|                         |                 |       |       |      |      |       |          |          |          |          |
|-------------------------|-----------------|-------|-------|------|------|-------|----------|----------|----------|----------|
| MmugDNA.2364.1.S1_at    | MmugDNA.2364.1  | 9.16  | 9.16  | 0.3  | 0.07 | 1     | 0.31135  | 0.650491 | 0.663209 | 0.795663 |
| MmugDNA.23641.1.S1_at   | MmugDNA.23641.1 | 6.82  | 9.05  | 1.18 | 0.24 | -4.69 | 0.043316 | 0.004568 | 0.371766 | 0.094375 |
| MmugDNA.23642.1.S1_at   | MmugDNA.23642.1 | 3.13  | 3.03  | 0.2  | 0.01 | 1.07  | 0.450836 | 0.773697 | 0.754916 | 0.868433 |
| MmugDNA.23645.1.S1_at   | MmugDNA.23645.1 | 7.8   | 8.1   | 0.81 | 0.16 | -1.23 | 0.590405 | 0.585999 | 0.832868 | 0.753172 |
| MmugDNA.23646.1.S1_at   | MmugDNA.23646.1 | 11.49 | 11.48 | 0.18 | 0.1  | 1.01  | 0.759012 | 0.792012 | 0.909414 | 0.879813 |
| MmugDNA.23660.1.S1_at   | MmugDNA.23660.1 | 5.22  | 5.3   | 0.19 | 0.19 | -1.06 | 0.449456 | 0.131429 | 0.754372 | 0.403584 |
| MmugDNA.23662.1.S1_at   | MmugDNA.23662.1 | 5.34  | 5.46  | 0.93 | 0.24 | -1.09 | 0.865104 | 0.280053 | 0.952585 | 0.543369 |
| MmugDNA.23662.1.S1_s_at | MmugDNA.23662.1 | 7.25  | 7.58  | 0.88 | 0.26 | -1.26 | 0.924505 | 0.187189 | 0.97475  | 0.463153 |
| MmugDNA.23665.1.S1_at   | MmugDNA.23665.1 | 12.38 | 12.25 | 0.49 | 0.04 | 1.09  | 0.628492 | 0.811583 | 0.851106 | 0.891244 |
| MmugDNA.23668.1.S1_s_at | MmugDNA.23668.1 | 11.57 | 11.1  | 0.33 | 0.22 | 1.38  | 0.060105 | 0.002507 | 0.407399 | 0.074142 |
| MmugDNA.23670.1.S1_at   | MmugDNA.23670.1 | 12.33 | 11.84 | 0.28 | 0.06 | 1.4   | 0.037972 | 0.027242 | 0.358308 | 0.206279 |
| MmugDNA.23676.1.S1_at   | MmugDNA.23676.1 | 5.06  | 4.86  | 0.03 | 0.09 | 1.15  | 0.016661 | 0.062946 | 0.287478 | 0.297579 |
| MmugDNA.23678.1.S1_at   | MmugDNA.23678.1 | 4.06  | 3.95  | 0.12 | 0.08 | 1.07  | 0.105182 | 0.569609 | 0.476924 | 0.742525 |
| MmugDNA.23689.1.S1_at   | MmugDNA.23689.1 | 9.87  | 9.98  | 0.39 | 0.15 | -1.08 | 0.969072 | 0.984409 | 0.989875 | 0.991287 |
| MmugDNA.23693.1.S1_at   | MmugDNA.23693.1 | 9.61  | 10.29 | 1.22 | 0.31 | -1.61 | 0.524989 | 0.024252 | 0.796179 | 0.194952 |
| MmugDNA.23694.1.S1_at   | MmugDNA.23694.1 | 4.36  | 4.35  | 0.28 | 0.37 | 1.01  | 0.944899 | 0.680678 | 0.980852 | 0.813548 |
| MmugDNA.23695.1.S1_s_at | MmugDNA.23695.1 | 9.09  | 8.68  | 0.28 | 0.34 | 1.33  | 0.371552 | 0.122289 | 0.705567 | 0.391973 |
| MmugDNA.23702.1.S1_at   | MmugDNA.23702.1 | 5.92  | 5.81  | 0.12 | 0.06 | 1.08  | 0.23766  | 0.323876 | 0.604643 | 0.574656 |
| MmugDNA.23704.1.S1_at   | MmugDNA.23704.1 | 7.33  | 7.45  | 0.81 | 0.08 | -1.08 | 0.819595 | 0.737222 | 0.93498  | 0.847869 |
| MmugDNA.23709.1.S1_at   | MmugDNA.23709.1 | 12.57 | 12.66 | 0.33 | 0.05 | -1.06 | 0.590314 | 0.703591 | 0.832841 | 0.828139 |
| MmugDNA.23718.1.S1_at   | MmugDNA.23718.1 | 7.01  | 7.29  | 0.25 | 0.15 | -1.21 | 0.210672 | 0.038263 | 0.581911 | 0.240378 |
| MmugDNA.23719.1.S1_at   | MmugDNA.23719.1 | 10.12 | 10.24 | 0.14 | 0.03 | -1.09 | 0.519939 | 0.000079 | 0.793377 | 0.027016 |
| MmugDNA.23722.1.S1_at   | MmugDNA.23722.1 | 5.34  | 5.67  | 0.16 | 0.28 | -1.26 | 0.116654 | 0.19718  | 0.489827 | 0.472213 |
| MmugDNA.23725.1.S1_at   | MmugDNA.23725.1 | 11.73 | 11.43 | 0.32 | 0.05 | 1.23  | 0.059311 | 0.069693 | 0.406303 | 0.310164 |
| MmugDNA.23734.1.S1_at   | MmugDNA.23734.1 | 7.51  | 7.52  | 0.45 | 0.14 | -1    | 0.684173 | 0.387991 | 0.876352 | 0.62253  |
| MmugDNA.23740.1.S1_at   | MmugDNA.23740.1 | 5.18  | 5.05  | 0.5  | 0.29 | 1.09  | 0.494071 | 0.203057 | 0.779231 | 0.477343 |
| MmugDNA.23741.1.S1_at   | MmugDNA.23741.1 | 9.81  | 9.87  | 0.1  | 0.11 | -1.05 | 0.872775 | 0.010019 | 0.955838 | 0.131262 |
| MmugDNA.2375.1.S1_at    | MmugDNA.2375.1  | 7.84  | 7.59  | 0.89 | 0.08 | 1.19  | 0.600848 | 0.273203 | 0.838005 | 0.537788 |
| MmugDNA.23757.1.S1_at   | MmugDNA.23757.1 | 9.37  | 9.62  | 0.6  | 0.03 | -1.18 | 0.800227 | 0.595216 | 0.92683  | 0.759023 |
| MmugDNA.23758.1.S1_at   | MmugDNA.23758.1 | 7.37  | 7.34  | 0.22 | 0.19 | 1.02  | 0.789492 | 0.007443 | 0.92257  | 0.115858 |
| MmugDNA.23758.1.S1_x_at | MmugDNA.23758.1 | 7.29  | 7.33  | 0.18 | 0.16 | -1.03 | 0.326227 | 0.004343 | 0.673788 | 0.092354 |
| MmugDNA.2376.1.S1_at    | MmugDNA.2376.1  | 8.83  | 8.64  | 2.32 | 0.41 | 1.14  | 0.931498 | 0.237542 | 0.97706  | 0.508196 |
| MmugDNA.23765.1.S1_at   | MmugDNA.23765.1 | 5.32  | 5.31  | 0.24 | 0.09 | 1     | 0.785044 | 0.956045 | 0.920961 | 0.975043 |
| MmugDNA.23771.1.S1_at   | MmugDNA.23771.1 | 10.95 | 10.46 | 0.33 | 0.14 | 1.41  | 0.129015 | 0.174018 | 0.503646 | 0.450269 |
| MmugDNA.23772.1.S1_at   | MmugDNA.23772.1 | 3.91  | 3.91  | 0.15 | 0.06 | 1     | 0.271777 | 0.32527  | 0.631538 | 0.575648 |
| MmugDNA.23781.1.S1_s_at | MmugDNA.23781.1 | 10.54 | 10.93 | 0.22 | 0.04 | -1.31 | 0.109113 | 0.067306 | 0.481684 | 0.305414 |
| MmugDNA.23788.1.S1_at   | MmugDNA.23788.1 | 6.38  | 6.38  | 0.08 | 0.07 | 1     | 0.222989 | 0.737296 | 0.592547 | 0.847869 |
| MmugDNA.23790.1.S1_at   | MmugDNA.23790.1 | 7.9   | 8.33  | 0.64 | 0.05 | -1.35 | 0.296954 | 0.086218 | 0.652525 | 0.33863  |
| MmugDNA.23792.1.S1_at   | MmugDNA.23792.1 | 4.1   | 4.12  | 0.22 | 0.06 | -1.01 | 0.998741 | 0.927735 | 0.999649 | 0.958972 |
| MmugDNA.23793.1.S1_at   | MmugDNA.23793.1 | 8.61  | 8.64  | 0.07 | 0.13 | -1.02 | 0.880949 | 0.586008 | 0.95889  | 0.753172 |
| MmugDNA.23793.1.S1_s_at | MmugDNA.23793.1 | 9.07  | 9.08  | 0.18 | 0.2  | -1    | 0.967953 | 0.856014 | 0.989418 | 0.917803 |
| MmugDNA.238.1.S1_at     | MmugDNA.238.1   | 9.92  | 9.49  | 0.76 | 0.1  | 1.35  | 0.3436   | 0.286297 | 0.686771 | 0.547784 |
| MmugDNA.23812.1.S1_at   | MmugDNA.23812.1 | 10.44 | 9.59  | 0.39 | 0.23 | 1.8   | 0.039719 | 0.00929  | 0.362432 | 0.127128 |

|                         |                 |       |       |      |      |       |          |          |          |          |
|-------------------------|-----------------|-------|-------|------|------|-------|----------|----------|----------|----------|
| MmugDNA.23817.1.S1_at   | MmugDNA.23817.1 | 6.2   | 6.03  | 0.2  | 0.06 | 1.12  | 0.3178   | 0.360061 | 0.667596 | 0.601204 |
| MmugDNA.23824.1.S1_at   | MmugDNA.23824.1 | 9.83  | 10.49 | 0.81 | 0.23 | -1.57 | 0.538149 | 0.754529 | 0.803016 | 0.857221 |
| MmugDNA.23833.1.S1_at   | MmugDNA.23833.1 | 4.98  | 4.96  | 0.29 | 0.07 | 1.01  | 0.310617 | 0.437962 | 0.662474 | 0.657057 |
| MmugDNA.23854.1.S1_at   | MmugDNA.23854.1 | 7.42  | 7.53  | 0.18 | 0.13 | -1.09 | 0.91722  | 0.82758  | 0.97197  | 0.901078 |
| MmugDNA.23862.1.S1_at   | MmugDNA.23862.1 | 7.44  | 7.99  | 1.56 | 0.23 | -1.46 | 0.548279 | 0.296953 | 0.809676 | 0.555895 |
| MmugDNA.23879.1.S1_at   | MmugDNA.23879.1 | 3.21  | 3.05  | 0.1  | 0.04 | 1.12  | 0.089617 | 0.129739 | 0.457723 | 0.401362 |
| MmugDNA.23887.1.S1_at   | MmugDNA.23887.1 | 2.96  | 3.14  | 0.04 | 0.18 | -1.13 | 0.386951 | 0.582878 | 0.713959 | 0.751428 |
| MmugDNA.23889.1.S1_s_at | MmugDNA.23889.1 | 10.16 | 10.13 | 0.26 | 0.07 | 1.02  | 0.45238  | 0.032069 | 0.755778 | 0.22165  |
| MmugDNA.23894.1.S1_at   | MmugDNA.23894.1 | 6.17  | 5.24  | 0.62 | 0.08 | 1.91  | 0.173042 | 0.128811 | 0.546142 | 0.400277 |
| MmugDNA.23896.1.S1_at   | MmugDNA.23896.1 | 12.23 | 12.54 | 0.12 | 0.06 | -1.24 | 0.01374  | 0.005737 | 0.271419 | 0.104271 |
| MmugDNA.23905.1.S1_at   | MmugDNA.23905.1 | 5.2   | 5.29  | 0.23 | 0.17 | -1.06 | 0.854332 | 0.795992 | 0.948469 | 0.882479 |
| MmugDNA.23909.1.S1_at   | MmugDNA.23909.1 | 6.52  | 7.39  | 0.15 | 0.35 | -1.82 | 0.021176 | 0.015473 | 0.307036 | 0.157908 |
| MmugDNA.23925.1.S1_at   | MmugDNA.23925.1 | 10.3  | 9.26  | 2.13 | 0.12 | 2.05  | 0.666322 | 0.412814 | 0.868243 | 0.639121 |
| MmugDNA.23928.1.S1_at   | MmugDNA.23928.1 | 10.97 | 11.23 | 0.11 | 0.12 | -1.2  | 0.078983 | 0.039261 | 0.441671 | 0.243333 |
| MmugDNA.23928.1.S1_x_at | MmugDNA.23928.1 | 11.02 | 11.21 | 0.05 | 0.12 | -1.14 | 0.079267 | 0.04874  | 0.442056 | 0.265744 |
| MmugDNA.2393.1.S1_at    | MmugDNA.2393.1  | 7.4   | 7.38  | 0.22 | 0.35 | 1.02  | 0.512831 | 0.754747 | 0.789522 | 0.857323 |
| MmugDNA.23932.1.S1_at   | MmugDNA.23932.1 | 6.11  | 5.99  | 0.17 | 0.09 | 1.09  | 0.094626 | 0.127534 | 0.463796 | 0.398407 |
| MmugDNA.23933.1.S1_at   | MmugDNA.23933.1 | 11.27 | 11.7  | 0.33 | 0.16 | -1.35 | 0.095063 | 0.013058 | 0.464131 | 0.146997 |
| MmugDNA.23938.1.S1_at   | MmugDNA.23938.1 | 10.85 | 11.13 | 0.36 | 0.09 | -1.21 | 0.653708 | 0.841384 | 0.862462 | 0.909644 |
| MmugDNA.23938.1.S1_s_at | MmugDNA.23938.1 | 11.58 | 11.71 | 0.33 | 0.03 | -1.1  | 0.613839 | 0.811543 | 0.843706 | 0.891234 |
| MmugDNA.2394.1.S1_at    | MmugDNA.2394.1  | 7.72  | 7.75  | 0.71 | 0.05 | -1.02 | 0.377923 | 0.153518 | 0.7079   | 0.42827  |
| MmugDNA.23942.1.S1_at   | MmugDNA.23942.1 | 6.58  | 7.38  | 1.01 | 0.28 | -1.74 | 0.304372 | 0.28585  | 0.657995 | 0.547484 |
| MmugDNA.23945.1.S1_at   | MmugDNA.23945.1 | 6.25  | 6.06  | 0.33 | 0.09 | 1.14  | 0.442037 | 0.459839 | 0.7498   | 0.671989 |
| MmugDNA.2395.1.S1_at    | MmugDNA.2395.1  | 10.58 | 10.43 | 0.53 | 0.08 | 1.1   | 0.671616 | 0.810583 | 0.870464 | 0.890812 |
| MmugDNA.23952.1.S1_at   | MmugDNA.23952.1 | 4.16  | 4.12  | 0.05 | 0.05 | 1.03  | 0.38518  | 0.174388 | 0.712501 | 0.450842 |
| MmugDNA.23954.1.S1_at   | MmugDNA.23954.1 | 8.64  | 8.61  | 0.96 | 0.19 | 1.02  | 0.775806 | 0.194373 | 0.91686  | 0.469464 |
| MmugDNA.23979.1.S1_at   | MmugDNA.23979.1 | 7.98  | 9.36  | 0.3  | 0.34 | -2.6  | 0.010301 | 0.001758 | 0.246929 | 0.063146 |
| MmugDNA.23982.1.S1_at   | MmugDNA.23982.1 | 10.48 | 11.09 | 0.25 | 0.05 | -1.53 | 0.014198 | 0.009617 | 0.274019 | 0.12918  |
| MmugDNA.23983.1.S1_at   | MmugDNA.23983.1 | 11.84 | 12.15 | 0.6  | 0.05 | -1.24 | 0.275164 | 0.225646 | 0.634581 | 0.498155 |
| MmugDNA.23986.1.S1_at   | MmugDNA.23986.1 | 5.76  | 5.7   | 0.19 | 0.24 | 1.04  | 0.660162 | 0.917236 | 0.865537 | 0.953758 |
| MmugDNA.2399.1.S1_at    | MmugDNA.2399.1  | 11.12 | 11.17 | 0.22 | 0.17 | -1.03 | 0.912541 | 0.039124 | 0.970287 | 0.243056 |
| MmugDNA.23995.1.S1_at   | MmugDNA.23995.1 | 7.62  | 8     | 0.89 | 0.29 | -1.31 | 0.37594  | 0.219237 | 0.706657 | 0.493013 |
| MmugDNA.23998.1.S1_at   | MmugDNA.23998.1 | 6.78  | 7.01  | 0.14 | 0.18 | -1.17 | 0.324727 | 0.500723 | 0.672781 | 0.699242 |
| MmugDNA.24001.1.S1_at   | MmugDNA.24001.1 | 6.1   | 6.03  | 0.04 | 0.04 | 1.05  | 0.163569 | 0.366377 | 0.536326 | 0.606087 |
| MmugDNA.24003.1.S1_at   | MmugDNA.24003.1 | 4.89  | 4.97  | 0.11 | 0.03 | -1.06 | 0.29204  | 0.33488  | 0.648376 | 0.58275  |
| MmugDNA.24004.1.S1_at   | MmugDNA.24004.1 | 9.43  | 9.25  | 0.16 | 0.08 | 1.14  | 0.059652 | 0.136409 | 0.406693 | 0.408839 |
| MmugDNA.24005.1.S1_at   | MmugDNA.24005.1 | 5.96  | 5.96  | 0.99 | 0.29 | -1    | 0.623856 | 0.158149 | 0.848386 | 0.433976 |
| MmugDNA.24006.1.S1_s_at | MmugDNA.24006.1 | 3.16  | 3.18  | 0.08 | 0.15 | -1.01 | 0.957575 | 0.956531 | 0.98598  | 0.975294 |
| MmugDNA.24007.1.S1_at   | MmugDNA.24007.1 | 9.07  | 9.75  | 0.21 | 0.06 | -1.6  | 0.003712 | 0.002449 | 0.197568 | 0.073236 |
| MmugDNA.2401.1.S1_s_at  | MmugDNA.2401.1  | 8.34  | 8.28  | 0.28 | 0.19 | 1.04  | 0.165842 | 0.147965 | 0.538623 | 0.422364 |
| MmugDNA.24017.1.S1_at   | MmugDNA.24017.1 | 9.57  | 9.16  | 0.51 | 0.04 | 1.33  | 0.073863 | 0.087672 | 0.434623 | 0.340941 |
| MmugDNA.24023.1.S1_at   | MmugDNA.24023.1 | 9.55  | 9.5   | 1.17 | 0.15 | 1.03  | 0.974932 | 0.398957 | 0.991912 | 0.629665 |
| MmugDNA.24026.1.S1_s_at | MmugDNA.24026.1 | 12.06 | 11.99 | 0.02 | 0.06 | 1.05  | 0.100426 | 0.36695  | 0.471142 | 0.606583 |

|                         |                 |       |       |      |      |       |          |          |          |          |
|-------------------------|-----------------|-------|-------|------|------|-------|----------|----------|----------|----------|
| MmugDNA.24027.1.S1_at   | MmugDNA.24027.1 | 9.26  | 9.66  | 0.86 | 0.16 | -1.32 | 0.458248 | 0.268663 | 0.758668 | 0.534138 |
| MmugDNA.24028.1.S1_at   | MmugDNA.24028.1 | 8.16  | 7.96  | 0.12 | 0.1  | 1.15  | 0.104616 | 0.003115 | 0.475786 | 0.081314 |
| MmugDNA.2403.1.S1_at    | MmugDNA.2403.1  | 6.05  | 7.13  | 0.88 | 0.32 | -2.12 | 0.248894 | 0.065057 | 0.614228 | 0.301009 |
| MmugDNA.24036.1.S1_s_at | MmugDNA.24036.1 | 11.35 | 10.19 | 0.3  | 0.12 | 2.24  | 0.006789 | 0.002531 | 0.223856 | 0.074292 |
| MmugDNA.24039.1.S1_at   | MmugDNA.24039.1 | 7.82  | 8.48  | 0.96 | 0.07 | -1.58 | 0.324284 | 0.09196  | 0.672562 | 0.347297 |
| MmugDNA.24044.1.S1_at   | MmugDNA.24044.1 | 3.76  | 3.64  | 0.35 | 0.08 | 1.09  | 0.238091 | 0.219848 | 0.605216 | 0.493388 |
| MmugDNA.24047.1.S1_s_at | MmugDNA.24047.1 | 11.16 | 12.21 | 0.49 | 0.03 | -2.07 | 0.022244 | 0.006853 | 0.310495 | 0.11185  |
| MmugDNA.24048.1.S1_at   | MmugDNA.24048.1 | 6.9   | 8.98  | 1.11 | 0.47 | -4.24 | 0.053565 | 0.049424 | 0.394992 | 0.267237 |
| MmugDNA.24069.1.S1_at   | MmugDNA.24069.1 | 6.46  | 6.42  | 0.15 | 0.14 | 1.03  | 0.721975 | 0.214719 | 0.892112 | 0.488578 |
| MmugDNA.24071.1.S1_at   | MmugDNA.24071.1 | 13.28 | 13.42 | 0.17 | 0.04 | -1.1  | 0.27555  | 0.373063 | 0.635035 | 0.611933 |
| MmugDNA.24076.1.S1_at   | MmugDNA.24076.1 | 8.62  | 8.26  | 1.22 | 0.15 | 1.28  | 0.763943 | 0.095257 | 0.911316 | 0.352251 |
| MmugDNA.24078.1.S1_at   | MmugDNA.24078.1 | 5.29  | 5.04  | 0.14 | 0.07 | 1.19  | 0.04703  | 0.03249  | 0.379283 | 0.223254 |
| MmugDNA.24081.1.S1_at   | MmugDNA.24081.1 | 8.4   | 8.34  | 0.22 | 0.08 | 1.04  | 0.64226  | 0.678757 | 0.857685 | 0.812378 |
| MmugDNA.24091.1.S1_at   | MmugDNA.24091.1 | 5.25  | 4.72  | 0.88 | 0.4  | 1.44  | 0.913461 | 0.920348 | 0.970597 | 0.95511  |
| MmugDNA.241.1.S1_at     | MmugDNA.241.1   | 8.04  | 7.98  | 0.61 | 0.19 | 1.04  | 0.288087 | 0.078873 | 0.645258 | 0.325852 |
| MmugDNA.24100.1.S1_at   | MmugDNA.24100.1 | 10.03 | 10.13 | 0.59 | 0.12 | -1.07 | 0.564169 | 0.669198 | 0.81857  | 0.806492 |
| MmugDNA.24112.1.S1_at   | MmugDNA.24112.1 | 9.93  | 9.84  | 0.08 | 0.08 | 1.06  | 0.114593 | 0.400905 | 0.487638 | 0.630658 |
| MmugDNA.24115.1.S1_at   | MmugDNA.24115.1 | 9.43  | 10.01 | 0.22 | 0.18 | -1.5  | 0.052521 | 0.012934 | 0.39261  | 0.146387 |
| MmugDNA.24119.1.S1_at   | MmugDNA.24119.1 | 4.54  | 4.41  | 0.1  | 0.08 | 1.09  | 0.151173 | 0.070695 | 0.52444  | 0.312066 |
| MmugDNA.24127.1.S1_at   | MmugDNA.24127.1 | 12.16 | 11.99 | 0.45 | 0.12 | 1.13  | 0.618532 | 0.755672 | 0.845998 | 0.85776  |
| MmugDNA.2413.1.S1_at    | MmugDNA.2413.1  | 11.3  | 11    | 0.49 | 0.03 | 1.23  | 0.291559 | 0.032691 | 0.647943 | 0.223883 |
| MmugDNA.24135.1.S1_at   | MmugDNA.24135.1 | 11.1  | 11.59 | 0.22 | 0.05 | -1.4  | 0.020504 | 0.013273 | 0.304231 | 0.147875 |
| MmugDNA.2414.1.S1_at    | MmugDNA.2414.1  | 8.17  | 9.33  | 1.11 | 0.19 | -2.24 | 0.150602 | 0.214852 | 0.524209 | 0.488734 |
| MmugDNA.24144.1.S1_at   | MmugDNA.24144.1 | 11.95 | 12.08 | 0.2  | 0.01 | -1.1  | 0.31797  | 0.48419  | 0.667635 | 0.688399 |
| MmugDNA.24146.1.S1_at   | MmugDNA.24146.1 | 11.45 | 11.77 | 0.72 | 0.14 | -1.25 | 0.498815 | 0.252709 | 0.781838 | 0.521174 |
| MmugDNA.24147.1.S1_at   | MmugDNA.24147.1 | 11.43 | 11.25 | 0.31 | 0.09 | 1.14  | 0.45417  | 0.579799 | 0.756616 | 0.749289 |
| MmugDNA.24148.1.S1_at   | MmugDNA.24148.1 | 11.72 | 12.33 | 0.11 | 0.02 | -1.53 | 0.000926 | 0.000302 | 0.153739 | 0.034907 |
| MmugDNA.24151.1.S1_at   | MmugDNA.24151.1 | 11.57 | 11.77 | 0.18 | 0.05 | -1.15 | 0.038692 | 0.143294 | 0.360112 | 0.417283 |
| MmugDNA.24157.1.S1_at   | MmugDNA.24157.1 | 5.35  | 5.35  | 0.07 | 0.03 | -1    | 0.349468 | 0.579494 | 0.690485 | 0.74918  |
| MmugDNA.24158.1.S1_at   | MmugDNA.24158.1 | 8.7   | 9.33  | 0.35 | 0.06 | -1.54 | 0.136001 | 0.095595 | 0.510524 | 0.352645 |
| MmugDNA.2416.1.S1_at    | MmugDNA.2416.1  | 4.44  | 4.16  | 0.17 | 0.19 | 1.21  | 0.667885 | 0.154199 | 0.868778 | 0.428949 |
| MmugDNA.24160.1.S1_at   | MmugDNA.24160.1 | 3.47  | 3.33  | 0.38 | 0.04 | 1.11  | 0.439719 | 0.638588 | 0.748282 | 0.787711 |
| MmugDNA.24161.1.S1_at   | MmugDNA.24161.1 | 8.1   | 7.51  | 0.22 | 0.05 | 1.51  | 0.009015 | 0.005545 | 0.240177 | 0.10275  |
| MmugDNA.24169.1.S1_at   | MmugDNA.24169.1 | 7.88  | 7.85  | 0.24 | 0.16 | 1.02  | 0.718915 | 0.330775 | 0.890837 | 0.579558 |
| MmugDNA.24172.1.S1_at   | MmugDNA.24172.1 | 9.85  | 10.09 | 0.36 | 0.34 | -1.19 | 0.289809 | 0.003032 | 0.646445 | 0.080386 |
| MmugDNA.24174.1.S1_at   | MmugDNA.24174.1 | 9.35  | 9.3   | 0.52 | 0.07 | 1.03  | 0.731364 | 0.409976 | 0.896567 | 0.637002 |
| MmugDNA.24181.1.S1_s_at | MmugDNA.24181.1 | 8.41  | 8.74  | 0.8  | 0.05 | -1.26 | 0.583741 | 0.199973 | 0.829243 | 0.474603 |
| MmugDNA.24185.1.S1_at   | MmugDNA.24185.1 | 8.45  | 8.5   | 0.17 | 0.09 | -1.03 | 0.652103 | 0.85465  | 0.86196  | 0.917159 |
| MmugDNA.24187.1.S1_at   | MmugDNA.24187.1 | 3.75  | 3.77  | 0.06 | 0.11 | -1.02 | 0.692046 | 0.058548 | 0.880095 | 0.288669 |
| MmugDNA.2419.1.S1_at    | MmugDNA.2419.1  | 5.37  | 5.05  | 0.31 | 0.05 | 1.25  | 0.497849 | 0.862624 | 0.781413 | 0.92189  |
| MmugDNA.24191.1.S1_at   | MmugDNA.24191.1 | 6.31  | 6.3   | 0.11 | 0.12 | 1.01  | 0.552076 | 0.824782 | 0.811632 | 0.89939  |
| MmugDNA.24192.1.S1_at   | MmugDNA.24192.1 | 4.55  | 4.54  | 0.07 | 0.23 | 1.01  | 0.284409 | 0.531961 | 0.642301 | 0.718995 |
| MmugDNA.24198.1.S1_at   | MmugDNA.24198.1 | 3.39  | 3.5   | 0.06 | 0.15 | -1.08 | 0.449039 | 0.324313 | 0.754053 | 0.574924 |

|                         |                 |       |       |      |      |       |          |          |          |          |
|-------------------------|-----------------|-------|-------|------|------|-------|----------|----------|----------|----------|
| MmugDNA.24203.1.S1_s_at | MmugDNA.24203.1 | 10.22 | 10.26 | 0.3  | 0.02 | -1.03 | 0.848179 | 0.986203 | 0.946669 | 0.992172 |
| MmugDNA.24205.1.S1_at   | MmugDNA.24205.1 | 6.73  | 6.64  | 0.02 | 0    | 1.06  | 0.006664 | 0.391782 | 0.221949 | 0.625301 |
| MmugDNA.24206.1.S1_at   | MmugDNA.24206.1 | 8.12  | 8.06  | 0.06 | 0.01 | 1.04  | 0.16982  | 0.142933 | 0.542773 | 0.416854 |
| MmugDNA.24210.1.S1_at   | MmugDNA.24210.1 | 10.68 | 10.51 | 0.25 | 0.19 | 1.13  | 0.192756 | 0.085159 | 0.563577 | 0.336997 |
| MmugDNA.24212.1.S1_at   | MmugDNA.24212.1 | 6.74  | 7.66  | 1.28 | 0.23 | -1.9  | 0.202844 | 0.221741 | 0.574251 | 0.494901 |
| MmugDNA.24215.1.S1_at   | MmugDNA.24215.1 | 10.13 | 11.19 | 0.67 | 0.34 | -2.08 | 0.058278 | 0.005954 | 0.403916 | 0.105513 |
| MmugDNA.24224.1.S1_at   | MmugDNA.24224.1 | 12.09 | 11.91 | 0.21 | 0.07 | 1.13  | 0.1836   | 0.264424 | 0.55651  | 0.530385 |
| MmugDNA.24228.1.S1_at   | MmugDNA.24228.1 | 11.61 | 11.47 | 0.29 | 0.06 | 1.1   | 0.988108 | 0.788212 | 0.995831 | 0.877514 |
| MmugDNA.24230.1.S1_s_at | MmugDNA.24230.1 | 11.63 | 11.54 | 0.1  | 0.01 | 1.06  | 0.408771 | 0.000319 | 0.729499 | 0.035423 |
| MmugDNA.24231.1.S1_at   | MmugDNA.24231.1 | 11.83 | 12    | 0.3  | 0.07 | -1.13 | 0.946332 | 0.971613 | 0.981401 | 0.984594 |
| MmugDNA.24238.1.S1_at   | MmugDNA.24238.1 | 5.11  | 4.55  | 0.2  | 0.21 | 1.48  | 0.045026 | 0.042739 | 0.375796 | 0.251216 |
| MmugDNA.24243.1.S1_at   | MmugDNA.24243.1 | 7.08  | 7.08  | 0.17 | 0.05 | 1.01  | 0.35495  | 0.672078 | 0.694619 | 0.808295 |
| MmugDNA.2425.1.S1_at    | MmugDNA.2425.1  | 9.73  | 10.86 | 0.69 | 0.13 | -2.19 | 0.101487 | 0.105544 | 0.471742 | 0.367526 |
| MmugDNA.24251.1.S1_at   | MmugDNA.24251.1 | 5.63  | 5.82  | 0.31 | 0.09 | -1.14 | 0.991573 | 0.680647 | 0.9967   | 0.813542 |
| MmugDNA.24263.1.S1_at   | MmugDNA.24263.1 | 11.39 | 11.88 | 0.25 | 0.03 | -1.41 | 0.021633 | 0.011361 | 0.309241 | 0.138214 |
| MmugDNA.24266.1.S1_at   | MmugDNA.24266.1 | 7.29  | 7.85  | 0.36 | 0.28 | -1.47 | 0.121337 | 0.022433 | 0.494968 | 0.187441 |
| MmugDNA.24267.1.S1_at   | MmugDNA.24267.1 | 12.83 | 12.92 | 0.19 | 0.05 | -1.06 | 0.475123 | 0.519179 | 0.768373 | 0.710878 |
| MmugDNA.2427.1.S1_at    | MmugDNA.2427.1  | 12.74 | 12.66 | 0.13 | 0.04 | 1.05  | 0.30282  | 0.003586 | 0.656669 | 0.085687 |
| MmugDNA.24275.1.S1_at   | MmugDNA.24275.1 | 7.8   | 7.84  | 0.05 | 0.09 | -1.03 | 0.440251 | 0.101692 | 0.748408 | 0.361562 |
| MmugDNA.24278.1.S1_at   | MmugDNA.24278.1 | 11.53 | 11.73 | 0.18 | 0.09 | -1.15 | 0.423036 | 0.392232 | 0.73875  | 0.625652 |
| MmugDNA.24286.1.S1_at   | MmugDNA.24286.1 | 12.84 | 11.93 | 0.53 | 0.38 | 1.87  | 0.077792 | 0.007897 | 0.439884 | 0.118462 |
| MmugDNA.24287.1.S1_at   | MmugDNA.24287.1 | 5.72  | 7.3   | 0.89 | 0.87 | -2.99 | 0.207395 | 0.031336 | 0.578933 | 0.219011 |
| MmugDNA.24291.1.S1_s_at | MmugDNA.24291.1 | 11.75 | 10.82 | 2.92 | 0.2  | 1.89  | 0.816646 | 0.541785 | 0.933716 | 0.725064 |
| MmugDNA.24305.1.S1_at   | MmugDNA.24305.1 | 10.98 | 11.05 | 0.15 | 0.05 | -1.05 | 0.640729 | 0.091047 | 0.856931 | 0.345842 |
| MmugDNA.24306.1.S1_at   | MmugDNA.24306.1 | 3.9   | 3.89  | 0.19 | 0.14 | 1     | 0.461301 | 0.200718 | 0.760872 | 0.47524  |
| MmugDNA.24308.1.S1_at   | MmugDNA.24308.1 | 10.95 | 11.18 | 0.8  | 0.16 | -1.18 | 0.984243 | 0.02733  | 0.995199 | 0.206625 |
| MmugDNA.2431.1.S1_at    | MmugDNA.2431.1  | 9.19  | 9.29  | 0.1  | 0.07 | -1.07 | 0.219462 | 0.429372 | 0.588927 | 0.650823 |
| MmugDNA.24325.1.S1_at   | MmugDNA.24325.1 | 12.32 | 12.21 | 0.21 | 0.06 | 1.08  | 0.452019 | 0.0146   | 0.755619 | 0.15408  |
| MmugDNA.24330.1.S1_at   | MmugDNA.24330.1 | 10.16 | 9.6   | 0.48 | 0.02 | 1.47  | 0.112378 | 0.158834 | 0.485674 | 0.434952 |
| MmugDNA.24333.1.S1_at   | MmugDNA.24333.1 | 9.55  | 10.05 | 0.27 | 0.06 | -1.42 | 0.070941 | 0.016926 | 0.430067 | 0.164991 |
| MmugDNA.24341.1.S1_at   | MmugDNA.24341.1 | 7.95  | 8.39  | 0.16 | 0.14 | -1.36 | 0.021621 | 0.003054 | 0.309241 | 0.080596 |
| MmugDNA.24342.1.S1_at   | MmugDNA.24342.1 | 3.57  | 3.57  | 0.08 | 0.04 | 1     | 0.983801 | 0.403544 | 0.995094 | 0.632211 |
| MmugDNA.24343.1.S1_at   | MmugDNA.24343.1 | 6.87  | 6.8   | 0.68 | 0.25 | 1.05  | 0.348734 | 0.083408 | 0.689979 | 0.333699 |
| MmugDNA.24350.1.S1_at   | MmugDNA.24350.1 | 12.88 | 12.95 | 0.16 | 0.09 | -1.04 | 0.989622 | 0.093628 | 0.996121 | 0.349995 |
| MmugDNA.2436.1.S1_at    | MmugDNA.2436.1  | 7.44  | 7.18  | 0.36 | 0.45 | 1.2   | 0.464615 | 0.173675 | 0.76259  | 0.450021 |
| MmugDNA.24363.1.S1_at   | MmugDNA.24363.1 | 8.88  | 7.93  | 0.94 | 0.36 | 1.93  | 0.146038 | 0.041844 | 0.520572 | 0.249172 |
| MmugDNA.24364.1.S1_at   | MmugDNA.24364.1 | 8.6   | 8.43  | 1.06 | 0.13 | 1.13  | 0.829394 | 0.130859 | 0.938794 | 0.403037 |
| MmugDNA.24379.1.S1_at   | MmugDNA.24379.1 | 10.94 | 10.16 | 0.27 | 0.19 | 1.71  | 0.023437 | 0.271144 | 0.315513 | 0.536259 |
| MmugDNA.2438.1.S1_at    | MmugDNA.2438.1  | 10.97 | 11.43 | 0.25 | 0.04 | -1.38 | 0.040015 | 0.062625 | 0.362955 | 0.297022 |
| MmugDNA.24380.1.S1_at   | MmugDNA.24380.1 | 13.22 | 13.32 | 0.18 | 0.03 | -1.07 | 0.286517 | 0.008126 | 0.643768 | 0.11972  |
| MmugDNA.2439.1.S1_at    | MmugDNA.2439.1  | 11.78 | 11.16 | 0.34 | 0.01 | 1.53  | 0.034913 | 0.029235 | 0.350632 | 0.212898 |
| MmugDNA.24390.1.S1_at   | MmugDNA.24390.1 | 11.27 | 11.37 | 0.17 | 0.01 | -1.07 | 0.977559 | 0.993814 | 0.992714 | 0.996274 |
| MmugDNA.24395.1.S1_at   | MmugDNA.24395.1 | 8.42  | 8.69  | 0.22 | 0.08 | -1.21 | 0.221088 | 0.12872  | 0.590384 | 0.400135 |



|                         |                 |       |       |      |      |       |          |          |          |          |
|-------------------------|-----------------|-------|-------|------|------|-------|----------|----------|----------|----------|
| MmugDNA.24397.1.S1_at   | MmugDNA.24397.1 | 9.97  | 10.92 | 0.12 | 0.11 | -1.93 | 0.000577 | 0.004306 | 0.143137 | 0.092019 |
| MmugDNA.24397.1.S1_x_at | MmugDNA.24397.1 | 10.01 | 10.93 | 0.15 | 0.09 | -1.9  | 0.000719 | 0.003214 | 0.147936 | 0.082043 |
| MmugDNA.24403.1.S1_at   | MmugDNA.24403.1 | 3.76  | 5.12  | 0.35 | 0.27 | -2.55 | 0.017103 | 0.085742 | 0.289261 | 0.337761 |
| MmugDNA.24413.1.S1_at   | MmugDNA.24413.1 | 12.37 | 12.33 | 0.41 | 0.13 | 1.03  | 0.820487 | 0.65308  | 0.935289 | 0.79718  |
| MmugDNA.24421.1.S1_at   | MmugDNA.24421.1 | 8.6   | 8.69  | 0.87 | 0.21 | -1.07 | 0.313874 | 0.015982 | 0.664925 | 0.160458 |
| MmugDNA.24422.1.S1_at   | MmugDNA.24422.1 | 3.02  | 3.13  | 0.22 | 0.13 | -1.08 | 0.928452 | 0.76857  | 0.976259 | 0.865637 |
| MmugDNA.24426.1.S1_at   | MmugDNA.24426.1 | 10.12 | 10.07 | 0.37 | 0.02 | 1.04  | 0.705645 | 0.110226 | 0.885355 | 0.374349 |
| MmugDNA.24431.1.S1_at   | MmugDNA.24431.1 | 4.92  | 4.53  | 0.1  | 0.04 | 1.31  | 0.005542 | 0.001859 | 0.208157 | 0.064693 |
| MmugDNA.24432.1.S1_at   | MmugDNA.24432.1 | 5.86  | 5.73  | 0.24 | 0.09 | 1.09  | 0.817363 | 0.00299  | 0.933935 | 0.079958 |
| MmugDNA.24437.1.S1_at   | MmugDNA.24437.1 | 6.56  | 6.6   | 0.77 | 0.11 | -1.03 | 0.562474 | 0.568247 | 0.8177   | 0.741866 |
| MmugDNA.24448.1.S1_at   | MmugDNA.24448.1 | 5.42  | 6.15  | 0.29 | 0.11 | -1.67 | 0.024297 | 0.013979 | 0.317812 | 0.151585 |
| MmugDNA.24450.1.S1_at   | MmugDNA.24450.1 | 8.24  | 8.13  | 0.42 | 0.11 | 1.08  | 0.743921 | 0.451162 | 0.902335 | 0.666085 |
| MmugDNA.24451.1.S1_at   | MmugDNA.24451.1 | 6.39  | 6.71  | 0.42 | 0.48 | -1.25 | 0.779825 | 0.075741 | 0.918878 | 0.32034  |
| MmugDNA.24454.1.S1_at   | MmugDNA.24454.1 | 5.64  | 5.72  | 0.53 | 0.09 | -1.05 | 0.57654  | 0.09533  | 0.825166 | 0.35236  |
| MmugDNA.24456.1.S1_at   | MmugDNA.24456.1 | 6.67  | 6.64  | 0.06 | 0.04 | 1.02  | 0.437963 | 0.612515 | 0.747043 | 0.770071 |
| MmugDNA.24456.1.S1_s_at | MmugDNA.24456.1 | 6.4   | 6.39  | 0.18 | 0.01 | 1.01  | 0.885123 | 0.846524 | 0.96025  | 0.912676 |
| MmugDNA.24456.1.S1_x_at | MmugDNA.24456.1 | 5.49  | 5.44  | 0.11 | 0.08 | 1.04  | 0.767896 | 0.582924 | 0.912714 | 0.75147  |
| MmugDNA.2446.1.S1_at    | MmugDNA.2446.1  | 10.26 | 10.08 | 0.2  | 0.29 | 1.13  | 0.628426 | 0.105057 | 0.851106 | 0.366736 |
| MmugDNA.24462.1.S1_at   | MmugDNA.24462.1 | 9.6   | 10.24 | 0.45 | 0.04 | -1.55 | 0.205644 | 0.035834 | 0.577447 | 0.233759 |
| MmugDNA.24463.1.S1_at   | MmugDNA.24463.1 | 4.26  | 4.1   | 0.23 | 0.03 | 1.12  | 0.095139 | 0.204854 | 0.464131 | 0.479224 |
| MmugDNA.24471.1.S1_at   | MmugDNA.24471.1 | 3.41  | 3.51  | 0.23 | 0.08 | -1.08 | 0.721033 | 0.103439 | 0.891885 | 0.364346 |
| MmugDNA.24474.1.S1_at   | MmugDNA.24474.1 | 8.55  | 8.53  | 0.15 | 0.05 | 1.01  | 0.890913 | 0.103762 | 0.962522 | 0.364519 |
| MmugDNA.24476.1.S1_at   | MmugDNA.24476.1 | 9.98  | 9.44  | 0.52 | 0.12 | 1.46  | 0.454303 | 0.703733 | 0.756717 | 0.828214 |
| MmugDNA.24477.1.S1_at   | MmugDNA.24477.1 | 10.7  | 10.66 | 0.05 | 0.19 | 1.03  | 0.343326 | 0.230758 | 0.686535 | 0.502451 |
| MmugDNA.24478.1.S1_at   | MmugDNA.24478.1 | 11.77 | 11.81 | 0.41 | 0.01 | -1.03 | 0.768747 | 0.283481 | 0.913254 | 0.545959 |
| MmugDNA.2449.1.S1_at    | MmugDNA.2449.1  | 4.79  | 4.82  | 0.02 | 0.09 | -1.02 | 0.840857 | 0.186418 | 0.943484 | 0.462263 |
| MmugDNA.24498.1.S1_at   | MmugDNA.24498.1 | 11.23 | 11.15 | 0.2  | 0.11 | 1.06  | 0.844919 | 0.000389 | 0.945566 | 0.037374 |
| MmugDNA.2450.1.S1_at    | MmugDNA.2450.1  | 8.37  | 8.41  | 0.12 | 0.1  | -1.03 | 0.527795 | 0.028296 | 0.797265 | 0.210038 |
| MmugDNA.24500.1.S1_at   | MmugDNA.24500.1 | 10.87 | 10.04 | 0.83 | 0.16 | 1.78  | 0.195618 | 0.23155  | 0.565981 | 0.503348 |
| MmugDNA.24509.1.S1_at   | MmugDNA.24509.1 | 6.57  | 6.56  | 0.06 | 0.24 | 1     | 0.874961 | 0.883472 | 0.956568 | 0.933594 |
| MmugDNA.24510.1.S1_at   | MmugDNA.24510.1 | 8     | 7.88  | 0.18 | 0.4  | 1.09  | 0.655085 | 0.819048 | 0.863003 | 0.895738 |
| MmugDNA.24512.1.S1_at   | MmugDNA.24512.1 | 5.28  | 5.78  | 0.84 | 0.58 | -1.42 | 0.67624  | 0.618019 | 0.873043 | 0.773852 |
| MmugDNA.24523.1.S1_at   | MmugDNA.24523.1 | 8.97  | 8.13  | 0.42 | 0.2  | 1.8   | 0.143626 | 0.005606 | 0.519043 | 0.103449 |
| MmugDNA.24533.1.S1_at   | MmugDNA.24533.1 | 11.46 | 10.97 | 2.89 | 0.38 | 1.41  | 0.688842 | 0.180308 | 0.878555 | 0.456927 |
| MmugDNA.24538.1.S1_at   | MmugDNA.24538.1 | 5.9   | 5.85  | 0.05 | 0.14 | 1.04  | 0.52375  | 0.59257  | 0.795656 | 0.757844 |
| MmugDNA.24551.1.S1_at   | MmugDNA.24551.1 | 11.13 | 9.51  | 0.55 | 0.3  | 3.07  | 0.017638 | 0.004442 | 0.292934 | 0.092958 |
| MmugDNA.24555.1.S1_at   | MmugDNA.24555.1 | 6.67  | 6.93  | 0.31 | 0.27 | -1.2  | 0.33484  | 0.051418 | 0.680656 | 0.272204 |
| MmugDNA.24563.1.S1_at   | MmugDNA.24563.1 | 9.59  | 10.19 | 0.15 | 0.06 | -1.51 | 0.006108 | 0.001224 | 0.215688 | 0.054593 |
| MmugDNA.24566.1.S1_at   | MmugDNA.24566.1 | 6.05  | 6.41  | 0.46 | 0.08 | -1.28 | 0.34099  | 0.437882 | 0.684816 | 0.657015 |
| MmugDNA.24567.1.S1_at   | MmugDNA.24567.1 | 5.13  | 5.14  | 0.06 | 0.06 | -1.01 | 0.324925 | 0.819677 | 0.672925 | 0.896127 |
| MmugDNA.24570.1.S1_at   | MmugDNA.24570.1 | 7.72  | 8.06  | 0.56 | 0.17 | -1.27 | 0.187243 | 0.036081 | 0.559729 | 0.234413 |
| MmugDNA.24582.1.S1_at   | MmugDNA.24582.1 | 3.68  | 3.11  | 0.18 | 0.15 | 1.48  | 0.05345  | 0.043417 | 0.394724 | 0.253032 |
| MmugDNA.24586.1.S1_at   | MmugDNA.24586.1 | 6.5   | 6.09  | 0.63 | 0.07 | 1.33  | 0.310219 | 0.368924 | 0.662073 | 0.608449 |

|                         |                 |       |       |      |      |       |          |          |          |          |
|-------------------------|-----------------|-------|-------|------|------|-------|----------|----------|----------|----------|
| MmugDNA.24595.1.S1_at   | MmugDNA.24595.1 | 5.75  | 5.94  | 1.65 | 0.59 | -1.14 | 0.95067  | 0.307156 | 0.983335 | 0.563487 |
| MmugDNA.24598.1.S1_at   | MmugDNA.24598.1 | 5.3   | 5.45  | 0.86 | 0.42 | -1.11 | 0.58049  | 0.65855  | 0.827159 | 0.800401 |
| MmugDNA.24600.1.S1_at   | MmugDNA.24600.1 | 4.75  | 4.83  | 0.01 | 0.09 | -1.06 | 0.148972 | 0.122436 | 0.52291  | 0.392278 |
| MmugDNA.24602.1.S1_at   | MmugDNA.24602.1 | 5.14  | 5.11  | 0.02 | 0.06 | 1.02  | 0.116613 | 0.397872 | 0.489792 | 0.629138 |
| MmugDNA.24614.1.S1_at   | MmugDNA.24614.1 | 9.98  | 10.51 | 0.88 | 0.08 | -1.44 | 0.114292 | 0.04381  | 0.487606 | 0.25387  |
| MmugDNA.2462.1.S1_at    | MmugDNA.2462.1  | 4.8   | 4.75  | 0.24 | 0.28 | 1.04  | 0.784328 | 0.093596 | 0.920715 | 0.349952 |
| MmugDNA.24624.1.S1_at   | MmugDNA.24624.1 | 5.21  | 5.2   | 0.06 | 0.09 | 1     | 0.603805 | 0.780357 | 0.839359 | 0.872597 |
| MmugDNA.24625.1.S1_at   | MmugDNA.24625.1 | 7.36  | 7.16  | 0.12 | 0.22 | 1.15  | 0.759938 | 0.701936 | 0.909794 | 0.827192 |
| MmugDNA.24630.1.S1_s_at | MmugDNA.24630.1 | 7.31  | 6.99  | 0.66 | 0.16 | 1.25  | 0.491813 | 0.446567 | 0.778032 | 0.662862 |
| MmugDNA.24631.1.S1_at   | MmugDNA.24631.1 | 7.44  | 7.36  | 0.43 | 0.22 | 1.06  | 0.570115 | 0.198852 | 0.821883 | 0.473475 |
| MmugDNA.24633.1.S1_at   | MmugDNA.24633.1 | 7.14  | 7.05  | 0.13 | 0.02 | -1.06 | 0.465653 | 0.304293 | 0.763118 | 0.5616   |
| MmugDNA.24635.1.S1_s_at | MmugDNA.24635.1 | 5.15  | 5.04  | 0.32 | 0.09 | 1.08  | 0.691107 | 0.238439 | 0.879715 | 0.50907  |
| MmugDNA.24636.1.S1_at   | MmugDNA.24636.1 | 3.18  | 3.11  | 0.08 | 0.03 | 1.06  | 0.183002 | 0.466602 | 0.555875 | 0.676398 |
| MmugDNA.24645.1.S1_at   | MmugDNA.24645.1 | 5.37  | 5.74  | 0.39 | 0.19 | -1.29 | 0.323253 | 0.703199 | 0.672034 | 0.827928 |
| MmugDNA.24646.1.S1_at   | MmugDNA.24646.1 | 5.76  | 5.86  | 0.11 | 0.09 | -1.07 | 0.473323 | 0.821292 | 0.767506 | 0.897125 |
| MmugDNA.24651.1.S1_at   | MmugDNA.24651.1 | 5.3   | 5.77  | 0.27 | 0.54 | -1.38 | 0.142663 | 0.097415 | 0.517642 | 0.355097 |
| MmugDNA.24652.1.S1_at   | MmugDNA.24652.1 | 4.54  | 4.44  | 0.18 | 0.29 | 1.07  | 0.95021  | 0.60934  | 0.98328  | 0.767726 |
| MmugDNA.24653.1.S1_at   | MmugDNA.24653.1 | 7.96  | 8.85  | 2.21 | 0.65 | -1.86 | 0.262775 | 0.469641 | 0.624951 | 0.678318 |
| MmugDNA.24659.1.S1_at   | MmugDNA.24659.1 | 5.81  | 5.63  | 0.05 | 0.09 | 1.13  | 0.026915 | 0.102027 | 0.326584 | 0.362086 |
| MmugDNA.24667.1.S1_at   | MmugDNA.24667.1 | 4.55  | 4.78  | 0.26 | 0.02 | -1.17 | 0.302285 | 0.56746  | 0.656167 | 0.741351 |
| MmugDNA.24668.1.S1_at   | MmugDNA.24668.1 | 13.01 | 13.17 | 0.17 | 0.05 | -1.12 | 0.21556  | 0.268246 | 0.585748 | 0.533977 |
| MmugDNA.2467.1.S1_at    | MmugDNA.2467.1  | 6.43  | 7.51  | 0.64 | 0.31 | -2.11 | 0.039776 | 0.033057 | 0.36261  | 0.225068 |
| MmugDNA.24671.1.S1_at   | MmugDNA.24671.1 | 6.29  | 6.83  | 0.87 | 0.42 | -1.45 | 0.639488 | 0.105305 | 0.85626  | 0.367141 |
| MmugDNA.24674.1.S1_at   | MmugDNA.24674.1 | 7.72  | 7.78  | 0.48 | 0.15 | -1.04 | 0.51447  | 0.729689 | 0.790351 | 0.843649 |
| MmugDNA.24679.1.S1_at   | MmugDNA.24679.1 | 4.29  | 4.62  | 0.23 | 0.73 | -1.26 | 0.618996 | 0.091806 | 0.846305 | 0.346977 |
| MmugDNA.24681.1.S1_at   | MmugDNA.24681.1 | 7.24  | 7.69  | 1.81 | 0.17 | -1.36 | 0.648508 | 0.2611   | 0.859926 | 0.527481 |
| MmugDNA.24682.1.S1_at   | MmugDNA.24682.1 | 4.49  | 4.41  | 0.21 | 0.06 | 1.06  | 0.579151 | 0.617553 | 0.826431 | 0.773477 |
| MmugDNA.24685.1.S1_at   | MmugDNA.24685.1 | 9.19  | 9.36  | 0.82 | 0.25 | -1.12 | 0.877018 | 0.243149 | 0.957122 | 0.513356 |
| MmugDNA.24690.1.S1_at   | MmugDNA.24690.1 | 10.44 | 10.69 | 1.07 | 0.1  | -1.19 | 0.237327 | 0.163604 | 0.604247 | 0.439768 |
| MmugDNA.24691.1.S1_at   | MmugDNA.24691.1 | 10.42 | 10.43 | 0.27 | 0.19 | -1.01 | 0.260685 | 0.358227 | 0.623301 | 0.599754 |
| MmugDNA.24692.1.S1_at   | MmugDNA.24692.1 | 4.25  | 4.29  | 0.1  | 0.14 | -1.02 | 0.444158 | 0.483321 | 0.751101 | 0.687887 |
| MmugDNA.247.1.S1_at     | MmugDNA.247.1   | 5.17  | 5.05  | 0.07 | 0.11 | 1.09  | 0.09272  | 0.376936 | 0.461192 | 0.614678 |
| MmugDNA.2470.1.S1_at    | MmugDNA.2470.1  | 6.44  | 6.89  | 0.28 | 0.19 | -1.36 | 0.259603 | 0.120283 | 0.622626 | 0.389248 |
| MmugDNA.24703.1.S1_at   | MmugDNA.24703.1 | 4.39  | 4.38  | 0.04 | 0.07 | 1     | 0.692679 | 0.196952 | 0.880215 | 0.472072 |
| MmugDNA.24705.1.S1_at   | MmugDNA.24705.1 | 6.07  | 6.16  | 0.26 | 0.12 | -1.06 | 0.308668 | 0.268679 | 0.661287 | 0.534138 |
| MmugDNA.24707.1.S1_at   | MmugDNA.24707.1 | 5.22  | 5.04  | 0.08 | 0.06 | 1.13  | 0.038083 | 0.00962  | 0.358549 | 0.12918  |
| MmugDNA.24708.1.S1_at   | MmugDNA.24708.1 | 7.6   | 7.85  | 0.53 | 0.8  | -1.18 | 0.145038 | 0.25278  | 0.520238 | 0.521174 |
| MmugDNA.24711.1.S1_at   | MmugDNA.24711.1 | 8.09  | 7.68  | 0.25 | 0.09 | 1.33  | 0.07775  | 0.038431 | 0.439884 | 0.240918 |
| MmugDNA.24712.1.S1_at   | MmugDNA.24712.1 | 3.1   | 3.04  | 0.03 | 0.04 | 1.05  | 0.246116 | 0.17937  | 0.611531 | 0.455841 |
| MmugDNA.24713.1.S1_at   | MmugDNA.24713.1 | 11.61 | 11.63 | 0.41 | 0.03 | -1.02 | 0.94659  | 0.947363 | 0.981513 | 0.970137 |
| MmugDNA.24715.1.S1_at   | MmugDNA.24715.1 | 9.28  | 9.07  | 0.32 | 0.03 | 1.16  | 0.340763 | 0.138636 | 0.684698 | 0.411695 |
| MmugDNA.24718.1.S1_at   | MmugDNA.24718.1 | 7.19  | 7.28  | 0.27 | 0.16 | -1.06 | 0.874336 | 0.026516 | 0.956448 | 0.203899 |
| MmugDNA.24721.1.S1_at   | MmugDNA.24721.1 | 9.67  | 8.88  | 0.5  | 0.1  | 1.73  | 0.086681 | 0.030677 | 0.454604 | 0.217148 |

|                         |                 |       |       |      |      |       |          |          |          |          |
|-------------------------|-----------------|-------|-------|------|------|-------|----------|----------|----------|----------|
| MmugDNA.24722.1.S1_s_at | MmugDNA.24722.1 | 12    | 11.94 | 0.21 | 0.02 | 1.04  | 0.639574 | 0.631762 | 0.85626  | 0.782957 |
| MmugDNA.24724.1.S1_at   | MmugDNA.24724.1 | 13.06 | 13.06 | 0.12 | 0.04 | -1    | 0.400361 | 0.382855 | 0.72379  | 0.61893  |
| MmugDNA.24727.1.S1_at   | MmugDNA.24727.1 | 9.27  | 9.18  | 0.25 | 0.13 | 1.06  | 0.822251 | 0.268698 | 0.935933 | 0.534138 |
| MmugDNA.24728.1.S1_at   | MmugDNA.24728.1 | 9.68  | 10.34 | 0.11 | 0.04 | -1.58 | 0.000517 | 0.000244 | 0.143137 | 0.032798 |
| MmugDNA.2473.1.S1_at    | MmugDNA.2473.1  | 10.02 | 10.27 | 0.6  | 0.05 | -1.19 | 0.758234 | 0.095742 | 0.909029 | 0.352753 |
| MmugDNA.24731.1.S1_at   | MmugDNA.24731.1 | 13.54 | 13.63 | 0.05 | 0.1  | -1.07 | 0.098216 | 0.142133 | 0.467679 | 0.415728 |
| MmugDNA.24736.1.S1_s_at | MmugDNA.24736.1 | 12.23 | 11.12 | 0.24 | 0.18 | 2.16  | 0.003938 | 0.00423  | 0.198571 | 0.091435 |
| MmugDNA.24737.1.S1_at   | MmugDNA.24737.1 | 11.07 | 11.23 | 0.09 | 0.05 | -1.12 | 0.021991 | 0.011722 | 0.309781 | 0.140206 |
| MmugDNA.24739.1.S1_at   | MmugDNA.24739.1 | 11.5  | 11.39 | 0.2  | 0.17 | 1.08  | 0.10093  | 0.011508 | 0.47159  | 0.138744 |
| MmugDNA.24740.1.S1_at   | MmugDNA.24740.1 | 5.8   | 7.61  | 0.31 | 0.26 | -3.5  | 0.001563 | 0.001603 | 0.161959 | 0.060491 |
| MmugDNA.24742.1.S1_at   | MmugDNA.24742.1 | 9.59  | 9.84  | 0.09 | 0.09 | -1.19 | 0.025606 | 0.037563 | 0.322382 | 0.238211 |
| MmugDNA.24742.1.S1_s_at | MmugDNA.24742.1 | 9.22  | 9.25  | 0.12 | 0.11 | -1.02 | 0.792018 | 0.186542 | 0.923583 | 0.462364 |
| MmugDNA.24743.1.S1_at   | MmugDNA.24743.1 | 3.31  | 3.08  | 0.12 | 0.05 | 1.17  | 0.163615 | 0.171463 | 0.536394 | 0.447895 |
| MmugDNA.24744.1.S1_at   | MmugDNA.24744.1 | 6.91  | 6.97  | 0.81 | 0.03 | -1.05 | 0.951094 | 0.519371 | 0.983463 | 0.710998 |
| MmugDNA.24746.1.S1_at   | MmugDNA.24746.1 | 11.62 | 11.4  | 0.2  | 0.02 | 1.16  | 0.148275 | 0.079275 | 0.522535 | 0.326444 |
| MmugDNA.24747.1.S1_at   | MmugDNA.24747.1 | 8.86  | 9     | 2.44 | 0.46 | -1.1  | 0.781444 | 0.285895 | 0.919573 | 0.547484 |
| MmugDNA.24749.1.S1_at   | MmugDNA.24749.1 | 12.05 | 12.08 | 0.23 | 0.06 | -1.02 | 0.652378 | 0.723523 | 0.862004 | 0.839934 |
| MmugDNA.24753.1.S1_at   | MmugDNA.24753.1 | 8.93  | 8.92  | 0.21 | 0.01 | 1     | 0.38194  | 0.357881 | 0.710335 | 0.599493 |
| MmugDNA.2476.1.S1_at    | MmugDNA.2476.1  | 5.77  | 5.72  | 0.44 | 0.16 | 1.04  | 0.435917 | 0.082838 | 0.745982 | 0.332362 |
| MmugDNA.24761.1.S1_at   | MmugDNA.24761.1 | 9.83  | 9.69  | 0.73 | 0.05 | 1.1   | 0.57968  | 0.744716 | 0.826569 | 0.852165 |
| MmugDNA.24771.1.S1_at   | MmugDNA.24771.1 | 8.93  | 9.07  | 1.26 | 0.15 | -1.11 | 0.87907  | 0.155541 | 0.957953 | 0.430888 |
| MmugDNA.24773.1.S1_at   | MmugDNA.24773.1 | 4.36  | 4.29  | 0.14 | 0.07 | 1.05  | 0.744957 | 0.489702 | 0.902816 | 0.691862 |
| MmugDNA.24778.1.S1_at   | MmugDNA.24778.1 | 6.43  | 6.54  | 0.29 | 0.35 | -1.08 | 0.784509 | 0.429369 | 0.920805 | 0.650823 |
| MmugDNA.2478.1.S1_at    | MmugDNA.2478.1  | 14.13 | 14.03 | 1.33 | 0.08 | 1.07  | 0.47794  | 0.212564 | 0.769891 | 0.486502 |
| MmugDNA.24780.1.S1_at   | MmugDNA.24780.1 | 11.34 | 11.52 | 0.07 | 0.14 | -1.14 | 0.181659 | 0.001128 | 0.554854 | 0.05299  |
| MmugDNA.24783.1.S1_at   | MmugDNA.24783.1 | 7.25  | 8.88  | 1.25 | 0.36 | -3.1  | 0.046952 | 0.034209 | 0.379253 | 0.228779 |
| MmugDNA.24784.1.S1_at   | MmugDNA.24784.1 | 12.07 | 12.24 | 0.08 | 0.05 | -1.12 | 0.020194 | 0.011703 | 0.303673 | 0.140174 |
| MmugDNA.24789.1.S1_at   | MmugDNA.24789.1 | 5.81  | 5.51  | 0.26 | 0.07 | 1.23  | 0.088383 | 0.060412 | 0.45606  | 0.292435 |
| MmugDNA.24791.1.S1_at   | MmugDNA.24791.1 | 11.9  | 11.52 | 0.23 | 0.11 | 1.3   | 0.058525 | 0.051636 | 0.404644 | 0.272698 |
| MmugDNA.24793.1.S1_at   | MmugDNA.24793.1 | 8.31  | 8.74  | 1.22 | 0.2  | -1.34 | 0.306591 | 0.243739 | 0.659542 | 0.513899 |
| MmugDNA.24794.1.S1_at   | MmugDNA.24794.1 | 7.12  | 7.17  | 0.1  | 0.07 | -1.04 | 0.993615 | 0.939899 | 0.997521 | 0.96581  |
| MmugDNA.24794.1.S1_s_at | MmugDNA.24794.1 | 6.89  | 7.29  | 0.36 | 0.02 | -1.32 | 0.444479 | 0.364419 | 0.751266 | 0.604791 |
| MmugDNA.24797.1.S1_at   | MmugDNA.24797.1 | 4.34  | 4.94  | 0.99 | 0.49 | -1.51 | 0.666946 | 0.804599 | 0.868458 | 0.88762  |
| MmugDNA.24798.1.S1_at   | MmugDNA.24798.1 | 6.02  | 5.92  | 0.02 | 0.09 | 1.07  | 0.359139 | 0.857727 | 0.697106 | 0.918838 |
| MmugDNA.24803.1.S1_at   | MmugDNA.24803.1 | 8.41  | 8.21  | 0.25 | 0.04 | 1.15  | 0.073163 | 0.035255 | 0.434019 | 0.231987 |
| MmugDNA.24804.1.S1_at   | MmugDNA.24804.1 | 4.07  | 3.74  | 0.19 | 0.05 | 1.26  | 0.047542 | 0.028243 | 0.380487 | 0.209816 |
| MmugDNA.24809.1.S1_at   | MmugDNA.24809.1 | 10.53 | 11.1  | 0.24 | 0.09 | -1.49 | 0.036107 | 0.020758 | 0.354333 | 0.180781 |
| MmugDNA.2481.1.S1_at    | MmugDNA.2481.1  | 3.15  | 3.06  | 0.12 | 0.04 | 1.07  | 0.155555 | 0.172783 | 0.528837 | 0.449341 |
| MmugDNA.24810.1.S1_at   | MmugDNA.24810.1 | 4.36  | 4.56  | 0.29 | 0.15 | -1.15 | 0.673344 | 0.202878 | 0.871263 | 0.477312 |
| MmugDNA.24816.1.S1_at   | MmugDNA.24816.1 | 2.63  | 2.63  | 0.09 | 0.01 | -1    | 0.423199 | 0.412549 | 0.738919 | 0.638941 |
| MmugDNA.24819.1.S1_at   | MmugDNA.24819.1 | 9.9   | 9.38  | 0.24 | 0.05 | 1.44  | 0.039832 | 0.04242  | 0.362691 | 0.250616 |
| MmugDNA.24820.1.S1_at   | MmugDNA.24820.1 | 11.78 | 11.7  | 0.13 | 0.1  | 1.06  | 0.214239 | 0.167125 | 0.584673 | 0.443617 |
| MmugDNA.24823.1.S1_at   | MmugDNA.24823.1 | 5.89  | 5.82  | 0.11 | 0.17 | 1.05  | 0.434651 | 0.491729 | 0.745238 | 0.693243 |

|                         |                 |       |       |      |      |       |          |          |          |          |
|-------------------------|-----------------|-------|-------|------|------|-------|----------|----------|----------|----------|
| MmugDNA.24828.1.S1_at   | MmugDNA.24828.1 | 9.88  | 9.61  | 0.17 | 0.17 | 1.2   | 0.268356 | 0.094345 | 0.628784 | 0.350889 |
| MmugDNA.24838.1.S1_at   | MmugDNA.24838.1 | 11.73 | 11.54 | 0.27 | 0.04 | 1.14  | 0.263184 | 0.034134 | 0.625172 | 0.228692 |
| MmugDNA.24839.1.S1_at   | MmugDNA.24839.1 | 6.26  | 6.17  | 0.12 | 0.08 | 1.06  | 0.830521 | 0.065768 | 0.939336 | 0.301767 |
| MmugDNA.24841.1.S1_at   | MmugDNA.24841.1 | 13.03 | 13.06 | 0.25 | 0.03 | -1.02 | 0.85858  | 0.119855 | 0.950074 | 0.388577 |
| MmugDNA.24861.1.S1_s_at | MmugDNA.24861.1 | 11.74 | 11.39 | 0.24 | 0.07 | 1.28  | 0.051612 | 0.062545 | 0.390696 | 0.296914 |
| MmugDNA.24862.1.S1_at   | MmugDNA.24862.1 | 7.76  | 7.74  | 0.39 | 0.13 | 1.02  | 0.566043 | 0.299383 | 0.819764 | 0.557857 |
| MmugDNA.24865.1.S1_at   | MmugDNA.24865.1 | 5.05  | 5.23  | 0.73 | 0.22 | -1.13 | 0.625628 | 0.794156 | 0.849478 | 0.881296 |
| MmugDNA.24878.1.S1_at   | MmugDNA.24878.1 | 10.08 | 10.6  | 0.28 | 0.23 | -1.44 | 0.043028 | 0.005073 | 0.371135 | 0.09907  |
| MmugDNA.24879.1.S1_at   | MmugDNA.24879.1 | 5.86  | 5.95  | 0.16 | 0.24 | -1.07 | 0.472192 | 0.725197 | 0.766895 | 0.840939 |
| MmugDNA.24880.1.S1_s_at | MmugDNA.24880.1 | 12.62 | 12.98 | 0.19 | 0.01 | -1.28 | 0.032027 | 0.011917 | 0.342916 | 0.141283 |
| MmugDNA.24887.1.S1_at   | MmugDNA.24887.1 | 11.08 | 11    | 0.86 | 0.07 | -1.05 | 0.486115 | 0.321694 | 0.774427 | 0.573346 |
| MmugDNA.24888.1.S1_s_at | MmugDNA.24888.1 | 8.92  | 8.93  | 0.2  | 0.03 | -1.01 | 0.597168 | 0.365936 | 0.83613  | 0.605798 |
| MmugDNA.2490.1.S1_at    | MmugDNA.2490.1  | 10.4  | 11.19 | 1.23 | 0.18 | -1.73 | 0.29354  | 0.211463 | 0.649839 | 0.485578 |
| MmugDNA.24907.1.S1_at   | MmugDNA.24907.1 | 12.04 | 11.83 | 0.08 | 0.06 | 1.16  | 0.017572 | 0.07365  | 0.292772 | 0.316984 |
| MmugDNA.24911.1.S1_at   | MmugDNA.24911.1 | 7.94  | 7.82  | 0.71 | 0.11 | 1.09  | 0.814346 | 0.45856  | 0.932969 | 0.671232 |
| MmugDNA.24918.1.S1_at   | MmugDNA.24918.1 | 9.57  | 9.49  | 0.11 | 0.13 | 1.06  | 0.862418 | 0.852041 | 0.951572 | 0.915853 |
| MmugDNA.24927.1.S1_at   | MmugDNA.24927.1 | 11.27 | 11.18 | 0.18 | 0.15 | 1.06  | 0.275367 | 0.11894  | 0.634828 | 0.387176 |
| MmugDNA.24936.1.S1_at   | MmugDNA.24936.1 | 11.7  | 11.74 | 0.11 | 0.07 | -1.03 | 0.950866 | 0.04051  | 0.983338 | 0.246264 |
| MmugDNA.24945.1.S1_at   | MmugDNA.24945.1 | 5.37  | 5.16  | 0.15 | 0.09 | 1.15  | 0.134399 | 0.15275  | 0.508462 | 0.427571 |
| MmugDNA.24946.1.S1_at   | MmugDNA.24946.1 | 5.2   | 4.98  | 0.13 | 0.13 | 1.17  | 0.095826 | 0.026334 | 0.464449 | 0.203321 |
| MmugDNA.24950.1.S1_at   | MmugDNA.24950.1 | 3.16  | 3.14  | 0.14 | 0.15 | 1.02  | 0.597258 | 0.58807  | 0.836164 | 0.754719 |
| MmugDNA.24950.1.S1_s_at | MmugDNA.24950.1 | 8.65  | 9.43  | 1.02 | 0.24 | -1.71 | 0.204533 | 0.016415 | 0.575907 | 0.162201 |
| MmugDNA.24951.1.S1_at   | MmugDNA.24951.1 | 12.92 | 12.92 | 0.3  | 0.12 | -1    | 0.788226 | 0.018676 | 0.922199 | 0.171717 |
| MmugDNA.24957.1.S1_at   | MmugDNA.24957.1 | 6.24  | 6.3   | 0.09 | 0.05 | -1.04 | 0.731039 | 0.716503 | 0.896371 | 0.835751 |
| MmugDNA.24959.1.S1_at   | MmugDNA.24959.1 | 8.67  | 8.59  | 0.23 | 0.11 | 1.06  | 0.640995 | 0.513407 | 0.857033 | 0.706881 |
| MmugDNA.24960.1.S1_at   | MmugDNA.24960.1 | 6.47  | 6.33  | 0.08 | 0.09 | 1.1   | 0.199995 | 0.537252 | 0.571864 | 0.722344 |
| MmugDNA.24964.1.S1_at   | MmugDNA.24964.1 | 6.5   | 6.3   | 0.34 | 0.02 | 1.15  | 0.91807  | 0.694591 | 0.972062 | 0.822424 |
| MmugDNA.2497.1.S1_at    | MmugDNA.2497.1  | 4.56  | 4.62  | 0.13 | 0.08 | -1.04 | 0.658635 | 0.6206   | 0.864804 | 0.775511 |
| MmugDNA.24970.1.S1_at   | MmugDNA.24970.1 | 9.96  | 10.49 | 0.44 | 0.12 | -1.45 | 0.343504 | 0.292663 | 0.686734 | 0.552736 |
| MmugDNA.24972.1.S1_at   | MmugDNA.24972.1 | 8.68  | 9.11  | 1.21 | 0.24 | -1.34 | 0.574085 | 0.420458 | 0.823829 | 0.644171 |
| MmugDNA.24979.1.S1_at   | MmugDNA.24979.1 | 3.18  | 3.15  | 0.09 | 0.13 | 1.02  | 0.871929 | 0.410835 | 0.95559  | 0.637644 |
| MmugDNA.24984.1.S1_at   | MmugDNA.24984.1 | 13.08 | 13.23 | 0.16 | 0.01 | -1.11 | 0.208176 | 0.095724 | 0.579837 | 0.352735 |
| MmugDNA.24998.1.S1_at   | MmugDNA.24998.1 | 6.4   | 6.43  | 0.11 | 0.11 | -1.02 | 0.794385 | 0.050749 | 0.924569 | 0.270423 |
| MmugDNA.25.1.S1_at      | MmugDNA.25.1    | 7.2   | 6.55  | 0.22 | 0.15 | 1.57  | 0.027955 | 0.021065 | 0.330017 | 0.181869 |
| MmugDNA.25002.1.S1_at   | MmugDNA.25002.1 | 9.93  | 9.7   | 0.34 | 0.1  | 1.17  | 0.449665 | 0.009748 | 0.754534 | 0.129897 |
| MmugDNA.25003.1.S1_at   | MmugDNA.25003.1 | 12.8  | 12.71 | 0.11 | 0.1  | 1.07  | 0.17286  | 0.148203 | 0.545989 | 0.422745 |
| MmugDNA.25007.1.S1_at   | MmugDNA.25007.1 | 6.98  | 6.84  | 0.26 | 0.3  | 1.1   | 0.628434 | 0.850761 | 0.851106 | 0.915085 |
| MmugDNA.25007.1.S1_s_at | MmugDNA.25007.1 | 10.48 | 10.8  | 0.29 | 0.03 | -1.25 | 0.368665 | 0.413042 | 0.703807 | 0.63938  |
| MmugDNA.25012.1.S1_at   | MmugDNA.25012.1 | 10.26 | 11.04 | 1.31 | 0.23 | -1.71 | 0.301558 | 0.425    | 0.6558   | 0.647464 |
| MmugDNA.25013.1.S1_at   | MmugDNA.25013.1 | 3.92  | 3.94  | 0.06 | 0.02 | -1.01 | 0.682558 | 0.000102 | 0.875769 | 0.028099 |
| MmugDNA.25018.1.S1_at   | MmugDNA.25018.1 | 6.46  | 6.62  | 0.18 | 0.16 | -1.11 | 0.148239 | 0.31078  | 0.522535 | 0.565832 |
| MmugDNA.25024.1.S1_at   | MmugDNA.25024.1 | 7.07  | 7.14  | 0.09 | 0.18 | -1.06 | 0.529091 | 0.654584 | 0.798106 | 0.798087 |
| MmugDNA.25028.1.S1_at   | MmugDNA.25028.1 | 4.18  | 4.22  | 0.13 | 0.07 | -1.03 | 0.409774 | 0.112451 | 0.730334 | 0.377784 |

|                         |                 |       |       |      |      |       |          |          |          |          |
|-------------------------|-----------------|-------|-------|------|------|-------|----------|----------|----------|----------|
| MmugDNA.25033.1.S1_at   | MmugDNA.25033.1 | 4.67  | 4.64  | 0.09 | 0.02 | 1.02  | 0.250158 | 0.221253 | 0.615476 | 0.49459  |
| MmugDNA.25034.1.S1_at   | MmugDNA.25034.1 | 7.28  | 6.77  | 0.4  | 0.35 | 1.43  | 0.366454 | 0.0675   | 0.701905 | 0.305843 |
| MmugDNA.25035.1.S1_s_at | MmugDNA.25035.1 | 9.02  | 9.19  | 0.56 | 0.12 | -1.12 | 0.529884 | 0.122993 | 0.79855  | 0.392923 |
| MmugDNA.25044.1.S1_at   | MmugDNA.25044.1 | 2.75  | 2.75  | 0.05 | 0.02 | 1     | 0.205187 | 0.420911 | 0.576948 | 0.644578 |
| MmugDNA.25045.1.S1_at   | MmugDNA.25045.1 | 11.06 | 11.14 | 0.2  | 0.09 | -1.06 | 0.583046 | 0.723918 | 0.828755 | 0.840188 |
| MmugDNA.25045.1.S1_s_at | MmugDNA.25045.1 | 12.29 | 12.38 | 0.21 | 0.04 | -1.06 | 0.805714 | 0.649113 | 0.929454 | 0.794594 |
| MmugDNA.25053.1.S1_at   | MmugDNA.25053.1 | 5.36  | 5.84  | 0.16 | 0.05 | -1.4  | 0.008563 | 0.000777 | 0.235156 | 0.045626 |
| MmugDNA.25053.1.S1_at   | MmugDNA.25053.1 | 4.06  | 3.94  | 0.18 | 0.12 | 1.08  | 0.374382 | 0.306968 | 0.705837 | 0.563427 |
| MmugDNA.25058.1.S1_at   | MmugDNA.25058.1 | 8.99  | 9.9   | 0.57 | 0.14 | -1.88 | 0.052372 | 0.062194 | 0.392215 | 0.296296 |
| MmugDNA.25060.1.S1_at   | MmugDNA.25060.1 | 7.9   | 7.58  | 0.08 | 0.14 | 1.25  | 0.039144 | 0.023966 | 0.361202 | 0.194025 |
| MmugDNA.25061.1.S1_at   | MmugDNA.25061.1 | 6.34  | 6.35  | 0.14 | 0.02 | -1    | 0.843838 | 0.875805 | 0.944956 | 0.929464 |
| MmugDNA.25068.1.S1_at   | MmugDNA.25068.1 | 7.19  | 7.28  | 0.1  | 0.07 | -1.07 | 0.26253  | 0.099676 | 0.624714 | 0.358211 |
| MmugDNA.25071.1.S1_at   | MmugDNA.25071.1 | 7.77  | 7.76  | 0.18 | 0.1  | 1.01  | 0.687595 | 0.890567 | 0.877864 | 0.93764  |
| MmugDNA.25072.1.S1_at   | MmugDNA.25072.1 | 8.81  | 9.57  | 0.3  | 0.18 | -1.69 | 0.008769 | 0.086621 | 0.236629 | 0.339176 |
| MmugDNA.25076.1.S1_at   | MmugDNA.25076.1 | 6.41  | 6.21  | 0.03 | 0.07 | 1.15  | 0.004403 | 0.036041 | 0.198874 | 0.234269 |
| MmugDNA.25079.1.S1_at   | MmugDNA.25079.1 | 10.56 | 10.84 | 0.36 | 0.06 | -1.22 | 0.252759 | 0.074612 | 0.617759 | 0.318299 |
| MmugDNA.25081.1.S1_at   | MmugDNA.25081.1 | 6.44  | 6.93  | 1.09 | 0.07 | -1.4  | 0.517808 | 0.87182  | 0.792286 | 0.927078 |
| MmugDNA.25088.1.S1_at   | MmugDNA.25088.1 | 5.56  | 6.37  | 0.87 | 0.27 | -1.75 | 0.195579 | 0.450913 | 0.565981 | 0.66589  |
| MmugDNA.25090.1.S1_at   | MmugDNA.25090.1 | 8     | 8.46  | 0.83 | 0.09 | -1.37 | 0.36413  | 0.467848 | 0.700455 | 0.677386 |
| MmugDNA.25103.1.S1_at   | MmugDNA.25103.1 | 5.41  | 5.4   | 0.14 | 0.11 | 1     | 0.381571 | 0.290443 | 0.710122 | 0.551169 |
| MmugDNA.25111.1.S1_at   | MmugDNA.25111.1 | 4.4   | 4.33  | 0.12 | 0.16 | 1.06  | 0.319384 | 0.559003 | 0.668706 | 0.735977 |
| MmugDNA.25114.1.S1_at   | MmugDNA.25114.1 | 8.23  | 8.5   | 0.11 | 0.02 | -1.21 | 0.029494 | 0.000663 | 0.334382 | 0.0439   |
| MmugDNA.25115.1.S1_at   | MmugDNA.25115.1 | 12.14 | 12.16 | 0.48 | 0.07 | -1.01 | 0.967833 | 0.027243 | 0.989393 | 0.206279 |
| MmugDNA.2512.1.S1_at    | MmugDNA.2512.1  | 7.61  | 7.69  | 0.12 | 0.22 | -1.06 | 0.831748 | 0.000052 | 0.939628 | 0.025333 |
| MmugDNA.25121.1.S1_at   | MmugDNA.25121.1 | 12.06 | 11.86 | 0.34 | 0.08 | 1.14  | 0.828588 | 0.505292 | 0.938354 | 0.702073 |
| MmugDNA.25137.1.S1_at   | MmugDNA.25137.1 | 7.7   | 7.81  | 0.8  | 0.01 | -1.08 | 0.510468 | 0.543121 | 0.788228 | 0.725952 |
| MmugDNA.25140.1.S1_at   | MmugDNA.25140.1 | 4.59  | 5.68  | 0.53 | 0.48 | -2.13 | 0.119987 | 0.222272 | 0.493281 | 0.495318 |
| MmugDNA.25146.1.S1_at   | MmugDNA.25146.1 | 12.09 | 11.67 | 0.18 | 0.05 | 1.34  | 0.010041 | 0.00195  | 0.24587  | 0.065813 |
| MmugDNA.25147.1.S1_at   | MmugDNA.25147.1 | 9.56  | 9.44  | 0.42 | 0.11 | 1.09  | 0.686614 | 0.030472 | 0.877418 | 0.216624 |
| MmugDNA.25153.1.S1_at   | MmugDNA.25153.1 | 11.57 | 11.64 | 0.26 | 0.1  | -1.05 | 0.849129 | 0.406466 | 0.946949 | 0.634352 |
| MmugDNA.25159.1.S1_at   | MmugDNA.25159.1 | 12.09 | 12.11 | 0.17 | 0.11 | -1.01 | 0.296406 | 0.471616 | 0.652054 | 0.679537 |
| MmugDNA.25164.1.S1_at   | MmugDNA.25164.1 | 10.32 | 10.76 | 0.19 | 0    | -1.35 | 0.01321  | 0.000457 | 0.266951 | 0.038572 |
| MmugDNA.25165.1.S1_at   | MmugDNA.25165.1 | 10.57 | 10.41 | 0.47 | 0.1  | 1.11  | 0.313925 | 0.064186 | 0.664925 | 0.299592 |
| MmugDNA.25169.1.S1_at   | MmugDNA.25169.1 | 3.9   | 3.82  | 0.43 | 0.27 | 1.05  | 0.887376 | 0.909013 | 0.960961 | 0.948484 |
| MmugDNA.25173.1.S1_at   | MmugDNA.25173.1 | 5.3   | 5.23  | 0.17 | 0.06 | 1.05  | 0.296773 | 0.26866  | 0.652405 | 0.534138 |
| MmugDNA.25176.1.S1_at   | MmugDNA.25176.1 | 3.94  | 4.01  | 0.04 | 0.05 | -1.05 | 0.119228 | 0.674883 | 0.492749 | 0.810065 |
| MmugDNA.25181.1.S1_at   | MmugDNA.25181.1 | 9.35  | 10.16 | 0.64 | 0.04 | -1.76 | 0.086322 | 0.122337 | 0.453939 | 0.392032 |
| MmugDNA.25184.1.S1_at   | MmugDNA.25184.1 | 7.61  | 7.44  | 0.13 | 0.04 | 1.13  | 0.130457 | 0.105953 | 0.504764 | 0.36826  |
| MmugDNA.2519.1.S1_at    | MmugDNA.2519.1  | 9.45  | 9.36  | 0.3  | 0.06 | 1.07  | 0.26771  | 0.158628 | 0.62827  | 0.434612 |
| MmugDNA.25198.1.S1_at   | MmugDNA.25198.1 | 8.64  | 8.05  | 0.16 | 0.11 | 1.51  | 0.005216 | 0.000032 | 0.206226 | 0.022097 |
| MmugDNA.252.1.S1_at     | MmugDNA.252.1   | 7.86  | 7.5   | 0.92 | 0.09 | 1.28  | 0.576576 | 0.247039 | 0.825166 | 0.516238 |
| MmugDNA.25203.1.S1_at   | MmugDNA.25203.1 | 11.69 | 12.21 | 0.23 | 0.06 | -1.44 | 0.018636 | 0.000903 | 0.298174 | 0.048084 |
| MmugDNA.25204.1.S1_at   | MmugDNA.25204.1 | 7.08  | 7.97  | 0.5  | 0.24 | -1.85 | 0.051208 | 0.073372 | 0.389565 | 0.316469 |

|                         |                 |       |       |      |      |       |          |          |          |          |
|-------------------------|-----------------|-------|-------|------|------|-------|----------|----------|----------|----------|
| MmugDNA.25205.1.S1_s_at | MmugDNA.25205.1 | 4.5   | 5.49  | 0.28 | 0.27 | -1.99 | 0.005531 | 0.002107 | 0.208157 | 0.067887 |
| MmugDNA.25208.1.S1_at   | MmugDNA.25208.1 | 10.33 | 11.52 | 1.58 | 0.19 | -2.28 | 0.163065 | 0.34557  | 0.536035 | 0.590813 |
| MmugDNA.2521.1.S1_at    | MmugDNA.2521.1  | 5     | 4.89  | 0.12 | 0.01 | 1.08  | 0.177839 | 0.137275 | 0.550984 | 0.410165 |
| MmugDNA.25211.1.S1_at   | MmugDNA.25211.1 | 7.7   | 7.18  | 0.27 | 0.24 | 1.44  | 0.062932 | 0.003606 | 0.414359 | 0.085909 |
| MmugDNA.25213.1.S1_at   | MmugDNA.25213.1 | 4.54  | 4.65  | 0.34 | 0.13 | -1.08 | 0.657256 | 0.284943 | 0.863937 | 0.547047 |
| MmugDNA.25218.1.S1_at   | MmugDNA.25218.1 | 3.9   | 3.32  | 0.2  | 0.12 | 1.5   | 0.020148 | 0.032747 | 0.303673 | 0.224042 |
| MmugDNA.2522.1.S1_at    | MmugDNA.2522.1  | 3.42  | 3.39  | 0.05 | 0.06 | 1.03  | 0.171055 | 0.123366 | 0.54417  | 0.393391 |
| MmugDNA.25220.1.S1_at   | MmugDNA.25220.1 | 6.66  | 7.25  | 0.18 | 0.12 | -1.5  | 0.008514 | 0.016846 | 0.234555 | 0.164528 |
| MmugDNA.25221.1.S1_at   | MmugDNA.25221.1 | 5.76  | 5.74  | 0.03 | 0.02 | 1.02  | 0.668441 | 0.162759 | 0.869115 | 0.438913 |
| MmugDNA.25223.1.S1_at   | MmugDNA.25223.1 | 9.24  | 9.03  | 0.22 | 0.02 | 1.15  | 0.160104 | 0.003522 | 0.53316  | 0.085137 |
| MmugDNA.25225.1.S1_at   | MmugDNA.25225.1 | 5.82  | 5.81  | 0.19 | 0.19 | -1.01 | 0.789841 | 0.960904 | 0.922682 | 0.977791 |
| MmugDNA.25229.1.S1_at   | MmugDNA.25229.1 | 4.91  | 5.29  | 0.39 | 0.12 | -1.29 | 0.16977  | 0.051734 | 0.542744 | 0.272993 |
| MmugDNA.25235.1.S1_at   | MmugDNA.25235.1 | 2.98  | 3.02  | 0.15 | 0.05 | -1.03 | 0.746354 | 0.601032 | 0.9034   | 0.762468 |
| MmugDNA.25243.1.S1_at   | MmugDNA.25243.1 | 9.53  | 9.43  | 1.82 | 0.31 | 1.08  | 0.974796 | 0.097628 | 0.991912 | 0.355473 |
| MmugDNA.25250.1.S1_at   | MmugDNA.25250.1 | 11.2  | 11.56 | 0.19 | 0.03 | -1.29 | 0.031028 | 0.025501 | 0.339397 | 0.200333 |
| MmugDNA.25255.1.S1_s_at | MmugDNA.25255.1 | 4.15  | 4.09  | 0.04 | 0.17 | 1.04  | 0.717478 | 0.984417 | 0.890426 | 0.991287 |
| MmugDNA.25258.1.S1_s_at | MmugDNA.25258.1 | 10.16 | 10.31 | 0.01 | 0.16 | -1.11 | 0.526897 | 0.007402 | 0.796797 | 0.115643 |
| MmugDNA.25263.1.S1_at   | MmugDNA.25263.1 | 8.68  | 9.93  | 0.19 | 0.04 | -2.37 | 0.000366 | 0.002143 | 0.137028 | 0.068507 |
| MmugDNA.25267.1.S1_at   | MmugDNA.25267.1 | 11.69 | 11.78 | 0.4  | 0.13 | -1.07 | 0.842675 | 0.011498 | 0.944281 | 0.138685 |
| MmugDNA.2527.1.S1_at    | MmugDNA.2527.1  | 11.72 | 11.58 | 0.03 | 0.03 | 1.1   | 0.002065 | 0.019717 | 0.174088 | 0.176461 |
| MmugDNA.25277.1.S1_at   | MmugDNA.25277.1 | 5.76  | 5.72  | 0.25 | 0.07 | 1.03  | 0.708328 | 0.818221 | 0.886591 | 0.895149 |
| MmugDNA.25281.1.S1_at   | MmugDNA.25281.1 | 12.09 | 12.39 | 0.33 | 0.05 | -1.23 | 0.201692 | 0.271574 | 0.573304 | 0.536577 |
| MmugDNA.25285.1.S1_at   | MmugDNA.25285.1 | 6.04  | 6.61  | 0.38 | 0.1  | -1.48 | 0.274118 | 0.371051 | 0.633792 | 0.609975 |
| MmugDNA.25292.1.S1_at   | MmugDNA.25292.1 | 11.28 | 11.15 | 0.22 | 0.05 | 1.1   | 0.274886 | 0.003922 | 0.63419  | 0.089057 |
| MmugDNA.25299.1.S1_at   | MmugDNA.25299.1 | 10.01 | 9.34  | 0.67 | 0.04 | 1.59  | 0.14103  | 0.142273 | 0.516345 | 0.41579  |
| MmugDNA.25302.1.S1_at   | MmugDNA.25302.1 | 11.49 | 11.74 | 0.57 | 0.1  | -1.19 | 0.506562 | 0.023726 | 0.785899 | 0.192873 |
| MmugDNA.25305.1.S1_at   | MmugDNA.25305.1 | 6.51  | 6.53  | 0.11 | 0.05 | -1.01 | 0.690752 | 0.264117 | 0.879579 | 0.530214 |
| MmugDNA.25307.1.S1_at   | MmugDNA.25307.1 | 10.79 | 9.93  | 0.57 | 0.05 | 1.82  | 0.187181 | 0.236182 | 0.559729 | 0.507225 |
| MmugDNA.25321.1.S1_at   | MmugDNA.25321.1 | 6.87  | 6.84  | 0.84 | 0.1  | 1.02  | 0.994511 | 0.56358  | 0.997927 | 0.738718 |
| MmugDNA.25322.1.S1_at   | MmugDNA.25322.1 | 9.21  | 8.86  | 0.13 | 0.08 | 1.28  | 0.016396 | 0.066717 | 0.287478 | 0.304114 |
| MmugDNA.25327.1.S1_at   | MmugDNA.25327.1 | 9.8   | 9.72  | 0.15 | 0.09 | 1.06  | 0.978637 | 0.577435 | 0.993045 | 0.747923 |
| MmugDNA.2533.1.S1_at    | MmugDNA.2533.1  | 11.62 | 11.73 | 0.21 | 0.14 | -1.08 | 0.184184 | 0.325527 | 0.55696  | 0.575827 |
| MmugDNA.25337.1.S1_at   | MmugDNA.25337.1 | 5.97  | 5.95  | 0.17 | 0.05 | 1.01  | 0.225245 | 0.445285 | 0.594523 | 0.662338 |
| MmugDNA.25341.1.S1_at   | MmugDNA.25341.1 | 12    | 11.27 | 0.75 | 0.28 | 1.66  | 0.14069  | 0.025865 | 0.51617  | 0.201654 |
| MmugDNA.25342.1.S1_at   | MmugDNA.25342.1 | 6.97  | 6.7   | 0.18 | 0.09 | 1.2   | 0.145349 | 0.259632 | 0.520409 | 0.526525 |
| MmugDNA.25343.1.S1_at   | MmugDNA.25343.1 | 8.9   | 9.44  | 0.11 | 0.14 | -1.45 | 0.005407 | 0.013455 | 0.208157 | 0.148623 |
| MmugDNA.25347.1.S1_at   | MmugDNA.25347.1 | 8.55  | 8.84  | 0.18 | 0.13 | -1.23 | 0.099048 | 0.290653 | 0.468463 | 0.551363 |
| MmugDNA.25348.1.S1_at   | MmugDNA.25348.1 | 5.92  | 5.7   | 0.47 | 0.05 | 1.16  | 0.796029 | 0.11295  | 0.925023 | 0.378759 |
| MmugDNA.25353.1.S1_at   | MmugDNA.25353.1 | 10.62 | 10.38 | 0.36 | 0.18 | 1.18  | 0.580936 | 0.360182 | 0.827323 | 0.601275 |
| MmugDNA.25354.1.S1_at   | MmugDNA.25354.1 | 11.4  | 11.23 | 0.27 | 0.12 | 1.13  | 0.769664 | 0.428663 | 0.91377  | 0.650233 |
| MmugDNA.25359.1.S1_at   | MmugDNA.25359.1 | 12.2  | 11.53 | 0.46 | 0.04 | 1.59  | 0.092895 | 0.10314  | 0.461563 | 0.364041 |
| MmugDNA.25362.1.S1_at   | MmugDNA.25362.1 | 9.17  | 10.07 | 2.19 | 0.3  | -1.87 | 0.445997 | 0.144241 | 0.752534 | 0.418146 |
| MmugDNA.25367.1.S1_at   | MmugDNA.25367.1 | 8.01  | 7.39  | 0.48 | 0.41 | 1.54  | 0.138001 | 0.24849  | 0.513671 | 0.517769 |

|                         |                 |       |       |      |      |       |          |          |          |          |
|-------------------------|-----------------|-------|-------|------|------|-------|----------|----------|----------|----------|
| MmugDNA.25369.1.S1_at   | MmugDNA.25369.1 | 3.24  | 3.28  | 0.06 | 0.06 | -1.03 | 0.531008 | 0.752288 | 0.799375 | 0.855787 |
| MmugDNA.25370.1.S1_at   | MmugDNA.25370.1 | 7.81  | 7.43  | 0.51 | 0.34 | 1.31  | 0.791885 | 0.883472 | 0.923517 | 0.933594 |
| MmugDNA.25384.1.S1_at   | MmugDNA.25384.1 | 12.37 | 11.72 | 0.56 | 0.33 | 1.57  | 0.544893 | 0.015679 | 0.807495 | 0.158633 |
| MmugDNA.25386.1.S1_at   | MmugDNA.25386.1 | 10.35 | 10.04 | 0.33 | 0.25 | 1.23  | 0.290907 | 0.44138  | 0.64744  | 0.659552 |
| MmugDNA.25389.1.S1_at   | MmugDNA.25389.1 | 9.65  | 9.48  | 0.04 | 0.02 | 1.13  | 0.002464 | 0.00067  | 0.177304 | 0.04413  |
| MmugDNA.25396.1.S1_at   | MmugDNA.25396.1 | 13.49 | 13.53 | 0.14 | 0.05 | -1.03 | 0.805287 | 0.143157 | 0.929175 | 0.417029 |
| MmugDNA.254.1.S1_at     | MmugDNA.254.1   | 3.74  | 3.48  | 0.05 | 0.1  | 1.2   | 0.03474  | 0.290404 | 0.350358 | 0.551169 |
| MmugDNA.25400.1.S1_s_at | MmugDNA.25400.1 | 12.7  | 13.06 | 0.75 | 0.01 | -1.29 | 0.364469 | 0.151498 | 0.700603 | 0.426223 |
| MmugDNA.25404.1.S1_at   | MmugDNA.25404.1 | 8.47  | 8.16  | 1.17 | 0.22 | 1.24  | 0.679019 | 0.430636 | 0.874211 | 0.651655 |
| MmugDNA.25409.1.S1_at   | MmugDNA.25409.1 | 6.88  | 6.69  | 0.48 | 0.31 | 1.14  | 0.819127 | 0.088872 | 0.934711 | 0.34272  |
| MmugDNA.25416.1.S1_at   | MmugDNA.25416.1 | 3.27  | 3.42  | 0.14 | 0.24 | -1.11 | 0.393846 | 0.360666 | 0.719517 | 0.601717 |
| MmugDNA.2542.1.S1_at    | MmugDNA.2542.1  | 7.39  | 7.69  | 0.14 | 0.15 | -1.22 | 0.100124 | 0.083938 | 0.470357 | 0.334848 |
| MmugDNA.25428.1.S1_at   | MmugDNA.25428.1 | 6.63  | 6.47  | 0.22 | 0.22 | 1.12  | 0.11946  | 0.297083 | 0.492875 | 0.555996 |
| MmugDNA.2543.1.S1_at    | MmugDNA.2543.1  | 8.83  | 9.95  | 0.52 | 0.15 | -2.18 | 0.022734 | 0.005851 | 0.312165 | 0.104779 |
| MmugDNA.25431.1.S1_at   | MmugDNA.25431.1 | 9.08  | 8.37  | 0.45 | 0.13 | 1.64  | 0.017747 | 0.008144 | 0.293545 | 0.119736 |
| MmugDNA.25433.1.S1_at   | MmugDNA.25433.1 | 5.33  | 5.42  | 0.25 | 0.03 | -1.07 | 0.704781 | 0.791655 | 0.885183 | 0.879663 |
| MmugDNA.25436.1.S1_at   | MmugDNA.25436.1 | 10.9  | 10.97 | 0.17 | 0.16 | -1.06 | 0.251992 | 0.000069 | 0.616976 | 0.025812 |
| MmugDNA.25439.1.S1_at   | MmugDNA.25439.1 | 3.89  | 3.77  | 0.16 | 0.17 | 1.09  | 0.640953 | 0.009282 | 0.857    | 0.127101 |
| MmugDNA.25440.1.S1_at   | MmugDNA.25440.1 | 7.19  | 7.19  | 0.14 | 0.04 | 1     | 0.283786 | 0.674949 | 0.641565 | 0.810089 |
| MmugDNA.25440.1.S1_s_at | MmugDNA.25440.1 | 6.12  | 6.03  | 0.13 | 0.22 | 1.06  | 0.30167  | 0.232793 | 0.655909 | 0.504426 |
| MmugDNA.25452.1.S1_at   | MmugDNA.25452.1 | 11.37 | 11.78 | 0.35 | 0.44 | -1.33 | 0.12983  | 0.192897 | 0.504468 | 0.468379 |
| MmugDNA.25454.1.S1_at   | MmugDNA.25454.1 | 7.9   | 7.96  | 0.3  | 0.08 | -1.04 | 0.249885 | 0.345295 | 0.615347 | 0.590593 |
| MmugDNA.25459.1.S1_at   | MmugDNA.25459.1 | 2.85  | 2.86  | 0.09 | 0.13 | -1.01 | 0.784186 | 0.606779 | 0.920671 | 0.766027 |
| MmugDNA.25461.1.S1_at   | MmugDNA.25461.1 | 12.44 | 12.51 | 0.17 | 0.06 | -1.05 | 0.790515 | 0.883814 | 0.922954 | 0.933691 |
| MmugDNA.25463.1.S1_at   | MmugDNA.25463.1 | 12.24 | 12.55 | 0.11 | 0.03 | -1.25 | 0.011083 | 0.002909 | 0.252486 | 0.079157 |
| MmugDNA.25463.1.S1_s_at | MmugDNA.25463.1 | 11.48 | 11.58 | 0.11 | 0.02 | -1.07 | 0.657477 | 0.020417 | 0.864078 | 0.179442 |
| MmugDNA.25468.1.S1_at   | MmugDNA.25468.1 | 7.96  | 7.95  | 0.27 | 0.41 | 1.01  | 0.481631 | 0.286012 | 0.772225 | 0.547512 |
| MmugDNA.25469.1.S1_at   | MmugDNA.25469.1 | 8.87  | 8.86  | 0.33 | 0.03 | 1     | 0.417271 | 0.704082 | 0.734845 | 0.828326 |
| MmugDNA.25471.1.S1_at   | MmugDNA.25471.1 | 9.75  | 10.57 | 0.23 | 0.09 | -1.77 | 0.004399 | 0.000893 | 0.198874 | 0.047789 |
| MmugDNA.25472.1.S1_at   | MmugDNA.25472.1 | 4.02  | 4.12  | 0.12 | 0.32 | -1.07 | 0.442253 | 0.632934 | 0.749953 | 0.783881 |
| MmugDNA.25477.1.S1_at   | MmugDNA.25477.1 | 6.2   | 6.37  | 0.26 | 0.15 | -1.12 | 0.262125 | 0.096673 | 0.624369 | 0.35417  |
| MmugDNA.25481.1.S1_at   | MmugDNA.25481.1 | 6.73  | 6.6   | 0.04 | 0.02 | 1.09  | 0.005207 | 0.129884 | 0.206226 | 0.401509 |
| MmugDNA.25487.1.S1_at   | MmugDNA.25487.1 | 13.41 | 13.44 | 0.03 | 0.03 | -1.02 | 0.132337 | 0.525219 | 0.506752 | 0.714809 |
| MmugDNA.2549.1.S1_at    | MmugDNA.2549.1  | 8.16  | 7.9   | 0.82 | 0.3  | 1.2   | 0.537628 | 0.584385 | 0.802735 | 0.75242  |
| MmugDNA.2549.1.S1_x_at  | MmugDNA.2549.1  | 7.9   | 7.87  | 0.41 | 0.3  | 1.02  | 0.267013 | 0.489787 | 0.627652 | 0.691918 |
| MmugDNA.25492.1.S1_s_at | MmugDNA.25492.1 | 10.43 | 10.39 | 0.39 | 0.03 | 1.03  | 0.286925 | 0.255983 | 0.644004 | 0.523919 |
| MmugDNA.25494.1.S1_at   | MmugDNA.25494.1 | 11.51 | 12    | 0.28 | 0.13 | -1.4  | 0.234139 | 0.159676 | 0.601531 | 0.435785 |
| MmugDNA.25496.1.S1_at   | MmugDNA.25496.1 | 6.55  | 5.2   | 0.8  | 0.26 | 2.56  | 0.131792 | 0.15689  | 0.506189 | 0.432372 |
| MmugDNA.2550.1.S1_at    | MmugDNA.2550.1  | 13.08 | 13.31 | 0.44 | 0.05 | -1.17 | 0.423712 | 0.559742 | 0.739193 | 0.736365 |
| MmugDNA.25504.1.S1_at   | MmugDNA.25504.1 | 9.06  | 9.34  | 0.13 | 0.26 | -1.21 | 0.063507 | 0.012404 | 0.415717 | 0.144058 |
| MmugDNA.25508.1.S1_at   | MmugDNA.25508.1 | 8.13  | 9.7   | 0.5  | 0.19 | -2.96 | 0.019814 | 0.020018 | 0.302615 | 0.177698 |
| MmugDNA.25509.1.S1_at   | MmugDNA.25509.1 | 5.41  | 5.21  | 0.59 | 0.32 | 1.15  | 0.551135 | 0.753806 | 0.811264 | 0.856687 |
| MmugDNA.25513.1.S1_at   | MmugDNA.25513.1 | 7.34  | 7.39  | 0.03 | 0.14 | -1.03 | 0.21737  | 0.662461 | 0.587269 | 0.802351 |

|                         |                 |       |       |      |      |       |          |          |          |          |
|-------------------------|-----------------|-------|-------|------|------|-------|----------|----------|----------|----------|
| MmugDNA.25515.1.S1_at   | MmugDNA.25515.1 | 6.22  | 7.63  | 0.15 | 0.18 | -2.66 | 0.000581 | 0.000209 | 0.143137 | 0.032262 |
| MmugDNA.25525.1.S1_at   | MmugDNA.25525.1 | 7.2   | 7.04  | 0.35 | 0.16 | 1.12  | 0.253608 | 0.416542 | 0.618323 | 0.641647 |
| MmugDNA.25527.1.S1_at   | MmugDNA.25527.1 | 5.23  | 5.07  | 0.15 | 0.06 | 1.12  | 0.591672 | 0.119005 | 0.833637 | 0.387269 |
| MmugDNA.25529.1.S1_at   | MmugDNA.25529.1 | 12.74 | 12.49 | 0.14 | 0.07 | 1.19  | 0.032759 | 0.082894 | 0.345393 | 0.332437 |
| MmugDNA.25530.1.S1_at   | MmugDNA.25530.1 | 12.77 | 12.78 | 0.22 | 0.02 | -1.01 | 0.376721 | 0.37971  | 0.706973 | 0.616542 |
| MmugDNA.25535.1.S1_at   | MmugDNA.25535.1 | 9.89  | 10.64 | 0.63 | 0.07 | -1.68 | 0.119944 | 0.107895 | 0.493259 | 0.370945 |
| MmugDNA.25538.1.S1_at   | MmugDNA.25538.1 | 3.63  | 3.6   | 0.1  | 0.21 | 1.02  | 0.518459 | 0.867678 | 0.792692 | 0.924794 |
| MmugDNA.25540.1.S1_at   | MmugDNA.25540.1 | 11.94 | 12    | 0.16 | 0.06 | -1.04 | 0.687796 | 0.183775 | 0.87793  | 0.459871 |
| MmugDNA.25541.1.S1_at   | MmugDNA.25541.1 | 6.99  | 7.23  | 0.43 | 0.05 | -1.18 | 0.696682 | 0.216142 | 0.882169 | 0.489701 |
| MmugDNA.25552.1.S1_at   | MmugDNA.25552.1 | 3.86  | 3.71  | 0.17 | 0.06 | 1.11  | 0.341713 | 0.296275 | 0.685359 | 0.555423 |
| MmugDNA.25552.1.S1_s_at | MmugDNA.25552.1 | 5.92  | 5.69  | 0.18 | 0.12 | -1.18 | 0.135044 | 0.109677 | 0.50914  | 0.373675 |
| MmugDNA.25553.1.S1_at   | MmugDNA.25553.1 | 7.48  | 8     | 0.46 | 0.22 | -1.42 | 0.160325 | 0.025122 | 0.533335 | 0.198608 |
| MmugDNA.25561.1.S1_at   | MmugDNA.25561.1 | 6.86  | 7.21  | 0.56 | 0.07 | -1.28 | 0.37021  | 0.468294 | 0.704556 | 0.6777   |
| MmugDNA.25570.1.S1_at   | MmugDNA.25570.1 | 4.77  | 4.73  | 0.82 | 0.3  | 1.02  | 0.898588 | 0.020716 | 0.965566 | 0.180645 |
| MmugDNA.25572.1.S1_at   | MmugDNA.25572.1 | 13.97 | 13.93 | 0.18 | 0.02 | 1.03  | 0.609542 | 0.446627 | 0.841773 | 0.66287  |
| MmugDNA.25572.1.S1_s_at | MmugDNA.25572.1 | 13.4  | 13.43 | 0.14 | 0.03 | -1.02 | 0.332566 | 0.304541 | 0.678964 | 0.561803 |
| MmugDNA.25573.1.S1_at   | MmugDNA.25573.1 | 6.41  | 6.65  | 0.87 | 0.08 | -1.17 | 0.719555 | 0.876406 | 0.89112  | 0.929683 |
| MmugDNA.25583.1.S1_at   | MmugDNA.25583.1 | 9.32  | 8.81  | 0.26 | 0.17 | 1.43  | 0.043711 | 0.019433 | 0.372554 | 0.175133 |
| MmugDNA.25587.1.S1_at   | MmugDNA.25587.1 | 10.61 | 10.38 | 0.29 | 0.01 | 1.17  | 0.20012  | 0.058381 | 0.571887 | 0.288369 |
| MmugDNA.25590.1.S1_at   | MmugDNA.25590.1 | 10.71 | 10.71 | 0.14 | 0.05 | -1    | 0.664491 | 0.75984  | 0.867683 | 0.860462 |
| MmugDNA.25594.1.S1_at   | MmugDNA.25594.1 | 4.09  | 3.9   | 0.14 | 0.17 | 1.14  | 0.487982 | 0.12909  | 0.775317 | 0.400583 |
| MmugDNA.25601.1.S1_at   | MmugDNA.25601.1 | 6.57  | 7.48  | 0.72 | 0.21 | -1.87 | 0.23206  | 0.282253 | 0.599895 | 0.544991 |
| MmugDNA.25616.1.S1_at   | MmugDNA.25616.1 | 6.87  | 6.61  | 0.2  | 0.17 | 1.19  | 0.39727  | 0.071152 | 0.721717 | 0.313041 |
| MmugDNA.25617.1.S1_at   | MmugDNA.25617.1 | 3.05  | 3.15  | 0.13 | 0.07 | -1.07 | 0.187218 | 0.176761 | 0.559729 | 0.45319  |
| MmugDNA.25619.1.S1_at   | MmugDNA.25619.1 | 8.99  | 8.92  | 0.32 | 0.15 | 1.05  | 0.978976 | 0.248265 | 0.993198 | 0.517596 |
| MmugDNA.25621.1.S1_at   | MmugDNA.25621.1 | 8.31  | 8.76  | 0.28 | 0.04 | -1.36 | 0.083634 | 0.048001 | 0.449639 | 0.264109 |
| MmugDNA.25622.1.S1_at   | MmugDNA.25622.1 | 8.73  | 9.26  | 0.53 | 0.41 | -1.45 | 0.120035 | 0.128209 | 0.493293 | 0.399281 |
| MmugDNA.25626.1.S1_at   | MmugDNA.25626.1 | 8.56  | 8.55  | 0.34 | 0.06 | 1     | 0.380476 | 0.040739 | 0.709387 | 0.246735 |
| MmugDNA.2563.1.S1_at    | MmugDNA.2563.1  | 10.1  | 10.43 | 0.47 | 0.12 | -1.26 | 0.19278  | 0.142937 | 0.563577 | 0.416854 |
| MmugDNA.25634.1.S1_at   | MmugDNA.25634.1 | 11.4  | 10.95 | 0.22 | 0.12 | 1.37  | 0.092497 | 0.012737 | 0.461062 | 0.14546  |
| MmugDNA.25642.1.S1_at   | MmugDNA.25642.1 | 3.47  | 3.31  | 0.06 | 0.11 | 1.11  | 0.145578 | 0.313297 | 0.520527 | 0.567753 |
| MmugDNA.25646.1.S1_s_at | MmugDNA.25646.1 | 10.24 | 10.4  | 0.32 | 0.08 | -1.11 | 0.451832 | 0.428049 | 0.755571 | 0.649619 |
| MmugDNA.25647.1.S1_at   | MmugDNA.25647.1 | 4.2   | 4.06  | 0.23 | 0.07 | 1.1   | 0.428239 | 0.213413 | 0.741698 | 0.48728  |
| MmugDNA.25649.1.S1_at   | MmugDNA.25649.1 | 4.74  | 4.65  | 0.14 | 0.04 | 1.06  | 0.107517 | 0.34448  | 0.480018 | 0.589886 |
| MmugDNA.2565.1.S1_at    | MmugDNA.2565.1  | 4.93  | 4.94  | 0.17 | 0.13 | -1.01 | 0.33922  | 0.519838 | 0.683685 | 0.71135  |
| MmugDNA.25652.1.S1_at   | MmugDNA.25652.1 | 7.83  | 8.14  | 0.46 | 0.09 | -1.24 | 0.274221 | 0.004689 | 0.633792 | 0.095363 |
| MmugDNA.25656.1.S1_at   | MmugDNA.25656.1 | 5.12  | 6.57  | 0.57 | 0.56 | -2.73 | 0.023233 | 0.013373 | 0.314809 | 0.14827  |
| MmugDNA.2566.1.S1_at    | MmugDNA.2566.1  | 9.5   | 9.28  | 0.12 | 0.14 | 1.16  | 0.122362 | 0.086154 | 0.495694 | 0.338528 |
| MmugDNA.25666.1.S1_at   | MmugDNA.25666.1 | 12.56 | 12.66 | 0.25 | 0.04 | -1.07 | 0.988435 | 0.517131 | 0.995877 | 0.709435 |
| MmugDNA.25667.1.S1_at   | MmugDNA.25667.1 | 7.68  | 8.84  | 1.04 | 0.07 | -2.24 | 0.129294 | 0.155532 | 0.504088 | 0.430888 |
| MmugDNA.25674.1.S1_at   | MmugDNA.25674.1 | 7.31  | 7.16  | 0.78 | 0.18 | 1.11  | 0.956689 | 0.979477 | 0.985606 | 0.988961 |
| MmugDNA.25678.1.S1_at   | MmugDNA.25678.1 | 7.62  | 7.36  | 0.42 | 0.03 | 1.2   | 0.186849 | 0.056091 | 0.559297 | 0.282723 |
| MmugDNA.25679.1.S1_at   | MmugDNA.25679.1 | 8.03  | 8.19  | 0.29 | 0.03 | -1.12 | 0.352028 | 0.444421 | 0.692649 | 0.662053 |



|                         |                 |       |       |      |      |       |          |          |          |          |
|-------------------------|-----------------|-------|-------|------|------|-------|----------|----------|----------|----------|
| MmugDNA.25681.1.S1_at   | MmugDNA.25681.1 | 7.02  | 7.54  | 0.41 | 0.18 | -1.43 | 0.030567 | 0.010602 | 0.338095 | 0.134272 |
| MmugDNA.25693.1.S1_at   | MmugDNA.25693.1 | 8.98  | 8.48  | 0.28 | 0.44 | 1.41  | 0.684542 | 0.020477 | 0.87645  | 0.179644 |
| MmugDNA.25698.1.S1_at   | MmugDNA.25698.1 | 9.48  | 9.61  | 0.27 | 0.19 | -1.09 | 0.852237 | 0.087548 | 0.947936 | 0.340753 |
| MmugDNA.25703.1.S1_at   | MmugDNA.25703.1 | 12.19 | 12.3  | 0.14 | 0.04 | -1.08 | 0.300576 | 0.434271 | 0.65512  | 0.65444  |
| MmugDNA.25704.1.S1_at   | MmugDNA.25704.1 | 9.25  | 9.06  | 1.37 | 0.13 | 1.14  | 0.71213  | 0.806004 | 0.887895 | 0.888436 |
| MmugDNA.2571.1.S1_at    | MmugDNA.2571.1  | 9.65  | 8.11  | 0.06 | 0.29 | 2.9   | 0.000662 | 0.000674 | 0.144737 | 0.04413  |
| MmugDNA.2571.1.S1_s_at  | MmugDNA.2571.1  | 10.33 | 8.87  | 0.04 | 0.21 | 2.75  | 0.000255 | 0.0004   | 0.130979 | 0.037471 |
| MmugDNA.2571.1.S1_x_at  | MmugDNA.2571.1  | 9.98  | 8.49  | 0.08 | 0.26 | 2.81  | 0.000578 | 0.000496 | 0.143137 | 0.038955 |
| MmugDNA.25716.1.S1_at   | MmugDNA.25716.1 | 8.72  | 8.85  | 0.28 | 0.1  | -1.09 | 0.626737 | 0.83962  | 0.850139 | 0.908582 |
| MmugDNA.25719.1.S1_at   | MmugDNA.25719.1 | 9.57  | 9.58  | 0.67 | 0.16 | -1.01 | 0.522269 | 0.169553 | 0.795143 | 0.446179 |
| MmugDNA.25725.1.S1_at   | MmugDNA.25725.1 | 4.53  | 4.66  | 0.56 | 0.15 | -1.1  | 0.609529 | 0.92632  | 0.841773 | 0.958277 |
| MmugDNA.2573.1.S1_at    | MmugDNA.2573.1  | 12.67 | 12.64 | 0.11 | 0.05 | 1.02  | 0.519846 | 0.393151 | 0.793373 | 0.626102 |
| MmugDNA.25730.1.S1_at   | MmugDNA.25730.1 | 11.37 | 11.44 | 0.25 | 0.05 | -1.05 | 0.793136 | 0.129158 | 0.924208 | 0.400611 |
| MmugDNA.25736.1.S1_at   | MmugDNA.25736.1 | 3.17  | 3.21  | 0.09 | 0.05 | -1.03 | 0.285474 | 0.609771 | 0.643438 | 0.768079 |
| MmugDNA.25746.1.S1_at   | MmugDNA.25746.1 | 3.59  | 3.6   | 0.13 | 0.05 | -1    | 0.54237  | 0.253269 | 0.805676 | 0.521645 |
| MmugDNA.25753.1.S1_at   | MmugDNA.25753.1 | 7.13  | 6.88  | 0.06 | 0.18 | 1.18  | 0.089879 | 0.044088 | 0.457893 | 0.254278 |
| MmugDNA.25755.1.S1_at   | MmugDNA.25755.1 | 8.91  | 8.82  | 0.5  | 0.32 | 1.06  | 0.821385 | 0.131336 | 0.935568 | 0.403431 |
| MmugDNA.25759.1.S1_at   | MmugDNA.25759.1 | 5.12  | 5.15  | 0.1  | 0.09 | -1.02 | 0.851756 | 0.802819 | 0.947748 | 0.886441 |
| MmugDNA.25764.1.S1_at   | MmugDNA.25764.1 | 6.5   | 6.69  | 0.94 | 0.02 | -1.14 | 0.55483  | 0.493897 | 0.813014 | 0.69445  |
| MmugDNA.25765.1.S1_at   | MmugDNA.25765.1 | 7.06  | 7     | 0.23 | 0.14 | 1.04  | 0.622761 | 0.718451 | 0.847944 | 0.837045 |
| MmugDNA.25766.1.S1_at   | MmugDNA.25766.1 | 12.18 | 12.26 | 0.13 | 0.09 | -1.06 | 0.378716 | 0.19966  | 0.708438 | 0.474335 |
| MmugDNA.25768.1.S1_at   | MmugDNA.25768.1 | 14.26 | 14.24 | 0.08 | 0    | 1.01  | 0.732168 | 0.804614 | 0.897011 | 0.88762  |
| MmugDNA.25770.1.S1_at   | MmugDNA.25770.1 | 14.27 | 14.27 | 0.04 | 0.01 | 1     | 0.397283 | 0.547454 | 0.721717 | 0.728464 |
| MmugDNA.25771.1.S1_at   | MmugDNA.25771.1 | 3.73  | 3.71  | 0.17 | 0.05 | 1.01  | 0.393038 | 0.139778 | 0.718935 | 0.413114 |
| MmugDNA.25777.1.S1_at   | MmugDNA.25777.1 | 9.41  | 9.96  | 0.95 | 0.1  | -1.47 | 0.121588 | 0.057749 | 0.495204 | 0.286658 |
| MmugDNA.25779.1.S1_at   | MmugDNA.25779.1 | 7.7   | 8.13  | 0.53 | 0.2  | -1.35 | 0.713508 | 0.052274 | 0.88844  | 0.274146 |
| MmugDNA.25789.1.S1_at   | MmugDNA.25789.1 | 9.02  | 8.99  | 0.17 | 0.05 | 1.02  | 0.968712 | 0.998179 | 0.989723 | 0.999049 |
| MmugDNA.25794.1.S1_s_at | MmugDNA.25794.1 | 6.14  | 6.16  | 0.95 | 0.21 | -1.02 | 0.99924  | 0.359809 | 0.999788 | 0.601084 |
| MmugDNA.25795.1.S1_at   | MmugDNA.25795.1 | 11.19 | 11.13 | 0.29 | 0.09 | 1.04  | 0.194236 | 0.158488 | 0.564864 | 0.434433 |
| MmugDNA.25796.1.S1_s_at | MmugDNA.25796.1 | 13.95 | 13.96 | 0.07 | 0.02 | -1.01 | 0.538464 | 0.774768 | 0.803282 | 0.868861 |
| MmugDNA.258.1.S1_s_at   | MmugDNA.258.1   | 10.18 | 10.61 | 0.14 | 0.08 | -1.35 | 0.026411 | 0.091935 | 0.32471  | 0.347267 |
| MmugDNA.25805.1.S1_at   | MmugDNA.25805.1 | 4.07  | 4.09  | 0.18 | 0.09 | -1.01 | 0.463367 | 0.290432 | 0.762124 | 0.551169 |
| MmugDNA.25824.1.S1_at   | MmugDNA.25824.1 | 5.01  | 5.06  | 0.02 | 0.22 | -1.04 | 0.713947 | 0.886173 | 0.88857  | 0.935211 |
| MmugDNA.2583.1.S1_s_at  | MmugDNA.2583.1  | 5.26  | 5.25  | 1.27 | 0.23 | 1     | 0.400632 | 0.365115 | 0.723891 | 0.605299 |
| MmugDNA.25831.1.S1_at   | MmugDNA.25831.1 | 13.33 | 13.33 | 0.06 | 0.04 | -1    | 0.318993 | 0.768417 | 0.668492 | 0.865521 |
| MmugDNA.25831.1.S1_s_at | MmugDNA.25831.1 | 14.44 | 14.45 | 0.04 | 0.02 | -1.01 | 0.667972 | 0.96273  | 0.86882  | 0.979102 |
| MmugDNA.25833.1.S1_at   | MmugDNA.25833.1 | 14.12 | 14.1  | 0.07 | 0.05 | 1.01  | 0.303022 | 0.321402 | 0.65693  | 0.573207 |
| MmugDNA.25833.1.S1_s_at | MmugDNA.25833.1 | 14.31 | 14.3  | 0.08 | 0.05 | 1     | 0.264022 | 0.267439 | 0.625926 | 0.533173 |
| MmugDNA.25843.1.S1_at   | MmugDNA.25843.1 | 14.33 | 14.33 | 0.06 | 0.01 | 1     | 0.472476 | 0.585488 | 0.767074 | 0.752852 |
| MmugDNA.2586.1.S1_at    | MmugDNA.2586.1  | 11.67 | 11.57 | 0.38 | 0.09 | 1.07  | 0.804108 | 0.94854  | 0.928756 | 0.970655 |
| MmugDNA.25861.1.S1_at   | MmugDNA.25861.1 | 6.82  | 6.72  | 0.12 | 0.06 | 1.07  | 0.762086 | 0.859034 | 0.910776 | 0.919753 |
| MmugDNA.25864.1.S1_at   | MmugDNA.25864.1 | 13.68 | 13.66 | 0.1  | 0.04 | 1.02  | 0.828774 | 0.004568 | 0.938525 | 0.094375 |
| MmugDNA.25869.1.S1_at   | MmugDNA.25869.1 | 14.24 | 14.23 | 0.05 | 0.01 | 1.01  | 0.930829 | 0.927593 | 0.97692  | 0.958862 |

|                         |                 |       |       |      |      |       |          |          |          |          |
|-------------------------|-----------------|-------|-------|------|------|-------|----------|----------|----------|----------|
| MmugDNA.25870.1.S1_at   | MmugDNA.25870.1 | 5.22  | 6.9   | 0.77 | 0.55 | -3.19 | 0.055851 | 0.047059 | 0.399441 | 0.261469 |
| MmugDNA.25879.1.S1_at   | MmugDNA.25879.1 | 9.03  | 8.84  | 0.2  | 0.05 | 1.14  | 0.187419 | 0.252435 | 0.559787 | 0.521061 |
| MmugDNA.2588.1.S1_at    | MmugDNA.2588.1  | 10.1  | 10.25 | 0.34 | 0.09 | -1.11 | 0.510883 | 0.394986 | 0.788393 | 0.627225 |
| MmugDNA.25881.1.S1_at   | MmugDNA.25881.1 | 8.38  | 8.26  | 0.15 | 0.09 | 1.08  | 0.954227 | 0.236401 | 0.984783 | 0.507314 |
| MmugDNA.25884.1.S1_at   | MmugDNA.25884.1 | 8.16  | 8.33  | 0.36 | 0.06 | -1.13 | 0.766226 | 0.068254 | 0.912101 | 0.307556 |
| MmugDNA.25888.1.S1_at   | MmugDNA.25888.1 | 4.91  | 4.92  | 0.1  | 0    | -1    | 0.856128 | 0.994587 | 0.949177 | 0.99666  |
| MmugDNA.2589.1.S1_at    | MmugDNA.2589.1  | 9.16  | 8.72  | 0.21 | 0.08 | 1.35  | 0.035222 | 0.038664 | 0.351392 | 0.24169  |
| MmugDNA.25896.1.S1_at   | MmugDNA.25896.1 | 7.34  | 7.63  | 0.31 | 0.14 | -1.23 | 0.219145 | 0.029717 | 0.588525 | 0.214029 |
| MmugDNA.25900.1.S1_at   | MmugDNA.25900.1 | 8.75  | 8.7   | 0.14 | 0.1  | 1.03  | 0.990661 | 0.944891 | 0.996447 | 0.968825 |
| MmugDNA.25903.1.S1_at   | MmugDNA.25903.1 | 14.07 | 14.09 | 0.14 | 0.07 | -1.01 | 0.336562 | 0.526361 | 0.681934 | 0.71555  |
| MmugDNA.25903.1.S1_s_at | MmugDNA.25903.1 | 14.08 | 14.15 | 0.06 | 0.04 | -1.05 | 0.091865 | 0.112274 | 0.460177 | 0.377561 |
| MmugDNA.2591.1.S1_at    | MmugDNA.2591.1  | 11.56 | 11.67 | 0.16 | 0.02 | -1.08 | 0.407244 | 0.568296 | 0.728545 | 0.741876 |
| MmugDNA.2591.1.S1_s_at  | MmugDNA.2591.1  | 11.09 | 10.92 | 0.15 | 0.09 | 1.13  | 0.059249 | 0.062312 | 0.406296 | 0.296445 |
| MmugDNA.2592.1.S1_at    | MmugDNA.2592.1  | 9.67  | 9.9   | 0.55 | 0.09 | -1.18 | 0.643644 | 0.352407 | 0.858218 | 0.595722 |
| MmugDNA.25921.1.S1_at   | MmugDNA.25921.1 | 14.01 | 14.01 | 0.02 | 0.04 | 1     | 0.454035 | 0.907286 | 0.75651  | 0.947562 |
| MmugDNA.25923.1.S1_at   | MmugDNA.25923.1 | 7.91  | 7.33  | 0.57 | 0.37 | 1.5   | 0.524168 | 0.752234 | 0.795761 | 0.855787 |
| MmugDNA.25924.1.S1_s_at | MmugDNA.25924.1 | 10.36 | 10.11 | 0.24 | 0.26 | 1.18  | 0.295219 | 0.493018 | 0.651026 | 0.69397  |
| MmugDNA.25925.1.S1_at   | MmugDNA.25925.1 | 12.38 | 12.21 | 0.16 | 0.04 | 1.12  | 0.050503 | 0.119971 | 0.387323 | 0.388672 |
| MmugDNA.25927.1.S1_at   | MmugDNA.25927.1 | 10.21 | 10.64 | 1.39 | 0.34 | -1.34 | 0.590547 | 0.420391 | 0.832911 | 0.644099 |
| MmugDNA.25931.1.S1_at   | MmugDNA.25931.1 | 5.12  | 5.1   | 0.23 | 0.02 | 1.01  | 0.491518 | 0.431547 | 0.777851 | 0.652437 |
| MmugDNA.25936.1.S1_at   | MmugDNA.25936.1 | 9.19  | 9.18  | 0.21 | 0.11 | 1     | 0.939057 | 0.296236 | 0.979446 | 0.555423 |
| MmugDNA.25941.1.S1_at   | MmugDNA.25941.1 | 5.21  | 6.5   | 0.39 | 0.38 | -2.45 | 0.026916 | 0.027134 | 0.326584 | 0.205864 |
| MmugDNA.25943.1.S1_at   | MmugDNA.25943.1 | 11.2  | 10.78 | 0.32 | 0.1  | 1.34  | 0.208123 | 0.23947  | 0.579837 | 0.510159 |
| MmugDNA.25950.1.S1_at   | MmugDNA.25950.1 | 14.1  | 14.06 | 0.07 | 0.02 | 1.03  | 0.394676 | 0.288625 | 0.719972 | 0.549827 |
| MmugDNA.25951.1.S1_at   | MmugDNA.25951.1 | 8.46  | 9.16  | 0.52 | 0.15 | -1.63 | 0.098472 | 0.203674 | 0.467888 | 0.477907 |
| MmugDNA.25954.1.S1_at   | MmugDNA.25954.1 | 14.35 | 14.29 | 0.1  | 0.04 | 1.05  | 0.394059 | 0.705345 | 0.719608 | 0.829145 |
| MmugDNA.25955.1.S1_at   | MmugDNA.25955.1 | 14.28 | 14.27 | 0.09 | 0.04 | 1.01  | 0.406177 | 0.688488 | 0.727818 | 0.818184 |
| MmugDNA.25958.1.S1_at   | MmugDNA.25958.1 | 8.35  | 8.68  | 0.38 | 0.1  | -1.26 | 0.2342   | 0.084559 | 0.601544 | 0.335953 |
| MmugDNA.25963.1.S1_at   | MmugDNA.25963.1 | 7.68  | 7.78  | 0.16 | 0.08 | -1.07 | 0.449114 | 0.328695 | 0.75411  | 0.578213 |
| MmugDNA.25964.1.S1_at   | MmugDNA.25964.1 | 11.08 | 10.83 | 0.62 | 0.06 | 1.18  | 0.546303 | 0.258106 | 0.808428 | 0.525574 |
| MmugDNA.25969.1.S1_at   | MmugDNA.25969.1 | 7.5   | 7.78  | 0.52 | 0.18 | -1.21 | 0.762096 | 0.017257 | 0.910776 | 0.166393 |
| MmugDNA.25970.1.S1_at   | MmugDNA.25970.1 | 6.43  | 6.4   | 0.05 | 0.03 | 1.03  | 0.127898 | 0.342888 | 0.502422 | 0.588712 |
| MmugDNA.25986.1.S1_at   | MmugDNA.25986.1 | 10.24 | 10.29 | 0.41 | 0.3  | -1.04 | 0.455219 | 0.443284 | 0.757332 | 0.661138 |
| MmugDNA.25993.1.S1_at   | MmugDNA.25993.1 | 10.13 | 10.04 | 0.23 | 0.02 | 1.06  | 0.671598 | 0.640184 | 0.870464 | 0.788741 |
| MmugDNA.2600.1.S1_at    | MmugDNA.2600.1  | 6.71  | 6.38  | 0.41 | 0.08 | 1.25  | 0.27163  | 0.03824  | 0.631445 | 0.240265 |
| MmugDNA.26005.1.S1_at   | MmugDNA.26005.1 | 7.61  | 6.98  | 0.08 | 0.13 | 1.54  | 0.001543 | 0.003035 | 0.161959 | 0.080386 |
| MmugDNA.26015.1.S1_at   | MmugDNA.26015.1 | 6.3   | 7.1   | 0.07 | 0.09 | -1.74 | 0.000219 | 0.003579 | 0.120771 | 0.085582 |
| MmugDNA.26022.1.S1_at   | MmugDNA.26022.1 | 5.59  | 5.51  | 0.46 | 0.03 | 1.06  | 0.264246 | 0.274072 | 0.626029 | 0.538557 |
| MmugDNA.26028.1.S1_at   | MmugDNA.26028.1 | 7.55  | 7.55  | 0.38 | 0.03 | -1    | 0.38921  | 0.000578 | 0.715989 | 0.041382 |
| MmugDNA.26044.1.S1_at   | MmugDNA.26044.1 | 4.41  | 4.93  | 0.15 | 0.16 | -1.43 | 0.040624 | 0.062203 | 0.364613 | 0.296296 |
| MmugDNA.26045.1.S1_at   | MmugDNA.26045.1 | 7.17  | 7.17  | 0.83 | 0.45 | -1    | 0.660845 | 0.866283 | 0.865819 | 0.923959 |
| MmugDNA.2605.1.S1_at    | MmugDNA.2605.1  | 8.43  | 8.6   | 0.79 | 0.2  | -1.13 | 0.886216 | 0.973779 | 0.960501 | 0.985656 |
| MmugDNA.26069.1.S1_at   | MmugDNA.26069.1 | 4.4   | 4.31  | 0.22 | 0.43 | 1.07  | 0.91292  | 0.532164 | 0.970413 | 0.718995 |

|                       |                 |       |       |      |      |       |          |          |          |          |
|-----------------------|-----------------|-------|-------|------|------|-------|----------|----------|----------|----------|
| MmugDNA.2607.1.S1_at  | MmugDNA.2607.1  | 5.16  | 5.14  | 0.17 | 0.15 | 1.01  | 0.766669 | 0.375924 | 0.912281 | 0.61375  |
| MmugDNA.26072.1.S1_at | MmugDNA.26072.1 | 9.12  | 9.71  | 0.47 | 0.08 | -1.51 | 0.357388 | 0.330134 | 0.695784 | 0.578987 |
| MmugDNA.26076.1.S1_at | MmugDNA.26076.1 | 3.65  | 3.47  | 0.22 | 0.14 | 1.13  | 0.126474 | 0.245449 | 0.500304 | 0.515213 |
| MmugDNA.26077.1.A1_at | MmugDNA.26077.1 | 7.41  | 7.4   | 0.46 | 0.08 | 1.01  | 0.687476 | 0.452064 | 0.877796 | 0.66677  |
| MmugDNA.26077.1.S1_at | MmugDNA.26077.1 | 7.19  | 7.39  | 0.67 | 0.05 | -1.15 | 0.489073 | 0.398352 | 0.775981 | 0.629355 |
| MmugDNA.26084.1.S1_at | MmugDNA.26084.1 | 11.03 | 11.29 | 0.69 | 0.11 | -1.2  | 0.512377 | 0.616194 | 0.789335 | 0.772513 |
| MmugDNA.26094.1.S1_at | MmugDNA.26094.1 | 11.84 | 12.19 | 0.22 | 0.03 | -1.27 | 0.141899 | 0.058207 | 0.516871 | 0.287988 |
| MmugDNA.26095.1.S1_at | MmugDNA.26095.1 | 9.54  | 10.69 | 0.3  | 0.13 | -2.2  | 0.008671 | 0.003248 | 0.236048 | 0.082187 |
| MmugDNA.26104.1.S1_at | MmugDNA.26104.1 | 10.4  | 8.97  | 0.9  | 0.34 | 2.7   | 0.04755  | 0.020984 | 0.380487 | 0.181647 |
| MmugDNA.2612.1.S1_at  | MmugDNA.2612.1  | 3.63  | 3.57  | 0.22 | 0.18 | 1.04  | 0.312861 | 0.378218 | 0.664259 | 0.615438 |
| MmugDNA.26132.1.S1_at | MmugDNA.26132.1 | 3.02  | 2.98  | 0.14 | 0.13 | -1.03 | 0.778653 | 0.849538 | 0.918374 | 0.914587 |
| MmugDNA.2614.1.S1_at  | MmugDNA.2614.1  | 8.12  | 8.84  | 1.13 | 0.1  | -1.66 | 0.897119 | 0.979386 | 0.964979 | 0.988889 |
| MmugDNA.26140.1.S1_at | MmugDNA.26140.1 | 7.94  | 7.65  | 0.17 | 0.06 | 1.22  | 0.090155 | 0.007165 | 0.458008 | 0.113808 |
| MmugDNA.26148.1.S1_at | MmugDNA.26148.1 | 9.47  | 8.47  | 0.17 | 0.05 | 2     | 0.000657 | 0.000129 | 0.144737 | 0.029087 |
| MmugDNA.26149.1.S1_at | MmugDNA.26149.1 | 5.9   | 5.72  | 0.25 | 0.1  | 1.13  | 0.311948 | 0.574797 | 0.663542 | 0.746142 |
| MmugDNA.26150.1.S1_at | MmugDNA.26150.1 | 8.76  | 8.53  | 0.22 | 0.02 | 1.17  | 0.07755  | 0.075643 | 0.439648 | 0.320087 |
| MmugDNA.26151.1.S1_at | MmugDNA.26151.1 | 4.34  | 4.15  | 0.35 | 0.12 | 1.14  | 0.147344 | 0.171245 | 0.521578 | 0.447792 |
| MmugDNA.26155.1.S1_at | MmugDNA.26155.1 | 5.28  | 5.42  | 0.19 | 0.11 | -1.1  | 0.223603 | 0.085615 | 0.592699 | 0.337614 |
| MmugDNA.26158.1.S1_at | MmugDNA.26158.1 | 5.32  | 5.15  | 0.06 | 0.12 | 1.12  | 0.090214 | 0.463953 | 0.458221 | 0.674724 |
| MmugDNA.26163.1.S1_at | MmugDNA.26163.1 | 6.5   | 7.09  | 0.19 | 0.06 | -1.51 | 0.004832 | 0.001992 | 0.202685 | 0.066247 |
| MmugDNA.26165.1.S1_at | MmugDNA.26165.1 | 7.12  | 7.7   | 0.15 | 0.18 | -1.49 | 0.013251 | 0.005871 | 0.267168 | 0.104856 |
| MmugDNA.26169.1.S1_at | MmugDNA.26169.1 | 5.07  | 5.05  | 0.18 | 0.01 | 1.01  | 0.935838 | 0.980804 | 0.978406 | 0.989478 |
| MmugDNA.26170.1.S1_at | MmugDNA.26170.1 | 4.98  | 4.51  | 0.8  | 0.02 | 1.39  | 0.297994 | 0.190698 | 0.652803 | 0.466141 |
| MmugDNA.26171.1.S1_at | MmugDNA.26171.1 | 7.89  | 8.26  | 0.47 | 0.16 | -1.3  | 0.297093 | 0.205565 | 0.652603 | 0.47981  |
| MmugDNA.26174.1.S1_at | MmugDNA.26174.1 | 5.08  | 5.01  | 0.65 | 0.79 | 1.05  | 0.85839  | 0.723088 | 0.95001  | 0.839592 |
| MmugDNA.26177.1.S1_at | MmugDNA.26177.1 | 11.69 | 11.42 | 0.5  | 0.16 | 1.21  | 0.437118 | 0.505091 | 0.746719 | 0.70197  |
| MmugDNA.26179.1.S1_at | MmugDNA.26179.1 | 4.59  | 4.48  | 0.04 | 0.06 | 1.08  | 0.056835 | 0.555315 | 0.401254 | 0.733767 |
| MmugDNA.26187.1.S1_at | MmugDNA.26187.1 | 10.82 | 10.82 | 0.05 | 0.19 | -1    | 0.503719 | 0.128382 | 0.784379 | 0.399645 |
| MmugDNA.26188.1.S1_at | MmugDNA.26188.1 | 7.07  | 6.85  | 0.07 | 0.07 | 1.16  | 0.031577 | 0.305419 | 0.341584 | 0.562418 |
| MmugDNA.26193.1.S1_at | MmugDNA.26193.1 | 8.89  | 7.93  | 0.72 | 0.05 | 1.95  | 0.029735 | 0.004152 | 0.33574  | 0.091036 |
| MmugDNA.26195.1.S1_at | MmugDNA.26195.1 | 5.2   | 5.12  | 0.1  | 0.13 | 1.05  | 0.237475 | 0.390055 | 0.604464 | 0.624002 |
| MmugDNA.262.1.S1_at   | MmugDNA.262.1   | 12.17 | 12.2  | 0.38 | 0.04 | -1.02 | 0.849768 | 0.428562 | 0.947149 | 0.650098 |
| MmugDNA.2620.1.S1_at  | MmugDNA.2620.1  | 11.94 | 11.93 | 0.18 | 0.05 | 1     | 0.981127 | 0.907644 | 0.993962 | 0.947753 |
| MmugDNA.26204.1.S1_at | MmugDNA.26204.1 | 9.78  | 10.24 | 0.36 | 0.06 | -1.38 | 0.313245 | 0.509021 | 0.664568 | 0.703967 |
| MmugDNA.26209.1.S1_at | MmugDNA.26209.1 | 10.83 | 10.68 | 0.57 | 0.04 | 1.11  | 0.223374 | 0.126201 | 0.592569 | 0.396748 |
| MmugDNA.2621.1.S1_at  | MmugDNA.2621.1  | 12.41 | 12.31 | 0.12 | 0.08 | 1.07  | 0.167256 | 0.388213 | 0.539832 | 0.62268  |
| MmugDNA.26212.1.S1_at | MmugDNA.26212.1 | 8.97  | 9.08  | 0.35 | 0.27 | -1.08 | 0.143486 | 0.000367 | 0.518836 | 0.037273 |
| MmugDNA.26219.1.S1_at | MmugDNA.26219.1 | 11.69 | 11.71 | 0.93 | 0.08 | -1.01 | 0.833212 | 0.115373 | 0.940167 | 0.382394 |
| MmugDNA.2622.1.S1_at  | MmugDNA.2622.1  | 9.93  | 9.64  | 0.49 | 0.11 | 1.22  | 0.528927 | 0.259776 | 0.798106 | 0.526648 |
| MmugDNA.26226.1.S1_at | MmugDNA.26226.1 | 12.78 | 12.7  | 0.22 | 0.08 | 1.06  | 0.514427 | 0.089123 | 0.790351 | 0.343152 |
| MmugDNA.2623.1.S1_at  | MmugDNA.2623.1  | 9.94  | 10.11 | 0.55 | 0.2  | -1.12 | 0.781547 | 0.462844 | 0.919573 | 0.674149 |
| MmugDNA.2624.1.S1_at  | MmugDNA.2624.1  | 6.34  | 6.35  | 0.3  | 0.3  | -1.01 | 0.846019 | 0.137074 | 0.945957 | 0.409843 |
| MmugDNA.26243.1.S1_at | MmugDNA.26243.1 | 3.82  | 6.42  | 2.34 | 0.2  | -6.09 | 0.370593 | 0.405868 | 0.704908 | 0.634037 |

|                         |                 |       |       |      |      |       |          |          |          |          |
|-------------------------|-----------------|-------|-------|------|------|-------|----------|----------|----------|----------|
| MmugDNA.26251.1.S1_at   | MmugDNA.26251.1 | 10.85 | 11.77 | 0.09 | 0.03 | -1.9  | 0.000059 | 0.000079 | 0.108151 | 0.027016 |
| MmugDNA.26256.1.S1_at   | MmugDNA.26256.1 | 11.26 | 10.52 | 3.45 | 0.22 | 1.66  | 0.640063 | 0.232433 | 0.856488 | 0.504189 |
| MmugDNA.26261.1.S1_at   | MmugDNA.26261.1 | 12.69 | 12.7  | 0.11 | 0.03 | -1.01 | 0.309339 | 0.205238 | 0.661672 | 0.479596 |
| MmugDNA.26264.1.S1_at   | MmugDNA.26264.1 | 11.92 | 12.1  | 0.38 | 0.09 | -1.14 | 0.462304 | 0.100978 | 0.761528 | 0.360543 |
| MmugDNA.26272.1.S1_s_at | MmugDNA.26272.1 | 9.3   | 8.42  | 0.3  | 0.32 | 1.84  | 0.025021 | 0.016254 | 0.320402 | 0.161612 |
| MmugDNA.26281.1.S1_at   | MmugDNA.26281.1 | 6.93  | 6.76  | 0.11 | 0.03 | 1.13  | 0.116114 | 0.115901 | 0.489554 | 0.383065 |
| MmugDNA.26286.1.S1_at   | MmugDNA.26286.1 | 6.14  | 6.62  | 0.59 | 0.17 | -1.39 | 0.099064 | 0.384496 | 0.468463 | 0.620142 |
| MmugDNA.26288.1.S1_at   | MmugDNA.26288.1 | 6.14  | 6.01  | 0.11 | 0.05 | 1.09  | 0.103627 | 0.094262 | 0.474343 | 0.350889 |
| MmugDNA.26289.1.S1_at   | MmugDNA.26289.1 | 10.06 | 10.29 | 0.31 | 0    | -1.17 | 0.087687 | 0.15916  | 0.455349 | 0.435217 |
| MmugDNA.26298.1.S1_at   | MmugDNA.26298.1 | 7.64  | 7.17  | 1.62 | 0.73 | 1.39  | 0.439493 | 0.600029 | 0.748221 | 0.761762 |
| MmugDNA.26305.1.S1_at   | MmugDNA.26305.1 | 5     | 4.84  | 0.12 | 0.16 | -1.12 | 0.541881 | 0.760797 | 0.805334 | 0.861028 |
| MmugDNA.26307.1.S1_at   | MmugDNA.26307.1 | 5.96  | 5.43  | 0.18 | 0.06 | 1.44  | 0.009385 | 0.027119 | 0.241869 | 0.205797 |
| MmugDNA.26310.1.S1_at   | MmugDNA.26310.1 | 12.95 | 12.85 | 0.33 | 0.02 | 1.07  | 0.67193  | 0.176661 | 0.870573 | 0.453138 |
| MmugDNA.26314.1.S1_at   | MmugDNA.26314.1 | 10.89 | 10.87 | 0.13 | 0.01 | 1.01  | 0.293882 | 0.360001 | 0.650207 | 0.601198 |
| MmugDNA.26316.1.S1_at   | MmugDNA.26316.1 | 6.45  | 6.49  | 0.42 | 0.14 | -1.03 | 0.476812 | 0.148719 | 0.769435 | 0.423201 |
| MmugDNA.26317.1.S1_at   | MmugDNA.26317.1 | 11.47 | 11.24 | 0.11 | 0.09 | 1.17  | 0.025915 | 0.022667 | 0.32273  | 0.188607 |
| MmugDNA.26318.1.S1_at   | MmugDNA.26318.1 | 12.66 | 12.52 | 0.16 | 0.08 | 1.1   | 0.231031 | 0.003197 | 0.599045 | 0.08199  |
| MmugDNA.26323.1.S1_at   | MmugDNA.26323.1 | 3.74  | 3.49  | 0.12 | 0.07 | 1.19  | 0.066746 | 0.18452  | 0.422643 | 0.460559 |
| MmugDNA.26328.1.S1_at   | MmugDNA.26328.1 | 12.44 | 12.71 | 0.11 | 0.02 | -1.21 | 0.03148  | 0.001881 | 0.341227 | 0.064979 |
| MmugDNA.2633.1.S1_at    | MmugDNA.2633.1  | 9.29  | 9.36  | 0.18 | 0.01 | -1.05 | 0.211662 | 0.005249 | 0.582625 | 0.100352 |
| MmugDNA.26347.1.S1_at   | MmugDNA.26347.1 | 11.85 | 11.77 | 0.12 | 0.14 | 1.06  | 0.236488 | 0.078527 | 0.603376 | 0.325285 |
| MmugDNA.2635.1.S1_s_at  | MmugDNA.2635.1  | 8.38  | 8.28  | 0.11 | 0.06 | 1.07  | 0.106526 | 0.613129 | 0.478992 | 0.770419 |
| MmugDNA.26353.1.S1_at   | MmugDNA.26353.1 | 8.63  | 8.59  | 0.3  | 0.15 | 1.03  | 0.876906 | 0.500905 | 0.95711  | 0.699336 |
| MmugDNA.26355.1.S1_at   | MmugDNA.26355.1 | 10.35 | 10.25 | 1.21 | 0.31 | 1.07  | 0.798087 | 0.079491 | 0.925892 | 0.32681  |
| MmugDNA.26357.1.S1_at   | MmugDNA.26357.1 | 3.87  | 4.06  | 0.47 | 0.42 | -1.15 | 0.851421 | 0.842592 | 0.947639 | 0.910315 |
| MmugDNA.26358.1.S1_at   | MmugDNA.26358.1 | 5.72  | 4.78  | 0.14 | 0.23 | 1.91  | 0.003167 | 0.003115 | 0.191107 | 0.081314 |
| MmugDNA.26367.1.S1_at   | MmugDNA.26367.1 | 9.89  | 10.32 | 0.57 | 0.28 | -1.35 | 0.839548 | 0.937349 | 0.942809 | 0.964687 |
| MmugDNA.2637.1.S1_at    | MmugDNA.2637.1  | 8.59  | 8.82  | 0.2  | 0.1  | -1.18 | 0.1839   | 0.050671 | 0.556837 | 0.270317 |
| MmugDNA.26376.1.S1_at   | MmugDNA.26376.1 | 5.48  | 5.35  | 0.22 | 0.19 | 1.09  | 0.767437 | 0.769256 | 0.912495 | 0.866004 |
| MmugDNA.26382.1.S1_at   | MmugDNA.26382.1 | 11.66 | 11.9  | 0.31 | 0.12 | -1.18 | 0.430524 | 0.142411 | 0.742836 | 0.415965 |
| MmugDNA.2639.1.S1_at    | MmugDNA.2639.1  | 7.32  | 7.65  | 0.16 | 0.14 | -1.26 | 0.035472 | 0.039293 | 0.352121 | 0.243338 |
| MmugDNA.26391.1.S1_at   | MmugDNA.26391.1 | 4.84  | 4.76  | 0.13 | 0.07 | 1.06  | 0.880839 | 0.910171 | 0.95879  | 0.949342 |
| MmugDNA.26394.1.S1_at   | MmugDNA.26394.1 | 6.71  | 6.56  | 0.37 | 0.09 | 1.11  | 0.533234 | 0.791932 | 0.80079  | 0.879785 |
| MmugDNA.26396.1.S1_at   | MmugDNA.26396.1 | 11.65 | 11.22 | 0.86 | 0.23 | 1.35  | 0.670968 | 0.526878 | 0.870106 | 0.71564  |
| MmugDNA.26397.1.S1_at   | MmugDNA.26397.1 | 11.34 | 11.61 | 0.52 | 0.03 | -1.21 | 0.378217 | 0.546554 | 0.708118 | 0.728079 |
| MmugDNA.26399.1.S1_at   | MmugDNA.26399.1 | 6.66  | 6.62  | 0.26 | 0.09 | 1.03  | 0.27897  | 0.363597 | 0.637933 | 0.603996 |
| MmugDNA.26399.1.S1_s_at | MmugDNA.26399.1 | 9.7   | 9.79  | 0.31 | 0.06 | -1.06 | 0.64341  | 0.774016 | 0.858218 | 0.868608 |
| MmugDNA.2640.1.S1_at    | MmugDNA.2640.1  | 5.71  | 5.52  | 0.15 | 0.07 | 1.14  | 0.064691 | 0.081752 | 0.418541 | 0.330085 |
| MmugDNA.26408.1.S1_at   | MmugDNA.26408.1 | 6.06  | 6.04  | 0.04 | 0.04 | 1.01  | 0.522498 | 0.213749 | 0.795143 | 0.487564 |
| MmugDNA.26410.1.S1_at   | MmugDNA.26410.1 | 5.7   | 4.98  | 0.2  | 0.4  | 1.64  | 0.073976 | 0.349831 | 0.434665 | 0.593595 |
| MmugDNA.26413.1.S1_at   | MmugDNA.26413.1 | 11.14 | 11.07 | 0.34 | 0.07 | 1.05  | 0.588108 | 0.519193 | 0.83181  | 0.710878 |
| MmugDNA.26426.1.S1_at   | MmugDNA.26426.1 | 8.2   | 8.69  | 1.19 | 0.26 | -1.41 | 0.523582 | 0.107738 | 0.795656 | 0.370816 |
| MmugDNA.26430.1.S1_at   | MmugDNA.26430.1 | 11    | 10.9  | 0.18 | 0.02 | 1.07  | 0.139171 | 0.007962 | 0.514459 | 0.118702 |

|                         |                 |       |       |      |      |       |          |          |          |          |
|-------------------------|-----------------|-------|-------|------|------|-------|----------|----------|----------|----------|
| MmugDNA.26432.1.S1_at   | MmugDNA.26432.1 | 4.71  | 4.7   | 0.18 | 0.09 | 1     | 0.905975 | 0.928874 | 0.968196 | 0.959449 |
| MmugDNA.26436.1.S1_at   | MmugDNA.26436.1 | 9.99  | 10.55 | 0.67 | 0.13 | -1.48 | 0.628458 | 0.809121 | 0.851106 | 0.889995 |
| MmugDNA.26446.1.S1_at   | MmugDNA.26446.1 | 11.09 | 10.72 | 0.48 | 0.09 | 1.3   | 0.200684 | 0.270908 | 0.572447 | 0.536026 |
| MmugDNA.26447.1.S1_at   | MmugDNA.26447.1 | 7.78  | 8.23  | 0.41 | 0.26 | -1.36 | 0.453079 | 0.364737 | 0.755962 | 0.605053 |
| MmugDNA.2646.1.S1_at    | MmugDNA.2646.1  | 9.48  | 9.55  | 0.28 | 0.12 | -1.05 | 0.299123 | 0.25016  | 0.653489 | 0.519186 |
| MmugDNA.26461.1.S1_at   | MmugDNA.26461.1 | 10.62 | 9.91  | 0.21 | 0.13 | 1.64  | 0.011869 | 0.001431 | 0.257858 | 0.057607 |
| MmugDNA.26466.1.S1_at   | MmugDNA.26466.1 | 7.34  | 8.21  | 0.44 | 0.11 | -1.83 | 0.019533 | 0.008405 | 0.301474 | 0.121726 |
| MmugDNA.26467.1.S1_at   | MmugDNA.26467.1 | 12.1  | 12.22 | 0.17 | 0.06 | -1.09 | 0.884919 | 0.951161 | 0.960159 | 0.972331 |
| MmugDNA.2647.1.S1_s_at  | MmugDNA.2647.1  | 12.39 | 12.42 | 0.49 | 0    | -1.02 | 0.755921 | 0.742904 | 0.90805  | 0.851074 |
| MmugDNA.26476.1.S1_at   | MmugDNA.26476.1 | 8.98  | 8.19  | 0.37 | 0.09 | 1.73  | 0.023228 | 0.03474  | 0.314809 | 0.230577 |
| MmugDNA.26485.1.S1_s_at | MmugDNA.26485.1 | 13.95 | 14.06 | 0.13 | 0.03 | -1.08 | 0.190078 | 0.609305 | 0.561346 | 0.767713 |
| MmugDNA.26489.1.S1_at   | MmugDNA.26489.1 | 11.93 | 12.09 | 0.58 | 0.01 | -1.12 | 0.466778 | 0.256951 | 0.763876 | 0.524777 |
| MmugDNA.26491.1.S1_at   | MmugDNA.26491.1 | 9.47  | 9.31  | 0.62 | 0.06 | 1.12  | 0.988407 | 0.074349 | 0.995877 | 0.318046 |
| MmugDNA.26500.1.S1_at   | MmugDNA.26500.1 | 10.16 | 9.92  | 0.37 | 0.04 | 1.18  | 0.363917 | 0.178745 | 0.70032  | 0.455039 |
| MmugDNA.26505.1.S1_at   | MmugDNA.26505.1 | 11.42 | 11.55 | 0.57 | 0.05 | -1.1  | 0.660331 | 0.2001   | 0.86557  | 0.474603 |
| MmugDNA.26506.1.S1_at   | MmugDNA.26506.1 | 14.43 | 14.48 | 0.09 | 0.04 | -1.04 | 0.287327 | 0.407304 | 0.644416 | 0.634886 |
| MmugDNA.26509.1.S1_at   | MmugDNA.26509.1 | 3.36  | 3.26  | 0.05 | 0.12 | 1.07  | 0.607269 | 0.469691 | 0.840774 | 0.678347 |
| MmugDNA.26510.1.S1_at   | MmugDNA.26510.1 | 7.32  | 5.88  | 1.63 | 0.65 | 2.72  | 0.261906 | 0.138194 | 0.624156 | 0.411145 |
| MmugDNA.26511.1.S1_at   | MmugDNA.26511.1 | 12.31 | 12.59 | 0.07 | 0.05 | -1.22 | 0.005533 | 0.007989 | 0.208157 | 0.118791 |
| MmugDNA.26514.1.S1_at   | MmugDNA.26514.1 | 5.36  | 5.43  | 0.18 | 0.02 | -1.05 | 0.761601 | 0.234429 | 0.910578 | 0.505674 |
| MmugDNA.26520.1.S1_at   | MmugDNA.26520.1 | 5.57  | 6.22  | 1.1  | 0.02 | -1.57 | 0.355604 | 0.415483 | 0.694743 | 0.64091  |
| MmugDNA.26525.1.S1_at   | MmugDNA.26525.1 | 6.55  | 6.2   | 0.21 | 0.03 | 1.28  | 0.129108 | 0.040272 | 0.503785 | 0.245902 |
| MmugDNA.26529.1.S1_at   | MmugDNA.26529.1 | 14.22 | 14.31 | 0.04 | 0.03 | -1.06 | 0.11615  | 0.162017 | 0.489554 | 0.438108 |
| MmugDNA.26533.1.S1_at   | MmugDNA.26533.1 | 4.9   | 4.9   | 0.06 | 0.02 | -1    | 0.9407   | 0.074734 | 0.979845 | 0.318465 |
| MmugDNA.26537.1.S1_at   | MmugDNA.26537.1 | 7.09  | 7.32  | 0.33 | 0.01 | -1.18 | 0.692262 | 0.534437 | 0.880095 | 0.720369 |
| MmugDNA.26541.1.S1_at   | MmugDNA.26541.1 | 7.45  | 6.31  | 0.28 | 0.17 | 2.2   | 0.003352 | 0.000248 | 0.194985 | 0.032979 |
| MmugDNA.26545.1.S1_at   | MmugDNA.26545.1 | 5.92  | 6.17  | 1.46 | 0.46 | -1.19 | 0.731052 | 0.006219 | 0.896371 | 0.106916 |
| MmugDNA.26547.1.S1_at   | MmugDNA.26547.1 | 6.45  | 6.37  | 0.1  | 0.01 | 1.06  | 0.212957 | 0.515348 | 0.58352  | 0.708259 |
| MmugDNA.26552.1.S1_at   | MmugDNA.26552.1 | 5.82  | 5.77  | 0.07 | 0.06 | 1.03  | 0.253142 | 0.365534 | 0.617925 | 0.605602 |
| MmugDNA.26556.1.S1_at   | MmugDNA.26556.1 | 7.1   | 7.06  | 0.13 | 0.13 | 1.03  | 0.352974 | 0.464419 | 0.692958 | 0.675068 |
| MmugDNA.26557.1.S1_at   | MmugDNA.26557.1 | 8.32  | 7.94  | 0.18 | 0.14 | 1.31  | 0.118255 | 0.088011 | 0.491763 | 0.341482 |
| MmugDNA.2656.1.S1_at    | MmugDNA.2656.1  | 6.26  | 6.25  | 0.08 | 0.05 | 1.01  | 0.629635 | 0.531667 | 0.851663 | 0.718819 |
| MmugDNA.26561.1.S1_at   | MmugDNA.26561.1 | 7.3   | 7.13  | 0.18 | 0.1  | 1.13  | 0.183003 | 0.176466 | 0.555875 | 0.452836 |
| MmugDNA.26564.1.S1_at   | MmugDNA.26564.1 | 7.95  | 8.33  | 0.15 | 0.06 | -1.3  | 0.013589 | 0.010147 | 0.269894 | 0.132001 |
| MmugDNA.26568.1.S1_at   | MmugDNA.26568.1 | 7.96  | 7.96  | 0.61 | 0.1  | -1    | 0.518502 | 0.386271 | 0.792695 | 0.621469 |
| MmugDNA.26575.1.S1_at   | MmugDNA.26575.1 | 5.85  | 5.9   | 0.03 | 0.12 | -1.04 | 0.720855 | 0.272182 | 0.891811 | 0.536939 |
| MmugDNA.26578.1.S1_x_at | MmugDNA.26578.1 | 7.49  | 7.33  | 0.13 | 0.04 | 1.12  | 0.262229 | 0.274041 | 0.624447 | 0.538527 |
| MmugDNA.26579.1.S1_at   | MmugDNA.26579.1 | 7.58  | 7.57  | 0.18 | 0.21 | 1.01  | 0.603461 | 0.681044 | 0.839251 | 0.813776 |
| MmugDNA.26585.1.S1_at   | MmugDNA.26585.1 | 11.62 | 11.54 | 0.07 | 0.05 | 1.06  | 0.116831 | 0.000619 | 0.490029 | 0.042444 |
| MmugDNA.26588.1.S1_at   | MmugDNA.26588.1 | 9.83  | 10.42 | 0.34 | 0.18 | -1.5  | 0.048799 | 0.006577 | 0.384408 | 0.109968 |
| MmugDNA.26593.1.S1_at   | MmugDNA.26593.1 | 10.22 | 9.77  | 0.03 | 0.14 | 1.36  | 0.008185 | 0.000715 | 0.232005 | 0.044419 |
| MmugDNA.26597.1.S1_at   | MmugDNA.26597.1 | 6.94  | 6.99  | 0.47 | 0.04 | -1.04 | 0.506135 | 0.511075 | 0.785701 | 0.705383 |
| MmugDNA.2660.1.S1_at    | MmugDNA.2660.1  | 10.18 | 10.83 | 0.2  | 0.08 | -1.57 | 0.012106 | 0.004423 | 0.259438 | 0.092904 |

|                         |                 |       |       |      |      |       |          |          |          |          |
|-------------------------|-----------------|-------|-------|------|------|-------|----------|----------|----------|----------|
| MmugDNA.26602.1.S1_at   | MmugDNA.26602.1 | 9.44  | 8.83  | 0.2  | 0.11 | 1.53  | 0.0132   | 0.003212 | 0.266951 | 0.082023 |
| MmugDNA.26604.1.S1_at   | MmugDNA.26604.1 | 11.49 | 11.32 | 0.2  | 0.12 | 1.13  | 0.096862 | 0.010709 | 0.465555 | 0.135227 |
| MmugDNA.26604.1.S1_s_at | MmugDNA.26604.1 | 12.46 | 12.3  | 0.17 | 0.13 | 1.11  | 0.154006 | 0.022706 | 0.527325 | 0.188723 |
| MmugDNA.26610.1.S1_at   | MmugDNA.26610.1 | 4.86  | 5.82  | 0.28 | 0.37 | -1.95 | 0.061593 | 0.052085 | 0.411026 | 0.273814 |
| MmugDNA.26613.1.S1_at   | MmugDNA.26613.1 | 8.32  | 8.24  | 1.41 | 0.23 | 1.06  | 0.805184 | 0.061498 | 0.929175 | 0.294828 |
| MmugDNA.26623.1.S1_at   | MmugDNA.26623.1 | 5.96  | 5.35  | 0.72 | 0.31 | 1.53  | 0.40877  | 0.190501 | 0.729499 | 0.465906 |
| MmugDNA.26626.1.S1_at   | MmugDNA.26626.1 | 6.63  | 5.63  | 0.38 | 0.02 | 2.01  | 0.022685 | 0.011643 | 0.311976 | 0.139789 |
| MmugDNA.26627.1.S1_at   | MmugDNA.26627.1 | 4.72  | 4.48  | 0.08 | 0.13 | 1.18  | 0.061347 | 0.149958 | 0.410536 | 0.424608 |
| MmugDNA.26629.1.S1_at   | MmugDNA.26629.1 | 11.43 | 11.39 | 0.21 | 0.08 | 1.02  | 0.933946 | 0.027231 | 0.977707 | 0.206279 |
| MmugDNA.26637.1.S1_at   | MmugDNA.26637.1 | 10.98 | 10.35 | 0.37 | 0.17 | 1.55  | 0.09654  | 0.065723 | 0.465152 | 0.30176  |
| MmugDNA.26642.1.S1_at   | MmugDNA.26642.1 | 12.99 | 12.94 | 0.71 | 0.02 | -1.04 | 0.439724 | 0.572032 | 0.748282 | 0.744198 |
| MmugDNA.26643.1.S1_at   | MmugDNA.26643.1 | 5.86  | 5.83  | 0.1  | 0.03 | 1.02  | 0.239663 | 0.740329 | 0.606153 | 0.849596 |
| MmugDNA.26645.1.S1_at   | MmugDNA.26645.1 | 10.17 | 10.21 | 0.27 | 0.04 | -1.03 | 0.781307 | 0.890262 | 0.919573 | 0.937505 |
| MmugDNA.26646.1.S1_at   | MmugDNA.26646.1 | 4.11  | 4.24  | 0.14 | 0.06 | -1.1  | 0.07235  | 0.259997 | 0.43218  | 0.52675  |
| MmugDNA.26648.1.S1_at   | MmugDNA.26648.1 | 8.72  | 8.59  | 0.18 | 0.21 | 1.1   | 0.228596 | 0.00406  | 0.597571 | 0.090288 |
| MmugDNA.26661.1.S1_at   | MmugDNA.26661.1 | 6.72  | 6.77  | 0.33 | 0.25 | -1.03 | 0.948304 | 0.644357 | 0.982226 | 0.791566 |
| MmugDNA.26664.1.S1_at   | MmugDNA.26664.1 | 12.7  | 12.19 | 0.23 | 0.19 | 1.43  | 0.056552 | 0.167407 | 0.400591 | 0.443785 |
| MmugDNA.26668.1.S1_s_at | MmugDNA.26668.1 | 13.68 | 13.81 | 0.24 | 0.1  | -1.1  | 0.265181 | 0.433185 | 0.626397 | 0.653513 |
| MmugDNA.26669.1.S1_at   | MmugDNA.26669.1 | 11.74 | 11.67 | 0.4  | 0.03 | 1.05  | 0.798795 | 0.434284 | 0.926306 | 0.65444  |
| MmugDNA.26670.1.S1_at   | MmugDNA.26670.1 | 6.71  | 6.54  | 0.12 | 0.05 | 1.13  | 0.07171  | 0.116634 | 0.431368 | 0.383829 |
| MmugDNA.26672.1.S1_at   | MmugDNA.26672.1 | 13.37 | 13.41 | 0.25 | 0.08 | -1.03 | 0.928329 | 0.392522 | 0.976259 | 0.625813 |
| MmugDNA.26673.1.S1_at   | MmugDNA.26673.1 | 6.24  | 6.42  | 0.2  | 0.26 | -1.13 | 0.374391 | 0.236705 | 0.705837 | 0.507459 |
| MmugDNA.26674.1.S1_at   | MmugDNA.26674.1 | 12.72 | 12.71 | 0.65 | 0.11 | 1.01  | 0.94581  | 0.052584 | 0.981128 | 0.274848 |
| MmugDNA.26679.1.S1_at   | MmugDNA.26679.1 | 4.78  | 4.54  | 0.22 | 0.13 | 1.18  | 0.158697 | 0.049104 | 0.531588 | 0.266518 |
| MmugDNA.2668.1.S1_at    | MmugDNA.2668.1  | 6.59  | 6.58  | 0.17 | 0.14 | 1.01  | 0.468307 | 0.579159 | 0.76491  | 0.748918 |
| MmugDNA.26681.1.S1_at   | MmugDNA.26681.1 | 13.03 | 13.08 | 0.08 | 0.09 | -1.03 | 0.464714 | 0.001074 | 0.762686 | 0.051908 |
| MmugDNA.26686.1.S1_at   | MmugDNA.26686.1 | 11.28 | 11.21 | 0.23 | 0.02 | 1.05  | 0.78154  | 0.870099 | 0.919573 | 0.926348 |
| MmugDNA.26687.1.S1_at   | MmugDNA.26687.1 | 9.2   | 9.21  | 0.22 | 0.04 | -1.01 | 0.864202 | 0.870897 | 0.952249 | 0.926656 |
| MmugDNA.26689.1.S1_at   | MmugDNA.26689.1 | 3.33  | 3.36  | 0.08 | 0.03 | -1.02 | 0.659268 | 0.495072 | 0.86514  | 0.695319 |
| MmugDNA.2669.1.S1_at    | MmugDNA.2669.1  | 10.97 | 10.87 | 0.42 | 0.16 | 1.07  | 0.7223   | 0.7461   | 0.892242 | 0.852688 |
| MmugDNA.26693.1.S1_at   | MmugDNA.26693.1 | 13.22 | 13.06 | 0.35 | 0.03 | 1.12  | 0.94092  | 0.828051 | 0.979891 | 0.901214 |
| MmugDNA.26695.1.S1_at   | MmugDNA.26695.1 | 9.59  | 10.84 | 0.03 | 0.01 | -2.38 | 2.03E-07 | 0.000564 | 0.008097 | 0.041049 |
| MmugDNA.26696.1.S1_at   | MmugDNA.26696.1 | 8.21  | 8.02  | 0.23 | 0.13 | 1.14  | 0.432737 | 0.035775 | 0.744101 | 0.233489 |
| MmugDNA.26702.1.S1_at   | MmugDNA.26702.1 | 8.13  | 8.9   | 0.8  | 0.08 | -1.7  | 0.202471 | 0.271472 | 0.573952 | 0.536512 |
| MmugDNA.26707.1.S1_at   | MmugDNA.26707.1 | 8.07  | 8.25  | 0.14 | 0.11 | -1.14 | 0.086189 | 0.494285 | 0.453748 | 0.694791 |
| MmugDNA.26715.1.S1_at   | MmugDNA.26715.1 | 5.01  | 4.82  | 0.04 | 0.16 | 1.14  | 0.103131 | 0.125693 | 0.473929 | 0.396249 |
| MmugDNA.26729.1.S1_at   | MmugDNA.26729.1 | 7.44  | 7.2   | 0.2  | 0    | 1.18  | 0.128909 | 0.283727 | 0.503626 | 0.54618  |
| MmugDNA.2673.1.S1_at    | MmugDNA.2673.1  | 7.32  | 7.41  | 0.59 | 0.06 | -1.06 | 0.448452 | 0.053863 | 0.753886 | 0.277613 |
| MmugDNA.26732.1.S1_at   | MmugDNA.26732.1 | 3.56  | 3.65  | 0.04 | 0.07 | -1.07 | 0.194244 | 0.689007 | 0.564864 | 0.818488 |
| MmugDNA.26734.1.S1_at   | MmugDNA.26734.1 | 9.86  | 9.77  | 0.09 | 0.16 | 1.07  | 0.272898 | 0.012312 | 0.632536 | 0.143646 |
| MmugDNA.26735.1.S1_at   | MmugDNA.26735.1 | 7.32  | 7.53  | 0.31 | 0.2  | -1.15 | 0.713451 | 0.35283  | 0.88844  | 0.596151 |
| MmugDNA.26737.1.S1_at   | MmugDNA.26737.1 | 6.41  | 6.25  | 0.15 | 0.03 | 1.12  | 0.466086 | 0.840178 | 0.763357 | 0.908919 |
| MmugDNA.26746.1.S1_at   | MmugDNA.26746.1 | 9.35  | 9.07  | 0.69 | 0.21 | 1.21  | 0.400537 | 0.054223 | 0.723841 | 0.278275 |

|                         |                 |       |       |      |      |       |          |          |          |          |
|-------------------------|-----------------|-------|-------|------|------|-------|----------|----------|----------|----------|
| MmugDNA.26749.1.S1_at   | MmugDNA.26749.1 | 6.36  | 6.33  | 0.11 | 0.13 | 1.02  | 0.372608 | 0.550381 | 0.705567 | 0.73041  |
| MmugDNA.26751.1.S1_at   | MmugDNA.26751.1 | 10.02 | 10.09 | 0.34 | 0.07 | -1.05 | 0.960547 | 0.704171 | 0.987213 | 0.828349 |
| MmugDNA.26752.1.S1_at   | MmugDNA.26752.1 | 3.88  | 3.66  | 0.08 | 0.08 | 1.16  | 0.050007 | 0.038878 | 0.386663 | 0.24211  |
| MmugDNA.26759.1.S1_at   | MmugDNA.26759.1 | 3.98  | 3.93  | 0.15 | 0.12 | 1.03  | 0.579351 | 0.687389 | 0.82645  | 0.817576 |
| MmugDNA.26763.1.S1_at   | MmugDNA.26763.1 | 11.46 | 11.41 | 0.28 | 0.12 | 1.03  | 0.677686 | 0.489289 | 0.873631 | 0.691774 |
| MmugDNA.26767.1.S1_at   | MmugDNA.26767.1 | 3.08  | 2.97  | 0.06 | 0.17 | 1.08  | 0.315163 | 0.161837 | 0.665641 | 0.437937 |
| MmugDNA.26767.1.S1_x_at | MmugDNA.26767.1 | 3.21  | 3.13  | 0.02 | 0.04 | 1.06  | 0.01844  | 0.38922  | 0.297408 | 0.623403 |
| MmugDNA.26774.1.S1_at   | MmugDNA.26774.1 | 12.22 | 12.36 | 0.36 | 0.05 | -1.11 | 0.156816 | 0.025365 | 0.530033 | 0.199629 |
| MmugDNA.26787.1.S1_at   | MmugDNA.26787.1 | 8.49  | 8.9   | 0.05 | 0.15 | -1.33 | 0.005093 | 0.012056 | 0.204981 | 0.142044 |
| MmugDNA.2679.1.S1_at    | MmugDNA.2679.1  | 12.15 | 11.64 | 0.1  | 0.15 | 1.43  | 0.020739 | 0.014528 | 0.305611 | 0.15376  |
| MmugDNA.26796.1.S1_at   | MmugDNA.26796.1 | 9.74  | 11.83 | 1.25 | 0.04 | -4.26 | 0.041032 | 0.008532 | 0.365672 | 0.122563 |
| MmugDNA.26797.1.S1_s_at | MmugDNA.26797.1 | 9.74  | 9.56  | 0.28 | 0.07 | 1.13  | 0.869468 | 0.094572 | 0.954458 | 0.351353 |
| MmugDNA.26799.1.S1_at   | MmugDNA.26799.1 | 10.16 | 10.16 | 2.19 | 0.24 | -1    | 0.724465 | 0.344977 | 0.893143 | 0.590239 |
| MmugDNA.26806.1.S1_at   | MmugDNA.26806.1 | 4.21  | 4.39  | 0.07 | 0.28 | -1.13 | 0.29985  | 0.381211 | 0.65432  | 0.617537 |
| MmugDNA.26808.1.S1_at   | MmugDNA.26808.1 | 4.46  | 4.16  | 0.1  | 0.17 | 1.23  | 0.044134 | 0.043531 | 0.374023 | 0.253227 |
| MmugDNA.2681.1.S1_s_at  | MmugDNA.2681.1  | 11.69 | 11.67 | 0.1  | 0.05 | 1.01  | 0.412362 | 0.39328  | 0.731945 | 0.626189 |
| MmugDNA.26814.1.S1_at   | MmugDNA.26814.1 | 8.2   | 8.2   | 0.24 | 0.11 | -1    | 0.28362  | 0.514119 | 0.641408 | 0.707434 |
| MmugDNA.26818.1.S1_at   | MmugDNA.26818.1 | 8.77  | 9.12  | 0.29 | 0.25 | -1.28 | 0.071253 | 0.003845 | 0.430589 | 0.088232 |
| MmugDNA.2682.1.S1_s_at  | MmugDNA.2682.1  | 13.25 | 13.21 | 0.18 | 0.07 | 1.03  | 0.763751 | 0.580339 | 0.911265 | 0.749637 |
| MmugDNA.26828.1.S1_at   | MmugDNA.26828.1 | 12.42 | 12.36 | 0.2  | 0.04 | 1.04  | 0.273614 | 0.334945 | 0.633298 | 0.58275  |
| MmugDNA.26837.1.S1_at   | MmugDNA.26837.1 | 12.73 | 12.7  | 0.15 | 0.13 | 1.02  | 0.621254 | 0.710679 | 0.847514 | 0.83219  |
| MmugDNA.26838.1.S1_s_at | MmugDNA.26838.1 | 5.81  | 5.85  | 0.21 | 0.11 | -1.03 | 0.987865 | 0.977017 | 0.995831 | 0.987496 |
| MmugDNA.26841.1.S1_at   | MmugDNA.26841.1 | 8.42  | 8     | 0.41 | 0.04 | 1.33  | 0.053759 | 0.007761 | 0.39536  | 0.117626 |
| MmugDNA.26854.1.S1_at   | MmugDNA.26854.1 | 9.95  | 9.74  | 0.26 | 0.18 | 1.16  | 0.24603  | 0.230027 | 0.611435 | 0.501872 |
| MmugDNA.26855.1.S1_at   | MmugDNA.26855.1 | 12.86 | 13.36 | 0.32 | 0.08 | -1.42 | 0.059023 | 0.048129 | 0.405968 | 0.264417 |
| MmugDNA.26872.1.S1_at   | MmugDNA.26872.1 | 13.09 | 13.17 | 0.09 | 0.04 | -1.06 | 0.10849  | 0.170557 | 0.480777 | 0.447179 |
| MmugDNA.26873.1.S1_at   | MmugDNA.26873.1 | 9.14  | 8.78  | 0.16 | 0.2  | 1.29  | 0.021247 | 0.032198 | 0.307222 | 0.222139 |
| MmugDNA.26881.1.S1_at   | MmugDNA.26881.1 | 6.42  | 6.47  | 0.07 | 0.05 | -1.03 | 0.905193 | 0.69339  | 0.968109 | 0.821664 |
| MmugDNA.26884.1.S1_at   | MmugDNA.26884.1 | 6.92  | 7.02  | 0.15 | 0.01 | -1.07 | 0.866144 | 0.416539 | 0.95294  | 0.641647 |
| MmugDNA.26885.1.S1_at   | MmugDNA.26885.1 | 3.79  | 3.73  | 0.03 | 0.28 | 1.05  | 0.674691 | 0.844528 | 0.872212 | 0.911525 |
| MmugDNA.26899.1.S1_at   | MmugDNA.26899.1 | 9.36  | 9.24  | 0.07 | 0.05 | 1.09  | 0.157571 | 0.001582 | 0.530588 | 0.060356 |
| MmugDNA.26903.1.S1_at   | MmugDNA.26903.1 | 11.03 | 11.15 | 0.3  | 0.03 | -1.09 | 0.728952 | 0.182069 | 0.895542 | 0.45857  |
| MmugDNA.26904.1.S1_at   | MmugDNA.26904.1 | 9.37  | 9.64  | 0.37 | 0.11 | -1.2  | 0.623611 | 0.270436 | 0.848284 | 0.535785 |
| MmugDNA.26905.1.S1_at   | MmugDNA.26905.1 | 11.72 | 12.07 | 0.23 | 0.11 | -1.28 | 0.061138 | 0.021827 | 0.41013  | 0.184799 |
| MmugDNA.26911.1.S1_at   | MmugDNA.26911.1 | 7.59  | 7.13  | 0.33 | 0.09 | 1.38  | 0.235822 | 0.007788 | 0.602926 | 0.117764 |
| MmugDNA.26915.1.S1_at   | MmugDNA.26915.1 | 11.67 | 11.2  | 1.57 | 0.12 | 1.39  | 0.695473 | 0.243143 | 0.881591 | 0.513356 |
| MmugDNA.26923.1.S1_at   | MmugDNA.26923.1 | 5.56  | 6.24  | 0.48 | 0.17 | -1.6  | 0.112537 | 0.128835 | 0.485852 | 0.400277 |
| MmugDNA.26925.1.S1_s_at | MmugDNA.26925.1 | 13.69 | 13.5  | 2.43 | 0.13 | 1.14  | 0.448259 | 0.374326 | 0.753886 | 0.612807 |
| MmugDNA.26926.1.S1_at   | MmugDNA.26926.1 | 12.74 | 12.75 | 0.12 | 0.09 | -1.01 | 0.873921 | 0.951569 | 0.95634  | 0.972522 |
| MmugDNA.26929.1.S1_s_at | MmugDNA.26929.1 | 5.89  | 5.47  | 0.22 | 0.03 | 1.33  | 0.056017 | 0.155659 | 0.399441 | 0.431037 |
| MmugDNA.26932.1.S1_at   | MmugDNA.26932.1 | 8.75  | 8.6   | 0.7  | 0.19 | 1.11  | 0.717145 | 0.686611 | 0.890289 | 0.81711  |
| MmugDNA.26933.1.S1_at   | MmugDNA.26933.1 | 7.5   | 7.15  | 0.25 | 0.24 | 1.27  | 0.259525 | 0.421888 | 0.622626 | 0.645369 |
| MmugDNA.2694.1.S1_at    | MmugDNA.2694.1  | 11.41 | 10.85 | 0.35 | 0.3  | 1.47  | 0.521185 | 0.002222 | 0.794371 | 0.069434 |

|                         |                 |       |       |      |      |       |          |          |          |          |
|-------------------------|-----------------|-------|-------|------|------|-------|----------|----------|----------|----------|
| MmugDNA.26947.1.S1_at   | MmugDNA.26947.1 | 9.62  | 9.77  | 0.2  | 0.05 | -1.11 | 0.257033 | 0.000127 | 0.620913 | 0.029087 |
| MmugDNA.26949.1.S1_at   | MmugDNA.26949.1 | 9.5   | 9.5   | 0.2  | 0.1  | 1     | 0.742146 | 0.905986 | 0.901638 | 0.946822 |
| MmugDNA.26951.1.S1_at   | MmugDNA.26951.1 | 7.38  | 7.72  | 0.55 | 0.07 | -1.27 | 0.921452 | 0.207693 | 0.973375 | 0.481924 |
| MmugDNA.26957.1.S1_at   | MmugDNA.26957.1 | 6.88  | 7.08  | 0.07 | 0.08 | -1.15 | 0.068017 | 0.019744 | 0.42451  | 0.176666 |
| MmugDNA.26959.1.S1_at   | MmugDNA.26959.1 | 4.25  | 4.14  | 0.08 | 0.11 | 1.09  | 0.166797 | 0.410542 | 0.539457 | 0.637376 |
| MmugDNA.26962.1.S1_at   | MmugDNA.26962.1 | 3.5   | 3.5   | 0.06 | 0.18 | -1    | 0.81893  | 0.927255 | 0.934641 | 0.958645 |
| MmugDNA.26964.1.S1_at   | MmugDNA.26964.1 | 8.14  | 7.68  | 0.73 | 0.21 | 1.37  | 0.254493 | 0.163098 | 0.618964 | 0.439256 |
| MmugDNA.26968.1.S1_at   | MmugDNA.26968.1 | 12.21 | 12.17 | 0.26 | 0.03 | 1.03  | 0.723606 | 0.017538 | 0.892847 | 0.167632 |
| MmugDNA.26968.1.S1_s_at | MmugDNA.26968.1 | 12.72 | 12.46 | 0.17 | 0.1  | 1.2   | 0.109414 | 0.007601 | 0.482257 | 0.116611 |
| MmugDNA.26971.1.S1_at   | MmugDNA.26971.1 | 4.92  | 5.58  | 0.76 | 0.15 | -1.58 | 0.614628 | 0.016066 | 0.843992 | 0.160618 |
| MmugDNA.26972.1.S1_at   | MmugDNA.26972.1 | 11.97 | 12.13 | 0.29 | 0.05 | -1.12 | 0.403031 | 0.558721 | 0.725406 | 0.735863 |
| MmugDNA.26975.1.S1_at   | MmugDNA.26975.1 | 6.84  | 7.32  | 0.29 | 0.14 | -1.4  | 0.101708 | 0.112013 | 0.471947 | 0.377171 |
| MmugDNA.26976.1.S1_at   | MmugDNA.26976.1 | 11.95 | 11.99 | 0.26 | 0.02 | -1.03 | 0.683389 | 0.168188 | 0.876089 | 0.444824 |
| MmugDNA.26978.1.S1_s_at | MmugDNA.26978.1 | 4.77  | 4.98  | 0.12 | 0.17 | -1.16 | 0.033659 | 0.046234 | 0.34712  | 0.259397 |
| MmugDNA.2698.1.S1_at    | MmugDNA.2698.1  | 13.09 | 12.74 | 0.16 | 0.17 | 1.28  | 0.030449 | 0.020512 | 0.337918 | 0.179742 |
| MmugDNA.26982.1.S1_at   | MmugDNA.26982.1 | 9.66  | 10.27 | 0.36 | 0.01 | -1.53 | 0.040551 | 0.007295 | 0.364613 | 0.114639 |
| MmugDNA.26990.1.S1_at   | MmugDNA.26990.1 | 7.58  | 8.58  | 0.21 | 0.23 | -2    | 0.007822 | 0.032578 | 0.230997 | 0.223585 |
| MmugDNA.26993.1.S1_at   | MmugDNA.26993.1 | 8.76  | 8.9   | 0.1  | 0.13 | -1.1  | 0.09235  | 0.494413 | 0.460762 | 0.694859 |
| MmugDNA.26994.1.S1_at   | MmugDNA.26994.1 | 5.83  | 5.92  | 0.12 | 0.03 | -1.07 | 0.288534 | 0.483438 | 0.645614 | 0.687931 |
| MmugDNA.26997.1.S1_at   | MmugDNA.26997.1 | 10.14 | 10.05 | 0.29 | 0    | 1.06  | 0.554457 | 0.583961 | 0.812723 | 0.752073 |
| MmugDNA.27000.1.S1_at   | MmugDNA.27000.1 | 9.7   | 9.79  | 0.69 | 0.06 | -1.06 | 0.2936   | 0.25621  | 0.649882 | 0.524069 |
| MmugDNA.27001.1.S1_at   | MmugDNA.27001.1 | 5.59  | 6.45  | 0.63 | 0.12 | -1.82 | 0.245191 | 0.038615 | 0.610609 | 0.241584 |
| MmugDNA.27002.1.S1_at   | MmugDNA.27002.1 | 7.47  | 8.11  | 0.97 | 0.15 | -1.55 | 0.315754 | 0.17125  | 0.666094 | 0.447792 |
| MmugDNA.27004.1.S1_at   | MmugDNA.27004.1 | 12.97 | 12.97 | 0.12 | 0.02 | 1     | 0.695788 | 0.234128 | 0.881741 | 0.505319 |
| MmugDNA.27006.1.S1_at   | MmugDNA.27006.1 | 4.03  | 4.01  | 0.22 | 0.1  | 1.01  | 0.412647 | 0.349386 | 0.732098 | 0.593405 |
| MmugDNA.27009.1.S1_at   | MmugDNA.27009.1 | 3.2   | 3.15  | 0.09 | 0.03 | 1.04  | 0.315043 | 0.429796 | 0.665641 | 0.651036 |
| MmugDNA.2701.1.S1_at    | MmugDNA.2701.1  | 13.32 | 13.33 | 0.07 | 0.01 | -1.01 | 0.736304 | 0.005737 | 0.899078 | 0.104271 |
| MmugDNA.27012.1.S1_at   | MmugDNA.27012.1 | 11.49 | 11.74 | 0.12 | 0.05 | -1.19 | 0.04808  | 0.641683 | 0.382163 | 0.789672 |
| MmugDNA.27017.1.S1_at   | MmugDNA.27017.1 | 8.28  | 8.12  | 0.03 | 0.07 | 1.11  | 0.034597 | 0.000036 | 0.350124 | 0.023031 |
| MmugDNA.27018.1.S1_at   | MmugDNA.27018.1 | 7.38  | 7.83  | 0.71 | 0.08 | -1.36 | 0.571633 | 0.438034 | 0.822859 | 0.657058 |
| MmugDNA.27019.1.S1_at   | MmugDNA.27019.1 | 11.88 | 11.93 | 0.16 | 0.03 | -1.04 | 0.50578  | 0.733925 | 0.785398 | 0.845896 |
| MmugDNA.2702.1.S1_at    | MmugDNA.2702.1  | 5.57  | 5.54  | 0.13 | 0.03 | 1.03  | 0.353903 | 0.674508 | 0.693507 | 0.809853 |
| MmugDNA.27020.1.S1_at   | MmugDNA.27020.1 | 8.47  | 8.31  | 0.3  | 0.09 | 1.11  | 0.66969  | 0.016454 | 0.869663 | 0.162441 |
| MmugDNA.27022.1.S1_s_at | MmugDNA.27022.1 | 9.77  | 10.32 | 0.42 | 0.17 | -1.46 | 0.313147 | 0.217281 | 0.664448 | 0.490911 |
| MmugDNA.27023.1.S1_at   | MmugDNA.27023.1 | 10.33 | 10.8  | 0.72 | 0.06 | -1.39 | 0.456541 | 0.631574 | 0.757961 | 0.782845 |
| MmugDNA.27027.1.S1_at   | MmugDNA.27027.1 | 5.24  | 6.98  | 1.01 | 0.48 | -3.33 | 0.138343 | 0.062464 | 0.51369  | 0.296717 |
| MmugDNA.27029.1.S1_at   | MmugDNA.27029.1 | 6.38  | 6.46  | 0.22 | 0.07 | -1.06 | 0.208586 | 0.285727 | 0.58027  | 0.54744  |
| MmugDNA.27030.1.S1_at   | MmugDNA.27030.1 | 7.32  | 7.8   | 0.54 | 0.13 | -1.4  | 0.067022 | 0.083958 | 0.422979 | 0.334877 |
| MmugDNA.27038.1.S1_at   | MmugDNA.27038.1 | 10.8  | 10.65 | 0.11 | 0.06 | 1.11  | 0.058677 | 0.120902 | 0.40517  | 0.389796 |
| MmugDNA.2704.1.S1_at    | MmugDNA.2704.1  | 12.22 | 12.54 | 0.04 | 0.31 | -1.25 | 0.058117 | 0.09275  | 0.403716 | 0.34896  |
| MmugDNA.27042.1.S1_at   | MmugDNA.27042.1 | 6.78  | 7.08  | 0.61 | 0.18 | -1.23 | 0.555705 | 0.087991 | 0.813597 | 0.341456 |
| MmugDNA.27044.1.S1_at   | MmugDNA.27044.1 | 5.76  | 6.09  | 0.17 | 0.07 | -1.26 | 0.047782 | 0.142244 | 0.381152 | 0.415754 |
| MmugDNA.27045.1.S1_at   | MmugDNA.27045.1 | 10.87 | 10.13 | 1.2  | 0.12 | 1.67  | 0.972869 | 0.423813 | 0.991155 | 0.646547 |



|                         |                 |       |       |      |      |       |          |          |          |          |
|-------------------------|-----------------|-------|-------|------|------|-------|----------|----------|----------|----------|
| MmugDNA.27046.1.S1_at   | MmugDNA.27046.1 | 5.98  | 6.14  | 0.26 | 0.14 | -1.11 | 0.347234 | 0.554952 | 0.688577 | 0.733559 |
| MmugDNA.27050.1.S1_at   | MmugDNA.27050.1 | 9.11  | 10.28 | 0.49 | 0.21 | -2.25 | 0.027258 | 0.039512 | 0.327322 | 0.243706 |
| MmugDNA.27052.1.S1_at   | MmugDNA.27052.1 | 8.54  | 8.93  | 0.33 | 0.19 | -1.31 | 0.264265 | 0.212961 | 0.626029 | 0.4869   |
| MmugDNA.27053.1.S1_at   | MmugDNA.27053.1 | 11.81 | 11.89 | 0.21 | 0.02 | -1.06 | 0.487817 | 0.369879 | 0.775245 | 0.609138 |
| MmugDNA.27053.1.S1_s_at | MmugDNA.27053.1 | 10.99 | 11.01 | 0.27 | 0.05 | -1.02 | 0.877732 | 0.34056  | 0.957399 | 0.586789 |
| MmugDNA.27056.1.S1_at   | MmugDNA.27056.1 | 10.81 | 10.75 | 0.41 | 0.15 | 1.04  | 0.229866 | 0.294598 | 0.598481 | 0.554282 |
| MmugDNA.27059.1.S1_at   | MmugDNA.27059.1 | 12.61 | 12.81 | 0.13 | 0.04 | -1.15 | 0.122173 | 0.141657 | 0.495677 | 0.415207 |
| MmugDNA.27071.1.S1_at   | MmugDNA.27071.1 | 11.96 | 12.76 | 0.47 | 0.08 | -1.74 | 0.042995 | 0.026537 | 0.371135 | 0.203915 |
| MmugDNA.27080.1.S1_at   | MmugDNA.27080.1 | 6.41  | 6.53  | 0.67 | 0.25 | -1.09 | 0.620323 | 0.820599 | 0.84709  | 0.896677 |
| MmugDNA.27082.1.S1_at   | MmugDNA.27082.1 | 11.66 | 11.88 | 0.15 | 0.05 | -1.17 | 0.188233 | 0.269284 | 0.560365 | 0.534534 |
| MmugDNA.27084.1.S1_at   | MmugDNA.27084.1 | 7.09  | 7.33  | 0.21 | 0.05 | -1.18 | 0.099551 | 0.062981 | 0.469263 | 0.297633 |
| MmugDNA.27090.1.S1_at   | MmugDNA.27090.1 | 8.97  | 9.82  | 0.69 | 0.08 | -1.8  | 0.09119  | 0.027527 | 0.459035 | 0.207161 |
| MmugDNA.27093.1.S1_at   | MmugDNA.27093.1 | 12.6  | 12.65 | 2.14 | 0.17 | -1.03 | 0.507669 | 0.330739 | 0.786506 | 0.57952  |
| MmugDNA.27107.1.S1_at   | MmugDNA.27107.1 | 6.22  | 6.8   | 0.27 | 0.39 | -1.5  | 0.29238  | 0.419882 | 0.648786 | 0.643733 |
| MmugDNA.27108.1.S1_at   | MmugDNA.27108.1 | 8.78  | 8.76  | 0.75 | 0.05 | 1.01  | 0.960711 | 0.228576 | 0.987225 | 0.500752 |
| MmugDNA.27111.1.S1_at   | MmugDNA.27111.1 | 10.93 | 11.63 | 0.43 | 0.07 | -1.63 | 0.05095  | 0.010726 | 0.388526 | 0.135271 |
| MmugDNA.27116.1.S1_at   | MmugDNA.27116.1 | 8.59  | 8.33  | 0.08 | 0.02 | 1.19  | 0.003375 | 0.00401  | 0.194985 | 0.089969 |
| MmugDNA.27119.1.S1_at   | MmugDNA.27119.1 | 9.26  | 9.35  | 0.47 | 0.18 | -1.06 | 0.908403 | 0.070029 | 0.969158 | 0.310889 |
| MmugDNA.27126.1.S1_at   | MmugDNA.27126.1 | 12.74 | 12.86 | 0.51 | 0.14 | -1.09 | 0.82179  | 0.336701 | 0.935673 | 0.584037 |
| MmugDNA.27127.1.S1_at   | MmugDNA.27127.1 | 3.27  | 3.3   | 0.07 | 0.15 | -1.03 | 0.616673 | 0.801466 | 0.845053 | 0.885779 |
| MmugDNA.27128.1.S1_at   | MmugDNA.27128.1 | 9.05  | 9.2   | 0.32 | 0.13 | -1.11 | 0.607873 | 0.150929 | 0.840979 | 0.425523 |
| MmugDNA.27129.1.S1_at   | MmugDNA.27129.1 | 7.01  | 6.78  | 0.49 | 0.16 | 1.17  | 0.39997  | 0.560554 | 0.723437 | 0.736809 |
| MmugDNA.27133.1.S1_at   | MmugDNA.27133.1 | 4.52  | 4.38  | 0.22 | 0.12 | 1.1   | 0.459064 | 0.631031 | 0.759258 | 0.782599 |
| MmugDNA.27139.1.S1_at   | MmugDNA.27139.1 | 10.2  | 10.05 | 0.34 | 0.23 | 1.11  | 0.607052 | 0.002226 | 0.840743 | 0.069502 |
| MmugDNA.2714.1.S1_at    | MmugDNA.2714.1  | 6.75  | 6.58  | 0.3  | 0.04 | 1.13  | 0.354507 | 0.192105 | 0.694035 | 0.46757  |
| MmugDNA.27155.1.S1_at   | MmugDNA.27155.1 | 8.13  | 7.45  | 0.18 | 0.22 | 1.61  | 0.013797 | 0.006533 | 0.272062 | 0.109634 |
| MmugDNA.27157.1.S1_at   | MmugDNA.27157.1 | 7.91  | 7.98  | 0.18 | 0.02 | -1.05 | 0.168296 | 0.078126 | 0.540913 | 0.324578 |
| MmugDNA.27160.1.S1_at   | MmugDNA.27160.1 | 9.06  | 9.67  | 0.17 | 0.18 | -1.52 | 0.015102 | 0.133001 | 0.2796   | 0.404667 |
| MmugDNA.27163.1.S1_at   | MmugDNA.27163.1 | 3.5   | 3.93  | 0.14 | 0.37 | -1.35 | 0.210644 | 0.326122 | 0.581872 | 0.576315 |
| MmugDNA.27171.1.S1_at   | MmugDNA.27171.1 | 4.6   | 4.11  | 0.72 | 0.27 | 1.41  | 0.217494 | 0.145703 | 0.587269 | 0.419653 |
| MmugDNA.27171.1.S1_x_at | MmugDNA.27171.1 | 4.67  | 4.51  | 0.42 | 0.09 | 1.12  | 0.484352 | 0.135397 | 0.773551 | 0.407478 |
| MmugDNA.27173.1.S1_at   | MmugDNA.27173.1 | 11.58 | 11.73 | 0.24 | 0.09 | -1.11 | 0.703829 | 0.655446 | 0.884872 | 0.798546 |
| MmugDNA.27174.1.S1_at   | MmugDNA.27174.1 | 10.78 | 11.16 | 0.37 | 0.03 | -1.3  | 0.173738 | 0.022216 | 0.546749 | 0.186513 |
| MmugDNA.27177.1.S1_at   | MmugDNA.27177.1 | 7.28  | 7.39  | 0.12 | 0.01 | -1.08 | 0.061222 | 0.055407 | 0.41029  | 0.28129  |
| MmugDNA.27181.1.S1_at   | MmugDNA.27181.1 | 8.55  | 8.99  | 0.5  | 0.18 | -1.36 | 0.256647 | 0.262006 | 0.620603 | 0.52836  |
| MmugDNA.27185.1.S1_at   | MmugDNA.27185.1 | 11.17 | 11.54 | 0.2  | 0.03 | -1.3  | 0.013319 | 0.009843 | 0.26777  | 0.130274 |
| MmugDNA.27189.1.S1_at   | MmugDNA.27189.1 | 10.44 | 10.66 | 0.51 | 0.2  | -1.16 | 0.509888 | 0.704939 | 0.787863 | 0.828883 |
| MmugDNA.2719.1.S1_at    | MmugDNA.2719.1  | 11.3  | 11.34 | 0.64 | 0.15 | -1.03 | 0.93059  | 0.613507 | 0.97685  | 0.770578 |
| MmugDNA.27195.1.S1_s_at | MmugDNA.27195.1 | 9.23  | 9.06  | 0.13 | 0.05 | 1.12  | 0.075822 | 0.093287 | 0.436877 | 0.349412 |
| MmugDNA.27199.1.S1_at   | MmugDNA.27199.1 | 5.67  | 5.58  | 0.23 | 0.13 | 1.06  | 0.186787 | 0.366361 | 0.559225 | 0.606087 |
| MmugDNA.27201.1.S1_at   | MmugDNA.27201.1 | 12.33 | 12.53 | 0.14 | 0.03 | -1.14 | 0.30822  | 0.397378 | 0.660917 | 0.628812 |
| MmugDNA.27204.1.S1_at   | MmugDNA.27204.1 | 11.55 | 11.65 | 0.18 | 0.24 | -1.08 | 0.587868 | 0.000379 | 0.83181  | 0.037273 |
| MmugDNA.27208.1.S1_at   | MmugDNA.27208.1 | 7.27  | 7.11  | 0.03 | 0.03 | 1.11  | 0.007915 | 0.001385 | 0.231562 | 0.056984 |

|                         |                 |       |       |      |      |       |          |          |          |          |
|-------------------------|-----------------|-------|-------|------|------|-------|----------|----------|----------|----------|
| MmugDNA.27213.1.S1_at   | MmugDNA.27213.1 | 9.24  | 8.63  | 0.04 | 0.21 | 1.53  | 0.00415  | 0.003247 | 0.198874 | 0.082187 |
| MmugDNA.27214.1.S1_at   | MmugDNA.27214.1 | 5.59  | 5.57  | 0.18 | 0.12 | 1.02  | 0.558339 | 0.95499  | 0.815196 | 0.974501 |
| MmugDNA.27218.1.S1_at   | MmugDNA.27218.1 | 3.18  | 3.12  | 0.33 | 0.14 | 1.05  | 0.432188 | 0.52683  | 0.743737 | 0.715627 |
| MmugDNA.27219.1.S1_at   | MmugDNA.27219.1 | 9.6   | 10.27 | 0.31 | 0.11 | -1.59 | 0.035285 | 0.027189 | 0.351598 | 0.206016 |
| MmugDNA.27223.1.S1_at   | MmugDNA.27223.1 | 7.34  | 7.21  | 0.08 | 0.01 | 1.1   | 0.06234  | 0.065059 | 0.413023 | 0.301009 |
| MmugDNA.27226.1.S1_at   | MmugDNA.27226.1 | 4.92  | 5.01  | 0.08 | 0.15 | -1.06 | 0.530422 | 0.284649 | 0.799019 | 0.546877 |
| MmugDNA.27230.1.S1_at   | MmugDNA.27230.1 | 4.66  | 4.68  | 0.07 | 0.05 | -1.02 | 0.979723 | 0.432519 | 0.993574 | 0.65297  |
| MmugDNA.27232.1.S1_at   | MmugDNA.27232.1 | 8.08  | 8.38  | 0.22 | 0.41 | -1.23 | 0.179593 | 0.094164 | 0.552935 | 0.350859 |
| MmugDNA.27237.1.S1_at   | MmugDNA.27237.1 | 8.32  | 8.47  | 1.54 | 0.3  | -1.11 | 0.994352 | 0.24665  | 0.997869 | 0.515994 |
| MmugDNA.27238.1.S1_at   | MmugDNA.27238.1 | 14.24 | 14.19 | 0.34 | 0.02 | 1.03  | 0.45308  | 0.335294 | 0.755962 | 0.58305  |
| MmugDNA.27239.1.S1_at   | MmugDNA.27239.1 | 6.34  | 4.64  | 0.64 | 0.56 | 3.25  | 0.017429 | 0.016723 | 0.291663 | 0.163772 |
| MmugDNA.27239.1.S1_s_at | MmugDNA.27239.1 | 5.71  | 5.49  | 0.52 | 0.19 | 1.17  | 0.209464 | 0.229462 | 0.580912 | 0.501527 |
| MmugDNA.27240.1.S1_at   | MmugDNA.27240.1 | 3.29  | 3.19  | 0.14 | 0.07 | 1.07  | 0.357641 | 0.272878 | 0.695949 | 0.537598 |
| MmugDNA.27241.1.S1_at   | MmugDNA.27241.1 | 4.12  | 4.01  | 0.12 | 0.1  | 1.08  | 0.125775 | 0.077502 | 0.49972  | 0.323421 |
| MmugDNA.27242.1.S1_at   | MmugDNA.27242.1 | 5.95  | 6.76  | 0.67 | 0.16 | -1.76 | 0.130552 | 0.148736 | 0.504947 | 0.423201 |
| MmugDNA.27246.1.S1_s_at | MmugDNA.27246.1 | 9.78  | 10.47 | 0.37 | 0.08 | -1.61 | 0.074019 | 0.106631 | 0.434725 | 0.36916  |
| MmugDNA.27250.1.S1_at   | MmugDNA.27250.1 | 3.45  | 3.67  | 0.21 | 0.07 | -1.17 | 0.131851 | 0.275427 | 0.506276 | 0.539682 |
| MmugDNA.27258.1.S1_at   | MmugDNA.27258.1 | 6.63  | 6.63  | 0.06 | 0.07 | 1     | 0.225431 | 0.646163 | 0.594622 | 0.792676 |
| MmugDNA.27262.1.S1_at   | MmugDNA.27262.1 | 3.85  | 4     | 0.09 | 0.19 | -1.11 | 0.484003 | 0.081438 | 0.773436 | 0.329632 |
| MmugDNA.27263.1.S1_at   | MmugDNA.27263.1 | 3.55  | 3.51  | 0.08 | 0.23 | 1.03  | 0.594133 | 0.872102 | 0.834588 | 0.927229 |
| MmugDNA.27265.1.S1_at   | MmugDNA.27265.1 | 7.75  | 6.48  | 0.29 | 0.44 | 2.4   | 0.011852 | 0.004126 | 0.257666 | 0.090887 |
| MmugDNA.27267.1.S1_at   | MmugDNA.27267.1 | 12.1  | 12.83 | 0.83 | 0.27 | -1.66 | 0.320458 | 0.388573 | 0.669365 | 0.622897 |
| MmugDNA.2727.1.S1_at    | MmugDNA.2727.1  | 13.58 | 13.63 | 0.04 | 0.04 | -1.04 | 0.097189 | 0.038926 | 0.465896 | 0.242297 |
| MmugDNA.27272.1.S1_at   | MmugDNA.27272.1 | 6.98  | 6.83  | 0.06 | 0.01 | 1.11  | 0.046588 | 0.423376 | 0.378317 | 0.646277 |
| MmugDNA.27274.1.S1_at   | MmugDNA.27274.1 | 10.58 | 11.08 | 0.36 | 0.13 | -1.42 | 0.211169 | 0.060573 | 0.582141 | 0.292769 |
| MmugDNA.27276.1.S1_at   | MmugDNA.27276.1 | 8.75  | 9.66  | 0.55 | 0.26 | -1.89 | 0.060075 | 0.015461 | 0.407399 | 0.157878 |
| MmugDNA.27279.1.S1_at   | MmugDNA.27279.1 | 9.83  | 9.99  | 0.14 | 0.18 | -1.12 | 0.680206 | 0.533394 | 0.874564 | 0.719587 |
| MmugDNA.27280.1.S1_at   | MmugDNA.27280.1 | 6     | 5.89  | 0.11 | 0.1  | 1.08  | 0.346869 | 0.483405 | 0.688435 | 0.687911 |
| MmugDNA.27284.1.S1_at   | MmugDNA.27284.1 | 9.84  | 9.94  | 0.47 | 0.03 | -1.07 | 0.70499  | 0.570339 | 0.885278 | 0.743056 |
| MmugDNA.27292.1.S1_at   | MmugDNA.27292.1 | 4.32  | 4.32  | 0.13 | 0.21 | -1    | 0.482703 | 0.627361 | 0.772527 | 0.780374 |
| MmugDNA.27298.1.S1_at   | MmugDNA.27298.1 | 10.47 | 11.03 | 3.3  | 0.19 | -1.48 | 0.305666 | 0.069467 | 0.65906  | 0.309778 |
| MmugDNA.27300.1.S1_at   | MmugDNA.27300.1 | 9.4   | 8.51  | 0.81 | 0.03 | 1.84  | 0.421676 | 0.43212  | 0.737581 | 0.652775 |
| MmugDNA.27318.1.S1_at   | MmugDNA.27318.1 | 5.36  | 5.05  | 0.23 | 0.19 | 1.24  | 0.088716 | 0.072073 | 0.456425 | 0.314519 |
| MmugDNA.27320.1.S1_s_at | MmugDNA.27320.1 | 10.98 | 10.94 | 0.42 | 0.02 | 1.03  | 0.919926 | 0.992119 | 0.972872 | 0.995515 |
| MmugDNA.27327.1.S1_at   | MmugDNA.27327.1 | 5.98  | 6.12  | 0.61 | 0.41 | -1.1  | 0.520308 | 0.01587  | 0.793643 | 0.159807 |
| MmugDNA.2733.1.S1_s_at  | MmugDNA.2733.1  | 6.95  | 8.23  | 0.86 | 0.09 | -2.42 | 0.167952 | 0.242392 | 0.540514 | 0.51282  |
| MmugDNA.27330.1.S1_at   | MmugDNA.27330.1 | 9.64  | 10.15 | 0.38 | 0.05 | -1.43 | 0.060535 | 0.041004 | 0.408362 | 0.247202 |
| MmugDNA.27332.1.S1_at   | MmugDNA.27332.1 | 7.25  | 7.33  | 0.13 | 0.08 | -1.06 | 0.890612 | 0.392943 | 0.962413 | 0.625917 |
| MmugDNA.27337.1.S1_at   | MmugDNA.27337.1 | 11.53 | 11.46 | 0.16 | 0.03 | 1.04  | 0.467894 | 0.875409 | 0.764607 | 0.929245 |
| MmugDNA.27339.1.S1_at   | MmugDNA.27339.1 | 12.2  | 12.21 | 0.76 | 0.07 | -1.01 | 0.753481 | 0.672931 | 0.907059 | 0.808874 |
| MmugDNA.27341.1.S1_at   | MmugDNA.27341.1 | 5.48  | 5.38  | 0.19 | 0.12 | 1.07  | 0.342396 | 0.432479 | 0.685795 | 0.65293  |
| MmugDNA.27342.1.S1_at   | MmugDNA.27342.1 | 7.77  | 8.09  | 0.42 | 0.08 | -1.24 | 0.911035 | 0.712549 | 0.969801 | 0.833383 |
| MmugDNA.27352.1.S1_at   | MmugDNA.27352.1 | 10.14 | 9.34  | 0.57 | 0.21 | 1.75  | 0.072281 | 0.009644 | 0.432116 | 0.129267 |

|                         |                 |       |       |      |      |       |          |          |          |          |
|-------------------------|-----------------|-------|-------|------|------|-------|----------|----------|----------|----------|
| MmugDNA.27353.1.S1_at   | MmugDNA.27353.1 | 6.42  | 6.06  | 0.07 | 0.11 | 1.29  | 0.007679 | 0.0541   | 0.230571 | 0.277914 |
| MmugDNA.27356.1.S1_at   | MmugDNA.27356.1 | 3.59  | 3.4   | 0.28 | 0.07 | 1.14  | 0.585367 | 0.782768 | 0.830512 | 0.874253 |
| MmugDNA.27358.1.S1_at   | MmugDNA.27358.1 | 9.47  | 10.2  | 0.48 | 0.13 | -1.66 | 0.034886 | 0.009284 | 0.350482 | 0.127101 |
| MmugDNA.27361.1.S1_at   | MmugDNA.27361.1 | 3.76  | 3.46  | 0.75 | 0.54 | 1.23  | 0.474845 | 0.222975 | 0.768229 | 0.495821 |
| MmugDNA.27362.1.S1_at   | MmugDNA.27362.1 | 6.93  | 6.51  | 0.14 | 0.1  | 1.34  | 0.012261 | 0.004816 | 0.260951 | 0.096904 |
| MmugDNA.27363.1.S1_at   | MmugDNA.27363.1 | 10.86 | 10.84 | 0.21 | 0.05 | 1.01  | 0.585532 | 0.008307 | 0.830549 | 0.120929 |
| MmugDNA.27364.1.S1_at   | MmugDNA.27364.1 | 7.05  | 7.09  | 0.08 | 0.04 | -1.03 | 0.300887 | 0.034951 | 0.655213 | 0.231062 |
| MmugDNA.2737.1.S1_at    | MmugDNA.2737.1  | 4.26  | 4.2   | 0.09 | 0.05 | 1.04  | 0.355311 | 0.874929 | 0.694708 | 0.929042 |
| MmugDNA.2738.1.S1_at    | MmugDNA.2738.1  | 6.1   | 5.96  | 0.31 | 0.11 | 1.1   | 0.75932  | 0.493302 | 0.909584 | 0.694036 |
| MmugDNA.27381.1.S1_at   | MmugDNA.27381.1 | 10.19 | 10.18 | 0.08 | 0.12 | 1     | 0.709512 | 0.013231 | 0.886953 | 0.147534 |
| MmugDNA.27382.1.S1_at   | MmugDNA.27382.1 | 11.97 | 12.04 | 0.22 | 0.02 | -1.05 | 0.283635 | 0.412061 | 0.641413 | 0.638478 |
| MmugDNA.27383.1.S1_at   | MmugDNA.27383.1 | 2.92  | 3.12  | 0.07 | 0.27 | -1.15 | 0.230384 | 0.057942 | 0.598513 | 0.287157 |
| MmugDNA.27384.1.S1_at   | MmugDNA.27384.1 | 7.76  | 7.72  | 0.38 | 0.05 | 1.03  | 0.476704 | 0.538771 | 0.769364 | 0.723368 |
| MmugDNA.27385.1.S1_at   | MmugDNA.27385.1 | 12.46 | 12.51 | 0.5  | 0.13 | -1.03 | 0.940499 | 0.987674 | 0.979714 | 0.993121 |
| MmugDNA.27387.1.S1_s_at | MmugDNA.27387.1 | 9.24  | 9.07  | 1.01 | 0.08 | 1.12  | 0.830719 | 0.552001 | 0.939399 | 0.731422 |
| MmugDNA.2739.1.S1_at    | MmugDNA.2739.1  | 3.49  | 3.25  | 0.15 | 0.09 | 1.18  | 0.08028  | 0.084027 | 0.443795 | 0.334975 |
| MmugDNA.27403.1.S1_at   | MmugDNA.27403.1 | 6.21  | 7.62  | 0.67 | 0.19 | -2.67 | 0.025613 | 0.010808 | 0.322382 | 0.135636 |
| MmugDNA.27412.1.S1_at   | MmugDNA.27412.1 | 5.57  | 6.89  | 0.77 | 0.43 | -2.5  | 0.106222 | 0.034941 | 0.47852  | 0.231062 |
| MmugDNA.27425.1.S1_at   | MmugDNA.27425.1 | 7.4   | 7.84  | 0.33 | 0.23 | -1.36 | 0.116412 | 0.108081 | 0.489622 | 0.371281 |
| MmugDNA.27427.1.S1_at   | MmugDNA.27427.1 | 11.58 | 11.83 | 0.28 | 0.05 | -1.19 | 0.207324 | 0.208183 | 0.578933 | 0.482086 |
| MmugDNA.27428.1.S1_at   | MmugDNA.27428.1 | 3.78  | 3.76  | 0.09 | 0.12 | 1.01  | 0.802197 | 0.867518 | 0.927856 | 0.924699 |
| MmugDNA.27429.1.S1_at   | MmugDNA.27429.1 | 7.88  | 7.63  | 0.12 | 0.07 | 1.18  | 0.029638 | 0.030848 | 0.335282 | 0.217427 |
| MmugDNA.2743.1.S1_at    | MmugDNA.2743.1  | 8.15  | 7.79  | 0.5  | 0.19 | 1.28  | 0.299218 | 0.403159 | 0.653572 | 0.631964 |
| MmugDNA.27432.1.S1_at   | MmugDNA.27432.1 | 11.53 | 11.52 | 0.42 | 0.17 | 1     | 0.38643  | 0.00725  | 0.713564 | 0.114309 |
| MmugDNA.27435.1.S1_at   | MmugDNA.27435.1 | 10.31 | 10.31 | 0.05 | 0.1  | 1     | 0.277319 | 0.632596 | 0.636787 | 0.783658 |
| MmugDNA.27438.1.S1_at   | MmugDNA.27438.1 | 8.65  | 9.36  | 0.53 | 0.18 | -1.63 | 0.304115 | 0.092555 | 0.657861 | 0.348519 |
| MmugDNA.27452.1.S1_at   | MmugDNA.27452.1 | 13.22 | 13.19 | 0.18 | 0    | 1.02  | 0.9686   | 0.195758 | 0.989723 | 0.470637 |
| MmugDNA.27463.1.S1_at   | MmugDNA.27463.1 | 12.2  | 11.94 | 0.29 | 0.02 | 1.2   | 0.186313 | 0.241757 | 0.559101 | 0.512327 |
| MmugDNA.27464.1.S1_at   | MmugDNA.27464.1 | 5.82  | 5.81  | 0.19 | 0.1  | 1.01  | 0.444845 | 0.742994 | 0.751597 | 0.851103 |
| MmugDNA.27467.1.S1_at   | MmugDNA.27467.1 | 3.78  | 3.61  | 0.08 | 0.05 | 1.12  | 0.06377  | 0.048858 | 0.416611 | 0.265858 |
| MmugDNA.27476.1.S1_at   | MmugDNA.27476.1 | 11.58 | 11.69 | 0.34 | 0.06 | -1.08 | 0.428881 | 0.56789  | 0.742105 | 0.741693 |
| MmugDNA.27477.1.S1_at   | MmugDNA.27477.1 | 5.52  | 5.28  | 0.16 | 0.11 | 1.18  | 0.120453 | 0.15211  | 0.493854 | 0.426866 |
| MmugDNA.27484.1.S1_at   | MmugDNA.27484.1 | 3.67  | 3.75  | 0.53 | 0.16 | -1.05 | 0.700326 | 0.632526 | 0.883486 | 0.783598 |
| MmugDNA.27489.1.S1_at   | MmugDNA.27489.1 | 5.61  | 5.58  | 0.57 | 0.22 | 1.02  | 0.762905 | 0.649004 | 0.910973 | 0.794525 |
| MmugDNA.27495.1.S1_at   | MmugDNA.27495.1 | 10.75 | 11.21 | 0.13 | 0.05 | -1.38 | 0.003456 | 0.012727 | 0.195142 | 0.145429 |
| MmugDNA.27497.1.S1_at   | MmugDNA.27497.1 | 5.59  | 5.86  | 0.79 | 0.46 | -1.2  | 0.424721 | 0.045166 | 0.739622 | 0.256979 |
| MmugDNA.27499.1.S1_at   | MmugDNA.27499.1 | 10.2  | 10.16 | 0.54 | 0.12 | 1.03  | 0.886747 | 0.010401 | 0.96068  | 0.133414 |
| MmugDNA.2752.1.S1_at    | MmugDNA.2752.1  | 11.54 | 11.55 | 0.03 | 0.01 | -1.01 | 0.670315 | 0.199044 | 0.869878 | 0.473621 |
| MmugDNA.27520.1.S1_at   | MmugDNA.27520.1 | 8     | 8.18  | 0.37 | 0.16 | -1.13 | 0.277607 | 0.229149 | 0.636883 | 0.501438 |
| MmugDNA.27539.1.S1_at   | MmugDNA.27539.1 | 7.89  | 7.77  | 0.97 | 0.03 | 1.08  | 0.447205 | 0.158624 | 0.753177 | 0.434612 |
| MmugDNA.2755.1.S1_at    | MmugDNA.2755.1  | 11.43 | 10.32 | 1.55 | 0.47 | 2.16  | 0.960461 | 0.295569 | 0.987213 | 0.555051 |
| MmugDNA.27552.1.S1_at   | MmugDNA.27552.1 | 8.22  | 8.23  | 0.3  | 0.19 | -1.01 | 0.999571 | 0.143499 | 0.999893 | 0.417442 |
| MmugDNA.27557.1.S1_at   | MmugDNA.27557.1 | 10.76 | 10.97 | 0.83 | 0.05 | -1.16 | 0.574749 | 0.319227 | 0.824267 | 0.571716 |

|                         |                 |       |       |      |      |       |          |          |          |          |
|-------------------------|-----------------|-------|-------|------|------|-------|----------|----------|----------|----------|
| MmugDNA.27564.1.S1_at   | MmugDNA.27564.1 | 3.27  | 3.13  | 0.22 | 0.27 | 1.1   | 0.958564 | 0.740607 | 0.986368 | 0.849805 |
| MmugDNA.27579.1.S1_at   | MmugDNA.27579.1 | 12.88 | 12.77 | 0.13 | 0.09 | 1.08  | 0.692532 | 0.281376 | 0.880115 | 0.544411 |
| MmugDNA.27580.1.S1_at   | MmugDNA.27580.1 | 5.33  | 5.23  | 0    | 0.05 | 1.08  | 0.049741 | 0.729626 | 0.386248 | 0.843613 |
| MmugDNA.27584.1.S1_at   | MmugDNA.27584.1 | 4.66  | 5.31  | 0.15 | 0.17 | -1.57 | 0.004    | 0.007373 | 0.198571 | 0.115313 |
| MmugDNA.27593.1.S1_at   | MmugDNA.27593.1 | 7.34  | 7.38  | 0.25 | 0.07 | -1.02 | 0.959756 | 0.14755  | 0.986938 | 0.421872 |
| MmugDNA.27606.1.S1_at   | MmugDNA.27606.1 | 10.74 | 10.39 | 0.5  | 0.04 | 1.27  | 0.210839 | 0.026295 | 0.582007 | 0.203132 |
| MmugDNA.27612.1.S1_at   | MmugDNA.27612.1 | 10.93 | 10.71 | 0.17 | 0.07 | 1.16  | 0.107833 | 0.127726 | 0.480316 | 0.398581 |
| MmugDNA.27617.1.S1_at   | MmugDNA.27617.1 | 6.88  | 6.76  | 0.28 | 0.13 | 1.08  | 0.176849 | 0.290422 | 0.549947 | 0.551169 |
| MmugDNA.27621.1.S1_at   | MmugDNA.27621.1 | 6.97  | 5.66  | 0.69 | 0.46 | 2.47  | 0.090951 | 0.078418 | 0.458897 | 0.325192 |
| MmugDNA.27626.1.S1_at   | MmugDNA.27626.1 | 5.9   | 5.74  | 0.09 | 0.06 | 1.11  | 0.162284 | 0.368327 | 0.535388 | 0.607917 |
| MmugDNA.27628.1.S1_s_at | MmugDNA.27628.1 | 14.14 | 14.09 | 0.06 | 0.01 | -1.03 | 0.578738 | 0.094837 | 0.826289 | 0.35185  |
| MmugDNA.2764.1.S1_at    | MmugDNA.2764.1  | 12.53 | 12.43 | 0.57 | 0.14 | 1.07  | 0.644303 | 0.254054 | 0.858491 | 0.522387 |
| MmugDNA.27652.1.S1_at   | MmugDNA.27652.1 | 11.21 | 11.15 | 0.13 | 0.06 | 1.04  | 0.65124  | 0.621644 | 0.861492 | 0.77621  |
| MmugDNA.27655.1.S1_at   | MmugDNA.27655.1 | 8.25  | 8.28  | 0.8  | 0.06 | -1.02 | 0.957183 | 0.780223 | 0.985852 | 0.87255  |
| MmugDNA.27659.1.S1_at   | MmugDNA.27659.1 | 7.38  | 8.18  | 0.19 | 0.04 | -1.74 | 0.001997 | 0.004994 | 0.172803 | 0.098469 |
| MmugDNA.27659.1.S1_s_at | MmugDNA.27659.1 | 6.71  | 7.35  | 0.32 | 0.19 | -1.55 | 0.021712 | 0.01     | 0.309332 | 0.131262 |
| MmugDNA.27660.1.S1_at   | MmugDNA.27660.1 | 5.68  | 5.71  | 0.04 | 0.04 | -1.02 | 0.244967 | 0.587144 | 0.610441 | 0.754042 |
| MmugDNA.27663.1.S1_at   | MmugDNA.27663.1 | 10.25 | 9.9   | 3.11 | 0.28 | 1.27  | 0.634341 | 0.183614 | 0.854043 | 0.459681 |
| MmugDNA.27664.1.S1_at   | MmugDNA.27664.1 | 12.52 | 12.47 | 1.91 | 0.14 | 1.03  | 0.534798 | 0.193079 | 0.801404 | 0.468554 |
| MmugDNA.27666.1.S1_at   | MmugDNA.27666.1 | 9.23  | 9.58  | 0.17 | 0.18 | -1.28 | 0.043184 | 0.048889 | 0.371555 | 0.265897 |
| MmugDNA.2767.1.S1_at    | MmugDNA.2767.1  | 10.75 | 11.1  | 0.15 | 0.08 | -1.28 | 0.024166 | 0.011853 | 0.317812 | 0.140973 |
| MmugDNA.27671.1.S1_at   | MmugDNA.27671.1 | 8.53  | 7.94  | 0.65 | 0.04 | 1.51  | 0.33803  | 0.145258 | 0.682737 | 0.419278 |
| MmugDNA.27675.1.S1_at   | MmugDNA.27675.1 | 5.59  | 4.91  | 1.35 | 0.41 | 1.6   | 0.519716 | 0.702692 | 0.793335 | 0.827658 |
| MmugDNA.27676.1.S1_at   | MmugDNA.27676.1 | 7.23  | 5.71  | 0.43 | 0.35 | 2.86  | 0.005518 | 0.103544 | 0.208157 | 0.364346 |
| MmugDNA.2768.1.S1_at    | MmugDNA.2768.1  | 10.69 | 9.77  | 0.36 | 0.19 | 1.89  | 0.044213 | 0.001051 | 0.374279 | 0.051467 |
| MmugDNA.27681.1.S1_at   | MmugDNA.27681.1 | 5.33  | 5.26  | 1.42 | 0.01 | 1.05  | 0.887985 | 0.259992 | 0.961205 | 0.52675  |
| MmugDNA.27682.1.S1_at   | MmugDNA.27682.1 | 12.79 | 12.62 | 0.25 | 0.03 | 1.13  | 0.537644 | 0.71822  | 0.802735 | 0.836905 |
| MmugDNA.27683.1.S1_at   | MmugDNA.27683.1 | 7.15  | 6.88  | 0.6  | 0.15 | 1.2   | 0.251527 | 0.258076 | 0.616712 | 0.525574 |
| MmugDNA.27684.1.S1_at   | MmugDNA.27684.1 | 6.89  | 7.21  | 1.2  | 0.22 | -1.25 | 0.706867 | 0.776505 | 0.88595  | 0.870052 |
| MmugDNA.27685.1.S1_at   | MmugDNA.27685.1 | 12.6  | 12.51 | 0.08 | 0.07 | 1.06  | 0.351733 | 0.024576 | 0.692508 | 0.196149 |
| MmugDNA.27687.1.S1_at   | MmugDNA.27687.1 | 11.3  | 11.8  | 0.29 | 0.15 | -1.41 | 0.039308 | 0.002045 | 0.361498 | 0.066887 |
| MmugDNA.27687.1.S1_s_at | MmugDNA.27687.1 | 12.48 | 13.06 | 0.19 | 0.13 | -1.49 | 0.013452 | 0.001641 | 0.268462 | 0.06124  |
| MmugDNA.27688.1.S1_at   | MmugDNA.27688.1 | 5.69  | 5.68  | 0.18 | 0.16 | 1.01  | 0.803401 | 0.282584 | 0.928371 | 0.545292 |
| MmugDNA.27689.1.S1_at   | MmugDNA.27689.1 | 11.88 | 11.93 | 0.12 | 0.06 | -1.04 | 0.807666 | 0.248063 | 0.930244 | 0.517567 |
| MmugDNA.27690.1.S1_at   | MmugDNA.27690.1 | 5.12  | 5.06  | 0.12 | 0.03 | 1.04  | 0.330957 | 0.66964  | 0.67754  | 0.806795 |
| MmugDNA.27691.1.S1_at   | MmugDNA.27691.1 | 4     | 4.15  | 0.2  | 0.29 | -1.12 | 0.886364 | 0.618819 | 0.960501 | 0.774185 |
| MmugDNA.27693.1.S1_at   | MmugDNA.27693.1 | 14.38 | 14.37 | 0.04 | 0.01 | 1.01  | 0.531267 | 0.789668 | 0.799582 | 0.87847  |
| MmugDNA.27695.1.S1_at   | MmugDNA.27695.1 | 9.9   | 9.27  | 0.66 | 0.3  | 1.55  | 0.560856 | 0.693234 | 0.816958 | 0.821571 |
| MmugDNA.27696.1.S1_at   | MmugDNA.27696.1 | 3.52  | 3.36  | 0.15 | 0.02 | 1.12  | 0.073366 | 0.177278 | 0.434422 | 0.45372  |
| MmugDNA.27699.1.S1_at   | MmugDNA.27699.1 | 7.51  | 7.33  | 0.11 | 0.09 | 1.13  | 0.285273 | 0.332518 | 0.643111 | 0.580937 |
| MmugDNA.277.1.S1_at     | MmugDNA.277.1   | 10.75 | 10.57 | 0.47 | 0.32 | 1.14  | 0.286886 | 0.578596 | 0.643994 | 0.748595 |
| MmugDNA.27710.1.S1_at   | MmugDNA.27710.1 | 10.27 | 11.11 | 0.43 | 0.03 | -1.8  | 0.076639 | 0.055415 | 0.438001 | 0.281304 |
| MmugDNA.27715.1.S1_at   | MmugDNA.27715.1 | 3.86  | 4.08  | 0.15 | 0.25 | -1.17 | 0.285844 | 0.528554 | 0.643438 | 0.716664 |

|                         |                 |       |       |      |      |       |          |          |          |          |
|-------------------------|-----------------|-------|-------|------|------|-------|----------|----------|----------|----------|
| MmugDNA.27729.1.S1_at   | MmugDNA.27729.1 | 4.44  | 4.37  | 0.17 | 0.28 | 1.05  | 0.325766 | 0.728762 | 0.673455 | 0.843203 |
| MmugDNA.27730.1.S1_at   | MmugDNA.27730.1 | 9.86  | 10.22 | 1.66 | 0.45 | -1.29 | 0.820762 | 0.892952 | 0.935289 | 0.938954 |
| MmugDNA.27741.1.S1_at   | MmugDNA.27741.1 | 6.6   | 6.53  | 0.21 | 0.17 | 1.05  | 0.648379 | 0.24631  | 0.859825 | 0.515889 |
| MmugDNA.27744.1.S1_at   | MmugDNA.27744.1 | 11.42 | 12.12 | 0.13 | 0.07 | -1.63 | 0.001117 | 0.000268 | 0.156386 | 0.033786 |
| MmugDNA.27746.1.S1_at   | MmugDNA.27746.1 | 6.99  | 7.26  | 0.04 | 0.32 | -1.21 | 0.062114 | 0.052641 | 0.41226  | 0.274934 |
| MmugDNA.27747.1.S1_at   | MmugDNA.27747.1 | 11.61 | 11.89 | 0.14 | 0.17 | -1.21 | 0.213253 | 0.000085 | 0.583803 | 0.027016 |
| MmugDNA.27747.1.S1_s_at | MmugDNA.27747.1 | 12.35 | 12.23 | 0.28 | 0.14 | 1.09  | 0.506266 | 0.019348 | 0.785721 | 0.174785 |
| MmugDNA.27752.1.S1_at   | MmugDNA.27752.1 | 10.43 | 10.9  | 2.07 | 0.16 | -1.38 | 0.497484 | 0.303851 | 0.781182 | 0.561225 |
| MmugDNA.27753.1.S1_at   | MmugDNA.27753.1 | 6.75  | 7.45  | 0.78 | 0.13 | -1.62 | 0.224606 | 0.491895 | 0.593868 | 0.693275 |
| MmugDNA.27757.1.S1_at   | MmugDNA.27757.1 | 6.98  | 6.38  | 0.86 | 0.21 | 1.52  | 0.450666 | 0.583875 | 0.754829 | 0.752043 |
| MmugDNA.27758.1.S1_at   | MmugDNA.27758.1 | 9.95  | 10.73 | 0.8  | 0.16 | -1.71 | 0.148489 | 0.080409 | 0.522567 | 0.328048 |
| MmugDNA.27760.1.S1_at   | MmugDNA.27760.1 | 6.8   | 6.57  | 0.13 | 0.1  | 1.17  | 0.121911 | 0.144129 | 0.495636 | 0.418024 |
| MmugDNA.27762.1.S1_at   | MmugDNA.27762.1 | 6.44  | 6.68  | 0.08 | 0.15 | -1.18 | 0.077812 | 0.00908  | 0.439952 | 0.125944 |
| MmugDNA.27763.1.S1_at   | MmugDNA.27763.1 | 13.71 | 13.7  | 0.5  | 0.04 | 1.01  | 0.399254 | 0.475916 | 0.722952 | 0.682387 |
| MmugDNA.27766.1.S1_at   | MmugDNA.27766.1 | 13.16 | 13.18 | 0.02 | 0.07 | -1.02 | 0.994809 | 0.043437 | 0.998057 | 0.253043 |
| MmugDNA.27769.1.S1_at   | MmugDNA.27769.1 | 8.84  | 8.88  | 0.08 | 0.04 | -1.03 | 0.696333 | 0.156498 | 0.882075 | 0.431866 |
| MmugDNA.2777.1.S1_at    | MmugDNA.2777.1  | 4.05  | 4.01  | 0    | 0.08 | 1.03  | 0.432084 | 0.272975 | 0.743696 | 0.53761  |
| MmugDNA.27772.1.S1_at   | MmugDNA.27772.1 | 4.88  | 5.76  | 0.8  | 0.14 | -1.84 | 0.120039 | 0.145041 | 0.493293 | 0.418994 |
| MmugDNA.27773.1.S1_s_at | MmugDNA.27773.1 | 3.69  | 4.27  | 0.15 | 0.57 | -1.49 | 0.13375  | 0.455639 | 0.508012 | 0.669614 |
| MmugDNA.27776.1.S1_at   | MmugDNA.27776.1 | 7.64  | 7.78  | 0.13 | 0.12 | -1.1  | 0.24708  | 0.21491  | 0.612582 | 0.488845 |
| MmugDNA.27779.1.S1_at   | MmugDNA.27779.1 | 11.62 | 11.91 | 0.11 | 0.01 | -1.23 | 0.010713 | 0.064426 | 0.249245 | 0.300001 |
| MmugDNA.2778.1.S1_at    | MmugDNA.2778.1  | 11.66 | 11.65 | 0.17 | 0.04 | 1.01  | 0.591691 | 0.086338 | 0.833637 | 0.338777 |
| MmugDNA.27781.1.S1_at   | MmugDNA.27781.1 | 5.85  | 5.55  | 0.23 | 0.05 | 1.23  | 0.145573 | 0.237395 | 0.520527 | 0.508117 |
| MmugDNA.27785.1.S1_at   | MmugDNA.27785.1 | 11.81 | 11.79 | 0.24 | 0.21 | 1.01  | 0.507221 | 0.204843 | 0.786203 | 0.479223 |
| MmugDNA.27787.1.S1_at   | MmugDNA.27787.1 | 10.4  | 10.21 | 0.16 | 0.09 | 1.13  | 0.439951 | 0.457577 | 0.748282 | 0.670864 |
| MmugDNA.27788.1.S1_at   | MmugDNA.27788.1 | 13.33 | 13.48 | 0.08 | 0.02 | -1.11 | 0.014456 | 0.006357 | 0.275691 | 0.108372 |
| MmugDNA.27793.1.S1_at   | MmugDNA.27793.1 | 7.16  | 9.18  | 0.38 | 0.44 | -4.04 | 0.00634  | 0.011486 | 0.218505 | 0.138627 |
| MmugDNA.278.1.S1_at     | MmugDNA.278.1   | 13.76 | 13.83 | 0.25 | 0.02 | -1.04 | 0.593848 | 0.220449 | 0.834469 | 0.493818 |
| MmugDNA.2780.1.S1_at    | MmugDNA.2780.1  | 9.65  | 9.83  | 0.11 | 0.16 | -1.14 | 0.681896 | 0.472976 | 0.875429 | 0.680272 |
| MmugDNA.27801.1.S1_at   | MmugDNA.27801.1 | 9.24  | 8.78  | 0.66 | 0.05 | 1.37  | 0.328099 | 0.451692 | 0.675589 | 0.666544 |
| MmugDNA.27804.1.S1_at   | MmugDNA.27804.1 | 10.36 | 10.3  | 0.34 | 0.1  | 1.04  | 0.757439 | 0.43281  | 0.908621 | 0.653151 |
| MmugDNA.27805.1.S1_at   | MmugDNA.27805.1 | 8.58  | 8.64  | 0.23 | 0.06 | -1.04 | 0.734589 | 0.906655 | 0.898457 | 0.947216 |
| MmugDNA.27808.1.S1_at   | MmugDNA.27808.1 | 9.2   | 9.41  | 0.34 | 0.06 | -1.16 | 0.889454 | 0.833066 | 0.961918 | 0.90427  |
| MmugDNA.2781.1.S1_at    | MmugDNA.2781.1  | 8.91  | 9.03  | 2.25 | 0.38 | -1.09 | 0.747817 | 0.185257 | 0.904205 | 0.461194 |
| MmugDNA.27816.1.S1_at   | MmugDNA.27816.1 | 9.74  | 9.78  | 0.15 | 0.13 | -1.02 | 0.644675 | 0.356557 | 0.858593 | 0.598459 |
| MmugDNA.2782.1.S1_at    | MmugDNA.2782.1  | 8.81  | 8.76  | 0.05 | 0.12 | 1.03  | 0.590172 | 0.001273 | 0.832832 | 0.055241 |
| MmugDNA.27827.1.S1_at   | MmugDNA.27827.1 | 8.21  | 8.38  | 0.72 | 0.23 | -1.13 | 0.609973 | 0.506423 | 0.841827 | 0.702383 |
| MmugDNA.27829.1.S1_at   | MmugDNA.27829.1 | 5.5   | 5.56  | 0.33 | 0.35 | -1.04 | 0.384376 | 0.004181 | 0.711984 | 0.091077 |
| MmugDNA.27833.1.S1_at   | MmugDNA.27833.1 | 9     | 8.69  | 0.08 | 0.16 | 1.24  | 0.023278 | 0.000305 | 0.314809 | 0.034907 |
| MmugDNA.27835.1.S1_at   | MmugDNA.27835.1 | 11.85 | 11.47 | 0.25 | 0.08 | 1.3   | 0.058373 | 0.02056  | 0.404238 | 0.179918 |
| MmugDNA.27836.1.S1_at   | MmugDNA.27836.1 | 5.99  | 6.21  | 0.29 | 0.18 | -1.17 | 0.163058 | 0.310563 | 0.536035 | 0.565771 |
| MmugDNA.27839.1.S1_at   | MmugDNA.27839.1 | 3.25  | 3.22  | 0.23 | 0.03 | 1.02  | 0.30395  | 0.396876 | 0.657774 | 0.62846  |
| MmugDNA.27844.1.S1_at   | MmugDNA.27844.1 | 3.75  | 3.78  | 0.15 | 0.33 | -1.02 | 0.440413 | 0.155584 | 0.748466 | 0.430941 |

|                         |                 |       |       |      |      |       |          |          |          |          |
|-------------------------|-----------------|-------|-------|------|------|-------|----------|----------|----------|----------|
| MmugDNA.27845.1.S1_at   | MmugDNA.27845.1 | 11.31 | 11.54 | 1.01 | 0.16 | -1.17 | 0.59177  | 0.39678  | 0.833648 | 0.62845  |
| MmugDNA.27848.1.S1_at   | MmugDNA.27848.1 | 11.15 | 11.78 | 0.48 | 0.02 | -1.54 | 0.266215 | 0.092537 | 0.627106 | 0.348504 |
| MmugDNA.2785.1.S1_at    | MmugDNA.2785.1  | 5.77  | 5.82  | 0.89 | 0.42 | -1.03 | 0.434575 | 0.351268 | 0.745225 | 0.594937 |
| MmugDNA.27850.1.S1_at   | MmugDNA.27850.1 | 4.66  | 3.88  | 0.46 | 0.28 | 1.72  | 0.318524 | 0.235567 | 0.668228 | 0.506633 |
| MmugDNA.27857.1.S1_at   | MmugDNA.27857.1 | 8.22  | 8.54  | 0.26 | 0.19 | -1.24 | 0.421498 | 0.654987 | 0.737563 | 0.7982   |
| MmugDNA.2786.1.S1_at    | MmugDNA.2786.1  | 8.08  | 8.6   | 2.16 | 0.24 | -1.43 | 0.688769 | 0.233702 | 0.878555 | 0.505032 |
| MmugDNA.27869.1.S1_at   | MmugDNA.27869.1 | 10.61 | 10.88 | 0.08 | 0.04 | -1.2  | 0.006457 | 0.038705 | 0.21945  | 0.24169  |
| MmugDNA.27870.1.S1_at   | MmugDNA.27870.1 | 10.85 | 10.89 | 0.35 | 0.08 | -1.03 | 0.813916 | 0.953419 | 0.932829 | 0.97351  |
| MmugDNA.27873.1.S1_at   | MmugDNA.27873.1 | 6.67  | 6.54  | 0.12 | 0.05 | 1.09  | 0.159756 | 0.400787 | 0.532756 | 0.63064  |
| MmugDNA.27876.1.S1_at   | MmugDNA.27876.1 | 9.21  | 9.27  | 0.96 | 0.1  | -1.04 | 0.511232 | 0.027388 | 0.78856  | 0.206719 |
| MmugDNA.2788.1.S1_at    | MmugDNA.2788.1  | 7.77  | 7.64  | 0.43 | 0.17 | 1.09  | 0.835877 | 0.52967  | 0.941202 | 0.717463 |
| MmugDNA.27885.1.S1_at   | MmugDNA.27885.1 | 8.53  | 8.09  | 0.24 | 0.08 | 1.36  | 0.047217 | 0.001122 | 0.379814 | 0.052924 |
| MmugDNA.27886.1.S1_at   | MmugDNA.27886.1 | 9.16  | 9.17  | 0.38 | 0.05 | -1    | 0.441318 | 0.191008 | 0.749251 | 0.46629  |
| MmugDNA.27888.1.S1_at   | MmugDNA.27888.1 | 5.3   | 5.27  | 0.5  | 0.23 | 1.02  | 0.647822 | 0.643148 | 0.859466 | 0.79068  |
| MmugDNA.27895.1.S1_at   | MmugDNA.27895.1 | 7.26  | 7.58  | 1.58 | 0.05 | -1.25 | 0.710546 | 0.719442 | 0.887343 | 0.837645 |
| MmugDNA.27900.1.S1_at   | MmugDNA.27900.1 | 9.12  | 8.79  | 0.44 | 0.14 | 1.25  | 0.102436 | 0.189646 | 0.472592 | 0.465297 |
| MmugDNA.27903.1.S1_at   | MmugDNA.27903.1 | 4.64  | 4.92  | 0.45 | 0.21 | -1.21 | 0.263877 | 0.404175 | 0.62583  | 0.632691 |
| MmugDNA.27905.1.S1_at   | MmugDNA.27905.1 | 3.61  | 3.49  | 0.52 | 0.04 | 1.09  | 0.231854 | 0.327191 | 0.599694 | 0.577156 |
| MmugDNA.27907.1.S1_at   | MmugDNA.27907.1 | 6.73  | 6.59  | 0.14 | 0    | 1.1   | 0.174739 | 0.117143 | 0.548031 | 0.384582 |
| MmugDNA.27910.1.S1_at   | MmugDNA.27910.1 | 3.86  | 3.82  | 0.17 | 0.05 | 1.03  | 0.700979 | 0.834319 | 0.883726 | 0.905078 |
| MmugDNA.27912.1.S1_at   | MmugDNA.27912.1 | 9.81  | 9.84  | 0.29 | 0.05 | -1.02 | 0.647133 | 0.605133 | 0.859341 | 0.764917 |
| MmugDNA.27913.1.S1_at   | MmugDNA.27913.1 | 8.78  | 8.51  | 0.56 | 0.19 | 1.2   | 0.833052 | 0.139649 | 0.940095 | 0.412964 |
| MmugDNA.27914.1.S1_at   | MmugDNA.27914.1 | 3.28  | 3.27  | 0.07 | 0.03 | 1.01  | 0.464045 | 0.699368 | 0.762376 | 0.825344 |
| MmugDNA.27915.1.S1_at   | MmugDNA.27915.1 | 12.83 | 11.84 | 0.48 | 0.09 | 2     | 0.068552 | 0.091785 | 0.425885 | 0.346977 |
| MmugDNA.2792.1.S1_at    | MmugDNA.2792.1  | 9.66  | 10.26 | 0.34 | 0.03 | -1.52 | 0.041662 | 0.004837 | 0.367007 | 0.097041 |
| MmugDNA.27922.1.S1_at   | MmugDNA.27922.1 | 8.08  | 8.17  | 0.03 | 0.07 | -1.06 | 0.534852 | 0.268344 | 0.801404 | 0.534041 |
| MmugDNA.27929.1.S1_at   | MmugDNA.27929.1 | 7.44  | 7.38  | 0.18 | 0.11 | 1.05  | 0.251555 | 0.567676 | 0.616712 | 0.74156  |
| MmugDNA.27934.1.S1_at   | MmugDNA.27934.1 | 5.53  | 5.55  | 0.12 | 0.06 | -1.01 | 0.637606 | 0.12253  | 0.855587 | 0.392427 |
| MmugDNA.27940.1.S1_at   | MmugDNA.27940.1 | 12.05 | 12.16 | 0.1  | 0.07 | -1.08 | 0.246584 | 0.289683 | 0.61204  | 0.550747 |
| MmugDNA.2795.1.S1_at    | MmugDNA.2795.1  | 4.7   | 4.32  | 0.39 | 0.11 | 1.3   | 0.131133 | 0.135425 | 0.5054   | 0.407515 |
| MmugDNA.27954.1.S1_at   | MmugDNA.27954.1 | 2.99  | 3.04  | 0.07 | 0.05 | -1.04 | 0.856542 | 0.532461 | 0.949449 | 0.719065 |
| MmugDNA.27955.1.S1_at   | MmugDNA.27955.1 | 8.57  | 8.84  | 0.42 | 0.03 | -1.2  | 0.501902 | 0.701005 | 0.783483 | 0.826611 |
| MmugDNA.27957.1.S1_at   | MmugDNA.27957.1 | 9.17  | 10    | 0.32 | 0.13 | -1.78 | 0.029392 | 0.080626 | 0.334078 | 0.328427 |
| MmugDNA.27961.1.S1_at   | MmugDNA.27961.1 | 4.93  | 4.87  | 0.18 | 0.22 | 1.04  | 0.371395 | 0.131111 | 0.705465 | 0.403084 |
| MmugDNA.27963.1.S1_at   | MmugDNA.27963.1 | 3.1   | 3.43  | 0.04 | 0.05 | -1.25 | 0.001234 | 0.001542 | 0.156419 | 0.05949  |
| MmugDNA.27963.1.S1_x_at | MmugDNA.27963.1 | 3.61  | 3.74  | 0.16 | 0.09 | -1.1  | 0.119496 | 0.023743 | 0.492875 | 0.192893 |
| MmugDNA.2797.1.S1_at    | MmugDNA.2797.1  | 6.77  | 6.41  | 0.25 | 0.06 | 1.28  | 0.206228 | 0.48511  | 0.578142 | 0.688913 |
| MmugDNA.27971.1.S1_at   | MmugDNA.27971.1 | 8.85  | 9.35  | 1.1  | 0.14 | -1.42 | 0.161686 | 0.025744 | 0.535125 | 0.201029 |
| MmugDNA.27973.1.S1_at   | MmugDNA.27973.1 | 7.7   | 9.5   | 0.91 | 0.32 | -3.48 | 0.118655 | 0.163835 | 0.492161 | 0.440054 |
| MmugDNA.27978.1.S1_at   | MmugDNA.27978.1 | 7.34  | 7.16  | 0.02 | 0.08 | 1.13  | 0.021417 | 0.020362 | 0.308506 | 0.17912  |
| MmugDNA.27983.1.S1_at   | MmugDNA.27983.1 | 9.88  | 10.2  | 0.27 | 0.12 | -1.25 | 0.401926 | 0.508491 | 0.724762 | 0.703646 |
| MmugDNA.27987.1.S1_at   | MmugDNA.27987.1 | 7.87  | 7.55  | 2.44 | 0.3  | 1.25  | 0.998674 | 0.191098 | 0.99961  | 0.466364 |
| MmugDNA.27990.1.S1_at   | MmugDNA.27990.1 | 12.71 | 12.52 | 0.06 | 0.03 | 1.14  | 0.007596 | 0.001357 | 0.229736 | 0.056687 |

|                         |                 |       |       |      |      |       |          |          |          |          |
|-------------------------|-----------------|-------|-------|------|------|-------|----------|----------|----------|----------|
| MmugDNA.27992.1.S1_at   | MmugDNA.27992.1 | 4.79  | 4.59  | 0.36 | 0.09 | 1.15  | 0.394986 | 0.592869 | 0.720296 | 0.757932 |
| MmugDNA.27997.1.S1_at   | MmugDNA.27997.1 | 5.1   | 5.1   | 0.08 | 0.06 | 1     | 0.850614 | 0.485508 | 0.947402 | 0.689159 |
| MmugDNA.28001.1.S1_at   | MmugDNA.28001.1 | 4.9   | 4.78  | 0.07 | 0.08 | 1.09  | 0.196172 | 0.119595 | 0.566663 | 0.388247 |
| MmugDNA.28002.1.S1_at   | MmugDNA.28002.1 | 10.41 | 9.35  | 0.54 | 0.42 | 2.09  | 0.246377 | 0.013811 | 0.611834 | 0.150628 |
| MmugDNA.28005.1.S1_at   | MmugDNA.28005.1 | 10.53 | 10.2  | 0.57 | 0.13 | 1.25  | 0.381194 | 0.323852 | 0.709924 | 0.574656 |
| MmugDNA.2801.1.S1_at    | MmugDNA.2801.1  | 6.16  | 5.91  | 0.06 | 0.1  | 1.19  | 0.071448 | 0.090525 | 0.431049 | 0.345015 |
| MmugDNA.28015.1.S1_at   | MmugDNA.28015.1 | 11.22 | 11.32 | 0.63 | 0.12 | -1.07 | 0.987033 | 0.2404   | 0.995808 | 0.510966 |
| MmugDNA.28020.1.S1_at   | MmugDNA.28020.1 | 10.52 | 10.24 | 0.16 | 0.15 | 1.22  | 0.194341 | 0.0004   | 0.564869 | 0.037471 |
| MmugDNA.28023.1.S1_at   | MmugDNA.28023.1 | 14.31 | 14.35 | 0.04 | 0.03 | -1.03 | 0.064312 | 0.105313 | 0.418034 | 0.367145 |
| MmugDNA.28027.1.S1_at   | MmugDNA.28027.1 | 3.39  | 3.47  | 0.2  | 0.09 | -1.05 | 0.599107 | 0.445633 | 0.837258 | 0.662468 |
| MmugDNA.28033.1.S1_at   | MmugDNA.28033.1 | 9.34  | 8.45  | 1.37 | 0.4  | -1.85 | 0.987676 | 0.070671 | 0.995831 | 0.312011 |
| MmugDNA.28034.1.S1_at   | MmugDNA.28034.1 | 12.92 | 12.97 | 0.09 | 0.05 | -1.04 | 0.393825 | 0.076763 | 0.719504 | 0.322197 |
| MmugDNA.28036.1.S1_at   | MmugDNA.28036.1 | 6.88  | 6.59  | 0.16 | 0.1  | 1.22  | 0.089803 | 0.226273 | 0.457893 | 0.498726 |
| MmugDNA.28037.1.S1_s_at | MmugDNA.28037.1 | 9.8   | 9.64  | 0.04 | 0.09 | 1.11  | 0.033993 | 0.305481 | 0.347481 | 0.562437 |
| MmugDNA.28038.1.S1_at   | MmugDNA.28038.1 | 5.31  | 5.53  | 0.31 | 0.11 | -1.17 | 0.696824 | 0.568889 | 0.882175 | 0.742129 |
| MmugDNA.2804.1.S1_at    | MmugDNA.2804.1  | 9.85  | 9.71  | 0.11 | 0.1  | 1.1   | 0.136129 | 0.016477 | 0.510655 | 0.162551 |
| MmugDNA.28042.1.S1_at   | MmugDNA.28042.1 | 9.88  | 9.47  | 0.19 | 0.06 | 1.33  | 0.025611 | 0.077946 | 0.322382 | 0.324283 |
| MmugDNA.28049.1.S1_at   | MmugDNA.28049.1 | 10.37 | 10.54 | 0.07 | 0.12 | -1.13 | 0.15876  | 0.015963 | 0.531595 | 0.160375 |
| MmugDNA.28053.1.S1_at   | MmugDNA.28053.1 | 9.97  | 10    | 0.34 | 0.07 | -1.02 | 0.83814  | 0.354746 | 0.941988 | 0.597422 |
| MmugDNA.28057.1.S1_at   | MmugDNA.28057.1 | 6.51  | 6.39  | 0.09 | 0.04 | 1.08  | 0.229897 | 0.520065 | 0.598481 | 0.711472 |
| MmugDNA.28060.1.S1_s_at | MmugDNA.28060.1 | 9.45  | 10    | 0.74 | 0.06 | -1.46 | 0.139128 | 0.103123 | 0.514459 | 0.364026 |
| MmugDNA.28067.1.S1_at   | MmugDNA.28067.1 | 5.67  | 6.94  | 0.23 | 0.39 | -2.41 | 0.017293 | 0.072147 | 0.290536 | 0.314664 |
| MmugDNA.2807.1.S1_at    | MmugDNA.2807.1  | 5.15  | 5.38  | 0.19 | 0.1  | -1.18 | 0.113574 | 0.682447 | 0.486895 | 0.814526 |
| MmugDNA.28073.1.S1_at   | MmugDNA.28073.1 | 9.52  | 8.84  | 0.49 | 0.39 | 1.6   | 0.036082 | 0.102681 | 0.354225 | 0.363067 |
| MmugDNA.28076.1.S1_at   | MmugDNA.28076.1 | 12.04 | 11.96 | 0.28 | 0.03 | 1.06  | 0.55129  | 0.260534 | 0.811314 | 0.527039 |
| MmugDNA.28079.1.S1_at   | MmugDNA.28079.1 | 8.68  | 8.99  | 0.64 | 0.1  | -1.23 | 0.633985 | 0.115986 | 0.853726 | 0.383164 |
| MmugDNA.28086.1.S1_at   | MmugDNA.28086.1 | 7.84  | 8.07  | 0.65 | 0.08 | -1.17 | 0.9106   | 0.978708 | 0.969704 | 0.988411 |
| MmugDNA.28096.1.S1_at   | MmugDNA.28096.1 | 8.81  | 9.21  | 0.56 | 0.29 | -1.32 | 0.384694 | 0.184038 | 0.712173 | 0.460224 |
| MmugDNA.28097.1.S1_s_at | MmugDNA.28097.1 | 7.39  | 6.75  | 0.27 | 0.12 | 1.56  | 0.013592 | 0.008502 | 0.269894 | 0.1223   |
| MmugDNA.28101.1.S1_at   | MmugDNA.28101.1 | 11.31 | 10.84 | 0.19 | 0.13 | 1.38  | 0.012557 | 0.010495 | 0.263116 | 0.133872 |
| MmugDNA.28109.1.S1_at   | MmugDNA.28109.1 | 6.98  | 6.91  | 0.13 | 0.03 | 1.05  | 0.445741 | 0.628328 | 0.752294 | 0.781112 |
| MmugDNA.28113.1.S1_at   | MmugDNA.28113.1 | 3.87  | 3.76  | 0.42 | 0.14 | 1.08  | 0.821496 | 0.505788 | 0.935582 | 0.702218 |
| MmugDNA.28117.1.S1_at   | MmugDNA.28117.1 | 11.69 | 11.58 | 0.06 | 0.06 | 1.08  | 0.024168 | 0.005935 | 0.317812 | 0.105426 |
| MmugDNA.28118.1.S1_at   | MmugDNA.28118.1 | 9.17  | 9.4   | 0.16 | 0.02 | -1.18 | 0.02618  | 0.000359 | 0.323574 | 0.037273 |
| MmugDNA.28121.1.S1_at   | MmugDNA.28121.1 | 4.9   | 5.16  | 0.36 | 0.41 | -1.2  | 0.450851 | 0.599093 | 0.754917 | 0.761287 |
| MmugDNA.28128.1.S1_at   | MmugDNA.28128.1 | 8.32  | 8.06  | 0.24 | 0.17 | 1.2   | 0.044681 | 0.11051  | 0.374916 | 0.374711 |
| MmugDNA.28137.1.S1_at   | MmugDNA.28137.1 | 6.24  | 6.23  | 0.23 | 0.38 | 1.01  | 0.687713 | 0.254279 | 0.877924 | 0.522605 |
| MmugDNA.28147.1.S1_at   | MmugDNA.28147.1 | 5.92  | 5.9   | 0.04 | 0.05 | 1.02  | 0.870021 | 0.299698 | 0.954701 | 0.558037 |
| MmugDNA.28159.1.S1_at   | MmugDNA.28159.1 | 7.71  | 7.84  | 0.45 | 0.16 | -1.1  | 0.277694 | 0.116552 | 0.636972 | 0.383705 |
| MmugDNA.2816.1.S1_at    | MmugDNA.2816.1  | 8.67  | 8.3   | 0.07 | 0.05 | 1.29  | 0.001922 | 0.009693 | 0.170183 | 0.129497 |
| MmugDNA.2816.1.S1_s_at  | MmugDNA.2816.1  | 6.84  | 6.83  | 0.14 | 0.07 | 1.01  | 0.790101 | 0.27531  | 0.922759 | 0.539663 |
| MmugDNA.28164.1.S1_at   | MmugDNA.28164.1 | 12.37 | 12.12 | 0.26 | 0.04 | 1.18  | 0.230261 | 0.39036  | 0.598481 | 0.624156 |
| MmugDNA.28165.1.S1_at   | MmugDNA.28165.1 | 7.04  | 6.73  | 1.24 | 0.27 | 1.25  | 0.859203 | 0.229455 | 0.950315 | 0.501527 |

|                         |                 |       |       |      |      |       |          |          |          |          |
|-------------------------|-----------------|-------|-------|------|------|-------|----------|----------|----------|----------|
| MmugDNA.28169.1.S1_at   | MmugDNA.28169.1 | 7.4   | 7.36  | 0.13 | 0.07 | 1.03  | 0.703732 | 0.697496 | 0.884872 | 0.824228 |
| MmugDNA.28179.1.S1_at   | MmugDNA.28179.1 | 11.42 | 11.89 | 1.24 | 0    | -1.38 | 0.388054 | 0.529089 | 0.714965 | 0.717133 |
| MmugDNA.28186.1.S1_at   | MmugDNA.28186.1 | 6.93  | 6.85  | 0.13 | 0.05 | 1.06  | 0.389714 | 0.445338 | 0.716272 | 0.662338 |
| MmugDNA.28190.1.S1_s_at | MmugDNA.28190.1 | 4.68  | 4.68  | 0.07 | 0.04 | -1    | 0.721851 | 0.916687 | 0.892101 | 0.953368 |
| MmugDNA.28191.1.S1_at   | MmugDNA.28191.1 | 9.15  | 9.64  | 0.82 | 0.04 | -1.4  | 0.965941 | 0.920858 | 0.988768 | 0.955413 |
| MmugDNA.28192.1.S1_at   | MmugDNA.28192.1 | 4.63  | 5.51  | 0.67 | 0.11 | -1.83 | 0.228896 | 0.234912 | 0.597884 | 0.506125 |
| MmugDNA.28198.1.S1_at   | MmugDNA.28198.1 | 6.25  | 6.11  | 1.13 | 0.18 | 1.11  | 0.734895 | 0.270276 | 0.8985   | 0.535654 |
| MmugDNA.2820.1.S1_at    | MmugDNA.2820.1  | 4.12  | 3.99  | 0.12 | 0.09 | 1.1   | 0.044686 | 0.221071 | 0.374916 | 0.494475 |
| MmugDNA.28206.1.S1_at   | MmugDNA.28206.1 | 4.45  | 4.49  | 0.16 | 0.16 | -1.03 | 0.846492 | 0.534562 | 0.946257 | 0.72045  |
| MmugDNA.28206.1.S1_x_at | MmugDNA.28206.1 | 8.12  | 8.07  | 0.18 | 0.06 | 1.04  | 0.916084 | 0.657011 | 0.971354 | 0.799401 |
| MmugDNA.28210.1.S1_at   | MmugDNA.28210.1 | 9.83  | 10.32 | 0.2  | 0.11 | -1.41 | 0.010055 | 0.003336 | 0.246058 | 0.083072 |
| MmugDNA.28211.1.S1_at   | MmugDNA.28211.1 | 9.04  | 9.01  | 0.11 | 0.08 | 1.02  | 0.763392 | 0.004755 | 0.911192 | 0.096208 |
| MmugDNA.28230.1.S1_at   | MmugDNA.28230.1 | 9.6   | 9.62  | 0.2  | 0.06 | -1.01 | 0.701949 | 0.774237 | 0.884041 | 0.868735 |
| MmugDNA.28234.1.S1_at   | MmugDNA.28234.1 | 5.54  | 6.08  | 1.24 | 0.07 | -1.46 | 0.621928 | 0.546268 | 0.847631 | 0.727894 |
| MmugDNA.28244.1.S1_at   | MmugDNA.28244.1 | 11.15 | 10.44 | 0.22 | 0.04 | 1.63  | 0.005466 | 0.001713 | 0.208157 | 0.062657 |
| MmugDNA.28246.1.S1_at   | MmugDNA.28246.1 | 10.64 | 10.78 | 0.11 | 0.07 | -1.1  | 0.15711  | 0.015431 | 0.530266 | 0.157727 |
| MmugDNA.28250.1.S1_at   | MmugDNA.28250.1 | 8.28  | 8.7   | 0.53 | 0.19 | -1.33 | 0.260605 | 0.146733 | 0.623301 | 0.42078  |
| MmugDNA.28252.1.S1_s_at | MmugDNA.28252.1 | 10.58 | 10.49 | 0.04 | 0.1  | 1.06  | 0.960246 | 0.042031 | 0.987116 | 0.249464 |
| MmugDNA.28260.1.S1_at   | MmugDNA.28260.1 | 9.54  | 9.63  | 2.35 | 0.31 | -1.07 | 0.806604 | 0.155409 | 0.929839 | 0.430802 |
| MmugDNA.28279.1.S1_at   | MmugDNA.28279.1 | 11.82 | 11.87 | 0.4  | 0.07 | -1.04 | 0.984754 | 0.918106 | 0.995256 | 0.954068 |
| MmugDNA.2828.1.S1_at    | MmugDNA.2828.1  | 6.12  | 6.1   | 0.34 | 0    | 1.01  | 0.610425 | 0.613712 | 0.841858 | 0.770786 |
| MmugDNA.28282.1.S1_at   | MmugDNA.28282.1 | 8.79  | 9.36  | 0.16 | 0.05 | -1.48 | 0.00718  | 0.123575 | 0.226471 | 0.393637 |
| MmugDNA.28284.1.S1_at   | MmugDNA.28284.1 | 11.78 | 11.71 | 0.03 | 0.07 | 1.05  | 0.119139 | 0.435786 | 0.492552 | 0.655526 |
| MmugDNA.28288.1.S1_at   | MmugDNA.28288.1 | 10.65 | 9.68  | 0.51 | 0.2  | 1.96  | 0.064616 | 0.018086 | 0.418466 | 0.169435 |
| MmugDNA.28291.1.S1_at   | MmugDNA.28291.1 | 9.83  | 9.48  | 0.47 | 0.3  | 1.27  | 0.801607 | 0.545797 | 0.927672 | 0.727653 |
| MmugDNA.28294.1.S1_at   | MmugDNA.28294.1 | 8.85  | 9.04  | 0.04 | 0.03 | -1.14 | 0.002178 | 0.000005 | 0.174757 | 0.015647 |
| MmugDNA.28294.1.S1_s_at | MmugDNA.28294.1 | 9.58  | 10.01 | 0.08 | 0.04 | -1.35 | 0.001554 | 0.000182 | 0.161959 | 0.030511 |
| MmugDNA.28295.1.S1_at   | MmugDNA.28295.1 | 6.7   | 6.6   | 0.09 | 0.13 | 1.08  | 0.221107 | 0.073631 | 0.590384 | 0.316952 |
| MmugDNA.2830.1.S1_at    | MmugDNA.2830.1  | 9.65  | 9.63  | 0.45 | 0.18 | 1.01  | 0.791087 | 0.756594 | 0.923197 | 0.858257 |
| MmugDNA.28301.1.S1_at   | MmugDNA.28301.1 | 4.9   | 4.73  | 0.15 | 0.13 | 1.13  | 0.292189 | 0.25194  | 0.648498 | 0.520632 |
| MmugDNA.28305.1.S1_at   | MmugDNA.28305.1 | 7.91  | 8.62  | 0.09 | 0.08 | -1.64 | 0.000584 | 0.005624 | 0.143137 | 0.103682 |
| MmugDNA.28307.1.S1_at   | MmugDNA.28307.1 | 5.1   | 5.06  | 0.03 | 0.17 | 1.03  | 0.2413   | 0.350217 | 0.607588 | 0.593975 |
| MmugDNA.28309.1.S1_at   | MmugDNA.28309.1 | 4.89  | 4.66  | 0.12 | 0.11 | 1.18  | 0.0678   | 0.06118  | 0.42446  | 0.293981 |
| MmugDNA.28314.1.S1_at   | MmugDNA.28314.1 | 10.64 | 10.62 | 0.25 | 0.09 | 1.02  | 0.535071 | 0.829784 | 0.801404 | 0.902214 |
| MmugDNA.28316.1.S1_at   | MmugDNA.28316.1 | 12.61 | 12.52 | 0.02 | 0.06 | 1.07  | 0.068715 | 0.281723 | 0.426    | 0.544807 |
| MmugDNA.28322.1.S1_at   | MmugDNA.28322.1 | 11.87 | 11.82 | 0.13 | 0.03 | 1.04  | 0.142217 | 0.343439 | 0.517202 | 0.58921  |
| MmugDNA.28323.1.S1_at   | MmugDNA.28323.1 | 4.81  | 4.94  | 0.07 | 0.07 | -1.1  | 0.071539 | 0.445367 | 0.431049 | 0.662343 |
| MmugDNA.28328.1.S1_at   | MmugDNA.28328.1 | 12.33 | 12.42 | 0.16 | 0.03 | -1.06 | 0.988043 | 0.714188 | 0.995831 | 0.834155 |
| MmugDNA.2833.1.S1_at    | MmugDNA.2833.1  | 5.93  | 5.81  | 0.12 | 0.06 | 1.09  | 0.218416 | 0.540866 | 0.588209 | 0.724604 |
| MmugDNA.28331.1.S1_at   | MmugDNA.28331.1 | 6.24  | 5.91  | 0.42 | 0.06 | 1.25  | 0.070626 | 0.097609 | 0.4297   | 0.355473 |
| MmugDNA.28333.1.S1_at   | MmugDNA.28333.1 | 3.77  | 3.72  | 0.05 | 0.1  | 1.03  | 0.452012 | 0.221387 | 0.755619 | 0.494644 |
| MmugDNA.28347.1.S1_at   | MmugDNA.28347.1 | 6.52  | 6.39  | 0.14 | 0.08 | 1.1   | 0.317209 | 0.114427 | 0.667034 | 0.38101  |
| MmugDNA.28349.1.S1_at   | MmugDNA.28349.1 | 7.56  | 7.51  | 0.68 | 0.13 | 1.03  | 0.915395 | 0.268553 | 0.971229 | 0.534126 |



|                         |                 |       |       |      |      |       |          |          |          |          |
|-------------------------|-----------------|-------|-------|------|------|-------|----------|----------|----------|----------|
| MmugDNA.28351.1.S1_at   | MmugDNA.28351.1 | 9.1   | 8.98  | 0.72 | 0.12 | 1.09  | 0.6189   | 0.334721 | 0.846305 | 0.582615 |
| MmugDNA.2836.1.S1_s_at  | MmugDNA.2836.1  | 11.9  | 11.47 | 0.19 | 0.12 | 1.34  | 0.043785 | 0.03397  | 0.372554 | 0.227969 |
| MmugDNA.28361.1.S1_at   | MmugDNA.28361.1 | 4.29  | 4.19  | 0.01 | 0.1  | 1.07  | 0.133425 | 0.726169 | 0.507921 | 0.84147  |
| MmugDNA.28367.1.S1_at   | MmugDNA.28367.1 | 13.23 | 13.37 | 0.26 | 0.02 | -1.1  | 0.116342 | 0.366141 | 0.489568 | 0.605941 |
| MmugDNA.28369.1.S1_at   | MmugDNA.28369.1 | 10.01 | 9.66  | 0.38 | 0.08 | 1.27  | 0.217182 | 0.056762 | 0.587151 | 0.284379 |
| MmugDNA.28376.1.S1_at   | MmugDNA.28376.1 | 4.58  | 4.44  | 0.11 | 0.09 | 1.11  | 0.670155 | 0.491944 | 0.869829 | 0.693325 |
| MmugDNA.28380.1.S1_at   | MmugDNA.28380.1 | 5.5   | 5.43  | 0.22 | 0.19 | 1.05  | 0.391521 | 0.828919 | 0.717597 | 0.901662 |
| MmugDNA.28382.1.S1_at   | MmugDNA.28382.1 | 7.52  | 7.34  | 0.12 | 0.11 | 1.14  | 0.224081 | 0.494476 | 0.593223 | 0.694893 |
| MmugDNA.28382.1.S1_s_at | MmugDNA.28382.1 | 8.39  | 8.32  | 0.18 | 0.09 | 1.05  | 0.86395  | 0.761886 | 0.952088 | 0.861579 |
| MmugDNA.28390.1.S1_at   | MmugDNA.28390.1 | 6.77  | 7.21  | 0.45 | 0.05 | -1.36 | 0.478912 | 0.647321 | 0.770342 | 0.793411 |
| MmugDNA.28393.1.S1_s_at | MmugDNA.28393.1 | 9.21  | 9.14  | 0.28 | 0.1  | -1.06 | 0.614967 | 0.045815 | 0.844155 | 0.258337 |
| MmugDNA.2840.1.S1_at    | MmugDNA.2840.1  | 10.2  | 10.14 | 0.25 | 0.2  | 1.04  | 0.341433 | 0.447839 | 0.685061 | 0.663881 |
| MmugDNA.28401.1.S1_at   | MmugDNA.28401.1 | 4.88  | 4.84  | 0.11 | 0.07 | 1.03  | 0.703139 | 0.526397 | 0.884538 | 0.715557 |
| MmugDNA.28402.1.S1_at   | MmugDNA.28402.1 | 7.1   | 7.04  | 0.15 | 0.05 | 1.04  | 0.182117 | 0.198344 | 0.555194 | 0.473267 |
| MmugDNA.28413.1.S1_at   | MmugDNA.28413.1 | 6.53  | 7.51  | 0.92 | 0.4  | -1.97 | 0.208881 | 0.075897 | 0.580477 | 0.320523 |
| MmugDNA.28414.1.S1_at   | MmugDNA.28414.1 | 4.29  | 4.28  | 0.02 | 0.07 | 1     | 0.576923 | 0.390261 | 0.825252 | 0.624128 |
| MmugDNA.28415.1.S1_at   | MmugDNA.28415.1 | 10.25 | 10.07 | 1.06 | 0.1  | 1.13  | 0.529122 | 0.094994 | 0.798106 | 0.352071 |
| MmugDNA.28418.1.S1_at   | MmugDNA.28418.1 | 3.78  | 4.25  | 0.06 | 0.45 | -1.38 | 0.064563 | 0.056703 | 0.418362 | 0.284214 |
| MmugDNA.28419.1.S1_at   | MmugDNA.28419.1 | 6.37  | 6.13  | 0.1  | 0.14 | 1.18  | 0.059357 | 0.068098 | 0.406303 | 0.307142 |
| MmugDNA.28420.1.S1_at   | MmugDNA.28420.1 | 11.78 | 12.01 | 0.12 | 0.01 | -1.17 | 0.058017 | 0.094843 | 0.403663 | 0.35185  |
| MmugDNA.28420.1.S1_s_at | MmugDNA.28420.1 | 10.14 | 10.17 | 0.21 | 0.1  | -1.02 | 0.838078 | 0.488653 | 0.941963 | 0.691273 |
| MmugDNA.28422.1.S1_at   | MmugDNA.28422.1 | 10.94 | 10.87 | 0.08 | 0.09 | 1.05  | 0.384187 | 0.729303 | 0.711835 | 0.843541 |
| MmugDNA.28423.1.S1_s_at | MmugDNA.28423.1 | 7.68  | 7.49  | 0.25 | 0.08 | 1.14  | 0.415278 | 0.156492 | 0.733613 | 0.431866 |
| MmugDNA.28430.1.S1_at   | MmugDNA.28430.1 | 9.4   | 9.59  | 0    | 0.1  | -1.14 | 0.05115  | 0.049915 | 0.38924  | 0.268548 |
| MmugDNA.28437.1.S1_at   | MmugDNA.28437.1 | 7.64  | 8.24  | 0.3  | 0.15 | -1.52 | 0.124919 | 0.142954 | 0.498917 | 0.416854 |
| MmugDNA.28439.1.S1_at   | MmugDNA.28439.1 | 7.26  | 8.62  | 0.29 | 0.44 | -2.57 | 0.016752 | 0.007969 | 0.288099 | 0.118702 |
| MmugDNA.28440.1.S1_at   | MmugDNA.28440.1 | 6.52  | 6.48  | 0.02 | 0.08 | 1.03  | 0.405987 | 0.353031 | 0.727638 | 0.596356 |
| MmugDNA.28441.1.S1_at   | MmugDNA.28441.1 | 4.32  | 4.45  | 0.09 | 0.08 | -1.09 | 0.340982 | 0.058149 | 0.684816 | 0.287812 |
| MmugDNA.28443.1.S1_at   | MmugDNA.28443.1 | 3.46  | 3.45  | 0.56 | 0.17 | 1     | 0.76427  | 0.527545 | 0.911428 | 0.716154 |
| MmugDNA.28444.1.S1_at   | MmugDNA.28444.1 | 5.68  | 5.35  | 0.09 | 0.06 | 1.26  | 0.008486 | 0.007943 | 0.23452  | 0.118702 |
| MmugDNA.28446.1.S1_at   | MmugDNA.28446.1 | 9.63  | 9.98  | 0.69 | 0.23 | -1.28 | 0.609493 | 0.535738 | 0.841773 | 0.721262 |
| MmugDNA.28451.1.S1_at   | MmugDNA.28451.1 | 9.92  | 10.05 | 0.3  | 0.02 | -1.09 | 0.714649 | 0.062805 | 0.888876 | 0.297213 |
| MmugDNA.28453.1.S1_at   | MmugDNA.28453.1 | 5.47  | 5.66  | 0.54 | 0.08 | -1.15 | 0.571835 | 0.343306 | 0.822967 | 0.58905  |
| MmugDNA.28455.1.S1_at   | MmugDNA.28455.1 | 6.87  | 6.94  | 0.08 | 0.16 | -1.05 | 0.728588 | 0.120413 | 0.895243 | 0.38925  |
| MmugDNA.28455.1.S1_s_at | MmugDNA.28455.1 | 6.97  | 6.88  | 0.3  | 0.17 | 1.06  | 0.820168 | 0.116488 | 0.935286 | 0.383671 |
| MmugDNA.2846.1.S1_at    | MmugDNA.2846.1  | 11.1  | 10.89 | 0.15 | 0.09 | 1.16  | 0.132349 | 0.269857 | 0.506752 | 0.535135 |
| MmugDNA.28461.1.S1_at   | MmugDNA.28461.1 | 2.98  | 2.98  | 0.12 | 0.05 | -1    | 0.65491  | 0.352956 | 0.862999 | 0.596268 |
| MmugDNA.28462.1.S1_at   | MmugDNA.28462.1 | 8.57  | 6.63  | 0.27 | 0.41 | 3.83  | 0.002585 | 0.000154 | 0.180775 | 0.030065 |
| MmugDNA.28465.1.S1_at   | MmugDNA.28465.1 | 6.1   | 6.46  | 1.31 | 0.27 | -1.28 | 0.816881 | 0.055956 | 0.933751 | 0.28236  |
| MmugDNA.28467.1.S1_at   | MmugDNA.28467.1 | 11.92 | 11.57 | 0.25 | 0.08 | 1.28  | 0.076562 | 0.025275 | 0.437977 | 0.19945  |
| MmugDNA.2847.1.S1_at    | MmugDNA.2847.1  | 9.49  | 9.08  | 0.39 | 0.08 | 1.33  | 0.150614 | 0.148237 | 0.524209 | 0.422745 |
| MmugDNA.28471.1.S1_at   | MmugDNA.28471.1 | 6.83  | 7.21  | 0.32 | 0.14 | -1.3  | 0.435241 | 0.378595 | 0.745593 | 0.615638 |
| MmugDNA.28472.1.S1_at   | MmugDNA.28472.1 | 9.31  | 9.6   | 0.25 | 0.09 | -1.22 | 0.279154 | 0.181325 | 0.638024 | 0.457834 |

|                         |                 |       |       |      |      |       |          |          |          |          |
|-------------------------|-----------------|-------|-------|------|------|-------|----------|----------|----------|----------|
| MmugDNA.28473.1.S1_at   | MmugDNA.28473.1 | 3.98  | 3.88  | 0.09 | 0.11 | 1.08  | 0.31345  | 0.53201  | 0.664763 | 0.718995 |
| MmugDNA.28474.1.S1_at   | MmugDNA.28474.1 | 12.8  | 12.65 | 0.12 | 0.04 | 1.11  | 0.332998 | 0.4807   | 0.679412 | 0.68597  |
| MmugDNA.28478.1.S1_at   | MmugDNA.28478.1 | 6.32  | 6.8   | 0.37 | 0.36 | -1.4  | 0.113031 | 0.169715 | 0.486436 | 0.446287 |
| MmugDNA.28479.1.S1_at   | MmugDNA.28479.1 | 4.91  | 4.69  | 0.42 | 0.13 | 1.17  | 0.10271  | 0.139876 | 0.473099 | 0.413173 |
| MmugDNA.28485.1.S1_at   | MmugDNA.28485.1 | 9.07  | 8.4   | 0.86 | 0.12 | 1.59  | 0.289272 | 0.631294 | 0.645968 | 0.782751 |
| MmugDNA.28489.1.S1_at   | MmugDNA.28489.1 | 13.08 | 13.03 | 0.17 | 0.02 | 1.04  | 0.690442 | 0.225029 | 0.879504 | 0.49773  |
| MmugDNA.2849.1.S1_s_at  | MmugDNA.2849.1  | 10.48 | 10.58 | 0.71 | 0.13 | -1.07 | 0.928576 | 0.06393  | 0.976296 | 0.29906  |
| MmugDNA.28490.1.S1_at   | MmugDNA.28490.1 | 10.11 | 9.65  | 0.52 | 0.08 | 1.38  | 0.615189 | 0.780637 | 0.844222 | 0.872726 |
| MmugDNA.28493.1.S1_at   | MmugDNA.28493.1 | 3.54  | 3.54  | 0.11 | 0.09 | -1    | 0.404855 | 0.765475 | 0.726978 | 0.863679 |
| MmugDNA.28495.1.S1_at   | MmugDNA.28495.1 | 8.37  | 8.43  | 0.1  | 0.09 | -1.04 | 0.097664 | 0.050046 | 0.466607 | 0.268916 |
| MmugDNA.28497.1.S1_at   | MmugDNA.28497.1 | 9.36  | 9.19  | 2.99 | 0.11 | -1.13 | 0.661997 | 0.378388 | 0.866635 | 0.615443 |
| MmugDNA.28501.1.S1_at   | MmugDNA.28501.1 | 10.42 | 9.57  | 0.53 | 0.2  | 1.81  | 0.185257 | 0.35816  | 0.558325 | 0.599694 |
| MmugDNA.28504.1.S1_at   | MmugDNA.28504.1 | 12.71 | 13.08 | 0.1  | 0.02 | -1.3  | 0.006374 | 0.000477 | 0.218572 | 0.038572 |
| MmugDNA.28514.1.S1_at   | MmugDNA.28514.1 | 6.06  | 6.03  | 0.28 | 0.03 | 1.02  | 0.704983 | 0.945287 | 0.885278 | 0.968942 |
| MmugDNA.28527.1.S1_at   | MmugDNA.28527.1 | 6.42  | 5.93  | 0.14 | 0.15 | 1.4   | 0.024534 | 0.023446 | 0.319083 | 0.191956 |
| MmugDNA.2853.1.S1_at    | MmugDNA.2853.1  | 13.21 | 12.93 | 0.23 | 0.02 | 1.22  | 0.1016   | 0.117637 | 0.47185  | 0.385352 |
| MmugDNA.28530.1.S1_s_at | MmugDNA.28530.1 | 11.41 | 11.33 | 0.28 | 0.2  | 1.06  | 0.143995 | 0.042106 | 0.519328 | 0.249656 |
| MmugDNA.28531.1.S1_at   | MmugDNA.28531.1 | 10.15 | 10.04 | 0.64 | 0.63 | 1.08  | 0.56683  | 0.056771 | 0.820086 | 0.284379 |
| MmugDNA.28534.1.S1_at   | MmugDNA.28534.1 | 9.54  | 9.42  | 0.54 | 0.17 | 1.09  | 0.478588 | 0.00775  | 0.770117 | 0.117622 |
| MmugDNA.28535.1.S1_s_at | MmugDNA.28535.1 | 11.55 | 10.82 | 0.14 | 0.12 | 1.66  | 0.004081 | 0.004088 | 0.198571 | 0.09055  |
| MmugDNA.28538.1.S1_at   | MmugDNA.28538.1 | 9.39  | 9.67  | 0.55 | 0.28 | -1.21 | 0.337078 | 0.488595 | 0.682214 | 0.691222 |
| MmugDNA.28544.1.S1_at   | MmugDNA.28544.1 | 7.74  | 8.29  | 0.55 | 0.21 | -1.46 | 0.09486  | 0.209578 | 0.464075 | 0.483264 |
| MmugDNA.28546.1.S1_at   | MmugDNA.28546.1 | 10.11 | 11.35 | 0.27 | 0.07 | -2.37 | 0.00117  | 0.000405 | 0.156386 | 0.03749  |
| MmugDNA.2855.1.S1_at    | MmugDNA.2855.1  | 11.03 | 10.9  | 0.33 | 0.11 | 1.09  | 0.643049 | 0.082761 | 0.857999 | 0.33223  |
| MmugDNA.28554.1.S1_at   | MmugDNA.28554.1 | 6.41  | 6.13  | 0.15 | 0.16 | 1.21  | 0.454597 | 0.686194 | 0.756874 | 0.816834 |
| MmugDNA.28561.1.S1_at   | MmugDNA.28561.1 | 6.36  | 6.02  | 0.75 | 0.21 | 1.26  | 0.658653 | 0.491822 | 0.864805 | 0.693275 |
| MmugDNA.28566.1.S1_at   | MmugDNA.28566.1 | 3.22  | 3.8   | 0.1  | 0.66 | -1.5  | 0.067153 | 0.032181 | 0.4232   | 0.222111 |
| MmugDNA.28569.1.S1_at   | MmugDNA.28569.1 | 4.19  | 4.07  | 0.07 | 0.06 | 1.09  | 0.190158 | 0.195744 | 0.561385 | 0.470637 |
| MmugDNA.2857.1.S1_at    | MmugDNA.2857.1  | 9.38  | 9.42  | 0.19 | 0.05 | -1.03 | 0.738345 | 0.014518 | 0.899866 | 0.15371  |
| MmugDNA.28570.1.S1_at   | MmugDNA.28570.1 | 5.03  | 4.99  | 0.19 | 0.13 | 1.03  | 0.229984 | 0.150393 | 0.598481 | 0.424934 |
| MmugDNA.28571.1.S1_at   | MmugDNA.28571.1 | 8.05  | 8.2   | 0.26 | 0.29 | -1.11 | 0.263324 | 0.256128 | 0.625264 | 0.524069 |
| MmugDNA.28572.1.S1_at   | MmugDNA.28572.1 | 8.45  | 8.45  | 0.4  | 0.03 | -1    | 0.952429 | 0.990658 | 0.984027 | 0.994725 |
| MmugDNA.28574.1.S1_at   | MmugDNA.28574.1 | 6.04  | 7.21  | 0.25 | 0.2  | -2.25 | 0.007656 | 0.002772 | 0.230571 | 0.077863 |
| MmugDNA.28591.1.S1_s_at | MmugDNA.28591.1 | 7.63  | 7.71  | 0.27 | 0.31 | -1.06 | 0.795557 | 0.691834 | 0.924888 | 0.82074  |
| MmugDNA.28599.1.S1_at   | MmugDNA.28599.1 | 12.18 | 12.65 | 0.18 | 0.05 | -1.39 | 0.020271 | 0.052148 | 0.303799 | 0.273955 |
| MmugDNA.286.1.S1_at     | MmugDNA.286.1   | 4.68  | 5.52  | 0.37 | 0.36 | -1.79 | 0.051689 | 0.022216 | 0.390999 | 0.186513 |
| MmugDNA.286.1.S1_s_at   | MmugDNA.286.1   | 6.48  | 7.21  | 0.16 | 0.21 | -1.66 | 0.005601 | 0.009772 | 0.209258 | 0.130026 |
| MmugDNA.28603.1.S1_at   | MmugDNA.28603.1 | 3.78  | 3.77  | 0.1  | 0.04 | 1.01  | 0.225379 | 0.278618 | 0.594611 | 0.542329 |
| MmugDNA.28625.1.S1_at   | MmugDNA.28625.1 | 9.45  | 9.21  | 1.07 | 0.02 | 1.18  | 0.649202 | 0.792999 | 0.860245 | 0.880435 |
| MmugDNA.28626.1.S1_at   | MmugDNA.28626.1 | 11.69 | 11.8  | 0.5  | 0.04 | -1.08 | 0.493292 | 0.675702 | 0.778798 | 0.810429 |
| MmugDNA.28627.1.S1_at   | MmugDNA.28627.1 | 9.73  | 9.78  | 0.36 | 0.17 | -1.03 | 0.881884 | 0.951225 | 0.95911  | 0.972378 |
| MmugDNA.2863.1.S1_at    | MmugDNA.2863.1  | 11.23 | 11.08 | 0.17 | 0.04 | 1.11  | 0.395515 | 0.380061 | 0.720494 | 0.61674  |
| MmugDNA.28631.1.S1_at   | MmugDNA.28631.1 | 11.4  | 11.55 | 0.73 | 0.21 | -1.11 | 0.994448 | 0.010315 | 0.997902 | 0.132962 |

|                         |                 |       |       |      |      |       |          |          |          |          |
|-------------------------|-----------------|-------|-------|------|------|-------|----------|----------|----------|----------|
| MmugDNA.28634.1.S1_at   | MmugDNA.28634.1 | 11.48 | 10.9  | 0.28 | 0.06 | 1.49  | 0.08565  | 0.076976 | 0.452706 | 0.322421 |
| MmugDNA.28635.1.S1_at   | MmugDNA.28635.1 | 13.23 | 12.68 | 0.19 | 0.23 | 1.46  | 0.030791 | 0.011823 | 0.3387   | 0.140866 |
| MmugDNA.28641.1.S1_at   | MmugDNA.28641.1 | 8.56  | 8.42  | 0.83 | 0.12 | 1.11  | 0.595861 | 0.433074 | 0.835646 | 0.653448 |
| MmugDNA.28643.1.S1_at   | MmugDNA.28643.1 | 6.73  | 6.8   | 0.26 | 0.14 | -1.05 | 0.961895 | 0.426434 | 0.987562 | 0.648601 |
| MmugDNA.28666.1.S1_at   | MmugDNA.28666.1 | 7.01  | 7.24  | 0.53 | 0.21 | -1.18 | 0.704596 | 0.625662 | 0.885155 | 0.779265 |
| MmugDNA.28672.1.S1_at   | MmugDNA.28672.1 | 3.44  | 3.36  | 0.1  | 0.08 | 1.05  | 0.182251 | 0.511778 | 0.555371 | 0.705797 |
| MmugDNA.28678.1.S1_at   | MmugDNA.28678.1 | 10.1  | 10.12 | 0.16 | 0.15 | -1.02 | 0.887684 | 0.004408 | 0.961096 | 0.092846 |
| MmugDNA.28682.1.S1_at   | MmugDNA.28682.1 | 4.16  | 4.01  | 0.14 | 0.05 | 1.11  | 0.097922 | 0.314638 | 0.467121 | 0.568415 |
| MmugDNA.28683.1.S1_at   | MmugDNA.28683.1 | 7.72  | 8.69  | 0.27 | 0.25 | -1.96 | 0.020079 | 0.002983 | 0.303364 | 0.079958 |
| MmugDNA.28686.1.S1_at   | MmugDNA.28686.1 | 10.15 | 10.4  | 0.33 | 0.09 | -1.19 | 0.212515 | 0.278647 | 0.58301  | 0.542347 |
| MmugDNA.28689.1.S1_at   | MmugDNA.28689.1 | 12.34 | 12.17 | 0.25 | 0.13 | -1.12 | 0.145692 | 0.056372 | 0.520555 | 0.283382 |
| MmugDNA.28694.1.S1_at   | MmugDNA.28694.1 | 10.99 | 10.54 | 0.72 | 0.26 | 1.36  | 0.289151 | 0.444697 | 0.645892 | 0.662072 |
| MmugDNA.28694.1.S1_s_at | MmugDNA.28694.1 | 10.71 | 10.35 | 0.79 | 0.14 | 1.29  | 0.645113 | 0.852472 | 0.858716 | 0.916174 |
| MmugDNA.28698.1.S1_at   | MmugDNA.28698.1 | 8.76  | 8.3   | 0.67 | 0.59 | 1.38  | 0.435323 | 0.194944 | 0.745628 | 0.470088 |
| MmugDNA.28698.1.S1_x_at | MmugDNA.28698.1 | 8.84  | 8.38  | 0.65 | 0.59 | 1.37  | 0.434559 | 0.197663 | 0.745222 | 0.472633 |
| MmugDNA.2870.1.S1_at    | MmugDNA.2870.1  | 8.79  | 8.74  | 0.81 | 0.33 | 1.04  | 0.587026 | 0.653642 | 0.831568 | 0.797546 |
| MmugDNA.28700.1.S1_at   | MmugDNA.28700.1 | 10.56 | 10.08 | 0.42 | 0.11 | 1.4   | 0.300097 | 0.386976 | 0.654617 | 0.621935 |
| MmugDNA.28704.1.S1_at   | MmugDNA.28704.1 | 11.88 | 11.88 | 0.12 | 0.11 | -1    | 0.933964 | 0.006468 | 0.977707 | 0.109304 |
| MmugDNA.28706.1.S1_at   | MmugDNA.28706.1 | 4.98  | 4.63  | 0.27 | 0.14 | 1.28  | 0.29479  | 0.422576 | 0.650909 | 0.645762 |
| MmugDNA.28721.1.S1_at   | MmugDNA.28721.1 | 11.16 | 10.73 | 0.34 | 0.09 | 1.34  | 0.130954 | 0.360068 | 0.5054   | 0.601204 |
| MmugDNA.28724.1.S1_at   | MmugDNA.28724.1 | 11.55 | 10.68 | 0.38 | 0.11 | 1.83  | 0.045558 | 0.028242 | 0.376843 | 0.209816 |
| MmugDNA.2873.1.S1_at    | MmugDNA.2873.1  | 8.52  | 8.8   | 0.2  | 0.07 | -1.22 | 0.209316 | 0.544836 | 0.580834 | 0.727177 |
| MmugDNA.28738.1.S1_at   | MmugDNA.28738.1 | 10.23 | 10.83 | 0.6  | 0.06 | -1.52 | 0.274971 | 0.154139 | 0.634249 | 0.42887  |
| MmugDNA.2874.1.S1_at    | MmugDNA.2874.1  | 9.01  | 9.57  | 0.24 | 0.09 | -1.47 | 0.028852 | 0.002726 | 0.333062 | 0.076945 |
| MmugDNA.28742.1.S1_at   | MmugDNA.28742.1 | 10.52 | 11    | 0.82 | 0.07 | -1.4  | 0.332229 | 0.397935 | 0.678722 | 0.629138 |
| MmugDNA.28748.1.S1_at   | MmugDNA.28748.1 | 10.22 | 9.76  | 0.31 | 0.08 | 1.37  | 0.029342 | 0.011281 | 0.334049 | 0.138076 |
| MmugDNA.28749.1.S1_at   | MmugDNA.28749.1 | 7.06  | 7.56  | 0.33 | 0.09 | -1.41 | 0.060002 | 0.076634 | 0.407399 | 0.321912 |
| MmugDNA.2875.1.S1_at    | MmugDNA.2875.1  | 8.29  | 8.89  | 0.18 | 0.06 | -1.51 | 0.005719 | 0.000324 | 0.210666 | 0.035587 |
| MmugDNA.28752.1.S1_at   | MmugDNA.28752.1 | 6.89  | 7.45  | 0.34 | 0.04 | -1.48 | 0.021325 | 0.008278 | 0.307781 | 0.12078  |
| MmugDNA.28757.1.S1_at   | MmugDNA.28757.1 | 4.51  | 4.53  | 0.19 | 0.23 | -1.01 | 0.799584 | 0.787747 | 0.926629 | 0.877256 |
| MmugDNA.28758.1.S1_at   | MmugDNA.28758.1 | 3.64  | 3.64  | 0.15 | 0.05 | 1     | 0.578222 | 0.831838 | 0.826177 | 0.903518 |
| MmugDNA.28773.1.S1_at   | MmugDNA.28773.1 | 4.93  | 4.84  | 0.21 | 0.09 | 1.07  | 0.537002 | 0.107517 | 0.802624 | 0.370389 |
| MmugDNA.28779.1.S1_at   | MmugDNA.28779.1 | 13.53 | 13.61 | 0.13 | 0.03 | -1.06 | 0.407212 | 0.562535 | 0.728545 | 0.738055 |
| MmugDNA.2878.1.S1_at    | MmugDNA.2878.1  | 8.03  | 8.44  | 0.44 | 0.34 | -1.33 | 0.125283 | 0.102635 | 0.499501 | 0.362991 |
| MmugDNA.28787.1.S1_at   | MmugDNA.28787.1 | 12.21 | 11.75 | 0.13 | 0.13 | 1.38  | 0.00543  | 0.004664 | 0.208157 | 0.095301 |
| MmugDNA.28792.1.S1_at   | MmugDNA.28792.1 | 9.52  | 9.63  | 0.85 | 0.24 | -1.08 | 0.779486 | 0.387278 | 0.918704 | 0.622027 |
| MmugDNA.2881.1.S1_at    | MmugDNA.2881.1  | 5.46  | 5.87  | 0.68 | 0.39 | -1.32 | 0.918454 | 0.720744 | 0.972122 | 0.838368 |
| MmugDNA.2882.1.S1_at    | MmugDNA.2882.1  | 10.07 | 10.22 | 0.71 | 0.05 | -1.11 | 0.241462 | 0.280441 | 0.607603 | 0.543648 |
| MmugDNA.28820.1.S1_at   | MmugDNA.28820.1 | 9.34  | 9.56  | 0.81 | 0.26 | -1.17 | 0.482494 | 0.396283 | 0.772474 | 0.628076 |
| MmugDNA.28821.1.S1_at   | MmugDNA.28821.1 | 9.94  | 10.05 | 0.18 | 0.12 | -1.08 | 0.23255  | 0.000214 | 0.600124 | 0.032361 |
| MmugDNA.28822.1.S1_at   | MmugDNA.28822.1 | 3.75  | 3.87  | 0.19 | 0.18 | -1.09 | 0.938869 | 0.989421 | 0.979343 | 0.994009 |
| MmugDNA.28828.1.S1_at   | MmugDNA.28828.1 | 5.67  | 4.98  | 0.65 | 0.31 | 1.61  | 0.151362 | 0.063652 | 0.524547 | 0.298815 |
| MmugDNA.28831.1.S1_at   | MmugDNA.28831.1 | 6.13  | 6.1   | 0.16 | 0.13 | 1.02  | 0.857655 | 0.851025 | 0.949729 | 0.915265 |

|                         |                 |       |       |      |      |       |          |          |          |          |
|-------------------------|-----------------|-------|-------|------|------|-------|----------|----------|----------|----------|
| MmugDNA.28837.1.S1_at   | MmugDNA.28837.1 | 5.28  | 5.09  | 0.1  | 0.05 | 1.14  | 0.063631 | 0.1032   | 0.416123 | 0.364123 |
| MmugDNA.2884.1.S1_at    | MmugDNA.2884.1  | 11.43 | 11.11 | 0.34 | 0.05 | 1.25  | 0.180094 | 0.044452 | 0.553239 | 0.25521  |
| MmugDNA.28842.1.S1_at   | MmugDNA.28842.1 | 9.98  | 9.48  | 0.39 | 0.09 | 1.41  | 0.137737 | 0.059576 | 0.513466 | 0.290619 |
| MmugDNA.28843.1.S1_at   | MmugDNA.28843.1 | 13.26 | 13.3  | 0.12 | 0.02 | -1.03 | 0.83381  | 0.087247 | 0.940428 | 0.340237 |
| MmugDNA.28848.1.S1_at   | MmugDNA.28848.1 | 11.73 | 11.53 | 0.19 | 0.1  | 1.15  | 0.279096 | 0.06369  | 0.637997 | 0.298842 |
| MmugDNA.28855.1.S1_at   | MmugDNA.28855.1 | 13.52 | 13.59 | 0.15 | 0.03 | -1.04 | 0.815076 | 0.080059 | 0.933137 | 0.327429 |
| MmugDNA.28875.1.S1_at   | MmugDNA.28875.1 | 3.19  | 3.22  | 0.27 | 0.09 | -1.02 | 0.626339 | 0.712534 | 0.849967 | 0.833383 |
| MmugDNA.28879.1.S1_at   | MmugDNA.28879.1 | 8.03  | 8.33  | 0.12 | 0.1  | -1.23 | 0.054056 | 0.712437 | 0.395747 | 0.833371 |
| MmugDNA.28880.1.S1_at   | MmugDNA.28880.1 | 7.13  | 7     | 0.02 | 0.04 | 1.09  | 0.004787 | 0.000135 | 0.202416 | 0.029087 |
| MmugDNA.28883.1.S1_at   | MmugDNA.28883.1 | 9.6   | 9.72  | 0.2  | 0.06 | -1.09 | 0.242882 | 0.032874 | 0.608808 | 0.224478 |
| MmugDNA.28889.1.S1_at   | MmugDNA.28889.1 | 6.2   | 5.93  | 0.96 | 0.17 | 1.2   | 0.597431 | 0.620247 | 0.836302 | 0.775303 |
| MmugDNA.28890.1.S1_at   | MmugDNA.28890.1 | 6.63  | 6.83  | 0.19 | 0.01 | -1.15 | 0.173843 | 0.054754 | 0.546898 | 0.279506 |
| MmugDNA.289.1.S1_at     | MmugDNA.289.1   | 3.36  | 3.27  | 0.22 | 0.15 | 1.07  | 0.784502 | 0.589908 | 0.920805 | 0.755994 |
| MmugDNA.28903.1.S1_at   | MmugDNA.28903.1 | 4.26  | 4.19  | 0.12 | 0.04 | 1.05  | 0.427076 | 0.257593 | 0.74088  | 0.525302 |
| MmugDNA.28907.1.S1_at   | MmugDNA.28907.1 | 7.22  | 7.06  | 0.2  | 0.3  | 1.12  | 0.362778 | 0.115627 | 0.699596 | 0.382714 |
| MmugDNA.28911.1.S1_at   | MmugDNA.28911.1 | 8.94  | 8.9   | 0.31 | 0.02 | 1.03  | 0.782574 | 0.283804 | 0.919923 | 0.546209 |
| MmugDNA.28916.1.S1_at   | MmugDNA.28916.1 | 7.52  | 7.42  | 0.31 | 0.13 | 1.06  | 0.964656 | 0.546087 | 0.988371 | 0.727769 |
| MmugDNA.28918.1.S1_at   | MmugDNA.28918.1 | 11.7  | 11.87 | 0.08 | 0.1  | -1.12 | 0.108275 | 0.005221 | 0.480728 | 0.100105 |
| MmugDNA.28919.1.A1_at   | MmugDNA.28919.1 | 3.68  | 3.7   | 0.18 | 0.11 | -1.01 | 0.517654 | 0.810629 | 0.792232 | 0.890812 |
| MmugDNA.28919.1.S1_at   | MmugDNA.28919.1 | 3.68  | 3.6   | 0.18 | 0.01 | 1.06  | 0.479406 | 0.697664 | 0.770726 | 0.824317 |
| MmugDNA.2892.1.S1_at    | MmugDNA.2892.1  | 3.96  | 3.97  | 0.02 | 0.21 | -1.01 | 0.475526 | 0.610552 | 0.768676 | 0.768734 |
| MmugDNA.28922.1.S1_at   | MmugDNA.28922.1 | 8.22  | 8.13  | 0.27 | 0.04 | 1.07  | 0.304868 | 0.07073  | 0.658493 | 0.31213  |
| MmugDNA.28933.1.S1_at   | MmugDNA.28933.1 | 12.55 | 12.17 | 0.34 | 0.05 | 1.3   | 0.397368 | 0.011672 | 0.721736 | 0.140009 |
| MmugDNA.28936.1.S1_x_at | MmugDNA.28936.1 | 11.64 | 11.89 | 0.14 | 0.17 | -1.19 | 0.132404 | 0.301625 | 0.506752 | 0.55955  |
| MmugDNA.2895.1.S1_at    | MmugDNA.2895.1  | 9.48  | 9.52  | 0.59 | 0.1  | -1.03 | 0.869173 | 0.24405  | 0.954244 | 0.514111 |
| MmugDNA.28958.1.S1_at   | MmugDNA.28958.1 | 10.38 | 11.02 | 0.06 | 0.06 | -1.55 | 0.000155 | 0.002948 | 0.112332 | 0.079945 |
| MmugDNA.28959.1.S1_s_at | MmugDNA.28959.1 | 12.32 | 12.01 | 0.16 | 0.06 | 1.24  | 0.035003 | 0.076379 | 0.350898 | 0.321368 |
| MmugDNA.28963.1.S1_at   | MmugDNA.28963.1 | 6.76  | 7.05  | 1.34 | 0.35 | -1.22 | 0.722215 | 0.032804 | 0.892211 | 0.22427  |
| MmugDNA.28965.1.S1_at   | MmugDNA.28965.1 | 11.6  | 12.17 | 0.05 | 0.03 | -1.49 | 0.000067 | 0.000003 | 0.108151 | 0.013386 |
| MmugDNA.2897.1.S1_at    | MmugDNA.2897.1  | 10.88 | 10.97 | 0.09 | 0.09 | -1.06 | 0.363248 | 0.6455   | 0.699934 | 0.792355 |
| MmugDNA.28982.1.S1_s_at | MmugDNA.28982.1 | 12.39 | 12.17 | 0.22 | 0.08 | 1.17  | 0.102447 | 0.107475 | 0.472592 | 0.370311 |
| MmugDNA.28984.1.S1_at   | MmugDNA.28984.1 | 7.83  | 7.92  | 0.09 | 0.06 | -1.06 | 0.427269 | 0.091423 | 0.740974 | 0.34639  |
| MmugDNA.28986.1.S1_at   | MmugDNA.28986.1 | 10.12 | 9.77  | 0.19 | 0.02 | 1.27  | 0.076249 | 0.1266   | 0.437711 | 0.397214 |
| MmugDNA.28987.1.S1_at   | MmugDNA.28987.1 | 7.88  | 8.23  | 0.39 | 0.14 | -1.28 | 0.283705 | 0.163036 | 0.641463 | 0.439203 |
| MmugDNA.28997.1.S1_at   | MmugDNA.28997.1 | 8.32  | 8.32  | 0.56 | 0.18 | 1.01  | 0.398063 | 0.46749  | 0.722279 | 0.677091 |
| MmugDNA.28998.1.S1_at   | MmugDNA.28998.1 | 12.25 | 12.28 | 0.11 | 0.09 | -1.02 | 0.25931  | 0.457561 | 0.622607 | 0.670864 |
| MmugDNA.29.1.S1_at      | MmugDNA.29.1    | 11.15 | 11.06 | 0.2  | 0.04 | 1.06  | 0.57822  | 0.363545 | 0.826177 | 0.603957 |
| MmugDNA.29001.1.S1_at   | MmugDNA.29001.1 | 12.81 | 12.94 | 0.07 | 0.04 | -1.1  | 0.137518 | 0.225594 | 0.513049 | 0.498155 |
| MmugDNA.29006.1.S1_at   | MmugDNA.29006.1 | 8.77  | 8.99  | 0.08 | 0.27 | -1.16 | 0.25299  | 0.116403 | 0.617861 | 0.383671 |
| MmugDNA.29007.1.S1_at   | MmugDNA.29007.1 | 10.18 | 10.23 | 0.9  | 0.15 | -1.04 | 0.965423 | 0.994041 | 0.988598 | 0.996397 |
| MmugDNA.2901.1.S1_at    | MmugDNA.2901.1  | 9.83  | 9.79  | 0.1  | 0.01 | 1.03  | 0.202638 | 0.338567 | 0.5742   | 0.585564 |
| MmugDNA.29014.1.S1_at   | MmugDNA.29014.1 | 5.3   | 5.15  | 0.06 | 0.1  | 1.11  | 0.051598 | 0.052357 | 0.390696 | 0.274315 |
| MmugDNA.29018.1.S1_at   | MmugDNA.29018.1 | 11.75 | 11.99 | 0.03 | 0.05 | -1.19 | 0.001796 | 0.000046 | 0.167444 | 0.025273 |

|                       |                 |       |       |      |      |       |          |          |          |          |
|-----------------------|-----------------|-------|-------|------|------|-------|----------|----------|----------|----------|
| MmugDNA.2902.1.S1_at  | MmugDNA.2902.1  | 7.72  | 7.67  | 0.13 | 0.07 | 1.03  | 0.92542  | 0.025666 | 0.975188 | 0.200834 |
| MmugDNA.29022.1.S1_at | MmugDNA.29022.1 | 11.34 | 11.62 | 0.17 | 0.1  | -1.22 | 0.043898 | 0.001484 | 0.373038 | 0.058804 |
| MmugDNA.29023.1.S1_at | MmugDNA.29023.1 | 11.48 | 12.06 | 0.04 | 0.09 | -1.49 | 0.000444 | 0.022435 | 0.139797 | 0.187441 |
| MmugDNA.29025.1.S1_at | MmugDNA.29025.1 | 4.86  | 5.72  | 0.61 | 0.14 | -1.81 | 0.232721 | 0.304421 | 0.600193 | 0.561712 |
| MmugDNA.29029.1.S1_at | MmugDNA.29029.1 | 6.97  | 7.53  | 0.18 | 0.14 | -1.47 | 0.015707 | 0.014214 | 0.28333  | 0.152269 |
| MmugDNA.29030.1.S1_at | MmugDNA.29030.1 | 8.13  | 8.9   | 0.28 | 0.43 | -1.71 | 0.246325 | 0.085393 | 0.611818 | 0.337289 |
| MmugDNA.29036.1.S1_at | MmugDNA.29036.1 | 11.28 | 11.82 | 0.12 | 0.1  | -1.46 | 0.003716 | 0.000934 | 0.197568 | 0.048962 |
| MmugDNA.29038.1.S1_at | MmugDNA.29038.1 | 5.66  | 5.35  | 0.11 | 0.13 | 1.24  | 0.06562  | 0.173714 | 0.420827 | 0.450055 |
| MmugDNA.29040.1.S1_at | MmugDNA.29040.1 | 8.89  | 10.24 | 1.21 | 0.22 | -2.55 | 0.161551 | 0.166014 | 0.534843 | 0.442579 |
| MmugDNA.29042.1.S1_at | MmugDNA.29042.1 | 9.52  | 9.41  | 0.11 | 0.05 | 1.08  | 0.152608 | 0.014198 | 0.525558 | 0.152173 |
| MmugDNA.29046.1.S1_at | MmugDNA.29046.1 | 5.8   | 7.51  | 0.63 | 0.32 | -3.29 | 0.013676 | 0.01907  | 0.270367 | 0.173701 |
| MmugDNA.29048.1.S1_at | MmugDNA.29048.1 | 5.52  | 5.59  | 0.1  | 0.18 | -1.04 | 0.746287 | 0.411056 | 0.90336  | 0.637874 |
| MmugDNA.29049.1.S1_at | MmugDNA.29049.1 | 4.83  | 4.77  | 0.43 | 0.24 | 1.05  | 0.817069 | 0.583104 | 0.933848 | 0.751559 |
| MmugDNA.2905.1.S1_at  | MmugDNA.2905.1  | 10.25 | 10.35 | 0.16 | 0.1  | -1.07 | 0.30174  | 0.300093 | 0.655973 | 0.558262 |
| MmugDNA.29053.1.S1_at | MmugDNA.29053.1 | 10.34 | 10.88 | 0.42 | 0.04 | -1.45 | 0.248977 | 0.101289 | 0.61432  | 0.361069 |
| MmugDNA.29055.1.S1_at | MmugDNA.29055.1 | 3.47  | 3.42  | 0.28 | 0.03 | 1.03  | 0.763159 | 0.561215 | 0.911064 | 0.737235 |
| MmugDNA.2906.1.S1_at  | MmugDNA.2906.1  | 3.12  | 3.16  | 0.4  | 0.19 | -1.03 | 0.340597 | 0.392804 | 0.684563 | 0.625846 |
| MmugDNA.29066.1.S1_at | MmugDNA.29066.1 | 4.8   | 4.89  | 0.04 | 0.21 | -1.07 | 0.236282 | 0.203851 | 0.603291 | 0.478102 |
| MmugDNA.29068.1.S1_at | MmugDNA.29068.1 | 5.99  | 5.96  | 0.12 | 0.02 | 1.02  | 0.625901 | 0.388141 | 0.849643 | 0.622607 |
| MmugDNA.29073.1.S1_at | MmugDNA.29073.1 | 7.08  | 6.99  | 0.42 | 0.24 | 1.07  | 0.393963 | 0.390556 | 0.719549 | 0.624329 |
| MmugDNA.29075.1.S1_at | MmugDNA.29075.1 | 3.75  | 3.41  | 0.41 | 0.06 | 1.27  | 0.557108 | 0.754796 | 0.814507 | 0.857323 |
| MmugDNA.29088.1.S1_at | MmugDNA.29088.1 | 3.18  | 3.18  | 0.14 | 0.17 | 1     | 0.933903 | 0.252316 | 0.977707 | 0.52096  |
| MmugDNA.29090.1.S1_at | MmugDNA.29090.1 | 12.61 | 12.71 | 0.08 | 0.02 | -1.07 | 0.081621 | 0.049005 | 0.445664 | 0.266254 |
| MmugDNA.29093.1.S1_at | MmugDNA.29093.1 | 8.59  | 9.39  | 0.97 | 0.24 | -1.75 | 0.307131 | 0.172076 | 0.660096 | 0.448508 |
| MmugDNA.29094.1.S1_at | MmugDNA.29094.1 | 4.58  | 5.86  | 0.23 | 0.22 | -2.42 | 0.001463 | 0.31316  | 0.161412 | 0.567717 |
| MmugDNA.29100.1.S1_at | MmugDNA.29100.1 | 13.78 | 13.62 | 0.19 | 0.01 | 1.12  | 0.553543 | 0.729035 | 0.812258 | 0.843391 |
| MmugDNA.29101.1.S1_at | MmugDNA.29101.1 | 10.77 | 11.22 | 0.58 | 0.19 | -1.37 | 0.778235 | 0.035733 | 0.91815  | 0.233413 |
| MmugDNA.29104.1.S1_at | MmugDNA.29104.1 | 5.63  | 5.52  | 0.23 | 0.06 | 1.08  | 0.244219 | 0.394969 | 0.60991  | 0.627216 |
| MmugDNA.29110.1.S1_at | MmugDNA.29110.1 | 9.46  | 9.42  | 0.27 | 0.18 | 1.02  | 0.407404 | 0.048656 | 0.728597 | 0.265613 |
| MmugDNA.29118.1.S1_at | MmugDNA.29118.1 | 8.84  | 8.76  | 0.5  | 0.22 | 1.06  | 0.563286 | 0.59359  | 0.818148 | 0.758334 |
| MmugDNA.29119.1.S1_at | MmugDNA.29119.1 | 5.09  | 5.92  | 0.57 | 0.34 | -1.78 | 0.319838 | 0.300074 | 0.669028 | 0.558262 |
| MmugDNA.2912.1.S1_at  | MmugDNA.2912.1  | 12.69 | 12.53 | 0.29 | 0.05 | 1.12  | 0.363692 | 0.043921 | 0.700278 | 0.254098 |
| MmugDNA.29127.1.S1_at | MmugDNA.29127.1 | 9.15  | 9.49  | 0.12 | 0.12 | -1.26 | 0.02851  | 0.011284 | 0.332598 | 0.138076 |
| MmugDNA.29130.1.S1_at | MmugDNA.29130.1 | 5.67  | 6.26  | 0.88 | 0.45 | -1.51 | 0.850068 | 0.96555  | 0.947281 | 0.980739 |
| MmugDNA.29134.1.S1_at | MmugDNA.29134.1 | 10.24 | 10.14 | 0.22 | 0.12 | 1.07  | 0.527619 | 0.544761 | 0.797158 | 0.727107 |
| MmugDNA.29136.1.S1_at | MmugDNA.29136.1 | 6.72  | 6.27  | 0.45 | 0.04 | 1.37  | 0.090958 | 0.055669 | 0.458897 | 0.281785 |
| MmugDNA.29138.1.S1_at | MmugDNA.29138.1 | 7.03  | 7.06  | 0.16 | 0.12 | -1.02 | 0.171615 | 0.201436 | 0.544918 | 0.475963 |
| MmugDNA.29139.1.S1_at | MmugDNA.29139.1 | 4.71  | 5.34  | 0.37 | 0.19 | -1.54 | 0.165672 | 0.157812 | 0.538504 | 0.433475 |
| MmugDNA.29144.1.S1_at | MmugDNA.29144.1 | 13.17 | 13.08 | 0.13 | 0.08 | 1.06  | 0.186767 | 0.275479 | 0.559225 | 0.539697 |
| MmugDNA.29146.1.S1_at | MmugDNA.29146.1 | 7.53  | 7.73  | 0.33 | 0.24 | -1.15 | 0.346784 | 0.508004 | 0.688398 | 0.703358 |
| MmugDNA.29147.1.S1_at | MmugDNA.29147.1 | 6.45  | 6.56  | 0.52 | 0.19 | -1.08 | 0.391139 | 0.030599 | 0.717473 | 0.216887 |
| MmugDNA.2915.1.S1_at  | MmugDNA.2915.1  | 8.13  | 8.8   | 0.06 | 0.21 | -1.59 | 0.007216 | 0.059199 | 0.226509 | 0.290208 |
| MmugDNA.29151.1.S1_at | MmugDNA.29151.1 | 11.15 | 11.47 | 0.02 | 0.11 | -1.25 | 0.014658 | 0.1768   | 0.277041 | 0.45321  |

|                         |                 |       |       |      |      |       |          |          |          |          |
|-------------------------|-----------------|-------|-------|------|------|-------|----------|----------|----------|----------|
| MmugDNA.29154.1.S1_at   | MmugDNA.29154.1 | 3.84  | 3.74  | 0.24 | 0.11 | 1.07  | 0.56513  | 0.694635 | 0.819091 | 0.822439 |
| MmugDNA.29157.1.S1_at   | MmugDNA.29157.1 | 11.27 | 11.84 | 0.3  | 0.08 | -1.48 | 0.033853 | 0.023455 | 0.347296 | 0.191956 |
| MmugDNA.29164.1.S1_a_at | MmugDNA.29164.1 | 7     | 6.68  | 0.04 | 0.15 | 1.25  | 0.032475 | 0.028196 | 0.344399 | 0.209526 |
| MmugDNA.29172.1.S1_at   | MmugDNA.29172.1 | 7.29  | 7.27  | 0.21 | 0.04 | 1.01  | 0.364879 | 0.134055 | 0.700775 | 0.406276 |
| MmugDNA.29174.1.S1_at   | MmugDNA.29174.1 | 7.97  | 8.28  | 0.97 | 0.04 | -1.24 | 0.195663 | 0.262402 | 0.565981 | 0.528655 |
| MmugDNA.29174.1.S1_s_at | MmugDNA.29174.1 | 6.92  | 6.89  | 0.19 | 0.02 | 1.02  | 0.512667 | 0.812796 | 0.789481 | 0.891795 |
| MmugDNA.29176.1.S1_at   | MmugDNA.29176.1 | 3.92  | 3.7   | 0.49 | 0.3  | 1.17  | 0.556921 | 0.701114 | 0.814405 | 0.826647 |
| MmugDNA.29183.1.S1_at   | MmugDNA.29183.1 | 11.69 | 12.29 | 0.25 | 0.05 | -1.52 | 0.017079 | 0.007984 | 0.289115 | 0.118766 |
| MmugDNA.29186.1.S1_at   | MmugDNA.29186.1 | 10.18 | 10.47 | 0.15 | 0.18 | -1.23 | 0.064479 | 0.620852 | 0.418343 | 0.775643 |
| MmugDNA.29188.1.S1_at   | MmugDNA.29188.1 | 11.66 | 12.04 | 0.13 | 0.08 | -1.3  | 0.016725 | 0.003274 | 0.287809 | 0.082366 |
| MmugDNA.29191.1.S1_at   | MmugDNA.29191.1 | 10.08 | 10.6  | 0.41 | 0.14 | -1.43 | 0.283274 | 0.113    | 0.641313 | 0.378851 |
| MmugDNA.29196.1.S1_at   | MmugDNA.29196.1 | 3.9   | 3.57  | 0.27 | 0.08 | 1.26  | 0.336593 | 0.403827 | 0.681969 | 0.632393 |
| MmugDNA.29197.1.S1_at   | MmugDNA.29197.1 | 10.92 | 10.54 | 0.39 | 0.06 | 1.31  | 0.144531 | 0.015981 | 0.519872 | 0.160458 |
| MmugDNA.29204.1.S1_at   | MmugDNA.29204.1 | 8.77  | 9.54  | 0.39 | 0.11 | -1.7  | 0.031363 | 0.005968 | 0.341154 | 0.105656 |
| MmugDNA.29211.1.S1_s_at | MmugDNA.29211.1 | 3.24  | 3.24  | 0.07 | 0.06 | 1     | 0.513335 | 0.82705  | 0.789834 | 0.900686 |
| MmugDNA.29213.1.S1_at   | MmugDNA.29213.1 | 5.96  | 6.3   | 0.67 | 0.5  | -1.27 | 0.905766 | 0.0432   | 0.968196 | 0.25263  |
| MmugDNA.29213.1.S1_s_at | MmugDNA.29213.1 | 8.92  | 9.86  | 0.7  | 0.13 | -1.93 | 0.050972 | 0.049279 | 0.388526 | 0.266845 |
| MmugDNA.29217.1.S1_at   | MmugDNA.29217.1 | 6.42  | 6.19  | 0.08 | 0.07 | 1.17  | 0.043743 | 0.189408 | 0.372554 | 0.465117 |
| MmugDNA.29218.1.S1_at   | MmugDNA.29218.1 | 3.9   | 3.66  | 0.19 | 0.14 | 1.18  | 0.168335 | 0.134429 | 0.540932 | 0.406603 |
| MmugDNA.29220.1.S1_at   | MmugDNA.29220.1 | 6.99  | 7.22  | 0.45 | 0.13 | -1.17 | 0.283496 | 0.004611 | 0.641407 | 0.09488  |
| MmugDNA.29223.1.S1_at   | MmugDNA.29223.1 | 8.99  | 9.56  | 0.67 | 0.07 | -1.48 | 0.667899 | 0.854512 | 0.868778 | 0.917099 |
| MmugDNA.2923.1.S1_at    | MmugDNA.2923.1  | 14.08 | 14.03 | 0.12 | 0.08 | 1.03  | 0.45529  | 0.68918  | 0.757353 | 0.818618 |
| MmugDNA.29230.1.S1_at   | MmugDNA.29230.1 | 10.6  | 10.59 | 0.12 | 0.1  | 1.01  | 0.870482 | 0.437715 | 0.954949 | 0.656896 |
| MmugDNA.29234.1.S1_at   | MmugDNA.29234.1 | 10.68 | 10.45 | 0.14 | 0.09 | 1.17  | 0.172525 | 0.066121 | 0.545782 | 0.302613 |
| MmugDNA.29242.1.S1_at   | MmugDNA.29242.1 | 9.39  | 9.58  | 0.42 | 0.11 | -1.14 | 0.398635 | 0.452822 | 0.722582 | 0.667356 |
| MmugDNA.29244.1.S1_at   | MmugDNA.29244.1 | 6.9   | 6.55  | 0.36 | 0.14 | 1.27  | 0.066912 | 0.123114 | 0.422979 | 0.393123 |
| MmugDNA.29246.1.S1_at   | MmugDNA.29246.1 | 6.14  | 6.15  | 0.32 | 0.09 | -1.01 | 0.473717 | 0.541034 | 0.767701 | 0.724718 |
| MmugDNA.2925.1.S1_at    | MmugDNA.2925.1  | 8.62  | 9.05  | 1.45 | 0.22 | -1.35 | 0.696971 | 0.651635 | 0.882175 | 0.796299 |
| MmugDNA.29251.1.S1_at   | MmugDNA.29251.1 | 6.62  | 5.84  | 0.35 | 0.18 | 1.71  | 0.038713 | 0.113492 | 0.360177 | 0.37961  |
| MmugDNA.29254.1.S1_at   | MmugDNA.29254.1 | 3.78  | 3.4   | 0.76 | 0.11 | 1.3   | 0.192412 | 0.309826 | 0.563564 | 0.565044 |
| MmugDNA.29263.1.S1_at   | MmugDNA.29263.1 | 9.72  | 10.07 | 0.94 | 0.25 | -1.27 | 0.77398  | 0.178952 | 0.916095 | 0.455243 |
| MmugDNA.29265.1.S1_at   | MmugDNA.29265.1 | 5.13  | 5.08  | 0.05 | 0.12 | 1.03  | 0.601193 | 0.046342 | 0.838121 | 0.259796 |
| MmugDNA.29269.1.S1_at   | MmugDNA.29269.1 | 9.42  | 9.37  | 0.14 | 0.16 | 1.04  | 0.740019 | 0.663477 | 0.900699 | 0.803016 |
| MmugDNA.29272.1.S1_at   | MmugDNA.29272.1 | 5.96  | 5.88  | 0.03 | 0.03 | 1.06  | 0.075946 | 0.076006 | 0.436969 | 0.320676 |
| MmugDNA.29274.1.S1_at   | MmugDNA.29274.1 | 8.66  | 8.2   | 0.28 | 0.08 | 1.38  | 0.146417 | 0.205671 | 0.520747 | 0.480015 |
| MmugDNA.29275.1.S1_s_at | MmugDNA.29275.1 | 9.07  | 8.75  | 0.17 | 0.07 | 1.24  | 0.015179 | 0.003416 | 0.279785 | 0.084071 |
| MmugDNA.29277.1.S1_at   | MmugDNA.29277.1 | 12.39 | 12.45 | 0.07 | 0.03 | -1.05 | 0.550002 | 0.703984 | 0.810567 | 0.828326 |
| MmugDNA.29278.1.S1_at   | MmugDNA.29278.1 | 9.67  | 9.95  | 0.33 | 0.18 | -1.21 | 0.868104 | 0.076807 | 0.953843 | 0.322252 |
| MmugDNA.2928.1.S1_at    | MmugDNA.2928.1  | 11.38 | 11.27 | 0.18 | 0.04 | 1.08  | 0.347262 | 0.181719 | 0.688577 | 0.458324 |
| MmugDNA.29285.1.S1_at   | MmugDNA.29285.1 | 8.81  | 7.68  | 0.98 | 0.98 | 2.19  | 0.46853  | 0.390523 | 0.764997 | 0.624319 |
| MmugDNA.29288.1.S1_at   | MmugDNA.29288.1 | 7.52  | 7.9   | 0.69 | 0.11 | -1.31 | 0.8724   | 0.114733 | 0.955759 | 0.381279 |
| MmugDNA.29299.1.S1_at   | MmugDNA.29299.1 | 9.39  | 10.05 | 0.44 | 0.04 | -1.59 | 0.065047 | 0.064073 | 0.419713 | 0.299311 |
| MmugDNA.29304.1.S1_at   | MmugDNA.29304.1 | 8.7   | 8.01  | 1.01 | 0.27 | 1.61  | 0.32847  | 0.031071 | 0.67577  | 0.218117 |

|                         |                 |       |       |      |      |       |          |          |          |          |
|-------------------------|-----------------|-------|-------|------|------|-------|----------|----------|----------|----------|
| MmugDNA.29308.1.S1_at   | MmugDNA.29308.1 | 4.48  | 4.5   | 0.27 | 0.25 | -1.01 | 0.532774 | 0.390478 | 0.800482 | 0.624267 |
| MmugDNA.29314.1.S1_at   | MmugDNA.29314.1 | 10.85 | 10.54 | 0.27 | 0.14 | 1.23  | 0.129548 | 0.044484 | 0.504312 | 0.255252 |
| MmugDNA.29316.1.S1_at   | MmugDNA.29316.1 | 11.01 | 11.25 | 0.82 | 0.05 | -1.18 | 0.644794 | 0.846725 | 0.858593 | 0.912823 |
| MmugDNA.29319.1.S1_at   | MmugDNA.29319.1 | 5.8   | 5.81  | 0.06 | 0.14 | -1    | 0.344041 | 0.038996 | 0.686913 | 0.242644 |
| MmugDNA.29320.1.S1_at   | MmugDNA.29320.1 | 11.78 | 11.71 | 0.47 | 0.32 | 1.05  | 0.746798 | 0.210153 | 0.903743 | 0.483994 |
| MmugDNA.29321.1.S1_at   | MmugDNA.29321.1 | 7.76  | 7.63  | 0.39 | 0.19 | 1.1   | 0.317593 | 0.322709 | 0.667471 | 0.574043 |
| MmugDNA.29321.1.S1_s_at | MmugDNA.29321.1 | 9.45  | 9.37  | 0.35 | 0.09 | 1.06  | 0.868054 | 0.33148  | 0.953842 | 0.580121 |
| MmugDNA.29322.1.S1_at   | MmugDNA.29322.1 | 2.93  | 2.92  | 0.06 | 0.22 | 1.01  | 0.909985 | 0.573125 | 0.96945  | 0.744941 |
| MmugDNA.29327.1.S1_at   | MmugDNA.29327.1 | 12.08 | 11.94 | 0.18 | 0.08 | 1.1   | 0.182252 | 0.204001 | 0.555371 | 0.47829  |
| MmugDNA.29328.1.S1_at   | MmugDNA.29328.1 | 6.43  | 6.28  | 0.16 | 0.07 | 1.11  | 0.255542 | 0.463332 | 0.619605 | 0.674359 |
| MmugDNA.2933.1.S1_at    | MmugDNA.2933.1  | 11.67 | 11.78 | 0.05 | 0.02 | -1.08 | 0.026502 | 0.014364 | 0.325143 | 0.152977 |
| MmugDNA.29330.1.S1_at   | MmugDNA.29330.1 | 10.68 | 10.7  | 0.39 | 0.04 | -1.02 | 0.916582 | 0.532672 | 0.971679 | 0.719186 |
| MmugDNA.29333.1.S1_at   | MmugDNA.29333.1 | 10.58 | 10.19 | 0.65 | 0.32 | 1.31  | 0.977415 | 0.12684  | 0.992685 | 0.397499 |
| MmugDNA.2934.1.S1_at    | MmugDNA.2934.1  | 12.71 | 12.58 | 0.18 | 0.04 | 1.09  | 0.473582 | 0.767908 | 0.767619 | 0.865256 |
| MmugDNA.2935.1.S1_at    | MmugDNA.2935.1  | 9.05  | 9.46  | 0.09 | 0.13 | -1.33 | 0.004445 | 0.002096 | 0.198949 | 0.067731 |
| MmugDNA.29353.1.S1_at   | MmugDNA.29353.1 | 7.47  | 7.57  | 2.21 | 0.02 | -1.07 | 0.830233 | 0.145299 | 0.939167 | 0.41934  |
| MmugDNA.2936.1.S1_at    | MmugDNA.2936.1  | 7.96  | 9.84  | 0.75 | 0.18 | -3.69 | 0.015382 | 0.033121 | 0.281283 | 0.225287 |
| MmugDNA.29370.1.S1_at   | MmugDNA.29370.1 | 12.16 | 11.9  | 0.28 | 0.06 | 1.19  | 0.063868 | 0.039    | 0.416709 | 0.242645 |
| MmugDNA.29374.1.S1_at   | MmugDNA.29374.1 | 12.33 | 12.47 | 0.21 | 0.07 | -1.1  | 0.268283 | 0.266883 | 0.628752 | 0.53244  |
| MmugDNA.29375.1.S1_at   | MmugDNA.29375.1 | 9.82  | 9.97  | 0.19 | 0.06 | -1.11 | 0.229497 | 0.070857 | 0.598339 | 0.312357 |
| MmugDNA.29391.1.S1_at   | MmugDNA.29391.1 | 9.28  | 9.04  | 0.31 | 0.13 | 1.18  | 0.999232 | 0.525771 | 0.999788 | 0.715217 |
| MmugDNA.2940.1.S1_at    | MmugDNA.2940.1  | 12.93 | 12.92 | 0.2  | 0.09 | 1.01  | 0.284656 | 0.07079  | 0.642354 | 0.312277 |
| MmugDNA.29410.1.S1_at   | MmugDNA.29410.1 | 5.66  | 5.81  | 0.02 | 0.11 | -1.1  | 0.033633 | 0.022485 | 0.34712  | 0.187631 |
| MmugDNA.29411.1.S1_at   | MmugDNA.29411.1 | 12.3  | 12.41 | 0.15 | 0.07 | -1.08 | 0.768249 | 0.409326 | 0.912929 | 0.636442 |
| MmugDNA.29417.1.S1_at   | MmugDNA.29417.1 | 7.38  | 7.4   | 0.01 | 0.04 | -1.01 | 0.211925 | 0.876181 | 0.582752 | 0.929602 |
| MmugDNA.29418.1.S1_at   | MmugDNA.29418.1 | 9.85  | 9.91  | 0.07 | 0.22 | -1.04 | 0.44644  | 0.572292 | 0.752767 | 0.744371 |
| MmugDNA.2942.1.S1_at    | MmugDNA.2942.1  | 7.88  | 7.72  | 0.53 | 0.2  | 1.11  | 0.665543 | 0.85979  | 0.867989 | 0.920098 |
| MmugDNA.29433.1.S1_at   | MmugDNA.29433.1 | 4.06  | 3.94  | 0.28 | 0.18 | 1.09  | 0.448121 | 0.312063 | 0.753761 | 0.566894 |
| MmugDNA.29436.1.S1_at   | MmugDNA.29436.1 | 11.22 | 11.58 | 1.19 | 0.14 | -1.29 | 0.647632 | 0.604297 | 0.859364 | 0.764558 |
| MmugDNA.2944.1.S1_at    | MmugDNA.2944.1  | 3.29  | 3.3   | 0.14 | 0.13 | -1.01 | 0.606488 | 0.200411 | 0.840496 | 0.474782 |
| MmugDNA.29440.1.S1_at   | MmugDNA.29440.1 | 12.06 | 11.98 | 0.09 | 0.04 | 1.06  | 0.60701  | 0.026688 | 0.840743 | 0.204241 |
| MmugDNA.29444.1.S1_at   | MmugDNA.29444.1 | 6.1   | 5.9   | 0.18 | 0.12 | 1.15  | 0.269719 | 0.074285 | 0.629945 | 0.318046 |
| MmugDNA.29449.1.S1_at   | MmugDNA.29449.1 | 7.8   | 8.07  | 0.18 | 0.07 | -1.2  | 0.032356 | 0.001445 | 0.343961 | 0.05795  |
| MmugDNA.2945.1.S1_at    | MmugDNA.2945.1  | 8.04  | 7.99  | 0.11 | 0.03 | 1.04  | 0.451214 | 0.492869 | 0.755064 | 0.693817 |
| MmugDNA.29467.1.S1_at   | MmugDNA.29467.1 | 11.68 | 11.57 | 0.16 | 0.25 | 1.08  | 0.519615 | 0.302316 | 0.793262 | 0.560092 |
| MmugDNA.29473.1.S1_at   | MmugDNA.29473.1 | 8.84  | 9.04  | 2.54 | 0.42 | -1.15 | 0.744347 | 0.275364 | 0.902542 | 0.539663 |
| MmugDNA.29475.1.S1_at   | MmugDNA.29475.1 | 5.95  | 5.93  | 0.23 | 0    | 1.01  | 0.328878 | 0.302083 | 0.676056 | 0.560071 |
| MmugDNA.29477.1.S1_at   | MmugDNA.29477.1 | 5.3   | 5.57  | 0.93 | 0.51 | -1.21 | 0.961049 | 0.195863 | 0.987225 | 0.470757 |
| MmugDNA.2948.1.S1_at    | MmugDNA.2948.1  | 10.23 | 10.14 | 0.01 | 0.1  | 1.06  | 0.620934 | 0.000386 | 0.847398 | 0.037273 |
| MmugDNA.29483.1.S1_at   | MmugDNA.29483.1 | 3.96  | 3.62  | 0.31 | 0.02 | 1.26  | 0.128864 | 0.165744 | 0.503618 | 0.442014 |
| MmugDNA.29494.1.S1_at   | MmugDNA.29494.1 | 12.06 | 11.6  | 0.35 | 0.1  | 1.38  | 0.108274 | 0.049347 | 0.480728 | 0.267081 |
| MmugDNA.29507.1.S1_at   | MmugDNA.29507.1 | 11.39 | 11.5  | 0.19 | 0.03 | -1.08 | 0.935893 | 0.823816 | 0.978432 | 0.898803 |
| MmugDNA.2951.1.S1_at    | MmugDNA.2951.1  | 11.15 | 11.24 | 0.46 | 0.05 | -1.06 | 0.561744 | 0.193665 | 0.817346 | 0.468785 |

|                         |                 |       |       |      |      |       |          |          |          |          |
|-------------------------|-----------------|-------|-------|------|------|-------|----------|----------|----------|----------|
| MmugDNA.2951.1.S1_s_at  | MmugDNA.2951.1  | 10.78 | 10.61 | 0.63 | 0.07 | 1.12  | 0.882479 | 0.273502 | 0.959252 | 0.537917 |
| MmugDNA.29514.1.S1_at   | MmugDNA.29514.1 | 5.79  | 5.85  | 0.41 | 0.05 | -1.04 | 0.764279 | 0.037639 | 0.911428 | 0.238465 |
| MmugDNA.29517.1.S1_at   | MmugDNA.29517.1 | 9.47  | 9.58  | 0.41 | 0.24 | -1.08 | 0.91087  | 0.160775 | 0.969778 | 0.436897 |
| MmugDNA.29522.1.S1_at   | MmugDNA.29522.1 | 5.89  | 5.59  | 0.25 | 0.04 | 1.23  | 0.315144 | 0.293956 | 0.665641 | 0.553909 |
| MmugDNA.29529.1.S1_at   | MmugDNA.29529.1 | 12.85 | 12.78 | 0.22 | 0.08 | 1.05  | 0.230187 | 0.008326 | 0.598481 | 0.121089 |
| MmugDNA.2953.1.S1_at    | MmugDNA.2953.1  | 5.66  | 5.6   | 0.14 | 0.14 | 1.04  | 0.446957 | 0.446345 | 0.752941 | 0.662773 |
| MmugDNA.29530.1.S1_at   | MmugDNA.29530.1 | 10.3  | 10.16 | 0.25 | 0.08 | 1.1   | 0.233058 | 0.246745 | 0.600508 | 0.51609  |
| MmugDNA.29530.1.S1_s_at | MmugDNA.29530.1 | 10.93 | 10.82 | 0.23 | 0.04 | 1.08  | 0.14969  | 0.193612 | 0.523226 | 0.468785 |
| MmugDNA.29531.1.S1_at   | MmugDNA.29531.1 | 6.8   | 6.81  | 0.1  | 0.02 | -1    | 0.320087 | 0.463123 | 0.669148 | 0.67424  |
| MmugDNA.29533.1.S1_at   | MmugDNA.29533.1 | 5.51  | 5.42  | 0.18 | 0.19 | 1.07  | 0.548901 | 0.72181  | 0.810008 | 0.838851 |
| MmugDNA.29534.1.S1_at   | MmugDNA.29534.1 | 11.98 | 11.7  | 0.51 | 0.1  | -1.22 | 0.683961 | 0.545634 | 0.876251 | 0.727579 |
| MmugDNA.2954.1.S1_at    | MmugDNA.2954.1  | 5.46  | 6.86  | 1.49 | 0.1  | -2.63 | 0.227504 | 0.375872 | 0.596631 | 0.613746 |
| MmugDNA.29540.1.S1_at   | MmugDNA.29540.1 | 6.89  | 6.72  | 0.18 | 0.06 | 1.13  | 0.30109  | 0.429649 | 0.655304 | 0.650973 |
| MmugDNA.29558.1.S1_at   | MmugDNA.29558.1 | 3.09  | 2.99  | 0.07 | 0.15 | 1.07  | 0.289804 | 0.47458  | 0.646445 | 0.681553 |
| MmugDNA.29561.1.S1_at   | MmugDNA.29561.1 | 6.83  | 6.76  | 0.07 | 0.05 | 1.05  | 0.180977 | 0.32649  | 0.554265 | 0.576576 |
| MmugDNA.29562.1.S1_at   | MmugDNA.29562.1 | 10.43 | 10.4  | 0.43 | 0.05 | 1.02  | 0.905742 | 0.642083 | 0.968196 | 0.789995 |
| MmugDNA.29565.1.S1_at   | MmugDNA.29565.1 | 10.75 | 10.11 | 0.17 | 0.1  | 1.56  | 0.003166 | 0.000635 | 0.191107 | 0.042882 |
| MmugDNA.29566.1.S1_s_at | MmugDNA.29566.1 | 8.21  | 8.18  | 1.56 | 0.35 | 1.02  | 0.977616 | 0.399954 | 0.992714 | 0.630116 |
| MmugDNA.29569.1.S1_at   | MmugDNA.29569.1 | 9.87  | 10.35 | 0.11 | 0.05 | -1.39 | 0.002753 | 0.005707 | 0.185352 | 0.104143 |
| MmugDNA.29570.1.S1_at   | MmugDNA.29570.1 | 3.55  | 3.46  | 0.38 | 0.04 | 1.07  | 0.688984 | 0.693927 | 0.878634 | 0.821989 |
| MmugDNA.29571.1.S1_at   | MmugDNA.29571.1 | 11.92 | 12.04 | 0.07 | 0.07 | -1.08 | 0.054233 | 0.055579 | 0.396159 | 0.281596 |
| MmugDNA.29577.1.S1_at   | MmugDNA.29577.1 | 4.93  | 4.44  | 0.37 | 0.63 | 1.41  | 0.45098  | 0.424825 | 0.755    | 0.64729  |
| MmugDNA.29578.1.S1_at   | MmugDNA.29578.1 | 9.84  | 9.92  | 0.51 | 0.15 | -1.05 | 0.877688 | 0.08237  | 0.957399 | 0.331354 |
| MmugDNA.29582.1.S1_at   | MmugDNA.29582.1 | 5.28  | 5.17  | 0.13 | 0.47 | 1.08  | 0.456996 | 0.663198 | 0.758051 | 0.802857 |
| MmugDNA.29585.1.S1_at   | MmugDNA.29585.1 | 12.48 | 12.41 | 0.3  | 0.14 | 1.05  | 0.914946 | 0.549343 | 0.970985 | 0.729804 |
| MmugDNA.29588.1.S1_at   | MmugDNA.29588.1 | 7.3   | 7.9   | 0.48 | 0.2  | -1.52 | 0.269771 | 0.337069 | 0.62995  | 0.584337 |
| MmugDNA.29593.1.S1_at   | MmugDNA.29593.1 | 6.53  | 6.51  | 0.12 | 0.05 | 1.02  | 0.371247 | 0.410827 | 0.705454 | 0.637644 |
| MmugDNA.29594.1.S1_at   | MmugDNA.29594.1 | 3.78  | 3.88  | 0.5  | 0.32 | -1.07 | 0.684642 | 0.12355  | 0.876465 | 0.393629 |
| MmugDNA.29599.1.S1_at   | MmugDNA.29599.1 | 9.71  | 10.3  | 0.83 | 0.31 | -1.51 | 0.448431 | 0.12263  | 0.753886 | 0.392564 |
| MmugDNA.2960.1.S1_at    | MmugDNA.2960.1  | 3.24  | 3.31  | 0.09 | 0.1  | -1.05 | 0.697704 | 0.317922 | 0.882415 | 0.571046 |
| MmugDNA.29604.1.S1_at   | MmugDNA.29604.1 | 8.95  | 9.3   | 0.27 | 0.02 | -1.27 | 0.067774 | 0.005075 | 0.42446  | 0.099077 |
| MmugDNA.29616.1.S1_at   | MmugDNA.29616.1 | 7.72  | 8.21  | 0.38 | 0.27 | -1.41 | 0.104446 | 0.060039 | 0.475473 | 0.291714 |
| MmugDNA.29617.1.S1_at   | MmugDNA.29617.1 | 7.66  | 7.82  | 0.22 | 0.02 | -1.12 | 0.806004 | 0.547495 | 0.929569 | 0.728479 |
| MmugDNA.29617.1.S1_s_at | MmugDNA.29617.1 | 10.35 | 10.64 | 0.33 | 0.04 | -1.22 | 0.174786 | 0.174486 | 0.548031 | 0.450952 |
| MmugDNA.29621.1.S1_at   | MmugDNA.29621.1 | 7.47  | 7.42  | 0.23 | 0.05 | 1.04  | 0.600407 | 0.197897 | 0.837867 | 0.472828 |
| MmugDNA.29622.1.S1_at   | MmugDNA.29622.1 | 6.13  | 6.14  | 0.34 | 0.12 | -1.01 | 0.940272 | 0.11802  | 0.979681 | 0.385881 |
| MmugDNA.29625.1.S1_at   | MmugDNA.29625.1 | 7.51  | 7.23  | 0.39 | 0.26 | 1.21  | 0.227695 | 0.016686 | 0.596693 | 0.163569 |
| MmugDNA.29627.1.S1_at   | MmugDNA.29627.1 | 4.7   | 4.39  | 0.33 | 0.18 | 1.24  | 0.596238 | 0.84391  | 0.835825 | 0.911089 |
| MmugDNA.2963.1.S1_at    | MmugDNA.2963.1  | 5.22  | 5.97  | 0.44 | 0.22 | -1.69 | 0.021621 | 0.016328 | 0.309241 | 0.16183  |
| MmugDNA.29648.1.S1_at   | MmugDNA.29648.1 | 8.17  | 8.28  | 0.14 | 0.14 | -1.08 | 0.286203 | 0.592945 | 0.64358  | 0.757956 |
| MmugDNA.29656.1.S1_at   | MmugDNA.29656.1 | 7.63  | 7.38  | 0.19 | 0.09 | 1.19  | 0.068206 | 0.172858 | 0.425017 | 0.449424 |
| MmugDNA.29670.1.S1_at   | MmugDNA.29670.1 | 8.39  | 9.85  | 0.57 | 0.14 | -2.74 | 0.010127 | 0.009643 | 0.24671  | 0.129267 |
| MmugDNA.29675.1.S1_at   | MmugDNA.29675.1 | 8.82  | 9.17  | 0.21 | 0.16 | -1.28 | 0.184756 | 0.010307 | 0.557496 | 0.132897 |



|                         |                 |       |       |      |      |       |          |          |          |          |
|-------------------------|-----------------|-------|-------|------|------|-------|----------|----------|----------|----------|
| MmugDNA.29681.1.S1_at   | MmugDNA.29681.1 | 10.42 | 10.7  | 0.06 | 0.03 | -1.22 | 0.001615 | 0.000824 | 0.162459 | 0.046626 |
| MmugDNA.29689.1.S1_at   | MmugDNA.29689.1 | 4.7   | 4.6   | 0.11 | 0.2  | 1.07  | 0.929313 | 0.758973 | 0.976333 | 0.859942 |
| MmugDNA.2969.1.S1_at    | MmugDNA.2969.1  | 2.97  | 2.97  | 0.07 | 0.05 | -1.01 | 0.389127 | 0.436431 | 0.715919 | 0.65599  |
| MmugDNA.29697.1.S1_s_at | MmugDNA.29697.1 | 6.33  | 6.51  | 0.14 | 0.14 | -1.13 | 0.093844 | 0.057413 | 0.463304 | 0.285608 |
| MmugDNA.29706.1.S1_at   | MmugDNA.29706.1 | 9.76  | 9.66  | 0.2  | 0.06 | 1.08  | 0.389154 | 0.532783 | 0.715944 | 0.719235 |
| MmugDNA.29710.1.S1_at   | MmugDNA.29710.1 | 6.71  | 7.53  | 0.47 | 0.32 | -1.76 | 0.183702 | 0.154379 | 0.55651  | 0.429245 |
| MmugDNA.29712.1.S1_at   | MmugDNA.29712.1 | 3.29  | 3.47  | 0.13 | 0.18 | -1.14 | 0.619679 | 0.162598 | 0.84683  | 0.43872  |
| MmugDNA.2972.1.S1_at    | MmugDNA.2972.1  | 10.04 | 10.04 | 0.54 | 0.25 | -1    | 0.727132 | 0.865881 | 0.894637 | 0.923757 |
| MmugDNA.29720.1.S1_at   | MmugDNA.29720.1 | 5.75  | 5.79  | 0.19 | 0.04 | -1.03 | 0.620511 | 0.212772 | 0.84711  | 0.486769 |
| MmugDNA.29722.1.S1_at   | MmugDNA.29722.1 | 5.77  | 6.24  | 1.18 | 0.09 | -1.39 | 0.484175 | 0.392688 | 0.773472 | 0.625813 |
| MmugDNA.29723.1.S1_at   | MmugDNA.29723.1 | 13.66 | 13.52 | 0.09 | 0.04 | -1.11 | 0.090717 | 0.102349 | 0.458873 | 0.362527 |
| MmugDNA.29724.1.S1_at   | MmugDNA.29724.1 | 3.75  | 3.66  | 0.11 | 0.02 | 1.06  | 0.253089 | 0.401002 | 0.617917 | 0.630658 |
| MmugDNA.29726.1.S1_at   | MmugDNA.29726.1 | 6.65  | 7.55  | 1.03 | 0.35 | -1.86 | 0.239659 | 0.16757  | 0.606153 | 0.443998 |
| MmugDNA.29727.1.S1_at   | MmugDNA.29727.1 | 3.43  | 3.5   | 0.25 | 0.1  | -1.05 | 0.361754 | 0.039297 | 0.698762 | 0.243338 |
| MmugDNA.29729.1.S1_at   | MmugDNA.29729.1 | 6.45  | 6.62  | 0.08 | 0.23 | -1.12 | 0.409067 | 0.232671 | 0.729748 | 0.504359 |
| MmugDNA.2973.1.S1_at    | MmugDNA.2973.1  | 10.76 | 10.96 | 0.49 | 0.08 | -1.15 | 0.137553 | 0.139526 | 0.513081 | 0.412743 |
| MmugDNA.29735.1.S1_at   | MmugDNA.29735.1 | 6.77  | 6.67  | 0.16 | 0.05 | 1.07  | 0.408099 | 0.050496 | 0.729179 | 0.270052 |
| MmugDNA.29736.1.S1_at   | MmugDNA.29736.1 | 7.16  | 7.1   | 0.24 | 0.03 | 1.04  | 0.338618 | 0.225059 | 0.683167 | 0.49773  |
| MmugDNA.2974.1.S1_at    | MmugDNA.2974.1  | 7.67  | 7.57  | 0.15 | 0.06 | 1.07  | 0.436214 | 0.008378 | 0.746244 | 0.121478 |
| MmugDNA.29743.1.S1_at   | MmugDNA.29743.1 | 7.68  | 7.75  | 0.39 | 0.29 | -1.05 | 0.269328 | 0.637863 | 0.629582 | 0.787216 |
| MmugDNA.29744.1.S1_at   | MmugDNA.29744.1 | 6.61  | 6.5   | 0.09 | 0.12 | 1.08  | 0.475052 | 0.859635 | 0.768329 | 0.92003  |
| MmugDNA.29748.1.S1_at   | MmugDNA.29748.1 | 7.89  | 7.9   | 0.38 | 0.14 | -1.01 | 0.64353  | 0.836756 | 0.858218 | 0.906703 |
| MmugDNA.2975.1.S1_at    | MmugDNA.2975.1  | 10.14 | 10.28 | 0.12 | 0.13 | -1.1  | 0.320491 | 0.007035 | 0.669365 | 0.113112 |
| MmugDNA.29754.1.S1_at   | MmugDNA.29754.1 | 5.87  | 5.81  | 0.24 | 0.34 | 1.05  | 0.731505 | 0.946446 | 0.896677 | 0.969629 |
| MmugDNA.29761.1.S1_at   | MmugDNA.29761.1 | 6.28  | 6.25  | 0.14 | 0.06 | 1.02  | 0.486281 | 0.328001 | 0.774492 | 0.5778   |
| MmugDNA.29763.1.S1_at   | MmugDNA.29763.1 | 12.77 | 12.58 | 0.16 | 0.06 | 1.14  | 0.165934 | 0.124091 | 0.538661 | 0.394389 |
| MmugDNA.29779.1.S1_at   | MmugDNA.29779.1 | 4.29  | 4.28  | 0.19 | 0.12 | 1.01  | 0.495924 | 0.675746 | 0.780172 | 0.810457 |
| MmugDNA.2978.1.S1_at    | MmugDNA.2978.1  | 10.84 | 11.05 | 0.07 | 0.05 | -1.16 | 0.01896  | 0.012253 | 0.299291 | 0.143179 |
| MmugDNA.29788.1.S1_at   | MmugDNA.29788.1 | 5.75  | 5.78  | 0.19 | 0.04 | -1.02 | 0.554586 | 0.539835 | 0.8128   | 0.723976 |
| MmugDNA.29792.1.S1_s_at | MmugDNA.29792.1 | 6.63  | 6.94  | 0.52 | 0.43 | -1.24 | 0.971186 | 0.628867 | 0.990583 | 0.781499 |
| MmugDNA.29799.1.S1_at   | MmugDNA.29799.1 | 11.14 | 10.83 | 0.26 | 0.2  | 1.24  | 0.107267 | 0.048715 | 0.47976  | 0.265744 |
| MmugDNA.29801.1.S1_at   | MmugDNA.29801.1 | 10.02 | 10.29 | 0.54 | 0.09 | -1.21 | 0.381642 | 0.437276 | 0.71018  | 0.656613 |
| MmugDNA.29802.1.S1_at   | MmugDNA.29802.1 | 9.47  | 8.93  | 0.56 | 0.14 | 1.45  | 0.128753 | 0.21108  | 0.50348  | 0.485099 |
| MmugDNA.29807.1.S1_at   | MmugDNA.29807.1 | 3.07  | 3.04  | 0.21 | 0.02 | 1.02  | 0.662962 | 0.871463 | 0.867013 | 0.926844 |
| MmugDNA.29807.1.S1_x_at | MmugDNA.29807.1 | 3.3   | 3.32  | 0.04 | 0.13 | -1.01 | 0.308061 | 0.490487 | 0.660862 | 0.692472 |
| MmugDNA.2981.1.S1_s_at  | MmugDNA.2981.1  | 10.32 | 10.57 | 0.29 | 0.07 | -1.19 | 0.058208 | 0.065367 | 0.403804 | 0.301409 |
| MmugDNA.29812.1.S1_at   | MmugDNA.29812.1 | 6.03  | 6.22  | 0.17 | 0.17 | -1.14 | 0.21432  | 0.132419 | 0.584705 | 0.404409 |
| MmugDNA.29814.1.S1_at   | MmugDNA.29814.1 | 8.49  | 9.14  | 0.64 | 0.2  | -1.57 | 0.505748 | 0.230357 | 0.785398 | 0.502115 |
| MmugDNA.29815.1.S1_at   | MmugDNA.29815.1 | 7.22  | 6.93  | 0.06 | 0.08 | 1.23  | 0.010425 | 0.036983 | 0.247912 | 0.236733 |
| MmugDNA.29819.1.S1_at   | MmugDNA.29819.1 | 6.24  | 6.37  | 0.15 | 0.24 | -1.09 | 0.360827 | 0.018597 | 0.698193 | 0.171539 |
| MmugDNA.29820.1.S1_at   | MmugDNA.29820.1 | 9.1   | 9.1   | 0.5  | 0.12 | -1    | 0.710736 | 0.198768 | 0.887398 | 0.473391 |
| MmugDNA.29822.1.S1_at   | MmugDNA.29822.1 | 7.05  | 7.27  | 1.35 | 0.08 | -1.16 | 0.874827 | 0.950253 | 0.956568 | 0.971666 |
| MmugDNA.29828.1.S1_at   | MmugDNA.29828.1 | 5.73  | 5.62  | 0.77 | 0.21 | 1.08  | 0.790951 | 0.751242 | 0.923119 | 0.855385 |

|                         |                 |       |       |      |      |       |          |          |          |          |
|-------------------------|-----------------|-------|-------|------|------|-------|----------|----------|----------|----------|
| MmugDNA.29830.1.S1_at   | MmugDNA.29830.1 | 4.19  | 3.86  | 0.11 | 0.21 | 1.26  | 0.131047 | 0.132289 | 0.5054   | 0.404294 |
| MmugDNA.29833.1.S1_at   | MmugDNA.29833.1 | 10.79 | 10.99 | 0.26 | 0.09 | -1.15 | 0.245939 | 0.051024 | 0.611421 | 0.271203 |
| MmugDNA.29839.1.S1_at   | MmugDNA.29839.1 | 9.98  | 10    | 0.99 | 0.12 | -1.01 | 0.972628 | 0.562809 | 0.991114 | 0.738167 |
| MmugDNA.29843.1.S1_at   | MmugDNA.29843.1 | 10.63 | 11.24 | 0.15 | 0.04 | -1.53 | 0.003662 | 0.001807 | 0.197111 | 0.063714 |
| MmugDNA.2985.1.S1_at    | MmugDNA.2985.1  | 5.01  | 5.01  | 0.2  | 0.06 | 1     | 0.660377 | 0.819033 | 0.865608 | 0.895738 |
| MmugDNA.29851.1.S1_at   | MmugDNA.29851.1 | 11.65 | 11.91 | 0.11 | 0.01 | -1.2  | 0.006175 | 0.003226 | 0.216868 | 0.082124 |
| MmugDNA.29855.1.S1_at   | MmugDNA.29855.1 | 12.7  | 12.66 | 0.02 | 0.25 | 1.03  | 0.603491 | 0.816268 | 0.839251 | 0.894028 |
| MmugDNA.29858.1.S1_at   | MmugDNA.29858.1 | 5.33  | 5.28  | 0.1  | 0.21 | 1.04  | 0.644531 | 0.124411 | 0.858547 | 0.394857 |
| MmugDNA.29861.1.S1_at   | MmugDNA.29861.1 | 8.01  | 8.48  | 0.49 | 0.04 | -1.39 | 0.587949 | 0.605809 | 0.83181  | 0.765497 |
| MmugDNA.29863.1.S1_at   | MmugDNA.29863.1 | 11.53 | 11.11 | 0.37 | 0.27 | 1.34  | 0.323818 | 0.338455 | 0.672332 | 0.585447 |
| MmugDNA.29867.1.S1_at   | MmugDNA.29867.1 | 6.37  | 6.32  | 0.07 | 0.03 | -1.03 | 0.327337 | 0.881575 | 0.675065 | 0.932407 |
| MmugDNA.29871.1.S1_at   | MmugDNA.29871.1 | 12.37 | 12.43 | 0.18 | 0.03 | -1.04 | 0.654972 | 0.098528 | 0.863003 | 0.356636 |
| MmugDNA.29871.1.S1_s_at | MmugDNA.29871.1 | 12.17 | 12.43 | 0.2  | 0.07 | -1.2  | 0.295246 | 0.224796 | 0.651026 | 0.497617 |
| MmugDNA.29872.1.S1_at   | MmugDNA.29872.1 | 10.14 | 10.75 | 0.34 | 0.13 | -1.53 | 0.029069 | 0.019919 | 0.333709 | 0.177443 |
| MmugDNA.29873.1.S1_at   | MmugDNA.29873.1 | 12.03 | 12.15 | 0.13 | 0.13 | -1.09 | 0.233083 | 0.150282 | 0.600541 | 0.424877 |
| MmugDNA.29876.1.S1_at   | MmugDNA.29876.1 | 6.39  | 6.18  | 0.19 | 0.09 | 1.15  | 0.0802   | 0.143018 | 0.443536 | 0.41689  |
| MmugDNA.29878.1.S1_at   | MmugDNA.29878.1 | 10.43 | 10.7  | 0.46 | 0.1  | -1.2  | 0.708857 | 0.473443 | 0.886591 | 0.680697 |
| MmugDNA.29879.1.S1_at   | MmugDNA.29879.1 | 13.08 | 13.26 | 0.11 | 0.03 | -1.13 | 0.206441 | 0.298573 | 0.578231 | 0.557183 |
| MmugDNA.2988.1.S1_at    | MmugDNA.2988.1  | 10    | 10.45 | 0.43 | 0.19 | -1.36 | 0.216847 | 0.21335  | 0.586873 | 0.487225 |
| MmugDNA.29880.1.S1_at   | MmugDNA.29880.1 | 7.01  | 7.21  | 0.46 | 0.11 | -1.15 | 0.802733 | 0.089041 | 0.92802  | 0.342913 |
| MmugDNA.29884.1.S1_at   | MmugDNA.29884.1 | 13.03 | 13.06 | 0.02 | 0.04 | -1.02 | 0.687636 | 0.00038  | 0.877874 | 0.037273 |
| MmugDNA.2989.1.S1_at    | MmugDNA.2989.1  | 12.21 | 12.35 | 0.3  | 0.08 | -1.1  | 0.643582 | 0.718886 | 0.858218 | 0.83732  |
| MmugDNA.29890.1.S1_at   | MmugDNA.29890.1 | 6.75  | 6.72  | 0.12 | 0.14 | 1.02  | 0.68359  | 0.77035  | 0.876134 | 0.866591 |
| MmugDNA.29891.1.S1_s_at | MmugDNA.29891.1 | 9.74  | 9.65  | 0.17 | 0.22 | 1.06  | 0.941181 | 0.918792 | 0.980018 | 0.954387 |
| MmugDNA.29895.1.S1_at   | MmugDNA.29895.1 | 10.93 | 10.89 | 0.14 | 0.14 | 1.02  | 0.816265 | 0.250136 | 0.933457 | 0.519168 |
| MmugDNA.29897.1.S1_s_at | MmugDNA.29897.1 | 11.44 | 11.53 | 0.25 | 0.13 | -1.07 | 0.748165 | 0.79376  | 0.904327 | 0.881039 |
| MmugDNA.29922.1.S1_at   | MmugDNA.29922.1 | 4.35  | 4.51  | 0.1  | 0.12 | -1.12 | 0.737887 | 0.917181 | 0.899668 | 0.953758 |
| MmugDNA.29924.1.S1_at   | MmugDNA.29924.1 | 8.78  | 9.28  | 0.36 | 0.16 | -1.41 | 0.055862 | 0.068073 | 0.399441 | 0.307142 |
| MmugDNA.29936.1.S1_at   | MmugDNA.29936.1 | 10.3  | 10.87 | 0.04 | 0.05 | -1.48 | 0.000128 | 0.021817 | 0.111942 | 0.184771 |
| MmugDNA.29939.1.S1_at   | MmugDNA.29939.1 | 5.53  | 5.37  | 0.11 | 0.19 | 1.12  | 0.178189 | 0.041739 | 0.551301 | 0.24892  |
| MmugDNA.29941.1.S1_at   | MmugDNA.29941.1 | 5.2   | 5.16  | 0.2  | 0.01 | 1.03  | 0.494823 | 0.544906 | 0.779514 | 0.727184 |
| MmugDNA.29950.1.S1_at   | MmugDNA.29950.1 | 4.18  | 4.32  | 0.08 | 0.09 | -1.1  | 0.056266 | 0.081245 | 0.399708 | 0.329351 |
| MmugDNA.29952.1.S1_at   | MmugDNA.29952.1 | 9.28  | 8.83  | 0.78 | 0.5  | 1.36  | 0.692328 | 0.493206 | 0.880095 | 0.694005 |
| MmugDNA.29954.1.S1_at   | MmugDNA.29954.1 | 7.03  | 7.71  | 0.8  | 0.14 | -1.59 | 0.622557 | 0.796687 | 0.847855 | 0.882782 |
| MmugDNA.29956.1.S1_at   | MmugDNA.29956.1 | 2.77  | 2.75  | 0.11 | 0.18 | 1.01  | 0.719103 | 0.731941 | 0.890853 | 0.844751 |
| MmugDNA.29958.1.S1_s_at | MmugDNA.29958.1 | 11.57 | 11.61 | 0.32 | 0.07 | -1.03 | 0.871927 | 0.603722 | 0.95559  | 0.764262 |
| MmugDNA.29962.1.S1_at   | MmugDNA.29962.1 | 6.08  | 5.74  | 0.2  | 0.17 | 1.27  | 0.392447 | 0.20587  | 0.718402 | 0.480109 |
| MmugDNA.29965.1.S1_at   | MmugDNA.29965.1 | 7.57  | 8.05  | 0.64 | 0.17 | -1.4  | 0.386518 | 0.115697 | 0.713603 | 0.382814 |
| MmugDNA.2997.1.S1_at    | MmugDNA.2997.1  | 5.43  | 5.53  | 0.47 | 0.25 | -1.07 | 0.534137 | 0.099554 | 0.8012   | 0.35796  |
| MmugDNA.29970.1.S1_at   | MmugDNA.29970.1 | 5.07  | 5.05  | 0.05 | 0.1  | 1.02  | 0.727395 | 0.62729  | 0.894665 | 0.780361 |
| MmugDNA.29972.1.S1_at   | MmugDNA.29972.1 | 11.11 | 11.36 | 0.27 | 0.08 | -1.19 | 0.085448 | 0.218482 | 0.452653 | 0.492079 |
| MmugDNA.29975.1.S1_at   | MmugDNA.29975.1 | 6.39  | 6.47  | 0.36 | 0.17 | -1.06 | 0.892105 | 0.648512 | 0.962988 | 0.7943   |
| MmugDNA.29977.1.S1_at   | MmugDNA.29977.1 | 6.36  | 6.27  | 0.19 | 0.07 | 1.07  | 0.328693 | 0.492516 | 0.67577  | 0.693604 |

|                         |                 |       |       |      |      |       |          |          |          |          |
|-------------------------|-----------------|-------|-------|------|------|-------|----------|----------|----------|----------|
| MmugDNA.29979.1.A1_at   | MmugDNA.29979.1 | 7.14  | 7.19  | 0.09 | 0.03 | -1.04 | 0.386216 | 0.064913 | 0.713368 | 0.300818 |
| MmugDNA.29979.1.S1_at   | MmugDNA.29979.1 | 6.48  | 6.61  | 0    | 0.02 | -1.1  | 0.000204 | 0.006273 | 0.117514 | 0.107461 |
| MmugDNA.29989.1.S1_at   | MmugDNA.29989.1 | 5.13  | 5.21  | 0.14 | 0.1  | -1.06 | 0.421444 | 0.163605 | 0.737563 | 0.439768 |
| MmugDNA.2999.1.S1_at    | MmugDNA.2999.1  | 4.55  | 4.31  | 0.07 | 0.16 | 1.18  | 0.077608 | 0.282132 | 0.43966  | 0.544937 |
| MmugDNA.29994.1.S1_at   | MmugDNA.29994.1 | 12.71 | 12.62 | 0.33 | 0    | 1.07  | 0.656605 | 0.450938 | 0.863636 | 0.665908 |
| MmugDNA.29996.1.S1_at   | MmugDNA.29996.1 | 11.59 | 12.01 | 0.16 | 0.1  | -1.34 | 0.0603   | 0.16029  | 0.407914 | 0.436406 |
| MmugDNA.3000.1.S1_at    | MmugDNA.3000.1  | 11.47 | 11.18 | 0.06 | 0.06 | 1.22  | 0.004204 | 0.082553 | 0.198874 | 0.3317   |
| MmugDNA.30003.1.S1_at   | MmugDNA.30003.1 | 7.52  | 8.88  | 0.62 | 0.15 | -2.56 | 0.028017 | 0.011476 | 0.330017 | 0.138611 |
| MmugDNA.3001.1.S1_at    | MmugDNA.3001.1  | 12.52 | 12.1  | 0.57 | 0.21 | 1.34  | 0.794    | 0.582629 | 0.924489 | 0.751273 |
| MmugDNA.30010.1.S1_at   | MmugDNA.30010.1 | 9.01  | 9.13  | 0.24 | 0.04 | -1.08 | 0.991895 | 0.742379 | 0.996849 | 0.850786 |
| MmugDNA.30011.1.S1_at   | MmugDNA.30011.1 | 3.56  | 3.44  | 0.03 | 0.06 | 1.09  | 0.01927  | 0.059451 | 0.30051  | 0.290548 |
| MmugDNA.30013.1.S1_at   | MmugDNA.30013.1 | 8.81  | 9.06  | 0.57 | 0.07 | -1.19 | 0.460537 | 0.06312  | 0.760265 | 0.29795  |
| MmugDNA.30016.1.S1_at   | MmugDNA.30016.1 | 5.43  | 5.33  | 0.08 | 0.01 | 1.07  | 0.038649 | 0.013664 | 0.360067 | 0.149643 |
| MmugDNA.30019.1.S1_at   | MmugDNA.30019.1 | 10.89 | 11.33 | 1.58 | 0.11 | -1.36 | 0.588884 | 0.060638 | 0.832011 | 0.292849 |
| MmugDNA.30026.1.S1_at   | MmugDNA.30026.1 | 7.91  | 8.59  | 0.91 | 0.08 | -1.6  | 0.784545 | 0.809335 | 0.920827 | 0.890103 |
| MmugDNA.30027.1.S1_at   | MmugDNA.30027.1 | 9.56  | 10.01 | 0.72 | 0.15 | -1.37 | 0.932236 | 0.945073 | 0.977191 | 0.968834 |
| MmugDNA.30028.1.S1_at   | MmugDNA.30028.1 | 11.5  | 11.8  | 0.79 | 0.19 | -1.23 | 0.704577 | 0.344725 | 0.885155 | 0.590076 |
| MmugDNA.30030.1.S1_at   | MmugDNA.30030.1 | 6.66  | 6.78  | 0.33 | 0.1  | -1.09 | 0.727404 | 0.936329 | 0.894665 | 0.964104 |
| MmugDNA.30031.1.S1_at   | MmugDNA.30031.1 | 4.18  | 4.27  | 0.1  | 0.27 | -1.07 | 0.780693 | 0.753317 | 0.919142 | 0.85647  |
| MmugDNA.30032.1.S1_at   | MmugDNA.30032.1 | 9.26  | 10    | 0.76 | 0.12 | -1.67 | 0.195162 | 0.283163 | 0.565616 | 0.545694 |
| MmugDNA.30033.1.S1_at   | MmugDNA.30033.1 | 12.82 | 12.83 | 0.19 | 0.06 | -1.01 | 0.795765 | 0.160972 | 0.924994 | 0.437116 |
| MmugDNA.30038.1.S1_at   | MmugDNA.30038.1 | 6.45  | 6.54  | 0.59 | 0.42 | -1.07 | 0.818982 | 0.602821 | 0.934641 | 0.763752 |
| MmugDNA.3004.1.S1_at    | MmugDNA.3004.1  | 11.95 | 12.05 | 0.14 | 0.1  | -1.07 | 0.945838 | 0.042932 | 0.981138 | 0.251759 |
| MmugDNA.30042.1.S1_at   | MmugDNA.30042.1 | 9.74  | 9.82  | 0.77 | 0.08 | -1.06 | 0.462248 | 0.322563 | 0.761512 | 0.573991 |
| MmugDNA.30044.1.S1_at   | MmugDNA.30044.1 | 9.62  | 10.04 | 0.44 | 0.09 | -1.34 | 0.050222 | 0.116507 | 0.38691  | 0.383671 |
| MmugDNA.30045.1.S1_at   | MmugDNA.30045.1 | 6.67  | 6.59  | 0.12 | 0.02 | 1.06  | 0.169464 | 0.375468 | 0.542425 | 0.613412 |
| MmugDNA.30046.1.S1_at   | MmugDNA.30046.1 | 6.54  | 6.35  | 0.07 | 0.03 | 1.14  | 0.005786 | 0.125525 | 0.211798 | 0.396226 |
| MmugDNA.3005.1.S1_at    | MmugDNA.3005.1  | 11.74 | 11.69 | 0.09 | 0.04 | 1.04  | 0.423622 | 0.752282 | 0.739193 | 0.855787 |
| MmugDNA.30057.1.S1_at   | MmugDNA.30057.1 | 7.19  | 7.27  | 0.23 | 0.07 | -1.06 | 0.865188 | 0.893583 | 0.952585 | 0.939277 |
| MmugDNA.30059.1.S1_at   | MmugDNA.30059.1 | 3.33  | 3.21  | 0.13 | 0.07 | 1.09  | 0.260036 | 0.336562 | 0.622946 | 0.58391  |
| MmugDNA.30064.1.S1_at   | MmugDNA.30064.1 | 8.56  | 9.05  | 0.06 | 0.09 | -1.4  | 0.002296 | 0.000223 | 0.174887 | 0.032385 |
| MmugDNA.30067.1.S1_at   | MmugDNA.30067.1 | 7.63  | 7.62  | 0.23 | 0.07 | 1     | 0.673381 | 0.215363 | 0.871268 | 0.489067 |
| MmugDNA.30069.1.S1_at   | MmugDNA.30069.1 | 4.74  | 4.53  | 0.2  | 0.09 | 1.16  | 0.379881 | 0.620264 | 0.709275 | 0.775303 |
| MmugDNA.30074.1.S1_at   | MmugDNA.30074.1 | 5.7   | 5.46  | 0.11 | 0.1  | 1.18  | 0.0548   | 0.241133 | 0.397122 | 0.511749 |
| MmugDNA.30076.1.S1_at   | MmugDNA.30076.1 | 10.24 | 10.12 | 0.81 | 0.21 | 1.08  | 0.763543 | 0.929935 | 0.911265 | 0.960138 |
| MmugDNA.30079.1.S1_at   | MmugDNA.30079.1 | 11.49 | 11.68 | 0.15 | 0.08 | -1.14 | 0.130418 | 0.300643 | 0.504689 | 0.558941 |
| MmugDNA.30085.1.S1_at   | MmugDNA.30085.1 | 6.27  | 6.26  | 0.15 | 0.02 | 1.01  | 0.568165 | 0.723773 | 0.820687 | 0.840126 |
| MmugDNA.30089.1.S1_at   | MmugDNA.30089.1 | 6.1   | 6.1   | 0.04 | 0.05 | -1    | 0.741448 | 0.688279 | 0.901406 | 0.818009 |
| MmugDNA.30089.1.S1_x_at | MmugDNA.30089.1 | 6.11  | 6.13  | 0.04 | 0.02 | -1.01 | 0.94025  | 0.088532 | 0.979681 | 0.341947 |
| MmugDNA.30097.1.S1_at   | MmugDNA.30097.1 | 11.65 | 11.57 | 0.04 | 0.25 | 1.06  | 0.195743 | 0.629882 | 0.566051 | 0.782009 |
| MmugDNA.30098.1.S1_at   | MmugDNA.30098.1 | 8.44  | 7.94  | 0.66 | 0.07 | 1.42  | 0.385195 | 0.241876 | 0.712501 | 0.512475 |
| MmugDNA.30102.1.S1_at   | MmugDNA.30102.1 | 10.16 | 10.47 | 2.61 | 0.15 | -1.24 | 0.608294 | 0.156276 | 0.841093 | 0.43161  |
| MmugDNA.30103.1.S1_at   | MmugDNA.30103.1 | 7.28  | 8.45  | 1.09 | 0.24 | -2.25 | 0.128814 | 0.157891 | 0.503567 | 0.433583 |

|                         |                 |       |       |      |      |       |          |          |          |          |
|-------------------------|-----------------|-------|-------|------|------|-------|----------|----------|----------|----------|
| MmugDNA.30105.1.S1_at   | MmugDNA.30105.1 | 8.17  | 7.86  | 0.67 | 0.19 | 1.25  | 0.874872 | 0.014342 | 0.956568 | 0.152889 |
| MmugDNA.30108.1.S1_at   | MmugDNA.30108.1 | 2.66  | 2.67  | 0.01 | 0.03 | -1    | 0.492883 | 0.838973 | 0.778657 | 0.908226 |
| MmugDNA.30111.1.S1_at   | MmugDNA.30111.1 | 10.85 | 11.13 | 0.22 | 0.04 | -1.21 | 0.059071 | 0.087334 | 0.405996 | 0.340404 |
| MmugDNA.3013.1.S1_at    | MmugDNA.3013.1  | 4.4   | 4.17  | 0.02 | 0.11 | 1.17  | 0.045465 | 0.143012 | 0.376492 | 0.41689  |
| MmugDNA.30136.1.S1_at   | MmugDNA.30136.1 | 10.15 | 10.64 | 0.14 | 0.18 | -1.4  | 0.016667 | 0.004313 | 0.287478 | 0.092121 |
| MmugDNA.30138.1.S1_at   | MmugDNA.30138.1 | 3.96  | 4.09  | 0.05 | 0.22 | -1.09 | 0.319956 | 0.461484 | 0.669028 | 0.673151 |
| MmugDNA.30140.1.S1_at   | MmugDNA.30140.1 | 9.38  | 9.84  | 0.62 | 0.1  | -1.37 | 0.255766 | 0.204579 | 0.61975  | 0.478946 |
| MmugDNA.30145.1.S1_at   | MmugDNA.30145.1 | 5.62  | 5.56  | 0.09 | 0.08 | 1.04  | 0.088666 | 0.080109 | 0.456387 | 0.327579 |
| MmugDNA.30147.1.S1_at   | MmugDNA.30147.1 | 5.07  | 4.86  | 1.13 | 0.38 | 1.15  | 0.360707 | 0.488591 | 0.698105 | 0.691222 |
| MmugDNA.3015.1.S1_at    | MmugDNA.3015.1  | 12.11 | 11.99 | 0.04 | 0.09 | 1.08  | 0.219098 | 0.000741 | 0.588516 | 0.044929 |
| MmugDNA.30154.1.S1_at   | MmugDNA.30154.1 | 8.69  | 8.83  | 0.23 | 0.08 | -1.1  | 0.084818 | 0.029767 | 0.451414 | 0.214185 |
| MmugDNA.30156.1.S1_at   | MmugDNA.30156.1 | 7.08  | 7.8   | 0.25 | 0.1  | -1.64 | 0.009798 | 0.002109 | 0.243636 | 0.067909 |
| MmugDNA.30162.1.S1_at   | MmugDNA.30162.1 | 4.09  | 4.48  | 0.26 | 0.42 | -1.31 | 0.80393  | 0.968503 | 0.928632 | 0.982645 |
| MmugDNA.30163.1.S1_at   | MmugDNA.30163.1 | 7.8   | 8.09  | 0.36 | 0.09 | -1.22 | 0.749121 | 0.643929 | 0.904864 | 0.791217 |
| MmugDNA.30164.1.S1_at   | MmugDNA.30164.1 | 9.94  | 10.11 | 0.14 | 0.17 | -1.13 | 0.104895 | 0.086847 | 0.476242 | 0.339651 |
| MmugDNA.30168.1.S1_at   | MmugDNA.30168.1 | 9.15  | 9.25  | 0.24 | 0.14 | -1.07 | 0.211942 | 0.071016 | 0.582752 | 0.312648 |
| MmugDNA.30169.1.S1_at   | MmugDNA.30169.1 | 6     | 6.37  | 0.08 | 0.06 | -1.3  | 0.006019 | 0.009961 | 0.214001 | 0.131094 |
| MmugDNA.30175.1.S1_at   | MmugDNA.30175.1 | 3.76  | 3.62  | 0.26 | 0.02 | 1.11  | 0.111925 | 0.132632 | 0.484976 | 0.404544 |
| MmugDNA.30177.1.S1_at   | MmugDNA.30177.1 | 5.26  | 4.96  | 0.16 | 0.18 | 1.23  | 0.088406 | 0.09372  | 0.45606  | 0.350192 |
| MmugDNA.3018.1.S1_at    | MmugDNA.3018.1  | 6.2   | 6.01  | 0.16 | 0.05 | 1.14  | 0.10549  | 0.097582 | 0.477131 | 0.355456 |
| MmugDNA.30181.1.S1_at   | MmugDNA.30181.1 | 8.76  | 9.68  | 0.46 | 0.27 | -1.89 | 0.102223 | 0.079484 | 0.472527 | 0.32681  |
| MmugDNA.30181.1.S1_s_at | MmugDNA.30181.1 | 6.96  | 7.83  | 0.61 | 0.17 | -1.83 | 0.116163 | 0.113557 | 0.489554 | 0.379632 |
| MmugDNA.30183.1.S1_at   | MmugDNA.30183.1 | 12.95 | 12.77 | 0.18 | 0.02 | 1.13  | 0.499351 | 0.626814 | 0.781984 | 0.779995 |
| MmugDNA.30186.1.S1_at   | MmugDNA.30186.1 | 8.01  | 7.35  | 1.47 | 0.37 | 1.58  | 0.627662 | 0.279076 | 0.850661 | 0.542782 |
| MmugDNA.30187.1.S1_at   | MmugDNA.30187.1 | 11.29 | 11.49 | 0.03 | 0.09 | -1.15 | 0.021923 | 0.181952 | 0.309781 | 0.458483 |
| MmugDNA.30190.1.S1_at   | MmugDNA.30190.1 | 5.03  | 4.91  | 0.04 | 0.09 | 1.09  | 0.235734 | 0.013283 | 0.602824 | 0.147922 |
| MmugDNA.30193.1.S1_at   | MmugDNA.30193.1 | 4.45  | 4.36  | 0.06 | 0.16 | 1.07  | 0.409867 | 0.190381 | 0.730334 | 0.465906 |
| MmugDNA.30200.1.S1_at   | MmugDNA.30200.1 | 7.66  | 8.59  | 0.27 | 0.06 | -1.91 | 0.008866 | 0.000391 | 0.238052 | 0.03746  |
| MmugDNA.30215.1.S1_at   | MmugDNA.30215.1 | 8.36  | 8.05  | 0.13 | 0.21 | 1.24  | 0.433393 | 0.025715 | 0.744486 | 0.201008 |
| MmugDNA.30219.1.S1_at   | MmugDNA.30219.1 | 3.14  | 3.22  | 0.15 | 0.04 | -1.06 | 0.986707 | 0.789988 | 0.995691 | 0.878631 |
| MmugDNA.30220.1.S1_at   | MmugDNA.30220.1 | 5.49  | 4.25  | 0.34 | 0.66 | 2.36  | 0.03558  | 0.046295 | 0.35243  | 0.25959  |
| MmugDNA.30227.1.S1_at   | MmugDNA.30227.1 | 11.63 | 11.83 | 0.53 | 0.06 | -1.15 | 0.16714  | 0.083306 | 0.539727 | 0.333375 |
| MmugDNA.30229.1.S1_at   | MmugDNA.30229.1 | 3.99  | 3.83  | 0.13 | 0.04 | 1.12  | 0.078858 | 0.057081 | 0.441464 | 0.284945 |
| MmugDNA.30249.1.S1_s_at | MmugDNA.30249.1 | 6.62  | 6.52  | 0.09 | 0.01 | 1.07  | 0.191858 | 0.514592 | 0.56298  | 0.707767 |
| MmugDNA.30250.1.S1_at   | MmugDNA.30250.1 | 5.89  | 6.34  | 0.6  | 0.55 | -1.37 | 0.342812 | 0.002473 | 0.686105 | 0.073576 |
| MmugDNA.30255.1.S1_at   | MmugDNA.30255.1 | 11.26 | 11.02 | 0.32 | 0.15 | 1.19  | 0.204832 | 0.124773 | 0.576441 | 0.395215 |
| MmugDNA.30257.1.S1_at   | MmugDNA.30257.1 | 13.17 | 12.96 | 0.18 | 0.05 | 1.16  | 0.240429 | 0.229902 | 0.606743 | 0.501802 |
| MmugDNA.3026.1.S1_at    | MmugDNA.3026.1  | 4.2   | 4.02  | 0.15 | 0.17 | 1.13  | 0.576018 | 0.768707 | 0.825049 | 0.865653 |
| MmugDNA.30263.1.S1_at   | MmugDNA.30263.1 | 5.71  | 5.21  | 0.83 | 0.28 | 1.41  | 0.417125 | 0.284903 | 0.734701 | 0.54701  |
| MmugDNA.30266.1.S1_at   | MmugDNA.30266.1 | 6.72  | 6.65  | 0.04 | 0.02 | 1.05  | 0.140184 | 0.105209 | 0.515581 | 0.366982 |
| MmugDNA.30268.1.S1_at   | MmugDNA.30268.1 | 11.18 | 11.57 | 0.09 | 0.05 | -1.32 | 0.002171 | 0.000572 | 0.174757 | 0.041171 |
| MmugDNA.3027.1.S1_at    | MmugDNA.3027.1  | 3.87  | 3.72  | 0.17 | 0.06 | 1.11  | 0.263688 | 0.410072 | 0.625638 | 0.637065 |
| MmugDNA.3027.1.S1_s_at  | MmugDNA.3027.1  | 10.52 | 10.42 | 0.74 | 0.02 | 1.07  | 0.859634 | 0.442215 | 0.9504   | 0.660275 |

|                         |                 |       |       |      |      |       |          |          |          |          |
|-------------------------|-----------------|-------|-------|------|------|-------|----------|----------|----------|----------|
| MmugDNA.30271.1.S1_at   | MmugDNA.30271.1 | 12.51 | 12.25 | 0.66 | 0.19 | 1.2   | 0.558865 | 0.011304 | 0.815742 | 0.138076 |
| MmugDNA.30286.1.S1_at   | MmugDNA.30286.1 | 9.89  | 10.32 | 0.36 | 0.44 | -1.34 | 0.134092 | 0.308478 | 0.508395 | 0.564515 |
| MmugDNA.30287.1.S1_at   | MmugDNA.30287.1 | 7.79  | 9.24  | 1.64 | 0.2  | -2.73 | 0.216617 | 0.130978 | 0.586682 | 0.403037 |
| MmugDNA.30297.1.S1_at   | MmugDNA.30297.1 | 5.24  | 5.39  | 0.09 | 0.23 | -1.12 | 0.911839 | 0.891187 | 0.970171 | 0.937993 |
| MmugDNA.30298.1.S1_at   | MmugDNA.30298.1 | 10.35 | 10.6  | 0.09 | 0.07 | -1.19 | 0.030264 | 0.00047  | 0.337191 | 0.038572 |
| MmugDNA.30299.1.S1_at   | MmugDNA.30299.1 | 6.73  | 6.8   | 0.11 | 0.17 | -1.05 | 0.996655 | 0.878866 | 0.998707 | 0.930872 |
| MmugDNA.30300.1.S1_at   | MmugDNA.30300.1 | 11.11 | 10.84 | 0.92 | 0.21 | 1.21  | 0.536189 | 0.193691 | 0.802181 | 0.468785 |
| MmugDNA.30302.1.S1_at   | MmugDNA.30302.1 | 6.1   | 6.05  | 0.08 | 0.02 | 1.04  | 0.377605 | 0.764122 | 0.707584 | 0.862852 |
| MmugDNA.30319.1.S1_at   | MmugDNA.30319.1 | 11.1  | 11.47 | 0.59 | 0.13 | -1.29 | 0.479355 | 0.181284 | 0.770712 | 0.457821 |
| MmugDNA.30321.1.S1_at   | MmugDNA.30321.1 | 9.33  | 9.52  | 0.28 | 0.05 | -1.14 | 0.315469 | 0.041262 | 0.66592  | 0.247995 |
| MmugDNA.30322.1.S1_at   | MmugDNA.30322.1 | 5.65  | 6.13  | 0.1  | 0.12 | -1.39 | 0.01137  | 0.13512  | 0.254437 | 0.407131 |
| MmugDNA.30323.1.S1_at   | MmugDNA.30323.1 | 10.69 | 10.86 | 0.37 | 0.05 | -1.13 | 0.744054 | 0.763422 | 0.902414 | 0.862471 |
| MmugDNA.30328.1.S1_at   | MmugDNA.30328.1 | 13.22 | 13.23 | 0.16 | 0.01 | -1    | 0.630726 | 0.831623 | 0.852095 | 0.903452 |
| MmugDNA.30329.1.S1_at   | MmugDNA.30329.1 | 11.64 | 11.59 | 0.12 | 0.11 | 1.04  | 0.530973 | 0.723171 | 0.79937  | 0.839639 |
| MmugDNA.30331.1.S1_at   | MmugDNA.30331.1 | 9.21  | 9.66  | 1.34 | 0.28 | -1.36 | 0.522945 | 0.201838 | 0.795371 | 0.476367 |
| MmugDNA.30333.1.S1_at   | MmugDNA.30333.1 | 6.15  | 6.14  | 0.08 | 0.03 | 1.01  | 0.231654 | 0.291746 | 0.59963  | 0.552054 |
| MmugDNA.30334.1.S1_at   | MmugDNA.30334.1 | 7.22  | 7.07  | 0.26 | 0.05 | 1.11  | 0.334619 | 0.090104 | 0.680478 | 0.344402 |
| MmugDNA.3034.1.S1_at    | MmugDNA.3034.1  | 6.07  | 5.95  | 0.11 | 0.13 | 1.08  | 0.109111 | 0.121267 | 0.481684 | 0.390351 |
| MmugDNA.30341.1.S1_at   | MmugDNA.30341.1 | 6.43  | 6.66  | 0.13 | 0.33 | -1.18 | 0.095104 | 0.114974 | 0.464131 | 0.381719 |
| MmugDNA.30350.1.S1_at   | MmugDNA.30350.1 | 5.91  | 6.66  | 1.89 | 0.51 | -1.68 | 0.544968 | 0.337101 | 0.80756  | 0.584337 |
| MmugDNA.30351.1.S1_at   | MmugDNA.30351.1 | 13.42 | 13.42 | 0.06 | 0.04 | 1     | 0.403503 | 0.454148 | 0.725709 | 0.668407 |
| MmugDNA.30352.1.S1_at   | MmugDNA.30352.1 | 13.01 | 13.02 | 0.07 | 0.05 | -1    | 0.389316 | 0.336764 | 0.716042 | 0.584089 |
| MmugDNA.30355.1.S1_s_at | MmugDNA.30355.1 | 5.97  | 5.98  | 0.12 | 0.15 | -1.01 | 0.924038 | 0.986234 | 0.974608 | 0.992174 |
| MmugDNA.30359.1.S1_at   | MmugDNA.30359.1 | 7.59  | 7.59  | 0.17 | 0.26 | -1    | 0.457644 | 0.203352 | 0.758364 | 0.477574 |
| MmugDNA.30361.1.S1_at   | MmugDNA.30361.1 | 6.42  | 6.53  | 0.3  | 0.09 | -1.08 | 0.832569 | 0.656915 | 0.939963 | 0.799401 |
| MmugDNA.30366.1.S1_at   | MmugDNA.30366.1 | 4.37  | 5.79  | 0.49 | 0.74 | -2.67 | 0.050438 | 0.046904 | 0.387138 | 0.261281 |
| MmugDNA.30367.1.S1_at   | MmugDNA.30367.1 | 6.2   | 6.82  | 0.77 | 0.31 | -1.54 | 0.225347 | 0.380812 | 0.594611 | 0.617426 |
| MmugDNA.30371.1.S1_at   | MmugDNA.30371.1 | 3.2   | 3.23  | 0.34 | 0.03 | -1.02 | 0.55821  | 0.742758 | 0.815182 | 0.851023 |
| MmugDNA.30376.1.S1_at   | MmugDNA.30376.1 | 10.74 | 10.91 | 0.46 | 0.19 | -1.13 | 0.534655 | 0.010141 | 0.801404 | 0.131979 |
| MmugDNA.30378.1.S1_at   | MmugDNA.30378.1 | 4.12  | 3.99  | 0.23 | 0.13 | 1.09  | 0.412234 | 0.781864 | 0.731945 | 0.873558 |
| MmugDNA.30384.1.S1_s_at | MmugDNA.30384.1 | 8.45  | 7.63  | 0.94 | 0.16 | 1.75  | 0.65613  | 0.876023 | 0.863476 | 0.929528 |
| MmugDNA.30391.1.S1_at   | MmugDNA.30391.1 | 7.51  | 7.12  | 0.09 | 0.16 | 1.31  | 0.032952 | 0.0213   | 0.345526 | 0.182706 |
| MmugDNA.30392.1.S1_at   | MmugDNA.30392.1 | 7.06  | 7.15  | 0.49 | 0.1  | -1.06 | 0.449446 | 0.011914 | 0.754372 | 0.141283 |
| MmugDNA.3040.1.S1_at    | MmugDNA.3040.1  | 7.51  | 7.08  | 0.8  | 0.61 | 1.34  | 0.794315 | 0.158016 | 0.924535 | 0.433769 |
| MmugDNA.30406.1.S1_at   | MmugDNA.30406.1 | 9.94  | 9.01  | 0.22 | 0.13 | 1.9   | 0.003173 | 0.003122 | 0.191107 | 0.081345 |
| MmugDNA.30412.1.S1_at   | MmugDNA.30412.1 | 8.05  | 8.16  | 0.24 | 0.03 | -1.08 | 0.911659 | 0.103071 | 0.970144 | 0.36396  |
| MmugDNA.30416.1.S1_at   | MmugDNA.30416.1 | 3.15  | 3.08  | 0.02 | 0.02 | 1.05  | 0.03376  | 0.329697 | 0.347257 | 0.578874 |
| MmugDNA.30419.1.S1_at   | MmugDNA.30419.1 | 10.09 | 10.71 | 0.48 | 0.03 | -1.54 | 0.082265 | 0.088056 | 0.447052 | 0.341547 |
| MmugDNA.30425.1.S1_at   | MmugDNA.30425.1 | 9.65  | 9.62  | 0.38 | 0.21 | 1.02  | 0.546052 | 0.049468 | 0.808283 | 0.267334 |
| MmugDNA.30427.1.S1_at   | MmugDNA.30427.1 | 8.55  | 8.64  | 0.21 | 0.07 | -1.07 | 0.526054 | 0.898234 | 0.796442 | 0.942072 |
| MmugDNA.30429.1.S1_at   | MmugDNA.30429.1 | 10.94 | 11.14 | 0.17 | 0.05 | -1.15 | 0.123434 | 0.126107 | 0.496754 | 0.39672  |
| MmugDNA.30433.1.S1_at   | MmugDNA.30433.1 | 9.51  | 9.57  | 0.28 | 0.02 | -1.05 | 0.588145 | 0.014061 | 0.83181  | 0.151841 |
| MmugDNA.30435.1.S1_at   | MmugDNA.30435.1 | 11.33 | 11.5  | 0.15 | 0.05 | -1.13 | 0.144779 | 0.588655 | 0.520103 | 0.755137 |

|                       |                 |       |       |      |      |       |          |          |          |          |
|-----------------------|-----------------|-------|-------|------|------|-------|----------|----------|----------|----------|
| MmugDNA.30439.1.S1_at | MmugDNA.30439.1 | 9.12  | 9.51  | 0.25 | 0.08 | -1.31 | 0.053954 | 0.037199 | 0.395633 | 0.237285 |
| MmugDNA.30445.1.S1_at | MmugDNA.30445.1 | 9.95  | 10.56 | 0.35 | 0.02 | -1.53 | 0.040611 | 0.017208 | 0.364613 | 0.166206 |
| MmugDNA.30446.1.S1_at | MmugDNA.30446.1 | 7.41  | 7.4   | 0.26 | 0.17 | 1.01  | 0.503873 | 0.073486 | 0.784418 | 0.316769 |
| MmugDNA.30447.1.S1_at | MmugDNA.30447.1 | 8.29  | 8     | 0.25 | 0.13 | 1.23  | 0.122273 | 0.015553 | 0.495677 | 0.158118 |
| MmugDNA.3045.1.S1_at  | MmugDNA.3045.1  | 10.78 | 10.48 | 0.36 | 0.04 | 1.23  | 0.218338 | 0.490174 | 0.58818  | 0.692234 |
| MmugDNA.30456.1.S1_at | MmugDNA.30456.1 | 10.72 | 10.1  | 0.2  | 0.08 | 1.53  | 0.004962 | 0.00116  | 0.204084 | 0.053615 |
| MmugDNA.3046.1.S1_at  | MmugDNA.3046.1  | 13.77 | 13.67 | 0.09 | 0.02 | 1.07  | 0.258301 | 0.049456 | 0.622127 | 0.267334 |
| MmugDNA.30463.1.S1_at | MmugDNA.30463.1 | 11.97 | 11.51 | 0.42 | 0.06 | 1.37  | 0.143542 | 0.138623 | 0.518958 | 0.41168  |
| MmugDNA.30464.1.S1_at | MmugDNA.30464.1 | 8.82  | 10.31 | 0.8  | 0.07 | -2.81 | 0.069849 | 0.048357 | 0.427911 | 0.265081 |
| MmugDNA.30466.1.S1_at | MmugDNA.30466.1 | 9.96  | 8.68  | 0.61 | 0.4  | 2.42  | 0.019563 | 0.011175 | 0.301601 | 0.137551 |
| MmugDNA.30467.1.S1_at | MmugDNA.30467.1 | 4.44  | 4.35  | 0.04 | 0.26 | -1.07 | 0.980935 | 0.600611 | 0.993927 | 0.762183 |
| MmugDNA.30481.1.S1_at | MmugDNA.30481.1 | 5.98  | 5.83  | 0.01 | 0.03 | 1.11  | 0.002254 | 0.180388 | 0.174757 | 0.457066 |
| MmugDNA.30487.1.S1_at | MmugDNA.30487.1 | 3.79  | 3.46  | 0.13 | 0.07 | 1.25  | 0.039069 | 0.085769 | 0.361019 | 0.337818 |
| MmugDNA.3049.1.S1_at  | MmugDNA.3049.1  | 10.81 | 11.4  | 0.2  | 0.25 | -1.5  | 0.028363 | 0.047722 | 0.332311 | 0.263325 |
| MmugDNA.30490.1.S1_at | MmugDNA.30490.1 | 8.04  | 8.46  | 0.43 | 0.14 | -1.34 | 0.390754 | 0.299239 | 0.716941 | 0.557769 |
| MmugDNA.30496.1.S1_at | MmugDNA.30496.1 | 7.86  | 8.43  | 0.36 | 0.1  | -1.48 | 0.112775 | 0.096406 | 0.486223 | 0.354015 |
| MmugDNA.30503.1.A1_at | MmugDNA.30503.1 | 3.35  | 3.31  | 0.21 | 0.16 | 1.03  | 0.587996 | 0.76475  | 0.83181  | 0.863203 |
| MmugDNA.30503.1.S1_at | MmugDNA.30503.1 | 4.94  | 4.88  | 0.32 | 0.33 | 1.04  | 0.369963 | 0.465365 | 0.704429 | 0.675748 |
| MmugDNA.30507.1.S1_at | MmugDNA.30507.1 | 3.49  | 3.48  | 0.08 | 0.03 | 1.01  | 0.604943 | 0.847175 | 0.839754 | 0.91316  |
| MmugDNA.30510.1.S1_at | MmugDNA.30510.1 | 7.97  | 8.13  | 0.29 | 0.08 | -1.12 | 0.415829 | 0.659357 | 0.73381  | 0.800682 |
| MmugDNA.30512.1.S1_at | MmugDNA.30512.1 | 5.19  | 5.68  | 0.54 | 0.65 | -1.4  | 0.13291  | 0.128412 | 0.507165 | 0.399676 |
| MmugDNA.30515.1.S1_at | MmugDNA.30515.1 | 5.85  | 5.45  | 0.06 | 0.04 | 1.32  | 0.000359 | 0.000165 | 0.137028 | 0.030511 |
| MmugDNA.30517.1.S1_at | MmugDNA.30517.1 | 5.96  | 5.86  | 0.06 | 0.03 | 1.07  | 0.105388 | 0.207746 | 0.477051 | 0.482005 |
| MmugDNA.30526.1.S1_at | MmugDNA.30526.1 | 2.89  | 3.06  | 0.09 | 0    | -1.13 | 0.027911 | 0.001242 | 0.330017 | 0.054826 |
| MmugDNA.30528.1.S1_at | MmugDNA.30528.1 | 4.65  | 4.58  | 0.02 | 0.04 | 1.05  | 0.031497 | 0.011285 | 0.341227 | 0.138076 |
| MmugDNA.3053.1.S1_at  | MmugDNA.3053.1  | 7.67  | 8.21  | 0.43 | 0.11 | -1.45 | 0.242075 | 0.233521 | 0.608207 | 0.504849 |
| MmugDNA.30530.1.S1_at | MmugDNA.30530.1 | 10.79 | 11.08 | 0.09 | 0.13 | -1.23 | 0.025091 | 0.010766 | 0.320458 | 0.135471 |
| MmugDNA.30534.1.S1_at | MmugDNA.30534.1 | 3.01  | 3.01  | 0.14 | 0.03 | 1     | 0.299063 | 0.80191  | 0.653475 | 0.885989 |
| MmugDNA.30537.1.S1_at | MmugDNA.30537.1 | 9.56  | 9.3   | 1.12 | 0.27 | 1.19  | 0.988052 | 0.818657 | 0.995831 | 0.895512 |
| MmugDNA.30541.1.S1_at | MmugDNA.30541.1 | 6.4   | 6.91  | 0.12 | 0.18 | -1.42 | 0.015588 | 0.018045 | 0.282748 | 0.169372 |
| MmugDNA.30551.1.S1_at | MmugDNA.30551.1 | 10.35 | 10.18 | 0.13 | 0.19 | 1.13  | 0.150066 | 0.369868 | 0.523569 | 0.609138 |
| MmugDNA.30554.1.S1_at | MmugDNA.30554.1 | 10.8  | 11.04 | 0.47 | 0.12 | -1.18 | 0.963019 | 0.095443 | 0.988102 | 0.35247  |
| MmugDNA.30555.1.S1_at | MmugDNA.30555.1 | 9.23  | 8.68  | 0.21 | 0.18 | 1.46  | 0.032007 | 0.043771 | 0.342916 | 0.25387  |
| MmugDNA.30559.1.S1_at | MmugDNA.30559.1 | 8.24  | 8.43  | 0.45 | 0.07 | -1.14 | 0.195624 | 0.207967 | 0.565981 | 0.482049 |
| MmugDNA.30562.1.S1_at | MmugDNA.30562.1 | 4.62  | 4.31  | 0.68 | 0.17 | 1.24  | 0.553039 | 0.722637 | 0.811981 | 0.83935  |
| MmugDNA.30563.1.S1_at | MmugDNA.30563.1 | 3.48  | 3.3   | 0.12 | 0.1  | 1.13  | 0.208797 | 0.226111 | 0.580477 | 0.49859  |
| MmugDNA.30565.1.S1_at | MmugDNA.30565.1 | 7.16  | 7.53  | 0.72 | 0.22 | -1.3  | 0.607712 | 0.191023 | 0.840969 | 0.46629  |
| MmugDNA.30566.1.S1_at | MmugDNA.30566.1 | 12.17 | 12.37 | 0.22 | 0.09 | -1.15 | 0.186261 | 0.079856 | 0.559101 | 0.327179 |
| MmugDNA.30568.1.S1_at | MmugDNA.30568.1 | 6.4   | 6.38  | 0.27 | 0.07 | 1.01  | 0.879321 | 0.297174 | 0.958144 | 0.556031 |
| MmugDNA.30572.1.S1_at | MmugDNA.30572.1 | 11.57 | 11.59 | 0.12 | 0.18 | -1.01 | 0.479047 | 0.014558 | 0.770454 | 0.153907 |
| MmugDNA.30578.1.S1_at | MmugDNA.30578.1 | 11.38 | 11.29 | 0.24 | 0.06 | 1.06  | 0.300171 | 0.575226 | 0.654723 | 0.746406 |
| MmugDNA.30581.1.S1_at | MmugDNA.30581.1 | 7.8   | 8.33  | 0.5  | 0.21 | -1.44 | 0.666716 | 0.742801 | 0.868398 | 0.851029 |
| MmugDNA.30582.1.S1_at | MmugDNA.30582.1 | 9.57  | 10.12 | 0.09 | 0.37 | -1.46 | 0.032116 | 0.127138 | 0.343204 | 0.397922 |

|                         |                 |       |       |      |      |       |          |          |          |          |
|-------------------------|-----------------|-------|-------|------|------|-------|----------|----------|----------|----------|
| MmugDNA.3059.1.S1_at    | MmugDNA.3059.1  | 5.16  | 4.82  | 0.06 | 0.08 | 1.27  | 0.003766 | 0.007433 | 0.197739 | 0.115858 |
| MmugDNA.30592.1.S1_at   | MmugDNA.30592.1 | 11.08 | 11.72 | 2.37 | 0.11 | -1.57 | 0.22764  | 0.510629 | 0.596693 | 0.705036 |
| MmugDNA.30592.1.S1_s_at | MmugDNA.30592.1 | 11.76 | 11.52 | 0.14 | 0.16 | 1.18  | 0.138922 | 0.040176 | 0.514459 | 0.245709 |
| MmugDNA.30593.1.S1_at   | MmugDNA.30593.1 | 11.44 | 11.05 | 0.48 | 0.04 | 1.3   | 0.716253 | 0.207051 | 0.889751 | 0.481115 |
| MmugDNA.30594.1.S1_at   | MmugDNA.30594.1 | 5.92  | 6.32  | 0.24 | 0.02 | -1.32 | 0.046315 | 0.005703 | 0.377679 | 0.104102 |
| MmugDNA.30595.1.S1_at   | MmugDNA.30595.1 | 8.32  | 9.33  | 0.11 | 0.47 | -2    | 0.010601 | 0.001959 | 0.2485   | 0.065832 |
| MmugDNA.30598.1.S1_at   | MmugDNA.30598.1 | 11.25 | 10.75 | 0.24 | 0.05 | 1.41  | 0.023463 | 0.050947 | 0.315664 | 0.270968 |
| MmugDNA.3060.1.S1_at    | MmugDNA.3060.1  | 10.76 | 10.69 | 0.15 | 0    | 1.05  | 0.242922 | 0.259477 | 0.608861 | 0.526418 |
| MmugDNA.30601.1.S1_at   | MmugDNA.30601.1 | 10.29 | 9.42  | 0.22 | 0.21 | 1.83  | 0.007494 | 0.003198 | 0.229281 | 0.08199  |
| MmugDNA.30604.1.S1_at   | MmugDNA.30604.1 | 6.66  | 6.63  | 0.21 | 0.12 | 1.02  | 0.755213 | 0.181197 | 0.907736 | 0.457667 |
| MmugDNA.30609.1.S1_at   | MmugDNA.30609.1 | 4.96  | 5     | 0.48 | 0.14 | -1.03 | 0.791824 | 0.942163 | 0.923496 | 0.967154 |
| MmugDNA.30611.1.S1_at   | MmugDNA.30611.1 | 10.31 | 9.95  | 0.5  | 0.13 | 1.29  | 0.189529 | 0.171794 | 0.560987 | 0.448198 |
| MmugDNA.30615.1.S1_at   | MmugDNA.30615.1 | 6.92  | 6.44  | 0.28 | 0.14 | 1.39  | 0.154153 | 0.038375 | 0.527483 | 0.240795 |
| MmugDNA.30619.1.S1_at   | MmugDNA.30619.1 | 13.48 | 13.5  | 0.06 | 0.05 | -1.02 | 0.641924 | 0.751202 | 0.857602 | 0.855385 |
| MmugDNA.30620.1.S1_at   | MmugDNA.30620.1 | 12.62 | 12.65 | 0.2  | 0.1  | -1.02 | 0.433057 | 0.085607 | 0.744201 | 0.337607 |
| MmugDNA.30621.1.S1_at   | MmugDNA.30621.1 | 12.06 | 12.08 | 0.07 | 0.11 | -1.01 | 0.468108 | 0.527236 | 0.764702 | 0.715896 |
| MmugDNA.30623.1.S1_at   | MmugDNA.30623.1 | 5.96  | 5.99  | 0.1  | 0.25 | -1.02 | 0.606156 | 0.289559 | 0.840399 | 0.55061  |
| MmugDNA.30628.1.S1_at   | MmugDNA.30628.1 | 9.78  | 9.59  | 0.1  | 0.05 | 1.15  | 0.159878 | 0.000114 | 0.532943 | 0.028568 |
| MmugDNA.30629.1.S1_at   | MmugDNA.30629.1 | 3.73  | 3.7   | 0.14 | 0.04 | 1.02  | 0.952292 | 0.657636 | 0.98399  | 0.79986  |
| MmugDNA.30632.1.S1_at   | MmugDNA.30632.1 | 9.58  | 9.69  | 0.05 | 0.06 | -1.08 | 0.068579 | 0.097705 | 0.425941 | 0.355581 |
| MmugDNA.30634.1.S1_at   | MmugDNA.30634.1 | 3.48  | 3.43  | 0.28 | 0.07 | 1.03  | 0.219398 | 0.263108 | 0.588927 | 0.529431 |
| MmugDNA.30635.1.S1_s_at | MmugDNA.30635.1 | 10.83 | 10.68 | 0.43 | 0.06 | 1.11  | 0.607028 | 0.037466 | 0.840743 | 0.237837 |
| MmugDNA.30636.1.S1_at   | MmugDNA.30636.1 | 8.93  | 8.66  | 0.5  | 0.23 | 1.21  | 0.463786 | 0.687614 | 0.762278 | 0.817624 |
| MmugDNA.30639.1.S1_at   | MmugDNA.30639.1 | 6.95  | 7.06  | 0.22 | 0.13 | -1.08 | 0.433386 | 0.584511 | 0.744486 | 0.752435 |
| MmugDNA.3064.1.S1_at    | MmugDNA.3064.1  | 13.66 | 13.52 | 0.01 | 0.04 | 1.1   | 0.007464 | 0.000051 | 0.229281 | 0.025273 |
| MmugDNA.30643.1.S1_at   | MmugDNA.30643.1 | 9.32  | 9.45  | 0.2  | 0.07 | -1.1  | 0.214821 | 0.451696 | 0.585236 | 0.666544 |
| MmugDNA.30644.1.S1_at   | MmugDNA.30644.1 | 11.84 | 11.82 | 0.94 | 0.13 | 1.01  | 0.673645 | 0.859683 | 0.871482 | 0.920049 |
| MmugDNA.30645.1.S1_at   | MmugDNA.30645.1 | 9.88  | 9.84  | 0.77 | 0.13 | 1.03  | 0.508944 | 0.701396 | 0.787373 | 0.826814 |
| MmugDNA.30646.1.S1_at   | MmugDNA.30646.1 | 12.01 | 12.08 | 0.33 | 0.06 | -1.05 | 0.425306 | 0.557562 | 0.739988 | 0.73509  |
| MmugDNA.30648.1.S1_at   | MmugDNA.30648.1 | 9.16  | 9.12  | 0.19 | 0.11 | 1.03  | 0.876664 | 0.7927   | 0.957055 | 0.880287 |
| MmugDNA.30649.1.S1_at   | MmugDNA.30649.1 | 10.17 | 9.82  | 0.39 | 0.03 | 1.27  | 0.609734 | 0.839057 | 0.841773 | 0.908268 |
| MmugDNA.3065.1.S1_at    | MmugDNA.3065.1  | 6.42  | 7.01  | 0.53 | 0.34 | -1.51 | 0.315071 | 0.183211 | 0.665641 | 0.459553 |
| MmugDNA.30654.1.S1_at   | MmugDNA.30654.1 | 7.57  | 10.6  | 1.75 | 0.09 | -8.13 | 0.115131 | 0.031549 | 0.488314 | 0.219708 |
| MmugDNA.30659.1.S1_at   | MmugDNA.30659.1 | 11.64 | 11.72 | 0.08 | 0.02 | -1.06 | 0.070413 | 0.025059 | 0.42919  | 0.198332 |
| MmugDNA.30662.1.S1_at   | MmugDNA.30662.1 | 5.02  | 4.85  | 0.8  | 0.21 | 1.13  | 0.669151 | 0.17269  | 0.869371 | 0.449186 |
| MmugDNA.30665.1.S1_at   | MmugDNA.30665.1 | 12.1  | 12.02 | 0.02 | 0.12 | 1.06  | 0.402755 | 0.419382 | 0.725094 | 0.643466 |
| MmugDNA.30666.1.S1_at   | MmugDNA.30666.1 | 7.37  | 6.86  | 0.37 | 0.26 | 1.43  | 0.120482 | 0.176266 | 0.493859 | 0.452718 |
| MmugDNA.30667.1.S1_at   | MmugDNA.30667.1 | 11.84 | 12.01 | 0.07 | 0.01 | -1.12 | 0.040499 | 0.056397 | 0.364605 | 0.283382 |
| MmugDNA.30670.1.S1_at   | MmugDNA.30670.1 | 6.11  | 5.95  | 0.21 | 0.12 | 1.11  | 0.372095 | 0.544769 | 0.705567 | 0.727107 |
| MmugDNA.30671.1.S1_at   | MmugDNA.30671.1 | 10.96 | 10.92 | 0.25 | 0.03 | 1.02  | 0.740338 | 0.014289 | 0.900774 | 0.152639 |
| MmugDNA.30677.1.S1_at   | MmugDNA.30677.1 | 5.44  | 5.56  | 0.58 | 0.18 | -1.09 | 0.998245 | 0.892716 | 0.999447 | 0.938817 |
| MmugDNA.30678.1.S1_at   | MmugDNA.30678.1 | 6.8   | 6.69  | 0.15 | 0.06 | 1.08  | 0.317987 | 0.44729  | 0.667635 | 0.663434 |
| MmugDNA.30679.1.S1_at   | MmugDNA.30679.1 | 8.24  | 8.53  | 0.18 | 0.17 | -1.22 | 0.026526 | 0.050949 | 0.325308 | 0.270968 |

|                         |                 |       |       |      |      |       |          |          |          |          |
|-------------------------|-----------------|-------|-------|------|------|-------|----------|----------|----------|----------|
| MmugDNA.30683.1.S1_at   | MmugDNA.30683.1 | 7.89  | 7.4   | 0.16 | 0.25 | 1.4   | 0.046825 | 0.0254   | 0.378847 | 0.199747 |
| MmugDNA.30684.1.S1_at   | MmugDNA.30684.1 | 6.71  | 6.74  | 0.03 | 0.02 | -1.02 | 0.367013 | 0.031177 | 0.702519 | 0.21838  |
| MmugDNA.30686.1.S1_at   | MmugDNA.30686.1 | 8.6   | 8.73  | 0.23 | 0.15 | -1.09 | 0.154354 | 0.058383 | 0.527483 | 0.288369 |
| MmugDNA.30688.1.S1_at   | MmugDNA.30688.1 | 3.54  | 3.34  | 0.18 | 0.07 | 1.15  | 0.468195 | 0.584629 | 0.764798 | 0.752482 |
| MmugDNA.30689.1.S1_at   | MmugDNA.30689.1 | 8.42  | 8.69  | 0.18 | 0.08 | -1.21 | 0.073027 | 0.070131 | 0.433915 | 0.311029 |
| MmugDNA.30691.1.S1_at   | MmugDNA.30691.1 | 9.07  | 9.69  | 0.2  | 0.17 | -1.53 | 0.016342 | 0.015668 | 0.287478 | 0.158598 |
| MmugDNA.30694.1.S1_s_at | MmugDNA.30694.1 | 9.95  | 9.9   | 0.23 | 0.14 | 1.04  | 0.272359 | 0.514217 | 0.632141 | 0.707531 |
| MmugDNA.30706.1.S1_at   | MmugDNA.30706.1 | 8.78  | 8.33  | 1.21 | 0.33 | 1.36  | 0.733822 | 0.095659 | 0.897935 | 0.35269  |
| MmugDNA.30711.1.S1_at   | MmugDNA.30711.1 | 5.54  | 5.24  | 0.17 | 0    | 1.23  | 0.041951 | 0.055745 | 0.367945 | 0.282006 |
| MmugDNA.30712.1.S1_at   | MmugDNA.30712.1 | 9.87  | 10.08 | 0.13 | 0.08 | -1.16 | 0.185719 | 0.017031 | 0.558625 | 0.165384 |
| MmugDNA.30712.1.S1_s_at | MmugDNA.30712.1 | 9.23  | 9.15  | 0.24 | 0.06 | 1.05  | 0.447247 | 0.119855 | 0.753177 | 0.388577 |
| MmugDNA.30713.1.S1_at   | MmugDNA.30713.1 | 7.89  | 7.52  | 0.54 | 0.28 | 1.29  | 0.164052 | 0.199341 | 0.536803 | 0.474002 |
| MmugDNA.30715.1.S1_at   | MmugDNA.30715.1 | 9.82  | 9.81  | 0.25 | 0.06 | 1.01  | 0.970783 | 0.967488 | 0.990456 | 0.982071 |
| MmugDNA.30719.1.S1_at   | MmugDNA.30719.1 | 9.22  | 8.62  | 0.17 | 0.06 | 1.51  | 0.005131 | 0.022872 | 0.205615 | 0.189285 |
| MmugDNA.30725.1.S1_at   | MmugDNA.30725.1 | 10.9  | 10.1  | 3.11 | 0.14 | 1.74  | 0.678832 | 0.283954 | 0.874196 | 0.546237 |
| MmugDNA.30730.1.S1_at   | MmugDNA.30730.1 | 6.65  | 6.79  | 0.08 | 0.09 | -1.1  | 0.307382 | 0.218087 | 0.660255 | 0.491683 |
| MmugDNA.30733.1.S1_at   | MmugDNA.30733.1 | 8.07  | 7.87  | 0.06 | 0.05 | 1.15  | 0.009879 | 0.005545 | 0.244171 | 0.10275  |
| MmugDNA.30744.1.S1_at   | MmugDNA.30744.1 | 9.09  | 9.91  | 0.19 | 0.36 | -1.76 | 0.052187 | 0.086703 | 0.392084 | 0.339345 |
| MmugDNA.30744.1.S1_s_at | MmugDNA.30744.1 | 9.67  | 9.59  | 0.16 | 0.07 | 1.06  | 0.789226 | 0.416587 | 0.922491 | 0.641647 |
| MmugDNA.30746.1.S1_at   | MmugDNA.30746.1 | 6.38  | 6.01  | 0.36 | 0.08 | 1.29  | 0.18113  | 0.178539 | 0.554358 | 0.454778 |
| MmugDNA.30747.1.S1_s_at | MmugDNA.30747.1 | 9.4   | 9.24  | 0.17 | 0.07 | 1.11  | 0.167733 | 0.387538 | 0.540411 | 0.622163 |
| MmugDNA.30757.1.S1_at   | MmugDNA.30757.1 | 11.41 | 11.2  | 0.6  | 0.13 | 1.16  | 0.944186 | 0.635777 | 0.980647 | 0.785637 |
| MmugDNA.3076.1.S1_at    | MmugDNA.3076.1  | 6.64  | 7     | 0.31 | 0.11 | -1.29 | 0.106641 | 0.157561 | 0.479    | 0.433131 |
| MmugDNA.30765.1.S1_at   | MmugDNA.30765.1 | 3.31  | 3.25  | 0.13 | 0.04 | 1.04  | 0.505441 | 0.734108 | 0.785377 | 0.845896 |
| MmugDNA.30768.1.S1_at   | MmugDNA.30768.1 | 12.15 | 12.36 | 0.27 | 0.05 | -1.16 | 0.079515 | 0.029422 | 0.442306 | 0.213368 |
| MmugDNA.30769.1.S1_at   | MmugDNA.30769.1 | 12.59 | 12.68 | 0.06 | 0.18 | -1.07 | 0.157376 | 0.116165 | 0.530565 | 0.383524 |
| MmugDNA.30771.1.S1_at   | MmugDNA.30771.1 | 6.33  | 5.82  | 0.43 | 0.33 | 1.42  | 0.524745 | 0.121455 | 0.796069 | 0.390578 |
| MmugDNA.30772.1.S1_at   | MmugDNA.30772.1 | 6.5   | 6.23  | 0.16 | 0.14 | 1.21  | 0.075847 | 0.10257  | 0.436927 | 0.362929 |
| MmugDNA.30775.1.S1_at   | MmugDNA.30775.1 | 7.93  | 8     | 0.88 | 0.05 | -1.06 | 0.965409 | 0.982667 | 0.988598 | 0.990442 |
| MmugDNA.30776.1.S1_at   | MmugDNA.30776.1 | 9.22  | 9.21  | 0.12 | 0.06 | 1.01  | 0.591577 | 0.299991 | 0.833587 | 0.558262 |
| MmugDNA.30778.1.S1_at   | MmugDNA.30778.1 | 6.95  | 6.97  | 0.26 | 0.09 | -1.01 | 0.761533 | 0.867489 | 0.910578 | 0.924699 |
| MmugDNA.30780.1.S1_at   | MmugDNA.30780.1 | 11.63 | 11.27 | 0.31 | 0.12 | 1.29  | 0.13005  | 0.127226 | 0.504648 | 0.397935 |
| MmugDNA.30781.1.S1_at   | MmugDNA.30781.1 | 10.51 | 10.16 | 0.42 | 0.09 | 1.28  | 0.060793 | 0.063919 | 0.408904 | 0.29906  |
| MmugDNA.30784.1.S1_at   | MmugDNA.30784.1 | 8.59  | 9.81  | 1.51 | 0.35 | -2.32 | 0.253534 | 0.242494 | 0.618308 | 0.51284  |
| MmugDNA.30790.1.S1_at   | MmugDNA.30790.1 | 8.47  | 8.91  | 0.03 | 0.17 | -1.36 | 0.027975 | 0.038087 | 0.330017 | 0.239753 |
| MmugDNA.30797.1.S1_at   | MmugDNA.30797.1 | 2.78  | 2.85  | 0.07 | 0.19 | -1.05 | 0.372493 | 0.510593 | 0.705567 | 0.70503  |
| MmugDNA.30798.1.S1_s_at | MmugDNA.30798.1 | 13.17 | 13.21 | 0.1  | 0.07 | -1.03 | 0.221369 | 0.345338 | 0.590984 | 0.590627 |
| MmugDNA.30799.1.S1_at   | MmugDNA.30799.1 | 10.42 | 11.13 | 0.27 | 0.09 | -1.64 | 0.028548 | 0.018937 | 0.332627 | 0.173137 |
| MmugDNA.30800.1.S1_at   | MmugDNA.30800.1 | 9.29  | 9.94  | 1.35 | 0.28 | -1.57 | 0.539534 | 0.301537 | 0.803863 | 0.55955  |
| MmugDNA.30802.1.S1_at   | MmugDNA.30802.1 | 11.89 | 11.26 | 0.35 | 0.17 | 1.55  | 0.140179 | 0.234951 | 0.515581 | 0.506146 |
| MmugDNA.30803.1.S1_at   | MmugDNA.30803.1 | 7.79  | 7.68  | 0.26 | 0.09 | 1.08  | 0.714433 | 0.003902 | 0.888774 | 0.088806 |
| MmugDNA.30804.1.S1_at   | MmugDNA.30804.1 | 6.54  | 6.41  | 0.1  | 0.03 | 1.09  | 0.097797 | 0.358484 | 0.466795 | 0.600011 |
| MmugDNA.30818.1.S1_at   | MmugDNA.30818.1 | 7.3   | 6.86  | 0.17 | 0.34 | 1.35  | 0.051285 | 0.084701 | 0.389613 | 0.336196 |



|                         |                 |       |       |      |      |       |          |          |          |          |
|-------------------------|-----------------|-------|-------|------|------|-------|----------|----------|----------|----------|
| MmugDNA.3082.1.S1_at    | MmugDNA.3082.1  | 10.95 | 11.18 | 0.36 | 0.07 | -1.18 | 0.986006 | 0.944382 | 0.995501 | 0.968528 |
| MmugDNA.30824.1.S1_at   | MmugDNA.30824.1 | 8.16  | 8.18  | 0.09 | 0.08 | -1.01 | 0.832798 | 0.659058 | 0.940026 | 0.800504 |
| MmugDNA.30828.1.S1_at   | MmugDNA.30828.1 | 11.9  | 11.85 | 0.14 | 0.05 | 1.04  | 0.190629 | 0.399844 | 0.561788 | 0.630048 |
| MmugDNA.30829.1.S1_at   | MmugDNA.30829.1 | 12.81 | 12.47 | 0.18 | 0.04 | 1.27  | 0.084599 | 0.164404 | 0.451141 | 0.440678 |
| MmugDNA.30830.1.S1_s_at | MmugDNA.30830.1 | 11.91 | 11.96 | 0.37 | 0.04 | -1.04 | 0.771154 | 0.837953 | 0.914377 | 0.907475 |
| MmugDNA.30831.1.S1_at   | MmugDNA.30831.1 | 10.65 | 10.66 | 0.2  | 0.13 | -1.01 | 0.659605 | 0.148811 | 0.865323 | 0.423201 |
| MmugDNA.30832.1.S1_at   | MmugDNA.30832.1 | 7.79  | 7.8   | 1.21 | 0.29 | -1.01 | 0.782213 | 0.96348  | 0.919732 | 0.979631 |
| MmugDNA.30836.1.S1_at   | MmugDNA.30836.1 | 10.79 | 10.8  | 0.4  | 0.19 | -1    | 0.424843 | 0.237474 | 0.739695 | 0.508139 |
| MmugDNA.30837.1.S1_at   | MmugDNA.30837.1 | 11.36 | 11.17 | 0.15 | 0.02 | 1.14  | 0.230353 | 0.022398 | 0.598513 | 0.187298 |
| MmugDNA.30841.1.S1_at   | MmugDNA.30841.1 | 8.53  | 8.43  | 0.09 | 0.15 | 1.08  | 0.393322 | 0.39803  | 0.719157 | 0.629138 |
| MmugDNA.30841.1.S1_x_at | MmugDNA.30841.1 | 9.46  | 9.35  | 0.14 | 0.07 | 1.08  | 0.952673 | 0.765858 | 0.984153 | 0.863946 |
| MmugDNA.30847.1.S1_at   | MmugDNA.30847.1 | 8.5   | 8.56  | 0.3  | 0.2  | -1.04 | 0.328474 | 0.028973 | 0.67577  | 0.212109 |
| MmugDNA.30848.1.S1_at   | MmugDNA.30848.1 | 7.26  | 7.85  | 0.71 | 0.44 | -1.51 | 0.656137 | 0.661223 | 0.863476 | 0.801687 |
| MmugDNA.30862.1.S1_at   | MmugDNA.30862.1 | 9.75  | 10.07 | 0.5  | 0.34 | -1.25 | 0.959743 | 0.147266 | 0.986938 | 0.421464 |
| MmugDNA.30874.1.S1_at   | MmugDNA.30874.1 | 5.91  | 5.08  | 0.37 | 0.36 | 1.78  | 0.037663 | 0.06395  | 0.35775  | 0.29906  |
| MmugDNA.30885.1.S1_at   | MmugDNA.30885.1 | 10.88 | 10.31 | 0.54 | 0.11 | 1.48  | 0.152241 | 0.021419 | 0.525274 | 0.183315 |
| MmugDNA.30894.1.S1_at   | MmugDNA.30894.1 | 3.18  | 2.94  | 0.12 | 0.06 | 1.18  | 0.035109 | 0.02962  | 0.351052 | 0.213783 |
| MmugDNA.30897.1.S1_at   | MmugDNA.30897.1 | 11.44 | 10.52 | 0.26 | 0.12 | 1.89  | 0.003842 | 0.001186 | 0.198541 | 0.054053 |
| MmugDNA.30902.1.S1_at   | MmugDNA.30902.1 | 7.9   | 8.78  | 1.43 | 0.2  | -1.85 | 0.333801 | 0.370837 | 0.679885 | 0.609814 |
| MmugDNA.3091.1.S1_at    | MmugDNA.3091.1  | 7.13  | 7.82  | 0.07 | 0.22 | -1.61 | 0.005505 | 0.01627  | 0.208157 | 0.161649 |
| MmugDNA.30914.1.S1_at   | MmugDNA.30914.1 | 6.51  | 5.89  | 1.12 | 0.27 | 1.54  | 0.484107 | 0.179129 | 0.773472 | 0.45547  |
| MmugDNA.30916.1.S1_at   | MmugDNA.30916.1 | 3.58  | 3.56  | 0.08 | 0.07 | 1.01  | 0.691651 | 0.178631 | 0.879919 | 0.454847 |
| MmugDNA.30919.1.S1_at   | MmugDNA.30919.1 | 6.61  | 7.01  | 0.14 | 0.19 | -1.32 | 0.189194 | 0.001243 | 0.560823 | 0.054826 |
| MmugDNA.3092.1.S1_at    | MmugDNA.3092.1  | 9.97  | 10.16 | 0.57 | 0.2  | -1.14 | 0.526143 | 0.585388 | 0.796453 | 0.752844 |
| MmugDNA.30921.1.S1_at   | MmugDNA.30921.1 | 7.7   | 7.71  | 0.38 | 0.09 | -1.01 | 0.54022  | 0.583796 | 0.804291 | 0.751989 |
| MmugDNA.30922.1.S1_x_at | MmugDNA.30922.1 | 4.14  | 4.18  | 0.08 | 0.02 | -1.03 | 0.427285 | 0.364508 | 0.740974 | 0.604846 |
| MmugDNA.30929.1.S1_at   | MmugDNA.30929.1 | 8.76  | 8.41  | 0.35 | 0.15 | 1.28  | 0.134319 | 0.001603 | 0.508462 | 0.060491 |
| MmugDNA.30933.1.S1_at   | MmugDNA.30933.1 | 6.39  | 6.63  | 0.19 | 0.09 | -1.18 | 0.319862 | 0.50837  | 0.669028 | 0.703589 |
| MmugDNA.30934.1.S1_at   | MmugDNA.30934.1 | 6.16  | 6.63  | 0.17 | 0.1  | -1.39 | 0.013241 | 0.003209 | 0.267062 | 0.082023 |
| MmugDNA.30937.1.S1_at   | MmugDNA.30937.1 | 8.68  | 8.45  | 0.39 | 0.19 | 1.17  | 0.43818  | 0.118401 | 0.747231 | 0.3864   |
| MmugDNA.30943.1.S1_at   | MmugDNA.30943.1 | 10.95 | 10.64 | 0.24 | 0.09 | 1.24  | 0.36244  | 0.556448 | 0.699302 | 0.734507 |
| MmugDNA.30953.1.S1_at   | MmugDNA.30953.1 | 7.7   | 7.56  | 0.24 | 0.09 | 1.1   | 0.263029 | 0.470806 | 0.625096 | 0.679123 |
| MmugDNA.30966.1.S1_at   | MmugDNA.30966.1 | 8.6   | 8.86  | 0.09 | 0.38 | -1.2  | 0.085491 | 0.007554 | 0.452653 | 0.116437 |
| MmugDNA.30973.1.S1_at   | MmugDNA.30973.1 | 10.17 | 10.4  | 0.4  | 0.09 | -1.17 | 0.833003 | 0.966539 | 0.940095 | 0.98139  |
| MmugDNA.30978.1.S1_at   | MmugDNA.30978.1 | 7.26  | 6.39  | 0.92 | 0.1  | 1.83  | 0.159019 | 0.084541 | 0.531755 | 0.335953 |
| MmugDNA.30984.1.S1_at   | MmugDNA.30984.1 | 9.63  | 9.18  | 1.15 | 0.03 | 1.37  | 0.755916 | 0.087484 | 0.90805  | 0.340617 |
| MmugDNA.30985.1.S1_at   | MmugDNA.30985.1 | 8.06  | 8.3   | 0.18 | 0.04 | -1.18 | 0.102448 | 0.070547 | 0.472592 | 0.311777 |
| MmugDNA.30998.1.S1_at   | MmugDNA.30998.1 | 11.86 | 11.57 | 0.56 | 0.21 | 1.22  | 0.230575 | 0.268664 | 0.59872  | 0.534138 |
| MmugDNA.3100.1.S1_at    | MmugDNA.3100.1  | 6.43  | 6.02  | 0.27 | 0.11 | 1.33  | 0.21171  | 0.365494 | 0.582625 | 0.605587 |
| MmugDNA.31002.1.S1_at   | MmugDNA.31002.1 | 6.42  | 6.43  | 0.06 | 0.01 | -1    | 0.455485 | 0.656998 | 0.757444 | 0.799401 |
| MmugDNA.31012.1.S1_at   | MmugDNA.31012.1 | 10.85 | 11.37 | 2.27 | 0.19 | -1.43 | 0.48002  | 0.38701  | 0.771035 | 0.621935 |
| MmugDNA.31013.1.S1_at   | MmugDNA.31013.1 | 6.2   | 6.53  | 0.43 | 0.13 | -1.26 | 0.9592   | 0.561586 | 0.986635 | 0.737505 |
| MmugDNA.31015.1.S1_at   | MmugDNA.31015.1 | 10.34 | 9.66  | 1.16 | 0.26 | 1.6   | 0.842841 | 0.774307 | 0.944371 | 0.868751 |

|                         |                 |       |       |      |      |       |          |          |          |          |
|-------------------------|-----------------|-------|-------|------|------|-------|----------|----------|----------|----------|
| MmugDNA.31018.1.S1_at   | MmugDNA.31018.1 | 7.61  | 7.58  | 0.1  | 0.04 | 1.02  | 0.29847  | 0.697842 | 0.653176 | 0.824445 |
| MmugDNA.31021.1.S1_at   | MmugDNA.31021.1 | 9.51  | 10.08 | 0.62 | 0.07 | -1.48 | 0.383913 | 0.160855 | 0.711626 | 0.43709  |
| MmugDNA.31030.1.S1_at   | MmugDNA.31030.1 | 7.06  | 6.85  | 0.32 | 0.39 | 1.16  | 0.883511 | 0.004582 | 0.95964  | 0.094484 |
| MmugDNA.31034.1.S1_at   | MmugDNA.31034.1 | 12.8  | 12.55 | 0.84 | 0.27 | 1.19  | 0.551832 | 0.443835 | 0.811455 | 0.661517 |
| MmugDNA.31040.1.S1_at   | MmugDNA.31040.1 | 9.56  | 9.81  | 0.07 | 0.05 | -1.19 | 0.00558  | 0.005218 | 0.208784 | 0.100105 |
| MmugDNA.31043.1.S1_at   | MmugDNA.31043.1 | 7.96  | 6.77  | 0.48 | 0.18 | 2.29  | 0.049286 | 0.079189 | 0.385423 | 0.32639  |
| MmugDNA.31049.1.S1_at   | MmugDNA.31049.1 | 3.43  | 3.37  | 0.1  | 0.02 | 1.04  | 0.377569 | 0.579518 | 0.707557 | 0.74918  |
| MmugDNA.3105.1.S1_at    | MmugDNA.3105.1  | 6.28  | 6.41  | 0.09 | 0.12 | -1.1  | 0.338187 | 0.050556 | 0.682759 | 0.270222 |
| MmugDNA.31054.1.S1_at   | MmugDNA.31054.1 | 4.87  | 5.05  | 0.76 | 0.07 | -1.13 | 0.716739 | 0.177801 | 0.89001  | 0.454111 |
| MmugDNA.31056.1.S1_at   | MmugDNA.31056.1 | 8.92  | 8.7   | 0.41 | 0.15 | 1.17  | 0.427316 | 0.282137 | 0.740992 | 0.544937 |
| MmugDNA.31057.1.S1_at   | MmugDNA.31057.1 | 5.21  | 5.07  | 0.13 | 0.07 | 1.1   | 0.305246 | 0.410342 | 0.658726 | 0.637216 |
| MmugDNA.3106.1.S1_at    | MmugDNA.3106.1  | 12.99 | 13.01 | 1.29 | 0.11 | -1.01 | 0.785029 | 0.419529 | 0.920961 | 0.643507 |
| MmugDNA.31067.1.S1_x_at | MmugDNA.31067.1 | 9.17  | 9.08  | 0.18 | 0.12 | 1.07  | 0.524767 | 0.606205 | 0.796081 | 0.765727 |
| MmugDNA.31070.1.S1_at   | MmugDNA.31070.1 | 10.17 | 10.39 | 0.25 | 0.07 | -1.17 | 0.466558 | 0.652193 | 0.763702 | 0.796592 |
| MmugDNA.31080.1.S1_at   | MmugDNA.31080.1 | 8.37  | 8.77  | 0.28 | 0.06 | -1.31 | 0.084883 | 0.002818 | 0.451489 | 0.078275 |
| MmugDNA.31085.1.S1_at   | MmugDNA.31085.1 | 10.96 | 10.96 | 0.88 | 0.01 | 1     | 0.889243 | 0.983158 | 0.96181  | 0.990726 |
| MmugDNA.31088.1.S1_at   | MmugDNA.31088.1 | 11.61 | 11.76 | 0.05 | 0.07 | -1.11 | 0.032792 | 0.035463 | 0.345393 | 0.232564 |
| MmugDNA.31090.1.S1_at   | MmugDNA.31090.1 | 10.42 | 10.2  | 0.49 | 0.11 | 1.17  | 0.511122 | 0.049088 | 0.78856  | 0.266518 |
| MmugDNA.31092.1.S1_at   | MmugDNA.31092.1 | 7.45  | 8.17  | 0.61 | 0.23 | -1.64 | 0.123607 | 0.015911 | 0.497069 | 0.160062 |
| MmugDNA.31096.1.S1_at   | MmugDNA.31096.1 | 12.01 | 12.19 | 0.07 | 0.11 | -1.14 | 0.082864 | 0.099513 | 0.44803  | 0.357898 |
| MmugDNA.31096.1.S1_x_at | MmugDNA.31096.1 | 12.25 | 12.26 | 0.08 | 0.02 | -1.01 | 0.360294 | 0.45379  | 0.697844 | 0.668253 |
| MmugDNA.31098.1.S1_at   | MmugDNA.31098.1 | 9.27  | 8.42  | 0.38 | 0.11 | 1.81  | 0.012592 | 0.0015   | 0.263116 | 0.059054 |
| MmugDNA.31100.1.S1_at   | MmugDNA.31100.1 | 9.29  | 9.97  | 0.29 | 0.27 | -1.6  | 0.019398 | 0.003231 | 0.300972 | 0.08214  |
| MmugDNA.31106.1.S1_at   | MmugDNA.31106.1 | 9.58  | 10.18 | 0.4  | 0.14 | -1.52 | 0.061466 | 0.045963 | 0.410745 | 0.258818 |
| MmugDNA.31107.1.S1_at   | MmugDNA.31107.1 | 7.16  | 7.03  | 0.33 | 0.12 | 1.09  | 0.377405 | 0.243637 | 0.707543 | 0.513777 |
| MmugDNA.31109.1.S1_at   | MmugDNA.31109.1 | 8.91  | 9.65  | 0.55 | 0.23 | -1.67 | 0.087887 | 0.044316 | 0.455784 | 0.255021 |
| MmugDNA.31112.1.S1_at   | MmugDNA.31112.1 | 12.05 | 11.58 | 0.27 | 0.07 | 1.39  | 0.053703 | 0.003244 | 0.39535  | 0.082187 |
| MmugDNA.31114.1.S1_at   | MmugDNA.31114.1 | 7.47  | 7.1   | 0.29 | 0.26 | 1.29  | 0.197089 | 0.454667 | 0.567954 | 0.668763 |
| MmugDNA.31120.1.S1_at   | MmugDNA.31120.1 | 9.57  | 9.06  | 0.33 | 0.04 | 1.42  | 0.173267 | 0.175888 | 0.546427 | 0.452486 |
| MmugDNA.31122.1.S1_at   | MmugDNA.31122.1 | 10.85 | 10.61 | 0.36 | 0.07 | 1.17  | 0.251462 | 0.30502  | 0.616712 | 0.562176 |
| MmugDNA.31125.1.S1_at   | MmugDNA.31125.1 | 10.47 | 9.86  | 3.5  | 0.33 | 1.52  | 0.572501 | 0.244316 | 0.823222 | 0.514184 |
| MmugDNA.31131.1.S1_at   | MmugDNA.31131.1 | 11.79 | 11.91 | 0.18 | 0.14 | -1.09 | 0.695726 | 0.895019 | 0.881723 | 0.940055 |
| MmugDNA.31132.1.S1_at   | MmugDNA.31132.1 | 4.78  | 5.28  | 0.28 | 0.3  | -1.42 | 0.051739 | 0.050714 | 0.391209 | 0.270344 |
| MmugDNA.31134.1.S1_at   | MmugDNA.31134.1 | 2.81  | 2.9   | 0.09 | 0.11 | -1.07 | 0.885764 | 0.260763 | 0.96038  | 0.52721  |
| MmugDNA.31135.1.S1_at   | MmugDNA.31135.1 | 10.97 | 10.66 | 0.68 | 0.03 | 1.23  | 0.357454 | 0.504064 | 0.695809 | 0.701301 |
| MmugDNA.31139.1.S1_at   | MmugDNA.31139.1 | 5.14  | 5.12  | 0.17 | 0.1  | 1.01  | 0.534448 | 0.297507 | 0.801404 | 0.556122 |
| MmugDNA.3114.1.S1_at    | MmugDNA.3114.1  | 11.89 | 11.59 | 0.16 | 0.06 | 1.23  | 0.088275 | 0.001115 | 0.45606  | 0.052851 |
| MmugDNA.31141.1.S1_at   | MmugDNA.31141.1 | 9.27  | 9.8   | 2.18 | 0.25 | -1.44 | 0.514576 | 0.229674 | 0.790442 | 0.501661 |
| MmugDNA.31148.1.S1_at   | MmugDNA.31148.1 | 6.78  | 6.41  | 0.06 | 0.08 | 1.29  | 0.004052 | 0.00079  | 0.198571 | 0.045969 |
| MmugDNA.31150.1.S1_at   | MmugDNA.31150.1 | 11.03 | 10.84 | 0.41 | 0.12 | 1.14  | 0.169094 | 0.174029 | 0.542061 | 0.450275 |
| MmugDNA.31154.1.S1_at   | MmugDNA.31154.1 | 9.55  | 9.89  | 0.32 | 0.01 | -1.27 | 0.129806 | 0.201414 | 0.504468 | 0.475963 |
| MmugDNA.31157.1.S1_at   | MmugDNA.31157.1 | 7.13  | 7.04  | 0.03 | 0.03 | 1.06  | 0.011934 | 0.209071 | 0.257858 | 0.482861 |
| MmugDNA.31162.1.S1_at   | MmugDNA.31162.1 | 9.47  | 9.2   | 0.02 | 0.29 | 1.2   | 0.063437 | 0.160274 | 0.415717 | 0.436406 |

|                         |                 |       |       |      |      |       |          |          |          |          |
|-------------------------|-----------------|-------|-------|------|------|-------|----------|----------|----------|----------|
| MmugDNA.31166.1.S1_at   | MmugDNA.31166.1 | 7.17  | 7.44  | 0.26 | 0.19 | -1.21 | 0.633922 | 0.279255 | 0.853703 | 0.54293  |
| MmugDNA.31172.1.S1_at   | MmugDNA.31172.1 | 5.81  | 6.36  | 0.35 | 0.1  | -1.47 | 0.086726 | 0.025357 | 0.454689 | 0.199595 |
| MmugDNA.31175.1.S1_at   | MmugDNA.31175.1 | 5.69  | 5.51  | 0.18 | 0.16 | 1.13  | 0.416008 | 0.388068 | 0.73398  | 0.622598 |
| MmugDNA.31177.1.S1_at   | MmugDNA.31177.1 | 6.07  | 6.38  | 0.09 | 0.41 | -1.24 | 0.214149 | 0.154411 | 0.584673 | 0.429288 |
| MmugDNA.31181.1.S1_at   | MmugDNA.31181.1 | 12.76 | 12.57 | 0.1  | 0.07 | 1.14  | 0.042095 | 0.071594 | 0.368438 | 0.313714 |
| MmugDNA.31181.1.S1_s_at | MmugDNA.31181.1 | 12.25 | 11.99 | 0.06 | 0.11 | 1.2   | 0.013876 | 0.069851 | 0.272841 | 0.310389 |
| MmugDNA.31185.1.S1_at   | MmugDNA.31185.1 | 5.76  | 5.7   | 0.07 | 0.09 | 1.04  | 0.288869 | 0.730452 | 0.645883 | 0.844017 |
| MmugDNA.31198.1.S1_at   | MmugDNA.31198.1 | 8.82  | 8.91  | 0.03 | 0.11 | -1.06 | 0.25534  | 0.000772 | 0.619432 | 0.045568 |
| MmugDNA.31201.1.S1_at   | MmugDNA.31201.1 | 9.42  | 8.53  | 0.47 | 0.27 | 1.86  | 0.0855   | 0.126482 | 0.452653 | 0.397038 |
| MmugDNA.31211.1.S1_at   | MmugDNA.31211.1 | 11.41 | 11.43 | 0.33 | 0.07 | -1.01 | 0.481638 | 0.21503  | 0.772225 | 0.488898 |
| MmugDNA.31218.1.S1_at   | MmugDNA.31218.1 | 6.83  | 6.04  | 1.22 | 0.1  | -1.72 | 0.347364 | 0.260523 | 0.68869  | 0.527038 |
| MmugDNA.31219.1.S1_at   | MmugDNA.31219.1 | 7.23  | 6.85  | 0.24 | 0.02 | 1.31  | 0.067492 | 0.15035  | 0.423901 | 0.42489  |
| MmugDNA.3122.1.S1_at    | MmugDNA.3122.1  | 11.57 | 11.81 | 0.44 | 0.21 | -1.18 | 0.718163 | 0.101467 | 0.890613 | 0.361266 |
| MmugDNA.31221.1.S1_at   | MmugDNA.31221.1 | 4.85  | 4.8   | 0.22 | 0.28 | 1.03  | 0.680898 | 0.487153 | 0.874873 | 0.690281 |
| MmugDNA.31223.1.S1_at   | MmugDNA.31223.1 | 4.1   | 4.88  | 1.47 | 0.01 | -1.72 | 0.447481 | 0.537206 | 0.753312 | 0.72233  |
| MmugDNA.31225.1.S1_at   | MmugDNA.31225.1 | 5.84  | 5.64  | 0.28 | 0.29 | 1.15  | 0.845883 | 0.76862  | 0.945947 | 0.865637 |
| MmugDNA.31227.1.S1_at   | MmugDNA.31227.1 | 3.18  | 3.15  | 0.07 | 0.17 | 1.02  | 0.642161 | 0.445898 | 0.857628 | 0.662593 |
| MmugDNA.31232.1.S1_at   | MmugDNA.31232.1 | 6.69  | 6.63  | 0.61 | 0.33 | 1.04  | 0.7878   | 0.195207 | 0.922045 | 0.470253 |
| MmugDNA.31244.1.S1_at   | MmugDNA.31244.1 | 6.9   | 7.22  | 0.44 | 0.67 | -1.25 | 0.403206 | 0.573076 | 0.725542 | 0.744941 |
| MmugDNA.31256.1.S1_at   | MmugDNA.31256.1 | 6     | 7.13  | 0.81 | 0.41 | -2.19 | 0.143079 | 0.234889 | 0.518366 | 0.506125 |
| MmugDNA.31258.1.S1_at   | MmugDNA.31258.1 | 11.71 | 11.59 | 0.34 | 0.25 | 1.09  | 0.827902 | 0.137945 | 0.938183 | 0.410912 |
| MmugDNA.31261.1.S1_at   | MmugDNA.31261.1 | 6.65  | 6.56  | 0.79 | 0.23 | 1.06  | 0.739576 | 0.343777 | 0.900683 | 0.589483 |
| MmugDNA.31263.1.S1_at   | MmugDNA.31263.1 | 4.17  | 4.12  | 0.1  | 0.11 | 1.03  | 0.858499 | 0.993014 | 0.950024 | 0.995888 |
| MmugDNA.31269.1.S1_at   | MmugDNA.31269.1 | 8.32  | 8.22  | 0.05 | 0.09 | 1.07  | 0.133009 | 0.033209 | 0.507287 | 0.225663 |
| MmugDNA.31270.1.S1_at   | MmugDNA.31270.1 | 6.73  | 7.01  | 0.16 | 0.07 | -1.22 | 0.075008 | 0.041122 | 0.435663 | 0.247654 |
| MmugDNA.31272.1.S1_at   | MmugDNA.31272.1 | 7.77  | 7.97  | 0.2  | 0.12 | -1.15 | 0.527367 | 0.752703 | 0.797084 | 0.855968 |
| MmugDNA.31274.1.S1_at   | MmugDNA.31274.1 | 7.84  | 7.61  | 0.31 | 0.07 | 1.17  | 0.199391 | 0.034565 | 0.571138 | 0.23001  |
| MmugDNA.31277.1.S1_at   | MmugDNA.31277.1 | 12.53 | 12.63 | 0.37 | 0.05 | -1.07 | 0.623078 | 0.562816 | 0.8481   | 0.738167 |
| MmugDNA.31288.1.S1_at   | MmugDNA.31288.1 | 9.5   | 9.42  | 0.29 | 0.05 | 1.05  | 0.678339 | 0.034528 | 0.873961 | 0.229979 |
| MmugDNA.31289.1.S1_at   | MmugDNA.31289.1 | 9.69  | 10.46 | 0.24 | 0.07 | -1.7  | 0.006918 | 0.002604 | 0.224141 | 0.075487 |
| MmugDNA.3129.1.S1_at    | MmugDNA.3129.1  | 6.51  | 8.43  | 1.69 | 0.1  | -3.8  | 0.374531 | 0.256809 | 0.705935 | 0.524607 |
| MmugDNA.31291.1.S1_at   | MmugDNA.31291.1 | 11.99 | 11.92 | 0.18 | 0.05 | 1.05  | 0.498118 | 0.207614 | 0.781592 | 0.481906 |
| MmugDNA.31292.1.S1_at   | MmugDNA.31292.1 | 6.82  | 6.89  | 0.31 | 0.13 | -1.05 | 0.5682   | 0.56617  | 0.820687 | 0.740296 |
| MmugDNA.31293.1.S1_at   | MmugDNA.31293.1 | 6.9   | 6.25  | 1    | 0.36 | 1.58  | 0.200698 | 0.113163 | 0.57245  | 0.379184 |
| MmugDNA.3130.1.S1_at    | MmugDNA.3130.1  | 5.25  | 5.17  | 0.35 | 0.2  | 1.05  | 0.926854 | 0.448554 | 0.975766 | 0.66441  |
| MmugDNA.31306.1.S1_at   | MmugDNA.31306.1 | 10.25 | 10.13 | 0.36 | 0.07 | 1.08  | 0.876396 | 0.028643 | 0.956919 | 0.210901 |
| MmugDNA.31312.1.S1_at   | MmugDNA.31312.1 | 5.15  | 5.06  | 0.35 | 0.01 | 1.06  | 0.574079 | 0.752795 | 0.823829 | 0.855968 |
| MmugDNA.31313.1.S1_at   | MmugDNA.31313.1 | 11.55 | 11.52 | 0.49 | 0.08 | 1.02  | 0.857631 | 0.169843 | 0.949729 | 0.446544 |
| MmugDNA.31324.1.S1_at   | MmugDNA.31324.1 | 9.91  | 10.25 | 0.26 | 0.12 | -1.26 | 0.120806 | 0.015019 | 0.49436  | 0.155736 |
| MmugDNA.31327.1.S1_at   | MmugDNA.31327.1 | 5.76  | 6.12  | 0.32 | 0.06 | -1.28 | 0.139292 | 0.108977 | 0.51471  | 0.37269  |
| MmugDNA.3133.1.S1_at    | MmugDNA.3133.1  | 10.8  | 10.93 | 0.2  | 0.09 | -1.1  | 0.117037 | 0.025099 | 0.490307 | 0.19845  |
| MmugDNA.31330.1.S1_at   | MmugDNA.31330.1 | 10.89 | 11.35 | 0.04 | 0.09 | -1.38 | 0.001046 | 0.000036 | 0.155374 | 0.023031 |
| MmugDNA.31331.1.S1_at   | MmugDNA.31331.1 | 10.27 | 9.78  | 0.37 | 0.27 | 1.4   | 0.689951 | 0.009167 | 0.879216 | 0.126331 |

|                         |                 |       |       |      |      |       |          |          |          |          |
|-------------------------|-----------------|-------|-------|------|------|-------|----------|----------|----------|----------|
| MmugDNA.31333.1.S1_at   | MmugDNA.31333.1 | 13.74 | 13.58 | 0.02 | 0.03 | 1.11  | 0.001395 | 0.006372 | 0.160065 | 0.108546 |
| MmugDNA.31335.1.S1_at   | MmugDNA.31335.1 | 11.84 | 12.16 | 0.16 | 0.05 | -1.26 | 0.031229 | 0.026252 | 0.340391 | 0.202991 |
| MmugDNA.31336.1.S1_at   | MmugDNA.31336.1 | 7.17  | 7.5   | 0.4  | 0.44 | -1.26 | 0.361038 | 0.385793 | 0.698314 | 0.621079 |
| MmugDNA.31337.1.S1_at   | MmugDNA.31337.1 | 12.81 | 12.93 | 0.08 | 0.02 | -1.09 | 0.048337 | 0.000678 | 0.383054 | 0.04413  |
| MmugDNA.31341.1.S1_at   | MmugDNA.31341.1 | 6.78  | 6.7   | 0.1  | 0.15 | 1.06  | 0.335781 | 0.183432 | 0.681213 | 0.459574 |
| MmugDNA.3135.1.S1_at    | MmugDNA.3135.1  | 6.25  | 6.07  | 0.26 | 0.18 | 1.13  | 0.3683   | 0.184104 | 0.703529 | 0.460323 |
| MmugDNA.31351.1.S1_at   | MmugDNA.31351.1 | 8.87  | 9.31  | 0.35 | 0.02 | -1.36 | 0.066868 | 0.136427 | 0.422979 | 0.408839 |
| MmugDNA.31356.1.S1_at   | MmugDNA.31356.1 | 8.53  | 9.98  | 0.63 | 0.05 | -2.72 | 0.03931  | 0.017731 | 0.361498 | 0.168367 |
| MmugDNA.31359.1.S1_at   | MmugDNA.31359.1 | 3.68  | 3.67  | 0.19 | 0.08 | 1.01  | 0.650367 | 0.411924 | 0.860897 | 0.638434 |
| MmugDNA.31360.1.S1_at   | MmugDNA.31360.1 | 3.58  | 3.44  | 0.05 | 0.1  | 1.1   | 0.086681 | 0.180667 | 0.454604 | 0.457245 |
| MmugDNA.31362.1.S1_at   | MmugDNA.31362.1 | 8.98  | 8.75  | 0.24 | 0.05 | -1.17 | 0.155404 | 0.000384 | 0.528651 | 0.037273 |
| MmugDNA.3137.1.S1_at    | MmugDNA.3137.1  | 11.08 | 10.88 | 0.3  | 0.06 | 1.15  | 0.297951 | 0.115444 | 0.652791 | 0.382557 |
| MmugDNA.31371.1.S1_at   | MmugDNA.31371.1 | 8.79  | 8.78  | 0.8  | 0.21 | 1.01  | 0.778812 | 0.871452 | 0.918438 | 0.926844 |
| MmugDNA.31378.1.S1_at   | MmugDNA.31378.1 | 10.95 | 10.72 | 0.18 | 0.04 | 1.17  | 0.038817 | 0.061071 | 0.36035  | 0.293952 |
| MmugDNA.31385.1.S1_at   | MmugDNA.31385.1 | 7.87  | 7.69  | 0.74 | 0.16 | 1.13  | 0.22042  | 0.274525 | 0.589697 | 0.538987 |
| MmugDNA.31387.1.S1_x_at | MmugDNA.31387.1 | 3.61  | 3.59  | 0.13 | 0.14 | 1.01  | 0.969176 | 0.698385 | 0.989875 | 0.82478  |
| MmugDNA.31388.1.S1_at   | MmugDNA.31388.1 | 10.77 | 10.3  | 0.05 | 0.2  | 1.39  | 0.032879 | 0.216008 | 0.345526 | 0.48965  |
| MmugDNA.31388.1.S1_s_at | MmugDNA.31388.1 | 12.2  | 11.9  | 0.01 | 0.19 | 1.24  | 0.150648 | 0.505352 | 0.524234 | 0.702077 |
| MmugDNA.31389.1.S1_at   | MmugDNA.31389.1 | 9.01  | 8.44  | 0.43 | 0.41 | 1.48  | 0.074119 | 0.005952 | 0.43493  | 0.105513 |
| MmugDNA.31391.1.S1_at   | MmugDNA.31391.1 | 8.13  | 8.45  | 0.45 | 0.05 | -1.25 | 0.329424 | 0.37292  | 0.676319 | 0.611775 |
| MmugDNA.31393.1.S1_at   | MmugDNA.31393.1 | 4.02  | 3.88  | 0.09 | 0.06 | 1.1   | 0.370566 | 0.682467 | 0.704904 | 0.814526 |
| MmugDNA.31394.1.S1_at   | MmugDNA.31394.1 | 10.65 | 10.47 | 0.36 | 0.12 | 1.14  | 0.479547 | 0.629877 | 0.770812 | 0.782009 |
| MmugDNA.31396.1.S1_at   | MmugDNA.31396.1 | 11.75 | 11.77 | 0.13 | 0.12 | -1.01 | 0.290997 | 0.305116 | 0.647518 | 0.562255 |
| MmugDNA.31398.1.S1_at   | MmugDNA.31398.1 | 4.07  | 3.69  | 0.23 | 0.05 | 1.3   | 0.030668 | 0.024011 | 0.338263 | 0.194236 |
| MmugDNA.31405.1.S1_at   | MmugDNA.31405.1 | 11.94 | 12.07 | 1.01 | 0.02 | -1.1  | 0.329159 | 0.398034 | 0.676252 | 0.629138 |
| MmugDNA.31406.1.S1_at   | MmugDNA.31406.1 | 11.69 | 11.82 | 0.36 | 0.13 | -1.1  | 0.900745 | 0.010748 | 0.966259 | 0.135385 |
| MmugDNA.31411.1.S1_at   | MmugDNA.31411.1 | 6.23  | 6.14  | 0.15 | 0.03 | 1.06  | 0.127501 | 0.283755 | 0.501664 | 0.546185 |
| MmugDNA.31412.1.S1_at   | MmugDNA.31412.1 | 5.68  | 5.78  | 0.17 | 0.14 | -1.07 | 0.685565 | 0.73048  | 0.876846 | 0.844017 |
| MmugDNA.31412.1.S1_s_at | MmugDNA.31412.1 | 13.84 | 13.95 | 0.07 | 0.02 | -1.08 | 0.172675 | 0.050352 | 0.545872 | 0.269642 |
| MmugDNA.31414.1.S1_at   | MmugDNA.31414.1 | 9.89  | 9.55  | 0.63 | 0.1  | 1.27  | 0.332955 | 0.36059  | 0.679412 | 0.601629 |
| MmugDNA.31419.1.S1_at   | MmugDNA.31419.1 | 6.5   | 6.43  | 0.12 | 0.07 | 1.05  | 0.403398 | 0.518525 | 0.725707 | 0.710477 |
| MmugDNA.31425.1.S1_at   | MmugDNA.31425.1 | 4.07  | 4.08  | 0.02 | 0.04 | -1.01 | 0.88216  | 0.09259  | 0.959161 | 0.348529 |
| MmugDNA.31427.1.S1_at   | MmugDNA.31427.1 | 4.71  | 4.82  | 0.2  | 0.08 | -1.08 | 0.49479  | 0.320053 | 0.779514 | 0.572421 |
| MmugDNA.31428.1.S1_at   | MmugDNA.31428.1 | 10.05 | 9.54  | 0.26 | 0.12 | 1.42  | 0.06058  | 0.08884  | 0.408456 | 0.342663 |
| MmugDNA.31436.1.S1_at   | MmugDNA.31436.1 | 9.77  | 9.46  | 0.21 | 0.11 | 1.24  | 0.071754 | 0.020228 | 0.431445 | 0.178641 |
| MmugDNA.3144.1.S1_at    | MmugDNA.3144.1  | 10.53 | 10.75 | 0.6  | 0.08 | -1.17 | 0.504053 | 0.470203 | 0.784489 | 0.678572 |
| MmugDNA.31446.1.S1_at   | MmugDNA.31446.1 | 11.11 | 10.95 | 0.11 | 0.15 | 1.12  | 0.059102 | 0.058777 | 0.406033 | 0.289182 |
| MmugDNA.31447.1.S1_at   | MmugDNA.31447.1 | 3.7   | 3.54  | 0.09 | 0.02 | 1.12  | 0.051818 | 0.143318 | 0.391451 | 0.417294 |
| MmugDNA.31448.1.S1_at   | MmugDNA.31448.1 | 12.33 | 12.29 | 0.08 | 0.03 | 1.03  | 0.473345 | 0.007983 | 0.767506 | 0.118766 |
| MmugDNA.31449.1.S1_at   | MmugDNA.31449.1 | 4.54  | 4.33  | 0.12 | 0.06 | 1.15  | 0.033748 | 0.063291 | 0.347257 | 0.298244 |
| MmugDNA.31450.1.S1_at   | MmugDNA.31450.1 | 7.07  | 6.82  | 0.04 | 0.08 | 1.19  | 0.007615 | 0.069956 | 0.229897 | 0.31072  |
| MmugDNA.31452.1.S1_at   | MmugDNA.31452.1 | 3.37  | 3.38  | 0.03 | 0.08 | -1.01 | 0.639547 | 0.324242 | 0.85626  | 0.57488  |
| MmugDNA.31456.1.S1_at   | MmugDNA.31456.1 | 7.12  | 7.44  | 1.03 | 0.68 | -1.24 | 0.900169 | 0.969521 | 0.966012 | 0.983323 |

|                         |                 |       |       |      |      |       |          |          |          |          |
|-------------------------|-----------------|-------|-------|------|------|-------|----------|----------|----------|----------|
| MmugDNA.31458.1.S1_at   | MmugDNA.31458.1 | 9.95  | 9.82  | 0.06 | 0.07 | 1.09  | 0.019017 | 0.061007 | 0.29965  | 0.293811 |
| MmugDNA.31462.1.S1_at   | MmugDNA.31462.1 | 5.06  | 5.04  | 0.05 | 0.01 | 1.02  | 0.142991 | 0.052063 | 0.51822  | 0.273754 |
| MmugDNA.31467.1.S1_at   | MmugDNA.31467.1 | 12.68 | 12.65 | 0.02 | 0.05 | 1.02  | 0.449909 | 0.164797 | 0.754621 | 0.441106 |
| MmugDNA.31476.1.S1_at   | MmugDNA.31476.1 | 5.24  | 5.55  | 0.32 | 0.22 | -1.24 | 0.215681 | 0.234082 | 0.585769 | 0.505319 |
| MmugDNA.31478.1.S1_at   | MmugDNA.31478.1 | 7.38  | 6.7   | 0.42 | 0.24 | 1.6   | 0.097072 | 0.107776 | 0.46573  | 0.370847 |
| MmugDNA.31481.1.S1_at   | MmugDNA.31481.1 | 6.35  | 6.62  | 0.26 | 0.05 | -1.21 | 0.461515 | 0.531791 | 0.76101  | 0.718951 |
| MmugDNA.31482.1.S1_at   | MmugDNA.31482.1 | 7.66  | 7.6   | 0.26 | 0.08 | 1.04  | 0.227834 | 0.564273 | 0.596693 | 0.739142 |
| MmugDNA.31482.1.S1_s_at | MmugDNA.31482.1 | 13.56 | 13.64 | 0.07 | 0.08 | -1.06 | 0.257308 | 0.353759 | 0.621065 | 0.596815 |
| MmugDNA.31484.1.S1_at   | MmugDNA.31484.1 | 5.39  | 5.39  | 0.09 | 0.13 | 1.01  | 0.211287 | 0.266789 | 0.582179 | 0.53241  |
| MmugDNA.31486.1.S1_at   | MmugDNA.31486.1 | 5.34  | 5.35  | 0.18 | 0.13 | -1    | 0.244275 | 0.509095 | 0.60991  | 0.703993 |
| MmugDNA.31492.1.S1_at   | MmugDNA.31492.1 | 11.46 | 11.31 | 0.53 | 0.05 | -1.11 | 0.619839 | 0.701673 | 0.846932 | 0.826974 |
| MmugDNA.31501.1.S1_at   | MmugDNA.31501.1 | 5.99  | 6.78  | 0.53 | 0.25 | -1.72 | 0.133394 | 0.020332 | 0.507921 | 0.179024 |
| MmugDNA.31505.1.S1_at   | MmugDNA.31505.1 | 11.47 | 11.47 | 0.04 | 0.09 | 1     | 0.928688 | 0.542001 | 0.976332 | 0.725169 |
| MmugDNA.31506.1.S1_at   | MmugDNA.31506.1 | 9.21  | 8.1   | 1.87 | 1.42 | 2.16  | 0.364993 | 0.188899 | 0.700775 | 0.464818 |
| MmugDNA.31508.1.S1_at   | MmugDNA.31508.1 | 12.54 | 12.54 | 0.09 | 0.1  | 1     | 0.25638  | 0.34111  | 0.620399 | 0.587233 |
| MmugDNA.31509.1.S1_at   | MmugDNA.31509.1 | 11.23 | 11.49 | 0.15 | 0.09 | -1.2  | 0.126834 | 0.250465 | 0.500609 | 0.519391 |
| MmugDNA.31513.1.S1_at   | MmugDNA.31513.1 | 11.23 | 10.7  | 0.25 | 0.07 | 1.44  | 0.014596 | 0.001937 | 0.276563 | 0.065795 |
| MmugDNA.31523.1.S1_at   | MmugDNA.31523.1 | 10.82 | 11.22 | 0.45 | 0.12 | -1.32 | 0.13347  | 0.185116 | 0.507931 | 0.460962 |
| MmugDNA.31523.1.S1_s_at | MmugDNA.31523.1 | 11.6  | 12.03 | 0.37 | 0.09 | -1.35 | 0.092265 | 0.126684 | 0.460762 | 0.397363 |
| MmugDNA.31524.1.S1_at   | MmugDNA.31524.1 | 11.12 | 10.89 | 0.42 | 0.06 | 1.18  | 0.883542 | 0.304617 | 0.95964  | 0.561838 |
| MmugDNA.31528.1.S1_at   | MmugDNA.31528.1 | 5.19  | 5.14  | 0.15 | 0.09 | 1.04  | 0.484135 | 0.133467 | 0.773472 | 0.405337 |
| MmugDNA.31529.1.S1_at   | MmugDNA.31529.1 | 9.73  | 9.76  | 0.1  | 0.14 | -1.02 | 0.383082 | 0.030898 | 0.711157 | 0.217584 |
| MmugDNA.31531.1.S1_at   | MmugDNA.31531.1 | 5.46  | 5.46  | 0.51 | 0.07 | -1    | 0.417071 | 0.356564 | 0.734701 | 0.598459 |
| MmugDNA.31532.1.S1_at   | MmugDNA.31532.1 | 8.89  | 8.62  | 0.72 | 0.05 | 1.21  | 0.585163 | 0.779916 | 0.830326 | 0.872422 |
| MmugDNA.31533.1.S1_at   | MmugDNA.31533.1 | 10.04 | 9.93  | 2.68 | 0.26 | 1.08  | 0.77189  | 0.782615 | 0.914891 | 0.874202 |
| MmugDNA.31534.1.S1_at   | MmugDNA.31534.1 | 7.07  | 5.94  | 0.88 | 0.22 | 2.18  | 0.075014 | 0.086793 | 0.435663 | 0.339559 |
| MmugDNA.31535.1.S1_at   | MmugDNA.31535.1 | 11.58 | 11.51 | 0.1  | 0.04 | 1.05  | 0.552255 | 0.758693 | 0.811712 | 0.859734 |
| MmugDNA.31536.1.S1_at   | MmugDNA.31536.1 | 8.99  | 8.76  | 0.15 | 0.14 | 1.17  | 0.642672 | 0.078997 | 0.857886 | 0.326009 |
| MmugDNA.31538.1.S1_at   | MmugDNA.31538.1 | 4.12  | 4.02  | 0.14 | 0.09 | 1.07  | 0.220593 | 0.189422 | 0.589805 | 0.465117 |
| MmugDNA.31540.1.S1_at   | MmugDNA.31540.1 | 6.01  | 5.94  | 0.09 | 0.03 | 1.05  | 0.234623 | 0.124352 | 0.601958 | 0.394826 |
| MmugDNA.31545.1.A1_at   | MmugDNA.31545.1 | 6.81  | 6.68  | 0.03 | 0.07 | 1.1   | 0.043774 | 0.055469 | 0.372554 | 0.281404 |
| MmugDNA.31545.1.S1_at   | MmugDNA.31545.1 | 5.88  | 5.73  | 0.26 | 0.03 | 1.11  | 0.377016 | 0.38125  | 0.707265 | 0.617581 |
| MmugDNA.31553.1.S1_at   | MmugDNA.31553.1 | 8.5   | 8.62  | 0.22 | 0.1  | -1.09 | 0.26525  | 0.028479 | 0.626397 | 0.21056  |
| MmugDNA.31554.1.S1_at   | MmugDNA.31554.1 | 6.41  | 6.33  | 0.23 | 0.14 | 1.05  | 0.702701 | 0.893324 | 0.884378 | 0.939163 |
| MmugDNA.31555.1.S1_at   | MmugDNA.31555.1 | 6.43  | 6.29  | 0.09 | 0.1  | 1.1   | 0.129465 | 0.144693 | 0.504211 | 0.418546 |
| MmugDNA.31556.1.S1_at   | MmugDNA.31556.1 | 12.72 | 12.58 | 0.36 | 0.11 | 1.1   | 0.537124 | 0.129491 | 0.802624 | 0.400938 |
| MmugDNA.31557.1.S1_at   | MmugDNA.31557.1 | 9.41  | 9.05  | 0.37 | 0.05 | 1.29  | 0.552339 | 0.062867 | 0.811726 | 0.297427 |
| MmugDNA.31558.1.S1_at   | MmugDNA.31558.1 | 9.4   | 9     | 0.5  | 0.16 | 1.32  | 0.552257 | 0.18293  | 0.811712 | 0.45941  |
| MmugDNA.31559.1.S1_at   | MmugDNA.31559.1 | 10.3  | 10.69 | 0.16 | 0.07 | -1.31 | 0.011582 | 0.007588 | 0.255545 | 0.11658  |
| MmugDNA.31560.1.S1_at   | MmugDNA.31560.1 | 5.94  | 5.88  | 0.09 | 0.1  | 1.04  | 0.676394 | 0.53975  | 0.873062 | 0.723926 |
| MmugDNA.31562.1.S1_at   | MmugDNA.31562.1 | 10.43 | 10.21 | 0.2  | 0.1  | 1.16  | 0.05371  | 0.059296 | 0.39535  | 0.290528 |
| MmugDNA.31563.1.S1_at   | MmugDNA.31563.1 | 10.43 | 10.45 | 0.29 | 0.12 | -1.01 | 0.353622 | 0.396759 | 0.693411 | 0.628438 |
| MmugDNA.31564.1.S1_at   | MmugDNA.31564.1 | 7.64  | 7.74  | 1.12 | 0.19 | -1.07 | 0.320236 | 0.273255 | 0.669207 | 0.537788 |

|                         |                 |       |       |      |      |       |          |          |          |          |
|-------------------------|-----------------|-------|-------|------|------|-------|----------|----------|----------|----------|
| MmugDNA.31566.1.S1_at   | MmugDNA.31566.1 | 5.86  | 6.84  | 0.6  | 0.18 | -1.97 | 0.080196 | 0.059442 | 0.443536 | 0.290548 |
| MmugDNA.31571.1.S1_at   | MmugDNA.31571.1 | 8.09  | 8.2   | 0.27 | 0.08 | -1.08 | 0.507393 | 0.395284 | 0.786331 | 0.62738  |
| MmugDNA.3158.1.S1_at    | MmugDNA.3158.1  | 9.17  | 10.04 | 2.02 | 0.1  | -1.82 | 0.25641  | 0.357182 | 0.620399 | 0.598833 |
| MmugDNA.31583.1.S1_at   | MmugDNA.31583.1 | 5.66  | 5.68  | 0.5  | 0.11 | -1.01 | 0.733745 | 0.916105 | 0.897902 | 0.953063 |
| MmugDNA.31588.1.S1_s_at | MmugDNA.31588.1 | 10.65 | 9.96  | 3.57 | 0.37 | 1.61  | 0.653796 | 0.269232 | 0.862462 | 0.534534 |
| MmugDNA.31591.1.S1_at   | MmugDNA.31591.1 | 6.56  | 6.55  | 0.12 | 0.04 | 1     | 0.635386 | 0.774443 | 0.854526 | 0.868766 |
| MmugDNA.31593.1.S1_at   | MmugDNA.31593.1 | 7.99  | 7.66  | 0.19 | 0.1  | 1.26  | 0.040844 | 0.032425 | 0.36514  | 0.223049 |
| MmugDNA.31597.1.S1_at   | MmugDNA.31597.1 | 13.5  | 13.33 | 0.08 | 0.07 | 1.13  | 0.02499  | 0.002602 | 0.320402 | 0.075487 |
| MmugDNA.316.1.S1_at     | MmugDNA.316.1   | 5.65  | 5.89  | 0.41 | 0.03 | -1.17 | 0.682826 | 0.594827 | 0.875927 | 0.758675 |
| MmugDNA.3160.1.S1_s_at  | MmugDNA.3160.1  | 12.67 | 12.6  | 0.07 | 0.05 | 1.05  | 0.606042 | 0.031385 | 0.840285 | 0.219065 |
| MmugDNA.31603.1.S1_at   | MmugDNA.31603.1 | 6.59  | 6.63  | 0.09 | 0.08 | -1.03 | 0.926253 | 0.419345 | 0.975484 | 0.643449 |
| MmugDNA.31613.1.S1_at   | MmugDNA.31613.1 | 6.79  | 6.58  | 0.11 | 0.05 | 1.15  | 0.041751 | 0.031383 | 0.36716  | 0.219065 |
| MmugDNA.31618.1.S1_at   | MmugDNA.31618.1 | 8.97  | 8.99  | 0.37 | 0.13 | -1.02 | 0.96899  | 0.148699 | 0.989849 | 0.423201 |
| MmugDNA.31619.1.S1_at   | MmugDNA.31619.1 | 12.88 | 13    | 0.08 | 0.01 | -1.09 | 0.053932 | 0.014063 | 0.395633 | 0.151841 |
| MmugDNA.31619.1.S1_s_at | MmugDNA.31619.1 | 9.55  | 9.49  | 0.32 | 0.09 | 1.04  | 0.56955  | 0.330286 | 0.82149  | 0.579046 |
| MmugDNA.31624.1.S1_at   | MmugDNA.31624.1 | 8.18  | 8.79  | 0.43 | 0.05 | -1.52 | 0.217228 | 0.113213 | 0.587164 | 0.379229 |
| MmugDNA.31625.1.S1_at   | MmugDNA.31625.1 | 5.82  | 5.97  | 0.19 | 0.04 | -1.1  | 0.78071  | 0.871093 | 0.919142 | 0.926785 |
| MmugDNA.31630.1.S1_at   | MmugDNA.31630.1 | 11.1  | 11    | 0.25 | 0.13 | 1.07  | 0.219662 | 0.065151 | 0.589083 | 0.301225 |
| MmugDNA.31633.1.S1_at   | MmugDNA.31633.1 | 5.48  | 5.36  | 0.27 | 0.13 | 1.08  | 0.271302 | 0.076472 | 0.631176 | 0.321562 |
| MmugDNA.31636.1.S1_at   | MmugDNA.31636.1 | 10.39 | 10.47 | 0.15 | 0.05 | -1.06 | 0.728585 | 0.310625 | 0.895243 | 0.565787 |
| MmugDNA.3164.1.S1_at    | MmugDNA.3164.1  | 10.35 | 10.86 | 0.76 | 0.22 | -1.43 | 0.30522  | 0.210803 | 0.658726 | 0.484883 |
| MmugDNA.31644.1.S1_at   | MmugDNA.31644.1 | 11.11 | 11.12 | 0.18 | 0.14 | -1.01 | 0.963361 | 0.941709 | 0.988152 | 0.966969 |
| MmugDNA.31645.1.S1_at   | MmugDNA.31645.1 | 6.54  | 6.26  | 0.1  | 0.11 | 1.21  | 0.046587 | 0.045574 | 0.378317 | 0.257646 |
| MmugDNA.31647.1.S1_at   | MmugDNA.31647.1 | 12.85 | 12.84 | 0.4  | 0.01 | 1.01  | 0.750459 | 0.910752 | 0.905496 | 0.949643 |
| MmugDNA.31649.1.S1_at   | MmugDNA.31649.1 | 3.08  | 3.08  | 0.09 | 0.08 | 1     | 0.940783 | 0.998151 | 0.979855 | 0.999039 |
| MmugDNA.31652.1.S1_at   | MmugDNA.31652.1 | 10.74 | 11.2  | 0.28 | 0.07 | -1.38 | 0.192512 | 0.228065 | 0.563577 | 0.500249 |
| MmugDNA.31654.1.S1_s_at | MmugDNA.31654.1 | 8.85  | 9.08  | 0.27 | 0.08 | -1.18 | 0.674038 | 0.205394 | 0.871714 | 0.479751 |
| MmugDNA.31655.1.S1_at   | MmugDNA.31655.1 | 9.85  | 10.11 | 0.45 | 0.23 | -1.2  | 0.260322 | 0.361478 | 0.62325  | 0.602216 |
| MmugDNA.31657.1.S1_at   | MmugDNA.31657.1 | 12.14 | 12.14 | 0.23 | 0.05 | 1     | 0.493459 | 0.017548 | 0.778968 | 0.167632 |
| MmugDNA.31659.1.S1_at   | MmugDNA.31659.1 | 9.27  | 8.96  | 0.83 | 0.15 | 1.24  | 0.554893 | 0.416512 | 0.813059 | 0.641647 |
| MmugDNA.31660.1.S1_at   | MmugDNA.31660.1 | 7.35  | 7.21  | 0.08 | 0.05 | 1.1   | 0.081794 | 0.036777 | 0.44633  | 0.236291 |
| MmugDNA.31662.1.S1_at   | MmugDNA.31662.1 | 8.88  | 9.49  | 0.6  | 0.03 | -1.53 | 0.481783 | 0.666151 | 0.772225 | 0.804415 |
| MmugDNA.31671.1.S1_at   | MmugDNA.31671.1 | 4.72  | 4.27  | 0.41 | 0.07 | 1.37  | 0.356473 | 0.390855 | 0.695154 | 0.624588 |
| MmugDNA.31677.1.S1_s_at | MmugDNA.31677.1 | 13.19 | 13.13 | 0.04 | 0.01 | 1.04  | 0.018843 | 0.030641 | 0.298593 | 0.217046 |
| MmugDNA.31679.1.S1_at   | MmugDNA.31679.1 | 9.04  | 9.88  | 0.41 | 0.13 | -1.79 | 0.067718 | 0.037788 | 0.42444  | 0.238765 |
| MmugDNA.31682.1.S1_at   | MmugDNA.31682.1 | 7.59  | 7.59  | 0.11 | 0.05 | -1    | 0.482639 | 0.333568 | 0.772518 | 0.581791 |
| MmugDNA.31684.1.S1_at   | MmugDNA.31684.1 | 5.62  | 5.61  | 0.17 | 0.02 | 1.01  | 0.341654 | 0.651632 | 0.685266 | 0.796299 |
| MmugDNA.31685.1.S1_at   | MmugDNA.31685.1 | 10.68 | 10.78 | 0.29 | 0.09 | -1.07 | 0.374143 | 0.300576 | 0.705764 | 0.558876 |
| MmugDNA.31689.1.S1_at   | MmugDNA.31689.1 | 9.09  | 9.5   | 0.31 | 0.12 | -1.32 | 0.18797  | 0.232083 | 0.560085 | 0.503802 |
| MmugDNA.3169.1.S1_at    | MmugDNA.3169.1  | 12.72 | 12.89 | 0.09 | 0.1  | -1.13 | 0.112995 | 0.001325 | 0.486386 | 0.056164 |
| MmugDNA.31690.1.S1_at   | MmugDNA.31690.1 | 12.14 | 11.8  | 0.47 | 0.1  | 1.27  | 0.845721 | 0.971867 | 0.945907 | 0.984795 |
| MmugDNA.31692.1.S1_at   | MmugDNA.31692.1 | 8.14  | 8.54  | 1.77 | 0.5  | -1.32 | 0.762994 | 0.048835 | 0.910975 | 0.265858 |
| MmugDNA.31696.1.S1_at   | MmugDNA.31696.1 | 9.19  | 8.77  | 0.23 | 0.1  | 1.34  | 0.01665  | 0.06958  | 0.287478 | 0.309848 |

|                         |                 |       |       |      |      |       |          |          |          |          |
|-------------------------|-----------------|-------|-------|------|------|-------|----------|----------|----------|----------|
| MmugDNA.31699.1.S1_at   | MmugDNA.31699.1 | 6.8   | 7.24  | 1.13 | 0.23 | -1.36 | 0.658819 | 0.852698 | 0.864874 | 0.916254 |
| MmugDNA.31704.1.S1_at   | MmugDNA.31704.1 | 11.19 | 11.06 | 0.13 | 0.18 | 1.1   | 0.169036 | 0.156805 | 0.541976 | 0.432353 |
| MmugDNA.31709.1.S1_at   | MmugDNA.31709.1 | 11.61 | 12.09 | 0.26 | 0.15 | -1.39 | 0.21038  | 0.261102 | 0.581688 | 0.527481 |
| MmugDNA.31713.1.S1_at   | MmugDNA.31713.1 | 5.03  | 4.99  | 0.08 | 0.25 | 1.03  | 0.929203 | 0.995202 | 0.976333 | 0.996999 |
| MmugDNA.31716.1.S1_s_at | MmugDNA.31716.1 | 7.3   | 7.52  | 0.57 | 0.32 | -1.16 | 0.652747 | 0.273067 | 0.86202  | 0.537644 |
| MmugDNA.31718.1.S1_at   | MmugDNA.31718.1 | 10.77 | 11    | 0.62 | 0.07 | -1.18 | 0.475461 | 0.445944 | 0.768639 | 0.662623 |
| MmugDNA.31719.1.S1_at   | MmugDNA.31719.1 | 9.54  | 9.94  | 0.28 | 0.04 | -1.32 | 0.103917 | 0.076532 | 0.474646 | 0.321612 |
| MmugDNA.31719.1.S1_s_at | MmugDNA.31719.1 | 10.14 | 10.32 | 0.24 | 0.02 | -1.13 | 0.266826 | 0.166692 | 0.627644 | 0.443163 |
| MmugDNA.3172.1.S1_at    | MmugDNA.3172.1  | 6.37  | 7.23  | 0.41 | 0.17 | -1.81 | 0.105863 | 0.115039 | 0.477635 | 0.381885 |
| MmugDNA.31728.1.S1_at   | MmugDNA.31728.1 | 3.03  | 2.9   | 0.16 | 0.02 | 1.1   | 0.174508 | 0.153891 | 0.547856 | 0.428542 |
| MmugDNA.31733.1.S1_at   | MmugDNA.31733.1 | 11.73 | 11.43 | 0.62 | 0.05 | -1.23 | 0.892099 | 0.499618 | 0.962988 | 0.698424 |
| MmugDNA.31738.1.S1_at   | MmugDNA.31738.1 | 4.1   | 4.08  | 0.12 | 0.06 | 1.01  | 0.348201 | 0.093709 | 0.689479 | 0.350192 |
| MmugDNA.31746.1.S1_at   | MmugDNA.31746.1 | 10.33 | 10.29 | 0.25 | 0.01 | 1.03  | 0.279967 | 0.491122 | 0.638821 | 0.692777 |
| MmugDNA.31753.1.S1_at   | MmugDNA.31753.1 | 4.78  | 4.82  | 0.23 | 0.03 | -1.03 | 0.795856 | 0.855426 | 0.924994 | 0.917581 |
| MmugDNA.3176.1.S1_at    | MmugDNA.3176.1  | 6.08  | 6.21  | 0.13 | 0.12 | -1.1  | 0.239034 | 0.329774 | 0.605503 | 0.578874 |
| MmugDNA.31764.1.S1_at   | MmugDNA.31764.1 | 10.79 | 10.67 | 0.12 | 0.05 | 1.09  | 0.307473 | 0.279064 | 0.660255 | 0.542782 |
| MmugDNA.31765.1.S1_at   | MmugDNA.31765.1 | 12.49 | 12.25 | 0.6  | 0.05 | 1.18  | 0.743587 | 0.159454 | 0.902179 | 0.435568 |
| MmugDNA.31767.1.S1_at   | MmugDNA.31767.1 | 4.83  | 4.91  | 0.25 | 0.18 | -1.05 | 0.328434 | 0.187536 | 0.67577  | 0.463628 |
| MmugDNA.31772.1.S1_at   | MmugDNA.31772.1 | 12.65 | 12.64 | 0.21 | 0.02 | 1.01  | 0.878161 | 0.790309 | 0.957601 | 0.878795 |
| MmugDNA.31779.1.S1_at   | MmugDNA.31779.1 | 6.11  | 5.97  | 0.29 | 0.02 | 1.1   | 0.466047 | 0.638495 | 0.763317 | 0.78765  |
| MmugDNA.31781.1.S1_at   | MmugDNA.31781.1 | 8.76  | 9.24  | 0.3  | 0.08 | -1.4  | 0.06393  | 0.059927 | 0.416821 | 0.291419 |
| MmugDNA.31784.1.S1_at   | MmugDNA.31784.1 | 7.06  | 7.32  | 0.13 | 0.25 | -1.19 | 0.322241 | 0.391207 | 0.670944 | 0.624922 |
| MmugDNA.31789.1.S1_s_at | MmugDNA.31789.1 | 6.81  | 6.6   | 0.06 | 0.09 | 1.15  | 0.015252 | 0.06984  | 0.280556 | 0.310363 |
| MmugDNA.31791.1.S1_at   | MmugDNA.31791.1 | 6.18  | 6.22  | 0.17 | 0.02 | -1.03 | 0.657887 | 0.480926 | 0.864304 | 0.686018 |
| MmugDNA.3180.1.S1_at    | MmugDNA.3180.1  | 11.5  | 11.21 | 0.39 | 0.14 | 1.22  | 0.257648 | 0.006842 | 0.621338 | 0.111782 |
| MmugDNA.31806.1.S1_at   | MmugDNA.31806.1 | 7.79  | 8.53  | 0.18 | 0.07 | -1.67 | 0.001988 | 0.001389 | 0.172557 | 0.057005 |
| MmugDNA.3182.1.S1_at    | MmugDNA.3182.1  | 7.55  | 7.58  | 0.15 | 0.16 | -1.02 | 0.465512 | 0.708041 | 0.763035 | 0.830647 |
| MmugDNA.31837.1.S1_at   | MmugDNA.31837.1 | 10.49 | 10.72 | 0.32 | 0.11 | -1.17 | 0.527376 | 0.757327 | 0.797084 | 0.85872  |
| MmugDNA.31841.1.S1_at   | MmugDNA.31841.1 | 9.37  | 9.48  | 2.93 | 0.22 | -1.08 | 0.547677 | 0.188639 | 0.809225 | 0.464569 |
| MmugDNA.31850.1.S1_at   | MmugDNA.31850.1 | 10.33 | 9.52  | 0.78 | 0.21 | 1.75  | 0.051216 | 0.083072 | 0.389571 | 0.332911 |
| MmugDNA.31861.1.S1_at   | MmugDNA.31861.1 | 7.82  | 7.47  | 0.33 | 0.11 | 1.28  | 0.18676  | 0.449517 | 0.559225 | 0.665109 |
| MmugDNA.31867.1.S1_at   | MmugDNA.31867.1 | 10.43 | 10.11 | 0.36 | 0.22 | 1.25  | 0.086534 | 0.066809 | 0.45441  | 0.304365 |
| MmugDNA.31877.1.S1_at   | MmugDNA.31877.1 | 5.49  | 5.4   | 0.16 | 0.35 | 1.07  | 0.440047 | 0.669134 | 0.748282 | 0.806492 |
| MmugDNA.31893.1.S1_at   | MmugDNA.31893.1 | 7.46  | 7.14  | 0.26 | 0.08 | 1.24  | 0.078215 | 0.03136  | 0.440443 | 0.219062 |
| MmugDNA.31899.1.S1_at   | MmugDNA.31899.1 | 7.29  | 7.37  | 0.06 | 0.03 | -1.05 | 0.168476 | 0.823991 | 0.541113 | 0.898873 |
| MmugDNA.319.1.S1_at     | MmugDNA.319.1   | 10.78 | 10.92 | 0.28 | 0.11 | -1.11 | 0.474868 | 0.074029 | 0.768229 | 0.317579 |
| MmugDNA.3190.1.S1_at    | MmugDNA.3190.1  | 8.45  | 8.67  | 0.36 | 0.04 | -1.16 | 0.296819 | 0.166368 | 0.652405 | 0.442884 |
| MmugDNA.31903.1.S1_at   | MmugDNA.31903.1 | 9.43  | 9.19  | 1.26 | 0.13 | 1.18  | 0.756269 | 0.263155 | 0.908165 | 0.529465 |
| MmugDNA.31905.1.S1_at   | MmugDNA.31905.1 | 6.43  | 5.56  | 0.23 | 0.56 | 1.82  | 0.077101 | 0.033814 | 0.438911 | 0.227489 |
| MmugDNA.31906.1.S1_at   | MmugDNA.31906.1 | 6.38  | 6.35  | 0.18 | 0.11 | 1.02  | 0.763726 | 0.655887 | 0.911265 | 0.798739 |
| MmugDNA.31916.1.S1_at   | MmugDNA.31916.1 | 6.62  | 6.99  | 0.3  | 0.06 | -1.29 | 0.090099 | 0.113545 | 0.457992 | 0.379632 |
| MmugDNA.31918.1.S1_at   | MmugDNA.31918.1 | 8.6   | 9.48  | 0.86 | 0.36 | -1.85 | 0.190982 | 0.246431 | 0.562184 | 0.515899 |
| MmugDNA.31920.1.S1_at   | MmugDNA.31920.1 | 7.56  | 7.47  | 1.36 | 0.16 | 1.06  | 0.705727 | 0.876449 | 0.885355 | 0.929683 |

|                         |                 |       |       |      |      |       |          |          |          |          |
|-------------------------|-----------------|-------|-------|------|------|-------|----------|----------|----------|----------|
| MmugDNA.31931.1.S1_at   | MmugDNA.31931.1 | 9.62  | 9.43  | 0.43 | 0.25 | 1.15  | 0.153638 | 0.030576 | 0.526757 | 0.216818 |
| MmugDNA.31934.1.S1_at   | MmugDNA.31934.1 | 6.59  | 6.55  | 0.17 | 0.1  | 1.03  | 0.692406 | 0.648    | 0.880095 | 0.793947 |
| MmugDNA.31936.1.S1_at   | MmugDNA.31936.1 | 7.73  | 7.27  | 2.62 | 0.27 | 1.37  | 0.885288 | 0.399174 | 0.960351 | 0.629695 |
| MmugDNA.31945.1.S1_at   | MmugDNA.31945.1 | 5.05  | 5.12  | 0.04 | 0.05 | -1.05 | 0.098626 | 0.118001 | 0.468025 | 0.385881 |
| MmugDNA.31946.1.S1_at   | MmugDNA.31946.1 | 4.77  | 4.7   | 0.12 | 0.1  | 1.05  | 0.53429  | 0.287379 | 0.80126  | 0.548636 |
| MmugDNA.31948.1.S1_at   | MmugDNA.31948.1 | 7.05  | 7.01  | 0.14 | 0.03 | 1.03  | 0.777686 | 0.427852 | 0.917769 | 0.649582 |
| MmugDNA.31955.1.S1_at   | MmugDNA.31955.1 | 11.2  | 11.53 | 0.6  | 0.01 | -1.26 | 0.361138 | 0.23388  | 0.698327 | 0.505169 |
| MmugDNA.31962.1.S1_s_at | MmugDNA.31962.1 | 10.49 | 10.37 | 0.47 | 0.03 | 1.09  | 0.748738 | 0.85619  | 0.904588 | 0.917861 |
| MmugDNA.31965.1.S1_at   | MmugDNA.31965.1 | 11.79 | 11.81 | 0.17 | 0.09 | -1.01 | 0.572884 | 0.790012 | 0.823428 | 0.878631 |
| MmugDNA.31968.1.S1_at   | MmugDNA.31968.1 | 11.89 | 11.74 | 0.27 | 0.06 | 1.11  | 0.339361 | 0.317563 | 0.683826 | 0.570774 |
| MmugDNA.31970.1.S1_at   | MmugDNA.31970.1 | 7.91  | 8.06  | 0.6  | 0.07 | -1.11 | 0.833693 | 0.120766 | 0.940368 | 0.389579 |
| MmugDNA.31979.1.S1_at   | MmugDNA.31979.1 | 9.2   | 9.42  | 0.16 | 0.16 | -1.17 | 0.071785 | 0.103456 | 0.431548 | 0.364346 |
| MmugDNA.31987.1.S1_at   | MmugDNA.31987.1 | 6.29  | 6.41  | 0.27 | 0.1  | -1.08 | 0.995414 | 0.706182 | 0.998274 | 0.829634 |
| MmugDNA.31989.1.S1_at   | MmugDNA.31989.1 | 11.75 | 11.92 | 0.1  | 0.04 | -1.13 | 0.08313  | 0.056656 | 0.448722 | 0.284094 |
| MmugDNA.31993.1.S1_at   | MmugDNA.31993.1 | 7.98  | 8.41  | 1.72 | 0.29 | -1.34 | 0.736311 | 0.139603 | 0.899078 | 0.41286  |
| MmugDNA.31995.1.S1_at   | MmugDNA.31995.1 | 8.72  | 9.08  | 1.29 | 0.02 | -1.28 | 0.64141  | 0.654977 | 0.857305 | 0.7982   |
| MmugDNA.31996.1.S1_at   | MmugDNA.31996.1 | 7.6   | 7.28  | 0.4  | 0.4  | 1.25  | 0.36276  | 0.37874  | 0.699596 | 0.615748 |
| MmugDNA.31997.1.S1_at   | MmugDNA.31997.1 | 6.14  | 5.92  | 0.21 | 0.04 | 1.17  | 0.187128 | 0.204913 | 0.559729 | 0.479254 |
| MmugDNA.32002.1.S1_at   | MmugDNA.32002.1 | 6.9   | 7.02  | 0.19 | 0.09 | -1.09 | 0.586523 | 0.276843 | 0.831386 | 0.540757 |
| MmugDNA.32004.1.S1_at   | MmugDNA.32004.1 | 8.08  | 8.12  | 0.75 | 0.2  | -1.03 | 0.999514 | 0.07927  | 0.999871 | 0.326444 |
| MmugDNA.32007.1.S1_at   | MmugDNA.32007.1 | 10.76 | 11.08 | 0.31 | 0.14 | -1.25 | 0.24785  | 0.404198 | 0.613504 | 0.632691 |
| MmugDNA.32013.1.S1_at   | MmugDNA.32013.1 | 10.67 | 10.73 | 0.1  | 0.13 | -1.04 | 0.233361 | 0.111345 | 0.600877 | 0.376045 |
| MmugDNA.32014.1.S1_at   | MmugDNA.32014.1 | 3.3   | 3.28  | 0.18 | 0.14 | 1.02  | 0.767622 | 0.922474 | 0.912495 | 0.956333 |
| MmugDNA.32018.1.S1_at   | MmugDNA.32018.1 | 10.74 | 11.34 | 0.36 | 0.06 | -1.52 | 0.0988   | 0.050183 | 0.468167 | 0.269223 |
| MmugDNA.32019.1.S1_at   | MmugDNA.32019.1 | 12.08 | 12.35 | 0.11 | 0    | -1.2  | 0.007673 | 0.003175 | 0.230571 | 0.081873 |
| MmugDNA.32022.1.S1_at   | MmugDNA.32022.1 | 4.42  | 4.81  | 0.68 | 0.18 | -1.31 | 0.995219 | 0.32627  | 0.998183 | 0.576452 |
| MmugDNA.32024.1.S1_at   | MmugDNA.32024.1 | 4.82  | 4.61  | 0.07 | 0.14 | 1.16  | 0.233849 | 0.129402 | 0.601403 | 0.4008   |
| MmugDNA.32031.1.S1_at   | MmugDNA.32031.1 | 4.81  | 4.69  | 0.11 | 0.09 | 1.09  | 0.162498 | 0.434257 | 0.535633 | 0.654437 |
| MmugDNA.32037.1.S1_at   | MmugDNA.32037.1 | 8.97  | 9.04  | 0.28 | 0.04 | -1.05 | 0.597885 | 0.182981 | 0.836567 | 0.459452 |
| MmugDNA.32042.1.S1_at   | MmugDNA.32042.1 | 4.56  | 3.95  | 0.42 | 0.33 | 1.52  | 0.499551 | 0.268726 | 0.7821   | 0.534138 |
| MmugDNA.32051.1.S1_at   | MmugDNA.32051.1 | 12.24 | 12.24 | 0.62 | 0.24 | 1.01  | 0.759314 | 0.017319 | 0.909584 | 0.166509 |
| MmugDNA.32054.1.S1_at   | MmugDNA.32054.1 | 10.36 | 10.59 | 0.49 | 0.03 | -1.18 | 0.902694 | 0.14023  | 0.967171 | 0.413405 |
| MmugDNA.32058.1.S1_at   | MmugDNA.32058.1 | 6.27  | 6.1   | 0.06 | 0.12 | 1.13  | 0.082419 | 0.254563 | 0.447261 | 0.522863 |
| MmugDNA.32059.1.S1_at   | MmugDNA.32059.1 | 7.85  | 9.19  | 0.94 | 0.22 | -2.52 | 0.181873 | 0.145841 | 0.55498  | 0.419888 |
| MmugDNA.32063.1.S1_at   | MmugDNA.32063.1 | 11.88 | 11.44 | 0.35 | 0.18 | 1.36  | 0.067897 | 0.013559 | 0.42451  | 0.149001 |
| MmugDNA.32064.1.S1_at   | MmugDNA.32064.1 | 6.56  | 7     | 0.93 | 0.29 | -1.36 | 0.792609 | 0.972994 | 0.923983 | 0.985389 |
| MmugDNA.32065.1.S1_at   | MmugDNA.32065.1 | 9.46  | 9.98  | 0.26 | 0.03 | -1.44 | 0.06451  | 0.004629 | 0.418343 | 0.094988 |
| MmugDNA.32067.1.S1_at   | MmugDNA.32067.1 | 6.47  | 6.28  | 0.5  | 0.16 | 1.14  | 0.722124 | 0.913364 | 0.892193 | 0.95123  |
| MmugDNA.32074.1.S1_at   | MmugDNA.32074.1 | 7.87  | 7.98  | 0.22 | 0.06 | -1.08 | 0.19151  | 0.275785 | 0.562859 | 0.540035 |
| MmugDNA.32079.1.S1_at   | MmugDNA.32079.1 | 9.48  | 9.5   | 0.33 | 0.04 | -1.01 | 0.50361  | 0.74287  | 0.784375 | 0.851074 |
| MmugDNA.3208.1.S1_at    | MmugDNA.3208.1  | 11.01 | 10.97 | 0.04 | 0.07 | 1.03  | 0.190777 | 0.021728 | 0.561793 | 0.184348 |
| MmugDNA.32081.1.S1_at   | MmugDNA.32081.1 | 13.75 | 13.81 | 0    | 0.02 | -1.04 | 0.013224 | 0.133658 | 0.266951 | 0.405612 |
| MmugDNA.32084.1.S1_at   | MmugDNA.32084.1 | 4.72  | 4.67  | 0.13 | 0.23 | 1.04  | 0.622754 | 0.39665  | 0.847944 | 0.628434 |



|                         |                 |       |       |      |      |       |          |          |          |          |
|-------------------------|-----------------|-------|-------|------|------|-------|----------|----------|----------|----------|
| MmugDNA.32085.1.S1_at   | MmugDNA.32085.1 | 10.29 | 10.75 | 0.32 | 0.02 | -1.37 | 0.113607 | 0.02694  | 0.486911 | 0.2053   |
| MmugDNA.32086.1.S1_at   | MmugDNA.32086.1 | 7.33  | 7.36  | 0.07 | 0.06 | -1.02 | 0.739889 | 0.093385 | 0.900699 | 0.349581 |
| MmugDNA.32089.1.S1_at   | MmugDNA.32089.1 | 9.77  | 9.51  | 0.22 | 0.16 | 1.19  | 0.399177 | 0.023576 | 0.722886 | 0.192311 |
| MmugDNA.3209.1.S1_at    | MmugDNA.3209.1  | 9.98  | 10.04 | 0.55 | 0.12 | -1.04 | 0.247064 | 0.36807  | 0.612582 | 0.607669 |
| MmugDNA.32090.1.S1_at   | MmugDNA.32090.1 | 11.05 | 11.69 | 0.48 | 0.07 | -1.55 | 0.064701 | 0.023131 | 0.418553 | 0.190443 |
| MmugDNA.32091.1.S1_at   | MmugDNA.32091.1 | 6.85  | 7.41  | 0.08 | 0.02 | -1.47 | 0.000358 | 0.000134 | 0.137028 | 0.029087 |
| MmugDNA.32093.1.S1_at   | MmugDNA.32093.1 | 5.06  | 4.89  | 0.06 | 0.03 | 1.13  | 0.022672 | 0.089575 | 0.311921 | 0.343811 |
| MmugDNA.32094.1.S1_at   | MmugDNA.32094.1 | 14.18 | 13.97 | 1.47 | 0.1  | 1.16  | 0.543543 | 0.173655 | 0.806603 | 0.450003 |
| MmugDNA.32097.1.S1_at   | MmugDNA.32097.1 | 8.07  | 8.12  | 0.12 | 0.39 | -1.04 | 0.430102 | 0.527243 | 0.742602 | 0.715896 |
| MmugDNA.32098.1.S1_at   | MmugDNA.32098.1 | 8.29  | 8.53  | 0.27 | 0.12 | -1.18 | 0.080178 | 0.221993 | 0.443536 | 0.49507  |
| MmugDNA.32099.1.S1_at   | MmugDNA.32099.1 | 8.59  | 8.8   | 0.1  | 0.06 | -1.16 | 0.036528 | 0.176697 | 0.355049 | 0.453142 |
| MmugDNA.32101.1.S1_s_at | MmugDNA.32101.1 | 11.39 | 11.56 | 0.3  | 0.02 | -1.12 | 0.960544 | 0.933855 | 0.987213 | 0.962344 |
| MmugDNA.32103.1.S1_at   | MmugDNA.32103.1 | 3.58  | 3.55  | 0.08 | 0.11 | 1.02  | 0.842057 | 0.221634 | 0.944062 | 0.494901 |
| MmugDNA.32116.1.S1_at   | MmugDNA.32116.1 | 11.43 | 11.8  | 0.41 | 0.15 | -1.29 | 0.145819 | 0.118884 | 0.520572 | 0.387068 |
| MmugDNA.32116.1.S1_s_at | MmugDNA.32116.1 | 11.02 | 11.34 | 0.49 | 0.02 | -1.25 | 0.275259 | 0.180472 | 0.634676 | 0.457115 |
| MmugDNA.32124.1.S1_at   | MmugDNA.32124.1 | 13.23 | 12.89 | 0.21 | 0.05 | 1.27  | 0.064791 | 0.158288 | 0.41883  | 0.43403  |
| MmugDNA.32124.1.S1_s_at | MmugDNA.32124.1 | 12.62 | 11.92 | 0.3  | 0.18 | 1.63  | 0.024928 | 0.053192 | 0.320397 | 0.276445 |
| MmugDNA.32127.1.S1_at   | MmugDNA.32127.1 | 8.6   | 8.49  | 0.04 | 0.1  | 1.08  | 0.083773 | 0.000023 | 0.449639 | 0.019635 |
| MmugDNA.32128.1.S1_at   | MmugDNA.32128.1 | 4.81  | 4.61  | 0.15 | 0.23 | 1.15  | 0.932997 | 0.070284 | 0.977247 | 0.31135  |
| MmugDNA.32129.1.S1_at   | MmugDNA.32129.1 | 3.97  | 4.01  | 0.18 | 0.12 | -1.03 | 0.363833 | 0.563483 | 0.700307 | 0.738692 |
| MmugDNA.32131.1.S1_at   | MmugDNA.32131.1 | 6.66  | 6.57  | 0.09 | 0.08 | 1.06  | 0.108399 | 0.232122 | 0.480777 | 0.503844 |
| MmugDNA.32132.1.S1_at   | MmugDNA.32132.1 | 4.88  | 4.65  | 0.17 | 0.04 | 1.17  | 0.107591 | 0.540529 | 0.480138 | 0.724446 |
| MmugDNA.32144.1.S1_at   | MmugDNA.32144.1 | 3.77  | 3.71  | 0.13 | 0.08 | 1.04  | 0.539987 | 0.314012 | 0.804169 | 0.568178 |
| MmugDNA.32145.1.S1_at   | MmugDNA.32145.1 | 10.81 | 11.15 | 0.32 | 0.01 | -1.27 | 0.219087 | 0.125139 | 0.588516 | 0.395577 |
| MmugDNA.32148.1.S1_at   | MmugDNA.32148.1 | 6.98  | 6.22  | 0.5  | 0.32 | 1.7   | 0.091789 | 0.074527 | 0.460161 | 0.318173 |
| MmugDNA.32150.1.S1_at   | MmugDNA.32150.1 | 4.41  | 4.14  | 0.07 | 0.37 | 1.2   | 0.805087 | 0.957168 | 0.929121 | 0.975774 |
| MmugDNA.32163.1.S1_at   | MmugDNA.32163.1 | 4.33  | 4.16  | 0.06 | 0.12 | 1.12  | 0.220474 | 0.271672 | 0.589697 | 0.536577 |
| MmugDNA.32169.1.S1_at   | MmugDNA.32169.1 | 6.29  | 6.26  | 0.57 | 0.39 | 1.02  | 0.443927 | 0.624116 | 0.751068 | 0.778434 |
| MmugDNA.32170.1.S1_at   | MmugDNA.32170.1 | 7.58  | 8.37  | 1.78 | 0.32 | -1.73 | 0.391248 | 0.583544 | 0.717502 | 0.751822 |
| MmugDNA.32172.1.S1_at   | MmugDNA.32172.1 | 10.81 | 11.46 | 0.28 | 0.2  | -1.56 | 0.023592 | 0.003261 | 0.31615  | 0.082278 |
| MmugDNA.32180.1.S1_at   | MmugDNA.32180.1 | 11.37 | 11.98 | 1.76 | 0.23 | -1.53 | 0.407015 | 0.237307 | 0.728471 | 0.508027 |
| MmugDNA.32182.1.S1_at   | MmugDNA.32182.1 | 10.04 | 8.27  | 1.82 | 0.43 | 3.41  | 0.581827 | 0.303383 | 0.827791 | 0.560842 |
| MmugDNA.32186.1.S1_at   | MmugDNA.32186.1 | 12.03 | 12.1  | 0.4  | 0.08 | -1.05 | 0.925883 | 0.9805   | 0.975337 | 0.989333 |
| MmugDNA.32191.1.S1_at   | MmugDNA.32191.1 | 9.46  | 9.82  | 0.34 | 0.08 | -1.29 | 0.44033  | 0.060341 | 0.748445 | 0.292254 |
| MmugDNA.32194.1.S1_at   | MmugDNA.32194.1 | 3.02  | 2.99  | 0.04 | 0.02 | 1.02  | 0.337444 | 0.567741 | 0.682344 | 0.741608 |
| MmugDNA.32195.1.S1_at   | MmugDNA.32195.1 | 7.68  | 7.62  | 0.43 | 0.54 | 1.05  | 0.996451 | 0.99436  | 0.998699 | 0.996547 |
| MmugDNA.322.1.S1_at     | MmugDNA.322.1   | 4.92  | 5.06  | 0.02 | 0.42 | -1.1  | 0.740406 | 0.806485 | 0.900779 | 0.888651 |
| MmugDNA.3220.1.S1_at    | MmugDNA.3220.1  | 9.68  | 9     | 0.82 | 0.04 | 1.6   | 0.686579 | 0.455076 | 0.877418 | 0.669066 |
| MmugDNA.32206.1.S1_at   | MmugDNA.32206.1 | 12.9  | 12.83 | 0.08 | 0.04 | 1.05  | 0.236421 | 0.025879 | 0.603291 | 0.201696 |
| MmugDNA.32220.1.S1_at   | MmugDNA.32220.1 | 6.47  | 6.47  | 0.09 | 0.03 | 1     | 0.263311 | 0.730744 | 0.625264 | 0.844055 |
| MmugDNA.32221.1.S1_at   | MmugDNA.32221.1 | 11.39 | 11.22 | 0.2  | 0.05 | 1.13  | 0.121952 | 0.158283 | 0.495655 | 0.43403  |
| MmugDNA.32223.1.S1_at   | MmugDNA.32223.1 | 13.41 | 13.51 | 0.04 | 0.03 | -1.07 | 0.039099 | 0.019315 | 0.361166 | 0.174723 |
| MmugDNA.32226.1.S1_at   | MmugDNA.32226.1 | 4.36  | 4.37  | 0.1  | 0.21 | -1.01 | 0.910816 | 0.937756 | 0.969778 | 0.964687 |

|                         |                 |       |       |      |      |       |          |          |          |          |
|-------------------------|-----------------|-------|-------|------|------|-------|----------|----------|----------|----------|
| MmugDNA.32229.1.S1_at   | MmugDNA.32229.1 | 9.17  | 9.4   | 0.27 | 0.11 | -1.17 | 0.055881 | 0.006277 | 0.399441 | 0.107487 |
| MmugDNA.3223.1.S1_at    | MmugDNA.3223.1  | 7.12  | 7.46  | 1.06 | 0.2  | -1.26 | 0.165209 | 0.127476 | 0.537925 | 0.398349 |
| MmugDNA.32230.1.S1_at   | MmugDNA.32230.1 | 7.54  | 7.72  | 0.99 | 0.35 | -1.13 | 0.78149  | 0.511574 | 0.919573 | 0.705677 |
| MmugDNA.32239.1.S1_at   | MmugDNA.32239.1 | 7.98  | 8     | 0.43 | 0.18 | -1.01 | 0.641772 | 0.61782  | 0.857493 | 0.773715 |
| MmugDNA.32242.1.S1_at   | MmugDNA.32242.1 | 5.36  | 5.16  | 0.19 | 0.01 | 1.14  | 0.42708  | 0.625165 | 0.74088  | 0.779025 |
| MmugDNA.32243.1.S1_at   | MmugDNA.32243.1 | 7.02  | 7.02  | 0.03 | 0.1  | -1    | 0.602551 | 0.880029 | 0.838885 | 0.93148  |
| MmugDNA.32245.1.S1_at   | MmugDNA.32245.1 | 10.18 | 10.37 | 0.01 | 0.12 | -1.14 | 0.036291 | 0.571283 | 0.35477  | 0.743642 |
| MmugDNA.32248.1.S1_at   | MmugDNA.32248.1 | 10.46 | 10.26 | 0.18 | 0.1  | 1.15  | 0.164464 | 0.047461 | 0.537322 | 0.262486 |
| MmugDNA.32248.1.S1_s_at | MmugDNA.32248.1 | 9.44  | 9.01  | 0.17 | 0.17 | 1.35  | 0.03668  | 0.020533 | 0.355272 | 0.179788 |
| MmugDNA.32249.1.S1_at   | MmugDNA.32249.1 | 9.7   | 9.7   | 0.22 | 0.06 | 1     | 0.959198 | 0.254129 | 0.986635 | 0.522439 |
| MmugDNA.32251.1.S1_at   | MmugDNA.32251.1 | 12.35 | 12.47 | 0.04 | 0.02 | -1.09 | 0.006717 | 0.000186 | 0.223042 | 0.030511 |
| MmugDNA.32254.1.S1_s_at | MmugDNA.32254.1 | 10.91 | 11.52 | 0.78 | 0.08 | -1.52 | 0.278285 | 0.411758 | 0.637526 | 0.638434 |
| MmugDNA.32255.1.S1_at   | MmugDNA.32255.1 | 10.25 | 9.99  | 0.24 | 0.07 | 1.2   | 0.446145 | 0.505462 | 0.752589 | 0.702161 |
| MmugDNA.32258.1.S1_at   | MmugDNA.32258.1 | 7.37  | 7.24  | 1.41 | 0.18 | 1.09  | 0.878858 | 0.630168 | 0.95792  | 0.782181 |
| MmugDNA.3226.1.S1_at    | MmugDNA.3226.1  | 12.84 | 12.79 | 0.12 | 0.1  | 1.03  | 0.511515 | 0.103282 | 0.78871  | 0.364143 |
| MmugDNA.32264.1.S1_at   | MmugDNA.32264.1 | 8.42  | 9.65  | 0.89 | 0.3  | -2.35 | 0.13437  | 0.062052 | 0.508462 | 0.29597  |
| MmugDNA.32274.1.S1_at   | MmugDNA.32274.1 | 13.95 | 13.83 | 0.11 | 0.06 | 1.08  | 0.457925 | 0.482102 | 0.758619 | 0.687016 |
| MmugDNA.32277.1.S1_at   | MmugDNA.32277.1 | 8.5   | 8.4   | 0.15 | 0.31 | 1.07  | 0.711508 | 0.023534 | 0.887684 | 0.192231 |
| MmugDNA.32278.1.S1_at   | MmugDNA.32278.1 | 10.53 | 10.52 | 0.14 | 0.12 | 1.01  | 0.956017 | 0.006471 | 0.985393 | 0.109304 |
| MmugDNA.32280.1.S1_at   | MmugDNA.32280.1 | 10.35 | 10.22 | 0.17 | 0.03 | 1.09  | 0.248432 | 0.055572 | 0.613851 | 0.28159  |
| MmugDNA.32283.1.S1_at   | MmugDNA.32283.1 | 6.36  | 6.44  | 0.21 | 0.1  | -1.06 | 0.376353 | 0.308701 | 0.706849 | 0.564619 |
| MmugDNA.32289.1.S1_at   | MmugDNA.32289.1 | 6.28  | 6.14  | 0.02 | 0.14 | 1.1   | 0.087155 | 0.117693 | 0.454785 | 0.385421 |
| MmugDNA.32293.1.S1_at   | MmugDNA.32293.1 | 10.59 | 10.55 | 0.07 | 0.2  | 1.03  | 0.654095 | 0.389216 | 0.862576 | 0.623403 |
| MmugDNA.32295.1.S1_s_at | MmugDNA.32295.1 | 8.17  | 8.56  | 0.64 | 0.12 | -1.31 | 0.821383 | 0.179543 | 0.935568 | 0.456011 |
| MmugDNA.323.1.S1_at     | MmugDNA.323.1   | 8.96  | 9.06  | 0.88 | 0.13 | -1.07 | 0.81187  | 0.774219 | 0.931979 | 0.868735 |
| MmugDNA.32300.1.S1_at   | MmugDNA.32300.1 | 13.07 | 12.81 | 0.02 | 0.09 | 1.2   | 0.006106 | 0.004128 | 0.215688 | 0.090887 |
| MmugDNA.32302.1.S1_at   | MmugDNA.32302.1 | 13.34 | 13.33 | 0.05 | 0.03 | 1.01  | 0.934749 | 0.729812 | 0.977918 | 0.843695 |
| MmugDNA.32306.1.S1_at   | MmugDNA.32306.1 | 6.18  | 6.3   | 0.06 | 0.15 | -1.09 | 0.583068 | 0.448849 | 0.828755 | 0.664661 |
| MmugDNA.32307.1.S1_at   | MmugDNA.32307.1 | 13.32 | 13.2  | 0.28 | 0.1  | 1.08  | 0.35758  | 0.088197 | 0.695902 | 0.341721 |
| MmugDNA.32309.1.S1_at   | MmugDNA.32309.1 | 13.46 | 13.41 | 0.5  | 0.07 | 1.04  | 0.463737 | 0.493185 | 0.762278 | 0.694004 |
| MmugDNA.3231.1.S1_at    | MmugDNA.3231.1  | 8.63  | 8.54  | 1.5  | 0.26 | 1.06  | 0.951451 | 0.226951 | 0.98364  | 0.499276 |
| MmugDNA.32318.1.S1_at   | MmugDNA.32318.1 | 5.55  | 5.24  | 0.09 | 0.07 | 1.24  | 0.009986 | 0.009967 | 0.245189 | 0.131094 |
| MmugDNA.3232.1.S1_at    | MmugDNA.3232.1  | 7.02  | 6.82  | 0.67 | 0.18 | 1.15  | 0.371853 | 0.526716 | 0.705567 | 0.715627 |
| MmugDNA.32321.1.S1_at   | MmugDNA.32321.1 | 9.29  | 9.46  | 0.17 | 0.1  | -1.12 | 0.195955 | 0.418291 | 0.566321 | 0.642707 |
| MmugDNA.32328.1.S1_at   | MmugDNA.32328.1 | 11.72 | 11.95 | 0.45 | 0.05 | -1.18 | 0.135662 | 0.232377 | 0.510119 | 0.504088 |
| MmugDNA.32329.1.S1_at   | MmugDNA.32329.1 | 11.8  | 12.65 | 0.25 | 0.06 | -1.8  | 0.004873 | 0.000529 | 0.203301 | 0.040069 |
| MmugDNA.32334.1.S1_at   | MmugDNA.32334.1 | 13.13 | 13.16 | 0.08 | 0.03 | -1.03 | 0.345888 | 0.478297 | 0.68787  | 0.684289 |
| MmugDNA.32339.1.S1_at   | MmugDNA.32339.1 | 6.32  | 6.12  | 0.42 | 0.07 | 1.15  | 0.382178 | 0.097812 | 0.710505 | 0.355639 |
| MmugDNA.32344.1.S1_at   | MmugDNA.32344.1 | 8.53  | 8.34  | 0.7  | 0.33 | 1.14  | 0.25126  | 0.334895 | 0.616546 | 0.58275  |
| MmugDNA.32345.1.S1_at   | MmugDNA.32345.1 | 9.58  | 9.2   | 0.28 | 0.16 | 1.3   | 0.106843 | 0.211375 | 0.479384 | 0.48553  |
| MmugDNA.32346.1.A1_at   | MmugDNA.32346.1 | 4.46  | 4.26  | 0.12 | 0.08 | 1.15  | 0.073762 | 0.265041 | 0.434623 | 0.531    |
| MmugDNA.32346.1.S1_at   | MmugDNA.32346.1 | 4.85  | 4.66  | 0.03 | 0.11 | 1.14  | 0.033382 | 0.259457 | 0.346442 | 0.526418 |
| MmugDNA.32347.1.S1_at   | MmugDNA.32347.1 | 9.76  | 9.75  | 0.08 | 0.06 | 1.01  | 0.469773 | 0.045708 | 0.765625 | 0.258049 |

|                       |                 |       |       |      |      |       |          |          |          |          |
|-----------------------|-----------------|-------|-------|------|------|-------|----------|----------|----------|----------|
| MmugDNA.32354.1.S1_at | MmugDNA.32354.1 | 5.98  | 5.84  | 0.4  | 0.28 | 1.1   | 0.532515 | 0.124503 | 0.800337 | 0.39495  |
| MmugDNA.32355.1.S1_at | MmugDNA.32355.1 | 11.13 | 11.91 | 0.34 | 0.04 | -1.71 | 0.013878 | 0.005257 | 0.272841 | 0.100401 |
| MmugDNA.32359.1.S1_at | MmugDNA.32359.1 | 11.27 | 10.86 | 0.29 | 0.49 | 1.33  | 0.915366 | 0.988592 | 0.971229 | 0.993572 |
| MmugDNA.32362.1.S1_at | MmugDNA.32362.1 | 13.15 | 13.03 | 1.15 | 0.12 | 1.09  | 0.564205 | 0.202264 | 0.81857  | 0.476672 |
| MmugDNA.32364.1.S1_at | MmugDNA.32364.1 | 10.21 | 10.82 | 0.08 | 0.14 | -1.53 | 0.001939 | 0.000233 | 0.17116  | 0.03241  |
| MmugDNA.32366.1.S1_at | MmugDNA.32366.1 | 5.43  | 6.35  | 0.9  | 0.23 | -1.89 | 0.160172 | 0.04186  | 0.533251 | 0.249172 |
| MmugDNA.32374.1.S1_at | MmugDNA.32374.1 | 8.45  | 8.28  | 0.21 | 0.07 | 1.12  | 0.151672 | 0.097718 | 0.524628 | 0.355598 |
| MmugDNA.32375.1.S1_at | MmugDNA.32375.1 | 5.36  | 5.29  | 0.03 | 0.17 | 1.05  | 0.508615 | 0.090215 | 0.787118 | 0.344604 |
| MmugDNA.32377.1.S1_at | MmugDNA.32377.1 | 8.53  | 9.1   | 0.39 | 0.04 | -1.49 | 0.06266  | 0.027303 | 0.413501 | 0.206611 |
| MmugDNA.32381.1.S1_at | MmugDNA.32381.1 | 10.74 | 10.95 | 0.54 | 0.05 | -1.16 | 0.621302 | 0.166489 | 0.847514 | 0.442928 |
| MmugDNA.32384.1.S1_at | MmugDNA.32384.1 | 7.49  | 7.5   | 0.1  | 0.04 | -1.01 | 0.562388 | 0.745768 | 0.817686 | 0.852562 |
| MmugDNA.32385.1.S1_at | MmugDNA.32385.1 | 10.46 | 10.99 | 0.23 | 0.09 | -1.44 | 0.056718 | 0.042408 | 0.401061 | 0.250603 |
| MmugDNA.32386.1.S1_at | MmugDNA.32386.1 | 11.79 | 11.49 | 0.15 | 0.04 | 1.24  | 0.026661 | 0.182953 | 0.325885 | 0.459434 |
| MmugDNA.32387.1.S1_at | MmugDNA.32387.1 | 8.28  | 8.71  | 0.4  | 0.12 | -1.35 | 0.500016 | 0.516702 | 0.782311 | 0.709161 |
| MmugDNA.32388.1.S1_at | MmugDNA.32388.1 | 13.01 | 12.53 | 0.79 | 0.03 | 1.39  | 0.911471 | 0.956341 | 0.970042 | 0.975138 |
| MmugDNA.32390.1.S1_at | MmugDNA.32390.1 | 9.85  | 9.07  | 0.52 | 0.06 | 1.71  | 0.159581 | 0.259887 | 0.532526 | 0.526748 |
| MmugDNA.32391.1.S1_at | MmugDNA.32391.1 | 12.1  | 12.36 | 0.16 | 0.12 | -1.2  | 0.378817 | 0.002043 | 0.708465 | 0.066887 |
| MmugDNA.32393.1.S1_at | MmugDNA.32393.1 | 4.83  | 4.62  | 0.1  | 0.05 | 1.16  | 0.077774 | 0.075711 | 0.439884 | 0.320299 |
| MmugDNA.32395.1.S1_at | MmugDNA.32395.1 | 8.61  | 9.25  | 0.35 | 0.13 | -1.56 | 0.030889 | 0.009096 | 0.339178 | 0.125944 |
| MmugDNA.32398.1.S1_at | MmugDNA.32398.1 | 5.98  | 5.95  | 0.36 | 0.19 | 1.02  | 0.691539 | 0.304035 | 0.879864 | 0.561388 |
| MmugDNA.32400.1.S1_at | MmugDNA.32400.1 | 6.15  | 6.27  | 0.41 | 0.17 | -1.08 | 0.927564 | 0.823927 | 0.975951 | 0.898821 |
| MmugDNA.32405.1.S1_at | MmugDNA.32405.1 | 4.41  | 4.38  | 0.14 | 0.08 | 1.02  | 0.700637 | 0.359691 | 0.883597 | 0.600963 |
| MmugDNA.32408.1.S1_at | MmugDNA.32408.1 | 7.59  | 7.44  | 0.07 | 0.04 | 1.11  | 0.020522 | 0.198373 | 0.304231 | 0.473292 |
| MmugDNA.32410.1.S1_at | MmugDNA.32410.1 | 11.08 | 10.42 | 0.76 | 0.14 | 1.59  | 0.289113 | 0.187644 | 0.645892 | 0.463663 |
| MmugDNA.32413.1.S1_at | MmugDNA.32413.1 | 7.15  | 7.34  | 0.38 | 0.14 | -1.14 | 0.652754 | 0.002026 | 0.86202  | 0.066885 |
| MmugDNA.32415.1.S1_at | MmugDNA.32415.1 | 5.24  | 5.07  | 0.09 | 0.08 | 1.13  | 0.093005 | 0.389529 | 0.46164  | 0.623635 |
| MmugDNA.32419.1.S1_at | MmugDNA.32419.1 | 12.05 | 11.26 | 0.12 | 0.14 | 1.74  | 0.002202 | 0.000672 | 0.174757 | 0.04413  |
| MmugDNA.32420.1.S1_at | MmugDNA.32420.1 | 11.06 | 10.85 | 0.13 | 0.06 | 1.16  | 0.229313 | 0.003949 | 0.598234 | 0.089397 |
| MmugDNA.32422.1.S1_at | MmugDNA.32422.1 | 9.28  | 9.5   | 2.49 | 0.15 | -1.16 | 0.624489 | 0.274348 | 0.848808 | 0.538779 |
| MmugDNA.32423.1.S1_at | MmugDNA.32423.1 | 7.28  | 7.76  | 1.01 | 0.13 | -1.39 | 0.174357 | 0.202661 | 0.547573 | 0.477075 |
| MmugDNA.32430.1.S1_at | MmugDNA.32430.1 | 10.12 | 10.1  | 0.25 | 0.02 | 1.01  | 0.97851  | 0.837028 | 0.993032 | 0.906826 |
| MmugDNA.32432.1.S1_at | MmugDNA.32432.1 | 9.06  | 9.8   | 0.2  | 0.07 | -1.67 | 0.007445 | 0.003267 | 0.229238 | 0.082312 |
| MmugDNA.32433.1.S1_at | MmugDNA.32433.1 | 7.71  | 7.94  | 0.2  | 0.01 | -1.18 | 0.037419 | 0.010404 | 0.357092 | 0.133414 |
| MmugDNA.32435.1.S1_at | MmugDNA.32435.1 | 5.63  | 5.63  | 0.07 | 0.03 | -1    | 0.990497 | 0.47366  | 0.996425 | 0.680935 |
| MmugDNA.32442.1.S1_at | MmugDNA.32442.1 | 12.12 | 12.14 | 0.03 | 0.04 | -1.01 | 0.237345 | 0.62224  | 0.604249 | 0.776771 |
| MmugDNA.3245.1.S1_at  | MmugDNA.3245.1  | 5.75  | 5.96  | 0.28 | 0.28 | -1.15 | 0.943812 | 0.286649 | 0.980614 | 0.548077 |
| MmugDNA.32450.1.S1_at | MmugDNA.32450.1 | 6.71  | 6.59  | 0.63 | 0.1  | 1.08  | 0.570129 | 0.520485 | 0.821883 | 0.711799 |
| MmugDNA.32452.1.S1_at | MmugDNA.32452.1 | 10.65 | 10.94 | 0.46 | 0.1  | -1.22 | 0.306147 | 0.412757 | 0.659271 | 0.63909  |
| MmugDNA.32453.1.S1_at | MmugDNA.32453.1 | 9.55  | 10.75 | 1.54 | 0.21 | -2.3  | 0.240709 | 0.31364  | 0.606939 | 0.568002 |
| MmugDNA.32458.1.S1_at | MmugDNA.32458.1 | 10.41 | 10.59 | 1.05 | 0.03 | -1.13 | 0.690417 | 0.877111 | 0.879504 | 0.92996  |
| MmugDNA.32459.1.S1_at | MmugDNA.32459.1 | 7.81  | 7.89  | 0.13 | 0.07 | -1.06 | 0.606514 | 0.201127 | 0.840496 | 0.475519 |
| MmugDNA.32460.1.S1_at | MmugDNA.32460.1 | 5.5   | 5.62  | 0.04 | 0.4  | -1.08 | 0.600652 | 0.822595 | 0.837957 | 0.89799  |
| MmugDNA.32466.1.S1_at | MmugDNA.32466.1 | 10.45 | 9.9   | 0.31 | 0.07 | 1.47  | 0.076805 | 0.10459  | 0.43838  | 0.36588  |

|                         |                 |       |       |      |      |       |          |          |          |          |
|-------------------------|-----------------|-------|-------|------|------|-------|----------|----------|----------|----------|
| MmugDNA.32470.1.S1_at   | MmugDNA.32470.1 | 12.43 | 12.57 | 0.59 | 0.08 | -1.11 | 0.549142 | 0.461031 | 0.810226 | 0.672829 |
| MmugDNA.32485.1.S1_at   | MmugDNA.32485.1 | 7.67  | 5.84  | 0.7  | 0.08 | 3.55  | 0.010003 | 0.003958 | 0.245352 | 0.089504 |
| MmugDNA.32493.1.S1_at   | MmugDNA.32493.1 | 5.7   | 6.94  | 0.4  | 0.15 | -2.35 | 0.019706 | 0.039498 | 0.302208 | 0.243676 |
| MmugDNA.32495.1.S1_at   | MmugDNA.32495.1 | 11.73 | 10.48 | 0.57 | 0.29 | 2.38  | 0.02732  | 0.072736 | 0.327322 | 0.31565  |
| MmugDNA.32496.1.S1_at   | MmugDNA.32496.1 | 7.32  | 7.26  | 0.02 | 0.03 | 1.04  | 0.091672 | 0.953405 | 0.45996  | 0.97351  |
| MmugDNA.32501.1.S1_at   | MmugDNA.32501.1 | 9.19  | 9.47  | 1.15 | 0.16 | -1.22 | 0.695714 | 0.779995 | 0.881723 | 0.872428 |
| MmugDNA.32504.1.S1_at   | MmugDNA.32504.1 | 6.15  | 6.16  | 0.05 | 0.04 | -1.01 | 0.804439 | 0.022985 | 0.928962 | 0.189624 |
| MmugDNA.3251.1.S1_at    | MmugDNA.3251.1  | 6.9   | 7.73  | 0.1  | 0.08 | -1.78 | 0.000265 | 0.006662 | 0.130979 | 0.110544 |
| MmugDNA.32511.1.S1_x_at | MmugDNA.32511.1 | 3.16  | 2.99  | 0.06 | 0.11 | 1.12  | 0.177159 | 0.239943 | 0.550212 | 0.510627 |
| MmugDNA.32515.1.S1_at   | MmugDNA.32515.1 | 7.15  | 7.22  | 0.36 | 0.16 | -1.05 | 0.778224 | 0.145102 | 0.91815  | 0.419055 |
| MmugDNA.32516.1.S1_at   | MmugDNA.32516.1 | 7.98  | 6.86  | 0.32 | 0.38 | 2.18  | 0.0206   | 0.02217  | 0.304935 | 0.186409 |
| MmugDNA.32522.1.S1_at   | MmugDNA.32522.1 | 7.38  | 6.58  | 0.71 | 0.17 | 1.74  | 0.111266 | 0.103187 | 0.484479 | 0.364123 |
| MmugDNA.32528.1.S1_at   | MmugDNA.32528.1 | 8.48  | 8.91  | 0.2  | 0.08 | -1.35 | 0.031486 | 0.001192 | 0.341227 | 0.054172 |
| MmugDNA.32529.1.S1_at   | MmugDNA.32529.1 | 6.22  | 6.18  | 0.02 | 0.01 | 1.03  | 0.067521 | 0.189104 | 0.423938 | 0.464934 |
| MmugDNA.32531.1.S1_at   | MmugDNA.32531.1 | 6.37  | 6.16  | 0.34 | 0.2  | 1.16  | 0.330181 | 0.662789 | 0.676891 | 0.802583 |
| MmugDNA.32535.1.S1_x_at | MmugDNA.32535.1 | 4.95  | 4.66  | 0.52 | 0.02 | 1.23  | 0.383381 | 0.222995 | 0.711306 | 0.495821 |
| MmugDNA.32538.1.S1_at   | MmugDNA.32538.1 | 10.15 | 9.5   | 3.59 | 0.3  | 1.57  | 0.589314 | 0.261641 | 0.832298 | 0.528107 |
| MmugDNA.32540.1.S1_at   | MmugDNA.32540.1 | 8.32  | 8.45  | 1.86 | 0.44 | -1.1  | 0.831736 | 0.360816 | 0.939628 | 0.601929 |
| MmugDNA.32541.1.S1_at   | MmugDNA.32541.1 | 5.15  | 5.04  | 0.32 | 0.02 | 1.08  | 0.51902  | 0.629945 | 0.793034 | 0.782031 |
| MmugDNA.32542.1.S1_at   | MmugDNA.32542.1 | 9.12  | 9.37  | 0.13 | 0.12 | -1.18 | 0.105479 | 0.062707 | 0.477122 | 0.297117 |
| MmugDNA.32546.1.S1_at   | MmugDNA.32546.1 | 9.63  | 10.31 | 0.49 | 0.12 | -1.61 | 0.103781 | 0.067211 | 0.474479 | 0.305225 |
| MmugDNA.32558.1.S1_at   | MmugDNA.32558.1 | 5.23  | 5.02  | 0.11 | 0.07 | 1.15  | 0.047289 | 0.060531 | 0.379841 | 0.292664 |
| MmugDNA.32561.1.S1_at   | MmugDNA.32561.1 | 9.9   | 9.94  | 0.23 | 0.01 | -1.02 | 0.498294 | 0.806347 | 0.781633 | 0.888642 |
| MmugDNA.32566.1.S1_at   | MmugDNA.32566.1 | 6.2   | 5.94  | 0.36 | 0.04 | 1.2   | 0.495816 | 0.46386  | 0.780125 | 0.674663 |
| MmugDNA.32567.1.S1_at   | MmugDNA.32567.1 | 9.53  | 9.93  | 0.59 | 0.02 | -1.32 | 0.287847 | 0.170459 | 0.644926 | 0.447103 |
| MmugDNA.32570.1.S1_at   | MmugDNA.32570.1 | 13.31 | 13.27 | 1.91 | 0.09 | 1.03  | 0.397783 | 0.243863 | 0.722092 | 0.514047 |
| MmugDNA.32576.1.S1_at   | MmugDNA.32576.1 | 6.52  | 6.33  | 0.2  | 0.04 | 1.14  | 0.474089 | 0.623832 | 0.767923 | 0.778207 |
| MmugDNA.32577.1.S1_s_at | MmugDNA.32577.1 | 11.09 | 11.31 | 0.16 | 0.08 | -1.17 | 0.057137 | 0.019601 | 0.401454 | 0.175863 |
| MmugDNA.3258.1.S1_at    | MmugDNA.3258.1  | 11.3  | 11.65 | 0.18 | 0.03 | -1.27 | 0.101328 | 0.081564 | 0.471667 | 0.329764 |
| MmugDNA.32582.1.S1_at   | MmugDNA.32582.1 | 10.87 | 10.24 | 0.38 | 0.04 | 1.55  | 0.146722 | 0.049138 | 0.521128 | 0.266534 |
| MmugDNA.32583.1.S1_at   | MmugDNA.32583.1 | 6.12  | 5.97  | 0.12 | 0.08 | 1.11  | 0.2034   | 0.132826 | 0.574902 | 0.404544 |
| MmugDNA.32584.1.S1_at   | MmugDNA.32584.1 | 8.44  | 9.26  | 0.4  | 0.19 | -1.76 | 0.037646 | 0.01545  | 0.357745 | 0.157803 |
| MmugDNA.32585.1.S1_at   | MmugDNA.32585.1 | 6.67  | 7.53  | 0.41 | 0.15 | -1.81 | 0.075607 | 0.002048 | 0.436722 | 0.066887 |
| MmugDNA.32586.1.S1_at   | MmugDNA.32586.1 | 4.22  | 4.19  | 0.36 | 0.09 | 1.02  | 0.344705 | 0.420003 | 0.687005 | 0.643787 |
| MmugDNA.32591.1.S1_at   | MmugDNA.32591.1 | 9.98  | 9.41  | 0.19 | 0.14 | 1.49  | 0.013588 | 0.000731 | 0.269894 | 0.044701 |
| MmugDNA.32594.1.S1_at   | MmugDNA.32594.1 | 7.41  | 8.96  | 1.13 | 0.02 | -2.93 | 0.118783 | 0.07094  | 0.492161 | 0.312444 |
| MmugDNA.32596.1.S1_at   | MmugDNA.32596.1 | 12.83 | 12.72 | 0.25 | 0.09 | 1.08  | 0.959661 | 0.201692 | 0.986898 | 0.476214 |
| MmugDNA.326.1.S1_at     | MmugDNA.326.1   | 8.32  | 8.81  | 0.35 | 0.41 | -1.41 | 0.16574  | 0.200494 | 0.538623 | 0.474913 |
| MmugDNA.32601.1.S1_at   | MmugDNA.32601.1 | 10.38 | 9.62  | 0.1  | 0.17 | 1.68  | 0.002402 | 0.000419 | 0.177075 | 0.038093 |
| MmugDNA.32608.1.S1_at   | MmugDNA.32608.1 | 9.57  | 9.45  | 0.4  | 0.14 | 1.09  | 0.207042 | 0.040928 | 0.578774 | 0.247161 |
| MmugDNA.32612.1.S1_s_at | MmugDNA.32612.1 | 9.8   | 10.51 | 0.64 | 0.1  | -1.63 | 0.488704 | 0.951891 | 0.775812 | 0.972702 |
| MmugDNA.32613.1.S1_at   | MmugDNA.32613.1 | 4.98  | 4.86  | 0.24 | 0.04 | 1.09  | 0.114137 | 0.061494 | 0.487405 | 0.294828 |
| MmugDNA.32624.1.S1_at   | MmugDNA.32624.1 | 11.61 | 11.54 | 0.56 | 0.48 | 1.05  | 0.932448 | 0.038691 | 0.977227 | 0.24169  |

|                         |                 |       |       |      |      |       |          |          |          |          |
|-------------------------|-----------------|-------|-------|------|------|-------|----------|----------|----------|----------|
| MmugDNA.32626.1.S1_at   | MmugDNA.32626.1 | 11.78 | 12.08 | 0.81 | 0.07 | -1.23 | 0.178995 | 0.078817 | 0.552029 | 0.325757 |
| MmugDNA.32641.1.S1_at   | MmugDNA.32641.1 | 8.43  | 8.27  | 0.18 | 0.11 | 1.11  | 0.660106 | 0.208953 | 0.865536 | 0.482751 |
| MmugDNA.32643.1.S1_at   | MmugDNA.32643.1 | 6.39  | 6.9   | 1.03 | 0.19 | -1.43 | 0.522603 | 0.57628  | 0.79517  | 0.747148 |
| MmugDNA.32645.1.S1_at   | MmugDNA.32645.1 | 2.96  | 2.88  | 0.09 | 0.03 | 1.06  | 0.130159 | 0.281026 | 0.504663 | 0.544179 |
| MmugDNA.32653.1.S1_at   | MmugDNA.32653.1 | 3.81  | 3.65  | 0.1  | 0.07 | 1.12  | 0.147403 | 0.067527 | 0.521578 | 0.305921 |
| MmugDNA.32656.1.S1_at   | MmugDNA.32656.1 | 6.72  | 7.18  | 0.36 | 0.13 | -1.38 | 0.099379 | 0.131688 | 0.468989 | 0.403835 |
| MmugDNA.32660.1.S1_at   | MmugDNA.32660.1 | 12.83 | 12.87 | 0.14 | 0.06 | -1.02 | 0.667007 | 0.044056 | 0.868458 | 0.254195 |
| MmugDNA.32660.1.S1_s_at | MmugDNA.32660.1 | 12.01 | 12.13 | 0    | 0.03 | -1.09 | 0.004126 | 0.029776 | 0.198822 | 0.214208 |
| MmugDNA.32678.1.S1_at   | MmugDNA.32678.1 | 3.03  | 2.77  | 0.24 | 0.08 | 1.2   | 0.088392 | 0.092383 | 0.45606  | 0.348294 |
| MmugDNA.32683.1.S1_at   | MmugDNA.32683.1 | 6.8   | 6.79  | 1.01 | 0.05 | 1.01  | 0.385631 | 0.290713 | 0.712961 | 0.551382 |
| MmugDNA.32690.1.S1_at   | MmugDNA.32690.1 | 11.61 | 12.09 | 0.46 | 0.09 | -1.4  | 0.160611 | 0.250055 | 0.533821 | 0.519111 |
| MmugDNA.32697.1.S1_s_at | MmugDNA.32697.1 | 10.22 | 10.02 | 0.03 | 0.1  | 1.15  | 0.014415 | 0.06591  | 0.27544  | 0.302129 |
| MmugDNA.327.1.S1_at     | MmugDNA.327.1   | 7.88  | 8.1   | 0.67 | 0.02 | -1.17 | 0.921336 | 0.991947 | 0.973336 | 0.995469 |
| MmugDNA.32703.1.S1_at   | MmugDNA.32703.1 | 5.45  | 6.5   | 0.46 | 0.06 | -2.07 | 0.008354 | 0.008025 | 0.233559 | 0.119047 |
| MmugDNA.32709.1.S1_at   | MmugDNA.32709.1 | 6.69  | 6.01  | 0.36 | 0.1  | 1.6   | 0.02461  | 0.02839  | 0.319173 | 0.210321 |
| MmugDNA.32715.1.S1_at   | MmugDNA.32715.1 | 11.79 | 11.81 | 0.44 | 0.01 | -1.01 | 0.656842 | 0.206205 | 0.863732 | 0.480377 |
| MmugDNA.32716.1.S1_at   | MmugDNA.32716.1 | 6.92  | 7.02  | 0.68 | 0.22 | -1.07 | 0.857504 | 0.024669 | 0.949729 | 0.196608 |
| MmugDNA.3272.1.S1_at    | MmugDNA.3272.1  | 7.26  | 7.12  | 0.09 | 0.04 | 1.1   | 0.072639 | 0.433369 | 0.433023 | 0.653658 |
| MmugDNA.32724.1.S1_at   | MmugDNA.32724.1 | 6.47  | 7.46  | 0.14 | 0.25 | -1.99 | 0.001764 | 0.001681 | 0.167444 | 0.062096 |
| MmugDNA.32725.1.S1_at   | MmugDNA.32725.1 | 3.51  | 3.3   | 0.19 | 0.13 | 1.16  | 0.179779 | 0.298787 | 0.553052 | 0.557392 |
| MmugDNA.32728.1.S1_at   | MmugDNA.32728.1 | 8.09  | 8.05  | 0.52 | 0.08 | 1.03  | 0.377906 | 0.467493 | 0.7079   | 0.677091 |
| MmugDNA.32731.1.S1_at   | MmugDNA.32731.1 | 5.25  | 5.53  | 0.55 | 0.27 | -1.21 | 0.972231 | 0.085974 | 0.991006 | 0.338116 |
| MmugDNA.32732.1.S1_at   | MmugDNA.32732.1 | 6.46  | 6.37  | 0.07 | 0.07 | 1.06  | 0.095274 | 0.342706 | 0.464131 | 0.588666 |
| MmugDNA.32734.1.S1_at   | MmugDNA.32734.1 | 3.75  | 3.63  | 0.12 | 0.07 | 1.09  | 0.400476 | 0.547842 | 0.723823 | 0.728723 |
| MmugDNA.32735.1.S1_at   | MmugDNA.32735.1 | 9.77  | 9.58  | 0.24 | 0.09 | 1.14  | 0.473194 | 0.02532  | 0.767466 | 0.199522 |
| MmugDNA.32740.1.S1_at   | MmugDNA.32740.1 | 4.9   | 4.69  | 0.08 | 0.05 | 1.16  | 0.019522 | 0.025789 | 0.301474 | 0.201323 |
| MmugDNA.32741.1.S1_at   | MmugDNA.32741.1 | 6.91  | 6.8   | 0.21 | 0.05 | 1.08  | 0.212966 | 0.118183 | 0.58352  | 0.386115 |
| MmugDNA.32742.1.S1_at   | MmugDNA.32742.1 | 6.18  | 5.69  | 0.93 | 0.3  | 1.41  | 0.479814 | 0.659577 | 0.770896 | 0.800802 |
| MmugDNA.3276.1.S1_at    | MmugDNA.3276.1  | 10.85 | 10.09 | 0.17 | 0.07 | 1.7   | 0.001715 | 0.065255 | 0.166176 | 0.301239 |
| MmugDNA.32761.1.S1_at   | MmugDNA.32761.1 | 10.21 | 9.97  | 0.32 | 0.04 | 1.18  | 0.074907 | 0.139833 | 0.43559  | 0.413131 |
| MmugDNA.32763.1.S1_at   | MmugDNA.32763.1 | 3.5   | 3.3   | 0.48 | 0.09 | 1.15  | 0.595274 | 0.275938 | 0.835312 | 0.540035 |
| MmugDNA.32776.1.S1_at   | MmugDNA.32776.1 | 10.24 | 10.87 | 0.2  | 0.09 | -1.54 | 0.003622 | 0.001008 | 0.197111 | 0.050657 |
| MmugDNA.32777.1.S1_at   | MmugDNA.32777.1 | 9.04  | 8.97  | 0.15 | 0.07 | 1.05  | 0.976625 | 0.00374  | 0.992376 | 0.08718  |
| MmugDNA.32784.1.S1_at   | MmugDNA.32784.1 | 12.97 | 12.59 | 0.24 | 0.11 | 1.3   | 0.042978 | 0.007597 | 0.371135 | 0.11661  |
| MmugDNA.32786.1.S1_at   | MmugDNA.32786.1 | 3.55  | 4.3   | 1.52 | 0.06 | -1.69 | 0.869071 | 0.975273 | 0.954233 | 0.986526 |
| MmugDNA.32799.1.S1_at   | MmugDNA.32799.1 | 11.66 | 11.71 | 0.69 | 0.13 | -1.03 | 0.97768  | 0.064218 | 0.99273  | 0.299668 |
| MmugDNA.328.1.S1_at     | MmugDNA.328.1   | 12.79 | 13.02 | 0.36 | 0.09 | -1.17 | 0.372867 | 0.016168 | 0.705567 | 0.161172 |
| MmugDNA.32800.1.S1_at   | MmugDNA.32800.1 | 3.78  | 3.68  | 0.28 | 0.17 | 1.08  | 0.135671 | 0.027347 | 0.510119 | 0.206637 |
| MmugDNA.32803.1.S1_at   | MmugDNA.32803.1 | 5.3   | 5.33  | 0.13 | 0.14 | -1.02 | 0.811052 | 0.191659 | 0.931578 | 0.466936 |
| MmugDNA.32804.1.S1_at   | MmugDNA.32804.1 | 7.59  | 7.62  | 0.12 | 0.1  | -1.02 | 0.436928 | 0.722707 | 0.746613 | 0.839378 |
| MmugDNA.32805.1.S1_at   | MmugDNA.32805.1 | 7.16  | 7.08  | 0.16 | 0.03 | 1.06  | 0.142482 | 0.233704 | 0.517603 | 0.505032 |
| MmugDNA.32807.1.S1_at   | MmugDNA.32807.1 | 9.39  | 9.28  | 0.18 | 0.02 | 1.08  | 0.9345   | 0.521515 | 0.977802 | 0.712483 |
| MmugDNA.32812.1.S1_at   | MmugDNA.32812.1 | 8.43  | 8.32  | 0.64 | 0.46 | 1.08  | 0.934703 | 0.271531 | 0.977915 | 0.536547 |

|                         |                 |       |       |      |      |       |          |          |          |          |
|-------------------------|-----------------|-------|-------|------|------|-------|----------|----------|----------|----------|
| MmugDNA.3282.1.S1_at    | MmugDNA.3282.1  | 4.33  | 4.17  | 0.53 | 0.05 | 1.12  | 0.178348 | 0.182653 | 0.551302 | 0.459186 |
| MmugDNA.32821.1.S1_at   | MmugDNA.32821.1 | 3.15  | 3.18  | 0.08 | 0.06 | -1.02 | 0.578854 | 0.873223 | 0.826338 | 0.92788  |
| MmugDNA.32827.1.S1_at   | MmugDNA.32827.1 | 11.36 | 11.94 | 1.34 | 0.08 | -1.5  | 0.498823 | 0.66064  | 0.781838 | 0.801485 |
| MmugDNA.32828.1.S1_at   | MmugDNA.32828.1 | 6.78  | 6.67  | 0.14 | 0.11 | 1.08  | 0.393801 | 0.539854 | 0.719504 | 0.723982 |
| MmugDNA.32837.1.S1_at   | MmugDNA.32837.1 | 12.04 | 12.06 | 0.36 | 0.14 | -1.01 | 0.783026 | 0.074092 | 0.920107 | 0.317745 |
| MmugDNA.32840.1.S1_at   | MmugDNA.32840.1 | 7.98  | 8.42  | 0.44 | 0.03 | -1.36 | 0.510176 | 0.730583 | 0.788001 | 0.844055 |
| MmugDNA.32841.1.S1_at   | MmugDNA.32841.1 | 6.07  | 5.94  | 0.1  | 0.1  | 1.09  | 0.092965 | 0.450829 | 0.461637 | 0.665869 |
| MmugDNA.32848.1.S1_at   | MmugDNA.32848.1 | 9.54  | 9.37  | 2.99 | 0.27 | 1.12  | 0.645374 | 0.490007 | 0.858761 | 0.692076 |
| MmugDNA.32852.1.S1_at   | MmugDNA.32852.1 | 8.35  | 8.67  | 1.06 | 0.17 | -1.25 | 0.705665 | 0.179448 | 0.885355 | 0.455929 |
| MmugDNA.32856.1.S1_at   | MmugDNA.32856.1 | 8.37  | 8.54  | 0.19 | 0.14 | -1.12 | 0.99418  | 0.012285 | 0.997789 | 0.143369 |
| MmugDNA.32866.1.S1_at   | MmugDNA.32866.1 | 5.17  | 5.34  | 0.16 | 0.02 | -1.12 | 0.544155 | 0.755328 | 0.80708  | 0.857558 |
| MmugDNA.32870.1.S1_at   | MmugDNA.32870.1 | 7.82  | 7.75  | 0.19 | 0.12 | 1.05  | 0.564467 | 0.499147 | 0.818716 | 0.698006 |
| MmugDNA.32873.1.S1_at   | MmugDNA.32873.1 | 11.2  | 11.39 | 0.53 | 0.05 | -1.15 | 0.684557 | 0.801332 | 0.87645  | 0.885696 |
| MmugDNA.32876.1.S1_at   | MmugDNA.32876.1 | 8.84  | 8.98  | 0.15 | 0.11 | -1.1  | 0.231092 | 0.190302 | 0.599062 | 0.465906 |
| MmugDNA.32877.1.S1_at   | MmugDNA.32877.1 | 11.1  | 11.37 | 0.03 | 0.06 | -1.2  | 0.002886 | 0.000036 | 0.187888 | 0.023031 |
| MmugDNA.32878.1.S1_at   | MmugDNA.32878.1 | 5.59  | 5.4   | 0.12 | 0.06 | 1.14  | 0.309875 | 0.020164 | 0.661854 | 0.178414 |
| MmugDNA.32883.1.S1_at   | MmugDNA.32883.1 | 4.57  | 4.67  | 0.07 | 0.06 | -1.07 | 0.084384 | 0.262058 | 0.450953 | 0.528374 |
| MmugDNA.32885.1.S1_at   | MmugDNA.32885.1 | 9.15  | 9.05  | 1.63 | 0.12 | 1.07  | 0.995821 | 0.174184 | 0.998312 | 0.450479 |
| MmugDNA.32888.1.S1_at   | MmugDNA.32888.1 | 11.22 | 11.21 | 0.83 | 0.62 | 1.01  | 0.952338 | 0.311455 | 0.984019 | 0.566456 |
| MmugDNA.32889.1.S1_at   | MmugDNA.32889.1 | 8.37  | 8.29  | 0.42 | 0.1  | 1.05  | 0.998782 | 0.567659 | 0.99967  | 0.74156  |
| MmugDNA.32889.1.S1_s_at | MmugDNA.32889.1 | 7.9   | 7.88  | 0.5  | 0.15 | 1.02  | 0.578425 | 0.347875 | 0.826202 | 0.592196 |
| MmugDNA.32890.1.S1_at   | MmugDNA.32890.1 | 9.77  | 9.7   | 0.33 | 0.1  | 1.05  | 0.254002 | 0.224261 | 0.618622 | 0.497164 |
| MmugDNA.32902.1.S1_at   | MmugDNA.32902.1 | 11.78 | 11.54 | 0.5  | 0    | 1.18  | 0.514207 | 0.450023 | 0.790322 | 0.665446 |
| MmugDNA.32903.1.S1_at   | MmugDNA.32903.1 | 8.62  | 8.45  | 0.56 | 0.25 | 1.13  | 0.974821 | 0.075554 | 0.991912 | 0.319982 |
| MmugDNA.32904.1.S1_at   | MmugDNA.32904.1 | 12.92 | 12.8  | 0.07 | 0.04 | 1.09  | 0.048327 | 0.008588 | 0.383054 | 0.123008 |
| MmugDNA.32907.1.S1_at   | MmugDNA.32907.1 | 11.42 | 11.05 | 0.13 | 0.03 | 1.29  | 0.010517 | 0.034445 | 0.248118 | 0.229628 |
| MmugDNA.32908.1.S1_at   | MmugDNA.32908.1 | 9.2   | 8.63  | 0.24 | 0.14 | 1.48  | 0.027508 | 0.146851 | 0.327829 | 0.42088  |
| MmugDNA.32914.1.S1_at   | MmugDNA.32914.1 | 11.11 | 11.43 | 0.1  | 0.08 | -1.25 | 0.01491  | 0.00001  | 0.278597 | 0.016526 |
| MmugDNA.32917.1.S1_at   | MmugDNA.32917.1 | 11.39 | 10.54 | 1.08 | 0.24 | 1.8   | 0.338903 | 0.162279 | 0.683378 | 0.438447 |
| MmugDNA.32920.1.S1_at   | MmugDNA.32920.1 | 12.96 | 12.94 | 0.14 | 0.04 | 1.01  | 0.878547 | 0.114638 | 0.957754 | 0.381156 |
| MmugDNA.32921.1.S1_at   | MmugDNA.32921.1 | 6.34  | 7.19  | 0.19 | 0.26 | -1.81 | 0.01488  | 0.069707 | 0.278597 | 0.310164 |
| MmugDNA.32925.1.S1_s_at | MmugDNA.32925.1 | 11.9  | 12.09 | 0.03 | 0.03 | -1.13 | 0.003062 | 0.027401 | 0.191107 | 0.206752 |
| MmugDNA.32938.1.S1_at   | MmugDNA.32938.1 | 3.24  | 3.38  | 0.08 | 0.14 | -1.1  | 0.12866  | 0.354825 | 0.503433 | 0.59746  |
| MmugDNA.32939.1.S1_at   | MmugDNA.32939.1 | 11.79 | 11.95 | 0.05 | 0.06 | -1.12 | 0.008144 | 0.007664 | 0.232005 | 0.117095 |
| MmugDNA.32944.1.S1_at   | MmugDNA.32944.1 | 5.18  | 4.9   | 0.13 | 0.1  | 1.22  | 0.19364  | 0.22764  | 0.564275 | 0.499898 |
| MmugDNA.32950.1.S1_at   | MmugDNA.32950.1 | 4.37  | 4.75  | 0.07 | 0.12 | -1.29 | 0.008316 | 0.057103 | 0.232735 | 0.284945 |
| MmugDNA.32953.1.S1_at   | MmugDNA.32953.1 | 6.04  | 6.09  | 0.37 | 0.19 | -1.03 | 0.683059 | 0.003247 | 0.876006 | 0.082187 |
| MmugDNA.32954.1.S1_at   | MmugDNA.32954.1 | 9.29  | 9.56  | 0.2  | 0.11 | -1.21 | 0.060404 | 0.000228 | 0.408081 | 0.032385 |
| MmugDNA.32958.1.S1_at   | MmugDNA.32958.1 | 6.75  | 6.79  | 0.11 | 0.09 | -1.03 | 0.988106 | 0.513035 | 0.995831 | 0.706696 |
| MmugDNA.32960.1.S1_at   | MmugDNA.32960.1 | 5.58  | 5.55  | 0.15 | 0.08 | 1.02  | 0.215713 | 0.643294 | 0.585794 | 0.79084  |
| MmugDNA.32962.1.S1_at   | MmugDNA.32962.1 | 9.54  | 10.1  | 1.05 | 0.13 | -1.48 | 0.352382 | 0.255076 | 0.692649 | 0.52317  |
| MmugDNA.32966.1.S1_at   | MmugDNA.32966.1 | 7.43  | 7.47  | 0.66 | 0.12 | -1.03 | 0.993185 | 0.586304 | 0.997423 | 0.753427 |
| MmugDNA.32968.1.S1_at   | MmugDNA.32968.1 | 7.81  | 7.83  | 0.13 | 0.01 | -1.01 | 0.500223 | 0.77183  | 0.78239  | 0.867369 |

|                         |                 |       |       |      |      |       |          |          |          |          |
|-------------------------|-----------------|-------|-------|------|------|-------|----------|----------|----------|----------|
| MmugDNA.32977.1.S1_at   | MmugDNA.32977.1 | 9.54  | 10.18 | 0.22 | 0.21 | -1.56 | 0.0187   | 0.03072  | 0.298184 | 0.217174 |
| MmugDNA.3298.1.S1_at    | MmugDNA.3298.1  | 12.03 | 12.64 | 0.07 | 0.06 | -1.53 | 0.000188 | 0.000017 | 0.114006 | 0.019635 |
| MmugDNA.32988.1.S1_at   | MmugDNA.32988.1 | 7.81  | 7.91  | 0.38 | 0.08 | -1.07 | 0.236035 | 0.324993 | 0.603096 | 0.575512 |
| MmugDNA.32990.1.S1_at   | MmugDNA.32990.1 | 5.96  | 6.32  | 1.14 | 0.06 | -1.28 | 0.807527 | 0.742738 | 0.930185 | 0.851023 |
| MmugDNA.32991.1.S1_at   | MmugDNA.32991.1 | 7.69  | 7.22  | 0.67 | 0.37 | 1.39  | 0.526821 | 0.22868  | 0.796797 | 0.500897 |
| MmugDNA.32998.1.S1_at   | MmugDNA.32998.1 | 7.1   | 7.17  | 0.08 | 0.09 | -1.05 | 0.776828 | 0.877227 | 0.917412 | 0.930041 |
| MmugDNA.33001.1.S1_at   | MmugDNA.33001.1 | 10.52 | 10.66 | 0.72 | 0.08 | -1.1  | 0.729138 | 0.202723 | 0.895624 | 0.477174 |
| MmugDNA.33003.1.S1_at   | MmugDNA.33003.1 | 3.08  | 2.98  | 0.07 | 0.03 | 1.07  | 0.114491 | 0.37389  | 0.487606 | 0.612508 |
| MmugDNA.33004.1.S1_at   | MmugDNA.33004.1 | 5.13  | 5.31  | 0.1  | 0.15 | -1.14 | 0.49362  | 0.948772 | 0.779001 | 0.970752 |
| MmugDNA.33011.1.S1_at   | MmugDNA.33011.1 | 10.3  | 9.95  | 0.84 | 0.27 | 1.28  | 0.610052 | 0.686987 | 0.841839 | 0.817375 |
| MmugDNA.33014.1.S1_at   | MmugDNA.33014.1 | 12.13 | 12.14 | 0.08 | 0.02 | -1.01 | 0.911772 | 0.105531 | 0.970168 | 0.367515 |
| MmugDNA.33017.1.S1_at   | MmugDNA.33017.1 | 10.75 | 10.92 | 0.28 | 0.04 | -1.13 | 0.490727 | 0.741    | 0.777256 | 0.850089 |
| MmugDNA.33019.1.S1_at   | MmugDNA.33019.1 | 7.55  | 7.52  | 0.07 | 0.05 | 1.03  | 0.595502 | 0.977482 | 0.835445 | 0.987777 |
| MmugDNA.3303.1.S1_at    | MmugDNA.3303.1  | 11.11 | 11.41 | 0.23 | 0.01 | -1.23 | 0.174937 | 0.116339 | 0.548031 | 0.383671 |
| MmugDNA.33031.1.S1_at   | MmugDNA.33031.1 | 11.91 | 11.66 | 0.19 | 0.03 | 1.19  | 0.093957 | 0.020271 | 0.463304 | 0.17872  |
| MmugDNA.33032.1.S1_at   | MmugDNA.33032.1 | 8.3   | 8.33  | 0.73 | 0.11 | -1.02 | 0.301873 | 0.208005 | 0.655978 | 0.482049 |
| MmugDNA.33036.1.S1_at   | MmugDNA.33036.1 | 6.04  | 5.91  | 0.41 | 0.36 | 1.1   | 0.390015 | 0.575178 | 0.71648  | 0.746362 |
| MmugDNA.33037.1.S1_s_at | MmugDNA.33037.1 | 8.86  | 8.2   | 0.25 | 0.3  | 1.58  | 0.059677 | 0.028597 | 0.406705 | 0.210901 |
| MmugDNA.3304.1.S1_at    | MmugDNA.3304.1  | 3.14  | 3.26  | 0.35 | 0.03 | -1.08 | 0.742414 | 0.935104 | 0.901769 | 0.963274 |
| MmugDNA.33042.1.S1_at   | MmugDNA.33042.1 | 7.29  | 8.1   | 0.42 | 0.24 | -1.75 | 0.102137 | 0.086987 | 0.472436 | 0.339851 |
| MmugDNA.3305.1.S1_at    | MmugDNA.3305.1  | 10.78 | 10.16 | 0.27 | 0.08 | 1.54  | 0.040801 | 0.072695 | 0.36514  | 0.31561  |
| MmugDNA.33059.1.S1_at   | MmugDNA.33059.1 | 11.96 | 12.2  | 0.15 | 0.07 | -1.18 | 0.028725 | 0.002754 | 0.333062 | 0.077522 |
| MmugDNA.3306.1.S1_at    | MmugDNA.3306.1  | 6.7   | 7.61  | 0.26 | 0.19 | -1.88 | 0.013536 | 0.02958  | 0.269615 | 0.213628 |
| MmugDNA.33060.1.S1_at   | MmugDNA.33060.1 | 10.44 | 10.5  | 3    | 0.16 | -1.04 | 0.553406 | 0.354235 | 0.812142 | 0.597105 |
| MmugDNA.33060.1.S1_x_at | MmugDNA.33060.1 | 10.12 | 10.45 | 2.82 | 0.19 | -1.26 | 0.56236  | 0.349224 | 0.817686 | 0.593263 |
| MmugDNA.33065.1.S1_at   | MmugDNA.33065.1 | 10.99 | 11.24 | 0.35 | 0.02 | -1.19 | 0.844406 | 0.527509 | 0.945333 | 0.716154 |
| MmugDNA.33067.1.S1_at   | MmugDNA.33067.1 | 4.79  | 5.11  | 0.45 | 0.2  | -1.25 | 0.774088 | 0.584731 | 0.916161 | 0.752515 |
| MmugDNA.33071.1.S1_at   | MmugDNA.33071.1 | 8.78  | 9.95  | 0.7  | 0.02 | -2.24 | 0.114539 | 0.353191 | 0.487606 | 0.596432 |
| MmugDNA.33079.1.S1_at   | MmugDNA.33079.1 | 6.08  | 5.88  | 0.14 | 0.04 | 1.14  | 0.243952 | 0.181051 | 0.609715 | 0.457562 |
| MmugDNA.33082.1.S1_s_at | MmugDNA.33082.1 | 9.56  | 9.6   | 0.18 | 0.04 | -1.03 | 0.899423 | 0.015006 | 0.965794 | 0.155713 |
| MmugDNA.33083.1.S1_at   | MmugDNA.33083.1 | 12.25 | 12.41 | 0.28 | 0.19 | -1.12 | 0.663074 | 0.317707 | 0.867092 | 0.57089  |
| MmugDNA.33085.1.S1_at   | MmugDNA.33085.1 | 3.9   | 4.16  | 0.06 | 0.27 | -1.2  | 0.681527 | 0.207665 | 0.875332 | 0.481906 |
| MmugDNA.33088.1.S1_at   | MmugDNA.33088.1 | 3.85  | 3.88  | 0.08 | 0.06 | -1.02 | 0.252651 | 0.477827 | 0.617608 | 0.683839 |
| MmugDNA.33089.1.S1_at   | MmugDNA.33089.1 | 10.14 | 10.36 | 0.7  | 0.16 | -1.16 | 0.853693 | 0.675684 | 0.948321 | 0.810429 |
| MmugDNA.33093.1.S1_at   | MmugDNA.33093.1 | 3.19  | 3.04  | 0.09 | 0.05 | 1.11  | 0.097971 | 0.05909  | 0.467271 | 0.289985 |
| MmugDNA.33095.1.S1_at   | MmugDNA.33095.1 | 3.36  | 3.36  | 0.11 | 0.35 | -1    | 0.280988 | 0.297064 | 0.639604 | 0.555996 |
| MmugDNA.33098.1.S1_at   | MmugDNA.33098.1 | 6     | 8.73  | 0.71 | 0.47 | -6.64 | 0.006357 | 0.001748 | 0.218572 | 0.062998 |
| MmugDNA.33099.1.S1_at   | MmugDNA.33099.1 | 10.19 | 10.59 | 0.19 | 0.13 | -1.32 | 0.029899 | 0.011276 | 0.33623  | 0.138076 |
| MmugDNA.3310.1.S1_at    | MmugDNA.3310.1  | 11.49 | 10.98 | 0.18 | 0.02 | 1.42  | 0.013867 | 0.002256 | 0.272841 | 0.069943 |
| MmugDNA.33114.1.S1_at   | MmugDNA.33114.1 | 4.41  | 4.76  | 0.15 | 0.16 | -1.27 | 0.043346 | 0.08891  | 0.371874 | 0.34275  |
| MmugDNA.33116.1.S1_at   | MmugDNA.33116.1 | 3.54  | 3.71  | 0.15 | 0.25 | -1.12 | 0.689642 | 0.68595  | 0.879045 | 0.816691 |
| MmugDNA.33119.1.S1_at   | MmugDNA.33119.1 | 8.93  | 9.44  | 0.63 | 0.07 | -1.42 | 0.698456 | 0.874669 | 0.882799 | 0.928837 |
| MmugDNA.33120.1.S1_x_at | MmugDNA.33120.1 | 4.78  | 4.43  | 0.51 | 0.27 | 1.27  | 0.254928 | 0.449369 | 0.619267 | 0.665021 |

|                         |                 |       |       |      |      |       |          |          |          |          |
|-------------------------|-----------------|-------|-------|------|------|-------|----------|----------|----------|----------|
| MmugDNA.33123.1.S1_at   | MmugDNA.33123.1 | 9.77  | 9.39  | 0.36 | 0.04 | 1.3   | 0.047592 | 0.002501 | 0.380705 | 0.074067 |
| MmugDNA.33130.1.S1_at   | MmugDNA.33130.1 | 9.49  | 9.65  | 0.23 | 0.11 | -1.12 | 0.320146 | 0.002391 | 0.669164 | 0.072347 |
| MmugDNA.33135.1.S1_at   | MmugDNA.33135.1 | 9.58  | 9.59  | 0.28 | 0.16 | -1.01 | 0.578177 | 0.482944 | 0.826177 | 0.687681 |
| MmugDNA.33136.1.S1_at   | MmugDNA.33136.1 | 3.33  | 3.24  | 0.08 | 0.13 | 1.06  | 0.179637 | 0.222806 | 0.552979 | 0.495734 |
| MmugDNA.33137.1.S1_at   | MmugDNA.33137.1 | 6.99  | 7.76  | 0.42 | 0.08 | -1.72 | 0.030571 | 0.0167   | 0.338095 | 0.163642 |
| MmugDNA.33139.1.S1_at   | MmugDNA.33139.1 | 5.62  | 4.82  | 0.46 | 0.55 | 1.74  | 0.283454 | 0.572964 | 0.641407 | 0.744895 |
| MmugDNA.33140.1.S1_at   | MmugDNA.33140.1 | 6     | 5.97  | 0.09 | 0.05 | 1.02  | 0.234239 | 0.309825 | 0.601579 | 0.565044 |
| MmugDNA.33141.1.S1_at   | MmugDNA.33141.1 | 8.54  | 8.74  | 0.19 | 0.09 | -1.15 | 0.037954 | 0.009464 | 0.358308 | 0.128094 |
| MmugDNA.33143.1.S1_at   | MmugDNA.33143.1 | 11.83 | 11.21 | 0.65 | 0.31 | 1.54  | 0.075983 | 0.184713 | 0.437134 | 0.460645 |
| MmugDNA.33149.1.S1_s_at | MmugDNA.33149.1 | 9.51  | 10.44 | 0.72 | 0.04 | -1.9  | 0.272353 | 0.089405 | 0.632141 | 0.343637 |
| MmugDNA.33159.1.S1_s_at | MmugDNA.33159.1 | 9.16  | 9.61  | 0.49 | 0.02 | -1.37 | 0.584133 | 0.485451 | 0.829466 | 0.68914  |
| MmugDNA.33161.1.S1_at   | MmugDNA.33161.1 | 3.96  | 3.77  | 0.22 | 0.09 | 1.14  | 0.471693 | 0.584201 | 0.76658  | 0.75229  |
| MmugDNA.33162.1.S1_at   | MmugDNA.33162.1 | 12.33 | 12.17 | 0.21 | 0.27 | 1.12  | 0.187726 | 0.006537 | 0.559968 | 0.109634 |
| MmugDNA.33163.1.S1_at   | MmugDNA.33163.1 | 13.26 | 13.17 | 0.08 | 0.04 | 1.07  | 0.142666 | 0.015693 | 0.517642 | 0.158742 |
| MmugDNA.33171.1.S1_at   | MmugDNA.33171.1 | 6.89  | 6.68  | 0.73 | 0.17 | 1.15  | 0.228458 | 0.05211  | 0.597474 | 0.273866 |
| MmugDNA.33172.1.S1_at   | MmugDNA.33172.1 | 11.71 | 11.73 | 0.52 | 0.05 | -1.01 | 0.868029 | 0.520083 | 0.953841 | 0.711472 |
| MmugDNA.33179.1.S1_s_at | MmugDNA.33179.1 | 7.2   | 7.37  | 0.12 | 0.07 | -1.12 | 0.163733 | 0.013187 | 0.536523 | 0.14735  |
| MmugDNA.33183.1.S1_at   | MmugDNA.33183.1 | 10.04 | 10.61 | 1.03 | 0.12 | -1.49 | 0.393228 | 0.134482 | 0.719034 | 0.406626 |
| MmugDNA.33184.1.S1_at   | MmugDNA.33184.1 | 9.95  | 10.44 | 0.07 | 0.05 | -1.4  | 0.000379 | 0.000373 | 0.137028 | 0.037273 |
| MmugDNA.33191.1.S1_at   | MmugDNA.33191.1 | 12.39 | 12.39 | 0.1  | 0.03 | -1    | 0.281547 | 0.055879 | 0.640011 | 0.282172 |
| MmugDNA.33193.1.S1_at   | MmugDNA.33193.1 | 6     | 5.84  | 0.15 | 0.04 | 1.11  | 0.368891 | 0.086498 | 0.703852 | 0.33907  |
| MmugDNA.33194.1.S1_at   | MmugDNA.33194.1 | 6.85  | 6.76  | 0.18 | 0.04 | 1.06  | 0.3454   | 0.525106 | 0.687499 | 0.714766 |
| MmugDNA.33195.1.S1_at   | MmugDNA.33195.1 | 10.69 | 10.61 | 1.09 | 0.25 | 1.06  | 0.846352 | 0.270499 | 0.946139 | 0.535835 |
| MmugDNA.33210.1.S1_at   | MmugDNA.33210.1 | 10.67 | 10.66 | 0.49 | 0.04 | 1.01  | 0.402294 | 0.002115 | 0.724848 | 0.068023 |
| MmugDNA.33212.1.S1_at   | MmugDNA.33212.1 | 10.34 | 10.37 | 0.58 | 0.05 | -1.02 | 0.877927 | 0.982178 | 0.957532 | 0.990279 |
| MmugDNA.33214.1.S1_at   | MmugDNA.33214.1 | 9.91  | 9.73  | 0.96 | 0.16 | 1.13  | 0.744983 | 0.02319  | 0.902816 | 0.190776 |
| MmugDNA.33216.1.S1_s_at | MmugDNA.33216.1 | 11.88 | 11.4  | 0.24 | 0.08 | 1.39  | 0.087054 | 0.098394 | 0.454785 | 0.356531 |
| MmugDNA.33218.1.S1_at   | MmugDNA.33218.1 | 11.94 | 11.28 | 0.19 | 0.13 | 1.57  | 0.010124 | 0.00405  | 0.24671  | 0.090281 |
| MmugDNA.33218.1.S1_s_at | MmugDNA.33218.1 | 12.05 | 11.12 | 0.11 | 0.04 | 1.9   | 0.000114 | 0.00069  | 0.108151 | 0.044166 |
| MmugDNA.33225.1.S1_at   | MmugDNA.33225.1 | 7.04  | 7.05  | 0.1  | 0.02 | -1    | 0.953872 | 0.610741 | 0.984675 | 0.768844 |
| MmugDNA.33226.1.S1_at   | MmugDNA.33226.1 | 9.7   | 10.09 | 0.33 | 0.21 | -1.3  | 0.412433 | 0.044858 | 0.731995 | 0.256375 |
| MmugDNA.33236.1.S1_at   | MmugDNA.33236.1 | 9.68  | 9.89  | 0.25 | 0.17 | -1.16 | 0.238299 | 0.092791 | 0.605262 | 0.34899  |
| MmugDNA.33237.1.S1_at   | MmugDNA.33237.1 | 7.01  | 6.99  | 0.09 | 0.11 | 1.01  | 0.553207 | 0.587196 | 0.812025 | 0.754083 |
| MmugDNA.33240.1.S1_at   | MmugDNA.33240.1 | 6.76  | 6.84  | 1.53 | 0.14 | -1.06 | 0.869175 | 0.48647  | 0.954244 | 0.68984  |
| MmugDNA.33242.1.S1_at   | MmugDNA.33242.1 | 10.94 | 10.5  | 0.38 | 0.2  | 1.36  | 0.093168 | 0.106574 | 0.462037 | 0.369107 |
| MmugDNA.33249.1.S1_at   | MmugDNA.33249.1 | 3.36  | 3.55  | 0.08 | 0.07 | -1.14 | 0.191794 | 0.099192 | 0.562944 | 0.357379 |
| MmugDNA.33251.1.S1_at   | MmugDNA.33251.1 | 12.18 | 11.89 | 0.16 | 0.12 | 1.22  | 0.041121 | 0.009691 | 0.365675 | 0.129497 |
| MmugDNA.33252.1.S1_at   | MmugDNA.33252.1 | 10.47 | 10.55 | 0.41 | 0.05 | -1.06 | 0.853399 | 0.011922 | 0.948299 | 0.141304 |
| MmugDNA.33255.1.S1_at   | MmugDNA.33255.1 | 12.21 | 11.79 | 0.25 | 0.06 | 1.34  | 0.094593 | 0.00687  | 0.463796 | 0.111992 |
| MmugDNA.33260.1.S1_s_at | MmugDNA.33260.1 | 10.28 | 10.31 | 0.09 | 0.02 | -1.02 | 0.683352 | 0.032814 | 0.876089 | 0.22427  |
| MmugDNA.33262.1.S1_at   | MmugDNA.33262.1 | 6.13  | 6.19  | 0.1  | 0.09 | -1.05 | 0.429122 | 0.177504 | 0.742138 | 0.453888 |
| MmugDNA.33263.1.S1_at   | MmugDNA.33263.1 | 8.44  | 8.61  | 0.37 | 0.16 | -1.12 | 0.69059  | 0.470649 | 0.879504 | 0.67895  |
| MmugDNA.33270.1.S1_at   | MmugDNA.33270.1 | 8.67  | 9.14  | 0.47 | 0.08 | -1.39 | 0.074006 | 0.044927 | 0.434724 | 0.25646  |



|                         |                 |       |       |      |      |       |          |          |          |          |
|-------------------------|-----------------|-------|-------|------|------|-------|----------|----------|----------|----------|
| MmugDNA.33272.1.S1_at   | MmugDNA.33272.1 | 9.9   | 9.82  | 0.43 | 0.06 | 1.06  | 0.794891 | 0.730622 | 0.924696 | 0.844055 |
| MmugDNA.33274.1.S1_at   | MmugDNA.33274.1 | 11.77 | 11.96 | 0.24 | 0.04 | -1.14 | 0.242853 | 0.381504 | 0.608808 | 0.617691 |
| MmugDNA.33276.1.S1_at   | MmugDNA.33276.1 | 8.39  | 8.67  | 0.15 | 0.03 | -1.22 | 0.021804 | 0.000613 | 0.309672 | 0.042275 |
| MmugDNA.33279.1.S1_at   | MmugDNA.33279.1 | 3.57  | 3.59  | 0.08 | 0.13 | -1.02 | 0.636988 | 0.006543 | 0.855316 | 0.109667 |
| MmugDNA.33281.1.S1_at   | MmugDNA.33281.1 | 8.67  | 8.8   | 0.08 | 0.06 | -1.1  | 0.037356 | 0.000234 | 0.357066 | 0.03241  |
| MmugDNA.33283.1.S1_at   | MmugDNA.33283.1 | 6.67  | 6.54  | 0.57 | 0.03 | 1.09  | 0.806583 | 0.309677 | 0.929839 | 0.565005 |
| MmugDNA.33286.1.S1_at   | MmugDNA.33286.1 | 9.49  | 9.98  | 0.31 | 0.06 | -1.4  | 0.019989 | 0.011846 | 0.303174 | 0.140973 |
| MmugDNA.33290.1.S1_at   | MmugDNA.33290.1 | 6.08  | 6.21  | 0.08 | 0.06 | -1.09 | 0.133694 | 0.185702 | 0.508012 | 0.46163  |
| MmugDNA.33292.1.S1_at   | MmugDNA.33292.1 | 9.74  | 9.82  | 1.21 | 0.03 | -1.06 | 0.857101 | 0.753554 | 0.94962  | 0.856527 |
| MmugDNA.33296.1.S1_at   | MmugDNA.33296.1 | 12.18 | 12.3  | 0.75 | 0.02 | -1.09 | 0.54649  | 0.660537 | 0.808546 | 0.801398 |
| MmugDNA.333.1.S1_at     | MmugDNA.333.1   | 6.92  | 7.28  | 0.27 | 0.13 | -1.29 | 0.104497 | 0.099119 | 0.475567 | 0.357258 |
| MmugDNA.33302.1.S1_at   | MmugDNA.33302.1 | 11.03 | 11.28 | 0.16 | 0.01 | -1.19 | 0.061357 | 0.015017 | 0.410536 | 0.155736 |
| MmugDNA.33303.1.S1_at   | MmugDNA.33303.1 | 13.38 | 13.37 | 0.15 | 0.02 | 1.01  | 0.921858 | 0.994904 | 0.973627 | 0.996846 |
| MmugDNA.33307.1.S1_s_at | MmugDNA.33307.1 | 4.42  | 4.49  | 0.2  | 0.07 | -1.05 | 0.523438 | 0.873059 | 0.795639 | 0.927822 |
| MmugDNA.33308.1.S1_at   | MmugDNA.33308.1 | 9.93  | 9.84  | 0.06 | 0.17 | 1.07  | 0.319917 | 0.305324 | 0.669028 | 0.562304 |
| MmugDNA.3331.1.S1_at    | MmugDNA.3331.1  | 6.7   | 7.05  | 2.02 | 0.49 | -1.27 | 0.819772 | 0.06235  | 0.935061 | 0.296503 |
| MmugDNA.33312.1.S1_at   | MmugDNA.33312.1 | 11.46 | 11.55 | 0.22 | 0.05 | -1.07 | 0.857095 | 0.743689 | 0.94962  | 0.851456 |
| MmugDNA.33318.1.S1_at   | MmugDNA.33318.1 | 11.04 | 11.32 | 0.09 | 0.09 | -1.22 | 0.006335 | 0.000293 | 0.218505 | 0.034892 |
| MmugDNA.33320.1.S1_at   | MmugDNA.33320.1 | 11.75 | 11.58 | 0.29 | 0.09 | 1.12  | 0.399654 | 0.392835 | 0.72327  | 0.625854 |
| MmugDNA.33323.1.S1_at   | MmugDNA.33323.1 | 8.08  | 8.48  | 0.24 | 0.2  | -1.33 | 0.058182 | 0.007533 | 0.403804 | 0.116336 |
| MmugDNA.33325.1.S1_at   | MmugDNA.33325.1 | 5.97  | 5.58  | 0.09 | 0.22 | 1.31  | 0.085559 | 0.190828 | 0.452672 | 0.466228 |
| MmugDNA.33326.1.S1_at   | MmugDNA.33326.1 | 7.02  | 7.12  | 0.84 | 0.07 | -1.07 | 0.962585 | 0.893382 | 0.987925 | 0.939163 |
| MmugDNA.33327.1.S1_s_at | MmugDNA.33327.1 | 11.81 | 12.05 | 1.83 | 0.03 | -1.18 | 0.290333 | 0.387133 | 0.646903 | 0.621935 |
| MmugDNA.33329.1.S1_at   | MmugDNA.33329.1 | 5.55  | 6.18  | 1.13 | 0.23 | -1.54 | 0.973168 | 0.989915 | 0.991241 | 0.994222 |
| MmugDNA.33330.1.S1_at   | MmugDNA.33330.1 | 6.84  | 7.03  | 0.45 | 0.05 | -1.14 | 0.808561 | 0.56063  | 0.930707 | 0.736889 |
| MmugDNA.33331.1.S1_at   | MmugDNA.33331.1 | 3.39  | 3.64  | 0.16 | 0.03 | -1.19 | 0.222218 | 0.367685 | 0.591828 | 0.607369 |
| MmugDNA.33333.1.S1_at   | MmugDNA.33333.1 | 12.19 | 12.18 | 0.21 | 0.04 | 1.01  | 0.75829  | 0.84374  | 0.909043 | 0.91098  |
| MmugDNA.33336.1.S1_at   | MmugDNA.33336.1 | 6     | 5.86  | 0.16 | 0.17 | 1.1   | 0.748924 | 0.05584  | 0.904734 | 0.282161 |
| MmugDNA.33338.1.S1_at   | MmugDNA.33338.1 | 5.54  | 6.82  | 0.69 | 0.18 | -2.42 | 0.034599 | 0.019069 | 0.350124 | 0.173701 |
| MmugDNA.33341.1.S1_at   | MmugDNA.33341.1 | 4.32  | 5.04  | 0.07 | 0.23 | -1.65 | 0.005627 | 0.002998 | 0.209565 | 0.079958 |
| MmugDNA.33343.1.S1_at   | MmugDNA.33343.1 | 3.24  | 3.28  | 0.16 | 0.13 | -1.03 | 0.395431 | 0.489517 | 0.72046  | 0.691824 |
| MmugDNA.33360.1.S1_at   | MmugDNA.33360.1 | 2.88  | 2.94  | 0.18 | 0.12 | -1.05 | 0.859212 | 0.896553 | 0.950315 | 0.940905 |
| MmugDNA.33366.1.S1_s_at | MmugDNA.33366.1 | 8.3   | 8.07  | 0.31 | 0.04 | 1.17  | 0.190555 | 0.169678 | 0.561786 | 0.446263 |
| MmugDNA.33367.1.S1_at   | MmugDNA.33367.1 | 5.61  | 5.37  | 0.06 | 0.13 | 1.18  | 0.074187 | 0.521601 | 0.434946 | 0.712505 |
| MmugDNA.33370.1.S1_at   | MmugDNA.33370.1 | 12.81 | 12.87 | 0.23 | 0.02 | -1.04 | 0.611062 | 0.626625 | 0.842323 | 0.779896 |
| MmugDNA.33370.1.S1_s_at | MmugDNA.33370.1 | 11.95 | 11.97 | 0.32 | 0.05 | -1.01 | 0.874928 | 0.618821 | 0.956568 | 0.774185 |
| MmugDNA.33371.1.S1_at   | MmugDNA.33371.1 | 6.5   | 6.54  | 0.12 | 0.13 | -1.03 | 0.874283 | 0.035319 | 0.956448 | 0.232207 |
| MmugDNA.33387.1.S1_at   | MmugDNA.33387.1 | 9.77  | 9.4   | 0.22 | 0.29 | 1.29  | 0.720494 | 0.00011  | 0.891614 | 0.028099 |
| MmugDNA.33390.1.S1_at   | MmugDNA.33390.1 | 5.94  | 5.83  | 0.1  | 0.03 | 1.08  | 0.083204 | 0.330948 | 0.448962 | 0.579631 |
| MmugDNA.33390.1.S1_s_at | MmugDNA.33390.1 | 5.83  | 5.59  | 0.14 | 0.01 | 1.18  | 0.116978 | 0.110493 | 0.490136 | 0.374684 |
| MmugDNA.33392.1.S1_at   | MmugDNA.33392.1 | 12.45 | 12.28 | 0.07 | 0.01 | 1.12  | 0.016118 | 0.017077 | 0.285918 | 0.165589 |
| MmugDNA.33395.1.S1_at   | MmugDNA.33395.1 | 4.32  | 4.79  | 0.1  | 0.06 | -1.39 | 0.002641 | 0.296253 | 0.18209  | 0.555423 |
| MmugDNA.334.1.S1_at     | MmugDNA.334.1   | 10    | 7.12  | 2.25 | 0.26 | 7.36  | 0.181856 | 0.087623 | 0.554973 | 0.340878 |

|                         |                 |       |       |      |      |       |          |          |          |          |
|-------------------------|-----------------|-------|-------|------|------|-------|----------|----------|----------|----------|
| MmugDNA.33409.1.S1_at   | MmugDNA.33409.1 | 7.73  | 7.72  | 0.03 | 0.05 | 1.01  | 0.41245  | 0.862404 | 0.731995 | 0.921765 |
| MmugDNA.33410.1.S1_at   | MmugDNA.33410.1 | 9.85  | 9.58  | 0.3  | 0.14 | 1.21  | 0.595567 | 0.356863 | 0.835491 | 0.598641 |
| MmugDNA.3342.1.S1_at    | MmugDNA.3342.1  | 10.26 | 10.67 | 0.54 | 0.07 | -1.33 | 0.442321 | 0.513147 | 0.749969 | 0.706796 |
| MmugDNA.33423.1.S1_at   | MmugDNA.33423.1 | 5.37  | 5.19  | 0.14 | 0.21 | 1.13  | 0.262523 | 0.346567 | 0.624714 | 0.591427 |
| MmugDNA.33426.1.S1_at   | MmugDNA.33426.1 | 10.18 | 10.64 | 0.27 | 0.05 | -1.37 | 0.018055 | 0.086161 | 0.295234 | 0.33853  |
| MmugDNA.33429.1.S1_at   | MmugDNA.33429.1 | 12.01 | 12.05 | 0.4  | 0.04 | -1.03 | 0.979886 | 0.98879  | 0.993606 | 0.993611 |
| MmugDNA.33430.1.S1_at   | MmugDNA.33430.1 | 12.2  | 11.73 | 0.28 | 0.04 | 1.38  | 0.114992 | 0.070841 | 0.488167 | 0.31232  |
| MmugDNA.33433.1.S1_at   | MmugDNA.33433.1 | 8.61  | 8.77  | 0.35 | 0.32 | -1.12 | 0.503642 | 0.042467 | 0.784375 | 0.250702 |
| MmugDNA.33434.1.S1_at   | MmugDNA.33434.1 | 7.5   | 7.27  | 0.48 | 0.05 | 1.17  | 0.755007 | 0.095849 | 0.907619 | 0.352962 |
| MmugDNA.33436.1.S1_at   | MmugDNA.33436.1 | 12.7  | 12.31 | 0.8  | 0.12 | 1.32  | 0.802067 | 0.641253 | 0.927856 | 0.789506 |
| MmugDNA.33438.1.S1_at   | MmugDNA.33438.1 | 10.66 | 10.72 | 0.09 | 0.19 | -1.04 | 0.592384 | 0.769045 | 0.833858 | 0.865823 |
| MmugDNA.33439.1.S1_at   | MmugDNA.33439.1 | 4.45  | 4.42  | 0.08 | 0.01 | 1.02  | 0.873103 | 0.681572 | 0.95598  | 0.814092 |
| MmugDNA.33443.1.S1_at   | MmugDNA.33443.1 | 7.33  | 7.48  | 0.45 | 0.21 | -1.11 | 0.661116 | 0.900637 | 0.865954 | 0.943473 |
| MmugDNA.33449.1.S1_at   | MmugDNA.33449.1 | 5.56  | 6.67  | 1.32 | 0.18 | -2.15 | 0.234231 | 0.308698 | 0.601579 | 0.564619 |
| MmugDNA.33451.1.S1_at   | MmugDNA.33451.1 | 5.19  | 5.18  | 0.19 | 0.09 | 1.01  | 0.372333 | 0.117465 | 0.705567 | 0.385175 |
| MmugDNA.33460.1.S1_at   | MmugDNA.33460.1 | 10.64 | 11.04 | 0.09 | 0.09 | -1.33 | 0.008185 | 0.009276 | 0.232005 | 0.127101 |
| MmugDNA.33463.1.S1_at   | MmugDNA.33463.1 | 11.61 | 11.68 | 0.26 | 0.15 | -1.05 | 0.239278 | 0.037517 | 0.605786 | 0.23801  |
| MmugDNA.33465.1.S1_s_at | MmugDNA.33465.1 | 7.54  | 7.23  | 0.1  | 0.28 | 1.24  | 0.05815  | 0.017317 | 0.403716 | 0.166509 |
| MmugDNA.33466.1.S1_s_at | MmugDNA.33466.1 | 11.46 | 11.79 | 0.32 | 0.05 | -1.25 | 0.174756 | 0.136058 | 0.548031 | 0.408363 |
| MmugDNA.33467.1.S1_at   | MmugDNA.33467.1 | 5.31  | 5.16  | 0.15 | 0.03 | 1.11  | 0.17901  | 0.141396 | 0.552029 | 0.414874 |
| MmugDNA.33472.1.S1_at   | MmugDNA.33472.1 | 5.31  | 5.53  | 1.95 | 0.51 | -1.17 | 0.483838 | 0.312078 | 0.77333  | 0.566904 |
| MmugDNA.33483.1.S1_at   | MmugDNA.33483.1 | 12.14 | 12.05 | 0.3  | 0    | 1.06  | 0.825301 | 0.764576 | 0.937201 | 0.863128 |
| MmugDNA.33484.1.S1_at   | MmugDNA.33484.1 | 6.57  | 6.88  | 0.55 | 0.21 | -1.24 | 0.367244 | 0.501234 | 0.702778 | 0.699458 |
| MmugDNA.3350.1.S1_at    | MmugDNA.3350.1  | 10.4  | 10    | 0.15 | 0.05 | 1.32  | 0.012417 | 0.099312 | 0.262146 | 0.357584 |
| MmugDNA.33513.1.S1_at   | MmugDNA.33513.1 | 9.33  | 9.77  | 0.44 | 0.21 | -1.35 | 0.22614  | 0.258952 | 0.5953   | 0.526175 |
| MmugDNA.33515.1.S1_at   | MmugDNA.33515.1 | 6.48  | 6.38  | 0.24 | 0.11 | 1.07  | 0.569239 | 0.244553 | 0.82131  | 0.514375 |
| MmugDNA.33518.1.S1_at   | MmugDNA.33518.1 | 10.94 | 10.95 | 1.12 | 0.03 | -1.01 | 0.837979 | 0.365943 | 0.941963 | 0.605798 |
| MmugDNA.33529.1.S1_at   | MmugDNA.33529.1 | 6.34  | 6.28  | 0.54 | 0.14 | 1.04  | 0.899755 | 0.240186 | 0.965967 | 0.51084  |
| MmugDNA.33535.1.S1_at   | MmugDNA.33535.1 | 5.43  | 5.63  | 0.51 | 0.12 | -1.14 | 0.729022 | 0.443935 | 0.895586 | 0.661553 |
| MmugDNA.33536.1.S1_at   | MmugDNA.33536.1 | 4.43  | 5.07  | 0.23 | 0.27 | -1.57 | 0.061821 | 0.083282 | 0.411556 | 0.333372 |
| MmugDNA.33537.1.S1_at   | MmugDNA.33537.1 | 6.16  | 7.09  | 0.75 | 0.36 | -1.89 | 0.217307 | 0.06464  | 0.587227 | 0.300314 |
| MmugDNA.33538.1.S1_at   | MmugDNA.33538.1 | 6.07  | 6     | 0.04 | 0.15 | 1.05  | 0.413374 | 0.843877 | 0.732218 | 0.911072 |
| MmugDNA.33538.1.S1_s_at | MmugDNA.33538.1 | 4.82  | 4.74  | 0.16 | 0.07 | 1.05  | 0.437186 | 0.523151 | 0.746719 | 0.713528 |
| MmugDNA.33541.1.S1_at   | MmugDNA.33541.1 | 5.24  | 4.85  | 0.34 | 0.15 | 1.31  | 0.143668 | 0.09569  | 0.519043 | 0.3527   |
| MmugDNA.33543.1.S1_at   | MmugDNA.33543.1 | 4.78  | 5.15  | 0.18 | 0.42 | -1.29 | 0.343676 | 0.143854 | 0.686779 | 0.417712 |
| MmugDNA.33544.1.S1_at   | MmugDNA.33544.1 | 10.23 | 10.49 | 0.19 | 0.08 | -1.19 | 0.16791  | 0.171801 | 0.5405   | 0.448198 |
| MmugDNA.33546.1.S1_at   | MmugDNA.33546.1 | 8.79  | 8.99  | 0.61 | 0.07 | -1.15 | 0.664376 | 0.863825 | 0.867683 | 0.922697 |
| MmugDNA.33558.1.S1_s_at | MmugDNA.33558.1 | 5.6   | 6.65  | 0.4  | 0.47 | -2.07 | 0.07401  | 0.157978 | 0.434724 | 0.433725 |
| MmugDNA.33562.1.S1_at   | MmugDNA.33562.1 | 5.96  | 6.17  | 0.63 | 0.09 | -1.15 | 0.871455 | 0.628362 | 0.955422 | 0.781113 |
| MmugDNA.33563.1.S1_at   | MmugDNA.33563.1 | 8.64  | 9.03  | 0.34 | 0.95 | -1.3  | 0.163328 | 0.207906 | 0.536063 | 0.482049 |
| MmugDNA.33563.1.S1_s_at | MmugDNA.33563.1 | 6.8   | 7.32  | 0.27 | 0.81 | -1.43 | 0.13099  | 0.145875 | 0.5054   | 0.419888 |
| MmugDNA.33569.1.S1_at   | MmugDNA.33569.1 | 9.99  | 9.92  | 0.51 | 0.36 | 1.05  | 0.837735 | 0.089642 | 0.941813 | 0.343842 |
| MmugDNA.33571.1.S1_at   | MmugDNA.33571.1 | 5.2   | 5.02  | 0.29 | 0.03 | 1.13  | 0.371472 | 0.532694 | 0.705567 | 0.719197 |

|                         |                 |       |       |      |      |       |          |          |          |          |
|-------------------------|-----------------|-------|-------|------|------|-------|----------|----------|----------|----------|
| MmugDNA.33572.1.S1_at   | MmugDNA.33572.1 | 4.06  | 4.16  | 0.21 | 0.63 | -1.07 | 0.305    | 0.373224 | 0.658544 | 0.612045 |
| MmugDNA.33573.1.S1_at   | MmugDNA.33573.1 | 9.73  | 10.07 | 0.06 | 0.13 | -1.26 | 0.006567 | 0.117117 | 0.219864 | 0.384557 |
| MmugDNA.33573.1.S1_s_at | MmugDNA.33573.1 | 9.44  | 9.94  | 0.05 | 0.09 | -1.41 | 0.000973 | 0.041281 | 0.155374 | 0.247995 |
| MmugDNA.33589.1.S1_at   | MmugDNA.33589.1 | 8.68  | 10.35 | 1.32 | 0.31 | -3.17 | 0.223358 | 0.275203 | 0.592569 | 0.53962  |
| MmugDNA.33590.1.S1_at   | MmugDNA.33590.1 | 10.02 | 10.51 | 0.14 | 0.07 | -1.41 | 0.008108 | 0.001595 | 0.232005 | 0.06044  |
| MmugDNA.33592.1.S1_at   | MmugDNA.33592.1 | 7.7   | 8.73  | 0.78 | 0.13 | -2.05 | 0.214628 | 0.437183 | 0.585085 | 0.656591 |
| MmugDNA.33593.1.S1_at   | MmugDNA.33593.1 | 4.81  | 4.98  | 0.11 | 0.07 | -1.13 | 0.130661 | 0.427341 | 0.505076 | 0.649175 |
| MmugDNA.33599.1.S1_at   | MmugDNA.33599.1 | 11.07 | 10.46 | 0.11 | 0.16 | 1.53  | 0.004864 | 0.009917 | 0.203301 | 0.130767 |
| MmugDNA.33600.1.S1_at   | MmugDNA.33600.1 | 6.55  | 6.43  | 0.23 | 0.02 | 1.09  | 0.544847 | 0.708524 | 0.807495 | 0.830943 |
| MmugDNA.33607.1.S1_at   | MmugDNA.33607.1 | 11.09 | 11.08 | 0.15 | 0.2  | 1.01  | 0.362798 | 0.065617 | 0.699596 | 0.301554 |
| MmugDNA.33607.1.S1_s_at | MmugDNA.33607.1 | 10.62 | 10.6  | 0.15 | 0.15 | -1.01 | 0.274544 | 0.118986 | 0.633927 | 0.387269 |
| MmugDNA.33609.1.S1_at   | MmugDNA.33609.1 | 10.5  | 10.48 | 0.14 | 0.05 | 1.01  | 0.527745 | 0.60585  | 0.797225 | 0.765513 |
| MmugDNA.33612.1.S1_at   | MmugDNA.33612.1 | 4.66  | 4.95  | 0.22 | 0.36 | -1.22 | 0.881969 | 0.001247 | 0.95911  | 0.054879 |
| MmugDNA.33618.1.S1_at   | MmugDNA.33618.1 | 7.49  | 7.57  | 0.55 | 0.05 | -1.06 | 0.498797 | 0.16357  | 0.781838 | 0.439765 |
| MmugDNA.33619.1.S1_at   | MmugDNA.33619.1 | 12.01 | 11.97 | 0.17 | 0.03 | 1.03  | 0.239319 | 0.220083 | 0.605811 | 0.493519 |
| MmugDNA.33625.1.S1_at   | MmugDNA.33625.1 | 7.53  | 9.15  | 2.76 | 0.48 | -3.08 | 0.199319 | 0.053606 | 0.571138 | 0.277182 |
| MmugDNA.33630.1.S1_at   | MmugDNA.33630.1 | 8.41  | 8.64  | 0.68 | 0.31 | -1.17 | 0.473178 | 0.011458 | 0.767466 | 0.138479 |
| MmugDNA.33633.1.S1_at   | MmugDNA.33633.1 | 9.31  | 8.63  | 0.24 | 0.13 | 1.6   | 0.01143  | 0.001375 | 0.254838 | 0.05691  |
| MmugDNA.33640.1.S1_at   | MmugDNA.33640.1 | 6.95  | 6.12  | 0.44 | 0.05 | 1.78  | 0.012633 | 0.00292  | 0.263441 | 0.079396 |
| MmugDNA.33643.1.S1_at   | MmugDNA.33643.1 | 5.1   | 5.03  | 0.2  | 0.06 | 1.05  | 0.58088  | 0.66688  | 0.827317 | 0.804864 |
| MmugDNA.33644.1.S1_at   | MmugDNA.33644.1 | 9.9   | 9.5   | 2.05 | 0.18 | 1.32  | 0.955024 | 0.414136 | 0.985067 | 0.640063 |
| MmugDNA.33646.1.S1_at   | MmugDNA.33646.1 | 6.52  | 6.2   | 0.33 | 0.1  | 1.25  | 0.194629 | 0.258385 | 0.565144 | 0.525642 |
| MmugDNA.33653.1.S1_at   | MmugDNA.33653.1 | 4.94  | 5.72  | 0.63 | 0.45 | -1.72 | 0.197298 | 0.090291 | 0.568336 | 0.3447   |
| MmugDNA.33655.1.S1_at   | MmugDNA.33655.1 | 11.41 | 11.67 | 0.4  | 0.01 | -1.19 | 0.344688 | 0.387917 | 0.686997 | 0.622509 |
| MmugDNA.33658.1.S1_at   | MmugDNA.33658.1 | 7.2   | 7.12  | 0.06 | 0.04 | 1.06  | 0.067094 | 0.242908 | 0.42315  | 0.513284 |
| MmugDNA.33659.1.S1_at   | MmugDNA.33659.1 | 9.01  | 9.28  | 0.43 | 0.23 | -1.21 | 0.699169 | 0.241526 | 0.883066 | 0.512152 |
| MmugDNA.33661.1.S1_at   | MmugDNA.33661.1 | 12.14 | 11.32 | 0.85 | 0.11 | 1.76  | 0.59764  | 0.447935 | 0.836481 | 0.663902 |
| MmugDNA.33666.1.S1_at   | MmugDNA.33666.1 | 11.4  | 11.56 | 0.18 | 0.07 | -1.12 | 0.067261 | 0.027161 | 0.423412 | 0.205893 |
| MmugDNA.33669.1.S1_at   | MmugDNA.33669.1 | 4.73  | 4.66  | 0.07 | 0.12 | 1.05  | 0.139482 | 0.041819 | 0.514956 | 0.249099 |
| MmugDNA.33670.1.S1_at   | MmugDNA.33670.1 | 6.78  | 6.78  | 0.1  | 0.06 | -1.01 | 0.511441 | 0.855007 | 0.78871  | 0.917393 |
| MmugDNA.33675.1.S1_at   | MmugDNA.33675.1 | 11.32 | 11.22 | 0.91 | 0.07 | 1.07  | 0.465349 | 0.206038 | 0.763035 | 0.480273 |
| MmugDNA.33677.1.S1_at   | MmugDNA.33677.1 | 7.24  | 7.15  | 0.08 | 0.05 | 1.06  | 0.156329 | 0.60067  | 0.529536 | 0.762228 |
| MmugDNA.33678.1.S1_at   | MmugDNA.33678.1 | 8.31  | 7.47  | 0.35 | 0.14 | 1.79  | 0.02858  | 0.121515 | 0.332627 | 0.39064  |
| MmugDNA.33685.1.S1_at   | MmugDNA.33685.1 | 12.02 | 11.41 | 0.09 | 0.14 | 1.52  | 0.00345  | 0.000749 | 0.195142 | 0.045119 |
| MmugDNA.3369.1.S1_at    | MmugDNA.3369.1  | 9.37  | 9.44  | 0.86 | 0.08 | -1.05 | 0.853713 | 0.365883 | 0.948321 | 0.605775 |
| MmugDNA.33695.1.S1_at   | MmugDNA.33695.1 | 7.99  | 8.49  | 0.03 | 0.28 | -1.42 | 0.116232 | 0.134587 | 0.489568 | 0.406629 |
| MmugDNA.337.1.S1_at     | MmugDNA.337.1   | 4.36  | 4.35  | 0.17 | 0.34 | 1.01  | 0.712251 | 0.349768 | 0.887927 | 0.593578 |
| MmugDNA.3370.1.S1_at    | MmugDNA.3370.1  | 8.64  | 7.92  | 0.41 | 0.19 | 1.65  | 0.113001 | 0.254826 | 0.486386 | 0.523051 |
| MmugDNA.33712.1.S1_at   | MmugDNA.33712.1 | 10.53 | 10.27 | 0.19 | 0.05 | 1.2   | 0.038615 | 0.019239 | 0.359972 | 0.174494 |
| MmugDNA.33714.1.S1_at   | MmugDNA.33714.1 | 9.48  | 9.27  | 0.16 | 0.05 | 1.15  | 0.097709 | 0.071186 | 0.466712 | 0.31311  |
| MmugDNA.33715.1.S1_at   | MmugDNA.33715.1 | 5.6   | 6.17  | 0.96 | 0.28 | -1.48 | 0.295622 | 0.083836 | 0.651318 | 0.33469  |
| MmugDNA.33723.1.S1_at   | MmugDNA.33723.1 | 7.04  | 7.27  | 0.27 | 0.17 | -1.17 | 0.254138 | 0.033066 | 0.61872  | 0.225068 |
| MmugDNA.33729.1.S1_at   | MmugDNA.33729.1 | 7.09  | 7.05  | 0.27 | 0.02 | 1.03  | 0.26176  | 0.465234 | 0.624034 | 0.675638 |

|                         |                 |       |       |      |      |       |          |          |          |          |
|-------------------------|-----------------|-------|-------|------|------|-------|----------|----------|----------|----------|
| MmugDNA.33732.1.S1_s_at | MmugDNA.33732.1 | 8.78  | 8.98  | 0.15 | 0.2  | -1.15 | 0.114211 | 0.128964 | 0.487585 | 0.400429 |
| MmugDNA.33737.1.S1_at   | MmugDNA.33737.1 | 8.05  | 8.79  | 0.49 | 0.07 | -1.66 | 0.157414 | 0.203921 | 0.530565 | 0.478164 |
| MmugDNA.33738.1.S1_at   | MmugDNA.33738.1 | 11.91 | 12.03 | 0.07 | 0.02 | -1.09 | 0.054042 | 0.03732  | 0.395747 | 0.237622 |
| MmugDNA.33746.1.S1_at   | MmugDNA.33746.1 | 7.3   | 7.53  | 0.22 | 0.15 | -1.17 | 0.337911 | 0.06702  | 0.682728 | 0.304872 |
| MmugDNA.33751.1.S1_at   | MmugDNA.33751.1 | 7.36  | 7.09  | 0.44 | 0.17 | 1.2   | 0.812897 | 0.205004 | 0.932245 | 0.479296 |
| MmugDNA.33762.1.S1_at   | MmugDNA.33762.1 | 8.3   | 9.35  | 0.56 | 0.14 | -2.07 | 0.08972  | 0.070533 | 0.457893 | 0.311777 |
| MmugDNA.33773.1.S1_at   | MmugDNA.33773.1 | 9.69  | 9.52  | 0.4  | 0.11 | 1.12  | 0.523771 | 0.334518 | 0.795656 | 0.582498 |
| MmugDNA.33776.1.S1_at   | MmugDNA.33776.1 | 4.72  | 4.39  | 0.19 | 0.04 | 1.26  | 0.024069 | 0.022648 | 0.31771  | 0.188488 |
| MmugDNA.33779.1.S1_at   | MmugDNA.33779.1 | 4.26  | 4.48  | 0.29 | 0.2  | -1.16 | 0.71375  | 0.090947 | 0.888497 | 0.345594 |
| MmugDNA.33782.1.S1_at   | MmugDNA.33782.1 | 9.23  | 9.03  | 0.3  | 0.02 | 1.15  | 0.088293 | 0.023286 | 0.45606  | 0.191274 |
| MmugDNA.33787.1.S1_at   | MmugDNA.33787.1 | 10.27 | 10.54 | 0.88 | 0.22 | -1.2  | 0.563665 | 0.750123 | 0.818336 | 0.854713 |
| MmugDNA.33794.1.S1_at   | MmugDNA.33794.1 | 3.48  | 3.56  | 0.06 | 0.05 | -1.05 | 0.216922 | 0.264955 | 0.586902 | 0.530944 |
| MmugDNA.33795.1.S1_at   | MmugDNA.33795.1 | 6.03  | 6.4   | 0.19 | 0.1  | -1.29 | 0.101027 | 0.357322 | 0.47159  | 0.598949 |
| MmugDNA.33798.1.S1_at   | MmugDNA.33798.1 | 6.62  | 6.74  | 0.09 | 0.17 | -1.09 | 0.232483 | 0.011275 | 0.600124 | 0.138076 |
| MmugDNA.33800.1.S1_at   | MmugDNA.33800.1 | 12.93 | 12.77 | 0.13 | 0.07 | 1.12  | 0.06871  | 0.020953 | 0.426    | 0.181537 |
| MmugDNA.33806.1.S1_at   | MmugDNA.33806.1 | 6.3   | 6.42  | 0.14 | 0.07 | -1.08 | 0.97338  | 0.108094 | 0.991364 | 0.371281 |
| MmugDNA.33816.1.S1_at   | MmugDNA.33816.1 | 3.14  | 3.43  | 0.17 | 0.41 | -1.23 | 0.380045 | 0.443361 | 0.709355 | 0.661168 |
| MmugDNA.33817.1.S1_at   | MmugDNA.33817.1 | 11.02 | 11.02 | 0.18 | 0.13 | -1    | 0.977487 | 0.010118 | 0.992697 | 0.131869 |
| MmugDNA.33820.1.S1_at   | MmugDNA.33820.1 | 9.6   | 9.44  | 0.11 | 0.05 | 1.12  | 0.10991  | 0.199711 | 0.482728 | 0.474335 |
| MmugDNA.33826.1.S1_at   | MmugDNA.33826.1 | 10.77 | 10.79 | 0.03 | 0.06 | -1.01 | 0.412898 | 0.268467 | 0.732114 | 0.534123 |
| MmugDNA.33830.1.S1_at   | MmugDNA.33830.1 | 12.26 | 12.14 | 0.06 | 0.13 | 1.09  | 0.379621 | 0.541635 | 0.709065 | 0.725033 |
| MmugDNA.33832.1.S1_at   | MmugDNA.33832.1 | 4.65  | 4.55  | 0.15 | 0.17 | 1.07  | 0.957654 | 0.980877 | 0.986043 | 0.989478 |
| MmugDNA.33832.1.S1_s_at | MmugDNA.33832.1 | 5.16  | 5.03  | 0.21 | 0.05 | 1.1   | 0.25403  | 0.408303 | 0.618635 | 0.635596 |
| MmugDNA.33845.1.S1_at   | MmugDNA.33845.1 | 11.82 | 11.43 | 3.3  | 0.24 | 1.31  | 0.48637  | 0.21199  | 0.774503 | 0.485975 |
| MmugDNA.33846.1.S1_at   | MmugDNA.33846.1 | 6.43  | 6.49  | 0.21 | 0.13 | -1.04 | 0.86553  | 0.787205 | 0.95264  | 0.876889 |
| MmugDNA.33851.1.S1_at   | MmugDNA.33851.1 | 10.41 | 10.35 | 0.12 | 0.07 | 1.04  | 0.394129 | 0.213803 | 0.719612 | 0.487564 |
| MmugDNA.33855.1.S1_at   | MmugDNA.33855.1 | 9.85  | 10.29 | 0.14 | 0.17 | -1.36 | 0.063516 | 0.012751 | 0.415717 | 0.145496 |
| MmugDNA.33857.1.S1_at   | MmugDNA.33857.1 | 12.76 | 12.42 | 0.14 | 0.08 | 1.26  | 0.046438 | 0.041169 | 0.377929 | 0.247733 |
| MmugDNA.33858.1.S1_at   | MmugDNA.33858.1 | 3.83  | 3.79  | 0.19 | 0.1  | 1.03  | 0.54007  | 0.527586 | 0.804248 | 0.716154 |
| MmugDNA.33859.1.S1_at   | MmugDNA.33859.1 | 5.38  | 5.31  | 0.11 | 0.1  | 1.05  | 0.491684 | 0.661936 | 0.777996 | 0.802028 |
| MmugDNA.33876.1.S1_s_at | MmugDNA.33876.1 | 7.93  | 7.53  | 1.07 | 0.12 | 1.32  | 0.713005 | 0.245066 | 0.88819  | 0.51484  |
| MmugDNA.33879.1.S1_at   | MmugDNA.33879.1 | 4.71  | 5.66  | 0.51 | 0.26 | -1.94 | 0.101889 | 0.035989 | 0.472267 | 0.234165 |
| MmugDNA.33882.1.S1_at   | MmugDNA.33882.1 | 8.42  | 8.85  | 0.31 | 0.07 | -1.34 | 0.312454 | 0.045708 | 0.664062 | 0.258049 |
| MmugDNA.33885.1.S1_at   | MmugDNA.33885.1 | 3.89  | 3.9   | 0.04 | 0.1  | -1.01 | 0.997772 | 0.4529   | 0.999265 | 0.667359 |
| MmugDNA.33893.1.S1_at   | MmugDNA.33893.1 | 4.4   | 4.37  | 0.13 | 0.05 | 1.02  | 0.355112 | 0.45044  | 0.69464  | 0.665643 |
| MmugDNA.33897.1.S1_at   | MmugDNA.33897.1 | 9.99  | 10.13 | 0.49 | 0.06 | -1.1  | 0.89333  | 0.387621 | 0.963467 | 0.622239 |
| MmugDNA.33900.1.S1_at   | MmugDNA.33900.1 | 5.55  | 6.27  | 0.34 | 0.36 | -1.64 | 0.01747  | 0.004576 | 0.291886 | 0.094474 |
| MmugDNA.33902.1.S1_at   | MmugDNA.33902.1 | 9.89  | 9.85  | 0.17 | 0.14 | 1.02  | 0.590134 | 0.290447 | 0.832832 | 0.551169 |
| MmugDNA.33905.1.S1_at   | MmugDNA.33905.1 | 11.79 | 12.07 | 0.25 | 0.06 | -1.21 | 0.248067 | 0.501257 | 0.613685 | 0.699458 |
| MmugDNA.33907.1.S1_at   | MmugDNA.33907.1 | 6.81  | 6.45  | 0.33 | 0.59 | 1.29  | 0.202723 | 0.38651  | 0.574251 | 0.621626 |
| MmugDNA.33908.1.S1_at   | MmugDNA.33908.1 | 10.87 | 10.78 | 0.25 | 0.04 | 1.06  | 0.247668 | 0.227998 | 0.613245 | 0.500211 |
| MmugDNA.33918.1.S1_at   | MmugDNA.33918.1 | 9.43  | 9.42  | 1.25 | 0.15 | 1.01  | 0.866977 | 0.114052 | 0.9533   | 0.380421 |
| MmugDNA.33920.1.S1_at   | MmugDNA.33920.1 | 6.78  | 6.91  | 0.33 | 0.07 | -1.1  | 0.637699 | 0.335907 | 0.855612 | 0.58354  |

|                         |                 |       |       |      |      |       |          |          |          |          |
|-------------------------|-----------------|-------|-------|------|------|-------|----------|----------|----------|----------|
| MmugDNA.33926.1.S1_at   | MmugDNA.33926.1 | 12.73 | 12.7  | 0.13 | 0.09 | 1.03  | 0.239393 | 0.125061 | 0.605874 | 0.395506 |
| MmugDNA.33927.1.S1_at   | MmugDNA.33927.1 | 9.02  | 8.21  | 0.06 | 0.13 | 1.75  | 0.000606 | 0.000555 | 0.143137 | 0.040995 |
| MmugDNA.33928.1.S1_at   | MmugDNA.33928.1 | 10.71 | 10.92 | 0.05 | 0.03 | -1.16 | 0.00502  | 0.093972 | 0.20461  | 0.350467 |
| MmugDNA.33929.1.S1_at   | MmugDNA.33929.1 | 6.96  | 7     | 0.17 | 0.09 | -1.03 | 0.688149 | 0.000109 | 0.878126 | 0.028099 |
| MmugDNA.33931.1.S1_at   | MmugDNA.33931.1 | 12.55 | 12.77 | 0.29 | 0.11 | -1.16 | 0.302725 | 0.38958  | 0.656634 | 0.623668 |
| MmugDNA.33932.1.S1_at   | MmugDNA.33932.1 | 6     | 6.05  | 0.24 | 0.06 | -1.04 | 0.438969 | 0.219878 | 0.747715 | 0.493401 |
| MmugDNA.33934.1.S1_at   | MmugDNA.33934.1 | 12.29 | 12.44 | 0.1  | 0.13 | -1.11 | 0.271291 | 0.324706 | 0.631176 | 0.575255 |
| MmugDNA.33935.1.S1_at   | MmugDNA.33935.1 | 8.68  | 8.92  | 0.23 | 0.1  | -1.18 | 0.236018 | 0.343537 | 0.603096 | 0.589301 |
| MmugDNA.3394.1.S1_at    | MmugDNA.3394.1  | 4.26  | 4.21  | 0.12 | 0.09 | 1.04  | 0.711383 | 0.607381 | 0.887632 | 0.766384 |
| MmugDNA.33941.1.S1_at   | MmugDNA.33941.1 | 5.39  | 5.24  | 0.17 | 0.04 | 1.11  | 0.685795 | 0.910295 | 0.876883 | 0.949391 |
| MmugDNA.33949.1.S1_at   | MmugDNA.33949.1 | 8.42  | 9.16  | 1.03 | 0.12 | -1.67 | 0.385683 | 0.260091 | 0.713006 | 0.52675  |
| MmugDNA.33950.1.S1_at   | MmugDNA.33950.1 | 9.48  | 9.9   | 0.27 | 0.2  | -1.34 | 0.094133 | 0.157326 | 0.463421 | 0.432817 |
| MmugDNA.33951.1.S1_at   | MmugDNA.33951.1 | 3.3   | 3.35  | 0.16 | 0.08 | -1.04 | 0.642408 | 0.657995 | 0.85775  | 0.80013  |
| MmugDNA.33952.1.S1_at   | MmugDNA.33952.1 | 7.06  | 6.98  | 0.05 | 0.07 | 1.06  | 0.215294 | 0.576568 | 0.585748 | 0.747267 |
| MmugDNA.33953.1.S1_at   | MmugDNA.33953.1 | 3.65  | 3.65  | 0.1  | 0.01 | -1    | 0.341449 | 0.602839 | 0.685061 | 0.763752 |
| MmugDNA.33954.1.S1_at   | MmugDNA.33954.1 | 7.2   | 7.52  | 0.12 | 0.28 | -1.25 | 0.306467 | 0.006685 | 0.659434 | 0.110612 |
| MmugDNA.33962.1.S1_at   | MmugDNA.33962.1 | 6.35  | 6.18  | 0.06 | 0.32 | 1.12  | 0.375903 | 0.505108 | 0.706657 | 0.70197  |
| MmugDNA.33965.1.S1_at   | MmugDNA.33965.1 | 6.4   | 6.25  | 0.12 | 0.17 | 1.11  | 0.145764 | 0.176204 | 0.520572 | 0.452714 |
| MmugDNA.33966.1.S1_s_at | MmugDNA.33966.1 | 12.22 | 12.18 | 0.34 | 0.02 | 1.03  | 0.780435 | 0.002785 | 0.919137 | 0.077966 |
| MmugDNA.33967.1.S1_at   | MmugDNA.33967.1 | 10.36 | 10.7  | 0.33 | 0.02 | -1.27 | 0.438577 | 0.085668 | 0.747368 | 0.337744 |
| MmugDNA.33969.1.S1_at   | MmugDNA.33969.1 | 9.98  | 10.72 | 0.17 | 0.02 | -1.67 | 0.001622 | 0.000596 | 0.162459 | 0.041941 |
| MmugDNA.3397.1.S1_at    | MmugDNA.3397.1  | 6.62  | 6.6   | 0.1  | 0.06 | 1.01  | 0.436866 | 0.060412 | 0.746611 | 0.292435 |
| MmugDNA.33973.1.S1_at   | MmugDNA.33973.1 | 11.44 | 11.01 | 0.05 | 0.06 | 1.35  | 0.000572 | 0.088073 | 0.143137 | 0.341573 |
| MmugDNA.33975.1.S1_at   | MmugDNA.33975.1 | 12.73 | 12.82 | 0.1  | 0.05 | -1.06 | 0.613269 | 0.445391 | 0.843393 | 0.662343 |
| MmugDNA.33978.1.S1_at   | MmugDNA.33978.1 | 11.85 | 11.77 | 0.08 | 0.02 | 1.06  | 0.147912 | 0.087346 | 0.522184 | 0.340426 |
| MmugDNA.33979.1.S1_at   | MmugDNA.33979.1 | 13.33 | 13.14 | 0.47 | 0.08 | 1.14  | 0.900608 | 0.212518 | 0.966203 | 0.486502 |
| MmugDNA.33982.1.S1_at   | MmugDNA.33982.1 | 8.4   | 8.29  | 0.11 | 0.06 | 1.08  | 0.371003 | 0.440376 | 0.705275 | 0.658939 |
| MmugDNA.33987.1.S1_at   | MmugDNA.33987.1 | 6.31  | 6.19  | 0.15 | 0.11 | 1.08  | 0.149371 | 0.28854  | 0.523208 | 0.549821 |
| MmugDNA.33989.1.S1_at   | MmugDNA.33989.1 | 7.63  | 8.97  | 0.69 | 0.17 | -2.52 | 0.035508 | 0.009837 | 0.352182 | 0.130274 |
| MmugDNA.33994.1.S1_at   | MmugDNA.33994.1 | 7.67  | 8.98  | 1.07 | 0.25 | -2.49 | 0.425068 | 0.08655  | 0.739805 | 0.33911  |
| MmugDNA.33996.1.S1_at   | MmugDNA.33996.1 | 4.25  | 4.24  | 0.24 | 0.26 | 1     | 0.852467 | 0.736168 | 0.947963 | 0.847335 |
| MmugDNA.33997.1.S1_at   | MmugDNA.33997.1 | 4.62  | 4.46  | 0.05 | 0.11 | 1.11  | 0.049051 | 0.09872  | 0.385247 | 0.356811 |
| MmugDNA.34.1.S1_at      | MmugDNA.34.1    | 9.19  | 9.82  | 3    | 0.29 | -1.54 | 0.533481 | 0.371754 | 0.80084  | 0.610541 |
| MmugDNA.34003.1.S1_at   | MmugDNA.34003.1 | 11.64 | 11.66 | 0.1  | 0.01 | -1.01 | 0.674346 | 0.480942 | 0.87192  | 0.686018 |
| MmugDNA.34004.1.S1_at   | MmugDNA.34004.1 | 10.04 | 9.89  | 0.6  | 0.21 | 1.11  | 0.500492 | 0.440404 | 0.78268  | 0.658939 |
| MmugDNA.34004.1.S1_s_at | MmugDNA.34004.1 | 11.07 | 10.8  | 0.5  | 0.06 | 1.21  | 0.358534 | 0.207103 | 0.696434 | 0.481189 |
| MmugDNA.34008.1.S1_at   | MmugDNA.34008.1 | 7.54  | 7.38  | 0.2  | 0.06 | 1.12  | 0.766463 | 0.925668 | 0.91214  | 0.957937 |
| MmugDNA.34009.1.S1_at   | MmugDNA.34009.1 | 7.58  | 8.09  | 0.41 | 0.04 | -1.43 | 0.09964  | 0.022377 | 0.469263 | 0.187176 |
| MmugDNA.34011.1.S1_at   | MmugDNA.34011.1 | 5.86  | 5.83  | 0.04 | 0.12 | 1.02  | 0.676146 | 0.921015 | 0.872987 | 0.955491 |
| MmugDNA.34012.1.S1_at   | MmugDNA.34012.1 | 10.87 | 10.48 | 0.37 | 0.09 | 1.31  | 0.153273 | 0.196555 | 0.526421 | 0.471584 |
| MmugDNA.34012.1.S1_x_at | MmugDNA.34012.1 | 10.99 | 10.59 | 0.37 | 0.08 | 1.32  | 0.156277 | 0.216204 | 0.529536 | 0.489765 |
| MmugDNA.34014.1.S1_at   | MmugDNA.34014.1 | 4.38  | 4.62  | 0.34 | 0.17 | -1.18 | 0.541524 | 0.028465 | 0.805165 | 0.210523 |
| MmugDNA.3402.1.S1_at    | MmugDNA.3402.1  | 3.88  | 3.76  | 0.41 | 0.12 | 1.09  | 0.58098  | 0.189011 | 0.827344 | 0.464897 |

|                         |                 |       |       |      |      |       |          |          |          |          |
|-------------------------|-----------------|-------|-------|------|------|-------|----------|----------|----------|----------|
| MmugDNA.34026.1.S1_at   | MmugDNA.34026.1 | 7.08  | 7.33  | 0.92 | 0.23 | -1.19 | 0.644568 | 0.386112 | 0.858549 | 0.621345 |
| MmugDNA.34027.1.S1_at   | MmugDNA.34027.1 | 7.81  | 7.46  | 1.45 | 0.17 | 1.27  | 0.944031 | 0.420028 | 0.980618 | 0.643804 |
| MmugDNA.34029.1.S1_at   | MmugDNA.34029.1 | 10.55 | 10.48 | 0.5  | 0.11 | 1.05  | 0.992317 | 0.198706 | 0.997013 | 0.473391 |
| MmugDNA.34030.1.S1_at   | MmugDNA.34030.1 | 9.44  | 9.49  | 0.18 | 0.12 | -1.03 | 0.401647 | 0.126198 | 0.724554 | 0.396748 |
| MmugDNA.34032.1.S1_at   | MmugDNA.34032.1 | 12.81 | 12.51 | 0.32 | 0.07 | 1.23  | 0.146846 | 0.053035 | 0.521393 | 0.275954 |
| MmugDNA.34033.1.S1_at   | MmugDNA.34033.1 | 8.58  | 8.84  | 0.33 | 0.04 | -1.2  | 0.501611 | 0.161346 | 0.783364 | 0.437519 |
| MmugDNA.34034.1.S1_at   | MmugDNA.34034.1 | 4.54  | 4.3   | 0.06 | 0.15 | 1.18  | 0.042465 | 0.137181 | 0.369047 | 0.410045 |
| MmugDNA.34035.1.S1_at   | MmugDNA.34035.1 | 9.35  | 9.62  | 0.32 | 0.08 | -1.21 | 0.288018 | 0.415079 | 0.645144 | 0.640695 |
| MmugDNA.34040.1.S1_at   | MmugDNA.34040.1 | 11.29 | 11.53 | 0.32 | 0.23 | -1.18 | 0.782084 | 0.229912 | 0.919732 | 0.501802 |
| MmugDNA.3405.1.S1_at    | MmugDNA.3405.1  | 9.95  | 9.97  | 0.82 | 0.18 | -1.02 | 0.877042 | 0.453026 | 0.957122 | 0.667463 |
| MmugDNA.34055.1.S1_at   | MmugDNA.34055.1 | 11.11 | 10.95 | 0.16 | 0.05 | -1.12 | 0.102146 | 0.016407 | 0.472436 | 0.162188 |
| MmugDNA.34056.1.S1_at   | MmugDNA.34056.1 | 10.46 | 10.72 | 0.24 | 0.14 | -1.2  | 0.147508 | 0.072463 | 0.521578 | 0.315294 |
| MmugDNA.34057.1.S1_at   | MmugDNA.34057.1 | 12.03 | 11.9  | 0.41 | 0.08 | 1.09  | 0.5276   | 0.366082 | 0.797158 | 0.605906 |
| MmugDNA.3406.1.S1_at    | MmugDNA.3406.1  | 11.66 | 11.73 | 0.42 | 0.13 | -1.05 | 0.915853 | 0.13041  | 0.97133  | 0.402257 |
| MmugDNA.34063.1.S1_at   | MmugDNA.34063.1 | 10.47 | 10.46 | 0.02 | 0.09 | 1     | 0.818314 | 0.236289 | 0.934325 | 0.507287 |
| MmugDNA.34063.1.S1_s_at | MmugDNA.34063.1 | 12.02 | 12.02 | 0.05 | 0.06 | 1.01  | 0.435737 | 0.275777 | 0.74588  | 0.540035 |
| MmugDNA.34064.1.S1_at   | MmugDNA.34064.1 | 9.95  | 9.5   | 0.5  | 0.23 | 1.36  | 0.462657 | 0.294332 | 0.761724 | 0.55407  |
| MmugDNA.34065.1.S1_at   | MmugDNA.34065.1 | 10.82 | 10.99 | 0.06 | 0.1  | -1.12 | 0.098318 | 0.29741  | 0.467704 | 0.556078 |
| MmugDNA.34067.1.S1_s_at | MmugDNA.34067.1 | 5.58  | 5.34  | 0.09 | 0.11 | 1.18  | 0.086376 | 0.058227 | 0.454016 | 0.287988 |
| MmugDNA.34068.1.S1_at   | MmugDNA.34068.1 | 6.99  | 6.64  | 0.07 | 0.15 | 1.28  | 0.031557 | 0.055768 | 0.341504 | 0.282044 |
| MmugDNA.34070.1.S1_at   | MmugDNA.34070.1 | 9.56  | 9.54  | 0.29 | 0.08 | 1.01  | 0.263174 | 0.205315 | 0.625172 | 0.479639 |
| MmugDNA.34071.1.S1_at   | MmugDNA.34071.1 | 7.6   | 7.59  | 0.08 | 0.1  | 1.01  | 0.956117 | 0.320863 | 0.985451 | 0.572849 |
| MmugDNA.34076.1.S1_at   | MmugDNA.34076.1 | 4.77  | 4.79  | 0.17 | 0.06 | -1.02 | 0.367833 | 0.382849 | 0.703298 | 0.61893  |
| MmugDNA.3408.1.S1_at    | MmugDNA.3408.1  | 9.87  | 9.71  | 0.35 | 0.08 | 1.12  | 0.418898 | 0.215001 | 0.73601  | 0.488898 |
| MmugDNA.34085.1.S1_at   | MmugDNA.34085.1 | 6.25  | 6.25  | 0.04 | 0.05 | 1     | 0.721675 | 0.241633 | 0.892101 | 0.512225 |
| MmugDNA.34089.1.S1_at   | MmugDNA.34089.1 | 10.7  | 10.75 | 0.09 | 0.04 | -1.04 | 0.796234 | 0.986918 | 0.925088 | 0.992589 |
| MmugDNA.34092.1.S1_at   | MmugDNA.34092.1 | 10.18 | 11.02 | 0.28 | 0.28 | -1.79 | 0.025401 | 0.017598 | 0.32178  | 0.167721 |
| MmugDNA.34095.1.S1_at   | MmugDNA.34095.1 | 3.32  | 3.27  | 0.12 | 0.07 | 1.03  | 0.673379 | 0.543579 | 0.871268 | 0.726214 |
| MmugDNA.34097.1.S1_at   | MmugDNA.34097.1 | 9.15  | 9.59  | 0.44 | 0.18 | -1.36 | 0.271748 | 0.211427 | 0.631538 | 0.485559 |
| MmugDNA.34098.1.S1_at   | MmugDNA.34098.1 | 6.68  | 6.12  | 0.17 | 0.33 | 1.47  | 0.087143 | 0.079654 | 0.454785 | 0.326981 |
| MmugDNA.341.1.S1_at     | MmugDNA.341.1   | 6.22  | 5.41  | 0.95 | 0.17 | 1.76  | 0.158468 | 0.218753 | 0.531551 | 0.492438 |
| MmugDNA.3410.1.S1_at    | MmugDNA.3410.1  | 5.75  | 5.55  | 0.15 | 0.08 | 1.15  | 0.074461 | 0.022216 | 0.435313 | 0.186513 |
| MmugDNA.34105.1.S1_at   | MmugDNA.34105.1 | 4.86  | 5.12  | 0.44 | 0.29 | -1.2  | 0.246565 | 0.145329 | 0.61204  | 0.419365 |
| MmugDNA.34108.1.S1_at   | MmugDNA.34108.1 | 8.61  | 9.88  | 1.45 | 0.05 | -2.41 | 0.159398 | 0.203076 | 0.53225  | 0.477343 |
| MmugDNA.34116.1.S1_x_at | MmugDNA.34116.1 | 12.38 | 12.4  | 0.13 | 0.16 | -1.01 | 0.516226 | 0.353915 | 0.791342 | 0.596894 |
| MmugDNA.34119.1.S1_at   | MmugDNA.34119.1 | 10.34 | 10.48 | 2.61 | 0.47 | -1.1  | 0.680442 | 0.186103 | 0.874676 | 0.461934 |
| MmugDNA.34120.1.S1_at   | MmugDNA.34120.1 | 11.34 | 11.37 | 0.06 | 0.02 | -1.02 | 0.534746 | 0.804193 | 0.801404 | 0.887383 |
| MmugDNA.34121.1.S1_at   | MmugDNA.34121.1 | 4.27  | 4.22  | 0.04 | 0.06 | 1.03  | 0.847319 | 0.749917 | 0.946525 | 0.854631 |
| MmugDNA.34123.1.S1_at   | MmugDNA.34123.1 | 8.38  | 8.48  | 1.4  | 0.34 | -1.07 | 0.821524 | 0.676688 | 0.935582 | 0.811035 |
| MmugDNA.34133.1.S1_at   | MmugDNA.34133.1 | 12.27 | 12.76 | 0.34 | 0.1  | -1.41 | 0.091916 | 0.091957 | 0.460278 | 0.347297 |
| MmugDNA.34135.1.S1_at   | MmugDNA.34135.1 | 13.03 | 12.49 | 0.39 | 0.11 | 1.45  | 0.024723 | 0.019062 | 0.319715 | 0.173688 |
| MmugDNA.34136.1.S1_at   | MmugDNA.34136.1 | 9.06  | 9.11  | 0.6  | 0.24 | -1.03 | 0.396597 | 0.02869  | 0.721517 | 0.211093 |
| MmugDNA.34143.1.S1_at   | MmugDNA.34143.1 | 9.75  | 10.05 | 0.47 | 0.03 | -1.24 | 0.300772 | 0.270083 | 0.65518  | 0.535356 |

|                         |                 |       |       |      |      |       |          |          |          |          |
|-------------------------|-----------------|-------|-------|------|------|-------|----------|----------|----------|----------|
| MmugDNA.34144.1.S1_at   | MmugDNA.34144.1 | 7.2   | 6.88  | 1.27 | 0.41 | 1.25  | 0.535447 | 0.367177 | 0.801767 | 0.606834 |
| MmugDNA.34145.1.S1_at   | MmugDNA.34145.1 | 11.81 | 11.78 | 0.08 | 0.05 | 1.02  | 0.316495 | 0.02122  | 0.666494 | 0.182388 |
| MmugDNA.34151.1.S1_at   | MmugDNA.34151.1 | 11.07 | 11.12 | 0.36 | 0.07 | -1.04 | 0.519809 | 0.117844 | 0.793373 | 0.38576  |
| MmugDNA.34153.1.S1_at   | MmugDNA.34153.1 | 5.43  | 5.47  | 0.21 | 0.26 | -1.03 | 0.82597  | 0.687745 | 0.937613 | 0.817665 |
| MmugDNA.3416.1.S1_at    | MmugDNA.3416.1  | 12.36 | 12.24 | 0.47 | 0.06 | 1.09  | 0.75049  | 0.900815 | 0.905496 | 0.943562 |
| MmugDNA.34160.1.S1_at   | MmugDNA.34160.1 | 9.77  | 8.98  | 0.62 | 0.24 | 1.73  | 0.19218  | 0.285564 | 0.563232 | 0.547395 |
| MmugDNA.34168.1.S1_at   | MmugDNA.34168.1 | 4.83  | 4.87  | 0.44 | 0.36 | -1.03 | 0.806369 | 0.946677 | 0.929743 | 0.969772 |
| MmugDNA.34171.1.S1_at   | MmugDNA.34171.1 | 11.18 | 10.64 | 0.04 | 0.06 | 1.45  | 0.000325 | 0.000023 | 0.137028 | 0.019635 |
| MmugDNA.34174.1.S1_s_at | MmugDNA.34174.1 | 3.57  | 3.67  | 0.1  | 0.28 | -1.07 | 0.805661 | 0.445777 | 0.929413 | 0.662505 |
| MmugDNA.3418.1.S1_at    | MmugDNA.3418.1  | 8.77  | 8.89  | 0.72 | 0.06 | -1.09 | 0.618327 | 0.096044 | 0.845915 | 0.353306 |
| MmugDNA.34184.1.S1_at   | MmugDNA.34184.1 | 12.9  | 12.64 | 0.33 | 0.11 | -1.19 | 0.976569 | 0.35653  | 0.992376 | 0.598459 |
| MmugDNA.3420.1.S1_at    | MmugDNA.3420.1  | 9.38  | 9.17  | 0.17 | 0.04 | 1.16  | 0.076353 | 0.045973 | 0.437977 | 0.258818 |
| MmugDNA.34204.1.S1_at   | MmugDNA.34204.1 | 6.26  | 8.46  | 0.88 | 0.15 | -4.6  | 0.034175 | 0.018798 | 0.348583 | 0.172349 |
| MmugDNA.34209.1.S1_at   | MmugDNA.34209.1 | 4.18  | 4.2   | 0.1  | 0.02 | -1.02 | 0.605112 | 0.788065 | 0.839779 | 0.877426 |
| MmugDNA.34216.1.S1_at   | MmugDNA.34216.1 | 8.7   | 8.66  | 0.56 | 0.15 | 1.03  | 0.91475  | 0.264653 | 0.970941 | 0.530661 |
| MmugDNA.34222.1.S1_s_at | MmugDNA.34222.1 | 8.9   | 8.99  | 0.26 | 0.09 | -1.06 | 0.976784 | 0.309234 | 0.992455 | 0.564807 |
| MmugDNA.34227.1.S1_at   | MmugDNA.34227.1 | 4.08  | 3.95  | 0.04 | 0.12 | 1.1   | 0.361929 | 0.024382 | 0.698882 | 0.195473 |
| MmugDNA.3423.1.S1_at    | MmugDNA.3423.1  | 6.06  | 6.17  | 0.03 | 0.23 | -1.08 | 0.770815 | 0.888669 | 0.914237 | 0.936536 |
| MmugDNA.34233.1.S1_at   | MmugDNA.34233.1 | 8.54  | 9.18  | 0.22 | 0.27 | -1.56 | 0.014823 | 0.004111 | 0.278564 | 0.090887 |
| MmugDNA.34241.1.S1_at   | MmugDNA.34241.1 | 8.02  | 8.19  | 0.42 | 0.09 | -1.12 | 0.903854 | 0.659283 | 0.967712 | 0.80063  |
| MmugDNA.34243.1.S1_at   | MmugDNA.34243.1 | 6.48  | 7.48  | 0.55 | 0.22 | -2    | 0.057969 | 0.238224 | 0.403539 | 0.508825 |
| MmugDNA.34245.1.S1_at   | MmugDNA.34245.1 | 3.79  | 3.61  | 0.28 | 0.03 | 1.13  | 0.288197 | 0.391782 | 0.645272 | 0.625301 |
| MmugDNA.34254.1.S1_at   | MmugDNA.34254.1 | 6.22  | 6.47  | 0.54 | 0.21 | -1.19 | 0.502997 | 0.045236 | 0.784    | 0.257005 |
| MmugDNA.34254.1.S1_s_at | MmugDNA.34254.1 | 6.88  | 6.61  | 0.3  | 0.2  | 1.2   | 0.906764 | 0.014936 | 0.968356 | 0.155342 |
| MmugDNA.34256.1.S1_at   | MmugDNA.34256.1 | 5.24  | 5.16  | 0.13 | 0.1  | 1.06  | 0.525146 | 0.72163  | 0.796179 | 0.838771 |
| MmugDNA.34259.1.S1_at   | MmugDNA.34259.1 | 10.17 | 10.64 | 0.54 | 0.07 | -1.38 | 0.628726 | 0.638139 | 0.851242 | 0.787396 |
| MmugDNA.34260.1.S1_at   | MmugDNA.34260.1 | 5.08  | 5.04  | 0.1  | 0.02 | 1.03  | 0.617376 | 0.396908 | 0.845362 | 0.628464 |
| MmugDNA.34264.1.S1_at   | MmugDNA.34264.1 | 10.93 | 10.95 | 0.88 | 0.24 | -1.01 | 0.817414 | 0.032146 | 0.933935 | 0.222002 |
| MmugDNA.34265.1.S1_at   | MmugDNA.34265.1 | 11.77 | 12.18 | 0.17 | 0.07 | -1.32 | 0.019252 | 0.067049 | 0.300345 | 0.304872 |
| MmugDNA.34265.1.S1_s_at | MmugDNA.34265.1 | 10.79 | 11.15 | 0.25 | 0.09 | -1.29 | 0.085531 | 0.131679 | 0.452653 | 0.403829 |
| MmugDNA.34269.1.S1_at   | MmugDNA.34269.1 | 11.31 | 10.92 | 0.16 | 0.03 | 1.3   | 0.025709 | 0.063044 | 0.322523 | 0.297758 |
| MmugDNA.3427.1.S1_at    | MmugDNA.3427.1  | 13.12 | 13.12 | 0.09 | 0.01 | -1    | 0.326659 | 0.594307 | 0.674247 | 0.758574 |
| MmugDNA.3428.1.S1_at    | MmugDNA.3428.1  | 8.35  | 8.14  | 0.4  | 0.49 | 1.16  | 0.852374 | 0.008769 | 0.947963 | 0.124009 |
| MmugDNA.34280.1.S1_at   | MmugDNA.34280.1 | 7.43  | 7.71  | 0.11 | 0.19 | -1.21 | 0.0915   | 0.285591 | 0.459497 | 0.547395 |
| MmugDNA.34283.1.S1_at   | MmugDNA.34283.1 | 5.56  | 5.35  | 0.33 | 0.18 | 1.15  | 0.603558 | 0.807087 | 0.839251 | 0.888946 |
| MmugDNA.34287.1.S1_at   | MmugDNA.34287.1 | 10.46 | 10.81 | 0.18 | 0.04 | -1.28 | 0.041763 | 0.043524 | 0.36716  | 0.253227 |
| MmugDNA.34290.1.S1_at   | MmugDNA.34290.1 | 7.19  | 7.24  | 1.19 | 0.46 | -1.04 | 0.802194 | 0.840098 | 0.927856 | 0.908905 |
| MmugDNA.34292.1.S1_at   | MmugDNA.34292.1 | 9.3   | 9.4   | 0.06 | 0.2  | -1.07 | 0.864703 | 0.875664 | 0.952416 | 0.929374 |
| MmugDNA.34293.1.S1_at   | MmugDNA.34293.1 | 13.04 | 12.99 | 0.25 | 0.15 | 1.03  | 0.463088 | 0.022464 | 0.761963 | 0.187548 |
| MmugDNA.34309.1.S1_at   | MmugDNA.34309.1 | 5.46  | 5.93  | 0.68 | 0.28 | -1.39 | 0.257816 | 0.246239 | 0.621456 | 0.515889 |
| MmugDNA.3431.1.S1_at    | MmugDNA.3431.1  | 12.29 | 11.96 | 0.07 | 0.07 | 1.25  | 0.014893 | 0.027327 | 0.278597 | 0.206625 |
| MmugDNA.34310.1.S1_at   | MmugDNA.34310.1 | 8.68  | 8.71  | 0.12 | 0.11 | -1.02 | 0.15666  | 0.163523 | 0.529799 | 0.439751 |
| MmugDNA.34326.1.S1_at   | MmugDNA.34326.1 | 10.56 | 10.81 | 0.18 | 0.21 | -1.2  | 0.200231 | 0.018126 | 0.572075 | 0.169609 |

|                         |                 |       |       |      |      |       |          |          |          |          |
|-------------------------|-----------------|-------|-------|------|------|-------|----------|----------|----------|----------|
| MmugDNA.34328.1.S1_at   | MmugDNA.34328.1 | 3.68  | 4.74  | 0.69 | 0.23 | -2.09 | 0.065187 | 0.076975 | 0.419963 | 0.322421 |
| MmugDNA.3433.1.S1_at    | MmugDNA.3433.1  | 11.13 | 11.22 | 0.37 | 0.16 | -1.06 | 0.741685 | 0.918957 | 0.90146  | 0.954477 |
| MmugDNA.34330.1.S1_at   | MmugDNA.34330.1 | 7.24  | 7.01  | 0.44 | 0.18 | 1.18  | 0.197761 | 0.097965 | 0.56882  | 0.355867 |
| MmugDNA.34332.1.S1_at   | MmugDNA.34332.1 | 10.12 | 11.18 | 0.5  | 0.06 | -2.08 | 0.027499 | 0.009235 | 0.327829 | 0.126941 |
| MmugDNA.34333.1.S1_at   | MmugDNA.34333.1 | 10.38 | 9.88  | 0.28 | 0.04 | 1.41  | 0.081407 | 0.045446 | 0.445406 | 0.2575   |
| MmugDNA.34338.1.S1_at   | MmugDNA.34338.1 | 4.31  | 4.69  | 0.28 | 0.18 | -1.3  | 0.058579 | 0.074901 | 0.404754 | 0.318838 |
| MmugDNA.3434.1.S1_at    | MmugDNA.3434.1  | 12.11 | 12.05 | 0.16 | 0.1  | 1.04  | 0.900848 | 0.077629 | 0.966343 | 0.323621 |
| MmugDNA.34340.1.S1_at   | MmugDNA.34340.1 | 11.78 | 11.53 | 0.58 | 0.1  | 1.19  | 0.52406  | 0.709849 | 0.795715 | 0.831863 |
| MmugDNA.3435.1.S1_at    | MmugDNA.3435.1  | 13.08 | 13.18 | 0.07 | 0.06 | -1.07 | 0.154947 | 0.148639 | 0.528235 | 0.423201 |
| MmugDNA.34353.1.S1_at   | MmugDNA.34353.1 | 8.27  | 8.75  | 0.71 | 0.34 | -1.39 | 0.922858 | 0.994092 | 0.974033 | 0.99641  |
| MmugDNA.34356.1.S1_at   | MmugDNA.34356.1 | 4.99  | 4.99  | 0.18 | 0.12 | -1    | 0.6809   | 0.650337 | 0.874873 | 0.795586 |
| MmugDNA.3436.1.S1_at    | MmugDNA.3436.1  | 12.59 | 12.84 | 0.24 | 0.03 | -1.19 | 0.152435 | 0.038421 | 0.52544  | 0.240918 |
| MmugDNA.34364.1.S1_at   | MmugDNA.34364.1 | 3.91  | 3.81  | 0.07 | 0.13 | 1.07  | 0.610338 | 0.104516 | 0.841841 | 0.365803 |
| MmugDNA.34376.1.S1_at   | MmugDNA.34376.1 | 3.81  | 3.73  | 0.03 | 0.22 | 1.05  | 0.764677 | 0.18902  | 0.911553 | 0.464897 |
| MmugDNA.34380.1.S1_at   | MmugDNA.34380.1 | 10.4  | 10.37 | 0.03 | 0.02 | 1.02  | 0.301298 | 0.494349 | 0.65564  | 0.694829 |
| MmugDNA.34382.1.S1_at   | MmugDNA.34382.1 | 10.31 | 10.48 | 0.19 | 0.07 | -1.12 | 0.117932 | 0.003416 | 0.49133  | 0.084071 |
| MmugDNA.34384.1.S1_s_at | MmugDNA.34384.1 | 12.73 | 12.66 | 0.1  | 0.09 | 1.05  | 0.455104 | 0.025229 | 0.75733  | 0.199215 |
| MmugDNA.34389.1.S1_at   | MmugDNA.34389.1 | 11.5  | 11.73 | 0.5  | 0.06 | -1.18 | 0.572034 | 0.785689 | 0.823145 | 0.875924 |
| MmugDNA.34397.1.S1_at   | MmugDNA.34397.1 | 5.33  | 5.19  | 0.08 | 0.04 | 1.1   | 0.08716  | 0.242157 | 0.454785 | 0.512652 |
| MmugDNA.3440.1.S1_at    | MmugDNA.3440.1  | 7.3   | 7.32  | 0.04 | 0.06 | -1.01 | 0.302262 | 0.341043 | 0.656154 | 0.587164 |
| MmugDNA.34402.1.S1_at   | MmugDNA.34402.1 | 4.43  | 4.22  | 0.12 | 0.04 | 1.16  | 0.035359 | 0.01636  | 0.351775 | 0.161959 |
| MmugDNA.34405.1.S1_at   | MmugDNA.34405.1 | 5.71  | 5.44  | 0.12 | 0.12 | 1.2   | 0.055318 | 0.0592   | 0.398418 | 0.290208 |
| MmugDNA.34405.1.S1_s_at | MmugDNA.34405.1 | 5.77  | 5.45  | 0.17 | 0.11 | 1.25  | 0.135983 | 0.072156 | 0.510492 | 0.314676 |
| MmugDNA.34407.1.S1_at   | MmugDNA.34407.1 | 7.81  | 7.1   | 0.38 | 0.29 | 1.64  | 0.129612 | 0.324501 | 0.504377 | 0.575707 |
| MmugDNA.34409.1.S1_at   | MmugDNA.34409.1 | 3.9   | 3.98  | 0.21 | 0.83 | -1.06 | 0.418595 | 0.040234 | 0.73577  | 0.245805 |
| MmugDNA.34415.1.S1_at   | MmugDNA.34415.1 | 5.48  | 5.39  | 0.19 | 0.07 | 1.07  | 0.16511  | 0.415297 | 0.537704 | 0.640769 |
| MmugDNA.34420.1.S1_at   | MmugDNA.34420.1 | 7.24  | 7.25  | 0.2  | 0.06 | -1.01 | 0.987831 | 0.579559 | 0.995831 | 0.749192 |
| MmugDNA.34428.1.S1_s_at | MmugDNA.34428.1 | 10.74 | 10.81 | 0.08 | 0.05 | -1.05 | 0.219022 | 0.101049 | 0.588433 | 0.3607   |
| MmugDNA.34431.1.S1_at   | MmugDNA.34431.1 | 11.62 | 11.93 | 0.18 | 0.03 | -1.24 | 0.037713 | 0.003544 | 0.357804 | 0.085371 |
| MmugDNA.34440.1.S1_at   | MmugDNA.34440.1 | 12.06 | 12.03 | 0.36 | 0.02 | 1.02  | 0.836713 | 0.783329 | 0.941365 | 0.874571 |
| MmugDNA.34442.1.S1_at   | MmugDNA.34442.1 | 5.23  | 5.24  | 0.08 | 0.11 | -1.01 | 0.934534 | 0.697197 | 0.977815 | 0.824045 |
| MmugDNA.34451.1.S1_at   | MmugDNA.34451.1 | 8.03  | 7.39  | 0.69 | 0.01 | 1.56  | 0.060088 | 0.015309 | 0.407399 | 0.157082 |
| MmugDNA.34456.1.S1_at   | MmugDNA.34456.1 | 4.83  | 4.75  | 0.04 | 0.05 | 1.06  | 0.1163   | 0.072791 | 0.489568 | 0.315651 |
| MmugDNA.34468.1.S1_at   | MmugDNA.34468.1 | 8.72  | 8.82  | 0.29 | 0.1  | -1.07 | 0.836539 | 0.141793 | 0.941249 | 0.415331 |
| MmugDNA.34471.1.S1_at   | MmugDNA.34471.1 | 11.94 | 12.05 | 0.51 | 0.15 | -1.08 | 0.508295 | 0.313928 | 0.786853 | 0.568116 |
| MmugDNA.34471.1.S1_s_at | MmugDNA.34471.1 | 12.09 | 12.17 | 0.49 | 0.09 | -1.05 | 0.718173 | 0.276048 | 0.890613 | 0.540071 |
| MmugDNA.34474.1.S1_at   | MmugDNA.34474.1 | 7.07  | 7.41  | 0.42 | 0.18 | -1.27 | 0.260129 | 0.377905 | 0.623011 | 0.615264 |
| MmugDNA.3448.1.S1_at    | MmugDNA.3448.1  | 7.53  | 7.53  | 0.29 | 0.03 | 1.01  | 0.361771 | 0.44616  | 0.698762 | 0.662743 |
| MmugDNA.34482.1.S1_at   | MmugDNA.34482.1 | 6.76  | 6.72  | 0.13 | 0.08 | 1.03  | 0.466023 | 0.652952 | 0.763317 | 0.797125 |
| MmugDNA.34496.1.S1_at   | MmugDNA.34496.1 | 2.75  | 2.75  | 0.02 | 0.04 | -1    | 0.329722 | 0.618408 | 0.676501 | 0.774054 |
| MmugDNA.34498.1.S1_at   | MmugDNA.34498.1 | 6.29  | 6.43  | 0.24 | 0.41 | -1.1  | 0.372523 | 0.685337 | 0.705567 | 0.816458 |
| MmugDNA.3450.1.S1_at    | MmugDNA.3450.1  | 11.71 | 11.6  | 0.28 | 0.11 | 1.08  | 0.529521 | 0.715348 | 0.798376 | 0.834994 |
| MmugDNA.34500.1.S1_s_at | MmugDNA.34500.1 | 6.35  | 6.75  | 0.42 | 0.23 | -1.32 | 0.578233 | 0.149919 | 0.826177 | 0.424549 |



|                         |                 |       |       |      |      |       |          |          |          |          |
|-------------------------|-----------------|-------|-------|------|------|-------|----------|----------|----------|----------|
| MmugDNA.34501.1.S1_at   | MmugDNA.34501.1 | 7.66  | 8.02  | 0.2  | 0.14 | -1.28 | 0.024718 | 0.077041 | 0.319715 | 0.322481 |
| MmugDNA.34503.1.S1_at   | MmugDNA.34503.1 | 5.36  | 5.3   | 0.11 | 0.09 | 1.04  | 0.199585 | 0.323858 | 0.571471 | 0.574656 |
| MmugDNA.34505.1.S1_at   | MmugDNA.34505.1 | 5.84  | 5.68  | 0.1  | 0.08 | 1.12  | 0.089685 | 0.040925 | 0.457878 | 0.247161 |
| MmugDNA.34509.1.S1_at   | MmugDNA.34509.1 | 6.61  | 6.57  | 0.07 | 0.01 | 1.03  | 0.360018 | 0.937009 | 0.697741 | 0.964492 |
| MmugDNA.34510.1.S1_at   | MmugDNA.34510.1 | 9.33  | 9.04  | 0.6  | 0.14 | 1.22  | 0.161538 | 0.17752  | 0.534843 | 0.453888 |
| MmugDNA.34517.1.S1_at   | MmugDNA.34517.1 | 7.35  | 7.27  | 0.51 | 0.89 | 1.06  | 0.519965 | 0.861301 | 0.793394 | 0.921113 |
| MmugDNA.34523.1.S1_at   | MmugDNA.34523.1 | 3.35  | 3.32  | 0.04 | 0.1  | 1.02  | 0.546079 | 0.675364 | 0.808301 | 0.81026  |
| MmugDNA.34528.1.S1_at   | MmugDNA.34528.1 | 10.96 | 10.78 | 0.25 | 0.05 | 1.13  | 0.290013 | 0.079102 | 0.646655 | 0.326188 |
| MmugDNA.34534.1.S1_at   | MmugDNA.34534.1 | 9.16  | 9.35  | 1.23 | 0.03 | -1.14 | 0.628747 | 0.796969 | 0.851249 | 0.882822 |
| MmugDNA.34538.1.S1_at   | MmugDNA.34538.1 | 10.76 | 10.03 | 0.86 | 0.13 | 1.66  | 0.709354 | 0.472216 | 0.886839 | 0.679876 |
| MmugDNA.34542.1.S1_at   | MmugDNA.34542.1 | 11.58 | 11.45 | 0.28 | 0.08 | -1.09 | 0.661728 | 0.580079 | 0.8665   | 0.749447 |
| MmugDNA.34546.1.S1_at   | MmugDNA.34546.1 | 7.64  | 7.29  | 0.6  | 0.29 | 1.27  | 0.345454 | 0.089618 | 0.687499 | 0.343811 |
| MmugDNA.34550.1.S1_at   | MmugDNA.34550.1 | 8.28  | 8.37  | 0.45 | 0.09 | -1.06 | 0.706987 | 0.787867 | 0.886005 | 0.877314 |
| MmugDNA.34551.1.S1_at   | MmugDNA.34551.1 | 10.73 | 11.55 | 0.41 | 0.03 | -1.76 | 0.07801  | 0.034676 | 0.439987 | 0.230412 |
| MmugDNA.34554.1.S1_at   | MmugDNA.34554.1 | 8.71  | 8.93  | 0.25 | 0.04 | -1.17 | 0.539538 | 0.082417 | 0.803863 | 0.331381 |
| MmugDNA.34557.1.S1_at   | MmugDNA.34557.1 | 12.09 | 12.18 | 0.11 | 0.02 | -1.07 | 0.30098  | 0.205901 | 0.655271 | 0.480109 |
| MmugDNA.3456.1.S1_at    | MmugDNA.3456.1  | 7.23  | 7.08  | 0.05 | 0.08 | 1.11  | 0.047983 | 0.270998 | 0.381764 | 0.536124 |
| MmugDNA.34566.1.S1_at   | MmugDNA.34566.1 | 8.1   | 9.26  | 0.33 | 0.21 | -2.24 | 0.013146 | 0.011175 | 0.266951 | 0.137551 |
| MmugDNA.34567.1.S1_at   | MmugDNA.34567.1 | 5.77  | 5.5   | 0.09 | 0.14 | 1.2   | 0.045452 | 0.046634 | 0.376492 | 0.260495 |
| MmugDNA.34575.1.S1_at   | MmugDNA.34575.1 | 10.81 | 10.88 | 0.47 | 0.05 | -1.05 | 0.846331 | 0.833986 | 0.946139 | 0.904865 |
| MmugDNA.34575.1.S1_s_at | MmugDNA.34575.1 | 9.97  | 10.18 | 0.35 | 0.01 | -1.16 | 0.975785 | 0.909056 | 0.992214 | 0.948511 |
| MmugDNA.34582.1.S1_at   | MmugDNA.34582.1 | 7.26  | 7     | 0.3  | 0.25 | 1.19  | 0.898213 | 0.03362  | 0.965455 | 0.227006 |
| MmugDNA.34583.1.S1_at   | MmugDNA.34583.1 | 8.2   | 8.26  | 0.15 | 0.06 | -1.05 | 0.407098 | 0.568047 | 0.72852  | 0.741761 |
| MmugDNA.34588.1.S1_at   | MmugDNA.34588.1 | 11.06 | 11.45 | 0.13 | 0.03 | -1.32 | 0.006467 | 0.006038 | 0.21945  | 0.106089 |
| MmugDNA.34589.1.S1_at   | MmugDNA.34589.1 | 12.38 | 12.61 | 0.25 | 0.04 | -1.17 | 0.487551 | 0.247168 | 0.775077 | 0.516341 |
| MmugDNA.34589.1.S1_s_at | MmugDNA.34589.1 | 11.43 | 11.77 | 0.41 | 0.03 | -1.26 | 0.687005 | 0.331711 | 0.877617 | 0.580294 |
| MmugDNA.34597.1.S1_at   | MmugDNA.34597.1 | 4.61  | 4.78  | 0.38 | 0.2  | -1.12 | 0.835353 | 0.663098 | 0.940956 | 0.802828 |
| MmugDNA.34598.1.S1_at   | MmugDNA.34598.1 | 4.27  | 4.06  | 0.14 | 0.07 | 1.16  | 0.083615 | 0.519096 | 0.449627 | 0.710813 |
| MmugDNA.34599.1.S1_at   | MmugDNA.34599.1 | 8.6   | 8.71  | 0.28 | 0.17 | -1.08 | 0.994358 | 0.696345 | 0.997869 | 0.823596 |
| MmugDNA.34603.1.S1_at   | MmugDNA.34603.1 | 9.38  | 9.97  | 0.08 | 0.17 | -1.5  | 0.007061 | 0.025563 | 0.225384 | 0.200612 |
| MmugDNA.34608.1.S1_at   | MmugDNA.34608.1 | 9.03  | 8.95  | 0.58 | 0.2  | 1.06  | 0.788895 | 0.900675 | 0.922472 | 0.943491 |
| MmugDNA.34609.1.S1_at   | MmugDNA.34609.1 | 7.73  | 7.98  | 0.76 | 0.14 | -1.19 | 0.600023 | 0.602645 | 0.837654 | 0.763561 |
| MmugDNA.34622.1.S1_at   | MmugDNA.34622.1 | 9.28  | 8.89  | 0.36 | 0.25 | 1.32  | 0.183707 | 0.165184 | 0.55651  | 0.441389 |
| MmugDNA.34623.1.S1_at   | MmugDNA.34623.1 | 6.15  | 6.11  | 0.05 | 0.04 | 1.02  | 0.722569 | 0.612687 | 0.892352 | 0.770138 |
| MmugDNA.34627.1.S1_at   | MmugDNA.34627.1 | 12.08 | 12.42 | 0.26 | 0.14 | -1.27 | 0.211464 | 0.230911 | 0.582453 | 0.502548 |
| MmugDNA.3463.1.S1_at    | MmugDNA.3463.1  | 7.48  | 8.45  | 0.24 | 0.07 | -1.96 | 0.002259 | 0.000355 | 0.174757 | 0.037229 |
| MmugDNA.34635.1.S1_at   | MmugDNA.34635.1 | 10.93 | 8.92  | 0.79 | 1.23 | 4.02  | 0.192537 | 0.09156  | 0.563577 | 0.346652 |
| MmugDNA.34639.1.S1_at   | MmugDNA.34639.1 | 4.21  | 5.81  | 0.67 | 0.15 | -3.03 | 0.039271 | 0.004061 | 0.361498 | 0.090288 |
| MmugDNA.34645.1.S1_s_at | MmugDNA.34645.1 | 10.05 | 11.02 | 0.61 | 0.21 | -1.97 | 0.059418 | 0.018256 | 0.406303 | 0.169945 |
| MmugDNA.34649.1.S1_at   | MmugDNA.34649.1 | 3.98  | 3.99  | 0.67 | 0.14 | -1    | 0.607422 | 0.800353 | 0.840876 | 0.885129 |
| MmugDNA.34650.1.S1_at   | MmugDNA.34650.1 | 12.23 | 12.43 | 0.12 | 0.05 | -1.14 | 0.062696 | 0.00006  | 0.41358  | 0.025666 |
| MmugDNA.34652.1.S1_at   | MmugDNA.34652.1 | 10.63 | 10.22 | 0.36 | 0.04 | 1.33  | 0.376096 | 0.471916 | 0.706657 | 0.679793 |
| MmugDNA.34655.1.S1_at   | MmugDNA.34655.1 | 5.13  | 4.96  | 0.33 | 0.26 | 1.12  | 0.997616 | 0.926649 | 0.999184 | 0.958374 |

|                         |                 |       |       |      |      |       |          |          |          |          |
|-------------------------|-----------------|-------|-------|------|------|-------|----------|----------|----------|----------|
| MmugDNA.34656.1.S1_at   | MmugDNA.34656.1 | 8.28  | 8.6   | 0.13 | 0.07 | -1.24 | 0.025969 | 0.173853 | 0.322777 | 0.450133 |
| MmugDNA.34658.1.S1_at   | MmugDNA.34658.1 | 12.06 | 11.89 | 3.02 | 0.25 | 1.12  | 0.647437 | 0.092153 | 0.859364 | 0.347825 |
| MmugDNA.34663.1.S1_at   | MmugDNA.34663.1 | 4.03  | 4.08  | 0.28 | 0.2  | -1.03 | 0.872207 | 0.08475  | 0.955756 | 0.336233 |
| MmugDNA.3467.1.S1_s_at  | MmugDNA.3467.1  | 11.66 | 11.73 | 0.19 | 0.04 | -1.04 | 0.637009 | 0.087471 | 0.855316 | 0.340617 |
| MmugDNA.34671.1.S1_at   | MmugDNA.34671.1 | 12.71 | 12.78 | 0.28 | 0.07 | -1.05 | 0.956591 | 0.062352 | 0.985575 | 0.296503 |
| MmugDNA.34672.1.S1_at   | MmugDNA.34672.1 | 3.67  | 3.59  | 0.13 | 0.05 | 1.06  | 0.695035 | 0.556545 | 0.881262 | 0.734607 |
| MmugDNA.34674.1.S1_at   | MmugDNA.34674.1 | 6.11  | 6.26  | 0.14 | 0.14 | -1.11 | 0.276768 | 0.386384 | 0.636451 | 0.621593 |
| MmugDNA.34676.1.S1_at   | MmugDNA.34676.1 | 11.39 | 11.69 | 0.72 | 0.09 | -1.23 | 0.791438 | 0.236361 | 0.923383 | 0.507308 |
| MmugDNA.34679.1.S1_at   | MmugDNA.34679.1 | 14.12 | 14.08 | 0.14 | 0.02 | 1.03  | 0.69749  | 0.893789 | 0.882315 | 0.939386 |
| MmugDNA.3468.1.S1_at    | MmugDNA.3468.1  | 13.51 | 13.36 | 0.18 | 0.03 | 1.11  | 0.552686 | 0.711711 | 0.811917 | 0.832794 |
| MmugDNA.34680.1.S1_at   | MmugDNA.34680.1 | 9.2   | 9.57  | 0.65 | 0.04 | -1.29 | 0.621395 | 0.548093 | 0.847514 | 0.728874 |
| MmugDNA.34681.1.S1_at   | MmugDNA.34681.1 | 8.74  | 8.92  | 0.52 | 0.26 | -1.14 | 0.776817 | 0.578398 | 0.917412 | 0.748482 |
| MmugDNA.34692.1.S1_at   | MmugDNA.34692.1 | 6.99  | 7.04  | 0.18 | 0.1  | -1.03 | 0.288397 | 0.107141 | 0.645509 | 0.36981  |
| MmugDNA.34696.1.S1_at   | MmugDNA.34696.1 | 11.13 | 11.4  | 0.21 | 0.11 | -1.2  | 0.167036 | 0.12989  | 0.539622 | 0.401509 |
| MmugDNA.34697.1.S1_at   | MmugDNA.34697.1 | 4.41  | 4.31  | 0.04 | 0.09 | 1.07  | 0.315259 | 0.562865 | 0.665688 | 0.738191 |
| MmugDNA.34699.1.S1_at   | MmugDNA.34699.1 | 4.29  | 4.24  | 0.16 | 0.07 | 1.04  | 0.286582 | 0.294191 | 0.643839 | 0.553979 |
| MmugDNA.34701.1.S1_at   | MmugDNA.34701.1 | 5.05  | 5.21  | 0.43 | 0.39 | -1.12 | 0.844518 | 0.882457 | 0.945377 | 0.933022 |
| MmugDNA.34704.1.S1_at   | MmugDNA.34704.1 | 9.85  | 9.93  | 0.16 | 0.21 | -1.06 | 0.4784   | 0.09295  | 0.77008  | 0.349044 |
| MmugDNA.3471.1.S1_at    | MmugDNA.3471.1  | 7.63  | 7.89  | 0.24 | 0.06 | -1.2  | 0.287482 | 0.196015 | 0.644595 | 0.471016 |
| MmugDNA.34717.1.S1_at   | MmugDNA.34717.1 | 9.65  | 8.89  | 0.61 | 0.03 | 1.69  | 0.304644 | 0.335863 | 0.658206 | 0.583533 |
| MmugDNA.34718.1.S1_at   | MmugDNA.34718.1 | 6.2   | 5.92  | 0.12 | 0.24 | 1.21  | 0.14575  | 0.49525  | 0.520572 | 0.695411 |
| MmugDNA.34721.1.S1_at   | MmugDNA.34721.1 | 4.84  | 4.72  | 0.14 | 0.15 | 1.09  | 0.294106 | 0.536022 | 0.650324 | 0.721454 |
| MmugDNA.34729.1.S1_s_at | MmugDNA.34729.1 | 9.55  | 10.03 | 0.53 | 0.38 | -1.39 | 0.912588 | 0.04939  | 0.970287 | 0.267165 |
| MmugDNA.34732.1.S1_at   | MmugDNA.34732.1 | 4.93  | 4.98  | 0.21 | 0.13 | -1.04 | 0.471161 | 0.655579 | 0.766384 | 0.798663 |
| MmugDNA.34735.1.S1_at   | MmugDNA.34735.1 | 3.13  | 3.1   | 0.04 | 0.11 | 1.02  | 0.692124 | 0.685546 | 0.880095 | 0.816542 |
| MmugDNA.34736.1.S1_at   | MmugDNA.34736.1 | 5.23  | 5.14  | 0.35 | 0.29 | 1.06  | 0.289161 | 0.416969 | 0.645892 | 0.641869 |
| MmugDNA.34739.1.S1_at   | MmugDNA.34739.1 | 11.32 | 11.67 | 0.15 | 0.12 | -1.28 | 0.038927 | 0.000257 | 0.360586 | 0.033501 |
| MmugDNA.34743.1.S1_at   | MmugDNA.34743.1 | 12.17 | 11.51 | 0.11 | 0.1  | 1.58  | 0.001861 | 0.000857 | 0.16843  | 0.047296 |
| MmugDNA.34747.1.S1_at   | MmugDNA.34747.1 | 10.8  | 11.25 | 0.62 | 0.05 | -1.36 | 0.31442  | 0.070291 | 0.665151 | 0.31135  |
| MmugDNA.34748.1.S1_at   | MmugDNA.34748.1 | 12.95 | 12.95 | 0.56 | 0.08 | -1.01 | 0.980173 | 0.056464 | 0.993785 | 0.283516 |
| MmugDNA.34753.1.S1_at   | MmugDNA.34753.1 | 5.85  | 5.67  | 0.08 | 0.02 | 1.13  | 0.027375 | 0.026176 | 0.32749  | 0.202787 |
| MmugDNA.34757.1.S1_s_at | MmugDNA.34757.1 | 12.73 | 12.57 | 0.05 | 0.06 | 1.12  | 0.032135 | 0.048975 | 0.343204 | 0.266119 |
| MmugDNA.34759.1.S1_at   | MmugDNA.34759.1 | 11.61 | 11.14 | 0.38 | 0.18 | 1.38  | 0.089645 | 0.036306 | 0.45775  | 0.235105 |
| MmugDNA.34761.1.S1_at   | MmugDNA.34761.1 | 10.25 | 10.28 | 0.07 | 0.08 | -1.02 | 0.872212 | 0.000118 | 0.955756 | 0.028664 |
| MmugDNA.34763.1.S1_at   | MmugDNA.34763.1 | 8.03  | 8.17  | 0.21 | 0.18 | -1.11 | 0.359339 | 0.657883 | 0.697237 | 0.800051 |
| MmugDNA.34766.1.S1_at   | MmugDNA.34766.1 | 3.5   | 3.17  | 0.15 | 0.22 | 1.26  | 0.276593 | 0.427314 | 0.636157 | 0.649175 |
| MmugDNA.34768.1.S1_at   | MmugDNA.34768.1 | 8.29  | 8.51  | 0.14 | 0.09 | -1.17 | 0.134092 | 0.021688 | 0.508395 | 0.184333 |
| MmugDNA.34773.1.S1_at   | MmugDNA.34773.1 | 5.07  | 5.09  | 0.13 | 0.15 | -1.02 | 0.344588 | 0.470144 | 0.686997 | 0.678572 |
| MmugDNA.34776.1.S1_at   | MmugDNA.34776.1 | 8.31  | 8.36  | 0.42 | 0.13 | -1.03 | 0.423706 | 0.68861  | 0.739193 | 0.818251 |
| MmugDNA.34778.1.S1_s_at | MmugDNA.34778.1 | 11.96 | 12.23 | 0.16 | 0.06 | -1.2  | 0.088461 | 0.018694 | 0.45606  | 0.171742 |
| MmugDNA.34780.1.S1_at   | MmugDNA.34780.1 | 6.01  | 5.98  | 0.12 | 0.16 | 1.02  | 0.730987 | 0.311167 | 0.896354 | 0.566215 |
| MmugDNA.34781.1.S1_at   | MmugDNA.34781.1 | 3.41  | 3.3   | 0.1  | 0.04 | 1.08  | 0.077192 | 0.061614 | 0.439109 | 0.295094 |
| MmugDNA.34787.1.S1_at   | MmugDNA.34787.1 | 9.8   | 10.36 | 2.28 | 0.18 | -1.48 | 0.464804 | 0.305812 | 0.762714 | 0.562731 |

|                         |                 |       |       |      |      |       |          |          |          |          |
|-------------------------|-----------------|-------|-------|------|------|-------|----------|----------|----------|----------|
| MmugDNA.34796.1.S1_at   | MmugDNA.34796.1 | 5.65  | 5.59  | 0.05 | 0.05 | 1.04  | 0.091856 | 0.736062 | 0.460177 | 0.847311 |
| MmugDNA.34798.1.S1_at   | MmugDNA.34798.1 | 5.87  | 5.59  | 0.32 | 0.19 | 1.21  | 0.726079 | 0.677078 | 0.894084 | 0.811373 |
| MmugDNA.348.1.S1_at     | MmugDNA.348.1   | 12    | 11.99 | 0.16 | 0.05 | 1.01  | 0.337931 | 0.094597 | 0.682728 | 0.351371 |
| MmugDNA.3480.1.S1_at    | MmugDNA.3480.1  | 11.2  | 11.12 | 1.11 | 0.15 | 1.05  | 0.951437 | 0.335996 | 0.98364  | 0.583601 |
| MmugDNA.34800.1.S1_at   | MmugDNA.34800.1 | 8.15  | 8.94  | 0.17 | 0.19 | -1.74 | 0.014013 | 0.021436 | 0.273301 | 0.183342 |
| MmugDNA.34804.1.S1_at   | MmugDNA.34804.1 | 6.27  | 6.2   | 0.26 | 0.08 | 1.04  | 0.639997 | 0.028147 | 0.856485 | 0.209306 |
| MmugDNA.34807.1.S1_at   | MmugDNA.34807.1 | 7.56  | 7.29  | 0.1  | 0.09 | 1.2   | 0.042242 | 0.011328 | 0.368818 | 0.138076 |
| MmugDNA.34813.1.S1_at   | MmugDNA.34813.1 | 5.86  | 6.36  | 0.34 | 0.1  | -1.41 | 0.070528 | 0.033699 | 0.429498 | 0.227173 |
| MmugDNA.34814.1.S1_at   | MmugDNA.34814.1 | 11.1  | 10.5  | 0.57 | 0.11 | 1.52  | 0.552284 | 0.326504 | 0.811712 | 0.576576 |
| MmugDNA.34815.1.S1_at   | MmugDNA.34815.1 | 3.03  | 3     | 0.08 | 0.08 | 1.02  | 0.444149 | 0.531346 | 0.751101 | 0.718588 |
| MmugDNA.34816.1.S1_at   | MmugDNA.34816.1 | 11.45 | 12.07 | 0.08 | 0.19 | -1.54 | 0.006298 | 0.006037 | 0.218168 | 0.106089 |
| MmugDNA.34819.1.S1_at   | MmugDNA.34819.1 | 10.74 | 10.94 | 0.13 | 0.16 | -1.15 | 0.046802 | 0.168631 | 0.37872  | 0.445303 |
| MmugDNA.34848.1.S1_at   | MmugDNA.34848.1 | 3.13  | 3.14  | 0.05 | 0.03 | -1.01 | 0.711631 | 0.276643 | 0.887691 | 0.540596 |
| MmugDNA.34850.1.S1_at   | MmugDNA.34850.1 | 3.58  | 3.56  | 0.17 | 0.02 | 1.01  | 0.665421 | 0.818022 | 0.86797  | 0.895039 |
| MmugDNA.34854.1.S1_at   | MmugDNA.34854.1 | 8.31  | 7.62  | 0.32 | 0.03 | 1.62  | 0.04409  | 0.010713 | 0.373772 | 0.135227 |
| MmugDNA.34873.1.S1_at   | MmugDNA.34873.1 | 4.38  | 4.28  | 0.13 | 0.14 | 1.07  | 0.898326 | 0.221895 | 0.965455 | 0.495019 |
| MmugDNA.34874.1.S1_at   | MmugDNA.34874.1 | 9.07  | 9.14  | 0.13 | 0.28 | -1.05 | 0.269813 | 0.181838 | 0.629965 | 0.458388 |
| MmugDNA.34879.1.S1_at   | MmugDNA.34879.1 | 9.43  | 8.42  | 0.16 | 0.21 | 2.02  | 0.003396 | 0.000527 | 0.194985 | 0.040039 |
| MmugDNA.34882.1.S1_at   | MmugDNA.34882.1 | 7.33  | 7.43  | 1.17 | 0.25 | -1.07 | 0.946608 | 0.227559 | 0.981513 | 0.499841 |
| MmugDNA.34884.1.S1_at   | MmugDNA.34884.1 | 3.69  | 3.68  | 0.15 | 0.12 | 1.01  | 0.448756 | 0.576642 | 0.754037 | 0.747307 |
| MmugDNA.34886.1.S1_at   | MmugDNA.34886.1 | 8.08  | 8.78  | 0.52 | 0.12 | -1.63 | 0.068301 | 0.030833 | 0.425182 | 0.21742  |
| MmugDNA.34889.1.S1_at   | MmugDNA.34889.1 | 7.97  | 8.36  | 0.19 | 0.16 | -1.31 | 0.052295 | 0.012893 | 0.392084 | 0.14622  |
| MmugDNA.34895.1.S1_at   | MmugDNA.34895.1 | 9.48  | 9.55  | 0.52 | 0.12 | -1.05 | 0.807901 | 0.113757 | 0.930332 | 0.379943 |
| MmugDNA.3490.1.S1_at    | MmugDNA.3490.1  | 9.95  | 10.04 | 0.85 | 0.53 | -1.06 | 0.681951 | 0.082801 | 0.875478 | 0.332331 |
| MmugDNA.34901.1.S1_at   | MmugDNA.34901.1 | 10.38 | 10.18 | 0.78 | 0.1  | 1.15  | 0.720088 | 0.103124 | 0.891372 | 0.364026 |
| MmugDNA.34903.1.S1_at   | MmugDNA.34903.1 | 9.82  | 9.54  | 0.26 | 0.21 | 1.21  | 0.540682 | 0.743084 | 0.804502 | 0.851135 |
| MmugDNA.34905.1.S1_at   | MmugDNA.34905.1 | 6.05  | 6.13  | 0.02 | 0.14 | -1.06 | 0.915002 | 0.626907 | 0.971014 | 0.780046 |
| MmugDNA.3491.1.S1_at    | MmugDNA.3491.1  | 6.46  | 7.36  | 0.91 | 0.73 | -1.86 | 0.99669  | 0.487027 | 0.998707 | 0.690176 |
| MmugDNA.34916.1.S1_at   | MmugDNA.34916.1 | 8.14  | 7.34  | 0.36 | 0.19 | 1.75  | 0.031671 | 0.029517 | 0.341694 | 0.21349  |
| MmugDNA.34917.1.S1_at   | MmugDNA.34917.1 | 8.01  | 7.82  | 0.17 | 0.07 | 1.14  | 0.398639 | 0.981146 | 0.722582 | 0.989586 |
| MmugDNA.34921.1.S1_at   | MmugDNA.34921.1 | 4.47  | 4.56  | 0.48 | 0.63 | -1.06 | 0.550111 | 0.152938 | 0.810615 | 0.42777  |
| MmugDNA.34925.1.S1_at   | MmugDNA.34925.1 | 13.16 | 13.35 | 0.23 | 0    | -1.14 | 0.22211  | 0.328069 | 0.591686 | 0.577851 |
| MmugDNA.34926.1.S1_at   | MmugDNA.34926.1 | 4.85  | 4.66  | 0.22 | 0.13 | 1.14  | 0.513245 | 0.325551 | 0.789797 | 0.575831 |
| MmugDNA.34929.1.S1_at   | MmugDNA.34929.1 | 10.25 | 10.4  | 0.52 | 0.08 | -1.11 | 0.267913 | 0.250543 | 0.628278 | 0.519391 |
| MmugDNA.34930.1.S1_at   | MmugDNA.34930.1 | 6.02  | 6.04  | 0.23 | 0.12 | -1.02 | 0.92188  | 0.095775 | 0.973627 | 0.352753 |
| MmugDNA.34933.1.S1_at   | MmugDNA.34933.1 | 7.41  | 7.95  | 0.46 | 0.05 | -1.46 | 0.101214 | 0.293936 | 0.471667 | 0.553893 |
| MmugDNA.34933.1.S1_x_at | MmugDNA.34933.1 | 7.5   | 8     | 0.35 | 0.04 | -1.41 | 0.064526 | 0.218337 | 0.418343 | 0.491877 |
| MmugDNA.34935.1.S1_at   | MmugDNA.34935.1 | 5.53  | 5.65  | 0.16 | 0.1  | -1.08 | 0.650678 | 0.845397 | 0.861158 | 0.912061 |
| MmugDNA.34940.1.S1_at   | MmugDNA.34940.1 | 6.01  | 5.94  | 0.12 | 0.17 | 1.04  | 0.172669 | 0.276047 | 0.545872 | 0.540071 |
| MmugDNA.34947.1.S1_at   | MmugDNA.34947.1 | 9.32  | 9.19  | 0.09 | 0.05 | 1.1   | 0.183387 | 0.417117 | 0.556402 | 0.642022 |
| MmugDNA.34949.1.S1_at   | MmugDNA.34949.1 | 7.12  | 7.47  | 0.09 | 0.1  | -1.28 | 0.005515 | 0.000636 | 0.208157 | 0.042882 |
| MmugDNA.34951.1.S1_at   | MmugDNA.34951.1 | 13.2  | 13.42 | 0.11 | 0.08 | -1.16 | 0.124545 | 0.190075 | 0.49855  | 0.465717 |
| MmugDNA.34954.1.S1_at   | MmugDNA.34954.1 | 12.01 | 11.99 | 0.31 | 0.04 | 1.01  | 0.972697 | 0.506597 | 0.991136 | 0.702503 |

|                         |                 |       |       |      |      |       |          |          |          |          |
|-------------------------|-----------------|-------|-------|------|------|-------|----------|----------|----------|----------|
| MmugDNA.34955.1.S1_at   | MmugDNA.34955.1 | 8.73  | 8.66  | 0.44 | 0.14 | 1.05  | 0.737303 | 0.101349 | 0.899426 | 0.36112  |
| MmugDNA.34961.1.S1_at   | MmugDNA.34961.1 | 10.46 | 10.66 | 0.13 | 0.07 | -1.14 | 0.094664 | 0.309699 | 0.463796 | 0.565005 |
| MmugDNA.34968.1.S1_at   | MmugDNA.34968.1 | 3.3   | 3.35  | 0.07 | 0.06 | -1.03 | 0.954991 | 0.1885   | 0.985066 | 0.464458 |
| MmugDNA.34970.1.S1_at   | MmugDNA.34970.1 | 12.62 | 12.15 | 0.13 | 0.08 | 1.38  | 0.01334  | 0.000804 | 0.267842 | 0.04607  |
| MmugDNA.34971.1.S1_at   | MmugDNA.34971.1 | 8.03  | 8.09  | 0.17 | 0.09 | -1.05 | 0.672651 | 0.339803 | 0.871051 | 0.586394 |
| MmugDNA.34978.1.S1_at   | MmugDNA.34978.1 | 9.77  | 10.36 | 0.1  | 0.07 | -1.51 | 0.001509 | 0.000415 | 0.161549 | 0.038093 |
| MmugDNA.34981.1.S1_at   | MmugDNA.34981.1 | 6.68  | 6.25  | 0.81 | 0.56 | 1.34  | 0.952439 | 0.128879 | 0.984027 | 0.400306 |
| MmugDNA.34986.1.S1_at   | MmugDNA.34986.1 | 10.12 | 9.55  | 0.53 | 0.08 | 1.48  | 0.118702 | 0.015067 | 0.492161 | 0.155875 |
| MmugDNA.3499.1.S1_at    | MmugDNA.3499.1  | 8.63  | 9.52  | 0.88 | 0.1  | -1.86 | 0.476704 | 0.113162 | 0.769364 | 0.379184 |
| MmugDNA.34990.1.S1_at   | MmugDNA.34990.1 | 11.31 | 11.2  | 0.25 | 0.03 | 1.07  | 0.579393 | 0.201963 | 0.82645  | 0.476412 |
| MmugDNA.34998.1.S1_s_at | MmugDNA.34998.1 | 9.32  | 9.81  | 0.18 | 0.08 | -1.4  | 0.013871 | 0.00329  | 0.272841 | 0.082553 |
| MmugDNA.34999.1.S1_at   | MmugDNA.34999.1 | 10.74 | 11.96 | 0.14 | 0.05 | -2.33 | 0.000182 | 0.000013 | 0.114006 | 0.017532 |
| MmugDNA.35.1.S1_at      | MmugDNA.35.1    | 9.24  | 9.95  | 0.26 | 0.06 | -1.64 | 0.01117  | 0.002977 | 0.252671 | 0.079958 |
| MmugDNA.3500.1.S1_at    | MmugDNA.3500.1  | 6.03  | 6.11  | 0.1  | 0.16 | -1.06 | 0.891759 | 0.983754 | 0.962825 | 0.990952 |
| MmugDNA.35000.1.S1_at   | MmugDNA.35000.1 | 8.44  | 8.21  | 0.5  | 0.19 | 1.17  | 0.282532 | 0.056866 | 0.640925 | 0.284598 |
| MmugDNA.35001.1.S1_at   | MmugDNA.35001.1 | 6.15  | 5.56  | 0.9  | 0.19 | 1.51  | 0.335431 | 0.233011 | 0.681042 | 0.50445  |
| MmugDNA.35003.1.S1_at   | MmugDNA.35003.1 | 11.36 | 11.81 | 0.47 | 0.04 | -1.36 | 0.549407 | 0.750222 | 0.810299 | 0.854752 |
| MmugDNA.35009.1.S1_at   | MmugDNA.35009.1 | 5.97  | 5.82  | 0.15 | 0.12 | 1.11  | 0.482512 | 0.628347 | 0.772474 | 0.781112 |
| MmugDNA.35011.1.S1_at   | MmugDNA.35011.1 | 5.49  | 6.24  | 1.19 | 0.3  | -1.69 | 0.417694 | 0.453954 | 0.735015 | 0.668338 |
| MmugDNA.35014.1.S1_at   | MmugDNA.35014.1 | 5.24  | 5.02  | 0.14 | 0.03 | 1.17  | 0.170089 | 0.287253 | 0.543144 | 0.548526 |
| MmugDNA.35015.1.S1_at   | MmugDNA.35015.1 | 7.8   | 7.38  | 0.23 | 0.08 | 1.34  | 0.102152 | 0.04515  | 0.472436 | 0.256979 |
| MmugDNA.35017.1.S1_at   | MmugDNA.35017.1 | 8.37  | 8.36  | 0.2  | 0.01 | 1.01  | 0.850114 | 0.482735 | 0.947289 | 0.687512 |
| MmugDNA.35019.1.S1_at   | MmugDNA.35019.1 | 10.84 | 11.18 | 0.27 | 0.05 | -1.27 | 0.083895 | 0.054736 | 0.449993 | 0.27944  |
| MmugDNA.3502.1.S1_at    | MmugDNA.3502.1  | 11.76 | 12.41 | 0.61 | 0.02 | -1.57 | 0.422764 | 0.146822 | 0.738482 | 0.42088  |
| MmugDNA.35020.1.S1_at   | MmugDNA.35020.1 | 9.91  | 10.48 | 0.17 | 0.05 | -1.48 | 0.009256 | 0.026877 | 0.241866 | 0.205096 |
| MmugDNA.35022.1.S1_at   | MmugDNA.35022.1 | 12.69 | 12.86 | 0.1  | 0.04 | -1.13 | 0.167212 | 0.244929 | 0.539832 | 0.514752 |
| MmugDNA.35035.1.S1_at   | MmugDNA.35035.1 | 12.14 | 12.33 | 0.31 | 0.12 | -1.14 | 0.770528 | 0.128649 | 0.914039 | 0.400083 |
| MmugDNA.35040.1.S1_s_at | MmugDNA.35040.1 | 9.22  | 9.2   | 0.15 | 0.08 | 1.02  | 0.497387 | 0.187557 | 0.781076 | 0.463628 |
| MmugDNA.35046.1.S1_at   | MmugDNA.35046.1 | 6.61  | 6.45  | 0.05 | 0.02 | 1.12  | 0.003799 | 0.000447 | 0.198464 | 0.038539 |
| MmugDNA.3505.1.S1_at    | MmugDNA.3505.1  | 6.34  | 6.26  | 0.79 | 0.38 | 1.06  | 0.912342 | 0.013512 | 0.970266 | 0.148824 |
| MmugDNA.35050.1.S1_at   | MmugDNA.35050.1 | 10.01 | 9.79  | 0.39 | 0.11 | 1.17  | 0.336786 | 0.40477  | 0.682118 | 0.633269 |
| MmugDNA.35052.1.S1_at   | MmugDNA.35052.1 | 11.43 | 11.93 | 0.62 | 0.11 | -1.42 | 0.398264 | 0.26986  | 0.722436 | 0.535135 |
| MmugDNA.35053.1.S1_at   | MmugDNA.35053.1 | 7.11  | 6.88  | 0.12 | 0.04 | 1.18  | 0.064667 | 0.082379 | 0.418501 | 0.331354 |
| MmugDNA.35054.1.S1_at   | MmugDNA.35054.1 | 7.33  | 7.23  | 0.22 | 0.19 | 1.07  | 0.250544 | 0.615467 | 0.615742 | 0.772012 |
| MmugDNA.35059.1.S1_at   | MmugDNA.35059.1 | 8.35  | 7.31  | 0.16 | 0.67 | 2.05  | 0.058047 | 0.17366  | 0.403663 | 0.450003 |
| MmugDNA.35061.1.S1_at   | MmugDNA.35061.1 | 11.23 | 11.49 | 0.17 | 0.03 | -1.2  | 0.155342 | 0.048573 | 0.528651 | 0.265572 |
| MmugDNA.35063.1.S1_at   | MmugDNA.35063.1 | 9.39  | 10.09 | 0.48 | 0.02 | -1.63 | 0.056309 | 0.037385 | 0.399837 | 0.237776 |
| MmugDNA.35064.1.S1_at   | MmugDNA.35064.1 | 7.46  | 8.29  | 0.42 | 0.03 | -1.78 | 0.034226 | 0.004049 | 0.348762 | 0.090281 |
| MmugDNA.35066.1.S1_at   | MmugDNA.35066.1 | 5.8   | 5.86  | 0.02 | 0.04 | -1.04 | 0.192763 | 0.03712  | 0.563577 | 0.23717  |
| MmugDNA.35067.1.S1_at   | MmugDNA.35067.1 | 11.26 | 11.33 | 0.1  | 0.09 | -1.05 | 0.175587 | 0.003162 | 0.548766 | 0.081787 |
| MmugDNA.35069.1.S1_at   | MmugDNA.35069.1 | 10.54 | 10.17 | 1.34 | 0.21 | 1.29  | 0.961095 | 0.797327 | 0.987225 | 0.883144 |
| MmugDNA.35077.1.S1_at   | MmugDNA.35077.1 | 6.44  | 6.29  | 0.11 | 0.15 | 1.11  | 0.384188 | 0.204982 | 0.711835 | 0.479296 |
| MmugDNA.35081.1.S1_at   | MmugDNA.35081.1 | 4.36  | 4.31  | 0.15 | 0.07 | 1.04  | 0.717722 | 0.671002 | 0.890498 | 0.807635 |

|                         |                 |       |       |      |      |       |          |          |          |          |
|-------------------------|-----------------|-------|-------|------|------|-------|----------|----------|----------|----------|
| MmugDNA.35086.1.S1_at   | MmugDNA.35086.1 | 11.93 | 11.71 | 0.12 | 0.06 | 1.16  | 0.035565 | 0.006932 | 0.352361 | 0.112493 |
| MmugDNA.35098.1.S1_at   | MmugDNA.35098.1 | 8.89  | 8.07  | 0.15 | 0.06 | 1.76  | 0.000615 | 0.000566 | 0.143137 | 0.041049 |
| MmugDNA.35103.1.S1_at   | MmugDNA.35103.1 | 14.28 | 14.29 | 0.12 | 0.02 | -1.01 | 0.804924 | 0.046891 | 0.92907  | 0.261281 |
| MmugDNA.35105.1.S1_at   | MmugDNA.35105.1 | 11.1  | 11.26 | 0.51 | 0.14 | -1.11 | 0.572335 | 0.741115 | 0.823212 | 0.850131 |
| MmugDNA.35106.1.S1_at   | MmugDNA.35106.1 | 6.08  | 6.46  | 0.7  | 0.3  | -1.3  | 0.147054 | 0.008476 | 0.521545 | 0.12212  |
| MmugDNA.35108.1.S1_at   | MmugDNA.35108.1 | 9.1   | 9.31  | 0.17 | 0.06 | -1.16 | 0.239504 | 0.637948 | 0.605982 | 0.787234 |
| MmugDNA.3511.1.S1_at    | MmugDNA.3511.1  | 6.16  | 6.85  | 0.36 | 0.09 | -1.61 | 0.056522 | 0.030268 | 0.400489 | 0.215828 |
| MmugDNA.35114.1.S1_at   | MmugDNA.35114.1 | 9.58  | 9.59  | 0.2  | 0.17 | -1.01 | 0.713604 | 0.168554 | 0.888496 | 0.445172 |
| MmugDNA.3512.1.S1_at    | MmugDNA.3512.1  | 7.74  | 7.7   | 0.44 | 0.11 | 1.03  | 0.944038 | 0.504531 | 0.980618 | 0.701656 |
| MmugDNA.35120.1.S1_at   | MmugDNA.35120.1 | 3.34  | 3.24  | 0.13 | 0.05 | 1.08  | 0.303643 | 0.531465 | 0.657413 | 0.718657 |
| MmugDNA.35121.1.S1_at   | MmugDNA.35121.1 | 5.78  | 5.47  | 0.92 | 0.32 | 1.24  | 0.721807 | 0.254155 | 0.892101 | 0.522453 |
| MmugDNA.35129.1.S1_at   | MmugDNA.35129.1 | 5.66  | 5.93  | 0.24 | 0.55 | -1.21 | 0.180539 | 0.164729 | 0.553753 | 0.441044 |
| MmugDNA.35130.1.S1_at   | MmugDNA.35130.1 | 12.63 | 12.44 | 0.11 | 0.05 | 1.14  | 0.036506 | 0.051849 | 0.355049 | 0.273151 |
| MmugDNA.35131.1.S1_at   | MmugDNA.35131.1 | 6.44  | 5.02  | 0.8  | 0.14 | 2.67  | 0.039847 | 0.011765 | 0.362753 | 0.140492 |
| MmugDNA.35133.1.S1_at   | MmugDNA.35133.1 | 4.51  | 4.89  | 0.3  | 0.15 | -1.3  | 0.044232 | 0.043808 | 0.374279 | 0.25387  |
| MmugDNA.35136.1.S1_at   | MmugDNA.35136.1 | 11.08 | 11.44 | 1.24 | 0.13 | -1.28 | 0.622205 | 0.697172 | 0.847666 | 0.824045 |
| MmugDNA.35141.1.S1_at   | MmugDNA.35141.1 | 10.19 | 10.37 | 0.32 | 0.12 | -1.13 | 0.137008 | 0.16328  | 0.511997 | 0.439456 |
| MmugDNA.35145.1.S1_at   | MmugDNA.35145.1 | 8.89  | 8.64  | 0.38 | 0.09 | 1.19  | 0.342404 | 0.188338 | 0.685795 | 0.46433  |
| MmugDNA.35149.1.S1_at   | MmugDNA.35149.1 | 9.6   | 9.18  | 0.14 | 0.08 | 1.34  | 0.004154 | 0.007504 | 0.198874 | 0.116291 |
| MmugDNA.35150.1.S1_at   | MmugDNA.35150.1 | 9.65  | 10.14 | 0.06 | 0.01 | -1.41 | 0.000093 | 0.010106 | 0.108151 | 0.131859 |
| MmugDNA.35156.1.S1_at   | MmugDNA.35156.1 | 12.58 | 12.63 | 0.24 | 0.09 | -1.03 | 0.755883 | 0.531964 | 0.90805  | 0.718995 |
| MmugDNA.3516.1.S1_s_at  | MmugDNA.3516.1  | 9     | 9.62  | 0.4  | 0.12 | -1.54 | 0.081077 | 0.110723 | 0.445056 | 0.374854 |
| MmugDNA.35161.1.S1_at   | MmugDNA.35161.1 | 3.11  | 3     | 0.18 | 0.15 | 1.08  | 0.143168 | 0.239287 | 0.518466 | 0.509995 |
| MmugDNA.35165.1.S1_at   | MmugDNA.35165.1 | 9.75  | 10.07 | 1.02 | 0.13 | -1.25 | 0.626353 | 0.586309 | 0.849967 | 0.753427 |
| MmugDNA.35169.1.S1_at   | MmugDNA.35169.1 | 5.69  | 7.25  | 0.67 | 0.47 | -2.96 | 0.125668 | 0.142913 | 0.499638 | 0.416854 |
| MmugDNA.3517.1.S1_at    | MmugDNA.3517.1  | 6.89  | 7.24  | 0.05 | 0.18 | -1.27 | 0.012299 | 0.004425 | 0.26123  | 0.092904 |
| MmugDNA.35178.1.S1_at   | MmugDNA.35178.1 | 12.85 | 12.8  | 0.15 | 0.03 | 1.03  | 0.61368  | 0.101359 | 0.843604 | 0.36112  |
| MmugDNA.3518.1.S1_at    | MmugDNA.3518.1  | 6.73  | 6.22  | 0.16 | 0.25 | 1.42  | 0.088119 | 0.070564 | 0.45606  | 0.311781 |
| MmugDNA.35182.1.S1_at   | MmugDNA.35182.1 | 9.2   | 9.19  | 1.24 | 0.08 | 1.01  | 0.73919  | 0.861973 | 0.900398 | 0.921556 |
| MmugDNA.35184.1.S1_at   | MmugDNA.35184.1 | 7.22  | 7.19  | 0.19 | 0.12 | 1.02  | 0.177801 | 0.595474 | 0.550946 | 0.759091 |
| MmugDNA.35189.1.S1_at   | MmugDNA.35189.1 | 12.33 | 12.93 | 0.2  | 0.05 | -1.52 | 0.010706 | 0.003882 | 0.249245 | 0.0887   |
| MmugDNA.3519.1.S1_at    | MmugDNA.3519.1  | 4.41  | 4.37  | 0.02 | 0.04 | 1.03  | 0.043658 | 0.062997 | 0.372554 | 0.297642 |
| MmugDNA.35192.1.S1_at   | MmugDNA.35192.1 | 7.68  | 9.16  | 0.41 | 0.15 | -2.79 | 0.004488 | 0.000123 | 0.200067 | 0.029087 |
| MmugDNA.35206.1.S1_at   | MmugDNA.35206.1 | 9.81  | 10.01 | 0.31 | 0.21 | -1.15 | 0.729784 | 0.625812 | 0.895824 | 0.779339 |
| MmugDNA.35206.1.S1_s_at | MmugDNA.35206.1 | 9.78  | 9.35  | 0.32 | 0.01 | 1.36  | 0.070131 | 0.064263 | 0.428522 | 0.299692 |
| MmugDNA.35207.1.S1_at   | MmugDNA.35207.1 | 7.22  | 5.15  | 0.99 | 0.78 | 4.21  | 0.046432 | 0.009672 | 0.377929 | 0.129405 |
| MmugDNA.35208.1.S1_at   | MmugDNA.35208.1 | 4.3   | 4.27  | 0.14 | 0.21 | 1.02  | 0.338601 | 0.330107 | 0.68316  | 0.578983 |
| MmugDNA.35209.1.S1_at   | MmugDNA.35209.1 | 12.03 | 12.37 | 0.14 | 0.06 | -1.27 | 0.036427 | 0.011376 | 0.354908 | 0.138214 |
| MmugDNA.35210.1.S1_at   | MmugDNA.35210.1 | 5.36  | 5.29  | 0.14 | 0.06 | 1.05  | 0.618873 | 0.511036 | 0.846305 | 0.705358 |
| MmugDNA.35214.1.S1_at   | MmugDNA.35214.1 | 3.35  | 3.15  | 0.55 | 0.27 | 1.15  | 0.76237  | 0.907638 | 0.910879 | 0.947753 |
| MmugDNA.35228.1.S1_at   | MmugDNA.35228.1 | 11.71 | 11.61 | 0.29 | 0.02 | 1.07  | 0.540906 | 0.474281 | 0.804745 | 0.68135  |
| MmugDNA.35232.1.S1_at   | MmugDNA.35232.1 | 6.81  | 7.08  | 0.23 | 0.06 | -1.2  | 0.153855 | 0.003687 | 0.527213 | 0.086591 |
| MmugDNA.35236.1.S1_at   | MmugDNA.35236.1 | 11.2  | 11.15 | 0.24 | 0.03 | 1.04  | 0.556236 | 0.270635 | 0.814002 | 0.535927 |

|                         |                 |       |       |      |      |       |          |          |          |          |
|-------------------------|-----------------|-------|-------|------|------|-------|----------|----------|----------|----------|
| MmugDNA.35241.1.S1_at   | MmugDNA.35241.1 | 12.05 | 12    | 0.13 | 0.07 | 1.03  | 0.621129 | 0.770727 | 0.847506 | 0.866807 |
| MmugDNA.35243.1.S1_s_at | MmugDNA.35243.1 | 3.96  | 3.66  | 0.06 | 0.09 | 1.23  | 0.013934 | 0.009686 | 0.273301 | 0.129473 |
| MmugDNA.35245.1.S1_at   | MmugDNA.35245.1 | 9.71  | 11.24 | 1.14 | 0.11 | -2.89 | 0.14194  | 0.109412 | 0.516923 | 0.373239 |
| MmugDNA.3526.1.S1_at    | MmugDNA.3526.1  | 3.29  | 2.97  | 0.3  | 0.06 | 1.25  | 0.140651 | 0.117909 | 0.516103 | 0.385837 |
| MmugDNA.35260.1.S1_at   | MmugDNA.35260.1 | 8.23  | 7.28  | 0.21 | 0.12 | 1.93  | 0.003052 | 0.001271 | 0.191107 | 0.055241 |
| MmugDNA.35261.1.S1_at   | MmugDNA.35261.1 | 12.3  | 12.49 | 1.98 | 0.21 | -1.14 | 0.477469 | 0.206436 | 0.769855 | 0.480571 |
| MmugDNA.35263.1.S1_at   | MmugDNA.35263.1 | 13.15 | 13.15 | 0.53 | 0.04 | 1     | 0.375903 | 0.457939 | 0.706657 | 0.670999 |
| MmugDNA.35267.1.S1_at   | MmugDNA.35267.1 | 9.64  | 9.6   | 0.55 | 0.14 | 1.03  | 0.639128 | 0.501011 | 0.856229 | 0.699373 |
| MmugDNA.35270.1.S1_at   | MmugDNA.35270.1 | 7.02  | 7.18  | 0.21 | 0.08 | -1.12 | 0.247598 | 0.030222 | 0.613245 | 0.21576  |
| MmugDNA.35286.1.S1_at   | MmugDNA.35286.1 | 7.84  | 7.01  | 0.36 | 0.31 | 1.79  | 0.030756 | 0.074586 | 0.338524 | 0.318266 |
| MmugDNA.3529.1.S1_at    | MmugDNA.3529.1  | 11.39 | 11.36 | 0.28 | 0.05 | -1.02 | 0.784641 | 0.313429 | 0.920879 | 0.567879 |
| MmugDNA.35293.1.S1_at   | MmugDNA.35293.1 | 13.74 | 13.76 | 0.17 | 0.01 | -1.01 | 0.465608 | 0.227592 | 0.76307  | 0.499882 |
| MmugDNA.35294.1.S1_at   | MmugDNA.35294.1 | 10.4  | 10.68 | 0.38 | 0.1  | -1.22 | 0.33331  | 0.040983 | 0.679565 | 0.247202 |
| MmugDNA.35302.1.S1_at   | MmugDNA.35302.1 | 11.74 | 10.93 | 0.29 | 0.03 | 1.75  | 0.020327 | 0.018699 | 0.303816 | 0.171742 |
| MmugDNA.35304.1.S1_at   | MmugDNA.35304.1 | 12    | 11.97 | 0.42 | 0.04 | 1.02  | 0.910074 | 0.991784 | 0.969453 | 0.995392 |
| MmugDNA.35307.1.S1_at   | MmugDNA.35307.1 | 11.99 | 12.58 | 0.89 | 0.2  | -1.51 | 0.178317 | 0.267593 | 0.551301 | 0.53333  |
| MmugDNA.35311.1.S1_at   | MmugDNA.35311.1 | 8.05  | 8.23  | 1.75 | 0.25 | -1.13 | 0.892565 | 0.326082 | 0.963185 | 0.576315 |
| MmugDNA.35313.1.S1_at   | MmugDNA.35313.1 | 8.5   | 9.07  | 0.57 | 0.13 | -1.49 | 0.123097 | 0.315402 | 0.496589 | 0.568939 |
| MmugDNA.35321.1.S1_at   | MmugDNA.35321.1 | 11.92 | 10.96 | 0.2  | 0.1  | 1.95  | 0.001506 | 0.000092 | 0.161549 | 0.027225 |
| MmugDNA.35328.1.S1_at   | MmugDNA.35328.1 | 8.61  | 8.47  | 0.5  | 0.04 | 1.11  | 0.693738 | 0.324534 | 0.880772 | 0.57507  |
| MmugDNA.35331.1.S1_at   | MmugDNA.35331.1 | 8.15  | 8.55  | 0.48 | 0.12 | -1.32 | 0.69005  | 0.248958 | 0.879271 | 0.518026 |
| MmugDNA.35334.1.S1_at   | MmugDNA.35334.1 | 4.68  | 4.59  | 0.2  | 0.06 | 1.06  | 0.713095 | 0.471177 | 0.888234 | 0.679213 |
| MmugDNA.35338.1.S1_at   | MmugDNA.35338.1 | 4.05  | 4.04  | 0.06 | 0.28 | 1     | 0.581896 | 0.143728 | 0.827791 | 0.417583 |
| MmugDNA.35339.1.S1_at   | MmugDNA.35339.1 | 5.33  | 5.17  | 0.14 | 0.19 | 1.12  | 0.274891 | 0.106134 | 0.63419  | 0.368499 |
| MmugDNA.3534.1.S1_at    | MmugDNA.3534.1  | 10.52 | 10.99 | 0.25 | 0.18 | -1.38 | 0.030736 | 0.007125 | 0.338443 | 0.113654 |
| MmugDNA.35341.1.S1_at   | MmugDNA.35341.1 | 11.75 | 11.85 | 0.1  | 0.05 | -1.07 | 0.496712 | 0.001653 | 0.780748 | 0.061436 |
| MmugDNA.35361.1.S1_at   | MmugDNA.35361.1 | 12.22 | 12.33 | 0.09 | 0.13 | -1.08 | 0.239165 | 0.226337 | 0.605733 | 0.498783 |
| MmugDNA.35362.1.S1_at   | MmugDNA.35362.1 | 10.79 | 10.76 | 0.35 | 0.07 | 1.02  | 0.468828 | 0.558133 | 0.765126 | 0.735418 |
| MmugDNA.35363.1.S1_at   | MmugDNA.35363.1 | 9.48  | 9.77  | 0.18 | 0.15 | -1.22 | 0.093055 | 0.074372 | 0.461711 | 0.318053 |
| MmugDNA.35367.1.S1_at   | MmugDNA.35367.1 | 10.84 | 11.03 | 0.31 | 0.09 | -1.13 | 0.124715 | 0.149025 | 0.498833 | 0.423337 |
| MmugDNA.35368.1.S1_at   | MmugDNA.35368.1 | 8.45  | 8.16  | 0.28 | 0.21 | 1.22  | 0.174961 | 0.132621 | 0.548031 | 0.404544 |
| MmugDNA.35383.1.S1_at   | MmugDNA.35383.1 | 10.53 | 11.38 | 0.18 | 0.07 | -1.81 | 0.001759 | 0.000459 | 0.167444 | 0.038572 |
| MmugDNA.35389.1.S1_at   | MmugDNA.35389.1 | 5.67  | 5.98  | 0.91 | 0.13 | -1.24 | 0.655403 | 0.011416 | 0.863101 | 0.138384 |
| MmugDNA.35394.1.S1_at   | MmugDNA.35394.1 | 4.26  | 4.26  | 0.04 | 0.12 | -1    | 0.290057 | 0.3811   | 0.646655 | 0.617478 |
| MmugDNA.35395.1.S1_at   | MmugDNA.35395.1 | 8.01  | 7.06  | 0.53 | 0.21 | 1.92  | 0.110525 | 0.050917 | 0.483606 | 0.270955 |
| MmugDNA.35402.1.S1_at   | MmugDNA.35402.1 | 5.89  | 5.23  | 1.09 | 0.7  | 1.58  | 0.525867 | 0.399615 | 0.796442 | 0.629912 |
| MmugDNA.35404.1.S1_at   | MmugDNA.35404.1 | 14.26 | 14.28 | 0.06 | 0.02 | -1.02 | 0.91935  | 0.025669 | 0.972534 | 0.200834 |
| MmugDNA.35424.1.S1_at   | MmugDNA.35424.1 | 11.7  | 11.56 | 0.13 | 0.17 | 1.1   | 0.441392 | 0.010788 | 0.74926  | 0.135565 |
| MmugDNA.35426.1.S1_at   | MmugDNA.35426.1 | 6.83  | 6.65  | 0.16 | 0.13 | 1.13  | 0.17228  | 0.229347 | 0.54564  | 0.501527 |
| MmugDNA.35427.1.S1_at   | MmugDNA.35427.1 | 12.37 | 12.57 | 0.76 | 0.2  | -1.15 | 0.353337 | 0.468406 | 0.693208 | 0.677714 |
| MmugDNA.35430.1.S1_s_at | MmugDNA.35430.1 | 5.73  | 5.8   | 0.05 | 0.1  | -1.05 | 0.82129  | 0.395934 | 0.935561 | 0.627788 |
| MmugDNA.35432.1.S1_at   | MmugDNA.35432.1 | 13.07 | 13.26 | 0.26 | 0.06 | -1.14 | 0.97699  | 0.995916 | 0.992518 | 0.997533 |
| MmugDNA.3544.1.S1_at    | MmugDNA.3544.1  | 8.44  | 7.81  | 0.53 | 0.3  | 1.55  | 0.269637 | 0.063258 | 0.629945 | 0.298244 |

|                         |                 |       |       |      |      |       |          |          |          |          |
|-------------------------|-----------------|-------|-------|------|------|-------|----------|----------|----------|----------|
| MmugDNA.35444.1.S1_at   | MmugDNA.35444.1 | 5.53  | 5.41  | 0.76 | 0.53 | 1.09  | 0.620751 | 0.4474   | 0.847214 | 0.66348  |
| MmugDNA.35444.1.S1_x_at | MmugDNA.35444.1 | 5.81  | 5.2   | 0.4  | 0.43 | 1.52  | 0.638449 | 0.527433 | 0.855923 | 0.716117 |
| MmugDNA.35447.1.S1_at   | MmugDNA.35447.1 | 6.29  | 6.26  | 0.11 | 0.14 | 1.02  | 0.161134 | 0.201057 | 0.534433 | 0.475509 |
| MmugDNA.35448.1.S1_at   | MmugDNA.35448.1 | 11.5  | 11.57 | 0.2  | 0.1  | -1.05 | 0.926965 | 0.030728 | 0.975766 | 0.217179 |
| MmugDNA.35448.1.S1_s_at | MmugDNA.35448.1 | 11.85 | 11.86 | 0.15 | 0.11 | -1    | 0.574144 | 0.019033 | 0.823843 | 0.173644 |
| MmugDNA.35450.1.S1_at   | MmugDNA.35450.1 | 12.9  | 12.84 | 0.82 | 0.08 | 1.05  | 0.915695 | 0.496434 | 0.971302 | 0.69607  |
| MmugDNA.35453.1.S1_at   | MmugDNA.35453.1 | 7.25  | 7.18  | 0.03 | 0.07 | 1.05  | 0.18516  | 0.361265 | 0.558161 | 0.602104 |
| MmugDNA.35455.1.S1_at   | MmugDNA.35455.1 | 5.2   | 5.35  | 0.35 | 0.21 | -1.11 | 0.608836 | 0.832546 | 0.841357 | 0.903934 |
| MmugDNA.35457.1.S1_s_at | MmugDNA.35457.1 | 12.84 | 13.03 | 0.14 | 0.13 | -1.14 | 0.488765 | 0.02731  | 0.775818 | 0.206625 |
| MmugDNA.35459.1.S1_at   | MmugDNA.35459.1 | 4.17  | 4.04  | 0.01 | 0.1  | 1.09  | 0.300302 | 0.044742 | 0.654847 | 0.256009 |
| MmugDNA.35468.1.S1_at   | MmugDNA.35468.1 | 7.91  | 7.88  | 0.57 | 0.07 | -1.02 | 0.291396 | 0.026039 | 0.64788  | 0.202252 |
| MmugDNA.35469.1.S1_at   | MmugDNA.35469.1 | 8.07  | 8.04  | 0.27 | 0.07 | 1.03  | 0.534593 | 0.007469 | 0.801404 | 0.115888 |
| MmugDNA.3547.1.S1_at    | MmugDNA.3547.1  | 9.61  | 9.5   | 0.31 | 0.16 | 1.08  | 0.307064 | 0.162529 | 0.659982 | 0.438649 |
| MmugDNA.35470.1.S1_at   | MmugDNA.35470.1 | 7.18  | 7.05  | 0.52 | 0.19 | 1.09  | 0.50101  | 0.327847 | 0.783101 | 0.577625 |
| MmugDNA.35473.1.S1_at   | MmugDNA.35473.1 | 8.18  | 8.78  | 0.39 | 0.12 | -1.51 | 0.055765 | 0.007728 | 0.399351 | 0.117463 |
| MmugDNA.3548.1.S1_at    | MmugDNA.3548.1  | 7.21  | 7.41  | 0.18 | 0.09 | -1.15 | 0.171273 | 0.048621 | 0.544457 | 0.265602 |
| MmugDNA.35480.1.S1_at   | MmugDNA.35480.1 | 11.89 | 12.4  | 0.54 | 0.02 | -1.42 | 0.228894 | 0.149357 | 0.597884 | 0.423811 |
| MmugDNA.35484.1.S1_at   | MmugDNA.35484.1 | 10.05 | 10.6  | 0.34 | 0.05 | -1.46 | 0.054672 | 0.032461 | 0.397122 | 0.22324  |
| MmugDNA.35488.1.S1_at   | MmugDNA.35488.1 | 4.13  | 4.16  | 0.09 | 0.18 | -1.02 | 0.818921 | 0.648689 | 0.934641 | 0.794407 |
| MmugDNA.3549.1.S1_at    | MmugDNA.3549.1  | 8.24  | 8.33  | 0.1  | 0.02 | -1.06 | 0.200978 | 0.093531 | 0.572759 | 0.349846 |
| MmugDNA.35490.1.S1_at   | MmugDNA.35490.1 | 6.14  | 6.34  | 0.57 | 0.34 | -1.14 | 0.600558 | 0.423836 | 0.837913 | 0.646547 |
| MmugDNA.35494.1.S1_at   | MmugDNA.35494.1 | 13.04 | 13.22 | 0.12 | 0.08 | -1.14 | 0.027009 | 0.014031 | 0.327141 | 0.15169  |
| MmugDNA.35496.1.S1_at   | MmugDNA.35496.1 | 3.31  | 3.31  | 0.08 | 0.06 | -1    | 0.323657 | 0.370263 | 0.672279 | 0.609406 |
| MmugDNA.35498.1.S1_at   | MmugDNA.35498.1 | 5.8   | 5.8   | 0.16 | 0.15 | 1     | 0.485467 | 0.640593 | 0.774354 | 0.789025 |
| MmugDNA.355.1.S1_at     | MmugDNA.355.1   | 4.12  | 3.92  | 0.1  | 0.06 | 1.14  | 0.054854 | 0.026113 | 0.397122 | 0.202544 |
| MmugDNA.35503.1.S1_at   | MmugDNA.35503.1 | 6.93  | 7.34  | 0.28 | 0.24 | -1.33 | 0.210814 | 0.348248 | 0.582007 | 0.592441 |
| MmugDNA.35504.1.S1_at   | MmugDNA.35504.1 | 8.1   | 8     | 0.02 | 0.08 | 1.07  | 0.071327 | 0.025615 | 0.430731 | 0.200819 |
| MmugDNA.3551.1.S1_at    | MmugDNA.3551.1  | 9.68  | 8.32  | 1.13 | 0.3  | 2.58  | 0.347578 | 0.394165 | 0.688798 | 0.62675  |
| MmugDNA.35516.1.S1_at   | MmugDNA.35516.1 | 12.01 | 12.1  | 1.86 | 0.11 | -1.06 | 0.683074 | 0.365524 | 0.876006 | 0.605602 |
| MmugDNA.35522.1.S1_at   | MmugDNA.35522.1 | 5.37  | 4.93  | 0.21 | 0.1  | 1.36  | 0.034158 | 0.021236 | 0.34854  | 0.182455 |
| MmugDNA.35525.1.S1_at   | MmugDNA.35525.1 | 5.95  | 5.77  | 0.22 | 0.05 | 1.13  | 0.18979  | 0.151183 | 0.561112 | 0.42587  |
| MmugDNA.35529.1.S1_at   | MmugDNA.35529.1 | 5.93  | 6.31  | 0.74 | 0.52 | -1.3  | 0.733122 | 0.200114 | 0.897503 | 0.474603 |
| MmugDNA.35530.1.S1_at   | MmugDNA.35530.1 | 6.79  | 6.83  | 0.45 | 0.18 | -1.04 | 0.893628 | 0.605965 | 0.963486 | 0.765547 |
| MmugDNA.35532.1.S1_at   | MmugDNA.35532.1 | 2.77  | 2.78  | 0.11 | 0.08 | -1    | 0.622934 | 0.647017 | 0.848004 | 0.793279 |
| MmugDNA.35534.1.S1_at   | MmugDNA.35534.1 | 6.53  | 6.2   | 0.08 | 0.15 | 1.26  | 0.077705 | 0.06849  | 0.439817 | 0.308214 |
| MmugDNA.35537.1.S1_at   | MmugDNA.35537.1 | 13.48 | 13.1  | 0.51 | 0.23 | 1.3   | 0.209675 | 0.027596 | 0.581295 | 0.207431 |
| MmugDNA.35544.1.S1_at   | MmugDNA.35544.1 | 10.35 | 10.24 | 0.5  | 0.1  | 1.08  | 0.706109 | 0.102348 | 0.885568 | 0.362527 |
| MmugDNA.35548.1.S1_s_at | MmugDNA.35548.1 | 8.73  | 8.6   | 0.61 | 0.2  | 1.09  | 0.563501 | 0.654512 | 0.818294 | 0.798087 |
| MmugDNA.35557.1.S1_at   | MmugDNA.35557.1 | 10.96 | 10.47 | 0.13 | 0.05 | 1.4   | 0.004109 | 0.001502 | 0.198572 | 0.059065 |
| MmugDNA.35558.1.S1_at   | MmugDNA.35558.1 | 10.99 | 10.64 | 0.16 | 0.11 | 1.28  | 0.053101 | 0.179043 | 0.394001 | 0.455404 |
| MmugDNA.35559.1.S1_at   | MmugDNA.35559.1 | 12.67 | 11.87 | 0.81 | 0.39 | 1.74  | 0.831513 | 0.078931 | 0.939628 | 0.325916 |
| MmugDNA.35562.1.S1_at   | MmugDNA.35562.1 | 6.31  | 7.42  | 1.55 | 0.18 | -2.15 | 0.901108 | 0.863718 | 0.966467 | 0.922638 |
| MmugDNA.35566.1.S1_at   | MmugDNA.35566.1 | 9.76  | 9.86  | 0.02 | 0.14 | -1.07 | 0.969732 | 0.780323 | 0.990053 | 0.872592 |

|                         |                 |       |       |      |      |       |          |          |          |          |
|-------------------------|-----------------|-------|-------|------|------|-------|----------|----------|----------|----------|
| MmugDNA.35571.1.S1_at   | MmugDNA.35571.1 | 7.75  | 9.63  | 0.83 | 0.4  | -3.69 | 0.018439 | 0.004247 | 0.297408 | 0.091685 |
| MmugDNA.35573.1.S1_at   | MmugDNA.35573.1 | 9.12  | 7.88  | 0.09 | 0.18 | 2.35  | 0.000392 | 0.019228 | 0.137028 | 0.174494 |
| MmugDNA.35576.1.S1_at   | MmugDNA.35576.1 | 4.02  | 4.02  | 0.03 | 0    | -1    | 0.562484 | 0.777573 | 0.8177   | 0.870732 |
| MmugDNA.35579.1.S1_at   | MmugDNA.35579.1 | 10.49 | 10.6  | 0.33 | 0.03 | -1.08 | 0.666927 | 0.855093 | 0.868458 | 0.91741  |
| MmugDNA.3558.1.S1_at    | MmugDNA.3558.1  | 10.49 | 11.21 | 0.66 | 0.08 | -1.64 | 0.141352 | 0.147928 | 0.516365 | 0.422304 |
| MmugDNA.35580.1.S1_at   | MmugDNA.35580.1 | 9.54  | 9.61  | 0.59 | 0.23 | -1.05 | 0.603715 | 0.507556 | 0.839328 | 0.703118 |
| MmugDNA.35583.1.S1_at   | MmugDNA.35583.1 | 3.72  | 3.35  | 1.48 | 0.22 | 1.29  | 0.274363 | 0.340239 | 0.633792 | 0.586637 |
| MmugDNA.35585.1.S1_at   | MmugDNA.35585.1 | 6     | 5.97  | 1.39 | 0.32 | 1.03  | 0.645875 | 0.232956 | 0.858896 | 0.50445  |
| MmugDNA.35588.1.S1_at   | MmugDNA.35588.1 | 10.15 | 10.4  | 0.17 | 0.15 | -1.19 | 0.067824 | 0.064848 | 0.42446  | 0.30069  |
| MmugDNA.35589.1.S1_at   | MmugDNA.35589.1 | 4.56  | 4.56  | 0.11 | 0.09 | -1    | 0.53651  | 0.499088 | 0.802417 | 0.697988 |
| MmugDNA.3559.1.S1_at    | MmugDNA.3559.1  | 3.13  | 3.37  | 0.1  | 0.13 | -1.18 | 0.097167 | 0.103254 | 0.465832 | 0.364143 |
| MmugDNA.35592.1.S1_at   | MmugDNA.35592.1 | 4.38  | 4.35  | 0.12 | 0.08 | 1.02  | 0.631117 | 0.887518 | 0.852361 | 0.935902 |
| MmugDNA.35594.1.S1_at   | MmugDNA.35594.1 | 9.28  | 9.24  | 2.3  | 0.26 | 1.03  | 0.75271  | 0.294871 | 0.906733 | 0.554429 |
| MmugDNA.35598.1.S1_at   | MmugDNA.35598.1 | 6.61  | 6.49  | 0.1  | 0.06 | 1.09  | 0.09578  | 0.144591 | 0.464449 | 0.418466 |
| MmugDNA.3560.1.S1_at    | MmugDNA.3560.1  | 4.37  | 4.32  | 0.12 | 0.11 | 1.04  | 0.900436 | 0.782633 | 0.966101 | 0.874202 |
| MmugDNA.35607.1.S1_at   | MmugDNA.35607.1 | 11.57 | 11.57 | 0.09 | 0.1  | -1    | 0.587337 | 0.233328 | 0.831578 | 0.50468  |
| MmugDNA.35610.1.S1_at   | MmugDNA.35610.1 | 9.52  | 9.58  | 0.17 | 0.12 | -1.04 | 0.64261  | 0.117141 | 0.857864 | 0.384582 |
| MmugDNA.35613.1.S1_at   | MmugDNA.35613.1 | 4.07  | 4.06  | 0.19 | 0.18 | 1.01  | 0.868217 | 0.57453  | 0.953843 | 0.745961 |
| MmugDNA.35617.1.S1_at   | MmugDNA.35617.1 | 4.62  | 4.21  | 0.11 | 0.13 | 1.33  | 0.040617 | 0.069005 | 0.364613 | 0.309017 |
| MmugDNA.35619.1.S1_at   | MmugDNA.35619.1 | 5.2   | 4.77  | 0.21 | 0.19 | 1.35  | 0.093949 | 0.2342   | 0.463304 | 0.505449 |
| MmugDNA.35629.1.S1_at   | MmugDNA.35629.1 | 10.71 | 10.12 | 0.89 | 0.37 | 1.5   | 0.122164 | 0.011393 | 0.495677 | 0.13824  |
| MmugDNA.3563.1.S1_at    | MmugDNA.3563.1  | 3.66  | 3.62  | 0.02 | 0.11 | 1.03  | 0.189984 | 0.085829 | 0.561309 | 0.337901 |
| MmugDNA.35637.1.S1_at   | MmugDNA.35637.1 | 6.39  | 6.42  | 0.28 | 0.04 | -1.02 | 0.848293 | 0.289717 | 0.946772 | 0.550776 |
| MmugDNA.35638.1.S1_at   | MmugDNA.35638.1 | 6.31  | 6.09  | 0.12 | 0    | 1.17  | 0.016446 | 0.003631 | 0.287478 | 0.086261 |
| MmugDNA.35643.1.S1_at   | MmugDNA.35643.1 | 11.47 | 11.67 | 0.2  | 0.05 | -1.14 | 0.187096 | 0.244845 | 0.559722 | 0.514662 |
| MmugDNA.35645.1.S1_s_at | MmugDNA.35645.1 | 6.32  | 6.47  | 1.44 | 0.31 | -1.11 | 0.885803 | 0.173854 | 0.96038  | 0.450133 |
| MmugDNA.35647.1.S1_at   | MmugDNA.35647.1 | 8.91  | 9.26  | 0.39 | 0.31 | -1.27 | 0.526063 | 0.804529 | 0.796442 | 0.887587 |
| MmugDNA.35648.1.S1_at   | MmugDNA.35648.1 | 9.06  | 9.25  | 0.13 | 0.04 | -1.15 | 0.055154 | 0.000236 | 0.398095 | 0.03241  |
| MmugDNA.35651.1.S1_at   | MmugDNA.35651.1 | 6.59  | 6.52  | 0.77 | 0.08 | 1.05  | 0.797272 | 0.130188 | 0.925402 | 0.401892 |
| MmugDNA.35656.1.S1_at   | MmugDNA.35656.1 | 4.25  | 4.12  | 0.52 | 0.2  | 1.09  | 0.2719   | 0.283118 | 0.631647 | 0.545694 |
| MmugDNA.3566.1.S1_at    | MmugDNA.3566.1  | 5.6   | 5.45  | 0.11 | 0.3  | 1.11  | 0.654872 | 0.524753 | 0.862999 | 0.714552 |
| MmugDNA.35679.1.S1_at   | MmugDNA.35679.1 | 9.24  | 9.08  | 0.09 | 0.07 | 1.11  | 0.110763 | 0.007965 | 0.484166 | 0.118702 |
| MmugDNA.35680.1.S1_at   | MmugDNA.35680.1 | 6.48  | 6.88  | 0.2  | 0.44 | -1.32 | 0.264496 | 0.308804 | 0.626029 | 0.56463  |
| MmugDNA.35681.1.S1_at   | MmugDNA.35681.1 | 6.09  | 6.2   | 0.86 | 0.16 | -1.08 | 0.74415  | 0.18886  | 0.902469 | 0.464789 |
| MmugDNA.35682.1.S1_at   | MmugDNA.35682.1 | 8.96  | 9.47  | 0.21 | 0.03 | -1.43 | 0.029616 | 0.021283 | 0.335183 | 0.182646 |
| MmugDNA.35683.1.S1_at   | MmugDNA.35683.1 | 6.09  | 5.99  | 0.18 | 0.43 | 1.07  | 0.499678 | 0.714039 | 0.782195 | 0.834108 |
| MmugDNA.35685.1.S1_at   | MmugDNA.35685.1 | 11.15 | 11.01 | 0.18 | 0.12 | 1.1   | 0.806078 | 0.180326 | 0.929569 | 0.456953 |
| MmugDNA.35687.1.S1_at   | MmugDNA.35687.1 | 11.06 | 11.13 | 0.11 | 0.06 | -1.05 | 0.958743 | 0.112823 | 0.986447 | 0.37844  |
| MmugDNA.35695.1.S1_at   | MmugDNA.35695.1 | 8.1   | 8.18  | 0.7  | 0.11 | -1.05 | 0.902771 | 0.973404 | 0.967189 | 0.985537 |
| MmugDNA.35697.1.S1_at   | MmugDNA.35697.1 | 9.92  | 9.8   | 0.45 | 0.01 | 1.09  | 0.697288 | 0.875903 | 0.882224 | 0.929502 |
| MmugDNA.35700.1.S1_at   | MmugDNA.35700.1 | 11.64 | 11.1  | 0.37 | 0.14 | 1.45  | 0.075001 | 0.043379 | 0.435663 | 0.25294  |
| MmugDNA.35702.1.S1_at   | MmugDNA.35702.1 | 6.53  | 6.13  | 0.48 | 0.44 | 1.32  | 0.833075 | 0.879165 | 0.940095 | 0.931052 |
| MmugDNA.35704.1.S1_at   | MmugDNA.35704.1 | 11.2  | 11.03 | 0.16 | 0.14 | 1.12  | 0.123061 | 0.199587 | 0.496589 | 0.474211 |



|                         |                 |       |       |      |      |       |          |          |          |          |
|-------------------------|-----------------|-------|-------|------|------|-------|----------|----------|----------|----------|
| MmugDNA.35709.1.S1_at   | MmugDNA.35709.1 | 9.07  | 8.36  | 0.94 | 0.19 | 1.63  | 0.767422 | 0.911736 | 0.912495 | 0.950257 |
| MmugDNA.3571.1.S1_at    | MmugDNA.3571.1  | 11.99 | 12.04 | 0.17 | 0.16 | -1.04 | 0.655426 | 0.775071 | 0.863101 | 0.869035 |
| MmugDNA.35711.1.S1_at   | MmugDNA.35711.1 | 10.67 | 11.24 | 0.85 | 0.08 | -1.49 | 0.943492 | 0.763482 | 0.980509 | 0.862471 |
| MmugDNA.3572.1.S1_at    | MmugDNA.3572.1  | 7.6   | 7.85  | 0.24 | 0.19 | -1.19 | 0.502309 | 0.223114 | 0.783529 | 0.49588  |
| MmugDNA.35720.1.S1_at   | MmugDNA.35720.1 | 4.81  | 6.69  | 0.62 | 0.19 | -3.7  | 0.015548 | 0.005775 | 0.282681 | 0.104378 |
| MmugDNA.35724.1.S1_at   | MmugDNA.35724.1 | 12.67 | 12.52 | 0.14 | 0.2  | 1.11  | 0.130119 | 0.071508 | 0.504663 | 0.313706 |
| MmugDNA.35730.1.S1_at   | MmugDNA.35730.1 | 9.17  | 7.41  | 2.42 | 0.47 | 3.38  | 0.519246 | 0.257545 | 0.793113 | 0.525294 |
| MmugDNA.35734.1.S1_at   | MmugDNA.35734.1 | 7.44  | 6.91  | 1.23 | 0.26 | 1.44  | 0.960934 | 0.05266  | 0.987225 | 0.275004 |
| MmugDNA.35738.1.S1_at   | MmugDNA.35738.1 | 8.98  | 9.54  | 0.11 | 0.16 | -1.48 | 0.007101 | 0.000019 | 0.225651 | 0.019635 |
| MmugDNA.35741.1.S1_at   | MmugDNA.35741.1 | 10.64 | 10.48 | 0.14 | 0.22 | 1.12  | 0.070241 | 0.179406 | 0.428837 | 0.455908 |
| MmugDNA.35742.1.S1_at   | MmugDNA.35742.1 | 7.02  | 7.17  | 0.32 | 0.14 | -1.11 | 0.390271 | 0.114973 | 0.716623 | 0.381719 |
| MmugDNA.35745.1.S1_at   | MmugDNA.35745.1 | 7.94  | 8.71  | 0.69 | 0.31 | -1.7  | 0.24323  | 0.184846 | 0.609142 | 0.460776 |
| MmugDNA.3575.1.S1_at    | MmugDNA.3575.1  | 6.35  | 5.88  | 0.37 | 0.11 | 1.39  | 0.163824 | 0.097421 | 0.53663  | 0.355097 |
| MmugDNA.35758.1.S1_at   | MmugDNA.35758.1 | 4.85  | 4.94  | 0.38 | 0.06 | -1.07 | 0.953312 | 0.506686 | 0.984409 | 0.702546 |
| MmugDNA.35759.1.S1_at   | MmugDNA.35759.1 | 7.41  | 7.39  | 0.12 | 0.03 | 1.01  | 0.743062 | 0.905124 | 0.901935 | 0.94617  |
| MmugDNA.3576.1.S1_at    | MmugDNA.3576.1  | 6.85  | 7.94  | 0.33 | 0.06 | -2.13 | 0.003963 | 0.001007 | 0.198571 | 0.050657 |
| MmugDNA.35760.1.S1_at   | MmugDNA.35760.1 | 7.1   | 6.28  | 0.3  | 0.2  | 1.77  | 0.01646  | 0.084505 | 0.287478 | 0.335901 |
| MmugDNA.35763.1.S1_at   | MmugDNA.35763.1 | 10.15 | 10.14 | 0.27 | 0.13 | 1.01  | 0.270395 | 0.40849  | 0.630298 | 0.635694 |
| MmugDNA.35767.1.S1_s_at | MmugDNA.35767.1 | 12.37 | 12.88 | 0.26 | 0.04 | -1.42 | 0.041087 | 0.049331 | 0.365672 | 0.267063 |
| MmugDNA.35771.1.S1_at   | MmugDNA.35771.1 | 7.86  | 8.75  | 0.69 | 0.22 | -1.86 | 0.114496 | 0.019949 | 0.487606 | 0.177476 |
| MmugDNA.35773.1.S1_at   | MmugDNA.35773.1 | 6.2   | 6.21  | 0.11 | 0.02 | -1.01 | 0.984423 | 0.928426 | 0.995256 | 0.959349 |
| MmugDNA.35776.1.S1_at   | MmugDNA.35776.1 | 10.2  | 10.72 | 0.49 | 0.14 | -1.44 | 0.32341  | 0.015037 | 0.672212 | 0.155766 |
| MmugDNA.35779.1.S1_at   | MmugDNA.35779.1 | 5.06  | 4.97  | 0.1  | 0.17 | 1.07  | 0.242991 | 0.411169 | 0.608888 | 0.637937 |
| MmugDNA.3578.1.S1_at    | MmugDNA.3578.1  | 6.65  | 6.55  | 0.07 | 0.03 | 1.07  | 0.035691 | 0.255362 | 0.352932 | 0.523406 |
| MmugDNA.35783.1.S1_at   | MmugDNA.35783.1 | 11.68 | 11.8  | 0.7  | 0.03 | -1.09 | 0.80667  | 0.308819 | 0.929839 | 0.56463  |
| MmugDNA.35790.1.S1_at   | MmugDNA.35790.1 | 6.87  | 6.81  | 1.17 | 0.54 | 1.04  | 0.386361 | 0.255019 | 0.713522 | 0.52317  |
| MmugDNA.35791.1.S1_at   | MmugDNA.35791.1 | 11.1  | 10.92 | 0.12 | 0.12 | 1.13  | 0.180742 | 0.287414 | 0.554068 | 0.548663 |
| MmugDNA.35794.1.S1_at   | MmugDNA.35794.1 | 8.48  | 9     | 0.99 | 0.23 | -1.43 | 0.519876 | 0.263083 | 0.793373 | 0.529402 |
| MmugDNA.35796.1.S1_at   | MmugDNA.35796.1 | 6.05  | 6.23  | 0.51 | 0.04 | -1.13 | 0.724341 | 0.32956  | 0.893143 | 0.578781 |
| MmugDNA.3580.1.S1_at    | MmugDNA.3580.1  | 11.84 | 11.77 | 0.24 | 0.03 | 1.05  | 0.217488 | 0.328331 | 0.587269 | 0.578034 |
| MmugDNA.35804.1.S1_at   | MmugDNA.35804.1 | 9.05  | 8.66  | 0.36 | 0.03 | 1.31  | 0.111933 | 0.119543 | 0.484976 | 0.388208 |
| MmugDNA.35807.1.S1_at   | MmugDNA.35807.1 | 6.78  | 6.75  | 0.38 | 0.47 | 1.02  | 0.520494 | 0.074603 | 0.79373  | 0.318299 |
| MmugDNA.35808.1.S1_at   | MmugDNA.35808.1 | 9.52  | 9.85  | 0.06 | 0.03 | -1.26 | 0.001281 | 0.000517 | 0.157784 | 0.039588 |
| MmugDNA.35810.1.S1_at   | MmugDNA.35810.1 | 9.19  | 8.47  | 1.02 | 0.11 | 1.64  | 0.220413 | 0.031835 | 0.589697 | 0.220909 |
| MmugDNA.35814.1.S1_at   | MmugDNA.35814.1 | 6.85  | 8.49  | 0.64 | 0.29 | -3.12 | 0.033684 | 0.011784 | 0.34712  | 0.140575 |
| MmugDNA.35816.1.S1_at   | MmugDNA.35816.1 | 6.51  | 6.52  | 0.17 | 0.03 | -1.01 | 0.566921 | 0.486856 | 0.820138 | 0.690091 |
| MmugDNA.35818.1.S1_at   | MmugDNA.35818.1 | 7.11  | 7.19  | 0.18 | 0.01 | -1.06 | 0.445696 | 0.279163 | 0.752285 | 0.542814 |
| MmugDNA.35823.1.S1_s_at | MmugDNA.35823.1 | 5.28  | 5.32  | 0.01 | 0.03 | -1.03 | 0.10754  | 0.097243 | 0.480041 | 0.3549   |
| MmugDNA.35828.1.S1_s_at | MmugDNA.35828.1 | 8.26  | 8.78  | 0.16 | 0.13 | -1.44 | 0.007661 | 0.075144 | 0.230571 | 0.319332 |
| MmugDNA.3583.1.S1_at    | MmugDNA.3583.1  | 6.39  | 6.33  | 0.11 | 0.11 | 1.04  | 0.334074 | 0.350198 | 0.680021 | 0.593963 |
| MmugDNA.35831.1.S1_at   | MmugDNA.35831.1 | 4.95  | 4.47  | 0.37 | 0.12 | 1.39  | 0.236816 | 0.142924 | 0.603719 | 0.416854 |
| MmugDNA.35837.1.S1_at   | MmugDNA.35837.1 | 7.63  | 7.69  | 0.13 | 0.07 | -1.04 | 0.110315 | 0.103725 | 0.483363 | 0.364519 |
| MmugDNA.35839.1.S1_at   | MmugDNA.35839.1 | 10.03 | 10.08 | 0.03 | 0.03 | -1.03 | 0.048264 | 0.611647 | 0.382735 | 0.769481 |

|                         |                 |       |       |      |      |       |          |          |          |          |
|-------------------------|-----------------|-------|-------|------|------|-------|----------|----------|----------|----------|
| MmugDNA.3584.1.S1_at    | MmugDNA.3584.1  | 5.58  | 5.55  | 0.06 | 0.03 | 1.02  | 0.175446 | 0.646133 | 0.548393 | 0.792676 |
| MmugDNA.35843.1.S1_at   | MmugDNA.35843.1 | 8.95  | 9.54  | 0.17 | 0.05 | -1.5  | 0.004879 | 0.000691 | 0.203301 | 0.044166 |
| MmugDNA.35844.1.S1_at   | MmugDNA.35844.1 | 10.3  | 10.51 | 0.22 | 0.03 | -1.16 | 0.135297 | 0.189343 | 0.509424 | 0.465092 |
| MmugDNA.35846.1.S1_at   | MmugDNA.35846.1 | 10.41 | 10.63 | 0.31 | 0.06 | -1.17 | 0.280527 | 0.118116 | 0.639288 | 0.385993 |
| MmugDNA.35847.1.S1_at   | MmugDNA.35847.1 | 7.15  | 7.13  | 0.06 | 0.11 | 1.01  | 0.194615 | 0.448233 | 0.565144 | 0.664158 |
| MmugDNA.35851.1.S1_at   | MmugDNA.35851.1 | 8.57  | 8.6   | 0.12 | 0.09 | -1.02 | 0.670473 | 0.051267 | 0.869943 | 0.271825 |
| MmugDNA.35853.1.S1_at   | MmugDNA.35853.1 | 7.35  | 6.58  | 0.83 | 0.27 | 1.7   | 0.198174 | 0.208005 | 0.569405 | 0.482049 |
| MmugDNA.35854.1.S1_at   | MmugDNA.35854.1 | 8.74  | 9.34  | 1.22 | 0.11 | -1.52 | 0.429089 | 0.113755 | 0.742138 | 0.379943 |
| MmugDNA.35867.1.S1_at   | MmugDNA.35867.1 | 7.3   | 7.19  | 1.04 | 0.17 | 1.08  | 0.543896 | 0.848183 | 0.806876 | 0.913817 |
| MmugDNA.35868.1.S1_at   | MmugDNA.35868.1 | 3.54  | 3.19  | 0.12 | 0.06 | 1.27  | 0.019754 | 0.154084 | 0.302373 | 0.428867 |
| MmugDNA.35870.1.S1_at   | MmugDNA.35870.1 | 6.98  | 7.85  | 0.63 | 0.1  | -1.82 | 0.143099 | 0.165174 | 0.518366 | 0.441389 |
| MmugDNA.35871.1.S1_at   | MmugDNA.35871.1 | 3.59  | 3.62  | 0.11 | 0.17 | -1.02 | 0.758716 | 0.909417 | 0.909286 | 0.948813 |
| MmugDNA.35874.1.S1_at   | MmugDNA.35874.1 | 5.36  | 5.22  | 0.19 | 0.02 | 1.1   | 0.227966 | 0.211649 | 0.596782 | 0.485681 |
| MmugDNA.35875.1.S1_at   | MmugDNA.35875.1 | 13.01 | 12.99 | 0.35 | 0.04 | 1.02  | 0.958051 | 0.835458 | 0.986201 | 0.905836 |
| MmugDNA.35876.1.S1_at   | MmugDNA.35876.1 | 7.08  | 7.67  | 0.75 | 0.16 | -1.51 | 0.294328 | 0.124979 | 0.650593 | 0.395386 |
| MmugDNA.35877.1.S1_s_at | MmugDNA.35877.1 | 13.48 | 13.22 | 0.27 | 0.13 | 1.2   | 0.071712 | 0.058128 | 0.431368 | 0.287755 |
| MmugDNA.3588.1.S1_at    | MmugDNA.3588.1  | 10.64 | 10.69 | 0.25 | 0.22 | -1.03 | 0.873751 | 0.024368 | 0.956275 | 0.195393 |
| MmugDNA.35887.1.S1_at   | MmugDNA.35887.1 | 6.3   | 6.06  | 0.07 | 0.08 | 1.18  | 0.03308  | 0.026273 | 0.346021 | 0.203033 |
| MmugDNA.35890.1.S1_at   | MmugDNA.35890.1 | 8.19  | 8.23  | 0.35 | 0.09 | -1.03 | 0.779189 | 0.626163 | 0.918608 | 0.779643 |
| MmugDNA.35890.1.S1_s_at | MmugDNA.35890.1 | 7.93  | 8.13  | 0.83 | 0.2  | -1.14 | 0.676581 | 0.877576 | 0.873165 | 0.930173 |
| MmugDNA.35891.1.S1_at   | MmugDNA.35891.1 | 6.32  | 6.3   | 0.1  | 0.19 | 1.02  | 0.586757 | 0.704108 | 0.83145  | 0.82833  |
| MmugDNA.35897.1.S1_at   | MmugDNA.35897.1 | 10.36 | 9.93  | 0.76 | 0.1  | 1.35  | 0.595364 | 0.729825 | 0.835317 | 0.843695 |
| MmugDNA.3590.1.S1_at    | MmugDNA.3590.1  | 10.12 | 10.22 | 0.17 | 0.08 | -1.07 | 0.731309 | 0.931437 | 0.896562 | 0.961034 |
| MmugDNA.35906.1.S1_at   | MmugDNA.35906.1 | 9.24  | 8.54  | 0.4  | 0.1  | 1.61  | 0.018673 | 0.006418 | 0.298184 | 0.108813 |
| MmugDNA.35910.1.S1_at   | MmugDNA.35910.1 | 9.08  | 8.78  | 0.09 | 0.2  | 1.23  | 0.113406 | 0.025684 | 0.486722 | 0.200834 |
| MmugDNA.35916.1.S1_at   | MmugDNA.35916.1 | 12.69 | 12.43 | 0.14 | 0.09 | 1.19  | 0.142935 | 0.174884 | 0.518156 | 0.451561 |
| MmugDNA.35917.1.S1_at   | MmugDNA.35917.1 | 7.02  | 6.89  | 0.56 | 0.05 | 1.09  | 0.293364 | 0.105195 | 0.649768 | 0.366982 |
| MmugDNA.35934.1.S1_at   | MmugDNA.35934.1 | 13.45 | 13.54 | 0.05 | 0.03 | -1.07 | 0.071579 | 0.082872 | 0.431049 | 0.332423 |
| MmugDNA.35937.1.S1_at   | MmugDNA.35937.1 | 7.42  | 7.33  | 0.13 | 0.04 | 1.06  | 0.190345 | 0.444412 | 0.561652 | 0.662053 |
| MmugDNA.35940.1.S1_at   | MmugDNA.35940.1 | 8.77  | 8.9   | 0.19 | 0.04 | -1.09 | 0.506041 | 0.010948 | 0.785663 | 0.13621  |
| MmugDNA.35942.1.S1_at   | MmugDNA.35942.1 | 6.21  | 5.66  | 0.37 | 0.19 | 1.46  | 0.222267 | 0.213884 | 0.591828 | 0.48758  |
| MmugDNA.35949.1.S1_at   | MmugDNA.35949.1 | 6.98  | 6.83  | 0.01 | 0.08 | 1.11  | 0.021171 | 0.150492 | 0.307036 | 0.425011 |
| MmugDNA.35951.1.S1_at   | MmugDNA.35951.1 | 11.43 | 12.06 | 0.91 | 0    | -1.54 | 0.287227 | 0.380789 | 0.644357 | 0.617426 |
| MmugDNA.3596.1.S1_at    | MmugDNA.3596.1  | 7.36  | 7.34  | 0.09 | 0.04 | 1.01  | 0.740714 | 0.519922 | 0.900905 | 0.7114   |
| MmugDNA.35963.1.S1_at   | MmugDNA.35963.1 | 7.25  | 7.24  | 0.18 | 0.07 | 1     | 0.93081  | 0.953709 | 0.97692  | 0.973663 |
| MmugDNA.35965.1.S1_at   | MmugDNA.35965.1 | 7.81  | 8.6   | 3.12 | 0.16 | -1.72 | 0.424498 | 0.327446 | 0.739618 | 0.577284 |
| MmugDNA.35972.1.S1_at   | MmugDNA.35972.1 | 4.89  | 4.81  | 0.2  | 0.05 | 1.05  | 0.415969 | 0.478956 | 0.73395  | 0.684806 |
| MmugDNA.35983.1.S1_at   | MmugDNA.35983.1 | 3.63  | 3.6   | 0.03 | 0.32 | 1.02  | 0.832927 | 0.967044 | 0.940086 | 0.981752 |
| MmugDNA.35984.1.S1_at   | MmugDNA.35984.1 | 4.43  | 4.57  | 0.04 | 0.23 | -1.1  | 0.374544 | 0.049984 | 0.705935 | 0.268812 |
| MmugDNA.35986.1.S1_at   | MmugDNA.35986.1 | 5.28  | 5.55  | 0.28 | 0.33 | -1.21 | 0.259505 | 0.258083 | 0.622626 | 0.525574 |
| MmugDNA.35993.1.S1_at   | MmugDNA.35993.1 | 4.79  | 4.55  | 0.13 | 0.11 | 1.18  | 0.17049  | 0.016041 | 0.543539 | 0.160532 |
| MmugDNA.36.1.S1_at      | MmugDNA.36.1    | 9.88  | 10.02 | 1.65 | 0.37 | -1.1  | 0.999465 | 0.323548 | 0.999871 | 0.574497 |
| MmugDNA.36001.1.S1_at   | MmugDNA.36001.1 | 6.77  | 7.04  | 0.84 | 0.18 | -1.21 | 0.651019 | 0.228923 | 0.861338 | 0.501181 |

|                         |                 |       |       |      |      |       |          |          |          |          |
|-------------------------|-----------------|-------|-------|------|------|-------|----------|----------|----------|----------|
| MmugDNA.36005.1.S1_at   | MmugDNA.36005.1 | 8.69  | 8.32  | 0.36 | 0.42 | 1.3   | 0.346135 | 0.140452 | 0.687873 | 0.413627 |
| MmugDNA.3601.1.S1_at    | MmugDNA.3601.1  | 5.45  | 5.5   | 0.12 | 0.03 | -1.03 | 0.16433  | 0.061948 | 0.537322 | 0.295734 |
| MmugDNA.36013.1.S1_at   | MmugDNA.36013.1 | 7.23  | 7.29  | 0.76 | 0.05 | -1.04 | 0.322165 | 0.458669 | 0.670822 | 0.671276 |
| MmugDNA.36017.1.S1_at   | MmugDNA.36017.1 | 5.99  | 5.93  | 0.16 | 0.12 | 1.04  | 0.708579 | 0.779809 | 0.886591 | 0.87235  |
| MmugDNA.36018.1.S1_at   | MmugDNA.36018.1 | 11.33 | 11.29 | 0.13 | 0.12 | 1.03  | 0.307964 | 0.082735 | 0.660815 | 0.332205 |
| MmugDNA.36026.1.S1_at   | MmugDNA.36026.1 | 3.53  | 3.68  | 0.12 | 0.16 | -1.11 | 0.282143 | 0.050814 | 0.640644 | 0.270632 |
| MmugDNA.36031.1.S1_at   | MmugDNA.36031.1 | 11.32 | 11.78 | 0.36 | 0.09 | -1.38 | 0.121289 | 0.170691 | 0.494864 | 0.447288 |
| MmugDNA.36034.1.S1_at   | MmugDNA.36034.1 | 3.36  | 3.12  | 0.03 | 0.14 | 1.18  | 0.10538  | 0.193093 | 0.477051 | 0.468554 |
| MmugDNA.36035.1.S1_s_at | MmugDNA.36035.1 | 11.41 | 11.9  | 0.45 | 0.09 | -1.41 | 0.424695 | 0.724758 | 0.739622 | 0.840668 |
| MmugDNA.36037.1.S1_at   | MmugDNA.36037.1 | 11.01 | 10.67 | 0.08 | 0.07 | 1.26  | 0.01147  | 0.01484  | 0.255267 | 0.154918 |
| MmugDNA.36038.1.S1_s_at | MmugDNA.36038.1 | 3.29  | 3.46  | 0.06 | 0.03 | -1.12 | 0.035459 | 0.173266 | 0.352096 | 0.449791 |
| MmugDNA.36039.1.S1_at   | MmugDNA.36039.1 | 5.31  | 5.09  | 0.09 | 0.09 | 1.17  | 0.020303 | 0.066185 | 0.303799 | 0.302785 |
| MmugDNA.36041.1.S1_at   | MmugDNA.36041.1 | 6.82  | 7.14  | 0.36 | 0.36 | -1.25 | 0.767282 | 0.850998 | 0.912495 | 0.915265 |
| MmugDNA.36042.1.S1_at   | MmugDNA.36042.1 | 10.12 | 10.22 | 0.34 | 0.08 | -1.07 | 0.804719 | 0.167108 | 0.929015 | 0.4436   |
| MmugDNA.36046.1.S1_at   | MmugDNA.36046.1 | 10.23 | 10.07 | 0.1  | 0.08 | 1.12  | 0.040832 | 0.050588 | 0.36514  | 0.270301 |
| MmugDNA.36047.1.S1_at   | MmugDNA.36047.1 | 10.15 | 9.95  | 0.57 | 0.01 | 1.14  | 0.576617 | 0.041633 | 0.825166 | 0.24887  |
| MmugDNA.36049.1.S1_at   | MmugDNA.36049.1 | 9.58  | 9.41  | 0.19 | 0.24 | 1.13  | 0.455392 | 0.007157 | 0.757444 | 0.113788 |
| MmugDNA.36053.1.S1_at   | MmugDNA.36053.1 | 6.26  | 6.27  | 0.3  | 0.06 | -1    | 0.805088 | 0.956365 | 0.929121 | 0.975143 |
| MmugDNA.36055.1.S1_at   | MmugDNA.36055.1 | 10.08 | 10.02 | 1.28 | 0.22 | 1.04  | 0.992195 | 0.205137 | 0.996928 | 0.47951  |
| MmugDNA.36058.1.S1_at   | MmugDNA.36058.1 | 10.22 | 10.78 | 0.33 | 0.13 | -1.47 | 0.201289 | 0.036334 | 0.57304  | 0.235105 |
| MmugDNA.36059.1.S1_at   | MmugDNA.36059.1 | 3.48  | 3.48  | 0.31 | 0.12 | -1    | 0.662222 | 0.20078  | 0.866673 | 0.475282 |
| MmugDNA.36064.1.S1_at   | MmugDNA.36064.1 | 7.51  | 7.91  | 0.09 | 0.15 | -1.32 | 0.031607 | 0.02109  | 0.341627 | 0.181869 |
| MmugDNA.36073.1.S1_at   | MmugDNA.36073.1 | 9.35  | 9.54  | 0.23 | 0.12 | -1.14 | 0.05983  | 0.027105 | 0.407171 | 0.205797 |
| MmugDNA.36074.1.S1_at   | MmugDNA.36074.1 | 5.49  | 5.48  | 0.09 | 0.04 | 1.01  | 0.802791 | 0.966483 | 0.928067 | 0.981353 |
| MmugDNA.36076.1.S1_at   | MmugDNA.36076.1 | 12.98 | 13.1  | 0.28 | 0.03 | -1.09 | 0.372813 | 0.517621 | 0.705567 | 0.709722 |
| MmugDNA.36085.1.S1_at   | MmugDNA.36085.1 | 11.34 | 11.44 | 0.2  | 0.09 | -1.07 | 0.708818 | 0.138047 | 0.886591 | 0.410919 |
| MmugDNA.36086.1.S1_at   | MmugDNA.36086.1 | 11.82 | 11.45 | 0.22 | 0.33 | 1.29  | 0.812487 | 0.377261 | 0.932099 | 0.614869 |
| MmugDNA.36086.1.S1_s_at | MmugDNA.36086.1 | 11.85 | 11.55 | 0.18 | 0.33 | 1.24  | 0.54051  | 0.279397 | 0.804382 | 0.543027 |
| MmugDNA.36098.1.S1_at   | MmugDNA.36098.1 | 8.6   | 9.59  | 0.38 | 0.27 | -1.98 | 0.012768 | 0.00548  | 0.264703 | 0.102081 |
| MmugDNA.36100.1.S1_at   | MmugDNA.36100.1 | 10.29 | 10.67 | 0.44 | 0.03 | -1.3  | 0.214535 | 0.213284 | 0.58502  | 0.487179 |
| MmugDNA.36101.1.S1_at   | MmugDNA.36101.1 | 4.74  | 4.61  | 0.32 | 0.19 | 1.09  | 0.392282 | 0.486118 | 0.718223 | 0.689618 |
| MmugDNA.36102.1.S1_at   | MmugDNA.36102.1 | 8.4   | 8.2   | 0.35 | 0.04 | 1.15  | 0.272495 | 0.366407 | 0.632289 | 0.606092 |
| MmugDNA.36103.1.S1_at   | MmugDNA.36103.1 | 9.71  | 9.7   | 0.12 | 0.07 | 1.01  | 0.608768 | 0.059534 | 0.841351 | 0.290548 |
| MmugDNA.36105.1.S1_at   | MmugDNA.36105.1 | 8.67  | 8.69  | 0.57 | 0.02 | -1.02 | 0.689968 | 0.746327 | 0.879216 | 0.85272  |
| MmugDNA.36108.1.S1_at   | MmugDNA.36108.1 | 9.79  | 9.5   | 0.25 | 0.25 | 1.22  | 0.050308 | 0.068523 | 0.386954 | 0.308267 |
| MmugDNA.36110.1.S1_at   | MmugDNA.36110.1 | 4.02  | 4.06  | 0.15 | 0.14 | -1.03 | 0.37288  | 0.150089 | 0.705567 | 0.424698 |
| MmugDNA.36114.1.S1_at   | MmugDNA.36114.1 | 10.21 | 10.1  | 0.16 | 0.26 | 1.08  | 0.510499 | 0.531096 | 0.788228 | 0.718415 |
| MmugDNA.36116.1.S1_at   | MmugDNA.36116.1 | 7.88  | 8.34  | 2    | 0.34 | -1.37 | 0.747123 | 0.251764 | 0.903875 | 0.520444 |
| MmugDNA.36118.1.S1_at   | MmugDNA.36118.1 | 9.98  | 10.01 | 0.11 | 0.1  | -1.02 | 0.573921 | 0.047908 | 0.823778 | 0.263765 |
| MmugDNA.36120.1.S1_at   | MmugDNA.36120.1 | 5.49  | 5.3   | 0.1  | 0.13 | 1.15  | 0.287752 | 0.333399 | 0.644849 | 0.581668 |
| MmugDNA.36127.1.S1_at   | MmugDNA.36127.1 | 6.14  | 6.21  | 0.15 | 0.05 | -1.04 | 0.254779 | 0.692156 | 0.619175 | 0.82091  |
| MmugDNA.36129.1.S1_at   | MmugDNA.36129.1 | 10.63 | 11.15 | 0.47 | 0.05 | -1.43 | 0.117713 | 0.11506  | 0.491034 | 0.381931 |
| MmugDNA.3613.1.S1_at    | MmugDNA.3613.1  | 6.59  | 6.94  | 0.65 | 0.04 | -1.27 | 0.741972 | 0.865453 | 0.901613 | 0.923596 |

|                         |                 |       |       |      |      |       |          |          |          |          |
|-------------------------|-----------------|-------|-------|------|------|-------|----------|----------|----------|----------|
| MmugDNA.36130.1.S1_at   | MmugDNA.36130.1 | 9.38  | 10.21 | 0.29 | 0.11 | -1.78 | 0.012406 | 0.005119 | 0.262097 | 0.09927  |
| MmugDNA.36132.1.S1_at   | MmugDNA.36132.1 | 7.08  | 6.93  | 0.09 | 0.01 | 1.11  | 0.033317 | 0.130362 | 0.346442 | 0.402216 |
| MmugDNA.36140.1.S1_at   | MmugDNA.36140.1 | 10.63 | 11.03 | 0.25 | 0.01 | -1.32 | 0.020383 | 0.011217 | 0.303945 | 0.137962 |
| MmugDNA.36144.1.S1_at   | MmugDNA.36144.1 | 5.22  | 5     | 0.23 | 0.08 | 1.16  | 0.188532 | 0.134702 | 0.560489 | 0.406729 |
| MmugDNA.36148.1.S1_at   | MmugDNA.36148.1 | 5.18  | 5.87  | 0.04 | 0.4  | -1.62 | 0.031908 | 0.007454 | 0.34281  | 0.115872 |
| MmugDNA.3615.1.S1_at    | MmugDNA.3615.1  | 3.9   | 3.8   | 0.08 | 0.07 | 1.07  | 0.642174 | 0.17326  | 0.857628 | 0.449791 |
| MmugDNA.36161.1.S1_at   | MmugDNA.36161.1 | 6.29  | 6.17  | 0.23 | 0.33 | 1.09  | 0.778843 | 0.566149 | 0.918438 | 0.740296 |
| MmugDNA.36167.1.S1_at   | MmugDNA.36167.1 | 3.23  | 3.02  | 0.26 | 0.02 | 1.15  | 0.219419 | 0.360893 | 0.588927 | 0.60194  |
| MmugDNA.36168.1.S1_at   | MmugDNA.36168.1 | 5.94  | 5.91  | 0.31 | 0.21 | 1.02  | 0.910603 | 0.473285 | 0.969704 | 0.680582 |
| MmugDNA.36171.1.S1_at   | MmugDNA.36171.1 | 3.44  | 3.41  | 0.1  | 0.24 | 1.02  | 0.850345 | 0.616834 | 0.947346 | 0.772992 |
| MmugDNA.36175.1.S1_at   | MmugDNA.36175.1 | 11.6  | 11.95 | 0.31 | 0.09 | -1.28 | 0.216735 | 0.186918 | 0.586817 | 0.462786 |
| MmugDNA.36182.1.S1_at   | MmugDNA.36182.1 | 9.57  | 10.69 | 1.34 | 0.08 | -2.17 | 0.221688 | 0.374963 | 0.591359 | 0.613186 |
| MmugDNA.36183.1.S1_at   | MmugDNA.36183.1 | 6.21  | 6.19  | 0.18 | 0.12 | 1.02  | 0.904323 | 0.523995 | 0.967773 | 0.714108 |
| MmugDNA.36185.1.S1_at   | MmugDNA.36185.1 | 6.7   | 5.99  | 0.24 | 0.11 | 1.64  | 0.02744  | 0.332963 | 0.327679 | 0.581326 |
| MmugDNA.36186.1.S1_at   | MmugDNA.36186.1 | 3.5   | 3.51  | 0.05 | 0.13 | -1.01 | 0.65702  | 0.501082 | 0.863842 | 0.699435 |
| MmugDNA.36188.1.S1_at   | MmugDNA.36188.1 | 8.16  | 8.08  | 0.36 | 0.17 | 1.06  | 0.262857 | 0.309581 | 0.624987 | 0.564987 |
| MmugDNA.36196.1.S1_at   | MmugDNA.36196.1 | 10.06 | 10.31 | 0.66 | 0.03 | -1.19 | 0.29504  | 0.243105 | 0.650971 | 0.513356 |
| MmugDNA.36197.1.S1_at   | MmugDNA.36197.1 | 7.06  | 7.42  | 0.32 | 0.07 | -1.29 | 0.354467 | 0.293149 | 0.694035 | 0.553061 |
| MmugDNA.36201.1.S1_at   | MmugDNA.36201.1 | 8.93  | 9.08  | 0.87 | 0.26 | -1.11 | 0.943525 | 0.007566 | 0.980509 | 0.116437 |
| MmugDNA.36212.1.S1_at   | MmugDNA.36212.1 | 5.1   | 4.98  | 0.12 | 0.09 | 1.09  | 0.129952 | 0.366187 | 0.504648 | 0.605975 |
| MmugDNA.36216.1.S1_at   | MmugDNA.36216.1 | 10.57 | 11.14 | 0.19 | 0.05 | -1.48 | 0.003391 | 0.000429 | 0.194985 | 0.038359 |
| MmugDNA.36219.1.S1_at   | MmugDNA.36219.1 | 12.59 | 12.5  | 0.18 | 0.08 | 1.06  | 0.829463 | 0.14989  | 0.938822 | 0.424511 |
| MmugDNA.3622.1.S1_at    | MmugDNA.3622.1  | 8.02  | 7.79  | 0.84 | 0.18 | 1.17  | 0.282175 | 0.258366 | 0.640663 | 0.525631 |
| MmugDNA.36222.1.S1_at   | MmugDNA.36222.1 | 5.84  | 5.75  | 0.09 | 0.07 | 1.06  | 0.201904 | 0.306749 | 0.573467 | 0.5633   |
| MmugDNA.3623.1.S1_at    | MmugDNA.3623.1  | 8.13  | 8.27  | 0.45 | 0.41 | -1.1  | 0.864452 | 0.676561 | 0.952385 | 0.810956 |
| MmugDNA.36233.1.S1_at   | MmugDNA.36233.1 | 13.1  | 13.16 | 0.06 | 0    | -1.05 | 0.119913 | 0.019052 | 0.493259 | 0.173688 |
| MmugDNA.36234.1.S1_at   | MmugDNA.36234.1 | 5.36  | 5.18  | 0.15 | 0.08 | 1.13  | 0.13508  | 0.356573 | 0.50914  | 0.598459 |
| MmugDNA.3624.1.S1_at    | MmugDNA.3624.1  | 11.03 | 10.68 | 0.42 | 0.19 | 1.28  | 0.147559 | 0.087429 | 0.52159  | 0.340617 |
| MmugDNA.36241.1.S1_at   | MmugDNA.36241.1 | 11.76 | 12.17 | 0.41 | 0.05 | -1.33 | 0.445701 | 0.484004 | 0.752285 | 0.688263 |
| MmugDNA.36250.1.S1_at   | MmugDNA.36250.1 | 8.64  | 9.1   | 0.15 | 0.06 | -1.37 | 0.004545 | 0.006551 | 0.200937 | 0.109707 |
| MmugDNA.36250.1.S1_x_at | MmugDNA.36250.1 | 8.45  | 8.91  | 0.07 | 0.09 | -1.38 | 0.001374 | 0.016036 | 0.159096 | 0.160532 |
| MmugDNA.36251.1.S1_at   | MmugDNA.36251.1 | 7.71  | 7.82  | 0.4  | 0.23 | -1.07 | 0.907731 | 0.016438 | 0.968792 | 0.162368 |
| MmugDNA.36254.1.S1_at   | MmugDNA.36254.1 | 11.06 | 11.09 | 0.33 | 0.09 | -1.02 | 0.988621 | 0.087003 | 0.995877 | 0.339865 |
| MmugDNA.36256.1.S1_at   | MmugDNA.36256.1 | 3.3   | 3.18  | 0.14 | 0.09 | 1.08  | 0.15515  | 0.173826 | 0.528509 | 0.450128 |
| MmugDNA.36257.1.S1_at   | MmugDNA.36257.1 | 8.66  | 9.02  | 0.25 | 0.06 | -1.29 | 0.217245 | 0.231892 | 0.58718  | 0.503594 |
| MmugDNA.36263.1.S1_at   | MmugDNA.36263.1 | 7.34  | 7.54  | 0.12 | 0.05 | -1.14 | 0.18152  | 0.344029 | 0.554659 | 0.58962  |
| MmugDNA.36266.1.S1_at   | MmugDNA.36266.1 | 7.23  | 7.18  | 0.29 | 0.18 | 1.03  | 0.826798 | 0.215387 | 0.938035 | 0.489067 |
| MmugDNA.36271.1.S1_at   | MmugDNA.36271.1 | 4.17  | 4.01  | 0.07 | 0.02 | 1.12  | 0.038341 | 0.069687 | 0.358936 | 0.310164 |
| MmugDNA.36276.1.S1_at   | MmugDNA.36276.1 | 9.72  | 10.35 | 0.22 | 0.05 | -1.56 | 0.00938  | 0.014403 | 0.241869 | 0.153204 |
| MmugDNA.36278.1.S1_at   | MmugDNA.36278.1 | 9.21  | 9.01  | 0.15 | 0.04 | 1.14  | 0.268269 | 0.49512  | 0.628749 | 0.695319 |
| MmugDNA.36279.1.S1_at   | MmugDNA.36279.1 | 8.65  | 8.6   | 0.28 | 0.14 | 1.03  | 0.724978 | 0.028808 | 0.893334 | 0.211578 |
| MmugDNA.36280.1.S1_at   | MmugDNA.36280.1 | 6.77  | 6.25  | 0.21 | 0.07 | 1.44  | 0.014233 | 0.056852 | 0.274186 | 0.284556 |
| MmugDNA.36281.1.S1_at   | MmugDNA.36281.1 | 7.96  | 8.3   | 0.13 | 0.41 | -1.27 | 0.097568 | 0.079221 | 0.466487 | 0.326399 |

|                         |                 |       |       |      |      |       |          |          |          |          |
|-------------------------|-----------------|-------|-------|------|------|-------|----------|----------|----------|----------|
| MmugDNA.36282.1.S1_at   | MmugDNA.36282.1 | 5.11  | 4.83  | 0.45 | 0.4  | 1.21  | 0.212706 | 0.244175 | 0.583216 | 0.514164 |
| MmugDNA.36283.1.S1_at   | MmugDNA.36283.1 | 9.11  | 9.22  | 0.1  | 0.32 | -1.08 | 0.212263 | 0.096411 | 0.582812 | 0.354015 |
| MmugDNA.36284.1.S1_at   | MmugDNA.36284.1 | 12.01 | 12.25 | 0.12 | 0.12 | -1.19 | 0.319657 | 0.181867 | 0.668882 | 0.458395 |
| MmugDNA.36286.1.S1_at   | MmugDNA.36286.1 | 12.74 | 11.89 | 0.27 | 0.01 | 1.79  | 0.004464 | 0.000979 | 0.199296 | 0.049927 |
| MmugDNA.36293.1.S1_at   | MmugDNA.36293.1 | 9.54  | 9.09  | 0.59 | 0.32 | 1.36  | 0.218942 | 0.435507 | 0.588341 | 0.655256 |
| MmugDNA.36294.1.S1_at   | MmugDNA.36294.1 | 4.27  | 4.08  | 0.23 | 0.19 | 1.14  | 0.56736  | 0.084547 | 0.820391 | 0.335953 |
| MmugDNA.36297.1.S1_at   | MmugDNA.36297.1 | 9.09  | 8.88  | 0.27 | 0.16 | 1.16  | 0.118082 | 0.05385  | 0.491371 | 0.277598 |
| MmugDNA.36298.1.S1_at   | MmugDNA.36298.1 | 5.91  | 5.85  | 0.08 | 0.01 | 1.04  | 0.255819 | 0.170746 | 0.619764 | 0.447316 |
| MmugDNA.36299.1.S1_s_at | MmugDNA.36299.1 | 3.89  | 3.64  | 0.16 | 0.07 | 1.19  | 0.125316 | 0.118732 | 0.499501 | 0.386775 |
| MmugDNA.36301.1.S1_at   | MmugDNA.36301.1 | 11.33 | 11.48 | 0.09 | 0.13 | -1.11 | 0.039543 | 0.06582  | 0.36217  | 0.301933 |
| MmugDNA.36303.1.S1_at   | MmugDNA.36303.1 | 5.83  | 5.7   | 0.13 | 0.06 | 1.1   | 0.188798 | 0.162447 | 0.560718 | 0.438575 |
| MmugDNA.36308.1.S1_at   | MmugDNA.36308.1 | 11.22 | 11.52 | 0.36 | 0.02 | -1.23 | 0.087615 | 0.039173 | 0.455349 | 0.243072 |
| MmugDNA.3631.1.S1_at    | MmugDNA.3631.1  | 7.75  | 8.23  | 0.32 | 0.03 | -1.4  | 0.024148 | 0.000893 | 0.317812 | 0.047789 |
| MmugDNA.36318.1.S1_at   | MmugDNA.36318.1 | 10.82 | 11.4  | 1.06 | 0.28 | -1.5  | 0.408712 | 0.507757 | 0.729499 | 0.703325 |
| MmugDNA.36319.1.S1_at   | MmugDNA.36319.1 | 6.31  | 6.27  | 0.21 | 0.06 | 1.03  | 0.638995 | 0.67243  | 0.856133 | 0.808568 |
| MmugDNA.3633.1.S1_at    | MmugDNA.3633.1  | 9.44  | 9.67  | 0.08 | 0.08 | -1.17 | 0.031489 | 0.042026 | 0.341227 | 0.249463 |
| MmugDNA.3634.1.S1_at    | MmugDNA.3634.1  | 5.55  | 5.58  | 0.13 | 0.41 | -1.02 | 0.292917 | 0.436905 | 0.649207 | 0.656357 |
| MmugDNA.36342.1.S1_s_at | MmugDNA.36342.1 | 8.74  | 9.15  | 0.59 | 0.03 | -1.33 | 0.312624 | 0.301627 | 0.664138 | 0.55955  |
| MmugDNA.36345.1.S1_at   | MmugDNA.36345.1 | 10.95 | 10.68 | 0.41 | 0.07 | 1.21  | 0.248328 | 0.352538 | 0.613851 | 0.595789 |
| MmugDNA.3635.1.S1_at    | MmugDNA.3635.1  | 4.04  | 4.09  | 0.16 | 0.26 | -1.04 | 0.788141 | 0.978862 | 0.922141 | 0.988548 |
| MmugDNA.36354.1.S1_at   | MmugDNA.36354.1 | 7.06  | 7.17  | 0.49 | 0.17 | -1.08 | 0.41984  | 0.798489 | 0.736572 | 0.884012 |
| MmugDNA.36355.1.S1_at   | MmugDNA.36355.1 | 11.14 | 10.97 | 0.14 | 0.09 | 1.13  | 0.148821 | 0.060048 | 0.522751 | 0.291714 |
| MmugDNA.3636.1.S1_at    | MmugDNA.3636.1  | 3.91  | 3.91  | 0.05 | 0.08 | 1     | 0.790415 | 0.985949 | 0.922945 | 0.99201  |
| MmugDNA.36364.1.S1_at   | MmugDNA.36364.1 | 4.06  | 4.06  | 0.19 | 0.01 | 1     | 0.541661 | 0.510339 | 0.805212 | 0.704837 |
| MmugDNA.36368.1.S1_at   | MmugDNA.36368.1 | 11.27 | 11.2  | 0.24 | 0.05 | 1.05  | 0.252862 | 0.229044 | 0.617842 | 0.501378 |
| MmugDNA.36369.1.S1_at   | MmugDNA.36369.1 | 6.32  | 6.24  | 1.24 | 0.09 | 1.05  | 0.521327 | 0.04209  | 0.79444  | 0.249638 |
| MmugDNA.36371.1.S1_at   | MmugDNA.36371.1 | 7.36  | 7.24  | 0.07 | 0.03 | 1.08  | 0.022883 | 0.232373 | 0.312993 | 0.504088 |
| MmugDNA.36372.1.S1_at   | MmugDNA.36372.1 | 9.97  | 9.95  | 0.23 | 0.03 | 1.01  | 0.901683 | 0.942726 | 0.966689 | 0.967499 |
| MmugDNA.36375.1.S1_at   | MmugDNA.36375.1 | 3.67  | 3.69  | 0.14 | 0.08 | -1.01 | 0.424617 | 0.535202 | 0.739618 | 0.720821 |
| MmugDNA.36378.1.S1_at   | MmugDNA.36378.1 | 5.49  | 5.45  | 0.14 | 0.02 | 1.03  | 0.579947 | 0.843642 | 0.826742 | 0.91093  |
| MmugDNA.36382.1.S1_at   | MmugDNA.36382.1 | 10.61 | 10.52 | 0.28 | 0.07 | 1.06  | 0.960097 | 0.110174 | 0.986981 | 0.374314 |
| MmugDNA.36383.1.S1_at   | MmugDNA.36383.1 | 5.6   | 5.75  | 0.08 | 0.1  | -1.11 | 0.039324 | 0.120884 | 0.361498 | 0.389784 |
| MmugDNA.36389.1.S1_at   | MmugDNA.36389.1 | 5.55  | 8.81  | 0.09 | 0.25 | -9.6  | 0.000035 | 0.000187 | 0.108151 | 0.030598 |
| MmugDNA.36391.1.S1_at   | MmugDNA.36391.1 | 8.88  | 9.01  | 0.15 | 0.1  | -1.09 | 0.455494 | 0.322046 | 0.757444 | 0.57365  |
| MmugDNA.36392.1.S1_at   | MmugDNA.36392.1 | 11.19 | 11.43 | 0.25 | 0.01 | -1.17 | 0.54423  | 0.312181 | 0.807148 | 0.566915 |
| MmugDNA.36394.1.S1_s_at | MmugDNA.36394.1 | 12.4  | 12.44 | 0.94 | 0.16 | -1.03 | 0.857738 | 0.875841 | 0.94975  | 0.929484 |
| MmugDNA.36395.1.S1_at   | MmugDNA.36395.1 | 12.34 | 12.1  | 0.05 | 0.02 | 1.18  | 0.001141 | 0.006512 | 0.156386 | 0.109536 |
| MmugDNA.36404.1.S1_at   | MmugDNA.36404.1 | 12.42 | 12.44 | 0.11 | 0.05 | -1.01 | 0.746562 | 0.277289 | 0.903548 | 0.54125  |
| MmugDNA.36406.1.S1_at   | MmugDNA.36406.1 | 12.27 | 12.16 | 0.19 | 0.1  | 1.08  | 0.232482 | 0.299005 | 0.600124 | 0.557628 |
| MmugDNA.36408.1.S1_at   | MmugDNA.36408.1 | 4.56  | 4.65  | 0.28 | 0.15 | -1.06 | 0.519297 | 0.283633 | 0.793113 | 0.546058 |
| MmugDNA.36409.1.S1_at   | MmugDNA.36409.1 | 2.86  | 3.17  | 0.1  | 0.3  | -1.24 | 0.201297 | 0.236416 | 0.57304  | 0.507314 |
| MmugDNA.36411.1.S1_at   | MmugDNA.36411.1 | 10.73 | 11.02 | 0.13 | 0.1  | -1.23 | 0.037228 | 0.003141 | 0.356955 | 0.081652 |
| MmugDNA.36418.1.S1_at   | MmugDNA.36418.1 | 5.86  | 5.62  | 0.02 | 0.13 | 1.18  | 0.097506 | 0.391487 | 0.466487 | 0.625086 |

|                         |                 |       |       |      |      |       |          |          |          |          |
|-------------------------|-----------------|-------|-------|------|------|-------|----------|----------|----------|----------|
| MmugDNA.36425.1.S1_at   | MmugDNA.36425.1 | 8.29  | 8.77  | 0.12 | 0.04 | -1.4  | 0.001455 | 0.000271 | 0.161412 | 0.033839 |
| MmugDNA.36430.1.S1_at   | MmugDNA.36430.1 | 3.8   | 3.12  | 0.46 | 0.55 | 1.6   | 0.812192 | 0.953484 | 0.932076 | 0.97352  |
| MmugDNA.36433.1.S1_at   | MmugDNA.36433.1 | 8     | 7.78  | 1.03 | 0.1  | 1.16  | 0.729101 | 0.147769 | 0.895623 | 0.422056 |
| MmugDNA.36434.1.S1_at   | MmugDNA.36434.1 | 5.67  | 6.74  | 0.64 | 0.19 | -2.1  | 0.171645 | 0.133125 | 0.544918 | 0.404764 |
| MmugDNA.36435.1.S1_s_at | MmugDNA.36435.1 | 10.85 | 10.7  | 0.08 | 0.13 | 1.11  | 0.0364   | 0.013182 | 0.35477  | 0.14735  |
| MmugDNA.36443.1.S1_at   | MmugDNA.36443.1 | 11.63 | 12.19 | 0.29 | 0.12 | -1.48 | 0.111541 | 0.198836 | 0.484799 | 0.473475 |
| MmugDNA.36444.1.S1_at   | MmugDNA.36444.1 | 11.08 | 11.19 | 0.14 | 0.07 | -1.08 | 0.668841 | 0.400998 | 0.86916  | 0.630658 |
| MmugDNA.36445.1.S1_at   | MmugDNA.36445.1 | 6.94  | 6.73  | 0.12 | 0.01 | 1.16  | 0.107811 | 0.305842 | 0.480316 | 0.562731 |
| MmugDNA.36448.1.S1_at   | MmugDNA.36448.1 | 10.93 | 10.94 | 0.31 | 0.17 | -1    | 0.795605 | 0.205436 | 0.924888 | 0.479764 |
| MmugDNA.3645.1.S1_at    | MmugDNA.3645.1  | 12.11 | 11.87 | 0.14 | 0.11 | 1.18  | 0.042367 | 0.031672 | 0.368985 | 0.22028  |
| MmugDNA.36451.1.S1_at   | MmugDNA.36451.1 | 14.35 | 14.29 | 0.08 | 0.02 | -1.04 | 0.776727 | 0.945267 | 0.917412 | 0.968942 |
| MmugDNA.36454.1.S1_at   | MmugDNA.36454.1 | 6.31  | 6.15  | 0.04 | 0.02 | 1.12  | 0.003699 | 0.102409 | 0.197111 | 0.36259  |
| MmugDNA.36456.1.S1_at   | MmugDNA.36456.1 | 7.11  | 6.63  | 0.29 | 0.32 | 1.4   | 0.368778 | 0.495799 | 0.703807 | 0.695734 |
| MmugDNA.36458.1.S1_at   | MmugDNA.36458.1 | 11.87 | 11.87 | 0.19 | 0.02 | 1     | 0.457362 | 0.401046 | 0.758326 | 0.630667 |
| MmugDNA.36459.1.S1_at   | MmugDNA.36459.1 | 12.29 | 12.16 | 2.91 | 0.29 | 1.1   | 0.442813 | 0.38946  | 0.750392 | 0.623564 |
| MmugDNA.36468.1.S1_at   | MmugDNA.36468.1 | 3.49  | 3.39  | 0.19 | 0.07 | 1.07  | 0.146103 | 0.114104 | 0.520572 | 0.380528 |
| MmugDNA.36470.1.S1_at   | MmugDNA.36470.1 | 9.61  | 9.93  | 0.43 | 0.27 | -1.25 | 0.587744 | 0.006053 | 0.83181  | 0.106152 |
| MmugDNA.36471.1.S1_at   | MmugDNA.36471.1 | 6.02  | 5.87  | 0.13 | 0.01 | 1.11  | 0.114102 | 0.272182 | 0.487405 | 0.536939 |
| MmugDNA.36474.1.S1_at   | MmugDNA.36474.1 | 9.84  | 10.38 | 0.85 | 0.74 | -1.45 | 0.910067 | 0.040744 | 0.969453 | 0.246735 |
| MmugDNA.36475.1.S1_at   | MmugDNA.36475.1 | 11.65 | 11.69 | 0.03 | 0.06 | -1.03 | 0.389794 | 0.651438 | 0.716349 | 0.796213 |
| MmugDNA.36477.1.S1_at   | MmugDNA.36477.1 | 7.02  | 6.99  | 0.32 | 0.03 | 1.03  | 0.303763 | 0.249047 | 0.657604 | 0.518159 |
| MmugDNA.36481.1.S1_at   | MmugDNA.36481.1 | 9.94  | 10    | 0.41 | 0.07 | -1.05 | 0.299107 | 0.018045 | 0.653482 | 0.169372 |
| MmugDNA.36482.1.S1_at   | MmugDNA.36482.1 | 11.98 | 11.87 | 0.36 | 0.03 | 1.07  | 0.710923 | 0.879185 | 0.88743  | 0.931052 |
| MmugDNA.36483.1.S1_at   | MmugDNA.36483.1 | 8.43  | 8.53  | 0.38 | 0.06 | -1.07 | 0.596553 | 0.216419 | 0.836009 | 0.49     |
| MmugDNA.36489.1.S1_at   | MmugDNA.36489.1 | 12.69 | 12.68 | 0.16 | 0.08 | 1.01  | 0.713415 | 0.208171 | 0.88844  | 0.482086 |
| MmugDNA.36492.1.S1_at   | MmugDNA.36492.1 | 4.88  | 6.31  | 0.59 | 0.34 | -2.69 | 0.015792 | 0.001426 | 0.283862 | 0.057607 |
| MmugDNA.36495.1.S1_at   | MmugDNA.36495.1 | 6.73  | 7.83  | 1.14 | 0.07 | -2.15 | 0.22333  | 0.074955 | 0.592569 | 0.318932 |
| MmugDNA.36496.1.S1_at   | MmugDNA.36496.1 | 5.63  | 5.33  | 0.83 | 0.47 | 1.23  | 0.412548 | 0.58147  | 0.732064 | 0.750474 |
| MmugDNA.36497.1.S1_at   | MmugDNA.36497.1 | 10.09 | 10.44 | 2.13 | 0.22 | -1.28 | 0.701403 | 0.28986  | 0.883866 | 0.550831 |
| MmugDNA.36501.1.S1_at   | MmugDNA.36501.1 | 5.51  | 5.32  | 0.11 | 0.02 | 1.14  | 0.139013 | 0.12306  | 0.514459 | 0.393015 |
| MmugDNA.36502.1.S1_at   | MmugDNA.36502.1 | 10.95 | 11.09 | 0.2  | 0.05 | -1.1  | 0.080371 | 0.068177 | 0.444007 | 0.307314 |
| MmugDNA.36503.1.S1_at   | MmugDNA.36503.1 | 3.62  | 3.75  | 0.1  | 0.01 | -1.09 | 0.305239 | 0.429851 | 0.658726 | 0.651082 |
| MmugDNA.36505.1.S1_at   | MmugDNA.36505.1 | 9.53  | 9.69  | 0.44 | 0.12 | -1.11 | 0.652363 | 0.401719 | 0.862004 | 0.631068 |
| MmugDNA.36507.1.S1_at   | MmugDNA.36507.1 | 9.9   | 9.82  | 0.35 | 0.06 | 1.06  | 0.773082 | 0.877281 | 0.915591 | 0.930079 |
| MmugDNA.36516.1.S1_at   | MmugDNA.36516.1 | 10.68 | 9.93  | 0.48 | 0.26 | 1.68  | 0.106617 | 0.00756  | 0.479    | 0.116437 |
| MmugDNA.36517.1.S1_at   | MmugDNA.36517.1 | 11.19 | 11.78 | 0.34 | 0.13 | -1.51 | 0.09063  | 0.057445 | 0.458873 | 0.285736 |
| MmugDNA.3652.1.S1_at    | MmugDNA.3652.1  | 12.07 | 12.15 | 0.08 | 0.05 | -1.06 | 0.10532  | 0.116164 | 0.477051 | 0.383524 |
| MmugDNA.36521.1.S1_at   | MmugDNA.36521.1 | 10.77 | 11    | 0.2  | 0.23 | -1.18 | 0.115435 | 0.305153 | 0.488779 | 0.562255 |
| MmugDNA.36523.1.S1_at   | MmugDNA.36523.1 | 10.43 | 9.71  | 0.25 | 0.2  | 1.64  | 0.035408 | 0.061467 | 0.351978 | 0.294736 |
| MmugDNA.36525.1.S1_at   | MmugDNA.36525.1 | 10.49 | 10.22 | 0.55 | 0.09 | 1.21  | 0.442978 | 0.054032 | 0.750481 | 0.277914 |
| MmugDNA.36529.1.S1_at   | MmugDNA.36529.1 | 10.59 | 11.05 | 0.27 | 0.1  | -1.37 | 0.06686  | 0.095431 | 0.422979 | 0.352453 |
| MmugDNA.3654.1.S1_at    | MmugDNA.3654.1  | 7.21  | 7.39  | 0.47 | 0.1  | -1.13 | 0.344443 | 0.628462 | 0.686923 | 0.781199 |
| MmugDNA.36544.1.S1_at   | MmugDNA.36544.1 | 10.43 | 10.28 | 0.15 | 0.13 | 1.11  | 0.444242 | 0.447525 | 0.751155 | 0.663579 |

|                         |                 |       |       |      |      |       |          |          |          |          |
|-------------------------|-----------------|-------|-------|------|------|-------|----------|----------|----------|----------|
| MmugDNA.36545.1.S1_at   | MmugDNA.36545.1 | 10.49 | 10.35 | 0.14 | 0.07 | 1.1   | 0.125368 | 0.044663 | 0.499523 | 0.255753 |
| MmugDNA.36546.1.S1_at   | MmugDNA.36546.1 | 12.33 | 12.63 | 0.18 | 0.07 | -1.23 | 0.023882 | 0.019313 | 0.317453 | 0.174723 |
| MmugDNA.36547.1.S1_at   | MmugDNA.36547.1 | 4.15  | 4.1   | 0.25 | 0.07 | 1.03  | 0.201529 | 0.409784 | 0.573165 | 0.636816 |
| MmugDNA.36548.1.S1_at   | MmugDNA.36548.1 | 6.36  | 6.37  | 0.19 | 0.15 | -1.01 | 0.253001 | 0.308055 | 0.617861 | 0.56421  |
| MmugDNA.36550.1.S1_at   | MmugDNA.36550.1 | 3.37  | 3.39  | 0.25 | 0.15 | -1.01 | 0.546677 | 0.411897 | 0.808733 | 0.638434 |
| MmugDNA.36554.1.S1_at   | MmugDNA.36554.1 | 3.59  | 3.44  | 0.16 | 0.07 | 1.11  | 0.650287 | 0.233117 | 0.860856 | 0.504458 |
| MmugDNA.36555.1.S1_at   | MmugDNA.36555.1 | 7.26  | 8.72  | 1.33 | 0.2  | -2.75 | 0.353055 | 0.39023  | 0.693013 | 0.624116 |
| MmugDNA.36556.1.S1_at   | MmugDNA.36556.1 | 9.18  | 8.66  | 0.38 | 0.14 | 1.43  | 0.094316 | 0.001635 | 0.463769 | 0.061167 |
| MmugDNA.36559.1.S1_at   | MmugDNA.36559.1 | 8.71  | 8.79  | 0.32 | 0.03 | -1.06 | 0.737811 | 0.326912 | 0.899631 | 0.576863 |
| MmugDNA.36563.1.S1_at   | MmugDNA.36563.1 | 6.08  | 6.1   | 0.17 | 0.05 | -1.01 | 0.431007 | 0.470837 | 0.74323  | 0.679124 |
| MmugDNA.36566.1.S1_at   | MmugDNA.36566.1 | 11.38 | 11.98 | 0.32 | 0.06 | -1.52 | 0.057096 | 0.058306 | 0.401454 | 0.288258 |
| MmugDNA.36567.1.S1_at   | MmugDNA.36567.1 | 8.17  | 8.53  | 0.49 | 0.12 | -1.28 | 0.634566 | 0.009969 | 0.854096 | 0.131094 |
| MmugDNA.36570.1.S1_at   | MmugDNA.36570.1 | 5.7   | 5.57  | 0.1  | 0.07 | 1.09  | 0.035983 | 0.01767  | 0.353759 | 0.168065 |
| MmugDNA.36573.1.S1_at   | MmugDNA.36573.1 | 3.74  | 3.84  | 0.42 | 0.09 | -1.08 | 0.78068  | 0.354036 | 0.919142 | 0.597005 |
| MmugDNA.36574.1.S1_at   | MmugDNA.36574.1 | 8.55  | 8.55  | 0.16 | 0.11 | 1     | 0.431513 | 0.068681 | 0.743474 | 0.308653 |
| MmugDNA.36576.1.S1_at   | MmugDNA.36576.1 | 12.4  | 12.06 | 2.83 | 0.21 | 1.27  | 0.532682 | 0.210054 | 0.800478 | 0.483835 |
| MmugDNA.36578.1.S1_at   | MmugDNA.36578.1 | 7.37  | 7.82  | 0.4  | 0.28 | -1.37 | 0.085676 | 0.258262 | 0.452722 | 0.52558  |
| MmugDNA.36580.1.S1_at   | MmugDNA.36580.1 | 7.56  | 7.53  | 0.3  | 0.02 | 1.03  | 0.474866 | 0.114847 | 0.768229 | 0.381487 |
| MmugDNA.36588.1.S1_at   | MmugDNA.36588.1 | 6.79  | 6.86  | 0.2  | 0.05 | -1.05 | 0.567628 | 0.423981 | 0.820586 | 0.646619 |
| MmugDNA.3659.1.S1_at    | MmugDNA.3659.1  | 11.76 | 11.96 | 0.47 | 0.09 | -1.15 | 0.64432  | 0.856143 | 0.858491 | 0.917847 |
| MmugDNA.36593.1.S1_at   | MmugDNA.36593.1 | 6.56  | 7.24  | 0.61 | 0.09 | -1.6  | 0.163747 | 0.07968  | 0.536523 | 0.326981 |
| MmugDNA.36597.1.S1_at   | MmugDNA.36597.1 | 6.43  | 7.07  | 0.49 | 0.14 | -1.55 | 0.02782  | 0.025278 | 0.329316 | 0.19945  |
| MmugDNA.366.1.S1_at     | MmugDNA.366.1   | 7.11  | 6.38  | 0.64 | 0.38 | 1.66  | 0.210004 | 0.306201 | 0.581522 | 0.562901 |
| MmugDNA.3660.1.S1_at    | MmugDNA.3660.1  | 9.82  | 10.69 | 0.28 | 0.01 | -1.83 | 0.011625 | 0.000369 | 0.255776 | 0.037273 |
| MmugDNA.36601.1.S1_at   | MmugDNA.36601.1 | 6.22  | 5.91  | 0.24 | 0.07 | 1.23  | 0.047712 | 0.028086 | 0.381123 | 0.209154 |
| MmugDNA.36608.1.S1_at   | MmugDNA.36608.1 | 3.83  | 3.74  | 0.16 | 0.09 | 1.07  | 0.659156 | 0.686945 | 0.865082 | 0.817365 |
| MmugDNA.36609.1.S1_at   | MmugDNA.36609.1 | 10.19 | 11.29 | 0.62 | 0.04 | -2.15 | 0.037217 | 0.017303 | 0.356948 | 0.166509 |
| MmugDNA.3661.1.S1_at    | MmugDNA.3661.1  | 11.09 | 10.95 | 0.21 | 0.09 | 1.1   | 0.88263  | 0.81553  | 0.95933  | 0.893609 |
| MmugDNA.36610.1.S1_at   | MmugDNA.36610.1 | 11.5  | 11.52 | 0.37 | 0.16 | -1.01 | 0.512879 | 0.317111 | 0.789522 | 0.570377 |
| MmugDNA.36612.1.S1_at   | MmugDNA.36612.1 | 12.78 | 12.73 | 0.14 | 0.08 | 1.03  | 0.433206 | 0.235314 | 0.744296 | 0.506346 |
| MmugDNA.36612.1.S1_s_at | MmugDNA.36612.1 | 12.8  | 12.71 | 0.09 | 0.09 | 1.07  | 0.125276 | 0.077375 | 0.499501 | 0.323177 |
| MmugDNA.36613.1.S1_at   | MmugDNA.36613.1 | 6.55  | 6.33  | 0.35 | 0.29 | 1.17  | 0.803181 | 0.961321 | 0.928233 | 0.97814  |
| MmugDNA.36617.1.S1_at   | MmugDNA.36617.1 | 5.65  | 5.02  | 0.87 | 0.19 | 1.55  | 0.298072 | 0.200135 | 0.652872 | 0.474603 |
| MmugDNA.36618.1.S1_at   | MmugDNA.36618.1 | 8.53  | 8.51  | 0.22 | 0.22 | 1.01  | 0.72857  | 0.958009 | 0.895243 | 0.976273 |
| MmugDNA.36618.1.S1_s_at | MmugDNA.36618.1 | 9.8   | 9.81  | 0.41 | 0.2  | -1    | 0.458883 | 0.402868 | 0.759132 | 0.631631 |
| MmugDNA.36620.1.S1_at   | MmugDNA.36620.1 | 10.67 | 10.79 | 0.28 | 0.01 | -1.09 | 0.834047 | 0.703103 | 0.940492 | 0.827866 |
| MmugDNA.36621.1.S1_s_at | MmugDNA.36621.1 | 7.71  | 7.43  | 1.09 | 0.17 | 1.21  | 0.707554 | 0.653414 | 0.886182 | 0.797435 |
| MmugDNA.36630.1.S1_at   | MmugDNA.36630.1 | 8.84  | 10.45 | 0.45 | 0.03 | -3.03 | 0.005215 | 0.007909 | 0.206226 | 0.118534 |
| MmugDNA.36631.1.S1_at   | MmugDNA.36631.1 | 10.11 | 9.79  | 0.31 | 0.18 | 1.24  | 0.426643 | 0.580266 | 0.740639 | 0.749616 |
| MmugDNA.36632.1.S1_s_at | MmugDNA.36632.1 | 4.92  | 4.75  | 0.16 | 0.03 | 1.12  | 0.141774 | 0.199753 | 0.516746 | 0.474382 |
| MmugDNA.36633.1.S1_at   | MmugDNA.36633.1 | 6.06  | 5.92  | 0.05 | 0.06 | 1.1   | 0.038679 | 0.475878 | 0.360112 | 0.682387 |
| MmugDNA.36634.1.S1_at   | MmugDNA.36634.1 | 6.44  | 6.04  | 0.61 | 0.46 | 1.31  | 0.450412 | 0.639218 | 0.754829 | 0.788125 |
| MmugDNA.36636.1.S1_at   | MmugDNA.36636.1 | 10.51 | 9.62  | 0.61 | 0.09 | 1.86  | 0.234653 | 0.284148 | 0.602006 | 0.546362 |

|                         |                 |       |       |      |      |       |          |          |          |          |
|-------------------------|-----------------|-------|-------|------|------|-------|----------|----------|----------|----------|
| MmugDNA.36639.1.S1_at   | MmugDNA.36639.1 | 8.55  | 9.23  | 0.33 | 0.21 | -1.61 | 0.079256 | 0.088107 | 0.442056 | 0.341641 |
| MmugDNA.3664.1.S1_at    | MmugDNA.3664.1  | 11.66 | 11.33 | 0.42 | 0.1  | 1.26  | 0.276426 | 0.397295 | 0.635968 | 0.628775 |
| MmugDNA.36640.1.S1_s_at | MmugDNA.36640.1 | 7.91  | 7.86  | 0.08 | 0.3  | 1.03  | 0.306194 | 0.266471 | 0.659271 | 0.532234 |
| MmugDNA.36642.1.S1_at   | MmugDNA.36642.1 | 4.72  | 4.66  | 0.14 | 0.04 | 1.05  | 0.662444 | 0.771415 | 0.866792 | 0.867177 |
| MmugDNA.36643.1.S1_at   | MmugDNA.36643.1 | 10.94 | 10.77 | 0.31 | 0.17 | 1.13  | 0.616471 | 0.003068 | 0.844957 | 0.080783 |
| MmugDNA.36644.1.S1_at   | MmugDNA.36644.1 | 4.98  | 5.73  | 0.47 | 0.25 | -1.68 | 0.124981 | 0.092598 | 0.498917 | 0.348536 |
| MmugDNA.36645.1.S1_at   | MmugDNA.36645.1 | 11.37 | 11.49 | 0.26 | 0.1  | -1.08 | 0.407884 | 0.005041 | 0.729039 | 0.098963 |
| MmugDNA.36647.1.S1_at   | MmugDNA.36647.1 | 3.26  | 3.27  | 0.04 | 0.03 | -1    | 0.606572 | 0.355891 | 0.840536 | 0.597869 |
| MmugDNA.36648.1.S1_at   | MmugDNA.36648.1 | 9.28  | 9.3   | 0.21 | 0.2  | -1.01 | 0.456981 | 0.003728 | 0.758051 | 0.087042 |
| MmugDNA.36649.1.S1_at   | MmugDNA.36649.1 | 12.12 | 11.9  | 0.33 | 0.41 | 1.17  | 0.960879 | 0.964751 | 0.987225 | 0.980422 |
| MmugDNA.36650.1.S1_at   | MmugDNA.36650.1 | 10.97 | 10.54 | 0.28 | 0.19 | -1.34 | 0.055594 | 0.046644 | 0.398909 | 0.260499 |
| MmugDNA.36655.1.S1_at   | MmugDNA.36655.1 | 3.52  | 3.39  | 0.03 | 0.14 | 1.09  | 0.348147 | 0.262214 | 0.689422 | 0.528516 |
| MmugDNA.36657.1.S1_at   | MmugDNA.36657.1 | 9.99  | 10.64 | 0.24 | 0.02 | -1.57 | 0.007534 | 0.005625 | 0.229281 | 0.103682 |
| MmugDNA.3666.1.S1_at    | MmugDNA.3666.1  | 9.08  | 8.95  | 0.21 | 0.06 | 1.09  | 0.222545 | 0.075129 | 0.592061 | 0.31932  |
| MmugDNA.36660.1.S1_at   | MmugDNA.36660.1 | 8.32  | 9.29  | 0.34 | 0.06 | -1.96 | 0.007574 | 0.006682 | 0.229596 | 0.110612 |
| MmugDNA.36662.1.S1_at   | MmugDNA.36662.1 | 10.59 | 9.98  | 0.34 | 0.07 | 1.53  | 0.103134 | 0.076495 | 0.473929 | 0.321584 |
| MmugDNA.36664.1.S1_at   | MmugDNA.36664.1 | 11.45 | 11.51 | 0.07 | 0.01 | -1.04 | 0.16923  | 0.650876 | 0.542076 | 0.795849 |
| MmugDNA.36668.1.S1_at   | MmugDNA.36668.1 | 12.49 | 12.33 | 0.19 | 0.04 | 1.12  | 0.195249 | 0.256978 | 0.565674 | 0.524781 |
| MmugDNA.36672.1.S1_at   | MmugDNA.36672.1 | 11.47 | 11.65 | 0.59 | 0.05 | -1.13 | 0.620147 | 0.678674 | 0.847046 | 0.812328 |
| MmugDNA.36673.1.S1_at   | MmugDNA.36673.1 | 3.44  | 3.4   | 0.31 | 0.06 | 1.03  | 0.964258 | 0.569376 | 0.988357 | 0.742382 |
| MmugDNA.36676.1.S1_at   | MmugDNA.36676.1 | 11.25 | 11.24 | 0.31 | 0.11 | 1.01  | 0.307252 | 0.228284 | 0.660118 | 0.500466 |
| MmugDNA.36678.1.S1_at   | MmugDNA.36678.1 | 11.44 | 11.16 | 0.27 | 0.05 | 1.21  | 0.598628 | 0.490023 | 0.836987 | 0.692076 |
| MmugDNA.36680.1.S1_s_at | MmugDNA.36680.1 | 11.91 | 12.76 | 0.27 | 0.11 | -1.8  | 0.015327 | 0.012688 | 0.281008 | 0.145243 |
| MmugDNA.36693.1.S1_at   | MmugDNA.36693.1 | 11.08 | 11.21 | 0.19 | 0.09 | -1.09 | 0.267961 | 0.282503 | 0.628305 | 0.545215 |
| MmugDNA.36699.1.S1_at   | MmugDNA.36699.1 | 7.11  | 7.84  | 0.47 | 0.33 | -1.67 | 0.028861 | 0.015527 | 0.333062 | 0.158053 |
| MmugDNA.36701.1.S1_at   | MmugDNA.36701.1 | 6.9   | 7.43  | 0.3  | 0.19 | -1.45 | 0.022731 | 0.132579 | 0.312165 | 0.404544 |
| MmugDNA.36704.1.S1_at   | MmugDNA.36704.1 | 5.28  | 5.27  | 0.16 | 0.11 | 1     | 0.233863 | 0.360866 | 0.601409 | 0.601938 |
| MmugDNA.36705.1.S1_at   | MmugDNA.36705.1 | 11.9  | 11.97 | 0.1  | 0.32 | -1.05 | 0.268531 | 0.54574  | 0.628857 | 0.727653 |
| MmugDNA.36707.1.S1_at   | MmugDNA.36707.1 | 12.1  | 11.97 | 0.57 | 0.47 | 1.1   | 0.492318 | 0.67397  | 0.77824  | 0.809483 |
| MmugDNA.36711.1.S1_at   | MmugDNA.36711.1 | 9.73  | 10.09 | 0.23 | 0.28 | -1.28 | 0.064285 | 0.029006 | 0.418012 | 0.212234 |
| MmugDNA.36714.1.S1_at   | MmugDNA.36714.1 | 8.46  | 9.1   | 0.46 | 0.05 | -1.56 | 0.038429 | 0.014595 | 0.359251 | 0.154067 |
| MmugDNA.36718.1.S1_at   | MmugDNA.36718.1 | 6     | 5.98  | 0.12 | 0.09 | 1.02  | 0.792029 | 0.369108 | 0.923583 | 0.608618 |
| MmugDNA.36719.1.S1_at   | MmugDNA.36719.1 | 7.87  | 7.96  | 0.15 | 0.03 | -1.07 | 0.111305 | 0.023978 | 0.484508 | 0.194091 |
| MmugDNA.36720.1.S1_at   | MmugDNA.36720.1 | 7.09  | 7.3   | 0.02 | 0.07 | -1.15 | 0.006878 | 0.006023 | 0.224141 | 0.106089 |
| MmugDNA.36721.1.S1_at   | MmugDNA.36721.1 | 6.02  | 5.93  | 0.13 | 0.11 | 1.07  | 0.743906 | 0.837187 | 0.902335 | 0.906927 |
| MmugDNA.36725.1.S1_at   | MmugDNA.36725.1 | 3.32  | 3.42  | 0.07 | 0.05 | -1.07 | 0.109924 | 0.465945 | 0.482728 | 0.676055 |
| MmugDNA.36726.1.S1_at   | MmugDNA.36726.1 | 6.56  | 6.96  | 0.25 | 0.26 | -1.32 | 0.277599 | 0.137355 | 0.636883 | 0.41029  |
| MmugDNA.36727.1.S1_at   | MmugDNA.36727.1 | 9.85  | 10.32 | 0.44 | 0.08 | -1.38 | 0.10201  | 0.040624 | 0.472436 | 0.246424 |
| MmugDNA.3673.1.S1_at    | MmugDNA.3673.1  | 12.77 | 12.8  | 0.25 | 0.03 | -1.02 | 0.909541 | 0.261998 | 0.969434 | 0.52836  |
| MmugDNA.36730.1.S1_at   | MmugDNA.36730.1 | 6.65  | 6.6   | 1.54 | 0.27 | 1.04  | 0.991511 | 0.825519 | 0.996693 | 0.89976  |
| MmugDNA.36731.1.S1_at   | MmugDNA.36731.1 | 11.2  | 11.21 | 0.21 | 0.07 | -1.01 | 0.938651 | 0.830205 | 0.979343 | 0.902541 |
| MmugDNA.36732.1.S1_s_at | MmugDNA.36732.1 | 12.35 | 11.85 | 0.13 | 0.11 | 1.42  | 0.007101 | 0.001877 | 0.225651 | 0.064979 |
| MmugDNA.36733.1.S1_at   | MmugDNA.36733.1 | 11.91 | 11.79 | 0.07 | 0.1  | 1.09  | 0.415319 | 0.016194 | 0.733613 | 0.161289 |



|                         |                 |       |       |      |      |       |          |          |          |          |
|-------------------------|-----------------|-------|-------|------|------|-------|----------|----------|----------|----------|
| MmugDNA.36733.1.S1_s_at | MmugDNA.36733.1 | 12.02 | 11.88 | 0.11 | 0.09 | 1.11  | 0.3164   | 0.010917 | 0.666473 | 0.136017 |
| MmugDNA.36736.1.S1_at   | MmugDNA.36736.1 | 6.48  | 6.15  | 0.24 | 0.2  | 1.26  | 0.640255 | 0.04729  | 0.856628 | 0.262176 |
| MmugDNA.36737.1.S1_at   | MmugDNA.36737.1 | 5.58  | 5.19  | 0.49 | 0.21 | 1.32  | 0.968091 | 0.933589 | 0.989447 | 0.962229 |
| MmugDNA.36737.1.S1_s_at | MmugDNA.36737.1 | 7.05  | 6.64  | 0.26 | 0.2  | 1.34  | 0.187384 | 0.051477 | 0.559787 | 0.27227  |
| MmugDNA.36740.1.S1_at   | MmugDNA.36740.1 | 5.1   | 4.93  | 0.08 | 0.05 | 1.13  | 0.142145 | 0.465649 | 0.51712  | 0.675863 |
| MmugDNA.36744.1.S1_at   | MmugDNA.36744.1 | 13.66 | 13.57 | 0.09 | 0.01 | 1.07  | 0.481674 | 0.706047 | 0.772225 | 0.829633 |
| MmugDNA.36747.1.S1_at   | MmugDNA.36747.1 | 6.53  | 6.46  | 0.25 | 0.07 | 1.04  | 0.41272  | 0.587502 | 0.732098 | 0.754278 |
| MmugDNA.36748.1.S1_at   | MmugDNA.36748.1 | 10.14 | 10.07 | 0.46 | 0.55 | 1.05  | 0.610217 | 0.054889 | 0.841839 | 0.279748 |
| MmugDNA.36749.1.S1_at   | MmugDNA.36749.1 | 10.29 | 10.8  | 3.42 | 0.42 | -1.42 | 0.419803 | 0.276498 | 0.736572 | 0.540513 |
| MmugDNA.36752.1.S1_at   | MmugDNA.36752.1 | 6.21  | 6.02  | 0.32 | 0.13 | 1.14  | 0.727557 | 0.754918 | 0.894744 | 0.857334 |
| MmugDNA.36753.1.S1_at   | MmugDNA.36753.1 | 7.2   | 6.74  | 0.35 | 0.23 | -1.37 | 0.06552  | 0.059489 | 0.420827 | 0.290548 |
| MmugDNA.36754.1.S1_at   | MmugDNA.36754.1 | 9.31  | 9.56  | 0.35 | 0.18 | -1.19 | 0.377368 | 0.352003 | 0.707532 | 0.595381 |
| MmugDNA.36754.1.S1_s_at | MmugDNA.36754.1 | 9.33  | 9.62  | 0.44 | 0.15 | -1.22 | 0.399806 | 0.569667 | 0.723356 | 0.742565 |
| MmugDNA.36756.1.S1_at   | MmugDNA.36756.1 | 10.02 | 10.11 | 0.53 | 0.11 | -1.06 | 0.546239 | 0.437501 | 0.808414 | 0.656769 |
| MmugDNA.36766.1.S1_at   | MmugDNA.36766.1 | 9.94  | 9.97  | 0.15 | 0.1  | -1.02 | 0.958007 | 0.383587 | 0.986194 | 0.619556 |
| MmugDNA.36767.1.S1_s_at | MmugDNA.36767.1 | 12.19 | 12.18 | 0.06 | 0.04 | 1.01  | 0.664319 | 0.001805 | 0.867677 | 0.063714 |
| MmugDNA.36779.1.S1_at   | MmugDNA.36779.1 | 12.23 | 12.33 | 0.16 | 0.1  | -1.07 | 0.253244 | 0.347656 | 0.617936 | 0.592045 |
| MmugDNA.36783.1.S1_at   | MmugDNA.36783.1 | 6.23  | 6.03  | 0.09 | 0.04 | 1.15  | 0.041219 | 0.027697 | 0.365734 | 0.207837 |
| MmugDNA.36784.1.S1_at   | MmugDNA.36784.1 | 10.95 | 10.53 | 0.62 | 0.13 | 1.34  | 0.907254 | 0.915157 | 0.968503 | 0.952344 |
| MmugDNA.36789.1.S1_at   | MmugDNA.36789.1 | 6.63  | 6.61  | 0.09 | 0.17 | 1.01  | 0.594468 | 0.601839 | 0.834747 | 0.763113 |
| MmugDNA.36793.1.S1_at   | MmugDNA.36793.1 | 8.45  | 8.46  | 0.54 | 0.2  | -1.01 | 0.720225 | 0.865831 | 0.891467 | 0.923757 |
| MmugDNA.36794.1.S1_at   | MmugDNA.36794.1 | 11.74 | 11.03 | 0.36 | 0.13 | 1.64  | 0.07509  | 0.140233 | 0.43584  | 0.413405 |
| MmugDNA.36795.1.S1_at   | MmugDNA.36795.1 | 4.12  | 4.04  | 0.14 | 0.1  | 1.06  | 0.505216 | 0.737619 | 0.785248 | 0.847996 |
| MmugDNA.36796.1.S1_at   | MmugDNA.36796.1 | 3.65  | 3.62  | 0.21 | 0.08 | 1.02  | 0.609838 | 0.299395 | 0.841773 | 0.557857 |
| MmugDNA.36797.1.S1_at   | MmugDNA.36797.1 | 10.77 | 10.02 | 0.2  | 0.16 | 1.69  | 0.005509 | 0.00342  | 0.208157 | 0.084124 |
| MmugDNA.36806.1.S1_at   | MmugDNA.36806.1 | 10.92 | 11.05 | 0.16 | 0.05 | -1.09 | 0.144177 | 0.215746 | 0.519528 | 0.489503 |
| MmugDNA.36827.1.S1_at   | MmugDNA.36827.1 | 6.82  | 6.82  | 0.1  | 0.25 | 1     | 0.775102 | 0.06855  | 0.916601 | 0.308364 |
| MmugDNA.36828.1.S1_at   | MmugDNA.36828.1 | 4.81  | 4.69  | 0.06 | 0.07 | 1.08  | 0.077305 | 0.08729  | 0.439109 | 0.340327 |
| MmugDNA.36834.1.S1_at   | MmugDNA.36834.1 | 9.01  | 9.6   | 0.3  | 0.15 | -1.51 | 0.027968 | 0.097517 | 0.330017 | 0.355338 |
| MmugDNA.36847.1.S1_at   | MmugDNA.36847.1 | 6.36  | 6.02  | 0.14 | 0.35 | 1.26  | 0.161862 | 0.343599 | 0.535244 | 0.589322 |
| MmugDNA.3685.1.S1_at    | MmugDNA.3685.1  | 8.81  | 8.46  | 0.21 | 0.16 | 1.27  | 0.078097 | 0.254766 | 0.440197 | 0.523037 |
| MmugDNA.36854.1.S1_at   | MmugDNA.36854.1 | 4.43  | 4.41  | 0.03 | 0.09 | 1.01  | 0.41074  | 0.374513 | 0.730947 | 0.6129   |
| MmugDNA.36863.1.S1_at   | MmugDNA.36863.1 | 5.35  | 5.29  | 0.06 | 0.03 | 1.04  | 0.484998 | 0.096108 | 0.773927 | 0.353322 |
| MmugDNA.36864.1.S1_at   | MmugDNA.36864.1 | 4.24  | 4.2   | 0.17 | 0.14 | 1.03  | 0.635481 | 0.809328 | 0.854585 | 0.890103 |
| MmugDNA.36867.1.S1_at   | MmugDNA.36867.1 | 5.58  | 5.55  | 0.15 | 0.08 | 1.02  | 0.718825 | 0.330071 | 0.890773 | 0.578938 |
| MmugDNA.3687.1.S1_at    | MmugDNA.3687.1  | 4.48  | 4.44  | 0.33 | 0.03 | 1.03  | 0.328641 | 0.351014 | 0.67577  | 0.594736 |
| MmugDNA.36875.1.S1_at   | MmugDNA.36875.1 | 3.42  | 3.38  | 0.2  | 0.01 | 1.03  | 0.276127 | 0.243956 | 0.635764 | 0.514069 |
| MmugDNA.36878.1.S1_at   | MmugDNA.36878.1 | 6.72  | 6.56  | 0.46 | 0.2  | 1.12  | 0.285729 | 0.108437 | 0.643438 | 0.371943 |
| MmugDNA.36883.1.S1_at   | MmugDNA.36883.1 | 10.63 | 10.75 | 0.54 | 0.16 | -1.09 | 0.552872 | 0.010562 | 0.811917 | 0.134181 |
| MmugDNA.36886.1.S1_at   | MmugDNA.36886.1 | 3.79  | 3.63  | 0.1  | 0.04 | 1.12  | 0.059405 | 0.132643 | 0.406303 | 0.404544 |
| MmugDNA.36887.1.S1_at   | MmugDNA.36887.1 | 5.87  | 5.8   | 0.07 | 0.02 | 1.05  | 0.091173 | 0.567852 | 0.459035 | 0.741693 |
| MmugDNA.3689.1.S1_at    | MmugDNA.3689.1  | 8.3   | 8.19  | 0.35 | 0.21 | 1.07  | 0.928471 | 0.888432 | 0.976259 | 0.936361 |
| MmugDNA.36894.1.S1_at   | MmugDNA.36894.1 | 13.14 | 12.84 | 0.08 | 0.01 | 1.23  | 0.004987 | 0.010371 | 0.2042   | 0.133236 |

|                         |                 |       |       |      |      |       |          |          |          |          |
|-------------------------|-----------------|-------|-------|------|------|-------|----------|----------|----------|----------|
| MmugDNA.36897.1.S1_at   | MmugDNA.36897.1 | 8.44  | 8.32  | 0.59 | 0.25 | 1.09  | 0.647471 | 0.195443 | 0.859364 | 0.470259 |
| MmugDNA.3690.1.S1_at    | MmugDNA.3690.1  | 6.66  | 6.39  | 0.81 | 0.11 | 1.2   | 0.229144 | 0.086339 | 0.598088 | 0.338777 |
| MmugDNA.36905.1.S1_at   | MmugDNA.36905.1 | 12.26 | 12.09 | 0.11 | 0.06 | 1.12  | 0.083595 | 0.087414 | 0.449622 | 0.340589 |
| MmugDNA.36906.1.S1_at   | MmugDNA.36906.1 | 3.76  | 3.79  | 0.29 | 0.15 | -1.02 | 0.501083 | 0.627394 | 0.783101 | 0.780374 |
| MmugDNA.36907.1.S1_at   | MmugDNA.36907.1 | 9.32  | 8.99  | 0.25 | 0.03 | 1.26  | 0.277489 | 0.139494 | 0.636861 | 0.412743 |
| MmugDNA.36912.1.S1_at   | MmugDNA.36912.1 | 9.15  | 9.28  | 1.09 | 0.17 | -1.1  | 0.904079 | 0.083895 | 0.967748 | 0.334776 |
| MmugDNA.36918.1.S1_at   | MmugDNA.36918.1 | 3.99  | 3.91  | 0.18 | 0.05 | 1.06  | 0.503695 | 0.529195 | 0.784375 | 0.717207 |
| MmugDNA.36924.1.S1_at   | MmugDNA.36924.1 | 7.08  | 7.02  | 0.09 | 0.06 | 1.05  | 0.18349  | 0.462482 | 0.55651  | 0.673807 |
| MmugDNA.36934.1.S1_at   | MmugDNA.36934.1 | 7.17  | 7.84  | 0.99 | 0.12 | -1.59 | 0.531444 | 0.747047 | 0.799647 | 0.853124 |
| MmugDNA.36939.1.S1_at   | MmugDNA.36939.1 | 7.62  | 7.5   | 0.02 | 0.09 | 1.08  | 0.104838 | 0.142624 | 0.476221 | 0.416343 |
| MmugDNA.36940.1.S1_at   | MmugDNA.36940.1 | 5.96  | 6.54  | 0.44 | 0.06 | -1.49 | 0.098035 | 0.013565 | 0.46743  | 0.149001 |
| MmugDNA.36946.1.S1_at   | MmugDNA.36946.1 | 12.61 | 12.38 | 0.53 | 0.11 | 1.17  | 0.795077 | 0.107391 | 0.924794 | 0.370219 |
| MmugDNA.36948.1.S1_at   | MmugDNA.36948.1 | 10.01 | 10.49 | 0.19 | 0.05 | -1.4  | 0.005407 | 0.000107 | 0.208157 | 0.028099 |
| MmugDNA.36954.1.S1_at   | MmugDNA.36954.1 | 7.96  | 8.61  | 0.31 | 0.09 | -1.57 | 0.036529 | 0.164459 | 0.355049 | 0.440678 |
| MmugDNA.36963.1.S1_at   | MmugDNA.36963.1 | 12.22 | 12.14 | 0.45 | 0.09 | 1.06  | 0.687203 | 0.337413 | 0.877656 | 0.58462  |
| MmugDNA.36965.1.S1_at   | MmugDNA.36965.1 | 11.02 | 10.47 | 0.24 | 0.13 | 1.47  | 0.028308 | 0.05129  | 0.331894 | 0.271872 |
| MmugDNA.36966.1.S1_at   | MmugDNA.36966.1 | 5.86  | 5.92  | 0.28 | 0.08 | -1.05 | 0.629608 | 0.841437 | 0.851663 | 0.909663 |
| MmugDNA.36967.1.S1_at   | MmugDNA.36967.1 | 6.18  | 6.45  | 0.91 | 0.24 | -1.2  | 0.743041 | 0.09009  | 0.901935 | 0.344402 |
| MmugDNA.36968.1.S1_at   | MmugDNA.36968.1 | 6     | 5.28  | 0.4  | 0.66 | 1.65  | 0.195689 | 0.007592 | 0.565981 | 0.11661  |
| MmugDNA.36971.1.S1_at   | MmugDNA.36971.1 | 7.73  | 7.9   | 0.46 | 0.11 | -1.13 | 0.812405 | 0.229276 | 0.932076 | 0.501527 |
| MmugDNA.36979.1.S1_at   | MmugDNA.36979.1 | 5.94  | 5.35  | 0.32 | 0.09 | 1.51  | 0.016025 | 0.600736 | 0.284946 | 0.76224  |
| MmugDNA.36982.1.S1_at   | MmugDNA.36982.1 | 12.35 | 12.21 | 0.47 | 0.05 | 1.11  | 0.641168 | 0.213926 | 0.857176 | 0.487596 |
| MmugDNA.36982.1.S1_s_at | MmugDNA.36982.1 | 11.73 | 11.63 | 0.62 | 0.07 | 1.07  | 0.562143 | 0.221615 | 0.817608 | 0.494901 |
| MmugDNA.36983.1.S1_at   | MmugDNA.36983.1 | 5.44  | 5.65  | 0.03 | 0.13 | -1.15 | 0.057854 | 0.018901 | 0.403172 | 0.172961 |
| MmugDNA.36985.1.S1_at   | MmugDNA.36985.1 | 11.46 | 11.3  | 0.44 | 0.12 | 1.12  | 0.259597 | 0.338367 | 0.622626 | 0.585432 |
| MmugDNA.36986.1.S1_at   | MmugDNA.36986.1 | 8.91  | 8.97  | 0.4  | 0.21 | -1.05 | 0.353233 | 0.025332 | 0.693204 | 0.199522 |
| MmugDNA.36990.1.S1_at   | MmugDNA.36990.1 | 7.52  | 7.67  | 0.27 | 0.08 | -1.11 | 0.361856 | 0.074325 | 0.698847 | 0.318046 |
| MmugDNA.36992.1.S1_at   | MmugDNA.36992.1 | 10.25 | 10.3  | 0.99 | 0.26 | -1.04 | 0.929347 | 0.832169 | 0.976333 | 0.90371  |
| MmugDNA.37002.1.S1_at   | MmugDNA.37002.1 | 5.37  | 5.48  | 0.15 | 0.18 | -1.08 | 0.590197 | 0.551069 | 0.832832 | 0.730772 |
| MmugDNA.37003.1.S1_at   | MmugDNA.37003.1 | 6.32  | 6.04  | 0.18 | 0.22 | 1.21  | 0.15532  | 0.468469 | 0.528651 | 0.67773  |
| MmugDNA.37004.1.S1_at   | MmugDNA.37004.1 | 6.37  | 6.35  | 0.11 | 0.27 | 1.01  | 0.727284 | 0.815643 | 0.894648 | 0.893657 |
| MmugDNA.37016.1.S1_s_at | MmugDNA.37016.1 | 10.4  | 10.98 | 0.63 | 0.01 | -1.49 | 0.171791 | 0.211457 | 0.545121 | 0.485578 |
| MmugDNA.37017.1.S1_at   | MmugDNA.37017.1 | 9.18  | 9.25  | 0.34 | 0.49 | -1.05 | 0.22438  | 0.212872 | 0.593568 | 0.486798 |
| MmugDNA.37020.1.S1_at   | MmugDNA.37020.1 | 8.66  | 8.66  | 0.18 | 0.07 | 1     | 0.873551 | 0.004293 | 0.956238 | 0.091989 |
| MmugDNA.37022.1.S1_at   | MmugDNA.37022.1 | 11.21 | 11.23 | 0.74 | 0.04 | -1.01 | 0.848766 | 0.724311 | 0.946844 | 0.840433 |
| MmugDNA.37028.1.S1_at   | MmugDNA.37028.1 | 3.94  | 3.81  | 0.06 | 0.05 | 1.1   | 0.023267 | 0.024119 | 0.314809 | 0.1945   |
| MmugDNA.3703.1.S1_at    | MmugDNA.3703.1  | 6.99  | 8.07  | 0.63 | 0.13 | -2.11 | 0.09867  | 0.068908 | 0.468025 | 0.308844 |
| MmugDNA.37031.1.S1_at   | MmugDNA.37031.1 | 7.32  | 7.17  | 0.12 | 0.05 | 1.11  | 0.103969 | 0.329268 | 0.474656 | 0.57869  |
| MmugDNA.37034.1.S1_at   | MmugDNA.37034.1 | 11.55 | 11.45 | 0.4  | 0.17 | 1.07  | 0.747216 | 0.739334 | 0.903916 | 0.848915 |
| MmugDNA.37035.1.S1_at   | MmugDNA.37035.1 | 10.07 | 10.52 | 0.3  | 0.02 | -1.37 | 0.039693 | 0.024217 | 0.362432 | 0.19489  |
| MmugDNA.37042.1.S1_at   | MmugDNA.37042.1 | 9.66  | 9.94  | 0.45 | 0.09 | -1.21 | 0.449052 | 0.626632 | 0.754053 | 0.779896 |
| MmugDNA.37044.1.S1_at   | MmugDNA.37044.1 | 11.41 | 10.68 | 0.21 | 0.2  | 1.66  | 0.010721 | 0.026971 | 0.249245 | 0.205423 |
| MmugDNA.37044.1.S1_s_at | MmugDNA.37044.1 | 11.8  | 10.96 | 0.17 | 0.11 | 1.8   | 0.002888 | 0.000638 | 0.187888 | 0.042882 |

|                         |                 |       |       |      |      |       |          |          |          |          |
|-------------------------|-----------------|-------|-------|------|------|-------|----------|----------|----------|----------|
| MmugDNA.37045.1.S1_at   | MmugDNA.37045.1 | 2.89  | 2.99  | 0.18 | 0.07 | -1.07 | 0.91727  | 0.670622 | 0.97197  | 0.807444 |
| MmugDNA.37050.1.S1_at   | MmugDNA.37050.1 | 12.37 | 12.29 | 0.43 | 0.09 | 1.06  | 0.696277 | 0.152909 | 0.882048 | 0.42777  |
| MmugDNA.37053.1.S1_at   | MmugDNA.37053.1 | 7.11  | 7.15  | 0.19 | 0.02 | -1.03 | 0.607745 | 0.228765 | 0.84097  | 0.501005 |
| MmugDNA.37054.1.S1_at   | MmugDNA.37054.1 | 9.28  | 9.35  | 1.63 | 0.26 | -1.05 | 0.957898 | 0.260334 | 0.986121 | 0.526897 |
| MmugDNA.37055.1.S1_at   | MmugDNA.37055.1 | 7.22  | 7.19  | 0.17 | 0.08 | 1.03  | 0.992145 | 0.994761 | 0.996928 | 0.996729 |
| MmugDNA.37061.1.S1_at   | MmugDNA.37061.1 | 12.91 | 12.94 | 0.28 | 0.03 | -1.03 | 0.821757 | 0.887934 | 0.935673 | 0.936115 |
| MmugDNA.37064.1.S1_at   | MmugDNA.37064.1 | 9.64  | 9.73  | 2.14 | 0.37 | -1.07 | 0.867359 | 0.099911 | 0.953465 | 0.358624 |
| MmugDNA.37068.1.S1_at   | MmugDNA.37068.1 | 4.29  | 4.34  | 0.12 | 0.24 | -1.03 | 0.386912 | 0.647125 | 0.713948 | 0.793279 |
| MmugDNA.37069.1.S1_at   | MmugDNA.37069.1 | 5.97  | 6.53  | 0.32 | 0.07 | -1.47 | 0.046421 | 0.138837 | 0.377929 | 0.412015 |
| MmugDNA.3707.1.S1_at    | MmugDNA.3707.1  | 9.75  | 10.23 | 0.11 | 0.14 | -1.39 | 0.006102 | 0.000546 | 0.215688 | 0.040793 |
| MmugDNA.37072.1.S1_at   | MmugDNA.37072.1 | 13.12 | 13.1  | 0.14 | 0.05 | -1.01 | 0.359788 | 0.461034 | 0.697545 | 0.672829 |
| MmugDNA.37074.1.S1_at   | MmugDNA.37074.1 | 4.78  | 4.82  | 0.12 | 0.17 | -1.03 | 0.700836 | 0.808508 | 0.883629 | 0.889757 |
| MmugDNA.37076.1.S1_at   | MmugDNA.37076.1 | 13.19 | 13.31 | 0.18 | 0.02 | -1.08 | 0.108304 | 0.124458 | 0.480728 | 0.394865 |
| MmugDNA.37077.1.S1_at   | MmugDNA.37077.1 | 6.81  | 6.98  | 0.08 | 0.14 | -1.13 | 0.640467 | 0.297338 | 0.85676  | 0.556071 |
| MmugDNA.37078.1.S1_at   | MmugDNA.37078.1 | 5.07  | 4.9   | 0.03 | 0.09 | 1.13  | 0.028585 | 0.195175 | 0.332627 | 0.470253 |
| MmugDNA.37083.1.S1_at   | MmugDNA.37083.1 | 10.79 | 11.35 | 0.39 | 0.12 | -1.47 | 0.049467 | 0.042603 | 0.385474 | 0.251035 |
| MmugDNA.37089.1.S1_at   | MmugDNA.37089.1 | 7.02  | 8.19  | 0.5  | 0.33 | -2.24 | 0.037813 | 0.035533 | 0.358028 | 0.232768 |
| MmugDNA.37094.1.S1_at   | MmugDNA.37094.1 | 7.25  | 7.39  | 1.14 | 0.1  | -1.1  | 0.701811 | 0.120011 | 0.883994 | 0.388672 |
| MmugDNA.37097.1.S1_at   | MmugDNA.37097.1 | 4.53  | 4.45  | 0.39 | 0.09 | 1.06  | 0.534444 | 0.480421 | 0.801404 | 0.685781 |
| MmugDNA.371.1.S1_at     | MmugDNA.371.1   | 5.43  | 6.05  | 0.05 | 0.16 | -1.53 | 0.002869 | 0.002248 | 0.187837 | 0.069739 |
| MmugDNA.37104.1.S1_at   | MmugDNA.37104.1 | 6.35  | 6.21  | 0.13 | 0.23 | 1.1   | 0.272795 | 0.389951 | 0.632514 | 0.624002 |
| MmugDNA.37106.1.S1_at   | MmugDNA.37106.1 | 7.74  | 7.66  | 0.04 | 0.04 | 1.06  | 0.159802 | 0.174466 | 0.532789 | 0.450952 |
| MmugDNA.37110.1.S1_at   | MmugDNA.37110.1 | 4.85  | 4.28  | 0.13 | 0.06 | 1.49  | 0.004922 | 0.018197 | 0.20375  | 0.169696 |
| MmugDNA.37114.1.S1_at   | MmugDNA.37114.1 | 7.74  | 9.08  | 2.73 | 0.35 | -2.54 | 0.447063 | 0.347091 | 0.753083 | 0.591815 |
| MmugDNA.37116.1.S1_at   | MmugDNA.37116.1 | 8.13  | 7.9   | 0.13 | 0.05 | 1.17  | 0.0497   | 0.078245 | 0.38604  | 0.324785 |
| MmugDNA.37118.1.S1_at   | MmugDNA.37118.1 | 9.37  | 9.96  | 0.16 | 0.02 | -1.51 | 0.005167 | 0.002171 | 0.205828 | 0.068862 |
| MmugDNA.3712.1.S1_at    | MmugDNA.3712.1  | 12.53 | 11.92 | 0.12 | 0.11 | 1.52  | 0.005068 | 0.001835 | 0.204969 | 0.064337 |
| MmugDNA.37121.1.S1_at   | MmugDNA.37121.1 | 11.83 | 11.78 | 0.38 | 0.12 | 1.04  | 0.805963 | 0.352939 | 0.929563 | 0.596259 |
| MmugDNA.37128.1.S1_at   | MmugDNA.37128.1 | 11.06 | 11.07 | 0.32 | 0.09 | -1    | 0.549348 | 0.241335 | 0.810299 | 0.511952 |
| MmugDNA.37135.1.S1_at   | MmugDNA.37135.1 | 8.96  | 8.62  | 0.9  | 0.07 | 1.26  | 0.571196 | 0.796817 | 0.822585 | 0.882803 |
| MmugDNA.37137.1.S1_at   | MmugDNA.37137.1 | 6.95  | 6.78  | 0.09 | 0.14 | 1.12  | 0.293042 | 0.327926 | 0.649382 | 0.577744 |
| MmugDNA.37138.1.S1_at   | MmugDNA.37138.1 | 5.74  | 7.42  | 0.78 | 0.16 | -3.22 | 0.024505 | 0.08682  | 0.319083 | 0.339594 |
| MmugDNA.37144.1.S1_at   | MmugDNA.37144.1 | 6.12  | 6.01  | 0.05 | 0.05 | 1.08  | 0.025016 | 0.032709 | 0.320402 | 0.223942 |
| MmugDNA.37147.1.S1_at   | MmugDNA.37147.1 | 7.2   | 7.34  | 0.66 | 0.13 | -1.1  | 0.661794 | 0.85998  | 0.86652  | 0.920188 |
| MmugDNA.37149.1.S1_at   | MmugDNA.37149.1 | 6.76  | 7.35  | 0.71 | 0.13 | -1.5  | 0.289766 | 0.268989 | 0.646411 | 0.534389 |
| MmugDNA.37149.1.S1_s_at | MmugDNA.37149.1 | 8.11  | 8.37  | 0.55 | 0.23 | -1.2  | 0.561825 | 0.334967 | 0.817417 | 0.58275  |
| MmugDNA.37153.1.S1_at   | MmugDNA.37153.1 | 11.53 | 11.3  | 0.32 | 0.14 | 1.18  | 0.293286 | 0.259497 | 0.649679 | 0.526418 |
| MmugDNA.37154.1.S1_at   | MmugDNA.37154.1 | 12.44 | 12.6  | 1.44 | 0.13 | -1.12 | 0.599282 | 0.137577 | 0.837333 | 0.410555 |
| MmugDNA.37156.1.S1_at   | MmugDNA.37156.1 | 6.42  | 6.16  | 0.51 | 0.17 | 1.2   | 0.461947 | 0.542286 | 0.761366 | 0.725385 |
| MmugDNA.37167.1.S1_at   | MmugDNA.37167.1 | 9.92  | 9.12  | 0.83 | 0.68 | 1.75  | 0.597696 | 0.838501 | 0.836517 | 0.907883 |
| MmugDNA.37168.1.S1_at   | MmugDNA.37168.1 | 9.34  | 9.52  | 2.09 | 0.29 | -1.13 | 0.733064 | 0.163343 | 0.897503 | 0.43947  |
| MmugDNA.37168.1.S1_s_at | MmugDNA.37168.1 | 8.57  | 8.75  | 2.03 | 0.29 | -1.13 | 0.795149 | 0.182601 | 0.924811 | 0.459107 |
| MmugDNA.3717.1.S1_at    | MmugDNA.3717.1  | 9.93  | 9.58  | 0.15 | 0.05 | 1.28  | 0.015989 | 0.040494 | 0.284693 | 0.246264 |

|                         |                 |       |       |      |      |       |          |          |          |          |
|-------------------------|-----------------|-------|-------|------|------|-------|----------|----------|----------|----------|
| MmugDNA.37171.1.S1_at   | MmugDNA.37171.1 | 6.77  | 6.8   | 0.05 | 0.01 | -1.02 | 0.40814  | 0.949213 | 0.729194 | 0.970902 |
| MmugDNA.37173.1.S1_at   | MmugDNA.37173.1 | 5.05  | 5.1   | 0.32 | 0.21 | -1.03 | 0.313132 | 0.022588 | 0.664448 | 0.188092 |
| MmugDNA.37175.1.S1_at   | MmugDNA.37175.1 | 12.15 | 12.4  | 0.07 | 0.14 | -1.19 | 0.08448  | 0.056842 | 0.451025 | 0.284531 |
| MmugDNA.37176.1.S1_at   | MmugDNA.37176.1 | 7.21  | 7.46  | 1.84 | 0.14 | -1.19 | 0.814795 | 0.169277 | 0.933137 | 0.44588  |
| MmugDNA.37178.1.S1_at   | MmugDNA.37178.1 | 3.2   | 3.18  | 0.42 | 0.17 | 1.02  | 0.91254  | 0.919971 | 0.970287 | 0.954967 |
| MmugDNA.37179.1.S1_at   | MmugDNA.37179.1 | 9.87  | 10.49 | 0.38 | 0.05 | -1.53 | 0.019289 | 0.012698 | 0.300531 | 0.145316 |
| MmugDNA.37188.1.S1_at   | MmugDNA.37188.1 | 6.81  | 6.83  | 0.05 | 0.1  | -1.02 | 0.938157 | 0.515603 | 0.979247 | 0.708449 |
| MmugDNA.37189.1.S1_at   | MmugDNA.37189.1 | 6.5   | 6.37  | 0.42 | 0.27 | 1.09  | 0.553283 | 0.289244 | 0.812089 | 0.550293 |
| MmugDNA.37200.1.S1_at   | MmugDNA.37200.1 | 10.64 | 10.76 | 0.48 | 0.09 | -1.09 | 0.592017 | 0.861531 | 0.833648 | 0.921307 |
| MmugDNA.37201.1.S1_at   | MmugDNA.37201.1 | 9.69  | 9.69  | 1.44 | 0.15 | -1    | 0.741681 | 0.475742 | 0.90146  | 0.682332 |
| MmugDNA.37205.1.S1_at   | MmugDNA.37205.1 | 6.36  | 6.18  | 0.38 | 0.22 | -1.13 | 0.991909 | 0.046434 | 0.996849 | 0.260036 |
| MmugDNA.37206.1.S1_at   | MmugDNA.37206.1 | 9.5   | 9.79  | 0.81 | 0.26 | -1.23 | 0.700537 | 0.169852 | 0.88359  | 0.446544 |
| MmugDNA.37209.1.S1_at   | MmugDNA.37209.1 | 7.29  | 6.95  | 0.2  | 0.06 | 1.26  | 0.04748  | 0.048273 | 0.380416 | 0.264779 |
| MmugDNA.37212.1.S1_at   | MmugDNA.37212.1 | 9.87  | 10    | 0.2  | 0.09 | -1.09 | 0.803966 | 0.589126 | 0.928633 | 0.755393 |
| MmugDNA.37225.1.S1_at   | MmugDNA.37225.1 | 8.1   | 8.12  | 0.37 | 0.2  | -1.01 | 0.26471  | 0.402598 | 0.626068 | 0.631505 |
| MmugDNA.37237.1.S1_at   | MmugDNA.37237.1 | 7.51  | 7.86  | 0.21 | 0.08 | -1.27 | 0.057121 | 0.04159  | 0.401454 | 0.248831 |
| MmugDNA.37248.1.S1_at   | MmugDNA.37248.1 | 4.93  | 4.79  | 0.03 | 0.03 | 1.1   | 0.003039 | 0.004695 | 0.191043 | 0.095363 |
| MmugDNA.37251.1.S1_at   | MmugDNA.37251.1 | 12    | 11.89 | 0.19 | 0.05 | 1.08  | 0.380118 | 0.024339 | 0.709362 | 0.19528  |
| MmugDNA.37253.1.S1_at   | MmugDNA.37253.1 | 11.45 | 11.64 | 0.53 | 0.14 | -1.14 | 0.911867 | 0.876755 | 0.970171 | 0.92982  |
| MmugDNA.37253.1.S1_s_at | MmugDNA.37253.1 | 9.01  | 9     | 0.53 | 0.09 | 1.01  | 0.300431 | 0.500378 | 0.654974 | 0.699024 |
| MmugDNA.37257.1.S1_at   | MmugDNA.37257.1 | 3.26  | 3.05  | 0.22 | 0.11 | 1.15  | 0.357687 | 0.054576 | 0.695982 | 0.279138 |
| MmugDNA.37261.1.S1_at   | MmugDNA.37261.1 | 7.56  | 7.7   | 0.21 | 0.1  | -1.1  | 0.429712 | 0.589308 | 0.742304 | 0.755536 |
| MmugDNA.37262.1.S1_at   | MmugDNA.37262.1 | 6.38  | 6.29  | 0.17 | 0.08 | 1.06  | 0.257353 | 0.322741 | 0.621065 | 0.574043 |
| MmugDNA.37265.1.S1_s_at | MmugDNA.37265.1 | 8.31  | 8.85  | 1.04 | 0.12 | -1.46 | 0.311827 | 0.486328 | 0.663542 | 0.689731 |
| MmugDNA.37268.1.S1_at   | MmugDNA.37268.1 | 6.35  | 6.26  | 0.08 | 0.06 | 1.06  | 0.119924 | 0.561897 | 0.493259 | 0.737659 |
| MmugDNA.37269.1.S1_at   | MmugDNA.37269.1 | 9.47  | 9.35  | 0.06 | 0.09 | 1.09  | 0.223945 | 0.026543 | 0.593038 | 0.203915 |
| MmugDNA.37270.1.S1_at   | MmugDNA.37270.1 | 7.56  | 7.54  | 0.15 | 0.12 | 1.02  | 0.593265 | 0.601052 | 0.834114 | 0.762475 |
| MmugDNA.37271.1.S1_at   | MmugDNA.37271.1 | 9.02  | 8.53  | 0.47 | 0.07 | 1.4   | 0.060844 | 0.035475 | 0.408966 | 0.232564 |
| MmugDNA.37272.1.S1_at   | MmugDNA.37272.1 | 6.16  | 6.39  | 0.17 | 0.19 | -1.17 | 0.476776 | 0.178122 | 0.7694   | 0.454504 |
| MmugDNA.37274.1.S1_at   | MmugDNA.37274.1 | 5.99  | 5.73  | 0.26 | 0.14 | 1.2   | 0.05677  | 0.071421 | 0.401111 | 0.313555 |
| MmugDNA.37274.1.S1_s_at | MmugDNA.37274.1 | 7.47  | 7.29  | 0.2  | 0.07 | 1.13  | 0.082194 | 0.042926 | 0.447052 | 0.251759 |
| MmugDNA.37276.1.S1_at   | MmugDNA.37276.1 | 10.43 | 10.84 | 0.22 | 0.03 | -1.33 | 0.085877 | 0.056207 | 0.453035 | 0.282978 |
| MmugDNA.37277.1.S1_at   | MmugDNA.37277.1 | 11.19 | 11.05 | 0.28 | 0.29 | 1.1   | 0.652531 | 0.871    | 0.862013 | 0.926745 |
| MmugDNA.37286.1.S1_at   | MmugDNA.37286.1 | 4.28  | 4.3   | 0.07 | 0.05 | -1.01 | 0.484503 | 0.834556 | 0.773652 | 0.905227 |
| MmugDNA.37289.1.S1_at   | MmugDNA.37289.1 | 11.25 | 11.42 | 0.19 | 0.02 | -1.13 | 0.123655 | 0.013304 | 0.497192 | 0.14804  |
| MmugDNA.37290.1.S1_at   | MmugDNA.37290.1 | 5.26  | 5.15  | 0.29 | 0.1  | 1.08  | 0.360348 | 0.099359 | 0.697871 | 0.357636 |
| MmugDNA.37292.1.S1_at   | MmugDNA.37292.1 | 8.48  | 8.09  | 0.14 | 0.04 | 1.31  | 0.00761  | 0.063293 | 0.229897 | 0.298244 |
| MmugDNA.37297.1.S1_at   | MmugDNA.37297.1 | 12.56 | 12.46 | 0.44 | 0.05 | 1.07  | 0.513587 | 0.337117 | 0.790001 | 0.584337 |
| MmugDNA.37304.1.S1_at   | MmugDNA.37304.1 | 5.54  | 5.55  | 0.22 | 0.11 | -1.01 | 0.943267 | 0.351369 | 0.980435 | 0.595032 |
| MmugDNA.37304.1.S1_x_at | MmugDNA.37304.1 | 5.38  | 5.12  | 0.12 | 0.23 | 1.19  | 0.456957 | 0.090635 | 0.758051 | 0.345151 |
| MmugDNA.37306.1.S1_at   | MmugDNA.37306.1 | 6.89  | 7.56  | 0.66 | 0.03 | -1.6  | 0.177964 | 0.042562 | 0.551163 | 0.250978 |
| MmugDNA.37307.1.S1_at   | MmugDNA.37307.1 | 8.93  | 9.43  | 0.36 | 0.13 | -1.42 | 0.167889 | 0.008633 | 0.5405   | 0.123154 |
| MmugDNA.37310.1.S1_at   | MmugDNA.37310.1 | 5.75  | 5.43  | 0.29 | 0.06 | 1.24  | 0.179339 | 0.419258 | 0.552525 | 0.643425 |

|                         |                 |       |       |      |      |       |          |          |          |          |
|-------------------------|-----------------|-------|-------|------|------|-------|----------|----------|----------|----------|
| MmugDNA.37316.1.S1_s_at | MmugDNA.37316.1 | 10.22 | 10.51 | 0.04 | 0.07 | -1.23 | 0.0049   | 0.177796 | 0.203301 | 0.454111 |
| MmugDNA.37317.1.S1_at   | MmugDNA.37317.1 | 4.03  | 4.19  | 0.1  | 0    | -1.12 | 0.144099 | 0.035923 | 0.519461 | 0.234021 |
| MmugDNA.37327.1.S1_at   | MmugDNA.37327.1 | 6.46  | 6.5   | 0.15 | 0.04 | -1.03 | 0.650895 | 0.387848 | 0.861251 | 0.622486 |
| MmugDNA.3733.1.S1_at    | MmugDNA.3733.1  | 11.74 | 12.01 | 0.48 | 0.04 | -1.2  | 0.434014 | 0.186299 | 0.744825 | 0.462168 |
| MmugDNA.37332.1.S1_at   | MmugDNA.37332.1 | 4.55  | 6.68  | 0.57 | 0.3  | -4.37 | 0.005621 | 0.015399 | 0.209565 | 0.157585 |
| MmugDNA.37336.1.S1_at   | MmugDNA.37336.1 | 4.12  | 4.12  | 0.21 | 0.04 | 1     | 0.344245 | 0.692546 | 0.686913 | 0.821061 |
| MmugDNA.37337.1.S1_at   | MmugDNA.37337.1 | 12.76 | 12.65 | 0.19 | 0.05 | 1.07  | 0.36839  | 0.37798  | 0.703604 | 0.615264 |
| MmugDNA.37341.1.S1_at   | MmugDNA.37341.1 | 9.18  | 9.9   | 1.22 | 0.2  | -1.64 | 0.714888 | 0.616987 | 0.889025 | 0.773098 |
| MmugDNA.37343.1.S1_at   | MmugDNA.37343.1 | 11.01 | 11.59 | 0.02 | 0.1  | -1.5  | 0.000888 | 0.000487 | 0.153739 | 0.038813 |
| MmugDNA.37345.1.S1_s_at | MmugDNA.37345.1 | 10.88 | 10.92 | 0.38 | 0.14 | -1.03 | 0.963963 | 0.910471 | 0.988189 | 0.949462 |
| MmugDNA.37346.1.S1_at   | MmugDNA.37346.1 | 3.55  | 4.3   | 0.24 | 0.26 | -1.69 | 0.021551 | 0.007212 | 0.309241 | 0.11412  |
| MmugDNA.3736.1.S1_at    | MmugDNA.3736.1  | 6.8   | 7.1   | 1.29 | 0.06 | -1.24 | 0.906755 | 0.491439 | 0.968356 | 0.693004 |
| MmugDNA.37362.1.S1_at   | MmugDNA.37362.1 | 7.36  | 7.64  | 0.4  | 0.06 | -1.22 | 0.353837 | 0.380521 | 0.693507 | 0.617172 |
| MmugDNA.37364.1.S1_at   | MmugDNA.37364.1 | 11.14 | 11.22 | 0.19 | 0.05 | -1.06 | 0.454592 | 0.237846 | 0.756874 | 0.508341 |
| MmugDNA.37366.1.S1_at   | MmugDNA.37366.1 | 9.96  | 10.13 | 0.36 | 0.13 | -1.13 | 0.265053 | 0.226228 | 0.626397 | 0.498692 |
| MmugDNA.37385.1.S1_at   | MmugDNA.37385.1 | 11.36 | 11.59 | 0.07 | 0.01 | -1.17 | 0.003141 | 0.000486 | 0.191107 | 0.038806 |
| MmugDNA.37389.1.S1_x_at | MmugDNA.37389.1 | 10.27 | 10.67 | 0.25 | 0.17 | -1.31 | 0.259738 | 0.260042 | 0.62278  | 0.52675  |
| MmugDNA.37391.1.S1_at   | MmugDNA.37391.1 | 11.48 | 10.97 | 0.77 | 0.15 | 1.43  | 0.535047 | 0.063439 | 0.801404 | 0.298441 |
| MmugDNA.37393.1.S1_at   | MmugDNA.37393.1 | 6.73  | 6.7   | 0.05 | 0.05 | 1.02  | 0.09424  | 0.173954 | 0.463745 | 0.450247 |
| MmugDNA.37403.1.S1_at   | MmugDNA.37403.1 | 11.54 | 11.58 | 0.07 | 0.06 | -1.03 | 0.413373 | 0.175973 | 0.732218 | 0.452526 |
| MmugDNA.37403.1.S1_s_at | MmugDNA.37403.1 | 10.93 | 11.03 | 0.06 | 0.13 | -1.07 | 0.524341 | 0.503466 | 0.795835 | 0.700892 |
| MmugDNA.37404.1.S1_at   | MmugDNA.37404.1 | 11.48 | 11.66 | 0.3  | 0.03 | -1.13 | 0.362472 | 0.117007 | 0.699302 | 0.384405 |
| MmugDNA.37407.1.S1_at   | MmugDNA.37407.1 | 6.43  | 6.33  | 0.65 | 0.15 | 1.07  | 0.707553 | 0.17017  | 0.886182 | 0.446906 |
| MmugDNA.37408.1.S1_at   | MmugDNA.37408.1 | 9.42  | 9.6   | 0.12 | 0.06 | -1.14 | 0.103552 | 0.216956 | 0.474343 | 0.490571 |
| MmugDNA.3741.1.S1_at    | MmugDNA.3741.1  | 3.06  | 3     | 0.15 | 0.14 | 1.04  | 0.841338 | 0.924598 | 0.943736 | 0.957386 |
| MmugDNA.37410.1.S1_at   | MmugDNA.37410.1 | 6.84  | 6.58  | 0.26 | 0.15 | 1.2   | 0.047282 | 0.009012 | 0.379841 | 0.125499 |
| MmugDNA.37420.1.S1_at   | MmugDNA.37420.1 | 3.78  | 3.93  | 0.3  | 0.16 | -1.11 | 0.615906 | 0.549846 | 0.844679 | 0.730104 |
| MmugDNA.37422.1.S1_at   | MmugDNA.37422.1 | 9.97  | 10.45 | 0.04 | 0.13 | -1.39 | 0.004689 | 0.00265  | 0.201699 | 0.07609  |
| MmugDNA.37426.1.S1_at   | MmugDNA.37426.1 | 11.4  | 11.64 | 0.33 | 0.07 | -1.18 | 0.290658 | 0.379312 | 0.647273 | 0.616294 |
| MmugDNA.3743.1.S1_at    | MmugDNA.3743.1  | 8.18  | 8.2   | 0.72 | 0.22 | -1.01 | 0.416646 | 0.148833 | 0.734439 | 0.423218 |
| MmugDNA.37430.1.S1_at   | MmugDNA.37430.1 | 5.14  | 4.72  | 0.26 | 0.03 | 1.34  | 0.128283 | 0.179914 | 0.502907 | 0.456453 |
| MmugDNA.37431.1.S1_at   | MmugDNA.37431.1 | 5.23  | 4.88  | 0.07 | 0.14 | 1.27  | 0.008722 | 0.038031 | 0.236406 | 0.239596 |
| MmugDNA.37444.1.S1_at   | MmugDNA.37444.1 | 11.69 | 11.39 | 0.1  | 0.03 | 1.23  | 0.007921 | 0.007782 | 0.231562 | 0.117732 |
| MmugDNA.37448.1.S1_at   | MmugDNA.37448.1 | 11.36 | 11.25 | 0.09 | 0.03 | 1.08  | 0.150881 | 0.242673 | 0.524381 | 0.513032 |
| MmugDNA.37450.1.S1_at   | MmugDNA.37450.1 | 10.27 | 10.56 | 1.12 | 0.14 | -1.23 | 0.621354 | 0.780792 | 0.847514 | 0.872821 |
| MmugDNA.37451.1.S1_at   | MmugDNA.37451.1 | 10.6  | 10.52 | 0.34 | 0.11 | 1.06  | 0.877371 | 0.140145 | 0.957302 | 0.413394 |
| MmugDNA.3746.1.S1_at    | MmugDNA.3746.1  | 10.65 | 8.31  | 3.87 | 0.27 | 5.07  | 0.915702 | 0.234575 | 0.971302 | 0.505783 |
| MmugDNA.37467.1.S1_at   | MmugDNA.37467.1 | 11.73 | 11.51 | 0.55 | 0.1  | 1.17  | 0.569541 | 0.038753 | 0.82149  | 0.241916 |
| MmugDNA.37470.1.S1_at   | MmugDNA.37470.1 | 10.55 | 10.47 | 0.17 | 0.06 | 1.06  | 0.355814 | 0.391315 | 0.694889 | 0.625    |
| MmugDNA.37472.1.S1_at   | MmugDNA.37472.1 | 12.24 | 12.66 | 0.17 | 0.12 | -1.33 | 0.063099 | 0.298513 | 0.414989 | 0.557175 |
| MmugDNA.37474.1.S1_at   | MmugDNA.37474.1 | 11.64 | 11.11 | 0.31 | 0.13 | 1.45  | 0.045725 | 0.009254 | 0.377029 | 0.126968 |
| MmugDNA.37475.1.S1_s_at | MmugDNA.37475.1 | 10.83 | 10.54 | 0.09 | 0.14 | 1.22  | 0.075691 | 0.148136 | 0.436722 | 0.422668 |
| MmugDNA.37488.1.S1_at   | MmugDNA.37488.1 | 9.27  | 9.07  | 0.25 | 0.05 | 1.15  | 0.162855 | 0.113845 | 0.535867 | 0.380071 |

|                         |                 |       |       |      |      |       |          |          |          |          |
|-------------------------|-----------------|-------|-------|------|------|-------|----------|----------|----------|----------|
| MmugDNA.3749.1.S1_at    | MmugDNA.3749.1  | 4.24  | 4.09  | 0.14 | 0.05 | 1.11  | 0.194286 | 0.363851 | 0.564864 | 0.604215 |
| MmugDNA.37494.1.S1_at   | MmugDNA.37494.1 | 7.08  | 7.34  | 0.39 | 0.14 | -1.2  | 0.785869 | 0.301527 | 0.921215 | 0.55955  |
| MmugDNA.37497.1.S1_at   | MmugDNA.37497.1 | 10.96 | 11.02 | 0.18 | 0.04 | -1.04 | 0.518909 | 0.502418 | 0.792996 | 0.700154 |
| MmugDNA.37498.1.S1_at   | MmugDNA.37498.1 | 5.84  | 5.81  | 0.12 | 0.04 | 1.03  | 0.824117 | 0.517597 | 0.936573 | 0.709722 |
| MmugDNA.375.1.S1_s_at   | MmugDNA.375.1   | 10.98 | 11.11 | 0.44 | 0.2  | -1.1  | 0.701876 | 0.920636 | 0.883997 | 0.955258 |
| MmugDNA.37500.1.S1_at   | MmugDNA.37500.1 | 3.68  | 4.02  | 0.09 | 0.17 | -1.27 | 0.10073  | 0.026878 | 0.471582 | 0.205096 |
| MmugDNA.37502.1.S1_at   | MmugDNA.37502.1 | 9.06  | 9.2   | 0.95 | 0.1  | -1.1  | 0.61961  | 0.816222 | 0.846815 | 0.893995 |
| MmugDNA.37503.1.S1_at   | MmugDNA.37503.1 | 8.06  | 7.62  | 0.17 | 0.09 | 1.36  | 0.053408 | 0.021654 | 0.394702 | 0.184333 |
| MmugDNA.37504.1.S1_at   | MmugDNA.37504.1 | 5.34  | 5.24  | 0.77 | 0.59 | 1.07  | 0.80873  | 0.34916  | 0.930841 | 0.59321  |
| MmugDNA.37505.1.S1_at   | MmugDNA.37505.1 | 8.56  | 9.07  | 0.74 | 0.2  | -1.43 | 0.3876   | 0.263151 | 0.714518 | 0.529465 |
| MmugDNA.37512.1.S1_s_at | MmugDNA.37512.1 | 9.15  | 9.36  | 0.23 | 0.01 | -1.15 | 0.277146 | 0.406192 | 0.636753 | 0.634213 |
| MmugDNA.37513.1.S1_at   | MmugDNA.37513.1 | 7.48  | 8.52  | 0.32 | 0.24 | -2.05 | 0.01218  | 0.101667 | 0.260124 | 0.361562 |
| MmugDNA.37516.1.S1_at   | MmugDNA.37516.1 | 6.76  | 6.87  | 0.37 | 0.2  | -1.08 | 0.316387 | 0.245342 | 0.666473 | 0.515132 |
| MmugDNA.37517.1.S1_at   | MmugDNA.37517.1 | 9.15  | 9.14  | 0.25 | 0.01 | 1.01  | 0.466218 | 0.110053 | 0.763431 | 0.374179 |
| MmugDNA.37520.1.S1_at   | MmugDNA.37520.1 | 7.96  | 8.29  | 0.17 | 0.07 | -1.26 | 0.048135 | 0.022893 | 0.382428 | 0.18934  |
| MmugDNA.37522.1.S1_at   | MmugDNA.37522.1 | 3.04  | 3.16  | 0.03 | 0.1  | -1.09 | 0.083761 | 0.477183 | 0.449639 | 0.683287 |
| MmugDNA.37529.1.S1_at   | MmugDNA.37529.1 | 9.69  | 10.14 | 0.73 | 0.24 | -1.36 | 0.228217 | 0.216735 | 0.597168 | 0.490311 |
| MmugDNA.37537.1.S1_at   | MmugDNA.37537.1 | 11.39 | 11.31 | 0.39 | 0.12 | 1.06  | 0.57576  | 0.351407 | 0.824888 | 0.595054 |
| MmugDNA.3754.1.S1_at    | MmugDNA.3754.1  | 10.5  | 11.1  | 0.19 | 0.08 | -1.52 | 0.012611 | 0.004488 | 0.263296 | 0.093554 |
| MmugDNA.37542.1.S1_at   | MmugDNA.37542.1 | 9.19  | 8.75  | 0.3  | 0.05 | 1.36  | 0.103633 | 0.179471 | 0.474343 | 0.455939 |
| MmugDNA.37543.1.S1_at   | MmugDNA.37543.1 | 10.7  | 10.64 | 0.67 | 0.06 | 1.04  | 0.450084 | 0.163922 | 0.754693 | 0.440105 |
| MmugDNA.37544.1.S1_at   | MmugDNA.37544.1 | 10.26 | 10.04 | 0.18 | 0.11 | 1.16  | 0.273017 | 0.25815  | 0.632603 | 0.525574 |
| MmugDNA.37546.1.S1_at   | MmugDNA.37546.1 | 8.4   | 8.81  | 1.04 | 0.08 | -1.33 | 0.629186 | 0.184696 | 0.851418 | 0.460645 |
| MmugDNA.37554.1.S1_at   | MmugDNA.37554.1 | 4.75  | 4.67  | 0.24 | 0.2  | 1.06  | 0.285725 | 0.744727 | 0.643438 | 0.852165 |
| MmugDNA.37557.1.S1_at   | MmugDNA.37557.1 | 8.44  | 8.22  | 1.16 | 0.2  | 1.16  | 0.961798 | 0.737058 | 0.987539 | 0.847791 |
| MmugDNA.37558.1.S1_at   | MmugDNA.37558.1 | 8.77  | 9.1   | 0.14 | 0.15 | -1.26 | 0.044022 | 0.042625 | 0.373552 | 0.251037 |
| MmugDNA.37561.1.S1_at   | MmugDNA.37561.1 | 6.93  | 7.17  | 0.61 | 0.09 | -1.18 | 0.674194 | 0.071041 | 0.871851 | 0.312704 |
| MmugDNA.37563.1.S1_at   | MmugDNA.37563.1 | 4.91  | 4.86  | 0.26 | 0.15 | 1.04  | 0.868066 | 0.23092  | 0.953842 | 0.502548 |
| MmugDNA.37564.1.S1_at   | MmugDNA.37564.1 | 11.1  | 11.47 | 0.22 | 0.07 | -1.29 | 0.06801  | 0.005207 | 0.42451  | 0.100033 |
| MmugDNA.37566.1.S1_at   | MmugDNA.37566.1 | 7.37  | 7.41  | 0.26 | 0.06 | -1.03 | 0.924179 | 0.472826 | 0.974623 | 0.680162 |
| MmugDNA.37572.1.S1_at   | MmugDNA.37572.1 | 5.33  | 5.38  | 0.23 | 0.02 | -1.03 | 0.70772  | 0.904925 | 0.88624  | 0.946143 |
| MmugDNA.37575.1.S1_at   | MmugDNA.37575.1 | 4.68  | 4.87  | 0.2  | 0.13 | -1.14 | 0.162845 | 0.255619 | 0.535867 | 0.523608 |
| MmugDNA.37587.1.S1_at   | MmugDNA.37587.1 | 5.42  | 5.33  | 0.03 | 0.11 | 1.07  | 0.532052 | 0.661317 | 0.799992 | 0.801687 |
| MmugDNA.3759.1.S1_a_at  | MmugDNA.3759.1  | 6.84  | 7.82  | 1.01 | 0.26 | -1.97 | 0.141107 | 0.11987  | 0.516345 | 0.388577 |
| MmugDNA.3759.1.S1_at    | MmugDNA.3759.1  | 6.91  | 7.72  | 0.72 | 0.33 | -1.75 | 0.102838 | 0.087467 | 0.473259 | 0.340617 |
| MmugDNA.37591.1.S1_at   | MmugDNA.37591.1 | 10.44 | 11    | 0.2  | 0.03 | -1.47 | 0.006612 | 0.063367 | 0.220539 | 0.298403 |
| MmugDNA.37593.1.S1_at   | MmugDNA.37593.1 | 5.7   | 5.51  | 0.07 | 0.02 | 1.13  | 0.017655 | 0.017837 | 0.292958 | 0.168707 |
| MmugDNA.37599.1.S1_at   | MmugDNA.37599.1 | 8.03  | 8.47  | 0.95 | 0.17 | -1.36 | 0.56675  | 0.761604 | 0.820086 | 0.861459 |
| MmugDNA.37601.1.S1_at   | MmugDNA.37601.1 | 11.74 | 11.46 | 0.39 | 0.13 | 1.22  | 0.247988 | 0.082608 | 0.613615 | 0.33182  |
| MmugDNA.37601.1.S1_s_at | MmugDNA.37601.1 | 12.5  | 12.24 | 0.35 | 0.08 | 1.2   | 0.169849 | 0.22127  | 0.542773 | 0.4946   |
| MmugDNA.37605.1.S1_at   | MmugDNA.37605.1 | 11.99 | 11.36 | 0.55 | 0.19 | 1.55  | 0.420972 | 0.5316   | 0.737155 | 0.718783 |
| MmugDNA.37608.1.S1_at   | MmugDNA.37608.1 | 9.79  | 9.13  | 0.42 | 0.19 | 1.58  | 0.057929 | 0.014257 | 0.403429 | 0.152418 |
| MmugDNA.37621.1.S1_at   | MmugDNA.37621.1 | 5.23  | 5.22  | 0.1  | 0.03 | 1.01  | 0.939759 | 0.603783 | 0.979532 | 0.764299 |

|                         |                 |       |       |      |      |       |          |          |          |          |
|-------------------------|-----------------|-------|-------|------|------|-------|----------|----------|----------|----------|
| MmugDNA.37622.1.S1_at   | MmugDNA.37622.1 | 5.99  | 6.05  | 0.5  | 0.11 | -1.05 | 0.889556 | 0.988653 | 0.961988 | 0.993595 |
| MmugDNA.37624.1.S1_at   | MmugDNA.37624.1 | 6.03  | 6.52  | 0.24 | 0.14 | -1.41 | 0.029342 | 0.054338 | 0.334049 | 0.278605 |
| MmugDNA.3763.1.S1_at    | MmugDNA.3763.1  | 7.75  | 7.9   | 0.21 | 0.17 | -1.11 | 0.33391  | 0.464789 | 0.679922 | 0.67542  |
| MmugDNA.3764.1.S1_at    | MmugDNA.3764.1  | 5.37  | 5.1   | 0.17 | 0.1  | 1.21  | 0.158526 | 0.312259 | 0.531553 | 0.566963 |
| MmugDNA.37640.1.S1_at   | MmugDNA.37640.1 | 7.97  | 7.93  | 0.07 | 0.07 | 1.03  | 0.763597 | 0.040589 | 0.911265 | 0.246322 |
| MmugDNA.37648.1.S1_at   | MmugDNA.37648.1 | 5.63  | 6.33  | 0.17 | 0.5  | -1.63 | 0.263919 | 0.320292 | 0.62583  | 0.572616 |
| MmugDNA.3765.1.S1_at    | MmugDNA.3765.1  | 11.39 | 11.47 | 0.1  | 0.18 | -1.06 | 0.820579 | 0.648178 | 0.935289 | 0.794002 |
| MmugDNA.37655.1.S1_at   | MmugDNA.37655.1 | 5.81  | 5.74  | 0.1  | 0.12 | 1.05  | 0.144267 | 0.15097  | 0.519687 | 0.425588 |
| MmugDNA.37656.1.S1_at   | MmugDNA.37656.1 | 4.02  | 3.7   | 0.15 | 0.16 | 1.25  | 0.147274 | 0.308757 | 0.521578 | 0.56463  |
| MmugDNA.3766.1.S1_at    | MmugDNA.3766.1  | 4.7   | 4.59  | 0.07 | 0.18 | 1.08  | 0.494176 | 0.761687 | 0.779281 | 0.861459 |
| MmugDNA.37663.1.S1_at   | MmugDNA.37663.1 | 11.23 | 11.27 | 0.25 | 0.15 | -1.03 | 0.938299 | 0.256725 | 0.979247 | 0.524574 |
| MmugDNA.37667.1.S1_at   | MmugDNA.37667.1 | 8.3   | 8.63  | 1.44 | 0.15 | -1.25 | 0.712039 | 0.181316 | 0.887845 | 0.457834 |
| MmugDNA.37670.1.S1_at   | MmugDNA.37670.1 | 12.47 | 12.38 | 0.07 | 0.01 | 1.06  | 0.112666 | 0.073562 | 0.486043 | 0.31689  |
| MmugDNA.37671.1.S1_at   | MmugDNA.37671.1 | 8.66  | 9.18  | 0.85 | 0.06 | -1.44 | 0.690518 | 0.672102 | 0.879504 | 0.808305 |
| MmugDNA.37672.1.S1_s_at | MmugDNA.37672.1 | 11.9  | 12.43 | 0.56 | 0.1  | -1.45 | 0.283142 | 0.521204 | 0.641313 | 0.712304 |
| MmugDNA.37674.1.S1_at   | MmugDNA.37674.1 | 7.97  | 7.95  | 0.07 | 0.06 | 1.01  | 0.479578 | 0.167792 | 0.77082  | 0.444359 |
| MmugDNA.37678.1.S1_at   | MmugDNA.37678.1 | 4.43  | 4.23  | 0.55 | 0.11 | 1.15  | 0.462933 | 0.541198 | 0.761899 | 0.724781 |
| MmugDNA.3768.1.S1_at    | MmugDNA.3768.1  | 7.16  | 6.92  | 0.35 | 0.15 | 1.18  | 0.562396 | 0.011381 | 0.817686 | 0.138214 |
| MmugDNA.37680.1.S1_at   | MmugDNA.37680.1 | 7.9   | 8.88  | 0.82 | 0.16 | -1.98 | 0.135905 | 0.013319 | 0.510454 | 0.148042 |
| MmugDNA.37690.1.S1_at   | MmugDNA.37690.1 | 6.65  | 8.31  | 0.35 | 0.15 | -3.15 | 0.00183  | 0.000193 | 0.167772 | 0.030888 |
| MmugDNA.37698.1.S1_at   | MmugDNA.37698.1 | 5.87  | 7.19  | 0.79 | 0.11 | -2.5  | 0.155472 | 0.072462 | 0.528724 | 0.315294 |
| MmugDNA.37708.1.S1_at   | MmugDNA.37708.1 | 11.07 | 10.42 | 0.15 | 0.4  | 1.56  | 0.017319 | 0.011441 | 0.290682 | 0.13846  |
| MmugDNA.37710.1.S1_at   | MmugDNA.37710.1 | 9.44  | 9.4   | 0.35 | 0.04 | 1.02  | 0.739831 | 0.673985 | 0.900699 | 0.809483 |
| MmugDNA.37715.1.S1_at   | MmugDNA.37715.1 | 9.69  | 8.81  | 0.28 | 0.14 | 1.83  | 0.006269 | 0.004141 | 0.218069 | 0.091027 |
| MmugDNA.37728.1.S1_at   | MmugDNA.37728.1 | 12.34 | 12.2  | 0.32 | 0.01 | 1.1   | 0.517775 | 0.344996 | 0.792286 | 0.590253 |
| MmugDNA.37732.1.S1_at   | MmugDNA.37732.1 | 8.17  | 8.71  | 0.3  | 0.09 | -1.45 | 0.116429 | 0.023367 | 0.489622 | 0.19158  |
| MmugDNA.37737.1.S1_at   | MmugDNA.37737.1 | 10.64 | 10.37 | 0.32 | 0.14 | 1.2   | 0.630441 | 0.16361  | 0.851961 | 0.439768 |
| MmugDNA.37741.1.S1_at   | MmugDNA.37741.1 | 7.57  | 7.81  | 0.25 | 0.16 | -1.18 | 0.300594 | 0.240139 | 0.655132 | 0.510821 |
| MmugDNA.37744.1.S1_at   | MmugDNA.37744.1 | 5.35  | 5.45  | 0.19 | 0.11 | -1.07 | 0.767817 | 0.878464 | 0.912642 | 0.930638 |
| MmugDNA.37748.1.S1_at   | MmugDNA.37748.1 | 4.73  | 5.17  | 0.94 | 0.38 | -1.35 | 0.454103 | 0.037943 | 0.756545 | 0.239302 |
| MmugDNA.37748.1.S1_s_at | MmugDNA.37748.1 | 6.37  | 6.67  | 0.77 | 0.3  | -1.23 | 0.599956 | 0.038077 | 0.837647 | 0.239748 |
| MmugDNA.3775.1.S1_at    | MmugDNA.3775.1  | 8.94  | 8.99  | 0.44 | 0.1  | -1.03 | 0.45823  | 0.048535 | 0.758668 | 0.265534 |
| MmugDNA.37756.1.S1_at   | MmugDNA.37756.1 | 10.58 | 10.45 | 0.03 | 0.43 | 1.09  | 0.669505 | 0.665182 | 0.869627 | 0.803767 |
| MmugDNA.37759.1.S1_at   | MmugDNA.37759.1 | 6.52  | 6.3   | 0.29 | 0.05 | 1.16  | 0.325599 | 0.302125 | 0.673403 | 0.560071 |
| MmugDNA.3776.1.S1_at    | MmugDNA.3776.1  | 9.04  | 9.17  | 0.26 | 0.16 | -1.09 | 0.735443 | 0.920704 | 0.89872  | 0.95529  |
| MmugDNA.37762.1.S1_at   | MmugDNA.37762.1 | 11.18 | 10.93 | 0.38 | 0.07 | 1.18  | 0.336777 | 0.023054 | 0.682118 | 0.190013 |
| MmugDNA.37765.1.S1_at   | MmugDNA.37765.1 | 4.43  | 4.14  | 0.21 | 0.55 | 1.22  | 0.91599  | 0.407185 | 0.97133  | 0.634794 |
| MmugDNA.37766.1.S1_at   | MmugDNA.37766.1 | 7.1   | 7.51  | 0.2  | 0.09 | -1.33 | 0.042385 | 0.008497 | 0.369001 | 0.122289 |
| MmugDNA.37779.1.S1_at   | MmugDNA.37779.1 | 7.1   | 6.99  | 0.29 | 0.09 | 1.08  | 0.516826 | 0.755702 | 0.791667 | 0.85776  |
| MmugDNA.37784.1.S1_at   | MmugDNA.37784.1 | 3.08  | 3.04  | 0.17 | 0.16 | 1.03  | 0.732186 | 0.147871 | 0.897013 | 0.422231 |
| MmugDNA.37797.1.S1_at   | MmugDNA.37797.1 | 6.83  | 6.77  | 0.15 | 0.01 | 1.04  | 0.506969 | 0.264473 | 0.786064 | 0.530437 |
| MmugDNA.37798.1.S1_at   | MmugDNA.37798.1 | 14.26 | 14.26 | 0.12 | 0.01 | -1    | 0.815985 | 0.852205 | 0.933284 | 0.915967 |
| MmugDNA.37802.1.S1_at   | MmugDNA.37802.1 | 13.85 | 13.78 | 0.19 | 0.07 | 1.05  | 0.912509 | 0.90806  | 0.970287 | 0.947901 |

|                         |                 |       |       |      |      |       |          |          |          |          |
|-------------------------|-----------------|-------|-------|------|------|-------|----------|----------|----------|----------|
| MmugDNA.37803.1.S1_at   | MmugDNA.37803.1 | 6.65  | 6.55  | 0.26 | 0.07 | 1.07  | 0.719057 | 0.813367 | 0.890853 | 0.892144 |
| MmugDNA.37811.1.S1_at   | MmugDNA.37811.1 | 8.77  | 9.45  | 0.71 | 0.24 | -1.6  | 0.131381 | 0.166258 | 0.505699 | 0.442798 |
| MmugDNA.37813.1.S1_at   | MmugDNA.37813.1 | 12.45 | 12.51 | 0.02 | 0.05 | -1.04 | 0.108004 | 0.495511 | 0.480459 | 0.695527 |
| MmugDNA.37814.1.S1_at   | MmugDNA.37814.1 | 7.45  | 7.37  | 0.36 | 0.3  | 1.06  | 0.862868 | 0.002521 | 0.951791 | 0.074158 |
| MmugDNA.3782.1.S1_at    | MmugDNA.3782.1  | 9.74  | 9.57  | 0.43 | 0.1  | 1.13  | 0.659223 | 0.658469 | 0.865124 | 0.800376 |
| MmugDNA.37820.1.S1_s_at | MmugDNA.37820.1 | 13.7  | 13.87 | 0.07 | 0.06 | -1.13 | 0.025519 | 0.018647 | 0.322263 | 0.171648 |
| MmugDNA.37823.1.S1_at   | MmugDNA.37823.1 | 6.04  | 5.84  | 0.1  | 0.05 | 1.15  | 0.037573 | 0.048434 | 0.357445 | 0.265307 |
| MmugDNA.37829.1.S1_at   | MmugDNA.37829.1 | 9.58  | 10.05 | 0.34 | 0.15 | -1.39 | 0.261672 | 0.119616 | 0.62388  | 0.388255 |
| MmugDNA.37834.1.S1_at   | MmugDNA.37834.1 | 7.05  | 7.37  | 0.41 | 0.22 | -1.25 | 0.473419 | 0.09119  | 0.767523 | 0.346097 |
| MmugDNA.37835.1.S1_at   | MmugDNA.37835.1 | 7.56  | 7.05  | 0.17 | 0.09 | 1.43  | 0.020879 | 0.008171 | 0.305672 | 0.119886 |
| MmugDNA.37837.1.S1_at   | MmugDNA.37837.1 | 10.17 | 10.06 | 0.08 | 0.05 | -1.08 | 0.17371  | 0.275302 | 0.546749 | 0.539663 |
| MmugDNA.3784.1.S1_at    | MmugDNA.3784.1  | 2.91  | 2.79  | 0.03 | 0.06 | 1.09  | 0.050853 | 0.057051 | 0.38821  | 0.284945 |
| MmugDNA.37840.1.S1_at   | MmugDNA.37840.1 | 9.19  | 8.93  | 0.39 | 0.07 | 1.2   | 0.275258 | 0.004403 | 0.634676 | 0.092846 |
| MmugDNA.37845.1.S1_at   | MmugDNA.37845.1 | 7.57  | 7.72  | 0.1  | 0.12 | -1.11 | 0.768799 | 0.00795  | 0.913275 | 0.118702 |
| MmugDNA.37853.1.S1_at   | MmugDNA.37853.1 | 10.51 | 9.9   | 0.65 | 0.08 | 1.52  | 0.424311 | 0.215746 | 0.739547 | 0.489503 |
| MmugDNA.37861.1.S1_s_at | MmugDNA.37861.1 | 9.31  | 9.61  | 0.24 | 0.15 | -1.23 | 0.137585 | 0.068295 | 0.513135 | 0.307706 |
| MmugDNA.37865.1.S1_at   | MmugDNA.37865.1 | 11.4  | 11.48 | 0.12 | 0.04 | -1.05 | 0.821567 | 0.918804 | 0.935582 | 0.954387 |
| MmugDNA.37869.1.S1_at   | MmugDNA.37869.1 | 8.35  | 8.47  | 0.11 | 0.13 | -1.09 | 0.326051 | 0.510799 | 0.67367  | 0.705196 |
| MmugDNA.3787.1.S1_at    | MmugDNA.3787.1  | 10.1  | 10.27 | 0.28 | 0.04 | -1.13 | 0.238893 | 0.450815 | 0.60547  | 0.665869 |
| MmugDNA.37871.1.S1_at   | MmugDNA.37871.1 | 4.65  | 4.56  | 0.09 | 0.09 | 1.06  | 0.302031 | 0.41657  | 0.655989 | 0.641647 |
| MmugDNA.37880.1.S1_at   | MmugDNA.37880.1 | 5.71  | 6.05  | 0.44 | 0.39 | -1.27 | 0.162607 | 0.057242 | 0.535778 | 0.285059 |
| MmugDNA.37891.1.S1_at   | MmugDNA.37891.1 | 4.6   | 4.44  | 0.06 | 0.12 | 1.12  | 0.147797 | 0.101733 | 0.52196  | 0.361601 |
| MmugDNA.37899.1.S1_at   | MmugDNA.37899.1 | 4.17  | 4.15  | 0.1  | 0.11 | 1.02  | 0.371688 | 0.253244 | 0.705567 | 0.521614 |
| MmugDNA.37900.1.S1_at   | MmugDNA.37900.1 | 12.84 | 12.77 | 0.04 | 0.07 | 1.05  | 0.197813 | 0.175846 | 0.568831 | 0.452475 |
| MmugDNA.37904.1.S1_at   | MmugDNA.37904.1 | 10.93 | 11.15 | 0.59 | 0.29 | -1.16 | 0.261292 | 0.449667 | 0.623819 | 0.665156 |
| MmugDNA.37909.1.S1_at   | MmugDNA.37909.1 | 9.04  | 9.57  | 0.43 | 0.08 | -1.45 | 0.177373 | 0.093323 | 0.550581 | 0.349412 |
| MmugDNA.3791.1.S1_at    | MmugDNA.3791.1  | 11.95 | 11.94 | 0.14 | 0.08 | 1     | 0.46102  | 0.001398 | 0.760738 | 0.057005 |
| MmugDNA.37921.1.S1_at   | MmugDNA.37921.1 | 9.85  | 9.63  | 1.64 | 0.15 | 1.17  | 0.893419 | 0.283155 | 0.963467 | 0.545694 |
| MmugDNA.37922.1.S1_at   | MmugDNA.37922.1 | 5.02  | 4.73  | 0.08 | 0.16 | 1.22  | 0.025063 | 0.161479 | 0.320402 | 0.437616 |
| MmugDNA.37923.1.S1_at   | MmugDNA.37923.1 | 11.75 | 11.56 | 0.29 | 0.17 | 1.14  | 0.886981 | 0.051256 | 0.960728 | 0.271825 |
| MmugDNA.37925.1.S1_at   | MmugDNA.37925.1 | 10.95 | 10.34 | 0.18 | 0.04 | 1.52  | 0.004811 | 0.016612 | 0.202685 | 0.163117 |
| MmugDNA.37927.1.S1_at   | MmugDNA.37927.1 | 8.63  | 9.12  | 0.23 | 0.15 | -1.41 | 0.042495 | 0.655153 | 0.369184 | 0.798309 |
| MmugDNA.37935.1.S1_at   | MmugDNA.37935.1 | 5.32  | 5.38  | 0.03 | 0.07 | -1.04 | 0.989283 | 0.360861 | 0.995994 | 0.601938 |
| MmugDNA.37936.1.S1_at   | MmugDNA.37936.1 | 8.59  | 9.12  | 0.54 | 0.11 | -1.44 | 0.528945 | 0.352903 | 0.798106 | 0.596217 |
| MmugDNA.37947.1.S1_at   | MmugDNA.37947.1 | 5.87  | 5.85  | 0.24 | 0.11 | 1.01  | 0.616606 | 0.692259 | 0.845004 | 0.820949 |
| MmugDNA.37954.1.S1_at   | MmugDNA.37954.1 | 2.95  | 2.97  | 0.56 | 0.06 | -1.01 | 0.390912 | 0.399616 | 0.717156 | 0.629912 |
| MmugDNA.37957.1.S1_at   | MmugDNA.37957.1 | 4.99  | 4.9   | 0.04 | 0.1  | 1.07  | 0.236723 | 0.02482  | 0.603684 | 0.197372 |
| MmugDNA.37959.1.S1_at   | MmugDNA.37959.1 | 4.73  | 4.39  | 0.17 | 0.39 | 1.26  | 0.128319 | 0.160415 | 0.50293  | 0.436528 |
| MmugDNA.37960.1.S1_at   | MmugDNA.37960.1 | 6.33  | 6.38  | 0.14 | 0.13 | -1.03 | 0.709028 | 0.440902 | 0.886611 | 0.659138 |
| MmugDNA.37961.1.S1_at   | MmugDNA.37961.1 | 9.14  | 8.99  | 0.48 | 0.13 | 1.11  | 0.653023 | 0.111196 | 0.862124 | 0.375832 |
| MmugDNA.37962.1.S1_at   | MmugDNA.37962.1 | 3.47  | 3.4   | 0.08 | 0.13 | 1.05  | 0.464073 | 0.442847 | 0.762381 | 0.660759 |
| MmugDNA.37963.1.S1_at   | MmugDNA.37963.1 | 8.42  | 9.41  | 1.36 | 0.07 | -1.99 | 0.277709 | 0.319038 | 0.636978 | 0.571591 |
| MmugDNA.37965.1.S1_at   | MmugDNA.37965.1 | 5.22  | 7.27  | 0.05 | 0.24 | -4.14 | 0.000142 | 0.002545 | 0.112063 | 0.07453  |



|                         |                 |       |       |      |      |       |          |          |          |          |
|-------------------------|-----------------|-------|-------|------|------|-------|----------|----------|----------|----------|
| MmugDNA.37973.1.S1_at   | MmugDNA.37973.1 | 3.23  | 3.11  | 0.18 | 0.1  | 1.09  | 0.593799 | 0.169087 | 0.834452 | 0.44561  |
| MmugDNA.37974.1.S1_at   | MmugDNA.37974.1 | 6     | 5.79  | 0.15 | 0.04 | 1.16  | 0.058101 | 0.043935 | 0.403716 | 0.254098 |
| MmugDNA.37980.1.S1_s_at | MmugDNA.37980.1 | 10.17 | 9.9   | 0.02 | 0.15 | 1.21  | 0.035521 | 0.024833 | 0.352182 | 0.197413 |
| MmugDNA.37982.1.S1_at   | MmugDNA.37982.1 | 5.54  | 6.28  | 0.47 | 0.16 | -1.67 | 0.205113 | 0.206208 | 0.576893 | 0.480377 |
| MmugDNA.37992.1.S1_at   | MmugDNA.37992.1 | 10.92 | 10.45 | 0.23 | 0.04 | 1.39  | 0.013262 | 0.004494 | 0.267226 | 0.093593 |
| MmugDNA.37993.1.S1_s_at | MmugDNA.37993.1 | 12.63 | 12.64 | 0.14 | 0.09 | -1.01 | 0.47747  | 0.346416 | 0.769855 | 0.591247 |
| MmugDNA.37995.1.S1_at   | MmugDNA.37995.1 | 11.46 | 10.86 | 0.34 | 0.05 | 1.52  | 0.11171  | 0.10041  | 0.484896 | 0.359541 |
| MmugDNA.37996.1.S1_at   | MmugDNA.37996.1 | 4.25  | 5.77  | 0.67 | 0.31 | -2.86 | 0.025761 | 0.009145 | 0.322693 | 0.12613  |
| MmugDNA.37998.1.S1_s_at | MmugDNA.37998.1 | 10.88 | 11.09 | 0.33 | 0.4  | -1.15 | 0.454588 | 0.654785 | 0.756874 | 0.798154 |
| MmugDNA.37999.1.S1_at   | MmugDNA.37999.1 | 4.81  | 4.76  | 0.1  | 0.07 | 1.03  | 0.333435 | 0.641553 | 0.679631 | 0.7896   |
| MmugDNA.38.1.S1_at      | MmugDNA.38.1    | 11.28 | 11.36 | 0.25 | 0.03 | -1.06 | 0.933328 | 0.101562 | 0.977395 | 0.361407 |
| MmugDNA.38000.1.S1_at   | MmugDNA.38000.1 | 12.72 | 12.78 | 0.36 | 0.06 | -1.04 | 0.278155 | 0.404237 | 0.637393 | 0.632691 |
| MmugDNA.38001.1.S1_at   | MmugDNA.38001.1 | 9.15  | 9.97  | 0.13 | 0.11 | -1.76 | 0.001114 | 0.00326  | 0.156386 | 0.082278 |
| MmugDNA.38003.1.S1_at   | MmugDNA.38003.1 | 11.77 | 11.42 | 0.43 | 0.1  | 1.27  | 0.207149 | 0.301605 | 0.578774 | 0.55955  |
| MmugDNA.38006.1.S1_s_at | MmugDNA.38006.1 | 8.97  | 9.39  | 2.12 | 0.36 | -1.34 | 0.560203 | 0.137714 | 0.816546 | 0.410711 |
| MmugDNA.38008.1.S1_at   | MmugDNA.38008.1 | 8.76  | 9.18  | 0.16 | 0.08 | -1.33 | 0.031112 | 0.089922 | 0.339751 | 0.344119 |
| MmugDNA.38010.1.S1_at   | MmugDNA.38010.1 | 13.26 | 13.68 | 0.19 | 0.05 | -1.34 | 0.027702 | 0.021675 | 0.328795 | 0.184333 |
| MmugDNA.38026.1.S1_at   | MmugDNA.38026.1 | 9.96  | 9.41  | 0.48 | 0.1  | 1.46  | 0.047949 | 0.053931 | 0.381691 | 0.277766 |
| MmugDNA.38029.1.S1_at   | MmugDNA.38029.1 | 3.06  | 3.08  | 0.07 | 0.02 | -1.01 | 0.781531 | 0.07007  | 0.919573 | 0.310966 |
| MmugDNA.38047.1.S1_at   | MmugDNA.38047.1 | 7.08  | 7.63  | 0.08 | 0.13 | -1.46 | 0.005924 | 0.040914 | 0.21232  | 0.247161 |
| MmugDNA.38049.1.S1_at   | MmugDNA.38049.1 | 7.66  | 7.43  | 1.01 | 0.24 | 1.18  | 0.595339 | 0.317638 | 0.835317 | 0.570802 |
| MmugDNA.38052.1.S1_at   | MmugDNA.38052.1 | 6.88  | 7.37  | 0.28 | 0.17 | -1.41 | 0.087146 | 0.000296 | 0.454785 | 0.034892 |
| MmugDNA.38053.1.S1_at   | MmugDNA.38053.1 | 10.34 | 9.2   | 0.02 | 0.34 | 2.19  | 0.002618 | 0.000182 | 0.181779 | 0.030511 |
| MmugDNA.38054.1.S1_at   | MmugDNA.38054.1 | 5.66  | 5.83  | 0.07 | 0.06 | -1.13 | 0.034399 | 0.278141 | 0.349795 | 0.541783 |
| MmugDNA.38062.1.S1_at   | MmugDNA.38062.1 | 10.96 | 11.03 | 0.49 | 0.04 | -1.05 | 0.673957 | 0.413101 | 0.871672 | 0.639419 |
| MmugDNA.38063.1.S1_at   | MmugDNA.38063.1 | 4.21  | 4.21  | 0.47 | 0.05 | -1    | 0.383181 | 0.577913 | 0.711259 | 0.748185 |
| MmugDNA.38069.1.S1_at   | MmugDNA.38069.1 | 8.41  | 8.02  | 0.12 | 0.01 | 1.31  | 0.003808 | 0.0528   | 0.198521 | 0.275412 |
| MmugDNA.38070.1.S1_at   | MmugDNA.38070.1 | 5.51  | 5.91  | 1.69 | 0.29 | -1.32 | 0.706282 | 0.743549 | 0.8857   | 0.851395 |
| MmugDNA.38072.1.S1_at   | MmugDNA.38072.1 | 9.78  | 10.08 | 0.31 | 0.15 | -1.24 | 0.058858 | 0.027168 | 0.405539 | 0.205893 |
| MmugDNA.38081.1.S1_at   | MmugDNA.38081.1 | 3.26  | 3.24  | 0.19 | 0.17 | 1.01  | 0.433031 | 0.417915 | 0.744194 | 0.642484 |
| MmugDNA.38086.1.S1_at   | MmugDNA.38086.1 | 9.72  | 10.29 | 0.06 | 0.09 | -1.48 | 0.00094  | 0.004852 | 0.153739 | 0.097235 |
| MmugDNA.38099.1.S1_at   | MmugDNA.38099.1 | 9.98  | 10.11 | 0.12 | 0.15 | -1.1  | 0.231716 | 0.079905 | 0.599679 | 0.327207 |
| MmugDNA.38102.1.S1_at   | MmugDNA.38102.1 | 11.15 | 10.75 | 0.21 | 0.06 | 1.33  | 0.022419 | 0.022863 | 0.310499 | 0.189271 |
| MmugDNA.38103.1.S1_at   | MmugDNA.38103.1 | 8.44  | 8.25  | 0.11 | 0.14 | 1.15  | 0.137868 | 0.181438 | 0.513592 | 0.457927 |
| MmugDNA.38107.1.S1_at   | MmugDNA.38107.1 | 3.86  | 3.93  | 0.35 | 0.07 | -1.04 | 0.490805 | 0.645206 | 0.777303 | 0.792105 |
| MmugDNA.3811.1.S1_at    | MmugDNA.3811.1  | 8.63  | 8.5   | 0.05 | 0.13 | 1.09  | 0.64264  | 0.014478 | 0.857864 | 0.153571 |
| MmugDNA.38117.1.S1_at   | MmugDNA.38117.1 | 11.81 | 12    | 0.18 | 0.07 | -1.14 | 0.157331 | 0.219621 | 0.530565 | 0.493215 |
| MmugDNA.38121.1.S1_at   | MmugDNA.38121.1 | 10.2  | 10.05 | 0.39 | 0.24 | 1.1   | 0.994048 | 0.995269 | 0.997747 | 0.997042 |
| MmugDNA.38124.1.S1_at   | MmugDNA.38124.1 | 6.8   | 6.94  | 0.07 | 0.05 | -1.1  | 0.039508 | 0.023719 | 0.362034 | 0.192852 |
| MmugDNA.38132.1.S1_at   | MmugDNA.38132.1 | 12.25 | 12.51 | 0.11 | 0.08 | -1.2  | 0.021885 | 0.030537 | 0.309781 | 0.216711 |
| MmugDNA.38135.1.S1_at   | MmugDNA.38135.1 | 10.21 | 9.65  | 0.33 | 0.1  | 1.47  | 0.102103 | 0.12989  | 0.472436 | 0.401509 |
| MmugDNA.38136.1.S1_at   | MmugDNA.38136.1 | 6.61  | 6.43  | 0.07 | 0.04 | 1.14  | 0.009695 | 0.008735 | 0.243347 | 0.12396  |
| MmugDNA.38137.1.S1_at   | MmugDNA.38137.1 | 8.46  | 8.23  | 0.18 | 0.14 | 1.17  | 0.507168 | 0.685539 | 0.78619  | 0.816542 |

|                         |                 |       |       |      |      |       |          |          |          |          |
|-------------------------|-----------------|-------|-------|------|------|-------|----------|----------|----------|----------|
| MmugDNA.38137.1.S1_x_at | MmugDNA.38137.1 | 8.75  | 8.59  | 0.13 | 0.09 | 1.12  | 0.394393 | 0.72026  | 0.719752 | 0.838202 |
| MmugDNA.38138.1.S1_at   | MmugDNA.38138.1 | 10.25 | 9.88  | 0.25 | 0.04 | 1.29  | 0.101578 | 0.116494 | 0.47185  | 0.383671 |
| MmugDNA.38148.1.S1_at   | MmugDNA.38148.1 | 12.14 | 12.14 | 0.21 | 0.07 | 1     | 0.376024 | 0.548574 | 0.706657 | 0.729276 |
| MmugDNA.3815.1.S1_at    | MmugDNA.3815.1  | 3.44  | 3.19  | 0.19 | 0.03 | 1.19  | 0.107269 | 0.059828 | 0.47976  | 0.291286 |
| MmugDNA.38153.1.S1_at   | MmugDNA.38153.1 | 6.64  | 6.5   | 0.14 | 0.04 | 1.1   | 0.07449  | 0.183549 | 0.435313 | 0.459681 |
| MmugDNA.38158.1.S1_at   | MmugDNA.38158.1 | 6.12  | 6.77  | 0.32 | 0.2  | -1.56 | 0.059808 | 0.038812 | 0.407076 | 0.241916 |
| MmugDNA.38158.1.S1_s_at | MmugDNA.38158.1 | 7.88  | 8     | 0.07 | 0.09 | -1.09 | 0.055683 | 0.081006 | 0.399024 | 0.329134 |
| MmugDNA.3816.1.S1_at    | MmugDNA.3816.1  | 12.7  | 12.76 | 0.09 | 0.03 | -1.04 | 0.877653 | 0.723497 | 0.957399 | 0.839925 |
| MmugDNA.38161.1.S1_at   | MmugDNA.38161.1 | 12.46 | 12.28 | 0.23 | 0.03 | 1.13  | 0.723393 | 0.874302 | 0.892813 | 0.928616 |
| MmugDNA.38165.1.S1_at   | MmugDNA.38165.1 | 8.42  | 8.43  | 0.45 | 0.22 | -1    | 0.665492 | 0.266025 | 0.86797  | 0.531815 |
| MmugDNA.38167.1.S1_at   | MmugDNA.38167.1 | 10.03 | 10.24 | 0.18 | 0.09 | -1.16 | 0.169163 | 0.30369  | 0.542061 | 0.561113 |
| MmugDNA.38182.1.S1_at   | MmugDNA.38182.1 | 5.84  | 5.73  | 0.02 | 0.08 | 1.09  | 0.074823 | 0.599255 | 0.435313 | 0.761382 |
| MmugDNA.38182.1.S1_s_at | MmugDNA.38182.1 | 5.72  | 5.72  | 0.1  | 0.12 | -1    | 0.967441 | 0.585032 | 0.98927  | 0.752682 |
| MmugDNA.38186.1.S1_at   | MmugDNA.38186.1 | 9.77  | 10.32 | 0.81 | 0    | -1.47 | 0.324584 | 0.265372 | 0.672781 | 0.531337 |
| MmugDNA.38195.1.S1_at   | MmugDNA.38195.1 | 6.19  | 6.94  | 0.38 | 0.06 | -1.68 | 0.062516 | 0.009636 | 0.413307 | 0.129267 |
| MmugDNA.38196.1.S1_at   | MmugDNA.38196.1 | 8.88  | 8.77  | 0.24 | 0.11 | 1.07  | 0.201907 | 0.079953 | 0.573467 | 0.327321 |
| MmugDNA.382.1.S1_at     | MmugDNA.382.1   | 7.67  | 7.6   | 0.02 | 0.01 | 1.05  | 0.011158 | 0.36407  | 0.252629 | 0.604449 |
| MmugDNA.38203.1.S1_at   | MmugDNA.38203.1 | 3.99  | 4.4   | 0.19 | 0.36 | -1.32 | 0.08729  | 0.05276  | 0.454785 | 0.275315 |
| MmugDNA.3821.1.A1_at    | MmugDNA.3821.1  | 5.17  | 4.83  | 0.13 | 0.12 | 1.27  | 0.017813 | 0.010317 | 0.293979 | 0.132962 |
| MmugDNA.3821.1.S1_at    | MmugDNA.3821.1  | 5.19  | 4.99  | 0.11 | 0.02 | 1.14  | 0.015473 | 0.145491 | 0.282058 | 0.419424 |
| MmugDNA.38216.1.S1_at   | MmugDNA.38216.1 | 12.57 | 12.58 | 0.16 | 0.01 | -1    | 0.741708 | 0.805819 | 0.90146  | 0.888395 |
| MmugDNA.38217.1.S1_at   | MmugDNA.38217.1 | 7.1   | 7.01  | 0.15 | 0.05 | 1.07  | 0.345252 | 0.476772 | 0.68742  | 0.682921 |
| MmugDNA.3822.1.S1_at    | MmugDNA.3822.1  | 6     | 5.32  | 1.02 | 0.24 | 1.6   | 0.902097 | 0.209769 | 0.966869 | 0.483536 |
| MmugDNA.38223.1.S1_at   | MmugDNA.38223.1 | 6.32  | 6.2   | 0.13 | 0.09 | 1.08  | 0.118477 | 0.098535 | 0.491933 | 0.356636 |
| MmugDNA.3823.1.S1_at    | MmugDNA.3823.1  | 6.56  | 6.41  | 0.08 | 0.04 | 1.11  | 0.048629 | 0.507296 | 0.383721 | 0.702917 |
| MmugDNA.38239.1.S1_at   | MmugDNA.38239.1 | 10.78 | 10.66 | 0.24 | 0.15 | 1.09  | 0.450412 | 0.072432 | 0.754829 | 0.315282 |
| MmugDNA.38240.1.S1_at   | MmugDNA.38240.1 | 11.21 | 11.19 | 0.14 | 0.03 | 1.01  | 0.87854  | 0.724706 | 0.957754 | 0.840645 |
| MmugDNA.38244.1.S1_at   | MmugDNA.38244.1 | 4.55  | 4.31  | 0.02 | 0.1  | 1.18  | 0.020302 | 0.01161  | 0.303799 | 0.139525 |
| MmugDNA.3825.1.S1_at    | MmugDNA.3825.1  | 6.72  | 6.61  | 0.08 | 0    | 1.08  | 0.1024   | 0.597291 | 0.472589 | 0.76013  |
| MmugDNA.38252.1.S1_at   | MmugDNA.38252.1 | 5.24  | 5.51  | 0.48 | 0.68 | -1.21 | 0.350178 | 0.17785  | 0.691084 | 0.454167 |
| MmugDNA.38254.1.S1_at   | MmugDNA.38254.1 | 9.33  | 9.14  | 0.21 | 0.06 | 1.14  | 0.188902 | 0.373849 | 0.560718 | 0.61248  |
| MmugDNA.38255.1.S1_at   | MmugDNA.38255.1 | 8.17  | 9.32  | 0.99 | 0.34 | -2.23 | 0.146632 | 0.155685 | 0.520956 | 0.431054 |
| MmugDNA.38256.1.S1_at   | MmugDNA.38256.1 | 6.08  | 5.94  | 0.28 | 0.04 | 1.1   | 0.492829 | 0.643138 | 0.778629 | 0.79068  |
| MmugDNA.38257.1.S1_at   | MmugDNA.38257.1 | 7.41  | 7.29  | 0.22 | 0.13 | 1.09  | 0.93152  | 0.002895 | 0.97706  | 0.079107 |
| MmugDNA.38258.1.S1_at   | MmugDNA.38258.1 | 4     | 4     | 0.24 | 0.56 | 1     | 0.337311 | 0.452887 | 0.682275 | 0.667359 |
| MmugDNA.3826.1.S1_at    | MmugDNA.3826.1  | 3.19  | 3.57  | 0.19 | 0.08 | -1.3  | 0.038824 | 0.185356 | 0.36035  | 0.461323 |
| MmugDNA.38260.1.S1_at   | MmugDNA.38260.1 | 7.89  | 8.94  | 0.51 | 0.12 | -2.06 | 0.068202 | 0.036775 | 0.425017 | 0.236291 |
| MmugDNA.38266.1.S1_at   | MmugDNA.38266.1 | 11.72 | 12.23 | 0.29 | 0.07 | -1.42 | 0.035884 | 0.090679 | 0.353707 | 0.345151 |
| MmugDNA.38270.1.S1_at   | MmugDNA.38270.1 | 6.66  | 6.49  | 0.08 | 0.07 | -1.12 | 0.032308 | 0.139274 | 0.343723 | 0.412461 |
| MmugDNA.38277.1.S1_at   | MmugDNA.38277.1 | 6.28  | 6.33  | 0.18 | 0.1  | -1.04 | 0.96118  | 0.244336 | 0.987231 | 0.514184 |
| MmugDNA.38277.1.S1_s_at | MmugDNA.38277.1 | 7.46  | 7.89  | 0.2  | 0.13 | -1.35 | 0.036343 | 0.032994 | 0.35477  | 0.224886 |
| MmugDNA.38282.1.S1_at   | MmugDNA.38282.1 | 5.75  | 6.19  | 0.35 | 0.12 | -1.36 | 0.040864 | 0.154222 | 0.365199 | 0.428967 |
| MmugDNA.38283.1.S1_at   | MmugDNA.38283.1 | 9.94  | 9.56  | 0.23 | 0.15 | 1.3   | 0.043773 | 0.002192 | 0.372554 | 0.069173 |

|                         |                 |       |       |      |      |       |          |          |          |          |
|-------------------------|-----------------|-------|-------|------|------|-------|----------|----------|----------|----------|
| MmugDNA.38284.1.S1_x_at | MmugDNA.38284.1 | 9.07  | 8.69  | 0.08 | 0.17 | 1.3   | 0.090655 | 0.047817 | 0.458873 | 0.263649 |
| MmugDNA.38290.1.S1_at   | MmugDNA.38290.1 | 11.52 | 11.75 | 0.55 | 0.18 | -1.17 | 0.997759 | 0.08843  | 0.999265 | 0.341877 |
| MmugDNA.38293.1.S1_at   | MmugDNA.38293.1 | 8.28  | 8.66  | 0.33 | 0.16 | -1.3  | 0.250165 | 0.065635 | 0.615476 | 0.301564 |
| MmugDNA.38298.1.S1_at   | MmugDNA.38298.1 | 7.65  | 8.52  | 0.51 | 0.42 | -1.83 | 0.102895 | 0.194216 | 0.473381 | 0.469316 |
| MmugDNA.383.1.S1_at     | MmugDNA.383.1   | 5.85  | 5.71  | 0.15 | 0.03 | 1.1   | 0.145197 | 0.552531 | 0.520318 | 0.731829 |
| MmugDNA.38309.1.S1_s_at | MmugDNA.38309.1 | 12.17 | 12.28 | 0.19 | 0.01 | -1.08 | 0.932506 | 0.109125 | 0.977227 | 0.372957 |
| MmugDNA.3831.1.S1_at    | MmugDNA.3831.1  | 4.84  | 4.55  | 0.51 | 0.29 | 1.22  | 0.134887 | 0.13217  | 0.508978 | 0.404274 |
| MmugDNA.38323.1.S1_at   | MmugDNA.38323.1 | 4.66  | 4.46  | 0.21 | 0.06 | 1.15  | 0.148064 | 0.246289 | 0.52235  | 0.515889 |
| MmugDNA.38327.1.S1_at   | MmugDNA.38327.1 | 7.13  | 7     | 0.05 | 0.07 | 1.09  | 0.034566 | 0.480383 | 0.350124 | 0.685752 |
| MmugDNA.38328.1.S1_at   | MmugDNA.38328.1 | 9.6   | 9.87  | 0.16 | 0.04 | -1.2  | 0.203724 | 0.454801 | 0.57513  | 0.668859 |
| MmugDNA.38332.1.S1_at   | MmugDNA.38332.1 | 7.2   | 7.25  | 0.17 | 0.03 | -1.03 | 0.723143 | 0.8056   | 0.892777 | 0.888306 |
| MmugDNA.38334.1.S1_at   | MmugDNA.38334.1 | 7.87  | 8.5   | 1.28 | 0.15 | -1.55 | 0.359551 | 0.216152 | 0.69735  | 0.489701 |
| MmugDNA.38339.1.S1_at   | MmugDNA.38339.1 | 10.93 | 10.51 | 0.35 | 0.15 | 1.34  | 0.093464 | 0.061303 | 0.462593 | 0.294321 |
| MmugDNA.38343.1.S1_at   | MmugDNA.38343.1 | 3.76  | 3.65  | 0.28 | 0.59 | 1.08  | 0.80665  | 0.846454 | 0.929839 | 0.912643 |
| MmugDNA.38346.1.S1_at   | MmugDNA.38346.1 | 9.71  | 8.57  | 1.17 | 0.55 | 2.21  | 0.072718 | 0.029144 | 0.433315 | 0.212767 |
| MmugDNA.38357.1.S1_at   | MmugDNA.38357.1 | 10.27 | 10.85 | 1.08 | 0.02 | -1.5  | 0.358103 | 0.108525 | 0.696048 | 0.37207  |
| MmugDNA.38358.1.S1_at   | MmugDNA.38358.1 | 8.08  | 8.54  | 0.21 | 0.14 | -1.37 | 0.080689 | 0.018999 | 0.444798 | 0.173527 |
| MmugDNA.38361.1.S1_at   | MmugDNA.38361.1 | 11.43 | 11.41 | 0.08 | 0.07 | 1.01  | 0.674604 | 0.315872 | 0.872168 | 0.569327 |
| MmugDNA.38366.1.S1_at   | MmugDNA.38366.1 | 11.57 | 10.51 | 0.45 | 0.18 | 2.08  | 0.019501 | 0.00718  | 0.301444 | 0.113932 |
| MmugDNA.38367.1.S1_at   | MmugDNA.38367.1 | 12.02 | 11.38 | 0.43 | 0.12 | 1.56  | 0.11839  | 0.021321 | 0.491933 | 0.182772 |
| MmugDNA.38368.1.S1_at   | MmugDNA.38368.1 | 13.67 | 13.56 | 0.1  | 0.02 | 1.08  | 0.219767 | 0.181146 | 0.589114 | 0.457583 |
| MmugDNA.3837.1.S1_at    | MmugDNA.3837.1  | 2.87  | 2.74  | 0.08 | 0.09 | 1.1   | 0.058101 | 0.079612 | 0.403716 | 0.326981 |
| MmugDNA.38371.1.S1_at   | MmugDNA.38371.1 | 11.2  | 10.98 | 0.65 | 0.09 | 1.16  | 0.609644 | 0.842592 | 0.841773 | 0.910315 |
| MmugDNA.38375.1.S1_at   | MmugDNA.38375.1 | 5.83  | 5.84  | 0.17 | 0.11 | -1.01 | 0.437617 | 0.761639 | 0.746873 | 0.861459 |
| MmugDNA.38379.1.S1_at   | MmugDNA.38379.1 | 10.65 | 10.87 | 0.17 | 0.05 | -1.17 | 0.029224 | 0.001243 | 0.333974 | 0.054826 |
| MmugDNA.38386.1.S1_at   | MmugDNA.38386.1 | 3.09  | 3.16  | 0.08 | 0.24 | -1.05 | 0.370146 | 0.507973 | 0.704536 | 0.703358 |
| MmugDNA.38387.1.S1_at   | MmugDNA.38387.1 | 13.31 | 13.39 | 0.11 | 0.02 | -1.06 | 0.289907 | 0.0291   | 0.646527 | 0.212733 |
| MmugDNA.38388.1.S1_at   | MmugDNA.38388.1 | 3.39  | 3.32  | 0.08 | 0.08 | 1.05  | 0.201693 | 0.332151 | 0.573304 | 0.580584 |
| MmugDNA.38396.1.S1_at   | MmugDNA.38396.1 | 8.25  | 8.47  | 0.37 | 0.09 | -1.16 | 0.909204 | 0.989907 | 0.969305 | 0.994222 |
| MmugDNA.38404.1.S1_at   | MmugDNA.38404.1 | 4.8   | 5.08  | 0.6  | 0.15 | -1.21 | 0.3373   | 0.568038 | 0.682275 | 0.741761 |
| MmugDNA.38411.1.S1_at   | MmugDNA.38411.1 | 10.67 | 10.41 | 0.23 | 0.02 | 1.2   | 0.368248 | 0.462908 | 0.70351  | 0.674149 |
| MmugDNA.38412.1.S1_at   | MmugDNA.38412.1 | 12.76 | 12.74 | 0.11 | 0.03 | 1.01  | 0.774523 | 0.853177 | 0.91641  | 0.916521 |
| MmugDNA.38416.1.S1_at   | MmugDNA.38416.1 | 8.83  | 8.7   | 0.23 | 0.03 | 1.1   | 0.245338 | 0.371007 | 0.610777 | 0.609964 |
| MmugDNA.38416.1.S1_s_at | MmugDNA.38416.1 | 11.17 | 11.25 | 0.3  | 0.03 | -1.06 | 0.699981 | 0.903772 | 0.88338  | 0.945386 |
| MmugDNA.38417.1.S1_at   | MmugDNA.38417.1 | 3.69  | 3.59  | 0.21 | 0.03 | 1.07  | 0.238459 | 0.33771  | 0.605341 | 0.584885 |
| MmugDNA.38426.1.S1_at   | MmugDNA.38426.1 | 9.41  | 9.84  | 0.29 | 0.08 | -1.35 | 0.025997 | 0.021221 | 0.32292  | 0.182388 |
| MmugDNA.38433.1.S1_at   | MmugDNA.38433.1 | 10.66 | 10.95 | 0.08 | 0.06 | -1.23 | 0.0078   | 0.031765 | 0.230997 | 0.220664 |
| MmugDNA.38439.1.S1_at   | MmugDNA.38439.1 | 6.4   | 6.4   | 0.06 | 0.08 | -1    | 0.859893 | 0.62862  | 0.950512 | 0.781323 |
| MmugDNA.38450.1.S1_at   | MmugDNA.38450.1 | 5.25  | 5.24  | 0.26 | 0.11 | 1     | 0.442406 | 0.425896 | 0.750045 | 0.6481   |
| MmugDNA.38454.1.S1_at   | MmugDNA.38454.1 | 7.59  | 7.7   | 0.1  | 0.11 | -1.08 | 0.370235 | 0.086566 | 0.704572 | 0.33911  |
| MmugDNA.38455.1.S1_at   | MmugDNA.38455.1 | 5.65  | 5.59  | 0.11 | 0.05 | 1.04  | 0.178266 | 0.005378 | 0.551301 | 0.101199 |
| MmugDNA.38459.1.S1_at   | MmugDNA.38459.1 | 9.21  | 9.13  | 0.09 | 0.07 | 1.06  | 0.319463 | 0.053862 | 0.668733 | 0.277613 |
| MmugDNA.38460.1.S1_at   | MmugDNA.38460.1 | 6.55  | 6.42  | 0.1  | 0.05 | 1.09  | 0.092952 | 0.190775 | 0.461637 | 0.466228 |

|                         |                 |       |       |      |      |       |          |          |          |          |
|-------------------------|-----------------|-------|-------|------|------|-------|----------|----------|----------|----------|
| MmugDNA.38469.1.S1_at   | MmugDNA.38469.1 | 4.85  | 4.84  | 0.17 | 0.12 | 1.01  | 0.604753 | 0.354999 | 0.839732 | 0.597466 |
| MmugDNA.38474.1.S1_at   | MmugDNA.38474.1 | 10.94 | 10.58 | 0.72 | 0.16 | 1.28  | 0.580158 | 0.59411  | 0.82691  | 0.758517 |
| MmugDNA.38474.1.S1_s_at | MmugDNA.38474.1 | 11.62 | 11.39 | 0.69 | 0.14 | 1.17  | 0.646386 | 0.661986 | 0.859027 | 0.802051 |
| MmugDNA.38475.1.S1_at   | MmugDNA.38475.1 | 11.22 | 10.64 | 0.47 | 0.08 | 1.49  | 0.145164 | 0.192328 | 0.520309 | 0.467833 |
| MmugDNA.38479.1.S1_at   | MmugDNA.38479.1 | 6.03  | 6.04  | 0.07 | 0.08 | -1    | 0.562637 | 0.325513 | 0.817773 | 0.575827 |
| MmugDNA.38481.1.S1_at   | MmugDNA.38481.1 | 12.82 | 11.61 | 0.41 | 0.28 | 2.3   | 0.01232  | 0.014001 | 0.261454 | 0.151595 |
| MmugDNA.38484.1.S1_at   | MmugDNA.38484.1 | 7.05  | 8.54  | 0.51 | 0.53 | -2.81 | 0.044529 | 0.223004 | 0.374916 | 0.495821 |
| MmugDNA.38488.1.S1_s_at | MmugDNA.38488.1 | 9.89  | 9.41  | 0.2  | 0.16 | 1.39  | 0.14999  | 0.304592 | 0.523486 | 0.561838 |
| MmugDNA.38489.1.S1_at   | MmugDNA.38489.1 | 3.32  | 3.29  | 0.09 | 0.1  | 1.02  | 0.622029 | 0.736982 | 0.847631 | 0.847779 |
| MmugDNA.38492.1.S1_at   | MmugDNA.38492.1 | 4.71  | 4.48  | 0.67 | 0.29 | 1.18  | 0.343276 | 0.057413 | 0.686514 | 0.285608 |
| MmugDNA.38498.1.S1_at   | MmugDNA.38498.1 | 11.2  | 11.23 | 0.19 | 0.13 | -1.02 | 0.573817 | 0.305976 | 0.823742 | 0.562732 |
| MmugDNA.38501.1.S1_at   | MmugDNA.38501.1 | 10.24 | 10.58 | 0.18 | 0.09 | -1.27 | 0.102719 | 0.592696 | 0.473099 | 0.757854 |
| MmugDNA.38506.1.S1_at   | MmugDNA.38506.1 | 12.11 | 11.87 | 0.7  | 0.23 | 1.18  | 0.395678 | 0.026018 | 0.720647 | 0.202179 |
| MmugDNA.38508.1.S1_at   | MmugDNA.38508.1 | 10.91 | 10.87 | 0.24 | 0.03 | 1.03  | 0.757432 | 0.920225 | 0.908621 | 0.95511  |
| MmugDNA.3851.1.S1_at    | MmugDNA.3851.1  | 4.02  | 4.3   | 0.25 | 0.31 | -1.22 | 0.05706  | 0.110644 | 0.401454 | 0.374854 |
| MmugDNA.38510.1.S1_at   | MmugDNA.38510.1 | 6.79  | 7.47  | 1.32 | 0.26 | -1.6  | 0.427367 | 0.208271 | 0.741004 | 0.48217  |
| MmugDNA.38513.1.S1_at   | MmugDNA.38513.1 | 6.22  | 6.06  | 0.09 | 0.06 | 1.12  | 0.039005 | 0.062706 | 0.36091  | 0.297117 |
| MmugDNA.38515.1.S1_at   | MmugDNA.38515.1 | 7.01  | 7.3   | 0.34 | 0.08 | -1.22 | 0.334005 | 0.258478 | 0.679986 | 0.525758 |
| MmugDNA.38516.1.S1_at   | MmugDNA.38516.1 | 10.82 | 10.92 | 1.33 | 0.26 | -1.07 | 0.530584 | 0.063878 | 0.799143 | 0.29906  |
| MmugDNA.38518.1.S1_at   | MmugDNA.38518.1 | 5.05  | 5.01  | 0.07 | 0.04 | 1.03  | 0.146881 | 0.413549 | 0.521445 | 0.639648 |
| MmugDNA.38522.1.S1_at   | MmugDNA.38522.1 | 9.99  | 9.76  | 0.53 | 0.04 | 1.17  | 0.804578 | 0.756942 | 0.928994 | 0.858495 |
| MmugDNA.38524.1.S1_at   | MmugDNA.38524.1 | 13.16 | 12.94 | 0.07 | 0.07 | 1.16  | 0.012817 | 0.005419 | 0.265262 | 0.10157  |
| MmugDNA.38525.1.S1_at   | MmugDNA.38525.1 | 10.59 | 10.14 | 0.23 | 0.35 | 1.37  | 0.637875 | 0.132776 | 0.855695 | 0.404544 |
| MmugDNA.38526.1.S1_at   | MmugDNA.38526.1 | 11.21 | 10.67 | 0.14 | 0.24 | 1.46  | 0.012562 | 0.017    | 0.263116 | 0.165304 |
| MmugDNA.38527.1.S1_at   | MmugDNA.38527.1 | 4.51  | 4.39  | 0.11 | 0.19 | 1.09  | 0.463308 | 0.605789 | 0.762124 | 0.76549  |
| MmugDNA.38528.1.S1_at   | MmugDNA.38528.1 | 8.17  | 7.77  | 1.05 | 0.06 | 1.32  | 0.451489 | 0.433034 | 0.755176 | 0.653414 |
| MmugDNA.3853.1.S1_at    | MmugDNA.3853.1  | 7.6   | 8.13  | 0.53 | 0.27 | -1.44 | 0.234041 | 0.347585 | 0.601531 | 0.592019 |
| MmugDNA.38530.1.S1_at   | MmugDNA.38530.1 | 11.07 | 10.67 | 2.88 | 0.29 | 1.32  | 0.760284 | 0.186694 | 0.909948 | 0.462471 |
| MmugDNA.38534.1.S1_at   | MmugDNA.38534.1 | 12.92 | 13.16 | 0.17 | 0.03 | -1.18 | 0.029518 | 0.04928  | 0.33458  | 0.266845 |
| MmugDNA.38535.1.S1_at   | MmugDNA.38535.1 | 8.13  | 8.49  | 0.13 | 0.11 | -1.29 | 0.045388 | 0.145548 | 0.376374 | 0.419451 |
| MmugDNA.38539.1.S1_x_at | MmugDNA.38539.1 | 6.95  | 6.92  | 0.19 | 0.03 | 1.02  | 0.32315  | 0.609345 | 0.671991 | 0.767726 |
| MmugDNA.38548.1.S1_s_at | MmugDNA.38548.1 | 11.37 | 11.18 | 0.04 | 0.06 | 1.14  | 0.007127 | 0.034953 | 0.225651 | 0.231062 |
| MmugDNA.38549.1.S1_at   | MmugDNA.38549.1 | 9.14  | 9.24  | 0.39 | 0.07 | -1.07 | 0.57035  | 0.028851 | 0.821994 | 0.211661 |
| MmugDNA.38554.1.S1_at   | MmugDNA.38554.1 | 9.33  | 8.65  | 0.41 | 0.08 | 1.6   | 0.104526 | 0.036317 | 0.47562  | 0.235105 |
| MmugDNA.38556.1.S1_at   | MmugDNA.38556.1 | 10.59 | 10.61 | 0.54 | 0.06 | -1.02 | 0.484608 | 0.078815 | 0.773748 | 0.325757 |
| MmugDNA.38558.1.S1_at   | MmugDNA.38558.1 | 12.31 | 12.61 | 0.04 | 0.12 | -1.23 | 0.006899 | 0.00132  | 0.224141 | 0.055996 |
| MmugDNA.38562.1.S1_at   | MmugDNA.38562.1 | 5.77  | 5.77  | 0.14 | 0.24 | -1    | 0.394595 | 0.722262 | 0.71989  | 0.839137 |
| MmugDNA.38563.1.S1_at   | MmugDNA.38563.1 | 9.71  | 9.53  | 1.72 | 0.3  | 1.14  | 0.937247 | 0.072337 | 0.978872 | 0.315103 |
| MmugDNA.38565.1.S1_at   | MmugDNA.38565.1 | 10.46 | 12.27 | 0.77 | 0.04 | -3.49 | 0.01681  | 0.00642  | 0.288545 | 0.108813 |
| MmugDNA.38579.1.S1_at   | MmugDNA.38579.1 | 8.14  | 7.93  | 0.22 | 0.17 | 1.16  | 0.539662 | 0.330356 | 0.80393  | 0.579112 |
| MmugDNA.38581.1.S1_at   | MmugDNA.38581.1 | 10.68 | 10.37 | 0.05 | 0.12 | 1.24  | 0.042998 | 0.09821  | 0.371135 | 0.356253 |
| MmugDNA.38595.1.S1_at   | MmugDNA.38595.1 | 7.33  | 7.27  | 0.04 | 0.12 | 1.04  | 0.411164 | 0.445143 | 0.731572 | 0.662309 |
| MmugDNA.38599.1.S1_at   | MmugDNA.38599.1 | 10.43 | 10.48 | 0.23 | 0.1  | -1.03 | 0.652414 | 0.752096 | 0.862004 | 0.855744 |

|                         |                 |       |       |      |      |       |          |          |          |          |
|-------------------------|-----------------|-------|-------|------|------|-------|----------|----------|----------|----------|
| MmugDNA.386.1.S1_at     | MmugDNA.386.1   | 5.61  | 5.47  | 0.16 | 0.04 | 1.1   | 0.218163 | 0.171463 | 0.588113 | 0.447895 |
| MmugDNA.38600.1.S1_at   | MmugDNA.38600.1 | 8.96  | 9.42  | 0.21 | 0.1  | -1.37 | 0.031931 | 0.00068  | 0.342819 | 0.04413  |
| MmugDNA.38601.1.S1_at   | MmugDNA.38601.1 | 8.91  | 9.1   | 0.36 | 0.09 | -1.14 | 0.396973 | 0.656222 | 0.721621 | 0.798968 |
| MmugDNA.38602.1.S1_at   | MmugDNA.38602.1 | 4.72  | 5.64  | 0.63 | 0.63 | -1.89 | 0.13159  | 0.037949 | 0.505989 | 0.239302 |
| MmugDNA.38606.1.S1_at   | MmugDNA.38606.1 | 9.16  | 9.45  | 0.24 | 0.03 | -1.22 | 0.16648  | 0.191634 | 0.539189 | 0.466918 |
| MmugDNA.38611.1.S1_at   | MmugDNA.38611.1 | 7.07  | 7.09  | 0.04 | 0.1  | -1.02 | 0.943099 | 0.761985 | 0.980374 | 0.861597 |
| MmugDNA.38615.1.S1_s_at | MmugDNA.38615.1 | 9.06  | 8.72  | 0.5  | 0.15 | 1.27  | 0.096662 | 0.005946 | 0.465288 | 0.105482 |
| MmugDNA.38618.1.S1_at   | MmugDNA.38618.1 | 13.41 | 13.33 | 0.24 | 0.09 | 1.06  | 0.898707 | 0.967253 | 0.965615 | 0.981908 |
| MmugDNA.38626.1.S1_at   | MmugDNA.38626.1 | 8.1   | 8.67  | 0.13 | 0.06 | -1.49 | 0.001372 | 0.215874 | 0.159096 | 0.489536 |
| MmugDNA.38628.1.S1_at   | MmugDNA.38628.1 | 9.26  | 9.41  | 0.18 | 0.05 | -1.11 | 0.390283 | 0.533856 | 0.716623 | 0.71991  |
| MmugDNA.38630.1.S1_at   | MmugDNA.38630.1 | 10.89 | 11.73 | 0.95 | 0.18 | -1.79 | 0.178336 | 0.041515 | 0.551301 | 0.24862  |
| MmugDNA.38638.1.S1_at   | MmugDNA.38638.1 | 9.75  | 9.61  | 0.23 | 0.08 | 1.11  | 0.487933 | 0.6692   | 0.775315 | 0.806492 |
| MmugDNA.38640.1.S1_at   | MmugDNA.38640.1 | 8.41  | 8.73  | 0.67 | 0.3  | -1.25 | 0.61555  | 0.433082 | 0.844542 | 0.653448 |
| MmugDNA.38641.1.S1_at   | MmugDNA.38641.1 | 12.29 | 12.4  | 0.05 | 0.03 | -1.08 | 0.074801 | 0.185596 | 0.435313 | 0.461566 |
| MmugDNA.38644.1.S1_at   | MmugDNA.38644.1 | 10.57 | 10.06 | 0.14 | 0.12 | 1.42  | 0.006469 | 0.00043  | 0.21945  | 0.038359 |
| MmugDNA.38654.1.S1_at   | MmugDNA.38654.1 | 10.4  | 10.67 | 0.46 | 0.36 | -1.2  | 0.220525 | 0.137581 | 0.589753 | 0.410555 |
| MmugDNA.38658.1.S1_at   | MmugDNA.38658.1 | 7.58  | 7.15  | 0.91 | 0.22 | 1.35  | 0.473765 | 0.027485 | 0.767741 | 0.207144 |
| MmugDNA.38660.1.S1_at   | MmugDNA.38660.1 | 6.52  | 6.53  | 0.19 | 0.09 | -1.01 | 0.443939 | 0.438458 | 0.751068 | 0.65742  |
| MmugDNA.38661.1.S1_at   | MmugDNA.38661.1 | 9.31  | 9.43  | 0.16 | 0.15 | -1.08 | 0.58256  | 0.342866 | 0.828367 | 0.588712 |
| MmugDNA.38662.1.S1_at   | MmugDNA.38662.1 | 6.68  | 6.62  | 0.15 | 0.08 | 1.05  | 0.195566 | 0.314445 | 0.565981 | 0.568319 |
| MmugDNA.38663.1.S1_at   | MmugDNA.38663.1 | 8.64  | 8.96  | 0.28 | 0.05 | -1.24 | 0.384345 | 0.024037 | 0.711951 | 0.194358 |
| MmugDNA.38664.1.S1_at   | MmugDNA.38664.1 | 12.64 | 12.66 | 0.14 | 0.03 | -1.01 | 0.981191 | 0.808503 | 0.993962 | 0.889757 |
| MmugDNA.38666.1.S1_at   | MmugDNA.38666.1 | 12.06 | 12.09 | 0.75 | 0.03 | -1.02 | 0.960968 | 0.996087 | 0.987225 | 0.997616 |
| MmugDNA.38675.1.S1_at   | MmugDNA.38675.1 | 3.46  | 3.77  | 0.37 | 0.38 | -1.24 | 0.75387  | 0.083124 | 0.907201 | 0.332999 |
| MmugDNA.38675.1.S1_s_at | MmugDNA.38675.1 | 12.06 | 12.35 | 0.13 | 0.08 | -1.21 | 0.017833 | 0.001889 | 0.293979 | 0.065004 |
| MmugDNA.38679.1.S1_at   | MmugDNA.38679.1 | 8.39  | 8.93  | 0.57 | 0.08 | -1.45 | 0.480379 | 0.068021 | 0.771141 | 0.307083 |
| MmugDNA.38686.1.S1_at   | MmugDNA.38686.1 | 12.59 | 12.62 | 0.12 | 0.05 | -1.02 | 0.983939 | 0.353981 | 0.99515  | 0.596951 |
| MmugDNA.38688.1.S1_at   | MmugDNA.38688.1 | 11.11 | 11.12 | 0.15 | 0.06 | -1.01 | 0.879647 | 0.977991 | 0.958264 | 0.988027 |
| MmugDNA.38690.1.S1_at   | MmugDNA.38690.1 | 8.48  | 8.6   | 0.78 | 0.03 | -1.09 | 0.290099 | 0.479335 | 0.646709 | 0.685088 |
| MmugDNA.38692.1.S1_at   | MmugDNA.38692.1 | 6.64  | 6.45  | 0.09 | 0.12 | 1.14  | 0.127032 | 0.414874 | 0.500933 | 0.64049  |
| MmugDNA.38693.1.S1_at   | MmugDNA.38693.1 | 11.22 | 12.03 | 0.4  | 0.06 | -1.75 | 0.074706 | 0.054423 | 0.435313 | 0.278814 |
| MmugDNA.38694.1.S1_at   | MmugDNA.38694.1 | 12.74 | 12.85 | 0.11 | 0.02 | -1.08 | 0.222645 | 0.01342  | 0.592117 | 0.148424 |
| MmugDNA.38697.1.S1_at   | MmugDNA.38697.1 | 9.09  | 8.47  | 0.09 | 0.16 | 1.54  | 0.007001 | 0.000405 | 0.225012 | 0.03749  |
| MmugDNA.38698.1.S1_at   | MmugDNA.38698.1 | 11.49 | 11.93 | 1.47 | 0.16 | -1.35 | 0.553037 | 0.532042 | 0.811981 | 0.718995 |
| MmugDNA.38699.1.S1_at   | MmugDNA.38699.1 | 4.52  | 4.7   | 0.06 | 0.15 | -1.13 | 0.181289 | 0.090188 | 0.554504 | 0.344588 |
| MmugDNA.38700.1.S1_at   | MmugDNA.38700.1 | 7.99  | 8.16  | 1.7  | 0.29 | -1.12 | 0.850199 | 0.230005 | 0.947304 | 0.501865 |
| MmugDNA.38701.1.S1_at   | MmugDNA.38701.1 | 9.1   | 9.04  | 0.16 | 0.09 | 1.04  | 0.210219 | 0.015642 | 0.581624 | 0.158535 |
| MmugDNA.38706.1.S1_s_at | MmugDNA.38706.1 | 11.31 | 11.3  | 0.19 | 0.02 | 1.01  | 0.644517 | 0.015498 | 0.858547 | 0.158044 |
| MmugDNA.3871.1.S1_at    | MmugDNA.3871.1  | 4.98  | 5.51  | 0.31 | 0.57 | -1.45 | 0.23872  | 0.176126 | 0.605393 | 0.452581 |
| MmugDNA.38710.1.S1_at   | MmugDNA.38710.1 | 13.63 | 13.59 | 0.05 | 0.06 | 1.03  | 0.698959 | 0.970915 | 0.882969 | 0.984133 |
| MmugDNA.38714.1.S1_at   | MmugDNA.38714.1 | 3.11  | 2.82  | 0.11 | 0.02 | 1.23  | 0.011738 | 0.005082 | 0.257061 | 0.099108 |
| MmugDNA.38715.1.S1_at   | MmugDNA.38715.1 | 5.57  | 5.92  | 0.58 | 0.08 | -1.28 | 0.39515  | 0.701097 | 0.720356 | 0.826646 |
| MmugDNA.38722.1.S1_at   | MmugDNA.38722.1 | 9.69  | 9.3   | 0.11 | 0.26 | 1.31  | 0.030959 | 0.002033 | 0.339277 | 0.066885 |

|                         |                 |       |       |      |      |       |          |          |          |          |
|-------------------------|-----------------|-------|-------|------|------|-------|----------|----------|----------|----------|
| MmugDNA.38723.1.S1_at   | MmugDNA.38723.1 | 6.38  | 5.31  | 2.03 | 0.59 | 2.1   | 0.590284 | 0.234896 | 0.832832 | 0.506125 |
| MmugDNA.38725.1.S1_at   | MmugDNA.38725.1 | 6.19  | 6.36  | 0.01 | 0.11 | -1.13 | 0.067541 | 0.055303 | 0.423952 | 0.280981 |
| MmugDNA.38729.1.S1_at   | MmugDNA.38729.1 | 6.55  | 6.58  | 0.1  | 0.06 | -1.01 | 0.455628 | 0.750182 | 0.757493 | 0.854731 |
| MmugDNA.3873.1.S1_at    | MmugDNA.3873.1  | 4.88  | 4.8   | 0.36 | 0.16 | 1.05  | 0.677201 | 0.281833 | 0.873403 | 0.544844 |
| MmugDNA.38733.1.S1_at   | MmugDNA.38733.1 | 4.47  | 4.42  | 0.04 | 0.13 | 1.03  | 0.561905 | 0.871659 | 0.817493 | 0.926963 |
| MmugDNA.38736.1.S1_at   | MmugDNA.38736.1 | 11.56 | 11.52 | 0.37 | 0.08 | 1.03  | 0.544586 | 0.128772 | 0.807356 | 0.400248 |
| MmugDNA.38747.1.S1_at   | MmugDNA.38747.1 | 11.48 | 12.08 | 0.19 | 0.02 | -1.52 | 0.004836 | 0.001845 | 0.202685 | 0.064452 |
| MmugDNA.38752.1.A1_at   | MmugDNA.38752.1 | 6.74  | 6.64  | 0.01 | 0.13 | 1.07  | 0.185483 | 0.175292 | 0.55851  | 0.452061 |
| MmugDNA.38752.1.S1_at   | MmugDNA.38752.1 | 5     | 4.86  | 0.04 | 0.06 | 1.1   | 0.034758 | 0.0199   | 0.350358 | 0.177357 |
| MmugDNA.38756.1.S1_at   | MmugDNA.38756.1 | 10.86 | 10.69 | 0.4  | 0.32 | 1.12  | 0.996609 | 0.854206 | 0.998707 | 0.916964 |
| MmugDNA.38761.1.S1_at   | MmugDNA.38761.1 | 6.87  | 6.68  | 0.12 | 0.03 | -1.15 | 0.094115 | 0.389274 | 0.463389 | 0.623403 |
| MmugDNA.38761.1.S1_x_at | MmugDNA.38761.1 | 7.03  | 6.7   | 0.04 | 0.07 | 1.26  | 0.001466 | 0.001573 | 0.161412 | 0.060185 |
| MmugDNA.38770.1.S1_at   | MmugDNA.38770.1 | 3.27  | 3.25  | 0.05 | 0.12 | 1.02  | 0.814405 | 0.891935 | 0.932969 | 0.938407 |
| MmugDNA.38778.1.S1_at   | MmugDNA.38778.1 | 7.24  | 8.29  | 0.29 | 0.2  | -2.07 | 0.009435 | 0.000939 | 0.24201  | 0.049026 |
| MmugDNA.38779.1.S1_at   | MmugDNA.38779.1 | 11.98 | 11.73 | 0.14 | 0.01 | 1.19  | 0.135008 | 0.111454 | 0.50914  | 0.376126 |
| MmugDNA.38780.1.S1_at   | MmugDNA.38780.1 | 6.47  | 6.36  | 0.06 | 0.09 | 1.08  | 0.103506 | 0.237304 | 0.474288 | 0.508027 |
| MmugDNA.38786.1.S1_at   | MmugDNA.38786.1 | 12.79 | 12.7  | 0.38 | 0.03 | 1.06  | 0.552831 | 0.085137 | 0.811917 | 0.336972 |
| MmugDNA.38791.1.S1_at   | MmugDNA.38791.1 | 5.13  | 5.04  | 0.1  | 0.06 | 1.07  | 0.425803 | 0.614923 | 0.740112 | 0.771627 |
| MmugDNA.38793.1.S1_at   | MmugDNA.38793.1 | 6.05  | 5.78  | 0.43 | 1.01 | 1.2   | 0.731747 | 0.780449 | 0.896887 | 0.872614 |
| MmugDNA.38799.1.S1_at   | MmugDNA.38799.1 | 10.98 | 11.24 | 0.93 | 0.15 | -1.2  | 0.743762 | 0.808237 | 0.902245 | 0.889636 |
| MmugDNA.38800.1.S1_at   | MmugDNA.38800.1 | 14.15 | 14.14 | 0.17 | 0.07 | 1.01  | 0.535653 | 0.626809 | 0.801869 | 0.779995 |
| MmugDNA.38801.1.S1_at   | MmugDNA.38801.1 | 7.66  | 7.93  | 0.59 | 0.09 | -1.2  | 0.313486 | 0.354794 | 0.664784 | 0.597445 |
| MmugDNA.38810.1.S1_at   | MmugDNA.38810.1 | 8.38  | 8.71  | 0.82 | 0.3  | -1.25 | 0.692308 | 0.28127  | 0.880095 | 0.544385 |
| MmugDNA.38813.1.S1_at   | MmugDNA.38813.1 | 7.92  | 8.5   | 0.63 | 0.2  | -1.49 | 0.104157 | 0.057713 | 0.475046 | 0.2866   |
| MmugDNA.38816.1.S1_at   | MmugDNA.38816.1 | 9.55  | 9.22  | 0.1  | 0.14 | 1.26  | 0.059503 | 0.018742 | 0.406657 | 0.171985 |
| MmugDNA.38818.1.S1_at   | MmugDNA.38818.1 | 10.83 | 11.36 | 0.3  | 0.17 | -1.44 | 0.085028 | 0.046874 | 0.451642 | 0.261272 |
| MmugDNA.3882.1.S1_at    | MmugDNA.3882.1  | 8.55  | 8.15  | 0.17 | 0.11 | 1.32  | 0.053943 | 0.057189 | 0.395633 | 0.285009 |
| MmugDNA.3883.1.S1_at    | MmugDNA.3883.1  | 11.99 | 11.21 | 0.64 | 0.18 | 1.71  | 0.25126  | 0.073073 | 0.616546 | 0.316017 |
| MmugDNA.38830.1.S1_s_at | MmugDNA.38830.1 | 6.72  | 6.72  | 0.1  | 0.05 | -1    | 0.745565 | 0.191413 | 0.903066 | 0.466776 |
| MmugDNA.38831.1.S1_at   | MmugDNA.38831.1 | 8.2   | 8.27  | 0.13 | 0.1  | -1.05 | 0.257571 | 0.022553 | 0.621338 | 0.187981 |
| MmugDNA.38831.1.S1_s_at | MmugDNA.38831.1 | 9.55  | 9.65  | 0.08 | 0.12 | -1.07 | 0.443067 | 0.022743 | 0.750521 | 0.188834 |
| MmugDNA.38833.1.S1_at   | MmugDNA.38833.1 | 12.56 | 12.36 | 0.27 | 0.02 | 1.15  | 0.248341 | 0.325751 | 0.613851 | 0.57602  |
| MmugDNA.38839.1.S1_at   | MmugDNA.38839.1 | 11.26 | 10.68 | 0.47 | 0.12 | 1.5   | 0.406702 | 0.419507 | 0.728299 | 0.643507 |
| MmugDNA.38840.1.S1_at   | MmugDNA.38840.1 | 4.38  | 4.34  | 0.14 | 0.16 | 1.03  | 0.545811 | 0.462243 | 0.808198 | 0.673608 |
| MmugDNA.38841.1.S1_at   | MmugDNA.38841.1 | 4.96  | 4.8   | 0.11 | 0.06 | 1.12  | 0.171554 | 0.463601 | 0.544814 | 0.674537 |
| MmugDNA.38845.1.S1_s_at | MmugDNA.38845.1 | 8.28  | 7.91  | 0.98 | 0.06 | 1.29  | 0.536793 | 0.158597 | 0.802473 | 0.434597 |
| MmugDNA.38851.1.S1_at   | MmugDNA.38851.1 | 8.91  | 9.17  | 0.84 | 0.14 | -1.2  | 0.762327 | 0.766894 | 0.910879 | 0.864635 |
| MmugDNA.38856.1.S1_at   | MmugDNA.38856.1 | 6.85  | 6.6   | 0.06 | 0.07 | 1.19  | 0.007692 | 0.046296 | 0.23074  | 0.25959  |
| MmugDNA.38870.1.S1_at   | MmugDNA.38870.1 | 10.64 | 10.03 | 0.17 | 0.07 | 1.53  | 0.0049   | 0.000208 | 0.203301 | 0.032262 |
| MmugDNA.38875.1.S1_at   | MmugDNA.38875.1 | 5.66  | 5.46  | 0.2  | 0.04 | 1.15  | 0.173079 | 0.152958 | 0.546142 | 0.42777  |
| MmugDNA.38879.1.S1_at   | MmugDNA.38879.1 | 4.32  | 4.38  | 0.12 | 0.14 | -1.04 | 0.408012 | 0.603908 | 0.729168 | 0.764392 |
| MmugDNA.38885.1.S1_at   | MmugDNA.38885.1 | 5.52  | 5.84  | 0.49 | 0.43 | -1.25 | 0.439814 | 0.561008 | 0.748282 | 0.737076 |
| MmugDNA.38886.1.S1_at   | MmugDNA.38886.1 | 6.34  | 5.5   | 0.25 | 0.08 | 1.8   | 0.01048  | 0.004018 | 0.24804  | 0.090008 |

|                         |                 |       |       |      |      |       |          |          |          |          |
|-------------------------|-----------------|-------|-------|------|------|-------|----------|----------|----------|----------|
| MmugDNA.38887.1.S1_s_at | MmugDNA.38887.1 | 5.83  | 5.03  | 0.32 | 0.36 | 1.74  | 0.04197  | 0.033818 | 0.367952 | 0.227489 |
| MmugDNA.38889.1.S1_at   | MmugDNA.38889.1 | 11.82 | 12.05 | 0.95 | 0.18 | -1.17 | 0.533995 | 0.216763 | 0.801159 | 0.490311 |
| MmugDNA.38892.1.S1_at   | MmugDNA.38892.1 | 7.77  | 5.86  | 0.94 | 0.79 | 3.75  | 0.265894 | 0.120308 | 0.626961 | 0.38925  |
| MmugDNA.38899.1.S1_at   | MmugDNA.38899.1 | 8.19  | 7.95  | 0.36 | 0.12 | 1.18  | 0.463302 | 0.567885 | 0.762124 | 0.741693 |
| MmugDNA.38900.1.S1_at   | MmugDNA.38900.1 | 6.07  | 6.03  | 0.15 | 0.01 | 1.03  | 0.693385 | 0.755921 | 0.880606 | 0.8579   |
| MmugDNA.3891.1.S1_at    | MmugDNA.3891.1  | 7.06  | 7.15  | 0.51 | 0.22 | -1.06 | 0.468026 | 0.2193   | 0.76464  | 0.493094 |
| MmugDNA.38910.1.S1_at   | MmugDNA.38910.1 | 8.26  | 8.19  | 0.32 | 0.22 | 1.05  | 0.806438 | 0.47327  | 0.929767 | 0.680582 |
| MmugDNA.38911.1.S1_at   | MmugDNA.38911.1 | 9.25  | 8.18  | 0.7  | 0.2  | 2.1   | 0.132155 | 0.175808 | 0.506698 | 0.4524   |
| MmugDNA.38914.1.S1_at   | MmugDNA.38914.1 | 7.12  | 8.47  | 0.74 | 0.18 | -2.54 | 0.102827 | 0.117664 | 0.473259 | 0.385372 |
| MmugDNA.38919.1.S1_at   | MmugDNA.38919.1 | 13.38 | 13.37 | 0.28 | 0.1  | 1     | 0.832236 | 0.039301 | 0.939788 | 0.243338 |
| MmugDNA.3892.1.S1_s_at  | MmugDNA.3892.1  | 10.4  | 10.46 | 0.37 | 0.05 | -1.04 | 0.291595 | 0.353323 | 0.647943 | 0.596477 |
| MmugDNA.38920.1.S1_at   | MmugDNA.38920.1 | 4.44  | 4.38  | 0.47 | 0.16 | 1.04  | 0.775744 | 0.373694 | 0.916815 | 0.612403 |
| MmugDNA.38923.1.S1_at   | MmugDNA.38923.1 | 4.19  | 4.12  | 0.03 | 0.1  | 1.06  | 0.234022 | 0.151516 | 0.601531 | 0.426239 |
| MmugDNA.3893.1.S1_at    | MmugDNA.3893.1  | 4.76  | 4.76  | 0.02 | 0.01 | 1     | 0.270423 | 0.088794 | 0.630304 | 0.342534 |
| MmugDNA.38930.1.S1_at   | MmugDNA.38930.1 | 6.09  | 6.14  | 0.22 | 0.1  | -1.04 | 0.64836  | 0.506141 | 0.859825 | 0.702359 |
| MmugDNA.38939.1.S1_at   | MmugDNA.38939.1 | 11.39 | 11.77 | 0.13 | 0.03 | -1.3  | 0.006291 | 0.001282 | 0.218069 | 0.05538  |
| MmugDNA.38940.1.S1_at   | MmugDNA.38940.1 | 9.69  | 9.98  | 0.35 | 0.08 | -1.22 | 0.193909 | 0.27499  | 0.564486 | 0.539402 |
| MmugDNA.38945.1.S1_at   | MmugDNA.38945.1 | 6.91  | 6.93  | 0.62 | 0.32 | -1.02 | 0.638659 | 0.720919 | 0.856034 | 0.838368 |
| MmugDNA.38953.1.S1_at   | MmugDNA.38953.1 | 6.44  | 6.4   | 0.12 | 0.04 | 1.03  | 0.324576 | 0.202163 | 0.672781 | 0.476559 |
| MmugDNA.38956.1.S1_at   | MmugDNA.38956.1 | 11.9  | 11.62 | 0.2  | 0.26 | 1.22  | 0.927239 | 0.001223 | 0.97587  | 0.054593 |
| MmugDNA.38959.1.S1_at   | MmugDNA.38959.1 | 10.81 | 10.55 | 0.32 | 0.01 | 1.2   | 0.676246 | 0.41267  | 0.873043 | 0.639042 |
| MmugDNA.38960.1.S1_at   | MmugDNA.38960.1 | 3.14  | 2.96  | 0.07 | 0.05 | 1.13  | 0.044433 | 0.103639 | 0.374916 | 0.364433 |
| MmugDNA.38962.1.S1_at   | MmugDNA.38962.1 | 11.18 | 11.08 | 0.19 | 0.08 | 1.07  | 0.620263 | 0.12273  | 0.84709  | 0.392719 |
| MmugDNA.38963.1.S1_at   | MmugDNA.38963.1 | 7.18  | 7.97  | 0.54 | 0.1  | -1.72 | 0.051912 | 0.069502 | 0.3916   | 0.309848 |
| MmugDNA.38966.1.S1_at   | MmugDNA.38966.1 | 4.61  | 4.76  | 0.33 | 0.23 | -1.12 | 0.987594 | 0.980655 | 0.995831 | 0.989424 |
| MmugDNA.38968.1.S1_at   | MmugDNA.38968.1 | 13.72 | 13.81 | 0.59 | 0.02 | -1.06 | 0.281433 | 0.347891 | 0.639917 | 0.592196 |
| MmugDNA.38971.1.S1_at   | MmugDNA.38971.1 | 6.74  | 6.94  | 0.31 | 0.13 | -1.16 | 0.471134 | 0.669227 | 0.766384 | 0.806499 |
| MmugDNA.38972.1.S1_at   | MmugDNA.38972.1 | 11.4  | 11.59 | 0.3  | 0.1  | -1.14 | 0.418368 | 0.53481  | 0.735543 | 0.720557 |
| MmugDNA.38981.1.S1_at   | MmugDNA.38981.1 | 3.93  | 4.28  | 0.42 | 0.27 | -1.27 | 0.19749  | 0.506787 | 0.568443 | 0.702575 |
| MmugDNA.38984.1.S1_at   | MmugDNA.38984.1 | 7.62  | 8.21  | 0.06 | 0.08 | -1.51 | 0.000504 | 0.002682 | 0.143137 | 0.076408 |
| MmugDNA.38987.1.S1_at   | MmugDNA.38987.1 | 7.64  | 8.04  | 0.22 | 0.09 | -1.32 | 0.036577 | 0.053751 | 0.355088 | 0.277384 |
| MmugDNA.39000.1.S1_at   | MmugDNA.39000.1 | 13.19 | 12.44 | 0.32 | 0.11 | 1.68  | 0.024615 | 0.008621 | 0.319173 | 0.123117 |
| MmugDNA.39004.1.S1_at   | MmugDNA.39004.1 | 6.45  | 6.43  | 0.11 | 0.07 | 1.02  | 0.628343 | 0.206524 | 0.851106 | 0.480571 |
| MmugDNA.39009.1.S1_at   | MmugDNA.39009.1 | 6.14  | 5.94  | 0.14 | 0.04 | 1.15  | 0.065427 | 0.065304 | 0.420625 | 0.301249 |
| MmugDNA.39012.1.S1_at   | MmugDNA.39012.1 | 10.37 | 10.4  | 0.94 | 0.08 | -1.02 | 0.474025 | 0.607072 | 0.767923 | 0.766185 |
| MmugDNA.39014.1.S1_at   | MmugDNA.39014.1 | 5.15  | 4.85  | 0.1  | 0.06 | 1.24  | 0.014529 | 0.041864 | 0.27631  | 0.249172 |
| MmugDNA.39015.1.S1_at   | MmugDNA.39015.1 | 5.3   | 5.3   | 0.03 | 0.08 | -1    | 0.413049 | 0.402572 | 0.732157 | 0.631493 |
| MmugDNA.39016.1.S1_at   | MmugDNA.39016.1 | 4.77  | 5.28  | 0.31 | 0.01 | -1.42 | 0.055195 | 0.065398 | 0.398095 | 0.301415 |
| MmugDNA.39018.1.S1_at   | MmugDNA.39018.1 | 5.25  | 5.01  | 0.18 | 0.03 | 1.18  | 0.066966 | 0.084382 | 0.422979 | 0.335713 |
| MmugDNA.3902.1.S1_at    | MmugDNA.3902.1  | 9.21  | 9.08  | 0.22 | 0.17 | 1.09  | 0.635331 | 0.826278 | 0.854522 | 0.900217 |
| MmugDNA.39022.1.S1_at   | MmugDNA.39022.1 | 11.22 | 11.49 | 0.15 | 0.04 | -1.2  | 0.037422 | 0.004261 | 0.357092 | 0.09182  |
| MmugDNA.39025.1.S1_at   | MmugDNA.39025.1 | 11.91 | 11.71 | 0.22 | 0.04 | 1.15  | 0.419183 | 0.011304 | 0.736167 | 0.138076 |
| MmugDNA.39029.1.S1_at   | MmugDNA.39029.1 | 11.71 | 11.97 | 0.3  | 0.08 | -1.2  | 0.641559 | 0.79564  | 0.857396 | 0.882255 |

|                         |                 |       |       |      |      |       |          |          |          |          |
|-------------------------|-----------------|-------|-------|------|------|-------|----------|----------|----------|----------|
| MmugDNA.39031.1.S1_at   | MmugDNA.39031.1 | 4.16  | 4.3   | 0.42 | 0.29 | -1.1  | 0.732251 | 0.756674 | 0.897044 | 0.858329 |
| MmugDNA.39034.1.S1_at   | MmugDNA.39034.1 | 8.31  | 8.33  | 0.09 | 0.04 | -1.01 | 0.861714 | 0.107814 | 0.951267 | 0.370945 |
| MmugDNA.39036.1.S1_at   | MmugDNA.39036.1 | 10.53 | 10.74 | 0.64 | 0.07 | -1.15 | 0.765876 | 0.881067 | 0.91197  | 0.932111 |
| MmugDNA.39049.1.S1_at   | MmugDNA.39049.1 | 10.65 | 10.49 | 0.1  | 0.08 | 1.12  | 0.05926  | 0.060513 | 0.406296 | 0.292656 |
| MmugDNA.3906.1.S1_at    | MmugDNA.3906.1  | 8.34  | 8.24  | 0.32 | 0.04 | 1.07  | 0.172689 | 0.207868 | 0.545872 | 0.482049 |
| MmugDNA.39061.1.S1_at   | MmugDNA.39061.1 | 9.82  | 10.11 | 0.04 | 0.04 | -1.22 | 0.000958 | 0.000047 | 0.154894 | 0.025273 |
| MmugDNA.39062.1.S1_at   | MmugDNA.39062.1 | 6.48  | 6.63  | 0.43 | 0.01 | -1.11 | 0.577471 | 0.753933 | 0.825728 | 0.856764 |
| MmugDNA.39068.1.S1_at   | MmugDNA.39068.1 | 4.24  | 4.48  | 0.5  | 1.03 | -1.18 | 0.320249 | 0.540791 | 0.669207 | 0.724559 |
| MmugDNA.39070.1.S1_at   | MmugDNA.39070.1 | 12.01 | 11.91 | 0.02 | 0.06 | 1.07  | 0.06081  | 0.232703 | 0.408904 | 0.504359 |
| MmugDNA.39074.1.S1_at   | MmugDNA.39074.1 | 3.38  | 3.39  | 0.05 | 0.04 | -1.01 | 0.703962 | 0.470912 | 0.884935 | 0.679128 |
| MmugDNA.39085.1.S1_at   | MmugDNA.39085.1 | 11.62 | 11.1  | 0.2  | 0.07 | 1.44  | 0.010806 | 0.000832 | 0.250389 | 0.046851 |
| MmugDNA.39090.1.S1_at   | MmugDNA.39090.1 | 11.39 | 11.42 | 0.35 | 0.1  | -1.02 | 0.717769 | 0.851248 | 0.890514 | 0.915366 |
| MmugDNA.39092.1.S1_at   | MmugDNA.39092.1 | 8.29  | 8.23  | 0.03 | 0.06 | 1.04  | 0.334767 | 0.431442 | 0.680619 | 0.652371 |
| MmugDNA.39093.1.S1_at   | MmugDNA.39093.1 | 10.58 | 10.52 | 0.27 | 0.11 | 1.04  | 0.703854 | 0.069825 | 0.88488  | 0.310353 |
| MmugDNA.39094.1.S1_at   | MmugDNA.39094.1 | 12.38 | 12.73 | 0.17 | 0.02 | -1.28 | 0.028038 | 0.023364 | 0.330072 | 0.19158  |
| MmugDNA.39094.1.S1_s_at | MmugDNA.39094.1 | 10.67 | 11.04 | 0.24 | 0.07 | -1.29 | 0.079775 | 0.143501 | 0.442778 | 0.417442 |
| MmugDNA.39095.1.S1_at   | MmugDNA.39095.1 | 4.78  | 4.6   | 0.1  | 0.2  | 1.13  | 0.104188 | 0.233621 | 0.475146 | 0.50492  |
| MmugDNA.391.1.S1_at     | MmugDNA.391.1   | 6.01  | 5.99  | 0.19 | 0.14 | 1.01  | 0.490125 | 0.39914  | 0.776766 | 0.62969  |
| MmugDNA.39100.1.S1_s_at | MmugDNA.39100.1 | 12.59 | 12.51 | 0.12 | 0.03 | 1.06  | 0.617272 | 0.164768 | 0.845362 | 0.441104 |
| MmugDNA.39112.1.S1_at   | MmugDNA.39112.1 | 11.47 | 10.81 | 0.1  | 0.14 | 1.57  | 0.003025 | 0.001703 | 0.19086  | 0.062505 |
| MmugDNA.39121.1.S1_at   | MmugDNA.39121.1 | 11.16 | 11.26 | 0.28 | 0.08 | -1.07 | 0.603012 | 0.099184 | 0.839107 | 0.357379 |
| MmugDNA.39122.1.S1_at   | MmugDNA.39122.1 | 10.58 | 10.64 | 0.37 | 0.09 | -1.04 | 0.876769 | 0.195371 | 0.957079 | 0.470253 |
| MmugDNA.39131.1.S1_at   | MmugDNA.39131.1 | 3.74  | 3.99  | 0.14 | 0.24 | -1.2  | 0.192502 | 0.546826 | 0.563577 | 0.728203 |
| MmugDNA.39132.1.S1_at   | MmugDNA.39132.1 | 11.7  | 11.93 | 0.08 | 0.08 | -1.17 | 0.029216 | 0.004122 | 0.333974 | 0.090887 |
| MmugDNA.39133.1.S1_at   | MmugDNA.39133.1 | 11.96 | 11.99 | 0.19 | 0.01 | -1.02 | 0.781712 | 0.105345 | 0.919573 | 0.367182 |
| MmugDNA.39136.1.S1_at   | MmugDNA.39136.1 | 12.36 | 12.36 | 0.01 | 0.1  | -1    | 0.337041 | 0.416026 | 0.6822   | 0.641342 |
| MmugDNA.39138.1.S1_at   | MmugDNA.39138.1 | 12.46 | 12.55 | 0.26 | 0.02 | -1.07 | 0.217374 | 0.063783 | 0.587269 | 0.29906  |
| MmugDNA.39139.1.S1_at   | MmugDNA.39139.1 | 11.8  | 11.67 | 0.21 | 0.08 | 1.09  | 0.171563 | 0.2778   | 0.544814 | 0.541664 |
| MmugDNA.39141.1.S1_at   | MmugDNA.39141.1 | 7.03  | 7.65  | 0.38 | 0.09 | -1.54 | 0.145899 | 0.198541 | 0.520572 | 0.473391 |
| MmugDNA.39149.1.S1_at   | MmugDNA.39149.1 | 12.57 | 12.59 | 0.16 | 0.02 | -1.02 | 0.869629 | 0.221708 | 0.954469 | 0.494901 |
| MmugDNA.39149.1.S1_s_at | MmugDNA.39149.1 | 12.49 | 12.26 | 0.2  | 0.09 | 1.17  | 0.091432 | 0.163742 | 0.45929  | 0.439924 |
| MmugDNA.39154.1.S1_at   | MmugDNA.39154.1 | 4.06  | 4.28  | 0.33 | 0.47 | -1.16 | 0.503771 | 0.804133 | 0.784384 | 0.887336 |
| MmugDNA.39157.1.S1_at   | MmugDNA.39157.1 | 7.37  | 7.08  | 0.03 | 0.11 | 1.22  | 0.020547 | 0.168717 | 0.304427 | 0.445379 |
| MmugDNA.39158.1.S1_at   | MmugDNA.39158.1 | 7.53  | 7.41  | 0.07 | 0.06 | 1.08  | 0.077267 | 0.193535 | 0.439109 | 0.468785 |
| MmugDNA.39159.1.S1_s_at | MmugDNA.39159.1 | 8.74  | 8.66  | 0.29 | 0.03 | 1.06  | 0.546345 | 0.309647 | 0.808448 | 0.564991 |
| MmugDNA.39160.1.S1_at   | MmugDNA.39160.1 | 11.49 | 11.78 | 0.03 | 0.01 | -1.23 | 0.000117 | 0.003269 | 0.108151 | 0.082312 |
| MmugDNA.39163.1.S1_at   | MmugDNA.39163.1 | 10.72 | 11.14 | 0.53 | 0.08 | -1.34 | 0.245166 | 0.250692 | 0.610577 | 0.51941  |
| MmugDNA.39166.1.S1_at   | MmugDNA.39166.1 | 5.84  | 5.76  | 0.06 | 0.09 | 1.06  | 0.119643 | 0.100331 | 0.493093 | 0.359424 |
| MmugDNA.39167.1.S1_at   | MmugDNA.39167.1 | 12.26 | 12.18 | 0.23 | 0.05 | 1.05  | 0.346856 | 0.421987 | 0.688435 | 0.645406 |
| MmugDNA.39168.1.S1_at   | MmugDNA.39168.1 | 12.81 | 12.95 | 0.32 | 0.13 | -1.1  | 0.214575 | 0.155893 | 0.58505  | 0.431279 |
| MmugDNA.39170.1.S1_at   | MmugDNA.39170.1 | 10.68 | 10.57 | 0.31 | 0.18 | 1.07  | 0.372769 | 0.465    | 0.705567 | 0.675534 |
| MmugDNA.39170.1.S1_s_at | MmugDNA.39170.1 | 11.46 | 11.22 | 0.24 | 0.19 | 1.18  | 0.213092 | 0.075212 | 0.583683 | 0.319389 |
| MmugDNA.39171.1.S1_at   | MmugDNA.39171.1 | 10.68 | 10.58 | 0.03 | 0.08 | 1.07  | 0.055159 | 0.0122   | 0.398095 | 0.142876 |



|                         |                 |       |       |      |      |       |          |          |          |          |
|-------------------------|-----------------|-------|-------|------|------|-------|----------|----------|----------|----------|
| MmugDNA.3918.1.S1_at    | MmugDNA.3918.1  | 9.02  | 9.87  | 0.64 | 0.02 | -1.81 | 0.269452 | 0.189659 | 0.62965  | 0.465297 |
| MmugDNA.39180.1.S1_at   | MmugDNA.39180.1 | 6.06  | 6.81  | 0.94 | 0.5  | -1.68 | 0.306837 | 0.539047 | 0.659737 | 0.723487 |
| MmugDNA.39182.1.S1_at   | MmugDNA.39182.1 | 5.25  | 5.08  | 0.08 | 0.07 | 1.12  | 0.058544 | 0.061168 | 0.404669 | 0.293981 |
| MmugDNA.39187.1.S1_at   | MmugDNA.39187.1 | 10.63 | 10.6  | 0.19 | 0.07 | 1.02  | 0.874404 | 0.644264 | 0.956448 | 0.791506 |
| MmugDNA.39188.1.S1_at   | MmugDNA.39188.1 | 4.11  | 4.07  | 0.28 | 0.15 | 1.03  | 0.74738  | 0.911532 | 0.903959 | 0.950138 |
| MmugDNA.39189.1.S1_at   | MmugDNA.39189.1 | 10.57 | 10.87 | 0.09 | 0.14 | -1.23 | 0.054453 | 0.006942 | 0.396542 | 0.112568 |
| MmugDNA.39192.1.S1_at   | MmugDNA.39192.1 | 6.97  | 7.11  | 0.1  | 0.06 | -1.1  | 0.211363 | 0.027755 | 0.582327 | 0.208032 |
| MmugDNA.39208.1.S1_at   | MmugDNA.39208.1 | 4.06  | 4.11  | 0.06 | 0.07 | -1.03 | 0.953888 | 0.68627  | 0.984675 | 0.816907 |
| MmugDNA.3921.1.S1_at    | MmugDNA.3921.1  | 5.96  | 6.02  | 0.08 | 0.03 | -1.04 | 0.849438 | 0.634218 | 0.947087 | 0.78472  |
| MmugDNA.39211.1.S1_at   | MmugDNA.39211.1 | 11.89 | 11.08 | 0.59 | 0.31 | 1.76  | 0.165405 | 0.01458  | 0.538165 | 0.153966 |
| MmugDNA.39216.1.S1_at   | MmugDNA.39216.1 | 9.78  | 9.95  | 0.43 | 0.22 | -1.13 | 0.706071 | 0.868947 | 0.885558 | 0.925568 |
| MmugDNA.39217.1.S1_at   | MmugDNA.39217.1 | 6.75  | 6.6   | 0.26 | 0.04 | 1.11  | 0.163598 | 0.206055 | 0.53638  | 0.480273 |
| MmugDNA.39221.1.S1_at   | MmugDNA.39221.1 | 9.87  | 10.29 | 2.24 | 0.3  | -1.34 | 0.642071 | 0.208763 | 0.857628 | 0.482608 |
| MmugDNA.39223.1.S1_at   | MmugDNA.39223.1 | 6.89  | 6.85  | 0.04 | 0.08 | 1.03  | 0.522528 | 0.839667 | 0.795143 | 0.908582 |
| MmugDNA.39227.1.S1_at   | MmugDNA.39227.1 | 6.85  | 6.69  | 0.19 | 0.06 | 1.11  | 0.281552 | 0.693959 | 0.640011 | 0.822006 |
| MmugDNA.39241.1.S1_at   | MmugDNA.39241.1 | 6.91  | 7.98  | 0.66 | 0.14 | -2.1  | 0.144804 | 0.098267 | 0.520103 | 0.356328 |
| MmugDNA.39243.1.S1_at   | MmugDNA.39243.1 | 5.99  | 5.77  | 0.1  | 0.04 | 1.17  | 0.023256 | 0.023162 | 0.314809 | 0.190579 |
| MmugDNA.39243.1.S1_x_at | MmugDNA.39243.1 | 6.05  | 5.92  | 0.11 | 0.05 | 1.1   | 0.048676 | 0.039091 | 0.383893 | 0.242995 |
| MmugDNA.39244.1.S1_at   | MmugDNA.39244.1 | 5.45  | 5.46  | 0.58 | 0.05 | -1.01 | 0.953883 | 0.979171 | 0.984675 | 0.988766 |
| MmugDNA.39247.1.S1_at   | MmugDNA.39247.1 | 13.75 | 13.64 | 0.1  | 0.05 | 1.08  | 0.682367 | 0.680649 | 0.875741 | 0.813542 |
| MmugDNA.39251.1.S1_at   | MmugDNA.39251.1 | 8.63  | 8.56  | 0.25 | 0.05 | 1.05  | 0.270985 | 0.242504 | 0.630919 | 0.51284  |
| MmugDNA.39253.1.S1_at   | MmugDNA.39253.1 | 7.94  | 8.01  | 0.31 | 0.09 | -1.06 | 0.802158 | 0.226376 | 0.927856 | 0.498806 |
| MmugDNA.39257.1.S1_at   | MmugDNA.39257.1 | 4.21  | 4.16  | 1.15 | 0.63 | 1.04  | 0.666483 | 0.873019 | 0.868243 | 0.927822 |
| MmugDNA.39263.1.S1_at   | MmugDNA.39263.1 | 7.19  | 7.06  | 0.15 | 0.1  | 1.09  | 0.219718 | 0.458129 | 0.589083 | 0.671077 |
| MmugDNA.39263.1.S1_s_at | MmugDNA.39263.1 | 6.91  | 6.75  | 0.07 | 0.12 | 1.12  | 0.085632 | 0.207812 | 0.452706 | 0.482031 |
| MmugDNA.39265.1.S1_at   | MmugDNA.39265.1 | 10.13 | 10.05 | 0.1  | 0.15 | 1.06  | 0.167497 | 0.870197 | 0.540065 | 0.926372 |
| MmugDNA.39273.1.S1_at   | MmugDNA.39273.1 | 6.41  | 6.47  | 0.29 | 0.1  | -1.05 | 0.847272 | 0.118669 | 0.946516 | 0.386699 |
| MmugDNA.39278.1.S1_at   | MmugDNA.39278.1 | 3.68  | 4.41  | 0.18 | 0.33 | -1.66 | 0.050628 | 0.036177 | 0.387563 | 0.234778 |
| MmugDNA.39281.1.S1_at   | MmugDNA.39281.1 | 4.81  | 4.56  | 0.18 | 0.04 | 1.19  | 0.074206 | 0.125595 | 0.434962 | 0.396226 |
| MmugDNA.39282.1.S1_at   | MmugDNA.39282.1 | 9.48  | 8.11  | 3.35 | 0.5  | 2.59  | 0.913357 | 0.375037 | 0.970545 | 0.613186 |
| MmugDNA.39283.1.S1_at   | MmugDNA.39283.1 | 4.27  | 4.05  | 0.04 | 0.07 | 1.17  | 0.012446 | 0.006862 | 0.262327 | 0.111933 |
| MmugDNA.39285.1.S1_at   | MmugDNA.39285.1 | 8.86  | 7.79  | 0.62 | 0.22 | 2.1   | 0.1128   | 0.583126 | 0.486223 | 0.751565 |
| MmugDNA.39291.1.S1_at   | MmugDNA.39291.1 | 7.1   | 8.09  | 0.37 | 0.08 | -1.98 | 0.015905 | 0.02205  | 0.284532 | 0.185911 |
| MmugDNA.39297.1.S1_at   | MmugDNA.39297.1 | 7.6   | 7.34  | 0.1  | 0.05 | 1.19  | 0.041084 | 0.205643 | 0.365672 | 0.479969 |
| MmugDNA.39298.1.S1_at   | MmugDNA.39298.1 | 9.43  | 9.23  | 0.47 | 0.2  | 1.15  | 0.880471 | 0.032922 | 0.958646 | 0.22466  |
| MmugDNA.39300.1.S1_at   | MmugDNA.39300.1 | 8.35  | 8.35  | 0.52 | 0.17 | 1     | 0.920877 | 0.007414 | 0.973215 | 0.115758 |
| MmugDNA.39305.1.S1_at   | MmugDNA.39305.1 | 7.08  | 7.27  | 0.57 | 0.23 | -1.15 | 0.762544 | 0.447908 | 0.91092  | 0.663881 |
| MmugDNA.39306.1.S1_at   | MmugDNA.39306.1 | 10.24 | 10.36 | 0.18 | 0.13 | -1.08 | 0.307154 | 0.006571 | 0.660096 | 0.109922 |
| MmugDNA.39307.1.S1_s_at | MmugDNA.39307.1 | 7.8   | 8.48  | 0.58 | 0.22 | -1.61 | 0.105375 | 0.03258  | 0.477051 | 0.223585 |
| MmugDNA.39309.1.S1_at   | MmugDNA.39309.1 | 11.11 | 11.09 | 0.19 | 0.02 | 1.01  | 0.726091 | 0.670645 | 0.894084 | 0.807453 |
| MmugDNA.39310.1.S1_at   | MmugDNA.39310.1 | 9.19  | 10.17 | 0.58 | 0.1  | -1.98 | 0.024    | 0.021939 | 0.317529 | 0.185351 |
| MmugDNA.39312.1.S1_at   | MmugDNA.39312.1 | 11.49 | 11.61 | 0.16 | 0.13 | -1.09 | 0.442408 | 0.053248 | 0.750045 | 0.276449 |
| MmugDNA.39316.1.S1_s_at | MmugDNA.39316.1 | 3.08  | 3.12  | 0.16 | 0.29 | -1.03 | 0.885327 | 0.51797  | 0.960354 | 0.710053 |

|                         |                 |       |       |      |      |       |          |          |          |          |
|-------------------------|-----------------|-------|-------|------|------|-------|----------|----------|----------|----------|
| MmugDNA.39317.1.S1_at   | MmugDNA.39317.1 | 4.25  | 4.24  | 0.11 | 0.02 | 1     | 0.891378 | 0.035552 | 0.962572 | 0.232812 |
| MmugDNA.39320.1.S1_at   | MmugDNA.39320.1 | 6.67  | 6.58  | 0.06 | 0.04 | 1.06  | 0.039037 | 0.213498 | 0.36091  | 0.487394 |
| MmugDNA.39325.1.S1_at   | MmugDNA.39325.1 | 11.77 | 10.94 | 0.72 | 0.26 | 1.78  | 0.11929  | 0.110477 | 0.492749 | 0.374684 |
| MmugDNA.39328.1.S1_at   | MmugDNA.39328.1 | 7.19  | 7.15  | 2.29 | 0.5  | 1.03  | 0.929872 | 0.121041 | 0.976533 | 0.390053 |
| MmugDNA.3933.1.S1_at    | MmugDNA.3933.1  | 8.08  | 7.28  | 0.73 | 0.53 | 1.75  | 0.839881 | 0.772906 | 0.943082 | 0.867952 |
| MmugDNA.39331.1.S1_s_at | MmugDNA.39331.1 | 7.71  | 7.69  | 0.04 | 0.02 | 1.02  | 0.437663 | 0.984328 | 0.746873 | 0.991284 |
| MmugDNA.39336.1.S1_at   | MmugDNA.39336.1 | 5.86  | 5.69  | 0.18 | 0.18 | 1.13  | 0.396552 | 0.59483  | 0.721517 | 0.758675 |
| MmugDNA.39345.1.S1_at   | MmugDNA.39345.1 | 9.86  | 9.49  | 0.14 | 0.34 | 1.29  | 0.122283 | 0.125383 | 0.495677 | 0.396008 |
| MmugDNA.39352.1.S1_at   | MmugDNA.39352.1 | 11.69 | 12.38 | 0.27 | 0.18 | -1.61 | 0.073234 | 0.004931 | 0.434073 | 0.097846 |
| MmugDNA.39356.1.S1_at   | MmugDNA.39356.1 | 9.77  | 10.02 | 0.9  | 0.04 | -1.18 | 0.3935   | 0.46864  | 0.719322 | 0.677755 |
| MmugDNA.3936.1.S1_at    | MmugDNA.3936.1  | 3.13  | 3.1   | 0.11 | 0.13 | 1.02  | 0.599478 | 0.584862 | 0.837382 | 0.75256  |
| MmugDNA.39366.1.S1_at   | MmugDNA.39366.1 | 8.55  | 8.37  | 2.81 | 0.37 | 1.13  | 0.847758 | 0.158136 | 0.946572 | 0.433962 |
| MmugDNA.39367.1.S1_at   | MmugDNA.39367.1 | 7.72  | 7.48  | 0.23 | 0.05 | 1.18  | 0.147291 | 0.168583 | 0.521578 | 0.445206 |
| MmugDNA.39371.1.S1_at   | MmugDNA.39371.1 | 7.42  | 7.38  | 0.64 | 0.21 | 1.03  | 0.647248 | 0.105385 | 0.859364 | 0.367262 |
| MmugDNA.39375.1.S1_at   | MmugDNA.39375.1 | 10.76 | 10.49 | 0.52 | 0.06 | 1.2   | 0.934465 | 0.930538 | 0.977802 | 0.960527 |
| MmugDNA.39377.1.S1_s_at | MmugDNA.39377.1 | 10.53 | 9.84  | 0.06 | 0.13 | 1.61  | 0.001155 | 0.000375 | 0.156386 | 0.037273 |
| MmugDNA.39378.1.S1_at   | MmugDNA.39378.1 | 10.38 | 10.04 | 0.24 | 0.16 | 1.27  | 0.486133 | 0.000747 | 0.774427 | 0.045119 |
| MmugDNA.3938.1.S1_at    | MmugDNA.3938.1  | 4.09  | 4.21  | 0.08 | 0.02 | -1.09 | 0.031252 | 0.010834 | 0.340505 | 0.135705 |
| MmugDNA.39382.1.S1_at   | MmugDNA.39382.1 | 6.14  | 6.3   | 0.07 | 0.21 | -1.11 | 0.227771 | 0.140238 | 0.596693 | 0.413405 |
| MmugDNA.39392.1.S1_at   | MmugDNA.39392.1 | 8.26  | 7.96  | 0.5  | 0.08 | 1.23  | 0.460864 | 0.120318 | 0.760624 | 0.38925  |
| MmugDNA.39396.1.S1_at   | MmugDNA.39396.1 | 6.49  | 6.46  | 0.1  | 0.07 | 1.03  | 0.417648 | 0.829018 | 0.735015 | 0.901696 |
| MmugDNA.39397.1.S1_at   | MmugDNA.39397.1 | 10.92 | 10.92 | 0.13 | 0.13 | -1    | 0.928046 | 0.830475 | 0.976259 | 0.902724 |
| MmugDNA.39401.1.S1_at   | MmugDNA.39401.1 | 6.87  | 6.45  | 0.52 | 0.12 | 1.34  | 0.181484 | 0.219781 | 0.554659 | 0.493388 |
| MmugDNA.39404.1.S1_at   | MmugDNA.39404.1 | 4.23  | 4.26  | 0.11 | 0.15 | -1.02 | 0.848167 | 0.808692 | 0.946669 | 0.889895 |
| MmugDNA.39405.1.S1_at   | MmugDNA.39405.1 | 7.31  | 7.43  | 0.05 | 0.2  | -1.09 | 0.475878 | 0.556967 | 0.768748 | 0.734853 |
| MmugDNA.39412.1.S1_at   | MmugDNA.39412.1 | 3.39  | 3.17  | 0.15 | 0.17 | 1.16  | 0.42698  | 0.29495  | 0.740878 | 0.5545   |
| MmugDNA.39414.1.S1_at   | MmugDNA.39414.1 | 11.88 | 11.03 | 0.33 | 0.12 | 1.8   | 0.041557 | 0.00901  | 0.366776 | 0.125499 |
| MmugDNA.39415.1.S1_at   | MmugDNA.39415.1 | 5.94  | 5.75  | 0.72 | 0.37 | 1.14  | 0.679651 | 0.327961 | 0.87431  | 0.577785 |
| MmugDNA.39416.1.S1_at   | MmugDNA.39416.1 | 9.39  | 9.48  | 1.25 | 0.16 | -1.06 | 0.9695   | 0.347799 | 0.989968 | 0.592154 |
| MmugDNA.39422.1.S1_at   | MmugDNA.39422.1 | 9.1   | 9.82  | 0.19 | 0.19 | -1.64 | 0.0069   | 0.000131 | 0.224141 | 0.029087 |
| MmugDNA.39424.1.S1_at   | MmugDNA.39424.1 | 11.32 | 11.48 | 0.07 | 0.09 | -1.11 | 0.135843 | 0.000734 | 0.510364 | 0.04476  |
| MmugDNA.39425.1.S1_at   | MmugDNA.39425.1 | 7.99  | 7.93  | 0.34 | 0.03 | 1.04  | 0.446181 | 0.618376 | 0.752589 | 0.774031 |
| MmugDNA.39427.1.S1_at   | MmugDNA.39427.1 | 6.12  | 5.87  | 0.21 | 0.17 | 1.19  | 0.244339 | 0.303973 | 0.60991  | 0.561344 |
| MmugDNA.39430.1.S1_at   | MmugDNA.39430.1 | 6.78  | 6.81  | 0.27 | 0.1  | -1.02 | 0.77568  | 0.231347 | 0.916804 | 0.503029 |
| MmugDNA.3944.1.S1_at    | MmugDNA.3944.1  | 8.75  | 9.46  | 0.57 | 0.24 | -1.63 | 0.253624 | 0.126556 | 0.618323 | 0.397149 |
| MmugDNA.39440.1.S1_at   | MmugDNA.39440.1 | 8.3   | 8.03  | 0.58 | 0.05 | 1.21  | 0.560683 | 0.21816  | 0.816948 | 0.491731 |
| MmugDNA.39443.1.S1_at   | MmugDNA.39443.1 | 6.54  | 6.49  | 0.07 | 0.03 | 1.03  | 0.351267 | 0.767085 | 0.691945 | 0.864712 |
| MmugDNA.39446.1.S1_at   | MmugDNA.39446.1 | 9.35  | 9.5   | 0.38 | 0.39 | -1.11 | 0.814369 | 0.713207 | 0.932969 | 0.833655 |
| MmugDNA.39450.1.S1_at   | MmugDNA.39450.1 | 9.79  | 10.18 | 0.69 | 0.04 | -1.31 | 0.657175 | 0.832282 | 0.863937 | 0.903796 |
| MmugDNA.39455.1.S1_at   | MmugDNA.39455.1 | 6.39  | 6.36  | 0.21 | 0.01 | 1.02  | 0.669717 | 0.907071 | 0.869663 | 0.947374 |
| MmugDNA.39457.1.S1_at   | MmugDNA.39457.1 | 8.79  | 8.88  | 1.37 | 0.13 | -1.07 | 0.906689 | 0.618977 | 0.968356 | 0.774229 |
| MmugDNA.39460.1.S1_at   | MmugDNA.39460.1 | 11.22 | 11.61 | 0.28 | 0.14 | -1.31 | 0.257906 | 0.597888 | 0.621602 | 0.760468 |
| MmugDNA.39465.1.S1_at   | MmugDNA.39465.1 | 8.91  | 9.16  | 0.33 | 0.03 | -1.19 | 0.111838 | 0.124185 | 0.48497  | 0.394496 |

|                         |                 |       |       |      |      |       |          |          |          |          |
|-------------------------|-----------------|-------|-------|------|------|-------|----------|----------|----------|----------|
| MmugDNA.39476.1.S1_s_at | MmugDNA.39476.1 | 10.86 | 10.67 | 0.85 | 0.09 | 1.15  | 0.742713 | 0.374533 | 0.901884 | 0.6129   |
| MmugDNA.39477.1.S1_at   | MmugDNA.39477.1 | 9.01  | 8.07  | 0.91 | 0.14 | 1.92  | 0.16477  | 0.112959 | 0.537466 | 0.378763 |
| MmugDNA.39487.1.S1_at   | MmugDNA.39487.1 | 9.88  | 9.68  | 0.34 | 0.03 | 1.15  | 0.129177 | 0.055623 | 0.503876 | 0.281649 |
| MmugDNA.39490.1.S1_at   | MmugDNA.39490.1 | 6.57  | 6.77  | 0.86 | 0.28 | -1.15 | 0.238978 | 0.082915 | 0.60548  | 0.332446 |
| MmugDNA.39494.1.S1_at   | MmugDNA.39494.1 | 5.62  | 5.5   | 0.02 | 0.12 | 1.09  | 0.155362 | 0.057227 | 0.528651 | 0.285059 |
| MmugDNA.395.1.S1_at     | MmugDNA.395.1   | 11.47 | 11    | 0.31 | 0.38 | 1.38  | 0.100817 | 0.016051 | 0.47159  | 0.160532 |
| MmugDNA.39501.1.S1_at   | MmugDNA.39501.1 | 11.49 | 11.69 | 0.31 | 0.05 | -1.15 | 0.439625 | 0.634978 | 0.748253 | 0.785108 |
| MmugDNA.39503.1.S1_at   | MmugDNA.39503.1 | 11.44 | 11.7  | 0.22 | 0.1  | -1.2  | 0.215477 | 0.059093 | 0.585748 | 0.289985 |
| MmugDNA.39507.1.S1_at   | MmugDNA.39507.1 | 4.74  | 4.55  | 0.23 | 0.09 | 1.14  | 0.179582 | 0.333045 | 0.552935 | 0.581374 |
| MmugDNA.3951.1.S1_at    | MmugDNA.3951.1  | 7.59  | 8.59  | 0.84 | 0.08 | -2    | 0.126181 | 0.070995 | 0.499902 | 0.312604 |
| MmugDNA.39510.1.S1_at   | MmugDNA.39510.1 | 11.07 | 11.43 | 0.34 | 0.07 | -1.28 | 0.166015 | 0.161051 | 0.538792 | 0.437227 |
| MmugDNA.39525.1.S1_at   | MmugDNA.39525.1 | 6.5   | 6.37  | 0.2  | 0.18 | 1.09  | 0.858257 | 0.002101 | 0.94994  | 0.067779 |
| MmugDNA.39529.1.S1_at   | MmugDNA.39529.1 | 13.28 | 13.3  | 0.08 | 0.03 | -1.01 | 0.703524 | 0.235959 | 0.88474  | 0.507056 |
| MmugDNA.39530.1.S1_at   | MmugDNA.39530.1 | 5.38  | 5.3   | 0.1  | 0.07 | 1.05  | 0.831067 | 0.107133 | 0.939611 | 0.369808 |
| MmugDNA.39532.1.S1_at   | MmugDNA.39532.1 | 8.95  | 8.36  | 0.38 | 0.14 | 1.51  | 0.104657 | 0.266551 | 0.475918 | 0.532301 |
| MmugDNA.39534.1.S1_at   | MmugDNA.39534.1 | 6.75  | 6.88  | 0.49 | 0.23 | -1.09 | 0.713999 | 0.05526  | 0.88857  | 0.280809 |
| MmugDNA.39536.1.S1_at   | MmugDNA.39536.1 | 9.43  | 9.04  | 0.42 | 0.1  | 1.31  | 0.449875 | 0.608041 | 0.754621 | 0.766741 |
| MmugDNA.39539.1.S1_at   | MmugDNA.39539.1 | 5.85  | 6.64  | 0.53 | 0.21 | -1.73 | 0.131107 | 0.284657 | 0.5054   | 0.546877 |
| MmugDNA.39540.1.S1_at   | MmugDNA.39540.1 | 4.67  | 4.37  | 0.67 | 0.19 | 1.23  | 0.793891 | 0.180013 | 0.924476 | 0.456552 |
| MmugDNA.39542.1.S1_at   | MmugDNA.39542.1 | 9.76  | 10.46 | 0.56 | 0.13 | -1.62 | 0.214315 | 0.079931 | 0.584705 | 0.327258 |
| MmugDNA.39545.1.S1_at   | MmugDNA.39545.1 | 6.98  | 6.89  | 0.09 | 0.11 | 1.06  | 0.591496 | 0.470834 | 0.833495 | 0.679124 |
| MmugDNA.39547.1.S1_at   | MmugDNA.39547.1 | 11.47 | 11.79 | 0.12 | 0.08 | -1.25 | 0.023855 | 0.02055  | 0.317251 | 0.179861 |
| MmugDNA.39548.1.S1_at   | MmugDNA.39548.1 | 4.29  | 4.12  | 0.16 | 0.08 | 1.13  | 0.187171 | 0.116375 | 0.559729 | 0.383671 |
| MmugDNA.39555.1.S1_at   | MmugDNA.39555.1 | 10.88 | 10.87 | 0.85 | 0.08 | 1.01  | 0.903541 | 0.164982 | 0.967608 | 0.44123  |
| MmugDNA.39559.1.S1_at   | MmugDNA.39559.1 | 11.2  | 11.48 | 0.74 | 0.11 | -1.21 | 0.475658 | 0.343611 | 0.768676 | 0.589322 |
| MmugDNA.3956.1.S1_at    | MmugDNA.3956.1  | 2.87  | 2.92  | 0.19 | 0.03 | -1.03 | 0.627887 | 0.34978  | 0.850825 | 0.593578 |
| MmugDNA.39560.1.S1_at   | MmugDNA.39560.1 | 4.14  | 4.12  | 0.24 | 0.07 | 1.01  | 0.588973 | 0.390901 | 0.832092 | 0.624603 |
| MmugDNA.39571.1.S1_at   | MmugDNA.39571.1 | 4.08  | 4.67  | 0.11 | 0.28 | -1.51 | 0.025244 | 0.080505 | 0.320823 | 0.328159 |
| MmugDNA.39574.1.S1_at   | MmugDNA.39574.1 | 8.63  | 8.04  | 0.27 | 0.26 | 1.51  | 0.096591 | 0.136415 | 0.465275 | 0.408839 |
| MmugDNA.39580.1.S1_at   | MmugDNA.39580.1 | 4.16  | 4.37  | 0.13 | 0.22 | -1.16 | 0.23873  | 0.29042  | 0.605393 | 0.551169 |
| MmugDNA.39582.1.S1_at   | MmugDNA.39582.1 | 11.44 | 11.02 | 1.05 | 0.15 | 1.33  | 0.458874 | 0.067647 | 0.759132 | 0.306199 |
| MmugDNA.39584.1.S1_at   | MmugDNA.39584.1 | 5.3   | 5.19  | 0.22 | 0.06 | 1.08  | 0.313015 | 0.45969  | 0.664399 | 0.671948 |
| MmugDNA.39588.1.S1_at   | MmugDNA.39588.1 | 7.96  | 8.86  | 1.76 | 0.15 | -1.87 | 0.479233 | 0.559693 | 0.770659 | 0.736365 |
| MmugDNA.396.1.S1_at     | MmugDNA.396.1   | 10.49 | 10.38 | 0.45 | 0.05 | 1.08  | 0.946827 | 0.603824 | 0.981556 | 0.764323 |
| MmugDNA.39606.1.S1_at   | MmugDNA.39606.1 | 9.68  | 10.45 | 0.67 | 0.19 | -1.7  | 0.134978 | 0.127427 | 0.509124 | 0.398274 |
| MmugDNA.39607.1.S1_at   | MmugDNA.39607.1 | 3.7   | 3.57  | 0.24 | 0.11 | 1.09  | 0.485895 | 0.289794 | 0.774427 | 0.55082  |
| MmugDNA.39609.1.S1_at   | MmugDNA.39609.1 | 8.31  | 7.65  | 2.28 | 0.2  | 1.59  | 0.777767 | 0.245572 | 0.917813 | 0.515348 |
| MmugDNA.39616.1.S1_at   | MmugDNA.39616.1 | 10.82 | 11.15 | 0.01 | 0.07 | -1.26 | 0.001068 | 0.001761 | 0.155464 | 0.063161 |
| MmugDNA.39618.1.S1_at   | MmugDNA.39618.1 | 4.13  | 4.01  | 0.22 | 0.27 | 1.08  | 0.302549 | 0.067339 | 0.656525 | 0.305492 |
| MmugDNA.39619.1.S1_at   | MmugDNA.39619.1 | 8.45  | 10.38 | 0.77 | 0.29 | -3.81 | 0.019561 | 0.022062 | 0.301601 | 0.185927 |
| MmugDNA.3962.1.S1_at    | MmugDNA.3962.1  | 6.85  | 6.85  | 0.13 | 0.08 | -1.01 | 0.709294 | 0.130177 | 0.886821 | 0.40188  |
| MmugDNA.39621.1.S1_at   | MmugDNA.39621.1 | 5.1   | 5.49  | 0.49 | 0.3  | -1.31 | 0.24964  | 0.373627 | 0.615064 | 0.612389 |
| MmugDNA.39626.1.S1_at   | MmugDNA.39626.1 | 8.93  | 8.8   | 1.01 | 0.03 | 1.1   | 0.985551 | 0.018337 | 0.995461 | 0.170279 |

|                         |                 |       |       |      |      |       |          |          |          |          |
|-------------------------|-----------------|-------|-------|------|------|-------|----------|----------|----------|----------|
| MmugDNA.39627.1.S1_at   | MmugDNA.39627.1 | 3.18  | 3.13  | 0.31 | 0.53 | 1.04  | 0.855805 | 0.642382 | 0.949014 | 0.790178 |
| MmugDNA.3963.1.S1_at    | MmugDNA.3963.1  | 8.49  | 9.35  | 0.55 | 0.18 | -1.81 | 0.049809 | 0.024395 | 0.386252 | 0.19551  |
| MmugDNA.39631.1.S1_at   | MmugDNA.39631.1 | 9.59  | 9.59  | 0.14 | 0.11 | -1    | 0.73073  | 0.053125 | 0.896248 | 0.276232 |
| MmugDNA.39632.1.S1_at   | MmugDNA.39632.1 | 3.51  | 3.36  | 0.2  | 0.04 | 1.11  | 0.27465  | 0.625544 | 0.633979 | 0.779222 |
| MmugDNA.39634.1.S1_s_at | MmugDNA.39634.1 | 3.65  | 3.71  | 0.13 | 0.12 | -1.04 | 0.518013 | 0.486562 | 0.792383 | 0.689898 |
| MmugDNA.39637.1.S1_at   | MmugDNA.39637.1 | 8.49  | 9.42  | 0.35 | 0.23 | -1.91 | 0.037097 | 0.006967 | 0.356778 | 0.112743 |
| MmugDNA.39645.1.S1_at   | MmugDNA.39645.1 | 5.82  | 6.01  | 0.03 | 0.28 | -1.14 | 0.208549 | 0.199401 | 0.580248 | 0.474002 |
| MmugDNA.3965.1.S1_at    | MmugDNA.3965.1  | 11.81 | 11.9  | 0.14 | 0.01 | -1.06 | 0.093018 | 0.044758 | 0.46164  | 0.256009 |
| MmugDNA.39652.1.S1_at   | MmugDNA.39652.1 | 7.22  | 7.2   | 0.13 | 0.13 | 1.01  | 0.68778  | 0.049238 | 0.87793  | 0.266752 |
| MmugDNA.39653.1.S1_at   | MmugDNA.39653.1 | 11.98 | 12    | 0.25 | 0.05 | -1.01 | 0.365838 | 0.492706 | 0.701377 | 0.693724 |
| MmugDNA.3966.1.S1_at    | MmugDNA.3966.1  | 7.04  | 7.1   | 0.13 | 0.19 | -1.05 | 0.470365 | 0.752011 | 0.766116 | 0.855739 |
| MmugDNA.39663.1.S1_at   | MmugDNA.39663.1 | 10.91 | 10.97 | 0.17 | 0.07 | -1.04 | 0.254721 | 0.272974 | 0.619146 | 0.53761  |
| MmugDNA.39664.1.S1_at   | MmugDNA.39664.1 | 3.09  | 3.03  | 0.12 | 0.12 | 1.05  | 0.431975 | 0.206728 | 0.743696 | 0.480825 |
| MmugDNA.39669.1.S1_at   | MmugDNA.39669.1 | 7.17  | 7.07  | 0.09 | 0.14 | 1.07  | 0.076605 | 0.048077 | 0.437977 | 0.26428  |
| MmugDNA.39678.1.S1_at   | MmugDNA.39678.1 | 6.85  | 6.64  | 0.54 | 0.08 | 1.16  | 0.739577 | 0.779751 | 0.900683 | 0.872303 |
| MmugDNA.39679.1.S1_at   | MmugDNA.39679.1 | 7.2   | 7.45  | 0.54 | 0.14 | -1.19 | 0.19616  | 0.146252 | 0.566663 | 0.420241 |
| MmugDNA.39699.1.S1_at   | MmugDNA.39699.1 | 7.94  | 9.34  | 0.69 | 0.08 | -2.63 | 0.027577 | 0.020085 | 0.328121 | 0.178007 |
| MmugDNA.39701.1.S1_at   | MmugDNA.39701.1 | 5.09  | 5.21  | 0.26 | 0.15 | -1.08 | 0.875823 | 0.332604 | 0.956816 | 0.580982 |
| MmugDNA.39708.1.S1_s_at | MmugDNA.39708.1 | 10.74 | 9.99  | 0.7  | 0.39 | 1.69  | 0.355693 | 0.2098   | 0.694812 | 0.483538 |
| MmugDNA.39709.1.S1_at   | MmugDNA.39709.1 | 5.52  | 6.61  | 0.65 | 0.13 | -2.12 | 0.049142 | 0.062749 | 0.385273 | 0.297193 |
| MmugDNA.3971.1.S1_at    | MmugDNA.3971.1  | 10.4  | 9.86  | 0.94 | 0.16 | 1.45  | 0.964329 | 0.688208 | 0.988358 | 0.817998 |
| MmugDNA.39714.1.S1_at   | MmugDNA.39714.1 | 8.82  | 9.06  | 2.11 | 0.27 | -1.19 | 0.749002 | 0.157549 | 0.9048   | 0.433131 |
| MmugDNA.3972.1.S1_at    | MmugDNA.3972.1  | 9.97  | 9.94  | 0.29 | 0.08 | 1.02  | 0.882826 | 0.562471 | 0.959428 | 0.738025 |
| MmugDNA.3973.1.S1_at    | MmugDNA.3973.1  | 12.2  | 12.21 | 0.4  | 0.05 | -1.01 | 0.318096 | 0.060242 | 0.667757 | 0.292091 |
| MmugDNA.39744.1.S1_at   | MmugDNA.39744.1 | 8.46  | 9.1   | 0.4  | 0.06 | -1.56 | 0.166191 | 0.137522 | 0.538934 | 0.410484 |
| MmugDNA.39763.1.S1_at   | MmugDNA.39763.1 | 10.7  | 9.93  | 0.51 | 0.08 | 1.71  | 0.10104  | 0.003853 | 0.47159  | 0.08832  |
| MmugDNA.39772.1.S1_at   | MmugDNA.39772.1 | 9.83  | 9.94  | 0.41 | 0.11 | -1.08 | 0.595473 | 0.055454 | 0.835425 | 0.281393 |
| MmugDNA.39774.1.S1_at   | MmugDNA.39774.1 | 8.49  | 8.25  | 0.67 | 0.08 | 1.18  | 0.850416 | 0.143944 | 0.947375 | 0.417867 |
| MmugDNA.39776.1.S1_at   | MmugDNA.39776.1 | 10.31 | 10.17 | 0.59 | 0.06 | 1.1   | 0.773472 | 0.590778 | 0.915801 | 0.756448 |
| MmugDNA.39779.1.S1_at   | MmugDNA.39779.1 | 4.87  | 4.92  | 0.04 | 0.17 | -1.03 | 0.212784 | 0.080816 | 0.583279 | 0.32873  |
| MmugDNA.39782.1.S1_at   | MmugDNA.39782.1 | 10.29 | 10.47 | 0.22 | 0.08 | -1.13 | 0.938709 | 0.134899 | 0.979343 | 0.406878 |
| MmugDNA.39789.1.S1_at   | MmugDNA.39789.1 | 7     | 6.47  | 0.09 | 0.12 | 1.44  | 0.003528 | 0.005678 | 0.196505 | 0.103959 |
| MmugDNA.39791.1.S1_at   | MmugDNA.39791.1 | 11.51 | 11.49 | 0.14 | 0.04 | 1.02  | 0.497914 | 0.008097 | 0.781446 | 0.119551 |
| MmugDNA.39796.1.S1_at   | MmugDNA.39796.1 | 9.32  | 7.71  | 0.44 | 0.2  | 3.06  | 0.006345 | 0.001736 | 0.218505 | 0.062895 |
| MmugDNA.39807.1.S1_at   | MmugDNA.39807.1 | 7.31  | 6.6   | 0.11 | 0.45 | 1.64  | 0.048621 | 0.08775  | 0.383721 | 0.341027 |
| MmugDNA.39811.1.S1_at   | MmugDNA.39811.1 | 8.08  | 7.87  | 0.2  | 0.04 | 1.16  | 0.372293 | 0.58095  | 0.705567 | 0.750041 |
| MmugDNA.39813.1.S1_at   | MmugDNA.39813.1 | 6.52  | 6.75  | 0.34 | 0.15 | -1.18 | 0.090885 | 0.115641 | 0.458873 | 0.382714 |
| MmugDNA.39821.1.S1_at   | MmugDNA.39821.1 | 10.81 | 10.97 | 0.36 | 0.16 | -1.12 | 0.694369 | 0.212225 | 0.881102 | 0.486124 |
| MmugDNA.39823.1.S1_at   | MmugDNA.39823.1 | 6.43  | 7.14  | 1.79 | 0.26 | -1.64 | 0.522647 | 0.081148 | 0.795192 | 0.329333 |
| MmugDNA.39828.1.S1_at   | MmugDNA.39828.1 | 8.36  | 8.41  | 0.47 | 0.21 | -1.04 | 0.733293 | 0.939738 | 0.897538 | 0.965752 |
| MmugDNA.3983.1.S1_at    | MmugDNA.3983.1  | 12.32 | 12.43 | 0.17 | 0.09 | -1.08 | 0.373251 | 0.634295 | 0.705567 | 0.784742 |
| MmugDNA.39834.1.S1_s_at | MmugDNA.39834.1 | 9.74  | 9.25  | 0.67 | 0.24 | 1.41  | 0.984509 | 0.999694 | 0.995256 | 0.999883 |
| MmugDNA.39839.1.S1_at   | MmugDNA.39839.1 | 10.32 | 10.13 | 0.27 | 0.12 | 1.14  | 0.356883 | 0.407135 | 0.695364 | 0.634753 |

|                         |                 |       |       |      |      |       |          |          |          |          |
|-------------------------|-----------------|-------|-------|------|------|-------|----------|----------|----------|----------|
| MmugDNA.39842.1.S1_at   | MmugDNA.39842.1 | 11.95 | 11.83 | 0.06 | 0.15 | 1.09  | 0.577485 | 0.93159  | 0.825728 | 0.961152 |
| MmugDNA.39842.1.S1_s_at | MmugDNA.39842.1 | 11.5  | 11.33 | 0.05 | 0.09 | 1.12  | 0.032146 | 0.053527 | 0.343204 | 0.277016 |
| MmugDNA.39847.1.S1_at   | MmugDNA.39847.1 | 9.64  | 10.41 | 0.45 | 0.13 | -1.71 | 0.136819 | 0.065661 | 0.511963 | 0.301631 |
| MmugDNA.39849.1.S1_at   | MmugDNA.39849.1 | 4.11  | 4.44  | 0.03 | 0.11 | -1.25 | 0.009764 | 0.000225 | 0.243347 | 0.032385 |
| MmugDNA.39851.1.S1_at   | MmugDNA.39851.1 | 10.11 | 10.53 | 0.54 | 0.19 | -1.34 | 0.186718 | 0.276065 | 0.559225 | 0.540086 |
| MmugDNA.39858.1.S1_at   | MmugDNA.39858.1 | 6.75  | 6.7   | 0.18 | 0.03 | 1.03  | 0.266173 | 0.043714 | 0.627106 | 0.253804 |
| MmugDNA.39859.1.S1_at   | MmugDNA.39859.1 | 11.89 | 11.76 | 0.27 | 0.15 | 1.09  | 0.680115 | 0.513215 | 0.874543 | 0.706851 |
| MmugDNA.39861.1.S1_at   | MmugDNA.39861.1 | 11.64 | 11.89 | 0.03 | 0.06 | -1.19 | 0.002279 | 0.000632 | 0.174757 | 0.042882 |
| MmugDNA.39864.1.S1_at   | MmugDNA.39864.1 | 2.98  | 2.92  | 0.11 | 0.12 | 1.04  | 0.686509 | 0.789999 | 0.877418 | 0.878631 |
| MmugDNA.39874.1.S1_at   | MmugDNA.39874.1 | 6.35  | 6.16  | 0.42 | 0.1  | 1.14  | 0.666689 | 0.391305 | 0.868397 | 0.625    |
| MmugDNA.39876.1.S1_at   | MmugDNA.39876.1 | 4.3   | 4.25  | 0.31 | 0.23 | -1.03 | 0.42335  | 0.572431 | 0.739018 | 0.744497 |
| MmugDNA.39881.1.S1_at   | MmugDNA.39881.1 | 6.7   | 7.42  | 1.59 | 0.19 | -1.65 | 0.282428 | 0.389092 | 0.640907 | 0.623345 |
| MmugDNA.39890.1.S1_at   | MmugDNA.39890.1 | 5.48  | 5.23  | 0.07 | 0.06 | 1.2   | 0.014882 | 0.027322 | 0.278597 | 0.206625 |
| MmugDNA.39898.1.S1_at   | MmugDNA.39898.1 | 10.52 | 9.79  | 0.58 | 0.09 | 1.66  | 0.206652 | 0.24266  | 0.578606 | 0.513025 |
| MmugDNA.399.1.S1_at     | MmugDNA.399.1   | 7.55  | 7.31  | 0.14 | 0.04 | 1.18  | 0.071913 | 0.191572 | 0.431859 | 0.466896 |
| MmugDNA.3990.1.S1_at    | MmugDNA.3990.1  | 7.22  | 7.07  | 0.06 | 0.09 | 1.1   | 0.063191 | 0.071554 | 0.415238 | 0.313714 |
| MmugDNA.39907.1.S1_at   | MmugDNA.39907.1 | 3.27  | 3.33  | 0.03 | 0.25 | -1.04 | 0.488862 | 0.666172 | 0.775831 | 0.804415 |
| MmugDNA.39913.1.S1_at   | MmugDNA.39913.1 | 14.38 | 14.4  | 0.25 | 0.06 | -1.02 | 0.755933 | 0.172272 | 0.90805  | 0.448666 |
| MmugDNA.39914.1.S1_at   | MmugDNA.39914.1 | 11.87 | 12.12 | 0.4  | 0.05 | -1.19 | 0.370677 | 0.348695 | 0.704961 | 0.592707 |
| MmugDNA.39919.1.S1_at   | MmugDNA.39919.1 | 10.87 | 12.05 | 1.77 | 0.2  | -2.27 | 0.266135 | 0.342143 | 0.627106 | 0.588322 |
| MmugDNA.39924.1.S1_at   | MmugDNA.39924.1 | 14.08 | 13.98 | 0.19 | 0.07 | 1.07  | 0.693174 | 0.907961 | 0.880472 | 0.947889 |
| MmugDNA.39925.1.S1_at   | MmugDNA.39925.1 | 4.58  | 4.52  | 0.05 | 0.19 | 1.04  | 0.246935 | 0.152155 | 0.612544 | 0.426919 |
| MmugDNA.39927.1.S1_s_at | MmugDNA.39927.1 | 9.63  | 10.01 | 0.7  | 0.05 | -1.3  | 0.363237 | 0.035851 | 0.699934 | 0.233788 |
| MmugDNA.39935.1.S1_at   | MmugDNA.39935.1 | 8.46  | 8.76  | 0.16 | 0.3  | -1.23 | 0.084619 | 0.045266 | 0.451162 | 0.257084 |
| MmugDNA.39939.1.S1_at   | MmugDNA.39939.1 | 12.84 | 12.75 | 0.27 | 0.04 | 1.06  | 0.679559 | 0.137864 | 0.87431  | 0.410833 |
| MmugDNA.3994.1.S1_at    | MmugDNA.3994.1  | 10.74 | 10.84 | 0.3  | 0.09 | -1.07 | 0.291666 | 0.2657   | 0.648031 | 0.531561 |
| MmugDNA.39948.1.S1_at   | MmugDNA.39948.1 | 8.74  | 8.91  | 0.1  | 0.04 | -1.12 | 0.08269  | 0.072735 | 0.447891 | 0.31565  |
| MmugDNA.39957.1.S1_at   | MmugDNA.39957.1 | 6.49  | 5.45  | 0.51 | 0.28 | 2.05  | 0.052658 | 0.063464 | 0.392806 | 0.298441 |
| MmugDNA.39958.1.S1_at   | MmugDNA.39958.1 | 10.81 | 10.37 | 1.21 | 0.05 | 1.36  | 0.862042 | 0.13207  | 0.951336 | 0.404046 |
| MmugDNA.3996.1.S1_at    | MmugDNA.3996.1  | 11.41 | 11.28 | 0.23 | 0.03 | 1.09  | 0.375342 | 0.312469 | 0.706463 | 0.567211 |
| MmugDNA.39967.1.S1_at   | MmugDNA.39967.1 | 3.12  | 3.04  | 0.02 | 0.06 | 1.05  | 0.101276 | 0.260267 | 0.471667 | 0.526809 |
| MmugDNA.39969.1.S1_at   | MmugDNA.39969.1 | 4.3   | 4.38  | 0.09 | 0.21 | -1.06 | 0.542484 | 0.525103 | 0.805755 | 0.714766 |
| MmugDNA.39974.1.S1_at   | MmugDNA.39974.1 | 8.62  | 9.19  | 1.44 | 0.37 | -1.48 | 0.64404  | 0.067201 | 0.85839  | 0.305204 |
| MmugDNA.39975.1.S1_at   | MmugDNA.39975.1 | 6.32  | 7.77  | 1.64 | 0.53 | -2.74 | 0.288187 | 0.101665 | 0.645272 | 0.361562 |
| MmugDNA.3998.1.S1_at    | MmugDNA.3998.1  | 4.49  | 4.62  | 0.8  | 0.55 | -1.09 | 0.934651 | 0.163306 | 0.977899 | 0.439468 |
| MmugDNA.39985.1.S1_at   | MmugDNA.39985.1 | 5.86  | 5.57  | 0.23 | 0.03 | 1.23  | 0.30219  | 0.010299 | 0.656154 | 0.132854 |
| MmugDNA.39994.1.S1_at   | MmugDNA.39994.1 | 5.47  | 5.56  | 0.27 | 0.11 | -1.07 | 0.355863 | 0.105973 | 0.694889 | 0.368302 |
| MmugDNA.39996.1.S1_at   | MmugDNA.39996.1 | 7.34  | 8.04  | 0.63 | 0.33 | -1.62 | 0.059594 | 0.142201 | 0.406669 | 0.415754 |
| MmugDNA.40001.1.S1_at   | MmugDNA.40001.1 | 10.11 | 10.61 | 0.81 | 0.2  | -1.41 | 0.445199 | 0.502495 | 0.75193  | 0.700192 |
| MmugDNA.40017.1.S1_at   | MmugDNA.40017.1 | 6.2   | 6.22  | 0.03 | 0.1  | -1.01 | 0.27451  | 0.502298 | 0.633904 | 0.700078 |
| MmugDNA.4002.1.S1_at    | MmugDNA.4002.1  | 8.76  | 8.37  | 0.05 | 0.25 | 1.31  | 0.026069 | 0.063615 | 0.323344 | 0.298759 |
| MmugDNA.40026.1.S1_at   | MmugDNA.40026.1 | 10.46 | 10.83 | 0.21 | 0.1  | -1.3  | 0.050065 | 0.021543 | 0.386663 | 0.183828 |
| MmugDNA.40045.1.S1_at   | MmugDNA.40045.1 | 7.46  | 7.59  | 0.12 | 0.1  | -1.09 | 0.091111 | 0.005013 | 0.458986 | 0.09867  |

|                         |                 |       |       |      |      |       |          |          |          |          |
|-------------------------|-----------------|-------|-------|------|------|-------|----------|----------|----------|----------|
| MmugDNA.40047.1.S1_at   | MmugDNA.40047.1 | 7.48  | 7.37  | 0.08 | 0.07 | 1.08  | 0.173614 | 0.475326 | 0.546749 | 0.682032 |
| MmugDNA.40058.1.S1_at   | MmugDNA.40058.1 | 9.56  | 9.85  | 0.57 | 0.13 | -1.22 | 0.930412 | 0.4474   | 0.976808 | 0.66348  |
| MmugDNA.40059.1.S1_at   | MmugDNA.40059.1 | 9.69  | 9.02  | 0.15 | 0.13 | 1.6   | 0.004271 | 0.010257 | 0.198874 | 0.132655 |
| MmugDNA.4006.1.S1_at    | MmugDNA.4006.1  | 10.45 | 10.54 | 0.16 | 0.02 | -1.06 | 0.151149 | 0.017179 | 0.52444  | 0.166059 |
| MmugDNA.40060.1.S1_s_at | MmugDNA.40060.1 | 6.28  | 5.93  | 1.21 | 0.09 | 1.27  | 0.697569 | 0.425778 | 0.882361 | 0.648089 |
| MmugDNA.40061.1.S1_at   | MmugDNA.40061.1 | 5.33  | 5.36  | 0.23 | 0.15 | -1.02 | 0.637572 | 0.091754 | 0.855587 | 0.346977 |
| MmugDNA.40066.1.S1_at   | MmugDNA.40066.1 | 8.69  | 8.86  | 0.19 | 0.1  | -1.13 | 0.627911 | 0.00008  | 0.850829 | 0.027016 |
| MmugDNA.40077.1.S1_at   | MmugDNA.40077.1 | 10.99 | 11.24 | 0.25 | 0.09 | -1.19 | 0.061538 | 0.020608 | 0.411001 | 0.180131 |
| MmugDNA.40078.1.S1_at   | MmugDNA.40078.1 | 6.17  | 6.29  | 0.07 | 0.04 | -1.08 | 0.106371 | 0.231797 | 0.478837 | 0.503592 |
| MmugDNA.40080.1.S1_at   | MmugDNA.40080.1 | 7.95  | 6.97  | 0.45 | 0.1  | 1.97  | 0.03295  | 0.024484 | 0.345526 | 0.195845 |
| MmugDNA.40085.1.S1_at   | MmugDNA.40085.1 | 5.93  | 5.85  | 0.13 | 0.08 | -1.06 | 0.223863 | 0.161136 | 0.59298  | 0.437288 |
| MmugDNA.40088.1.S1_at   | MmugDNA.40088.1 | 3.5   | 3.46  | 0.06 | 0.09 | 1.02  | 0.177582 | 0.537729 | 0.55065  | 0.722664 |
| MmugDNA.40088.1.S1_x_at | MmugDNA.40088.1 | 3.64  | 3.58  | 0.1  | 0.04 | 1.04  | 0.61871  | 0.100415 | 0.846177 | 0.359541 |
| MmugDNA.40090.1.S1_at   | MmugDNA.40090.1 | 9.81  | 10.17 | 0.22 | 0.04 | -1.28 | 0.13105  | 0.252746 | 0.5054   | 0.521174 |
| MmugDNA.40091.1.S1_at   | MmugDNA.40091.1 | 8.2   | 7.36  | 0.88 | 0.08 | 1.78  | 0.617361 | 0.418831 | 0.845362 | 0.643118 |
| MmugDNA.40097.1.S1_at   | MmugDNA.40097.1 | 10.15 | 9.7   | 0.81 | 0.06 | 1.37  | 0.156508 | 0.172515 | 0.529581 | 0.448864 |
| MmugDNA.40105.1.S1_at   | MmugDNA.40105.1 | 10.26 | 9.61  | 0.14 | 0.15 | 1.57  | 0.007056 | 0.000044 | 0.225384 | 0.025273 |
| MmugDNA.40109.1.S1_at   | MmugDNA.40109.1 | 9.58  | 9.73  | 0.08 | 0.04 | -1.11 | 0.070334 | 0.120478 | 0.429009 | 0.38925  |
| MmugDNA.40113.1.S1_at   | MmugDNA.40113.1 | 7.04  | 7.46  | 0.19 | 0.13 | -1.34 | 0.022375 | 0.114625 | 0.310499 | 0.381156 |
| MmugDNA.40118.1.S1_at   | MmugDNA.40118.1 | 6.37  | 6.55  | 0.17 | 0.12 | -1.13 | 0.607599 | 0.336434 | 0.840951 | 0.583831 |
| MmugDNA.40124.1.S1_at   | MmugDNA.40124.1 | 9.56  | 9.66  | 0.59 | 0.07 | -1.07 | 0.775671 | 0.784462 | 0.916804 | 0.875181 |
| MmugDNA.40124.1.S1_s_at | MmugDNA.40124.1 | 10.95 | 11.06 | 0.55 | 0.06 | -1.08 | 0.902378 | 0.850992 | 0.967018 | 0.915265 |
| MmugDNA.40134.1.S1_at   | MmugDNA.40134.1 | 11.29 | 12.08 | 0.35 | 0.13 | -1.74 | 0.03264  | 0.01131  | 0.345045 | 0.138076 |
| MmugDNA.40137.1.S1_at   | MmugDNA.40137.1 | 11.54 | 11.31 | 0.62 | 0.23 | 1.17  | 0.489028 | 0.146179 | 0.775981 | 0.420124 |
| MmugDNA.40138.1.S1_at   | MmugDNA.40138.1 | 10.46 | 10.54 | 0.97 | 0.08 | -1.06 | 0.849624 | 0.859818 | 0.947112 | 0.920108 |
| MmugDNA.40139.1.S1_at   | MmugDNA.40139.1 | 3.42  | 3.37  | 0.09 | 0.12 | 1.04  | 0.72507  | 0.088435 | 0.893356 | 0.341877 |
| MmugDNA.40144.1.S1_at   | MmugDNA.40144.1 | 10.43 | 11.03 | 1.05 | 0.08 | -1.52 | 0.297936 | 0.309601 | 0.652791 | 0.564987 |
| MmugDNA.40146.1.S1_at   | MmugDNA.40146.1 | 8.41  | 8.68  | 0.23 | 0.02 | -1.21 | 0.408222 | 0.156513 | 0.729223 | 0.431885 |
| MmugDNA.40147.1.S1_at   | MmugDNA.40147.1 | 11.89 | 11.94 | 0.15 | 0.05 | -1.04 | 0.947398 | 0.46744  | 0.981851 | 0.677085 |
| MmugDNA.40153.1.S1_at   | MmugDNA.40153.1 | 10.03 | 10.95 | 0.72 | 0.13 | -1.89 | 0.280164 | 0.207511 | 0.639052 | 0.481819 |
| MmugDNA.40164.1.S1_at   | MmugDNA.40164.1 | 7.52  | 7.96  | 2.49 | 0.12 | -1.36 | 0.636268 | 0.52815  | 0.854842 | 0.716456 |
| MmugDNA.40170.1.S1_s_at | MmugDNA.40170.1 | 5.99  | 8.16  | 0.6  | 0.48 | -4.49 | 0.014759 | 0.000769 | 0.278005 | 0.04544  |
| MmugDNA.40178.1.S1_at   | MmugDNA.40178.1 | 11.06 | 11.55 | 0.26 | 0.1  | -1.4  | 0.068587 | 0.087084 | 0.425941 | 0.340056 |
| MmugDNA.4019.1.S1_at    | MmugDNA.4019.1  | 8.8   | 8.54  | 0.42 | 0.06 | 1.2   | 0.402556 | 0.133815 | 0.725006 | 0.405813 |
| MmugDNA.4019.1.S1_s_at  | MmugDNA.4019.1  | 8.56  | 8.66  | 0.53 | 0.09 | -1.08 | 0.70435  | 0.218143 | 0.885126 | 0.491731 |
| MmugDNA.40192.1.S1_at   | MmugDNA.40192.1 | 11.48 | 11.42 | 0.17 | 0.07 | 1.04  | 0.619661 | 0.004266 | 0.84683  | 0.091847 |
| MmugDNA.40193.1.S1_at   | MmugDNA.40193.1 | 5.95  | 5.98  | 0.17 | 0.05 | -1.02 | 0.497588 | 0.823842 | 0.781215 | 0.898803 |
| MmugDNA.40198.1.S1_at   | MmugDNA.40198.1 | 8.34  | 8.31  | 0.21 | 0.04 | 1.02  | 0.443658 | 0.564596 | 0.750982 | 0.739382 |
| MmugDNA.40204.1.S1_at   | MmugDNA.40204.1 | 12.34 | 12.89 | 0.35 | 0.1  | -1.47 | 0.060091 | 0.043823 | 0.407399 | 0.253914 |
| MmugDNA.40206.1.S1_at   | MmugDNA.40206.1 | 9.84  | 9.77  | 0.1  | 0.06 | 1.05  | 0.3123   | 0.45729  | 0.663896 | 0.670746 |
| MmugDNA.40208.1.S1_at   | MmugDNA.40208.1 | 8.68  | 8.91  | 0.04 | 0.16 | -1.17 | 0.070387 | 0.054074 | 0.429174 | 0.277914 |
| MmugDNA.40213.1.S1_s_at | MmugDNA.40213.1 | 12.48 | 12.64 | 0.06 | 0.08 | -1.12 | 0.044692 | 0.10109  | 0.374916 | 0.360724 |
| MmugDNA.40218.1.S1_at   | MmugDNA.40218.1 | 6.66  | 7.39  | 0.27 | 0.31 | -1.65 | 0.04275  | 0.002765 | 0.370345 | 0.077756 |

|                         |                 |       |       |      |      |       |          |          |          |          |
|-------------------------|-----------------|-------|-------|------|------|-------|----------|----------|----------|----------|
| MmugDNA.40218.1.S1_x_at | MmugDNA.40218.1 | 6.72  | 7.36  | 0.12 | 0.27 | -1.56 | 0.050611 | 0.002433 | 0.387563 | 0.073093 |
| MmugDNA.40219.1.S1_s_at | MmugDNA.40219.1 | 10.69 | 11.2  | 0.46 | 0.01 | -1.43 | 0.157088 | 0.141748 | 0.530266 | 0.415331 |
| MmugDNA.40225.1.S1_at   | MmugDNA.40225.1 | 10.29 | 10.64 | 0.25 | 0.13 | -1.27 | 0.118326 | 0.03917  | 0.491809 | 0.243072 |
| MmugDNA.40227.1.S1_at   | MmugDNA.40227.1 | 7.83  | 7.81  | 0.12 | 0.01 | 1.01  | 0.281845 | 0.150389 | 0.64027  | 0.424934 |
| MmugDNA.40227.1.S1_s_at | MmugDNA.40227.1 | 9.82  | 10.09 | 0.53 | 0.19 | -1.2  | 0.29806  | 0.010509 | 0.652872 | 0.133936 |
| MmugDNA.40228.1.S1_at   | MmugDNA.40228.1 | 8.32  | 7.22  | 0.82 | 0.16 | 2.14  | 0.084388 | 0.073371 | 0.450953 | 0.316469 |
| MmugDNA.40230.1.S1_at   | MmugDNA.40230.1 | 4.43  | 4.47  | 0.14 | 0.05 | -1.03 | 0.223158 | 0.047759 | 0.592569 | 0.26344  |
| MmugDNA.40232.1.S1_at   | MmugDNA.40232.1 | 5.65  | 5.69  | 0.67 | 0.4  | -1.03 | 0.445722 | 0.498589 | 0.752285 | 0.697641 |
| MmugDNA.40233.1.S1_at   | MmugDNA.40233.1 | 11.19 | 11.56 | 0.16 | 0.28 | -1.29 | 0.129833 | 0.030184 | 0.504468 | 0.215679 |
| MmugDNA.40236.1.S1_at   | MmugDNA.40236.1 | 9.44  | 10.02 | 0.26 | 0.1  | -1.5  | 0.035323 | 0.013198 | 0.351731 | 0.147385 |
| MmugDNA.40254.1.S1_at   | MmugDNA.40254.1 | 8.11  | 8.7   | 1.25 | 0.2  | -1.51 | 0.502179 | 0.626401 | 0.783497 | 0.77972  |
| MmugDNA.40258.1.S1_at   | MmugDNA.40258.1 | 10.68 | 10.07 | 0.5  | 0.14 | 1.52  | 0.376244 | 0.012483 | 0.70673  | 0.144302 |
| MmugDNA.40259.1.S1_at   | MmugDNA.40259.1 | 4.5   | 3.71  | 0.74 | 0.27 | 1.73  | 0.303066 | 0.462918 | 0.656954 | 0.674149 |
| MmugDNA.4026.1.S1_s_at  | MmugDNA.4026.1  | 9.98  | 10.23 | 0.3  | 0.09 | -1.18 | 0.247695 | 0.073761 | 0.613245 | 0.317123 |
| MmugDNA.40261.1.S1_at   | MmugDNA.40261.1 | 6     | 5.72  | 0.02 | 0.08 | 1.22  | 0.004123 | 0.05484  | 0.198822 | 0.279675 |
| MmugDNA.40264.1.S1_at   | MmugDNA.40264.1 | 11.79 | 11.9  | 0.06 | 0.05 | -1.08 | 0.037046 | 0.080419 | 0.356628 | 0.328057 |
| MmugDNA.40274.1.S1_at   | MmugDNA.40274.1 | 5.8   | 6.08  | 1.1  | 0.43 | -1.21 | 0.565116 | 0.166606 | 0.819091 | 0.443115 |
| MmugDNA.40274.1.S1_s_at | MmugDNA.40274.1 | 4.79  | 5.82  | 0.95 | 0.61 | -2.05 | 0.839492 | 0.139075 | 0.942786 | 0.412165 |
| MmugDNA.40283.1.S1_at   | MmugDNA.40283.1 | 4.56  | 4.39  | 0.28 | 0.05 | 1.12  | 0.414971 | 0.545641 | 0.733473 | 0.727579 |
| MmugDNA.40288.1.S1_at   | MmugDNA.40288.1 | 4.76  | 4.55  | 0.19 | 0.02 | 1.15  | 0.1376   | 0.241018 | 0.513135 | 0.511657 |
| MmugDNA.4029.1.S1_at    | MmugDNA.4029.1  | 12.83 | 12.82 | 0.19 | 0.03 | 1.01  | 0.93618  | 0.081303 | 0.978537 | 0.329355 |
| MmugDNA.40291.1.S1_at   | MmugDNA.40291.1 | 7.01  | 7.81  | 0.19 | 0.4  | -1.74 | 0.034748 | 0.148858 | 0.350358 | 0.42322  |
| MmugDNA.40292.1.S1_at   | MmugDNA.40292.1 | 9.95  | 10.16 | 0.23 | 0.07 | -1.16 | 0.248748 | 0.003297 | 0.614127 | 0.082571 |
| MmugDNA.40294.1.S1_at   | MmugDNA.40294.1 | 6.49  | 6.34  | 0.03 | 0.08 | 1.11  | 0.022316 | 0.236614 | 0.310495 | 0.50743  |
| MmugDNA.403.1.S1_s_at   | MmugDNA.403.1   | 9.34  | 8.99  | 1.16 | 0.11 | 1.27  | 0.68706  | 0.852694 | 0.877626 | 0.916254 |
| MmugDNA.40305.1.S1_at   | MmugDNA.40305.1 | 11.04 | 11.02 | 0.7  | 0.17 | 1.01  | 0.781678 | 0.878466 | 0.919573 | 0.930638 |
| MmugDNA.40307.1.S1_at   | MmugDNA.40307.1 | 6.07  | 5.93  | 0.08 | 0.12 | 1.1   | 0.047183 | 0.072077 | 0.379711 | 0.314519 |
| MmugDNA.40309.1.S1_at   | MmugDNA.40309.1 | 6.61  | 6.59  | 0.09 | 0.11 | 1.01  | 0.606752 | 0.749955 | 0.840675 | 0.85465  |
| MmugDNA.4031.1.S1_at    | MmugDNA.4031.1  | 11.07 | 10.59 | 0.65 | 0.07 | 1.4   | 0.649605 | 0.592982 | 0.860406 | 0.757985 |
| MmugDNA.40310.1.S1_at   | MmugDNA.40310.1 | 6.4   | 5.58  | 0.85 | 0.29 | 1.76  | 0.268573 | 0.270358 | 0.628857 | 0.535681 |
| MmugDNA.40311.1.S1_at   | MmugDNA.40311.1 | 6.15  | 5.75  | 0.14 | 0.03 | 1.32  | 0.009397 | 0.004671 | 0.241869 | 0.095314 |
| MmugDNA.40314.1.S1_at   | MmugDNA.40314.1 | 7.47  | 6.94  | 0.64 | 0.54 | 1.44  | 0.158499 | 0.024553 | 0.531551 | 0.196073 |
| MmugDNA.40315.1.S1_at   | MmugDNA.40315.1 | 6.05  | 6.04  | 0.22 | 0.01 | 1.01  | 0.85711  | 0.622884 | 0.94962  | 0.777391 |
| MmugDNA.40319.1.S1_at   | MmugDNA.40319.1 | 8.14  | 8.26  | 0.32 | 0.06 | -1.08 | 0.727175 | 0.656375 | 0.894637 | 0.799062 |
| MmugDNA.4032.1.S1_at    | MmugDNA.4032.1  | 12.51 | 12.05 | 0.24 | 0.15 | 1.38  | 0.053405 | 0.198514 | 0.394702 | 0.473391 |
| MmugDNA.40329.1.S1_at   | MmugDNA.40329.1 | 11.61 | 11.62 | 0.2  | 0.06 | -1.01 | 0.727575 | 0.895001 | 0.894744 | 0.940055 |
| MmugDNA.40331.1.S1_at   | MmugDNA.40331.1 | 8.19  | 8.71  | 0.3  | 0.06 | -1.44 | 0.016824 | 0.003287 | 0.288586 | 0.082551 |
| MmugDNA.40333.1.S1_at   | MmugDNA.40333.1 | 11.16 | 11.13 | 0.11 | 0.01 | 1.02  | 0.888812 | 0.569026 | 0.961633 | 0.742233 |
| MmugDNA.40334.1.S1_at   | MmugDNA.40334.1 | 6.52  | 6.26  | 0.11 | 0.2  | 1.19  | 0.210084 | 0.369151 | 0.581555 | 0.608669 |
| MmugDNA.40337.1.S1_at   | MmugDNA.40337.1 | 11.91 | 11.55 | 0.11 | 0.26 | 1.28  | 0.119402 | 0.166914 | 0.492862 | 0.443394 |
| MmugDNA.40338.1.S1_s_at | MmugDNA.40338.1 | 11.66 | 11.98 | 0.67 | 0.04 | -1.24 | 0.604993 | 0.709423 | 0.839761 | 0.831622 |
| MmugDNA.40357.1.S1_at   | MmugDNA.40357.1 | 5.54  | 4.88  | 0.42 | 0.33 | 1.57  | 0.10141  | 0.207037 | 0.471667 | 0.481115 |
| MmugDNA.40359.1.S1_at   | MmugDNA.40359.1 | 9.64  | 9.52  | 0.39 | 0.12 | 1.08  | 0.748599 | 0.923077 | 0.904527 | 0.956739 |

|                         |                 |       |       |      |      |       |          |          |          |          |
|-------------------------|-----------------|-------|-------|------|------|-------|----------|----------|----------|----------|
| MmugDNA.40361.1.S1_at   | MmugDNA.40361.1 | 12    | 12.03 | 0.16 | 0.13 | -1.02 | 0.552591 | 0.550638 | 0.811888 | 0.730605 |
| MmugDNA.40364.1.S1_at   | MmugDNA.40364.1 | 6.29  | 6.59  | 0.46 | 0.12 | -1.23 | 0.761602 | 0.153126 | 0.910578 | 0.428011 |
| MmugDNA.40365.1.S1_at   | MmugDNA.40365.1 | 3.27  | 3.33  | 0.03 | 0.08 | -1.04 | 0.165681 | 0.592939 | 0.538504 | 0.757956 |
| MmugDNA.40366.1.S1_at   | MmugDNA.40366.1 | 9.2   | 9.57  | 0.39 | 0.25 | -1.29 | 0.067307 | 0.085255 | 0.423432 | 0.337096 |
| MmugDNA.40371.1.S1_at   | MmugDNA.40371.1 | 6.56  | 6.84  | 0.34 | 0.11 | -1.21 | 0.703964 | 0.096527 | 0.884935 | 0.354096 |
| MmugDNA.40381.1.S1_at   | MmugDNA.40381.1 | 8.69  | 8.36  | 0.33 | 0.57 | 1.26  | 0.286735 | 0.067199 | 0.643964 | 0.305204 |
| MmugDNA.40383.1.S1_at   | MmugDNA.40383.1 | 4.5   | 3.83  | 0.45 | 0.51 | 1.59  | 0.401963 | 0.049472 | 0.724779 | 0.267334 |
| MmugDNA.40384.1.S1_at   | MmugDNA.40384.1 | 8.78  | 8.2   | 0.66 | 0.09 | 1.49  | 0.648316 | 0.269878 | 0.859825 | 0.53515  |
| MmugDNA.40386.1.S1_at   | MmugDNA.40386.1 | 7.1   | 6.78  | 0.38 | 0.02 | 1.25  | 0.207973 | 0.027885 | 0.579653 | 0.208455 |
| MmugDNA.40388.1.S1_at   | MmugDNA.40388.1 | 7.02  | 7.25  | 0.09 | 0.1  | -1.18 | 0.126184 | 0.097361 | 0.499902 | 0.355507 |
| MmugDNA.40391.1.S1_at   | MmugDNA.40391.1 | 6.99  | 6.97  | 0.14 | 0.08 | -1.01 | 0.373085 | 0.505479 | 0.705567 | 0.702161 |
| MmugDNA.40392.1.S1_at   | MmugDNA.40392.1 | 5.35  | 8.63  | 0.79 | 0.74 | -9.7  | 0.003978 | 0.000229 | 0.198571 | 0.032385 |
| MmugDNA.40394.1.S1_at   | MmugDNA.40394.1 | 9.63  | 9.69  | 0.22 | 0.19 | -1.04 | 0.809607 | 0.341885 | 0.93108  | 0.587972 |
| MmugDNA.40397.1.S1_at   | MmugDNA.40397.1 | 11.84 | 12.01 | 0.46 | 0.06 | -1.13 | 0.820052 | 0.067247 | 0.935275 | 0.30531  |
| MmugDNA.40400.1.S1_at   | MmugDNA.40400.1 | 5.6   | 5.34  | 0.15 | 0.23 | 1.19  | 0.198361 | 0.091906 | 0.569615 | 0.347243 |
| MmugDNA.40403.1.S1_at   | MmugDNA.40403.1 | 10.84 | 11.14 | 0.33 | 0.05 | -1.23 | 0.1762   | 0.077133 | 0.549326 | 0.322675 |
| MmugDNA.40405.1.S1_at   | MmugDNA.40405.1 | 4.88  | 4.95  | 0.45 | 0.1  | -1.05 | 0.368746 | 0.202315 | 0.703807 | 0.476691 |
| MmugDNA.40406.1.S1_at   | MmugDNA.40406.1 | 6.61  | 6.52  | 0.21 | 0.1  | 1.07  | 0.472075 | 0.596273 | 0.766862 | 0.759456 |
| MmugDNA.40407.1.S1_at   | MmugDNA.40407.1 | 7.87  | 7.34  | 0.43 | 0.32 | 1.44  | 0.187841 | 0.51005  | 0.560014 | 0.704549 |
| MmugDNA.40408.1.S1_at   | MmugDNA.40408.1 | 3.61  | 3.31  | 0.03 | 0.1  | 1.23  | 0.005538 | 0.072649 | 0.208157 | 0.315579 |
| MmugDNA.40410.1.S1_at   | MmugDNA.40410.1 | 3.99  | 4.07  | 0.21 | 0.02 | -1.06 | 0.684979 | 0.290112 | 0.876641 | 0.551128 |
| MmugDNA.40417.1.S1_at   | MmugDNA.40417.1 | 5.79  | 5.62  | 0.1  | 0.06 | 1.13  | 0.064367 | 0.121337 | 0.418055 | 0.390364 |
| MmugDNA.4042.1.S1_at    | MmugDNA.4042.1  | 8.7   | 8.69  | 0.23 | 0.08 | 1.01  | 0.504275 | 0.225613 | 0.784627 | 0.498155 |
| MmugDNA.40424.1.S1_at   | MmugDNA.40424.1 | 10.95 | 11.25 | 0.32 | 0.01 | -1.23 | 0.059445 | 0.062218 | 0.406381 | 0.296307 |
| MmugDNA.40427.1.S1_at   | MmugDNA.40427.1 | 11.85 | 11.14 | 0.13 | 0.09 | 1.64  | 0.001606 | 0.001365 | 0.162459 | 0.056835 |
| MmugDNA.40429.1.S1_at   | MmugDNA.40429.1 | 11.09 | 10.91 | 0.18 | 0.21 | 1.13  | 0.404874 | 0.011453 | 0.726978 | 0.13846  |
| MmugDNA.40431.1.S1_at   | MmugDNA.40431.1 | 7.27  | 7.38  | 0.09 | 0.07 | -1.08 | 0.327972 | 0.001797 | 0.675501 | 0.063638 |
| MmugDNA.40438.1.S1_at   | MmugDNA.40438.1 | 5.81  | 5.28  | 0.54 | 0.32 | 1.45  | 0.843047 | 0.728605 | 0.944479 | 0.843115 |
| MmugDNA.40449.1.S1_at   | MmugDNA.40449.1 | 6.96  | 6.93  | 0.66 | 0.27 | 1.02  | 0.732004 | 0.190172 | 0.896977 | 0.465826 |
| MmugDNA.40451.1.S1_at   | MmugDNA.40451.1 | 9.78  | 10.19 | 0.59 | 0.05 | -1.33 | 0.302821 | 0.279514 | 0.656669 | 0.543055 |
| MmugDNA.40456.1.S1_at   | MmugDNA.40456.1 | 6.56  | 6.29  | 0.17 | 0.16 | 1.21  | 0.350174 | 0.284995 | 0.691084 | 0.547087 |
| MmugDNA.40457.1.S1_at   | MmugDNA.40457.1 | 11.48 | 11.79 | 0.09 | 0.04 | -1.24 | 0.00554  | 0.007901 | 0.208157 | 0.11849  |
| MmugDNA.40459.1.S1_at   | MmugDNA.40459.1 | 3.49  | 3.37  | 0.04 | 0.07 | 1.09  | 0.053108 | 0.259616 | 0.394001 | 0.526525 |
| MmugDNA.40462.1.S1_at   | MmugDNA.40462.1 | 11.11 | 11.23 | 0.31 | 0.04 | -1.08 | 0.544409 | 0.68177  | 0.807207 | 0.81413  |
| MmugDNA.40470.1.S1_at   | MmugDNA.40470.1 | 5.19  | 4.66  | 0.58 | 0.14 | 1.45  | 0.236465 | 0.159383 | 0.603346 | 0.435442 |
| MmugDNA.40481.1.S1_at   | MmugDNA.40481.1 | 11.91 | 11.8  | 0.1  | 0.08 | 1.08  | 0.063847 | 0.212148 | 0.416646 | 0.486036 |
| MmugDNA.40482.1.S1_at   | MmugDNA.40482.1 | 4.08  | 4.08  | 0.17 | 0.08 | 1     | 0.249715 | 0.629075 | 0.615117 | 0.781597 |
| MmugDNA.40485.1.S1_x_at | MmugDNA.40485.1 | 10.46 | 10.74 | 0.18 | 0.13 | -1.21 | 0.182324 | 0.299691 | 0.555371 | 0.558037 |
| MmugDNA.40486.1.S1_s_at | MmugDNA.40486.1 | 7.88  | 7.55  | 0.27 | 0.17 | 1.26  | 0.154193 | 0.22677  | 0.527483 | 0.499176 |
| MmugDNA.40487.1.S1_at   | MmugDNA.40487.1 | 5.68  | 5.47  | 0.12 | 0.07 | 1.15  | 0.04703  | 0.164351 | 0.379283 | 0.44061  |
| MmugDNA.40488.1.S1_at   | MmugDNA.40488.1 | 3.5   | 4.42  | 0.34 | 0.25 | -1.89 | 0.009636 | 0.003142 | 0.243036 | 0.081652 |
| MmugDNA.40489.1.S1_at   | MmugDNA.40489.1 | 9.73  | 9.29  | 0.1  | 0.15 | 1.35  | 0.026581 | 0.334349 | 0.325381 | 0.582352 |
| MmugDNA.40492.1.S1_at   | MmugDNA.40492.1 | 3.59  | 3.54  | 0.08 | 0.05 | 1.03  | 0.203663 | 0.244001 | 0.57513  | 0.514069 |



|                         |                 |       |       |      |      |       |          |          |          |          |
|-------------------------|-----------------|-------|-------|------|------|-------|----------|----------|----------|----------|
| MmugDNA.40495.1.S1_at   | MmugDNA.40495.1 | 4.95  | 4.84  | 0.1  | 0.03 | 1.08  | 0.295601 | 0.789336 | 0.651318 | 0.878316 |
| MmugDNA.40504.1.S1_at   | MmugDNA.40504.1 | 11.01 | 11.49 | 0.55 | 0.23 | -1.39 | 0.140528 | 0.231242 | 0.516012 | 0.502925 |
| MmugDNA.40506.1.S1_at   | MmugDNA.40506.1 | 10.15 | 10.48 | 0.18 | 0.01 | -1.26 | 0.105926 | 0.088277 | 0.477795 | 0.341721 |
| MmugDNA.40509.1.S1_at   | MmugDNA.40509.1 | 10.76 | 10.95 | 0.42 | 0.05 | -1.14 | 0.489481 | 0.210913 | 0.776198 | 0.484934 |
| MmugDNA.40512.1.S1_at   | MmugDNA.40512.1 | 10.52 | 10.04 | 0.13 | 0.15 | 1.4   | 0.023185 | 0.033804 | 0.314809 | 0.227489 |
| MmugDNA.40513.1.S1_at   | MmugDNA.40513.1 | 6.32  | 6.1   | 0.1  | 0.08 | 1.17  | 0.068938 | 0.030547 | 0.426331 | 0.216711 |
| MmugDNA.4052.1.S1_at    | MmugDNA.4052.1  | 7.28  | 7.55  | 1.29 | 0.09 | -1.21 | 0.704309 | 0.391765 | 0.885095 | 0.625301 |
| MmugDNA.40527.1.S1_at   | MmugDNA.40527.1 | 10.7  | 10.99 | 0.34 | 0.18 | -1.23 | 0.824361 | 0.827728 | 0.936737 | 0.901127 |
| MmugDNA.40531.1.A1_at   | MmugDNA.40531.1 | 6.1   | 5.98  | 0.28 | 0.02 | 1.08  | 0.495747 | 0.201523 | 0.780125 | 0.476036 |
| MmugDNA.40531.1.S1_at   | MmugDNA.40531.1 | 6.34  | 6.45  | 0.08 | 0.05 | -1.08 | 0.24663  | 0.594741 | 0.612089 | 0.758628 |
| MmugDNA.40532.1.S1_at   | MmugDNA.40532.1 | 5.58  | 5.31  | 0.26 | 0.08 | 1.21  | 0.202036 | 0.052586 | 0.573629 | 0.274848 |
| MmugDNA.40536.1.S1_at   | MmugDNA.40536.1 | 9.93  | 10.1  | 0.32 | 0.16 | -1.12 | 0.602794 | 0.344886 | 0.839015 | 0.590208 |
| MmugDNA.40551.1.S1_s_at | MmugDNA.40551.1 | 5.23  | 5.12  | 0.09 | 0.08 | 1.07  | 0.211858 | 0.470859 | 0.582715 | 0.679124 |
| MmugDNA.40551.1.S1_x_at | MmugDNA.40551.1 | 3.82  | 3.78  | 0.22 | 0.06 | 1.03  | 0.405588 | 0.612326 | 0.727426 | 0.76996  |
| MmugDNA.40552.1.S1_at   | MmugDNA.40552.1 | 10.35 | 10.31 | 0.79 | 0.06 | 1.03  | 0.380264 | 0.48162  | 0.709387 | 0.686557 |
| MmugDNA.40554.1.S1_at   | MmugDNA.40554.1 | 4.33  | 4.25  | 0.28 | 0.3  | 1.06  | 0.778716 | 0.928244 | 0.918374 | 0.959217 |
| MmugDNA.40569.1.S1_at   | MmugDNA.40569.1 | 10.98 | 10.97 | 0.04 | 0.1  | 1.01  | 0.662742 | 0.177143 | 0.866912 | 0.453611 |
| MmugDNA.40572.1.S1_at   | MmugDNA.40572.1 | 13.33 | 12.86 | 1.38 | 0.09 | 1.39  | 0.972596 | 0.417344 | 0.991114 | 0.642147 |
| MmugDNA.40581.1.S1_at   | MmugDNA.40581.1 | 11.42 | 11.74 | 0.15 | 0.1  | -1.25 | 0.086325 | 0.12408  | 0.453939 | 0.394389 |
| MmugDNA.40584.1.S1_at   | MmugDNA.40584.1 | 7.93  | 8.5   | 0.29 | 0.11 | -1.49 | 0.057221 | 0.010222 | 0.401473 | 0.132544 |
| MmugDNA.4059.1.S1_at    | MmugDNA.4059.1  | 3.09  | 2.97  | 0.04 | 0.07 | 1.08  | 0.143085 | 0.78575  | 0.518366 | 0.875936 |
| MmugDNA.40592.1.S1_at   | MmugDNA.40592.1 | 6.73  | 6.49  | 0.1  | 0.07 | 1.18  | 0.02161  | 0.002897 | 0.309241 | 0.079107 |
| MmugDNA.40598.1.S1_at   | MmugDNA.40598.1 | 8.76  | 7.79  | 1.7  | 0.22 | 1.96  | 0.401726 | 0.245396 | 0.724599 | 0.515213 |
| MmugDNA.406.1.S1_s_at   | MmugDNA.406.1   | 13.96 | 14.04 | 0.08 | 0.03 | -1.05 | 0.305667 | 0.401799 | 0.65906  | 0.631068 |
| MmugDNA.40603.1.S1_x_at | MmugDNA.40603.1 | 10.93 | 10.97 | 0.16 | 0.14 | -1.03 | 0.815829 | 0.300694 | 0.933242 | 0.558959 |
| MmugDNA.40607.1.S1_at   | MmugDNA.40607.1 | 4.33  | 4.29  | 0.06 | 0.1  | 1.03  | 0.888764 | 0.769946 | 0.961633 | 0.866376 |
| MmugDNA.40610.1.S1_at   | MmugDNA.40610.1 | 7.86  | 6.62  | 0.82 | 0.35 | 2.37  | 0.234498 | 0.056337 | 0.601754 | 0.283348 |
| MmugDNA.40614.1.S1_at   | MmugDNA.40614.1 | 8.15  | 9.37  | 0.6  | 0.14 | -2.33 | 0.061858 | 0.065303 | 0.411594 | 0.301249 |
| MmugDNA.40615.1.S1_at   | MmugDNA.40615.1 | 10.91 | 10.87 | 0.23 | 0.01 | 1.03  | 0.956622 | 0.454512 | 0.985575 | 0.668664 |
| MmugDNA.40616.1.S1_at   | MmugDNA.40616.1 | 6.93  | 6.82  | 0.12 | 0.07 | 1.08  | 0.14165  | 0.256954 | 0.516507 | 0.524777 |
| MmugDNA.40623.1.S1_at   | MmugDNA.40623.1 | 9.67  | 9.08  | 0.72 | 0.24 | 1.5   | 0.132949 | 0.02948  | 0.507241 | 0.213368 |
| MmugDNA.40625.1.S1_at   | MmugDNA.40625.1 | 11.87 | 10.97 | 0.56 | 0.11 | 1.87  | 0.043989 | 0.006968 | 0.373462 | 0.112743 |
| MmugDNA.40626.1.S1_at   | MmugDNA.40626.1 | 4.25  | 4.78  | 0.49 | 0.32 | -1.45 | 0.855796 | 0.018182 | 0.949014 | 0.169673 |
| MmugDNA.40628.1.S1_at   | MmugDNA.40628.1 | 7.87  | 7.3   | 0.36 | 0.19 | 1.48  | 0.14647  | 0.127922 | 0.520749 | 0.398878 |
| MmugDNA.40630.1.S1_at   | MmugDNA.40630.1 | 4.51  | 4.57  | 0.23 | 0.12 | -1.04 | 0.341926 | 0.058734 | 0.68555  | 0.28904  |
| MmugDNA.40633.1.S1_at   | MmugDNA.40633.1 | 7.95  | 8.07  | 0.32 | 0.06 | -1.09 | 0.479841 | 0.042798 | 0.770896 | 0.251394 |
| MmugDNA.40640.1.S1_at   | MmugDNA.40640.1 | 10.87 | 10.75 | 0.38 | 0.04 | 1.08  | 0.49935  | 0.153164 | 0.781984 | 0.428011 |
| MmugDNA.40644.1.S1_at   | MmugDNA.40644.1 | 11.73 | 11.65 | 0.05 | 0.04 | 1.06  | 0.181782 | 0.000459 | 0.554854 | 0.038572 |
| MmugDNA.40645.1.S1_at   | MmugDNA.40645.1 | 6.3   | 6.32  | 0.16 | 0.09 | -1.01 | 0.6142   | 0.023872 | 0.843828 | 0.193495 |
| MmugDNA.40647.1.S1_at   | MmugDNA.40647.1 | 5.98  | 5.85  | 0.43 | 0.08 | 1.1   | 0.660707 | 0.803022 | 0.865819 | 0.886557 |
| MmugDNA.40648.1.S1_at   | MmugDNA.40648.1 | 9.35  | 10.07 | 0.69 | 0.11 | -1.65 | 0.14503  | 0.197982 | 0.520238 | 0.472936 |
| MmugDNA.40649.1.S1_at   | MmugDNA.40649.1 | 10.6  | 10.15 | 0.4  | 0.36 | 1.37  | 0.088831 | 0.021794 | 0.456567 | 0.184765 |
| MmugDNA.40661.1.S1_at   | MmugDNA.40661.1 | 8.76  | 8.5   | 0.1  | 0.07 | 1.19  | 0.032556 | 0.041328 | 0.344624 | 0.247995 |

|                         |                 |       |       |      |      |        |          |          |          |          |
|-------------------------|-----------------|-------|-------|------|------|--------|----------|----------|----------|----------|
| MmugDNA.40662.1.S1_at   | MmugDNA.40662.1 | 8.18  | 6.94  | 0.86 | 0.56 | 2.37   | 0.025812 | 0.016269 | 0.32273  | 0.161649 |
| MmugDNA.40663.1.S1_at   | MmugDNA.40663.1 | 11.57 | 11.55 | 0.26 | 0.03 | 1.01   | 0.640069 | 0.717625 | 0.856488 | 0.836506 |
| MmugDNA.40668.1.S1_at   | MmugDNA.40668.1 | 11.25 | 11.69 | 0.33 | 0.02 | -1.36  | 0.03292  | 0.007279 | 0.345526 | 0.114488 |
| MmugDNA.40669.1.S1_at   | MmugDNA.40669.1 | 5.66  | 5.32  | 0.45 | 0.04 | 1.27   | 0.391619 | 0.658921 | 0.717611 | 0.800473 |
| MmugDNA.40670.1.S1_at   | MmugDNA.40670.1 | 7.67  | 8.32  | 0.48 | 0.3  | -1.56  | 0.15422  | 0.112216 | 0.527483 | 0.377537 |
| MmugDNA.40671.1.S1_at   | MmugDNA.40671.1 | 6.61  | 6.59  | 0.26 | 0.08 | 1.02   | 0.829653 | 0.94784  | 0.938862 | 0.970378 |
| MmugDNA.40672.1.S1_at   | MmugDNA.40672.1 | 7.04  | 6.58  | 0.23 | 0.15 | 1.38   | 0.03968  | 0.032508 | 0.362432 | 0.223271 |
| MmugDNA.40673.1.S1_at   | MmugDNA.40673.1 | 3.63  | 3.49  | 0.11 | 0.07 | 1.1    | 0.572941 | 0.470074 | 0.823428 | 0.678572 |
| MmugDNA.40686.1.S1_at   | MmugDNA.40686.1 | 3.42  | 3.43  | 0.13 | 0.12 | -1     | 0.611821 | 0.865927 | 0.842611 | 0.923766 |
| MmugDNA.40688.1.S1_at   | MmugDNA.40688.1 | 7.54  | 8.33  | 0.08 | 0.08 | -1.72  | 0.000232 | 0.000015 | 0.123632 | 0.018485 |
| MmugDNA.40690.1.S1_at   | MmugDNA.40690.1 | 7.12  | 7.64  | 0.37 | 0.04 | -1.43  | 0.102632 | 0.02045  | 0.472874 | 0.179597 |
| MmugDNA.40693.1.S1_s_at | MmugDNA.40693.1 | 6.06  | 5.88  | 0.27 | 0.12 | 1.13   | 0.58247  | 0.352479 | 0.828307 | 0.595743 |
| MmugDNA.40703.1.S1_at   | MmugDNA.40703.1 | 3.31  | 3.27  | 0.1  | 0.05 | 1.03   | 0.25553  | 0.754302 | 0.619604 | 0.857018 |
| MmugDNA.40704.1.S1_at   | MmugDNA.40704.1 | 9.35  | 9.54  | 0.15 | 0.06 | -1.15  | 0.253704 | 0.008883 | 0.618323 | 0.124698 |
| MmugDNA.40707.1.S1_at   | MmugDNA.40707.1 | 12.22 | 11.38 | 0.75 | 0.1  | 1.8    | 0.397551 | 0.251521 | 0.721771 | 0.520274 |
| MmugDNA.40707.1.S1_s_at | MmugDNA.40707.1 | 11.07 | 9.92  | 0.95 | 0.15 | 2.23   | 0.337486 | 0.254305 | 0.682386 | 0.522613 |
| MmugDNA.40709.1.S1_at   | MmugDNA.40709.1 | 6.52  | 6.67  | 0.99 | 0.13 | -1.11  | 0.876294 | 0.836257 | 0.956886 | 0.906346 |
| MmugDNA.40711.1.S1_at   | MmugDNA.40711.1 | 5.09  | 4.84  | 0.11 | 0    | 1.18   | 0.016922 | 0.019899 | 0.288966 | 0.177357 |
| MmugDNA.40714.1.S1_at   | MmugDNA.40714.1 | 12.16 | 11.26 | 0.21 | 0.46 | 1.88   | 0.026552 | 0.017987 | 0.32537  | 0.169137 |
| MmugDNA.40717.1.S1_at   | MmugDNA.40717.1 | 9.33  | 9.3   | 0.38 | 0.16 | 1.02   | 0.964655 | 0.213527 | 0.988371 | 0.48741  |
| MmugDNA.40718.1.S1_at   | MmugDNA.40718.1 | 5.21  | 5.18  | 0.26 | 0.05 | 1.02   | 0.828286 | 0.446336 | 0.938273 | 0.662773 |
| MmugDNA.40719.1.S1_at   | MmugDNA.40719.1 | 8.68  | 7.93  | 0.38 | 0.13 | 1.68   | 0.053232 | 0.035311 | 0.394296 | 0.232207 |
| MmugDNA.40720.1.S1_at   | MmugDNA.40720.1 | 4.63  | 4.7   | 0.19 | 0.02 | -1.05  | 0.693153 | 0.203218 | 0.880472 | 0.477415 |
| MmugDNA.40722.1.S1_at   | MmugDNA.40722.1 | 9.85  | 10.79 | 0.6  | 0.12 | -1.91  | 0.098944 | 0.04028  | 0.468321 | 0.245902 |
| MmugDNA.4073.1.S1_at    | MmugDNA.4073.1  | 9.52  | 9.58  | 0.23 | 0.19 | -1.05  | 0.297115 | 0.179422 | 0.652608 | 0.455908 |
| MmugDNA.40734.1.S1_at   | MmugDNA.40734.1 | 5.99  | 5.82  | 0.62 | 0.08 | 1.12   | 0.21772  | 0.206897 | 0.587622 | 0.481052 |
| MmugDNA.40737.1.S1_s_at | MmugDNA.40737.1 | 13.6  | 13.43 | 0.27 | 0.04 | 1.13   | 0.424908 | 0.699399 | 0.739715 | 0.825344 |
| MmugDNA.40739.1.S1_at   | MmugDNA.40739.1 | 12.42 | 12.46 | 0.13 | 0.06 | -1.02  | 0.809983 | 0.382574 | 0.931255 | 0.61876  |
| MmugDNA.4074.1.S1_at    | MmugDNA.4074.1  | 10.01 | 10.49 | 0.22 | 0.12 | -1.39  | 0.121355 | 0.018308 | 0.494968 | 0.170154 |
| MmugDNA.40742.1.S1_at   | MmugDNA.40742.1 | 11.09 | 10.57 | 0.28 | 0.24 | 1.43   | 0.195006 | 0.001016 | 0.565435 | 0.050814 |
| MmugDNA.40743.1.S1_at   | MmugDNA.40743.1 | 3.94  | 9     | 3.09 | 0.07 | -33.53 | 0.142377 | 0.189942 | 0.517538 | 0.4655   |
| MmugDNA.40744.1.S1_at   | MmugDNA.40744.1 | 4.59  | 4.69  | 0.09 | 0.37 | -1.07  | 0.663608 | 0.675531 | 0.867226 | 0.810383 |
| MmugDNA.40745.1.S1_at   | MmugDNA.40745.1 | 8.22  | 8.47  | 1.08 | 0.17 | -1.19  | 0.653864 | 0.370187 | 0.862462 | 0.609371 |
| MmugDNA.40753.1.S1_at   | MmugDNA.40753.1 | 11.07 | 11.58 | 0.18 | 0.06 | -1.42  | 0.014327 | 0.004561 | 0.274812 | 0.094371 |
| MmugDNA.40760.1.S1_at   | MmugDNA.40760.1 | 6.91  | 7.34  | 0.41 | 0.28 | -1.35  | 0.099174 | 0.017824 | 0.468572 | 0.168645 |
| MmugDNA.40763.1.S1_at   | MmugDNA.40763.1 | 6.3   | 6.28  | 0.02 | 0.08 | 1.01   | 0.239613 | 0.672443 | 0.606142 | 0.808568 |
| MmugDNA.40764.1.S1_at   | MmugDNA.40764.1 | 6.53  | 6.86  | 1.46 | 0.43 | -1.25  | 0.836467 | 0.205842 | 0.941249 | 0.480094 |
| MmugDNA.40764.1.S1_s_at | MmugDNA.40764.1 | 7.9   | 7.85  | 0.66 | 0.15 | 1.03   | 0.866767 | 0.063431 | 0.953168 | 0.298441 |
| MmugDNA.40765.1.S1_at   | MmugDNA.40765.1 | 11.1  | 10.93 | 0.03 | 0.07 | 1.13   | 0.017585 | 0.026971 | 0.292844 | 0.205423 |
| MmugDNA.4077.1.S1_at    | MmugDNA.4077.1  | 7.85  | 8.99  | 0.49 | 0.3  | -2.2   | 0.036427 | 0.028129 | 0.354908 | 0.209306 |
| MmugDNA.40770.1.S1_at   | MmugDNA.40770.1 | 7.93  | 8.25  | 0.33 | 0.14 | -1.25  | 0.350014 | 0.089807 | 0.691084 | 0.34404  |
| MmugDNA.40798.1.S1_at   | MmugDNA.40798.1 | 4.09  | 4.19  | 0.28 | 0.08 | -1.07  | 0.523153 | 0.709602 | 0.795458 | 0.831691 |
| MmugDNA.4080.1.S1_at    | MmugDNA.4080.1  | 12.31 | 12.45 | 0.36 | 0.12 | -1.1   | 0.568343 | 0.308569 | 0.820734 | 0.564575 |

|                         |                 |       |       |      |      |       |          |          |          |          |
|-------------------------|-----------------|-------|-------|------|------|-------|----------|----------|----------|----------|
| MmugDNA.40800.1.S1_at   | MmugDNA.40800.1 | 5.24  | 5.16  | 0.06 | 0.11 | 1.06  | 0.219062 | 0.300489 | 0.58851  | 0.55882  |
| MmugDNA.40802.1.S1_at   | MmugDNA.40802.1 | 6.73  | 6.76  | 0.05 | 0.11 | -1.02 | 0.697396 | 0.940764 | 0.882272 | 0.966468 |
| MmugDNA.40803.1.S1_at   | MmugDNA.40803.1 | 5.4   | 5.09  | 0.24 | 0.12 | 1.24  | 0.10521  | 0.10902  | 0.47701  | 0.372792 |
| MmugDNA.40811.1.S1_at   | MmugDNA.40811.1 | 7.77  | 7.7   | 0.37 | 0.06 | 1.05  | 0.261334 | 0.393645 | 0.623819 | 0.626522 |
| MmugDNA.40814.1.S1_at   | MmugDNA.40814.1 | 10.68 | 10.63 | 0.32 | 0.27 | 1.03  | 0.432954 | 0.29307  | 0.744142 | 0.552978 |
| MmugDNA.40816.1.S1_at   | MmugDNA.40816.1 | 9.52  | 7.57  | 3.11 | 0.43 | 3.86  | 0.551724 | 0.18761  | 0.81144  | 0.463631 |
| MmugDNA.40819.1.S1_at   | MmugDNA.40819.1 | 6.63  | 6.65  | 0.19 | 0.03 | -1.01 | 0.474888 | 0.4193   | 0.768229 | 0.643445 |
| MmugDNA.4084.1.S1_at    | MmugDNA.4084.1  | 6.42  | 6.36  | 0.11 | 0.02 | 1.04  | 0.649213 | 0.870522 | 0.860245 | 0.926446 |
| MmugDNA.40846.1.S1_at   | MmugDNA.40846.1 | 8.05  | 9.61  | 1.41 | 0.09 | -2.96 | 0.398457 | 0.5438   | 0.722497 | 0.726362 |
| MmugDNA.4085.1.S1_at    | MmugDNA.4085.1  | 10.73 | 10.77 | 0.01 | 0.11 | -1.02 | 0.432516 | 0.005276 | 0.743915 | 0.100659 |
| MmugDNA.40855.1.S1_s_at | MmugDNA.40855.1 | 8.54  | 8.56  | 0.28 | 0.1  | -1.02 | 0.566836 | 0.774446 | 0.820086 | 0.868766 |
| MmugDNA.40858.1.S1_at   | MmugDNA.40858.1 | 3.05  | 3.13  | 0.14 | 0.04 | -1.06 | 0.835988 | 0.548349 | 0.941202 | 0.729086 |
| MmugDNA.40868.1.S1_at   | MmugDNA.40868.1 | 5.14  | 4.99  | 0.07 | 0.04 | 1.11  | 0.040513 | 0.294461 | 0.364613 | 0.554212 |
| MmugDNA.40871.1.S1_at   | MmugDNA.40871.1 | 3.36  | 3.34  | 0.12 | 0.08 | 1.02  | 0.810572 | 0.469224 | 0.931338 | 0.678155 |
| MmugDNA.40872.1.S1_at   | MmugDNA.40872.1 | 7.35  | 7.8   | 0.76 | 0.1  | -1.36 | 0.356686 | 0.023767 | 0.695204 | 0.193002 |
| MmugDNA.40876.1.S1_at   | MmugDNA.40876.1 | 8.56  | 8.65  | 0.32 | 0.08 | -1.07 | 0.560552 | 0.23524  | 0.816802 | 0.50629  |
| MmugDNA.4088.1.S1_at    | MmugDNA.4088.1  | 7.35  | 7.36  | 0.5  | 0.17 | -1.01 | 0.956964 | 0.958064 | 0.985736 | 0.976273 |
| MmugDNA.40882.1.S1_at   | MmugDNA.40882.1 | 9.18  | 9.48  | 0.33 | 0.17 | -1.23 | 0.368895 | 0.307465 | 0.703852 | 0.563734 |
| MmugDNA.40885.1.S1_at   | MmugDNA.40885.1 | 3.32  | 3.13  | 0.2  | 0.1  | 1.14  | 0.274859 | 0.422565 | 0.634184 | 0.645762 |
| MmugDNA.40886.1.S1_at   | MmugDNA.40886.1 | 5.01  | 4.89  | 0.09 | 0.17 | 1.08  | 0.176592 | 0.169995 | 0.549666 | 0.446725 |
| MmugDNA.4089.1.S1_at    | MmugDNA.4089.1  | 9.88  | 9.76  | 0.43 | 0.06 | 1.09  | 0.565176 | 0.664921 | 0.819115 | 0.803709 |
| MmugDNA.40893.1.S1_at   | MmugDNA.40893.1 | 5.1   | 4.6   | 0.18 | 0.06 | 1.41  | 0.009846 | 0.013743 | 0.244005 | 0.150134 |
| MmugDNA.40899.1.S1_at   | MmugDNA.40899.1 | 6.47  | 6.45  | 0.27 | 0.09 | 1.01  | 0.924721 | 0.795447 | 0.974823 | 0.882189 |
| MmugDNA.4090.1.S1_at    | MmugDNA.4090.1  | 6.35  | 6.55  | 1.01 | 0.57 | -1.15 | 0.356232 | 0.503053 | 0.69508  | 0.700559 |
| MmugDNA.40909.1.S1_at   | MmugDNA.40909.1 | 4.74  | 5.35  | 0.8  | 0.11 | -1.52 | 0.853989 | 0.598875 | 0.948436 | 0.761193 |
| MmugDNA.4091.1.S1_at    | MmugDNA.4091.1  | 10.7  | 10.69 | 0.14 | 0.08 | 1     | 0.429391 | 0.0985   | 0.742161 | 0.356636 |
| MmugDNA.40917.1.S1_at   | MmugDNA.40917.1 | 5.74  | 5.69  | 0.1  | 0.11 | 1.04  | 0.487982 | 0.585415 | 0.775317 | 0.752846 |
| MmugDNA.4092.1.S1_at    | MmugDNA.4092.1  | 8.3   | 8     | 0.19 | 0.07 | 1.23  | 0.09301  | 0.021718 | 0.46164  | 0.184333 |
| MmugDNA.4092.1.S1_s_at  | MmugDNA.4092.1  | 8.54  | 8.38  | 0.08 | 0.07 | 1.12  | 0.11515  | 0.118436 | 0.488314 | 0.386431 |
| MmugDNA.40922.1.S1_at   | MmugDNA.40922.1 | 10.97 | 11.16 | 0.25 | 0.1  | -1.14 | 0.446041 | 0.148435 | 0.75256  | 0.423007 |
| MmugDNA.40926.1.S1_at   | MmugDNA.40926.1 | 5.81  | 5.64  | 0.06 | 0.02 | 1.12  | 0.01687  | 0.54524  | 0.288837 | 0.727441 |
| MmugDNA.4093.1.S1_at    | MmugDNA.4093.1  | 7.1   | 6.74  | 0.17 | 0.28 | 1.28  | 0.126988 | 0.176559 | 0.500834 | 0.452965 |
| MmugDNA.40937.1.S1_at   | MmugDNA.40937.1 | 10.42 | 10.23 | 0.24 | 0.07 | 1.14  | 0.699376 | 0.845014 | 0.883137 | 0.911799 |
| MmugDNA.40943.1.S1_at   | MmugDNA.40943.1 | 2.91  | 3.1   | 0.09 | 0.25 | -1.14 | 0.221921 | 0.131963 | 0.591503 | 0.404024 |
| MmugDNA.40945.1.S1_at   | MmugDNA.40945.1 | 11.88 | 11.69 | 0.42 | 0.06 | 1.14  | 0.212764 | 0.027867 | 0.583269 | 0.208453 |
| MmugDNA.40954.1.S1_at   | MmugDNA.40954.1 | 9.4   | 9.57  | 2.4  | 0.35 | -1.13 | 0.811005 | 0.150449 | 0.931553 | 0.424978 |
| MmugDNA.40954.1.S1_x_at | MmugDNA.40954.1 | 9.38  | 9.42  | 2.35 | 0.36 | -1.03 | 0.831571 | 0.130147 | 0.939628 | 0.401835 |
| MmugDNA.40957.1.S1_at   | MmugDNA.40957.1 | 4.22  | 4.1   | 0.05 | 0.03 | 1.08  | 0.054251 | 0.115628 | 0.396159 | 0.382714 |
| MmugDNA.40962.1.S1_at   | MmugDNA.40962.1 | 10.28 | 10.71 | 0.6  | 0.57 | -1.35 | 0.180146 | 0.025336 | 0.553357 | 0.199522 |
| MmugDNA.40973.1.S1_at   | MmugDNA.40973.1 | 11    | 10.93 | 0.26 | 0.04 | 1.05  | 0.818585 | 0.108026 | 0.93444  | 0.37124  |
| MmugDNA.40975.1.S1_at   | MmugDNA.40975.1 | 9.11  | 9.4   | 0.2  | 0.04 | -1.22 | 0.157716 | 0.277868 | 0.53073  | 0.541664 |
| MmugDNA.40977.1.S1_at   | MmugDNA.40977.1 | 9.66  | 9.72  | 0.7  | 0.12 | -1.04 | 0.735058 | 0.142576 | 0.898576 | 0.416239 |
| MmugDNA.40979.1.S1_at   | MmugDNA.40979.1 | 10.55 | 10.72 | 0.65 | 0.01 | -1.12 | 0.54601  | 0.630228 | 0.808283 | 0.782181 |

|                         |                 |       |       |      |      |       |          |          |          |          |
|-------------------------|-----------------|-------|-------|------|------|-------|----------|----------|----------|----------|
| MmugDNA.40981.1.S1_at   | MmugDNA.40981.1 | 5.78  | 5.83  | 0.04 | 0.03 | -1.03 | 0.439288 | 0.120749 | 0.748046 | 0.389579 |
| MmugDNA.40984.1.S1_at   | MmugDNA.40984.1 | 8.23  | 9     | 0.15 | 0.16 | -1.71 | 0.005547 | 0.008012 | 0.208157 | 0.118982 |
| MmugDNA.40987.1.S1_at   | MmugDNA.40987.1 | 8.97  | 9.3   | 0.16 | 0.09 | -1.26 | 0.049633 | 0.01675  | 0.385845 | 0.163916 |
| MmugDNA.40987.1.S1_s_at | MmugDNA.40987.1 | 8.6   | 8.79  | 0.22 | 0.12 | -1.14 | 0.432923 | 0.039911 | 0.744141 | 0.244852 |
| MmugDNA.40999.1.S1_at   | MmugDNA.40999.1 | 11.31 | 11.28 | 0.34 | 0.06 | 1.02  | 0.872302 | 0.512326 | 0.955759 | 0.706198 |
| MmugDNA.41000.1.S1_at   | MmugDNA.41000.1 | 5.23  | 5.22  | 0.49 | 0.26 | 1.01  | 0.690333 | 0.809411 | 0.879445 | 0.890131 |
| MmugDNA.41001.1.S1_at   | MmugDNA.41001.1 | 10.57 | 10.17 | 0.11 | 0.05 | 1.31  | 0.00471  | 0.000485 | 0.201699 | 0.038753 |
| MmugDNA.41003.1.S1_s_at | MmugDNA.41003.1 | 8.71  | 8.57  | 0.09 | 0.06 | 1.1   | 0.055477 | 0.055478 | 0.398621 | 0.281404 |
| MmugDNA.4101.1.S1_at    | MmugDNA.4101.1  | 2.87  | 2.87  | 0.11 | 0.11 | -1    | 0.583138 | 0.300034 | 0.828788 | 0.558262 |
| MmugDNA.41012.1.S1_at   | MmugDNA.41012.1 | 10.9  | 10.81 | 0.34 | 0.19 | 1.06  | 0.879188 | 0.121274 | 0.958039 | 0.390351 |
| MmugDNA.41014.1.S1_at   | MmugDNA.41014.1 | 11.58 | 11.72 | 0.21 | 0.08 | -1.1  | 0.111635 | 0.089895 | 0.484896 | 0.344073 |
| MmugDNA.41018.1.S1_at   | MmugDNA.41018.1 | 6.01  | 5.82  | 0.06 | 0.15 | 1.14  | 0.107016 | 0.064921 | 0.47951  | 0.300818 |
| MmugDNA.41026.1.S1_at   | MmugDNA.41026.1 | 6.85  | 8.13  | 0.71 | 0.04 | -2.44 | 0.074419 | 0.065111 | 0.435313 | 0.301119 |
| MmugDNA.41042.1.S1_at   | MmugDNA.41042.1 | 3.39  | 3.18  | 0.19 | 0.04 | 1.16  | 0.169848 | 0.067661 | 0.542773 | 0.306199 |
| MmugDNA.41046.1.S1_at   | MmugDNA.41046.1 | 10.95 | 10.78 | 0.17 | 0.07 | 1.13  | 0.085985 | 0.130865 | 0.453337 | 0.403037 |
| MmugDNA.41046.1.S1_s_at | MmugDNA.41046.1 | 14.07 | 14.1  | 0.05 | 0.02 | -1.02 | 0.170504 | 0.392229 | 0.543549 | 0.625652 |
| MmugDNA.41051.1.S1_at   | MmugDNA.41051.1 | 11.88 | 11.95 | 0.14 | 0.01 | -1.05 | 0.994935 | 0.201674 | 0.998126 | 0.476208 |
| MmugDNA.41055.1.S1_at   | MmugDNA.41055.1 | 8.3   | 8.64  | 0.09 | 0.11 | -1.26 | 0.01303  | 0.003483 | 0.266166 | 0.084834 |
| MmugDNA.41056.1.S1_s_at | MmugDNA.41056.1 | 10.82 | 11.36 | 0.31 | 0.12 | -1.46 | 0.055794 | 0.039483 | 0.399433 | 0.243642 |
| MmugDNA.41066.1.S1_at   | MmugDNA.41066.1 | 6.28  | 6.21  | 0.4  | 0.06 | 1.05  | 0.685178 | 0.948829 | 0.87671  | 0.97077  |
| MmugDNA.41067.1.S1_at   | MmugDNA.41067.1 | 6.25  | 4.62  | 1.54 | 0.89 | 3.09  | 0.828024 | 0.505783 | 0.938183 | 0.702218 |
| MmugDNA.41076.1.S1_at   | MmugDNA.41076.1 | 7.31  | 7.47  | 0.16 | 0.1  | -1.12 | 0.445695 | 0.798055 | 0.752285 | 0.883728 |
| MmugDNA.41079.1.S1_at   | MmugDNA.41079.1 | 8.23  | 7.86  | 0.37 | 0.04 | 1.29  | 0.138271 | 0.195511 | 0.513671 | 0.470351 |
| MmugDNA.41082.1.S1_at   | MmugDNA.41082.1 | 10.8  | 10.88 | 0.59 | 0.07 | -1.06 | 0.617847 | 0.08811  | 0.845661 | 0.341641 |
| MmugDNA.41087.1.S1_at   | MmugDNA.41087.1 | 3.75  | 3.6   | 0.13 | 0.12 | 1.11  | 0.095338 | 0.103573 | 0.464159 | 0.364346 |
| MmugDNA.41090.1.S1_at   | MmugDNA.41090.1 | 4.32  | 4.43  | 0.07 | 0.02 | -1.08 | 0.07124  | 0.279702 | 0.430589 | 0.543228 |
| MmugDNA.41091.1.S1_at   | MmugDNA.41091.1 | 8.68  | 8.66  | 0.14 | 0.11 | 1.01  | 0.784806 | 0.239489 | 0.920949 | 0.510162 |
| MmugDNA.41093.1.S1_at   | MmugDNA.41093.1 | 7.88  | 9.14  | 2.14 | 0.19 | -2.39 | 0.301628 | 0.161214 | 0.655844 | 0.437386 |
| MmugDNA.41094.1.S1_at   | MmugDNA.41094.1 | 5.38  | 5.18  | 0.15 | 0.06 | 1.15  | 0.430065 | 0.11736  | 0.742573 | 0.384998 |
| MmugDNA.41097.1.S1_at   | MmugDNA.41097.1 | 7.57  | 7.44  | 0.48 | 0.23 | 1.09  | 0.683608 | 0.49824  | 0.876134 | 0.697383 |
| MmugDNA.41100.1.S1_at   | MmugDNA.41100.1 | 5.48  | 5.26  | 0.15 | 0.16 | 1.17  | 0.07205  | 0.08392  | 0.431899 | 0.334824 |
| MmugDNA.41101.1.S1_at   | MmugDNA.41101.1 | 12.82 | 12.86 | 0.04 | 0.03 | -1.03 | 0.695368 | 0.778063 | 0.881536 | 0.871097 |
| MmugDNA.41102.1.S1_at   | MmugDNA.41102.1 | 11.37 | 11.81 | 0.3  | 0.11 | -1.36 | 0.055697 | 0.044042 | 0.399024 | 0.254195 |
| MmugDNA.41102.1.S1_x_at | MmugDNA.41102.1 | 11.53 | 11.99 | 0.27 | 0.09 | -1.38 | 0.043545 | 0.035005 | 0.372168 | 0.231203 |
| MmugDNA.41105.1.S1_s_at | MmugDNA.41105.1 | 6.58  | 6.57  | 0.14 | 0.03 | 1.01  | 0.755926 | 0.930587 | 0.90805  | 0.960549 |
| MmugDNA.41106.1.S1_at   | MmugDNA.41106.1 | 3.75  | 3.65  | 0.16 | 0.06 | 1.07  | 0.716703 | 0.84486  | 0.889987 | 0.911705 |
| MmugDNA.41110.1.S1_s_at | MmugDNA.41110.1 | 11.73 | 11.62 | 0.08 | 0.16 | 1.08  | 0.99427  | 0.548813 | 0.997838 | 0.72944  |
| MmugDNA.41111.1.S1_at   | MmugDNA.41111.1 | 10.35 | 10.73 | 0.1  | 0.16 | -1.3  | 0.034042 | 0.069213 | 0.347625 | 0.309372 |
| MmugDNA.41114.1.S1_at   | MmugDNA.41114.1 | 10.27 | 11.2  | 0.33 | 0.11 | -1.9  | 0.019291 | 0.009648 | 0.300531 | 0.129267 |
| MmugDNA.41119.1.S1_at   | MmugDNA.41119.1 | 4.42  | 4.54  | 0.24 | 0.41 | -1.09 | 0.936714 | 0.871364 | 0.97876  | 0.926844 |
| MmugDNA.41122.1.S1_at   | MmugDNA.41122.1 | 8.65  | 9.16  | 0.25 | 0.37 | -1.42 | 0.197986 | 0.006693 | 0.569172 | 0.110702 |
| MmugDNA.41128.1.S1_at   | MmugDNA.41128.1 | 6.93  | 6.92  | 0.21 | 0.05 | 1.01  | 0.917715 | 0.100473 | 0.97205  | 0.359615 |
| MmugDNA.4113.1.S1_at    | MmugDNA.4113.1  | 8.2   | 8.32  | 0.56 | 0.08 | -1.09 | 0.486346 | 0.010404 | 0.774492 | 0.133414 |

|                       |                 |       |       |      |      |       |          |          |          |          |
|-----------------------|-----------------|-------|-------|------|------|-------|----------|----------|----------|----------|
| MmugDNA.41134.1.S1_at | MmugDNA.41134.1 | 4.05  | 3.91  | 0.14 | 0.04 | 1.1   | 0.264555 | 0.091986 | 0.626029 | 0.347348 |
| MmugDNA.41136.1.S1_at | MmugDNA.41136.1 | 11.61 | 11.89 | 0.34 | 0.1  | -1.22 | 0.302054 | 0.370032 | 0.655989 | 0.609286 |
| MmugDNA.41138.1.S1_at | MmugDNA.41138.1 | 4.34  | 4.7   | 0.53 | 0.33 | -1.28 | 0.727352 | 0.693152 | 0.894656 | 0.821511 |
| MmugDNA.41148.1.S1_at | MmugDNA.41148.1 | 3.51  | 3     | 0.21 | 0.46 | 1.42  | 0.689189 | 0.418903 | 0.878732 | 0.643141 |
| MmugDNA.41149.1.S1_at | MmugDNA.41149.1 | 3.88  | 3.76  | 0.05 | 0.14 | 1.08  | 0.303136 | 0.281375 | 0.657006 | 0.544411 |
| MmugDNA.41155.1.S1_at | MmugDNA.41155.1 | 10.53 | 10.88 | 0.28 | 0.03 | -1.27 | 0.317962 | 0.406776 | 0.667635 | 0.634497 |
| MmugDNA.41156.1.S1_at | MmugDNA.41156.1 | 5.4   | 5.36  | 0.09 | 0.24 | 1.03  | 0.556465 | 0.601165 | 0.814119 | 0.762545 |
| MmugDNA.41157.1.S1_at | MmugDNA.41157.1 | 11.56 | 12    | 1.37 | 0.21 | -1.36 | 0.573039 | 0.215725 | 0.823428 | 0.489503 |
| MmugDNA.41164.1.S1_at | MmugDNA.41164.1 | 8.05  | 8.96  | 0.51 | 0.24 | -1.88 | 0.049411 | 0.036602 | 0.385474 | 0.235884 |
| MmugDNA.41170.1.S1_at | MmugDNA.41170.1 | 12.35 | 12.48 | 0.26 | 0.14 | -1.1  | 0.945001 | 0.972973 | 0.980852 | 0.985389 |
| MmugDNA.41172.1.S1_at | MmugDNA.41172.1 | 9.9   | 10.41 | 0.44 | 0.05 | -1.42 | 0.377092 | 0.125069 | 0.707366 | 0.395506 |
| MmugDNA.41173.1.S1_at | MmugDNA.41173.1 | 11.18 | 10.21 | 0.41 | 0.03 | 1.95  | 0.035969 | 0.031441 | 0.353759 | 0.219107 |
| MmugDNA.41174.1.S1_at | MmugDNA.41174.1 | 10.74 | 11.21 | 0.41 | 0.1  | -1.39 | 0.046606 | 0.045488 | 0.378317 | 0.2575   |
| MmugDNA.41175.1.S1_at | MmugDNA.41175.1 | 12.1  | 12.01 | 0.17 | 0.04 | 1.06  | 0.138404 | 0.243036 | 0.513727 | 0.513356 |
| MmugDNA.41188.1.S1_at | MmugDNA.41188.1 | 6.26  | 7.08  | 0.32 | 0.2  | -1.76 | 0.01536  | 0.037107 | 0.281111 | 0.237165 |
| MmugDNA.41189.1.S1_at | MmugDNA.41189.1 | 5.99  | 5.97  | 0.11 | 0.12 | 1.01  | 0.510151 | 0.320814 | 0.788001 | 0.572849 |
| MmugDNA.41192.1.S1_at | MmugDNA.41192.1 | 10.13 | 10.13 | 0.04 | 0.1  | 1     | 0.490936 | 0.123894 | 0.777361 | 0.3942   |
| MmugDNA.41194.1.S1_at | MmugDNA.41194.1 | 7.56  | 7.53  | 0.48 | 0.15 | 1.02  | 0.941786 | 0.825989 | 0.980207 | 0.900031 |
| MmugDNA.41197.1.S1_at | MmugDNA.41197.1 | 11.94 | 12.53 | 0.2  | 0.03 | -1.5  | 0.017001 | 0.00335  | 0.288969 | 0.083346 |
| MmugDNA.41198.1.S1_at | MmugDNA.41198.1 | 7.48  | 7.18  | 0.14 | 0.11 | 1.23  | 0.04688  | 0.047381 | 0.379063 | 0.262418 |
| MmugDNA.4120.1.S1_at  | MmugDNA.4120.1  | 4.1   | 3.91  | 0.06 | 0.12 | 1.14  | 0.335781 | 0.20939  | 0.681213 | 0.483069 |
| MmugDNA.41203.1.S1_at | MmugDNA.41203.1 | 5     | 4.92  | 0.13 | 0.05 | 1.05  | 0.317818 | 0.499504 | 0.667596 | 0.69832  |
| MmugDNA.41205.1.S1_at | MmugDNA.41205.1 | 8.65  | 8.96  | 0.59 | 0.13 | -1.24 | 0.107384 | 0.120389 | 0.47976  | 0.38925  |
| MmugDNA.41211.1.S1_at | MmugDNA.41211.1 | 10.25 | 10.48 | 0.19 | 0.14 | -1.17 | 0.226358 | 0.280255 | 0.595591 | 0.543514 |
| MmugDNA.41217.1.S1_at | MmugDNA.41217.1 | 11.83 | 11.7  | 0.2  | 0.08 | 1.09  | 0.529069 | 0.374983 | 0.798106 | 0.613186 |
| MmugDNA.41220.1.S1_at | MmugDNA.41220.1 | 5.46  | 6.13  | 0.92 | 0.19 | -1.6  | 0.37591  | 0.586475 | 0.706657 | 0.753512 |
| MmugDNA.4124.1.S1_at  | MmugDNA.4124.1  | 8.78  | 8.5   | 0.28 | 0.24 | 1.21  | 0.70451  | 0.000155 | 0.885155 | 0.030072 |
| MmugDNA.41244.1.S1_at | MmugDNA.41244.1 | 12.05 | 12.32 | 0.64 | 0.13 | -1.21 | 0.679296 | 0.125254 | 0.874274 | 0.395813 |
| MmugDNA.41250.1.S1_at | MmugDNA.41250.1 | 9.75  | 10.04 | 0.51 | 0.04 | -1.22 | 0.538606 | 0.506231 | 0.803381 | 0.702368 |
| MmugDNA.41252.1.S1_at | MmugDNA.41252.1 | 8.71  | 9.02  | 0.55 | 0.05 | -1.24 | 0.175144 | 0.222575 | 0.548031 | 0.495615 |
| MmugDNA.41254.1.S1_at | MmugDNA.41254.1 | 9.85  | 10.5  | 0.6  | 0.23 | -1.56 | 0.666371 | 0.32263  | 0.868243 | 0.574024 |
| MmugDNA.41258.1.S1_at | MmugDNA.41258.1 | 4.31  | 4.09  | 0.09 | 0.11 | 1.16  | 0.057325 | 0.063291 | 0.401913 | 0.298244 |
| MmugDNA.41264.1.S1_at | MmugDNA.41264.1 | 2.96  | 3.13  | 0.16 | 0.09 | -1.12 | 0.631711 | 0.306478 | 0.852554 | 0.563029 |
| MmugDNA.41265.1.S1_at | MmugDNA.41265.1 | 3.99  | 4.05  | 0.1  | 0.21 | -1.05 | 0.678596 | 0.550338 | 0.874071 | 0.73039  |
| MmugDNA.41267.1.S1_at | MmugDNA.41267.1 | 11.23 | 11.12 | 0.93 | 0.1  | 1.08  | 0.836502 | 0.908832 | 0.941249 | 0.948389 |
| MmugDNA.41286.1.S1_at | MmugDNA.41286.1 | 8.5   | 7.55  | 0.4  | 0.11 | 1.94  | 0.03866  | 0.266715 | 0.360067 | 0.53241  |
| MmugDNA.41293.1.S1_at | MmugDNA.41293.1 | 11.01 | 10.89 | 0.21 | 0.08 | 1.09  | 0.316212 | 0.43403  | 0.666364 | 0.654207 |
| MmugDNA.41296.1.S1_at | MmugDNA.41296.1 | 7.4   | 7.26  | 0.33 | 0.02 | 1.11  | 0.497349 | 0.13585  | 0.781071 | 0.408027 |
| MmugDNA.41299.1.S1_at | MmugDNA.41299.1 | 4.24  | 4.12  | 0.28 | 0.03 | 1.09  | 0.463401 | 0.183622 | 0.762124 | 0.459681 |
| MmugDNA.4130.1.S1_at  | MmugDNA.4130.1  | 11.82 | 11.51 | 0.06 | 0.07 | 1.24  | 0.007226 | 0.004823 | 0.226509 | 0.096904 |
| MmugDNA.41308.1.S1_at | MmugDNA.41308.1 | 13.14 | 13.28 | 0.46 | 0.12 | -1.11 | 0.317374 | 0.324188 | 0.667276 | 0.57488  |
| MmugDNA.41310.1.S1_at | MmugDNA.41310.1 | 7.98  | 8.57  | 0.36 | 0.23 | -1.51 | 0.084268 | 0.098026 | 0.450891 | 0.355964 |
| MmugDNA.41311.1.S1_at | MmugDNA.41311.1 | 6.43  | 7.29  | 0.63 | 0.21 | -1.81 | 0.122285 | 0.056366 | 0.495677 | 0.283382 |

|                         |                 |       |       |      |      |       |          |          |          |          |
|-------------------------|-----------------|-------|-------|------|------|-------|----------|----------|----------|----------|
| MmugDNA.41312.1.S1_at   | MmugDNA.41312.1 | 13.33 | 13.29 | 0.17 | 0.05 | 1.03  | 0.837899 | 0.027372 | 0.941957 | 0.206695 |
| MmugDNA.41313.1.S1_at   | MmugDNA.41313.1 | 6.8   | 6.18  | 0.42 | 0.29 | 1.53  | 0.129967 | 0.059682 | 0.504648 | 0.290919 |
| MmugDNA.41314.1.S1_at   | MmugDNA.41314.1 | 6.57  | 7.06  | 1.39 | 0.28 | -1.4  | 0.577312 | 0.715384 | 0.825545 | 0.835018 |
| MmugDNA.41315.1.S1_at   | MmugDNA.41315.1 | 10.83 | 9.89  | 0.56 | 0.19 | 1.92  | 0.110787 | 0.028644 | 0.484198 | 0.210901 |
| MmugDNA.41318.1.S1_at   | MmugDNA.41318.1 | 3.39  | 3.49  | 0.02 | 0.32 | -1.07 | 0.636787 | 0.311979 | 0.855278 | 0.566838 |
| MmugDNA.41334.1.S1_at   | MmugDNA.41334.1 | 9.18  | 9.43  | 0.31 | 0.11 | -1.19 | 0.245666 | 0.004015 | 0.611181 | 0.089976 |
| MmugDNA.41336.1.S1_at   | MmugDNA.41336.1 | 6.76  | 6.48  | 0.17 | 0.12 | 1.22  | 0.120338 | 0.146347 | 0.49361  | 0.420368 |
| MmugDNA.41339.1.S1_at   | MmugDNA.41339.1 | 10.15 | 9.57  | 0.29 | 0.17 | 1.5   | 0.014487 | 0.000779 | 0.275993 | 0.045626 |
| MmugDNA.41345.1.S1_at   | MmugDNA.41345.1 | 7.99  | 7.84  | 0.08 | 0.09 | 1.1   | 0.147475 | 0.498596 | 0.521578 | 0.697641 |
| MmugDNA.41347.1.S1_at   | MmugDNA.41347.1 | 5.09  | 4.94  | 0.09 | 0.09 | 1.11  | 0.129901 | 0.068036 | 0.504571 | 0.307124 |
| MmugDNA.41356.1.S1_at   | MmugDNA.41356.1 | 4.43  | 4.49  | 0.19 | 0.32 | -1.04 | 0.172979 | 0.453148 | 0.546108 | 0.667568 |
| MmugDNA.41357.1.S1_at   | MmugDNA.41357.1 | 12.63 | 12.63 | 0.14 | 0.14 | 1     | 0.380488 | 0.732362 | 0.709387 | 0.844986 |
| MmugDNA.41359.1.S1_at   | MmugDNA.41359.1 | 11.41 | 11.61 | 0.17 | 0.21 | -1.15 | 0.108698 | 0.020764 | 0.480942 | 0.180781 |
| MmugDNA.41361.1.S1_at   | MmugDNA.41361.1 | 4.9   | 4.78  | 0.1  | 0.09 | 1.09  | 0.460524 | 0.92323  | 0.760265 | 0.956822 |
| MmugDNA.41364.1.S1_at   | MmugDNA.41364.1 | 12.99 | 13.04 | 0.49 | 0.11 | -1.03 | 0.952129 | 0.083608 | 0.983952 | 0.334212 |
| MmugDNA.41371.1.S1_at   | MmugDNA.41371.1 | 9.6   | 9.94  | 0.49 | 0.03 | -1.27 | 0.24903  | 0.136356 | 0.614353 | 0.408804 |
| MmugDNA.41374.1.S1_at   | MmugDNA.41374.1 | 6.74  | 7.43  | 0.52 | 0.06 | -1.61 | 0.106886 | 0.044032 | 0.479405 | 0.254195 |
| MmugDNA.41376.1.S1_at   | MmugDNA.41376.1 | 4.34  | 4.7   | 0.12 | 0.11 | -1.28 | 0.02324  | 0.029715 | 0.314809 | 0.214029 |
| MmugDNA.41379.1.S1_at   | MmugDNA.41379.1 | 5.92  | 6.09  | 0.3  | 0.19 | -1.12 | 0.952534 | 0.980882 | 0.98407  | 0.989478 |
| MmugDNA.4138.1.S1_at    | MmugDNA.4138.1  | 10.78 | 11.21 | 0.19 | 0.11 | -1.34 | 0.043676 | 0.030707 | 0.372554 | 0.217148 |
| MmugDNA.41383.1.S1_at   | MmugDNA.41383.1 | 7.69  | 7.86  | 0.8  | 0.21 | -1.13 | 0.998082 | 0.700468 | 0.999386 | 0.826162 |
| MmugDNA.41384.1.S1_at   | MmugDNA.41384.1 | 9.58  | 9.03  | 2.87 | 0.41 | 1.47  | 0.943036 | 0.170755 | 0.980374 | 0.447316 |
| MmugDNA.4139.1.S1_at    | MmugDNA.4139.1  | 8.52  | 8.59  | 0.25 | 0.21 | -1.05 | 0.415977 | 0.231882 | 0.73395  | 0.503594 |
| MmugDNA.41391.1.S1_at   | MmugDNA.41391.1 | 3.78  | 3.75  | 0.04 | 0.03 | 1.03  | 0.690123 | 0.013909 | 0.879286 | 0.151286 |
| MmugDNA.41395.1.S1_at   | MmugDNA.41395.1 | 3.16  | 3.1   | 0.02 | 0.1  | 1.04  | 0.320264 | 0.087761 | 0.669207 | 0.341027 |
| MmugDNA.41402.1.S1_at   | MmugDNA.41402.1 | 6.95  | 6.9   | 0.07 | 0.08 | 1.03  | 0.974699 | 0.234302 | 0.991912 | 0.505553 |
| MmugDNA.41405.1.S1_at   | MmugDNA.41405.1 | 8.91  | 9.32  | 0.27 | 0.03 | -1.33 | 0.020984 | 0.001402 | 0.306271 | 0.057117 |
| MmugDNA.41412.1.S1_at   | MmugDNA.41412.1 | 5.78  | 5.28  | 0.57 | 0.4  | 1.41  | 0.905074 | 0.185091 | 0.968109 | 0.460961 |
| MmugDNA.41413.1.S1_at   | MmugDNA.41413.1 | 11.66 | 11.75 | 0.26 | 0.02 | -1.07 | 0.68176  | 0.258773 | 0.875387 | 0.525949 |
| MmugDNA.41414.1.S1_at   | MmugDNA.41414.1 | 4.83  | 4.47  | 0.24 | 0.22 | 1.28  | 0.06889  | 0.126119 | 0.426252 | 0.39672  |
| MmugDNA.41417.1.S1_at   | MmugDNA.41417.1 | 7.52  | 7.87  | 0.18 | 0.11 | -1.27 | 0.038073 | 0.18127  | 0.358549 | 0.457809 |
| MmugDNA.41418.1.S1_at   | MmugDNA.41418.1 | 12.18 | 12.05 | 0.14 | 0.04 | 1.1   | 0.234483 | 0.228767 | 0.601746 | 0.501005 |
| MmugDNA.41418.1.S1_s_at | MmugDNA.41418.1 | 12.14 | 12.04 | 0.24 | 0.04 | 1.07  | 0.930841 | 0.730113 | 0.97692  | 0.843808 |
| MmugDNA.41419.1.S1_at   | MmugDNA.41419.1 | 12.34 | 12.24 | 0.19 | 0.01 | 1.08  | 0.431629 | 0.520806 | 0.743486 | 0.711942 |
| MmugDNA.41420.1.S1_at   | MmugDNA.41420.1 | 4.72  | 5.13  | 0.29 | 0.2  | -1.33 | 0.047    | 0.07863  | 0.379253 | 0.32546  |
| MmugDNA.41424.1.S1_at   | MmugDNA.41424.1 | 10.29 | 10.17 | 0.34 | 0.04 | 1.09  | 0.196118 | 0.029425 | 0.566607 | 0.213368 |
| MmugDNA.41424.1.S1_s_at | MmugDNA.41424.1 | 10.82 | 10.69 | 0.43 | 0.07 | 1.09  | 0.289234 | 0.063474 | 0.645925 | 0.298441 |
| MmugDNA.41430.1.S1_at   | MmugDNA.41430.1 | 10.41 | 10.1  | 0.1  | 0.1  | 1.24  | 0.029839 | 0.013786 | 0.336071 | 0.150462 |
| MmugDNA.41434.1.S1_at   | MmugDNA.41434.1 | 9.13  | 8.87  | 0.49 | 0.06 | 1.19  | 0.37184  | 0.443128 | 0.705567 | 0.661003 |
| MmugDNA.41447.1.S1_at   | MmugDNA.41447.1 | 5.54  | 5.38  | 0.12 | 0.09 | 1.12  | 0.137933 | 0.527578 | 0.513671 | 0.716154 |
| MmugDNA.41448.1.S1_at   | MmugDNA.41448.1 | 3.7   | 3.56  | 0.03 | 0.04 | 1.1   | 0.012722 | 0.099986 | 0.264058 | 0.3588   |
| MmugDNA.41452.1.S1_at   | MmugDNA.41452.1 | 8.36  | 8.47  | 1.15 | 0.65 | -1.08 | 0.575531 | 0.184278 | 0.824671 | 0.460412 |
| MmugDNA.41453.1.S1_at   | MmugDNA.41453.1 | 9.16  | 9.54  | 1.73 | 0.17 | -1.3  | 0.73824  | 0.378644 | 0.8998   | 0.61568  |

|                         |                 |       |       |      |      |       |          |          |          |          |
|-------------------------|-----------------|-------|-------|------|------|-------|----------|----------|----------|----------|
| MmugDNA.41454.1.S1_at   | MmugDNA.41454.1 | 5.44  | 5.3   | 0.12 | 0.16 | 1.1   | 0.25161  | 0.372937 | 0.616728 | 0.611783 |
| MmugDNA.4146.1.S1_at    | MmugDNA.4146.1  | 10.56 | 10.63 | 0.11 | 0.13 | -1.05 | 0.642975 | 0.047187 | 0.857999 | 0.261793 |
| MmugDNA.41461.1.S1_at   | MmugDNA.41461.1 | 8.23  | 9.04  | 0.21 | 0.17 | -1.75 | 0.006117 | 0.001008 | 0.215868 | 0.050657 |
| MmugDNA.41462.1.S1_at   | MmugDNA.41462.1 | 9.65  | 10    | 0.45 | 0.13 | -1.28 | 0.279626 | 0.250675 | 0.638549 | 0.51941  |
| MmugDNA.41468.1.S1_at   | MmugDNA.41468.1 | 11.34 | 11.14 | 0.17 | 0.18 | 1.14  | 0.075705 | 0.088785 | 0.436722 | 0.342524 |
| MmugDNA.41469.1.S1_at   | MmugDNA.41469.1 | 9.25  | 8.89  | 0.39 | 0.11 | 1.28  | 0.157235 | 0.02368  | 0.530382 | 0.19268  |
| MmugDNA.41472.1.S1_at   | MmugDNA.41472.1 | 5.91  | 6.2   | 0.78 | 0.18 | -1.23 | 0.616914 | 0.718193 | 0.845163 | 0.836902 |
| MmugDNA.41475.1.S1_at   | MmugDNA.41475.1 | 9.15  | 8.83  | 0.38 | 0.05 | 1.24  | 0.411234 | 0.125638 | 0.731262 | 0.396249 |
| MmugDNA.41481.1.S1_at   | MmugDNA.41481.1 | 6.09  | 5.75  | 0.25 | 0.1  | 1.26  | 0.131247 | 0.058943 | 0.505491 | 0.28962  |
| MmugDNA.41486.1.S1_at   | MmugDNA.41486.1 | 10.83 | 10.95 | 0.69 | 0.09 | -1.09 | 0.651443 | 0.771052 | 0.861635 | 0.86692  |
| MmugDNA.41486.1.S1_s_at | MmugDNA.41486.1 | 11.91 | 11.91 | 0.57 | 0.01 | -1    | 0.962542 | 0.799786 | 0.987901 | 0.884885 |
| MmugDNA.41487.1.S1_at   | MmugDNA.41487.1 | 10.17 | 10.19 | 0.19 | 0.14 | -1.01 | 0.756566 | 0.59674  | 0.908296 | 0.759776 |
| MmugDNA.41488.1.S1_s_at | MmugDNA.41488.1 | 12.28 | 12.28 | 0.22 | 0.07 | -1    | 0.779395 | 0.945408 | 0.918638 | 0.968942 |
| MmugDNA.41491.1.S1_at   | MmugDNA.41491.1 | 4.5   | 4.48  | 0.15 | 0.01 | 1.01  | 0.684968 | 0.611602 | 0.876641 | 0.769451 |
| MmugDNA.41502.1.S1_at   | MmugDNA.41502.1 | 3.94  | 3.93  | 0.1  | 0.06 | 1.01  | 0.497252 | 0.337609 | 0.781055 | 0.584788 |
| MmugDNA.41506.1.S1_at   | MmugDNA.41506.1 | 7.93  | 7.36  | 0.43 | 0.09 | 1.48  | 0.137263 | 0.188091 | 0.512385 | 0.464169 |
| MmugDNA.41507.1.S1_at   | MmugDNA.41507.1 | 8.17  | 8.63  | 0.42 | 0    | -1.38 | 0.078837 | 0.039145 | 0.441464 | 0.243072 |
| MmugDNA.41509.1.S1_at   | MmugDNA.41509.1 | 6.9   | 6.76  | 0.02 | 0.08 | 1.11  | 0.040823 | 0.005168 | 0.36514  | 0.099727 |
| MmugDNA.41515.1.S1_s_at | MmugDNA.41515.1 | 4.35  | 4.29  | 0.07 | 0.16 | 1.04  | 0.697736 | 0.899567 | 0.882415 | 0.942903 |
| MmugDNA.4152.1.S1_at    | MmugDNA.4152.1  | 10.1  | 8.73  | 0.37 | 0.86 | 2.59  | 0.174988 | 0.257038 | 0.548031 | 0.524781 |
| MmugDNA.41522.1.S1_at   | MmugDNA.41522.1 | 5.19  | 4.93  | 0.16 | 0.12 | 1.2   | 0.211964 | 0.142552 | 0.582752 | 0.416206 |
| MmugDNA.41532.1.S1_at   | MmugDNA.41532.1 | 6.25  | 6.6   | 0.33 | 0.15 | -1.27 | 0.276502 | 0.728388 | 0.636031 | 0.842993 |
| MmugDNA.4154.1.S1_at    | MmugDNA.4154.1  | 9.06  | 9.44  | 0.26 | 0.18 | -1.3  | 0.194418 | 0.387027 | 0.564999 | 0.621935 |
| MmugDNA.41540.1.S1_at   | MmugDNA.41540.1 | 7.26  | 7.45  | 1.02 | 0.1  | -1.14 | 0.759812 | 0.318148 | 0.909769 | 0.571046 |
| MmugDNA.41546.1.S1_at   | MmugDNA.41546.1 | 3.09  | 3.24  | 0.31 | 0.11 | -1.11 | 0.667586 | 0.810135 | 0.868641 | 0.890539 |
| MmugDNA.41547.1.S1_at   | MmugDNA.41547.1 | 9.84  | 10.51 | 0.38 | 0.14 | -1.6  | 0.032271 | 0.000816 | 0.343536 | 0.046361 |
| MmugDNA.41548.1.S1_at   | MmugDNA.41548.1 | 5     | 4.69  | 0.51 | 0.3  | 1.24  | 0.282505 | 0.025876 | 0.640925 | 0.201696 |
| MmugDNA.41559.1.S1_at   | MmugDNA.41559.1 | 3.44  | 3.49  | 0.07 | 0.07 | -1.04 | 0.310446 | 0.448019 | 0.662193 | 0.663986 |
| MmugDNA.4156.1.S1_at    | MmugDNA.4156.1  | 8.53  | 8.74  | 0.14 | 0.14 | -1.15 | 0.185725 | 0.025681 | 0.558625 | 0.200834 |
| MmugDNA.41562.1.S1_at   | MmugDNA.41562.1 | 3.47  | 3.44  | 0.12 | 0.06 | 1.02  | 0.647445 | 0.202348 | 0.859364 | 0.4767   |
| MmugDNA.41568.1.S1_at   | MmugDNA.41568.1 | 4.04  | 3.96  | 0.6  | 0.36 | 1.06  | 0.478429 | 0.656476 | 0.770085 | 0.799097 |
| MmugDNA.4157.1.S1_at    | MmugDNA.4157.1  | 5.18  | 4.7   | 0.39 | 0.23 | 1.39  | 0.195395 | 0.315688 | 0.565786 | 0.569119 |
| MmugDNA.41570.1.S1_at   | MmugDNA.41570.1 | 5.56  | 4.98  | 0.43 | 0.75 | 1.5   | 0.944636 | 0.600452 | 0.980778 | 0.762128 |
| MmugDNA.41572.1.S1_at   | MmugDNA.41572.1 | 11.21 | 10.93 | 0.63 | 0.05 | 1.22  | 0.324872 | 0.450506 | 0.672925 | 0.665705 |
| MmugDNA.41576.1.S1_at   | MmugDNA.41576.1 | 9.59  | 9.4   | 0.12 | 0.06 | 1.15  | 0.148031 | 0.692418 | 0.522302 | 0.821009 |
| MmugDNA.41579.1.S1_at   | MmugDNA.41579.1 | 6.54  | 6.26  | 0.63 | 0.06 | 1.21  | 0.330709 | 0.167398 | 0.677358 | 0.443785 |
| MmugDNA.4158.1.S1_at    | MmugDNA.4158.1  | 13.75 | 13.56 | 0.07 | 0.02 | 1.14  | 0.010928 | 0.027578 | 0.250796 | 0.207355 |
| MmugDNA.41581.1.S1_at   | MmugDNA.41581.1 | 7.01  | 7.38  | 0.32 | 0.53 | -1.29 | 0.15678  | 0.21857  | 0.529969 | 0.492172 |
| MmugDNA.41582.1.S1_at   | MmugDNA.41582.1 | 10.81 | 11.27 | 0.11 | 0.01 | -1.37 | 0.002014 | 0.000519 | 0.173387 | 0.039636 |
| MmugDNA.41588.1.S1_at   | MmugDNA.41588.1 | 5.53  | 6.07  | 0.61 | 0.12 | -1.45 | 0.260017 | 0.065747 | 0.622946 | 0.301766 |
| MmugDNA.41594.1.S1_at   | MmugDNA.41594.1 | 7.02  | 7.11  | 0.52 | 0.08 | -1.07 | 0.521756 | 0.369896 | 0.794797 | 0.609138 |
| MmugDNA.41595.1.S1_at   | MmugDNA.41595.1 | 2.99  | 3     | 0.16 | 0.07 | -1    | 0.681778 | 0.402514 | 0.875387 | 0.631481 |
| MmugDNA.41601.1.S1_at   | MmugDNA.41601.1 | 8.65  | 8.9   | 0.85 | 0.19 | -1.19 | 0.536509 | 0.155767 | 0.802417 | 0.431134 |

|                         |                 |       |       |      |      |       |          |          |          |          |
|-------------------------|-----------------|-------|-------|------|------|-------|----------|----------|----------|----------|
| MmugDNA.41606.1.S1_at   | MmugDNA.41606.1 | 12.23 | 12.31 | 0.1  | 0.07 | -1.06 | 0.292762 | 0.07941  | 0.649033 | 0.326766 |
| MmugDNA.4162.1.S1_s_at  | MmugDNA.4162.1  | 5.42  | 6.38  | 0.51 | 0.26 | -1.94 | 0.189448 | 0.252688 | 0.560916 | 0.521174 |
| MmugDNA.41626.1.S1_at   | MmugDNA.41626.1 | 8.6   | 8.67  | 0.16 | 0.13 | -1.05 | 0.486124 | 0.072319 | 0.774427 | 0.31505  |
| MmugDNA.41632.1.S1_at   | MmugDNA.41632.1 | 11.85 | 11.38 | 0.5  | 0.21 | 1.38  | 0.141146 | 0.060232 | 0.516345 | 0.292091 |
| MmugDNA.41633.1.S1_at   | MmugDNA.41633.1 | 13.51 | 13.5  | 0.05 | 0.04 | 1     | 0.999159 | 0.738103 | 0.999788 | 0.848202 |
| MmugDNA.41636.1.S1_at   | MmugDNA.41636.1 | 8.33  | 8.55  | 0.16 | 0.05 | -1.17 | 0.04239  | 0.019387 | 0.369001 | 0.175012 |
| MmugDNA.41640.1.S1_at   | MmugDNA.41640.1 | 3.29  | 3.26  | 0.07 | 0.1  | 1.03  | 0.168668 | 0.210928 | 0.541482 | 0.484934 |
| MmugDNA.41641.1.S1_at   | MmugDNA.41641.1 | 12.36 | 11.92 | 3.43 | 0.24 | 1.35  | 0.528906 | 0.195097 | 0.7981   | 0.470241 |
| MmugDNA.41647.1.S1_s_at | MmugDNA.41647.1 | 7.17  | 6.55  | 0.47 | 0.04 | 1.53  | 0.090511 | 0.05417  | 0.458781 | 0.27811  |
| MmugDNA.41648.1.S1_at   | MmugDNA.41648.1 | 11.37 | 11.95 | 0.47 | 0.03 | -1.49 | 0.093101 | 0.113683 | 0.461836 | 0.379818 |
| MmugDNA.41661.1.S1_at   | MmugDNA.41661.1 | 4.42  | 4.34  | 0.04 | 0.04 | 1.06  | 0.18284  | 0.226361 | 0.555631 | 0.498806 |
| MmugDNA.4167.1.S1_at    | MmugDNA.4167.1  | 3.14  | 3.01  | 0.14 | 0.07 | 1.09  | 0.181077 | 0.5322   | 0.554326 | 0.718995 |
| MmugDNA.41672.1.S1_at   | MmugDNA.41672.1 | 4.93  | 4.92  | 0.09 | 0.04 | 1     | 0.235405 | 0.150605 | 0.602502 | 0.425171 |
| MmugDNA.41674.1.S1_at   | MmugDNA.41674.1 | 13.76 | 13.63 | 0.27 | 0.16 | 1.1   | 0.905809 | 0.115572 | 0.968196 | 0.382674 |
| MmugDNA.41674.1.S1_x_at | MmugDNA.41674.1 | 13.6  | 13.5  | 0.34 | 0.16 | 1.07  | 0.930618 | 0.163985 | 0.97685  | 0.440128 |
| MmugDNA.41683.1.S1_at   | MmugDNA.41683.1 | 9.53  | 9.19  | 0.78 | 0.09 | 1.27  | 0.613199 | 0.712103 | 0.843382 | 0.833156 |
| MmugDNA.41685.1.S1_at   | MmugDNA.41685.1 | 4.41  | 4.4   | 0.04 | 0.08 | 1.01  | 0.589089 | 0.843295 | 0.832167 | 0.910767 |
| MmugDNA.41689.1.S1_at   | MmugDNA.41689.1 | 12.09 | 11.6  | 0.32 | 0.03 | 1.41  | 0.194101 | 0.071801 | 0.564699 | 0.314082 |
| MmugDNA.4169.1.S1_at    | MmugDNA.4169.1  | 3.63  | 3.53  | 0.2  | 0.21 | 1.07  | 0.893524 | 0.890794 | 0.963469 | 0.937722 |
| MmugDNA.41691.1.S1_at   | MmugDNA.41691.1 | 7.74  | 8.47  | 0.72 | 0.02 | -1.66 | 0.495503 | 0.115974 | 0.780094 | 0.383164 |
| MmugDNA.41701.1.S1_at   | MmugDNA.41701.1 | 6.91  | 6.67  | 0.05 | 0.08 | 1.18  | 0.038934 | 0.190807 | 0.360586 | 0.466228 |
| MmugDNA.41710.1.S1_at   | MmugDNA.41710.1 | 7.16  | 7.48  | 0.2  | 0.03 | -1.25 | 0.068918 | 0.050411 | 0.42633  | 0.269746 |
| MmugDNA.4172.1.S1_at    | MmugDNA.4172.1  | 12.2  | 12.93 | 0.18 | 0.02 | -1.66 | 0.004087 | 0.124606 | 0.198571 | 0.394995 |
| MmugDNA.41726.1.S1_at   | MmugDNA.41726.1 | 4.47  | 4.39  | 0.1  | 0.04 | 1.06  | 0.284434 | 0.076198 | 0.642301 | 0.321076 |
| MmugDNA.41728.1.S1_at   | MmugDNA.41728.1 | 10.46 | 11.07 | 3.13 | 0.33 | -1.53 | 0.381619 | 0.293402 | 0.710163 | 0.553341 |
| MmugDNA.41731.1.S1_at   | MmugDNA.41731.1 | 9.06  | 8.85  | 0.23 | 0.21 | 1.16  | 0.985345 | 0.457581 | 0.995405 | 0.670864 |
| MmugDNA.41732.1.S1_at   | MmugDNA.41732.1 | 3.56  | 3.5   | 0.06 | 0.19 | 1.04  | 0.480636 | 0.561688 | 0.771344 | 0.73751  |
| MmugDNA.41734.1.S1_at   | MmugDNA.41734.1 | 7.84  | 7.8   | 0.24 | 0.17 | 1.03  | 0.466333 | 0.001665 | 0.763501 | 0.061711 |
| MmugDNA.41738.1.S1_at   | MmugDNA.41738.1 | 11.33 | 11.35 | 0.12 | 0.05 | -1.01 | 0.70063  | 0.000435 | 0.883597 | 0.038359 |
| MmugDNA.41741.1.S1_at   | MmugDNA.41741.1 | 5.6   | 5.58  | 0.32 | 0.08 | 1.02  | 0.73301  | 0.730726 | 0.897482 | 0.844055 |
| MmugDNA.41750.1.S1_at   | MmugDNA.41750.1 | 9.52  | 9.57  | 0.27 | 0.06 | -1.04 | 0.681568 | 0.867949 | 0.875349 | 0.925008 |
| MmugDNA.41752.1.S1_at   | MmugDNA.41752.1 | 6.37  | 6.3   | 0.09 | 0.1  | 1.05  | 0.809876 | 0.472664 | 0.931227 | 0.68007  |
| MmugDNA.41752.1.S1_s_at | MmugDNA.41752.1 | 6.44  | 6.38  | 0.04 | 0.14 | 1.04  | 0.181035 | 0.394544 | 0.554326 | 0.627068 |
| MmugDNA.41756.1.S1_at   | MmugDNA.41756.1 | 10.04 | 9.56  | 0.79 | 0.2  | 1.39  | 0.853413 | 0.219794 | 0.948299 | 0.493388 |
| MmugDNA.41768.1.S1_at   | MmugDNA.41768.1 | 11.31 | 11.43 | 0.73 | 0.08 | -1.08 | 0.800065 | 0.670539 | 0.926794 | 0.807399 |
| MmugDNA.41774.1.S1_at   | MmugDNA.41774.1 | 5.13  | 5.38  | 0.66 | 0.14 | -1.19 | 0.906294 | 0.529274 | 0.968295 | 0.717233 |
| MmugDNA.41776.1.S1_at   | MmugDNA.41776.1 | 6.02  | 5.97  | 0.57 | 0.35 | 1.03  | 0.69476  | 0.013329 | 0.881181 | 0.148042 |
| MmugDNA.41782.1.S1_at   | MmugDNA.41782.1 | 12.45 | 12.77 | 0.12 | 0.03 | -1.25 | 0.010194 | 0.015877 | 0.246929 | 0.15984  |
| MmugDNA.41783.1.S1_at   | MmugDNA.41783.1 | 10.82 | 10.69 | 0.2  | 0.04 | 1.09  | 0.230213 | 0.156325 | 0.598481 | 0.43161  |
| MmugDNA.41791.1.S1_at   | MmugDNA.41791.1 | 7.05  | 7.07  | 0.51 | 0.24 | -1.02 | 0.768694 | 0.421922 | 0.91322  | 0.645378 |
| MmugDNA.41792.1.S1_at   | MmugDNA.41792.1 | 5.38  | 5.3   | 0.24 | 0.13 | 1.06  | 0.973095 | 0.978292 | 0.991226 | 0.988124 |
| MmugDNA.41794.1.S1_at   | MmugDNA.41794.1 | 12.98 | 13.09 | 0.34 | 0.06 | -1.08 | 0.671938 | 0.091622 | 0.870573 | 0.346716 |
| MmugDNA.41799.1.S1_at   | MmugDNA.41799.1 | 4.35  | 4.22  | 0.14 | 0.04 | 1.1   | 0.216184 | 0.099692 | 0.586342 | 0.358226 |



|                         |                 |       |       |      |      |       |          |          |          |          |
|-------------------------|-----------------|-------|-------|------|------|-------|----------|----------|----------|----------|
| MmugDNA.418.1.S1_at     | MmugDNA.418.1   | 7.95  | 8.33  | 1.28 | 0.16 | -1.3  | 0.66892  | 0.275495 | 0.86922  | 0.539709 |
| MmugDNA.41809.1.S1_at   | MmugDNA.41809.1 | 10.31 | 9.86  | 0.24 | 0.13 | 1.36  | 0.075469 | 0.490358 | 0.436649 | 0.692363 |
| MmugDNA.41811.1.S1_at   | MmugDNA.41811.1 | 12.99 | 13    | 0.03 | 0.03 | -1    | 0.777445 | 0.002625 | 0.9176   | 0.075772 |
| MmugDNA.41812.1.S1_at   | MmugDNA.41812.1 | 9.18  | 8.18  | 1.46 | 0.66 | 2     | 0.399107 | 0.44833  | 0.722883 | 0.66421  |
| MmugDNA.41818.1.S1_at   | MmugDNA.41818.1 | 6.17  | 6.23  | 0.22 | 0.28 | -1.05 | 0.53591  | 0.375423 | 0.802014 | 0.613405 |
| MmugDNA.41819.1.S1_at   | MmugDNA.41819.1 | 7.65  | 8.55  | 1.11 | 0.17 | -1.86 | 0.178915 | 0.199915 | 0.551958 | 0.474603 |
| MmugDNA.41821.1.S1_at   | MmugDNA.41821.1 | 7.16  | 7.15  | 0.24 | 0.04 | 1.01  | 0.950417 | 0.94676  | 0.983308 | 0.96978  |
| MmugDNA.4183.1.S1_at    | MmugDNA.4183.1  | 3.95  | 3.88  | 0.04 | 0.04 | 1.05  | 0.22368  | 0.55178  | 0.592842 | 0.73122  |
| MmugDNA.41832.1.S1_at   | MmugDNA.41832.1 | 5.24  | 5.21  | 0.27 | 0.07 | 1.01  | 0.251986 | 0.27023  | 0.616976 | 0.535587 |
| MmugDNA.41833.1.S1_at   | MmugDNA.41833.1 | 11.66 | 11.81 | 0.17 | 0.1  | -1.12 | 0.443935 | 0.818181 | 0.751068 | 0.89514  |
| MmugDNA.41835.1.S1_at   | MmugDNA.41835.1 | 10.03 | 9.87  | 0.31 | 0.06 | -1.12 | 0.425027 | 0.000505 | 0.739773 | 0.039158 |
| MmugDNA.41837.1.S1_at   | MmugDNA.41837.1 | 11.77 | 11.58 | 0.12 | 0.07 | 1.14  | 0.097392 | 0.063481 | 0.466321 | 0.298441 |
| MmugDNA.41838.1.S1_at   | MmugDNA.41838.1 | 11.85 | 12.21 | 0.72 | 0.08 | -1.28 | 0.396047 | 0.286163 | 0.720997 | 0.5477   |
| MmugDNA.41838.1.S1_x_at | MmugDNA.41838.1 | 11.52 | 11.83 | 0.71 | 0.09 | -1.24 | 0.448628 | 0.251109 | 0.75399  | 0.519792 |
| MmugDNA.41840.1.S1_at   | MmugDNA.41840.1 | 10.11 | 10.53 | 0.33 | 0.04 | -1.34 | 0.28765  | 0.344892 | 0.644777 | 0.590208 |
| MmugDNA.41842.1.S1_at   | MmugDNA.41842.1 | 9.44  | 9.24  | 0.15 | 0.3  | 1.15  | 0.780266 | 0.004987 | 0.919087 | 0.09844  |
| MmugDNA.41843.1.S1_at   | MmugDNA.41843.1 | 11.35 | 11.21 | 0.09 | 0.05 | 1.1   | 0.107963 | 0.623099 | 0.480459 | 0.777513 |
| MmugDNA.41844.1.S1_at   | MmugDNA.41844.1 | 7.96  | 8.59  | 0.21 | 0.29 | -1.55 | 0.049636 | 0.378145 | 0.385845 | 0.615438 |
| MmugDNA.41848.1.S1_at   | MmugDNA.41848.1 | 10.84 | 10.27 | 0.57 | 0.07 | 1.49  | 0.319921 | 0.429543 | 0.669028 | 0.650961 |
| MmugDNA.41849.1.S1_s_at | MmugDNA.41849.1 | 13.22 | 13.26 | 0.39 | 0.04 | -1.03 | 0.891352 | 0.235916 | 0.962572 | 0.507056 |
| MmugDNA.4185.1.S1_at    | MmugDNA.4185.1  | 6.77  | 7.04  | 0.07 | 0.03 | -1.2  | 0.003137 | 0.000528 | 0.191107 | 0.040039 |
| MmugDNA.41858.1.S1_at   | MmugDNA.41858.1 | 6.28  | 6.04  | 0.74 | 0.19 | 1.18  | 0.720919 | 0.330569 | 0.891829 | 0.579307 |
| MmugDNA.41863.1.S1_at   | MmugDNA.41863.1 | 12.26 | 12.12 | 0.15 | 0.07 | 1.1   | 0.263705 | 0.21599  | 0.625638 | 0.48965  |
| MmugDNA.41865.1.S1_at   | MmugDNA.41865.1 | 10.27 | 10.86 | 0.59 | 0.1  | -1.51 | 0.524431 | 0.677564 | 0.795867 | 0.81168  |
| MmugDNA.41866.1.S1_at   | MmugDNA.41866.1 | 5.22  | 5.33  | 0.45 | 0.12 | -1.08 | 0.941628 | 0.626329 | 0.980194 | 0.779698 |
| MmugDNA.41868.1.S1_at   | MmugDNA.41868.1 | 6.65  | 6.45  | 0.1  | 0.07 | 1.15  | 0.041761 | 0.222569 | 0.36716  | 0.495615 |
| MmugDNA.41870.1.S1_at   | MmugDNA.41870.1 | 6.87  | 6.26  | 1.72 | 0.14 | 1.54  | 0.601263 | 0.308873 | 0.838121 | 0.564656 |
| MmugDNA.41882.1.S1_at   | MmugDNA.41882.1 | 9.23  | 9.65  | 0.63 | 0.12 | -1.33 | 0.466286 | 0.178483 | 0.763448 | 0.454778 |
| MmugDNA.41887.1.S1_at   | MmugDNA.41887.1 | 9.12  | 8.52  | 0.3  | 0.05 | 1.52  | 0.071512 | 0.000562 | 0.431049 | 0.041049 |
| MmugDNA.41890.1.S1_at   | MmugDNA.41890.1 | 9.02  | 9.16  | 0.5  | 0.27 | -1.1  | 0.455627 | 0.480293 | 0.757493 | 0.68574  |
| MmugDNA.41900.1.S1_at   | MmugDNA.41900.1 | 6.07  | 5.93  | 1.19 | 0.2  | 1.1   | 0.367415 | 0.599528 | 0.702896 | 0.761473 |
| MmugDNA.41909.1.S1_at   | MmugDNA.41909.1 | 8.12  | 9.32  | 1.14 | 0.09 | -2.3  | 0.133109 | 0.109088 | 0.507433 | 0.372869 |
| MmugDNA.41913.1.S1_at   | MmugDNA.41913.1 | 6.86  | 7.45  | 0.61 | 0.09 | -1.5  | 0.135719 | 0.136321 | 0.510186 | 0.408746 |
| MmugDNA.41914.1.S1_at   | MmugDNA.41914.1 | 8.51  | 8.91  | 0.23 | 0.21 | -1.31 | 0.084766 | 0.14404  | 0.45134  | 0.417912 |
| MmugDNA.4192.1.S1_at    | MmugDNA.4192.1  | 4.92  | 4.86  | 0.19 | 0.12 | 1.04  | 0.662047 | 0.347025 | 0.866635 | 0.59181  |
| MmugDNA.41922.1.S1_at   | MmugDNA.41922.1 | 10.6  | 10.81 | 0.41 | 0.11 | -1.15 | 0.535077 | 0.253686 | 0.801404 | 0.522037 |
| MmugDNA.41926.1.S1_at   | MmugDNA.41926.1 | 10.38 | 11.23 | 0.31 | 0.03 | -1.8  | 0.019211 | 0.005033 | 0.300345 | 0.098963 |
| MmugDNA.41934.1.S1_at   | MmugDNA.41934.1 | 5.56  | 5.39  | 0.3  | 0.07 | 1.13  | 0.125581 | 0.150741 | 0.499523 | 0.4253   |
| MmugDNA.41946.1.S1_at   | MmugDNA.41946.1 | 4.86  | 4.53  | 0.4  | 0.15 | 1.26  | 0.36825  | 0.750643 | 0.70351  | 0.854991 |
| MmugDNA.41949.1.S1_at   | MmugDNA.41949.1 | 7.33  | 7.22  | 0.55 | 0.46 | 1.08  | 0.956463 | 0.871909 | 0.985548 | 0.927098 |
| MmugDNA.41953.1.S1_at   | MmugDNA.41953.1 | 4.13  | 4.18  | 0.02 | 0.07 | -1.04 | 0.385831 | 0.478005 | 0.713055 | 0.684037 |
| MmugDNA.41963.1.S1_at   | MmugDNA.41963.1 | 6.89  | 6.91  | 0.13 | 0.09 | -1.02 | 0.776779 | 0.96427  | 0.917412 | 0.98014  |
| MmugDNA.41963.1.S1_s_at | MmugDNA.41963.1 | 11.57 | 11.42 | 0.29 | 0.06 | 1.11  | 0.201853 | 0.083875 | 0.573399 | 0.334771 |

|                         |                 |       |       |      |      |       |          |          |          |          |
|-------------------------|-----------------|-------|-------|------|------|-------|----------|----------|----------|----------|
| MmugDNA.41966.1.S1_at   | MmugDNA.41966.1 | 4.71  | 5.45  | 0.96 | 0.55 | -1.68 | 0.708501 | 0.162308 | 0.886591 | 0.438447 |
| MmugDNA.4197.1.S1_at    | MmugDNA.4197.1  | 8.39  | 8.29  | 0.21 | 0.14 | 1.08  | 0.894968 | 0.480635 | 0.964146 | 0.685926 |
| MmugDNA.41984.1.S1_at   | MmugDNA.41984.1 | 9.26  | 9.2   | 1.11 | 0.07 | 1.04  | 0.756313 | 0.886066 | 0.908175 | 0.935136 |
| MmugDNA.41986.1.S1_at   | MmugDNA.41986.1 | 4.34  | 4.23  | 0.16 | 0.07 | 1.08  | 0.513641 | 0.635021 | 0.790027 | 0.785143 |
| MmugDNA.41994.1.S1_at   | MmugDNA.41994.1 | 7.5   | 7.61  | 0.39 | 0.03 | -1.08 | 0.957994 | 0.258209 | 0.986194 | 0.52558  |
| MmugDNA.42006.1.S1_at   | MmugDNA.42006.1 | 6.84  | 6.8   | 0.08 | 0.11 | 1.03  | 0.37681  | 0.219601 | 0.707087 | 0.49321  |
| MmugDNA.42009.1.S1_at   | MmugDNA.42009.1 | 6.93  | 7     | 0.38 | 0.12 | -1.05 | 0.589852 | 0.065408 | 0.832674 | 0.301415 |
| MmugDNA.4201.1.S1_at    | MmugDNA.4201.1  | 9.25  | 9.59  | 0.79 | 0.15 | -1.26 | 0.605199 | 0.440656 | 0.839843 | 0.659046 |
| MmugDNA.42015.1.S1_at   | MmugDNA.42015.1 | 12.13 | 11.22 | 0.59 | 0.08 | 1.88  | 0.145773 | 0.181954 | 0.520572 | 0.458483 |
| MmugDNA.42018.1.S1_at   | MmugDNA.42018.1 | 11.81 | 11.63 | 0.08 | 0.11 | 1.14  | 0.038064 | 0.025536 | 0.358549 | 0.200461 |
| MmugDNA.42019.1.S1_at   | MmugDNA.42019.1 | 6.93  | 6.83  | 0.17 | 0.11 | -1.07 | 0.299887 | 0.392512 | 0.654365 | 0.625813 |
| MmugDNA.42026.1.S1_at   | MmugDNA.42026.1 | 8.3   | 9.55  | 2.25 | 0.27 | -2.38 | 0.356709 | 0.126169 | 0.695204 | 0.396742 |
| MmugDNA.42027.1.S1_at   | MmugDNA.42027.1 | 10.75 | 10.98 | 0.57 | 0.11 | -1.17 | 0.916851 | 0.85498  | 0.971796 | 0.917383 |
| MmugDNA.42036.1.S1_at   | MmugDNA.42036.1 | 11.33 | 11.55 | 0.81 | 0.04 | -1.16 | 0.640712 | 0.828084 | 0.856931 | 0.901214 |
| MmugDNA.42044.1.S1_at   | MmugDNA.42044.1 | 13.33 | 13.11 | 0.24 | 0.11 | 1.16  | 0.19522  | 0.036673 | 0.565674 | 0.235973 |
| MmugDNA.42046.1.S1_at   | MmugDNA.42046.1 | 5.51  | 5.23  | 0.11 | 0.07 | 1.21  | 0.02342  | 0.035064 | 0.315397 | 0.231425 |
| MmugDNA.42049.1.S1_at   | MmugDNA.42049.1 | 7.11  | 6.9   | 0.29 | 0.7  | 1.16  | 0.990845 | 0.037437 | 0.996556 | 0.237777 |
| MmugDNA.42051.1.S1_at   | MmugDNA.42051.1 | 8.49  | 8.18  | 0.15 | 0.04 | 1.23  | 0.024433 | 0.042535 | 0.318767 | 0.250848 |
| MmugDNA.42058.1.S1_at   | MmugDNA.42058.1 | 4.05  | 4.18  | 0.7  | 0.47 | -1.09 | 0.42044  | 0.290702 | 0.736979 | 0.551382 |
| MmugDNA.42064.1.S1_at   | MmugDNA.42064.1 | 8.54  | 8.28  | 0.56 | 0.18 | 1.2   | 0.848357 | 0.926159 | 0.946776 | 0.95813  |
| MmugDNA.42065.1.S1_at   | MmugDNA.42065.1 | 5.44  | 5.45  | 0.58 | 0.47 | -1.01 | 0.614478 | 0.563298 | 0.843969 | 0.738523 |
| MmugDNA.42069.1.S1_s_at | MmugDNA.42069.1 | 6.37  | 6.16  | 0.11 | 0.1  | 1.16  | 0.065001 | 0.27574  | 0.41962  | 0.540008 |
| MmugDNA.42070.1.S1_at   | MmugDNA.42070.1 | 10.51 | 10.94 | 0.32 | 0.07 | -1.34 | 0.1504   | 0.043332 | 0.523988 | 0.252847 |
| MmugDNA.42071.1.S1_at   | MmugDNA.42071.1 | 10.41 | 10.45 | 0.51 | 0.13 | -1.03 | 0.335138 | 0.331329 | 0.680744 | 0.58006  |
| MmugDNA.4208.1.S1_at    | MmugDNA.4208.1  | 4.99  | 4.91  | 0.07 | 0.08 | 1.06  | 0.141888 | 0.552781 | 0.516871 | 0.732052 |
| MmugDNA.42088.1.S1_at   | MmugDNA.42088.1 | 6.93  | 7.05  | 0.52 | 0.24 | -1.08 | 0.594464 | 0.573434 | 0.834747 | 0.745125 |
| MmugDNA.42100.1.S1_at   | MmugDNA.42100.1 | 12.73 | 12.6  | 0.02 | 0.12 | 1.09  | 0.049    | 0.084919 | 0.385127 | 0.336523 |
| MmugDNA.42107.1.S1_at   | MmugDNA.42107.1 | 12.47 | 12.61 | 0.24 | 0.08 | -1.11 | 0.088389 | 0.101361 | 0.45606  | 0.36112  |
| MmugDNA.4211.1.S1_s_at  | MmugDNA.4211.1  | 10.69 | 10.64 | 0.06 | 0.09 | 1.03  | 0.196481 | 0.288587 | 0.567086 | 0.549827 |
| MmugDNA.42128.1.S1_at   | MmugDNA.42128.1 | 10.14 | 10.41 | 0.43 | 0.17 | -1.21 | 0.5984   | 0.353763 | 0.836965 | 0.596815 |
| MmugDNA.42129.1.S1_at   | MmugDNA.42129.1 | 6.68  | 6     | 0.15 | 0.19 | 1.6   | 0.014237 | 0.014825 | 0.274186 | 0.154895 |
| MmugDNA.42130.1.S1_at   | MmugDNA.42130.1 | 3.48  | 3.65  | 0.27 | 0.56 | -1.12 | 0.545776 | 0.072071 | 0.808169 | 0.314519 |
| MmugDNA.42139.1.S1_at   | MmugDNA.42139.1 | 5.95  | 6.07  | 0.27 | 0.11 | -1.09 | 0.639724 | 0.102363 | 0.856326 | 0.362527 |
| MmugDNA.42141.1.S1_at   | MmugDNA.42141.1 | 5.95  | 5.8   | 0.07 | 0.09 | 1.11  | 0.162767 | 0.562293 | 0.535867 | 0.737938 |
| MmugDNA.42143.1.S1_at   | MmugDNA.42143.1 | 10.41 | 10.65 | 0.34 | 0.04 | -1.19 | 0.788021 | 0.931    | 0.922084 | 0.960769 |
| MmugDNA.42149.1.S1_at   | MmugDNA.42149.1 | 10.68 | 10.12 | 0.14 | 0.13 | 1.47  | 0.009508 | 0.007401 | 0.242401 | 0.115643 |
| MmugDNA.4215.1.S1_at    | MmugDNA.4215.1  | 8.21  | 8.55  | 0.19 | 0.1  | -1.26 | 0.070373 | 0.003836 | 0.429144 | 0.088143 |
| MmugDNA.42153.1.S1_at   | MmugDNA.42153.1 | 11.25 | 10.72 | 0.22 | 0.09 | 1.45  | 0.019697 | 0.012569 | 0.302208 | 0.144568 |
| MmugDNA.42162.1.S1_at   | MmugDNA.42162.1 | 5.01  | 4.99  | 0.02 | 0.08 | 1.02  | 0.224855 | 0.244467 | 0.59408  | 0.514295 |
| MmugDNA.42175.1.S1_at   | MmugDNA.42175.1 | 4.91  | 4.53  | 0.01 | 0.21 | 1.31  | 0.102761 | 0.104826 | 0.473133 | 0.366341 |
| MmugDNA.42177.1.S1_at   | MmugDNA.42177.1 | 11.34 | 10.69 | 0.33 | 0.17 | 1.57  | 0.037244 | 0.014272 | 0.357005 | 0.152546 |
| MmugDNA.42181.1.S1_at   | MmugDNA.42181.1 | 10.13 | 11.69 | 0.73 | 0.12 | -2.94 | 0.059627 | 0.056159 | 0.406681 | 0.282888 |
| MmugDNA.42186.1.S1_at   | MmugDNA.42186.1 | 11.01 | 10.92 | 0.19 | 0.04 | 1.06  | 0.193994 | 0.255614 | 0.564574 | 0.523608 |

|                         |                 |       |       |      |      |       |          |          |          |          |
|-------------------------|-----------------|-------|-------|------|------|-------|----------|----------|----------|----------|
| MmugDNA.42189.1.S1_at   | MmugDNA.42189.1 | 13.16 | 13.16 | 0.04 | 0.04 | 1     | 0.714897 | 0.254052 | 0.889025 | 0.522387 |
| MmugDNA.4219.1.S1_at    | MmugDNA.4219.1  | 12.09 | 12.16 | 0.81 | 0.08 | -1.05 | 0.823525 | 0.302356 | 0.936302 | 0.560109 |
| MmugDNA.42196.1.S1_at   | MmugDNA.42196.1 | 11.45 | 11.86 | 2.35 | 0.17 | -1.33 | 0.558844 | 0.448166 | 0.815742 | 0.664096 |
| MmugDNA.42198.1.S1_at   | MmugDNA.42198.1 | 7.48  | 7.57  | 0.28 | 0.03 | -1.06 | 0.60097  | 0.059457 | 0.838005 | 0.290548 |
| MmugDNA.422.1.S1_at     | MmugDNA.422.1   | 6.75  | 6.73  | 0.12 | 0.2  | 1.01  | 0.600607 | 0.770936 | 0.837936 | 0.866807 |
| MmugDNA.42202.1.S1_at   | MmugDNA.42202.1 | 9.59  | 9.43  | 0.95 | 0.12 | 1.11  | 0.845225 | 0.695703 | 0.945709 | 0.823132 |
| MmugDNA.42203.1.S1_at   | MmugDNA.42203.1 | 10.41 | 9.83  | 1.08 | 0.01 | 1.49  | 0.942547 | 0.132035 | 0.98031  | 0.404043 |
| MmugDNA.42205.1.S1_at   | MmugDNA.42205.1 | 8.38  | 9.16  | 0.63 | 0.21 | -1.72 | 0.181584 | 0.111481 | 0.554726 | 0.376193 |
| MmugDNA.42206.1.S1_at   | MmugDNA.42206.1 | 8.19  | 8.45  | 1.14 | 0.29 | -1.2  | 0.880048 | 0.674262 | 0.958422 | 0.809716 |
| MmugDNA.42215.1.S1_at   | MmugDNA.42215.1 | 10.19 | 9.87  | 0.54 | 0.08 | 1.25  | 0.926482 | 0.574578 | 0.975571 | 0.745995 |
| MmugDNA.42222.1.S1_at   | MmugDNA.42222.1 | 7.67  | 7.8   | 0.23 | 0.18 | -1.09 | 0.483354 | 0.215469 | 0.773041 | 0.489168 |
| MmugDNA.42230.1.S1_s_at | MmugDNA.42230.1 | 11.07 | 10.64 | 1.03 | 0.16 | 1.35  | 0.437717 | 0.567291 | 0.746873 | 0.741185 |
| MmugDNA.4224.1.S1_at    | MmugDNA.4224.1  | 12.01 | 11.79 | 0.1  | 0.21 | 1.16  | 0.082769 | 0.004597 | 0.448001 | 0.094706 |
| MmugDNA.42240.1.S1_at   | MmugDNA.42240.1 | 7.37  | 7.35  | 0.12 | 0.07 | 1.01  | 0.193675 | 0.447548 | 0.564275 | 0.663579 |
| MmugDNA.42241.1.S1_at   | MmugDNA.42241.1 | 5.57  | 5.54  | 0.08 | 0.02 | 1.02  | 0.665033 | 0.472214 | 0.867733 | 0.679876 |
| MmugDNA.42243.1.S1_at   | MmugDNA.42243.1 | 12.68 | 12.63 | 0.1  | 0.02 | 1.03  | 0.73671  | 0.918181 | 0.899286 | 0.954096 |
| MmugDNA.42245.1.S1_at   | MmugDNA.42245.1 | 11.56 | 11.65 | 0.96 | 0.17 | -1.07 | 0.89114  | 0.504015 | 0.962566 | 0.701269 |
| MmugDNA.42247.1.S1_at   | MmugDNA.42247.1 | 9.71  | 9.94  | 0.23 | 0.04 | -1.17 | 0.565649 | 0.233059 | 0.819418 | 0.50445  |
| MmugDNA.42249.1.S1_at   | MmugDNA.42249.1 | 7.36  | 7.52  | 0.27 | 0.2  | -1.12 | 0.253661 | 0.641192 | 0.618323 | 0.789487 |
| MmugDNA.42250.1.S1_at   | MmugDNA.42250.1 | 9.41  | 9.56  | 0.19 | 0.06 | -1.11 | 0.221838 | 0.135106 | 0.5914   | 0.407128 |
| MmugDNA.42251.1.S1_at   | MmugDNA.42251.1 | 9.15  | 8.12  | 1.19 | 0.11 | 2.04  | 0.604718 | 0.492481 | 0.839732 | 0.693583 |
| MmugDNA.42255.1.S1_at   | MmugDNA.42255.1 | 11.06 | 11.05 | 0.43 | 0.1  | 1.01  | 0.506159 | 0.513896 | 0.785701 | 0.707322 |
| MmugDNA.42257.1.S1_at   | MmugDNA.42257.1 | 5.75  | 5.77  | 0.23 | 0.08 | -1.02 | 0.482112 | 0.144834 | 0.772274 | 0.418716 |
| MmugDNA.42265.1.S1_at   | MmugDNA.42265.1 | 6.16  | 5.95  | 0.21 | 0.17 | 1.16  | 0.665761 | 0.814412 | 0.868043 | 0.892923 |
| MmugDNA.42269.1.S1_at   | MmugDNA.42269.1 | 7.97  | 8.03  | 1.51 | 0.23 | -1.04 | 0.925636 | 0.68309  | 0.975188 | 0.815134 |
| MmugDNA.4227.1.S1_at    | MmugDNA.4227.1  | 3.9   | 3.89  | 0.06 | 0.1  | 1.01  | 0.506564 | 0.070805 | 0.785899 | 0.31231  |
| MmugDNA.42270.1.S1_at   | MmugDNA.42270.1 | 12.42 | 12.61 | 0.6  | 0.11 | -1.14 | 0.594833 | 0.166476 | 0.834949 | 0.442916 |
| MmugDNA.42283.1.S1_at   | MmugDNA.42283.1 | 5.43  | 5.4   | 0.07 | 0.04 | 1.02  | 0.40542  | 0.528216 | 0.727426 | 0.716462 |
| MmugDNA.42284.1.S1_at   | MmugDNA.42284.1 | 12.36 | 12.86 | 0.03 | 0.05 | -1.42 | 0.000074 | 0.002847 | 0.108151 | 0.078601 |
| MmugDNA.42284.1.S1_s_at | MmugDNA.42284.1 | 8.03  | 9     | 0.12 | 0.14 | -1.97 | 0.0009   | 0.019341 | 0.153739 | 0.174785 |
| MmugDNA.42287.1.S1_at   | MmugDNA.42287.1 | 6.1   | 6.11  | 0.23 | 0.21 | -1    | 0.506169 | 0.123608 | 0.785701 | 0.393646 |
| MmugDNA.42302.1.S1_at   | MmugDNA.42302.1 | 12.36 | 12.15 | 0.29 | 0.19 | 1.16  | 0.513376 | 0.109471 | 0.789838 | 0.373337 |
| MmugDNA.42304.1.S1_at   | MmugDNA.42304.1 | 7.57  | 7.58  | 1.1  | 0.42 | -1.01 | 0.704699 | 0.173336 | 0.885183 | 0.449791 |
| MmugDNA.4231.1.S1_at    | MmugDNA.4231.1  | 4.72  | 4.71  | 0.18 | 0.01 | 1.01  | 0.732946 | 0.916137 | 0.897471 | 0.953065 |
| MmugDNA.42323.1.S1_at   | MmugDNA.42323.1 | 9.9   | 9.36  | 0.16 | 0.1  | 1.46  | 0.006894 | 0.014436 | 0.224141 | 0.153335 |
| MmugDNA.42326.1.S1_at   | MmugDNA.42326.1 | 9.61  | 9.82  | 0.17 | 0.14 | -1.16 | 0.105704 | 0.168456 | 0.477409 | 0.445092 |
| MmugDNA.42327.1.S1_at   | MmugDNA.42327.1 | 12.89 | 13.13 | 0.47 | 0.14 | -1.18 | 0.314082 | 0.215049 | 0.665    | 0.488898 |
| MmugDNA.42328.1.S1_at   | MmugDNA.42328.1 | 11.49 | 11.73 | 0.27 | 0.08 | -1.19 | 0.269304 | 0.296469 | 0.629582 | 0.555528 |
| MmugDNA.42336.1.S1_s_at | MmugDNA.42336.1 | 10.4  | 10.59 | 0.05 | 0.06 | -1.14 | 0.012567 | 0.015371 | 0.263116 | 0.157415 |
| MmugDNA.42341.1.S1_at   | MmugDNA.42341.1 | 8.89  | 9.14  | 0.87 | 0.2  | -1.19 | 0.552848 | 0.594666 | 0.811917 | 0.758623 |
| MmugDNA.42345.1.S1_at   | MmugDNA.42345.1 | 7.84  | 7.86  | 0.51 | 0.09 | -1.02 | 0.798508 | 0.885007 | 0.926173 | 0.934484 |
| MmugDNA.42355.1.S1_at   | MmugDNA.42355.1 | 9.53  | 9.62  | 0.4  | 0.03 | -1.06 | 0.838939 | 0.946743 | 0.942422 | 0.96978  |
| MmugDNA.42361.1.S1_at   | MmugDNA.42361.1 | 5.72  | 5.03  | 0.72 | 0.25 | 1.61  | 0.234974 | 0.328935 | 0.602251 | 0.578482 |

|                         |                 |       |       |      |      |       |          |          |          |          |
|-------------------------|-----------------|-------|-------|------|------|-------|----------|----------|----------|----------|
| MmugDNA.42375.1.S1_at   | MmugDNA.42375.1 | 5.24  | 5.02  | 0.86 | 0.45 | 1.16  | 0.782571 | 0.199822 | 0.919923 | 0.474491 |
| MmugDNA.42376.1.S1_at   | MmugDNA.42376.1 | 12.26 | 12.02 | 0.47 | 0.24 | 1.18  | 0.612638 | 0.520573 | 0.843101 | 0.711831 |
| MmugDNA.42378.1.S1_at   | MmugDNA.42378.1 | 5.93  | 5.85  | 0.27 | 0.2  | 1.06  | 0.624636 | 0.855478 | 0.848871 | 0.9176   |
| MmugDNA.42380.1.S1_at   | MmugDNA.42380.1 | 6.25  | 6.21  | 0.21 | 0.13 | 1.03  | 0.884012 | 0.26149  | 0.959789 | 0.527999 |
| MmugDNA.42381.1.S1_at   | MmugDNA.42381.1 | 5.06  | 5.74  | 0.58 | 0.14 | -1.61 | 0.371878 | 0.647699 | 0.705567 | 0.793691 |
| MmugDNA.42382.1.S1_at   | MmugDNA.42382.1 | 7.28  | 8.52  | 0.83 | 0.23 | -2.35 | 0.189976 | 0.129629 | 0.561309 | 0.401242 |
| MmugDNA.42383.1.S1_s_at | MmugDNA.42383.1 | 10.02 | 10.32 | 0.85 | 0.24 | -1.23 | 0.763244 | 0.149569 | 0.911099 | 0.424095 |
| MmugDNA.42385.1.S1_at   | MmugDNA.42385.1 | 5.1   | 5.59  | 0.64 | 0.16 | -1.41 | 0.285128 | 0.572068 | 0.643069 | 0.744208 |
| MmugDNA.42399.1.S1_at   | MmugDNA.42399.1 | 11.93 | 11.99 | 0.2  | 0.11 | -1.04 | 0.711031 | 0.385908 | 0.887436 | 0.621161 |
| MmugDNA.42401.1.S1_at   | MmugDNA.42401.1 | 11.21 | 11.39 | 0.11 | 0.08 | -1.13 | 0.184618 | 0.178013 | 0.557393 | 0.45438  |
| MmugDNA.42405.1.S1_at   | MmugDNA.42405.1 | 10.5  | 11.03 | 0.27 | 0.09 | -1.44 | 0.034403 | 0.031437 | 0.349795 | 0.219107 |
| MmugDNA.42410.1.S1_at   | MmugDNA.42410.1 | 11.18 | 11.21 | 0.04 | 0.04 | -1.02 | 0.760124 | 0.072176 | 0.909862 | 0.314715 |
| MmugDNA.42411.1.S1_at   | MmugDNA.42411.1 | 3.06  | 2.99  | 0.09 | 0.09 | 1.04  | 0.362383 | 0.30321  | 0.699302 | 0.560717 |
| MmugDNA.42412.1.S1_at   | MmugDNA.42412.1 | 4.56  | 4.61  | 0.02 | 0.14 | -1.03 | 0.214042 | 0.467323 | 0.584591 | 0.677035 |
| MmugDNA.42418.1.S1_at   | MmugDNA.42418.1 | 8.95  | 8.63  | 0.52 | 0.14 | 1.24  | 0.912959 | 0.891417 | 0.970415 | 0.938143 |
| MmugDNA.42423.1.S1_at   | MmugDNA.42423.1 | 8.46  | 9.15  | 0.51 | 0.12 | -1.62 | 0.274716 | 0.419069 | 0.634046 | 0.643266 |
| MmugDNA.42442.1.S1_at   | MmugDNA.42442.1 | 6.37  | 6.51  | 0.06 | 0.32 | -1.1  | 0.48365  | 0.299595 | 0.773246 | 0.557956 |
| MmugDNA.42446.1.S1_at   | MmugDNA.42446.1 | 7.22  | 7.94  | 0.17 | 0.14 | -1.64 | 0.00313  | 0.033643 | 0.191107 | 0.227006 |
| MmugDNA.4245.1.S1_at    | MmugDNA.4245.1  | 5.22  | 5.34  | 0.06 | 0.11 | -1.09 | 0.290537 | 0.620301 | 0.647135 | 0.775303 |
| MmugDNA.42454.1.S1_at   | MmugDNA.42454.1 | 12.65 | 12.92 | 0.4  | 0.03 | -1.2  | 0.344093 | 0.355511 | 0.686913 | 0.597777 |
| MmugDNA.42458.1.S1_at   | MmugDNA.42458.1 | 7     | 6.83  | 0.13 | 0.1  | 1.12  | 0.264975 | 0.374176 | 0.62636  | 0.612678 |
| MmugDNA.42468.1.S1_at   | MmugDNA.42468.1 | 5.25  | 4.35  | 1    | 0.13 | 1.87  | 0.180206 | 0.119012 | 0.553357 | 0.387269 |
| MmugDNA.42469.1.S1_at   | MmugDNA.42469.1 | 12.47 | 12.57 | 0.34 | 0.01 | -1.08 | 0.630434 | 0.786388 | 0.851961 | 0.876296 |
| MmugDNA.42476.1.S1_at   | MmugDNA.42476.1 | 9.39  | 9.55  | 0.6  | 0.05 | -1.11 | 0.610226 | 0.816582 | 0.841839 | 0.894202 |
| MmugDNA.42480.1.S1_at   | MmugDNA.42480.1 | 7.74  | 8.15  | 0.25 | 0.04 | -1.32 | 0.188267 | 0.248886 | 0.560388 | 0.517964 |
| MmugDNA.42481.1.S1_at   | MmugDNA.42481.1 | 11.28 | 11.46 | 0.19 | 0.19 | -1.13 | 0.87449  | 0.063478 | 0.956448 | 0.298441 |
| MmugDNA.42482.1.S1_at   | MmugDNA.42482.1 | 9.41  | 9.62  | 0.51 | 0.05 | -1.15 | 0.205944 | 0.008806 | 0.577849 | 0.124117 |
| MmugDNA.42484.1.S1_at   | MmugDNA.42484.1 | 9.7   | 9.89  | 0.52 | 0.11 | -1.15 | 0.448372 | 0.363049 | 0.753886 | 0.603503 |
| MmugDNA.42485.1.S1_at   | MmugDNA.42485.1 | 11.56 | 11.78 | 0.13 | 0.04 | -1.16 | 0.093705 | 0.079153 | 0.46305  | 0.326338 |
| MmugDNA.42489.1.S1_at   | MmugDNA.42489.1 | 3.99  | 4.04  | 0.25 | 0.08 | -1.04 | 0.561254 | 0.030087 | 0.817194 | 0.215257 |
| MmugDNA.4249.1.S1_at    | MmugDNA.4249.1  | 9.08  | 7.89  | 0.45 | 0.23 | 2.27  | 0.015683 | 0.007704 | 0.28333  | 0.117294 |
| MmugDNA.42499.1.S1_at   | MmugDNA.42499.1 | 8.74  | 8.41  | 2.62 | 0.33 | 1.26  | 0.957551 | 0.35116  | 0.985977 | 0.594851 |
| MmugDNA.42505.1.S1_at   | MmugDNA.42505.1 | 10.22 | 9.97  | 0.51 | 0.25 | 1.19  | 0.62952  | 0.746272 | 0.851663 | 0.85272  |
| MmugDNA.42506.1.S1_at   | MmugDNA.42506.1 | 7.47  | 7.62  | 0.18 | 0.13 | -1.11 | 0.402401 | 0.181778 | 0.724848 | 0.458373 |
| MmugDNA.42507.1.S1_at   | MmugDNA.42507.1 | 13.07 | 13.12 | 0.06 | 0.02 | -1.03 | 0.632389 | 0.544122 | 0.852926 | 0.726618 |
| MmugDNA.42511.1.S1_at   | MmugDNA.42511.1 | 5.47  | 5.37  | 0.09 | 0.09 | 1.07  | 0.092998 | 0.0808   | 0.46164  | 0.328703 |
| MmugDNA.42517.1.S1_at   | MmugDNA.42517.1 | 6.65  | 6.55  | 0.08 | 0.01 | 1.07  | 0.0321   | 0.47197  | 0.343203 | 0.679799 |
| MmugDNA.42519.1.S1_at   | MmugDNA.42519.1 | 6.59  | 6.65  | 0.04 | 0.08 | -1.04 | 0.180953 | 0.394743 | 0.554261 | 0.627208 |
| MmugDNA.42521.1.S1_at   | MmugDNA.42521.1 | 12.82 | 12.92 | 0.08 | 0.03 | -1.08 | 0.090234 | 0.05974  | 0.458233 | 0.29107  |
| MmugDNA.42522.1.S1_at   | MmugDNA.42522.1 | 12.77 | 12.95 | 0.09 | 0.03 | -1.13 | 0.037941 | 0.048679 | 0.358308 | 0.265631 |
| MmugDNA.42525.1.S1_at   | MmugDNA.42525.1 | 11.43 | 11.5  | 0.05 | 0.02 | -1.05 | 0.261052 | 0.527234 | 0.623612 | 0.715896 |
| MmugDNA.42528.1.S1_at   | MmugDNA.42528.1 | 4.97  | 4.72  | 0.23 | 0.07 | 1.18  | 0.362996 | 0.488715 | 0.699794 | 0.691325 |
| MmugDNA.42530.1.S1_at   | MmugDNA.42530.1 | 12.53 | 12.76 | 0.03 | 0.07 | -1.17 | 0.003584 | 0.024527 | 0.197111 | 0.196012 |

|                         |                 |       |       |      |      |       |          |          |          |          |
|-------------------------|-----------------|-------|-------|------|------|-------|----------|----------|----------|----------|
| MmugDNA.42544.1.S1_at   | MmugDNA.42544.1 | 11.26 | 11.27 | 0.38 | 0.08 | -1.01 | 0.917817 | 0.947672 | 0.972062 | 0.970284 |
| MmugDNA.42544.1.S1_s_at | MmugDNA.42544.1 | 12.27 | 12.32 | 0.33 | 0.06 | -1.03 | 0.995819 | 0.999816 | 0.998312 | 0.999948 |
| MmugDNA.42547.1.S1_at   | MmugDNA.42547.1 | 9.6   | 9.94  | 0.01 | 0.03 | -1.27 | 0.000038 | 0.000845 | 0.108151 | 0.047038 |
| MmugDNA.42549.1.S1_at   | MmugDNA.42549.1 | 9.73  | 9.82  | 0.64 | 0.11 | -1.06 | 0.413225 | 0.018711 | 0.732218 | 0.171763 |
| MmugDNA.4255.1.S1_at    | MmugDNA.4255.1  | 7.19  | 7.13  | 0.09 | 0.13 | 1.04  | 0.521484 | 0.528526 | 0.794543 | 0.716664 |
| MmugDNA.42553.1.S1_at   | MmugDNA.42553.1 | 7.26  | 7.28  | 0.19 | 0.15 | -1.01 | 0.939097 | 0.041987 | 0.979451 | 0.249463 |
| MmugDNA.42562.1.S1_at   | MmugDNA.42562.1 | 4.39  | 4.4   | 0.49 | 0.34 | -1    | 0.247133 | 0.402048 | 0.612582 | 0.631153 |
| MmugDNA.42571.1.S1_at   | MmugDNA.42571.1 | 11.87 | 11.59 | 0.36 | 0.15 | 1.21  | 0.097348 | 0.009108 | 0.466234 | 0.125983 |
| MmugDNA.42575.1.S1_at   | MmugDNA.42575.1 | 6.11  | 6.09  | 0.08 | 0.08 | 1.01  | 0.676916 | 0.910391 | 0.873333 | 0.949416 |
| MmugDNA.4258.1.S1_at    | MmugDNA.4258.1  | 4.07  | 4.1   | 0.09 | 0.11 | -1.02 | 0.335017 | 0.218041 | 0.680736 | 0.491683 |
| MmugDNA.42588.1.S1_at   | MmugDNA.42588.1 | 8.82  | 8.32  | 0.59 | 0.11 | 1.42  | 0.219932 | 0.009721 | 0.589114 | 0.129718 |
| MmugDNA.4260.1.S1_at    | MmugDNA.4260.1  | 7.95  | 7.92  | 0.19 | 0.09 | 1.02  | 0.621141 | 0.81068  | 0.847506 | 0.890836 |
| MmugDNA.42607.1.S1_at   | MmugDNA.42607.1 | 8.59  | 9.05  | 0.61 | 0.09 | -1.38 | 0.128985 | 0.047693 | 0.503646 | 0.263323 |
| MmugDNA.42613.1.S1_at   | MmugDNA.42613.1 | 5.38  | 4.61  | 1.33 | 0.16 | 1.71  | 0.370353 | 0.540941 | 0.704574 | 0.724649 |
| MmugDNA.42615.1.S1_at   | MmugDNA.42615.1 | 10.65 | 9.99  | 0.16 | 0.09 | 1.58  | 0.003657 | 0.023162 | 0.197111 | 0.190579 |
| MmugDNA.42624.1.S1_at   | MmugDNA.42624.1 | 5.23  | 4.83  | 0.49 | 0.23 | 1.32  | 0.411047 | 0.432882 | 0.731088 | 0.653221 |
| MmugDNA.42634.1.S1_at   | MmugDNA.42634.1 | 3.18  | 3.29  | 0.05 | 0.04 | -1.08 | 0.037363 | 0.399259 | 0.357066 | 0.629735 |
| MmugDNA.42635.1.S1_at   | MmugDNA.42635.1 | 8.1   | 7.78  | 0.25 | 0.1  | 1.25  | 0.106622 | 0.13198  | 0.479    | 0.404024 |
| MmugDNA.42638.1.S1_at   | MmugDNA.42638.1 | 12.13 | 11.92 | 0.16 | 0.06 | 1.16  | 0.076219 | 0.074912 | 0.437681 | 0.318845 |
| MmugDNA.42657.1.S1_s_at | MmugDNA.42657.1 | 10.74 | 11.12 | 0.02 | 0.05 | -1.3  | 0.000194 | 0.000101 | 0.114029 | 0.027996 |
| MmugDNA.42663.1.S1_at   | MmugDNA.42663.1 | 10.41 | 9.93  | 1.15 | 0.15 | 1.39  | 0.941455 | 0.607521 | 0.980111 | 0.766417 |
| MmugDNA.42664.1.S1_at   | MmugDNA.42664.1 | 7.8   | 8.32  | 0.73 | 0.17 | -1.44 | 0.814296 | 0.933611 | 0.932961 | 0.962229 |
| MmugDNA.42668.1.S1_at   | MmugDNA.42668.1 | 5.52  | 5.38  | 0.2  | 0.07 | 1.1   | 0.107261 | 0.200962 | 0.47976  | 0.475426 |
| MmugDNA.4267.1.S1_at    | MmugDNA.4267.1  | 10.19 | 9.73  | 0.15 | 0.05 | 1.37  | 0.008249 | 0.022877 | 0.232164 | 0.189288 |
| MmugDNA.42682.1.S1_at   | MmugDNA.42682.1 | 11.17 | 10.98 | 0.51 | 0.04 | 1.15  | 0.493047 | 0.094205 | 0.778657 | 0.350889 |
| MmugDNA.42683.1.S1_at   | MmugDNA.42683.1 | 8.86  | 7.62  | 0.54 | 0.33 | 2.36  | 0.043997 | 0.006914 | 0.373462 | 0.112399 |
| MmugDNA.42684.1.S1_at   | MmugDNA.42684.1 | 8.5   | 9.38  | 0.24 | 0.07 | -1.85 | 0.00429  | 0.002742 | 0.198874 | 0.077231 |
| MmugDNA.42694.1.S1_at   | MmugDNA.42694.1 | 7.19  | 7.15  | 0.57 | 0.22 | 1.03  | 0.961035 | 0.995679 | 0.987225 | 0.997321 |
| MmugDNA.42698.1.S1_at   | MmugDNA.42698.1 | 9.35  | 10.04 | 0.46 | 0.13 | -1.62 | 0.07501  | 0.070199 | 0.435663 | 0.311194 |
| MmugDNA.42699.1.S1_at   | MmugDNA.42699.1 | 6.74  | 6.61  | 0.58 | 0.28 | 1.09  | 0.894702 | 0.022005 | 0.963956 | 0.18564  |
| MmugDNA.427.1.S1_at     | MmugDNA.427.1   | 7.41  | 7.36  | 0.42 | 0.1  | 1.04  | 0.995857 | 0.978919 | 0.998312 | 0.988587 |
| MmugDNA.42705.1.S1_at   | MmugDNA.42705.1 | 10.98 | 10.84 | 0.25 | 0.16 | 1.1   | 0.528605 | 0.032877 | 0.797961 | 0.224478 |
| MmugDNA.42706.1.S1_at   | MmugDNA.42706.1 | 12.63 | 12.7  | 0.27 | 0.04 | -1.05 | 0.759861 | 0.895267 | 0.909772 | 0.940185 |
| MmugDNA.4271.1.S1_at    | MmugDNA.4271.1  | 9.83  | 9.96  | 0.2  | 0.06 | -1.09 | 0.812363 | 0.552124 | 0.932076 | 0.731511 |
| MmugDNA.42717.1.S1_at   | MmugDNA.42717.1 | 2.92  | 3.42  | 0.18 | 0.18 | -1.42 | 0.112138 | 0.217951 | 0.485238 | 0.491553 |
| MmugDNA.42724.1.S1_at   | MmugDNA.42724.1 | 4.98  | 5     | 0.11 | 0.21 | -1.01 | 0.8675   | 0.868671 | 0.953557 | 0.925405 |
| MmugDNA.42726.1.S1_at   | MmugDNA.42726.1 | 7.19  | 8.06  | 0.22 | 0.11 | -1.83 | 0.00755  | 0.000104 | 0.229394 | 0.028099 |
| MmugDNA.42739.1.S1_at   | MmugDNA.42739.1 | 8.55  | 9.97  | 0.27 | 0.18 | -2.67 | 0.001673 | 0.0013   | 0.164062 | 0.055602 |
| MmugDNA.4274.1.S1_at    | MmugDNA.4274.1  | 7.49  | 8.01  | 1.77 | 0.18 | -1.43 | 0.563273 | 0.713077 | 0.818148 | 0.833638 |
| MmugDNA.42742.1.S1_at   | MmugDNA.42742.1 | 9.95  | 9.53  | 0.48 | 0.54 | 1.34  | 0.833817 | 0.041366 | 0.940428 | 0.247995 |
| MmugDNA.42748.1.S1_at   | MmugDNA.42748.1 | 11.52 | 13.07 | 1.48 | 0.12 | -2.95 | 0.148842 | 0.175109 | 0.522782 | 0.451787 |
| MmugDNA.42749.1.S1_at   | MmugDNA.42749.1 | 3.54  | 3.58  | 0.09 | 0.04 | -1.02 | 0.265299 | 0.421682 | 0.626397 | 0.645222 |
| MmugDNA.4275.1.S1_at    | MmugDNA.4275.1  | 8.79  | 8.79  | 0.26 | 0.05 | -1    | 0.985637 | 0.097743 | 0.995461 | 0.355598 |

|                         |                 |       |       |      |      |       |          |          |          |          |
|-------------------------|-----------------|-------|-------|------|------|-------|----------|----------|----------|----------|
| MmugDNA.42752.1.S1_at   | MmugDNA.42752.1 | 7.73  | 7.55  | 0.35 | 0.03 | 1.13  | 0.459564 | 0.230154 | 0.759647 | 0.502007 |
| MmugDNA.42754.1.S1_at   | MmugDNA.42754.1 | 9.63  | 9.89  | 0.4  | 0.13 | -1.2  | 0.420722 | 0.298266 | 0.737059 | 0.556931 |
| MmugDNA.42755.1.S1_at   | MmugDNA.42755.1 | 5.69  | 5.66  | 0.1  | 0.11 | 1.02  | 0.365817 | 0.119012 | 0.701371 | 0.387269 |
| MmugDNA.42762.1.S1_at   | MmugDNA.42762.1 | 12.06 | 11.71 | 0.37 | 0.02 | 1.28  | 0.154476 | 0.026274 | 0.527576 | 0.203033 |
| MmugDNA.42768.1.S1_at   | MmugDNA.42768.1 | 10.39 | 10.13 | 0.19 | 0.09 | 1.2   | 0.112093 | 0.087485 | 0.485224 | 0.340617 |
| MmugDNA.42769.1.S1_at   | MmugDNA.42769.1 | 6.22  | 6.08  | 0.47 | 0.08 | 1.1   | 0.63569  | 0.124865 | 0.854692 | 0.395219 |
| MmugDNA.42770.1.S1_at   | MmugDNA.42770.1 | 5.11  | 5.02  | 0.12 | 0.16 | 1.06  | 0.540164 | 0.377552 | 0.804251 | 0.615012 |
| MmugDNA.42772.1.S1_at   | MmugDNA.42772.1 | 10.55 | 10.92 | 0.27 | 0.07 | -1.3  | 0.074051 | 0.113431 | 0.434824 | 0.379509 |
| MmugDNA.42775.1.S1_at   | MmugDNA.42775.1 | 6.67  | 7.2   | 0.27 | 0.17 | -1.45 | 0.106659 | 0.331667 | 0.479    | 0.580237 |
| MmugDNA.42776.1.S1_at   | MmugDNA.42776.1 | 8.07  | 8.07  | 0.16 | 0.05 | 1     | 0.680179 | 0.60734  | 0.874564 | 0.766359 |
| MmugDNA.42778.1.S1_at   | MmugDNA.42778.1 | 12.57 | 12.63 | 0.09 | 0.12 | -1.04 | 0.622837 | 0.036808 | 0.84796  | 0.236386 |
| MmugDNA.42779.1.S1_at   | MmugDNA.42779.1 | 9.4   | 8.81  | 0.55 | 0.09 | 1.51  | 0.056483 | 0.071597 | 0.400268 | 0.313714 |
| MmugDNA.42780.1.S1_at   | MmugDNA.42780.1 | 8.25  | 8.22  | 0.19 | 0.1  | 1.02  | 0.562181 | 0.398619 | 0.817608 | 0.629458 |
| MmugDNA.42783.1.S1_at   | MmugDNA.42783.1 | 10.27 | 11.16 | 0.1  | 0.02 | -1.85 | 0.00008  | 0.000003 | 0.108151 | 0.013386 |
| MmugDNA.42793.1.S1_at   | MmugDNA.42793.1 | 7.65  | 8.15  | 0.7  | 0.28 | -1.41 | 0.932038 | 0.107217 | 0.977118 | 0.369902 |
| MmugDNA.42794.1.S1_at   | MmugDNA.42794.1 | 4.46  | 4.44  | 0.79 | 0.09 | 1.01  | 0.425028 | 0.583506 | 0.739773 | 0.751817 |
| MmugDNA.42795.1.S1_s_at | MmugDNA.42795.1 | 10.04 | 10.75 | 0.3  | 0.04 | -1.64 | 0.025877 | 0.006181 | 0.32273  | 0.106774 |
| MmugDNA.42796.1.S1_at   | MmugDNA.42796.1 | 9.48  | 9.45  | 0.27 | 0.07 | 1.02  | 0.736961 | 0.152276 | 0.899286 | 0.42706  |
| MmugDNA.42799.1.S1_at   | MmugDNA.42799.1 | 12.71 | 12.65 | 0.06 | 0.04 | 1.04  | 0.288463 | 0.0106   | 0.645568 | 0.134272 |
| MmugDNA.42801.1.S1_at   | MmugDNA.42801.1 | 6.61  | 6.95  | 0.52 | 0.19 | -1.26 | 0.464813 | 0.339237 | 0.762714 | 0.585918 |
| MmugDNA.42810.1.S1_at   | MmugDNA.42810.1 | 9.35  | 9.37  | 0.18 | 0.09 | -1.02 | 0.66698  | 0.052289 | 0.868458 | 0.27415  |
| MmugDNA.42815.1.S1_at   | MmugDNA.42815.1 | 6.8   | 6.18  | 0.29 | 0.55 | 1.53  | 0.714078 | 0.087209 | 0.888585 | 0.340194 |
| MmugDNA.42816.1.S1_at   | MmugDNA.42816.1 | 10.36 | 10.33 | 0.47 | 0.04 | 1.02  | 0.812843 | 0.953203 | 0.932245 | 0.973457 |
| MmugDNA.4282.1.S1_at    | MmugDNA.4282.1  | 12.31 | 12    | 0.22 | 0.11 | 1.25  | 0.047092 | 0.005786 | 0.379283 | 0.104502 |
| MmugDNA.42823.1.S1_at   | MmugDNA.42823.1 | 9.66  | 9.79  | 1.53 | 0.16 | -1.09 | 0.907142 | 0.41628  | 0.968482 | 0.641518 |
| MmugDNA.42828.1.S1_at   | MmugDNA.42828.1 | 6.08  | 6.47  | 0.09 | 0.17 | -1.31 | 0.021572 | 0.011451 | 0.309241 | 0.13846  |
| MmugDNA.42829.1.S1_s_at | MmugDNA.42829.1 | 7.97  | 7.86  | 0.16 | 0.09 | 1.08  | 0.144354 | 0.151641 | 0.519769 | 0.426383 |
| MmugDNA.42832.1.S1_at   | MmugDNA.42832.1 | 8.47  | 7.87  | 0.33 | 0.22 | 1.52  | 0.047989 | 0.068842 | 0.381764 | 0.308714 |
| MmugDNA.42838.1.S1_at   | MmugDNA.42838.1 | 9.79  | 9.71  | 0.06 | 0.15 | 1.06  | 0.636886 | 0.092465 | 0.855281 | 0.34836  |
| MmugDNA.42847.1.S1_at   | MmugDNA.42847.1 | 11.54 | 11.52 | 0.11 | 0.15 | 1.02  | 0.317446 | 0.431021 | 0.667352 | 0.651995 |
| MmugDNA.42847.1.S1_s_at | MmugDNA.42847.1 | 10.65 | 10.48 | 0.08 | 0.1  | 1.12  | 0.330695 | 0.287872 | 0.677358 | 0.549161 |
| MmugDNA.42851.1.S1_at   | MmugDNA.42851.1 | 6.56  | 6.49  | 0.05 | 0.05 | 1.05  | 0.226826 | 0.736853 | 0.596222 | 0.847693 |
| MmugDNA.42852.1.S1_at   | MmugDNA.42852.1 | 5.16  | 4.64  | 0.12 | 0.27 | 1.44  | 0.03707  | 0.110978 | 0.356667 | 0.375405 |
| MmugDNA.42852.1.S1_s_at | MmugDNA.42852.1 | 12.98 | 12.51 | 0.19 | 0.05 | 1.39  | 0.045242 | 0.057097 | 0.376169 | 0.284945 |
| MmugDNA.42859.1.S1_at   | MmugDNA.42859.1 | 8.29  | 8.3   | 0.12 | 0.09 | -1.01 | 0.677425 | 0.853399 | 0.873508 | 0.916579 |
| MmugDNA.42860.1.S1_at   | MmugDNA.42860.1 | 5.38  | 5.12  | 0.22 | 0.02 | 1.2   | 0.346845 | 0.320191 | 0.688435 | 0.572551 |
| MmugDNA.42870.1.S1_at   | MmugDNA.42870.1 | 11.62 | 11.64 | 0.29 | 0.06 | -1.02 | 0.677924 | 0.356728 | 0.873818 | 0.598529 |
| MmugDNA.42872.1.S1_at   | MmugDNA.42872.1 | 6.16  | 6.16  | 0.11 | 0.03 | 1     | 0.284456 | 0.316185 | 0.642303 | 0.569645 |
| MmugDNA.42873.1.S1_at   | MmugDNA.42873.1 | 5.32  | 5.68  | 0.32 | 0.05 | -1.29 | 0.112779 | 0.27333  | 0.486223 | 0.537788 |
| MmugDNA.42876.1.S1_at   | MmugDNA.42876.1 | 4.87  | 3.55  | 0.52 | 0.04 | 2.49  | 0.026178 | 0.007031 | 0.323574 | 0.113112 |
| MmugDNA.42877.1.S1_at   | MmugDNA.42877.1 | 9.09  | 9.95  | 0.35 | 0.23 | -1.81 | 0.028868 | 0.0117   | 0.333062 | 0.140174 |
| MmugDNA.42880.1.S1_at   | MmugDNA.42880.1 | 4.67  | 4.64  | 0.22 | 0.22 | 1.02  | 0.9061   | 0.985287 | 0.968225 | 0.991665 |
| MmugDNA.42881.1.S1_at   | MmugDNA.42881.1 | 11.2  | 10.83 | 0.06 | 0.09 | 1.3   | 0.002117 | 0.000477 | 0.174757 | 0.038572 |

|                         |                 |       |       |      |      |       |          |          |          |          |
|-------------------------|-----------------|-------|-------|------|------|-------|----------|----------|----------|----------|
| MmugDNA.42883.1.S1_at   | MmugDNA.42883.1 | 7.08  | 6.96  | 0.06 | 0.13 | 1.09  | 0.285584 | 0.290861 | 0.643438 | 0.551436 |
| MmugDNA.42885.1.S1_at   | MmugDNA.42885.1 | 8.34  | 8.8   | 1.17 | 0.13 | -1.38 | 0.600574 | 0.417227 | 0.837913 | 0.642079 |
| MmugDNA.42889.1.S1_at   | MmugDNA.42889.1 | 10.82 | 11.28 | 0.22 | 0.04 | -1.38 | 0.066938 | 0.051214 | 0.422979 | 0.271799 |
| MmugDNA.42890.1.S1_at   | MmugDNA.42890.1 | 13.2  | 13.53 | 0.12 | 0.02 | -1.26 | 0.007212 | 0.000995 | 0.226509 | 0.050459 |
| MmugDNA.42891.1.S1_at   | MmugDNA.42891.1 | 3.74  | 3.56  | 0.03 | 0.14 | 1.13  | 0.335182 | 0.05319  | 0.680744 | 0.276445 |
| MmugDNA.42897.1.S1_at   | MmugDNA.42897.1 | 6.97  | 6.43  | 0.56 | 0.24 | 1.46  | 0.15906  | 0.268493 | 0.53176  | 0.534123 |
| MmugDNA.42899.1.S1_at   | MmugDNA.42899.1 | 13.31 | 13.25 | 0.05 | 0.04 | 1.04  | 0.4536   | 0.12045  | 0.756215 | 0.38925  |
| MmugDNA.42901.1.S1_at   | MmugDNA.42901.1 | 9.41  | 10.6  | 0.26 | 0.08 | -2.29 | 0.001576 | 0.000221 | 0.161959 | 0.032385 |
| MmugDNA.42902.1.S1_at   | MmugDNA.42902.1 | 12.97 | 12.99 | 0.35 | 0.06 | -1.02 | 0.897579 | 0.818465 | 0.965207 | 0.895358 |
| MmugDNA.42903.1.S1_at   | MmugDNA.42903.1 | 7.57  | 7.47  | 0.14 | 0.18 | 1.07  | 0.786684 | 0.00724  | 0.921642 | 0.114286 |
| MmugDNA.42905.1.S1_at   | MmugDNA.42905.1 | 7.76  | 7.49  | 0.29 | 0.55 | 1.2   | 0.369657 | 0.119477 | 0.704264 | 0.388113 |
| MmugDNA.42910.1.S1_at   | MmugDNA.42910.1 | 8.49  | 8.82  | 0.59 | 0.25 | -1.26 | 0.536686 | 0.73705  | 0.802441 | 0.847791 |
| MmugDNA.42913.1.S1_s_at | MmugDNA.42913.1 | 3.31  | 3.33  | 0.09 | 0.01 | -1.01 | 0.827462 | 0.829047 | 0.938039 | 0.901709 |
| MmugDNA.42921.1.S1_at   | MmugDNA.42921.1 | 12.29 | 12.38 | 0.24 | 0.08 | -1.06 | 0.568115 | 0.136738 | 0.820687 | 0.409301 |
| MmugDNA.42924.1.S1_at   | MmugDNA.42924.1 | 10.35 | 10.03 | 0.28 | 0.18 | 1.25  | 0.20301  | 0.015923 | 0.574415 | 0.160155 |
| MmugDNA.42925.1.S1_at   | MmugDNA.42925.1 | 9.17  | 9.11  | 0.4  | 0.11 | 1.04  | 0.717637 | 0.063957 | 0.890477 | 0.29906  |
| MmugDNA.42926.1.S1_at   | MmugDNA.42926.1 | 10.45 | 10.88 | 0.15 | 0.08 | -1.34 | 0.023714 | 0.008287 | 0.316281 | 0.120788 |
| MmugDNA.42928.1.S1_at   | MmugDNA.42928.1 | 6.85  | 6.57  | 0.19 | 0.14 | 1.21  | 0.269851 | 0.488397 | 0.629998 | 0.691144 |
| MmugDNA.42934.1.S1_s_at | MmugDNA.42934.1 | 11.52 | 11.24 | 0.24 | 0.2  | 1.21  | 0.109309 | 0.119706 | 0.482239 | 0.388402 |
| MmugDNA.42938.1.S1_at   | MmugDNA.42938.1 | 11.4  | 11.84 | 0.16 | 0.05 | -1.35 | 0.02097  | 0.012261 | 0.30624  | 0.14321  |
| MmugDNA.42939.1.S1_at   | MmugDNA.42939.1 | 7.09  | 6.36  | 0.06 | 0.4  | 1.66  | 0.082231 | 0.016052 | 0.447052 | 0.160532 |
| MmugDNA.42942.1.S1_at   | MmugDNA.42942.1 | 9.63  | 10.19 | 0.2  | 0.1  | -1.47 | 0.011575 | 0.006777 | 0.255545 | 0.111388 |
| MmugDNA.42957.1.S1_at   | MmugDNA.42957.1 | 7.08  | 6.72  | 0.12 | 0.09 | 1.28  | 0.010559 | 0.034792 | 0.248239 | 0.230686 |
| MmugDNA.42960.1.S1_at   | MmugDNA.42960.1 | 6.97  | 8.02  | 0.17 | 0.32 | -2.08 | 0.007571 | 0.065141 | 0.229596 | 0.301205 |
| MmugDNA.42968.1.S1_at   | MmugDNA.42968.1 | 3.42  | 3.35  | 0.13 | 0.22 | 1.04  | 0.989338 | 0.317567 | 0.996026 | 0.570774 |
| MmugDNA.4297.1.S1_at    | MmugDNA.4297.1  | 12.42 | 12.63 | 0.14 | 0.09 | -1.16 | 0.210324 | 0.212095 | 0.581649 | 0.486036 |
| MmugDNA.4297.1.S1_s_at  | MmugDNA.4297.1  | 12.07 | 12.21 | 0.16 | 0.07 | -1.1  | 0.471667 | 0.532502 | 0.76658  | 0.719065 |
| MmugDNA.42977.1.S1_at   | MmugDNA.42977.1 | 11.43 | 11.47 | 0.2  | 0.07 | -1.03 | 0.336055 | 0.117187 | 0.681441 | 0.384646 |
| MmugDNA.4298.1.S1_at    | MmugDNA.4298.1  | 5.59  | 5.42  | 0.04 | 0.04 | 1.13  | 0.013185 | 0.057027 | 0.266951 | 0.284893 |
| MmugDNA.43.1.S1_at      | MmugDNA.43.1    | 10.26 | 10.78 | 0.51 | 0.06 | -1.44 | 0.220761 | 0.258758 | 0.590084 | 0.525949 |
| MmugDNA.43001.1.S1_s_at | MmugDNA.43001.1 | 10.27 | 9.63  | 0.04 | 0.06 | 1.56  | 0.000113 | 0.000218 | 0.108151 | 0.032385 |
| MmugDNA.43009.1.S1_at   | MmugDNA.43009.1 | 11.35 | 11.52 | 0.24 | 0.07 | -1.12 | 0.309036 | 0.024431 | 0.661444 | 0.195601 |
| MmugDNA.43010.1.S1_at   | MmugDNA.43010.1 | 10.78 | 10.98 | 0.53 | 0.08 | -1.15 | 0.180461 | 0.030819 | 0.553635 | 0.217376 |
| MmugDNA.43012.1.S1_at   | MmugDNA.43012.1 | 7.21  | 7.32  | 0.13 | 0.14 | -1.08 | 0.758156 | 0.78703  | 0.908979 | 0.876809 |
| MmugDNA.43019.1.S1_at   | MmugDNA.43019.1 | 10.47 | 10.88 | 0.17 | 0.04 | -1.33 | 0.03474  | 0.066753 | 0.350358 | 0.304215 |
| MmugDNA.43024.1.S1_s_at | MmugDNA.43024.1 | 10.89 | 11.17 | 0.45 | 0.11 | -1.21 | 0.885028 | 0.023347 | 0.960167 | 0.19156  |
| MmugDNA.43027.1.S1_s_at | MmugDNA.43027.1 | 8.44  | 8.51  | 0.19 | 0.07 | -1.05 | 0.996705 | 0.323695 | 0.998707 | 0.57456  |
| MmugDNA.43033.1.S1_at   | MmugDNA.43033.1 | 6.69  | 7.42  | 0.06 | 0.16 | -1.66 | 0.001175 | 0.00311  | 0.156386 | 0.081305 |
| MmugDNA.43035.1.S1_at   | MmugDNA.43035.1 | 11.62 | 12.47 | 0.28 | 0.05 | -1.8  | 0.006836 | 0.000942 | 0.224141 | 0.049026 |
| MmugDNA.43037.1.S1_at   | MmugDNA.43037.1 | 10.92 | 11.15 | 0.35 | 0.12 | -1.18 | 0.451264 | 0.036239 | 0.755064 | 0.234952 |
| MmugDNA.43038.1.S1_s_at | MmugDNA.43038.1 | 12.91 | 12.84 | 0.41 | 0.01 | 1.05  | 0.935704 | 0.248658 | 0.978343 | 0.517917 |
| MmugDNA.43040.1.S1_at   | MmugDNA.43040.1 | 11.58 | 11.23 | 0.45 | 0.16 | 1.27  | 0.392278 | 0.326449 | 0.718223 | 0.576576 |
| MmugDNA.43041.1.S1_at   | MmugDNA.43041.1 | 6.07  | 5.98  | 0.11 | 0.14 | 1.07  | 0.097515 | 0.140589 | 0.466487 | 0.413822 |

|                         |                 |       |       |      |      |       |          |          |          |          |
|-------------------------|-----------------|-------|-------|------|------|-------|----------|----------|----------|----------|
| MmugDNA.43050.1.S1_at   | MmugDNA.43050.1 | 6.03  | 5.58  | 0.44 | 0.12 | 1.37  | 0.21046  | 0.380695 | 0.58172  | 0.617363 |
| MmugDNA.43054.1.S1_at   | MmugDNA.43054.1 | 11.47 | 11.8  | 0.17 | 0.11 | -1.25 | 0.073754 | 0.065771 | 0.434623 | 0.301767 |
| MmugDNA.43055.1.S1_at   | MmugDNA.43055.1 | 9.16  | 8.99  | 0.55 | 0.15 | 1.12  | 0.242504 | 0.319363 | 0.608517 | 0.571724 |
| MmugDNA.43060.1.S1_at   | MmugDNA.43060.1 | 4.12  | 4.03  | 0.2  | 0.17 | 1.07  | 0.498876 | 0.683341 | 0.781844 | 0.815238 |
| MmugDNA.43065.1.S1_at   | MmugDNA.43065.1 | 8.3   | 7.31  | 0.34 | 0.19 | 1.98  | 0.016238 | 0.016455 | 0.286783 | 0.162441 |
| MmugDNA.43070.1.S1_at   | MmugDNA.43070.1 | 9.19  | 9.16  | 0.12 | 0.09 | 1.02  | 0.872872 | 0.594605 | 0.95589  | 0.758623 |
| MmugDNA.43085.1.S1_at   | MmugDNA.43085.1 | 6.59  | 6.67  | 0.28 | 0.08 | -1.06 | 0.502184 | 0.70424  | 0.783497 | 0.828375 |
| MmugDNA.43094.1.S1_at   | MmugDNA.43094.1 | 8.29  | 8.98  | 1.22 | 0.19 | -1.61 | 0.453627 | 0.109289 | 0.756225 | 0.37308  |
| MmugDNA.43096.1.S1_at   | MmugDNA.43096.1 | 10.39 | 10.34 | 0.42 | 0.11 | 1.04  | 0.48178  | 0.138959 | 0.772225 | 0.412048 |
| MmugDNA.43098.1.S1_at   | MmugDNA.43098.1 | 8.17  | 9.09  | 1.13 | 0.28 | -1.89 | 0.322621 | 0.207362 | 0.671289 | 0.481579 |
| MmugDNA.43099.1.S1_at   | MmugDNA.43099.1 | 5.98  | 5.75  | 0.21 | 0.06 | 1.17  | 0.203866 | 0.283898 | 0.57513  | 0.546237 |
| MmugDNA.4310.1.S1_at    | MmugDNA.4310.1  | 12.84 | 12.51 | 0.1  | 0.05 | 1.26  | 0.004162 | 0.000905 | 0.198874 | 0.048084 |
| MmugDNA.43107.1.S1_at   | MmugDNA.43107.1 | 3.25  | 3.41  | 0.1  | 0.24 | -1.12 | 0.399989 | 0.203813 | 0.723437 | 0.478081 |
| MmugDNA.43109.1.S1_at   | MmugDNA.43109.1 | 9.87  | 10.05 | 0.35 | 0.04 | -1.14 | 0.783136 | 0.261372 | 0.920153 | 0.527867 |
| MmugDNA.43112.1.S1_at   | MmugDNA.43112.1 | 4.09  | 3.72  | 0.16 | 0.2  | 1.3   | 0.275908 | 0.085853 | 0.635438 | 0.337972 |
| MmugDNA.43113.1.S1_at   | MmugDNA.43113.1 | 5.87  | 4.32  | 0.87 | 0.09 | 2.92  | 0.031201 | 0.021809 | 0.340298 | 0.184765 |
| MmugDNA.43116.1.S1_at   | MmugDNA.43116.1 | 13.83 | 13.72 | 2.4  | 0.1  | 1.08  | 0.419159 | 0.253639 | 0.736167 | 0.52198  |
| MmugDNA.43117.1.S1_at   | MmugDNA.43117.1 | 4.05  | 4.04  | 0.07 | 0.19 | 1.01  | 0.982823 | 0.508779 | 0.994764 | 0.703824 |
| MmugDNA.43120.1.S1_at   | MmugDNA.43120.1 | 13.97 | 13.88 | 0.08 | 0.06 | 1.06  | 0.433087 | 0.465867 | 0.744201 | 0.675982 |
| MmugDNA.43121.1.S1_at   | MmugDNA.43121.1 | 12.18 | 12    | 2.48 | 0.18 | 1.13  | 0.440171 | 0.164721 | 0.748388 | 0.441043 |
| MmugDNA.43126.1.S1_at   | MmugDNA.43126.1 | 5.13  | 4.89  | 0.22 | 0.16 | 1.18  | 0.162372 | 0.383989 | 0.5354   | 0.619866 |
| MmugDNA.43128.1.S1_at   | MmugDNA.43128.1 | 9.73  | 8.25  | 0.97 | 0.06 | 2.79  | 0.1736   | 0.237568 | 0.546749 | 0.508196 |
| MmugDNA.4313.1.S1_at    | MmugDNA.4313.1  | 12.01 | 11.83 | 0.38 | 0.13 | 1.13  | 0.27557  | 0.006925 | 0.635035 | 0.112445 |
| MmugDNA.43131.1.S1_s_at | MmugDNA.43131.1 | 7.52  | 7.6   | 0.01 | 0.11 | -1.06 | 0.250345 | 0.895528 | 0.615561 | 0.940298 |
| MmugDNA.43132.1.S1_at   | MmugDNA.43132.1 | 2.81  | 2.76  | 0.06 | 0.18 | 1.04  | 0.932791 | 0.607076 | 0.977227 | 0.766185 |
| MmugDNA.43133.1.S1_at   | MmugDNA.43133.1 | 8.15  | 7.94  | 1.42 | 0.48 | 1.16  | 0.734728 | 0.653095 | 0.898485 | 0.79718  |
| MmugDNA.43158.1.S1_at   | MmugDNA.43158.1 | 8.88  | 8.84  | 0.35 | 0.18 | 1.03  | 0.30515  | 0.011138 | 0.658653 | 0.137313 |
| MmugDNA.43167.1.S1_s_at | MmugDNA.43167.1 | 12.92 | 13.23 | 0.42 | 0.05 | -1.24 | 0.264504 | 0.073088 | 0.626029 | 0.316057 |
| MmugDNA.43169.1.S1_at   | MmugDNA.43169.1 | 7.3   | 6.46  | 1.33 | 0.06 | 1.79  | 0.402174 | 0.634876 | 0.724846 | 0.785042 |
| MmugDNA.43172.1.S1_at   | MmugDNA.43172.1 | 5.76  | 5.82  | 0.09 | 0.07 | -1.04 | 0.357994 | 0.008678 | 0.695993 | 0.12355  |
| MmugDNA.4318.1.S1_at    | MmugDNA.4318.1  | 9.17  | 9.87  | 0.33 | 0.2  | -1.63 | 0.025203 | 0.013595 | 0.320761 | 0.149236 |
| MmugDNA.43184.1.S1_at   | MmugDNA.43184.1 | 6.11  | 6     | 0.17 | 0.16 | 1.08  | 0.481038 | 0.333067 | 0.771639 | 0.581374 |
| MmugDNA.43187.1.S1_at   | MmugDNA.43187.1 | 10.68 | 11.06 | 0.42 | 0.13 | -1.3  | 0.152957 | 0.005132 | 0.525888 | 0.099446 |
| MmugDNA.4319.1.S1_at    | MmugDNA.4319.1  | 10.38 | 10.19 | 0.33 | 0.16 | 1.14  | 0.151031 | 0.091175 | 0.52444  | 0.346097 |
| MmugDNA.43190.1.S1_at   | MmugDNA.43190.1 | 5.38  | 5.23  | 0.12 | 0.06 | 1.11  | 0.108442 | 0.103897 | 0.480777 | 0.364564 |
| MmugDNA.43193.1.S1_at   | MmugDNA.43193.1 | 11.58 | 11.27 | 0.52 | 0.48 | 1.24  | 0.877182 | 0.98079  | 0.957174 | 0.989478 |
| MmugDNA.43195.1.S1_at   | MmugDNA.43195.1 | 7.5   | 7.53  | 0.97 | 0.36 | -1.02 | 0.746187 | 0.018532 | 0.903302 | 0.171243 |
| MmugDNA.43195.1.S1_s_at | MmugDNA.43195.1 | 7.84  | 7.7   | 0.86 | 0.41 | 1.1   | 0.865617 | 0.008935 | 0.952676 | 0.125013 |
| MmugDNA.4320.1.S1_at    | MmugDNA.4320.1  | 7.52  | 8.1   | 0.13 | 0.46 | -1.5  | 0.097129 | 0.111758 | 0.465734 | 0.376793 |
| MmugDNA.43201.1.S1_at   | MmugDNA.43201.1 | 5.83  | 5.52  | 0.12 | 0.16 | 1.24  | 0.044331 | 0.007078 | 0.37443  | 0.113284 |
| MmugDNA.43206.1.S1_at   | MmugDNA.43206.1 | 5.6   | 5.52  | 0.1  | 0.03 | 1.06  | 0.277639 | 0.182167 | 0.636929 | 0.458671 |
| MmugDNA.43209.1.S1_at   | MmugDNA.43209.1 | 6.99  | 7.95  | 0.92 | 0.41 | -1.95 | 0.745307 | 0.137747 | 0.90296  | 0.410738 |
| MmugDNA.43210.1.S1_at   | MmugDNA.43210.1 | 9.66  | 9.63  | 0.61 | 0.14 | 1.02  | 0.899183 | 0.631236 | 0.965792 | 0.782734 |



|                       |                 |       |       |      |      |       |          |          |          |          |
|-----------------------|-----------------|-------|-------|------|------|-------|----------|----------|----------|----------|
| MmugDNA.43211.1.S1_at | MmugDNA.43211.1 | 8.21  | 8.2   | 0.36 | 0.27 | 1     | 0.98847  | 0.248128 | 0.995877 | 0.517567 |
| MmugDNA.43213.1.S1_at | MmugDNA.43213.1 | 11.21 | 11.29 | 0.4  | 0.06 | -1.06 | 0.813805 | 0.227983 | 0.932803 | 0.500211 |
| MmugDNA.43217.1.S1_at | MmugDNA.43217.1 | 12.8  | 12.5  | 0.05 | 0.01 | 1.22  | 0.000663 | 0.001027 | 0.144737 | 0.051145 |
| MmugDNA.43219.1.S1_at | MmugDNA.43219.1 | 7.74  | 8.47  | 0.45 | 0.05 | -1.66 | 0.038414 | 0.00817  | 0.359251 | 0.119886 |
| MmugDNA.43225.1.S1_at | MmugDNA.43225.1 | 6.96  | 7.09  | 0.39 | 0.37 | -1.1  | 0.324724 | 0.130547 | 0.672781 | 0.402412 |
| MmugDNA.43233.1.S1_at | MmugDNA.43233.1 | 6.76  | 6.43  | 0.24 | 0.15 | 1.26  | 0.026784 | 0.044159 | 0.326232 | 0.254547 |
| MmugDNA.43237.1.S1_at | MmugDNA.43237.1 | 9.9   | 9.89  | 0.19 | 0.09 | 1.01  | 0.754818 | 0.021639 | 0.907518 | 0.184333 |
| MmugDNA.43238.1.S1_at | MmugDNA.43238.1 | 6.03  | 5.88  | 0.11 | 0.04 | 1.11  | 0.02453  | 0.091777 | 0.319083 | 0.346977 |
| MmugDNA.43239.1.S1_at | MmugDNA.43239.1 | 10.04 | 10.24 | 0.45 | 0.03 | -1.15 | 0.633002 | 0.730486 | 0.853404 | 0.844017 |
| MmugDNA.4324.1.S1_at  | MmugDNA.4324.1  | 8.5   | 8.74  | 0.33 | 0.06 | -1.19 | 0.177834 | 0.022199 | 0.550984 | 0.186482 |
| MmugDNA.43242.1.S1_at | MmugDNA.43242.1 | 6.05  | 6.17  | 0.71 | 0.15 | -1.09 | 0.893676 | 0.982012 | 0.963491 | 0.99016  |
| MmugDNA.43244.1.S1_at | MmugDNA.43244.1 | 9.49  | 9.71  | 0.73 | 0.13 | -1.16 | 0.915934 | 0.864015 | 0.97133  | 0.922844 |
| MmugDNA.43246.1.S1_at | MmugDNA.43246.1 | 10.66 | 10.69 | 0.33 | 0.03 | -1.02 | 0.562498 | 0.294851 | 0.8177   | 0.554412 |
| MmugDNA.43248.1.S1_at | MmugDNA.43248.1 | 9.18  | 9.12  | 0.86 | 0.14 | 1.05  | 0.863673 | 0.06912  | 0.952043 | 0.309162 |
| MmugDNA.43249.1.S1_at | MmugDNA.43249.1 | 12.74 | 12.77 | 0.22 | 0.09 | -1.02 | 0.763083 | 0.503397 | 0.91103  | 0.700871 |
| MmugDNA.43251.1.S1_at | MmugDNA.43251.1 | 10.11 | 10.12 | 0.25 | 0.05 | -1.01 | 0.94493  | 0.047858 | 0.980852 | 0.263679 |
| MmugDNA.43253.1.S1_at | MmugDNA.43253.1 | 10.78 | 10.81 | 0.4  | 0.15 | -1.02 | 0.537657 | 0.681148 | 0.802735 | 0.813797 |
| MmugDNA.43254.1.S1_at | MmugDNA.43254.1 | 7.18  | 7.12  | 0.85 | 0.17 | 1.04  | 0.933321 | 0.152332 | 0.977395 | 0.427072 |
| MmugDNA.43255.1.S1_at | MmugDNA.43255.1 | 10    | 10.24 | 0.5  | 0.08 | -1.18 | 0.48705  | 0.64128  | 0.774859 | 0.789506 |
| MmugDNA.43260.1.S1_at | MmugDNA.43260.1 | 14.45 | 14.45 | 0.01 | 0.02 | -1    | 0.275862 | 0.70309  | 0.635416 | 0.827866 |
| MmugDNA.43265.1.S1_at | MmugDNA.43265.1 | 5.12  | 5.09  | 0.03 | 0.04 | 1.03  | 0.140088 | 0.116193 | 0.515581 | 0.383524 |
| MmugDNA.43266.1.S1_at | MmugDNA.43266.1 | 11.79 | 11.66 | 0.23 | 0.08 | 1.09  | 0.360475 | 0.079747 | 0.697914 | 0.327009 |
| MmugDNA.43267.1.S1_at | MmugDNA.43267.1 | 6.96  | 6.64  | 0.28 | 0.39 | 1.25  | 0.75736  | 0.088341 | 0.908621 | 0.341767 |
| MmugDNA.43273.1.S1_at | MmugDNA.43273.1 | 4.73  | 4.91  | 0.9  | 0.03 | -1.14 | 0.713725 | 0.775765 | 0.888497 | 0.869526 |
| MmugDNA.4328.1.S1_at  | MmugDNA.4328.1  | 5.18  | 5.07  | 0.32 | 0.19 | 1.08  | 0.629962 | 0.779325 | 0.851781 | 0.872047 |
| MmugDNA.43283.1.S1_at | MmugDNA.43283.1 | 8.81  | 8.47  | 0.27 | 0.05 | 1.26  | 0.260848 | 0.461522 | 0.62332  | 0.673152 |
| MmugDNA.43286.1.S1_at | MmugDNA.43286.1 | 7     | 6.82  | 0.25 | 0.02 | 1.13  | 0.53092  | 0.582721 | 0.799314 | 0.751337 |
| MmugDNA.43290.1.S1_at | MmugDNA.43290.1 | 9.43  | 9.38  | 0.35 | 0.04 | 1.04  | 0.322416 | 0.541612 | 0.671134 | 0.725033 |
| MmugDNA.43291.1.S1_at | MmugDNA.43291.1 | 3.15  | 3.19  | 0.18 | 0.03 | -1.02 | 0.881932 | 0.387316 | 0.95911  | 0.622027 |
| MmugDNA.43297.1.S1_at | MmugDNA.43297.1 | 5.23  | 4.96  | 0.39 | 0.46 | 1.21  | 0.471035 | 0.162616 | 0.766294 | 0.43872  |
| MmugDNA.43308.1.S1_at | MmugDNA.43308.1 | 11.44 | 10.49 | 0.27 | 0.03 | 1.94  | 0.003519 | 0.007521 | 0.196225 | 0.116291 |
| MmugDNA.43310.1.S1_at | MmugDNA.43310.1 | 9.26  | 9.2   | 0.75 | 0.06 | 1.04  | 0.897986 | 0.980494 | 0.965424 | 0.989333 |
| MmugDNA.43313.1.S1_at | MmugDNA.43313.1 | 5.59  | 5.54  | 0.09 | 0.1  | 1.04  | 0.524854 | 0.551335 | 0.796143 | 0.730922 |
| MmugDNA.43316.1.S1_at | MmugDNA.43316.1 | 11.78 | 11.84 | 0.13 | 0.02 | -1.04 | 0.982257 | 0.908648 | 0.994472 | 0.948282 |
| MmugDNA.43318.1.S1_at | MmugDNA.43318.1 | 7.73  | 8.54  | 1    | 0.23 | -1.75 | 0.203015 | 0.123393 | 0.574415 | 0.393391 |
| MmugDNA.43327.1.S1_at | MmugDNA.43327.1 | 10.86 | 10.14 | 0.22 | 0.07 | 1.65  | 0.007995 | 0.052966 | 0.232005 | 0.275787 |
| MmugDNA.4334.1.S1_at  | MmugDNA.4334.1  | 5.15  | 5.32  | 1.01 | 0.61 | -1.13 | 0.787804 | 0.277224 | 0.922045 | 0.54117  |
| MmugDNA.43340.1.S1_at | MmugDNA.43340.1 | 11.61 | 11.73 | 0    | 0.03 | -1.08 | 0.003947 | 0.005162 | 0.198571 | 0.0997   |
| MmugDNA.43343.1.S1_at | MmugDNA.43343.1 | 11.59 | 12.02 | 0.16 | 0.03 | -1.34 | 0.006784 | 0.001278 | 0.223856 | 0.055351 |
| MmugDNA.43354.1.S1_at | MmugDNA.43354.1 | 8.78  | 8.86  | 0.18 | 0.07 | -1.06 | 0.860488 | 0.983436 | 0.950834 | 0.99078  |
| MmugDNA.43368.1.S1_at | MmugDNA.43368.1 | 10.8  | 10.17 | 0.44 | 0.11 | 1.55  | 0.076383 | 0.012087 | 0.437977 | 0.142211 |
| MmugDNA.4337.1.S1_at  | MmugDNA.4337.1  | 6.33  | 6.15  | 0.11 | 0.01 | 1.13  | 0.140816 | 0.506767 | 0.516316 | 0.702575 |
| MmugDNA.43374.1.S1_at | MmugDNA.43374.1 | 7.24  | 7.05  | 0.27 | 0.11 | 1.14  | 0.415819 | 0.134721 | 0.73381  | 0.406763 |

|                         |                 |       |       |      |      |       |          |          |          |          |
|-------------------------|-----------------|-------|-------|------|------|-------|----------|----------|----------|----------|
| MmugDNA.43402.1.S1_at   | MmugDNA.43402.1 | 10.33 | 10.24 | 0.29 | 0.04 | 1.06  | 0.845016 | 0.024419 | 0.945601 | 0.195563 |
| MmugDNA.43404.1.S1_at   | MmugDNA.43404.1 | 8.1   | 8.24  | 0.45 | 0.04 | -1.1  | 0.754348 | 0.727253 | 0.907331 | 0.84224  |
| MmugDNA.43407.1.S1_at   | MmugDNA.43407.1 | 6.62  | 7.15  | 1.18 | 0.16 | -1.44 | 0.496068 | 0.825245 | 0.780189 | 0.899591 |
| MmugDNA.43409.1.S1_at   | MmugDNA.43409.1 | 6.16  | 6.15  | 0.32 | 0.11 | 1     | 0.371173 | 0.353117 | 0.705423 | 0.596383 |
| MmugDNA.43412.1.S1_at   | MmugDNA.43412.1 | 13.44 | 13.26 | 0.07 | 0.08 | 1.13  | 0.045451 | 0.097837 | 0.376492 | 0.355639 |
| MmugDNA.43424.1.S1_at   | MmugDNA.43424.1 | 12.07 | 11.62 | 0.73 | 0.25 | 1.37  | 0.822724 | 0.139982 | 0.936084 | 0.413309 |
| MmugDNA.43429.1.S1_at   | MmugDNA.43429.1 | 4.85  | 4.17  | 0.58 | 0.34 | 1.6   | 0.154327 | 0.308439 | 0.527483 | 0.564482 |
| MmugDNA.43431.1.S1_at   | MmugDNA.43431.1 | 10.17 | 9.94  | 0.27 | 0.17 | 1.17  | 0.419233 | 0.004228 | 0.736167 | 0.091435 |
| MmugDNA.43433.1.S1_at   | MmugDNA.43433.1 | 8.77  | 9.22  | 0.4  | 0.14 | -1.37 | 0.282788 | 0.244347 | 0.641027 | 0.514188 |
| MmugDNA.43436.1.S1_at   | MmugDNA.43436.1 | 5.5   | 5.19  | 0.58 | 0.2  | 1.24  | 0.728227 | 0.142156 | 0.895067 | 0.41575  |
| MmugDNA.43458.1.S1_at   | MmugDNA.43458.1 | 6.48  | 6.44  | 0.1  | 0.02 | -1.03 | 0.458043 | 0.087111 | 0.758638 | 0.340073 |
| MmugDNA.43461.1.S1_at   | MmugDNA.43461.1 | 6.95  | 7.72  | 0.62 | 0.35 | -1.71 | 0.220109 | 0.277989 | 0.589227 | 0.541684 |
| MmugDNA.43464.1.S1_at   | MmugDNA.43464.1 | 13.4  | 13.5  | 0.09 | 0.01 | -1.07 | 0.155204 | 0.183309 | 0.528509 | 0.459553 |
| MmugDNA.43466.1.S1_at   | MmugDNA.43466.1 | 6.69  | 6.25  | 1.07 | 1.89 | 1.36  | 0.644772 | 0.009117 | 0.858593 | 0.125994 |
| MmugDNA.43469.1.S1_at   | MmugDNA.43469.1 | 9.16  | 9.87  | 0.71 | 0.15 | -1.64 | 0.158931 | 0.182232 | 0.531703 | 0.458762 |
| MmugDNA.4347.1.S1_at    | MmugDNA.4347.1  | 10.37 | 10.2  | 0.24 | 0.04 | 1.13  | 0.356675 | 0.147477 | 0.695204 | 0.421765 |
| MmugDNA.43477.1.S1_at   | MmugDNA.43477.1 | 7.14  | 6.5   | 0.77 | 0.2  | 1.55  | 0.208325 | 0.009025 | 0.580006 | 0.125557 |
| MmugDNA.43478.1.S1_at   | MmugDNA.43478.1 | 6.89  | 6.59  | 0.89 | 0.19 | 1.23  | 0.740812 | 0.248666 | 0.900942 | 0.517917 |
| MmugDNA.43487.1.S1_at   | MmugDNA.43487.1 | 3.87  | 3.86  | 0.06 | 0.1  | 1.01  | 0.427584 | 0.577655 | 0.741242 | 0.748038 |
| MmugDNA.43498.1.S1_at   | MmugDNA.43498.1 | 10.27 | 9.39  | 0.42 | 0.09 | 1.83  | 0.058984 | 0.201073 | 0.405865 | 0.475509 |
| MmugDNA.43500.1.S1_at   | MmugDNA.43500.1 | 6.7   | 7.03  | 0.39 | 0.31 | -1.26 | 0.53763  | 0.175497 | 0.802735 | 0.452157 |
| MmugDNA.43510.1.S1_at   | MmugDNA.43510.1 | 7.97  | 7.82  | 0.44 | 0.15 | 1.11  | 0.523184 | 0.031849 | 0.795463 | 0.220909 |
| MmugDNA.43511.1.S1_at   | MmugDNA.43511.1 | 12.85 | 12.74 | 0.11 | 0.05 | 1.08  | 0.264104 | 0.560166 | 0.625948 | 0.736517 |
| MmugDNA.43513.1.S1_at   | MmugDNA.43513.1 | 10.62 | 10.47 | 0.7  | 0.14 | 1.12  | 0.61598  | 0.760708 | 0.844679 | 0.860984 |
| MmugDNA.43514.1.S1_at   | MmugDNA.43514.1 | 4.04  | 5.26  | 0.86 | 0.68 | -2.32 | 0.157606 | 0.057158 | 0.530588 | 0.284972 |
| MmugDNA.43518.1.S1_s_at | MmugDNA.43518.1 | 12.23 | 12.13 | 0.2  | 0.03 | 1.07  | 0.497863 | 0.522529 | 0.781413 | 0.713196 |
| MmugDNA.43519.1.S1_at   | MmugDNA.43519.1 | 10.5  | 10.52 | 0.01 | 0.03 | -1.02 | 0.039813 | 0.061901 | 0.362691 | 0.295668 |
| MmugDNA.4352.1.S1_at    | MmugDNA.4352.1  | 8.19  | 8.12  | 0.69 | 0.17 | 1.05  | 0.336389 | 0.166507 | 0.681741 | 0.442933 |
| MmugDNA.43521.1.S1_at   | MmugDNA.43521.1 | 10.8  | 10.41 | 0.17 | 0.04 | 1.31  | 0.037468 | 0.011492 | 0.357167 | 0.138678 |
| MmugDNA.43526.1.S1_at   | MmugDNA.43526.1 | 10.29 | 9.84  | 0.57 | 0.12 | 1.37  | 0.129226 | 0.149255 | 0.50395  | 0.42373  |
| MmugDNA.43529.1.S1_at   | MmugDNA.43529.1 | 9.21  | 8.4   | 0.14 | 0.22 | 1.75  | 0.006361 | 0.00744  | 0.218572 | 0.115858 |
| MmugDNA.4353.1.S1_at    | MmugDNA.4353.1  | 11.36 | 11.37 | 0.18 | 0.03 | -1    | 0.769378 | 0.065627 | 0.913614 | 0.301554 |
| MmugDNA.43532.1.S1_at   | MmugDNA.43532.1 | 6.53  | 6.2   | 0.15 | 0.22 | 1.26  | 0.355124 | 0.566752 | 0.69464  | 0.74076  |
| MmugDNA.43533.1.S1_at   | MmugDNA.43533.1 | 7.24  | 7.02  | 0.2  | 0.13 | 1.16  | 0.63176  | 0.731279 | 0.852577 | 0.84425  |
| MmugDNA.43536.1.S1_at   | MmugDNA.43536.1 | 3.66  | 3.43  | 0.02 | 0.07 | 1.17  | 0.007879 | 0.143479 | 0.231135 | 0.417442 |
| MmugDNA.43537.1.S1_at   | MmugDNA.43537.1 | 7.85  | 8.02  | 0.29 | 0.07 | -1.12 | 0.33801  | 0.019847 | 0.682728 | 0.177189 |
| MmugDNA.43546.1.S1_at   | MmugDNA.43546.1 | 9.11  | 9     | 0.22 | 0.11 | 1.08  | 0.817418 | 0.427977 | 0.933935 | 0.649602 |
| MmugDNA.43551.1.S1_at   | MmugDNA.43551.1 | 5.83  | 5.47  | 0.08 | 0.17 | 1.29  | 0.108489 | 0.305834 | 0.480777 | 0.562731 |
| MmugDNA.43556.1.S1_at   | MmugDNA.43556.1 | 9.76  | 9.8   | 1.24 | 0.22 | -1.03 | 0.371577 | 0.561066 | 0.705567 | 0.737097 |
| MmugDNA.43557.1.S1_s_at | MmugDNA.43557.1 | 8.17  | 7.8   | 0.58 | 0.11 | 1.3   | 0.276357 | 0.168049 | 0.635937 | 0.444641 |
| MmugDNA.43560.1.S1_at   | MmugDNA.43560.1 | 10.2  | 10.17 | 0.18 | 0.06 | 1.02  | 0.759701 | 0.033641 | 0.909769 | 0.227006 |
| MmugDNA.43579.1.S1_at   | MmugDNA.43579.1 | 8.66  | 10.43 | 0.2  | 0.07 | -3.41 | 0.000159 | 0.000049 | 0.112332 | 0.025273 |
| MmugDNA.43585.1.S1_at   | MmugDNA.43585.1 | 6.62  | 6.42  | 0.03 | 0.02 | 1.15  | 0.0007   | 0.0049   | 0.147476 | 0.097632 |

|                        |                 |       |       |      |      |       |          |          |          |          |
|------------------------|-----------------|-------|-------|------|------|-------|----------|----------|----------|----------|
| MmugDNA.43588.1.S1_at  | MmugDNA.43588.1 | 10.85 | 10.4  | 0.12 | 0.37 | 1.37  | 0.348286 | 0.007829 | 0.689616 | 0.117929 |
| MmugDNA.43589.1.S1_at  | MmugDNA.43589.1 | 7.98  | 8.96  | 0.31 | 0.07 | -1.97 | 0.005646 | 0.000924 | 0.209598 | 0.048724 |
| MmugDNA.4359.1.S1_at   | MmugDNA.4359.1  | 7.45  | 7.55  | 0.61 | 0.09 | -1.07 | 0.475965 | 0.443635 | 0.768865 | 0.66135  |
| MmugDNA.43591.1.S1_at  | MmugDNA.43591.1 | 4.62  | 4.54  | 0.2  | 0.3  | 1.06  | 0.697221 | 0.918566 | 0.882224 | 0.954327 |
| MmugDNA.4360.1.S1_at   | MmugDNA.4360.1  | 11.65 | 11.91 | 0.22 | 0.01 | -1.2  | 0.036334 | 0.016965 | 0.35477  | 0.165103 |
| MmugDNA.43604.1.S1_at  | MmugDNA.43604.1 | 9.54  | 8.77  | 0.66 | 0.06 | 1.71  | 0.122024 | 0.006731 | 0.495677 | 0.110984 |
| MmugDNA.43613.1.S1_at  | MmugDNA.43613.1 | 8.15  | 8.01  | 0.12 | 0.03 | 1.11  | 0.130735 | 0.122277 | 0.505234 | 0.391973 |
| MmugDNA.4364.1.S1_at   | MmugDNA.4364.1  | 6.58  | 6.7   | 0.51 | 0.08 | -1.09 | 0.846765 | 0.211667 | 0.94629  | 0.485688 |
| MmugDNA.4368.1.S1_at   | MmugDNA.4368.1  | 8.79  | 8.24  | 0.67 | 0.3  | 1.47  | 0.398623 | 0.552833 | 0.722582 | 0.732102 |
| MmugDNA.4368.1.S1_s_at | MmugDNA.4368.1  | 8.35  | 8.1   | 0.61 | 0.23 | 1.19  | 0.848442 | 0.958997 | 0.946776 | 0.976777 |
| MmugDNA.4370.1.S1_at   | MmugDNA.4370.1  | 8.76  | 8.79  | 0.36 | 0.22 | -1.03 | 0.607217 | 0.318522 | 0.840749 | 0.571239 |
| MmugDNA.4374.1.S1_at   | MmugDNA.4374.1  | 10.15 | 9.89  | 0.15 | 0.08 | 1.2   | 0.089614 | 0.051039 | 0.457723 | 0.271214 |
| MmugDNA.4379.1.S1_at   | MmugDNA.4379.1  | 12.18 | 12.12 | 0.14 | 0.04 | 1.04  | 0.255915 | 0.274008 | 0.619882 | 0.538517 |
| MmugDNA.4385.1.S1_at   | MmugDNA.4385.1  | 12.2  | 12.21 | 0.1  | 0.09 | -1    | 0.655444 | 0.359171 | 0.863101 | 0.600528 |
| MmugDNA.4389.1.S1_at   | MmugDNA.4389.1  | 5.03  | 4.96  | 0.09 | 0.04 | 1.05  | 0.144527 | 0.307892 | 0.519872 | 0.563992 |
| MmugDNA.4395.1.S1_at   | MmugDNA.4395.1  | 10.15 | 10.91 | 0.42 | 0.15 | -1.69 | 0.017617 | 0.002546 | 0.292913 | 0.07453  |
| MmugDNA.440.1.S1_at    | MmugDNA.440.1   | 11.46 | 11.4  | 0.32 | 0.01 | 1.04  | 0.881542 | 0.196674 | 0.959065 | 0.47172  |
| MmugDNA.4404.1.S1_at   | MmugDNA.4404.1  | 9.53  | 9.87  | 1.63 | 0.22 | -1.26 | 0.708859 | 0.224697 | 0.886591 | 0.497614 |
| MmugDNA.4405.1.S1_at   | MmugDNA.4405.1  | 12.06 | 11.9  | 0.31 | 0.23 | 1.12  | 0.901808 | 0.589414 | 0.966765 | 0.755652 |
| MmugDNA.4406.1.S1_at   | MmugDNA.4406.1  | 4.06  | 3.76  | 0.22 | 0.09 | 1.23  | 0.261222 | 0.481481 | 0.623819 | 0.686469 |
| MmugDNA.4409.1.S1_at   | MmugDNA.4409.1  | 10.52 | 10.62 | 0.23 | 0.19 | -1.07 | 0.23709  | 0.337755 | 0.60395  | 0.584925 |
| MmugDNA.4416.1.S1_at   | MmugDNA.4416.1  | 8.5   | 8.6   | 0.15 | 0.03 | -1.07 | 0.574373 | 0.906758 | 0.824006 | 0.947216 |
| MmugDNA.4419.1.S1_at   | MmugDNA.4419.1  | 6.38  | 6.78  | 0.27 | 0.18 | -1.32 | 0.423213 | 0.256183 | 0.738919 | 0.524069 |
| MmugDNA.442.1.S1_at    | MmugDNA.442.1   | 7.36  | 7.57  | 0.64 | 0.13 | -1.16 | 0.613449 | 0.256444 | 0.843466 | 0.524201 |
| MmugDNA.4420.1.S1_at   | MmugDNA.4420.1  | 4.89  | 5.9   | 0.59 | 0.71 | -2.02 | 0.15389  | 0.292115 | 0.527213 | 0.552273 |
| MmugDNA.4422.1.S1_s_at | MmugDNA.4422.1  | 5.03  | 4.89  | 0.14 | 0.17 | 1.1   | 0.626979 | 0.451241 | 0.850306 | 0.666095 |
| MmugDNA.4427.1.S1_at   | MmugDNA.4427.1  | 3.48  | 3.27  | 0.09 | 0.01 | 1.15  | 0.042015 | 0.045846 | 0.368163 | 0.258382 |
| MmugDNA.4430.1.S1_at   | MmugDNA.4430.1  | 11.1  | 11.05 | 0.14 | 0.06 | 1.04  | 0.325294 | 0.45799  | 0.673112 | 0.670999 |
| MmugDNA.4433.1.S1_at   | MmugDNA.4433.1  | 7.57  | 7.67  | 0.52 | 0.24 | -1.07 | 0.872866 | 0.164136 | 0.95589  | 0.440346 |
| MmugDNA.4434.1.S1_at   | MmugDNA.4434.1  | 9.34  | 9.39  | 0.07 | 0.07 | -1.04 | 0.93483  | 0.807175 | 0.977924 | 0.888967 |
| MmugDNA.4438.1.S1_at   | MmugDNA.4438.1  | 7.75  | 8.08  | 0.07 | 0.11 | -1.26 | 0.020757 | 0.053216 | 0.305611 | 0.276445 |
| MmugDNA.4449.1.S1_at   | MmugDNA.4449.1  | 4.03  | 4.02  | 0.11 | 0.03 | 1.01  | 0.905183 | 0.604541 | 0.968109 | 0.764663 |
| MmugDNA.4461.1.S1_at   | MmugDNA.4461.1  | 10.65 | 10.81 | 0.3  | 0.1  | -1.12 | 0.270871 | 0.27749  | 0.630819 | 0.541411 |
| MmugDNA.4463.1.S1_at   | MmugDNA.4463.1  | 10.15 | 10.32 | 0.23 | 0.07 | -1.12 | 0.210767 | 0.096094 | 0.582007 | 0.353322 |
| MmugDNA.4478.1.S1_at   | MmugDNA.4478.1  | 8.8   | 9.19  | 1.69 | 0.2  | -1.31 | 0.730835 | 0.143487 | 0.896252 | 0.417442 |
| MmugDNA.4479.1.S1_at   | MmugDNA.4479.1  | 6.26  | 6.42  | 0.69 | 0.18 | -1.11 | 0.983942 | 0.206431 | 0.99515  | 0.480571 |
| MmugDNA.4487.1.S1_at   | MmugDNA.4487.1  | 3.26  | 3.13  | 0.05 | 0.1  | 1.1   | 0.121991 | 0.08864  | 0.495677 | 0.342167 |
| MmugDNA.4496.1.S1_at   | MmugDNA.4496.1  | 7.17  | 7.02  | 0.12 | 0.04 | 1.11  | 0.159387 | 0.257041 | 0.532247 | 0.524781 |
| MmugDNA.45.1.S1_at     | MmugDNA.45.1    | 6.17  | 5.98  | 0.17 | 0.1  | 1.14  | 0.249186 | 0.391466 | 0.614508 | 0.625086 |
| MmugDNA.4501.1.S1_at   | MmugDNA.4501.1  | 6.16  | 6.18  | 0.16 | 0.03 | -1.01 | 0.50223  | 0.553424 | 0.783497 | 0.732583 |
| MmugDNA.4510.1.S1_at   | MmugDNA.4510.1  | 8.92  | 9.57  | 0.22 | 0.06 | -1.56 | 0.016617 | 0.040521 | 0.287478 | 0.246264 |
| MmugDNA.4515.1.S1_at   | MmugDNA.4515.1  | 5.12  | 5.28  | 0.19 | 0.11 | -1.12 | 0.916826 | 0.915629 | 0.971796 | 0.952718 |
| MmugDNA.452.1.S1_at    | MmugDNA.452.1   | 7.52  | 7.54  | 0.11 | 0.1  | -1.01 | 0.282695 | 0.767381 | 0.641025 | 0.864926 |

|                        |                |       |       |      |      |       |          |          |          |          |
|------------------------|----------------|-------|-------|------|------|-------|----------|----------|----------|----------|
| MmugDNA.4531.1.S1_at   | MmugDNA.4531.1 | 10.02 | 10.44 | 0.35 | 0.02 | -1.34 | 0.116151 | 0.055822 | 0.489554 | 0.282127 |
| MmugDNA.4547.1.S1_at   | MmugDNA.4547.1 | 8     | 8.4   | 0.35 | 0.11 | -1.32 | 0.115517 | 0.146226 | 0.488793 | 0.420213 |
| MmugDNA.4552.1.S1_at   | MmugDNA.4552.1 | 8.6   | 8.93  | 0.24 | 0.09 | -1.26 | 0.116807 | 0.343204 | 0.490029 | 0.588959 |
| MmugDNA.4554.1.S1_at   | MmugDNA.4554.1 | 6.8   | 7.05  | 0.37 | 0.15 | -1.19 | 0.333779 | 0.110057 | 0.679885 | 0.374179 |
| MmugDNA.456.1.S1_at    | MmugDNA.456.1  | 12.09 | 11.56 | 0.22 | 0.19 | 1.45  | 0.026074 | 0.00315  | 0.323344 | 0.081739 |
| MmugDNA.456.1.S1_x_at  | MmugDNA.456.1  | 11.27 | 10.71 | 0.23 | 0.16 | 1.46  | 0.024235 | 0.002469 | 0.317812 | 0.073576 |
| MmugDNA.4562.1.S1_at   | MmugDNA.4562.1 | 8.27  | 7.99  | 0.92 | 0.23 | 1.22  | 0.163306 | 0.103291 | 0.536063 | 0.364143 |
| MmugDNA.4567.1.S1_at   | MmugDNA.4567.1 | 4.84  | 4.94  | 1.14 | 0.08 | -1.07 | 0.976124 | 0.427216 | 0.992259 | 0.649175 |
| MmugDNA.457.1.S1_at    | MmugDNA.457.1  | 11.31 | 11.3  | 0.13 | 0    | 1.01  | 0.294478 | 0.418676 | 0.650602 | 0.643036 |
| MmugDNA.4573.1.S1_s_at | MmugDNA.4573.1 | 9.94  | 10.08 | 0.51 | 0.2  | -1.1  | 0.867905 | 0.270284 | 0.953785 | 0.535654 |
| MmugDNA.4574.1.S1_at   | MmugDNA.4574.1 | 7.78  | 7.57  | 0.17 | 0.16 | -1.15 | 0.928    | 0.20638  | 0.976259 | 0.480546 |
| MmugDNA.4578.1.S1_at   | MmugDNA.4578.1 | 7.72  | 7.87  | 0.08 | 0.06 | -1.11 | 0.073983 | 0.009073 | 0.434665 | 0.125944 |
| MmugDNA.4581.1.S1_at   | MmugDNA.4581.1 | 10.69 | 11.28 | 0.15 | 0.01 | -1.5  | 0.002893 | 0.0004   | 0.187888 | 0.037471 |
| MmugDNA.4584.1.S1_at   | MmugDNA.4584.1 | 8.69  | 9.24  | 0.22 | 0.14 | -1.46 | 0.016669 | 0.026642 | 0.287478 | 0.204089 |
| MmugDNA.4589.1.S1_at   | MmugDNA.4589.1 | 3.96  | 3.86  | 0.1  | 0.1  | 1.07  | 0.826309 | 0.15158  | 0.937736 | 0.426333 |
| MmugDNA.4592.1.A1_at   | MmugDNA.4592.1 | 5.54  | 5.27  | 0.32 | 0.04 | 1.2   | 0.07374  | 0.129216 | 0.434623 | 0.400635 |
| MmugDNA.4592.1.S1_at   | MmugDNA.4592.1 | 5.8   | 5.82  | 0.25 | 0.07 | -1.01 | 0.340236 | 0.516195 | 0.68442  | 0.708757 |
| MmugDNA.4594.1.S1_at   | MmugDNA.4594.1 | 5.77  | 5.59  | 0.21 | 0.4  | 1.13  | 0.86919  | 0.941868 | 0.954244 | 0.967076 |
| MmugDNA.4609.1.S1_at   | MmugDNA.4609.1 | 8.59  | 8.83  | 0.62 | 0.41 | -1.18 | 0.242314 | 0.113427 | 0.608517 | 0.379509 |
| MmugDNA.4615.1.S1_at   | MmugDNA.4615.1 | 13.68 | 13.78 | 0.08 | 0.02 | -1.07 | 0.046915 | 0.047724 | 0.37917  | 0.263325 |
| MmugDNA.4618.1.S1_s_at | MmugDNA.4618.1 | 10.25 | 10.56 | 0.58 | 0.23 | -1.24 | 0.48472  | 0.658273 | 0.773772 | 0.800244 |
| MmugDNA.4622.1.S1_at   | MmugDNA.4622.1 | 6.91  | 6.89  | 0.07 | 0.04 | 1.01  | 0.261223 | 0.440572 | 0.623819 | 0.659029 |
| MmugDNA.4630.1.S1_at   | MmugDNA.4630.1 | 6.32  | 6.12  | 0.07 | 0.07 | 1.15  | 0.029026 | 0.180515 | 0.333482 | 0.457128 |
| MmugDNA.4645.1.S1_at   | MmugDNA.4645.1 | 9     | 9.23  | 0.28 | 0.11 | -1.18 | 0.16101  | 0.112124 | 0.534327 | 0.377398 |
| MmugDNA.4646.1.S1_at   | MmugDNA.4646.1 | 8.02  | 7.85  | 0.6  | 0.12 | 1.12  | 0.297709 | 0.211655 | 0.652791 | 0.485681 |
| MmugDNA.4647.1.S1_at   | MmugDNA.4647.1 | 7.59  | 7.41  | 0.36 | 0.31 | 1.13  | 0.932269 | 0.32135  | 0.977206 | 0.57319  |
| MmugDNA.4651.1.S1_at   | MmugDNA.4651.1 | 6.55  | 6.52  | 0.08 | 0.11 | 1.02  | 0.285246 | 0.280169 | 0.643077 | 0.543469 |
| MmugDNA.4657.1.S1_at   | MmugDNA.4657.1 | 3.18  | 3.12  | 0.03 | 0.05 | 1.04  | 0.185822 | 0.777563 | 0.558723 | 0.870732 |
| MmugDNA.4664.1.S1_at   | MmugDNA.4664.1 | 6.75  | 6.62  | 0.12 | 0.04 | 1.1   | 0.038578 | 0.047891 | 0.359938 | 0.263751 |
| MmugDNA.4667.1.S1_at   | MmugDNA.4667.1 | 9.95  | 10.02 | 0.43 | 0.01 | -1.05 | 0.928824 | 0.90519  | 0.976332 | 0.946213 |
| MmugDNA.467.1.S1_at    | MmugDNA.467.1  | 6.02  | 6.01  | 0.36 | 0.03 | 1.01  | 0.413132 | 0.124824 | 0.732218 | 0.395219 |
| MmugDNA.4670.1.S1_at   | MmugDNA.4670.1 | 12.22 | 12.27 | 0.11 | 0.15 | -1.03 | 0.469579 | 0.017507 | 0.765623 | 0.167516 |
| MmugDNA.4671.1.S1_at   | MmugDNA.4671.1 | 12.13 | 12.23 | 0.2  | 0.08 | -1.07 | 0.583516 | 0.076797 | 0.829124 | 0.322252 |
| MmugDNA.4679.1.S1_at   | MmugDNA.4679.1 | 6.04  | 6.02  | 0.04 | 0.09 | 1.01  | 0.57278  | 0.812251 | 0.823366 | 0.891561 |
| MmugDNA.468.1.S1_at    | MmugDNA.468.1  | 5.22  | 5.2   | 0.12 | 0.03 | 1.02  | 0.250866 | 0.588716 | 0.615977 | 0.755137 |
| MmugDNA.4681.1.S1_at   | MmugDNA.4681.1 | 6.88  | 6.84  | 0.02 | 0.11 | 1.03  | 0.536302 | 0.926516 | 0.80223  | 0.958312 |
| MmugDNA.4693.1.S1_at   | MmugDNA.4693.1 | 9.23  | 9.02  | 0.36 | 0.2  | 1.16  | 0.282793 | 0.414731 | 0.641027 | 0.640456 |
| MmugDNA.4696.1.S1_at   | MmugDNA.4696.1 | 2.88  | 2.8   | 0.1  | 0.04 | 1.05  | 0.225247 | 0.573353 | 0.594523 | 0.745072 |
| MmugDNA.4698.1.S1_at   | MmugDNA.4698.1 | 11.15 | 11.1  | 0.13 | 0.07 | 1.04  | 0.788005 | 0.007687 | 0.922084 | 0.117153 |
| MmugDNA.4703.1.S1_at   | MmugDNA.4703.1 | 9.07  | 8.47  | 0.89 | 0.53 | 1.52  | 0.742342 | 0.898916 | 0.901724 | 0.942467 |
| MmugDNA.4707.1.S1_at   | MmugDNA.4707.1 | 6.86  | 6.86  | 0.06 | 0.05 | 1     | 0.410647 | 0.733492 | 0.730888 | 0.845679 |
| MmugDNA.4719.1.S1_at   | MmugDNA.4719.1 | 5.33  | 5.74  | 0.19 | 0.1  | -1.33 | 0.102228 | 0.101181 | 0.472527 | 0.360831 |
| MmugDNA.4725.1.S1_at   | MmugDNA.4725.1 | 7.27  | 7.28  | 0.15 | 0.02 | -1    | 0.698366 | 0.520247 | 0.882746 | 0.711569 |

|                        |                |       |       |      |      |       |          |          |          |          |
|------------------------|----------------|-------|-------|------|------|-------|----------|----------|----------|----------|
| MmugDNA.4728.1.S1_at   | MmugDNA.4728.1 | 9.36  | 9.51  | 0.32 | 0.08 | -1.11 | 0.455257 | 0.349024 | 0.757352 | 0.593037 |
| MmugDNA.4731.1.S1_at   | MmugDNA.4731.1 | 4.7   | 4.66  | 0.03 | 0.07 | 1.02  | 0.294936 | 0.343111 | 0.650971 | 0.588883 |
| MmugDNA.4732.1.S1_at   | MmugDNA.4732.1 | 9.17  | 10.04 | 0.5  | 0.14 | -1.82 | 0.039957 | 0.022728 | 0.362955 | 0.188771 |
| MmugDNA.474.1.S1_at    | MmugDNA.474.1  | 8.86  | 8.64  | 0.57 | 0.09 | 1.17  | 0.524914 | 0.758088 | 0.796167 | 0.859252 |
| MmugDNA.4740.1.S1_at   | MmugDNA.4740.1 | 9.36  | 9.49  | 0.73 | 0.05 | -1.09 | 0.821184 | 0.88818  | 0.93552  | 0.936226 |
| MmugDNA.4742.1.S1_at   | MmugDNA.4742.1 | 11.23 | 11.96 | 0.22 | 0.17 | -1.66 | 0.02375  | 0.032694 | 0.316649 | 0.223883 |
| MmugDNA.4745.1.S1_at   | MmugDNA.4745.1 | 7.77  | 7.67  | 0.23 | 0.01 | 1.07  | 0.525172 | 0.343061 | 0.796179 | 0.588878 |
| MmugDNA.4749.1.S1_at   | MmugDNA.4749.1 | 10.03 | 9.91  | 0.8  | 0.12 | 1.09  | 0.804676 | 0.340716 | 0.929002 | 0.586899 |
| MmugDNA.4752.1.S1_at   | MmugDNA.4752.1 | 10.77 | 10.53 | 2.7  | 0.18 | 1.18  | 0.644399 | 0.347488 | 0.858501 | 0.592019 |
| MmugDNA.4757.1.S1_at   | MmugDNA.4757.1 | 7.72  | 7.61  | 0.07 | 0.07 | 1.08  | 0.052015 | 0.288798 | 0.391724 | 0.549936 |
| MmugDNA.476.1.S1_s_at  | MmugDNA.476.1  | 10.26 | 10.62 | 0.35 | 0.02 | -1.28 | 0.053919 | 0.03015  | 0.395633 | 0.215504 |
| MmugDNA.4760.1.S1_s_at | MmugDNA.4760.1 | 12.15 | 11.96 | 0.05 | 0.2  | 1.14  | 0.117998 | 0.012468 | 0.491371 | 0.14417  |
| MmugDNA.4761.1.S1_at   | MmugDNA.4761.1 | 7.02  | 6.82  | 0.19 | 0.28 | 1.15  | 0.280264 | 0.741064 | 0.639123 | 0.850126 |
| MmugDNA.4762.1.S1_at   | MmugDNA.4762.1 | 5.85  | 5.59  | 0.31 | 0.02 | 1.2   | 0.13018  | 0.107912 | 0.504663 | 0.370945 |
| MmugDNA.4766.1.S1_at   | MmugDNA.4766.1 | 8.24  | 8.75  | 0.22 | 0.09 | -1.43 | 0.021978 | 0.028134 | 0.309781 | 0.209306 |
| MmugDNA.477.1.S1_at    | MmugDNA.477.1  | 3.75  | 3.49  | 0.12 | 0.08 | 1.2   | 0.142607 | 0.106765 | 0.517642 | 0.369349 |
| MmugDNA.4773.1.S1_a_at | MmugDNA.4773.1 | 5.06  | 4.85  | 0.11 | 0.13 | 1.15  | 0.451185 | 0.134793 | 0.755046 | 0.406854 |
| MmugDNA.4773.1.S1_at   | MmugDNA.4773.1 | 5.37  | 5.42  | 0.07 | 0.03 | -1.03 | 0.771312 | 0.006323 | 0.914451 | 0.107969 |
| MmugDNA.4778.1.S1_at   | MmugDNA.4778.1 | 6.47  | 7.26  | 0.31 | 0.13 | -1.73 | 0.01429  | 0.045523 | 0.274633 | 0.257526 |
| MmugDNA.4784.1.S1_at   | MmugDNA.4784.1 | 9.98  | 8.59  | 1.64 | 0.02 | 2.62  | 0.648636 | 0.801993 | 0.859988 | 0.885995 |
| MmugDNA.4789.1.S1_at   | MmugDNA.4789.1 | 10.48 | 10.2  | 0.38 | 0.06 | 1.21  | 0.105753 | 0.166802 | 0.477585 | 0.443274 |
| MmugDNA.4791.1.S1_at   | MmugDNA.4791.1 | 12.76 | 12.44 | 0.13 | 0.13 | 1.25  | 0.040704 | 0.036931 | 0.364778 | 0.236659 |
| MmugDNA.480.1.S1_at    | MmugDNA.480.1  | 8.85  | 9.01  | 1.63 | 0.16 | -1.12 | 0.846666 | 0.517069 | 0.94629  | 0.709425 |
| MmugDNA.4801.1.S1_at   | MmugDNA.4801.1 | 3.88  | 4.07  | 0.36 | 0.31 | -1.14 | 0.815658 | 0.533831 | 0.933219 | 0.719904 |
| MmugDNA.4804.1.S1_at   | MmugDNA.4804.1 | 4.16  | 4.06  | 0.08 | 0.18 | 1.08  | 0.089203 | 0.086975 | 0.45704  | 0.33984  |
| MmugDNA.4806.1.S1_at   | MmugDNA.4806.1 | 7.88  | 7.87  | 0.46 | 0.07 | 1.01  | 0.967673 | 0.047619 | 0.989344 | 0.262996 |
| MmugDNA.4815.1.S1_at   | MmugDNA.4815.1 | 11.95 | 12.29 | 0.57 | 0.09 | -1.26 | 0.423531 | 0.229462 | 0.739163 | 0.501527 |
| MmugDNA.4818.1.S1_at   | MmugDNA.4818.1 | 6.01  | 5.78  | 0.12 | 0.17 | 1.18  | 0.118741 | 0.061178 | 0.492161 | 0.293981 |
| MmugDNA.4820.1.S1_at   | MmugDNA.4820.1 | 10.17 | 10.16 | 0.22 | 0.28 | 1.01  | 0.68103  | 0.333446 | 0.874927 | 0.581683 |
| MmugDNA.4822.1.S1_at   | MmugDNA.4822.1 | 9.32  | 9.34  | 1.16 | 0.11 | -1.01 | 0.979277 | 0.646387 | 0.993408 | 0.792839 |
| MmugDNA.4823.1.S1_at   | MmugDNA.4823.1 | 11.31 | 10.94 | 0.22 | 0.04 | 1.3   | 0.036947 | 0.005322 | 0.356252 | 0.100928 |
| MmugDNA.4827.1.S1_at   | MmugDNA.4827.1 | 6.91  | 7.93  | 0.24 | 0.28 | -2.02 | 0.004676 | 0.000674 | 0.201699 | 0.04413  |
| MmugDNA.4828.1.S1_at   | MmugDNA.4828.1 | 9.28  | 9.1   | 0.26 | 0.12 | 1.13  | 0.813637 | 0.964941 | 0.93266  | 0.980546 |
| MmugDNA.483.1.S1_at    | MmugDNA.483.1  | 9.77  | 10.11 | 0.15 | 0.07 | -1.27 | 0.067742 | 0.047856 | 0.424449 | 0.263679 |
| MmugDNA.4830.1.S1_at   | MmugDNA.4830.1 | 11.12 | 11.4  | 0.26 | 0.02 | -1.21 | 0.211251 | 0.006528 | 0.582141 | 0.109613 |
| MmugDNA.4834.1.S1_at   | MmugDNA.4834.1 | 9.79  | 9.57  | 0.16 | 0.1  | 1.16  | 0.047109 | 0.003508 | 0.379287 | 0.08503  |
| MmugDNA.4837.1.S1_at   | MmugDNA.4837.1 | 12.32 | 12.65 | 0.26 | 0.05 | -1.26 | 0.033916 | 0.008604 | 0.347468 | 0.123072 |
| MmugDNA.484.1.S1_at    | MmugDNA.484.1  | 4.13  | 3.92  | 0.15 | 0.09 | 1.16  | 0.104865 | 0.218106 | 0.476242 | 0.491693 |
| MmugDNA.4849.1.S1_at   | MmugDNA.4849.1 | 6.96  | 7.9   | 0.14 | 0.19 | -1.92 | 0.003031 | 0.006161 | 0.190987 | 0.106774 |
| MmugDNA.4850.1.S1_at   | MmugDNA.4850.1 | 8.2   | 8.87  | 1.05 | 0.25 | -1.58 | 0.313366 | 0.173348 | 0.664719 | 0.449791 |
| MmugDNA.4857.1.S1_at   | MmugDNA.4857.1 | 9.47  | 9.14  | 0.19 | 0.13 | 1.26  | 0.061628 | 0.003554 | 0.411207 | 0.085408 |
| MmugDNA.4859.1.S1_at   | MmugDNA.4859.1 | 9.58  | 10.13 | 0.38 | 0.05 | -1.47 | 0.078803 | 0.011326 | 0.441464 | 0.138076 |
| MmugDNA.486.1.S1_at    | MmugDNA.486.1  | 9.16  | 8.74  | 0.35 | 0.1  | 1.34  | 0.10378  | 0.048137 | 0.474479 | 0.264417 |

|                        |                |       |       |      |      |       |          |          |          |          |
|------------------------|----------------|-------|-------|------|------|-------|----------|----------|----------|----------|
| MmugDNA.4866.1.S1_at   | MmugDNA.4866.1 | 12.68 | 12.71 | 0.17 | 0.01 | -1.02 | 0.934121 | 0.521604 | 0.977721 | 0.712505 |
| MmugDNA.4871.1.S1_at   | MmugDNA.4871.1 | 10.96 | 10.97 | 2.87 | 0.21 | -1.01 | 0.607854 | 0.209    | 0.840979 | 0.482795 |
| MmugDNA.4872.1.S1_at   | MmugDNA.4872.1 | 10.74 | 9.98  | 0.25 | 0.09 | 1.7   | 0.015055 | 0.000729 | 0.2796   | 0.044699 |
| MmugDNA.4874.1.S1_at   | MmugDNA.4874.1 | 8.59  | 9.72  | 2.3  | 0.25 | -2.19 | 0.356152 | 0.150306 | 0.69508  | 0.424877 |
| MmugDNA.4878.1.S1_at   | MmugDNA.4878.1 | 7.08  | 7.03  | 0.06 | 0.07 | 1.04  | 0.80772  | 0.828806 | 0.930266 | 0.901577 |
| MmugDNA.488.1.S1_at    | MmugDNA.488.1  | 3.22  | 3.28  | 0.13 | 0    | -1.04 | 0.806596 | 0.940369 | 0.929839 | 0.966182 |
| MmugDNA.4888.1.S1_at   | MmugDNA.4888.1 | 5.78  | 5.63  | 0.09 | 0.01 | 1.11  | 0.114799 | 0.198073 | 0.487957 | 0.473057 |
| MmugDNA.4895.1.S1_at   | MmugDNA.4895.1 | 6.11  | 5.88  | 0.09 | 0.05 | 1.17  | 0.021279 | 0.30199  | 0.307431 | 0.559929 |
| MmugDNA.4896.1.S1_at   | MmugDNA.4896.1 | 10.23 | 10.35 | 0.35 | 0.03 | -1.09 | 0.571447 | 0.376003 | 0.822774 | 0.613815 |
| MmugDNA.4899.1.S1_at   | MmugDNA.4899.1 | 9.14  | 9.11  | 0.38 | 0.08 | 1.02  | 0.673622 | 0.137604 | 0.871474 | 0.410562 |
| MmugDNA.49.1.S1_at     | MmugDNA.49.1   | 3.02  | 3.02  | 0.12 | 0.1  | 1     | 0.51709  | 0.651894 | 0.79175  | 0.796505 |
| MmugDNA.4909.1.S1_at   | MmugDNA.4909.1 | 6.15  | 5.9   | 0.1  | 0.11 | 1.19  | 0.046424 | 0.057098 | 0.377929 | 0.284945 |
| MmugDNA.4912.1.S1_at   | MmugDNA.4912.1 | 4.47  | 4.24  | 0.15 | 0.11 | 1.18  | 0.073663 | 0.030941 | 0.434623 | 0.217717 |
| MmugDNA.4913.1.S1_at   | MmugDNA.4913.1 | 8.08  | 9.42  | 0.26 | 0.08 | -2.53 | 0.001644 | 0.000318 | 0.163037 | 0.035423 |
| MmugDNA.4916.1.S1_at   | MmugDNA.4916.1 | 12.65 | 12.68 | 0.13 | 0.02 | -1.02 | 0.81325  | 0.028558 | 0.93247  | 0.210768 |
| MmugDNA.4918.1.S1_x_at | MmugDNA.4918.1 | 10.78 | 11.09 | 0.28 | 0.28 | -1.24 | 0.260769 | 0.264769 | 0.623301 | 0.530791 |
| MmugDNA.4919.1.S1_at   | MmugDNA.4919.1 | 4.16  | 4.1   | 0.14 | 0.12 | 1.04  | 0.295677 | 0.664938 | 0.651371 | 0.803712 |
| MmugDNA.4926.1.S1_at   | MmugDNA.4926.1 | 11.27 | 11.25 | 0.16 | 0.03 | 1.02  | 0.986664 | 0.007629 | 0.995667 | 0.116869 |
| MmugDNA.4927.1.S1_at   | MmugDNA.4927.1 | 11.01 | 10.6  | 0.7  | 0.07 | 1.33  | 0.363979 | 0.384902 | 0.700336 | 0.620513 |
| MmugDNA.4930.1.S1_at   | MmugDNA.4930.1 | 9.15  | 9.84  | 0.56 | 0.03 | -1.61 | 0.105857 | 0.630298 | 0.477635 | 0.782213 |
| MmugDNA.4938.1.S1_at   | MmugDNA.4938.1 | 5.53  | 5.44  | 0.16 | 0.08 | 1.06  | 0.260676 | 0.646533 | 0.623301 | 0.792953 |
| MmugDNA.4939.1.S1_at   | MmugDNA.4939.1 | 5.1   | 5.12  | 0.22 | 0.07 | -1.01 | 0.949035 | 0.879735 | 0.982717 | 0.93128  |
| MmugDNA.494.1.S1_at    | MmugDNA.494.1  | 12.12 | 12.39 | 0.23 | 0.13 | -1.21 | 0.300554 | 0.431365 | 0.6551   | 0.65231  |
| MmugDNA.4940.1.S1_at   | MmugDNA.4940.1 | 3.77  | 3.73  | 0.07 | 0.15 | 1.02  | 0.598215 | 0.814389 | 0.836817 | 0.892923 |
| MmugDNA.4944.1.S1_at   | MmugDNA.4944.1 | 5.8   | 6.02  | 0.11 | 0.42 | -1.17 | 0.191534 | 0.073142 | 0.562859 | 0.316064 |
| MmugDNA.4948.1.S1_at   | MmugDNA.4948.1 | 11.26 | 11.4  | 0.27 | 0.07 | -1.11 | 0.544685 | 0.365343 | 0.807438 | 0.605468 |
| MmugDNA.4954.1.S1_at   | MmugDNA.4954.1 | 9.11  | 8.62  | 0.1  | 0.04 | 1.4   | 0.000927 | 0.004644 | 0.153739 | 0.095    |
| MmugDNA.4962.1.S1_at   | MmugDNA.4962.1 | 4.44  | 4.41  | 0.04 | 0.03 | 1.02  | 0.077256 | 0.04274  | 0.439109 | 0.251216 |
| MmugDNA.4967.1.S1_at   | MmugDNA.4967.1 | 12.53 | 12.2  | 0.06 | 0.11 | 1.25  | 0.006847 | 0.000739 | 0.224141 | 0.044895 |
| MmugDNA.4969.1.S1_at   | MmugDNA.4969.1 | 4.73  | 4.53  | 0.42 | 0.14 | 1.15  | 0.884973 | 0.120638 | 0.960159 | 0.389476 |
| MmugDNA.497.1.S1_at    | MmugDNA.497.1  | 10.85 | 11.28 | 0.38 | 0.06 | -1.34 | 0.100877 | 0.061247 | 0.47159  | 0.294161 |
| MmugDNA.4973.1.S1_at   | MmugDNA.4973.1 | 6.21  | 7.32  | 0.51 | 0.12 | -2.16 | 0.056711 | 0.010894 | 0.401061 | 0.135939 |
| MmugDNA.4974.1.S1_at   | MmugDNA.4974.1 | 3.57  | 3.66  | 0.01 | 0.09 | -1.06 | 0.624149 | 0.338288 | 0.848545 | 0.585417 |
| MmugDNA.4983.1.S1_at   | MmugDNA.4983.1 | 9.61  | 9.99  | 0.13 | 0.12 | -1.3  | 0.028374 | 0.003934 | 0.332315 | 0.089223 |
| MmugDNA.4986.1.S1_at   | MmugDNA.4986.1 | 6.42  | 6.34  | 0.16 | 0.15 | 1.06  | 0.27393  | 0.654865 | 0.633618 | 0.798179 |
| MmugDNA.4993.1.S1_at   | MmugDNA.4993.1 | 13.32 | 13.37 | 0.05 | 0.05 | -1.04 | 0.599726 | 0.072957 | 0.837539 | 0.315986 |
| MmugDNA.4996.1.S1_at   | MmugDNA.4996.1 | 4.38  | 5.05  | 0.5  | 0.51 | -1.58 | 0.406374 | 0.292292 | 0.727915 | 0.552389 |
| MmugDNA.4997.1.S1_at   | MmugDNA.4997.1 | 6.86  | 6.72  | 0.06 | 0.1  | 1.1   | 0.069288 | 0.280439 | 0.426761 | 0.543648 |
| MmugDNA.4998.1.S1_at   | MmugDNA.4998.1 | 8.84  | 8.65  | 0.31 | 0.12 | 1.14  | 0.419178 | 0.231916 | 0.736167 | 0.503604 |
| MmugDNA.4999.1.S1_at   | MmugDNA.4999.1 | 9.29  | 9.47  | 0.41 | 0.11 | -1.13 | 0.444168 | 0.602609 | 0.751101 | 0.763534 |
| MmugDNA.50.1.S1_at     | MmugDNA.50.1   | 10.53 | 10.98 | 0.36 | 0.09 | -1.36 | 0.216781 | 0.361296 | 0.586817 | 0.602104 |
| MmugDNA.5012.1.S1_at   | MmugDNA.5012.1 | 3.92  | 3.81  | 0.29 | 0.3  | 1.07  | 0.557143 | 0.67645  | 0.814507 | 0.81095  |
| MmugDNA.5018.1.S1_at   | MmugDNA.5018.1 | 9.36  | 9.39  | 0.69 | 0.04 | -1.02 | 0.751509 | 0.514528 | 0.90603  | 0.707757 |

|                        |                |       |       |      |      |       |          |          |          |          |
|------------------------|----------------|-------|-------|------|------|-------|----------|----------|----------|----------|
| MmugDNA.5023.1.S1_at   | MmugDNA.5023.1 | 7.13  | 7.97  | 0.52 | 0.1  | -1.79 | 0.056035 | 0.021053 | 0.399441 | 0.181869 |
| MmugDNA.5024.1.S1_at   | MmugDNA.5024.1 | 8.99  | 9.13  | 0.08 | 0.14 | -1.1  | 0.328993 | 0.139854 | 0.676156 | 0.413131 |
| MmugDNA.5028.1.S1_at   | MmugDNA.5028.1 | 9.51  | 9.4   | 1.22 | 0.4  | 1.09  | 0.668759 | 0.163328 | 0.869159 | 0.43947  |
| MmugDNA.503.1.S1_at    | MmugDNA.503.1  | 5.4   | 5.29  | 0.2  | 0.23 | 1.08  | 0.580649 | 0.763495 | 0.827245 | 0.862471 |
| MmugDNA.5045.1.S1_at   | MmugDNA.5045.1 | 6.82  | 8.63  | 0.67 | 0.3  | -3.5  | 0.030338 | 0.005038 | 0.337434 | 0.098963 |
| MmugDNA.505.1.S1_at    | MmugDNA.505.1  | 8.67  | 8.11  | 0.09 | 0.26 | 1.47  | 0.025151 | 0.010815 | 0.320548 | 0.135641 |
| MmugDNA.5051.1.S1_at   | MmugDNA.5051.1 | 12.72 | 12.81 | 0.23 | 0.01 | -1.06 | 0.567998 | 0.066276 | 0.820586 | 0.303058 |
| MmugDNA.5051.1.S1_s_at | MmugDNA.5051.1 | 12.2  | 12.26 | 0.26 | 0.03 | -1.04 | 0.725012 | 0.080764 | 0.893337 | 0.328634 |
| MmugDNA.5052.1.S1_at   | MmugDNA.5052.1 | 7.33  | 7.34  | 0.04 | 0.1  | -1.01 | 0.67672  | 0.304196 | 0.873224 | 0.561558 |
| MmugDNA.5058.1.S1_at   | MmugDNA.5058.1 | 11.45 | 11.5  | 0.04 | 0.01 | -1.03 | 0.08839  | 0.030859 | 0.45606  | 0.217427 |
| MmugDNA.5059.1.S1_at   | MmugDNA.5059.1 | 9.57  | 9.82  | 0.56 | 0.2  | -1.19 | 0.293758 | 0.317063 | 0.650097 | 0.570334 |
| MmugDNA.5063.1.S1_s_at | MmugDNA.5063.1 | 12.39 | 12.29 | 0.11 | 0.15 | 1.07  | 0.251937 | 0.08829  | 0.616976 | 0.341721 |
| MmugDNA.5064.1.S1_at   | MmugDNA.5064.1 | 11.93 | 12.12 | 2.38 | 0.24 | -1.14 | 0.530888 | 0.393656 | 0.799314 | 0.626522 |
| MmugDNA.5075.1.S1_at   | MmugDNA.5075.1 | 6.6   | 6.75  | 0.35 | 0.25 | -1.11 | 0.482131 | 0.027509 | 0.772274 | 0.207161 |
| MmugDNA.5077.1.S1_at   | MmugDNA.5077.1 | 10.03 | 10.77 | 0.41 | 0.28 | -1.67 | 0.117346 | 0.085217 | 0.490925 | 0.337096 |
| MmugDNA.5086.1.S1_at   | MmugDNA.5086.1 | 10.34 | 10.4  | 0.04 | 0.25 | -1.04 | 0.231427 | 0.493276 | 0.599368 | 0.694018 |
| MmugDNA.5087.1.S1_at   | MmugDNA.5087.1 | 9.03  | 8.87  | 0.21 | 0.15 | 1.12  | 0.735381 | 0.012464 | 0.89872  | 0.14417  |
| MmugDNA.5090.1.S1_at   | MmugDNA.5090.1 | 6.65  | 6.79  | 0.34 | 0.07 | -1.11 | 0.479651 | 0.061517 | 0.770863 | 0.294835 |
| MmugDNA.5091.1.S1_at   | MmugDNA.5091.1 | 5.88  | 6.65  | 0.44 | 0.19 | -1.71 | 0.056098 | 0.020371 | 0.399441 | 0.179158 |
| MmugDNA.5094.1.S1_at   | MmugDNA.5094.1 | 8.98  | 9.29  | 0.2  | 0.14 | -1.23 | 0.254256 | 0.020227 | 0.618749 | 0.178641 |
| MmugDNA.5095.1.S1_at   | MmugDNA.5095.1 | 11.5  | 11.21 | 0.44 | 0.09 | 1.23  | 0.374833 | 0.626624 | 0.706109 | 0.779896 |
| MmugDNA.5098.1.S1_at   | MmugDNA.5098.1 | 5.89  | 5.76  | 0.11 | 0.06 | 1.1   | 0.069694 | 0.126258 | 0.427525 | 0.39678  |
| MmugDNA.510.1.S1_at    | MmugDNA.510.1  | 11.24 | 11.05 | 0.4  | 0.04 | 1.14  | 0.795235 | 0.636317 | 0.924811 | 0.786047 |
| MmugDNA.5101.1.S1_at   | MmugDNA.5101.1 | 11.17 | 11.55 | 0.06 | 0.12 | -1.3  | 0.019955 | 0.015415 | 0.302971 | 0.157687 |
| MmugDNA.5103.1.S1_at   | MmugDNA.5103.1 | 5.93  | 5.79  | 0.03 | 0.03 | 1.1   | 0.005544 | 0.298528 | 0.208157 | 0.557175 |
| MmugDNA.511.1.S1_at    | MmugDNA.511.1  | 12.97 | 12.93 | 0.05 | 0.17 | 1.03  | 0.88083  | 0.390032 | 0.95879  | 0.624002 |
| MmugDNA.5112.1.S1_at   | MmugDNA.5112.1 | 5.75  | 5.63  | 0.15 | 0.08 | 1.09  | 0.540135 | 0.635871 | 0.804251 | 0.785716 |
| MmugDNA.512.1.S1_at    | MmugDNA.512.1  | 6.85  | 6.6   | 0.43 | 0.06 | 1.19  | 0.594983 | 0.751566 | 0.83502  | 0.855508 |
| MmugDNA.5125.1.S1_at   | MmugDNA.5125.1 | 6.47  | 6.37  | 0.03 | 0.05 | 1.07  | 0.074968 | 0.092218 | 0.435663 | 0.347969 |
| MmugDNA.5126.1.S1_at   | MmugDNA.5126.1 | 11.08 | 11.39 | 0.52 | 0.09 | -1.24 | 0.361453 | 0.151398 | 0.698655 | 0.426104 |
| MmugDNA.5129.1.S1_at   | MmugDNA.5129.1 | 8.54  | 8.87  | 0.36 | 0.15 | -1.25 | 0.217685 | 0.157861 | 0.587588 | 0.433522 |
| MmugDNA.5130.1.S1_at   | MmugDNA.5130.1 | 11.1  | 11.11 | 0.6  | 0.08 | -1.01 | 0.942054 | 0.717198 | 0.980252 | 0.836322 |
| MmugDNA.5134.1.S1_at   | MmugDNA.5134.1 | 8.7   | 10.44 | 0.99 | 0.23 | -3.35 | 0.051907 | 0.091793 | 0.3916   | 0.346977 |
| MmugDNA.5139.1.S1_at   | MmugDNA.5139.1 | 5.36  | 5.37  | 0.07 | 0.07 | -1.01 | 0.765125 | 0.377955 | 0.911696 | 0.615264 |
| MmugDNA.514.1.S1_at    | MmugDNA.514.1  | 5.08  | 4.99  | 0.32 | 0.05 | 1.07  | 0.256301 | 0.327133 | 0.620399 | 0.577136 |
| MmugDNA.5146.1.S1_at   | MmugDNA.5146.1 | 8.25  | 8.34  | 0.11 | 0.07 | -1.06 | 0.451055 | 0.106936 | 0.755    | 0.369499 |
| MmugDNA.515.1.S1_at    | MmugDNA.515.1  | 11.23 | 11.38 | 0.16 | 0.02 | -1.11 | 0.130056 | 0.758893 | 0.504648 | 0.859892 |
| MmugDNA.5153.1.S1_at   | MmugDNA.5153.1 | 5.85  | 5.66  | 0.11 | 0.03 | 1.14  | 0.123835 | 0.29157  | 0.497344 | 0.551953 |
| MmugDNA.5155.1.S1_at   | MmugDNA.5155.1 | 10.76 | 9.78  | 0.8  | 0.1  | 1.98  | 0.268049 | 0.19258  | 0.628386 | 0.468079 |
| MmugDNA.5160.1.S1_at   | MmugDNA.5160.1 | 11.26 | 11.34 | 0.08 | 0.07 | -1.06 | 0.431814 | 0.577985 | 0.743599 | 0.748204 |
| MmugDNA.5165.1.S1_at   | MmugDNA.5165.1 | 10.06 | 10.22 | 0.11 | 0.16 | -1.11 | 0.351792 | 0.000246 | 0.692541 | 0.032859 |
| MmugDNA.5167.1.S1_at   | MmugDNA.5167.1 | 6.34  | 5.88  | 0.26 | 0.26 | 1.38  | 0.161707 | 0.062657 | 0.535125 | 0.297022 |
| MmugDNA.5169.1.S1_at   | MmugDNA.5169.1 | 8.69  | 9.18  | 0.22 | 0.19 | -1.41 | 0.024693 | 0.04218  | 0.319523 | 0.249842 |

|                        |                |       |       |      |      |       |          |          |          |          |
|------------------------|----------------|-------|-------|------|------|-------|----------|----------|----------|----------|
| MmugDNA.5170.1.S1_at   | MmugDNA.5170.1 | 3.33  | 3.35  | 0.22 | 0.05 | -1.02 | 0.40641  | 0.606263 | 0.727931 | 0.765727 |
| MmugDNA.5174.1.S1_at   | MmugDNA.5174.1 | 7.45  | 7.86  | 0.24 | 0.01 | -1.33 | 0.016495 | 0.001429 | 0.287478 | 0.057607 |
| MmugDNA.5179.1.S1_at   | MmugDNA.5179.1 | 7.03  | 8.26  | 0.42 | 0.21 | -2.35 | 0.007545 | 0.000776 | 0.229394 | 0.045626 |
| MmugDNA.518.1.S1_at    | MmugDNA.518.1  | 7.46  | 7.4   | 0.36 | 0.02 | 1.05  | 0.255165 | 0.30957  | 0.619267 | 0.564987 |
| MmugDNA.5183.1.S1_at   | MmugDNA.5183.1 | 5.81  | 5.64  | 0.19 | 0.09 | 1.13  | 0.213452 | 0.640984 | 0.584004 | 0.789322 |
| MmugDNA.5186.1.S1_at   | MmugDNA.5186.1 | 10.01 | 10.22 | 0.22 | 0.16 | -1.15 | 0.129586 | 0.132896 | 0.504359 | 0.404544 |
| MmugDNA.5195.1.S1_at   | MmugDNA.5195.1 | 7.56  | 7.56  | 0.27 | 0.05 | 1     | 0.928923 | 0.666219 | 0.976332 | 0.804419 |
| MmugDNA.5196.1.S1_at   | MmugDNA.5196.1 | 7.32  | 7.59  | 0.64 | 0.11 | -1.21 | 0.495066 | 0.336262 | 0.779732 | 0.583736 |
| MmugDNA.5197.1.S1_at   | MmugDNA.5197.1 | 8.82  | 8.69  | 0.67 | 0.12 | 1.09  | 0.370868 | 0.112105 | 0.705098 | 0.377398 |
| MmugDNA.5201.1.S1_at   | MmugDNA.5201.1 | 10.18 | 10.57 | 0.22 | 0.06 | -1.31 | 0.113975 | 0.006293 | 0.487339 | 0.107725 |
| MmugDNA.5209.1.S1_at   | MmugDNA.5209.1 | 6.71  | 7.63  | 0.93 | 0.09 | -1.9  | 0.161106 | 0.270522 | 0.534413 | 0.535835 |
| MmugDNA.5218.1.S1_at   | MmugDNA.5218.1 | 7.92  | 8.33  | 1.35 | 0.27 | -1.33 | 0.564427 | 0.730056 | 0.818716 | 0.843796 |
| MmugDNA.522.1.S1_at    | MmugDNA.522.1  | 8.14  | 8.35  | 0.24 | 0.08 | -1.16 | 0.84303  | 0.025065 | 0.944479 | 0.198332 |
| MmugDNA.5222.1.S1_at   | MmugDNA.5222.1 | 7.25  | 7.39  | 0.17 | 0.1  | -1.1  | 0.495702 | 0.704085 | 0.780125 | 0.828326 |
| MmugDNA.5231.1.S1_at   | MmugDNA.5231.1 | 6.19  | 6     | 0.33 | 0.25 | 1.14  | 0.38095  | 0.388144 | 0.709817 | 0.622607 |
| MmugDNA.5238.1.S1_at   | MmugDNA.5238.1 | 9.64  | 10.04 | 0.3  | 0.2  | -1.32 | 0.193614 | 0.244644 | 0.564275 | 0.514463 |
| MmugDNA.5239.1.S1_at   | MmugDNA.5239.1 | 12.18 | 12.35 | 0.42 | 0.11 | -1.12 | 0.739957 | 0.244179 | 0.900699 | 0.514164 |
| MmugDNA.5250.1.S1_at   | MmugDNA.5250.1 | 10.11 | 9.97  | 0.08 | 0.09 | 1.1   | 0.057423 | 0.242658 | 0.402072 | 0.513025 |
| MmugDNA.5253.1.S1_s_at | MmugDNA.5253.1 | 11.01 | 11.35 | 0.05 | 0.12 | -1.26 | 0.017468 | 0.254101 | 0.291886 | 0.522439 |
| MmugDNA.526.1.S1_at    | MmugDNA.526.1  | 4.85  | 4.89  | 0.22 | 0.05 | -1.03 | 0.636148 | 0.381091 | 0.854813 | 0.617478 |
| MmugDNA.5261.1.S1_at   | MmugDNA.5261.1 | 11.43 | 12.31 | 0.7  | 0.08 | -1.84 | 0.094105 | 0.0831   | 0.463389 | 0.332962 |
| MmugDNA.5264.1.S1_at   | MmugDNA.5264.1 | 11.83 | 11.83 | 0.3  | 0.12 | 1     | 0.262889 | 0.280074 | 0.624987 | 0.543369 |
| MmugDNA.5265.1.S1_at   | MmugDNA.5265.1 | 6.47  | 6.4   | 0.58 | 0.3  | 1.05  | 0.934931 | 0.005988 | 0.977948 | 0.1058   |
| MmugDNA.5277.1.S1_at   | MmugDNA.5277.1 | 9.92  | 10.3  | 0.33 | 0.07 | -1.3  | 0.129431 | 0.078204 | 0.504211 | 0.324752 |
| MmugDNA.5278.1.S1_at   | MmugDNA.5278.1 | 6.71  | 6.69  | 0.14 | 0.04 | 1.01  | 0.322454 | 0.172855 | 0.67114  | 0.449424 |
| MmugDNA.5279.1.S1_at   | MmugDNA.5279.1 | 10.55 | 10.51 | 0.07 | 0.15 | 1.03  | 0.633935 | 0.949461 | 0.853703 | 0.971102 |
| MmugDNA.5281.1.S1_at   | MmugDNA.5281.1 | 6.23  | 6.01  | 0.06 | 0.09 | 1.16  | 0.023944 | 0.007676 | 0.317529 | 0.117153 |
| MmugDNA.5286.1.S1_at   | MmugDNA.5286.1 | 7.08  | 6.73  | 0.26 | 0.04 | 1.28  | 0.110308 | 0.029134 | 0.483363 | 0.212747 |
| MmugDNA.5288.1.S1_at   | MmugDNA.5288.1 | 10.55 | 10.91 | 0.13 | 0.09 | -1.28 | 0.033341 | 0.145607 | 0.346442 | 0.419505 |
| MmugDNA.5290.1.S1_at   | MmugDNA.5290.1 | 11.87 | 11.76 | 0.18 | 0.03 | 1.08  | 0.702199 | 0.012337 | 0.884146 | 0.143659 |
| MmugDNA.5293.1.S1_at   | MmugDNA.5293.1 | 7.36  | 7.15  | 0.24 | 0.08 | 1.16  | 0.251526 | 0.119958 | 0.616712 | 0.388671 |
| MmugDNA.5294.1.S1_at   | MmugDNA.5294.1 | 4.08  | 4.12  | 0.92 | 0.34 | -1.03 | 0.880502 | 0.552315 | 0.95866  | 0.731658 |
| MmugDNA.5299.1.S1_at   | MmugDNA.5299.1 | 12.85 | 13.26 | 0.56 | 0.08 | -1.33 | 0.198413 | 0.197203 | 0.569719 | 0.472213 |
| MmugDNA.53.1.S1_at     | MmugDNA.53.1   | 9.38  | 9.57  | 0.16 | 0.08 | -1.14 | 0.132468 | 0.010382 | 0.506752 | 0.133312 |
| MmugDNA.530.1.S1_at    | MmugDNA.530.1  | 11.96 | 11.95 | 0.25 | 0.12 | 1.01  | 0.295522 | 0.364951 | 0.651282 | 0.60517  |
| MmugDNA.5307.1.S1_at   | MmugDNA.5307.1 | 4.39  | 4.44  | 0.14 | 0.09 | -1.04 | 0.827081 | 0.07454  | 0.938039 | 0.318173 |
| MmugDNA.531.1.S1_at    | MmugDNA.531.1  | 9.57  | 8.58  | 0.23 | 0.25 | 1.98  | 0.008258 | 0.175184 | 0.232164 | 0.45196  |
| MmugDNA.5311.1.S1_at   | MmugDNA.5311.1 | 10.75 | 11.23 | 0.39 | 0.09 | -1.4  | 0.135729 | 0.173827 | 0.510186 | 0.450128 |
| MmugDNA.5318.1.S1_at   | MmugDNA.5318.1 | 8.41  | 8.56  | 0.21 | 0.03 | -1.1  | 0.957875 | 0.642914 | 0.986116 | 0.79054  |
| MmugDNA.5326.1.S1_at   | MmugDNA.5326.1 | 7.06  | 7.44  | 0.26 | 0.02 | -1.31 | 0.064846 | 0.005046 | 0.419026 | 0.09901  |
| MmugDNA.5327.1.S1_at   | MmugDNA.5327.1 | 12.13 | 11.92 | 0.17 | 0.07 | 1.16  | 0.045964 | 0.038805 | 0.37735  | 0.241916 |
| MmugDNA.5331.1.S1_at   | MmugDNA.5331.1 | 7.92  | 7.75  | 0.17 | 0.05 | 1.12  | 0.23843  | 0.083699 | 0.605341 | 0.334399 |
| MmugDNA.5338.1.S1_at   | MmugDNA.5338.1 | 9.53  | 9.46  | 0.31 | 0.2  | 1.05  | 0.424141 | 0.030306 | 0.739432 | 0.215977 |



|                        |                |       |       |      |      |       |          |          |          |          |
|------------------------|----------------|-------|-------|------|------|-------|----------|----------|----------|----------|
| MmugDNA.5341.1.S1_at   | MmugDNA.5341.1 | 6.22  | 6.18  | 1.21 | 0.12 | 1.03  | 0.329971 | 0.261242 | 0.676698 | 0.527724 |
| MmugDNA.5343.1.S1_at   | MmugDNA.5343.1 | 7.74  | 7.75  | 0.16 | 0.02 | -1    | 0.993605 | 0.927414 | 0.997521 | 0.958778 |
| MmugDNA.5344.1.S1_at   | MmugDNA.5344.1 | 10.34 | 10.26 | 0.74 | 0.15 | 1.06  | 0.743684 | 0.818384 | 0.902193 | 0.895287 |
| MmugDNA.5345.1.S1_at   | MmugDNA.5345.1 | 4.69  | 4.76  | 0.09 | 0.15 | -1.05 | 0.401727 | 0.363183 | 0.724599 | 0.603574 |
| MmugDNA.5347.1.S1_at   | MmugDNA.5347.1 | 12.92 | 11.67 | 0.14 | 0.31 | 2.38  | 0.004076 | 0.00015  | 0.198571 | 0.029832 |
| MmugDNA.5353.1.S1_at   | MmugDNA.5353.1 | 8.63  | 8.05  | 0.72 | 0.03 | 1.49  | 0.077685 | 0.067677 | 0.439817 | 0.306208 |
| MmugDNA.5357.1.S1_at   | MmugDNA.5357.1 | 12.96 | 12.63 | 0.12 | 0.02 | 1.26  | 0.017424 | 0.001755 | 0.291663 | 0.063111 |
| MmugDNA.5362.1.S1_at   | MmugDNA.5362.1 | 8.31  | 8.15  | 0.08 | 0.02 | 1.12  | 0.014006 | 0.266715 | 0.273301 | 0.53241  |
| MmugDNA.5366.1.S1_at   | MmugDNA.5366.1 | 4.63  | 4.56  | 0.27 | 0.02 | 1.05  | 0.47441  | 0.266384 | 0.767951 | 0.532173 |
| MmugDNA.5382.1.S1_at   | MmugDNA.5382.1 | 12.62 | 12.56 | 0.02 | 0.06 | 1.04  | 0.419886 | 0.020901 | 0.736572 | 0.181404 |
| MmugDNA.5386.1.S1_at   | MmugDNA.5386.1 | 8     | 9.17  | 0.55 | 0.54 | -2.25 | 0.12281  | 0.134518 | 0.496214 | 0.406629 |
| MmugDNA.5388.1.S1_at   | MmugDNA.5388.1 | 3.59  | 3.58  | 0.08 | 0.08 | 1.01  | 0.203754 | 0.235882 | 0.57513  | 0.507056 |
| MmugDNA.5388.1.S1_x_at | MmugDNA.5388.1 | 4.39  | 4.3   | 0.04 | 0.07 | 1.07  | 0.049981 | 0.038667 | 0.386663 | 0.24169  |
| MmugDNA.5389.1.S1_at   | MmugDNA.5389.1 | 11.46 | 11.53 | 0.35 | 0.04 | -1.05 | 0.540632 | 0.523967 | 0.804454 | 0.714099 |
| MmugDNA.539.1.S1_at    | MmugDNA.539.1  | 8.08  | 8.4   | 0.23 | 0.05 | -1.24 | 0.07619  | 0.057106 | 0.437613 | 0.284945 |
| MmugDNA.5391.1.S1_at   | MmugDNA.5391.1 | 12.02 | 12.17 | 0.1  | 0.03 | -1.11 | 0.067956 | 0.08252  | 0.42451  | 0.331642 |
| MmugDNA.54.1.S1_at     | MmugDNA.54.1   | 10.37 | 10.69 | 0.57 | 0.03 | -1.25 | 0.323644 | 0.197595 | 0.672279 | 0.472564 |
| MmugDNA.5404.1.S1_at   | MmugDNA.5404.1 | 9.92  | 9.15  | 0.39 | 0.2  | 1.71  | 0.138217 | 0.142073 | 0.513671 | 0.415655 |
| MmugDNA.5406.1.S1_at   | MmugDNA.5406.1 | 5.52  | 5.6   | 0.34 | 0.18 | -1.05 | 0.386898 | 0.090503 | 0.713948 | 0.345015 |
| MmugDNA.5408.1.S1_at   | MmugDNA.5408.1 | 11.37 | 11.15 | 0.12 | 0.04 | 1.16  | 0.09253  | 0.001901 | 0.461167 | 0.065038 |
| MmugDNA.5409.1.S1_at   | MmugDNA.5409.1 | 8.83  | 8.65  | 0.51 | 0.05 | 1.13  | 0.447507 | 0.475602 | 0.753327 | 0.68228  |
| MmugDNA.5410.1.S1_at   | MmugDNA.5410.1 | 5.16  | 5.31  | 0.6  | 0.29 | -1.11 | 0.434855 | 0.394886 | 0.745353 | 0.627216 |
| MmugDNA.5413.1.S1_at   | MmugDNA.5413.1 | 8.76  | 9.09  | 0.74 | 0.18 | -1.26 | 0.615437 | 0.624521 | 0.844453 | 0.778707 |
| MmugDNA.5415.1.S1_at   | MmugDNA.5415.1 | 6.61  | 6.54  | 0.96 | 0.37 | 1.05  | 0.507208 | 0.384478 | 0.786203 | 0.620142 |
| MmugDNA.5429.1.S1_at   | MmugDNA.5429.1 | 10.28 | 10.48 | 0.28 | 0.04 | -1.15 | 0.257685 | 0.23917  | 0.621352 | 0.509902 |
| MmugDNA.5430.1.S1_at   | MmugDNA.5430.1 | 9.56  | 9.48  | 0.47 | 0.15 | 1.05  | 0.827121 | 0.108648 | 0.938039 | 0.372171 |
| MmugDNA.5432.1.S1_at   | MmugDNA.5432.1 | 2.73  | 2.67  | 0.09 | 0.1  | 1.04  | 0.45908  | 0.674295 | 0.759258 | 0.809716 |
| MmugDNA.5435.1.S1_at   | MmugDNA.5435.1 | 7.4   | 7.4   | 0.21 | 0.03 | 1     | 0.38157  | 0.607003 | 0.710122 | 0.766181 |
| MmugDNA.5435.1.S1_s_at | MmugDNA.5435.1 | 9.33  | 8.45  | 0.13 | 0.04 | 1.84  | 0.000265 | 0.000385 | 0.130979 | 0.037273 |
| MmugDNA.5438.1.S1_at   | MmugDNA.5438.1 | 5.48  | 5.2   | 0.17 | 0.05 | 1.21  | 0.156517 | 0.200256 | 0.529581 | 0.474689 |
| MmugDNA.5445.1.S1_at   | MmugDNA.5445.1 | 9.22  | 10.27 | 0.71 | 0.03 | -2.07 | 0.198553 | 0.257717 | 0.56986  | 0.525343 |
| MmugDNA.5448.1.S1_at   | MmugDNA.5448.1 | 11.04 | 11.04 | 0.17 | 0.17 | -1    | 0.484205 | 0.599271 | 0.773472 | 0.761384 |
| MmugDNA.5453.1.S1_at   | MmugDNA.5453.1 | 5.97  | 5.88  | 0.07 | 0.08 | 1.06  | 0.540155 | 0.209345 | 0.804251 | 0.483065 |
| MmugDNA.5457.1.S1_at   | MmugDNA.5457.1 | 3.54  | 3.52  | 0.15 | 0.09 | 1.01  | 0.321895 | 0.326562 | 0.67054  | 0.576612 |
| MmugDNA.5459.1.S1_at   | MmugDNA.5459.1 | 3.65  | 3.54  | 0.14 | 0.07 | 1.08  | 0.419525 | 0.54199  | 0.736303 | 0.725169 |
| MmugDNA.5460.1.S1_at   | MmugDNA.5460.1 | 12.77 | 13.14 | 0.24 | 0.06 | -1.29 | 0.079479 | 0.023926 | 0.442306 | 0.19376  |
| MmugDNA.5461.1.S1_at   | MmugDNA.5461.1 | 11.61 | 11.91 | 0.04 | 0.09 | -1.23 | 0.009061 | 0.335556 | 0.240704 | 0.583326 |
| MmugDNA.5464.1.S1_at   | MmugDNA.5464.1 | 9.91  | 10.48 | 0.16 | 0.1  | -1.49 | 0.005896 | 0.025313 | 0.21217  | 0.199522 |
| MmugDNA.5464.1.S1_s_at | MmugDNA.5464.1 | 9.35  | 10.02 | 0.22 | 0.07 | -1.59 | 0.015223 | 0.025954 | 0.280405 | 0.20198  |
| MmugDNA.5466.1.S1_s_at | MmugDNA.5466.1 | 10.72 | 10.67 | 0.19 | 0.06 | 1.04  | 0.895528 | 0.495939 | 0.964244 | 0.695811 |
| MmugDNA.5467.1.S1_at   | MmugDNA.5467.1 | 13.92 | 13.81 | 0.19 | 0.04 | 1.08  | 0.983416 | 0.82923  | 0.994928 | 0.901815 |
| MmugDNA.5472.1.S1_at   | MmugDNA.5472.1 | 6.37  | 5.87  | 0.25 | 0.08 | 1.41  | 0.087397 | 0.256208 | 0.454796 | 0.524069 |
| MmugDNA.5473.1.S1_at   | MmugDNA.5473.1 | 5.81  | 5.36  | 0.47 | 0.23 | 1.36  | 0.872415 | 0.344347 | 0.955759 | 0.589762 |

|                        |                |       |       |      |      |       |          |          |          |          |
|------------------------|----------------|-------|-------|------|------|-------|----------|----------|----------|----------|
| MmugDNA.5482.1.S1_at   | MmugDNA.5482.1 | 10.11 | 10.05 | 0.84 | 0.1  | 1.04  | 0.880386 | 0.982283 | 0.958593 | 0.990339 |
| MmugDNA.5485.1.S1_at   | MmugDNA.5485.1 | 7.25  | 7.13  | 0.76 | 0.12 | 1.09  | 0.709456 | 0.173214 | 0.886946 | 0.449779 |
| MmugDNA.5486.1.S1_at   | MmugDNA.5486.1 | 8.52  | 8.42  | 0.43 | 0.05 | 1.08  | 0.343316 | 0.403237 | 0.686535 | 0.631996 |
| MmugDNA.5488.1.S1_at   | MmugDNA.5488.1 | 11.98 | 11.65 | 0.19 | 0.03 | 1.26  | 0.123803 | 0.000955 | 0.497339 | 0.049326 |
| MmugDNA.549.1.S1_at    | MmugDNA.549.1  | 3.59  | 3.59  | 0.04 | 0.09 | -1    | 0.440523 | 0.064318 | 0.748529 | 0.299804 |
| MmugDNA.5492.1.S1_at   | MmugDNA.5492.1 | 12.43 | 12.26 | 0.65 | 0.05 | 1.13  | 0.831573 | 0.892154 | 0.939628 | 0.938526 |
| MmugDNA.5506.1.S1_at   | MmugDNA.5506.1 | 3.23  | 3.7   | 0.08 | 0.6  | -1.39 | 0.081696 | 0.194697 | 0.445931 | 0.469765 |
| MmugDNA.5508.1.S1_at   | MmugDNA.5508.1 | 3.31  | 3.39  | 0.08 | 0.05 | -1.06 | 0.319359 | 0.498013 | 0.668706 | 0.697194 |
| MmugDNA.5510.1.S1_s_at | MmugDNA.5510.1 | 10.1  | 9.57  | 2.48 | 0.21 | 1.44  | 0.939152 | 0.331778 | 0.979469 | 0.580372 |
| MmugDNA.5514.1.S1_at   | MmugDNA.5514.1 | 7.36  | 7.1   | 0.16 | 0.13 | 1.2   | 0.08525  | 0.214952 | 0.452338 | 0.488897 |
| MmugDNA.5517.1.S1_at   | MmugDNA.5517.1 | 13.14 | 13.15 | 0.02 | 0.02 | -1.01 | 0.630476 | 0.00648  | 0.851961 | 0.109342 |
| MmugDNA.5518.1.S1_at   | MmugDNA.5518.1 | 6.85  | 7.4   | 0.56 | 0.28 | -1.47 | 0.097389 | 0.032881 | 0.466321 | 0.224478 |
| MmugDNA.5519.1.S1_at   | MmugDNA.5519.1 | 12.94 | 13.03 | 0.15 | 0.01 | -1.07 | 0.249643 | 0.009806 | 0.615064 | 0.130166 |
| MmugDNA.5522.1.S1_at   | MmugDNA.5522.1 | 3.34  | 3.43  | 0.08 | 0.02 | -1.07 | 0.186565 | 0.320265 | 0.559164 | 0.572605 |
| MmugDNA.553.1.S1_at    | MmugDNA.553.1  | 7.98  | 8.49  | 0.21 | 0.06 | -1.43 | 0.027476 | 0.000386 | 0.327829 | 0.037273 |
| MmugDNA.5534.1.S1_at   | MmugDNA.5534.1 | 4.33  | 3.78  | 0.15 | 0.13 | 1.46  | 0.009053 | 0.012626 | 0.240704 | 0.144972 |
| MmugDNA.5536.1.S1_at   | MmugDNA.5536.1 | 11.14 | 11.02 | 0.21 | 0.04 | 1.09  | 0.219135 | 0.307639 | 0.588525 | 0.563799 |
| MmugDNA.5537.1.S1_at   | MmugDNA.5537.1 | 4     | 3.68  | 0.15 | 0.12 | 1.24  | 0.167999 | 0.207963 | 0.540586 | 0.482049 |
| MmugDNA.5539.1.S1_at   | MmugDNA.5539.1 | 3.85  | 4.09  | 0.21 | 0.2  | -1.18 | 0.23176  | 0.141556 | 0.599694 | 0.415063 |
| MmugDNA.5542.1.S1_at   | MmugDNA.5542.1 | 8.65  | 8.77  | 0.27 | 0.03 | -1.08 | 0.702981 | 0.137754 | 0.884538 | 0.410738 |
| MmugDNA.5552.1.S1_at   | MmugDNA.5552.1 | 10.66 | 10.61 | 0.19 | 0.03 | 1.04  | 0.679424 | 0.082144 | 0.874274 | 0.330937 |
| MmugDNA.5553.1.S1_at   | MmugDNA.5553.1 | 6.58  | 6.42  | 0.77 | 0.4  | 1.12  | 0.485914 | 0.034584 | 0.774427 | 0.230061 |
| MmugDNA.5558.1.S1_at   | MmugDNA.5558.1 | 8.67  | 8.99  | 0.43 | 0.08 | -1.25 | 0.322823 | 0.253336 | 0.671626 | 0.521662 |
| MmugDNA.556.1.S1_at    | MmugDNA.556.1  | 8.59  | 8.53  | 0.92 | 0.17 | 1.04  | 0.895134 | 0.094228 | 0.964244 | 0.350889 |
| MmugDNA.5565.1.S1_at   | MmugDNA.5565.1 | 6.16  | 6.02  | 0.07 | 0.1  | 1.1   | 0.232129 | 0.537607 | 0.599986 | 0.722616 |
| MmugDNA.5581.1.S1_s_at | MmugDNA.5581.1 | 12.85 | 12.9  | 0.21 | 0.05 | -1.03 | 0.642812 | 0.188958 | 0.857894 | 0.464854 |
| MmugDNA.5583.1.S1_at   | MmugDNA.5583.1 | 7.22  | 7.23  | 0.25 | 0.05 | -1.01 | 0.612415 | 0.65946  | 0.843047 | 0.800788 |
| MmugDNA.5584.1.S1_at   | MmugDNA.5584.1 | 10.99 | 10.48 | 0.26 | 0.24 | 1.42  | 0.151073 | 0.156798 | 0.52444  | 0.432353 |
| MmugDNA.5594.1.S1_at   | MmugDNA.5594.1 | 4.11  | 4.2   | 0.25 | 0.69 | -1.07 | 0.335013 | 0.113641 | 0.680736 | 0.379775 |
| MmugDNA.5600.1.S1_at   | MmugDNA.5600.1 | 12.39 | 12.33 | 0.08 | 0.06 | 1.04  | 0.177006 | 0.023311 | 0.550114 | 0.191355 |
| MmugDNA.5601.1.S1_at   | MmugDNA.5601.1 | 12.74 | 12.64 | 0.34 | 0.01 | 1.08  | 0.612679 | 0.391227 | 0.843107 | 0.624922 |
| MmugDNA.5610.1.S1_at   | MmugDNA.5610.1 | 10.2  | 10.51 | 0.4  | 0.17 | -1.24 | 0.947066 | 0.01676  | 0.981622 | 0.163986 |
| MmugDNA.5612.1.S1_at   | MmugDNA.5612.1 | 4.53  | 4.41  | 0.28 | 0.17 | 1.09  | 0.612882 | 0.870458 | 0.843245 | 0.926446 |
| MmugDNA.5614.1.S1_at   | MmugDNA.5614.1 | 9.48  | 9.53  | 0.29 | 0.13 | -1.04 | 0.369394 | 0.014315 | 0.704236 | 0.152756 |
| MmugDNA.5620.1.S1_at   | MmugDNA.5620.1 | 5.45  | 5.03  | 0.62 | 0.36 | 1.34  | 0.133514 | 0.265064 | 0.508003 | 0.531    |
| MmugDNA.5628.1.S1_at   | MmugDNA.5628.1 | 14.2  | 14.21 | 0.17 | 0.03 | -1.01 | 0.568202 | 0.055655 | 0.820687 | 0.28174  |
| MmugDNA.563.1.S1_at    | MmugDNA.563.1  | 5.66  | 6.23  | 0.7  | 0.25 | -1.49 | 0.400794 | 0.024516 | 0.723941 | 0.196001 |
| MmugDNA.5631.1.S1_at   | MmugDNA.5631.1 | 12.32 | 11.97 | 0.07 | 0.1  | 1.27  | 0.010503 | 0.001092 | 0.248118 | 0.052283 |
| MmugDNA.564.1.S1_at    | MmugDNA.564.1  | 11.53 | 11.58 | 0.39 | 0.1  | -1.03 | 0.815816 | 0.296579 | 0.933242 | 0.555566 |
| MmugDNA.5642.1.S1_at   | MmugDNA.5642.1 | 8.68  | 7.88  | 1.28 | 0.3  | 1.74  | 0.468831 | 0.547506 | 0.765126 | 0.728479 |
| MmugDNA.5643.1.S1_at   | MmugDNA.5643.1 | 5.6   | 5.56  | 0.21 | 0.29 | 1.03  | 0.608641 | 0.111915 | 0.841286 | 0.377006 |
| MmugDNA.5645.1.S1_at   | MmugDNA.5645.1 | 10.11 | 10.17 | 0.28 | 0.07 | -1.04 | 0.576728 | 0.03632  | 0.825166 | 0.235105 |
| MmugDNA.5654.1.S1_at   | MmugDNA.5654.1 | 7.83  | 7.81  | 0.27 | 0.03 | 1.01  | 0.344833 | 0.195304 | 0.68712  | 0.470253 |

|                        |                |       |       |      |      |       |          |          |          |          |
|------------------------|----------------|-------|-------|------|------|-------|----------|----------|----------|----------|
| MmugDNA.5655.1.S1_at   | MmugDNA.5655.1 | 9.18  | 9.35  | 0.13 | 0.09 | -1.13 | 0.275332 | 0.231426 | 0.634776 | 0.503138 |
| MmugDNA.5656.1.S1_at   | MmugDNA.5656.1 | 10.47 | 9.82  | 0.2  | 0.13 | 1.56  | 0.008924 | 0.003311 | 0.238979 | 0.082825 |
| MmugDNA.5657.1.S1_at   | MmugDNA.5657.1 | 8.37  | 8.06  | 1.03 | 0.42 | 1.24  | 0.718342 | 0.233894 | 0.890613 | 0.505169 |
| MmugDNA.5658.1.S1_at   | MmugDNA.5658.1 | 10.59 | 9.37  | 2.2  | 0.47 | 2.33  | 0.472664 | 0.400993 | 0.767214 | 0.630658 |
| MmugDNA.5661.1.S1_at   | MmugDNA.5661.1 | 10.07 | 10.28 | 0.27 | 0.08 | -1.16 | 0.182838 | 0.006166 | 0.555631 | 0.106774 |
| MmugDNA.5662.1.S1_at   | MmugDNA.5662.1 | 10.49 | 10.65 | 0.15 | 0.11 | -1.12 | 0.084661 | 0.140448 | 0.451162 | 0.413627 |
| MmugDNA.5663.1.S1_at   | MmugDNA.5663.1 | 12.88 | 13.02 | 0.15 | 0.02 | -1.1  | 0.228966 | 0.445337 | 0.597921 | 0.662338 |
| MmugDNA.5665.1.S1_at   | MmugDNA.5665.1 | 12.4  | 12.45 | 0    | 0.03 | -1.04 | 0.03031  | 0.113606 | 0.33739  | 0.379726 |
| MmugDNA.5669.1.S1_at   | MmugDNA.5669.1 | 7.91  | 7.91  | 0.29 | 0.14 | 1     | 0.789843 | 0.930547 | 0.922682 | 0.960527 |
| MmugDNA.567.1.S1_s_at  | MmugDNA.567.1  | 6.5   | 6.49  | 0.05 | 0.01 | 1.01  | 0.25065  | 0.24254  | 0.615805 | 0.512875 |
| MmugDNA.5671.1.S1_at   | MmugDNA.5671.1 | 4.29  | 4.98  | 0.32 | 0.18 | -1.62 | 0.010061 | 0.020737 | 0.246058 | 0.180661 |
| MmugDNA.5683.1.S1_s_at | MmugDNA.5683.1 | 8.05  | 7.78  | 0.14 | 0.18 | 1.21  | 0.106383 | 0.265553 | 0.478837 | 0.531418 |
| MmugDNA.5685.1.S1_at   | MmugDNA.5685.1 | 3.7   | 3.71  | 0.43 | 0.23 | -1    | 0.43708  | 0.560869 | 0.746719 | 0.736993 |
| MmugDNA.5688.1.S1_at   | MmugDNA.5688.1 | 7.6   | 7.36  | 0.25 | 0.29 | 1.18  | 0.374235 | 0.937678 | 0.705837 | 0.964687 |
| MmugDNA.5694.1.S1_at   | MmugDNA.5694.1 | 4.19  | 6.08  | 1.31 | 0.22 | -3.72 | 0.173727 | 0.159162 | 0.546749 | 0.435217 |
| MmugDNA.5702.1.S1_at   | MmugDNA.5702.1 | 9.7   | 9.46  | 0.01 | 0.09 | 1.18  | 0.014407 | 0.022488 | 0.27544  | 0.187631 |
| MmugDNA.5704.1.S1_at   | MmugDNA.5704.1 | 5.64  | 5.4   | 0.22 | 0.1  | 1.18  | 0.422108 | 0.44002  | 0.738013 | 0.658635 |
| MmugDNA.5704.1.S1_x_at | MmugDNA.5704.1 | 4.93  | 4.62  | 0.18 | 0.05 | 1.24  | 0.094139 | 0.135353 | 0.463421 | 0.40745  |
| MmugDNA.5705.1.S1_at   | MmugDNA.5705.1 | 10.34 | 10.72 | 0.13 | 0.01 | -1.3  | 0.008144 | 0.000647 | 0.232005 | 0.043083 |
| MmugDNA.5711.1.S1_at   | MmugDNA.5711.1 | 6.42  | 6.17  | 0.66 | 0.28 | 1.19  | 0.44576  | 0.33786  | 0.752302 | 0.585031 |
| MmugDNA.5714.1.S1_at   | MmugDNA.5714.1 | 8.53  | 8.69  | 0.34 | 0.19 | -1.12 | 0.833341 | 0.000255 | 0.940218 | 0.033475 |
| MmugDNA.5715.1.S1_at   | MmugDNA.5715.1 | 13.92 | 14.07 | 0.34 | 0.1  | -1.11 | 0.67313  | 0.331825 | 0.871201 | 0.580397 |
| MmugDNA.5716.1.S1_at   | MmugDNA.5716.1 | 13.61 | 13.67 | 0.04 | 0.03 | -1.04 | 0.101712 | 0.482598 | 0.471947 | 0.687368 |
| MmugDNA.5720.1.S1_at   | MmugDNA.5720.1 | 6.65  | 6.6   | 0.11 | 0.14 | 1.04  | 0.334174 | 0.557537 | 0.680119 | 0.73509  |
| MmugDNA.5725.1.S1_at   | MmugDNA.5725.1 | 5.98  | 5.55  | 0.2  | 0.07 | 1.35  | 0.021566 | 0.001497 | 0.309241 | 0.058967 |
| MmugDNA.5729.1.S1_at   | MmugDNA.5729.1 | 9.74  | 9.29  | 0.19 | 0.09 | 1.37  | 0.011915 | 0.000175 | 0.257858 | 0.030511 |
| MmugDNA.573.1.S1_at    | MmugDNA.573.1  | 9.56  | 9.3   | 0.14 | 0.07 | 1.19  | 0.219914 | 0.296787 | 0.589114 | 0.555779 |
| MmugDNA.5731.1.S1_at   | MmugDNA.5731.1 | 8.36  | 7.3   | 0.33 | 0.48 | 2.09  | 0.060253 | 0.052953 | 0.407794 | 0.275774 |
| MmugDNA.5733.1.S1_at   | MmugDNA.5733.1 | 9.45  | 9.08  | 0.28 | 0.17 | 1.29  | 0.100021 | 0.189061 | 0.470251 | 0.464897 |
| MmugDNA.5734.1.S1_at   | MmugDNA.5734.1 | 8.14  | 7.92  | 0.11 | 0.06 | 1.17  | 0.095977 | 0.168889 | 0.464552 | 0.445458 |
| MmugDNA.5736.1.S1_at   | MmugDNA.5736.1 | 11.3  | 11.85 | 0.17 | 0.03 | -1.46 | 0.011932 | 0.050087 | 0.257858 | 0.268916 |
| MmugDNA.5738.1.S1_at   | MmugDNA.5738.1 | 9.49  | 8.97  | 0.43 | 0.27 | 1.43  | 0.217639 | 0.208646 | 0.587525 | 0.482544 |
| MmugDNA.5742.1.S1_at   | MmugDNA.5742.1 | 7.23  | 7.5   | 0.25 | 0.06 | -1.21 | 0.171914 | 0.025772 | 0.54526  | 0.201218 |
| MmugDNA.5746.1.S1_at   | MmugDNA.5746.1 | 8.17  | 7.83  | 0.18 | 0.03 | 1.27  | 0.057043 | 0.001899 | 0.401454 | 0.065035 |
| MmugDNA.5747.1.S1_at   | MmugDNA.5747.1 | 12.27 | 12.17 | 0.34 | 0.16 | 1.07  | 0.149203 | 0.071695 | 0.523063 | 0.313904 |
| MmugDNA.575.1.S1_at    | MmugDNA.575.1  | 5.01  | 5.06  | 0.3  | 0.02 | -1.04 | 0.705313 | 0.866022 | 0.885355 | 0.923791 |
| MmugDNA.5754.1.S1_at   | MmugDNA.5754.1 | 6.76  | 8.46  | 0.64 | 0.53 | -3.23 | 0.074536 | 0.157636 | 0.435313 | 0.433131 |
| MmugDNA.5757.1.S1_at   | MmugDNA.5757.1 | 10.28 | 10.66 | 0.45 | 0.04 | -1.3  | 0.153067 | 0.070397 | 0.52613  | 0.311676 |
| MmugDNA.5759.1.S1_at   | MmugDNA.5759.1 | 8.16  | 7.97  | 0.18 | 0.02 | 1.14  | 0.450773 | 0.000111 | 0.754859 | 0.028099 |
| MmugDNA.5761.1.S1_at   | MmugDNA.5761.1 | 8.9   | 8.57  | 0.68 | 0.33 | 1.26  | 0.605391 | 0.019286 | 0.839978 | 0.174698 |
| MmugDNA.5768.1.S1_at   | MmugDNA.5768.1 | 11.95 | 12.15 | 0.14 | 0.02 | -1.15 | 0.187588 | 0.004421 | 0.559893 | 0.092904 |
| MmugDNA.5769.1.S1_at   | MmugDNA.5769.1 | 7.7   | 7.87  | 0.32 | 0.13 | -1.13 | 0.972625 | 0.308112 | 0.991114 | 0.564219 |
| MmugDNA.5778.1.S1_at   | MmugDNA.5778.1 | 10.83 | 11.24 | 0.19 | 0.01 | -1.33 | 0.027087 | 0.067165 | 0.327141 | 0.305174 |

|                        |                |       |       |      |      |       |          |          |          |          |
|------------------------|----------------|-------|-------|------|------|-------|----------|----------|----------|----------|
| MmugDNA.5781.1.S1_at   | MmugDNA.5781.1 | 8.18  | 7.98  | 0.98 | 0.26 | 1.15  | 0.621709 | 0.32651  | 0.847631 | 0.576576 |
| MmugDNA.5783.1.S1_at   | MmugDNA.5783.1 | 4.83  | 4.82  | 0.21 | 0.32 | 1     | 0.91398  | 0.984422 | 0.970812 | 0.991287 |
| MmugDNA.5784.1.S1_at   | MmugDNA.5784.1 | 8.83  | 8.31  | 1.11 | 0.18 | 1.44  | 0.823383 | 0.954998 | 0.936294 | 0.974501 |
| MmugDNA.5788.1.S1_s_at | MmugDNA.5788.1 | 6     | 5.84  | 0.09 | 0.03 | 1.12  | 0.157633 | 0.011392 | 0.530616 | 0.13824  |
| MmugDNA.579.1.S1_at    | MmugDNA.579.1  | 9.7   | 9.83  | 0.2  | 0.07 | -1.09 | 0.337008 | 0.120441 | 0.682166 | 0.38925  |
| MmugDNA.5793.1.S1_at   | MmugDNA.5793.1 | 2.97  | 3.02  | 0.11 | 0.07 | -1.03 | 0.739174 | 0.430002 | 0.900398 | 0.65111  |
| MmugDNA.5794.1.S1_at   | MmugDNA.5794.1 | 13.65 | 13.2  | 0.31 | 0.16 | 1.37  | 0.072808 | 0.03056  | 0.433468 | 0.216739 |
| MmugDNA.5803.1.S1_at   | MmugDNA.5803.1 | 6.53  | 6.6   | 0.29 | 0.29 | -1.05 | 0.780569 | 0.951598 | 0.919137 | 0.972522 |
| MmugDNA.5807.1.S1_at   | MmugDNA.5807.1 | 8.67  | 8.96  | 0.12 | 0.2  | -1.23 | 0.042206 | 0.000178 | 0.368796 | 0.030511 |
| MmugDNA.5809.1.S1_at   | MmugDNA.5809.1 | 3.67  | 3.62  | 0.03 | 0.11 | 1.04  | 0.147622 | 0.454539 | 0.521685 | 0.668668 |
| MmugDNA.5812.1.S1_at   | MmugDNA.5812.1 | 11.01 | 11.32 | 0.1  | 0.1  | -1.24 | 0.012473 | 0.011062 | 0.262327 | 0.136934 |
| MmugDNA.5819.1.S1_at   | MmugDNA.5819.1 | 6.32  | 6.57  | 0.15 | 0.03 | -1.19 | 0.125903 | 0.603853 | 0.49972  | 0.764341 |
| MmugDNA.5825.1.A1_at   | MmugDNA.5825.1 | 4.04  | 4.05  | 0.01 | 0.11 | -1.01 | 0.392314 | 0.771199 | 0.718258 | 0.866992 |
| MmugDNA.5825.1.S1_at   | MmugDNA.5825.1 | 6.02  | 5.93  | 0.1  | 0.04 | 1.06  | 0.601768 | 0.845908 | 0.838575 | 0.912277 |
| MmugDNA.5827.1.S1_at   | MmugDNA.5827.1 | 9.46  | 10.34 | 1.61 | 0.32 | -1.83 | 0.369569 | 0.167146 | 0.704264 | 0.443629 |
| MmugDNA.5830.1.S1_at   | MmugDNA.5830.1 | 8.67  | 8.62  | 0.24 | 0.26 | 1.04  | 0.607089 | 0.025978 | 0.840743 | 0.202105 |
| MmugDNA.5833.1.S1_at   | MmugDNA.5833.1 | 8.92  | 9.1   | 0.2  | 0.01 | -1.13 | 0.152522 | 0.067007 | 0.525558 | 0.304872 |
| MmugDNA.5837.1.S1_at   | MmugDNA.5837.1 | 4.36  | 4.12  | 0.06 | 0.07 | 1.18  | 0.01465  | 0.046011 | 0.277041 | 0.258956 |
| MmugDNA.584.1.S1_at    | MmugDNA.584.1  | 5.77  | 6.5   | 0.84 | 0.16 | -1.65 | 0.312843 | 0.431623 | 0.664259 | 0.652439 |
| MmugDNA.5841.1.S1_at   | MmugDNA.5841.1 | 11.44 | 11.68 | 0.24 | 0.05 | -1.17 | 0.428971 | 0.318602 | 0.74212  | 0.571258 |
| MmugDNA.5842.1.S1_at   | MmugDNA.5842.1 | 8.14  | 8.56  | 0.13 | 0.2  | -1.33 | 0.08836  | 0.080215 | 0.45606  | 0.32783  |
| MmugDNA.585.1.S1_at    | MmugDNA.585.1  | 6.21  | 6.06  | 0.07 | 0.02 | 1.11  | 0.026407 | 0.089615 | 0.32471  | 0.343811 |
| MmugDNA.5856.1.S1_at   | MmugDNA.5856.1 | 8.81  | 9.52  | 0.94 | 0.29 | -1.64 | 0.578387 | 0.570805 | 0.826202 | 0.74337  |
| MmugDNA.5867.1.S1_at   | MmugDNA.5867.1 | 4.1   | 3.9   | 0.13 | 0.08 | 1.15  | 0.241005 | 0.67077  | 0.607241 | 0.807475 |
| MmugDNA.5868.1.S1_at   | MmugDNA.5868.1 | 9.67  | 10.08 | 0.28 | 0.13 | -1.33 | 0.057678 | 0.092782 | 0.402592 | 0.348989 |
| MmugDNA.5872.1.S1_at   | MmugDNA.5872.1 | 3.22  | 3.2   | 0.12 | 0.03 | 1.01  | 0.849662 | 0.011379 | 0.947112 | 0.138214 |
| MmugDNA.5873.1.S1_at   | MmugDNA.5873.1 | 10.28 | 9.7   | 0.37 | 0.29 | 1.49  | 0.219343 | 0.006535 | 0.588877 | 0.109634 |
| MmugDNA.5875.1.S1_at   | MmugDNA.5875.1 | 7.09  | 6.6   | 0.34 | 0.08 | 1.4   | 0.17518  | 0.297736 | 0.548034 | 0.556393 |
| MmugDNA.5876.1.S1_at   | MmugDNA.5876.1 | 10.05 | 10.17 | 0.24 | 0.31 | -1.08 | 0.264277 | 0.009416 | 0.626029 | 0.127871 |
| MmugDNA.5877.1.S1_at   | MmugDNA.5877.1 | 11.49 | 11.68 | 0.06 | 0    | -1.14 | 0.00649  | 0.010129 | 0.219643 | 0.131974 |
| MmugDNA.5879.1.S1_at   | MmugDNA.5879.1 | 3.63  | 3.3   | 0.25 | 0.05 | 1.25  | 0.063456 | 0.094697 | 0.415717 | 0.351482 |
| MmugDNA.588.1.S1_at    | MmugDNA.588.1  | 5.42  | 4.31  | 0.16 | 0.17 | 2.15  | 0.000941 | 0.001557 | 0.153739 | 0.059701 |
| MmugDNA.5880.1.S1_at   | MmugDNA.5880.1 | 9.52  | 8.83  | 0.07 | 0.25 | 1.62  | 0.006139 | 0.000105 | 0.216351 | 0.028099 |
| MmugDNA.5881.1.S1_at   | MmugDNA.5881.1 | 7.83  | 8.46  | 0.28 | 0.15 | -1.55 | 0.068722 | 0.148978 | 0.426    | 0.423313 |
| MmugDNA.5885.1.S1_at   | MmugDNA.5885.1 | 10.9  | 10.59 | 0.18 | 0.16 | 1.24  | 0.033223 | 0.407887 | 0.346442 | 0.635288 |
| MmugDNA.5901.1.S1_at   | MmugDNA.5901.1 | 9.35  | 9.19  | 0.79 | 0.09 | 1.12  | 0.608573 | 0.756176 | 0.841285 | 0.858114 |
| MmugDNA.5904.1.S1_at   | MmugDNA.5904.1 | 8.19  | 9.14  | 1.04 | 0.21 | -1.92 | 0.573925 | 0.779751 | 0.823778 | 0.872303 |
| MmugDNA.5905.1.S1_at   | MmugDNA.5905.1 | 3.48  | 3.32  | 0.19 | 0.17 | 1.12  | 0.650822 | 0.19999  | 0.861228 | 0.474603 |
| MmugDNA.5912.1.S1_at   | MmugDNA.5912.1 | 6.63  | 6.59  | 0.14 | 0.06 | 1.03  | 0.285605 | 0.612256 | 0.643438 | 0.769908 |
| MmugDNA.5929.1.S1_at   | MmugDNA.5929.1 | 10.61 | 11.22 | 0.17 | 0.11 | -1.52 | 0.005685 | 0.003207 | 0.210153 | 0.082023 |
| MmugDNA.5930.1.S1_at   | MmugDNA.5930.1 | 8.7   | 8.73  | 0.2  | 0.08 | -1.02 | 0.639296 | 0.558561 | 0.856238 | 0.735725 |
| MmugDNA.5933.1.S1_at   | MmugDNA.5933.1 | 11.45 | 11.77 | 0.19 | 0.02 | -1.25 | 0.084718 | 0.01297  | 0.451293 | 0.14654  |
| MmugDNA.5939.1.S1_at   | MmugDNA.5939.1 | 9.44  | 9.26  | 0.36 | 0.23 | 1.13  | 0.17298  | 0.018036 | 0.546108 | 0.169372 |

|                        |                |       |       |      |      |       |          |          |          |          |
|------------------------|----------------|-------|-------|------|------|-------|----------|----------|----------|----------|
| MmugDNA.5940.1.S1_at   | MmugDNA.5940.1 | 9.09  | 9.01  | 0.14 | 0.07 | 1.06  | 0.487078 | 0.295085 | 0.774859 | 0.554551 |
| MmugDNA.5943.1.S1_at   | MmugDNA.5943.1 | 10.69 | 10.59 | 0.34 | 0.12 | 1.07  | 0.613194 | 0.69461  | 0.843382 | 0.822427 |
| MmugDNA.5943.1.S1_s_at | MmugDNA.5943.1 | 10.3  | 10.11 | 0.35 | 0.14 | 1.13  | 0.715284 | 0.848678 | 0.889207 | 0.914071 |
| MmugDNA.5950.1.S1_at   | MmugDNA.5950.1 | 8.2   | 8.25  | 0.04 | 0.05 | -1.04 | 0.386982 | 0.4291   | 0.713959 | 0.65062  |
| MmugDNA.5954.1.S1_at   | MmugDNA.5954.1 | 9.5   | 8.99  | 0.24 | 0.08 | 1.43  | 0.05376  | 0.029474 | 0.39536  | 0.213368 |
| MmugDNA.5963.1.S1_at   | MmugDNA.5963.1 | 4.2   | 4.01  | 0.06 | 0.08 | 1.14  | 0.115688 | 0.17888  | 0.488929 | 0.455208 |
| MmugDNA.5968.1.S1_at   | MmugDNA.5968.1 | 10.23 | 10.57 | 0.05 | 0.08 | -1.26 | 0.004036 | 0.000481 | 0.198571 | 0.038665 |
| MmugDNA.5971.1.S1_at   | MmugDNA.5971.1 | 7.52  | 7.73  | 0.53 | 0.23 | -1.16 | 0.510658 | 0.016126 | 0.788228 | 0.160936 |
| MmugDNA.5976.1.S1_at   | MmugDNA.5976.1 | 10.16 | 10.54 | 0.33 | 0.05 | -1.31 | 0.188897 | 0.01178  | 0.560718 | 0.140575 |
| MmugDNA.5988.1.S1_at   | MmugDNA.5988.1 | 7.62  | 7.72  | 0.23 | 0.1  | -1.07 | 0.558331 | 0.435188 | 0.815196 | 0.655058 |
| MmugDNA.5990.1.S1_at   | MmugDNA.5990.1 | 4.47  | 4.31  | 0.11 | 0.05 | -1.11 | 0.173074 | 0.40174  | 0.546142 | 0.631068 |
| MmugDNA.5992.1.S1_at   | MmugDNA.5992.1 | 5.43  | 5.16  | 0.15 | 0.08 | 1.2   | 0.081412 | 0.06982  | 0.445406 | 0.310353 |
| MmugDNA.5996.1.S1_at   | MmugDNA.5996.1 | 11.23 | 10.78 | 0.46 | 0.02 | 1.37  | 0.065335 | 0.1341   | 0.420444 | 0.406351 |
| MmugDNA.5997.1.S1_at   | MmugDNA.5997.1 | 9.81  | 9.73  | 0.25 | 0.12 | 1.06  | 0.964352 | 0.66281  | 0.988358 | 0.80259  |
| MmugDNA.6.1.S1_at      | MmugDNA.6.1    | 6.41  | 6.88  | 0.71 | 0.14 | -1.39 | 0.974219 | 0.999395 | 0.991817 | 0.999773 |
| MmugDNA.6002.1.S1_at   | MmugDNA.6002.1 | 11.36 | 11.28 | 0.22 | 0.17 | 1.06  | 0.492051 | 0.87759  | 0.778088 | 0.930173 |
| MmugDNA.6007.1.S1_at   | MmugDNA.6007.1 | 4.58  | 4.39  | 0.1  | 0.11 | 1.14  | 0.092161 | 0.260964 | 0.460755 | 0.527351 |
| MmugDNA.601.1.S1_at    | MmugDNA.601.1  | 7.98  | 7.83  | 1.44 | 0.2  | 1.11  | 0.689701 | 0.429461 | 0.879045 | 0.650931 |
| MmugDNA.6010.1.S1_at   | MmugDNA.6010.1 | 3.09  | 3.1   | 0.29 | 0.1  | -1    | 0.689468 | 0.627371 | 0.87891  | 0.780374 |
| MmugDNA.6010.1.S1_s_at | MmugDNA.6010.1 | 11.33 | 11.21 | 0.36 | 0.1  | 1.09  | 0.760914 | 0.593602 | 0.910207 | 0.758334 |
| MmugDNA.6015.1.S1_at   | MmugDNA.6015.1 | 4.63  | 4.4   | 0.1  | 0.07 | 1.17  | 0.048604 | 0.702292 | 0.383721 | 0.827417 |
| MmugDNA.6017.1.S1_at   | MmugDNA.6017.1 | 8.87  | 9.05  | 0.16 | 0.11 | -1.13 | 0.190143 | 0.221972 | 0.561371 | 0.495044 |
| MmugDNA.602.1.S1_at    | MmugDNA.602.1  | 7.94  | 8.21  | 0.47 | 0.1  | -1.21 | 0.878109 | 0.798005 | 0.95758  | 0.883691 |
| MmugDNA.6021.1.A1_at   | MmugDNA.6021.1 | 3.97  | 3.88  | 0.28 | 0.05 | 1.07  | 0.242529 | 0.508402 | 0.608517 | 0.703597 |
| MmugDNA.6021.1.S1_at   | MmugDNA.6021.1 | 4.69  | 4.73  | 0.19 | 0.14 | -1.03 | 0.597728 | 0.854175 | 0.836517 | 0.916964 |
| MmugDNA.603.1.S1_at    | MmugDNA.603.1  | 9.61  | 8.76  | 0.72 | 0.24 | 1.81  | 0.174844 | 0.199237 | 0.548031 | 0.473931 |
| MmugDNA.6032.1.S1_at   | MmugDNA.6032.1 | 11.64 | 11.81 | 0.1  | 0.05 | -1.13 | 0.053413 | 0.064465 | 0.394702 | 0.300076 |
| MmugDNA.6036.1.S1_at   | MmugDNA.6036.1 | 4     | 3.76  | 0.16 | 0.03 | 1.18  | 0.206323 | 0.712734 | 0.578142 | 0.8335   |
| MmugDNA.6042.1.S1_s_at | MmugDNA.6042.1 | 10.48 | 10.5  | 0.54 | 0.1  | -1.01 | 0.339956 | 0.495352 | 0.684096 | 0.695433 |
| MmugDNA.6048.1.S1_at   | MmugDNA.6048.1 | 8.95  | 9.22  | 0.23 | 0.14 | -1.21 | 0.168471 | 0.017719 | 0.541113 | 0.168367 |
| MmugDNA.6051.1.S1_at   | MmugDNA.6051.1 | 12.08 | 11.35 | 0.2  | 0.1  | 1.66  | 0.008547 | 0.003026 | 0.235156 | 0.0803   |
| MmugDNA.6063.1.S1_at   | MmugDNA.6063.1 | 8.46  | 8.39  | 0.23 | 0.03 | 1.05  | 0.560157 | 0.734402 | 0.816542 | 0.846131 |
| MmugDNA.607.1.S1_at    | MmugDNA.607.1  | 10.66 | 10.32 | 0.2  | 0.16 | 1.27  | 0.077251 | 0.003667 | 0.439109 | 0.086563 |
| MmugDNA.6070.1.S1_at   | MmugDNA.6070.1 | 10.61 | 11.6  | 0.1  | 0.14 | -2    | 0.000932 | 0.000374 | 0.153739 | 0.037273 |
| MmugDNA.6073.1.S1_at   | MmugDNA.6073.1 | 12.07 | 12.53 | 0.14 | 0.07 | -1.38 | 0.008118 | 0.003686 | 0.232005 | 0.086591 |
| MmugDNA.6074.1.S1_at   | MmugDNA.6074.1 | 7.07  | 7.43  | 0.31 | 0.09 | -1.28 | 0.548019 | 0.231179 | 0.80936  | 0.5029   |
| MmugDNA.6080.1.S1_at   | MmugDNA.6080.1 | 10.16 | 10.42 | 0.45 | 0.03 | -1.2  | 0.937817 | 0.494787 | 0.979097 | 0.695092 |
| MmugDNA.6083.1.S1_at   | MmugDNA.6083.1 | 6     | 5.86  | 0.1  | 0.05 | 1.1   | 0.117661 | 0.196225 | 0.491034 | 0.471236 |
| MmugDNA.6091.1.S1_at   | MmugDNA.6091.1 | 8.87  | 8.85  | 0.3  | 0.03 | 1.01  | 0.886837 | 0.672909 | 0.960715 | 0.80887  |
| MmugDNA.6095.1.S1_at   | MmugDNA.6095.1 | 9.83  | 9.88  | 0.09 | 0.24 | -1.03 | 0.606058 | 0.825061 | 0.840285 | 0.899488 |
| MmugDNA.6097.1.S1_at   | MmugDNA.6097.1 | 10.96 | 10.51 | 2.67 | 0.18 | 1.37  | 0.67388  | 0.40859  | 0.871616 | 0.635757 |
| MmugDNA.6100.1.S1_at   | MmugDNA.6100.1 | 5.81  | 5.56  | 0.13 | 0.18 | 1.19  | 0.324978 | 0.057852 | 0.67293  | 0.286898 |
| MmugDNA.6102.1.S1_at   | MmugDNA.6102.1 | 4.17  | 4.17  | 0.22 | 0.26 | -1    | 0.796848 | 0.919184 | 0.925364 | 0.954612 |

|                        |                |       |       |      |      |       |          |          |          |          |
|------------------------|----------------|-------|-------|------|------|-------|----------|----------|----------|----------|
| MmugDNA.6107.1.S1_at   | MmugDNA.6107.1 | 10.47 | 10.43 | 0.65 | 0.11 | 1.03  | 0.987176 | 0.32553  | 0.995822 | 0.575827 |
| MmugDNA.6108.1.S1_at   | MmugDNA.6108.1 | 9     | 8.62  | 0.67 | 0.19 | 1.3   | 0.288882 | 0.033395 | 0.645883 | 0.226396 |
| MmugDNA.6110.1.S1_at   | MmugDNA.6110.1 | 9.48  | 9.6   | 0.21 | 0.06 | -1.08 | 0.131994 | 0.03721  | 0.506447 | 0.237285 |
| MmugDNA.6111.1.S1_at   | MmugDNA.6111.1 | 8.26  | 8.59  | 0.52 | 0.18 | -1.26 | 0.118259 | 0.259358 | 0.491763 | 0.526418 |
| MmugDNA.6115.1.S1_at   | MmugDNA.6115.1 | 4.76  | 4.84  | 0.07 | 0.07 | -1.06 | 0.355635 | 0.450444 | 0.694777 | 0.665643 |
| MmugDNA.6116.1.S1_at   | MmugDNA.6116.1 | 6.63  | 6.57  | 0.16 | 0.02 | 1.04  | 0.177918 | 0.327987 | 0.551101 | 0.577794 |
| MmugDNA.612.1.S1_s_at  | MmugDNA.612.1  | 13.19 | 13.26 | 0.05 | 0.01 | -1.05 | 0.031487 | 0.007038 | 0.341227 | 0.113112 |
| MmugDNA.6120.1.S1_at   | MmugDNA.6120.1 | 7.57  | 7.39  | 0.11 | 0.07 | 1.13  | 0.192171 | 0.049809 | 0.563232 | 0.268277 |
| MmugDNA.6125.1.S1_at   | MmugDNA.6125.1 | 11.51 | 11.56 | 0.31 | 0.05 | -1.04 | 0.713398 | 0.115773 | 0.88844  | 0.382814 |
| MmugDNA.613.1.S1_at    | MmugDNA.613.1  | 11.15 | 10.91 | 0.92 | 0.04 | 1.17  | 0.625428 | 0.252481 | 0.849409 | 0.521077 |
| MmugDNA.6133.1.S1_at   | MmugDNA.6133.1 | 4.26  | 3.55  | 0.4  | 0.03 | -1.64 | 0.101009 | 0.086576 | 0.47159  | 0.33911  |
| MmugDNA.6138.1.S1_at   | MmugDNA.6138.1 | 10.37 | 10.67 | 0.18 | 0.2  | -1.23 | 0.292875 | 0.021575 | 0.649149 | 0.18405  |
| MmugDNA.6143.1.S1_at   | MmugDNA.6143.1 | 8.14  | 7.25  | 2.69 | 0.17 | 1.85  | 0.957715 | 0.404014 | 0.986067 | 0.632558 |
| MmugDNA.6144.1.S1_at   | MmugDNA.6144.1 | 10.6  | 10.12 | 0.62 | 0.25 | 1.4   | 0.154062 | 0.024082 | 0.527392 | 0.194487 |
| MmugDNA.6146.1.S1_at   | MmugDNA.6146.1 | 7.31  | 7.16  | 0.12 | 0.11 | 1.11  | 0.371263 | 0.555222 | 0.705454 | 0.733759 |
| MmugDNA.6148.1.S1_at   | MmugDNA.6148.1 | 3.85  | 3.86  | 0.08 | 0.15 | -1.01 | 0.947151 | 0.535758 | 0.981659 | 0.72127  |
| MmugDNA.615.1.S1_at    | MmugDNA.615.1  | 9.19  | 7.7   | 0.07 | 0.14 | 2.82  | 0.000074 | 0.000004 | 0.108151 | 0.014484 |
| MmugDNA.615.1.S1_s_at  | MmugDNA.615.1  | 10.54 | 9.73  | 0.1  | 0.1  | 1.75  | 0.000406 | 0.000163 | 0.137028 | 0.030506 |
| MmugDNA.6150.1.S1_at   | MmugDNA.6150.1 | 5.44  | 5.11  | 0.98 | 0.25 | 1.26  | 0.685215 | 0.307181 | 0.87671  | 0.563487 |
| MmugDNA.6151.1.S1_at   | MmugDNA.6151.1 | 8.32  | 8.15  | 0.42 | 0.08 | 1.13  | 0.443121 | 0.102239 | 0.750532 | 0.36236  |
| MmugDNA.6159.1.S1_at   | MmugDNA.6159.1 | 5.84  | 6.25  | 0.35 | 0.22 | -1.32 | 0.312266 | 0.445329 | 0.663896 | 0.662338 |
| MmugDNA.616.1.S1_at    | MmugDNA.616.1  | 13.62 | 13.34 | 5.71 | 0.12 | 1.22  | 0.417659 | 0.378786 | 0.735015 | 0.615795 |
| MmugDNA.6161.1.S1_at   | MmugDNA.6161.1 | 10.34 | 10.77 | 0.21 | 0.03 | -1.35 | 0.017608 | 0.015234 | 0.292913 | 0.156807 |
| MmugDNA.6167.1.S1_at   | MmugDNA.6167.1 | 12.14 | 12.07 | 0.78 | 0.08 | 1.05  | 0.568007 | 0.627867 | 0.820586 | 0.780845 |
| MmugDNA.617.1.S1_at    | MmugDNA.617.1  | 9.76  | 10.35 | 1.03 | 0.09 | -1.5  | 0.149626 | 0.008624 | 0.523226 | 0.123123 |
| MmugDNA.6170.1.S1_at   | MmugDNA.6170.1 | 11.5  | 11.03 | 0.5  | 0.31 | 1.39  | 0.15319  | 0.013129 | 0.526347 | 0.147338 |
| MmugDNA.6176.1.S1_at   | MmugDNA.6176.1 | 6.74  | 6.72  | 0.14 | 0.08 | 1.01  | 0.762048 | 0.884684 | 0.910776 | 0.934321 |
| MmugDNA.6178.1.S1_at   | MmugDNA.6178.1 | 3.73  | 3.82  | 0.31 | 0.16 | -1.06 | 0.709107 | 0.892996 | 0.886677 | 0.938982 |
| MmugDNA.6179.1.S1_at   | MmugDNA.6179.1 | 4.41  | 4.66  | 0.15 | 0.14 | -1.19 | 0.085538 | 0.232794 | 0.452653 | 0.504426 |
| MmugDNA.6182.1.S1_at   | MmugDNA.6182.1 | 12.51 | 12.47 | 0.24 | 0.01 | 1.03  | 0.758546 | 0.264011 | 0.909232 | 0.530183 |
| MmugDNA.6187.1.S1_at   | MmugDNA.6187.1 | 10.41 | 9.81  | 0.28 | 0.09 | 1.52  | 0.035356 | 0.002955 | 0.351775 | 0.079945 |
| MmugDNA.6188.1.S1_at   | MmugDNA.6188.1 | 12.41 | 12.42 | 0.06 | 0.06 | -1.01 | 0.818531 | 0.011111 | 0.93444  | 0.137209 |
| MmugDNA.6199.1.S1_at   | MmugDNA.6199.1 | 5.38  | 5.18  | 0.09 | 0.09 | 1.15  | 0.113518 | 0.126892 | 0.486829 | 0.397591 |
| MmugDNA.6202.1.S1_at   | MmugDNA.6202.1 | 4.79  | 4.8   | 0.34 | 0.07 | -1.01 | 0.931331 | 0.812307 | 0.97706  | 0.891561 |
| MmugDNA.6203.1.S1_at   | MmugDNA.6203.1 | 9.59  | 9.58  | 0.29 | 0.11 | 1.01  | 0.808149 | 0.722167 | 0.930496 | 0.839044 |
| MmugDNA.6205.1.S1_at   | MmugDNA.6205.1 | 2.78  | 2.79  | 0.09 | 0.14 | -1.01 | 0.42573  | 0.618281 | 0.740112 | 0.774002 |
| MmugDNA.6206.1.S1_at   | MmugDNA.6206.1 | 7.28  | 6.72  | 0.35 | 0.17 | 1.48  | 0.055597 | 0.034949 | 0.398909 | 0.231062 |
| MmugDNA.6206.1.S1_s_at | MmugDNA.6206.1 | 8.95  | 8.36  | 0.27 | 0.17 | 1.5   | 0.014291 | 0.010896 | 0.274633 | 0.135939 |
| MmugDNA.6210.1.S1_at   | MmugDNA.6210.1 | 10.11 | 10.46 | 0.8  | 0.16 | -1.27 | 0.711577 | 0.102877 | 0.887684 | 0.363508 |
| MmugDNA.6212.1.S1_at   | MmugDNA.6212.1 | 7.96  | 8.47  | 0.69 | 0.2  | -1.42 | 0.801592 | 0.938637 | 0.927672 | 0.965105 |
| MmugDNA.6221.1.S1_at   | MmugDNA.6221.1 | 10.64 | 10.61 | 0.17 | 0.01 | 1.03  | 0.59593  | 0.818975 | 0.835668 | 0.895712 |
| MmugDNA.6224.1.S1_at   | MmugDNA.6224.1 | 4.25  | 4.42  | 0.23 | 0.17 | -1.13 | 0.794504 | 0.548645 | 0.924569 | 0.729318 |
| MmugDNA.6229.1.S1_at   | MmugDNA.6229.1 | 10.27 | 10.14 | 0.27 | 0.08 | 1.1   | 0.434876 | 0.001899 | 0.745353 | 0.065035 |

|                        |                |       |       |      |      |       |          |          |          |          |
|------------------------|----------------|-------|-------|------|------|-------|----------|----------|----------|----------|
| MmugDNA.6235.1.S1_at   | MmugDNA.6235.1 | 11.09 | 11.54 | 0.3  | 0.05 | -1.37 | 0.079165 | 0.047042 | 0.442056 | 0.261469 |
| MmugDNA.6239.1.S1_at   | MmugDNA.6239.1 | 5.81  | 5.67  | 0.14 | 0.03 | 1.1   | 0.243364 | 0.21586  | 0.609284 | 0.489536 |
| MmugDNA.6241.1.S1_at   | MmugDNA.6241.1 | 9.47  | 9.42  | 0.11 | 0.01 | 1.03  | 0.887396 | 0.251738 | 0.960961 | 0.520444 |
| MmugDNA.6242.1.S1_at   | MmugDNA.6242.1 | 11.13 | 10.73 | 0.47 | 0.09 | 1.32  | 0.126713 | 0.135845 | 0.500599 | 0.408027 |
| MmugDNA.6242.1.S1_s_at | MmugDNA.6242.1 | 9.47  | 8.95  | 0.62 | 0.12 | 1.43  | 0.138877 | 0.131839 | 0.514459 | 0.403891 |
| MmugDNA.6245.1.S1_s_at | MmugDNA.6245.1 | 9.49  | 9.63  | 0.38 | 0.04 | -1.1  | 0.813992 | 0.941282 | 0.932855 | 0.966729 |
| MmugDNA.6247.1.S1_at   | MmugDNA.6247.1 | 11.13 | 11.17 | 0.05 | 0.07 | -1.02 | 0.946723 | 0.948632 | 0.981556 | 0.970666 |
| MmugDNA.6250.1.S1_at   | MmugDNA.6250.1 | 9.03  | 9.33  | 0.17 | 0.08 | -1.23 | 0.08358  | 0.006197 | 0.449622 | 0.106818 |
| MmugDNA.6260.1.S1_at   | MmugDNA.6260.1 | 7.07  | 6.95  | 0.1  | 0.06 | 1.09  | 0.201767 | 0.210159 | 0.573323 | 0.483994 |
| MmugDNA.6263.1.S1_at   | MmugDNA.6263.1 | 5.63  | 5.99  | 0.48 | 0.19 | -1.28 | 0.103429 | 0.026213 | 0.474255 | 0.202891 |
| MmugDNA.6263.1.S1_x_at | MmugDNA.6263.1 | 6.49  | 6.83  | 0.31 | 0.25 | -1.27 | 0.096035 | 0.007536 | 0.464614 | 0.116358 |
| MmugDNA.6264.1.S1_at   | MmugDNA.6264.1 | 8.26  | 8.47  | 0.15 | 0.25 | -1.15 | 0.225801 | 0.315278 | 0.594935 | 0.568939 |
| MmugDNA.6267.1.S1_at   | MmugDNA.6267.1 | 6.57  | 6.49  | 0.48 | 0.11 | 1.06  | 0.606257 | 0.414649 | 0.840408 | 0.640456 |
| MmugDNA.6269.1.S1_at   | MmugDNA.6269.1 | 10.29 | 10.63 | 0.24 | 0.15 | -1.26 | 0.027053 | 0.0253   | 0.327141 | 0.199522 |
| MmugDNA.6270.1.S1_at   | MmugDNA.6270.1 | 8.9   | 8.44  | 0.7  | 0.48 | 1.37  | 0.504947 | 0.328968 | 0.785092 | 0.578482 |
| MmugDNA.6277.1.S1_at   | MmugDNA.6277.1 | 9.99  | 9.88  | 0.32 | 0.22 | 1.08  | 0.929168 | 0.00044  | 0.976333 | 0.038359 |
| MmugDNA.6284.1.S1_at   | MmugDNA.6284.1 | 12.46 | 12.52 | 0.08 | 0.01 | -1.04 | 0.211542 | 0.184587 | 0.582565 | 0.460617 |
| MmugDNA.6286.1.S1_at   | MmugDNA.6286.1 | 7.93  | 8.04  | 0.73 | 0.04 | -1.08 | 0.723205 | 0.71837  | 0.892777 | 0.837024 |
| MmugDNA.6287.1.S1_at   | MmugDNA.6287.1 | 8.02  | 7.45  | 0.56 | 0.11 | 1.48  | 0.480878 | 0.425482 | 0.771638 | 0.647866 |
| MmugDNA.6295.1.S1_at   | MmugDNA.6295.1 | 2.98  | 2.81  | 0.14 | 0.05 | 1.12  | 0.363642 | 0.505003 | 0.700278 | 0.70197  |
| MmugDNA.6302.1.S1_at   | MmugDNA.6302.1 | 9.5   | 9.18  | 0.36 | 0.13 | 1.25  | 0.095954 | 0.094269 | 0.464482 | 0.350889 |
| MmugDNA.6306.1.S1_at   | MmugDNA.6306.1 | 8.68  | 8.77  | 0.36 | 0.1  | -1.06 | 0.229189 | 0.075627 | 0.598088 | 0.320061 |
| MmugDNA.6310.1.S1_at   | MmugDNA.6310.1 | 11.07 | 10.86 | 0.09 | 0.07 | 1.16  | 0.024061 | 0.003979 | 0.317679 | 0.089708 |
| MmugDNA.6313.1.S1_at   | MmugDNA.6313.1 | 10.14 | 10.06 | 0.24 | 0.09 | 1.06  | 0.369952 | 0.547607 | 0.704429 | 0.728557 |
| MmugDNA.6314.1.S1_at   | MmugDNA.6314.1 | 11.07 | 10.71 | 0.42 | 0.02 | 1.29  | 0.189622 | 0.246357 | 0.561075 | 0.515899 |
| MmugDNA.6316.1.S1_at   | MmugDNA.6316.1 | 13.06 | 12.96 | 0.04 | 0.04 | 1.08  | 0.051252 | 0.286363 | 0.38958  | 0.547791 |
| MmugDNA.6318.1.S1_at   | MmugDNA.6318.1 | 3.66  | 3.51  | 0.16 | 0.05 | 1.11  | 0.156839 | 0.477204 | 0.530033 | 0.683299 |
| MmugDNA.6328.1.S1_at   | MmugDNA.6328.1 | 6.89  | 6.95  | 0.4  | 0.69 | -1.04 | 0.8733   | 0.046959 | 0.956096 | 0.261341 |
| MmugDNA.633.1.S1_at    | MmugDNA.633.1  | 8.79  | 8.87  | 0.64 | 0.11 | -1.05 | 0.746885 | 0.516635 | 0.903767 | 0.709087 |
| MmugDNA.6332.1.S1_at   | MmugDNA.6332.1 | 9.6   | 9.71  | 0.04 | 0.3  | -1.08 | 0.152876 | 0.220153 | 0.525753 | 0.493612 |
| MmugDNA.6342.1.S1_at   | MmugDNA.6342.1 | 11.31 | 10.53 | 0.57 | 0.16 | 1.71  | 0.056188 | 0.022456 | 0.399676 | 0.187518 |
| MmugDNA.6343.1.S1_at   | MmugDNA.6343.1 | 6.82  | 6.77  | 1.33 | 0.45 | 1.03  | 0.9458   | 0.145281 | 0.981128 | 0.419322 |
| MmugDNA.6344.1.S1_at   | MmugDNA.6344.1 | 5.32  | 4.97  | 1.13 | 0.29 | 1.28  | 0.676361 | 0.165737 | 0.873062 | 0.442014 |
| MmugDNA.6345.1.S1_at   | MmugDNA.6345.1 | 8.09  | 9.12  | 0.55 | 0.23 | -2.04 | 0.070269 | 0.116319 | 0.428889 | 0.383671 |
| MmugDNA.6346.1.S1_at   | MmugDNA.6346.1 | 8.47  | 8.88  | 0.42 | 0.14 | -1.33 | 0.551738 | 0.392208 | 0.81144  | 0.625652 |
| MmugDNA.6347.1.S1_at   | MmugDNA.6347.1 | 7.9   | 7.55  | 2.04 | 0.34 | 1.28  | 0.741524 | 0.200708 | 0.901431 | 0.47524  |
| MmugDNA.6349.1.S1_at   | MmugDNA.6349.1 | 10.4  | 11.4  | 0.9  | 0.12 | -2    | 0.163792 | 0.167241 | 0.536618 | 0.443684 |
| MmugDNA.6350.1.S1_at   | MmugDNA.6350.1 | 5.34  | 5.05  | 0.07 | 0.03 | 1.22  | 0.003783 | 0.001891 | 0.19819  | 0.065004 |
| MmugDNA.6360.1.S1_at   | MmugDNA.6360.1 | 9.31  | 8.8   | 0.28 | 0.07 | 1.43  | 0.029886 | 0.020209 | 0.336151 | 0.178561 |
| MmugDNA.6368.1.S1_at   | MmugDNA.6368.1 | 12.58 | 12.69 | 0.18 | 0.08 | -1.08 | 0.183679 | 0.073057 | 0.55651  | 0.316017 |
| MmugDNA.6372.1.S1_at   | MmugDNA.6372.1 | 10.57 | 10.9  | 0.05 | 0.1  | -1.26 | 0.018794 | 0.000931 | 0.298593 | 0.048955 |
| MmugDNA.6380.1.S1_at   | MmugDNA.6380.1 | 11.68 | 11.71 | 0.61 | 0.06 | -1.02 | 0.962835 | 0.715049 | 0.988029 | 0.834792 |
| MmugDNA.6381.1.S1_at   | MmugDNA.6381.1 | 7.22  | 7.15  | 1.12 | 0.03 | 1.05  | 0.772311 | 0.672765 | 0.915123 | 0.808768 |

|                        |                |       |       |      |      |       |          |          |          |          |
|------------------------|----------------|-------|-------|------|------|-------|----------|----------|----------|----------|
| MmugDNA.6382.1.S1_at   | MmugDNA.6382.1 | 8.35  | 9.08  | 1.29 | 0.29 | -1.65 | 0.373307 | 0.056619 | 0.705567 | 0.284037 |
| MmugDNA.6385.1.S1_at   | MmugDNA.6385.1 | 10.5  | 10.98 | 0.82 | 0.09 | -1.4  | 0.362995 | 0.030674 | 0.699794 | 0.217148 |
| MmugDNA.6388.1.S1_at   | MmugDNA.6388.1 | 13.07 | 13.11 | 0.16 | 0.14 | -1.03 | 0.295985 | 0.349682 | 0.65167  | 0.593563 |
| MmugDNA.6389.1.S1_at   | MmugDNA.6389.1 | 8.28  | 8.39  | 1.74 | 0.15 | -1.08 | 0.975924 | 0.693617 | 0.992259 | 0.821804 |
| MmugDNA.6393.1.S1_at   | MmugDNA.6393.1 | 10.83 | 11.59 | 0.38 | 0.08 | -1.69 | 0.029146 | 0.00509  | 0.333944 | 0.099108 |
| MmugDNA.6398.1.S1_at   | MmugDNA.6398.1 | 6.52  | 6.88  | 0.24 | 0.08 | -1.28 | 0.071141 | 0.160549 | 0.430356 | 0.436708 |
| MmugDNA.6402.1.S1_at   | MmugDNA.6402.1 | 11.52 | 11.93 | 0.24 | 0.06 | -1.32 | 0.076993 | 0.096073 | 0.438889 | 0.353322 |
| MmugDNA.641.1.S1_at    | MmugDNA.641.1  | 3.72  | 3.92  | 0.14 | 0.02 | -1.14 | 0.204089 | 0.564135 | 0.5753   | 0.738997 |
| MmugDNA.6412.1.S1_at   | MmugDNA.6412.1 | 10.12 | 9.56  | 0.45 | 0.11 | 1.47  | 0.247174 | 0.24781  | 0.612604 | 0.517219 |
| MmugDNA.6413.1.S1_at   | MmugDNA.6413.1 | 8.51  | 9.15  | 0.22 | 0.18 | -1.56 | 0.019812 | 0.030237 | 0.302615 | 0.215784 |
| MmugDNA.6416.1.S1_at   | MmugDNA.6416.1 | 8.82  | 7.9   | 0.17 | 0.46 | 1.9   | 0.025071 | 0.094008 | 0.320402 | 0.350575 |
| MmugDNA.6418.1.S1_at   | MmugDNA.6418.1 | 9.76  | 9.83  | 0.5  | 0.22 | -1.05 | 0.714566 | 0.605013 | 0.888858 | 0.764917 |
| MmugDNA.6426.1.S1_at   | MmugDNA.6426.1 | 9.14  | 9.13  | 0.39 | 0.16 | 1.01  | 0.490884 | 0.020619 | 0.777359 | 0.180141 |
| MmugDNA.6428.1.S1_at   | MmugDNA.6428.1 | 12.14 | 11.96 | 0.08 | 0.02 | 1.14  | 0.023606 | 0.081268 | 0.316166 | 0.329351 |
| MmugDNA.6430.1.S1_at   | MmugDNA.6430.1 | 11.73 | 11.78 | 0.91 | 0.23 | -1.03 | 0.908511 | 0.155986 | 0.969214 | 0.431398 |
| MmugDNA.6431.1.S1_at   | MmugDNA.6431.1 | 10.72 | 10.79 | 0.17 | 0.06 | -1.04 | 0.572483 | 0.007109 | 0.823222 | 0.113555 |
| MmugDNA.6435.1.S1_at   | MmugDNA.6435.1 | 9.29  | 9.06  | 0.27 | 0.1  | 1.17  | 0.079429 | 0.13975  | 0.442296 | 0.413109 |
| MmugDNA.6436.1.S1_at   | MmugDNA.6436.1 | 10.24 | 10.34 | 0.09 | 0.02 | -1.07 | 0.212918 | 0.733921 | 0.583514 | 0.845896 |
| MmugDNA.644.1.S1_at    | MmugDNA.644.1  | 10.8  | 10.71 | 0.31 | 0.12 | 1.06  | 0.579123 | 0.51332  | 0.826431 | 0.706881 |
| MmugDNA.6440.1.S1_at   | MmugDNA.6440.1 | 7.12  | 8.03  | 0.37 | 1.11 | -1.88 | 0.178707 | 0.282811 | 0.551531 | 0.545524 |
| MmugDNA.6443.1.S1_at   | MmugDNA.6443.1 | 11.39 | 11.36 | 0.21 | 0.04 | 1.02  | 0.737906 | 0.433879 | 0.899668 | 0.654054 |
| MmugDNA.6450.1.S1_at   | MmugDNA.6450.1 | 6.93  | 6.57  | 0.11 | 0.07 | 1.28  | 0.015645 | 0.036966 | 0.28333  | 0.236733 |
| MmugDNA.6452.1.S1_s_at | MmugDNA.6452.1 | 13.17 | 12.99 | 0.04 | 0.04 | 1.13  | 0.011296 | 0.021694 | 0.253564 | 0.184333 |
| MmugDNA.6453.1.S1_at   | MmugDNA.6453.1 | 8.17  | 8.19  | 0.2  | 0.04 | -1.01 | 0.672438 | 0.070985 | 0.870944 | 0.312602 |
| MmugDNA.6456.1.S1_at   | MmugDNA.6456.1 | 6.67  | 6.18  | 0.56 | 0.11 | 1.4   | 0.253225 | 0.338623 | 0.617925 | 0.585641 |
| MmugDNA.6457.1.S1_at   | MmugDNA.6457.1 | 2.72  | 2.78  | 0.09 | 0.05 | -1.05 | 0.337259 | 0.076005 | 0.682275 | 0.320676 |
| MmugDNA.6457.1.S1_x_at | MmugDNA.6457.1 | 3.07  | 3.13  | 0.11 | 0.18 | -1.04 | 0.700252 | 0.385238 | 0.883486 | 0.620709 |
| MmugDNA.6458.1.S1_at   | MmugDNA.6458.1 | 12.85 | 12.52 | 0.31 | 0.07 | 1.26  | 0.360601 | 0.526942 | 0.697979 | 0.715708 |
| MmugDNA.646.1.S1_at    | MmugDNA.646.1  | 8.62  | 9.53  | 0.37 | 0.22 | -1.88 | 0.0296   | 0.011213 | 0.335145 | 0.137948 |
| MmugDNA.6468.1.S1_at   | MmugDNA.6468.1 | 10.19 | 10.27 | 0.3  | 0.11 | -1.06 | 0.773412 | 0.15261  | 0.915791 | 0.427435 |
| MmugDNA.6472.1.S1_at   | MmugDNA.6472.1 | 8.58  | 9.1   | 0.14 | 0.19 | -1.43 | 0.009842 | 0.011224 | 0.244005 | 0.137995 |
| MmugDNA.6477.1.S1_at   | MmugDNA.6477.1 | 6.28  | 6.55  | 0.37 | 0.06 | -1.21 | 0.799865 | 0.815904 | 0.926711 | 0.893781 |
| MmugDNA.6478.1.S1_at   | MmugDNA.6478.1 | 6.71  | 7.05  | 0.65 | 0.18 | -1.27 | 0.954016 | 0.54248  | 0.984675 | 0.725516 |
| MmugDNA.6482.1.S1_at   | MmugDNA.6482.1 | 6.58  | 6.35  | 0.21 | 0.13 | 1.17  | 0.282776 | 0.706357 | 0.641027 | 0.829634 |
| MmugDNA.6494.1.S1_at   | MmugDNA.6494.1 | 7.06  | 7.25  | 0.71 | 0.23 | -1.14 | 0.934054 | 0.891057 | 0.977707 | 0.937894 |
| MmugDNA.6498.1.S1_at   | MmugDNA.6498.1 | 11.71 | 11.89 | 0.83 | 0.4  | -1.13 | 0.70551  | 0.108632 | 0.885355 | 0.372171 |
| MmugDNA.6505.1.S1_at   | MmugDNA.6505.1 | 5.38  | 5.29  | 0.23 | 0.01 | 1.06  | 0.309411 | 0.519393 | 0.661718 | 0.711008 |
| MmugDNA.6506.1.S1_at   | MmugDNA.6506.1 | 10.7  | 11.39 | 0.09 | 0.03 | -1.61 | 0.00026  | 0.000067 | 0.130979 | 0.025805 |
| MmugDNA.6512.1.S1_at   | MmugDNA.6512.1 | 10.68 | 10.52 | 0.14 | 0.17 | 1.12  | 0.090777 | 0.298464 | 0.458873 | 0.557143 |
| MmugDNA.6517.1.S1_at   | MmugDNA.6517.1 | 5.72  | 5.62  | 0.08 | 0.11 | 1.07  | 0.329077 | 0.586832 | 0.676177 | 0.753843 |
| MmugDNA.6520.1.S1_at   | MmugDNA.6520.1 | 3.95  | 3.97  | 0.05 | 0.02 | -1.01 | 0.240853 | 0.737175 | 0.607158 | 0.847854 |
| MmugDNA.6539.1.S1_at   | MmugDNA.6539.1 | 9.96  | 10.47 | 0.85 | 0.79 | -1.43 | 0.411014 | 0.065108 | 0.731074 | 0.301119 |
| MmugDNA.6540.1.S1_at   | MmugDNA.6540.1 | 2.75  | 2.78  | 0.05 | 0.11 | -1.02 | 0.906511 | 0.695156 | 0.968356 | 0.822797 |



|                        |                |       |       |      |      |       |          |          |          |          |
|------------------------|----------------|-------|-------|------|------|-------|----------|----------|----------|----------|
| MmugDNA.6542.1.S1_at   | MmugDNA.6542.1 | 11.38 | 11.31 | 0.35 | 0.11 | 1.05  | 0.787777 | 0.166634 | 0.922045 | 0.443133 |
| MmugDNA.6553.1.S1_at   | MmugDNA.6553.1 | 3.66  | 3.9   | 0.27 | 0.28 | -1.18 | 0.752546 | 0.763498 | 0.906598 | 0.862471 |
| MmugDNA.6554.1.S1_at   | MmugDNA.6554.1 | 7.42  | 7.23  | 0.07 | 0.08 | 1.14  | 0.027419 | 0.003211 | 0.327679 | 0.082023 |
| MmugDNA.6559.1.S1_at   | MmugDNA.6559.1 | 11.34 | 11.79 | 0.23 | 0.15 | -1.36 | 0.029828 | 0.011523 | 0.336071 | 0.138822 |
| MmugDNA.656.1.S1_at    | MmugDNA.656.1  | 5.99  | 7.84  | 1.58 | 0.04 | -3.58 | 0.121154 | 0.031434 | 0.494771 | 0.219107 |
| MmugDNA.6560.1.S1_at   | MmugDNA.6560.1 | 11.91 | 12.1  | 0.17 | 0.05 | -1.14 | 0.125958 | 0.027146 | 0.49972  | 0.205893 |
| MmugDNA.6561.1.S1_at   | MmugDNA.6561.1 | 8.27  | 9.18  | 2.65 | 0.19 | -1.88 | 0.425544 | 0.189832 | 0.740112 | 0.465403 |
| MmugDNA.6568.1.S1_at   | MmugDNA.6568.1 | 6.3   | 6.21  | 0.52 | 0.23 | 1.06  | 0.51225  | 0.743801 | 0.789208 | 0.851528 |
| MmugDNA.6571.1.S1_at   | MmugDNA.6571.1 | 10.31 | 10.62 | 0.53 | 0.26 | -1.23 | 0.379919 | 0.032726 | 0.709295 | 0.223957 |
| MmugDNA.6572.1.S1_at   | MmugDNA.6572.1 | 5.85  | 6     | 0.18 | 0.35 | -1.11 | 0.61577  | 0.189219 | 0.844625 | 0.464997 |
| MmugDNA.658.1.S1_at    | MmugDNA.658.1  | 9.61  | 10.06 | 0.49 | 0.3  | -1.37 | 0.053458 | 0.021003 | 0.394724 | 0.181715 |
| MmugDNA.6580.1.S1_at   | MmugDNA.6580.1 | 5.15  | 5.28  | 0.25 | 0.12 | -1.09 | 0.97357  | 0.220209 | 0.991386 | 0.493655 |
| MmugDNA.6583.1.S1_at   | MmugDNA.6583.1 | 12.93 | 12.95 | 0.06 | 0.08 | -1.02 | 0.565036 | 0.745489 | 0.819091 | 0.852409 |
| MmugDNA.6586.1.S1_at   | MmugDNA.6586.1 | 6.43  | 6.37  | 0.48 | 0.15 | 1.05  | 0.318667 | 0.433153 | 0.668228 | 0.653513 |
| MmugDNA.659.1.S1_at    | MmugDNA.659.1  | 8.52  | 8.98  | 0.81 | 0.04 | -1.38 | 0.986376 | 0.981218 | 0.995644 | 0.989624 |
| MmugDNA.6590.1.S1_at   | MmugDNA.6590.1 | 11.29 | 11.42 | 0.06 | 0.03 | -1.09 | 0.016456 | 0.007159 | 0.287478 | 0.113788 |
| MmugDNA.66.1.S1_at     | MmugDNA.66.1   | 7.81  | 7.92  | 0.21 | 0.24 | -1.08 | 0.583181 | 0.016817 | 0.828826 | 0.164298 |
| MmugDNA.6601.1.S1_at   | MmugDNA.6601.1 | 4.42  | 4.32  | 0.15 | 0.1  | 1.07  | 0.104407 | 0.132236 | 0.475473 | 0.404274 |
| MmugDNA.6605.1.S1_at   | MmugDNA.6605.1 | 8.42  | 8.49  | 0.71 | 0.14 | -1.04 | 0.671962 | 0.040438 | 0.870583 | 0.24621  |
| MmugDNA.6607.1.S1_at   | MmugDNA.6607.1 | 12.28 | 12.41 | 0.2  | 0.08 | -1.1  | 0.873082 | 0.327423 | 0.955976 | 0.577284 |
| MmugDNA.6608.1.S1_at   | MmugDNA.6608.1 | 8.92  | 9.4   | 0.31 | 0.01 | -1.39 | 0.171503 | 0.008536 | 0.544814 | 0.122563 |
| MmugDNA.6614.1.S1_at   | MmugDNA.6614.1 | 9.01  | 9.35  | 0.26 | 0.02 | -1.27 | 0.068481 | 0.006427 | 0.42567  | 0.108896 |
| MmugDNA.6621.1.S1_at   | MmugDNA.6621.1 | 13.62 | 13.3  | 0.18 | 0.11 | 1.25  | 0.034474 | 0.030498 | 0.350081 | 0.216644 |
| MmugDNA.6623.1.S1_at   | MmugDNA.6623.1 | 8.71  | 8.76  | 0.21 | 0.19 | -1.04 | 0.376058 | 0.326628 | 0.706657 | 0.576649 |
| MmugDNA.6623.1.S1_s_at | MmugDNA.6623.1 | 9.74  | 9.94  | 0.16 | 0.31 | -1.14 | 0.138337 | 0.124112 | 0.51369  | 0.394389 |
| MmugDNA.6626.1.S1_at   | MmugDNA.6626.1 | 6.58  | 6.65  | 0.31 | 0.19 | -1.05 | 0.555898 | 0.019924 | 0.81378  | 0.177443 |
| MmugDNA.6627.1.S1_at   | MmugDNA.6627.1 | 10.64 | 10.76 | 0.35 | 0.1  | -1.08 | 0.603885 | 0.761682 | 0.8394   | 0.861459 |
| MmugDNA.6634.1.S1_at   | MmugDNA.6634.1 | 9.16  | 7.64  | 0.36 | 0.16 | 2.86  | 0.00476  | 0.001281 | 0.20206  | 0.055351 |
| MmugDNA.6635.1.S1_at   | MmugDNA.6635.1 | 5.41  | 5.41  | 0.19 | 0.13 | -1    | 0.908898 | 0.264853 | 0.969277 | 0.530861 |
| MmugDNA.6640.1.S1_at   | MmugDNA.6640.1 | 9.78  | 9.8   | 0.19 | 0.11 | -1.01 | 0.367846 | 0.414409 | 0.703298 | 0.640293 |
| MmugDNA.6641.1.S1_at   | MmugDNA.6641.1 | 10.32 | 10.93 | 0.23 | 0.12 | -1.53 | 0.018149 | 0.011878 | 0.295482 | 0.141097 |
| MmugDNA.6642.1.S1_at   | MmugDNA.6642.1 | 12.07 | 12.47 | 0.27 | 0.21 | -1.32 | 0.242266 | 0.18422  | 0.608428 | 0.460382 |
| MmugDNA.6650.1.S1_at   | MmugDNA.6650.1 | 10.61 | 10.73 | 0.43 | 0.01 | -1.09 | 0.207043 | 0.124868 | 0.578774 | 0.395219 |
| MmugDNA.6650.1.S1_s_at | MmugDNA.6650.1 | 10.42 | 10.62 | 0.43 | 0.09 | -1.15 | 0.188166 | 0.076468 | 0.56029  | 0.321562 |
| MmugDNA.6653.1.S1_at   | MmugDNA.6653.1 | 9.68  | 9.56  | 0.26 | 0.12 | 1.09  | 0.571237 | 0.198753 | 0.822619 | 0.473391 |
| MmugDNA.6655.1.S1_at   | MmugDNA.6655.1 | 7.44  | 7.63  | 0.16 | 0.01 | -1.14 | 0.216377 | 0.176136 | 0.586544 | 0.452581 |
| MmugDNA.6656.1.S1_at   | MmugDNA.6656.1 | 3.39  | 3.47  | 0.73 | 0.49 | -1.06 | 0.677218 | 0.911084 | 0.873403 | 0.949839 |
| MmugDNA.6657.1.S1_at   | MmugDNA.6657.1 | 5.79  | 6.15  | 0.81 | 0.26 | -1.28 | 0.653975 | 0.845607 | 0.862543 | 0.912157 |
| MmugDNA.6659.1.S1_at   | MmugDNA.6659.1 | 10.8  | 11.44 | 0.24 | 0.12 | -1.56 | 0.044164 | 0.06489  | 0.374157 | 0.30078  |
| MmugDNA.6660.1.S1_at   | MmugDNA.6660.1 | 7.18  | 7.92  | 0.28 | 0.17 | -1.67 | 0.011559 | 0.000835 | 0.255545 | 0.046851 |
| MmugDNA.6662.1.S1_at   | MmugDNA.6662.1 | 11.43 | 10.8  | 0.06 | 0.13 | 1.54  | 0.001776 | 0.001771 | 0.167444 | 0.063359 |
| MmugDNA.6664.1.S1_at   | MmugDNA.6664.1 | 9.45  | 9.49  | 0.44 | 0.08 | -1.02 | 0.451377 | 0.019142 | 0.755167 | 0.174115 |
| MmugDNA.6668.1.S1_at   | MmugDNA.6668.1 | 8.89  | 8.83  | 1.64 | 0.85 | 1.04  | 0.672351 | 0.424775 | 0.870895 | 0.64727  |

|                        |                |       |       |      |      |       |          |          |          |          |
|------------------------|----------------|-------|-------|------|------|-------|----------|----------|----------|----------|
| MmugDNA.6669.1.S1_at   | MmugDNA.6669.1 | 5.52  | 5.4   | 0.1  | 0.14 | 1.09  | 0.397012 | 0.106371 | 0.721621 | 0.368933 |
| MmugDNA.6674.1.S1_at   | MmugDNA.6674.1 | 6.01  | 6.5   | 0.36 | 0.27 | -1.41 | 0.045615 | 0.020976 | 0.376875 | 0.181633 |
| MmugDNA.6675.1.S1_at   | MmugDNA.6675.1 | 5.63  | 6.61  | 1    | 0.33 | -1.98 | 0.146625 | 0.182816 | 0.520956 | 0.459321 |
| MmugDNA.6677.1.S1_at   | MmugDNA.6677.1 | 10.51 | 9.94  | 0.22 | 0.04 | 1.48  | 0.019333 | 0.113392 | 0.300575 | 0.379509 |
| MmugDNA.6678.1.S1_at   | MmugDNA.6678.1 | 13.16 | 13.19 | 0.21 | 0.11 | -1.02 | 0.335194 | 0.150786 | 0.680744 | 0.425322 |
| MmugDNA.6679.1.S1_at   | MmugDNA.6679.1 | 10.17 | 10.22 | 0.38 | 0.05 | -1.03 | 0.525272 | 0.322197 | 0.796198 | 0.573769 |
| MmugDNA.6681.1.S1_at   | MmugDNA.6681.1 | 2.96  | 3.03  | 0.19 | 0.15 | -1.05 | 0.648652 | 0.175023 | 0.859988 | 0.451676 |
| MmugDNA.6681.1.S1_s_at | MmugDNA.6681.1 | 3.08  | 3.12  | 0.08 | 0.15 | -1.03 | 0.927486 | 0.810781 | 0.97593  | 0.890845 |
| MmugDNA.6683.1.S1_at   | MmugDNA.6683.1 | 8.04  | 8.03  | 0.97 | 0.19 | 1.01  | 0.39364  | 0.199816 | 0.719389 | 0.474491 |
| MmugDNA.6685.1.S1_at   | MmugDNA.6685.1 | 8.87  | 9.43  | 0.19 | 0.05 | -1.47 | 0.006063 | 0.000743 | 0.214987 | 0.044964 |
| MmugDNA.6687.1.S1_at   | MmugDNA.6687.1 | 11.97 | 12.22 | 0.17 | 0.05 | -1.19 | 0.104567 | 0.085256 | 0.475679 | 0.337096 |
| MmugDNA.6695.1.S1_at   | MmugDNA.6695.1 | 3.25  | 3.25  | 0.16 | 0.06 | -1    | 0.395752 | 0.424356 | 0.720706 | 0.646929 |
| MmugDNA.6702.1.S1_at   | MmugDNA.6702.1 | 5.35  | 5.93  | 0.22 | 0.44 | -1.49 | 0.192816 | 0.230606 | 0.563577 | 0.502307 |
| MmugDNA.6706.1.S1_at   | MmugDNA.6706.1 | 11.85 | 11.65 | 0.4  | 0.21 | 1.15  | 0.883205 | 0.006738 | 0.95964  | 0.110984 |
| MmugDNA.6709.1.S1_at   | MmugDNA.6709.1 | 7.65  | 8.09  | 0.22 | 0.08 | -1.36 | 0.032482 | 0.001518 | 0.344399 | 0.059307 |
| MmugDNA.671.1.S1_at    | MmugDNA.671.1  | 4.72  | 4.79  | 0.41 | 0.07 | -1.05 | 0.756211 | 0.556447 | 0.90814  | 0.734507 |
| MmugDNA.6714.1.S1_at   | MmugDNA.6714.1 | 8.69  | 8.7   | 0.16 | 0.01 | -1.01 | 0.378508 | 0.654955 | 0.708363 | 0.7982   |
| MmugDNA.6717.1.S1_at   | MmugDNA.6717.1 | 8.83  | 8.43  | 0.27 | 0.05 | 1.32  | 0.056099 | 0.0156   | 0.399441 | 0.158262 |
| MmugDNA.6724.1.S1_at   | MmugDNA.6724.1 | 10.92 | 11    | 0.22 | 0.11 | -1.05 | 0.693554 | 0.314013 | 0.880681 | 0.568178 |
| MmugDNA.6728.1.S1_at   | MmugDNA.6728.1 | 5.11  | 5.45  | 0.64 | 0.45 | -1.27 | 0.587123 | 0.791586 | 0.831568 | 0.879621 |
| MmugDNA.6730.1.S1_at   | MmugDNA.6730.1 | 7.43  | 7.63  | 0.27 | 0.11 | -1.15 | 0.304625 | 0.13872  | 0.658206 | 0.411807 |
| MmugDNA.6731.1.S1_at   | MmugDNA.6731.1 | 3.7   | 3.5   | 0.08 | 0.05 | 1.14  | 0.020051 | 0.059684 | 0.303343 | 0.290919 |
| MmugDNA.6734.1.S1_at   | MmugDNA.6734.1 | 6.58  | 6.95  | 0.78 | 0.1  | -1.3  | 0.780599 | 0.033497 | 0.919137 | 0.226577 |
| MmugDNA.6735.1.S1_at   | MmugDNA.6735.1 | 8.17  | 8.46  | 0.76 | 0.13 | -1.22 | 0.815861 | 0.719915 | 0.933242 | 0.837957 |
| MmugDNA.6739.1.S1_at   | MmugDNA.6739.1 | 11.34 | 11.38 | 0.17 | 0.07 | -1.02 | 0.719094 | 0.081044 | 0.890853 | 0.329189 |
| MmugDNA.674.1.S1_at    | MmugDNA.674.1  | 5.75  | 7.9   | 1.27 | 0.3  | -4.45 | 0.062568 | 0.029214 | 0.41335  | 0.212898 |
| MmugDNA.6745.1.S1_at   | MmugDNA.6745.1 | 10.71 | 10.5  | 0.26 | 0.08 | 1.16  | 0.702947 | 0.275391 | 0.884538 | 0.539663 |
| MmugDNA.6753.1.S1_at   | MmugDNA.6753.1 | 3.6   | 3.73  | 0.14 | 0.17 | -1.1  | 0.383549 | 0.410162 | 0.711425 | 0.637086 |
| MmugDNA.6756.1.S1_at   | MmugDNA.6756.1 | 12.09 | 12.12 | 0.07 | 0.13 | -1.02 | 0.912258 | 0.527853 | 0.970255 | 0.71629  |
| MmugDNA.6757.1.S1_at   | MmugDNA.6757.1 | 6.6   | 6.75  | 0.09 | 0.04 | -1.11 | 0.150798 | 0.801275 | 0.524367 | 0.88568  |
| MmugDNA.6760.1.S1_at   | MmugDNA.6760.1 | 5.36  | 5.46  | 0.16 | 0.14 | -1.07 | 0.875297 | 0.226242 | 0.956677 | 0.498698 |
| MmugDNA.6761.1.S1_at   | MmugDNA.6761.1 | 12.24 | 12.08 | 0.12 | 0.02 | 1.12  | 0.036162 | 0.02288  | 0.354541 | 0.189288 |
| MmugDNA.6761.1.S1_x_at | MmugDNA.6761.1 | 12.14 | 12    | 0.15 | 0.03 | 1.11  | 0.106799 | 0.065513 | 0.479384 | 0.301415 |
| MmugDNA.6764.1.S1_at   | MmugDNA.6764.1 | 8.01  | 7.97  | 0.1  | 0.02 | 1.03  | 0.184535 | 0.146413 | 0.557319 | 0.420454 |
| MmugDNA.6766.1.S1_at   | MmugDNA.6766.1 | 5.7   | 5.51  | 0.01 | 0.1  | 1.14  | 0.075683 | 0.006172 | 0.436722 | 0.106774 |
| MmugDNA.6768.1.S1_at   | MmugDNA.6768.1 | 7.34  | 7.34  | 0.47 | 0.05 | 1     | 0.380173 | 0.580515 | 0.709369 | 0.74976  |
| MmugDNA.6772.1.S1_at   | MmugDNA.6772.1 | 10.6  | 10.8  | 0.31 | 0.08 | -1.15 | 0.231926 | 0.244511 | 0.599694 | 0.51432  |
| MmugDNA.6778.1.S1_at   | MmugDNA.6778.1 | 11.22 | 11.63 | 0.13 | 0.09 | -1.33 | 0.023423 | 0.096717 | 0.315397 | 0.354171 |
| MmugDNA.6782.1.S1_at   | MmugDNA.6782.1 | 10.01 | 9.17  | 1.37 | 0.14 | 1.79  | 0.918719 | 0.146004 | 0.972261 | 0.420006 |
| MmugDNA.6783.1.S1_at   | MmugDNA.6783.1 | 3.26  | 3.15  | 0.09 | 0.13 | 1.08  | 0.382194 | 0.356933 | 0.710505 | 0.5987   |
| MmugDNA.6786.1.S1_at   | MmugDNA.6786.1 | 5.01  | 4.96  | 0.11 | 0.06 | 1.03  | 0.501992 | 0.608591 | 0.783497 | 0.767142 |
| MmugDNA.6790.1.S1_at   | MmugDNA.6790.1 | 11.94 | 11.4  | 1.93 | 0.2  | 1.45  | 0.785495 | 0.295196 | 0.921144 | 0.554568 |
| MmugDNA.6793.1.S1_at   | MmugDNA.6793.1 | 10.68 | 11.33 | 0.19 | 0.03 | -1.56 | 0.008704 | 0.000329 | 0.236219 | 0.035806 |

|                        |                |       |       |      |      |       |          |          |          |          |
|------------------------|----------------|-------|-------|------|------|-------|----------|----------|----------|----------|
| MmugDNA.68.1.S1_at     | MmugDNA.68.1   | 9.88  | 9.61  | 0.31 | 0.03 | 1.21  | 0.529741 | 0.316592 | 0.798493 | 0.569952 |
| MmugDNA.6805.1.S1_at   | MmugDNA.6805.1 | 4.31  | 5.43  | 0.46 | 0.15 | -2.17 | 0.014679 | 0.005102 | 0.277052 | 0.099108 |
| MmugDNA.6808.1.S1_at   | MmugDNA.6808.1 | 9.61  | 9.7   | 0.27 | 0.12 | -1.06 | 0.713476 | 0.923793 | 0.88844  | 0.957119 |
| MmugDNA.6809.1.S1_at   | MmugDNA.6809.1 | 11.74 | 11.87 | 0.13 | 0.03 | -1.09 | 0.174806 | 0.094618 | 0.548031 | 0.351374 |
| MmugDNA.6811.1.S1_at   | MmugDNA.6811.1 | 8.58  | 8.44  | 0.37 | 0.19 | 1.1   | 0.560881 | 0.526666 | 0.816958 | 0.715627 |
| MmugDNA.6812.1.S1_at   | MmugDNA.6812.1 | 11.48 | 11.63 | 0.49 | 0.09 | -1.11 | 0.670449 | 0.747159 | 0.869943 | 0.853124 |
| MmugDNA.6815.1.S1_at   | MmugDNA.6815.1 | 3.3   | 3.21  | 0.04 | 0.11 | 1.07  | 0.143721 | 0.132835 | 0.519054 | 0.404544 |
| MmugDNA.6818.1.S1_at   | MmugDNA.6818.1 | 7.12  | 8.03  | 0.44 | 0.31 | -1.89 | 0.050199 | 0.161501 | 0.386852 | 0.437651 |
| MmugDNA.6819.1.S1_at   | MmugDNA.6819.1 | 3.29  | 3.28  | 0.04 | 0.05 | 1.01  | 0.341755 | 0.371478 | 0.68539  | 0.610204 |
| MmugDNA.6820.1.S1_at   | MmugDNA.6820.1 | 3.46  | 3.29  | 0.23 | 0.14 | 1.12  | 0.581923 | 0.658958 | 0.827791 | 0.800473 |
| MmugDNA.6823.1.S1_s_at | MmugDNA.6823.1 | 7.98  | 8.29  | 0.21 | 0.03 | -1.24 | 0.073324 | 0.087019 | 0.434364 | 0.339889 |
| MmugDNA.6828.1.S1_at   | MmugDNA.6828.1 | 6.64  | 6.24  | 1.27 | 0.31 | 1.32  | 0.544495 | 0.620033 | 0.807267 | 0.775207 |
| MmugDNA.683.1.S1_at    | MmugDNA.683.1  | 6.16  | 6.15  | 0.01 | 0.15 | 1.01  | 0.453751 | 0.506323 | 0.756276 | 0.702371 |
| MmugDNA.6836.1.S1_at   | MmugDNA.6836.1 | 6.53  | 6.26  | 0.13 | 0.08 | 1.21  | 0.069495 | 0.096912 | 0.427341 | 0.354311 |
| MmugDNA.684.1.S1_at    | MmugDNA.684.1  | 6.42  | 6.84  | 0.24 | 0.19 | -1.34 | 0.046717 | 0.003813 | 0.378614 | 0.08794  |
| MmugDNA.6840.1.S1_at   | MmugDNA.6840.1 | 10.16 | 10.4  | 0.19 | 0.07 | -1.18 | 0.320059 | 0.208022 | 0.669117 | 0.482049 |
| MmugDNA.6842.1.S1_at   | MmugDNA.6842.1 | 11.68 | 11.72 | 0.24 | 0.01 | -1.03 | 0.770686 | 0.928822 | 0.914161 | 0.959449 |
| MmugDNA.6845.1.S1_at   | MmugDNA.6845.1 | 9.21  | 8.99  | 0.2  | 0.07 | 1.17  | 0.053458 | 0.034794 | 0.394724 | 0.230686 |
| MmugDNA.6846.1.S1_at   | MmugDNA.6846.1 | 4.72  | 4.86  | 0.07 | 0.02 | -1.09 | 0.014166 | 0.012151 | 0.274019 | 0.142648 |
| MmugDNA.6849.1.S1_at   | MmugDNA.6849.1 | 7.31  | 7     | 0.11 | 0.07 | 1.25  | 0.050599 | 0.042081 | 0.387563 | 0.249638 |
| MmugDNA.6852.1.S1_at   | MmugDNA.6852.1 | 6.4   | 6.5   | 0.24 | 0.14 | -1.07 | 0.502932 | 0.131243 | 0.783991 | 0.403263 |
| MmugDNA.6854.1.S1_at   | MmugDNA.6854.1 | 9.12  | 9.99  | 0.5  | 0.19 | -1.83 | 0.087704 | 0.088677 | 0.455349 | 0.342234 |
| MmugDNA.6858.1.S1_at   | MmugDNA.6858.1 | 7.01  | 7.06  | 0.6  | 0.11 | -1.03 | 0.804163 | 0.733853 | 0.928759 | 0.845891 |
| MmugDNA.6859.1.S1_at   | MmugDNA.6859.1 | 6.12  | 7.73  | 0.82 | 0.28 | -3.07 | 0.091044 | 0.008941 | 0.458927 | 0.125013 |
| MmugDNA.6864.1.S1_at   | MmugDNA.6864.1 | 11.54 | 11.38 | 0.3  | 0.06 | 1.12  | 0.211077 | 0.096493 | 0.582141 | 0.35409  |
| MmugDNA.6866.1.S1_at   | MmugDNA.6866.1 | 5.84  | 6.27  | 0.51 | 0.12 | -1.34 | 0.852206 | 0.907869 | 0.947936 | 0.947871 |
| MmugDNA.6867.1.S1_at   | MmugDNA.6867.1 | 12.46 | 12.51 | 0.49 | 0.09 | -1.03 | 0.93143  | 0.199739 | 0.97706  | 0.47438  |
| MmugDNA.6869.1.S1_at   | MmugDNA.6869.1 | 8.14  | 8.24  | 0.23 | 0.2  | -1.07 | 0.872608 | 0.003909 | 0.955794 | 0.088806 |
| MmugDNA.6873.1.S1_at   | MmugDNA.6873.1 | 6.46  | 6.23  | 0.11 | 0.09 | 1.17  | 0.04999  | 0.300098 | 0.386663 | 0.558262 |
| MmugDNA.6875.1.S1_at   | MmugDNA.6875.1 | 5.76  | 6.71  | 1.17 | 0.13 | -1.93 | 0.234977 | 0.630654 | 0.602251 | 0.782345 |
| MmugDNA.6876.1.S1_at   | MmugDNA.6876.1 | 3.99  | 3.98  | 0.04 | 0.03 | 1.01  | 0.398808 | 0.562381 | 0.722745 | 0.738016 |
| MmugDNA.6880.1.S1_at   | MmugDNA.6880.1 | 8.48  | 8.36  | 0.66 | 0.33 | 1.09  | 0.359411 | 0.498625 | 0.697237 | 0.697648 |
| MmugDNA.6884.1.S1_at   | MmugDNA.6884.1 | 10.62 | 10.37 | 0.3  | 0.17 | 1.19  | 0.086272 | 0.021306 | 0.453862 | 0.182727 |
| MmugDNA.6887.1.S1_at   | MmugDNA.6887.1 | 6.32  | 6.08  | 0.08 | 0.11 | 1.18  | 0.023451 | 0.033243 | 0.31561  | 0.225803 |
| MmugDNA.6890.1.S1_at   | MmugDNA.6890.1 | 4.36  | 4.39  | 0.25 | 0.08 | -1.02 | 0.860381 | 0.856454 | 0.950774 | 0.917996 |
| MmugDNA.6891.1.S1_s_at | MmugDNA.6891.1 | 12.78 | 12.75 | 0.06 | 0.11 | 1.02  | 0.692382 | 0.911407 | 0.880095 | 0.950063 |
| MmugDNA.6892.1.S1_at   | MmugDNA.6892.1 | 6.33  | 6.29  | 0.19 | 0.05 | 1.03  | 0.581908 | 0.536583 | 0.827791 | 0.721903 |
| MmugDNA.6898.1.S1_at   | MmugDNA.6898.1 | 10.17 | 10.2  | 0.33 | 0.05 | -1.02 | 0.902853 | 0.057173 | 0.967218 | 0.284974 |
| MmugDNA.6899.1.S1_at   | MmugDNA.6899.1 | 9.73  | 10.47 | 0.27 | 0.07 | -1.68 | 0.028603 | 0.021191 | 0.332767 | 0.182325 |
| MmugDNA.6901.1.S1_at   | MmugDNA.6901.1 | 7.91  | 7.36  | 0.3  | 0.17 | 1.46  | 0.039614 | 0.014165 | 0.362432 | 0.152135 |
| MmugDNA.6908.1.S1_at   | MmugDNA.6908.1 | 5.5   | 5.26  | 0.09 | 0.18 | 1.18  | 0.075273 | 0.108294 | 0.436118 | 0.371557 |
| MmugDNA.6910.1.S1_at   | MmugDNA.6910.1 | 12.15 | 12.19 | 0.12 | 0.08 | -1.03 | 0.629576 | 0.532312 | 0.851663 | 0.719017 |
| MmugDNA.6911.1.S1_at   | MmugDNA.6911.1 | 4.65  | 4.6   | 0.19 | 0.06 | 1.04  | 0.525119 | 0.185952 | 0.796179 | 0.461778 |

|                        |                |       |       |      |      |       |          |          |          |          |
|------------------------|----------------|-------|-------|------|------|-------|----------|----------|----------|----------|
| MmugDNA.6912.1.S1_at   | MmugDNA.6912.1 | 10.02 | 9.49  | 1.76 | 0.25 | 1.44  | 0.745869 | 0.362677 | 0.90313  | 0.603206 |
| MmugDNA.6915.1.S1_at   | MmugDNA.6915.1 | 3.57  | 3.56  | 0.21 | 0.12 | 1.01  | 0.917926 | 0.920559 | 0.972062 | 0.955234 |
| MmugDNA.6919.1.S1_at   | MmugDNA.6919.1 | 7.91  | 8.13  | 1.28 | 0.13 | -1.16 | 0.291572 | 0.042535 | 0.647943 | 0.250848 |
| MmugDNA.6931.1.S1_at   | MmugDNA.6931.1 | 9.79  | 9.45  | 0.94 | 0.12 | 1.27  | 0.547538 | 0.05633  | 0.809169 | 0.283348 |
| MmugDNA.6932.1.S1_at   | MmugDNA.6932.1 | 3.55  | 3.49  | 0.11 | 0.14 | 1.04  | 0.592161 | 0.741416 | 0.833766 | 0.850285 |
| MmugDNA.6939.1.S1_at   | MmugDNA.6939.1 | 4.92  | 4.92  | 0.05 | 0.11 | -1    | 0.988456 | 0.550626 | 0.995877 | 0.730605 |
| MmugDNA.6941.1.S1_at   | MmugDNA.6941.1 | 9.92  | 9.88  | 0.43 | 0.12 | 1.03  | 0.775654 | 0.584874 | 0.916804 | 0.75256  |
| MmugDNA.6944.1.S1_at   | MmugDNA.6944.1 | 9.12  | 8.66  | 0.3  | 0.1  | 1.38  | 0.128595 | 0.081941 | 0.503383 | 0.330521 |
| MmugDNA.6948.1.S1_at   | MmugDNA.6948.1 | 9.45  | 8.56  | 0.39 | 0.18 | 1.85  | 0.033155 | 0.00107  | 0.346294 | 0.051873 |
| MmugDNA.6954.1.S1_at   | MmugDNA.6954.1 | 10.78 | 11.18 | 0.11 | 0.05 | -1.32 | 0.008265 | 0.003159 | 0.232164 | 0.081739 |
| MmugDNA.6956.1.S1_at   | MmugDNA.6956.1 | 7.88  | 8.52  | 0.2  | 0.12 | -1.56 | 0.026629 | 0.00602  | 0.325592 | 0.106089 |
| MmugDNA.6959.1.S1_at   | MmugDNA.6959.1 | 8.49  | 8.51  | 0.75 | 0.13 | -1.01 | 0.99839  | 0.588336 | 0.999506 | 0.754874 |
| MmugDNA.6962.1.S1_at   | MmugDNA.6962.1 | 6.73  | 5.96  | 0.26 | 0.56 | 1.7   | 0.101144 | 0.108737 | 0.471667 | 0.372257 |
| MmugDNA.6963.1.S1_at   | MmugDNA.6963.1 | 9.13  | 9.32  | 0.36 | 0.09 | -1.14 | 0.564274 | 0.177875 | 0.818615 | 0.454182 |
| MmugDNA.6971.1.S1_at   | MmugDNA.6971.1 | 10.66 | 10.97 | 0.53 | 0.01 | -1.24 | 0.358551 | 0.262433 | 0.696434 | 0.528697 |
| MmugDNA.6974.1.S1_at   | MmugDNA.6974.1 | 7.05  | 7.06  | 0.07 | 0.05 | -1.01 | 0.78013  | 0.775772 | 0.919011 | 0.869526 |
| MmugDNA.6975.1.S1_at   | MmugDNA.6975.1 | 4.52  | 4.86  | 0.02 | 0.07 | -1.27 | 0.001244 | 0.059329 | 0.15692  | 0.29054  |
| MmugDNA.6976.1.S1_at   | MmugDNA.6976.1 | 6.55  | 6.84  | 0.19 | 0.11 | -1.22 | 0.083454 | 0.171644 | 0.44954  | 0.448044 |
| MmugDNA.6978.1.S1_at   | MmugDNA.6978.1 | 5.04  | 4.96  | 0.07 | 0.37 | 1.06  | 0.675321 | 0.282376 | 0.872632 | 0.545076 |
| MmugDNA.6979.1.S1_at   | MmugDNA.6979.1 | 8.24  | 8.46  | 0.35 | 0.1  | -1.17 | 0.159017 | 0.015219 | 0.531755 | 0.156741 |
| MmugDNA.6980.1.S1_at   | MmugDNA.6980.1 | 12.64 | 12.56 | 0.14 | 0.04 | 1.05  | 0.500809 | 0.456375 | 0.782991 | 0.670155 |
| MmugDNA.6983.1.S1_at   | MmugDNA.6983.1 | 11.83 | 11.3  | 0.32 | 0.19 | 1.43  | 0.027778 | 0.012613 | 0.329202 | 0.144864 |
| MmugDNA.699.1.S1_at    | MmugDNA.699.1  | 5.48  | 5.75  | 0.38 | 0.07 | -1.21 | 0.697782 | 0.030363 | 0.882451 | 0.216116 |
| MmugDNA.6997.1.S1_at   | MmugDNA.6997.1 | 9.12  | 9.12  | 0.26 | 0.07 | 1     | 0.841289 | 0.385876 | 0.943701 | 0.621161 |
| MmugDNA.6998.1.S1_at   | MmugDNA.6998.1 | 14.31 | 14.36 | 0.05 | 0.05 | -1.04 | 0.158845 | 0.190461 | 0.531595 | 0.465906 |
| MmugDNA.70.1.S1_at     | MmugDNA.70.1   | 10.86 | 10.58 | 0.42 | 0.34 | 1.22  | 0.205565 | 0.010296 | 0.577387 | 0.132854 |
| MmugDNA.7002.1.S1_s_at | MmugDNA.7002.1 | 14.36 | 14.37 | 0.07 | 0.01 | -1.01 | 0.37287  | 0.569047 | 0.705567 | 0.742233 |
| MmugDNA.7007.1.S1_at   | MmugDNA.7007.1 | 10.09 | 10.26 | 0.37 | 0.1  | -1.12 | 0.419325 | 0.576293 | 0.736245 | 0.747148 |
| MmugDNA.701.1.S1_at    | MmugDNA.701.1  | 2.82  | 2.79  | 0.01 | 0.09 | 1.02  | 0.635778 | 0.613229 | 0.854748 | 0.770484 |
| MmugDNA.7018.1.S1_at   | MmugDNA.7018.1 | 6.3   | 7.38  | 1.17 | 0.35 | -2.11 | 0.448695 | 0.241728 | 0.754021 | 0.512306 |
| MmugDNA.7021.1.S1_at   | MmugDNA.7021.1 | 12.55 | 12.57 | 0.01 | 0.03 | -1.01 | 0.977255 | 0.087642 | 0.992633 | 0.340903 |
| MmugDNA.7023.1.S1_at   | MmugDNA.7023.1 | 9.31  | 8.79  | 0.51 | 0.16 | 1.43  | 0.19853  | 0.175222 | 0.569837 | 0.452011 |
| MmugDNA.7024.1.S1_at   | MmugDNA.7024.1 | 7.45  | 7.03  | 0.27 | 0.19 | 1.34  | 0.095023 | 0.21527  | 0.464131 | 0.489011 |
| MmugDNA.7027.1.S1_at   | MmugDNA.7027.1 | 10.49 | 10.44 | 0.07 | 0.06 | 1.04  | 0.120692 | 0.137249 | 0.494166 | 0.410155 |
| MmugDNA.7029.1.S1_at   | MmugDNA.7029.1 | 6.91  | 7.4   | 0.79 | 0.25 | -1.4  | 0.926953 | 0.205269 | 0.975766 | 0.479599 |
| MmugDNA.703.1.S1_at    | MmugDNA.703.1  | 6.72  | 6.92  | 0.17 | 0.29 | -1.15 | 0.301515 | 0.621613 | 0.655783 | 0.776191 |
| MmugDNA.7034.1.S1_at   | MmugDNA.7034.1 | 9.61  | 8.89  | 0.33 | 0.23 | 1.65  | 0.014999 | 0.01202  | 0.2791   | 0.141889 |
| MmugDNA.7037.1.S1_at   | MmugDNA.7037.1 | 4.89  | 5.85  | 0.31 | 0.21 | -1.94 | 0.014568 | 0.001687 | 0.276536 | 0.062186 |
| MmugDNA.7038.1.S1_at   | MmugDNA.7038.1 | 12.47 | 12.15 | 4.15 | 0.2  | 1.25  | 0.466102 | 0.357336 | 0.76336  | 0.598949 |
| MmugDNA.7044.1.S1_at   | MmugDNA.7044.1 | 11.76 | 11.86 | 0.69 | 0.07 | -1.07 | 0.790506 | 0.94317  | 0.922954 | 0.967774 |
| MmugDNA.7046.1.S1_at   | MmugDNA.7046.1 | 7.13  | 7.44  | 0.48 | 0.14 | -1.24 | 0.346683 | 0.088926 | 0.688361 | 0.34275  |
| MmugDNA.705.1.S1_at    | MmugDNA.705.1  | 4.29  | 4.1   | 0.15 | 0.12 | 1.14  | 0.101209 | 0.145093 | 0.471667 | 0.419053 |
| MmugDNA.7052.1.S1_at   | MmugDNA.7052.1 | 12.07 | 12.09 | 0.46 | 0.1  | -1.01 | 0.997041 | 0.066438 | 0.998914 | 0.303406 |

|                        |                |       |       |      |      |       |          |          |          |          |
|------------------------|----------------|-------|-------|------|------|-------|----------|----------|----------|----------|
| MmugDNA.7057.1.S1_s_at | MmugDNA.7057.1 | 11.81 | 11.7  | 0.24 | 0.03 | 1.08  | 0.852953 | 0.456989 | 0.948114 | 0.670592 |
| MmugDNA.7058.1.S1_at   | MmugDNA.7058.1 | 10.29 | 10.83 | 0.22 | 0.1  | -1.46 | 0.031697 | 0.038395 | 0.341772 | 0.240833 |
| MmugDNA.7059.1.S1_at   | MmugDNA.7059.1 | 12.95 | 12.98 | 0.05 | 0.11 | -1.02 | 0.712533 | 0.92953  | 0.887958 | 0.959757 |
| MmugDNA.7060.1.S1_at   | MmugDNA.7060.1 | 7.95  | 8.01  | 0.27 | 0.26 | -1.04 | 0.172702 | 0.359082 | 0.545872 | 0.600438 |
| MmugDNA.7066.1.S1_at   | MmugDNA.7066.1 | 9.36  | 8.75  | 0.37 | 0.1  | 1.53  | 0.054185 | 0.147998 | 0.396146 | 0.422406 |
| MmugDNA.7071.1.S1_at   | MmugDNA.7071.1 | 3.86  | 3.85  | 0.08 | 0.02 | 1.01  | 0.26528  | 0.764579 | 0.626397 | 0.863128 |
| MmugDNA.7072.1.S1_at   | MmugDNA.7072.1 | 8.86  | 9.31  | 0.48 | 0.07 | -1.37 | 0.588717 | 0.681567 | 0.831968 | 0.814092 |
| MmugDNA.7088.1.S1_at   | MmugDNA.7088.1 | 12.89 | 12.88 | 0.09 | 0.07 | 1     | 0.485754 | 0.411751 | 0.774425 | 0.638434 |
| MmugDNA.7099.1.S1_at   | MmugDNA.7099.1 | 11.84 | 12.12 | 0.28 | 0.03 | -1.21 | 0.1757   | 0.212068 | 0.548828 | 0.486036 |
| MmugDNA.7099.1.S1_s_at | MmugDNA.7099.1 | 12.58 | 12.72 | 0.2  | 0.04 | -1.1  | 0.299051 | 0.494079 | 0.653475 | 0.694663 |
| MmugDNA.71.1.S1_at     | MmugDNA.71.1   | 4.76  | 5.1   | 0.35 | 0.15 | -1.27 | 0.152648 | 0.091693 | 0.525558 | 0.346934 |
| MmugDNA.7103.1.S1_at   | MmugDNA.7103.1 | 7.22  | 7.27  | 0.33 | 0.09 | -1.03 | 0.644108 | 0.602123 | 0.858432 | 0.763172 |
| MmugDNA.7106.1.S1_at   | MmugDNA.7106.1 | 8.04  | 8.1   | 0.46 | 0.01 | -1.04 | 0.506626 | 0.037399 | 0.785926 | 0.237776 |
| MmugDNA.7107.1.S1_at   | MmugDNA.7107.1 | 10.19 | 9.98  | 0.54 | 0.27 | 1.15  | 0.897006 | 0.329866 | 0.964979 | 0.578874 |
| MmugDNA.7107.1.S1_s_at | MmugDNA.7107.1 | 8.99  | 8.64  | 0.66 | 0.28 | 1.27  | 0.673824 | 0.47244  | 0.871607 | 0.67999  |
| MmugDNA.7108.1.S1_at   | MmugDNA.7108.1 | 6.92  | 6.08  | 0.72 | 0.22 | 1.79  | 0.115308 | 0.09513  | 0.488677 | 0.352151 |
| MmugDNA.7109.1.S1_at   | MmugDNA.7109.1 | 7.49  | 7.78  | 1    | 0.33 | -1.22 | 0.860624 | 0.219325 | 0.950856 | 0.493094 |
| MmugDNA.7115.1.S1_at   | MmugDNA.7115.1 | 10.16 | 10.31 | 0.27 | 0.03 | -1.11 | 0.396796 | 0.024862 | 0.721565 | 0.197552 |
| MmugDNA.7117.1.S1_at   | MmugDNA.7117.1 | 3.98  | 4     | 0.07 | 0.22 | -1.02 | 0.854559 | 0.958735 | 0.948538 | 0.976654 |
| MmugDNA.7118.1.S1_at   | MmugDNA.7118.1 | 7.77  | 7.56  | 0.78 | 0.11 | 1.16  | 0.683588 | 0.407458 | 0.876134 | 0.635032 |
| MmugDNA.712.1.S1_at    | MmugDNA.712.1  | 8.45  | 9.2   | 0.07 | 0.23 | -1.67 | 0.005811 | 0.001292 | 0.211798 | 0.055585 |
| MmugDNA.7121.1.S1_at   | MmugDNA.7121.1 | 6.99  | 6.98  | 0.01 | 0.03 | 1.01  | 0.512594 | 0.000601 | 0.789481 | 0.041985 |
| MmugDNA.7127.1.S1_at   | MmugDNA.7127.1 | 6.74  | 6.39  | 0.7  | 0.43 | 1.28  | 0.908685 | 0.301861 | 0.969262 | 0.559788 |
| MmugDNA.7128.1.S1_at   | MmugDNA.7128.1 | 7.92  | 8.19  | 1.32 | 0.2  | -1.21 | 0.72653  | 0.831781 | 0.894374 | 0.903503 |
| MmugDNA.7129.1.S1_at   | MmugDNA.7129.1 | 7.02  | 7.47  | 0.41 | 0.15 | -1.37 | 0.11063  | 0.304051 | 0.483783 | 0.561388 |
| MmugDNA.7136.1.S1_at   | MmugDNA.7136.1 | 7.05  | 7.13  | 0.08 | 0.02 | -1.06 | 0.216417 | 0.022787 | 0.586564 | 0.18908  |
| MmugDNA.7140.1.S1_at   | MmugDNA.7140.1 | 11.09 | 11.96 | 0.15 | 0.02 | -1.83 | 0.000793 | 0.000097 | 0.15004  | 0.0278   |
| MmugDNA.7146.1.S1_at   | MmugDNA.7146.1 | 6.09  | 5.91  | 0.13 | 0.11 | 1.13  | 0.243934 | 0.18593  | 0.609715 | 0.461772 |
| MmugDNA.7147.1.S1_at   | MmugDNA.7147.1 | 10.71 | 10.2  | 0.55 | 0.25 | 1.42  | 0.488775 | 0.358623 | 0.775818 | 0.600139 |
| MmugDNA.7157.1.S1_s_at | MmugDNA.7157.1 | 6.04  | 6.11  | 0.25 | 0.09 | -1.06 | 0.91843  | 0.23653  | 0.972122 | 0.507364 |
| MmugDNA.7159.1.S1_at   | MmugDNA.7159.1 | 6.83  | 7.14  | 0.35 | 0.07 | -1.24 | 0.571759 | 0.777073 | 0.822923 | 0.870505 |
| MmugDNA.7167.1.S1_at   | MmugDNA.7167.1 | 12.13 | 11.34 | 0.34 | 0.04 | 1.73  | 0.023565 | 0.02292  | 0.31615  | 0.189403 |
| MmugDNA.7170.1.S1_at   | MmugDNA.7170.1 | 11.7  | 11.51 | 0.21 | 0.09 | 1.15  | 0.052918 | 0.016097 | 0.393459 | 0.160775 |
| MmugDNA.7171.1.S1_at   | MmugDNA.7171.1 | 11    | 10.99 | 0.05 | 0.01 | 1     | 0.788838 | 0.18067  | 0.922472 | 0.457245 |
| MmugDNA.7172.1.S1_at   | MmugDNA.7172.1 | 10.85 | 11.18 | 0.15 | 0.15 | -1.26 | 0.050566 | 0.006413 | 0.387529 | 0.108813 |
| MmugDNA.7177.1.S1_at   | MmugDNA.7177.1 | 8.56  | 8.32  | 0.22 | 0.05 | 1.18  | 0.159229 | 0.336338 | 0.531922 | 0.583813 |
| MmugDNA.7178.1.S1_at   | MmugDNA.7178.1 | 11.92 | 11.3  | 0.19 | 0.14 | 1.54  | 0.010227 | 0.006071 | 0.246929 | 0.106175 |
| MmugDNA.7181.1.S1_at   | MmugDNA.7181.1 | 8.26  | 8.17  | 0.29 | 0.06 | 1.06  | 0.658172 | 0.511094 | 0.864461 | 0.705383 |
| MmugDNA.7183.1.S1_at   | MmugDNA.7183.1 | 13.2  | 13.22 | 0.28 | 0.08 | -1.02 | 0.889712 | 0.086773 | 0.961988 | 0.339521 |
| MmugDNA.7187.1.S1_at   | MmugDNA.7187.1 | 10.45 | 10.45 | 0.14 | 0.05 | -1    | 0.567763 | 0.41104  | 0.820586 | 0.637874 |
| MmugDNA.7190.1.S1_at   | MmugDNA.7190.1 | 8.56  | 9.43  | 0.61 | 0.15 | -1.83 | 0.205534 | 0.199451 | 0.577371 | 0.474035 |
| MmugDNA.7204.1.S1_at   | MmugDNA.7204.1 | 13.18 | 13.22 | 0.22 | 0.08 | -1.03 | 0.436938 | 0.026181 | 0.746613 | 0.202791 |
| MmugDNA.7205.1.S1_at   | MmugDNA.7205.1 | 6.93  | 7.37  | 0.6  | 0.66 | -1.35 | 0.895485 | 0.575787 | 0.964244 | 0.746767 |

|                        |                |       |       |      |      |       |          |          |          |          |
|------------------------|----------------|-------|-------|------|------|-------|----------|----------|----------|----------|
| MmugDNA.7206.1.S1_at   | MmugDNA.7206.1 | 10.62 | 10.38 | 0.27 | 0.03 | 1.18  | 0.258894 | 0.241362 | 0.622286 | 0.511961 |
| MmugDNA.7208.1.S1_at   | MmugDNA.7208.1 | 5.4   | 5.71  | 0.46 | 0.22 | -1.24 | 0.781607 | 0.428432 | 0.919573 | 0.649993 |
| MmugDNA.7220.1.S1_at   | MmugDNA.7220.1 | 5.06  | 4.86  | 0.33 | 0.31 | 1.14  | 0.649447 | 0.782084 | 0.860318 | 0.873766 |
| MmugDNA.7222.1.S1_at   | MmugDNA.7222.1 | 7.61  | 8.44  | 0.6  | 0.21 | -1.78 | 0.02477  | 0.024295 | 0.31972  | 0.195069 |
| MmugDNA.7232.1.S1_at   | MmugDNA.7232.1 | 11.34 | 12.22 | 0.61 | 0.02 | -1.85 | 0.059854 | 0.068794 | 0.407284 | 0.308711 |
| MmugDNA.7239.1.S1_at   | MmugDNA.7239.1 | 11.42 | 11.71 | 0.24 | 0.1  | -1.22 | 0.052431 | 0.029462 | 0.392384 | 0.213368 |
| MmugDNA.724.1.S1_at    | MmugDNA.724.1  | 12.29 | 12.6  | 0.45 | 0.06 | -1.24 | 0.097547 | 0.079791 | 0.466487 | 0.327113 |
| MmugDNA.725.1.S1_at    | MmugDNA.725.1  | 6.5   | 5.76  | 0.42 | 0.27 | 1.67  | 0.067729 | 0.014018 | 0.42444  | 0.151595 |
| MmugDNA.7250.1.S1_at   | MmugDNA.7250.1 | 4.73  | 4.84  | 0.16 | 0.09 | -1.08 | 0.888964 | 0.257677 | 0.961733 | 0.525332 |
| MmugDNA.7254.1.S1_at   | MmugDNA.7254.1 | 5.19  | 4.72  | 0.33 | 0.1  | 1.39  | 0.101071 | 0.136146 | 0.471606 | 0.408473 |
| MmugDNA.726.1.S1_at    | MmugDNA.726.1  | 12.77 | 12.68 | 0.05 | 0.05 | -1.06 | 0.136985 | 0.093019 | 0.511963 | 0.349177 |
| MmugDNA.7262.1.S1_at   | MmugDNA.7262.1 | 3.78  | 3.66  | 0.08 | 0.04 | 1.08  | 0.031493 | 0.739518 | 0.341227 | 0.849052 |
| MmugDNA.7275.1.S1_at   | MmugDNA.7275.1 | 11.25 | 11.12 | 0.12 | 0.12 | 1.09  | 0.19859  | 0.155477 | 0.56986  | 0.430848 |
| MmugDNA.7278.1.S1_at   | MmugDNA.7278.1 | 7.34  | 6.94  | 0.57 | 0.09 | 1.33  | 0.14854  | 0.019927 | 0.522567 | 0.177443 |
| MmugDNA.7279.1.S1_at   | MmugDNA.7279.1 | 6.53  | 6.56  | 0.25 | 0.28 | -1.01 | 0.667554 | 0.163186 | 0.868641 | 0.439316 |
| MmugDNA.7280.1.S1_at   | MmugDNA.7280.1 | 11.14 | 10.86 | 0.09 | 0.06 | 1.22  | 0.030433 | 0.19404  | 0.337918 | 0.469151 |
| MmugDNA.729.1.S1_at    | MmugDNA.729.1  | 9.49  | 9.62  | 0.1  | 0.11 | -1.1  | 0.254274 | 0.000561 | 0.618749 | 0.041049 |
| MmugDNA.7291.1.S1_at   | MmugDNA.7291.1 | 5.73  | 5.24  | 0.39 | 0.27 | 1.4   | 0.311949 | 0.234492 | 0.663542 | 0.505674 |
| MmugDNA.7301.1.S1_s_at | MmugDNA.7301.1 | 12.65 | 12.41 | 0.16 | 0.03 | 1.18  | 0.087243 | 0.015038 | 0.454785 | 0.155766 |
| MmugDNA.731.1.S1_at    | MmugDNA.731.1  | 4.7   | 4.69  | 0.17 | 0.14 | 1.01  | 0.215497 | 0.251766 | 0.585748 | 0.520444 |
| MmugDNA.7316.1.S1_at   | MmugDNA.7316.1 | 11.94 | 11.87 | 0.15 | 0.05 | 1.05  | 0.830253 | 0.01523  | 0.939167 | 0.156798 |
| MmugDNA.7319.1.S1_at   | MmugDNA.7319.1 | 4.97  | 5.07  | 0.1  | 0.1  | -1.07 | 0.280777 | 0.260242 | 0.639467 | 0.526807 |
| MmugDNA.732.1.S1_at    | MmugDNA.732.1  | 12.75 | 12.77 | 0.89 | 0.13 | -1.01 | 0.934878 | 0.14032  | 0.977924 | 0.413498 |
| MmugDNA.7320.1.S1_at   | MmugDNA.7320.1 | 5.07  | 5.08  | 0.2  | 0.04 | -1    | 0.865262 | 0.378211 | 0.952585 | 0.615438 |
| MmugDNA.7322.1.S1_at   | MmugDNA.7322.1 | 5.35  | 5.26  | 0.18 | 0.34 | 1.06  | 0.97581  | 0.955986 | 0.992214 | 0.97502  |
| MmugDNA.7325.1.S1_at   | MmugDNA.7325.1 | 7.82  | 7.99  | 0.19 | 0.03 | -1.13 | 0.232074 | 0.022097 | 0.599901 | 0.185973 |
| MmugDNA.7329.1.S1_s_at | MmugDNA.7329.1 | 9.49  | 8.82  | 0.17 | 0.19 | 1.59  | 0.006786 | 0.012176 | 0.223856 | 0.142754 |
| MmugDNA.7330.1.S1_at   | MmugDNA.7330.1 | 9.13  | 9.67  | 1.46 | 0.2  | -1.46 | 0.458111 | 0.27133  | 0.758638 | 0.53644  |
| MmugDNA.7332.1.S1_at   | MmugDNA.7332.1 | 5.2   | 5.09  | 0.1  | 0.04 | 1.08  | 0.283484 | 0.31789  | 0.641407 | 0.571044 |
| MmugDNA.7337.1.S1_at   | MmugDNA.7337.1 | 4.5   | 4.19  | 0.39 | 0.46 | 1.24  | 0.858179 | 0.915864 | 0.949904 | 0.952836 |
| MmugDNA.7339.1.S1_at   | MmugDNA.7339.1 | 3.96  | 4.16  | 0.24 | 0.11 | -1.15 | 0.141977 | 0.162949 | 0.516979 | 0.4391   |
| MmugDNA.7348.1.S1_at   | MmugDNA.7348.1 | 7.12  | 6.92  | 0.14 | 0.02 | 1.15  | 0.074556 | 0.310135 | 0.435313 | 0.565354 |
| MmugDNA.7349.1.S1_at   | MmugDNA.7349.1 | 10.66 | 10.42 | 0.53 | 0.03 | 1.18  | 0.477903 | 0.574963 | 0.76987  | 0.746216 |
| MmugDNA.7359.1.S1_s_at | MmugDNA.7359.1 | 12.93 | 13.17 | 2.32 | 0.13 | -1.19 | 0.400453 | 0.228184 | 0.723823 | 0.500351 |
| MmugDNA.7361.1.S1_at   | MmugDNA.7361.1 | 11.84 | 12.04 | 0.24 | 0.02 | -1.15 | 0.235152 | 0.069533 | 0.602266 | 0.309848 |
| MmugDNA.7363.1.S1_at   | MmugDNA.7363.1 | 3.08  | 3.27  | 0.12 | 0.19 | -1.14 | 0.145963 | 0.177595 | 0.520572 | 0.453962 |
| MmugDNA.7371.1.S1_at   | MmugDNA.7371.1 | 11.87 | 12.27 | 0.61 | 0.09 | -1.31 | 0.357957 | 0.426607 | 0.695993 | 0.648739 |
| MmugDNA.7372.1.S1_at   | MmugDNA.7372.1 | 3.98  | 3.98  | 0.01 | 0.12 | 1     | 0.493711 | 0.593155 | 0.77903  | 0.758096 |
| MmugDNA.7382.1.S1_at   | MmugDNA.7382.1 | 5.7   | 6.45  | 0.27 | 0.15 | -1.69 | 0.027244 | 0.007727 | 0.327322 | 0.117463 |
| MmugDNA.7383.1.S1_at   | MmugDNA.7383.1 | 6.35  | 6.37  | 0.09 | 0.15 | -1.02 | 0.542465 | 0.38444  | 0.805748 | 0.620107 |
| MmugDNA.7384.1.S1_at   | MmugDNA.7384.1 | 12.31 | 11.5  | 0.89 | 0.09 | 1.75  | 0.474065 | 0.573618 | 0.767923 | 0.745229 |
| MmugDNA.7385.1.S1_at   | MmugDNA.7385.1 | 12.41 | 12.5  | 0.24 | 0.04 | -1.06 | 0.605776 | 0.549414 | 0.840193 | 0.729841 |
| MmugDNA.7386.1.S1_at   | MmugDNA.7386.1 | 12.24 | 12.45 | 0.14 | 0.04 | -1.16 | 0.067787 | 0.011652 | 0.42446  | 0.139826 |

|                        |                |       |       |      |      |       |          |          |          |          |
|------------------------|----------------|-------|-------|------|------|-------|----------|----------|----------|----------|
| MmugDNA.7390.1.S1_at   | MmugDNA.7390.1 | 8.84  | 9.2   | 0.13 | 0.03 | -1.28 | 0.027197 | 0.037557 | 0.327322 | 0.238211 |
| MmugDNA.7393.1.S1_at   | MmugDNA.7393.1 | 3.11  | 3.18  | 0.06 | 0.08 | -1.05 | 0.295394 | 0.392941 | 0.651089 | 0.625917 |
| MmugDNA.7395.1.S1_at   | MmugDNA.7395.1 | 7.48  | 6.74  | 0.75 | 0.11 | 1.66  | 0.139574 | 0.129492 | 0.515012 | 0.400938 |
| MmugDNA.7397.1.S1_at   | MmugDNA.7397.1 | 7.72  | 7.93  | 0.26 | 0.23 | -1.16 | 0.39042  | 0.589809 | 0.716734 | 0.755973 |
| MmugDNA.7403.1.S1_at   | MmugDNA.7403.1 | 6.21  | 5.88  | 0.6  | 0.12 | 1.26  | 0.324888 | 0.60048  | 0.672925 | 0.762128 |
| MmugDNA.7405.1.S1_at   | MmugDNA.7405.1 | 10.79 | 11.14 | 0.03 | 0.04 | -1.27 | 0.000175 | 0.000637 | 0.112975 | 0.042882 |
| MmugDNA.7407.1.S1_at   | MmugDNA.7407.1 | 9.64  | 10.19 | 0.35 | 0.05 | -1.46 | 0.070995 | 0.064537 | 0.430162 | 0.300255 |
| MmugDNA.7408.1.S1_at   | MmugDNA.7408.1 | 10.63 | 11.12 | 0.27 | 0.05 | -1.4  | 0.03325  | 0.024544 | 0.346442 | 0.196058 |
| MmugDNA.7413.1.S1_at   | MmugDNA.7413.1 | 12.82 | 12.87 | 0.03 | 0.07 | -1.03 | 0.905673 | 0.034327 | 0.968196 | 0.229241 |
| MmugDNA.742.1.S1_at    | MmugDNA.742.1  | 10.26 | 10.7  | 0.34 | 0.04 | -1.35 | 0.297306 | 0.377971 | 0.652737 | 0.615264 |
| MmugDNA.7423.1.S1_at   | MmugDNA.7423.1 | 8.72  | 8.67  | 0.25 | 0.07 | -1.03 | 0.54788  | 0.231681 | 0.809245 | 0.503506 |
| MmugDNA.7429.1.S1_at   | MmugDNA.7429.1 | 9.31  | 9.66  | 0.19 | 0.03 | -1.27 | 0.100921 | 0.014444 | 0.47159  | 0.153383 |
| MmugDNA.743.1.S1_at    | MmugDNA.743.1  | 6.72  | 6.92  | 0.03 | 0.02 | -1.15 | 0.000794 | 0.009111 | 0.15004  | 0.125983 |
| MmugDNA.7430.1.S1_at   | MmugDNA.7430.1 | 5.87  | 6     | 0.51 | 0.15 | -1.1  | 0.934876 | 0.158537 | 0.977924 | 0.434453 |
| MmugDNA.7432.1.S1_at   | MmugDNA.7432.1 | 6.77  | 7.03  | 0.31 | 0.22 | -1.2  | 0.287715 | 0.224333 | 0.644849 | 0.497249 |
| MmugDNA.7448.1.S1_at   | MmugDNA.7448.1 | 8.03  | 8.73  | 0.05 | 0.02 | -1.62 | 0.00003  | 0.000018 | 0.108151 | 0.019635 |
| MmugDNA.7451.1.S1_at   | MmugDNA.7451.1 | 7.2   | 7.13  | 0.37 | 0.16 | 1.05  | 0.655545 | 0.890624 | 0.863179 | 0.937649 |
| MmugDNA.7463.1.S1_at   | MmugDNA.7463.1 | 10.45 | 10.29 | 0.2  | 0.12 | 1.12  | 0.324706 | 0.508689 | 0.672781 | 0.703791 |
| MmugDNA.7468.1.S1_at   | MmugDNA.7468.1 | 10.46 | 10.3  | 0.23 | 0.01 | 1.12  | 0.110794 | 0.144425 | 0.484198 | 0.418323 |
| MmugDNA.7471.1.S1_s_at | MmugDNA.7471.1 | 11.04 | 11.16 | 0.24 | 0.07 | -1.09 | 0.735294 | 0.028704 | 0.898655 | 0.211165 |
| MmugDNA.7478.1.S1_at   | MmugDNA.7478.1 | 12.44 | 12.38 | 0.11 | 0.03 | 1.05  | 0.46389  | 0.048776 | 0.762287 | 0.2658   |
| MmugDNA.7479.1.S1_at   | MmugDNA.7479.1 | 8.25  | 8.3   | 0.78 | 0.27 | -1.03 | 0.61845  | 0.195201 | 0.845965 | 0.470253 |
| MmugDNA.7483.1.S1_at   | MmugDNA.7483.1 | 11.44 | 11.94 | 0.24 | 0.08 | -1.41 | 0.02905  | 0.016903 | 0.333566 | 0.164899 |
| MmugDNA.7486.1.S1_at   | MmugDNA.7486.1 | 3.64  | 3.54  | 0.1  | 0.07 | 1.07  | 0.207436 | 0.201366 | 0.578968 | 0.47589  |
| MmugDNA.7493.1.S1_at   | MmugDNA.7493.1 | 7.58  | 7.77  | 0.13 | 0.02 | -1.14 | 0.131063 | 0.048541 | 0.5054   | 0.265534 |
| MmugDNA.7494.1.S1_at   | MmugDNA.7494.1 | 6.94  | 7.25  | 0.23 | 0.08 | -1.24 | 0.123718 | 0.164952 | 0.49725  | 0.44123  |
| MmugDNA.7495.1.S1_at   | MmugDNA.7495.1 | 6.36  | 7.14  | 0.35 | 0.14 | -1.72 | 0.013554 | 0.164258 | 0.269788 | 0.440539 |
| MmugDNA.7497.1.S1_at   | MmugDNA.7497.1 | 3.7   | 4.28  | 0.56 | 0.47 | -1.5  | 0.332383 | 0.527122 | 0.678846 | 0.715861 |
| MmugDNA.7499.1.S1_at   | MmugDNA.7499.1 | 4.31  | 4.3   | 0.03 | 0.07 | 1.01  | 0.332999 | 0.708478 | 0.679412 | 0.830919 |
| MmugDNA.7502.1.S1_at   | MmugDNA.7502.1 | 10.27 | 10.5  | 0.58 | 0.01 | -1.17 | 0.580075 | 0.595372 | 0.826842 | 0.759091 |
| MmugDNA.7503.1.S1_at   | MmugDNA.7503.1 | 6.46  | 6.9   | 0.8  | 0.11 | -1.36 | 0.975612 | 0.999431 | 0.992157 | 0.999791 |
| MmugDNA.7504.1.S1_at   | MmugDNA.7504.1 | 13.61 | 13.63 | 0.1  | 0.03 | -1.01 | 0.448345 | 0.523416 | 0.753886 | 0.713713 |
| MmugDNA.7508.1.S1_s_at | MmugDNA.7508.1 | 9.83  | 9.88  | 0.06 | 0.04 | -1.03 | 0.355977 | 0.122221 | 0.694982 | 0.391921 |
| MmugDNA.751.1.S1_at    | MmugDNA.751.1  | 3.82  | 3.6   | 0.07 | 0.25 | 1.17  | 0.835935 | 0.267168 | 0.941202 | 0.532773 |
| MmugDNA.7512.1.S1_at   | MmugDNA.7512.1 | 9.61  | 9.29  | 0.2  | 0.06 | 1.25  | 0.02364  | 0.012923 | 0.316279 | 0.146343 |
| MmugDNA.7516.1.S1_at   | MmugDNA.7516.1 | 11.32 | 11.2  | 0.08 | 0.1  | 1.08  | 0.131562 | 0.00035  | 0.505989 | 0.037097 |
| MmugDNA.7521.1.S1_at   | MmugDNA.7521.1 | 6.41  | 6.76  | 0.13 | 0.15 | -1.28 | 0.074842 | 0.179578 | 0.435313 | 0.45603  |
| MmugDNA.7522.1.S1_at   | MmugDNA.7522.1 | 8.22  | 8.84  | 0.64 | 0.01 | -1.54 | 0.51573  | 0.764595 | 0.791016 | 0.863128 |
| MmugDNA.7524.1.S1_at   | MmugDNA.7524.1 | 6.04  | 5.13  | 0.77 | 0.19 | 1.87  | 0.094312 | 0.061449 | 0.463769 | 0.294704 |
| MmugDNA.7526.1.S1_at   | MmugDNA.7526.1 | 6.14  | 6.29  | 1.16 | 0.21 | -1.11 | 0.751077 | 0.422472 | 0.905757 | 0.645729 |
| MmugDNA.7527.1.S1_at   | MmugDNA.7527.1 | 13.58 | 13.45 | 0.04 | 0.04 | 1.09  | 0.00932  | 0.015367 | 0.241866 | 0.157403 |
| MmugDNA.7528.1.S1_at   | MmugDNA.7528.1 | 5.93  | 6.54  | 0.71 | 0.09 | -1.52 | 0.468864 | 0.292988 | 0.765156 | 0.552954 |
| MmugDNA.7533.1.S1_at   | MmugDNA.7533.1 | 7.7   | 7.77  | 0.41 | 0.08 | -1.05 | 0.950479 | 0.105407 | 0.983308 | 0.367279 |

|                        |                |       |       |      |      |       |          |          |          |          |
|------------------------|----------------|-------|-------|------|------|-------|----------|----------|----------|----------|
| MmugDNA.7534.1.S1_at   | MmugDNA.7534.1 | 11.78 | 11.54 | 0.45 | 0.01 | 1.18  | 0.365043 | 0.249457 | 0.700784 | 0.518532 |
| MmugDNA.7535.1.S1_at   | MmugDNA.7535.1 | 6.36  | 6.13  | 0.26 | 0.06 | 1.17  | 0.174382 | 0.272118 | 0.547573 | 0.536934 |
| MmugDNA.7536.1.S1_at   | MmugDNA.7536.1 | 10.74 | 10.71 | 0.12 | 0.16 | 1.02  | 0.188981 | 0.23468  | 0.560718 | 0.505897 |
| MmugDNA.754.1.S1_at    | MmugDNA.754.1  | 9.92  | 9.52  | 0.44 | 0.07 | 1.32  | 0.626176 | 0.366937 | 0.849835 | 0.606583 |
| MmugDNA.7540.1.S1_at   | MmugDNA.7540.1 | 7.23  | 7.21  | 0.35 | 0.13 | 1.02  | 0.845486 | 0.891636 | 0.945862 | 0.938242 |
| MmugDNA.7542.1.S1_at   | MmugDNA.7542.1 | 11.08 | 11.54 | 0.04 | 0.04 | -1.38 | 0.000149 | 0.000068 | 0.112332 | 0.025805 |
| MmugDNA.7544.1.S1_at   | MmugDNA.7544.1 | 10.51 | 10.96 | 0.15 | 0.05 | -1.37 | 0.008286 | 0.002474 | 0.232289 | 0.073576 |
| MmugDNA.7548.1.S1_s_at | MmugDNA.7548.1 | 5.87  | 5.86  | 0.31 | 0.09 | 1.01  | 0.853378 | 0.859145 | 0.948299 | 0.919754 |
| MmugDNA.7549.1.S1_s_at | MmugDNA.7549.1 | 12.22 | 12.16 | 0.12 | 0.09 | 1.04  | 0.200562 | 0.183412 | 0.572378 | 0.459553 |
| MmugDNA.7550.1.S1_at   | MmugDNA.7550.1 | 8.89  | 8.85  | 0.14 | 0.18 | 1.03  | 0.640849 | 0.041137 | 0.856959 | 0.247659 |
| MmugDNA.7551.1.S1_at   | MmugDNA.7551.1 | 6.4   | 6.31  | 0.27 | 0.07 | 1.06  | 0.493059 | 0.047049 | 0.778657 | 0.261469 |
| MmugDNA.7562.1.S1_at   | MmugDNA.7562.1 | 4.38  | 4.33  | 0.18 | 0.07 | 1.04  | 0.567729 | 0.740435 | 0.820586 | 0.849662 |
| MmugDNA.7566.1.S1_at   | MmugDNA.7566.1 | 9.37  | 9.28  | 0.53 | 0.17 | 1.06  | 0.215411 | 0.203536 | 0.585748 | 0.477767 |
| MmugDNA.7569.1.S1_at   | MmugDNA.7569.1 | 12.75 | 12.66 | 0.16 | 0.03 | 1.07  | 0.297293 | 0.226713 | 0.652737 | 0.499176 |
| MmugDNA.7569.1.S1_s_at | MmugDNA.7569.1 | 11.57 | 11.13 | 0.33 | 0.08 | 1.36  | 0.061497 | 0.049354 | 0.410846 | 0.267081 |
| MmugDNA.7573.1.S1_at   | MmugDNA.7573.1 | 3.75  | 4.38  | 0.82 | 0.14 | -1.55 | 0.334753 | 0.530519 | 0.680617 | 0.71804  |
| MmugDNA.7582.1.S1_at   | MmugDNA.7582.1 | 6.61  | 6.6   | 0.47 | 0.08 | 1.01  | 0.816342 | 0.719723 | 0.933499 | 0.837881 |
| MmugDNA.7589.1.S1_at   | MmugDNA.7589.1 | 7.12  | 7.6   | 0.31 | 0.14 | -1.39 | 0.074352 | 0.088156 | 0.43519  | 0.341721 |
| MmugDNA.7590.1.S1_at   | MmugDNA.7590.1 | 11.25 | 11.14 | 0.63 | 0.11 | 1.08  | 0.842566 | 0.499442 | 0.944281 | 0.698289 |
| MmugDNA.7599.1.S1_at   | MmugDNA.7599.1 | 11.92 | 11.44 | 0.21 | 0.09 | 1.4   | 0.042886 | 0.029122 | 0.370814 | 0.212733 |
| MmugDNA.7602.1.S1_at   | MmugDNA.7602.1 | 10.3  | 10.61 | 0.09 | 0.01 | -1.24 | 0.005092 | 0.004686 | 0.204981 | 0.095363 |
| MmugDNA.7608.1.S1_at   | MmugDNA.7608.1 | 10.87 | 10.72 | 0.07 | 0.07 | 1.11  | 0.071432 | 0.167693 | 0.431049 | 0.444209 |
| MmugDNA.7613.1.S1_at   | MmugDNA.7613.1 | 7.01  | 6.45  | 0.68 | 0.19 | 1.48  | 0.244806 | 0.171134 | 0.61037  | 0.447694 |
| MmugDNA.7614.1.S1_at   | MmugDNA.7614.1 | 7.91  | 8.72  | 0.39 | 0.4  | -1.76 | 0.135978 | 0.108505 | 0.510492 | 0.372066 |
| MmugDNA.7619.1.S1_at   | MmugDNA.7619.1 | 4.46  | 4.39  | 0.15 | 0.07 | 1.05  | 0.73145  | 0.831518 | 0.896631 | 0.903392 |
| MmugDNA.7629.1.S1_at   | MmugDNA.7629.1 | 7.01  | 6.15  | 1.38 | 0.31 | 1.82  | 0.411893 | 0.176134 | 0.731751 | 0.452581 |
| MmugDNA.7635.1.S1_at   | MmugDNA.7635.1 | 4.84  | 5.22  | 0.21 | 0.12 | -1.31 | 0.228571 | 0.413183 | 0.597571 | 0.639484 |
| MmugDNA.7636.1.S1_at   | MmugDNA.7636.1 | 10.01 | 10.48 | 0.5  | 0.03 | -1.39 | 0.578068 | 0.6292   | 0.826158 | 0.781712 |
| MmugDNA.7639.1.S1_at   | MmugDNA.7639.1 | 5.42  | 5.22  | 0.25 | 0.07 | 1.15  | 0.218257 | 0.448659 | 0.58818  | 0.664492 |
| MmugDNA.764.1.S1_at    | MmugDNA.764.1  | 7.33  | 7.39  | 0.41 | 0.11 | -1.05 | 0.750172 | 0.085947 | 0.905347 | 0.338116 |
| MmugDNA.7642.1.S1_at   | MmugDNA.7642.1 | 5.85  | 5.8   | 0.15 | 0.07 | 1.03  | 0.641712 | 0.120524 | 0.85747  | 0.38929  |
| MmugDNA.7646.1.S1_at   | MmugDNA.7646.1 | 6     | 6.21  | 0.2  | 0.1  | -1.16 | 0.403509 | 0.532204 | 0.725709 | 0.718995 |
| MmugDNA.7649.1.S1_at   | MmugDNA.7649.1 | 6.11  | 6.09  | 0.07 | 0.02 | 1.01  | 0.497338 | 0.727936 | 0.781071 | 0.842707 |
| MmugDNA.7655.1.S1_at   | MmugDNA.7655.1 | 7.52  | 7.84  | 1.34 | 0.39 | -1.25 | 0.885703 | 0.229596 | 0.96038  | 0.501574 |
| MmugDNA.7656.1.S1_at   | MmugDNA.7656.1 | 3.97  | 3.93  | 0.13 | 0.07 | 1.03  | 0.919908 | 0.480169 | 0.972871 | 0.685723 |
| MmugDNA.7657.1.S1_at   | MmugDNA.7657.1 | 11.94 | 12.02 | 0.08 | 0.03 | -1.06 | 0.04184  | 0.009932 | 0.367361 | 0.130838 |
| MmugDNA.7664.1.S1_at   | MmugDNA.7664.1 | 7.47  | 7.48  | 0.34 | 0.05 | -1    | 0.866613 | 0.872381 | 0.953134 | 0.92745  |
| MmugDNA.7669.1.S1_at   | MmugDNA.7669.1 | 11.65 | 11.66 | 0.21 | 0.02 | -1.01 | 0.922672 | 0.913721 | 0.973908 | 0.951474 |
| MmugDNA.7683.1.S1_at   | MmugDNA.7683.1 | 13.5  | 13.31 | 0.13 | 0.05 | 1.14  | 0.220959 | 0.468873 | 0.590217 | 0.677906 |
| MmugDNA.7691.1.S1_at   | MmugDNA.7691.1 | 10.37 | 10.57 | 0.04 | 0.02 | -1.15 | 0.000798 | 0.664206 | 0.15004  | 0.803247 |
| MmugDNA.7698.1.S1_at   | MmugDNA.7698.1 | 11.04 | 11.44 | 0.2  | 0.12 | -1.32 | 0.091376 | 0.032722 | 0.459181 | 0.223956 |
| MmugDNA.7706.1.S1_at   | MmugDNA.7706.1 | 5.43  | 5     | 0.43 | 0.2  | 1.35  | 0.324391 | 0.442799 | 0.672608 | 0.660759 |
| MmugDNA.7713.1.S1_at   | MmugDNA.7713.1 | 4.56  | 4.12  | 0.1  | 0.2  | 1.35  | 0.066423 | 0.075119 | 0.422255 | 0.319301 |



|                        |                |       |       |      |      |       |          |          |          |          |
|------------------------|----------------|-------|-------|------|------|-------|----------|----------|----------|----------|
| MmugDNA.7717.1.S1_at   | MmugDNA.7717.1 | 8.34  | 5.09  | 0.04 | 0.82 | 9.51  | 0.0034   | 0.0006   | 0.194985 | 0.041985 |
| MmugDNA.7720.1.S1_at   | MmugDNA.7720.1 | 10.31 | 10.17 | 0.22 | 0.14 | 1.1   | 0.258297 | 0.244892 | 0.622127 | 0.514728 |
| MmugDNA.7721.1.S1_at   | MmugDNA.7721.1 | 4.44  | 4.36  | 0.16 | 0.18 | 1.06  | 0.53351  | 0.828373 | 0.80084  | 0.901365 |
| MmugDNA.7726.1.S1_at   | MmugDNA.7726.1 | 10.95 | 10.95 | 0.05 | 0.1  | 1     | 0.630482 | 0.690779 | 0.851961 | 0.819875 |
| MmugDNA.7729.1.S1_at   | MmugDNA.7729.1 | 12.36 | 12.64 | 0.41 | 0.09 | -1.22 | 0.918202 | 0.037705 | 0.972089 | 0.23859  |
| MmugDNA.7737.1.S1_at   | MmugDNA.7737.1 | 5.54  | 5.56  | 0.14 | 0.1  | -1.01 | 0.567209 | 0.491535 | 0.820329 | 0.693026 |
| MmugDNA.7739.1.S1_x_at | MmugDNA.7739.1 | 8.18  | 8.27  | 0.11 | 0.07 | -1.07 | 0.527958 | 0.171029 | 0.79742  | 0.447573 |
| MmugDNA.7743.1.S1_at   | MmugDNA.7743.1 | 7.9   | 8.64  | 0.53 | 0.14 | -1.67 | 0.28304  | 0.41288  | 0.641195 | 0.639186 |
| MmugDNA.7745.1.S1_at   | MmugDNA.7745.1 | 8.99  | 9.57  | 0.49 | 0.12 | -1.49 | 0.394417 | 0.445878 | 0.719752 | 0.662593 |
| MmugDNA.7746.1.S1_at   | MmugDNA.7746.1 | 4.16  | 3.97  | 0.19 | 0.06 | 1.14  | 0.201219 | 0.07559  | 0.573015 | 0.32003  |
| MmugDNA.7746.1.S1_s_at | MmugDNA.7746.1 | 5.29  | 6.14  | 0.58 | 0.56 | -1.8  | 0.250718 | 0.117927 | 0.615874 | 0.385837 |
| MmugDNA.7748.1.S1_s_at | MmugDNA.7748.1 | 11.01 | 10.95 | 0.05 | 0.13 | 1.05  | 0.519017 | 0.74197  | 0.793034 | 0.850556 |
| MmugDNA.7749.1.S1_at   | MmugDNA.7749.1 | 11.19 | 10.52 | 0.17 | 0.09 | 1.59  | 0.003188 | 0.013849 | 0.191107 | 0.150924 |
| MmugDNA.7752.1.S1_at   | MmugDNA.7752.1 | 8.95  | 9.1   | 0.27 | 0.19 | -1.11 | 0.395549 | 0.569857 | 0.720494 | 0.742702 |
| MmugDNA.7754.1.S1_at   | MmugDNA.7754.1 | 13.1  | 13.48 | 0.11 | 0.03 | -1.3  | 0.004052 | 0.001374 | 0.198571 | 0.05691  |
| MmugDNA.7756.1.S1_at   | MmugDNA.7756.1 | 11.21 | 10.85 | 0.12 | 0.01 | 1.29  | 0.006274 | 0.000087 | 0.218069 | 0.027016 |
| MmugDNA.776.1.S1_at    | MmugDNA.776.1  | 11.9  | 12.06 | 0.21 | 0.01 | -1.12 | 0.280222 | 0.308193 | 0.639123 | 0.564324 |
| MmugDNA.776.1.S1_s_at  | MmugDNA.776.1  | 11.74 | 11.87 | 0.22 | 0.03 | -1.1  | 0.337387 | 0.579839 | 0.682344 | 0.74931  |
| MmugDNA.7765.1.S1_at   | MmugDNA.7765.1 | 4.96  | 4.91  | 0.06 | 0.18 | 1.03  | 0.44901  | 0.772071 | 0.754037 | 0.867474 |
| MmugDNA.7768.1.S1_at   | MmugDNA.7768.1 | 8.35  | 8.38  | 0.57 | 0.08 | -1.02 | 0.748048 | 0.143438 | 0.904312 | 0.417442 |
| MmugDNA.7769.1.S1_at   | MmugDNA.7769.1 | 6.41  | 7.3   | 0.53 | 0.32 | -1.85 | 0.156968 | 0.047746 | 0.530209 | 0.263394 |
| MmugDNA.777.1.S1_at    | MmugDNA.777.1  | 3.74  | 3.82  | 0.05 | 0.05 | -1.05 | 0.130069 | 0.091283 | 0.504648 | 0.346281 |
| MmugDNA.7772.1.S1_at   | MmugDNA.7772.1 | 9.06  | 8     | 1.44 | 0.29 | 2.1   | 0.30464  | 0.053223 | 0.658206 | 0.276445 |
| MmugDNA.7776.1.S1_at   | MmugDNA.7776.1 | 11.65 | 12.16 | 0.14 | 0.02 | -1.43 | 0.005265 | 0.001044 | 0.207075 | 0.051426 |
| MmugDNA.7777.1.S1_s_at | MmugDNA.7777.1 | 11.83 | 11.99 | 0.38 | 0.08 | -1.12 | 0.592697 | 0.864257 | 0.833974 | 0.922977 |
| MmugDNA.7779.1.S1_at   | MmugDNA.7779.1 | 11.46 | 11.74 | 0.15 | 0.16 | -1.21 | 0.464226 | 0.050077 | 0.762507 | 0.268916 |
| MmugDNA.7782.1.S1_at   | MmugDNA.7782.1 | 6.29  | 6.84  | 0.81 | 0.09 | -1.46 | 0.780549 | 0.269497 | 0.919137 | 0.534796 |
| MmugDNA.7784.1.S1_at   | MmugDNA.7784.1 | 12.05 | 12.05 | 0.09 | 0.08 | -1    | 0.565063 | 0.1494   | 0.819091 | 0.423825 |
| MmugDNA.7790.1.S1_at   | MmugDNA.7790.1 | 8.69  | 8.86  | 0.52 | 0.07 | -1.12 | 0.550843 | 0.226824 | 0.81106  | 0.499232 |
| MmugDNA.7797.1.S1_at   | MmugDNA.7797.1 | 8.6   | 10.35 | 2.6  | 0.22 | -3.35 | 0.196493 | 0.109331 | 0.567086 | 0.373129 |
| MmugDNA.7806.1.S1_at   | MmugDNA.7806.1 | 10.73 | 10.73 | 0.23 | 0.16 | -1    | 0.406818 | 0.391538 | 0.72838  | 0.625149 |
| MmugDNA.7807.1.S1_at   | MmugDNA.7807.1 | 12.4  | 12.53 | 0.06 | 0.06 | -1.09 | 0.03596  | 0.233121 | 0.353759 | 0.504458 |
| MmugDNA.7808.1.S1_s_at | MmugDNA.7808.1 | 10.44 | 10.23 | 0.12 | 0.14 | 1.16  | 0.239718 | 0.004947 | 0.606154 | 0.097981 |
| MmugDNA.7810.1.S1_at   | MmugDNA.7810.1 | 4.08  | 3.91  | 0.3  | 0.28 | 1.13  | 0.499751 | 0.317634 | 0.782208 | 0.570802 |
| MmugDNA.7811.1.S1_at   | MmugDNA.7811.1 | 8.8   | 9.16  | 0.64 | 0.04 | -1.28 | 0.351842 | 0.426987 | 0.692553 | 0.649087 |
| MmugDNA.7812.1.S1_at   | MmugDNA.7812.1 | 10.89 | 10.63 | 0.16 | 0.03 | 1.2   | 0.024781 | 0.006613 | 0.319753 | 0.110163 |
| MmugDNA.7815.1.S1_at   | MmugDNA.7815.1 | 9.54  | 9.64  | 0.04 | 0.06 | -1.08 | 0.087058 | 0.068948 | 0.454785 | 0.308945 |
| MmugDNA.7820.1.S1_at   | MmugDNA.7820.1 | 9.97  | 8.99  | 0.21 | 0.22 | 1.96  | 0.008243 | 0.008599 | 0.232164 | 0.123072 |
| MmugDNA.7821.1.S1_at   | MmugDNA.7821.1 | 11.35 | 10.64 | 0.18 | 0.04 | 1.63  | 0.00257  | 0.001449 | 0.180597 | 0.057999 |
| MmugDNA.7826.1.S1_at   | MmugDNA.7826.1 | 6.68  | 6.56  | 0.18 | 0.09 | 1.09  | 0.126553 | 0.20944  | 0.500465 | 0.483069 |
| MmugDNA.7828.1.S1_at   | MmugDNA.7828.1 | 10.84 | 11.19 | 0.14 | 0.13 | -1.28 | 0.023599 | 0.030491 | 0.316163 | 0.216644 |
| MmugDNA.783.1.S1_s_at  | MmugDNA.783.1  | 11.96 | 11.65 | 0.32 | 0.11 | 1.23  | 0.408102 | 0.10172  | 0.729179 | 0.361581 |
| MmugDNA.7830.1.S1_at   | MmugDNA.7830.1 | 5.01  | 4.99  | 0.05 | 0.03 | 1.01  | 0.294607 | 0.30785  | 0.650731 | 0.56397  |

|                        |                |       |       |      |      |       |          |          |          |          |
|------------------------|----------------|-------|-------|------|------|-------|----------|----------|----------|----------|
| MmugDNA.7831.1.S1_at   | MmugDNA.7831.1 | 3.28  | 3.21  | 0.16 | 0.14 | 1.05  | 0.72554  | 0.662099 | 0.893676 | 0.802107 |
| MmugDNA.7832.1.S1_at   | MmugDNA.7832.1 | 7.39  | 7.33  | 1.35 | 0.2  | 1.04  | 0.91864  | 0.928218 | 0.972234 | 0.959209 |
| MmugDNA.7833.1.S1_at   | MmugDNA.7833.1 | 8.36  | 8.94  | 0.41 | 0.16 | -1.49 | 0.031627 | 0.003058 | 0.341694 | 0.080621 |
| MmugDNA.7834.1.S1_at   | MmugDNA.7834.1 | 4.94  | 4.75  | 0.18 | 0.41 | 1.14  | 0.782128 | 0.011481 | 0.919732 | 0.138627 |
| MmugDNA.7839.1.S1_at   | MmugDNA.7839.1 | 12.22 | 12.11 | 0.21 | 0.05 | 1.08  | 0.193578 | 0.278591 | 0.564275 | 0.542329 |
| MmugDNA.7840.1.S1_at   | MmugDNA.7840.1 | 6.96  | 5.98  | 0.26 | 0.38 | 1.97  | 0.010721 | 0.002966 | 0.249245 | 0.079958 |
| MmugDNA.7841.1.S1_at   | MmugDNA.7841.1 | 5.14  | 5.2   | 0.1  | 0.1  | -1.04 | 0.506932 | 0.565808 | 0.786064 | 0.740112 |
| MmugDNA.7849.1.S1_at   | MmugDNA.7849.1 | 4.32  | 4.46  | 0.11 | 0.28 | -1.1  | 0.5503   | 0.688709 | 0.810757 | 0.818296 |
| MmugDNA.7852.1.S1_at   | MmugDNA.7852.1 | 7.04  | 7.27  | 0.47 | 0.28 | -1.17 | 0.175853 | 0.224903 | 0.549021 | 0.497657 |
| MmugDNA.7856.1.S1_at   | MmugDNA.7856.1 | 8.95  | 8.86  | 0.1  | 0.07 | 1.07  | 0.969149 | 0.357223 | 0.989875 | 0.598864 |
| MmugDNA.7857.1.S1_at   | MmugDNA.7857.1 | 11.17 | 10.86 | 0.19 | 0.32 | -1.24 | 0.577786 | 0.749361 | 0.825932 | 0.854379 |
| MmugDNA.7860.1.S1_at   | MmugDNA.7860.1 | 3.4   | 3.46  | 0.06 | 0.08 | -1.04 | 0.690481 | 0.228788 | 0.879504 | 0.501011 |
| MmugDNA.7861.1.S1_at   | MmugDNA.7861.1 | 9.61  | 10.07 | 0.23 | 0.06 | -1.38 | 0.070121 | 0.073288 | 0.428522 | 0.316241 |
| MmugDNA.7862.1.S1_at   | MmugDNA.7862.1 | 5.2   | 5.22  | 0.1  | 0.02 | -1.01 | 0.591135 | 0.839663 | 0.833275 | 0.908582 |
| MmugDNA.7864.1.S1_at   | MmugDNA.7864.1 | 9.24  | 9.21  | 0.5  | 0.23 | 1.02  | 0.811655 | 0.14377  | 0.931835 | 0.41759  |
| MmugDNA.7866.1.S1_at   | MmugDNA.7866.1 | 7.23  | 7.33  | 0.39 | 0.14 | -1.07 | 0.702072 | 0.034282 | 0.884146 | 0.22906  |
| MmugDNA.7874.1.S1_at   | MmugDNA.7874.1 | 7.85  | 8.43  | 0.17 | 0.13 | -1.5  | 0.014625 | 0.010845 | 0.276821 | 0.135758 |
| MmugDNA.7878.1.S1_at   | MmugDNA.7878.1 | 6.79  | 6.55  | 0.25 | 0.12 | 1.18  | 0.51894  | 0.034461 | 0.793021 | 0.229704 |
| MmugDNA.7880.1.S1_at   | MmugDNA.7880.1 | 7.27  | 6.95  | 0.14 | 0.02 | 1.25  | 0.03493  | 0.003046 | 0.350632 | 0.080462 |
| MmugDNA.7881.1.S1_at   | MmugDNA.7881.1 | 4.41  | 4.26  | 0.46 | 0.06 | 1.11  | 0.624773 | 0.747356 | 0.848955 | 0.853149 |
| MmugDNA.7883.1.S1_at   | MmugDNA.7883.1 | 10.77 | 10.91 | 0.69 | 0.18 | -1.1  | 0.5992   | 0.604486 | 0.837299 | 0.764647 |
| MmugDNA.7889.1.S1_at   | MmugDNA.7889.1 | 7.27  | 7.59  | 0.33 | 0.21 | -1.24 | 0.579898 | 0.787235 | 0.826739 | 0.876889 |
| MmugDNA.7890.1.S1_at   | MmugDNA.7890.1 | 10.29 | 10.58 | 0.09 | 0.22 | -1.23 | 0.053376 | 0.045415 | 0.394644 | 0.257437 |
| MmugDNA.7893.1.S1_at   | MmugDNA.7893.1 | 6.47  | 6.51  | 0.19 | 0.32 | -1.03 | 0.966674 | 0.971897 | 0.989053 | 0.984807 |
| MmugDNA.790.1.S1_at    | MmugDNA.790.1  | 10.46 | 10.16 | 0.14 | 0.09 | 1.23  | 0.023261 | 0.004528 | 0.314809 | 0.093974 |
| MmugDNA.7903.1.S1_at   | MmugDNA.7903.1 | 11.78 | 11.59 | 1.73 | 0.06 | 1.14  | 0.597264 | 0.772815 | 0.836164 | 0.867905 |
| MmugDNA.7910.1.S1_at   | MmugDNA.7910.1 | 8.4   | 8.57  | 0.3  | 0.07 | -1.12 | 0.465862 | 0.183237 | 0.763236 | 0.459553 |
| MmugDNA.7913.1.S1_at   | MmugDNA.7913.1 | 7.25  | 7.5   | 0.52 | 0.09 | -1.19 | 0.444616 | 0.110495 | 0.7514   | 0.374684 |
| MmugDNA.7916.1.S1_at   | MmugDNA.7916.1 | 7.01  | 7.13  | 1.1  | 0.39 | -1.09 | 0.871726 | 0.949555 | 0.955537 | 0.971159 |
| MmugDNA.7917.1.S1_at   | MmugDNA.7917.1 | 11.25 | 11.26 | 0.43 | 0.05 | -1    | 0.697408 | 0.185023 | 0.882272 | 0.460856 |
| MmugDNA.792.1.S1_at    | MmugDNA.792.1  | 8.46  | 8.08  | 0.26 | 0.21 | 1.3   | 0.05114  | 0.099064 | 0.389216 | 0.357208 |
| MmugDNA.7924.1.S1_at   | MmugDNA.7924.1 | 13.73 | 13.77 | 0.12 | 0.11 | -1.02 | 0.301093 | 0.263262 | 0.655304 | 0.529531 |
| MmugDNA.793.1.S1_at    | MmugDNA.793.1  | 5.33  | 5.17  | 0.09 | 0.12 | 1.11  | 0.172681 | 0.493187 | 0.545872 | 0.694004 |
| MmugDNA.7930.1.S1_at   | MmugDNA.7930.1 | 10.29 | 10.54 | 0.34 | 0.15 | -1.18 | 0.509597 | 0.634044 | 0.787715 | 0.784615 |
| MmugDNA.7932.1.S1_at   | MmugDNA.7932.1 | 9.52  | 9.27  | 0.63 | 0.06 | 1.19  | 0.248842 | 0.308503 | 0.614173 | 0.564541 |
| MmugDNA.7933.1.S1_s_at | MmugDNA.7933.1 | 8.6   | 8.79  | 0.12 | 0.13 | -1.14 | 0.153884 | 0.01407  | 0.527213 | 0.151858 |
| MmugDNA.794.1.S1_s_at  | MmugDNA.794.1  | 5.45  | 5.48  | 0.52 | 0.13 | -1.02 | 0.877644 | 0.845862 | 0.957399 | 0.912246 |
| MmugDNA.794.1.S1_x_at  | MmugDNA.794.1  | 6.24  | 6.35  | 0.39 | 0.09 | -1.08 | 0.833148 | 0.122841 | 0.940114 | 0.392861 |
| MmugDNA.7940.1.S1_at   | MmugDNA.7940.1 | 11.32 | 11.62 | 0.06 | 0.05 | -1.23 | 0.002431 | 0.001046 | 0.177075 | 0.051426 |
| MmugDNA.7948.1.S1_at   | MmugDNA.7948.1 | 10.64 | 10.91 | 0.43 | 0.04 | -1.2  | 0.564927 | 0.773814 | 0.819077 | 0.868485 |
| MmugDNA.7950.1.S1_at   | MmugDNA.7950.1 | 11.6  | 11.6  | 0.2  | 0.04 | 1     | 0.460451 | 0.280772 | 0.760242 | 0.543952 |
| MmugDNA.7951.1.S1_at   | MmugDNA.7951.1 | 5.14  | 5.02  | 0.21 | 0.17 | 1.09  | 0.981573 | 0.506532 | 0.994146 | 0.702503 |
| MmugDNA.7955.1.S1_at   | MmugDNA.7955.1 | 8.02  | 7.99  | 0.75 | 0.11 | 1.02  | 0.976531 | 0.550827 | 0.992376 | 0.730625 |

|                        |                |       |       |      |      |       |          |          |          |          |
|------------------------|----------------|-------|-------|------|------|-------|----------|----------|----------|----------|
| MmugDNA.7959.1.S1_at   | MmugDNA.7959.1 | 10.81 | 11.17 | 0.08 | 0.01 | -1.28 | 0.001693 | 0.000303 | 0.164787 | 0.034907 |
| MmugDNA.7962.1.S1_at   | MmugDNA.7962.1 | 6.06  | 6.56  | 0.1  | 0.1  | -1.41 | 0.004091 | 0.004996 | 0.198572 | 0.098484 |
| MmugDNA.7964.1.S1_at   | MmugDNA.7964.1 | 6.41  | 7.19  | 0.3  | 0.1  | -1.72 | 0.022491 | 0.007137 | 0.31097  | 0.113735 |
| MmugDNA.7965.1.S1_at   | MmugDNA.7965.1 | 10.97 | 10.91 | 0.09 | 0.05 | 1.05  | 0.074185 | 0.053345 | 0.434946 | 0.276533 |
| MmugDNA.797.1.S1_at    | MmugDNA.797.1  | 13.23 | 13.34 | 0.07 | 0.02 | -1.07 | 0.096486 | 0.045546 | 0.465152 | 0.257596 |
| MmugDNA.7974.1.S1_at   | MmugDNA.7974.1 | 6.84  | 7     | 0.42 | 0.1  | -1.12 | 0.614772 | 0.242255 | 0.844066 | 0.512683 |
| MmugDNA.7984.1.S1_at   | MmugDNA.7984.1 | 4.5   | 3.9   | 0.2  | 0.37 | 1.51  | 0.194784 | 0.406666 | 0.565193 | 0.634475 |
| MmugDNA.7988.1.S1_at   | MmugDNA.7988.1 | 11.01 | 11.35 | 0.59 | 0.09 | -1.26 | 0.31389  | 0.420871 | 0.664925 | 0.644535 |
| MmugDNA.7993.1.S1_at   | MmugDNA.7993.1 | 6.71  | 6.94  | 0.14 | 0.09 | -1.18 | 0.115952 | 0.230887 | 0.48949  | 0.502546 |
| MmugDNA.7996.1.S1_at   | MmugDNA.7996.1 | 8.41  | 7.79  | 1.64 | 0.44 | 1.54  | 0.660231 | 0.765092 | 0.865556 | 0.863431 |
| MmugDNA.800.1.S1_at    | MmugDNA.800.1  | 11.05 | 10.73 | 1.16 | 0.23 | -1.24 | 0.661865 | 0.125772 | 0.866591 | 0.396313 |
| MmugDNA.8000.1.S1_at   | MmugDNA.8000.1 | 4.66  | 4.65  | 0.06 | 0.03 | 1     | 0.810735 | 0.407038 | 0.931425 | 0.634713 |
| MmugDNA.8002.1.S1_at   | MmugDNA.8002.1 | 3.1   | 3.02  | 0.07 | 0.07 | 1.05  | 0.242152 | 0.158949 | 0.608285 | 0.435111 |
| MmugDNA.8002.1.S1_x_at | MmugDNA.8002.1 | 3.43  | 3.34  | 0.05 | 0.02 | 1.07  | 0.056946 | 0.056027 | 0.401454 | 0.2826   |
| MmugDNA.8022.1.S1_at   | MmugDNA.8022.1 | 4.62  | 4.49  | 0.27 | 0.08 | 1.09  | 0.37508  | 0.113536 | 0.706298 | 0.379632 |
| MmugDNA.803.1.S1_at    | MmugDNA.803.1  | 11.94 | 12.49 | 0.07 | 0.04 | -1.47 | 0.000296 | 0.000005 | 0.132733 | 0.015647 |
| MmugDNA.8038.1.S1_at   | MmugDNA.8038.1 | 4.95  | 4.88  | 0.11 | 0.16 | 1.05  | 0.884958 | 0.469975 | 0.960159 | 0.678572 |
| MmugDNA.804.1.S1_at    | MmugDNA.804.1  | 4.32  | 4.83  | 0.56 | 0.8  | -1.42 | 0.571815 | 0.602135 | 0.822961 | 0.763172 |
| MmugDNA.8043.1.S1_at   | MmugDNA.8043.1 | 4.04  | 4.02  | 0.08 | 0.07 | 1.01  | 0.744762 | 0.892146 | 0.902692 | 0.938526 |
| MmugDNA.8044.1.S1_at   | MmugDNA.8044.1 | 3.35  | 3.43  | 0.1  | 0.03 | -1.06 | 0.712867 | 0.962749 | 0.888122 | 0.979103 |
| MmugDNA.8048.1.S1_at   | MmugDNA.8048.1 | 10.19 | 9.86  | 0.24 | 0.16 | 1.26  | 0.161656 | 0.023698 | 0.53509  | 0.192768 |
| MmugDNA.8049.1.S1_at   | MmugDNA.8049.1 | 12.5  | 11.66 | 0.51 | 0.2  | 1.8   | 0.165296 | 0.0752   | 0.538018 | 0.319384 |
| MmugDNA.8056.1.S1_at   | MmugDNA.8056.1 | 4.42  | 4.58  | 0.29 | 0.02 | -1.11 | 0.432094 | 0.751536 | 0.743696 | 0.855508 |
| MmugDNA.8057.1.S1_s_at | MmugDNA.8057.1 | 10.61 | 10.52 | 0.47 | 0.18 | 1.07  | 0.426341 | 0.03037  | 0.740427 | 0.216116 |
| MmugDNA.8062.1.S1_at   | MmugDNA.8062.1 | 7.69  | 6.59  | 1.24 | 0.3  | 2.15  | 0.430505 | 0.239853 | 0.742836 | 0.510611 |
| MmugDNA.8064.1.S1_at   | MmugDNA.8064.1 | 6.12  | 6.1   | 0.22 | 0.05 | 1.01  | 0.351948 | 0.550119 | 0.692615 | 0.730241 |
| MmugDNA.807.1.S1_at    | MmugDNA.807.1  | 9.63  | 9.74  | 0.17 | 0.11 | -1.08 | 0.145552 | 0.231168 | 0.520527 | 0.5029   |
| MmugDNA.8070.1.S1_at   | MmugDNA.8070.1 | 9.72  | 9.33  | 0.05 | 0.05 | 1.31  | 0.000492 | 0.000266 | 0.143137 | 0.033786 |
| MmugDNA.8072.1.S1_at   | MmugDNA.8072.1 | 11.02 | 10.12 | 0.11 | 0.14 | 1.86  | 0.001293 | 0.000032 | 0.157871 | 0.022097 |
| MmugDNA.8075.1.S1_at   | MmugDNA.8075.1 | 12.82 | 12.65 | 0.11 | 0.02 | 1.13  | 0.153607 | 0.019053 | 0.526754 | 0.173688 |
| MmugDNA.8076.1.S1_at   | MmugDNA.8076.1 | 7.55  | 6.96  | 0.33 | 0.27 | 1.5   | 0.071566 | 0.004208 | 0.431049 | 0.091368 |
| MmugDNA.8077.1.S1_at   | MmugDNA.8077.1 | 6.49  | 6.56  | 0.39 | 0.07 | -1.05 | 0.53584  | 0.661097 | 0.801985 | 0.801683 |
| MmugDNA.8084.1.S1_s_at | MmugDNA.8084.1 | 5.99  | 6.11  | 0.15 | 0.06 | -1.09 | 0.936738 | 0.882272 | 0.978763 | 0.932845 |
| MmugDNA.8088.1.S1_at   | MmugDNA.8088.1 | 5.98  | 5.66  | 0.13 | 0.11 | 1.24  | 0.031953 | 0.031079 | 0.342891 | 0.218117 |
| MmugDNA.8093.1.S1_at   | MmugDNA.8093.1 | 12.31 | 12.25 | 0.13 | 0.02 | 1.05  | 0.569104 | 0.361342 | 0.821167 | 0.602122 |
| MmugDNA.8100.1.S1_at   | MmugDNA.8100.1 | 8.08  | 7.87  | 0.33 | 0.1  | 1.16  | 0.26102  | 0.000499 | 0.623563 | 0.038955 |
| MmugDNA.8102.1.S1_at   | MmugDNA.8102.1 | 8.18  | 8.52  | 0.56 | 0.15 | -1.27 | 0.853382 | 0.271133 | 0.948299 | 0.536259 |
| MmugDNA.8106.1.S1_at   | MmugDNA.8106.1 | 3.24  | 3.15  | 0.1  | 0.09 | 1.06  | 0.61476  | 0.173334 | 0.844066 | 0.449791 |
| MmugDNA.8107.1.S1_at   | MmugDNA.8107.1 | 6.18  | 4.85  | 0.97 | 0.17 | 2.52  | 0.070038 | 0.06078  | 0.428436 | 0.29326  |
| MmugDNA.8111.1.S1_at   | MmugDNA.8111.1 | 9.9   | 10.39 | 0.19 | 0.11 | -1.41 | 0.017695 | 0.008672 | 0.293353 | 0.123535 |
| MmugDNA.813.1.S1_at    | MmugDNA.813.1  | 8.73  | 8.36  | 0.18 | 0.08 | 1.29  | 0.016285 | 0.007106 | 0.28707  | 0.113555 |
| MmugDNA.8132.1.S1_at   | MmugDNA.8132.1 | 4.46  | 4.41  | 0.2  | 0.11 | 1.04  | 0.290464 | 0.39898  | 0.64704  | 0.629665 |
| MmugDNA.8133.1.S1_at   | MmugDNA.8133.1 | 6.15  | 7.08  | 0.35 | 0.15 | -1.91 | 0.034561 | 0.038955 | 0.350124 | 0.242449 |

|                        |                |       |       |      |      |       |          |          |          |          |
|------------------------|----------------|-------|-------|------|------|-------|----------|----------|----------|----------|
| MmugDNA.8134.1.S1_at   | MmugDNA.8134.1 | 6.22  | 6.69  | 0.18 | 0.06 | -1.39 | 0.02112  | 0.000871 | 0.306884 | 0.047471 |
| MmugDNA.8140.1.S1_at   | MmugDNA.8140.1 | 8.99  | 9.3   | 0.25 | 0.16 | -1.24 | 0.053469 | 0.013371 | 0.394728 | 0.14827  |
| MmugDNA.8141.1.S1_at   | MmugDNA.8141.1 | 10.08 | 9.53  | 1.2  | 0.24 | 1.46  | 0.400415 | 0.059739 | 0.723814 | 0.29107  |
| MmugDNA.8145.1.S1_at   | MmugDNA.8145.1 | 6.74  | 6.21  | 1.69 | 0.1  | 1.44  | 0.185513 | 0.242152 | 0.55851  | 0.512652 |
| MmugDNA.8146.1.S1_at   | MmugDNA.8146.1 | 6.69  | 5.18  | 0.88 | 0.43 | 2.85  | 0.066756 | 0.133851 | 0.422643 | 0.405875 |
| MmugDNA.8160.1.S1_at   | MmugDNA.8160.1 | 12.07 | 12.03 | 0.23 | 0.07 | 1.03  | 0.699225 | 0.313012 | 0.883094 | 0.567594 |
| MmugDNA.8167.1.S1_at   | MmugDNA.8167.1 | 10.52 | 10.41 | 0.7  | 0.14 | 1.08  | 0.70888  | 0.416925 | 0.886591 | 0.641838 |
| MmugDNA.8172.1.S1_x_at | MmugDNA.8172.1 | 8.99  | 9.24  | 0.28 | 0.22 | -1.19 | 0.257204 | 0.310558 | 0.621021 | 0.565771 |
| MmugDNA.8183.1.S1_at   | MmugDNA.8183.1 | 11.59 | 11.63 | 0.21 | 0.16 | -1.02 | 0.981181 | 0.078332 | 0.993962 | 0.324964 |
| MmugDNA.819.1.S1_at    | MmugDNA.819.1  | 11.57 | 11.86 | 0.1  | 0.05 | -1.23 | 0.016644 | 0.053098 | 0.287478 | 0.276147 |
| MmugDNA.8190.1.S1_at   | MmugDNA.8190.1 | 7.32  | 7.16  | 0.14 | 0.12 | -1.11 | 0.323773 | 0.137035 | 0.672332 | 0.409836 |
| MmugDNA.8197.1.S1_at   | MmugDNA.8197.1 | 9.91  | 9.74  | 0.28 | 0.08 | 1.12  | 0.218968 | 0.239031 | 0.588349 | 0.509798 |
| MmugDNA.8198.1.S1_at   | MmugDNA.8198.1 | 4.53  | 3.77  | 0.77 | 0.04 | 1.7   | 0.133387 | 0.06169  | 0.507921 | 0.295135 |
| MmugDNA.8199.1.S1_at   | MmugDNA.8199.1 | 11.63 | 11.95 | 0.14 | 0.25 | -1.25 | 0.194839 | 0.207003 | 0.565228 | 0.481115 |
| MmugDNA.8200.1.S1_at   | MmugDNA.8200.1 | 7.38  | 7.96  | 0.3  | 0.28 | -1.49 | 0.074826 | 0.097286 | 0.435313 | 0.354959 |
| MmugDNA.8201.1.S1_at   | MmugDNA.8201.1 | 5.53  | 5.31  | 0.58 | 0.32 | 1.17  | 0.341349 | 0.223252 | 0.685051 | 0.496078 |
| MmugDNA.8202.1.S1_at   | MmugDNA.8202.1 | 6.59  | 4.88  | 2.39 | 0.81 | 3.26  | 0.435124 | 0.245034 | 0.745512 | 0.514813 |
| MmugDNA.8208.1.S1_at   | MmugDNA.8208.1 | 9.16  | 8.85  | 0.73 | 0.19 | 1.24  | 0.376961 | 0.181536 | 0.707245 | 0.458087 |
| MmugDNA.8209.1.S1_at   | MmugDNA.8209.1 | 4.36  | 4.45  | 0.11 | 0.19 | -1.07 | 0.513118 | 0.636037 | 0.789654 | 0.78583  |
| MmugDNA.821.1.S1_at    | MmugDNA.821.1  | 4.34  | 4.31  | 0.18 | 0.07 | 1.02  | 0.48659  | 0.083147 | 0.774667 | 0.332999 |
| MmugDNA.8210.1.S1_at   | MmugDNA.8210.1 | 4.44  | 5.13  | 1.87 | 0.42 | -1.62 | 0.989965 | 0.875483 | 0.996285 | 0.929259 |
| MmugDNA.8211.1.S1_at   | MmugDNA.8211.1 | 8.67  | 8.01  | 0.67 | 0.09 | 1.58  | 0.549914 | 0.232158 | 0.810479 | 0.503874 |
| MmugDNA.8217.1.S1_s_at | MmugDNA.8217.1 | 11.49 | 11.45 | 0.47 | 0.04 | 1.03  | 0.651487 | 0.762784 | 0.861636 | 0.862041 |
| MmugDNA.8221.1.S1_at   | MmugDNA.8221.1 | 7.01  | 6.88  | 0.48 | 0.11 | 1.1   | 0.235514 | 0.288651 | 0.602643 | 0.549827 |
| MmugDNA.8231.1.S1_at   | MmugDNA.8231.1 | 7.69  | 7.91  | 0.1  | 0.07 | -1.17 | 0.062257 | 0.126171 | 0.412841 | 0.396742 |
| MmugDNA.8242.1.S1_at   | MmugDNA.8242.1 | 6.85  | 6.93  | 0.33 | 0.03 | -1.05 | 0.21512  | 0.189064 | 0.585748 | 0.464897 |
| MmugDNA.8245.1.S1_at   | MmugDNA.8245.1 | 11.28 | 11.41 | 0.13 | 0.03 | -1.1  | 0.125485 | 0.021506 | 0.499523 | 0.18373  |
| MmugDNA.8247.1.S1_at   | MmugDNA.8247.1 | 6.44  | 8.11  | 1.48 | 0.08 | -3.19 | 0.39007  | 0.639206 | 0.716509 | 0.788125 |
| MmugDNA.8253.1.S1_at   | MmugDNA.8253.1 | 6.54  | 6.02  | 0.62 | 0.58 | 1.43  | 0.800519 | 0.047319 | 0.927001 | 0.262262 |
| MmugDNA.8254.1.S1_at   | MmugDNA.8254.1 | 7.07  | 6.96  | 0.67 | 0.11 | 1.08  | 0.849502 | 0.330468 | 0.947106 | 0.579193 |
| MmugDNA.8256.1.S1_at   | MmugDNA.8256.1 | 7.57  | 7.5   | 2.17 | 0.37 | 1.05  | 0.881921 | 0.121539 | 0.95911  | 0.390665 |
| MmugDNA.8257.1.S1_at   | MmugDNA.8257.1 | 11.43 | 11.21 | 0.07 | 0.11 | 1.17  | 0.042515 | 0.001074 | 0.369237 | 0.051908 |
| MmugDNA.8259.1.S1_at   | MmugDNA.8259.1 | 8.43  | 8.22  | 0.1  | 0.1  | 1.16  | 0.023267 | 0.00436  | 0.314809 | 0.092464 |
| MmugDNA.8261.1.S1_at   | MmugDNA.8261.1 | 4.46  | 4.35  | 0.08 | 0.06 | 1.08  | 0.046033 | 0.149737 | 0.37735  | 0.424351 |
| MmugDNA.8263.1.S1_at   | MmugDNA.8263.1 | 4.25  | 3.94  | 0.13 | 0.04 | 1.24  | 0.014983 | 0.115933 | 0.279093 | 0.383147 |
| MmugDNA.8265.1.S1_at   | MmugDNA.8265.1 | 6.23  | 5.97  | 0.3  | 0.05 | 1.2   | 0.087436 | 0.197299 | 0.454909 | 0.472213 |
| MmugDNA.8268.1.S1_at   | MmugDNA.8268.1 | 5.17  | 5.01  | 0.15 | 0.11 | 1.12  | 0.130337 | 0.144468 | 0.504682 | 0.418323 |
| MmugDNA.8275.1.S1_at   | MmugDNA.8275.1 | 5.9   | 5.94  | 0.84 | 0.1  | -1.02 | 0.640939 | 0.224819 | 0.857    | 0.497617 |
| MmugDNA.8279.1.S1_at   | MmugDNA.8279.1 | 5.53  | 5.75  | 0.26 | 0.14 | -1.17 | 0.105802 | 0.397791 | 0.477611 | 0.629114 |
| MmugDNA.8283.1.S1_at   | MmugDNA.8283.1 | 5.29  | 5.1   | 0.22 | 0.14 | 1.14  | 0.751218 | 0.287948 | 0.905845 | 0.549227 |
| MmugDNA.8285.1.S1_at   | MmugDNA.8285.1 | 6.47  | 6.22  | 0.04 | 0.18 | 1.2   | 0.102293 | 0.199941 | 0.472589 | 0.474603 |
| MmugDNA.8287.1.S1_at   | MmugDNA.8287.1 | 8.78  | 8.37  | 0.19 | 0.12 | 1.32  | 0.0387   | 0.022387 | 0.360126 | 0.187228 |
| MmugDNA.8296.1.S1_at   | MmugDNA.8296.1 | 3.72  | 4.15  | 0.18 | 0.12 | -1.35 | 0.028219 | 0.014961 | 0.33163  | 0.155453 |

|                        |                |       |       |      |      |       |          |          |          |          |
|------------------------|----------------|-------|-------|------|------|-------|----------|----------|----------|----------|
| MmugDNA.8299.1.S1_at   | MmugDNA.8299.1 | 5.38  | 5.31  | 0.07 | 0.12 | 1.05  | 0.085578 | 0.201633 | 0.452706 | 0.476208 |
| MmugDNA.83.1.S1_at     | MmugDNA.83.1   | 9.18  | 8.83  | 0.34 | 0.17 | 1.27  | 0.263307 | 0.348413 | 0.625264 | 0.592591 |
| MmugDNA.8300.1.S1_at   | MmugDNA.8300.1 | 7.6   | 7.73  | 0.15 | 0.04 | -1.09 | 0.336052 | 0.248537 | 0.681441 | 0.51783  |
| MmugDNA.8308.1.S1_at   | MmugDNA.8308.1 | 11.03 | 11.12 | 0.33 | 0.29 | -1.06 | 0.792617 | 0.679704 | 0.923983 | 0.812998 |
| MmugDNA.8308.1.S1_x_at | MmugDNA.8308.1 | 10.79 | 10.83 | 0.3  | 0.36 | -1.03 | 0.970882 | 0.683608 | 0.990496 | 0.815387 |
| MmugDNA.8316.1.S1_at   | MmugDNA.8316.1 | 12.21 | 12.25 | 0.22 | 0.03 | -1.03 | 0.761047 | 0.067878 | 0.910284 | 0.306745 |
| MmugDNA.8318.1.S1_at   | MmugDNA.8318.1 | 7.81  | 8.01  | 0.37 | 0.06 | -1.15 | 0.439418 | 0.454982 | 0.748153 | 0.669026 |
| MmugDNA.8321.1.S1_at   | MmugDNA.8321.1 | 13.65 | 13.71 | 0.04 | 0.03 | -1.04 | 0.095276 | 0.440051 | 0.464131 | 0.658651 |
| MmugDNA.8324.1.S1_at   | MmugDNA.8324.1 | 8.17  | 8.5   | 0.18 | 0.19 | -1.26 | 0.489084 | 0.323481 | 0.775981 | 0.574473 |
| MmugDNA.8326.1.S1_at   | MmugDNA.8326.1 | 6.43  | 6.84  | 0.88 | 0.19 | -1.33 | 0.509735 | 0.36903  | 0.787834 | 0.608583 |
| MmugDNA.8327.1.S1_at   | MmugDNA.8327.1 | 8.44  | 8     | 0.4  | 0.18 | -1.36 | 0.255789 | 0.5383   | 0.619764 | 0.723028 |
| MmugDNA.8347.1.S1_at   | MmugDNA.8347.1 | 6.72  | 6.8   | 0.1  | 0.06 | -1.06 | 0.310272 | 0.614256 | 0.662073 | 0.77118  |
| MmugDNA.8348.1.S1_at   | MmugDNA.8348.1 | 3.14  | 3.1   | 0.05 | 0.02 | 1.03  | 0.116155 | 0.493132 | 0.489554 | 0.694001 |
| MmugDNA.8349.1.S1_at   | MmugDNA.8349.1 | 8.62  | 8.82  | 0.36 | 0.14 | -1.15 | 0.412284 | 0.04259  | 0.731945 | 0.251035 |
| MmugDNA.8354.1.S1_at   | MmugDNA.8354.1 | 8.61  | 9.38  | 0.71 | 0.13 | -1.7  | 0.362776 | 0.016481 | 0.699596 | 0.162551 |
| MmugDNA.8358.1.S1_at   | MmugDNA.8358.1 | 5.48  | 5.26  | 0.27 | 0.05 | 1.16  | 0.336735 | 0.197205 | 0.682118 | 0.472213 |
| MmugDNA.8380.1.S1_at   | MmugDNA.8380.1 | 3.58  | 3.62  | 0.05 | 0.29 | -1.03 | 0.735145 | 0.902944 | 0.898576 | 0.944917 |
| MmugDNA.8384.1.S1_at   | MmugDNA.8384.1 | 4.88  | 4.72  | 0.26 | 0.12 | 1.12  | 0.236077 | 0.241565 | 0.603096 | 0.512166 |
| MmugDNA.8387.1.S1_at   | MmugDNA.8387.1 | 3.14  | 3.15  | 0.16 | 0.11 | -1.01 | 0.472071 | 0.058585 | 0.766862 | 0.288747 |
| MmugDNA.8389.1.S1_at   | MmugDNA.8389.1 | 10.41 | 11.15 | 1.97 | 0.24 | -1.67 | 0.448345 | 0.127687 | 0.753886 | 0.398581 |
| MmugDNA.8391.1.S1_at   | MmugDNA.8391.1 | 6.58  | 6.11  | 0.98 | 0.72 | 1.39  | 0.847783 | 0.418011 | 0.946572 | 0.642537 |
| MmugDNA.8393.1.S1_at   | MmugDNA.8393.1 | 6.91  | 6.89  | 0.51 | 0.18 | 1.01  | 0.511339 | 0.440018 | 0.788632 | 0.658635 |
| MmugDNA.8397.1.S1_at   | MmugDNA.8397.1 | 8.46  | 8.78  | 0.14 | 0.08 | -1.25 | 0.01248  | 0.00366  | 0.262327 | 0.086526 |
| MmugDNA.840.1.S1_at    | MmugDNA.840.1  | 10.26 | 10.89 | 1.03 | 0.18 | -1.54 | 0.434881 | 0.585062 | 0.745353 | 0.752684 |
| MmugDNA.8403.1.S1_at   | MmugDNA.8403.1 | 6.05  | 5.79  | 0.15 | 0.06 | 1.2   | 0.091048 | 0.256194 | 0.458927 | 0.524069 |
| MmugDNA.8405.1.S1_at   | MmugDNA.8405.1 | 11.09 | 10.47 | 0.48 | 0.36 | 1.54  | 0.18678  | 0.191447 | 0.559225 | 0.466812 |
| MmugDNA.8406.1.S1_at   | MmugDNA.8406.1 | 8.83  | 9.45  | 0.45 | 0.26 | -1.54 | 0.176351 | 0.18431  | 0.549355 | 0.460458 |
| MmugDNA.8407.1.S1_at   | MmugDNA.8407.1 | 9.96  | 9.47  | 0.53 | 0.15 | 1.4   | 0.532264 | 0.698085 | 0.800197 | 0.824603 |
| MmugDNA.8408.1.S1_at   | MmugDNA.8408.1 | 5.08  | 5     | 0.02 | 0.1  | 1.06  | 0.191723 | 0.400277 | 0.562859 | 0.630158 |
| MmugDNA.8413.1.S1_at   | MmugDNA.8413.1 | 9.28  | 9.24  | 0.51 | 0.06 | 1.03  | 0.390198 | 0.315891 | 0.716592 | 0.569327 |
| MmugDNA.8414.1.S1_at   | MmugDNA.8414.1 | 8.51  | 9.06  | 0.66 | 0.14 | -1.47 | 0.247149 | 0.054068 | 0.612582 | 0.277914 |
| MmugDNA.8418.1.S1_at   | MmugDNA.8418.1 | 6.92  | 7.42  | 0.16 | 0.12 | -1.42 | 0.014743 | 0.007039 | 0.277959 | 0.113112 |
| MmugDNA.8420.1.S1_at   | MmugDNA.8420.1 | 9.04  | 9.73  | 0.21 | 0.05 | -1.61 | 0.00966  | 0.008677 | 0.243152 | 0.12355  |
| MmugDNA.8421.1.S1_at   | MmugDNA.8421.1 | 10.59 | 11.57 | 0.14 | 0.11 | -1.98 | 0.000767 | 0.000664 | 0.15004  | 0.0439   |
| MmugDNA.8422.1.S1_at   | MmugDNA.8422.1 | 6.99  | 6.87  | 0.06 | 0.07 | 1.09  | 0.121026 | 0.153723 | 0.494696 | 0.428413 |
| MmugDNA.8423.1.S1_at   | MmugDNA.8423.1 | 6.8   | 6.78  | 0.12 | 0.13 | 1.02  | 0.420947 | 0.051841 | 0.737135 | 0.273151 |
| MmugDNA.8431.1.S1_at   | MmugDNA.8431.1 | 8.72  | 9.73  | 0.5  | 0.16 | -2.01 | 0.06253  | 0.043876 | 0.413307 | 0.254088 |
| MmugDNA.8435.1.S1_at   | MmugDNA.8435.1 | 11.23 | 11.56 | 0.16 | 0.19 | -1.26 | 0.207308 | 0.009971 | 0.578933 | 0.131094 |
| MmugDNA.844.1.S1_at    | MmugDNA.844.1  | 11.78 | 11.94 | 0.47 | 0.04 | -1.12 | 0.597013 | 0.402666 | 0.83613  | 0.631543 |
| MmugDNA.8447.1.S1_at   | MmugDNA.8447.1 | 9.25  | 10.06 | 1.25 | 0.15 | -1.75 | 0.341407 | 0.464736 | 0.685061 | 0.675398 |
| MmugDNA.8449.1.S1_at   | MmugDNA.8449.1 | 6.61  | 6.51  | 0.27 | 0.05 | 1.07  | 0.800017 | 0.693287 | 0.926794 | 0.821612 |
| MmugDNA.8450.1.S1_at   | MmugDNA.8450.1 | 4.68  | 4.55  | 0.06 | 0.09 | 1.09  | 0.05922  | 0.077121 | 0.406296 | 0.322673 |
| MmugDNA.8455.1.S1_at   | MmugDNA.8455.1 | 8.69  | 8.78  | 0.21 | 0.14 | -1.07 | 0.252021 | 0.002089 | 0.616982 | 0.067534 |

|                        |                |       |       |      |      |       |          |          |          |          |
|------------------------|----------------|-------|-------|------|------|-------|----------|----------|----------|----------|
| MmugDNA.8456.1.S1_at   | MmugDNA.8456.1 | 11.1  | 11.02 | 0.1  | 0.06 | 1.06  | 0.092853 | 0.002353 | 0.461489 | 0.07161  |
| MmugDNA.8458.1.S1_at   | MmugDNA.8458.1 | 10.79 | 9.71  | 0.28 | 0.17 | 2.11  | 0.00749  | 0.044399 | 0.229281 | 0.255192 |
| MmugDNA.8460.1.S1_at   | MmugDNA.8460.1 | 11.43 | 11.57 | 0.38 | 0.09 | -1.11 | 0.503697 | 0.454809 | 0.784375 | 0.668859 |
| MmugDNA.8461.1.S1_at   | MmugDNA.8461.1 | 13.03 | 12.86 | 0.99 | 0.05 | 1.13  | 0.539126 | 0.157859 | 0.803644 | 0.433522 |
| MmugDNA.8462.1.S1_at   | MmugDNA.8462.1 | 5.25  | 5.17  | 0.07 | 0.04 | 1.06  | 0.063475 | 0.122266 | 0.415717 | 0.391971 |
| MmugDNA.8463.1.S1_at   | MmugDNA.8463.1 | 7.84  | 8.67  | 0.66 | 0.11 | -1.77 | 0.088147 | 0.032641 | 0.45606  | 0.223694 |
| MmugDNA.8468.1.S1_at   | MmugDNA.8468.1 | 10.11 | 10.16 | 0.42 | 0.03 | -1.03 | 0.469629 | 0.445812 | 0.765623 | 0.66252  |
| MmugDNA.8475.1.S1_at   | MmugDNA.8475.1 | 7.85  | 8.43  | 0.73 | 0.23 | -1.5  | 0.230313 | 0.270908 | 0.598481 | 0.536026 |
| MmugDNA.8481.1.S1_at   | MmugDNA.8481.1 | 9.54  | 10.35 | 0.71 | 0.26 | -1.75 | 0.41648  | 0.087166 | 0.734327 | 0.340133 |
| MmugDNA.8488.1.S1_at   | MmugDNA.8488.1 | 8.32  | 8.4   | 0.81 | 0.07 | -1.06 | 0.546012 | 0.759309 | 0.808283 | 0.860036 |
| MmugDNA.8496.1.S1_at   | MmugDNA.8496.1 | 6.02  | 5.95  | 0.44 | 0.18 | 1.05  | 0.514552 | 0.435799 | 0.790432 | 0.655528 |
| MmugDNA.8497.1.S1_at   | MmugDNA.8497.1 | 11.46 | 11.84 | 0.2  | 0.05 | -1.3  | 0.03855  | 0.020874 | 0.359747 | 0.181318 |
| MmugDNA.8498.1.S1_at   | MmugDNA.8498.1 | 4.78  | 4.8   | 0.02 | 0.06 | -1.01 | 0.931923 | 0.336588 | 0.977118 | 0.583937 |
| MmugDNA.8502.1.S1_at   | MmugDNA.8502.1 | 4.61  | 3.73  | 0.49 | 0.07 | 1.85  | 0.048478 | 0.182109 | 0.38332  | 0.45859  |
| MmugDNA.8502.1.S1_x_at | MmugDNA.8502.1 | 4.81  | 4.25  | 0.42 | 0.08 | 1.47  | 0.26871  | 0.49229  | 0.629002 | 0.693485 |
| MmugDNA.8503.1.S1_at   | MmugDNA.8503.1 | 11.65 | 11.61 | 0.21 | 0.06 | 1.03  | 0.534907 | 0.38167  | 0.801404 | 0.617883 |
| MmugDNA.8506.1.S1_at   | MmugDNA.8506.1 | 12.36 | 11.42 | 0.15 | 0.23 | 1.92  | 0.003353 | 0.001547 | 0.194985 | 0.05949  |
| MmugDNA.8509.1.S1_at   | MmugDNA.8509.1 | 11.86 | 11.76 | 0.08 | 0.07 | 1.07  | 0.149206 | 0.017319 | 0.523063 | 0.166509 |
| MmugDNA.851.1.S1_at    | MmugDNA.851.1  | 10.25 | 10.18 | 0.18 | 0.05 | 1.05  | 0.244211 | 0.157616 | 0.60991  | 0.433131 |
| MmugDNA.8510.1.S1_s_at | MmugDNA.8510.1 | 8.66  | 8.74  | 0.7  | 0.18 | -1.06 | 0.873271 | 0.189865 | 0.956084 | 0.465403 |
| MmugDNA.8511.1.S1_at   | MmugDNA.8511.1 | 8.02  | 8.52  | 1.04 | 0.06 | -1.42 | 0.247988 | 0.309091 | 0.613615 | 0.564787 |
| MmugDNA.8530.1.S1_at   | MmugDNA.8530.1 | 8.28  | 8.56  | 0.42 | 0.16 | -1.21 | 0.266922 | 0.415961 | 0.627652 | 0.641288 |
| MmugDNA.8534.1.S1_at   | MmugDNA.8534.1 | 5.05  | 4.95  | 0.2  | 0.02 | 1.07  | 0.128595 | 0.018225 | 0.503383 | 0.169777 |
| MmugDNA.8538.1.S1_at   | MmugDNA.8538.1 | 4.49  | 4.49  | 0.09 | 0.02 | 1     | 0.506615 | 0.152762 | 0.785926 | 0.427571 |
| MmugDNA.8540.1.S1_at   | MmugDNA.8540.1 | 4.78  | 5.08  | 0.23 | 0.62 | -1.23 | 0.435727 | 0.614509 | 0.74588  | 0.771283 |
| MmugDNA.8543.1.S1_at   | MmugDNA.8543.1 | 7.21  | 7.15  | 0.17 | 0.58 | 1.04  | 0.426191 | 0.046074 | 0.740383 | 0.258977 |
| MmugDNA.8545.1.S1_at   | MmugDNA.8545.1 | 6.44  | 6.97  | 0.71 | 0.21 | -1.44 | 0.354811 | 0.234245 | 0.694423 | 0.505485 |
| MmugDNA.8550.1.S1_at   | MmugDNA.8550.1 | 6.51  | 6.46  | 0.09 | 0.1  | 1.04  | 0.154544 | 0.253806 | 0.527741 | 0.52217  |
| MmugDNA.8552.1.S1_at   | MmugDNA.8552.1 | 5.18  | 4.83  | 0.15 | 0.14 | 1.28  | 0.080729 | 0.014628 | 0.444813 | 0.154176 |
| MmugDNA.8572.1.S1_at   | MmugDNA.8572.1 | 8.33  | 8.22  | 0.07 | 0.06 | 1.08  | 0.230567 | 0.569034 | 0.59872  | 0.742233 |
| MmugDNA.8574.1.S1_at   | MmugDNA.8574.1 | 6.58  | 6.59  | 0.16 | 0.12 | -1.01 | 0.459043 | 0.321817 | 0.759258 | 0.57348  |
| MmugDNA.8578.1.S1_at   | MmugDNA.8578.1 | 8.04  | 7.66  | 0.53 | 0.38 | 1.29  | 0.39591  | 0.495618 | 0.720823 | 0.695576 |
| MmugDNA.8580.1.S1_at   | MmugDNA.8580.1 | 8.46  | 8.43  | 0.6  | 0.08 | 1.03  | 0.754886 | 0.883715 | 0.907518 | 0.933691 |
| MmugDNA.8589.1.S1_at   | MmugDNA.8589.1 | 5.85  | 5.42  | 0.95 | 0.08 | 1.35  | 0.140114 | 0.259041 | 0.515581 | 0.526234 |
| MmugDNA.8591.1.S1_at   | MmugDNA.8591.1 | 8.3   | 8.19  | 0.31 | 0.24 | 1.08  | 0.424974 | 0.596041 | 0.739773 | 0.759325 |
| MmugDNA.8592.1.S1_at   | MmugDNA.8592.1 | 9.01  | 8.73  | 0.92 | 0.19 | 1.21  | 0.82739  | 0.262057 | 0.938039 | 0.528374 |
| MmugDNA.8593.1.S1_at   | MmugDNA.8593.1 | 12.45 | 12.07 | 0.32 | 0.1  | 1.29  | 0.142256 | 0.078018 | 0.517218 | 0.324416 |
| MmugDNA.8595.1.S1_at   | MmugDNA.8595.1 | 8.24  | 9.32  | 0.55 | 0.2  | -2.12 | 0.03203  | 0.023319 | 0.342916 | 0.191394 |
| MmugDNA.8597.1.S1_at   | MmugDNA.8597.1 | 8.23  | 8.99  | 0.77 | 0.26 | -1.7  | 0.373529 | 0.135553 | 0.705567 | 0.407655 |
| MmugDNA.8598.1.S1_at   | MmugDNA.8598.1 | 9.37  | 9.8   | 0.39 | 0.06 | -1.34 | 0.170435 | 0.012743 | 0.543528 | 0.145496 |
| MmugDNA.8599.1.S1_at   | MmugDNA.8599.1 | 8.69  | 7.58  | 0.26 | 0.24 | 2.17  | 0.005423 | 0.006303 | 0.208157 | 0.107813 |
| MmugDNA.86.1.S1_at     | MmugDNA.86.1   | 7.78  | 8.17  | 0.37 | 0.29 | -1.31 | 0.252876 | 0.150553 | 0.617842 | 0.425106 |
| MmugDNA.8603.1.S1_at   | MmugDNA.8603.1 | 5.97  | 6.54  | 1.52 | 0.47 | -1.49 | 0.601103 | 0.230322 | 0.838101 | 0.502102 |

|                        |                |       |       |      |      |       |          |          |          |          |
|------------------------|----------------|-------|-------|------|------|-------|----------|----------|----------|----------|
| MmugDNA.8605.1.S1_at   | MmugDNA.8605.1 | 6.22  | 6.51  | 0.21 | 0.24 | -1.22 | 0.042462 | 0.046877 | 0.369047 | 0.261272 |
| MmugDNA.8612.1.S1_at   | MmugDNA.8612.1 | 6.64  | 6.68  | 0.2  | 0.1  | -1.02 | 0.905667 | 0.317607 | 0.968196 | 0.570787 |
| MmugDNA.8617.1.S1_at   | MmugDNA.8617.1 | 9.08  | 9.29  | 0.28 | 0.08 | -1.16 | 0.260045 | 0.111098 | 0.622946 | 0.375667 |
| MmugDNA.8618.1.S1_at   | MmugDNA.8618.1 | 10.75 | 10.81 | 2.18 | 0.22 | -1.05 | 0.745993 | 0.454756 | 0.903166 | 0.668859 |
| MmugDNA.8619.1.S1_at   | MmugDNA.8619.1 | 11.19 | 10.75 | 0.14 | 0.09 | 1.35  | 0.017469 | 0.008764 | 0.291886 | 0.124009 |
| MmugDNA.8621.1.S1_at   | MmugDNA.8621.1 | 11.86 | 11.78 | 0.23 | 0.1  | 1.06  | 0.187299 | 0.084247 | 0.559729 | 0.335371 |
| MmugDNA.8622.1.S1_at   | MmugDNA.8622.1 | 8.85  | 8.61  | 0.06 | 0.15 | 1.18  | 0.167093 | 0.000385 | 0.539661 | 0.037273 |
| MmugDNA.8625.1.S1_at   | MmugDNA.8625.1 | 10.7  | 11.01 | 0.21 | 0.09 | -1.24 | 0.17157  | 0.437178 | 0.544814 | 0.656591 |
| MmugDNA.8626.1.S1_at   | MmugDNA.8626.1 | 6     | 6.22  | 0.07 | 0.28 | -1.16 | 0.183698 | 0.127377 | 0.55651  | 0.398205 |
| MmugDNA.863.1.S1_at    | MmugDNA.863.1  | 3.71  | 3.76  | 0.07 | 0.03 | -1.04 | 0.946861 | 0.187588 | 0.981556 | 0.463628 |
| MmugDNA.8630.1.S1_at   | MmugDNA.8630.1 | 6.29  | 6.52  | 0.16 | 0.14 | -1.17 | 0.098252 | 0.097858 | 0.467704 | 0.355649 |
| MmugDNA.8634.1.S1_at   | MmugDNA.8634.1 | 10.03 | 10.21 | 0.33 | 0.07 | -1.13 | 0.980413 | 0.879446 | 0.993785 | 0.931144 |
| MmugDNA.8639.1.S1_at   | MmugDNA.8639.1 | 12.6  | 12.16 | 0.15 | 0.06 | 1.36  | 0.008573 | 0.004909 | 0.235325 | 0.097662 |
| MmugDNA.8640.1.S1_at   | MmugDNA.8640.1 | 3.94  | 3.94  | 0.14 | 0.25 | -1    | 0.392028 | 0.203515 | 0.718015 | 0.477767 |
| MmugDNA.8645.1.S1_at   | MmugDNA.8645.1 | 9.63  | 3.87  | 2.92 | 0.15 | 54.46 | 0.072125 | 0.02801  | 0.432038 | 0.208903 |
| MmugDNA.8645.1.S1_x_at | MmugDNA.8645.1 | 9.47  | 5.49  | 2.04 | 0.15 | 15.73 | 0.074135 | 0.041161 | 0.43493  | 0.247723 |
| MmugDNA.8646.1.S1_at   | MmugDNA.8646.1 | 10.39 | 10.36 | 0.28 | 0.11 | 1.02  | 0.875417 | 0.937594 | 0.956729 | 0.964687 |
| MmugDNA.8648.1.S1_at   | MmugDNA.8648.1 | 10.69 | 10.2  | 0.67 | 0.15 | 1.4   | 0.971167 | 0.983175 | 0.990583 | 0.990726 |
| MmugDNA.8649.1.S1_at   | MmugDNA.8649.1 | 11.23 | 11.54 | 0.64 | 0.09 | -1.23 | 0.597081 | 0.671099 | 0.83613  | 0.80765  |
| MmugDNA.865.1.S1_at    | MmugDNA.865.1  | 12.43 | 12.52 | 0.13 | 0.09 | -1.06 | 0.411244 | 0.003396 | 0.731262 | 0.083974 |
| MmugDNA.8650.1.S1_at   | MmugDNA.8650.1 | 6.72  | 6.6   | 0.1  | 0.08 | 1.09  | 0.13257  | 0.332792 | 0.506856 | 0.58121  |
| MmugDNA.8652.1.S1_at   | MmugDNA.8652.1 | 9.49  | 8.52  | 0.49 | 0.44 | 1.95  | 0.218919 | 0.175509 | 0.588341 | 0.452159 |
| MmugDNA.8653.1.S1_at   | MmugDNA.8653.1 | 12.69 | 12.49 | 0.06 | 0.05 | 1.15  | 0.012097 | 0.003194 | 0.259438 | 0.08199  |
| MmugDNA.8656.1.S1_at   | MmugDNA.8656.1 | 5.57  | 4.4   | 0.77 | 0.23 | 2.25  | 0.116488 | 0.046959 | 0.489676 | 0.261341 |
| MmugDNA.8658.1.S1_at   | MmugDNA.8658.1 | 3.84  | 3.8   | 0.15 | 0.04 | 1.03  | 0.340254 | 0.483334 | 0.684431 | 0.687887 |
| MmugDNA.8660.1.S1_at   | MmugDNA.8660.1 | 10.35 | 10.7  | 0.22 | 0.14 | -1.27 | 0.369307 | 0.134883 | 0.704181 | 0.406878 |
| MmugDNA.8663.1.S1_at   | MmugDNA.8663.1 | 7.36  | 7.72  | 0.23 | 0.12 | -1.28 | 0.075822 | 0.064339 | 0.436877 | 0.29983  |
| MmugDNA.8667.1.S1_at   | MmugDNA.8667.1 | 7.15  | 7.15  | 0.11 | 0.07 | 1     | 0.418013 | 0.289239 | 0.73531  | 0.550293 |
| MmugDNA.8668.1.S1_at   | MmugDNA.8668.1 | 7.85  | 7.97  | 0.27 | 0.22 | -1.09 | 0.903939 | 0.173893 | 0.967741 | 0.450211 |
| MmugDNA.8670.1.S1_at   | MmugDNA.8670.1 | 9.93  | 10.15 | 0.14 | 0.14 | -1.16 | 0.092353 | 0.282139 | 0.460762 | 0.544937 |
| MmugDNA.8671.1.S1_at   | MmugDNA.8671.1 | 4     | 3.89  | 0.2  | 0.05 | 1.08  | 0.247414 | 0.355894 | 0.613027 | 0.597869 |
| MmugDNA.8676.1.S1_at   | MmugDNA.8676.1 | 8.66  | 8.26  | 0.27 | 0.09 | 1.32  | 0.063473 | 0.055326 | 0.415717 | 0.281024 |
| MmugDNA.8677.1.S1_at   | MmugDNA.8677.1 | 7.74  | 7.29  | 0.24 | 0.14 | 1.37  | 0.01481  | 0.16461  | 0.278527 | 0.440881 |
| MmugDNA.8691.1.S1_at   | MmugDNA.8691.1 | 5.31  | 4.97  | 0.32 | 0.73 | 1.27  | 0.790547 | 0.129865 | 0.922954 | 0.401509 |
| MmugDNA.8695.1.S1_at   | MmugDNA.8695.1 | 9.59  | 10.32 | 0.42 | 0.1  | -1.66 | 0.01826  | 0.00079  | 0.296007 | 0.045969 |
| MmugDNA.8697.1.S1_at   | MmugDNA.8697.1 | 3.27  | 3.25  | 0.21 | 0.16 | 1.01  | 0.657771 | 0.100672 | 0.864279 | 0.360037 |
| MmugDNA.87.1.S1_at     | MmugDNA.87.1   | 6.79  | 6.74  | 0.14 | 0.05 | 1.04  | 0.131772 | 0.053985 | 0.506189 | 0.27777  |
| MmugDNA.8700.1.S1_at   | MmugDNA.8700.1 | 6.12  | 5.92  | 0.04 | 0.02 | 1.15  | 0.001507 | 0.147694 | 0.161549 | 0.422007 |
| MmugDNA.8702.1.S1_at   | MmugDNA.8702.1 | 11.98 | 11.78 | 0.23 | 0.02 | 1.15  | 0.068778 | 0.045502 | 0.426056 | 0.2575   |
| MmugDNA.8704.1.S1_at   | MmugDNA.8704.1 | 7.15  | 6.13  | 0.76 | 0.29 | 2.03  | 0.269334 | 0.17862  | 0.629582 | 0.454847 |
| MmugDNA.871.1.S1_at    | MmugDNA.871.1  | 7.81  | 7.26  | 2.63 | 0.58 | 1.47  | 0.708518 | 0.877536 | 0.886591 | 0.930162 |
| MmugDNA.8711.1.S1_at   | MmugDNA.8711.1 | 12.44 | 11.87 | 0.06 | 0.23 | 1.49  | 0.022907 | 0.006018 | 0.313237 | 0.106089 |
| MmugDNA.8714.1.S1_at   | MmugDNA.8714.1 | 11.63 | 12.01 | 0.06 | 0.09 | -1.31 | 0.004267 | 0.043218 | 0.198874 | 0.252653 |

|                        |                |       |       |      |      |       |          |          |          |          |
|------------------------|----------------|-------|-------|------|------|-------|----------|----------|----------|----------|
| MmugDNA.8714.1.S1_s_at | MmugDNA.8714.1 | 9.18  | 9.31  | 0.09 | 0.04 | -1.1  | 0.07427  | 0.442826 | 0.435027 | 0.660759 |
| MmugDNA.8719.1.S1_at   | MmugDNA.8719.1 | 10.81 | 10.95 | 0.34 | 0.09 | -1.1  | 0.440005 | 0.653652 | 0.748282 | 0.797546 |
| MmugDNA.8721.1.S1_at   | MmugDNA.8721.1 | 8.19  | 8.67  | 0.24 | 0.17 | -1.4  | 0.020174 | 0.033159 | 0.303673 | 0.225374 |
| MmugDNA.8722.1.S1_at   | MmugDNA.8722.1 | 7.66  | 7.94  | 0.22 | 0.11 | -1.21 | 0.076098 | 0.043303 | 0.437449 | 0.252847 |
| MmugDNA.8723.1.S1_at   | MmugDNA.8723.1 | 12.08 | 12.24 | 0.18 | 0.11 | -1.11 | 0.64442  | 0.470113 | 0.858506 | 0.678572 |
| MmugDNA.8725.1.S1_at   | MmugDNA.8725.1 | 11.06 | 10.67 | 1.5  | 0.17 | 1.31  | 0.893364 | 0.480444 | 0.963467 | 0.685781 |
| MmugDNA.8732.1.S1_at   | MmugDNA.8732.1 | 8.31  | 9.16  | 1.91 | 0.28 | -1.79 | 0.458694 | 0.13797  | 0.759033 | 0.410912 |
| MmugDNA.8734.1.S1_s_at | MmugDNA.8734.1 | 12.58 | 12.87 | 0.09 | 0.02 | -1.22 | 0.005868 | 0.023355 | 0.211798 | 0.191568 |
| MmugDNA.8735.1.S1_at   | MmugDNA.8735.1 | 7.98  | 8.31  | 1.08 | 0.07 | -1.26 | 0.687207 | 0.521108 | 0.877656 | 0.712212 |
| MmugDNA.8741.1.S1_at   | MmugDNA.8741.1 | 3.41  | 3.25  | 0.29 | 0.04 | 1.12  | 0.744967 | 0.912689 | 0.902816 | 0.950818 |
| MmugDNA.8743.1.S1_at   | MmugDNA.8743.1 | 11.15 | 12.03 | 0.41 | 0.16 | -1.85 | 0.029865 | 0.035365 | 0.336071 | 0.232348 |
| MmugDNA.875.1.S1_at    | MmugDNA.875.1  | 7.74  | 8.23  | 1.88 | 0.27 | -1.41 | 0.643569 | 0.274862 | 0.858218 | 0.539335 |
| MmugDNA.8756.1.S1_at   | MmugDNA.8756.1 | 5.87  | 5.77  | 0.13 | 0.1  | 1.07  | 0.520167 | 0.813708 | 0.793553 | 0.892425 |
| MmugDNA.8758.1.S1_at   | MmugDNA.8758.1 | 5.37  | 5.11  | 0.11 | 0.19 | 1.2   | 0.105809 | 0.303877 | 0.477611 | 0.561243 |
| MmugDNA.876.1.S1_at    | MmugDNA.876.1  | 9.12  | 9.97  | 0.67 | 0.27 | -1.8  | 0.099152 | 0.016581 | 0.468557 | 0.163023 |
| MmugDNA.8761.1.S1_at   | MmugDNA.8761.1 | 7.97  | 6.99  | 0.59 | 0.3  | 1.98  | 0.09765  | 0.104485 | 0.466607 | 0.36573  |
| MmugDNA.8765.1.S1_at   | MmugDNA.8765.1 | 7.41  | 8.28  | 0.43 | 0.23 | -1.83 | 0.035716 | 0.075398 | 0.352985 | 0.319693 |
| MmugDNA.877.1.S1_at    | MmugDNA.877.1  | 9.73  | 11.11 | 0.47 | 0.19 | -2.59 | 0.022272 | 0.05038  | 0.310495 | 0.269722 |
| MmugDNA.8778.1.S1_at   | MmugDNA.8778.1 | 11.65 | 11.59 | 0.32 | 0.08 | 1.04  | 0.883007 | 0.079987 | 0.959529 | 0.327352 |
| MmugDNA.8781.1.S1_at   | MmugDNA.8781.1 | 7.94  | 8.4   | 1.08 | 0.22 | -1.37 | 0.40803  | 0.409425 | 0.729168 | 0.636503 |
| MmugDNA.8789.1.S1_at   | MmugDNA.8789.1 | 13.14 | 13.32 | 0.39 | 0.04 | -1.13 | 0.152698 | 0.134031 | 0.525612 | 0.406234 |
| MmugDNA.879.1.S1_at    | MmugDNA.879.1  | 8.07  | 8.52  | 0.34 | 0.16 | -1.37 | 0.432403 | 0.438883 | 0.74389  | 0.657753 |
| MmugDNA.8790.1.S1_at   | MmugDNA.8790.1 | 6.51  | 7.71  | 0.76 | 0.13 | -2.3  | 0.169525 | 0.199987 | 0.542554 | 0.474603 |
| MmugDNA.8791.1.S1_at   | MmugDNA.8791.1 | 8.05  | 8.5   | 0.13 | 0.05 | -1.36 | 0.004511 | 0.000449 | 0.200386 | 0.038539 |
| MmugDNA.8793.1.S1_at   | MmugDNA.8793.1 | 4.94  | 4.87  | 0.11 | 0.08 | 1.05  | 0.329346 | 0.465746 | 0.676319 | 0.6759   |
| MmugDNA.8794.1.S1_at   | MmugDNA.8794.1 | 6.86  | 6.59  | 0.29 | 0.36 | 1.2   | 0.860766 | 0.898931 | 0.950901 | 0.942467 |
| MmugDNA.8804.1.S1_at   | MmugDNA.8804.1 | 8.54  | 8.84  | 0.34 | 0.27 | -1.23 | 0.51862  | 0.652968 | 0.792784 | 0.797125 |
| MmugDNA.8811.1.S1_at   | MmugDNA.8811.1 | 10.42 | 10.46 | 0.2  | 0.08 | -1.03 | 0.570836 | 0.765269 | 0.82229  | 0.863539 |
| MmugDNA.8812.1.S1_at   | MmugDNA.8812.1 | 7.07  | 7.3   | 0.16 | 0.09 | -1.18 | 0.058324 | 0.02738  | 0.40405  | 0.206695 |
| MmugDNA.8817.1.S1_at   | MmugDNA.8817.1 | 5.94  | 6.03  | 0.06 | 0.01 | -1.06 | 0.030949 | 0.033664 | 0.339277 | 0.227052 |
| MmugDNA.8819.1.S1_at   | MmugDNA.8819.1 | 12.86 | 13    | 0.36 | 0.03 | -1.1  | 0.467319 | 0.589102 | 0.764287 | 0.755393 |
| MmugDNA.8820.1.S1_at   | MmugDNA.8820.1 | 13.17 | 12.95 | 0.01 | 0.02 | 1.16  | 0.000095 | 0.000072 | 0.108151 | 0.02644  |
| MmugDNA.8823.1.S1_at   | MmugDNA.8823.1 | 8.81  | 9.09  | 0.14 | 0.07 | -1.21 | 0.040374 | 0.065249 | 0.364227 | 0.301239 |
| MmugDNA.8826.1.S1_at   | MmugDNA.8826.1 | 12.59 | 11.78 | 0.61 | 0.14 | 1.74  | 0.202763 | 0.07444  | 0.574251 | 0.318062 |
| MmugDNA.8832.1.S1_s_at | MmugDNA.8832.1 | 9.55  | 10.27 | 0.36 | 0.15 | -1.65 | 0.05311  | 0.038783 | 0.394001 | 0.241916 |
| MmugDNA.8845.1.S1_at   | MmugDNA.8845.1 | 10.71 | 10.34 | 0.72 | 0.05 | 1.3   | 0.413011 | 0.198472 | 0.732147 | 0.47339  |
| MmugDNA.8850.1.S1_s_at | MmugDNA.8850.1 | 4.28  | 4.08  | 0.13 | 0.08 | 1.15  | 0.041955 | 0.046092 | 0.367945 | 0.259052 |
| MmugDNA.8851.1.S1_at   | MmugDNA.8851.1 | 8.93  | 8.96  | 0.74 | 0.25 | -1.02 | 0.998074 | 0.008445 | 0.999386 | 0.121922 |
| MmugDNA.8863.1.S1_at   | MmugDNA.8863.1 | 10.65 | 10.32 | 0.16 | 0.07 | 1.25  | 0.014411 | 0.004486 | 0.27544  | 0.093544 |
| MmugDNA.8866.1.S1_at   | MmugDNA.8866.1 | 8.76  | 8.96  | 0.61 | 0.02 | -1.15 | 0.711417 | 0.11554  | 0.887632 | 0.38267  |
| MmugDNA.8868.1.S1_at   | MmugDNA.8868.1 | 6.57  | 6.37  | 1.11 | 0.13 | 1.15  | 0.72874  | 0.834559 | 0.895364 | 0.905227 |
| MmugDNA.8870.1.S1_at   | MmugDNA.8870.1 | 8.03  | 8.18  | 1.09 | 0.16 | -1.11 | 0.824816 | 0.20043  | 0.937078 | 0.474805 |
| MmugDNA.8872.1.S1_at   | MmugDNA.8872.1 | 7.82  | 7.28  | 0.22 | 0.3  | 1.45  | 0.045093 | 0.034262 | 0.375796 | 0.228981 |



|                        |                |       |       |      |      |       |          |          |          |          |
|------------------------|----------------|-------|-------|------|------|-------|----------|----------|----------|----------|
| MmugDNA.8879.1.S1_at   | MmugDNA.8879.1 | 8.95  | 9.04  | 0.67 | 0.09 | -1.06 | 0.40205  | 0.465862 | 0.724787 | 0.675982 |
| MmugDNA.8882.1.S1_at   | MmugDNA.8882.1 | 10.06 | 9.86  | 0.27 | 0.3  | 1.15  | 0.592995 | 0.227935 | 0.83403  | 0.500211 |
| MmugDNA.8886.1.S1_at   | MmugDNA.8886.1 | 10.93 | 10.31 | 0.22 | 0.18 | 1.54  | 0.019345 | 0.04391  | 0.300575 | 0.254098 |
| MmugDNA.8887.1.S1_at   | MmugDNA.8887.1 | 6.32  | 6.45  | 0.1  | 0.12 | -1.09 | 0.368709 | 0.244935 | 0.703807 | 0.514752 |
| MmugDNA.8888.1.S1_at   | MmugDNA.8888.1 | 7.45  | 7.33  | 0.16 | 0.08 | 1.08  | 0.764395 | 0.195598 | 0.911482 | 0.470441 |
| MmugDNA.8895.1.S1_at   | MmugDNA.8895.1 | 3.58  | 3.59  | 0.07 | 0.12 | -1.01 | 0.536666 | 0.685074 | 0.802434 | 0.816309 |
| MmugDNA.8896.1.S1_at   | MmugDNA.8896.1 | 5.79  | 5.87  | 0.12 | 0.07 | -1.06 | 0.646271 | 0.286093 | 0.859027 | 0.547586 |
| MmugDNA.8903.1.S1_at   | MmugDNA.8903.1 | 7.73  | 7.86  | 0.75 | 0.17 | -1.09 | 0.646314 | 0.268731 | 0.859027 | 0.534138 |
| MmugDNA.8906.1.S1_at   | MmugDNA.8906.1 | 10.89 | 11.02 | 0.11 | 0.04 | -1.1  | 0.041769 | 0.140545 | 0.36716  | 0.413807 |
| MmugDNA.8913.1.S1_at   | MmugDNA.8913.1 | 5.07  | 4.8   | 0.44 | 0.29 | 1.2   | 0.331633 | 0.467075 | 0.678133 | 0.676825 |
| MmugDNA.8918.1.S1_at   | MmugDNA.8918.1 | 7.19  | 7.24  | 0.33 | 0.16 | -1.04 | 0.973865 | 0.796357 | 0.99154  | 0.882625 |
| MmugDNA.8921.1.S1_at   | MmugDNA.8921.1 | 9.05  | 9.88  | 0.45 | 0.06 | -1.78 | 0.081456 | 0.058467 | 0.445406 | 0.288549 |
| MmugDNA.8927.1.S1_at   | MmugDNA.8927.1 | 5.02  | 5.04  | 0.06 | 0.13 | -1.01 | 0.723059 | 0.301321 | 0.892742 | 0.559356 |
| MmugDNA.8933.1.S1_at   | MmugDNA.8933.1 | 12.86 | 12.81 | 0.21 | 0.08 | 1.03  | 0.562633 | 0.184394 | 0.817773 | 0.460458 |
| MmugDNA.8935.1.S1_at   | MmugDNA.8935.1 | 4.44  | 5.46  | 0.61 | 0.26 | -2.02 | 0.138031 | 0.245838 | 0.513671 | 0.515519 |
| MmugDNA.8936.1.S1_x_at | MmugDNA.8936.1 | 6.77  | 6.73  | 0.03 | 0.05 | 1.03  | 0.767916 | 0.829842 | 0.912714 | 0.902225 |
| MmugDNA.8950.1.S1_at   | MmugDNA.8950.1 | 2.9   | 2.91  | 0.1  | 0.01 | -1    | 0.923494 | 0.696007 | 0.974364 | 0.82338  |
| MmugDNA.8954.1.S1_at   | MmugDNA.8954.1 | 4.85  | 4.74  | 0.27 | 0.14 | 1.08  | 0.3491   | 0.307488 | 0.690223 | 0.563757 |
| MmugDNA.8958.1.S1_at   | MmugDNA.8958.1 | 3.13  | 3.05  | 0.03 | 0.1  | 1.06  | 0.351225 | 0.488981 | 0.691945 | 0.691529 |
| MmugDNA.896.1.S1_at    | MmugDNA.896.1  | 11.22 | 11.45 | 0.47 | 0.07 | -1.18 | 0.900533 | 0.428124 | 0.966163 | 0.649676 |
| MmugDNA.8963.1.S1_at   | MmugDNA.8963.1 | 5.8   | 6.27  | 0.41 | 0.07 | -1.39 | 0.214317 | 0.483118 | 0.584705 | 0.687725 |
| MmugDNA.8964.1.S1_at   | MmugDNA.8964.1 | 9.52  | 10.6  | 0.83 | 0.13 | -2.11 | 0.156905 | 0.197962 | 0.530153 | 0.472936 |
| MmugDNA.8964.1.S1_s_at | MmugDNA.8964.1 | 8.62  | 9.84  | 0.74 | 0.1  | -2.33 | 0.144992 | 0.174799 | 0.520238 | 0.451407 |
| MmugDNA.8970.1.S1_at   | MmugDNA.8970.1 | 9.88  | 10.49 | 0.52 | 0.16 | -1.53 | 0.4046   | 0.186263 | 0.726732 | 0.462138 |
| MmugDNA.8974.1.S1_at   | MmugDNA.8974.1 | 11.55 | 11.48 | 0.06 | 0.1  | 1.05  | 0.60681  | 0.18197  | 0.840686 | 0.458503 |
| MmugDNA.8975.1.S1_at   | MmugDNA.8975.1 | 5.58  | 5.45  | 0.12 | 0.03 | 1.1   | 0.352498 | 0.473865 | 0.692659 | 0.681082 |
| MmugDNA.899.1.S1_at    | MmugDNA.899.1  | 10.98 | 10.98 | 0.13 | 0.05 | 1     | 0.541301 | 0.653878 | 0.805083 | 0.797692 |
| MmugDNA.8996.1.S1_at   | MmugDNA.8996.1 | 8.33  | 8.82  | 0.2  | 0.08 | -1.4  | 0.03045  | 0.023835 | 0.337918 | 0.193372 |
| MmugDNA.900.1.S1_at    | MmugDNA.900.1  | 4.8   | 4.83  | 0.02 | 0.05 | -1.02 | 0.686384 | 0.664203 | 0.877356 | 0.803247 |
| MmugDNA.9000.1.S1_at   | MmugDNA.9000.1 | 10.93 | 11.96 | 0.62 | 0.18 | -2.03 | 0.037126 | 0.154137 | 0.356778 | 0.42887  |
| MmugDNA.9001.1.S1_at   | MmugDNA.9001.1 | 7.52  | 7.46  | 0.09 | 0.09 | 1.04  | 0.157175 | 0.728442 | 0.530287 | 0.843019 |
| MmugDNA.9002.1.S1_at   | MmugDNA.9002.1 | 9.82  | 9.92  | 0.24 | 0.07 | -1.07 | 0.353873 | 0.425488 | 0.693507 | 0.647866 |
| MmugDNA.9004.1.S1_at   | MmugDNA.9004.1 | 4.15  | 4.1   | 0.05 | 0.15 | 1.03  | 0.600431 | 0.682373 | 0.837867 | 0.814526 |
| MmugDNA.9006.1.S1_at   | MmugDNA.9006.1 | 6.42  | 6.85  | 1.06 | 0.14 | -1.34 | 0.749869 | 0.86168  | 0.905306 | 0.921392 |
| MmugDNA.902.1.S1_at    | MmugDNA.902.1  | 10.19 | 10.4  | 0.04 | 0.27 | -1.16 | 0.141459 | 0.007017 | 0.516365 | 0.113044 |
| MmugDNA.9020.1.S1_at   | MmugDNA.9020.1 | 9.98  | 10.22 | 0.22 | 0.09 | -1.18 | 0.208467 | 0.042656 | 0.580185 | 0.251037 |
| MmugDNA.9022.1.S1_at   | MmugDNA.9022.1 | 7.54  | 7.42  | 0.23 | 0.03 | 1.09  | 0.448854 | 0.228365 | 0.754037 | 0.50054  |
| MmugDNA.9025.1.S1_at   | MmugDNA.9025.1 | 2.84  | 2.81  | 0.04 | 0.02 | 1.02  | 0.175174 | 0.250851 | 0.548034 | 0.51956  |
| MmugDNA.903.1.S1_at    | MmugDNA.903.1  | 5.94  | 5.88  | 0.77 | 0.46 | 1.04  | 0.365769 | 0.339295 | 0.701331 | 0.58598  |
| MmugDNA.9030.1.S1_at   | MmugDNA.9030.1 | 10.74 | 10.67 | 1.46 | 0.08 | 1.05  | 0.958923 | 0.50965  | 0.986539 | 0.704273 |
| MmugDNA.9031.1.S1_at   | MmugDNA.9031.1 | 6.96  | 7.01  | 0.19 | 0.32 | -1.04 | 0.29328  | 0.234987 | 0.649679 | 0.506162 |
| MmugDNA.9032.1.S1_at   | MmugDNA.9032.1 | 12.34 | 12.4  | 0.12 | 0.05 | -1.04 | 0.8568   | 0.021081 | 0.949535 | 0.181869 |
| MmugDNA.9033.1.S1_at   | MmugDNA.9033.1 | 12.59 | 12.06 | 0.61 | 0.12 | 1.44  | 0.639903 | 0.276034 | 0.856417 | 0.540071 |

|                        |                |       |       |      |      |       |          |          |          |          |
|------------------------|----------------|-------|-------|------|------|-------|----------|----------|----------|----------|
| MmugDNA.9035.1.S1_at   | MmugDNA.9035.1 | 5.86  | 5.76  | 0.17 | 0.02 | 1.07  | 0.295617 | 0.30921  | 0.651318 | 0.564807 |
| MmugDNA.9040.1.S1_at   | MmugDNA.9040.1 | 6.76  | 6.52  | 0.08 | 0.45 | 1.18  | 0.41565  | 0.485978 | 0.733766 | 0.689551 |
| MmugDNA.9044.1.S1_at   | MmugDNA.9044.1 | 11.25 | 11.4  | 0.39 | 0.07 | -1.11 | 0.698742 | 0.272792 | 0.882848 | 0.537505 |
| MmugDNA.9047.1.S1_at   | MmugDNA.9047.1 | 7.78  | 8.44  | 0.17 | 0.13 | -1.58 | 0.005807 | 0.001011 | 0.211798 | 0.050657 |
| MmugDNA.9049.1.S1_at   | MmugDNA.9049.1 | 5.77  | 5.63  | 0.11 | 0.08 | 1.1   | 0.18807  | 0.417836 | 0.560256 | 0.642449 |
| MmugDNA.9051.1.S1_at   | MmugDNA.9051.1 | 9.52  | 9.24  | 0.2  | 0.06 | 1.21  | 0.051934 | 0.055501 | 0.3916   | 0.281404 |
| MmugDNA.9052.1.S1_at   | MmugDNA.9052.1 | 9.02  | 9.21  | 0.67 | 0.32 | -1.14 | 0.753482 | 0.942014 | 0.907059 | 0.967113 |
| MmugDNA.9055.1.S1_at   | MmugDNA.9055.1 | 3.97  | 4.41  | 0.45 | 0.41 | -1.36 | 0.151312 | 0.246936 | 0.524506 | 0.516238 |
| MmugDNA.9056.1.S1_at   | MmugDNA.9056.1 | 10.11 | 9.31  | 0.27 | 0.07 | 1.75  | 0.01474  | 0.011742 | 0.277959 | 0.140342 |
| MmugDNA.906.1.S1_at    | MmugDNA.906.1  | 9     | 9.25  | 0.38 | 0.02 | -1.19 | 0.360904 | 0.071582 | 0.698207 | 0.313714 |
| MmugDNA.9062.1.S1_at   | MmugDNA.9062.1 | 4.29  | 4.87  | 0.46 | 0.16 | -1.5  | 0.152021 | 0.181672 | 0.525094 | 0.458271 |
| MmugDNA.9066.1.S1_at   | MmugDNA.9066.1 | 11.81 | 11.96 | 0.1  | 0.11 | -1.11 | 0.044056 | 0.01726  | 0.373596 | 0.166393 |
| MmugDNA.9069.1.S1_at   | MmugDNA.9069.1 | 9.34  | 10.16 | 0.41 | 0.2  | -1.76 | 0.054968 | 0.024458 | 0.397531 | 0.195724 |
| MmugDNA.9078.1.S1_at   | MmugDNA.9078.1 | 9.43  | 9.29  | 0.66 | 0.37 | 1.1   | 0.88351  | 0.865352 | 0.95964  | 0.923563 |
| MmugDNA.9079.1.S1_at   | MmugDNA.9079.1 | 5.26  | 5.18  | 0.15 | 0.1  | 1.05  | 0.865228 | 0.978652 | 0.952585 | 0.988411 |
| MmugDNA.908.1.S1_at    | MmugDNA.908.1  | 7.36  | 7.26  | 0.09 | 0.05 | 1.08  | 0.112295 | 0.394046 | 0.48556  | 0.626734 |
| MmugDNA.908.1.S1_x_at  | MmugDNA.908.1  | 7.2   | 7.18  | 0.14 | 0.08 | 1.02  | 0.833371 | 0.232702 | 0.940218 | 0.504359 |
| MmugDNA.9083.1.S1_at   | MmugDNA.9083.1 | 5.75  | 6.16  | 0.49 | 0.19 | -1.33 | 0.073971 | 0.328359 | 0.434665 | 0.578045 |
| MmugDNA.9088.1.S1_at   | MmugDNA.9088.1 | 4.82  | 4.98  | 0.21 | 0.08 | -1.12 | 0.213413 | 0.155443 | 0.583973 | 0.430802 |
| MmugDNA.9095.1.S1_at   | MmugDNA.9095.1 | 3.45  | 3.57  | 0.07 | 0.33 | -1.09 | 0.175996 | 0.410699 | 0.549155 | 0.637509 |
| MmugDNA.91.1.S1_at     | MmugDNA.91.1   | 11.45 | 11.44 | 0.17 | 0.07 | 1.01  | 0.347902 | 0.366725 | 0.689091 | 0.606498 |
| MmugDNA.910.1.S1_at    | MmugDNA.910.1  | 5.79  | 5.73  | 0.72 | 0.48 | 1.04  | 0.350967 | 0.428443 | 0.691768 | 0.649993 |
| MmugDNA.9100.1.S1_at   | MmugDNA.9100.1 | 7.56  | 7.58  | 0.15 | 0.03 | -1.01 | 0.850892 | 0.534158 | 0.947487 | 0.720143 |
| MmugDNA.9101.1.S1_at   | MmugDNA.9101.1 | 8.78  | 9.41  | 0.79 | 0.37 | -1.55 | 0.739026 | 0.059833 | 0.900302 | 0.291286 |
| MmugDNA.9106.1.S1_at   | MmugDNA.9106.1 | 9.32  | 9.02  | 0.59 | 0.24 | 1.23  | 0.481936 | 0.377284 | 0.772261 | 0.614869 |
| MmugDNA.9113.1.S1_at   | MmugDNA.9113.1 | 9.12  | 8.35  | 0.44 | 0.2  | 1.7   | 0.053745 | 0.017811 | 0.39536  | 0.168588 |
| MmugDNA.912.1.S1_at    | MmugDNA.912.1  | 9.41  | 9.95  | 0.48 | 0.08 | -1.45 | 0.131148 | 0.408365 | 0.5054   | 0.635639 |
| MmugDNA.9127.1.S1_at   | MmugDNA.9127.1 | 7.01  | 7.66  | 0.16 | 0.29 | -1.58 | 0.0108   | 0.00769  | 0.250389 | 0.117153 |
| MmugDNA.9128.1.S1_at   | MmugDNA.9128.1 | 4.15  | 4.16  | 0.31 | 0.05 | -1.01 | 0.344674 | 0.444343 | 0.686997 | 0.66198  |
| MmugDNA.9129.1.S1_at   | MmugDNA.9129.1 | 9.77  | 10.13 | 0.31 | 0.14 | -1.29 | 0.612784 | 0.643902 | 0.843176 | 0.791202 |
| MmugDNA.9131.1.S1_at   | MmugDNA.9131.1 | 9.05  | 8.6   | 0.31 | 0.24 | 1.37  | 0.588254 | 0.005864 | 0.83181  | 0.104856 |
| MmugDNA.9133.1.S1_s_at | MmugDNA.9133.1 | 4.19  | 4.2   | 0.22 | 0.13 | -1.01 | 0.735336 | 0.673898 | 0.898685 | 0.809483 |
| MmugDNA.9137.1.S1_at   | MmugDNA.9137.1 | 4.78  | 4.83  | 0.32 | 0.16 | -1.03 | 0.833323 | 0.948844 | 0.940218 | 0.97077  |
| MmugDNA.914.1.S1_at    | MmugDNA.914.1  | 6.21  | 6.11  | 0.14 | 0.06 | 1.07  | 0.56216  | 0.467879 | 0.817608 | 0.677386 |
| MmugDNA.9141.1.S1_at   | MmugDNA.9141.1 | 4.99  | 4.91  | 0.22 | 0.35 | 1.06  | 0.710879 | 0.135342 | 0.88743  | 0.40745  |
| MmugDNA.9141.1.S1_x_at | MmugDNA.9141.1 | 6.03  | 6     | 0.23 | 0.27 | 1.02  | 0.653866 | 0.230077 | 0.862462 | 0.50194  |
| MmugDNA.9147.1.S1_at   | MmugDNA.9147.1 | 9.05  | 8.61  | 0.92 | 0.18 | 1.35  | 0.906477 | 0.289837 | 0.968353 | 0.550831 |
| MmugDNA.9151.1.S1_at   | MmugDNA.9151.1 | 10.97 | 11.12 | 0.12 | 0.03 | -1.11 | 0.234261 | 0.41338  | 0.601579 | 0.63964  |
| MmugDNA.9158.1.S1_at   | MmugDNA.9158.1 | 11.64 | 11.88 | 0.24 | 0.02 | -1.18 | 0.492598 | 0.033067 | 0.778396 | 0.225068 |
| MmugDNA.916.1.S1_at    | MmugDNA.916.1  | 10.72 | 10.79 | 0.48 | 0.1  | -1.05 | 0.631736 | 0.741783 | 0.852566 | 0.850508 |
| MmugDNA.9164.1.S1_at   | MmugDNA.9164.1 | 4.13  | 3.91  | 0.18 | 0.11 | 1.16  | 0.248458 | 0.320664 | 0.613851 | 0.572758 |
| MmugDNA.9172.1.S1_at   | MmugDNA.9172.1 | 13.2  | 13.25 | 0.15 | 0.02 | -1.03 | 0.523832 | 0.487752 | 0.795656 | 0.690658 |
| MmugDNA.9177.1.S1_at   | MmugDNA.9177.1 | 8.07  | 8.07  | 0.63 | 0.06 | 1     | 0.900034 | 0.926915 | 0.966011 | 0.958424 |

|                        |                |       |       |      |      |       |          |          |          |          |
|------------------------|----------------|-------|-------|------|------|-------|----------|----------|----------|----------|
| MmugDNA.9179.1.S1_at   | MmugDNA.9179.1 | 9.45  | 9.43  | 0.29 | 0.02 | 1.02  | 0.45026  | 0.319274 | 0.754759 | 0.571722 |
| MmugDNA.9192.1.S1_at   | MmugDNA.9192.1 | 8.1   | 8.13  | 0.07 | 0.26 | -1.02 | 0.391521 | 0.693316 | 0.717597 | 0.821612 |
| MmugDNA.9195.1.S1_at   | MmugDNA.9195.1 | 5.7   | 5.64  | 0.43 | 0.18 | 1.04  | 0.95867  | 0.244776 | 0.986397 | 0.514629 |
| MmugDNA.9199.1.S1_at   | MmugDNA.9199.1 | 9.23  | 7.91  | 0.82 | 0.12 | 2.5   | 0.151302 | 0.239424 | 0.524506 | 0.510101 |
| MmugDNA.9206.1.S1_at   | MmugDNA.9206.1 | 6.15  | 6.32  | 0.29 | 0.11 | -1.13 | 0.38014  | 0.151933 | 0.709362 | 0.426597 |
| MmugDNA.9209.1.S1_at   | MmugDNA.9209.1 | 8.97  | 8.56  | 0.4  | 0.11 | 1.32  | 0.089845 | 0.126928 | 0.457893 | 0.397655 |
| MmugDNA.9210.1.S1_at   | MmugDNA.9210.1 | 8.2   | 8.53  | 1.05 | 0.37 | -1.25 | 0.379678 | 0.548822 | 0.709082 | 0.72944  |
| MmugDNA.9218.1.S1_at   | MmugDNA.9218.1 | 9.1   | 9.62  | 0.03 | 0.05 | -1.44 | 0.000086 | 0.018586 | 0.108151 | 0.171539 |
| MmugDNA.9219.1.S1_at   | MmugDNA.9219.1 | 10.92 | 11.26 | 0.27 | 0.04 | -1.27 | 0.082303 | 0.037457 | 0.447124 | 0.23783  |
| MmugDNA.9222.1.A1_at   | MmugDNA.9222.1 | 4.04  | 3.88  | 0.36 | 0.22 | 1.12  | 0.77302  | 0.692617 | 0.915591 | 0.821061 |
| MmugDNA.9222.1.S1_at   | MmugDNA.9222.1 | 3.5   | 3.48  | 0.2  | 0.09 | -1.01 | 0.498959 | 0.416704 | 0.781868 | 0.64167  |
| MmugDNA.9225.1.S1_at   | MmugDNA.9225.1 | 6.13  | 6.34  | 0.28 | 0.08 | -1.16 | 0.335159 | 0.497381 | 0.680744 | 0.696715 |
| MmugDNA.9227.1.S1_at   | MmugDNA.9227.1 | 9.19  | 9.08  | 0.04 | 0.05 | 1.08  | 0.021364 | 0.00223  | 0.308025 | 0.069565 |
| MmugDNA.9234.1.S1_at   | MmugDNA.9234.1 | 8.72  | 9.49  | 0.27 | 0.01 | -1.69 | 0.01811  | 0.006525 | 0.295257 | 0.10961  |
| MmugDNA.9235.1.S1_s_at | MmugDNA.9235.1 | 12    | 12.23 | 0.06 | 0.04 | -1.17 | 0.009001 | 0.002371 | 0.239987 | 0.071964 |
| MmugDNA.9238.1.S1_at   | MmugDNA.9238.1 | 9.15  | 9.37  | 0.49 | 0.11 | -1.16 | 0.842563 | 0.174749 | 0.944281 | 0.451302 |
| MmugDNA.9241.1.S1_at   | MmugDNA.9241.1 | 8.67  | 8.74  | 0.23 | 0.12 | -1.05 | 0.966372 | 0.913815 | 0.988971 | 0.951523 |
| MmugDNA.9248.1.S1_at   | MmugDNA.9248.1 | 10.42 | 10.57 | 0.12 | 0.02 | -1.11 | 0.28631  | 0.280227 | 0.64358  | 0.543487 |
| MmugDNA.9251.1.S1_at   | MmugDNA.9251.1 | 6.11  | 5.97  | 0.08 | 0.05 | 1.1   | 0.043517 | 0.024531 | 0.372168 | 0.196012 |
| MmugDNA.9253.1.S1_at   | MmugDNA.9253.1 | 7.1   | 6.87  | 0.48 | 0.08 | 1.17  | 0.391971 | 0.433674 | 0.718015 | 0.65392  |
| MmugDNA.9257.1.S1_at   | MmugDNA.9257.1 | 7.44  | 7.08  | 0.46 | 0.31 | 1.28  | 0.568049 | 0.812206 | 0.820624 | 0.891555 |
| MmugDNA.9262.1.S1_at   | MmugDNA.9262.1 | 4.73  | 4.62  | 0.08 | 0.26 | 1.08  | 0.659335 | 0.723094 | 0.865173 | 0.839592 |
| MmugDNA.9266.1.S1_at   | MmugDNA.9266.1 | 7.62  | 7.6   | 0.05 | 0.06 | 1.02  | 0.499285 | 0.711124 | 0.781984 | 0.832417 |
| MmugDNA.928.1.S1_at    | MmugDNA.928.1  | 8.22  | 8.6   | 0.89 | 0.22 | -1.3  | 0.668154 | 0.682327 | 0.868924 | 0.814506 |
| MmugDNA.9282.1.S1_at   | MmugDNA.9282.1 | 10.1  | 10.44 | 0.56 | 0.11 | -1.27 | 0.368684 | 0.712754 | 0.703807 | 0.8335   |
| MmugDNA.9284.1.S1_at   | MmugDNA.9284.1 | 13.23 | 13.31 | 0.22 | 0.05 | -1.06 | 0.981332 | 0.939421 | 0.994005 | 0.965611 |
| MmugDNA.9285.1.S1_at   | MmugDNA.9285.1 | 3.89  | 4.4   | 0.13 | 0.4  | -1.42 | 0.114461 | 0.142447 | 0.487606 | 0.416035 |
| MmugDNA.9287.1.S1_at   | MmugDNA.9287.1 | 4.14  | 4.59  | 0.11 | 0.1  | -1.36 | 0.006775 | 0.381701 | 0.223856 | 0.617895 |
| MmugDNA.9291.1.S1_at   | MmugDNA.9291.1 | 3.54  | 3.55  | 0.11 | 0.02 | -1.01 | 0.818095 | 0.528155 | 0.934249 | 0.716456 |
| MmugDNA.9293.1.S1_at   | MmugDNA.9293.1 | 4.65  | 4.52  | 0.12 | 0.09 | 1.1   | 0.100131 | 0.139316 | 0.470357 | 0.412518 |
| MmugDNA.9294.1.S1_at   | MmugDNA.9294.1 | 7.84  | 8.07  | 0.18 | 0.16 | -1.18 | 0.262373 | 0.038815 | 0.624639 | 0.241916 |
| MmugDNA.9295.1.S1_at   | MmugDNA.9295.1 | 12.69 | 12.83 | 0.76 | 0.02 | -1.1  | 0.66414  | 0.832451 | 0.867615 | 0.903893 |
| MmugDNA.9301.1.S1_at   | MmugDNA.9301.1 | 8.6   | 8.42  | 0.33 | 0.04 | 1.13  | 0.392537 | 0.097624 | 0.718456 | 0.355473 |
| MmugDNA.9302.1.S1_at   | MmugDNA.9302.1 | 6.17  | 6.33  | 0.22 | 0.08 | -1.12 | 0.265191 | 0.365747 | 0.626397 | 0.605685 |
| MmugDNA.9304.1.S1_at   | MmugDNA.9304.1 | 8.5   | 9.16  | 2.29 | 0.25 | -1.59 | 0.617395 | 0.271328 | 0.845362 | 0.53644  |
| MmugDNA.9311.1.S1_at   | MmugDNA.9311.1 | 3.66  | 3.62  | 0.04 | 0.06 | 1.03  | 0.238026 | 0.38268  | 0.605206 | 0.618843 |
| MmugDNA.9313.1.S1_at   | MmugDNA.9313.1 | 6.33  | 6.45  | 0.21 | 0.03 | -1.09 | 0.352185 | 0.1004   | 0.692649 | 0.359541 |
| MmugDNA.9315.1.S1_at   | MmugDNA.9315.1 | 6.7   | 6.93  | 0.09 | 0.1  | -1.17 | 0.068022 | 0.025448 | 0.42451  | 0.200043 |
| MmugDNA.9322.1.S1_s_at | MmugDNA.9322.1 | 11.09 | 11.07 | 0.06 | 0.01 | 1.01  | 0.488955 | 0.285333 | 0.775908 | 0.547198 |
| MmugDNA.9325.1.S1_s_at | MmugDNA.9325.1 | 10.45 | 10.6  | 0.3  | 0.2  | -1.11 | 0.326167 | 0.446637 | 0.673733 | 0.66287  |
| MmugDNA.9326.1.S1_at   | MmugDNA.9326.1 | 11.84 | 12.15 | 0.41 | 0.07 | -1.24 | 0.348755 | 0.164448 | 0.689979 | 0.440678 |
| MmugDNA.9329.1.S1_at   | MmugDNA.9329.1 | 6.49  | 6.4   | 0.22 | 0.05 | 1.06  | 0.509848 | 0.240295 | 0.78785  | 0.510871 |
| MmugDNA.933.1.S1_at    | MmugDNA.933.1  | 9.14  | 9.22  | 0.21 | 0.1  | -1.06 | 0.447247 | 0.401312 | 0.753177 | 0.630922 |

|                      |                |       |       |      |      |       |          |          |          |          |
|----------------------|----------------|-------|-------|------|------|-------|----------|----------|----------|----------|
| MmugDNA.9333.1.S1_at | MmugDNA.9333.1 | 12.13 | 12.16 | 0.3  | 0.08 | -1.02 | 0.638053 | 0.217822 | 0.855783 | 0.491385 |
| MmugDNA.9335.1.S1_at | MmugDNA.9335.1 | 6.08  | 6.32  | 0.4  | 0.3  | -1.18 | 0.261153 | 0.022926 | 0.623768 | 0.189403 |
| MmugDNA.9336.1.S1_at | MmugDNA.9336.1 | 12.99 | 12.8  | 0.05 | 0.14 | 1.14  | 0.048269 | 0.056547 | 0.382735 | 0.283835 |
| MmugDNA.9338.1.S1_at | MmugDNA.9338.1 | 10.94 | 11.12 | 0.21 | 0.06 | -1.14 | 0.509451 | 0.812166 | 0.787587 | 0.89155  |
| MmugDNA.9339.1.S1_at | MmugDNA.9339.1 | 6.84  | 6.53  | 0.44 | 0.36 | 1.24  | 0.222097 | 0.084703 | 0.591686 | 0.336196 |
| MmugDNA.934.1.S1_at  | MmugDNA.934.1  | 6.26  | 6.29  | 0.08 | 0.07 | -1.02 | 0.332874 | 0.435905 | 0.679338 | 0.655618 |
| MmugDNA.9342.1.S1_at | MmugDNA.9342.1 | 6.97  | 6.77  | 1.52 | 0.37 | 1.15  | 0.784639 | 0.265568 | 0.920879 | 0.531428 |
| MmugDNA.9347.1.S1_at | MmugDNA.9347.1 | 6.62  | 6.44  | 0.12 | 0.05 | 1.13  | 0.045654 | 0.036357 | 0.376875 | 0.235105 |
| MmugDNA.9349.1.S1_at | MmugDNA.9349.1 | 10.84 | 11.13 | 0.31 | 0.09 | -1.22 | 0.080156 | 0.07812  | 0.443513 | 0.324578 |
| MmugDNA.9351.1.S1_at | MmugDNA.9351.1 | 12.16 | 12.45 | 1.58 | 0.04 | -1.22 | 0.550601 | 0.74573  | 0.810885 | 0.85256  |
| MmugDNA.9352.1.S1_at | MmugDNA.9352.1 | 11.5  | 11.42 | 0.12 | 0.04 | -1.06 | 0.103623 | 0.224731 | 0.474343 | 0.497614 |
| MmugDNA.9356.1.S1_at | MmugDNA.9356.1 | 5.5   | 5.38  | 0.25 | 0.1  | 1.09  | 0.896655 | 0.000927 | 0.964821 | 0.048858 |
| MmugDNA.9363.1.S1_at | MmugDNA.9363.1 | 4.75  | 4.7   | 0.12 | 0.17 | 1.03  | 0.871045 | 0.986756 | 0.955209 | 0.992539 |
| MmugDNA.9364.1.S1_at | MmugDNA.9364.1 | 10.89 | 10.96 | 0.14 | 0.03 | -1.05 | 0.635245 | 0.101677 | 0.854522 | 0.361562 |
| MmugDNA.9368.1.S1_at | MmugDNA.9368.1 | 8.37  | 8.21  | 0.95 | 0.12 | 1.12  | 0.806945 | 0.250088 | 0.930007 | 0.519139 |
| MmugDNA.9394.1.S1_at | MmugDNA.9394.1 | 5.24  | 5.12  | 0.12 | 0.02 | 1.09  | 0.125387 | 0.518988 | 0.499523 | 0.710813 |
| MmugDNA.9395.1.S1_at | MmugDNA.9395.1 | 6.9   | 6.88  | 0.06 | 0.12 | 1.01  | 0.928437 | 0.995604 | 0.976259 | 0.997264 |
| MmugDNA.94.1.S1_at   | MmugDNA.94.1   | 6.21  | 6.13  | 0.18 | 0.02 | 1.06  | 0.539812 | 0.310798 | 0.804055 | 0.565832 |
| MmugDNA.9400.1.S1_at | MmugDNA.9400.1 | 5.53  | 6.19  | 1.01 | 0.36 | -1.59 | 0.613882 | 0.275931 | 0.843708 | 0.540035 |
| MmugDNA.9401.1.S1_at | MmugDNA.9401.1 | 10.25 | 10.24 | 0.17 | 0.09 | 1     | 0.802584 | 0.558375 | 0.92801  | 0.735578 |
| MmugDNA.9403.1.S1_at | MmugDNA.9403.1 | 6.82  | 7.05  | 1.14 | 0.22 | -1.17 | 0.647322 | 0.290424 | 0.859364 | 0.551169 |
| MmugDNA.9404.1.S1_at | MmugDNA.9404.1 | 9.25  | 9.42  | 0.17 | 0.29 | -1.12 | 0.420217 | 0.036771 | 0.736809 | 0.236291 |
| MmugDNA.941.1.S1_at  | MmugDNA.941.1  | 7.67  | 7.47  | 0.22 | 0.12 | 1.15  | 0.136472 | 0.46947  | 0.511528 | 0.678248 |
| MmugDNA.9413.1.S1_at | MmugDNA.9413.1 | 12.88 | 12.9  | 0.06 | 0.04 | -1.02 | 0.275101 | 0.018601 | 0.634466 | 0.171539 |
| MmugDNA.9415.1.S1_at | MmugDNA.9415.1 | 9.61  | 9.39  | 0.05 | 0.13 | 1.17  | 0.03854  | 0.050774 | 0.359709 | 0.270472 |
| MmugDNA.9417.1.S1_at | MmugDNA.9417.1 | 9.72  | 10.31 | 0.36 | 0.11 | -1.51 | 0.148095 | 0.114753 | 0.522369 | 0.381297 |
| MmugDNA.9420.1.S1_at | MmugDNA.9420.1 | 7.61  | 7.9   | 0.22 | 0.01 | -1.22 | 0.080429 | 0.049374 | 0.444108 | 0.267126 |
| MmugDNA.9422.1.S1_at | MmugDNA.9422.1 | 10.24 | 9.95  | 0.39 | 0.02 | 1.22  | 0.239991 | 0.427929 | 0.60621  | 0.649602 |
| MmugDNA.9424.1.S1_at | MmugDNA.9424.1 | 11.2  | 12.23 | 0.4  | 0.08 | -2.05 | 0.012831 | 0.006071 | 0.265376 | 0.106175 |
| MmugDNA.9433.1.S1_at | MmugDNA.9433.1 | 7.59  | 7.45  | 0.07 | 0.08 | 1.1   | 0.067033 | 0.01919  | 0.422979 | 0.174282 |
| MmugDNA.9434.1.S1_at | MmugDNA.9434.1 | 10.5  | 10.24 | 0.23 | 0.14 | 1.2   | 0.159108 | 0.028765 | 0.531786 | 0.211466 |
| MmugDNA.9435.1.S1_at | MmugDNA.9435.1 | 5.55  | 5.75  | 0.28 | 0.17 | -1.15 | 0.759968 | 0.207676 | 0.909796 | 0.481906 |
| MmugDNA.9438.1.S1_at | MmugDNA.9438.1 | 11.58 | 11.36 | 0.56 | 0.06 | 1.17  | 0.912085 | 0.490016 | 0.970255 | 0.692076 |
| MmugDNA.9440.1.S1_at | MmugDNA.9440.1 | 9.53  | 9.54  | 0.37 | 0.04 | -1    | 0.960514 | 0.953799 | 0.987213 | 0.973691 |
| MmugDNA.9442.1.S1_at | MmugDNA.9442.1 | 6.55  | 7.1   | 0.62 | 0.22 | -1.47 | 0.256837 | 0.152461 | 0.620749 | 0.42728  |
| MmugDNA.9452.1.S1_at | MmugDNA.9452.1 | 6.68  | 6.25  | 0.15 | 0.12 | 1.35  | 0.060071 | 0.015186 | 0.407399 | 0.156614 |
| MmugDNA.9462.1.S1_at | MmugDNA.9462.1 | 12.95 | 13.05 | 0.08 | 0.08 | -1.07 | 0.579664 | 0.12351  | 0.826569 | 0.393572 |
| MmugDNA.9465.1.S1_at | MmugDNA.9465.1 | 8.76  | 8.81  | 0.38 | 0.02 | -1.03 | 0.883882 | 0.772004 | 0.959789 | 0.867436 |
| MmugDNA.9466.1.S1_at | MmugDNA.9466.1 | 12.01 | 11.9  | 0.28 | 0.15 | 1.08  | 0.266628 | 0.353582 | 0.627504 | 0.59664  |
| MmugDNA.9469.1.S1_at | MmugDNA.9469.1 | 12.4  | 12.4  | 0.29 | 0.04 | -1    | 0.865183 | 0.359192 | 0.952585 | 0.600528 |
| MmugDNA.9470.1.S1_at | MmugDNA.9470.1 | 12.1  | 11.91 | 0.04 | 0.07 | 1.14  | 0.014041 | 0.111133 | 0.273301 | 0.375714 |
| MmugDNA.9471.1.S1_at | MmugDNA.9471.1 | 9.03  | 9.47  | 0.19 | 0.05 | -1.36 | 0.013009 | 0.009127 | 0.266166 | 0.125994 |
| MmugDNA.9479.1.S1_at | MmugDNA.9479.1 | 5.03  | 5.73  | 0.07 | 0.5  | -1.63 | 0.062249 | 0.097879 | 0.412841 | 0.355678 |

|                        |                |       |       |      |      |       |          |          |          |          |
|------------------------|----------------|-------|-------|------|------|-------|----------|----------|----------|----------|
| MmugDNA.948.1.S1_at    | MmugDNA.948.1  | 4.71  | 4.63  | 0.09 | 0.12 | 1.05  | 0.51544  | 0.421549 | 0.79089  | 0.645162 |
| MmugDNA.948.1.S1_x_at  | MmugDNA.948.1  | 4.51  | 4.38  | 0.09 | 0.08 | 1.09  | 0.460663 | 0.297134 | 0.760365 | 0.555996 |
| MmugDNA.9481.1.S1_at   | MmugDNA.9481.1 | 3.66  | 3.53  | 0.2  | 0.19 | 1.09  | 0.410705 | 0.377863 | 0.730947 | 0.615263 |
| MmugDNA.9488.1.S1_at   | MmugDNA.9488.1 | 12.69 | 12.61 | 0.14 | 0.05 | 1.05  | 0.683854 | 0.952675 | 0.876251 | 0.973147 |
| MmugDNA.9491.1.S1_at   | MmugDNA.9491.1 | 8.67  | 9.39  | 0.46 | 0.1  | -1.66 | 0.093037 | 0.070101 | 0.461694 | 0.310998 |
| MmugDNA.9495.1.S1_at   | MmugDNA.9495.1 | 8.82  | 9.12  | 0.47 | 0.07 | -1.23 | 0.279698 | 0.393112 | 0.63865  | 0.626102 |
| MmugDNA.9496.1.S1_at   | MmugDNA.9496.1 | 5.53  | 5.33  | 0.09 | 0.23 | 1.15  | 0.111144 | 0.138375 | 0.484303 | 0.411244 |
| MmugDNA.9497.1.S1_at   | MmugDNA.9497.1 | 8.85  | 8.36  | 0.63 | 0.2  | 1.4   | 0.16287  | 0.02771  | 0.535867 | 0.207873 |
| MmugDNA.950.1.S1_at    | MmugDNA.950.1  | 3.36  | 3.23  | 0.08 | 0.02 | 1.09  | 0.073976 | 0.435186 | 0.434665 | 0.655058 |
| MmugDNA.9500.1.S1_at   | MmugDNA.9500.1 | 7.25  | 7.2   | 0.7  | 0.26 | 1.04  | 0.827291 | 0.29893  | 0.938039 | 0.557561 |
| MmugDNA.9513.1.S1_at   | MmugDNA.9513.1 | 11.2  | 11.53 | 0.22 | 0.09 | -1.26 | 0.056219 | 0.005973 | 0.399676 | 0.105716 |
| MmugDNA.9517.1.S1_at   | MmugDNA.9517.1 | 4.68  | 4.57  | 0.07 | 0.14 | 1.08  | 0.92887  | 0.983007 | 0.976332 | 0.990691 |
| MmugDNA.9521.1.S1_at   | MmugDNA.9521.1 | 8.46  | 8.83  | 1.07 | 0.37 | -1.29 | 0.673072 | 0.457143 | 0.871167 | 0.670743 |
| MmugDNA.9522.1.S1_at   | MmugDNA.9522.1 | 7.04  | 6.87  | 0.32 | 0.13 | 1.12  | 0.331744 | 0.327263 | 0.678207 | 0.577173 |
| MmugDNA.9523.1.S1_at   | MmugDNA.9523.1 | 3.36  | 3.35  | 0.05 | 0.14 | 1.01  | 0.340688 | 0.381139 | 0.684574 | 0.617478 |
| MmugDNA.9524.1.S1_at   | MmugDNA.9524.1 | 9.47  | 10.23 | 0.35 | 0.19 | -1.7  | 0.078626 | 0.135394 | 0.441389 | 0.407478 |
| MmugDNA.9526.1.S1_at   | MmugDNA.9526.1 | 12.09 | 11.02 | 1.18 | 0.22 | 2.1   | 0.713144 | 0.327183 | 0.888238 | 0.577156 |
| MmugDNA.9528.1.S1_at   | MmugDNA.9528.1 | 12.96 | 12.98 | 0.01 | 0.05 | -1.01 | 0.786713 | 0.603791 | 0.921642 | 0.764299 |
| MmugDNA.9529.1.S1_at   | MmugDNA.9529.1 | 11.78 | 12.04 | 0.26 | 0.04 | -1.2  | 0.169394 | 0.17711  | 0.542311 | 0.453611 |
| MmugDNA.9537.1.S1_at   | MmugDNA.9537.1 | 13.92 | 13.95 | 0.12 | 0.05 | -1.02 | 0.756182 | 0.772642 | 0.90814  | 0.867785 |
| MmugDNA.9537.1.S1_s_at | MmugDNA.9537.1 | 14.46 | 14.53 | 0.02 | 0.03 | -1.05 | 0.032482 | 0.042328 | 0.344399 | 0.250324 |
| MmugDNA.954.1.S1_at    | MmugDNA.954.1  | 10.4  | 10.81 | 0.18 | 0.1  | -1.32 | 0.017772 | 0.012281 | 0.293582 | 0.143352 |
| MmugDNA.9545.1.S1_at   | MmugDNA.9545.1 | 5.31  | 5.35  | 0.4  | 0.11 | -1.03 | 0.414804 | 0.692512 | 0.733374 | 0.821061 |
| MmugDNA.9546.1.S1_s_at | MmugDNA.9546.1 | 12.11 | 12.03 | 0.17 | 0.03 | 1.06  | 0.28645  | 0.303686 | 0.643702 | 0.561113 |
| MmugDNA.9548.1.S1_at   | MmugDNA.9548.1 | 9.04  | 8.98  | 0.72 | 0.35 | 1.04  | 0.799098 | 0.077105 | 0.926464 | 0.322673 |
| MmugDNA.9553.1.S1_at   | MmugDNA.9553.1 | 11.88 | 11.87 | 0.28 | 0.08 | 1.01  | 0.979046 | 0.109817 | 0.99325  | 0.373758 |
| MmugDNA.9555.1.S1_at   | MmugDNA.9555.1 | 6.94  | 7.47  | 0.45 | 0.13 | -1.44 | 0.10232  | 0.086371 | 0.472589 | 0.338805 |
| MmugDNA.9556.1.S1_at   | MmugDNA.9556.1 | 10.08 | 9.88  | 0.21 | 0.11 | 1.15  | 0.293436 | 0.310652 | 0.649776 | 0.565787 |
| MmugDNA.9558.1.S1_at   | MmugDNA.9558.1 | 4.87  | 4.89  | 0.02 | 0.02 | -1.02 | 0.195617 | 0.537989 | 0.565981 | 0.72281  |
| MmugDNA.9559.1.S1_at   | MmugDNA.9559.1 | 6.96  | 6.87  | 0.29 | 0.11 | 1.06  | 0.671198 | 0.139832 | 0.870255 | 0.413131 |
| MmugDNA.9560.1.S1_at   | MmugDNA.9560.1 | 7.29  | 6.94  | 0.06 | 0.35 | 1.28  | 0.604424 | 0.008279 | 0.839628 | 0.12078  |
| MmugDNA.9572.1.S1_at   | MmugDNA.9572.1 | 6.46  | 5.79  | 0.46 | 0.35 | 1.59  | 0.177849 | 0.176023 | 0.550984 | 0.452526 |
| MmugDNA.9575.1.S1_at   | MmugDNA.9575.1 | 9.75  | 9.03  | 2.35 | 0.11 | 1.65  | 0.834513 | 0.882962 | 0.940671 | 0.933236 |
| MmugDNA.9578.1.S1_at   | MmugDNA.9578.1 | 10.15 | 9.28  | 0.44 | 0.17 | 1.83  | 0.043007 | 0.033494 | 0.371135 | 0.226577 |
| MmugDNA.9580.1.S1_at   | MmugDNA.9580.1 | 9.37  | 9.33  | 0.45 | 0.11 | 1.03  | 0.394286 | 0.476359 | 0.719675 | 0.682695 |
| MmugDNA.9581.1.S1_at   | MmugDNA.9581.1 | 12.32 | 12.01 | 0.24 | 0.13 | 1.24  | 0.113498 | 0.069156 | 0.486822 | 0.30917  |
| MmugDNA.9582.1.S1_at   | MmugDNA.9582.1 | 3.87  | 3.7   | 0.22 | 0.13 | 1.13  | 0.604288 | 0.899014 | 0.839615 | 0.942524 |
| MmugDNA.9588.1.S1_s_at | MmugDNA.9588.1 | 10.71 | 10.8  | 1.06 | 0.06 | -1.07 | 0.757846 | 0.891736 | 0.90887  | 0.938272 |
| MmugDNA.9591.1.S1_at   | MmugDNA.9591.1 | 9.82  | 9.18  | 0.14 | 0.15 | 1.57  | 0.00934  | 0.002085 | 0.241869 | 0.067486 |
| MmugDNA.9592.1.S1_at   | MmugDNA.9592.1 | 9.27  | 9.53  | 0.06 | 0.07 | -1.2  | 0.004267 | 0.003159 | 0.198874 | 0.081739 |
| MmugDNA.9595.1.S1_at   | MmugDNA.9595.1 | 5     | 5     | 0.01 | 0.03 | 1     | 0.400272 | 0.109301 | 0.723654 | 0.37308  |
| MmugDNA.9597.1.S1_at   | MmugDNA.9597.1 | 7.48  | 7.36  | 0.43 | 0.09 | 1.09  | 0.343847 | 0.388466 | 0.686882 | 0.622858 |
| MmugDNA.9600.1.S1_at   | MmugDNA.9600.1 | 6.81  | 6.51  | 0.32 | 0.52 | 1.23  | 0.602331 | 0.390285 | 0.838783 | 0.624128 |

|                        |                |       |       |      |      |       |          |          |          |          |
|------------------------|----------------|-------|-------|------|------|-------|----------|----------|----------|----------|
| MmugDNA.9601.1.S1_at   | MmugDNA.9601.1 | 5.24  | 5.01  | 0.37 | 0.14 | 1.17  | 0.515368 | 0.198141 | 0.79089  | 0.473135 |
| MmugDNA.9603.1.S1_at   | MmugDNA.9603.1 | 9.16  | 9.71  | 0.22 | 0.17 | -1.46 | 0.036468 | 0.040648 | 0.355049 | 0.246539 |
| MmugDNA.9604.1.S1_at   | MmugDNA.9604.1 | 13.69 | 13.77 | 0.07 | 0.02 | -1.06 | 0.099023 | 0.012603 | 0.4684   | 0.144807 |
| MmugDNA.9605.1.S1_at   | MmugDNA.9605.1 | 12.44 | 12.23 | 0.28 | 0.1  | 1.16  | 0.693948 | 0.777112 | 0.880933 | 0.870511 |
| MmugDNA.9607.1.S1_at   | MmugDNA.9607.1 | 13.67 | 13.68 | 0.08 | 0.01 | -1.01 | 0.768116 | 0.585321 | 0.912812 | 0.752844 |
| MmugDNA.9612.1.S1_s_at | MmugDNA.9612.1 | 13.21 | 12.96 | 0.07 | 0.04 | 1.19  | 0.009697 | 0.018521 | 0.243347 | 0.171238 |
| MmugDNA.9614.1.S1_at   | MmugDNA.9614.1 | 4.66  | 4.61  | 0.49 | 0.15 | 1.04  | 0.320661 | 0.603451 | 0.669445 | 0.76418  |
| MmugDNA.9615.1.S1_at   | MmugDNA.9615.1 | 4.77  | 4.58  | 0.13 | 0.06 | 1.14  | 0.026833 | 0.049639 | 0.326468 | 0.267876 |
| MmugDNA.9623.1.S1_at   | MmugDNA.9623.1 | 7.55  | 8.4   | 0.41 | 0.07 | -1.81 | 0.031265 | 0.00751  | 0.340574 | 0.116291 |
| MmugDNA.9629.1.S1_at   | MmugDNA.9629.1 | 10.41 | 10.47 | 0.45 | 0.05 | -1.04 | 0.26086  | 0.107123 | 0.62332  | 0.369808 |
| MmugDNA.9631.1.S1_at   | MmugDNA.9631.1 | 9.72  | 9.17  | 0.2  | 0.03 | -1.46 | 0.005546 | 0.001271 | 0.208157 | 0.055241 |
| MmugDNA.9632.1.S1_at   | MmugDNA.9632.1 | 6.27  | 6.9   | 1.17 | 0.16 | -1.54 | 0.447841 | 0.451814 | 0.753612 | 0.66662  |
| MmugDNA.9634.1.S1_at   | MmugDNA.9634.1 | 4.88  | 4.94  | 0.11 | 0.26 | -1.04 | 0.711883 | 0.663489 | 0.887734 | 0.803016 |
| MmugDNA.9639.1.S1_at   | MmugDNA.9639.1 | 11.07 | 10.93 | 0.04 | 0.06 | 1.1   | 0.051346 | 0.051345 | 0.389889 | 0.272052 |
| MmugDNA.964.1.S1_at    | MmugDNA.964.1  | 7.27  | 7.17  | 0.4  | 0.03 | 1.07  | 0.787899 | 0.06124  | 0.922082 | 0.294151 |
| MmugDNA.9642.1.S1_at   | MmugDNA.9642.1 | 5.72  | 5.49  | 0.16 | 0.03 | 1.18  | 0.06701  | 0.056835 | 0.422979 | 0.284531 |
| MmugDNA.9646.1.S1_at   | MmugDNA.9646.1 | 9.06  | 8.69  | 0.35 | 0.22 | 1.3   | 0.180962 | 0.013554 | 0.554261 | 0.149001 |
| MmugDNA.9648.1.S1_at   | MmugDNA.9648.1 | 3.18  | 3.14  | 0.07 | 0.15 | 1.02  | 0.498692 | 0.260929 | 0.781838 | 0.527351 |
| MmugDNA.9649.1.S1_at   | MmugDNA.9649.1 | 11.84 | 11.49 | 0.1  | 0.15 | 1.27  | 0.051429 | 0.079196 | 0.390055 | 0.32639  |
| MmugDNA.9650.1.S1_at   | MmugDNA.9650.1 | 11.52 | 11.57 | 0.22 | 0.03 | -1.04 | 0.694132 | 0.494429 | 0.880976 | 0.694864 |
| MmugDNA.9652.1.S1_at   | MmugDNA.9652.1 | 5.99  | 6.59  | 0.26 | 0.1  | -1.52 | 0.044553 | 0.123413 | 0.374916 | 0.393429 |
| MmugDNA.9659.1.S1_at   | MmugDNA.9659.1 | 6.47  | 6.49  | 0.13 | 0.01 | -1.01 | 0.439103 | 0.546599 | 0.747871 | 0.728105 |
| MmugDNA.9662.1.S1_at   | MmugDNA.9662.1 | 11.37 | 11    | 0.42 | 0.2  | 1.29  | 0.313617 | 0.417154 | 0.664799 | 0.642042 |
| MmugDNA.9668.1.S1_at   | MmugDNA.9668.1 | 7.9   | 8.07  | 0.6  | 0.04 | -1.13 | 0.685182 | 0.887859 | 0.87671  | 0.936094 |
| MmugDNA.9682.1.S1_at   | MmugDNA.9682.1 | 5.58  | 5.44  | 0.16 | 0.22 | 1.11  | 0.179989 | 0.245495 | 0.553155 | 0.515269 |
| MmugDNA.9683.1.S1_at   | MmugDNA.9683.1 | 6.01  | 6.15  | 0.17 | 0.05 | -1.1  | 0.353649 | 0.489395 | 0.693411 | 0.691792 |
| MmugDNA.9689.1.S1_at   | MmugDNA.9689.1 | 11.18 | 11.98 | 1.22 | 0.18 | -1.75 | 0.302371 | 0.175067 | 0.656301 | 0.451724 |
| MmugDNA.9701.1.S1_at   | MmugDNA.9701.1 | 9.11  | 9.06  | 0.5  | 0.21 | 1.04  | 0.881185 | 0.728668 | 0.958973 | 0.843151 |
| MmugDNA.9703.1.S1_at   | MmugDNA.9703.1 | 11.83 | 10.51 | 3.83 | 0.29 | 2.49  | 0.73761  | 0.463512 | 0.899613 | 0.674472 |
| MmugDNA.9705.1.S1_at   | MmugDNA.9705.1 | 8.97  | 10.13 | 1.07 | 0.07 | -2.23 | 0.456404 | 0.407281 | 0.75784  | 0.634867 |
| MmugDNA.971.1.S1_at    | MmugDNA.971.1  | 5.3   | 5.17  | 0.04 | 0.11 | 1.1   | 0.055255 | 0.143749 | 0.398125 | 0.417583 |
| MmugDNA.9713.1.S1_at   | MmugDNA.9713.1 | 5.04  | 5.37  | 0.49 | 0.17 | -1.26 | 0.356966 | 0.496353 | 0.695386 | 0.695995 |
| MmugDNA.9720.1.S1_at   | MmugDNA.9720.1 | 7.25  | 8.07  | 0.38 | 0.18 | -1.76 | 0.020193 | 0.010433 | 0.303673 | 0.133551 |
| MmugDNA.9725.1.S1_at   | MmugDNA.9725.1 | 11.12 | 11.21 | 0.14 | 0.06 | -1.06 | 0.22843  | 0.152921 | 0.597435 | 0.42777  |
| MmugDNA.9728.1.S1_s_at | MmugDNA.9728.1 | 12.07 | 12.16 | 0.05 | 0.07 | -1.06 | 0.082864 | 0.096036 | 0.44803  | 0.353302 |
| MmugDNA.9730.1.S1_at   | MmugDNA.9730.1 | 7.68  | 7.27  | 0.23 | 0.14 | 1.33  | 0.20968  | 0.760865 | 0.581295 | 0.86105  |
| MmugDNA.9731.1.S1_s_at | MmugDNA.9731.1 | 5.12  | 5.12  | 0.2  | 0.07 | 1     | 0.756518 | 0.6093   | 0.908278 | 0.767713 |
| MmugDNA.9737.1.S1_at   | MmugDNA.9737.1 | 5.28  | 5.3   | 0.06 | 0.04 | -1.01 | 0.941839 | 0.219088 | 0.980207 | 0.49285  |
| MmugDNA.9737.1.S1_x_at | MmugDNA.9737.1 | 5.69  | 5.77  | 0.12 | 0.15 | -1.06 | 0.560082 | 0.933616 | 0.816457 | 0.962229 |
| MmugDNA.9740.1.S1_at   | MmugDNA.9740.1 | 5.6   | 5.7   | 0.22 | 0.19 | -1.07 | 0.484472 | 0.650333 | 0.773652 | 0.795586 |
| MmugDNA.9741.1.S1_at   | MmugDNA.9741.1 | 3.54  | 3.56  | 0.09 | 0.04 | -1.01 | 0.860149 | 0.625445 | 0.950679 | 0.779175 |
| MmugDNA.9742.1.S1_at   | MmugDNA.9742.1 | 9.83  | 9.53  | 0.56 | 0.15 | 1.24  | 0.310708 | 0.359941 | 0.662616 | 0.601191 |
| MmugDNA.9742.1.S1_s_at | MmugDNA.9742.1 | 10.15 | 9.96  | 0.45 | 0.13 | 1.14  | 0.492227 | 0.503581 | 0.778227 | 0.700979 |

|                        |                |       |       |      |      |       |          |          |          |          |
|------------------------|----------------|-------|-------|------|------|-------|----------|----------|----------|----------|
| MmugDNA.9744.1.S1_at   | MmugDNA.9744.1 | 11.81 | 11.75 | 0.23 | 0.1  | 1.04  | 0.827512 | 0.015327 | 0.938039 | 0.157179 |
| MmugDNA.9745.1.S1_at   | MmugDNA.9745.1 | 10.88 | 11.12 | 0.91 | 0.2  | -1.18 | 0.699708 | 0.105668 | 0.883309 | 0.367776 |
| MmugDNA.975.1.S1_at    | MmugDNA.975.1  | 5.63  | 5.7   | 0.04 | 0.02 | -1.05 | 0.253888 | 0.735403 | 0.618601 | 0.846919 |
| MmugDNA.9750.1.S1_at   | MmugDNA.9750.1 | 2.66  | 2.57  | 0.05 | 0.07 | 1.06  | 0.637588 | 0.847822 | 0.855587 | 0.91354  |
| MmugDNA.9750.1.S1_s_at | MmugDNA.9750.1 | 8.43  | 8.97  | 0.52 | 0.4  | -1.45 | 0.052147 | 0.066395 | 0.392084 | 0.303314 |
| MmugDNA.9755.1.S1_at   | MmugDNA.9755.1 | 6.36  | 6.68  | 0.08 | 0.06 | -1.25 | 0.008599 | 0.043145 | 0.235775 | 0.252421 |
| MmugDNA.9760.1.S1_at   | MmugDNA.9760.1 | 5.58  | 5.84  | 0.12 | 0.08 | -1.2  | 0.024873 | 0.03471  | 0.320135 | 0.230506 |
| MmugDNA.9766.1.S1_at   | MmugDNA.9766.1 | 7.04  | 7.07  | 0.12 | 0.15 | -1.02 | 0.828388 | 0.543945 | 0.938275 | 0.726502 |
| MmugDNA.9768.1.S1_at   | MmugDNA.9768.1 | 8.32  | 8.35  | 0.3  | 0.06 | -1.02 | 0.667574 | 0.295724 | 0.868641 | 0.555146 |
| MmugDNA.9768.1.S1_s_at | MmugDNA.9768.1 | 9.61  | 9.76  | 0.45 | 0.04 | -1.11 | 0.658043 | 0.208134 | 0.864413 | 0.482082 |
| MmugDNA.977.1.S1_at    | MmugDNA.977.1  | 12.47 | 12.42 | 0.15 | 0.13 | 1.04  | 0.648357 | 0.053641 | 0.859825 | 0.277224 |
| MmugDNA.9774.1.S1_at   | MmugDNA.9774.1 | 7.39  | 6.48  | 0.41 | 0.43 | 1.88  | 0.064805 | 0.051051 | 0.418864 | 0.271214 |
| MmugDNA.9774.1.S1_s_at | MmugDNA.9774.1 | 12.23 | 12.3  | 0.06 | 0.03 | -1.05 | 0.075928 | 0.132946 | 0.436934 | 0.404616 |
| MmugDNA.9779.1.S1_at   | MmugDNA.9779.1 | 11.32 | 11.37 | 0.14 | 0.07 | -1.04 | 0.679978 | 0.654517 | 0.874475 | 0.798087 |
| MmugDNA.9782.1.S1_at   | MmugDNA.9782.1 | 9.87  | 10.64 | 0.14 | 0.14 | -1.71 | 0.004059 | 0.007141 | 0.198571 | 0.113735 |
| MmugDNA.9783.1.S1_at   | MmugDNA.9783.1 | 10.66 | 11.13 | 0.17 | 0.05 | -1.39 | 0.012051 | 0.010031 | 0.258759 | 0.131295 |
| MmugDNA.9787.1.S1_s_at | MmugDNA.9787.1 | 12.05 | 11.91 | 0.23 | 0.09 | 1.11  | 0.317842 | 0.359702 | 0.667596 | 0.600963 |
| MmugDNA.979.1.S1_at    | MmugDNA.979.1  | 5.47  | 5.22  | 0.6  | 0.22 | 1.19  | 0.477806 | 0.407967 | 0.76987  | 0.635339 |
| MmugDNA.9793.1.S1_at   | MmugDNA.9793.1 | 3.88  | 3.93  | 0.11 | 0.02 | -1.04 | 0.470527 | 0.58655  | 0.766162 | 0.753589 |
| MmugDNA.9799.1.S1_at   | MmugDNA.9799.1 | 6.3   | 5.84  | 0.24 | 0.25 | 1.38  | 0.204762 | 0.012451 | 0.576337 | 0.14417  |
| MmugDNA.9802.1.S1_at   | MmugDNA.9802.1 | 6.79  | 6.73  | 0.09 | 0.01 | 1.04  | 0.245632 | 0.196163 | 0.611181 | 0.471236 |
| MmugDNA.9802.1.S1_s_at | MmugDNA.9802.1 | 6.25  | 6.24  | 0.13 | 0.07 | 1.01  | 0.521355 | 0.046531 | 0.794461 | 0.260221 |
| MmugDNA.9807.1.S1_at   | MmugDNA.9807.1 | 7.17  | 6.95  | 0.23 | 0.06 | 1.16  | 0.344334 | 0.449509 | 0.686913 | 0.665109 |
| MmugDNA.9809.1.S1_at   | MmugDNA.9809.1 | 12.06 | 11.83 | 0.24 | 0.12 | 1.17  | 0.094022 | 0.07327  | 0.463368 | 0.316233 |
| MmugDNA.9809.1.S1_s_at | MmugDNA.9809.1 | 12.14 | 11.69 | 0.23 | 0.14 | 1.37  | 0.036556 | 0.070509 | 0.355049 | 0.311777 |
| MmugDNA.9822.1.S1_at   | MmugDNA.9822.1 | 5.21  | 5.14  | 0.33 | 0.15 | 1.05  | 0.436298 | 0.499863 | 0.746272 | 0.698564 |
| MmugDNA.9823.1.S1_at   | MmugDNA.9823.1 | 11.38 | 11.57 | 0.19 | 0.02 | -1.14 | 0.063919 | 0.071505 | 0.416821 | 0.313706 |
| MmugDNA.9824.1.S1_at   | MmugDNA.9824.1 | 5.99  | 5.82  | 0.39 | 0.19 | 1.13  | 0.874839 | 0.769547 | 0.956568 | 0.866185 |
| MmugDNA.9827.1.S1_at   | MmugDNA.9827.1 | 9.69  | 10.38 | 0.06 | 0.04 | -1.62 | 0.000076 | 0.000157 | 0.108151 | 0.030199 |
| MmugDNA.9829.1.S1_at   | MmugDNA.9829.1 | 8.84  | 9.14  | 1.7  | 0.15 | -1.23 | 0.663452 | 0.358058 | 0.867123 | 0.599613 |
| MmugDNA.9845.1.S1_at   | MmugDNA.9845.1 | 10.63 | 10.52 | 0.32 | 0.08 | 1.08  | 0.965426 | 0.288639 | 0.988598 | 0.549827 |
| MmugDNA.9849.1.S1_at   | MmugDNA.9849.1 | 8.18  | 7.18  | 1.19 | 0.13 | 2.01  | 0.685562 | 0.622901 | 0.876846 | 0.777394 |
| MmugDNA.9851.1.S1_at   | MmugDNA.9851.1 | 5.45  | 5.59  | 0.55 | 0.26 | -1.1  | 0.705402 | 0.392928 | 0.885355 | 0.625917 |
| MmugDNA.9853.1.S1_at   | MmugDNA.9853.1 | 6.86  | 6.93  | 1.24 | 0.2  | -1.06 | 0.896191 | 0.611588 | 0.964538 | 0.769451 |
| MmugDNA.9854.1.S1_at   | MmugDNA.9854.1 | 10.06 | 10.39 | 2.13 | 0.29 | -1.25 | 0.702804 | 0.467295 | 0.884465 | 0.677032 |
| MmugDNA.9856.1.S1_at   | MmugDNA.9856.1 | 10.8  | 10.82 | 0.11 | 0.27 | -1.01 | 0.235177 | 0.005834 | 0.602266 | 0.104669 |
| MmugDNA.9860.1.S1_at   | MmugDNA.9860.1 | 8.67  | 9.48  | 0.56 | 0.17 | -1.75 | 0.231033 | 0.010224 | 0.599045 | 0.132544 |
| MmugDNA.9863.1.S1_at   | MmugDNA.9863.1 | 11.59 | 11.19 | 0.2  | 0.07 | 1.31  | 0.07893  | 0.029361 | 0.441599 | 0.213234 |
| MmugDNA.9872.1.S1_at   | MmugDNA.9872.1 | 12.51 | 12.32 | 0.54 | 0.11 | 1.14  | 0.492599 | 0.470852 | 0.778396 | 0.679124 |
| MmugDNA.9872.1.S1_s_at | MmugDNA.9872.1 | 12.97 | 12.76 | 0.58 | 0.14 | 1.16  | 0.501301 | 0.503147 | 0.783112 | 0.700633 |
| MmugDNA.9873.1.S1_at   | MmugDNA.9873.1 | 5.77  | 5.57  | 0.02 | 0.11 | 1.15  | 0.030679 | 0.197715 | 0.338263 | 0.472633 |
| MmugDNA.9874.1.S1_at   | MmugDNA.9874.1 | 11.66 | 10.72 | 0.53 | 0.09 | 1.92  | 0.101322 | 0.007744 | 0.471667 | 0.117619 |
| MmugDNA.9878.1.S1_at   | MmugDNA.9878.1 | 3.73  | 3.8   | 0.1  | 0.09 | -1.05 | 0.700012 | 0.588806 | 0.883386 | 0.755149 |

|                         |                 |       |       |      |      |       |          |          |          |          |
|-------------------------|-----------------|-------|-------|------|------|-------|----------|----------|----------|----------|
| MmugDNA.9883.1.S1_at    | MmugDNA.9883.1  | 7.61  | 7.63  | 0.33 | 0.04 | -1.01 | 0.62492  | 0.294655 | 0.849047 | 0.55432  |
| MmugDNA.9887.1.S1_at    | MmugDNA.9887.1  | 5.34  | 5.33  | 0.09 | 0.06 | 1.01  | 0.196861 | 0.245473 | 0.567663 | 0.515244 |
| MmugDNA.9889.1.S1_s_at  | MmugDNA.9889.1  | 10.09 | 9.59  | 1.16 | 0.21 | 1.42  | 0.987472 | 0.745726 | 0.995831 | 0.85256  |
| MmugDNA.9892.1.S1_at    | MmugDNA.9892.1  | 8.04  | 7.98  | 0.07 | 0.09 | 1.05  | 0.14546  | 0.227544 | 0.52043  | 0.499841 |
| MmugDNA.9898.1.S1_at    | MmugDNA.9898.1  | 6.23  | 6.76  | 0.21 | 0.18 | -1.44 | 0.015694 | 0.006114 | 0.28333  | 0.10649  |
| MmugDNA.99.1.S1_at      | MmugDNA.99.1    | 4.53  | 4.65  | 0.1  | 0.24 | -1.08 | 0.69878  | 0.68334  | 0.882848 | 0.815238 |
| MmugDNA.990.1.S1_at     | MmugDNA.990.1   | 9.18  | 9.28  | 0.16 | 0.03 | -1.07 | 0.11411  | 0.052122 | 0.487405 | 0.273899 |
| MmugDNA.9906.1.S1_at    | MmugDNA.9906.1  | 7.53  | 6.93  | 0.31 | 0.4  | 1.51  | 0.297349 | 0.021715 | 0.652737 | 0.184333 |
| MmugDNA.9909.1.S1_at    | MmugDNA.9909.1  | 5.34  | 5.09  | 0.21 | 0.06 | 1.19  | 0.171059 | 0.107388 | 0.54417  | 0.370219 |
| MmugDNA.9910.1.S1_at    | MmugDNA.9910.1  | 6.13  | 6.23  | 0.23 | 0.28 | -1.07 | 0.741485 | 0.254848 | 0.901407 | 0.523051 |
| MmugDNA.9920.1.S1_at    | MmugDNA.9920.1  | 11.96 | 11.18 | 0.45 | 0.04 | -1.71 | 0.106396 | 0.186963 | 0.478838 | 0.462875 |
| MmugDNA.9922.1.S1_at    | MmugDNA.9922.1  | 11.74 | 11.37 | 0.11 | 0.05 | 1.3   | 0.004313 | 0.006736 | 0.198874 | 0.110984 |
| MmugDNA.9925.1.S1_at    | MmugDNA.9925.1  | 9.06  | 8.94  | 0.78 | 0.24 | 1.09  | 0.296033 | 0.041477 | 0.651699 | 0.248517 |
| MmugDNA.9930.1.S1_s_at  | MmugDNA.9930.1  | 8.82  | 8.94  | 0.31 | 0.2  | -1.08 | 0.269212 | 0.554356 | 0.629522 | 0.733168 |
| MmugDNA.9933.1.S1_at    | MmugDNA.9933.1  | 11.17 | 10.37 | 0.46 | 0.07 | 1.75  | 0.109926 | 0.031865 | 0.482728 | 0.220909 |
| MmugDNA.9939.1.S1_at    | MmugDNA.9939.1  | 4.23  | 4.21  | 0.06 | 0.03 | 1.01  | 0.417993 | 0.082884 | 0.735299 | 0.332423 |
| MmugDNA.9940.1.S1_s_at  | MmugDNA.9940.1  | 7.77  | 7.32  | 0.52 | 0.04 | 1.37  | 0.202075 | 0.227235 | 0.573629 | 0.499574 |
| MmugDNA.9942.1.S1_at    | MmugDNA.9942.1  | 12.47 | 12.65 | 0.23 | 0.06 | -1.13 | 0.1758   | 0.195401 | 0.548999 | 0.470253 |
| MmugDNA.9944.1.S1_at    | MmugDNA.9944.1  | 6.72  | 6.69  | 0.06 | 0.01 | 1.02  | 0.406656 | 0.905842 | 0.728248 | 0.946727 |
| MmugDNA.9951.1.S1_at    | MmugDNA.9951.1  | 7.58  | 8.21  | 0.33 | 0.43 | -1.54 | 0.140493 | 0.160516 | 0.516012 | 0.436686 |
| MmugDNA.9958.1.S1_at    | MmugDNA.9958.1  | 6.99  | 8.14  | 1.01 | 0.21 | -2.22 | 0.142627 | 0.241516 | 0.517642 | 0.512152 |
| MmugDNA.9967.1.S1_s_at  | MmugDNA.9967.1  | 8.81  | 9.14  | 0.2  | 0.01 | -1.25 | 0.026822 | 0.002792 | 0.326468 | 0.077966 |
| MmugDNA.9968.1.S1_at    | MmugDNA.9968.1  | 11.61 | 11.55 | 0.05 | 0.04 | 1.05  | 0.260743 | 0.434445 | 0.623301 | 0.654569 |
| MmugDNA.9968.1.S1_s_at  | MmugDNA.9968.1  | 11.2  | 11.08 | 0.09 | 0.05 | 1.08  | 0.122625 | 0.186868 | 0.496146 | 0.462707 |
| MmugDNA.9969.1.S1_at    | MmugDNA.9969.1  | 13.74 | 13.57 | 0.01 | 0.04 | 1.12  | 0.002215 | 0.001331 | 0.174757 | 0.056205 |
| MmugDNA.9970.1.S1_at    | MmugDNA.9970.1  | 5.53  | 5.28  | 0.07 | 0.12 | 1.19  | 0.034757 | 0.098852 | 0.350358 | 0.357002 |
| MmugDNA.9973.1.S1_at    | MmugDNA.9973.1  | 12.37 | 12.18 | 0.1  | 0.04 | 1.14  | 0.098344 | 0.200776 | 0.467743 | 0.475282 |
| MmugDNA.9977.1.S1_at    | MmugDNA.9977.1  | 9.43  | 8.85  | 0.48 | 0.03 | 1.49  | 0.336348 | 0.178504 | 0.68171  | 0.454778 |
| MmugDNA.9978.1.S1_at    | MmugDNA.9978.1  | 6.07  | 5.98  | 0.05 | 0.14 | 1.06  | 0.39583  | 0.506664 | 0.720801 | 0.702542 |
| MmugDNA.9992.1.S1_at    | MmugDNA.9992.1  | 4.95  | 4.81  | 0.12 | 0.23 | 1.1   | 0.695598 | 0.63183  | 0.881673 | 0.782971 |
| MmugDNA.9994.1.S1_at    | MmugDNA.9994.1  | 12.57 | 12.81 | 0.16 | 0.11 | -1.18 | 0.375898 | 0.004035 | 0.706657 | 0.090281 |
| MmunewRS.1.1.S1_at      | MmunewRS.1.1    | 6.74  | 6.75  | 0.06 | 0.08 | -1.01 | 0.749066 | 0.634815 | 0.904839 | 0.785036 |
| MmunewRS.10.1.S1_at     | MmunewRS.10.1   | 2.89  | 2.86  | 0.14 | 0.03 | 1.02  | 0.616742 | 0.807303 | 0.845081 | 0.889071 |
| MmunewRS.100.1.S1_at    | MmunewRS.100.1  | 6.03  | 5.94  | 0.12 | 0.01 | 1.07  | 0.108561 | 0.113612 | 0.480777 | 0.379726 |
| MmunewRS.1000.1.S1_s_at | MmunewRS.1000.1 | 9.05  | 9.34  | 0.57 | 0.22 | -1.22 | 0.425602 | 0.545224 | 0.740112 | 0.727441 |
| MmunewRS.1001.1.S1_at   | MmunewRS.1001.1 | 5.58  | 5.85  | 0.22 | 0.47 | -1.21 | 0.305934 | 0.081801 | 0.659264 | 0.330183 |
| MmunewRS.1002.1.S1_at   | MmunewRS.1002.1 | 6.98  | 7.02  | 0.42 | 0.18 | -1.02 | 0.563964 | 0.738972 | 0.818525 | 0.848701 |
| MmunewRS.1003.1.S1_at   | MmunewRS.1003.1 | 4.3   | 4.15  | 0.2  | 0.13 | 1.12  | 0.636231 | 0.829357 | 0.854813 | 0.901879 |
| MmunewRS.1004.1.S1_at   | MmunewRS.1004.1 | 3.62  | 3.45  | 0.6  | 0.13 | 1.13  | 0.214328 | 0.212386 | 0.584705 | 0.486325 |
| MmunewRS.1005.1.S1_at   | MmunewRS.1005.1 | 3.94  | 3.87  | 0.25 | 0.06 | 1.05  | 0.799865 | 0.321945 | 0.926711 | 0.573573 |
| MmunewRS.1006.1.S1_s_at | MmunewRS.1006.1 | 3.75  | 3.65  | 0.09 | 0    | 1.07  | 0.134853 | 0.088275 | 0.50896  | 0.341721 |
| MmunewRS.1007.1.S1_at   | MmunewRS.1007.1 | 3.69  | 3.68  | 0.22 | 0.09 | 1.01  | 0.562729 | 0.129061 | 0.81781  | 0.400548 |
| MmunewRS.1008.1.S1_at   | MmunewRS.1008.1 | 3.28  | 3.27  | 0.07 | 0.14 | 1.01  | 0.469761 | 0.590272 | 0.765625 | 0.756124 |



|                         |                 |       |       |      |      |       |          |          |          |          |
|-------------------------|-----------------|-------|-------|------|------|-------|----------|----------|----------|----------|
| MmunewRS.1009.1.S1_at   | MmunewRS.1009.1 | 3.53  | 3.63  | 0.1  | 0.21 | -1.07 | 0.579398 | 0.333046 | 0.82645  | 0.581374 |
| MmunewRS.101.1.S1_at    | MmunewRS.101.1  | 4.85  | 4.82  | 0.23 | 0.04 | 1.02  | 0.754866 | 0.795511 | 0.907518 | 0.882189 |
| MmunewRS.1010.1.S1_at   | MmunewRS.1010.1 | 7     | 6.76  | 0.15 | 0.04 | 1.18  | 0.14378  | 0.199381 | 0.519062 | 0.474002 |
| MmunewRS.1011.1.S1_at   | MmunewRS.1011.1 | 5.43  | 5.23  | 0.15 | 0.07 | 1.15  | 0.100702 | 0.179833 | 0.471575 | 0.45636  |
| MmunewRS.1012.1.S1_at   | MmunewRS.1012.1 | 4.07  | 4.06  | 0.05 | 0.07 | 1     | 0.2226   | 0.156037 | 0.592081 | 0.43145  |
| MmunewRS.1013.1.S1_at   | MmunewRS.1013.1 | 3.02  | 3.02  | 0.17 | 0.05 | -1    | 0.300885 | 0.314723 | 0.655213 | 0.568449 |
| MmunewRS.1014.1.S1_at   | MmunewRS.1014.1 | 7.25  | 7.29  | 0.15 | 0.31 | -1.03 | 0.853304 | 0.462997 | 0.948299 | 0.674149 |
| MmunewRS.1014.1.S1_s_at | MmunewRS.1014.1 | 7.87  | 7.82  | 0.15 | 0.23 | 1.03  | 0.871684 | 0.358692 | 0.955537 | 0.600178 |
| MmunewRS.1015.1.S1_at   | MmunewRS.1015.1 | 10.35 | 11.18 | 0.79 | 0.14 | -1.79 | 0.120698 | 0.100608 | 0.494166 | 0.359897 |
| MmunewRS.1016.1.S1_at   | MmunewRS.1016.1 | 7.4   | 6.98  | 0.23 | 0.13 | 1.34  | 0.111708 | 0.265337 | 0.484896 | 0.531314 |
| MmunewRS.1017.1.S1_at   | MmunewRS.1017.1 | 6.02  | 5.81  | 0.06 | 0.09 | -1.15 | 0.058282 | 0.115775 | 0.403916 | 0.382814 |
| MmunewRS.1018.1.S1_at   | MmunewRS.1018.1 | 8.07  | 8     | 0.54 | 0.19 | 1.05  | 0.979976 | 0.912685 | 0.993679 | 0.950818 |
| MmunewRS.1019.1.S1_at   | MmunewRS.1019.1 | 4.54  | 4.47  | 0.1  | 0.12 | 1.05  | 0.820869 | 0.228255 | 0.935343 | 0.500443 |
| MmunewRS.102.1.S1_at    | MmunewRS.102.1  | 6.15  | 6.86  | 0.67 | 0.05 | -1.64 | 0.175645 | 0.282746 | 0.548781 | 0.545473 |
| MmunewRS.1020.1.S1_at   | MmunewRS.1020.1 | 4.6   | 4.54  | 0.17 | 0.22 | 1.04  | 0.967773 | 0.81664  | 0.989373 | 0.89423  |
| MmunewRS.1021.1.S1_at   | MmunewRS.1021.1 | 3.97  | 3.72  | 0.03 | 0.11 | 1.19  | 0.05529  | 0.150536 | 0.398272 | 0.42509  |
| MmunewRS.1022.1.S1_at   | MmunewRS.1022.1 | 6.25  | 6.16  | 0.04 | 0.01 | 1.06  | 0.011372 | 0.22416  | 0.254437 | 0.497157 |
| MmunewRS.1023.1.S1_at   | MmunewRS.1023.1 | 8.2   | 9.26  | 0.89 | 0.24 | -2.08 | 0.046617 | 0.036431 | 0.378317 | 0.235383 |
| MmunewRS.1023.1.S1_s_at | MmunewRS.1023.1 | 8.13  | 9.06  | 0.78 | 0.25 | -1.9  | 0.051204 | 0.040305 | 0.389565 | 0.245928 |
| MmunewRS.1024.1.S1_at   | MmunewRS.1024.1 | 6.65  | 6.64  | 0.13 | 0.08 | 1.01  | 0.362447 | 0.282933 | 0.699302 | 0.545692 |
| MmunewRS.1025.1.S1_at   | MmunewRS.1025.1 | 3.08  | 3.07  | 0.1  | 0.09 | 1.01  | 0.694334 | 0.938652 | 0.881084 | 0.965105 |
| MmunewRS.1026.1.S1_at   | MmunewRS.1026.1 | 3.01  | 3.06  | 0.24 | 0.61 | -1.04 | 0.317132 | 0.56568  | 0.666951 | 0.740066 |
| MmunewRS.1027.1.S1_at   | MmunewRS.1027.1 | 14.32 | 14.36 | 0.04 | 0.01 | -1.02 | 0.181699 | 0.190815 | 0.554854 | 0.466228 |
| MmunewRS.1028.1.S1_at   | MmunewRS.1028.1 | 8.58  | 10.22 | 1.67 | 0.01 | -3.12 | 0.154349 | 0.181356 | 0.527483 | 0.457872 |
| MmunewRS.1029.1.S1_at   | MmunewRS.1029.1 | 4.78  | 4.7   | 0.12 | 0.14 | 1.06  | 0.153343 | 0.09577  | 0.526421 | 0.352753 |
| MmunewRS.103.1.S1_at    | MmunewRS.103.1  | 6.7   | 8.86  | 0.68 | 0.16 | -4.48 | 0.006806 | 0.002125 | 0.223918 | 0.06817  |
| MmunewRS.1030.1.S1_at   | MmunewRS.1030.1 | 6.89  | 6.87  | 0.02 | 0.04 | 1.01  | 0.113809 | 0.74115  | 0.487244 | 0.850135 |
| MmunewRS.1031.1.S1_at   | MmunewRS.1031.1 | 4.43  | 4.44  | 0.23 | 0.06 | -1    | 0.913778 | 0.718535 | 0.97072  | 0.837072 |
| MmunewRS.1032.1.S1_at   | MmunewRS.1032.1 | 11.62 | 11.9  | 0.09 | 0.07 | -1.22 | 0.010623 | 0.004301 | 0.2485   | 0.092019 |
| MmunewRS.1033.1.S1_at   | MmunewRS.1033.1 | 3.36  | 3.34  | 0.11 | 0.04 | 1.01  | 0.397114 | 0.647429 | 0.721696 | 0.793471 |
| MmunewRS.1034.1.S1_at   | MmunewRS.1034.1 | 5.02  | 5     | 0.09 | 0.28 | 1.01  | 0.484694 | 0.442796 | 0.773772 | 0.660759 |
| MmunewRS.1035.1.S1_s_at | MmunewRS.1035.1 | 8.65  | 8.01  | 0.46 | 0.19 | 1.55  | 0.127414 | 0.052532 | 0.501582 | 0.274771 |
| MmunewRS.1037.1.S1_at   | MmunewRS.1037.1 | 7.29  | 7.29  | 0.1  | 0.07 | -1    | 0.263163 | 0.696152 | 0.625172 | 0.823455 |
| MmunewRS.1038.1.S1_at   | MmunewRS.1038.1 | 5.41  | 5.36  | 0.55 | 0.09 | 1.04  | 0.383981 | 0.365714 | 0.711691 | 0.605684 |
| MmunewRS.1039.1.S1_at   | MmunewRS.1039.1 | 9.26  | 9.05  | 0.53 | 0.42 | 1.16  | 0.685106 | 0.194652 | 0.87671  | 0.469765 |
| MmunewRS.104.1.S1_s_at  | MmunewRS.104.1  | 4.96  | 4.94  | 0.05 | 0.11 | 1.01  | 0.564949 | 0.586942 | 0.819077 | 0.75391  |
| MmunewRS.1040.1.S1_at   | MmunewRS.1040.1 | 5.51  | 5.4   | 0.09 | 0.03 | 1.08  | 0.093253 | 0.276801 | 0.462288 | 0.540725 |
| MmunewRS.1041.1.S1_at   | MmunewRS.1041.1 | 5.61  | 5.61  | 0.17 | 0.05 | 1     | 0.622262 | 0.852348 | 0.847678 | 0.916102 |
| MmunewRS.1042.1.S1_at   | MmunewRS.1042.1 | 4.83  | 4.71  | 0.1  | 0.01 | 1.09  | 0.099612 | 0.122802 | 0.469263 | 0.392784 |
| MmunewRS.1045.1.S1_at   | MmunewRS.1045.1 | 4.52  | 4.37  | 0.09 | 0.04 | 1.11  | 0.056426 | 0.067967 | 0.400189 | 0.306909 |
| MmunewRS.1046.1.S1_at   | MmunewRS.1046.1 | 4.04  | 3.89  | 0.2  | 0.05 | 1.11  | 0.165046 | 0.272221 | 0.537704 | 0.536976 |
| MmunewRS.1047.1.S1_at   | MmunewRS.1047.1 | 5.6   | 5.49  | 0.14 | 0    | 1.08  | 0.278774 | 0.382758 | 0.637886 | 0.618887 |
| MmunewRS.1048.1.S1_s_at | MmunewRS.1048.1 | 3.48  | 3.58  | 0.22 | 0.01 | -1.07 | 0.823475 | 0.955168 | 0.936294 | 0.9746   |

|                         |                 |       |       |      |      |       |          |          |          |          |
|-------------------------|-----------------|-------|-------|------|------|-------|----------|----------|----------|----------|
| MmunewRS.105.1.S1_at    | MmunewRS.105.1  | 4.33  | 4.31  | 0.05 | 0.08 | 1.01  | 0.87475  | 0.865889 | 0.956568 | 0.923757 |
| MmunewRS.1051.1.S1_at   | MmunewRS.1051.1 | 4.51  | 4.53  | 0.33 | 0.07 | -1.02 | 0.455914 | 0.64705  | 0.75759  | 0.793279 |
| MmunewRS.1052.1.S1_at   | MmunewRS.1052.1 | 4.12  | 4.06  | 0.05 | 0.13 | 1.04  | 0.33386  | 0.527769 | 0.679921 | 0.716271 |
| MmunewRS.1054.1.S1_at   | MmunewRS.1054.1 | 3.66  | 3.65  | 0.1  | 0.04 | 1.01  | 0.200782 | 0.205416 | 0.572488 | 0.479757 |
| MmunewRS.1055.1.S1_at   | MmunewRS.1055.1 | 13.41 | 13.59 | 0.09 | 0.05 | -1.13 | 0.137925 | 0.297555 | 0.513671 | 0.556192 |
| MmunewRS.1056.1.S1_at   | MmunewRS.1056.1 | 4.26  | 4.26  | 0.13 | 0.12 | 1     | 0.56     | 0.33256  | 0.816426 | 0.580954 |
| MmunewRS.1057.1.S1_at   | MmunewRS.1057.1 | 3.67  | 3.57  | 0.12 | 0.06 | 1.07  | 0.978972 | 0.695976 | 0.993198 | 0.823362 |
| MmunewRS.1058.1.S1_at   | MmunewRS.1058.1 | 5.32  | 5.25  | 0.09 | 0.11 | 1.05  | 0.518075 | 0.460064 | 0.792409 | 0.671989 |
| MmunewRS.106.1.S1_at    | MmunewRS.106.1  | 7.27  | 7     | 0.98 | 0.87 | 1.21  | 0.870776 | 0.499845 | 0.955116 | 0.698557 |
| MmunewRS.1060.1.S1_at   | MmunewRS.1060.1 | 9.33  | 9.16  | 0.14 | 0.14 | 1.13  | 0.499409 | 0.074315 | 0.782027 | 0.318046 |
| MmunewRS.1061.1.S1_at   | MmunewRS.1061.1 | 5.24  | 5.12  | 0.1  | 0.07 | -1.09 | 0.034591 | 0.040175 | 0.350124 | 0.245709 |
| MmunewRS.1062.1.S1_at   | MmunewRS.1062.1 | 4.17  | 4.06  | 0.13 | 0.16 | 1.08  | 0.171855 | 0.219939 | 0.545194 | 0.49344  |
| MmunewRS.1063.1.S1_at   | MmunewRS.1063.1 | 6.5   | 6.5   | 0.26 | 0.24 | -1    | 0.903324 | 0.008165 | 0.967488 | 0.119874 |
| MmunewRS.1064.1.S1_at   | MmunewRS.1064.1 | 3.69  | 3.84  | 0.21 | 0.06 | -1.11 | 0.827981 | 0.83502  | 0.938183 | 0.905549 |
| MmunewRS.1065.1.S1_at   | MmunewRS.1065.1 | 4.33  | 4.36  | 0.12 | 0.51 | -1.02 | 0.664629 | 0.731116 | 0.867683 | 0.844198 |
| MmunewRS.1066.1.S1_s_at | MmunewRS.1066.1 | 3.36  | 3.33  | 0.05 | 0.08 | 1.02  | 0.63337  | 0.65885  | 0.853438 | 0.800473 |
| MmunewRS.1067.1.S1_at   | MmunewRS.1067.1 | 3.83  | 3.81  | 0.06 | 0.15 | 1.01  | 0.552989 | 0.384122 | 0.811981 | 0.619926 |
| MmunewRS.1068.1.S1_at   | MmunewRS.1068.1 | 3.56  | 3.55  | 0.1  | 0.1  | 1     | 0.625456 | 0.471109 | 0.849422 | 0.679173 |
| MmunewRS.1069.1.S1_s_at | MmunewRS.1069.1 | 5.56  | 5.24  | 0.17 | 0.05 | 1.25  | 0.052362 | 0.034971 | 0.392196 | 0.231149 |
| MmunewRS.107.1.S1_at    | MmunewRS.107.1  | 3.46  | 3.58  | 0.11 | 0.02 | -1.09 | 0.321889 | 0.405343 | 0.67054  | 0.633693 |
| MmunewRS.1070.1.S1_at   | MmunewRS.1070.1 | 12.11 | 10.82 | 0.45 | 0.48 | 2.44  | 0.012345 | 0.024222 | 0.261773 | 0.194904 |
| MmunewRS.1071.1.S1_at   | MmunewRS.1071.1 | 3.54  | 3.48  | 0.01 | 0.07 | 1.04  | 0.211199 | 0.220378 | 0.582141 | 0.493783 |
| MmunewRS.1073.1.S1_at   | MmunewRS.1073.1 | 12.94 | 13.18 | 0.41 | 0.02 | -1.18 | 0.292065 | 0.331394 | 0.648386 | 0.580076 |
| MmunewRS.1074.1.S1_at   | MmunewRS.1074.1 | 6.97  | 6.8   | 0.07 | 0.09 | 1.12  | 0.163947 | 0.537149 | 0.536665 | 0.722316 |
| MmunewRS.1075.1.S1_at   | MmunewRS.1075.1 | 5.57  | 5.43  | 0.21 | 0.06 | 1.11  | 0.095327 | 0.090818 | 0.464159 | 0.345355 |
| MmunewRS.1076.1.S1_at   | MmunewRS.1076.1 | 7.26  | 7.27  | 0.1  | 0.03 | -1    | 0.751825 | 0.9194   | 0.906228 | 0.954743 |
| MmunewRS.1077.1.S1_at   | MmunewRS.1077.1 | 4.32  | 4.35  | 0.03 | 0.08 | -1.02 | 0.678989 | 0.545602 | 0.874211 | 0.727579 |
| MmunewRS.1078.1.S1_at   | MmunewRS.1078.1 | 5.18  | 5.19  | 0.05 | 0.2  | -1    | 0.89333  | 0.988793 | 0.963467 | 0.993611 |
| MmunewRS.1079.1.S1_at   | MmunewRS.1079.1 | 5.95  | 5.95  | 0.01 | 0.02 | 1     | 0.340648 | 0.358031 | 0.684572 | 0.599604 |
| MmunewRS.108.1.S1_at    | MmunewRS.108.1  | 9.93  | 9.52  | 0.18 | 0.17 | 1.33  | 0.094949 | 0.190152 | 0.464131 | 0.465798 |
| MmunewRS.1080.1.S1_at   | MmunewRS.1080.1 | 9.99  | 10.18 | 0.77 | 0.1  | -1.14 | 0.558179 | 0.292219 | 0.815182 | 0.552363 |
| MmunewRS.1081.1.S1_at   | MmunewRS.1081.1 | 4.15  | 4.17  | 0.18 | 0.06 | -1.02 | 0.609086 | 0.123679 | 0.841525 | 0.393778 |
| MmunewRS.1082.1.S1_at   | MmunewRS.1082.1 | 5.62  | 5.58  | 0.17 | 0.05 | 1.03  | 0.446963 | 0.698794 | 0.752941 | 0.824997 |
| MmunewRS.1083.1.S1_at   | MmunewRS.1083.1 | 4.02  | 3.9   | 0.05 | 0.07 | 1.09  | 0.077113 | 0.229489 | 0.438911 | 0.501527 |
| MmunewRS.1084.1.S1_at   | MmunewRS.1084.1 | 5.29  | 5.33  | 0.03 | 0.08 | -1.02 | 0.771122 | 0.710218 | 0.914377 | 0.831904 |
| MmunewRS.1085.1.S1_at   | MmunewRS.1085.1 | 5.73  | 5.51  | 0.28 | 0.1  | 1.16  | 0.360808 | 0.474836 | 0.698193 | 0.681736 |
| MmunewRS.1086.1.S1_at   | MmunewRS.1086.1 | 5.3   | 5.32  | 0.07 | 0.09 | -1.02 | 0.611782 | 0.906819 | 0.842611 | 0.947238 |
| MmunewRS.1087.1.S1_at   | MmunewRS.1087.1 | 5.82  | 5.39  | 0.32 | 0.25 | 1.35  | 0.151794 | 0.105399 | 0.524861 | 0.367275 |
| MmunewRS.1088.1.S1_at   | MmunewRS.1088.1 | 4.07  | 4.14  | 0.17 | 0.15 | -1.05 | 0.441108 | 0.637867 | 0.748993 | 0.787216 |
| MmunewRS.1089.1.S1_at   | MmunewRS.1089.1 | 11.5  | 11.44 | 0.13 | 0.09 | 1.05  | 0.929901 | 0.13607  | 0.976539 | 0.408363 |
| MmunewRS.1090.1.S1_at   | MmunewRS.1090.1 | 4.62  | 4.58  | 0.11 | 0.11 | 1.03  | 0.248853 | 0.056287 | 0.614173 | 0.283274 |
| MmunewRS.1091.1.S1_at   | MmunewRS.1091.1 | 5.3   | 5.89  | 0.42 | 0.16 | -1.5  | 0.289971 | 0.171114 | 0.646644 | 0.447686 |
| MmunewRS.1092.1.S1_at   | MmunewRS.1092.1 | 6.76  | 7.22  | 0.72 | 0.48 | -1.38 | 0.208852 | 0.269175 | 0.580477 | 0.534497 |

|                        |                 |       |       |      |      |       |          |          |          |          |
|------------------------|-----------------|-------|-------|------|------|-------|----------|----------|----------|----------|
| MmunewRS.1093.1.S1_at  | MmunewRS.1093.1 | 4.63  | 4.56  | 0.19 | 0.04 | 1.05  | 0.741983 | 0.277408 | 0.901613 | 0.54133  |
| MmunewRS.1094.1.S1_at  | MmunewRS.1094.1 | 9.83  | 8.62  | 0.86 | 0.38 | 2.31  | 0.150952 | 0.194875 | 0.52444  | 0.469963 |
| MmunewRS.1095.1.S1_at  | MmunewRS.1095.1 | 5.47  | 5.26  | 0.05 | 0.11 | 1.15  | 0.034176 | 0.024789 | 0.348583 | 0.197269 |
| MmunewRS.1096.1.S1_at  | MmunewRS.1096.1 | 4.3   | 4.38  | 0.06 | 0.35 | -1.05 | 0.691635 | 0.885334 | 0.879919 | 0.934774 |
| MmunewRS.1097.1.S1_at  | MmunewRS.1097.1 | 5.55  | 5.48  | 0.03 | 0.01 | 1.05  | 0.020376 | 0.775679 | 0.303945 | 0.869477 |
| MmunewRS.1098.1.S1_at  | MmunewRS.1098.1 | 3.38  | 3.38  | 0.15 | 0.03 | -1    | 0.90135  | 0.392664 | 0.966509 | 0.625813 |
| MmunewRS.111.1.S1_at   | MmunewRS.111.1  | 3.81  | 3.78  | 0.14 | 0.08 | 1.02  | 0.328383 | 0.259627 | 0.67577  | 0.526525 |
| MmunewRS.110.1.S1_at   | MmunewRS.110.1  | 5.29  | 5.13  | 0.05 | 0.06 | 1.12  | 0.011898 | 0.02424  | 0.257858 | 0.194936 |
| MmunewRS.111.1.S1_at   | MmunewRS.111.1  | 3.65  | 3.39  | 0.25 | 0.29 | 1.2   | 0.48005  | 0.446824 | 0.771035 | 0.663037 |
| MmunewRS.112.1.S1_at   | MmunewRS.112.1  | 9.54  | 9.95  | 0.21 | 0.17 | -1.33 | 0.107733 | 0.080746 | 0.480288 | 0.328632 |
| MmunewRS.113.1.S1_at   | MmunewRS.113.1  | 3.99  | 4.04  | 0.29 | 0.21 | -1.04 | 0.501696 | 0.570897 | 0.783425 | 0.743422 |
| MmunewRS.114.1.S1_at   | MmunewRS.114.1  | 3.45  | 3.38  | 0.03 | 0.01 | 1.05  | 0.028243 | 0.664983 | 0.33163  | 0.803726 |
| MmunewRS.116.1.S1_at   | MmunewRS.116.1  | 6.21  | 6     | 0.12 | 0.06 | 1.16  | 0.097123 | 0.157907 | 0.465734 | 0.433583 |
| MmunewRS.117.1.S1_at   | MmunewRS.117.1  | 3.62  | 3.54  | 0.06 | 0.11 | 1.06  | 0.695568 | 0.255486 | 0.881655 | 0.523505 |
| MmunewRS.118.1.S1_at   | MmunewRS.118.1  | 2.62  | 2.57  | 0.12 | 0.08 | 1.03  | 0.666343 | 0.611898 | 0.868243 | 0.769622 |
| MmunewRS.119.1.S1_at   | MmunewRS.119.1  | 4.77  | 4.73  | 0.12 | 0.06 | 1.03  | 0.796731 | 0.944525 | 0.925303 | 0.968614 |
| MmunewRS.120.1.S1_at   | MmunewRS.120.1  | 3.92  | 4.06  | 0.24 | 0.21 | -1.1  | 0.85405  | 0.085286 | 0.948436 | 0.337119 |
| MmunewRS.121.1.S1_at   | MmunewRS.121.1  | 3.32  | 3.38  | 0.1  | 0.02 | -1.04 | 0.910911 | 0.834174 | 0.969778 | 0.904977 |
| MmunewRS.123.1.S1_at   | MmunewRS.123.1  | 3.97  | 3.84  | 0.41 | 0.08 | 1.1   | 0.600729 | 0.508609 | 0.837959 | 0.703719 |
| MmunewRS.126.1.S1_at   | MmunewRS.126.1  | 3.79  | 3.65  | 0.05 | 0.11 | 1.1   | 0.095547 | 0.267479 | 0.464229 | 0.533213 |
| MmunewRS.127.1.S1_at   | MmunewRS.127.1  | 7.96  | 8.53  | 0.59 | 0.18 | -1.49 | 0.497716 | 0.196313 | 0.781297 | 0.47127  |
| MmunewRS.128.1.S1_at   | MmunewRS.128.1  | 5.96  | 6.26  | 0.27 | 0.27 | -1.23 | 0.376465 | 0.070094 | 0.706899 | 0.310995 |
| MmunewRS.129.1.S1_at   | MmunewRS.129.1  | 5.93  | 5.83  | 0.04 | 0.1  | 1.07  | 0.107352 | 0.239698 | 0.47976  | 0.510405 |
| MmunewRS.13.1.S1_at    | MmunewRS.13.1   | 4.07  | 3.94  | 0.16 | 0.02 | 1.09  | 0.612393 | 0.780085 | 0.843047 | 0.872491 |
| MmunewRS.131.1.S1_at   | MmunewRS.131.1  | 3.32  | 3.33  | 0.18 | 0.02 | -1.01 | 0.734714 | 0.941366 | 0.898485 | 0.966767 |
| MmunewRS.132.1.S1_at   | MmunewRS.132.1  | 8.85  | 8.81  | 0.59 | 0.28 | 1.02  | 0.4445   | 0.150709 | 0.751278 | 0.425281 |
| MmunewRS.133.1.S1_at   | MmunewRS.133.1  | 5.3   | 5.06  | 0.13 | 0.09 | 1.18  | 0.076141 | 0.222622 | 0.4375   | 0.495617 |
| MmunewRS.134.1.S1_at   | MmunewRS.134.1  | 8.3   | 8     | 0.12 | 0.06 | 1.23  | 0.013075 | 0.156233 | 0.26652  | 0.43161  |
| MmunewRS.136.1.S1_at   | MmunewRS.136.1  | 4.49  | 4.57  | 0.2  | 0.12 | -1.06 | 0.827473 | 0.81926  | 0.938039 | 0.895838 |
| MmunewRS.137.1.S1_at   | MmunewRS.137.1  | 3.99  | 4.01  | 0.13 | 0.06 | -1.02 | 0.946593 | 0.27258  | 0.981513 | 0.537323 |
| MmunewRS.138.1.S1_at   | MmunewRS.138.1  | 6.54  | 6.41  | 0.17 | 0.08 | 1.09  | 0.429932 | 0.04347  | 0.742417 | 0.253142 |
| MmunewRS.138.1.S1_s_at | MmunewRS.138.1  | 6.94  | 6.8   | 0.03 | 0.04 | 1.11  | 0.013214 | 0.154919 | 0.266951 | 0.429909 |
| MmunewRS.139.1.S1_at   | MmunewRS.139.1  | 5.26  | 5.02  | 0.03 | 0.06 | 1.18  | 0.003853 | 0.004177 | 0.198541 | 0.091064 |
| MmunewRS.140.1.S1_at   | MmunewRS.140.1  | 3.81  | 4.16  | 0.64 | 0.14 | -1.27 | 0.807117 | 0.850294 | 0.930053 | 0.914874 |
| MmunewRS.141.1.S1_at   | MmunewRS.141.1  | 5.35  | 5.34  | 0.11 | 0.15 | 1.01  | 0.211698 | 0.268505 | 0.582625 | 0.534123 |
| MmunewRS.142.1.S1_at   | MmunewRS.142.1  | 5.47  | 5.09  | 0.23 | 0.23 | 1.3   | 0.102581 | 0.136583 | 0.472846 | 0.409084 |
| MmunewRS.143.1.S1_at   | MmunewRS.143.1  | 4.89  | 4.94  | 0.44 | 0.04 | -1.03 | 0.996563 | 0.232552 | 0.998707 | 0.504341 |
| MmunewRS.144.1.S1_at   | MmunewRS.144.1  | 3.14  | 3.19  | 0.11 | 0.07 | -1.03 | 0.858794 | 0.971663 | 0.950111 | 0.984608 |
| MmunewRS.144.1.S1_s_at | MmunewRS.144.1  | 3.24  | 3.22  | 0.17 | 0.04 | 1.01  | 0.584037 | 0.679297 | 0.829433 | 0.81275  |
| MmunewRS.145.1.S1_at   | MmunewRS.145.1  | 5.13  | 5.18  | 0.05 | 0.11 | -1.03 | 0.501409 | 0.137205 | 0.78321  | 0.410063 |
| MmunewRS.147.1.S1_at   | MmunewRS.147.1  | 6.72  | 6.76  | 0.25 | 0.13 | -1.03 | 0.344224 | 0.47648  | 0.686913 | 0.682725 |
| MmunewRS.149.1.S1_at   | MmunewRS.149.1  | 11.35 | 11.59 | 0.38 | 0.11 | -1.18 | 0.874417 | 0.570662 | 0.956448 | 0.743269 |
| MmunewRS.15.1.S1_at    | MmunewRS.15.1   | 5.26  | 5.28  | 0.1  | 0.07 | -1.02 | 0.631916 | 0.754062 | 0.85263  | 0.856837 |

|                        |                |       |       |      |      |       |          |          |          |          |
|------------------------|----------------|-------|-------|------|------|-------|----------|----------|----------|----------|
| MmunewRS.150.1.S1_at   | MmunewRS.150.1 | 4.98  | 4.96  | 0.08 | 0.03 | 1.01  | 0.592472 | 0.796561 | 0.833893 | 0.882721 |
| MmunewRS.151.1.S1_at   | MmunewRS.151.1 | 3.47  | 3.41  | 0.15 | 0.1  | 1.04  | 0.856702 | 0.48969  | 0.949506 | 0.691862 |
| MmunewRS.152.1.S1_at   | MmunewRS.152.1 | 2.86  | 2.98  | 0.14 | 0.12 | -1.09 | 0.494313 | 0.819531 | 0.779404 | 0.896039 |
| MmunewRS.153.1.S1_at   | MmunewRS.153.1 | 3.91  | 4.11  | 0.29 | 0.32 | -1.15 | 0.444354 | 0.555689 | 0.751266 | 0.734    |
| MmunewRS.154.1.S1_at   | MmunewRS.154.1 | 7.07  | 6.85  | 0.12 | 0.04 | 1.16  | 0.021447 | 0.062631 | 0.308774 | 0.297022 |
| MmunewRS.154.1.S1_s_at | MmunewRS.154.1 | 4.11  | 3.91  | 0.11 | 0.09 | 1.15  | 0.029408 | 0.079404 | 0.334078 | 0.326766 |
| MmunewRS.155.1.S1_at   | MmunewRS.155.1 | 5.95  | 5.67  | 0.12 | 0.04 | 1.22  | 0.043556 | 0.073254 | 0.372168 | 0.316233 |
| MmunewRS.156.1.S1_at   | MmunewRS.156.1 | 5.43  | 5.35  | 0.24 | 0.03 | 1.05  | 0.637169 | 0.808482 | 0.855394 | 0.889757 |
| MmunewRS.157.1.S1_at   | MmunewRS.157.1 | 4.47  | 4.47  | 0.18 | 0.19 | -1    | 0.769602 | 0.7021   | 0.913757 | 0.827304 |
| MmunewRS.158.1.S1_at   | MmunewRS.158.1 | 3.11  | 3.09  | 0.13 | 0.09 | 1.02  | 0.282109 | 0.526514 | 0.640628 | 0.715583 |
| MmunewRS.159.1.S1_at   | MmunewRS.159.1 | 10.79 | 10.58 | 0.08 | 0.08 | -1.15 | 0.027533 | 0.273528 | 0.327829 | 0.53793  |
| MmunewRS.16.1.S1_at    | MmunewRS.16.1  | 7.52  | 7.92  | 0.16 | 0.09 | -1.32 | 0.030361 | 0.025737 | 0.337481 | 0.201029 |
| MmunewRS.161.1.S1_at   | MmunewRS.161.1 | 4.58  | 4.61  | 0.02 | 0.18 | -1.02 | 0.956149 | 0.602876 | 0.985451 | 0.763762 |
| MmunewRS.163.1.S1_at   | MmunewRS.163.1 | 3.82  | 3.77  | 0.02 | 0.06 | 1.04  | 0.225899 | 0.75822  | 0.594935 | 0.859308 |
| MmunewRS.164.1.S1_s_at | MmunewRS.164.1 | 3.72  | 3.41  | 0.13 | 0.21 | 1.24  | 0.358765 | 0.363551 | 0.696644 | 0.603957 |
| MmunewRS.165.1.S1_at   | MmunewRS.165.1 | 4.07  | 4.2   | 0.34 | 0.11 | -1.1  | 0.97383  | 0.370117 | 0.991535 | 0.609369 |
| MmunewRS.167.1.S1_s_at | MmunewRS.167.1 | 5.76  | 5.6   | 0.04 | 0.12 | 1.12  | 0.258743 | 0.100299 | 0.622286 | 0.359368 |
| MmunewRS.169.1.S1_at   | MmunewRS.169.1 | 2.85  | 2.76  | 0.07 | 0.29 | 1.06  | 0.69744  | 0.887259 | 0.882272 | 0.935815 |
| MmunewRS.17.1.S1_at    | MmunewRS.17.1  | 9.67  | 8.98  | 0.27 | 0.31 | 1.61  | 0.050166 | 0.000697 | 0.386848 | 0.04424  |
| MmunewRS.170.1.S1_at   | MmunewRS.170.1 | 7.26  | 7.32  | 0.25 | 0.2  | -1.04 | 0.615986 | 0.846288 | 0.844679 | 0.91252  |
| MmunewRS.171.1.S1_x_at | MmunewRS.171.1 | 8.6   | 7.26  | 0.99 | 0.22 | 2.53  | 0.095457 | 0.105596 | 0.464229 | 0.367621 |
| MmunewRS.172.1.S1_at   | MmunewRS.172.1 | 6.84  | 6.76  | 0.11 | 0.05 | 1.06  | 0.144782 | 0.178359 | 0.520103 | 0.454714 |
| MmunewRS.173.1.S1_at   | MmunewRS.173.1 | 7.35  | 6.6   | 0.64 | 0.16 | 1.68  | 0.112566 | 0.114211 | 0.485877 | 0.380761 |
| MmunewRS.174.1.S1_s_at | MmunewRS.174.1 | 4.33  | 4.28  | 0.09 | 0.07 | 1.03  | 0.255996 | 0.345635 | 0.619926 | 0.590854 |
| MmunewRS.175.1.S1_at   | MmunewRS.175.1 | 3.47  | 3.38  | 0.06 | 0.08 | 1.06  | 0.129192 | 0.25724  | 0.503889 | 0.525017 |
| MmunewRS.177.1.S1_at   | MmunewRS.177.1 | 5.66  | 5.49  | 0.01 | 0.07 | 1.12  | 0.012917 | 0.100503 | 0.265815 | 0.359698 |
| MmunewRS.179.1.S1_at   | MmunewRS.179.1 | 6.64  | 6.58  | 0.17 | 0.03 | 1.04  | 0.232775 | 0.295248 | 0.600212 | 0.554627 |
| MmunewRS.18.1.S1_at    | MmunewRS.18.1  | 3.47  | 3.48  | 0.09 | 0.27 | -1.01 | 0.741028 | 0.854384 | 0.9011   | 0.91705  |
| MmunewRS.180.1.S1_at   | MmunewRS.180.1 | 5.6   | 5.69  | 0.2  | 0.05 | -1.06 | 0.697265 | 0.255383 | 0.882224 | 0.52343  |
| MmunewRS.181.1.S1_at   | MmunewRS.181.1 | 7.38  | 7.69  | 0.53 | 0.1  | -1.24 | 0.406304 | 0.301601 | 0.727915 | 0.55955  |
| MmunewRS.182.1.S1_at   | MmunewRS.182.1 | 7.38  | 7.2   | 0.13 | 0.19 | 1.14  | 0.802455 | 0.811982 | 0.927969 | 0.891493 |
| MmunewRS.183.1.S1_at   | MmunewRS.183.1 | 3.6   | 3.5   | 0.07 | 0.17 | 1.07  | 0.606652 | 0.737537 | 0.840581 | 0.847993 |
| MmunewRS.184.1.S1_at   | MmunewRS.184.1 | 5.96  | 5.91  | 0.07 | 0.16 | 1.04  | 0.905874 | 0.431286 | 0.968196 | 0.652249 |
| MmunewRS.185.1.S1_at   | MmunewRS.185.1 | 3.2   | 3.09  | 0.06 | 0.1  | 1.08  | 0.279785 | 0.278562 | 0.63872  | 0.542327 |
| MmunewRS.186.1.S1_at   | MmunewRS.186.1 | 7.84  | 8.15  | 0.7  | 0.29 | -1.24 | 0.644857 | 0.459981 | 0.858635 | 0.671989 |
| MmunewRS.187.1.S1_at   | MmunewRS.187.1 | 3.54  | 3.56  | 0.15 | 0.17 | -1.01 | 0.331484 | 0.385917 | 0.678103 | 0.621161 |
| MmunewRS.188.1.S1_at   | MmunewRS.188.1 | 3.02  | 2.91  | 0.1  | 0.12 | 1.08  | 0.557865 | 0.450719 | 0.815043 | 0.665844 |
| MmunewRS.189.1.S1_at   | MmunewRS.189.1 | 5.87  | 5.32  | 0.4  | 0.59 | 1.47  | 0.684905 | 0.169813 | 0.876588 | 0.446515 |
| MmunewRS.19.1.S1_at    | MmunewRS.19.1  | 3.53  | 3.33  | 0.08 | 0.06 | 1.15  | 0.022451 | 0.058244 | 0.310698 | 0.287992 |
| MmunewRS.190.1.S1_at   | MmunewRS.190.1 | 13.07 | 13.24 | 0.06 | 0.14 | -1.13 | 0.494257 | 0.073011 | 0.779363 | 0.316017 |
| MmunewRS.191.1.S1_at   | MmunewRS.191.1 | 3.6   | 3.65  | 0.14 | 0.07 | -1.03 | 0.640636 | 0.721833 | 0.85692  | 0.838859 |
| MmunewRS.192.1.S1_at   | MmunewRS.192.1 | 3.21  | 3.19  | 0.18 | 0.16 | 1.01  | 0.451233 | 0.450349 | 0.755064 | 0.665643 |
| MmunewRS.193.1.S1_at   | MmunewRS.193.1 | 6.63  | 6.49  | 0.15 | 0.08 | 1.11  | 0.301784 | 0.37696  | 0.655978 | 0.614682 |

|                        |                |       |       |      |      |       |          |          |          |          |
|------------------------|----------------|-------|-------|------|------|-------|----------|----------|----------|----------|
| MmunewRS.196.1.S1_at   | MmunewRS.196.1 | 4.14  | 3.96  | 0.09 | 0.03 | 1.13  | 0.020861 | 0.011601 | 0.305672 | 0.139446 |
| MmunewRS.197.1.S1_at   | MmunewRS.197.1 | 4.82  | 4.6   | 0.15 | 0.05 | 1.17  | 0.199359 | 0.320535 | 0.571138 | 0.572648 |
| MmunewRS.198.1.S1_at   | MmunewRS.198.1 | 4.95  | 5.17  | 0.05 | 0.01 | -1.16 | 0.001169 | 0.018182 | 0.156386 | 0.169673 |
| MmunewRS.199.1.S1_at   | MmunewRS.199.1 | 3.23  | 3.25  | 0.15 | 0.07 | -1.01 | 0.827054 | 0.875763 | 0.938039 | 0.929439 |
| MmunewRS.2.1.S1_at     | MmunewRS.2.1   | 8.8   | 8.34  | 0.19 | 0.1  | 1.38  | 0.010959 | 0.12891  | 0.250904 | 0.400331 |
| MmunewRS.20.1.S1_at    | MmunewRS.20.1  | 10.82 | 10.69 | 0.81 | 0.23 | 1.09  | 0.50988  | 0.05898  | 0.787863 | 0.289669 |
| MmunewRS.200.1.S1_at   | MmunewRS.200.1 | 5.2   | 5.2   | 0.03 | 0.01 | -1    | 0.439937 | 0.921279 | 0.748282 | 0.9557   |
| MmunewRS.202.1.S1_at   | MmunewRS.202.1 | 6.72  | 6.62  | 0.16 | 0.06 | 1.08  | 0.437681 | 0.541985 | 0.746873 | 0.725169 |
| MmunewRS.203.1.S1_at   | MmunewRS.203.1 | 6.37  | 6.06  | 0.68 | 0.12 | 1.25  | 0.700481 | 0.043763 | 0.88354  | 0.25387  |
| MmunewRS.203.1.S1_x_at | MmunewRS.203.1 | 6.66  | 6.39  | 0.83 | 0.18 | 1.2   | 0.915498 | 0.068807 | 0.971239 | 0.308711 |
| MmunewRS.204.1.S1_at   | MmunewRS.204.1 | 6.84  | 6.62  | 0.08 | 0.08 | -1.16 | 0.069231 | 0.112253 | 0.426664 | 0.37755  |
| MmunewRS.205.1.S1_at   | MmunewRS.205.1 | 6.61  | 6.48  | 1.04 | 0.15 | 1.09  | 0.769104 | 0.213792 | 0.913441 | 0.487564 |
| MmunewRS.206.1.S1_at   | MmunewRS.206.1 | 4.17  | 4     | 0.31 | 0.12 | 1.12  | 0.224237 | 0.264868 | 0.593425 | 0.530872 |
| MmunewRS.207.1.S1_at   | MmunewRS.207.1 | 3.13  | 3.14  | 0.03 | 0.07 | -1.01 | 0.36094  | 0.43872  | 0.698248 | 0.657639 |
| MmunewRS.208.1.S1_s_at | MmunewRS.208.1 | 10.94 | 11.06 | 0.29 | 0.07 | -1.08 | 0.516844 | 0.012703 | 0.791667 | 0.145329 |
| MmunewRS.21.1.S1_at    | MmunewRS.21.1  | 4.7   | 4.59  | 0.02 | 0.17 | 1.07  | 0.885487 | 0.636755 | 0.960369 | 0.78635  |
| MmunewRS.210.1.S1_at   | MmunewRS.210.1 | 3.98  | 3.83  | 0.09 | 0.22 | 1.11  | 0.541425 | 0.423866 | 0.805165 | 0.646555 |
| MmunewRS.211.1.S1_at   | MmunewRS.211.1 | 4.25  | 4.11  | 0.03 | 0.03 | 1.1   | 0.003617 | 0.022924 | 0.197111 | 0.189403 |
| MmunewRS.212.1.S1_at   | MmunewRS.212.1 | 4.08  | 3.95  | 0.12 | 0.03 | 1.09  | 0.150074 | 0.418389 | 0.523569 | 0.642783 |
| MmunewRS.213.1.S1_at   | MmunewRS.213.1 | 5     | 4.82  | 0.17 | 0.03 | 1.13  | 0.175823 | 0.236122 | 0.548999 | 0.507179 |
| MmunewRS.214.1.S1_at   | MmunewRS.214.1 | 3.83  | 3.82  | 0.04 | 0.02 | 1.01  | 0.336258 | 0.072123 | 0.681654 | 0.314611 |
| MmunewRS.215.1.S1_s_at | MmunewRS.215.1 | 4.4   | 4.41  | 0.09 | 0.03 | -1.01 | 0.850338 | 0.146996 | 0.947346 | 0.421098 |
| MmunewRS.216.1.S1_at   | MmunewRS.216.1 | 4.06  | 3.99  | 0.15 | 0.08 | 1.05  | 0.300874 | 0.330163 | 0.655213 | 0.578987 |
| MmunewRS.217.1.S1_at   | MmunewRS.217.1 | 3.87  | 4.23  | 0.48 | 0.23 | -1.28 | 0.280396 | 0.455039 | 0.639232 | 0.66903  |
| MmunewRS.219.1.S1_at   | MmunewRS.219.1 | 4.36  | 4.4   | 0.4  | 0.16 | -1.03 | 0.384439 | 0.534852 | 0.711993 | 0.720564 |
| MmunewRS.220.1.S1_at   | MmunewRS.220.1 | 4.76  | 4.66  | 0.01 | 0.06 | 1.07  | 0.070074 | 0.812916 | 0.428522 | 0.891875 |
| MmunewRS.221.1.S1_at   | MmunewRS.221.1 | 4.72  | 4.58  | 0.26 | 0.1  | 1.1   | 0.92741  | 0.768192 | 0.97593  | 0.865415 |
| MmunewRS.222.1.S1_at   | MmunewRS.222.1 | 4.29  | 4.39  | 0.43 | 0.17 | -1.07 | 0.800485 | 0.842672 | 0.926981 | 0.910333 |
| MmunewRS.223.1.S1_at   | MmunewRS.223.1 | 6.06  | 6.03  | 0.15 | 0.04 | 1.03  | 0.710391 | 0.710309 | 0.887291 | 0.831912 |
| MmunewRS.224.1.S1_at   | MmunewRS.224.1 | 7.83  | 8.4   | 0.42 | 0.21 | -1.48 | 0.260922 | 0.402627 | 0.623391 | 0.631506 |
| MmunewRS.225.1.S1_at   | MmunewRS.225.1 | 5.96  | 6.78  | 0.82 | 0.05 | -1.76 | 0.16922  | 0.114252 | 0.542076 | 0.380761 |
| MmunewRS.226.1.S1_at   | MmunewRS.226.1 | 9.81  | 9.72  | 0.24 | 0.13 | 1.07  | 0.2809   | 0.203408 | 0.639554 | 0.477634 |
| MmunewRS.227.1.S1_at   | MmunewRS.227.1 | 10.51 | 10.56 | 0.28 | 0.05 | -1.03 | 0.791333 | 0.781659 | 0.923383 | 0.87342  |
| MmunewRS.228.1.S1_at   | MmunewRS.228.1 | 4.43  | 4.4   | 0.06 | 0.09 | 1.02  | 0.462408 | 0.391465 | 0.761639 | 0.625086 |
| MmunewRS.229.1.S1_at   | MmunewRS.229.1 | 7.17  | 7.83  | 0.53 | 0.21 | -1.58 | 0.046736 | 0.045593 | 0.378713 | 0.257674 |
| MmunewRS.23.1.S1_at    | MmunewRS.23.1  | 3.65  | 3.49  | 0.16 | 0.11 | 1.12  | 0.186036 | 0.120867 | 0.558986 | 0.389753 |
| MmunewRS.230.1.S1_at   | MmunewRS.230.1 | 6.51  | 6.84  | 0.04 | 0.1  | -1.26 | 0.007282 | 0.005984 | 0.226979 | 0.1058   |
| MmunewRS.232.1.S1_at   | MmunewRS.232.1 | 4.9   | 4.89  | 0.1  | 0.07 | 1.01  | 0.193696 | 0.295145 | 0.564275 | 0.554551 |
| MmunewRS.233.1.S1_at   | MmunewRS.233.1 | 3.43  | 3.61  | 0.11 | 0.11 | -1.14 | 0.116322 | 0.15701  | 0.489568 | 0.432467 |
| MmunewRS.234.1.S1_at   | MmunewRS.234.1 | 6.39  | 6.64  | 0.25 | 0.27 | -1.18 | 0.063424 | 0.001003 | 0.415717 | 0.050657 |
| MmunewRS.235.1.S1_at   | MmunewRS.235.1 | 3.71  | 3.32  | 0.26 | 0.14 | 1.31  | 0.140205 | 0.186722 | 0.515581 | 0.462497 |
| MmunewRS.236.1.S1_at   | MmunewRS.236.1 | 4.35  | 4.3   | 0.16 | 0.04 | 1.04  | 0.764277 | 0.924418 | 0.911428 | 0.95736  |
| MmunewRS.237.1.S1_at   | MmunewRS.237.1 | 3.09  | 2.91  | 0.16 | 0.06 | 1.13  | 0.467431 | 0.640343 | 0.76435  | 0.788874 |

|                        |                |       |       |      |      |       |          |          |          |          |
|------------------------|----------------|-------|-------|------|------|-------|----------|----------|----------|----------|
| MmunewRS.238.1.S1_at   | MmunewRS.238.1 | 3.46  | 3.39  | 0.46 | 0.1  | 1.05  | 0.359386 | 0.438683 | 0.697237 | 0.65762  |
| MmunewRS.24.1.S1_at    | MmunewRS.24.1  | 6.22  | 6.23  | 0.1  | 0.08 | -1.01 | 0.796373 | 0.087931 | 0.925177 | 0.341336 |
| MmunewRS.240.1.S1_at   | MmunewRS.240.1 | 13.73 | 13.78 | 0.05 | 0.01 | -1.04 | 0.2181   | 0.582123 | 0.588076 | 0.750784 |
| MmunewRS.241.1.S1_at   | MmunewRS.241.1 | 3.91  | 3.92  | 0.23 | 0.14 | -1.01 | 0.499343 | 0.242235 | 0.781984 | 0.51267  |
| MmunewRS.242.1.S1_at   | MmunewRS.242.1 | 3.27  | 3.4   | 0.04 | 0.05 | -1.09 | 0.047272 | 0.449911 | 0.379841 | 0.665343 |
| MmunewRS.412.1.S1_s_at | MmunewRS.412.1 | 4.72  | 5.1   | 0.38 | 0.32 | -1.31 | 0.552691 | 0.1699   | 0.811917 | 0.446569 |
| MmunewRS.412.1.S1_x_at | MmunewRS.412.1 | 2.91  | 2.89  | 0.1  | 0.14 | 1.01  | 0.475257 | 0.377378 | 0.768515 | 0.6149   |
| MmunewRS.244.1.S1_at   | MmunewRS.244.1 | 3.5   | 3.41  | 0.11 | 0    | 1.07  | 0.205333 | 0.098541 | 0.577053 | 0.356636 |
| MmunewRS.245.1.S1_at   | MmunewRS.245.1 | 5.07  | 5.05  | 0.16 | 0.21 | 1.02  | 0.703435 | 0.436232 | 0.884712 | 0.655899 |
| MmunewRS.246.1.S1_at   | MmunewRS.246.1 | 2.95  | 2.94  | 0.04 | 0.03 | 1.01  | 0.750817 | 0.763594 | 0.905567 | 0.862496 |
| MmunewRS.247.1.S1_at   | MmunewRS.247.1 | 4.24  | 4.15  | 0.12 | 0.06 | -1.06 | 0.702098 | 0.46633  | 0.884146 | 0.67624  |
| MmunewRS.248.1.S1_at   | MmunewRS.248.1 | 3.16  | 3.22  | 0.09 | 0.14 | -1.04 | 0.307913 | 0.547386 | 0.660765 | 0.728447 |
| MmunewRS.249.1.S1_at   | MmunewRS.249.1 | 4.29  | 4.19  | 0.12 | 0.09 | 1.07  | 0.837434 | 0.741447 | 0.941594 | 0.850285 |
| MmunewRS.25.1.S1_at    | MmunewRS.25.1  | 3.65  | 3.88  | 0.06 | 0.94 | -1.17 | 0.236417 | 0.202373 | 0.603291 | 0.476737 |
| MmunewRS.250.1.S1_at   | MmunewRS.250.1 | 8.08  | 7.27  | 1.25 | 0.33 | 1.75  | 0.093903 | 0.094995 | 0.463304 | 0.352071 |
| MmunewRS.251.1.S1_at   | MmunewRS.251.1 | 4.68  | 4.73  | 0.12 | 0.1  | -1.03 | 0.873051 | 0.588768 | 0.955976 | 0.755137 |
| MmunewRS.252.1.S1_at   | MmunewRS.252.1 | 8.13  | 7.97  | 0.21 | 0.28 | 1.12  | 0.884348 | 0.060012 | 0.959932 | 0.291649 |
| MmunewRS.253.1.S1_at   | MmunewRS.253.1 | 7.09  | 7.18  | 0.1  | 0.2  | -1.07 | 0.107303 | 0.614384 | 0.47976  | 0.771226 |
| MmunewRS.254.1.S1_at   | MmunewRS.254.1 | 13.5  | 13.61 | 0.23 | 0.05 | -1.08 | 0.336383 | 0.08085  | 0.681741 | 0.328803 |
| MmunewRS.255.1.S1_at   | MmunewRS.255.1 | 4.49  | 5.22  | 0.71 | 0.36 | -1.65 | 0.486461 | 0.637135 | 0.774578 | 0.786653 |
| MmunewRS.257.1.S1_at   | MmunewRS.257.1 | 3.97  | 3.81  | 0.16 | 0.06 | 1.12  | 0.067277 | 0.093152 | 0.423412 | 0.349303 |
| MmunewRS.258.1.S1_at   | MmunewRS.258.1 | 4.85  | 4.84  | 0.11 | 0.1  | 1.01  | 0.457813 | 0.471939 | 0.758501 | 0.679793 |
| MmunewRS.259.1.S1_at   | MmunewRS.259.1 | 5.61  | 7.26  | 0.49 | 0.34 | -3.13 | 0.02042  | 0.008536 | 0.303985 | 0.122563 |
| MmunewRS.26.1.S1_s_at  | MmunewRS.26.1  | 4.68  | 4.66  | 0.11 | 0.13 | 1.01  | 0.993147 | 0.643998 | 0.997423 | 0.791265 |
| MmunewRS.260.1.S1_at   | MmunewRS.260.1 | 3.34  | 3.35  | 0.05 | 0.07 | -1    | 0.226362 | 0.483931 | 0.595591 | 0.688243 |
| MmunewRS.261.1.S1_at   | MmunewRS.261.1 | 5.98  | 5.92  | 0.18 | 0.1  | 1.04  | 0.18314  | 0.110294 | 0.556057 | 0.374403 |
| MmunewRS.262.1.S1_at   | MmunewRS.262.1 | 3.04  | 3.06  | 0.17 | 0.16 | -1.01 | 0.714434 | 0.554868 | 0.888774 | 0.733544 |
| MmunewRS.263.1.S1_at   | MmunewRS.263.1 | 4.93  | 6.71  | 0.35 | 0.17 | -3.45 | 0.002713 | 0.041184 | 0.184127 | 0.247733 |
| MmunewRS.264.1.S1_s_at | MmunewRS.264.1 | 6.31  | 6.17  | 0.2  | 0.1  | 1.1   | 0.34814  | 0.195158 | 0.689422 | 0.470241 |
| MmunewRS.265.1.S1_at   | MmunewRS.265.1 | 5.57  | 6.1   | 0.83 | 0.12 | -1.45 | 0.956184 | 0.376721 | 0.985451 | 0.614539 |
| MmunewRS.267.1.S1_at   | MmunewRS.267.1 | 7.87  | 7.64  | 0.09 | 0.04 | 1.17  | 0.026581 | 0.21181  | 0.325381 | 0.485784 |
| MmunewRS.268.1.S1_s_at | MmunewRS.268.1 | 12.3  | 12.12 | 0.17 | 0.14 | 1.14  | 0.087255 | 0.044903 | 0.454785 | 0.256424 |
| MmunewRS.269.1.S1_at   | MmunewRS.269.1 | 5.82  | 6     | 0.2  | 0.12 | -1.13 | 0.255117 | 0.370289 | 0.619267 | 0.609406 |
| MmunewRS.270.1.S1_at   | MmunewRS.270.1 | 5.45  | 5.36  | 0.16 | 0.05 | 1.06  | 0.16605  | 0.35583  | 0.538839 | 0.597864 |
| MmunewRS.271.1.S1_at   | MmunewRS.271.1 | 4.9   | 4.8   | 0.23 | 0.14 | 1.08  | 0.845022 | 0.569094 | 0.945601 | 0.742239 |
| MmunewRS.272.1.S1_at   | MmunewRS.272.1 | 6.68  | 6.32  | 0.26 | 0.13 | 1.28  | 0.238679 | 0.184949 | 0.605393 | 0.460776 |
| MmunewRS.273.1.S1_at   | MmunewRS.273.1 | 4.5   | 4.48  | 0.17 | 0.07 | 1.01  | 0.795812 | 0.926629 | 0.924994 | 0.958372 |
| MmunewRS.274.1.S1_at   | MmunewRS.274.1 | 3.07  | 3.09  | 0.6  | 0.05 | -1.02 | 0.413142 | 0.605118 | 0.732218 | 0.764917 |
| MmunewRS.275.1.S1_at   | MmunewRS.275.1 | 3.09  | 3.04  | 0.14 | 0.28 | 1.04  | 0.587292 | 0.406868 | 0.831578 | 0.634579 |
| MmunewRS.276.1.S1_at   | MmunewRS.276.1 | 4.56  | 4.56  | 0.3  | 0.13 | -1    | 0.405156 | 0.519884 | 0.727237 | 0.711367 |
| MmunewRS.277.1.S1_at   | MmunewRS.277.1 | 10.41 | 10.11 | 0.32 | 0.14 | 1.23  | 0.151319 | 0.097973 | 0.524506 | 0.355872 |
| MmunewRS.278.1.S1_at   | MmunewRS.278.1 | 3.42  | 3.29  | 0.09 | 0.1  | 1.1   | 0.50125  | 0.531842 | 0.783112 | 0.718957 |
| MmunewRS.279.1.S1_at   | MmunewRS.279.1 | 3.76  | 3.75  | 0.17 | 0.16 | 1.01  | 0.713108 | 0.795878 | 0.888234 | 0.882408 |

|                        |                |       |       |      |      |       |          |          |          |          |
|------------------------|----------------|-------|-------|------|------|-------|----------|----------|----------|----------|
| MmunewRS.280.1.S1_at   | MmunewRS.280.1 | 4.96  | 4.86  | 0.12 | 0.15 | 1.07  | 0.200379 | 0.166247 | 0.57221  | 0.442797 |
| MmunewRS.281.1.S1_at   | MmunewRS.281.1 | 4.67  | 4.48  | 0.04 | 0.27 | 1.14  | 0.861631 | 0.680234 | 0.951267 | 0.813311 |
| MmunewRS.283.1.S1_at   | MmunewRS.283.1 | 6.43  | 7.09  | 0.35 | 0.24 | -1.58 | 0.262812 | 0.240963 | 0.624987 | 0.511648 |
| MmunewRS.284.1.S1_at   | MmunewRS.284.1 | 3.9   | 3.85  | 0.07 | 0.13 | 1.03  | 0.35423  | 0.312261 | 0.6938   | 0.566963 |
| MmunewRS.286.1.S1_at   | MmunewRS.286.1 | 4.77  | 4.83  | 0.13 | 0.02 | -1.04 | 0.82134  | 0.43856  | 0.935568 | 0.657511 |
| MmunewRS.287.1.S1_at   | MmunewRS.287.1 | 6.76  | 6.66  | 0.08 | 0.01 | 1.07  | 0.087372 | 0.166642 | 0.454796 | 0.443133 |
| MmunewRS.288.1.S1_at   | MmunewRS.288.1 | 4.83  | 4.86  | 0.08 | 0.39 | -1.02 | 0.607551 | 0.396687 | 0.840951 | 0.628434 |
| MmunewRS.289.1.S1_at   | MmunewRS.289.1 | 5.8   | 5.73  | 0.04 | 0.01 | 1.05  | 0.038341 | 0.043609 | 0.358936 | 0.253501 |
| MmunewRS.290.1.S1_at   | MmunewRS.290.1 | 4.54  | 4.6   | 0.02 | 0.05 | -1.04 | 0.183647 | 0.463207 | 0.55651  | 0.674269 |
| MmunewRS.291.1.S1_at   | MmunewRS.291.1 | 8.49  | 8.45  | 0.14 | 0.15 | 1.02  | 0.672802 | 0.282102 | 0.871072 | 0.544937 |
| MmunewRS.292.1.S1_at   | MmunewRS.292.1 | 5.75  | 5.74  | 0.11 | 0.01 | -1.01 | 0.406487 | 0.807422 | 0.727994 | 0.889121 |
| MmunewRS.293.1.S1_at   | MmunewRS.293.1 | 5.73  | 4.89  | 1.4  | 0.46 | 1.79  | 0.325163 | 0.617543 | 0.673069 | 0.773477 |
| MmunewRS.294.1.S1_at   | MmunewRS.294.1 | 5.08  | 5.09  | 0.04 | 0.01 | -1.01 | 0.229139 | 0.887785 | 0.598088 | 0.936048 |
| MmunewRS.295.1.S1_at   | MmunewRS.295.1 | 5.02  | 4.9   | 0.05 | 0.05 | 1.09  | 0.079663 | 0.279648 | 0.442558 | 0.543212 |
| MmunewRS.296.1.S1_at   | MmunewRS.296.1 | 4.28  | 4.18  | 0.09 | 0.05 | 1.07  | 0.072281 | 0.134372 | 0.432116 | 0.406603 |
| MmunewRS.297.1.S1_at   | MmunewRS.297.1 | 3.1   | 3.04  | 0.19 | 0.11 | 1.05  | 0.50941  | 0.59401  | 0.787587 | 0.75851  |
| MmunewRS.298.1.S1_at   | MmunewRS.298.1 | 8.88  | 8.11  | 0.69 | 0.09 | 1.7   | 0.347428 | 0.579653 | 0.688705 | 0.749254 |
| MmunewRS.299.1.S1_at   | MmunewRS.299.1 | 3.54  | 3.8   | 0.28 | 0.09 | -1.2  | 0.560271 | 0.100439 | 0.816576 | 0.359541 |
| MmunewRS.300.1.S1_at   | MmunewRS.300.1 | 6.25  | 6.31  | 0.44 | 0.08 | -1.04 | 0.90626  | 0.988722 | 0.968295 | 0.993595 |
| MmunewRS.301.1.S1_a_at | MmunewRS.301.1 | 8.32  | 7.82  | 0.07 | 0.18 | 1.41  | 0.011925 | 0.009081 | 0.257858 | 0.125944 |
| MmunewRS.301.1.S1_at   | MmunewRS.301.1 | 5.27  | 5.24  | 0.03 | 0.13 | 1.02  | 0.251584 | 0.180516 | 0.616712 | 0.457128 |
| MmunewRS.302.1.S1_at   | MmunewRS.302.1 | 3.01  | 3.06  | 0.11 | 0.05 | -1.04 | 0.591946 | 0.488785 | 0.833648 | 0.691362 |
| MmunewRS.304.1.S1_at   | MmunewRS.304.1 | 3.2   | 3.16  | 0.06 | 0.03 | 1.02  | 0.176031 | 0.44041  | 0.549155 | 0.658939 |
| MmunewRS.306.1.S1_at   | MmunewRS.306.1 | 7.17  | 7.28  | 0.5  | 0.17 | -1.07 | 0.575347 | 0.72885  | 0.824632 | 0.843269 |
| MmunewRS.307.1.S1_at   | MmunewRS.307.1 | 13.64 | 13.8  | 0.14 | 0.06 | -1.12 | 0.088794 | 0.101576 | 0.456556 | 0.361433 |
| MmunewRS.308.1.S1_at   | MmunewRS.308.1 | 10.48 | 10.96 | 0.21 | 0.09 | -1.39 | 0.026017 | 0.011748 | 0.323007 | 0.140378 |
| MmunewRS.309.1.S1_at   | MmunewRS.309.1 | 3.89  | 3.78  | 0.1  | 0.05 | 1.08  | 0.151115 | 0.728013 | 0.52444  | 0.842711 |
| MmunewRS.31.1.S1_at    | MmunewRS.31.1  | 6.28  | 7.6   | 0.66 | 0.2  | -2.49 | 0.022757 | 0.002301 | 0.312286 | 0.070694 |
| MmunewRS.310.1.S1_at   | MmunewRS.310.1 | 11.28 | 11.28 | 0.13 | 0.12 | -1    | 0.440891 | 0.613347 | 0.748794 | 0.770518 |
| MmunewRS.311.1.S1_at   | MmunewRS.311.1 | 3.97  | 4.05  | 0.04 | 0.07 | -1.06 | 0.248169 | 0.805365 | 0.61369  | 0.888121 |
| MmunewRS.312.1.S1_s_at | MmunewRS.312.1 | 3.37  | 3.49  | 0.06 | 0.05 | -1.09 | 0.119538 | 0.020046 | 0.49288  | 0.177855 |
| MmunewRS.313.1.S1_at   | MmunewRS.313.1 | 3.76  | 3.83  | 0.16 | 0.08 | -1.05 | 0.323594 | 0.219493 | 0.672279 | 0.493168 |
| MmunewRS.314.1.S1_s_at | MmunewRS.314.1 | 11.04 | 10.16 | 0.54 | 0.53 | 1.84  | 0.57062  | 0.072698 | 0.822247 | 0.31561  |
| MmunewRS.315.1.S1_at   | MmunewRS.315.1 | 12.44 | 12.98 | 0.43 | 0.02 | -1.45 | 0.07661  | 0.085369 | 0.437977 | 0.337246 |
| MmunewRS.316.1.S1_at   | MmunewRS.316.1 | 3.17  | 3.12  | 0.05 | 0.07 | 1.03  | 0.523121 | 0.003934 | 0.795458 | 0.089223 |
| MmunewRS.317.1.S1_at   | MmunewRS.317.1 | 3.53  | 3.53  | 0.19 | 0.08 | -1    | 0.748421 | 0.843938 | 0.904473 | 0.9111   |
| MmunewRS.318.1.S1_at   | MmunewRS.318.1 | 5.98  | 5.81  | 0.07 | 0.08 | 1.12  | 0.064853 | 0.146143 | 0.419026 | 0.420099 |
| MmunewRS.319.1.S1_at   | MmunewRS.319.1 | 6.41  | 6.46  | 0.15 | 0.03 | -1.04 | 0.791425 | 0.924968 | 0.923383 | 0.957573 |
| MmunewRS.32.1.S1_at    | MmunewRS.32.1  | 5.29  | 4.03  | 0.99 | 0.55 | 2.41  | 0.128883 | 0.291021 | 0.503626 | 0.551574 |
| MmunewRS.320.1.S1_at   | MmunewRS.320.1 | 4.9   | 4.96  | 0.04 | 0.04 | -1.04 | 0.366379 | 0.032101 | 0.701814 | 0.221776 |
| MmunewRS.321.1.S1_at   | MmunewRS.321.1 | 4.5   | 4.38  | 0.12 | 0.01 | 1.08  | 0.174822 | 0.294797 | 0.548031 | 0.55437  |
| MmunewRS.322.1.S1_at   | MmunewRS.322.1 | 5.86  | 5.67  | 0.11 | 0.05 | 1.14  | 0.05667  | 0.143162 | 0.401051 | 0.417029 |
| MmunewRS.323.1.S1_at   | MmunewRS.323.1 | 6.13  | 5.96  | 0.07 | 0.1  | 1.12  | 0.078978 | 0.334608 | 0.441671 | 0.582581 |

|                        |                |       |       |      |      |       |          |          |          |          |
|------------------------|----------------|-------|-------|------|------|-------|----------|----------|----------|----------|
| MmunewRS.324.1.S1_at   | MmunewRS.324.1 | 3.73  | 3.6   | 0.24 | 0.04 | 1.09  | 0.909995 | 0.853388 | 0.96945  | 0.916579 |
| MmunewRS.325.1.S1_at   | MmunewRS.325.1 | 4.72  | 4.72  | 0.11 | 0.04 | 1     | 0.270605 | 0.600566 | 0.630519 | 0.76217  |
| MmunewRS.326.1.S1_at   | MmunewRS.326.1 | 3.19  | 3     | 0.12 | 0.08 | 1.14  | 0.209804 | 0.339235 | 0.581305 | 0.585918 |
| MmunewRS.328.1.S1_at   | MmunewRS.328.1 | 5.84  | 5.79  | 0.65 | 0.32 | 1.03  | 0.866337 | 0.110465 | 0.953052 | 0.374684 |
| MmunewRS.329.1.S1_at   | MmunewRS.329.1 | 4.9   | 4.92  | 0.11 | 0.01 | -1.01 | 0.905361 | 0.918944 | 0.968115 | 0.954477 |
| MmunewRS.330.1.S1_at   | MmunewRS.330.1 | 5.68  | 5.54  | 0.04 | 0.02 | 1.1   | 0.006213 | 0.063441 | 0.217382 | 0.298441 |
| MmunewRS.331.1.S1_at   | MmunewRS.331.1 | 4.48  | 4.35  | 0.11 | 0.12 | 1.09  | 0.262437 | 0.397955 | 0.624669 | 0.629138 |
| MmunewRS.332.1.S1_at   | MmunewRS.332.1 | 3.91  | 3.86  | 0.06 | 0.15 | 1.03  | 0.145815 | 0.231253 | 0.520572 | 0.502929 |
| MmunewRS.333.1.S1_at   | MmunewRS.333.1 | 5.71  | 6.5   | 1.07 | 0.15 | -1.72 | 0.322297 | 0.459236 | 0.671034 | 0.671669 |
| MmunewRS.334.1.S1_at   | MmunewRS.334.1 | 3.08  | 2.8   | 0.14 | 0.06 | 1.22  | 0.064533 | 0.050887 | 0.418343 | 0.270882 |
| MmunewRS.335.1.S1_at   | MmunewRS.335.1 | 7.63  | 7.13  | 0.34 | 0.05 | -1.42 | 0.079134 | 0.131549 | 0.442034 | 0.403665 |
| MmunewRS.338.1.S1_at   | MmunewRS.338.1 | 7.95  | 7.81  | 0.68 | 0.04 | 1.1   | 0.669216 | 0.868091 | 0.869412 | 0.925106 |
| MmunewRS.339.1.S1_at   | MmunewRS.339.1 | 3.39  | 3.43  | 0.09 | 0.1  | -1.03 | 0.948898 | 0.534793 | 0.982634 | 0.720557 |
| MmunewRS.340.1.S1_at   | MmunewRS.340.1 | 5.18  | 5.22  | 0.07 | 0.02 | -1.03 | 0.958315 | 0.37566  | 0.986346 | 0.613577 |
| MmunewRS.341.1.S1_at   | MmunewRS.341.1 | 5.71  | 5.69  | 0.22 | 0.02 | 1.02  | 0.516165 | 0.715184 | 0.791319 | 0.834894 |
| MmunewRS.342.1.S1_at   | MmunewRS.342.1 | 6.63  | 6.32  | 0.07 | 0.08 | 1.24  | 0.016722 | 0.203202 | 0.287809 | 0.477415 |
| MmunewRS.344.1.S1_at   | MmunewRS.344.1 | 4.38  | 4.37  | 0    | 0.02 | 1.01  | 0.518403 | 0.973166 | 0.792681 | 0.985431 |
| MmunewRS.345.1.S1_at   | MmunewRS.345.1 | 3.01  | 2.93  | 0.04 | 0.07 | 1.05  | 0.054622 | 0.078072 | 0.397122 | 0.324575 |
| MmunewRS.346.1.S1_at   | MmunewRS.346.1 | 3.89  | 3.91  | 0.21 | 0.12 | -1.01 | 0.922245 | 0.972011 | 0.973786 | 0.984884 |
| MmunewRS.347.1.S1_at   | MmunewRS.347.1 | 5.21  | 5.15  | 0.56 | 0.57 | 1.04  | 0.38973  | 0.027908 | 0.716272 | 0.208529 |
| MmunewRS.348.1.S1_at   | MmunewRS.348.1 | 3.4   | 3.41  | 0.03 | 0.07 | -1    | 0.288734 | 0.386376 | 0.645736 | 0.621593 |
| MmunewRS.35.1.S1_at    | MmunewRS.35.1  | 11.12 | 9.83  | 3.44 | 0.07 | 2.44  | 0.81423  | 0.573927 | 0.932949 | 0.745476 |
| MmunewRS.350.1.S1_at   | MmunewRS.350.1 | 5.55  | 5.5   | 0.17 | 0.11 | 1.04  | 0.494921 | 0.765811 | 0.779636 | 0.86393  |
| MmunewRS.351.1.S1_at   | MmunewRS.351.1 | 4.63  | 4.5   | 0.1  | 0.14 | 1.09  | 0.123024 | 0.216807 | 0.496589 | 0.490373 |
| MmunewRS.352.1.S1_at   | MmunewRS.352.1 | 6.08  | 5.87  | 0.15 | 0.1  | 1.16  | 0.111122 | 0.099707 | 0.484303 | 0.358256 |
| MmunewRS.353.1.S1_at   | MmunewRS.353.1 | 6.43  | 6.42  | 0.07 | 0.09 | 1.01  | 0.390441 | 0.338548 | 0.716739 | 0.58555  |
| MmunewRS.354.1.S1_at   | MmunewRS.354.1 | 4.31  | 4.16  | 0.09 | 0.06 | 1.11  | 0.134098 | 0.049243 | 0.508395 | 0.266752 |
| MmunewRS.355.1.S1_at   | MmunewRS.355.1 | 3.75  | 3.7   | 0.07 | 0.13 | 1.03  | 0.448888 | 0.198418 | 0.754037 | 0.473302 |
| MmunewRS.356.1.S1_s_at | MmunewRS.356.1 | 10.72 | 10.38 | 1.3  | 0.05 | 1.27  | 0.719786 | 0.828188 | 0.891282 | 0.901235 |
| MmunewRS.358.1.S1_at   | MmunewRS.358.1 | 7.3   | 7.48  | 0.12 | 0.09 | -1.13 | 0.086732 | 0.359186 | 0.454689 | 0.600528 |
| MmunewRS.359.1.S1_at   | MmunewRS.359.1 | 3.19  | 3.03  | 0.32 | 0.07 | 1.11  | 0.412797 | 0.421839 | 0.732098 | 0.645364 |
| MmunewRS.36.1.S1_at    | MmunewRS.36.1  | 13.48 | 13.39 | 0.09 | 0.03 | 1.06  | 0.169391 | 0.615956 | 0.542311 | 0.772359 |
| MmunewRS.360.1.S1_at   | MmunewRS.360.1 | 4.61  | 4.45  | 0.07 | 0.02 | 1.12  | 0.023347 | 0.015944 | 0.315046 | 0.160254 |
| MmunewRS.361.1.S1_at   | MmunewRS.361.1 | 3.67  | 3.55  | 0.07 | 0.01 | 1.08  | 0.053878 | 0.100431 | 0.395633 | 0.359541 |
| MmunewRS.362.1.S1_at   | MmunewRS.362.1 | 3.75  | 3.74  | 0.12 | 0.05 | 1     | 0.972744 | 0.408219 | 0.991136 | 0.635527 |
| MmunewRS.363.1.S1_at   | MmunewRS.363.1 | 3.02  | 3     | 0.14 | 0.14 | 1.02  | 0.186321 | 0.208728 | 0.559101 | 0.482608 |
| MmunewRS.365.1.S1_at   | MmunewRS.365.1 | 12.81 | 12.38 | 0.24 | 0.1  | 1.34  | 0.110989 | 0.035133 | 0.484303 | 0.231645 |
| MmunewRS.366.1.S1_at   | MmunewRS.366.1 | 8.93  | 8.97  | 0.47 | 0.17 | -1.03 | 0.480047 | 0.063801 | 0.771035 | 0.29906  |
| MmunewRS.367.1.S1_at   | MmunewRS.367.1 | 5.59  | 5.65  | 0.54 | 0.11 | -1.04 | 0.392813 | 0.101637 | 0.718623 | 0.361529 |
| MmunewRS.368.1.S1_at   | MmunewRS.368.1 | 5.27  | 5.07  | 0.04 | 0.04 | 1.15  | 0.007367 | 0.062857 | 0.228072 | 0.297418 |
| MmunewRS.369.1.S1_at   | MmunewRS.369.1 | 5.68  | 5.56  | 0.08 | 0.06 | 1.09  | 0.107749 | 0.153461 | 0.480288 | 0.42827  |
| MmunewRS.37.1.S1_at    | MmunewRS.37.1  | 5.63  | 5.79  | 0.26 | 0.25 | -1.11 | 0.222333 | 0.000441 | 0.591869 | 0.038359 |
| MmunewRS.371.1.S1_at   | MmunewRS.371.1 | 6.22  | 6.38  | 0.08 | 0.08 | -1.11 | 0.221077 | 0.002685 | 0.590384 | 0.076408 |



|                        |                |       |       |      |      |       |          |          |          |          |
|------------------------|----------------|-------|-------|------|------|-------|----------|----------|----------|----------|
| MmunewRS.371.1.S1_x_at | MmunewRS.371.1 | 6.65  | 6.69  | 0.11 | 0.09 | -1.02 | 0.378558 | 0.012582 | 0.708405 | 0.14463  |
| MmunewRS.372.1.S1_at   | MmunewRS.372.1 | 5.48  | 5.26  | 0.08 | 0.1  | 1.17  | 0.060018 | 0.063052 | 0.407399 | 0.297772 |
| MmunewRS.373.1.S1_at   | MmunewRS.373.1 | 6.42  | 6.33  | 0.09 | 0.06 | 1.07  | 0.137016 | 0.645374 | 0.511997 | 0.792219 |
| MmunewRS.374.1.S1_at   | MmunewRS.374.1 | 3.36  | 3.31  | 0.09 | 0.21 | 1.03  | 0.708944 | 0.561513 | 0.886591 | 0.737449 |
| MmunewRS.375.1.S1_at   | MmunewRS.375.1 | 5.73  | 5.72  | 0.15 | 0.1  | 1.01  | 0.365581 | 0.463176 | 0.701199 | 0.674261 |
| MmunewRS.377.1.S1_at   | MmunewRS.377.1 | 4.25  | 4.29  | 0.13 | 0.07 | -1.03 | 0.771244 | 0.931644 | 0.914428 | 0.961188 |
| MmunewRS.378.1.S1_at   | MmunewRS.378.1 | 8.06  | 8.13  | 0.82 | 0.19 | -1.05 | 0.619159 | 0.101995 | 0.846458 | 0.362071 |
| MmunewRS.379.1.S1_at   | MmunewRS.379.1 | 4.3   | 4.3   | 0.09 | 0.07 | -1    | 0.753725 | 0.076436 | 0.907191 | 0.321464 |
| MmunewRS.38.1.S1_at    | MmunewRS.38.1  | 8.09  | 7.81  | 2.53 | 0.07 | 1.22  | 0.978313 | 0.317246 | 0.992983 | 0.570488 |
| MmunewRS.380.1.S1_at   | MmunewRS.380.1 | 5.41  | 5.19  | 0.14 | 0.08 | 1.16  | 0.07707  | 0.08126  | 0.438911 | 0.329351 |
| MmunewRS.381.1.S1_at   | MmunewRS.381.1 | 2.97  | 2.92  | 0.09 | 0.08 | -1.03 | 0.539167 | 0.502547 | 0.803644 | 0.700192 |
| MmunewRS.382.1.S1_at   | MmunewRS.382.1 | 8.05  | 8.48  | 0.43 | 0.29 | -1.34 | 0.093768 | 0.028261 | 0.463101 | 0.209854 |
| MmunewRS.383.1.S1_at   | MmunewRS.383.1 | 11.03 | 11.16 | 0.61 | 0.21 | -1.1  | 0.988866 | 0.291175 | 0.995895 | 0.551659 |
| MmunewRS.384.1.S1_at   | MmunewRS.384.1 | 4.98  | 4.85  | 0.53 | 0.25 | 1.1   | 0.957677 | 0.538614 | 0.986047 | 0.723301 |
| MmunewRS.385.1.S1_at   | MmunewRS.385.1 | 3.56  | 3.55  | 0.02 | 0.1  | 1.01  | 0.863647 | 0.72997  | 0.952043 | 0.843733 |
| MmunewRS.387.1.S1_at   | MmunewRS.387.1 | 10.15 | 9.78  | 0.27 | 0.08 | 1.29  | 0.04544  | 0.009599 | 0.376492 | 0.129123 |
| MmunewRS.388.1.S1_s_at | MmunewRS.388.1 | 6.55  | 6.95  | 0.21 | 0.12 | -1.32 | 0.121353 | 0.298249 | 0.494968 | 0.556931 |
| MmunewRS.389.1.S1_at   | MmunewRS.389.1 | 4.45  | 4.47  | 0.1  | 0.05 | -1.01 | 0.762894 | 0.78508  | 0.910973 | 0.875577 |
| MmunewRS.39.1.S1_at    | MmunewRS.39.1  | 4.54  | 4.38  | 0.04 | 0.02 | 1.11  | 0.008099 | 0.008802 | 0.232005 | 0.124117 |
| MmunewRS.390.1.S1_x_at | MmunewRS.390.1 | 10.59 | 10.8  | 0.31 | 0.21 | -1.15 | 0.405856 | 0.353494 | 0.727533 | 0.596547 |
| MmunewRS.391.1.S1_at   | MmunewRS.391.1 | 9.02  | 8.92  | 0.16 | 0.12 | 1.07  | 0.493295 | 0.672578 | 0.778798 | 0.808638 |
| MmunewRS.392.1.S1_at   | MmunewRS.392.1 | 5.13  | 5.13  | 0.18 | 0.13 | 1     | 0.237217 | 0.422001 | 0.604124 | 0.645406 |
| MmunewRS.393.1.S1_at   | MmunewRS.393.1 | 6.16  | 6.96  | 0.7  | 0.23 | -1.74 | 0.151006 | 0.131563 | 0.52444  | 0.403665 |
| MmunewRS.394.1.S1_at   | MmunewRS.394.1 | 9.67  | 10.21 | 0.54 | 0.06 | -1.45 | 0.522817 | 0.465862 | 0.795346 | 0.675982 |
| MmunewRS.395.1.S1_at   | MmunewRS.395.1 | 2.99  | 2.9   | 0.09 | 0.04 | 1.06  | 0.320843 | 0.194153 | 0.669445 | 0.469266 |
| MmunewRS.396.1.S1_at   | MmunewRS.396.1 | 3.39  | 3.44  | 0.17 | 0.14 | -1.03 | 0.856111 | 0.632218 | 0.949177 | 0.783289 |
| MmunewRS.397.1.S1_at   | MmunewRS.397.1 | 4.33  | 3.81  | 0.15 | 0.2  | 1.44  | 0.027814 | 0.034196 | 0.329316 | 0.228773 |
| MmunewRS.398.1.S1_at   | MmunewRS.398.1 | 14.44 | 14.43 | 0.03 | 0.03 | 1.01  | 0.33849  | 0.438988 | 0.682988 | 0.657798 |
| MmunewRS.399.1.S1_at   | MmunewRS.399.1 | 3.32  | 3.33  | 0.03 | 0.1  | -1    | 0.390424 | 0.737371 | 0.716734 | 0.847889 |
| MmunewRS.4.1.S1_at     | MmunewRS.4.1   | 6.96  | 6.77  | 0.07 | 0.05 | 1.14  | 0.037736 | 0.208407 | 0.357858 | 0.482316 |
| MmunewRS.40.1.S1_at    | MmunewRS.40.1  | 4.6   | 4.49  | 0.24 | 0.15 | 1.07  | 0.567887 | 0.759451 | 0.820586 | 0.860113 |
| MmunewRS.400.1.S1_at   | MmunewRS.400.1 | 12.3  | 12.54 | 0.64 | 0    | -1.18 | 0.348986 | 0.324487 | 0.690079 | 0.57507  |
| MmunewRS.401.1.S1_at   | MmunewRS.401.1 | 6.78  | 6.67  | 0.13 | 0.08 | 1.08  | 0.138613 | 0.479953 | 0.514023 | 0.685569 |
| MmunewRS.402.1.S1_at   | MmunewRS.402.1 | 4.13  | 4.04  | 0.09 | 0.03 | 1.06  | 0.324852 | 0.095581 | 0.672925 | 0.352645 |
| MmunewRS.403.1.S1_at   | MmunewRS.403.1 | 3.52  | 3.35  | 0.16 | 0.34 | 1.13  | 0.60973  | 0.750009 | 0.841773 | 0.854656 |
| MmunewRS.405.1.S1_at   | MmunewRS.405.1 | 4.62  | 4.56  | 0.11 | 0.08 | 1.04  | 0.473357 | 0.705111 | 0.767506 | 0.828994 |
| MmunewRS.406.1.S1_at   | MmunewRS.406.1 | 5.02  | 5.88  | 0.89 | 0.34 | -1.82 | 0.240161 | 0.490208 | 0.606482 | 0.692262 |
| MmunewRS.407.1.S1_at   | MmunewRS.407.1 | 11.83 | 11.78 | 0.13 | 0.13 | 1.04  | 0.272155 | 0.438549 | 0.631921 | 0.657511 |
| MmunewRS.408.1.S1_at   | MmunewRS.408.1 | 3.54  | 3.62  | 0.17 | 0.14 | -1.06 | 0.924682 | 0.905056 | 0.974823 | 0.946165 |
| MmunewRS.409.1.S1_at   | MmunewRS.409.1 | 5.53  | 5.5   | 0.05 | 0.09 | 1.02  | 0.987543 | 0.269128 | 0.995831 | 0.534447 |
| MmunewRS.410.1.S1_at   | MmunewRS.410.1 | 7.07  | 7.18  | 1.38 | 0.32 | -1.08 | 0.943651 | 0.381176 | 0.980562 | 0.617518 |
| MmunewRS.411.1.S1_at   | MmunewRS.411.1 | 3.29  | 4.44  | 1.03 | 0.23 | -2.21 | 0.404146 | 0.237353 | 0.726203 | 0.508084 |
| MmunewRS.413.1.S1_at   | MmunewRS.413.1 | 13.25 | 13.2  | 0.09 | 0.06 | 1.04  | 0.530905 | 0.004445 | 0.799314 | 0.092958 |

|                        |                |       |       |      |      |       |          |          |          |          |
|------------------------|----------------|-------|-------|------|------|-------|----------|----------|----------|----------|
| MmunewRS.414.1.S1_at   | MmunewRS.414.1 | 10.87 | 10.77 | 0.04 | 0.1  | 1.07  | 0.789285 | 0.184169 | 0.922523 | 0.460382 |
| MmunewRS.415.1.S1_at   | MmunewRS.415.1 | 5.9   | 5.95  | 0.49 | 0.08 | -1.04 | 0.739776 | 0.585147 | 0.900699 | 0.752757 |
| MmunewRS.416.1.S1_at   | MmunewRS.416.1 | 5.27  | 5.33  | 0.08 | 0.17 | -1.04 | 0.3874   | 0.072462 | 0.714242 | 0.315294 |
| MmunewRS.417.1.S1_at   | MmunewRS.417.1 | 5.49  | 5.47  | 0.28 | 0.14 | 1.02  | 0.988336 | 0.249814 | 0.995877 | 0.518876 |
| MmunewRS.418.1.S1_at   | MmunewRS.418.1 | 3.39  | 3.37  | 0.12 | 0.02 | 1.01  | 0.684565 | 0.922725 | 0.87645  | 0.956468 |
| MmunewRS.419.1.S1_at   | MmunewRS.419.1 | 4.91  | 4.61  | 0.52 | 0.42 | 1.23  | 0.224059 | 0.078958 | 0.593222 | 0.325977 |
| MmunewRS.42.1.S1_at    | MmunewRS.42.1  | 4.52  | 4.59  | 0.26 | 0.06 | -1.05 | 0.778479 | 0.552544 | 0.918264 | 0.731829 |
| MmunewRS.420.1.S1_at   | MmunewRS.420.1 | 5.34  | 5.42  | 0.12 | 0.26 | -1.06 | 0.500855 | 0.491055 | 0.782994 | 0.692753 |
| MmunewRS.421.1.S1_at   | MmunewRS.421.1 | 9.03  | 8.77  | 0.1  | 0.19 | 1.2   | 0.113719 | 0.058477 | 0.487196 | 0.288549 |
| MmunewRS.423.1.S1_at   | MmunewRS.423.1 | 3.14  | 3.33  | 0.14 | 0.2  | -1.14 | 0.329759 | 0.511828 | 0.676511 | 0.705797 |
| MmunewRS.423.1.S1_s_at | MmunewRS.423.1 | 3.74  | 3.75  | 0.2  | 0.07 | -1.01 | 0.879605 | 0.974871 | 0.958264 | 0.986264 |
| MmunewRS.424.1.S1_s_at | MmunewRS.424.1 | 3.68  | 3.66  | 0.08 | 0.14 | 1.01  | 0.610441 | 0.72795  | 0.841859 | 0.842707 |
| MmunewRS.425.1.S1_at   | MmunewRS.425.1 | 3.74  | 3.64  | 0.07 | 0.08 | 1.07  | 0.223517 | 0.299852 | 0.592569 | 0.558138 |
| MmunewRS.426.1.S1_at   | MmunewRS.426.1 | 5.7   | 5.53  | 0.38 | 0.13 | 1.13  | 0.850564 | 0.411096 | 0.947381 | 0.63788  |
| MmunewRS.427.1.S1_at   | MmunewRS.427.1 | 9.77  | 9.48  | 0.21 | 0.17 | 1.22  | 0.115908 | 0.026616 | 0.489414 | 0.204008 |
| MmunewRS.428.1.S1_at   | MmunewRS.428.1 | 3.14  | 3.15  | 0.04 | 0.01 | -1.01 | 0.821822 | 0.145196 | 0.935673 | 0.41919  |
| MmunewRS.429.1.S1_at   | MmunewRS.429.1 | 6.7   | 6.52  | 0.07 | 0.04 | 1.13  | 0.014726 | 0.013654 | 0.277829 | 0.149597 |
| MmunewRS.43.1.S1_at    | MmunewRS.43.1  | 3.72  | 3.58  | 0.12 | 0.09 | 1.1   | 0.082153 | 0.36198  | 0.446998 | 0.602725 |
| MmunewRS.430.1.S1_at   | MmunewRS.430.1 | 4.48  | 4.32  | 0.06 | 0.19 | 1.12  | 0.346468 | 0.22324  | 0.688288 | 0.496073 |
| MmunewRS.431.1.S1_at   | MmunewRS.431.1 | 11.08 | 11.32 | 0.37 | 0.17 | -1.18 | 0.341737 | 0.168425 | 0.68538  | 0.445092 |
| MmunewRS.432.1.S1_at   | MmunewRS.432.1 | 10.27 | 10.03 | 0.34 | 0.06 | 1.17  | 0.990737 | 0.933439 | 0.996487 | 0.962195 |
| MmunewRS.433.1.S1_at   | MmunewRS.433.1 | 3.82  | 3.66  | 0.06 | 0.15 | 1.11  | 0.717627 | 0.973871 | 0.890477 | 0.98573  |
| MmunewRS.434.1.S1_at   | MmunewRS.434.1 | 3.66  | 3.74  | 0.14 | 0.18 | -1.05 | 0.470625 | 0.586988 | 0.766172 | 0.753933 |
| MmunewRS.435.1.S1_at   | MmunewRS.435.1 | 6.96  | 7.39  | 0.34 | 0.14 | -1.35 | 0.340937 | 0.016783 | 0.684799 | 0.164091 |
| MmunewRS.435.1.S1_s_at | MmunewRS.435.1 | 12.02 | 12.33 | 0.23 | 0.1  | -1.24 | 0.193942 | 0.258742 | 0.564486 | 0.525949 |
| MmunewRS.436.1.S1_s_at | MmunewRS.436.1 | 13.19 | 13.34 | 2.15 | 0.13 | -1.1  | 0.339689 | 0.207303 | 0.683982 | 0.481485 |
| MmunewRS.438.1.S1_at   | MmunewRS.438.1 | 2.77  | 2.82  | 0.04 | 0.09 | -1.04 | 0.767593 | 0.678513 | 0.912495 | 0.81221  |
| MmunewRS.439.1.S1_at   | MmunewRS.439.1 | 9.93  | 10.59 | 0.3  | 0.26 | -1.59 | 0.092093 | 0.004446 | 0.460683 | 0.092958 |
| MmunewRS.44.1.S1_at    | MmunewRS.44.1  | 4.62  | 4.56  | 0.14 | 0.18 | 1.05  | 0.537113 | 0.168282 | 0.802624 | 0.444935 |
| MmunewRS.440.1.S1_at   | MmunewRS.440.1 | 3.47  | 3.41  | 0.02 | 0.06 | 1.04  | 0.501647 | 0.064385 | 0.783394 | 0.299968 |
| MmunewRS.441.1.S1_at   | MmunewRS.441.1 | 4.37  | 4.18  | 0.11 | 0.47 | 1.14  | 0.646681 | 0.076005 | 0.859201 | 0.320676 |
| MmunewRS.442.1.S1_at   | MmunewRS.442.1 | 3.44  | 3.46  | 0.07 | 0.1  | -1.01 | 0.80347  | 0.068768 | 0.928415 | 0.308711 |
| MmunewRS.443.1.S1_at   | MmunewRS.443.1 | 3.45  | 3.46  | 0.28 | 0.16 | -1.01 | 0.805581 | 0.483916 | 0.929362 | 0.688243 |
| MmunewRS.444.1.S1_at   | MmunewRS.444.1 | 3.14  | 3.03  | 0.2  | 0.28 | 1.08  | 0.469357 | 0.710358 | 0.765531 | 0.831943 |
| MmunewRS.445.1.S1_at   | MmunewRS.445.1 | 5.95  | 6     | 0.05 | 0.04 | -1.03 | 0.740384 | 0.523516 | 0.900777 | 0.713769 |
| MmunewRS.446.1.S1_at   | MmunewRS.446.1 | 7.48  | 7.34  | 0.14 | 0.04 | 1.1   | 0.125673 | 0.480362 | 0.499638 | 0.68574  |
| MmunewRS.447.1.S1_at   | MmunewRS.447.1 | 4.86  | 4.89  | 0.02 | 0.14 | -1.02 | 0.758378 | 0.420005 | 0.909091 | 0.643787 |
| MmunewRS.448.1.S1_at   | MmunewRS.448.1 | 6.79  | 6.6   | 0.23 | 0.06 | 1.14  | 0.853339 | 0.496187 | 0.948299 | 0.695883 |
| MmunewRS.449.1.S1_at   | MmunewRS.449.1 | 5.02  | 4.8   | 0.14 | 0.13 | 1.17  | 0.102512 | 0.063772 | 0.472762 | 0.29906  |
| MmunewRS.450.1.S1_at   | MmunewRS.450.1 | 5.88  | 5.83  | 0.17 | 0.12 | 1.03  | 0.291084 | 0.124911 | 0.647526 | 0.395313 |
| MmunewRS.451.1.S1_at   | MmunewRS.451.1 | 6.42  | 6.99  | 0.14 | 0.12 | -1.49 | 0.006339 | 0.004942 | 0.218505 | 0.097917 |
| MmunewRS.452.1.S1_at   | MmunewRS.452.1 | 7.83  | 8.17  | 0.95 | 0.31 | -1.27 | 0.558261 | 0.059964 | 0.815182 | 0.291576 |
| MmunewRS.453.1.S1_at   | MmunewRS.453.1 | 4.42  | 4.1   | 0.12 | 0.05 | 1.25  | 0.013621 | 0.007299 | 0.26999  | 0.114662 |

|                        |                |       |       |      |      |       |          |          |          |          |
|------------------------|----------------|-------|-------|------|------|-------|----------|----------|----------|----------|
| MmunewRS.454.1.S1_at   | MmunewRS.454.1 | 3.4   | 3.66  | 0.17 | 0.15 | -1.2  | 0.352723 | 0.609215 | 0.692748 | 0.767677 |
| MmunewRS.455.1.S1_at   | MmunewRS.455.1 | 7.01  | 6.85  | 0.14 | 0.02 | 1.12  | 0.361336 | 0.604581 | 0.698556 | 0.764695 |
| MmunewRS.456.1.S1_at   | MmunewRS.456.1 | 8.23  | 7.8   | 0.84 | 0.25 | 1.35  | 0.676917 | 0.524225 | 0.873333 | 0.71422  |
| MmunewRS.458.1.S1_at   | MmunewRS.458.1 | 3.71  | 3.69  | 0.07 | 0.11 | 1.02  | 0.313658 | 0.419109 | 0.664799 | 0.643308 |
| MmunewRS.46.1.S1_at    | MmunewRS.46.1  | 5.35  | 5.37  | 1.03 | 0.01 | -1.01 | 0.979561 | 0.851967 | 0.993506 | 0.91585  |
| MmunewRS.460.1.S1_at   | MmunewRS.460.1 | 2.75  | 2.79  | 0.03 | 0.03 | -1.03 | 0.068672 | 0.302898 | 0.426    | 0.560356 |
| MmunewRS.461.1.S1_at   | MmunewRS.461.1 | 5.53  | 5.15  | 0.6  | 0.19 | 1.3   | 0.387322 | 0.488072 | 0.714163 | 0.690889 |
| MmunewRS.462.1.S1_s_at | MmunewRS.462.1 | 4.68  | 4.36  | 0.08 | 0.21 | 1.25  | 0.068292 | 0.276683 | 0.425182 | 0.540615 |
| MmunewRS.463.1.S1_at   | MmunewRS.463.1 | 8.69  | 8.81  | 0.33 | 0.09 | -1.08 | 0.792145 | 0.933654 | 0.923677 | 0.962249 |
| MmunewRS.464.1.S1_at   | MmunewRS.464.1 | 3.09  | 3.08  | 0.18 | 0.07 | 1.01  | 0.994882 | 0.530456 | 0.998092 | 0.717991 |
| MmunewRS.465.1.S1_at   | MmunewRS.465.1 | 6.7   | 6.3   | 0.15 | 0.06 | -1.32 | 0.012203 | 0.006333 | 0.260438 | 0.108074 |
| MmunewRS.466.1.S1_at   | MmunewRS.466.1 | 4.11  | 3.99  | 0.17 | 0.12 | 1.09  | 0.855832 | 0.142455 | 0.949019 | 0.416035 |
| MmunewRS.467.1.S1_at   | MmunewRS.467.1 | 5.95  | 5.9   | 0.17 | 0.12 | 1.04  | 0.875533 | 0.97594  | 0.956756 | 0.986856 |
| MmunewRS.468.1.S1_at   | MmunewRS.468.1 | 7.44  | 7.24  | 0.22 | 0.14 | 1.15  | 0.624179 | 0.654132 | 0.848562 | 0.79789  |
| MmunewRS.469.1.S1_at   | MmunewRS.469.1 | 7.81  | 7.95  | 0.43 | 0.42 | -1.1  | 0.874487 | 0.721889 | 0.956448 | 0.838904 |
| MmunewRS.47.1.S1_at    | MmunewRS.47.1  | 9.84  | 10.11 | 0.3  | 0.09 | -1.21 | 0.18637  | 0.125936 | 0.559101 | 0.396461 |
| MmunewRS.47.1.S1_s_at  | MmunewRS.47.1  | 10.27 | 10.39 | 0.27 | 0.03 | -1.09 | 0.559665 | 0.308244 | 0.816365 | 0.564378 |
| MmunewRS.470.1.S1_x_at | MmunewRS.470.1 | 8.8   | 9.04  | 0.2  | 0.18 | -1.18 | 0.278829 | 0.373289 | 0.637903 | 0.612113 |
| MmunewRS.471.1.S1_at   | MmunewRS.471.1 | 3.56  | 3.53  | 0.18 | 0.12 | 1.03  | 0.66894  | 0.048313 | 0.869224 | 0.264916 |
| MmunewRS.472.1.S1_at   | MmunewRS.472.1 | 3.1   | 2.99  | 0.02 | 0.08 | 1.08  | 0.174571 | 0.257967 | 0.547958 | 0.525548 |
| MmunewRS.473.1.S1_at   | MmunewRS.473.1 | 4.99  | 4.99  | 0.21 | 0.09 | 1     | 0.774764 | 0.662384 | 0.91642  | 0.802294 |
| MmunewRS.474.1.S1_at   | MmunewRS.474.1 | 10.98 | 10.96 | 0.31 | 0.09 | 1.01  | 0.526894 | 0.752519 | 0.796797 | 0.855912 |
| MmunewRS.475.1.S1_at   | MmunewRS.475.1 | 6.32  | 6.78  | 1.12 | 0.16 | -1.38 | 0.976326 | 0.213171 | 0.992314 | 0.487068 |
| MmunewRS.476.1.S1_at   | MmunewRS.476.1 | 3     | 2.97  | 0.14 | 0.01 | 1.02  | 0.764428 | 0.525868 | 0.911482 | 0.715223 |
| MmunewRS.478.1.S1_at   | MmunewRS.478.1 | 2.52  | 3.01  | 0.1  | 0.22 | -1.41 | 0.061582 | 0.210912 | 0.411026 | 0.484934 |
| MmunewRS.48.1.S1_at    | MmunewRS.48.1  | 8.02  | 7.73  | 2.12 | 0.32 | 1.22  | 0.867237 | 0.745379 | 0.953465 | 0.852384 |
| MmunewRS.480.1.S1_at   | MmunewRS.480.1 | 5.06  | 5.12  | 0.24 | 0.01 | -1.04 | 0.572107 | 0.76538  | 0.823145 | 0.863627 |
| MmunewRS.481.1.S1_at   | MmunewRS.481.1 | 7.15  | 6.89  | 0.23 | 0.03 | 1.2   | 0.329796 | 0.074327 | 0.676544 | 0.318046 |
| MmunewRS.482.1.S1_at   | MmunewRS.482.1 | 3.27  | 3.27  | 0.04 | 0.11 | 1     | 0.766053 | 0.702141 | 0.912062 | 0.827304 |
| MmunewRS.483.1.S1_at   | MmunewRS.483.1 | 8.57  | 8.82  | 0.78 | 0.22 | -1.19 | 0.696309 | 0.059581 | 0.882065 | 0.290619 |
| MmunewRS.484.1.S1_at   | MmunewRS.484.1 | 9     | 8.01  | 0.16 | 0.27 | 2     | 0.010242 | 0.029237 | 0.246929 | 0.212898 |
| MmunewRS.485.1.S1_at   | MmunewRS.485.1 | 3.2   | 3.24  | 0.03 | 0.05 | -1.03 | 0.84428  | 0.27478  | 0.945231 | 0.539228 |
| MmunewRS.486.1.S1_at   | MmunewRS.486.1 | 5     | 4.92  | 0.26 | 0.12 | 1.06  | 0.777904 | 0.958015 | 0.917924 | 0.976273 |
| MmunewRS.487.1.S1_at   | MmunewRS.487.1 | 6.03  | 5.66  | 0.14 | 0.09 | 1.29  | 0.008231 | 0.283062 | 0.232164 | 0.545692 |
| MmunewRS.488.1.S1_at   | MmunewRS.488.1 | 4.3   | 5.16  | 0.61 | 0.57 | -1.82 | 0.146954 | 0.425263 | 0.521545 | 0.647679 |
| MmunewRS.489.1.S1_at   | MmunewRS.489.1 | 12.81 | 12.69 | 0.55 | 0.09 | 1.09  | 0.620532 | 0.202976 | 0.84711  | 0.477343 |
| MmunewRS.49.1.S1_at    | MmunewRS.49.1  | 8.06  | 8.53  | 0.58 | 0.47 | -1.38 | 0.308155 | 0.081181 | 0.660917 | 0.329351 |
| MmunewRS.490.1.S1_x_at | MmunewRS.490.1 | 7.25  | 7.23  | 0.15 | 0.18 | 1.01  | 0.962912 | 0.464305 | 0.98807  | 0.674993 |
| MmunewRS.491.1.S1_at   | MmunewRS.491.1 | 6.06  | 6.06  | 0.26 | 0.02 | 1     | 0.365949 | 0.491807 | 0.701433 | 0.693275 |
| MmunewRS.492.1.S1_at   | MmunewRS.492.1 | 3.06  | 2.97  | 0.03 | 0.06 | 1.07  | 0.083726 | 0.497675 | 0.449639 | 0.696997 |
| MmunewRS.493.1.S1_at   | MmunewRS.493.1 | 3.09  | 3.1   | 0.21 | 0.03 | -1.01 | 0.59494  | 0.475948 | 0.83502  | 0.682387 |
| MmunewRS.494.1.S1_at   | MmunewRS.494.1 | 11.21 | 11.54 | 0.12 | 0.05 | -1.26 | 0.022649 | 0.061266 | 0.311731 | 0.294225 |
| MmunewRS.495.1.S1_at   | MmunewRS.495.1 | 3.51  | 3.52  | 0.13 | 0.07 | -1.01 | 0.84153  | 0.873212 | 0.94378  | 0.92788  |

|                        |                |       |       |      |      |       |          |          |          |          |
|------------------------|----------------|-------|-------|------|------|-------|----------|----------|----------|----------|
| MmunewRS.496.1.S1_at   | MmunewRS.496.1 | 9.04  | 9.44  | 0.81 | 0.32 | -1.32 | 0.656348 | 0.014728 | 0.863538 | 0.154415 |
| MmunewRS.497.1.S1_at   | MmunewRS.497.1 | 4.7   | 4.58  | 0.82 | 0.12 | 1.09  | 0.853014 | 0.87647  | 0.948162 | 0.929683 |
| MmunewRS.498.1.S1_at   | MmunewRS.498.1 | 10.22 | 9.89  | 0.67 | 0.2  | 1.26  | 0.221638 | 0.024945 | 0.591315 | 0.197799 |
| MmunewRS.499.1.S1_at   | MmunewRS.499.1 | 3.54  | 3.83  | 0.19 | 0.07 | -1.23 | 0.132318 | 0.582137 | 0.506752 | 0.750784 |
| MmunewRS.5.1.S1_at     | MmunewRS.5.1   | 4.5   | 4.87  | 0.26 | 0.43 | -1.29 | 0.414558 | 0.122875 | 0.733159 | 0.392923 |
| MmunewRS.50.1.S1_at    | MmunewRS.50.1  | 5.99  | 6.33  | 0.15 | 0.19 | -1.27 | 0.046873 | 0.034539 | 0.379063 | 0.229979 |
| MmunewRS.500.1.S1_at   | MmunewRS.500.1 | 13.66 | 13.57 | 0.67 | 0.1  | 1.06  | 0.886004 | 0.197605 | 0.960417 | 0.472564 |
| MmunewRS.501.1.S1_at   | MmunewRS.501.1 | 4.99  | 5.16  | 0.3  | 0.27 | -1.12 | 0.803747 | 0.932942 | 0.928583 | 0.961911 |
| MmunewRS.502.1.S1_at   | MmunewRS.502.1 | 4.65  | 4.42  | 0.15 | 0.11 | 1.17  | 0.086789 | 0.064617 | 0.454762 | 0.300314 |
| MmunewRS.503.1.S1_at   | MmunewRS.503.1 | 7.81  | 8.32  | 0.39 | 0.03 | -1.42 | 0.03271  | 0.007135 | 0.34527  | 0.113735 |
| MmunewRS.504.1.S1_at   | MmunewRS.504.1 | 3.33  | 3.2   | 0.27 | 0.03 | 1.09  | 0.172526 | 0.271759 | 0.545782 | 0.536577 |
| MmunewRS.505.1.S1_x_at | MmunewRS.505.1 | 7.76  | 7.84  | 0.2  | 0.21 | -1.06 | 0.873708 | 0.812201 | 0.956275 | 0.891555 |
| MmunewRS.506.1.S1_at   | MmunewRS.506.1 | 8.49  | 8.48  | 0.39 | 0.06 | 1.01  | 0.99061  | 0.495145 | 0.996425 | 0.695319 |
| MmunewRS.507.1.S1_at   | MmunewRS.507.1 | 9.9   | 10.08 | 2.47 | 0.24 | -1.13 | 0.645986 | 0.229549 | 0.858948 | 0.501534 |
| MmunewRS.508.1.S1_at   | MmunewRS.508.1 | 3.32  | 3.29  | 0.04 | 0.11 | 1.02  | 0.770133 | 0.848788 | 0.913903 | 0.914134 |
| MmunewRS.509.1.S1_at   | MmunewRS.509.1 | 3.53  | 3.48  | 0.5  | 0.07 | 1.04  | 0.836534 | 0.958856 | 0.941249 | 0.976695 |
| MmunewRS.510.1.S1_at   | MmunewRS.510.1 | 4.25  | 4.44  | 0.02 | 0.18 | -1.15 | 0.163654 | 0.120149 | 0.536466 | 0.388911 |
| MmunewRS.511.1.S1_at   | MmunewRS.511.1 | 4.24  | 4.11  | 0.17 | 0.12 | 1.1   | 0.387871 | 0.493035 | 0.714828 | 0.693975 |
| MmunewRS.512.1.S1_at   | MmunewRS.512.1 | 6.25  | 6.14  | 0.07 | 0.08 | 1.08  | 0.134318 | 0.01948  | 0.508462 | 0.175288 |
| MmunewRS.513.1.S1_at   | MmunewRS.513.1 | 3.96  | 4.13  | 0.1  | 0.12 | -1.12 | 0.382936 | 0.401909 | 0.711061 | 0.63109  |
| MmunewRS.514.1.S1_at   | MmunewRS.514.1 | 3.19  | 3.23  | 0.32 | 0.12 | -1.03 | 0.59907  | 0.694294 | 0.837258 | 0.822254 |
| MmunewRS.515.1.S1_at   | MmunewRS.515.1 | 3.72  | 3.65  | 0.03 | 0.06 | 1.06  | 0.095784 | 0.210213 | 0.464449 | 0.484033 |
| MmunewRS.517.1.S1_at   | MmunewRS.517.1 | 2.79  | 2.8   | 0.08 | 0.01 | -1    | 0.447372 | 0.335563 | 0.753242 | 0.583326 |
| MmunewRS.518.1.S1_at   | MmunewRS.518.1 | 3.53  | 3.57  | 0.05 | 0.03 | -1.02 | 0.514819 | 0.149714 | 0.790654 | 0.42433  |
| MmunewRS.519.1.S1_at   | MmunewRS.519.1 | 6.34  | 5.94  | 0.25 | 0.2  | 1.32  | 0.104707 | 0.061351 | 0.475918 | 0.29448  |
| MmunewRS.52.1.S1_s_at  | MmunewRS.52.1  | 13.32 | 13.33 | 0.3  | 0.03 | -1.01 | 0.393227 | 0.148455 | 0.719034 | 0.423009 |
| MmunewRS.520.1.S1_at   | MmunewRS.520.1 | 7.73  | 7.12  | 0.26 | 0.26 | 1.53  | 0.095377 | 0.000778 | 0.464194 | 0.045626 |
| MmunewRS.521.1.S1_at   | MmunewRS.521.1 | 6.52  | 6.35  | 0.12 | 0.05 | 1.12  | 0.22609  | 0.278177 | 0.595263 | 0.541811 |
| MmunewRS.522.1.S1_s_at | MmunewRS.522.1 | 14.18 | 14.11 | 0.08 | 0.02 | 1.05  | 0.281753 | 0.442831 | 0.640218 | 0.660759 |
| MmunewRS.523.1.S1_x_at | MmunewRS.523.1 | 8.22  | 8.25  | 0.22 | 0.17 | -1.02 | 0.462078 | 0.344325 | 0.761439 | 0.589762 |
| MmunewRS.524.1.S1_at   | MmunewRS.524.1 | 7.14  | 7.01  | 0.07 | 0.16 | 1.09  | 0.269131 | 0.387524 | 0.629522 | 0.622163 |
| MmunewRS.525.1.S1_at   | MmunewRS.525.1 | 3.28  | 3.25  | 0.08 | 0.02 | 1.02  | 0.863556 | 0.577589 | 0.952043 | 0.748013 |
| MmunewRS.527.1.S1_at   | MmunewRS.527.1 | 4.32  | 4.15  | 0.12 | 0.18 | 1.12  | 0.296799 | 0.544618 | 0.652405 | 0.726978 |
| MmunewRS.528.1.S1_at   | MmunewRS.528.1 | 5.44  | 5.45  | 0.09 | 0.07 | -1.01 | 0.996749 | 0.625448 | 0.998733 | 0.779175 |
| MmunewRS.53.1.S1_at    | MmunewRS.53.1  | 12.41 | 12.61 | 0.16 | 0.12 | -1.15 | 0.158762 | 0.543225 | 0.531595 | 0.726012 |
| MmunewRS.531.1.S1_at   | MmunewRS.531.1 | 2.61  | 2.63  | 0.07 | 0.01 | -1.01 | 0.605069 | 0.38026  | 0.839774 | 0.616942 |
| MmunewRS.531.1.S1_s_at | MmunewRS.531.1 | 3.88  | 3.9   | 0.11 | 0.06 | -1.01 | 0.768003 | 0.838004 | 0.912771 | 0.907512 |
| MmunewRS.532.1.S1_at   | MmunewRS.532.1 | 5.08  | 4.94  | 0.09 | 0.07 | 1.11  | 0.084659 | 0.082745 | 0.451162 | 0.332206 |
| MmunewRS.533.1.S1_at   | MmunewRS.533.1 | 3.33  | 3.13  | 0.14 | 0.02 | 1.15  | 0.21077  | 0.639109 | 0.582007 | 0.788078 |
| MmunewRS.534.1.S1_at   | MmunewRS.534.1 | 9.61  | 9.75  | 0.6  | 0.1  | -1.1  | 0.663363 | 0.108629 | 0.867106 | 0.372171 |
| MmunewRS.535.1.S1_at   | MmunewRS.535.1 | 4.15  | 3.85  | 0.11 | 0.15 | 1.23  | 0.049593 | 0.069071 | 0.385822 | 0.30905  |
| MmunewRS.536.1.S1_at   | MmunewRS.536.1 | 13.88 | 13.75 | 1.59 | 0.12 | 1.09  | 0.496716 | 0.190112 | 0.780748 | 0.465774 |
| MmunewRS.537.1.S1_at   | MmunewRS.537.1 | 3.96  | 3.85  | 0.18 | 0.13 | 1.07  | 0.206287 | 0.382963 | 0.578142 | 0.61903  |

|                        |                |       |       |      |      |       |          |          |          |          |
|------------------------|----------------|-------|-------|------|------|-------|----------|----------|----------|----------|
| MmunewRS.538.1.S1_at   | MmunewRS.538.1 | 2.93  | 2.72  | 0.08 | 0.11 | 1.15  | 0.03628  | 0.352199 | 0.35477  | 0.595568 |
| MmunewRS.539.1.S1_at   | MmunewRS.539.1 | 2.85  | 2.75  | 0.05 | 0.04 | 1.07  | 0.092664 | 0.497948 | 0.461192 | 0.697158 |
| MmunewRS.54.1.S1_at    | MmunewRS.54.1  | 4.23  | 4.15  | 0.04 | 0.12 | 1.06  | 0.320438 | 0.460012 | 0.669365 | 0.671989 |
| MmunewRS.540.1.S1_at   | MmunewRS.540.1 | 4.56  | 4.44  | 0.04 | 0.12 | 1.09  | 0.234102 | 0.477556 | 0.601531 | 0.683599 |
| MmunewRS.541.1.S1_at   | MmunewRS.541.1 | 5.21  | 5.42  | 0.2  | 0.29 | -1.16 | 0.939682 | 0.091595 | 0.979532 | 0.346713 |
| MmunewRS.543.1.S1_at   | MmunewRS.543.1 | 3.36  | 3.23  | 0.02 | 0.03 | 1.09  | 0.004901 | 0.077166 | 0.203301 | 0.322751 |
| MmunewRS.544.1.S1_at   | MmunewRS.544.1 | 3.63  | 3.45  | 0.06 | 0.06 | 1.13  | 0.048476 | 0.102965 | 0.38332  | 0.363685 |
| MmunewRS.545.1.S1_at   | MmunewRS.545.1 | 4.82  | 4.7   | 0.05 | 0.1  | 1.09  | 0.340912 | 0.568949 | 0.684799 | 0.742178 |
| MmunewRS.546.1.S1_at   | MmunewRS.546.1 | 6.04  | 5.86  | 0.4  | 0.1  | 1.13  | 0.914678 | 0.957764 | 0.970895 | 0.976118 |
| MmunewRS.547.1.S1_at   | MmunewRS.547.1 | 5.92  | 5.64  | 0.13 | 0.21 | 1.21  | 0.572003 | 0.460287 | 0.823145 | 0.672148 |
| MmunewRS.548.1.S1_at   | MmunewRS.548.1 | 3.1   | 3.2   | 0.15 | 0.14 | -1.07 | 0.462055 | 0.2665   | 0.761426 | 0.532235 |
| MmunewRS.549.1.S1_at   | MmunewRS.549.1 | 6.55  | 7.25  | 0.48 | 0.09 | -1.63 | 0.07131  | 0.310851 | 0.43069  | 0.565879 |
| MmunewRS.55.1.S1_at    | MmunewRS.55.1  | 13.53 | 13.4  | 2.69 | 0.13 | 1.09  | 0.437351 | 0.355452 | 0.746793 | 0.597738 |
| MmunewRS.550.1.S1_at   | MmunewRS.550.1 | 4.73  | 5.6   | 0.49 | 0.33 | -1.82 | 0.163559 | 0.243735 | 0.536326 | 0.513899 |
| MmunewRS.551.1.S1_at   | MmunewRS.551.1 | 3.59  | 4.42  | 0.63 | 0.54 | -1.77 | 0.374554 | 0.426765 | 0.705935 | 0.648862 |
| MmunewRS.552.1.S1_at   | MmunewRS.552.1 | 3.84  | 3.72  | 0.07 | 0.09 | 1.09  | 0.171671 | 0.086887 | 0.544918 | 0.339688 |
| MmunewRS.553.1.S1_at   | MmunewRS.553.1 | 4.39  | 4.6   | 0.03 | 0.31 | -1.16 | 0.114263 | 0.030851 | 0.487606 | 0.217427 |
| MmunewRS.555.1.S1_at   | MmunewRS.555.1 | 4.31  | 4.36  | 0.28 | 0.05 | -1.03 | 0.64421  | 0.599717 | 0.858491 | 0.761544 |
| MmunewRS.556.1.S1_at   | MmunewRS.556.1 | 4.48  | 4.44  | 0.1  | 0.1  | 1.03  | 0.827659 | 0.25072  | 0.938069 | 0.51941  |
| MmunewRS.557.1.S1_s_at | MmunewRS.557.1 | 14.35 | 14.33 | 0.05 | 0.04 | 1.02  | 0.515356 | 0.713638 | 0.79089  | 0.833863 |
| MmunewRS.559.1.S1_at   | MmunewRS.559.1 | 5.7   | 5.45  | 0.07 | 0.03 | 1.19  | 0.008658 | 0.009011 | 0.236048 | 0.125499 |
| MmunewRS.56.1.S1_at    | MmunewRS.56.1  | 3.97  | 4.1   | 0.06 | 0.11 | -1.09 | 0.261612 | 0.365493 | 0.62388  | 0.605587 |
| MmunewRS.560.1.S1_at   | MmunewRS.560.1 | 4.53  | 4.54  | 0.01 | 0.05 | -1.01 | 0.416925 | 0.918118 | 0.734593 | 0.954068 |
| MmunewRS.561.1.S1_at   | MmunewRS.561.1 | 5.39  | 5.45  | 0.09 | 0.12 | -1.04 | 0.498011 | 0.880837 | 0.781511 | 0.93198  |
| MmunewRS.562.1.S1_at   | MmunewRS.562.1 | 3.56  | 3.42  | 0.07 | 0.19 | 1.1   | 0.171731 | 0.139703 | 0.545064 | 0.413303 |
| MmunewRS.563.1.S1_at   | MmunewRS.563.1 | 7.27  | 7.11  | 0.1  | 0.12 | 1.11  | 0.470461 | 0.012544 | 0.766162 | 0.144478 |
| MmunewRS.564.1.S1_at   | MmunewRS.564.1 | 6.06  | 6.1   | 0.13 | 0.01 | -1.02 | 0.613351 | 0.799245 | 0.84343  | 0.884448 |
| MmunewRS.565.1.S1_at   | MmunewRS.565.1 | 4.25  | 4.12  | 0.15 | 0.07 | 1.1   | 0.202869 | 0.189801 | 0.574251 | 0.465403 |
| MmunewRS.566.1.S1_at   | MmunewRS.566.1 | 4.05  | 3.74  | 0.07 | 0.11 | 1.24  | 0.010674 | 0.014698 | 0.249231 | 0.154371 |
| MmunewRS.567.1.S1_at   | MmunewRS.567.1 | 6.25  | 6.01  | 0.07 | 0.12 | 1.18  | 0.065216 | 0.108941 | 0.420085 | 0.372637 |
| MmunewRS.569.1.S1_at   | MmunewRS.569.1 | 5.45  | 5.44  | 0.03 | 0.22 | 1.01  | 0.301094 | 0.4609   | 0.655304 | 0.672763 |
| MmunewRS.57.1.S1_s_at  | MmunewRS.57.1  | 9.69  | 10.01 | 1.03 | 0.17 | -1.25 | 0.752901 | 0.285609 | 0.906881 | 0.547395 |
| MmunewRS.570.1.S1_at   | MmunewRS.570.1 | 3.89  | 4.22  | 0.15 | 0.45 | -1.26 | 0.189008 | 0.25742  | 0.560718 | 0.52521  |
| MmunewRS.571.1.S1_at   | MmunewRS.571.1 | 4.33  | 4.13  | 0.16 | 0.06 | 1.15  | 0.109723 | 0.099456 | 0.48257  | 0.357827 |
| MmunewRS.572.1.S1_at   | MmunewRS.572.1 | 3.46  | 3.27  | 0.08 | 0.06 | 1.14  | 0.063809 | 0.076801 | 0.416646 | 0.322252 |
| MmunewRS.573.1.S1_at   | MmunewRS.573.1 | 5.92  | 6.32  | 0.31 | 0.5  | -1.32 | 0.208049 | 0.022689 | 0.579723 | 0.188685 |
| MmunewRS.575.1.S1_at   | MmunewRS.575.1 | 8.54  | 7.95  | 0.44 | 0.14 | 1.5   | 0.29532  | 0.477662 | 0.651046 | 0.683695 |
| MmunewRS.576.1.S1_at   | MmunewRS.576.1 | 8.61  | 8.44  | 0.25 | 0.03 | 1.13  | 0.287835 | 0.300047 | 0.644926 | 0.558262 |
| MmunewRS.577.1.S1_s_at | MmunewRS.577.1 | 8.26  | 8.55  | 0.67 | 0.05 | -1.23 | 0.505727 | 0.643338 | 0.785398 | 0.79084  |
| MmunewRS.578.1.S1_at   | MmunewRS.578.1 | 5.14  | 5.14  | 0.18 | 0.12 | 1     | 0.774348 | 0.874078 | 0.916259 | 0.928468 |
| MmunewRS.579.1.S1_at   | MmunewRS.579.1 | 7.5   | 7.05  | 0.43 | 0.16 | 1.36  | 0.225087 | 0.514057 | 0.594321 | 0.707422 |
| MmunewRS.58.1.S1_at    | MmunewRS.58.1  | 4.66  | 4.5   | 0.06 | 0.11 | 1.12  | 0.062445 | 0.157807 | 0.413164 | 0.433475 |
| MmunewRS.580.1.S1_at   | MmunewRS.580.1 | 4.93  | 4.74  | 0.12 | 0.16 | 1.14  | 0.112792 | 0.128159 | 0.486223 | 0.399148 |

|                        |                |       |       |      |      |       |          |          |          |          |
|------------------------|----------------|-------|-------|------|------|-------|----------|----------|----------|----------|
| MmunewRS.581.1.S1_at   | MmunewRS.581.1 | 3.22  | 3.3   | 0.13 | 0.04 | -1.06 | 0.252135 | 0.536175 | 0.617147 | 0.721547 |
| MmunewRS.582.1.S1_at   | MmunewRS.582.1 | 3.99  | 4.11  | 0.11 | 0.05 | -1.09 | 0.70072  | 0.805105 | 0.883597 | 0.887962 |
| MmunewRS.583.1.S1_at   | MmunewRS.583.1 | 6.31  | 5.84  | 0.24 | 0.23 | 1.38  | 0.146588 | 0.225739 | 0.520956 | 0.498159 |
| MmunewRS.584.1.S1_at   | MmunewRS.584.1 | 4.6   | 4.58  | 0.07 | 0.07 | 1.01  | 0.670655 | 0.732452 | 0.869999 | 0.845013 |
| MmunewRS.585.1.S1_at   | MmunewRS.585.1 | 5.35  | 5.17  | 0.05 | 0.03 | 1.13  | 0.004227 | 0.005649 | 0.198874 | 0.103804 |
| MmunewRS.586.1.S1_at   | MmunewRS.586.1 | 4.87  | 4.73  | 0.07 | 0.05 | 1.11  | 0.14619  | 0.397228 | 0.520572 | 0.628763 |
| MmunewRS.587.1.S1_at   | MmunewRS.587.1 | 7.54  | 6.78  | 0.48 | 0.25 | 1.69  | 0.122712 | 0.076096 | 0.496146 | 0.320848 |
| MmunewRS.588.1.S1_at   | MmunewRS.588.1 | 10.75 | 10.8  | 0.2  | 0.06 | -1.04 | 0.487996 | 0.734519 | 0.775317 | 0.84619  |
| MmunewRS.589.1.S1_at   | MmunewRS.589.1 | 3.2   | 3.15  | 0.05 | 0.06 | 1.03  | 0.26046  | 0.605606 | 0.623301 | 0.76535  |
| MmunewRS.59.1.S1_at    | MmunewRS.59.1  | 4.76  | 4.69  | 0.08 | 0.07 | 1.05  | 0.335183 | 0.137976 | 0.680744 | 0.410912 |
| MmunewRS.590.1.S1_at   | MmunewRS.590.1 | 11    | 11.56 | 0.13 | 0.48 | -1.47 | 0.131791 | 0.05127  | 0.506189 | 0.271825 |
| MmunewRS.591.1.S1_at   | MmunewRS.591.1 | 5.13  | 5.14  | 0.2  | 0.06 | -1    | 0.840779 | 0.974593 | 0.943429 | 0.986197 |
| MmunewRS.592.1.S1_at   | MmunewRS.592.1 | 3.4   | 3.29  | 0.02 | 0.11 | 1.08  | 0.162208 | 0.616199 | 0.535244 | 0.772513 |
| MmunewRS.593.1.S1_at   | MmunewRS.593.1 | 3.75  | 3.72  | 0.17 | 0.06 | 1.02  | 0.566947 | 0.760673 | 0.820153 | 0.860963 |
| MmunewRS.594.1.S1_at   | MmunewRS.594.1 | 5.17  | 5.19  | 0.16 | 0.09 | -1.01 | 0.32314  | 0.439493 | 0.671991 | 0.6582   |
| MmunewRS.597.1.S1_at   | MmunewRS.597.1 | 5.98  | 5.99  | 0.21 | 0.55 | -1.01 | 0.345768 | 0.401502 | 0.68775  | 0.631068 |
| MmunewRS.599.1.S1_s_at | MmunewRS.599.1 | 3.6   | 3.78  | 0.09 | 0.18 | -1.13 | 0.305909 | 0.255583 | 0.659264 | 0.523597 |
| MmunewRS.6.1.S1_at     | MmunewRS.6.1   | 7.35  | 7.45  | 0.06 | 0.05 | -1.07 | 0.108653 | 0.375114 | 0.480791 | 0.613186 |
| MmunewRS.60.1.S1_at    | MmunewRS.60.1  | 3.43  | 3.33  | 0.27 | 0.08 | 1.07  | 0.430428 | 0.449119 | 0.742767 | 0.664892 |
| MmunewRS.600.1.S1_at   | MmunewRS.600.1 | 3.97  | 3.92  | 0.13 | 0.07 | 1.04  | 0.340511 | 0.611777 | 0.684537 | 0.769583 |
| MmunewRS.601.1.S1_at   | MmunewRS.601.1 | 4.36  | 3.95  | 0.22 | 0.07 | 1.32  | 0.059312 | 0.095324 | 0.406303 | 0.35236  |
| MmunewRS.602.1.S1_at   | MmunewRS.602.1 | 4.89  | 4.6   | 0.15 | 0.03 | 1.22  | 0.027114 | 0.017572 | 0.327173 | 0.167721 |
| MmunewRS.603.1.S1_at   | MmunewRS.603.1 | 5.69  | 5.69  | 0    | 0.05 | -1    | 0.905678 | 0.493898 | 0.968196 | 0.69445  |
| MmunewRS.604.1.S1_at   | MmunewRS.604.1 | 4.32  | 4.47  | 0.04 | 0.14 | -1.11 | 0.167621 | 0.187082 | 0.54021  | 0.462997 |
| MmunewRS.605.1.S1_at   | MmunewRS.605.1 | 4.91  | 4.88  | 0.11 | 0.06 | 1.02  | 0.485543 | 0.587804 | 0.774378 | 0.75454  |
| MmunewRS.606.1.S1_at   | MmunewRS.606.1 | 5.15  | 5.31  | 0.4  | 0.25 | -1.12 | 0.234183 | 0.269295 | 0.601531 | 0.534534 |
| MmunewRS.607.1.S1_s_at | MmunewRS.607.1 | 3.09  | 3.26  | 1.09 | 0.1  | -1.13 | 0.559342 | 0.361049 | 0.816094 | 0.602069 |
| MmunewRS.608.1.S1_at   | MmunewRS.608.1 | 2.9   | 2.83  | 0.04 | 0.03 | 1.05  | 0.053107 | 0.012217 | 0.394001 | 0.142932 |
| MmunewRS.609.1.S1_at   | MmunewRS.609.1 | 4.99  | 4.71  | 0.19 | 0.14 | 1.21  | 0.080984 | 0.112639 | 0.445056 | 0.378183 |
| MmunewRS.61.1.S1_at    | MmunewRS.61.1  | 6.3   | 6.34  | 0.09 | 0.27 | -1.03 | 0.958395 | 0.85654  | 0.986346 | 0.918032 |
| MmunewRS.610.1.S1_at   | MmunewRS.610.1 | 3.88  | 3.78  | 0.16 | 0.04 | 1.07  | 0.396917 | 0.603262 | 0.721611 | 0.764037 |
| MmunewRS.611.1.S1_s_at | MmunewRS.611.1 | 12.48 | 12.52 | 0.07 | 0.06 | -1.03 | 0.403008 | 0.003448 | 0.7254   | 0.084511 |
| MmunewRS.612.1.S1_at   | MmunewRS.612.1 | 3.21  | 3.19  | 0.01 | 0.17 | 1.01  | 0.645611 | 0.830312 | 0.858801 | 0.902639 |
| MmunewRS.615.1.S1_at   | MmunewRS.615.1 | 3.25  | 3.19  | 0.17 | 0.17 | 1.04  | 0.717322 | 0.768759 | 0.890353 | 0.865653 |
| MmunewRS.616.1.S1_at   | MmunewRS.616.1 | 5.67  | 6.08  | 0.63 | 0.14 | -1.33 | 0.312493 | 0.269522 | 0.664096 | 0.534806 |
| MmunewRS.617.1.S1_at   | MmunewRS.617.1 | 6.06  | 5.99  | 0.16 | 0.08 | 1.05  | 0.206578 | 0.394809 | 0.578429 | 0.627216 |
| MmunewRS.618.1.S1_at   | MmunewRS.618.1 | 3.25  | 3.27  | 0.13 | 0    | -1.01 | 0.773248 | 0.789933 | 0.9157   | 0.878631 |
| MmunewRS.619.1.S1_at   | MmunewRS.619.1 | 4.87  | 4.85  | 0.02 | 0.17 | 1.01  | 0.788009 | 0.975387 | 0.922084 | 0.986565 |
| MmunewRS.62.1.S1_at    | MmunewRS.62.1  | 5.98  | 5.96  | 0.14 | 0.04 | 1.02  | 0.213137 | 0.176727 | 0.583778 | 0.453171 |
| MmunewRS.620.1.S1_at   | MmunewRS.620.1 | 4.02  | 3.85  | 0.16 | 0.05 | 1.13  | 0.612133 | 0.40349  | 0.842895 | 0.632164 |
| MmunewRS.621.1.S1_at   | MmunewRS.621.1 | 3.61  | 3.42  | 0.16 | 0.13 | 1.15  | 0.046847 | 0.048206 | 0.378908 | 0.264671 |
| MmunewRS.623.1.S1_at   | MmunewRS.623.1 | 3.47  | 3.43  | 0.11 | 0.08 | 1.03  | 0.255438 | 0.127228 | 0.619502 | 0.397935 |
| MmunewRS.624.1.S1_s_at | MmunewRS.624.1 | 14.31 | 14.31 | 0.09 | 0.06 | 1     | 0.650577 | 0.853705 | 0.861045 | 0.916773 |

|                        |                |       |       |      |      |       |          |          |          |          |
|------------------------|----------------|-------|-------|------|------|-------|----------|----------|----------|----------|
| MmunewRS.625.1.S1_at   | MmunewRS.625.1 | 3.74  | 3.67  | 0.21 | 0.05 | 1.04  | 0.38736  | 0.698655 | 0.714208 | 0.824932 |
| MmunewRS.626.1.S1_at   | MmunewRS.626.1 | 11.21 | 10.78 | 0.2  | 0.16 | 1.35  | 0.049557 | 0.034554 | 0.385783 | 0.229979 |
| MmunewRS.627.1.S1_at   | MmunewRS.627.1 | 3.94  | 3.75  | 0.11 | 0.09 | 1.14  | 0.071824 | 0.020236 | 0.431668 | 0.178669 |
| MmunewRS.628.1.S1_at   | MmunewRS.628.1 | 5.16  | 4.82  | 0.01 | 0.14 | 1.27  | 0.020851 | 0.026567 | 0.305672 | 0.203931 |
| MmunewRS.629.1.S1_at   | MmunewRS.629.1 | 4.69  | 4.71  | 0.23 | 0.15 | -1.01 | 0.554592 | 0.747179 | 0.8128   | 0.853124 |
| MmunewRS.630.1.S1_at   | MmunewRS.630.1 | 3.21  | 3.11  | 0.08 | 0.08 | 1.07  | 0.105127 | 0.236948 | 0.476837 | 0.507675 |
| MmunewRS.631.1.S1_at   | MmunewRS.631.1 | 8.46  | 7.48  | 1.56 | 0.3  | 1.97  | 0.616658 | 0.266655 | 0.845053 | 0.532407 |
| MmunewRS.632.1.S1_at   | MmunewRS.632.1 | 4.14  | 4.1   | 0.29 | 0.09 | 1.03  | 0.644505 | 0.802646 | 0.858547 | 0.886398 |
| MmunewRS.633.1.S1_s_at | MmunewRS.633.1 | 8.02  | 7.56  | 0.53 | 0.05 | 1.38  | 0.185429 | 0.06769  | 0.55849  | 0.306219 |
| MmunewRS.634.1.S1_at   | MmunewRS.634.1 | 4.4   | 4.15  | 0.05 | 0.32 | 1.19  | 0.616087 | 0.154873 | 0.844731 | 0.429849 |
| MmunewRS.636.1.S1_at   | MmunewRS.636.1 | 2.93  | 2.91  | 0.02 | 0.06 | -1.01 | 0.872702 | 0.188428 | 0.955811 | 0.464416 |
| MmunewRS.637.1.S1_s_at | MmunewRS.637.1 | 6.77  | 6.68  | 0.05 | 0.03 | 1.07  | 0.028953 | 0.433858 | 0.333482 | 0.654041 |
| MmunewRS.638.1.S1_at   | MmunewRS.638.1 | 11.32 | 11.39 | 0.12 | 0.04 | -1.05 | 0.993303 | 0.104062 | 0.99744  | 0.364998 |
| MmunewRS.639.1.S1_at   | MmunewRS.639.1 | 7.34  | 7.33  | 0.11 | 0.06 | 1.01  | 0.219964 | 0.416336 | 0.589114 | 0.641553 |
| MmunewRS.64.1.S1_at    | MmunewRS.64.1  | 12.35 | 12.35 | 0.14 | 0.16 | 1     | 0.381197 | 0.150923 | 0.709924 | 0.425523 |
| MmunewRS.640.1.S1_at   | MmunewRS.640.1 | 4.15  | 3.93  | 0.15 | 0.27 | 1.16  | 0.746084 | 0.880865 | 0.903229 | 0.931991 |
| MmunewRS.641.1.S1_at   | MmunewRS.641.1 | 7.54  | 6.53  | 0.38 | 0.06 | 2.01  | 0.011455 | 0.000566 | 0.255165 | 0.041049 |
| MmunewRS.642.1.S1_at   | MmunewRS.642.1 | 4.42  | 4.35  | 0.1  | 0.11 | 1.05  | 0.09355  | 0.134559 | 0.462739 | 0.406629 |
| MmunewRS.644.1.S1_at   | MmunewRS.644.1 | 3.09  | 3.03  | 0.06 | 0.11 | 1.04  | 0.102173 | 0.316371 | 0.472478 | 0.569809 |
| MmunewRS.645.1.S1_at   | MmunewRS.645.1 | 4.93  | 4.61  | 0.19 | 0.04 | 1.25  | 0.154894 | 0.19034  | 0.528221 | 0.465906 |
| MmunewRS.646.1.S1_s_at | MmunewRS.646.1 | 3.3   | 3.18  | 0.33 | 0.13 | 1.09  | 0.511695 | 0.134185 | 0.788813 | 0.406421 |
| MmunewRS.647.1.S1_at   | MmunewRS.647.1 | 5.02  | 5.83  | 0.86 | 0.13 | -1.75 | 0.618749 | 0.254647 | 0.846208 | 0.522936 |
| MmunewRS.648.1.S1_at   | MmunewRS.648.1 | 6.62  | 6.49  | 0.1  | 0.01 | 1.09  | 0.109371 | 0.167588 | 0.482257 | 0.443998 |
| MmunewRS.649.1.S1_at   | MmunewRS.649.1 | 4.34  | 4.4   | 0.11 | 0.09 | -1.04 | 0.109194 | 0.162509 | 0.481971 | 0.438649 |
| MmunewRS.65.1.S1_at    | MmunewRS.65.1  | 3.81  | 3.74  | 0.15 | 0.03 | 1.05  | 0.121487 | 0.128356 | 0.495106 | 0.399618 |
| MmunewRS.650.1.S1_at   | MmunewRS.650.1 | 4.37  | 4.23  | 0.09 | 0.06 | 1.1   | 0.109035 | 0.365375 | 0.481549 | 0.605483 |
| MmunewRS.651.1.S1_at   | MmunewRS.651.1 | 4.58  | 5.18  | 0.11 | 0.33 | -1.52 | 0.029417 | 0.062151 | 0.334078 | 0.296237 |
| MmunewRS.651.1.S1_x_at | MmunewRS.651.1 | 5.01  | 5.77  | 0.16 | 0.4  | -1.69 | 0.036103 | 0.086906 | 0.354333 | 0.339713 |
| MmunewRS.652.1.S1_at   | MmunewRS.652.1 | 13.42 | 13.49 | 0.05 | 0.03 | -1.05 | 0.614247 | 0.090647 | 0.843872 | 0.345151 |
| MmunewRS.653.1.S1_at   | MmunewRS.653.1 | 3.81  | 3.92  | 0.18 | 0.1  | -1.08 | 0.708783 | 0.850544 | 0.886591 | 0.914981 |
| MmunewRS.654.1.S1_at   | MmunewRS.654.1 | 3.44  | 3.57  | 0.25 | 0.11 | -1.1  | 0.526145 | 0.717538 | 0.796453 | 0.836463 |
| MmunewRS.655.1.S1_at   | MmunewRS.655.1 | 3.77  | 4.06  | 0.44 | 0.15 | -1.22 | 0.250003 | 0.026114 | 0.615473 | 0.202544 |
| MmunewRS.656.1.S1_at   | MmunewRS.656.1 | 8.73  | 8.76  | 0.16 | 0.13 | -1.03 | 0.745289 | 0.933903 | 0.902958 | 0.962375 |
| MmunewRS.658.1.S1_at   | MmunewRS.658.1 | 8.11  | 8     | 0.12 | 0.08 | 1.07  | 0.25956  | 0.578703 | 0.622626 | 0.748611 |
| MmunewRS.66.1.S1_at    | MmunewRS.66.1  | 11.9  | 11.7  | 0.14 | 0.01 | 1.15  | 0.214228 | 0.130605 | 0.584673 | 0.402568 |
| MmunewRS.660.1.S1_at   | MmunewRS.660.1 | 3.48  | 3.27  | 0.02 | 0.03 | 1.16  | 0.000329 | 0.009005 | 0.137028 | 0.125499 |
| MmunewRS.661.1.S1_at   | MmunewRS.661.1 | 7.97  | 7.39  | 0.5  | 0.32 | 1.5   | 0.319114 | 0.238953 | 0.668551 | 0.509678 |
| MmunewRS.662.1.S1_at   | MmunewRS.662.1 | 4.55  | 4.42  | 0.13 | 0.05 | 1.09  | 0.334146 | 0.539688 | 0.680111 | 0.72391  |
| MmunewRS.664.1.S1_at   | MmunewRS.664.1 | 4.75  | 4.7   | 0.04 | 0.07 | 1.03  | 0.254291 | 0.566769 | 0.618749 | 0.74076  |
| MmunewRS.665.1.S1_at   | MmunewRS.665.1 | 4.85  | 4.87  | 0.11 | 0.03 | -1.02 | 0.569712 | 0.408021 | 0.821593 | 0.635378 |
| MmunewRS.666.1.S1_at   | MmunewRS.666.1 | 3.78  | 3.88  | 0.12 | 0.1  | -1.07 | 0.15583  | 0.136077 | 0.529022 | 0.408363 |
| MmunewRS.667.1.S1_at   | MmunewRS.667.1 | 5.71  | 5.46  | 0.08 | 0.09 | 1.19  | 0.044319 | 0.058421 | 0.374395 | 0.288459 |
| MmunewRS.669.1.S1_at   | MmunewRS.669.1 | 3.64  | 3.51  | 0.07 | 0.08 | 1.1   | 0.043295 | 0.086399 | 0.371758 | 0.33887  |

|                        |                |       |       |      |      |       |          |          |          |          |
|------------------------|----------------|-------|-------|------|------|-------|----------|----------|----------|----------|
| MmunewRS.67.1.S1_at    | MmunewRS.67.1  | 11.89 | 11.76 | 0.08 | 0.04 | 1.1   | 0.048625 | 0.229118 | 0.383721 | 0.501438 |
| MmunewRS.670.1.S1_at   | MmunewRS.670.1 | 3.12  | 3.13  | 0.09 | 0.05 | -1    | 0.942038 | 0.996764 | 0.980252 | 0.998142 |
| MmunewRS.671.1.S1_at   | MmunewRS.671.1 | 7.52  | 8.19  | 0.68 | 0.17 | -1.6  | 0.185033 | 0.106892 | 0.557905 | 0.369499 |
| MmunewRS.673.1.S1_at   | MmunewRS.673.1 | 7.2   | 7.97  | 0.45 | 0.1  | -1.71 | 0.121508 | 0.099644 | 0.495106 | 0.358128 |
| MmunewRS.674.1.S1_at   | MmunewRS.674.1 | 4.25  | 4.29  | 0.12 | 0.13 | -1.02 | 0.342434 | 0.521488 | 0.685799 | 0.712474 |
| MmunewRS.675.1.S1_at   | MmunewRS.675.1 | 3.39  | 3.51  | 0.18 | 0.07 | -1.08 | 0.568338 | 0.316412 | 0.820734 | 0.569809 |
| MmunewRS.677.1.S1_at   | MmunewRS.677.1 | 3.98  | 4.05  | 0.07 | 0.24 | -1.05 | 0.415544 | 0.033382 | 0.733656 | 0.226396 |
| MmunewRS.679.1.S1_at   | MmunewRS.679.1 | 3.95  | 3.84  | 0.1  | 0.11 | 1.08  | 0.678505 | 0.344041 | 0.874048 | 0.58962  |
| MmunewRS.681.1.S1_at   | MmunewRS.681.1 | 4.43  | 6.56  | 0.33 | 0.26 | -4.39 | 0.001475 | 0.000515 | 0.16146  | 0.039579 |
| MmunewRS.682.1.S1_at   | MmunewRS.682.1 | 4.05  | 3.78  | 0.57 | 0.33 | 1.21  | 0.865041 | 0.202405 | 0.952557 | 0.476765 |
| MmunewRS.685.1.S1_at   | MmunewRS.685.1 | 7.45  | 7.23  | 0.17 | 0.09 | -1.17 | 0.190001 | 0.365561 | 0.561309 | 0.605602 |
| MmunewRS.686.1.S1_at   | MmunewRS.686.1 | 3.12  | 3.18  | 0.37 | 0.05 | -1.04 | 0.604818 | 0.674609 | 0.83974  | 0.809902 |
| MmunewRS.687.1.S1_at   | MmunewRS.687.1 | 2.9   | 2.9   | 0.08 | 0.15 | 1     | 0.655216 | 0.806667 | 0.86308  | 0.888775 |
| MmunewRS.688.1.S1_x_at | MmunewRS.688.1 | 5.25  | 5.2   | 0.11 | 0.08 | 1.04  | 0.316501 | 0.787006 | 0.666494 | 0.8768   |
| MmunewRS.689.1.S1_at   | MmunewRS.689.1 | 3.95  | 3.74  | 0.04 | 0.09 | 1.15  | 0.04869  | 0.227469 | 0.383951 | 0.499777 |
| MmunewRS.690.1.S1_at   | MmunewRS.690.1 | 4.18  | 4.12  | 0.06 | 0.04 | 1.04  | 0.108342 | 0.382855 | 0.480755 | 0.61893  |
| MmunewRS.692.1.S1_at   | MmunewRS.692.1 | 10.93 | 10.35 | 0.75 | 0.12 | 1.49  | 0.686779 | 0.413759 | 0.8775   | 0.63976  |
| MmunewRS.693.1.S1_at   | MmunewRS.693.1 | 3.36  | 3.26  | 0.13 | 0.12 | 1.07  | 0.753515 | 0.264347 | 0.907059 | 0.530385 |
| MmunewRS.695.1.S1_at   | MmunewRS.695.1 | 2.98  | 3.07  | 0.07 | 0.09 | -1.06 | 0.638259 | 0.517204 | 0.855896 | 0.709435 |
| MmunewRS.697.1.S1_at   | MmunewRS.697.1 | 3.34  | 3.29  | 0.18 | 0.1  | 1.03  | 0.699539 | 0.918434 | 0.883237 | 0.95425  |
| MmunewRS.698.1.S1_at   | MmunewRS.698.1 | 3.05  | 2.91  | 0.12 | 0.14 | 1.1   | 0.353268 | 0.739888 | 0.693208 | 0.849294 |
| MmunewRS.698.1.S1_s_at | MmunewRS.698.1 | 3.62  | 3.61  | 0.12 | 0.06 | 1.01  | 0.356446 | 0.488134 | 0.695154 | 0.690902 |
| MmunewRS.699.1.S1_at   | MmunewRS.699.1 | 7.4   | 5.25  | 2.19 | 0.44 | 4.45  | 0.232239 | 0.179899 | 0.600094 | 0.456453 |
| MmunewRS.70.1.S1_at    | MmunewRS.70.1  | 4.91  | 4.86  | 0.15 | 0.19 | 1.03  | 0.364446 | 0.092578 | 0.700603 | 0.348529 |
| MmunewRS.701.1.S1_at   | MmunewRS.701.1 | 6.17  | 7.03  | 1.14 | 0.12 | -1.81 | 0.765967 | 0.496446 | 0.911981 | 0.69607  |
| MmunewRS.702.1.S1_s_at | MmunewRS.702.1 | 4.93  | 4.66  | 0.2  | 0.11 | 1.2   | 0.114508 | 0.095937 | 0.487606 | 0.35321  |
| MmunewRS.703.1.S1_at   | MmunewRS.703.1 | 3.97  | 3.95  | 0.09 | 0.1  | 1.01  | 0.697508 | 0.893017 | 0.882316 | 0.938985 |
| MmunewRS.704.1.S1_at   | MmunewRS.704.1 | 3.12  | 3.05  | 0.19 | 0.09 | 1.05  | 0.5261   | 0.625079 | 0.796442 | 0.778973 |
| MmunewRS.705.1.S1_at   | MmunewRS.705.1 | 3.21  | 3.33  | 0.17 | 0.21 | -1.09 | 0.742685 | 0.924011 | 0.901884 | 0.957162 |
| MmunewRS.706.1.S1_at   | MmunewRS.706.1 | 4.64  | 4.52  | 0.12 | 0.08 | 1.09  | 0.131689 | 0.461338 | 0.506124 | 0.672994 |
| MmunewRS.707.1.S1_at   | MmunewRS.707.1 | 7.2   | 6.72  | 0.18 | 0.5  | 1.4   | 0.11556  | 0.165562 | 0.488806 | 0.441885 |
| MmunewRS.708.1.S1_at   | MmunewRS.708.1 | 3.68  | 3.59  | 0.14 | 0.08 | 1.06  | 0.150283 | 0.172141 | 0.523933 | 0.448529 |
| MmunewRS.709.1.S1_at   | MmunewRS.709.1 | 5.91  | 6.4   | 0.31 | 0.2  | -1.41 | 0.113969 | 0.510885 | 0.487339 | 0.70525  |
| MmunewRS.71.1.S1_at    | MmunewRS.71.1  | 3.34  | 3.52  | 0.48 | 1.06 | -1.13 | 0.492948 | 0.601673 | 0.778657 | 0.763001 |
| MmunewRS.710.1.S1_at   | MmunewRS.710.1 | 3.64  | 3.55  | 0.12 | 0.03 | 1.07  | 0.544155 | 0.37499  | 0.80708  | 0.613186 |
| MmunewRS.710.1.S1_s_at | MmunewRS.710.1 | 3.14  | 3.15  | 0.12 | 0.05 | -1    | 0.917497 | 0.991802 | 0.972005 | 0.995392 |
| MmunewRS.711.1.S1_at   | MmunewRS.711.1 | 12.86 | 12.88 | 0.73 | 0.05 | -1.01 | 0.355551 | 0.217569 | 0.694743 | 0.491172 |
| MmunewRS.712.1.S1_at   | MmunewRS.712.1 | 5.58  | 5.92  | 0.41 | 0.35 | -1.26 | 0.13683  | 0.226117 | 0.511963 | 0.49859  |
| MmunewRS.713.1.S1_at   | MmunewRS.713.1 | 3.69  | 3.74  | 0.04 | 0.01 | -1.04 | 0.332872 | 0.006867 | 0.679338 | 0.111982 |
| MmunewRS.714.1.S1_at   | MmunewRS.714.1 | 4.4   | 4.4   | 0.07 | 0.08 | -1    | 0.243457 | 0.176443 | 0.609335 | 0.45282  |
| MmunewRS.715.1.S1_at   | MmunewRS.715.1 | 3.66  | 3.57  | 0.18 | 0.07 | 1.06  | 0.318613 | 0.44926  | 0.668228 | 0.664972 |
| MmunewRS.717.1.S1_at   | MmunewRS.717.1 | 3.31  | 3.23  | 0.11 | 0.13 | 1.05  | 0.992857 | 0.942669 | 0.997353 | 0.967498 |
| MmunewRS.718.1.S1_at   | MmunewRS.718.1 | 3.19  | 3.2   | 0.07 | 0.05 | -1.01 | 0.980317 | 0.398687 | 0.993785 | 0.629458 |



|                        |                |       |       |      |      |       |          |          |          |          |
|------------------------|----------------|-------|-------|------|------|-------|----------|----------|----------|----------|
| MmunewRS.719.1.S1_at   | MmunewRS.719.1 | 4.8   | 4.38  | 0.18 | 0.28 | 1.34  | 0.103871 | 0.059499 | 0.474583 | 0.290548 |
| MmunewRS.72.1.S1_at    | MmunewRS.72.1  | 6.42  | 6.22  | 0.08 | 0.1  | 1.15  | 0.019823 | 0.036456 | 0.302615 | 0.235423 |
| MmunewRS.720.1.S1_at   | MmunewRS.720.1 | 4.44  | 4.7   | 0.58 | 0.36 | -1.19 | 0.662631 | 0.869859 | 0.866912 | 0.926148 |
| MmunewRS.721.1.S1_at   | MmunewRS.721.1 | 3.94  | 3.93  | 0.02 | 0.17 | 1     | 0.495937 | 0.570435 | 0.780172 | 0.743121 |
| MmunewRS.722.1.S1_at   | MmunewRS.722.1 | 4.5   | 4.42  | 0.08 | 0.06 | 1.05  | 0.125928 | 0.141889 | 0.49972  | 0.415403 |
| MmunewRS.723.1.S1_at   | MmunewRS.723.1 | 12.53 | 12.57 | 0.2  | 0.09 | -1.03 | 0.656674 | 0.051467 | 0.863636 | 0.272242 |
| MmunewRS.724.1.S1_at   | MmunewRS.724.1 | 4.06  | 4.02  | 0.03 | 0.19 | 1.03  | 0.60684  | 0.298247 | 0.840686 | 0.556931 |
| MmunewRS.725.1.S1_at   | MmunewRS.725.1 | 5.63  | 5.57  | 0.05 | 0.02 | 1.04  | 0.085634 | 0.116217 | 0.452706 | 0.38353  |
| MmunewRS.726.1.S1_at   | MmunewRS.726.1 | 12.86 | 12.91 | 0.04 | 0.05 | -1.04 | 0.516805 | 0.822144 | 0.791667 | 0.897673 |
| MmunewRS.728.1.S1_at   | MmunewRS.728.1 | 4.25  | 4.13  | 0.11 | 0.02 | 1.09  | 0.159168 | 0.074642 | 0.531816 | 0.318322 |
| MmunewRS.73.1.S1_at    | MmunewRS.73.1  | 6.08  | 5.99  | 0.1  | 0.03 | -1.06 | 0.167079 | 0.237174 | 0.539661 | 0.507908 |
| MmunewRS.730.1.S1_at   | MmunewRS.730.1 | 5.43  | 5.22  | 0.63 | 0.27 | 1.16  | 0.179795 | 0.016261 | 0.553052 | 0.161621 |
| MmunewRS.731.1.S1_a_at | MmunewRS.731.1 | 2.87  | 2.8   | 0.09 | 0.04 | 1.05  | 0.962238 | 0.37837  | 0.987723 | 0.615443 |
| MmunewRS.731.1.S1_at   | MmunewRS.731.1 | 2.85  | 2.81  | 0.09 | 0    | 1.03  | 0.429057 | 0.537212 | 0.742138 | 0.72233  |
| MmunewRS.732.1.S1_at   | MmunewRS.732.1 | 5.8   | 5.72  | 0.13 | 0.15 | 1.05  | 0.405032 | 0.406737 | 0.72707  | 0.634487 |
| MmunewRS.733.1.S1_at   | MmunewRS.733.1 | 3.82  | 3.84  | 0.12 | 0.12 | -1.02 | 0.587296 | 0.770036 | 0.831578 | 0.86644  |
| MmunewRS.734.1.S1_at   | MmunewRS.734.1 | 4.52  | 4.69  | 0.32 | 0.07 | -1.12 | 0.878668 | 0.905033 | 0.957827 | 0.946165 |
| MmunewRS.735.1.S1_at   | MmunewRS.735.1 | 5.25  | 5.23  | 0.08 | 0.04 | 1.01  | 0.332476 | 0.428874 | 0.678846 | 0.650408 |
| MmunewRS.736.1.S1_at   | MmunewRS.736.1 | 10.42 | 10.55 | 0.27 | 0.06 | -1.09 | 0.723981 | 0.447033 | 0.893004 | 0.663235 |
| MmunewRS.737.1.S1_at   | MmunewRS.737.1 | 4.51  | 4.28  | 0.11 | 0.02 | 1.17  | 0.033343 | 0.036509 | 0.346442 | 0.235526 |
| MmunewRS.738.1.S1_at   | MmunewRS.738.1 | 4.92  | 4.89  | 0.16 | 0.12 | 1.02  | 0.31031  | 0.552382 | 0.662087 | 0.731707 |
| MmunewRS.739.1.S1_at   | MmunewRS.739.1 | 4.52  | 4.38  | 0.27 | 0.1  | 1.11  | 0.436516 | 0.151333 | 0.746319 | 0.426087 |
| MmunewRS.74.1.S1_at    | MmunewRS.74.1  | 3.39  | 3.5   | 0.26 | 0.14 | -1.08 | 0.838661 | 0.808541 | 0.942303 | 0.889768 |
| MmunewRS.740.1.S1_at   | MmunewRS.740.1 | 6.25  | 6.65  | 0.23 | 0.13 | -1.32 | 0.100999 | 0.091322 | 0.47159  | 0.346281 |
| MmunewRS.743.1.S1_at   | MmunewRS.743.1 | 10.08 | 10.23 | 0.23 | 0.26 | -1.11 | 0.658486 | 0.395273 | 0.864659 | 0.62738  |
| MmunewRS.744.1.S1_at   | MmunewRS.744.1 | 2.94  | 2.92  | 0.08 | 0.08 | 1.01  | 0.409187 | 0.512772 | 0.72983  | 0.7065   |
| MmunewRS.745.1.S1_at   | MmunewRS.745.1 | 7.42  | 7.6   | 0.24 | 0.16 | -1.13 | 0.179994 | 0.314661 | 0.553155 | 0.56843  |
| MmunewRS.746.1.S1_at   | MmunewRS.746.1 | 5.2   | 4.72  | 0.65 | 0.32 | 1.39  | 0.118355 | 0.133641 | 0.49189  | 0.405587 |
| MmunewRS.747.1.S1_at   | MmunewRS.747.1 | 3.48  | 3.52  | 0.12 | 0.14 | -1.02 | 0.76318  | 0.826404 | 0.911064 | 0.900298 |
| MmunewRS.748.1.S1_at   | MmunewRS.748.1 | 6.37  | 6.21  | 0.28 | 0.18 | 1.12  | 0.993707 | 0.589139 | 0.997595 | 0.755393 |
| MmunewRS.749.1.S1_at   | MmunewRS.749.1 | 3.45  | 3.49  | 0.05 | 0.09 | -1.03 | 0.235948 | 0.294542 | 0.603047 | 0.554265 |
| MmunewRS.75.1.S1_at    | MmunewRS.75.1  | 3.88  | 3.77  | 0.09 | 0.33 | 1.08  | 0.62111  | 0.65841  | 0.847506 | 0.800323 |
| MmunewRS.750.1.S1_at   | MmunewRS.750.1 | 14.43 | 14.45 | 0.06 | 0.03 | -1.02 | 0.132603 | 0.163727 | 0.506908 | 0.43992  |
| MmunewRS.751.1.S1_at   | MmunewRS.751.1 | 4.07  | 3.96  | 0.09 | 0.04 | 1.08  | 0.186117 | 0.011577 | 0.559096 | 0.139225 |
| MmunewRS.752.1.S1_at   | MmunewRS.752.1 | 5.75  | 5.1   | 0.62 | 0.15 | 1.57  | 0.088994 | 0.016716 | 0.456831 | 0.163766 |
| MmunewRS.755.1.S1_at   | MmunewRS.755.1 | 8.82  | 8.92  | 0.18 | 0.22 | -1.08 | 0.573409 | 0.004732 | 0.823609 | 0.095831 |
| MmunewRS.756.1.S1_at   | MmunewRS.756.1 | 10.31 | 10.83 | 0.11 | 0.12 | -1.43 | 0.004825 | 0.005287 | 0.202685 | 0.100736 |
| MmunewRS.757.1.S1_at   | MmunewRS.757.1 | 5.22  | 5.02  | 0.11 | 0.07 | 1.15  | 0.039697 | 0.144874 | 0.362432 | 0.418762 |
| MmunewRS.759.1.S1_at   | MmunewRS.759.1 | 5.85  | 5.91  | 0.24 | 0.09 | -1.04 | 0.517878 | 0.695141 | 0.792289 | 0.822797 |
| MmunewRS.76.1.S1_at    | MmunewRS.76.1  | 6.48  | 6.21  | 0.55 | 0.31 | 1.2   | 0.615737 | 0.200084 | 0.844623 | 0.474603 |
| MmunewRS.760.1.S1_at   | MmunewRS.760.1 | 12.8  | 12.64 | 1.46 | 0.18 | 1.12  | 0.543705 | 0.114261 | 0.806752 | 0.380761 |
| MmunewRS.761.1.S1_at   | MmunewRS.761.1 | 3.54  | 3.41  | 0.11 | 0.04 | 1.1   | 0.086583 | 0.176051 | 0.454448 | 0.452526 |
| MmunewRS.762.1.S1_s_at | MmunewRS.762.1 | 4.29  | 4.22  | 0.1  | 0.04 | 1.04  | 0.687223 | 0.249382 | 0.877656 | 0.518496 |

|                        |                |       |       |      |      |       |          |          |          |          |
|------------------------|----------------|-------|-------|------|------|-------|----------|----------|----------|----------|
| MmunewRS.764.1.S1_at   | MmunewRS.764.1 | 6.5   | 6.31  | 0.03 | 0.06 | 1.14  | 0.024344 | 0.258237 | 0.317828 | 0.52558  |
| MmunewRS.765.1.S1_at   | MmunewRS.765.1 | 4.07  | 3.89  | 0.2  | 0.11 | 1.14  | 0.088422 | 0.089777 | 0.45606  | 0.34404  |
| MmunewRS.766.1.S1_at   | MmunewRS.766.1 | 4.62  | 4.64  | 0.72 | 0.2  | -1.01 | 0.689008 | 0.862892 | 0.878634 | 0.922054 |
| MmunewRS.767.1.S1_at   | MmunewRS.767.1 | 5.94  | 5.76  | 0.13 | 0.03 | 1.13  | 0.046988 | 0.043012 | 0.379253 | 0.252029 |
| MmunewRS.768.1.S1_at   | MmunewRS.768.1 | 7.37  | 7.29  | 0.05 | 0.1  | 1.06  | 0.155487 | 0.46695  | 0.528742 | 0.676718 |
| MmunewRS.769.1.S1_at   | MmunewRS.769.1 | 5.31  | 5.2   | 0.09 | 0.18 | 1.08  | 0.363975 | 0.401701 | 0.700336 | 0.631068 |
| MmunewRS.770.1.S1_at   | MmunewRS.770.1 | 4.42  | 6.7   | 0.84 | 0.39 | -4.86 | 0.012716 | 0.017392 | 0.26403  | 0.16699  |
| MmunewRS.771.1.S1_at   | MmunewRS.771.1 | 7.27  | 7.1   | 0.1  | 0.06 | 1.13  | 0.027333 | 0.09256  | 0.327322 | 0.348519 |
| MmunewRS.772.1.S1_x_at | MmunewRS.772.1 | 7.95  | 8.35  | 0.7  | 0.1  | -1.31 | 0.307204 | 0.162936 | 0.660096 | 0.43909  |
| MmunewRS.773.1.S1_at   | MmunewRS.773.1 | 4.67  | 4.6   | 0.22 | 0.04 | 1.05  | 0.440251 | 0.567371 | 0.748408 | 0.741271 |
| MmunewRS.774.1.S1_at   | MmunewRS.774.1 | 5.48  | 4.78  | 0.35 | 0.39 | 1.62  | 0.039011 | 0.094504 | 0.36091  | 0.35126  |
| MmunewRS.775.1.S1_at   | MmunewRS.775.1 | 3.21  | 3.14  | 0.1  | 0.06 | 1.04  | 0.130827 | 0.163918 | 0.505266 | 0.440105 |
| MmunewRS.775.1.S1_x_at | MmunewRS.775.1 | 3.14  | 3.02  | 0.14 | 0.04 | 1.09  | 0.142242 | 0.191324 | 0.517202 | 0.466637 |
| MmunewRS.776.1.S1_at   | MmunewRS.776.1 | 3.63  | 3.59  | 0.05 | 0.06 | 1.02  | 0.256773 | 0.238955 | 0.620689 | 0.509678 |
| MmunewRS.777.1.S1_at   | MmunewRS.777.1 | 6.39  | 6.35  | 0.11 | 0.07 | 1.02  | 0.27595  | 0.521268 | 0.635509 | 0.712339 |
| MmunewRS.779.1.S1_at   | MmunewRS.779.1 | 6.23  | 6.13  | 0.13 | 0.03 | 1.07  | 0.242567 | 0.483458 | 0.608517 | 0.687931 |
| MmunewRS.78.1.S1_at    | MmunewRS.78.1  | 13.24 | 13.04 | 0.23 | 0.05 | 1.15  | 0.491117 | 0.277947 | 0.777532 | 0.541664 |
| MmunewRS.784.1.S1_at   | MmunewRS.784.1 | 5.02  | 5.79  | 0.56 | 0.27 | -1.71 | 0.118781 | 0.053775 | 0.492161 | 0.27744  |
| MmunewRS.785.1.S1_at   | MmunewRS.785.1 | 4.11  | 4.1   | 0.14 | 0.16 | 1.01  | 0.64024  | 0.847735 | 0.856628 | 0.913501 |
| MmunewRS.786.1.S1_at   | MmunewRS.786.1 | 3.6   | 3.6   | 0.06 | 0.07 | 1     | 0.237563 | 0.380926 | 0.604484 | 0.617426 |
| MmunewRS.788.1.S1_x_at | MmunewRS.788.1 | 3.32  | 3.28  | 0.17 | 0.09 | 1.03  | 0.285606 | 0.173529 | 0.643438 | 0.449938 |
| MmunewRS.79.1.S1_at    | MmunewRS.79.1  | 4.82  | 5.02  | 0.79 | 0.41 | -1.15 | 0.653985 | 0.125382 | 0.862543 | 0.396008 |
| MmunewRS.790.1.S1_at   | MmunewRS.790.1 | 9.5   | 9.62  | 1.15 | 0.21 | -1.09 | 0.969922 | 0.108541 | 0.990053 | 0.372091 |
| MmunewRS.790.1.S1_x_at | MmunewRS.790.1 | 9.6   | 9.82  | 1.16 | 0.19 | -1.16 | 0.849825 | 0.124614 | 0.947164 | 0.394995 |
| MmunewRS.791.1.S1_at   | MmunewRS.791.1 | 4.28  | 4     | 0.37 | 0.98 | 1.22  | 0.73706  | 0.87444  | 0.899319 | 0.928687 |
| MmunewRS.791.1.S1_s_at | MmunewRS.791.1 | 3.95  | 3.98  | 0.44 | 0.57 | -1.03 | 0.749017 | 0.526491 | 0.9048   | 0.715574 |
| MmunewRS.793.1.S1_at   | MmunewRS.793.1 | 7.91  | 8.38  | 0.15 | 0.16 | -1.39 | 0.010337 | 0.003243 | 0.246929 | 0.082187 |
| MmunewRS.795.1.S1_at   | MmunewRS.795.1 | 3.41  | 3.41  | 0.14 | 0.09 | 1     | 0.583206 | 0.186278 | 0.82884  | 0.462155 |
| MmunewRS.796.1.S1_at   | MmunewRS.796.1 | 3.82  | 3.58  | 0.11 | 0.09 | 1.19  | 0.206937 | 0.219767 | 0.578774 | 0.493388 |
| MmunewRS.797.1.S1_at   | MmunewRS.797.1 | 2.93  | 2.96  | 0.08 | 0.07 | -1.03 | 0.534287 | 0.445508 | 0.80126  | 0.662422 |
| MmunewRS.798.1.S1_at   | MmunewRS.798.1 | 4.69  | 4.73  | 0.18 | 0.05 | -1.02 | 0.727517 | 0.543177 | 0.894744 | 0.725996 |
| MmunewRS.799.1.S1_at   | MmunewRS.799.1 | 3.69  | 3.56  | 0.07 | 0.03 | 1.1   | 0.015824 | 0.054975 | 0.284247 | 0.279898 |
| MmunewRS.8.1.S1_at     | MmunewRS.8.1   | 7.34  | 7.19  | 0.12 | 0.14 | 1.11  | 0.108638 | 0.192889 | 0.480791 | 0.468379 |
| MmunewRS.80.1.S1_at    | MmunewRS.80.1  | 7.18  | 7.63  | 0.29 | 0.07 | -1.37 | 0.039918 | 0.037398 | 0.362955 | 0.237776 |
| MmunewRS.800.1.S1_at   | MmunewRS.800.1 | 5.01  | 4.94  | 0.11 | 0.13 | 1.05  | 0.554997 | 0.732431 | 0.813117 | 0.845008 |
| MmunewRS.801.1.S1_at   | MmunewRS.801.1 | 3.52  | 3.47  | 0.12 | 0.04 | 1.03  | 0.572323 | 0.195412 | 0.823212 | 0.470253 |
| MmunewRS.803.1.S1_at   | MmunewRS.803.1 | 3.61  | 3.54  | 0.11 | 0.03 | 1.05  | 0.862908 | 0.818765 | 0.951792 | 0.895556 |
| MmunewRS.804.1.S1_at   | MmunewRS.804.1 | 4.33  | 4.32  | 0.14 | 0.06 | 1     | 0.673335 | 0.151725 | 0.871263 | 0.426383 |
| MmunewRS.805.1.S1_at   | MmunewRS.805.1 | 7.43  | 7.03  | 0.21 | 0.04 | 1.32  | 0.014952 | 0.106544 | 0.279017 | 0.369099 |
| MmunewRS.806.1.S1_at   | MmunewRS.806.1 | 4.34  | 4.58  | 0.15 | 0.17 | -1.18 | 0.090029 | 0.295129 | 0.457992 | 0.554551 |
| MmunewRS.807.1.S1_at   | MmunewRS.807.1 | 3.9   | 3.91  | 0.15 | 0.14 | -1.01 | 0.420717 | 0.524138 | 0.737059 | 0.714207 |
| MmunewRS.808.1.S1_at   | MmunewRS.808.1 | 13.27 | 12.75 | 0.22 | 0.1  | 1.43  | 0.047267 | 0.081824 | 0.379841 | 0.330204 |
| MmunewRS.809.1.S1_at   | MmunewRS.809.1 | 5.93  | 5.91  | 0.17 | 0    | 1.01  | 0.686713 | 0.725706 | 0.877453 | 0.841142 |

|                        |                |       |       |      |      |       |          |          |          |          |
|------------------------|----------------|-------|-------|------|------|-------|----------|----------|----------|----------|
| MmunewRS.81.1.S1_at    | MmunewRS.81.1  | 11.16 | 11.84 | 0.5  | 0.06 | -1.6  | 0.218194 | 0.522428 | 0.588113 | 0.713139 |
| MmunewRS.810.1.S1_at   | MmunewRS.810.1 | 10.22 | 10.38 | 0.41 | 0.05 | -1.12 | 0.855591 | 0.385794 | 0.948972 | 0.621079 |
| MmunewRS.811.1.S1_at   | MmunewRS.811.1 | 7.8   | 7.71  | 0.25 | 0.01 | 1.06  | 0.716196 | 0.89842  | 0.889712 | 0.942211 |
| MmunewRS.812.1.S1_at   | MmunewRS.812.1 | 5.55  | 5.4   | 0.14 | 0.14 | 1.11  | 0.234    | 0.304538 | 0.601531 | 0.561803 |
| MmunewRS.813.1.S1_at   | MmunewRS.813.1 | 3.74  | 3.56  | 0.31 | 0.15 | 1.13  | 0.694382 | 0.849258 | 0.881102 | 0.914453 |
| MmunewRS.814.1.S1_at   | MmunewRS.814.1 | 3.98  | 4.16  | 0.1  | 0.34 | -1.13 | 0.396568 | 0.41118  | 0.721517 | 0.637937 |
| MmunewRS.815.1.S1_at   | MmunewRS.815.1 | 4.6   | 4.55  | 0.03 | 0.09 | 1.04  | 0.514648 | 0.618629 | 0.790506 | 0.774185 |
| MmunewRS.817.1.S1_at   | MmunewRS.817.1 | 3.76  | 3.99  | 0.19 | 0.44 | -1.17 | 0.280395 | 0.268791 | 0.639232 | 0.534218 |
| MmunewRS.818.1.S1_at   | MmunewRS.818.1 | 4.91  | 4.93  | 1.19 | 0.44 | -1.01 | 0.957033 | 0.123333 | 0.985787 | 0.393386 |
| MmunewRS.819.1.S1_at   | MmunewRS.819.1 | 4.42  | 4.36  | 0.03 | 0.04 | 1.05  | 0.04078  | 0.092843 | 0.365087 | 0.349024 |
| MmunewRS.82.1.S1_at    | MmunewRS.82.1  | 7.91  | 5.42  | 1.75 | 0.16 | 5.63  | 0.088852 | 0.117917 | 0.456567 | 0.385837 |
| MmunewRS.820.1.S1_at   | MmunewRS.820.1 | 4.35  | 4.67  | 1.47 | 0.4  | -1.25 | 0.553101 | 0.415856 | 0.811981 | 0.641182 |
| MmunewRS.821.1.S1_at   | MmunewRS.821.1 | 4.42  | 4.43  | 0.14 | 0.08 | -1    | 0.271108 | 0.075981 | 0.631011 | 0.320676 |
| MmunewRS.822.1.S1_at   | MmunewRS.822.1 | 3.79  | 3.88  | 0.2  | 0.11 | -1.07 | 0.43816  | 0.595748 | 0.747231 | 0.759208 |
| MmunewRS.823.1.S1_at   | MmunewRS.823.1 | 6.91  | 6.77  | 0.09 | 0.07 | 1.09  | 0.141288 | 0.225307 | 0.516365 | 0.497892 |
| MmunewRS.824.1.S1_at   | MmunewRS.824.1 | 3.25  | 3.1   | 0.05 | 0.08 | 1.11  | 0.086192 | 0.203928 | 0.453748 | 0.478164 |
| MmunewRS.825.1.S1_at   | MmunewRS.825.1 | 5.17  | 4.97  | 0.47 | 0.24 | 1.14  | 0.483116 | 0.17223  | 0.772862 | 0.448609 |
| MmunewRS.829.1.S1_at   | MmunewRS.829.1 | 9.83  | 7.55  | 1.27 | 0.86 | 4.86  | 0.093058 | 0.114936 | 0.461711 | 0.381665 |
| MmunewRS.83.1.S1_at    | MmunewRS.83.1  | 4.29  | 3.75  | 0.36 | 0.3  | 1.44  | 0.189044 | 0.122579 | 0.560728 | 0.39249  |
| MmunewRS.830.1.S1_at   | MmunewRS.830.1 | 3.94  | 3.85  | 0.1  | 0.12 | 1.07  | 0.433256 | 0.488176 | 0.744339 | 0.690944 |
| MmunewRS.831.1.S1_at   | MmunewRS.831.1 | 5.01  | 5.13  | 0.14 | 0.11 | -1.09 | 0.200384 | 0.260129 | 0.57221  | 0.526776 |
| MmunewRS.833.1.S1_at   | MmunewRS.833.1 | 3.96  | 3.88  | 0.02 | 0.13 | 1.06  | 0.184807 | 0.222179 | 0.557573 | 0.495178 |
| MmunewRS.834.1.S1_at   | MmunewRS.834.1 | 4.66  | 4.13  | 0.4  | 0.72 | 1.45  | 0.429443 | 0.671841 | 0.742163 | 0.808157 |
| MmunewRS.835.1.S1_at   | MmunewRS.835.1 | 5.12  | 5.26  | 0.05 | 0.32 | -1.1  | 0.134543 | 0.113835 | 0.508462 | 0.380062 |
| MmunewRS.836.1.S1_at   | MmunewRS.836.1 | 8.94  | 9.53  | 0.56 | 0.11 | -1.5  | 0.157231 | 0.106977 | 0.530382 | 0.369557 |
| MmunewRS.837.1.S1_at   | MmunewRS.837.1 | 4.39  | 4.22  | 0.12 | 0.11 | 1.13  | 0.12353  | 0.332118 | 0.497016 | 0.580584 |
| MmunewRS.838.1.S1_at   | MmunewRS.838.1 | 6.51  | 6.58  | 0.79 | 0.21 | -1.05 | 0.464144 | 0.164274 | 0.762403 | 0.440539 |
| MmunewRS.84.1.S1_at    | MmunewRS.84.1  | 3.38  | 3.2   | 0.17 | 0.08 | 1.13  | 0.49399  | 0.603652 | 0.779169 | 0.764215 |
| MmunewRS.840.1.S1_at   | MmunewRS.840.1 | 5.15  | 5.15  | 0.17 | 0.05 | 1     | 0.817073 | 0.817433 | 0.933848 | 0.894694 |
| MmunewRS.841.1.S1_at   | MmunewRS.841.1 | 3.09  | 3.12  | 0.18 | 0.02 | -1.01 | 0.966857 | 0.626714 | 0.989076 | 0.779962 |
| MmunewRS.842.1.S1_at   | MmunewRS.842.1 | 8.1   | 9.86  | 0.99 | 0.09 | -3.37 | 0.107922 | 0.095072 | 0.480445 | 0.352124 |
| MmunewRS.843.1.S1_at   | MmunewRS.843.1 | 6.61  | 7.36  | 0.62 | 0.27 | -1.68 | 0.134675 | 0.016551 | 0.508544 | 0.162881 |
| MmunewRS.844.1.S1_at   | MmunewRS.844.1 | 3.6   | 3.59  | 0.19 | 0.17 | 1.01  | 0.449866 | 0.775845 | 0.754621 | 0.869553 |
| MmunewRS.845.1.S1_at   | MmunewRS.845.1 | 4.5   | 4.44  | 0.19 | 0.02 | 1.05  | 0.588175 | 0.726107 | 0.83181  | 0.841422 |
| MmunewRS.846.1.S1_at   | MmunewRS.846.1 | 3.17  | 3.18  | 0.21 | 0.23 | -1    | 0.783262 | 0.151131 | 0.920187 | 0.425795 |
| MmunewRS.847.1.S1_at   | MmunewRS.847.1 | 3.45  | 3.37  | 0.31 | 0.22 | 1.06  | 0.274507 | 0.486781 | 0.633904 | 0.690091 |
| MmunewRS.848.1.S1_at   | MmunewRS.848.1 | 3.29  | 3.32  | 0.19 | 0.16 | -1.02 | 0.38837  | 0.3739   | 0.715274 | 0.612508 |
| MmunewRS.849.1.S1_at   | MmunewRS.849.1 | 14.34 | 14.41 | 0.06 | 0.02 | -1.05 | 0.049576 | 0.070403 | 0.385822 | 0.311676 |
| MmunewRS.849.1.S1_s_at | MmunewRS.849.1 | 14.14 | 14.25 | 0.07 | 0.04 | -1.08 | 0.0682   | 0.139008 | 0.425017 | 0.412152 |
| MmunewRS.85.1.S1_at    | MmunewRS.85.1  | 6.71  | 6.74  | 0.17 | 0.05 | -1.02 | 0.897835 | 0.737995 | 0.965325 | 0.848158 |
| MmunewRS.850.1.S1_at   | MmunewRS.850.1 | 4.82  | 4.76  | 0.07 | 0.08 | 1.04  | 0.761906 | 0.4637   | 0.910735 | 0.674615 |
| MmunewRS.851.1.S1_at   | MmunewRS.851.1 | 7.99  | 7.86  | 0.1  | 0.02 | 1.09  | 0.165499 | 0.715962 | 0.538324 | 0.835339 |
| MmunewRS.852.1.S1_at   | MmunewRS.852.1 | 3.54  | 3.55  | 0.13 | 0.08 | -1.01 | 0.672268 | 0.706274 | 0.870852 | 0.829634 |

|                        |                |       |       |      |      |       |          |          |          |          |
|------------------------|----------------|-------|-------|------|------|-------|----------|----------|----------|----------|
| MmunewRS.853.1.S1_at   | MmunewRS.853.1 | 6.7   | 6.49  | 0.14 | 0.05 | 1.16  | 0.062637 | 0.078326 | 0.413501 | 0.324964 |
| MmunewRS.854.1.S1_s_at | MmunewRS.854.1 | 3.21  | 3.25  | 0.03 | 0.04 | -1.03 | 0.271294 | 0.736407 | 0.631176 | 0.847487 |
| MmunewRS.855.1.S1_at   | MmunewRS.855.1 | 4.66  | 4.29  | 0.15 | 0.1  | 1.29  | 0.041854 | 0.116383 | 0.367362 | 0.383671 |
| MmunewRS.856.1.S1_at   | MmunewRS.856.1 | 5.51  | 5.36  | 0.23 | 0.11 | 1.11  | 0.2764   | 0.343312 | 0.635968 | 0.58905  |
| MmunewRS.857.1.S1_at   | MmunewRS.857.1 | 3.93  | 3.68  | 0.05 | 0.04 | 1.19  | 0.00424  | 0.011175 | 0.198874 | 0.137551 |
| MmunewRS.858.1.S1_at   | MmunewRS.858.1 | 6.01  | 6.01  | 0.42 | 0.04 | 1     | 0.374272 | 0.073056 | 0.705837 | 0.316017 |
| MmunewRS.859.1.S1_s_at | MmunewRS.859.1 | 11.32 | 11.14 | 0.15 | 0.28 | 1.14  | 0.272924 | 0.099896 | 0.632536 | 0.358618 |
| MmunewRS.859.1.S1_x_at | MmunewRS.859.1 | 11.5  | 11.22 | 0.31 | 0.26 | 1.21  | 0.635832 | 0.133251 | 0.854777 | 0.40503  |
| MmunewRS.86.1.S1_at    | MmunewRS.86.1  | 3.55  | 3.57  | 0.1  | 0.09 | -1.01 | 0.309517 | 0.634669 | 0.661771 | 0.784965 |
| MmunewRS.860.1.S1_at   | MmunewRS.860.1 | 3.25  | 3.21  | 0.11 | 0.03 | 1.02  | 0.64502  | 0.181023 | 0.85869  | 0.457529 |
| MmunewRS.861.1.S1_at   | MmunewRS.861.1 | 4.52  | 4.43  | 0.19 | 0.06 | -1.06 | 0.778488 | 0.928423 | 0.918264 | 0.959349 |
| MmunewRS.864.1.S1_at   | MmunewRS.864.1 | 6.17  | 7.2   | 0.27 | 0.18 | -2.03 | 0.004435 | 0.000089 | 0.198874 | 0.027016 |
| MmunewRS.865.1.S1_at   | MmunewRS.865.1 | 5.61  | 6.34  | 0.18 | 0.23 | -1.65 | 0.02252  | 0.013779 | 0.311164 | 0.150434 |
| MmunewRS.866.1.S1_at   | MmunewRS.866.1 | 2.97  | 3.09  | 0.09 | 0.01 | -1.09 | 0.21064  | 0.294997 | 0.581872 | 0.554551 |
| MmunewRS.867.1.S1_at   | MmunewRS.867.1 | 9.24  | 9.94  | 0.33 | 0.05 | -1.62 | 0.022985 | 0.053185 | 0.313862 | 0.276445 |
| MmunewRS.868.1.S1_at   | MmunewRS.868.1 | 10.6  | 11.39 | 0.19 | 0.06 | -1.73 | 0.003424 | 0.003746 | 0.194985 | 0.087236 |
| MmunewRS.869.1.S1_at   | MmunewRS.869.1 | 6.69  | 6.58  | 0.09 | 0.03 | 1.08  | 0.30335  | 0.742316 | 0.657248 | 0.850749 |
| MmunewRS.87.1.S1_at    | MmunewRS.87.1  | 7.79  | 7.7   | 0.55 | 0.24 | 1.07  | 0.188834 | 0.154845 | 0.560718 | 0.429849 |
| MmunewRS.87.1.S1_x_at  | MmunewRS.87.1  | 7.89  | 7.76  | 0.53 | 0.16 | 1.09  | 0.211043 | 0.189585 | 0.582141 | 0.465297 |
| MmunewRS.870.1.S1_at   | MmunewRS.870.1 | 4.68  | 4.64  | 0.1  | 0.04 | 1.03  | 0.214658 | 0.290149 | 0.585093 | 0.551134 |
| MmunewRS.871.1.S1_at   | MmunewRS.871.1 | 3.66  | 3.79  | 0.11 | 0.09 | -1.09 | 0.24436  | 0.600596 | 0.60992  | 0.762183 |
| MmunewRS.872.1.S1_at   | MmunewRS.872.1 | 5.02  | 4.95  | 0.09 | 0.12 | 1.05  | 0.420164 | 0.105439 | 0.736789 | 0.367279 |
| MmunewRS.873.1.S1_at   | MmunewRS.873.1 | 7.62  | 7.4   | 0.08 | 0.05 | 1.16  | 0.019826 | 0.249175 | 0.302615 | 0.518302 |
| MmunewRS.874.1.S1_at   | MmunewRS.874.1 | 3.38  | 4.26  | 0.65 | 0.34 | -1.84 | 0.486722 | 0.55368  | 0.774667 | 0.732777 |
| MmunewRS.875.1.S1_at   | MmunewRS.875.1 | 4.92  | 4.83  | 1.06 | 0.3  | 1.06  | 0.450156 | 0.516455 | 0.754757 | 0.709006 |
| MmunewRS.876.1.S1_at   | MmunewRS.876.1 | 6.64  | 6.64  | 0.02 | 0.01 | -1    | 0.250605 | 0.872716 | 0.615805 | 0.927621 |
| MmunewRS.878.1.S1_at   | MmunewRS.878.1 | 4.18  | 4.18  | 0.12 | 0.14 | -1    | 0.359272 | 0.457956 | 0.697193 | 0.670999 |
| MmunewRS.880.1.S1_at   | MmunewRS.880.1 | 7.27  | 7.26  | 0.68 | 0.04 | 1     | 0.898985 | 0.965052 | 0.965677 | 0.980558 |
| MmunewRS.881.1.S1_at   | MmunewRS.881.1 | 11.77 | 11.56 | 0.14 | 0.11 | 1.16  | 0.049014 | 0.090252 | 0.385152 | 0.344664 |
| MmunewRS.882.1.S1_at   | MmunewRS.882.1 | 3.98  | 3.91  | 0.31 | 0.1  | 1.05  | 0.984224 | 0.744949 | 0.995199 | 0.852232 |
| MmunewRS.883.1.S1_at   | MmunewRS.883.1 | 5.89  | 5.68  | 0.15 | 0.11 | 1.15  | 0.09168  | 0.18014  | 0.45996  | 0.456743 |
| MmunewRS.884.1.S1_at   | MmunewRS.884.1 | 5.42  | 5.49  | 0.2  | 0.06 | -1.05 | 0.191659 | 0.55895  | 0.562859 | 0.735944 |
| MmunewRS.885.1.S1_at   | MmunewRS.885.1 | 6.25  | 6.15  | 0.19 | 0.11 | 1.07  | 0.444993 | 0.615607 | 0.751776 | 0.772101 |
| MmunewRS.886.1.S1_at   | MmunewRS.886.1 | 3.46  | 3.56  | 0.03 | 0.33 | -1.08 | 0.18725  | 0.604609 | 0.559729 | 0.764711 |
| MmunewRS.887.1.S1_at   | MmunewRS.887.1 | 3.22  | 3.83  | 0.5  | 0.34 | -1.53 | 0.186631 | 0.245102 | 0.559223 | 0.514861 |
| MmunewRS.888.1.S1_s_at | MmunewRS.888.1 | 3.59  | 3.46  | 0.08 | 0.05 | 1.1   | 0.099262 | 0.008055 | 0.468747 | 0.119277 |
| MmunewRS.89.1.S1_s_at  | MmunewRS.89.1  | 14.03 | 13.92 | 0.03 | 0.02 | 1.08  | 0.004619 | 0.005232 | 0.201101 | 0.100211 |
| MmunewRS.890.1.S1_at   | MmunewRS.890.1 | 5.81  | 6.4   | 0.35 | 0.68 | -1.5  | 0.235738 | 0.411972 | 0.602824 | 0.638434 |
| MmunewRS.891.1.S1_x_at | MmunewRS.891.1 | 10.67 | 10.92 | 0.27 | 0.21 | -1.19 | 0.323507 | 0.263956 | 0.672279 | 0.530153 |
| MmunewRS.893.1.S1_at   | MmunewRS.893.1 | 5.73  | 5.95  | 0.25 | 0.24 | -1.17 | 0.301584 | 0.365021 | 0.655804 | 0.605222 |
| MmunewRS.893.1.S1_x_at | MmunewRS.893.1 | 6.1   | 6.13  | 0.05 | 0.07 | -1.03 | 0.937745 | 0.147378 | 0.979074 | 0.421554 |
| MmunewRS.894.1.S1_at   | MmunewRS.894.1 | 7.55  | 7.26  | 0.15 | 0.04 | 1.23  | 0.039725 | 0.275062 | 0.362432 | 0.539481 |
| MmunewRS.896.1.S1_at   | MmunewRS.896.1 | 10.74 | 11.38 | 0.98 | 0.26 | -1.56 | 0.192431 | 0.243659 | 0.563564 | 0.513803 |

|                        |                |       |       |      |      |       |          |          |          |          |
|------------------------|----------------|-------|-------|------|------|-------|----------|----------|----------|----------|
| MmunewRS.897.1.S1_x_at | MmunewRS.897.1 | 7.76  | 7.72  | 0.1  | 0.11 | 1.03  | 0.712991 | 0.968545 | 0.88819  | 0.982645 |
| MmunewRS.898.1.S1_at   | MmunewRS.898.1 | 4.5   | 4.43  | 0.08 | 0.06 | 1.04  | 0.568955 | 0.766217 | 0.821103 | 0.864166 |
| MmunewRS.899.1.S1_at   | MmunewRS.899.1 | 7.15  | 7.88  | 0.27 | 0.17 | -1.67 | 0.019083 | 0.008656 | 0.299783 | 0.12341  |
| MmunewRS.9.1.S1_at     | MmunewRS.9.1   | 3.48  | 3.48  | 0.08 | 0.04 | -1    | 0.26844  | 0.530799 | 0.628814 | 0.718143 |
| MmunewRS.90.1.S1_at    | MmunewRS.90.1  | 3.28  | 3.25  | 0.08 | 0.04 | 1.02  | 0.265132 | 0.690421 | 0.626397 | 0.81956  |
| MmunewRS.900.1.S1_at   | MmunewRS.900.1 | 9.56  | 9.07  | 0.67 | 0.24 | 1.4   | 0.203614 | 0.400125 | 0.575096 | 0.630158 |
| MmunewRS.901.1.S1_at   | MmunewRS.901.1 | 6.28  | 6.78  | 0.81 | 0.18 | -1.41 | 0.95612  | 0.972978 | 0.985451 | 0.985389 |
| MmunewRS.902.1.S1_at   | MmunewRS.902.1 | 6.72  | 6.04  | 1.13 | 0.31 | 1.6   | 0.263578 | 0.077599 | 0.625576 | 0.323548 |
| MmunewRS.903.1.S1_at   | MmunewRS.903.1 | 2.99  | 2.99  | 0.14 | 0.05 | 1     | 0.390262 | 0.27048  | 0.716623 | 0.535821 |
| MmunewRS.904.1.S1_at   | MmunewRS.904.1 | 3.43  | 3.43  | 0.04 | 0.25 | -1.01 | 0.473819 | 0.665117 | 0.767769 | 0.803733 |
| MmunewRS.905.1.S1_at   | MmunewRS.905.1 | 3.68  | 3.85  | 0.09 | 0.08 | -1.13 | 0.35799  | 0.100697 | 0.695993 | 0.360078 |
| MmunewRS.906.1.S1_at   | MmunewRS.906.1 | 5.11  | 5.24  | 0.12 | 0.06 | -1.1  | 0.146548 | 0.063855 | 0.520912 | 0.29906  |
| MmunewRS.907.1.S1_at   | MmunewRS.907.1 | 5.49  | 5.5   | 0.02 | 0.1  | -1.01 | 0.834229 | 0.918648 | 0.940531 | 0.954356 |
| MmunewRS.908.1.S1_at   | MmunewRS.908.1 | 7.65  | 7.67  | 0.19 | 0.01 | -1.01 | 0.438517 | 0.716057 | 0.747368 | 0.835415 |
| MmunewRS.909.1.S1_at   | MmunewRS.909.1 | 9.87  | 9.84  | 0.71 | 0.16 | 1.02  | 0.683946 | 0.651619 | 0.876251 | 0.796299 |
| MmunewRS.91.1.S1_at    | MmunewRS.91.1  | 5.15  | 5.02  | 0.13 | 0.06 | 1.09  | 0.377555 | 0.510181 | 0.707557 | 0.704711 |
| MmunewRS.910.1.S1_at   | MmunewRS.910.1 | 7.24  | 8.14  | 0.19 | 0.07 | -1.87 | 0.001515 | 0.000368 | 0.161549 | 0.037273 |
| MmunewRS.911.1.S1_at   | MmunewRS.911.1 | 3.44  | 3.44  | 0.05 | 0.02 | -1    | 0.356469 | 0.507134 | 0.695154 | 0.70278  |
| MmunewRS.912.1.S1_x_at | MmunewRS.912.1 | 7.4   | 7.37  | 0.06 | 0.07 | 1.03  | 0.103063 | 0.312672 | 0.473774 | 0.567299 |
| MmunewRS.914.1.S1_at   | MmunewRS.914.1 | 7.46  | 7.39  | 0.04 | 0.06 | 1.05  | 0.08717  | 0.677527 | 0.454785 | 0.811672 |
| MmunewRS.914.1.S1_x_at | MmunewRS.914.1 | 7.42  | 7.19  | 0.2  | 0.06 | 1.18  | 0.109541 | 0.366132 | 0.482328 | 0.605941 |
| MmunewRS.915.1.S1_s_at | MmunewRS.915.1 | 4.68  | 4.52  | 0.14 | 0.1  | 1.12  | 0.094499 | 0.235919 | 0.463794 | 0.507056 |
| MmunewRS.916.1.S1_at   | MmunewRS.916.1 | 8.19  | 8.25  | 0.09 | 0.02 | -1.04 | 0.297193 | 0.938371 | 0.652609 | 0.965059 |
| MmunewRS.918.1.S1_at   | MmunewRS.918.1 | 3.59  | 3.71  | 0.28 | 0.05 | -1.09 | 0.619047 | 0.252191 | 0.84633  | 0.520864 |
| MmunewRS.92.1.S1_at    | MmunewRS.92.1  | 5.52  | 5.59  | 0.15 | 0.05 | -1.05 | 0.709712 | 0.86547  | 0.887017 | 0.923596 |
| MmunewRS.920.1.S1_at   | MmunewRS.920.1 | 3.63  | 3.58  | 0.08 | 0.27 | 1.04  | 0.482849 | 0.716694 | 0.77262  | 0.835937 |
| MmunewRS.921.1.S1_at   | MmunewRS.921.1 | 6.61  | 6.64  | 0.17 | 0.09 | -1.02 | 0.882431 | 0.969971 | 0.95922  | 0.983571 |
| MmunewRS.922.1.S1_at   | MmunewRS.922.1 | 9.61  | 10.03 | 0.16 | 0.04 | -1.34 | 0.011811 | 0.005701 | 0.257504 | 0.104102 |
| MmunewRS.923.1.S1_at   | MmunewRS.923.1 | 6.08  | 4.89  | 0.7  | 0.53 | 2.28  | 0.160411 | 0.026689 | 0.533524 | 0.204241 |
| MmunewRS.924.1.S1_at   | MmunewRS.924.1 | 4.69  | 4.67  | 0.03 | 0.16 | 1.01  | 0.842994 | 0.896951 | 0.944479 | 0.941193 |
| MmunewRS.925.1.S1_at   | MmunewRS.925.1 | 4.3   | 4.24  | 0.2  | 0.12 | 1.04  | 0.982088 | 0.53031  | 0.994358 | 0.71787  |
| MmunewRS.926.1.S1_at   | MmunewRS.926.1 | 4.84  | 4.68  | 0.05 | 0.14 | 1.12  | 0.103444 | 0.04294  | 0.474255 | 0.251776 |
| MmunewRS.927.1.S1_at   | MmunewRS.927.1 | 12.14 | 12.2  | 0.08 | 0.04 | -1.04 | 0.11308  | 0.039288 | 0.486528 | 0.243338 |
| MmunewRS.928.1.S1_at   | MmunewRS.928.1 | 3.03  | 3.04  | 0.06 | 0.03 | -1.01 | 0.843599 | 0.887105 | 0.944829 | 0.93569  |
| MmunewRS.929.1.S1_at   | MmunewRS.929.1 | 6.73  | 6.66  | 0.05 | 0.1  | 1.06  | 0.159801 | 0.325169 | 0.532789 | 0.575591 |
| MmunewRS.929.1.S1_x_at | MmunewRS.929.1 | 7.31  | 7.1   | 0.11 | 0.01 | 1.15  | 0.088084 | 0.450086 | 0.45606  | 0.665505 |
| MmunewRS.930.1.S1_at   | MmunewRS.930.1 | 7.25  | 9.76  | 1.16 | 0.21 | -5.69 | 0.043586 | 0.001966 | 0.372206 | 0.065838 |
| MmunewRS.931.1.S1_at   | MmunewRS.931.1 | 5.58  | 5.63  | 0.11 | 0.09 | -1.04 | 0.845496 | 0.937563 | 0.945862 | 0.964687 |
| MmunewRS.932.1.S1_at   | MmunewRS.932.1 | 3     | 3.09  | 0.03 | 0.14 | -1.06 | 0.891783 | 0.60707  | 0.962833 | 0.766185 |
| MmunewRS.934.1.S1_at   | MmunewRS.934.1 | 7.05  | 7.4   | 1.02 | 0.17 | -1.28 | 0.706318 | 0.416315 | 0.885704 | 0.641553 |
| MmunewRS.935.1.S1_at   | MmunewRS.935.1 | 8.37  | 8.53  | 0.83 | 0.51 | -1.12 | 0.709306 | 0.192141 | 0.886821 | 0.467614 |
| MmunewRS.935.1.S1_x_at | MmunewRS.935.1 | 8.18  | 8.2   | 0.83 | 0.51 | -1.01 | 0.804824 | 0.175448 | 0.929036 | 0.452157 |
| MmunewRS.936.1.S1_at   | MmunewRS.936.1 | 9.1   | 10.21 | 0.77 | 0.21 | -2.16 | 0.110933 | 0.020474 | 0.48424  | 0.179641 |

|                        |                |       |       |      |      |       |          |          |          |          |
|------------------------|----------------|-------|-------|------|------|-------|----------|----------|----------|----------|
| MmunewRS.937.1.S1_at   | MmunewRS.937.1 | 5.8   | 5.37  | 0.32 | 0.19 | 1.35  | 0.1528   | 0.09603  | 0.525725 | 0.353302 |
| MmunewRS.938.1.S1_at   | MmunewRS.938.1 | 12.2  | 12.3  | 0.37 | 0.11 | -1.08 | 0.646858 | 0.44837  | 0.85932  | 0.664212 |
| MmunewRS.939.1.S1_at   | MmunewRS.939.1 | 4.6   | 4.63  | 0.08 | 0.06 | -1.02 | 0.709659 | 0.40619  | 0.88701  | 0.634213 |
| MmunewRS.94.1.S1_at    | MmunewRS.94.1  | 3.15  | 3.18  | 0.1  | 0.03 | -1.02 | 0.864553 | 0.543933 | 0.952391 | 0.726502 |
| MmunewRS.940.1.S1_s_at | MmunewRS.940.1 | 14.44 | 14.46 | 0.02 | 0    | -1.01 | 0.149584 | 0.72083  | 0.523226 | 0.838368 |
| MmunewRS.942.1.S1_at   | MmunewRS.942.1 | 7.88  | 7.78  | 0.32 | 0.04 | 1.07  | 0.534753 | 0.302672 | 0.801404 | 0.560269 |
| MmunewRS.942.1.S1_x_at | MmunewRS.942.1 | 8.52  | 8.31  | 0.26 | 0.03 | 1.16  | 0.190799 | 0.168637 | 0.561803 | 0.445303 |
| MmunewRS.943.1.S1_at   | MmunewRS.943.1 | 7.9   | 7.99  | 0.19 | 0.01 | -1.06 | 0.641238 | 0.925071 | 0.857205 | 0.957602 |
| MmunewRS.945.1.S1_at   | MmunewRS.945.1 | 9.63  | 9.05  | 0.4  | 0.25 | 1.49  | 0.289436 | 0.099167 | 0.646114 | 0.357379 |
| MmunewRS.946.1.S1_at   | MmunewRS.946.1 | 8.92  | 7.28  | 0.59 | 0.55 | 3.12  | 0.03786  | 0.020069 | 0.358096 | 0.177952 |
| MmunewRS.947.1.S1_at   | MmunewRS.947.1 | 3.22  | 3.03  | 0.32 | 0.13 | 1.14  | 0.535971 | 0.395618 | 0.802014 | 0.627583 |
| MmunewRS.948.1.S1_at   | MmunewRS.948.1 | 6.14  | 6.14  | 0.15 | 0.08 | -1    | 0.262163 | 0.318509 | 0.624399 | 0.571239 |
| MmunewRS.949.1.S1_at   | MmunewRS.949.1 | 10.43 | 11.31 | 0.77 | 0.22 | -1.84 | 0.100676 | 0.250602 | 0.471575 | 0.51941  |
| MmunewRS.95.1.S1_at    | MmunewRS.95.1  | 6.26  | 6.13  | 0.35 | 0.09 | 1.1   | 0.639634 | 0.422459 | 0.85626  | 0.645729 |
| MmunewRS.950.1.S1_at   | MmunewRS.950.1 | 3.09  | 3.02  | 0.08 | 0.07 | 1.05  | 0.428918 | 0.388568 | 0.74211  | 0.622897 |
| MmunewRS.951.1.S1_at   | MmunewRS.951.1 | 5.6   | 6.02  | 0.47 | 0.27 | -1.34 | 0.987654 | 0.331559 | 0.995831 | 0.580182 |
| MmunewRS.952.1.S1_s_at | MmunewRS.952.1 | 10.62 | 10.28 | 0.27 | 0.38 | 1.26  | 0.125853 | 0.06759  | 0.49972  | 0.306076 |
| MmunewRS.953.1.S1_at   | MmunewRS.953.1 | 2.82  | 2.84  | 0.11 | 0.04 | -1.01 | 0.601381 | 0.460931 | 0.838197 | 0.672772 |
| MmunewRS.953.1.S1_x_at | MmunewRS.953.1 | 3.82  | 3.85  | 0.06 | 0.15 | -1.02 | 0.883259 | 0.840382 | 0.95964  | 0.909015 |
| MmunewRS.954.1.S1_at   | MmunewRS.954.1 | 7.64  | 8.47  | 0.49 | 0.5  | -1.78 | 0.082886 | 0.007417 | 0.448078 | 0.115764 |
| MmunewRS.955.1.S1_at   | MmunewRS.955.1 | 3.99  | 4.16  | 0.22 | 0.04 | -1.13 | 0.724152 | 0.775325 | 0.893065 | 0.869227 |
| MmunewRS.956.1.S1_at   | MmunewRS.956.1 | 7.45  | 8.02  | 0.23 | 0.14 | -1.48 | 0.031809 | 0.029219 | 0.342474 | 0.212898 |
| MmunewRS.956.1.S1_s_at | MmunewRS.956.1 | 9.05  | 9.42  | 0.48 | 0.12 | -1.28 | 0.176859 | 0.076987 | 0.549947 | 0.322421 |
| MmunewRS.957.1.S1_at   | MmunewRS.957.1 | 6.39  | 6.17  | 0.26 | 0.04 | 1.17  | 0.201711 | 0.250714 | 0.573304 | 0.51941  |
| MmunewRS.959.1.S1_at   | MmunewRS.959.1 | 5.42  | 5.27  | 0.1  | 0.09 | 1.11  | 0.282939 | 0.309373 | 0.641159 | 0.564912 |
| MmunewRS.960.1.S1_at   | MmunewRS.960.1 | 5.36  | 5.2   | 0.08 | 0.09 | 1.12  | 0.098974 | 0.184238 | 0.468321 | 0.460382 |
| MmunewRS.961.1.S1_at   | MmunewRS.961.1 | 5.64  | 5.69  | 0.13 | 0.09 | -1.04 | 0.482226 | 0.829708 | 0.7723   | 0.902187 |
| MmunewRS.962.1.S1_at   | MmunewRS.962.1 | 10.06 | 9.56  | 0.34 | 0.1  | 1.41  | 0.080931 | 0.195981 | 0.445056 | 0.470976 |
| MmunewRS.963.1.S1_at   | MmunewRS.963.1 | 3.6   | 3.62  | 0.11 | 0.07 | -1.02 | 0.822386 | 0.228088 | 0.935982 | 0.500265 |
| MmunewRS.964.1.S1_at   | MmunewRS.964.1 | 5.04  | 5.1   | 0.37 | 0.17 | -1.04 | 0.49759  | 0.615016 | 0.781215 | 0.771689 |
| MmunewRS.965.1.S1_at   | MmunewRS.965.1 | 5.78  | 5.79  | 0.1  | 0.08 | -1    | 0.269728 | 0.263592 | 0.629945 | 0.529881 |
| MmunewRS.966.1.S1_at   | MmunewRS.966.1 | 7.39  | 7.58  | 0.02 | 0.14 | -1.14 | 0.027638 | 0.058353 | 0.328402 | 0.288356 |
| MmunewRS.967.1.S1_at   | MmunewRS.967.1 | 6.39  | 7.15  | 1.48 | 0.19 | -1.7  | 0.465477 | 0.226212 | 0.763035 | 0.498692 |
| MmunewRS.968.1.S1_at   | MmunewRS.968.1 | 3.66  | 3.78  | 0.06 | 0.12 | -1.08 | 0.105682 | 0.462716 | 0.477409 | 0.674056 |
| MmunewRS.969.1.S1_at   | MmunewRS.969.1 | 6.88  | 6.8   | 0.47 | 0.28 | 1.06  | 0.88284  | 0.010635 | 0.959428 | 0.134593 |
| MmunewRS.97.1.S1_at    | MmunewRS.97.1  | 3.42  | 3.4   | 0.01 | 0.06 | 1.02  | 0.48847  | 0.691581 | 0.775568 | 0.820606 |
| MmunewRS.970.1.S1_at   | MmunewRS.970.1 | 8.61  | 8.66  | 1.37 | 0.23 | -1.03 | 0.339995 | 0.210964 | 0.684117 | 0.484938 |
| MmunewRS.971.1.S1_at   | MmunewRS.971.1 | 10    | 10.84 | 0.09 | 0.1  | -1.79 | 0.000516 | 0.001143 | 0.143137 | 0.053342 |
| MmunewRS.972.1.S1_at   | MmunewRS.972.1 | 3.48  | 3.49  | 0.12 | 0.03 | -1.01 | 0.682651 | 0.876786 | 0.875848 | 0.929829 |
| MmunewRS.973.1.S1_at   | MmunewRS.973.1 | 4.74  | 4.28  | 0.24 | 0.17 | 1.38  | 0.078711 | 0.098897 | 0.441464 | 0.357049 |
| MmunewRS.974.1.S1_s_at | MmunewRS.974.1 | 4.81  | 4.67  | 0.11 | 0.11 | 1.1   | 0.395159 | 0.219132 | 0.720356 | 0.492868 |
| MmunewRS.975.1.S1_at   | MmunewRS.975.1 | 6.33  | 6.98  | 0.54 | 0.19 | -1.56 | 0.379635 | 0.068635 | 0.709066 | 0.308537 |
| MmunewRS.977.1.S1_s_at | MmunewRS.977.1 | 9.98  | 9.67  | 0.63 | 0.3  | 1.24  | 0.684068 | 0.005347 | 0.876319 | 0.101089 |

|                        |                |       |       |      |      |       |          |          |          |          |
|------------------------|----------------|-------|-------|------|------|-------|----------|----------|----------|----------|
| MmunewRS.978.1.S1_at   | MmunewRS.978.1 | 4.03  | 3.97  | 0.05 | 0.17 | 1.04  | 0.862171 | 0.559575 | 0.951428 | 0.736365 |
| MmunewRS.978.1.S1_s_at | MmunewRS.978.1 | 4.68  | 4.89  | 0.09 | 0.26 | -1.16 | 0.410811 | 0.549028 | 0.730947 | 0.729531 |
| MmunewRS.98.1.S1_at    | MmunewRS.98.1  | 4.38  | 4.37  | 0.13 | 0.02 | 1.01  | 0.487549 | 0.759881 | 0.775077 | 0.86049  |
| MmunewRS.980.1.S1_at   | MmunewRS.980.1 | 3.71  | 3.72  | 0.08 | 0.03 | -1    | 0.310244 | 0.432286 | 0.662073 | 0.652778 |
| MmunewRS.981.1.S1_at   | MmunewRS.981.1 | 3.5   | 3.39  | 0.1  | 0.07 | 1.08  | 0.110611 | 0.127408 | 0.48378  | 0.398249 |
| MmunewRS.982.1.S1_at   | MmunewRS.982.1 | 5.18  | 4.55  | 0.64 | 0.14 | 1.55  | 0.191863 | 0.185773 | 0.56298  | 0.461631 |
| MmunewRS.983.1.S1_at   | MmunewRS.983.1 | 6.37  | 6.06  | 0.24 | 0.06 | 1.24  | 0.154566 | 0.07675  | 0.52775  | 0.322168 |
| MmunewRS.984.1.S1_at   | MmunewRS.984.1 | 3.26  | 3.16  | 0.02 | 0.13 | 1.08  | 0.277561 | 0.061882 | 0.636861 | 0.295625 |
| MmunewRS.985.1.S1_at   | MmunewRS.985.1 | 4.9   | 4.86  | 0.15 | 0.07 | 1.03  | 0.163174 | 0.290445 | 0.536035 | 0.551169 |
| MmunewRS.986.1.S1_at   | MmunewRS.986.1 | 3.36  | 3.31  | 0.13 | 0.24 | 1.04  | 0.545057 | 0.243031 | 0.807598 | 0.513356 |
| MmunewRS.987.1.S1_at   | MmunewRS.987.1 | 3.6   | 3.54  | 0.16 | 0.04 | -1.05 | 0.189098 | 0.23249  | 0.560735 | 0.504249 |
| MmunewRS.988.1.S1_at   | MmunewRS.988.1 | 6.46  | 6.52  | 0.59 | 0.04 | -1.04 | 0.757971 | 0.856117 | 0.908926 | 0.917842 |
| MmunewRS.989.1.S1_at   | MmunewRS.989.1 | 3.49  | 3.24  | 0.09 | 0.26 | 1.19  | 0.797234 | 0.376772 | 0.925402 | 0.614547 |
| MmunewRS.99.1.S1_at    | MmunewRS.99.1  | 9.64  | 9.35  | 0.27 | 0.1  | 1.22  | 0.266211 | 0.0252   | 0.627106 | 0.199043 |
| MmunewRS.990.1.S1_at   | MmunewRS.990.1 | 11.54 | 11.5  | 0.11 | 0.06 | 1.03  | 0.560808 | 0.029882 | 0.816958 | 0.21455  |
| MmunewRS.991.1.S1_at   | MmunewRS.991.1 | 3.76  | 4.62  | 0.32 | 0.18 | -1.81 | 0.005818 | 0.006614 | 0.211798 | 0.110163 |
| MmunewRS.992.1.S1_at   | MmunewRS.992.1 | 5.85  | 6.01  | 0.38 | 0.4  | -1.12 | 0.546593 | 0.668674 | 0.808632 | 0.806111 |
| MmunewRS.993.1.S1_at   | MmunewRS.993.1 | 5.63  | 5.51  | 0.11 | 0.13 | 1.09  | 0.267568 | 0.649264 | 0.628193 | 0.794724 |
| MmunewRS.994.1.S1_at   | MmunewRS.994.1 | 3.68  | 3.54  | 0.17 | 0.1  | 1.1   | 0.207404 | 0.574837 | 0.578933 | 0.746142 |
| MmunewRS.995.1.S1_at   | MmunewRS.995.1 | 5.64  | 5.43  | 0.11 | 0.15 | 1.16  | 0.153943 | 0.209945 | 0.527271 | 0.48371  |
| MmunewRS.996.1.S1_at   | MmunewRS.996.1 | 10.4  | 10.47 | 0.39 | 0.19 | -1.05 | 0.948354 | 0.144296 | 0.982226 | 0.418196 |
| MmunewRS.997.1.S1_at   | MmunewRS.997.1 | 5.41  | 5.42  | 0.2  | 0.18 | -1.01 | 0.829803 | 0.964416 | 0.938865 | 0.980213 |
| MmunewRS.998.1.S1_at   | MmunewRS.998.1 | 11.63 | 11.11 | 0.26 | 0.05 | 1.44  | 0.00976  | 0.001793 | 0.243347 | 0.063586 |
| MmunewRS.999.1.S1_at   | MmunewRS.999.1 | 3.96  | 3.82  | 0.05 | 0.03 | 1.1   | 0.033247 | 0.497398 | 0.346442 | 0.696721 |
